# Supplementary material
Source: PubMed Central journal article supplement (PMC5625521)
Supplement: JVI.01141-17_zjv999182953s1.pdf [file JVI.01141-17_zjv999182953s1.pdf]

TABLE S1 VZV-DEN09 DNA counts per nucleotide (cpn)

| Library                          | A          |               | B           |             | Combined      |
|----------------------------------|------------|---------------|-------------|-------------|---------------|
| Enrichment                       | No         | Yes           | No          | Yes         |               |
| cpn                              | 18,290,717 | 2,875,245,431 | 799,838,265 | 482,208,634 | 4,175,583,047 |
| Average cpn                      | 142        | 22,309        | 6,206       | 3,741       | 33,436        |
| Total reads mapping to VZV       | 361,609    | 56,834,979    | 15,808,173  | 9,531,226   | 82,535,987    |
| Nucleotides per read             | 50.6       | 50.6          | 50.6        | 50.6        | 50.6          |
| Nucleotide location <sup>a</sup> | cpn        | cpn           | cpn         | cpn         | Total cpn     |
| 1                                | 0          | 111           | 62          | 25          | 198           |
| 2                                | 2          | 1,135         | 1,016       | 365         | 2,518         |
| 3                                | 6          | 1,371         | 1,140       | 407         | 2,924         |
| 4                                | 6          | 1,646         | 1,281       | 465         | 3,398         |
| 5                                | 9          | 1,917         | 1,406       | 517         | 3,849         |
| 6                                | 10         | 2,124         | 1,524       | 554         | 4,212         |
| 7                                | 10         | 2,321         | 1,635       | 598         | 4,564         |
| 8                                | 10         | 2,569         | 1,764       | 642         | 4,985         |
| 9                                | 12         | 2,788         | 1,883       | 677         | 5,360         |
| 10                               | 13         | 2,828         | 1,914       | 690         | 5,445         |
| 11                               | 13         | 2,891         | 1,944       | 707         | 5,555         |
| 12                               | 14         | 2,986         | 2,021       | 738         | 5,759         |
| 13                               | 14         | 2,996         | 2,037       | 742         | 5,789         |
| 14                               | 15         | 3,256         | 2,299       | 838         | 6,408         |
| 15                               | 15         | 3,400         | 2,377       | 863         | 6,655         |
| 16                               | 16         | 3,580         | 2,483       | 897         | 6,976         |
| 17                               | 18         | 3,779         | 2,597       | 948         | 7,342         |
| 18                               | 19         | 3,949         | 2,707       | 987         | 7,662         |
| 19                               | 22         | 4,078         | 2,815       | 1,024       | 7,939         |
| 20                               | 25         | 4,278         | 2,943       | 1,072       | 8,318         |
| 21                               | 28         | 4,467         | 3,073       | 1,121       | 8,689         |
| 22                               | 30         | 4,715         | 3,210       | 1,164       | 9,119         |
| 23                               | 32         | 4,864         | 3,286       | 1,194       | 9,376         |

|    |     |        |        |       |        |
|----|-----|--------|--------|-------|--------|
| 24 | 32  | 5,001  | 3,369  | 1,236 | 9,638  |
| 25 | 35  | 5,513  | 3,721  | 1,365 | 10,634 |
| 26 | 35  | 5,978  | 3,914  | 1,457 | 11,384 |
| 27 | 38  | 6,526  | 4,113  | 1,536 | 12,213 |
| 28 | 39  | 6,969  | 4,273  | 1,613 | 12,894 |
| 29 | 48  | 7,504  | 4,484  | 1,708 | 13,744 |
| 30 | 49  | 7,995  | 4,712  | 1,783 | 14,539 |
| 31 | 56  | 8,467  | 4,916  | 1,848 | 15,287 |
| 32 | 57  | 8,946  | 5,165  | 1,913 | 16,081 |
| 33 | 61  | 9,002  | 5,266  | 1,927 | 16,256 |
| 34 | 68  | 9,917  | 5,654  | 2,086 | 17,725 |
| 35 | 77  | 10,414 | 5,903  | 2,185 | 18,579 |
| 36 | 83  | 10,893 | 6,166  | 2,278 | 19,420 |
| 37 | 85  | 11,277 | 6,368  | 2,370 | 20,100 |
| 38 | 85  | 11,642 | 6,591  | 2,453 | 20,771 |
| 39 | 89  | 12,163 | 6,877  | 2,549 | 21,678 |
| 40 | 93  | 12,755 | 7,153  | 2,642 | 22,643 |
| 41 | 96  | 13,334 | 7,482  | 2,760 | 23,672 |
| 42 | 102 | 14,018 | 7,839  | 2,883 | 24,842 |
| 43 | 103 | 14,458 | 8,131  | 3,003 | 25,695 |
| 44 | 111 | 14,877 | 8,525  | 3,120 | 26,633 |
| 45 | 114 | 15,716 | 8,896  | 3,261 | 27,987 |
| 46 | 116 | 16,315 | 9,243  | 3,373 | 29,047 |
| 47 | 121 | 16,907 | 9,584  | 3,499 | 30,111 |
| 48 | 128 | 17,579 | 9,940  | 3,640 | 31,287 |
| 49 | 132 | 18,092 | 10,321 | 3,768 | 32,313 |
| 50 | 142 | 18,576 | 10,645 | 3,879 | 33,242 |
| 51 | 141 | 18,596 | 10,341 | 3,772 | 32,850 |
| 52 | 145 | 18,792 | 10,419 | 3,794 | 33,150 |
| 53 | 146 | 18,757 | 10,394 | 3,790 | 33,087 |
| 54 | 141 | 18,671 | 10,420 | 3,792 | 33,024 |
| 55 | 150 | 19,129 | 10,865 | 3,946 | 34,090 |

|    |     |        |        |       |        |
|----|-----|--------|--------|-------|--------|
| 56 | 152 | 19,103 | 11,001 | 3,973 | 34,229 |
| 57 | 151 | 19,235 | 11,175 | 4,042 | 34,603 |
| 58 | 153 | 19,292 | 11,307 | 4,080 | 34,832 |
| 59 | 153 | 19,393 | 11,417 | 4,124 | 35,087 |
| 60 | 152 | 19,481 | 11,494 | 4,166 | 35,293 |
| 61 | 152 | 19,727 | 11,669 | 4,229 | 35,777 |
| 62 | 158 | 19,869 | 11,819 | 4,250 | 36,096 |
| 63 | 160 | 20,177 | 11,955 | 4,309 | 36,601 |
| 64 | 160 | 20,218 | 11,982 | 4,323 | 36,683 |
| 65 | 161 | 20,316 | 12,125 | 4,369 | 36,971 |
| 66 | 162 | 20,374 | 12,250 | 4,401 | 37,187 |
| 67 | 162 | 20,597 | 12,526 | 4,475 | 37,760 |
| 68 | 164 | 20,754 | 12,647 | 4,505 | 38,070 |
| 69 | 163 | 20,871 | 12,738 | 4,535 | 38,307 |
| 70 | 161 | 21,121 | 12,843 | 4,564 | 38,689 |
| 71 | 157 | 21,234 | 13,009 | 4,603 | 39,003 |
| 72 | 156 | 21,277 | 13,102 | 4,619 | 39,154 |
| 73 | 155 | 21,342 | 13,203 | 4,643 | 39,343 |
| 74 | 154 | 21,548 | 13,340 | 4,657 | 39,699 |
| 75 | 155 | 21,405 | 13,339 | 4,615 | 39,514 |
| 76 | 158 | 21,718 | 13,571 | 4,676 | 40,123 |
| 77 | 159 | 21,573 | 13,641 | 4,683 | 40,056 |
| 78 | 159 | 21,032 | 13,609 | 4,638 | 39,438 |
| 79 | 158 | 20,977 | 13,611 | 4,634 | 39,380 |
| 80 | 154 | 20,935 | 13,791 | 4,641 | 39,521 |
| 81 | 154 | 20,769 | 13,778 | 4,625 | 39,326 |
| 82 | 150 | 20,749 | 13,873 | 4,663 | 39,435 |
| 83 | 150 | 20,677 | 13,910 | 4,691 | 39,428 |
| 84 | 151 | 20,618 | 13,939 | 4,707 | 39,415 |
| 85 | 147 | 20,550 | 13,960 | 4,706 | 39,363 |
| 86 | 142 | 20,570 | 14,007 | 4,689 | 39,408 |
| 87 | 140 | 20,615 | 14,028 | 4,691 | 39,474 |

|     |     |        |        |       |        |
|-----|-----|--------|--------|-------|--------|
| 88  | 144 | 20,478 | 13,975 | 4,641 | 39,238 |
| 89  | 144 | 20,533 | 13,983 | 4,643 | 39,303 |
| 90  | 143 | 20,559 | 14,152 | 4,688 | 39,542 |
| 91  | 139 | 20,394 | 14,132 | 4,682 | 39,347 |
| 92  | 137 | 20,183 | 14,029 | 4,649 | 38,998 |
| 93  | 132 | 19,675 | 13,770 | 4,530 | 38,107 |
| 94  | 132 | 19,637 | 13,729 | 4,508 | 38,006 |
| 95  | 125 | 19,646 | 13,572 | 4,474 | 37,817 |
| 96  | 124 | 19,198 | 13,459 | 4,426 | 37,207 |
| 97  | 124 | 18,966 | 13,342 | 4,395 | 36,827 |
| 98  | 124 | 18,661 | 13,226 | 4,335 | 36,346 |
| 99  | 117 | 18,272 | 13,130 | 4,268 | 35,787 |
| 100 | 114 | 18,282 | 13,095 | 4,230 | 35,721 |
| 101 | 104 | 18,188 | 12,978 | 4,190 | 35,460 |
| 102 | 104 | 18,073 | 12,887 | 4,151 | 35,215 |
| 103 | 101 | 18,042 | 12,838 | 4,141 | 35,122 |
| 104 | 97  | 17,983 | 12,723 | 4,111 | 34,914 |
| 105 | 96  | 18,067 | 12,591 | 4,087 | 34,841 |
| 106 | 89  | 17,641 | 12,264 | 3,969 | 33,963 |
| 107 | 89  | 17,838 | 12,213 | 3,967 | 34,107 |
| 108 | 87  | 18,035 | 12,134 | 3,929 | 34,185 |
| 109 | 60  | 13,171 | 8,942  | 2,903 | 25,076 |
| 110 | 93  | 18,089 | 12,156 | 3,907 | 34,245 |
| 111 | 92  | 18,312 | 12,282 | 3,940 | 34,626 |
| 112 | 92  | 18,468 | 12,288 | 3,942 | 34,790 |
| 113 | 89  | 18,635 | 12,297 | 3,979 | 35,000 |
| 114 | 87  | 18,740 | 12,339 | 3,986 | 35,152 |
| 115 | 90  | 18,954 | 12,380 | 4,011 | 35,435 |
| 116 | 91  | 19,164 | 12,444 | 4,066 | 35,765 |
| 117 | 97  | 19,456 | 12,496 | 4,120 | 36,169 |
| 118 | 100 | 19,726 | 12,527 | 4,135 | 36,488 |
| 119 | 102 | 20,062 | 12,673 | 4,213 | 37,050 |

|     |     |        |        |       |        |
|-----|-----|--------|--------|-------|--------|
| 120 | 106 | 20,376 | 12,786 | 4,280 | 37,548 |
| 121 | 111 | 20,307 | 12,717 | 4,251 | 37,386 |
| 122 | 112 | 20,621 | 12,785 | 4,295 | 37,813 |
| 123 | 116 | 20,970 | 12,916 | 4,366 | 38,368 |
| 124 | 128 | 21,160 | 12,901 | 4,378 | 38,567 |
| 125 | 127 | 21,107 | 12,882 | 4,391 | 38,507 |
| 126 | 134 | 21,633 | 13,054 | 4,484 | 39,305 |
| 127 | 133 | 21,906 | 13,113 | 4,533 | 39,685 |
| 128 | 137 | 22,220 | 13,198 | 4,542 | 40,097 |
| 129 | 133 | 22,369 | 13,185 | 4,552 | 40,239 |
| 130 | 137 | 22,720 | 13,306 | 4,609 | 40,772 |
| 131 | 135 | 22,883 | 13,338 | 4,635 | 40,991 |
| 132 | 136 | 22,993 | 13,336 | 4,661 | 41,126 |
| 133 | 137 | 23,239 | 13,358 | 4,677 | 41,411 |
| 134 | 136 | 23,312 | 13,366 | 4,688 | 41,502 |
| 135 | 141 | 23,517 | 13,490 | 4,745 | 41,893 |
| 136 | 136 | 23,525 | 13,576 | 4,778 | 42,015 |
| 137 | 137 | 23,493 | 13,662 | 4,806 | 42,098 |
| 138 | 137 | 23,586 | 13,694 | 4,820 | 42,237 |
| 139 | 134 | 23,482 | 13,662 | 4,818 | 42,096 |
| 140 | 132 | 23,666 | 13,681 | 4,853 | 42,332 |
| 141 | 140 | 23,874 | 13,702 | 4,886 | 42,602 |
| 142 | 145 | 23,643 | 13,593 | 4,834 | 42,215 |
| 143 | 144 | 23,517 | 13,546 | 4,799 | 42,006 |
| 144 | 144 | 23,789 | 13,674 | 4,833 | 42,440 |
| 145 | 142 | 23,861 | 13,726 | 4,894 | 42,623 |
| 146 | 143 | 23,863 | 13,762 | 4,897 | 42,665 |
| 147 | 143 | 24,119 | 13,853 | 4,995 | 43,110 |
| 148 | 141 | 24,142 | 13,893 | 5,061 | 43,237 |
| 149 | 145 | 24,174 | 13,929 | 5,085 | 43,333 |
| 150 | 144 | 24,222 | 13,851 | 5,078 | 43,295 |
| 151 | 148 | 24,642 | 14,018 | 5,168 | 43,976 |

|     |     |        |        |       |        |
|-----|-----|--------|--------|-------|--------|
| 152 | 149 | 24,776 | 14,052 | 5,179 | 44,156 |
| 153 | 151 | 24,636 | 13,983 | 5,184 | 43,954 |
| 154 | 157 | 24,789 | 14,181 | 5,226 | 44,353 |
| 155 | 166 | 24,900 | 14,233 | 5,229 | 44,528 |
| 156 | 167 | 24,945 | 14,338 | 5,272 | 44,722 |
| 157 | 178 | 24,790 | 14,250 | 5,234 | 44,452 |
| 158 | 178 | 24,562 | 14,227 | 5,221 | 44,188 |
| 159 | 182 | 25,054 | 14,531 | 5,380 | 45,147 |
| 160 | 184 | 25,342 | 14,646 | 5,412 | 45,584 |
| 161 | 180 | 25,313 | 14,552 | 5,405 | 45,450 |
| 162 | 180 | 25,428 | 14,619 | 5,444 | 45,671 |
| 163 | 180 | 25,420 | 14,627 | 5,451 | 45,678 |
| 164 | 177 | 25,437 | 14,624 | 5,493 | 45,731 |
| 165 | 177 | 25,418 | 14,597 | 5,491 | 45,683 |
| 166 | 173 | 25,108 | 14,467 | 5,431 | 45,179 |
| 167 | 173 | 25,497 | 14,678 | 5,504 | 45,852 |
| 168 | 167 | 25,251 | 14,555 | 5,454 | 45,427 |
| 169 | 164 | 24,849 | 14,427 | 5,403 | 44,843 |
| 170 | 159 | 25,182 | 14,629 | 5,429 | 45,399 |
| 171 | 155 | 25,233 | 14,613 | 5,382 | 45,383 |
| 172 | 150 | 25,183 | 14,536 | 5,394 | 45,263 |
| 173 | 144 | 24,883 | 14,330 | 5,329 | 44,686 |
| 174 | 144 | 24,991 | 14,348 | 5,335 | 44,818 |
| 175 | 128 | 24,890 | 14,409 | 5,395 | 44,822 |
| 176 | 127 | 24,608 | 14,259 | 5,356 | 44,350 |
| 177 | 127 | 24,288 | 14,132 | 5,311 | 43,858 |
| 178 | 129 | 24,317 | 14,106 | 5,312 | 43,864 |
| 179 | 125 | 23,889 | 13,930 | 5,252 | 43,196 |
| 180 | 128 | 24,201 | 13,989 | 5,294 | 43,612 |
| 181 | 123 | 24,168 | 13,927 | 5,283 | 43,501 |
| 182 | 122 | 24,135 | 13,850 | 5,291 | 43,398 |
| 183 | 120 | 23,781 | 13,713 | 5,243 | 42,857 |

|     |     |        |        |       |        |
|-----|-----|--------|--------|-------|--------|
| 184 | 120 | 24,023 | 13,814 | 5,295 | 43,252 |
| 185 | 122 | 24,160 | 13,801 | 5,291 | 43,374 |
| 186 | 119 | 24,101 | 13,629 | 5,189 | 43,038 |
| 187 | 125 | 24,261 | 13,633 | 5,183 | 43,202 |
| 188 | 120 | 24,055 | 13,425 | 5,136 | 42,736 |
| 189 | 115 | 24,133 | 13,517 | 5,181 | 42,946 |
| 190 | 118 | 24,066 | 13,544 | 5,181 | 42,909 |
| 191 | 118 | 23,636 | 13,398 | 5,113 | 42,265 |
| 192 | 117 | 24,028 | 13,597 | 5,180 | 42,922 |
| 193 | 110 | 23,874 | 13,546 | 5,188 | 42,718 |
| 194 | 115 | 23,696 | 13,491 | 5,188 | 42,490 |
| 195 | 116 | 23,697 | 13,561 | 5,174 | 42,548 |
| 196 | 114 | 23,672 | 13,573 | 5,181 | 42,540 |
| 197 | 115 | 23,741 | 13,561 | 5,173 | 42,590 |
| 198 | 116 | 23,866 | 13,578 | 5,154 | 42,714 |
| 199 | 111 | 23,672 | 13,392 | 5,058 | 42,233 |
| 200 | 117 | 24,270 | 13,642 | 5,137 | 43,166 |
| 201 | 120 | 24,037 | 13,487 | 5,089 | 42,733 |
| 202 | 116 | 23,912 | 13,367 | 5,044 | 42,439 |
| 203 | 121 | 24,372 | 13,711 | 5,147 | 43,351 |
| 204 | 118 | 24,228 | 13,668 | 5,134 | 43,148 |
| 205 | 113 | 24,318 | 13,568 | 5,112 | 43,111 |
| 206 | 104 | 23,994 | 13,380 | 5,039 | 42,517 |
| 207 | 110 | 24,157 | 13,470 | 5,069 | 42,806 |
| 208 | 101 | 24,172 | 13,471 | 5,053 | 42,797 |
| 209 | 100 | 24,041 | 13,457 | 5,047 | 42,645 |
| 210 | 99  | 23,945 | 13,431 | 5,003 | 42,478 |
| 211 | 97  | 23,708 | 13,362 | 4,980 | 42,147 |
| 212 | 96  | 23,676 | 13,287 | 4,966 | 42,025 |
| 213 | 98  | 23,762 | 13,265 | 4,960 | 42,085 |
| 214 | 99  | 23,768 | 13,233 | 4,934 | 42,034 |
| 215 | 101 | 23,805 | 13,196 | 4,894 | 41,996 |

|     |     |        |        |       |        |
|-----|-----|--------|--------|-------|--------|
| 216 | 100 | 23,645 | 13,073 | 4,840 | 41,658 |
| 217 | 106 | 23,955 | 13,212 | 4,906 | 42,179 |
| 218 | 105 | 23,653 | 13,007 | 4,807 | 41,572 |
| 219 | 110 | 23,940 | 13,054 | 4,826 | 41,930 |
| 220 | 115 | 24,041 | 13,073 | 4,813 | 42,042 |
| 221 | 120 | 23,745 | 12,909 | 4,782 | 41,556 |
| 222 | 119 | 23,185 | 12,729 | 4,734 | 40,767 |
| 223 | 127 | 23,593 | 12,992 | 4,801 | 41,513 |
| 224 | 126 | 23,326 | 12,849 | 4,742 | 41,043 |
| 225 | 128 | 23,516 | 12,970 | 4,761 | 41,375 |
| 226 | 131 | 23,408 | 12,878 | 4,724 | 41,141 |
| 227 | 128 | 23,148 | 12,714 | 4,664 | 40,654 |
| 228 | 127 | 23,370 | 12,840 | 4,709 | 41,046 |
| 229 | 127 | 23,144 | 12,776 | 4,674 | 40,721 |
| 230 | 126 | 22,885 | 12,677 | 4,634 | 40,322 |
| 231 | 130 | 23,075 | 12,920 | 4,715 | 40,840 |
| 232 | 134 | 23,091 | 12,922 | 4,725 | 40,872 |
| 233 | 140 | 23,089 | 12,990 | 4,706 | 40,925 |
| 234 | 139 | 23,097 | 13,038 | 4,708 | 40,982 |
| 235 | 138 | 22,985 | 13,020 | 4,694 | 40,837 |
| 236 | 133 | 22,380 | 12,741 | 4,611 | 39,865 |
| 237 | 138 | 22,490 | 12,823 | 4,649 | 40,100 |
| 238 | 144 | 22,730 | 12,886 | 4,687 | 40,447 |
| 239 | 147 | 22,616 | 12,790 | 4,633 | 40,186 |
| 240 | 147 | 22,813 | 12,798 | 4,630 | 40,388 |
| 241 | 144 | 22,912 | 12,838 | 4,641 | 40,535 |
| 242 | 146 | 23,029 | 12,821 | 4,639 | 40,635 |
| 243 | 152 | 22,889 | 12,648 | 4,572 | 40,261 |
| 244 | 152 | 22,834 | 12,619 | 4,571 | 40,176 |
| 245 | 147 | 23,140 | 12,703 | 4,607 | 40,597 |
| 246 | 146 | 22,757 | 12,439 | 4,542 | 39,884 |
| 247 | 146 | 22,965 | 12,504 | 4,557 | 40,172 |



|     |     |        |        |       |        |
|-----|-----|--------|--------|-------|--------|
| 248 | 145 | 23,183 | 12,532 | 4,556 | 40,416 |
| 249 | 144 | 22,724 | 12,360 | 4,488 | 39,716 |
| 250 | 145 | 22,580 | 12,365 | 4,489 | 39,579 |
| 251 | 139 | 22,424 | 12,410 | 4,500 | 39,473 |
| 252 | 138 | 22,267 | 12,323 | 4,483 | 39,211 |
| 253 | 141 | 22,267 | 12,318 | 4,494 | 39,220 |
| 254 | 141 | 21,933 | 12,146 | 4,474 | 38,694 |
| 255 | 144 | 22,264 | 12,280 | 4,498 | 39,186 |
| 256 | 151 | 22,333 | 12,375 | 4,517 | 39,376 |
| 257 | 150 | 22,502 | 12,394 | 4,519 | 39,565 |
| 258 | 148 | 22,809 | 12,515 | 4,566 | 40,038 |
| 259 | 145 | 22,954 | 12,573 | 4,583 | 40,255 |
| 260 | 151 | 23,147 | 12,528 | 4,567 | 40,393 |
| 261 | 151 | 23,078 | 12,533 | 4,571 | 40,333 |
| 262 | 152 | 23,359 | 12,727 | 4,642 | 40,880 |
| 263 | 159 | 23,500 | 12,822 | 4,659 | 41,140 |
| 264 | 165 | 23,560 | 12,855 | 4,675 | 41,255 |
| 265 | 173 | 23,265 | 12,746 | 4,634 | 40,818 |
| 266 | 171 | 23,188 | 12,698 | 4,624 | 40,681 |
| 267 | 171 | 23,542 | 12,932 | 4,692 | 41,337 |
| 268 | 182 | 23,879 | 13,109 | 4,772 | 41,942 |
| 269 | 188 | 23,692 | 13,033 | 4,758 | 41,671 |
| 270 | 184 | 23,565 | 13,006 | 4,755 | 41,510 |
| 271 | 178 | 23,900 | 13,284 | 4,877 | 42,239 |
| 272 | 184 | 24,232 | 13,452 | 4,924 | 42,792 |
| 273 | 188 | 24,418 | 13,536 | 4,942 | 43,084 |
| 274 | 184 | 24,429 | 13,565 | 4,970 | 43,148 |
| 275 | 186 | 24,306 | 13,495 | 4,939 | 42,926 |
| 276 | 195 | 24,586 | 13,591 | 4,977 | 43,349 |
| 277 | 196 | 24,552 | 13,542 | 4,931 | 43,221 |
| 278 | 197 | 24,672 | 13,581 | 4,950 | 43,400 |
| 279 | 194 | 24,658 | 13,555 | 4,961 | 43,368 |

|     |     |        |        |       |        |
|-----|-----|--------|--------|-------|--------|
| 280 | 206 | 24,799 | 13,692 | 5,000 | 43,697 |
| 281 | 207 | 25,182 | 13,769 | 5,036 | 44,194 |
| 282 | 204 | 25,365 | 13,861 | 5,071 | 44,501 |
| 283 | 206 | 25,355 | 13,942 | 5,071 | 44,574 |
| 284 | 201 | 25,534 | 13,976 | 5,109 | 44,820 |
| 285 | 198 | 24,894 | 13,679 | 4,994 | 43,765 |
| 286 | 200 | 25,307 | 13,814 | 5,065 | 44,386 |
| 287 | 196 | 25,606 | 13,907 | 5,115 | 44,824 |
| 288 | 194 | 25,638 | 13,896 | 5,122 | 44,850 |
| 289 | 191 | 25,695 | 13,929 | 5,129 | 44,944 |
| 290 | 187 | 25,708 | 13,860 | 5,133 | 44,888 |
| 291 | 189 | 25,549 | 13,721 | 5,091 | 44,550 |
| 292 | 189 | 25,976 | 13,956 | 5,170 | 45,291 |
| 293 | 186 | 26,019 | 14,012 | 5,181 | 45,398 |
| 294 | 178 | 26,048 | 14,050 | 5,221 | 45,497 |
| 295 | 180 | 25,556 | 13,818 | 5,127 | 44,681 |
| 296 | 182 | 25,957 | 13,981 | 5,180 | 45,300 |
| 297 | 182 | 26,291 | 14,124 | 5,227 | 45,824 |
| 298 | 186 | 26,544 | 14,268 | 5,283 | 46,281 |
| 299 | 186 | 26,360 | 14,239 | 5,293 | 46,078 |
| 300 | 186 | 26,496 | 14,275 | 5,318 | 46,275 |
| 301 | 188 | 26,677 | 14,286 | 5,331 | 46,482 |
| 302 | 190 | 26,667 | 14,220 | 5,316 | 46,393 |
| 303 | 191 | 27,160 | 14,296 | 5,353 | 47,000 |
| 304 | 195 | 27,052 | 14,244 | 5,333 | 46,824 |
| 305 | 202 | 27,089 | 14,260 | 5,340 | 46,891 |
| 306 | 204 | 27,193 | 14,315 | 5,381 | 47,093 |
| 307 | 205 | 27,295 | 14,327 | 5,403 | 47,230 |
| 308 | 209 | 27,470 | 14,371 | 5,445 | 47,495 |
| 309 | 213 | 27,272 | 14,226 | 5,379 | 47,090 |
| 310 | 211 | 27,121 | 14,094 | 5,347 | 46,773 |
| 311 | 212 | 27,482 | 14,223 | 5,447 | 47,364 |

|     |     |        |        |       |        |
|-----|-----|--------|--------|-------|--------|
| 312 | 218 | 27,622 | 14,179 | 5,465 | 47,484 |
| 313 | 219 | 28,090 | 14,345 | 5,546 | 48,200 |
| 314 | 209 | 27,226 | 13,850 | 5,366 | 46,651 |
| 315 | 208 | 27,595 | 13,972 | 5,428 | 47,203 |
| 316 | 204 | 28,023 | 14,061 | 5,495 | 47,783 |
| 317 | 203 | 27,854 | 13,894 | 5,452 | 47,403 |
| 318 | 205 | 28,210 | 13,973 | 5,484 | 47,872 |
| 319 | 198 | 28,504 | 14,084 | 5,549 | 48,335 |
| 320 | 195 | 28,474 | 14,041 | 5,543 | 48,253 |
| 321 | 197 | 28,569 | 14,004 | 5,559 | 48,329 |
| 322 | 197 | 28,635 | 13,956 | 5,557 | 48,345 |
| 323 | 191 | 28,859 | 13,934 | 5,549 | 48,533 |
| 324 | 177 | 27,932 | 13,448 | 5,382 | 46,939 |
| 325 | 179 | 28,429 | 13,579 | 5,439 | 47,626 |
| 326 | 181 | 28,561 | 13,555 | 5,454 | 47,751 |
| 327 | 183 | 29,025 | 13,694 | 5,526 | 48,428 |
| 328 | 180 | 29,065 | 13,720 | 5,539 | 48,504 |
| 329 | 184 | 28,888 | 13,590 | 5,469 | 48,131 |
| 330 | 183 | 28,852 | 13,486 | 5,426 | 47,947 |
| 331 | 176 | 29,774 | 13,814 | 5,595 | 49,359 |
| 332 | 176 | 29,590 | 13,709 | 5,535 | 49,010 |
| 333 | 175 | 29,255 | 13,473 | 5,470 | 48,373 |
| 334 | 172 | 29,545 | 13,505 | 5,499 | 48,721 |
| 335 | 171 | 29,112 | 13,287 | 5,420 | 47,990 |
| 336 | 172 | 29,052 | 13,272 | 5,435 | 47,931 |
| 337 | 177 | 28,848 | 13,133 | 5,378 | 47,536 |
| 338 | 178 | 28,571 | 13,009 | 5,356 | 47,114 |
| 339 | 183 | 29,600 | 13,408 | 5,530 | 48,721 |
| 340 | 183 | 29,605 | 13,382 | 5,530 | 48,700 |
| 341 | 189 | 29,440 | 13,369 | 5,523 | 48,521 |
| 342 | 198 | 29,451 | 13,383 | 5,548 | 48,580 |
| 343 | 204 | 29,656 | 13,415 | 5,586 | 48,861 |

|     |     |        |        |       |        |
|-----|-----|--------|--------|-------|--------|
| 344 | 208 | 29,704 | 13,425 | 5,603 | 48,940 |
| 345 | 222 | 29,690 | 13,355 | 5,561 | 48,828 |
| 346 | 221 | 29,508 | 13,236 | 5,530 | 48,495 |
| 347 | 226 | 29,373 | 13,155 | 5,537 | 48,291 |
| 348 | 225 | 29,163 | 13,022 | 5,496 | 47,906 |
| 349 | 231 | 29,960 | 13,339 | 5,638 | 49,168 |
| 350 | 231 | 29,939 | 13,324 | 5,658 | 49,152 |
| 351 | 230 | 30,007 | 13,343 | 5,652 | 49,232 |
| 352 | 229 | 30,066 | 13,373 | 5,651 | 49,319 |
| 353 | 232 | 30,675 | 13,587 | 5,751 | 50,245 |
| 354 | 238 | 30,444 | 13,486 | 5,708 | 49,876 |
| 355 | 231 | 30,054 | 13,350 | 5,660 | 49,295 |
| 356 | 226 | 30,529 | 13,628 | 5,807 | 50,190 |
| 357 | 215 | 30,331 | 13,465 | 5,777 | 49,788 |
| 358 | 213 | 30,618 | 13,546 | 5,811 | 50,188 |
| 359 | 217 | 30,663 | 13,538 | 5,833 | 50,251 |
| 360 | 210 | 30,365 | 13,342 | 5,784 | 49,701 |
| 361 | 212 | 30,572 | 13,367 | 5,792 | 49,943 |
| 362 | 215 | 30,462 | 13,324 | 5,721 | 49,722 |
| 363 | 207 | 28,933 | 12,767 | 5,439 | 47,346 |
| 364 | 209 | 29,304 | 12,861 | 5,474 | 47,848 |
| 365 | 199 | 29,635 | 12,946 | 5,530 | 48,310 |
| 366 | 202 | 29,436 | 12,880 | 5,509 | 48,027 |
| 367 | 202 | 29,553 | 12,853 | 5,495 | 48,103 |
| 368 | 204 | 29,725 | 12,925 | 5,484 | 48,338 |
| 369 | 205 | 29,782 | 12,953 | 5,471 | 48,411 |
| 370 | 207 | 29,810 | 12,943 | 5,462 | 48,422 |
| 371 | 202 | 29,390 | 12,707 | 5,352 | 47,651 |
| 372 | 201 | 29,583 | 12,813 | 5,393 | 47,990 |
| 373 | 215 | 29,444 | 12,752 | 5,377 | 47,788 |
| 374 | 213 | 28,742 | 12,545 | 5,339 | 46,839 |
| 375 | 216 | 28,988 | 12,601 | 5,378 | 47,183 |

|     |     |        |        |       |        |
|-----|-----|--------|--------|-------|--------|
| 376 | 219 | 29,015 | 12,595 | 5,363 | 47,192 |
| 377 | 219 | 29,084 | 12,588 | 5,384 | 47,275 |
| 378 | 215 | 28,817 | 12,428 | 5,323 | 46,783 |
| 379 | 214 | 28,862 | 12,400 | 5,321 | 46,797 |
| 380 | 219 | 29,316 | 12,513 | 5,384 | 47,432 |
| 381 | 219 | 28,445 | 12,222 | 5,278 | 46,164 |
| 382 | 222 | 28,726 | 12,308 | 5,302 | 46,558 |
| 383 | 222 | 28,824 | 12,277 | 5,300 | 46,623 |
| 384 | 226 | 28,594 | 12,135 | 5,245 | 46,200 |
| 385 | 225 | 28,287 | 12,055 | 5,212 | 45,779 |
| 386 | 225 | 28,926 | 12,408 | 5,328 | 46,887 |
| 387 | 223 | 28,984 | 12,398 | 5,317 | 46,922 |
| 388 | 236 | 29,196 | 12,488 | 5,365 | 47,285 |
| 389 | 233 | 29,386 | 12,508 | 5,374 | 47,501 |
| 390 | 226 | 28,916 | 12,337 | 5,312 | 46,791 |
| 391 | 227 | 28,837 | 12,305 | 5,281 | 46,650 |
| 392 | 228 | 28,840 | 12,281 | 5,261 | 46,610 |
| 393 | 215 | 29,230 | 12,349 | 5,326 | 47,120 |
| 394 | 218 | 29,099 | 12,330 | 5,303 | 46,950 |
| 395 | 217 | 28,810 | 12,159 | 5,238 | 46,424 |
| 396 | 203 | 28,591 | 12,067 | 5,187 | 46,048 |
| 397 | 202 | 28,214 | 11,929 | 5,078 | 45,423 |
| 398 | 204 | 28,419 | 11,983 | 5,122 | 45,728 |
| 399 | 205 | 28,795 | 12,090 | 5,183 | 46,273 |
| 400 | 209 | 28,834 | 12,085 | 5,173 | 46,301 |
| 401 | 208 | 28,581 | 11,993 | 5,120 | 45,902 |
| 402 | 211 | 28,703 | 12,114 | 5,188 | 46,216 |
| 403 | 217 | 28,500 | 12,066 | 5,161 | 45,944 |
| 404 | 215 | 28,128 | 11,990 | 5,132 | 45,465 |
| 405 | 205 | 27,909 | 11,836 | 5,050 | 45,000 |
| 406 | 204 | 27,894 | 11,740 | 5,031 | 44,869 |
| 407 | 209 | 28,226 | 11,918 | 5,072 | 45,425 |

|     |     |        |        |       |        |
|-----|-----|--------|--------|-------|--------|
| 408 | 214 | 27,997 | 11,848 | 4,975 | 45,034 |
| 409 | 215 | 28,050 | 11,841 | 4,989 | 45,095 |
| 410 | 209 | 28,163 | 11,952 | 5,011 | 45,335 |
| 411 | 208 | 27,736 | 11,818 | 4,954 | 44,716 |
| 412 | 208 | 27,685 | 11,792 | 4,936 | 44,621 |
| 413 | 200 | 28,151 | 11,999 | 5,041 | 45,391 |
| 414 | 198 | 28,342 | 12,083 | 5,089 | 45,712 |
| 415 | 201 | 28,226 | 12,045 | 5,082 | 45,554 |
| 416 | 201 | 28,520 | 12,144 | 5,139 | 46,004 |
| 417 | 199 | 28,476 | 12,113 | 5,120 | 45,908 |
| 418 | 203 | 29,172 | 12,508 | 5,270 | 47,153 |
| 419 | 210 | 29,257 | 12,636 | 5,336 | 47,439 |
| 420 | 207 | 29,371 | 12,662 | 5,355 | 47,595 |
| 421 | 213 | 29,686 | 12,793 | 5,384 | 48,076 |
| 422 | 207 | 29,004 | 12,575 | 5,244 | 47,030 |
| 423 | 207 | 29,392 | 12,713 | 5,301 | 47,613 |
| 424 | 199 | 29,754 | 12,855 | 5,353 | 48,161 |
| 425 | 203 | 29,843 | 12,838 | 5,337 | 48,221 |
| 426 | 199 | 29,589 | 12,762 | 5,293 | 47,843 |
| 427 | 195 | 29,580 | 12,904 | 5,368 | 48,047 |
| 428 | 204 | 29,783 | 12,975 | 5,376 | 48,338 |
| 429 | 201 | 29,242 | 12,787 | 5,271 | 47,501 |
| 430 | 205 | 29,646 | 12,849 | 5,294 | 47,994 |
| 431 | 206 | 29,593 | 12,840 | 5,282 | 47,921 |
| 432 | 204 | 29,301 | 12,783 | 5,244 | 47,532 |
| 433 | 216 | 30,503 | 13,225 | 5,434 | 49,378 |
| 434 | 223 | 30,786 | 13,273 | 5,471 | 49,753 |
| 435 | 223 | 30,507 | 13,170 | 5,387 | 49,287 |
| 436 | 222 | 30,220 | 13,051 | 5,328 | 48,821 |
| 437 | 252 | 30,959 | 13,385 | 5,476 | 50,072 |
| 438 | 258 | 31,171 | 13,384 | 5,502 | 50,315 |
| 439 | 246 | 31,506 | 13,477 | 5,536 | 50,765 |

|     |     |        |        |       |        |
|-----|-----|--------|--------|-------|--------|
| 440 | 257 | 31,043 | 13,324 | 5,455 | 50,079 |
| 441 | 258 | 30,807 | 13,250 | 5,415 | 49,730 |
| 442 | 273 | 32,419 | 13,751 | 5,596 | 52,039 |
| 443 | 266 | 31,887 | 13,525 | 5,470 | 51,148 |
| 444 | 267 | 32,263 | 13,661 | 5,524 | 51,715 |
| 445 | 266 | 32,560 | 13,766 | 5,548 | 52,140 |
| 446 | 269 | 32,504 | 13,675 | 5,541 | 51,989 |
| 447 | 268 | 32,336 | 13,617 | 5,512 | 51,733 |
| 448 | 258 | 32,238 | 13,528 | 5,505 | 51,529 |
| 449 | 259 | 32,631 | 13,738 | 5,552 | 52,180 |
| 450 | 257 | 32,631 | 13,783 | 5,574 | 52,245 |
| 451 | 253 | 32,689 | 13,765 | 5,572 | 52,279 |
| 452 | 258 | 32,717 | 13,693 | 5,529 | 52,197 |
| 453 | 254 | 32,956 | 13,671 | 5,506 | 52,387 |
| 454 | 253 | 32,901 | 13,614 | 5,480 | 52,248 |
| 455 | 253 | 32,890 | 13,606 | 5,468 | 52,217 |
| 456 | 254 | 32,974 | 13,595 | 5,462 | 52,285 |
| 457 | 255 | 32,644 | 13,416 | 5,380 | 51,695 |
| 458 | 253 | 32,385 | 13,339 | 5,338 | 51,315 |
| 459 | 251 | 32,687 | 13,498 | 5,405 | 51,841 |
| 460 | 249 | 32,380 | 13,359 | 5,332 | 51,320 |
| 461 | 249 | 32,518 | 13,368 | 5,337 | 51,472 |
| 462 | 246 | 32,120 | 13,256 | 5,298 | 50,920 |
| 463 | 253 | 31,824 | 13,200 | 5,255 | 50,532 |
| 464 | 257 | 31,960 | 13,257 | 5,297 | 50,771 |
| 465 | 257 | 31,587 | 13,253 | 5,250 | 50,347 |
| 466 | 260 | 31,336 | 13,221 | 5,223 | 50,040 |
| 467 | 257 | 31,155 | 13,183 | 5,207 | 49,802 |
| 468 | 261 | 30,766 | 12,997 | 5,133 | 49,157 |
| 469 | 257 | 30,501 | 12,894 | 5,062 | 48,714 |
| 470 | 251 | 30,562 | 12,940 | 5,038 | 48,791 |
| 471 | 256 | 30,363 | 12,847 | 5,023 | 48,489 |

|     |     |        |        |       |        |
|-----|-----|--------|--------|-------|--------|
| 472 | 250 | 30,168 | 12,776 | 4,983 | 48,177 |
| 473 | 248 | 29,915 | 12,707 | 4,975 | 47,845 |
| 474 | 256 | 29,989 | 12,689 | 4,964 | 47,898 |
| 475 | 255 | 29,965 | 12,686 | 4,966 | 47,872 |
| 476 | 262 | 30,005 | 12,641 | 4,952 | 47,860 |
| 477 | 265 | 29,948 | 12,603 | 4,935 | 47,751 |
| 478 | 260 | 30,008 | 12,594 | 4,898 | 47,760 |
| 479 | 265 | 29,615 | 12,536 | 4,870 | 47,286 |
| 480 | 264 | 29,078 | 12,421 | 4,833 | 46,596 |
| 481 | 260 | 29,390 | 12,631 | 4,908 | 47,189 |
| 482 | 259 | 29,239 | 12,608 | 4,890 | 46,996 |
| 483 | 257 | 29,152 | 12,567 | 4,881 | 46,857 |
| 484 | 247 | 29,122 | 12,561 | 4,854 | 46,784 |
| 485 | 240 | 29,219 | 12,633 | 4,847 | 46,939 |
| 486 | 224 | 29,269 | 12,552 | 4,848 | 46,893 |
| 487 | 214 | 29,126 | 12,412 | 4,796 | 46,548 |
| 488 | 217 | 28,703 | 12,342 | 4,772 | 46,034 |
| 489 | 217 | 28,482 | 12,305 | 4,743 | 45,747 |
| 490 | 205 | 28,379 | 12,304 | 4,723 | 45,611 |
| 491 | 205 | 28,061 | 12,183 | 4,686 | 45,135 |
| 492 | 203 | 27,509 | 12,074 | 4,636 | 44,422 |
| 493 | 206 | 27,637 | 12,247 | 4,710 | 44,800 |
| 494 | 214 | 27,272 | 12,140 | 4,659 | 44,285 |
| 495 | 225 | 27,410 | 12,216 | 4,675 | 44,526 |
| 496 | 225 | 27,464 | 12,249 | 4,704 | 44,642 |
| 497 | 229 | 27,160 | 12,182 | 4,655 | 44,226 |
| 498 | 227 | 26,939 | 12,112 | 4,630 | 43,908 |
| 499 | 229 | 27,376 | 12,267 | 4,685 | 44,557 |
| 500 | 227 | 27,076 | 12,131 | 4,613 | 44,047 |
| 501 | 230 | 27,016 | 12,110 | 4,594 | 43,950 |
| 502 | 225 | 26,675 | 12,000 | 4,543 | 43,443 |
| 503 | 221 | 26,894 | 12,105 | 4,595 | 43,815 |



|     |     |        |        |       |        |
|-----|-----|--------|--------|-------|--------|
| 504 | 217 | 26,507 | 12,016 | 4,560 | 43,300 |
| 505 | 217 | 26,264 | 11,964 | 4,524 | 42,969 |
| 506 | 214 | 26,564 | 12,059 | 4,551 | 43,388 |
| 507 | 213 | 26,159 | 11,939 | 4,503 | 42,814 |
| 508 | 212 | 26,144 | 11,947 | 4,508 | 42,811 |
| 509 | 213 | 25,914 | 11,866 | 4,495 | 42,488 |
| 510 | 212 | 25,708 | 11,753 | 4,449 | 42,122 |
| 511 | 219 | 25,775 | 11,776 | 4,464 | 42,234 |
| 512 | 224 | 25,596 | 11,743 | 4,455 | 42,018 |
| 513 | 218 | 25,322 | 11,587 | 4,386 | 41,513 |
| 514 | 220 | 25,287 | 11,660 | 4,418 | 41,585 |
| 515 | 218 | 25,122 | 11,579 | 4,372 | 41,291 |
| 516 | 222 | 25,262 | 11,495 | 4,374 | 41,353 |
| 517 | 219 | 25,269 | 11,438 | 4,348 | 41,274 |
| 518 | 217 | 24,905 | 11,198 | 4,240 | 40,560 |
| 519 | 216 | 24,856 | 11,164 | 4,251 | 40,487 |
| 520 | 218 | 24,748 | 11,064 | 4,253 | 40,283 |
| 521 | 224 | 24,857 | 11,072 | 4,224 | 40,377 |
| 522 | 220 | 24,360 | 10,872 | 4,161 | 39,613 |
| 523 | 219 | 24,154 | 10,836 | 4,127 | 39,336 |
| 524 | 214 | 24,340 | 10,910 | 4,160 | 39,624 |
| 525 | 211 | 24,164 | 10,848 | 4,147 | 39,370 |
| 526 | 209 | 23,961 | 10,843 | 4,159 | 39,172 |
| 527 | 202 | 23,897 | 10,853 | 4,173 | 39,125 |
| 528 | 199 | 23,604 | 10,751 | 4,124 | 38,678 |
| 529 | 203 | 23,501 | 10,792 | 4,156 | 38,652 |
| 530 | 197 | 23,491 | 10,787 | 4,153 | 38,628 |
| 531 | 204 | 23,437 | 10,740 | 4,183 | 38,564 |
| 532 | 208 | 23,350 | 10,777 | 4,183 | 38,518 |
| 533 | 206 | 23,500 | 10,903 | 4,239 | 38,848 |
| 534 | 217 | 23,402 | 10,879 | 4,238 | 38,736 |
| 535 | 222 | 23,223 | 10,774 | 4,231 | 38,450 |

|     |     |        |        |       |        |
|-----|-----|--------|--------|-------|--------|
| 536 | 226 | 23,113 | 10,742 | 4,244 | 38,325 |
| 537 | 204 | 21,749 | 10,243 | 4,044 | 36,240 |
| 538 | 208 | 21,984 | 10,287 | 4,043 | 36,522 |
| 539 | 210 | 22,160 | 10,308 | 4,050 | 36,728 |
| 540 | 220 | 21,579 | 9,995  | 3,942 | 35,736 |
| 541 | 204 | 21,470 | 9,875  | 3,891 | 35,440 |
| 542 | 221 | 21,724 | 9,963  | 3,930 | 35,838 |
| 543 | 224 | 21,474 | 9,784  | 3,865 | 35,347 |
| 544 | 214 | 21,246 | 9,630  | 3,799 | 34,889 |
| 545 | 224 | 21,924 | 9,769  | 3,918 | 35,835 |
| 546 | 215 | 21,973 | 9,767  | 3,911 | 35,866 |
| 547 | 228 | 21,976 | 9,745  | 3,903 | 35,852 |
| 548 | 217 | 21,649 | 9,579  | 3,833 | 35,278 |
| 549 | 220 | 21,645 | 9,508  | 3,800 | 35,173 |
| 550 | 235 | 21,699 | 9,518  | 3,799 | 35,251 |
| 551 | 234 | 21,419 | 9,414  | 3,774 | 34,841 |
| 552 | 240 | 22,397 | 9,757  | 3,934 | 36,328 |
| 553 | 241 | 22,342 | 9,673  | 3,886 | 36,142 |
| 554 | 244 | 22,553 | 9,643  | 3,879 | 36,319 |
| 555 | 246 | 22,665 | 9,677  | 3,896 | 36,484 |
| 556 | 245 | 22,558 | 9,546  | 3,860 | 36,209 |
| 557 | 244 | 23,069 | 9,705  | 3,927 | 36,945 |
| 558 | 244 | 23,262 | 9,793  | 3,937 | 37,236 |
| 559 | 241 | 23,163 | 9,724  | 3,930 | 37,058 |
| 560 | 241 | 23,294 | 9,787  | 3,957 | 37,279 |
| 561 | 241 | 23,499 | 9,943  | 4,014 | 37,697 |
| 562 | 233 | 23,338 | 9,932  | 4,004 | 37,507 |
| 563 | 230 | 23,508 | 9,971  | 4,047 | 37,756 |
| 564 | 228 | 23,604 | 9,974  | 4,064 | 37,870 |
| 565 | 232 | 23,640 | 9,950  | 4,059 | 37,881 |
| 566 | 229 | 23,429 | 9,888  | 4,016 | 37,562 |
| 567 | 218 | 23,406 | 10,045 | 4,090 | 37,759 |

|     |     |        |        |       |        |
|-----|-----|--------|--------|-------|--------|
| 568 | 218 | 23,577 | 10,188 | 4,146 | 38,129 |
| 569 | 216 | 23,394 | 10,188 | 4,170 | 37,968 |
| 570 | 215 | 23,577 | 10,272 | 4,205 | 38,269 |
| 571 | 211 | 23,197 | 10,167 | 4,173 | 37,748 |
| 572 | 214 | 23,704 | 10,359 | 4,246 | 38,523 |
| 573 | 213 | 23,938 | 10,429 | 4,286 | 38,866 |
| 574 | 214 | 24,301 | 10,473 | 4,318 | 39,306 |
| 575 | 215 | 24,453 | 10,517 | 4,356 | 39,541 |
| 576 | 213 | 24,419 | 10,461 | 4,344 | 39,437 |
| 577 | 213 | 24,463 | 10,403 | 4,294 | 39,373 |
| 578 | 215 | 24,781 | 10,508 | 4,332 | 39,836 |
| 579 | 209 | 25,108 | 10,582 | 4,385 | 40,284 |
| 580 | 211 | 25,395 | 10,580 | 4,383 | 40,569 |
| 581 | 211 | 25,464 | 10,655 | 4,405 | 40,735 |
| 582 | 218 | 25,583 | 10,619 | 4,390 | 40,810 |
| 583 | 220 | 25,399 | 10,477 | 4,308 | 40,404 |
| 584 | 224 | 25,598 | 10,505 | 4,329 | 40,656 |
| 585 | 220 | 25,808 | 10,560 | 4,335 | 40,923 |
| 586 | 218 | 25,498 | 10,423 | 4,300 | 40,439 |
| 587 | 222 | 25,261 | 10,325 | 4,231 | 40,039 |
| 588 | 221 | 25,278 | 10,322 | 4,235 | 40,056 |
| 589 | 227 | 25,348 | 10,357 | 4,262 | 40,194 |
| 590 | 225 | 25,471 | 10,459 | 4,281 | 40,436 |
| 591 | 227 | 25,736 | 10,539 | 4,328 | 40,830 |
| 592 | 226 | 25,595 | 10,507 | 4,325 | 40,653 |
| 593 | 211 | 25,619 | 10,535 | 4,328 | 40,693 |
| 594 | 211 | 25,372 | 10,458 | 4,307 | 40,348 |
| 595 | 202 | 24,961 | 10,356 | 4,279 | 39,798 |
| 596 | 206 | 25,488 | 10,661 | 4,358 | 40,713 |
| 597 | 205 | 25,541 | 10,678 | 4,363 | 40,787 |
| 598 | 196 | 25,215 | 10,552 | 4,303 | 40,266 |
| 599 | 195 | 24,985 | 10,489 | 4,278 | 39,947 |

|     |     |        |        |       |        |
|-----|-----|--------|--------|-------|--------|
| 600 | 192 | 25,103 | 10,627 | 4,364 | 40,286 |
| 601 | 180 | 25,124 | 10,717 | 4,403 | 40,424 |
| 602 | 179 | 25,167 | 10,726 | 4,387 | 40,459 |
| 603 | 178 | 24,824 | 10,647 | 4,336 | 39,985 |
| 604 | 179 | 24,970 | 10,711 | 4,388 | 40,248 |
| 605 | 187 | 25,089 | 10,813 | 4,422 | 40,511 |
| 606 | 191 | 25,006 | 10,823 | 4,419 | 40,439 |
| 607 | 193 | 24,988 | 10,835 | 4,410 | 40,426 |
| 608 | 192 | 25,000 | 10,887 | 4,435 | 40,514 |
| 609 | 190 | 24,685 | 10,774 | 4,415 | 40,064 |
| 610 | 194 | 24,634 | 10,879 | 4,467 | 40,174 |
| 611 | 194 | 24,586 | 10,858 | 4,445 | 40,083 |
| 612 | 194 | 24,468 | 10,842 | 4,422 | 39,926 |
| 613 | 195 | 24,534 | 10,798 | 4,426 | 39,953 |
| 614 | 196 | 24,710 | 10,819 | 4,427 | 40,152 |
| 615 | 205 | 24,933 | 10,881 | 4,440 | 40,459 |
| 616 | 199 | 24,969 | 10,828 | 4,405 | 40,401 |
| 617 | 206 | 25,195 | 10,894 | 4,434 | 40,729 |
| 618 | 206 | 25,095 | 10,796 | 4,399 | 40,496 |
| 619 | 215 | 25,275 | 10,779 | 4,386 | 40,655 |
| 620 | 215 | 25,246 | 10,770 | 4,387 | 40,618 |
| 621 | 215 | 25,151 | 10,812 | 4,391 | 40,569 |
| 622 | 215 | 25,281 | 10,803 | 4,400 | 40,699 |
| 623 | 217 | 24,955 | 10,664 | 4,367 | 40,203 |
| 624 | 218 | 25,311 | 10,731 | 4,422 | 40,682 |
| 625 | 217 | 24,942 | 10,639 | 4,369 | 40,167 |
| 626 | 222 | 24,746 | 10,579 | 4,330 | 39,877 |
| 627 | 232 | 25,040 | 10,667 | 4,379 | 40,318 |
| 628 | 234 | 24,826 | 10,628 | 4,372 | 40,060 |
| 629 | 234 | 24,899 | 10,636 | 4,373 | 40,142 |
| 630 | 228 | 24,931 | 10,651 | 4,382 | 40,192 |
| 631 | 231 | 24,443 | 10,440 | 4,287 | 39,401 |

|     |     |        |        |       |        |
|-----|-----|--------|--------|-------|--------|
| 632 | 231 | 24,808 | 10,512 | 4,323 | 39,874 |
| 633 | 228 | 24,908 | 10,497 | 4,325 | 39,958 |
| 634 | 228 | 24,741 | 10,423 | 4,311 | 39,703 |
| 635 | 233 | 25,045 | 10,555 | 4,379 | 40,212 |
| 636 | 235 | 25,171 | 10,568 | 4,401 | 40,375 |
| 637 | 227 | 25,223 | 10,658 | 4,400 | 40,508 |
| 638 | 225 | 25,360 | 10,678 | 4,423 | 40,686 |
| 639 | 224 | 25,407 | 10,792 | 4,450 | 40,873 |
| 640 | 223 | 25,476 | 10,796 | 4,482 | 40,977 |
| 641 | 222 | 25,772 | 10,881 | 4,545 | 41,420 |
| 642 | 216 | 25,476 | 10,850 | 4,525 | 41,067 |
| 643 | 222 | 25,875 | 11,038 | 4,611 | 41,746 |
| 644 | 226 | 25,860 | 10,972 | 4,613 | 41,671 |
| 645 | 233 | 26,197 | 11,091 | 4,658 | 42,179 |
| 646 | 239 | 26,550 | 11,170 | 4,686 | 42,645 |
| 647 | 239 | 26,454 | 11,180 | 4,678 | 42,551 |
| 648 | 236 | 26,436 | 11,138 | 4,657 | 42,467 |
| 649 | 239 | 26,284 | 10,989 | 4,589 | 42,101 |
| 650 | 241 | 26,713 | 11,061 | 4,619 | 42,634 |
| 651 | 239 | 27,067 | 11,210 | 4,689 | 43,205 |
| 652 | 244 | 27,083 | 11,203 | 4,680 | 43,210 |
| 653 | 240 | 26,712 | 11,041 | 4,638 | 42,631 |
| 654 | 239 | 26,743 | 11,042 | 4,626 | 42,650 |
| 655 | 239 | 27,135 | 11,159 | 4,676 | 43,209 |
| 656 | 229 | 27,210 | 11,138 | 4,701 | 43,278 |
| 657 | 223 | 26,955 | 11,008 | 4,668 | 42,854 |
| 658 | 228 | 27,023 | 11,093 | 4,720 | 43,064 |
| 659 | 228 | 27,024 | 11,071 | 4,713 | 43,036 |
| 660 | 228 | 27,351 | 11,112 | 4,720 | 43,411 |
| 661 | 231 | 27,634 | 11,143 | 4,742 | 43,750 |
| 662 | 227 | 27,340 | 10,949 | 4,675 | 43,191 |
| 663 | 228 | 27,345 | 10,923 | 4,672 | 43,168 |

|     |     |        |        |       |        |
|-----|-----|--------|--------|-------|--------|
| 664 | 228 | 27,078 | 10,838 | 4,625 | 42,769 |
| 665 | 226 | 26,792 | 10,736 | 4,573 | 42,327 |
| 666 | 242 | 27,914 | 11,152 | 4,791 | 44,099 |
| 667 | 246 | 27,887 | 11,166 | 4,813 | 44,112 |
| 668 | 240 | 27,377 | 10,933 | 4,733 | 43,283 |
| 669 | 241 | 27,598 | 11,015 | 4,771 | 43,625 |
| 670 | 233 | 27,686 | 10,985 | 4,782 | 43,686 |
| 671 | 232 | 27,596 | 10,988 | 4,786 | 43,602 |
| 672 | 234 | 27,695 | 10,951 | 4,777 | 43,657 |
| 673 | 231 | 27,362 | 10,805 | 4,728 | 43,126 |
| 674 | 226 | 27,208 | 10,827 | 4,743 | 43,004 |
| 675 | 228 | 27,258 | 10,895 | 4,772 | 43,153 |
| 676 | 222 | 26,796 | 10,772 | 4,733 | 42,523 |
| 677 | 225 | 27,043 | 10,832 | 4,765 | 42,865 |
| 678 | 217 | 27,010 | 10,807 | 4,744 | 42,778 |
| 679 | 217 | 26,951 | 10,757 | 4,742 | 42,667 |
| 680 | 215 | 26,293 | 10,538 | 4,622 | 41,668 |
| 681 | 216 | 26,470 | 10,547 | 4,633 | 41,866 |
| 682 | 209 | 26,534 | 10,539 | 4,627 | 41,909 |
| 683 | 202 | 26,369 | 10,474 | 4,568 | 41,613 |
| 684 | 207 | 26,724 | 10,558 | 4,612 | 42,101 |
| 685 | 204 | 26,633 | 10,523 | 4,601 | 41,961 |
| 686 | 193 | 26,392 | 10,438 | 4,557 | 41,580 |
| 687 | 195 | 26,411 | 10,450 | 4,570 | 41,626 |
| 688 | 190 | 26,367 | 10,520 | 4,602 | 41,679 |
| 689 | 190 | 26,476 | 10,480 | 4,587 | 41,733 |
| 690 | 191 | 26,334 | 10,432 | 4,534 | 41,491 |
| 691 | 190 | 26,385 | 10,471 | 4,555 | 41,601 |
| 692 | 191 | 26,405 | 10,451 | 4,544 | 41,591 |
| 693 | 187 | 26,301 | 10,431 | 4,524 | 41,443 |
| 694 | 191 | 26,591 | 10,503 | 4,571 | 41,856 |
| 695 | 186 | 26,145 | 10,381 | 4,517 | 41,229 |

|     |     |        |        |       |        |
|-----|-----|--------|--------|-------|--------|
| 696 | 182 | 25,879 | 10,284 | 4,471 | 40,816 |
| 697 | 176 | 26,250 | 10,455 | 4,537 | 41,418 |
| 698 | 168 | 25,861 | 10,270 | 4,465 | 40,764 |
| 699 | 168 | 26,163 | 10,416 | 4,553 | 41,300 |
| 700 | 185 | 26,145 | 10,441 | 4,577 | 41,348 |
| 701 | 192 | 25,492 | 10,231 | 4,487 | 40,402 |
| 702 | 192 | 25,481 | 10,206 | 4,488 | 40,367 |
| 703 | 200 | 25,283 | 10,090 | 4,456 | 40,029 |
| 704 | 199 | 24,836 | 9,971  | 4,405 | 39,411 |
| 705 | 209 | 25,591 | 10,330 | 4,577 | 40,707 |
| 706 | 210 | 25,583 | 10,344 | 4,576 | 40,713 |
| 707 | 225 | 25,581 | 10,350 | 4,546 | 40,702 |
| 708 | 224 | 25,632 | 10,398 | 4,574 | 40,828 |
| 709 | 222 | 25,721 | 10,431 | 4,589 | 40,963 |
| 710 | 226 | 25,666 | 10,449 | 4,610 | 40,951 |
| 711 | 229 | 25,679 | 10,465 | 4,630 | 41,003 |
| 712 | 229 | 25,959 | 10,602 | 4,699 | 41,489 |
| 713 | 232 | 25,695 | 10,485 | 4,644 | 41,056 |
| 714 | 233 | 26,110 | 10,618 | 4,720 | 41,681 |
| 715 | 224 | 26,117 | 10,643 | 4,733 | 41,717 |
| 716 | 222 | 25,941 | 10,665 | 4,775 | 41,603 |
| 717 | 218 | 25,921 | 10,799 | 4,823 | 41,761 |
| 718 | 222 | 25,878 | 10,824 | 4,816 | 41,740 |
| 719 | 222 | 25,963 | 10,925 | 4,873 | 41,983 |
| 720 | 224 | 26,165 | 11,033 | 4,903 | 42,325 |
| 721 | 231 | 26,456 | 11,143 | 4,946 | 42,776 |
| 722 | 231 | 26,637 | 11,183 | 4,962 | 43,013 |
| 723 | 227 | 26,451 | 11,151 | 4,913 | 42,742 |
| 724 | 242 | 26,749 | 11,292 | 4,964 | 43,247 |
| 725 | 254 | 26,937 | 11,386 | 4,971 | 43,548 |
| 726 | 259 | 27,270 | 11,459 | 4,979 | 43,967 |
| 727 | 272 | 27,103 | 11,365 | 4,929 | 43,669 |

|     |     |        |        |       |        |
|-----|-----|--------|--------|-------|--------|
| 728 | 267 | 26,903 | 11,300 | 4,885 | 43,355 |
| 729 | 265 | 27,112 | 11,451 | 4,921 | 43,749 |
| 730 | 262 | 26,889 | 11,439 | 4,873 | 43,463 |
| 731 | 261 | 26,571 | 11,361 | 4,852 | 43,045 |
| 732 | 260 | 26,224 | 11,320 | 4,844 | 42,648 |
| 733 | 262 | 26,774 | 11,643 | 4,955 | 43,634 |
| 734 | 260 | 26,773 | 11,689 | 4,996 | 43,718 |
| 735 | 255 | 26,856 | 11,730 | 5,031 | 43,872 |
| 736 | 250 | 26,830 | 11,691 | 5,020 | 43,791 |
| 737 | 250 | 26,907 | 11,693 | 5,018 | 43,868 |
| 738 | 253 | 26,764 | 11,551 | 4,959 | 43,527 |
| 739 | 253 | 26,784 | 11,543 | 4,954 | 43,534 |
| 740 | 251 | 26,949 | 11,556 | 4,986 | 43,742 |
| 741 | 251 | 26,946 | 11,508 | 4,998 | 43,703 |
| 742 | 248 | 26,799 | 11,430 | 4,952 | 43,429 |
| 743 | 247 | 26,978 | 11,522 | 4,993 | 43,740 |
| 744 | 247 | 26,993 | 11,543 | 4,989 | 43,772 |
| 745 | 246 | 27,152 | 11,575 | 5,002 | 43,975 |
| 746 | 244 | 26,966 | 11,493 | 4,953 | 43,656 |
| 747 | 238 | 26,598 | 11,370 | 4,902 | 43,108 |
| 748 | 242 | 26,744 | 11,469 | 4,958 | 43,413 |
| 749 | 244 | 26,907 | 11,551 | 4,962 | 43,664 |
| 750 | 242 | 26,815 | 11,506 | 4,940 | 43,503 |
| 751 | 230 | 26,788 | 11,470 | 4,909 | 43,397 |
| 752 | 212 | 26,565 | 11,341 | 4,849 | 42,967 |
| 753 | 225 | 26,929 | 11,459 | 4,883 | 43,496 |
| 754 | 214 | 26,750 | 11,350 | 4,835 | 43,149 |
| 755 | 213 | 26,783 | 11,348 | 4,853 | 43,197 |
| 756 | 215 | 27,081 | 11,489 | 4,882 | 43,667 |
| 757 | 204 | 26,651 | 11,316 | 4,801 | 42,972 |
| 758 | 200 | 26,953 | 11,266 | 4,801 | 43,220 |
| 759 | 204 | 27,355 | 11,418 | 4,871 | 43,848 |



|     |     |        |        |       |        |
|-----|-----|--------|--------|-------|--------|
| 760 | 201 | 27,523 | 11,472 | 4,880 | 44,076 |
| 761 | 199 | 27,145 | 11,229 | 4,759 | 43,332 |
| 762 | 198 | 27,423 | 11,278 | 4,791 | 43,690 |
| 763 | 196 | 27,551 | 11,284 | 4,795 | 43,826 |
| 764 | 193 | 27,965 | 11,378 | 4,851 | 44,387 |
| 765 | 190 | 27,923 | 11,317 | 4,818 | 44,248 |
| 766 | 192 | 27,929 | 11,125 | 4,688 | 43,934 |
| 767 | 198 | 28,067 | 11,009 | 4,634 | 43,908 |
| 768 | 197 | 28,137 | 11,027 | 4,656 | 44,017 |
| 769 | 196 | 28,347 | 10,903 | 4,610 | 44,056 |
| 770 | 192 | 27,518 | 10,533 | 4,439 | 42,682 |
| 771 | 194 | 27,797 | 10,630 | 4,482 | 43,103 |
| 772 | 192 | 28,267 | 10,744 | 4,530 | 43,733 |
| 773 | 191 | 28,254 | 10,735 | 4,525 | 43,705 |
| 774 | 191 | 28,519 | 10,824 | 4,595 | 44,129 |
| 775 | 181 | 28,628 | 10,845 | 4,608 | 44,262 |
| 776 | 170 | 28,533 | 10,831 | 4,612 | 44,146 |
| 777 | 166 | 28,547 | 10,809 | 4,618 | 44,140 |
| 778 | 157 | 28,626 | 10,862 | 4,625 | 44,270 |
| 779 | 161 | 28,725 | 10,844 | 4,655 | 44,385 |
| 780 | 164 | 28,904 | 10,803 | 4,692 | 44,563 |
| 781 | 165 | 28,941 | 10,738 | 4,678 | 44,522 |
| 782 | 167 | 29,385 | 10,857 | 4,736 | 45,145 |
| 783 | 184 | 29,718 | 10,842 | 4,738 | 45,482 |
| 784 | 181 | 29,542 | 10,735 | 4,708 | 45,166 |
| 785 | 185 | 29,199 | 10,605 | 4,652 | 44,641 |
| 786 | 186 | 28,713 | 10,471 | 4,582 | 43,952 |
| 787 | 192 | 29,401 | 10,692 | 4,686 | 44,971 |
| 788 | 190 | 29,542 | 10,776 | 4,750 | 45,258 |
| 789 | 185 | 29,175 | 10,668 | 4,710 | 44,738 |
| 790 | 191 | 29,363 | 10,740 | 4,742 | 45,036 |
| 791 | 187 | 29,469 | 10,750 | 4,750 | 45,156 |

|     |     |        |        |       |        |
|-----|-----|--------|--------|-------|--------|
| 792 | 186 | 29,690 | 10,814 | 4,777 | 45,467 |
| 793 | 189 | 29,486 | 10,701 | 4,717 | 45,093 |
| 794 | 188 | 29,581 | 10,642 | 4,722 | 45,133 |
| 795 | 201 | 29,817 | 10,720 | 4,764 | 45,502 |
| 796 | 197 | 29,974 | 10,751 | 4,784 | 45,706 |
| 797 | 197 | 29,831 | 10,602 | 4,730 | 45,360 |
| 798 | 206 | 30,173 | 10,671 | 4,772 | 45,822 |
| 799 | 210 | 30,295 | 10,682 | 4,816 | 46,003 |
| 800 | 206 | 29,699 | 10,455 | 4,748 | 45,108 |
| 801 | 216 | 30,052 | 10,515 | 4,784 | 45,567 |
| 802 | 209 | 30,080 | 10,544 | 4,796 | 45,629 |
| 803 | 223 | 30,368 | 10,624 | 4,838 | 46,053 |
| 804 | 212 | 30,221 | 10,577 | 4,848 | 45,858 |
| 805 | 216 | 30,213 | 10,521 | 4,834 | 45,784 |
| 806 | 219 | 30,436 | 10,592 | 4,853 | 46,100 |
| 807 | 212 | 30,176 | 10,422 | 4,809 | 45,619 |
| 808 | 218 | 30,516 | 10,531 | 4,844 | 46,109 |
| 809 | 216 | 30,418 | 10,500 | 4,826 | 45,960 |
| 810 | 227 | 30,475 | 10,500 | 4,814 | 46,016 |
| 811 | 232 | 30,642 | 10,473 | 4,815 | 46,162 |
| 812 | 227 | 30,304 | 10,374 | 4,779 | 45,684 |
| 813 | 228 | 30,357 | 10,460 | 4,805 | 45,850 |
| 814 | 230 | 30,388 | 10,507 | 4,810 | 45,935 |
| 815 | 227 | 30,052 | 10,406 | 4,774 | 45,459 |
| 816 | 226 | 29,993 | 10,391 | 4,767 | 45,377 |
| 817 | 228 | 29,738 | 10,319 | 4,760 | 45,045 |
| 818 | 223 | 29,431 | 10,262 | 4,744 | 44,660 |
| 819 | 230 | 30,171 | 10,565 | 4,858 | 45,824 |
| 820 | 230 | 30,044 | 10,493 | 4,848 | 45,615 |
| 821 | 237 | 29,815 | 10,405 | 4,808 | 45,265 |
| 822 | 236 | 29,913 | 10,403 | 4,806 | 45,358 |
| 823 | 234 | 30,028 | 10,465 | 4,821 | 45,548 |

|     |     |        |        |       |        |
|-----|-----|--------|--------|-------|--------|
| 824 | 238 | 30,042 | 10,333 | 4,789 | 45,402 |
| 825 | 240 | 30,342 | 10,431 | 4,830 | 45,843 |
| 826 | 245 | 30,385 | 10,439 | 4,847 | 45,916 |
| 827 | 247 | 30,140 | 10,299 | 4,799 | 45,485 |
| 828 | 262 | 30,195 | 10,269 | 4,808 | 45,534 |
| 829 | 257 | 29,970 | 10,105 | 4,774 | 45,106 |
| 830 | 256 | 30,280 | 10,292 | 4,875 | 45,703 |
| 831 | 253 | 30,035 | 10,191 | 4,824 | 45,303 |
| 832 | 253 | 29,959 | 10,117 | 4,797 | 45,126 |
| 833 | 253 | 29,919 | 10,086 | 4,787 | 45,045 |
| 834 | 238 | 30,171 | 10,124 | 4,818 | 45,351 |
| 835 | 243 | 29,895 | 10,032 | 4,777 | 44,947 |
| 836 | 244 | 29,789 | 9,948  | 4,755 | 44,736 |
| 837 | 252 | 30,457 | 10,099 | 4,850 | 45,658 |
| 838 | 259 | 30,249 | 10,029 | 4,783 | 45,320 |
| 839 | 262 | 30,472 | 10,040 | 4,790 | 45,564 |
| 840 | 261 | 30,557 | 10,010 | 4,792 | 45,620 |
| 841 | 262 | 30,789 | 10,069 | 4,822 | 45,942 |
| 842 | 272 | 30,495 | 9,996  | 4,781 | 45,544 |
| 843 | 271 | 30,572 | 10,001 | 4,807 | 45,651 |
| 844 | 267 | 30,384 | 9,925  | 4,785 | 45,361 |
| 845 | 267 | 30,552 | 9,903  | 4,794 | 45,516 |
| 846 | 257 | 30,431 | 9,879  | 4,768 | 45,335 |
| 847 | 264 | 30,665 | 9,959  | 4,790 | 45,678 |
| 848 | 252 | 30,414 | 9,849  | 4,752 | 45,267 |
| 849 | 256 | 30,733 | 9,956  | 4,795 | 45,740 |
| 850 | 249 | 29,848 | 9,627  | 4,629 | 44,353 |
| 851 | 249 | 30,170 | 9,736  | 4,685 | 44,840 |
| 852 | 242 | 30,118 | 9,729  | 4,693 | 44,782 |
| 853 | 244 | 30,219 | 9,768  | 4,710 | 44,941 |
| 854 | 228 | 30,300 | 9,754  | 4,708 | 44,990 |
| 855 | 235 | 30,173 | 9,683  | 4,664 | 44,755 |

|     |     |        |        |       |        |
|-----|-----|--------|--------|-------|--------|
| 856 | 229 | 30,088 | 9,652  | 4,649 | 44,618 |
| 857 | 231 | 30,711 | 9,855  | 4,763 | 45,560 |
| 858 | 235 | 30,509 | 9,779  | 4,735 | 45,258 |
| 859 | 236 | 30,641 | 9,756  | 4,728 | 45,361 |
| 860 | 236 | 30,529 | 9,744  | 4,740 | 45,249 |
| 861 | 224 | 30,612 | 9,814  | 4,802 | 45,452 |
| 862 | 220 | 30,370 | 9,831  | 4,818 | 45,239 |
| 863 | 229 | 30,185 | 9,705  | 4,771 | 44,890 |
| 864 | 235 | 30,144 | 9,640  | 4,732 | 44,751 |
| 865 | 237 | 30,243 | 9,687  | 4,766 | 44,933 |
| 866 | 237 | 30,220 | 9,672  | 4,776 | 44,905 |
| 867 | 243 | 30,856 | 9,909  | 4,882 | 45,890 |
| 868 | 218 | 29,553 | 9,523  | 4,681 | 43,975 |
| 869 | 224 | 29,883 | 9,659  | 4,743 | 44,509 |
| 870 | 228 | 30,404 | 9,802  | 4,817 | 45,251 |
| 871 | 228 | 30,354 | 9,782  | 4,800 | 45,164 |
| 872 | 225 | 30,500 | 9,913  | 4,888 | 45,526 |
| 873 | 236 | 31,439 | 10,205 | 5,081 | 46,961 |
| 874 | 240 | 31,744 | 10,294 | 5,148 | 47,426 |
| 875 | 244 | 31,981 | 10,417 | 5,186 | 47,828 |
| 876 | 243 | 32,460 | 10,595 | 5,247 | 48,545 |
| 877 | 230 | 32,252 | 10,579 | 5,226 | 48,287 |
| 878 | 214 | 32,376 | 10,675 | 5,286 | 48,551 |
| 879 | 220 | 32,799 | 10,848 | 5,374 | 49,241 |
| 880 | 221 | 32,466 | 10,888 | 5,350 | 48,925 |
| 881 | 226 | 32,889 | 10,982 | 5,405 | 49,502 |
| 882 | 237 | 32,452 | 10,885 | 5,346 | 48,920 |
| 883 | 230 | 32,016 | 10,783 | 5,310 | 48,339 |
| 884 | 235 | 32,115 | 10,949 | 5,387 | 48,686 |
| 885 | 240 | 32,262 | 11,049 | 5,427 | 48,978 |
| 886 | 234 | 32,210 | 11,041 | 5,423 | 48,908 |
| 887 | 231 | 32,166 | 10,985 | 5,395 | 48,777 |

|     |     |        |        |       |        |
|-----|-----|--------|--------|-------|--------|
| 888 | 236 | 32,150 | 10,961 | 5,382 | 48,729 |
| 889 | 226 | 31,772 | 10,854 | 5,352 | 48,204 |
| 890 | 229 | 31,739 | 10,961 | 5,368 | 48,297 |
| 891 | 233 | 32,151 | 11,082 | 5,433 | 48,899 |
| 892 | 240 | 32,203 | 11,125 | 5,453 | 49,021 |
| 893 | 240 | 32,315 | 11,107 | 5,454 | 49,116 |
| 894 | 257 | 32,362 | 11,111 | 5,421 | 49,151 |
| 895 | 259 | 32,072 | 11,039 | 5,391 | 48,761 |
| 896 | 259 | 32,104 | 11,041 | 5,392 | 48,796 |
| 897 | 257 | 32,053 | 11,029 | 5,403 | 48,742 |
| 898 | 265 | 32,126 | 10,985 | 5,399 | 48,775 |
| 899 | 265 | 31,681 | 10,868 | 5,352 | 48,166 |
| 900 | 262 | 32,355 | 11,110 | 5,490 | 49,217 |
| 901 | 263 | 32,253 | 11,074 | 5,460 | 49,050 |
| 902 | 265 | 32,290 | 11,032 | 5,449 | 49,036 |
| 903 | 260 | 32,051 | 10,924 | 5,398 | 48,633 |
| 904 | 260 | 32,138 | 10,941 | 5,407 | 48,746 |
| 905 | 253 | 32,051 | 10,962 | 5,413 | 48,679 |
| 906 | 255 | 32,345 | 11,035 | 5,446 | 49,081 |
| 907 | 262 | 32,252 | 10,974 | 5,428 | 48,916 |
| 908 | 267 | 31,981 | 10,900 | 5,383 | 48,531 |
| 909 | 261 | 31,757 | 10,825 | 5,324 | 48,167 |
| 910 | 259 | 32,298 | 10,987 | 5,413 | 48,957 |
| 911 | 267 | 32,484 | 10,993 | 5,409 | 49,153 |
| 912 | 264 | 32,272 | 10,783 | 5,313 | 48,632 |
| 913 | 274 | 32,761 | 10,842 | 5,347 | 49,224 |
| 914 | 259 | 32,318 | 10,702 | 5,287 | 48,566 |
| 915 | 259 | 32,372 | 10,699 | 5,272 | 48,602 |
| 916 | 258 | 32,415 | 10,705 | 5,283 | 48,661 |
| 917 | 262 | 33,009 | 10,846 | 5,361 | 49,478 |
| 918 | 255 | 33,097 | 10,813 | 5,368 | 49,533 |
| 919 | 257 | 33,269 | 10,747 | 5,329 | 49,602 |

|     |     |        |        |       |        |
|-----|-----|--------|--------|-------|--------|
| 920 | 249 | 33,604 | 10,753 | 5,333 | 49,939 |
| 921 | 253 | 33,552 | 10,670 | 5,294 | 49,769 |
| 922 | 253 | 33,814 | 10,645 | 5,278 | 49,990 |
| 923 | 264 | 34,092 | 10,660 | 5,302 | 50,318 |
| 924 | 278 | 33,825 | 10,610 | 5,247 | 49,960 |
| 925 | 295 | 33,683 | 10,553 | 5,240 | 49,771 |
| 926 | 297 | 33,524 | 10,393 | 5,195 | 49,409 |
| 927 | 303 | 33,650 | 10,285 | 5,174 | 49,412 |
| 928 | 319 | 33,932 | 10,211 | 5,119 | 49,581 |
| 929 | 325 | 34,180 | 10,102 | 5,062 | 49,669 |
| 930 | 350 | 34,490 | 10,067 | 5,044 | 49,951 |
| 931 | 355 | 34,856 | 10,005 | 5,029 | 50,245 |
| 932 | 358 | 35,384 | 10,110 | 5,072 | 50,924 |
| 933 | 356 | 35,704 | 10,060 | 5,080 | 51,200 |
| 934 | 372 | 36,517 | 10,133 | 5,140 | 52,162 |
| 935 | 389 | 36,849 | 10,178 | 5,151 | 52,567 |
| 936 | 389 | 37,047 | 10,140 | 5,163 | 52,739 |
| 937 | 395 | 37,198 | 10,175 | 5,165 | 52,933 |
| 938 | 391 | 37,240 | 10,134 | 5,181 | 52,946 |
| 939 | 377 | 37,359 | 10,181 | 5,195 | 53,112 |
| 940 | 382 | 37,760 | 10,217 | 5,217 | 53,576 |
| 941 | 380 | 38,017 | 10,180 | 5,221 | 53,798 |
| 942 | 385 | 38,605 | 10,231 | 5,259 | 54,480 |
| 943 | 369 | 38,298 | 10,077 | 5,198 | 53,942 |
| 944 | 371 | 38,736 | 10,176 | 5,256 | 54,539 |
| 945 | 368 | 39,292 | 10,242 | 5,306 | 55,208 |
| 946 | 370 | 39,156 | 10,170 | 5,281 | 54,977 |
| 947 | 371 | 39,258 | 10,179 | 5,281 | 55,089 |
| 948 | 369 | 39,251 | 10,211 | 5,312 | 55,143 |
| 949 | 360 | 39,343 | 10,324 | 5,354 | 55,381 |
| 950 | 372 | 39,860 | 10,390 | 5,388 | 56,010 |
| 951 | 393 | 39,785 | 10,294 | 5,337 | 55,809 |

|     |     |        |        |       |        |
|-----|-----|--------|--------|-------|--------|
| 952 | 392 | 39,753 | 10,252 | 5,334 | 55,731 |
| 953 | 393 | 39,965 | 10,348 | 5,395 | 56,101 |
| 954 | 407 | 40,002 | 10,336 | 5,396 | 56,141 |
| 955 | 407 | 40,016 | 10,280 | 5,401 | 56,104 |
| 956 | 405 | 40,307 | 10,301 | 5,437 | 56,450 |
| 957 | 410 | 40,398 | 10,273 | 5,447 | 56,528 |
| 958 | 400 | 40,087 | 10,186 | 5,407 | 56,080 |
| 959 | 395 | 40,373 | 10,264 | 5,471 | 56,503 |
| 960 | 394 | 40,315 | 10,274 | 5,502 | 56,485 |
| 961 | 401 | 40,747 | 10,383 | 5,551 | 57,082 |
| 962 | 396 | 40,573 | 10,290 | 5,501 | 56,760 |
| 963 | 397 | 40,388 | 10,237 | 5,452 | 56,474 |
| 964 | 385 | 40,453 | 10,275 | 5,472 | 56,585 |
| 965 | 395 | 40,688 | 10,261 | 5,482 | 56,826 |
| 966 | 401 | 40,160 | 10,074 | 5,368 | 56,003 |
| 967 | 402 | 40,285 | 10,058 | 5,365 | 56,110 |
| 968 | 412 | 40,294 | 9,975  | 5,379 | 56,060 |
| 969 | 412 | 39,944 | 9,863  | 5,286 | 55,505 |
| 970 | 415 | 39,764 | 9,912  | 5,307 | 55,398 |
| 971 | 420 | 39,069 | 9,745  | 5,234 | 54,468 |
| 972 | 422 | 39,131 | 9,720  | 5,220 | 54,493 |
| 973 | 420 | 38,761 | 9,577  | 5,130 | 53,888 |
| 974 | 420 | 38,631 | 9,565  | 5,124 | 53,740 |
| 975 | 397 | 38,475 | 9,439  | 5,039 | 53,350 |
| 976 | 384 | 37,923 | 9,310  | 4,971 | 52,588 |
| 977 | 388 | 37,362 | 9,164  | 4,889 | 51,803 |
| 978 | 389 | 37,375 | 9,154  | 4,892 | 51,810 |
| 979 | 375 | 37,088 | 9,142  | 4,901 | 51,506 |
| 980 | 367 | 36,904 | 9,101  | 4,910 | 51,282 |
| 981 | 337 | 36,240 | 8,973  | 4,871 | 50,421 |
| 982 | 334 | 36,303 | 8,960  | 4,861 | 50,458 |
| 983 | 323 | 36,356 | 8,923  | 4,888 | 50,490 |

|       |     |        |       |       |        |
|-------|-----|--------|-------|-------|--------|
| 984   | 310 | 35,682 | 8,822 | 4,820 | 49,634 |
| 985   | 300 | 35,642 | 8,860 | 4,826 | 49,628 |
| 986   | 300 | 35,571 | 8,850 | 4,835 | 49,556 |
| 987   | 300 | 35,419 | 8,819 | 4,821 | 49,359 |
| 988   | 295 | 34,861 | 8,728 | 4,730 | 48,614 |
| 989   | 295 | 35,048 | 8,694 | 4,726 | 48,763 |
| 990   | 287 | 34,536 | 8,533 | 4,690 | 48,046 |
| 991   | 292 | 34,700 | 8,534 | 4,700 | 48,226 |
| 992   | 305 | 33,561 | 8,272 | 4,579 | 46,717 |
| 993   | 303 | 33,613 | 8,267 | 4,591 | 46,774 |
| 994   | 305 | 32,967 | 8,171 | 4,515 | 45,958 |
| 995   | 301 | 32,523 | 8,065 | 4,464 | 45,353 |
| 996   | 303 | 32,993 | 8,206 | 4,553 | 46,055 |
| 997   | 311 | 32,660 | 8,156 | 4,533 | 45,660 |
| 998   | 307 | 32,552 | 7,968 | 4,431 | 45,258 |
| 999   | 308 | 32,848 | 7,980 | 4,452 | 45,588 |
| 1,000 | 297 | 33,029 | 8,008 | 4,476 | 45,810 |
| 1,001 | 294 | 33,274 | 8,020 | 4,528 | 46,116 |
| 1,002 | 276 | 33,354 | 7,973 | 4,517 | 46,120 |
| 1,003 | 277 | 33,105 | 7,886 | 4,458 | 45,726 |
| 1,004 | 277 | 33,124 | 7,862 | 4,448 | 45,711 |
| 1,005 | 264 | 33,467 | 7,934 | 4,519 | 46,184 |
| 1,006 | 266 | 33,603 | 7,961 | 4,531 | 46,361 |
| 1,007 | 270 | 33,670 | 7,955 | 4,509 | 46,404 |
| 1,008 | 267 | 33,342 | 7,895 | 4,452 | 45,956 |
| 1,009 | 268 | 33,693 | 7,946 | 4,484 | 46,391 |
| 1,010 | 285 | 34,176 | 7,988 | 4,516 | 46,965 |
| 1,011 | 290 | 34,151 | 7,953 | 4,500 | 46,894 |
| 1,012 | 287 | 33,778 | 7,894 | 4,483 | 46,442 |
| 1,013 | 290 | 33,852 | 7,877 | 4,481 | 46,500 |
| 1,014 | 307 | 33,978 | 7,900 | 4,495 | 46,680 |
| 1,015 | 307 | 34,113 | 7,925 | 4,499 | 46,844 |



|       |     |        |       |       |        |
|-------|-----|--------|-------|-------|--------|
| 1,016 | 309 | 34,326 | 7,984 | 4,552 | 47,171 |
| 1,017 | 302 | 34,490 | 8,036 | 4,592 | 47,420 |
| 1,018 | 293 | 34,647 | 8,100 | 4,573 | 47,613 |
| 1,019 | 294 | 34,716 | 8,111 | 4,578 | 47,699 |
| 1,020 | 285 | 34,613 | 8,068 | 4,632 | 47,598 |
| 1,021 | 289 | 34,860 | 8,181 | 4,675 | 48,005 |
| 1,022 | 277 | 34,599 | 8,130 | 4,665 | 47,671 |
| 1,023 | 275 | 34,579 | 8,164 | 4,700 | 47,718 |
| 1,024 | 263 | 34,489 | 8,227 | 4,739 | 47,718 |
| 1,025 | 275 | 35,100 | 8,389 | 4,852 | 48,616 |
| 1,026 | 266 | 35,214 | 8,437 | 4,882 | 48,799 |
| 1,027 | 268 | 35,009 | 8,388 | 4,879 | 48,544 |
| 1,028 | 257 | 34,865 | 8,362 | 4,882 | 48,366 |
| 1,029 | 273 | 35,756 | 8,507 | 4,955 | 49,491 |
| 1,030 | 269 | 35,231 | 8,440 | 4,908 | 48,848 |
| 1,031 | 288 | 35,717 | 8,583 | 4,952 | 49,540 |
| 1,032 | 294 | 35,491 | 8,493 | 4,894 | 49,172 |
| 1,033 | 302 | 36,058 | 8,667 | 4,968 | 49,995 |
| 1,034 | 307 | 36,230 | 8,730 | 4,965 | 50,232 |
| 1,035 | 310 | 36,038 | 8,651 | 4,910 | 49,909 |
| 1,036 | 332 | 36,687 | 8,784 | 4,985 | 50,788 |
| 1,037 | 319 | 35,870 | 8,647 | 4,904 | 49,740 |
| 1,038 | 315 | 36,187 | 8,705 | 4,936 | 50,143 |
| 1,039 | 318 | 36,388 | 8,755 | 4,972 | 50,433 |
| 1,040 | 297 | 35,872 | 8,680 | 4,885 | 49,734 |
| 1,041 | 303 | 36,454 | 8,822 | 4,962 | 50,541 |
| 1,042 | 301 | 36,968 | 8,932 | 5,025 | 51,226 |
| 1,043 | 308 | 37,066 | 8,967 | 5,024 | 51,365 |
| 1,044 | 301 | 36,801 | 8,942 | 4,991 | 51,035 |
| 1,045 | 300 | 37,785 | 9,155 | 5,124 | 52,364 |
| 1,046 | 297 | 37,610 | 9,104 | 5,101 | 52,112 |
| 1,047 | 296 | 38,161 | 9,194 | 5,163 | 52,814 |

|       |     |        |        |       |        |
|-------|-----|--------|--------|-------|--------|
| 1,048 | 284 | 37,797 | 9,135  | 5,142 | 52,358 |
| 1,049 | 285 | 37,984 | 9,233  | 5,210 | 52,712 |
| 1,050 | 314 | 38,505 | 9,332  | 5,267 | 53,418 |
| 1,051 | 321 | 38,953 | 9,446  | 5,332 | 54,052 |
| 1,052 | 322 | 39,004 | 9,496  | 5,342 | 54,164 |
| 1,053 | 335 | 39,075 | 9,529  | 5,383 | 54,322 |
| 1,054 | 338 | 38,861 | 9,493  | 5,334 | 54,026 |
| 1,055 | 350 | 39,000 | 9,538  | 5,361 | 54,249 |
| 1,056 | 350 | 39,207 | 9,590  | 5,379 | 54,526 |
| 1,057 | 352 | 39,531 | 9,674  | 5,419 | 54,976 |
| 1,058 | 361 | 39,726 | 9,704  | 5,457 | 55,248 |
| 1,059 | 359 | 39,588 | 9,638  | 5,432 | 55,017 |
| 1,060 | 364 | 40,076 | 9,741  | 5,528 | 55,709 |
| 1,061 | 352 | 40,443 | 9,847  | 5,644 | 56,286 |
| 1,062 | 344 | 40,234 | 9,812  | 5,644 | 56,034 |
| 1,063 | 339 | 40,416 | 9,883  | 5,664 | 56,302 |
| 1,064 | 345 | 39,952 | 9,842  | 5,673 | 55,812 |
| 1,065 | 331 | 39,682 | 9,802  | 5,657 | 55,472 |
| 1,066 | 323 | 40,884 | 10,027 | 5,823 | 57,057 |
| 1,067 | 331 | 41,045 | 10,099 | 5,887 | 57,362 |
| 1,068 | 325 | 41,187 | 10,141 | 5,944 | 57,597 |
| 1,069 | 328 | 41,575 | 10,264 | 6,013 | 58,180 |
| 1,070 | 328 | 42,152 | 10,390 | 6,062 | 58,932 |
| 1,071 | 326 | 42,503 | 10,488 | 6,132 | 59,449 |
| 1,072 | 329 | 42,783 | 10,514 | 6,162 | 59,788 |
| 1,073 | 334 | 42,938 | 10,590 | 6,223 | 60,085 |
| 1,074 | 337 | 42,854 | 10,658 | 6,225 | 60,074 |
| 1,075 | 329 | 43,071 | 10,786 | 6,316 | 60,502 |
| 1,076 | 332 | 42,933 | 10,744 | 6,281 | 60,290 |
| 1,077 | 329 | 42,509 | 10,674 | 6,252 | 59,764 |
| 1,078 | 326 | 42,992 | 10,840 | 6,338 | 60,496 |
| 1,079 | 324 | 42,942 | 10,900 | 6,351 | 60,517 |

|       |     |        |        |       |        |
|-------|-----|--------|--------|-------|--------|
| 1,080 | 324 | 43,107 | 10,927 | 6,375 | 60,733 |
| 1,081 | 319 | 42,953 | 10,966 | 6,393 | 60,631 |
| 1,082 | 309 | 43,020 | 11,021 | 6,413 | 60,763 |
| 1,083 | 311 | 43,343 | 11,167 | 6,497 | 61,318 |
| 1,084 | 308 | 43,409 | 11,194 | 6,529 | 61,440 |
| 1,085 | 311 | 43,370 | 11,182 | 6,544 | 61,407 |
| 1,086 | 298 | 42,999 | 11,099 | 6,545 | 60,941 |
| 1,087 | 314 | 43,275 | 11,202 | 6,604 | 61,395 |
| 1,088 | 305 | 42,997 | 11,128 | 6,578 | 61,008 |
| 1,089 | 306 | 42,710 | 11,144 | 6,601 | 60,761 |
| 1,090 | 322 | 42,722 | 11,178 | 6,629 | 60,851 |
| 1,091 | 345 | 43,004 | 11,342 | 6,701 | 61,392 |
| 1,092 | 339 | 42,574 | 11,280 | 6,653 | 60,846 |
| 1,093 | 336 | 42,660 | 11,384 | 6,686 | 61,066 |
| 1,094 | 331 | 42,727 | 11,424 | 6,713 | 61,195 |
| 1,095 | 337 | 42,792 | 11,415 | 6,720 | 61,264 |
| 1,096 | 352 | 42,804 | 11,429 | 6,732 | 61,317 |
| 1,097 | 353 | 42,752 | 11,455 | 6,735 | 61,295 |
| 1,098 | 361 | 42,847 | 11,458 | 6,716 | 61,382 |
| 1,099 | 365 | 43,142 | 11,605 | 6,797 | 61,909 |
| 1,100 | 354 | 43,144 | 11,685 | 6,818 | 62,001 |
| 1,101 | 353 | 42,914 | 11,670 | 6,800 | 61,737 |
| 1,102 | 378 | 42,885 | 11,795 | 6,835 | 61,893 |
| 1,103 | 380 | 42,821 | 11,856 | 6,860 | 61,917 |
| 1,104 | 364 | 42,733 | 11,912 | 6,842 | 61,851 |
| 1,105 | 351 | 42,415 | 11,872 | 6,843 | 61,481 |
| 1,106 | 350 | 42,208 | 11,854 | 6,822 | 61,234 |
| 1,107 | 356 | 42,633 | 11,960 | 6,877 | 61,826 |
| 1,108 | 352 | 42,748 | 11,974 | 6,935 | 62,009 |
| 1,109 | 341 | 42,071 | 11,918 | 6,885 | 61,215 |
| 1,110 | 340 | 41,723 | 11,979 | 6,859 | 60,901 |
| 1,111 | 347 | 41,621 | 11,941 | 6,808 | 60,717 |

|       |     |        |        |       |        |
|-------|-----|--------|--------|-------|--------|
| 1,112 | 351 | 42,085 | 12,084 | 6,871 | 61,391 |
| 1,113 | 358 | 41,802 | 12,101 | 6,849 | 61,110 |
| 1,114 | 363 | 41,683 | 12,112 | 6,832 | 60,990 |
| 1,115 | 360 | 41,190 | 12,023 | 6,736 | 60,309 |
| 1,116 | 368 | 41,393 | 12,172 | 6,816 | 60,749 |
| 1,117 | 378 | 41,025 | 12,194 | 6,797 | 60,394 |
| 1,118 | 379 | 40,764 | 12,194 | 6,767 | 60,104 |
| 1,119 | 384 | 40,552 | 12,152 | 6,753 | 59,841 |
| 1,120 | 388 | 40,134 | 12,106 | 6,717 | 59,345 |
| 1,121 | 391 | 39,728 | 12,042 | 6,690 | 58,851 |
| 1,122 | 386 | 39,197 | 11,971 | 6,650 | 58,204 |
| 1,123 | 386 | 39,391 | 12,004 | 6,684 | 58,465 |
| 1,124 | 390 | 40,042 | 12,003 | 6,705 | 59,140 |
| 1,125 | 396 | 40,483 | 12,022 | 6,695 | 59,596 |
| 1,126 | 398 | 40,623 | 12,000 | 6,687 | 59,708 |
| 1,127 | 398 | 40,724 | 12,058 | 6,711 | 59,891 |
| 1,128 | 399 | 40,790 | 12,114 | 6,756 | 60,059 |
| 1,129 | 400 | 40,490 | 11,934 | 6,696 | 59,520 |
| 1,130 | 399 | 40,602 | 11,977 | 6,722 | 59,700 |
| 1,131 | 400 | 40,741 | 11,961 | 6,723 | 59,825 |
| 1,132 | 398 | 40,721 | 11,940 | 6,745 | 59,804 |
| 1,133 | 395 | 40,705 | 11,950 | 6,725 | 59,775 |
| 1,134 | 395 | 40,687 | 11,872 | 6,683 | 59,637 |
| 1,135 | 393 | 40,652 | 11,909 | 6,700 | 59,654 |
| 1,136 | 402 | 41,191 | 12,065 | 6,797 | 60,455 |
| 1,137 | 409 | 41,513 | 12,123 | 6,806 | 60,851 |
| 1,138 | 428 | 41,450 | 12,164 | 6,793 | 60,835 |
| 1,139 | 427 | 41,525 | 12,200 | 6,826 | 60,978 |
| 1,140 | 432 | 42,070 | 12,316 | 6,868 | 61,686 |
| 1,141 | 418 | 41,755 | 12,267 | 6,869 | 61,309 |
| 1,142 | 408 | 41,952 | 12,211 | 6,846 | 61,417 |
| 1,143 | 412 | 41,983 | 12,167 | 6,846 | 61,408 |

|       |     |        |        |       |        |
|-------|-----|--------|--------|-------|--------|
| 1,144 | 408 | 41,950 | 12,172 | 6,864 | 61,394 |
| 1,145 | 402 | 41,986 | 12,261 | 6,926 | 61,575 |
| 1,146 | 397 | 42,029 | 12,283 | 6,946 | 61,655 |
| 1,147 | 393 | 41,674 | 12,241 | 6,917 | 61,225 |
| 1,148 | 392 | 41,517 | 12,214 | 6,881 | 61,004 |
| 1,149 | 388 | 42,453 | 12,425 | 7,030 | 62,296 |
| 1,150 | 355 | 40,943 | 11,911 | 6,735 | 59,944 |
| 1,151 | 362 | 41,581 | 11,996 | 6,798 | 60,737 |
| 1,152 | 342 | 42,132 | 12,151 | 6,896 | 61,521 |
| 1,153 | 356 | 42,508 | 12,284 | 7,023 | 62,171 |
| 1,154 | 357 | 42,134 | 12,171 | 6,977 | 61,639 |
| 1,155 | 371 | 42,218 | 12,220 | 7,008 | 61,817 |
| 1,156 | 366 | 42,002 | 12,219 | 7,004 | 61,591 |
| 1,157 | 361 | 42,307 | 12,317 | 7,080 | 62,065 |
| 1,158 | 353 | 42,639 | 12,405 | 7,111 | 62,508 |
| 1,159 | 358 | 42,526 | 12,439 | 7,072 | 62,395 |
| 1,160 | 368 | 42,227 | 12,264 | 7,007 | 61,866 |
| 1,161 | 368 | 42,371 | 12,312 | 7,019 | 62,070 |
| 1,162 | 358 | 42,244 | 12,315 | 6,997 | 61,914 |
| 1,163 | 359 | 42,272 | 12,325 | 7,010 | 61,966 |
| 1,164 | 352 | 42,561 | 12,395 | 7,030 | 62,338 |
| 1,165 | 342 | 42,471 | 12,337 | 7,033 | 62,183 |
| 1,166 | 336 | 42,346 | 12,344 | 7,034 | 62,060 |
| 1,167 | 336 | 42,511 | 12,366 | 7,031 | 62,244 |
| 1,168 | 338 | 42,267 | 12,205 | 6,947 | 61,757 |
| 1,169 | 337 | 42,353 | 12,234 | 6,961 | 61,885 |
| 1,170 | 332 | 42,541 | 12,310 | 6,983 | 62,166 |
| 1,171 | 324 | 41,962 | 12,173 | 6,902 | 61,361 |
| 1,172 | 324 | 41,705 | 12,171 | 6,874 | 61,074 |
| 1,173 | 334 | 42,066 | 12,220 | 6,914 | 61,534 |
| 1,174 | 329 | 41,803 | 12,161 | 6,876 | 61,169 |
| 1,175 | 330 | 41,255 | 12,149 | 6,867 | 60,601 |

|       |     |        |        |       |        |
|-------|-----|--------|--------|-------|--------|
| 1,176 | 328 | 41,191 | 12,159 | 6,895 | 60,573 |
| 1,177 | 328 | 40,967 | 12,141 | 6,854 | 60,290 |
| 1,178 | 343 | 40,384 | 12,037 | 6,784 | 59,548 |
| 1,179 | 344 | 40,513 | 12,079 | 6,806 | 59,742 |
| 1,180 | 345 | 40,254 | 12,124 | 6,818 | 59,541 |
| 1,181 | 345 | 40,214 | 12,164 | 6,827 | 59,550 |
| 1,182 | 345 | 39,832 | 12,116 | 6,774 | 59,067 |
| 1,183 | 347 | 39,896 | 12,157 | 6,790 | 59,190 |
| 1,184 | 347 | 39,753 | 12,166 | 6,810 | 59,076 |
| 1,185 | 347 | 39,638 | 12,110 | 6,797 | 58,892 |
| 1,186 | 343 | 39,665 | 12,156 | 6,804 | 58,968 |
| 1,187 | 329 | 40,093 | 12,292 | 6,838 | 59,552 |
| 1,188 | 317 | 40,359 | 12,399 | 6,883 | 59,958 |
| 1,189 | 293 | 40,235 | 12,376 | 6,891 | 59,795 |
| 1,190 | 294 | 40,031 | 12,281 | 6,845 | 59,451 |
| 1,191 | 289 | 39,716 | 12,264 | 6,806 | 59,075 |
| 1,192 | 290 | 40,367 | 12,536 | 6,955 | 60,148 |
| 1,193 | 293 | 40,187 | 12,563 | 6,956 | 59,999 |
| 1,194 | 292 | 39,867 | 12,511 | 6,882 | 59,552 |
| 1,195 | 298 | 39,851 | 12,536 | 6,890 | 59,575 |
| 1,196 | 297 | 39,421 | 12,413 | 6,814 | 58,945 |
| 1,197 | 295 | 39,141 | 12,376 | 6,832 | 58,644 |
| 1,198 | 285 | 38,809 | 12,275 | 6,777 | 58,146 |
| 1,199 | 288 | 39,746 | 12,622 | 6,990 | 59,646 |
| 1,200 | 294 | 39,486 | 12,607 | 7,008 | 59,395 |
| 1,201 | 293 | 38,867 | 12,462 | 6,948 | 58,570 |
| 1,202 | 296 | 38,958 | 12,624 | 7,049 | 58,927 |
| 1,203 | 296 | 38,364 | 12,561 | 6,996 | 58,217 |
| 1,204 | 298 | 38,481 | 12,548 | 6,974 | 58,301 |
| 1,205 | 296 | 38,073 | 12,395 | 6,889 | 57,653 |
| 1,206 | 291 | 38,491 | 12,547 | 6,955 | 58,284 |
| 1,207 | 303 | 38,484 | 12,542 | 6,946 | 58,275 |

|       |     |        |        |       |        |
|-------|-----|--------|--------|-------|--------|
| 1,208 | 313 | 38,586 | 12,527 | 6,924 | 58,350 |
| 1,209 | 301 | 37,457 | 12,214 | 6,720 | 56,692 |
| 1,210 | 320 | 37,838 | 12,293 | 6,782 | 57,233 |
| 1,211 | 319 | 37,865 | 12,301 | 6,811 | 57,296 |
| 1,212 | 325 | 38,067 | 12,294 | 6,806 | 57,492 |
| 1,213 | 328 | 38,261 | 12,334 | 6,834 | 57,757 |
| 1,214 | 341 | 38,492 | 12,422 | 6,883 | 58,138 |
| 1,215 | 339 | 38,580 | 12,442 | 6,895 | 58,256 |
| 1,216 | 352 | 38,607 | 12,447 | 6,887 | 58,293 |
| 1,217 | 356 | 39,154 | 12,604 | 7,007 | 59,121 |
| 1,218 | 356 | 39,424 | 12,624 | 7,041 | 59,445 |
| 1,219 | 341 | 39,397 | 12,667 | 7,055 | 59,460 |
| 1,220 | 343 | 39,635 | 12,696 | 7,094 | 59,768 |
| 1,221 | 342 | 39,903 | 12,719 | 7,102 | 60,066 |
| 1,222 | 344 | 40,272 | 12,854 | 7,211 | 60,681 |
| 1,223 | 344 | 40,297 | 12,910 | 7,258 | 60,809 |
| 1,224 | 339 | 40,219 | 12,975 | 7,253 | 60,786 |
| 1,225 | 340 | 40,229 | 13,041 | 7,284 | 60,894 |
| 1,226 | 348 | 40,527 | 13,091 | 7,289 | 61,255 |
| 1,227 | 348 | 40,412 | 13,117 | 7,288 | 61,165 |
| 1,228 | 319 | 39,417 | 12,835 | 7,143 | 59,714 |
| 1,229 | 331 | 39,947 | 12,932 | 7,167 | 60,377 |
| 1,230 | 327 | 40,289 | 13,027 | 7,230 | 60,873 |
| 1,231 | 323 | 39,951 | 12,849 | 7,127 | 60,250 |
| 1,232 | 319 | 40,104 | 12,849 | 7,105 | 60,377 |
| 1,233 | 324 | 40,143 | 12,800 | 7,055 | 60,322 |
| 1,234 | 322 | 40,259 | 12,794 | 7,040 | 60,415 |
| 1,235 | 322 | 40,332 | 12,808 | 7,059 | 60,521 |
| 1,236 | 325 | 40,706 | 12,977 | 7,115 | 61,123 |
| 1,237 | 334 | 40,412 | 12,953 | 7,124 | 60,823 |
| 1,238 | 338 | 40,009 | 12,903 | 7,122 | 60,372 |
| 1,239 | 330 | 39,377 | 12,754 | 7,054 | 59,515 |

|       |     |        |        |       |        |
|-------|-----|--------|--------|-------|--------|
| 1,240 | 328 | 39,324 | 12,657 | 7,023 | 59,332 |
| 1,241 | 321 | 39,289 | 12,582 | 6,994 | 59,186 |
| 1,242 | 320 | 38,970 | 12,410 | 6,915 | 58,615 |
| 1,243 | 320 | 39,716 | 12,605 | 7,037 | 59,678 |
| 1,244 | 309 | 38,817 | 12,195 | 6,829 | 58,150 |
| 1,245 | 307 | 39,263 | 12,282 | 6,884 | 58,736 |
| 1,246 | 308 | 39,834 | 12,450 | 6,955 | 59,547 |
| 1,247 | 316 | 39,987 | 12,520 | 6,976 | 59,799 |
| 1,248 | 316 | 40,027 | 12,553 | 6,998 | 59,894 |
| 1,249 | 325 | 40,177 | 12,697 | 7,071 | 60,270 |
| 1,250 | 321 | 39,938 | 12,680 | 7,055 | 59,994 |
| 1,251 | 329 | 40,028 | 12,746 | 7,068 | 60,171 |
| 1,252 | 338 | 40,275 | 12,816 | 7,082 | 60,511 |
| 1,253 | 342 | 40,383 | 12,753 | 7,060 | 60,538 |
| 1,254 | 344 | 40,565 | 12,766 | 7,050 | 60,725 |
| 1,255 | 331 | 40,801 | 12,972 | 7,125 | 61,229 |
| 1,256 | 325 | 40,302 | 12,875 | 7,079 | 60,581 |
| 1,257 | 326 | 40,598 | 12,925 | 7,129 | 60,978 |
| 1,258 | 322 | 40,610 | 12,904 | 7,116 | 60,952 |
| 1,259 | 313 | 40,563 | 12,871 | 7,129 | 60,876 |
| 1,260 | 315 | 40,374 | 12,900 | 7,122 | 60,711 |
| 1,261 | 295 | 40,191 | 12,989 | 7,180 | 60,655 |
| 1,262 | 296 | 40,344 | 13,036 | 7,185 | 60,861 |
| 1,263 | 295 | 40,658 | 13,138 | 7,238 | 61,329 |
| 1,264 | 287 | 40,808 | 13,175 | 7,244 | 61,514 |
| 1,265 | 294 | 40,195 | 12,964 | 7,137 | 60,590 |
| 1,266 | 300 | 40,736 | 13,084 | 7,207 | 61,327 |
| 1,267 | 285 | 40,536 | 13,047 | 7,200 | 61,068 |
| 1,268 | 281 | 41,235 | 13,264 | 7,308 | 62,088 |
| 1,269 | 275 | 40,474 | 13,107 | 7,216 | 61,072 |
| 1,270 | 270 | 39,930 | 12,937 | 7,148 | 60,285 |
| 1,271 | 278 | 40,337 | 13,120 | 7,218 | 60,953 |



|       |     |        |        |       |        |
|-------|-----|--------|--------|-------|--------|
| 1,272 | 284 | 40,390 | 13,158 | 7,270 | 61,102 |
| 1,273 | 281 | 40,739 | 13,205 | 7,272 | 61,497 |
| 1,274 | 281 | 41,254 | 13,247 | 7,297 | 62,079 |
| 1,275 | 282 | 41,339 | 13,224 | 7,269 | 62,114 |
| 1,276 | 285 | 41,460 | 13,187 | 7,235 | 62,167 |
| 1,277 | 269 | 41,356 | 13,137 | 7,224 | 61,986 |
| 1,278 | 257 | 39,853 | 12,768 | 6,993 | 59,871 |
| 1,279 | 257 | 40,369 | 12,845 | 7,073 | 60,544 |
| 1,280 | 252 | 40,964 | 12,987 | 7,184 | 61,387 |
| 1,281 | 258 | 41,053 | 12,945 | 7,173 | 61,429 |
| 1,282 | 262 | 41,124 | 12,966 | 7,187 | 61,539 |
| 1,283 | 263 | 40,832 | 12,866 | 7,149 | 61,110 |
| 1,284 | 269 | 41,947 | 13,256 | 7,356 | 62,828 |
| 1,285 | 266 | 41,635 | 13,149 | 7,305 | 62,355 |
| 1,286 | 273 | 41,401 | 12,925 | 7,193 | 61,792 |
| 1,287 | 270 | 41,821 | 13,049 | 7,276 | 62,416 |
| 1,288 | 261 | 42,179 | 13,175 | 7,344 | 62,959 |
| 1,289 | 277 | 42,521 | 13,265 | 7,413 | 63,476 |
| 1,290 | 273 | 42,115 | 13,164 | 7,354 | 62,906 |
| 1,291 | 273 | 41,646 | 13,071 | 7,286 | 62,276 |
| 1,292 | 284 | 42,172 | 13,248 | 7,377 | 63,081 |
| 1,293 | 286 | 42,121 | 13,237 | 7,356 | 63,000 |
| 1,294 | 291 | 42,329 | 13,324 | 7,360 | 63,304 |
| 1,295 | 305 | 41,602 | 13,203 | 7,287 | 62,397 |
| 1,296 | 317 | 41,989 | 13,285 | 7,341 | 62,932 |
| 1,297 | 317 | 42,244 | 13,362 | 7,390 | 63,313 |
| 1,298 | 324 | 42,182 | 13,367 | 7,401 | 63,274 |
| 1,299 | 323 | 42,263 | 13,353 | 7,375 | 63,314 |
| 1,300 | 316 | 42,651 | 13,282 | 7,387 | 63,636 |
| 1,301 | 308 | 41,867 | 13,011 | 7,177 | 62,363 |
| 1,302 | 315 | 42,498 | 13,068 | 7,223 | 63,104 |
| 1,303 | 310 | 43,015 | 13,157 | 7,303 | 63,785 |

|       |     |        |        |       |        |
|-------|-----|--------|--------|-------|--------|
| 1,304 | 313 | 43,016 | 13,112 | 7,269 | 63,710 |
| 1,305 | 311 | 43,168 | 13,085 | 7,242 | 63,806 |
| 1,306 | 324 | 43,587 | 13,194 | 7,309 | 64,414 |
| 1,307 | 325 | 43,457 | 13,162 | 7,297 | 64,241 |
| 1,308 | 318 | 43,204 | 13,054 | 7,249 | 63,825 |
| 1,309 | 315 | 43,155 | 13,118 | 7,264 | 63,852 |
| 1,310 | 312 | 43,353 | 13,132 | 7,310 | 64,107 |
| 1,311 | 322 | 43,852 | 13,216 | 7,357 | 64,747 |
| 1,312 | 320 | 43,410 | 13,153 | 7,278 | 64,161 |
| 1,313 | 325 | 43,546 | 13,220 | 7,362 | 64,453 |
| 1,314 | 322 | 42,632 | 13,024 | 7,224 | 63,202 |
| 1,315 | 325 | 42,440 | 13,010 | 7,243 | 63,018 |
| 1,316 | 316 | 41,853 | 12,956 | 7,241 | 62,366 |
| 1,317 | 312 | 41,247 | 12,827 | 7,150 | 61,536 |
| 1,318 | 314 | 41,438 | 12,894 | 7,141 | 61,787 |
| 1,319 | 314 | 40,855 | 12,712 | 7,054 | 60,935 |
| 1,320 | 307 | 40,501 | 12,586 | 6,987 | 60,381 |
| 1,321 | 304 | 40,896 | 12,683 | 7,015 | 60,898 |
| 1,322 | 299 | 40,726 | 12,552 | 6,947 | 60,524 |
| 1,323 | 312 | 40,811 | 12,564 | 6,946 | 60,633 |
| 1,324 | 319 | 41,110 | 12,682 | 7,010 | 61,121 |
| 1,325 | 332 | 40,625 | 12,635 | 6,975 | 60,567 |
| 1,326 | 329 | 40,183 | 12,502 | 6,978 | 59,992 |
| 1,327 | 331 | 39,994 | 12,475 | 6,933 | 59,733 |
| 1,328 | 332 | 40,067 | 12,444 | 6,908 | 59,751 |
| 1,329 | 335 | 40,301 | 12,500 | 6,925 | 60,061 |
| 1,330 | 341 | 40,697 | 12,642 | 6,963 | 60,643 |
| 1,331 | 356 | 40,340 | 12,564 | 6,892 | 60,152 |
| 1,332 | 355 | 40,026 | 12,473 | 6,850 | 59,704 |
| 1,333 | 360 | 40,364 | 12,656 | 6,937 | 60,317 |
| 1,334 | 365 | 40,190 | 12,585 | 6,911 | 60,051 |
| 1,335 | 359 | 40,334 | 12,698 | 6,993 | 60,384 |

|       |     |        |        |       |        |
|-------|-----|--------|--------|-------|--------|
| 1,336 | 347 | 39,843 | 12,613 | 6,939 | 59,742 |
| 1,337 | 346 | 39,684 | 12,560 | 6,913 | 59,503 |
| 1,338 | 350 | 39,526 | 12,512 | 6,900 | 59,288 |
| 1,339 | 352 | 39,545 | 12,497 | 6,902 | 59,296 |
| 1,340 | 333 | 39,454 | 12,523 | 6,906 | 59,216 |
| 1,341 | 336 | 39,576 | 12,561 | 6,908 | 59,381 |
| 1,342 | 328 | 39,387 | 12,537 | 6,887 | 59,139 |
| 1,343 | 328 | 39,274 | 12,581 | 6,886 | 59,069 |
| 1,344 | 341 | 39,656 | 12,718 | 6,973 | 59,688 |
| 1,345 | 333 | 39,464 | 12,663 | 6,974 | 59,434 |
| 1,346 | 317 | 39,169 | 12,628 | 6,964 | 59,078 |
| 1,347 | 307 | 37,529 | 12,233 | 6,724 | 56,793 |
| 1,348 | 309 | 37,890 | 12,343 | 6,803 | 57,345 |
| 1,349 | 312 | 38,347 | 12,476 | 6,863 | 57,998 |
| 1,350 | 312 | 38,481 | 12,488 | 6,874 | 58,155 |
| 1,351 | 304 | 38,408 | 12,529 | 6,889 | 58,130 |
| 1,352 | 302 | 38,372 | 12,528 | 6,898 | 58,100 |
| 1,353 | 304 | 37,672 | 12,375 | 6,834 | 57,185 |
| 1,354 | 304 | 37,809 | 12,445 | 6,865 | 57,423 |
| 1,355 | 284 | 38,167 | 12,641 | 6,956 | 58,048 |
| 1,356 | 278 | 37,882 | 12,608 | 6,948 | 57,716 |
| 1,357 | 267 | 37,980 | 12,573 | 6,920 | 57,740 |
| 1,358 | 269 | 38,029 | 12,560 | 6,885 | 57,743 |
| 1,359 | 274 | 38,736 | 12,775 | 7,026 | 58,811 |
| 1,360 | 276 | 38,799 | 12,861 | 7,057 | 58,993 |
| 1,361 | 277 | 38,982 | 12,945 | 7,100 | 59,304 |
| 1,362 | 267 | 39,236 | 13,059 | 7,163 | 59,725 |
| 1,363 | 269 | 39,574 | 13,079 | 7,186 | 60,108 |
| 1,364 | 268 | 39,907 | 13,201 | 7,196 | 60,572 |
| 1,365 | 269 | 40,569 | 13,354 | 7,277 | 61,469 |
| 1,366 | 265 | 40,961 | 13,372 | 7,273 | 61,871 |
| 1,367 | 264 | 41,405 | 13,506 | 7,346 | 62,521 |

|       |     |        |        |       |        |
|-------|-----|--------|--------|-------|--------|
| 1,368 | 278 | 42,112 | 13,735 | 7,482 | 63,607 |
| 1,369 | 279 | 42,380 | 13,794 | 7,571 | 64,024 |
| 1,370 | 276 | 42,124 | 13,680 | 7,512 | 63,592 |
| 1,371 | 291 | 41,709 | 13,559 | 7,439 | 62,998 |
| 1,372 | 289 | 41,312 | 13,463 | 7,387 | 62,451 |
| 1,373 | 310 | 42,662 | 14,012 | 7,691 | 64,675 |
| 1,374 | 300 | 42,269 | 13,872 | 7,653 | 64,094 |
| 1,375 | 309 | 42,554 | 13,982 | 7,696 | 64,541 |
| 1,376 | 303 | 43,059 | 14,121 | 7,721 | 65,204 |
| 1,377 | 298 | 42,565 | 13,982 | 7,612 | 64,457 |
| 1,378 | 294 | 42,139 | 13,858 | 7,567 | 63,858 |
| 1,379 | 295 | 42,322 | 13,988 | 7,631 | 64,236 |
| 1,380 | 305 | 42,574 | 14,068 | 7,680 | 64,627 |
| 1,381 | 309 | 42,762 | 14,063 | 7,687 | 64,821 |
| 1,382 | 299 | 42,736 | 14,045 | 7,683 | 64,763 |
| 1,383 | 299 | 42,674 | 14,061 | 7,687 | 64,721 |
| 1,384 | 296 | 42,786 | 14,075 | 7,690 | 64,847 |
| 1,385 | 290 | 42,437 | 13,936 | 7,614 | 64,277 |
| 1,386 | 291 | 42,055 | 13,802 | 7,529 | 63,677 |
| 1,387 | 292 | 41,719 | 13,660 | 7,448 | 63,119 |
| 1,388 | 316 | 43,449 | 14,320 | 7,815 | 65,900 |
| 1,389 | 325 | 43,369 | 14,361 | 7,801 | 65,856 |
| 1,390 | 325 | 43,431 | 14,377 | 7,801 | 65,934 |
| 1,391 | 328 | 43,221 | 14,217 | 7,739 | 65,505 |
| 1,392 | 326 | 43,677 | 14,296 | 7,822 | 66,121 |
| 1,393 | 316 | 44,052 | 14,379 | 7,913 | 66,660 |
| 1,394 | 312 | 43,995 | 14,308 | 7,903 | 66,518 |
| 1,395 | 308 | 43,895 | 14,267 | 7,863 | 66,333 |
| 1,396 | 309 | 43,815 | 14,218 | 7,805 | 66,147 |
| 1,397 | 307 | 43,250 | 14,031 | 7,694 | 65,282 |
| 1,398 | 301 | 43,109 | 14,106 | 7,709 | 65,225 |
| 1,399 | 302 | 43,038 | 14,067 | 7,668 | 65,075 |

|       |     |        |        |       |        |
|-------|-----|--------|--------|-------|--------|
| 1,400 | 299 | 42,580 | 13,869 | 7,577 | 64,325 |
| 1,401 | 305 | 42,598 | 13,891 | 7,555 | 64,349 |
| 1,402 | 306 | 42,559 | 13,918 | 7,559 | 64,342 |
| 1,403 | 306 | 42,702 | 14,011 | 7,608 | 64,627 |
| 1,404 | 296 | 41,765 | 13,773 | 7,465 | 63,299 |
| 1,405 | 301 | 41,997 | 13,837 | 7,490 | 63,625 |
| 1,406 | 300 | 41,857 | 13,739 | 7,436 | 63,332 |
| 1,407 | 301 | 41,458 | 13,590 | 7,368 | 62,717 |
| 1,408 | 301 | 40,962 | 13,470 | 7,278 | 62,011 |
| 1,409 | 300 | 40,414 | 13,308 | 7,209 | 61,231 |
| 1,410 | 295 | 40,864 | 13,310 | 7,214 | 61,683 |
| 1,411 | 293 | 40,497 | 13,147 | 7,145 | 61,082 |
| 1,412 | 295 | 39,529 | 12,805 | 6,972 | 59,601 |
| 1,413 | 299 | 39,657 | 12,831 | 6,958 | 59,745 |
| 1,414 | 296 | 39,571 | 12,840 | 6,965 | 59,672 |
| 1,415 | 290 | 39,047 | 12,641 | 6,878 | 58,856 |
| 1,416 | 288 | 39,077 | 12,664 | 6,886 | 58,915 |
| 1,417 | 293 | 39,147 | 12,636 | 6,852 | 58,928 |
| 1,418 | 293 | 39,203 | 12,591 | 6,809 | 58,896 |
| 1,419 | 302 | 38,742 | 12,385 | 6,693 | 58,122 |
| 1,420 | 308 | 39,064 | 12,474 | 6,679 | 58,525 |
| 1,421 | 300 | 39,121 | 12,478 | 6,698 | 58,597 |
| 1,422 | 285 | 38,655 | 12,303 | 6,564 | 57,807 |
| 1,423 | 302 | 38,896 | 12,325 | 6,562 | 58,085 |
| 1,424 | 309 | 38,561 | 12,174 | 6,450 | 57,494 |
| 1,425 | 316 | 38,587 | 12,159 | 6,429 | 57,491 |
| 1,426 | 310 | 38,480 | 12,121 | 6,403 | 57,314 |
| 1,427 | 315 | 38,252 | 12,041 | 6,403 | 57,011 |
| 1,428 | 326 | 38,286 | 12,000 | 6,393 | 57,005 |
| 1,429 | 326 | 38,173 | 11,982 | 6,379 | 56,860 |
| 1,430 | 321 | 38,283 | 11,974 | 6,386 | 56,964 |
| 1,431 | 326 | 38,327 | 11,925 | 6,386 | 56,964 |

|       |     |        |        |       |        |
|-------|-----|--------|--------|-------|--------|
| 1,432 | 320 | 37,909 | 11,921 | 6,376 | 56,526 |
| 1,433 | 310 | 37,936 | 11,898 | 6,364 | 56,508 |
| 1,434 | 301 | 37,971 | 11,965 | 6,393 | 56,630 |
| 1,435 | 298 | 37,904 | 11,922 | 6,363 | 56,487 |
| 1,436 | 301 | 38,432 | 12,060 | 6,452 | 57,245 |
| 1,437 | 284 | 38,573 | 12,013 | 6,415 | 57,285 |
| 1,438 | 288 | 38,717 | 11,949 | 6,397 | 57,351 |
| 1,439 | 285 | 39,113 | 12,021 | 6,414 | 57,833 |
| 1,440 | 277 | 39,085 | 11,948 | 6,395 | 57,705 |
| 1,441 | 277 | 39,431 | 11,967 | 6,387 | 58,062 |
| 1,442 | 275 | 39,697 | 12,122 | 6,441 | 58,535 |
| 1,443 | 279 | 39,347 | 12,054 | 6,388 | 58,068 |
| 1,444 | 283 | 39,193 | 11,934 | 6,315 | 57,725 |
| 1,445 | 288 | 39,562 | 12,018 | 6,363 | 58,231 |
| 1,446 | 284 | 39,978 | 12,101 | 6,417 | 58,780 |
| 1,447 | 283 | 39,692 | 11,984 | 6,365 | 58,324 |
| 1,448 | 288 | 40,005 | 12,016 | 6,396 | 58,705 |
| 1,449 | 288 | 40,345 | 12,035 | 6,428 | 59,096 |
| 1,450 | 285 | 40,249 | 11,990 | 6,396 | 58,920 |
| 1,451 | 280 | 40,463 | 12,061 | 6,444 | 59,248 |
| 1,452 | 276 | 40,882 | 12,126 | 6,533 | 59,817 |
| 1,453 | 277 | 41,203 | 12,134 | 6,540 | 60,154 |
| 1,454 | 281 | 41,381 | 12,079 | 6,538 | 60,279 |
| 1,455 | 281 | 41,554 | 12,066 | 6,538 | 60,439 |
| 1,456 | 280 | 42,230 | 12,229 | 6,662 | 61,401 |
| 1,457 | 284 | 42,261 | 12,188 | 6,653 | 61,386 |
| 1,458 | 280 | 42,008 | 12,096 | 6,610 | 60,994 |
| 1,459 | 284 | 42,376 | 12,225 | 6,663 | 61,548 |
| 1,460 | 286 | 42,360 | 12,217 | 6,656 | 61,519 |
| 1,461 | 291 | 42,465 | 12,245 | 6,631 | 61,632 |
| 1,462 | 307 | 42,757 | 12,392 | 6,694 | 62,150 |
| 1,463 | 305 | 42,643 | 12,345 | 6,675 | 61,968 |

|       |     |        |        |       |        |
|-------|-----|--------|--------|-------|--------|
| 1,464 | 304 | 42,441 | 12,236 | 6,643 | 61,624 |
| 1,465 | 302 | 42,029 | 12,131 | 6,598 | 61,060 |
| 1,466 | 300 | 42,302 | 12,167 | 6,616 | 61,385 |
| 1,467 | 303 | 42,336 | 12,164 | 6,618 | 61,421 |
| 1,468 | 301 | 41,902 | 12,024 | 6,563 | 60,790 |
| 1,469 | 294 | 41,577 | 11,840 | 6,497 | 60,208 |
| 1,470 | 281 | 40,992 | 11,667 | 6,413 | 59,353 |
| 1,471 | 269 | 40,662 | 11,586 | 6,372 | 58,889 |
| 1,472 | 268 | 40,648 | 11,584 | 6,356 | 58,856 |
| 1,473 | 264 | 40,860 | 11,646 | 6,409 | 59,179 |
| 1,474 | 236 | 40,578 | 11,508 | 6,340 | 58,662 |
| 1,475 | 231 | 40,721 | 11,490 | 6,357 | 58,799 |
| 1,476 | 231 | 40,609 | 11,462 | 6,334 | 58,636 |
| 1,477 | 221 | 40,710 | 11,540 | 6,376 | 58,847 |
| 1,478 | 213 | 40,373 | 11,441 | 6,309 | 58,336 |
| 1,479 | 202 | 40,614 | 11,539 | 6,366 | 58,721 |
| 1,480 | 201 | 40,816 | 11,533 | 6,393 | 58,943 |
| 1,481 | 199 | 40,465 | 11,412 | 6,302 | 58,378 |
| 1,482 | 187 | 40,653 | 11,440 | 6,313 | 58,593 |
| 1,483 | 192 | 40,900 | 11,539 | 6,379 | 59,010 |
| 1,484 | 194 | 40,820 | 11,429 | 6,378 | 58,821 |
| 1,485 | 196 | 40,771 | 11,358 | 6,339 | 58,664 |
| 1,486 | 194 | 40,443 | 11,259 | 6,310 | 58,206 |
| 1,487 | 193 | 39,778 | 11,059 | 6,196 | 57,226 |
| 1,488 | 194 | 39,129 | 10,863 | 6,102 | 56,288 |
| 1,489 | 182 | 39,100 | 10,897 | 6,134 | 56,313 |
| 1,490 | 188 | 38,815 | 10,878 | 6,163 | 56,044 |
| 1,491 | 189 | 38,632 | 10,801 | 6,099 | 55,721 |
| 1,492 | 187 | 37,974 | 10,614 | 6,026 | 54,801 |
| 1,493 | 186 | 37,954 | 10,599 | 6,030 | 54,769 |
| 1,494 | 181 | 37,750 | 10,605 | 6,012 | 54,548 |
| 1,495 | 177 | 37,597 | 10,551 | 5,984 | 54,309 |

|       |     |        |        |       |        |
|-------|-----|--------|--------|-------|--------|
| 1,496 | 184 | 37,439 | 10,585 | 5,983 | 54,191 |
| 1,497 | 187 | 37,333 | 10,568 | 5,970 | 54,058 |
| 1,498 | 185 | 36,967 | 10,435 | 5,899 | 53,486 |
| 1,499 | 187 | 37,560 | 10,598 | 5,980 | 54,325 |
| 1,500 | 195 | 37,383 | 10,546 | 5,911 | 54,035 |
| 1,501 | 201 | 36,911 | 10,451 | 5,850 | 53,413 |
| 1,502 | 201 | 36,738 | 10,375 | 5,804 | 53,118 |
| 1,503 | 211 | 37,431 | 10,499 | 5,856 | 53,997 |
| 1,504 | 220 | 37,373 | 10,504 | 5,851 | 53,948 |
| 1,505 | 213 | 36,623 | 10,328 | 5,723 | 52,887 |
| 1,506 | 214 | 36,541 | 10,304 | 5,698 | 52,757 |
| 1,507 | 219 | 36,184 | 10,187 | 5,625 | 52,215 |
| 1,508 | 214 | 35,750 | 10,068 | 5,569 | 51,601 |
| 1,509 | 219 | 37,090 | 10,415 | 5,775 | 53,499 |
| 1,510 | 221 | 36,987 | 10,379 | 5,754 | 53,341 |
| 1,511 | 230 | 37,506 | 10,509 | 5,835 | 54,080 |
| 1,512 | 229 | 37,615 | 10,545 | 5,853 | 54,242 |
| 1,513 | 220 | 38,032 | 10,599 | 5,891 | 54,742 |
| 1,514 | 215 | 37,483 | 10,462 | 5,817 | 53,977 |
| 1,515 | 217 | 37,645 | 10,593 | 5,904 | 54,359 |
| 1,516 | 232 | 37,920 | 10,790 | 5,965 | 54,907 |
| 1,517 | 232 | 37,630 | 10,707 | 5,927 | 54,496 |
| 1,518 | 231 | 37,527 | 10,684 | 5,909 | 54,351 |
| 1,519 | 231 | 37,565 | 10,779 | 5,908 | 54,483 |
| 1,520 | 227 | 37,420 | 10,861 | 5,926 | 54,434 |
| 1,521 | 228 | 36,891 | 10,736 | 5,857 | 53,712 |
| 1,522 | 227 | 36,370 | 10,622 | 5,810 | 53,029 |
| 1,523 | 240 | 37,394 | 10,924 | 6,011 | 54,569 |
| 1,524 | 242 | 37,364 | 10,937 | 6,003 | 54,546 |
| 1,525 | 239 | 37,214 | 10,905 | 6,025 | 54,383 |
| 1,526 | 242 | 37,309 | 10,901 | 6,024 | 54,476 |
| 1,527 | 254 | 37,382 | 10,900 | 6,031 | 54,567 |



|       |     |        |        |       |        |
|-------|-----|--------|--------|-------|--------|
| 1,528 | 268 | 37,936 | 11,014 | 6,062 | 55,280 |
| 1,529 | 270 | 37,586 | 10,966 | 6,002 | 54,824 |
| 1,530 | 278 | 38,021 | 11,052 | 6,051 | 55,402 |
| 1,531 | 278 | 37,719 | 10,986 | 5,972 | 54,955 |
| 1,532 | 297 | 38,182 | 11,109 | 6,039 | 55,627 |
| 1,533 | 308 | 38,278 | 11,133 | 6,034 | 55,753 |
| 1,534 | 307 | 38,344 | 11,112 | 6,038 | 55,801 |
| 1,535 | 305 | 37,841 | 11,016 | 5,944 | 55,106 |
| 1,536 | 301 | 37,867 | 11,063 | 5,952 | 55,183 |
| 1,537 | 306 | 37,930 | 11,092 | 5,942 | 55,270 |
| 1,538 | 309 | 38,168 | 11,151 | 5,937 | 55,565 |
| 1,539 | 316 | 38,021 | 11,059 | 5,882 | 55,278 |
| 1,540 | 318 | 38,440 | 11,145 | 5,901 | 55,804 |
| 1,541 | 311 | 38,459 | 11,175 | 5,904 | 55,849 |
| 1,542 | 307 | 38,470 | 11,215 | 5,972 | 55,964 |
| 1,543 | 314 | 38,738 | 11,228 | 5,959 | 56,239 |
| 1,544 | 321 | 39,092 | 11,344 | 5,999 | 56,756 |
| 1,545 | 318 | 38,367 | 11,142 | 5,873 | 55,700 |
| 1,546 | 313 | 38,677 | 11,203 | 5,924 | 56,117 |
| 1,547 | 307 | 37,537 | 10,837 | 5,754 | 54,435 |
| 1,548 | 307 | 37,402 | 10,790 | 5,735 | 54,234 |
| 1,549 | 307 | 37,359 | 10,787 | 5,716 | 54,169 |
| 1,550 | 305 | 37,291 | 10,762 | 5,706 | 54,064 |
| 1,551 | 304 | 37,181 | 10,756 | 5,710 | 53,951 |
| 1,552 | 306 | 37,140 | 10,773 | 5,731 | 53,950 |
| 1,553 | 328 | 38,209 | 11,157 | 5,957 | 55,651 |
| 1,554 | 320 | 37,704 | 11,087 | 5,900 | 55,011 |
| 1,555 | 320 | 39,053 | 11,495 | 6,100 | 56,968 |
| 1,556 | 317 | 38,407 | 11,353 | 6,010 | 56,087 |
| 1,557 | 325 | 38,344 | 11,425 | 6,036 | 56,130 |
| 1,558 | 320 | 38,238 | 11,544 | 6,049 | 56,151 |
| 1,559 | 320 | 38,112 | 11,545 | 6,054 | 56,031 |

|       |     |        |        |       |        |
|-------|-----|--------|--------|-------|--------|
| 1,560 | 320 | 37,974 | 11,535 | 6,052 | 55,881 |
| 1,561 | 321 | 37,967 | 11,607 | 6,115 | 56,010 |
| 1,562 | 313 | 37,361 | 11,593 | 6,084 | 55,351 |
| 1,563 | 309 | 37,169 | 11,594 | 6,076 | 55,148 |
| 1,564 | 311 | 37,135 | 11,590 | 6,071 | 55,107 |
| 1,565 | 318 | 37,287 | 11,598 | 6,022 | 55,225 |
| 1,566 | 319 | 37,575 | 11,583 | 6,019 | 55,496 |
| 1,567 | 323 | 37,906 | 11,566 | 6,031 | 55,826 |
| 1,568 | 322 | 37,618 | 11,522 | 6,003 | 55,465 |
| 1,569 | 325 | 37,889 | 11,626 | 6,091 | 55,931 |
| 1,570 | 329 | 37,952 | 11,652 | 6,117 | 56,050 |
| 1,571 | 331 | 38,079 | 11,654 | 6,104 | 56,168 |
| 1,572 | 335 | 38,069 | 11,675 | 6,129 | 56,208 |
| 1,573 | 335 | 37,939 | 11,633 | 6,119 | 56,026 |
| 1,574 | 327 | 37,790 | 11,707 | 6,124 | 55,948 |
| 1,575 | 326 | 37,730 | 11,717 | 6,147 | 55,920 |
| 1,576 | 326 | 37,881 | 11,773 | 6,146 | 56,126 |
| 1,577 | 330 | 37,846 | 11,778 | 6,130 | 56,084 |
| 1,578 | 327 | 38,325 | 11,894 | 6,209 | 56,755 |
| 1,579 | 324 | 38,279 | 11,902 | 6,212 | 56,717 |
| 1,580 | 325 | 38,371 | 11,878 | 6,217 | 56,791 |
| 1,581 | 327 | 38,722 | 11,941 | 6,276 | 57,266 |
| 1,582 | 325 | 38,581 | 11,952 | 6,279 | 57,137 |
| 1,583 | 311 | 39,025 | 12,054 | 6,354 | 57,744 |
| 1,584 | 308 | 38,998 | 12,131 | 6,377 | 57,814 |
| 1,585 | 314 | 38,878 | 12,125 | 6,362 | 57,679 |
| 1,586 | 315 | 38,938 | 12,112 | 6,372 | 57,737 |
| 1,587 | 315 | 39,122 | 12,123 | 6,406 | 57,966 |
| 1,588 | 318 | 38,955 | 12,090 | 6,393 | 57,756 |
| 1,589 | 309 | 39,391 | 12,206 | 6,461 | 58,367 |
| 1,590 | 315 | 39,315 | 12,262 | 6,478 | 58,370 |
| 1,591 | 317 | 39,276 | 12,250 | 6,473 | 58,316 |

|       |     |        |        |       |        |
|-------|-----|--------|--------|-------|--------|
| 1,592 | 329 | 39,276 | 12,261 | 6,482 | 58,348 |
| 1,593 | 336 | 39,542 | 12,370 | 6,509 | 58,757 |
| 1,594 | 335 | 39,430 | 12,387 | 6,528 | 58,680 |
| 1,595 | 329 | 39,075 | 12,288 | 6,471 | 58,163 |
| 1,596 | 338 | 38,593 | 12,175 | 6,408 | 57,514 |
| 1,597 | 344 | 38,245 | 12,108 | 6,379 | 57,076 |
| 1,598 | 335 | 39,045 | 12,408 | 6,510 | 58,298 |
| 1,599 | 340 | 39,252 | 12,455 | 6,542 | 58,589 |
| 1,600 | 341 | 39,011 | 12,436 | 6,520 | 58,308 |
| 1,601 | 332 | 39,666 | 12,518 | 6,629 | 59,145 |
| 1,602 | 315 | 39,274 | 12,424 | 6,583 | 58,596 |
| 1,603 | 312 | 39,010 | 12,415 | 6,576 | 58,313 |
| 1,604 | 302 | 38,843 | 12,444 | 6,579 | 58,168 |
| 1,605 | 301 | 39,111 | 12,451 | 6,587 | 58,450 |
| 1,606 | 305 | 39,212 | 12,483 | 6,618 | 58,618 |
| 1,607 | 302 | 39,399 | 12,460 | 6,627 | 58,788 |
| 1,608 | 298 | 39,468 | 12,403 | 6,624 | 58,793 |
| 1,609 | 297 | 38,585 | 12,092 | 6,435 | 57,409 |
| 1,610 | 305 | 38,881 | 12,152 | 6,468 | 57,806 |
| 1,611 | 297 | 39,298 | 12,241 | 6,484 | 58,320 |
| 1,612 | 307 | 39,597 | 12,206 | 6,482 | 58,592 |
| 1,613 | 310 | 39,748 | 12,224 | 6,477 | 58,759 |
| 1,614 | 310 | 39,450 | 12,072 | 6,414 | 58,246 |
| 1,615 | 309 | 39,208 | 12,029 | 6,413 | 57,959 |
| 1,616 | 307 | 39,020 | 12,069 | 6,483 | 57,879 |
| 1,617 | 302 | 38,755 | 12,028 | 6,473 | 57,558 |
| 1,618 | 294 | 38,371 | 11,983 | 6,422 | 57,070 |
| 1,619 | 293 | 38,311 | 11,879 | 6,414 | 56,897 |
| 1,620 | 297 | 38,385 | 11,942 | 6,423 | 57,047 |
| 1,621 | 290 | 37,963 | 11,797 | 6,347 | 56,397 |
| 1,622 | 282 | 38,268 | 11,808 | 6,358 | 56,716 |
| 1,623 | 283 | 38,281 | 11,798 | 6,333 | 56,695 |

|       |     |        |        |       |        |
|-------|-----|--------|--------|-------|--------|
| 1,624 | 289 | 38,333 | 11,735 | 6,306 | 56,663 |
| 1,625 | 289 | 38,384 | 11,719 | 6,316 | 56,708 |
| 1,626 | 286 | 38,017 | 11,645 | 6,237 | 56,185 |
| 1,627 | 297 | 38,227 | 11,729 | 6,301 | 56,554 |
| 1,628 | 294 | 38,090 | 11,697 | 6,287 | 56,368 |
| 1,629 | 292 | 37,493 | 11,510 | 6,195 | 55,490 |
| 1,630 | 300 | 37,398 | 11,520 | 6,180 | 55,398 |
| 1,631 | 300 | 36,966 | 11,474 | 6,113 | 54,853 |
| 1,632 | 297 | 37,574 | 11,580 | 6,173 | 55,624 |
| 1,633 | 300 | 37,160 | 11,443 | 6,094 | 54,997 |
| 1,634 | 293 | 37,052 | 11,352 | 6,067 | 54,764 |
| 1,635 | 288 | 36,859 | 11,207 | 6,013 | 54,367 |
| 1,636 | 305 | 37,132 | 11,270 | 6,030 | 54,737 |
| 1,637 | 300 | 36,391 | 11,178 | 5,949 | 53,818 |
| 1,638 | 305 | 36,664 | 11,299 | 6,005 | 54,273 |
| 1,639 | 312 | 36,288 | 11,229 | 5,972 | 53,801 |
| 1,640 | 313 | 35,838 | 11,124 | 5,915 | 53,190 |
| 1,641 | 304 | 36,109 | 11,088 | 5,917 | 53,418 |
| 1,642 | 308 | 36,081 | 11,062 | 5,910 | 53,361 |
| 1,643 | 296 | 35,814 | 10,944 | 5,832 | 52,886 |
| 1,644 | 284 | 35,484 | 10,814 | 5,790 | 52,372 |
| 1,645 | 282 | 35,314 | 10,838 | 5,793 | 52,227 |
| 1,646 | 270 | 35,309 | 10,750 | 5,793 | 52,122 |
| 1,647 | 264 | 35,121 | 10,656 | 5,763 | 51,804 |
| 1,648 | 265 | 35,252 | 10,718 | 5,804 | 52,039 |
| 1,649 | 263 | 35,286 | 10,731 | 5,795 | 52,075 |
| 1,650 | 256 | 34,719 | 10,576 | 5,723 | 51,274 |
| 1,651 | 260 | 35,039 | 10,702 | 5,750 | 51,751 |
| 1,652 | 260 | 35,122 | 10,760 | 5,753 | 51,895 |
| 1,653 | 257 | 35,046 | 10,627 | 5,677 | 51,607 |
| 1,654 | 265 | 35,470 | 10,742 | 5,716 | 52,193 |
| 1,655 | 268 | 35,438 | 10,736 | 5,710 | 52,152 |

|       |     |        |        |       |        |
|-------|-----|--------|--------|-------|--------|
| 1,656 | 264 | 35,031 | 10,606 | 5,628 | 51,529 |
| 1,657 | 262 | 34,808 | 10,660 | 5,625 | 51,355 |
| 1,658 | 259 | 34,401 | 10,585 | 5,533 | 50,778 |
| 1,659 | 254 | 34,425 | 10,559 | 5,529 | 50,767 |
| 1,660 | 257 | 34,859 | 10,683 | 5,598 | 51,397 |
| 1,661 | 250 | 34,486 | 10,623 | 5,563 | 50,922 |
| 1,662 | 250 | 34,373 | 10,650 | 5,566 | 50,839 |
| 1,663 | 241 | 34,350 | 10,711 | 5,587 | 50,889 |
| 1,664 | 237 | 34,389 | 10,765 | 5,634 | 51,025 |
| 1,665 | 237 | 34,369 | 10,748 | 5,598 | 50,952 |
| 1,666 | 232 | 34,578 | 10,735 | 5,597 | 51,142 |
| 1,667 | 237 | 34,553 | 10,760 | 5,586 | 51,136 |
| 1,668 | 236 | 34,005 | 10,654 | 5,522 | 50,417 |
| 1,669 | 230 | 34,522 | 10,789 | 5,618 | 51,159 |
| 1,670 | 227 | 34,392 | 10,804 | 5,576 | 50,999 |
| 1,671 | 215 | 33,889 | 10,554 | 5,460 | 50,118 |
| 1,672 | 220 | 34,511 | 10,710 | 5,526 | 50,967 |
| 1,673 | 233 | 33,513 | 10,471 | 5,341 | 49,558 |
| 1,674 | 233 | 33,980 | 10,609 | 5,402 | 50,224 |
| 1,675 | 226 | 34,317 | 10,731 | 5,453 | 50,727 |
| 1,676 | 217 | 33,320 | 10,474 | 5,313 | 49,324 |
| 1,677 | 223 | 33,778 | 10,631 | 5,381 | 50,013 |
| 1,678 | 219 | 34,236 | 10,772 | 5,451 | 50,678 |
| 1,679 | 223 | 34,244 | 10,820 | 5,459 | 50,746 |
| 1,680 | 212 | 33,803 | 10,726 | 5,397 | 50,138 |
| 1,681 | 201 | 33,763 | 10,716 | 5,410 | 50,090 |
| 1,682 | 199 | 33,443 | 10,621 | 5,387 | 49,650 |
| 1,683 | 202 | 34,155 | 10,911 | 5,516 | 50,784 |
| 1,684 | 204 | 33,934 | 10,918 | 5,498 | 50,554 |
| 1,685 | 203 | 33,579 | 10,840 | 5,447 | 50,069 |
| 1,686 | 202 | 33,949 | 10,975 | 5,492 | 50,618 |
| 1,687 | 185 | 33,589 | 10,898 | 5,446 | 50,118 |

|       |     |        |        |       |        |
|-------|-----|--------|--------|-------|--------|
| 1,688 | 170 | 33,312 | 10,753 | 5,375 | 49,610 |
| 1,689 | 170 | 33,508 | 10,847 | 5,423 | 49,948 |
| 1,690 | 169 | 33,809 | 11,015 | 5,491 | 50,484 |
| 1,691 | 182 | 33,700 | 11,068 | 5,497 | 50,447 |
| 1,692 | 179 | 33,404 | 11,082 | 5,495 | 50,160 |
| 1,693 | 176 | 33,345 | 11,141 | 5,493 | 50,155 |
| 1,694 | 187 | 32,878 | 11,086 | 5,418 | 49,569 |
| 1,695 | 199 | 32,967 | 11,126 | 5,410 | 49,702 |
| 1,696 | 197 | 32,671 | 11,052 | 5,354 | 49,274 |
| 1,697 | 205 | 32,960 | 11,187 | 5,405 | 49,757 |
| 1,698 | 214 | 33,054 | 11,203 | 5,394 | 49,865 |
| 1,699 | 217 | 33,199 | 11,309 | 5,436 | 50,161 |
| 1,700 | 225 | 32,982 | 11,251 | 5,414 | 49,872 |
| 1,701 | 223 | 33,021 | 11,218 | 5,373 | 49,835 |
| 1,702 | 236 | 33,287 | 11,340 | 5,450 | 50,313 |
| 1,703 | 239 | 32,935 | 11,286 | 5,391 | 49,851 |
| 1,704 | 236 | 32,485 | 11,198 | 5,353 | 49,272 |
| 1,705 | 235 | 32,995 | 11,329 | 5,406 | 49,965 |
| 1,706 | 231 | 32,085 | 10,948 | 5,219 | 48,483 |
| 1,707 | 232 | 32,781 | 11,083 | 5,257 | 49,353 |
| 1,708 | 229 | 33,258 | 11,254 | 5,324 | 50,065 |
| 1,709 | 231 | 33,415 | 11,389 | 5,402 | 50,437 |
| 1,710 | 233 | 33,357 | 11,426 | 5,408 | 50,424 |
| 1,711 | 236 | 33,583 | 11,498 | 5,435 | 50,752 |
| 1,712 | 245 | 33,461 | 11,357 | 5,385 | 50,448 |
| 1,713 | 252 | 34,001 | 11,519 | 5,441 | 51,213 |
| 1,714 | 260 | 34,365 | 11,609 | 5,460 | 51,694 |
| 1,715 | 266 | 34,375 | 11,586 | 5,456 | 51,683 |
| 1,716 | 268 | 34,113 | 11,483 | 5,405 | 51,269 |
| 1,717 | 271 | 34,084 | 11,489 | 5,388 | 51,232 |
| 1,718 | 264 | 33,838 | 11,419 | 5,355 | 50,876 |
| 1,719 | 276 | 34,046 | 11,486 | 5,357 | 51,165 |

|       |     |        |        |       |        |
|-------|-----|--------|--------|-------|--------|
| 1,720 | 276 | 33,773 | 11,404 | 5,317 | 50,770 |
| 1,721 | 293 | 34,617 | 11,772 | 5,504 | 52,186 |
| 1,722 | 297 | 34,604 | 11,777 | 5,503 | 52,181 |
| 1,723 | 297 | 34,520 | 11,772 | 5,496 | 52,085 |
| 1,724 | 285 | 34,192 | 11,626 | 5,447 | 51,550 |
| 1,725 | 287 | 34,170 | 11,643 | 5,422 | 51,522 |
| 1,726 | 292 | 34,756 | 11,846 | 5,503 | 52,397 |
| 1,727 | 297 | 34,928 | 11,891 | 5,537 | 52,653 |
| 1,728 | 297 | 34,719 | 11,818 | 5,502 | 52,336 |
| 1,729 | 294 | 34,529 | 11,740 | 5,462 | 52,025 |
| 1,730 | 335 | 35,284 | 11,986 | 5,611 | 53,216 |
| 1,731 | 337 | 35,451 | 12,013 | 5,623 | 53,424 |
| 1,732 | 346 | 36,026 | 12,175 | 5,673 | 54,220 |
| 1,733 | 345 | 35,294 | 11,893 | 5,558 | 53,090 |
| 1,734 | 350 | 35,675 | 12,000 | 5,600 | 53,625 |
| 1,735 | 354 | 36,246 | 12,143 | 5,642 | 54,385 |
| 1,736 | 359 | 36,487 | 12,199 | 5,655 | 54,700 |
| 1,737 | 368 | 36,596 | 12,215 | 5,697 | 54,876 |
| 1,738 | 365 | 36,545 | 12,115 | 5,659 | 54,684 |
| 1,739 | 372 | 36,205 | 11,930 | 5,569 | 54,076 |
| 1,740 | 374 | 36,537 | 11,981 | 5,604 | 54,496 |
| 1,741 | 370 | 36,830 | 12,030 | 5,637 | 54,867 |
| 1,742 | 355 | 36,476 | 11,829 | 5,554 | 54,214 |
| 1,743 | 335 | 35,750 | 11,478 | 5,444 | 53,007 |
| 1,744 | 335 | 36,146 | 11,516 | 5,484 | 53,481 |
| 1,745 | 326 | 36,631 | 11,637 | 5,525 | 54,119 |
| 1,746 | 342 | 36,906 | 11,707 | 5,594 | 54,549 |
| 1,747 | 340 | 37,014 | 11,680 | 5,589 | 54,623 |
| 1,748 | 334 | 36,818 | 11,596 | 5,542 | 54,290 |
| 1,749 | 333 | 36,974 | 11,585 | 5,541 | 54,433 |
| 1,750 | 336 | 37,202 | 11,719 | 5,572 | 54,829 |
| 1,751 | 325 | 36,451 | 11,468 | 5,448 | 53,692 |

|       |     |        |        |       |        |
|-------|-----|--------|--------|-------|--------|
| 1,752 | 324 | 36,534 | 11,510 | 5,460 | 53,828 |
| 1,753 | 315 | 36,459 | 11,496 | 5,449 | 53,719 |
| 1,754 | 319 | 36,377 | 11,466 | 5,452 | 53,614 |
| 1,755 | 318 | 36,380 | 11,451 | 5,423 | 53,572 |
| 1,756 | 318 | 36,456 | 11,458 | 5,431 | 53,663 |
| 1,757 | 318 | 36,260 | 11,401 | 5,412 | 53,391 |
| 1,758 | 319 | 35,802 | 11,225 | 5,367 | 52,713 |
| 1,759 | 317 | 35,995 | 11,192 | 5,394 | 52,898 |
| 1,760 | 322 | 36,418 | 11,268 | 5,421 | 53,429 |
| 1,761 | 318 | 35,915 | 11,083 | 5,336 | 52,652 |
| 1,762 | 315 | 35,762 | 11,055 | 5,322 | 52,454 |
| 1,763 | 307 | 35,397 | 11,049 | 5,324 | 52,077 |
| 1,764 | 304 | 35,535 | 11,121 | 5,374 | 52,334 |
| 1,765 | 300 | 35,143 | 11,075 | 5,370 | 51,888 |
| 1,766 | 292 | 34,783 | 10,972 | 5,311 | 51,358 |
| 1,767 | 290 | 34,770 | 11,012 | 5,329 | 51,401 |
| 1,768 | 284 | 34,804 | 10,944 | 5,315 | 51,347 |
| 1,769 | 271 | 34,611 | 10,767 | 5,214 | 50,863 |
| 1,770 | 284 | 34,607 | 10,752 | 5,198 | 50,841 |
| 1,771 | 284 | 34,601 | 10,754 | 5,199 | 50,838 |
| 1,772 | 280 | 34,446 | 10,670 | 5,199 | 50,595 |
| 1,773 | 279 | 34,393 | 10,651 | 5,205 | 50,528 |
| 1,774 | 278 | 34,449 | 10,698 | 5,220 | 50,645 |
| 1,775 | 271 | 34,030 | 10,678 | 5,224 | 50,203 |
| 1,776 | 269 | 33,843 | 10,641 | 5,256 | 50,009 |
| 1,777 | 266 | 33,727 | 10,618 | 5,240 | 49,851 |
| 1,778 | 256 | 33,184 | 10,429 | 5,152 | 49,021 |
| 1,779 | 257 | 33,565 | 10,509 | 5,165 | 49,496 |
| 1,780 | 220 | 34,025 | 10,602 | 5,211 | 50,058 |
| 1,781 | 215 | 33,585 | 10,448 | 5,120 | 49,368 |
| 1,782 | 214 | 33,430 | 10,462 | 5,137 | 49,243 |
| 1,783 | 211 | 33,672 | 10,624 | 5,203 | 49,710 |



|       |     |        |        |       |        |
|-------|-----|--------|--------|-------|--------|
| 1,784 | 205 | 33,470 | 10,729 | 5,234 | 49,638 |
| 1,785 | 217 | 33,288 | 10,801 | 5,273 | 49,579 |
| 1,786 | 228 | 33,368 | 10,889 | 5,332 | 49,817 |
| 1,787 | 232 | 33,223 | 10,931 | 5,360 | 49,746 |
| 1,788 | 226 | 33,516 | 11,069 | 5,404 | 50,215 |
| 1,789 | 229 | 33,100 | 11,062 | 5,400 | 49,791 |
| 1,790 | 222 | 32,742 | 10,997 | 5,380 | 49,341 |
| 1,791 | 224 | 33,457 | 11,324 | 5,520 | 50,525 |
| 1,792 | 229 | 33,320 | 11,347 | 5,501 | 50,397 |
| 1,793 | 230 | 33,520 | 11,455 | 5,508 | 50,713 |
| 1,794 | 240 | 34,308 | 11,738 | 5,625 | 51,911 |
| 1,795 | 229 | 33,677 | 11,661 | 5,580 | 51,147 |
| 1,796 | 245 | 34,160 | 11,834 | 5,640 | 51,879 |
| 1,797 | 257 | 34,814 | 12,058 | 5,709 | 52,838 |
| 1,798 | 255 | 34,916 | 12,141 | 5,727 | 53,039 |
| 1,799 | 250 | 35,127 | 12,253 | 5,796 | 53,426 |
| 1,800 | 249 | 35,203 | 12,302 | 5,825 | 53,579 |
| 1,801 | 245 | 34,973 | 12,149 | 5,793 | 53,160 |
| 1,802 | 245 | 34,577 | 12,045 | 5,738 | 52,605 |
| 1,803 | 244 | 34,318 | 11,972 | 5,705 | 52,239 |
| 1,804 | 276 | 36,668 | 12,668 | 6,070 | 55,682 |
| 1,805 | 272 | 36,215 | 12,561 | 6,025 | 55,073 |
| 1,806 | 277 | 37,029 | 12,779 | 6,138 | 56,223 |
| 1,807 | 272 | 36,724 | 12,738 | 6,153 | 55,887 |
| 1,808 | 274 | 36,994 | 12,916 | 6,243 | 56,427 |
| 1,809 | 278 | 36,901 | 12,926 | 6,245 | 56,350 |
| 1,810 | 285 | 36,802 | 12,940 | 6,211 | 56,238 |
| 1,811 | 284 | 36,770 | 13,018 | 6,232 | 56,304 |
| 1,812 | 289 | 36,593 | 12,984 | 6,212 | 56,078 |
| 1,813 | 288 | 36,406 | 12,897 | 6,154 | 55,745 |
| 1,814 | 288 | 36,473 | 12,953 | 6,139 | 55,853 |
| 1,815 | 289 | 34,975 | 12,464 | 5,909 | 53,637 |

|       |     |        |        |       |        |
|-------|-----|--------|--------|-------|--------|
| 1,816 | 296 | 35,343 | 12,563 | 5,956 | 54,158 |
| 1,817 | 297 | 35,629 | 12,664 | 6,012 | 54,602 |
| 1,818 | 297 | 35,543 | 12,649 | 6,010 | 54,499 |
| 1,819 | 295 | 35,795 | 12,783 | 6,075 | 54,948 |
| 1,820 | 296 | 35,722 | 12,808 | 6,076 | 54,902 |
| 1,821 | 295 | 36,104 | 12,875 | 6,122 | 55,396 |
| 1,822 | 302 | 35,989 | 12,864 | 6,105 | 55,260 |
| 1,823 | 302 | 36,086 | 12,924 | 6,131 | 55,443 |
| 1,824 | 300 | 36,261 | 13,020 | 6,156 | 55,737 |
| 1,825 | 299 | 35,952 | 12,855 | 6,107 | 55,213 |
| 1,826 | 299 | 36,145 | 12,871 | 6,115 | 55,430 |
| 1,827 | 310 | 36,584 | 13,011 | 6,177 | 56,082 |
| 1,828 | 308 | 36,055 | 12,847 | 6,097 | 55,307 |
| 1,829 | 306 | 35,477 | 12,681 | 6,034 | 54,498 |
| 1,830 | 308 | 35,243 | 12,725 | 6,078 | 54,354 |
| 1,831 | 318 | 35,723 | 12,881 | 6,129 | 55,051 |
| 1,832 | 316 | 35,637 | 12,868 | 6,111 | 54,932 |
| 1,833 | 317 | 35,844 | 12,861 | 6,128 | 55,150 |
| 1,834 | 309 | 35,111 | 12,487 | 5,965 | 53,872 |
| 1,835 | 316 | 35,614 | 12,619 | 6,036 | 54,585 |
| 1,836 | 301 | 36,095 | 12,722 | 6,089 | 55,207 |
| 1,837 | 283 | 35,725 | 12,612 | 6,041 | 54,661 |
| 1,838 | 285 | 35,676 | 12,572 | 6,030 | 54,563 |
| 1,839 | 294 | 35,336 | 12,459 | 5,980 | 54,069 |
| 1,840 | 292 | 35,240 | 12,399 | 5,934 | 53,865 |
| 1,841 | 304 | 35,314 | 12,423 | 5,928 | 53,969 |
| 1,842 | 303 | 35,169 | 12,413 | 5,905 | 53,790 |
| 1,843 | 304 | 35,091 | 12,468 | 5,913 | 53,776 |
| 1,844 | 311 | 35,386 | 12,627 | 5,992 | 54,316 |
| 1,845 | 312 | 35,022 | 12,470 | 5,919 | 53,723 |
| 1,846 | 315 | 35,035 | 12,456 | 5,902 | 53,708 |
| 1,847 | 317 | 35,775 | 12,732 | 6,051 | 54,875 |

|       |     |        |        |       |        |
|-------|-----|--------|--------|-------|--------|
| 1,848 | 301 | 35,548 | 12,681 | 6,044 | 54,574 |
| 1,849 | 307 | 35,970 | 12,802 | 6,088 | 55,167 |
| 1,850 | 327 | 35,944 | 12,820 | 6,086 | 55,177 |
| 1,851 | 329 | 35,863 | 12,806 | 6,089 | 55,087 |
| 1,852 | 358 | 36,768 | 13,136 | 6,208 | 56,470 |
| 1,853 | 361 | 36,858 | 13,154 | 6,205 | 56,578 |
| 1,854 | 370 | 36,543 | 13,128 | 6,168 | 56,209 |
| 1,855 | 366 | 36,266 | 13,123 | 6,144 | 55,899 |
| 1,856 | 402 | 37,914 | 13,631 | 6,372 | 58,319 |
| 1,857 | 408 | 37,996 | 13,689 | 6,370 | 58,463 |
| 1,858 | 428 | 38,367 | 13,817 | 6,390 | 59,002 |
| 1,859 | 427 | 38,274 | 13,776 | 6,347 | 58,824 |
| 1,860 | 420 | 38,767 | 13,924 | 6,440 | 59,551 |
| 1,861 | 417 | 39,022 | 13,985 | 6,487 | 59,911 |
| 1,862 | 411 | 39,292 | 13,996 | 6,505 | 60,204 |
| 1,863 | 435 | 39,542 | 14,057 | 6,497 | 60,531 |
| 1,864 | 437 | 39,463 | 14,062 | 6,483 | 60,445 |
| 1,865 | 442 | 39,940 | 14,195 | 6,570 | 61,147 |
| 1,866 | 446 | 40,416 | 14,338 | 6,633 | 61,833 |
| 1,867 | 446 | 40,367 | 14,386 | 6,638 | 61,837 |
| 1,868 | 454 | 40,624 | 14,478 | 6,709 | 62,265 |
| 1,869 | 460 | 40,323 | 14,431 | 6,679 | 61,893 |
| 1,870 | 455 | 39,996 | 14,358 | 6,630 | 61,439 |
| 1,871 | 448 | 40,458 | 14,542 | 6,709 | 62,157 |
| 1,872 | 446 | 40,011 | 14,554 | 6,701 | 61,712 |
| 1,873 | 440 | 39,839 | 14,534 | 6,680 | 61,493 |
| 1,874 | 435 | 39,525 | 14,526 | 6,661 | 61,147 |
| 1,875 | 432 | 39,130 | 14,434 | 6,614 | 60,610 |
| 1,876 | 438 | 39,440 | 14,544 | 6,660 | 61,082 |
| 1,877 | 435 | 39,355 | 14,543 | 6,634 | 60,967 |
| 1,878 | 426 | 39,092 | 14,436 | 6,580 | 60,534 |
| 1,879 | 426 | 39,233 | 14,463 | 6,579 | 60,701 |

|       |     |        |        |       |        |
|-------|-----|--------|--------|-------|--------|
| 1,880 | 426 | 39,309 | 14,538 | 6,575 | 60,848 |
| 1,881 | 440 | 39,620 | 14,685 | 6,651 | 61,396 |
| 1,882 | 431 | 39,188 | 14,583 | 6,599 | 60,801 |
| 1,883 | 433 | 39,132 | 14,670 | 6,646 | 60,881 |
| 1,884 | 438 | 39,174 | 14,742 | 6,671 | 61,025 |
| 1,885 | 446 | 39,026 | 14,734 | 6,665 | 60,871 |
| 1,886 | 442 | 38,592 | 14,646 | 6,603 | 60,283 |
| 1,887 | 449 | 38,587 | 14,626 | 6,574 | 60,236 |
| 1,888 | 450 | 38,522 | 14,648 | 6,568 | 60,188 |
| 1,889 | 440 | 38,323 | 14,633 | 6,531 | 59,927 |
| 1,890 | 426 | 38,093 | 14,601 | 6,526 | 59,646 |
| 1,891 | 423 | 37,814 | 14,505 | 6,500 | 59,242 |
| 1,892 | 412 | 37,606 | 14,472 | 6,470 | 58,960 |
| 1,893 | 414 | 37,582 | 14,349 | 6,440 | 58,785 |
| 1,894 | 414 | 37,493 | 14,344 | 6,435 | 58,686 |
| 1,895 | 405 | 37,292 | 14,338 | 6,422 | 58,457 |
| 1,896 | 393 | 37,074 | 14,278 | 6,425 | 58,170 |
| 1,897 | 379 | 36,552 | 14,080 | 6,355 | 57,366 |
| 1,898 | 381 | 36,202 | 13,987 | 6,246 | 56,816 |
| 1,899 | 381 | 35,914 | 13,926 | 6,218 | 56,439 |
| 1,900 | 379 | 35,864 | 13,965 | 6,212 | 56,420 |
| 1,901 | 362 | 35,850 | 14,032 | 6,230 | 56,474 |
| 1,902 | 348 | 35,472 | 14,006 | 6,139 | 55,965 |
| 1,903 | 329 | 35,151 | 13,977 | 6,127 | 55,584 |
| 1,904 | 319 | 34,570 | 13,889 | 6,082 | 54,860 |
| 1,905 | 294 | 33,490 | 13,348 | 5,831 | 52,963 |
| 1,906 | 300 | 33,455 | 13,477 | 5,860 | 53,092 |
| 1,907 | 273 | 33,305 | 13,532 | 5,859 | 52,969 |
| 1,908 | 274 | 33,273 | 13,567 | 5,906 | 53,020 |
| 1,909 | 278 | 33,380 | 13,612 | 5,935 | 53,205 |
| 1,910 | 280 | 33,051 | 13,502 | 5,887 | 52,720 |
| 1,911 | 280 | 32,935 | 13,479 | 5,899 | 52,593 |

|       |     |        |        |       |        |
|-------|-----|--------|--------|-------|--------|
| 1,912 | 283 | 32,708 | 13,502 | 5,870 | 52,363 |
| 1,913 | 287 | 32,884 | 13,655 | 5,910 | 52,736 |
| 1,914 | 264 | 32,616 | 13,670 | 5,927 | 52,477 |
| 1,915 | 257 | 32,635 | 13,750 | 5,985 | 52,627 |
| 1,916 | 251 | 32,496 | 13,805 | 5,979 | 52,531 |
| 1,917 | 243 | 32,488 | 13,862 | 5,992 | 52,585 |
| 1,918 | 235 | 32,311 | 13,794 | 5,953 | 52,293 |
| 1,919 | 229 | 32,334 | 13,817 | 5,946 | 52,326 |
| 1,920 | 219 | 32,228 | 13,747 | 5,917 | 52,111 |
| 1,921 | 220 | 32,097 | 13,632 | 5,872 | 51,821 |
| 1,922 | 223 | 32,351 | 13,737 | 5,908 | 52,219 |
| 1,923 | 221 | 32,205 | 13,479 | 5,805 | 51,710 |
| 1,924 | 223 | 32,344 | 13,538 | 5,823 | 51,928 |
| 1,925 | 224 | 32,570 | 13,635 | 5,879 | 52,308 |
| 1,926 | 227 | 32,636 | 13,620 | 5,874 | 52,357 |
| 1,927 | 219 | 32,463 | 13,591 | 5,848 | 52,121 |
| 1,928 | 220 | 31,965 | 13,449 | 5,781 | 51,415 |
| 1,929 | 218 | 31,598 | 13,331 | 5,735 | 50,882 |
| 1,930 | 221 | 31,880 | 13,435 | 5,781 | 51,317 |
| 1,931 | 222 | 31,751 | 13,310 | 5,740 | 51,023 |
| 1,932 | 208 | 31,629 | 13,286 | 5,710 | 50,833 |
| 1,933 | 209 | 31,324 | 13,186 | 5,661 | 50,380 |
| 1,934 | 212 | 30,983 | 13,020 | 5,571 | 49,786 |
| 1,935 | 201 | 30,642 | 12,907 | 5,503 | 49,253 |
| 1,936 | 192 | 30,740 | 12,934 | 5,540 | 49,406 |
| 1,937 | 189 | 30,506 | 12,843 | 5,514 | 49,052 |
| 1,938 | 182 | 30,281 | 12,850 | 5,496 | 48,809 |
| 1,939 | 179 | 30,582 | 12,922 | 5,584 | 49,267 |
| 1,940 | 189 | 30,572 | 12,932 | 5,572 | 49,265 |
| 1,941 | 194 | 30,550 | 12,896 | 5,571 | 49,211 |
| 1,942 | 197 | 30,669 | 12,944 | 5,576 | 49,386 |
| 1,943 | 201 | 30,593 | 12,920 | 5,594 | 49,308 |

|       |     |        |        |       |        |
|-------|-----|--------|--------|-------|--------|
| 1,944 | 196 | 30,174 | 12,783 | 5,525 | 48,678 |
| 1,945 | 198 | 30,368 | 12,891 | 5,570 | 49,027 |
| 1,946 | 210 | 29,918 | 12,684 | 5,480 | 48,292 |
| 1,947 | 209 | 30,035 | 12,689 | 5,471 | 48,404 |
| 1,948 | 211 | 29,727 | 12,638 | 5,480 | 48,056 |
| 1,949 | 230 | 30,074 | 12,829 | 5,526 | 48,659 |
| 1,950 | 228 | 29,504 | 12,618 | 5,418 | 47,768 |
| 1,951 | 237 | 29,436 | 12,588 | 5,398 | 47,659 |
| 1,952 | 246 | 29,798 | 12,751 | 5,464 | 48,259 |
| 1,953 | 244 | 28,996 | 12,335 | 5,324 | 46,899 |
| 1,954 | 243 | 29,102 | 12,347 | 5,336 | 47,028 |
| 1,955 | 245 | 29,004 | 12,262 | 5,299 | 46,810 |
| 1,956 | 232 | 28,259 | 11,971 | 5,199 | 45,661 |
| 1,957 | 232 | 28,213 | 11,959 | 5,187 | 45,591 |
| 1,958 | 230 | 28,101 | 11,876 | 5,159 | 45,366 |
| 1,959 | 232 | 28,008 | 11,825 | 5,146 | 45,211 |
| 1,960 | 214 | 27,531 | 11,614 | 5,050 | 44,409 |
| 1,961 | 213 | 27,145 | 11,463 | 4,958 | 43,779 |
| 1,962 | 212 | 27,142 | 11,468 | 4,981 | 43,803 |
| 1,963 | 218 | 27,123 | 11,547 | 5,001 | 43,889 |
| 1,964 | 216 | 26,990 | 11,489 | 4,993 | 43,688 |
| 1,965 | 225 | 26,800 | 11,332 | 4,951 | 43,308 |
| 1,966 | 223 | 26,557 | 11,199 | 4,895 | 42,874 |
| 1,967 | 234 | 27,255 | 11,367 | 4,980 | 43,836 |
| 1,968 | 245 | 27,179 | 11,293 | 4,946 | 43,663 |
| 1,969 | 244 | 27,117 | 11,260 | 4,930 | 43,551 |
| 1,970 | 248 | 26,611 | 11,064 | 4,806 | 42,729 |
| 1,971 | 248 | 26,648 | 11,086 | 4,815 | 42,797 |
| 1,972 | 253 | 26,920 | 11,199 | 4,854 | 43,226 |
| 1,973 | 253 | 27,224 | 11,257 | 4,871 | 43,605 |
| 1,974 | 252 | 27,118 | 11,188 | 4,870 | 43,428 |
| 1,975 | 253 | 27,436 | 11,344 | 4,936 | 43,969 |

|       |     |        |        |       |        |
|-------|-----|--------|--------|-------|--------|
| 1,976 | 251 | 27,425 | 11,365 | 4,958 | 43,999 |
| 1,977 | 255 | 27,577 | 11,423 | 4,990 | 44,245 |
| 1,978 | 258 | 27,729 | 11,466 | 5,014 | 44,467 |
| 1,979 | 257 | 27,662 | 11,410 | 4,993 | 44,322 |
| 1,980 | 263 | 28,196 | 11,567 | 5,055 | 45,081 |
| 1,981 | 267 | 28,469 | 11,627 | 5,068 | 45,431 |
| 1,982 | 269 | 28,255 | 11,554 | 5,025 | 45,103 |
| 1,983 | 265 | 28,246 | 11,547 | 5,027 | 45,085 |
| 1,984 | 269 | 28,717 | 11,720 | 5,078 | 45,784 |
| 1,985 | 265 | 28,519 | 11,646 | 5,010 | 45,440 |
| 1,986 | 268 | 28,509 | 11,630 | 4,997 | 45,404 |
| 1,987 | 267 | 28,210 | 11,562 | 4,993 | 45,032 |
| 1,988 | 272 | 28,526 | 11,693 | 5,077 | 45,568 |
| 1,989 | 275 | 28,519 | 11,735 | 5,086 | 45,615 |
| 1,990 | 273 | 28,491 | 11,720 | 5,058 | 45,542 |
| 1,991 | 265 | 28,457 | 11,676 | 5,053 | 45,451 |
| 1,992 | 260 | 28,599 | 11,682 | 5,036 | 45,577 |
| 1,993 | 258 | 28,523 | 11,649 | 5,023 | 45,453 |
| 1,994 | 251 | 27,588 | 11,237 | 4,871 | 43,947 |
| 1,995 | 252 | 28,051 | 11,330 | 4,876 | 44,509 |
| 1,996 | 256 | 28,493 | 11,510 | 4,928 | 45,187 |
| 1,997 | 254 | 28,476 | 11,484 | 4,887 | 45,101 |
| 1,998 | 260 | 28,777 | 11,573 | 4,912 | 45,522 |
| 1,999 | 251 | 29,024 | 11,638 | 4,953 | 45,866 |
| 2,000 | 233 | 29,119 | 11,623 | 4,967 | 45,942 |
| 2,001 | 229 | 29,049 | 11,587 | 4,987 | 45,852 |
| 2,002 | 217 | 29,032 | 11,574 | 5,008 | 45,831 |
| 2,003 | 208 | 28,745 | 11,459 | 4,964 | 45,376 |
| 2,004 | 209 | 28,845 | 11,484 | 4,992 | 45,530 |
| 2,005 | 204 | 29,013 | 11,574 | 5,028 | 45,819 |
| 2,006 | 203 | 29,112 | 11,643 | 5,058 | 46,016 |
| 2,007 | 207 | 29,104 | 11,670 | 5,100 | 46,081 |

|       |     |        |        |       |        |
|-------|-----|--------|--------|-------|--------|
| 2,008 | 212 | 29,434 | 11,788 | 5,164 | 46,598 |
| 2,009 | 202 | 29,195 | 11,667 | 5,097 | 46,161 |
| 2,010 | 203 | 29,130 | 11,652 | 5,081 | 46,066 |
| 2,011 | 204 | 29,179 | 11,689 | 5,095 | 46,167 |
| 2,012 | 203 | 29,605 | 11,877 | 5,147 | 46,832 |
| 2,013 | 193 | 29,530 | 11,712 | 5,097 | 46,532 |
| 2,014 | 198 | 30,009 | 11,846 | 5,167 | 47,220 |
| 2,015 | 189 | 29,339 | 11,545 | 4,990 | 46,063 |
| 2,016 | 191 | 29,603 | 11,636 | 5,072 | 46,502 |
| 2,017 | 189 | 29,676 | 11,721 | 5,085 | 46,671 |
| 2,018 | 184 | 29,940 | 11,795 | 5,106 | 47,025 |
| 2,019 | 178 | 29,581 | 11,655 | 5,051 | 46,465 |
| 2,020 | 178 | 29,626 | 11,647 | 5,056 | 46,507 |
| 2,021 | 180 | 29,962 | 11,783 | 5,107 | 47,032 |
| 2,022 | 186 | 30,330 | 11,956 | 5,204 | 47,676 |
| 2,023 | 193 | 30,489 | 12,024 | 5,249 | 47,955 |
| 2,024 | 200 | 30,644 | 12,092 | 5,277 | 48,213 |
| 2,025 | 203 | 30,585 | 12,084 | 5,247 | 48,119 |
| 2,026 | 202 | 30,579 | 12,101 | 5,255 | 48,137 |
| 2,027 | 202 | 30,617 | 12,139 | 5,261 | 48,219 |
| 2,028 | 203 | 30,430 | 12,074 | 5,223 | 47,930 |
| 2,029 | 202 | 30,645 | 12,193 | 5,266 | 48,306 |
| 2,030 | 200 | 30,768 | 12,404 | 5,343 | 48,715 |
| 2,031 | 199 | 30,730 | 12,495 | 5,374 | 48,798 |
| 2,032 | 201 | 30,688 | 12,579 | 5,447 | 48,915 |
| 2,033 | 208 | 30,720 | 12,652 | 5,466 | 49,046 |
| 2,034 | 209 | 31,030 | 12,782 | 5,525 | 49,546 |
| 2,035 | 204 | 30,361 | 12,460 | 5,379 | 48,404 |
| 2,036 | 205 | 30,461 | 12,517 | 5,407 | 48,590 |
| 2,037 | 215 | 30,887 | 12,685 | 5,460 | 49,247 |
| 2,038 | 216 | 30,994 | 12,702 | 5,461 | 49,373 |
| 2,039 | 213 | 31,418 | 12,915 | 5,551 | 50,097 |



|       |     |        |        |       |        |
|-------|-----|--------|--------|-------|--------|
| 2,040 | 210 | 31,325 | 12,755 | 5,488 | 49,778 |
| 2,041 | 210 | 31,344 | 12,815 | 5,520 | 49,889 |
| 2,042 | 217 | 31,654 | 12,937 | 5,592 | 50,400 |
| 2,043 | 228 | 31,214 | 12,835 | 5,543 | 49,820 |
| 2,044 | 236 | 31,559 | 13,013 | 5,587 | 50,395 |
| 2,045 | 235 | 31,485 | 13,079 | 5,595 | 50,394 |
| 2,046 | 236 | 31,595 | 13,145 | 5,667 | 50,643 |
| 2,047 | 233 | 30,866 | 12,861 | 5,576 | 49,536 |
| 2,048 | 236 | 31,109 | 12,957 | 5,632 | 49,934 |
| 2,049 | 232 | 31,367 | 13,090 | 5,697 | 50,386 |
| 2,050 | 236 | 31,216 | 13,149 | 5,702 | 50,303 |
| 2,051 | 239 | 31,560 | 13,292 | 5,799 | 50,890 |
| 2,052 | 235 | 31,078 | 13,117 | 5,723 | 50,153 |
| 2,053 | 240 | 31,369 | 13,281 | 5,793 | 50,683 |
| 2,054 | 235 | 31,455 | 13,402 | 5,818 | 50,910 |
| 2,055 | 254 | 31,601 | 13,460 | 5,841 | 51,156 |
| 2,056 | 263 | 31,871 | 13,516 | 5,867 | 51,517 |
| 2,057 | 270 | 31,686 | 13,470 | 5,827 | 51,253 |
| 2,058 | 279 | 31,873 | 13,467 | 5,838 | 51,457 |
| 2,059 | 274 | 31,515 | 13,340 | 5,784 | 50,913 |
| 2,060 | 285 | 32,148 | 13,701 | 5,931 | 52,065 |
| 2,061 | 285 | 32,278 | 13,734 | 5,954 | 52,251 |
| 2,062 | 285 | 31,541 | 13,499 | 5,858 | 51,183 |
| 2,063 | 294 | 31,719 | 13,556 | 5,897 | 51,466 |
| 2,064 | 304 | 32,085 | 13,683 | 5,933 | 52,005 |
| 2,065 | 303 | 31,596 | 13,519 | 5,857 | 51,275 |
| 2,066 | 302 | 31,732 | 13,528 | 5,863 | 51,425 |
| 2,067 | 309 | 31,958 | 13,639 | 5,864 | 51,770 |
| 2,068 | 310 | 31,302 | 13,363 | 5,774 | 50,749 |
| 2,069 | 310 | 31,254 | 13,349 | 5,787 | 50,700 |
| 2,070 | 311 | 30,912 | 13,240 | 5,751 | 50,214 |
| 2,071 | 310 | 30,663 | 13,172 | 5,733 | 49,878 |

|       |     |        |        |       |        |
|-------|-----|--------|--------|-------|--------|
| 2,072 | 325 | 32,030 | 13,757 | 6,002 | 52,114 |
| 2,073 | 323 | 31,615 | 13,577 | 5,925 | 51,440 |
| 2,074 | 313 | 31,312 | 13,456 | 5,862 | 50,943 |
| 2,075 | 309 | 31,754 | 13,594 | 5,947 | 51,604 |
| 2,076 | 306 | 31,088 | 13,255 | 5,824 | 50,473 |
| 2,077 | 310 | 31,608 | 13,391 | 5,870 | 51,179 |
| 2,078 | 304 | 31,389 | 13,328 | 5,843 | 50,864 |
| 2,079 | 304 | 31,269 | 13,301 | 5,850 | 50,724 |
| 2,080 | 305 | 31,382 | 13,327 | 5,888 | 50,902 |
| 2,081 | 301 | 31,464 | 13,253 | 5,888 | 50,906 |
| 2,082 | 300 | 31,498 | 13,184 | 5,913 | 50,895 |
| 2,083 | 291 | 31,345 | 13,075 | 5,851 | 50,562 |
| 2,084 | 283 | 31,376 | 13,003 | 5,839 | 50,501 |
| 2,085 | 286 | 31,330 | 12,904 | 5,832 | 50,352 |
| 2,086 | 286 | 31,005 | 12,720 | 5,771 | 49,782 |
| 2,087 | 288 | 30,980 | 12,692 | 5,774 | 49,734 |
| 2,088 | 281 | 31,630 | 12,883 | 5,880 | 50,674 |
| 2,089 | 284 | 31,463 | 12,830 | 5,860 | 50,437 |
| 2,090 | 286 | 31,559 | 12,833 | 5,860 | 50,538 |
| 2,091 | 291 | 31,809 | 12,903 | 5,882 | 50,885 |
| 2,092 | 293 | 32,231 | 12,994 | 5,947 | 51,465 |
| 2,093 | 296 | 32,289 | 12,966 | 5,936 | 51,487 |
| 2,094 | 285 | 31,926 | 12,809 | 5,863 | 50,883 |
| 2,095 | 274 | 31,989 | 12,805 | 5,932 | 51,000 |
| 2,096 | 274 | 32,019 | 12,732 | 5,907 | 50,932 |
| 2,097 | 271 | 31,667 | 12,562 | 5,809 | 50,309 |
| 2,098 | 271 | 31,607 | 12,527 | 5,796 | 50,201 |
| 2,099 | 273 | 31,963 | 12,678 | 5,877 | 50,791 |
| 2,100 | 279 | 32,029 | 12,636 | 5,904 | 50,848 |
| 2,101 | 284 | 32,256 | 12,524 | 5,908 | 50,972 |
| 2,102 | 283 | 32,330 | 12,490 | 5,860 | 50,963 |
| 2,103 | 282 | 32,607 | 12,489 | 5,883 | 51,261 |

|       |     |        |        |       |        |
|-------|-----|--------|--------|-------|--------|
| 2,104 | 292 | 32,374 | 12,440 | 5,838 | 50,944 |
| 2,105 | 293 | 32,771 | 12,448 | 5,879 | 51,391 |
| 2,106 | 279 | 33,294 | 12,534 | 5,954 | 52,061 |
| 2,107 | 278 | 33,324 | 12,469 | 5,975 | 52,046 |
| 2,108 | 274 | 33,100 | 12,358 | 5,935 | 51,667 |
| 2,109 | 266 | 33,421 | 12,414 | 5,973 | 52,074 |
| 2,110 | 259 | 33,471 | 12,345 | 5,937 | 52,012 |
| 2,111 | 254 | 33,517 | 12,330 | 5,939 | 52,040 |
| 2,112 | 256 | 33,305 | 12,254 | 5,974 | 51,789 |
| 2,113 | 256 | 33,430 | 12,250 | 5,957 | 51,893 |
| 2,114 | 247 | 33,611 | 12,326 | 6,014 | 52,198 |
| 2,115 | 240 | 33,470 | 12,324 | 6,031 | 52,065 |
| 2,116 | 240 | 33,457 | 12,348 | 6,057 | 52,102 |
| 2,117 | 236 | 33,688 | 12,355 | 6,099 | 52,378 |
| 2,118 | 238 | 33,593 | 12,408 | 6,095 | 52,334 |
| 2,119 | 237 | 33,988 | 12,466 | 6,161 | 52,852 |
| 2,120 | 236 | 34,486 | 12,596 | 6,248 | 53,566 |
| 2,121 | 239 | 34,785 | 12,662 | 6,276 | 53,962 |
| 2,122 | 243 | 34,715 | 12,565 | 6,207 | 53,730 |
| 2,123 | 244 | 34,585 | 12,554 | 6,227 | 53,610 |
| 2,124 | 232 | 34,553 | 12,560 | 6,247 | 53,592 |
| 2,125 | 232 | 34,357 | 12,527 | 6,230 | 53,346 |
| 2,126 | 234 | 34,402 | 12,626 | 6,291 | 53,553 |
| 2,127 | 233 | 34,527 | 12,619 | 6,293 | 53,672 |
| 2,128 | 235 | 34,548 | 12,625 | 6,311 | 53,719 |
| 2,129 | 238 | 34,842 | 12,642 | 6,340 | 54,062 |
| 2,130 | 233 | 34,910 | 12,573 | 6,291 | 54,007 |
| 2,131 | 237 | 35,154 | 12,569 | 6,282 | 54,242 |
| 2,132 | 239 | 35,063 | 12,527 | 6,251 | 54,080 |
| 2,133 | 243 | 35,642 | 12,605 | 6,286 | 54,776 |
| 2,134 | 249 | 35,234 | 12,445 | 6,193 | 54,121 |
| 2,135 | 254 | 35,482 | 12,557 | 6,258 | 54,551 |

|       |     |        |        |       |        |
|-------|-----|--------|--------|-------|--------|
| 2,136 | 250 | 35,282 | 12,490 | 6,254 | 54,276 |
| 2,137 | 256 | 35,694 | 12,653 | 6,347 | 54,950 |
| 2,138 | 257 | 35,736 | 12,645 | 6,355 | 54,993 |
| 2,139 | 253 | 35,450 | 12,576 | 6,325 | 54,604 |
| 2,140 | 249 | 35,384 | 12,555 | 6,344 | 54,532 |
| 2,141 | 255 | 35,692 | 12,580 | 6,384 | 54,911 |
| 2,142 | 252 | 35,925 | 12,597 | 6,419 | 55,193 |
| 2,143 | 246 | 35,996 | 12,587 | 6,401 | 55,230 |
| 2,144 | 241 | 35,814 | 12,480 | 6,378 | 54,913 |
| 2,145 | 244 | 35,898 | 12,498 | 6,357 | 54,997 |
| 2,146 | 244 | 35,975 | 12,485 | 6,363 | 55,067 |
| 2,147 | 241 | 35,982 | 12,498 | 6,401 | 55,122 |
| 2,148 | 243 | 35,986 | 12,549 | 6,425 | 55,203 |
| 2,149 | 244 | 35,818 | 12,417 | 6,376 | 54,855 |
| 2,150 | 247 | 36,292 | 12,468 | 6,419 | 55,426 |
| 2,151 | 240 | 36,812 | 12,563 | 6,465 | 56,080 |
| 2,152 | 227 | 35,647 | 12,222 | 6,278 | 54,374 |
| 2,153 | 230 | 36,011 | 12,297 | 6,311 | 54,849 |
| 2,154 | 225 | 36,419 | 12,342 | 6,345 | 55,331 |
| 2,155 | 220 | 36,103 | 12,156 | 6,284 | 54,763 |
| 2,156 | 219 | 35,594 | 12,031 | 6,258 | 54,102 |
| 2,157 | 224 | 36,110 | 12,213 | 6,311 | 54,858 |
| 2,158 | 222 | 35,816 | 12,211 | 6,279 | 54,528 |
| 2,159 | 213 | 35,583 | 12,141 | 6,215 | 54,152 |
| 2,160 | 217 | 35,438 | 12,054 | 6,221 | 53,930 |
| 2,161 | 217 | 35,392 | 12,018 | 6,218 | 53,845 |
| 2,162 | 212 | 35,478 | 12,025 | 6,226 | 53,941 |
| 2,163 | 215 | 35,988 | 12,176 | 6,277 | 54,656 |
| 2,164 | 211 | 35,987 | 12,189 | 6,277 | 54,664 |
| 2,165 | 203 | 36,167 | 12,180 | 6,315 | 54,865 |
| 2,166 | 207 | 36,063 | 12,077 | 6,255 | 54,602 |
| 2,167 | 206 | 35,907 | 11,981 | 6,219 | 54,313 |

|       |     |        |        |       |        |
|-------|-----|--------|--------|-------|--------|
| 2,168 | 205 | 36,824 | 12,172 | 6,347 | 55,548 |
| 2,169 | 201 | 36,592 | 12,002 | 6,304 | 55,099 |
| 2,170 | 183 | 36,285 | 11,831 | 6,202 | 54,501 |
| 2,171 | 185 | 36,561 | 11,918 | 6,262 | 54,926 |
| 2,172 | 191 | 36,954 | 11,994 | 6,302 | 55,441 |
| 2,173 | 184 | 36,451 | 11,827 | 6,255 | 54,717 |
| 2,174 | 191 | 37,053 | 11,934 | 6,321 | 55,499 |
| 2,175 | 198 | 36,928 | 11,793 | 6,243 | 55,162 |
| 2,176 | 196 | 36,959 | 11,753 | 6,246 | 55,154 |
| 2,177 | 200 | 37,355 | 11,846 | 6,282 | 55,683 |
| 2,178 | 196 | 36,630 | 11,664 | 6,175 | 54,665 |
| 2,179 | 198 | 36,719 | 11,673 | 6,185 | 54,775 |
| 2,180 | 201 | 36,315 | 11,710 | 6,156 | 54,382 |
| 2,181 | 202 | 36,728 | 11,828 | 6,219 | 54,977 |
| 2,182 | 199 | 36,169 | 11,715 | 6,144 | 54,227 |
| 2,183 | 198 | 36,105 | 11,708 | 6,149 | 54,160 |
| 2,184 | 196 | 36,129 | 11,778 | 6,169 | 54,272 |
| 2,185 | 197 | 36,306 | 11,801 | 6,212 | 54,516 |
| 2,186 | 191 | 36,366 | 11,818 | 6,198 | 54,573 |
| 2,187 | 188 | 36,670 | 11,868 | 6,181 | 54,907 |
| 2,188 | 183 | 36,739 | 11,787 | 6,167 | 54,876 |
| 2,189 | 198 | 36,384 | 11,586 | 6,074 | 54,242 |
| 2,190 | 198 | 36,456 | 11,577 | 6,068 | 54,299 |
| 2,191 | 198 | 36,300 | 11,545 | 6,066 | 54,109 |
| 2,192 | 203 | 36,773 | 11,708 | 6,133 | 54,817 |
| 2,193 | 206 | 35,402 | 11,263 | 5,842 | 52,713 |
| 2,194 | 218 | 35,972 | 11,419 | 5,928 | 53,537 |
| 2,195 | 231 | 36,443 | 11,590 | 5,990 | 54,254 |
| 2,196 | 231 | 36,434 | 11,558 | 6,013 | 54,236 |
| 2,197 | 225 | 37,332 | 11,776 | 6,127 | 55,460 |
| 2,198 | 224 | 37,620 | 11,844 | 6,148 | 55,836 |
| 2,199 | 219 | 37,266 | 11,693 | 6,090 | 55,268 |

|       |     |        |        |       |        |
|-------|-----|--------|--------|-------|--------|
| 2,200 | 217 | 37,252 | 11,721 | 6,089 | 55,279 |
| 2,201 | 214 | 37,111 | 11,749 | 6,070 | 55,144 |
| 2,202 | 219 | 36,386 | 11,588 | 5,979 | 54,172 |
| 2,203 | 220 | 36,327 | 11,540 | 5,978 | 54,065 |
| 2,204 | 222 | 36,025 | 11,461 | 5,962 | 53,670 |
| 2,205 | 219 | 35,613 | 11,382 | 5,945 | 53,159 |
| 2,206 | 214 | 36,327 | 11,859 | 6,165 | 54,565 |
| 2,207 | 217 | 36,335 | 11,844 | 6,156 | 54,552 |
| 2,208 | 212 | 35,892 | 11,654 | 6,039 | 53,797 |
| 2,209 | 216 | 36,404 | 11,837 | 6,150 | 54,607 |
| 2,210 | 226 | 36,268 | 11,765 | 6,152 | 54,411 |
| 2,211 | 220 | 36,003 | 11,674 | 6,102 | 53,999 |
| 2,212 | 227 | 36,339 | 11,801 | 6,169 | 54,536 |
| 2,213 | 229 | 36,552 | 11,923 | 6,201 | 54,905 |
| 2,214 | 225 | 36,081 | 11,844 | 6,163 | 54,313 |
| 2,215 | 221 | 35,364 | 11,591 | 6,062 | 53,238 |
| 2,216 | 225 | 35,494 | 11,666 | 6,093 | 53,478 |
| 2,217 | 228 | 35,561 | 11,692 | 6,092 | 53,573 |
| 2,218 | 234 | 35,932 | 11,887 | 6,147 | 54,200 |
| 2,219 | 256 | 36,042 | 11,946 | 6,152 | 54,396 |
| 2,220 | 259 | 35,563 | 11,819 | 6,060 | 53,701 |
| 2,221 | 264 | 35,537 | 11,772 | 6,070 | 53,643 |
| 2,222 | 264 | 35,503 | 11,781 | 6,070 | 53,618 |
| 2,223 | 262 | 35,785 | 11,945 | 6,131 | 54,123 |
| 2,224 | 260 | 35,528 | 11,868 | 6,059 | 53,715 |
| 2,225 | 250 | 35,704 | 11,932 | 6,078 | 53,964 |
| 2,226 | 254 | 36,025 | 11,976 | 6,102 | 54,357 |
| 2,227 | 251 | 36,291 | 11,998 | 6,122 | 54,662 |
| 2,228 | 254 | 36,492 | 12,024 | 6,142 | 54,912 |
| 2,229 | 252 | 36,500 | 11,959 | 6,121 | 54,832 |
| 2,230 | 252 | 37,014 | 12,064 | 6,204 | 55,534 |
| 2,231 | 255 | 37,761 | 12,178 | 6,295 | 56,489 |

|       |     |        |        |       |        |
|-------|-----|--------|--------|-------|--------|
| 2,232 | 263 | 38,163 | 12,263 | 6,344 | 57,033 |
| 2,233 | 260 | 38,097 | 12,181 | 6,320 | 56,858 |
| 2,234 | 265 | 38,790 | 12,335 | 6,416 | 57,806 |
| 2,235 | 258 | 38,685 | 12,224 | 6,370 | 57,537 |
| 2,236 | 259 | 38,732 | 12,245 | 6,378 | 57,614 |
| 2,237 | 267 | 38,793 | 12,204 | 6,347 | 57,611 |
| 2,238 | 275 | 39,037 | 12,210 | 6,386 | 57,908 |
| 2,239 | 275 | 39,133 | 12,259 | 6,395 | 58,062 |
| 2,240 | 259 | 39,808 | 12,478 | 6,470 | 59,015 |
| 2,241 | 257 | 39,889 | 12,474 | 6,443 | 59,063 |
| 2,242 | 256 | 39,732 | 12,500 | 6,457 | 58,945 |
| 2,243 | 248 | 40,250 | 12,734 | 6,569 | 59,801 |
| 2,244 | 237 | 39,758 | 12,656 | 6,536 | 59,187 |
| 2,245 | 228 | 40,086 | 12,761 | 6,607 | 59,682 |
| 2,246 | 226 | 40,503 | 12,880 | 6,687 | 60,296 |
| 2,247 | 237 | 40,742 | 12,918 | 6,764 | 60,661 |
| 2,248 | 239 | 40,493 | 12,995 | 6,783 | 60,510 |
| 2,249 | 241 | 40,525 | 13,003 | 6,786 | 60,555 |
| 2,250 | 240 | 40,312 | 12,949 | 6,763 | 60,264 |
| 2,251 | 248 | 40,441 | 12,927 | 6,764 | 60,380 |
| 2,252 | 256 | 40,594 | 12,965 | 6,795 | 60,610 |
| 2,253 | 254 | 40,655 | 12,968 | 6,788 | 60,665 |
| 2,254 | 258 | 41,217 | 13,051 | 6,829 | 61,355 |
| 2,255 | 257 | 41,045 | 12,956 | 6,767 | 61,025 |
| 2,256 | 257 | 41,418 | 12,977 | 6,805 | 61,457 |
| 2,257 | 255 | 42,146 | 13,045 | 6,868 | 62,314 |
| 2,258 | 251 | 41,564 | 12,890 | 6,778 | 61,483 |
| 2,259 | 254 | 41,400 | 12,917 | 6,840 | 61,411 |
| 2,260 | 252 | 41,919 | 13,035 | 6,899 | 62,105 |
| 2,261 | 246 | 41,431 | 12,893 | 6,792 | 61,362 |
| 2,262 | 246 | 41,014 | 12,800 | 6,722 | 60,782 |
| 2,263 | 249 | 41,872 | 13,055 | 6,867 | 62,043 |

|       |     |        |        |       |        |
|-------|-----|--------|--------|-------|--------|
| 2,264 | 250 | 41,925 | 12,949 | 6,864 | 61,988 |
| 2,265 | 247 | 41,665 | 12,748 | 6,787 | 61,447 |
| 2,266 | 241 | 40,992 | 12,481 | 6,670 | 60,384 |
| 2,267 | 241 | 41,564 | 12,585 | 6,718 | 61,108 |
| 2,268 | 230 | 41,399 | 12,516 | 6,719 | 60,864 |
| 2,269 | 233 | 41,763 | 12,581 | 6,750 | 61,327 |
| 2,270 | 228 | 42,170 | 12,644 | 6,787 | 61,829 |
| 2,271 | 217 | 41,836 | 12,498 | 6,739 | 61,290 |
| 2,272 | 224 | 42,428 | 12,630 | 6,795 | 62,077 |
| 2,273 | 221 | 42,230 | 12,471 | 6,729 | 61,651 |
| 2,274 | 221 | 42,178 | 12,451 | 6,744 | 61,594 |
| 2,275 | 224 | 41,970 | 12,351 | 6,736 | 61,281 |
| 2,276 | 220 | 41,766 | 12,324 | 6,715 | 61,025 |
| 2,277 | 227 | 42,205 | 12,473 | 6,765 | 61,670 |
| 2,278 | 240 | 41,792 | 12,368 | 6,694 | 61,094 |
| 2,279 | 237 | 41,460 | 12,264 | 6,645 | 60,606 |
| 2,280 | 250 | 41,377 | 12,253 | 6,637 | 60,517 |
| 2,281 | 250 | 40,954 | 12,125 | 6,571 | 59,900 |
| 2,282 | 241 | 41,570 | 12,351 | 6,685 | 60,847 |
| 2,283 | 235 | 41,143 | 12,216 | 6,611 | 60,205 |
| 2,284 | 231 | 41,124 | 12,187 | 6,613 | 60,155 |
| 2,285 | 237 | 41,521 | 12,288 | 6,673 | 60,719 |
| 2,286 | 236 | 41,121 | 12,173 | 6,614 | 60,144 |
| 2,287 | 238 | 41,612 | 12,349 | 6,709 | 60,908 |
| 2,288 | 233 | 41,614 | 12,393 | 6,743 | 60,983 |
| 2,289 | 225 | 41,639 | 12,391 | 6,758 | 61,013 |
| 2,290 | 225 | 41,187 | 12,255 | 6,708 | 60,375 |
| 2,291 | 221 | 40,795 | 12,179 | 6,729 | 59,924 |
| 2,292 | 222 | 41,243 | 12,254 | 6,787 | 60,506 |
| 2,293 | 226 | 39,814 | 11,633 | 6,442 | 58,115 |
| 2,294 | 229 | 40,334 | 11,719 | 6,516 | 58,798 |
| 2,295 | 223 | 40,443 | 11,666 | 6,508 | 58,840 |



|       |     |        |        |       |        |
|-------|-----|--------|--------|-------|--------|
| 2,296 | 224 | 40,937 | 11,774 | 6,609 | 59,544 |
| 2,297 | 217 | 41,510 | 11,895 | 6,712 | 60,334 |
| 2,298 | 208 | 41,278 | 11,858 | 6,654 | 59,998 |
| 2,299 | 203 | 41,659 | 11,831 | 6,663 | 60,356 |
| 2,300 | 201 | 41,088 | 11,666 | 6,557 | 59,512 |
| 2,301 | 201 | 41,191 | 11,664 | 6,554 | 59,610 |
| 2,302 | 194 | 41,565 | 11,775 | 6,661 | 60,195 |
| 2,303 | 186 | 41,433 | 11,753 | 6,659 | 60,031 |
| 2,304 | 186 | 41,183 | 11,706 | 6,666 | 59,741 |
| 2,305 | 182 | 41,172 | 11,706 | 6,668 | 59,728 |
| 2,306 | 176 | 40,642 | 11,553 | 6,583 | 58,954 |
| 2,307 | 188 | 41,226 | 11,854 | 6,703 | 59,971 |
| 2,308 | 191 | 41,424 | 11,936 | 6,741 | 60,292 |
| 2,309 | 189 | 41,740 | 11,957 | 6,732 | 60,618 |
| 2,310 | 185 | 41,608 | 11,851 | 6,675 | 60,319 |
| 2,311 | 190 | 41,917 | 11,970 | 6,763 | 60,840 |
| 2,312 | 186 | 41,948 | 11,960 | 6,772 | 60,866 |
| 2,313 | 188 | 41,792 | 11,840 | 6,700 | 60,520 |
| 2,314 | 187 | 41,834 | 11,807 | 6,690 | 60,518 |
| 2,315 | 188 | 42,015 | 11,925 | 6,749 | 60,877 |
| 2,316 | 188 | 41,478 | 11,813 | 6,700 | 60,179 |
| 2,317 | 187 | 41,716 | 11,900 | 6,738 | 60,541 |
| 2,318 | 187 | 41,058 | 11,693 | 6,639 | 59,577 |
| 2,319 | 189 | 41,454 | 11,827 | 6,695 | 60,165 |
| 2,320 | 184 | 41,276 | 11,748 | 6,693 | 59,901 |
| 2,321 | 174 | 41,312 | 11,783 | 6,720 | 59,989 |
| 2,322 | 175 | 41,609 | 11,895 | 6,776 | 60,455 |
| 2,323 | 167 | 41,530 | 11,886 | 6,804 | 60,387 |
| 2,324 | 162 | 41,654 | 11,926 | 6,829 | 60,571 |
| 2,325 | 155 | 41,428 | 11,859 | 6,795 | 60,237 |
| 2,326 | 164 | 42,086 | 11,975 | 6,872 | 61,097 |
| 2,327 | 169 | 42,704 | 12,069 | 6,966 | 61,908 |

|       |     |        |        |       |        |
|-------|-----|--------|--------|-------|--------|
| 2,328 | 163 | 42,437 | 12,062 | 6,995 | 61,657 |
| 2,329 | 148 | 42,695 | 12,056 | 7,000 | 61,899 |
| 2,330 | 153 | 42,436 | 12,023 | 7,006 | 61,618 |
| 2,331 | 140 | 42,233 | 11,937 | 6,979 | 61,289 |
| 2,332 | 150 | 42,728 | 12,036 | 7,031 | 61,945 |
| 2,333 | 151 | 42,263 | 11,887 | 6,969 | 61,270 |
| 2,334 | 154 | 42,253 | 11,979 | 7,045 | 61,431 |
| 2,335 | 157 | 42,395 | 12,020 | 7,066 | 61,638 |
| 2,336 | 155 | 42,055 | 11,919 | 7,027 | 61,156 |
| 2,337 | 162 | 42,470 | 12,024 | 7,098 | 61,754 |
| 2,338 | 164 | 42,406 | 11,963 | 7,067 | 61,600 |
| 2,339 | 161 | 41,836 | 11,834 | 7,017 | 60,848 |
| 2,340 | 164 | 41,664 | 11,821 | 6,998 | 60,647 |
| 2,341 | 168 | 42,089 | 11,987 | 7,065 | 61,309 |
| 2,342 | 167 | 41,696 | 11,820 | 6,972 | 60,655 |
| 2,343 | 169 | 41,646 | 11,806 | 6,988 | 60,609 |
| 2,344 | 167 | 41,489 | 11,759 | 7,018 | 60,433 |
| 2,345 | 167 | 41,805 | 11,878 | 7,060 | 60,910 |
| 2,346 | 166 | 41,632 | 11,887 | 7,051 | 60,736 |
| 2,347 | 169 | 41,234 | 11,841 | 6,958 | 60,202 |
| 2,348 | 165 | 41,035 | 11,810 | 6,967 | 59,977 |
| 2,349 | 175 | 41,305 | 11,900 | 7,013 | 60,393 |
| 2,350 | 183 | 41,322 | 11,913 | 6,997 | 60,415 |
| 2,351 | 188 | 41,413 | 11,919 | 7,028 | 60,548 |
| 2,352 | 193 | 41,814 | 11,965 | 7,013 | 60,985 |
| 2,353 | 193 | 41,405 | 11,797 | 6,880 | 60,275 |
| 2,354 | 198 | 41,784 | 11,852 | 6,925 | 60,759 |
| 2,355 | 194 | 41,731 | 11,842 | 6,932 | 60,699 |
| 2,356 | 201 | 42,140 | 11,898 | 6,989 | 61,228 |
| 2,357 | 198 | 42,347 | 11,905 | 6,996 | 61,446 |
| 2,358 | 196 | 42,605 | 11,880 | 7,017 | 61,698 |
| 2,359 | 193 | 42,210 | 11,821 | 6,999 | 61,223 |

|       |     |        |        |       |        |
|-------|-----|--------|--------|-------|--------|
| 2,360 | 197 | 41,967 | 11,802 | 6,987 | 60,953 |
| 2,361 | 197 | 41,903 | 11,668 | 6,894 | 60,662 |
| 2,362 | 203 | 41,725 | 11,657 | 6,910 | 60,495 |
| 2,363 | 204 | 41,590 | 11,648 | 6,925 | 60,367 |
| 2,364 | 202 | 41,473 | 11,614 | 6,930 | 60,219 |
| 2,365 | 203 | 41,298 | 11,551 | 6,877 | 59,929 |
| 2,366 | 204 | 41,295 | 11,524 | 6,853 | 59,876 |
| 2,367 | 203 | 40,918 | 11,422 | 6,782 | 59,325 |
| 2,368 | 208 | 41,239 | 11,556 | 6,858 | 59,861 |
| 2,369 | 212 | 41,274 | 11,653 | 6,883 | 60,022 |
| 2,370 | 210 | 40,966 | 11,530 | 6,823 | 59,529 |
| 2,371 | 227 | 41,658 | 11,706 | 6,883 | 60,474 |
| 2,372 | 224 | 41,291 | 11,603 | 6,841 | 59,959 |
| 2,373 | 231 | 41,203 | 11,558 | 6,781 | 59,773 |
| 2,374 | 233 | 41,224 | 11,556 | 6,780 | 59,793 |
| 2,375 | 230 | 40,881 | 11,467 | 6,715 | 59,293 |
| 2,376 | 231 | 41,235 | 11,591 | 6,787 | 59,844 |
| 2,377 | 224 | 41,429 | 11,721 | 6,866 | 60,240 |
| 2,378 | 220 | 40,937 | 11,608 | 6,789 | 59,554 |
| 2,379 | 221 | 41,182 | 11,659 | 6,832 | 59,894 |
| 2,380 | 220 | 41,185 | 11,731 | 6,883 | 60,019 |
| 2,381 | 224 | 41,007 | 11,731 | 6,858 | 59,820 |
| 2,382 | 229 | 41,181 | 11,760 | 6,887 | 60,057 |
| 2,383 | 220 | 40,818 | 11,711 | 6,857 | 59,606 |
| 2,384 | 217 | 41,177 | 11,697 | 6,847 | 59,938 |
| 2,385 | 220 | 41,771 | 11,881 | 6,939 | 60,811 |
| 2,386 | 220 | 42,344 | 12,030 | 7,002 | 61,596 |
| 2,387 | 218 | 42,451 | 12,072 | 7,017 | 61,758 |
| 2,388 | 217 | 42,588 | 12,081 | 7,034 | 61,920 |
| 2,389 | 212 | 41,928 | 11,945 | 6,970 | 61,055 |
| 2,390 | 217 | 42,860 | 12,275 | 7,107 | 62,459 |
| 2,391 | 218 | 42,531 | 12,154 | 7,001 | 61,904 |

|       |     |        |        |       |        |
|-------|-----|--------|--------|-------|--------|
| 2,392 | 220 | 43,116 | 12,216 | 7,033 | 62,585 |
| 2,393 | 226 | 43,752 | 12,366 | 7,095 | 63,439 |
| 2,394 | 226 | 43,347 | 12,307 | 7,038 | 62,918 |
| 2,395 | 227 | 43,597 | 12,361 | 7,083 | 63,268 |
| 2,396 | 228 | 43,846 | 12,427 | 7,085 | 63,586 |
| 2,397 | 234 | 43,952 | 12,395 | 7,064 | 63,645 |
| 2,398 | 231 | 42,695 | 11,970 | 6,801 | 61,697 |
| 2,399 | 233 | 43,166 | 12,066 | 6,862 | 62,327 |
| 2,400 | 229 | 43,498 | 12,145 | 6,918 | 62,790 |
| 2,401 | 231 | 43,377 | 12,124 | 6,918 | 62,650 |
| 2,402 | 237 | 43,573 | 12,230 | 6,973 | 63,013 |
| 2,403 | 236 | 43,730 | 12,308 | 7,054 | 63,328 |
| 2,404 | 240 | 43,451 | 12,253 | 7,042 | 62,986 |
| 2,405 | 243 | 43,379 | 12,274 | 7,041 | 62,937 |
| 2,406 | 240 | 42,818 | 12,188 | 6,971 | 62,217 |
| 2,407 | 251 | 43,609 | 12,425 | 7,087 | 63,372 |
| 2,408 | 257 | 44,000 | 12,495 | 7,105 | 63,857 |
| 2,409 | 253 | 44,025 | 12,492 | 7,083 | 63,853 |
| 2,410 | 248 | 43,751 | 12,337 | 7,009 | 63,345 |
| 2,411 | 249 | 44,028 | 12,341 | 7,010 | 63,628 |
| 2,412 | 252 | 44,430 | 12,451 | 7,100 | 64,233 |
| 2,413 | 245 | 44,465 | 12,438 | 7,046 | 64,194 |
| 2,414 | 237 | 44,544 | 12,427 | 7,005 | 64,213 |
| 2,415 | 235 | 44,059 | 12,340 | 6,949 | 63,583 |
| 2,416 | 233 | 44,115 | 12,371 | 6,977 | 63,696 |
| 2,417 | 231 | 44,414 | 12,441 | 7,013 | 64,099 |
| 2,418 | 231 | 44,163 | 12,315 | 6,930 | 63,639 |
| 2,419 | 237 | 44,203 | 12,293 | 6,926 | 63,659 |
| 2,420 | 232 | 43,626 | 12,212 | 6,873 | 62,943 |
| 2,421 | 233 | 44,354 | 12,357 | 7,005 | 63,949 |
| 2,422 | 233 | 43,761 | 12,245 | 6,916 | 63,155 |
| 2,423 | 234 | 43,202 | 12,149 | 6,845 | 62,430 |

|       |     |        |        |       |        |
|-------|-----|--------|--------|-------|--------|
| 2,424 | 227 | 43,274 | 12,214 | 6,906 | 62,621 |
| 2,425 | 227 | 42,923 | 12,120 | 6,859 | 62,129 |
| 2,426 | 233 | 43,238 | 12,221 | 6,902 | 62,594 |
| 2,427 | 240 | 43,220 | 12,175 | 6,842 | 62,477 |
| 2,428 | 238 | 42,815 | 11,991 | 6,721 | 61,765 |
| 2,429 | 236 | 42,590 | 11,894 | 6,621 | 61,341 |
| 2,430 | 234 | 41,924 | 11,651 | 6,484 | 60,293 |
| 2,431 | 239 | 42,208 | 11,672 | 6,478 | 60,597 |
| 2,432 | 246 | 42,205 | 11,656 | 6,471 | 60,578 |
| 2,433 | 242 | 41,704 | 11,540 | 6,361 | 59,847 |
| 2,434 | 254 | 42,255 | 11,697 | 6,439 | 60,645 |
| 2,435 | 259 | 42,191 | 11,696 | 6,458 | 60,604 |
| 2,436 | 267 | 42,133 | 11,645 | 6,421 | 60,466 |
| 2,437 | 270 | 41,732 | 11,522 | 6,369 | 59,893 |
| 2,438 | 266 | 41,296 | 11,365 | 6,278 | 59,205 |
| 2,439 | 262 | 41,323 | 11,350 | 6,260 | 59,195 |
| 2,440 | 269 | 41,043 | 11,300 | 6,249 | 58,861 |
| 2,441 | 263 | 40,636 | 11,094 | 6,130 | 58,123 |
| 2,442 | 276 | 40,323 | 10,953 | 6,114 | 57,666 |
| 2,443 | 281 | 40,196 | 10,959 | 6,117 | 57,553 |
| 2,444 | 294 | 40,301 | 11,027 | 6,167 | 57,789 |
| 2,445 | 305 | 40,240 | 10,930 | 6,147 | 57,622 |
| 2,446 | 314 | 39,742 | 10,750 | 6,066 | 56,872 |
| 2,447 | 314 | 39,697 | 10,707 | 6,059 | 56,777 |
| 2,448 | 314 | 39,653 | 10,733 | 6,085 | 56,785 |
| 2,449 | 314 | 39,925 | 10,789 | 6,125 | 57,153 |
| 2,450 | 318 | 39,826 | 10,758 | 6,088 | 56,990 |
| 2,451 | 318 | 39,839 | 10,764 | 6,092 | 57,013 |
| 2,452 | 310 | 40,121 | 10,816 | 6,109 | 57,356 |
| 2,453 | 317 | 40,183 | 10,783 | 6,104 | 57,387 |
| 2,454 | 314 | 40,258 | 10,769 | 6,077 | 57,418 |
| 2,455 | 312 | 40,327 | 10,782 | 6,070 | 57,491 |

|       |     |        |        |       |        |
|-------|-----|--------|--------|-------|--------|
| 2,456 | 315 | 40,527 | 10,906 | 6,137 | 57,885 |
| 2,457 | 311 | 40,728 | 10,959 | 6,142 | 58,140 |
| 2,458 | 304 | 40,230 | 10,825 | 6,111 | 57,470 |
| 2,459 | 300 | 39,546 | 10,692 | 6,092 | 56,630 |
| 2,460 | 308 | 39,594 | 10,702 | 6,147 | 56,751 |
| 2,461 | 305 | 39,447 | 10,722 | 6,136 | 56,610 |
| 2,462 | 308 | 39,320 | 10,712 | 6,098 | 56,438 |
| 2,463 | 305 | 38,857 | 10,600 | 6,013 | 55,775 |
| 2,464 | 302 | 38,734 | 10,547 | 6,010 | 55,593 |
| 2,465 | 311 | 39,049 | 10,608 | 6,024 | 55,992 |
| 2,466 | 316 | 39,062 | 10,546 | 5,989 | 55,913 |
| 2,467 | 328 | 39,316 | 10,657 | 6,057 | 56,358 |
| 2,468 | 334 | 39,453 | 10,712 | 6,072 | 56,571 |
| 2,469 | 328 | 39,080 | 10,622 | 6,020 | 56,050 |
| 2,470 | 326 | 38,814 | 10,573 | 5,967 | 55,680 |
| 2,471 | 323 | 38,710 | 10,452 | 5,910 | 55,395 |
| 2,472 | 331 | 39,872 | 10,750 | 6,096 | 57,049 |
| 2,473 | 327 | 39,907 | 10,746 | 6,089 | 57,069 |
| 2,474 | 328 | 39,585 | 10,600 | 6,016 | 56,529 |
| 2,475 | 348 | 40,224 | 10,748 | 6,128 | 57,448 |
| 2,476 | 349 | 39,931 | 10,674 | 6,062 | 57,016 |
| 2,477 | 349 | 40,020 | 10,726 | 6,131 | 57,226 |
| 2,478 | 344 | 39,360 | 10,570 | 6,075 | 56,349 |
| 2,479 | 351 | 39,346 | 10,624 | 6,098 | 56,419 |
| 2,480 | 350 | 38,798 | 10,479 | 6,055 | 55,682 |
| 2,481 | 351 | 38,527 | 10,434 | 6,055 | 55,367 |
| 2,482 | 346 | 38,353 | 10,423 | 6,045 | 55,167 |
| 2,483 | 338 | 38,433 | 10,459 | 6,071 | 55,301 |
| 2,484 | 329 | 38,428 | 10,391 | 6,046 | 55,194 |
| 2,485 | 338 | 38,655 | 10,442 | 6,062 | 55,497 |
| 2,486 | 341 | 38,483 | 10,448 | 6,054 | 55,326 |
| 2,487 | 336 | 38,417 | 10,431 | 6,080 | 55,264 |

|       |     |        |        |       |        |
|-------|-----|--------|--------|-------|--------|
| 2,488 | 329 | 38,258 | 10,412 | 6,075 | 55,074 |
| 2,489 | 328 | 37,252 | 10,220 | 5,952 | 53,752 |
| 2,490 | 325 | 37,345 | 10,177 | 5,916 | 53,763 |
| 2,491 | 326 | 37,478 | 10,178 | 5,906 | 53,888 |
| 2,492 | 324 | 37,598 | 10,229 | 5,931 | 54,082 |
| 2,493 | 271 | 36,073 | 9,857  | 5,753 | 51,954 |
| 2,494 | 268 | 36,145 | 9,885  | 5,748 | 52,046 |
| 2,495 | 262 | 35,507 | 9,713  | 5,638 | 51,120 |
| 2,496 | 260 | 35,625 | 9,740  | 5,633 | 51,258 |
| 2,497 | 258 | 35,745 | 9,754  | 5,658 | 51,415 |
| 2,498 | 255 | 35,981 | 9,787  | 5,688 | 51,711 |
| 2,499 | 251 | 35,719 | 9,657  | 5,613 | 51,240 |
| 2,500 | 245 | 35,699 | 9,580  | 5,590 | 51,114 |
| 2,501 | 238 | 35,444 | 9,444  | 5,501 | 50,627 |
| 2,502 | 239 | 35,242 | 9,337  | 5,464 | 50,282 |
| 2,503 | 238 | 35,255 | 9,256  | 5,420 | 50,169 |
| 2,504 | 231 | 34,959 | 9,167  | 5,345 | 49,702 |
| 2,505 | 231 | 35,065 | 9,164  | 5,381 | 49,841 |
| 2,506 | 240 | 35,034 | 8,972  | 5,313 | 49,559 |
| 2,507 | 244 | 34,849 | 8,705  | 5,188 | 48,986 |
| 2,508 | 246 | 35,112 | 8,657  | 5,169 | 49,184 |
| 2,509 | 245 | 33,690 | 8,231  | 4,887 | 47,053 |
| 2,510 | 251 | 34,283 | 8,324  | 4,914 | 47,772 |
| 2,511 | 262 | 34,866 | 8,403  | 4,973 | 48,504 |
| 2,512 | 262 | 34,950 | 8,327  | 4,924 | 48,463 |
| 2,513 | 270 | 35,755 | 8,451  | 5,030 | 49,506 |
| 2,514 | 270 | 35,538 | 8,386  | 4,982 | 49,176 |
| 2,515 | 270 | 35,599 | 8,335  | 4,978 | 49,182 |
| 2,516 | 265 | 36,396 | 8,553  | 5,119 | 50,333 |
| 2,517 | 263 | 36,406 | 8,517  | 5,080 | 50,266 |
| 2,518 | 250 | 36,184 | 8,311  | 4,955 | 49,700 |
| 2,519 | 248 | 36,102 | 8,237  | 4,922 | 49,509 |

|       |     |        |       |       |        |
|-------|-----|--------|-------|-------|--------|
| 2,520 | 256 | 36,432 | 8,263 | 4,941 | 49,892 |
| 2,521 | 254 | 37,612 | 8,504 | 5,084 | 51,454 |
| 2,522 | 256 | 37,447 | 8,404 | 5,012 | 51,119 |
| 2,523 | 255 | 38,029 | 8,453 | 5,036 | 51,773 |
| 2,524 | 256 | 37,970 | 8,358 | 4,993 | 51,577 |
| 2,525 | 256 | 38,519 | 8,483 | 5,048 | 52,306 |
| 2,526 | 257 | 39,047 | 8,557 | 5,080 | 52,941 |
| 2,527 | 255 | 39,051 | 8,498 | 5,037 | 52,841 |
| 2,528 | 259 | 39,699 | 8,532 | 5,069 | 53,559 |
| 2,529 | 259 | 39,723 | 8,461 | 5,022 | 53,465 |
| 2,530 | 263 | 40,771 | 8,648 | 5,134 | 54,816 |
| 2,531 | 260 | 40,521 | 8,523 | 5,041 | 54,345 |
| 2,532 | 263 | 41,251 | 8,638 | 5,105 | 55,257 |
| 2,533 | 265 | 41,315 | 8,567 | 5,070 | 55,217 |
| 2,534 | 264 | 41,233 | 8,470 | 5,022 | 54,989 |
| 2,535 | 271 | 41,517 | 8,482 | 5,052 | 55,322 |
| 2,536 | 270 | 41,373 | 8,436 | 5,035 | 55,114 |
| 2,537 | 273 | 41,248 | 8,339 | 4,971 | 54,831 |
| 2,538 | 274 | 41,240 | 8,245 | 4,897 | 54,656 |
| 2,539 | 283 | 40,874 | 8,096 | 4,799 | 54,052 |
| 2,540 | 296 | 41,018 | 8,014 | 4,769 | 54,097 |
| 2,541 | 295 | 40,998 | 7,944 | 4,735 | 53,972 |
| 2,542 | 307 | 40,743 | 7,817 | 4,671 | 53,538 |
| 2,543 | 307 | 40,804 | 7,753 | 4,627 | 53,491 |
| 2,544 | 321 | 40,846 | 7,767 | 4,636 | 53,570 |
| 2,545 | 321 | 40,852 | 7,706 | 4,600 | 53,479 |
| 2,546 | 329 | 41,043 | 7,745 | 4,592 | 53,709 |
| 2,547 | 329 | 40,916 | 7,676 | 4,559 | 53,480 |
| 2,548 | 330 | 41,453 | 7,840 | 4,618 | 54,241 |
| 2,549 | 336 | 41,595 | 7,816 | 4,602 | 54,349 |
| 2,550 | 340 | 41,578 | 7,851 | 4,597 | 54,366 |
| 2,551 | 354 | 41,442 | 7,886 | 4,598 | 54,280 |



|       |     |        |       |       |        |
|-------|-----|--------|-------|-------|--------|
| 2,552 | 354 | 41,176 | 7,884 | 4,591 | 54,005 |
| 2,553 | 357 | 41,412 | 7,939 | 4,603 | 54,311 |
| 2,554 | 360 | 41,947 | 8,025 | 4,641 | 54,973 |
| 2,555 | 370 | 42,028 | 7,982 | 4,620 | 55,000 |
| 2,556 | 367 | 41,485 | 7,894 | 4,566 | 54,312 |
| 2,557 | 370 | 41,686 | 8,067 | 4,618 | 54,741 |
| 2,558 | 365 | 41,467 | 8,084 | 4,573 | 54,489 |
| 2,559 | 396 | 41,728 | 8,063 | 4,542 | 54,729 |
| 2,560 | 404 | 41,512 | 7,918 | 4,459 | 54,293 |
| 2,561 | 400 | 41,113 | 7,760 | 4,378 | 53,651 |
| 2,562 | 389 | 41,514 | 7,871 | 4,433 | 54,207 |
| 2,563 | 405 | 41,595 | 7,901 | 4,454 | 54,355 |
| 2,564 | 406 | 41,863 | 7,900 | 4,441 | 54,610 |
| 2,565 | 412 | 42,005 | 7,882 | 4,412 | 54,711 |
| 2,566 | 412 | 42,057 | 7,785 | 4,360 | 54,614 |
| 2,567 | 417 | 41,881 | 7,697 | 4,305 | 54,300 |
| 2,568 | 433 | 41,955 | 7,527 | 4,233 | 54,148 |
| 2,569 | 433 | 41,887 | 7,374 | 4,154 | 53,848 |
| 2,570 | 448 | 42,431 | 7,510 | 4,226 | 54,615 |
| 2,571 | 471 | 42,257 | 7,380 | 4,142 | 54,250 |
| 2,572 | 493 | 41,939 | 7,252 | 4,070 | 53,754 |
| 2,573 | 488 | 41,415 | 7,106 | 4,018 | 53,027 |
| 2,574 | 505 | 41,678 | 6,956 | 3,949 | 53,088 |
| 2,575 | 503 | 41,333 | 6,856 | 3,869 | 52,561 |
| 2,576 | 523 | 41,119 | 6,691 | 3,793 | 52,126 |
| 2,577 | 536 | 41,379 | 6,527 | 3,695 | 52,137 |
| 2,578 | 552 | 41,050 | 6,443 | 3,651 | 51,696 |
| 2,579 | 555 | 40,866 | 6,275 | 3,545 | 51,241 |
| 2,580 | 554 | 40,671 | 6,153 | 3,496 | 50,874 |
| 2,581 | 555 | 40,720 | 6,185 | 3,502 | 50,962 |
| 2,582 | 567 | 40,609 | 6,060 | 3,432 | 50,668 |
| 2,583 | 587 | 40,470 | 6,004 | 3,415 | 50,476 |

|       |     |        |       |       |        |
|-------|-----|--------|-------|-------|--------|
| 2,584 | 581 | 40,600 | 5,911 | 3,359 | 50,451 |
| 2,585 | 577 | 40,669 | 5,896 | 3,330 | 50,472 |
| 2,586 | 577 | 40,682 | 5,899 | 3,339 | 50,497 |
| 2,587 | 569 | 40,665 | 5,864 | 3,321 | 50,419 |
| 2,588 | 565 | 40,807 | 5,877 | 3,315 | 50,564 |
| 2,589 | 577 | 40,629 | 5,977 | 3,344 | 50,527 |
| 2,590 | 579 | 40,744 | 5,887 | 3,300 | 50,510 |
| 2,591 | 575 | 40,717 | 5,893 | 3,297 | 50,482 |
| 2,592 | 585 | 40,626 | 6,036 | 3,373 | 50,620 |
| 2,593 | 599 | 40,883 | 6,018 | 3,362 | 50,862 |
| 2,594 | 606 | 40,864 | 5,900 | 3,309 | 50,679 |
| 2,595 | 613 | 40,690 | 5,799 | 3,259 | 50,361 |
| 2,596 | 609 | 40,495 | 5,686 | 3,205 | 49,995 |
| 2,597 | 613 | 41,718 | 5,923 | 3,369 | 51,623 |
| 2,598 | 623 | 42,113 | 5,930 | 3,400 | 52,066 |
| 2,599 | 632 | 42,301 | 5,887 | 3,405 | 52,225 |
| 2,600 | 630 | 42,556 | 6,009 | 3,491 | 52,686 |
| 2,601 | 626 | 42,518 | 5,871 | 3,430 | 52,445 |
| 2,602 | 619 | 42,902 | 5,862 | 3,432 | 52,815 |
| 2,603 | 626 | 43,145 | 5,966 | 3,493 | 53,230 |
| 2,604 | 658 | 43,221 | 5,912 | 3,459 | 53,250 |
| 2,605 | 659 | 43,425 | 5,778 | 3,413 | 53,275 |
| 2,606 | 652 | 43,641 | 5,826 | 3,428 | 53,547 |
| 2,607 | 651 | 43,769 | 5,730 | 3,388 | 53,538 |
| 2,608 | 618 | 42,732 | 5,745 | 3,411 | 52,506 |
| 2,609 | 618 | 43,132 | 5,652 | 3,413 | 52,815 |
| 2,610 | 605 | 43,600 | 5,611 | 3,403 | 53,219 |
| 2,611 | 634 | 43,356 | 5,526 | 3,365 | 52,881 |
| 2,612 | 631 | 43,371 | 5,418 | 3,315 | 52,735 |
| 2,613 | 637 | 43,577 | 5,480 | 3,357 | 53,051 |
| 2,614 | 630 | 42,826 | 5,447 | 3,334 | 52,237 |
| 2,615 | 641 | 43,220 | 5,391 | 3,337 | 52,589 |

|       |     |        |       |       |        |
|-------|-----|--------|-------|-------|--------|
| 2,616 | 651 | 42,412 | 5,392 | 3,335 | 51,790 |
| 2,617 | 650 | 42,497 | 5,340 | 3,294 | 51,781 |
| 2,618 | 651 | 42,324 | 5,406 | 3,344 | 51,725 |
| 2,619 | 656 | 41,816 | 5,419 | 3,356 | 51,247 |
| 2,620 | 638 | 41,421 | 5,367 | 3,337 | 50,763 |
| 2,621 | 656 | 41,912 | 5,355 | 3,341 | 51,264 |
| 2,622 | 614 | 41,085 | 5,326 | 3,341 | 50,366 |
| 2,623 | 619 | 40,789 | 5,332 | 3,333 | 50,073 |
| 2,624 | 619 | 40,880 | 5,278 | 3,313 | 50,090 |
| 2,625 | 614 | 40,584 | 5,290 | 3,311 | 49,799 |
| 2,626 | 613 | 40,883 | 5,388 | 3,395 | 50,279 |
| 2,627 | 569 | 40,027 | 5,361 | 3,386 | 49,343 |
| 2,628 | 567 | 40,046 | 5,317 | 3,363 | 49,293 |
| 2,629 | 541 | 40,017 | 5,413 | 3,433 | 49,404 |
| 2,630 | 545 | 39,973 | 5,411 | 3,441 | 49,370 |
| 2,631 | 540 | 39,755 | 5,423 | 3,438 | 49,156 |
| 2,632 | 536 | 39,853 | 5,436 | 3,461 | 49,286 |
| 2,633 | 534 | 39,805 | 5,379 | 3,441 | 49,159 |
| 2,634 | 524 | 40,145 | 5,469 | 3,491 | 49,629 |
| 2,635 | 524 | 39,675 | 5,460 | 3,491 | 49,150 |
| 2,636 | 523 | 39,392 | 5,421 | 3,460 | 48,796 |
| 2,637 | 527 | 39,919 | 5,421 | 3,470 | 49,337 |
| 2,638 | 522 | 40,340 | 5,383 | 3,489 | 49,734 |
| 2,639 | 516 | 40,271 | 5,334 | 3,487 | 49,608 |
| 2,640 | 494 | 40,283 | 5,281 | 3,486 | 49,544 |
| 2,641 | 483 | 40,001 | 5,212 | 3,456 | 49,152 |
| 2,642 | 489 | 40,357 | 5,169 | 3,496 | 49,511 |
| 2,643 | 494 | 40,311 | 5,138 | 3,479 | 49,422 |
| 2,644 | 481 | 40,063 | 5,058 | 3,436 | 49,038 |
| 2,645 | 490 | 40,275 | 5,067 | 3,457 | 49,289 |
| 2,646 | 471 | 39,819 | 4,979 | 3,412 | 48,681 |
| 2,647 | 479 | 39,507 | 4,941 | 3,392 | 48,319 |

|       |     |        |       |       |        |
|-------|-----|--------|-------|-------|--------|
| 2,648 | 478 | 39,574 | 4,860 | 3,338 | 48,250 |
| 2,649 | 466 | 39,330 | 4,831 | 3,318 | 47,945 |
| 2,650 | 465 | 39,353 | 4,770 | 3,267 | 47,855 |
| 2,651 | 467 | 39,343 | 4,721 | 3,221 | 47,752 |
| 2,652 | 470 | 39,689 | 4,692 | 3,235 | 48,086 |
| 2,653 | 465 | 38,981 | 4,589 | 3,192 | 47,227 |
| 2,654 | 465 | 38,846 | 4,537 | 3,192 | 47,040 |
| 2,655 | 437 | 38,604 | 4,517 | 3,211 | 46,769 |
| 2,656 | 431 | 38,225 | 4,512 | 3,196 | 46,364 |
| 2,657 | 443 | 38,319 | 4,493 | 3,191 | 46,446 |
| 2,658 | 437 | 38,334 | 4,480 | 3,170 | 46,421 |
| 2,659 | 437 | 38,151 | 4,454 | 3,159 | 46,201 |
| 2,660 | 438 | 37,877 | 4,438 | 3,145 | 45,898 |
| 2,661 | 444 | 37,958 | 4,406 | 3,123 | 45,931 |
| 2,662 | 442 | 38,219 | 4,440 | 3,127 | 46,228 |
| 2,663 | 444 | 38,248 | 4,405 | 3,123 | 46,220 |
| 2,664 | 421 | 38,164 | 4,391 | 3,136 | 46,112 |
| 2,665 | 412 | 38,228 | 4,381 | 3,125 | 46,146 |
| 2,666 | 404 | 38,125 | 4,364 | 3,140 | 46,033 |
| 2,667 | 399 | 38,112 | 4,337 | 3,127 | 45,975 |
| 2,668 | 384 | 38,100 | 4,307 | 3,137 | 45,928 |
| 2,669 | 388 | 38,528 | 4,292 | 3,142 | 46,350 |
| 2,670 | 409 | 38,599 | 4,310 | 3,144 | 46,462 |
| 2,671 | 410 | 38,820 | 4,297 | 3,128 | 46,655 |
| 2,672 | 404 | 39,170 | 4,314 | 3,157 | 47,045 |
| 2,673 | 399 | 39,001 | 4,309 | 3,144 | 46,853 |
| 2,674 | 395 | 39,706 | 4,355 | 3,208 | 47,664 |
| 2,675 | 383 | 39,493 | 4,354 | 3,211 | 47,441 |
| 2,676 | 379 | 39,765 | 4,373 | 3,243 | 47,760 |
| 2,677 | 373 | 39,899 | 4,416 | 3,277 | 47,965 |
| 2,678 | 380 | 40,003 | 4,433 | 3,284 | 48,100 |
| 2,679 | 394 | 40,351 | 4,445 | 3,286 | 48,476 |

|       |     |        |       |       |        |
|-------|-----|--------|-------|-------|--------|
| 2,680 | 398 | 40,849 | 4,470 | 3,298 | 49,015 |
| 2,681 | 388 | 40,855 | 4,518 | 3,337 | 49,098 |
| 2,682 | 386 | 40,824 | 4,481 | 3,306 | 48,997 |
| 2,683 | 385 | 41,070 | 4,486 | 3,302 | 49,243 |
| 2,684 | 378 | 41,374 | 4,535 | 3,326 | 49,613 |
| 2,685 | 384 | 41,234 | 4,528 | 3,337 | 49,483 |
| 2,686 | 382 | 41,331 | 4,535 | 3,350 | 49,598 |
| 2,687 | 386 | 41,709 | 4,561 | 3,390 | 50,046 |
| 2,688 | 385 | 41,432 | 4,550 | 3,376 | 49,743 |
| 2,689 | 398 | 41,461 | 4,571 | 3,368 | 49,798 |
| 2,690 | 412 | 41,396 | 4,560 | 3,351 | 49,719 |
| 2,691 | 410 | 41,406 | 4,575 | 3,360 | 49,751 |
| 2,692 | 402 | 40,966 | 4,539 | 3,324 | 49,231 |
| 2,693 | 420 | 41,280 | 4,563 | 3,346 | 49,609 |
| 2,694 | 408 | 41,738 | 4,620 | 3,370 | 50,136 |
| 2,695 | 397 | 41,260 | 4,631 | 3,355 | 49,643 |
| 2,696 | 413 | 41,120 | 4,601 | 3,302 | 49,436 |
| 2,697 | 413 | 41,086 | 4,630 | 3,314 | 49,443 |
| 2,698 | 400 | 41,006 | 4,632 | 3,321 | 49,359 |
| 2,699 | 401 | 40,937 | 4,636 | 3,330 | 49,304 |
| 2,700 | 425 | 40,670 | 4,619 | 3,301 | 49,015 |
| 2,701 | 433 | 40,598 | 4,651 | 3,319 | 49,001 |
| 2,702 | 430 | 40,096 | 4,649 | 3,329 | 48,504 |
| 2,703 | 434 | 40,393 | 4,630 | 3,318 | 48,775 |
| 2,704 | 435 | 40,344 | 4,671 | 3,346 | 48,796 |
| 2,705 | 430 | 40,602 | 4,717 | 3,355 | 49,104 |
| 2,706 | 430 | 40,230 | 4,729 | 3,344 | 48,733 |
| 2,707 | 430 | 39,859 | 4,736 | 3,353 | 48,378 |
| 2,708 | 440 | 40,661 | 4,770 | 3,399 | 49,270 |
| 2,709 | 441 | 40,671 | 4,769 | 3,417 | 49,298 |
| 2,710 | 461 | 41,416 | 4,845 | 3,470 | 50,192 |
| 2,711 | 447 | 41,036 | 4,839 | 3,439 | 49,761 |

|       |     |        |       |       |        |
|-------|-----|--------|-------|-------|--------|
| 2,712 | 447 | 41,262 | 4,903 | 3,459 | 50,071 |
| 2,713 | 441 | 41,664 | 4,969 | 3,496 | 50,570 |
| 2,714 | 439 | 41,217 | 4,997 | 3,512 | 50,165 |
| 2,715 | 444 | 41,552 | 4,982 | 3,515 | 50,493 |
| 2,716 | 441 | 41,553 | 4,999 | 3,506 | 50,499 |
| 2,717 | 449 | 41,683 | 4,979 | 3,477 | 50,588 |
| 2,718 | 451 | 41,750 | 5,037 | 3,513 | 50,751 |
| 2,719 | 443 | 41,608 | 5,053 | 3,486 | 50,590 |
| 2,720 | 443 | 41,406 | 5,126 | 3,508 | 50,483 |
| 2,721 | 438 | 41,503 | 5,149 | 3,527 | 50,617 |
| 2,722 | 437 | 40,828 | 5,211 | 3,524 | 50,000 |
| 2,723 | 432 | 40,417 | 5,270 | 3,530 | 49,649 |
| 2,724 | 443 | 40,822 | 5,335 | 3,555 | 50,155 |
| 2,725 | 455 | 40,489 | 5,263 | 3,474 | 49,681 |
| 2,726 | 469 | 40,273 | 5,259 | 3,435 | 49,436 |
| 2,727 | 473 | 40,261 | 5,334 | 3,450 | 49,518 |
| 2,728 | 473 | 40,665 | 5,322 | 3,430 | 49,890 |
| 2,729 | 458 | 40,142 | 5,260 | 3,370 | 49,230 |
| 2,730 | 458 | 39,972 | 5,343 | 3,410 | 49,183 |
| 2,731 | 454 | 39,844 | 5,338 | 3,412 | 49,048 |
| 2,732 | 473 | 39,863 | 5,271 | 3,327 | 48,934 |
| 2,733 | 486 | 40,160 | 5,330 | 3,346 | 49,322 |
| 2,734 | 487 | 40,356 | 5,337 | 3,344 | 49,524 |
| 2,735 | 484 | 40,585 | 5,320 | 3,306 | 49,695 |
| 2,736 | 535 | 41,175 | 5,370 | 3,303 | 50,383 |
| 2,737 | 534 | 41,118 | 5,448 | 3,318 | 50,418 |
| 2,738 | 534 | 41,621 | 5,427 | 3,284 | 50,866 |
| 2,739 | 542 | 42,035 | 5,550 | 3,339 | 51,466 |
| 2,740 | 527 | 42,014 | 5,592 | 3,327 | 51,460 |
| 2,741 | 528 | 42,359 | 5,626 | 3,322 | 51,835 |
| 2,742 | 536 | 42,468 | 5,646 | 3,309 | 51,959 |
| 2,743 | 533 | 42,429 | 5,732 | 3,353 | 52,047 |

|       |     |        |       |       |        |
|-------|-----|--------|-------|-------|--------|
| 2,744 | 514 | 42,609 | 5,791 | 3,379 | 52,293 |
| 2,745 | 524 | 42,502 | 5,646 | 3,300 | 51,972 |
| 2,746 | 534 | 42,841 | 5,749 | 3,348 | 52,472 |
| 2,747 | 517 | 42,974 | 5,907 | 3,410 | 52,808 |
| 2,748 | 526 | 43,409 | 5,917 | 3,383 | 53,235 |
| 2,749 | 524 | 43,237 | 6,010 | 3,416 | 53,187 |
| 2,750 | 513 | 43,568 | 6,068 | 3,425 | 53,574 |
| 2,751 | 503 | 43,226 | 6,105 | 3,430 | 53,264 |
| 2,752 | 494 | 43,273 | 6,144 | 3,439 | 53,350 |
| 2,753 | 493 | 43,252 | 6,162 | 3,439 | 53,346 |
| 2,754 | 491 | 43,223 | 6,195 | 3,438 | 53,347 |
| 2,755 | 492 | 43,569 | 6,215 | 3,423 | 53,699 |
| 2,756 | 469 | 43,226 | 6,121 | 3,355 | 53,171 |
| 2,757 | 467 | 43,638 | 6,238 | 3,397 | 53,740 |
| 2,758 | 461 | 43,252 | 6,226 | 3,347 | 53,286 |
| 2,759 | 461 | 42,620 | 6,162 | 3,281 | 52,524 |
| 2,760 | 462 | 42,939 | 6,253 | 3,314 | 52,968 |
| 2,761 | 460 | 43,261 | 6,395 | 3,380 | 53,496 |
| 2,762 | 460 | 42,882 | 6,328 | 3,369 | 53,039 |
| 2,763 | 460 | 42,882 | 6,437 | 3,427 | 53,206 |
| 2,764 | 464 | 43,363 | 6,442 | 3,428 | 53,697 |
| 2,765 | 466 | 43,098 | 6,344 | 3,334 | 53,242 |
| 2,766 | 469 | 43,285 | 6,407 | 3,334 | 53,495 |
| 2,767 | 476 | 43,570 | 6,437 | 3,352 | 53,835 |
| 2,768 | 485 | 43,886 | 6,468 | 3,334 | 54,173 |
| 2,769 | 496 | 43,959 | 6,373 | 3,274 | 54,102 |
| 2,770 | 504 | 44,466 | 6,469 | 3,328 | 54,767 |
| 2,771 | 489 | 45,032 | 6,552 | 3,372 | 55,445 |
| 2,772 | 481 | 44,517 | 6,557 | 3,356 | 54,911 |
| 2,773 | 484 | 44,627 | 6,352 | 3,256 | 54,719 |
| 2,774 | 473 | 44,503 | 6,441 | 3,301 | 54,718 |
| 2,775 | 473 | 44,342 | 6,397 | 3,260 | 54,472 |

|       |     |        |       |       |        |
|-------|-----|--------|-------|-------|--------|
| 2,776 | 470 | 44,297 | 6,370 | 3,262 | 54,399 |
| 2,777 | 458 | 44,134 | 6,351 | 3,244 | 54,187 |
| 2,778 | 455 | 43,929 | 6,332 | 3,253 | 53,969 |
| 2,779 | 454 | 43,680 | 6,367 | 3,237 | 53,738 |
| 2,780 | 468 | 43,689 | 6,265 | 3,180 | 53,602 |
| 2,781 | 467 | 43,583 | 6,389 | 3,217 | 53,656 |
| 2,782 | 456 | 43,281 | 6,488 | 3,237 | 53,462 |
| 2,783 | 451 | 43,161 | 6,537 | 3,256 | 53,405 |
| 2,784 | 438 | 43,077 | 6,605 | 3,283 | 53,403 |
| 2,785 | 432 | 42,524 | 6,482 | 3,222 | 52,660 |
| 2,786 | 431 | 42,613 | 6,611 | 3,292 | 52,947 |
| 2,787 | 391 | 43,030 | 6,910 | 3,428 | 53,759 |
| 2,788 | 390 | 42,405 | 6,754 | 3,336 | 52,885 |
| 2,789 | 404 | 42,513 | 6,906 | 3,388 | 53,211 |
| 2,790 | 399 | 42,458 | 7,066 | 3,477 | 53,400 |
| 2,791 | 396 | 42,223 | 7,095 | 3,501 | 53,215 |
| 2,792 | 395 | 42,107 | 7,063 | 3,481 | 53,046 |
| 2,793 | 397 | 42,076 | 7,102 | 3,484 | 53,059 |
| 2,794 | 393 | 41,667 | 6,999 | 3,431 | 52,490 |
| 2,795 | 392 | 41,939 | 7,079 | 3,489 | 52,899 |
| 2,796 | 375 | 42,335 | 7,237 | 3,558 | 53,505 |
| 2,797 | 358 | 42,049 | 7,248 | 3,556 | 53,211 |
| 2,798 | 352 | 41,656 | 7,063 | 3,467 | 52,538 |
| 2,799 | 365 | 41,580 | 7,152 | 3,514 | 52,611 |
| 2,800 | 362 | 41,380 | 7,168 | 3,511 | 52,421 |
| 2,801 | 354 | 41,821 | 7,077 | 3,480 | 52,732 |
| 2,802 | 365 | 41,763 | 7,178 | 3,526 | 52,832 |
| 2,803 | 369 | 41,386 | 7,102 | 3,479 | 52,336 |
| 2,804 | 376 | 41,250 | 7,211 | 3,531 | 52,368 |
| 2,805 | 377 | 40,745 | 7,231 | 3,527 | 51,880 |
| 2,806 | 375 | 40,883 | 7,378 | 3,598 | 52,234 |
| 2,807 | 379 | 40,396 | 7,390 | 3,588 | 51,753 |



|       |     |        |       |       |        |
|-------|-----|--------|-------|-------|--------|
| 2,808 | 395 | 40,096 | 7,385 | 3,604 | 51,480 |
| 2,809 | 393 | 40,048 | 7,432 | 3,631 | 51,504 |
| 2,810 | 412 | 39,930 | 7,497 | 3,671 | 51,510 |
| 2,811 | 412 | 39,829 | 7,593 | 3,727 | 51,561 |
| 2,812 | 406 | 39,313 | 7,606 | 3,707 | 51,032 |
| 2,813 | 404 | 39,226 | 7,707 | 3,762 | 51,099 |
| 2,814 | 392 | 38,923 | 7,792 | 3,813 | 50,920 |
| 2,815 | 390 | 38,554 | 7,951 | 3,869 | 50,764 |
| 2,816 | 372 | 38,149 | 8,041 | 3,894 | 50,456 |
| 2,817 | 377 | 38,355 | 8,264 | 4,031 | 51,027 |
| 2,818 | 371 | 38,142 | 8,372 | 4,113 | 50,998 |
| 2,819 | 359 | 38,006 | 8,521 | 4,197 | 51,083 |
| 2,820 | 341 | 37,553 | 8,565 | 4,241 | 50,700 |
| 2,821 | 333 | 37,340 | 8,671 | 4,319 | 50,663 |
| 2,822 | 332 | 37,299 | 8,800 | 4,374 | 50,805 |
| 2,823 | 334 | 37,591 | 8,960 | 4,451 | 51,336 |
| 2,824 | 321 | 37,593 | 9,060 | 4,509 | 51,483 |
| 2,825 | 311 | 37,450 | 9,081 | 4,533 | 51,375 |
| 2,826 | 310 | 37,443 | 9,230 | 4,611 | 51,594 |
| 2,827 | 308 | 37,608 | 9,417 | 4,693 | 52,026 |
| 2,828 | 305 | 37,698 | 9,524 | 4,752 | 52,279 |
| 2,829 | 301 | 37,615 | 9,572 | 4,783 | 52,271 |
| 2,830 | 301 | 37,581 | 9,592 | 4,838 | 52,312 |
| 2,831 | 286 | 37,353 | 9,656 | 4,876 | 52,171 |
| 2,832 | 282 | 37,038 | 9,591 | 4,857 | 51,768 |
| 2,833 | 284 | 37,156 | 9,649 | 4,929 | 52,018 |
| 2,834 | 285 | 35,277 | 9,160 | 4,717 | 49,439 |
| 2,835 | 288 | 35,484 | 9,302 | 4,802 | 49,876 |
| 2,836 | 286 | 35,892 | 9,497 | 4,911 | 50,586 |
| 2,837 | 280 | 34,920 | 9,337 | 4,855 | 49,392 |
| 2,838 | 267 | 32,992 | 8,786 | 4,603 | 46,648 |
| 2,839 | 269 | 33,301 | 8,942 | 4,678 | 47,190 |

|       |     |        |        |       |        |
|-------|-----|--------|--------|-------|--------|
| 2,840 | 265 | 33,676 | 9,115  | 4,771 | 47,827 |
| 2,841 | 266 | 33,521 | 9,175  | 4,795 | 47,757 |
| 2,842 | 261 | 34,042 | 9,471  | 4,964 | 48,738 |
| 2,843 | 255 | 33,926 | 9,551  | 4,987 | 48,719 |
| 2,844 | 256 | 33,660 | 9,644  | 5,018 | 48,578 |
| 2,845 | 254 | 33,370 | 9,699  | 5,057 | 48,380 |
| 2,846 | 254 | 33,242 | 9,814  | 5,088 | 48,398 |
| 2,847 | 256 | 32,762 | 9,808  | 5,086 | 47,912 |
| 2,848 | 269 | 32,342 | 9,851  | 5,093 | 47,555 |
| 2,849 | 274 | 32,258 | 9,925  | 5,123 | 47,580 |
| 2,850 | 260 | 32,104 | 10,005 | 5,150 | 47,519 |
| 2,851 | 250 | 31,788 | 9,985  | 5,146 | 47,169 |
| 2,852 | 252 | 31,523 | 9,942  | 5,145 | 46,862 |
| 2,853 | 267 | 32,079 | 10,130 | 5,218 | 47,694 |
| 2,854 | 263 | 31,954 | 10,163 | 5,240 | 47,620 |
| 2,855 | 251 | 32,096 | 10,204 | 5,285 | 47,836 |
| 2,856 | 257 | 32,546 | 10,331 | 5,389 | 48,523 |
| 2,857 | 247 | 32,081 | 10,028 | 5,282 | 47,638 |
| 2,858 | 245 | 32,646 | 10,164 | 5,350 | 48,405 |
| 2,859 | 228 | 32,875 | 10,204 | 5,361 | 48,668 |
| 2,860 | 227 | 33,211 | 10,337 | 5,425 | 49,200 |
| 2,861 | 219 | 33,491 | 10,434 | 5,472 | 49,616 |
| 2,862 | 215 | 33,391 | 10,360 | 5,439 | 49,405 |
| 2,863 | 203 | 33,103 | 10,238 | 5,384 | 48,928 |
| 2,864 | 202 | 33,128 | 10,216 | 5,333 | 48,879 |
| 2,865 | 207 | 33,265 | 10,315 | 5,367 | 49,154 |
| 2,866 | 210 | 32,775 | 10,093 | 5,280 | 48,358 |
| 2,867 | 212 | 32,774 | 10,087 | 5,283 | 48,356 |
| 2,868 | 211 | 32,609 | 10,055 | 5,232 | 48,107 |
| 2,869 | 221 | 32,812 | 10,175 | 5,265 | 48,473 |
| 2,870 | 220 | 31,815 | 9,925  | 5,139 | 47,099 |
| 2,871 | 220 | 31,524 | 9,847  | 5,083 | 46,674 |

|       |     |        |        |       |        |
|-------|-----|--------|--------|-------|--------|
| 2,872 | 222 | 31,890 | 9,965  | 5,143 | 47,220 |
| 2,873 | 223 | 31,144 | 9,801  | 5,071 | 46,239 |
| 2,874 | 220 | 31,147 | 9,887  | 5,106 | 46,360 |
| 2,875 | 220 | 31,135 | 9,920  | 5,110 | 46,385 |
| 2,876 | 224 | 30,622 | 9,746  | 5,022 | 45,614 |
| 2,877 | 228 | 31,110 | 9,840  | 5,079 | 46,257 |
| 2,878 | 229 | 30,927 | 9,762  | 5,044 | 45,962 |
| 2,879 | 228 | 30,687 | 9,687  | 5,004 | 45,606 |
| 2,880 | 233 | 30,909 | 9,763  | 5,038 | 45,943 |
| 2,881 | 231 | 30,660 | 9,735  | 4,987 | 45,613 |
| 2,882 | 239 | 30,586 | 9,722  | 4,981 | 45,528 |
| 2,883 | 239 | 30,173 | 9,632  | 4,909 | 44,953 |
| 2,884 | 248 | 31,215 | 10,098 | 5,148 | 46,709 |
| 2,885 | 243 | 31,054 | 10,111 | 5,162 | 46,570 |
| 2,886 | 243 | 31,395 | 10,290 | 5,220 | 47,148 |
| 2,887 | 252 | 31,240 | 10,333 | 5,226 | 47,051 |
| 2,888 | 251 | 30,997 | 10,230 | 5,173 | 46,651 |
| 2,889 | 244 | 31,154 | 10,289 | 5,216 | 46,903 |
| 2,890 | 246 | 31,526 | 10,447 | 5,283 | 47,502 |
| 2,891 | 241 | 31,531 | 10,461 | 5,280 | 47,513 |
| 2,892 | 236 | 31,542 | 10,379 | 5,237 | 47,394 |
| 2,893 | 249 | 31,793 | 10,482 | 5,248 | 47,772 |
| 2,894 | 249 | 31,799 | 10,431 | 5,235 | 47,714 |
| 2,895 | 254 | 31,986 | 10,396 | 5,215 | 47,851 |
| 2,896 | 252 | 31,788 | 10,292 | 5,151 | 47,483 |
| 2,897 | 267 | 32,316 | 10,457 | 5,227 | 48,267 |
| 2,898 | 254 | 32,254 | 10,376 | 5,214 | 48,098 |
| 2,899 | 254 | 32,305 | 10,351 | 5,228 | 48,138 |
| 2,900 | 248 | 32,584 | 10,442 | 5,264 | 48,538 |
| 2,901 | 240 | 32,452 | 10,399 | 5,271 | 48,362 |
| 2,902 | 241 | 32,733 | 10,495 | 5,296 | 48,765 |
| 2,903 | 232 | 33,039 | 10,592 | 5,324 | 49,187 |

|       |     |        |        |       |        |
|-------|-----|--------|--------|-------|--------|
| 2,904 | 222 | 33,028 | 10,549 | 5,332 | 49,131 |
| 2,905 | 229 | 33,310 | 10,615 | 5,340 | 49,494 |
| 2,906 | 241 | 33,029 | 10,512 | 5,266 | 49,048 |
| 2,907 | 238 | 32,703 | 10,390 | 5,218 | 48,549 |
| 2,908 | 254 | 32,646 | 10,436 | 5,234 | 48,570 |
| 2,909 | 256 | 32,294 | 10,333 | 5,193 | 48,076 |
| 2,910 | 259 | 32,904 | 10,665 | 5,372 | 49,200 |
| 2,911 | 259 | 32,872 | 10,644 | 5,360 | 49,135 |
| 2,912 | 262 | 33,064 | 10,660 | 5,380 | 49,366 |
| 2,913 | 260 | 33,013 | 10,698 | 5,404 | 49,375 |
| 2,914 | 263 | 33,304 | 10,763 | 5,476 | 49,806 |
| 2,915 | 259 | 33,160 | 10,734 | 5,470 | 49,623 |
| 2,916 | 257 | 33,552 | 10,819 | 5,530 | 50,158 |
| 2,917 | 250 | 33,542 | 10,827 | 5,533 | 50,152 |
| 2,918 | 249 | 33,915 | 10,928 | 5,555 | 50,647 |
| 2,919 | 239 | 33,940 | 10,941 | 5,563 | 50,683 |
| 2,920 | 237 | 33,765 | 10,951 | 5,556 | 50,509 |
| 2,921 | 245 | 33,904 | 10,944 | 5,563 | 50,656 |
| 2,922 | 245 | 33,254 | 10,678 | 5,433 | 49,610 |
| 2,923 | 255 | 33,587 | 10,754 | 5,432 | 50,028 |
| 2,924 | 253 | 33,972 | 10,827 | 5,465 | 50,517 |
| 2,925 | 255 | 34,452 | 10,903 | 5,506 | 51,116 |
| 2,926 | 257 | 34,082 | 10,755 | 5,447 | 50,541 |
| 2,927 | 255 | 33,968 | 10,727 | 5,426 | 50,376 |
| 2,928 | 258 | 34,262 | 10,880 | 5,470 | 50,870 |
| 2,929 | 258 | 33,880 | 10,750 | 5,411 | 50,299 |
| 2,930 | 258 | 34,130 | 10,810 | 5,433 | 50,631 |
| 2,931 | 261 | 34,212 | 10,846 | 5,450 | 50,769 |
| 2,932 | 259 | 34,187 | 10,815 | 5,462 | 50,723 |
| 2,933 | 261 | 34,278 | 10,812 | 5,425 | 50,776 |
| 2,934 | 261 | 34,436 | 10,771 | 5,419 | 50,887 |
| 2,935 | 260 | 34,785 | 10,696 | 5,395 | 51,136 |

|       |     |        |        |       |        |
|-------|-----|--------|--------|-------|--------|
| 2,936 | 262 | 34,525 | 10,553 | 5,310 | 50,650 |
| 2,937 | 271 | 34,678 | 10,497 | 5,318 | 50,764 |
| 2,938 | 265 | 34,486 | 10,351 | 5,236 | 50,338 |
| 2,939 | 276 | 34,375 | 10,330 | 5,231 | 50,212 |
| 2,940 | 276 | 34,320 | 10,328 | 5,211 | 50,135 |
| 2,941 | 284 | 34,430 | 10,298 | 5,224 | 50,236 |
| 2,942 | 284 | 34,339 | 10,264 | 5,206 | 50,093 |
| 2,943 | 275 | 34,426 | 10,238 | 5,240 | 50,179 |
| 2,944 | 281 | 34,124 | 10,138 | 5,190 | 49,733 |
| 2,945 | 277 | 33,793 | 10,056 | 5,157 | 49,283 |
| 2,946 | 284 | 34,271 | 10,376 | 5,311 | 50,242 |
| 2,947 | 309 | 34,500 | 10,436 | 5,385 | 50,630 |
| 2,948 | 295 | 34,231 | 10,355 | 5,330 | 50,211 |
| 2,949 | 290 | 34,393 | 10,413 | 5,333 | 50,429 |
| 2,950 | 289 | 34,284 | 10,326 | 5,298 | 50,197 |
| 2,951 | 298 | 34,562 | 10,412 | 5,317 | 50,589 |
| 2,952 | 294 | 34,189 | 10,352 | 5,268 | 50,103 |
| 2,953 | 303 | 33,996 | 10,282 | 5,249 | 49,830 |
| 2,954 | 301 | 33,556 | 10,183 | 5,190 | 49,230 |
| 2,955 | 299 | 33,755 | 10,306 | 5,250 | 49,610 |
| 2,956 | 289 | 33,544 | 10,347 | 5,266 | 49,446 |
| 2,957 | 269 | 33,002 | 10,196 | 5,168 | 48,635 |
| 2,958 | 258 | 32,965 | 10,093 | 5,123 | 48,439 |
| 2,959 | 258 | 33,134 | 10,176 | 5,144 | 48,712 |
| 2,960 | 259 | 32,909 | 10,102 | 5,105 | 48,375 |
| 2,961 | 254 | 32,589 | 9,966  | 5,056 | 47,865 |
| 2,962 | 252 | 32,515 | 9,973  | 5,048 | 47,788 |
| 2,963 | 253 | 32,381 | 10,006 | 5,043 | 47,683 |
| 2,964 | 265 | 32,733 | 10,116 | 5,088 | 48,202 |
| 2,965 | 277 | 32,655 | 10,089 | 5,042 | 48,063 |
| 2,966 | 275 | 32,686 | 10,051 | 5,042 | 48,054 |
| 2,967 | 277 | 32,715 | 10,036 | 5,052 | 48,080 |

|       |     |        |        |       |        |
|-------|-----|--------|--------|-------|--------|
| 2,968 | 284 | 32,493 | 9,991  | 5,017 | 47,785 |
| 2,969 | 286 | 32,522 | 10,009 | 5,031 | 47,848 |
| 2,970 | 289 | 32,296 | 9,884  | 4,972 | 47,441 |
| 2,971 | 290 | 32,408 | 9,871  | 4,957 | 47,526 |
| 2,972 | 286 | 32,312 | 9,925  | 4,969 | 47,492 |
| 2,973 | 286 | 32,233 | 9,935  | 4,970 | 47,424 |
| 2,974 | 286 | 32,735 | 10,185 | 5,118 | 48,324 |
| 2,975 | 287 | 32,508 | 10,174 | 5,122 | 48,091 |
| 2,976 | 287 | 32,446 | 10,176 | 5,114 | 48,023 |
| 2,977 | 282 | 32,307 | 10,334 | 5,170 | 48,093 |
| 2,978 | 285 | 32,272 | 10,269 | 5,166 | 47,992 |
| 2,979 | 285 | 32,230 | 10,255 | 5,159 | 47,929 |
| 2,980 | 286 | 32,454 | 10,361 | 5,219 | 48,320 |
| 2,981 | 285 | 32,375 | 10,357 | 5,225 | 48,242 |
| 2,982 | 279 | 32,412 | 10,380 | 5,249 | 48,320 |
| 2,983 | 286 | 32,885 | 10,566 | 5,327 | 49,064 |
| 2,984 | 291 | 32,609 | 10,545 | 5,326 | 48,771 |
| 2,985 | 286 | 32,124 | 10,475 | 5,288 | 48,173 |
| 2,986 | 283 | 32,144 | 10,575 | 5,350 | 48,352 |
| 2,987 | 270 | 31,709 | 10,515 | 5,292 | 47,786 |
| 2,988 | 274 | 31,709 | 10,523 | 5,309 | 47,815 |
| 2,989 | 269 | 31,643 | 10,491 | 5,290 | 47,693 |
| 2,990 | 268 | 31,692 | 10,494 | 5,293 | 47,747 |
| 2,991 | 272 | 31,645 | 10,509 | 5,292 | 47,718 |
| 2,992 | 262 | 31,665 | 10,570 | 5,306 | 47,803 |
| 2,993 | 274 | 31,087 | 10,458 | 5,245 | 47,064 |
| 2,994 | 276 | 31,587 | 10,582 | 5,323 | 47,768 |
| 2,995 | 279 | 31,859 | 10,592 | 5,332 | 48,062 |
| 2,996 | 281 | 32,153 | 10,632 | 5,353 | 48,419 |
| 2,997 | 269 | 32,445 | 10,777 | 5,450 | 48,941 |
| 2,998 | 270 | 32,413 | 10,806 | 5,455 | 48,944 |
| 2,999 | 269 | 32,007 | 10,710 | 5,401 | 48,387 |

|       |     |        |        |       |        |
|-------|-----|--------|--------|-------|--------|
| 3,000 | 273 | 32,350 | 10,790 | 5,461 | 48,874 |
| 3,001 | 273 | 32,352 | 10,794 | 5,473 | 48,892 |
| 3,002 | 274 | 32,303 | 10,704 | 5,473 | 48,754 |
| 3,003 | 267 | 31,971 | 10,609 | 5,437 | 48,284 |
| 3,004 | 270 | 32,337 | 10,698 | 5,480 | 48,785 |
| 3,005 | 273 | 32,041 | 10,609 | 5,435 | 48,358 |
| 3,006 | 282 | 32,235 | 10,603 | 5,422 | 48,542 |
| 3,007 | 289 | 32,347 | 10,590 | 5,433 | 48,659 |
| 3,008 | 287 | 32,106 | 10,497 | 5,404 | 48,294 |
| 3,009 | 298 | 32,556 | 10,662 | 5,475 | 48,991 |
| 3,010 | 298 | 32,591 | 10,651 | 5,459 | 48,999 |
| 3,011 | 298 | 32,199 | 10,535 | 5,386 | 48,418 |
| 3,012 | 297 | 32,168 | 10,498 | 5,385 | 48,348 |
| 3,013 | 291 | 32,069 | 10,465 | 5,383 | 48,208 |
| 3,014 | 289 | 31,917 | 10,357 | 5,310 | 47,873 |
| 3,015 | 291 | 32,181 | 10,419 | 5,339 | 48,230 |
| 3,016 | 286 | 32,557 | 10,488 | 5,399 | 48,730 |
| 3,017 | 289 | 32,394 | 10,416 | 5,357 | 48,456 |
| 3,018 | 282 | 32,280 | 10,363 | 5,355 | 48,280 |
| 3,019 | 282 | 32,145 | 10,316 | 5,355 | 48,098 |
| 3,020 | 275 | 32,111 | 10,332 | 5,386 | 48,104 |
| 3,021 | 269 | 32,056 | 10,311 | 5,401 | 48,037 |
| 3,022 | 270 | 32,090 | 10,331 | 5,388 | 48,079 |
| 3,023 | 262 | 31,969 | 10,279 | 5,386 | 47,896 |
| 3,024 | 264 | 31,898 | 10,202 | 5,335 | 47,699 |
| 3,025 | 264 | 32,167 | 10,143 | 5,352 | 47,926 |
| 3,026 | 269 | 31,720 | 9,960  | 5,271 | 47,220 |
| 3,027 | 274 | 31,883 | 9,900  | 5,274 | 47,331 |
| 3,028 | 273 | 31,967 | 9,901  | 5,260 | 47,401 |
| 3,029 | 281 | 32,339 | 10,003 | 5,303 | 47,926 |
| 3,030 | 281 | 32,127 | 9,885  | 5,215 | 47,508 |
| 3,031 | 280 | 32,095 | 9,840  | 5,204 | 47,419 |

|       |     |        |       |       |        |
|-------|-----|--------|-------|-------|--------|
| 3,032 | 282 | 32,203 | 9,796 | 5,177 | 47,458 |
| 3,033 | 275 | 31,994 | 9,703 | 5,131 | 47,103 |
| 3,034 | 278 | 32,027 | 9,724 | 5,161 | 47,190 |
| 3,035 | 262 | 31,598 | 9,580 | 5,077 | 46,517 |
| 3,036 | 264 | 31,728 | 9,495 | 5,042 | 46,529 |
| 3,037 | 267 | 31,781 | 9,430 | 5,021 | 46,499 |
| 3,038 | 271 | 32,013 | 9,486 | 5,060 | 46,830 |
| 3,039 | 265 | 31,739 | 9,367 | 4,993 | 46,364 |
| 3,040 | 265 | 31,760 | 9,389 | 4,982 | 46,396 |
| 3,041 | 267 | 32,062 | 9,374 | 4,972 | 46,675 |
| 3,042 | 267 | 32,002 | 9,376 | 4,974 | 46,619 |
| 3,043 | 259 | 31,867 | 9,367 | 4,978 | 46,471 |
| 3,044 | 261 | 31,183 | 9,149 | 4,884 | 45,477 |
| 3,045 | 263 | 31,382 | 9,202 | 4,905 | 45,752 |
| 3,046 | 249 | 31,364 | 9,210 | 4,907 | 45,730 |
| 3,047 | 254 | 30,725 | 8,997 | 4,750 | 44,726 |
| 3,048 | 252 | 30,848 | 9,036 | 4,776 | 44,912 |
| 3,049 | 244 | 30,992 | 9,069 | 4,808 | 45,113 |
| 3,050 | 244 | 30,831 | 9,007 | 4,774 | 44,856 |
| 3,051 | 246 | 30,576 | 8,945 | 4,734 | 44,501 |
| 3,052 | 245 | 30,616 | 8,948 | 4,743 | 44,552 |
| 3,053 | 239 | 30,509 | 8,982 | 4,739 | 44,469 |
| 3,054 | 240 | 30,629 | 9,043 | 4,779 | 44,691 |
| 3,055 | 235 | 30,309 | 8,905 | 4,725 | 44,174 |
| 3,056 | 233 | 30,533 | 8,981 | 4,747 | 44,494 |
| 3,057 | 225 | 30,481 | 8,974 | 4,776 | 44,456 |
| 3,058 | 216 | 30,215 | 8,911 | 4,719 | 44,061 |
| 3,059 | 218 | 30,341 | 8,981 | 4,749 | 44,289 |
| 3,060 | 212 | 30,020 | 8,858 | 4,669 | 43,759 |
| 3,061 | 212 | 30,184 | 8,828 | 4,663 | 43,887 |
| 3,062 | 209 | 29,979 | 8,785 | 4,637 | 43,610 |
| 3,063 | 209 | 29,823 | 8,751 | 4,620 | 43,403 |



|       |     |        |       |       |        |
|-------|-----|--------|-------|-------|--------|
| 3,064 | 210 | 29,816 | 8,717 | 4,633 | 43,376 |
| 3,065 | 206 | 29,316 | 8,539 | 4,574 | 42,635 |
| 3,066 | 210 | 29,151 | 8,514 | 4,571 | 42,446 |
| 3,067 | 203 | 28,674 | 8,384 | 4,494 | 41,755 |
| 3,068 | 200 | 28,299 | 8,297 | 4,444 | 41,240 |
| 3,069 | 203 | 28,275 | 8,279 | 4,408 | 41,165 |
| 3,070 | 205 | 28,229 | 8,232 | 4,382 | 41,048 |
| 3,071 | 202 | 27,989 | 8,141 | 4,332 | 40,664 |
| 3,072 | 203 | 28,151 | 8,167 | 4,337 | 40,858 |
| 3,073 | 201 | 27,892 | 8,033 | 4,310 | 40,436 |
| 3,074 | 196 | 27,592 | 7,948 | 4,257 | 39,993 |
| 3,075 | 193 | 27,305 | 7,908 | 4,233 | 39,639 |
| 3,076 | 184 | 27,050 | 7,840 | 4,184 | 39,258 |
| 3,077 | 174 | 26,632 | 7,751 | 4,141 | 38,698 |
| 3,078 | 168 | 26,407 | 7,683 | 4,113 | 38,371 |
| 3,079 | 161 | 26,645 | 7,708 | 4,121 | 38,635 |
| 3,080 | 159 | 26,277 | 7,602 | 4,067 | 38,105 |
| 3,081 | 163 | 25,887 | 7,544 | 4,041 | 37,635 |
| 3,082 | 163 | 25,596 | 7,521 | 3,996 | 37,276 |
| 3,083 | 168 | 25,399 | 7,470 | 3,970 | 37,007 |
| 3,084 | 163 | 24,858 | 7,342 | 3,897 | 36,260 |
| 3,085 | 163 | 24,661 | 7,261 | 3,834 | 35,919 |
| 3,086 | 170 | 24,818 | 7,296 | 3,842 | 36,126 |
| 3,087 | 157 | 23,908 | 7,060 | 3,719 | 34,844 |
| 3,088 | 159 | 23,921 | 7,076 | 3,731 | 34,887 |
| 3,089 | 158 | 23,742 | 7,032 | 3,696 | 34,628 |
| 3,090 | 153 | 23,313 | 6,948 | 3,652 | 34,066 |
| 3,091 | 155 | 23,231 | 6,885 | 3,658 | 33,929 |
| 3,092 | 151 | 23,001 | 6,802 | 3,624 | 33,578 |
| 3,093 | 146 | 22,898 | 6,713 | 3,576 | 33,333 |
| 3,094 | 144 | 22,756 | 6,617 | 3,531 | 33,048 |
| 3,095 | 136 | 22,625 | 6,556 | 3,494 | 32,811 |

|       |     |        |       |       |        |
|-------|-----|--------|-------|-------|--------|
| 3,096 | 132 | 21,421 | 6,180 | 3,321 | 31,054 |
| 3,097 | 132 | 21,632 | 6,163 | 3,350 | 31,277 |
| 3,098 | 120 | 21,340 | 6,044 | 3,290 | 30,794 |
| 3,099 | 120 | 21,479 | 6,043 | 3,298 | 30,940 |
| 3,100 | 118 | 21,383 | 6,003 | 3,275 | 30,779 |
| 3,101 | 125 | 21,122 | 5,963 | 3,251 | 30,461 |
| 3,102 | 125 | 21,155 | 5,954 | 3,264 | 30,498 |
| 3,103 | 126 | 20,877 | 5,830 | 3,216 | 30,049 |
| 3,104 | 121 | 19,997 | 5,556 | 3,043 | 28,717 |
| 3,105 | 121 | 19,969 | 5,485 | 3,032 | 28,607 |
| 3,106 | 124 | 20,266 | 5,553 | 3,070 | 29,013 |
| 3,107 | 128 | 20,461 | 5,592 | 3,090 | 29,271 |
| 3,108 | 134 | 20,348 | 5,540 | 3,049 | 29,071 |
| 3,109 | 136 | 20,225 | 5,466 | 3,041 | 28,868 |
| 3,110 | 139 | 20,321 | 5,494 | 3,063 | 29,017 |
| 3,111 | 139 | 20,127 | 5,454 | 3,058 | 28,778 |
| 3,112 | 139 | 20,144 | 5,471 | 3,056 | 28,810 |
| 3,113 | 141 | 20,329 | 5,503 | 3,045 | 29,018 |
| 3,114 | 141 | 20,347 | 5,495 | 3,053 | 29,036 |
| 3,115 | 149 | 20,454 | 5,511 | 3,050 | 29,164 |
| 3,116 | 145 | 20,440 | 5,485 | 3,028 | 29,098 |
| 3,117 | 133 | 20,259 | 5,406 | 2,980 | 28,778 |
| 3,118 | 133 | 20,211 | 5,376 | 2,976 | 28,696 |
| 3,119 | 133 | 20,339 | 5,396 | 2,987 | 28,855 |
| 3,120 | 130 | 20,143 | 5,338 | 2,947 | 28,558 |
| 3,121 | 133 | 20,313 | 5,366 | 2,971 | 28,783 |
| 3,122 | 139 | 20,400 | 5,365 | 2,969 | 28,873 |
| 3,123 | 141 | 20,095 | 5,299 | 2,941 | 28,476 |
| 3,124 | 140 | 19,780 | 5,261 | 2,899 | 28,080 |
| 3,125 | 142 | 20,523 | 5,329 | 2,964 | 28,958 |
| 3,126 | 142 | 20,346 | 5,265 | 2,938 | 28,691 |
| 3,127 | 143 | 20,403 | 5,270 | 2,949 | 28,765 |

|       |     |        |       |       |        |
|-------|-----|--------|-------|-------|--------|
| 3,128 | 142 | 20,478 | 5,247 | 2,954 | 28,821 |
| 3,129 | 135 | 20,012 | 5,087 | 2,875 | 28,109 |
| 3,130 | 133 | 20,173 | 5,105 | 2,919 | 28,330 |
| 3,131 | 130 | 20,440 | 5,137 | 2,962 | 28,669 |
| 3,132 | 134 | 19,930 | 4,961 | 2,894 | 27,919 |
| 3,133 | 141 | 20,107 | 5,004 | 2,926 | 28,178 |
| 3,134 | 135 | 20,221 | 5,037 | 2,958 | 28,351 |
| 3,135 | 137 | 19,944 | 4,948 | 2,898 | 27,927 |
| 3,136 | 138 | 20,139 | 4,950 | 2,916 | 28,143 |
| 3,137 | 131 | 20,466 | 4,985 | 2,956 | 28,538 |
| 3,138 | 133 | 20,797 | 5,052 | 2,990 | 28,972 |
| 3,139 | 131 | 20,599 | 4,978 | 2,946 | 28,654 |
| 3,140 | 129 | 20,669 | 4,991 | 2,959 | 28,748 |
| 3,141 | 131 | 20,599 | 4,950 | 2,947 | 28,627 |
| 3,142 | 131 | 20,404 | 4,915 | 2,942 | 28,392 |
| 3,143 | 136 | 20,870 | 5,027 | 3,024 | 29,057 |
| 3,144 | 137 | 20,957 | 5,009 | 3,026 | 29,129 |
| 3,145 | 140 | 21,038 | 5,054 | 3,059 | 29,291 |
| 3,146 | 138 | 20,955 | 5,022 | 3,035 | 29,150 |
| 3,147 | 137 | 20,997 | 5,037 | 3,045 | 29,216 |
| 3,148 | 139 | 21,048 | 5,069 | 3,042 | 29,298 |
| 3,149 | 139 | 21,015 | 5,063 | 3,036 | 29,253 |
| 3,150 | 139 | 21,265 | 5,121 | 3,079 | 29,604 |
| 3,151 | 132 | 21,389 | 5,144 | 3,101 | 29,766 |
| 3,152 | 133 | 21,516 | 5,162 | 3,118 | 29,929 |
| 3,153 | 138 | 21,667 | 5,191 | 3,149 | 30,145 |
| 3,154 | 140 | 21,770 | 5,209 | 3,174 | 30,293 |
| 3,155 | 145 | 21,824 | 5,214 | 3,221 | 30,404 |
| 3,156 | 144 | 21,475 | 5,154 | 3,150 | 29,923 |
| 3,157 | 145 | 21,473 | 5,155 | 3,146 | 29,919 |
| 3,158 | 148 | 21,496 | 5,119 | 3,150 | 29,913 |
| 3,159 | 141 | 21,344 | 5,077 | 3,130 | 29,692 |

|       |     |        |       |       |        |
|-------|-----|--------|-------|-------|--------|
| 3,160 | 138 | 21,473 | 5,127 | 3,141 | 29,879 |
| 3,161 | 134 | 21,304 | 5,114 | 3,138 | 29,690 |
| 3,162 | 137 | 21,337 | 5,106 | 3,113 | 29,693 |
| 3,163 | 141 | 21,329 | 5,102 | 3,131 | 29,703 |
| 3,164 | 146 | 21,253 | 5,066 | 3,136 | 29,601 |
| 3,165 | 143 | 21,158 | 5,051 | 3,110 | 29,462 |
| 3,166 | 137 | 21,521 | 5,130 | 3,164 | 29,952 |
| 3,167 | 139 | 21,482 | 5,155 | 3,176 | 29,952 |
| 3,168 | 150 | 21,743 | 5,224 | 3,199 | 30,316 |
| 3,169 | 153 | 21,774 | 5,252 | 3,202 | 30,381 |
| 3,170 | 158 | 21,948 | 5,258 | 3,226 | 30,590 |
| 3,171 | 157 | 21,903 | 5,258 | 3,232 | 30,550 |
| 3,172 | 164 | 21,979 | 5,299 | 3,269 | 30,711 |
| 3,173 | 162 | 21,710 | 5,260 | 3,238 | 30,370 |
| 3,174 | 159 | 21,478 | 5,214 | 3,236 | 30,087 |
| 3,175 | 173 | 22,199 | 5,482 | 3,358 | 31,212 |
| 3,176 | 172 | 22,045 | 5,505 | 3,358 | 31,080 |
| 3,177 | 179 | 21,949 | 5,512 | 3,325 | 30,965 |
| 3,178 | 180 | 21,952 | 5,542 | 3,313 | 30,987 |
| 3,179 | 180 | 22,007 | 5,545 | 3,314 | 31,046 |
| 3,180 | 183 | 21,898 | 5,515 | 3,250 | 30,846 |
| 3,181 | 184 | 22,137 | 5,581 | 3,294 | 31,196 |
| 3,182 | 181 | 22,071 | 5,587 | 3,308 | 31,147 |
| 3,183 | 183 | 22,468 | 5,705 | 3,384 | 31,740 |
| 3,184 | 184 | 22,260 | 5,670 | 3,384 | 31,498 |
| 3,185 | 187 | 22,303 | 5,695 | 3,397 | 31,582 |
| 3,186 | 185 | 22,104 | 5,668 | 3,403 | 31,360 |
| 3,187 | 185 | 22,418 | 5,786 | 3,477 | 31,866 |
| 3,188 | 187 | 22,685 | 5,898 | 3,571 | 32,341 |
| 3,189 | 186 | 22,779 | 5,951 | 3,611 | 32,527 |
| 3,190 | 176 | 22,523 | 5,884 | 3,567 | 32,150 |
| 3,191 | 176 | 22,682 | 5,937 | 3,611 | 32,406 |

|       |     |        |       |       |        |
|-------|-----|--------|-------|-------|--------|
| 3,192 | 171 | 22,868 | 6,000 | 3,640 | 32,679 |
| 3,193 | 170 | 22,640 | 5,962 | 3,597 | 32,369 |
| 3,194 | 170 | 22,711 | 5,982 | 3,598 | 32,461 |
| 3,195 | 168 | 22,792 | 6,018 | 3,625 | 32,603 |
| 3,196 | 166 | 22,991 | 6,032 | 3,633 | 32,822 |
| 3,197 | 170 | 22,827 | 6,023 | 3,612 | 32,632 |
| 3,198 | 170 | 22,766 | 6,059 | 3,638 | 32,633 |
| 3,199 | 174 | 22,998 | 6,121 | 3,674 | 32,967 |
| 3,200 | 181 | 22,800 | 6,047 | 3,617 | 32,645 |
| 3,201 | 188 | 22,798 | 6,027 | 3,591 | 32,604 |
| 3,202 | 190 | 22,868 | 6,040 | 3,592 | 32,690 |
| 3,203 | 191 | 23,190 | 6,108 | 3,617 | 33,106 |
| 3,204 | 185 | 23,207 | 6,119 | 3,610 | 33,121 |
| 3,205 | 181 | 23,142 | 6,110 | 3,574 | 33,007 |
| 3,206 | 175 | 22,860 | 6,047 | 3,521 | 32,603 |
| 3,207 | 177 | 22,821 | 6,030 | 3,537 | 32,565 |
| 3,208 | 175 | 22,890 | 6,033 | 3,550 | 32,648 |
| 3,209 | 170 | 22,568 | 5,999 | 3,547 | 32,284 |
| 3,210 | 170 | 22,516 | 5,997 | 3,547 | 32,230 |
| 3,211 | 175 | 22,355 | 5,938 | 3,524 | 31,992 |
| 3,212 | 177 | 22,417 | 5,930 | 3,529 | 32,053 |
| 3,213 | 180 | 22,514 | 5,950 | 3,571 | 32,215 |
| 3,214 | 172 | 22,352 | 5,918 | 3,540 | 31,982 |
| 3,215 | 166 | 22,547 | 5,973 | 3,561 | 32,247 |
| 3,216 | 164 | 22,350 | 5,939 | 3,534 | 31,987 |
| 3,217 | 163 | 21,872 | 5,771 | 3,464 | 31,270 |
| 3,218 | 160 | 21,960 | 5,787 | 3,478 | 31,385 |
| 3,219 | 156 | 22,208 | 5,833 | 3,506 | 31,703 |
| 3,220 | 156 | 22,182 | 5,825 | 3,510 | 31,673 |
| 3,221 | 153 | 22,473 | 5,902 | 3,559 | 32,087 |
| 3,222 | 142 | 22,358 | 5,885 | 3,537 | 31,922 |
| 3,223 | 138 | 22,222 | 5,831 | 3,524 | 31,715 |

|       |     |        |       |       |        |
|-------|-----|--------|-------|-------|--------|
| 3,224 | 130 | 21,961 | 5,810 | 3,520 | 31,421 |
| 3,225 | 130 | 21,808 | 5,737 | 3,471 | 31,146 |
| 3,226 | 129 | 21,388 | 5,600 | 3,391 | 30,508 |
| 3,227 | 130 | 21,594 | 5,648 | 3,425 | 30,797 |
| 3,228 | 127 | 21,499 | 5,629 | 3,425 | 30,680 |
| 3,229 | 126 | 21,357 | 5,624 | 3,434 | 30,541 |
| 3,230 | 126 | 21,196 | 5,606 | 3,429 | 30,357 |
| 3,231 | 123 | 21,014 | 5,582 | 3,443 | 30,162 |
| 3,232 | 125 | 21,056 | 5,592 | 3,455 | 30,228 |
| 3,233 | 122 | 21,069 | 5,594 | 3,443 | 30,228 |
| 3,234 | 118 | 21,148 | 5,612 | 3,430 | 30,308 |
| 3,235 | 112 | 21,288 | 5,610 | 3,436 | 30,446 |
| 3,236 | 113 | 21,420 | 5,598 | 3,434 | 30,565 |
| 3,237 | 114 | 21,479 | 5,608 | 3,403 | 30,604 |
| 3,238 | 133 | 21,379 | 5,551 | 3,360 | 30,423 |
| 3,239 | 131 | 21,351 | 5,517 | 3,318 | 30,317 |
| 3,240 | 137 | 21,332 | 5,494 | 3,300 | 30,263 |
| 3,241 | 140 | 21,405 | 5,474 | 3,267 | 30,286 |
| 3,242 | 143 | 21,502 | 5,505 | 3,294 | 30,444 |
| 3,243 | 146 | 21,281 | 5,435 | 3,263 | 30,125 |
| 3,244 | 146 | 21,240 | 5,440 | 3,271 | 30,097 |
| 3,245 | 149 | 21,180 | 5,427 | 3,259 | 30,015 |
| 3,246 | 151 | 21,133 | 5,426 | 3,248 | 29,958 |
| 3,247 | 152 | 20,989 | 5,393 | 3,232 | 29,766 |
| 3,248 | 148 | 20,870 | 5,303 | 3,188 | 29,509 |
| 3,249 | 148 | 20,973 | 5,263 | 3,193 | 29,577 |
| 3,250 | 148 | 21,007 | 5,254 | 3,195 | 29,604 |
| 3,251 | 143 | 21,201 | 5,348 | 3,251 | 29,943 |
| 3,252 | 138 | 21,293 | 5,359 | 3,267 | 30,057 |
| 3,253 | 132 | 21,192 | 5,314 | 3,266 | 29,904 |
| 3,254 | 139 | 21,282 | 5,329 | 3,309 | 30,059 |
| 3,255 | 140 | 21,256 | 5,302 | 3,317 | 30,015 |

|       |     |        |       |       |        |
|-------|-----|--------|-------|-------|--------|
| 3,256 | 139 | 21,106 | 5,275 | 3,307 | 29,827 |
| 3,257 | 139 | 21,154 | 5,293 | 3,324 | 29,910 |
| 3,258 | 137 | 21,198 | 5,306 | 3,316 | 29,957 |
| 3,259 | 135 | 21,335 | 5,281 | 3,312 | 30,063 |
| 3,260 | 137 | 21,573 | 5,322 | 3,314 | 30,346 |
| 3,261 | 132 | 21,414 | 5,222 | 3,264 | 30,032 |
| 3,262 | 134 | 21,513 | 5,258 | 3,280 | 30,185 |
| 3,263 | 127 | 21,478 | 5,254 | 3,287 | 30,146 |
| 3,264 | 127 | 21,441 | 5,265 | 3,304 | 30,137 |
| 3,265 | 130 | 21,457 | 5,272 | 3,309 | 30,168 |
| 3,266 | 134 | 21,203 | 5,229 | 3,284 | 29,850 |
| 3,267 | 129 | 21,063 | 5,223 | 3,271 | 29,686 |
| 3,268 | 127 | 21,269 | 5,293 | 3,285 | 29,974 |
| 3,269 | 127 | 21,279 | 5,331 | 3,289 | 30,026 |
| 3,270 | 123 | 21,127 | 5,297 | 3,290 | 29,837 |
| 3,271 | 125 | 20,960 | 5,260 | 3,291 | 29,636 |
| 3,272 | 119 | 20,292 | 5,044 | 3,170 | 28,625 |
| 3,273 | 120 | 20,599 | 5,095 | 3,183 | 28,997 |
| 3,274 | 122 | 20,795 | 5,166 | 3,217 | 29,300 |
| 3,275 | 122 | 20,855 | 5,180 | 3,217 | 29,374 |
| 3,276 | 120 | 20,584 | 5,113 | 3,180 | 28,997 |
| 3,277 | 121 | 20,890 | 5,207 | 3,247 | 29,465 |
| 3,278 | 123 | 20,860 | 5,233 | 3,261 | 29,477 |
| 3,279 | 125 | 20,862 | 5,217 | 3,241 | 29,445 |
| 3,280 | 125 | 20,849 | 5,254 | 3,261 | 29,489 |
| 3,281 | 128 | 21,156 | 5,335 | 3,298 | 29,917 |
| 3,282 | 125 | 20,938 | 5,303 | 3,268 | 29,634 |
| 3,283 | 128 | 20,896 | 5,262 | 3,250 | 29,536 |
| 3,284 | 129 | 20,793 | 5,193 | 3,235 | 29,350 |
| 3,285 | 130 | 20,830 | 5,216 | 3,261 | 29,437 |
| 3,286 | 136 | 21,161 | 5,286 | 3,277 | 29,860 |
| 3,287 | 134 | 20,734 | 5,160 | 3,218 | 29,246 |

|       |     |        |       |       |        |
|-------|-----|--------|-------|-------|--------|
| 3,288 | 119 | 20,637 | 5,138 | 3,203 | 29,097 |
| 3,289 | 119 | 20,613 | 5,142 | 3,201 | 29,075 |
| 3,290 | 118 | 20,611 | 5,196 | 3,235 | 29,160 |
| 3,291 | 119 | 20,244 | 5,151 | 3,202 | 28,716 |
| 3,292 | 121 | 20,379 | 5,170 | 3,224 | 28,894 |
| 3,293 | 120 | 19,963 | 5,033 | 3,137 | 28,253 |
| 3,294 | 121 | 20,267 | 5,095 | 3,186 | 28,669 |
| 3,295 | 116 | 20,457 | 5,153 | 3,219 | 28,945 |
| 3,296 | 114 | 20,440 | 5,166 | 3,231 | 28,951 |
| 3,297 | 111 | 20,599 | 5,228 | 3,269 | 29,207 |
| 3,298 | 116 | 20,435 | 5,174 | 3,231 | 28,956 |
| 3,299 | 115 | 20,233 | 5,142 | 3,213 | 28,703 |
| 3,300 | 113 | 20,561 | 5,281 | 3,297 | 29,252 |
| 3,301 | 114 | 20,559 | 5,291 | 3,298 | 29,262 |
| 3,302 | 111 | 20,267 | 5,207 | 3,227 | 28,812 |
| 3,303 | 117 | 20,481 | 5,273 | 3,262 | 29,133 |
| 3,304 | 119 | 20,465 | 5,303 | 3,252 | 29,139 |
| 3,305 | 112 | 20,242 | 5,267 | 3,197 | 28,818 |
| 3,306 | 112 | 20,026 | 5,207 | 3,168 | 28,513 |
| 3,307 | 115 | 20,060 | 5,200 | 3,168 | 28,543 |
| 3,308 | 113 | 20,153 | 5,221 | 3,173 | 28,660 |
| 3,309 | 116 | 19,939 | 5,163 | 3,161 | 28,379 |
| 3,310 | 120 | 19,892 | 5,169 | 3,161 | 28,342 |
| 3,311 | 118 | 19,702 | 5,133 | 3,155 | 28,108 |
| 3,312 | 122 | 19,529 | 5,127 | 3,153 | 27,931 |
| 3,313 | 117 | 19,411 | 5,109 | 3,140 | 27,777 |
| 3,314 | 121 | 19,614 | 5,165 | 3,186 | 28,086 |
| 3,315 | 121 | 19,363 | 5,094 | 3,136 | 27,714 |
| 3,316 | 131 | 20,084 | 5,322 | 3,252 | 28,789 |
| 3,317 | 130 | 19,974 | 5,254 | 3,210 | 28,568 |
| 3,318 | 132 | 20,053 | 5,291 | 3,243 | 28,719 |
| 3,319 | 135 | 19,968 | 5,270 | 3,242 | 28,615 |



|       |     |        |       |       |        |
|-------|-----|--------|-------|-------|--------|
| 3,320 | 135 | 19,900 | 5,273 | 3,238 | 28,546 |
| 3,321 | 133 | 19,712 | 5,220 | 3,186 | 28,251 |
| 3,322 | 133 | 19,692 | 5,194 | 3,166 | 28,185 |
| 3,323 | 136 | 19,782 | 5,272 | 3,179 | 28,369 |
| 3,324 | 136 | 19,636 | 5,246 | 3,182 | 28,200 |
| 3,325 | 137 | 19,539 | 5,206 | 3,169 | 28,051 |
| 3,326 | 137 | 19,557 | 5,191 | 3,169 | 28,054 |
| 3,327 | 137 | 19,579 | 5,190 | 3,159 | 28,065 |
| 3,328 | 134 | 19,713 | 5,228 | 3,182 | 28,257 |
| 3,329 | 137 | 19,846 | 5,222 | 3,164 | 28,369 |
| 3,330 | 135 | 19,807 | 5,161 | 3,147 | 28,250 |
| 3,331 | 139 | 19,994 | 5,184 | 3,137 | 28,454 |
| 3,332 | 138 | 19,815 | 5,124 | 3,107 | 28,184 |
| 3,333 | 137 | 19,982 | 5,139 | 3,107 | 28,365 |
| 3,334 | 140 | 20,032 | 5,153 | 3,122 | 28,447 |
| 3,335 | 140 | 19,960 | 5,162 | 3,102 | 28,364 |
| 3,336 | 138 | 20,167 | 5,186 | 3,127 | 28,618 |
| 3,337 | 133 | 20,003 | 5,161 | 3,097 | 28,394 |
| 3,338 | 129 | 19,869 | 5,138 | 3,060 | 28,196 |
| 3,339 | 125 | 19,897 | 5,159 | 3,079 | 28,260 |
| 3,340 | 126 | 19,555 | 5,023 | 2,983 | 27,687 |
| 3,341 | 127 | 19,804 | 5,035 | 2,988 | 27,954 |
| 3,342 | 124 | 19,784 | 5,046 | 2,991 | 27,945 |
| 3,343 | 126 | 19,806 | 5,064 | 2,981 | 27,977 |
| 3,344 | 124 | 19,643 | 5,036 | 2,968 | 27,771 |
| 3,345 | 126 | 19,511 | 4,994 | 2,932 | 27,563 |
| 3,346 | 126 | 19,474 | 4,987 | 2,949 | 27,536 |
| 3,347 | 128 | 19,543 | 4,985 | 2,941 | 27,597 |
| 3,348 | 128 | 19,701 | 5,006 | 2,942 | 27,777 |
| 3,349 | 123 | 19,891 | 5,038 | 2,960 | 28,012 |
| 3,350 | 126 | 20,130 | 5,077 | 2,983 | 28,316 |
| 3,351 | 126 | 20,222 | 5,073 | 2,988 | 28,409 |

|       |     |        |       |       |        |
|-------|-----|--------|-------|-------|--------|
| 3,352 | 127 | 20,336 | 5,086 | 3,012 | 28,561 |
| 3,353 | 126 | 20,333 | 5,073 | 3,019 | 28,551 |
| 3,354 | 120 | 20,438 | 5,148 | 3,066 | 28,772 |
| 3,355 | 120 | 20,217 | 5,089 | 3,044 | 28,470 |
| 3,356 | 125 | 20,220 | 5,100 | 3,035 | 28,480 |
| 3,357 | 122 | 20,005 | 5,077 | 3,024 | 28,228 |
| 3,358 | 128 | 20,553 | 5,249 | 3,118 | 29,048 |
| 3,359 | 127 | 20,474 | 5,240 | 3,100 | 28,941 |
| 3,360 | 123 | 20,621 | 5,252 | 3,123 | 29,119 |
| 3,361 | 121 | 20,560 | 5,222 | 3,089 | 28,992 |
| 3,362 | 124 | 20,802 | 5,255 | 3,094 | 29,275 |
| 3,363 | 127 | 21,043 | 5,317 | 3,114 | 29,601 |
| 3,364 | 123 | 20,832 | 5,270 | 3,074 | 29,299 |
| 3,365 | 124 | 20,987 | 5,304 | 3,099 | 29,514 |
| 3,366 | 125 | 21,190 | 5,314 | 3,112 | 29,741 |
| 3,367 | 124 | 21,243 | 5,303 | 3,131 | 29,801 |
| 3,368 | 125 | 21,118 | 5,266 | 3,116 | 29,625 |
| 3,369 | 125 | 21,158 | 5,280 | 3,124 | 29,687 |
| 3,370 | 127 | 21,291 | 5,293 | 3,133 | 29,844 |
| 3,371 | 130 | 21,381 | 5,285 | 3,152 | 29,948 |
| 3,372 | 130 | 21,413 | 5,242 | 3,144 | 29,929 |
| 3,373 | 133 | 21,774 | 5,301 | 3,162 | 30,370 |
| 3,374 | 131 | 21,808 | 5,300 | 3,165 | 30,404 |
| 3,375 | 134 | 22,038 | 5,363 | 3,183 | 30,718 |
| 3,376 | 135 | 22,624 | 5,470 | 3,235 | 31,464 |
| 3,377 | 137 | 22,491 | 5,437 | 3,208 | 31,273 |
| 3,378 | 137 | 22,436 | 5,433 | 3,207 | 31,213 |
| 3,379 | 138 | 22,320 | 5,436 | 3,229 | 31,123 |
| 3,380 | 132 | 22,037 | 5,375 | 3,201 | 30,745 |
| 3,381 | 133 | 22,028 | 5,461 | 3,231 | 30,853 |
| 3,382 | 132 | 21,943 | 5,434 | 3,224 | 30,733 |
| 3,383 | 133 | 21,846 | 5,436 | 3,213 | 30,628 |

|       |     |        |       |       |        |
|-------|-----|--------|-------|-------|--------|
| 3,384 | 133 | 21,592 | 5,391 | 3,186 | 30,302 |
| 3,385 | 131 | 21,741 | 5,387 | 3,177 | 30,436 |
| 3,386 | 135 | 22,036 | 5,468 | 3,204 | 30,843 |
| 3,387 | 136 | 21,800 | 5,432 | 3,194 | 30,562 |
| 3,388 | 136 | 21,732 | 5,451 | 3,201 | 30,520 |
| 3,389 | 137 | 22,027 | 5,502 | 3,231 | 30,897 |
| 3,390 | 134 | 21,790 | 5,468 | 3,214 | 30,606 |
| 3,391 | 134 | 21,736 | 5,474 | 3,223 | 30,567 |
| 3,392 | 136 | 21,681 | 5,522 | 3,245 | 30,584 |
| 3,393 | 127 | 21,467 | 5,493 | 3,220 | 30,307 |
| 3,394 | 126 | 21,382 | 5,476 | 3,233 | 30,217 |
| 3,395 | 130 | 21,361 | 5,490 | 3,232 | 30,213 |
| 3,396 | 127 | 21,000 | 5,456 | 3,219 | 29,802 |
| 3,397 | 126 | 21,405 | 5,549 | 3,298 | 30,378 |
| 3,398 | 127 | 21,288 | 5,564 | 3,304 | 30,283 |
| 3,399 | 126 | 21,163 | 5,588 | 3,287 | 30,164 |
| 3,400 | 127 | 21,082 | 5,560 | 3,265 | 30,034 |
| 3,401 | 133 | 21,057 | 5,555 | 3,265 | 30,010 |
| 3,402 | 138 | 20,933 | 5,589 | 3,250 | 29,910 |
| 3,403 | 143 | 20,698 | 5,582 | 3,223 | 29,646 |
| 3,404 | 147 | 20,012 | 5,367 | 3,092 | 28,618 |
| 3,405 | 152 | 20,279 | 5,400 | 3,112 | 28,943 |
| 3,406 | 157 | 20,457 | 5,439 | 3,150 | 29,203 |
| 3,407 | 157 | 20,434 | 5,445 | 3,146 | 29,182 |
| 3,408 | 152 | 20,822 | 5,533 | 3,203 | 29,710 |
| 3,409 | 148 | 20,481 | 5,456 | 3,163 | 29,248 |
| 3,410 | 154 | 20,590 | 5,513 | 3,181 | 29,438 |
| 3,411 | 153 | 20,249 | 5,475 | 3,126 | 29,003 |
| 3,412 | 150 | 20,216 | 5,479 | 3,132 | 28,977 |
| 3,413 | 147 | 20,184 | 5,534 | 3,160 | 29,025 |
| 3,414 | 144 | 19,995 | 5,553 | 3,151 | 28,843 |
| 3,415 | 145 | 20,064 | 5,567 | 3,189 | 28,965 |

|       |     |        |       |       |        |
|-------|-----|--------|-------|-------|--------|
| 3,416 | 140 | 19,865 | 5,513 | 3,158 | 28,676 |
| 3,417 | 138 | 19,828 | 5,528 | 3,161 | 28,655 |
| 3,418 | 135 | 19,747 | 5,558 | 3,150 | 28,590 |
| 3,419 | 133 | 19,718 | 5,569 | 3,138 | 28,558 |
| 3,420 | 133 | 19,845 | 5,600 | 3,158 | 28,736 |
| 3,421 | 130 | 19,666 | 5,610 | 3,147 | 28,553 |
| 3,422 | 133 | 19,822 | 5,696 | 3,199 | 28,850 |
| 3,423 | 136 | 19,829 | 5,756 | 3,242 | 28,963 |
| 3,424 | 135 | 19,808 | 5,788 | 3,269 | 29,000 |
| 3,425 | 135 | 19,796 | 5,807 | 3,287 | 29,025 |
| 3,426 | 139 | 19,916 | 5,801 | 3,324 | 29,180 |
| 3,427 | 137 | 19,952 | 5,827 | 3,335 | 29,251 |
| 3,428 | 142 | 19,900 | 5,801 | 3,339 | 29,182 |
| 3,429 | 143 | 19,993 | 5,838 | 3,337 | 29,311 |
| 3,430 | 143 | 20,075 | 5,848 | 3,328 | 29,394 |
| 3,431 | 143 | 20,120 | 5,848 | 3,317 | 29,428 |
| 3,432 | 144 | 20,426 | 5,909 | 3,347 | 29,826 |
| 3,433 | 139 | 20,200 | 5,850 | 3,318 | 29,507 |
| 3,434 | 139 | 20,225 | 5,832 | 3,334 | 29,530 |
| 3,435 | 135 | 20,411 | 5,890 | 3,407 | 29,843 |
| 3,436 | 136 | 20,525 | 5,944 | 3,439 | 30,044 |
| 3,437 | 141 | 20,400 | 5,905 | 3,446 | 29,892 |
| 3,438 | 142 | 20,650 | 5,978 | 3,482 | 30,252 |
| 3,439 | 143 | 20,753 | 5,998 | 3,509 | 30,403 |
| 3,440 | 143 | 20,878 | 6,033 | 3,542 | 30,596 |
| 3,441 | 141 | 20,931 | 6,024 | 3,554 | 30,650 |
| 3,442 | 139 | 21,111 | 6,011 | 3,553 | 30,814 |
| 3,443 | 140 | 21,142 | 5,981 | 3,546 | 30,809 |
| 3,444 | 142 | 21,349 | 6,004 | 3,566 | 31,061 |
| 3,445 | 148 | 21,546 | 6,066 | 3,581 | 31,341 |
| 3,446 | 150 | 21,729 | 6,065 | 3,580 | 31,524 |
| 3,447 | 152 | 21,912 | 6,049 | 3,564 | 31,677 |

|       |     |        |       |       |        |
|-------|-----|--------|-------|-------|--------|
| 3,448 | 158 | 21,825 | 5,969 | 3,530 | 31,482 |
| 3,449 | 158 | 21,827 | 5,970 | 3,517 | 31,472 |
| 3,450 | 158 | 22,046 | 5,989 | 3,535 | 31,728 |
| 3,451 | 149 | 21,796 | 5,921 | 3,493 | 31,359 |
| 3,452 | 147 | 21,754 | 5,868 | 3,474 | 31,243 |
| 3,453 | 148 | 21,746 | 5,851 | 3,474 | 31,219 |
| 3,454 | 149 | 21,897 | 5,869 | 3,480 | 31,395 |
| 3,455 | 139 | 21,689 | 5,831 | 3,465 | 31,124 |
| 3,456 | 144 | 21,940 | 5,880 | 3,489 | 31,453 |
| 3,457 | 137 | 21,922 | 5,873 | 3,484 | 31,416 |
| 3,458 | 142 | 21,711 | 5,816 | 3,447 | 31,116 |
| 3,459 | 142 | 21,456 | 5,768 | 3,414 | 30,780 |
| 3,460 | 143 | 21,523 | 5,768 | 3,416 | 30,850 |
| 3,461 | 137 | 21,298 | 5,698 | 3,383 | 30,516 |
| 3,462 | 143 | 21,804 | 5,774 | 3,464 | 31,185 |
| 3,463 | 146 | 22,072 | 5,817 | 3,482 | 31,517 |
| 3,464 | 147 | 21,947 | 5,726 | 3,464 | 31,284 |
| 3,465 | 144 | 21,950 | 5,699 | 3,441 | 31,234 |
| 3,466 | 143 | 21,875 | 5,691 | 3,436 | 31,145 |
| 3,467 | 142 | 21,796 | 5,695 | 3,431 | 31,064 |
| 3,468 | 144 | 22,028 | 5,702 | 3,442 | 31,316 |
| 3,469 | 139 | 21,854 | 5,621 | 3,409 | 31,023 |
| 3,470 | 139 | 21,909 | 5,631 | 3,421 | 31,100 |
| 3,471 | 141 | 21,764 | 5,602 | 3,414 | 30,921 |
| 3,472 | 140 | 21,896 | 5,578 | 3,377 | 30,991 |
| 3,473 | 139 | 21,571 | 5,457 | 3,291 | 30,458 |
| 3,474 | 139 | 21,585 | 5,454 | 3,273 | 30,451 |
| 3,475 | 139 | 21,153 | 5,360 | 3,209 | 29,861 |
| 3,476 | 138 | 21,077 | 5,339 | 3,214 | 29,768 |
| 3,477 | 136 | 21,027 | 5,371 | 3,197 | 29,731 |
| 3,478 | 139 | 20,947 | 5,332 | 3,177 | 29,595 |
| 3,479 | 131 | 20,858 | 5,288 | 3,123 | 29,400 |

|       |     |        |       |       |        |
|-------|-----|--------|-------|-------|--------|
| 3,480 | 128 | 20,684 | 5,207 | 3,093 | 29,112 |
| 3,481 | 131 | 20,732 | 5,211 | 3,097 | 29,171 |
| 3,482 | 130 | 20,618 | 5,168 | 3,102 | 29,018 |
| 3,483 | 130 | 20,777 | 5,228 | 3,120 | 29,255 |
| 3,484 | 131 | 20,784 | 5,247 | 3,129 | 29,291 |
| 3,485 | 133 | 20,835 | 5,278 | 3,107 | 29,353 |
| 3,486 | 132 | 20,330 | 5,142 | 3,008 | 28,612 |
| 3,487 | 133 | 20,337 | 5,170 | 3,004 | 28,644 |
| 3,488 | 126 | 20,293 | 5,180 | 2,993 | 28,592 |
| 3,489 | 126 | 20,097 | 5,138 | 2,967 | 28,328 |
| 3,490 | 126 | 19,967 | 5,094 | 2,936 | 28,123 |
| 3,491 | 128 | 19,715 | 5,082 | 2,921 | 27,846 |
| 3,492 | 128 | 19,552 | 5,083 | 2,908 | 27,671 |
| 3,493 | 130 | 19,692 | 5,136 | 2,935 | 27,893 |
| 3,494 | 130 | 19,480 | 5,108 | 2,932 | 27,650 |
| 3,495 | 124 | 19,368 | 5,072 | 2,923 | 27,487 |
| 3,496 | 125 | 19,390 | 5,093 | 2,922 | 27,530 |
| 3,497 | 120 | 19,173 | 5,103 | 2,910 | 27,306 |
| 3,498 | 119 | 19,286 | 5,182 | 2,949 | 27,536 |
| 3,499 | 112 | 19,030 | 5,158 | 2,913 | 27,213 |
| 3,500 | 111 | 18,894 | 5,174 | 2,926 | 27,105 |
| 3,501 | 111 | 18,904 | 5,204 | 2,928 | 27,147 |
| 3,502 | 109 | 18,968 | 5,260 | 2,967 | 27,304 |
| 3,503 | 109 | 18,716 | 5,220 | 2,935 | 26,980 |
| 3,504 | 106 | 18,732 | 5,222 | 2,929 | 26,989 |
| 3,505 | 111 | 18,589 | 5,210 | 2,911 | 26,821 |
| 3,506 | 108 | 18,456 | 5,223 | 2,899 | 26,686 |
| 3,507 | 111 | 19,032 | 5,362 | 3,034 | 27,539 |
| 3,508 | 105 | 19,108 | 5,415 | 3,048 | 27,676 |
| 3,509 | 106 | 19,186 | 5,422 | 3,036 | 27,750 |
| 3,510 | 106 | 19,184 | 5,464 | 3,016 | 27,770 |
| 3,511 | 100 | 19,303 | 5,499 | 3,072 | 27,974 |

|       |     |        |       |       |        |
|-------|-----|--------|-------|-------|--------|
| 3,512 | 97  | 19,150 | 5,495 | 3,067 | 27,809 |
| 3,513 | 99  | 19,310 | 5,554 | 3,077 | 28,040 |
| 3,514 | 103 | 19,347 | 5,599 | 3,083 | 28,132 |
| 3,515 | 101 | 19,202 | 5,548 | 3,064 | 27,915 |
| 3,516 | 104 | 19,282 | 5,583 | 3,082 | 28,051 |
| 3,517 | 105 | 19,482 | 5,661 | 3,126 | 28,374 |
| 3,518 | 107 | 19,587 | 5,701 | 3,134 | 28,529 |
| 3,519 | 108 | 19,589 | 5,758 | 3,158 | 28,613 |
| 3,520 | 109 | 19,153 | 5,654 | 3,101 | 28,017 |
| 3,521 | 110 | 19,439 | 5,730 | 3,119 | 28,398 |
| 3,522 | 107 | 19,435 | 5,735 | 3,120 | 28,397 |
| 3,523 | 107 | 19,691 | 5,833 | 3,179 | 28,810 |
| 3,524 | 105 | 19,478 | 5,797 | 3,152 | 28,532 |
| 3,525 | 104 | 19,423 | 5,792 | 3,145 | 28,464 |
| 3,526 | 104 | 19,514 | 5,804 | 3,147 | 28,569 |
| 3,527 | 104 | 19,619 | 5,863 | 3,182 | 28,768 |
| 3,528 | 103 | 19,597 | 5,848 | 3,163 | 28,711 |
| 3,529 | 99  | 19,231 | 5,805 | 3,137 | 28,272 |
| 3,530 | 101 | 19,336 | 5,911 | 3,221 | 28,569 |
| 3,531 | 97  | 19,062 | 5,848 | 3,188 | 28,195 |
| 3,532 | 99  | 19,198 | 5,894 | 3,229 | 28,420 |
| 3,533 | 100 | 19,241 | 5,903 | 3,250 | 28,494 |
| 3,534 | 100 | 18,974 | 5,837 | 3,226 | 28,137 |
| 3,535 | 98  | 18,975 | 5,824 | 3,205 | 28,102 |
| 3,536 | 102 | 19,168 | 5,897 | 3,246 | 28,413 |
| 3,537 | 103 | 19,234 | 5,924 | 3,275 | 28,536 |
| 3,538 | 102 | 18,983 | 5,871 | 3,258 | 28,214 |
| 3,539 | 101 | 18,757 | 5,838 | 3,243 | 27,939 |
| 3,540 | 103 | 19,119 | 6,016 | 3,345 | 28,583 |
| 3,541 | 103 | 19,025 | 5,987 | 3,340 | 28,455 |
| 3,542 | 105 | 18,992 | 5,998 | 3,322 | 28,417 |
| 3,543 | 105 | 18,965 | 5,985 | 3,325 | 28,380 |

|       |     |        |       |       |        |
|-------|-----|--------|-------|-------|--------|
| 3,544 | 108 | 18,946 | 6,010 | 3,317 | 28,381 |
| 3,545 | 107 | 18,969 | 6,022 | 3,301 | 28,399 |
| 3,546 | 104 | 19,094 | 6,026 | 3,306 | 28,530 |
| 3,547 | 102 | 19,053 | 5,966 | 3,289 | 28,410 |
| 3,548 | 105 | 19,334 | 6,028 | 3,345 | 28,812 |
| 3,549 | 108 | 19,331 | 6,008 | 3,342 | 28,789 |
| 3,550 | 114 | 18,888 | 5,801 | 3,244 | 28,047 |
| 3,551 | 115 | 19,013 | 5,829 | 3,265 | 28,222 |
| 3,552 | 119 | 19,212 | 5,875 | 3,320 | 28,526 |
| 3,553 | 121 | 19,417 | 5,924 | 3,348 | 28,810 |
| 3,554 | 111 | 19,360 | 5,892 | 3,329 | 28,692 |
| 3,555 | 105 | 19,167 | 5,814 | 3,289 | 28,375 |
| 3,556 | 106 | 19,270 | 5,843 | 3,287 | 28,506 |
| 3,557 | 105 | 18,963 | 5,737 | 3,241 | 28,046 |
| 3,558 | 109 | 19,092 | 5,815 | 3,288 | 28,304 |
| 3,559 | 112 | 19,038 | 5,805 | 3,288 | 28,243 |
| 3,560 | 116 | 18,801 | 5,699 | 3,264 | 27,880 |
| 3,561 | 116 | 18,806 | 5,712 | 3,267 | 27,901 |
| 3,562 | 116 | 18,834 | 5,726 | 3,261 | 27,937 |
| 3,563 | 119 | 18,673 | 5,627 | 3,206 | 27,625 |
| 3,564 | 118 | 18,778 | 5,664 | 3,248 | 27,808 |
| 3,565 | 114 | 18,986 | 5,708 | 3,286 | 28,094 |
| 3,566 | 113 | 18,776 | 5,639 | 3,227 | 27,755 |
| 3,567 | 113 | 18,982 | 5,682 | 3,261 | 28,038 |
| 3,568 | 113 | 19,149 | 5,698 | 3,256 | 28,216 |
| 3,569 | 114 | 19,113 | 5,672 | 3,270 | 28,169 |
| 3,570 | 113 | 18,998 | 5,639 | 3,257 | 28,007 |
| 3,571 | 111 | 18,998 | 5,637 | 3,283 | 28,029 |
| 3,572 | 113 | 18,878 | 5,630 | 3,291 | 27,912 |
| 3,573 | 113 | 18,789 | 5,618 | 3,291 | 27,811 |
| 3,574 | 110 | 18,595 | 5,548 | 3,267 | 27,520 |
| 3,575 | 110 | 18,728 | 5,597 | 3,268 | 27,703 |



|       |     |        |       |       |        |
|-------|-----|--------|-------|-------|--------|
| 3,576 | 111 | 18,691 | 5,574 | 3,267 | 27,643 |
| 3,577 | 110 | 18,652 | 5,583 | 3,261 | 27,606 |
| 3,578 | 110 | 18,616 | 5,573 | 3,243 | 27,542 |
| 3,579 | 111 | 18,872 | 5,620 | 3,296 | 27,899 |
| 3,580 | 111 | 18,993 | 5,608 | 3,281 | 27,993 |
| 3,581 | 113 | 19,049 | 5,570 | 3,245 | 27,977 |
| 3,582 | 113 | 19,035 | 5,581 | 3,245 | 27,974 |
| 3,583 | 111 | 19,323 | 5,666 | 3,283 | 28,383 |
| 3,584 | 111 | 19,396 | 5,669 | 3,269 | 28,445 |
| 3,585 | 104 | 19,253 | 5,627 | 3,245 | 28,229 |
| 3,586 | 108 | 19,504 | 5,698 | 3,263 | 28,573 |
| 3,587 | 110 | 19,597 | 5,726 | 3,293 | 28,726 |
| 3,588 | 112 | 19,537 | 5,710 | 3,271 | 28,630 |
| 3,589 | 110 | 19,567 | 5,669 | 3,260 | 28,606 |
| 3,590 | 113 | 19,490 | 5,624 | 3,237 | 28,464 |
| 3,591 | 115 | 19,687 | 5,595 | 3,216 | 28,613 |
| 3,592 | 115 | 19,740 | 5,603 | 3,217 | 28,675 |
| 3,593 | 113 | 19,979 | 5,631 | 3,216 | 28,939 |
| 3,594 | 113 | 19,968 | 5,628 | 3,212 | 28,921 |
| 3,595 | 112 | 20,012 | 5,623 | 3,238 | 28,985 |
| 3,596 | 116 | 19,715 | 5,557 | 3,198 | 28,586 |
| 3,597 | 118 | 19,704 | 5,559 | 3,210 | 28,591 |
| 3,598 | 121 | 19,724 | 5,576 | 3,210 | 28,631 |
| 3,599 | 127 | 19,686 | 5,567 | 3,183 | 28,563 |
| 3,600 | 122 | 19,430 | 5,544 | 3,157 | 28,253 |
| 3,601 | 122 | 19,409 | 5,542 | 3,177 | 28,250 |
| 3,602 | 122 | 19,164 | 5,513 | 3,162 | 27,961 |
| 3,603 | 120 | 19,431 | 5,641 | 3,219 | 28,411 |
| 3,604 | 122 | 19,502 | 5,649 | 3,220 | 28,493 |
| 3,605 | 121 | 19,313 | 5,628 | 3,203 | 28,265 |
| 3,606 | 120 | 19,262 | 5,663 | 3,213 | 28,258 |
| 3,607 | 124 | 19,325 | 5,683 | 3,199 | 28,331 |

|       |     |        |       |       |        |
|-------|-----|--------|-------|-------|--------|
| 3,608 | 121 | 19,364 | 5,673 | 3,195 | 28,353 |
| 3,609 | 124 | 19,478 | 5,691 | 3,220 | 28,513 |
| 3,610 | 124 | 19,499 | 5,699 | 3,219 | 28,541 |
| 3,611 | 117 | 19,532 | 5,721 | 3,223 | 28,593 |
| 3,612 | 118 | 19,514 | 5,754 | 3,237 | 28,623 |
| 3,613 | 116 | 19,659 | 5,796 | 3,241 | 28,812 |
| 3,614 | 115 | 19,421 | 5,747 | 3,220 | 28,503 |
| 3,615 | 115 | 19,160 | 5,709 | 3,185 | 28,169 |
| 3,616 | 120 | 19,055 | 5,718 | 3,161 | 28,054 |
| 3,617 | 120 | 18,739 | 5,676 | 3,145 | 27,680 |
| 3,618 | 126 | 19,381 | 5,840 | 3,206 | 28,553 |
| 3,619 | 126 | 19,374 | 5,830 | 3,208 | 28,538 |
| 3,620 | 127 | 19,341 | 5,817 | 3,194 | 28,479 |
| 3,621 | 126 | 19,316 | 5,814 | 3,183 | 28,439 |
| 3,622 | 131 | 19,340 | 5,814 | 3,166 | 28,451 |
| 3,623 | 129 | 19,405 | 5,806 | 3,164 | 28,504 |
| 3,624 | 131 | 19,453 | 5,804 | 3,151 | 28,539 |
| 3,625 | 136 | 19,442 | 5,733 | 3,137 | 28,448 |
| 3,626 | 134 | 19,403 | 5,710 | 3,147 | 28,394 |
| 3,627 | 133 | 19,409 | 5,696 | 3,148 | 28,386 |
| 3,628 | 134 | 19,363 | 5,666 | 3,142 | 28,305 |
| 3,629 | 135 | 19,219 | 5,632 | 3,127 | 28,113 |
| 3,630 | 135 | 19,447 | 5,696 | 3,142 | 28,420 |
| 3,631 | 134 | 19,200 | 5,623 | 3,099 | 28,056 |
| 3,632 | 149 | 19,331 | 5,653 | 3,126 | 28,259 |
| 3,633 | 149 | 19,171 | 5,600 | 3,104 | 28,024 |
| 3,634 | 158 | 19,719 | 5,713 | 3,164 | 28,754 |
| 3,635 | 159 | 19,849 | 5,740 | 3,191 | 28,939 |
| 3,636 | 159 | 19,872 | 5,704 | 3,187 | 28,922 |
| 3,637 | 153 | 19,672 | 5,623 | 3,163 | 28,611 |
| 3,638 | 150 | 19,608 | 5,593 | 3,149 | 28,500 |
| 3,639 | 149 | 19,531 | 5,581 | 3,157 | 28,418 |

|       |     |        |       |       |        |
|-------|-----|--------|-------|-------|--------|
| 3,640 | 146 | 19,443 | 5,570 | 3,148 | 28,307 |
| 3,641 | 145 | 19,443 | 5,577 | 3,130 | 28,295 |
| 3,642 | 142 | 19,518 | 5,600 | 3,145 | 28,405 |
| 3,643 | 140 | 19,378 | 5,592 | 3,139 | 28,249 |
| 3,644 | 140 | 19,335 | 5,574 | 3,166 | 28,215 |
| 3,645 | 139 | 19,349 | 5,565 | 3,162 | 28,215 |
| 3,646 | 139 | 19,510 | 5,592 | 3,158 | 28,399 |
| 3,647 | 141 | 19,789 | 5,648 | 3,195 | 28,773 |
| 3,648 | 138 | 19,607 | 5,607 | 3,156 | 28,508 |
| 3,649 | 137 | 19,370 | 5,554 | 3,124 | 28,185 |
| 3,650 | 133 | 19,681 | 5,631 | 3,198 | 28,643 |
| 3,651 | 132 | 19,541 | 5,587 | 3,162 | 28,422 |
| 3,652 | 131 | 19,626 | 5,584 | 3,154 | 28,495 |
| 3,653 | 134 | 19,750 | 5,637 | 3,178 | 28,699 |
| 3,654 | 131 | 19,812 | 5,645 | 3,198 | 28,786 |
| 3,655 | 137 | 19,664 | 5,600 | 3,161 | 28,562 |
| 3,656 | 137 | 19,722 | 5,599 | 3,168 | 28,626 |
| 3,657 | 133 | 19,610 | 5,551 | 3,157 | 28,451 |
| 3,658 | 133 | 19,711 | 5,550 | 3,170 | 28,564 |
| 3,659 | 132 | 19,544 | 5,504 | 3,142 | 28,322 |
| 3,660 | 129 | 19,304 | 5,453 | 3,114 | 28,000 |
| 3,661 | 137 | 19,587 | 5,546 | 3,151 | 28,421 |
| 3,662 | 143 | 19,396 | 5,473 | 3,103 | 28,115 |
| 3,663 | 142 | 19,413 | 5,481 | 3,100 | 28,136 |
| 3,664 | 143 | 19,443 | 5,475 | 3,130 | 28,191 |
| 3,665 | 135 | 19,259 | 5,403 | 3,089 | 27,886 |
| 3,666 | 136 | 19,296 | 5,405 | 3,119 | 27,956 |
| 3,667 | 126 | 19,145 | 5,361 | 3,106 | 27,738 |
| 3,668 | 130 | 19,060 | 5,328 | 3,077 | 27,595 |
| 3,669 | 133 | 18,943 | 5,284 | 3,059 | 27,419 |
| 3,670 | 134 | 19,457 | 5,444 | 3,175 | 28,210 |
| 3,671 | 136 | 19,302 | 5,389 | 3,139 | 27,966 |

|       |     |        |       |       |        |
|-------|-----|--------|-------|-------|--------|
| 3,672 | 138 | 19,294 | 5,391 | 3,143 | 27,966 |
| 3,673 | 139 | 19,519 | 5,473 | 3,179 | 28,310 |
| 3,674 | 144 | 19,376 | 5,420 | 3,166 | 28,106 |
| 3,675 | 142 | 19,329 | 5,407 | 3,163 | 28,041 |
| 3,676 | 137 | 19,163 | 5,419 | 3,153 | 27,872 |
| 3,677 | 139 | 19,045 | 5,423 | 3,147 | 27,754 |
| 3,678 | 140 | 18,759 | 5,329 | 3,099 | 27,327 |
| 3,679 | 138 | 18,546 | 5,285 | 3,061 | 27,030 |
| 3,680 | 136 | 18,868 | 5,415 | 3,128 | 27,547 |
| 3,681 | 132 | 18,644 | 5,429 | 3,143 | 27,348 |
| 3,682 | 136 | 18,308 | 5,373 | 3,126 | 26,943 |
| 3,683 | 124 | 18,048 | 5,343 | 3,100 | 26,615 |
| 3,684 | 125 | 18,625 | 5,527 | 3,209 | 27,486 |
| 3,685 | 124 | 18,601 | 5,529 | 3,231 | 27,485 |
| 3,686 | 124 | 18,419 | 5,536 | 3,202 | 27,281 |
| 3,687 | 128 | 18,382 | 5,561 | 3,206 | 27,277 |
| 3,688 | 128 | 18,163 | 5,517 | 3,182 | 26,990 |
| 3,689 | 130 | 18,419 | 5,598 | 3,220 | 27,367 |
| 3,690 | 131 | 18,390 | 5,596 | 3,223 | 27,340 |
| 3,691 | 131 | 18,284 | 5,550 | 3,194 | 27,159 |
| 3,692 | 135 | 18,565 | 5,604 | 3,258 | 27,562 |
| 3,693 | 133 | 18,417 | 5,555 | 3,225 | 27,330 |
| 3,694 | 133 | 18,431 | 5,543 | 3,217 | 27,324 |
| 3,695 | 131 | 18,539 | 5,589 | 3,208 | 27,467 |
| 3,696 | 132 | 18,602 | 5,656 | 3,248 | 27,638 |
| 3,697 | 130 | 18,684 | 5,694 | 3,288 | 27,796 |
| 3,698 | 130 | 18,430 | 5,582 | 3,240 | 27,382 |
| 3,699 | 129 | 18,709 | 5,610 | 3,283 | 27,731 |
| 3,700 | 129 | 18,936 | 5,665 | 3,305 | 28,035 |
| 3,701 | 130 | 18,547 | 5,588 | 3,244 | 27,509 |
| 3,702 | 130 | 18,775 | 5,637 | 3,261 | 27,803 |
| 3,703 | 125 | 18,986 | 5,659 | 3,289 | 28,059 |

|       |     |        |       |       |        |
|-------|-----|--------|-------|-------|--------|
| 3,704 | 128 | 19,011 | 5,652 | 3,286 | 28,077 |
| 3,705 | 127 | 19,091 | 5,663 | 3,289 | 28,170 |
| 3,706 | 121 | 18,939 | 5,607 | 3,265 | 27,932 |
| 3,707 | 123 | 19,086 | 5,636 | 3,274 | 28,119 |
| 3,708 | 121 | 19,263 | 5,718 | 3,313 | 28,415 |
| 3,709 | 119 | 19,141 | 5,691 | 3,301 | 28,252 |
| 3,710 | 120 | 18,908 | 5,588 | 3,270 | 27,886 |
| 3,711 | 122 | 19,125 | 5,634 | 3,291 | 28,172 |
| 3,712 | 119 | 19,375 | 5,688 | 3,326 | 28,508 |
| 3,713 | 115 | 19,160 | 5,645 | 3,312 | 28,232 |
| 3,714 | 116 | 19,176 | 5,672 | 3,342 | 28,306 |
| 3,715 | 124 | 19,086 | 5,676 | 3,329 | 28,215 |
| 3,716 | 124 | 19,261 | 5,679 | 3,354 | 28,418 |
| 3,717 | 129 | 19,245 | 5,718 | 3,346 | 28,438 |
| 3,718 | 139 | 19,123 | 5,664 | 3,311 | 28,237 |
| 3,719 | 136 | 18,911 | 5,590 | 3,288 | 27,925 |
| 3,720 | 140 | 18,701 | 5,545 | 3,242 | 27,628 |
| 3,721 | 139 | 18,399 | 5,504 | 3,204 | 27,246 |
| 3,722 | 134 | 18,659 | 5,579 | 3,272 | 27,644 |
| 3,723 | 136 | 18,903 | 5,637 | 3,281 | 27,957 |
| 3,724 | 138 | 18,868 | 5,604 | 3,291 | 27,901 |
| 3,725 | 133 | 18,777 | 5,568 | 3,263 | 27,741 |
| 3,726 | 132 | 18,806 | 5,559 | 3,266 | 27,763 |
| 3,727 | 133 | 18,852 | 5,560 | 3,280 | 27,825 |
| 3,728 | 135 | 18,826 | 5,548 | 3,266 | 27,775 |
| 3,729 | 137 | 19,117 | 5,631 | 3,306 | 28,191 |
| 3,730 | 138 | 18,935 | 5,534 | 3,294 | 27,901 |
| 3,731 | 139 | 19,191 | 5,607 | 3,298 | 28,235 |
| 3,732 | 136 | 19,123 | 5,470 | 3,212 | 27,941 |
| 3,733 | 137 | 19,287 | 5,507 | 3,220 | 28,151 |
| 3,734 | 139 | 19,469 | 5,540 | 3,235 | 28,383 |
| 3,735 | 137 | 19,451 | 5,470 | 3,215 | 28,273 |

|       |     |        |       |       |        |
|-------|-----|--------|-------|-------|--------|
| 3,736 | 137 | 19,201 | 5,355 | 3,138 | 27,831 |
| 3,737 | 137 | 19,164 | 5,327 | 3,134 | 27,762 |
| 3,738 | 133 | 19,299 | 5,347 | 3,133 | 27,912 |
| 3,739 | 134 | 19,276 | 5,332 | 3,130 | 27,872 |
| 3,740 | 133 | 18,991 | 5,270 | 3,082 | 27,476 |
| 3,741 | 133 | 18,965 | 5,272 | 3,064 | 27,434 |
| 3,742 | 139 | 19,086 | 5,309 | 3,071 | 27,605 |
| 3,743 | 136 | 18,854 | 5,254 | 3,020 | 27,264 |
| 3,744 | 139 | 18,941 | 5,290 | 3,050 | 27,420 |
| 3,745 | 139 | 19,009 | 5,289 | 3,050 | 27,487 |
| 3,746 | 142 | 19,056 | 5,243 | 3,020 | 27,461 |
| 3,747 | 143 | 18,762 | 5,165 | 2,982 | 27,052 |
| 3,748 | 142 | 18,986 | 5,200 | 2,989 | 27,317 |
| 3,749 | 137 | 18,626 | 5,119 | 2,955 | 26,837 |
| 3,750 | 138 | 18,481 | 5,144 | 2,952 | 26,715 |
| 3,751 | 136 | 18,393 | 5,164 | 2,941 | 26,634 |
| 3,752 | 137 | 18,349 | 5,157 | 2,941 | 26,584 |
| 3,753 | 140 | 18,109 | 5,077 | 2,923 | 26,249 |
| 3,754 | 141 | 17,887 | 5,048 | 2,888 | 25,964 |
| 3,755 | 134 | 18,161 | 5,154 | 2,948 | 26,397 |
| 3,756 | 137 | 18,264 | 5,176 | 2,950 | 26,527 |
| 3,757 | 136 | 18,203 | 5,159 | 2,936 | 26,434 |
| 3,758 | 143 | 18,230 | 5,124 | 2,926 | 26,423 |
| 3,759 | 150 | 18,243 | 5,121 | 2,934 | 26,448 |
| 3,760 | 149 | 18,019 | 5,092 | 2,880 | 26,140 |
| 3,761 | 149 | 18,247 | 5,183 | 2,941 | 26,520 |
| 3,762 | 147 | 18,263 | 5,198 | 2,947 | 26,555 |
| 3,763 | 146 | 18,258 | 5,236 | 2,956 | 26,596 |
| 3,764 | 145 | 17,973 | 5,142 | 2,877 | 26,137 |
| 3,765 | 153 | 18,219 | 5,175 | 2,898 | 26,445 |
| 3,766 | 144 | 18,308 | 5,186 | 2,902 | 26,540 |
| 3,767 | 146 | 18,407 | 5,237 | 2,912 | 26,702 |

|       |     |        |       |       |        |
|-------|-----|--------|-------|-------|--------|
| 3,768 | 142 | 18,337 | 5,171 | 2,878 | 26,528 |
| 3,769 | 133 | 18,410 | 5,174 | 2,894 | 26,611 |
| 3,770 | 131 | 18,462 | 5,171 | 2,890 | 26,654 |
| 3,771 | 129 | 18,468 | 5,169 | 2,892 | 26,658 |
| 3,772 | 130 | 18,704 | 5,222 | 2,906 | 26,962 |
| 3,773 | 127 | 18,175 | 5,078 | 2,813 | 26,193 |
| 3,774 | 126 | 18,198 | 5,081 | 2,806 | 26,211 |
| 3,775 | 123 | 18,241 | 5,092 | 2,807 | 26,263 |
| 3,776 | 123 | 18,201 | 5,075 | 2,803 | 26,202 |
| 3,777 | 122 | 18,242 | 5,101 | 2,805 | 26,270 |
| 3,778 | 121 | 18,421 | 5,136 | 2,836 | 26,514 |
| 3,779 | 118 | 19,372 | 5,377 | 2,977 | 27,844 |
| 3,780 | 117 | 19,431 | 5,380 | 2,979 | 27,907 |
| 3,781 | 115 | 19,307 | 5,317 | 2,933 | 27,672 |
| 3,782 | 116 | 19,367 | 5,313 | 2,929 | 27,725 |
| 3,783 | 115 | 19,423 | 5,343 | 2,954 | 27,835 |
| 3,784 | 113 | 19,159 | 5,294 | 2,944 | 27,510 |
| 3,785 | 113 | 19,090 | 5,274 | 2,944 | 27,421 |
| 3,786 | 115 | 19,193 | 5,352 | 2,984 | 27,644 |
| 3,787 | 117 | 19,400 | 5,434 | 3,050 | 28,001 |
| 3,788 | 117 | 19,199 | 5,415 | 3,052 | 27,783 |
| 3,789 | 119 | 19,385 | 5,496 | 3,088 | 28,088 |
| 3,790 | 119 | 19,426 | 5,502 | 3,093 | 28,140 |
| 3,791 | 118 | 19,371 | 5,456 | 3,081 | 28,026 |
| 3,792 | 118 | 19,398 | 5,473 | 3,085 | 28,074 |
| 3,793 | 117 | 19,525 | 5,520 | 3,122 | 28,284 |
| 3,794 | 117 | 19,307 | 5,510 | 3,114 | 28,048 |
| 3,795 | 119 | 19,524 | 5,574 | 3,149 | 28,366 |
| 3,796 | 120 | 19,335 | 5,569 | 3,151 | 28,175 |
| 3,797 | 122 | 19,361 | 5,564 | 3,162 | 28,209 |
| 3,798 | 119 | 19,370 | 5,581 | 3,167 | 28,237 |
| 3,799 | 120 | 19,238 | 5,577 | 3,168 | 28,103 |

|       |     |        |       |       |        |
|-------|-----|--------|-------|-------|--------|
| 3,800 | 122 | 19,127 | 5,525 | 3,124 | 27,898 |
| 3,801 | 121 | 18,989 | 5,491 | 3,103 | 27,704 |
| 3,802 | 124 | 19,152 | 5,513 | 3,114 | 27,903 |
| 3,803 | 119 | 19,214 | 5,513 | 3,098 | 27,944 |
| 3,804 | 118 | 19,226 | 5,487 | 3,059 | 27,890 |
| 3,805 | 118 | 19,234 | 5,500 | 3,064 | 27,916 |
| 3,806 | 121 | 19,334 | 5,524 | 3,106 | 28,085 |
| 3,807 | 121 | 19,319 | 5,539 | 3,115 | 28,094 |
| 3,808 | 124 | 19,245 | 5,524 | 3,134 | 28,027 |
| 3,809 | 117 | 19,106 | 5,499 | 3,116 | 27,838 |
| 3,810 | 106 | 19,217 | 5,556 | 3,130 | 28,009 |
| 3,811 | 109 | 19,295 | 5,536 | 3,129 | 28,069 |
| 3,812 | 113 | 19,166 | 5,480 | 3,103 | 27,862 |
| 3,813 | 116 | 19,287 | 5,477 | 3,126 | 28,006 |
| 3,814 | 113 | 19,300 | 5,510 | 3,134 | 28,057 |
| 3,815 | 113 | 19,305 | 5,535 | 3,152 | 28,105 |
| 3,816 | 112 | 19,510 | 5,573 | 3,181 | 28,376 |
| 3,817 | 112 | 19,426 | 5,568 | 3,190 | 28,296 |
| 3,818 | 114 | 19,040 | 5,431 | 3,151 | 27,736 |
| 3,819 | 114 | 19,229 | 5,470 | 3,159 | 27,972 |
| 3,820 | 111 | 19,237 | 5,472 | 3,147 | 27,967 |
| 3,821 | 112 | 19,083 | 5,439 | 3,136 | 27,770 |
| 3,822 | 112 | 19,011 | 5,421 | 3,129 | 27,673 |
| 3,823 | 117 | 19,243 | 5,526 | 3,209 | 28,095 |
| 3,824 | 121 | 19,190 | 5,513 | 3,197 | 28,021 |
| 3,825 | 117 | 18,906 | 5,433 | 3,141 | 27,597 |
| 3,826 | 126 | 19,104 | 5,487 | 3,166 | 27,883 |
| 3,827 | 126 | 19,240 | 5,515 | 3,177 | 28,058 |
| 3,828 | 123 | 19,021 | 5,448 | 3,142 | 27,734 |
| 3,829 | 122 | 18,679 | 5,370 | 3,091 | 27,262 |
| 3,830 | 122 | 18,458 | 5,315 | 3,058 | 26,953 |
| 3,831 | 131 | 18,536 | 5,386 | 3,100 | 27,153 |



|       |     |        |       |       |        |
|-------|-----|--------|-------|-------|--------|
| 3,832 | 129 | 18,337 | 5,357 | 3,090 | 26,913 |
| 3,833 | 131 | 18,748 | 5,527 | 3,204 | 27,610 |
| 3,834 | 132 | 18,641 | 5,543 | 3,222 | 27,538 |
| 3,835 | 133 | 18,447 | 5,510 | 3,194 | 27,284 |
| 3,836 | 132 | 18,469 | 5,491 | 3,174 | 27,266 |
| 3,837 | 131 | 18,881 | 5,560 | 3,207 | 27,779 |
| 3,838 | 127 | 18,760 | 5,515 | 3,164 | 27,566 |
| 3,839 | 128 | 18,714 | 5,450 | 3,119 | 27,411 |
| 3,840 | 133 | 18,774 | 5,452 | 3,127 | 27,486 |
| 3,841 | 137 | 18,808 | 5,453 | 3,142 | 27,540 |
| 3,842 | 137 | 18,822 | 5,425 | 3,136 | 27,520 |
| 3,843 | 137 | 18,883 | 5,430 | 3,132 | 27,582 |
| 3,844 | 132 | 19,023 | 5,463 | 3,151 | 27,769 |
| 3,845 | 138 | 19,191 | 5,418 | 3,131 | 27,878 |
| 3,846 | 134 | 19,048 | 5,373 | 3,089 | 27,644 |
| 3,847 | 136 | 19,057 | 5,364 | 3,083 | 27,640 |
| 3,848 | 130 | 19,079 | 5,374 | 3,092 | 27,675 |
| 3,849 | 131 | 19,367 | 5,392 | 3,107 | 27,997 |
| 3,850 | 125 | 19,205 | 5,315 | 3,078 | 27,723 |
| 3,851 | 125 | 19,413 | 5,310 | 3,083 | 27,931 |
| 3,852 | 125 | 19,375 | 5,310 | 3,089 | 27,899 |
| 3,853 | 124 | 19,630 | 5,370 | 3,159 | 28,283 |
| 3,854 | 125 | 19,733 | 5,399 | 3,210 | 28,467 |
| 3,855 | 122 | 19,666 | 5,370 | 3,208 | 28,366 |
| 3,856 | 122 | 19,894 | 5,389 | 3,220 | 28,625 |
| 3,857 | 117 | 19,794 | 5,364 | 3,190 | 28,465 |
| 3,858 | 115 | 19,675 | 5,314 | 3,159 | 28,263 |
| 3,859 | 117 | 19,736 | 5,287 | 3,121 | 28,261 |
| 3,860 | 118 | 19,846 | 5,294 | 3,138 | 28,396 |
| 3,861 | 115 | 19,901 | 5,290 | 3,141 | 28,447 |
| 3,862 | 114 | 20,232 | 5,369 | 3,200 | 28,915 |
| 3,863 | 110 | 20,028 | 5,303 | 3,170 | 28,611 |

|       |     |        |       |       |        |
|-------|-----|--------|-------|-------|--------|
| 3,864 | 109 | 20,045 | 5,295 | 3,180 | 28,629 |
| 3,865 | 113 | 20,295 | 5,342 | 3,214 | 28,964 |
| 3,866 | 118 | 20,239 | 5,321 | 3,193 | 28,871 |
| 3,867 | 116 | 20,311 | 5,319 | 3,193 | 28,939 |
| 3,868 | 120 | 20,663 | 5,401 | 3,237 | 29,421 |
| 3,869 | 120 | 20,584 | 5,439 | 3,243 | 29,386 |
| 3,870 | 119 | 20,536 | 5,421 | 3,237 | 29,313 |
| 3,871 | 116 | 20,624 | 5,424 | 3,251 | 29,415 |
| 3,872 | 117 | 20,589 | 5,355 | 3,209 | 29,270 |
| 3,873 | 119 | 20,957 | 5,405 | 3,259 | 29,740 |
| 3,874 | 115 | 20,895 | 5,434 | 3,262 | 29,706 |
| 3,875 | 115 | 20,842 | 5,458 | 3,252 | 29,667 |
| 3,876 | 113 | 20,627 | 5,466 | 3,254 | 29,460 |
| 3,877 | 104 | 20,584 | 5,480 | 3,269 | 29,437 |
| 3,878 | 106 | 20,748 | 5,525 | 3,327 | 29,706 |
| 3,879 | 105 | 21,012 | 5,553 | 3,356 | 30,026 |
| 3,880 | 103 | 21,316 | 5,582 | 3,377 | 30,378 |
| 3,881 | 104 | 21,395 | 5,588 | 3,396 | 30,483 |
| 3,882 | 101 | 21,544 | 5,632 | 3,406 | 30,683 |
| 3,883 | 103 | 21,757 | 5,676 | 3,433 | 30,969 |
| 3,884 | 102 | 21,770 | 5,660 | 3,422 | 30,954 |
| 3,885 | 103 | 21,793 | 5,677 | 3,424 | 30,997 |
| 3,886 | 99  | 21,797 | 5,693 | 3,440 | 31,029 |
| 3,887 | 101 | 22,013 | 5,735 | 3,494 | 31,343 |
| 3,888 | 99  | 21,798 | 5,683 | 3,461 | 31,041 |
| 3,889 | 100 | 21,936 | 5,698 | 3,485 | 31,219 |
| 3,890 | 97  | 21,932 | 5,702 | 3,470 | 31,201 |
| 3,891 | 89  | 21,767 | 5,664 | 3,447 | 30,967 |
| 3,892 | 99  | 22,141 | 5,738 | 3,470 | 31,448 |
| 3,893 | 102 | 22,227 | 5,737 | 3,477 | 31,543 |
| 3,894 | 101 | 22,153 | 5,715 | 3,474 | 31,443 |
| 3,895 | 100 | 22,062 | 5,680 | 3,456 | 31,298 |

|       |     |        |       |       |        |
|-------|-----|--------|-------|-------|--------|
| 3,896 | 100 | 22,263 | 5,775 | 3,498 | 31,636 |
| 3,897 | 103 | 22,246 | 5,796 | 3,511 | 31,656 |
| 3,898 | 104 | 22,203 | 5,762 | 3,489 | 31,558 |
| 3,899 | 105 | 22,437 | 5,830 | 3,530 | 31,902 |
| 3,900 | 105 | 22,287 | 5,822 | 3,540 | 31,754 |
| 3,901 | 110 | 22,756 | 5,929 | 3,587 | 32,382 |
| 3,902 | 109 | 22,700 | 5,917 | 3,577 | 32,303 |
| 3,903 | 110 | 22,810 | 5,973 | 3,600 | 32,493 |
| 3,904 | 112 | 22,816 | 5,975 | 3,609 | 32,512 |
| 3,905 | 116 | 22,747 | 5,964 | 3,571 | 32,398 |
| 3,906 | 124 | 22,490 | 5,930 | 3,550 | 32,094 |
| 3,907 | 125 | 22,199 | 5,856 | 3,527 | 31,707 |
| 3,908 | 125 | 22,428 | 5,946 | 3,595 | 32,094 |
| 3,909 | 125 | 22,525 | 5,987 | 3,607 | 32,244 |
| 3,910 | 123 | 22,595 | 5,988 | 3,631 | 32,337 |
| 3,911 | 126 | 22,524 | 6,005 | 3,622 | 32,277 |
| 3,912 | 130 | 22,201 | 5,963 | 3,589 | 31,883 |
| 3,913 | 132 | 22,348 | 6,006 | 3,604 | 32,090 |
| 3,914 | 130 | 22,305 | 6,007 | 3,592 | 32,034 |
| 3,915 | 144 | 22,051 | 5,957 | 3,564 | 31,716 |
| 3,916 | 141 | 21,770 | 5,893 | 3,540 | 31,344 |
| 3,917 | 135 | 21,660 | 5,882 | 3,573 | 31,250 |
| 3,918 | 134 | 21,727 | 5,906 | 3,599 | 31,366 |
| 3,919 | 131 | 21,677 | 5,867 | 3,586 | 31,261 |
| 3,920 | 124 | 21,458 | 5,811 | 3,566 | 30,959 |
| 3,921 | 126 | 21,391 | 5,793 | 3,561 | 30,871 |
| 3,922 | 124 | 21,318 | 5,815 | 3,540 | 30,797 |
| 3,923 | 129 | 21,448 | 5,852 | 3,563 | 30,992 |
| 3,924 | 130 | 21,449 | 5,869 | 3,564 | 31,012 |
| 3,925 | 128 | 21,480 | 5,805 | 3,542 | 30,955 |
| 3,926 | 131 | 21,719 | 5,819 | 3,541 | 31,210 |
| 3,927 | 131 | 21,640 | 5,825 | 3,537 | 31,133 |

|       |     |        |       |       |        |
|-------|-----|--------|-------|-------|--------|
| 3,928 | 136 | 21,756 | 5,844 | 3,512 | 31,248 |
| 3,929 | 144 | 21,999 | 5,906 | 3,552 | 31,601 |
| 3,930 | 143 | 21,819 | 5,907 | 3,526 | 31,395 |
| 3,931 | 145 | 21,645 | 5,894 | 3,508 | 31,192 |
| 3,932 | 144 | 21,391 | 5,858 | 3,463 | 30,856 |
| 3,933 | 144 | 21,521 | 5,831 | 3,493 | 30,989 |
| 3,934 | 146 | 21,278 | 5,807 | 3,460 | 30,691 |
| 3,935 | 149 | 21,259 | 5,741 | 3,420 | 30,569 |
| 3,936 | 150 | 21,331 | 5,749 | 3,418 | 30,648 |
| 3,937 | 151 | 21,355 | 5,764 | 3,417 | 30,687 |
| 3,938 | 158 | 21,317 | 5,771 | 3,395 | 30,641 |
| 3,939 | 158 | 21,352 | 5,797 | 3,400 | 30,707 |
| 3,940 | 159 | 21,285 | 5,794 | 3,393 | 30,631 |
| 3,941 | 158 | 21,203 | 5,804 | 3,415 | 30,580 |
| 3,942 | 160 | 21,336 | 5,850 | 3,440 | 30,786 |
| 3,943 | 161 | 21,194 | 5,822 | 3,432 | 30,609 |
| 3,944 | 158 | 21,001 | 5,786 | 3,418 | 30,363 |
| 3,945 | 158 | 21,414 | 5,894 | 3,469 | 30,935 |
| 3,946 | 154 | 21,223 | 5,866 | 3,476 | 30,719 |
| 3,947 | 151 | 20,994 | 5,806 | 3,445 | 30,396 |
| 3,948 | 151 | 20,959 | 5,804 | 3,452 | 30,366 |
| 3,949 | 150 | 20,726 | 5,757 | 3,425 | 30,058 |
| 3,950 | 153 | 20,568 | 5,762 | 3,415 | 29,898 |
| 3,951 | 152 | 21,279 | 5,957 | 3,541 | 30,929 |
| 3,952 | 159 | 21,259 | 5,977 | 3,544 | 30,939 |
| 3,953 | 158 | 21,060 | 5,870 | 3,476 | 30,564 |
| 3,954 | 167 | 21,239 | 5,911 | 3,513 | 30,830 |
| 3,955 | 165 | 21,261 | 5,923 | 3,516 | 30,865 |
| 3,956 | 153 | 21,208 | 5,920 | 3,531 | 30,812 |
| 3,957 | 157 | 21,302 | 5,979 | 3,570 | 31,008 |
| 3,958 | 157 | 21,370 | 5,999 | 3,589 | 31,115 |
| 3,959 | 165 | 21,316 | 5,954 | 3,567 | 31,002 |

|       |     |        |       |       |        |
|-------|-----|--------|-------|-------|--------|
| 3,960 | 165 | 21,269 | 5,964 | 3,558 | 30,956 |
| 3,961 | 167 | 21,660 | 6,110 | 3,626 | 31,563 |
| 3,962 | 167 | 21,703 | 6,138 | 3,624 | 31,632 |
| 3,963 | 164 | 21,701 | 6,104 | 3,610 | 31,579 |
| 3,964 | 172 | 21,946 | 6,149 | 3,641 | 31,908 |
| 3,965 | 160 | 21,766 | 6,100 | 3,608 | 31,634 |
| 3,966 | 162 | 21,852 | 6,140 | 3,612 | 31,766 |
| 3,967 | 162 | 22,089 | 6,167 | 3,593 | 32,011 |
| 3,968 | 163 | 22,296 | 6,236 | 3,618 | 32,313 |
| 3,969 | 162 | 22,106 | 6,178 | 3,585 | 32,031 |
| 3,970 | 164 | 22,304 | 6,256 | 3,614 | 32,338 |
| 3,971 | 164 | 21,812 | 6,076 | 3,494 | 31,546 |
| 3,972 | 165 | 21,986 | 6,131 | 3,529 | 31,811 |
| 3,973 | 160 | 22,058 | 6,135 | 3,529 | 31,882 |
| 3,974 | 159 | 21,966 | 6,145 | 3,530 | 31,800 |
| 3,975 | 156 | 21,721 | 6,087 | 3,485 | 31,449 |
| 3,976 | 154 | 21,531 | 6,027 | 3,461 | 31,173 |
| 3,977 | 156 | 21,645 | 6,028 | 3,512 | 31,341 |
| 3,978 | 156 | 21,916 | 6,085 | 3,543 | 31,700 |
| 3,979 | 152 | 22,062 | 6,122 | 3,582 | 31,918 |
| 3,980 | 152 | 22,186 | 6,183 | 3,614 | 32,135 |
| 3,981 | 150 | 22,126 | 6,184 | 3,633 | 32,093 |
| 3,982 | 147 | 21,812 | 6,086 | 3,597 | 31,642 |
| 3,983 | 147 | 21,824 | 6,076 | 3,600 | 31,647 |
| 3,984 | 148 | 22,064 | 6,185 | 3,640 | 32,037 |
| 3,985 | 144 | 21,934 | 6,102 | 3,605 | 31,785 |
| 3,986 | 140 | 22,094 | 6,191 | 3,640 | 32,065 |
| 3,987 | 136 | 22,059 | 6,193 | 3,635 | 32,023 |
| 3,988 | 130 | 21,469 | 6,041 | 3,569 | 31,209 |
| 3,989 | 133 | 21,604 | 6,070 | 3,593 | 31,400 |
| 3,990 | 131 | 21,565 | 6,073 | 3,618 | 31,387 |
| 3,991 | 132 | 21,708 | 6,131 | 3,662 | 31,633 |

|       |     |        |       |       |        |
|-------|-----|--------|-------|-------|--------|
| 3,992 | 130 | 21,543 | 6,093 | 3,627 | 31,393 |
| 3,993 | 126 | 21,074 | 5,999 | 3,577 | 30,776 |
| 3,994 | 122 | 21,304 | 6,114 | 3,638 | 31,178 |
| 3,995 | 121 | 21,154 | 6,082 | 3,605 | 30,962 |
| 3,996 | 121 | 21,088 | 6,084 | 3,624 | 30,917 |
| 3,997 | 122 | 20,857 | 6,000 | 3,582 | 30,561 |
| 3,998 | 118 | 20,654 | 5,938 | 3,537 | 30,247 |
| 3,999 | 120 | 21,024 | 6,040 | 3,594 | 30,778 |
| 4,000 | 115 | 20,865 | 6,015 | 3,579 | 30,574 |
| 4,001 | 110 | 20,293 | 5,821 | 3,454 | 29,678 |
| 4,002 | 115 | 20,519 | 5,853 | 3,476 | 29,963 |
| 4,003 | 112 | 20,525 | 5,855 | 3,465 | 29,957 |
| 4,004 | 111 | 20,509 | 5,901 | 3,460 | 29,981 |
| 4,005 | 103 | 20,411 | 5,900 | 3,458 | 29,872 |
| 4,006 | 104 | 20,099 | 5,785 | 3,351 | 29,339 |
| 4,007 | 104 | 20,323 | 5,830 | 3,370 | 29,627 |
| 4,008 | 108 | 20,630 | 5,877 | 3,400 | 30,015 |
| 4,009 | 110 | 20,511 | 5,878 | 3,373 | 29,872 |
| 4,010 | 100 | 20,086 | 5,771 | 3,315 | 29,272 |
| 4,011 | 102 | 19,975 | 5,719 | 3,301 | 29,097 |
| 4,012 | 102 | 20,050 | 5,741 | 3,309 | 29,202 |
| 4,013 | 98  | 19,693 | 5,676 | 3,262 | 28,729 |
| 4,014 | 98  | 19,736 | 5,662 | 3,273 | 28,769 |
| 4,015 | 99  | 19,730 | 5,657 | 3,282 | 28,768 |
| 4,016 | 98  | 19,617 | 5,608 | 3,261 | 28,584 |
| 4,017 | 96  | 19,952 | 5,658 | 3,333 | 29,039 |
| 4,018 | 106 | 20,144 | 5,691 | 3,351 | 29,292 |
| 4,019 | 106 | 19,919 | 5,673 | 3,328 | 29,026 |
| 4,020 | 107 | 19,915 | 5,682 | 3,329 | 29,033 |
| 4,021 | 111 | 20,404 | 5,791 | 3,387 | 29,693 |
| 4,022 | 110 | 20,434 | 5,799 | 3,372 | 29,715 |
| 4,023 | 110 | 20,374 | 5,795 | 3,374 | 29,653 |

|       |     |        |       |       |        |
|-------|-----|--------|-------|-------|--------|
| 4,024 | 112 | 20,376 | 5,815 | 3,397 | 29,700 |
| 4,025 | 111 | 20,467 | 5,887 | 3,442 | 29,907 |
| 4,026 | 115 | 20,912 | 6,012 | 3,518 | 30,557 |
| 4,027 | 113 | 20,879 | 6,039 | 3,511 | 30,542 |
| 4,028 | 111 | 20,910 | 6,072 | 3,502 | 30,595 |
| 4,029 | 112 | 20,911 | 6,084 | 3,519 | 30,626 |
| 4,030 | 108 | 20,913 | 6,053 | 3,517 | 30,591 |
| 4,031 | 108 | 20,864 | 6,021 | 3,492 | 30,485 |
| 4,032 | 108 | 20,851 | 6,011 | 3,489 | 30,459 |
| 4,033 | 109 | 21,184 | 6,098 | 3,544 | 30,935 |
| 4,034 | 110 | 21,229 | 6,107 | 3,551 | 30,997 |
| 4,035 | 110 | 21,225 | 6,074 | 3,546 | 30,955 |
| 4,036 | 112 | 21,047 | 6,011 | 3,517 | 30,687 |
| 4,037 | 111 | 21,249 | 6,044 | 3,561 | 30,965 |
| 4,038 | 120 | 21,113 | 6,008 | 3,534 | 30,775 |
| 4,039 | 124 | 21,188 | 6,010 | 3,530 | 30,852 |
| 4,040 | 123 | 21,136 | 5,992 | 3,517 | 30,768 |
| 4,041 | 123 | 21,510 | 6,067 | 3,559 | 31,259 |
| 4,042 | 129 | 21,821 | 6,101 | 3,575 | 31,626 |
| 4,043 | 125 | 21,998 | 6,095 | 3,576 | 31,794 |
| 4,044 | 127 | 22,194 | 6,069 | 3,561 | 31,951 |
| 4,045 | 128 | 22,230 | 6,067 | 3,563 | 31,988 |
| 4,046 | 129 | 22,216 | 6,077 | 3,571 | 31,993 |
| 4,047 | 127 | 22,448 | 6,116 | 3,605 | 32,296 |
| 4,048 | 129 | 22,375 | 6,115 | 3,616 | 32,235 |
| 4,049 | 134 | 22,338 | 6,100 | 3,610 | 32,182 |
| 4,050 | 134 | 22,567 | 6,144 | 3,628 | 32,473 |
| 4,051 | 139 | 22,455 | 6,119 | 3,619 | 32,332 |
| 4,052 | 142 | 22,735 | 6,159 | 3,648 | 32,684 |
| 4,053 | 135 | 22,742 | 6,151 | 3,645 | 32,673 |
| 4,054 | 146 | 23,049 | 6,186 | 3,708 | 33,089 |
| 4,055 | 148 | 22,933 | 6,132 | 3,695 | 32,908 |

|       |     |        |       |       |        |
|-------|-----|--------|-------|-------|--------|
| 4,056 | 147 | 22,947 | 6,116 | 3,702 | 32,912 |
| 4,057 | 147 | 23,140 | 6,171 | 3,760 | 33,218 |
| 4,058 | 153 | 23,314 | 6,203 | 3,765 | 33,435 |
| 4,059 | 149 | 23,361 | 6,231 | 3,776 | 33,517 |
| 4,060 | 144 | 23,129 | 6,126 | 3,735 | 33,134 |
| 4,061 | 144 | 22,961 | 6,068 | 3,705 | 32,878 |
| 4,062 | 150 | 23,284 | 6,122 | 3,740 | 33,296 |
| 4,063 | 145 | 23,508 | 6,141 | 3,758 | 33,552 |
| 4,064 | 145 | 23,237 | 6,069 | 3,721 | 33,172 |
| 4,065 | 148 | 23,168 | 6,087 | 3,737 | 33,140 |
| 4,066 | 146 | 23,241 | 6,127 | 3,763 | 33,277 |
| 4,067 | 148 | 23,196 | 6,127 | 3,752 | 33,223 |
| 4,068 | 146 | 22,936 | 6,083 | 3,731 | 32,896 |
| 4,069 | 141 | 22,714 | 6,026 | 3,715 | 32,596 |
| 4,070 | 139 | 22,575 | 5,937 | 3,681 | 32,332 |
| 4,071 | 136 | 23,041 | 6,031 | 3,781 | 32,989 |
| 4,072 | 137 | 22,929 | 5,999 | 3,787 | 32,852 |
| 4,073 | 134 | 22,733 | 5,893 | 3,765 | 32,525 |
| 4,074 | 135 | 22,802 | 5,832 | 3,731 | 32,500 |
| 4,075 | 135 | 22,828 | 5,811 | 3,744 | 32,518 |
| 4,076 | 136 | 22,876 | 5,857 | 3,768 | 32,637 |
| 4,077 | 137 | 22,587 | 5,750 | 3,707 | 32,181 |
| 4,078 | 139 | 22,514 | 5,710 | 3,710 | 32,073 |
| 4,079 | 140 | 22,385 | 5,653 | 3,701 | 31,879 |
| 4,080 | 141 | 22,466 | 5,655 | 3,710 | 31,972 |
| 4,081 | 141 | 22,447 | 5,665 | 3,683 | 31,936 |
| 4,082 | 151 | 22,642 | 5,716 | 3,731 | 32,240 |
| 4,083 | 156 | 22,450 | 5,715 | 3,682 | 32,003 |
| 4,084 | 160 | 22,552 | 5,722 | 3,676 | 32,110 |
| 4,085 | 161 | 22,391 | 5,705 | 3,683 | 31,940 |
| 4,086 | 161 | 22,619 | 5,730 | 3,687 | 32,197 |
| 4,087 | 161 | 22,409 | 5,671 | 3,672 | 31,913 |



|       |     |        |       |       |        |
|-------|-----|--------|-------|-------|--------|
| 4,088 | 164 | 22,651 | 5,727 | 3,692 | 32,234 |
| 4,089 | 156 | 22,683 | 5,747 | 3,703 | 32,289 |
| 4,090 | 160 | 22,550 | 5,699 | 3,675 | 32,084 |
| 4,091 | 157 | 22,360 | 5,664 | 3,644 | 31,825 |
| 4,092 | 159 | 22,869 | 5,822 | 3,740 | 32,590 |
| 4,093 | 158 | 23,356 | 5,969 | 3,844 | 33,327 |
| 4,094 | 161 | 23,127 | 5,951 | 3,826 | 33,065 |
| 4,095 | 166 | 23,556 | 6,060 | 3,882 | 33,664 |
| 4,096 | 163 | 23,655 | 6,084 | 3,913 | 33,815 |
| 4,097 | 162 | 23,704 | 6,116 | 3,916 | 33,898 |
| 4,098 | 158 | 23,742 | 6,138 | 3,924 | 33,962 |
| 4,099 | 157 | 23,767 | 6,140 | 3,922 | 33,986 |
| 4,100 | 155 | 23,330 | 6,091 | 3,878 | 33,454 |
| 4,101 | 156 | 23,498 | 6,123 | 3,907 | 33,684 |
| 4,102 | 153 | 23,597 | 6,123 | 3,937 | 33,810 |
| 4,103 | 145 | 23,207 | 6,064 | 3,880 | 33,296 |
| 4,104 | 147 | 23,454 | 6,104 | 3,898 | 33,603 |
| 4,105 | 147 | 23,685 | 6,176 | 3,927 | 33,935 |
| 4,106 | 161 | 24,001 | 6,262 | 3,969 | 34,393 |
| 4,107 | 165 | 24,030 | 6,256 | 3,946 | 34,397 |
| 4,108 | 166 | 24,125 | 6,353 | 4,001 | 34,645 |
| 4,109 | 160 | 24,170 | 6,385 | 4,041 | 34,756 |
| 4,110 | 158 | 23,745 | 6,290 | 4,001 | 34,194 |
| 4,111 | 160 | 23,407 | 6,254 | 3,972 | 33,793 |
| 4,112 | 158 | 23,298 | 6,230 | 3,941 | 33,627 |
| 4,113 | 152 | 24,123 | 6,475 | 4,103 | 34,853 |
| 4,114 | 154 | 24,217 | 6,543 | 4,133 | 35,047 |
| 4,115 | 151 | 24,398 | 6,545 | 4,170 | 35,264 |
| 4,116 | 145 | 24,212 | 6,498 | 4,138 | 34,993 |
| 4,117 | 149 | 24,450 | 6,605 | 4,195 | 35,399 |
| 4,118 | 157 | 24,393 | 6,568 | 4,194 | 35,312 |
| 4,119 | 159 | 24,610 | 6,574 | 4,183 | 35,526 |

|       |     |        |       |       |        |
|-------|-----|--------|-------|-------|--------|
| 4,120 | 155 | 24,439 | 6,531 | 4,153 | 35,278 |
| 4,121 | 157 | 24,449 | 6,571 | 4,146 | 35,323 |
| 4,122 | 157 | 24,679 | 6,656 | 4,201 | 35,693 |
| 4,123 | 154 | 24,692 | 6,680 | 4,214 | 35,740 |
| 4,124 | 150 | 24,203 | 6,620 | 4,137 | 35,110 |
| 4,125 | 156 | 24,197 | 6,608 | 4,134 | 35,095 |
| 4,126 | 156 | 24,160 | 6,599 | 4,122 | 35,037 |
| 4,127 | 152 | 24,145 | 6,539 | 4,107 | 34,943 |
| 4,128 | 148 | 24,265 | 6,618 | 4,140 | 35,171 |
| 4,129 | 140 | 24,054 | 6,586 | 4,100 | 34,880 |
| 4,130 | 142 | 23,902 | 6,537 | 4,056 | 34,637 |
| 4,131 | 143 | 24,143 | 6,576 | 4,097 | 34,959 |
| 4,132 | 141 | 24,359 | 6,670 | 4,128 | 35,298 |
| 4,133 | 129 | 23,643 | 6,481 | 4,035 | 34,288 |
| 4,134 | 129 | 23,863 | 6,508 | 4,070 | 34,570 |
| 4,135 | 132 | 23,885 | 6,517 | 4,087 | 34,621 |
| 4,136 | 131 | 24,032 | 6,557 | 4,094 | 34,814 |
| 4,137 | 129 | 24,226 | 6,576 | 4,115 | 35,046 |
| 4,138 | 127 | 24,317 | 6,615 | 4,114 | 35,173 |
| 4,139 | 124 | 24,471 | 6,633 | 4,126 | 35,354 |
| 4,140 | 117 | 24,367 | 6,557 | 4,111 | 35,152 |
| 4,141 | 117 | 24,435 | 6,581 | 4,115 | 35,248 |
| 4,142 | 120 | 24,635 | 6,661 | 4,171 | 35,587 |
| 4,143 | 121 | 24,709 | 6,646 | 4,152 | 35,628 |
| 4,144 | 125 | 24,390 | 6,559 | 4,105 | 35,179 |
| 4,145 | 123 | 23,968 | 6,484 | 4,062 | 34,637 |
| 4,146 | 117 | 24,129 | 6,603 | 4,103 | 34,952 |
| 4,147 | 125 | 23,832 | 6,580 | 4,061 | 34,598 |
| 4,148 | 129 | 23,797 | 6,521 | 4,041 | 34,488 |
| 4,149 | 136 | 24,032 | 6,518 | 4,037 | 34,723 |
| 4,150 | 134 | 24,133 | 6,483 | 4,044 | 34,794 |
| 4,151 | 136 | 24,219 | 6,510 | 4,043 | 34,908 |

|       |     |        |       |       |        |
|-------|-----|--------|-------|-------|--------|
| 4,152 | 136 | 24,337 | 6,509 | 4,047 | 35,029 |
| 4,153 | 136 | 24,033 | 6,453 | 3,974 | 34,596 |
| 4,154 | 136 | 24,092 | 6,460 | 3,991 | 34,679 |
| 4,155 | 137 | 23,804 | 6,431 | 3,961 | 34,333 |
| 4,156 | 134 | 23,667 | 6,386 | 3,935 | 34,122 |
| 4,157 | 133 | 24,502 | 6,562 | 4,062 | 35,259 |
| 4,158 | 125 | 24,477 | 6,442 | 4,030 | 35,074 |
| 4,159 | 131 | 24,864 | 6,520 | 4,079 | 35,594 |
| 4,160 | 136 | 24,733 | 6,479 | 4,023 | 35,371 |
| 4,161 | 136 | 24,966 | 6,461 | 4,022 | 35,585 |
| 4,162 | 138 | 24,906 | 6,458 | 4,026 | 35,528 |
| 4,163 | 162 | 24,963 | 6,501 | 4,075 | 35,701 |
| 4,164 | 171 | 25,287 | 6,565 | 4,119 | 36,142 |
| 4,165 | 171 | 25,330 | 6,565 | 4,123 | 36,189 |
| 4,166 | 174 | 25,496 | 6,631 | 4,109 | 36,410 |
| 4,167 | 173 | 25,496 | 6,588 | 4,070 | 36,327 |
| 4,168 | 174 | 25,795 | 6,614 | 4,103 | 36,686 |
| 4,169 | 165 | 25,471 | 6,550 | 4,059 | 36,245 |
| 4,170 | 164 | 25,379 | 6,522 | 4,050 | 36,115 |
| 4,171 | 162 | 25,331 | 6,505 | 4,050 | 36,048 |
| 4,172 | 161 | 25,360 | 6,495 | 4,088 | 36,104 |
| 4,173 | 163 | 25,390 | 6,498 | 4,083 | 36,134 |
| 4,174 | 161 | 25,049 | 6,403 | 4,016 | 35,629 |
| 4,175 | 161 | 25,358 | 6,445 | 4,027 | 35,991 |
| 4,176 | 159 | 25,225 | 6,455 | 4,027 | 35,866 |
| 4,177 | 161 | 25,383 | 6,532 | 4,082 | 36,158 |
| 4,178 | 160 | 25,503 | 6,565 | 4,115 | 36,343 |
| 4,179 | 162 | 25,395 | 6,540 | 4,116 | 36,213 |
| 4,180 | 168 | 25,183 | 6,466 | 4,081 | 35,898 |
| 4,181 | 166 | 25,002 | 6,426 | 4,056 | 35,650 |
| 4,182 | 173 | 25,439 | 6,527 | 4,107 | 36,246 |
| 4,183 | 170 | 25,227 | 6,420 | 4,067 | 35,884 |

|       |     |        |       |       |        |
|-------|-----|--------|-------|-------|--------|
| 4,184 | 173 | 25,020 | 6,360 | 3,995 | 35,548 |
| 4,185 | 173 | 25,050 | 6,360 | 4,002 | 35,585 |
| 4,186 | 170 | 24,714 | 6,290 | 3,940 | 35,114 |
| 4,187 | 169 | 24,467 | 6,246 | 3,927 | 34,809 |
| 4,188 | 178 | 25,398 | 6,541 | 4,145 | 36,262 |
| 4,189 | 178 | 25,422 | 6,592 | 4,187 | 36,379 |
| 4,190 | 181 | 25,251 | 6,580 | 4,188 | 36,200 |
| 4,191 | 184 | 25,162 | 6,585 | 4,176 | 36,107 |
| 4,192 | 187 | 25,251 | 6,575 | 4,204 | 36,217 |
| 4,193 | 194 | 25,406 | 6,587 | 4,190 | 36,377 |
| 4,194 | 187 | 25,149 | 6,493 | 4,124 | 35,953 |
| 4,195 | 187 | 25,288 | 6,468 | 4,128 | 36,071 |
| 4,196 | 187 | 25,396 | 6,466 | 4,144 | 36,193 |
| 4,197 | 190 | 25,682 | 6,471 | 4,200 | 36,543 |
| 4,198 | 182 | 25,465 | 6,365 | 4,146 | 36,158 |
| 4,199 | 182 | 25,202 | 6,324 | 4,096 | 35,804 |
| 4,200 | 182 | 25,419 | 6,360 | 4,131 | 36,092 |
| 4,201 | 180 | 25,088 | 6,294 | 4,093 | 35,655 |
| 4,202 | 180 | 24,420 | 6,130 | 3,986 | 34,716 |
| 4,203 | 183 | 24,625 | 6,166 | 4,022 | 34,996 |
| 4,204 | 178 | 24,973 | 6,209 | 4,049 | 35,409 |
| 4,205 | 178 | 24,866 | 6,175 | 4,054 | 35,273 |
| 4,206 | 178 | 24,799 | 6,165 | 4,053 | 35,195 |
| 4,207 | 178 | 24,709 | 6,159 | 4,052 | 35,098 |
| 4,208 | 178 | 24,715 | 6,170 | 4,050 | 35,113 |
| 4,209 | 177 | 24,515 | 6,153 | 3,998 | 34,843 |
| 4,210 | 178 | 24,616 | 6,138 | 3,982 | 34,914 |
| 4,211 | 171 | 24,499 | 6,039 | 3,938 | 34,647 |
| 4,212 | 175 | 24,837 | 6,082 | 3,965 | 35,059 |
| 4,213 | 161 | 25,164 | 6,123 | 4,004 | 35,452 |
| 4,214 | 153 | 24,909 | 6,054 | 3,947 | 35,063 |
| 4,215 | 152 | 24,483 | 5,982 | 3,903 | 34,520 |

|       |     |        |       |       |        |
|-------|-----|--------|-------|-------|--------|
| 4,216 | 161 | 24,869 | 6,068 | 3,963 | 35,061 |
| 4,217 | 158 | 24,482 | 5,937 | 3,912 | 34,489 |
| 4,218 | 159 | 24,637 | 5,958 | 3,942 | 34,696 |
| 4,219 | 160 | 24,681 | 5,964 | 3,933 | 34,738 |
| 4,220 | 159 | 24,652 | 5,967 | 3,929 | 34,707 |
| 4,221 | 160 | 24,637 | 5,888 | 3,882 | 34,567 |
| 4,222 | 160 | 24,610 | 5,873 | 3,853 | 34,496 |
| 4,223 | 164 | 24,865 | 5,923 | 3,884 | 34,836 |
| 4,224 | 161 | 24,717 | 5,892 | 3,856 | 34,626 |
| 4,225 | 159 | 24,617 | 5,852 | 3,822 | 34,450 |
| 4,226 | 159 | 24,557 | 5,856 | 3,827 | 34,399 |
| 4,227 | 158 | 24,682 | 5,838 | 3,812 | 34,490 |
| 4,228 | 163 | 24,873 | 5,796 | 3,795 | 34,627 |
| 4,229 | 160 | 24,774 | 5,739 | 3,746 | 34,419 |
| 4,230 | 157 | 24,917 | 5,720 | 3,749 | 34,543 |
| 4,231 | 157 | 25,018 | 5,725 | 3,751 | 34,651 |
| 4,232 | 155 | 25,219 | 5,759 | 3,764 | 34,897 |
| 4,233 | 150 | 25,097 | 5,728 | 3,772 | 34,747 |
| 4,234 | 148 | 24,946 | 5,688 | 3,771 | 34,553 |
| 4,235 | 148 | 24,873 | 5,655 | 3,758 | 34,434 |
| 4,236 | 149 | 24,696 | 5,594 | 3,710 | 34,149 |
| 4,237 | 148 | 24,708 | 5,543 | 3,687 | 34,086 |
| 4,238 | 155 | 24,782 | 5,592 | 3,681 | 34,210 |
| 4,239 | 155 | 24,696 | 5,514 | 3,651 | 34,016 |
| 4,240 | 154 | 24,705 | 5,476 | 3,637 | 33,972 |
| 4,241 | 151 | 24,661 | 5,440 | 3,607 | 33,859 |
| 4,242 | 137 | 24,087 | 5,323 | 3,523 | 33,070 |
| 4,243 | 136 | 24,114 | 5,343 | 3,525 | 33,118 |
| 4,244 | 132 | 24,051 | 5,317 | 3,507 | 33,007 |
| 4,245 | 137 | 24,025 | 5,312 | 3,507 | 32,981 |
| 4,246 | 135 | 23,815 | 5,274 | 3,451 | 32,675 |
| 4,247 | 138 | 23,973 | 5,288 | 3,468 | 32,867 |

|       |     |        |       |       |        |
|-------|-----|--------|-------|-------|--------|
| 4,248 | 141 | 23,652 | 5,211 | 3,408 | 32,412 |
| 4,249 | 144 | 23,613 | 5,187 | 3,403 | 32,347 |
| 4,250 | 140 | 23,834 | 5,238 | 3,421 | 32,633 |
| 4,251 | 139 | 23,525 | 5,160 | 3,368 | 32,192 |
| 4,252 | 139 | 23,502 | 5,143 | 3,364 | 32,148 |
| 4,253 | 133 | 23,561 | 5,162 | 3,363 | 32,219 |
| 4,254 | 130 | 23,739 | 5,205 | 3,401 | 32,475 |
| 4,255 | 130 | 23,760 | 5,239 | 3,414 | 32,543 |
| 4,256 | 129 | 23,722 | 5,222 | 3,395 | 32,468 |
| 4,257 | 129 | 24,203 | 5,292 | 3,451 | 33,075 |
| 4,258 | 126 | 23,888 | 5,228 | 3,423 | 32,665 |
| 4,259 | 125 | 23,916 | 5,256 | 3,438 | 32,735 |
| 4,260 | 122 | 23,876 | 5,284 | 3,459 | 32,741 |
| 4,261 | 124 | 23,485 | 5,226 | 3,428 | 32,263 |
| 4,262 | 122 | 23,192 | 5,153 | 3,370 | 31,837 |
| 4,263 | 129 | 23,792 | 5,343 | 3,498 | 32,762 |
| 4,264 | 128 | 23,841 | 5,343 | 3,475 | 32,787 |
| 4,265 | 121 | 23,858 | 5,319 | 3,483 | 32,781 |
| 4,266 | 118 | 23,286 | 5,184 | 3,394 | 31,982 |
| 4,267 | 123 | 23,465 | 5,215 | 3,430 | 32,233 |
| 4,268 | 120 | 23,453 | 5,227 | 3,426 | 32,226 |
| 4,269 | 119 | 23,452 | 5,261 | 3,430 | 32,262 |
| 4,270 | 120 | 23,316 | 5,249 | 3,438 | 32,123 |
| 4,271 | 117 | 23,236 | 5,258 | 3,431 | 32,042 |
| 4,272 | 119 | 23,149 | 5,297 | 3,470 | 32,035 |
| 4,273 | 121 | 22,951 | 5,258 | 3,458 | 31,788 |
| 4,274 | 123 | 22,935 | 5,253 | 3,447 | 31,758 |
| 4,275 | 123 | 22,728 | 5,212 | 3,434 | 31,497 |
| 4,276 | 124 | 22,747 | 5,296 | 3,540 | 31,707 |
| 4,277 | 125 | 22,699 | 5,310 | 3,546 | 31,680 |
| 4,278 | 134 | 22,901 | 5,371 | 3,565 | 31,971 |
| 4,279 | 137 | 22,794 | 5,372 | 3,565 | 31,868 |

|       |     |        |       |       |        |
|-------|-----|--------|-------|-------|--------|
| 4,280 | 147 | 22,787 | 5,397 | 3,567 | 31,898 |
| 4,281 | 146 | 22,885 | 5,453 | 3,603 | 32,087 |
| 4,282 | 147 | 22,721 | 5,438 | 3,582 | 31,888 |
| 4,283 | 152 | 22,676 | 5,453 | 3,569 | 31,850 |
| 4,284 | 152 | 22,688 | 5,465 | 3,568 | 31,873 |
| 4,285 | 152 | 22,991 | 5,527 | 3,612 | 32,282 |
| 4,286 | 140 | 22,856 | 5,526 | 3,591 | 32,113 |
| 4,287 | 146 | 22,735 | 5,482 | 3,584 | 31,947 |
| 4,288 | 146 | 23,046 | 5,517 | 3,638 | 32,347 |
| 4,289 | 143 | 23,071 | 5,513 | 3,628 | 32,355 |
| 4,290 | 143 | 22,888 | 5,476 | 3,602 | 32,109 |
| 4,291 | 143 | 23,080 | 5,574 | 3,678 | 32,475 |
| 4,292 | 145 | 23,047 | 5,587 | 3,709 | 32,488 |
| 4,293 | 151 | 23,285 | 5,612 | 3,737 | 32,785 |
| 4,294 | 152 | 23,112 | 5,574 | 3,706 | 32,544 |
| 4,295 | 152 | 22,874 | 5,555 | 3,676 | 32,257 |
| 4,296 | 154 | 23,489 | 5,783 | 3,801 | 33,227 |
| 4,297 | 165 | 23,410 | 5,752 | 3,786 | 33,113 |
| 4,298 | 164 | 23,170 | 5,741 | 3,765 | 32,840 |
| 4,299 | 169 | 23,351 | 5,807 | 3,793 | 33,120 |
| 4,300 | 167 | 23,342 | 5,797 | 3,797 | 33,103 |
| 4,301 | 176 | 23,084 | 5,765 | 3,747 | 32,772 |
| 4,302 | 171 | 22,851 | 5,717 | 3,720 | 32,459 |
| 4,303 | 176 | 22,952 | 5,768 | 3,754 | 32,650 |
| 4,304 | 175 | 22,773 | 5,761 | 3,780 | 32,489 |
| 4,305 | 178 | 22,827 | 5,809 | 3,814 | 32,628 |
| 4,306 | 175 | 22,510 | 5,740 | 3,765 | 32,190 |
| 4,307 | 174 | 22,427 | 5,728 | 3,767 | 32,096 |
| 4,308 | 183 | 22,472 | 5,813 | 3,791 | 32,259 |
| 4,309 | 187 | 22,356 | 5,806 | 3,793 | 32,142 |
| 4,310 | 185 | 22,178 | 5,751 | 3,751 | 31,865 |
| 4,311 | 193 | 22,305 | 5,762 | 3,742 | 32,002 |

|       |     |        |       |       |        |
|-------|-----|--------|-------|-------|--------|
| 4,312 | 205 | 22,371 | 5,754 | 3,741 | 32,071 |
| 4,313 | 204 | 22,362 | 5,730 | 3,734 | 32,030 |
| 4,314 | 201 | 22,752 | 5,870 | 3,798 | 32,621 |
| 4,315 | 209 | 22,797 | 5,930 | 3,818 | 32,754 |
| 4,316 | 206 | 22,814 | 5,953 | 3,798 | 32,771 |
| 4,317 | 204 | 22,919 | 5,955 | 3,812 | 32,890 |
| 4,318 | 216 | 23,397 | 6,071 | 3,860 | 33,544 |
| 4,319 | 219 | 23,545 | 6,102 | 3,876 | 33,742 |
| 4,320 | 218 | 23,666 | 6,150 | 3,899 | 33,933 |
| 4,321 | 223 | 23,856 | 6,172 | 3,904 | 34,155 |
| 4,322 | 225 | 24,032 | 6,206 | 3,916 | 34,379 |
| 4,323 | 226 | 24,051 | 6,222 | 3,918 | 34,417 |
| 4,324 | 227 | 24,210 | 6,282 | 3,929 | 34,648 |
| 4,325 | 226 | 24,224 | 6,283 | 3,909 | 34,642 |
| 4,326 | 228 | 24,402 | 6,351 | 3,928 | 34,909 |
| 4,327 | 232 | 24,433 | 6,332 | 3,910 | 34,907 |
| 4,328 | 227 | 24,306 | 6,288 | 3,880 | 34,701 |
| 4,329 | 227 | 24,280 | 6,270 | 3,877 | 34,654 |
| 4,330 | 219 | 24,040 | 6,223 | 3,848 | 34,330 |
| 4,331 | 212 | 24,185 | 6,254 | 3,900 | 34,551 |
| 4,332 | 217 | 23,883 | 6,182 | 3,843 | 34,125 |
| 4,333 | 217 | 23,652 | 6,123 | 3,809 | 33,801 |
| 4,334 | 216 | 23,758 | 6,148 | 3,851 | 33,973 |
| 4,335 | 217 | 23,739 | 6,131 | 3,840 | 33,927 |
| 4,336 | 223 | 23,486 | 6,073 | 3,796 | 33,578 |
| 4,337 | 224 | 23,585 | 6,114 | 3,805 | 33,728 |
| 4,338 | 219 | 23,763 | 6,191 | 3,831 | 34,004 |
| 4,339 | 224 | 23,714 | 6,182 | 3,822 | 33,942 |
| 4,340 | 225 | 23,762 | 6,181 | 3,783 | 33,951 |
| 4,341 | 228 | 23,754 | 6,146 | 3,763 | 33,891 |
| 4,342 | 228 | 23,854 | 6,141 | 3,748 | 33,971 |
| 4,343 | 229 | 23,658 | 6,116 | 3,733 | 33,736 |



|       |     |        |       |       |        |
|-------|-----|--------|-------|-------|--------|
| 4,344 | 224 | 23,594 | 6,110 | 3,725 | 33,653 |
| 4,345 | 216 | 23,660 | 6,118 | 3,766 | 33,760 |
| 4,346 | 215 | 23,512 | 6,029 | 3,728 | 33,484 |
| 4,347 | 219 | 23,639 | 6,039 | 3,721 | 33,618 |
| 4,348 | 208 | 23,690 | 6,034 | 3,725 | 33,657 |
| 4,349 | 203 | 23,520 | 5,960 | 3,690 | 33,373 |
| 4,350 | 202 | 23,596 | 5,967 | 3,679 | 33,444 |
| 4,351 | 195 | 23,514 | 5,986 | 3,694 | 33,389 |
| 4,352 | 194 | 23,476 | 5,997 | 3,688 | 33,355 |
| 4,353 | 199 | 23,548 | 5,996 | 3,696 | 33,439 |
| 4,354 | 204 | 23,562 | 5,982 | 3,664 | 33,412 |
| 4,355 | 201 | 23,599 | 5,953 | 3,651 | 33,404 |
| 4,356 | 201 | 23,594 | 5,950 | 3,634 | 33,379 |
| 4,357 | 207 | 23,604 | 5,953 | 3,624 | 33,388 |
| 4,358 | 208 | 23,798 | 5,980 | 3,641 | 33,627 |
| 4,359 | 197 | 23,483 | 5,908 | 3,611 | 33,199 |
| 4,360 | 197 | 23,535 | 5,910 | 3,608 | 33,250 |
| 4,361 | 190 | 23,355 | 5,899 | 3,599 | 33,043 |
| 4,362 | 185 | 23,322 | 5,924 | 3,626 | 33,057 |
| 4,363 | 179 | 23,334 | 5,929 | 3,645 | 33,087 |
| 4,364 | 173 | 23,016 | 5,880 | 3,642 | 32,711 |
| 4,365 | 172 | 23,250 | 5,922 | 3,667 | 33,011 |
| 4,366 | 168 | 22,581 | 5,765 | 3,601 | 32,115 |
| 4,367 | 167 | 22,681 | 5,798 | 3,646 | 32,292 |
| 4,368 | 160 | 22,928 | 5,892 | 3,711 | 32,691 |
| 4,369 | 157 | 22,819 | 5,889 | 3,709 | 32,574 |
| 4,370 | 154 | 22,649 | 5,844 | 3,662 | 32,309 |
| 4,371 | 154 | 22,922 | 5,884 | 3,699 | 32,659 |
| 4,372 | 151 | 23,211 | 5,925 | 3,731 | 33,018 |
| 4,373 | 147 | 23,454 | 6,001 | 3,747 | 33,349 |
| 4,374 | 150 | 23,680 | 6,044 | 3,773 | 33,647 |
| 4,375 | 147 | 23,668 | 6,040 | 3,777 | 33,632 |

|       |     |        |       |       |        |
|-------|-----|--------|-------|-------|--------|
| 4,376 | 149 | 23,701 | 6,038 | 3,799 | 33,687 |
| 4,377 | 145 | 23,603 | 5,999 | 3,779 | 33,526 |
| 4,378 | 150 | 23,989 | 6,069 | 3,830 | 34,038 |
| 4,379 | 151 | 23,859 | 6,054 | 3,829 | 33,893 |
| 4,380 | 151 | 23,909 | 6,060 | 3,819 | 33,939 |
| 4,381 | 148 | 23,839 | 6,088 | 3,821 | 33,896 |
| 4,382 | 144 | 23,820 | 6,075 | 3,812 | 33,851 |
| 4,383 | 144 | 23,766 | 6,076 | 3,800 | 33,786 |
| 4,384 | 144 | 23,487 | 6,021 | 3,765 | 33,417 |
| 4,385 | 149 | 23,923 | 6,127 | 3,827 | 34,026 |
| 4,386 | 147 | 23,666 | 6,075 | 3,794 | 33,682 |
| 4,387 | 139 | 23,343 | 5,948 | 3,732 | 33,162 |
| 4,388 | 139 | 23,376 | 5,973 | 3,751 | 33,239 |
| 4,389 | 142 | 23,362 | 6,009 | 3,779 | 33,292 |
| 4,390 | 138 | 23,068 | 5,983 | 3,737 | 32,926 |
| 4,391 | 142 | 22,983 | 5,955 | 3,746 | 32,826 |
| 4,392 | 147 | 22,761 | 5,895 | 3,710 | 32,513 |
| 4,393 | 144 | 22,776 | 5,906 | 3,687 | 32,513 |
| 4,394 | 147 | 22,957 | 5,954 | 3,701 | 32,759 |
| 4,395 | 152 | 22,760 | 5,871 | 3,645 | 32,428 |
| 4,396 | 152 | 22,742 | 5,855 | 3,622 | 32,371 |
| 4,397 | 154 | 22,778 | 5,861 | 3,636 | 32,429 |
| 4,398 | 149 | 22,502 | 5,797 | 3,620 | 32,068 |
| 4,399 | 152 | 22,431 | 5,806 | 3,624 | 32,013 |
| 4,400 | 144 | 22,577 | 5,801 | 3,657 | 32,179 |
| 4,401 | 142 | 22,299 | 5,729 | 3,619 | 31,789 |
| 4,402 | 148 | 22,764 | 5,776 | 3,657 | 32,345 |
| 4,403 | 147 | 22,902 | 5,782 | 3,660 | 32,491 |
| 4,404 | 147 | 22,721 | 5,731 | 3,629 | 32,228 |
| 4,405 | 147 | 22,759 | 5,730 | 3,639 | 32,275 |
| 4,406 | 145 | 22,791 | 5,752 | 3,646 | 32,334 |
| 4,407 | 145 | 22,775 | 5,743 | 3,637 | 32,300 |

|       |     |        |       |       |        |
|-------|-----|--------|-------|-------|--------|
| 4,408 | 138 | 22,853 | 5,758 | 3,647 | 32,396 |
| 4,409 | 141 | 22,883 | 5,799 | 3,676 | 32,499 |
| 4,410 | 141 | 22,881 | 5,798 | 3,685 | 32,505 |
| 4,411 | 140 | 22,682 | 5,703 | 3,625 | 32,150 |
| 4,412 | 143 | 22,880 | 5,784 | 3,658 | 32,465 |
| 4,413 | 144 | 22,815 | 5,769 | 3,629 | 32,357 |
| 4,414 | 140 | 22,539 | 5,687 | 3,560 | 31,926 |
| 4,415 | 142 | 22,111 | 5,566 | 3,484 | 31,303 |
| 4,416 | 142 | 22,090 | 5,560 | 3,474 | 31,266 |
| 4,417 | 138 | 21,820 | 5,504 | 3,437 | 30,899 |
| 4,418 | 146 | 21,808 | 5,508 | 3,437 | 30,899 |
| 4,419 | 142 | 21,406 | 5,394 | 3,383 | 30,325 |
| 4,420 | 149 | 21,027 | 5,281 | 3,315 | 29,772 |
| 4,421 | 154 | 20,855 | 5,243 | 3,306 | 29,558 |
| 4,422 | 160 | 20,830 | 5,228 | 3,264 | 29,482 |
| 4,423 | 165 | 20,740 | 5,208 | 3,264 | 29,377 |
| 4,424 | 168 | 20,499 | 5,142 | 3,227 | 29,036 |
| 4,425 | 164 | 20,255 | 5,094 | 3,171 | 28,684 |
| 4,426 | 173 | 20,157 | 5,093 | 3,161 | 28,584 |
| 4,427 | 174 | 20,160 | 5,091 | 3,137 | 28,562 |
| 4,428 | 180 | 20,121 | 5,061 | 3,106 | 28,468 |
| 4,429 | 190 | 20,319 | 5,086 | 3,128 | 28,723 |
| 4,430 | 200 | 20,230 | 5,039 | 3,089 | 28,558 |
| 4,431 | 201 | 20,333 | 5,041 | 3,096 | 28,671 |
| 4,432 | 219 | 20,727 | 5,103 | 3,152 | 29,201 |
| 4,433 | 221 | 20,688 | 5,116 | 3,138 | 29,163 |
| 4,434 | 221 | 21,073 | 5,184 | 3,177 | 29,655 |
| 4,435 | 223 | 20,981 | 5,134 | 3,140 | 29,478 |
| 4,436 | 222 | 20,972 | 5,140 | 3,148 | 29,482 |
| 4,437 | 224 | 21,038 | 5,195 | 3,155 | 29,612 |
| 4,438 | 224 | 21,134 | 5,231 | 3,175 | 29,764 |
| 4,439 | 224 | 21,376 | 5,229 | 3,176 | 30,005 |

|       |     |        |       |       |        |
|-------|-----|--------|-------|-------|--------|
| 4,440 | 226 | 21,395 | 5,198 | 3,149 | 29,968 |
| 4,441 | 229 | 21,519 | 5,192 | 3,151 | 30,091 |
| 4,442 | 231 | 21,535 | 5,191 | 3,144 | 30,101 |
| 4,443 | 233 | 21,858 | 5,286 | 3,178 | 30,555 |
| 4,444 | 231 | 21,776 | 5,250 | 3,176 | 30,433 |
| 4,445 | 230 | 21,812 | 5,242 | 3,180 | 30,464 |
| 4,446 | 230 | 21,725 | 5,258 | 3,193 | 30,406 |
| 4,447 | 237 | 21,757 | 5,283 | 3,212 | 30,489 |
| 4,448 | 237 | 21,720 | 5,289 | 3,208 | 30,454 |
| 4,449 | 239 | 21,992 | 5,373 | 3,262 | 30,866 |
| 4,450 | 244 | 21,901 | 5,404 | 3,249 | 30,798 |
| 4,451 | 244 | 21,697 | 5,398 | 3,223 | 30,562 |
| 4,452 | 239 | 21,906 | 5,493 | 3,281 | 30,919 |
| 4,453 | 239 | 21,916 | 5,548 | 3,299 | 31,002 |
| 4,454 | 238 | 21,841 | 5,533 | 3,319 | 30,931 |
| 4,455 | 229 | 21,575 | 5,473 | 3,282 | 30,559 |
| 4,456 | 229 | 21,504 | 5,510 | 3,275 | 30,518 |
| 4,457 | 233 | 21,680 | 5,542 | 3,288 | 30,743 |
| 4,458 | 233 | 21,758 | 5,529 | 3,287 | 30,807 |
| 4,459 | 232 | 21,542 | 5,488 | 3,249 | 30,511 |
| 4,460 | 231 | 21,600 | 5,485 | 3,255 | 30,571 |
| 4,461 | 228 | 21,470 | 5,476 | 3,242 | 30,416 |
| 4,462 | 228 | 21,323 | 5,483 | 3,250 | 30,284 |
| 4,463 | 227 | 21,539 | 5,514 | 3,272 | 30,552 |
| 4,464 | 225 | 21,578 | 5,503 | 3,272 | 30,578 |
| 4,465 | 225 | 21,468 | 5,457 | 3,252 | 30,402 |
| 4,466 | 225 | 21,352 | 5,440 | 3,227 | 30,244 |
| 4,467 | 221 | 21,297 | 5,409 | 3,203 | 30,130 |
| 4,468 | 218 | 21,985 | 5,567 | 3,277 | 31,047 |
| 4,469 | 219 | 22,092 | 5,557 | 3,260 | 31,128 |
| 4,470 | 224 | 22,254 | 5,637 | 3,269 | 31,384 |
| 4,471 | 215 | 22,060 | 5,591 | 3,240 | 31,106 |

|       |     |        |       |       |        |
|-------|-----|--------|-------|-------|--------|
| 4,472 | 214 | 22,013 | 5,596 | 3,241 | 31,064 |
| 4,473 | 203 | 21,824 | 5,554 | 3,247 | 30,828 |
| 4,474 | 193 | 20,949 | 5,272 | 3,118 | 29,532 |
| 4,475 | 193 | 21,116 | 5,312 | 3,139 | 29,760 |
| 4,476 | 191 | 21,430 | 5,403 | 3,175 | 30,199 |
| 4,477 | 192 | 21,429 | 5,397 | 3,164 | 30,182 |
| 4,478 | 187 | 21,403 | 5,432 | 3,197 | 30,219 |
| 4,479 | 188 | 21,417 | 5,442 | 3,205 | 30,252 |
| 4,480 | 165 | 21,255 | 5,411 | 3,182 | 30,013 |
| 4,481 | 160 | 20,759 | 5,303 | 3,119 | 29,341 |
| 4,482 | 156 | 20,891 | 5,330 | 3,141 | 29,518 |
| 4,483 | 155 | 20,917 | 5,341 | 3,145 | 29,558 |
| 4,484 | 151 | 20,693 | 5,307 | 3,124 | 29,275 |
| 4,485 | 158 | 20,638 | 5,319 | 3,136 | 29,251 |
| 4,486 | 150 | 20,458 | 5,286 | 3,123 | 29,017 |
| 4,487 | 164 | 21,056 | 5,369 | 3,189 | 29,778 |
| 4,488 | 170 | 21,080 | 5,372 | 3,182 | 29,804 |
| 4,489 | 168 | 20,961 | 5,327 | 3,144 | 29,600 |
| 4,490 | 176 | 21,339 | 5,444 | 3,226 | 30,185 |
| 4,491 | 176 | 21,338 | 5,445 | 3,230 | 30,189 |
| 4,492 | 165 | 21,239 | 5,449 | 3,220 | 30,073 |
| 4,493 | 166 | 21,344 | 5,475 | 3,253 | 30,238 |
| 4,494 | 159 | 21,496 | 5,521 | 3,264 | 30,440 |
| 4,495 | 157 | 21,598 | 5,533 | 3,289 | 30,577 |
| 4,496 | 150 | 21,212 | 5,452 | 3,222 | 30,036 |
| 4,497 | 150 | 21,457 | 5,513 | 3,245 | 30,365 |
| 4,498 | 149 | 21,713 | 5,588 | 3,284 | 30,734 |
| 4,499 | 151 | 21,785 | 5,599 | 3,301 | 30,836 |
| 4,500 | 147 | 21,589 | 5,518 | 3,261 | 30,515 |
| 4,501 | 143 | 21,815 | 5,565 | 3,305 | 30,828 |
| 4,502 | 145 | 21,807 | 5,550 | 3,299 | 30,801 |
| 4,503 | 150 | 21,532 | 5,467 | 3,229 | 30,378 |

|       |     |        |       |       |        |
|-------|-----|--------|-------|-------|--------|
| 4,504 | 151 | 21,639 | 5,476 | 3,226 | 30,492 |
| 4,505 | 148 | 21,518 | 5,481 | 3,192 | 30,339 |
| 4,506 | 154 | 21,738 | 5,546 | 3,237 | 30,675 |
| 4,507 | 155 | 21,535 | 5,478 | 3,200 | 30,368 |
| 4,508 | 154 | 21,524 | 5,487 | 3,193 | 30,358 |
| 4,509 | 157 | 21,635 | 5,547 | 3,233 | 30,572 |
| 4,510 | 158 | 21,602 | 5,512 | 3,198 | 30,470 |
| 4,511 | 159 | 21,676 | 5,500 | 3,192 | 30,527 |
| 4,512 | 160 | 21,954 | 5,550 | 3,228 | 30,892 |
| 4,513 | 158 | 22,006 | 5,560 | 3,215 | 30,939 |
| 4,514 | 164 | 22,069 | 5,548 | 3,201 | 30,982 |
| 4,515 | 163 | 21,662 | 5,451 | 3,142 | 30,418 |
| 4,516 | 161 | 21,842 | 5,510 | 3,173 | 30,686 |
| 4,517 | 160 | 22,092 | 5,544 | 3,198 | 30,994 |
| 4,518 | 162 | 21,999 | 5,512 | 3,211 | 30,884 |
| 4,519 | 164 | 22,119 | 5,522 | 3,217 | 31,022 |
| 4,520 | 153 | 21,566 | 5,384 | 3,143 | 30,246 |
| 4,521 | 152 | 21,809 | 5,380 | 3,169 | 30,510 |
| 4,522 | 152 | 22,096 | 5,410 | 3,186 | 30,844 |
| 4,523 | 156 | 22,144 | 5,407 | 3,192 | 30,899 |
| 4,524 | 156 | 22,100 | 5,398 | 3,178 | 30,832 |
| 4,525 | 155 | 22,212 | 5,500 | 3,226 | 31,093 |
| 4,526 | 157 | 22,363 | 5,523 | 3,257 | 31,300 |
| 4,527 | 155 | 22,269 | 5,512 | 3,250 | 31,186 |
| 4,528 | 150 | 22,172 | 5,449 | 3,246 | 31,017 |
| 4,529 | 153 | 22,333 | 5,446 | 3,235 | 31,167 |
| 4,530 | 153 | 22,392 | 5,441 | 3,232 | 31,218 |
| 4,531 | 148 | 22,525 | 5,477 | 3,272 | 31,422 |
| 4,532 | 145 | 22,344 | 5,425 | 3,242 | 31,156 |
| 4,533 | 138 | 22,250 | 5,426 | 3,233 | 31,047 |
| 4,534 | 136 | 22,194 | 5,408 | 3,228 | 30,966 |
| 4,535 | 137 | 22,331 | 5,472 | 3,289 | 31,229 |

|       |     |        |       |       |        |
|-------|-----|--------|-------|-------|--------|
| 4,536 | 124 | 22,020 | 5,391 | 3,262 | 30,797 |
| 4,537 | 124 | 22,079 | 5,418 | 3,277 | 30,898 |
| 4,538 | 127 | 22,018 | 5,373 | 3,242 | 30,760 |
| 4,539 | 116 | 21,850 | 5,333 | 3,223 | 30,522 |
| 4,540 | 120 | 21,675 | 5,280 | 3,210 | 30,285 |
| 4,541 | 116 | 21,441 | 5,191 | 3,171 | 29,919 |
| 4,542 | 119 | 21,396 | 5,174 | 3,181 | 29,870 |
| 4,543 | 119 | 21,433 | 5,152 | 3,173 | 29,877 |
| 4,544 | 122 | 21,413 | 5,152 | 3,153 | 29,840 |
| 4,545 | 124 | 21,327 | 5,132 | 3,141 | 29,724 |
| 4,546 | 124 | 21,364 | 5,124 | 3,138 | 29,750 |
| 4,547 | 128 | 21,634 | 5,154 | 3,168 | 30,084 |
| 4,548 | 132 | 21,593 | 5,120 | 3,170 | 30,015 |
| 4,549 | 132 | 21,632 | 5,148 | 3,187 | 30,099 |
| 4,550 | 133 | 21,593 | 5,129 | 3,163 | 30,018 |
| 4,551 | 138 | 21,555 | 5,132 | 3,152 | 29,977 |
| 4,552 | 138 | 21,487 | 5,088 | 3,148 | 29,861 |
| 4,553 | 145 | 21,638 | 5,063 | 3,153 | 29,999 |
| 4,554 | 140 | 21,511 | 5,000 | 3,145 | 29,796 |
| 4,555 | 141 | 21,653 | 4,996 | 3,146 | 29,936 |
| 4,556 | 149 | 21,857 | 5,038 | 3,162 | 30,206 |
| 4,557 | 152 | 21,905 | 5,029 | 3,162 | 30,248 |
| 4,558 | 146 | 21,708 | 4,960 | 3,131 | 29,945 |
| 4,559 | 153 | 21,973 | 5,043 | 3,162 | 30,331 |
| 4,560 | 150 | 21,892 | 4,988 | 3,130 | 30,160 |
| 4,561 | 163 | 21,996 | 5,008 | 3,153 | 30,320 |
| 4,562 | 164 | 21,988 | 4,991 | 3,146 | 30,289 |
| 4,563 | 166 | 21,802 | 4,936 | 3,131 | 30,035 |
| 4,564 | 166 | 21,821 | 4,917 | 3,136 | 30,040 |
| 4,565 | 161 | 21,898 | 4,938 | 3,176 | 30,173 |
| 4,566 | 161 | 21,746 | 4,915 | 3,175 | 29,997 |
| 4,567 | 165 | 21,582 | 4,874 | 3,158 | 29,779 |

|       |     |        |       |       |        |
|-------|-----|--------|-------|-------|--------|
| 4,568 | 163 | 21,464 | 4,842 | 3,130 | 29,599 |
| 4,569 | 164 | 21,703 | 4,881 | 3,131 | 29,879 |
| 4,570 | 164 | 21,699 | 4,867 | 3,124 | 29,854 |
| 4,571 | 165 | 21,697 | 4,874 | 3,118 | 29,854 |
| 4,572 | 169 | 21,726 | 4,892 | 3,120 | 29,907 |
| 4,573 | 166 | 21,501 | 4,906 | 3,111 | 29,684 |
| 4,574 | 167 | 21,417 | 4,854 | 3,076 | 29,514 |
| 4,575 | 167 | 21,552 | 4,876 | 3,103 | 29,698 |
| 4,576 | 175 | 21,774 | 4,900 | 3,112 | 29,961 |
| 4,577 | 175 | 21,677 | 4,903 | 3,111 | 29,866 |
| 4,578 | 171 | 21,513 | 4,822 | 3,086 | 29,592 |
| 4,579 | 170 | 21,409 | 4,819 | 3,065 | 29,463 |
| 4,580 | 178 | 21,367 | 4,836 | 3,089 | 29,470 |
| 4,581 | 180 | 21,386 | 4,835 | 3,075 | 29,476 |
| 4,582 | 180 | 21,322 | 4,826 | 3,069 | 29,397 |
| 4,583 | 180 | 21,114 | 4,757 | 2,996 | 29,047 |
| 4,584 | 180 | 21,336 | 4,782 | 3,032 | 29,330 |
| 4,585 | 184 | 21,562 | 4,828 | 3,064 | 29,638 |
| 4,586 | 190 | 21,420 | 4,821 | 3,036 | 29,467 |
| 4,587 | 191 | 21,724 | 4,868 | 3,057 | 29,840 |
| 4,588 | 190 | 21,363 | 4,814 | 3,027 | 29,394 |
| 4,589 | 180 | 21,331 | 4,823 | 3,019 | 29,353 |
| 4,590 | 180 | 21,345 | 4,811 | 3,009 | 29,345 |
| 4,591 | 173 | 21,228 | 4,844 | 3,011 | 29,256 |
| 4,592 | 178 | 21,548 | 4,879 | 3,015 | 29,620 |
| 4,593 | 172 | 21,412 | 4,861 | 3,000 | 29,445 |
| 4,594 | 172 | 21,418 | 4,824 | 2,992 | 29,406 |
| 4,595 | 174 | 21,741 | 4,897 | 3,053 | 29,865 |
| 4,596 | 177 | 21,848 | 4,926 | 3,071 | 30,022 |
| 4,597 | 176 | 21,117 | 4,783 | 2,957 | 29,033 |
| 4,598 | 180 | 21,332 | 4,817 | 2,968 | 29,297 |
| 4,599 | 187 | 21,717 | 4,914 | 3,013 | 29,831 |



|       |     |        |       |       |        |
|-------|-----|--------|-------|-------|--------|
| 4,600 | 188 | 21,725 | 4,911 | 3,010 | 29,834 |
| 4,601 | 192 | 22,413 | 5,059 | 3,086 | 30,750 |
| 4,602 | 187 | 22,124 | 4,956 | 3,053 | 30,320 |
| 4,603 | 186 | 22,158 | 4,948 | 3,053 | 30,345 |
| 4,604 | 187 | 22,042 | 4,943 | 3,025 | 30,197 |
| 4,605 | 186 | 21,998 | 4,925 | 3,025 | 30,134 |
| 4,606 | 182 | 21,999 | 4,897 | 3,036 | 30,114 |
| 4,607 | 181 | 21,940 | 4,877 | 3,032 | 30,030 |
| 4,608 | 179 | 22,135 | 4,920 | 3,052 | 30,286 |
| 4,609 | 177 | 21,747 | 4,832 | 3,002 | 29,758 |
| 4,610 | 175 | 21,877 | 4,846 | 3,033 | 29,931 |
| 4,611 | 168 | 22,026 | 4,876 | 3,049 | 30,119 |
| 4,612 | 160 | 22,065 | 4,898 | 3,076 | 30,199 |
| 4,613 | 157 | 21,895 | 4,854 | 3,034 | 29,940 |
| 4,614 | 157 | 21,931 | 4,860 | 3,037 | 29,985 |
| 4,615 | 159 | 21,935 | 4,886 | 3,036 | 30,016 |
| 4,616 | 161 | 21,895 | 4,860 | 3,014 | 29,930 |
| 4,617 | 162 | 22,014 | 4,897 | 3,050 | 30,123 |
| 4,618 | 166 | 21,690 | 4,841 | 3,012 | 29,709 |
| 4,619 | 166 | 21,536 | 4,792 | 3,008 | 29,502 |
| 4,620 | 189 | 22,121 | 4,946 | 3,090 | 30,346 |
| 4,621 | 192 | 22,080 | 4,940 | 3,106 | 30,318 |
| 4,622 | 191 | 21,843 | 4,857 | 3,094 | 29,985 |
| 4,623 | 193 | 21,828 | 4,855 | 3,091 | 29,967 |
| 4,624 | 191 | 21,888 | 4,857 | 3,098 | 30,034 |
| 4,625 | 191 | 21,696 | 4,856 | 3,082 | 29,825 |
| 4,626 | 196 | 21,982 | 4,893 | 3,097 | 30,168 |
| 4,627 | 191 | 22,245 | 4,949 | 3,125 | 30,510 |
| 4,628 | 190 | 21,913 | 4,891 | 3,074 | 30,068 |
| 4,629 | 189 | 22,030 | 4,885 | 3,073 | 30,177 |
| 4,630 | 187 | 22,191 | 4,928 | 3,095 | 30,401 |
| 4,631 | 184 | 22,005 | 4,887 | 3,047 | 30,123 |

|       |     |        |       |       |        |
|-------|-----|--------|-------|-------|--------|
| 4,632 | 183 | 21,878 | 4,861 | 3,039 | 29,961 |
| 4,633 | 183 | 21,858 | 4,866 | 3,024 | 29,931 |
| 4,634 | 193 | 21,889 | 4,919 | 3,015 | 30,016 |
| 4,635 | 188 | 21,831 | 4,898 | 2,996 | 29,913 |
| 4,636 | 197 | 22,031 | 4,923 | 3,006 | 30,157 |
| 4,637 | 193 | 21,964 | 4,889 | 2,978 | 30,024 |
| 4,638 | 190 | 21,788 | 4,840 | 2,945 | 29,763 |
| 4,639 | 189 | 22,017 | 4,864 | 2,963 | 30,033 |
| 4,640 | 196 | 22,146 | 4,862 | 2,990 | 30,194 |
| 4,641 | 208 | 22,458 | 4,892 | 3,011 | 30,569 |
| 4,642 | 208 | 22,405 | 4,869 | 2,977 | 30,459 |
| 4,643 | 207 | 22,546 | 4,891 | 3,023 | 30,667 |
| 4,644 | 214 | 22,286 | 4,831 | 2,983 | 30,314 |
| 4,645 | 213 | 22,064 | 4,806 | 2,970 | 30,053 |
| 4,646 | 210 | 22,347 | 4,862 | 2,988 | 30,407 |
| 4,647 | 206 | 22,289 | 4,854 | 2,977 | 30,326 |
| 4,648 | 206 | 22,253 | 4,834 | 2,975 | 30,268 |
| 4,649 | 205 | 22,168 | 4,808 | 2,956 | 30,137 |
| 4,650 | 194 | 22,214 | 4,806 | 2,970 | 30,184 |
| 4,651 | 190 | 22,115 | 4,776 | 2,974 | 30,055 |
| 4,652 | 199 | 21,962 | 4,731 | 2,937 | 29,829 |
| 4,653 | 200 | 21,957 | 4,742 | 2,925 | 29,824 |
| 4,654 | 200 | 22,050 | 4,743 | 2,921 | 29,914 |
| 4,655 | 200 | 21,966 | 4,723 | 2,906 | 29,795 |
| 4,656 | 202 | 22,031 | 4,744 | 2,921 | 29,898 |
| 4,657 | 202 | 21,964 | 4,740 | 2,918 | 29,824 |
| 4,658 | 197 | 21,829 | 4,742 | 2,929 | 29,697 |
| 4,659 | 196 | 21,688 | 4,712 | 2,911 | 29,507 |
| 4,660 | 194 | 21,748 | 4,713 | 2,918 | 29,573 |
| 4,661 | 195 | 21,709 | 4,720 | 2,919 | 29,543 |
| 4,662 | 197 | 21,643 | 4,697 | 2,898 | 29,435 |
| 4,663 | 196 | 21,593 | 4,699 | 2,865 | 29,353 |

|       |     |        |       |       |        |
|-------|-----|--------|-------|-------|--------|
| 4,664 | 199 | 21,715 | 4,715 | 2,876 | 29,505 |
| 4,665 | 198 | 21,635 | 4,670 | 2,862 | 29,365 |
| 4,666 | 197 | 21,781 | 4,728 | 2,882 | 29,588 |
| 4,667 | 193 | 21,797 | 4,739 | 2,873 | 29,602 |
| 4,668 | 193 | 21,904 | 4,742 | 2,874 | 29,713 |
| 4,669 | 175 | 21,711 | 4,721 | 2,823 | 29,430 |
| 4,670 | 171 | 21,867 | 4,736 | 2,835 | 29,609 |
| 4,671 | 168 | 22,061 | 4,760 | 2,884 | 29,873 |
| 4,672 | 163 | 21,961 | 4,715 | 2,852 | 29,691 |
| 4,673 | 156 | 21,726 | 4,691 | 2,824 | 29,397 |
| 4,674 | 155 | 21,925 | 4,729 | 2,845 | 29,654 |
| 4,675 | 153 | 21,578 | 4,662 | 2,797 | 29,190 |
| 4,676 | 153 | 21,753 | 4,645 | 2,804 | 29,355 |
| 4,677 | 155 | 21,917 | 4,650 | 2,833 | 29,555 |
| 4,678 | 154 | 21,616 | 4,575 | 2,799 | 29,144 |
| 4,679 | 155 | 21,624 | 4,575 | 2,805 | 29,159 |
| 4,680 | 155 | 21,608 | 4,610 | 2,814 | 29,187 |
| 4,681 | 153 | 21,476 | 4,603 | 2,822 | 29,054 |
| 4,682 | 155 | 21,595 | 4,593 | 2,845 | 29,188 |
| 4,683 | 160 | 21,678 | 4,577 | 2,850 | 29,265 |
| 4,684 | 158 | 21,680 | 4,564 | 2,862 | 29,264 |
| 4,685 | 150 | 21,737 | 4,582 | 2,865 | 29,334 |
| 4,686 | 157 | 21,722 | 4,576 | 2,865 | 29,320 |
| 4,687 | 147 | 21,506 | 4,524 | 2,846 | 29,023 |
| 4,688 | 143 | 21,591 | 4,563 | 2,861 | 29,158 |
| 4,689 | 143 | 21,589 | 4,579 | 2,874 | 29,185 |
| 4,690 | 145 | 21,485 | 4,570 | 2,878 | 29,078 |
| 4,691 | 153 | 21,560 | 4,577 | 2,883 | 29,173 |
| 4,692 | 141 | 21,429 | 4,568 | 2,873 | 29,011 |
| 4,693 | 144 | 21,779 | 4,672 | 2,957 | 29,552 |
| 4,694 | 138 | 21,452 | 4,624 | 2,898 | 29,112 |
| 4,695 | 139 | 21,497 | 4,637 | 2,907 | 29,180 |

|       |     |        |       |       |        |
|-------|-----|--------|-------|-------|--------|
| 4,696 | 144 | 21,418 | 4,629 | 2,884 | 29,075 |
| 4,697 | 146 | 21,725 | 4,692 | 2,924 | 29,487 |
| 4,698 | 148 | 21,734 | 4,683 | 2,913 | 29,478 |
| 4,699 | 147 | 21,583 | 4,657 | 2,895 | 29,282 |
| 4,700 | 148 | 21,504 | 4,654 | 2,901 | 29,207 |
| 4,701 | 156 | 21,637 | 4,676 | 2,902 | 29,371 |
| 4,702 | 152 | 21,518 | 4,671 | 2,894 | 29,235 |
| 4,703 | 144 | 21,339 | 4,670 | 2,898 | 29,051 |
| 4,704 | 140 | 21,308 | 4,676 | 2,904 | 29,028 |
| 4,705 | 130 | 20,957 | 4,634 | 2,889 | 28,610 |
| 4,706 | 130 | 21,169 | 4,669 | 2,918 | 28,886 |
| 4,707 | 126 | 21,078 | 4,659 | 2,918 | 28,781 |
| 4,708 | 129 | 21,285 | 4,656 | 2,933 | 29,003 |
| 4,709 | 131 | 21,214 | 4,622 | 2,889 | 28,856 |
| 4,710 | 131 | 21,306 | 4,627 | 2,918 | 28,982 |
| 4,711 | 135 | 21,397 | 4,615 | 2,912 | 29,059 |
| 4,712 | 135 | 21,362 | 4,588 | 2,907 | 28,992 |
| 4,713 | 135 | 21,122 | 4,512 | 2,879 | 28,648 |
| 4,714 | 137 | 21,116 | 4,495 | 2,861 | 28,609 |
| 4,715 | 139 | 21,080 | 4,460 | 2,839 | 28,518 |
| 4,716 | 144 | 21,301 | 4,500 | 2,869 | 28,814 |
| 4,717 | 153 | 20,971 | 4,417 | 2,837 | 28,378 |
| 4,718 | 153 | 21,023 | 4,433 | 2,844 | 28,453 |
| 4,719 | 162 | 21,294 | 4,457 | 2,851 | 28,764 |
| 4,720 | 162 | 20,970 | 4,377 | 2,800 | 28,309 |
| 4,721 | 164 | 21,114 | 4,417 | 2,834 | 28,529 |
| 4,722 | 161 | 20,643 | 4,364 | 2,763 | 27,931 |
| 4,723 | 162 | 20,704 | 4,395 | 2,772 | 28,033 |
| 4,724 | 169 | 20,608 | 4,337 | 2,746 | 27,860 |
| 4,725 | 171 | 20,559 | 4,358 | 2,737 | 27,825 |
| 4,726 | 173 | 20,721 | 4,397 | 2,783 | 28,074 |
| 4,727 | 170 | 20,628 | 4,405 | 2,767 | 27,970 |

|       |     |        |       |       |        |
|-------|-----|--------|-------|-------|--------|
| 4,728 | 171 | 20,742 | 4,386 | 2,781 | 28,080 |
| 4,729 | 172 | 21,028 | 4,459 | 2,812 | 28,471 |
| 4,730 | 175 | 20,953 | 4,418 | 2,804 | 28,350 |
| 4,731 | 173 | 20,742 | 4,378 | 2,769 | 28,062 |
| 4,732 | 174 | 20,901 | 4,439 | 2,797 | 28,311 |
| 4,733 | 174 | 21,044 | 4,516 | 2,808 | 28,542 |
| 4,734 | 176 | 21,225 | 4,541 | 2,831 | 28,773 |
| 4,735 | 182 | 21,298 | 4,533 | 2,833 | 28,846 |
| 4,736 | 175 | 21,165 | 4,485 | 2,818 | 28,643 |
| 4,737 | 176 | 21,169 | 4,450 | 2,804 | 28,599 |
| 4,738 | 179 | 21,208 | 4,449 | 2,818 | 28,654 |
| 4,739 | 179 | 20,989 | 4,388 | 2,783 | 28,339 |
| 4,740 | 177 | 20,930 | 4,398 | 2,802 | 28,307 |
| 4,741 | 174 | 20,859 | 4,372 | 2,789 | 28,194 |
| 4,742 | 169 | 20,968 | 4,346 | 2,768 | 28,251 |
| 4,743 | 167 | 20,796 | 4,279 | 2,727 | 27,969 |
| 4,744 | 166 | 20,584 | 4,242 | 2,715 | 27,707 |
| 4,745 | 166 | 20,603 | 4,250 | 2,727 | 27,746 |
| 4,746 | 167 | 20,524 | 4,215 | 2,713 | 27,619 |
| 4,747 | 166 | 20,560 | 4,213 | 2,722 | 27,661 |
| 4,748 | 164 | 20,604 | 4,218 | 2,737 | 27,723 |
| 4,749 | 161 | 20,549 | 4,195 | 2,735 | 27,640 |
| 4,750 | 155 | 20,545 | 4,177 | 2,727 | 27,604 |
| 4,751 | 148 | 20,444 | 4,171 | 2,729 | 27,492 |
| 4,752 | 160 | 20,611 | 4,158 | 2,746 | 27,675 |
| 4,753 | 159 | 20,657 | 4,132 | 2,727 | 27,675 |
| 4,754 | 171 | 21,002 | 4,162 | 2,752 | 28,087 |
| 4,755 | 179 | 21,021 | 4,143 | 2,759 | 28,102 |
| 4,756 | 186 | 21,207 | 4,140 | 2,757 | 28,290 |
| 4,757 | 197 | 20,724 | 4,041 | 2,688 | 27,650 |
| 4,758 | 197 | 21,059 | 4,103 | 2,715 | 28,074 |
| 4,759 | 201 | 21,370 | 4,165 | 2,754 | 28,490 |

|       |     |        |       |       |        |
|-------|-----|--------|-------|-------|--------|
| 4,760 | 206 | 21,053 | 4,132 | 2,688 | 28,079 |
| 4,761 | 210 | 21,262 | 4,195 | 2,702 | 28,369 |
| 4,762 | 208 | 21,465 | 4,234 | 2,741 | 28,648 |
| 4,763 | 208 | 21,416 | 4,212 | 2,750 | 28,586 |
| 4,764 | 208 | 21,361 | 4,235 | 2,760 | 28,564 |
| 4,765 | 208 | 21,550 | 4,271 | 2,777 | 28,806 |
| 4,766 | 206 | 21,299 | 4,258 | 2,772 | 28,535 |
| 4,767 | 202 | 21,286 | 4,244 | 2,772 | 28,504 |
| 4,768 | 194 | 21,470 | 4,295 | 2,798 | 28,757 |
| 4,769 | 196 | 21,537 | 4,303 | 2,807 | 28,843 |
| 4,770 | 190 | 21,477 | 4,263 | 2,805 | 28,735 |
| 4,771 | 186 | 21,611 | 4,248 | 2,840 | 28,885 |
| 4,772 | 186 | 21,727 | 4,263 | 2,837 | 29,013 |
| 4,773 | 187 | 21,748 | 4,253 | 2,839 | 29,027 |
| 4,774 | 184 | 21,864 | 4,267 | 2,866 | 29,181 |
| 4,775 | 183 | 21,854 | 4,271 | 2,871 | 29,179 |
| 4,776 | 196 | 22,113 | 4,302 | 2,900 | 29,511 |
| 4,777 | 193 | 22,169 | 4,307 | 2,882 | 29,551 |
| 4,778 | 193 | 22,109 | 4,293 | 2,865 | 29,460 |
| 4,779 | 199 | 22,038 | 4,319 | 2,855 | 29,411 |
| 4,780 | 199 | 21,879 | 4,256 | 2,822 | 29,156 |
| 4,781 | 198 | 21,933 | 4,256 | 2,835 | 29,222 |
| 4,782 | 196 | 21,843 | 4,224 | 2,817 | 29,080 |
| 4,783 | 197 | 21,933 | 4,199 | 2,818 | 29,147 |
| 4,784 | 192 | 21,839 | 4,151 | 2,785 | 28,967 |
| 4,785 | 193 | 21,837 | 4,167 | 2,825 | 29,022 |
| 4,786 | 187 | 21,769 | 4,154 | 2,835 | 28,945 |
| 4,787 | 184 | 21,512 | 4,138 | 2,801 | 28,635 |
| 4,788 | 187 | 21,641 | 4,163 | 2,806 | 28,797 |
| 4,789 | 192 | 21,631 | 4,163 | 2,797 | 28,783 |
| 4,790 | 193 | 21,666 | 4,164 | 2,807 | 28,830 |
| 4,791 | 192 | 21,689 | 4,185 | 2,803 | 28,869 |

|       |     |        |       |       |        |
|-------|-----|--------|-------|-------|--------|
| 4,792 | 193 | 21,969 | 4,279 | 2,843 | 29,284 |
| 4,793 | 191 | 21,504 | 4,199 | 2,801 | 28,695 |
| 4,794 | 192 | 21,572 | 4,234 | 2,829 | 28,827 |
| 4,795 | 187 | 21,622 | 4,228 | 2,852 | 28,889 |
| 4,796 | 188 | 21,705 | 4,252 | 2,867 | 29,012 |
| 4,797 | 181 | 21,331 | 4,192 | 2,833 | 28,537 |
| 4,798 | 188 | 21,276 | 4,212 | 2,825 | 28,501 |
| 4,799 | 187 | 21,300 | 4,211 | 2,827 | 28,525 |
| 4,800 | 195 | 21,215 | 4,199 | 2,839 | 28,448 |
| 4,801 | 193 | 21,161 | 4,202 | 2,854 | 28,410 |
| 4,802 | 184 | 21,309 | 4,208 | 2,838 | 28,539 |
| 4,803 | 180 | 21,175 | 4,221 | 2,830 | 28,406 |
| 4,804 | 180 | 21,097 | 4,249 | 2,830 | 28,356 |
| 4,805 | 172 | 21,191 | 4,295 | 2,861 | 28,519 |
| 4,806 | 164 | 20,935 | 4,263 | 2,841 | 28,203 |
| 4,807 | 162 | 20,960 | 4,294 | 2,872 | 28,288 |
| 4,808 | 152 | 20,881 | 4,305 | 2,875 | 28,213 |
| 4,809 | 151 | 21,068 | 4,355 | 2,911 | 28,485 |
| 4,810 | 147 | 21,032 | 4,363 | 2,894 | 28,436 |
| 4,811 | 141 | 21,038 | 4,372 | 2,895 | 28,446 |
| 4,812 | 146 | 21,003 | 4,358 | 2,896 | 28,403 |
| 4,813 | 146 | 21,053 | 4,369 | 2,891 | 28,459 |
| 4,814 | 151 | 21,053 | 4,389 | 2,883 | 28,476 |
| 4,815 | 151 | 21,042 | 4,382 | 2,897 | 28,472 |
| 4,816 | 146 | 21,038 | 4,411 | 2,920 | 28,515 |
| 4,817 | 151 | 21,230 | 4,447 | 2,926 | 28,754 |
| 4,818 | 150 | 21,378 | 4,443 | 2,946 | 28,917 |
| 4,819 | 155 | 21,428 | 4,456 | 2,956 | 28,995 |
| 4,820 | 154 | 21,121 | 4,408 | 2,933 | 28,616 |
| 4,821 | 152 | 21,393 | 4,533 | 2,990 | 29,068 |
| 4,822 | 154 | 21,172 | 4,543 | 2,968 | 28,837 |
| 4,823 | 155 | 21,412 | 4,575 | 2,998 | 29,140 |

|       |     |        |       |       |        |
|-------|-----|--------|-------|-------|--------|
| 4,824 | 159 | 21,155 | 4,510 | 2,930 | 28,754 |
| 4,825 | 160 | 21,427 | 4,550 | 2,977 | 29,114 |
| 4,826 | 163 | 21,636 | 4,562 | 3,009 | 29,370 |
| 4,827 | 153 | 21,403 | 4,490 | 2,979 | 29,025 |
| 4,828 | 154 | 21,454 | 4,496 | 2,983 | 29,087 |
| 4,829 | 159 | 21,774 | 4,555 | 3,026 | 29,514 |
| 4,830 | 154 | 21,519 | 4,498 | 3,015 | 29,186 |
| 4,831 | 154 | 21,435 | 4,484 | 3,010 | 29,083 |
| 4,832 | 151 | 21,693 | 4,563 | 3,047 | 29,454 |
| 4,833 | 156 | 21,897 | 4,601 | 3,084 | 29,738 |
| 4,834 | 153 | 21,886 | 4,598 | 3,069 | 29,706 |
| 4,835 | 156 | 21,752 | 4,595 | 3,030 | 29,533 |
| 4,836 | 158 | 21,819 | 4,610 | 3,023 | 29,610 |
| 4,837 | 158 | 21,858 | 4,607 | 3,034 | 29,657 |
| 4,838 | 157 | 22,133 | 4,653 | 3,084 | 30,027 |
| 4,839 | 154 | 22,221 | 4,665 | 3,122 | 30,162 |
| 4,840 | 153 | 22,310 | 4,684 | 3,143 | 30,290 |
| 4,841 | 160 | 22,409 | 4,730 | 3,177 | 30,476 |
| 4,842 | 163 | 22,592 | 4,762 | 3,190 | 30,707 |
| 4,843 | 160 | 22,456 | 4,739 | 3,163 | 30,518 |
| 4,844 | 163 | 22,668 | 4,764 | 3,175 | 30,770 |
| 4,845 | 173 | 23,008 | 4,802 | 3,171 | 31,154 |
| 4,846 | 179 | 23,447 | 4,843 | 3,211 | 31,680 |
| 4,847 | 180 | 23,360 | 4,854 | 3,189 | 31,583 |
| 4,848 | 180 | 23,433 | 4,855 | 3,199 | 31,667 |
| 4,849 | 174 | 23,604 | 4,882 | 3,220 | 31,880 |
| 4,850 | 181 | 23,655 | 4,930 | 3,243 | 32,009 |
| 4,851 | 174 | 23,694 | 4,963 | 3,251 | 32,082 |
| 4,852 | 173 | 23,523 | 4,940 | 3,237 | 31,873 |
| 4,853 | 176 | 23,699 | 4,971 | 3,259 | 32,105 |
| 4,854 | 180 | 23,625 | 4,928 | 3,231 | 31,964 |
| 4,855 | 176 | 23,681 | 4,872 | 3,222 | 31,951 |



|       |     |        |       |       |        |
|-------|-----|--------|-------|-------|--------|
| 4,856 | 184 | 23,544 | 4,881 | 3,212 | 31,821 |
| 4,857 | 185 | 23,541 | 4,861 | 3,211 | 31,798 |
| 4,858 | 180 | 23,314 | 4,825 | 3,193 | 31,512 |
| 4,859 | 188 | 23,482 | 4,851 | 3,231 | 31,752 |
| 4,860 | 198 | 23,496 | 4,836 | 3,202 | 31,732 |
| 4,861 | 194 | 23,138 | 4,780 | 3,182 | 31,294 |
| 4,862 | 201 | 23,554 | 4,863 | 3,251 | 31,869 |
| 4,863 | 192 | 23,765 | 4,910 | 3,281 | 32,148 |
| 4,864 | 194 | 23,988 | 4,926 | 3,313 | 32,421 |
| 4,865 | 196 | 24,255 | 4,955 | 3,319 | 32,725 |
| 4,866 | 203 | 24,539 | 4,947 | 3,329 | 33,018 |
| 4,867 | 203 | 24,649 | 4,931 | 3,342 | 33,125 |
| 4,868 | 200 | 24,793 | 4,981 | 3,372 | 33,346 |
| 4,869 | 202 | 24,979 | 5,058 | 3,400 | 33,639 |
| 4,870 | 197 | 24,850 | 5,013 | 3,387 | 33,447 |
| 4,871 | 201 | 25,051 | 5,059 | 3,421 | 33,732 |
| 4,872 | 206 | 24,957 | 5,033 | 3,402 | 33,598 |
| 4,873 | 203 | 24,806 | 5,056 | 3,403 | 33,468 |
| 4,874 | 202 | 24,898 | 5,059 | 3,405 | 33,564 |
| 4,875 | 194 | 24,890 | 5,050 | 3,406 | 33,540 |
| 4,876 | 194 | 25,095 | 5,095 | 3,423 | 33,807 |
| 4,877 | 193 | 24,783 | 5,085 | 3,403 | 33,464 |
| 4,878 | 192 | 24,805 | 5,104 | 3,407 | 33,508 |
| 4,879 | 186 | 24,675 | 5,081 | 3,432 | 33,374 |
| 4,880 | 188 | 24,741 | 5,148 | 3,467 | 33,544 |
| 4,881 | 184 | 24,766 | 5,159 | 3,459 | 33,568 |
| 4,882 | 187 | 24,653 | 5,145 | 3,453 | 33,438 |
| 4,883 | 188 | 24,702 | 5,148 | 3,461 | 33,499 |
| 4,884 | 193 | 24,543 | 5,154 | 3,473 | 33,363 |
| 4,885 | 192 | 24,588 | 5,166 | 3,486 | 33,432 |
| 4,886 | 192 | 24,564 | 5,179 | 3,497 | 33,432 |
| 4,887 | 198 | 24,812 | 5,236 | 3,526 | 33,772 |

|       |     |        |       |       |        |
|-------|-----|--------|-------|-------|--------|
| 4,888 | 195 | 24,714 | 5,228 | 3,522 | 33,659 |
| 4,889 | 195 | 24,601 | 5,236 | 3,506 | 33,538 |
| 4,890 | 195 | 24,521 | 5,187 | 3,504 | 33,407 |
| 4,891 | 204 | 24,816 | 5,235 | 3,536 | 33,791 |
| 4,892 | 200 | 24,825 | 5,223 | 3,509 | 33,757 |
| 4,893 | 201 | 24,507 | 5,154 | 3,477 | 33,339 |
| 4,894 | 204 | 24,395 | 5,152 | 3,475 | 33,226 |
| 4,895 | 202 | 24,490 | 5,160 | 3,498 | 33,350 |
| 4,896 | 198 | 24,380 | 5,191 | 3,512 | 33,281 |
| 4,897 | 195 | 24,109 | 5,136 | 3,494 | 32,934 |
| 4,898 | 194 | 24,438 | 5,143 | 3,529 | 33,304 |
| 4,899 | 196 | 24,510 | 5,144 | 3,527 | 33,377 |
| 4,900 | 193 | 24,684 | 5,179 | 3,538 | 33,594 |
| 4,901 | 198 | 24,738 | 5,172 | 3,529 | 33,637 |
| 4,902 | 204 | 24,853 | 5,146 | 3,516 | 33,719 |
| 4,903 | 202 | 24,963 | 5,148 | 3,523 | 33,836 |
| 4,904 | 206 | 24,930 | 5,130 | 3,522 | 33,788 |
| 4,905 | 207 | 24,898 | 5,156 | 3,543 | 33,804 |
| 4,906 | 207 | 25,098 | 5,221 | 3,578 | 34,104 |
| 4,907 | 206 | 24,933 | 5,198 | 3,551 | 33,888 |
| 4,908 | 206 | 25,004 | 5,223 | 3,568 | 34,001 |
| 4,909 | 202 | 25,124 | 5,262 | 3,575 | 34,163 |
| 4,910 | 197 | 25,240 | 5,303 | 3,595 | 34,335 |
| 4,911 | 188 | 24,937 | 5,290 | 3,602 | 34,017 |
| 4,912 | 185 | 24,955 | 5,319 | 3,644 | 34,103 |
| 4,913 | 186 | 24,480 | 5,198 | 3,537 | 33,401 |
| 4,914 | 186 | 24,727 | 5,268 | 3,589 | 33,770 |
| 4,915 | 184 | 24,924 | 5,321 | 3,623 | 34,052 |
| 4,916 | 183 | 24,675 | 5,310 | 3,620 | 33,788 |
| 4,917 | 178 | 24,656 | 5,409 | 3,667 | 33,910 |
| 4,918 | 182 | 24,623 | 5,406 | 3,647 | 33,858 |
| 4,919 | 180 | 24,327 | 5,343 | 3,604 | 33,454 |

|       |     |        |       |       |        |
|-------|-----|--------|-------|-------|--------|
| 4,920 | 186 | 24,549 | 5,381 | 3,647 | 33,763 |
| 4,921 | 185 | 24,546 | 5,358 | 3,630 | 33,719 |
| 4,922 | 185 | 24,436 | 5,311 | 3,608 | 33,540 |
| 4,923 | 186 | 24,417 | 5,285 | 3,602 | 33,490 |
| 4,924 | 189 | 24,655 | 5,301 | 3,622 | 33,767 |
| 4,925 | 189 | 24,490 | 5,294 | 3,612 | 33,585 |
| 4,926 | 188 | 24,338 | 5,259 | 3,582 | 33,367 |
| 4,927 | 187 | 24,400 | 5,252 | 3,579 | 33,418 |
| 4,928 | 187 | 24,504 | 5,247 | 3,579 | 33,517 |
| 4,929 | 185 | 24,438 | 5,242 | 3,549 | 33,414 |
| 4,930 | 189 | 24,515 | 5,199 | 3,542 | 33,445 |
| 4,931 | 190 | 24,600 | 5,192 | 3,536 | 33,518 |
| 4,932 | 191 | 24,555 | 5,203 | 3,543 | 33,492 |
| 4,933 | 188 | 24,354 | 5,137 | 3,484 | 33,163 |
| 4,934 | 187 | 24,599 | 5,187 | 3,500 | 33,473 |
| 4,935 | 189 | 24,896 | 5,233 | 3,537 | 33,855 |
| 4,936 | 191 | 24,945 | 5,208 | 3,533 | 33,877 |
| 4,937 | 189 | 24,818 | 5,165 | 3,490 | 33,662 |
| 4,938 | 191 | 24,998 | 5,193 | 3,519 | 33,901 |
| 4,939 | 189 | 24,573 | 5,090 | 3,433 | 33,285 |
| 4,940 | 190 | 24,867 | 5,135 | 3,455 | 33,647 |
| 4,941 | 181 | 24,482 | 5,094 | 3,409 | 33,166 |
| 4,942 | 178 | 24,347 | 5,053 | 3,398 | 32,976 |
| 4,943 | 179 | 24,349 | 5,048 | 3,396 | 32,972 |
| 4,944 | 173 | 24,336 | 5,062 | 3,398 | 32,969 |
| 4,945 | 175 | 24,486 | 5,040 | 3,422 | 33,123 |
| 4,946 | 180 | 24,679 | 5,077 | 3,464 | 33,400 |
| 4,947 | 175 | 24,585 | 5,019 | 3,450 | 33,229 |
| 4,948 | 170 | 24,141 | 4,975 | 3,406 | 32,692 |
| 4,949 | 174 | 24,194 | 5,009 | 3,411 | 32,788 |
| 4,950 | 172 | 23,742 | 4,942 | 3,367 | 32,223 |
| 4,951 | 168 | 23,675 | 4,915 | 3,370 | 32,128 |

|       |     |        |       |       |        |
|-------|-----|--------|-------|-------|--------|
| 4,952 | 167 | 23,844 | 4,960 | 3,401 | 32,372 |
| 4,953 | 161 | 23,914 | 5,005 | 3,429 | 32,509 |
| 4,954 | 163 | 24,099 | 5,029 | 3,444 | 32,735 |
| 4,955 | 153 | 23,571 | 4,882 | 3,339 | 31,945 |
| 4,956 | 156 | 23,766 | 4,916 | 3,361 | 32,199 |
| 4,957 | 161 | 24,120 | 4,961 | 3,394 | 32,636 |
| 4,958 | 164 | 24,299 | 4,949 | 3,397 | 32,809 |
| 4,959 | 166 | 24,661 | 5,017 | 3,423 | 33,267 |
| 4,960 | 165 | 24,317 | 4,907 | 3,361 | 32,750 |
| 4,961 | 165 | 24,417 | 4,880 | 3,352 | 32,814 |
| 4,962 | 165 | 24,398 | 4,881 | 3,346 | 32,790 |
| 4,963 | 161 | 24,146 | 4,796 | 3,312 | 32,415 |
| 4,964 | 165 | 24,230 | 4,811 | 3,337 | 32,543 |
| 4,965 | 165 | 24,217 | 4,746 | 3,326 | 32,454 |
| 4,966 | 157 | 23,735 | 4,589 | 3,201 | 31,682 |
| 4,967 | 160 | 23,944 | 4,577 | 3,199 | 31,880 |
| 4,968 | 160 | 23,942 | 4,570 | 3,199 | 31,871 |
| 4,969 | 155 | 23,885 | 4,573 | 3,197 | 31,810 |
| 4,970 | 153 | 23,728 | 4,558 | 3,182 | 31,621 |
| 4,971 | 150 | 23,784 | 4,541 | 3,165 | 31,640 |
| 4,972 | 150 | 23,915 | 4,572 | 3,187 | 31,824 |
| 4,973 | 142 | 23,704 | 4,537 | 3,152 | 31,535 |
| 4,974 | 142 | 23,975 | 4,574 | 3,177 | 31,868 |
| 4,975 | 149 | 23,916 | 4,555 | 3,133 | 31,753 |
| 4,976 | 149 | 23,878 | 4,549 | 3,145 | 31,721 |
| 4,977 | 151 | 24,012 | 4,577 | 3,179 | 31,919 |
| 4,978 | 153 | 24,042 | 4,604 | 3,170 | 31,969 |
| 4,979 | 155 | 24,032 | 4,618 | 3,172 | 31,977 |
| 4,980 | 150 | 24,299 | 4,662 | 3,183 | 32,294 |
| 4,981 | 150 | 24,148 | 4,610 | 3,154 | 32,062 |
| 4,982 | 155 | 24,524 | 4,653 | 3,198 | 32,530 |
| 4,983 | 151 | 24,848 | 4,683 | 3,236 | 32,918 |

|       |     |        |       |       |        |
|-------|-----|--------|-------|-------|--------|
| 4,984 | 149 | 24,561 | 4,638 | 3,209 | 32,557 |
| 4,985 | 156 | 25,004 | 4,735 | 3,253 | 33,148 |
| 4,986 | 150 | 24,797 | 4,669 | 3,211 | 32,827 |
| 4,987 | 145 | 24,222 | 4,574 | 3,188 | 32,129 |
| 4,988 | 144 | 24,299 | 4,602 | 3,210 | 32,255 |
| 4,989 | 141 | 24,542 | 4,627 | 3,232 | 32,542 |
| 4,990 | 141 | 24,617 | 4,630 | 3,236 | 32,624 |
| 4,991 | 139 | 24,590 | 4,629 | 3,227 | 32,585 |
| 4,992 | 139 | 24,591 | 4,637 | 3,225 | 32,592 |
| 4,993 | 139 | 24,507 | 4,632 | 3,223 | 32,501 |
| 4,994 | 140 | 24,501 | 4,649 | 3,258 | 32,548 |
| 4,995 | 139 | 24,559 | 4,694 | 3,268 | 32,660 |
| 4,996 | 140 | 24,651 | 4,709 | 3,257 | 32,757 |
| 4,997 | 138 | 24,700 | 4,730 | 3,236 | 32,804 |
| 4,998 | 136 | 24,385 | 4,683 | 3,199 | 32,403 |
| 4,999 | 134 | 24,445 | 4,686 | 3,197 | 32,462 |
| 5,000 | 132 | 24,309 | 4,681 | 3,192 | 32,314 |
| 5,001 | 140 | 24,364 | 4,701 | 3,188 | 32,393 |
| 5,002 | 142 | 24,406 | 4,694 | 3,174 | 32,416 |
| 5,003 | 139 | 24,395 | 4,688 | 3,153 | 32,375 |
| 5,004 | 139 | 24,512 | 4,712 | 3,174 | 32,537 |
| 5,005 | 137 | 24,372 | 4,708 | 3,152 | 32,369 |
| 5,006 | 135 | 24,223 | 4,687 | 3,143 | 32,188 |
| 5,007 | 134 | 24,167 | 4,698 | 3,149 | 32,148 |
| 5,008 | 132 | 24,034 | 4,706 | 3,149 | 32,021 |
| 5,009 | 129 | 24,188 | 4,736 | 3,156 | 32,209 |
| 5,010 | 129 | 24,152 | 4,740 | 3,144 | 32,165 |
| 5,011 | 130 | 24,014 | 4,719 | 3,136 | 31,999 |
| 5,012 | 130 | 23,872 | 4,718 | 3,125 | 31,845 |
| 5,013 | 134 | 23,719 | 4,699 | 3,092 | 31,644 |
| 5,014 | 132 | 23,647 | 4,667 | 3,079 | 31,525 |
| 5,015 | 129 | 24,849 | 4,904 | 3,260 | 33,142 |

|       |     |        |       |       |        |
|-------|-----|--------|-------|-------|--------|
| 5,016 | 132 | 24,457 | 4,866 | 3,209 | 32,664 |
| 5,017 | 131 | 24,216 | 4,840 | 3,196 | 32,383 |
| 5,018 | 129 | 24,400 | 4,917 | 3,261 | 32,707 |
| 5,019 | 135 | 24,208 | 4,886 | 3,217 | 32,446 |
| 5,020 | 137 | 24,297 | 4,906 | 3,218 | 32,558 |
| 5,021 | 146 | 24,250 | 4,959 | 3,233 | 32,588 |
| 5,022 | 151 | 24,078 | 4,958 | 3,201 | 32,388 |
| 5,023 | 151 | 23,994 | 4,957 | 3,200 | 32,302 |
| 5,024 | 149 | 23,389 | 4,824 | 3,110 | 31,472 |
| 5,025 | 152 | 23,373 | 4,865 | 3,137 | 31,527 |
| 5,026 | 144 | 23,468 | 4,914 | 3,179 | 31,705 |
| 5,027 | 143 | 23,311 | 4,935 | 3,173 | 31,562 |
| 5,028 | 150 | 23,471 | 4,989 | 3,216 | 31,826 |
| 5,029 | 145 | 23,300 | 4,996 | 3,229 | 31,670 |
| 5,030 | 146 | 23,119 | 4,990 | 3,225 | 31,480 |
| 5,031 | 148 | 23,154 | 5,018 | 3,259 | 31,579 |
| 5,032 | 146 | 23,127 | 5,059 | 3,273 | 31,605 |
| 5,033 | 142 | 23,111 | 5,106 | 3,280 | 31,639 |
| 5,034 | 141 | 23,133 | 5,167 | 3,287 | 31,728 |
| 5,035 | 138 | 23,093 | 5,142 | 3,290 | 31,663 |
| 5,036 | 135 | 23,173 | 5,157 | 3,298 | 31,763 |
| 5,037 | 130 | 22,844 | 5,102 | 3,245 | 31,321 |
| 5,038 | 130 | 23,143 | 5,176 | 3,264 | 31,713 |
| 5,039 | 135 | 23,285 | 5,162 | 3,264 | 31,846 |
| 5,040 | 134 | 23,077 | 5,154 | 3,246 | 31,611 |
| 5,041 | 136 | 23,604 | 5,286 | 3,342 | 32,368 |
| 5,042 | 136 | 23,353 | 5,252 | 3,328 | 32,069 |
| 5,043 | 140 | 23,390 | 5,254 | 3,314 | 32,098 |
| 5,044 | 144 | 23,447 | 5,267 | 3,314 | 32,172 |
| 5,045 | 143 | 23,374 | 5,259 | 3,301 | 32,077 |
| 5,046 | 146 | 23,629 | 5,311 | 3,344 | 32,430 |
| 5,047 | 145 | 23,507 | 5,319 | 3,336 | 32,307 |

|       |     |        |       |       |        |
|-------|-----|--------|-------|-------|--------|
| 5,048 | 143 | 23,232 | 5,257 | 3,307 | 31,939 |
| 5,049 | 149 | 23,261 | 5,286 | 3,291 | 31,987 |
| 5,050 | 149 | 23,244 | 5,288 | 3,284 | 31,965 |
| 5,051 | 154 | 23,438 | 5,335 | 3,340 | 32,267 |
| 5,052 | 153 | 23,607 | 5,340 | 3,362 | 32,462 |
| 5,053 | 151 | 22,456 | 5,122 | 3,251 | 30,980 |
| 5,054 | 154 | 22,648 | 5,154 | 3,276 | 31,232 |
| 5,055 | 163 | 22,891 | 5,209 | 3,311 | 31,574 |
| 5,056 | 162 | 22,916 | 5,219 | 3,319 | 31,616 |
| 5,057 | 166 | 22,749 | 5,227 | 3,292 | 31,434 |
| 5,058 | 167 | 22,833 | 5,255 | 3,297 | 31,552 |
| 5,059 | 166 | 22,985 | 5,279 | 3,305 | 31,735 |
| 5,060 | 171 | 22,939 | 5,293 | 3,309 | 31,712 |
| 5,061 | 175 | 22,786 | 5,268 | 3,281 | 31,510 |
| 5,062 | 170 | 22,574 | 5,224 | 3,246 | 31,214 |
| 5,063 | 171 | 22,567 | 5,232 | 3,235 | 31,205 |
| 5,064 | 173 | 22,744 | 5,253 | 3,235 | 31,405 |
| 5,065 | 176 | 22,618 | 5,253 | 3,199 | 31,246 |
| 5,066 | 175 | 22,265 | 5,212 | 3,149 | 30,801 |
| 5,067 | 179 | 22,240 | 5,183 | 3,114 | 30,716 |
| 5,068 | 178 | 22,296 | 5,198 | 3,132 | 30,804 |
| 5,069 | 173 | 22,332 | 5,194 | 3,136 | 30,835 |
| 5,070 | 172 | 22,321 | 5,155 | 3,132 | 30,780 |
| 5,071 | 173 | 22,604 | 5,184 | 3,151 | 31,112 |
| 5,072 | 161 | 22,617 | 5,179 | 3,147 | 31,104 |
| 5,073 | 156 | 22,394 | 5,148 | 3,146 | 30,844 |
| 5,074 | 156 | 22,482 | 5,144 | 3,152 | 30,934 |
| 5,075 | 152 | 22,534 | 5,168 | 3,167 | 31,021 |
| 5,076 | 146 | 22,284 | 5,054 | 3,099 | 30,583 |
| 5,077 | 147 | 22,433 | 5,079 | 3,102 | 30,761 |
| 5,078 | 137 | 22,388 | 5,075 | 3,101 | 30,701 |
| 5,079 | 138 | 22,455 | 5,070 | 3,103 | 30,766 |

|       |     |        |       |       |        |
|-------|-----|--------|-------|-------|--------|
| 5,080 | 137 | 22,441 | 5,037 | 3,089 | 30,704 |
| 5,081 | 134 | 22,323 | 4,972 | 3,041 | 30,470 |
| 5,082 | 137 | 22,335 | 4,983 | 3,043 | 30,498 |
| 5,083 | 138 | 22,241 | 4,934 | 3,033 | 30,346 |
| 5,084 | 138 | 21,821 | 4,825 | 2,981 | 29,765 |
| 5,085 | 139 | 22,014 | 4,851 | 2,997 | 30,001 |
| 5,086 | 140 | 21,684 | 4,765 | 2,945 | 29,534 |
| 5,087 | 140 | 21,551 | 4,769 | 2,940 | 29,400 |
| 5,088 | 140 | 21,585 | 4,742 | 2,939 | 29,406 |
| 5,089 | 143 | 21,821 | 4,769 | 2,951 | 29,684 |
| 5,090 | 142 | 21,696 | 4,747 | 2,910 | 29,495 |
| 5,091 | 140 | 21,464 | 4,673 | 2,891 | 29,168 |
| 5,092 | 143 | 21,417 | 4,674 | 2,883 | 29,117 |
| 5,093 | 140 | 21,358 | 4,667 | 2,890 | 29,055 |
| 5,094 | 144 | 21,537 | 4,670 | 2,910 | 29,261 |
| 5,095 | 144 | 21,364 | 4,632 | 2,877 | 29,017 |
| 5,096 | 142 | 21,353 | 4,623 | 2,878 | 28,996 |
| 5,097 | 150 | 21,259 | 4,586 | 2,859 | 28,854 |
| 5,098 | 150 | 21,256 | 4,577 | 2,845 | 28,828 |
| 5,099 | 148 | 21,318 | 4,563 | 2,838 | 28,867 |
| 5,100 | 149 | 21,331 | 4,563 | 2,843 | 28,886 |
| 5,101 | 143 | 21,498 | 4,561 | 2,885 | 29,087 |
| 5,102 | 150 | 21,017 | 4,498 | 2,828 | 28,493 |
| 5,103 | 150 | 21,094 | 4,535 | 2,836 | 28,615 |
| 5,104 | 148 | 20,935 | 4,490 | 2,800 | 28,373 |
| 5,105 | 145 | 21,275 | 4,557 | 2,845 | 28,822 |
| 5,106 | 145 | 21,231 | 4,529 | 2,850 | 28,755 |
| 5,107 | 144 | 21,498 | 4,573 | 2,887 | 29,102 |
| 5,108 | 137 | 21,509 | 4,579 | 2,888 | 29,113 |
| 5,109 | 139 | 21,468 | 4,587 | 2,882 | 29,076 |
| 5,110 | 143 | 21,591 | 4,619 | 2,927 | 29,280 |
| 5,111 | 137 | 21,429 | 4,560 | 2,908 | 29,034 |



|       |     |        |       |       |        |
|-------|-----|--------|-------|-------|--------|
| 5,112 | 135 | 21,510 | 4,572 | 2,932 | 29,149 |
| 5,113 | 138 | 21,504 | 4,549 | 2,949 | 29,140 |
| 5,114 | 138 | 21,539 | 4,558 | 2,951 | 29,186 |
| 5,115 | 130 | 21,634 | 4,590 | 2,969 | 29,323 |
| 5,116 | 128 | 21,178 | 4,485 | 2,932 | 28,723 |
| 5,117 | 128 | 21,362 | 4,520 | 2,954 | 28,964 |
| 5,118 | 124 | 21,616 | 4,579 | 2,989 | 29,308 |
| 5,119 | 133 | 21,855 | 4,641 | 3,016 | 29,645 |
| 5,120 | 136 | 21,921 | 4,676 | 3,021 | 29,754 |
| 5,121 | 142 | 22,027 | 4,719 | 3,048 | 29,936 |
| 5,122 | 147 | 22,151 | 4,752 | 3,064 | 30,114 |
| 5,123 | 150 | 22,090 | 4,750 | 3,077 | 30,067 |
| 5,124 | 160 | 22,006 | 4,708 | 3,055 | 29,929 |
| 5,125 | 161 | 22,036 | 4,712 | 3,063 | 29,972 |
| 5,126 | 161 | 22,007 | 4,687 | 3,065 | 29,920 |
| 5,127 | 163 | 22,057 | 4,696 | 3,080 | 29,996 |
| 5,128 | 162 | 21,939 | 4,672 | 3,060 | 29,833 |
| 5,129 | 160 | 21,892 | 4,673 | 3,044 | 29,769 |
| 5,130 | 160 | 22,058 | 4,693 | 3,064 | 29,975 |
| 5,131 | 158 | 22,099 | 4,697 | 3,054 | 30,008 |
| 5,132 | 155 | 22,108 | 4,747 | 3,070 | 30,080 |
| 5,133 | 155 | 22,079 | 4,721 | 3,068 | 30,023 |
| 5,134 | 155 | 21,969 | 4,680 | 3,036 | 29,840 |
| 5,135 | 157 | 22,139 | 4,731 | 3,089 | 30,116 |
| 5,136 | 161 | 22,187 | 4,719 | 3,092 | 30,159 |
| 5,137 | 161 | 21,791 | 4,656 | 3,064 | 29,672 |
| 5,138 | 164 | 21,923 | 4,693 | 3,077 | 29,857 |
| 5,139 | 170 | 21,908 | 4,686 | 3,064 | 29,828 |
| 5,140 | 166 | 21,608 | 4,642 | 3,022 | 29,438 |
| 5,141 | 166 | 21,615 | 4,652 | 3,036 | 29,469 |
| 5,142 | 171 | 21,603 | 4,646 | 3,039 | 29,459 |
| 5,143 | 171 | 21,417 | 4,626 | 3,029 | 29,243 |

|       |     |        |       |       |        |
|-------|-----|--------|-------|-------|--------|
| 5,144 | 166 | 21,350 | 4,616 | 3,013 | 29,145 |
| 5,145 | 166 | 21,277 | 4,612 | 3,006 | 29,061 |
| 5,146 | 167 | 21,416 | 4,625 | 3,033 | 29,241 |
| 5,147 | 157 | 21,304 | 4,611 | 3,007 | 29,079 |
| 5,148 | 153 | 21,464 | 4,646 | 3,044 | 29,307 |
| 5,149 | 154 | 21,460 | 4,656 | 3,052 | 29,322 |
| 5,150 | 154 | 21,561 | 4,707 | 3,073 | 29,495 |
| 5,151 | 153 | 21,329 | 4,659 | 3,048 | 29,189 |
| 5,152 | 160 | 21,622 | 4,736 | 3,076 | 29,594 |
| 5,153 | 157 | 21,713 | 4,745 | 3,091 | 29,706 |
| 5,154 | 155 | 21,538 | 4,702 | 3,055 | 29,450 |
| 5,155 | 155 | 21,415 | 4,704 | 3,046 | 29,320 |
| 5,156 | 157 | 21,363 | 4,763 | 3,059 | 29,342 |
| 5,157 | 152 | 21,351 | 4,751 | 3,067 | 29,321 |
| 5,158 | 153 | 21,171 | 4,713 | 3,045 | 29,082 |
| 5,159 | 154 | 21,254 | 4,724 | 3,046 | 29,178 |
| 5,160 | 146 | 21,161 | 4,716 | 3,028 | 29,051 |
| 5,161 | 149 | 21,322 | 4,766 | 3,054 | 29,291 |
| 5,162 | 148 | 20,950 | 4,717 | 3,007 | 28,822 |
| 5,163 | 154 | 21,110 | 4,791 | 3,034 | 29,089 |
| 5,164 | 151 | 20,825 | 4,722 | 3,025 | 28,723 |
| 5,165 | 153 | 20,915 | 4,773 | 3,064 | 28,905 |
| 5,166 | 153 | 20,563 | 4,699 | 2,996 | 28,411 |
| 5,167 | 162 | 20,584 | 4,703 | 2,999 | 28,448 |
| 5,168 | 162 | 20,363 | 4,644 | 2,974 | 28,143 |
| 5,169 | 173 | 20,704 | 4,666 | 3,020 | 28,563 |
| 5,170 | 167 | 20,557 | 4,564 | 2,987 | 28,275 |
| 5,171 | 167 | 20,543 | 4,574 | 2,999 | 28,283 |
| 5,172 | 162 | 20,727 | 4,605 | 3,038 | 28,532 |
| 5,173 | 158 | 20,327 | 4,540 | 3,010 | 28,035 |
| 5,174 | 156 | 20,297 | 4,537 | 3,020 | 28,010 |
| 5,175 | 153 | 20,394 | 4,620 | 3,062 | 28,229 |

|       |     |        |       |       |        |
|-------|-----|--------|-------|-------|--------|
| 5,176 | 157 | 20,341 | 4,625 | 3,068 | 28,191 |
| 5,177 | 156 | 20,611 | 4,669 | 3,080 | 28,516 |
| 5,178 | 160 | 20,813 | 4,714 | 3,103 | 28,790 |
| 5,179 | 165 | 20,832 | 4,705 | 3,100 | 28,802 |
| 5,180 | 165 | 20,705 | 4,675 | 3,098 | 28,643 |
| 5,181 | 173 | 21,189 | 4,828 | 3,187 | 29,377 |
| 5,182 | 173 | 21,257 | 4,839 | 3,213 | 29,482 |
| 5,183 | 175 | 21,385 | 4,817 | 3,223 | 29,600 |
| 5,184 | 179 | 21,658 | 4,878 | 3,264 | 29,979 |
| 5,185 | 178 | 21,624 | 4,883 | 3,254 | 29,939 |
| 5,186 | 182 | 21,931 | 4,974 | 3,310 | 30,397 |
| 5,187 | 177 | 22,082 | 5,025 | 3,349 | 30,633 |
| 5,188 | 171 | 21,724 | 4,972 | 3,309 | 30,176 |
| 5,189 | 173 | 21,880 | 5,003 | 3,326 | 30,382 |
| 5,190 | 173 | 22,194 | 5,074 | 3,361 | 30,802 |
| 5,191 | 172 | 22,280 | 5,097 | 3,382 | 30,931 |
| 5,192 | 168 | 22,401 | 5,114 | 3,356 | 31,039 |
| 5,193 | 168 | 22,217 | 5,086 | 3,319 | 30,790 |
| 5,194 | 165 | 22,403 | 5,134 | 3,377 | 31,079 |
| 5,195 | 165 | 22,398 | 5,145 | 3,377 | 31,085 |
| 5,196 | 165 | 22,765 | 5,208 | 3,413 | 31,551 |
| 5,197 | 171 | 22,959 | 5,257 | 3,441 | 31,828 |
| 5,198 | 174 | 22,972 | 5,245 | 3,456 | 31,847 |
| 5,199 | 176 | 23,005 | 5,245 | 3,410 | 31,836 |
| 5,200 | 176 | 23,022 | 5,236 | 3,420 | 31,854 |
| 5,201 | 171 | 22,884 | 5,188 | 3,356 | 31,599 |
| 5,202 | 180 | 23,202 | 5,262 | 3,414 | 32,058 |
| 5,203 | 179 | 23,561 | 5,322 | 3,459 | 32,521 |
| 5,204 | 171 | 23,618 | 5,316 | 3,451 | 32,556 |
| 5,205 | 169 | 23,471 | 5,251 | 3,450 | 32,341 |
| 5,206 | 170 | 23,766 | 5,280 | 3,472 | 32,688 |
| 5,207 | 171 | 23,867 | 5,272 | 3,486 | 32,796 |

|       |     |        |       |       |        |
|-------|-----|--------|-------|-------|--------|
| 5,208 | 169 | 23,888 | 5,282 | 3,481 | 32,820 |
| 5,209 | 173 | 23,930 | 5,258 | 3,477 | 32,838 |
| 5,210 | 175 | 23,975 | 5,275 | 3,503 | 32,928 |
| 5,211 | 176 | 24,391 | 5,324 | 3,527 | 33,418 |
| 5,212 | 172 | 24,145 | 5,223 | 3,483 | 33,023 |
| 5,213 | 172 | 24,472 | 5,269 | 3,491 | 33,404 |
| 5,214 | 168 | 24,860 | 5,324 | 3,528 | 33,880 |
| 5,215 | 166 | 24,751 | 5,311 | 3,517 | 33,745 |
| 5,216 | 165 | 24,733 | 5,329 | 3,497 | 33,724 |
| 5,217 | 170 | 24,927 | 5,384 | 3,539 | 34,020 |
| 5,218 | 160 | 24,617 | 5,348 | 3,502 | 33,627 |
| 5,219 | 162 | 24,604 | 5,376 | 3,531 | 33,673 |
| 5,220 | 154 | 24,594 | 5,412 | 3,555 | 33,715 |
| 5,221 | 150 | 24,467 | 5,403 | 3,539 | 33,559 |
| 5,222 | 161 | 24,193 | 5,363 | 3,504 | 33,221 |
| 5,223 | 159 | 24,159 | 5,344 | 3,487 | 33,149 |
| 5,224 | 157 | 24,358 | 5,365 | 3,477 | 33,357 |
| 5,225 | 151 | 24,121 | 5,324 | 3,405 | 33,001 |
| 5,226 | 152 | 24,286 | 5,317 | 3,412 | 33,167 |
| 5,227 | 147 | 24,317 | 5,329 | 3,432 | 33,225 |
| 5,228 | 145 | 23,820 | 5,239 | 3,367 | 32,571 |
| 5,229 | 145 | 23,964 | 5,266 | 3,396 | 32,771 |
| 5,230 | 138 | 24,218 | 5,297 | 3,394 | 33,047 |
| 5,231 | 143 | 24,371 | 5,325 | 3,409 | 33,248 |
| 5,232 | 145 | 24,169 | 5,322 | 3,362 | 32,998 |
| 5,233 | 154 | 24,242 | 5,386 | 3,389 | 33,171 |
| 5,234 | 152 | 23,968 | 5,343 | 3,327 | 32,790 |
| 5,235 | 150 | 23,962 | 5,357 | 3,333 | 32,802 |
| 5,236 | 147 | 23,756 | 5,321 | 3,287 | 32,511 |
| 5,237 | 150 | 23,382 | 5,240 | 3,241 | 32,013 |
| 5,238 | 149 | 23,340 | 5,234 | 3,217 | 31,940 |
| 5,239 | 150 | 23,260 | 5,211 | 3,201 | 31,822 |

|       |     |        |       |       |        |
|-------|-----|--------|-------|-------|--------|
| 5,240 | 157 | 23,312 | 5,235 | 3,226 | 31,930 |
| 5,241 | 157 | 23,222 | 5,236 | 3,226 | 31,841 |
| 5,242 | 151 | 23,061 | 5,194 | 3,217 | 31,623 |
| 5,243 | 155 | 22,966 | 5,182 | 3,208 | 31,511 |
| 5,244 | 155 | 22,881 | 5,127 | 3,185 | 31,348 |
| 5,245 | 157 | 22,896 | 5,120 | 3,176 | 31,349 |
| 5,246 | 159 | 22,840 | 5,119 | 3,184 | 31,302 |
| 5,247 | 158 | 22,919 | 5,154 | 3,215 | 31,446 |
| 5,248 | 157 | 22,756 | 5,141 | 3,195 | 31,249 |
| 5,249 | 156 | 22,709 | 5,184 | 3,221 | 31,270 |
| 5,250 | 154 | 22,398 | 5,163 | 3,224 | 30,939 |
| 5,251 | 154 | 22,186 | 5,144 | 3,202 | 30,686 |
| 5,252 | 165 | 22,619 | 5,288 | 3,331 | 31,403 |
| 5,253 | 156 | 22,334 | 5,219 | 3,288 | 30,997 |
| 5,254 | 162 | 22,110 | 5,209 | 3,253 | 30,734 |
| 5,255 | 162 | 21,728 | 5,191 | 3,224 | 30,305 |
| 5,256 | 168 | 21,859 | 5,256 | 3,265 | 30,548 |
| 5,257 | 169 | 21,900 | 5,276 | 3,271 | 30,616 |
| 5,258 | 167 | 21,651 | 5,242 | 3,239 | 30,299 |
| 5,259 | 167 | 21,661 | 5,255 | 3,239 | 30,322 |
| 5,260 | 166 | 21,690 | 5,300 | 3,259 | 30,415 |
| 5,261 | 168 | 21,872 | 5,342 | 3,261 | 30,643 |
| 5,262 | 176 | 21,653 | 5,337 | 3,257 | 30,423 |
| 5,263 | 174 | 21,462 | 5,307 | 3,251 | 30,194 |
| 5,264 | 178 | 21,493 | 5,328 | 3,283 | 30,282 |
| 5,265 | 178 | 21,356 | 5,309 | 3,268 | 30,111 |
| 5,266 | 177 | 21,271 | 5,249 | 3,231 | 29,928 |
| 5,267 | 177 | 21,503 | 5,300 | 3,278 | 30,258 |
| 5,268 | 177 | 21,706 | 5,371 | 3,326 | 30,580 |
| 5,269 | 182 | 21,715 | 5,348 | 3,317 | 30,562 |
| 5,270 | 180 | 21,618 | 5,315 | 3,293 | 30,406 |
| 5,271 | 178 | 22,086 | 5,407 | 3,355 | 31,026 |

|       |     |        |       |       |        |
|-------|-----|--------|-------|-------|--------|
| 5,272 | 177 | 22,003 | 5,406 | 3,372 | 30,958 |
| 5,273 | 167 | 21,737 | 5,344 | 3,304 | 30,552 |
| 5,274 | 168 | 21,733 | 5,362 | 3,316 | 30,579 |
| 5,275 | 175 | 22,005 | 5,392 | 3,360 | 30,932 |
| 5,276 | 175 | 21,781 | 5,334 | 3,350 | 30,640 |
| 5,277 | 176 | 22,073 | 5,404 | 3,383 | 31,036 |
| 5,278 | 178 | 22,117 | 5,413 | 3,391 | 31,099 |
| 5,279 | 169 | 22,107 | 5,376 | 3,393 | 31,045 |
| 5,280 | 172 | 22,051 | 5,372 | 3,401 | 30,996 |
| 5,281 | 172 | 21,762 | 5,302 | 3,380 | 30,616 |
| 5,282 | 169 | 22,221 | 5,345 | 3,435 | 31,170 |
| 5,283 | 169 | 22,222 | 5,306 | 3,424 | 31,121 |
| 5,284 | 157 | 21,899 | 5,208 | 3,415 | 30,679 |
| 5,285 | 153 | 21,182 | 5,047 | 3,322 | 29,704 |
| 5,286 | 160 | 21,435 | 5,106 | 3,360 | 30,061 |
| 5,287 | 161 | 21,779 | 5,156 | 3,401 | 30,497 |
| 5,288 | 161 | 21,861 | 5,159 | 3,413 | 30,594 |
| 5,289 | 159 | 22,214 | 5,253 | 3,489 | 31,115 |
| 5,290 | 150 | 22,237 | 5,257 | 3,509 | 31,153 |
| 5,291 | 150 | 22,232 | 5,237 | 3,505 | 31,124 |
| 5,292 | 157 | 22,020 | 5,171 | 3,449 | 30,797 |
| 5,293 | 158 | 22,057 | 5,162 | 3,462 | 30,839 |
| 5,294 | 158 | 22,111 | 5,171 | 3,467 | 30,907 |
| 5,295 | 156 | 22,229 | 5,215 | 3,481 | 31,081 |
| 5,296 | 155 | 22,355 | 5,263 | 3,527 | 31,300 |
| 5,297 | 149 | 22,220 | 5,205 | 3,490 | 31,064 |
| 5,298 | 146 | 21,852 | 5,044 | 3,411 | 30,453 |
| 5,299 | 148 | 22,135 | 5,105 | 3,452 | 30,840 |
| 5,300 | 146 | 22,324 | 5,180 | 3,475 | 31,125 |
| 5,301 | 143 | 22,032 | 5,054 | 3,418 | 30,647 |
| 5,302 | 146 | 22,321 | 5,114 | 3,438 | 31,019 |
| 5,303 | 141 | 22,433 | 5,087 | 3,443 | 31,104 |

|       |     |        |       |       |        |
|-------|-----|--------|-------|-------|--------|
| 5,304 | 144 | 22,149 | 4,988 | 3,384 | 30,665 |
| 5,305 | 144 | 22,212 | 4,997 | 3,390 | 30,743 |
| 5,306 | 146 | 22,574 | 5,010 | 3,410 | 31,140 |
| 5,307 | 141 | 22,337 | 4,947 | 3,376 | 30,801 |
| 5,308 | 152 | 22,110 | 4,852 | 3,313 | 30,427 |
| 5,309 | 156 | 22,360 | 4,881 | 3,343 | 30,740 |
| 5,310 | 152 | 22,435 | 4,884 | 3,355 | 30,826 |
| 5,311 | 152 | 22,371 | 4,830 | 3,345 | 30,698 |
| 5,312 | 152 | 22,345 | 4,833 | 3,352 | 30,682 |
| 5,313 | 145 | 22,620 | 4,881 | 3,372 | 31,018 |
| 5,314 | 146 | 22,333 | 4,805 | 3,330 | 30,614 |
| 5,315 | 145 | 22,530 | 4,867 | 3,375 | 30,917 |
| 5,316 | 151 | 22,413 | 4,818 | 3,364 | 30,746 |
| 5,317 | 154 | 22,629 | 4,886 | 3,400 | 31,069 |
| 5,318 | 154 | 22,667 | 4,886 | 3,399 | 31,106 |
| 5,319 | 153 | 22,656 | 4,895 | 3,387 | 31,091 |
| 5,320 | 148 | 22,381 | 4,832 | 3,339 | 30,700 |
| 5,321 | 149 | 22,419 | 4,849 | 3,341 | 30,758 |
| 5,322 | 157 | 22,533 | 4,905 | 3,356 | 30,951 |
| 5,323 | 159 | 22,560 | 4,901 | 3,335 | 30,955 |
| 5,324 | 159 | 22,377 | 4,854 | 3,317 | 30,707 |
| 5,325 | 159 | 22,683 | 4,936 | 3,325 | 31,103 |
| 5,326 | 154 | 22,429 | 4,893 | 3,300 | 30,776 |
| 5,327 | 153 | 22,616 | 4,922 | 3,329 | 31,020 |
| 5,328 | 161 | 22,781 | 4,951 | 3,340 | 31,233 |
| 5,329 | 167 | 22,835 | 4,961 | 3,331 | 31,294 |
| 5,330 | 173 | 22,805 | 4,980 | 3,321 | 31,279 |
| 5,331 | 169 | 22,504 | 4,946 | 3,283 | 30,902 |
| 5,332 | 175 | 22,992 | 5,081 | 3,377 | 31,625 |
| 5,333 | 180 | 23,019 | 5,104 | 3,380 | 31,683 |
| 5,334 | 176 | 22,960 | 5,102 | 3,390 | 31,628 |
| 5,335 | 179 | 22,883 | 5,075 | 3,363 | 31,500 |

|       |     |        |       |       |        |
|-------|-----|--------|-------|-------|--------|
| 5,336 | 181 | 23,119 | 5,111 | 3,387 | 31,798 |
| 5,337 | 175 | 23,019 | 5,116 | 3,384 | 31,694 |
| 5,338 | 177 | 22,959 | 5,162 | 3,395 | 31,693 |
| 5,339 | 186 | 23,208 | 5,250 | 3,401 | 32,045 |
| 5,340 | 186 | 23,315 | 5,262 | 3,396 | 32,159 |
| 5,341 | 188 | 23,305 | 5,272 | 3,387 | 32,152 |
| 5,342 | 187 | 23,291 | 5,292 | 3,389 | 32,159 |
| 5,343 | 180 | 23,263 | 5,321 | 3,408 | 32,172 |
| 5,344 | 179 | 23,397 | 5,324 | 3,425 | 32,325 |
| 5,345 | 184 | 23,859 | 5,409 | 3,479 | 32,931 |
| 5,346 | 184 | 24,033 | 5,410 | 3,485 | 33,112 |
| 5,347 | 188 | 23,882 | 5,402 | 3,455 | 32,927 |
| 5,348 | 189 | 23,939 | 5,431 | 3,482 | 33,041 |
| 5,349 | 189 | 24,105 | 5,489 | 3,481 | 33,264 |
| 5,350 | 186 | 24,198 | 5,449 | 3,472 | 33,305 |
| 5,351 | 186 | 24,170 | 5,455 | 3,485 | 33,296 |
| 5,352 | 182 | 24,370 | 5,505 | 3,498 | 33,555 |
| 5,353 | 182 | 24,422 | 5,554 | 3,518 | 33,676 |
| 5,354 | 182 | 24,732 | 5,624 | 3,539 | 34,077 |
| 5,355 | 175 | 25,149 | 5,676 | 3,608 | 34,608 |
| 5,356 | 169 | 25,041 | 5,655 | 3,610 | 34,475 |
| 5,357 | 169 | 25,231 | 5,750 | 3,659 | 34,809 |
| 5,358 | 166 | 25,211 | 5,757 | 3,657 | 34,791 |
| 5,359 | 161 | 25,086 | 5,746 | 3,655 | 34,648 |
| 5,360 | 157 | 25,230 | 5,834 | 3,703 | 34,924 |
| 5,361 | 161 | 24,956 | 5,795 | 3,658 | 34,570 |
| 5,362 | 157 | 24,838 | 5,785 | 3,640 | 34,420 |
| 5,363 | 163 | 25,026 | 5,818 | 3,667 | 34,674 |
| 5,364 | 163 | 25,214 | 5,809 | 3,700 | 34,886 |
| 5,365 | 169 | 25,267 | 5,844 | 3,685 | 34,965 |
| 5,366 | 174 | 25,473 | 5,929 | 3,703 | 35,279 |
| 5,367 | 170 | 25,502 | 5,931 | 3,718 | 35,321 |



|       |     |        |       |       |        |
|-------|-----|--------|-------|-------|--------|
| 5,368 | 183 | 25,691 | 5,970 | 3,710 | 35,554 |
| 5,369 | 184 | 25,915 | 5,972 | 3,733 | 35,804 |
| 5,370 | 189 | 25,313 | 5,819 | 3,628 | 34,949 |
| 5,371 | 191 | 25,594 | 5,883 | 3,669 | 35,337 |
| 5,372 | 191 | 25,860 | 5,950 | 3,724 | 35,725 |
| 5,373 | 192 | 25,866 | 5,938 | 3,728 | 35,724 |
| 5,374 | 191 | 26,177 | 6,022 | 3,797 | 36,187 |
| 5,375 | 191 | 26,631 | 6,147 | 3,878 | 36,847 |
| 5,376 | 188 | 26,476 | 6,099 | 3,863 | 36,626 |
| 5,377 | 188 | 26,206 | 6,099 | 3,850 | 36,343 |
| 5,378 | 184 | 26,103 | 6,102 | 3,842 | 36,231 |
| 5,379 | 179 | 26,089 | 6,174 | 3,896 | 36,338 |
| 5,380 | 176 | 26,097 | 6,161 | 3,905 | 36,339 |
| 5,381 | 172 | 26,106 | 6,117 | 3,903 | 36,298 |
| 5,382 | 171 | 26,049 | 6,105 | 3,904 | 36,229 |
| 5,383 | 174 | 26,182 | 6,167 | 3,903 | 36,426 |
| 5,384 | 173 | 26,002 | 6,175 | 3,890 | 36,240 |
| 5,385 | 174 | 25,961 | 6,190 | 3,888 | 36,213 |
| 5,386 | 173 | 25,687 | 6,159 | 3,876 | 35,895 |
| 5,387 | 173 | 25,741 | 6,153 | 3,890 | 35,957 |
| 5,388 | 169 | 25,726 | 6,147 | 3,909 | 35,951 |
| 5,389 | 171 | 26,016 | 6,221 | 3,947 | 36,355 |
| 5,390 | 172 | 25,748 | 6,144 | 3,916 | 35,980 |
| 5,391 | 173 | 25,588 | 6,090 | 3,886 | 35,737 |
| 5,392 | 179 | 25,827 | 6,135 | 3,905 | 36,046 |
| 5,393 | 179 | 25,744 | 6,128 | 3,892 | 35,943 |
| 5,394 | 179 | 25,812 | 6,192 | 3,917 | 36,100 |
| 5,395 | 180 | 25,654 | 6,178 | 3,906 | 35,918 |
| 5,396 | 180 | 25,381 | 6,181 | 3,896 | 35,638 |
| 5,397 | 179 | 25,095 | 6,090 | 3,852 | 35,216 |
| 5,398 | 186 | 25,139 | 6,091 | 3,833 | 35,249 |
| 5,399 | 186 | 24,847 | 6,020 | 3,788 | 34,841 |

|       |     |        |       |       |        |
|-------|-----|--------|-------|-------|--------|
| 5,400 | 183 | 24,875 | 6,033 | 3,820 | 34,911 |
| 5,401 | 186 | 24,785 | 6,035 | 3,804 | 34,810 |
| 5,402 | 187 | 24,911 | 6,024 | 3,786 | 34,908 |
| 5,403 | 179 | 24,611 | 5,949 | 3,757 | 34,496 |
| 5,404 | 182 | 24,040 | 5,795 | 3,685 | 33,702 |
| 5,405 | 183 | 24,166 | 5,821 | 3,697 | 33,867 |
| 5,406 | 187 | 24,389 | 5,891 | 3,735 | 34,202 |
| 5,407 | 189 | 24,046 | 5,801 | 3,669 | 33,705 |
| 5,408 | 188 | 24,025 | 5,760 | 3,652 | 33,625 |
| 5,409 | 191 | 23,938 | 5,744 | 3,638 | 33,511 |
| 5,410 | 195 | 23,856 | 5,709 | 3,614 | 33,374 |
| 5,411 | 194 | 23,998 | 5,757 | 3,637 | 33,586 |
| 5,412 | 197 | 23,661 | 5,681 | 3,594 | 33,133 |
| 5,413 | 196 | 23,661 | 5,674 | 3,608 | 33,139 |
| 5,414 | 187 | 23,460 | 5,654 | 3,608 | 32,909 |
| 5,415 | 189 | 23,576 | 5,738 | 3,626 | 33,129 |
| 5,416 | 178 | 23,257 | 5,660 | 3,591 | 32,686 |
| 5,417 | 174 | 23,217 | 5,630 | 3,586 | 32,607 |
| 5,418 | 170 | 23,254 | 5,653 | 3,590 | 32,667 |
| 5,419 | 157 | 22,821 | 5,558 | 3,540 | 32,076 |
| 5,420 | 152 | 22,911 | 5,619 | 3,575 | 32,257 |
| 5,421 | 142 | 22,972 | 5,648 | 3,589 | 32,351 |
| 5,422 | 136 | 22,952 | 5,636 | 3,569 | 32,293 |
| 5,423 | 136 | 22,953 | 5,589 | 3,547 | 32,225 |
| 5,424 | 137 | 23,174 | 5,622 | 3,555 | 32,488 |
| 5,425 | 139 | 23,330 | 5,677 | 3,596 | 32,742 |
| 5,426 | 142 | 23,328 | 5,662 | 3,605 | 32,737 |
| 5,427 | 146 | 23,128 | 5,615 | 3,561 | 32,450 |
| 5,428 | 147 | 23,255 | 5,581 | 3,561 | 32,544 |
| 5,429 | 150 | 23,152 | 5,553 | 3,532 | 32,387 |
| 5,430 | 150 | 23,216 | 5,565 | 3,536 | 32,467 |
| 5,431 | 148 | 22,852 | 5,501 | 3,483 | 31,984 |

|       |     |        |       |       |        |
|-------|-----|--------|-------|-------|--------|
| 5,432 | 147 | 23,088 | 5,537 | 3,510 | 32,282 |
| 5,433 | 142 | 22,969 | 5,478 | 3,471 | 32,060 |
| 5,434 | 143 | 23,103 | 5,519 | 3,495 | 32,260 |
| 5,435 | 139 | 22,788 | 5,403 | 3,435 | 31,765 |
| 5,436 | 137 | 22,775 | 5,391 | 3,438 | 31,741 |
| 5,437 | 140 | 22,864 | 5,371 | 3,418 | 31,793 |
| 5,438 | 142 | 23,083 | 5,405 | 3,444 | 32,074 |
| 5,439 | 143 | 23,139 | 5,407 | 3,442 | 32,131 |
| 5,440 | 142 | 23,187 | 5,381 | 3,431 | 32,141 |
| 5,441 | 133 | 22,898 | 5,303 | 3,408 | 31,742 |
| 5,442 | 130 | 22,835 | 5,318 | 3,423 | 31,706 |
| 5,443 | 127 | 23,220 | 5,354 | 3,457 | 32,158 |
| 5,444 | 129 | 23,151 | 5,302 | 3,432 | 32,014 |
| 5,445 | 129 | 23,501 | 5,378 | 3,485 | 32,493 |
| 5,446 | 120 | 23,197 | 5,309 | 3,428 | 32,054 |
| 5,447 | 120 | 23,210 | 5,295 | 3,431 | 32,056 |
| 5,448 | 117 | 23,210 | 5,366 | 3,467 | 32,160 |
| 5,449 | 113 | 23,126 | 5,334 | 3,459 | 32,032 |
| 5,450 | 113 | 23,131 | 5,325 | 3,456 | 32,025 |
| 5,451 | 118 | 23,569 | 5,435 | 3,523 | 32,645 |
| 5,452 | 124 | 23,475 | 5,446 | 3,563 | 32,608 |
| 5,453 | 123 | 23,100 | 5,404 | 3,531 | 32,158 |
| 5,454 | 123 | 22,989 | 5,419 | 3,519 | 32,050 |
| 5,455 | 120 | 22,599 | 5,366 | 3,485 | 31,570 |
| 5,456 | 126 | 22,972 | 5,479 | 3,535 | 32,112 |
| 5,457 | 117 | 23,032 | 5,459 | 3,532 | 32,140 |
| 5,458 | 117 | 22,994 | 5,464 | 3,520 | 32,095 |
| 5,459 | 112 | 22,369 | 5,381 | 3,455 | 31,317 |
| 5,460 | 112 | 22,605 | 5,438 | 3,474 | 31,629 |
| 5,461 | 112 | 22,555 | 5,401 | 3,449 | 31,517 |
| 5,462 | 114 | 22,771 | 5,440 | 3,464 | 31,789 |
| 5,463 | 116 | 23,078 | 5,513 | 3,501 | 32,208 |

|       |     |        |       |       |        |
|-------|-----|--------|-------|-------|--------|
| 5,464 | 120 | 23,262 | 5,592 | 3,545 | 32,519 |
| 5,465 | 123 | 23,083 | 5,565 | 3,512 | 32,283 |
| 5,466 | 126 | 23,343 | 5,633 | 3,555 | 32,657 |
| 5,467 | 134 | 23,207 | 5,587 | 3,517 | 32,445 |
| 5,468 | 138 | 23,145 | 5,576 | 3,519 | 32,378 |
| 5,469 | 138 | 23,141 | 5,594 | 3,521 | 32,394 |
| 5,470 | 138 | 23,003 | 5,580 | 3,520 | 32,241 |
| 5,471 | 138 | 23,256 | 5,639 | 3,555 | 32,588 |
| 5,472 | 135 | 22,782 | 5,551 | 3,508 | 31,976 |
| 5,473 | 138 | 22,902 | 5,570 | 3,537 | 32,147 |
| 5,474 | 137 | 22,853 | 5,601 | 3,535 | 32,126 |
| 5,475 | 138 | 23,014 | 5,658 | 3,550 | 32,360 |
| 5,476 | 135 | 23,013 | 5,631 | 3,534 | 32,313 |
| 5,477 | 132 | 22,968 | 5,634 | 3,506 | 32,240 |
| 5,478 | 137 | 22,952 | 5,604 | 3,499 | 32,192 |
| 5,479 | 134 | 22,603 | 5,513 | 3,444 | 31,694 |
| 5,480 | 135 | 22,944 | 5,531 | 3,467 | 32,077 |
| 5,481 | 135 | 23,309 | 5,604 | 3,507 | 32,555 |
| 5,482 | 142 | 23,470 | 5,653 | 3,547 | 32,812 |
| 5,483 | 150 | 23,546 | 5,705 | 3,576 | 32,977 |
| 5,484 | 148 | 23,247 | 5,647 | 3,552 | 32,594 |
| 5,485 | 146 | 23,214 | 5,652 | 3,551 | 32,563 |
| 5,486 | 147 | 22,773 | 5,577 | 3,502 | 31,999 |
| 5,487 | 145 | 22,484 | 5,529 | 3,449 | 31,607 |
| 5,488 | 144 | 22,860 | 5,640 | 3,518 | 32,162 |
| 5,489 | 146 | 23,101 | 5,700 | 3,575 | 32,522 |
| 5,490 | 145 | 22,752 | 5,625 | 3,523 | 32,045 |
| 5,491 | 144 | 22,356 | 5,540 | 3,485 | 31,525 |
| 5,492 | 150 | 23,027 | 5,726 | 3,585 | 32,488 |
| 5,493 | 148 | 22,949 | 5,732 | 3,593 | 32,422 |
| 5,494 | 145 | 22,757 | 5,725 | 3,597 | 32,224 |
| 5,495 | 143 | 22,584 | 5,701 | 3,600 | 32,028 |

|       |     |        |       |       |        |
|-------|-----|--------|-------|-------|--------|
| 5,496 | 143 | 22,709 | 5,717 | 3,611 | 32,180 |
| 5,497 | 144 | 22,630 | 5,683 | 3,607 | 32,064 |
| 5,498 | 145 | 22,821 | 5,704 | 3,609 | 32,279 |
| 5,499 | 146 | 23,069 | 5,731 | 3,615 | 32,561 |
| 5,500 | 142 | 23,041 | 5,730 | 3,620 | 32,533 |
| 5,501 | 146 | 23,076 | 5,729 | 3,623 | 32,574 |
| 5,502 | 142 | 23,118 | 5,725 | 3,628 | 32,613 |
| 5,503 | 140 | 23,030 | 5,673 | 3,579 | 32,422 |
| 5,504 | 140 | 23,057 | 5,673 | 3,576 | 32,446 |
| 5,505 | 143 | 23,352 | 5,653 | 3,590 | 32,738 |
| 5,506 | 144 | 23,256 | 5,642 | 3,589 | 32,631 |
| 5,507 | 148 | 23,531 | 5,715 | 3,661 | 33,055 |
| 5,508 | 147 | 23,451 | 5,708 | 3,646 | 32,952 |
| 5,509 | 143 | 23,212 | 5,620 | 3,632 | 32,607 |
| 5,510 | 142 | 22,926 | 5,533 | 3,613 | 32,214 |
| 5,511 | 142 | 23,251 | 5,548 | 3,632 | 32,573 |
| 5,512 | 137 | 23,566 | 5,576 | 3,656 | 32,935 |
| 5,513 | 138 | 23,908 | 5,644 | 3,705 | 33,395 |
| 5,514 | 132 | 23,783 | 5,616 | 3,671 | 33,202 |
| 5,515 | 128 | 23,767 | 5,530 | 3,638 | 33,063 |
| 5,516 | 130 | 23,950 | 5,575 | 3,666 | 33,321 |
| 5,517 | 127 | 23,939 | 5,559 | 3,685 | 33,310 |
| 5,518 | 119 | 24,074 | 5,604 | 3,723 | 33,520 |
| 5,519 | 123 | 24,004 | 5,591 | 3,713 | 33,431 |
| 5,520 | 129 | 24,243 | 5,614 | 3,719 | 33,705 |
| 5,521 | 132 | 24,582 | 5,684 | 3,783 | 34,181 |
| 5,522 | 136 | 24,450 | 5,673 | 3,766 | 34,025 |
| 5,523 | 138 | 24,270 | 5,641 | 3,735 | 33,784 |
| 5,524 | 138 | 24,030 | 5,568 | 3,716 | 33,452 |
| 5,525 | 139 | 23,931 | 5,576 | 3,733 | 33,379 |
| 5,526 | 137 | 23,616 | 5,513 | 3,718 | 32,984 |
| 5,527 | 136 | 23,511 | 5,504 | 3,707 | 32,858 |

|       |     |        |       |       |        |
|-------|-----|--------|-------|-------|--------|
| 5,528 | 138 | 23,638 | 5,521 | 3,747 | 33,044 |
| 5,529 | 129 | 23,299 | 5,488 | 3,704 | 32,620 |
| 5,530 | 130 | 23,211 | 5,487 | 3,727 | 32,555 |
| 5,531 | 129 | 23,572 | 5,619 | 3,796 | 33,116 |
| 5,532 | 131 | 23,456 | 5,624 | 3,811 | 33,022 |
| 5,533 | 123 | 23,287 | 5,619 | 3,789 | 32,818 |
| 5,534 | 123 | 23,231 | 5,599 | 3,755 | 32,708 |
| 5,535 | 140 | 23,222 | 5,562 | 3,753 | 32,677 |
| 5,536 | 140 | 23,347 | 5,555 | 3,765 | 32,807 |
| 5,537 | 143 | 23,405 | 5,539 | 3,766 | 32,853 |
| 5,538 | 143 | 23,323 | 5,554 | 3,759 | 32,779 |
| 5,539 | 143 | 23,601 | 5,614 | 3,799 | 33,157 |
| 5,540 | 138 | 23,434 | 5,559 | 3,734 | 32,865 |
| 5,541 | 138 | 23,569 | 5,596 | 3,757 | 33,060 |
| 5,542 | 138 | 23,480 | 5,618 | 3,754 | 32,990 |
| 5,543 | 139 | 23,381 | 5,571 | 3,736 | 32,827 |
| 5,544 | 156 | 23,875 | 5,683 | 3,811 | 33,525 |
| 5,545 | 163 | 23,631 | 5,624 | 3,740 | 33,158 |
| 5,546 | 164 | 23,615 | 5,571 | 3,706 | 33,056 |
| 5,547 | 170 | 23,575 | 5,557 | 3,693 | 32,995 |
| 5,548 | 170 | 23,653 | 5,562 | 3,680 | 33,065 |
| 5,549 | 169 | 23,573 | 5,573 | 3,704 | 33,019 |
| 5,550 | 170 | 23,571 | 5,584 | 3,675 | 33,000 |
| 5,551 | 177 | 23,897 | 5,641 | 3,702 | 33,417 |
| 5,552 | 174 | 23,789 | 5,626 | 3,709 | 33,298 |
| 5,553 | 179 | 23,887 | 5,673 | 3,738 | 33,477 |
| 5,554 | 176 | 23,810 | 5,673 | 3,734 | 33,393 |
| 5,555 | 174 | 23,648 | 5,673 | 3,743 | 33,238 |
| 5,556 | 176 | 23,313 | 5,599 | 3,676 | 32,764 |
| 5,557 | 176 | 23,430 | 5,609 | 3,692 | 32,907 |
| 5,558 | 176 | 23,374 | 5,648 | 3,674 | 32,872 |
| 5,559 | 178 | 23,467 | 5,708 | 3,713 | 33,066 |

|       |     |        |       |       |        |
|-------|-----|--------|-------|-------|--------|
| 5,560 | 185 | 23,269 | 5,703 | 3,671 | 32,828 |
| 5,561 | 187 | 22,963 | 5,689 | 3,628 | 32,467 |
| 5,562 | 187 | 22,662 | 5,665 | 3,612 | 32,126 |
| 5,563 | 188 | 22,746 | 5,713 | 3,644 | 32,291 |
| 5,564 | 186 | 22,761 | 5,715 | 3,661 | 32,323 |
| 5,565 | 185 | 22,640 | 5,694 | 3,665 | 32,184 |
| 5,566 | 184 | 22,790 | 5,778 | 3,710 | 32,462 |
| 5,567 | 187 | 22,534 | 5,735 | 3,658 | 32,114 |
| 5,568 | 187 | 22,579 | 5,740 | 3,668 | 32,174 |
| 5,569 | 187 | 22,561 | 5,800 | 3,720 | 32,268 |
| 5,570 | 179 | 22,326 | 5,784 | 3,735 | 32,024 |
| 5,571 | 183 | 22,374 | 5,761 | 3,748 | 32,066 |
| 5,572 | 184 | 22,323 | 5,739 | 3,705 | 31,951 |
| 5,573 | 179 | 22,087 | 5,685 | 3,671 | 31,622 |
| 5,574 | 181 | 22,199 | 5,693 | 3,673 | 31,746 |
| 5,575 | 180 | 22,193 | 5,703 | 3,641 | 31,717 |
| 5,576 | 186 | 22,327 | 5,770 | 3,661 | 31,944 |
| 5,577 | 198 | 22,311 | 5,752 | 3,642 | 31,903 |
| 5,578 | 204 | 22,233 | 5,751 | 3,630 | 31,818 |
| 5,579 | 202 | 21,981 | 5,697 | 3,578 | 31,458 |
| 5,580 | 201 | 22,145 | 5,756 | 3,629 | 31,731 |
| 5,581 | 201 | 22,136 | 5,752 | 3,587 | 31,676 |
| 5,582 | 202 | 22,183 | 5,747 | 3,573 | 31,705 |
| 5,583 | 203 | 22,043 | 5,687 | 3,533 | 31,466 |
| 5,584 | 204 | 22,173 | 5,672 | 3,540 | 31,589 |
| 5,585 | 195 | 22,330 | 5,725 | 3,564 | 31,814 |
| 5,586 | 184 | 22,090 | 5,695 | 3,498 | 31,467 |
| 5,587 | 183 | 22,113 | 5,699 | 3,487 | 31,482 |
| 5,588 | 180 | 22,425 | 5,782 | 3,551 | 31,938 |
| 5,589 | 178 | 22,238 | 5,757 | 3,524 | 31,697 |
| 5,590 | 177 | 22,196 | 5,798 | 3,531 | 31,702 |
| 5,591 | 178 | 22,143 | 5,820 | 3,570 | 31,711 |

|       |     |        |       |       |        |
|-------|-----|--------|-------|-------|--------|
| 5,592 | 171 | 21,787 | 5,687 | 3,497 | 31,142 |
| 5,593 | 175 | 22,047 | 5,748 | 3,532 | 31,502 |
| 5,594 | 171 | 22,337 | 5,825 | 3,563 | 31,896 |
| 5,595 | 162 | 22,172 | 5,775 | 3,531 | 31,640 |
| 5,596 | 160 | 22,110 | 5,823 | 3,528 | 31,621 |
| 5,597 | 160 | 22,057 | 5,847 | 3,531 | 31,595 |
| 5,598 | 163 | 22,049 | 5,865 | 3,551 | 31,628 |
| 5,599 | 163 | 21,925 | 5,845 | 3,554 | 31,487 |
| 5,600 | 160 | 21,821 | 5,810 | 3,542 | 31,333 |
| 5,601 | 167 | 21,887 | 5,907 | 3,626 | 31,587 |
| 5,602 | 160 | 21,899 | 5,933 | 3,652 | 31,644 |
| 5,603 | 160 | 21,877 | 5,921 | 3,607 | 31,565 |
| 5,604 | 153 | 22,124 | 5,972 | 3,624 | 31,873 |
| 5,605 | 154 | 21,847 | 5,888 | 3,566 | 31,455 |
| 5,606 | 154 | 21,902 | 5,905 | 3,567 | 31,528 |
| 5,607 | 149 | 22,239 | 5,980 | 3,599 | 31,967 |
| 5,608 | 147 | 22,268 | 5,936 | 3,587 | 31,938 |
| 5,609 | 150 | 22,411 | 5,973 | 3,604 | 32,138 |
| 5,610 | 148 | 22,478 | 5,993 | 3,629 | 32,248 |
| 5,611 | 141 | 22,440 | 6,000 | 3,636 | 32,217 |
| 5,612 | 136 | 22,571 | 6,018 | 3,648 | 32,373 |
| 5,613 | 137 | 22,686 | 6,025 | 3,663 | 32,511 |
| 5,614 | 140 | 22,692 | 6,031 | 3,642 | 32,505 |
| 5,615 | 141 | 22,840 | 6,039 | 3,654 | 32,674 |
| 5,616 | 143 | 22,827 | 6,043 | 3,643 | 32,656 |
| 5,617 | 146 | 22,929 | 6,062 | 3,659 | 32,796 |
| 5,618 | 145 | 22,767 | 6,007 | 3,631 | 32,550 |
| 5,619 | 144 | 22,835 | 5,979 | 3,633 | 32,591 |
| 5,620 | 145 | 22,963 | 5,966 | 3,619 | 32,693 |
| 5,621 | 145 | 23,126 | 5,989 | 3,619 | 32,879 |
| 5,622 | 140 | 23,232 | 6,064 | 3,602 | 33,038 |
| 5,623 | 135 | 22,976 | 6,019 | 3,567 | 32,697 |



|       |     |        |       |       |        |
|-------|-----|--------|-------|-------|--------|
| 5,624 | 136 | 23,004 | 5,983 | 3,545 | 32,668 |
| 5,625 | 139 | 23,234 | 6,022 | 3,577 | 32,972 |
| 5,626 | 137 | 22,887 | 5,944 | 3,540 | 32,508 |
| 5,627 | 135 | 23,068 | 5,961 | 3,580 | 32,744 |
| 5,628 | 129 | 23,325 | 6,019 | 3,599 | 33,072 |
| 5,629 | 125 | 23,197 | 5,968 | 3,580 | 32,870 |
| 5,630 | 124 | 23,313 | 5,950 | 3,574 | 32,961 |
| 5,631 | 124 | 23,411 | 5,943 | 3,582 | 33,060 |
| 5,632 | 127 | 23,324 | 5,934 | 3,595 | 32,980 |
| 5,633 | 126 | 23,193 | 5,949 | 3,598 | 32,866 |
| 5,634 | 119 | 23,099 | 5,938 | 3,617 | 32,773 |
| 5,635 | 125 | 22,938 | 5,914 | 3,583 | 32,560 |
| 5,636 | 125 | 22,777 | 5,871 | 3,576 | 32,349 |
| 5,637 | 127 | 23,102 | 5,936 | 3,640 | 32,805 |
| 5,638 | 129 | 23,085 | 5,943 | 3,630 | 32,787 |
| 5,639 | 130 | 22,783 | 5,866 | 3,574 | 32,353 |
| 5,640 | 135 | 22,949 | 5,888 | 3,596 | 32,568 |
| 5,641 | 135 | 22,723 | 5,785 | 3,530 | 32,173 |
| 5,642 | 137 | 22,632 | 5,765 | 3,494 | 32,028 |
| 5,643 | 137 | 22,702 | 5,773 | 3,507 | 32,119 |
| 5,644 | 132 | 21,866 | 5,543 | 3,396 | 30,937 |
| 5,645 | 134 | 21,956 | 5,548 | 3,421 | 31,059 |
| 5,646 | 138 | 22,076 | 5,582 | 3,446 | 31,242 |
| 5,647 | 136 | 22,114 | 5,574 | 3,451 | 31,275 |
| 5,648 | 130 | 22,218 | 5,614 | 3,482 | 31,444 |
| 5,649 | 131 | 22,056 | 5,566 | 3,456 | 31,209 |
| 5,650 | 132 | 22,027 | 5,542 | 3,448 | 31,149 |
| 5,651 | 129 | 22,285 | 5,599 | 3,451 | 31,464 |
| 5,652 | 138 | 22,196 | 5,545 | 3,406 | 31,285 |
| 5,653 | 140 | 22,229 | 5,545 | 3,409 | 31,323 |
| 5,654 | 143 | 21,854 | 5,452 | 3,365 | 30,814 |
| 5,655 | 142 | 21,852 | 5,451 | 3,371 | 30,816 |

|       |     |        |       |       |        |
|-------|-----|--------|-------|-------|--------|
| 5,656 | 138 | 21,916 | 5,478 | 3,399 | 30,931 |
| 5,657 | 136 | 22,295 | 5,565 | 3,480 | 31,476 |
| 5,658 | 135 | 21,979 | 5,531 | 3,471 | 31,116 |
| 5,659 | 135 | 21,967 | 5,582 | 3,544 | 31,228 |
| 5,660 | 136 | 21,970 | 5,602 | 3,541 | 31,249 |
| 5,661 | 136 | 21,729 | 5,549 | 3,490 | 30,904 |
| 5,662 | 137 | 22,172 | 5,612 | 3,596 | 31,517 |
| 5,663 | 136 | 21,810 | 5,525 | 3,548 | 31,019 |
| 5,664 | 138 | 22,017 | 5,591 | 3,559 | 31,305 |
| 5,665 | 135 | 22,059 | 5,587 | 3,557 | 31,338 |
| 5,666 | 135 | 21,658 | 5,479 | 3,512 | 30,784 |
| 5,667 | 144 | 22,053 | 5,550 | 3,559 | 31,306 |
| 5,668 | 146 | 21,812 | 5,491 | 3,506 | 30,955 |
| 5,669 | 146 | 21,925 | 5,500 | 3,515 | 31,086 |
| 5,670 | 157 | 21,808 | 5,468 | 3,456 | 30,889 |
| 5,671 | 157 | 22,060 | 5,551 | 3,511 | 31,279 |
| 5,672 | 156 | 22,320 | 5,580 | 3,549 | 31,605 |
| 5,673 | 156 | 22,299 | 5,592 | 3,589 | 31,636 |
| 5,674 | 159 | 22,045 | 5,525 | 3,570 | 31,299 |
| 5,675 | 156 | 21,760 | 5,478 | 3,546 | 30,940 |
| 5,676 | 157 | 22,348 | 5,661 | 3,659 | 31,825 |
| 5,677 | 156 | 22,342 | 5,683 | 3,665 | 31,846 |
| 5,678 | 156 | 21,769 | 5,538 | 3,555 | 31,018 |
| 5,679 | 157 | 22,004 | 5,596 | 3,580 | 31,337 |
| 5,680 | 156 | 22,001 | 5,609 | 3,568 | 31,334 |
| 5,681 | 158 | 22,217 | 5,673 | 3,604 | 31,652 |
| 5,682 | 158 | 22,002 | 5,650 | 3,565 | 31,375 |
| 5,683 | 157 | 22,103 | 5,647 | 3,581 | 31,488 |
| 5,684 | 162 | 22,095 | 5,618 | 3,557 | 31,432 |
| 5,685 | 157 | 21,991 | 5,588 | 3,545 | 31,281 |
| 5,686 | 157 | 21,920 | 5,590 | 3,545 | 31,212 |
| 5,687 | 162 | 21,931 | 5,571 | 3,535 | 31,199 |

|       |     |        |       |       |        |
|-------|-----|--------|-------|-------|--------|
| 5,688 | 164 | 21,876 | 5,578 | 3,545 | 31,163 |
| 5,689 | 169 | 21,976 | 5,596 | 3,575 | 31,316 |
| 5,690 | 166 | 21,740 | 5,536 | 3,558 | 31,000 |
| 5,691 | 169 | 21,888 | 5,583 | 3,599 | 31,239 |
| 5,692 | 171 | 21,950 | 5,589 | 3,603 | 31,313 |
| 5,693 | 168 | 21,357 | 5,439 | 3,524 | 30,488 |
| 5,694 | 174 | 21,639 | 5,507 | 3,558 | 30,878 |
| 5,695 | 171 | 21,776 | 5,562 | 3,624 | 31,133 |
| 5,696 | 182 | 22,100 | 5,673 | 3,698 | 31,653 |
| 5,697 | 175 | 22,123 | 5,665 | 3,693 | 31,656 |
| 5,698 | 172 | 22,019 | 5,602 | 3,645 | 31,438 |
| 5,699 | 172 | 22,406 | 5,673 | 3,682 | 31,933 |
| 5,700 | 172 | 22,357 | 5,654 | 3,671 | 31,854 |
| 5,701 | 170 | 22,307 | 5,673 | 3,665 | 31,815 |
| 5,702 | 162 | 22,315 | 5,657 | 3,683 | 31,817 |
| 5,703 | 166 | 22,585 | 5,720 | 3,708 | 32,179 |
| 5,704 | 165 | 22,472 | 5,739 | 3,703 | 32,079 |
| 5,705 | 162 | 22,476 | 5,738 | 3,715 | 32,091 |
| 5,706 | 168 | 22,397 | 5,760 | 3,698 | 32,023 |
| 5,707 | 171 | 22,268 | 5,713 | 3,709 | 31,861 |
| 5,708 | 178 | 22,126 | 5,695 | 3,671 | 31,670 |
| 5,709 | 175 | 22,312 | 5,669 | 3,627 | 31,783 |
| 5,710 | 180 | 22,118 | 5,599 | 3,556 | 31,453 |
| 5,711 | 176 | 21,839 | 5,486 | 3,513 | 31,014 |
| 5,712 | 190 | 21,849 | 5,455 | 3,471 | 30,965 |
| 5,713 | 190 | 21,560 | 5,391 | 3,428 | 30,569 |
| 5,714 | 195 | 22,274 | 5,545 | 3,520 | 31,534 |
| 5,715 | 196 | 22,391 | 5,513 | 3,562 | 31,662 |
| 5,716 | 198 | 22,402 | 5,532 | 3,572 | 31,704 |
| 5,717 | 194 | 22,069 | 5,499 | 3,570 | 31,332 |
| 5,718 | 195 | 22,297 | 5,556 | 3,623 | 31,671 |
| 5,719 | 188 | 22,287 | 5,546 | 3,621 | 31,642 |

|       |     |        |       |       |        |
|-------|-----|--------|-------|-------|--------|
| 5,720 | 189 | 22,344 | 5,574 | 3,651 | 31,758 |
| 5,721 | 184 | 22,492 | 5,632 | 3,697 | 32,005 |
| 5,722 | 193 | 22,327 | 5,551 | 3,656 | 31,727 |
| 5,723 | 193 | 22,260 | 5,518 | 3,641 | 31,612 |
| 5,724 | 192 | 22,613 | 5,564 | 3,683 | 32,052 |
| 5,725 | 188 | 22,708 | 5,578 | 3,684 | 32,158 |
| 5,726 | 196 | 23,035 | 5,630 | 3,720 | 32,581 |
| 5,727 | 196 | 22,830 | 5,529 | 3,697 | 32,252 |
| 5,728 | 197 | 23,018 | 5,547 | 3,720 | 32,482 |
| 5,729 | 196 | 23,235 | 5,558 | 3,774 | 32,763 |
| 5,730 | 198 | 23,396 | 5,558 | 3,804 | 32,956 |
| 5,731 | 200 | 22,930 | 5,429 | 3,724 | 32,283 |
| 5,732 | 203 | 23,138 | 5,476 | 3,745 | 32,562 |
| 5,733 | 204 | 23,275 | 5,514 | 3,765 | 32,758 |
| 5,734 | 204 | 23,276 | 5,494 | 3,773 | 32,747 |
| 5,735 | 199 | 23,438 | 5,567 | 3,810 | 33,014 |
| 5,736 | 198 | 23,339 | 5,539 | 3,815 | 32,891 |
| 5,737 | 196 | 23,298 | 5,564 | 3,833 | 32,891 |
| 5,738 | 191 | 23,162 | 5,587 | 3,849 | 32,789 |
| 5,739 | 187 | 23,246 | 5,608 | 3,858 | 32,899 |
| 5,740 | 182 | 23,221 | 5,590 | 3,837 | 32,830 |
| 5,741 | 185 | 23,386 | 5,616 | 3,855 | 33,042 |
| 5,742 | 182 | 23,508 | 5,635 | 3,867 | 33,192 |
| 5,743 | 182 | 23,551 | 5,652 | 3,879 | 33,264 |
| 5,744 | 181 | 23,561 | 5,641 | 3,861 | 33,244 |
| 5,745 | 175 | 23,180 | 5,540 | 3,799 | 32,694 |
| 5,746 | 176 | 23,419 | 5,544 | 3,786 | 32,925 |
| 5,747 | 183 | 23,399 | 5,535 | 3,762 | 32,879 |
| 5,748 | 184 | 23,198 | 5,468 | 3,730 | 32,580 |
| 5,749 | 184 | 23,466 | 5,558 | 3,771 | 32,979 |
| 5,750 | 185 | 23,533 | 5,534 | 3,768 | 33,020 |
| 5,751 | 194 | 23,644 | 5,520 | 3,755 | 33,113 |

|       |     |        |       |       |        |
|-------|-----|--------|-------|-------|--------|
| 5,752 | 194 | 23,611 | 5,502 | 3,734 | 33,041 |
| 5,753 | 192 | 23,821 | 5,523 | 3,773 | 33,309 |
| 5,754 | 192 | 23,777 | 5,514 | 3,771 | 33,254 |
| 5,755 | 189 | 23,856 | 5,537 | 3,785 | 33,367 |
| 5,756 | 192 | 23,911 | 5,543 | 3,794 | 33,440 |
| 5,757 | 187 | 24,212 | 5,602 | 3,860 | 33,861 |
| 5,758 | 186 | 23,976 | 5,558 | 3,799 | 33,519 |
| 5,759 | 180 | 24,155 | 5,596 | 3,812 | 33,743 |
| 5,760 | 182 | 24,274 | 5,630 | 3,857 | 33,943 |
| 5,761 | 177 | 24,376 | 5,650 | 3,875 | 34,078 |
| 5,762 | 177 | 24,341 | 5,617 | 3,885 | 34,020 |
| 5,763 | 162 | 24,215 | 5,649 | 3,901 | 33,927 |
| 5,764 | 167 | 24,326 | 5,707 | 3,918 | 34,118 |
| 5,765 | 169 | 24,286 | 5,757 | 3,932 | 34,144 |
| 5,766 | 170 | 24,250 | 5,768 | 3,957 | 34,145 |
| 5,767 | 165 | 24,128 | 5,793 | 3,950 | 34,036 |
| 5,768 | 166 | 24,175 | 5,794 | 3,933 | 34,068 |
| 5,769 | 170 | 24,063 | 5,794 | 3,921 | 33,948 |
| 5,770 | 173 | 23,856 | 5,749 | 3,890 | 33,668 |
| 5,771 | 166 | 23,865 | 5,721 | 3,874 | 33,626 |
| 5,772 | 169 | 24,110 | 5,777 | 3,893 | 33,949 |
| 5,773 | 169 | 23,822 | 5,716 | 3,851 | 33,558 |
| 5,774 | 167 | 23,417 | 5,659 | 3,819 | 33,062 |
| 5,775 | 173 | 23,497 | 5,705 | 3,836 | 33,211 |
| 5,776 | 171 | 23,383 | 5,694 | 3,817 | 33,065 |
| 5,777 | 180 | 23,588 | 5,735 | 3,860 | 33,363 |
| 5,778 | 182 | 23,421 | 5,743 | 3,834 | 33,180 |
| 5,779 | 177 | 23,044 | 5,701 | 3,784 | 32,706 |
| 5,780 | 181 | 22,913 | 5,711 | 3,756 | 32,561 |
| 5,781 | 185 | 23,029 | 5,756 | 3,772 | 32,742 |
| 5,782 | 184 | 22,834 | 5,737 | 3,781 | 32,536 |
| 5,783 | 178 | 22,859 | 5,720 | 3,796 | 32,553 |

|       |     |        |       |       |        |
|-------|-----|--------|-------|-------|--------|
| 5,784 | 179 | 22,969 | 5,739 | 3,790 | 32,677 |
| 5,785 | 179 | 23,020 | 5,725 | 3,788 | 32,712 |
| 5,786 | 180 | 23,090 | 5,743 | 3,772 | 32,785 |
| 5,787 | 180 | 23,221 | 5,722 | 3,763 | 32,886 |
| 5,788 | 185 | 23,302 | 5,726 | 3,763 | 32,976 |
| 5,789 | 183 | 23,227 | 5,673 | 3,722 | 32,805 |
| 5,790 | 184 | 23,266 | 5,711 | 3,736 | 32,897 |
| 5,791 | 181 | 22,903 | 5,643 | 3,710 | 32,437 |
| 5,792 | 179 | 23,266 | 5,736 | 3,766 | 32,947 |
| 5,793 | 178 | 23,281 | 5,739 | 3,753 | 32,951 |
| 5,794 | 179 | 23,328 | 5,717 | 3,758 | 32,982 |
| 5,795 | 172 | 23,110 | 5,663 | 3,732 | 32,677 |
| 5,796 | 172 | 23,062 | 5,689 | 3,773 | 32,696 |
| 5,797 | 172 | 23,072 | 5,703 | 3,777 | 32,724 |
| 5,798 | 157 | 22,982 | 5,681 | 3,767 | 32,587 |
| 5,799 | 157 | 22,997 | 5,710 | 3,783 | 32,647 |
| 5,800 | 157 | 22,944 | 5,704 | 3,802 | 32,607 |
| 5,801 | 158 | 22,987 | 5,761 | 3,836 | 32,742 |
| 5,802 | 150 | 23,006 | 5,796 | 3,882 | 32,834 |
| 5,803 | 151 | 22,953 | 5,803 | 3,906 | 32,813 |
| 5,804 | 150 | 22,902 | 5,822 | 3,904 | 32,778 |
| 5,805 | 157 | 22,860 | 5,834 | 3,920 | 32,771 |
| 5,806 | 155 | 22,913 | 5,800 | 3,882 | 32,750 |
| 5,807 | 153 | 22,681 | 5,756 | 3,849 | 32,439 |
| 5,808 | 156 | 22,969 | 5,777 | 3,879 | 32,781 |
| 5,809 | 156 | 23,201 | 5,819 | 3,935 | 33,111 |
| 5,810 | 157 | 22,989 | 5,767 | 3,898 | 32,811 |
| 5,811 | 154 | 22,937 | 5,722 | 3,918 | 32,731 |
| 5,812 | 160 | 22,727 | 5,721 | 3,874 | 32,482 |
| 5,813 | 159 | 22,755 | 5,705 | 3,860 | 32,479 |
| 5,814 | 162 | 22,876 | 5,724 | 3,847 | 32,609 |
| 5,815 | 157 | 22,557 | 5,675 | 3,813 | 32,202 |

|       |     |        |       |       |        |
|-------|-----|--------|-------|-------|--------|
| 5,816 | 169 | 22,514 | 5,626 | 3,771 | 32,080 |
| 5,817 | 170 | 22,455 | 5,533 | 3,745 | 31,903 |
| 5,818 | 168 | 22,316 | 5,466 | 3,709 | 31,659 |
| 5,819 | 166 | 22,481 | 5,481 | 3,698 | 31,826 |
| 5,820 | 164 | 22,485 | 5,477 | 3,694 | 31,820 |
| 5,821 | 164 | 22,529 | 5,513 | 3,701 | 31,907 |
| 5,822 | 165 | 22,618 | 5,514 | 3,689 | 31,986 |
| 5,823 | 159 | 22,644 | 5,485 | 3,698 | 31,986 |
| 5,824 | 160 | 22,658 | 5,491 | 3,692 | 32,001 |
| 5,825 | 156 | 22,635 | 5,515 | 3,695 | 32,001 |
| 5,826 | 158 | 22,784 | 5,573 | 3,737 | 32,252 |
| 5,827 | 153 | 23,079 | 5,616 | 3,757 | 32,605 |
| 5,828 | 142 | 23,025 | 5,560 | 3,735 | 32,462 |
| 5,829 | 148 | 23,276 | 5,551 | 3,740 | 32,715 |
| 5,830 | 142 | 23,226 | 5,497 | 3,724 | 32,589 |
| 5,831 | 145 | 23,855 | 5,634 | 3,813 | 33,447 |
| 5,832 | 149 | 23,926 | 5,615 | 3,800 | 33,490 |
| 5,833 | 147 | 23,729 | 5,581 | 3,780 | 33,237 |
| 5,834 | 147 | 23,778 | 5,547 | 3,792 | 33,264 |
| 5,835 | 151 | 24,034 | 5,564 | 3,821 | 33,570 |
| 5,836 | 152 | 23,812 | 5,517 | 3,800 | 33,281 |
| 5,837 | 151 | 23,809 | 5,514 | 3,807 | 33,281 |
| 5,838 | 151 | 23,825 | 5,542 | 3,805 | 33,323 |
| 5,839 | 148 | 23,915 | 5,564 | 3,808 | 33,435 |
| 5,840 | 151 | 24,050 | 5,575 | 3,846 | 33,622 |
| 5,841 | 150 | 24,011 | 5,509 | 3,812 | 33,482 |
| 5,842 | 150 | 24,087 | 5,529 | 3,808 | 33,574 |
| 5,843 | 151 | 23,847 | 5,506 | 3,801 | 33,305 |
| 5,844 | 149 | 24,248 | 5,582 | 3,861 | 33,840 |
| 5,845 | 146 | 24,096 | 5,587 | 3,855 | 33,684 |
| 5,846 | 152 | 24,265 | 5,653 | 3,882 | 33,952 |
| 5,847 | 153 | 24,341 | 5,676 | 3,895 | 34,065 |

|       |     |        |       |       |        |
|-------|-----|--------|-------|-------|--------|
| 5,848 | 153 | 24,179 | 5,639 | 3,863 | 33,834 |
| 5,849 | 153 | 24,087 | 5,597 | 3,843 | 33,680 |
| 5,850 | 153 | 23,922 | 5,573 | 3,808 | 33,456 |
| 5,851 | 156 | 24,573 | 5,696 | 3,885 | 34,310 |
| 5,852 | 158 | 24,645 | 5,673 | 3,863 | 34,339 |
| 5,853 | 154 | 24,344 | 5,576 | 3,782 | 33,856 |
| 5,854 | 157 | 24,340 | 5,563 | 3,748 | 33,808 |
| 5,855 | 156 | 24,281 | 5,553 | 3,736 | 33,726 |
| 5,856 | 155 | 24,448 | 5,574 | 3,741 | 33,918 |
| 5,857 | 155 | 23,983 | 5,474 | 3,696 | 33,308 |
| 5,858 | 162 | 23,950 | 5,462 | 3,670 | 33,244 |
| 5,859 | 161 | 23,783 | 5,399 | 3,625 | 32,968 |
| 5,860 | 169 | 23,638 | 5,330 | 3,580 | 32,717 |
| 5,861 | 169 | 23,615 | 5,339 | 3,557 | 32,680 |
| 5,862 | 165 | 23,779 | 5,362 | 3,554 | 32,860 |
| 5,863 | 159 | 23,642 | 5,316 | 3,533 | 32,650 |
| 5,864 | 157 | 23,589 | 5,275 | 3,526 | 32,547 |
| 5,865 | 157 | 23,336 | 5,171 | 3,443 | 32,107 |
| 5,866 | 158 | 23,626 | 5,227 | 3,471 | 32,482 |
| 5,867 | 141 | 23,525 | 5,206 | 3,468 | 32,340 |
| 5,868 | 141 | 23,288 | 5,240 | 3,453 | 32,122 |
| 5,869 | 144 | 23,188 | 5,269 | 3,456 | 32,057 |
| 5,870 | 139 | 23,357 | 5,323 | 3,515 | 32,334 |
| 5,871 | 136 | 23,365 | 5,340 | 3,523 | 32,364 |
| 5,872 | 136 | 23,447 | 5,366 | 3,546 | 32,495 |
| 5,873 | 135 | 23,567 | 5,401 | 3,558 | 32,661 |
| 5,874 | 138 | 23,541 | 5,406 | 3,566 | 32,651 |
| 5,875 | 137 | 23,652 | 5,392 | 3,562 | 32,743 |
| 5,876 | 132 | 23,469 | 5,302 | 3,530 | 32,433 |
| 5,877 | 133 | 23,394 | 5,290 | 3,532 | 32,349 |
| 5,878 | 131 | 23,059 | 5,207 | 3,481 | 31,878 |
| 5,879 | 134 | 22,621 | 5,154 | 3,412 | 31,321 |



|       |     |        |       |       |        |
|-------|-----|--------|-------|-------|--------|
| 5,880 | 126 | 22,242 | 5,084 | 3,380 | 30,832 |
| 5,881 | 123 | 22,266 | 5,083 | 3,423 | 30,895 |
| 5,882 | 122 | 22,267 | 5,084 | 3,406 | 30,879 |
| 5,883 | 120 | 22,357 | 5,113 | 3,451 | 31,041 |
| 5,884 | 118 | 22,085 | 5,039 | 3,384 | 30,626 |
| 5,885 | 125 | 22,237 | 5,084 | 3,415 | 30,861 |
| 5,886 | 126 | 21,925 | 5,071 | 3,375 | 30,497 |
| 5,887 | 129 | 21,999 | 5,077 | 3,380 | 30,585 |
| 5,888 | 140 | 22,181 | 5,132 | 3,431 | 30,884 |
| 5,889 | 137 | 22,051 | 5,076 | 3,408 | 30,672 |
| 5,890 | 145 | 22,323 | 5,145 | 3,430 | 31,043 |
| 5,891 | 151 | 22,013 | 5,090 | 3,360 | 30,614 |
| 5,892 | 153 | 22,242 | 5,121 | 3,391 | 30,907 |
| 5,893 | 155 | 22,180 | 5,082 | 3,356 | 30,773 |
| 5,894 | 157 | 22,205 | 5,069 | 3,356 | 30,787 |
| 5,895 | 158 | 22,265 | 5,045 | 3,345 | 30,813 |
| 5,896 | 163 | 22,559 | 5,081 | 3,367 | 31,170 |
| 5,897 | 156 | 22,454 | 5,012 | 3,344 | 30,966 |
| 5,898 | 165 | 22,359 | 5,001 | 3,297 | 30,822 |
| 5,899 | 164 | 22,265 | 4,956 | 3,270 | 30,655 |
| 5,900 | 163 | 22,373 | 4,959 | 3,286 | 30,781 |
| 5,901 | 166 | 22,301 | 4,965 | 3,260 | 30,692 |
| 5,902 | 167 | 22,389 | 4,977 | 3,256 | 30,789 |
| 5,903 | 166 | 22,294 | 4,968 | 3,275 | 30,703 |
| 5,904 | 167 | 22,311 | 4,958 | 3,276 | 30,712 |
| 5,905 | 166 | 22,193 | 4,959 | 3,273 | 30,591 |
| 5,906 | 166 | 22,198 | 4,965 | 3,268 | 30,597 |
| 5,907 | 159 | 22,410 | 5,032 | 3,314 | 30,915 |
| 5,908 | 156 | 22,154 | 4,960 | 3,271 | 30,541 |
| 5,909 | 151 | 22,190 | 4,982 | 3,293 | 30,616 |
| 5,910 | 152 | 22,319 | 5,006 | 3,303 | 30,780 |
| 5,911 | 143 | 22,501 | 5,058 | 3,338 | 31,040 |

|       |     |        |       |       |        |
|-------|-----|--------|-------|-------|--------|
| 5,912 | 144 | 22,880 | 5,116 | 3,406 | 31,546 |
| 5,913 | 148 | 22,742 | 5,107 | 3,413 | 31,410 |
| 5,914 | 152 | 22,757 | 5,119 | 3,405 | 31,433 |
| 5,915 | 151 | 22,535 | 5,114 | 3,414 | 31,214 |
| 5,916 | 153 | 23,269 | 5,304 | 3,527 | 32,253 |
| 5,917 | 158 | 23,111 | 5,256 | 3,491 | 32,016 |
| 5,918 | 156 | 22,981 | 5,252 | 3,478 | 31,867 |
| 5,919 | 155 | 23,647 | 5,403 | 3,584 | 32,789 |
| 5,920 | 155 | 23,400 | 5,232 | 3,490 | 32,277 |
| 5,921 | 157 | 23,584 | 5,284 | 3,525 | 32,550 |
| 5,922 | 158 | 23,866 | 5,335 | 3,562 | 32,921 |
| 5,923 | 158 | 23,527 | 5,266 | 3,499 | 32,450 |
| 5,924 | 157 | 23,434 | 5,232 | 3,474 | 32,297 |
| 5,925 | 159 | 23,793 | 5,304 | 3,519 | 32,775 |
| 5,926 | 161 | 23,779 | 5,292 | 3,495 | 32,727 |
| 5,927 | 168 | 23,949 | 5,321 | 3,495 | 32,933 |
| 5,928 | 176 | 24,297 | 5,425 | 3,545 | 33,443 |
| 5,929 | 172 | 24,138 | 5,374 | 3,519 | 33,203 |
| 5,930 | 170 | 24,114 | 5,384 | 3,521 | 33,189 |
| 5,931 | 182 | 24,080 | 5,390 | 3,500 | 33,152 |
| 5,932 | 182 | 24,090 | 5,420 | 3,524 | 33,216 |
| 5,933 | 180 | 24,022 | 5,431 | 3,512 | 33,145 |
| 5,934 | 179 | 23,972 | 5,438 | 3,527 | 33,116 |
| 5,935 | 178 | 24,037 | 5,458 | 3,534 | 33,207 |
| 5,936 | 172 | 24,361 | 5,581 | 3,567 | 33,681 |
| 5,937 | 173 | 24,555 | 5,655 | 3,594 | 33,977 |
| 5,938 | 171 | 24,734 | 5,702 | 3,616 | 34,223 |
| 5,939 | 161 | 24,417 | 5,640 | 3,564 | 33,782 |
| 5,940 | 164 | 24,595 | 5,688 | 3,608 | 34,055 |
| 5,941 | 157 | 24,698 | 5,684 | 3,619 | 34,158 |
| 5,942 | 152 | 24,290 | 5,642 | 3,577 | 33,661 |
| 5,943 | 154 | 24,564 | 5,693 | 3,612 | 34,023 |

|       |     |        |       |       |        |
|-------|-----|--------|-------|-------|--------|
| 5,944 | 150 | 24,479 | 5,687 | 3,616 | 33,932 |
| 5,945 | 152 | 24,477 | 5,714 | 3,638 | 33,981 |
| 5,946 | 150 | 24,721 | 5,783 | 3,697 | 34,351 |
| 5,947 | 145 | 24,424 | 5,747 | 3,660 | 33,976 |
| 5,948 | 149 | 24,550 | 5,813 | 3,675 | 34,187 |
| 5,949 | 146 | 24,397 | 5,786 | 3,667 | 33,996 |
| 5,950 | 145 | 24,029 | 5,705 | 3,605 | 33,484 |
| 5,951 | 142 | 23,973 | 5,658 | 3,616 | 33,389 |
| 5,952 | 146 | 24,230 | 5,717 | 3,677 | 33,770 |
| 5,953 | 149 | 24,132 | 5,728 | 3,689 | 33,698 |
| 5,954 | 146 | 24,207 | 5,745 | 3,700 | 33,798 |
| 5,955 | 144 | 24,184 | 5,742 | 3,705 | 33,775 |
| 5,956 | 142 | 24,376 | 5,763 | 3,733 | 34,014 |
| 5,957 | 143 | 24,384 | 5,756 | 3,728 | 34,011 |
| 5,958 | 143 | 24,132 | 5,724 | 3,691 | 33,690 |
| 5,959 | 150 | 24,521 | 5,844 | 3,753 | 34,268 |
| 5,960 | 153 | 24,507 | 5,889 | 3,776 | 34,325 |
| 5,961 | 155 | 24,235 | 5,831 | 3,745 | 33,966 |
| 5,962 | 156 | 23,946 | 5,768 | 3,712 | 33,582 |
| 5,963 | 157 | 24,378 | 5,891 | 3,771 | 34,197 |
| 5,964 | 154 | 24,114 | 5,831 | 3,738 | 33,837 |
| 5,965 | 151 | 24,277 | 5,866 | 3,757 | 34,051 |
| 5,966 | 155 | 24,248 | 5,839 | 3,741 | 33,983 |
| 5,967 | 155 | 23,970 | 5,807 | 3,701 | 33,633 |
| 5,968 | 150 | 23,936 | 5,803 | 3,706 | 33,595 |
| 5,969 | 155 | 24,082 | 5,813 | 3,714 | 33,764 |
| 5,970 | 153 | 23,770 | 5,727 | 3,669 | 33,319 |
| 5,971 | 158 | 23,680 | 5,737 | 3,655 | 33,230 |
| 5,972 | 163 | 23,716 | 5,739 | 3,677 | 33,295 |
| 5,973 | 162 | 23,617 | 5,726 | 3,671 | 33,176 |
| 5,974 | 157 | 23,280 | 5,662 | 3,639 | 32,738 |
| 5,975 | 167 | 23,433 | 5,715 | 3,689 | 33,004 |

|       |     |        |       |       |        |
|-------|-----|--------|-------|-------|--------|
| 5,976 | 164 | 23,424 | 5,719 | 3,676 | 32,983 |
| 5,977 | 165 | 23,551 | 5,750 | 3,691 | 33,157 |
| 5,978 | 157 | 23,582 | 5,733 | 3,680 | 33,152 |
| 5,979 | 148 | 23,014 | 5,562 | 3,592 | 32,316 |
| 5,980 | 155 | 23,309 | 5,648 | 3,631 | 32,743 |
| 5,981 | 144 | 23,614 | 5,697 | 3,652 | 33,107 |
| 5,982 | 150 | 23,838 | 5,739 | 3,682 | 33,409 |
| 5,983 | 158 | 23,933 | 5,770 | 3,705 | 33,566 |
| 5,984 | 158 | 24,123 | 5,795 | 3,700 | 33,776 |
| 5,985 | 161 | 24,149 | 5,803 | 3,697 | 33,810 |
| 5,986 | 159 | 23,494 | 5,634 | 3,628 | 32,915 |
| 5,987 | 159 | 23,683 | 5,664 | 3,656 | 33,162 |
| 5,988 | 155 | 23,894 | 5,699 | 3,696 | 33,444 |
| 5,989 | 152 | 23,796 | 5,691 | 3,675 | 33,314 |
| 5,990 | 160 | 23,275 | 5,625 | 3,602 | 32,662 |
| 5,991 | 161 | 23,611 | 5,643 | 3,635 | 33,050 |
| 5,992 | 156 | 23,750 | 5,652 | 3,621 | 33,179 |
| 5,993 | 163 | 23,508 | 5,602 | 3,604 | 32,877 |
| 5,994 | 161 | 23,302 | 5,572 | 3,588 | 32,623 |
| 5,995 | 165 | 23,988 | 5,749 | 3,695 | 33,597 |
| 5,996 | 168 | 24,096 | 5,748 | 3,666 | 33,678 |
| 5,997 | 168 | 24,043 | 5,744 | 3,662 | 33,617 |
| 5,998 | 168 | 23,903 | 5,730 | 3,664 | 33,465 |
| 5,999 | 176 | 23,926 | 5,739 | 3,663 | 33,504 |
| 6,000 | 169 | 23,826 | 5,684 | 3,646 | 33,325 |
| 6,001 | 169 | 24,069 | 5,785 | 3,689 | 33,712 |
| 6,002 | 171 | 23,945 | 5,778 | 3,691 | 33,585 |
| 6,003 | 171 | 24,393 | 5,884 | 3,724 | 34,172 |
| 6,004 | 168 | 24,254 | 5,852 | 3,707 | 33,981 |
| 6,005 | 169 | 24,518 | 5,938 | 3,758 | 34,383 |
| 6,006 | 173 | 24,723 | 5,978 | 3,782 | 34,656 |
| 6,007 | 173 | 24,812 | 5,997 | 3,790 | 34,772 |

|       |     |        |       |       |        |
|-------|-----|--------|-------|-------|--------|
| 6,008 | 172 | 24,655 | 5,952 | 3,773 | 34,552 |
| 6,009 | 175 | 24,881 | 5,973 | 3,799 | 34,828 |
| 6,010 | 169 | 24,861 | 5,947 | 3,780 | 34,757 |
| 6,011 | 178 | 24,712 | 5,866 | 3,738 | 34,494 |
| 6,012 | 175 | 24,603 | 5,832 | 3,715 | 34,325 |
| 6,013 | 187 | 24,619 | 5,821 | 3,703 | 34,330 |
| 6,014 | 186 | 24,634 | 5,820 | 3,719 | 34,359 |
| 6,015 | 187 | 24,515 | 5,806 | 3,687 | 34,195 |
| 6,016 | 184 | 24,497 | 5,784 | 3,674 | 34,139 |
| 6,017 | 182 | 24,546 | 5,758 | 3,669 | 34,155 |
| 6,018 | 185 | 24,708 | 5,811 | 3,692 | 34,396 |
| 6,019 | 190 | 24,448 | 5,732 | 3,646 | 34,016 |
| 6,020 | 186 | 24,482 | 5,724 | 3,650 | 34,042 |
| 6,021 | 182 | 24,818 | 5,777 | 3,687 | 34,464 |
| 6,022 | 185 | 24,417 | 5,684 | 3,625 | 33,911 |
| 6,023 | 191 | 24,641 | 5,733 | 3,659 | 34,224 |
| 6,024 | 189 | 24,738 | 5,773 | 3,657 | 34,357 |
| 6,025 | 187 | 24,724 | 5,745 | 3,641 | 34,297 |
| 6,026 | 187 | 24,771 | 5,762 | 3,643 | 34,363 |
| 6,027 | 194 | 24,421 | 5,668 | 3,614 | 33,897 |
| 6,028 | 193 | 24,215 | 5,659 | 3,604 | 33,671 |
| 6,029 | 208 | 25,207 | 5,890 | 3,751 | 35,056 |
| 6,030 | 207 | 25,213 | 5,900 | 3,756 | 35,076 |
| 6,031 | 202 | 25,143 | 5,907 | 3,756 | 35,008 |
| 6,032 | 198 | 25,126 | 5,869 | 3,738 | 34,931 |
| 6,033 | 194 | 25,116 | 5,844 | 3,745 | 34,899 |
| 6,034 | 202 | 25,261 | 5,884 | 3,758 | 35,105 |
| 6,035 | 201 | 25,302 | 5,927 | 3,794 | 35,224 |
| 6,036 | 198 | 25,069 | 5,894 | 3,742 | 34,903 |
| 6,037 | 199 | 25,085 | 5,907 | 3,758 | 34,949 |
| 6,038 | 199 | 25,060 | 5,878 | 3,751 | 34,888 |
| 6,039 | 198 | 24,710 | 5,774 | 3,701 | 34,383 |

|       |     |        |       |       |        |
|-------|-----|--------|-------|-------|--------|
| 6,040 | 199 | 24,940 | 5,811 | 3,718 | 34,668 |
| 6,041 | 192 | 24,909 | 5,794 | 3,733 | 34,628 |
| 6,042 | 192 | 25,240 | 5,880 | 3,797 | 35,109 |
| 6,043 | 193 | 25,162 | 5,872 | 3,803 | 35,030 |
| 6,044 | 186 | 25,144 | 5,879 | 3,793 | 35,002 |
| 6,045 | 188 | 25,267 | 5,891 | 3,832 | 35,178 |
| 6,046 | 186 | 25,100 | 5,843 | 3,814 | 34,943 |
| 6,047 | 186 | 25,126 | 5,898 | 3,853 | 35,063 |
| 6,048 | 185 | 25,343 | 5,899 | 3,855 | 35,282 |
| 6,049 | 179 | 25,515 | 5,914 | 3,854 | 35,462 |
| 6,050 | 179 | 25,532 | 5,921 | 3,852 | 35,484 |
| 6,051 | 177 | 25,439 | 5,890 | 3,839 | 35,345 |
| 6,052 | 177 | 25,594 | 5,896 | 3,868 | 35,535 |
| 6,053 | 175 | 25,662 | 5,887 | 3,841 | 35,565 |
| 6,054 | 179 | 25,604 | 5,866 | 3,842 | 35,491 |
| 6,055 | 184 | 25,460 | 5,782 | 3,782 | 35,208 |
| 6,056 | 189 | 25,653 | 5,798 | 3,789 | 35,429 |
| 6,057 | 191 | 25,644 | 5,830 | 3,792 | 35,457 |
| 6,058 | 190 | 25,216 | 5,770 | 3,733 | 34,909 |
| 6,059 | 195 | 25,191 | 5,773 | 3,726 | 34,885 |
| 6,060 | 194 | 25,236 | 5,772 | 3,728 | 34,930 |
| 6,061 | 187 | 25,161 | 5,802 | 3,727 | 34,877 |
| 6,062 | 185 | 25,135 | 5,801 | 3,727 | 34,848 |
| 6,063 | 178 | 24,861 | 5,788 | 3,706 | 34,533 |
| 6,064 | 176 | 24,888 | 5,784 | 3,701 | 34,549 |
| 6,065 | 173 | 24,763 | 5,767 | 3,698 | 34,401 |
| 6,066 | 180 | 25,044 | 5,830 | 3,750 | 34,804 |
| 6,067 | 179 | 24,870 | 5,828 | 3,721 | 34,598 |
| 6,068 | 176 | 24,893 | 5,834 | 3,719 | 34,622 |
| 6,069 | 178 | 25,228 | 5,895 | 3,773 | 35,074 |
| 6,070 | 170 | 25,106 | 5,924 | 3,762 | 34,962 |
| 6,071 | 170 | 25,115 | 5,909 | 3,765 | 34,959 |

|       |     |        |       |       |        |
|-------|-----|--------|-------|-------|--------|
| 6,072 | 170 | 25,221 | 5,948 | 3,763 | 35,102 |
| 6,073 | 170 | 25,116 | 5,937 | 3,759 | 34,982 |
| 6,074 | 160 | 25,018 | 5,996 | 3,769 | 34,943 |
| 6,075 | 167 | 25,106 | 6,022 | 3,812 | 35,107 |
| 6,076 | 160 | 24,945 | 6,000 | 3,811 | 34,916 |
| 6,077 | 166 | 24,698 | 6,010 | 3,793 | 34,667 |
| 6,078 | 155 | 24,680 | 6,025 | 3,807 | 34,667 |
| 6,079 | 152 | 24,302 | 5,932 | 3,736 | 34,122 |
| 6,080 | 144 | 24,259 | 5,923 | 3,740 | 34,066 |
| 6,081 | 152 | 24,288 | 5,955 | 3,755 | 34,150 |
| 6,082 | 151 | 24,255 | 5,961 | 3,740 | 34,107 |
| 6,083 | 142 | 23,704 | 5,839 | 3,653 | 33,338 |
| 6,084 | 140 | 23,835 | 5,874 | 3,658 | 33,507 |
| 6,085 | 141 | 24,050 | 5,927 | 3,682 | 33,800 |
| 6,086 | 142 | 23,623 | 5,774 | 3,596 | 33,135 |
| 6,087 | 141 | 23,536 | 5,762 | 3,580 | 33,019 |
| 6,088 | 142 | 23,830 | 5,820 | 3,614 | 33,406 |
| 6,089 | 141 | 23,561 | 5,765 | 3,574 | 33,041 |
| 6,090 | 140 | 23,628 | 5,817 | 3,586 | 33,171 |
| 6,091 | 142 | 23,444 | 5,805 | 3,614 | 33,005 |
| 6,092 | 143 | 23,433 | 5,773 | 3,579 | 32,928 |
| 6,093 | 143 | 23,180 | 5,712 | 3,524 | 32,559 |
| 6,094 | 140 | 22,916 | 5,641 | 3,478 | 32,175 |
| 6,095 | 140 | 22,981 | 5,663 | 3,491 | 32,275 |
| 6,096 | 138 | 22,783 | 5,663 | 3,461 | 32,045 |
| 6,097 | 143 | 22,541 | 5,584 | 3,397 | 31,665 |
| 6,098 | 147 | 22,169 | 5,495 | 3,351 | 31,162 |
| 6,099 | 156 | 22,545 | 5,613 | 3,418 | 31,732 |
| 6,100 | 152 | 22,234 | 5,536 | 3,384 | 31,306 |
| 6,101 | 152 | 22,133 | 5,539 | 3,364 | 31,188 |
| 6,102 | 157 | 21,954 | 5,506 | 3,336 | 30,953 |
| 6,103 | 158 | 21,964 | 5,520 | 3,332 | 30,974 |

|       |     |        |       |       |        |
|-------|-----|--------|-------|-------|--------|
| 6,104 | 156 | 21,849 | 5,492 | 3,325 | 30,822 |
| 6,105 | 153 | 21,757 | 5,469 | 3,320 | 30,699 |
| 6,106 | 148 | 21,552 | 5,459 | 3,323 | 30,482 |
| 6,107 | 146 | 21,401 | 5,468 | 3,329 | 30,344 |
| 6,108 | 141 | 21,418 | 5,431 | 3,330 | 30,320 |
| 6,109 | 140 | 21,096 | 5,335 | 3,294 | 29,865 |
| 6,110 | 137 | 21,259 | 5,367 | 3,314 | 30,077 |
| 6,111 | 135 | 21,358 | 5,376 | 3,319 | 30,188 |
| 6,112 | 132 | 21,265 | 5,356 | 3,312 | 30,065 |
| 6,113 | 129 | 21,375 | 5,324 | 3,318 | 30,146 |
| 6,114 | 129 | 21,436 | 5,343 | 3,312 | 30,220 |
| 6,115 | 139 | 21,776 | 5,385 | 3,358 | 30,658 |
| 6,116 | 147 | 21,934 | 5,417 | 3,372 | 30,870 |
| 6,117 | 142 | 21,867 | 5,412 | 3,373 | 30,794 |
| 6,118 | 150 | 21,611 | 5,344 | 3,350 | 30,455 |
| 6,119 | 149 | 21,309 | 5,294 | 3,314 | 30,066 |
| 6,120 | 150 | 21,558 | 5,350 | 3,342 | 30,400 |
| 6,121 | 150 | 21,498 | 5,350 | 3,353 | 30,351 |
| 6,122 | 146 | 21,725 | 5,398 | 3,381 | 30,650 |
| 6,123 | 151 | 21,919 | 5,421 | 3,389 | 30,880 |
| 6,124 | 145 | 21,946 | 5,334 | 3,341 | 30,766 |
| 6,125 | 145 | 22,284 | 5,403 | 3,396 | 31,228 |
| 6,126 | 141 | 22,366 | 5,424 | 3,389 | 31,320 |
| 6,127 | 138 | 22,478 | 5,486 | 3,445 | 31,547 |
| 6,128 | 132 | 22,625 | 5,458 | 3,473 | 31,688 |
| 6,129 | 130 | 22,417 | 5,398 | 3,420 | 31,365 |
| 6,130 | 130 | 21,860 | 5,271 | 3,339 | 30,600 |
| 6,131 | 130 | 22,099 | 5,334 | 3,378 | 30,941 |
| 6,132 | 123 | 22,410 | 5,370 | 3,411 | 31,314 |
| 6,133 | 129 | 22,667 | 5,407 | 3,451 | 31,654 |
| 6,134 | 130 | 22,570 | 5,419 | 3,455 | 31,574 |
| 6,135 | 132 | 22,645 | 5,441 | 3,482 | 31,700 |



|       |     |        |       |       |        |
|-------|-----|--------|-------|-------|--------|
| 6,136 | 134 | 22,786 | 5,467 | 3,510 | 31,897 |
| 6,137 | 132 | 22,552 | 5,453 | 3,496 | 31,633 |
| 6,138 | 133 | 22,533 | 5,435 | 3,499 | 31,600 |
| 6,139 | 134 | 22,352 | 5,374 | 3,470 | 31,330 |
| 6,140 | 140 | 22,939 | 5,485 | 3,546 | 32,110 |
| 6,141 | 137 | 23,158 | 5,504 | 3,544 | 32,343 |
| 6,142 | 139 | 23,472 | 5,579 | 3,583 | 32,773 |
| 6,143 | 139 | 23,513 | 5,612 | 3,622 | 32,886 |
| 6,144 | 136 | 23,555 | 5,630 | 3,623 | 32,944 |
| 6,145 | 138 | 23,582 | 5,598 | 3,600 | 32,918 |
| 6,146 | 137 | 23,722 | 5,598 | 3,597 | 33,054 |
| 6,147 | 130 | 23,571 | 5,506 | 3,540 | 32,747 |
| 6,148 | 130 | 23,810 | 5,547 | 3,576 | 33,063 |
| 6,149 | 125 | 24,071 | 5,608 | 3,631 | 33,435 |
| 6,150 | 122 | 24,051 | 5,609 | 3,623 | 33,405 |
| 6,151 | 122 | 23,900 | 5,556 | 3,606 | 33,184 |
| 6,152 | 122 | 23,853 | 5,526 | 3,591 | 33,092 |
| 6,153 | 120 | 23,888 | 5,549 | 3,626 | 33,183 |
| 6,154 | 125 | 23,962 | 5,576 | 3,640 | 33,303 |
| 6,155 | 126 | 24,140 | 5,612 | 3,687 | 33,565 |
| 6,156 | 127 | 24,228 | 5,647 | 3,700 | 33,702 |
| 6,157 | 128 | 24,351 | 5,650 | 3,697 | 33,826 |
| 6,158 | 129 | 24,212 | 5,620 | 3,675 | 33,636 |
| 6,159 | 129 | 24,166 | 5,607 | 3,658 | 33,560 |
| 6,160 | 129 | 24,253 | 5,593 | 3,656 | 33,631 |
| 6,161 | 129 | 24,439 | 5,608 | 3,661 | 33,837 |
| 6,162 | 130 | 24,454 | 5,572 | 3,663 | 33,819 |
| 6,163 | 129 | 24,150 | 5,481 | 3,609 | 33,369 |
| 6,164 | 130 | 24,217 | 5,490 | 3,647 | 33,484 |
| 6,165 | 140 | 24,436 | 5,545 | 3,692 | 33,813 |
| 6,166 | 138 | 24,572 | 5,582 | 3,694 | 33,986 |
| 6,167 | 135 | 24,597 | 5,556 | 3,683 | 33,971 |

|       |     |        |       |       |        |
|-------|-----|--------|-------|-------|--------|
| 6,168 | 124 | 24,404 | 5,518 | 3,639 | 33,685 |
| 6,169 | 123 | 24,395 | 5,530 | 3,636 | 33,684 |
| 6,170 | 123 | 24,378 | 5,518 | 3,653 | 33,672 |
| 6,171 | 129 | 24,577 | 5,529 | 3,676 | 33,911 |
| 6,172 | 133 | 24,614 | 5,489 | 3,666 | 33,902 |
| 6,173 | 138 | 24,248 | 5,419 | 3,606 | 33,411 |
| 6,174 | 136 | 23,952 | 5,342 | 3,550 | 32,980 |
| 6,175 | 139 | 24,402 | 5,414 | 3,623 | 33,578 |
| 6,176 | 145 | 24,020 | 5,316 | 3,568 | 33,049 |
| 6,177 | 153 | 24,118 | 5,309 | 3,546 | 33,126 |
| 6,178 | 159 | 24,224 | 5,304 | 3,509 | 33,196 |
| 6,179 | 171 | 24,529 | 5,328 | 3,517 | 33,545 |
| 6,180 | 188 | 24,238 | 5,250 | 3,466 | 33,142 |
| 6,181 | 191 | 24,034 | 5,174 | 3,441 | 32,840 |
| 6,182 | 198 | 24,451 | 5,207 | 3,484 | 33,340 |
| 6,183 | 199 | 24,326 | 5,195 | 3,465 | 33,185 |
| 6,184 | 199 | 24,415 | 5,196 | 3,481 | 33,291 |
| 6,185 | 197 | 24,426 | 5,181 | 3,474 | 33,278 |
| 6,186 | 197 | 24,383 | 5,154 | 3,455 | 33,189 |
| 6,187 | 202 | 24,023 | 5,074 | 3,410 | 32,709 |
| 6,188 | 204 | 23,812 | 5,012 | 3,369 | 32,397 |
| 6,189 | 212 | 24,212 | 5,051 | 3,402 | 32,877 |
| 6,190 | 210 | 24,088 | 5,013 | 3,360 | 32,671 |
| 6,191 | 205 | 24,726 | 5,164 | 3,444 | 33,539 |
| 6,192 | 215 | 24,811 | 5,174 | 3,465 | 33,665 |
| 6,193 | 212 | 24,969 | 5,183 | 3,474 | 33,838 |
| 6,194 | 217 | 25,024 | 5,232 | 3,482 | 33,955 |
| 6,195 | 210 | 24,556 | 5,154 | 3,436 | 33,356 |
| 6,196 | 213 | 24,688 | 5,166 | 3,440 | 33,507 |
| 6,197 | 211 | 24,615 | 5,158 | 3,456 | 33,440 |
| 6,198 | 208 | 24,582 | 5,165 | 3,458 | 33,413 |
| 6,199 | 210 | 24,437 | 5,136 | 3,453 | 33,236 |

|       |     |        |       |       |        |
|-------|-----|--------|-------|-------|--------|
| 6,200 | 210 | 24,548 | 5,140 | 3,449 | 33,347 |
| 6,201 | 213 | 24,363 | 5,084 | 3,419 | 33,079 |
| 6,202 | 221 | 24,603 | 5,113 | 3,442 | 33,379 |
| 6,203 | 222 | 24,814 | 5,130 | 3,463 | 33,629 |
| 6,204 | 215 | 24,826 | 5,128 | 3,466 | 33,635 |
| 6,205 | 211 | 24,702 | 5,109 | 3,437 | 33,459 |
| 6,206 | 212 | 24,162 | 5,009 | 3,368 | 32,751 |
| 6,207 | 213 | 24,391 | 5,008 | 3,380 | 32,992 |
| 6,208 | 209 | 24,483 | 5,028 | 3,389 | 33,109 |
| 6,209 | 209 | 24,607 | 5,052 | 3,405 | 33,273 |
| 6,210 | 209 | 24,589 | 5,055 | 3,392 | 33,245 |
| 6,211 | 211 | 24,493 | 5,073 | 3,378 | 33,155 |
| 6,212 | 210 | 24,445 | 5,088 | 3,394 | 33,137 |
| 6,213 | 209 | 24,538 | 5,157 | 3,419 | 33,323 |
| 6,214 | 213 | 24,248 | 5,124 | 3,360 | 32,945 |
| 6,215 | 213 | 24,116 | 5,108 | 3,342 | 32,779 |
| 6,216 | 206 | 24,308 | 5,164 | 3,360 | 33,038 |
| 6,217 | 199 | 24,159 | 5,120 | 3,339 | 32,817 |
| 6,218 | 194 | 23,855 | 5,066 | 3,311 | 32,426 |
| 6,219 | 197 | 23,841 | 4,978 | 3,269 | 32,285 |
| 6,220 | 198 | 24,131 | 5,027 | 3,285 | 32,641 |
| 6,221 | 197 | 24,027 | 5,016 | 3,276 | 32,516 |
| 6,222 | 191 | 23,993 | 5,030 | 3,270 | 32,484 |
| 6,223 | 193 | 23,919 | 5,027 | 3,271 | 32,410 |
| 6,224 | 186 | 23,797 | 4,993 | 3,261 | 32,237 |
| 6,225 | 188 | 24,035 | 5,021 | 3,287 | 32,531 |
| 6,226 | 184 | 23,550 | 4,929 | 3,225 | 31,888 |
| 6,227 | 182 | 23,498 | 4,918 | 3,227 | 31,825 |
| 6,228 | 177 | 23,404 | 4,950 | 3,232 | 31,763 |
| 6,229 | 174 | 23,414 | 4,972 | 3,280 | 31,840 |
| 6,230 | 162 | 23,041 | 4,932 | 3,254 | 31,389 |
| 6,231 | 144 | 22,803 | 4,939 | 3,260 | 31,146 |

|       |     |        |       |       |        |
|-------|-----|--------|-------|-------|--------|
| 6,232 | 140 | 22,732 | 4,988 | 3,259 | 31,119 |
| 6,233 | 134 | 22,849 | 5,023 | 3,291 | 31,297 |
| 6,234 | 130 | 22,674 | 4,981 | 3,249 | 31,034 |
| 6,235 | 130 | 22,765 | 4,981 | 3,256 | 31,132 |
| 6,236 | 130 | 22,792 | 4,994 | 3,267 | 31,183 |
| 6,237 | 132 | 22,980 | 5,040 | 3,316 | 31,468 |
| 6,238 | 127 | 22,883 | 4,995 | 3,287 | 31,292 |
| 6,239 | 128 | 22,707 | 4,968 | 3,276 | 31,079 |
| 6,240 | 124 | 22,779 | 5,015 | 3,290 | 31,208 |
| 6,241 | 126 | 22,851 | 5,023 | 3,305 | 31,305 |
| 6,242 | 120 | 22,766 | 4,982 | 3,288 | 31,156 |
| 6,243 | 127 | 22,839 | 4,945 | 3,260 | 31,171 |
| 6,244 | 130 | 22,873 | 4,969 | 3,260 | 31,232 |
| 6,245 | 125 | 22,680 | 4,897 | 3,217 | 30,919 |
| 6,246 | 129 | 22,964 | 4,910 | 3,251 | 31,254 |
| 6,247 | 126 | 22,726 | 4,858 | 3,230 | 30,940 |
| 6,248 | 130 | 22,963 | 4,896 | 3,240 | 31,229 |
| 6,249 | 127 | 22,725 | 4,844 | 3,207 | 30,903 |
| 6,250 | 130 | 22,678 | 4,828 | 3,178 | 30,814 |
| 6,251 | 130 | 22,717 | 4,842 | 3,187 | 30,876 |
| 6,252 | 129 | 22,757 | 4,810 | 3,185 | 30,881 |
| 6,253 | 121 | 22,667 | 4,803 | 3,177 | 30,768 |
| 6,254 | 117 | 22,391 | 4,761 | 3,122 | 30,391 |
| 6,255 | 124 | 22,408 | 4,758 | 3,108 | 30,398 |
| 6,256 | 122 | 22,209 | 4,680 | 3,078 | 30,089 |
| 6,257 | 119 | 22,526 | 4,718 | 3,115 | 30,478 |
| 6,258 | 126 | 22,922 | 4,755 | 3,152 | 30,955 |
| 6,259 | 130 | 22,486 | 4,639 | 3,104 | 30,359 |
| 6,260 | 134 | 22,772 | 4,666 | 3,116 | 30,688 |
| 6,261 | 130 | 23,066 | 4,700 | 3,155 | 31,051 |
| 6,262 | 136 | 23,279 | 4,727 | 3,177 | 31,319 |
| 6,263 | 136 | 23,365 | 4,712 | 3,171 | 31,384 |

|       |     |        |       |       |        |
|-------|-----|--------|-------|-------|--------|
| 6,264 | 137 | 23,172 | 4,665 | 3,146 | 31,120 |
| 6,265 | 134 | 23,255 | 4,668 | 3,150 | 31,207 |
| 6,266 | 137 | 23,552 | 4,739 | 3,188 | 31,616 |
| 6,267 | 134 | 23,443 | 4,670 | 3,155 | 31,402 |
| 6,268 | 143 | 23,133 | 4,623 | 3,115 | 31,014 |
| 6,269 | 142 | 22,836 | 4,556 | 3,064 | 30,598 |
| 6,270 | 144 | 23,549 | 4,728 | 3,171 | 31,592 |
| 6,271 | 143 | 23,307 | 4,655 | 3,119 | 31,224 |
| 6,272 | 153 | 23,524 | 4,695 | 3,150 | 31,522 |
| 6,273 | 150 | 23,355 | 4,627 | 3,098 | 31,230 |
| 6,274 | 153 | 23,423 | 4,659 | 3,090 | 31,325 |
| 6,275 | 153 | 23,259 | 4,629 | 3,084 | 31,125 |
| 6,276 | 152 | 23,357 | 4,648 | 3,125 | 31,282 |
| 6,277 | 152 | 23,376 | 4,632 | 3,110 | 31,270 |
| 6,278 | 153 | 23,366 | 4,622 | 3,115 | 31,256 |
| 6,279 | 152 | 23,410 | 4,636 | 3,119 | 31,317 |
| 6,280 | 154 | 23,501 | 4,634 | 3,112 | 31,401 |
| 6,281 | 158 | 23,633 | 4,605 | 3,095 | 31,491 |
| 6,282 | 160 | 23,621 | 4,544 | 3,074 | 31,399 |
| 6,283 | 169 | 23,906 | 4,601 | 3,101 | 31,777 |
| 6,284 | 170 | 23,894 | 4,600 | 3,097 | 31,761 |
| 6,285 | 178 | 23,726 | 4,540 | 3,063 | 31,507 |
| 6,286 | 178 | 23,795 | 4,539 | 3,065 | 31,577 |
| 6,287 | 172 | 23,746 | 4,537 | 3,064 | 31,519 |
| 6,288 | 178 | 23,944 | 4,603 | 3,086 | 31,811 |
| 6,289 | 178 | 23,791 | 4,559 | 3,079 | 31,607 |
| 6,290 | 179 | 23,738 | 4,557 | 3,070 | 31,544 |
| 6,291 | 189 | 24,045 | 4,580 | 3,120 | 31,934 |
| 6,292 | 202 | 23,561 | 4,511 | 3,048 | 31,322 |
| 6,293 | 200 | 23,354 | 4,485 | 3,048 | 31,087 |
| 6,294 | 203 | 23,358 | 4,497 | 3,068 | 31,126 |
| 6,295 | 202 | 23,063 | 4,418 | 3,025 | 30,708 |

|       |     |        |       |       |        |
|-------|-----|--------|-------|-------|--------|
| 6,296 | 205 | 23,594 | 4,576 | 3,120 | 31,495 |
| 6,297 | 202 | 23,431 | 4,579 | 3,096 | 31,308 |
| 6,298 | 208 | 23,606 | 4,601 | 3,106 | 31,521 |
| 6,299 | 209 | 23,630 | 4,617 | 3,110 | 31,566 |
| 6,300 | 211 | 23,434 | 4,647 | 3,113 | 31,405 |
| 6,301 | 223 | 23,494 | 4,650 | 3,102 | 31,469 |
| 6,302 | 224 | 23,477 | 4,646 | 3,110 | 31,457 |
| 6,303 | 231 | 23,418 | 4,698 | 3,108 | 31,455 |
| 6,304 | 239 | 23,217 | 4,668 | 3,075 | 31,199 |
| 6,305 | 238 | 22,967 | 4,611 | 3,061 | 30,877 |
| 6,306 | 239 | 23,180 | 4,632 | 3,090 | 31,141 |
| 6,307 | 239 | 23,036 | 4,640 | 3,068 | 30,983 |
| 6,308 | 235 | 23,512 | 4,755 | 3,138 | 31,640 |
| 6,309 | 245 | 23,269 | 4,740 | 3,091 | 31,345 |
| 6,310 | 241 | 23,096 | 4,710 | 3,075 | 31,122 |
| 6,311 | 248 | 23,553 | 4,880 | 3,171 | 31,852 |
| 6,312 | 252 | 23,780 | 4,897 | 3,192 | 32,121 |
| 6,313 | 248 | 23,740 | 4,902 | 3,171 | 32,061 |
| 6,314 | 250 | 24,044 | 4,969 | 3,212 | 32,475 |
| 6,315 | 248 | 23,910 | 4,984 | 3,216 | 32,358 |
| 6,316 | 247 | 24,183 | 5,011 | 3,252 | 32,693 |
| 6,317 | 248 | 24,233 | 5,009 | 3,267 | 32,757 |
| 6,318 | 248 | 24,037 | 4,977 | 3,243 | 32,505 |
| 6,319 | 245 | 24,166 | 5,018 | 3,298 | 32,727 |
| 6,320 | 246 | 23,893 | 4,957 | 3,262 | 32,358 |
| 6,321 | 254 | 23,876 | 4,946 | 3,271 | 32,347 |
| 6,322 | 257 | 23,919 | 4,943 | 3,273 | 32,392 |
| 6,323 | 252 | 23,918 | 4,933 | 3,282 | 32,385 |
| 6,324 | 252 | 23,973 | 4,927 | 3,293 | 32,445 |
| 6,325 | 250 | 23,861 | 4,930 | 3,280 | 32,321 |
| 6,326 | 250 | 23,745 | 4,919 | 3,289 | 32,203 |
| 6,327 | 251 | 23,875 | 4,987 | 3,311 | 32,424 |

|       |     |        |       |       |        |
|-------|-----|--------|-------|-------|--------|
| 6,328 | 251 | 23,767 | 4,965 | 3,304 | 32,287 |
| 6,329 | 249 | 23,759 | 4,977 | 3,316 | 32,301 |
| 6,330 | 254 | 23,700 | 4,988 | 3,309 | 32,251 |
| 6,331 | 253 | 23,475 | 4,961 | 3,281 | 31,970 |
| 6,332 | 253 | 23,393 | 4,961 | 3,291 | 31,898 |
| 6,333 | 252 | 23,343 | 4,981 | 3,305 | 31,881 |
| 6,334 | 247 | 23,428 | 4,979 | 3,310 | 31,964 |
| 6,335 | 245 | 23,403 | 4,966 | 3,294 | 31,908 |
| 6,336 | 240 | 23,071 | 4,940 | 3,281 | 31,532 |
| 6,337 | 241 | 22,869 | 4,906 | 3,260 | 31,276 |
| 6,338 | 250 | 23,522 | 5,007 | 3,299 | 32,078 |
| 6,339 | 250 | 23,456 | 4,983 | 3,303 | 31,992 |
| 6,340 | 247 | 23,683 | 5,001 | 3,321 | 32,252 |
| 6,341 | 240 | 23,572 | 4,974 | 3,309 | 32,095 |
| 6,342 | 224 | 23,556 | 4,995 | 3,310 | 32,085 |
| 6,343 | 225 | 23,462 | 4,990 | 3,272 | 31,949 |
| 6,344 | 216 | 23,427 | 4,992 | 3,267 | 31,902 |
| 6,345 | 216 | 23,363 | 4,966 | 3,268 | 31,813 |
| 6,346 | 216 | 23,396 | 4,935 | 3,273 | 31,820 |
| 6,347 | 214 | 23,366 | 4,922 | 3,262 | 31,764 |
| 6,348 | 215 | 23,361 | 4,949 | 3,276 | 31,801 |
| 6,349 | 207 | 23,455 | 4,963 | 3,281 | 31,906 |
| 6,350 | 201 | 23,328 | 4,895 | 3,267 | 31,691 |
| 6,351 | 203 | 23,468 | 4,906 | 3,283 | 31,860 |
| 6,352 | 194 | 23,504 | 4,907 | 3,310 | 31,915 |
| 6,353 | 182 | 23,277 | 4,881 | 3,296 | 31,636 |
| 6,354 | 180 | 23,367 | 4,890 | 3,331 | 31,768 |
| 6,355 | 174 | 22,676 | 4,749 | 3,221 | 30,820 |
| 6,356 | 174 | 22,901 | 4,805 | 3,228 | 31,108 |
| 6,357 | 177 | 23,112 | 4,876 | 3,281 | 31,446 |
| 6,358 | 180 | 23,001 | 4,858 | 3,268 | 31,307 |
| 6,359 | 179 | 23,074 | 4,854 | 3,275 | 31,382 |

|       |     |        |       |       |        |
|-------|-----|--------|-------|-------|--------|
| 6,360 | 165 | 23,166 | 4,826 | 3,300 | 31,457 |
| 6,361 | 161 | 23,077 | 4,789 | 3,299 | 31,326 |
| 6,362 | 161 | 22,706 | 4,721 | 3,261 | 30,849 |
| 6,363 | 157 | 22,517 | 4,722 | 3,246 | 30,642 |
| 6,364 | 163 | 22,829 | 4,802 | 3,305 | 31,099 |
| 6,365 | 164 | 22,664 | 4,767 | 3,291 | 30,886 |
| 6,366 | 162 | 22,429 | 4,690 | 3,249 | 30,530 |
| 6,367 | 166 | 22,406 | 4,693 | 3,239 | 30,504 |
| 6,368 | 164 | 22,290 | 4,649 | 3,220 | 30,323 |
| 6,369 | 164 | 22,289 | 4,638 | 3,217 | 30,308 |
| 6,370 | 162 | 22,503 | 4,677 | 3,235 | 30,577 |
| 6,371 | 162 | 22,463 | 4,684 | 3,229 | 30,538 |
| 6,372 | 164 | 22,768 | 4,772 | 3,263 | 30,967 |
| 6,373 | 175 | 22,759 | 4,777 | 3,262 | 30,973 |
| 6,374 | 169 | 22,528 | 4,734 | 3,257 | 30,688 |
| 6,375 | 175 | 22,648 | 4,735 | 3,263 | 30,821 |
| 6,376 | 175 | 22,671 | 4,754 | 3,264 | 30,864 |
| 6,377 | 173 | 22,921 | 4,769 | 3,260 | 31,123 |
| 6,378 | 172 | 22,751 | 4,757 | 3,248 | 30,928 |
| 6,379 | 171 | 22,666 | 4,710 | 3,213 | 30,760 |
| 6,380 | 172 | 22,714 | 4,718 | 3,219 | 30,823 |
| 6,381 | 165 | 22,783 | 4,721 | 3,228 | 30,897 |
| 6,382 | 164 | 22,788 | 4,709 | 3,203 | 30,864 |
| 6,383 | 163 | 22,833 | 4,713 | 3,207 | 30,916 |
| 6,384 | 166 | 23,000 | 4,790 | 3,232 | 31,188 |
| 6,385 | 171 | 22,879 | 4,760 | 3,223 | 31,033 |
| 6,386 | 165 | 22,870 | 4,771 | 3,223 | 31,029 |
| 6,387 | 164 | 23,104 | 4,830 | 3,247 | 31,345 |
| 6,388 | 163 | 22,813 | 4,807 | 3,249 | 31,032 |
| 6,389 | 164 | 22,811 | 4,817 | 3,263 | 31,055 |
| 6,390 | 179 | 23,335 | 4,883 | 3,319 | 31,716 |
| 6,391 | 184 | 23,561 | 4,934 | 3,336 | 32,015 |



|       |     |        |       |       |        |
|-------|-----|--------|-------|-------|--------|
| 6,392 | 190 | 23,442 | 4,900 | 3,286 | 31,818 |
| 6,393 | 188 | 23,462 | 4,857 | 3,270 | 31,777 |
| 6,394 | 194 | 23,642 | 4,892 | 3,296 | 32,024 |
| 6,395 | 195 | 23,533 | 4,872 | 3,266 | 31,866 |
| 6,396 | 196 | 23,814 | 4,933 | 3,298 | 32,241 |
| 6,397 | 203 | 23,543 | 4,906 | 3,266 | 31,918 |
| 6,398 | 203 | 23,412 | 4,891 | 3,258 | 31,764 |
| 6,399 | 209 | 23,868 | 4,952 | 3,309 | 32,338 |
| 6,400 | 209 | 23,513 | 4,880 | 3,252 | 31,854 |
| 6,401 | 209 | 23,549 | 4,878 | 3,261 | 31,897 |
| 6,402 | 213 | 23,860 | 4,944 | 3,276 | 32,293 |
| 6,403 | 215 | 23,960 | 4,988 | 3,279 | 32,442 |
| 6,404 | 218 | 24,030 | 4,955 | 3,269 | 32,472 |
| 6,405 | 217 | 23,901 | 4,916 | 3,234 | 32,268 |
| 6,406 | 210 | 23,460 | 4,810 | 3,181 | 31,661 |
| 6,407 | 210 | 23,655 | 4,823 | 3,218 | 31,906 |
| 6,408 | 205 | 23,799 | 4,851 | 3,239 | 32,094 |
| 6,409 | 202 | 23,568 | 4,793 | 3,209 | 31,772 |
| 6,410 | 206 | 23,482 | 4,802 | 3,201 | 31,691 |
| 6,411 | 208 | 23,651 | 4,834 | 3,219 | 31,912 |
| 6,412 | 205 | 23,309 | 4,746 | 3,126 | 31,386 |
| 6,413 | 202 | 23,520 | 4,802 | 3,156 | 31,680 |
| 6,414 | 199 | 23,790 | 4,848 | 3,193 | 32,030 |
| 6,415 | 195 | 23,640 | 4,814 | 3,183 | 31,832 |
| 6,416 | 199 | 24,034 | 4,910 | 3,216 | 32,359 |
| 6,417 | 201 | 23,914 | 4,920 | 3,217 | 32,252 |
| 6,418 | 205 | 23,893 | 4,930 | 3,204 | 32,232 |
| 6,419 | 200 | 24,461 | 5,073 | 3,277 | 33,011 |
| 6,420 | 206 | 24,643 | 5,133 | 3,324 | 33,306 |
| 6,421 | 205 | 24,347 | 5,057 | 3,284 | 32,893 |
| 6,422 | 210 | 24,629 | 5,101 | 3,330 | 33,270 |
| 6,423 | 204 | 24,597 | 5,094 | 3,330 | 33,225 |

|       |     |        |       |       |        |
|-------|-----|--------|-------|-------|--------|
| 6,424 | 190 | 24,634 | 5,107 | 3,332 | 33,263 |
| 6,425 | 186 | 24,570 | 5,122 | 3,336 | 33,214 |
| 6,426 | 184 | 24,473 | 5,108 | 3,335 | 33,100 |
| 6,427 | 191 | 24,336 | 5,091 | 3,318 | 32,936 |
| 6,428 | 191 | 24,346 | 5,087 | 3,331 | 32,955 |
| 6,429 | 188 | 24,375 | 5,116 | 3,335 | 33,014 |
| 6,430 | 188 | 24,347 | 5,107 | 3,322 | 32,964 |
| 6,431 | 194 | 24,278 | 5,067 | 3,298 | 32,837 |
| 6,432 | 199 | 24,326 | 5,063 | 3,292 | 32,880 |
| 6,433 | 211 | 24,437 | 5,051 | 3,296 | 32,995 |
| 6,434 | 211 | 24,526 | 5,066 | 3,309 | 33,112 |
| 6,435 | 202 | 24,379 | 5,064 | 3,308 | 32,953 |
| 6,436 | 205 | 24,520 | 5,081 | 3,334 | 33,140 |
| 6,437 | 210 | 24,937 | 5,160 | 3,391 | 33,698 |
| 6,438 | 205 | 24,763 | 5,099 | 3,342 | 33,409 |
| 6,439 | 204 | 24,870 | 5,128 | 3,340 | 33,542 |
| 6,440 | 198 | 25,266 | 5,228 | 3,384 | 34,076 |
| 6,441 | 192 | 25,185 | 5,263 | 3,389 | 34,029 |
| 6,442 | 188 | 24,973 | 5,247 | 3,364 | 33,772 |
| 6,443 | 177 | 24,588 | 5,171 | 3,336 | 33,272 |
| 6,444 | 184 | 24,323 | 5,171 | 3,332 | 33,010 |
| 6,445 | 178 | 24,128 | 5,154 | 3,325 | 32,785 |
| 6,446 | 175 | 24,287 | 5,233 | 3,384 | 33,079 |
| 6,447 | 176 | 24,294 | 5,249 | 3,403 | 33,122 |
| 6,448 | 177 | 24,479 | 5,279 | 3,438 | 33,373 |
| 6,449 | 174 | 24,289 | 5,241 | 3,401 | 33,105 |
| 6,450 | 171 | 24,393 | 5,278 | 3,420 | 33,262 |
| 6,451 | 172 | 24,273 | 5,278 | 3,416 | 33,139 |
| 6,452 | 170 | 24,515 | 5,345 | 3,432 | 33,462 |
| 6,453 | 172 | 24,805 | 5,388 | 3,476 | 33,841 |
| 6,454 | 171 | 24,756 | 5,335 | 3,472 | 33,734 |
| 6,455 | 169 | 24,549 | 5,328 | 3,437 | 33,483 |

|       |     |        |       |       |        |
|-------|-----|--------|-------|-------|--------|
| 6,456 | 168 | 24,581 | 5,350 | 3,453 | 33,552 |
| 6,457 | 169 | 24,627 | 5,365 | 3,468 | 33,629 |
| 6,458 | 174 | 24,571 | 5,365 | 3,474 | 33,584 |
| 6,459 | 175 | 24,681 | 5,425 | 3,486 | 33,767 |
| 6,460 | 171 | 24,652 | 5,456 | 3,497 | 33,776 |
| 6,461 | 173 | 24,596 | 5,413 | 3,469 | 33,651 |
| 6,462 | 180 | 24,688 | 5,471 | 3,487 | 33,826 |
| 6,463 | 178 | 24,510 | 5,436 | 3,480 | 33,604 |
| 6,464 | 178 | 24,496 | 5,404 | 3,470 | 33,548 |
| 6,465 | 182 | 24,550 | 5,407 | 3,461 | 33,600 |
| 6,466 | 184 | 24,303 | 5,339 | 3,447 | 33,273 |
| 6,467 | 180 | 23,953 | 5,300 | 3,428 | 32,861 |
| 6,468 | 177 | 23,927 | 5,301 | 3,417 | 32,822 |
| 6,469 | 173 | 23,724 | 5,252 | 3,389 | 32,538 |
| 6,470 | 177 | 23,867 | 5,285 | 3,411 | 32,740 |
| 6,471 | 168 | 23,682 | 5,226 | 3,370 | 32,446 |
| 6,472 | 154 | 23,434 | 5,162 | 3,328 | 32,078 |
| 6,473 | 163 | 23,558 | 5,170 | 3,319 | 32,210 |
| 6,474 | 164 | 23,533 | 5,152 | 3,325 | 32,174 |
| 6,475 | 163 | 23,597 | 5,148 | 3,308 | 32,216 |
| 6,476 | 156 | 23,289 | 5,104 | 3,269 | 31,818 |
| 6,477 | 158 | 23,642 | 5,148 | 3,302 | 32,250 |
| 6,478 | 153 | 23,740 | 5,155 | 3,308 | 32,356 |
| 6,479 | 159 | 23,741 | 5,131 | 3,304 | 32,335 |
| 6,480 | 160 | 23,729 | 5,107 | 3,313 | 32,309 |
| 6,481 | 160 | 23,762 | 5,115 | 3,321 | 32,358 |
| 6,482 | 154 | 23,716 | 5,122 | 3,331 | 32,323 |
| 6,483 | 146 | 23,819 | 5,163 | 3,371 | 32,499 |
| 6,484 | 138 | 23,798 | 5,179 | 3,360 | 32,475 |
| 6,485 | 135 | 23,509 | 5,109 | 3,321 | 32,074 |
| 6,486 | 135 | 23,484 | 5,096 | 3,329 | 32,044 |
| 6,487 | 131 | 23,544 | 5,140 | 3,332 | 32,147 |

|       |     |        |       |       |        |
|-------|-----|--------|-------|-------|--------|
| 6,488 | 129 | 23,441 | 5,131 | 3,322 | 32,023 |
| 6,489 | 123 | 23,271 | 5,142 | 3,333 | 31,869 |
| 6,490 | 125 | 23,080 | 5,147 | 3,341 | 31,693 |
| 6,491 | 128 | 22,898 | 5,106 | 3,320 | 31,452 |
| 6,492 | 124 | 22,546 | 5,020 | 3,270 | 30,960 |
| 6,493 | 127 | 22,445 | 5,007 | 3,290 | 30,869 |
| 6,494 | 132 | 22,380 | 4,956 | 3,282 | 30,750 |
| 6,495 | 133 | 22,446 | 4,925 | 3,248 | 30,752 |
| 6,496 | 140 | 22,539 | 4,902 | 3,226 | 30,807 |
| 6,497 | 143 | 22,501 | 4,881 | 3,210 | 30,735 |
| 6,498 | 144 | 22,539 | 4,893 | 3,206 | 30,782 |
| 6,499 | 137 | 22,546 | 4,909 | 3,187 | 30,779 |
| 6,500 | 140 | 22,787 | 4,961 | 3,207 | 31,095 |
| 6,501 | 139 | 22,813 | 4,946 | 3,192 | 31,090 |
| 6,502 | 139 | 22,535 | 4,868 | 3,158 | 30,700 |
| 6,503 | 141 | 22,461 | 4,857 | 3,163 | 30,622 |
| 6,504 | 140 | 22,606 | 4,918 | 3,174 | 30,838 |
| 6,505 | 136 | 22,447 | 4,900 | 3,162 | 30,645 |
| 6,506 | 139 | 22,598 | 4,941 | 3,197 | 30,875 |
| 6,507 | 138 | 22,790 | 4,955 | 3,207 | 31,090 |
| 6,508 | 137 | 22,675 | 4,921 | 3,165 | 30,898 |
| 6,509 | 139 | 22,861 | 4,915 | 3,175 | 31,090 |
| 6,510 | 145 | 22,920 | 4,894 | 3,172 | 31,131 |
| 6,511 | 145 | 22,866 | 4,886 | 3,166 | 31,063 |
| 6,512 | 148 | 23,007 | 4,953 | 3,188 | 31,296 |
| 6,513 | 149 | 22,857 | 4,894 | 3,163 | 31,063 |
| 6,514 | 150 | 22,647 | 4,831 | 3,128 | 30,756 |
| 6,515 | 161 | 22,886 | 4,930 | 3,166 | 31,143 |
| 6,516 | 159 | 22,785 | 4,902 | 3,148 | 30,994 |
| 6,517 | 155 | 22,653 | 4,845 | 3,133 | 30,786 |
| 6,518 | 158 | 22,447 | 4,730 | 3,077 | 30,412 |
| 6,519 | 158 | 22,455 | 4,710 | 3,080 | 30,403 |

|       |     |        |       |       |        |
|-------|-----|--------|-------|-------|--------|
| 6,520 | 160 | 22,504 | 4,721 | 3,058 | 30,443 |
| 6,521 | 157 | 22,345 | 4,656 | 3,037 | 30,195 |
| 6,522 | 159 | 22,247 | 4,593 | 3,003 | 30,002 |
| 6,523 | 157 | 22,000 | 4,549 | 2,964 | 29,670 |
| 6,524 | 151 | 21,730 | 4,503 | 2,934 | 29,318 |
| 6,525 | 150 | 21,638 | 4,468 | 2,920 | 29,176 |
| 6,526 | 164 | 21,431 | 4,390 | 2,886 | 28,871 |
| 6,527 | 165 | 21,506 | 4,372 | 2,867 | 28,910 |
| 6,528 | 164 | 21,585 | 4,391 | 2,874 | 29,014 |
| 6,529 | 164 | 21,317 | 4,317 | 2,842 | 28,640 |
| 6,530 | 164 | 21,445 | 4,317 | 2,817 | 28,743 |
| 6,531 | 166 | 21,598 | 4,332 | 2,824 | 28,920 |
| 6,532 | 180 | 21,726 | 4,344 | 2,806 | 29,056 |
| 6,533 | 186 | 21,716 | 4,345 | 2,807 | 29,054 |
| 6,534 | 186 | 21,675 | 4,321 | 2,795 | 28,977 |
| 6,535 | 186 | 21,553 | 4,297 | 2,779 | 28,815 |
| 6,536 | 188 | 21,961 | 4,360 | 2,809 | 29,318 |
| 6,537 | 195 | 22,099 | 4,355 | 2,821 | 29,470 |
| 6,538 | 196 | 22,297 | 4,332 | 2,825 | 29,650 |
| 6,539 | 195 | 22,106 | 4,245 | 2,771 | 29,317 |
| 6,540 | 194 | 22,019 | 4,174 | 2,747 | 29,134 |
| 6,541 | 194 | 22,125 | 4,148 | 2,730 | 29,197 |
| 6,542 | 190 | 22,417 | 4,188 | 2,726 | 29,521 |
| 6,543 | 189 | 22,544 | 4,165 | 2,684 | 29,582 |
| 6,544 | 184 | 22,579 | 4,136 | 2,651 | 29,550 |
| 6,545 | 179 | 22,410 | 4,079 | 2,607 | 29,275 |
| 6,546 | 179 | 22,379 | 4,065 | 2,584 | 29,207 |
| 6,547 | 183 | 22,660 | 4,141 | 2,639 | 29,623 |
| 6,548 | 184 | 22,678 | 4,139 | 2,620 | 29,621 |
| 6,549 | 190 | 22,647 | 4,092 | 2,612 | 29,541 |
| 6,550 | 187 | 22,365 | 4,005 | 2,578 | 29,135 |
| 6,551 | 191 | 22,234 | 3,963 | 2,565 | 28,953 |

|       |     |        |       |       |        |
|-------|-----|--------|-------|-------|--------|
| 6,552 | 190 | 22,183 | 3,948 | 2,573 | 28,894 |
| 6,553 | 192 | 22,110 | 3,932 | 2,572 | 28,806 |
| 6,554 | 193 | 21,920 | 3,858 | 2,526 | 28,497 |
| 6,555 | 190 | 21,716 | 3,783 | 2,503 | 28,192 |
| 6,556 | 195 | 22,191 | 3,877 | 2,558 | 28,821 |
| 6,557 | 201 | 22,100 | 3,834 | 2,512 | 28,647 |
| 6,558 | 201 | 22,096 | 3,804 | 2,507 | 28,608 |
| 6,559 | 196 | 22,107 | 3,843 | 2,540 | 28,686 |
| 6,560 | 196 | 22,130 | 3,825 | 2,532 | 28,683 |
| 6,561 | 196 | 22,503 | 3,908 | 2,588 | 29,195 |
| 6,562 | 202 | 22,570 | 3,859 | 2,593 | 29,224 |
| 6,563 | 198 | 22,664 | 3,849 | 2,614 | 29,325 |
| 6,564 | 199 | 22,646 | 3,824 | 2,600 | 29,269 |
| 6,565 | 199 | 22,917 | 3,862 | 2,612 | 29,590 |
| 6,566 | 192 | 22,943 | 3,840 | 2,609 | 29,584 |
| 6,567 | 192 | 22,691 | 3,784 | 2,576 | 29,243 |
| 6,568 | 193 | 22,603 | 3,748 | 2,541 | 29,085 |
| 6,569 | 195 | 23,286 | 3,929 | 2,644 | 30,054 |
| 6,570 | 200 | 23,482 | 3,951 | 2,671 | 30,304 |
| 6,571 | 206 | 23,375 | 3,951 | 2,683 | 30,215 |
| 6,572 | 203 | 23,305 | 3,932 | 2,676 | 30,116 |
| 6,573 | 202 | 23,516 | 3,998 | 2,711 | 30,427 |
| 6,574 | 201 | 23,350 | 3,992 | 2,709 | 30,252 |
| 6,575 | 195 | 22,994 | 3,953 | 2,703 | 29,845 |
| 6,576 | 197 | 23,247 | 3,983 | 2,703 | 30,130 |
| 6,577 | 190 | 23,231 | 3,957 | 2,693 | 30,071 |
| 6,578 | 194 | 23,251 | 3,972 | 2,701 | 30,118 |
| 6,579 | 193 | 23,245 | 3,945 | 2,683 | 30,066 |
| 6,580 | 199 | 23,413 | 4,017 | 2,723 | 30,352 |
| 6,581 | 193 | 23,039 | 4,008 | 2,707 | 29,947 |
| 6,582 | 193 | 23,230 | 4,032 | 2,726 | 30,181 |
| 6,583 | 188 | 23,413 | 4,035 | 2,745 | 30,381 |

|       |     |        |       |       |        |
|-------|-----|--------|-------|-------|--------|
| 6,584 | 181 | 23,235 | 3,980 | 2,709 | 30,105 |
| 6,585 | 181 | 23,307 | 3,995 | 2,716 | 30,199 |
| 6,586 | 182 | 23,262 | 4,005 | 2,715 | 30,164 |
| 6,587 | 181 | 23,290 | 4,010 | 2,734 | 30,215 |
| 6,588 | 175 | 23,096 | 3,948 | 2,681 | 29,900 |
| 6,589 | 180 | 23,121 | 3,972 | 2,668 | 29,941 |
| 6,590 | 183 | 22,790 | 3,903 | 2,638 | 29,514 |
| 6,591 | 185 | 22,828 | 3,869 | 2,621 | 29,503 |
| 6,592 | 187 | 22,851 | 3,874 | 2,640 | 29,552 |
| 6,593 | 197 | 22,946 | 3,924 | 2,676 | 29,743 |
| 6,594 | 196 | 22,868 | 3,881 | 2,682 | 29,627 |
| 6,595 | 193 | 22,906 | 3,940 | 2,728 | 29,767 |
| 6,596 | 193 | 22,291 | 3,877 | 2,697 | 29,058 |
| 6,597 | 194 | 22,409 | 3,868 | 2,708 | 29,179 |
| 6,598 | 188 | 22,660 | 3,918 | 2,712 | 29,478 |
| 6,599 | 186 | 22,631 | 3,878 | 2,708 | 29,403 |
| 6,600 | 179 | 22,828 | 3,888 | 2,720 | 29,615 |
| 6,601 | 175 | 22,945 | 3,900 | 2,742 | 29,762 |
| 6,602 | 182 | 23,266 | 3,974 | 2,765 | 30,187 |
| 6,603 | 180 | 23,165 | 3,925 | 2,744 | 30,014 |
| 6,604 | 179 | 23,218 | 3,965 | 2,800 | 30,162 |
| 6,605 | 179 | 23,127 | 3,930 | 2,795 | 30,031 |
| 6,606 | 178 | 23,187 | 3,940 | 2,808 | 30,113 |
| 6,607 | 174 | 23,301 | 4,007 | 2,837 | 30,319 |
| 6,608 | 175 | 23,310 | 4,014 | 2,846 | 30,345 |
| 6,609 | 176 | 23,295 | 3,994 | 2,842 | 30,307 |
| 6,610 | 175 | 23,365 | 4,002 | 2,839 | 30,381 |
| 6,611 | 174 | 23,091 | 3,982 | 2,826 | 30,073 |
| 6,612 | 176 | 23,335 | 3,982 | 2,834 | 30,327 |
| 6,613 | 173 | 23,327 | 3,975 | 2,813 | 30,288 |
| 6,614 | 170 | 23,146 | 3,954 | 2,787 | 30,057 |
| 6,615 | 168 | 23,411 | 4,056 | 2,852 | 30,487 |

|       |     |        |       |       |        |
|-------|-----|--------|-------|-------|--------|
| 6,616 | 177 | 23,121 | 4,044 | 2,835 | 30,177 |
| 6,617 | 177 | 23,072 | 4,026 | 2,842 | 30,117 |
| 6,618 | 174 | 23,001 | 4,051 | 2,854 | 30,080 |
| 6,619 | 174 | 23,086 | 4,108 | 2,871 | 30,239 |
| 6,620 | 185 | 22,771 | 4,049 | 2,843 | 29,848 |
| 6,621 | 180 | 22,524 | 4,012 | 2,830 | 29,546 |
| 6,622 | 179 | 22,776 | 4,062 | 2,848 | 29,865 |
| 6,623 | 179 | 22,645 | 4,036 | 2,832 | 29,692 |
| 6,624 | 182 | 22,663 | 4,047 | 2,845 | 29,737 |
| 6,625 | 184 | 22,574 | 4,040 | 2,845 | 29,643 |
| 6,626 | 189 | 22,615 | 4,080 | 2,861 | 29,745 |
| 6,627 | 191 | 22,597 | 4,060 | 2,838 | 29,686 |
| 6,628 | 189 | 22,566 | 4,113 | 2,849 | 29,717 |
| 6,629 | 189 | 22,562 | 4,102 | 2,849 | 29,702 |
| 6,630 | 187 | 22,759 | 4,145 | 2,872 | 29,963 |
| 6,631 | 187 | 22,831 | 4,152 | 2,872 | 30,042 |
| 6,632 | 189 | 22,654 | 4,114 | 2,861 | 29,818 |
| 6,633 | 191 | 22,867 | 4,137 | 2,873 | 30,068 |
| 6,634 | 188 | 22,875 | 4,101 | 2,887 | 30,051 |
| 6,635 | 188 | 22,732 | 4,075 | 2,857 | 29,852 |
| 6,636 | 189 | 22,882 | 4,085 | 2,893 | 30,049 |
| 6,637 | 189 | 22,396 | 3,999 | 2,832 | 29,416 |
| 6,638 | 189 | 22,381 | 3,988 | 2,826 | 29,384 |
| 6,639 | 187 | 22,024 | 3,959 | 2,827 | 28,997 |
| 6,640 | 184 | 21,683 | 3,923 | 2,808 | 28,598 |
| 6,641 | 188 | 22,237 | 4,019 | 2,867 | 29,311 |
| 6,642 | 185 | 22,118 | 4,017 | 2,855 | 29,175 |
| 6,643 | 191 | 22,186 | 4,017 | 2,876 | 29,270 |
| 6,644 | 180 | 22,054 | 3,987 | 2,864 | 29,085 |
| 6,645 | 183 | 22,019 | 3,978 | 2,849 | 29,029 |
| 6,646 | 181 | 21,766 | 3,908 | 2,806 | 28,661 |
| 6,647 | 174 | 21,701 | 3,908 | 2,792 | 28,575 |



|       |     |        |       |       |        |
|-------|-----|--------|-------|-------|--------|
| 6,648 | 175 | 21,702 | 3,900 | 2,772 | 28,549 |
| 6,649 | 180 | 21,788 | 3,882 | 2,808 | 28,658 |
| 6,650 | 180 | 21,538 | 3,828 | 2,785 | 28,331 |
| 6,651 | 182 | 21,412 | 3,825 | 2,769 | 28,188 |
| 6,652 | 183 | 21,264 | 3,806 | 2,740 | 27,993 |
| 6,653 | 174 | 21,262 | 3,762 | 2,748 | 27,946 |
| 6,654 | 178 | 20,927 | 3,709 | 2,672 | 27,486 |
| 6,655 | 178 | 20,870 | 3,691 | 2,655 | 27,394 |
| 6,656 | 175 | 21,050 | 3,690 | 2,675 | 27,590 |
| 6,657 | 173 | 20,618 | 3,628 | 2,632 | 27,051 |
| 6,658 | 170 | 20,532 | 3,624 | 2,631 | 26,957 |
| 6,659 | 169 | 20,411 | 3,604 | 2,608 | 26,792 |
| 6,660 | 168 | 20,426 | 3,601 | 2,605 | 26,800 |
| 6,661 | 168 | 20,339 | 3,580 | 2,594 | 26,681 |
| 6,662 | 165 | 20,280 | 3,575 | 2,585 | 26,605 |
| 6,663 | 164 | 20,105 | 3,544 | 2,576 | 26,389 |
| 6,664 | 149 | 19,357 | 3,370 | 2,487 | 25,363 |
| 6,665 | 150 | 19,620 | 3,385 | 2,491 | 25,646 |
| 6,666 | 152 | 19,843 | 3,405 | 2,503 | 25,903 |
| 6,667 | 157 | 19,905 | 3,360 | 2,469 | 25,891 |
| 6,668 | 158 | 19,965 | 3,321 | 2,438 | 25,882 |
| 6,669 | 158 | 20,153 | 3,336 | 2,463 | 26,110 |
| 6,670 | 158 | 20,067 | 3,315 | 2,465 | 26,005 |
| 6,671 | 143 | 19,865 | 3,271 | 2,447 | 25,726 |
| 6,672 | 143 | 19,953 | 3,268 | 2,442 | 25,806 |
| 6,673 | 144 | 19,943 | 3,235 | 2,437 | 25,759 |
| 6,674 | 143 | 20,078 | 3,266 | 2,429 | 25,916 |
| 6,675 | 143 | 20,073 | 3,278 | 2,428 | 25,922 |
| 6,676 | 138 | 20,198 | 3,286 | 2,448 | 26,070 |
| 6,677 | 135 | 20,289 | 3,273 | 2,467 | 26,164 |
| 6,678 | 135 | 20,505 | 3,285 | 2,505 | 26,430 |
| 6,679 | 132 | 20,107 | 3,150 | 2,445 | 25,834 |

|       |     |        |       |       |        |
|-------|-----|--------|-------|-------|--------|
| 6,680 | 133 | 20,332 | 3,190 | 2,492 | 26,147 |
| 6,681 | 126 | 20,498 | 3,215 | 2,511 | 26,350 |
| 6,682 | 129 | 20,766 | 3,266 | 2,548 | 26,709 |
| 6,683 | 129 | 20,720 | 3,272 | 2,539 | 26,660 |
| 6,684 | 127 | 20,530 | 3,227 | 2,529 | 26,413 |
| 6,685 | 127 | 20,097 | 3,119 | 2,423 | 25,766 |
| 6,686 | 128 | 20,222 | 3,147 | 2,438 | 25,935 |
| 6,687 | 131 | 20,523 | 3,182 | 2,471 | 26,307 |
| 6,688 | 131 | 20,516 | 3,200 | 2,492 | 26,339 |
| 6,689 | 127 | 20,804 | 3,216 | 2,498 | 26,645 |
| 6,690 | 134 | 20,971 | 3,221 | 2,495 | 26,821 |
| 6,691 | 133 | 20,965 | 3,247 | 2,513 | 26,858 |
| 6,692 | 139 | 20,954 | 3,230 | 2,470 | 26,793 |
| 6,693 | 143 | 21,172 | 3,265 | 2,497 | 27,077 |
| 6,694 | 135 | 21,134 | 3,292 | 2,506 | 27,067 |
| 6,695 | 131 | 21,116 | 3,286 | 2,503 | 27,036 |
| 6,696 | 128 | 21,022 | 3,283 | 2,484 | 26,917 |
| 6,697 | 127 | 20,845 | 3,235 | 2,458 | 26,665 |
| 6,698 | 130 | 21,043 | 3,246 | 2,482 | 26,901 |
| 6,699 | 128 | 20,932 | 3,258 | 2,474 | 26,792 |
| 6,700 | 129 | 21,306 | 3,294 | 2,510 | 27,239 |
| 6,701 | 128 | 21,303 | 3,269 | 2,486 | 27,186 |
| 6,702 | 129 | 21,460 | 3,283 | 2,505 | 27,377 |
| 6,703 | 129 | 21,455 | 3,293 | 2,489 | 27,366 |
| 6,704 | 130 | 21,295 | 3,302 | 2,475 | 27,202 |
| 6,705 | 126 | 22,108 | 3,388 | 2,536 | 28,158 |
| 6,706 | 137 | 22,364 | 3,407 | 2,532 | 28,440 |
| 6,707 | 144 | 22,259 | 3,383 | 2,481 | 28,267 |
| 6,708 | 145 | 22,328 | 3,411 | 2,483 | 28,367 |
| 6,709 | 149 | 22,213 | 3,346 | 2,448 | 28,156 |
| 6,710 | 149 | 22,096 | 3,358 | 2,459 | 28,062 |
| 6,711 | 147 | 21,837 | 3,338 | 2,425 | 27,747 |

|       |     |        |       |       |        |
|-------|-----|--------|-------|-------|--------|
| 6,712 | 147 | 21,496 | 3,287 | 2,401 | 27,331 |
| 6,713 | 156 | 22,636 | 3,394 | 2,497 | 28,683 |
| 6,714 | 160 | 22,636 | 3,410 | 2,497 | 28,703 |
| 6,715 | 156 | 22,433 | 3,400 | 2,504 | 28,493 |
| 6,716 | 152 | 22,011 | 3,340 | 2,484 | 27,987 |
| 6,717 | 153 | 22,040 | 3,373 | 2,495 | 28,061 |
| 6,718 | 146 | 22,030 | 3,397 | 2,505 | 28,078 |
| 6,719 | 148 | 22,058 | 3,436 | 2,543 | 28,185 |
| 6,720 | 142 | 21,775 | 3,397 | 2,488 | 27,802 |
| 6,721 | 143 | 21,633 | 3,365 | 2,460 | 27,601 |
| 6,722 | 147 | 21,658 | 3,395 | 2,487 | 27,687 |
| 6,723 | 144 | 21,923 | 3,476 | 2,511 | 28,054 |
| 6,724 | 154 | 21,756 | 3,473 | 2,514 | 27,897 |
| 6,725 | 151 | 21,688 | 3,464 | 2,503 | 27,806 |
| 6,726 | 161 | 21,645 | 3,495 | 2,496 | 27,797 |
| 6,727 | 161 | 21,278 | 3,446 | 2,454 | 27,339 |
| 6,728 | 163 | 21,013 | 3,422 | 2,408 | 27,006 |
| 6,729 | 166 | 21,203 | 3,467 | 2,423 | 27,259 |
| 6,730 | 166 | 20,857 | 3,459 | 2,374 | 26,856 |
| 6,731 | 170 | 20,740 | 3,450 | 2,372 | 26,732 |
| 6,732 | 165 | 20,717 | 3,449 | 2,366 | 26,697 |
| 6,733 | 166 | 20,524 | 3,430 | 2,357 | 26,477 |
| 6,734 | 166 | 20,493 | 3,436 | 2,360 | 26,455 |
| 6,735 | 160 | 20,423 | 3,446 | 2,355 | 26,384 |
| 6,736 | 156 | 20,279 | 3,464 | 2,368 | 26,267 |
| 6,737 | 159 | 20,491 | 3,512 | 2,392 | 26,554 |
| 6,738 | 156 | 20,244 | 3,480 | 2,369 | 26,249 |
| 6,739 | 157 | 20,239 | 3,496 | 2,365 | 26,257 |
| 6,740 | 155 | 20,227 | 3,544 | 2,415 | 26,341 |
| 6,741 | 153 | 20,105 | 3,551 | 2,417 | 26,226 |
| 6,742 | 151 | 19,852 | 3,495 | 2,385 | 25,883 |
| 6,743 | 151 | 19,705 | 3,515 | 2,390 | 25,761 |

|       |     |        |       |       |        |
|-------|-----|--------|-------|-------|--------|
| 6,744 | 147 | 19,519 | 3,514 | 2,385 | 25,565 |
| 6,745 | 150 | 19,515 | 3,520 | 2,367 | 25,552 |
| 6,746 | 152 | 19,523 | 3,514 | 2,383 | 25,572 |
| 6,747 | 152 | 19,443 | 3,521 | 2,389 | 25,505 |
| 6,748 | 158 | 19,484 | 3,580 | 2,423 | 25,645 |
| 6,749 | 166 | 19,462 | 3,623 | 2,433 | 25,684 |
| 6,750 | 166 | 19,566 | 3,667 | 2,468 | 25,867 |
| 6,751 | 162 | 19,365 | 3,645 | 2,445 | 25,617 |
| 6,752 | 161 | 19,316 | 3,683 | 2,463 | 25,623 |
| 6,753 | 159 | 19,249 | 3,714 | 2,482 | 25,604 |
| 6,754 | 157 | 19,171 | 3,733 | 2,499 | 25,560 |
| 6,755 | 153 | 18,865 | 3,703 | 2,488 | 25,209 |
| 6,756 | 153 | 18,946 | 3,733 | 2,527 | 25,359 |
| 6,757 | 150 | 18,958 | 3,777 | 2,560 | 25,445 |
| 6,758 | 142 | 18,620 | 3,760 | 2,559 | 25,081 |
| 6,759 | 142 | 18,770 | 3,837 | 2,602 | 25,351 |
| 6,760 | 140 | 18,542 | 3,838 | 2,590 | 25,110 |
| 6,761 | 140 | 18,313 | 3,826 | 2,582 | 24,861 |
| 6,762 | 139 | 18,726 | 3,921 | 2,634 | 25,420 |
| 6,763 | 142 | 18,736 | 3,987 | 2,652 | 25,517 |
| 6,764 | 142 | 18,705 | 4,000 | 2,642 | 25,489 |
| 6,765 | 141 | 18,636 | 3,998 | 2,641 | 25,416 |
| 6,766 | 139 | 18,648 | 4,013 | 2,615 | 25,415 |
| 6,767 | 141 | 18,907 | 4,070 | 2,633 | 25,751 |
| 6,768 | 140 | 18,932 | 4,069 | 2,632 | 25,773 |
| 6,769 | 139 | 18,901 | 4,063 | 2,624 | 25,727 |
| 6,770 | 139 | 18,996 | 4,052 | 2,605 | 25,792 |
| 6,771 | 141 | 18,997 | 4,061 | 2,608 | 25,807 |
| 6,772 | 140 | 18,867 | 4,052 | 2,592 | 25,651 |
| 6,773 | 139 | 19,183 | 4,113 | 2,613 | 26,048 |
| 6,774 | 140 | 19,096 | 4,118 | 2,621 | 25,975 |
| 6,775 | 127 | 18,814 | 4,022 | 2,556 | 25,519 |

|       |     |        |       |       |        |
|-------|-----|--------|-------|-------|--------|
| 6,776 | 128 | 19,170 | 4,095 | 2,573 | 25,966 |
| 6,777 | 130 | 19,438 | 4,146 | 2,608 | 26,322 |
| 6,778 | 132 | 19,121 | 4,110 | 2,588 | 25,951 |
| 6,779 | 130 | 18,842 | 4,086 | 2,572 | 25,630 |
| 6,780 | 127 | 19,292 | 4,201 | 2,644 | 26,264 |
| 6,781 | 131 | 19,081 | 4,149 | 2,634 | 25,995 |
| 6,782 | 127 | 18,745 | 4,100 | 2,592 | 25,564 |
| 6,783 | 130 | 18,887 | 4,134 | 2,631 | 25,782 |
| 6,784 | 133 | 18,853 | 4,142 | 2,627 | 25,755 |
| 6,785 | 137 | 18,817 | 4,137 | 2,626 | 25,717 |
| 6,786 | 145 | 18,887 | 4,164 | 2,606 | 25,802 |
| 6,787 | 143 | 18,610 | 4,118 | 2,597 | 25,468 |
| 6,788 | 139 | 18,569 | 4,160 | 2,595 | 25,463 |
| 6,789 | 139 | 18,449 | 4,154 | 2,602 | 25,344 |
| 6,790 | 136 | 18,368 | 4,124 | 2,584 | 25,212 |
| 6,791 | 139 | 18,639 | 4,193 | 2,603 | 25,574 |
| 6,792 | 142 | 18,527 | 4,187 | 2,594 | 25,450 |
| 6,793 | 144 | 18,840 | 4,219 | 2,642 | 25,845 |
| 6,794 | 144 | 18,735 | 4,159 | 2,614 | 25,652 |
| 6,795 | 145 | 19,033 | 4,225 | 2,656 | 26,059 |
| 6,796 | 146 | 19,148 | 4,219 | 2,669 | 26,182 |
| 6,797 | 155 | 19,318 | 4,264 | 2,685 | 26,422 |
| 6,798 | 153 | 19,445 | 4,291 | 2,704 | 26,593 |
| 6,799 | 148 | 19,705 | 4,343 | 2,724 | 26,920 |
| 6,800 | 143 | 19,558 | 4,302 | 2,697 | 26,700 |
| 6,801 | 142 | 19,469 | 4,336 | 2,722 | 26,669 |
| 6,802 | 142 | 19,222 | 4,328 | 2,706 | 26,398 |
| 6,803 | 141 | 19,288 | 4,363 | 2,692 | 26,484 |
| 6,804 | 137 | 18,995 | 4,290 | 2,652 | 26,074 |
| 6,805 | 136 | 18,834 | 4,255 | 2,649 | 25,874 |
| 6,806 | 136 | 18,492 | 4,213 | 2,598 | 25,439 |
| 6,807 | 135 | 18,315 | 4,210 | 2,579 | 25,239 |

|       |     |        |       |       |        |
|-------|-----|--------|-------|-------|--------|
| 6,808 | 138 | 18,190 | 4,194 | 2,548 | 25,070 |
| 6,809 | 140 | 18,262 | 4,205 | 2,540 | 25,147 |
| 6,810 | 138 | 17,923 | 4,134 | 2,486 | 24,681 |
| 6,811 | 138 | 17,809 | 4,115 | 2,478 | 24,540 |
| 6,812 | 141 | 17,914 | 4,164 | 2,511 | 24,730 |
| 6,813 | 141 | 17,789 | 4,122 | 2,484 | 24,536 |
| 6,814 | 142 | 17,780 | 4,143 | 2,502 | 24,567 |
| 6,815 | 142 | 17,707 | 4,141 | 2,504 | 24,494 |
| 6,816 | 138 | 17,496 | 4,097 | 2,491 | 24,222 |
| 6,817 | 139 | 17,701 | 4,163 | 2,525 | 24,528 |
| 6,818 | 142 | 17,812 | 4,190 | 2,552 | 24,696 |
| 6,819 | 142 | 17,822 | 4,192 | 2,565 | 24,721 |
| 6,820 | 144 | 18,272 | 4,301 | 2,636 | 25,353 |
| 6,821 | 144 | 18,289 | 4,314 | 2,646 | 25,393 |
| 6,822 | 143 | 18,452 | 4,384 | 2,703 | 25,682 |
| 6,823 | 148 | 18,449 | 4,390 | 2,735 | 25,722 |
| 6,824 | 146 | 18,355 | 4,405 | 2,748 | 25,654 |
| 6,825 | 146 | 18,368 | 4,409 | 2,767 | 25,690 |
| 6,826 | 150 | 18,394 | 4,407 | 2,798 | 25,749 |
| 6,827 | 149 | 18,496 | 4,447 | 2,849 | 25,941 |
| 6,828 | 146 | 18,716 | 4,534 | 2,931 | 26,327 |
| 6,829 | 147 | 18,804 | 4,535 | 2,933 | 26,419 |
| 6,830 | 149 | 18,984 | 4,581 | 2,949 | 26,663 |
| 6,831 | 149 | 19,069 | 4,585 | 2,964 | 26,767 |
| 6,832 | 145 | 19,248 | 4,700 | 2,987 | 27,080 |
| 6,833 | 144 | 19,332 | 4,735 | 2,989 | 27,200 |
| 6,834 | 148 | 19,566 | 4,798 | 3,033 | 27,545 |
| 6,835 | 146 | 19,405 | 4,776 | 3,028 | 27,355 |
| 6,836 | 151 | 19,607 | 4,818 | 3,057 | 27,633 |
| 6,837 | 145 | 19,849 | 4,871 | 3,118 | 27,983 |
| 6,838 | 141 | 19,918 | 4,865 | 3,116 | 28,040 |
| 6,839 | 141 | 20,201 | 4,893 | 3,140 | 28,375 |

|       |     |        |       |       |        |
|-------|-----|--------|-------|-------|--------|
| 6,840 | 140 | 20,374 | 4,928 | 3,158 | 28,600 |
| 6,841 | 140 | 20,265 | 4,953 | 3,165 | 28,523 |
| 6,842 | 138 | 20,482 | 5,040 | 3,241 | 28,901 |
| 6,843 | 130 | 20,359 | 5,054 | 3,251 | 28,794 |
| 6,844 | 128 | 20,212 | 5,074 | 3,268 | 28,682 |
| 6,845 | 124 | 20,533 | 5,198 | 3,349 | 29,204 |
| 6,846 | 126 | 20,870 | 5,253 | 3,393 | 29,642 |
| 6,847 | 123 | 21,001 | 5,311 | 3,426 | 29,861 |
| 6,848 | 113 | 20,888 | 5,315 | 3,465 | 29,781 |
| 6,849 | 110 | 20,667 | 5,338 | 3,471 | 29,586 |
| 6,850 | 109 | 20,606 | 5,345 | 3,483 | 29,543 |
| 6,851 | 109 | 20,744 | 5,356 | 3,491 | 29,700 |
| 6,852 | 113 | 20,958 | 5,417 | 3,518 | 30,006 |
| 6,853 | 116 | 21,138 | 5,480 | 3,578 | 30,312 |
| 6,854 | 116 | 21,002 | 5,431 | 3,585 | 30,134 |
| 6,855 | 120 | 21,339 | 5,534 | 3,640 | 30,633 |
| 6,856 | 119 | 21,499 | 5,546 | 3,682 | 30,846 |
| 6,857 | 121 | 21,748 | 5,568 | 3,716 | 31,153 |
| 6,858 | 113 | 21,835 | 5,608 | 3,759 | 31,315 |
| 6,859 | 110 | 22,010 | 5,665 | 3,808 | 31,593 |
| 6,860 | 113 | 22,166 | 5,669 | 3,847 | 31,795 |
| 6,861 | 112 | 22,337 | 5,681 | 3,846 | 31,976 |
| 6,862 | 123 | 22,681 | 5,732 | 3,872 | 32,408 |
| 6,863 | 122 | 22,897 | 5,808 | 3,915 | 32,742 |
| 6,864 | 122 | 22,764 | 5,772 | 3,894 | 32,552 |
| 6,865 | 121 | 22,668 | 5,763 | 3,889 | 32,441 |
| 6,866 | 123 | 23,167 | 5,925 | 3,969 | 33,184 |
| 6,867 | 129 | 23,456 | 6,014 | 4,018 | 33,617 |
| 6,868 | 131 | 23,517 | 6,046 | 4,040 | 33,734 |
| 6,869 | 141 | 23,518 | 6,044 | 4,057 | 33,760 |
| 6,870 | 142 | 23,442 | 6,022 | 4,042 | 33,648 |
| 6,871 | 139 | 23,268 | 6,002 | 4,010 | 33,419 |

|       |     |        |       |       |        |
|-------|-----|--------|-------|-------|--------|
| 6,872 | 139 | 23,430 | 6,031 | 4,029 | 33,629 |
| 6,873 | 146 | 23,519 | 6,054 | 4,025 | 33,744 |
| 6,874 | 144 | 23,549 | 6,053 | 4,014 | 33,760 |
| 6,875 | 148 | 23,636 | 6,079 | 4,025 | 33,888 |
| 6,876 | 150 | 23,872 | 6,151 | 4,072 | 34,245 |
| 6,877 | 141 | 23,264 | 6,022 | 3,947 | 33,374 |
| 6,878 | 143 | 23,416 | 6,052 | 3,965 | 33,576 |
| 6,879 | 139 | 23,632 | 6,080 | 3,977 | 33,828 |
| 6,880 | 136 | 23,550 | 6,077 | 3,981 | 33,744 |
| 6,881 | 136 | 23,276 | 5,985 | 3,936 | 33,333 |
| 6,882 | 135 | 23,290 | 5,964 | 3,941 | 33,330 |
| 6,883 | 136 | 23,276 | 5,917 | 3,959 | 33,288 |
| 6,884 | 142 | 23,603 | 5,991 | 4,004 | 33,740 |
| 6,885 | 143 | 23,530 | 5,975 | 3,982 | 33,630 |
| 6,886 | 136 | 23,256 | 5,887 | 3,938 | 33,217 |
| 6,887 | 135 | 23,415 | 5,960 | 3,977 | 33,487 |
| 6,888 | 133 | 23,382 | 5,936 | 3,971 | 33,422 |
| 6,889 | 145 | 22,733 | 5,761 | 3,913 | 32,552 |
| 6,890 | 148 | 22,866 | 5,789 | 3,930 | 32,733 |
| 6,891 | 147 | 22,817 | 5,789 | 3,934 | 32,687 |
| 6,892 | 147 | 22,857 | 5,771 | 3,924 | 32,699 |
| 6,893 | 153 | 22,607 | 5,661 | 3,846 | 32,267 |
| 6,894 | 158 | 22,813 | 5,700 | 3,873 | 32,544 |
| 6,895 | 160 | 22,560 | 5,613 | 3,805 | 32,138 |
| 6,896 | 160 | 22,148 | 5,485 | 3,751 | 31,544 |
| 6,897 | 165 | 22,319 | 5,560 | 3,793 | 31,837 |
| 6,898 | 167 | 21,517 | 5,288 | 3,604 | 30,576 |
| 6,899 | 170 | 21,716 | 5,327 | 3,616 | 30,829 |
| 6,900 | 172 | 21,900 | 5,358 | 3,652 | 31,082 |
| 6,901 | 177 | 21,864 | 5,341 | 3,634 | 31,016 |
| 6,902 | 176 | 21,827 | 5,344 | 3,640 | 30,987 |
| 6,903 | 177 | 21,993 | 5,336 | 3,652 | 31,158 |



|       |     |        |       |       |        |
|-------|-----|--------|-------|-------|--------|
| 6,904 | 176 | 21,906 | 5,290 | 3,614 | 30,986 |
| 6,905 | 173 | 21,896 | 5,292 | 3,611 | 30,972 |
| 6,906 | 178 | 21,915 | 5,275 | 3,598 | 30,966 |
| 6,907 | 178 | 21,939 | 5,290 | 3,584 | 30,991 |
| 6,908 | 178 | 21,845 | 5,271 | 3,551 | 30,845 |
| 6,909 | 178 | 21,920 | 5,271 | 3,558 | 30,927 |
| 6,910 | 178 | 22,068 | 5,290 | 3,571 | 31,107 |
| 6,911 | 176 | 21,613 | 5,212 | 3,519 | 30,520 |
| 6,912 | 176 | 21,699 | 5,233 | 3,545 | 30,653 |
| 6,913 | 165 | 21,854 | 5,252 | 3,565 | 30,836 |
| 6,914 | 162 | 21,815 | 5,208 | 3,567 | 30,752 |
| 6,915 | 162 | 21,542 | 5,136 | 3,536 | 30,376 |
| 6,916 | 163 | 21,424 | 5,066 | 3,508 | 30,161 |
| 6,917 | 161 | 21,690 | 5,080 | 3,534 | 30,465 |
| 6,918 | 159 | 21,504 | 5,015 | 3,515 | 30,193 |
| 6,919 | 157 | 21,331 | 4,948 | 3,468 | 29,904 |
| 6,920 | 151 | 21,862 | 5,099 | 3,541 | 30,653 |
| 6,921 | 155 | 21,765 | 5,097 | 3,553 | 30,570 |
| 6,922 | 155 | 21,712 | 5,113 | 3,545 | 30,525 |
| 6,923 | 155 | 22,206 | 5,231 | 3,646 | 31,238 |
| 6,924 | 149 | 22,301 | 5,274 | 3,701 | 31,425 |
| 6,925 | 146 | 22,086 | 5,193 | 3,671 | 31,096 |
| 6,926 | 146 | 22,348 | 5,322 | 3,740 | 31,556 |
| 6,927 | 143 | 22,318 | 5,317 | 3,755 | 31,533 |
| 6,928 | 145 | 22,452 | 5,360 | 3,815 | 31,772 |
| 6,929 | 146 | 22,582 | 5,430 | 3,860 | 32,018 |
| 6,930 | 152 | 22,751 | 5,482 | 3,909 | 32,294 |
| 6,931 | 151 | 22,796 | 5,551 | 3,962 | 32,460 |
| 6,932 | 151 | 22,786 | 5,547 | 3,974 | 32,458 |
| 6,933 | 150 | 22,916 | 5,647 | 4,001 | 32,714 |
| 6,934 | 147 | 23,000 | 5,678 | 4,035 | 32,860 |
| 6,935 | 151 | 22,971 | 5,665 | 4,028 | 32,815 |

|       |     |        |       |       |        |
|-------|-----|--------|-------|-------|--------|
| 6,936 | 145 | 22,678 | 5,631 | 4,007 | 32,461 |
| 6,937 | 156 | 23,108 | 5,829 | 4,115 | 33,208 |
| 6,938 | 155 | 22,854 | 5,760 | 4,077 | 32,846 |
| 6,939 | 157 | 23,148 | 5,830 | 4,126 | 33,261 |
| 6,940 | 147 | 23,435 | 5,893 | 4,156 | 33,631 |
| 6,941 | 148 | 23,396 | 5,893 | 4,143 | 33,580 |
| 6,942 | 146 | 23,468 | 5,907 | 4,137 | 33,658 |
| 6,943 | 146 | 23,973 | 5,957 | 4,198 | 34,274 |
| 6,944 | 147 | 24,132 | 5,988 | 4,214 | 34,481 |
| 6,945 | 144 | 24,083 | 5,951 | 4,186 | 34,364 |
| 6,946 | 144 | 24,095 | 5,952 | 4,186 | 34,377 |
| 6,947 | 149 | 24,592 | 6,048 | 4,227 | 35,016 |
| 6,948 | 155 | 24,845 | 6,114 | 4,285 | 35,399 |
| 6,949 | 152 | 24,698 | 6,125 | 4,267 | 35,242 |
| 6,950 | 152 | 24,700 | 6,121 | 4,275 | 35,248 |
| 6,951 | 151 | 25,259 | 6,270 | 4,350 | 36,030 |
| 6,952 | 153 | 25,263 | 6,254 | 4,330 | 36,000 |
| 6,953 | 152 | 25,298 | 6,262 | 4,328 | 36,040 |
| 6,954 | 152 | 25,674 | 6,345 | 4,406 | 36,577 |
| 6,955 | 150 | 25,461 | 6,280 | 4,379 | 36,270 |
| 6,956 | 150 | 25,937 | 6,325 | 4,446 | 36,858 |
| 6,957 | 145 | 25,760 | 6,301 | 4,421 | 36,627 |
| 6,958 | 149 | 25,981 | 6,368 | 4,497 | 36,995 |
| 6,959 | 147 | 25,900 | 6,423 | 4,525 | 36,995 |
| 6,960 | 148 | 25,757 | 6,407 | 4,501 | 36,813 |
| 6,961 | 147 | 25,639 | 6,372 | 4,493 | 36,651 |
| 6,962 | 146 | 25,890 | 6,472 | 4,529 | 37,037 |
| 6,963 | 146 | 25,881 | 6,489 | 4,520 | 37,036 |
| 6,964 | 147 | 25,920 | 6,538 | 4,549 | 37,154 |
| 6,965 | 148 | 25,810 | 6,551 | 4,528 | 37,037 |
| 6,966 | 144 | 25,795 | 6,541 | 4,546 | 37,026 |
| 6,967 | 138 | 25,186 | 6,410 | 4,406 | 36,140 |

|       |     |        |       |       |        |
|-------|-----|--------|-------|-------|--------|
| 6,968 | 138 | 25,315 | 6,407 | 4,429 | 36,289 |
| 6,969 | 137 | 25,366 | 6,430 | 4,443 | 36,376 |
| 6,970 | 136 | 25,237 | 6,400 | 4,443 | 36,216 |
| 6,971 | 129 | 25,021 | 6,389 | 4,421 | 35,960 |
| 6,972 | 127 | 25,057 | 6,382 | 4,421 | 35,987 |
| 6,973 | 125 | 24,510 | 6,227 | 4,322 | 35,184 |
| 6,974 | 126 | 24,539 | 6,236 | 4,318 | 35,219 |
| 6,975 | 131 | 24,789 | 6,277 | 4,338 | 35,535 |
| 6,976 | 131 | 24,058 | 6,119 | 4,194 | 34,502 |
| 6,977 | 131 | 24,357 | 6,132 | 4,198 | 34,818 |
| 6,978 | 135 | 24,363 | 6,084 | 4,168 | 34,750 |
| 6,979 | 134 | 24,533 | 6,082 | 4,173 | 34,922 |
| 6,980 | 132 | 24,691 | 6,095 | 4,157 | 35,075 |
| 6,981 | 135 | 24,785 | 6,104 | 4,134 | 35,158 |
| 6,982 | 133 | 24,943 | 6,101 | 4,112 | 35,289 |
| 6,983 | 140 | 25,000 | 6,050 | 4,102 | 35,292 |
| 6,984 | 143 | 25,053 | 6,023 | 4,085 | 35,304 |
| 6,985 | 142 | 25,336 | 6,070 | 4,091 | 35,639 |
| 6,986 | 137 | 24,959 | 5,891 | 4,004 | 34,991 |
| 6,987 | 140 | 25,370 | 5,995 | 4,059 | 35,564 |
| 6,988 | 134 | 25,536 | 6,003 | 4,076 | 35,749 |
| 6,989 | 137 | 25,224 | 6,007 | 4,034 | 35,402 |
| 6,990 | 138 | 25,219 | 5,994 | 4,015 | 35,366 |
| 6,991 | 137 | 25,202 | 5,993 | 4,029 | 35,361 |
| 6,992 | 136 | 24,841 | 5,952 | 3,992 | 34,921 |
| 6,993 | 141 | 25,056 | 5,995 | 4,028 | 35,220 |
| 6,994 | 136 | 24,948 | 6,021 | 4,032 | 35,137 |
| 6,995 | 135 | 24,974 | 6,015 | 4,035 | 35,159 |
| 6,996 | 132 | 25,039 | 6,056 | 4,053 | 35,280 |
| 6,997 | 134 | 24,949 | 6,068 | 4,055 | 35,206 |
| 6,998 | 126 | 25,201 | 6,094 | 4,103 | 35,524 |
| 6,999 | 120 | 25,306 | 6,094 | 4,089 | 35,609 |

|       |     |        |       |       |        |
|-------|-----|--------|-------|-------|--------|
| 7,000 | 118 | 25,513 | 6,093 | 4,110 | 35,834 |
| 7,001 | 119 | 25,620 | 6,088 | 4,109 | 35,936 |
| 7,002 | 120 | 25,418 | 6,069 | 4,125 | 35,732 |
| 7,003 | 119 | 25,736 | 6,198 | 4,192 | 36,245 |
| 7,004 | 118 | 25,888 | 6,267 | 4,242 | 36,515 |
| 7,005 | 117 | 26,114 | 6,346 | 4,260 | 36,837 |
| 7,006 | 117 | 26,204 | 6,417 | 4,280 | 37,018 |
| 7,007 | 117 | 26,207 | 6,438 | 4,278 | 37,040 |
| 7,008 | 116 | 26,160 | 6,417 | 4,261 | 36,954 |
| 7,009 | 116 | 26,129 | 6,398 | 4,221 | 36,864 |
| 7,010 | 119 | 26,071 | 6,310 | 4,156 | 36,656 |
| 7,011 | 118 | 25,868 | 6,248 | 4,146 | 36,380 |
| 7,012 | 128 | 26,455 | 6,373 | 4,193 | 37,149 |
| 7,013 | 132 | 26,384 | 6,371 | 4,181 | 37,068 |
| 7,014 | 133 | 26,380 | 6,328 | 4,175 | 37,016 |
| 7,015 | 136 | 26,560 | 6,341 | 4,193 | 37,230 |
| 7,016 | 136 | 26,558 | 6,340 | 4,197 | 37,231 |
| 7,017 | 139 | 26,858 | 6,424 | 4,232 | 37,653 |
| 7,018 | 140 | 26,580 | 6,355 | 4,214 | 37,289 |
| 7,019 | 145 | 26,608 | 6,349 | 4,219 | 37,321 |
| 7,020 | 144 | 26,724 | 6,359 | 4,211 | 37,438 |
| 7,021 | 145 | 26,737 | 6,327 | 4,192 | 37,401 |
| 7,022 | 145 | 26,968 | 6,379 | 4,216 | 37,708 |
| 7,023 | 147 | 26,887 | 6,326 | 4,223 | 37,583 |
| 7,024 | 140 | 26,028 | 6,151 | 4,062 | 36,381 |
| 7,025 | 143 | 26,403 | 6,202 | 4,115 | 36,863 |
| 7,026 | 139 | 26,471 | 6,199 | 4,131 | 36,940 |
| 7,027 | 138 | 26,147 | 6,158 | 4,064 | 36,507 |
| 7,028 | 141 | 26,283 | 6,204 | 4,097 | 36,725 |
| 7,029 | 136 | 26,199 | 6,172 | 4,051 | 36,558 |
| 7,030 | 134 | 25,677 | 6,080 | 3,978 | 35,869 |
| 7,031 | 137 | 26,069 | 6,166 | 4,048 | 36,420 |

|       |     |        |       |       |        |
|-------|-----|--------|-------|-------|--------|
| 7,032 | 137 | 25,885 | 6,153 | 4,041 | 36,216 |
| 7,033 | 131 | 25,470 | 6,061 | 3,987 | 35,649 |
| 7,034 | 140 | 25,443 | 6,062 | 3,981 | 35,626 |
| 7,035 | 137 | 25,128 | 5,995 | 3,946 | 35,206 |
| 7,036 | 135 | 24,957 | 6,018 | 3,992 | 35,102 |
| 7,037 | 135 | 24,758 | 5,994 | 3,998 | 34,885 |
| 7,038 | 132 | 24,634 | 6,000 | 4,015 | 34,781 |
| 7,039 | 129 | 24,581 | 5,984 | 3,976 | 34,670 |
| 7,040 | 122 | 24,377 | 5,915 | 3,960 | 34,374 |
| 7,041 | 120 | 24,311 | 5,911 | 3,967 | 34,309 |
| 7,042 | 119 | 24,221 | 5,881 | 3,920 | 34,141 |
| 7,043 | 120 | 24,794 | 5,990 | 3,994 | 34,898 |
| 7,044 | 120 | 25,042 | 6,042 | 4,036 | 35,240 |
| 7,045 | 117 | 24,896 | 5,959 | 4,005 | 34,977 |
| 7,046 | 118 | 24,776 | 5,961 | 4,032 | 34,887 |
| 7,047 | 120 | 24,404 | 5,900 | 3,980 | 34,404 |
| 7,048 | 124 | 24,408 | 5,844 | 3,933 | 34,309 |
| 7,049 | 125 | 24,317 | 5,850 | 3,940 | 34,232 |
| 7,050 | 128 | 24,373 | 5,891 | 3,971 | 34,363 |
| 7,051 | 129 | 24,334 | 5,915 | 3,959 | 34,337 |
| 7,052 | 124 | 23,830 | 5,832 | 3,905 | 33,691 |
| 7,053 | 124 | 23,975 | 5,831 | 3,924 | 33,854 |
| 7,054 | 123 | 23,624 | 5,766 | 3,901 | 33,414 |
| 7,055 | 124 | 23,623 | 5,749 | 3,912 | 33,408 |
| 7,056 | 129 | 23,331 | 5,716 | 3,918 | 33,094 |
| 7,057 | 131 | 22,964 | 5,597 | 3,854 | 32,546 |
| 7,058 | 131 | 23,001 | 5,617 | 3,880 | 32,629 |
| 7,059 | 128 | 22,732 | 5,575 | 3,866 | 32,301 |
| 7,060 | 132 | 22,944 | 5,635 | 3,898 | 32,609 |
| 7,061 | 130 | 22,858 | 5,652 | 3,920 | 32,560 |
| 7,062 | 130 | 22,991 | 5,695 | 3,939 | 32,755 |
| 7,063 | 126 | 23,096 | 5,732 | 3,956 | 32,910 |

|       |     |        |       |       |        |
|-------|-----|--------|-------|-------|--------|
| 7,064 | 123 | 23,205 | 5,708 | 3,969 | 33,005 |
| 7,065 | 126 | 22,929 | 5,658 | 3,933 | 32,646 |
| 7,066 | 123 | 22,687 | 5,654 | 3,917 | 32,381 |
| 7,067 | 124 | 23,347 | 5,822 | 4,001 | 33,294 |
| 7,068 | 125 | 23,210 | 5,796 | 3,969 | 33,100 |
| 7,069 | 124 | 23,012 | 5,764 | 3,928 | 32,828 |
| 7,070 | 125 | 23,498 | 5,881 | 4,000 | 33,504 |
| 7,071 | 126 | 23,522 | 5,915 | 4,029 | 33,592 |
| 7,072 | 125 | 23,401 | 5,875 | 4,014 | 33,415 |
| 7,073 | 121 | 23,443 | 5,890 | 4,022 | 33,476 |
| 7,074 | 121 | 23,535 | 5,924 | 4,017 | 33,597 |
| 7,075 | 121 | 23,837 | 5,993 | 4,064 | 34,015 |
| 7,076 | 119 | 23,847 | 6,042 | 4,066 | 34,074 |
| 7,077 | 117 | 23,672 | 6,034 | 4,069 | 33,892 |
| 7,078 | 120 | 23,484 | 6,005 | 4,062 | 33,671 |
| 7,079 | 117 | 23,237 | 5,947 | 4,029 | 33,330 |
| 7,080 | 130 | 23,221 | 6,031 | 4,079 | 33,461 |
| 7,081 | 127 | 23,020 | 6,062 | 4,092 | 33,301 |
| 7,082 | 124 | 22,905 | 6,041 | 4,087 | 33,157 |
| 7,083 | 123 | 22,950 | 6,008 | 4,101 | 33,182 |
| 7,084 | 123 | 23,014 | 6,014 | 4,080 | 33,231 |
| 7,085 | 114 | 23,179 | 6,038 | 4,085 | 33,416 |
| 7,086 | 115 | 23,246 | 6,039 | 4,048 | 33,448 |
| 7,087 | 112 | 23,294 | 6,059 | 4,046 | 33,511 |
| 7,088 | 114 | 23,419 | 6,027 | 4,035 | 33,595 |
| 7,089 | 117 | 23,719 | 6,063 | 4,068 | 33,967 |
| 7,090 | 123 | 23,524 | 5,988 | 4,032 | 33,667 |
| 7,091 | 128 | 23,782 | 6,047 | 4,070 | 34,027 |
| 7,092 | 127 | 23,544 | 6,046 | 4,072 | 33,789 |
| 7,093 | 129 | 23,494 | 6,015 | 4,073 | 33,711 |
| 7,094 | 129 | 23,331 | 5,967 | 4,042 | 33,469 |
| 7,095 | 128 | 23,072 | 5,918 | 3,970 | 33,088 |

|       |     |        |       |       |        |
|-------|-----|--------|-------|-------|--------|
| 7,096 | 130 | 23,223 | 5,930 | 3,951 | 33,234 |
| 7,097 | 130 | 23,288 | 5,930 | 3,955 | 33,303 |
| 7,098 | 135 | 23,433 | 5,994 | 3,982 | 33,544 |
| 7,099 | 138 | 23,010 | 5,959 | 3,959 | 33,066 |
| 7,100 | 136 | 22,713 | 5,928 | 3,931 | 32,708 |
| 7,101 | 148 | 23,133 | 6,060 | 3,994 | 33,335 |
| 7,102 | 146 | 22,768 | 5,976 | 3,947 | 32,837 |
| 7,103 | 147 | 22,863 | 5,970 | 3,947 | 32,927 |
| 7,104 | 143 | 23,101 | 5,944 | 3,935 | 33,123 |
| 7,105 | 148 | 23,089 | 5,904 | 3,907 | 33,048 |
| 7,106 | 148 | 23,117 | 5,906 | 3,898 | 33,069 |
| 7,107 | 142 | 23,231 | 5,869 | 3,867 | 33,109 |
| 7,108 | 145 | 22,844 | 5,743 | 3,759 | 32,491 |
| 7,109 | 146 | 23,214 | 5,828 | 3,788 | 32,976 |
| 7,110 | 148 | 23,709 | 5,932 | 3,839 | 33,628 |
| 7,111 | 152 | 24,082 | 5,999 | 3,887 | 34,120 |
| 7,112 | 159 | 24,089 | 5,927 | 3,837 | 34,012 |
| 7,113 | 163 | 24,288 | 5,949 | 3,864 | 34,264 |
| 7,114 | 163 | 24,281 | 5,955 | 3,863 | 34,262 |
| 7,115 | 170 | 24,345 | 6,008 | 3,881 | 34,404 |
| 7,116 | 171 | 25,020 | 6,185 | 3,981 | 35,357 |
| 7,117 | 177 | 25,174 | 6,169 | 3,983 | 35,503 |
| 7,118 | 175 | 24,826 | 6,070 | 3,925 | 34,996 |
| 7,119 | 172 | 25,015 | 6,150 | 3,994 | 35,331 |
| 7,120 | 168 | 24,809 | 6,130 | 3,984 | 35,091 |
| 7,121 | 170 | 24,838 | 6,128 | 3,958 | 35,094 |
| 7,122 | 171 | 24,885 | 6,149 | 3,947 | 35,152 |
| 7,123 | 172 | 24,756 | 6,152 | 3,928 | 35,008 |
| 7,124 | 173 | 24,957 | 6,196 | 3,985 | 35,311 |
| 7,125 | 177 | 24,972 | 6,226 | 4,010 | 35,385 |
| 7,126 | 177 | 25,065 | 6,241 | 4,024 | 35,507 |
| 7,127 | 179 | 24,952 | 6,197 | 3,991 | 35,319 |

|       |     |        |       |       |        |
|-------|-----|--------|-------|-------|--------|
| 7,128 | 183 | 25,193 | 6,195 | 3,989 | 35,560 |
| 7,129 | 177 | 24,993 | 6,092 | 3,945 | 35,207 |
| 7,130 | 179 | 25,499 | 6,135 | 3,999 | 35,812 |
| 7,131 | 172 | 25,694 | 6,133 | 4,002 | 36,001 |
| 7,132 | 175 | 25,762 | 6,049 | 3,961 | 35,947 |
| 7,133 | 175 | 25,758 | 6,042 | 3,949 | 35,924 |
| 7,134 | 178 | 25,684 | 6,053 | 3,933 | 35,848 |
| 7,135 | 181 | 25,662 | 6,092 | 3,952 | 35,887 |
| 7,136 | 181 | 26,172 | 6,131 | 4,033 | 36,517 |
| 7,137 | 181 | 25,845 | 6,064 | 4,007 | 36,097 |
| 7,138 | 183 | 26,339 | 6,133 | 4,068 | 36,723 |
| 7,139 | 187 | 26,654 | 6,201 | 4,117 | 37,159 |
| 7,140 | 188 | 26,860 | 6,239 | 4,148 | 37,435 |
| 7,141 | 179 | 26,696 | 6,178 | 4,110 | 37,163 |
| 7,142 | 180 | 26,710 | 6,164 | 4,095 | 37,149 |
| 7,143 | 180 | 26,750 | 6,152 | 4,087 | 37,169 |
| 7,144 | 176 | 26,384 | 6,115 | 4,079 | 36,754 |
| 7,145 | 176 | 26,431 | 6,130 | 4,102 | 36,839 |
| 7,146 | 174 | 26,441 | 6,122 | 4,106 | 36,843 |
| 7,147 | 170 | 26,551 | 6,168 | 4,145 | 37,034 |
| 7,148 | 168 | 26,455 | 6,181 | 4,129 | 36,933 |
| 7,149 | 153 | 26,081 | 5,978 | 4,032 | 36,244 |
| 7,150 | 152 | 26,228 | 5,984 | 4,032 | 36,396 |
| 7,151 | 142 | 26,320 | 6,001 | 4,065 | 36,528 |
| 7,152 | 140 | 26,050 | 5,878 | 4,006 | 36,074 |
| 7,153 | 142 | 26,219 | 5,931 | 4,015 | 36,307 |
| 7,154 | 143 | 26,182 | 5,908 | 3,991 | 36,224 |
| 7,155 | 139 | 25,878 | 5,852 | 3,946 | 35,815 |
| 7,156 | 139 | 25,782 | 5,838 | 3,934 | 35,693 |
| 7,157 | 148 | 25,846 | 5,877 | 3,944 | 35,815 |
| 7,158 | 150 | 25,726 | 5,852 | 3,918 | 35,646 |
| 7,159 | 149 | 25,324 | 5,799 | 3,892 | 35,164 |



|       |     |        |       |       |        |
|-------|-----|--------|-------|-------|--------|
| 7,160 | 149 | 25,242 | 5,752 | 3,883 | 35,026 |
| 7,161 | 143 | 25,232 | 5,739 | 3,879 | 34,993 |
| 7,162 | 142 | 25,191 | 5,736 | 3,875 | 34,944 |
| 7,163 | 136 | 25,218 | 5,764 | 3,893 | 35,011 |
| 7,164 | 130 | 25,144 | 5,731 | 3,877 | 34,882 |
| 7,165 | 127 | 24,990 | 5,607 | 3,822 | 34,546 |
| 7,166 | 134 | 24,776 | 5,544 | 3,800 | 34,254 |
| 7,167 | 127 | 24,421 | 5,484 | 3,767 | 33,799 |
| 7,168 | 129 | 24,706 | 5,511 | 3,799 | 34,145 |
| 7,169 | 134 | 24,607 | 5,468 | 3,760 | 33,969 |
| 7,170 | 135 | 24,542 | 5,426 | 3,720 | 33,823 |
| 7,171 | 135 | 24,450 | 5,390 | 3,717 | 33,692 |
| 7,172 | 131 | 24,271 | 5,352 | 3,705 | 33,459 |
| 7,173 | 137 | 24,512 | 5,380 | 3,741 | 33,770 |
| 7,174 | 136 | 24,316 | 5,293 | 3,715 | 33,460 |
| 7,175 | 139 | 24,449 | 5,346 | 3,730 | 33,664 |
| 7,176 | 136 | 24,457 | 5,306 | 3,707 | 33,606 |
| 7,177 | 138 | 24,337 | 5,289 | 3,685 | 33,449 |
| 7,178 | 135 | 24,370 | 5,286 | 3,721 | 33,512 |
| 7,179 | 135 | 24,545 | 5,341 | 3,779 | 33,800 |
| 7,180 | 136 | 24,368 | 5,308 | 3,762 | 33,574 |
| 7,181 | 139 | 24,382 | 5,315 | 3,752 | 33,588 |
| 7,182 | 139 | 24,278 | 5,310 | 3,747 | 33,474 |
| 7,183 | 137 | 24,315 | 5,347 | 3,773 | 33,572 |
| 7,184 | 131 | 24,065 | 5,296 | 3,743 | 33,235 |
| 7,185 | 130 | 23,945 | 5,309 | 3,761 | 33,145 |
| 7,186 | 130 | 23,935 | 5,321 | 3,743 | 33,129 |
| 7,187 | 133 | 23,905 | 5,335 | 3,757 | 33,130 |
| 7,188 | 137 | 24,046 | 5,430 | 3,800 | 33,413 |
| 7,189 | 148 | 24,032 | 5,443 | 3,781 | 33,404 |
| 7,190 | 141 | 23,874 | 5,413 | 3,739 | 33,167 |
| 7,191 | 143 | 24,082 | 5,448 | 3,763 | 33,436 |

|       |     |        |       |       |        |
|-------|-----|--------|-------|-------|--------|
| 7,192 | 145 | 23,978 | 5,428 | 3,754 | 33,305 |
| 7,193 | 146 | 24,024 | 5,467 | 3,764 | 33,401 |
| 7,194 | 146 | 24,190 | 5,489 | 3,767 | 33,592 |
| 7,195 | 146 | 24,032 | 5,422 | 3,734 | 33,334 |
| 7,196 | 146 | 24,395 | 5,493 | 3,807 | 33,841 |
| 7,197 | 149 | 24,465 | 5,532 | 3,808 | 33,954 |
| 7,198 | 149 | 24,140 | 5,417 | 3,756 | 33,462 |
| 7,199 | 155 | 24,376 | 5,466 | 3,803 | 33,800 |
| 7,200 | 153 | 24,319 | 5,457 | 3,789 | 33,718 |
| 7,201 | 152 | 24,338 | 5,477 | 3,820 | 33,787 |
| 7,202 | 151 | 24,165 | 5,442 | 3,824 | 33,582 |
| 7,203 | 151 | 24,316 | 5,504 | 3,865 | 33,836 |
| 7,204 | 150 | 24,545 | 5,555 | 3,924 | 34,174 |
| 7,205 | 147 | 24,739 | 5,607 | 3,935 | 34,428 |
| 7,206 | 144 | 24,459 | 5,555 | 3,906 | 34,064 |
| 7,207 | 147 | 24,310 | 5,518 | 3,878 | 33,853 |
| 7,208 | 141 | 24,658 | 5,607 | 3,956 | 34,362 |
| 7,209 | 136 | 24,361 | 5,536 | 3,932 | 33,965 |
| 7,210 | 147 | 24,085 | 5,584 | 3,960 | 33,776 |
| 7,211 | 147 | 24,492 | 5,643 | 4,022 | 34,304 |
| 7,212 | 148 | 24,400 | 5,641 | 4,011 | 34,200 |
| 7,213 | 147 | 24,142 | 5,579 | 3,970 | 33,838 |
| 7,214 | 147 | 24,243 | 5,652 | 3,998 | 34,040 |
| 7,215 | 148 | 24,567 | 5,718 | 4,051 | 34,484 |
| 7,216 | 146 | 24,891 | 5,786 | 4,118 | 34,941 |
| 7,217 | 138 | 24,477 | 5,698 | 4,047 | 34,360 |
| 7,218 | 146 | 24,888 | 5,777 | 4,136 | 34,947 |
| 7,219 | 135 | 24,499 | 5,732 | 4,108 | 34,474 |
| 7,220 | 139 | 24,830 | 5,788 | 4,142 | 34,899 |
| 7,221 | 142 | 24,666 | 5,735 | 4,086 | 34,629 |
| 7,222 | 142 | 24,643 | 5,723 | 4,083 | 34,591 |
| 7,223 | 142 | 24,789 | 5,747 | 4,085 | 34,763 |

|       |     |        |       |       |        |
|-------|-----|--------|-------|-------|--------|
| 7,224 | 147 | 24,966 | 5,775 | 4,109 | 34,997 |
| 7,225 | 149 | 24,905 | 5,765 | 4,076 | 34,895 |
| 7,226 | 155 | 25,000 | 5,755 | 4,084 | 34,994 |
| 7,227 | 166 | 24,767 | 5,707 | 4,032 | 34,672 |
| 7,228 | 165 | 24,553 | 5,655 | 3,986 | 34,359 |
| 7,229 | 169 | 25,074 | 5,700 | 4,010 | 34,953 |
| 7,230 | 169 | 25,023 | 5,701 | 3,994 | 34,887 |
| 7,231 | 165 | 25,042 | 5,688 | 4,000 | 34,895 |
| 7,232 | 167 | 25,216 | 5,688 | 4,011 | 35,082 |
| 7,233 | 169 | 25,183 | 5,669 | 3,997 | 35,018 |
| 7,234 | 171 | 25,162 | 5,666 | 3,993 | 34,992 |
| 7,235 | 169 | 24,966 | 5,610 | 3,942 | 34,687 |
| 7,236 | 173 | 25,354 | 5,637 | 3,960 | 35,124 |
| 7,237 | 177 | 25,567 | 5,669 | 3,992 | 35,405 |
| 7,238 | 182 | 25,268 | 5,563 | 3,909 | 34,922 |
| 7,239 | 179 | 24,907 | 5,482 | 3,845 | 34,413 |
| 7,240 | 172 | 24,844 | 5,437 | 3,848 | 34,301 |
| 7,241 | 178 | 25,093 | 5,475 | 3,875 | 34,621 |
| 7,242 | 178 | 25,362 | 5,523 | 3,898 | 34,961 |
| 7,243 | 172 | 24,920 | 5,441 | 3,829 | 34,362 |
| 7,244 | 172 | 25,097 | 5,446 | 3,832 | 34,547 |
| 7,245 | 172 | 24,907 | 5,430 | 3,832 | 34,341 |
| 7,246 | 181 | 24,918 | 5,511 | 3,854 | 34,464 |
| 7,247 | 190 | 25,367 | 5,592 | 3,883 | 35,032 |
| 7,248 | 189 | 25,361 | 5,572 | 3,857 | 34,979 |
| 7,249 | 189 | 25,533 | 5,569 | 3,858 | 35,149 |
| 7,250 | 184 | 25,773 | 5,564 | 3,872 | 35,393 |
| 7,251 | 186 | 25,840 | 5,573 | 3,897 | 35,496 |
| 7,252 | 193 | 25,857 | 5,526 | 3,861 | 35,437 |
| 7,253 | 193 | 25,882 | 5,544 | 3,837 | 35,456 |
| 7,254 | 193 | 26,085 | 5,502 | 3,838 | 35,618 |
| 7,255 | 197 | 26,211 | 5,503 | 3,825 | 35,736 |

|       |     |        |       |       |        |
|-------|-----|--------|-------|-------|--------|
| 7,256 | 201 | 25,983 | 5,466 | 3,803 | 35,453 |
| 7,257 | 199 | 26,135 | 5,466 | 3,799 | 35,599 |
| 7,258 | 198 | 26,190 | 5,449 | 3,797 | 35,634 |
| 7,259 | 196 | 25,852 | 5,367 | 3,695 | 35,110 |
| 7,260 | 198 | 26,036 | 5,325 | 3,688 | 35,247 |
| 7,261 | 185 | 26,138 | 5,326 | 3,668 | 35,317 |
| 7,262 | 196 | 25,940 | 5,276 | 3,628 | 35,040 |
| 7,263 | 192 | 25,708 | 5,209 | 3,623 | 34,732 |
| 7,264 | 191 | 25,710 | 5,207 | 3,636 | 34,744 |
| 7,265 | 192 | 25,618 | 5,181 | 3,611 | 34,602 |
| 7,266 | 192 | 25,528 | 5,151 | 3,560 | 34,431 |
| 7,267 | 193 | 25,411 | 5,086 | 3,477 | 34,167 |
| 7,268 | 210 | 25,509 | 5,110 | 3,472 | 34,301 |
| 7,269 | 205 | 25,381 | 5,069 | 3,433 | 34,088 |
| 7,270 | 210 | 25,410 | 5,070 | 3,420 | 34,110 |
| 7,271 | 207 | 25,411 | 5,060 | 3,421 | 34,099 |
| 7,272 | 207 | 25,533 | 5,110 | 3,460 | 34,310 |
| 7,273 | 207 | 25,356 | 5,109 | 3,462 | 34,134 |
| 7,274 | 200 | 25,579 | 5,139 | 3,495 | 34,413 |
| 7,275 | 195 | 25,356 | 5,090 | 3,474 | 34,115 |
| 7,276 | 191 | 25,337 | 5,090 | 3,477 | 34,095 |
| 7,277 | 182 | 25,355 | 5,073 | 3,469 | 34,079 |
| 7,278 | 172 | 25,322 | 5,069 | 3,494 | 34,057 |
| 7,279 | 165 | 25,172 | 5,000 | 3,494 | 33,831 |
| 7,280 | 168 | 25,391 | 5,055 | 3,533 | 34,147 |
| 7,281 | 164 | 25,446 | 5,062 | 3,533 | 34,205 |
| 7,282 | 166 | 25,425 | 5,086 | 3,537 | 34,214 |
| 7,283 | 164 | 25,380 | 5,090 | 3,530 | 34,164 |
| 7,284 | 164 | 25,324 | 5,089 | 3,517 | 34,094 |
| 7,285 | 162 | 25,427 | 5,117 | 3,540 | 34,246 |
| 7,286 | 162 | 25,711 | 5,186 | 3,600 | 34,659 |
| 7,287 | 156 | 25,605 | 5,129 | 3,564 | 34,454 |

|       |     |        |       |       |        |
|-------|-----|--------|-------|-------|--------|
| 7,288 | 153 | 25,632 | 5,139 | 3,561 | 34,485 |
| 7,289 | 153 | 25,583 | 5,150 | 3,544 | 34,430 |
| 7,290 | 151 | 25,501 | 5,145 | 3,532 | 34,329 |
| 7,291 | 149 | 25,416 | 5,159 | 3,525 | 34,249 |
| 7,292 | 145 | 25,550 | 5,204 | 3,551 | 34,450 |
| 7,293 | 143 | 25,651 | 5,221 | 3,567 | 34,582 |
| 7,294 | 147 | 25,900 | 5,246 | 3,599 | 34,892 |
| 7,295 | 149 | 25,710 | 5,256 | 3,601 | 34,716 |
| 7,296 | 147 | 26,142 | 5,285 | 3,650 | 35,224 |
| 7,297 | 148 | 26,031 | 5,227 | 3,630 | 35,036 |
| 7,298 | 149 | 26,520 | 5,328 | 3,672 | 35,669 |
| 7,299 | 156 | 26,669 | 5,357 | 3,699 | 35,881 |
| 7,300 | 154 | 26,571 | 5,385 | 3,702 | 35,812 |
| 7,301 | 155 | 26,252 | 5,348 | 3,645 | 35,400 |
| 7,302 | 156 | 26,293 | 5,364 | 3,627 | 35,440 |
| 7,303 | 152 | 26,011 | 5,309 | 3,597 | 35,069 |
| 7,304 | 152 | 25,702 | 5,265 | 3,563 | 34,682 |
| 7,305 | 165 | 26,988 | 5,551 | 3,720 | 36,424 |
| 7,306 | 161 | 26,513 | 5,495 | 3,678 | 35,847 |
| 7,307 | 162 | 26,657 | 5,506 | 3,701 | 36,026 |
| 7,308 | 161 | 26,726 | 5,522 | 3,732 | 36,141 |
| 7,309 | 161 | 26,384 | 5,470 | 3,678 | 35,693 |
| 7,310 | 165 | 26,413 | 5,488 | 3,718 | 35,784 |
| 7,311 | 165 | 26,347 | 5,481 | 3,717 | 35,710 |
| 7,312 | 152 | 25,892 | 5,390 | 3,660 | 35,094 |
| 7,313 | 150 | 25,376 | 5,279 | 3,560 | 34,365 |
| 7,314 | 150 | 25,478 | 5,305 | 3,576 | 34,509 |
| 7,315 | 149 | 25,449 | 5,303 | 3,573 | 34,474 |
| 7,316 | 152 | 25,179 | 5,271 | 3,577 | 34,179 |
| 7,317 | 155 | 25,241 | 5,288 | 3,611 | 34,295 |
| 7,318 | 137 | 24,493 | 5,172 | 3,524 | 33,326 |
| 7,319 | 137 | 24,512 | 5,171 | 3,524 | 33,344 |

|       |     |        |       |       |        |
|-------|-----|--------|-------|-------|--------|
| 7,320 | 137 | 24,555 | 5,160 | 3,520 | 33,372 |
| 7,321 | 131 | 24,633 | 5,149 | 3,550 | 33,463 |
| 7,322 | 129 | 24,163 | 5,053 | 3,510 | 32,855 |
| 7,323 | 138 | 24,618 | 5,105 | 3,541 | 33,402 |
| 7,324 | 140 | 24,354 | 5,041 | 3,492 | 33,027 |
| 7,325 | 140 | 24,219 | 5,043 | 3,487 | 32,889 |
| 7,326 | 144 | 24,423 | 5,096 | 3,507 | 33,170 |
| 7,327 | 148 | 24,268 | 5,086 | 3,473 | 32,975 |
| 7,328 | 150 | 24,441 | 5,090 | 3,489 | 33,170 |
| 7,329 | 153 | 24,270 | 5,091 | 3,455 | 32,969 |
| 7,330 | 152 | 24,275 | 5,131 | 3,421 | 32,979 |
| 7,331 | 152 | 24,092 | 5,067 | 3,389 | 32,700 |
| 7,332 | 152 | 24,066 | 5,060 | 3,377 | 32,655 |
| 7,333 | 155 | 24,076 | 5,079 | 3,393 | 32,703 |
| 7,334 | 156 | 24,170 | 5,073 | 3,414 | 32,813 |
| 7,335 | 157 | 24,206 | 5,075 | 3,424 | 32,862 |
| 7,336 | 158 | 24,020 | 5,037 | 3,395 | 32,610 |
| 7,337 | 158 | 23,768 | 4,980 | 3,359 | 32,265 |
| 7,338 | 156 | 23,506 | 4,959 | 3,333 | 31,954 |
| 7,339 | 156 | 23,092 | 4,885 | 3,290 | 31,423 |
| 7,340 | 155 | 22,692 | 4,814 | 3,244 | 30,905 |
| 7,341 | 154 | 22,844 | 4,830 | 3,300 | 31,128 |
| 7,342 | 154 | 22,712 | 4,759 | 3,278 | 30,903 |
| 7,343 | 161 | 22,526 | 4,725 | 3,252 | 30,664 |
| 7,344 | 162 | 22,283 | 4,716 | 3,263 | 30,424 |
| 7,345 | 168 | 22,132 | 4,705 | 3,236 | 30,241 |
| 7,346 | 161 | 21,955 | 4,637 | 3,173 | 29,926 |
| 7,347 | 164 | 21,998 | 4,615 | 3,167 | 29,944 |
| 7,348 | 162 | 21,720 | 4,521 | 3,123 | 29,526 |
| 7,349 | 162 | 21,634 | 4,544 | 3,133 | 29,473 |
| 7,350 | 157 | 21,272 | 4,426 | 3,084 | 28,939 |
| 7,351 | 159 | 21,439 | 4,449 | 3,081 | 29,128 |

|       |     |        |       |       |        |
|-------|-----|--------|-------|-------|--------|
| 7,352 | 152 | 21,255 | 4,448 | 3,098 | 28,953 |
| 7,353 | 157 | 21,524 | 4,494 | 3,126 | 29,301 |
| 7,354 | 153 | 21,396 | 4,453 | 3,077 | 29,079 |
| 7,355 | 154 | 21,514 | 4,475 | 3,097 | 29,240 |
| 7,356 | 154 | 21,598 | 4,493 | 3,114 | 29,359 |
| 7,357 | 156 | 21,559 | 4,489 | 3,115 | 29,319 |
| 7,358 | 159 | 21,565 | 4,488 | 3,117 | 29,329 |
| 7,359 | 159 | 21,670 | 4,495 | 3,106 | 29,430 |
| 7,360 | 159 | 22,003 | 4,535 | 3,121 | 29,818 |
| 7,361 | 155 | 21,805 | 4,511 | 3,101 | 29,572 |
| 7,362 | 154 | 21,975 | 4,519 | 3,116 | 29,764 |
| 7,363 | 157 | 22,301 | 4,588 | 3,176 | 30,222 |
| 7,364 | 159 | 22,095 | 4,512 | 3,130 | 29,896 |
| 7,365 | 159 | 22,352 | 4,528 | 3,149 | 30,188 |
| 7,366 | 157 | 22,653 | 4,589 | 3,180 | 30,579 |
| 7,367 | 162 | 22,781 | 4,654 | 3,204 | 30,801 |
| 7,368 | 159 | 22,897 | 4,667 | 3,215 | 30,938 |
| 7,369 | 155 | 22,389 | 4,597 | 3,184 | 30,325 |
| 7,370 | 157 | 22,663 | 4,641 | 3,240 | 30,701 |
| 7,371 | 156 | 22,840 | 4,687 | 3,280 | 30,963 |
| 7,372 | 155 | 22,815 | 4,698 | 3,273 | 30,941 |
| 7,373 | 153 | 23,049 | 4,709 | 3,293 | 31,204 |
| 7,374 | 152 | 22,912 | 4,690 | 3,270 | 31,024 |
| 7,375 | 151 | 22,928 | 4,678 | 3,248 | 31,005 |
| 7,376 | 148 | 23,138 | 4,670 | 3,252 | 31,208 |
| 7,377 | 150 | 23,304 | 4,706 | 3,299 | 31,459 |
| 7,378 | 151 | 23,105 | 4,657 | 3,265 | 31,178 |
| 7,379 | 154 | 23,127 | 4,658 | 3,270 | 31,209 |
| 7,380 | 160 | 23,296 | 4,681 | 3,294 | 31,431 |
| 7,381 | 176 | 23,103 | 4,607 | 3,303 | 31,189 |
| 7,382 | 179 | 23,030 | 4,618 | 3,304 | 31,131 |
| 7,383 | 175 | 22,957 | 4,628 | 3,301 | 31,061 |

|       |     |        |       |       |        |
|-------|-----|--------|-------|-------|--------|
| 7,384 | 177 | 22,969 | 4,636 | 3,302 | 31,084 |
| 7,385 | 178 | 23,157 | 4,663 | 3,310 | 31,308 |
| 7,386 | 177 | 23,260 | 4,677 | 3,339 | 31,453 |
| 7,387 | 173 | 23,416 | 4,680 | 3,352 | 31,621 |
| 7,388 | 173 | 23,521 | 4,696 | 3,361 | 31,751 |
| 7,389 | 168 | 23,712 | 4,695 | 3,360 | 31,935 |
| 7,390 | 174 | 23,910 | 4,725 | 3,372 | 32,181 |
| 7,391 | 174 | 23,893 | 4,779 | 3,390 | 32,236 |
| 7,392 | 171 | 23,976 | 4,833 | 3,414 | 32,394 |
| 7,393 | 165 | 23,918 | 4,782 | 3,370 | 32,235 |
| 7,394 | 166 | 24,274 | 4,823 | 3,402 | 32,665 |
| 7,395 | 158 | 24,768 | 4,900 | 3,468 | 33,294 |
| 7,396 | 160 | 24,298 | 4,830 | 3,406 | 32,694 |
| 7,397 | 161 | 24,574 | 4,863 | 3,440 | 33,038 |
| 7,398 | 153 | 24,642 | 4,890 | 3,475 | 33,160 |
| 7,399 | 151 | 24,210 | 4,787 | 3,393 | 32,541 |
| 7,400 | 151 | 24,261 | 4,813 | 3,417 | 32,642 |
| 7,401 | 156 | 24,115 | 4,833 | 3,425 | 32,529 |
| 7,402 | 154 | 23,816 | 4,805 | 3,416 | 32,191 |
| 7,403 | 158 | 23,788 | 4,806 | 3,418 | 32,170 |
| 7,404 | 152 | 23,375 | 4,738 | 3,364 | 31,629 |
| 7,405 | 159 | 23,704 | 4,842 | 3,424 | 32,129 |
| 7,406 | 158 | 23,489 | 4,859 | 3,420 | 31,926 |
| 7,407 | 160 | 23,149 | 4,800 | 3,403 | 31,512 |
| 7,408 | 156 | 23,051 | 4,792 | 3,374 | 31,373 |
| 7,409 | 157 | 23,214 | 4,838 | 3,396 | 31,605 |
| 7,410 | 158 | 23,151 | 4,862 | 3,411 | 31,582 |
| 7,411 | 156 | 23,218 | 4,882 | 3,421 | 31,677 |
| 7,412 | 156 | 23,058 | 4,850 | 3,385 | 31,449 |
| 7,413 | 158 | 23,252 | 4,890 | 3,402 | 31,702 |
| 7,414 | 154 | 23,433 | 4,914 | 3,428 | 31,929 |
| 7,415 | 151 | 23,218 | 4,902 | 3,407 | 31,678 |



|       |     |        |       |       |        |
|-------|-----|--------|-------|-------|--------|
| 7,416 | 154 | 23,374 | 4,937 | 3,445 | 31,910 |
| 7,417 | 159 | 23,536 | 4,980 | 3,468 | 32,143 |
| 7,418 | 158 | 23,690 | 4,947 | 3,472 | 32,267 |
| 7,419 | 154 | 23,441 | 4,898 | 3,421 | 31,914 |
| 7,420 | 154 | 23,376 | 4,890 | 3,424 | 31,844 |
| 7,421 | 156 | 23,561 | 4,920 | 3,461 | 32,098 |
| 7,422 | 158 | 23,344 | 4,872 | 3,411 | 31,785 |
| 7,423 | 158 | 23,377 | 4,869 | 3,399 | 31,803 |
| 7,424 | 161 | 23,353 | 4,895 | 3,392 | 31,801 |
| 7,425 | 154 | 23,230 | 4,879 | 3,411 | 31,674 |
| 7,426 | 155 | 23,092 | 4,867 | 3,404 | 31,518 |
| 7,427 | 160 | 22,736 | 4,864 | 3,402 | 31,162 |
| 7,428 | 151 | 22,026 | 4,730 | 3,316 | 30,223 |
| 7,429 | 152 | 22,227 | 4,765 | 3,345 | 30,489 |
| 7,430 | 136 | 22,251 | 4,781 | 3,339 | 30,507 |
| 7,431 | 138 | 22,455 | 4,824 | 3,372 | 30,789 |
| 7,432 | 128 | 22,698 | 4,876 | 3,413 | 31,115 |
| 7,433 | 126 | 22,435 | 4,789 | 3,367 | 30,717 |
| 7,434 | 129 | 22,454 | 4,822 | 3,392 | 30,797 |
| 7,435 | 125 | 22,381 | 4,815 | 3,394 | 30,715 |
| 7,436 | 124 | 22,269 | 4,776 | 3,387 | 30,556 |
| 7,437 | 130 | 22,252 | 4,775 | 3,363 | 30,520 |
| 7,438 | 130 | 21,985 | 4,728 | 3,323 | 30,166 |
| 7,439 | 132 | 22,038 | 4,731 | 3,332 | 30,233 |
| 7,440 | 132 | 21,999 | 4,716 | 3,329 | 30,176 |
| 7,441 | 128 | 22,084 | 4,634 | 3,286 | 30,132 |
| 7,442 | 128 | 22,029 | 4,619 | 3,289 | 30,065 |
| 7,443 | 128 | 21,940 | 4,621 | 3,306 | 29,995 |
| 7,444 | 135 | 22,336 | 4,761 | 3,376 | 30,608 |
| 7,445 | 133 | 21,829 | 4,660 | 3,301 | 29,923 |
| 7,446 | 136 | 21,966 | 4,710 | 3,341 | 30,153 |
| 7,447 | 127 | 21,736 | 4,693 | 3,323 | 29,879 |

|       |     |        |       |       |        |
|-------|-----|--------|-------|-------|--------|
| 7,448 | 128 | 21,836 | 4,711 | 3,300 | 29,975 |
| 7,449 | 125 | 21,759 | 4,717 | 3,312 | 29,913 |
| 7,450 | 132 | 21,576 | 4,673 | 3,296 | 29,677 |
| 7,451 | 132 | 21,535 | 4,681 | 3,292 | 29,640 |
| 7,452 | 126 | 21,248 | 4,597 | 3,251 | 29,222 |
| 7,453 | 123 | 21,056 | 4,564 | 3,211 | 28,954 |
| 7,454 | 128 | 22,014 | 4,756 | 3,389 | 30,287 |
| 7,455 | 126 | 22,018 | 4,689 | 3,355 | 30,188 |
| 7,456 | 129 | 22,471 | 4,754 | 3,380 | 30,734 |
| 7,457 | 125 | 22,576 | 4,764 | 3,381 | 30,846 |
| 7,458 | 129 | 22,723 | 4,803 | 3,419 | 31,074 |
| 7,459 | 127 | 22,708 | 4,791 | 3,417 | 31,043 |
| 7,460 | 128 | 22,885 | 4,848 | 3,476 | 31,337 |
| 7,461 | 127 | 22,642 | 4,798 | 3,448 | 31,015 |
| 7,462 | 138 | 22,643 | 4,820 | 3,455 | 31,056 |
| 7,463 | 139 | 22,714 | 4,850 | 3,471 | 31,174 |
| 7,464 | 144 | 22,938 | 4,913 | 3,514 | 31,509 |
| 7,465 | 147 | 22,995 | 4,944 | 3,537 | 31,623 |
| 7,466 | 145 | 23,069 | 4,948 | 3,518 | 31,680 |
| 7,467 | 144 | 22,825 | 4,895 | 3,478 | 31,342 |
| 7,468 | 138 | 22,685 | 4,871 | 3,477 | 31,171 |
| 7,469 | 138 | 23,048 | 5,004 | 3,540 | 31,730 |
| 7,470 | 140 | 23,244 | 5,055 | 3,589 | 32,028 |
| 7,471 | 138 | 23,138 | 5,028 | 3,553 | 31,857 |
| 7,472 | 136 | 23,196 | 5,027 | 3,540 | 31,899 |
| 7,473 | 138 | 23,403 | 5,068 | 3,585 | 32,194 |
| 7,474 | 138 | 23,621 | 5,086 | 3,614 | 32,459 |
| 7,475 | 137 | 23,430 | 5,058 | 3,579 | 32,204 |
| 7,476 | 140 | 23,724 | 5,103 | 3,594 | 32,561 |
| 7,477 | 140 | 23,750 | 5,111 | 3,594 | 32,595 |
| 7,478 | 139 | 23,602 | 5,055 | 3,564 | 32,360 |
| 7,479 | 138 | 23,346 | 5,002 | 3,530 | 32,016 |

|       |     |        |       |       |        |
|-------|-----|--------|-------|-------|--------|
| 7,480 | 138 | 22,999 | 4,967 | 3,489 | 31,593 |
| 7,481 | 150 | 23,595 | 5,118 | 3,586 | 32,449 |
| 7,482 | 150 | 23,346 | 5,072 | 3,547 | 32,115 |
| 7,483 | 153 | 23,175 | 5,017 | 3,513 | 31,858 |
| 7,484 | 154 | 22,896 | 4,919 | 3,439 | 31,408 |
| 7,485 | 154 | 23,024 | 4,924 | 3,441 | 31,543 |
| 7,486 | 157 | 22,763 | 4,871 | 3,389 | 31,180 |
| 7,487 | 155 | 22,417 | 4,839 | 3,353 | 30,764 |
| 7,488 | 164 | 23,973 | 5,220 | 3,587 | 32,944 |
| 7,489 | 165 | 23,635 | 5,172 | 3,558 | 32,530 |
| 7,490 | 165 | 23,668 | 5,229 | 3,580 | 32,642 |
| 7,491 | 166 | 23,600 | 5,265 | 3,620 | 32,651 |
| 7,492 | 172 | 23,895 | 5,398 | 3,701 | 33,166 |
| 7,493 | 177 | 23,956 | 5,445 | 3,704 | 33,282 |
| 7,494 | 183 | 23,985 | 5,394 | 3,697 | 33,259 |
| 7,495 | 178 | 23,815 | 5,324 | 3,669 | 32,986 |
| 7,496 | 180 | 23,810 | 5,332 | 3,665 | 32,987 |
| 7,497 | 181 | 23,928 | 5,360 | 3,680 | 33,149 |
| 7,498 | 182 | 24,092 | 5,383 | 3,694 | 33,351 |
| 7,499 | 182 | 23,859 | 5,345 | 3,679 | 33,065 |
| 7,500 | 178 | 23,898 | 5,347 | 3,668 | 33,091 |
| 7,501 | 177 | 23,955 | 5,324 | 3,654 | 33,110 |
| 7,502 | 184 | 24,054 | 5,334 | 3,662 | 33,234 |
| 7,503 | 182 | 23,907 | 5,259 | 3,622 | 32,970 |
| 7,504 | 179 | 23,846 | 5,259 | 3,612 | 32,896 |
| 7,505 | 176 | 23,730 | 5,257 | 3,602 | 32,765 |
| 7,506 | 179 | 23,766 | 5,322 | 3,656 | 32,923 |
| 7,507 | 182 | 23,490 | 5,266 | 3,637 | 32,575 |
| 7,508 | 179 | 23,525 | 5,257 | 3,634 | 32,595 |
| 7,509 | 181 | 23,664 | 5,270 | 3,650 | 32,765 |
| 7,510 | 180 | 23,672 | 5,254 | 3,644 | 32,750 |
| 7,511 | 179 | 23,697 | 5,251 | 3,641 | 32,768 |

|       |     |        |       |       |        |
|-------|-----|--------|-------|-------|--------|
| 7,512 | 176 | 23,940 | 5,296 | 3,648 | 33,060 |
| 7,513 | 171 | 23,620 | 5,234 | 3,617 | 32,642 |
| 7,514 | 171 | 23,791 | 5,296 | 3,633 | 32,891 |
| 7,515 | 173 | 23,912 | 5,312 | 3,647 | 33,044 |
| 7,516 | 175 | 24,052 | 5,316 | 3,646 | 33,189 |
| 7,517 | 177 | 23,026 | 5,115 | 3,505 | 31,823 |
| 7,518 | 181 | 23,178 | 5,170 | 3,541 | 32,070 |
| 7,519 | 185 | 23,477 | 5,222 | 3,577 | 32,461 |
| 7,520 | 185 | 23,537 | 5,233 | 3,571 | 32,526 |
| 7,521 | 189 | 23,831 | 5,279 | 3,594 | 32,893 |
| 7,522 | 188 | 23,843 | 5,281 | 3,575 | 32,887 |
| 7,523 | 192 | 23,867 | 5,303 | 3,581 | 32,943 |
| 7,524 | 192 | 23,898 | 5,295 | 3,561 | 32,946 |
| 7,525 | 197 | 23,939 | 5,340 | 3,609 | 33,085 |
| 7,526 | 195 | 23,941 | 5,341 | 3,610 | 33,087 |
| 7,527 | 191 | 23,910 | 5,352 | 3,610 | 33,063 |
| 7,528 | 191 | 23,938 | 5,334 | 3,594 | 33,057 |
| 7,529 | 188 | 23,892 | 5,314 | 3,589 | 32,983 |
| 7,530 | 183 | 24,120 | 5,368 | 3,620 | 33,291 |
| 7,531 | 185 | 24,140 | 5,325 | 3,584 | 33,234 |
| 7,532 | 183 | 24,055 | 5,306 | 3,582 | 33,126 |
| 7,533 | 184 | 24,382 | 5,372 | 3,638 | 33,576 |
| 7,534 | 175 | 24,228 | 5,336 | 3,611 | 33,350 |
| 7,535 | 169 | 24,378 | 5,363 | 3,617 | 33,527 |
| 7,536 | 173 | 24,420 | 5,379 | 3,633 | 33,605 |
| 7,537 | 175 | 24,325 | 5,381 | 3,641 | 33,522 |
| 7,538 | 172 | 24,203 | 5,377 | 3,637 | 33,389 |
| 7,539 | 175 | 24,317 | 5,452 | 3,693 | 33,637 |
| 7,540 | 172 | 24,253 | 5,384 | 3,649 | 33,458 |
| 7,541 | 171 | 24,572 | 5,427 | 3,660 | 33,830 |
| 7,542 | 172 | 24,893 | 5,467 | 3,689 | 34,221 |
| 7,543 | 167 | 25,026 | 5,455 | 3,703 | 34,351 |

|       |     |        |       |       |        |
|-------|-----|--------|-------|-------|--------|
| 7,544 | 163 | 24,698 | 5,360 | 3,670 | 33,891 |
| 7,545 | 162 | 24,355 | 5,307 | 3,607 | 33,431 |
| 7,546 | 160 | 24,137 | 5,267 | 3,585 | 33,149 |
| 7,547 | 164 | 24,606 | 5,369 | 3,654 | 33,793 |
| 7,548 | 160 | 24,432 | 5,344 | 3,619 | 33,555 |
| 7,549 | 157 | 23,995 | 5,233 | 3,565 | 32,950 |
| 7,550 | 156 | 23,868 | 5,202 | 3,535 | 32,761 |
| 7,551 | 159 | 23,878 | 5,201 | 3,522 | 32,760 |
| 7,552 | 161 | 23,655 | 5,162 | 3,490 | 32,468 |
| 7,553 | 154 | 23,958 | 5,200 | 3,545 | 32,857 |
| 7,554 | 154 | 24,031 | 5,224 | 3,539 | 32,948 |
| 7,555 | 152 | 24,182 | 5,178 | 3,515 | 33,027 |
| 7,556 | 154 | 23,968 | 5,106 | 3,470 | 32,698 |
| 7,557 | 159 | 24,165 | 5,126 | 3,475 | 32,925 |
| 7,558 | 158 | 24,455 | 5,165 | 3,500 | 33,278 |
| 7,559 | 162 | 24,361 | 5,145 | 3,478 | 33,146 |
| 7,560 | 169 | 24,111 | 5,113 | 3,436 | 32,829 |
| 7,561 | 167 | 23,756 | 5,055 | 3,375 | 32,353 |
| 7,562 | 164 | 24,007 | 5,055 | 3,382 | 32,608 |
| 7,563 | 165 | 23,990 | 5,062 | 3,396 | 32,613 |
| 7,564 | 165 | 24,007 | 5,033 | 3,378 | 32,583 |
| 7,565 | 169 | 23,685 | 4,952 | 3,330 | 32,136 |
| 7,566 | 160 | 23,347 | 4,859 | 3,264 | 31,630 |
| 7,567 | 155 | 23,516 | 4,904 | 3,283 | 31,858 |
| 7,568 | 155 | 23,408 | 4,885 | 3,276 | 31,724 |
| 7,569 | 153 | 23,581 | 4,911 | 3,294 | 31,939 |
| 7,570 | 157 | 23,471 | 4,843 | 3,284 | 31,755 |
| 7,571 | 156 | 23,123 | 4,770 | 3,246 | 31,295 |
| 7,572 | 152 | 23,138 | 4,766 | 3,254 | 31,310 |
| 7,573 | 156 | 23,541 | 4,843 | 3,333 | 31,873 |
| 7,574 | 150 | 23,623 | 4,828 | 3,334 | 31,935 |
| 7,575 | 147 | 23,458 | 4,800 | 3,306 | 31,711 |

|       |     |        |       |       |        |
|-------|-----|--------|-------|-------|--------|
| 7,576 | 148 | 23,645 | 4,804 | 3,320 | 31,917 |
| 7,577 | 148 | 23,692 | 4,794 | 3,324 | 31,958 |
| 7,578 | 149 | 23,767 | 4,773 | 3,329 | 32,018 |
| 7,579 | 146 | 23,884 | 4,799 | 3,345 | 32,174 |
| 7,580 | 145 | 23,922 | 4,811 | 3,348 | 32,226 |
| 7,581 | 138 | 23,849 | 4,804 | 3,367 | 32,158 |
| 7,582 | 144 | 23,849 | 4,825 | 3,375 | 32,193 |
| 7,583 | 144 | 23,613 | 4,779 | 3,346 | 31,882 |
| 7,584 | 151 | 24,124 | 4,876 | 3,399 | 32,550 |
| 7,585 | 151 | 24,136 | 4,866 | 3,391 | 32,544 |
| 7,586 | 153 | 24,136 | 4,827 | 3,397 | 32,513 |
| 7,587 | 152 | 24,006 | 4,728 | 3,335 | 32,221 |
| 7,588 | 152 | 24,179 | 4,727 | 3,325 | 32,383 |
| 7,589 | 156 | 24,187 | 4,652 | 3,294 | 32,289 |
| 7,590 | 158 | 24,146 | 4,644 | 3,290 | 32,238 |
| 7,591 | 158 | 23,776 | 4,577 | 3,252 | 31,763 |
| 7,592 | 168 | 24,360 | 4,651 | 3,333 | 32,512 |
| 7,593 | 175 | 24,181 | 4,613 | 3,283 | 32,252 |
| 7,594 | 179 | 24,209 | 4,591 | 3,268 | 32,247 |
| 7,595 | 179 | 24,203 | 4,550 | 3,217 | 32,149 |
| 7,596 | 181 | 24,242 | 4,580 | 3,222 | 32,225 |
| 7,597 | 178 | 24,048 | 4,518 | 3,180 | 31,924 |
| 7,598 | 182 | 23,966 | 4,486 | 3,160 | 31,794 |
| 7,599 | 182 | 23,907 | 4,484 | 3,157 | 31,730 |
| 7,600 | 179 | 23,881 | 4,512 | 3,157 | 31,729 |
| 7,601 | 177 | 24,016 | 4,525 | 3,175 | 31,893 |
| 7,602 | 180 | 24,089 | 4,619 | 3,235 | 32,123 |
| 7,603 | 186 | 24,047 | 4,618 | 3,229 | 32,080 |
| 7,604 | 186 | 24,153 | 4,591 | 3,218 | 32,148 |
| 7,605 | 185 | 23,922 | 4,561 | 3,197 | 31,865 |
| 7,606 | 190 | 23,938 | 4,600 | 3,201 | 31,929 |
| 7,607 | 185 | 24,149 | 4,615 | 3,209 | 32,158 |

|       |     |        |       |       |        |
|-------|-----|--------|-------|-------|--------|
| 7,608 | 181 | 23,989 | 4,579 | 3,202 | 31,951 |
| 7,609 | 180 | 24,130 | 4,604 | 3,221 | 32,135 |
| 7,610 | 174 | 23,927 | 4,570 | 3,208 | 31,879 |
| 7,611 | 172 | 23,670 | 4,521 | 3,175 | 31,538 |
| 7,612 | 172 | 23,594 | 4,495 | 3,165 | 31,426 |
| 7,613 | 185 | 24,294 | 4,617 | 3,286 | 32,382 |
| 7,614 | 186 | 24,139 | 4,558 | 3,249 | 32,132 |
| 7,615 | 187 | 24,258 | 4,596 | 3,291 | 32,332 |
| 7,616 | 188 | 24,238 | 4,597 | 3,294 | 32,317 |
| 7,617 | 191 | 24,432 | 4,637 | 3,339 | 32,599 |
| 7,618 | 188 | 24,227 | 4,589 | 3,316 | 32,320 |
| 7,619 | 189 | 24,325 | 4,579 | 3,303 | 32,396 |
| 7,620 | 189 | 24,251 | 4,560 | 3,302 | 32,302 |
| 7,621 | 181 | 24,082 | 4,561 | 3,281 | 32,105 |
| 7,622 | 185 | 24,233 | 4,601 | 3,314 | 32,333 |
| 7,623 | 188 | 24,111 | 4,583 | 3,281 | 32,163 |
| 7,624 | 197 | 23,902 | 4,546 | 3,244 | 31,889 |
| 7,625 | 196 | 23,579 | 4,521 | 3,214 | 31,510 |
| 7,626 | 203 | 23,948 | 4,581 | 3,276 | 32,008 |
| 7,627 | 199 | 23,649 | 4,551 | 3,250 | 31,649 |
| 7,628 | 204 | 23,715 | 4,595 | 3,276 | 31,790 |
| 7,629 | 210 | 23,713 | 4,608 | 3,278 | 31,809 |
| 7,630 | 210 | 23,769 | 4,601 | 3,289 | 31,869 |
| 7,631 | 210 | 23,841 | 4,601 | 3,272 | 31,924 |
| 7,632 | 209 | 23,826 | 4,594 | 3,257 | 31,886 |
| 7,633 | 205 | 24,115 | 4,632 | 3,277 | 32,229 |
| 7,634 | 201 | 23,947 | 4,578 | 3,240 | 31,966 |
| 7,635 | 196 | 23,827 | 4,553 | 3,226 | 31,802 |
| 7,636 | 199 | 24,092 | 4,592 | 3,256 | 32,139 |
| 7,637 | 196 | 23,937 | 4,583 | 3,248 | 31,964 |
| 7,638 | 188 | 23,662 | 4,559 | 3,222 | 31,631 |
| 7,639 | 188 | 23,727 | 4,576 | 3,234 | 31,725 |

|       |     |        |       |       |        |
|-------|-----|--------|-------|-------|--------|
| 7,640 | 192 | 23,305 | 4,511 | 3,184 | 31,192 |
| 7,641 | 193 | 23,473 | 4,548 | 3,218 | 31,432 |
| 7,642 | 188 | 23,557 | 4,547 | 3,239 | 31,531 |
| 7,643 | 194 | 23,725 | 4,600 | 3,245 | 31,764 |
| 7,644 | 199 | 23,849 | 4,680 | 3,284 | 32,012 |
| 7,645 | 197 | 23,492 | 4,650 | 3,252 | 31,591 |
| 7,646 | 193 | 23,499 | 4,634 | 3,256 | 31,582 |
| 7,647 | 189 | 23,441 | 4,638 | 3,263 | 31,531 |
| 7,648 | 187 | 23,385 | 4,631 | 3,269 | 31,472 |
| 7,649 | 190 | 23,278 | 4,621 | 3,266 | 31,355 |
| 7,650 | 191 | 23,395 | 4,604 | 3,277 | 31,467 |
| 7,651 | 196 | 23,726 | 4,676 | 3,321 | 31,919 |
| 7,652 | 194 | 23,924 | 4,661 | 3,330 | 32,109 |
| 7,653 | 193 | 23,912 | 4,632 | 3,296 | 32,033 |
| 7,654 | 184 | 23,757 | 4,617 | 3,276 | 31,834 |
| 7,655 | 192 | 24,157 | 4,684 | 3,318 | 32,351 |
| 7,656 | 188 | 23,907 | 4,614 | 3,275 | 31,984 |
| 7,657 | 187 | 24,100 | 4,652 | 3,293 | 32,232 |
| 7,658 | 187 | 23,905 | 4,615 | 3,267 | 31,974 |
| 7,659 | 193 | 23,879 | 4,601 | 3,269 | 31,942 |
| 7,660 | 194 | 23,839 | 4,597 | 3,245 | 31,875 |
| 7,661 | 195 | 24,083 | 4,616 | 3,265 | 32,159 |
| 7,662 | 191 | 23,838 | 4,554 | 3,221 | 31,804 |
| 7,663 | 191 | 23,461 | 4,498 | 3,183 | 31,333 |
| 7,664 | 191 | 23,797 | 4,577 | 3,214 | 31,779 |
| 7,665 | 194 | 23,661 | 4,545 | 3,210 | 31,610 |
| 7,666 | 192 | 23,501 | 4,511 | 3,177 | 31,381 |
| 7,667 | 202 | 23,727 | 4,577 | 3,216 | 31,722 |
| 7,668 | 198 | 23,607 | 4,516 | 3,178 | 31,499 |
| 7,669 | 201 | 23,610 | 4,506 | 3,187 | 31,504 |
| 7,670 | 200 | 23,665 | 4,501 | 3,184 | 31,550 |
| 7,671 | 202 | 23,989 | 4,562 | 3,211 | 31,964 |



|       |     |        |       |       |        |
|-------|-----|--------|-------|-------|--------|
| 7,672 | 203 | 23,960 | 4,554 | 3,203 | 31,920 |
| 7,673 | 200 | 24,070 | 4,587 | 3,243 | 32,100 |
| 7,674 | 196 | 23,655 | 4,509 | 3,203 | 31,563 |
| 7,675 | 184 | 23,478 | 4,481 | 3,191 | 31,334 |
| 7,676 | 185 | 23,626 | 4,465 | 3,189 | 31,465 |
| 7,677 | 180 | 23,234 | 4,348 | 3,106 | 30,868 |
| 7,678 | 182 | 23,422 | 4,360 | 3,115 | 31,079 |
| 7,679 | 182 | 23,713 | 4,381 | 3,118 | 31,394 |
| 7,680 | 176 | 23,475 | 4,357 | 3,076 | 31,084 |
| 7,681 | 174 | 23,422 | 4,324 | 3,082 | 31,002 |
| 7,682 | 176 | 23,690 | 4,341 | 3,110 | 31,317 |
| 7,683 | 174 | 23,463 | 4,300 | 3,089 | 31,026 |
| 7,684 | 172 | 23,513 | 4,288 | 3,076 | 31,049 |
| 7,685 | 172 | 23,802 | 4,332 | 3,117 | 31,423 |
| 7,686 | 170 | 23,485 | 4,306 | 3,107 | 31,068 |
| 7,687 | 172 | 23,431 | 4,292 | 3,111 | 31,006 |
| 7,688 | 171 | 23,424 | 4,286 | 3,097 | 30,978 |
| 7,689 | 171 | 23,363 | 4,251 | 3,080 | 30,865 |
| 7,690 | 172 | 23,540 | 4,287 | 3,075 | 31,074 |
| 7,691 | 160 | 23,156 | 4,223 | 3,037 | 30,576 |
| 7,692 | 159 | 23,225 | 4,215 | 3,036 | 30,635 |
| 7,693 | 163 | 23,258 | 4,195 | 3,054 | 30,670 |
| 7,694 | 156 | 23,318 | 4,192 | 3,071 | 30,737 |
| 7,695 | 146 | 23,064 | 4,115 | 3,039 | 30,364 |
| 7,696 | 152 | 23,165 | 4,120 | 3,034 | 30,471 |
| 7,697 | 158 | 23,036 | 4,070 | 2,984 | 30,248 |
| 7,698 | 159 | 23,191 | 4,100 | 2,991 | 30,441 |
| 7,699 | 152 | 23,274 | 4,101 | 2,996 | 30,523 |
| 7,700 | 151 | 23,226 | 4,130 | 3,003 | 30,510 |
| 7,701 | 150 | 23,202 | 4,112 | 2,994 | 30,458 |
| 7,702 | 150 | 22,985 | 4,055 | 2,956 | 30,146 |
| 7,703 | 150 | 22,985 | 4,054 | 2,951 | 30,140 |

|       |     |        |       |       |        |
|-------|-----|--------|-------|-------|--------|
| 7,704 | 151 | 23,171 | 4,093 | 2,990 | 30,405 |
| 7,705 | 146 | 23,035 | 4,098 | 2,961 | 30,240 |
| 7,706 | 146 | 23,085 | 4,145 | 2,984 | 30,360 |
| 7,707 | 146 | 23,031 | 4,158 | 2,997 | 30,332 |
| 7,708 | 142 | 22,533 | 4,096 | 2,964 | 29,735 |
| 7,709 | 142 | 22,850 | 4,151 | 2,992 | 30,135 |
| 7,710 | 133 | 23,393 | 4,244 | 3,058 | 30,828 |
| 7,711 | 145 | 23,927 | 4,335 | 3,116 | 31,523 |
| 7,712 | 143 | 23,913 | 4,406 | 3,108 | 31,570 |
| 7,713 | 145 | 24,252 | 4,457 | 3,147 | 32,001 |
| 7,714 | 145 | 24,787 | 4,566 | 3,209 | 32,707 |
| 7,715 | 137 | 24,644 | 4,595 | 3,249 | 32,625 |
| 7,716 | 138 | 24,721 | 4,612 | 3,271 | 32,742 |
| 7,717 | 144 | 25,171 | 4,706 | 3,326 | 33,347 |
| 7,718 | 137 | 25,053 | 4,709 | 3,316 | 33,215 |
| 7,719 | 138 | 25,394 | 4,854 | 3,377 | 33,763 |
| 7,720 | 136 | 25,355 | 4,892 | 3,422 | 33,805 |
| 7,721 | 135 | 25,425 | 4,906 | 3,455 | 33,921 |
| 7,722 | 135 | 25,350 | 4,888 | 3,447 | 33,820 |
| 7,723 | 135 | 25,381 | 4,906 | 3,451 | 33,873 |
| 7,724 | 139 | 25,500 | 4,905 | 3,429 | 33,973 |
| 7,725 | 140 | 25,588 | 4,910 | 3,437 | 34,075 |
| 7,726 | 145 | 25,263 | 4,899 | 3,410 | 33,717 |
| 7,727 | 144 | 25,210 | 4,914 | 3,411 | 33,679 |
| 7,728 | 142 | 25,007 | 4,904 | 3,408 | 33,461 |
| 7,729 | 149 | 25,216 | 4,968 | 3,449 | 33,782 |
| 7,730 | 144 | 24,889 | 4,953 | 3,425 | 33,411 |
| 7,731 | 151 | 24,946 | 4,919 | 3,432 | 33,448 |
| 7,732 | 156 | 25,311 | 4,999 | 3,465 | 33,931 |
| 7,733 | 158 | 25,341 | 5,060 | 3,473 | 34,032 |
| 7,734 | 161 | 25,390 | 5,078 | 3,508 | 34,137 |
| 7,735 | 171 | 25,200 | 5,041 | 3,462 | 33,874 |

|       |     |        |       |       |        |
|-------|-----|--------|-------|-------|--------|
| 7,736 | 179 | 25,131 | 5,032 | 3,448 | 33,790 |
| 7,737 | 179 | 24,890 | 4,979 | 3,423 | 33,471 |
| 7,738 | 187 | 25,634 | 5,085 | 3,485 | 34,391 |
| 7,739 | 195 | 25,988 | 5,120 | 3,521 | 34,824 |
| 7,740 | 197 | 25,969 | 5,104 | 3,516 | 34,786 |
| 7,741 | 198 | 26,129 | 5,099 | 3,517 | 34,943 |
| 7,742 | 198 | 26,124 | 5,111 | 3,514 | 34,947 |
| 7,743 | 196 | 26,223 | 5,167 | 3,531 | 35,117 |
| 7,744 | 194 | 25,987 | 5,168 | 3,500 | 34,849 |
| 7,745 | 197 | 26,245 | 5,213 | 3,530 | 35,185 |
| 7,746 | 193 | 26,586 | 5,293 | 3,570 | 35,642 |
| 7,747 | 184 | 26,390 | 5,261 | 3,566 | 35,401 |
| 7,748 | 179 | 26,463 | 5,317 | 3,605 | 35,564 |
| 7,749 | 180 | 26,503 | 5,310 | 3,625 | 35,618 |
| 7,750 | 179 | 26,429 | 5,311 | 3,620 | 35,539 |
| 7,751 | 186 | 26,642 | 5,338 | 3,627 | 35,793 |
| 7,752 | 185 | 26,661 | 5,369 | 3,650 | 35,865 |
| 7,753 | 184 | 26,822 | 5,388 | 3,667 | 36,061 |
| 7,754 | 187 | 26,877 | 5,404 | 3,694 | 36,162 |
| 7,755 | 181 | 26,869 | 5,400 | 3,692 | 36,142 |
| 7,756 | 186 | 26,729 | 5,367 | 3,693 | 35,975 |
| 7,757 | 188 | 26,354 | 5,262 | 3,661 | 35,465 |
| 7,758 | 190 | 26,437 | 5,266 | 3,651 | 35,544 |
| 7,759 | 191 | 26,201 | 5,242 | 3,625 | 35,259 |
| 7,760 | 192 | 26,277 | 5,260 | 3,654 | 35,383 |
| 7,761 | 192 | 26,201 | 5,235 | 3,631 | 35,259 |
| 7,762 | 180 | 26,008 | 5,183 | 3,608 | 34,979 |
| 7,763 | 175 | 25,765 | 5,106 | 3,605 | 34,651 |
| 7,764 | 171 | 25,791 | 5,128 | 3,601 | 34,691 |
| 7,765 | 175 | 25,272 | 5,020 | 3,521 | 33,988 |
| 7,766 | 176 | 25,543 | 5,048 | 3,509 | 34,276 |
| 7,767 | 165 | 25,425 | 5,043 | 3,496 | 34,129 |

|       |     |        |       |       |        |
|-------|-----|--------|-------|-------|--------|
| 7,768 | 163 | 25,408 | 5,021 | 3,487 | 34,079 |
| 7,769 | 167 | 25,478 | 4,987 | 3,477 | 34,109 |
| 7,770 | 169 | 25,591 | 4,976 | 3,454 | 34,190 |
| 7,771 | 172 | 25,514 | 4,929 | 3,398 | 34,013 |
| 7,772 | 176 | 25,476 | 4,936 | 3,378 | 33,966 |
| 7,773 | 176 | 25,438 | 4,927 | 3,369 | 33,910 |
| 7,774 | 178 | 25,627 | 4,941 | 3,401 | 34,147 |
| 7,775 | 176 | 25,486 | 4,904 | 3,375 | 33,941 |
| 7,776 | 171 | 25,514 | 4,873 | 3,364 | 33,922 |
| 7,777 | 174 | 25,458 | 4,838 | 3,345 | 33,815 |
| 7,778 | 174 | 25,436 | 4,855 | 3,328 | 33,793 |
| 7,779 | 173 | 25,254 | 4,826 | 3,284 | 33,537 |
| 7,780 | 167 | 24,988 | 4,781 | 3,260 | 33,196 |
| 7,781 | 164 | 25,691 | 4,920 | 3,369 | 34,144 |
| 7,782 | 164 | 25,562 | 4,915 | 3,341 | 33,982 |
| 7,783 | 157 | 25,587 | 4,860 | 3,327 | 33,931 |
| 7,784 | 155 | 25,628 | 4,857 | 3,321 | 33,961 |
| 7,785 | 154 | 25,454 | 4,892 | 3,303 | 33,803 |
| 7,786 | 145 | 25,422 | 4,945 | 3,319 | 33,831 |
| 7,787 | 134 | 25,547 | 5,010 | 3,356 | 34,047 |
| 7,788 | 127 | 25,501 | 5,027 | 3,365 | 34,020 |
| 7,789 | 129 | 25,282 | 5,007 | 3,336 | 33,754 |
| 7,790 | 123 | 25,062 | 5,014 | 3,334 | 33,533 |
| 7,791 | 128 | 25,341 | 5,121 | 3,393 | 33,983 |
| 7,792 | 122 | 25,088 | 5,098 | 3,379 | 33,687 |
| 7,793 | 122 | 25,159 | 5,087 | 3,356 | 33,724 |
| 7,794 | 122 | 24,972 | 5,015 | 3,323 | 33,432 |
| 7,795 | 123 | 25,077 | 5,039 | 3,346 | 33,585 |
| 7,796 | 120 | 25,053 | 5,059 | 3,330 | 33,562 |
| 7,797 | 129 | 25,186 | 5,059 | 3,355 | 33,729 |
| 7,798 | 135 | 24,939 | 4,993 | 3,306 | 33,373 |
| 7,799 | 138 | 24,990 | 5,009 | 3,319 | 33,456 |

|       |     |        |       |       |        |
|-------|-----|--------|-------|-------|--------|
| 7,800 | 140 | 25,152 | 5,043 | 3,317 | 33,652 |
| 7,801 | 138 | 25,083 | 5,057 | 3,333 | 33,611 |
| 7,802 | 145 | 25,383 | 5,137 | 3,354 | 34,019 |
| 7,803 | 146 | 25,118 | 5,086 | 3,298 | 33,648 |
| 7,804 | 148 | 25,250 | 5,132 | 3,309 | 33,839 |
| 7,805 | 145 | 25,558 | 5,198 | 3,334 | 34,235 |
| 7,806 | 154 | 25,478 | 5,189 | 3,315 | 34,136 |
| 7,807 | 151 | 25,491 | 5,201 | 3,305 | 34,148 |
| 7,808 | 148 | 25,558 | 5,214 | 3,287 | 34,207 |
| 7,809 | 143 | 25,343 | 5,179 | 3,273 | 33,938 |
| 7,810 | 146 | 25,440 | 5,194 | 3,257 | 34,037 |
| 7,811 | 148 | 25,313 | 5,179 | 3,246 | 33,886 |
| 7,812 | 153 | 25,582 | 5,225 | 3,296 | 34,256 |
| 7,813 | 157 | 25,316 | 5,214 | 3,277 | 33,964 |
| 7,814 | 156 | 24,822 | 5,064 | 3,184 | 33,226 |
| 7,815 | 151 | 24,655 | 5,038 | 3,168 | 33,012 |
| 7,816 | 156 | 24,894 | 5,090 | 3,196 | 33,336 |
| 7,817 | 159 | 24,798 | 5,053 | 3,196 | 33,206 |
| 7,818 | 159 | 24,373 | 4,973 | 3,137 | 32,642 |
| 7,819 | 164 | 24,212 | 4,912 | 3,110 | 32,398 |
| 7,820 | 164 | 24,244 | 4,924 | 3,112 | 32,444 |
| 7,821 | 162 | 24,276 | 4,914 | 3,119 | 32,471 |
| 7,822 | 160 | 24,415 | 4,969 | 3,152 | 32,696 |
| 7,823 | 154 | 24,020 | 4,920 | 3,125 | 32,219 |
| 7,824 | 157 | 24,037 | 4,900 | 3,120 | 32,214 |
| 7,825 | 154 | 24,068 | 4,879 | 3,130 | 32,231 |
| 7,826 | 156 | 24,053 | 4,906 | 3,122 | 32,237 |
| 7,827 | 155 | 23,813 | 4,898 | 3,110 | 31,976 |
| 7,828 | 154 | 24,214 | 4,935 | 3,169 | 32,472 |
| 7,829 | 152 | 24,508 | 4,973 | 3,218 | 32,851 |
| 7,830 | 148 | 24,222 | 4,937 | 3,193 | 32,500 |
| 7,831 | 151 | 24,415 | 5,008 | 3,256 | 32,830 |

|       |     |        |       |       |        |
|-------|-----|--------|-------|-------|--------|
| 7,832 | 150 | 24,113 | 4,971 | 3,216 | 32,450 |
| 7,833 | 155 | 24,318 | 5,046 | 3,260 | 32,779 |
| 7,834 | 155 | 24,199 | 5,042 | 3,263 | 32,659 |
| 7,835 | 155 | 24,066 | 5,032 | 3,263 | 32,516 |
| 7,836 | 155 | 23,927 | 4,954 | 3,240 | 32,276 |
| 7,837 | 155 | 23,990 | 4,895 | 3,227 | 32,267 |
| 7,838 | 158 | 23,960 | 4,882 | 3,208 | 32,208 |
| 7,839 | 157 | 23,926 | 4,858 | 3,200 | 32,141 |
| 7,840 | 154 | 23,467 | 4,761 | 3,145 | 31,527 |
| 7,841 | 147 | 23,279 | 4,704 | 3,108 | 31,238 |
| 7,842 | 151 | 23,358 | 4,688 | 3,107 | 31,304 |
| 7,843 | 158 | 23,466 | 4,756 | 3,137 | 31,517 |
| 7,844 | 156 | 23,022 | 4,702 | 3,110 | 30,990 |
| 7,845 | 154 | 22,532 | 4,640 | 3,058 | 30,384 |
| 7,846 | 158 | 22,850 | 4,702 | 3,097 | 30,807 |
| 7,847 | 151 | 22,866 | 4,722 | 3,120 | 30,859 |
| 7,848 | 143 | 22,627 | 4,686 | 3,094 | 30,550 |
| 7,849 | 139 | 22,580 | 4,646 | 3,077 | 30,442 |
| 7,850 | 138 | 22,560 | 4,670 | 3,085 | 30,453 |
| 7,851 | 141 | 22,357 | 4,552 | 3,010 | 30,060 |
| 7,852 | 139 | 22,461 | 4,609 | 3,050 | 30,259 |
| 7,853 | 134 | 22,811 | 4,662 | 3,100 | 30,707 |
| 7,854 | 133 | 22,826 | 4,667 | 3,110 | 30,736 |
| 7,855 | 130 | 22,566 | 4,630 | 3,095 | 30,421 |
| 7,856 | 130 | 22,733 | 4,643 | 3,128 | 30,634 |
| 7,857 | 120 | 22,484 | 4,605 | 3,109 | 30,318 |
| 7,858 | 120 | 22,332 | 4,587 | 3,091 | 30,130 |
| 7,859 | 126 | 22,572 | 4,631 | 3,144 | 30,473 |
| 7,860 | 130 | 22,734 | 4,689 | 3,201 | 30,754 |
| 7,861 | 130 | 22,772 | 4,732 | 3,232 | 30,866 |
| 7,862 | 126 | 22,788 | 4,719 | 3,214 | 30,847 |
| 7,863 | 122 | 22,677 | 4,690 | 3,217 | 30,706 |

|       |     |        |       |       |        |
|-------|-----|--------|-------|-------|--------|
| 7,864 | 122 | 22,849 | 4,738 | 3,248 | 30,957 |
| 7,865 | 124 | 22,554 | 4,705 | 3,218 | 30,601 |
| 7,866 | 129 | 22,491 | 4,709 | 3,219 | 30,548 |
| 7,867 | 124 | 22,257 | 4,676 | 3,201 | 30,258 |
| 7,868 | 117 | 22,073 | 4,680 | 3,170 | 30,040 |
| 7,869 | 117 | 22,119 | 4,696 | 3,182 | 30,114 |
| 7,870 | 114 | 22,068 | 4,734 | 3,215 | 30,131 |
| 7,871 | 112 | 21,919 | 4,729 | 3,203 | 29,963 |
| 7,872 | 112 | 21,623 | 4,677 | 3,179 | 29,591 |
| 7,873 | 111 | 21,563 | 4,677 | 3,187 | 29,538 |
| 7,874 | 108 | 21,526 | 4,687 | 3,202 | 29,523 |
| 7,875 | 103 | 21,439 | 4,692 | 3,179 | 29,413 |
| 7,876 | 102 | 21,325 | 4,727 | 3,189 | 29,343 |
| 7,877 | 98  | 21,225 | 4,750 | 3,192 | 29,265 |
| 7,878 | 99  | 21,557 | 4,805 | 3,235 | 29,696 |
| 7,879 | 99  | 21,172 | 4,723 | 3,144 | 29,138 |
| 7,880 | 100 | 21,355 | 4,772 | 3,168 | 29,395 |
| 7,881 | 99  | 21,596 | 4,797 | 3,186 | 29,678 |
| 7,882 | 99  | 21,741 | 4,847 | 3,198 | 29,885 |
| 7,883 | 99  | 21,952 | 4,901 | 3,210 | 30,162 |
| 7,884 | 96  | 21,940 | 4,889 | 3,219 | 30,144 |
| 7,885 | 93  | 21,794 | 4,848 | 3,193 | 29,928 |
| 7,886 | 102 | 21,829 | 4,893 | 3,205 | 30,029 |
| 7,887 | 105 | 21,931 | 4,940 | 3,215 | 30,191 |
| 7,888 | 107 | 21,684 | 4,939 | 3,200 | 29,930 |
| 7,889 | 109 | 21,719 | 4,941 | 3,214 | 29,983 |
| 7,890 | 114 | 21,897 | 4,958 | 3,218 | 30,187 |
| 7,891 | 114 | 21,880 | 4,955 | 3,215 | 30,164 |
| 7,892 | 114 | 21,825 | 5,011 | 3,218 | 30,168 |
| 7,893 | 112 | 21,783 | 5,039 | 3,220 | 30,154 |
| 7,894 | 107 | 21,654 | 4,955 | 3,202 | 29,918 |
| 7,895 | 109 | 21,880 | 4,962 | 3,217 | 30,168 |

|       |     |        |       |       |        |
|-------|-----|--------|-------|-------|--------|
| 7,896 | 116 | 22,288 | 5,038 | 3,266 | 30,708 |
| 7,897 | 112 | 22,086 | 4,980 | 3,211 | 30,389 |
| 7,898 | 115 | 22,338 | 4,999 | 3,229 | 30,681 |
| 7,899 | 116 | 22,353 | 5,008 | 3,235 | 30,712 |
| 7,900 | 125 | 22,600 | 5,068 | 3,277 | 31,070 |
| 7,901 | 125 | 22,622 | 5,068 | 3,280 | 31,095 |
| 7,902 | 119 | 22,693 | 5,089 | 3,298 | 31,199 |
| 7,903 | 119 | 22,705 | 5,131 | 3,343 | 31,298 |
| 7,904 | 119 | 22,558 | 5,159 | 3,336 | 31,172 |
| 7,905 | 119 | 22,361 | 5,138 | 3,336 | 30,954 |
| 7,906 | 119 | 22,373 | 5,161 | 3,349 | 31,002 |
| 7,907 | 121 | 22,414 | 5,139 | 3,346 | 31,020 |
| 7,908 | 119 | 22,535 | 5,151 | 3,354 | 31,159 |
| 7,909 | 121 | 22,775 | 5,207 | 3,397 | 31,500 |
| 7,910 | 115 | 22,822 | 5,265 | 3,418 | 31,620 |
| 7,911 | 111 | 22,934 | 5,291 | 3,432 | 31,768 |
| 7,912 | 111 | 22,943 | 5,277 | 3,409 | 31,740 |
| 7,913 | 111 | 22,956 | 5,269 | 3,436 | 31,772 |
| 7,914 | 114 | 22,646 | 5,213 | 3,362 | 31,335 |
| 7,915 | 114 | 23,067 | 5,256 | 3,395 | 31,832 |
| 7,916 | 114 | 23,331 | 5,304 | 3,434 | 32,183 |
| 7,917 | 117 | 23,229 | 5,257 | 3,434 | 32,037 |
| 7,918 | 116 | 23,321 | 5,272 | 3,427 | 32,136 |
| 7,919 | 115 | 23,437 | 5,303 | 3,469 | 32,324 |
| 7,920 | 121 | 23,548 | 5,338 | 3,469 | 32,476 |
| 7,921 | 126 | 23,419 | 5,279 | 3,440 | 32,264 |
| 7,922 | 126 | 23,371 | 5,280 | 3,435 | 32,212 |
| 7,923 | 137 | 23,628 | 5,380 | 3,475 | 32,620 |
| 7,924 | 139 | 23,834 | 5,440 | 3,512 | 32,925 |
| 7,925 | 142 | 23,827 | 5,460 | 3,531 | 32,960 |
| 7,926 | 150 | 23,865 | 5,496 | 3,522 | 33,033 |
| 7,927 | 150 | 23,912 | 5,469 | 3,532 | 33,063 |



|       |     |        |       |       |        |
|-------|-----|--------|-------|-------|--------|
| 7,928 | 151 | 24,019 | 5,471 | 3,510 | 33,151 |
| 7,929 | 152 | 23,317 | 5,332 | 3,408 | 32,209 |
| 7,930 | 156 | 23,491 | 5,360 | 3,423 | 32,430 |
| 7,931 | 154 | 23,552 | 5,364 | 3,412 | 32,482 |
| 7,932 | 157 | 22,979 | 5,243 | 3,326 | 31,705 |
| 7,933 | 158 | 23,152 | 5,261 | 3,344 | 31,915 |
| 7,934 | 156 | 23,171 | 5,236 | 3,337 | 31,900 |
| 7,935 | 160 | 23,372 | 5,271 | 3,346 | 32,149 |
| 7,936 | 153 | 23,239 | 5,260 | 3,338 | 31,990 |
| 7,937 | 157 | 23,581 | 5,295 | 3,374 | 32,407 |
| 7,938 | 155 | 23,578 | 5,286 | 3,386 | 32,405 |
| 7,939 | 150 | 23,252 | 5,193 | 3,338 | 31,933 |
| 7,940 | 158 | 23,512 | 5,290 | 3,368 | 32,328 |
| 7,941 | 154 | 23,409 | 5,273 | 3,363 | 32,199 |
| 7,942 | 155 | 23,397 | 5,228 | 3,352 | 32,132 |
| 7,943 | 157 | 23,532 | 5,247 | 3,374 | 32,310 |
| 7,944 | 154 | 23,404 | 5,238 | 3,363 | 32,159 |
| 7,945 | 154 | 23,307 | 5,222 | 3,349 | 32,032 |
| 7,946 | 150 | 23,328 | 5,261 | 3,383 | 32,122 |
| 7,947 | 149 | 23,328 | 5,256 | 3,391 | 32,124 |
| 7,948 | 153 | 22,857 | 5,196 | 3,322 | 31,528 |
| 7,949 | 152 | 22,818 | 5,196 | 3,318 | 31,484 |
| 7,950 | 151 | 23,037 | 5,234 | 3,351 | 31,773 |
| 7,951 | 153 | 23,084 | 5,237 | 3,348 | 31,822 |
| 7,952 | 154 | 22,860 | 5,204 | 3,318 | 31,536 |
| 7,953 | 155 | 22,876 | 5,171 | 3,298 | 31,500 |
| 7,954 | 155 | 22,910 | 5,154 | 3,296 | 31,515 |
| 7,955 | 157 | 23,007 | 5,151 | 3,304 | 31,619 |
| 7,956 | 158 | 22,953 | 5,117 | 3,282 | 31,510 |
| 7,957 | 157 | 22,599 | 5,066 | 3,244 | 31,066 |
| 7,958 | 156 | 22,655 | 5,138 | 3,277 | 31,226 |
| 7,959 | 160 | 22,758 | 5,169 | 3,284 | 31,371 |

|       |     |        |       |       |        |
|-------|-----|--------|-------|-------|--------|
| 7,960 | 158 | 22,242 | 5,063 | 3,193 | 30,656 |
| 7,961 | 157 | 22,438 | 5,083 | 3,227 | 30,905 |
| 7,962 | 160 | 22,303 | 5,059 | 3,197 | 30,719 |
| 7,963 | 158 | 21,935 | 5,002 | 3,168 | 30,263 |
| 7,964 | 159 | 21,662 | 4,978 | 3,133 | 29,932 |
| 7,965 | 158 | 21,658 | 5,047 | 3,187 | 30,050 |
| 7,966 | 165 | 21,694 | 5,053 | 3,203 | 30,115 |
| 7,967 | 162 | 21,495 | 5,022 | 3,172 | 29,851 |
| 7,968 | 159 | 21,515 | 5,013 | 3,183 | 29,870 |
| 7,969 | 158 | 21,613 | 5,025 | 3,200 | 29,996 |
| 7,970 | 157 | 21,714 | 5,000 | 3,194 | 30,065 |
| 7,971 | 152 | 21,939 | 5,015 | 3,217 | 30,323 |
| 7,972 | 147 | 22,069 | 5,051 | 3,232 | 30,499 |
| 7,973 | 146 | 22,217 | 5,071 | 3,251 | 30,685 |
| 7,974 | 142 | 22,280 | 5,044 | 3,237 | 30,703 |
| 7,975 | 148 | 22,110 | 5,021 | 3,206 | 30,485 |
| 7,976 | 148 | 22,297 | 5,011 | 3,202 | 30,658 |
| 7,977 | 146 | 22,335 | 4,999 | 3,194 | 30,674 |
| 7,978 | 147 | 22,358 | 4,996 | 3,193 | 30,694 |
| 7,979 | 148 | 22,327 | 4,994 | 3,203 | 30,672 |
| 7,980 | 151 | 22,283 | 4,973 | 3,216 | 30,623 |
| 7,981 | 151 | 22,258 | 4,978 | 3,220 | 30,607 |
| 7,982 | 156 | 22,518 | 5,008 | 3,276 | 30,958 |
| 7,983 | 157 | 22,350 | 4,983 | 3,274 | 30,764 |
| 7,984 | 156 | 22,378 | 4,974 | 3,283 | 30,791 |
| 7,985 | 156 | 22,631 | 5,044 | 3,336 | 31,167 |
| 7,986 | 153 | 22,422 | 4,998 | 3,326 | 30,899 |
| 7,987 | 152 | 22,635 | 5,028 | 3,351 | 31,166 |
| 7,988 | 150 | 22,612 | 5,043 | 3,320 | 31,125 |
| 7,989 | 152 | 22,738 | 5,071 | 3,345 | 31,306 |
| 7,990 | 153 | 22,673 | 5,072 | 3,342 | 31,240 |
| 7,991 | 151 | 22,439 | 5,035 | 3,326 | 30,951 |

|       |     |        |       |       |        |
|-------|-----|--------|-------|-------|--------|
| 7,992 | 160 | 22,739 | 5,134 | 3,403 | 31,436 |
| 7,993 | 157 | 22,483 | 5,097 | 3,370 | 31,107 |
| 7,994 | 154 | 22,236 | 5,039 | 3,341 | 30,770 |
| 7,995 | 162 | 22,634 | 5,117 | 3,395 | 31,308 |
| 7,996 | 162 | 22,487 | 5,083 | 3,371 | 31,103 |
| 7,997 | 167 | 22,751 | 5,130 | 3,400 | 31,448 |
| 7,998 | 164 | 22,805 | 5,151 | 3,406 | 31,526 |
| 7,999 | 162 | 22,628 | 5,127 | 3,405 | 31,322 |
| 8,000 | 170 | 23,048 | 5,217 | 3,451 | 31,886 |
| 8,001 | 177 | 22,998 | 5,201 | 3,446 | 31,822 |
| 8,002 | 170 | 22,819 | 5,167 | 3,422 | 31,578 |
| 8,003 | 168 | 22,670 | 5,164 | 3,436 | 31,438 |
| 8,004 | 168 | 22,767 | 5,205 | 3,461 | 31,601 |
| 8,005 | 169 | 22,864 | 5,219 | 3,452 | 31,704 |
| 8,006 | 169 | 22,774 | 5,217 | 3,449 | 31,609 |
| 8,007 | 170 | 22,762 | 5,183 | 3,429 | 31,544 |
| 8,008 | 170 | 22,841 | 5,196 | 3,426 | 31,633 |
| 8,009 | 167 | 22,952 | 5,215 | 3,429 | 31,763 |
| 8,010 | 167 | 23,064 | 5,232 | 3,453 | 31,916 |
| 8,011 | 168 | 23,095 | 5,225 | 3,465 | 31,953 |
| 8,012 | 168 | 23,106 | 5,217 | 3,445 | 31,936 |
| 8,013 | 161 | 23,057 | 5,201 | 3,442 | 31,861 |
| 8,014 | 165 | 23,154 | 5,199 | 3,426 | 31,944 |
| 8,015 | 171 | 23,229 | 5,205 | 3,418 | 32,023 |
| 8,016 | 173 | 23,309 | 5,199 | 3,419 | 32,100 |
| 8,017 | 166 | 22,955 | 5,177 | 3,388 | 31,686 |
| 8,018 | 167 | 23,398 | 5,251 | 3,429 | 32,245 |
| 8,019 | 166 | 23,422 | 5,290 | 3,435 | 32,313 |
| 8,020 | 170 | 23,417 | 5,292 | 3,411 | 32,290 |
| 8,021 | 169 | 23,157 | 5,277 | 3,375 | 31,978 |
| 8,022 | 175 | 23,357 | 5,363 | 3,436 | 32,331 |
| 8,023 | 175 | 23,683 | 5,435 | 3,497 | 32,790 |

|       |     |        |       |       |        |
|-------|-----|--------|-------|-------|--------|
| 8,024 | 184 | 23,708 | 5,452 | 3,504 | 32,848 |
| 8,025 | 173 | 22,989 | 5,294 | 3,436 | 31,892 |
| 8,026 | 171 | 23,275 | 5,319 | 3,455 | 32,220 |
| 8,027 | 166 | 23,309 | 5,365 | 3,472 | 32,312 |
| 8,028 | 167 | 23,535 | 5,390 | 3,527 | 32,619 |
| 8,029 | 166 | 23,534 | 5,389 | 3,536 | 32,625 |
| 8,030 | 165 | 23,629 | 5,433 | 3,559 | 32,786 |
| 8,031 | 158 | 23,356 | 5,422 | 3,528 | 32,464 |
| 8,032 | 166 | 23,371 | 5,438 | 3,545 | 32,520 |
| 8,033 | 170 | 23,527 | 5,544 | 3,573 | 32,814 |
| 8,034 | 172 | 23,496 | 5,563 | 3,576 | 32,807 |
| 8,035 | 181 | 23,314 | 5,539 | 3,534 | 32,568 |
| 8,036 | 178 | 23,081 | 5,499 | 3,515 | 32,273 |
| 8,037 | 180 | 23,055 | 5,516 | 3,504 | 32,255 |
| 8,038 | 181 | 22,815 | 5,436 | 3,466 | 31,898 |
| 8,039 | 178 | 23,335 | 5,519 | 3,555 | 32,587 |
| 8,040 | 177 | 23,088 | 5,460 | 3,520 | 32,245 |
| 8,041 | 171 | 23,268 | 5,465 | 3,530 | 32,434 |
| 8,042 | 164 | 23,090 | 5,378 | 3,474 | 32,106 |
| 8,043 | 164 | 23,083 | 5,360 | 3,461 | 32,068 |
| 8,044 | 163 | 23,387 | 5,443 | 3,501 | 32,494 |
| 8,045 | 161 | 23,440 | 5,456 | 3,500 | 32,557 |
| 8,046 | 160 | 23,293 | 5,422 | 3,482 | 32,357 |
| 8,047 | 160 | 23,328 | 5,432 | 3,495 | 32,415 |
| 8,048 | 155 | 23,164 | 5,384 | 3,424 | 32,127 |
| 8,049 | 154 | 23,369 | 5,437 | 3,461 | 32,421 |
| 8,050 | 149 | 23,531 | 5,472 | 3,478 | 32,630 |
| 8,051 | 142 | 23,465 | 5,458 | 3,475 | 32,540 |
| 8,052 | 132 | 23,458 | 5,459 | 3,465 | 32,514 |
| 8,053 | 133 | 23,264 | 5,440 | 3,438 | 32,275 |
| 8,054 | 133 | 23,016 | 5,371 | 3,382 | 31,902 |
| 8,055 | 134 | 22,992 | 5,368 | 3,359 | 31,853 |

|       |     |        |       |       |        |
|-------|-----|--------|-------|-------|--------|
| 8,056 | 134 | 22,983 | 5,370 | 3,367 | 31,854 |
| 8,057 | 130 | 22,670 | 5,308 | 3,321 | 31,429 |
| 8,058 | 132 | 22,667 | 5,309 | 3,326 | 31,434 |
| 8,059 | 141 | 22,611 | 5,280 | 3,304 | 31,336 |
| 8,060 | 142 | 22,531 | 5,239 | 3,283 | 31,195 |
| 8,061 | 142 | 22,297 | 5,178 | 3,254 | 30,871 |
| 8,062 | 142 | 22,371 | 5,179 | 3,255 | 30,947 |
| 8,063 | 149 | 22,338 | 5,139 | 3,220 | 30,846 |
| 8,064 | 148 | 22,367 | 5,125 | 3,225 | 30,865 |
| 8,065 | 148 | 22,345 | 5,137 | 3,222 | 30,852 |
| 8,066 | 143 | 22,756 | 5,200 | 3,263 | 31,362 |
| 8,067 | 141 | 22,703 | 5,224 | 3,247 | 31,315 |
| 8,068 | 150 | 22,350 | 5,144 | 3,210 | 30,854 |
| 8,069 | 147 | 21,996 | 5,035 | 3,171 | 30,349 |
| 8,070 | 147 | 21,887 | 5,054 | 3,180 | 30,268 |
| 8,071 | 144 | 21,737 | 5,049 | 3,176 | 30,106 |
| 8,072 | 142 | 21,768 | 5,058 | 3,193 | 30,161 |
| 8,073 | 141 | 21,515 | 5,013 | 3,147 | 29,816 |
| 8,074 | 150 | 21,453 | 4,992 | 3,120 | 29,715 |
| 8,075 | 140 | 21,052 | 4,903 | 3,055 | 29,150 |
| 8,076 | 139 | 20,867 | 4,889 | 3,034 | 28,929 |
| 8,077 | 140 | 20,794 | 4,898 | 3,019 | 28,851 |
| 8,078 | 144 | 20,641 | 4,858 | 2,990 | 28,633 |
| 8,079 | 144 | 20,660 | 4,837 | 2,963 | 28,604 |
| 8,080 | 144 | 20,667 | 4,832 | 2,970 | 28,613 |
| 8,081 | 143 | 20,685 | 4,826 | 2,965 | 28,619 |
| 8,082 | 136 | 20,980 | 4,871 | 2,987 | 28,974 |
| 8,083 | 137 | 21,026 | 4,826 | 2,980 | 28,969 |
| 8,084 | 131 | 20,824 | 4,760 | 2,952 | 28,667 |
| 8,085 | 131 | 20,974 | 4,746 | 2,975 | 28,826 |
| 8,086 | 119 | 20,740 | 4,667 | 2,953 | 28,479 |
| 8,087 | 125 | 21,254 | 4,721 | 3,001 | 29,101 |

|       |     |        |       |       |        |
|-------|-----|--------|-------|-------|--------|
| 8,088 | 122 | 20,937 | 4,659 | 2,968 | 28,686 |
| 8,089 | 123 | 20,891 | 4,667 | 2,969 | 28,650 |
| 8,090 | 122 | 21,010 | 4,681 | 2,969 | 28,782 |
| 8,091 | 118 | 20,716 | 4,623 | 2,935 | 28,392 |
| 8,092 | 117 | 20,716 | 4,670 | 2,929 | 28,432 |
| 8,093 | 117 | 20,753 | 4,702 | 2,940 | 28,512 |
| 8,094 | 118 | 20,911 | 4,752 | 2,961 | 28,742 |
| 8,095 | 121 | 20,932 | 4,719 | 2,950 | 28,722 |
| 8,096 | 132 | 20,651 | 4,654 | 2,930 | 28,367 |
| 8,097 | 133 | 20,553 | 4,673 | 2,934 | 28,293 |
| 8,098 | 144 | 20,922 | 4,771 | 2,971 | 28,808 |
| 8,099 | 152 | 20,368 | 4,616 | 2,899 | 28,035 |
| 8,100 | 159 | 20,577 | 4,657 | 2,923 | 28,316 |
| 8,101 | 161 | 20,641 | 4,654 | 2,914 | 28,370 |
| 8,102 | 163 | 20,767 | 4,692 | 2,950 | 28,572 |
| 8,103 | 163 | 20,714 | 4,698 | 2,953 | 28,528 |
| 8,104 | 165 | 20,777 | 4,701 | 2,965 | 28,608 |
| 8,105 | 165 | 20,878 | 4,702 | 2,976 | 28,721 |
| 8,106 | 176 | 21,212 | 4,750 | 3,014 | 29,152 |
| 8,107 | 175 | 21,028 | 4,702 | 2,983 | 28,888 |
| 8,108 | 179 | 21,107 | 4,695 | 2,971 | 28,952 |
| 8,109 | 178 | 21,084 | 4,713 | 2,985 | 28,960 |
| 8,110 | 172 | 21,000 | 4,740 | 2,999 | 28,911 |
| 8,111 | 171 | 20,934 | 4,759 | 2,999 | 28,863 |
| 8,112 | 175 | 20,860 | 4,760 | 2,995 | 28,790 |
| 8,113 | 175 | 20,588 | 4,760 | 2,965 | 28,488 |
| 8,114 | 171 | 20,790 | 4,814 | 3,021 | 28,796 |
| 8,115 | 175 | 20,989 | 4,901 | 3,083 | 29,148 |
| 8,116 | 180 | 21,056 | 4,921 | 3,112 | 29,269 |
| 8,117 | 177 | 21,152 | 4,943 | 3,133 | 29,405 |
| 8,118 | 170 | 20,858 | 4,843 | 3,052 | 28,923 |
| 8,119 | 180 | 21,133 | 4,870 | 3,074 | 29,257 |

|       |     |        |       |       |        |
|-------|-----|--------|-------|-------|--------|
| 8,120 | 180 | 21,168 | 4,872 | 3,090 | 29,310 |
| 8,121 | 183 | 21,414 | 4,885 | 3,117 | 29,599 |
| 8,122 | 181 | 21,363 | 4,835 | 3,084 | 29,463 |
| 8,123 | 180 | 21,405 | 4,797 | 3,080 | 29,462 |
| 8,124 | 180 | 21,446 | 4,799 | 3,073 | 29,498 |
| 8,125 | 176 | 21,571 | 4,845 | 3,106 | 29,698 |
| 8,126 | 171 | 21,362 | 4,787 | 3,079 | 29,399 |
| 8,127 | 178 | 21,562 | 4,805 | 3,096 | 29,641 |
| 8,128 | 177 | 21,320 | 4,749 | 3,065 | 29,311 |
| 8,129 | 178 | 21,288 | 4,770 | 3,076 | 29,312 |
| 8,130 | 178 | 21,197 | 4,764 | 3,078 | 29,217 |
| 8,131 | 178 | 21,267 | 4,822 | 3,106 | 29,373 |
| 8,132 | 179 | 21,251 | 4,831 | 3,097 | 29,358 |
| 8,133 | 181 | 21,013 | 4,795 | 3,071 | 29,060 |
| 8,134 | 189 | 20,727 | 4,757 | 3,040 | 28,713 |
| 8,135 | 188 | 20,418 | 4,728 | 3,012 | 28,346 |
| 8,136 | 183 | 20,998 | 4,864 | 3,083 | 29,128 |
| 8,137 | 188 | 20,990 | 4,881 | 3,090 | 29,149 |
| 8,138 | 186 | 20,887 | 4,910 | 3,079 | 29,062 |
| 8,139 | 192 | 20,812 | 4,919 | 3,062 | 28,985 |
| 8,140 | 193 | 20,916 | 4,953 | 3,056 | 29,118 |
| 8,141 | 194 | 21,000 | 4,984 | 3,072 | 29,250 |
| 8,142 | 197 | 20,958 | 4,964 | 3,080 | 29,199 |
| 8,143 | 195 | 21,170 | 4,980 | 3,085 | 29,430 |
| 8,144 | 199 | 21,522 | 5,064 | 3,131 | 29,916 |
| 8,145 | 200 | 21,440 | 5,055 | 3,131 | 29,826 |
| 8,146 | 200 | 21,431 | 5,063 | 3,137 | 29,831 |
| 8,147 | 186 | 21,541 | 5,053 | 3,121 | 29,901 |
| 8,148 | 191 | 21,814 | 5,110 | 3,147 | 30,262 |
| 8,149 | 183 | 22,123 | 5,176 | 3,198 | 30,680 |
| 8,150 | 176 | 22,071 | 5,163 | 3,178 | 30,588 |
| 8,151 | 169 | 21,890 | 5,149 | 3,150 | 30,358 |

|       |     |        |       |       |        |
|-------|-----|--------|-------|-------|--------|
| 8,152 | 174 | 21,958 | 5,185 | 3,179 | 30,496 |
| 8,153 | 174 | 21,931 | 5,182 | 3,159 | 30,446 |
| 8,154 | 178 | 22,232 | 5,258 | 3,197 | 30,865 |
| 8,155 | 177 | 21,564 | 5,119 | 3,102 | 29,962 |
| 8,156 | 175 | 21,748 | 5,185 | 3,145 | 30,253 |
| 8,157 | 185 | 22,031 | 5,267 | 3,175 | 30,658 |
| 8,158 | 186 | 22,017 | 5,287 | 3,178 | 30,668 |
| 8,159 | 184 | 22,285 | 5,326 | 3,202 | 30,997 |
| 8,160 | 184 | 22,292 | 5,336 | 3,207 | 31,019 |
| 8,161 | 183 | 22,364 | 5,325 | 3,232 | 31,104 |
| 8,162 | 186 | 22,473 | 5,334 | 3,232 | 31,225 |
| 8,163 | 186 | 22,440 | 5,348 | 3,232 | 31,206 |
| 8,164 | 187 | 22,544 | 5,383 | 3,249 | 31,363 |
| 8,165 | 187 | 22,396 | 5,384 | 3,233 | 31,200 |
| 8,166 | 183 | 22,537 | 5,429 | 3,266 | 31,415 |
| 8,167 | 180 | 22,459 | 5,417 | 3,262 | 31,318 |
| 8,168 | 183 | 22,379 | 5,417 | 3,246 | 31,225 |
| 8,169 | 179 | 22,244 | 5,427 | 3,276 | 31,126 |
| 8,170 | 176 | 21,969 | 5,385 | 3,231 | 30,761 |
| 8,171 | 175 | 21,958 | 5,423 | 3,231 | 30,787 |
| 8,172 | 176 | 21,915 | 5,457 | 3,224 | 30,772 |
| 8,173 | 180 | 21,987 | 5,518 | 3,251 | 30,936 |
| 8,174 | 186 | 22,018 | 5,570 | 3,277 | 31,051 |
| 8,175 | 190 | 22,248 | 5,635 | 3,307 | 31,380 |
| 8,176 | 187 | 22,506 | 5,704 | 3,325 | 31,722 |
| 8,177 | 189 | 22,539 | 5,707 | 3,329 | 31,764 |
| 8,178 | 182 | 22,552 | 5,686 | 3,318 | 31,738 |
| 8,179 | 180 | 22,285 | 5,634 | 3,288 | 31,387 |
| 8,180 | 179 | 22,500 | 5,664 | 3,339 | 31,682 |
| 8,181 | 183 | 22,392 | 5,638 | 3,299 | 31,512 |
| 8,182 | 183 | 22,340 | 5,604 | 3,271 | 31,398 |
| 8,183 | 182 | 22,643 | 5,691 | 3,331 | 31,847 |



|       |     |        |       |       |        |
|-------|-----|--------|-------|-------|--------|
| 8,184 | 182 | 22,760 | 5,695 | 3,320 | 31,957 |
| 8,185 | 177 | 22,588 | 5,657 | 3,277 | 31,699 |
| 8,186 | 178 | 22,563 | 5,657 | 3,275 | 31,673 |
| 8,187 | 176 | 22,523 | 5,641 | 3,261 | 31,601 |
| 8,188 | 180 | 22,679 | 5,693 | 3,278 | 31,830 |
| 8,189 | 178 | 22,578 | 5,716 | 3,275 | 31,747 |
| 8,190 | 171 | 22,335 | 5,626 | 3,232 | 31,364 |
| 8,191 | 171 | 22,303 | 5,624 | 3,226 | 31,324 |
| 8,192 | 170 | 22,253 | 5,625 | 3,271 | 31,319 |
| 8,193 | 170 | 22,166 | 5,633 | 3,266 | 31,235 |
| 8,194 | 170 | 22,169 | 5,671 | 3,271 | 31,281 |
| 8,195 | 169 | 22,118 | 5,667 | 3,282 | 31,236 |
| 8,196 | 166 | 22,079 | 5,661 | 3,271 | 31,177 |
| 8,197 | 176 | 21,872 | 5,614 | 3,242 | 30,904 |
| 8,198 | 175 | 21,606 | 5,546 | 3,193 | 30,520 |
| 8,199 | 183 | 21,869 | 5,588 | 3,241 | 30,881 |
| 8,200 | 203 | 21,808 | 5,601 | 3,252 | 30,864 |
| 8,201 | 202 | 21,799 | 5,581 | 3,239 | 30,821 |
| 8,202 | 195 | 21,819 | 5,548 | 3,221 | 30,783 |
| 8,203 | 195 | 21,787 | 5,551 | 3,224 | 30,757 |
| 8,204 | 190 | 21,771 | 5,522 | 3,212 | 30,695 |
| 8,205 | 185 | 21,659 | 5,511 | 3,233 | 30,588 |
| 8,206 | 181 | 21,384 | 5,407 | 3,175 | 30,147 |
| 8,207 | 182 | 21,467 | 5,419 | 3,188 | 30,256 |
| 8,208 | 178 | 21,467 | 5,419 | 3,184 | 30,248 |
| 8,209 | 178 | 21,269 | 5,380 | 3,167 | 29,994 |
| 8,210 | 174 | 21,353 | 5,407 | 3,172 | 30,106 |
| 8,211 | 172 | 21,166 | 5,402 | 3,150 | 29,890 |
| 8,212 | 169 | 20,905 | 5,351 | 3,112 | 29,537 |
| 8,213 | 170 | 20,828 | 5,308 | 3,105 | 29,411 |
| 8,214 | 167 | 20,832 | 5,252 | 3,081 | 29,332 |
| 8,215 | 169 | 20,869 | 5,197 | 3,063 | 29,298 |

|       |     |        |       |       |        |
|-------|-----|--------|-------|-------|--------|
| 8,216 | 169 | 20,785 | 5,180 | 3,057 | 29,191 |
| 8,217 | 166 | 20,770 | 5,192 | 3,044 | 29,172 |
| 8,218 | 163 | 20,206 | 5,038 | 2,922 | 28,329 |
| 8,219 | 169 | 20,285 | 5,068 | 2,926 | 28,448 |
| 8,220 | 168 | 20,349 | 5,074 | 2,942 | 28,533 |
| 8,221 | 163 | 20,286 | 5,069 | 2,939 | 28,457 |
| 8,222 | 159 | 20,201 | 5,053 | 2,961 | 28,374 |
| 8,223 | 156 | 20,327 | 5,081 | 2,970 | 28,534 |
| 8,224 | 154 | 20,322 | 5,062 | 2,953 | 28,491 |
| 8,225 | 151 | 20,365 | 5,078 | 2,958 | 28,552 |
| 8,226 | 146 | 20,145 | 5,016 | 2,927 | 28,234 |
| 8,227 | 149 | 20,131 | 5,021 | 2,957 | 28,258 |
| 8,228 | 149 | 20,162 | 5,045 | 2,965 | 28,321 |
| 8,229 | 149 | 20,269 | 5,078 | 2,986 | 28,482 |
| 8,230 | 147 | 20,335 | 5,140 | 2,989 | 28,611 |
| 8,231 | 142 | 20,333 | 5,153 | 2,988 | 28,616 |
| 8,232 | 143 | 20,359 | 5,139 | 2,981 | 28,622 |
| 8,233 | 143 | 20,338 | 5,136 | 3,000 | 28,617 |
| 8,234 | 150 | 20,639 | 5,203 | 3,044 | 29,036 |
| 8,235 | 146 | 20,525 | 5,187 | 3,053 | 28,911 |
| 8,236 | 145 | 20,722 | 5,199 | 3,068 | 29,134 |
| 8,237 | 145 | 21,008 | 5,310 | 3,163 | 29,626 |
| 8,238 | 140 | 20,862 | 5,311 | 3,157 | 29,470 |
| 8,239 | 143 | 20,948 | 5,320 | 3,174 | 29,585 |
| 8,240 | 143 | 20,985 | 5,324 | 3,197 | 29,649 |
| 8,241 | 144 | 20,994 | 5,349 | 3,245 | 29,732 |
| 8,242 | 147 | 21,109 | 5,369 | 3,248 | 29,873 |
| 8,243 | 155 | 21,177 | 5,386 | 3,241 | 29,959 |
| 8,244 | 159 | 21,308 | 5,400 | 3,243 | 30,110 |
| 8,245 | 159 | 21,422 | 5,420 | 3,278 | 30,279 |
| 8,246 | 152 | 21,109 | 5,387 | 3,236 | 29,884 |
| 8,247 | 152 | 21,260 | 5,415 | 3,252 | 30,079 |

|       |     |        |       |       |        |
|-------|-----|--------|-------|-------|--------|
| 8,248 | 135 | 20,694 | 5,346 | 3,184 | 29,359 |
| 8,249 | 136 | 20,955 | 5,395 | 3,222 | 29,708 |
| 8,250 | 121 | 21,184 | 5,502 | 3,276 | 30,083 |
| 8,251 | 118 | 21,198 | 5,502 | 3,290 | 30,108 |
| 8,252 | 117 | 21,230 | 5,529 | 3,349 | 30,225 |
| 8,253 | 116 | 20,500 | 5,387 | 3,259 | 29,262 |
| 8,254 | 125 | 20,634 | 5,429 | 3,291 | 29,479 |
| 8,255 | 126 | 20,841 | 5,510 | 3,332 | 29,809 |
| 8,256 | 129 | 21,020 | 5,612 | 3,365 | 30,126 |
| 8,257 | 133 | 21,074 | 5,672 | 3,404 | 30,283 |
| 8,258 | 135 | 21,048 | 5,681 | 3,408 | 30,272 |
| 8,259 | 131 | 21,021 | 5,656 | 3,402 | 30,210 |
| 8,260 | 134 | 21,043 | 5,635 | 3,402 | 30,214 |
| 8,261 | 137 | 21,015 | 5,648 | 3,404 | 30,204 |
| 8,262 | 138 | 20,827 | 5,587 | 3,367 | 29,919 |
| 8,263 | 136 | 20,854 | 5,579 | 3,372 | 29,941 |
| 8,264 | 133 | 20,972 | 5,636 | 3,398 | 30,139 |
| 8,265 | 136 | 20,873 | 5,637 | 3,414 | 30,060 |
| 8,266 | 133 | 20,764 | 5,623 | 3,396 | 29,916 |
| 8,267 | 136 | 20,903 | 5,618 | 3,395 | 30,052 |
| 8,268 | 136 | 21,069 | 5,641 | 3,417 | 30,263 |
| 8,269 | 129 | 20,624 | 5,521 | 3,361 | 29,635 |
| 8,270 | 128 | 20,617 | 5,507 | 3,363 | 29,615 |
| 8,271 | 127 | 20,444 | 5,454 | 3,319 | 29,344 |
| 8,272 | 127 | 20,310 | 5,397 | 3,283 | 29,117 |
| 8,273 | 131 | 21,209 | 5,638 | 3,422 | 30,400 |
| 8,274 | 133 | 21,229 | 5,644 | 3,420 | 30,426 |
| 8,275 | 132 | 20,605 | 5,499 | 3,332 | 29,568 |
| 8,276 | 133 | 20,727 | 5,520 | 3,347 | 29,727 |
| 8,277 | 131 | 20,615 | 5,475 | 3,332 | 29,553 |
| 8,278 | 130 | 20,632 | 5,491 | 3,338 | 29,591 |
| 8,279 | 131 | 20,629 | 5,542 | 3,375 | 29,677 |

|       |     |        |       |       |        |
|-------|-----|--------|-------|-------|--------|
| 8,280 | 131 | 20,454 | 5,498 | 3,358 | 29,441 |
| 8,281 | 132 | 20,555 | 5,505 | 3,406 | 29,598 |
| 8,282 | 137 | 20,571 | 5,495 | 3,411 | 29,614 |
| 8,283 | 139 | 20,608 | 5,516 | 3,412 | 29,675 |
| 8,284 | 141 | 20,717 | 5,517 | 3,409 | 29,784 |
| 8,285 | 152 | 20,801 | 5,568 | 3,420 | 29,941 |
| 8,286 | 156 | 20,792 | 5,568 | 3,400 | 29,916 |
| 8,287 | 159 | 20,691 | 5,523 | 3,363 | 29,736 |
| 8,288 | 169 | 20,911 | 5,546 | 3,352 | 29,978 |
| 8,289 | 174 | 20,990 | 5,549 | 3,356 | 30,069 |
| 8,290 | 174 | 20,854 | 5,489 | 3,321 | 29,838 |
| 8,291 | 175 | 20,844 | 5,468 | 3,303 | 29,790 |
| 8,292 | 176 | 20,969 | 5,457 | 3,301 | 29,903 |
| 8,293 | 176 | 21,125 | 5,510 | 3,303 | 30,114 |
| 8,294 | 179 | 21,352 | 5,543 | 3,363 | 30,437 |
| 8,295 | 184 | 21,373 | 5,513 | 3,357 | 30,427 |
| 8,296 | 192 | 21,501 | 5,499 | 3,366 | 30,558 |
| 8,297 | 192 | 21,484 | 5,498 | 3,368 | 30,542 |
| 8,298 | 195 | 21,438 | 5,457 | 3,382 | 30,472 |
| 8,299 | 190 | 21,420 | 5,436 | 3,374 | 30,420 |
| 8,300 | 188 | 21,376 | 5,376 | 3,344 | 30,284 |
| 8,301 | 186 | 21,380 | 5,377 | 3,324 | 30,267 |
| 8,302 | 183 | 21,297 | 5,326 | 3,299 | 30,105 |
| 8,303 | 184 | 21,354 | 5,314 | 3,277 | 30,129 |
| 8,304 | 184 | 21,371 | 5,308 | 3,303 | 30,166 |
| 8,305 | 179 | 21,775 | 5,377 | 3,318 | 30,649 |
| 8,306 | 183 | 22,108 | 5,404 | 3,346 | 31,041 |
| 8,307 | 187 | 22,480 | 5,478 | 3,399 | 31,544 |
| 8,308 | 182 | 22,660 | 5,459 | 3,404 | 31,705 |
| 8,309 | 179 | 22,535 | 5,433 | 3,381 | 31,528 |
| 8,310 | 177 | 22,583 | 5,463 | 3,421 | 31,644 |
| 8,311 | 178 | 23,103 | 5,595 | 3,467 | 32,343 |

|       |     |        |       |       |        |
|-------|-----|--------|-------|-------|--------|
| 8,312 | 172 | 23,118 | 5,570 | 3,483 | 32,343 |
| 8,313 | 175 | 23,325 | 5,627 | 3,507 | 32,634 |
| 8,314 | 179 | 23,528 | 5,658 | 3,524 | 32,889 |
| 8,315 | 179 | 23,420 | 5,641 | 3,520 | 32,760 |
| 8,316 | 183 | 23,785 | 5,728 | 3,582 | 33,278 |
| 8,317 | 186 | 23,829 | 5,750 | 3,614 | 33,379 |
| 8,318 | 185 | 23,711 | 5,747 | 3,602 | 33,245 |
| 8,319 | 185 | 23,708 | 5,770 | 3,616 | 33,279 |
| 8,320 | 187 | 24,090 | 5,850 | 3,665 | 33,792 |
| 8,321 | 192 | 24,050 | 5,832 | 3,668 | 33,742 |
| 8,322 | 186 | 23,931 | 5,804 | 3,636 | 33,557 |
| 8,323 | 186 | 24,281 | 5,840 | 3,671 | 33,978 |
| 8,324 | 192 | 24,497 | 5,898 | 3,705 | 34,292 |
| 8,325 | 188 | 24,348 | 5,824 | 3,687 | 34,047 |
| 8,326 | 190 | 24,337 | 5,831 | 3,693 | 34,051 |
| 8,327 | 195 | 24,465 | 5,849 | 3,700 | 34,209 |
| 8,328 | 197 | 24,496 | 5,838 | 3,691 | 34,222 |
| 8,329 | 196 | 24,582 | 5,840 | 3,689 | 34,307 |
| 8,330 | 197 | 24,282 | 5,761 | 3,640 | 33,880 |
| 8,331 | 201 | 24,239 | 5,740 | 3,612 | 33,792 |
| 8,332 | 197 | 24,249 | 5,724 | 3,582 | 33,752 |
| 8,333 | 198 | 24,231 | 5,735 | 3,579 | 33,743 |
| 8,334 | 206 | 24,387 | 5,780 | 3,606 | 33,979 |
| 8,335 | 201 | 24,369 | 5,734 | 3,579 | 33,883 |
| 8,336 | 194 | 24,057 | 5,657 | 3,545 | 33,453 |
| 8,337 | 191 | 24,162 | 5,665 | 3,560 | 33,578 |
| 8,338 | 191 | 23,985 | 5,661 | 3,568 | 33,405 |
| 8,339 | 184 | 23,657 | 5,594 | 3,541 | 32,976 |
| 8,340 | 184 | 23,567 | 5,589 | 3,554 | 32,894 |
| 8,341 | 180 | 23,313 | 5,578 | 3,551 | 32,622 |
| 8,342 | 177 | 23,188 | 5,569 | 3,538 | 32,472 |
| 8,343 | 175 | 23,171 | 5,558 | 3,524 | 32,428 |

|       |     |        |       |       |        |
|-------|-----|--------|-------|-------|--------|
| 8,344 | 170 | 23,043 | 5,546 | 3,487 | 32,246 |
| 8,345 | 165 | 22,853 | 5,485 | 3,456 | 31,959 |
| 8,346 | 160 | 22,823 | 5,479 | 3,456 | 31,918 |
| 8,347 | 155 | 22,927 | 5,544 | 3,480 | 32,106 |
| 8,348 | 152 | 23,090 | 5,548 | 3,494 | 32,284 |
| 8,349 | 158 | 22,931 | 5,524 | 3,459 | 32,072 |
| 8,350 | 160 | 22,819 | 5,512 | 3,438 | 31,929 |
| 8,351 | 161 | 23,248 | 5,611 | 3,518 | 32,538 |
| 8,352 | 170 | 23,209 | 5,645 | 3,533 | 32,557 |
| 8,353 | 171 | 23,029 | 5,639 | 3,503 | 32,342 |
| 8,354 | 170 | 22,857 | 5,617 | 3,501 | 32,145 |
| 8,355 | 174 | 22,963 | 5,603 | 3,504 | 32,244 |
| 8,356 | 177 | 22,949 | 5,596 | 3,522 | 32,244 |
| 8,357 | 170 | 22,568 | 5,534 | 3,473 | 31,745 |
| 8,358 | 167 | 22,534 | 5,504 | 3,442 | 31,647 |
| 8,359 | 165 | 22,364 | 5,516 | 3,458 | 31,503 |
| 8,360 | 168 | 22,308 | 5,518 | 3,459 | 31,453 |
| 8,361 | 170 | 22,558 | 5,519 | 3,466 | 31,713 |
| 8,362 | 174 | 22,242 | 5,412 | 3,410 | 31,238 |
| 8,363 | 174 | 22,526 | 5,480 | 3,446 | 31,626 |
| 8,364 | 172 | 22,518 | 5,501 | 3,462 | 31,653 |
| 8,365 | 169 | 22,679 | 5,550 | 3,495 | 31,893 |
| 8,366 | 164 | 22,846 | 5,555 | 3,498 | 32,063 |
| 8,367 | 167 | 22,835 | 5,550 | 3,484 | 32,036 |
| 8,368 | 162 | 22,627 | 5,495 | 3,438 | 31,722 |
| 8,369 | 159 | 22,713 | 5,503 | 3,466 | 31,841 |
| 8,370 | 163 | 22,798 | 5,534 | 3,477 | 31,972 |
| 8,371 | 158 | 22,621 | 5,490 | 3,470 | 31,739 |
| 8,372 | 158 | 22,671 | 5,542 | 3,494 | 31,865 |
| 8,373 | 158 | 22,582 | 5,558 | 3,518 | 31,816 |
| 8,374 | 158 | 22,371 | 5,494 | 3,506 | 31,529 |
| 8,375 | 156 | 22,549 | 5,527 | 3,519 | 31,751 |

|       |     |        |       |       |        |
|-------|-----|--------|-------|-------|--------|
| 8,376 | 157 | 22,465 | 5,554 | 3,512 | 31,688 |
| 8,377 | 155 | 22,535 | 5,540 | 3,512 | 31,742 |
| 8,378 | 159 | 22,460 | 5,537 | 3,511 | 31,667 |
| 8,379 | 156 | 22,488 | 5,519 | 3,522 | 31,685 |
| 8,380 | 157 | 22,414 | 5,466 | 3,497 | 31,534 |
| 8,381 | 160 | 22,488 | 5,486 | 3,515 | 31,649 |
| 8,382 | 158 | 22,379 | 5,513 | 3,515 | 31,565 |
| 8,383 | 151 | 22,268 | 5,461 | 3,498 | 31,378 |
| 8,384 | 153 | 22,325 | 5,490 | 3,535 | 31,503 |
| 8,385 | 147 | 22,244 | 5,482 | 3,535 | 31,408 |
| 8,386 | 138 | 22,206 | 5,507 | 3,548 | 31,399 |
| 8,387 | 137 | 22,294 | 5,533 | 3,551 | 31,515 |
| 8,388 | 138 | 22,291 | 5,514 | 3,521 | 31,464 |
| 8,389 | 131 | 22,314 | 5,506 | 3,524 | 31,475 |
| 8,390 | 128 | 22,152 | 5,455 | 3,488 | 31,223 |
| 8,391 | 127 | 22,134 | 5,442 | 3,493 | 31,196 |
| 8,392 | 126 | 22,193 | 5,461 | 3,488 | 31,268 |
| 8,393 | 127 | 22,117 | 5,490 | 3,509 | 31,243 |
| 8,394 | 127 | 22,041 | 5,480 | 3,490 | 31,138 |
| 8,395 | 124 | 21,567 | 5,405 | 3,435 | 30,531 |
| 8,396 | 122 | 21,477 | 5,426 | 3,477 | 30,502 |
| 8,397 | 124 | 21,388 | 5,433 | 3,459 | 30,404 |
| 8,398 | 126 | 21,144 | 5,402 | 3,430 | 30,102 |
| 8,399 | 126 | 20,988 | 5,404 | 3,415 | 29,933 |
| 8,400 | 120 | 20,700 | 5,349 | 3,354 | 29,523 |
| 8,401 | 124 | 20,600 | 5,331 | 3,330 | 29,385 |
| 8,402 | 121 | 19,990 | 5,164 | 3,247 | 28,522 |
| 8,403 | 121 | 20,030 | 5,153 | 3,246 | 28,550 |
| 8,404 | 120 | 19,675 | 5,083 | 3,199 | 28,077 |
| 8,405 | 120 | 19,535 | 5,043 | 3,180 | 27,878 |
| 8,406 | 119 | 20,290 | 5,242 | 3,290 | 28,941 |
| 8,407 | 115 | 19,823 | 5,169 | 3,233 | 28,340 |

|       |     |        |       |       |        |
|-------|-----|--------|-------|-------|--------|
| 8,408 | 115 | 20,115 | 5,240 | 3,299 | 28,769 |
| 8,409 | 118 | 20,121 | 5,230 | 3,284 | 28,753 |
| 8,410 | 128 | 20,019 | 5,188 | 3,261 | 28,596 |
| 8,411 | 126 | 19,747 | 5,143 | 3,204 | 28,220 |
| 8,412 | 125 | 19,373 | 5,108 | 3,176 | 27,782 |
| 8,413 | 129 | 19,592 | 5,199 | 3,209 | 28,129 |
| 8,414 | 133 | 19,531 | 5,206 | 3,206 | 28,076 |
| 8,415 | 136 | 19,426 | 5,201 | 3,194 | 27,957 |
| 8,416 | 140 | 19,116 | 5,103 | 3,139 | 27,498 |
| 8,417 | 140 | 19,021 | 5,103 | 3,137 | 27,401 |
| 8,418 | 137 | 18,936 | 5,128 | 3,135 | 27,336 |
| 8,419 | 139 | 18,971 | 5,146 | 3,148 | 27,404 |
| 8,420 | 139 | 19,164 | 5,155 | 3,155 | 27,613 |
| 8,421 | 134 | 19,200 | 5,150 | 3,154 | 27,638 |
| 8,422 | 142 | 19,349 | 5,171 | 3,154 | 27,816 |
| 8,423 | 144 | 19,212 | 5,108 | 3,102 | 27,566 |
| 8,424 | 161 | 19,558 | 5,168 | 3,138 | 28,025 |
| 8,425 | 161 | 19,417 | 5,136 | 3,090 | 27,804 |
| 8,426 | 160 | 19,484 | 5,131 | 3,109 | 27,884 |
| 8,427 | 156 | 19,207 | 5,032 | 3,052 | 27,447 |
| 8,428 | 156 | 19,443 | 5,074 | 3,076 | 27,749 |
| 8,429 | 160 | 19,718 | 5,135 | 3,103 | 28,116 |
| 8,430 | 163 | 19,936 | 5,199 | 3,102 | 28,400 |
| 8,431 | 161 | 20,091 | 5,246 | 3,136 | 28,634 |
| 8,432 | 159 | 19,950 | 5,177 | 3,107 | 28,393 |
| 8,433 | 170 | 20,247 | 5,235 | 3,149 | 28,801 |
| 8,434 | 173 | 19,933 | 5,151 | 3,104 | 28,361 |
| 8,435 | 173 | 20,023 | 5,152 | 3,112 | 28,460 |
| 8,436 | 173 | 19,840 | 5,118 | 3,082 | 28,213 |
| 8,437 | 173 | 19,713 | 5,065 | 3,069 | 28,020 |
| 8,438 | 172 | 20,586 | 5,240 | 3,177 | 29,175 |
| 8,439 | 175 | 20,545 | 5,233 | 3,148 | 29,101 |



|       |     |        |       |       |        |
|-------|-----|--------|-------|-------|--------|
| 8,440 | 175 | 20,780 | 5,302 | 3,195 | 29,452 |
| 8,441 | 169 | 20,658 | 5,298 | 3,187 | 29,312 |
| 8,442 | 169 | 21,009 | 5,384 | 3,216 | 29,778 |
| 8,443 | 168 | 21,177 | 5,393 | 3,241 | 29,979 |
| 8,444 | 170 | 21,323 | 5,382 | 3,249 | 30,124 |
| 8,445 | 171 | 21,339 | 5,398 | 3,243 | 30,151 |
| 8,446 | 171 | 21,259 | 5,300 | 3,175 | 29,905 |
| 8,447 | 171 | 21,421 | 5,353 | 3,203 | 30,148 |
| 8,448 | 168 | 21,522 | 5,352 | 3,222 | 30,264 |
| 8,449 | 172 | 21,638 | 5,431 | 3,292 | 30,533 |
| 8,450 | 172 | 21,720 | 5,422 | 3,294 | 30,608 |
| 8,451 | 164 | 21,480 | 5,349 | 3,274 | 30,267 |
| 8,452 | 158 | 21,281 | 5,298 | 3,232 | 29,969 |
| 8,453 | 159 | 21,373 | 5,317 | 3,250 | 30,099 |
| 8,454 | 160 | 21,405 | 5,315 | 3,241 | 30,121 |
| 8,455 | 160 | 21,428 | 5,329 | 3,261 | 30,178 |
| 8,456 | 161 | 21,470 | 5,336 | 3,253 | 30,220 |
| 8,457 | 164 | 21,572 | 5,357 | 3,290 | 30,383 |
| 8,458 | 168 | 21,622 | 5,370 | 3,306 | 30,466 |
| 8,459 | 171 | 21,592 | 5,355 | 3,307 | 30,425 |
| 8,460 | 168 | 21,356 | 5,328 | 3,287 | 30,139 |
| 8,461 | 163 | 21,734 | 5,445 | 3,375 | 30,717 |
| 8,462 | 165 | 21,576 | 5,383 | 3,358 | 30,482 |
| 8,463 | 167 | 21,864 | 5,464 | 3,411 | 30,906 |
| 8,464 | 165 | 21,913 | 5,504 | 3,412 | 30,994 |
| 8,465 | 163 | 21,820 | 5,427 | 3,388 | 30,798 |
| 8,466 | 169 | 22,003 | 5,485 | 3,412 | 31,069 |
| 8,467 | 166 | 21,804 | 5,462 | 3,386 | 30,818 |
| 8,468 | 164 | 21,860 | 5,466 | 3,382 | 30,872 |
| 8,469 | 167 | 21,784 | 5,439 | 3,368 | 30,758 |
| 8,470 | 170 | 21,954 | 5,489 | 3,397 | 31,010 |
| 8,471 | 176 | 21,469 | 5,367 | 3,330 | 30,342 |

|       |     |        |       |       |        |
|-------|-----|--------|-------|-------|--------|
| 8,472 | 177 | 21,781 | 5,429 | 3,369 | 30,756 |
| 8,473 | 163 | 21,719 | 5,421 | 3,382 | 30,685 |
| 8,474 | 163 | 21,845 | 5,466 | 3,411 | 30,885 |
| 8,475 | 154 | 22,152 | 5,524 | 3,439 | 31,269 |
| 8,476 | 150 | 21,850 | 5,473 | 3,427 | 30,900 |
| 8,477 | 150 | 21,742 | 5,482 | 3,415 | 30,789 |
| 8,478 | 149 | 21,449 | 5,430 | 3,371 | 30,399 |
| 8,479 | 149 | 21,188 | 5,394 | 3,357 | 30,088 |
| 8,480 | 153 | 22,090 | 5,639 | 3,526 | 31,408 |
| 8,481 | 152 | 21,811 | 5,591 | 3,511 | 31,065 |
| 8,482 | 152 | 21,988 | 5,651 | 3,526 | 31,317 |
| 8,483 | 151 | 21,853 | 5,619 | 3,513 | 31,136 |
| 8,484 | 146 | 21,714 | 5,604 | 3,505 | 30,969 |
| 8,485 | 148 | 22,140 | 5,753 | 3,582 | 31,623 |
| 8,486 | 148 | 22,063 | 5,736 | 3,562 | 31,509 |
| 8,487 | 148 | 21,940 | 5,717 | 3,564 | 31,369 |
| 8,488 | 149 | 21,611 | 5,634 | 3,547 | 30,941 |
| 8,489 | 149 | 21,208 | 5,572 | 3,511 | 30,440 |
| 8,490 | 157 | 22,238 | 5,875 | 3,712 | 31,982 |
| 8,491 | 158 | 22,084 | 5,863 | 3,699 | 31,804 |
| 8,492 | 160 | 22,264 | 5,912 | 3,711 | 32,047 |
| 8,493 | 163 | 22,241 | 5,895 | 3,741 | 32,040 |
| 8,494 | 162 | 22,036 | 5,830 | 3,729 | 31,757 |
| 8,495 | 165 | 22,046 | 5,859 | 3,732 | 31,802 |
| 8,496 | 164 | 21,938 | 5,803 | 3,725 | 31,630 |
| 8,497 | 166 | 22,122 | 5,895 | 3,790 | 31,973 |
| 8,498 | 175 | 22,115 | 5,836 | 3,743 | 31,869 |
| 8,499 | 181 | 22,495 | 5,915 | 3,783 | 32,374 |
| 8,500 | 180 | 22,757 | 6,006 | 3,839 | 32,782 |
| 8,501 | 180 | 22,299 | 5,947 | 3,813 | 32,239 |
| 8,502 | 179 | 22,307 | 5,967 | 3,842 | 32,295 |
| 8,503 | 184 | 22,653 | 6,065 | 3,874 | 32,776 |

|       |     |        |       |       |        |
|-------|-----|--------|-------|-------|--------|
| 8,504 | 183 | 22,585 | 6,044 | 3,867 | 32,679 |
| 8,505 | 181 | 22,574 | 6,029 | 3,869 | 32,653 |
| 8,506 | 180 | 22,873 | 6,099 | 3,889 | 33,041 |
| 8,507 | 173 | 22,640 | 6,058 | 3,839 | 32,710 |
| 8,508 | 173 | 22,779 | 6,127 | 3,882 | 32,961 |
| 8,509 | 170 | 22,876 | 6,187 | 3,902 | 33,135 |
| 8,510 | 167 | 22,959 | 6,226 | 3,903 | 33,255 |
| 8,511 | 165 | 22,711 | 6,150 | 3,858 | 32,884 |
| 8,512 | 168 | 23,116 | 6,203 | 3,909 | 33,396 |
| 8,513 | 161 | 23,207 | 6,201 | 3,911 | 33,480 |
| 8,514 | 165 | 23,455 | 6,261 | 3,940 | 33,821 |
| 8,515 | 159 | 23,489 | 6,225 | 3,948 | 33,821 |
| 8,516 | 159 | 23,464 | 6,247 | 3,947 | 33,817 |
| 8,517 | 150 | 22,475 | 6,010 | 3,798 | 32,433 |
| 8,518 | 153 | 22,513 | 6,039 | 3,835 | 32,540 |
| 8,519 | 153 | 22,730 | 6,063 | 3,854 | 32,800 |
| 8,520 | 153 | 22,763 | 6,062 | 3,854 | 32,832 |
| 8,521 | 153 | 22,870 | 6,117 | 3,877 | 33,017 |
| 8,522 | 144 | 22,934 | 6,142 | 3,912 | 33,132 |
| 8,523 | 151 | 22,923 | 6,133 | 3,885 | 33,092 |
| 8,524 | 152 | 22,768 | 6,112 | 3,867 | 32,899 |
| 8,525 | 155 | 23,069 | 6,171 | 3,899 | 33,294 |
| 8,526 | 157 | 22,869 | 6,119 | 3,873 | 33,018 |
| 8,527 | 158 | 22,797 | 6,105 | 3,865 | 32,925 |
| 8,528 | 157 | 23,108 | 6,179 | 3,910 | 33,354 |
| 8,529 | 162 | 23,157 | 6,175 | 3,922 | 33,416 |
| 8,530 | 160 | 22,863 | 6,120 | 3,886 | 33,029 |
| 8,531 | 158 | 22,550 | 6,047 | 3,840 | 32,595 |
| 8,532 | 155 | 22,768 | 6,070 | 3,880 | 32,873 |
| 8,533 | 155 | 22,772 | 6,059 | 3,909 | 32,895 |
| 8,534 | 153 | 22,764 | 6,080 | 3,911 | 32,908 |
| 8,535 | 146 | 22,518 | 6,017 | 3,855 | 32,536 |

|       |     |        |       |       |        |
|-------|-----|--------|-------|-------|--------|
| 8,536 | 147 | 22,698 | 6,037 | 3,882 | 32,764 |
| 8,537 | 146 | 22,660 | 6,027 | 3,883 | 32,716 |
| 8,538 | 149 | 22,624 | 6,043 | 3,902 | 32,718 |
| 8,539 | 145 | 22,687 | 6,045 | 3,864 | 32,741 |
| 8,540 | 144 | 22,701 | 6,012 | 3,851 | 32,708 |
| 8,541 | 151 | 22,778 | 6,025 | 3,827 | 32,781 |
| 8,542 | 151 | 22,842 | 6,026 | 3,832 | 32,851 |
| 8,543 | 154 | 22,643 | 5,991 | 3,803 | 32,591 |
| 8,544 | 152 | 22,596 | 6,006 | 3,782 | 32,536 |
| 8,545 | 153 | 22,546 | 6,000 | 3,777 | 32,476 |
| 8,546 | 157 | 22,465 | 6,014 | 3,761 | 32,397 |
| 8,547 | 152 | 22,391 | 5,998 | 3,749 | 32,290 |
| 8,548 | 154 | 22,530 | 6,057 | 3,773 | 32,514 |
| 8,549 | 149 | 22,595 | 6,060 | 3,770 | 32,574 |
| 8,550 | 151 | 22,627 | 6,034 | 3,781 | 32,593 |
| 8,551 | 146 | 22,324 | 5,899 | 3,702 | 32,071 |
| 8,552 | 147 | 22,442 | 5,929 | 3,717 | 32,235 |
| 8,553 | 148 | 22,370 | 5,909 | 3,694 | 32,121 |
| 8,554 | 145 | 22,327 | 5,917 | 3,724 | 32,113 |
| 8,555 | 145 | 22,279 | 5,962 | 3,688 | 32,074 |
| 8,556 | 144 | 21,932 | 5,908 | 3,658 | 31,642 |
| 8,557 | 144 | 22,062 | 5,962 | 3,699 | 31,867 |
| 8,558 | 146 | 22,087 | 5,984 | 3,726 | 31,943 |
| 8,559 | 145 | 22,237 | 5,977 | 3,722 | 32,081 |
| 8,560 | 142 | 22,030 | 5,898 | 3,698 | 31,768 |
| 8,561 | 143 | 21,877 | 5,899 | 3,674 | 31,593 |
| 8,562 | 143 | 21,871 | 5,898 | 3,660 | 31,572 |
| 8,563 | 142 | 22,022 | 5,945 | 3,658 | 31,767 |
| 8,564 | 139 | 22,029 | 5,948 | 3,665 | 31,781 |
| 8,565 | 134 | 21,587 | 5,872 | 3,623 | 31,216 |
| 8,566 | 137 | 21,688 | 5,883 | 3,632 | 31,340 |
| 8,567 | 133 | 21,910 | 5,895 | 3,645 | 31,583 |

|       |     |        |       |       |        |
|-------|-----|--------|-------|-------|--------|
| 8,568 | 132 | 21,694 | 5,835 | 3,625 | 31,286 |
| 8,569 | 132 | 21,745 | 5,846 | 3,608 | 31,331 |
| 8,570 | 127 | 21,769 | 5,856 | 3,609 | 31,361 |
| 8,571 | 127 | 21,872 | 5,860 | 3,605 | 31,464 |
| 8,572 | 132 | 21,968 | 5,848 | 3,607 | 31,555 |
| 8,573 | 133 | 21,961 | 5,882 | 3,605 | 31,581 |
| 8,574 | 126 | 22,196 | 5,951 | 3,662 | 31,935 |
| 8,575 | 130 | 22,301 | 5,989 | 3,691 | 32,111 |
| 8,576 | 128 | 22,258 | 5,957 | 3,682 | 32,025 |
| 8,577 | 129 | 22,237 | 5,950 | 3,672 | 31,988 |
| 8,578 | 122 | 22,191 | 5,871 | 3,658 | 31,842 |
| 8,579 | 126 | 22,443 | 5,959 | 3,692 | 32,220 |
| 8,580 | 120 | 22,382 | 5,946 | 3,683 | 32,131 |
| 8,581 | 118 | 22,294 | 5,965 | 3,672 | 32,049 |
| 8,582 | 122 | 22,578 | 6,019 | 3,694 | 32,413 |
| 8,583 | 125 | 22,454 | 5,965 | 3,620 | 32,164 |
| 8,584 | 123 | 22,455 | 5,980 | 3,610 | 32,168 |
| 8,585 | 123 | 22,465 | 5,981 | 3,612 | 32,181 |
| 8,586 | 126 | 22,282 | 5,926 | 3,595 | 31,929 |
| 8,587 | 128 | 22,455 | 6,004 | 3,614 | 32,201 |
| 8,588 | 125 | 22,509 | 6,009 | 3,626 | 32,269 |
| 8,589 | 119 | 22,238 | 5,917 | 3,563 | 31,837 |
| 8,590 | 125 | 22,261 | 5,923 | 3,566 | 31,875 |
| 8,591 | 126 | 22,554 | 6,000 | 3,604 | 32,284 |
| 8,592 | 123 | 22,742 | 6,010 | 3,600 | 32,475 |
| 8,593 | 117 | 22,722 | 5,980 | 3,613 | 32,432 |
| 8,594 | 117 | 22,760 | 5,991 | 3,619 | 32,487 |
| 8,595 | 113 | 22,461 | 5,922 | 3,573 | 32,069 |
| 8,596 | 113 | 22,542 | 5,942 | 3,580 | 32,177 |
| 8,597 | 113 | 22,820 | 6,004 | 3,621 | 32,558 |
| 8,598 | 115 | 22,843 | 5,998 | 3,611 | 32,567 |
| 8,599 | 106 | 22,162 | 5,827 | 3,488 | 31,583 |

|       |     |        |       |       |        |
|-------|-----|--------|-------|-------|--------|
| 8,600 | 108 | 22,274 | 5,838 | 3,490 | 31,710 |
| 8,601 | 102 | 22,252 | 5,839 | 3,495 | 31,688 |
| 8,602 | 102 | 22,433 | 5,918 | 3,528 | 31,981 |
| 8,603 | 100 | 22,268 | 5,842 | 3,477 | 31,687 |
| 8,604 | 105 | 22,341 | 5,827 | 3,466 | 31,739 |
| 8,605 | 105 | 22,359 | 5,830 | 3,469 | 31,763 |
| 8,606 | 108 | 22,332 | 5,824 | 3,486 | 31,750 |
| 8,607 | 109 | 22,276 | 5,779 | 3,439 | 31,603 |
| 8,608 | 110 | 22,176 | 5,776 | 3,433 | 31,495 |
| 8,609 | 112 | 22,233 | 5,789 | 3,425 | 31,559 |
| 8,610 | 119 | 22,248 | 5,782 | 3,410 | 31,559 |
| 8,611 | 120 | 21,748 | 5,621 | 3,314 | 30,803 |
| 8,612 | 118 | 21,995 | 5,677 | 3,339 | 31,129 |
| 8,613 | 116 | 22,147 | 5,728 | 3,363 | 31,354 |
| 8,614 | 124 | 22,352 | 5,773 | 3,390 | 31,639 |
| 8,615 | 125 | 22,307 | 5,751 | 3,388 | 31,571 |
| 8,616 | 129 | 22,340 | 5,716 | 3,368 | 31,553 |
| 8,617 | 126 | 22,141 | 5,694 | 3,342 | 31,303 |
| 8,618 | 124 | 22,243 | 5,750 | 3,395 | 31,512 |
| 8,619 | 123 | 22,069 | 5,718 | 3,368 | 31,278 |
| 8,620 | 128 | 22,229 | 5,786 | 3,389 | 31,532 |
| 8,621 | 126 | 21,975 | 5,738 | 3,371 | 31,210 |
| 8,622 | 127 | 22,087 | 5,815 | 3,403 | 31,432 |
| 8,623 | 127 | 22,029 | 5,827 | 3,400 | 31,383 |
| 8,624 | 130 | 21,973 | 5,839 | 3,394 | 31,336 |
| 8,625 | 132 | 21,389 | 5,758 | 3,332 | 30,611 |
| 8,626 | 138 | 21,415 | 5,776 | 3,339 | 30,668 |
| 8,627 | 136 | 21,410 | 5,769 | 3,333 | 30,648 |
| 8,628 | 135 | 21,173 | 5,735 | 3,279 | 30,322 |
| 8,629 | 138 | 21,392 | 5,851 | 3,308 | 30,689 |
| 8,630 | 142 | 21,310 | 5,826 | 3,306 | 30,584 |
| 8,631 | 143 | 21,258 | 5,837 | 3,300 | 30,538 |

|       |     |        |       |       |        |
|-------|-----|--------|-------|-------|--------|
| 8,632 | 146 | 21,354 | 5,865 | 3,312 | 30,677 |
| 8,633 | 143 | 21,047 | 5,810 | 3,286 | 30,286 |
| 8,634 | 142 | 21,127 | 5,840 | 3,298 | 30,407 |
| 8,635 | 140 | 21,099 | 5,812 | 3,276 | 30,327 |
| 8,636 | 138 | 20,856 | 5,766 | 3,234 | 29,994 |
| 8,637 | 138 | 20,859 | 5,782 | 3,241 | 30,020 |
| 8,638 | 135 | 20,695 | 5,752 | 3,208 | 29,790 |
| 8,639 | 135 | 20,561 | 5,762 | 3,194 | 29,652 |
| 8,640 | 134 | 20,858 | 5,861 | 3,242 | 30,095 |
| 8,641 | 140 | 20,499 | 5,786 | 3,202 | 29,627 |
| 8,642 | 140 | 20,178 | 5,740 | 3,190 | 29,248 |
| 8,643 | 137 | 20,517 | 5,852 | 3,271 | 29,777 |
| 8,644 | 138 | 20,550 | 5,878 | 3,234 | 29,800 |
| 8,645 | 135 | 20,379 | 5,795 | 3,199 | 29,508 |
| 8,646 | 136 | 20,515 | 5,829 | 3,204 | 29,684 |
| 8,647 | 136 | 20,626 | 5,862 | 3,208 | 29,832 |
| 8,648 | 131 | 20,510 | 5,799 | 3,185 | 29,625 |
| 8,649 | 134 | 20,591 | 5,856 | 3,225 | 29,806 |
| 8,650 | 136 | 20,463 | 5,866 | 3,235 | 29,700 |
| 8,651 | 136 | 20,352 | 5,875 | 3,217 | 29,580 |
| 8,652 | 138 | 20,250 | 5,893 | 3,222 | 29,503 |
| 8,653 | 143 | 20,225 | 5,909 | 3,223 | 29,500 |
| 8,654 | 144 | 20,090 | 5,871 | 3,206 | 29,311 |
| 8,655 | 143 | 20,453 | 5,975 | 3,264 | 29,835 |
| 8,656 | 139 | 20,358 | 5,940 | 3,233 | 29,670 |
| 8,657 | 141 | 20,009 | 5,833 | 3,189 | 29,172 |
| 8,658 | 142 | 20,219 | 5,854 | 3,217 | 29,432 |
| 8,659 | 136 | 20,052 | 5,833 | 3,189 | 29,210 |
| 8,660 | 137 | 20,245 | 5,886 | 3,211 | 29,479 |
| 8,661 | 134 | 20,375 | 5,950 | 3,245 | 29,704 |
| 8,662 | 136 | 20,161 | 5,905 | 3,226 | 29,428 |
| 8,663 | 141 | 19,745 | 5,836 | 3,179 | 28,901 |

|       |     |        |       |       |        |
|-------|-----|--------|-------|-------|--------|
| 8,664 | 141 | 19,725 | 5,829 | 3,172 | 28,867 |
| 8,665 | 136 | 19,522 | 5,802 | 3,149 | 28,609 |
| 8,666 | 134 | 19,241 | 5,764 | 3,109 | 28,248 |
| 8,667 | 132 | 19,799 | 5,969 | 3,211 | 29,111 |
| 8,668 | 134 | 19,773 | 5,968 | 3,204 | 29,079 |
| 8,669 | 135 | 19,754 | 5,978 | 3,197 | 29,064 |
| 8,670 | 132 | 20,107 | 6,074 | 3,247 | 29,560 |
| 8,671 | 130 | 20,137 | 6,070 | 3,250 | 29,587 |
| 8,672 | 132 | 19,833 | 5,923 | 3,175 | 29,063 |
| 8,673 | 132 | 20,050 | 6,000 | 3,227 | 29,409 |
| 8,674 | 127 | 20,071 | 5,995 | 3,222 | 29,415 |
| 8,675 | 127 | 20,214 | 6,080 | 3,243 | 29,664 |
| 8,676 | 122 | 20,533 | 6,197 | 3,287 | 30,139 |
| 8,677 | 116 | 20,260 | 6,129 | 3,248 | 29,753 |
| 8,678 | 120 | 20,465 | 6,224 | 3,299 | 30,108 |
| 8,679 | 123 | 20,417 | 6,224 | 3,311 | 30,075 |
| 8,680 | 128 | 20,419 | 6,252 | 3,311 | 30,110 |
| 8,681 | 122 | 20,233 | 6,212 | 3,283 | 29,850 |
| 8,682 | 122 | 20,547 | 6,288 | 3,338 | 30,295 |
| 8,683 | 117 | 20,357 | 6,259 | 3,314 | 30,047 |
| 8,684 | 116 | 20,372 | 6,305 | 3,335 | 30,128 |
| 8,685 | 117 | 20,461 | 6,343 | 3,370 | 30,291 |
| 8,686 | 119 | 20,556 | 6,386 | 3,383 | 30,444 |
| 8,687 | 119 | 20,717 | 6,446 | 3,408 | 30,690 |
| 8,688 | 118 | 20,650 | 6,422 | 3,416 | 30,606 |
| 8,689 | 117 | 20,862 | 6,481 | 3,444 | 30,904 |
| 8,690 | 116 | 20,940 | 6,510 | 3,477 | 31,043 |
| 8,691 | 118 | 20,932 | 6,555 | 3,510 | 31,115 |
| 8,692 | 111 | 20,845 | 6,518 | 3,483 | 30,957 |
| 8,693 | 113 | 21,085 | 6,600 | 3,520 | 31,318 |
| 8,694 | 115 | 21,150 | 6,646 | 3,538 | 31,449 |
| 8,695 | 121 | 21,079 | 6,671 | 3,540 | 31,411 |



|       |     |        |       |       |        |
|-------|-----|--------|-------|-------|--------|
| 8,696 | 123 | 21,086 | 6,725 | 3,568 | 31,502 |
| 8,697 | 124 | 21,138 | 6,764 | 3,610 | 31,636 |
| 8,698 | 129 | 21,072 | 6,742 | 3,605 | 31,548 |
| 8,699 | 127 | 20,834 | 6,701 | 3,570 | 31,232 |
| 8,700 | 129 | 21,141 | 6,783 | 3,611 | 31,664 |
| 8,701 | 128 | 21,462 | 6,837 | 3,662 | 32,089 |
| 8,702 | 125 | 21,233 | 6,735 | 3,604 | 31,697 |
| 8,703 | 128 | 21,587 | 6,807 | 3,646 | 32,168 |
| 8,704 | 123 | 21,813 | 6,889 | 3,682 | 32,507 |
| 8,705 | 125 | 21,674 | 6,893 | 3,671 | 32,363 |
| 8,706 | 125 | 21,785 | 6,924 | 3,691 | 32,525 |
| 8,707 | 126 | 21,854 | 6,947 | 3,721 | 32,648 |
| 8,708 | 124 | 21,944 | 6,962 | 3,721 | 32,751 |
| 8,709 | 123 | 21,700 | 6,912 | 3,686 | 32,421 |
| 8,710 | 122 | 21,473 | 6,856 | 3,667 | 32,118 |
| 8,711 | 122 | 21,751 | 6,959 | 3,732 | 32,564 |
| 8,712 | 120 | 21,561 | 6,877 | 3,703 | 32,261 |
| 8,713 | 115 | 21,422 | 6,829 | 3,681 | 32,047 |
| 8,714 | 109 | 21,815 | 6,947 | 3,735 | 32,606 |
| 8,715 | 110 | 21,774 | 6,972 | 3,759 | 32,615 |
| 8,716 | 107 | 21,660 | 6,944 | 3,723 | 32,434 |
| 8,717 | 112 | 21,721 | 6,962 | 3,724 | 32,519 |
| 8,718 | 115 | 21,652 | 6,916 | 3,711 | 32,394 |
| 8,719 | 113 | 21,443 | 6,855 | 3,690 | 32,101 |
| 8,720 | 113 | 21,796 | 6,974 | 3,755 | 32,638 |
| 8,721 | 113 | 21,803 | 6,956 | 3,754 | 32,626 |
| 8,722 | 118 | 21,638 | 6,852 | 3,707 | 32,315 |
| 8,723 | 115 | 21,222 | 6,717 | 3,665 | 31,719 |
| 8,724 | 116 | 21,478 | 6,776 | 3,677 | 32,047 |
| 8,725 | 120 | 21,457 | 6,736 | 3,671 | 31,984 |
| 8,726 | 121 | 21,590 | 6,757 | 3,703 | 32,171 |
| 8,727 | 124 | 21,850 | 6,777 | 3,727 | 32,478 |

|       |     |        |       |       |        |
|-------|-----|--------|-------|-------|--------|
| 8,728 | 120 | 21,733 | 6,697 | 3,692 | 32,242 |
| 8,729 | 120 | 21,514 | 6,651 | 3,663 | 31,948 |
| 8,730 | 118 | 21,564 | 6,637 | 3,691 | 32,010 |
| 8,731 | 113 | 21,387 | 6,577 | 3,672 | 31,749 |
| 8,732 | 120 | 21,247 | 6,558 | 3,657 | 31,582 |
| 8,733 | 121 | 21,397 | 6,541 | 3,650 | 31,709 |
| 8,734 | 124 | 21,479 | 6,580 | 3,683 | 31,866 |
| 8,735 | 126 | 21,358 | 6,567 | 3,679 | 31,730 |
| 8,736 | 126 | 21,344 | 6,537 | 3,655 | 31,662 |
| 8,737 | 128 | 21,150 | 6,490 | 3,607 | 31,375 |
| 8,738 | 129 | 21,061 | 6,424 | 3,591 | 31,205 |
| 8,739 | 128 | 21,470 | 6,534 | 3,665 | 31,797 |
| 8,740 | 129 | 21,285 | 6,455 | 3,623 | 31,492 |
| 8,741 | 132 | 21,526 | 6,482 | 3,650 | 31,790 |
| 8,742 | 127 | 21,049 | 6,308 | 3,535 | 31,019 |
| 8,743 | 128 | 21,097 | 6,282 | 3,504 | 31,011 |
| 8,744 | 127 | 21,059 | 6,270 | 3,511 | 30,967 |
| 8,745 | 126 | 21,071 | 6,214 | 3,504 | 30,915 |
| 8,746 | 122 | 20,914 | 6,145 | 3,493 | 30,674 |
| 8,747 | 120 | 20,569 | 5,999 | 3,396 | 30,084 |
| 8,748 | 122 | 20,628 | 5,999 | 3,398 | 30,147 |
| 8,749 | 117 | 20,523 | 5,959 | 3,372 | 29,971 |
| 8,750 | 119 | 20,603 | 5,930 | 3,352 | 30,004 |
| 8,751 | 118 | 20,494 | 5,931 | 3,357 | 29,900 |
| 8,752 | 118 | 20,384 | 5,935 | 3,347 | 29,784 |
| 8,753 | 118 | 20,662 | 6,022 | 3,420 | 30,222 |
| 8,754 | 116 | 20,698 | 6,016 | 3,429 | 30,259 |
| 8,755 | 115 | 20,615 | 5,947 | 3,407 | 30,084 |
| 8,756 | 111 | 20,531 | 5,919 | 3,379 | 29,940 |
| 8,757 | 112 | 20,688 | 6,009 | 3,427 | 30,236 |
| 8,758 | 111 | 20,706 | 5,987 | 3,419 | 30,223 |
| 8,759 | 109 | 20,690 | 5,952 | 3,425 | 30,176 |

|       |     |        |       |       |        |
|-------|-----|--------|-------|-------|--------|
| 8,760 | 111 | 20,970 | 6,017 | 3,459 | 30,557 |
| 8,761 | 116 | 20,878 | 5,956 | 3,430 | 30,380 |
| 8,762 | 120 | 20,785 | 5,919 | 3,405 | 30,229 |
| 8,763 | 120 | 20,763 | 5,921 | 3,414 | 30,218 |
| 8,764 | 120 | 20,566 | 5,849 | 3,380 | 29,915 |
| 8,765 | 123 | 21,168 | 5,974 | 3,455 | 30,720 |
| 8,766 | 123 | 21,061 | 5,952 | 3,442 | 30,578 |
| 8,767 | 125 | 21,181 | 5,977 | 3,458 | 30,741 |
| 8,768 | 120 | 21,112 | 5,922 | 3,450 | 30,604 |
| 8,769 | 116 | 20,877 | 5,845 | 3,418 | 30,256 |
| 8,770 | 117 | 20,823 | 5,802 | 3,409 | 30,151 |
| 8,771 | 118 | 20,136 | 5,700 | 3,332 | 29,286 |
| 8,772 | 119 | 20,397 | 5,728 | 3,357 | 29,601 |
| 8,773 | 108 | 20,644 | 5,829 | 3,382 | 29,963 |
| 8,774 | 107 | 20,146 | 5,726 | 3,308 | 29,287 |
| 8,775 | 108 | 20,278 | 5,747 | 3,331 | 29,464 |
| 8,776 | 104 | 20,513 | 5,828 | 3,353 | 29,798 |
| 8,777 | 105 | 20,809 | 5,918 | 3,393 | 30,225 |
| 8,778 | 105 | 20,869 | 5,950 | 3,402 | 30,326 |
| 8,779 | 99  | 20,732 | 5,902 | 3,359 | 30,092 |
| 8,780 | 103 | 20,717 | 5,863 | 3,348 | 30,031 |
| 8,781 | 104 | 20,846 | 5,952 | 3,378 | 30,280 |
| 8,782 | 100 | 20,812 | 5,939 | 3,381 | 30,232 |
| 8,783 | 96  | 20,777 | 6,022 | 3,416 | 30,311 |
| 8,784 | 95  | 20,524 | 5,992 | 3,391 | 30,002 |
| 8,785 | 96  | 20,432 | 5,912 | 3,364 | 29,804 |
| 8,786 | 91  | 20,330 | 5,859 | 3,329 | 29,609 |
| 8,787 | 90  | 20,221 | 5,889 | 3,360 | 29,560 |
| 8,788 | 90  | 19,905 | 5,806 | 3,310 | 29,111 |
| 8,789 | 90  | 19,620 | 5,738 | 3,263 | 28,711 |
| 8,790 | 93  | 20,211 | 5,930 | 3,359 | 29,593 |
| 8,791 | 99  | 20,172 | 5,933 | 3,365 | 29,569 |

|       |     |        |       |       |        |
|-------|-----|--------|-------|-------|--------|
| 8,792 | 94  | 19,343 | 5,750 | 3,271 | 28,458 |
| 8,793 | 97  | 19,672 | 5,809 | 3,326 | 28,904 |
| 8,794 | 99  | 19,920 | 5,863 | 3,366 | 29,248 |
| 8,795 | 99  | 20,017 | 5,859 | 3,369 | 29,344 |
| 8,796 | 97  | 20,146 | 5,951 | 3,402 | 29,596 |
| 8,797 | 98  | 20,227 | 5,972 | 3,407 | 29,704 |
| 8,798 | 98  | 20,171 | 5,966 | 3,397 | 29,632 |
| 8,799 | 96  | 20,143 | 5,971 | 3,408 | 29,618 |
| 8,800 | 98  | 20,322 | 6,039 | 3,442 | 29,901 |
| 8,801 | 96  | 20,299 | 6,040 | 3,455 | 29,890 |
| 8,802 | 99  | 20,383 | 6,018 | 3,455 | 29,955 |
| 8,803 | 95  | 20,687 | 6,093 | 3,483 | 30,358 |
| 8,804 | 94  | 20,252 | 5,987 | 3,426 | 29,759 |
| 8,805 | 100 | 20,399 | 6,071 | 3,472 | 30,042 |
| 8,806 | 103 | 20,477 | 6,093 | 3,487 | 30,160 |
| 8,807 | 102 | 20,344 | 6,009 | 3,458 | 29,913 |
| 8,808 | 102 | 20,267 | 5,997 | 3,465 | 29,831 |
| 8,809 | 101 | 20,243 | 5,986 | 3,450 | 29,780 |
| 8,810 | 105 | 20,471 | 6,067 | 3,469 | 30,112 |
| 8,811 | 107 | 20,580 | 6,069 | 3,468 | 30,224 |
| 8,812 | 100 | 20,228 | 5,996 | 3,423 | 29,747 |
| 8,813 | 104 | 20,379 | 6,080 | 3,492 | 30,055 |
| 8,814 | 104 | 20,302 | 6,079 | 3,513 | 29,998 |
| 8,815 | 107 | 20,247 | 6,058 | 3,517 | 29,929 |
| 8,816 | 107 | 20,034 | 6,023 | 3,495 | 29,659 |
| 8,817 | 108 | 20,180 | 6,025 | 3,512 | 29,825 |
| 8,818 | 109 | 20,258 | 6,023 | 3,509 | 29,899 |
| 8,819 | 110 | 20,280 | 6,019 | 3,495 | 29,904 |
| 8,820 | 110 | 20,364 | 6,052 | 3,503 | 30,029 |
| 8,821 | 108 | 19,929 | 5,968 | 3,432 | 29,437 |
| 8,822 | 107 | 20,071 | 6,006 | 3,458 | 29,642 |
| 8,823 | 107 | 20,273 | 6,071 | 3,474 | 29,925 |

|       |     |        |       |       |        |
|-------|-----|--------|-------|-------|--------|
| 8,824 | 110 | 20,047 | 5,967 | 3,446 | 29,570 |
| 8,825 | 107 | 19,850 | 5,908 | 3,434 | 29,299 |
| 8,826 | 110 | 19,975 | 5,972 | 3,439 | 29,496 |
| 8,827 | 114 | 19,997 | 5,972 | 3,442 | 29,525 |
| 8,828 | 116 | 20,187 | 6,010 | 3,472 | 29,785 |
| 8,829 | 115 | 20,075 | 5,951 | 3,471 | 29,612 |
| 8,830 | 117 | 19,979 | 5,946 | 3,458 | 29,500 |
| 8,831 | 115 | 19,851 | 5,899 | 3,440 | 29,305 |
| 8,832 | 122 | 19,906 | 5,869 | 3,446 | 29,343 |
| 8,833 | 125 | 20,193 | 5,856 | 3,455 | 29,629 |
| 8,834 | 126 | 20,210 | 5,797 | 3,414 | 29,547 |
| 8,835 | 124 | 20,461 | 5,832 | 3,422 | 29,839 |
| 8,836 | 127 | 20,550 | 5,815 | 3,413 | 29,905 |
| 8,837 | 126 | 20,287 | 5,728 | 3,366 | 29,507 |
| 8,838 | 128 | 20,526 | 5,779 | 3,431 | 29,864 |
| 8,839 | 125 | 20,570 | 5,744 | 3,411 | 29,850 |
| 8,840 | 126 | 20,680 | 5,764 | 3,426 | 29,996 |
| 8,841 | 124 | 20,512 | 5,740 | 3,408 | 29,784 |
| 8,842 | 120 | 20,196 | 5,645 | 3,361 | 29,322 |
| 8,843 | 118 | 19,912 | 5,563 | 3,292 | 28,885 |
| 8,844 | 122 | 20,140 | 5,647 | 3,306 | 29,215 |
| 8,845 | 122 | 20,083 | 5,632 | 3,284 | 29,121 |
| 8,846 | 125 | 19,950 | 5,606 | 3,257 | 28,938 |
| 8,847 | 125 | 19,903 | 5,575 | 3,249 | 28,852 |
| 8,848 | 130 | 20,100 | 5,624 | 3,269 | 29,123 |
| 8,849 | 130 | 19,925 | 5,558 | 3,242 | 28,855 |
| 8,850 | 130 | 19,954 | 5,560 | 3,240 | 28,884 |
| 8,851 | 131 | 19,690 | 5,476 | 3,204 | 28,501 |
| 8,852 | 131 | 19,454 | 5,412 | 3,168 | 28,165 |
| 8,853 | 136 | 20,128 | 5,592 | 3,253 | 29,109 |
| 8,854 | 137 | 19,930 | 5,485 | 3,219 | 28,771 |
| 8,855 | 132 | 19,943 | 5,437 | 3,199 | 28,711 |

|       |     |        |       |       |        |
|-------|-----|--------|-------|-------|--------|
| 8,856 | 125 | 19,906 | 5,360 | 3,177 | 28,568 |
| 8,857 | 126 | 19,906 | 5,334 | 3,154 | 28,520 |
| 8,858 | 132 | 20,141 | 5,350 | 3,174 | 28,797 |
| 8,859 | 139 | 20,067 | 5,308 | 3,163 | 28,677 |
| 8,860 | 137 | 19,986 | 5,297 | 3,160 | 28,580 |
| 8,861 | 139 | 19,973 | 5,271 | 3,159 | 28,542 |
| 8,862 | 136 | 20,085 | 5,296 | 3,192 | 28,709 |
| 8,863 | 129 | 19,967 | 5,216 | 3,146 | 28,458 |
| 8,864 | 134 | 20,098 | 5,185 | 3,137 | 28,554 |
| 8,865 | 133 | 20,114 | 5,184 | 3,133 | 28,564 |
| 8,866 | 134 | 20,286 | 5,227 | 3,159 | 28,806 |
| 8,867 | 133 | 20,274 | 5,190 | 3,144 | 28,741 |
| 8,868 | 132 | 20,166 | 5,164 | 3,129 | 28,591 |
| 8,869 | 131 | 20,190 | 5,173 | 3,158 | 28,652 |
| 8,870 | 134 | 20,382 | 5,245 | 3,188 | 28,949 |
| 8,871 | 134 | 20,367 | 5,202 | 3,192 | 28,895 |
| 8,872 | 133 | 20,468 | 5,179 | 3,193 | 28,973 |
| 8,873 | 132 | 20,563 | 5,154 | 3,185 | 29,034 |
| 8,874 | 135 | 20,741 | 5,200 | 3,221 | 29,297 |
| 8,875 | 134 | 20,584 | 5,100 | 3,173 | 28,991 |
| 8,876 | 133 | 20,752 | 5,150 | 3,216 | 29,251 |
| 8,877 | 135 | 20,998 | 5,180 | 3,253 | 29,566 |
| 8,878 | 136 | 20,824 | 5,158 | 3,232 | 29,350 |
| 8,879 | 135 | 21,094 | 5,216 | 3,259 | 29,704 |
| 8,880 | 135 | 21,158 | 5,228 | 3,253 | 29,774 |
| 8,881 | 137 | 21,034 | 5,215 | 3,207 | 29,593 |
| 8,882 | 137 | 21,000 | 5,183 | 3,202 | 29,522 |
| 8,883 | 129 | 20,973 | 5,161 | 3,202 | 29,465 |
| 8,884 | 126 | 20,806 | 5,173 | 3,192 | 29,297 |
| 8,885 | 124 | 20,701 | 5,171 | 3,192 | 29,188 |
| 8,886 | 123 | 20,557 | 5,167 | 3,229 | 29,076 |
| 8,887 | 127 | 20,608 | 5,167 | 3,237 | 29,139 |

|       |     |        |       |       |        |
|-------|-----|--------|-------|-------|--------|
| 8,888 | 127 | 20,572 | 5,131 | 3,221 | 29,051 |
| 8,889 | 130 | 20,949 | 5,211 | 3,266 | 29,556 |
| 8,890 | 129 | 20,857 | 5,216 | 3,280 | 29,482 |
| 8,891 | 126 | 20,552 | 5,114 | 3,236 | 29,028 |
| 8,892 | 126 | 20,762 | 5,125 | 3,262 | 29,275 |
| 8,893 | 126 | 21,058 | 5,173 | 3,310 | 29,667 |
| 8,894 | 126 | 21,028 | 5,169 | 3,317 | 29,640 |
| 8,895 | 134 | 21,235 | 5,297 | 3,388 | 30,054 |
| 8,896 | 132 | 21,212 | 5,291 | 3,398 | 30,033 |
| 8,897 | 138 | 21,384 | 5,328 | 3,421 | 30,271 |
| 8,898 | 141 | 21,555 | 5,424 | 3,477 | 30,597 |
| 8,899 | 140 | 21,718 | 5,466 | 3,513 | 30,837 |
| 8,900 | 140 | 21,832 | 5,501 | 3,517 | 30,990 |
| 8,901 | 143 | 22,012 | 5,507 | 3,521 | 31,183 |
| 8,902 | 135 | 22,147 | 5,514 | 3,542 | 31,338 |
| 8,903 | 134 | 22,029 | 5,475 | 3,506 | 31,144 |
| 8,904 | 142 | 21,806 | 5,426 | 3,471 | 30,845 |
| 8,905 | 141 | 21,492 | 5,365 | 3,424 | 30,422 |
| 8,906 | 146 | 21,698 | 5,468 | 3,463 | 30,775 |
| 8,907 | 148 | 21,615 | 5,482 | 3,444 | 30,689 |
| 8,908 | 142 | 21,546 | 5,464 | 3,453 | 30,605 |
| 8,909 | 145 | 21,651 | 5,492 | 3,481 | 30,769 |
| 8,910 | 140 | 21,613 | 5,524 | 3,481 | 30,758 |
| 8,911 | 139 | 21,658 | 5,533 | 3,474 | 30,804 |
| 8,912 | 139 | 21,679 | 5,558 | 3,483 | 30,859 |
| 8,913 | 140 | 21,742 | 5,585 | 3,519 | 30,986 |
| 8,914 | 139 | 21,548 | 5,538 | 3,487 | 30,712 |
| 8,915 | 141 | 21,790 | 5,629 | 3,531 | 31,091 |
| 8,916 | 144 | 21,920 | 5,648 | 3,545 | 31,257 |
| 8,917 | 140 | 21,686 | 5,594 | 3,516 | 30,936 |
| 8,918 | 140 | 21,989 | 5,712 | 3,581 | 31,422 |
| 8,919 | 140 | 21,957 | 5,742 | 3,593 | 31,432 |

|       |     |        |       |       |        |
|-------|-----|--------|-------|-------|--------|
| 8,920 | 138 | 21,723 | 5,663 | 3,583 | 31,107 |
| 8,921 | 135 | 21,569 | 5,620 | 3,557 | 30,881 |
| 8,922 | 136 | 21,574 | 5,638 | 3,555 | 30,903 |
| 8,923 | 138 | 21,794 | 5,706 | 3,615 | 31,253 |
| 8,924 | 136 | 21,657 | 5,651 | 3,598 | 31,042 |
| 8,925 | 146 | 21,933 | 5,708 | 3,631 | 31,418 |
| 8,926 | 143 | 21,751 | 5,673 | 3,604 | 31,171 |
| 8,927 | 148 | 22,087 | 5,721 | 3,644 | 31,600 |
| 8,928 | 142 | 21,796 | 5,669 | 3,586 | 31,193 |
| 8,929 | 142 | 21,852 | 5,682 | 3,596 | 31,272 |
| 8,930 | 142 | 22,214 | 5,712 | 3,631 | 31,699 |
| 8,931 | 142 | 22,155 | 5,702 | 3,640 | 31,639 |
| 8,932 | 136 | 22,075 | 5,652 | 3,632 | 31,495 |
| 8,933 | 138 | 22,163 | 5,655 | 3,603 | 31,559 |
| 8,934 | 145 | 22,221 | 5,632 | 3,591 | 31,589 |
| 8,935 | 148 | 22,270 | 5,608 | 3,582 | 31,608 |
| 8,936 | 157 | 22,371 | 5,597 | 3,569 | 31,694 |
| 8,937 | 153 | 22,106 | 5,545 | 3,516 | 31,320 |
| 8,938 | 153 | 22,792 | 5,745 | 3,632 | 32,322 |
| 8,939 | 151 | 22,543 | 5,710 | 3,594 | 31,998 |
| 8,940 | 158 | 22,665 | 5,726 | 3,602 | 32,151 |
| 8,941 | 160 | 22,795 | 5,727 | 3,593 | 32,275 |
| 8,942 | 163 | 22,794 | 5,724 | 3,608 | 32,289 |
| 8,943 | 166 | 23,179 | 5,822 | 3,648 | 32,815 |
| 8,944 | 166 | 23,136 | 5,879 | 3,667 | 32,848 |
| 8,945 | 163 | 23,390 | 5,902 | 3,678 | 33,133 |
| 8,946 | 161 | 23,226 | 5,801 | 3,641 | 32,829 |
| 8,947 | 158 | 23,002 | 5,761 | 3,614 | 32,535 |
| 8,948 | 154 | 23,257 | 5,828 | 3,664 | 32,903 |
| 8,949 | 151 | 23,201 | 5,797 | 3,688 | 32,837 |
| 8,950 | 149 | 22,895 | 5,699 | 3,649 | 32,392 |
| 8,951 | 150 | 22,700 | 5,623 | 3,615 | 32,088 |



|       |     |        |       |       |        |
|-------|-----|--------|-------|-------|--------|
| 8,952 | 148 | 22,866 | 5,723 | 3,684 | 32,421 |
| 8,953 | 154 | 22,506 | 5,647 | 3,654 | 31,961 |
| 8,954 | 154 | 22,607 | 5,647 | 3,665 | 32,073 |
| 8,955 | 146 | 22,590 | 5,630 | 3,679 | 32,045 |
| 8,956 | 148 | 22,531 | 5,615 | 3,663 | 31,957 |
| 8,957 | 151 | 22,704 | 5,635 | 3,690 | 32,180 |
| 8,958 | 150 | 22,454 | 5,590 | 3,659 | 31,853 |
| 8,959 | 153 | 22,724 | 5,674 | 3,688 | 32,239 |
| 8,960 | 150 | 22,659 | 5,647 | 3,659 | 32,115 |
| 8,961 | 150 | 22,588 | 5,625 | 3,659 | 32,022 |
| 8,962 | 148 | 22,655 | 5,635 | 3,655 | 32,093 |
| 8,963 | 152 | 22,626 | 5,616 | 3,666 | 32,060 |
| 8,964 | 155 | 22,739 | 5,653 | 3,669 | 32,216 |
| 8,965 | 155 | 22,751 | 5,633 | 3,655 | 32,194 |
| 8,966 | 156 | 22,578 | 5,601 | 3,625 | 31,960 |
| 8,967 | 154 | 22,928 | 5,628 | 3,677 | 32,387 |
| 8,968 | 160 | 22,978 | 5,619 | 3,667 | 32,424 |
| 8,969 | 161 | 22,850 | 5,547 | 3,629 | 32,187 |
| 8,970 | 164 | 22,763 | 5,514 | 3,584 | 32,025 |
| 8,971 | 164 | 22,765 | 5,511 | 3,585 | 32,025 |
| 8,972 | 164 | 22,770 | 5,490 | 3,600 | 32,024 |
| 8,973 | 166 | 22,719 | 5,494 | 3,596 | 31,975 |
| 8,974 | 177 | 22,826 | 5,533 | 3,600 | 32,136 |
| 8,975 | 184 | 22,739 | 5,525 | 3,602 | 32,050 |
| 8,976 | 183 | 22,796 | 5,496 | 3,607 | 32,082 |
| 8,977 | 189 | 22,457 | 5,446 | 3,561 | 31,653 |
| 8,978 | 188 | 22,398 | 5,437 | 3,550 | 31,573 |
| 8,979 | 189 | 22,183 | 5,391 | 3,556 | 31,319 |
| 8,980 | 190 | 22,122 | 5,367 | 3,544 | 31,223 |
| 8,981 | 198 | 22,215 | 5,419 | 3,558 | 31,390 |
| 8,982 | 196 | 22,044 | 5,375 | 3,521 | 31,136 |
| 8,983 | 199 | 21,940 | 5,366 | 3,504 | 31,009 |

|       |     |        |       |       |        |
|-------|-----|--------|-------|-------|--------|
| 8,984 | 197 | 21,878 | 5,354 | 3,522 | 30,951 |
| 8,985 | 194 | 21,993 | 5,379 | 3,531 | 31,097 |
| 8,986 | 196 | 22,081 | 5,396 | 3,572 | 31,245 |
| 8,987 | 188 | 22,241 | 5,422 | 3,612 | 31,463 |
| 8,988 | 188 | 22,021 | 5,404 | 3,598 | 31,211 |
| 8,989 | 184 | 22,146 | 5,421 | 3,607 | 31,358 |
| 8,990 | 189 | 22,281 | 5,439 | 3,610 | 31,519 |
| 8,991 | 183 | 22,185 | 5,425 | 3,601 | 31,394 |
| 8,992 | 180 | 21,818 | 5,356 | 3,575 | 30,929 |
| 8,993 | 178 | 21,810 | 5,379 | 3,578 | 30,945 |
| 8,994 | 181 | 21,908 | 5,362 | 3,594 | 31,045 |
| 8,995 | 178 | 21,750 | 5,288 | 3,563 | 30,779 |
| 8,996 | 181 | 21,537 | 5,263 | 3,550 | 30,531 |
| 8,997 | 183 | 21,570 | 5,290 | 3,569 | 30,612 |
| 8,998 | 185 | 21,689 | 5,254 | 3,565 | 30,693 |
| 8,999 | 186 | 21,846 | 5,270 | 3,546 | 30,848 |
| 9,000 | 186 | 21,933 | 5,261 | 3,539 | 30,919 |
| 9,001 | 184 | 21,768 | 5,207 | 3,485 | 30,644 |
| 9,002 | 183 | 21,707 | 5,244 | 3,481 | 30,615 |
| 9,003 | 182 | 21,629 | 5,236 | 3,462 | 30,509 |
| 9,004 | 179 | 21,397 | 5,178 | 3,409 | 30,163 |
| 9,005 | 180 | 21,401 | 5,181 | 3,393 | 30,155 |
| 9,006 | 181 | 21,506 | 5,206 | 3,414 | 30,307 |
| 9,007 | 174 | 21,293 | 5,176 | 3,393 | 30,036 |
| 9,008 | 176 | 21,224 | 5,178 | 3,388 | 29,966 |
| 9,009 | 178 | 21,123 | 5,157 | 3,395 | 29,853 |
| 9,010 | 186 | 21,050 | 5,133 | 3,388 | 29,757 |
| 9,011 | 184 | 20,772 | 5,080 | 3,353 | 29,389 |
| 9,012 | 190 | 21,022 | 5,072 | 3,397 | 29,681 |
| 9,013 | 196 | 21,085 | 5,109 | 3,416 | 29,806 |
| 9,014 | 192 | 20,970 | 5,081 | 3,369 | 29,612 |
| 9,015 | 187 | 21,024 | 5,076 | 3,358 | 29,645 |

|       |     |        |       |       |        |
|-------|-----|--------|-------|-------|--------|
| 9,016 | 183 | 20,681 | 5,006 | 3,304 | 29,174 |
| 9,017 | 185 | 20,716 | 5,021 | 3,312 | 29,234 |
| 9,018 | 188 | 20,944 | 5,053 | 3,341 | 29,526 |
| 9,019 | 185 | 20,627 | 4,982 | 3,289 | 29,083 |
| 9,020 | 184 | 20,665 | 4,976 | 3,287 | 29,112 |
| 9,021 | 186 | 20,878 | 5,010 | 3,294 | 29,368 |
| 9,022 | 187 | 20,780 | 5,024 | 3,293 | 29,284 |
| 9,023 | 185 | 20,832 | 5,029 | 3,274 | 29,320 |
| 9,024 | 189 | 21,003 | 5,061 | 3,298 | 29,551 |
| 9,025 | 177 | 20,753 | 4,988 | 3,271 | 29,189 |
| 9,026 | 176 | 21,034 | 5,012 | 3,266 | 29,488 |
| 9,027 | 167 | 21,046 | 5,054 | 3,255 | 29,522 |
| 9,028 | 162 | 20,835 | 5,001 | 3,205 | 29,203 |
| 9,029 | 162 | 20,854 | 4,998 | 3,203 | 29,217 |
| 9,030 | 162 | 21,093 | 5,054 | 3,238 | 29,547 |
| 9,031 | 153 | 20,972 | 4,980 | 3,217 | 29,322 |
| 9,032 | 157 | 20,910 | 4,952 | 3,192 | 29,211 |
| 9,033 | 153 | 21,004 | 4,943 | 3,215 | 29,315 |
| 9,034 | 156 | 21,318 | 5,029 | 3,238 | 29,741 |
| 9,035 | 158 | 21,479 | 5,078 | 3,272 | 29,987 |
| 9,036 | 158 | 21,213 | 5,021 | 3,235 | 29,627 |
| 9,037 | 158 | 20,962 | 4,993 | 3,181 | 29,294 |
| 9,038 | 159 | 21,423 | 5,090 | 3,218 | 29,890 |
| 9,039 | 162 | 20,328 | 4,827 | 3,059 | 28,376 |
| 9,040 | 162 | 20,505 | 4,866 | 3,073 | 28,606 |
| 9,041 | 161 | 20,691 | 4,898 | 3,116 | 28,866 |
| 9,042 | 161 | 20,792 | 4,908 | 3,118 | 28,979 |
| 9,043 | 161 | 20,794 | 4,911 | 3,115 | 28,981 |
| 9,044 | 157 | 20,834 | 4,928 | 3,127 | 29,046 |
| 9,045 | 159 | 20,684 | 4,878 | 3,076 | 28,797 |
| 9,046 | 157 | 20,811 | 4,902 | 3,094 | 28,964 |
| 9,047 | 157 | 20,913 | 4,897 | 3,072 | 29,039 |

|       |     |        |       |       |        |
|-------|-----|--------|-------|-------|--------|
| 9,048 | 151 | 20,924 | 4,899 | 3,067 | 29,041 |
| 9,049 | 150 | 20,605 | 4,855 | 3,024 | 28,634 |
| 9,050 | 149 | 20,379 | 4,785 | 3,013 | 28,326 |
| 9,051 | 163 | 20,926 | 4,906 | 3,075 | 29,070 |
| 9,052 | 167 | 20,765 | 4,846 | 3,097 | 28,875 |
| 9,053 | 167 | 20,922 | 4,843 | 3,097 | 29,029 |
| 9,054 | 164 | 20,784 | 4,789 | 3,080 | 28,817 |
| 9,055 | 164 | 20,918 | 4,836 | 3,126 | 29,044 |
| 9,056 | 160 | 20,900 | 4,837 | 3,114 | 29,011 |
| 9,057 | 156 | 21,161 | 4,924 | 3,143 | 29,384 |
| 9,058 | 155 | 21,092 | 4,890 | 3,114 | 29,251 |
| 9,059 | 147 | 20,996 | 4,859 | 3,067 | 29,069 |
| 9,060 | 148 | 21,218 | 4,891 | 3,096 | 29,353 |
| 9,061 | 145 | 21,241 | 4,901 | 3,107 | 29,394 |
| 9,062 | 146 | 21,393 | 4,951 | 3,107 | 29,597 |
| 9,063 | 147 | 21,303 | 4,950 | 3,096 | 29,496 |
| 9,064 | 141 | 21,170 | 4,901 | 3,061 | 29,273 |
| 9,065 | 146 | 21,275 | 4,921 | 3,096 | 29,438 |
| 9,066 | 150 | 21,007 | 4,827 | 3,055 | 29,039 |
| 9,067 | 151 | 20,990 | 4,818 | 3,056 | 29,015 |
| 9,068 | 155 | 21,187 | 4,888 | 3,085 | 29,315 |
| 9,069 | 149 | 20,973 | 4,859 | 3,057 | 29,038 |
| 9,070 | 145 | 20,789 | 4,817 | 3,020 | 28,771 |
| 9,071 | 144 | 20,594 | 4,796 | 2,999 | 28,533 |
| 9,072 | 152 | 21,122 | 4,965 | 3,102 | 29,341 |
| 9,073 | 152 | 20,973 | 4,929 | 3,078 | 29,132 |
| 9,074 | 157 | 21,023 | 4,916 | 3,084 | 29,180 |
| 9,075 | 160 | 21,278 | 4,978 | 3,104 | 29,520 |
| 9,076 | 156 | 21,055 | 4,958 | 3,053 | 29,222 |
| 9,077 | 154 | 20,886 | 4,953 | 3,053 | 29,046 |
| 9,078 | 156 | 20,989 | 4,993 | 3,094 | 29,232 |
| 9,079 | 150 | 20,704 | 4,935 | 3,082 | 28,871 |

|       |     |        |       |       |        |
|-------|-----|--------|-------|-------|--------|
| 9,080 | 156 | 20,665 | 4,931 | 3,059 | 28,811 |
| 9,081 | 159 | 20,384 | 4,874 | 3,016 | 28,433 |
| 9,082 | 157 | 20,012 | 4,832 | 2,970 | 27,971 |
| 9,083 | 155 | 20,198 | 4,895 | 3,022 | 28,270 |
| 9,084 | 156 | 20,060 | 4,886 | 3,009 | 28,111 |
| 9,085 | 153 | 20,008 | 4,860 | 3,000 | 28,021 |
| 9,086 | 150 | 20,133 | 4,882 | 3,010 | 28,175 |
| 9,087 | 145 | 20,089 | 4,866 | 3,005 | 28,105 |
| 9,088 | 143 | 19,526 | 4,671 | 2,931 | 27,271 |
| 9,089 | 143 | 19,814 | 4,719 | 2,966 | 27,642 |
| 9,090 | 143 | 20,091 | 4,797 | 2,989 | 28,020 |
| 9,091 | 145 | 20,241 | 4,814 | 2,998 | 28,198 |
| 9,092 | 145 | 20,272 | 4,812 | 2,986 | 28,215 |
| 9,093 | 149 | 20,451 | 4,824 | 3,000 | 28,424 |
| 9,094 | 154 | 20,421 | 4,810 | 2,988 | 28,373 |
| 9,095 | 154 | 20,195 | 4,782 | 2,957 | 28,088 |
| 9,096 | 151 | 20,202 | 4,808 | 2,976 | 28,137 |
| 9,097 | 153 | 20,016 | 4,792 | 2,966 | 27,927 |
| 9,098 | 157 | 20,499 | 4,904 | 3,047 | 28,607 |
| 9,099 | 161 | 20,549 | 4,924 | 3,053 | 28,687 |
| 9,100 | 155 | 20,627 | 4,896 | 3,055 | 28,733 |
| 9,101 | 151 | 20,612 | 4,881 | 3,029 | 28,673 |
| 9,102 | 148 | 20,585 | 4,863 | 3,014 | 28,610 |
| 9,103 | 142 | 20,242 | 4,811 | 2,947 | 28,142 |
| 9,104 | 147 | 20,467 | 4,863 | 2,963 | 28,440 |
| 9,105 | 152 | 20,485 | 4,846 | 2,956 | 28,439 |
| 9,106 | 152 | 20,357 | 4,776 | 2,908 | 28,193 |
| 9,107 | 154 | 20,459 | 4,782 | 2,934 | 28,329 |
| 9,108 | 161 | 20,781 | 4,834 | 2,995 | 28,771 |
| 9,109 | 160 | 20,603 | 4,786 | 2,970 | 28,519 |
| 9,110 | 157 | 20,511 | 4,751 | 2,957 | 28,376 |
| 9,111 | 162 | 20,883 | 4,833 | 3,007 | 28,885 |

|       |     |        |       |       |        |
|-------|-----|--------|-------|-------|--------|
| 9,112 | 163 | 20,970 | 4,826 | 3,028 | 28,987 |
| 9,113 | 159 | 20,933 | 4,830 | 3,047 | 28,969 |
| 9,114 | 159 | 21,180 | 4,870 | 3,101 | 29,310 |
| 9,115 | 166 | 20,983 | 4,827 | 3,049 | 29,025 |
| 9,116 | 162 | 20,736 | 4,782 | 3,019 | 28,699 |
| 9,117 | 171 | 21,227 | 4,945 | 3,116 | 29,459 |
| 9,118 | 170 | 20,854 | 4,884 | 3,061 | 28,969 |
| 9,119 | 170 | 20,946 | 4,922 | 3,083 | 29,121 |
| 9,120 | 164 | 21,076 | 4,945 | 3,108 | 29,293 |
| 9,121 | 160 | 21,019 | 4,928 | 3,096 | 29,203 |
| 9,122 | 163 | 20,698 | 4,854 | 3,050 | 28,765 |
| 9,123 | 162 | 20,684 | 4,847 | 3,061 | 28,754 |
| 9,124 | 170 | 20,788 | 4,904 | 3,088 | 28,950 |
| 9,125 | 167 | 20,781 | 4,923 | 3,096 | 28,967 |
| 9,126 | 161 | 20,560 | 4,886 | 3,103 | 28,710 |
| 9,127 | 163 | 20,587 | 4,890 | 3,121 | 28,761 |
| 9,128 | 168 | 20,654 | 4,909 | 3,125 | 28,856 |
| 9,129 | 180 | 20,873 | 4,938 | 3,162 | 29,153 |
| 9,130 | 173 | 20,859 | 4,947 | 3,159 | 29,138 |
| 9,131 | 174 | 20,827 | 4,931 | 3,159 | 29,091 |
| 9,132 | 169 | 21,010 | 5,010 | 3,198 | 29,387 |
| 9,133 | 167 | 20,841 | 4,961 | 3,173 | 29,142 |
| 9,134 | 166 | 20,828 | 4,948 | 3,177 | 29,119 |
| 9,135 | 165 | 20,831 | 4,956 | 3,179 | 29,131 |
| 9,136 | 170 | 20,925 | 4,970 | 3,220 | 29,285 |
| 9,137 | 173 | 20,786 | 4,953 | 3,200 | 29,112 |
| 9,138 | 172 | 20,617 | 4,923 | 3,174 | 28,886 |
| 9,139 | 165 | 20,383 | 4,875 | 3,151 | 28,574 |
| 9,140 | 166 | 20,500 | 4,922 | 3,167 | 28,755 |
| 9,141 | 166 | 20,359 | 4,878 | 3,165 | 28,568 |
| 9,142 | 166 | 20,415 | 4,885 | 3,187 | 28,653 |
| 9,143 | 171 | 20,701 | 4,926 | 3,203 | 29,001 |

|       |     |        |       |       |        |
|-------|-----|--------|-------|-------|--------|
| 9,144 | 171 | 20,705 | 4,926 | 3,199 | 29,001 |
| 9,145 | 168 | 20,594 | 4,876 | 3,170 | 28,808 |
| 9,146 | 168 | 20,502 | 4,864 | 3,162 | 28,696 |
| 9,147 | 166 | 20,732 | 4,875 | 3,174 | 28,947 |
| 9,148 | 162 | 20,552 | 4,802 | 3,130 | 28,646 |
| 9,149 | 161 | 20,472 | 4,776 | 3,125 | 28,534 |
| 9,150 | 162 | 20,456 | 4,760 | 3,117 | 28,495 |
| 9,151 | 162 | 20,278 | 4,778 | 3,097 | 28,315 |
| 9,152 | 167 | 19,964 | 4,734 | 3,072 | 27,937 |
| 9,153 | 165 | 19,915 | 4,727 | 3,068 | 27,875 |
| 9,154 | 161 | 19,804 | 4,690 | 3,043 | 27,698 |
| 9,155 | 163 | 19,620 | 4,649 | 3,045 | 27,477 |
| 9,156 | 175 | 20,030 | 4,887 | 3,165 | 28,257 |
| 9,157 | 173 | 20,011 | 4,893 | 3,160 | 28,237 |
| 9,158 | 169 | 19,842 | 4,907 | 3,162 | 28,080 |
| 9,159 | 169 | 19,827 | 4,950 | 3,186 | 28,132 |
| 9,160 | 182 | 19,753 | 4,929 | 3,178 | 28,042 |
| 9,161 | 181 | 19,527 | 4,910 | 3,159 | 27,777 |
| 9,162 | 179 | 19,685 | 5,005 | 3,213 | 28,082 |
| 9,163 | 178 | 19,667 | 5,014 | 3,210 | 28,069 |
| 9,164 | 172 | 19,576 | 4,997 | 3,188 | 27,933 |
| 9,165 | 173 | 19,703 | 5,054 | 3,196 | 28,126 |
| 9,166 | 168 | 19,869 | 5,110 | 3,215 | 28,362 |
| 9,167 | 167 | 19,952 | 5,100 | 3,230 | 28,449 |
| 9,168 | 163 | 19,985 | 5,113 | 3,235 | 28,496 |
| 9,169 | 162 | 19,893 | 5,108 | 3,216 | 28,379 |
| 9,170 | 164 | 20,056 | 5,100 | 3,202 | 28,522 |
| 9,171 | 167 | 20,059 | 5,092 | 3,186 | 28,504 |
| 9,172 | 165 | 20,090 | 5,099 | 3,202 | 28,556 |
| 9,173 | 166 | 20,119 | 5,103 | 3,188 | 28,576 |
| 9,174 | 167 | 20,315 | 5,183 | 3,205 | 28,870 |
| 9,175 | 160 | 20,275 | 5,139 | 3,211 | 28,785 |

|       |     |        |       |       |        |
|-------|-----|--------|-------|-------|--------|
| 9,176 | 162 | 20,275 | 5,142 | 3,214 | 28,793 |
| 9,177 | 158 | 20,313 | 5,158 | 3,186 | 28,815 |
| 9,178 | 162 | 20,363 | 5,166 | 3,180 | 28,871 |
| 9,179 | 153 | 20,151 | 5,122 | 3,143 | 28,569 |
| 9,180 | 148 | 20,152 | 5,167 | 3,153 | 28,620 |
| 9,181 | 147 | 20,127 | 5,158 | 3,196 | 28,628 |
| 9,182 | 149 | 20,332 | 5,220 | 3,203 | 28,904 |
| 9,183 | 149 | 20,489 | 5,231 | 3,216 | 29,085 |
| 9,184 | 150 | 20,693 | 5,263 | 3,220 | 29,326 |
| 9,185 | 153 | 20,752 | 5,271 | 3,244 | 29,420 |
| 9,186 | 147 | 20,842 | 5,292 | 3,246 | 29,527 |
| 9,187 | 146 | 21,086 | 5,348 | 3,262 | 29,842 |
| 9,188 | 142 | 20,902 | 5,308 | 3,241 | 29,593 |
| 9,189 | 142 | 20,907 | 5,315 | 3,255 | 29,619 |
| 9,190 | 144 | 21,098 | 5,376 | 3,299 | 29,917 |
| 9,191 | 147 | 20,850 | 5,350 | 3,300 | 29,647 |
| 9,192 | 155 | 21,072 | 5,408 | 3,343 | 29,978 |
| 9,193 | 166 | 20,877 | 5,382 | 3,307 | 29,732 |
| 9,194 | 161 | 20,744 | 5,364 | 3,296 | 29,565 |
| 9,195 | 165 | 20,930 | 5,485 | 3,336 | 29,916 |
| 9,196 | 165 | 20,890 | 5,487 | 3,346 | 29,888 |
| 9,197 | 173 | 20,974 | 5,534 | 3,365 | 30,046 |
| 9,198 | 173 | 21,020 | 5,581 | 3,402 | 30,176 |
| 9,199 | 178 | 21,100 | 5,590 | 3,416 | 30,284 |
| 9,200 | 179 | 21,239 | 5,604 | 3,428 | 30,450 |
| 9,201 | 177 | 21,243 | 5,600 | 3,445 | 30,465 |
| 9,202 | 181 | 21,569 | 5,705 | 3,510 | 30,965 |
| 9,203 | 178 | 21,640 | 5,739 | 3,535 | 31,092 |
| 9,204 | 175 | 21,770 | 5,758 | 3,544 | 31,247 |
| 9,205 | 166 | 21,494 | 5,713 | 3,505 | 30,878 |
| 9,206 | 166 | 21,717 | 5,745 | 3,538 | 31,166 |
| 9,207 | 158 | 21,806 | 5,758 | 3,569 | 31,291 |



|       |     |        |       |       |        |
|-------|-----|--------|-------|-------|--------|
| 9,208 | 165 | 21,864 | 5,751 | 3,545 | 31,325 |
| 9,209 | 167 | 21,817 | 5,709 | 3,519 | 31,212 |
| 9,210 | 153 | 21,704 | 5,626 | 3,466 | 30,949 |
| 9,211 | 156 | 22,045 | 5,687 | 3,490 | 31,378 |
| 9,212 | 154 | 21,723 | 5,597 | 3,429 | 30,903 |
| 9,213 | 161 | 21,860 | 5,628 | 3,463 | 31,112 |
| 9,214 | 164 | 21,662 | 5,567 | 3,414 | 30,807 |
| 9,215 | 164 | 21,560 | 5,522 | 3,384 | 30,630 |
| 9,216 | 167 | 21,626 | 5,540 | 3,391 | 30,724 |
| 9,217 | 176 | 21,595 | 5,526 | 3,379 | 30,676 |
| 9,218 | 179 | 21,377 | 5,485 | 3,338 | 30,379 |
| 9,219 | 180 | 21,304 | 5,489 | 3,320 | 30,293 |
| 9,220 | 183 | 20,969 | 5,426 | 3,286 | 29,864 |
| 9,221 | 183 | 20,669 | 5,399 | 3,259 | 29,510 |
| 9,222 | 189 | 21,820 | 5,629 | 3,394 | 31,032 |
| 9,223 | 186 | 21,763 | 5,596 | 3,372 | 30,917 |
| 9,224 | 188 | 21,797 | 5,561 | 3,383 | 30,929 |
| 9,225 | 186 | 21,771 | 5,547 | 3,351 | 30,855 |
| 9,226 | 186 | 21,804 | 5,571 | 3,359 | 30,920 |
| 9,227 | 184 | 21,751 | 5,569 | 3,348 | 30,852 |
| 9,228 | 180 | 21,555 | 5,501 | 3,350 | 30,586 |
| 9,229 | 175 | 21,485 | 5,497 | 3,341 | 30,498 |
| 9,230 | 175 | 21,464 | 5,471 | 3,344 | 30,454 |
| 9,231 | 178 | 21,612 | 5,530 | 3,336 | 30,656 |
| 9,232 | 179 | 21,720 | 5,537 | 3,319 | 30,755 |
| 9,233 | 184 | 21,727 | 5,546 | 3,335 | 30,792 |
| 9,234 | 187 | 21,537 | 5,558 | 3,326 | 30,608 |
| 9,235 | 190 | 21,485 | 5,557 | 3,341 | 30,573 |
| 9,236 | 194 | 21,197 | 5,501 | 3,287 | 30,179 |
| 9,237 | 204 | 21,203 | 5,518 | 3,283 | 30,208 |
| 9,238 | 205 | 20,981 | 5,483 | 3,270 | 29,939 |
| 9,239 | 217 | 21,250 | 5,524 | 3,294 | 30,285 |

|       |     |        |       |       |        |
|-------|-----|--------|-------|-------|--------|
| 9,240 | 226 | 21,429 | 5,504 | 3,251 | 30,410 |
| 9,241 | 226 | 21,470 | 5,506 | 3,250 | 30,452 |
| 9,242 | 202 | 20,791 | 5,316 | 3,095 | 29,404 |
| 9,243 | 204 | 20,999 | 5,355 | 3,113 | 29,671 |
| 9,244 | 202 | 21,188 | 5,386 | 3,137 | 29,913 |
| 9,245 | 199 | 20,984 | 5,300 | 3,079 | 29,562 |
| 9,246 | 198 | 21,097 | 5,330 | 3,100 | 29,725 |
| 9,247 | 190 | 21,158 | 5,341 | 3,100 | 29,789 |
| 9,248 | 192 | 21,113 | 5,287 | 3,057 | 29,649 |
| 9,249 | 190 | 21,033 | 5,283 | 3,043 | 29,549 |
| 9,250 | 186 | 21,180 | 5,308 | 3,068 | 29,742 |
| 9,251 | 188 | 21,180 | 5,314 | 3,078 | 29,760 |
| 9,252 | 186 | 21,188 | 5,297 | 3,063 | 29,734 |
| 9,253 | 186 | 20,846 | 5,154 | 2,961 | 29,147 |
| 9,254 | 187 | 20,979 | 5,173 | 2,973 | 29,312 |
| 9,255 | 194 | 20,855 | 5,082 | 2,933 | 29,064 |
| 9,256 | 197 | 20,894 | 5,075 | 2,897 | 29,063 |
| 9,257 | 198 | 20,938 | 5,089 | 2,907 | 29,132 |
| 9,258 | 193 | 21,060 | 5,033 | 2,894 | 29,180 |
| 9,259 | 189 | 20,913 | 5,001 | 2,887 | 28,990 |
| 9,260 | 194 | 21,048 | 5,049 | 2,909 | 29,200 |
| 9,261 | 188 | 20,718 | 4,971 | 2,871 | 28,748 |
| 9,262 | 189 | 20,870 | 4,990 | 2,895 | 28,944 |
| 9,263 | 184 | 20,421 | 4,894 | 2,842 | 28,341 |
| 9,264 | 183 | 20,478 | 4,896 | 2,840 | 28,397 |
| 9,265 | 180 | 20,300 | 4,881 | 2,828 | 28,189 |
| 9,266 | 179 | 20,147 | 4,895 | 2,823 | 28,044 |
| 9,267 | 173 | 20,664 | 4,954 | 2,900 | 28,691 |
| 9,268 | 167 | 20,698 | 4,924 | 2,902 | 28,691 |
| 9,269 | 170 | 20,974 | 4,977 | 2,946 | 29,067 |
| 9,270 | 175 | 20,825 | 4,947 | 2,939 | 28,886 |
| 9,271 | 165 | 20,679 | 4,919 | 2,928 | 28,691 |

|       |     |        |       |       |        |
|-------|-----|--------|-------|-------|--------|
| 9,272 | 158 | 20,785 | 4,883 | 2,950 | 28,776 |
| 9,273 | 161 | 20,606 | 4,878 | 2,938 | 28,583 |
| 9,274 | 164 | 20,682 | 4,930 | 2,949 | 28,725 |
| 9,275 | 161 | 20,407 | 4,903 | 2,915 | 28,386 |
| 9,276 | 164 | 20,568 | 4,930 | 2,958 | 28,620 |
| 9,277 | 162 | 20,712 | 4,924 | 2,975 | 28,773 |
| 9,278 | 169 | 20,882 | 4,954 | 2,982 | 28,987 |
| 9,279 | 172 | 20,911 | 4,947 | 2,996 | 29,026 |
| 9,280 | 172 | 20,996 | 4,952 | 2,983 | 29,103 |
| 9,281 | 171 | 21,030 | 4,950 | 2,973 | 29,124 |
| 9,282 | 170 | 20,898 | 4,904 | 2,963 | 28,935 |
| 9,283 | 174 | 21,116 | 4,995 | 3,007 | 29,292 |
| 9,284 | 169 | 21,210 | 4,974 | 3,005 | 29,358 |
| 9,285 | 167 | 21,209 | 4,957 | 3,000 | 29,333 |
| 9,286 | 172 | 21,098 | 4,952 | 2,975 | 29,197 |
| 9,287 | 173 | 21,117 | 4,986 | 2,996 | 29,272 |
| 9,288 | 150 | 21,273 | 5,011 | 3,025 | 29,459 |
| 9,289 | 150 | 21,277 | 5,016 | 3,031 | 29,474 |
| 9,290 | 151 | 21,347 | 5,044 | 3,053 | 29,595 |
| 9,291 | 144 | 21,089 | 5,019 | 3,045 | 29,297 |
| 9,292 | 146 | 21,439 | 5,107 | 3,111 | 29,803 |
| 9,293 | 145 | 20,695 | 4,950 | 3,052 | 28,842 |
| 9,294 | 145 | 20,893 | 5,003 | 3,089 | 29,130 |
| 9,295 | 145 | 21,089 | 5,076 | 3,119 | 29,429 |
| 9,296 | 148 | 21,091 | 5,084 | 3,111 | 29,434 |
| 9,297 | 149 | 21,025 | 5,031 | 3,106 | 29,311 |
| 9,298 | 156 | 21,043 | 5,055 | 3,115 | 29,369 |
| 9,299 | 153 | 20,870 | 5,011 | 3,099 | 29,133 |
| 9,300 | 155 | 20,907 | 5,011 | 3,114 | 29,187 |
| 9,301 | 152 | 20,708 | 4,969 | 3,093 | 28,922 |
| 9,302 | 148 | 20,816 | 5,001 | 3,125 | 29,090 |
| 9,303 | 145 | 21,057 | 5,093 | 3,188 | 29,483 |

|       |     |        |       |       |        |
|-------|-----|--------|-------|-------|--------|
| 9,304 | 146 | 20,546 | 5,017 | 3,167 | 28,876 |
| 9,305 | 140 | 20,720 | 5,104 | 3,240 | 29,204 |
| 9,306 | 141 | 20,823 | 5,163 | 3,275 | 29,402 |
| 9,307 | 138 | 20,672 | 5,178 | 3,291 | 29,279 |
| 9,308 | 139 | 20,724 | 5,206 | 3,298 | 29,367 |
| 9,309 | 141 | 20,667 | 5,217 | 3,317 | 29,342 |
| 9,310 | 141 | 20,508 | 5,184 | 3,310 | 29,143 |
| 9,311 | 138 | 20,710 | 5,242 | 3,354 | 29,444 |
| 9,312 | 137 | 20,484 | 5,177 | 3,333 | 29,131 |
| 9,313 | 137 | 20,404 | 5,212 | 3,344 | 29,097 |
| 9,314 | 135 | 20,482 | 5,250 | 3,356 | 29,223 |
| 9,315 | 133 | 20,139 | 5,182 | 3,313 | 28,767 |
| 9,316 | 140 | 20,442 | 5,243 | 3,326 | 29,151 |
| 9,317 | 140 | 20,432 | 5,223 | 3,335 | 29,130 |
| 9,318 | 143 | 20,414 | 5,229 | 3,345 | 29,131 |
| 9,319 | 142 | 20,389 | 5,235 | 3,342 | 29,108 |
| 9,320 | 131 | 20,099 | 5,155 | 3,305 | 28,690 |
| 9,321 | 139 | 20,130 | 5,164 | 3,292 | 28,725 |
| 9,322 | 143 | 20,127 | 5,187 | 3,288 | 28,745 |
| 9,323 | 142 | 20,199 | 5,185 | 3,283 | 28,809 |
| 9,324 | 143 | 20,613 | 5,279 | 3,333 | 29,368 |
| 9,325 | 143 | 20,061 | 5,098 | 3,241 | 28,543 |
| 9,326 | 144 | 20,514 | 5,208 | 3,302 | 29,168 |
| 9,327 | 150 | 21,032 | 5,331 | 3,382 | 29,895 |
| 9,328 | 154 | 21,292 | 5,442 | 3,428 | 30,316 |
| 9,329 | 147 | 21,525 | 5,475 | 3,426 | 30,573 |
| 9,330 | 144 | 21,827 | 5,525 | 3,461 | 30,957 |
| 9,331 | 148 | 21,946 | 5,503 | 3,498 | 31,095 |
| 9,332 | 145 | 21,203 | 5,266 | 3,356 | 29,970 |
| 9,333 | 145 | 21,674 | 5,356 | 3,411 | 30,586 |
| 9,334 | 147 | 22,014 | 5,409 | 3,454 | 31,024 |
| 9,335 | 147 | 22,018 | 5,411 | 3,457 | 31,033 |

|       |     |        |       |       |        |
|-------|-----|--------|-------|-------|--------|
| 9,336 | 145 | 22,737 | 5,547 | 3,557 | 31,986 |
| 9,337 | 134 | 22,523 | 5,474 | 3,514 | 31,645 |
| 9,338 | 138 | 22,628 | 5,495 | 3,513 | 31,774 |
| 9,339 | 141 | 22,927 | 5,528 | 3,552 | 32,148 |
| 9,340 | 147 | 22,579 | 5,418 | 3,490 | 31,634 |
| 9,341 | 146 | 22,492 | 5,368 | 3,456 | 31,462 |
| 9,342 | 151 | 22,728 | 5,420 | 3,495 | 31,794 |
| 9,343 | 149 | 22,668 | 5,400 | 3,483 | 31,700 |
| 9,344 | 146 | 22,570 | 5,350 | 3,461 | 31,527 |
| 9,345 | 143 | 22,358 | 5,277 | 3,421 | 31,199 |
| 9,346 | 147 | 22,564 | 5,324 | 3,450 | 31,485 |
| 9,347 | 144 | 22,437 | 5,273 | 3,434 | 31,288 |
| 9,348 | 136 | 22,487 | 5,255 | 3,424 | 31,302 |
| 9,349 | 138 | 22,610 | 5,305 | 3,459 | 31,512 |
| 9,350 | 144 | 22,638 | 5,315 | 3,467 | 31,564 |
| 9,351 | 142 | 22,612 | 5,324 | 3,457 | 31,535 |
| 9,352 | 148 | 22,562 | 5,309 | 3,423 | 31,442 |
| 9,353 | 151 | 22,546 | 5,287 | 3,413 | 31,397 |
| 9,354 | 152 | 22,357 | 5,260 | 3,362 | 31,131 |
| 9,355 | 146 | 22,387 | 5,239 | 3,345 | 31,117 |
| 9,356 | 150 | 22,460 | 5,174 | 3,312 | 31,096 |
| 9,357 | 148 | 22,440 | 5,104 | 3,276 | 30,968 |
| 9,358 | 148 | 22,597 | 5,087 | 3,268 | 31,100 |
| 9,359 | 152 | 22,834 | 5,152 | 3,304 | 31,442 |
| 9,360 | 152 | 22,660 | 5,093 | 3,269 | 31,174 |
| 9,361 | 153 | 22,480 | 5,011 | 3,204 | 30,848 |
| 9,362 | 154 | 22,714 | 5,047 | 3,213 | 31,128 |
| 9,363 | 155 | 23,044 | 5,093 | 3,243 | 31,535 |
| 9,364 | 156 | 23,077 | 5,084 | 3,222 | 31,539 |
| 9,365 | 161 | 23,196 | 5,063 | 3,204 | 31,624 |
| 9,366 | 162 | 23,310 | 5,054 | 3,211 | 31,737 |
| 9,367 | 163 | 23,701 | 5,167 | 3,280 | 32,311 |

|       |     |        |       |       |        |
|-------|-----|--------|-------|-------|--------|
| 9,368 | 164 | 23,876 | 5,183 | 3,271 | 32,494 |
| 9,369 | 162 | 24,009 | 5,211 | 3,260 | 32,642 |
| 9,370 | 164 | 23,880 | 5,176 | 3,246 | 32,466 |
| 9,371 | 168 | 23,960 | 5,166 | 3,242 | 32,536 |
| 9,372 | 167 | 24,182 | 5,205 | 3,264 | 32,818 |
| 9,373 | 162 | 24,108 | 5,160 | 3,246 | 32,676 |
| 9,374 | 163 | 24,356 | 5,176 | 3,286 | 32,981 |
| 9,375 | 162 | 24,525 | 5,239 | 3,268 | 33,194 |
| 9,376 | 160 | 24,383 | 5,223 | 3,280 | 33,046 |
| 9,377 | 162 | 24,749 | 5,293 | 3,316 | 33,520 |
| 9,378 | 166 | 24,648 | 5,224 | 3,286 | 33,324 |
| 9,379 | 163 | 24,670 | 5,153 | 3,279 | 33,265 |
| 9,380 | 167 | 24,807 | 5,223 | 3,350 | 33,547 |
| 9,381 | 182 | 25,030 | 5,283 | 3,363 | 33,858 |
| 9,382 | 177 | 24,725 | 5,218 | 3,304 | 33,424 |
| 9,383 | 183 | 24,969 | 5,276 | 3,350 | 33,778 |
| 9,384 | 185 | 24,981 | 5,244 | 3,333 | 33,743 |
| 9,385 | 189 | 25,137 | 5,317 | 3,381 | 34,024 |
| 9,386 | 187 | 25,102 | 5,344 | 3,371 | 34,004 |
| 9,387 | 204 | 25,087 | 5,330 | 3,367 | 33,988 |
| 9,388 | 205 | 25,176 | 5,332 | 3,364 | 34,077 |
| 9,389 | 208 | 25,316 | 5,376 | 3,379 | 34,279 |
| 9,390 | 206 | 25,318 | 5,386 | 3,378 | 34,288 |
| 9,391 | 196 | 25,285 | 5,404 | 3,394 | 34,279 |
| 9,392 | 201 | 25,668 | 5,518 | 3,482 | 34,869 |
| 9,393 | 197 | 25,525 | 5,502 | 3,460 | 34,684 |
| 9,394 | 198 | 25,633 | 5,533 | 3,457 | 34,821 |
| 9,395 | 204 | 25,738 | 5,559 | 3,474 | 34,975 |
| 9,396 | 204 | 25,787 | 5,559 | 3,479 | 35,029 |
| 9,397 | 209 | 25,999 | 5,715 | 3,564 | 35,487 |
| 9,398 | 214 | 26,112 | 5,816 | 3,618 | 35,760 |
| 9,399 | 215 | 26,475 | 5,903 | 3,680 | 36,273 |

|       |     |        |       |       |        |
|-------|-----|--------|-------|-------|--------|
| 9,400 | 214 | 26,608 | 5,977 | 3,702 | 36,501 |
| 9,401 | 218 | 26,759 | 6,040 | 3,723 | 36,740 |
| 9,402 | 219 | 26,839 | 6,036 | 3,718 | 36,812 |
| 9,403 | 213 | 26,723 | 6,038 | 3,723 | 36,697 |
| 9,404 | 233 | 27,568 | 6,235 | 3,826 | 37,862 |
| 9,405 | 236 | 27,654 | 6,263 | 3,837 | 37,990 |
| 9,406 | 245 | 27,693 | 6,273 | 3,823 | 38,034 |
| 9,407 | 243 | 27,920 | 6,314 | 3,870 | 38,347 |
| 9,408 | 251 | 27,998 | 6,350 | 3,890 | 38,489 |
| 9,409 | 251 | 28,193 | 6,399 | 3,912 | 38,755 |
| 9,410 | 245 | 28,207 | 6,418 | 3,930 | 38,800 |
| 9,411 | 241 | 27,947 | 6,398 | 3,889 | 38,475 |
| 9,412 | 240 | 27,945 | 6,456 | 3,905 | 38,546 |
| 9,413 | 240 | 27,921 | 6,487 | 3,932 | 38,580 |
| 9,414 | 238 | 27,695 | 6,447 | 3,909 | 38,289 |
| 9,415 | 237 | 27,559 | 6,432 | 3,921 | 38,149 |
| 9,416 | 233 | 28,128 | 6,635 | 4,070 | 39,066 |
| 9,417 | 235 | 28,066 | 6,612 | 4,108 | 39,021 |
| 9,418 | 227 | 27,855 | 6,556 | 4,081 | 38,719 |
| 9,419 | 225 | 28,050 | 6,599 | 4,135 | 39,009 |
| 9,420 | 225 | 27,778 | 6,517 | 4,114 | 38,634 |
| 9,421 | 222 | 27,515 | 6,482 | 4,082 | 38,301 |
| 9,422 | 223 | 27,485 | 6,468 | 4,089 | 38,265 |
| 9,423 | 222 | 27,638 | 6,527 | 4,140 | 38,527 |
| 9,424 | 220 | 27,168 | 6,474 | 4,099 | 37,961 |
| 9,425 | 225 | 26,940 | 6,444 | 4,089 | 37,698 |
| 9,426 | 224 | 26,660 | 6,384 | 4,090 | 37,358 |
| 9,427 | 225 | 26,634 | 6,372 | 4,075 | 37,306 |
| 9,428 | 224 | 26,399 | 6,312 | 4,061 | 36,996 |
| 9,429 | 215 | 25,819 | 6,225 | 3,979 | 36,238 |
| 9,430 | 213 | 25,763 | 6,222 | 3,972 | 36,170 |
| 9,431 | 206 | 25,517 | 6,140 | 3,938 | 35,801 |

|       |     |        |       |       |        |
|-------|-----|--------|-------|-------|--------|
| 9,432 | 203 | 25,334 | 6,109 | 3,942 | 35,588 |
| 9,433 | 208 | 25,061 | 6,070 | 3,900 | 35,239 |
| 9,434 | 212 | 25,078 | 6,061 | 3,895 | 35,246 |
| 9,435 | 206 | 24,818 | 6,003 | 3,845 | 34,872 |
| 9,436 | 207 | 24,647 | 5,938 | 3,844 | 34,636 |
| 9,437 | 208 | 24,693 | 5,929 | 3,843 | 34,673 |
| 9,438 | 207 | 24,643 | 5,922 | 3,880 | 34,652 |
| 9,439 | 204 | 24,565 | 5,910 | 3,893 | 34,572 |
| 9,440 | 206 | 24,727 | 5,883 | 3,915 | 34,731 |
| 9,441 | 215 | 24,810 | 5,891 | 3,908 | 34,824 |
| 9,442 | 211 | 24,768 | 5,846 | 3,867 | 34,692 |
| 9,443 | 212 | 24,716 | 5,839 | 3,868 | 34,635 |
| 9,444 | 213 | 24,740 | 5,842 | 3,872 | 34,667 |
| 9,445 | 209 | 24,696 | 5,865 | 3,887 | 34,657 |
| 9,446 | 207 | 24,650 | 5,849 | 3,897 | 34,603 |
| 9,447 | 205 | 24,873 | 5,832 | 3,897 | 34,807 |
| 9,448 | 199 | 24,997 | 5,824 | 3,881 | 34,901 |
| 9,449 | 198 | 24,998 | 5,786 | 3,870 | 34,852 |
| 9,450 | 200 | 25,333 | 5,823 | 3,894 | 35,250 |
| 9,451 | 195 | 25,037 | 5,723 | 3,846 | 34,801 |
| 9,452 | 190 | 25,047 | 5,740 | 3,843 | 34,820 |
| 9,453 | 186 | 24,933 | 5,708 | 3,836 | 34,663 |
| 9,454 | 183 | 25,300 | 5,736 | 3,846 | 35,065 |
| 9,455 | 176 | 24,941 | 5,712 | 3,854 | 34,683 |
| 9,456 | 173 | 24,829 | 5,714 | 3,845 | 34,561 |
| 9,457 | 163 | 25,385 | 5,774 | 3,892 | 35,214 |
| 9,458 | 162 | 25,169 | 5,721 | 3,849 | 34,901 |
| 9,459 | 157 | 24,946 | 5,672 | 3,816 | 34,591 |
| 9,460 | 156 | 24,835 | 5,606 | 3,804 | 34,401 |
| 9,461 | 160 | 25,318 | 5,626 | 3,809 | 34,913 |
| 9,462 | 158 | 25,351 | 5,567 | 3,807 | 34,883 |
| 9,463 | 158 | 25,371 | 5,526 | 3,783 | 34,838 |



|       |     |        |       |       |        |
|-------|-----|--------|-------|-------|--------|
| 9,464 | 163 | 25,468 | 5,508 | 3,760 | 34,899 |
| 9,465 | 161 | 25,307 | 5,437 | 3,722 | 34,627 |
| 9,466 | 164 | 25,591 | 5,417 | 3,708 | 34,880 |
| 9,467 | 170 | 25,543 | 5,353 | 3,675 | 34,741 |
| 9,468 | 170 | 25,297 | 5,294 | 3,614 | 34,375 |
| 9,469 | 171 | 25,196 | 5,265 | 3,577 | 34,209 |
| 9,470 | 173 | 25,129 | 5,179 | 3,522 | 34,003 |
| 9,471 | 173 | 25,129 | 5,179 | 3,505 | 33,986 |
| 9,472 | 172 | 25,046 | 5,138 | 3,482 | 33,838 |
| 9,473 | 168 | 25,145 | 5,084 | 3,452 | 33,849 |
| 9,474 | 172 | 25,206 | 5,078 | 3,444 | 33,900 |
| 9,475 | 173 | 25,012 | 4,956 | 3,382 | 33,523 |
| 9,476 | 175 | 24,987 | 4,943 | 3,393 | 33,498 |
| 9,477 | 175 | 25,014 | 4,927 | 3,361 | 33,477 |
| 9,478 | 174 | 25,023 | 4,891 | 3,334 | 33,422 |
| 9,479 | 173 | 24,908 | 4,812 | 3,285 | 33,178 |
| 9,480 | 171 | 24,956 | 4,766 | 3,272 | 33,165 |
| 9,481 | 170 | 24,890 | 4,772 | 3,260 | 33,092 |
| 9,482 | 172 | 25,077 | 4,764 | 3,258 | 33,271 |
| 9,483 | 165 | 24,784 | 4,721 | 3,216 | 32,886 |
| 9,484 | 158 | 24,774 | 4,685 | 3,204 | 32,821 |
| 9,485 | 152 | 24,758 | 4,669 | 3,197 | 32,776 |
| 9,486 | 152 | 24,749 | 4,642 | 3,188 | 32,731 |
| 9,487 | 155 | 24,527 | 4,542 | 3,115 | 32,339 |
| 9,488 | 157 | 24,671 | 4,565 | 3,108 | 32,501 |
| 9,489 | 145 | 24,736 | 4,586 | 3,123 | 32,590 |
| 9,490 | 138 | 24,130 | 4,457 | 2,986 | 31,711 |
| 9,491 | 136 | 24,194 | 4,461 | 2,997 | 31,788 |
| 9,492 | 127 | 24,432 | 4,466 | 3,038 | 32,063 |
| 9,493 | 128 | 24,405 | 4,445 | 3,031 | 32,009 |
| 9,494 | 126 | 24,379 | 4,415 | 3,015 | 31,935 |
| 9,495 | 129 | 24,420 | 4,359 | 2,989 | 31,897 |

|       |     |        |       |       |        |
|-------|-----|--------|-------|-------|--------|
| 9,496 | 129 | 24,467 | 4,357 | 2,975 | 31,928 |
| 9,497 | 124 | 24,465 | 4,355 | 2,972 | 31,916 |
| 9,498 | 122 | 24,363 | 4,317 | 2,942 | 31,744 |
| 9,499 | 122 | 23,759 | 4,169 | 2,851 | 30,901 |
| 9,500 | 129 | 24,056 | 4,221 | 2,865 | 31,271 |
| 9,501 | 132 | 23,533 | 4,078 | 2,778 | 30,521 |
| 9,502 | 131 | 23,523 | 4,083 | 2,787 | 30,524 |
| 9,503 | 132 | 23,659 | 4,096 | 2,824 | 30,711 |
| 9,504 | 136 | 23,566 | 4,032 | 2,792 | 30,526 |
| 9,505 | 135 | 23,206 | 3,953 | 2,752 | 30,046 |
| 9,506 | 131 | 23,120 | 3,894 | 2,728 | 29,873 |
| 9,507 | 136 | 22,813 | 3,842 | 2,707 | 29,498 |
| 9,508 | 138 | 23,048 | 3,903 | 2,757 | 29,846 |
| 9,509 | 138 | 22,777 | 3,878 | 2,730 | 29,523 |
| 9,510 | 137 | 22,812 | 3,925 | 2,742 | 29,616 |
| 9,511 | 135 | 22,890 | 3,934 | 2,744 | 29,703 |
| 9,512 | 140 | 22,552 | 3,905 | 2,728 | 29,325 |
| 9,513 | 140 | 22,338 | 3,872 | 2,693 | 29,043 |
| 9,514 | 147 | 23,090 | 4,062 | 2,799 | 30,098 |
| 9,515 | 143 | 23,079 | 4,072 | 2,820 | 30,114 |
| 9,516 | 147 | 23,252 | 4,152 | 2,873 | 30,424 |
| 9,517 | 147 | 23,121 | 4,162 | 2,870 | 30,300 |
| 9,518 | 145 | 23,497 | 4,295 | 2,942 | 30,879 |
| 9,519 | 141 | 23,174 | 4,248 | 2,920 | 30,483 |
| 9,520 | 142 | 23,260 | 4,303 | 2,962 | 30,667 |
| 9,521 | 139 | 23,197 | 4,323 | 2,980 | 30,639 |
| 9,522 | 137 | 23,365 | 4,404 | 3,032 | 30,938 |
| 9,523 | 139 | 23,620 | 4,505 | 3,120 | 31,384 |
| 9,524 | 136 | 23,534 | 4,505 | 3,121 | 31,296 |
| 9,525 | 132 | 23,566 | 4,527 | 3,148 | 31,373 |
| 9,526 | 132 | 23,730 | 4,633 | 3,200 | 31,695 |
| 9,527 | 127 | 23,794 | 4,701 | 3,213 | 31,835 |

|       |     |        |       |       |        |
|-------|-----|--------|-------|-------|--------|
| 9,528 | 129 | 23,731 | 4,715 | 3,229 | 31,804 |
| 9,529 | 129 | 23,890 | 4,751 | 3,262 | 32,032 |
| 9,530 | 135 | 23,963 | 4,820 | 3,283 | 32,201 |
| 9,531 | 136 | 23,906 | 4,826 | 3,283 | 32,151 |
| 9,532 | 135 | 24,248 | 4,933 | 3,352 | 32,668 |
| 9,533 | 134 | 24,184 | 4,970 | 3,379 | 32,667 |
| 9,534 | 134 | 23,962 | 4,942 | 3,378 | 32,416 |
| 9,535 | 134 | 24,090 | 5,017 | 3,429 | 32,670 |
| 9,536 | 135 | 24,032 | 5,081 | 3,435 | 32,683 |
| 9,537 | 130 | 23,981 | 5,105 | 3,444 | 32,660 |
| 9,538 | 132 | 24,049 | 5,175 | 3,489 | 32,845 |
| 9,539 | 129 | 23,696 | 5,125 | 3,466 | 32,416 |
| 9,540 | 131 | 23,558 | 5,109 | 3,461 | 32,259 |
| 9,541 | 136 | 23,635 | 5,150 | 3,509 | 32,430 |
| 9,542 | 142 | 23,603 | 5,177 | 3,513 | 32,435 |
| 9,543 | 148 | 23,489 | 5,210 | 3,493 | 32,340 |
| 9,544 | 145 | 23,363 | 5,223 | 3,496 | 32,227 |
| 9,545 | 146 | 23,393 | 5,239 | 3,499 | 32,277 |
| 9,546 | 141 | 22,983 | 5,196 | 3,464 | 31,784 |
| 9,547 | 142 | 22,928 | 5,200 | 3,476 | 31,746 |
| 9,548 | 144 | 23,172 | 5,267 | 3,510 | 32,093 |
| 9,549 | 143 | 22,995 | 5,266 | 3,505 | 31,909 |
| 9,550 | 139 | 22,697 | 5,205 | 3,483 | 31,524 |
| 9,551 | 132 | 22,609 | 5,164 | 3,475 | 31,380 |
| 9,552 | 126 | 22,946 | 5,259 | 3,556 | 31,887 |
| 9,553 | 128 | 22,967 | 5,252 | 3,544 | 31,891 |
| 9,554 | 124 | 22,896 | 5,265 | 3,545 | 31,830 |
| 9,555 | 118 | 22,596 | 5,228 | 3,504 | 31,446 |
| 9,556 | 117 | 22,842 | 5,288 | 3,520 | 31,767 |
| 9,557 | 115 | 22,751 | 5,241 | 3,473 | 31,580 |
| 9,558 | 114 | 22,887 | 5,245 | 3,479 | 31,725 |
| 9,559 | 112 | 22,844 | 5,233 | 3,485 | 31,674 |

|       |     |        |       |       |        |
|-------|-----|--------|-------|-------|--------|
| 9,560 | 116 | 22,585 | 5,167 | 3,443 | 31,311 |
| 9,561 | 118 | 22,440 | 5,105 | 3,414 | 31,077 |
| 9,562 | 114 | 22,413 | 5,125 | 3,402 | 31,054 |
| 9,563 | 114 | 22,398 | 5,088 | 3,395 | 30,995 |
| 9,564 | 112 | 22,385 | 5,073 | 3,375 | 30,945 |
| 9,565 | 109 | 21,507 | 4,892 | 3,254 | 29,762 |
| 9,566 | 111 | 21,323 | 4,835 | 3,226 | 29,495 |
| 9,567 | 111 | 21,296 | 4,823 | 3,206 | 29,436 |
| 9,568 | 116 | 21,293 | 4,799 | 3,191 | 29,399 |
| 9,569 | 120 | 21,228 | 4,760 | 3,181 | 29,289 |
| 9,570 | 120 | 21,117 | 4,778 | 3,181 | 29,196 |
| 9,571 | 128 | 22,269 | 5,066 | 3,374 | 30,837 |
| 9,572 | 128 | 22,019 | 5,005 | 3,350 | 30,502 |
| 9,573 | 132 | 22,202 | 5,043 | 3,360 | 30,737 |
| 9,574 | 132 | 22,225 | 5,066 | 3,344 | 30,767 |
| 9,575 | 128 | 21,957 | 4,995 | 3,313 | 30,393 |
| 9,576 | 137 | 22,092 | 5,045 | 3,325 | 30,599 |
| 9,577 | 138 | 22,273 | 5,042 | 3,324 | 30,777 |
| 9,578 | 137 | 22,258 | 5,037 | 3,335 | 30,767 |
| 9,579 | 133 | 22,201 | 5,049 | 3,353 | 30,736 |
| 9,580 | 134 | 22,441 | 5,122 | 3,394 | 31,091 |
| 9,581 | 130 | 22,471 | 5,115 | 3,397 | 31,113 |
| 9,582 | 142 | 22,792 | 5,196 | 3,416 | 31,546 |
| 9,583 | 142 | 22,816 | 5,200 | 3,445 | 31,603 |
| 9,584 | 145 | 22,783 | 5,232 | 3,459 | 31,619 |
| 9,585 | 152 | 22,839 | 5,239 | 3,464 | 31,694 |
| 9,586 | 152 | 22,809 | 5,232 | 3,464 | 31,657 |
| 9,587 | 160 | 22,977 | 5,245 | 3,464 | 31,846 |
| 9,588 | 158 | 23,258 | 5,321 | 3,511 | 32,248 |
| 9,589 | 156 | 23,177 | 5,309 | 3,508 | 32,150 |
| 9,590 | 158 | 23,182 | 5,301 | 3,497 | 32,138 |
| 9,591 | 158 | 23,138 | 5,296 | 3,482 | 32,074 |

|       |     |        |       |       |        |
|-------|-----|--------|-------|-------|--------|
| 9,592 | 157 | 23,270 | 5,315 | 3,506 | 32,248 |
| 9,593 | 157 | 23,620 | 5,393 | 3,548 | 32,718 |
| 9,594 | 151 | 23,410 | 5,346 | 3,508 | 32,415 |
| 9,595 | 154 | 23,680 | 5,373 | 3,555 | 32,762 |
| 9,596 | 157 | 23,768 | 5,437 | 3,586 | 32,948 |
| 9,597 | 160 | 23,959 | 5,465 | 3,590 | 33,174 |
| 9,598 | 167 | 24,098 | 5,489 | 3,624 | 33,378 |
| 9,599 | 165 | 24,232 | 5,518 | 3,641 | 33,556 |
| 9,600 | 166 | 24,374 | 5,533 | 3,663 | 33,736 |
| 9,601 | 167 | 24,467 | 5,546 | 3,659 | 33,839 |
| 9,602 | 168 | 24,449 | 5,556 | 3,658 | 33,831 |
| 9,603 | 169 | 24,336 | 5,537 | 3,628 | 33,670 |
| 9,604 | 172 | 24,509 | 5,610 | 3,678 | 33,969 |
| 9,605 | 173 | 24,535 | 5,597 | 3,669 | 33,974 |
| 9,606 | 179 | 24,819 | 5,595 | 3,698 | 34,291 |
| 9,607 | 191 | 24,702 | 5,627 | 3,723 | 34,243 |
| 9,608 | 193 | 24,757 | 5,647 | 3,719 | 34,316 |
| 9,609 | 200 | 24,583 | 5,631 | 3,705 | 34,119 |
| 9,610 | 203 | 24,801 | 5,674 | 3,714 | 34,392 |
| 9,611 | 195 | 24,413 | 5,594 | 3,679 | 33,881 |
| 9,612 | 196 | 24,423 | 5,581 | 3,679 | 33,879 |
| 9,613 | 193 | 24,353 | 5,568 | 3,694 | 33,808 |
| 9,614 | 192 | 24,410 | 5,589 | 3,720 | 33,911 |
| 9,615 | 188 | 24,277 | 5,667 | 3,770 | 33,902 |
| 9,616 | 194 | 24,425 | 5,699 | 3,804 | 34,122 |
| 9,617 | 190 | 24,352 | 5,691 | 3,808 | 34,041 |
| 9,618 | 189 | 24,210 | 5,670 | 3,805 | 33,874 |
| 9,619 | 187 | 24,183 | 5,690 | 3,801 | 33,861 |
| 9,620 | 179 | 24,230 | 5,689 | 3,783 | 33,881 |
| 9,621 | 180 | 24,406 | 5,643 | 3,763 | 33,992 |
| 9,622 | 180 | 24,227 | 5,592 | 3,704 | 33,703 |
| 9,623 | 180 | 24,367 | 5,608 | 3,714 | 33,869 |

|       |     |        |       |       |        |
|-------|-----|--------|-------|-------|--------|
| 9,624 | 180 | 24,349 | 5,629 | 3,714 | 33,872 |
| 9,625 | 184 | 24,537 | 5,656 | 3,735 | 34,112 |
| 9,626 | 180 | 24,697 | 5,685 | 3,770 | 34,332 |
| 9,627 | 185 | 24,518 | 5,644 | 3,759 | 34,106 |
| 9,628 | 186 | 24,566 | 5,601 | 3,757 | 34,110 |
| 9,629 | 189 | 24,524 | 5,596 | 3,762 | 34,071 |
| 9,630 | 189 | 24,210 | 5,511 | 3,707 | 33,617 |
| 9,631 | 192 | 24,365 | 5,516 | 3,714 | 33,787 |
| 9,632 | 182 | 24,626 | 5,519 | 3,735 | 34,062 |
| 9,633 | 185 | 24,424 | 5,450 | 3,694 | 33,753 |
| 9,634 | 185 | 24,363 | 5,401 | 3,662 | 33,611 |
| 9,635 | 188 | 24,393 | 5,341 | 3,629 | 33,551 |
| 9,636 | 189 | 24,341 | 5,323 | 3,616 | 33,469 |
| 9,637 | 187 | 24,559 | 5,333 | 3,615 | 33,694 |
| 9,638 | 184 | 24,556 | 5,326 | 3,651 | 33,717 |
| 9,639 | 185 | 24,177 | 5,202 | 3,581 | 33,145 |
| 9,640 | 182 | 24,154 | 5,179 | 3,564 | 33,079 |
| 9,641 | 185 | 24,150 | 5,165 | 3,550 | 33,050 |
| 9,642 | 181 | 24,101 | 5,181 | 3,538 | 33,001 |
| 9,643 | 177 | 24,020 | 5,180 | 3,545 | 32,922 |
| 9,644 | 177 | 23,885 | 5,148 | 3,555 | 32,765 |
| 9,645 | 187 | 23,816 | 5,135 | 3,533 | 32,671 |
| 9,646 | 189 | 23,684 | 5,098 | 3,512 | 32,483 |
| 9,647 | 185 | 23,552 | 5,043 | 3,486 | 32,266 |
| 9,648 | 188 | 23,674 | 5,084 | 3,517 | 32,463 |
| 9,649 | 187 | 23,654 | 5,063 | 3,514 | 32,418 |
| 9,650 | 188 | 23,658 | 5,085 | 3,504 | 32,435 |
| 9,651 | 190 | 23,633 | 5,057 | 3,499 | 32,379 |
| 9,652 | 190 | 23,598 | 5,082 | 3,494 | 32,364 |
| 9,653 | 196 | 23,772 | 5,151 | 3,530 | 32,649 |
| 9,654 | 194 | 23,765 | 5,140 | 3,530 | 32,629 |
| 9,655 | 196 | 23,534 | 5,100 | 3,511 | 32,341 |

|       |     |        |       |       |        |
|-------|-----|--------|-------|-------|--------|
| 9,656 | 197 | 23,429 | 5,132 | 3,520 | 32,278 |
| 9,657 | 193 | 23,435 | 5,179 | 3,545 | 32,352 |
| 9,658 | 182 | 23,287 | 5,118 | 3,502 | 32,089 |
| 9,659 | 182 | 23,457 | 5,146 | 3,563 | 32,348 |
| 9,660 | 173 | 23,195 | 5,119 | 3,542 | 32,029 |
| 9,661 | 169 | 23,106 | 5,132 | 3,557 | 31,964 |
| 9,662 | 166 | 22,942 | 5,130 | 3,541 | 31,779 |
| 9,663 | 165 | 22,927 | 5,141 | 3,548 | 31,781 |
| 9,664 | 178 | 23,020 | 5,126 | 3,509 | 31,833 |
| 9,665 | 181 | 22,965 | 5,030 | 3,431 | 31,607 |
| 9,666 | 183 | 23,313 | 5,050 | 3,450 | 31,996 |
| 9,667 | 178 | 23,265 | 5,072 | 3,463 | 31,978 |
| 9,668 | 182 | 23,742 | 5,163 | 3,509 | 32,596 |
| 9,669 | 177 | 23,521 | 5,117 | 3,501 | 32,316 |
| 9,670 | 174 | 23,334 | 5,069 | 3,487 | 32,064 |
| 9,671 | 174 | 23,192 | 5,072 | 3,501 | 31,939 |
| 9,672 | 169 | 23,120 | 5,082 | 3,488 | 31,859 |
| 9,673 | 169 | 23,093 | 5,092 | 3,489 | 31,843 |
| 9,674 | 164 | 23,189 | 5,107 | 3,492 | 31,952 |
| 9,675 | 164 | 23,127 | 5,102 | 3,506 | 31,899 |
| 9,676 | 161 | 23,184 | 5,100 | 3,499 | 31,944 |
| 9,677 | 158 | 22,860 | 5,045 | 3,458 | 31,521 |
| 9,678 | 155 | 22,956 | 5,066 | 3,448 | 31,625 |
| 9,679 | 151 | 22,738 | 5,034 | 3,403 | 31,326 |
| 9,680 | 153 | 22,527 | 5,024 | 3,368 | 31,072 |
| 9,681 | 154 | 22,620 | 5,007 | 3,380 | 31,161 |
| 9,682 | 154 | 22,308 | 4,965 | 3,348 | 30,775 |
| 9,683 | 159 | 22,107 | 4,956 | 3,327 | 30,549 |
| 9,684 | 152 | 21,506 | 4,848 | 3,259 | 29,765 |
| 9,685 | 152 | 21,571 | 4,872 | 3,259 | 29,854 |
| 9,686 | 146 | 21,333 | 4,855 | 3,225 | 29,559 |
| 9,687 | 144 | 21,302 | 4,826 | 3,231 | 29,503 |

|       |     |        |       |       |        |
|-------|-----|--------|-------|-------|--------|
| 9,688 | 148 | 21,924 | 4,960 | 3,293 | 30,325 |
| 9,689 | 148 | 21,861 | 4,960 | 3,284 | 30,253 |
| 9,690 | 148 | 21,893 | 4,990 | 3,293 | 30,324 |
| 9,691 | 144 | 22,166 | 5,052 | 3,324 | 30,686 |
| 9,692 | 147 | 22,182 | 5,061 | 3,353 | 30,743 |
| 9,693 | 148 | 22,453 | 5,104 | 3,392 | 31,097 |
| 9,694 | 145 | 22,201 | 5,060 | 3,345 | 30,751 |
| 9,695 | 141 | 22,267 | 5,115 | 3,402 | 30,925 |
| 9,696 | 142 | 22,574 | 5,180 | 3,440 | 31,336 |
| 9,697 | 135 | 22,242 | 5,101 | 3,391 | 30,869 |
| 9,698 | 137 | 22,517 | 5,140 | 3,411 | 31,205 |
| 9,699 | 133 | 22,248 | 5,083 | 3,376 | 30,840 |
| 9,700 | 131 | 22,005 | 5,041 | 3,331 | 30,508 |
| 9,701 | 136 | 22,278 | 5,088 | 3,370 | 30,872 |
| 9,702 | 133 | 21,926 | 5,040 | 3,326 | 30,425 |
| 9,703 | 140 | 22,058 | 5,029 | 3,340 | 30,567 |
| 9,704 | 134 | 22,119 | 4,988 | 3,331 | 30,572 |
| 9,705 | 132 | 21,961 | 4,928 | 3,281 | 30,302 |
| 9,706 | 133 | 21,697 | 4,819 | 3,194 | 29,843 |
| 9,707 | 134 | 21,934 | 4,854 | 3,229 | 30,151 |
| 9,708 | 132 | 22,292 | 4,889 | 3,262 | 30,575 |
| 9,709 | 133 | 22,364 | 4,903 | 3,262 | 30,662 |
| 9,710 | 132 | 22,120 | 4,864 | 3,205 | 30,321 |
| 9,711 | 134 | 21,742 | 4,736 | 3,134 | 29,746 |
| 9,712 | 134 | 21,795 | 4,750 | 3,141 | 29,820 |
| 9,713 | 142 | 21,549 | 4,717 | 3,112 | 29,520 |
| 9,714 | 138 | 21,241 | 4,686 | 3,084 | 29,149 |
| 9,715 | 145 | 22,382 | 4,956 | 3,279 | 30,762 |
| 9,716 | 141 | 22,297 | 4,975 | 3,296 | 30,709 |
| 9,717 | 142 | 22,042 | 4,983 | 3,295 | 30,462 |
| 9,718 | 150 | 21,926 | 4,942 | 3,251 | 30,269 |
| 9,719 | 146 | 21,642 | 4,909 | 3,218 | 29,915 |



|       |     |        |       |       |        |
|-------|-----|--------|-------|-------|--------|
| 9,720 | 151 | 21,755 | 4,916 | 3,206 | 30,028 |
| 9,721 | 150 | 21,752 | 4,945 | 3,204 | 30,051 |
| 9,722 | 150 | 21,921 | 4,950 | 3,217 | 30,238 |
| 9,723 | 154 | 22,094 | 4,950 | 3,219 | 30,417 |
| 9,724 | 161 | 22,080 | 4,906 | 3,211 | 30,358 |
| 9,725 | 161 | 22,096 | 4,933 | 3,198 | 30,388 |
| 9,726 | 162 | 22,120 | 4,899 | 3,183 | 30,364 |
| 9,727 | 166 | 22,460 | 4,945 | 3,230 | 30,801 |
| 9,728 | 164 | 22,605 | 4,981 | 3,232 | 30,982 |
| 9,729 | 162 | 22,479 | 4,932 | 3,214 | 30,787 |
| 9,730 | 161 | 22,446 | 4,940 | 3,227 | 30,774 |
| 9,731 | 163 | 22,400 | 4,954 | 3,221 | 30,738 |
| 9,732 | 160 | 22,652 | 5,035 | 3,228 | 31,075 |
| 9,733 | 152 | 22,487 | 5,000 | 3,218 | 30,857 |
| 9,734 | 152 | 22,675 | 5,007 | 3,233 | 31,067 |
| 9,735 | 151 | 22,431 | 4,955 | 3,205 | 30,742 |
| 9,736 | 149 | 22,340 | 4,959 | 3,211 | 30,659 |
| 9,737 | 148 | 22,504 | 4,997 | 3,244 | 30,893 |
| 9,738 | 143 | 22,324 | 4,977 | 3,210 | 30,654 |
| 9,739 | 144 | 22,508 | 5,017 | 3,267 | 30,936 |
| 9,740 | 148 | 22,605 | 5,053 | 3,268 | 31,074 |
| 9,741 | 150 | 22,511 | 5,070 | 3,253 | 30,984 |
| 9,742 | 151 | 22,501 | 5,041 | 3,244 | 30,937 |
| 9,743 | 149 | 22,353 | 5,012 | 3,211 | 30,725 |
| 9,744 | 151 | 22,512 | 5,058 | 3,255 | 30,976 |
| 9,745 | 159 | 21,695 | 4,831 | 3,080 | 29,765 |
| 9,746 | 161 | 21,991 | 4,881 | 3,108 | 30,141 |
| 9,747 | 154 | 22,150 | 4,906 | 3,142 | 30,352 |
| 9,748 | 158 | 22,220 | 4,930 | 3,147 | 30,455 |
| 9,749 | 156 | 22,505 | 4,994 | 3,181 | 30,836 |
| 9,750 | 158 | 22,510 | 4,977 | 3,180 | 30,825 |
| 9,751 | 157 | 22,549 | 4,989 | 3,171 | 30,866 |

|       |     |        |       |       |        |
|-------|-----|--------|-------|-------|--------|
| 9,752 | 160 | 22,454 | 4,948 | 3,181 | 30,743 |
| 9,753 | 159 | 22,449 | 4,952 | 3,184 | 30,744 |
| 9,754 | 152 | 22,321 | 4,932 | 3,180 | 30,585 |
| 9,755 | 157 | 22,508 | 4,994 | 3,213 | 30,872 |
| 9,756 | 158 | 22,478 | 4,991 | 3,214 | 30,841 |
| 9,757 | 154 | 22,236 | 4,957 | 3,205 | 30,552 |
| 9,758 | 158 | 21,819 | 4,862 | 3,162 | 30,001 |
| 9,759 | 163 | 21,988 | 4,919 | 3,172 | 30,242 |
| 9,760 | 166 | 22,367 | 4,952 | 3,199 | 30,684 |
| 9,761 | 171 | 22,410 | 4,948 | 3,189 | 30,718 |
| 9,762 | 171 | 22,381 | 4,952 | 3,200 | 30,704 |
| 9,763 | 171 | 22,371 | 4,970 | 3,208 | 30,720 |
| 9,764 | 163 | 22,573 | 4,995 | 3,220 | 30,951 |
| 9,765 | 153 | 22,951 | 5,026 | 3,251 | 31,381 |
| 9,766 | 158 | 23,290 | 5,097 | 3,293 | 31,838 |
| 9,767 | 152 | 23,019 | 5,010 | 3,230 | 31,411 |
| 9,768 | 150 | 23,337 | 5,091 | 3,267 | 31,845 |
| 9,769 | 146 | 23,293 | 5,125 | 3,285 | 31,849 |
| 9,770 | 146 | 23,524 | 5,137 | 3,334 | 32,141 |
| 9,771 | 142 | 23,254 | 5,100 | 3,308 | 31,804 |
| 9,772 | 143 | 23,224 | 5,127 | 3,318 | 31,812 |
| 9,773 | 150 | 22,925 | 5,085 | 3,294 | 31,454 |
| 9,774 | 148 | 22,739 | 5,083 | 3,287 | 31,257 |
| 9,775 | 152 | 23,730 | 5,320 | 3,428 | 32,630 |
| 9,776 | 154 | 23,591 | 5,284 | 3,397 | 32,426 |
| 9,777 | 152 | 23,339 | 5,259 | 3,375 | 32,125 |
| 9,778 | 153 | 23,733 | 5,354 | 3,430 | 32,670 |
| 9,779 | 150 | 23,614 | 5,287 | 3,424 | 32,475 |
| 9,780 | 153 | 23,452 | 5,220 | 3,372 | 32,197 |
| 9,781 | 154 | 23,956 | 5,267 | 3,435 | 32,812 |
| 9,782 | 156 | 24,350 | 5,342 | 3,482 | 33,330 |
| 9,783 | 159 | 24,419 | 5,323 | 3,497 | 33,398 |

|       |     |        |       |       |        |
|-------|-----|--------|-------|-------|--------|
| 9,784 | 160 | 24,566 | 5,364 | 3,512 | 33,602 |
| 9,785 | 159 | 24,359 | 5,352 | 3,509 | 33,379 |
| 9,786 | 158 | 24,297 | 5,350 | 3,504 | 33,309 |
| 9,787 | 159 | 24,495 | 5,401 | 3,518 | 33,573 |
| 9,788 | 151 | 24,428 | 5,398 | 3,536 | 33,513 |
| 9,789 | 155 | 24,295 | 5,408 | 3,521 | 33,379 |
| 9,790 | 152 | 24,199 | 5,401 | 3,488 | 33,240 |
| 9,791 | 148 | 23,862 | 5,330 | 3,447 | 32,787 |
| 9,792 | 145 | 23,894 | 5,269 | 3,446 | 32,754 |
| 9,793 | 153 | 23,895 | 5,295 | 3,456 | 32,799 |
| 9,794 | 157 | 23,899 | 5,246 | 3,422 | 32,724 |
| 9,795 | 151 | 23,601 | 5,170 | 3,382 | 32,304 |
| 9,796 | 165 | 23,668 | 5,189 | 3,408 | 32,430 |
| 9,797 | 162 | 23,443 | 5,117 | 3,358 | 32,080 |
| 9,798 | 164 | 23,700 | 5,159 | 3,381 | 32,404 |
| 9,799 | 160 | 23,375 | 5,077 | 3,357 | 31,969 |
| 9,800 | 163 | 23,609 | 5,122 | 3,384 | 32,278 |
| 9,801 | 161 | 23,633 | 5,131 | 3,363 | 32,288 |
| 9,802 | 155 | 23,412 | 5,084 | 3,329 | 31,980 |
| 9,803 | 155 | 23,507 | 5,083 | 3,325 | 32,070 |
| 9,804 | 163 | 23,493 | 5,087 | 3,297 | 32,040 |
| 9,805 | 158 | 23,529 | 5,074 | 3,288 | 32,049 |
| 9,806 | 158 | 23,430 | 5,053 | 3,287 | 31,928 |
| 9,807 | 155 | 23,422 | 5,068 | 3,279 | 31,924 |
| 9,808 | 155 | 23,343 | 5,033 | 3,246 | 31,777 |
| 9,809 | 153 | 23,084 | 4,971 | 3,198 | 31,406 |
| 9,810 | 149 | 22,889 | 4,918 | 3,181 | 31,137 |
| 9,811 | 152 | 23,015 | 4,974 | 3,217 | 31,358 |
| 9,812 | 148 | 22,719 | 4,904 | 3,169 | 30,940 |
| 9,813 | 148 | 22,689 | 4,903 | 3,163 | 30,903 |
| 9,814 | 152 | 22,700 | 4,900 | 3,180 | 30,932 |
| 9,815 | 153 | 22,600 | 4,835 | 3,140 | 30,728 |

|       |     |        |       |       |        |
|-------|-----|--------|-------|-------|--------|
| 9,816 | 154 | 22,389 | 4,785 | 3,095 | 30,423 |
| 9,817 | 152 | 22,080 | 4,703 | 3,035 | 29,970 |
| 9,818 | 150 | 21,780 | 4,590 | 2,985 | 29,505 |
| 9,819 | 156 | 21,698 | 4,556 | 2,974 | 29,384 |
| 9,820 | 155 | 21,561 | 4,492 | 2,943 | 29,151 |
| 9,821 | 152 | 21,350 | 4,453 | 2,918 | 28,873 |
| 9,822 | 161 | 21,547 | 4,483 | 2,920 | 29,111 |
| 9,823 | 164 | 21,277 | 4,401 | 2,875 | 28,717 |
| 9,824 | 153 | 21,011 | 4,280 | 2,819 | 28,263 |
| 9,825 | 154 | 21,186 | 4,272 | 2,813 | 28,425 |
| 9,826 | 150 | 20,993 | 4,194 | 2,779 | 28,116 |
| 9,827 | 147 | 20,406 | 4,030 | 2,693 | 27,276 |
| 9,828 | 146 | 20,375 | 4,018 | 2,685 | 27,224 |
| 9,829 | 152 | 20,071 | 3,947 | 2,634 | 26,804 |
| 9,830 | 151 | 19,769 | 3,911 | 2,591 | 26,422 |
| 9,831 | 148 | 20,396 | 4,039 | 2,702 | 27,285 |
| 9,832 | 155 | 20,325 | 4,074 | 2,718 | 27,272 |
| 9,833 | 156 | 20,138 | 4,035 | 2,710 | 27,039 |
| 9,834 | 159 | 19,970 | 3,991 | 2,687 | 26,807 |
| 9,835 | 160 | 20,146 | 3,990 | 2,710 | 27,006 |
| 9,836 | 162 | 20,441 | 4,008 | 2,713 | 27,324 |
| 9,837 | 162 | 20,448 | 4,012 | 2,735 | 27,357 |
| 9,838 | 169 | 20,649 | 4,045 | 2,735 | 27,598 |
| 9,839 | 170 | 20,773 | 4,031 | 2,723 | 27,697 |
| 9,840 | 171 | 20,982 | 4,106 | 2,747 | 28,006 |
| 9,841 | 171 | 21,027 | 4,094 | 2,747 | 28,039 |
| 9,842 | 182 | 21,416 | 4,221 | 2,804 | 28,623 |
| 9,843 | 180 | 21,376 | 4,234 | 2,801 | 28,591 |
| 9,844 | 177 | 21,668 | 4,278 | 2,844 | 28,967 |
| 9,845 | 173 | 21,935 | 4,329 | 2,901 | 29,338 |
| 9,846 | 173 | 22,064 | 4,357 | 2,903 | 29,497 |
| 9,847 | 159 | 22,009 | 4,338 | 2,886 | 29,392 |

|       |     |        |       |       |        |
|-------|-----|--------|-------|-------|--------|
| 9,848 | 163 | 22,100 | 4,340 | 2,904 | 29,507 |
| 9,849 | 164 | 22,272 | 4,388 | 2,936 | 29,760 |
| 9,850 | 169 | 22,370 | 4,445 | 2,960 | 29,944 |
| 9,851 | 169 | 22,369 | 4,423 | 2,939 | 29,900 |
| 9,852 | 173 | 22,346 | 4,471 | 2,996 | 29,986 |
| 9,853 | 178 | 22,288 | 4,464 | 2,988 | 29,918 |
| 9,854 | 171 | 22,100 | 4,432 | 2,983 | 29,686 |
| 9,855 | 176 | 22,701 | 4,574 | 3,083 | 30,534 |
| 9,856 | 184 | 22,812 | 4,572 | 3,089 | 30,657 |
| 9,857 | 184 | 23,013 | 4,576 | 3,076 | 30,849 |
| 9,858 | 189 | 22,909 | 4,553 | 3,080 | 30,731 |
| 9,859 | 190 | 22,954 | 4,545 | 3,082 | 30,771 |
| 9,860 | 186 | 23,156 | 4,568 | 3,117 | 31,027 |
| 9,861 | 184 | 22,917 | 4,530 | 3,084 | 30,715 |
| 9,862 | 186 | 23,140 | 4,548 | 3,102 | 30,976 |
| 9,863 | 183 | 23,657 | 4,651 | 3,171 | 31,662 |
| 9,864 | 178 | 23,638 | 4,617 | 3,157 | 31,590 |
| 9,865 | 181 | 23,788 | 4,690 | 3,179 | 31,838 |
| 9,866 | 178 | 23,581 | 4,677 | 3,183 | 31,619 |
| 9,867 | 181 | 23,823 | 4,711 | 3,215 | 31,930 |
| 9,868 | 176 | 23,857 | 4,706 | 3,216 | 31,955 |
| 9,869 | 179 | 24,175 | 4,797 | 3,258 | 32,409 |
| 9,870 | 181 | 24,295 | 4,830 | 3,269 | 32,575 |
| 9,871 | 185 | 24,381 | 4,871 | 3,285 | 32,722 |
| 9,872 | 189 | 23,976 | 4,836 | 3,241 | 32,242 |
| 9,873 | 194 | 24,098 | 4,825 | 3,259 | 32,376 |
| 9,874 | 191 | 24,055 | 4,813 | 3,263 | 32,322 |
| 9,875 | 199 | 23,776 | 4,794 | 3,226 | 31,995 |
| 9,876 | 199 | 23,534 | 4,749 | 3,203 | 31,685 |
| 9,877 | 211 | 23,767 | 4,840 | 3,252 | 32,070 |
| 9,878 | 208 | 23,527 | 4,808 | 3,249 | 31,792 |
| 9,879 | 217 | 24,177 | 4,996 | 3,350 | 32,740 |

|       |     |        |       |       |        |
|-------|-----|--------|-------|-------|--------|
| 9,880 | 212 | 24,184 | 5,033 | 3,352 | 32,781 |
| 9,881 | 213 | 24,193 | 5,026 | 3,354 | 32,786 |
| 9,882 | 208 | 24,493 | 5,075 | 3,364 | 33,140 |
| 9,883 | 218 | 24,511 | 5,083 | 3,366 | 33,178 |
| 9,884 | 217 | 24,365 | 5,061 | 3,355 | 32,998 |
| 9,885 | 216 | 24,705 | 5,154 | 3,408 | 33,483 |
| 9,886 | 217 | 24,526 | 5,139 | 3,378 | 33,260 |
| 9,887 | 218 | 24,544 | 5,144 | 3,401 | 33,307 |
| 9,888 | 218 | 24,575 | 5,119 | 3,394 | 33,306 |
| 9,889 | 221 | 24,671 | 5,148 | 3,440 | 33,480 |
| 9,890 | 223 | 24,222 | 5,044 | 3,411 | 32,900 |
| 9,891 | 225 | 24,454 | 5,019 | 3,420 | 33,118 |
| 9,892 | 213 | 24,549 | 5,064 | 3,447 | 33,273 |
| 9,893 | 215 | 24,610 | 5,100 | 3,473 | 33,398 |
| 9,894 | 217 | 24,410 | 5,078 | 3,464 | 33,169 |
| 9,895 | 221 | 24,380 | 5,050 | 3,435 | 33,086 |
| 9,896 | 221 | 24,327 | 5,035 | 3,417 | 33,000 |
| 9,897 | 221 | 24,262 | 5,033 | 3,423 | 32,939 |
| 9,898 | 220 | 24,251 | 5,058 | 3,440 | 32,969 |
| 9,899 | 225 | 24,242 | 5,057 | 3,418 | 32,942 |
| 9,900 | 232 | 24,232 | 5,042 | 3,418 | 32,924 |
| 9,901 | 237 | 24,318 | 5,046 | 3,430 | 33,031 |
| 9,902 | 237 | 24,378 | 5,042 | 3,422 | 33,079 |
| 9,903 | 227 | 24,443 | 5,022 | 3,397 | 33,089 |
| 9,904 | 228 | 24,499 | 5,007 | 3,405 | 33,139 |
| 9,905 | 228 | 24,456 | 4,983 | 3,377 | 33,044 |
| 9,906 | 227 | 24,398 | 4,976 | 3,384 | 32,985 |
| 9,907 | 220 | 24,345 | 5,000 | 3,391 | 32,956 |
| 9,908 | 226 | 24,256 | 5,028 | 3,406 | 32,916 |
| 9,909 | 225 | 23,956 | 4,987 | 3,381 | 32,549 |
| 9,910 | 233 | 23,951 | 4,998 | 3,391 | 32,573 |
| 9,911 | 232 | 23,886 | 5,013 | 3,388 | 32,519 |

|       |     |        |       |       |        |
|-------|-----|--------|-------|-------|--------|
| 9,912 | 236 | 24,019 | 5,032 | 3,414 | 32,701 |
| 9,913 | 241 | 23,604 | 4,999 | 3,386 | 32,230 |
| 9,914 | 239 | 23,394 | 4,982 | 3,376 | 31,991 |
| 9,915 | 240 | 23,610 | 5,026 | 3,433 | 32,309 |
| 9,916 | 245 | 23,589 | 5,026 | 3,441 | 32,301 |
| 9,917 | 246 | 23,543 | 5,045 | 3,466 | 32,300 |
| 9,918 | 246 | 23,709 | 5,090 | 3,487 | 32,532 |
| 9,919 | 244 | 23,623 | 5,098 | 3,496 | 32,461 |
| 9,920 | 245 | 23,604 | 5,092 | 3,488 | 32,429 |
| 9,921 | 251 | 23,641 | 5,072 | 3,475 | 32,439 |
| 9,922 | 251 | 23,709 | 5,068 | 3,483 | 32,511 |
| 9,923 | 244 | 23,912 | 5,081 | 3,509 | 32,746 |
| 9,924 | 243 | 23,931 | 5,091 | 3,512 | 32,777 |
| 9,925 | 223 | 23,775 | 5,056 | 3,497 | 32,551 |
| 9,926 | 233 | 23,961 | 5,064 | 3,517 | 32,775 |
| 9,927 | 231 | 24,276 | 5,088 | 3,542 | 33,137 |
| 9,928 | 228 | 24,217 | 5,066 | 3,524 | 33,035 |
| 9,929 | 230 | 24,291 | 5,078 | 3,534 | 33,133 |
| 9,930 | 232 | 24,126 | 5,030 | 3,532 | 32,920 |
| 9,931 | 232 | 24,283 | 5,032 | 3,530 | 33,077 |
| 9,932 | 231 | 24,147 | 4,999 | 3,504 | 32,881 |
| 9,933 | 230 | 24,163 | 4,993 | 3,508 | 32,894 |
| 9,934 | 225 | 24,278 | 4,976 | 3,499 | 32,978 |
| 9,935 | 226 | 24,397 | 4,960 | 3,493 | 33,076 |
| 9,936 | 225 | 24,231 | 4,909 | 3,447 | 32,812 |
| 9,937 | 225 | 24,058 | 4,873 | 3,414 | 32,570 |
| 9,938 | 228 | 24,257 | 4,896 | 3,413 | 32,794 |
| 9,939 | 220 | 23,841 | 4,789 | 3,356 | 32,206 |
| 9,940 | 221 | 24,072 | 4,816 | 3,376 | 32,485 |
| 9,941 | 216 | 23,904 | 4,765 | 3,339 | 32,224 |
| 9,942 | 221 | 23,748 | 4,715 | 3,309 | 31,993 |
| 9,943 | 232 | 23,792 | 4,651 | 3,274 | 31,949 |

|       |     |        |       |       |        |
|-------|-----|--------|-------|-------|--------|
| 9,944 | 234 | 23,879 | 4,680 | 3,268 | 32,061 |
| 9,945 | 226 | 23,673 | 4,604 | 3,230 | 31,733 |
| 9,946 | 225 | 23,653 | 4,609 | 3,243 | 31,730 |
| 9,947 | 227 | 23,807 | 4,641 | 3,268 | 31,943 |
| 9,948 | 225 | 23,490 | 4,544 | 3,172 | 31,431 |
| 9,949 | 223 | 23,508 | 4,564 | 3,193 | 31,488 |
| 9,950 | 216 | 23,334 | 4,517 | 3,172 | 31,239 |
| 9,951 | 216 | 23,339 | 4,539 | 3,171 | 31,265 |
| 9,952 | 214 | 23,394 | 4,557 | 3,199 | 31,364 |
| 9,953 | 214 | 23,251 | 4,533 | 3,195 | 31,193 |
| 9,954 | 215 | 23,146 | 4,543 | 3,188 | 31,092 |
| 9,955 | 213 | 23,135 | 4,541 | 3,178 | 31,067 |
| 9,956 | 211 | 23,003 | 4,540 | 3,182 | 30,936 |
| 9,957 | 214 | 23,176 | 4,524 | 3,158 | 31,072 |
| 9,958 | 212 | 23,035 | 4,470 | 3,126 | 30,843 |
| 9,959 | 211 | 22,877 | 4,434 | 3,111 | 30,633 |
| 9,960 | 203 | 22,688 | 4,391 | 3,083 | 30,365 |
| 9,961 | 197 | 23,016 | 4,406 | 3,094 | 30,713 |
| 9,962 | 203 | 22,795 | 4,343 | 3,061 | 30,402 |
| 9,963 | 197 | 22,515 | 4,302 | 3,024 | 30,038 |
| 9,964 | 192 | 22,985 | 4,325 | 3,032 | 30,534 |
| 9,965 | 194 | 23,148 | 4,321 | 3,001 | 30,664 |
| 9,966 | 189 | 22,971 | 4,262 | 2,964 | 30,386 |
| 9,967 | 189 | 22,849 | 4,239 | 2,923 | 30,200 |
| 9,968 | 190 | 22,787 | 4,181 | 2,877 | 30,035 |
| 9,969 | 187 | 22,544 | 4,113 | 2,850 | 29,694 |
| 9,970 | 186 | 22,567 | 4,096 | 2,831 | 29,680 |
| 9,971 | 183 | 22,493 | 4,082 | 2,821 | 29,579 |
| 9,972 | 174 | 22,469 | 4,092 | 2,826 | 29,561 |
| 9,973 | 175 | 22,450 | 4,085 | 2,812 | 29,522 |
| 9,974 | 168 | 22,445 | 4,061 | 2,810 | 29,484 |
| 9,975 | 169 | 22,036 | 3,967 | 2,736 | 28,908 |



|        |     |        |       |       |        |
|--------|-----|--------|-------|-------|--------|
| 9,976  | 169 | 22,002 | 3,955 | 2,734 | 28,860 |
| 9,977  | 160 | 21,862 | 3,950 | 2,718 | 28,690 |
| 9,978  | 159 | 21,857 | 3,953 | 2,718 | 28,687 |
| 9,979  | 155 | 21,403 | 3,860 | 2,637 | 28,055 |
| 9,980  | 160 | 21,476 | 3,873 | 2,632 | 28,141 |
| 9,981  | 160 | 21,755 | 3,915 | 2,655 | 28,485 |
| 9,982  | 165 | 21,454 | 3,834 | 2,601 | 28,054 |
| 9,983  | 164 | 21,475 | 3,837 | 2,613 | 28,089 |
| 9,984  | 176 | 21,417 | 3,831 | 2,591 | 28,015 |
| 9,985  | 177 | 21,354 | 3,822 | 2,599 | 27,952 |
| 9,986  | 172 | 21,404 | 3,835 | 2,610 | 28,021 |
| 9,987  | 169 | 20,899 | 3,776 | 2,572 | 27,416 |
| 9,988  | 168 | 20,759 | 3,757 | 2,560 | 27,244 |
| 9,989  | 165 | 20,625 | 3,731 | 2,561 | 27,082 |
| 9,990  | 174 | 20,704 | 3,746 | 2,570 | 27,194 |
| 9,991  | 172 | 20,441 | 3,701 | 2,547 | 26,861 |
| 9,992  | 163 | 20,076 | 3,626 | 2,506 | 26,371 |
| 9,993  | 164 | 20,212 | 3,674 | 2,531 | 26,581 |
| 9,994  | 157 | 20,379 | 3,735 | 2,572 | 26,843 |
| 9,995  | 153 | 20,132 | 3,677 | 2,546 | 26,508 |
| 9,996  | 150 | 20,131 | 3,699 | 2,542 | 26,522 |
| 9,997  | 147 | 20,048 | 3,687 | 2,530 | 26,412 |
| 9,998  | 150 | 20,014 | 3,657 | 2,507 | 26,328 |
| 9,999  | 152 | 20,226 | 3,720 | 2,548 | 26,646 |
| 10,000 | 146 | 20,458 | 3,768 | 2,582 | 26,954 |
| 10,001 | 144 | 20,389 | 3,777 | 2,589 | 26,899 |
| 10,002 | 138 | 20,305 | 3,729 | 2,541 | 26,713 |
| 10,003 | 136 | 20,386 | 3,710 | 2,543 | 26,775 |
| 10,004 | 139 | 20,702 | 3,791 | 2,588 | 27,220 |
| 10,005 | 139 | 20,508 | 3,722 | 2,570 | 26,939 |
| 10,006 | 139 | 20,446 | 3,729 | 2,562 | 26,876 |
| 10,007 | 140 | 20,963 | 3,786 | 2,619 | 27,508 |

|        |     |        |       |       |        |
|--------|-----|--------|-------|-------|--------|
| 10,008 | 137 | 20,926 | 3,817 | 2,627 | 27,507 |
| 10,009 | 137 | 20,749 | 3,837 | 2,626 | 27,349 |
| 10,010 | 139 | 20,885 | 3,874 | 2,638 | 27,536 |
| 10,011 | 140 | 20,914 | 3,929 | 2,678 | 27,661 |
| 10,012 | 139 | 20,906 | 3,936 | 2,684 | 27,665 |
| 10,013 | 130 | 21,019 | 4,006 | 2,728 | 27,883 |
| 10,014 | 135 | 21,117 | 4,018 | 2,736 | 28,006 |
| 10,015 | 135 | 20,959 | 4,006 | 2,746 | 27,846 |
| 10,016 | 143 | 21,122 | 4,044 | 2,759 | 28,068 |
| 10,017 | 143 | 21,044 | 4,059 | 2,766 | 28,012 |
| 10,018 | 144 | 21,091 | 4,094 | 2,789 | 28,118 |
| 10,019 | 143 | 20,886 | 4,092 | 2,760 | 27,881 |
| 10,020 | 143 | 20,692 | 4,050 | 2,747 | 27,632 |
| 10,021 | 154 | 21,430 | 4,246 | 2,871 | 28,701 |
| 10,022 | 158 | 21,522 | 4,288 | 2,911 | 28,879 |
| 10,023 | 155 | 21,012 | 4,216 | 2,858 | 28,241 |
| 10,024 | 160 | 21,321 | 4,263 | 2,910 | 28,654 |
| 10,025 | 160 | 21,564 | 4,345 | 2,944 | 29,013 |
| 10,026 | 166 | 21,815 | 4,384 | 2,968 | 29,333 |
| 10,027 | 166 | 21,847 | 4,411 | 2,971 | 29,395 |
| 10,028 | 175 | 22,056 | 4,509 | 3,042 | 29,782 |
| 10,029 | 185 | 22,252 | 4,563 | 3,079 | 30,079 |
| 10,030 | 191 | 22,105 | 4,527 | 3,062 | 29,885 |
| 10,031 | 185 | 22,009 | 4,526 | 3,060 | 29,780 |
| 10,032 | 180 | 22,356 | 4,649 | 3,151 | 30,336 |
| 10,033 | 181 | 22,357 | 4,652 | 3,154 | 30,344 |
| 10,034 | 175 | 22,823 | 4,751 | 3,226 | 30,975 |
| 10,035 | 164 | 22,705 | 4,729 | 3,217 | 30,815 |
| 10,036 | 163 | 23,171 | 4,815 | 3,264 | 31,413 |
| 10,037 | 162 | 23,402 | 4,851 | 3,291 | 31,706 |
| 10,038 | 169 | 23,280 | 4,862 | 3,297 | 31,608 |
| 10,039 | 175 | 23,530 | 4,907 | 3,345 | 31,957 |

|        |     |        |       |       |        |
|--------|-----|--------|-------|-------|--------|
| 10,040 | 171 | 23,798 | 4,963 | 3,375 | 32,307 |
| 10,041 | 165 | 23,500 | 4,936 | 3,349 | 31,950 |
| 10,042 | 164 | 23,407 | 4,937 | 3,372 | 31,880 |
| 10,043 | 164 | 23,625 | 5,021 | 3,416 | 32,226 |
| 10,044 | 162 | 23,731 | 5,047 | 3,432 | 32,372 |
| 10,045 | 164 | 23,819 | 5,052 | 3,422 | 32,457 |
| 10,046 | 167 | 23,849 | 5,070 | 3,441 | 32,527 |
| 10,047 | 172 | 23,615 | 5,041 | 3,407 | 32,235 |
| 10,048 | 174 | 23,335 | 4,989 | 3,374 | 31,872 |
| 10,049 | 173 | 23,732 | 5,036 | 3,412 | 32,353 |
| 10,050 | 171 | 23,549 | 4,986 | 3,376 | 32,082 |
| 10,051 | 171 | 23,395 | 4,969 | 3,344 | 31,879 |
| 10,052 | 172 | 23,962 | 5,097 | 3,398 | 32,629 |
| 10,053 | 169 | 23,676 | 5,052 | 3,380 | 32,277 |
| 10,054 | 172 | 23,761 | 5,119 | 3,417 | 32,469 |
| 10,055 | 180 | 23,974 | 5,148 | 3,457 | 32,759 |
| 10,056 | 178 | 23,904 | 5,161 | 3,469 | 32,712 |
| 10,057 | 179 | 24,026 | 5,238 | 3,496 | 32,939 |
| 10,058 | 177 | 23,825 | 5,210 | 3,460 | 32,672 |
| 10,059 | 177 | 23,698 | 5,220 | 3,470 | 32,565 |
| 10,060 | 172 | 23,657 | 5,195 | 3,465 | 32,489 |
| 10,061 | 168 | 23,518 | 5,133 | 3,414 | 32,233 |
| 10,062 | 172 | 23,478 | 5,107 | 3,391 | 32,148 |
| 10,063 | 179 | 23,428 | 5,113 | 3,369 | 32,089 |
| 10,064 | 179 | 23,530 | 5,115 | 3,375 | 32,199 |
| 10,065 | 171 | 23,228 | 5,070 | 3,347 | 31,816 |
| 10,066 | 171 | 23,132 | 5,069 | 3,344 | 31,716 |
| 10,067 | 168 | 23,256 | 5,094 | 3,353 | 31,871 |
| 10,068 | 165 | 22,982 | 4,985 | 3,296 | 31,428 |
| 10,069 | 175 | 23,090 | 5,029 | 3,304 | 31,598 |
| 10,070 | 174 | 23,313 | 5,088 | 3,346 | 31,921 |
| 10,071 | 175 | 23,178 | 5,078 | 3,299 | 31,730 |

|        |     |        |       |       |        |
|--------|-----|--------|-------|-------|--------|
| 10,072 | 176 | 23,124 | 5,048 | 3,284 | 31,632 |
| 10,073 | 175 | 23,148 | 5,046 | 3,258 | 31,627 |
| 10,074 | 175 | 23,146 | 5,031 | 3,250 | 31,602 |
| 10,075 | 173 | 22,926 | 5,046 | 3,225 | 31,370 |
| 10,076 | 172 | 23,106 | 5,099 | 3,273 | 31,650 |
| 10,077 | 167 | 22,730 | 4,990 | 3,222 | 31,109 |
| 10,078 | 170 | 22,984 | 4,981 | 3,225 | 31,360 |
| 10,079 | 159 | 23,477 | 5,050 | 3,273 | 31,959 |
| 10,080 | 149 | 23,201 | 4,977 | 3,231 | 31,558 |
| 10,081 | 141 | 23,147 | 4,960 | 3,242 | 31,490 |
| 10,082 | 141 | 23,089 | 4,968 | 3,230 | 31,428 |
| 10,083 | 142 | 23,154 | 4,936 | 3,225 | 31,457 |
| 10,084 | 143 | 23,185 | 4,931 | 3,212 | 31,471 |
| 10,085 | 150 | 23,350 | 4,956 | 3,240 | 31,696 |
| 10,086 | 151 | 23,219 | 4,935 | 3,239 | 31,544 |
| 10,087 | 157 | 23,130 | 4,904 | 3,215 | 31,406 |
| 10,088 | 159 | 23,073 | 4,888 | 3,183 | 31,303 |
| 10,089 | 151 | 22,854 | 4,817 | 3,140 | 30,962 |
| 10,090 | 150 | 22,810 | 4,825 | 3,126 | 30,911 |
| 10,091 | 148 | 22,738 | 4,820 | 3,149 | 30,855 |
| 10,092 | 147 | 22,696 | 4,816 | 3,126 | 30,785 |
| 10,093 | 148 | 22,777 | 4,839 | 3,126 | 30,890 |
| 10,094 | 149 | 22,864 | 4,831 | 3,148 | 30,992 |
| 10,095 | 154 | 22,664 | 4,756 | 3,109 | 30,683 |
| 10,096 | 152 | 22,707 | 4,767 | 3,118 | 30,744 |
| 10,097 | 147 | 22,794 | 4,756 | 3,157 | 30,854 |
| 10,098 | 150 | 22,796 | 4,754 | 3,183 | 30,883 |
| 10,099 | 150 | 22,746 | 4,739 | 3,192 | 30,827 |
| 10,100 | 150 | 22,624 | 4,758 | 3,221 | 30,753 |
| 10,101 | 160 | 22,500 | 4,768 | 3,252 | 30,680 |
| 10,102 | 160 | 22,690 | 4,792 | 3,300 | 30,942 |
| 10,103 | 159 | 22,604 | 4,748 | 3,262 | 30,773 |

|        |     |        |       |       |        |
|--------|-----|--------|-------|-------|--------|
| 10,104 | 158 | 22,902 | 4,807 | 3,292 | 31,159 |
| 10,105 | 154 | 23,017 | 4,853 | 3,303 | 31,327 |
| 10,106 | 148 | 23,070 | 4,849 | 3,316 | 31,383 |
| 10,107 | 147 | 22,988 | 4,844 | 3,309 | 31,288 |
| 10,108 | 147 | 23,055 | 4,802 | 3,311 | 31,315 |
| 10,109 | 150 | 22,618 | 4,689 | 3,258 | 30,715 |
| 10,110 | 154 | 22,949 | 4,729 | 3,292 | 31,124 |
| 10,111 | 153 | 22,986 | 4,715 | 3,282 | 31,136 |
| 10,112 | 151 | 22,940 | 4,708 | 3,300 | 31,099 |
| 10,113 | 149 | 23,027 | 4,730 | 3,326 | 31,232 |
| 10,114 | 148 | 23,279 | 4,757 | 3,363 | 31,547 |
| 10,115 | 148 | 23,160 | 4,741 | 3,341 | 31,390 |
| 10,116 | 148 | 23,197 | 4,746 | 3,343 | 31,434 |
| 10,117 | 148 | 23,393 | 4,771 | 3,358 | 31,670 |
| 10,118 | 148 | 23,233 | 4,728 | 3,368 | 31,477 |
| 10,119 | 148 | 23,477 | 4,747 | 3,388 | 31,760 |
| 10,120 | 141 | 23,743 | 4,765 | 3,431 | 32,080 |
| 10,121 | 141 | 23,770 | 4,715 | 3,422 | 32,048 |
| 10,122 | 138 | 23,416 | 4,646 | 3,398 | 31,598 |
| 10,123 | 138 | 23,480 | 4,665 | 3,402 | 31,685 |
| 10,124 | 140 | 23,772 | 4,713 | 3,450 | 32,075 |
| 10,125 | 139 | 23,827 | 4,663 | 3,431 | 32,060 |
| 10,126 | 145 | 23,784 | 4,617 | 3,419 | 31,965 |
| 10,127 | 148 | 23,783 | 4,614 | 3,408 | 31,953 |
| 10,128 | 144 | 23,454 | 4,576 | 3,359 | 31,533 |
| 10,129 | 147 | 23,582 | 4,647 | 3,401 | 31,777 |
| 10,130 | 148 | 23,427 | 4,633 | 3,386 | 31,594 |
| 10,131 | 149 | 23,127 | 4,557 | 3,314 | 31,147 |
| 10,132 | 159 | 23,204 | 4,533 | 3,309 | 31,205 |
| 10,133 | 159 | 23,068 | 4,522 | 3,304 | 31,053 |
| 10,134 | 160 | 23,211 | 4,598 | 3,330 | 31,299 |
| 10,135 | 162 | 23,043 | 4,597 | 3,325 | 31,127 |

|        |     |        |       |       |        |
|--------|-----|--------|-------|-------|--------|
| 10,136 | 159 | 22,682 | 4,525 | 3,266 | 30,632 |
| 10,137 | 161 | 22,762 | 4,552 | 3,262 | 30,737 |
| 10,138 | 155 | 22,647 | 4,571 | 3,296 | 30,669 |
| 10,139 | 153 | 22,513 | 4,568 | 3,305 | 30,539 |
| 10,140 | 149 | 22,599 | 4,609 | 3,337 | 30,694 |
| 10,141 | 149 | 22,739 | 4,619 | 3,337 | 30,844 |
| 10,142 | 150 | 22,965 | 4,612 | 3,344 | 31,071 |
| 10,143 | 155 | 23,011 | 4,600 | 3,313 | 31,079 |
| 10,144 | 158 | 23,091 | 4,592 | 3,304 | 31,145 |
| 10,145 | 156 | 23,118 | 4,606 | 3,296 | 31,176 |
| 10,146 | 149 | 23,120 | 4,612 | 3,318 | 31,199 |
| 10,147 | 149 | 23,220 | 4,617 | 3,314 | 31,300 |
| 10,148 | 149 | 23,332 | 4,611 | 3,296 | 31,388 |
| 10,149 | 146 | 23,255 | 4,551 | 3,232 | 31,184 |
| 10,150 | 143 | 23,307 | 4,555 | 3,246 | 31,251 |
| 10,151 | 138 | 23,493 | 4,629 | 3,290 | 31,550 |
| 10,152 | 135 | 23,716 | 4,626 | 3,292 | 31,769 |
| 10,153 | 138 | 22,541 | 4,353 | 3,095 | 30,127 |
| 10,154 | 140 | 22,922 | 4,388 | 3,133 | 30,583 |
| 10,155 | 144 | 23,231 | 4,426 | 3,187 | 30,988 |
| 10,156 | 145 | 23,175 | 4,426 | 3,185 | 30,931 |
| 10,157 | 145 | 23,426 | 4,502 | 3,223 | 31,296 |
| 10,158 | 145 | 23,269 | 4,453 | 3,185 | 31,052 |
| 10,159 | 144 | 22,964 | 4,421 | 3,161 | 30,690 |
| 10,160 | 141 | 22,894 | 4,425 | 3,167 | 30,627 |
| 10,161 | 140 | 22,938 | 4,446 | 3,194 | 30,718 |
| 10,162 | 147 | 22,628 | 4,369 | 3,145 | 30,289 |
| 10,163 | 153 | 22,776 | 4,409 | 3,178 | 30,516 |
| 10,164 | 151 | 23,047 | 4,472 | 3,227 | 30,897 |
| 10,165 | 161 | 22,984 | 4,492 | 3,233 | 30,870 |
| 10,166 | 161 | 23,091 | 4,511 | 3,261 | 31,024 |
| 10,167 | 163 | 23,206 | 4,540 | 3,283 | 31,192 |

|        |     |        |       |       |        |
|--------|-----|--------|-------|-------|--------|
| 10,168 | 161 | 22,944 | 4,503 | 3,250 | 30,858 |
| 10,169 | 160 | 22,882 | 4,511 | 3,243 | 30,796 |
| 10,170 | 163 | 22,791 | 4,518 | 3,249 | 30,721 |
| 10,171 | 158 | 22,628 | 4,508 | 3,262 | 30,556 |
| 10,172 | 153 | 22,551 | 4,519 | 3,269 | 30,492 |
| 10,173 | 151 | 22,692 | 4,560 | 3,289 | 30,692 |
| 10,174 | 150 | 22,990 | 4,598 | 3,325 | 31,063 |
| 10,175 | 153 | 23,192 | 4,619 | 3,349 | 31,313 |
| 10,176 | 153 | 23,344 | 4,630 | 3,364 | 31,491 |
| 10,177 | 147 | 22,963 | 4,529 | 3,296 | 30,935 |
| 10,178 | 148 | 23,321 | 4,589 | 3,330 | 31,388 |
| 10,179 | 142 | 23,922 | 4,670 | 3,365 | 32,099 |
| 10,180 | 144 | 23,884 | 4,663 | 3,377 | 32,068 |
| 10,181 | 147 | 24,236 | 4,705 | 3,405 | 32,493 |
| 10,182 | 146 | 24,393 | 4,760 | 3,453 | 32,752 |
| 10,183 | 142 | 24,229 | 4,767 | 3,462 | 32,600 |
| 10,184 | 142 | 24,262 | 4,790 | 3,476 | 32,670 |
| 10,185 | 139 | 24,002 | 4,723 | 3,448 | 32,312 |
| 10,186 | 143 | 24,143 | 4,728 | 3,456 | 32,470 |
| 10,187 | 138 | 23,883 | 4,686 | 3,432 | 32,139 |
| 10,188 | 138 | 24,094 | 4,718 | 3,460 | 32,410 |
| 10,189 | 139 | 24,093 | 4,689 | 3,454 | 32,375 |
| 10,190 | 143 | 24,302 | 4,710 | 3,477 | 32,632 |
| 10,191 | 142 | 24,184 | 4,648 | 3,442 | 32,416 |
| 10,192 | 152 | 23,800 | 4,591 | 3,406 | 31,949 |
| 10,193 | 150 | 23,456 | 4,580 | 3,397 | 31,583 |
| 10,194 | 154 | 24,026 | 4,703 | 3,506 | 32,389 |
| 10,195 | 153 | 24,072 | 4,677 | 3,512 | 32,414 |
| 10,196 | 152 | 23,965 | 4,684 | 3,503 | 32,304 |
| 10,197 | 152 | 23,919 | 4,681 | 3,510 | 32,262 |
| 10,198 | 151 | 23,865 | 4,686 | 3,518 | 32,220 |
| 10,199 | 149 | 23,693 | 4,683 | 3,524 | 32,049 |

|        |     |        |       |       |        |
|--------|-----|--------|-------|-------|--------|
| 10,200 | 146 | 23,568 | 4,721 | 3,530 | 31,965 |
| 10,201 | 145 | 23,768 | 4,691 | 3,525 | 32,129 |
| 10,202 | 145 | 24,219 | 4,748 | 3,564 | 32,676 |
| 10,203 | 147 | 24,207 | 4,764 | 3,582 | 32,700 |
| 10,204 | 144 | 24,231 | 4,785 | 3,602 | 32,762 |
| 10,205 | 144 | 24,372 | 4,825 | 3,642 | 32,983 |
| 10,206 | 142 | 24,329 | 4,834 | 3,647 | 32,952 |
| 10,207 | 139 | 24,224 | 4,810 | 3,628 | 32,801 |
| 10,208 | 138 | 24,431 | 4,834 | 3,651 | 33,054 |
| 10,209 | 139 | 24,771 | 4,927 | 3,694 | 33,531 |
| 10,210 | 137 | 24,553 | 4,900 | 3,657 | 33,247 |
| 10,211 | 131 | 24,402 | 4,850 | 3,621 | 33,004 |
| 10,212 | 132 | 24,653 | 4,928 | 3,652 | 33,365 |
| 10,213 | 129 | 24,637 | 4,958 | 3,647 | 33,371 |
| 10,214 | 123 | 24,218 | 4,776 | 3,515 | 32,632 |
| 10,215 | 123 | 24,395 | 4,810 | 3,543 | 32,871 |
| 10,216 | 118 | 24,632 | 4,839 | 3,583 | 33,172 |
| 10,217 | 119 | 24,551 | 4,841 | 3,591 | 33,102 |
| 10,218 | 116 | 24,720 | 4,897 | 3,639 | 33,372 |
| 10,219 | 121 | 25,017 | 4,966 | 3,699 | 33,803 |
| 10,220 | 119 | 24,849 | 4,918 | 3,672 | 33,558 |
| 10,221 | 123 | 25,021 | 4,963 | 3,688 | 33,795 |
| 10,222 | 125 | 25,227 | 4,981 | 3,653 | 33,986 |
| 10,223 | 126 | 25,151 | 4,940 | 3,636 | 33,853 |
| 10,224 | 126 | 24,928 | 4,929 | 3,623 | 33,606 |
| 10,225 | 125 | 24,773 | 4,930 | 3,622 | 33,450 |
| 10,226 | 121 | 24,779 | 4,940 | 3,618 | 33,458 |
| 10,227 | 119 | 24,267 | 4,895 | 3,596 | 32,877 |
| 10,228 | 117 | 24,272 | 4,946 | 3,631 | 32,966 |
| 10,229 | 118 | 24,239 | 4,959 | 3,654 | 32,970 |
| 10,230 | 123 | 24,141 | 4,959 | 3,683 | 32,906 |
| 10,231 | 119 | 24,074 | 4,956 | 3,666 | 32,815 |



|        |     |        |       |       |        |
|--------|-----|--------|-------|-------|--------|
| 10,232 | 114 | 24,127 | 4,995 | 3,686 | 32,922 |
| 10,233 | 110 | 23,942 | 4,943 | 3,645 | 32,640 |
| 10,234 | 116 | 24,011 | 4,914 | 3,626 | 32,667 |
| 10,235 | 112 | 24,072 | 4,903 | 3,622 | 32,709 |
| 10,236 | 109 | 24,154 | 4,920 | 3,616 | 32,799 |
| 10,237 | 110 | 24,171 | 4,923 | 3,615 | 32,819 |
| 10,238 | 107 | 24,121 | 4,933 | 3,620 | 32,781 |
| 10,239 | 106 | 24,274 | 4,954 | 3,620 | 32,954 |
| 10,240 | 103 | 24,259 | 4,977 | 3,622 | 32,961 |
| 10,241 | 102 | 24,504 | 5,039 | 3,637 | 33,282 |
| 10,242 | 99  | 24,500 | 5,052 | 3,664 | 33,315 |
| 10,243 | 85  | 24,643 | 5,077 | 3,635 | 33,440 |
| 10,244 | 83  | 24,469 | 5,035 | 3,596 | 33,183 |
| 10,245 | 82  | 24,488 | 5,072 | 3,615 | 33,257 |
| 10,246 | 82  | 24,201 | 5,090 | 3,616 | 32,989 |
| 10,247 | 84  | 24,208 | 5,096 | 3,614 | 33,002 |
| 10,248 | 84  | 24,025 | 5,101 | 3,600 | 32,810 |
| 10,249 | 84  | 24,427 | 5,183 | 3,655 | 33,349 |
| 10,250 | 83  | 24,270 | 5,142 | 3,628 | 33,123 |
| 10,251 | 82  | 23,947 | 5,106 | 3,597 | 32,732 |
| 10,252 | 81  | 24,076 | 5,165 | 3,622 | 32,944 |
| 10,253 | 81  | 23,886 | 5,147 | 3,612 | 32,726 |
| 10,254 | 80  | 23,688 | 5,127 | 3,595 | 32,490 |
| 10,255 | 80  | 23,565 | 5,106 | 3,573 | 32,324 |
| 10,256 | 81  | 23,315 | 5,051 | 3,533 | 31,980 |
| 10,257 | 81  | 23,485 | 5,082 | 3,535 | 32,183 |
| 10,258 | 81  | 23,372 | 5,039 | 3,505 | 31,997 |
| 10,259 | 84  | 23,232 | 5,038 | 3,481 | 31,835 |
| 10,260 | 89  | 23,345 | 5,028 | 3,469 | 31,931 |
| 10,261 | 89  | 23,382 | 5,029 | 3,460 | 31,960 |
| 10,262 | 89  | 23,578 | 5,115 | 3,536 | 32,318 |
| 10,263 | 89  | 23,946 | 5,193 | 3,577 | 32,805 |

|        |     |        |       |       |        |
|--------|-----|--------|-------|-------|--------|
| 10,264 | 90  | 23,712 | 5,194 | 3,565 | 32,561 |
| 10,265 | 86  | 23,621 | 5,223 | 3,554 | 32,484 |
| 10,266 | 81  | 23,766 | 5,239 | 3,586 | 32,672 |
| 10,267 | 77  | 23,598 | 5,196 | 3,545 | 32,416 |
| 10,268 | 77  | 23,721 | 5,264 | 3,582 | 32,644 |
| 10,269 | 72  | 24,003 | 5,318 | 3,636 | 33,029 |
| 10,270 | 71  | 23,921 | 5,302 | 3,642 | 32,936 |
| 10,271 | 72  | 23,678 | 5,263 | 3,630 | 32,643 |
| 10,272 | 72  | 23,390 | 5,237 | 3,616 | 32,315 |
| 10,273 | 69  | 23,560 | 5,324 | 3,658 | 32,611 |
| 10,274 | 68  | 23,277 | 5,280 | 3,616 | 32,241 |
| 10,275 | 69  | 23,463 | 5,267 | 3,613 | 32,412 |
| 10,276 | 71  | 23,235 | 5,228 | 3,586 | 32,120 |
| 10,277 | 70  | 23,236 | 5,241 | 3,597 | 32,144 |
| 10,278 | 72  | 23,329 | 5,266 | 3,594 | 32,261 |
| 10,279 | 78  | 23,198 | 5,209 | 3,561 | 32,046 |
| 10,280 | 84  | 23,159 | 5,224 | 3,553 | 32,020 |
| 10,281 | 79  | 22,705 | 5,167 | 3,512 | 31,463 |
| 10,282 | 84  | 23,212 | 5,277 | 3,594 | 32,167 |
| 10,283 | 87  | 22,869 | 5,210 | 3,569 | 31,735 |
| 10,284 | 81  | 22,623 | 5,169 | 3,531 | 31,404 |
| 10,285 | 86  | 22,592 | 5,164 | 3,514 | 31,356 |
| 10,286 | 86  | 22,401 | 5,145 | 3,487 | 31,119 |
| 10,287 | 94  | 23,400 | 5,318 | 3,621 | 32,433 |
| 10,288 | 91  | 23,139 | 5,291 | 3,606 | 32,127 |
| 10,289 | 91  | 23,072 | 5,286 | 3,619 | 32,068 |
| 10,290 | 92  | 22,993 | 5,297 | 3,624 | 32,006 |
| 10,291 | 98  | 23,295 | 5,367 | 3,675 | 32,435 |
| 10,292 | 102 | 23,261 | 5,376 | 3,686 | 32,425 |
| 10,293 | 104 | 23,206 | 5,359 | 3,666 | 32,335 |
| 10,294 | 107 | 22,982 | 5,356 | 3,675 | 32,120 |
| 10,295 | 116 | 22,988 | 5,354 | 3,636 | 32,094 |

|        |     |        |       |       |        |
|--------|-----|--------|-------|-------|--------|
| 10,296 | 121 | 22,890 | 5,287 | 3,593 | 31,891 |
| 10,297 | 121 | 22,973 | 5,294 | 3,605 | 31,993 |
| 10,298 | 127 | 23,235 | 5,342 | 3,653 | 32,357 |
| 10,299 | 127 | 22,965 | 5,282 | 3,601 | 31,975 |
| 10,300 | 132 | 22,964 | 5,263 | 3,584 | 31,943 |
| 10,301 | 132 | 23,013 | 5,291 | 3,582 | 32,018 |
| 10,302 | 137 | 23,414 | 5,327 | 3,640 | 32,518 |
| 10,303 | 143 | 23,559 | 5,364 | 3,642 | 32,708 |
| 10,304 | 146 | 23,441 | 5,376 | 3,643 | 32,606 |
| 10,305 | 145 | 23,170 | 5,334 | 3,597 | 32,246 |
| 10,306 | 148 | 23,561 | 5,451 | 3,691 | 32,851 |
| 10,307 | 145 | 23,509 | 5,473 | 3,700 | 32,827 |
| 10,308 | 152 | 23,436 | 5,457 | 3,690 | 32,735 |
| 10,309 | 152 | 23,040 | 5,383 | 3,663 | 32,238 |
| 10,310 | 148 | 23,026 | 5,380 | 3,698 | 32,252 |
| 10,311 | 145 | 23,133 | 5,398 | 3,723 | 32,399 |
| 10,312 | 146 | 23,065 | 5,364 | 3,711 | 32,286 |
| 10,313 | 145 | 23,055 | 5,363 | 3,677 | 32,240 |
| 10,314 | 146 | 22,979 | 5,337 | 3,691 | 32,153 |
| 10,315 | 144 | 22,785 | 5,256 | 3,663 | 31,848 |
| 10,316 | 150 | 23,133 | 5,307 | 3,720 | 32,310 |
| 10,317 | 151 | 22,686 | 5,272 | 3,650 | 31,759 |
| 10,318 | 154 | 22,857 | 5,289 | 3,653 | 31,953 |
| 10,319 | 157 | 22,950 | 5,289 | 3,649 | 32,045 |
| 10,320 | 165 | 22,903 | 5,299 | 3,622 | 31,989 |
| 10,321 | 158 | 23,122 | 5,295 | 3,601 | 32,176 |
| 10,322 | 165 | 23,246 | 5,274 | 3,581 | 32,266 |
| 10,323 | 171 | 23,343 | 5,266 | 3,592 | 32,372 |
| 10,324 | 171 | 23,331 | 5,271 | 3,595 | 32,368 |
| 10,325 | 176 | 23,171 | 5,271 | 3,595 | 32,213 |
| 10,326 | 176 | 23,396 | 5,336 | 3,641 | 32,549 |
| 10,327 | 173 | 23,371 | 5,311 | 3,631 | 32,486 |

|        |     |        |       |       |        |
|--------|-----|--------|-------|-------|--------|
| 10,328 | 170 | 23,220 | 5,270 | 3,601 | 32,261 |
| 10,329 | 170 | 23,040 | 5,226 | 3,569 | 32,005 |
| 10,330 | 163 | 23,618 | 5,344 | 3,660 | 32,785 |
| 10,331 | 164 | 23,891 | 5,390 | 3,704 | 33,149 |
| 10,332 | 164 | 23,748 | 5,338 | 3,643 | 32,893 |
| 10,333 | 161 | 23,545 | 5,335 | 3,632 | 32,673 |
| 10,334 | 166 | 23,805 | 5,391 | 3,668 | 33,030 |
| 10,335 | 162 | 23,168 | 5,284 | 3,599 | 32,213 |
| 10,336 | 161 | 23,147 | 5,305 | 3,602 | 32,215 |
| 10,337 | 156 | 23,240 | 5,382 | 3,628 | 32,406 |
| 10,338 | 158 | 23,144 | 5,366 | 3,597 | 32,265 |
| 10,339 | 159 | 23,057 | 5,326 | 3,567 | 32,109 |
| 10,340 | 159 | 23,241 | 5,387 | 3,590 | 32,377 |
| 10,341 | 159 | 23,395 | 5,416 | 3,604 | 32,574 |
| 10,342 | 153 | 23,437 | 5,409 | 3,595 | 32,594 |
| 10,343 | 151 | 23,439 | 5,403 | 3,578 | 32,571 |
| 10,344 | 142 | 22,662 | 5,240 | 3,489 | 31,533 |
| 10,345 | 142 | 22,916 | 5,271 | 3,510 | 31,839 |
| 10,346 | 139 | 22,968 | 5,280 | 3,511 | 31,898 |
| 10,347 | 138 | 22,771 | 5,238 | 3,465 | 31,612 |
| 10,348 | 138 | 22,687 | 5,237 | 3,443 | 31,505 |
| 10,349 | 132 | 22,415 | 5,194 | 3,408 | 31,149 |
| 10,350 | 132 | 22,241 | 5,170 | 3,405 | 30,948 |
| 10,351 | 127 | 22,768 | 5,321 | 3,530 | 31,746 |
| 10,352 | 128 | 22,700 | 5,310 | 3,501 | 31,639 |
| 10,353 | 124 | 22,667 | 5,343 | 3,498 | 31,632 |
| 10,354 | 128 | 22,616 | 5,317 | 3,496 | 31,557 |
| 10,355 | 125 | 22,678 | 5,287 | 3,478 | 31,568 |
| 10,356 | 124 | 22,697 | 5,275 | 3,471 | 31,567 |
| 10,357 | 124 | 22,703 | 5,272 | 3,482 | 31,581 |
| 10,358 | 127 | 22,921 | 5,307 | 3,498 | 31,853 |
| 10,359 | 122 | 22,716 | 5,265 | 3,443 | 31,546 |

|        |     |        |       |       |        |
|--------|-----|--------|-------|-------|--------|
| 10,360 | 124 | 22,750 | 5,242 | 3,414 | 31,530 |
| 10,361 | 124 | 22,741 | 5,247 | 3,415 | 31,527 |
| 10,362 | 123 | 22,792 | 5,279 | 3,411 | 31,605 |
| 10,363 | 124 | 22,739 | 5,254 | 3,413 | 31,530 |
| 10,364 | 123 | 22,718 | 5,253 | 3,415 | 31,509 |
| 10,365 | 123 | 23,050 | 5,336 | 3,449 | 31,958 |
| 10,366 | 120 | 22,846 | 5,271 | 3,412 | 31,649 |
| 10,367 | 119 | 22,855 | 5,274 | 3,416 | 31,664 |
| 10,368 | 120 | 23,319 | 5,365 | 3,473 | 32,277 |
| 10,369 | 116 | 22,997 | 5,263 | 3,414 | 31,790 |
| 10,370 | 116 | 23,142 | 5,349 | 3,468 | 32,075 |
| 10,371 | 108 | 23,068 | 5,359 | 3,480 | 32,015 |
| 10,372 | 108 | 23,188 | 5,408 | 3,530 | 32,234 |
| 10,373 | 104 | 23,164 | 5,420 | 3,557 | 32,245 |
| 10,374 | 106 | 23,279 | 5,457 | 3,593 | 32,435 |
| 10,375 | 100 | 23,250 | 5,443 | 3,589 | 32,382 |
| 10,376 | 102 | 23,269 | 5,445 | 3,591 | 32,407 |
| 10,377 | 102 | 23,210 | 5,459 | 3,592 | 32,363 |
| 10,378 | 102 | 23,043 | 5,479 | 3,563 | 32,187 |
| 10,379 | 104 | 23,199 | 5,526 | 3,619 | 32,448 |
| 10,380 | 105 | 23,145 | 5,481 | 3,606 | 32,337 |
| 10,381 | 105 | 23,022 | 5,462 | 3,606 | 32,195 |
| 10,382 | 96  | 23,051 | 5,504 | 3,621 | 32,272 |
| 10,383 | 95  | 23,239 | 5,598 | 3,695 | 32,627 |
| 10,384 | 92  | 23,481 | 5,656 | 3,737 | 32,966 |
| 10,385 | 84  | 23,635 | 5,657 | 3,725 | 33,101 |
| 10,386 | 82  | 23,305 | 5,555 | 3,668 | 32,610 |
| 10,387 | 81  | 23,515 | 5,607 | 3,712 | 32,915 |
| 10,388 | 81  | 23,664 | 5,655 | 3,746 | 33,146 |
| 10,389 | 78  | 23,386 | 5,610 | 3,736 | 32,810 |
| 10,390 | 77  | 23,442 | 5,617 | 3,745 | 32,881 |
| 10,391 | 77  | 23,496 | 5,644 | 3,760 | 32,977 |

|        |     |        |       |       |        |
|--------|-----|--------|-------|-------|--------|
| 10,392 | 80  | 23,530 | 5,683 | 3,796 | 33,089 |
| 10,393 | 81  | 23,473 | 5,681 | 3,799 | 33,034 |
| 10,394 | 80  | 23,258 | 5,598 | 3,778 | 32,714 |
| 10,395 | 86  | 23,427 | 5,606 | 3,785 | 32,904 |
| 10,396 | 83  | 23,297 | 5,588 | 3,756 | 32,724 |
| 10,397 | 92  | 23,413 | 5,621 | 3,797 | 32,923 |
| 10,398 | 90  | 23,504 | 5,607 | 3,815 | 33,016 |
| 10,399 | 89  | 23,476 | 5,627 | 3,803 | 32,995 |
| 10,400 | 91  | 23,749 | 5,684 | 3,835 | 33,359 |
| 10,401 | 94  | 23,842 | 5,683 | 3,825 | 33,444 |
| 10,402 | 92  | 23,670 | 5,627 | 3,809 | 33,198 |
| 10,403 | 95  | 23,561 | 5,616 | 3,802 | 33,074 |
| 10,404 | 96  | 23,853 | 5,671 | 3,848 | 33,468 |
| 10,405 | 90  | 23,338 | 5,572 | 3,785 | 32,785 |
| 10,406 | 92  | 23,613 | 5,638 | 3,821 | 33,164 |
| 10,407 | 96  | 23,667 | 5,654 | 3,816 | 33,233 |
| 10,408 | 96  | 23,506 | 5,626 | 3,794 | 33,022 |
| 10,409 | 94  | 23,934 | 5,763 | 3,869 | 33,660 |
| 10,410 | 95  | 23,885 | 5,756 | 3,875 | 33,611 |
| 10,411 | 95  | 23,752 | 5,725 | 3,853 | 33,425 |
| 10,412 | 95  | 23,731 | 5,699 | 3,837 | 33,362 |
| 10,413 | 96  | 23,753 | 5,709 | 3,830 | 33,388 |
| 10,414 | 92  | 23,533 | 5,666 | 3,820 | 33,111 |
| 10,415 | 92  | 23,796 | 5,780 | 3,899 | 33,567 |
| 10,416 | 99  | 23,507 | 5,709 | 3,856 | 33,171 |
| 10,417 | 100 | 23,320 | 5,679 | 3,823 | 32,922 |
| 10,418 | 103 | 23,559 | 5,730 | 3,840 | 33,232 |
| 10,419 | 110 | 23,408 | 5,685 | 3,809 | 33,012 |
| 10,420 | 120 | 22,988 | 5,609 | 3,738 | 32,455 |
| 10,421 | 119 | 23,133 | 5,586 | 3,742 | 32,580 |
| 10,422 | 131 | 23,172 | 5,566 | 3,715 | 32,584 |
| 10,423 | 131 | 23,188 | 5,562 | 3,711 | 32,592 |

|        |     |        |       |       |        |
|--------|-----|--------|-------|-------|--------|
| 10,424 | 128 | 23,028 | 5,511 | 3,668 | 32,335 |
| 10,425 | 129 | 23,038 | 5,494 | 3,659 | 32,320 |
| 10,426 | 129 | 23,077 | 5,505 | 3,646 | 32,357 |
| 10,427 | 130 | 23,182 | 5,494 | 3,645 | 32,451 |
| 10,428 | 130 | 23,311 | 5,489 | 3,656 | 32,586 |
| 10,429 | 131 | 23,561 | 5,534 | 3,677 | 32,903 |
| 10,430 | 130 | 23,544 | 5,556 | 3,667 | 32,897 |
| 10,431 | 130 | 23,504 | 5,576 | 3,683 | 32,893 |
| 10,432 | 136 | 23,681 | 5,565 | 3,680 | 33,062 |
| 10,433 | 140 | 23,535 | 5,574 | 3,690 | 32,939 |
| 10,434 | 140 | 23,466 | 5,510 | 3,660 | 32,776 |
| 10,435 | 146 | 23,348 | 5,471 | 3,620 | 32,585 |
| 10,436 | 149 | 23,235 | 5,503 | 3,618 | 32,505 |
| 10,437 | 149 | 23,024 | 5,455 | 3,569 | 32,197 |
| 10,438 | 152 | 23,213 | 5,482 | 3,596 | 32,443 |
| 10,439 | 151 | 23,089 | 5,405 | 3,569 | 32,214 |
| 10,440 | 155 | 23,253 | 5,400 | 3,573 | 32,381 |
| 10,441 | 161 | 23,213 | 5,351 | 3,585 | 32,310 |
| 10,442 | 164 | 23,327 | 5,400 | 3,591 | 32,482 |
| 10,443 | 154 | 22,379 | 5,199 | 3,454 | 31,186 |
| 10,444 | 156 | 22,552 | 5,232 | 3,454 | 31,394 |
| 10,445 | 157 | 22,843 | 5,310 | 3,488 | 31,798 |
| 10,446 | 157 | 22,800 | 5,312 | 3,481 | 31,750 |
| 10,447 | 151 | 22,893 | 5,350 | 3,523 | 31,917 |
| 10,448 | 148 | 22,792 | 5,344 | 3,521 | 31,805 |
| 10,449 | 150 | 22,746 | 5,338 | 3,511 | 31,745 |
| 10,450 | 150 | 22,694 | 5,299 | 3,509 | 31,652 |
| 10,451 | 153 | 23,157 | 5,364 | 3,556 | 32,230 |
| 10,452 | 148 | 22,170 | 5,202 | 3,418 | 30,938 |
| 10,453 | 149 | 22,500 | 5,229 | 3,447 | 31,325 |
| 10,454 | 149 | 22,851 | 5,268 | 3,468 | 31,736 |
| 10,455 | 149 | 22,936 | 5,268 | 3,468 | 31,821 |

|        |     |        |       |       |        |
|--------|-----|--------|-------|-------|--------|
| 10,456 | 147 | 23,410 | 5,294 | 3,506 | 32,357 |
| 10,457 | 146 | 23,413 | 5,289 | 3,518 | 32,366 |
| 10,458 | 142 | 23,403 | 5,280 | 3,516 | 32,341 |
| 10,459 | 142 | 22,908 | 5,147 | 3,416 | 31,613 |
| 10,460 | 144 | 23,132 | 5,183 | 3,444 | 31,903 |
| 10,461 | 145 | 23,065 | 5,169 | 3,444 | 31,823 |
| 10,462 | 144 | 22,851 | 5,159 | 3,446 | 31,600 |
| 10,463 | 148 | 22,900 | 5,236 | 3,510 | 31,794 |
| 10,464 | 147 | 23,073 | 5,243 | 3,496 | 31,959 |
| 10,465 | 147 | 22,492 | 5,073 | 3,380 | 31,092 |
| 10,466 | 148 | 22,835 | 5,104 | 3,415 | 31,502 |
| 10,467 | 146 | 22,805 | 5,090 | 3,415 | 31,456 |
| 10,468 | 144 | 22,705 | 5,068 | 3,400 | 31,317 |
| 10,469 | 143 | 22,626 | 5,083 | 3,397 | 31,249 |
| 10,470 | 140 | 22,262 | 5,010 | 3,350 | 30,762 |
| 10,471 | 128 | 21,996 | 4,938 | 3,316 | 30,378 |
| 10,472 | 128 | 22,408 | 5,037 | 3,383 | 30,956 |
| 10,473 | 121 | 22,659 | 5,084 | 3,403 | 31,267 |
| 10,474 | 115 | 22,465 | 5,028 | 3,379 | 30,987 |
| 10,475 | 117 | 22,655 | 5,087 | 3,389 | 31,248 |
| 10,476 | 116 | 22,542 | 5,102 | 3,383 | 31,143 |
| 10,477 | 113 | 22,234 | 5,046 | 3,347 | 30,740 |
| 10,478 | 116 | 22,135 | 5,043 | 3,349 | 30,643 |
| 10,479 | 121 | 22,440 | 5,084 | 3,398 | 31,043 |
| 10,480 | 120 | 22,536 | 5,085 | 3,404 | 31,145 |
| 10,481 | 119 | 22,691 | 5,108 | 3,420 | 31,338 |
| 10,482 | 118 | 22,547 | 5,055 | 3,386 | 31,106 |
| 10,483 | 109 | 21,961 | 4,918 | 3,300 | 30,288 |
| 10,484 | 111 | 22,185 | 4,942 | 3,300 | 30,538 |
| 10,485 | 111 | 22,278 | 4,930 | 3,294 | 30,613 |
| 10,486 | 104 | 21,983 | 4,884 | 3,284 | 30,255 |
| 10,487 | 103 | 21,966 | 4,826 | 3,273 | 30,168 |



|        |     |        |       |       |        |
|--------|-----|--------|-------|-------|--------|
| 10,488 | 102 | 22,153 | 4,842 | 3,278 | 30,375 |
| 10,489 | 103 | 22,006 | 4,806 | 3,234 | 30,149 |
| 10,490 | 102 | 22,104 | 4,824 | 3,251 | 30,281 |
| 10,491 | 103 | 22,329 | 4,864 | 3,273 | 30,569 |
| 10,492 | 99  | 22,341 | 4,864 | 3,245 | 30,549 |
| 10,493 | 100 | 22,523 | 4,863 | 3,274 | 30,760 |
| 10,494 | 99  | 22,247 | 4,787 | 3,243 | 30,376 |
| 10,495 | 100 | 22,237 | 4,803 | 3,260 | 30,400 |
| 10,496 | 99  | 22,526 | 4,824 | 3,312 | 30,761 |
| 10,497 | 97  | 22,664 | 4,809 | 3,288 | 30,858 |
| 10,498 | 98  | 22,693 | 4,808 | 3,281 | 30,880 |
| 10,499 | 105 | 23,083 | 4,927 | 3,355 | 31,470 |
| 10,500 | 104 | 22,806 | 4,870 | 3,317 | 31,097 |
| 10,501 | 114 | 23,244 | 4,968 | 3,386 | 31,712 |
| 10,502 | 112 | 23,341 | 5,007 | 3,416 | 31,876 |
| 10,503 | 115 | 23,036 | 4,967 | 3,401 | 31,519 |
| 10,504 | 122 | 23,066 | 4,970 | 3,404 | 31,562 |
| 10,505 | 120 | 22,784 | 4,919 | 3,375 | 31,198 |
| 10,506 | 121 | 22,976 | 5,025 | 3,426 | 31,548 |
| 10,507 | 131 | 23,045 | 5,049 | 3,418 | 31,643 |
| 10,508 | 134 | 22,959 | 5,023 | 3,403 | 31,519 |
| 10,509 | 131 | 22,732 | 4,979 | 3,367 | 31,209 |
| 10,510 | 125 | 23,331 | 5,098 | 3,463 | 32,017 |
| 10,511 | 129 | 23,461 | 5,126 | 3,462 | 32,178 |
| 10,512 | 135 | 23,853 | 5,177 | 3,459 | 32,624 |
| 10,513 | 135 | 23,801 | 5,185 | 3,444 | 32,565 |
| 10,514 | 133 | 24,045 | 5,227 | 3,491 | 32,896 |
| 10,515 | 136 | 24,024 | 5,227 | 3,513 | 32,900 |
| 10,516 | 127 | 23,955 | 5,210 | 3,489 | 32,781 |
| 10,517 | 133 | 23,818 | 5,190 | 3,456 | 32,597 |
| 10,518 | 131 | 23,818 | 5,164 | 3,454 | 32,567 |
| 10,519 | 143 | 24,475 | 5,286 | 3,526 | 33,430 |

|        |     |        |       |       |        |
|--------|-----|--------|-------|-------|--------|
| 10,520 | 141 | 24,512 | 5,309 | 3,545 | 33,507 |
| 10,521 | 146 | 24,777 | 5,361 | 3,564 | 33,848 |
| 10,522 | 144 | 24,620 | 5,314 | 3,528 | 33,606 |
| 10,523 | 154 | 24,812 | 5,363 | 3,548 | 33,877 |
| 10,524 | 153 | 24,923 | 5,381 | 3,562 | 34,019 |
| 10,525 | 159 | 25,050 | 5,380 | 3,555 | 34,144 |
| 10,526 | 160 | 24,936 | 5,308 | 3,546 | 33,950 |
| 10,527 | 161 | 24,962 | 5,302 | 3,547 | 33,972 |
| 10,528 | 160 | 25,090 | 5,322 | 3,556 | 34,128 |
| 10,529 | 162 | 25,521 | 5,437 | 3,605 | 34,725 |
| 10,530 | 165 | 25,626 | 5,468 | 3,619 | 34,878 |
| 10,531 | 168 | 25,038 | 5,386 | 3,554 | 34,146 |
| 10,532 | 168 | 25,356 | 5,424 | 3,605 | 34,553 |
| 10,533 | 175 | 25,669 | 5,495 | 3,637 | 34,976 |
| 10,534 | 185 | 25,801 | 5,515 | 3,655 | 35,156 |
| 10,535 | 185 | 25,714 | 5,485 | 3,637 | 35,021 |
| 10,536 | 187 | 25,654 | 5,471 | 3,625 | 34,937 |
| 10,537 | 187 | 25,611 | 5,451 | 3,632 | 34,881 |
| 10,538 | 196 | 25,367 | 5,406 | 3,601 | 34,570 |
| 10,539 | 196 | 25,253 | 5,393 | 3,583 | 34,425 |
| 10,540 | 203 | 26,240 | 5,615 | 3,743 | 35,801 |
| 10,541 | 205 | 26,189 | 5,627 | 3,733 | 35,754 |
| 10,542 | 206 | 25,851 | 5,615 | 3,698 | 35,370 |
| 10,543 | 206 | 26,057 | 5,660 | 3,728 | 35,651 |
| 10,544 | 203 | 25,695 | 5,616 | 3,677 | 35,191 |
| 10,545 | 201 | 25,718 | 5,607 | 3,673 | 35,199 |
| 10,546 | 205 | 25,536 | 5,576 | 3,657 | 34,974 |
| 10,547 | 208 | 25,712 | 5,640 | 3,658 | 35,218 |
| 10,548 | 208 | 25,282 | 5,545 | 3,595 | 34,630 |
| 10,549 | 211 | 25,460 | 5,535 | 3,598 | 34,804 |
| 10,550 | 206 | 25,801 | 5,578 | 3,619 | 35,204 |
| 10,551 | 201 | 25,538 | 5,523 | 3,588 | 34,850 |

|        |     |        |       |       |        |
|--------|-----|--------|-------|-------|--------|
| 10,552 | 205 | 25,651 | 5,557 | 3,610 | 35,023 |
| 10,553 | 206 | 25,668 | 5,592 | 3,642 | 35,108 |
| 10,554 | 198 | 25,598 | 5,565 | 3,604 | 34,965 |
| 10,555 | 200 | 25,699 | 5,554 | 3,604 | 35,057 |
| 10,556 | 203 | 25,684 | 5,536 | 3,603 | 35,026 |
| 10,557 | 196 | 25,563 | 5,533 | 3,589 | 34,881 |
| 10,558 | 193 | 25,877 | 5,582 | 3,656 | 35,308 |
| 10,559 | 193 | 25,552 | 5,514 | 3,603 | 34,862 |
| 10,560 | 194 | 25,282 | 5,459 | 3,556 | 34,491 |
| 10,561 | 201 | 25,510 | 5,515 | 3,606 | 34,832 |
| 10,562 | 201 | 25,403 | 5,493 | 3,606 | 34,703 |
| 10,563 | 195 | 25,162 | 5,467 | 3,605 | 34,429 |
| 10,564 | 195 | 25,406 | 5,446 | 3,613 | 34,660 |
| 10,565 | 199 | 25,209 | 5,381 | 3,581 | 34,370 |
| 10,566 | 202 | 25,010 | 5,355 | 3,561 | 34,128 |
| 10,567 | 197 | 24,963 | 5,345 | 3,556 | 34,061 |
| 10,568 | 199 | 24,965 | 5,356 | 3,563 | 34,083 |
| 10,569 | 196 | 24,891 | 5,349 | 3,556 | 33,992 |
| 10,570 | 195 | 25,049 | 5,361 | 3,586 | 34,191 |
| 10,571 | 192 | 24,874 | 5,304 | 3,554 | 33,924 |
| 10,572 | 190 | 24,577 | 5,265 | 3,539 | 33,571 |
| 10,573 | 190 | 24,640 | 5,267 | 3,549 | 33,646 |
| 10,574 | 186 | 24,410 | 5,229 | 3,534 | 33,359 |
| 10,575 | 187 | 24,100 | 5,184 | 3,509 | 32,980 |
| 10,576 | 181 | 24,666 | 5,278 | 3,618 | 33,743 |
| 10,577 | 180 | 24,628 | 5,320 | 3,624 | 33,752 |
| 10,578 | 180 | 24,720 | 5,350 | 3,647 | 33,897 |
| 10,579 | 183 | 24,876 | 5,338 | 3,675 | 34,072 |
| 10,580 | 183 | 24,945 | 5,343 | 3,669 | 34,140 |
| 10,581 | 174 | 24,877 | 5,326 | 3,657 | 34,034 |
| 10,582 | 175 | 25,265 | 5,354 | 3,700 | 34,494 |
| 10,583 | 171 | 25,170 | 5,310 | 3,690 | 34,341 |

|        |     |        |       |       |        |
|--------|-----|--------|-------|-------|--------|
| 10,584 | 168 | 25,249 | 5,348 | 3,716 | 34,481 |
| 10,585 | 160 | 25,184 | 5,346 | 3,682 | 34,372 |
| 10,586 | 155 | 25,227 | 5,393 | 3,709 | 34,484 |
| 10,587 | 152 | 25,051 | 5,370 | 3,673 | 34,246 |
| 10,588 | 152 | 25,052 | 5,382 | 3,684 | 34,270 |
| 10,589 | 137 | 24,995 | 5,404 | 3,713 | 34,249 |
| 10,590 | 136 | 25,076 | 5,437 | 3,750 | 34,399 |
| 10,591 | 142 | 25,097 | 5,439 | 3,767 | 34,445 |
| 10,592 | 137 | 24,999 | 5,406 | 3,759 | 34,301 |
| 10,593 | 135 | 24,866 | 5,293 | 3,728 | 34,022 |
| 10,594 | 138 | 24,834 | 5,274 | 3,721 | 33,967 |
| 10,595 | 139 | 24,878 | 5,269 | 3,729 | 34,015 |
| 10,596 | 139 | 24,661 | 5,238 | 3,701 | 33,739 |
| 10,597 | 140 | 24,684 | 5,248 | 3,747 | 33,819 |
| 10,598 | 139 | 24,650 | 5,260 | 3,763 | 33,812 |
| 10,599 | 139 | 24,438 | 5,256 | 3,758 | 33,591 |
| 10,600 | 137 | 24,333 | 5,258 | 3,752 | 33,480 |
| 10,601 | 134 | 24,220 | 5,227 | 3,775 | 33,356 |
| 10,602 | 130 | 24,178 | 5,198 | 3,735 | 33,241 |
| 10,603 | 136 | 23,927 | 5,106 | 3,666 | 32,835 |
| 10,604 | 136 | 23,704 | 5,088 | 3,638 | 32,566 |
| 10,605 | 138 | 23,684 | 5,111 | 3,672 | 32,605 |
| 10,606 | 139 | 23,887 | 5,172 | 3,708 | 32,906 |
| 10,607 | 135 | 23,557 | 5,085 | 3,661 | 32,438 |
| 10,608 | 135 | 23,365 | 5,057 | 3,641 | 32,198 |
| 10,609 | 133 | 23,294 | 5,050 | 3,630 | 32,107 |
| 10,610 | 132 | 23,234 | 5,067 | 3,651 | 32,084 |
| 10,611 | 137 | 23,688 | 5,179 | 3,704 | 32,708 |
| 10,612 | 130 | 23,570 | 5,130 | 3,699 | 32,529 |
| 10,613 | 129 | 23,651 | 5,144 | 3,710 | 32,634 |
| 10,614 | 128 | 23,703 | 5,146 | 3,710 | 32,687 |
| 10,615 | 128 | 23,580 | 5,140 | 3,708 | 32,556 |

|        |     |        |       |       |        |
|--------|-----|--------|-------|-------|--------|
| 10,616 | 128 | 23,954 | 5,223 | 3,774 | 33,079 |
| 10,617 | 132 | 23,776 | 5,206 | 3,775 | 32,889 |
| 10,618 | 134 | 24,015 | 5,253 | 3,797 | 33,199 |
| 10,619 | 137 | 23,805 | 5,220 | 3,766 | 32,928 |
| 10,620 | 136 | 23,601 | 5,176 | 3,746 | 32,659 |
| 10,621 | 145 | 24,197 | 5,315 | 3,848 | 33,505 |
| 10,622 | 148 | 23,961 | 5,268 | 3,803 | 33,180 |
| 10,623 | 156 | 23,930 | 5,281 | 3,811 | 33,178 |
| 10,624 | 156 | 23,922 | 5,277 | 3,824 | 33,179 |
| 10,625 | 150 | 24,050 | 5,295 | 3,827 | 33,322 |
| 10,626 | 153 | 24,068 | 5,344 | 3,831 | 33,396 |
| 10,627 | 157 | 24,137 | 5,339 | 3,815 | 33,448 |
| 10,628 | 160 | 24,023 | 5,327 | 3,813 | 33,323 |
| 10,629 | 162 | 23,647 | 5,292 | 3,762 | 32,863 |
| 10,630 | 169 | 24,207 | 5,384 | 3,810 | 33,570 |
| 10,631 | 173 | 24,032 | 5,333 | 3,807 | 33,345 |
| 10,632 | 177 | 23,910 | 5,349 | 3,800 | 33,236 |
| 10,633 | 180 | 23,718 | 5,360 | 3,770 | 33,028 |
| 10,634 | 179 | 23,155 | 5,286 | 3,702 | 32,322 |
| 10,635 | 179 | 23,210 | 5,296 | 3,692 | 32,377 |
| 10,636 | 180 | 23,051 | 5,249 | 3,690 | 32,170 |
| 10,637 | 183 | 23,025 | 5,212 | 3,675 | 32,095 |
| 10,638 | 184 | 22,997 | 5,199 | 3,663 | 32,043 |
| 10,639 | 183 | 22,831 | 5,137 | 3,600 | 31,751 |
| 10,640 | 183 | 22,024 | 4,970 | 3,470 | 30,647 |
| 10,641 | 185 | 22,352 | 5,016 | 3,481 | 31,034 |
| 10,642 | 196 | 22,718 | 5,076 | 3,516 | 31,506 |
| 10,643 | 197 | 22,805 | 5,086 | 3,525 | 31,613 |
| 10,644 | 201 | 23,746 | 5,243 | 3,614 | 32,804 |
| 10,645 | 203 | 24,066 | 5,293 | 3,605 | 33,167 |
| 10,646 | 206 | 24,427 | 5,324 | 3,613 | 33,570 |
| 10,647 | 205 | 24,392 | 5,312 | 3,596 | 33,505 |

|        |     |        |       |       |        |
|--------|-----|--------|-------|-------|--------|
| 10,648 | 203 | 24,389 | 5,313 | 3,589 | 33,494 |
| 10,649 | 215 | 24,972 | 5,414 | 3,632 | 34,233 |
| 10,650 | 215 | 24,950 | 5,415 | 3,615 | 34,195 |
| 10,651 | 216 | 25,036 | 5,428 | 3,611 | 34,291 |
| 10,652 | 216 | 25,038 | 5,439 | 3,601 | 34,294 |
| 10,653 | 218 | 25,176 | 5,438 | 3,626 | 34,458 |
| 10,654 | 207 | 25,174 | 5,396 | 3,630 | 34,407 |
| 10,655 | 208 | 25,303 | 5,461 | 3,657 | 34,629 |
| 10,656 | 213 | 25,334 | 5,458 | 3,656 | 34,661 |
| 10,657 | 213 | 25,384 | 5,451 | 3,626 | 34,674 |
| 10,658 | 218 | 25,030 | 5,398 | 3,578 | 34,224 |
| 10,659 | 217 | 24,791 | 5,395 | 3,558 | 33,961 |
| 10,660 | 217 | 24,764 | 5,420 | 3,579 | 33,980 |
| 10,661 | 232 | 24,817 | 5,408 | 3,579 | 34,036 |
| 10,662 | 233 | 24,633 | 5,358 | 3,545 | 33,769 |
| 10,663 | 227 | 24,408 | 5,345 | 3,510 | 33,490 |
| 10,664 | 229 | 24,462 | 5,370 | 3,516 | 33,577 |
| 10,665 | 241 | 24,484 | 5,399 | 3,548 | 33,672 |
| 10,666 | 239 | 24,331 | 5,359 | 3,495 | 33,424 |
| 10,667 | 240 | 24,348 | 5,373 | 3,491 | 33,452 |
| 10,668 | 235 | 24,333 | 5,347 | 3,475 | 33,390 |
| 10,669 | 234 | 24,357 | 5,352 | 3,487 | 33,430 |
| 10,670 | 225 | 24,340 | 5,361 | 3,478 | 33,404 |
| 10,671 | 220 | 24,211 | 5,315 | 3,457 | 33,203 |
| 10,672 | 215 | 24,064 | 5,276 | 3,407 | 32,962 |
| 10,673 | 216 | 24,122 | 5,267 | 3,412 | 33,017 |
| 10,674 | 207 | 24,217 | 5,305 | 3,403 | 33,132 |
| 10,675 | 204 | 24,285 | 5,293 | 3,404 | 33,186 |
| 10,676 | 207 | 24,465 | 5,372 | 3,441 | 33,485 |
| 10,677 | 208 | 24,581 | 5,396 | 3,456 | 33,641 |
| 10,678 | 205 | 24,368 | 5,349 | 3,409 | 33,331 |
| 10,679 | 208 | 24,309 | 5,375 | 3,403 | 33,295 |

|        |     |        |       |       |        |
|--------|-----|--------|-------|-------|--------|
| 10,680 | 204 | 24,537 | 5,426 | 3,447 | 33,614 |
| 10,681 | 196 | 24,400 | 5,467 | 3,449 | 33,512 |
| 10,682 | 190 | 24,456 | 5,462 | 3,417 | 33,525 |
| 10,683 | 189 | 24,318 | 5,429 | 3,423 | 33,359 |
| 10,684 | 192 | 24,456 | 5,465 | 3,434 | 33,547 |
| 10,685 | 196 | 24,397 | 5,467 | 3,441 | 33,501 |
| 10,686 | 193 | 24,222 | 5,457 | 3,443 | 33,315 |
| 10,687 | 196 | 24,129 | 5,464 | 3,452 | 33,241 |
| 10,688 | 200 | 24,036 | 5,457 | 3,452 | 33,145 |
| 10,689 | 204 | 23,963 | 5,444 | 3,445 | 33,056 |
| 10,690 | 203 | 24,025 | 5,439 | 3,450 | 33,117 |
| 10,691 | 198 | 24,070 | 5,471 | 3,470 | 33,209 |
| 10,692 | 200 | 24,073 | 5,529 | 3,531 | 33,333 |
| 10,693 | 190 | 23,999 | 5,575 | 3,590 | 33,354 |
| 10,694 | 187 | 23,862 | 5,629 | 3,604 | 33,282 |
| 10,695 | 188 | 23,846 | 5,696 | 3,645 | 33,375 |
| 10,696 | 185 | 23,775 | 5,737 | 3,724 | 33,421 |
| 10,697 | 185 | 24,139 | 5,829 | 3,794 | 33,947 |
| 10,698 | 182 | 24,364 | 5,850 | 3,827 | 34,223 |
| 10,699 | 179 | 24,805 | 5,922 | 3,901 | 34,807 |
| 10,700 | 167 | 25,106 | 5,950 | 3,919 | 35,142 |
| 10,701 | 167 | 25,168 | 5,931 | 3,912 | 35,178 |
| 10,702 | 167 | 25,417 | 5,996 | 3,943 | 35,523 |
| 10,703 | 161 | 25,731 | 6,102 | 3,996 | 35,990 |
| 10,704 | 160 | 25,976 | 6,180 | 4,019 | 36,335 |
| 10,705 | 158 | 25,897 | 6,133 | 3,977 | 36,165 |
| 10,706 | 159 | 26,123 | 6,182 | 4,029 | 36,493 |
| 10,707 | 151 | 26,494 | 6,272 | 4,099 | 37,016 |
| 10,708 | 150 | 26,256 | 6,195 | 4,052 | 36,653 |
| 10,709 | 150 | 26,454 | 6,265 | 4,096 | 36,965 |
| 10,710 | 148 | 26,563 | 6,294 | 4,112 | 37,117 |
| 10,711 | 147 | 26,950 | 6,348 | 4,147 | 37,592 |

|        |     |        |       |       |        |
|--------|-----|--------|-------|-------|--------|
| 10,712 | 133 | 27,131 | 6,385 | 4,159 | 37,808 |
| 10,713 | 127 | 27,028 | 6,376 | 4,183 | 37,714 |
| 10,714 | 125 | 26,937 | 6,344 | 4,175 | 37,581 |
| 10,715 | 111 | 26,369 | 6,209 | 4,101 | 36,790 |
| 10,716 | 112 | 26,538 | 6,258 | 4,131 | 37,039 |
| 10,717 | 112 | 26,753 | 6,332 | 4,175 | 37,372 |
| 10,718 | 117 | 26,668 | 6,340 | 4,159 | 37,284 |
| 10,719 | 113 | 26,365 | 6,282 | 4,105 | 36,865 |
| 10,720 | 113 | 26,185 | 6,241 | 4,101 | 36,640 |
| 10,721 | 113 | 26,143 | 6,252 | 4,093 | 36,601 |
| 10,722 | 115 | 26,130 | 6,280 | 4,105 | 36,630 |
| 10,723 | 113 | 25,786 | 6,223 | 4,076 | 36,198 |
| 10,724 | 111 | 25,810 | 6,272 | 4,095 | 36,288 |
| 10,725 | 111 | 25,594 | 6,223 | 4,069 | 35,997 |
| 10,726 | 122 | 25,636 | 6,283 | 4,073 | 36,114 |
| 10,727 | 118 | 25,746 | 6,254 | 4,069 | 36,187 |
| 10,728 | 107 | 24,756 | 5,999 | 3,968 | 34,830 |
| 10,729 | 108 | 25,174 | 6,077 | 4,028 | 35,387 |
| 10,730 | 113 | 25,361 | 6,174 | 4,094 | 35,742 |
| 10,731 | 114 | 25,272 | 6,126 | 4,079 | 35,591 |
| 10,732 | 115 | 25,282 | 6,176 | 4,096 | 35,669 |
| 10,733 | 117 | 25,007 | 6,139 | 4,077 | 35,340 |
| 10,734 | 116 | 25,020 | 6,145 | 4,066 | 35,347 |
| 10,735 | 111 | 24,886 | 6,090 | 4,048 | 35,135 |
| 10,736 | 112 | 24,918 | 6,068 | 4,029 | 35,127 |
| 10,737 | 111 | 24,871 | 6,070 | 4,030 | 35,082 |
| 10,738 | 106 | 24,904 | 6,088 | 4,036 | 35,134 |
| 10,739 | 104 | 24,967 | 6,096 | 4,053 | 35,220 |
| 10,740 | 101 | 24,811 | 6,083 | 4,052 | 35,047 |
| 10,741 | 104 | 24,770 | 6,074 | 4,045 | 34,993 |
| 10,742 | 106 | 25,007 | 6,115 | 4,054 | 35,282 |
| 10,743 | 105 | 25,220 | 6,110 | 4,050 | 35,485 |



|        |     |        |       |       |        |
|--------|-----|--------|-------|-------|--------|
| 10,744 | 105 | 25,345 | 6,085 | 4,004 | 35,539 |
| 10,745 | 102 | 24,865 | 5,934 | 3,929 | 34,830 |
| 10,746 | 102 | 24,881 | 5,942 | 3,936 | 34,861 |
| 10,747 | 104 | 24,903 | 5,945 | 3,912 | 34,864 |
| 10,748 | 101 | 24,574 | 5,881 | 3,872 | 34,428 |
| 10,749 | 100 | 24,265 | 5,793 | 3,820 | 33,978 |
| 10,750 | 101 | 22,781 | 5,556 | 3,621 | 32,059 |
| 10,751 | 104 | 22,859 | 5,612 | 3,636 | 32,211 |
| 10,752 | 108 | 22,822 | 5,626 | 3,634 | 32,190 |
| 10,753 | 109 | 22,375 | 5,552 | 3,605 | 31,641 |
| 10,754 | 112 | 22,642 | 5,607 | 3,664 | 32,025 |
| 10,755 | 112 | 22,221 | 5,507 | 3,622 | 31,462 |
| 10,756 | 111 | 21,909 | 5,443 | 3,591 | 31,054 |
| 10,757 | 122 | 22,028 | 5,472 | 3,605 | 31,227 |
| 10,758 | 124 | 21,920 | 5,438 | 3,580 | 31,062 |
| 10,759 | 121 | 21,736 | 5,368 | 3,567 | 30,792 |
| 10,760 | 124 | 21,563 | 5,320 | 3,532 | 30,539 |
| 10,761 | 124 | 21,256 | 5,237 | 3,496 | 30,113 |
| 10,762 | 127 | 21,522 | 5,341 | 3,569 | 30,559 |
| 10,763 | 129 | 21,428 | 5,335 | 3,570 | 30,462 |
| 10,764 | 129 | 21,301 | 5,302 | 3,520 | 30,252 |
| 10,765 | 129 | 21,626 | 5,364 | 3,550 | 30,669 |
| 10,766 | 126 | 21,623 | 5,350 | 3,552 | 30,651 |
| 10,767 | 124 | 21,372 | 5,224 | 3,468 | 30,188 |
| 10,768 | 125 | 21,575 | 5,270 | 3,490 | 30,460 |
| 10,769 | 122 | 21,572 | 5,271 | 3,501 | 30,466 |
| 10,770 | 124 | 21,538 | 5,285 | 3,500 | 30,447 |
| 10,771 | 124 | 21,625 | 5,305 | 3,507 | 30,561 |
| 10,772 | 127 | 21,681 | 5,297 | 3,516 | 30,621 |
| 10,773 | 127 | 21,702 | 5,299 | 3,511 | 30,639 |
| 10,774 | 133 | 21,880 | 5,378 | 3,529 | 30,920 |
| 10,775 | 133 | 21,737 | 5,372 | 3,524 | 30,766 |

|        |     |        |       |       |        |
|--------|-----|--------|-------|-------|--------|
| 10,776 | 127 | 21,876 | 5,430 | 3,561 | 30,994 |
| 10,777 | 128 | 21,901 | 5,413 | 3,578 | 31,020 |
| 10,778 | 122 | 21,461 | 5,304 | 3,511 | 30,398 |
| 10,779 | 123 | 21,786 | 5,369 | 3,527 | 30,805 |
| 10,780 | 122 | 21,852 | 5,356 | 3,503 | 30,833 |
| 10,781 | 121 | 21,965 | 5,318 | 3,470 | 30,874 |
| 10,782 | 122 | 21,994 | 5,250 | 3,422 | 30,788 |
| 10,783 | 121 | 21,978 | 5,239 | 3,424 | 30,762 |
| 10,784 | 123 | 22,502 | 5,318 | 3,515 | 31,458 |
| 10,785 | 122 | 22,418 | 5,253 | 3,503 | 31,296 |
| 10,786 | 121 | 22,580 | 5,300 | 3,535 | 31,536 |
| 10,787 | 122 | 22,697 | 5,328 | 3,545 | 31,692 |
| 10,788 | 120 | 23,280 | 5,445 | 3,622 | 32,467 |
| 10,789 | 121 | 23,224 | 5,434 | 3,594 | 32,373 |
| 10,790 | 121 | 23,200 | 5,431 | 3,586 | 32,338 |
| 10,791 | 124 | 23,515 | 5,527 | 3,642 | 32,808 |
| 10,792 | 125 | 23,228 | 5,474 | 3,583 | 32,410 |
| 10,793 | 123 | 23,389 | 5,549 | 3,641 | 32,702 |
| 10,794 | 128 | 23,336 | 5,574 | 3,637 | 32,675 |
| 10,795 | 131 | 22,904 | 5,512 | 3,591 | 32,138 |
| 10,796 | 132 | 23,112 | 5,558 | 3,623 | 32,425 |
| 10,797 | 133 | 23,262 | 5,600 | 3,622 | 32,617 |
| 10,798 | 135 | 22,950 | 5,539 | 3,586 | 32,210 |
| 10,799 | 133 | 22,700 | 5,517 | 3,556 | 31,906 |
| 10,800 | 146 | 22,915 | 5,647 | 3,615 | 32,323 |
| 10,801 | 145 | 22,907 | 5,654 | 3,636 | 32,342 |
| 10,802 | 147 | 22,973 | 5,633 | 3,661 | 32,414 |
| 10,803 | 152 | 22,739 | 5,559 | 3,614 | 32,064 |
| 10,804 | 149 | 22,598 | 5,516 | 3,577 | 31,840 |
| 10,805 | 150 | 23,201 | 5,674 | 3,692 | 32,717 |
| 10,806 | 151 | 23,052 | 5,678 | 3,671 | 32,552 |
| 10,807 | 150 | 23,087 | 5,649 | 3,643 | 32,529 |

|        |     |        |       |       |        |
|--------|-----|--------|-------|-------|--------|
| 10,808 | 150 | 23,873 | 5,797 | 3,726 | 33,546 |
| 10,809 | 153 | 24,131 | 5,863 | 3,783 | 33,930 |
| 10,810 | 152 | 24,139 | 5,891 | 3,786 | 33,968 |
| 10,811 | 150 | 24,217 | 5,875 | 3,758 | 34,000 |
| 10,812 | 152 | 24,225 | 5,853 | 3,712 | 33,942 |
| 10,813 | 153 | 24,219 | 5,859 | 3,723 | 33,954 |
| 10,814 | 159 | 24,408 | 5,878 | 3,749 | 34,194 |
| 10,815 | 163 | 24,477 | 5,919 | 3,764 | 34,323 |
| 10,816 | 164 | 24,134 | 5,875 | 3,724 | 33,897 |
| 10,817 | 164 | 23,828 | 5,827 | 3,690 | 33,509 |
| 10,818 | 162 | 24,233 | 5,936 | 3,761 | 34,092 |
| 10,819 | 163 | 24,255 | 5,970 | 3,794 | 34,182 |
| 10,820 | 162 | 24,294 | 5,943 | 3,825 | 34,224 |
| 10,821 | 159 | 24,538 | 6,049 | 3,853 | 34,599 |
| 10,822 | 157 | 24,566 | 6,042 | 3,858 | 34,623 |
| 10,823 | 152 | 24,733 | 6,090 | 3,861 | 34,836 |
| 10,824 | 151 | 24,792 | 6,051 | 3,855 | 34,849 |
| 10,825 | 149 | 24,885 | 6,053 | 3,867 | 34,954 |
| 10,826 | 145 | 24,905 | 6,018 | 3,859 | 34,927 |
| 10,827 | 145 | 25,262 | 6,069 | 3,919 | 35,395 |
| 10,828 | 144 | 24,997 | 6,017 | 3,878 | 35,036 |
| 10,829 | 146 | 25,345 | 6,110 | 3,943 | 35,544 |
| 10,830 | 146 | 25,150 | 6,043 | 3,911 | 35,250 |
| 10,831 | 148 | 25,332 | 6,101 | 3,961 | 35,542 |
| 10,832 | 141 | 25,022 | 6,066 | 3,934 | 35,163 |
| 10,833 | 144 | 24,884 | 6,041 | 3,937 | 35,006 |
| 10,834 | 147 | 25,040 | 6,058 | 3,942 | 35,187 |
| 10,835 | 144 | 25,219 | 6,111 | 3,950 | 35,424 |
| 10,836 | 144 | 25,220 | 6,141 | 3,936 | 35,441 |
| 10,837 | 144 | 24,959 | 6,053 | 3,883 | 35,039 |
| 10,838 | 144 | 24,637 | 5,991 | 3,833 | 34,605 |
| 10,839 | 147 | 24,846 | 6,051 | 3,871 | 34,915 |

|        |     |        |       |       |        |
|--------|-----|--------|-------|-------|--------|
| 10,840 | 145 | 25,062 | 6,046 | 3,893 | 35,146 |
| 10,841 | 145 | 25,000 | 6,042 | 3,857 | 35,044 |
| 10,842 | 142 | 25,060 | 6,095 | 3,872 | 35,169 |
| 10,843 | 143 | 25,007 | 6,112 | 3,910 | 35,172 |
| 10,844 | 144 | 25,168 | 6,153 | 3,928 | 35,393 |
| 10,845 | 138 | 25,075 | 6,113 | 3,921 | 35,247 |
| 10,846 | 134 | 24,871 | 6,035 | 3,881 | 34,921 |
| 10,847 | 132 | 24,885 | 6,040 | 3,878 | 34,935 |
| 10,848 | 127 | 24,628 | 5,930 | 3,834 | 34,519 |
| 10,849 | 128 | 24,783 | 5,919 | 3,843 | 34,673 |
| 10,850 | 123 | 24,721 | 5,905 | 3,844 | 34,593 |
| 10,851 | 118 | 24,688 | 5,869 | 3,819 | 34,494 |
| 10,852 | 114 | 24,895 | 5,939 | 3,853 | 34,801 |
| 10,853 | 112 | 24,761 | 5,921 | 3,830 | 34,624 |
| 10,854 | 112 | 24,727 | 5,919 | 3,813 | 34,571 |
| 10,855 | 112 | 24,854 | 5,959 | 3,848 | 34,773 |
| 10,856 | 111 | 24,601 | 5,888 | 3,819 | 34,419 |
| 10,857 | 111 | 24,429 | 5,892 | 3,807 | 34,239 |
| 10,858 | 104 | 24,569 | 5,930 | 3,848 | 34,451 |
| 10,859 | 102 | 24,642 | 5,943 | 3,896 | 34,583 |
| 10,860 | 102 | 24,644 | 5,925 | 3,886 | 34,557 |
| 10,861 | 100 | 24,300 | 5,840 | 3,843 | 34,083 |
| 10,862 | 100 | 24,498 | 5,870 | 3,907 | 34,375 |
| 10,863 | 98  | 24,127 | 5,801 | 3,884 | 33,910 |
| 10,864 | 97  | 24,185 | 5,836 | 3,897 | 34,015 |
| 10,865 | 93  | 24,085 | 5,856 | 3,914 | 33,948 |
| 10,866 | 91  | 24,283 | 5,882 | 3,941 | 34,197 |
| 10,867 | 90  | 24,393 | 5,893 | 3,951 | 34,327 |
| 10,868 | 94  | 24,393 | 5,859 | 3,949 | 34,295 |
| 10,869 | 93  | 24,474 | 5,889 | 3,928 | 34,384 |
| 10,870 | 94  | 24,375 | 5,842 | 3,904 | 34,215 |
| 10,871 | 95  | 24,430 | 5,842 | 3,907 | 34,274 |

|        |     |        |       |       |        |
|--------|-----|--------|-------|-------|--------|
| 10,872 | 98  | 24,324 | 5,826 | 3,926 | 34,174 |
| 10,873 | 98  | 24,390 | 5,827 | 3,923 | 34,238 |
| 10,874 | 98  | 24,341 | 5,810 | 3,952 | 34,201 |
| 10,875 | 108 | 24,339 | 5,853 | 3,965 | 34,265 |
| 10,876 | 114 | 24,186 | 5,910 | 3,985 | 34,195 |
| 10,877 | 119 | 24,058 | 5,915 | 3,983 | 34,075 |
| 10,878 | 119 | 23,743 | 5,873 | 3,946 | 33,681 |
| 10,879 | 124 | 23,879 | 5,980 | 4,039 | 34,022 |
| 10,880 | 127 | 23,887 | 5,977 | 4,031 | 34,022 |
| 10,881 | 128 | 23,544 | 5,959 | 3,999 | 33,630 |
| 10,882 | 130 | 23,513 | 5,975 | 4,024 | 33,642 |
| 10,883 | 136 | 23,213 | 5,923 | 4,003 | 33,275 |
| 10,884 | 130 | 22,981 | 5,884 | 3,960 | 32,955 |
| 10,885 | 130 | 23,645 | 6,066 | 4,086 | 33,927 |
| 10,886 | 130 | 23,435 | 6,003 | 4,067 | 33,635 |
| 10,887 | 128 | 23,236 | 5,921 | 4,044 | 33,329 |
| 10,888 | 128 | 23,144 | 5,919 | 4,045 | 33,236 |
| 10,889 | 128 | 23,089 | 5,915 | 4,055 | 33,187 |
| 10,890 | 130 | 22,998 | 5,910 | 4,079 | 33,117 |
| 10,891 | 134 | 23,094 | 5,955 | 4,106 | 33,289 |
| 10,892 | 131 | 23,170 | 5,956 | 4,158 | 33,415 |
| 10,893 | 133 | 23,320 | 5,942 | 4,153 | 33,548 |
| 10,894 | 134 | 23,029 | 5,917 | 4,107 | 33,187 |
| 10,895 | 137 | 23,266 | 5,965 | 4,136 | 33,504 |
| 10,896 | 138 | 23,523 | 6,031 | 4,182 | 33,874 |
| 10,897 | 140 | 23,237 | 5,994 | 4,150 | 33,521 |
| 10,898 | 143 | 23,521 | 6,061 | 4,192 | 33,917 |
| 10,899 | 141 | 23,483 | 6,075 | 4,221 | 33,920 |
| 10,900 | 138 | 23,281 | 6,042 | 4,171 | 33,632 |
| 10,901 | 134 | 23,498 | 6,099 | 4,202 | 33,933 |
| 10,902 | 134 | 23,383 | 6,052 | 4,176 | 33,745 |
| 10,903 | 127 | 23,157 | 5,989 | 4,138 | 33,411 |

|        |     |        |       |       |        |
|--------|-----|--------|-------|-------|--------|
| 10,904 | 128 | 23,198 | 5,987 | 4,151 | 33,464 |
| 10,905 | 129 | 23,059 | 5,982 | 4,124 | 33,294 |
| 10,906 | 126 | 22,964 | 5,964 | 4,108 | 33,162 |
| 10,907 | 132 | 23,065 | 6,010 | 4,125 | 33,332 |
| 10,908 | 130 | 23,179 | 6,036 | 4,143 | 33,488 |
| 10,909 | 134 | 23,136 | 6,041 | 4,125 | 33,436 |
| 10,910 | 136 | 23,027 | 6,035 | 4,094 | 33,292 |
| 10,911 | 133 | 22,627 | 5,985 | 4,041 | 32,786 |
| 10,912 | 134 | 22,579 | 6,001 | 4,014 | 32,728 |
| 10,913 | 133 | 22,424 | 6,017 | 4,011 | 32,585 |
| 10,914 | 132 | 22,530 | 6,062 | 4,043 | 32,767 |
| 10,915 | 134 | 22,700 | 6,048 | 4,044 | 32,926 |
| 10,916 | 140 | 22,624 | 5,998 | 4,001 | 32,763 |
| 10,917 | 139 | 22,519 | 5,963 | 3,989 | 32,610 |
| 10,918 | 144 | 22,705 | 6,046 | 3,997 | 32,892 |
| 10,919 | 144 | 22,688 | 6,059 | 4,007 | 32,898 |
| 10,920 | 143 | 22,654 | 6,037 | 4,002 | 32,836 |
| 10,921 | 142 | 22,609 | 6,059 | 4,009 | 32,819 |
| 10,922 | 143 | 22,488 | 6,062 | 3,992 | 32,685 |
| 10,923 | 142 | 22,230 | 6,017 | 3,950 | 32,339 |
| 10,924 | 144 | 22,525 | 6,064 | 3,972 | 32,705 |
| 10,925 | 137 | 22,973 | 6,151 | 4,043 | 33,304 |
| 10,926 | 135 | 23,164 | 6,108 | 4,039 | 33,446 |
| 10,927 | 134 | 23,145 | 6,097 | 4,052 | 33,428 |
| 10,928 | 127 | 23,229 | 6,088 | 4,025 | 33,469 |
| 10,929 | 125 | 22,923 | 5,921 | 3,947 | 32,916 |
| 10,930 | 126 | 23,207 | 5,948 | 3,960 | 33,241 |
| 10,931 | 124 | 23,380 | 5,989 | 3,979 | 33,472 |
| 10,932 | 122 | 23,409 | 5,943 | 3,945 | 33,419 |
| 10,933 | 124 | 23,341 | 5,921 | 3,932 | 33,318 |
| 10,934 | 115 | 23,157 | 5,857 | 3,864 | 32,993 |
| 10,935 | 118 | 23,305 | 5,914 | 3,890 | 33,227 |

|        |     |        |       |       |        |
|--------|-----|--------|-------|-------|--------|
| 10,936 | 117 | 23,020 | 5,861 | 3,838 | 32,836 |
| 10,937 | 116 | 23,043 | 5,908 | 3,866 | 32,933 |
| 10,938 | 116 | 22,987 | 5,913 | 3,868 | 32,884 |
| 10,939 | 117 | 23,077 | 5,917 | 3,874 | 32,985 |
| 10,940 | 114 | 22,721 | 5,774 | 3,776 | 32,385 |
| 10,941 | 114 | 22,879 | 5,806 | 3,799 | 32,598 |
| 10,942 | 112 | 22,909 | 5,806 | 3,791 | 32,618 |
| 10,943 | 112 | 23,124 | 5,830 | 3,797 | 32,863 |
| 10,944 | 108 | 23,397 | 5,876 | 3,827 | 33,208 |
| 10,945 | 111 | 23,372 | 5,843 | 3,806 | 33,132 |
| 10,946 | 116 | 23,450 | 5,839 | 3,805 | 33,210 |
| 10,947 | 118 | 23,465 | 5,852 | 3,799 | 33,234 |
| 10,948 | 117 | 23,511 | 5,822 | 3,794 | 33,244 |
| 10,949 | 115 | 23,231 | 5,760 | 3,750 | 32,856 |
| 10,950 | 117 | 22,833 | 5,673 | 3,686 | 32,309 |
| 10,951 | 126 | 23,105 | 5,758 | 3,754 | 32,743 |
| 10,952 | 127 | 22,846 | 5,708 | 3,754 | 32,435 |
| 10,953 | 129 | 22,793 | 5,734 | 3,748 | 32,404 |
| 10,954 | 129 | 22,877 | 5,742 | 3,743 | 32,491 |
| 10,955 | 129 | 23,103 | 5,768 | 3,770 | 32,770 |
| 10,956 | 133 | 23,145 | 5,765 | 3,776 | 32,819 |
| 10,957 | 133 | 23,128 | 5,767 | 3,779 | 32,807 |
| 10,958 | 127 | 23,299 | 5,760 | 3,785 | 32,971 |
| 10,959 | 126 | 23,301 | 5,798 | 3,826 | 33,051 |
| 10,960 | 123 | 23,342 | 5,815 | 3,839 | 33,119 |
| 10,961 | 124 | 23,352 | 5,811 | 3,823 | 33,110 |
| 10,962 | 125 | 23,506 | 5,829 | 3,832 | 33,292 |
| 10,963 | 125 | 23,683 | 5,804 | 3,839 | 33,451 |
| 10,964 | 125 | 23,572 | 5,741 | 3,788 | 33,226 |
| 10,965 | 124 | 23,215 | 5,695 | 3,741 | 32,775 |
| 10,966 | 119 | 22,795 | 5,641 | 3,704 | 32,259 |
| 10,967 | 118 | 23,241 | 5,695 | 3,793 | 32,847 |

|        |     |        |       |       |        |
|--------|-----|--------|-------|-------|--------|
| 10,968 | 121 | 23,213 | 5,662 | 3,815 | 32,811 |
| 10,969 | 115 | 23,271 | 5,674 | 3,821 | 32,881 |
| 10,970 | 118 | 23,297 | 5,640 | 3,807 | 32,862 |
| 10,971 | 117 | 22,991 | 5,555 | 3,763 | 32,426 |
| 10,972 | 123 | 23,142 | 5,567 | 3,806 | 32,638 |
| 10,973 | 121 | 22,961 | 5,517 | 3,772 | 32,371 |
| 10,974 | 120 | 22,926 | 5,496 | 3,771 | 32,313 |
| 10,975 | 118 | 22,819 | 5,472 | 3,754 | 32,163 |
| 10,976 | 120 | 22,726 | 5,452 | 3,737 | 32,035 |
| 10,977 | 119 | 22,475 | 5,460 | 3,727 | 31,781 |
| 10,978 | 116 | 22,188 | 5,388 | 3,645 | 31,337 |
| 10,979 | 115 | 22,177 | 5,373 | 3,647 | 31,312 |
| 10,980 | 112 | 22,075 | 5,355 | 3,609 | 31,151 |
| 10,981 | 112 | 22,056 | 5,347 | 3,597 | 31,112 |
| 10,982 | 113 | 22,047 | 5,332 | 3,600 | 31,092 |
| 10,983 | 109 | 21,859 | 5,326 | 3,607 | 30,901 |
| 10,984 | 112 | 21,912 | 5,336 | 3,616 | 30,976 |
| 10,985 | 112 | 21,636 | 5,246 | 3,562 | 30,556 |
| 10,986 | 110 | 21,806 | 5,311 | 3,603 | 30,830 |
| 10,987 | 114 | 21,691 | 5,303 | 3,585 | 30,693 |
| 10,988 | 113 | 21,530 | 5,246 | 3,535 | 30,424 |
| 10,989 | 123 | 21,901 | 5,305 | 3,570 | 30,899 |
| 10,990 | 126 | 21,880 | 5,316 | 3,549 | 30,871 |
| 10,991 | 129 | 21,551 | 5,255 | 3,481 | 30,416 |
| 10,992 | 133 | 21,336 | 5,235 | 3,443 | 30,147 |
| 10,993 | 135 | 21,367 | 5,290 | 3,475 | 30,267 |
| 10,994 | 136 | 21,225 | 5,285 | 3,473 | 30,119 |
| 10,995 | 138 | 21,391 | 5,333 | 3,515 | 30,377 |
| 10,996 | 134 | 21,268 | 5,305 | 3,521 | 30,228 |
| 10,997 | 126 | 21,064 | 5,267 | 3,499 | 29,956 |
| 10,998 | 126 | 21,094 | 5,253 | 3,494 | 29,967 |
| 10,999 | 131 | 21,059 | 5,261 | 3,489 | 29,940 |



|        |     |        |       |       |        |
|--------|-----|--------|-------|-------|--------|
| 11,000 | 133 | 21,102 | 5,275 | 3,463 | 29,973 |
| 11,001 | 133 | 21,057 | 5,260 | 3,458 | 29,908 |
| 11,002 | 131 | 21,030 | 5,247 | 3,466 | 29,874 |
| 11,003 | 129 | 21,169 | 5,256 | 3,465 | 30,019 |
| 11,004 | 132 | 21,348 | 5,319 | 3,510 | 30,309 |
| 11,005 | 137 | 21,425 | 5,364 | 3,536 | 30,462 |
| 11,006 | 134 | 21,529 | 5,437 | 3,569 | 30,669 |
| 11,007 | 130 | 21,415 | 5,415 | 3,545 | 30,505 |
| 11,008 | 136 | 21,768 | 5,457 | 3,572 | 30,933 |
| 11,009 | 137 | 21,885 | 5,459 | 3,565 | 31,046 |
| 11,010 | 137 | 21,983 | 5,447 | 3,554 | 31,121 |
| 11,011 | 137 | 22,164 | 5,525 | 3,576 | 31,402 |
| 11,012 | 134 | 22,209 | 5,532 | 3,587 | 31,462 |
| 11,013 | 136 | 22,143 | 5,488 | 3,606 | 31,373 |
| 11,014 | 136 | 21,850 | 5,480 | 3,543 | 31,009 |
| 11,015 | 135 | 21,820 | 5,498 | 3,553 | 31,006 |
| 11,016 | 138 | 21,630 | 5,463 | 3,520 | 30,751 |
| 11,017 | 138 | 21,428 | 5,430 | 3,497 | 30,493 |
| 11,018 | 138 | 22,030 | 5,645 | 3,621 | 31,434 |
| 11,019 | 139 | 22,195 | 5,745 | 3,661 | 31,740 |
| 11,020 | 137 | 22,106 | 5,753 | 3,654 | 31,650 |
| 11,021 | 137 | 22,218 | 5,805 | 3,645 | 31,805 |
| 11,022 | 131 | 22,088 | 5,785 | 3,623 | 31,627 |
| 11,023 | 134 | 22,465 | 5,877 | 3,652 | 32,128 |
| 11,024 | 135 | 22,548 | 5,878 | 3,651 | 32,212 |
| 11,025 | 138 | 22,688 | 5,898 | 3,663 | 32,387 |
| 11,026 | 138 | 22,546 | 5,892 | 3,651 | 32,227 |
| 11,027 | 141 | 22,788 | 5,941 | 3,704 | 32,574 |
| 11,028 | 136 | 22,788 | 5,882 | 3,665 | 32,471 |
| 11,029 | 136 | 23,149 | 5,954 | 3,711 | 32,950 |
| 11,030 | 137 | 22,854 | 5,894 | 3,679 | 32,564 |
| 11,031 | 141 | 23,102 | 5,959 | 3,714 | 32,916 |

|        |     |        |       |       |        |
|--------|-----|--------|-------|-------|--------|
| 11,032 | 140 | 23,413 | 6,036 | 3,754 | 33,343 |
| 11,033 | 142 | 23,413 | 6,044 | 3,752 | 33,351 |
| 11,034 | 140 | 23,402 | 6,028 | 3,738 | 33,308 |
| 11,035 | 139 | 23,545 | 6,123 | 3,786 | 33,593 |
| 11,036 | 139 | 23,480 | 6,150 | 3,806 | 33,575 |
| 11,037 | 138 | 23,651 | 6,149 | 3,798 | 33,736 |
| 11,038 | 134 | 23,344 | 6,066 | 3,760 | 33,304 |
| 11,039 | 140 | 23,591 | 6,143 | 3,786 | 33,660 |
| 11,040 | 131 | 23,667 | 6,165 | 3,804 | 33,767 |
| 11,041 | 135 | 23,465 | 6,106 | 3,774 | 33,480 |
| 11,042 | 130 | 23,379 | 6,094 | 3,759 | 33,362 |
| 11,043 | 137 | 23,371 | 6,113 | 3,764 | 33,385 |
| 11,044 | 134 | 23,225 | 6,101 | 3,755 | 33,215 |
| 11,045 | 131 | 23,879 | 6,300 | 3,874 | 34,184 |
| 11,046 | 130 | 23,864 | 6,331 | 3,894 | 34,219 |
| 11,047 | 130 | 23,810 | 6,343 | 3,887 | 34,170 |
| 11,048 | 127 | 23,896 | 6,385 | 3,949 | 34,357 |
| 11,049 | 127 | 23,891 | 6,388 | 3,980 | 34,386 |
| 11,050 | 121 | 23,471 | 6,297 | 3,948 | 33,837 |
| 11,051 | 122 | 23,737 | 6,338 | 3,965 | 34,162 |
| 11,052 | 116 | 23,680 | 6,361 | 3,964 | 34,121 |
| 11,053 | 113 | 23,739 | 6,399 | 3,997 | 34,248 |
| 11,054 | 112 | 23,462 | 6,369 | 3,966 | 33,909 |
| 11,055 | 114 | 23,315 | 6,322 | 3,945 | 33,696 |
| 11,056 | 108 | 23,128 | 6,248 | 3,898 | 33,382 |
| 11,057 | 112 | 23,089 | 6,251 | 3,889 | 33,341 |
| 11,058 | 113 | 22,862 | 6,195 | 3,855 | 33,025 |
| 11,059 | 110 | 22,690 | 6,160 | 3,826 | 32,786 |
| 11,060 | 112 | 22,674 | 6,172 | 3,836 | 32,794 |
| 11,061 | 113 | 22,574 | 6,129 | 3,831 | 32,647 |
| 11,062 | 115 | 22,478 | 6,082 | 3,796 | 32,471 |
| 11,063 | 112 | 22,443 | 6,093 | 3,801 | 32,449 |

|        |     |        |       |       |        |
|--------|-----|--------|-------|-------|--------|
| 11,064 | 115 | 22,497 | 6,170 | 3,830 | 32,612 |
| 11,065 | 114 | 22,237 | 6,041 | 3,800 | 32,192 |
| 11,066 | 109 | 22,313 | 6,019 | 3,796 | 32,237 |
| 11,067 | 112 | 22,521 | 6,087 | 3,854 | 32,574 |
| 11,068 | 109 | 22,523 | 6,069 | 3,828 | 32,529 |
| 11,069 | 114 | 22,638 | 6,093 | 3,832 | 32,677 |
| 11,070 | 118 | 22,434 | 6,036 | 3,795 | 32,383 |
| 11,071 | 119 | 22,308 | 5,973 | 3,756 | 32,156 |
| 11,072 | 117 | 22,018 | 5,877 | 3,744 | 31,756 |
| 11,073 | 118 | 22,110 | 5,928 | 3,768 | 31,924 |
| 11,074 | 115 | 22,016 | 5,934 | 3,762 | 31,827 |
| 11,075 | 116 | 21,985 | 5,936 | 3,758 | 31,795 |
| 11,076 | 118 | 22,061 | 5,952 | 3,781 | 31,912 |
| 11,077 | 118 | 21,958 | 5,951 | 3,784 | 31,811 |
| 11,078 | 113 | 21,632 | 5,911 | 3,781 | 31,437 |
| 11,079 | 114 | 21,707 | 5,961 | 3,833 | 31,615 |
| 11,080 | 117 | 21,516 | 5,958 | 3,833 | 31,424 |
| 11,081 | 120 | 21,392 | 5,967 | 3,800 | 31,279 |
| 11,082 | 119 | 21,277 | 5,924 | 3,784 | 31,104 |
| 11,083 | 117 | 21,046 | 5,866 | 3,785 | 30,814 |
| 11,084 | 127 | 21,335 | 5,919 | 3,823 | 31,204 |
| 11,085 | 129 | 21,052 | 5,863 | 3,799 | 30,843 |
| 11,086 | 133 | 21,099 | 5,843 | 3,793 | 30,868 |
| 11,087 | 133 | 21,194 | 5,853 | 3,799 | 30,979 |
| 11,088 | 137 | 21,244 | 5,885 | 3,836 | 31,102 |
| 11,089 | 135 | 21,059 | 5,860 | 3,844 | 30,898 |
| 11,090 | 128 | 21,104 | 5,880 | 3,885 | 30,997 |
| 11,091 | 127 | 20,997 | 5,883 | 3,875 | 30,882 |
| 11,092 | 109 | 20,669 | 5,776 | 3,813 | 30,367 |
| 11,093 | 105 | 20,673 | 5,735 | 3,797 | 30,310 |
| 11,094 | 106 | 20,925 | 5,793 | 3,824 | 30,648 |
| 11,095 | 109 | 20,719 | 5,736 | 3,805 | 30,369 |

|        |     |        |       |       |        |
|--------|-----|--------|-------|-------|--------|
| 11,096 | 110 | 20,434 | 5,740 | 3,806 | 30,090 |
| 11,097 | 111 | 20,255 | 5,732 | 3,772 | 29,870 |
| 11,098 | 114 | 20,312 | 5,707 | 3,761 | 29,894 |
| 11,099 | 113 | 20,259 | 5,730 | 3,743 | 29,845 |
| 11,100 | 109 | 20,175 | 5,738 | 3,716 | 29,738 |
| 11,101 | 106 | 20,113 | 5,739 | 3,714 | 29,672 |
| 11,102 | 108 | 20,075 | 5,755 | 3,734 | 29,672 |
| 11,103 | 107 | 20,104 | 5,742 | 3,731 | 29,684 |
| 11,104 | 106 | 20,003 | 5,692 | 3,694 | 29,495 |
| 11,105 | 104 | 19,798 | 5,613 | 3,644 | 29,159 |
| 11,106 | 104 | 20,068 | 5,681 | 3,681 | 29,534 |
| 11,107 | 102 | 20,027 | 5,670 | 3,683 | 29,482 |
| 11,108 | 103 | 20,177 | 5,695 | 3,710 | 29,685 |
| 11,109 | 101 | 19,827 | 5,634 | 3,669 | 29,231 |
| 11,110 | 99  | 19,884 | 5,665 | 3,693 | 29,341 |
| 11,111 | 97  | 19,727 | 5,661 | 3,695 | 29,180 |
| 11,112 | 95  | 19,342 | 5,587 | 3,646 | 28,670 |
| 11,113 | 98  | 19,536 | 5,629 | 3,681 | 28,944 |
| 11,114 | 97  | 19,564 | 5,646 | 3,695 | 29,002 |
| 11,115 | 95  | 19,456 | 5,576 | 3,645 | 28,772 |
| 11,116 | 98  | 19,304 | 5,558 | 3,600 | 28,560 |
| 11,117 | 102 | 19,537 | 5,610 | 3,630 | 28,879 |
| 11,118 | 105 | 19,722 | 5,670 | 3,650 | 29,147 |
| 11,119 | 100 | 19,301 | 5,542 | 3,604 | 28,547 |
| 11,120 | 99  | 19,419 | 5,595 | 3,627 | 28,740 |
| 11,121 | 96  | 19,241 | 5,543 | 3,602 | 28,482 |
| 11,122 | 95  | 18,955 | 5,494 | 3,558 | 28,102 |
| 11,123 | 98  | 18,860 | 5,511 | 3,560 | 28,029 |
| 11,124 | 98  | 18,775 | 5,494 | 3,546 | 27,913 |
| 11,125 | 101 | 18,724 | 5,464 | 3,535 | 27,824 |
| 11,126 | 102 | 18,570 | 5,439 | 3,495 | 27,606 |
| 11,127 | 99  | 18,467 | 5,385 | 3,443 | 27,394 |

|        |     |        |       |       |        |
|--------|-----|--------|-------|-------|--------|
| 11,128 | 101 | 18,602 | 5,407 | 3,440 | 27,550 |
| 11,129 | 102 | 18,837 | 5,478 | 3,458 | 27,875 |
| 11,130 | 105 | 18,598 | 5,408 | 3,403 | 27,514 |
| 11,131 | 105 | 18,611 | 5,383 | 3,403 | 27,502 |
| 11,132 | 100 | 18,459 | 5,359 | 3,412 | 27,330 |
| 11,133 | 104 | 18,690 | 5,457 | 3,459 | 27,710 |
| 11,134 | 97  | 18,077 | 5,327 | 3,336 | 26,837 |
| 11,135 | 97  | 18,394 | 5,402 | 3,369 | 27,262 |
| 11,136 | 95  | 18,667 | 5,447 | 3,393 | 27,602 |
| 11,137 | 100 | 18,952 | 5,527 | 3,443 | 28,022 |
| 11,138 | 98  | 18,990 | 5,539 | 3,440 | 28,067 |
| 11,139 | 97  | 19,054 | 5,521 | 3,413 | 28,085 |
| 11,140 | 99  | 19,104 | 5,515 | 3,421 | 28,139 |
| 11,141 | 100 | 18,785 | 5,461 | 3,365 | 27,711 |
| 11,142 | 109 | 19,573 | 5,661 | 3,482 | 28,825 |
| 11,143 | 110 | 19,644 | 5,713 | 3,511 | 28,978 |
| 11,144 | 110 | 19,359 | 5,642 | 3,462 | 28,573 |
| 11,145 | 111 | 19,363 | 5,672 | 3,482 | 28,628 |
| 11,146 | 109 | 19,559 | 5,771 | 3,555 | 28,994 |
| 11,147 | 111 | 19,884 | 5,770 | 3,578 | 29,343 |
| 11,148 | 110 | 20,033 | 5,751 | 3,592 | 29,486 |
| 11,149 | 108 | 19,817 | 5,692 | 3,555 | 29,172 |
| 11,150 | 108 | 19,936 | 5,679 | 3,556 | 29,279 |
| 11,151 | 113 | 20,076 | 5,683 | 3,559 | 29,431 |
| 11,152 | 115 | 20,389 | 5,734 | 3,587 | 29,825 |
| 11,153 | 119 | 20,169 | 5,621 | 3,531 | 29,440 |
| 11,154 | 119 | 20,116 | 5,626 | 3,527 | 29,388 |
| 11,155 | 119 | 20,062 | 5,613 | 3,517 | 29,311 |
| 11,156 | 126 | 20,331 | 5,749 | 3,540 | 29,746 |
| 11,157 | 128 | 20,503 | 5,810 | 3,577 | 30,018 |
| 11,158 | 128 | 20,498 | 5,827 | 3,579 | 30,032 |
| 11,159 | 126 | 20,391 | 5,841 | 3,565 | 29,923 |

|        |     |        |       |       |        |
|--------|-----|--------|-------|-------|--------|
| 11,160 | 131 | 20,615 | 5,912 | 3,602 | 30,260 |
| 11,161 | 133 | 20,377 | 5,848 | 3,521 | 29,879 |
| 11,162 | 133 | 20,617 | 5,918 | 3,560 | 30,228 |
| 11,163 | 132 | 20,497 | 5,908 | 3,560 | 30,097 |
| 11,164 | 128 | 20,599 | 5,950 | 3,590 | 30,267 |
| 11,165 | 128 | 20,931 | 6,038 | 3,635 | 30,732 |
| 11,166 | 124 | 21,030 | 6,060 | 3,648 | 30,862 |
| 11,167 | 122 | 21,038 | 6,086 | 3,648 | 30,894 |
| 11,168 | 122 | 21,124 | 6,142 | 3,674 | 31,062 |
| 11,169 | 119 | 21,146 | 6,221 | 3,706 | 31,192 |
| 11,170 | 128 | 21,422 | 6,318 | 3,715 | 31,583 |
| 11,171 | 132 | 21,503 | 6,395 | 3,732 | 31,762 |
| 11,172 | 130 | 21,457 | 6,364 | 3,713 | 31,664 |
| 11,173 | 131 | 21,497 | 6,384 | 3,717 | 31,729 |
| 11,174 | 134 | 21,633 | 6,398 | 3,735 | 31,900 |
| 11,175 | 138 | 21,465 | 6,355 | 3,702 | 31,660 |
| 11,176 | 135 | 21,247 | 6,323 | 3,658 | 31,363 |
| 11,177 | 139 | 22,041 | 6,519 | 3,792 | 32,491 |
| 11,178 | 140 | 21,821 | 6,459 | 3,769 | 32,189 |
| 11,179 | 137 | 21,551 | 6,442 | 3,737 | 31,867 |
| 11,180 | 137 | 21,782 | 6,542 | 3,810 | 32,271 |
| 11,181 | 133 | 21,568 | 6,480 | 3,779 | 31,960 |
| 11,182 | 132 | 21,402 | 6,464 | 3,759 | 31,757 |
| 11,183 | 132 | 21,684 | 6,679 | 3,826 | 32,321 |
| 11,184 | 130 | 21,715 | 6,656 | 3,812 | 32,313 |
| 11,185 | 124 | 21,276 | 6,550 | 3,730 | 31,680 |
| 11,186 | 128 | 21,337 | 6,550 | 3,755 | 31,770 |
| 11,187 | 126 | 21,309 | 6,551 | 3,759 | 31,745 |
| 11,188 | 123 | 21,440 | 6,586 | 3,773 | 31,922 |
| 11,189 | 123 | 21,132 | 6,526 | 3,726 | 31,507 |
| 11,190 | 126 | 21,079 | 6,546 | 3,739 | 31,490 |
| 11,191 | 130 | 21,163 | 6,604 | 3,755 | 31,652 |

|        |     |        |       |       |        |
|--------|-----|--------|-------|-------|--------|
| 11,192 | 131 | 21,106 | 6,610 | 3,750 | 31,597 |
| 11,193 | 125 | 21,111 | 6,627 | 3,753 | 31,616 |
| 11,194 | 126 | 20,997 | 6,567 | 3,722 | 31,412 |
| 11,195 | 127 | 20,971 | 6,518 | 3,685 | 31,301 |
| 11,196 | 137 | 20,687 | 6,384 | 3,587 | 30,795 |
| 11,197 | 138 | 20,800 | 6,392 | 3,573 | 30,903 |
| 11,198 | 142 | 20,505 | 6,341 | 3,517 | 30,505 |
| 11,199 | 141 | 20,240 | 6,304 | 3,483 | 30,168 |
| 11,200 | 142 | 20,626 | 6,468 | 3,566 | 30,802 |
| 11,201 | 143 | 20,609 | 6,470 | 3,566 | 30,788 |
| 11,202 | 143 | 20,635 | 6,472 | 3,561 | 30,811 |
| 11,203 | 146 | 20,526 | 6,460 | 3,535 | 30,667 |
| 11,204 | 140 | 20,534 | 6,488 | 3,536 | 30,698 |
| 11,205 | 140 | 20,633 | 6,552 | 3,577 | 30,902 |
| 11,206 | 136 | 20,598 | 6,511 | 3,585 | 30,830 |
| 11,207 | 134 | 20,501 | 6,508 | 3,611 | 30,754 |
| 11,208 | 134 | 20,422 | 6,440 | 3,573 | 30,569 |
| 11,209 | 134 | 20,598 | 6,456 | 3,582 | 30,770 |
| 11,210 | 144 | 20,837 | 6,484 | 3,603 | 31,068 |
| 11,211 | 140 | 20,543 | 6,406 | 3,585 | 30,674 |
| 11,212 | 140 | 20,586 | 6,410 | 3,584 | 30,720 |
| 11,213 | 140 | 20,582 | 6,401 | 3,591 | 30,714 |
| 11,214 | 144 | 20,454 | 6,393 | 3,571 | 30,562 |
| 11,215 | 145 | 20,310 | 6,342 | 3,543 | 30,340 |
| 11,216 | 148 | 20,223 | 6,336 | 3,539 | 30,246 |
| 11,217 | 154 | 20,196 | 6,302 | 3,527 | 30,179 |
| 11,218 | 153 | 20,246 | 6,309 | 3,522 | 30,230 |
| 11,219 | 147 | 20,196 | 6,222 | 3,509 | 30,074 |
| 11,220 | 149 | 20,260 | 6,260 | 3,534 | 30,203 |
| 11,221 | 140 | 20,405 | 6,273 | 3,549 | 30,367 |
| 11,222 | 137 | 20,391 | 6,199 | 3,547 | 30,274 |
| 11,223 | 149 | 20,628 | 6,283 | 3,579 | 30,639 |

|        |     |        |       |       |        |
|--------|-----|--------|-------|-------|--------|
| 11,224 | 148 | 20,640 | 6,324 | 3,587 | 30,699 |
| 11,225 | 145 | 20,767 | 6,345 | 3,590 | 30,847 |
| 11,226 | 142 | 20,590 | 6,348 | 3,576 | 30,656 |
| 11,227 | 144 | 20,278 | 6,285 | 3,563 | 30,270 |
| 11,228 | 146 | 20,411 | 6,389 | 3,610 | 30,556 |
| 11,229 | 143 | 20,316 | 6,363 | 3,599 | 30,421 |
| 11,230 | 146 | 20,428 | 6,373 | 3,594 | 30,541 |
| 11,231 | 147 | 20,644 | 6,343 | 3,601 | 30,735 |
| 11,232 | 143 | 20,700 | 6,282 | 3,595 | 30,720 |
| 11,233 | 143 | 20,739 | 6,240 | 3,588 | 30,710 |
| 11,234 | 143 | 21,040 | 6,293 | 3,615 | 31,091 |
| 11,235 | 149 | 20,738 | 6,213 | 3,573 | 30,673 |
| 11,236 | 148 | 20,761 | 6,218 | 3,578 | 30,705 |
| 11,237 | 149 | 20,862 | 6,297 | 3,622 | 30,930 |
| 11,238 | 154 | 20,631 | 6,214 | 3,565 | 30,564 |
| 11,239 | 152 | 20,618 | 6,197 | 3,547 | 30,514 |
| 11,240 | 156 | 20,901 | 6,264 | 3,581 | 30,902 |
| 11,241 | 165 | 20,800 | 6,280 | 3,552 | 30,797 |
| 11,242 | 160 | 20,479 | 6,147 | 3,493 | 30,279 |
| 11,243 | 160 | 20,349 | 6,073 | 3,461 | 30,043 |
| 11,244 | 159 | 20,132 | 6,055 | 3,443 | 29,789 |
| 11,245 | 161 | 20,294 | 6,102 | 3,461 | 30,018 |
| 11,246 | 159 | 20,261 | 6,104 | 3,457 | 29,981 |
| 11,247 | 150 | 19,912 | 5,976 | 3,421 | 29,459 |
| 11,248 | 151 | 19,981 | 5,992 | 3,425 | 29,549 |
| 11,249 | 142 | 19,685 | 5,924 | 3,404 | 29,155 |
| 11,250 | 145 | 19,858 | 5,977 | 3,446 | 29,426 |
| 11,251 | 146 | 19,864 | 5,963 | 3,434 | 29,407 |
| 11,252 | 135 | 19,378 | 5,841 | 3,384 | 28,738 |
| 11,253 | 136 | 19,487 | 5,850 | 3,387 | 28,860 |
| 11,254 | 137 | 19,642 | 5,895 | 3,398 | 29,072 |
| 11,255 | 139 | 18,986 | 5,710 | 3,288 | 28,123 |



|        |     |        |       |       |        |
|--------|-----|--------|-------|-------|--------|
| 11,256 | 138 | 18,732 | 5,590 | 3,224 | 27,684 |
| 11,257 | 139 | 18,419 | 5,533 | 3,181 | 27,272 |
| 11,258 | 141 | 18,477 | 5,544 | 3,197 | 27,359 |
| 11,259 | 150 | 18,471 | 5,598 | 3,219 | 27,438 |
| 11,260 | 150 | 18,345 | 5,582 | 3,196 | 27,273 |
| 11,261 | 142 | 18,426 | 5,603 | 3,210 | 27,381 |
| 11,262 | 139 | 18,466 | 5,580 | 3,206 | 27,391 |
| 11,263 | 140 | 18,452 | 5,598 | 3,189 | 27,379 |
| 11,264 | 141 | 18,611 | 5,618 | 3,217 | 27,587 |
| 11,265 | 138 | 18,885 | 5,666 | 3,258 | 27,947 |
| 11,266 | 137 | 18,847 | 5,676 | 3,263 | 27,923 |
| 11,267 | 136 | 19,262 | 5,796 | 3,311 | 28,505 |
| 11,268 | 130 | 18,818 | 5,723 | 3,271 | 27,942 |
| 11,269 | 131 | 18,823 | 5,732 | 3,265 | 27,951 |
| 11,270 | 131 | 18,515 | 5,666 | 3,213 | 27,525 |
| 11,271 | 131 | 18,625 | 5,679 | 3,210 | 27,645 |
| 11,272 | 136 | 18,197 | 5,578 | 3,158 | 27,069 |
| 11,273 | 135 | 18,124 | 5,575 | 3,156 | 26,990 |
| 11,274 | 120 | 17,668 | 5,412 | 3,092 | 26,292 |
| 11,275 | 115 | 17,270 | 5,204 | 2,987 | 25,576 |
| 11,276 | 116 | 17,397 | 5,246 | 3,011 | 25,770 |
| 11,277 | 119 | 17,571 | 5,268 | 3,027 | 25,985 |
| 11,278 | 123 | 17,857 | 5,306 | 3,057 | 26,343 |
| 11,279 | 123 | 17,781 | 5,249 | 3,012 | 26,165 |
| 11,280 | 123 | 17,750 | 5,236 | 3,010 | 26,119 |
| 11,281 | 126 | 17,807 | 5,255 | 3,014 | 26,202 |
| 11,282 | 125 | 17,815 | 5,283 | 3,020 | 26,243 |
| 11,283 | 124 | 17,473 | 5,258 | 2,975 | 25,830 |
| 11,284 | 127 | 17,484 | 5,257 | 2,981 | 25,849 |
| 11,285 | 125 | 17,578 | 5,324 | 3,041 | 26,068 |
| 11,286 | 121 | 17,496 | 5,314 | 3,030 | 25,961 |
| 11,287 | 116 | 17,322 | 5,246 | 2,996 | 25,680 |

|        |     |        |       |       |        |
|--------|-----|--------|-------|-------|--------|
| 11,288 | 117 | 17,582 | 5,305 | 3,032 | 26,036 |
| 11,289 | 113 | 17,571 | 5,305 | 3,038 | 26,027 |
| 11,290 | 114 | 17,484 | 5,267 | 3,033 | 25,898 |
| 11,291 | 113 | 17,704 | 5,309 | 3,066 | 26,192 |
| 11,292 | 101 | 17,672 | 5,290 | 3,066 | 26,129 |
| 11,293 | 101 | 17,928 | 5,405 | 3,130 | 26,564 |
| 11,294 | 98  | 17,884 | 5,414 | 3,140 | 26,536 |
| 11,295 | 100 | 17,917 | 5,422 | 3,150 | 26,589 |
| 11,296 | 101 | 17,957 | 5,454 | 3,157 | 26,669 |
| 11,297 | 103 | 17,880 | 5,442 | 3,155 | 26,580 |
| 11,298 | 109 | 17,894 | 5,455 | 3,160 | 26,618 |
| 11,299 | 109 | 17,750 | 5,411 | 3,135 | 26,405 |
| 11,300 | 109 | 17,564 | 5,356 | 3,092 | 26,121 |
| 11,301 | 106 | 17,626 | 5,422 | 3,129 | 26,283 |
| 11,302 | 106 | 17,472 | 5,421 | 3,150 | 26,149 |
| 11,303 | 108 | 17,570 | 5,483 | 3,183 | 26,344 |
| 11,304 | 108 | 17,709 | 5,520 | 3,209 | 26,546 |
| 11,305 | 107 | 17,829 | 5,530 | 3,231 | 26,697 |
| 11,306 | 107 | 17,817 | 5,557 | 3,226 | 26,707 |
| 11,307 | 101 | 17,609 | 5,464 | 3,167 | 26,341 |
| 11,308 | 100 | 17,873 | 5,529 | 3,188 | 26,690 |
| 11,309 | 93  | 18,150 | 5,570 | 3,226 | 27,039 |
| 11,310 | 90  | 18,088 | 5,554 | 3,232 | 26,964 |
| 11,311 | 96  | 18,043 | 5,579 | 3,235 | 26,953 |
| 11,312 | 94  | 17,913 | 5,568 | 3,234 | 26,809 |
| 11,313 | 100 | 17,789 | 5,517 | 3,197 | 26,603 |
| 11,314 | 98  | 17,583 | 5,449 | 3,161 | 26,291 |
| 11,315 | 97  | 17,697 | 5,500 | 3,188 | 26,482 |
| 11,316 | 98  | 17,777 | 5,501 | 3,180 | 26,556 |
| 11,317 | 102 | 18,089 | 5,544 | 3,206 | 26,941 |
| 11,318 | 102 | 17,685 | 5,410 | 3,156 | 26,353 |
| 11,319 | 102 | 17,827 | 5,417 | 3,178 | 26,524 |

|        |     |        |       |       |        |
|--------|-----|--------|-------|-------|--------|
| 11,320 | 102 | 17,966 | 5,473 | 3,210 | 26,751 |
| 11,321 | 102 | 18,152 | 5,533 | 3,246 | 27,033 |
| 11,322 | 97  | 18,128 | 5,470 | 3,249 | 26,944 |
| 11,323 | 96  | 18,128 | 5,463 | 3,248 | 26,935 |
| 11,324 | 95  | 18,371 | 5,529 | 3,273 | 27,268 |
| 11,325 | 96  | 18,311 | 5,532 | 3,254 | 27,193 |
| 11,326 | 99  | 18,337 | 5,550 | 3,239 | 27,225 |
| 11,327 | 99  | 18,332 | 5,532 | 3,235 | 27,198 |
| 11,328 | 93  | 18,197 | 5,526 | 3,222 | 27,038 |
| 11,329 | 108 | 18,770 | 5,724 | 3,319 | 27,921 |
| 11,330 | 110 | 18,770 | 5,699 | 3,326 | 27,905 |
| 11,331 | 108 | 18,658 | 5,650 | 3,307 | 27,723 |
| 11,332 | 106 | 18,777 | 5,683 | 3,322 | 27,888 |
| 11,333 | 107 | 18,929 | 5,697 | 3,336 | 28,069 |
| 11,334 | 102 | 19,005 | 5,661 | 3,311 | 28,079 |
| 11,335 | 102 | 18,587 | 5,487 | 3,222 | 27,398 |
| 11,336 | 107 | 18,844 | 5,544 | 3,239 | 27,734 |
| 11,337 | 107 | 19,097 | 5,637 | 3,302 | 28,143 |
| 11,338 | 106 | 18,997 | 5,639 | 3,296 | 28,038 |
| 11,339 | 115 | 19,390 | 5,767 | 3,359 | 28,631 |
| 11,340 | 117 | 19,252 | 5,754 | 3,345 | 28,468 |
| 11,341 | 114 | 19,052 | 5,724 | 3,323 | 28,213 |
| 11,342 | 118 | 19,322 | 5,856 | 3,398 | 28,694 |
| 11,343 | 119 | 19,192 | 5,818 | 3,354 | 28,483 |
| 11,344 | 122 | 19,063 | 5,771 | 3,323 | 28,279 |
| 11,345 | 122 | 19,049 | 5,762 | 3,319 | 28,252 |
| 11,346 | 124 | 19,210 | 5,825 | 3,330 | 28,489 |
| 11,347 | 124 | 19,184 | 5,816 | 3,327 | 28,451 |
| 11,348 | 123 | 19,372 | 5,926 | 3,373 | 28,794 |
| 11,349 | 115 | 19,302 | 5,920 | 3,349 | 28,686 |
| 11,350 | 119 | 19,496 | 5,969 | 3,369 | 28,953 |
| 11,351 | 122 | 19,559 | 6,030 | 3,391 | 29,102 |

|        |     |        |       |       |        |
|--------|-----|--------|-------|-------|--------|
| 11,352 | 121 | 19,627 | 6,041 | 3,366 | 29,155 |
| 11,353 | 128 | 19,827 | 6,107 | 3,407 | 29,469 |
| 11,354 | 127 | 19,885 | 6,138 | 3,414 | 29,564 |
| 11,355 | 131 | 19,833 | 6,177 | 3,422 | 29,563 |
| 11,356 | 130 | 19,884 | 6,256 | 3,451 | 29,721 |
| 11,357 | 132 | 19,725 | 6,202 | 3,432 | 29,491 |
| 11,358 | 132 | 19,701 | 6,225 | 3,439 | 29,497 |
| 11,359 | 136 | 20,034 | 6,337 | 3,522 | 30,029 |
| 11,360 | 134 | 19,967 | 6,308 | 3,500 | 29,909 |
| 11,361 | 135 | 20,300 | 6,363 | 3,549 | 30,347 |
| 11,362 | 130 | 20,271 | 6,376 | 3,572 | 30,349 |
| 11,363 | 134 | 20,464 | 6,462 | 3,606 | 30,666 |
| 11,364 | 128 | 20,232 | 6,418 | 3,580 | 30,358 |
| 11,365 | 131 | 20,020 | 6,343 | 3,504 | 29,998 |
| 11,366 | 130 | 20,143 | 6,441 | 3,556 | 30,270 |
| 11,367 | 135 | 20,403 | 6,559 | 3,620 | 30,717 |
| 11,368 | 136 | 20,405 | 6,572 | 3,621 | 30,734 |
| 11,369 | 157 | 20,503 | 6,616 | 3,631 | 30,907 |
| 11,370 | 163 | 20,540 | 6,648 | 3,645 | 30,996 |
| 11,371 | 160 | 20,587 | 6,660 | 3,652 | 31,059 |
| 11,372 | 164 | 20,827 | 6,736 | 3,693 | 31,420 |
| 11,373 | 170 | 20,863 | 6,752 | 3,681 | 31,466 |
| 11,374 | 175 | 20,554 | 6,690 | 3,632 | 31,051 |
| 11,375 | 175 | 20,590 | 6,703 | 3,640 | 31,108 |
| 11,376 | 181 | 20,361 | 6,653 | 3,619 | 30,814 |
| 11,377 | 176 | 20,229 | 6,625 | 3,636 | 30,666 |
| 11,378 | 172 | 20,387 | 6,604 | 3,641 | 30,804 |
| 11,379 | 172 | 20,274 | 6,591 | 3,631 | 30,668 |
| 11,380 | 169 | 20,231 | 6,597 | 3,629 | 30,626 |
| 11,381 | 167 | 20,160 | 6,603 | 3,637 | 30,567 |
| 11,382 | 173 | 20,087 | 6,616 | 3,643 | 30,519 |
| 11,383 | 173 | 20,051 | 6,647 | 3,682 | 30,553 |

|        |     |        |       |       |        |
|--------|-----|--------|-------|-------|--------|
| 11,384 | 178 | 20,526 | 6,855 | 3,847 | 31,406 |
| 11,385 | 179 | 20,320 | 6,850 | 3,857 | 31,206 |
| 11,386 | 181 | 20,224 | 6,876 | 3,865 | 31,146 |
| 11,387 | 176 | 20,113 | 6,855 | 3,869 | 31,013 |
| 11,388 | 192 | 20,012 | 6,852 | 3,855 | 30,911 |
| 11,389 | 183 | 19,939 | 6,816 | 3,841 | 30,779 |
| 11,390 | 177 | 19,942 | 6,812 | 3,850 | 30,781 |
| 11,391 | 179 | 19,911 | 6,786 | 3,844 | 30,720 |
| 11,392 | 182 | 20,030 | 6,814 | 3,848 | 30,874 |
| 11,393 | 179 | 20,031 | 6,806 | 3,840 | 30,856 |
| 11,394 | 175 | 20,054 | 6,817 | 3,846 | 30,892 |
| 11,395 | 174 | 20,019 | 6,824 | 3,863 | 30,880 |
| 11,396 | 173 | 19,928 | 6,872 | 3,895 | 30,868 |
| 11,397 | 168 | 19,881 | 6,885 | 3,934 | 30,868 |
| 11,398 | 167 | 19,922 | 6,933 | 3,971 | 30,993 |
| 11,399 | 165 | 19,861 | 6,916 | 3,987 | 30,929 |
| 11,400 | 167 | 19,945 | 6,922 | 4,012 | 31,046 |
| 11,401 | 167 | 19,978 | 6,957 | 4,024 | 31,126 |
| 11,402 | 167 | 20,161 | 6,942 | 4,042 | 31,312 |
| 11,403 | 167 | 20,052 | 6,904 | 4,029 | 31,152 |
| 11,404 | 164 | 20,049 | 6,922 | 4,049 | 31,184 |
| 11,405 | 159 | 19,867 | 6,891 | 4,031 | 30,948 |
| 11,406 | 160 | 19,670 | 6,815 | 4,011 | 30,656 |
| 11,407 | 158 | 19,583 | 6,794 | 3,989 | 30,524 |
| 11,408 | 164 | 19,787 | 6,881 | 4,033 | 30,865 |
| 11,409 | 175 | 19,481 | 6,784 | 3,972 | 30,412 |
| 11,410 | 173 | 19,208 | 6,731 | 3,963 | 30,075 |
| 11,411 | 172 | 19,324 | 6,800 | 3,992 | 30,288 |
| 11,412 | 176 | 19,283 | 6,807 | 3,965 | 30,231 |
| 11,413 | 182 | 19,278 | 6,821 | 3,963 | 30,244 |
| 11,414 | 182 | 19,261 | 6,814 | 3,969 | 30,226 |
| 11,415 | 180 | 19,253 | 6,843 | 4,002 | 30,278 |

|        |     |        |       |       |        |
|--------|-----|--------|-------|-------|--------|
| 11,416 | 179 | 18,610 | 6,711 | 3,951 | 29,451 |
| 11,417 | 181 | 18,830 | 6,765 | 3,984 | 29,760 |
| 11,418 | 173 | 18,798 | 6,813 | 4,002 | 29,786 |
| 11,419 | 177 | 18,898 | 6,879 | 4,038 | 29,992 |
| 11,420 | 161 | 19,057 | 6,954 | 4,082 | 30,254 |
| 11,421 | 158 | 18,996 | 6,892 | 4,046 | 30,092 |
| 11,422 | 158 | 19,038 | 6,917 | 4,051 | 30,164 |
| 11,423 | 154 | 18,915 | 6,953 | 4,054 | 30,076 |
| 11,424 | 156 | 18,997 | 7,044 | 4,102 | 30,299 |
| 11,425 | 157 | 18,737 | 7,002 | 4,059 | 29,955 |
| 11,426 | 159 | 18,811 | 7,060 | 4,086 | 30,116 |
| 11,427 | 155 | 18,851 | 7,088 | 4,090 | 30,184 |
| 11,428 | 155 | 18,930 | 7,109 | 4,103 | 30,297 |
| 11,429 | 149 | 18,735 | 7,080 | 4,085 | 30,049 |
| 11,430 | 144 | 18,635 | 7,032 | 4,033 | 29,844 |
| 11,431 | 144 | 18,871 | 7,118 | 4,077 | 30,210 |
| 11,432 | 145 | 19,001 | 7,175 | 4,103 | 30,424 |
| 11,433 | 137 | 19,190 | 7,234 | 4,171 | 30,732 |
| 11,434 | 135 | 18,797 | 7,095 | 4,044 | 30,071 |
| 11,435 | 136 | 19,048 | 7,165 | 4,056 | 30,405 |
| 11,436 | 135 | 19,022 | 7,171 | 4,054 | 30,382 |
| 11,437 | 135 | 18,812 | 7,138 | 4,033 | 30,118 |
| 11,438 | 135 | 19,001 | 7,231 | 4,067 | 30,434 |
| 11,439 | 118 | 18,987 | 7,237 | 4,075 | 30,417 |
| 11,440 | 121 | 18,875 | 7,245 | 4,071 | 30,312 |
| 11,441 | 120 | 18,742 | 7,233 | 4,075 | 30,170 |
| 11,442 | 118 | 18,705 | 7,266 | 4,053 | 30,142 |
| 11,443 | 115 | 18,667 | 7,234 | 4,025 | 30,041 |
| 11,444 | 114 | 18,639 | 7,222 | 4,030 | 30,005 |
| 11,445 | 114 | 18,566 | 7,202 | 4,031 | 29,913 |
| 11,446 | 114 | 18,303 | 6,989 | 3,918 | 29,324 |
| 11,447 | 114 | 18,462 | 7,029 | 3,945 | 29,550 |

|        |     |        |       |       |        |
|--------|-----|--------|-------|-------|--------|
| 11,448 | 113 | 18,712 | 7,110 | 3,974 | 29,909 |
| 11,449 | 112 | 18,279 | 6,932 | 3,877 | 29,200 |
| 11,450 | 113 | 18,557 | 6,995 | 3,887 | 29,552 |
| 11,451 | 109 | 18,702 | 7,065 | 3,917 | 29,793 |
| 11,452 | 110 | 18,518 | 7,008 | 3,904 | 29,540 |
| 11,453 | 107 | 18,394 | 7,001 | 3,877 | 29,379 |
| 11,454 | 106 | 18,425 | 7,032 | 3,885 | 29,448 |
| 11,455 | 110 | 18,376 | 6,955 | 3,822 | 29,263 |
| 11,456 | 111 | 18,520 | 6,976 | 3,842 | 29,449 |
| 11,457 | 111 | 18,510 | 6,977 | 3,841 | 29,439 |
| 11,458 | 109 | 18,424 | 6,976 | 3,846 | 29,355 |
| 11,459 | 108 | 18,636 | 7,026 | 3,858 | 29,628 |
| 11,460 | 99  | 18,567 | 7,001 | 3,830 | 29,497 |
| 11,461 | 98  | 18,638 | 7,005 | 3,840 | 29,581 |
| 11,462 | 95  | 18,240 | 6,842 | 3,779 | 28,956 |
| 11,463 | 95  | 18,346 | 6,857 | 3,810 | 29,108 |
| 11,464 | 90  | 18,536 | 6,925 | 3,847 | 29,398 |
| 11,465 | 91  | 18,539 | 6,917 | 3,823 | 29,370 |
| 11,466 | 91  | 18,614 | 6,857 | 3,804 | 29,366 |
| 11,467 | 88  | 18,634 | 6,826 | 3,797 | 29,345 |
| 11,468 | 84  | 17,773 | 6,514 | 3,644 | 28,015 |
| 11,469 | 85  | 17,968 | 6,529 | 3,670 | 28,252 |
| 11,470 | 85  | 18,233 | 6,566 | 3,696 | 28,580 |
| 11,471 | 88  | 18,365 | 6,610 | 3,712 | 28,775 |
| 11,472 | 93  | 18,224 | 6,603 | 3,712 | 28,632 |
| 11,473 | 94  | 18,122 | 6,483 | 3,653 | 28,352 |
| 11,474 | 94  | 18,103 | 6,464 | 3,647 | 28,308 |
| 11,475 | 91  | 18,121 | 6,486 | 3,655 | 28,353 |
| 11,476 | 86  | 18,035 | 6,444 | 3,649 | 28,214 |
| 11,477 | 85  | 18,228 | 6,460 | 3,681 | 28,454 |
| 11,478 | 83  | 18,381 | 6,536 | 3,732 | 28,732 |
| 11,479 | 86  | 18,084 | 6,423 | 3,668 | 28,261 |

|        |     |        |       |       |        |
|--------|-----|--------|-------|-------|--------|
| 11,480 | 86  | 17,900 | 6,376 | 3,623 | 27,985 |
| 11,481 | 85  | 18,113 | 6,483 | 3,667 | 28,348 |
| 11,482 | 87  | 18,454 | 6,551 | 3,688 | 28,780 |
| 11,483 | 87  | 18,038 | 6,355 | 3,596 | 28,076 |
| 11,484 | 86  | 18,209 | 6,392 | 3,642 | 28,329 |
| 11,485 | 86  | 18,532 | 6,473 | 3,679 | 28,770 |
| 11,486 | 87  | 18,555 | 6,431 | 3,664 | 28,737 |
| 11,487 | 87  | 18,662 | 6,459 | 3,673 | 28,881 |
| 11,488 | 87  | 18,572 | 6,407 | 3,627 | 28,693 |
| 11,489 | 89  | 19,020 | 6,511 | 3,683 | 29,303 |
| 11,490 | 100 | 19,094 | 6,509 | 3,678 | 29,381 |
| 11,491 | 98  | 19,127 | 6,439 | 3,653 | 29,317 |
| 11,492 | 103 | 19,300 | 6,494 | 3,672 | 29,569 |
| 11,493 | 107 | 19,355 | 6,477 | 3,697 | 29,636 |
| 11,494 | 109 | 19,053 | 6,412 | 3,702 | 29,276 |
| 11,495 | 110 | 19,264 | 6,478 | 3,719 | 29,571 |
| 11,496 | 110 | 19,252 | 6,501 | 3,731 | 29,594 |
| 11,497 | 110 | 19,422 | 6,508 | 3,724 | 29,764 |
| 11,498 | 110 | 19,448 | 6,493 | 3,713 | 29,764 |
| 11,499 | 116 | 19,694 | 6,558 | 3,749 | 30,117 |
| 11,500 | 124 | 19,690 | 6,537 | 3,724 | 30,075 |
| 11,501 | 123 | 19,835 | 6,568 | 3,756 | 30,282 |
| 11,502 | 130 | 20,002 | 6,585 | 3,768 | 30,485 |
| 11,503 | 130 | 19,977 | 6,546 | 3,697 | 30,350 |
| 11,504 | 128 | 20,076 | 6,516 | 3,682 | 30,402 |
| 11,505 | 138 | 20,342 | 6,585 | 3,723 | 30,788 |
| 11,506 | 133 | 20,152 | 6,553 | 3,707 | 30,545 |
| 11,507 | 135 | 20,183 | 6,525 | 3,676 | 30,519 |
| 11,508 | 139 | 20,528 | 6,641 | 3,735 | 31,043 |
| 11,509 | 139 | 20,524 | 6,663 | 3,740 | 31,066 |
| 11,510 | 139 | 20,225 | 6,591 | 3,704 | 30,659 |
| 11,511 | 139 | 20,543 | 6,715 | 3,746 | 31,143 |



|        |     |        |       |       |        |
|--------|-----|--------|-------|-------|--------|
| 11,512 | 139 | 20,624 | 6,684 | 3,717 | 31,164 |
| 11,513 | 135 | 20,457 | 6,622 | 3,687 | 30,901 |
| 11,514 | 135 | 20,702 | 6,702 | 3,724 | 31,263 |
| 11,515 | 132 | 20,681 | 6,680 | 3,721 | 31,214 |
| 11,516 | 131 | 20,362 | 6,591 | 3,672 | 30,756 |
| 11,517 | 131 | 20,375 | 6,663 | 3,680 | 30,849 |
| 11,518 | 130 | 20,301 | 6,647 | 3,649 | 30,727 |
| 11,519 | 125 | 20,301 | 6,651 | 3,643 | 30,720 |
| 11,520 | 125 | 20,194 | 6,635 | 3,637 | 30,591 |
| 11,521 | 124 | 20,031 | 6,588 | 3,614 | 30,357 |
| 11,522 | 123 | 20,164 | 6,658 | 3,654 | 30,599 |
| 11,523 | 116 | 20,010 | 6,586 | 3,622 | 30,334 |
| 11,524 | 115 | 19,810 | 6,531 | 3,609 | 30,065 |
| 11,525 | 117 | 20,189 | 6,593 | 3,642 | 30,541 |
| 11,526 | 120 | 20,278 | 6,670 | 3,687 | 30,755 |
| 11,527 | 119 | 20,306 | 6,682 | 3,668 | 30,775 |
| 11,528 | 121 | 20,506 | 6,694 | 3,697 | 31,018 |
| 11,529 | 123 | 20,717 | 6,681 | 3,680 | 31,201 |
| 11,530 | 127 | 20,598 | 6,562 | 3,647 | 30,934 |
| 11,531 | 128 | 20,734 | 6,571 | 3,666 | 31,099 |
| 11,532 | 136 | 21,067 | 6,643 | 3,720 | 31,566 |
| 11,533 | 137 | 20,822 | 6,624 | 3,674 | 31,257 |
| 11,534 | 139 | 20,934 | 6,613 | 3,674 | 31,360 |
| 11,535 | 148 | 21,035 | 6,688 | 3,662 | 31,533 |
| 11,536 | 148 | 21,076 | 6,691 | 3,682 | 31,597 |
| 11,537 | 146 | 20,982 | 6,730 | 3,719 | 31,577 |
| 11,538 | 151 | 21,085 | 6,716 | 3,737 | 31,689 |
| 11,539 | 153 | 21,354 | 6,802 | 3,795 | 32,104 |
| 11,540 | 146 | 21,152 | 6,774 | 3,801 | 31,873 |
| 11,541 | 144 | 21,127 | 6,785 | 3,815 | 31,871 |
| 11,542 | 140 | 21,237 | 6,796 | 3,836 | 32,009 |
| 11,543 | 150 | 21,436 | 6,914 | 3,910 | 32,410 |

|        |     |        |       |       |        |
|--------|-----|--------|-------|-------|--------|
| 11,544 | 148 | 21,494 | 6,965 | 3,941 | 32,548 |
| 11,545 | 154 | 21,410 | 6,956 | 3,925 | 32,445 |
| 11,546 | 164 | 21,481 | 6,965 | 3,938 | 32,548 |
| 11,547 | 164 | 21,393 | 6,918 | 3,922 | 32,397 |
| 11,548 | 169 | 21,173 | 6,895 | 3,905 | 32,142 |
| 11,549 | 170 | 20,995 | 6,863 | 3,884 | 31,912 |
| 11,550 | 168 | 21,537 | 7,008 | 3,971 | 32,684 |
| 11,551 | 160 | 21,500 | 7,009 | 3,990 | 32,659 |
| 11,552 | 160 | 21,335 | 6,979 | 3,977 | 32,451 |
| 11,553 | 155 | 21,390 | 7,039 | 4,025 | 32,609 |
| 11,554 | 151 | 21,142 | 6,947 | 4,022 | 32,262 |
| 11,555 | 150 | 21,560 | 7,115 | 4,126 | 32,951 |
| 11,556 | 144 | 21,294 | 7,067 | 4,120 | 32,625 |
| 11,557 | 143 | 21,270 | 7,044 | 4,099 | 32,556 |
| 11,558 | 143 | 21,487 | 7,097 | 4,154 | 32,881 |
| 11,559 | 141 | 21,892 | 7,209 | 4,245 | 33,487 |
| 11,560 | 135 | 22,232 | 7,309 | 4,316 | 33,992 |
| 11,561 | 138 | 22,405 | 7,386 | 4,350 | 34,279 |
| 11,562 | 137 | 22,202 | 7,304 | 4,327 | 33,970 |
| 11,563 | 140 | 22,312 | 7,427 | 4,413 | 34,292 |
| 11,564 | 144 | 22,389 | 7,470 | 4,427 | 34,430 |
| 11,565 | 146 | 22,484 | 7,506 | 4,446 | 34,582 |
| 11,566 | 151 | 22,477 | 7,526 | 4,449 | 34,603 |
| 11,567 | 153 | 22,599 | 7,574 | 4,470 | 34,796 |
| 11,568 | 153 | 22,725 | 7,592 | 4,486 | 34,956 |
| 11,569 | 156 | 22,800 | 7,596 | 4,503 | 35,055 |
| 11,570 | 162 | 22,890 | 7,601 | 4,522 | 35,175 |
| 11,571 | 161 | 22,791 | 7,586 | 4,505 | 35,043 |
| 11,572 | 164 | 22,837 | 7,627 | 4,518 | 35,146 |
| 11,573 | 164 | 23,123 | 7,660 | 4,551 | 35,498 |
| 11,574 | 156 | 23,330 | 7,731 | 4,592 | 35,809 |
| 11,575 | 159 | 23,337 | 7,756 | 4,605 | 35,857 |

|        |     |        |       |       |        |
|--------|-----|--------|-------|-------|--------|
| 11,576 | 162 | 23,278 | 7,735 | 4,591 | 35,766 |
| 11,577 | 161 | 23,354 | 7,729 | 4,594 | 35,838 |
| 11,578 | 160 | 23,340 | 7,731 | 4,580 | 35,811 |
| 11,579 | 155 | 22,803 | 7,650 | 4,531 | 35,139 |
| 11,580 | 155 | 22,764 | 7,636 | 4,506 | 35,061 |
| 11,581 | 148 | 22,519 | 7,659 | 4,523 | 34,849 |
| 11,582 | 148 | 22,410 | 7,645 | 4,515 | 34,718 |
| 11,583 | 136 | 21,871 | 7,524 | 4,461 | 33,992 |
| 11,584 | 137 | 22,072 | 7,539 | 4,493 | 34,241 |
| 11,585 | 132 | 22,367 | 7,572 | 4,546 | 34,617 |
| 11,586 | 130 | 22,278 | 7,568 | 4,551 | 34,527 |
| 11,587 | 130 | 22,020 | 7,504 | 4,500 | 34,154 |
| 11,588 | 131 | 22,416 | 7,566 | 4,533 | 34,646 |
| 11,589 | 121 | 22,035 | 7,511 | 4,501 | 34,168 |
| 11,590 | 123 | 21,961 | 7,513 | 4,464 | 34,061 |
| 11,591 | 124 | 21,952 | 7,501 | 4,469 | 34,046 |
| 11,592 | 117 | 21,811 | 7,434 | 4,399 | 33,761 |
| 11,593 | 117 | 22,037 | 7,463 | 4,412 | 34,029 |
| 11,594 | 111 | 22,363 | 7,514 | 4,450 | 34,438 |
| 11,595 | 109 | 22,009 | 7,409 | 4,375 | 33,902 |
| 11,596 | 100 | 21,801 | 7,345 | 4,335 | 33,581 |
| 11,597 | 94  | 22,138 | 7,443 | 4,412 | 34,087 |
| 11,598 | 95  | 22,203 | 7,481 | 4,411 | 34,190 |
| 11,599 | 93  | 22,258 | 7,461 | 4,392 | 34,204 |
| 11,600 | 90  | 22,205 | 7,440 | 4,399 | 34,134 |
| 11,601 | 92  | 22,015 | 7,376 | 4,348 | 33,831 |
| 11,602 | 91  | 21,842 | 7,300 | 4,304 | 33,537 |
| 11,603 | 91  | 22,047 | 7,348 | 4,326 | 33,812 |
| 11,604 | 91  | 22,242 | 7,391 | 4,343 | 34,067 |
| 11,605 | 91  | 22,073 | 7,352 | 4,294 | 33,810 |
| 11,606 | 93  | 22,104 | 7,291 | 4,257 | 33,745 |
| 11,607 | 94  | 21,886 | 7,153 | 4,173 | 33,306 |

|        |     |        |       |       |        |
|--------|-----|--------|-------|-------|--------|
| 11,608 | 91  | 21,524 | 7,046 | 4,125 | 32,786 |
| 11,609 | 95  | 21,770 | 7,103 | 4,150 | 33,118 |
| 11,610 | 96  | 21,939 | 7,115 | 4,140 | 33,290 |
| 11,611 | 97  | 21,644 | 6,983 | 4,088 | 32,812 |
| 11,612 | 95  | 21,499 | 6,880 | 4,037 | 32,511 |
| 11,613 | 102 | 21,524 | 6,852 | 4,025 | 32,503 |
| 11,614 | 102 | 21,480 | 6,830 | 4,005 | 32,417 |
| 11,615 | 104 | 21,431 | 6,765 | 3,979 | 32,279 |
| 11,616 | 105 | 21,590 | 6,790 | 3,989 | 32,474 |
| 11,617 | 100 | 21,568 | 6,766 | 3,980 | 32,414 |
| 11,618 | 99  | 21,692 | 6,738 | 3,975 | 32,504 |
| 11,619 | 97  | 21,570 | 6,717 | 3,971 | 32,355 |
| 11,620 | 97  | 21,512 | 6,690 | 3,943 | 32,242 |
| 11,621 | 96  | 21,690 | 6,724 | 3,969 | 32,479 |
| 11,622 | 94  | 21,939 | 6,731 | 3,977 | 32,741 |
| 11,623 | 98  | 21,929 | 6,707 | 3,985 | 32,719 |
| 11,624 | 102 | 22,018 | 6,717 | 3,971 | 32,808 |
| 11,625 | 106 | 22,080 | 6,712 | 3,967 | 32,865 |
| 11,626 | 103 | 21,943 | 6,619 | 3,931 | 32,596 |
| 11,627 | 102 | 21,565 | 6,501 | 3,876 | 32,044 |
| 11,628 | 105 | 21,925 | 6,537 | 3,929 | 32,496 |
| 11,629 | 106 | 22,368 | 6,583 | 3,977 | 33,034 |
| 11,630 | 108 | 22,225 | 6,494 | 3,945 | 32,772 |
| 11,631 | 116 | 22,407 | 6,473 | 3,935 | 32,931 |
| 11,632 | 117 | 22,412 | 6,451 | 3,915 | 32,895 |
| 11,633 | 118 | 22,560 | 6,458 | 3,936 | 33,072 |
| 11,634 | 119 | 22,602 | 6,447 | 3,943 | 33,111 |
| 11,635 | 119 | 22,650 | 6,505 | 3,962 | 33,236 |
| 11,636 | 120 | 22,776 | 6,497 | 3,977 | 33,370 |
| 11,637 | 119 | 22,845 | 6,522 | 3,995 | 33,481 |
| 11,638 | 122 | 22,900 | 6,517 | 4,000 | 33,539 |
| 11,639 | 127 | 23,089 | 6,517 | 4,004 | 33,737 |

|        |     |        |       |       |        |
|--------|-----|--------|-------|-------|--------|
| 11,640 | 131 | 23,108 | 6,474 | 3,991 | 33,704 |
| 11,641 | 134 | 23,325 | 6,459 | 3,998 | 33,916 |
| 11,642 | 134 | 23,319 | 6,414 | 3,970 | 33,837 |
| 11,643 | 136 | 23,420 | 6,427 | 3,989 | 33,972 |
| 11,644 | 139 | 23,305 | 6,283 | 3,914 | 33,641 |
| 11,645 | 140 | 23,494 | 6,295 | 3,946 | 33,875 |
| 11,646 | 138 | 23,721 | 6,341 | 3,971 | 34,171 |
| 11,647 | 139 | 23,773 | 6,379 | 3,997 | 34,288 |
| 11,648 | 148 | 23,669 | 6,354 | 3,974 | 34,145 |
| 11,649 | 150 | 23,623 | 6,278 | 3,953 | 34,004 |
| 11,650 | 149 | 23,365 | 6,197 | 3,910 | 33,621 |
| 11,651 | 150 | 23,397 | 6,196 | 3,895 | 33,638 |
| 11,652 | 148 | 23,377 | 6,177 | 3,911 | 33,613 |
| 11,653 | 154 | 23,560 | 6,227 | 3,942 | 33,883 |
| 11,654 | 154 | 23,368 | 6,155 | 3,912 | 33,589 |
| 11,655 | 160 | 23,463 | 6,172 | 3,943 | 33,738 |
| 11,656 | 161 | 23,586 | 6,177 | 3,970 | 33,894 |
| 11,657 | 156 | 23,664 | 6,215 | 4,004 | 34,039 |
| 11,658 | 166 | 23,948 | 6,276 | 4,037 | 34,427 |
| 11,659 | 165 | 24,034 | 6,309 | 4,034 | 34,542 |
| 11,660 | 166 | 24,168 | 6,343 | 4,057 | 34,734 |
| 11,661 | 164 | 24,186 | 6,343 | 4,063 | 34,756 |
| 11,662 | 157 | 23,711 | 6,208 | 3,985 | 34,061 |
| 11,663 | 157 | 23,988 | 6,233 | 3,981 | 34,359 |
| 11,664 | 155 | 24,194 | 6,256 | 3,993 | 34,598 |
| 11,665 | 158 | 24,137 | 6,218 | 3,988 | 34,501 |
| 11,666 | 154 | 24,002 | 6,198 | 3,957 | 34,311 |
| 11,667 | 153 | 23,805 | 6,142 | 3,934 | 34,034 |
| 11,668 | 155 | 23,774 | 6,138 | 3,911 | 33,978 |
| 11,669 | 159 | 23,711 | 6,135 | 3,928 | 33,933 |
| 11,670 | 159 | 23,669 | 6,112 | 3,909 | 33,849 |
| 11,671 | 161 | 23,702 | 6,110 | 3,907 | 33,880 |

|        |     |        |       |       |        |
|--------|-----|--------|-------|-------|--------|
| 11,672 | 161 | 23,748 | 6,143 | 3,937 | 33,989 |
| 11,673 | 168 | 23,468 | 6,080 | 3,896 | 33,612 |
| 11,674 | 163 | 23,159 | 6,007 | 3,842 | 33,171 |
| 11,675 | 159 | 22,979 | 5,955 | 3,815 | 32,908 |
| 11,676 | 158 | 22,879 | 5,944 | 3,819 | 32,800 |
| 11,677 | 159 | 22,717 | 5,921 | 3,791 | 32,588 |
| 11,678 | 157 | 22,725 | 5,954 | 3,802 | 32,638 |
| 11,679 | 159 | 22,804 | 5,981 | 3,789 | 32,733 |
| 11,680 | 162 | 22,597 | 5,948 | 3,771 | 32,478 |
| 11,681 | 159 | 22,507 | 5,945 | 3,763 | 32,374 |
| 11,682 | 150 | 22,180 | 5,898 | 3,724 | 31,952 |
| 11,683 | 148 | 22,064 | 5,900 | 3,722 | 31,834 |
| 11,684 | 150 | 21,996 | 5,869 | 3,696 | 31,711 |
| 11,685 | 152 | 21,930 | 5,826 | 3,664 | 31,572 |
| 11,686 | 153 | 21,979 | 5,825 | 3,661 | 31,618 |
| 11,687 | 157 | 21,971 | 5,869 | 3,667 | 31,664 |
| 11,688 | 156 | 21,337 | 5,702 | 3,562 | 30,757 |
| 11,689 | 157 | 21,424 | 5,711 | 3,580 | 30,872 |
| 11,690 | 154 | 21,440 | 5,736 | 3,587 | 30,917 |
| 11,691 | 155 | 21,267 | 5,707 | 3,569 | 30,698 |
| 11,692 | 150 | 20,954 | 5,657 | 3,541 | 30,302 |
| 11,693 | 149 | 20,911 | 5,663 | 3,547 | 30,270 |
| 11,694 | 152 | 20,856 | 5,679 | 3,565 | 30,252 |
| 11,695 | 151 | 20,835 | 5,723 | 3,568 | 30,277 |
| 11,696 | 156 | 20,738 | 5,713 | 3,545 | 30,152 |
| 11,697 | 164 | 20,788 | 5,662 | 3,539 | 30,153 |
| 11,698 | 165 | 20,754 | 5,635 | 3,526 | 30,080 |
| 11,699 | 157 | 20,867 | 5,655 | 3,554 | 30,233 |
| 11,700 | 154 | 20,922 | 5,659 | 3,560 | 30,295 |
| 11,701 | 153 | 20,973 | 5,662 | 3,591 | 30,379 |
| 11,702 | 155 | 20,996 | 5,675 | 3,581 | 30,407 |
| 11,703 | 156 | 21,100 | 5,674 | 3,580 | 30,510 |

|        |     |        |       |       |        |
|--------|-----|--------|-------|-------|--------|
| 11,704 | 159 | 21,239 | 5,801 | 3,643 | 30,842 |
| 11,705 | 152 | 21,489 | 5,888 | 3,698 | 31,227 |
| 11,706 | 151 | 21,518 | 5,906 | 3,680 | 31,255 |
| 11,707 | 153 | 21,296 | 5,871 | 3,666 | 30,986 |
| 11,708 | 152 | 21,425 | 5,918 | 3,678 | 31,173 |
| 11,709 | 146 | 21,644 | 5,998 | 3,733 | 31,521 |
| 11,710 | 146 | 21,529 | 5,996 | 3,738 | 31,409 |
| 11,711 | 146 | 21,491 | 5,959 | 3,737 | 31,333 |
| 11,712 | 155 | 21,308 | 5,899 | 3,707 | 31,069 |
| 11,713 | 154 | 21,204 | 5,877 | 3,696 | 30,931 |
| 11,714 | 158 | 21,500 | 5,996 | 3,778 | 31,432 |
| 11,715 | 159 | 21,577 | 5,988 | 3,785 | 31,509 |
| 11,716 | 160 | 21,584 | 5,991 | 3,788 | 31,523 |
| 11,717 | 159 | 21,625 | 6,009 | 3,836 | 31,629 |
| 11,718 | 157 | 21,368 | 5,973 | 3,817 | 31,315 |
| 11,719 | 156 | 21,274 | 5,954 | 3,819 | 31,203 |
| 11,720 | 156 | 21,390 | 6,012 | 3,845 | 31,403 |
| 11,721 | 152 | 21,629 | 6,071 | 3,887 | 31,739 |
| 11,722 | 145 | 21,184 | 5,983 | 3,810 | 31,122 |
| 11,723 | 144 | 21,486 | 6,032 | 3,830 | 31,492 |
| 11,724 | 139 | 21,793 | 6,091 | 3,862 | 31,885 |
| 11,725 | 145 | 21,903 | 6,163 | 3,889 | 32,100 |
| 11,726 | 142 | 21,705 | 6,133 | 3,866 | 31,846 |
| 11,727 | 139 | 21,650 | 6,122 | 3,840 | 31,751 |
| 11,728 | 143 | 21,646 | 6,167 | 3,868 | 31,824 |
| 11,729 | 145 | 21,806 | 6,179 | 3,893 | 32,023 |
| 11,730 | 144 | 22,055 | 6,211 | 3,934 | 32,344 |
| 11,731 | 139 | 21,837 | 6,171 | 3,913 | 32,060 |
| 11,732 | 137 | 22,131 | 6,263 | 3,959 | 32,490 |
| 11,733 | 136 | 22,106 | 6,235 | 3,955 | 32,432 |
| 11,734 | 130 | 21,966 | 6,196 | 3,930 | 32,222 |
| 11,735 | 132 | 22,243 | 6,254 | 3,957 | 32,586 |

|        |     |        |       |       |        |
|--------|-----|--------|-------|-------|--------|
| 11,736 | 132 | 22,478 | 6,324 | 3,988 | 32,922 |
| 11,737 | 127 | 22,005 | 6,194 | 3,905 | 32,231 |
| 11,738 | 130 | 22,155 | 6,227 | 3,908 | 32,420 |
| 11,739 | 130 | 22,310 | 6,281 | 3,930 | 32,651 |
| 11,740 | 129 | 22,002 | 6,250 | 3,890 | 32,271 |
| 11,741 | 128 | 21,995 | 6,253 | 3,883 | 32,259 |
| 11,742 | 122 | 22,027 | 6,281 | 3,889 | 32,319 |
| 11,743 | 121 | 21,988 | 6,247 | 3,891 | 32,247 |
| 11,744 | 123 | 22,011 | 6,231 | 3,885 | 32,250 |
| 11,745 | 124 | 21,857 | 6,174 | 3,841 | 31,996 |
| 11,746 | 125 | 21,957 | 6,209 | 3,852 | 32,143 |
| 11,747 | 125 | 21,904 | 6,195 | 3,857 | 32,081 |
| 11,748 | 118 | 22,075 | 6,283 | 3,886 | 32,362 |
| 11,749 | 118 | 21,942 | 6,278 | 3,857 | 32,195 |
| 11,750 | 118 | 21,760 | 6,232 | 3,839 | 31,949 |
| 11,751 | 116 | 21,762 | 6,230 | 3,830 | 31,938 |
| 11,752 | 115 | 21,728 | 6,217 | 3,817 | 31,877 |
| 11,753 | 116 | 21,912 | 6,290 | 3,866 | 32,184 |
| 11,754 | 117 | 21,819 | 6,228 | 3,824 | 31,988 |
| 11,755 | 113 | 21,702 | 6,157 | 3,787 | 31,759 |
| 11,756 | 122 | 21,829 | 6,185 | 3,772 | 31,908 |
| 11,757 | 122 | 21,635 | 6,107 | 3,744 | 31,608 |
| 11,758 | 124 | 21,373 | 5,963 | 3,679 | 31,139 |
| 11,759 | 128 | 21,553 | 5,974 | 3,706 | 31,361 |
| 11,760 | 127 | 21,179 | 5,830 | 3,624 | 30,760 |
| 11,761 | 126 | 21,315 | 5,834 | 3,619 | 30,894 |
| 11,762 | 122 | 21,110 | 5,788 | 3,584 | 30,604 |
| 11,763 | 123 | 21,009 | 5,748 | 3,547 | 30,427 |
| 11,764 | 122 | 20,839 | 5,721 | 3,544 | 30,226 |
| 11,765 | 124 | 20,797 | 5,761 | 3,584 | 30,266 |
| 11,766 | 124 | 20,839 | 5,802 | 3,590 | 30,355 |
| 11,767 | 121 | 20,704 | 5,751 | 3,543 | 30,119 |



|        |     |        |       |       |        |
|--------|-----|--------|-------|-------|--------|
| 11,768 | 120 | 20,822 | 5,739 | 3,569 | 30,250 |
| 11,769 | 124 | 20,938 | 5,735 | 3,565 | 30,362 |
| 11,770 | 125 | 21,088 | 5,749 | 3,577 | 30,539 |
| 11,771 | 124 | 21,175 | 5,720 | 3,568 | 30,587 |
| 11,772 | 129 | 21,147 | 5,737 | 3,567 | 30,580 |
| 11,773 | 129 | 20,973 | 5,700 | 3,524 | 30,326 |
| 11,774 | 133 | 21,566 | 5,833 | 3,620 | 31,152 |
| 11,775 | 132 | 21,593 | 5,853 | 3,638 | 31,216 |
| 11,776 | 129 | 20,938 | 5,659 | 3,569 | 30,295 |
| 11,777 | 133 | 21,252 | 5,718 | 3,612 | 30,715 |
| 11,778 | 132 | 21,557 | 5,802 | 3,652 | 31,143 |
| 11,779 | 130 | 21,584 | 5,804 | 3,642 | 31,160 |
| 11,780 | 130 | 21,808 | 5,889 | 3,701 | 31,528 |
| 11,781 | 129 | 21,859 | 5,911 | 3,711 | 31,610 |
| 11,782 | 130 | 21,783 | 5,849 | 3,743 | 31,505 |
| 11,783 | 130 | 21,952 | 5,880 | 3,774 | 31,736 |
| 11,784 | 131 | 21,749 | 5,801 | 3,730 | 31,411 |
| 11,785 | 130 | 21,887 | 5,847 | 3,757 | 31,621 |
| 11,786 | 128 | 22,167 | 5,906 | 3,808 | 32,009 |
| 11,787 | 128 | 22,231 | 5,933 | 3,810 | 32,102 |
| 11,788 | 127 | 22,202 | 5,918 | 3,830 | 32,077 |
| 11,789 | 124 | 22,165 | 5,909 | 3,837 | 32,035 |
| 11,790 | 119 | 22,212 | 5,930 | 3,857 | 32,118 |
| 11,791 | 121 | 22,384 | 5,925 | 3,877 | 32,307 |
| 11,792 | 128 | 22,301 | 5,894 | 3,883 | 32,206 |
| 11,793 | 128 | 22,432 | 5,914 | 3,882 | 32,356 |
| 11,794 | 130 | 22,491 | 5,956 | 3,896 | 32,473 |
| 11,795 | 125 | 22,453 | 5,935 | 3,882 | 32,395 |
| 11,796 | 121 | 22,412 | 5,881 | 3,889 | 32,303 |
| 11,797 | 123 | 22,315 | 5,836 | 3,873 | 32,147 |
| 11,798 | 126 | 22,460 | 5,825 | 3,860 | 32,271 |
| 11,799 | 127 | 22,474 | 5,793 | 3,845 | 32,239 |

|        |     |        |       |       |        |
|--------|-----|--------|-------|-------|--------|
| 11,800 | 128 | 22,549 | 5,800 | 3,849 | 32,326 |
| 11,801 | 127 | 22,664 | 5,815 | 3,863 | 32,469 |
| 11,802 | 128 | 22,464 | 5,776 | 3,845 | 32,213 |
| 11,803 | 131 | 22,565 | 5,766 | 3,839 | 32,301 |
| 11,804 | 135 | 22,774 | 5,801 | 3,864 | 32,574 |
| 11,805 | 140 | 22,532 | 5,770 | 3,840 | 32,282 |
| 11,806 | 137 | 22,345 | 5,701 | 3,816 | 31,999 |
| 11,807 | 138 | 22,325 | 5,695 | 3,833 | 31,991 |
| 11,808 | 138 | 22,354 | 5,689 | 3,832 | 32,013 |
| 11,809 | 136 | 22,752 | 5,776 | 3,852 | 32,516 |
| 11,810 | 132 | 22,506 | 5,753 | 3,819 | 32,210 |
| 11,811 | 132 | 22,526 | 5,802 | 3,841 | 32,301 |
| 11,812 | 138 | 22,563 | 5,863 | 3,867 | 32,431 |
| 11,813 | 133 | 22,574 | 5,871 | 3,855 | 32,433 |
| 11,814 | 132 | 22,531 | 5,854 | 3,848 | 32,365 |
| 11,815 | 129 | 22,670 | 5,847 | 3,814 | 32,460 |
| 11,816 | 132 | 22,927 | 5,900 | 3,843 | 32,802 |
| 11,817 | 129 | 22,592 | 5,792 | 3,808 | 32,321 |
| 11,818 | 127 | 22,378 | 5,721 | 3,745 | 31,971 |
| 11,819 | 131 | 22,603 | 5,772 | 3,763 | 32,269 |
| 11,820 | 127 | 22,530 | 5,760 | 3,784 | 32,201 |
| 11,821 | 125 | 22,420 | 5,719 | 3,759 | 32,023 |
| 11,822 | 133 | 22,552 | 5,762 | 3,767 | 32,214 |
| 11,823 | 128 | 22,601 | 5,762 | 3,759 | 32,250 |
| 11,824 | 127 | 22,399 | 5,694 | 3,741 | 31,961 |
| 11,825 | 130 | 22,175 | 5,654 | 3,717 | 31,676 |
| 11,826 | 126 | 21,938 | 5,578 | 3,645 | 31,287 |
| 11,827 | 132 | 22,229 | 5,579 | 3,685 | 31,625 |
| 11,828 | 135 | 22,337 | 5,620 | 3,725 | 31,817 |
| 11,829 | 134 | 22,349 | 5,632 | 3,737 | 31,852 |
| 11,830 | 136 | 22,235 | 5,591 | 3,673 | 31,635 |
| 11,831 | 137 | 22,275 | 5,591 | 3,664 | 31,667 |

|        |     |        |       |       |        |
|--------|-----|--------|-------|-------|--------|
| 11,832 | 139 | 22,258 | 5,590 | 3,606 | 31,593 |
| 11,833 | 139 | 22,194 | 5,567 | 3,584 | 31,484 |
| 11,834 | 139 | 21,703 | 5,474 | 3,510 | 30,826 |
| 11,835 | 139 | 22,041 | 5,571 | 3,531 | 31,282 |
| 11,836 | 139 | 22,017 | 5,570 | 3,521 | 31,247 |
| 11,837 | 141 | 21,990 | 5,563 | 3,510 | 31,204 |
| 11,838 | 139 | 22,066 | 5,557 | 3,534 | 31,296 |
| 11,839 | 137 | 21,923 | 5,531 | 3,496 | 31,087 |
| 11,840 | 138 | 22,163 | 5,540 | 3,505 | 31,346 |
| 11,841 | 142 | 22,582 | 5,592 | 3,531 | 31,847 |
| 11,842 | 140 | 22,604 | 5,588 | 3,527 | 31,859 |
| 11,843 | 133 | 22,564 | 5,541 | 3,508 | 31,746 |
| 11,844 | 136 | 22,417 | 5,482 | 3,475 | 31,510 |
| 11,845 | 136 | 22,551 | 5,483 | 3,485 | 31,655 |
| 11,846 | 133 | 22,530 | 5,497 | 3,466 | 31,626 |
| 11,847 | 138 | 22,692 | 5,550 | 3,494 | 31,874 |
| 11,848 | 139 | 22,454 | 5,508 | 3,469 | 31,570 |
| 11,849 | 140 | 22,695 | 5,567 | 3,522 | 31,924 |
| 11,850 | 138 | 22,570 | 5,547 | 3,522 | 31,777 |
| 11,851 | 136 | 22,635 | 5,554 | 3,527 | 31,852 |
| 11,852 | 137 | 22,686 | 5,549 | 3,512 | 31,884 |
| 11,853 | 138 | 22,952 | 5,644 | 3,559 | 32,293 |
| 11,854 | 135 | 22,945 | 5,654 | 3,558 | 32,292 |
| 11,855 | 121 | 22,746 | 5,573 | 3,488 | 31,928 |
| 11,856 | 122 | 22,874 | 5,590 | 3,501 | 32,087 |
| 11,857 | 120 | 22,633 | 5,563 | 3,474 | 31,790 |
| 11,858 | 121 | 23,453 | 5,754 | 3,586 | 32,914 |
| 11,859 | 119 | 23,457 | 5,796 | 3,591 | 32,963 |
| 11,860 | 119 | 23,289 | 5,763 | 3,591 | 32,762 |
| 11,861 | 118 | 23,225 | 5,748 | 3,574 | 32,665 |
| 11,862 | 122 | 23,086 | 5,677 | 3,548 | 32,433 |
| 11,863 | 115 | 23,101 | 5,616 | 3,508 | 32,340 |

|        |     |        |       |       |        |
|--------|-----|--------|-------|-------|--------|
| 11,864 | 114 | 22,762 | 5,549 | 3,485 | 31,910 |
| 11,865 | 114 | 22,824 | 5,569 | 3,496 | 32,003 |
| 11,866 | 113 | 22,687 | 5,544 | 3,454 | 31,798 |
| 11,867 | 117 | 22,582 | 5,530 | 3,420 | 31,649 |
| 11,868 | 122 | 22,599 | 5,541 | 3,424 | 31,686 |
| 11,869 | 123 | 22,426 | 5,498 | 3,400 | 31,447 |
| 11,870 | 125 | 22,551 | 5,555 | 3,402 | 31,633 |
| 11,871 | 129 | 22,579 | 5,544 | 3,386 | 31,638 |
| 11,872 | 129 | 22,543 | 5,522 | 3,375 | 31,569 |
| 11,873 | 127 | 22,559 | 5,534 | 3,409 | 31,629 |
| 11,874 | 126 | 22,508 | 5,519 | 3,410 | 31,563 |
| 11,875 | 123 | 22,234 | 5,419 | 3,347 | 31,123 |
| 11,876 | 127 | 22,041 | 5,369 | 3,277 | 30,814 |
| 11,877 | 130 | 22,342 | 5,417 | 3,294 | 31,183 |
| 11,878 | 124 | 22,373 | 5,448 | 3,280 | 31,225 |
| 11,879 | 120 | 22,132 | 5,375 | 3,216 | 30,843 |
| 11,880 | 121 | 22,346 | 5,407 | 3,246 | 31,120 |
| 11,881 | 120 | 22,530 | 5,425 | 3,263 | 31,338 |
| 11,882 | 118 | 22,375 | 5,379 | 3,236 | 31,108 |
| 11,883 | 117 | 22,236 | 5,332 | 3,217 | 30,902 |
| 11,884 | 116 | 22,217 | 5,320 | 3,190 | 30,843 |
| 11,885 | 117 | 22,130 | 5,268 | 3,168 | 30,683 |
| 11,886 | 118 | 22,068 | 5,193 | 3,150 | 30,529 |
| 11,887 | 118 | 21,992 | 5,126 | 3,128 | 30,364 |
| 11,888 | 119 | 22,018 | 5,112 | 3,111 | 30,360 |
| 11,889 | 120 | 21,633 | 4,985 | 3,027 | 29,765 |
| 11,890 | 120 | 21,385 | 4,883 | 2,980 | 29,368 |
| 11,891 | 125 | 21,612 | 4,928 | 2,994 | 29,659 |
| 11,892 | 125 | 21,513 | 4,887 | 2,975 | 29,500 |
| 11,893 | 124 | 21,176 | 4,818 | 2,904 | 29,022 |
| 11,894 | 124 | 21,208 | 4,798 | 2,875 | 29,005 |
| 11,895 | 123 | 21,390 | 4,814 | 2,903 | 29,230 |

|        |     |        |       |       |        |
|--------|-----|--------|-------|-------|--------|
| 11,896 | 122 | 21,338 | 4,775 | 2,867 | 29,102 |
| 11,897 | 117 | 20,988 | 4,679 | 2,819 | 28,603 |
| 11,898 | 120 | 21,243 | 4,723 | 2,831 | 28,917 |
| 11,899 | 113 | 21,528 | 4,732 | 2,850 | 29,223 |
| 11,900 | 113 | 21,461 | 4,698 | 2,840 | 29,112 |
| 11,901 | 120 | 21,582 | 4,660 | 2,821 | 29,183 |
| 11,902 | 120 | 21,482 | 4,592 | 2,771 | 28,965 |
| 11,903 | 118 | 21,929 | 4,719 | 2,826 | 29,592 |
| 11,904 | 123 | 21,807 | 4,632 | 2,764 | 29,326 |
| 11,905 | 123 | 21,818 | 4,600 | 2,752 | 29,293 |
| 11,906 | 124 | 21,926 | 4,600 | 2,759 | 29,409 |
| 11,907 | 123 | 21,953 | 4,618 | 2,763 | 29,457 |
| 11,908 | 124 | 21,763 | 4,543 | 2,726 | 29,156 |
| 11,909 | 129 | 21,627 | 4,487 | 2,694 | 28,937 |
| 11,910 | 129 | 21,608 | 4,425 | 2,653 | 28,815 |
| 11,911 | 132 | 21,459 | 4,327 | 2,604 | 28,522 |
| 11,912 | 129 | 21,537 | 4,299 | 2,581 | 28,546 |
| 11,913 | 129 | 21,562 | 4,278 | 2,554 | 28,523 |
| 11,914 | 131 | 21,556 | 4,235 | 2,526 | 28,448 |
| 11,915 | 131 | 21,736 | 4,208 | 2,524 | 28,599 |
| 11,916 | 132 | 21,556 | 4,130 | 2,490 | 28,308 |
| 11,917 | 133 | 21,878 | 4,183 | 2,523 | 28,717 |
| 11,918 | 129 | 22,241 | 4,204 | 2,552 | 29,126 |
| 11,919 | 126 | 22,332 | 4,192 | 2,534 | 29,184 |
| 11,920 | 137 | 22,167 | 4,124 | 2,498 | 28,926 |
| 11,921 | 136 | 22,265 | 4,095 | 2,499 | 28,995 |
| 11,922 | 132 | 22,273 | 4,087 | 2,514 | 29,006 |
| 11,923 | 132 | 22,341 | 4,066 | 2,513 | 29,052 |
| 11,924 | 130 | 22,184 | 4,027 | 2,475 | 28,816 |
| 11,925 | 130 | 22,201 | 4,019 | 2,454 | 28,804 |
| 11,926 | 129 | 22,264 | 4,000 | 2,465 | 28,858 |
| 11,927 | 124 | 22,253 | 4,008 | 2,484 | 28,869 |

|        |     |        |       |       |        |
|--------|-----|--------|-------|-------|--------|
| 11,928 | 129 | 22,243 | 3,996 | 2,511 | 28,879 |
| 11,929 | 130 | 22,380 | 4,018 | 2,532 | 29,060 |
| 11,930 | 128 | 22,340 | 3,966 | 2,512 | 28,946 |
| 11,931 | 127 | 22,419 | 3,959 | 2,512 | 29,017 |
| 11,932 | 131 | 22,178 | 3,923 | 2,473 | 28,705 |
| 11,933 | 134 | 22,496 | 3,962 | 2,491 | 29,083 |
| 11,934 | 134 | 22,587 | 3,939 | 2,496 | 29,156 |
| 11,935 | 136 | 22,834 | 4,000 | 2,548 | 29,518 |
| 11,936 | 136 | 22,887 | 4,013 | 2,572 | 29,608 |
| 11,937 | 140 | 23,232 | 4,061 | 2,616 | 30,049 |
| 11,938 | 139 | 23,367 | 4,077 | 2,629 | 30,212 |
| 11,939 | 138 | 23,407 | 4,102 | 2,631 | 30,278 |
| 11,940 | 137 | 23,289 | 4,073 | 2,623 | 30,122 |
| 11,941 | 135 | 23,434 | 4,095 | 2,651 | 30,315 |
| 11,942 | 133 | 23,511 | 4,175 | 2,706 | 30,525 |
| 11,943 | 130 | 23,686 | 4,266 | 2,759 | 30,841 |
| 11,944 | 138 | 23,957 | 4,323 | 2,807 | 31,225 |
| 11,945 | 139 | 24,212 | 4,356 | 2,843 | 31,550 |
| 11,946 | 139 | 24,516 | 4,385 | 2,860 | 31,900 |
| 11,947 | 139 | 24,551 | 4,396 | 2,888 | 31,974 |
| 11,948 | 141 | 24,653 | 4,371 | 2,867 | 32,032 |
| 11,949 | 140 | 24,674 | 4,314 | 2,843 | 31,971 |
| 11,950 | 141 | 24,670 | 4,365 | 2,853 | 32,029 |
| 11,951 | 141 | 24,826 | 4,357 | 2,848 | 32,172 |
| 11,952 | 132 | 24,881 | 4,375 | 2,848 | 32,236 |
| 11,953 | 145 | 24,777 | 4,413 | 2,880 | 32,215 |
| 11,954 | 146 | 24,847 | 4,370 | 2,871 | 32,234 |
| 11,955 | 146 | 24,861 | 4,414 | 2,922 | 32,343 |
| 11,956 | 146 | 24,859 | 4,362 | 2,899 | 32,266 |
| 11,957 | 160 | 24,963 | 4,413 | 2,869 | 32,405 |
| 11,958 | 160 | 25,104 | 4,377 | 2,868 | 32,509 |
| 11,959 | 157 | 25,115 | 4,426 | 2,880 | 32,578 |

|        |     |        |       |       |        |
|--------|-----|--------|-------|-------|--------|
| 11,960 | 163 | 25,066 | 4,407 | 2,907 | 32,543 |
| 11,961 | 165 | 25,164 | 4,393 | 2,903 | 32,625 |
| 11,962 | 163 | 24,968 | 4,408 | 2,907 | 32,446 |
| 11,963 | 166 | 24,976 | 4,409 | 2,922 | 32,473 |
| 11,964 | 166 | 24,996 | 4,412 | 2,938 | 32,512 |
| 11,965 | 166 | 25,087 | 4,400 | 2,955 | 32,608 |
| 11,966 | 168 | 25,066 | 4,466 | 2,973 | 32,673 |
| 11,967 | 167 | 25,094 | 4,482 | 2,978 | 32,721 |
| 11,968 | 167 | 25,028 | 4,474 | 2,968 | 32,637 |
| 11,969 | 172 | 25,364 | 4,530 | 2,995 | 33,061 |
| 11,970 | 169 | 25,484 | 4,538 | 3,010 | 33,201 |
| 11,971 | 153 | 25,388 | 4,528 | 3,003 | 33,072 |
| 11,972 | 160 | 25,550 | 4,627 | 3,048 | 33,385 |
| 11,973 | 161 | 25,688 | 4,646 | 3,069 | 33,564 |
| 11,974 | 163 | 25,847 | 4,719 | 3,094 | 33,823 |
| 11,975 | 167 | 25,962 | 4,732 | 3,115 | 33,976 |
| 11,976 | 171 | 26,062 | 4,753 | 3,135 | 34,121 |
| 11,977 | 173 | 25,790 | 4,694 | 3,089 | 33,746 |
| 11,978 | 173 | 26,046 | 4,707 | 3,116 | 34,042 |
| 11,979 | 166 | 26,510 | 4,750 | 3,154 | 34,580 |
| 11,980 | 167 | 26,893 | 4,768 | 3,192 | 35,020 |
| 11,981 | 168 | 26,303 | 4,749 | 3,172 | 34,392 |
| 11,982 | 172 | 26,666 | 4,798 | 3,209 | 34,845 |
| 11,983 | 167 | 26,653 | 4,789 | 3,215 | 34,824 |
| 11,984 | 170 | 26,998 | 4,816 | 3,271 | 35,255 |
| 11,985 | 169 | 27,115 | 4,831 | 3,291 | 35,406 |
| 11,986 | 168 | 26,886 | 4,787 | 3,258 | 35,099 |
| 11,987 | 169 | 27,324 | 4,844 | 3,292 | 35,629 |
| 11,988 | 170 | 27,423 | 4,849 | 3,285 | 35,727 |
| 11,989 | 168 | 27,165 | 4,811 | 3,261 | 35,405 |
| 11,990 | 170 | 27,330 | 4,841 | 3,291 | 35,632 |
| 11,991 | 170 | 27,426 | 4,871 | 3,285 | 35,752 |

|        |     |        |       |       |        |
|--------|-----|--------|-------|-------|--------|
| 11,992 | 173 | 27,810 | 4,901 | 3,321 | 36,205 |
| 11,993 | 173 | 27,615 | 4,833 | 3,268 | 35,889 |
| 11,994 | 182 | 28,126 | 4,898 | 3,306 | 36,512 |
| 11,995 | 176 | 27,833 | 4,814 | 3,267 | 36,090 |
| 11,996 | 177 | 27,822 | 4,821 | 3,252 | 36,072 |
| 11,997 | 174 | 27,836 | 4,834 | 3,244 | 36,088 |
| 11,998 | 183 | 27,692 | 4,804 | 3,218 | 35,897 |
| 11,999 | 185 | 27,587 | 4,795 | 3,224 | 35,791 |
| 12,000 | 184 | 27,575 | 4,790 | 3,202 | 35,751 |
| 12,001 | 186 | 27,620 | 4,759 | 3,204 | 35,769 |
| 12,002 | 186 | 27,609 | 4,725 | 3,200 | 35,720 |
| 12,003 | 176 | 27,560 | 4,707 | 3,199 | 35,642 |
| 12,004 | 179 | 27,393 | 4,695 | 3,197 | 35,464 |
| 12,005 | 180 | 27,450 | 4,649 | 3,172 | 35,451 |
| 12,006 | 180 | 27,505 | 4,642 | 3,162 | 35,489 |
| 12,007 | 175 | 27,618 | 4,631 | 3,168 | 35,592 |
| 12,008 | 168 | 27,288 | 4,577 | 3,162 | 35,195 |
| 12,009 | 171 | 27,318 | 4,568 | 3,168 | 35,225 |
| 12,010 | 170 | 27,141 | 4,523 | 3,141 | 34,975 |
| 12,011 | 167 | 27,115 | 4,542 | 3,137 | 34,961 |
| 12,012 | 171 | 27,133 | 4,558 | 3,147 | 35,009 |
| 12,013 | 166 | 27,153 | 4,564 | 3,160 | 35,043 |
| 12,014 | 163 | 27,186 | 4,559 | 3,149 | 35,057 |
| 12,015 | 163 | 27,173 | 4,550 | 3,147 | 35,033 |
| 12,016 | 166 | 27,188 | 4,497 | 3,123 | 34,974 |
| 12,017 | 166 | 27,200 | 4,481 | 3,114 | 34,961 |
| 12,018 | 166 | 27,345 | 4,452 | 3,136 | 35,099 |
| 12,019 | 166 | 27,117 | 4,418 | 3,124 | 34,825 |
| 12,020 | 166 | 27,316 | 4,370 | 3,127 | 34,979 |
| 12,021 | 166 | 26,943 | 4,295 | 3,078 | 34,482 |
| 12,022 | 168 | 27,151 | 4,290 | 3,088 | 34,697 |
| 12,023 | 166 | 26,900 | 4,184 | 3,032 | 34,282 |



|        |     |        |       |       |        |
|--------|-----|--------|-------|-------|--------|
| 12,024 | 167 | 26,920 | 4,186 | 3,031 | 34,304 |
| 12,025 | 163 | 26,722 | 4,072 | 2,986 | 33,943 |
| 12,026 | 163 | 26,762 | 4,050 | 2,993 | 33,968 |
| 12,027 | 162 | 26,839 | 4,020 | 2,967 | 33,988 |
| 12,028 | 167 | 26,686 | 3,993 | 2,940 | 33,786 |
| 12,029 | 167 | 26,665 | 3,973 | 2,927 | 33,732 |
| 12,030 | 176 | 26,605 | 3,962 | 2,892 | 33,635 |
| 12,031 | 176 | 26,581 | 3,939 | 2,859 | 33,555 |
| 12,032 | 173 | 26,625 | 3,867 | 2,827 | 33,492 |
| 12,033 | 179 | 26,587 | 3,856 | 2,814 | 33,436 |
| 12,034 | 179 | 26,405 | 3,825 | 2,779 | 33,188 |
| 12,035 | 183 | 26,848 | 3,841 | 2,799 | 33,671 |
| 12,036 | 181 | 26,492 | 3,817 | 2,763 | 33,253 |
| 12,037 | 180 | 26,325 | 3,815 | 2,773 | 33,093 |
| 12,038 | 179 | 26,165 | 3,810 | 2,774 | 32,928 |
| 12,039 | 177 | 25,984 | 3,754 | 2,739 | 32,654 |
| 12,040 | 176 | 25,746 | 3,693 | 2,704 | 32,319 |
| 12,041 | 178 | 25,584 | 3,658 | 2,701 | 32,121 |
| 12,042 | 178 | 25,501 | 3,658 | 2,700 | 32,037 |
| 12,043 | 174 | 25,157 | 3,551 | 2,643 | 31,525 |
| 12,044 | 176 | 25,191 | 3,558 | 2,641 | 31,566 |
| 12,045 | 173 | 25,255 | 3,563 | 2,667 | 31,658 |
| 12,046 | 173 | 25,187 | 3,485 | 2,619 | 31,464 |
| 12,047 | 178 | 25,051 | 3,492 | 2,636 | 31,357 |
| 12,048 | 177 | 24,847 | 3,470 | 2,645 | 31,139 |
| 12,049 | 164 | 24,557 | 3,410 | 2,590 | 30,721 |
| 12,050 | 168 | 24,645 | 3,409 | 2,611 | 30,833 |
| 12,051 | 169 | 24,536 | 3,411 | 2,595 | 30,711 |
| 12,052 | 166 | 24,280 | 3,348 | 2,578 | 30,372 |
| 12,053 | 168 | 24,422 | 3,339 | 2,581 | 30,510 |
| 12,054 | 172 | 24,367 | 3,306 | 2,562 | 30,407 |
| 12,055 | 167 | 24,289 | 3,269 | 2,528 | 30,253 |

|        |     |        |       |       |        |
|--------|-----|--------|-------|-------|--------|
| 12,056 | 167 | 24,204 | 3,233 | 2,517 | 30,121 |
| 12,057 | 167 | 24,153 | 3,222 | 2,512 | 30,054 |
| 12,058 | 170 | 23,932 | 3,213 | 2,501 | 29,816 |
| 12,059 | 165 | 23,822 | 3,173 | 2,464 | 29,624 |
| 12,060 | 165 | 23,760 | 3,183 | 2,469 | 29,577 |
| 12,061 | 159 | 23,866 | 3,160 | 2,456 | 29,641 |
| 12,062 | 155 | 23,557 | 3,075 | 2,409 | 29,196 |
| 12,063 | 155 | 23,519 | 3,049 | 2,376 | 29,099 |
| 12,064 | 161 | 23,680 | 3,084 | 2,406 | 29,331 |
| 12,065 | 153 | 23,091 | 3,003 | 2,340 | 28,587 |
| 12,066 | 162 | 23,236 | 3,037 | 2,358 | 28,793 |
| 12,067 | 159 | 23,193 | 3,066 | 2,374 | 28,792 |
| 12,068 | 158 | 23,247 | 3,062 | 2,380 | 28,847 |
| 12,069 | 157 | 23,244 | 3,063 | 2,365 | 28,829 |
| 12,070 | 168 | 23,303 | 3,058 | 2,362 | 28,891 |
| 12,071 | 168 | 23,232 | 3,092 | 2,373 | 28,865 |
| 12,072 | 178 | 23,186 | 3,065 | 2,343 | 28,772 |
| 12,073 | 174 | 23,065 | 3,047 | 2,321 | 28,607 |
| 12,074 | 172 | 22,937 | 3,080 | 2,332 | 28,521 |
| 12,075 | 174 | 23,119 | 3,132 | 2,362 | 28,787 |
| 12,076 | 168 | 22,803 | 3,130 | 2,331 | 28,432 |
| 12,077 | 175 | 23,124 | 3,198 | 2,369 | 28,866 |
| 12,078 | 169 | 23,129 | 3,225 | 2,392 | 28,915 |
| 12,079 | 167 | 23,158 | 3,265 | 2,426 | 29,016 |
| 12,080 | 168 | 23,521 | 3,376 | 2,504 | 29,569 |
| 12,081 | 167 | 23,228 | 3,335 | 2,499 | 29,229 |
| 12,082 | 164 | 23,008 | 3,314 | 2,497 | 28,983 |
| 12,083 | 162 | 23,319 | 3,427 | 2,544 | 29,452 |
| 12,084 | 173 | 23,497 | 3,508 | 2,591 | 29,769 |
| 12,085 | 177 | 23,586 | 3,548 | 2,614 | 29,925 |
| 12,086 | 171 | 23,429 | 3,535 | 2,584 | 29,719 |
| 12,087 | 171 | 23,463 | 3,528 | 2,572 | 29,734 |

|        |     |        |       |       |        |
|--------|-----|--------|-------|-------|--------|
| 12,088 | 177 | 23,481 | 3,503 | 2,563 | 29,724 |
| 12,089 | 182 | 23,682 | 3,555 | 2,592 | 30,011 |
| 12,090 | 180 | 23,395 | 3,554 | 2,578 | 29,707 |
| 12,091 | 177 | 23,350 | 3,541 | 2,573 | 29,641 |
| 12,092 | 180 | 23,366 | 3,563 | 2,576 | 29,685 |
| 12,093 | 196 | 23,682 | 3,626 | 2,611 | 30,115 |
| 12,094 | 201 | 23,549 | 3,636 | 2,643 | 30,029 |
| 12,095 | 203 | 23,448 | 3,644 | 2,650 | 29,945 |
| 12,096 | 204 | 23,223 | 3,627 | 2,606 | 29,660 |
| 12,097 | 199 | 23,034 | 3,588 | 2,555 | 29,376 |
| 12,098 | 199 | 23,012 | 3,600 | 2,556 | 29,367 |
| 12,099 | 195 | 23,093 | 3,631 | 2,577 | 29,496 |
| 12,100 | 192 | 22,590 | 3,632 | 2,543 | 28,957 |
| 12,101 | 204 | 22,829 | 3,692 | 2,577 | 29,302 |
| 12,102 | 202 | 23,059 | 3,746 | 2,619 | 29,626 |
| 12,103 | 206 | 23,360 | 3,830 | 2,656 | 30,052 |
| 12,104 | 205 | 23,463 | 3,887 | 2,687 | 30,242 |
| 12,105 | 200 | 23,490 | 3,937 | 2,712 | 30,339 |
| 12,106 | 196 | 23,510 | 3,974 | 2,743 | 30,423 |
| 12,107 | 194 | 23,567 | 4,031 | 2,785 | 30,577 |
| 12,108 | 203 | 23,721 | 4,052 | 2,814 | 30,790 |
| 12,109 | 207 | 23,819 | 4,080 | 2,839 | 30,945 |
| 12,110 | 202 | 23,622 | 4,060 | 2,834 | 30,718 |
| 12,111 | 201 | 23,691 | 4,097 | 2,857 | 30,846 |
| 12,112 | 208 | 23,733 | 4,135 | 2,877 | 30,953 |
| 12,113 | 216 | 23,850 | 4,182 | 2,901 | 31,149 |
| 12,114 | 217 | 24,167 | 4,257 | 2,955 | 31,596 |
| 12,115 | 226 | 24,025 | 4,222 | 2,931 | 31,404 |
| 12,116 | 226 | 24,057 | 4,243 | 2,934 | 31,460 |
| 12,117 | 222 | 24,195 | 4,292 | 2,936 | 31,645 |
| 12,118 | 225 | 24,191 | 4,327 | 2,958 | 31,701 |
| 12,119 | 222 | 24,038 | 4,327 | 2,940 | 31,527 |

|        |     |        |       |       |        |
|--------|-----|--------|-------|-------|--------|
| 12,120 | 221 | 24,220 | 4,378 | 2,961 | 31,780 |
| 12,121 | 212 | 24,450 | 4,420 | 2,974 | 32,056 |
| 12,122 | 211 | 24,443 | 4,415 | 2,964 | 32,033 |
| 12,123 | 207 | 24,483 | 4,425 | 2,960 | 32,075 |
| 12,124 | 212 | 24,638 | 4,449 | 2,985 | 32,284 |
| 12,125 | 210 | 24,602 | 4,469 | 3,001 | 32,282 |
| 12,126 | 224 | 24,822 | 4,540 | 3,044 | 32,630 |
| 12,127 | 225 | 24,725 | 4,581 | 3,046 | 32,577 |
| 12,128 | 231 | 24,476 | 4,582 | 3,034 | 32,323 |
| 12,129 | 234 | 24,401 | 4,564 | 3,006 | 32,205 |
| 12,130 | 239 | 24,614 | 4,597 | 3,033 | 32,483 |
| 12,131 | 240 | 24,587 | 4,618 | 3,028 | 32,473 |
| 12,132 | 240 | 24,497 | 4,598 | 3,031 | 32,366 |
| 12,133 | 237 | 24,238 | 4,554 | 3,038 | 32,067 |
| 12,134 | 234 | 24,117 | 4,579 | 3,050 | 31,980 |
| 12,135 | 222 | 24,061 | 4,571 | 3,041 | 31,895 |
| 12,136 | 224 | 24,016 | 4,559 | 3,018 | 31,817 |
| 12,137 | 227 | 24,034 | 4,541 | 3,014 | 31,816 |
| 12,138 | 235 | 24,004 | 4,554 | 3,015 | 31,808 |
| 12,139 | 233 | 23,857 | 4,557 | 3,021 | 31,668 |
| 12,140 | 233 | 24,383 | 4,670 | 3,084 | 32,370 |
| 12,141 | 239 | 24,483 | 4,688 | 3,091 | 32,501 |
| 12,142 | 230 | 23,984 | 4,615 | 3,013 | 31,842 |
| 12,143 | 227 | 24,264 | 4,641 | 3,032 | 32,164 |
| 12,144 | 223 | 24,490 | 4,717 | 3,064 | 32,494 |
| 12,145 | 222 | 24,518 | 4,721 | 3,069 | 32,530 |
| 12,146 | 220 | 24,762 | 4,780 | 3,101 | 32,863 |
| 12,147 | 219 | 24,744 | 4,812 | 3,118 | 32,893 |
| 12,148 | 217 | 24,547 | 4,821 | 3,153 | 32,738 |
| 12,149 | 225 | 24,625 | 4,870 | 3,155 | 32,875 |
| 12,150 | 239 | 24,713 | 4,883 | 3,146 | 32,981 |
| 12,151 | 239 | 24,559 | 4,877 | 3,139 | 32,814 |

|        |     |        |       |       |        |
|--------|-----|--------|-------|-------|--------|
| 12,152 | 247 | 24,706 | 4,938 | 3,173 | 33,064 |
| 12,153 | 248 | 24,602 | 4,929 | 3,166 | 32,945 |
| 12,154 | 258 | 24,950 | 4,982 | 3,256 | 33,446 |
| 12,155 | 258 | 24,841 | 4,981 | 3,266 | 33,346 |
| 12,156 | 256 | 24,803 | 4,975 | 3,257 | 33,291 |
| 12,157 | 254 | 24,531 | 4,906 | 3,207 | 32,898 |
| 12,158 | 257 | 24,755 | 4,962 | 3,238 | 33,212 |
| 12,159 | 246 | 24,835 | 4,991 | 3,247 | 33,319 |
| 12,160 | 245 | 24,945 | 5,026 | 3,233 | 33,449 |
| 12,161 | 247 | 24,964 | 5,049 | 3,251 | 33,511 |
| 12,162 | 245 | 25,278 | 5,111 | 3,314 | 33,948 |
| 12,163 | 239 | 25,292 | 5,103 | 3,320 | 33,954 |
| 12,164 | 235 | 24,926 | 5,055 | 3,289 | 33,505 |
| 12,165 | 238 | 24,964 | 5,089 | 3,310 | 33,601 |
| 12,166 | 227 | 24,919 | 5,099 | 3,324 | 33,569 |
| 12,167 | 228 | 25,181 | 5,144 | 3,371 | 33,924 |
| 12,168 | 225 | 24,944 | 5,107 | 3,353 | 33,629 |
| 12,169 | 229 | 24,828 | 5,091 | 3,360 | 33,508 |
| 12,170 | 231 | 24,702 | 5,115 | 3,365 | 33,413 |
| 12,171 | 232 | 24,613 | 5,126 | 3,375 | 33,346 |
| 12,172 | 228 | 24,436 | 5,140 | 3,397 | 33,201 |
| 12,173 | 226 | 24,315 | 5,158 | 3,418 | 33,117 |
| 12,174 | 220 | 24,074 | 5,132 | 3,408 | 32,834 |
| 12,175 | 220 | 24,307 | 5,182 | 3,444 | 33,153 |
| 12,176 | 218 | 24,588 | 5,261 | 3,504 | 33,571 |
| 12,177 | 213 | 24,397 | 5,185 | 3,478 | 33,273 |
| 12,178 | 199 | 24,207 | 5,117 | 3,470 | 32,993 |
| 12,179 | 202 | 24,327 | 5,138 | 3,499 | 33,166 |
| 12,180 | 192 | 24,147 | 5,121 | 3,479 | 32,939 |
| 12,181 | 192 | 24,059 | 5,068 | 3,471 | 32,790 |
| 12,182 | 185 | 23,775 | 5,036 | 3,418 | 32,414 |
| 12,183 | 184 | 23,823 | 5,021 | 3,413 | 32,441 |

|        |     |        |       |       |        |
|--------|-----|--------|-------|-------|--------|
| 12,184 | 189 | 24,062 | 5,073 | 3,449 | 32,773 |
| 12,185 | 190 | 23,772 | 5,004 | 3,412 | 32,378 |
| 12,186 | 189 | 23,804 | 5,001 | 3,416 | 32,410 |
| 12,187 | 189 | 24,107 | 5,098 | 3,485 | 32,879 |
| 12,188 | 188 | 23,931 | 5,069 | 3,450 | 32,638 |
| 12,189 | 179 | 23,678 | 5,029 | 3,423 | 32,309 |
| 12,190 | 171 | 23,270 | 4,986 | 3,420 | 31,847 |
| 12,191 | 176 | 23,386 | 5,010 | 3,446 | 32,018 |
| 12,192 | 170 | 23,458 | 5,025 | 3,439 | 32,092 |
| 12,193 | 168 | 23,500 | 5,063 | 3,427 | 32,158 |
| 12,194 | 169 | 23,683 | 5,116 | 3,458 | 32,426 |
| 12,195 | 157 | 22,716 | 4,830 | 3,310 | 31,013 |
| 12,196 | 158 | 22,930 | 4,863 | 3,332 | 31,283 |
| 12,197 | 159 | 23,163 | 4,938 | 3,367 | 31,627 |
| 12,198 | 160 | 23,155 | 4,943 | 3,358 | 31,616 |
| 12,199 | 154 | 23,261 | 4,929 | 3,361 | 31,705 |
| 12,200 | 158 | 23,384 | 4,963 | 3,367 | 31,872 |
| 12,201 | 141 | 23,318 | 4,932 | 3,372 | 31,763 |
| 12,202 | 136 | 22,972 | 4,865 | 3,336 | 31,309 |
| 12,203 | 129 | 23,060 | 4,860 | 3,332 | 31,381 |
| 12,204 | 125 | 22,960 | 4,896 | 3,309 | 31,290 |
| 12,205 | 118 | 22,705 | 4,817 | 3,232 | 30,872 |
| 12,206 | 125 | 22,636 | 4,797 | 3,216 | 30,774 |
| 12,207 | 124 | 22,532 | 4,777 | 3,215 | 30,648 |
| 12,208 | 129 | 22,737 | 4,833 | 3,234 | 30,933 |
| 12,209 | 131 | 22,782 | 4,831 | 3,248 | 30,992 |
| 12,210 | 129 | 22,473 | 4,775 | 3,229 | 30,606 |
| 12,211 | 130 | 22,029 | 4,682 | 3,175 | 30,016 |
| 12,212 | 131 | 22,200 | 4,734 | 3,193 | 30,258 |
| 12,213 | 125 | 22,215 | 4,729 | 3,193 | 30,262 |
| 12,214 | 124 | 22,054 | 4,722 | 3,196 | 30,096 |
| 12,215 | 124 | 22,065 | 4,698 | 3,187 | 30,074 |

|        |     |        |       |       |        |
|--------|-----|--------|-------|-------|--------|
| 12,216 | 121 | 22,178 | 4,712 | 3,177 | 30,188 |
| 12,217 | 119 | 22,199 | 4,756 | 3,179 | 30,253 |
| 12,218 | 127 | 22,549 | 4,808 | 3,233 | 30,717 |
| 12,219 | 127 | 22,717 | 4,822 | 3,241 | 30,907 |
| 12,220 | 125 | 22,865 | 4,817 | 3,253 | 31,060 |
| 12,221 | 126 | 22,903 | 4,792 | 3,230 | 31,051 |
| 12,222 | 128 | 23,130 | 4,793 | 3,247 | 31,298 |
| 12,223 | 131 | 23,539 | 4,860 | 3,283 | 31,813 |
| 12,224 | 132 | 23,261 | 4,824 | 3,236 | 31,453 |
| 12,225 | 130 | 22,775 | 4,739 | 3,183 | 30,827 |
| 12,226 | 134 | 23,052 | 4,785 | 3,212 | 31,183 |
| 12,227 | 130 | 23,258 | 4,840 | 3,244 | 31,472 |
| 12,228 | 134 | 23,282 | 4,849 | 3,234 | 31,499 |
| 12,229 | 133 | 23,405 | 4,879 | 3,245 | 31,662 |
| 12,230 | 130 | 23,275 | 4,873 | 3,225 | 31,503 |
| 12,231 | 129 | 23,266 | 4,874 | 3,238 | 31,507 |
| 12,232 | 128 | 23,267 | 4,938 | 3,258 | 31,591 |
| 12,233 | 128 | 23,065 | 4,867 | 3,225 | 31,285 |
| 12,234 | 136 | 23,312 | 4,905 | 3,232 | 31,585 |
| 12,235 | 137 | 23,471 | 4,926 | 3,243 | 31,777 |
| 12,236 | 136 | 23,309 | 4,889 | 3,214 | 31,548 |
| 12,237 | 138 | 23,340 | 4,912 | 3,248 | 31,638 |
| 12,238 | 136 | 23,323 | 4,914 | 3,232 | 31,605 |
| 12,239 | 139 | 23,333 | 4,891 | 3,225 | 31,588 |
| 12,240 | 149 | 23,297 | 4,905 | 3,185 | 31,536 |
| 12,241 | 149 | 23,343 | 4,925 | 3,206 | 31,623 |
| 12,242 | 147 | 23,253 | 4,938 | 3,203 | 31,541 |
| 12,243 | 150 | 23,185 | 4,933 | 3,209 | 31,477 |
| 12,244 | 157 | 23,394 | 4,980 | 3,257 | 31,788 |
| 12,245 | 158 | 23,076 | 4,941 | 3,222 | 31,397 |
| 12,246 | 162 | 23,152 | 4,952 | 3,222 | 31,488 |
| 12,247 | 163 | 23,356 | 5,024 | 3,262 | 31,805 |

|        |     |        |       |       |        |
|--------|-----|--------|-------|-------|--------|
| 12,248 | 164 | 23,148 | 4,975 | 3,240 | 31,527 |
| 12,249 | 170 | 23,134 | 4,966 | 3,241 | 31,511 |
| 12,250 | 171 | 23,017 | 4,965 | 3,246 | 31,399 |
| 12,251 | 175 | 23,235 | 5,014 | 3,285 | 31,709 |
| 12,252 | 176 | 23,121 | 5,038 | 3,274 | 31,609 |
| 12,253 | 169 | 22,822 | 4,978 | 3,241 | 31,210 |
| 12,254 | 168 | 22,779 | 5,004 | 3,247 | 31,198 |
| 12,255 | 172 | 22,942 | 5,034 | 3,282 | 31,430 |
| 12,256 | 170 | 22,734 | 4,994 | 3,250 | 31,148 |
| 12,257 | 170 | 22,818 | 5,033 | 3,270 | 31,291 |
| 12,258 | 172 | 23,053 | 5,102 | 3,307 | 31,634 |
| 12,259 | 169 | 23,279 | 5,148 | 3,343 | 31,939 |
| 12,260 | 169 | 23,206 | 5,146 | 3,336 | 31,857 |
| 12,261 | 169 | 22,975 | 5,126 | 3,305 | 31,575 |
| 12,262 | 168 | 23,227 | 5,166 | 3,343 | 31,904 |
| 12,263 | 168 | 22,960 | 5,104 | 3,310 | 31,542 |
| 12,264 | 169 | 23,024 | 5,114 | 3,310 | 31,617 |
| 12,265 | 165 | 23,209 | 5,152 | 3,324 | 31,850 |
| 12,266 | 162 | 22,944 | 5,118 | 3,306 | 31,530 |
| 12,267 | 168 | 22,837 | 5,058 | 3,270 | 31,333 |
| 12,268 | 171 | 23,057 | 5,123 | 3,286 | 31,637 |
| 12,269 | 169 | 23,271 | 5,181 | 3,330 | 31,951 |
| 12,270 | 167 | 22,909 | 5,142 | 3,278 | 31,496 |
| 12,271 | 166 | 22,788 | 5,157 | 3,273 | 31,384 |
| 12,272 | 169 | 23,059 | 5,180 | 3,299 | 31,707 |
| 12,273 | 167 | 23,049 | 5,200 | 3,302 | 31,718 |
| 12,274 | 166 | 23,005 | 5,201 | 3,297 | 31,669 |
| 12,275 | 168 | 22,673 | 5,122 | 3,254 | 31,217 |
| 12,276 | 170 | 22,775 | 5,121 | 3,250 | 31,316 |
| 12,277 | 178 | 22,660 | 5,090 | 3,229 | 31,157 |
| 12,278 | 179 | 22,595 | 5,078 | 3,227 | 31,079 |
| 12,279 | 171 | 22,357 | 5,045 | 3,224 | 30,797 |



|        |     |        |       |       |        |
|--------|-----|--------|-------|-------|--------|
| 12,280 | 172 | 22,566 | 5,126 | 3,251 | 31,115 |
| 12,281 | 172 | 22,510 | 5,098 | 3,237 | 31,017 |
| 12,282 | 174 | 22,324 | 5,047 | 3,191 | 30,736 |
| 12,283 | 173 | 22,320 | 5,030 | 3,183 | 30,706 |
| 12,284 | 168 | 22,246 | 5,012 | 3,189 | 30,615 |
| 12,285 | 168 | 22,291 | 5,071 | 3,217 | 30,747 |
| 12,286 | 163 | 22,403 | 5,116 | 3,229 | 30,911 |
| 12,287 | 169 | 22,351 | 5,104 | 3,201 | 30,825 |
| 12,288 | 166 | 22,418 | 5,077 | 3,204 | 30,865 |
| 12,289 | 161 | 22,365 | 5,078 | 3,209 | 30,813 |
| 12,290 | 166 | 22,511 | 5,126 | 3,247 | 31,050 |
| 12,291 | 155 | 22,443 | 5,110 | 3,256 | 30,964 |
| 12,292 | 154 | 22,199 | 5,058 | 3,222 | 30,633 |
| 12,293 | 158 | 22,877 | 5,179 | 3,297 | 31,511 |
| 12,294 | 167 | 22,949 | 5,215 | 3,313 | 31,644 |
| 12,295 | 160 | 22,880 | 5,194 | 3,302 | 31,536 |
| 12,296 | 157 | 23,179 | 5,247 | 3,351 | 31,934 |
| 12,297 | 152 | 23,819 | 5,380 | 3,470 | 32,821 |
| 12,298 | 153 | 23,911 | 5,378 | 3,469 | 32,911 |
| 12,299 | 143 | 24,513 | 5,529 | 3,549 | 33,734 |
| 12,300 | 143 | 24,490 | 5,535 | 3,552 | 33,720 |
| 12,301 | 139 | 24,596 | 5,573 | 3,570 | 33,878 |
| 12,302 | 138 | 25,004 | 5,707 | 3,662 | 34,511 |
| 12,303 | 139 | 24,952 | 5,689 | 3,636 | 34,416 |
| 12,304 | 140 | 25,174 | 5,727 | 3,667 | 34,708 |
| 12,305 | 138 | 25,133 | 5,693 | 3,662 | 34,626 |
| 12,306 | 136 | 25,074 | 5,707 | 3,674 | 34,591 |
| 12,307 | 129 | 25,123 | 5,771 | 3,715 | 34,738 |
| 12,308 | 125 | 25,230 | 5,781 | 3,740 | 34,876 |
| 12,309 | 132 | 24,687 | 5,661 | 3,639 | 34,119 |
| 12,310 | 147 | 24,923 | 5,716 | 3,679 | 34,465 |
| 12,311 | 142 | 24,876 | 5,706 | 3,685 | 34,409 |

|        |     |        |       |       |        |
|--------|-----|--------|-------|-------|--------|
| 12,312 | 140 | 24,824 | 5,705 | 3,690 | 34,359 |
| 12,313 | 142 | 24,869 | 5,739 | 3,704 | 34,454 |
| 12,314 | 143 | 24,956 | 5,768 | 3,718 | 34,585 |
| 12,315 | 147 | 25,069 | 5,805 | 3,741 | 34,762 |
| 12,316 | 153 | 25,022 | 5,789 | 3,728 | 34,692 |
| 12,317 | 156 | 24,975 | 5,803 | 3,751 | 34,685 |
| 12,318 | 148 | 24,701 | 5,792 | 3,734 | 34,375 |
| 12,319 | 149 | 25,171 | 5,894 | 3,823 | 35,037 |
| 12,320 | 151 | 24,836 | 5,838 | 3,792 | 34,617 |
| 12,321 | 146 | 24,679 | 5,795 | 3,779 | 34,399 |
| 12,322 | 151 | 25,218 | 5,949 | 3,846 | 35,164 |
| 12,323 | 154 | 25,217 | 5,973 | 3,848 | 35,192 |
| 12,324 | 157 | 25,211 | 6,000 | 3,853 | 35,221 |
| 12,325 | 154 | 24,828 | 5,961 | 3,830 | 34,773 |
| 12,326 | 153 | 24,622 | 5,917 | 3,785 | 34,477 |
| 12,327 | 151 | 24,371 | 5,892 | 3,761 | 34,175 |
| 12,328 | 144 | 24,848 | 6,064 | 3,851 | 34,907 |
| 12,329 | 147 | 24,775 | 6,069 | 3,835 | 34,826 |
| 12,330 | 145 | 24,762 | 6,064 | 3,811 | 34,782 |
| 12,331 | 151 | 24,736 | 6,048 | 3,800 | 34,735 |
| 12,332 | 153 | 24,523 | 6,015 | 3,771 | 34,462 |
| 12,333 | 150 | 24,157 | 5,952 | 3,748 | 34,007 |
| 12,334 | 150 | 24,390 | 6,011 | 3,778 | 34,329 |
| 12,335 | 153 | 24,522 | 6,012 | 3,795 | 34,482 |
| 12,336 | 152 | 24,485 | 5,983 | 3,773 | 34,393 |
| 12,337 | 153 | 24,433 | 5,957 | 3,781 | 34,324 |
| 12,338 | 143 | 24,176 | 5,879 | 3,759 | 33,957 |
| 12,339 | 144 | 24,024 | 5,865 | 3,708 | 33,741 |
| 12,340 | 147 | 24,158 | 5,882 | 3,727 | 33,914 |
| 12,341 | 144 | 24,128 | 5,871 | 3,721 | 33,864 |
| 12,342 | 144 | 23,887 | 5,785 | 3,669 | 33,485 |
| 12,343 | 141 | 23,638 | 5,758 | 3,613 | 33,150 |

|        |     |        |       |       |        |
|--------|-----|--------|-------|-------|--------|
| 12,344 | 146 | 23,571 | 5,767 | 3,629 | 33,113 |
| 12,345 | 146 | 23,735 | 5,796 | 3,661 | 33,338 |
| 12,346 | 154 | 23,537 | 5,772 | 3,632 | 33,095 |
| 12,347 | 161 | 22,936 | 5,689 | 3,564 | 32,350 |
| 12,348 | 161 | 22,351 | 5,598 | 3,496 | 31,606 |
| 12,349 | 162 | 22,401 | 5,613 | 3,534 | 31,710 |
| 12,350 | 163 | 22,276 | 5,604 | 3,523 | 31,566 |
| 12,351 | 164 | 22,288 | 5,614 | 3,502 | 31,568 |
| 12,352 | 165 | 22,121 | 5,561 | 3,476 | 31,323 |
| 12,353 | 163 | 22,131 | 5,547 | 3,468 | 31,309 |
| 12,354 | 160 | 22,048 | 5,501 | 3,456 | 31,165 |
| 12,355 | 158 | 22,063 | 5,495 | 3,459 | 31,175 |
| 12,356 | 158 | 21,968 | 5,441 | 3,426 | 30,993 |
| 12,357 | 160 | 21,964 | 5,402 | 3,392 | 30,918 |
| 12,358 | 160 | 22,096 | 5,408 | 3,387 | 31,051 |
| 12,359 | 164 | 21,821 | 5,309 | 3,335 | 30,629 |
| 12,360 | 161 | 21,862 | 5,307 | 3,336 | 30,666 |
| 12,361 | 152 | 22,050 | 5,337 | 3,351 | 30,890 |
| 12,362 | 155 | 21,998 | 5,281 | 3,308 | 30,742 |
| 12,363 | 155 | 21,971 | 5,255 | 3,285 | 30,666 |
| 12,364 | 159 | 22,269 | 5,279 | 3,313 | 31,020 |
| 12,365 | 161 | 21,798 | 5,174 | 3,218 | 30,351 |
| 12,366 | 158 | 21,949 | 5,199 | 3,240 | 30,546 |
| 12,367 | 153 | 21,960 | 5,189 | 3,243 | 30,545 |
| 12,368 | 149 | 22,053 | 5,212 | 3,247 | 30,661 |
| 12,369 | 152 | 21,868 | 5,131 | 3,220 | 30,371 |
| 12,370 | 146 | 21,890 | 5,102 | 3,195 | 30,333 |
| 12,371 | 145 | 21,828 | 5,087 | 3,194 | 30,254 |
| 12,372 | 143 | 21,752 | 5,035 | 3,183 | 30,113 |
| 12,373 | 142 | 21,955 | 5,076 | 3,214 | 30,387 |
| 12,374 | 138 | 22,095 | 5,073 | 3,229 | 30,535 |
| 12,375 | 136 | 22,094 | 5,031 | 3,193 | 30,454 |

|        |     |        |       |       |        |
|--------|-----|--------|-------|-------|--------|
| 12,376 | 136 | 21,972 | 4,953 | 3,164 | 30,225 |
| 12,377 | 131 | 21,677 | 4,838 | 3,116 | 29,762 |
| 12,378 | 131 | 21,737 | 4,829 | 3,112 | 29,809 |
| 12,379 | 131 | 21,602 | 4,775 | 3,082 | 29,590 |
| 12,380 | 127 | 21,406 | 4,729 | 3,063 | 29,325 |
| 12,381 | 138 | 22,231 | 4,965 | 3,287 | 30,621 |
| 12,382 | 141 | 22,314 | 5,046 | 3,345 | 30,846 |
| 12,383 | 145 | 22,276 | 5,020 | 3,334 | 30,775 |
| 12,384 | 145 | 22,204 | 5,018 | 3,323 | 30,690 |
| 12,385 | 140 | 22,154 | 5,040 | 3,332 | 30,666 |
| 12,386 | 143 | 22,185 | 5,059 | 3,320 | 30,707 |
| 12,387 | 142 | 22,176 | 5,069 | 3,323 | 30,710 |
| 12,388 | 141 | 22,188 | 5,079 | 3,322 | 30,730 |
| 12,389 | 144 | 22,371 | 5,129 | 3,346 | 30,990 |
| 12,390 | 143 | 21,676 | 4,994 | 3,258 | 30,071 |
| 12,391 | 142 | 22,009 | 5,062 | 3,290 | 30,503 |
| 12,392 | 140 | 22,457 | 5,116 | 3,327 | 31,040 |
| 12,393 | 139 | 22,320 | 5,069 | 3,307 | 30,835 |
| 12,394 | 138 | 22,556 | 5,079 | 3,348 | 31,121 |
| 12,395 | 134 | 22,879 | 5,103 | 3,387 | 31,503 |
| 12,396 | 134 | 22,829 | 5,097 | 3,386 | 31,446 |
| 12,397 | 127 | 22,672 | 5,058 | 3,368 | 31,225 |
| 12,398 | 124 | 22,600 | 5,018 | 3,352 | 31,094 |
| 12,399 | 122 | 22,622 | 4,999 | 3,321 | 31,064 |
| 12,400 | 123 | 22,564 | 4,995 | 3,324 | 31,006 |
| 12,401 | 127 | 22,695 | 4,976 | 3,329 | 31,127 |
| 12,402 | 126 | 22,475 | 4,905 | 3,313 | 30,819 |
| 12,403 | 125 | 22,534 | 4,909 | 3,331 | 30,899 |
| 12,404 | 130 | 22,608 | 4,901 | 3,334 | 30,973 |
| 12,405 | 129 | 22,522 | 4,884 | 3,344 | 30,879 |
| 12,406 | 136 | 22,542 | 4,890 | 3,340 | 30,908 |
| 12,407 | 136 | 22,362 | 4,879 | 3,305 | 30,682 |

|        |     |        |       |       |        |
|--------|-----|--------|-------|-------|--------|
| 12,408 | 141 | 22,692 | 4,921 | 3,353 | 31,107 |
| 12,409 | 141 | 22,708 | 4,926 | 3,356 | 31,131 |
| 12,410 | 137 | 22,972 | 5,005 | 3,385 | 31,499 |
| 12,411 | 133 | 22,760 | 4,981 | 3,365 | 31,239 |
| 12,412 | 133 | 22,681 | 4,975 | 3,364 | 31,153 |
| 12,413 | 147 | 22,838 | 5,040 | 3,392 | 31,417 |
| 12,414 | 143 | 22,551 | 4,990 | 3,364 | 31,048 |
| 12,415 | 144 | 22,233 | 4,945 | 3,320 | 30,642 |
| 12,416 | 142 | 21,920 | 4,906 | 3,314 | 30,282 |
| 12,417 | 148 | 22,342 | 5,056 | 3,403 | 30,949 |
| 12,418 | 150 | 22,561 | 5,092 | 3,419 | 31,222 |
| 12,419 | 147 | 22,201 | 5,044 | 3,362 | 30,754 |
| 12,420 | 147 | 22,183 | 5,063 | 3,352 | 30,745 |
| 12,421 | 150 | 22,200 | 5,076 | 3,327 | 30,753 |
| 12,422 | 153 | 22,425 | 5,121 | 3,358 | 31,057 |
| 12,423 | 153 | 22,203 | 5,067 | 3,334 | 30,757 |
| 12,424 | 153 | 21,948 | 5,023 | 3,317 | 30,441 |
| 12,425 | 160 | 22,338 | 5,151 | 3,383 | 31,032 |
| 12,426 | 160 | 22,146 | 5,136 | 3,400 | 30,842 |
| 12,427 | 157 | 21,934 | 5,068 | 3,340 | 30,499 |
| 12,428 | 157 | 21,962 | 5,069 | 3,342 | 30,530 |
| 12,429 | 160 | 22,194 | 5,125 | 3,360 | 30,839 |
| 12,430 | 155 | 22,286 | 5,148 | 3,350 | 30,939 |
| 12,431 | 153 | 22,277 | 5,075 | 3,295 | 30,800 |
| 12,432 | 160 | 22,626 | 5,119 | 3,307 | 31,212 |
| 12,433 | 157 | 22,857 | 5,137 | 3,316 | 31,467 |
| 12,434 | 154 | 22,731 | 5,062 | 3,279 | 31,226 |
| 12,435 | 160 | 22,724 | 5,062 | 3,274 | 31,220 |
| 12,436 | 159 | 22,813 | 5,048 | 3,272 | 31,292 |
| 12,437 | 160 | 22,830 | 5,071 | 3,288 | 31,349 |
| 12,438 | 165 | 22,868 | 5,081 | 3,283 | 31,397 |
| 12,439 | 165 | 22,845 | 5,074 | 3,281 | 31,365 |

|        |     |        |       |       |        |
|--------|-----|--------|-------|-------|--------|
| 12,440 | 161 | 22,752 | 5,085 | 3,279 | 31,277 |
| 12,441 | 166 | 22,477 | 5,024 | 3,257 | 30,924 |
| 12,442 | 164 | 22,170 | 4,966 | 3,230 | 30,530 |
| 12,443 | 169 | 22,821 | 5,088 | 3,319 | 31,397 |
| 12,444 | 169 | 22,610 | 5,058 | 3,282 | 31,119 |
| 12,445 | 169 | 22,516 | 5,062 | 3,274 | 31,021 |
| 12,446 | 172 | 22,544 | 5,138 | 3,313 | 31,167 |
| 12,447 | 167 | 22,248 | 5,089 | 3,275 | 30,779 |
| 12,448 | 168 | 22,087 | 5,096 | 3,283 | 30,634 |
| 12,449 | 164 | 22,131 | 5,086 | 3,299 | 30,680 |
| 12,450 | 166 | 22,122 | 5,074 | 3,296 | 30,658 |
| 12,451 | 166 | 22,359 | 5,124 | 3,323 | 30,972 |
| 12,452 | 174 | 21,975 | 5,066 | 3,265 | 30,480 |
| 12,453 | 171 | 21,833 | 5,020 | 3,232 | 30,256 |
| 12,454 | 171 | 21,877 | 5,052 | 3,227 | 30,327 |
| 12,455 | 171 | 21,828 | 5,061 | 3,232 | 30,292 |
| 12,456 | 174 | 21,936 | 5,103 | 3,230 | 30,443 |
| 12,457 | 165 | 21,854 | 5,115 | 3,246 | 30,380 |
| 12,458 | 162 | 21,796 | 5,141 | 3,248 | 30,347 |
| 12,459 | 162 | 21,854 | 5,126 | 3,260 | 30,402 |
| 12,460 | 161 | 22,094 | 5,209 | 3,326 | 30,790 |
| 12,461 | 155 | 21,655 | 5,119 | 3,286 | 30,215 |
| 12,462 | 158 | 21,887 | 5,147 | 3,308 | 30,500 |
| 12,463 | 150 | 22,109 | 5,169 | 3,322 | 30,750 |
| 12,464 | 147 | 21,933 | 5,123 | 3,299 | 30,502 |
| 12,465 | 149 | 22,126 | 5,137 | 3,302 | 30,714 |
| 12,466 | 146 | 21,976 | 5,084 | 3,280 | 30,486 |
| 12,467 | 144 | 21,854 | 5,030 | 3,256 | 30,284 |
| 12,468 | 145 | 22,069 | 5,062 | 3,278 | 30,554 |
| 12,469 | 145 | 22,052 | 5,077 | 3,293 | 30,567 |
| 12,470 | 148 | 22,113 | 5,072 | 3,321 | 30,654 |
| 12,471 | 148 | 22,037 | 5,057 | 3,337 | 30,579 |

|        |     |        |       |       |        |
|--------|-----|--------|-------|-------|--------|
| 12,472 | 144 | 21,950 | 5,027 | 3,356 | 30,477 |
| 12,473 | 141 | 22,084 | 5,074 | 3,373 | 30,672 |
| 12,474 | 146 | 21,994 | 5,072 | 3,357 | 30,569 |
| 12,475 | 144 | 21,892 | 5,031 | 3,333 | 30,400 |
| 12,476 | 140 | 21,699 | 4,969 | 3,323 | 30,131 |
| 12,477 | 140 | 21,847 | 4,975 | 3,322 | 30,284 |
| 12,478 | 142 | 21,828 | 5,017 | 3,320 | 30,307 |
| 12,479 | 144 | 21,817 | 5,014 | 3,325 | 30,300 |
| 12,480 | 143 | 22,047 | 5,076 | 3,367 | 30,633 |
| 12,481 | 141 | 21,645 | 4,995 | 3,323 | 30,104 |
| 12,482 | 141 | 21,603 | 4,992 | 3,318 | 30,054 |
| 12,483 | 139 | 21,902 | 5,065 | 3,378 | 30,484 |
| 12,484 | 141 | 22,031 | 5,109 | 3,415 | 30,696 |
| 12,485 | 139 | 21,790 | 5,087 | 3,391 | 30,407 |
| 12,486 | 131 | 21,901 | 5,107 | 3,427 | 30,566 |
| 12,487 | 131 | 21,905 | 5,116 | 3,434 | 30,586 |
| 12,488 | 133 | 22,006 | 5,162 | 3,461 | 30,762 |
| 12,489 | 136 | 22,250 | 5,235 | 3,487 | 31,108 |
| 12,490 | 136 | 22,130 | 5,220 | 3,477 | 30,963 |
| 12,491 | 137 | 22,517 | 5,319 | 3,577 | 31,550 |
| 12,492 | 128 | 22,551 | 5,349 | 3,592 | 31,620 |
| 12,493 | 129 | 22,512 | 5,368 | 3,609 | 31,618 |
| 12,494 | 126 | 22,444 | 5,379 | 3,639 | 31,588 |
| 12,495 | 127 | 22,433 | 5,402 | 3,635 | 31,597 |
| 12,496 | 131 | 22,496 | 5,378 | 3,620 | 31,625 |
| 12,497 | 129 | 22,416 | 5,313 | 3,565 | 31,423 |
| 12,498 | 129 | 22,513 | 5,313 | 3,555 | 31,510 |
| 12,499 | 127 | 22,816 | 5,329 | 3,572 | 31,844 |
| 12,500 | 129 | 22,904 | 5,330 | 3,566 | 31,929 |
| 12,501 | 111 | 21,804 | 5,087 | 3,411 | 30,413 |
| 12,502 | 114 | 21,925 | 5,091 | 3,415 | 30,545 |
| 12,503 | 118 | 22,178 | 5,144 | 3,421 | 30,861 |

|        |     |        |       |       |        |
|--------|-----|--------|-------|-------|--------|
| 12,504 | 120 | 22,093 | 5,168 | 3,424 | 30,805 |
| 12,505 | 123 | 22,756 | 5,286 | 3,513 | 31,678 |
| 12,506 | 121 | 22,539 | 5,218 | 3,476 | 31,354 |
| 12,507 | 123 | 22,879 | 5,258 | 3,515 | 31,775 |
| 12,508 | 134 | 22,934 | 5,252 | 3,522 | 31,842 |
| 12,509 | 132 | 22,671 | 5,206 | 3,495 | 31,504 |
| 12,510 | 137 | 22,749 | 5,233 | 3,510 | 31,629 |
| 12,511 | 142 | 22,472 | 5,159 | 3,443 | 31,216 |
| 12,512 | 143 | 22,552 | 5,161 | 3,443 | 31,299 |
| 12,513 | 143 | 22,251 | 5,128 | 3,415 | 30,937 |
| 12,514 | 143 | 21,945 | 5,084 | 3,387 | 30,559 |
| 12,515 | 145 | 22,990 | 5,294 | 3,551 | 31,980 |
| 12,516 | 135 | 22,666 | 5,232 | 3,518 | 31,551 |
| 12,517 | 136 | 22,487 | 5,222 | 3,499 | 31,344 |
| 12,518 | 136 | 22,670 | 5,288 | 3,527 | 31,621 |
| 12,519 | 134 | 22,551 | 5,285 | 3,533 | 31,503 |
| 12,520 | 136 | 22,537 | 5,263 | 3,504 | 31,440 |
| 12,521 | 134 | 22,396 | 5,226 | 3,477 | 31,233 |
| 12,522 | 135 | 22,438 | 5,232 | 3,474 | 31,279 |
| 12,523 | 135 | 22,448 | 5,199 | 3,452 | 31,234 |
| 12,524 | 138 | 22,665 | 5,237 | 3,490 | 31,530 |
| 12,525 | 133 | 22,332 | 5,195 | 3,439 | 31,099 |
| 12,526 | 130 | 22,082 | 5,146 | 3,408 | 30,766 |
| 12,527 | 136 | 22,320 | 5,193 | 3,435 | 31,084 |
| 12,528 | 144 | 22,292 | 5,210 | 3,435 | 31,081 |
| 12,529 | 139 | 22,107 | 5,125 | 3,408 | 30,779 |
| 12,530 | 136 | 22,125 | 5,105 | 3,410 | 30,776 |
| 12,531 | 131 | 21,745 | 4,961 | 3,307 | 30,144 |
| 12,532 | 134 | 21,987 | 5,013 | 3,329 | 30,463 |
| 12,533 | 133 | 22,175 | 5,075 | 3,370 | 30,753 |
| 12,534 | 137 | 22,345 | 5,143 | 3,390 | 31,015 |
| 12,535 | 137 | 22,328 | 5,124 | 3,378 | 30,967 |



|        |     |        |       |       |        |
|--------|-----|--------|-------|-------|--------|
| 12,536 | 137 | 22,172 | 5,062 | 3,322 | 30,693 |
| 12,537 | 141 | 22,265 | 5,068 | 3,322 | 30,796 |
| 12,538 | 140 | 22,438 | 5,103 | 3,340 | 31,021 |
| 12,539 | 138 | 22,150 | 5,025 | 3,312 | 30,625 |
| 12,540 | 138 | 22,124 | 5,015 | 3,305 | 30,582 |
| 12,541 | 139 | 22,470 | 5,073 | 3,324 | 31,006 |
| 12,542 | 135 | 22,183 | 4,949 | 3,252 | 30,519 |
| 12,543 | 136 | 22,131 | 4,920 | 3,230 | 30,417 |
| 12,544 | 147 | 22,139 | 4,898 | 3,185 | 30,369 |
| 12,545 | 150 | 22,068 | 4,891 | 3,174 | 30,283 |
| 12,546 | 154 | 22,028 | 4,902 | 3,210 | 30,294 |
| 12,547 | 150 | 21,789 | 4,867 | 3,190 | 29,996 |
| 12,548 | 147 | 21,654 | 4,859 | 3,205 | 29,865 |
| 12,549 | 149 | 21,709 | 4,875 | 3,225 | 29,958 |
| 12,550 | 150 | 21,700 | 4,891 | 3,231 | 29,972 |
| 12,551 | 149 | 21,506 | 4,872 | 3,226 | 29,753 |
| 12,552 | 148 | 21,522 | 4,888 | 3,227 | 29,785 |
| 12,553 | 146 | 21,655 | 4,950 | 3,242 | 29,993 |
| 12,554 | 142 | 21,666 | 4,957 | 3,287 | 30,052 |
| 12,555 | 142 | 21,770 | 4,969 | 3,281 | 30,162 |
| 12,556 | 141 | 21,701 | 4,973 | 3,301 | 30,116 |
| 12,557 | 145 | 21,836 | 5,066 | 3,347 | 30,394 |
| 12,558 | 137 | 21,680 | 5,076 | 3,344 | 30,237 |
| 12,559 | 134 | 21,698 | 5,120 | 3,342 | 30,294 |
| 12,560 | 132 | 21,822 | 5,207 | 3,374 | 30,535 |
| 12,561 | 135 | 21,913 | 5,262 | 3,407 | 30,717 |
| 12,562 | 134 | 22,127 | 5,317 | 3,460 | 31,038 |
| 12,563 | 138 | 22,350 | 5,408 | 3,480 | 31,376 |
| 12,564 | 133 | 22,349 | 5,439 | 3,507 | 31,428 |
| 12,565 | 133 | 22,421 | 5,471 | 3,516 | 31,541 |
| 12,566 | 133 | 22,588 | 5,484 | 3,536 | 31,741 |
| 12,567 | 133 | 22,330 | 5,439 | 3,509 | 31,411 |

|        |     |        |       |       |        |
|--------|-----|--------|-------|-------|--------|
| 12,568 | 132 | 22,225 | 5,473 | 3,519 | 31,349 |
| 12,569 | 136 | 22,505 | 5,522 | 3,581 | 31,744 |
| 12,570 | 141 | 22,499 | 5,538 | 3,569 | 31,747 |
| 12,571 | 140 | 22,418 | 5,536 | 3,573 | 31,667 |
| 12,572 | 140 | 22,141 | 5,497 | 3,546 | 31,324 |
| 12,573 | 138 | 22,066 | 5,532 | 3,551 | 31,287 |
| 12,574 | 142 | 22,303 | 5,605 | 3,591 | 31,641 |
| 12,575 | 142 | 22,314 | 5,607 | 3,602 | 31,665 |
| 12,576 | 138 | 22,082 | 5,555 | 3,577 | 31,352 |
| 12,577 | 139 | 22,070 | 5,567 | 3,579 | 31,355 |
| 12,578 | 139 | 21,997 | 5,578 | 3,580 | 31,294 |
| 12,579 | 134 | 22,019 | 5,603 | 3,606 | 31,362 |
| 12,580 | 135 | 21,981 | 5,614 | 3,591 | 31,321 |
| 12,581 | 138 | 21,686 | 5,569 | 3,569 | 30,962 |
| 12,582 | 138 | 21,471 | 5,550 | 3,562 | 30,721 |
| 12,583 | 136 | 21,333 | 5,523 | 3,549 | 30,541 |
| 12,584 | 139 | 21,460 | 5,572 | 3,562 | 30,733 |
| 12,585 | 137 | 21,427 | 5,574 | 3,581 | 30,719 |
| 12,586 | 136 | 21,256 | 5,561 | 3,606 | 30,559 |
| 12,587 | 138 | 21,137 | 5,558 | 3,590 | 30,423 |
| 12,588 | 133 | 20,826 | 5,493 | 3,580 | 30,032 |
| 12,589 | 138 | 20,923 | 5,536 | 3,610 | 30,207 |
| 12,590 | 138 | 20,887 | 5,512 | 3,600 | 30,137 |
| 12,591 | 134 | 20,555 | 5,437 | 3,546 | 29,672 |
| 12,592 | 135 | 20,393 | 5,425 | 3,550 | 29,503 |
| 12,593 | 130 | 20,180 | 5,411 | 3,545 | 29,266 |
| 12,594 | 130 | 20,509 | 5,468 | 3,585 | 29,692 |
| 12,595 | 125 | 20,716 | 5,532 | 3,614 | 29,987 |
| 12,596 | 120 | 20,719 | 5,530 | 3,607 | 29,976 |
| 12,597 | 119 | 20,782 | 5,525 | 3,584 | 30,010 |
| 12,598 | 119 | 20,952 | 5,574 | 3,602 | 30,247 |
| 12,599 | 122 | 20,843 | 5,574 | 3,621 | 30,160 |

|        |     |        |       |       |        |
|--------|-----|--------|-------|-------|--------|
| 12,600 | 118 | 20,885 | 5,602 | 3,621 | 30,226 |
| 12,601 | 118 | 20,635 | 5,557 | 3,572 | 29,882 |
| 12,602 | 118 | 20,900 | 5,612 | 3,603 | 30,233 |
| 12,603 | 119 | 20,909 | 5,611 | 3,611 | 30,250 |
| 12,604 | 118 | 20,885 | 5,576 | 3,624 | 30,203 |
| 12,605 | 118 | 20,873 | 5,571 | 3,613 | 30,175 |
| 12,606 | 115 | 20,695 | 5,558 | 3,617 | 29,985 |
| 12,607 | 116 | 20,351 | 5,486 | 3,556 | 29,509 |
| 12,608 | 112 | 20,049 | 5,366 | 3,491 | 29,018 |
| 12,609 | 112 | 20,058 | 5,361 | 3,526 | 29,057 |
| 12,610 | 110 | 19,962 | 5,350 | 3,516 | 28,938 |
| 12,611 | 107 | 20,059 | 5,300 | 3,493 | 28,959 |
| 12,612 | 101 | 18,983 | 5,022 | 3,310 | 27,416 |
| 12,613 | 102 | 19,093 | 5,045 | 3,351 | 27,591 |
| 12,614 | 100 | 19,074 | 5,021 | 3,344 | 27,539 |
| 12,615 | 100 | 18,777 | 4,954 | 3,289 | 27,120 |
| 12,616 | 101 | 18,804 | 4,996 | 3,336 | 27,237 |
| 12,617 | 98  | 18,701 | 5,026 | 3,340 | 27,165 |
| 12,618 | 98  | 18,839 | 5,061 | 3,357 | 27,355 |
| 12,619 | 97  | 19,022 | 5,066 | 3,373 | 27,558 |
| 12,620 | 95  | 18,826 | 5,023 | 3,332 | 27,276 |
| 12,621 | 94  | 18,891 | 5,033 | 3,365 | 27,383 |
| 12,622 | 95  | 19,185 | 5,124 | 3,428 | 27,832 |
| 12,623 | 96  | 19,187 | 5,049 | 3,394 | 27,726 |
| 12,624 | 97  | 19,467 | 5,098 | 3,429 | 28,091 |
| 12,625 | 101 | 19,749 | 5,148 | 3,489 | 28,487 |
| 12,626 | 99  | 19,588 | 5,083 | 3,452 | 28,222 |
| 12,627 | 100 | 19,844 | 5,122 | 3,497 | 28,563 |
| 12,628 | 94  | 20,084 | 5,200 | 3,541 | 28,919 |
| 12,629 | 92  | 19,963 | 5,149 | 3,502 | 28,706 |
| 12,630 | 92  | 20,077 | 5,210 | 3,554 | 28,933 |
| 12,631 | 90  | 20,038 | 5,218 | 3,574 | 28,920 |

|        |     |        |       |       |        |
|--------|-----|--------|-------|-------|--------|
| 12,632 | 86  | 19,744 | 5,118 | 3,503 | 28,451 |
| 12,633 | 89  | 19,908 | 5,141 | 3,513 | 28,651 |
| 12,634 | 89  | 20,134 | 5,177 | 3,563 | 28,963 |
| 12,635 | 93  | 20,021 | 5,125 | 3,532 | 28,771 |
| 12,636 | 91  | 20,031 | 5,128 | 3,522 | 28,772 |
| 12,637 | 91  | 20,047 | 5,137 | 3,504 | 28,779 |
| 12,638 | 95  | 20,277 | 5,232 | 3,582 | 29,186 |
| 12,639 | 97  | 20,193 | 5,211 | 3,562 | 29,063 |
| 12,640 | 94  | 20,070 | 5,159 | 3,538 | 28,861 |
| 12,641 | 96  | 20,028 | 5,172 | 3,545 | 28,841 |
| 12,642 | 94  | 19,973 | 5,196 | 3,555 | 28,818 |
| 12,643 | 94  | 20,063 | 5,187 | 3,535 | 28,879 |
| 12,644 | 92  | 20,340 | 5,215 | 3,559 | 29,206 |
| 12,645 | 93  | 20,395 | 5,217 | 3,556 | 29,261 |
| 12,646 | 94  | 20,544 | 5,235 | 3,589 | 29,462 |
| 12,647 | 93  | 20,244 | 5,179 | 3,528 | 29,044 |
| 12,648 | 96  | 20,239 | 5,087 | 3,492 | 28,914 |
| 12,649 | 98  | 20,519 | 5,141 | 3,526 | 29,284 |
| 12,650 | 96  | 20,825 | 5,176 | 3,556 | 29,653 |
| 12,651 | 95  | 20,871 | 5,177 | 3,572 | 29,715 |
| 12,652 | 98  | 20,824 | 5,168 | 3,563 | 29,653 |
| 12,653 | 98  | 20,653 | 5,142 | 3,547 | 29,440 |
| 12,654 | 104 | 20,973 | 5,229 | 3,610 | 29,916 |
| 12,655 | 105 | 21,010 | 5,283 | 3,633 | 30,031 |
| 12,656 | 105 | 20,824 | 5,272 | 3,657 | 29,858 |
| 12,657 | 103 | 20,731 | 5,240 | 3,633 | 29,707 |
| 12,658 | 104 | 20,846 | 5,255 | 3,628 | 29,833 |
| 12,659 | 107 | 20,921 | 5,268 | 3,629 | 29,925 |
| 12,660 | 112 | 21,037 | 5,304 | 3,643 | 30,096 |
| 12,661 | 113 | 21,232 | 5,377 | 3,672 | 30,394 |
| 12,662 | 114 | 21,270 | 5,383 | 3,670 | 30,437 |
| 12,663 | 112 | 21,386 | 5,378 | 3,667 | 30,543 |

|        |     |        |       |       |        |
|--------|-----|--------|-------|-------|--------|
| 12,664 | 110 | 21,438 | 5,369 | 3,640 | 30,557 |
| 12,665 | 110 | 21,468 | 5,323 | 3,630 | 30,531 |
| 12,666 | 115 | 21,272 | 5,272 | 3,586 | 30,245 |
| 12,667 | 118 | 21,661 | 5,311 | 3,598 | 30,688 |
| 12,668 | 118 | 22,023 | 5,334 | 3,616 | 31,091 |
| 12,669 | 119 | 22,057 | 5,314 | 3,595 | 31,085 |
| 12,670 | 121 | 22,238 | 5,332 | 3,603 | 31,294 |
| 12,671 | 117 | 22,483 | 5,368 | 3,625 | 31,593 |
| 12,672 | 118 | 22,466 | 5,316 | 3,597 | 31,497 |
| 12,673 | 115 | 22,582 | 5,313 | 3,586 | 31,596 |
| 12,674 | 118 | 22,524 | 5,339 | 3,575 | 31,556 |
| 12,675 | 120 | 22,647 | 5,377 | 3,591 | 31,735 |
| 12,676 | 117 | 22,479 | 5,374 | 3,555 | 31,525 |
| 12,677 | 121 | 22,515 | 5,418 | 3,560 | 31,614 |
| 12,678 | 123 | 22,471 | 5,421 | 3,526 | 31,541 |
| 12,679 | 124 | 22,547 | 5,421 | 3,544 | 31,636 |
| 12,680 | 124 | 22,702 | 5,412 | 3,538 | 31,776 |
| 12,681 | 129 | 22,767 | 5,412 | 3,554 | 31,862 |
| 12,682 | 131 | 22,854 | 5,418 | 3,533 | 31,936 |
| 12,683 | 128 | 22,717 | 5,375 | 3,498 | 31,718 |
| 12,684 | 123 | 22,563 | 5,448 | 3,558 | 31,692 |
| 12,685 | 130 | 22,632 | 5,466 | 3,539 | 31,767 |
| 12,686 | 123 | 22,570 | 5,441 | 3,527 | 31,661 |
| 12,687 | 125 | 22,700 | 5,478 | 3,539 | 31,842 |
| 12,688 | 129 | 22,800 | 5,511 | 3,546 | 31,986 |
| 12,689 | 124 | 22,784 | 5,523 | 3,529 | 31,960 |
| 12,690 | 120 | 22,745 | 5,540 | 3,526 | 31,931 |
| 12,691 | 122 | 22,831 | 5,561 | 3,514 | 32,028 |
| 12,692 | 135 | 22,776 | 5,517 | 3,495 | 31,923 |
| 12,693 | 134 | 22,680 | 5,477 | 3,482 | 31,773 |
| 12,694 | 133 | 22,842 | 5,571 | 3,517 | 32,063 |
| 12,695 | 135 | 22,580 | 5,613 | 3,526 | 31,854 |

|        |     |        |       |       |        |
|--------|-----|--------|-------|-------|--------|
| 12,696 | 135 | 22,541 | 5,590 | 3,524 | 31,790 |
| 12,697 | 136 | 22,440 | 5,590 | 3,502 | 31,668 |
| 12,698 | 147 | 22,688 | 5,636 | 3,551 | 32,022 |
| 12,699 | 142 | 22,472 | 5,617 | 3,533 | 31,764 |
| 12,700 | 146 | 22,551 | 5,673 | 3,551 | 31,921 |
| 12,701 | 149 | 22,628 | 5,682 | 3,539 | 31,998 |
| 12,702 | 153 | 22,676 | 5,692 | 3,528 | 32,049 |
| 12,703 | 152 | 22,533 | 5,677 | 3,516 | 31,878 |
| 12,704 | 148 | 22,855 | 5,757 | 3,567 | 32,327 |
| 12,705 | 148 | 22,878 | 5,774 | 3,541 | 32,341 |
| 12,706 | 151 | 22,902 | 5,718 | 3,477 | 32,248 |
| 12,707 | 152 | 23,054 | 5,749 | 3,482 | 32,437 |
| 12,708 | 154 | 23,249 | 5,786 | 3,504 | 32,693 |
| 12,709 | 157 | 23,294 | 5,785 | 3,486 | 32,722 |
| 12,710 | 158 | 23,232 | 5,782 | 3,471 | 32,643 |
| 12,711 | 156 | 23,165 | 5,735 | 3,452 | 32,508 |
| 12,712 | 157 | 23,352 | 5,768 | 3,477 | 32,754 |
| 12,713 | 159 | 23,316 | 5,781 | 3,503 | 32,759 |
| 12,714 | 158 | 23,080 | 5,746 | 3,488 | 32,472 |
| 12,715 | 158 | 22,975 | 5,779 | 3,514 | 32,426 |
| 12,716 | 156 | 22,651 | 5,737 | 3,477 | 32,021 |
| 12,717 | 155 | 22,708 | 5,733 | 3,471 | 32,067 |
| 12,718 | 155 | 22,513 | 5,688 | 3,448 | 31,804 |
| 12,719 | 154 | 22,222 | 5,676 | 3,438 | 31,490 |
| 12,720 | 163 | 22,934 | 5,858 | 3,603 | 32,558 |
| 12,721 | 164 | 22,930 | 5,882 | 3,608 | 32,584 |
| 12,722 | 164 | 22,660 | 5,844 | 3,556 | 32,224 |
| 12,723 | 164 | 22,217 | 5,774 | 3,512 | 31,667 |
| 12,724 | 169 | 22,439 | 5,816 | 3,544 | 31,968 |
| 12,725 | 165 | 22,539 | 5,846 | 3,559 | 32,109 |
| 12,726 | 159 | 22,188 | 5,773 | 3,528 | 31,648 |
| 12,727 | 155 | 22,131 | 5,729 | 3,521 | 31,536 |

|        |     |        |       |       |        |
|--------|-----|--------|-------|-------|--------|
| 12,728 | 152 | 22,286 | 5,769 | 3,545 | 31,752 |
| 12,729 | 148 | 22,183 | 5,739 | 3,519 | 31,589 |
| 12,730 | 149 | 22,082 | 5,703 | 3,509 | 31,443 |
| 12,731 | 150 | 21,982 | 5,747 | 3,500 | 31,379 |
| 12,732 | 146 | 21,956 | 5,756 | 3,519 | 31,377 |
| 12,733 | 144 | 21,634 | 5,691 | 3,500 | 30,969 |
| 12,734 | 147 | 21,730 | 5,694 | 3,489 | 31,060 |
| 12,735 | 141 | 21,764 | 5,688 | 3,479 | 31,072 |
| 12,736 | 141 | 21,448 | 5,609 | 3,448 | 30,646 |
| 12,737 | 142 | 21,656 | 5,628 | 3,468 | 30,894 |
| 12,738 | 140 | 21,784 | 5,674 | 3,509 | 31,107 |
| 12,739 | 136 | 21,503 | 5,571 | 3,479 | 30,689 |
| 12,740 | 140 | 21,693 | 5,598 | 3,492 | 30,923 |
| 12,741 | 137 | 21,650 | 5,560 | 3,477 | 30,824 |
| 12,742 | 122 | 21,515 | 5,523 | 3,454 | 30,614 |
| 12,743 | 129 | 21,882 | 5,586 | 3,504 | 31,101 |
| 12,744 | 134 | 21,570 | 5,524 | 3,469 | 30,697 |
| 12,745 | 136 | 21,718 | 5,536 | 3,475 | 30,865 |
| 12,746 | 138 | 21,770 | 5,541 | 3,476 | 30,925 |
| 12,747 | 135 | 21,412 | 5,504 | 3,471 | 30,522 |
| 12,748 | 136 | 21,464 | 5,527 | 3,489 | 30,616 |
| 12,749 | 130 | 21,532 | 5,552 | 3,516 | 30,730 |
| 12,750 | 125 | 21,230 | 5,459 | 3,454 | 30,268 |
| 12,751 | 128 | 20,939 | 5,424 | 3,425 | 29,916 |
| 12,752 | 125 | 20,677 | 5,405 | 3,404 | 29,611 |
| 12,753 | 120 | 21,049 | 5,486 | 3,478 | 30,133 |
| 12,754 | 128 | 21,040 | 5,423 | 3,437 | 30,028 |
| 12,755 | 132 | 20,913 | 5,402 | 3,420 | 29,867 |
| 12,756 | 132 | 20,905 | 5,398 | 3,426 | 29,861 |
| 12,757 | 133 | 20,915 | 5,395 | 3,423 | 29,866 |
| 12,758 | 132 | 20,909 | 5,381 | 3,432 | 29,854 |
| 12,759 | 123 | 20,833 | 5,356 | 3,416 | 29,728 |

|        |     |        |       |       |        |
|--------|-----|--------|-------|-------|--------|
| 12,760 | 123 | 21,049 | 5,402 | 3,490 | 30,064 |
| 12,761 | 120 | 20,972 | 5,335 | 3,492 | 29,919 |
| 12,762 | 125 | 20,906 | 5,351 | 3,498 | 29,880 |
| 12,763 | 123 | 20,801 | 5,359 | 3,497 | 29,780 |
| 12,764 | 124 | 20,767 | 5,334 | 3,472 | 29,697 |
| 12,765 | 126 | 21,130 | 5,389 | 3,488 | 30,133 |
| 12,766 | 131 | 21,164 | 5,379 | 3,477 | 30,151 |
| 12,767 | 122 | 20,906 | 5,333 | 3,440 | 29,801 |
| 12,768 | 121 | 20,735 | 5,321 | 3,430 | 29,607 |
| 12,769 | 124 | 21,150 | 5,408 | 3,494 | 30,176 |
| 12,770 | 122 | 20,902 | 5,310 | 3,433 | 29,767 |
| 12,771 | 125 | 21,281 | 5,376 | 3,474 | 30,256 |
| 12,772 | 122 | 21,349 | 5,385 | 3,483 | 30,339 |
| 12,773 | 124 | 20,711 | 5,249 | 3,399 | 29,483 |
| 12,774 | 124 | 20,797 | 5,307 | 3,431 | 29,659 |
| 12,775 | 127 | 20,986 | 5,367 | 3,452 | 29,932 |
| 12,776 | 132 | 21,040 | 5,360 | 3,446 | 29,978 |
| 12,777 | 133 | 20,935 | 5,303 | 3,423 | 29,794 |
| 12,778 | 133 | 21,188 | 5,344 | 3,457 | 30,122 |
| 12,779 | 133 | 21,307 | 5,367 | 3,461 | 30,268 |
| 12,780 | 133 | 21,097 | 5,333 | 3,442 | 30,005 |
| 12,781 | 134 | 21,267 | 5,385 | 3,487 | 30,273 |
| 12,782 | 133 | 20,982 | 5,280 | 3,438 | 29,833 |
| 12,783 | 134 | 21,144 | 5,301 | 3,450 | 30,029 |
| 12,784 | 134 | 20,893 | 5,235 | 3,417 | 29,679 |
| 12,785 | 132 | 21,062 | 5,262 | 3,452 | 29,908 |
| 12,786 | 133 | 21,190 | 5,259 | 3,483 | 30,065 |
| 12,787 | 134 | 21,263 | 5,282 | 3,514 | 30,193 |
| 12,788 | 137 | 21,158 | 5,273 | 3,494 | 30,062 |
| 12,789 | 137 | 21,312 | 5,279 | 3,498 | 30,226 |
| 12,790 | 140 | 21,415 | 5,293 | 3,499 | 30,347 |
| 12,791 | 136 | 21,225 | 5,257 | 3,501 | 30,119 |



|        |     |        |       |       |        |
|--------|-----|--------|-------|-------|--------|
| 12,792 | 138 | 21,515 | 5,436 | 3,579 | 30,668 |
| 12,793 | 130 | 21,060 | 5,331 | 3,533 | 30,054 |
| 12,794 | 128 | 21,206 | 5,346 | 3,548 | 30,228 |
| 12,795 | 126 | 21,576 | 5,402 | 3,573 | 30,677 |
| 12,796 | 126 | 21,613 | 5,435 | 3,593 | 30,767 |
| 12,797 | 124 | 21,633 | 5,387 | 3,562 | 30,706 |
| 12,798 | 126 | 21,975 | 5,427 | 3,568 | 31,096 |
| 12,799 | 126 | 21,959 | 5,409 | 3,551 | 31,045 |
| 12,800 | 129 | 22,298 | 5,481 | 3,576 | 31,484 |
| 12,801 | 128 | 22,262 | 5,500 | 3,582 | 31,472 |
| 12,802 | 123 | 22,567 | 5,534 | 3,606 | 31,830 |
| 12,803 | 123 | 22,582 | 5,539 | 3,611 | 31,855 |
| 12,804 | 116 | 22,756 | 5,582 | 3,633 | 32,087 |
| 12,805 | 114 | 22,568 | 5,559 | 3,626 | 31,867 |
| 12,806 | 113 | 22,363 | 5,513 | 3,598 | 31,587 |
| 12,807 | 107 | 23,168 | 5,664 | 3,709 | 32,648 |
| 12,808 | 116 | 23,171 | 5,664 | 3,717 | 32,668 |
| 12,809 | 116 | 22,998 | 5,630 | 3,697 | 32,441 |
| 12,810 | 117 | 23,384 | 5,731 | 3,737 | 32,969 |
| 12,811 | 115 | 22,597 | 5,502 | 3,561 | 31,775 |
| 12,812 | 122 | 22,724 | 5,527 | 3,576 | 31,949 |
| 12,813 | 122 | 22,988 | 5,584 | 3,594 | 32,288 |
| 12,814 | 126 | 23,005 | 5,589 | 3,589 | 32,309 |
| 12,815 | 132 | 23,070 | 5,608 | 3,600 | 32,410 |
| 12,816 | 132 | 23,062 | 5,591 | 3,602 | 32,387 |
| 12,817 | 129 | 23,015 | 5,587 | 3,603 | 32,334 |
| 12,818 | 131 | 23,145 | 5,610 | 3,595 | 32,481 |
| 12,819 | 129 | 23,042 | 5,611 | 3,592 | 32,374 |
| 12,820 | 133 | 23,370 | 5,687 | 3,639 | 32,829 |
| 12,821 | 131 | 23,549 | 5,729 | 3,654 | 33,063 |
| 12,822 | 128 | 23,336 | 5,694 | 3,621 | 32,779 |
| 12,823 | 129 | 23,541 | 5,759 | 3,650 | 33,079 |

|        |     |        |       |       |        |
|--------|-----|--------|-------|-------|--------|
| 12,824 | 120 | 23,094 | 5,637 | 3,591 | 32,442 |
| 12,825 | 124 | 23,488 | 5,695 | 3,625 | 32,932 |
| 12,826 | 120 | 23,806 | 5,766 | 3,668 | 33,360 |
| 12,827 | 115 | 23,653 | 5,734 | 3,641 | 33,143 |
| 12,828 | 116 | 23,786 | 5,827 | 3,674 | 33,403 |
| 12,829 | 116 | 23,786 | 5,836 | 3,667 | 33,405 |
| 12,830 | 115 | 23,654 | 5,812 | 3,662 | 33,243 |
| 12,831 | 114 | 23,391 | 5,778 | 3,630 | 32,913 |
| 12,832 | 114 | 23,192 | 5,731 | 3,573 | 32,610 |
| 12,833 | 121 | 23,417 | 5,773 | 3,588 | 32,899 |
| 12,834 | 120 | 23,408 | 5,782 | 3,596 | 32,906 |
| 12,835 | 120 | 23,313 | 5,770 | 3,565 | 32,768 |
| 12,836 | 120 | 23,438 | 5,799 | 3,560 | 32,917 |
| 12,837 | 121 | 23,576 | 5,811 | 3,541 | 33,049 |
| 12,838 | 118 | 23,482 | 5,781 | 3,527 | 32,908 |
| 12,839 | 117 | 23,451 | 5,798 | 3,510 | 32,876 |
| 12,840 | 117 | 23,477 | 5,814 | 3,529 | 32,937 |
| 12,841 | 120 | 23,522 | 5,814 | 3,547 | 33,003 |
| 12,842 | 120 | 23,760 | 5,827 | 3,527 | 33,234 |
| 12,843 | 118 | 23,565 | 5,752 | 3,502 | 32,937 |
| 12,844 | 124 | 23,334 | 5,717 | 3,458 | 32,633 |
| 12,845 | 124 | 23,165 | 5,696 | 3,448 | 32,433 |
| 12,846 | 124 | 23,267 | 5,756 | 3,474 | 32,621 |
| 12,847 | 121 | 22,970 | 5,660 | 3,402 | 32,153 |
| 12,848 | 119 | 22,622 | 5,590 | 3,353 | 31,684 |
| 12,849 | 122 | 23,109 | 5,706 | 3,439 | 32,376 |
| 12,850 | 119 | 22,898 | 5,634 | 3,420 | 32,071 |
| 12,851 | 124 | 23,151 | 5,652 | 3,439 | 32,366 |
| 12,852 | 128 | 23,312 | 5,711 | 3,470 | 32,621 |
| 12,853 | 139 | 23,118 | 5,650 | 3,439 | 32,346 |
| 12,854 | 141 | 22,959 | 5,601 | 3,425 | 32,126 |
| 12,855 | 144 | 23,259 | 5,639 | 3,478 | 32,520 |

|        |     |        |       |       |        |
|--------|-----|--------|-------|-------|--------|
| 12,856 | 149 | 23,370 | 5,688 | 3,488 | 32,695 |
| 12,857 | 153 | 23,170 | 5,630 | 3,466 | 32,419 |
| 12,858 | 153 | 23,157 | 5,652 | 3,463 | 32,425 |
| 12,859 | 143 | 23,086 | 5,628 | 3,464 | 32,321 |
| 12,860 | 145 | 22,964 | 5,622 | 3,458 | 32,189 |
| 12,861 | 149 | 22,892 | 5,648 | 3,443 | 32,132 |
| 12,862 | 149 | 22,990 | 5,642 | 3,430 | 32,211 |
| 12,863 | 144 | 23,105 | 5,662 | 3,444 | 32,355 |
| 12,864 | 145 | 23,128 | 5,655 | 3,448 | 32,376 |
| 12,865 | 136 | 23,115 | 5,678 | 3,475 | 32,404 |
| 12,866 | 133 | 23,093 | 5,749 | 3,499 | 32,474 |
| 12,867 | 136 | 23,097 | 5,764 | 3,521 | 32,518 |
| 12,868 | 136 | 23,093 | 5,744 | 3,545 | 32,518 |
| 12,869 | 138 | 23,572 | 5,798 | 3,605 | 33,113 |
| 12,870 | 138 | 23,972 | 5,834 | 3,633 | 33,577 |
| 12,871 | 133 | 24,063 | 5,829 | 3,653 | 33,678 |
| 12,872 | 133 | 23,737 | 5,791 | 3,631 | 33,292 |
| 12,873 | 133 | 23,476 | 5,765 | 3,621 | 32,995 |
| 12,874 | 134 | 23,477 | 5,780 | 3,635 | 33,026 |
| 12,875 | 141 | 23,547 | 5,844 | 3,669 | 33,201 |
| 12,876 | 137 | 23,696 | 5,898 | 3,717 | 33,448 |
| 12,877 | 142 | 23,583 | 5,899 | 3,736 | 33,360 |
| 12,878 | 145 | 23,681 | 5,911 | 3,746 | 33,483 |
| 12,879 | 144 | 23,485 | 5,850 | 3,733 | 33,212 |
| 12,880 | 147 | 23,932 | 5,954 | 3,799 | 33,832 |
| 12,881 | 149 | 23,919 | 5,896 | 3,777 | 33,741 |
| 12,882 | 151 | 24,198 | 5,977 | 3,833 | 34,159 |
| 12,883 | 151 | 24,192 | 5,993 | 3,845 | 34,181 |
| 12,884 | 146 | 24,245 | 6,034 | 3,879 | 34,304 |
| 12,885 | 145 | 24,449 | 6,101 | 3,929 | 34,624 |
| 12,886 | 145 | 24,582 | 6,152 | 3,993 | 34,872 |
| 12,887 | 144 | 25,013 | 6,271 | 4,058 | 35,486 |

|        |     |        |       |       |        |
|--------|-----|--------|-------|-------|--------|
| 12,888 | 148 | 24,853 | 6,250 | 4,063 | 35,314 |
| 12,889 | 148 | 24,770 | 6,232 | 4,042 | 35,192 |
| 12,890 | 148 | 25,327 | 6,375 | 4,140 | 35,990 |
| 12,891 | 146 | 25,247 | 6,396 | 4,131 | 35,920 |
| 12,892 | 144 | 25,246 | 6,414 | 4,142 | 35,946 |
| 12,893 | 146 | 25,150 | 6,424 | 4,143 | 35,863 |
| 12,894 | 146 | 25,026 | 6,347 | 4,108 | 35,627 |
| 12,895 | 139 | 25,163 | 6,374 | 4,138 | 35,814 |
| 12,896 | 138 | 25,269 | 6,370 | 4,150 | 35,927 |
| 12,897 | 140 | 25,535 | 6,497 | 4,222 | 36,394 |
| 12,898 | 137 | 25,286 | 6,458 | 4,202 | 36,083 |
| 12,899 | 141 | 25,210 | 6,457 | 4,199 | 36,007 |
| 12,900 | 146 | 25,530 | 6,512 | 4,225 | 36,413 |
| 12,901 | 145 | 25,394 | 6,545 | 4,208 | 36,292 |
| 12,902 | 138 | 25,261 | 6,529 | 4,208 | 36,136 |
| 12,903 | 137 | 25,282 | 6,522 | 4,225 | 36,166 |
| 12,904 | 124 | 24,430 | 6,374 | 4,095 | 35,023 |
| 12,905 | 127 | 24,527 | 6,423 | 4,089 | 35,166 |
| 12,906 | 125 | 24,521 | 6,434 | 4,088 | 35,168 |
| 12,907 | 124 | 24,404 | 6,489 | 4,109 | 35,126 |
| 12,908 | 115 | 24,107 | 6,418 | 4,086 | 34,726 |
| 12,909 | 115 | 23,823 | 6,350 | 4,045 | 34,333 |
| 12,910 | 115 | 23,802 | 6,342 | 4,045 | 34,304 |
| 12,911 | 114 | 23,553 | 6,270 | 4,018 | 33,955 |
| 12,912 | 107 | 23,348 | 6,197 | 4,005 | 33,657 |
| 12,913 | 105 | 23,802 | 6,413 | 4,178 | 34,498 |
| 12,914 | 105 | 23,759 | 6,422 | 4,178 | 34,464 |
| 12,915 | 106 | 23,579 | 6,386 | 4,144 | 34,215 |
| 12,916 | 108 | 23,674 | 6,428 | 4,157 | 34,367 |
| 12,917 | 103 | 23,333 | 6,344 | 4,088 | 33,868 |
| 12,918 | 106 | 23,479 | 6,366 | 4,094 | 34,045 |
| 12,919 | 102 | 23,338 | 6,349 | 4,057 | 33,846 |

|        |     |        |       |       |        |
|--------|-----|--------|-------|-------|--------|
| 12,920 | 103 | 23,089 | 6,331 | 4,012 | 33,535 |
| 12,921 | 104 | 22,865 | 6,298 | 3,989 | 33,256 |
| 12,922 | 106 | 22,538 | 6,265 | 3,935 | 32,844 |
| 12,923 | 105 | 22,141 | 6,133 | 3,844 | 32,223 |
| 12,924 | 109 | 22,429 | 6,173 | 3,897 | 32,608 |
| 12,925 | 108 | 22,485 | 6,133 | 3,894 | 32,620 |
| 12,926 | 101 | 22,387 | 6,066 | 3,854 | 32,408 |
| 12,927 | 104 | 22,594 | 6,102 | 3,861 | 32,661 |
| 12,928 | 96  | 22,288 | 6,017 | 3,801 | 32,202 |
| 12,929 | 94  | 22,068 | 5,993 | 3,780 | 31,935 |
| 12,930 | 93  | 22,020 | 5,985 | 3,749 | 31,847 |
| 12,931 | 91  | 22,143 | 6,004 | 3,778 | 32,016 |
| 12,932 | 88  | 22,056 | 6,029 | 3,759 | 31,932 |
| 12,933 | 87  | 22,005 | 5,993 | 3,736 | 31,821 |
| 12,934 | 86  | 22,237 | 5,963 | 3,749 | 32,035 |
| 12,935 | 93  | 22,014 | 5,909 | 3,700 | 31,716 |
| 12,936 | 94  | 21,750 | 5,868 | 3,653 | 31,365 |
| 12,937 | 99  | 22,081 | 5,911 | 3,677 | 31,768 |
| 12,938 | 98  | 21,992 | 5,875 | 3,672 | 31,637 |
| 12,939 | 96  | 21,969 | 5,828 | 3,649 | 31,542 |
| 12,940 | 95  | 21,940 | 5,750 | 3,612 | 31,397 |
| 12,941 | 98  | 21,903 | 5,698 | 3,577 | 31,276 |
| 12,942 | 98  | 21,903 | 5,635 | 3,563 | 31,199 |
| 12,943 | 99  | 21,872 | 5,611 | 3,550 | 31,132 |
| 12,944 | 98  | 21,671 | 5,562 | 3,540 | 30,871 |
| 12,945 | 104 | 21,975 | 5,708 | 3,579 | 31,366 |
| 12,946 | 104 | 21,851 | 5,638 | 3,511 | 31,104 |
| 12,947 | 107 | 22,117 | 5,680 | 3,532 | 31,436 |
| 12,948 | 105 | 21,930 | 5,612 | 3,497 | 31,144 |
| 12,949 | 106 | 21,871 | 5,581 | 3,479 | 31,037 |
| 12,950 | 103 | 22,378 | 5,661 | 3,553 | 31,695 |
| 12,951 | 100 | 22,382 | 5,650 | 3,562 | 31,694 |

|        |     |        |       |       |        |
|--------|-----|--------|-------|-------|--------|
| 12,952 | 103 | 22,194 | 5,540 | 3,539 | 31,376 |
| 12,953 | 104 | 22,463 | 5,596 | 3,590 | 31,753 |
| 12,954 | 103 | 22,526 | 5,601 | 3,575 | 31,805 |
| 12,955 | 99  | 22,563 | 5,594 | 3,585 | 31,841 |
| 12,956 | 96  | 22,424 | 5,555 | 3,564 | 31,639 |
| 12,957 | 92  | 22,470 | 5,502 | 3,547 | 31,611 |
| 12,958 | 94  | 22,801 | 5,561 | 3,589 | 32,045 |
| 12,959 | 99  | 22,859 | 5,558 | 3,577 | 32,093 |
| 12,960 | 97  | 22,664 | 5,491 | 3,527 | 31,779 |
| 12,961 | 102 | 23,105 | 5,576 | 3,551 | 32,334 |
| 12,962 | 103 | 23,120 | 5,552 | 3,518 | 32,293 |
| 12,963 | 102 | 23,061 | 5,497 | 3,458 | 32,118 |
| 12,964 | 104 | 23,415 | 5,525 | 3,501 | 32,545 |
| 12,965 | 103 | 23,048 | 5,397 | 3,428 | 31,976 |
| 12,966 | 106 | 23,294 | 5,423 | 3,437 | 32,260 |
| 12,967 | 104 | 23,312 | 5,427 | 3,436 | 32,279 |
| 12,968 | 105 | 23,309 | 5,429 | 3,444 | 32,287 |
| 12,969 | 114 | 23,738 | 5,518 | 3,511 | 32,881 |
| 12,970 | 111 | 23,609 | 5,485 | 3,487 | 32,692 |
| 12,971 | 118 | 23,811 | 5,528 | 3,517 | 32,974 |
| 12,972 | 120 | 23,745 | 5,525 | 3,509 | 32,899 |
| 12,973 | 119 | 23,541 | 5,471 | 3,495 | 32,626 |
| 12,974 | 123 | 23,648 | 5,531 | 3,513 | 32,815 |
| 12,975 | 119 | 23,409 | 5,507 | 3,461 | 32,496 |
| 12,976 | 121 | 23,353 | 5,535 | 3,480 | 32,489 |
| 12,977 | 122 | 23,331 | 5,528 | 3,484 | 32,465 |
| 12,978 | 125 | 23,210 | 5,485 | 3,481 | 32,301 |
| 12,979 | 124 | 23,158 | 5,475 | 3,465 | 32,222 |
| 12,980 | 125 | 23,286 | 5,472 | 3,484 | 32,367 |
| 12,981 | 127 | 23,304 | 5,480 | 3,473 | 32,384 |
| 12,982 | 130 | 23,407 | 5,499 | 3,489 | 32,525 |
| 12,983 | 132 | 23,088 | 5,407 | 3,430 | 32,057 |

|        |     |        |       |       |        |
|--------|-----|--------|-------|-------|--------|
| 12,984 | 131 | 23,027 | 5,398 | 3,422 | 31,978 |
| 12,985 | 133 | 23,146 | 5,435 | 3,428 | 32,142 |
| 12,986 | 128 | 22,804 | 5,342 | 3,388 | 31,662 |
| 12,987 | 126 | 22,539 | 5,273 | 3,359 | 31,297 |
| 12,988 | 132 | 22,891 | 5,385 | 3,400 | 31,808 |
| 12,989 | 131 | 22,678 | 5,311 | 3,343 | 31,463 |
| 12,990 | 130 | 22,601 | 5,324 | 3,341 | 31,396 |
| 12,991 | 130 | 22,569 | 5,323 | 3,341 | 31,363 |
| 12,992 | 133 | 22,682 | 5,360 | 3,378 | 31,553 |
| 12,993 | 128 | 22,879 | 5,430 | 3,431 | 31,868 |
| 12,994 | 129 | 22,770 | 5,416 | 3,416 | 31,731 |
| 12,995 | 132 | 23,147 | 5,474 | 3,459 | 32,212 |
| 12,996 | 129 | 23,352 | 5,511 | 3,517 | 32,509 |
| 12,997 | 129 | 23,101 | 5,502 | 3,522 | 32,254 |
| 12,998 | 129 | 23,081 | 5,512 | 3,535 | 32,257 |
| 12,999 | 144 | 23,334 | 5,619 | 3,587 | 32,684 |
| 13,000 | 144 | 23,332 | 5,626 | 3,595 | 32,697 |
| 13,001 | 145 | 22,952 | 5,591 | 3,570 | 32,258 |
| 13,002 | 145 | 23,192 | 5,673 | 3,599 | 32,609 |
| 13,003 | 144 | 23,012 | 5,668 | 3,575 | 32,399 |
| 13,004 | 143 | 22,937 | 5,652 | 3,547 | 32,279 |
| 13,005 | 147 | 22,759 | 5,600 | 3,514 | 32,020 |
| 13,006 | 151 | 22,422 | 5,541 | 3,478 | 31,592 |
| 13,007 | 151 | 22,483 | 5,527 | 3,476 | 31,637 |
| 13,008 | 153 | 22,511 | 5,551 | 3,508 | 31,723 |
| 13,009 | 158 | 22,778 | 5,609 | 3,543 | 32,088 |
| 13,010 | 152 | 22,452 | 5,546 | 3,493 | 31,643 |
| 13,011 | 159 | 22,845 | 5,658 | 3,544 | 32,206 |
| 13,012 | 155 | 22,624 | 5,607 | 3,528 | 31,914 |
| 13,013 | 157 | 22,739 | 5,657 | 3,567 | 32,120 |
| 13,014 | 168 | 23,022 | 5,753 | 3,622 | 32,565 |
| 13,015 | 167 | 22,992 | 5,756 | 3,618 | 32,533 |

|        |     |        |       |       |        |
|--------|-----|--------|-------|-------|--------|
| 13,016 | 164 | 23,101 | 5,806 | 3,645 | 32,716 |
| 13,017 | 159 | 23,211 | 5,868 | 3,667 | 32,905 |
| 13,018 | 158 | 23,341 | 5,930 | 3,705 | 33,134 |
| 13,019 | 151 | 23,623 | 5,993 | 3,747 | 33,514 |
| 13,020 | 153 | 23,392 | 5,961 | 3,746 | 33,252 |
| 13,021 | 156 | 23,441 | 5,965 | 3,758 | 33,320 |
| 13,022 | 151 | 23,705 | 6,005 | 3,793 | 33,654 |
| 13,023 | 146 | 23,567 | 5,982 | 3,778 | 33,473 |
| 13,024 | 144 | 23,343 | 5,938 | 3,752 | 33,177 |
| 13,025 | 145 | 23,461 | 5,890 | 3,761 | 33,257 |
| 13,026 | 146 | 23,470 | 5,899 | 3,741 | 33,256 |
| 13,027 | 147 | 23,659 | 5,941 | 3,752 | 33,499 |
| 13,028 | 150 | 23,677 | 5,948 | 3,741 | 33,516 |
| 13,029 | 148 | 23,307 | 5,869 | 3,687 | 33,011 |
| 13,030 | 153 | 23,303 | 5,875 | 3,677 | 33,008 |
| 13,031 | 151 | 23,117 | 5,840 | 3,658 | 32,766 |
| 13,032 | 155 | 23,400 | 5,917 | 3,693 | 33,165 |
| 13,033 | 152 | 23,349 | 5,923 | 3,683 | 33,107 |
| 13,034 | 152 | 23,544 | 5,985 | 3,722 | 33,403 |
| 13,035 | 146 | 23,236 | 5,908 | 3,673 | 32,963 |
| 13,036 | 148 | 23,337 | 5,973 | 3,712 | 33,170 |
| 13,037 | 146 | 23,551 | 6,050 | 3,776 | 33,523 |
| 13,038 | 145 | 23,574 | 6,075 | 3,783 | 33,577 |
| 13,039 | 142 | 23,371 | 6,001 | 3,754 | 33,268 |
| 13,040 | 142 | 23,004 | 5,965 | 3,721 | 32,832 |
| 13,041 | 143 | 22,678 | 5,919 | 3,701 | 32,441 |
| 13,042 | 141 | 23,269 | 6,061 | 3,787 | 33,258 |
| 13,043 | 142 | 23,315 | 6,100 | 3,757 | 33,314 |
| 13,044 | 144 | 23,150 | 6,059 | 3,733 | 33,086 |
| 13,045 | 140 | 23,003 | 6,048 | 3,729 | 32,920 |
| 13,046 | 142 | 23,087 | 6,100 | 3,748 | 33,077 |
| 13,047 | 148 | 23,077 | 6,076 | 3,716 | 33,017 |



|        |     |        |       |       |        |
|--------|-----|--------|-------|-------|--------|
| 13,048 | 147 | 22,615 | 5,950 | 3,641 | 32,353 |
| 13,049 | 150 | 22,940 | 5,986 | 3,652 | 32,728 |
| 13,050 | 146 | 23,119 | 6,050 | 3,690 | 33,005 |
| 13,051 | 146 | 23,030 | 6,040 | 3,662 | 32,878 |
| 13,052 | 146 | 22,805 | 5,985 | 3,618 | 32,554 |
| 13,053 | 147 | 22,778 | 5,941 | 3,593 | 32,459 |
| 13,054 | 149 | 22,957 | 5,976 | 3,617 | 32,699 |
| 13,055 | 149 | 22,982 | 5,985 | 3,640 | 32,756 |
| 13,056 | 144 | 23,016 | 6,013 | 3,687 | 32,860 |
| 13,057 | 144 | 23,151 | 6,013 | 3,683 | 32,991 |
| 13,058 | 146 | 23,280 | 6,046 | 3,688 | 33,160 |
| 13,059 | 146 | 23,242 | 6,041 | 3,688 | 33,117 |
| 13,060 | 139 | 23,252 | 6,076 | 3,713 | 33,180 |
| 13,061 | 141 | 23,389 | 6,104 | 3,764 | 33,398 |
| 13,062 | 135 | 23,438 | 6,170 | 3,823 | 33,566 |
| 13,063 | 133 | 23,211 | 6,175 | 3,816 | 33,335 |
| 13,064 | 129 | 23,178 | 6,193 | 3,834 | 33,334 |
| 13,065 | 121 | 22,891 | 6,200 | 3,855 | 33,067 |
| 13,066 | 124 | 22,750 | 6,194 | 3,861 | 32,929 |
| 13,067 | 126 | 22,632 | 6,173 | 3,865 | 32,796 |
| 13,068 | 127 | 22,505 | 6,143 | 3,873 | 32,648 |
| 13,069 | 128 | 22,500 | 6,128 | 3,869 | 32,625 |
| 13,070 | 132 | 22,535 | 6,120 | 3,871 | 32,658 |
| 13,071 | 124 | 21,784 | 5,962 | 3,735 | 31,605 |
| 13,072 | 127 | 22,164 | 6,006 | 3,754 | 32,051 |
| 13,073 | 128 | 22,524 | 6,080 | 3,786 | 32,518 |
| 13,074 | 130 | 22,698 | 6,114 | 3,810 | 32,752 |
| 13,075 | 131 | 22,757 | 6,100 | 3,815 | 32,803 |
| 13,076 | 129 | 22,635 | 6,089 | 3,789 | 32,642 |
| 13,077 | 133 | 23,371 | 6,211 | 3,922 | 33,637 |
| 13,078 | 136 | 23,421 | 6,243 | 3,943 | 33,743 |
| 13,079 | 132 | 23,442 | 6,223 | 3,939 | 33,736 |

|        |     |        |       |       |        |
|--------|-----|--------|-------|-------|--------|
| 13,080 | 127 | 23,227 | 6,143 | 3,912 | 33,409 |
| 13,081 | 127 | 23,176 | 6,135 | 3,896 | 33,334 |
| 13,082 | 123 | 22,934 | 6,084 | 3,865 | 33,006 |
| 13,083 | 121 | 23,251 | 6,169 | 3,935 | 33,476 |
| 13,084 | 127 | 23,201 | 6,180 | 3,945 | 33,453 |
| 13,085 | 132 | 23,086 | 6,116 | 3,909 | 33,243 |
| 13,086 | 132 | 22,833 | 6,062 | 3,886 | 32,913 |
| 13,087 | 132 | 22,814 | 6,040 | 3,864 | 32,850 |
| 13,088 | 132 | 22,668 | 5,959 | 3,799 | 32,558 |
| 13,089 | 130 | 22,930 | 5,954 | 3,826 | 32,840 |
| 13,090 | 131 | 23,046 | 6,009 | 3,866 | 33,052 |
| 13,091 | 128 | 23,047 | 6,030 | 3,854 | 33,059 |
| 13,092 | 126 | 23,122 | 6,044 | 3,886 | 33,178 |
| 13,093 | 130 | 22,052 | 5,763 | 3,699 | 31,644 |
| 13,094 | 134 | 22,193 | 5,757 | 3,705 | 31,789 |
| 13,095 | 132 | 22,436 | 5,777 | 3,724 | 32,069 |
| 13,096 | 132 | 22,425 | 5,774 | 3,722 | 32,053 |
| 13,097 | 130 | 22,790 | 5,860 | 3,770 | 32,550 |
| 13,098 | 129 | 22,578 | 5,805 | 3,741 | 32,253 |
| 13,099 | 130 | 22,708 | 5,852 | 3,748 | 32,438 |
| 13,100 | 126 | 22,501 | 5,821 | 3,741 | 32,189 |
| 13,101 | 119 | 22,179 | 5,721 | 3,699 | 31,718 |
| 13,102 | 119 | 21,891 | 5,661 | 3,650 | 31,321 |
| 13,103 | 113 | 21,551 | 5,586 | 3,617 | 30,867 |
| 13,104 | 114 | 21,922 | 5,666 | 3,676 | 31,378 |
| 13,105 | 112 | 21,986 | 5,683 | 3,676 | 31,457 |
| 13,106 | 112 | 21,797 | 5,609 | 3,622 | 31,140 |
| 13,107 | 111 | 21,869 | 5,591 | 3,601 | 31,172 |
| 13,108 | 112 | 22,103 | 5,668 | 3,640 | 31,523 |
| 13,109 | 112 | 22,032 | 5,585 | 3,592 | 31,321 |
| 13,110 | 115 | 21,598 | 5,369 | 3,441 | 30,523 |
| 13,111 | 118 | 21,872 | 5,428 | 3,472 | 30,890 |

|        |     |        |       |       |        |
|--------|-----|--------|-------|-------|--------|
| 13,112 | 121 | 22,134 | 5,490 | 3,514 | 31,259 |
| 13,113 | 122 | 22,234 | 5,457 | 3,480 | 31,293 |
| 13,114 | 124 | 22,024 | 5,406 | 3,425 | 30,979 |
| 13,115 | 127 | 22,126 | 5,336 | 3,397 | 30,986 |
| 13,116 | 129 | 22,471 | 5,393 | 3,421 | 31,414 |
| 13,117 | 126 | 22,001 | 5,305 | 3,337 | 30,769 |
| 13,118 | 121 | 22,021 | 5,266 | 3,310 | 30,718 |
| 13,119 | 123 | 21,756 | 5,192 | 3,248 | 30,319 |
| 13,120 | 123 | 21,746 | 5,177 | 3,250 | 30,296 |
| 13,121 | 120 | 21,294 | 5,094 | 3,208 | 29,716 |
| 13,122 | 120 | 20,955 | 5,044 | 3,165 | 29,284 |
| 13,123 | 122 | 21,824 | 5,282 | 3,286 | 30,514 |
| 13,124 | 121 | 21,795 | 5,284 | 3,279 | 30,479 |
| 13,125 | 121 | 21,755 | 5,268 | 3,289 | 30,433 |
| 13,126 | 116 | 21,435 | 5,227 | 3,235 | 30,013 |
| 13,127 | 117 | 21,418 | 5,235 | 3,229 | 29,999 |
| 13,128 | 121 | 21,577 | 5,256 | 3,233 | 30,187 |
| 13,129 | 121 | 21,685 | 5,234 | 3,244 | 30,284 |
| 13,130 | 120 | 21,472 | 5,191 | 3,220 | 30,003 |
| 13,131 | 116 | 21,578 | 5,220 | 3,212 | 30,126 |
| 13,132 | 117 | 22,060 | 5,283 | 3,269 | 30,729 |
| 13,133 | 118 | 22,039 | 5,223 | 3,222 | 30,602 |
| 13,134 | 112 | 22,063 | 5,226 | 3,202 | 30,603 |
| 13,135 | 115 | 22,397 | 5,290 | 3,224 | 31,026 |
| 13,136 | 113 | 22,182 | 5,243 | 3,184 | 30,722 |
| 13,137 | 111 | 22,190 | 5,245 | 3,188 | 30,734 |
| 13,138 | 113 | 22,409 | 5,283 | 3,203 | 31,008 |
| 13,139 | 119 | 22,283 | 5,272 | 3,205 | 30,879 |
| 13,140 | 124 | 22,037 | 5,225 | 3,175 | 30,561 |
| 13,141 | 123 | 21,843 | 5,165 | 3,120 | 30,251 |
| 13,142 | 126 | 22,296 | 5,276 | 3,190 | 30,888 |
| 13,143 | 119 | 22,115 | 5,225 | 3,158 | 30,617 |

|        |     |        |       |       |        |
|--------|-----|--------|-------|-------|--------|
| 13,144 | 119 | 22,079 | 5,222 | 3,167 | 30,587 |
| 13,145 | 122 | 22,083 | 5,273 | 3,192 | 30,670 |
| 13,146 | 122 | 22,107 | 5,277 | 3,215 | 30,721 |
| 13,147 | 122 | 21,984 | 5,292 | 3,231 | 30,629 |
| 13,148 | 125 | 22,160 | 5,352 | 3,266 | 30,903 |
| 13,149 | 123 | 22,090 | 5,352 | 3,251 | 30,816 |
| 13,150 | 132 | 22,106 | 5,350 | 3,232 | 30,820 |
| 13,151 | 132 | 21,942 | 5,312 | 3,206 | 30,592 |
| 13,152 | 133 | 21,954 | 5,333 | 3,187 | 30,607 |
| 13,153 | 131 | 22,089 | 5,387 | 3,216 | 30,823 |
| 13,154 | 137 | 21,899 | 5,337 | 3,199 | 30,572 |
| 13,155 | 137 | 21,890 | 5,327 | 3,199 | 30,553 |
| 13,156 | 137 | 21,801 | 5,321 | 3,194 | 30,453 |
| 13,157 | 140 | 21,848 | 5,382 | 3,210 | 30,580 |
| 13,158 | 143 | 21,693 | 5,363 | 3,190 | 30,389 |
| 13,159 | 144 | 21,806 | 5,397 | 3,226 | 30,573 |
| 13,160 | 144 | 21,594 | 5,407 | 3,220 | 30,365 |
| 13,161 | 137 | 21,304 | 5,382 | 3,192 | 30,015 |
| 13,162 | 143 | 21,531 | 5,432 | 3,214 | 30,320 |
| 13,163 | 139 | 21,611 | 5,464 | 3,211 | 30,425 |
| 13,164 | 141 | 21,693 | 5,463 | 3,228 | 30,525 |
| 13,165 | 138 | 21,370 | 5,395 | 3,190 | 30,093 |
| 13,166 | 138 | 21,562 | 5,466 | 3,258 | 30,424 |
| 13,167 | 136 | 21,616 | 5,455 | 3,252 | 30,459 |
| 13,168 | 138 | 21,665 | 5,421 | 3,271 | 30,495 |
| 13,169 | 140 | 21,483 | 5,375 | 3,254 | 30,252 |
| 13,170 | 137 | 21,512 | 5,432 | 3,301 | 30,382 |
| 13,171 | 138 | 21,463 | 5,403 | 3,303 | 30,307 |
| 13,172 | 140 | 21,538 | 5,396 | 3,323 | 30,397 |
| 13,173 | 140 | 21,262 | 5,342 | 3,314 | 30,058 |
| 13,174 | 140 | 21,145 | 5,331 | 3,307 | 29,923 |
| 13,175 | 140 | 21,005 | 5,314 | 3,302 | 29,761 |

|        |     |        |       |       |        |
|--------|-----|--------|-------|-------|--------|
| 13,176 | 137 | 20,950 | 5,300 | 3,282 | 29,669 |
| 13,177 | 136 | 20,747 | 5,235 | 3,255 | 29,373 |
| 13,178 | 136 | 20,384 | 5,192 | 3,215 | 28,927 |
| 13,179 | 134 | 20,877 | 5,337 | 3,292 | 29,640 |
| 13,180 | 129 | 20,693 | 5,365 | 3,287 | 29,474 |
| 13,181 | 137 | 20,804 | 5,390 | 3,305 | 29,636 |
| 13,182 | 142 | 20,645 | 5,385 | 3,299 | 29,471 |
| 13,183 | 144 | 20,516 | 5,411 | 3,316 | 29,387 |
| 13,184 | 145 | 20,293 | 5,389 | 3,308 | 29,135 |
| 13,185 | 145 | 20,503 | 5,460 | 3,339 | 29,447 |
| 13,186 | 145 | 20,426 | 5,445 | 3,341 | 29,357 |
| 13,187 | 142 | 20,137 | 5,414 | 3,319 | 29,012 |
| 13,188 | 155 | 20,204 | 5,442 | 3,331 | 29,132 |
| 13,189 | 147 | 19,924 | 5,385 | 3,289 | 28,745 |
| 13,190 | 147 | 19,995 | 5,375 | 3,303 | 28,820 |
| 13,191 | 140 | 19,893 | 5,384 | 3,293 | 28,710 |
| 13,192 | 139 | 19,936 | 5,394 | 3,289 | 28,758 |
| 13,193 | 137 | 19,738 | 5,342 | 3,235 | 28,452 |
| 13,194 | 138 | 19,953 | 5,393 | 3,279 | 28,763 |
| 13,195 | 137 | 20,137 | 5,437 | 3,325 | 29,036 |
| 13,196 | 137 | 20,281 | 5,479 | 3,351 | 29,248 |
| 13,197 | 134 | 20,242 | 5,441 | 3,320 | 29,137 |
| 13,198 | 135 | 20,398 | 5,472 | 3,341 | 29,346 |
| 13,199 | 139 | 20,105 | 5,403 | 3,324 | 28,971 |
| 13,200 | 139 | 20,389 | 5,434 | 3,381 | 29,343 |
| 13,201 | 130 | 20,395 | 5,430 | 3,401 | 29,356 |
| 13,202 | 128 | 20,358 | 5,447 | 3,411 | 29,344 |
| 13,203 | 125 | 19,989 | 5,364 | 3,351 | 28,829 |
| 13,204 | 127 | 20,207 | 5,381 | 3,362 | 29,077 |
| 13,205 | 123 | 20,358 | 5,443 | 3,389 | 29,313 |
| 13,206 | 126 | 20,517 | 5,470 | 3,413 | 29,526 |
| 13,207 | 122 | 20,694 | 5,486 | 3,412 | 29,714 |

|        |     |        |       |       |        |
|--------|-----|--------|-------|-------|--------|
| 13,208 | 116 | 20,754 | 5,472 | 3,423 | 29,765 |
| 13,209 | 121 | 20,667 | 5,454 | 3,413 | 29,655 |
| 13,210 | 121 | 20,706 | 5,460 | 3,421 | 29,708 |
| 13,211 | 122 | 20,952 | 5,508 | 3,434 | 30,016 |
| 13,212 | 122 | 20,775 | 5,513 | 3,441 | 29,851 |
| 13,213 | 120 | 21,202 | 5,642 | 3,528 | 30,492 |
| 13,214 | 123 | 21,269 | 5,661 | 3,543 | 30,596 |
| 13,215 | 118 | 21,279 | 5,703 | 3,552 | 30,652 |
| 13,216 | 118 | 21,363 | 5,722 | 3,564 | 30,767 |
| 13,217 | 118 | 21,107 | 5,683 | 3,532 | 30,440 |
| 13,218 | 128 | 21,048 | 5,751 | 3,588 | 30,515 |
| 13,219 | 126 | 20,887 | 5,717 | 3,514 | 30,244 |
| 13,220 | 135 | 20,935 | 5,720 | 3,528 | 30,318 |
| 13,221 | 135 | 21,018 | 5,735 | 3,521 | 30,409 |
| 13,222 | 136 | 21,259 | 5,836 | 3,561 | 30,792 |
| 13,223 | 139 | 21,070 | 5,783 | 3,523 | 30,515 |
| 13,224 | 139 | 20,999 | 5,791 | 3,519 | 30,448 |
| 13,225 | 138 | 21,345 | 5,896 | 3,556 | 30,935 |
| 13,226 | 146 | 21,186 | 5,853 | 3,523 | 30,708 |
| 13,227 | 144 | 20,906 | 5,826 | 3,498 | 30,374 |
| 13,228 | 149 | 21,341 | 5,986 | 3,573 | 31,049 |
| 13,229 | 153 | 21,238 | 5,915 | 3,559 | 30,865 |
| 13,230 | 146 | 20,851 | 5,788 | 3,492 | 30,277 |
| 13,231 | 151 | 21,147 | 5,819 | 3,518 | 30,635 |
| 13,232 | 147 | 21,431 | 5,898 | 3,558 | 31,034 |
| 13,233 | 149 | 21,454 | 5,894 | 3,567 | 31,064 |
| 13,234 | 151 | 21,726 | 5,934 | 3,612 | 31,423 |
| 13,235 | 153 | 21,697 | 5,980 | 3,651 | 31,481 |
| 13,236 | 153 | 21,670 | 5,997 | 3,679 | 31,499 |
| 13,237 | 147 | 21,088 | 5,854 | 3,584 | 30,673 |
| 13,238 | 151 | 21,370 | 5,901 | 3,611 | 31,033 |
| 13,239 | 145 | 21,689 | 5,992 | 3,654 | 31,480 |

|        |     |        |       |       |        |
|--------|-----|--------|-------|-------|--------|
| 13,240 | 149 | 22,060 | 6,071 | 3,711 | 31,991 |
| 13,241 | 156 | 21,984 | 6,048 | 3,679 | 31,867 |
| 13,242 | 156 | 21,941 | 6,056 | 3,685 | 31,838 |
| 13,243 | 156 | 22,214 | 6,111 | 3,732 | 32,213 |
| 13,244 | 155 | 21,932 | 6,052 | 3,695 | 31,834 |
| 13,245 | 153 | 21,834 | 6,058 | 3,680 | 31,725 |
| 13,246 | 154 | 21,982 | 6,105 | 3,712 | 31,953 |
| 13,247 | 151 | 21,974 | 6,149 | 3,720 | 31,994 |
| 13,248 | 145 | 21,585 | 6,041 | 3,664 | 31,435 |
| 13,249 | 147 | 21,756 | 6,059 | 3,688 | 31,650 |
| 13,250 | 145 | 21,961 | 6,083 | 3,725 | 31,914 |
| 13,251 | 149 | 22,065 | 6,096 | 3,693 | 32,003 |
| 13,252 | 153 | 22,261 | 6,094 | 3,672 | 32,180 |
| 13,253 | 157 | 21,983 | 6,005 | 3,630 | 31,775 |
| 13,254 | 160 | 22,039 | 6,016 | 3,629 | 31,844 |
| 13,255 | 164 | 22,058 | 6,075 | 3,695 | 31,992 |
| 13,256 | 166 | 21,869 | 6,005 | 3,684 | 31,724 |
| 13,257 | 166 | 21,786 | 6,010 | 3,697 | 31,659 |
| 13,258 | 173 | 21,923 | 6,023 | 3,722 | 31,841 |
| 13,259 | 178 | 21,611 | 5,995 | 3,686 | 31,470 |
| 13,260 | 172 | 21,297 | 5,919 | 3,641 | 31,029 |
| 13,261 | 171 | 21,374 | 5,998 | 3,644 | 31,187 |
| 13,262 | 173 | 21,347 | 5,966 | 3,625 | 31,111 |
| 13,263 | 177 | 21,355 | 5,993 | 3,644 | 31,169 |
| 13,264 | 177 | 21,235 | 5,954 | 3,625 | 30,991 |
| 13,265 | 180 | 21,090 | 5,965 | 3,627 | 30,862 |
| 13,266 | 181 | 21,033 | 5,922 | 3,625 | 30,761 |
| 13,267 | 181 | 21,260 | 5,953 | 3,630 | 31,024 |
| 13,268 | 178 | 21,426 | 5,995 | 3,642 | 31,241 |
| 13,269 | 175 | 21,304 | 5,945 | 3,624 | 31,048 |
| 13,270 | 177 | 21,531 | 6,006 | 3,647 | 31,361 |
| 13,271 | 169 | 21,528 | 6,025 | 3,637 | 31,359 |

|        |     |        |       |       |        |
|--------|-----|--------|-------|-------|--------|
| 13,272 | 169 | 21,521 | 6,023 | 3,633 | 31,346 |
| 13,273 | 170 | 21,809 | 6,032 | 3,651 | 31,662 |
| 13,274 | 160 | 21,596 | 5,971 | 3,611 | 31,338 |
| 13,275 | 160 | 21,719 | 5,962 | 3,635 | 31,476 |
| 13,276 | 164 | 21,961 | 5,999 | 3,658 | 31,782 |
| 13,277 | 153 | 21,781 | 5,937 | 3,637 | 31,508 |
| 13,278 | 152 | 21,804 | 5,920 | 3,622 | 31,498 |
| 13,279 | 148 | 21,691 | 5,886 | 3,587 | 31,312 |
| 13,280 | 151 | 21,726 | 5,858 | 3,569 | 31,304 |
| 13,281 | 151 | 21,773 | 5,884 | 3,563 | 31,371 |
| 13,282 | 152 | 21,429 | 5,789 | 3,502 | 30,872 |
| 13,283 | 152 | 21,643 | 5,848 | 3,544 | 31,187 |
| 13,284 | 148 | 21,873 | 5,909 | 3,590 | 31,520 |
| 13,285 | 144 | 21,931 | 5,925 | 3,563 | 31,563 |
| 13,286 | 144 | 21,834 | 5,849 | 3,540 | 31,367 |
| 13,287 | 149 | 21,912 | 5,881 | 3,541 | 31,483 |
| 13,288 | 143 | 21,699 | 5,869 | 3,550 | 31,261 |
| 13,289 | 140 | 21,667 | 5,882 | 3,579 | 31,268 |
| 13,290 | 143 | 21,858 | 5,923 | 3,602 | 31,526 |
| 13,291 | 140 | 21,979 | 5,931 | 3,592 | 31,642 |
| 13,292 | 133 | 21,972 | 5,932 | 3,594 | 31,631 |
| 13,293 | 133 | 21,819 | 5,895 | 3,565 | 31,412 |
| 13,294 | 142 | 21,813 | 5,860 | 3,562 | 31,377 |
| 13,295 | 143 | 21,991 | 5,895 | 3,587 | 31,616 |
| 13,296 | 140 | 22,070 | 5,903 | 3,602 | 31,715 |
| 13,297 | 139 | 21,801 | 5,787 | 3,573 | 31,300 |
| 13,298 | 139 | 21,780 | 5,799 | 3,555 | 31,273 |
| 13,299 | 139 | 21,900 | 5,861 | 3,584 | 31,484 |
| 13,300 | 137 | 21,708 | 5,833 | 3,544 | 31,222 |
| 13,301 | 137 | 21,610 | 5,859 | 3,547 | 31,153 |
| 13,302 | 138 | 21,435 | 5,893 | 3,571 | 31,037 |
| 13,303 | 135 | 21,283 | 5,897 | 3,556 | 30,871 |



|        |     |        |       |       |        |
|--------|-----|--------|-------|-------|--------|
| 13,304 | 126 | 21,198 | 5,865 | 3,567 | 30,756 |
| 13,305 | 119 | 21,193 | 5,835 | 3,528 | 30,675 |
| 13,306 | 123 | 21,315 | 5,869 | 3,530 | 30,837 |
| 13,307 | 126 | 21,365 | 5,888 | 3,513 | 30,892 |
| 13,308 | 127 | 21,274 | 5,870 | 3,487 | 30,758 |
| 13,309 | 115 | 21,371 | 5,877 | 3,502 | 30,865 |
| 13,310 | 117 | 21,369 | 5,862 | 3,510 | 30,858 |
| 13,311 | 117 | 21,408 | 5,888 | 3,538 | 30,951 |
| 13,312 | 119 | 21,075 | 5,786 | 3,507 | 30,487 |
| 13,313 | 118 | 21,025 | 5,767 | 3,510 | 30,420 |
| 13,314 | 114 | 21,100 | 5,754 | 3,518 | 30,486 |
| 13,315 | 111 | 20,924 | 5,748 | 3,492 | 30,275 |
| 13,316 | 104 | 20,834 | 5,688 | 3,455 | 30,081 |
| 13,317 | 103 | 20,259 | 5,520 | 3,353 | 29,235 |
| 13,318 | 102 | 20,564 | 5,595 | 3,388 | 29,649 |
| 13,319 | 96  | 20,765 | 5,657 | 3,413 | 29,931 |
| 13,320 | 95  | 20,704 | 5,677 | 3,415 | 29,891 |
| 13,321 | 97  | 20,860 | 5,754 | 3,451 | 30,162 |
| 13,322 | 107 | 20,644 | 5,721 | 3,429 | 29,901 |
| 13,323 | 106 | 20,530 | 5,673 | 3,409 | 29,718 |
| 13,324 | 107 | 20,766 | 5,805 | 3,497 | 30,175 |
| 13,325 | 110 | 20,807 | 5,839 | 3,500 | 30,256 |
| 13,326 | 114 | 20,911 | 5,892 | 3,506 | 30,423 |
| 13,327 | 112 | 20,638 | 5,837 | 3,474 | 30,061 |
| 13,328 | 120 | 20,761 | 5,861 | 3,470 | 30,212 |
| 13,329 | 123 | 20,744 | 5,856 | 3,478 | 30,201 |
| 13,330 | 124 | 20,693 | 5,868 | 3,487 | 30,172 |
| 13,331 | 124 | 20,578 | 5,891 | 3,494 | 30,087 |
| 13,332 | 122 | 20,213 | 5,830 | 3,466 | 29,631 |
| 13,333 | 121 | 20,162 | 5,825 | 3,453 | 29,561 |
| 13,334 | 121 | 20,235 | 5,881 | 3,477 | 29,714 |
| 13,335 | 124 | 20,157 | 5,887 | 3,452 | 29,620 |

|        |     |        |       |       |        |
|--------|-----|--------|-------|-------|--------|
| 13,336 | 123 | 20,105 | 5,864 | 3,456 | 29,548 |
| 13,337 | 119 | 18,615 | 5,474 | 3,183 | 27,391 |
| 13,338 | 119 | 18,833 | 5,516 | 3,211 | 27,679 |
| 13,339 | 119 | 19,068 | 5,546 | 3,238 | 27,971 |
| 13,340 | 118 | 19,104 | 5,546 | 3,244 | 28,012 |
| 13,341 | 124 | 19,491 | 5,661 | 3,306 | 28,582 |
| 13,342 | 123 | 19,397 | 5,651 | 3,318 | 28,489 |
| 13,343 | 123 | 19,028 | 5,566 | 3,269 | 27,986 |
| 13,344 | 121 | 19,234 | 5,610 | 3,311 | 28,276 |
| 13,345 | 122 | 19,078 | 5,595 | 3,300 | 28,095 |
| 13,346 | 121 | 19,113 | 5,604 | 3,294 | 28,132 |
| 13,347 | 120 | 19,142 | 5,602 | 3,269 | 28,133 |
| 13,348 | 123 | 18,995 | 5,582 | 3,243 | 27,943 |
| 13,349 | 125 | 19,057 | 5,576 | 3,248 | 28,006 |
| 13,350 | 124 | 19,056 | 5,549 | 3,224 | 27,953 |
| 13,351 | 124 | 19,112 | 5,524 | 3,220 | 27,980 |
| 13,352 | 124 | 19,091 | 5,472 | 3,200 | 27,887 |
| 13,353 | 132 | 19,367 | 5,523 | 3,232 | 28,254 |
| 13,354 | 132 | 19,320 | 5,514 | 3,236 | 28,202 |
| 13,355 | 134 | 19,287 | 5,509 | 3,199 | 28,129 |
| 13,356 | 130 | 19,062 | 5,454 | 3,163 | 27,809 |
| 13,357 | 130 | 19,195 | 5,522 | 3,201 | 28,048 |
| 13,358 | 123 | 19,197 | 5,529 | 3,208 | 28,057 |
| 13,359 | 123 | 18,958 | 5,488 | 3,153 | 27,722 |
| 13,360 | 132 | 19,212 | 5,563 | 3,210 | 28,117 |
| 13,361 | 134 | 19,269 | 5,552 | 3,207 | 28,162 |
| 13,362 | 137 | 19,477 | 5,594 | 3,222 | 28,430 |
| 13,363 | 143 | 19,474 | 5,617 | 3,249 | 28,483 |
| 13,364 | 145 | 19,483 | 5,677 | 3,246 | 28,551 |
| 13,365 | 144 | 19,416 | 5,644 | 3,232 | 28,436 |
| 13,366 | 147 | 19,650 | 5,717 | 3,280 | 28,794 |
| 13,367 | 147 | 19,548 | 5,710 | 3,270 | 28,675 |

|        |     |        |       |       |        |
|--------|-----|--------|-------|-------|--------|
| 13,368 | 149 | 19,462 | 5,685 | 3,263 | 28,559 |
| 13,369 | 149 | 19,133 | 5,566 | 3,206 | 28,054 |
| 13,370 | 149 | 19,318 | 5,622 | 3,248 | 28,337 |
| 13,371 | 148 | 19,139 | 5,531 | 3,204 | 28,022 |
| 13,372 | 146 | 18,951 | 5,440 | 3,159 | 27,696 |
| 13,373 | 143 | 19,186 | 5,462 | 3,167 | 27,958 |
| 13,374 | 144 | 18,989 | 5,414 | 3,134 | 27,681 |
| 13,375 | 147 | 19,298 | 5,524 | 3,175 | 28,144 |
| 13,376 | 149 | 19,308 | 5,502 | 3,175 | 28,134 |
| 13,377 | 147 | 19,083 | 5,446 | 3,162 | 27,838 |
| 13,378 | 137 | 18,902 | 5,392 | 3,123 | 27,554 |
| 13,379 | 136 | 18,870 | 5,403 | 3,149 | 27,558 |
| 13,380 | 132 | 18,807 | 5,395 | 3,160 | 27,494 |
| 13,381 | 131 | 18,735 | 5,396 | 3,156 | 27,418 |
| 13,382 | 132 | 18,925 | 5,382 | 3,175 | 27,614 |
| 13,383 | 132 | 19,124 | 5,375 | 3,185 | 27,816 |
| 13,384 | 134 | 19,175 | 5,380 | 3,172 | 27,861 |
| 13,385 | 141 | 19,318 | 5,431 | 3,214 | 28,104 |
| 13,386 | 140 | 19,304 | 5,414 | 3,236 | 28,094 |
| 13,387 | 144 | 19,429 | 5,452 | 3,247 | 28,272 |
| 13,388 | 144 | 19,699 | 5,460 | 3,271 | 28,574 |
| 13,389 | 144 | 19,619 | 5,425 | 3,248 | 28,436 |
| 13,390 | 149 | 19,889 | 5,487 | 3,279 | 28,804 |
| 13,391 | 146 | 20,074 | 5,544 | 3,302 | 29,066 |
| 13,392 | 144 | 20,302 | 5,559 | 3,296 | 29,301 |
| 13,393 | 144 | 20,487 | 5,559 | 3,302 | 29,492 |
| 13,394 | 144 | 20,721 | 5,628 | 3,340 | 29,833 |
| 13,395 | 146 | 20,874 | 5,673 | 3,342 | 30,035 |
| 13,396 | 138 | 20,680 | 5,621 | 3,312 | 29,751 |
| 13,397 | 141 | 21,001 | 5,659 | 3,368 | 30,169 |
| 13,398 | 142 | 20,856 | 5,606 | 3,323 | 29,927 |
| 13,399 | 138 | 20,843 | 5,586 | 3,330 | 29,897 |

|        |     |        |       |       |        |
|--------|-----|--------|-------|-------|--------|
| 13,400 | 136 | 20,975 | 5,627 | 3,345 | 30,083 |
| 13,401 | 137 | 21,619 | 5,767 | 3,396 | 30,919 |
| 13,402 | 137 | 21,817 | 5,848 | 3,417 | 31,219 |
| 13,403 | 134 | 22,069 | 5,877 | 3,435 | 31,515 |
| 13,404 | 127 | 22,307 | 5,907 | 3,447 | 31,788 |
| 13,405 | 126 | 22,226 | 5,856 | 3,440 | 31,648 |
| 13,406 | 124 | 22,354 | 5,893 | 3,464 | 31,835 |
| 13,407 | 131 | 22,780 | 5,974 | 3,529 | 32,414 |
| 13,408 | 141 | 23,114 | 6,055 | 3,545 | 32,855 |
| 13,409 | 141 | 23,436 | 6,135 | 3,597 | 33,309 |
| 13,410 | 143 | 23,617 | 6,177 | 3,639 | 33,576 |
| 13,411 | 140 | 23,824 | 6,194 | 3,660 | 33,818 |
| 13,412 | 139 | 23,740 | 6,163 | 3,632 | 33,674 |
| 13,413 | 134 | 24,065 | 6,245 | 3,681 | 34,125 |
| 13,414 | 125 | 24,099 | 6,199 | 3,629 | 34,052 |
| 13,415 | 127 | 24,193 | 6,192 | 3,634 | 34,146 |
| 13,416 | 130 | 24,222 | 6,157 | 3,626 | 34,135 |
| 13,417 | 131 | 24,295 | 6,142 | 3,621 | 34,189 |
| 13,418 | 132 | 24,257 | 6,132 | 3,628 | 34,149 |
| 13,419 | 133 | 24,356 | 6,180 | 3,654 | 34,323 |
| 13,420 | 140 | 24,404 | 6,176 | 3,641 | 34,361 |
| 13,421 | 140 | 24,328 | 6,149 | 3,643 | 34,260 |
| 13,422 | 140 | 24,317 | 6,136 | 3,651 | 34,244 |
| 13,423 | 135 | 24,293 | 6,155 | 3,654 | 34,237 |
| 13,424 | 131 | 24,365 | 6,131 | 3,674 | 34,301 |
| 13,425 | 134 | 24,571 | 6,173 | 3,702 | 34,580 |
| 13,426 | 131 | 24,675 | 6,166 | 3,696 | 34,668 |
| 13,427 | 125 | 24,521 | 6,131 | 3,663 | 34,440 |
| 13,428 | 128 | 24,758 | 6,167 | 3,689 | 34,742 |
| 13,429 | 128 | 24,897 | 6,184 | 3,696 | 34,905 |
| 13,430 | 129 | 25,014 | 6,173 | 3,692 | 35,008 |
| 13,431 | 130 | 25,281 | 6,203 | 3,707 | 35,321 |

|        |     |        |       |       |        |
|--------|-----|--------|-------|-------|--------|
| 13,432 | 130 | 25,406 | 6,227 | 3,704 | 35,467 |
| 13,433 | 127 | 25,273 | 6,212 | 3,672 | 35,284 |
| 13,434 | 130 | 25,481 | 6,310 | 3,721 | 35,642 |
| 13,435 | 132 | 25,555 | 6,294 | 3,712 | 35,693 |
| 13,436 | 139 | 25,505 | 6,251 | 3,663 | 35,558 |
| 13,437 | 136 | 25,483 | 6,238 | 3,664 | 35,521 |
| 13,438 | 131 | 25,619 | 6,253 | 3,684 | 35,687 |
| 13,439 | 132 | 25,357 | 6,276 | 3,681 | 35,446 |
| 13,440 | 133 | 25,309 | 6,292 | 3,695 | 35,429 |
| 13,441 | 137 | 25,062 | 6,241 | 3,695 | 35,135 |
| 13,442 | 134 | 24,999 | 6,266 | 3,718 | 35,117 |
| 13,443 | 133 | 24,950 | 6,302 | 3,748 | 35,133 |
| 13,444 | 136 | 24,920 | 6,316 | 3,757 | 35,129 |
| 13,445 | 142 | 24,922 | 6,324 | 3,779 | 35,167 |
| 13,446 | 140 | 24,851 | 6,308 | 3,783 | 35,082 |
| 13,447 | 144 | 25,059 | 6,360 | 3,831 | 35,394 |
| 13,448 | 142 | 24,997 | 6,376 | 3,820 | 35,335 |
| 13,449 | 143 | 24,993 | 6,417 | 3,869 | 35,422 |
| 13,450 | 145 | 25,165 | 6,455 | 3,892 | 35,657 |
| 13,451 | 146 | 25,189 | 6,483 | 3,932 | 35,750 |
| 13,452 | 149 | 25,167 | 6,478 | 3,953 | 35,747 |
| 13,453 | 151 | 25,116 | 6,430 | 3,960 | 35,657 |
| 13,454 | 153 | 25,374 | 6,506 | 4,012 | 36,045 |
| 13,455 | 156 | 25,210 | 6,493 | 3,989 | 35,848 |
| 13,456 | 154 | 25,292 | 6,480 | 4,017 | 35,943 |
| 13,457 | 154 | 25,098 | 6,474 | 4,001 | 35,727 |
| 13,458 | 148 | 24,962 | 6,485 | 4,033 | 35,628 |
| 13,459 | 140 | 24,553 | 6,451 | 4,037 | 35,181 |
| 13,460 | 144 | 24,608 | 6,475 | 4,066 | 35,293 |
| 13,461 | 148 | 24,665 | 6,485 | 4,078 | 35,376 |
| 13,462 | 145 | 24,556 | 6,509 | 4,068 | 35,278 |
| 13,463 | 148 | 24,498 | 6,492 | 4,053 | 35,191 |

|        |     |        |       |       |        |
|--------|-----|--------|-------|-------|--------|
| 13,464 | 148 | 24,242 | 6,419 | 4,016 | 34,825 |
| 13,465 | 148 | 24,103 | 6,391 | 3,998 | 34,640 |
| 13,466 | 148 | 24,145 | 6,388 | 3,996 | 34,677 |
| 13,467 | 140 | 23,940 | 6,393 | 3,973 | 34,446 |
| 13,468 | 141 | 23,937 | 6,385 | 3,966 | 34,429 |
| 13,469 | 137 | 24,121 | 6,402 | 3,976 | 34,636 |
| 13,470 | 136 | 23,915 | 6,380 | 3,948 | 34,379 |
| 13,471 | 128 | 23,727 | 6,356 | 3,916 | 34,127 |
| 13,472 | 130 | 23,699 | 6,367 | 3,891 | 34,087 |
| 13,473 | 130 | 23,671 | 6,360 | 3,892 | 34,053 |
| 13,474 | 134 | 23,727 | 6,369 | 3,896 | 34,126 |
| 13,475 | 132 | 23,470 | 6,330 | 3,860 | 33,792 |
| 13,476 | 129 | 23,220 | 6,253 | 3,819 | 33,421 |
| 13,477 | 129 | 22,831 | 6,162 | 3,774 | 32,896 |
| 13,478 | 134 | 23,295 | 6,266 | 3,856 | 33,551 |
| 13,479 | 132 | 23,001 | 6,185 | 3,819 | 33,137 |
| 13,480 | 135 | 23,019 | 6,184 | 3,822 | 33,160 |
| 13,481 | 133 | 22,677 | 6,106 | 3,784 | 32,700 |
| 13,482 | 134 | 22,615 | 6,099 | 3,781 | 32,629 |
| 13,483 | 133 | 22,609 | 6,110 | 3,806 | 32,658 |
| 13,484 | 130 | 22,308 | 6,033 | 3,757 | 32,228 |
| 13,485 | 132 | 22,425 | 6,066 | 3,767 | 32,390 |
| 13,486 | 131 | 22,161 | 6,024 | 3,748 | 32,064 |
| 13,487 | 118 | 21,892 | 5,961 | 3,716 | 31,687 |
| 13,488 | 127 | 21,876 | 5,962 | 3,700 | 31,665 |
| 13,489 | 127 | 21,606 | 5,915 | 3,664 | 31,312 |
| 13,490 | 119 | 21,810 | 5,895 | 3,663 | 31,487 |
| 13,491 | 115 | 21,838 | 5,880 | 3,619 | 31,452 |
| 13,492 | 117 | 21,655 | 5,792 | 3,552 | 31,116 |
| 13,493 | 119 | 21,706 | 5,785 | 3,562 | 31,172 |
| 13,494 | 116 | 21,669 | 5,792 | 3,559 | 31,136 |
| 13,495 | 115 | 21,753 | 5,816 | 3,573 | 31,257 |

|        |     |        |       |       |        |
|--------|-----|--------|-------|-------|--------|
| 13,496 | 114 | 21,856 | 5,793 | 3,577 | 31,340 |
| 13,497 | 113 | 21,892 | 5,774 | 3,565 | 31,344 |
| 13,498 | 111 | 21,845 | 5,749 | 3,529 | 31,234 |
| 13,499 | 110 | 21,894 | 5,754 | 3,521 | 31,279 |
| 13,500 | 113 | 21,870 | 5,724 | 3,501 | 31,208 |
| 13,501 | 113 | 21,888 | 5,689 | 3,512 | 31,202 |
| 13,502 | 114 | 21,557 | 5,641 | 3,446 | 30,758 |
| 13,503 | 113 | 21,578 | 5,665 | 3,443 | 30,799 |
| 13,504 | 114 | 21,143 | 5,590 | 3,379 | 30,226 |
| 13,505 | 114 | 20,921 | 5,517 | 3,366 | 29,918 |
| 13,506 | 112 | 20,761 | 5,494 | 3,328 | 29,695 |
| 13,507 | 113 | 20,602 | 5,358 | 3,207 | 29,280 |
| 13,508 | 115 | 20,978 | 5,443 | 3,261 | 29,797 |
| 13,509 | 114 | 21,406 | 5,521 | 3,320 | 30,361 |
| 13,510 | 110 | 20,911 | 5,389 | 3,232 | 29,642 |
| 13,511 | 111 | 21,160 | 5,440 | 3,266 | 29,977 |
| 13,512 | 114 | 21,624 | 5,533 | 3,316 | 30,587 |
| 13,513 | 115 | 21,816 | 5,492 | 3,323 | 30,746 |
| 13,514 | 112 | 21,876 | 5,494 | 3,350 | 30,832 |
| 13,515 | 116 | 21,756 | 5,498 | 3,379 | 30,749 |
| 13,516 | 111 | 21,698 | 5,475 | 3,396 | 30,680 |
| 13,517 | 112 | 21,637 | 5,464 | 3,394 | 30,607 |
| 13,518 | 113 | 21,882 | 5,523 | 3,425 | 30,943 |
| 13,519 | 113 | 21,929 | 5,551 | 3,418 | 31,011 |
| 13,520 | 113 | 21,597 | 5,439 | 3,377 | 30,526 |
| 13,521 | 116 | 21,914 | 5,481 | 3,402 | 30,913 |
| 13,522 | 116 | 22,012 | 5,491 | 3,425 | 31,044 |
| 13,523 | 116 | 22,292 | 5,520 | 3,443 | 31,371 |
| 13,524 | 114 | 22,222 | 5,476 | 3,418 | 31,230 |
| 13,525 | 118 | 22,489 | 5,506 | 3,431 | 31,544 |
| 13,526 | 118 | 22,465 | 5,500 | 3,430 | 31,513 |
| 13,527 | 117 | 22,736 | 5,550 | 3,464 | 31,867 |

|        |     |        |       |       |        |
|--------|-----|--------|-------|-------|--------|
| 13,528 | 120 | 22,909 | 5,580 | 3,479 | 32,088 |
| 13,529 | 122 | 23,181 | 5,614 | 3,484 | 32,401 |
| 13,530 | 120 | 23,103 | 5,606 | 3,446 | 32,275 |
| 13,531 | 120 | 23,323 | 5,677 | 3,493 | 32,613 |
| 13,532 | 120 | 23,247 | 5,683 | 3,515 | 32,565 |
| 13,533 | 118 | 23,330 | 5,710 | 3,530 | 32,688 |
| 13,534 | 117 | 23,473 | 5,779 | 3,571 | 32,940 |
| 13,535 | 118 | 23,688 | 5,779 | 3,604 | 33,189 |
| 13,536 | 118 | 23,841 | 5,792 | 3,642 | 33,393 |
| 13,537 | 111 | 23,762 | 5,751 | 3,617 | 33,241 |
| 13,538 | 108 | 23,893 | 5,764 | 3,650 | 33,415 |
| 13,539 | 109 | 24,113 | 5,817 | 3,675 | 33,714 |
| 13,540 | 108 | 24,056 | 5,812 | 3,668 | 33,644 |
| 13,541 | 114 | 24,055 | 5,820 | 3,697 | 33,686 |
| 13,542 | 115 | 24,030 | 5,842 | 3,709 | 33,696 |
| 13,543 | 113 | 24,198 | 5,869 | 3,753 | 33,933 |
| 13,544 | 112 | 24,156 | 5,857 | 3,735 | 33,860 |
| 13,545 | 115 | 24,528 | 5,938 | 3,774 | 34,355 |
| 13,546 | 115 | 24,669 | 5,948 | 3,784 | 34,516 |
| 13,547 | 116 | 24,398 | 5,911 | 3,735 | 34,160 |
| 13,548 | 119 | 24,211 | 5,876 | 3,704 | 33,910 |
| 13,549 | 121 | 24,686 | 6,013 | 3,789 | 34,609 |
| 13,550 | 124 | 24,686 | 5,978 | 3,781 | 34,569 |
| 13,551 | 120 | 24,785 | 5,985 | 3,771 | 34,661 |
| 13,552 | 115 | 24,627 | 5,920 | 3,750 | 34,412 |
| 13,553 | 115 | 24,598 | 5,928 | 3,745 | 34,386 |
| 13,554 | 111 | 24,768 | 5,953 | 3,794 | 34,626 |
| 13,555 | 111 | 24,564 | 5,896 | 3,772 | 34,343 |
| 13,556 | 110 | 24,586 | 5,900 | 3,752 | 34,348 |
| 13,557 | 109 | 24,564 | 5,870 | 3,743 | 34,286 |
| 13,558 | 109 | 24,552 | 5,864 | 3,743 | 34,268 |
| 13,559 | 111 | 24,505 | 5,849 | 3,732 | 34,197 |



|        |     |        |       |       |        |
|--------|-----|--------|-------|-------|--------|
| 13,560 | 115 | 24,826 | 5,897 | 3,750 | 34,588 |
| 13,561 | 112 | 24,315 | 5,739 | 3,631 | 33,797 |
| 13,562 | 110 | 24,626 | 5,789 | 3,666 | 34,191 |
| 13,563 | 107 | 24,711 | 5,863 | 3,692 | 34,373 |
| 13,564 | 108 | 24,296 | 5,862 | 3,671 | 33,937 |
| 13,565 | 111 | 24,192 | 5,888 | 3,679 | 33,870 |
| 13,566 | 117 | 24,198 | 5,873 | 3,655 | 33,843 |
| 13,567 | 122 | 24,131 | 5,864 | 3,644 | 33,761 |
| 13,568 | 121 | 24,014 | 5,831 | 3,618 | 33,584 |
| 13,569 | 121 | 23,892 | 5,841 | 3,620 | 33,474 |
| 13,570 | 119 | 23,670 | 5,788 | 3,628 | 33,205 |
| 13,571 | 121 | 23,739 | 5,802 | 3,636 | 33,298 |
| 13,572 | 120 | 23,573 | 5,752 | 3,620 | 33,065 |
| 13,573 | 122 | 23,473 | 5,735 | 3,617 | 32,947 |
| 13,574 | 125 | 23,565 | 5,783 | 3,635 | 33,108 |
| 13,575 | 125 | 23,705 | 5,827 | 3,673 | 33,330 |
| 13,576 | 121 | 23,414 | 5,776 | 3,657 | 32,968 |
| 13,577 | 124 | 23,192 | 5,753 | 3,629 | 32,698 |
| 13,578 | 123 | 22,846 | 5,701 | 3,597 | 32,267 |
| 13,579 | 117 | 23,346 | 5,880 | 3,729 | 33,072 |
| 13,580 | 115 | 23,195 | 5,869 | 3,738 | 32,917 |
| 13,581 | 116 | 23,121 | 5,874 | 3,757 | 32,868 |
| 13,582 | 116 | 22,984 | 5,822 | 3,738 | 32,660 |
| 13,583 | 117 | 23,277 | 5,902 | 3,759 | 33,055 |
| 13,584 | 124 | 23,400 | 5,931 | 3,764 | 33,219 |
| 13,585 | 124 | 23,439 | 5,918 | 3,771 | 33,252 |
| 13,586 | 128 | 23,257 | 5,918 | 3,736 | 33,039 |
| 13,587 | 129 | 22,867 | 5,861 | 3,675 | 32,532 |
| 13,588 | 132 | 23,035 | 5,897 | 3,689 | 32,753 |
| 13,589 | 129 | 23,066 | 5,897 | 3,686 | 32,778 |
| 13,590 | 131 | 23,446 | 5,923 | 3,689 | 33,189 |
| 13,591 | 131 | 23,291 | 5,911 | 3,698 | 33,031 |

|        |     |        |       |       |        |
|--------|-----|--------|-------|-------|--------|
| 13,592 | 128 | 23,640 | 6,002 | 3,756 | 33,526 |
| 13,593 | 128 | 23,859 | 6,034 | 3,778 | 33,799 |
| 13,594 | 127 | 23,483 | 5,928 | 3,721 | 33,259 |
| 13,595 | 127 | 23,744 | 5,997 | 3,749 | 33,617 |
| 13,596 | 124 | 23,604 | 5,979 | 3,753 | 33,460 |
| 13,597 | 128 | 23,867 | 6,035 | 3,781 | 33,811 |
| 13,598 | 130 | 23,784 | 6,004 | 3,789 | 33,707 |
| 13,599 | 131 | 23,783 | 5,954 | 3,760 | 33,628 |
| 13,600 | 130 | 23,753 | 5,943 | 3,752 | 33,578 |
| 13,601 | 127 | 23,400 | 5,922 | 3,712 | 33,161 |
| 13,602 | 130 | 23,534 | 5,968 | 3,755 | 33,387 |
| 13,603 | 137 | 23,358 | 5,927 | 3,720 | 33,142 |
| 13,604 | 137 | 23,425 | 5,930 | 3,715 | 33,207 |
| 13,605 | 134 | 23,377 | 5,959 | 3,704 | 33,174 |
| 13,606 | 136 | 23,420 | 5,966 | 3,706 | 33,228 |
| 13,607 | 137 | 23,269 | 5,961 | 3,698 | 33,065 |
| 13,608 | 135 | 23,282 | 5,979 | 3,739 | 33,135 |
| 13,609 | 135 | 23,245 | 5,968 | 3,754 | 33,102 |
| 13,610 | 133 | 23,346 | 6,021 | 3,786 | 33,286 |
| 13,611 | 129 | 23,332 | 6,060 | 3,791 | 33,312 |
| 13,612 | 128 | 23,552 | 6,144 | 3,830 | 33,654 |
| 13,613 | 127 | 23,488 | 6,151 | 3,836 | 33,602 |
| 13,614 | 120 | 23,073 | 5,946 | 3,743 | 32,882 |
| 13,615 | 120 | 23,299 | 5,975 | 3,777 | 33,171 |
| 13,616 | 115 | 23,418 | 6,016 | 3,806 | 33,355 |
| 13,617 | 105 | 23,447 | 5,991 | 3,792 | 33,335 |
| 13,618 | 102 | 23,218 | 5,934 | 3,747 | 33,001 |
| 13,619 | 102 | 23,338 | 5,907 | 3,750 | 33,097 |
| 13,620 | 102 | 23,306 | 5,906 | 3,740 | 33,054 |
| 13,621 | 105 | 23,459 | 5,959 | 3,785 | 33,308 |
| 13,622 | 103 | 23,364 | 5,969 | 3,788 | 33,224 |
| 13,623 | 101 | 23,273 | 5,976 | 3,787 | 33,137 |

|        |     |        |       |       |        |
|--------|-----|--------|-------|-------|--------|
| 13,624 | 96  | 23,273 | 5,986 | 3,769 | 33,124 |
| 13,625 | 98  | 23,220 | 5,979 | 3,740 | 33,037 |
| 13,626 | 99  | 23,159 | 6,012 | 3,737 | 33,007 |
| 13,627 | 98  | 22,980 | 5,988 | 3,724 | 32,790 |
| 13,628 | 96  | 22,963 | 5,931 | 3,697 | 32,687 |
| 13,629 | 98  | 23,287 | 6,021 | 3,738 | 33,144 |
| 13,630 | 99  | 22,740 | 5,850 | 3,647 | 32,336 |
| 13,631 | 100 | 22,882 | 5,900 | 3,678 | 32,560 |
| 13,632 | 102 | 23,188 | 5,943 | 3,693 | 32,926 |
| 13,633 | 100 | 23,050 | 5,886 | 3,652 | 32,688 |
| 13,634 | 100 | 22,994 | 5,850 | 3,655 | 32,599 |
| 13,635 | 100 | 22,693 | 5,781 | 3,605 | 32,179 |
| 13,636 | 101 | 22,765 | 5,781 | 3,583 | 32,230 |
| 13,637 | 98  | 22,757 | 5,764 | 3,614 | 32,233 |
| 13,638 | 97  | 22,700 | 5,760 | 3,603 | 32,160 |
| 13,639 | 104 | 22,752 | 5,835 | 3,634 | 32,325 |
| 13,640 | 105 | 22,636 | 5,825 | 3,634 | 32,200 |
| 13,641 | 105 | 22,321 | 5,785 | 3,607 | 31,818 |
| 13,642 | 111 | 22,183 | 5,741 | 3,564 | 31,599 |
| 13,643 | 109 | 21,917 | 5,677 | 3,528 | 31,231 |
| 13,644 | 112 | 21,973 | 5,710 | 3,549 | 31,344 |
| 13,645 | 116 | 21,996 | 5,676 | 3,530 | 31,318 |
| 13,646 | 116 | 21,949 | 5,650 | 3,528 | 31,243 |
| 13,647 | 112 | 21,960 | 5,673 | 3,541 | 31,286 |
| 13,648 | 116 | 22,135 | 5,698 | 3,585 | 31,534 |
| 13,649 | 115 | 22,161 | 5,732 | 3,581 | 31,589 |
| 13,650 | 110 | 21,848 | 5,676 | 3,576 | 31,210 |
| 13,651 | 113 | 22,011 | 5,708 | 3,588 | 31,420 |
| 13,652 | 105 | 21,302 | 5,569 | 3,485 | 30,461 |
| 13,653 | 109 | 21,524 | 5,579 | 3,488 | 30,700 |
| 13,654 | 107 | 21,686 | 5,617 | 3,516 | 30,926 |
| 13,655 | 110 | 21,662 | 5,602 | 3,510 | 30,884 |

|        |     |        |       |       |        |
|--------|-----|--------|-------|-------|--------|
| 13,656 | 108 | 21,355 | 5,556 | 3,491 | 30,510 |
| 13,657 | 112 | 21,755 | 5,620 | 3,550 | 31,037 |
| 13,658 | 117 | 21,869 | 5,625 | 3,561 | 31,172 |
| 13,659 | 120 | 21,806 | 5,624 | 3,538 | 31,088 |
| 13,660 | 123 | 21,788 | 5,629 | 3,522 | 31,062 |
| 13,661 | 124 | 21,739 | 5,596 | 3,511 | 30,970 |
| 13,662 | 124 | 21,706 | 5,560 | 3,516 | 30,906 |
| 13,663 | 127 | 21,364 | 5,460 | 3,478 | 30,429 |
| 13,664 | 127 | 21,049 | 5,379 | 3,436 | 29,991 |
| 13,665 | 127 | 21,420 | 5,490 | 3,465 | 30,502 |
| 13,666 | 127 | 21,284 | 5,452 | 3,434 | 30,297 |
| 13,667 | 127 | 21,617 | 5,527 | 3,464 | 30,735 |
| 13,668 | 124 | 21,297 | 5,472 | 3,428 | 30,321 |
| 13,669 | 126 | 21,384 | 5,496 | 3,440 | 30,446 |
| 13,670 | 128 | 21,368 | 5,496 | 3,434 | 30,426 |
| 13,671 | 128 | 21,499 | 5,537 | 3,446 | 30,610 |
| 13,672 | 128 | 21,427 | 5,466 | 3,430 | 30,451 |
| 13,673 | 128 | 21,731 | 5,547 | 3,465 | 30,871 |
| 13,674 | 130 | 21,883 | 5,575 | 3,474 | 31,062 |
| 13,675 | 131 | 21,912 | 5,569 | 3,483 | 31,095 |
| 13,676 | 130 | 21,786 | 5,479 | 3,465 | 30,860 |
| 13,677 | 134 | 21,851 | 5,472 | 3,459 | 30,916 |
| 13,678 | 138 | 22,154 | 5,524 | 3,482 | 31,298 |
| 13,679 | 136 | 21,875 | 5,463 | 3,421 | 30,895 |
| 13,680 | 140 | 22,100 | 5,492 | 3,447 | 31,179 |
| 13,681 | 138 | 22,071 | 5,488 | 3,425 | 31,122 |
| 13,682 | 137 | 21,892 | 5,444 | 3,393 | 30,866 |
| 13,683 | 136 | 21,821 | 5,438 | 3,405 | 30,800 |
| 13,684 | 141 | 21,609 | 5,416 | 3,394 | 30,560 |
| 13,685 | 140 | 21,567 | 5,425 | 3,389 | 30,521 |
| 13,686 | 136 | 21,746 | 5,504 | 3,409 | 30,795 |
| 13,687 | 133 | 21,635 | 5,500 | 3,392 | 30,660 |

|        |     |        |       |       |        |
|--------|-----|--------|-------|-------|--------|
| 13,688 | 132 | 21,607 | 5,504 | 3,370 | 30,613 |
| 13,689 | 130 | 21,473 | 5,460 | 3,350 | 30,413 |
| 13,690 | 131 | 21,590 | 5,489 | 3,373 | 30,583 |
| 13,691 | 130 | 21,386 | 5,403 | 3,331 | 30,250 |
| 13,692 | 123 | 21,483 | 5,415 | 3,335 | 30,356 |
| 13,693 | 129 | 21,751 | 5,485 | 3,365 | 30,730 |
| 13,694 | 132 | 21,652 | 5,510 | 3,340 | 30,634 |
| 13,695 | 130 | 21,557 | 5,493 | 3,332 | 30,512 |
| 13,696 | 139 | 21,574 | 5,527 | 3,335 | 30,575 |
| 13,697 | 139 | 21,556 | 5,523 | 3,331 | 30,549 |
| 13,698 | 136 | 21,548 | 5,525 | 3,325 | 30,534 |
| 13,699 | 137 | 21,756 | 5,600 | 3,338 | 30,831 |
| 13,700 | 135 | 21,650 | 5,578 | 3,311 | 30,674 |
| 13,701 | 136 | 21,411 | 5,530 | 3,262 | 30,339 |
| 13,702 | 136 | 21,395 | 5,490 | 3,257 | 30,278 |
| 13,703 | 136 | 21,343 | 5,484 | 3,254 | 30,217 |
| 13,704 | 131 | 21,245 | 5,506 | 3,272 | 30,154 |
| 13,705 | 140 | 21,406 | 5,541 | 3,282 | 30,369 |
| 13,706 | 137 | 21,305 | 5,505 | 3,245 | 30,192 |
| 13,707 | 138 | 21,413 | 5,580 | 3,265 | 30,396 |
| 13,708 | 133 | 21,271 | 5,552 | 3,232 | 30,188 |
| 13,709 | 141 | 21,446 | 5,599 | 3,278 | 30,464 |
| 13,710 | 138 | 21,418 | 5,595 | 3,277 | 30,428 |
| 13,711 | 139 | 21,339 | 5,577 | 3,263 | 30,318 |
| 13,712 | 138 | 21,190 | 5,565 | 3,210 | 30,103 |
| 13,713 | 144 | 21,267 | 5,611 | 3,239 | 30,261 |
| 13,714 | 145 | 21,182 | 5,601 | 3,224 | 30,152 |
| 13,715 | 148 | 21,066 | 5,622 | 3,226 | 30,062 |
| 13,716 | 149 | 20,995 | 5,576 | 3,223 | 29,943 |
| 13,717 | 153 | 20,255 | 5,413 | 3,092 | 28,913 |
| 13,718 | 156 | 20,448 | 5,431 | 3,111 | 29,146 |
| 13,719 | 165 | 20,802 | 5,484 | 3,135 | 29,586 |

|        |     |        |       |       |        |
|--------|-----|--------|-------|-------|--------|
| 13,720 | 166 | 20,906 | 5,489 | 3,141 | 29,702 |
| 13,721 | 168 | 21,086 | 5,529 | 3,176 | 29,959 |
| 13,722 | 168 | 21,031 | 5,553 | 3,171 | 29,923 |
| 13,723 | 169 | 20,923 | 5,582 | 3,149 | 29,823 |
| 13,724 | 173 | 20,977 | 5,610 | 3,164 | 29,924 |
| 13,725 | 172 | 20,667 | 5,551 | 3,136 | 29,526 |
| 13,726 | 172 | 20,760 | 5,608 | 3,139 | 29,679 |
| 13,727 | 172 | 20,701 | 5,628 | 3,159 | 29,660 |
| 13,728 | 171 | 20,587 | 5,584 | 3,132 | 29,474 |
| 13,729 | 178 | 20,509 | 5,579 | 3,113 | 29,379 |
| 13,730 | 178 | 20,531 | 5,592 | 3,119 | 29,420 |
| 13,731 | 174 | 20,536 | 5,597 | 3,129 | 29,436 |
| 13,732 | 177 | 20,621 | 5,645 | 3,156 | 29,599 |
| 13,733 | 181 | 20,218 | 5,484 | 3,049 | 28,932 |
| 13,734 | 185 | 20,411 | 5,518 | 3,073 | 29,187 |
| 13,735 | 186 | 20,666 | 5,597 | 3,117 | 29,566 |
| 13,736 | 187 | 20,668 | 5,583 | 3,108 | 29,546 |
| 13,737 | 188 | 20,615 | 5,533 | 3,096 | 29,432 |
| 13,738 | 192 | 20,812 | 5,604 | 3,126 | 29,734 |
| 13,739 | 191 | 20,597 | 5,537 | 3,103 | 29,428 |
| 13,740 | 191 | 20,643 | 5,564 | 3,105 | 29,503 |
| 13,741 | 184 | 20,589 | 5,516 | 3,116 | 29,405 |
| 13,742 | 183 | 20,371 | 5,472 | 3,093 | 29,119 |
| 13,743 | 187 | 20,607 | 5,514 | 3,105 | 29,413 |
| 13,744 | 183 | 20,479 | 5,527 | 3,108 | 29,297 |
| 13,745 | 178 | 20,406 | 5,541 | 3,129 | 29,254 |
| 13,746 | 176 | 20,395 | 5,602 | 3,160 | 29,333 |
| 13,747 | 169 | 20,459 | 5,626 | 3,168 | 29,422 |
| 13,748 | 173 | 20,544 | 5,624 | 3,203 | 29,544 |
| 13,749 | 171 | 20,439 | 5,602 | 3,200 | 29,412 |
| 13,750 | 171 | 20,177 | 5,560 | 3,179 | 29,087 |
| 13,751 | 168 | 20,098 | 5,581 | 3,183 | 29,030 |

|        |     |        |       |       |        |
|--------|-----|--------|-------|-------|--------|
| 13,752 | 173 | 20,430 | 5,646 | 3,224 | 29,473 |
| 13,753 | 168 | 20,251 | 5,641 | 3,223 | 29,283 |
| 13,754 | 164 | 19,775 | 5,535 | 3,165 | 28,639 |
| 13,755 | 165 | 20,058 | 5,585 | 3,180 | 28,988 |
| 13,756 | 163 | 20,171 | 5,637 | 3,197 | 29,168 |
| 13,757 | 163 | 20,144 | 5,618 | 3,185 | 29,110 |
| 13,758 | 167 | 20,122 | 5,612 | 3,191 | 29,092 |
| 13,759 | 164 | 19,860 | 5,547 | 3,159 | 28,730 |
| 13,760 | 163 | 20,017 | 5,535 | 3,136 | 28,851 |
| 13,761 | 166 | 19,961 | 5,542 | 3,128 | 28,797 |
| 13,762 | 163 | 19,760 | 5,486 | 3,100 | 28,509 |
| 13,763 | 162 | 20,224 | 5,605 | 3,203 | 29,194 |
| 13,764 | 160 | 19,996 | 5,536 | 3,170 | 28,862 |
| 13,765 | 159 | 19,984 | 5,530 | 3,178 | 28,851 |
| 13,766 | 164 | 19,970 | 5,551 | 3,166 | 28,851 |
| 13,767 | 162 | 19,603 | 5,500 | 3,131 | 28,396 |
| 13,768 | 164 | 19,729 | 5,608 | 3,191 | 28,692 |
| 13,769 | 163 | 19,624 | 5,623 | 3,200 | 28,610 |
| 13,770 | 154 | 19,680 | 5,622 | 3,201 | 28,657 |
| 13,771 | 152 | 19,053 | 5,387 | 3,107 | 27,699 |
| 13,772 | 152 | 19,259 | 5,449 | 3,126 | 27,986 |
| 13,773 | 154 | 19,563 | 5,506 | 3,152 | 28,375 |
| 13,774 | 155 | 19,591 | 5,513 | 3,148 | 28,407 |
| 13,775 | 159 | 20,055 | 5,657 | 3,228 | 29,099 |
| 13,776 | 158 | 20,039 | 5,652 | 3,236 | 29,085 |
| 13,777 | 155 | 19,845 | 5,541 | 3,185 | 28,726 |
| 13,778 | 154 | 19,727 | 5,536 | 3,174 | 28,591 |
| 13,779 | 148 | 19,840 | 5,597 | 3,210 | 28,795 |
| 13,780 | 141 | 19,439 | 5,471 | 3,148 | 28,199 |
| 13,781 | 143 | 19,591 | 5,518 | 3,191 | 28,443 |
| 13,782 | 141 | 19,772 | 5,582 | 3,212 | 28,707 |
| 13,783 | 134 | 19,444 | 5,508 | 3,183 | 28,269 |

|        |     |        |       |       |        |
|--------|-----|--------|-------|-------|--------|
| 13,784 | 136 | 19,606 | 5,565 | 3,213 | 28,520 |
| 13,785 | 136 | 19,115 | 5,459 | 3,140 | 27,850 |
| 13,786 | 133 | 19,369 | 5,508 | 3,172 | 28,182 |
| 13,787 | 134 | 19,562 | 5,558 | 3,210 | 28,464 |
| 13,788 | 125 | 19,160 | 5,465 | 3,144 | 27,894 |
| 13,789 | 128 | 19,322 | 5,468 | 3,154 | 28,072 |
| 13,790 | 128 | 19,255 | 5,455 | 3,147 | 27,985 |
| 13,791 | 129 | 19,229 | 5,453 | 3,128 | 27,939 |
| 13,792 | 129 | 18,957 | 5,395 | 3,068 | 27,549 |
| 13,793 | 124 | 18,685 | 5,350 | 3,048 | 27,207 |
| 13,794 | 130 | 19,082 | 5,475 | 3,108 | 27,795 |
| 13,795 | 129 | 18,882 | 5,355 | 3,036 | 27,402 |
| 13,796 | 138 | 19,040 | 5,396 | 3,062 | 27,636 |
| 13,797 | 137 | 18,908 | 5,375 | 3,040 | 27,460 |
| 13,798 | 143 | 18,810 | 5,326 | 3,006 | 27,285 |
| 13,799 | 144 | 18,544 | 5,277 | 2,922 | 26,887 |
| 13,800 | 144 | 18,551 | 5,295 | 2,918 | 26,908 |
| 13,801 | 150 | 18,745 | 5,324 | 2,936 | 27,155 |
| 13,802 | 155 | 18,581 | 5,302 | 2,926 | 26,964 |
| 13,803 | 149 | 18,406 | 5,263 | 2,930 | 26,748 |
| 13,804 | 147 | 18,178 | 5,187 | 2,872 | 26,384 |
| 13,805 | 147 | 18,150 | 5,176 | 2,861 | 26,334 |
| 13,806 | 148 | 18,051 | 5,185 | 2,903 | 26,287 |
| 13,807 | 145 | 17,807 | 5,118 | 2,887 | 25,957 |
| 13,808 | 145 | 17,684 | 5,122 | 2,867 | 25,818 |
| 13,809 | 139 | 17,532 | 5,098 | 2,874 | 25,643 |
| 13,810 | 139 | 17,415 | 5,085 | 2,874 | 25,513 |
| 13,811 | 137 | 17,204 | 5,089 | 2,861 | 25,291 |
| 13,812 | 134 | 17,211 | 5,166 | 2,882 | 25,393 |
| 13,813 | 140 | 17,135 | 5,175 | 2,867 | 25,317 |
| 13,814 | 142 | 17,155 | 5,152 | 2,846 | 25,295 |
| 13,815 | 137 | 17,142 | 5,134 | 2,839 | 25,252 |



|        |     |        |       |       |        |
|--------|-----|--------|-------|-------|--------|
| 13,816 | 135 | 17,131 | 5,114 | 2,826 | 25,206 |
| 13,817 | 129 | 17,105 | 5,023 | 2,786 | 25,043 |
| 13,818 | 130 | 17,125 | 5,024 | 2,771 | 25,050 |
| 13,819 | 129 | 17,236 | 5,006 | 2,784 | 25,155 |
| 13,820 | 134 | 17,405 | 5,082 | 2,830 | 25,451 |
| 13,821 | 134 | 17,244 | 5,089 | 2,833 | 25,300 |
| 13,822 | 129 | 17,275 | 5,147 | 2,840 | 25,391 |
| 13,823 | 140 | 17,121 | 5,116 | 2,824 | 25,201 |
| 13,824 | 136 | 16,865 | 5,080 | 2,801 | 24,882 |
| 13,825 | 145 | 17,158 | 5,175 | 2,853 | 25,331 |
| 13,826 | 145 | 17,150 | 5,185 | 2,874 | 25,354 |
| 13,827 | 152 | 17,307 | 5,258 | 2,873 | 25,590 |
| 13,828 | 152 | 17,253 | 5,245 | 2,864 | 25,514 |
| 13,829 | 152 | 17,157 | 5,235 | 2,871 | 25,415 |
| 13,830 | 157 | 17,388 | 5,312 | 2,900 | 25,757 |
| 13,831 | 165 | 17,210 | 5,290 | 2,876 | 25,541 |
| 13,832 | 164 | 17,157 | 5,304 | 2,864 | 25,489 |
| 13,833 | 165 | 17,140 | 5,323 | 2,875 | 25,503 |
| 13,834 | 173 | 16,922 | 5,294 | 2,844 | 25,233 |
| 13,835 | 173 | 16,738 | 5,262 | 2,825 | 24,998 |
| 13,836 | 175 | 17,306 | 5,436 | 2,932 | 25,849 |
| 13,837 | 179 | 17,260 | 5,488 | 2,945 | 25,872 |
| 13,838 | 187 | 17,083 | 5,471 | 2,922 | 25,663 |
| 13,839 | 187 | 17,041 | 5,463 | 2,922 | 25,613 |
| 13,840 | 191 | 17,199 | 5,521 | 2,930 | 25,841 |
| 13,841 | 190 | 17,169 | 5,527 | 2,932 | 25,818 |
| 13,842 | 195 | 17,401 | 5,542 | 2,975 | 26,113 |
| 13,843 | 196 | 17,480 | 5,555 | 3,002 | 26,233 |
| 13,844 | 194 | 17,433 | 5,538 | 3,007 | 26,172 |
| 13,845 | 193 | 17,748 | 5,668 | 3,069 | 26,678 |
| 13,846 | 206 | 17,902 | 5,705 | 3,098 | 26,911 |
| 13,847 | 205 | 17,923 | 5,709 | 3,069 | 26,906 |

|        |     |        |       |       |        |
|--------|-----|--------|-------|-------|--------|
| 13,848 | 204 | 17,900 | 5,695 | 3,058 | 26,857 |
| 13,849 | 198 | 18,409 | 5,895 | 3,127 | 27,629 |
| 13,850 | 201 | 18,490 | 5,914 | 3,164 | 27,769 |
| 13,851 | 206 | 18,690 | 5,975 | 3,160 | 28,031 |
| 13,852 | 202 | 18,627 | 5,951 | 3,163 | 27,943 |
| 13,853 | 205 | 18,728 | 5,962 | 3,159 | 28,054 |
| 13,854 | 221 | 18,881 | 6,053 | 3,197 | 28,352 |
| 13,855 | 220 | 18,738 | 6,050 | 3,202 | 28,210 |
| 13,856 | 229 | 18,927 | 6,071 | 3,180 | 28,407 |
| 13,857 | 231 | 19,056 | 6,098 | 3,180 | 28,565 |
| 13,858 | 238 | 19,146 | 6,104 | 3,197 | 28,685 |
| 13,859 | 238 | 19,130 | 6,119 | 3,192 | 28,679 |
| 13,860 | 236 | 19,290 | 6,189 | 3,215 | 28,930 |
| 13,861 | 247 | 19,465 | 6,261 | 3,231 | 29,204 |
| 13,862 | 250 | 19,425 | 6,199 | 3,215 | 29,089 |
| 13,863 | 251 | 19,412 | 6,198 | 3,214 | 29,075 |
| 13,864 | 252 | 19,561 | 6,285 | 3,255 | 29,353 |
| 13,865 | 251 | 19,265 | 6,243 | 3,234 | 28,993 |
| 13,866 | 250 | 19,263 | 6,223 | 3,241 | 28,977 |
| 13,867 | 252 | 19,215 | 6,241 | 3,234 | 28,942 |
| 13,868 | 250 | 19,034 | 6,221 | 3,228 | 28,733 |
| 13,869 | 248 | 19,209 | 6,297 | 3,280 | 29,034 |
| 13,870 | 256 | 19,151 | 6,299 | 3,257 | 28,963 |
| 13,871 | 255 | 19,310 | 6,362 | 3,275 | 29,202 |
| 13,872 | 246 | 18,653 | 6,154 | 3,152 | 28,205 |
| 13,873 | 246 | 18,612 | 6,154 | 3,163 | 28,175 |
| 13,874 | 237 | 18,771 | 6,187 | 3,170 | 28,365 |
| 13,875 | 243 | 18,870 | 6,248 | 3,185 | 28,546 |
| 13,876 | 247 | 18,625 | 6,216 | 3,143 | 28,231 |
| 13,877 | 249 | 18,597 | 6,220 | 3,141 | 28,207 |
| 13,878 | 246 | 18,636 | 6,254 | 3,155 | 28,291 |
| 13,879 | 246 | 18,427 | 6,239 | 3,115 | 28,027 |

|        |     |        |       |       |        |
|--------|-----|--------|-------|-------|--------|
| 13,880 | 251 | 18,418 | 6,246 | 3,104 | 28,019 |
| 13,881 | 242 | 18,399 | 6,218 | 3,115 | 27,974 |
| 13,882 | 245 | 18,385 | 6,214 | 3,102 | 27,946 |
| 13,883 | 245 | 18,314 | 6,223 | 3,096 | 27,878 |
| 13,884 | 245 | 18,433 | 6,281 | 3,124 | 28,083 |
| 13,885 | 244 | 18,428 | 6,285 | 3,117 | 28,074 |
| 13,886 | 247 | 18,482 | 6,317 | 3,081 | 28,127 |
| 13,887 | 253 | 18,377 | 6,277 | 3,056 | 27,963 |
| 13,888 | 257 | 18,426 | 6,283 | 3,052 | 28,018 |
| 13,889 | 256 | 18,470 | 6,304 | 3,065 | 28,095 |
| 13,890 | 254 | 18,345 | 6,314 | 3,055 | 27,968 |
| 13,891 | 258 | 18,296 | 6,339 | 3,084 | 27,977 |
| 13,892 | 261 | 18,141 | 6,374 | 3,077 | 27,853 |
| 13,893 | 260 | 17,971 | 6,423 | 3,062 | 27,716 |
| 13,894 | 262 | 17,764 | 6,395 | 3,026 | 27,447 |
| 13,895 | 267 | 17,603 | 6,357 | 2,997 | 27,224 |
| 13,896 | 262 | 17,490 | 6,379 | 2,989 | 27,120 |
| 13,897 | 249 | 17,325 | 6,385 | 2,996 | 26,955 |
| 13,898 | 242 | 17,145 | 6,366 | 2,990 | 26,743 |
| 13,899 | 240 | 16,920 | 6,309 | 2,991 | 26,460 |
| 13,900 | 243 | 16,981 | 6,389 | 3,022 | 26,635 |
| 13,901 | 236 | 16,776 | 6,418 | 2,997 | 26,427 |
| 13,902 | 231 | 16,579 | 6,384 | 2,988 | 26,182 |
| 13,903 | 222 | 15,937 | 6,232 | 2,853 | 25,244 |
| 13,904 | 220 | 15,988 | 6,266 | 2,872 | 25,346 |
| 13,905 | 218 | 15,954 | 6,261 | 2,857 | 25,290 |
| 13,906 | 218 | 16,058 | 6,286 | 2,896 | 25,458 |
| 13,907 | 211 | 16,108 | 6,350 | 2,935 | 25,604 |
| 13,908 | 207 | 16,068 | 6,376 | 2,929 | 25,580 |
| 13,909 | 205 | 15,888 | 6,379 | 2,891 | 25,363 |
| 13,910 | 202 | 15,699 | 6,317 | 2,881 | 25,099 |
| 13,911 | 207 | 15,861 | 6,360 | 2,882 | 25,310 |

|        |     |        |       |       |        |
|--------|-----|--------|-------|-------|--------|
| 13,912 | 204 | 15,773 | 6,370 | 2,890 | 25,237 |
| 13,913 | 200 | 15,581 | 6,358 | 2,869 | 25,008 |
| 13,914 | 196 | 15,903 | 6,402 | 2,907 | 25,408 |
| 13,915 | 197 | 15,737 | 6,366 | 2,878 | 25,178 |
| 13,916 | 197 | 15,667 | 6,389 | 2,880 | 25,133 |
| 13,917 | 200 | 15,724 | 6,470 | 2,919 | 25,313 |
| 13,918 | 204 | 15,411 | 6,352 | 2,860 | 24,827 |
| 13,919 | 203 | 15,487 | 6,390 | 2,901 | 24,981 |
| 13,920 | 202 | 15,597 | 6,482 | 2,948 | 25,229 |
| 13,921 | 210 | 15,433 | 6,425 | 2,918 | 24,986 |
| 13,922 | 207 | 15,356 | 6,401 | 2,925 | 24,889 |
| 13,923 | 207 | 15,303 | 6,396 | 2,917 | 24,823 |
| 13,924 | 207 | 15,294 | 6,427 | 2,909 | 24,837 |
| 13,925 | 211 | 15,315 | 6,477 | 2,942 | 24,945 |
| 13,926 | 206 | 15,088 | 6,389 | 2,913 | 24,596 |
| 13,927 | 203 | 15,073 | 6,403 | 2,900 | 24,579 |
| 13,928 | 209 | 15,261 | 6,490 | 2,943 | 24,903 |
| 13,929 | 210 | 15,073 | 6,399 | 2,921 | 24,603 |
| 13,930 | 208 | 14,970 | 6,397 | 2,911 | 24,486 |
| 13,931 | 202 | 15,019 | 6,468 | 2,953 | 24,642 |
| 13,932 | 202 | 14,837 | 6,446 | 2,935 | 24,420 |
| 13,933 | 208 | 14,799 | 6,447 | 2,926 | 24,380 |
| 13,934 | 208 | 14,712 | 6,447 | 2,907 | 24,274 |
| 13,935 | 207 | 14,655 | 6,471 | 2,923 | 24,256 |
| 13,936 | 206 | 14,638 | 6,537 | 2,941 | 24,322 |
| 13,937 | 202 | 14,606 | 6,586 | 2,963 | 24,357 |
| 13,938 | 197 | 14,723 | 6,644 | 2,991 | 24,555 |
| 13,939 | 187 | 14,494 | 6,617 | 2,978 | 24,276 |
| 13,940 | 187 | 14,588 | 6,755 | 3,023 | 24,553 |
| 13,941 | 179 | 14,623 | 6,825 | 3,050 | 24,677 |
| 13,942 | 178 | 14,691 | 6,877 | 3,038 | 24,784 |
| 13,943 | 181 | 14,864 | 6,914 | 3,063 | 25,022 |

|        |     |        |        |       |        |
|--------|-----|--------|--------|-------|--------|
| 13,944 | 174 | 15,363 | 7,118  | 3,145 | 25,800 |
| 13,945 | 174 | 15,419 | 7,198  | 3,166 | 25,957 |
| 13,946 | 176 | 16,001 | 7,616  | 3,373 | 27,166 |
| 13,947 | 179 | 16,539 | 7,876  | 3,469 | 28,063 |
| 13,948 | 178 | 16,765 | 7,999  | 3,512 | 28,454 |
| 13,949 | 184 | 17,044 | 8,261  | 3,633 | 29,122 |
| 13,950 | 186 | 17,559 | 8,506  | 3,711 | 29,962 |
| 13,951 | 184 | 17,306 | 8,504  | 3,744 | 29,738 |
| 13,952 | 184 | 17,663 | 8,786  | 3,847 | 30,480 |
| 13,953 | 194 | 17,756 | 8,863  | 3,881 | 30,694 |
| 13,954 | 194 | 17,443 | 8,758  | 3,859 | 30,254 |
| 13,955 | 197 | 17,743 | 8,897  | 3,905 | 30,742 |
| 13,956 | 191 | 17,987 | 9,068  | 3,964 | 31,210 |
| 13,957 | 199 | 18,171 | 9,227  | 3,989 | 31,586 |
| 13,958 | 196 | 17,939 | 9,092  | 3,935 | 31,162 |
| 13,959 | 201 | 18,207 | 9,259  | 4,001 | 31,668 |
| 13,960 | 200 | 18,554 | 9,415  | 4,103 | 32,272 |
| 13,961 | 201 | 19,355 | 9,831  | 4,284 | 33,671 |
| 13,962 | 201 | 19,881 | 10,085 | 4,405 | 34,572 |
| 13,963 | 200 | 20,091 | 10,315 | 4,502 | 35,108 |
| 13,964 | 200 | 20,192 | 10,421 | 4,559 | 35,372 |
| 13,965 | 201 | 20,881 | 10,715 | 4,710 | 36,507 |
| 13,966 | 205 | 21,131 | 10,801 | 4,734 | 36,871 |
| 13,967 | 205 | 21,635 | 11,071 | 4,841 | 37,752 |
| 13,968 | 210 | 22,321 | 11,368 | 4,966 | 38,865 |
| 13,969 | 212 | 22,600 | 11,512 | 4,994 | 39,318 |
| 13,970 | 216 | 23,227 | 11,761 | 5,071 | 40,275 |
| 13,971 | 211 | 23,549 | 11,930 | 5,120 | 40,810 |
| 13,972 | 205 | 23,622 | 11,993 | 5,140 | 40,960 |
| 13,973 | 203 | 23,612 | 11,970 | 5,145 | 40,930 |
| 13,974 | 211 | 23,940 | 12,153 | 5,218 | 41,522 |
| 13,975 | 214 | 24,329 | 12,301 | 5,277 | 42,121 |

|        |     |        |        |       |        |
|--------|-----|--------|--------|-------|--------|
| 13,976 | 216 | 24,713 | 12,462 | 5,341 | 42,732 |
| 13,977 | 216 | 24,948 | 12,613 | 5,401 | 43,178 |
| 13,978 | 218 | 24,982 | 12,740 | 5,474 | 43,414 |
| 13,979 | 215 | 25,212 | 12,859 | 5,512 | 43,798 |
| 13,980 | 216 | 25,404 | 12,996 | 5,568 | 44,184 |
| 13,981 | 214 | 25,490 | 13,025 | 5,568 | 44,297 |
| 13,982 | 214 | 25,747 | 13,197 | 5,637 | 44,795 |
| 13,983 | 216 | 26,051 | 13,364 | 5,731 | 45,362 |
| 13,984 | 214 | 26,050 | 13,359 | 5,724 | 45,347 |
| 13,985 | 215 | 26,305 | 13,508 | 5,782 | 45,810 |
| 13,986 | 210 | 26,607 | 13,628 | 5,828 | 46,273 |
| 13,987 | 207 | 26,406 | 13,545 | 5,806 | 45,964 |
| 13,988 | 208 | 26,512 | 13,592 | 5,874 | 46,186 |
| 13,989 | 202 | 26,311 | 13,609 | 5,874 | 45,996 |
| 13,990 | 207 | 26,284 | 13,642 | 5,855 | 45,988 |
| 13,991 | 209 | 26,377 | 13,607 | 5,858 | 46,051 |
| 13,992 | 205 | 25,869 | 13,327 | 5,749 | 45,150 |
| 13,993 | 205 | 25,814 | 13,251 | 5,722 | 44,992 |
| 13,994 | 202 | 25,381 | 13,094 | 5,644 | 44,321 |
| 13,995 | 199 | 24,518 | 12,697 | 5,501 | 42,915 |
| 13,996 | 192 | 23,855 | 12,214 | 5,310 | 41,571 |
| 13,997 | 192 | 23,559 | 12,046 | 5,206 | 41,003 |
| 13,998 | 189 | 22,703 | 11,645 | 5,056 | 39,593 |
| 13,999 | 184 | 21,828 | 11,141 | 4,856 | 38,009 |
| 14,000 | 183 | 21,611 | 10,965 | 4,764 | 37,523 |
| 14,001 | 181 | 20,740 | 10,576 | 4,607 | 36,104 |
| 14,002 | 178 | 19,947 | 9,992  | 4,363 | 34,480 |
| 14,003 | 178 | 19,704 | 9,827  | 4,296 | 34,005 |
| 14,004 | 165 | 19,420 | 9,707  | 4,234 | 33,526 |
| 14,005 | 157 | 19,043 | 9,523  | 4,143 | 32,866 |
| 14,006 | 152 | 18,139 | 9,081  | 3,980 | 31,352 |
| 14,007 | 152 | 17,857 | 8,918  | 3,920 | 30,847 |

|        |     |        |       |       |        |
|--------|-----|--------|-------|-------|--------|
| 14,008 | 144 | 17,357 | 8,682 | 3,805 | 29,988 |
| 14,009 | 144 | 17,026 | 8,518 | 3,745 | 29,433 |
| 14,010 | 139 | 16,644 | 8,327 | 3,686 | 28,796 |
| 14,011 | 133 | 16,015 | 8,027 | 3,534 | 27,709 |
| 14,012 | 133 | 15,407 | 7,713 | 3,377 | 26,630 |
| 14,013 | 128 | 14,703 | 7,404 | 3,230 | 25,465 |
| 14,014 | 124 | 13,538 | 6,770 | 2,930 | 23,362 |
| 14,015 | 123 | 13,233 | 6,604 | 2,841 | 22,801 |
| 14,016 | 118 | 12,835 | 6,395 | 2,756 | 22,104 |
| 14,017 | 111 | 11,412 | 5,804 | 2,507 | 19,834 |
| 14,018 | 111 | 11,058 | 5,598 | 2,411 | 19,178 |
| 14,019 | 101 | 10,697 | 5,399 | 2,325 | 18,522 |
| 14,020 | 90  | 9,656  | 4,940 | 2,133 | 16,819 |
| 14,021 | 84  | 8,661  | 4,502 | 1,971 | 15,218 |
| 14,022 | 83  | 8,333  | 4,337 | 1,899 | 14,652 |
| 14,023 | 77  | 7,959  | 4,121 | 1,803 | 13,960 |
| 14,024 | 76  | 7,644  | 3,978 | 1,743 | 13,441 |
| 14,025 | 66  | 7,278  | 3,808 | 1,666 | 12,818 |
| 14,026 | 56  | 6,652  | 3,548 | 1,561 | 11,817 |
| 14,027 | 54  | 6,108  | 3,321 | 1,455 | 10,938 |
| 14,028 | 48  | 5,665  | 3,094 | 1,351 | 10,158 |
| 14,029 | 43  | 4,847  | 2,634 | 1,141 | 8,665  |
| 14,030 | 43  | 4,584  | 2,502 | 1,087 | 8,216  |
| 14,031 | 37  | 4,281  | 2,347 | 1,031 | 7,696  |
| 14,032 | 34  | 3,445  | 1,924 | 849   | 6,252  |
| 14,033 | 34  | 3,193  | 1,753 | 767   | 5,747  |
| 14,034 | 28  | 2,930  | 1,615 | 685   | 5,258  |
| 14,035 | 22  | 2,322  | 1,259 | 557   | 4,160  |
| 14,036 | 22  | 2,076  | 1,143 | 509   | 3,750  |
| 14,037 | 16  | 1,600  | 942   | 432   | 2,990  |
| 14,038 | 14  | 1,337  | 776   | 362   | 2,489  |
| 14,039 | 12  | 1,010  | 613   | 253   | 1,888  |

|        |   |     |     |     |     |
|--------|---|-----|-----|-----|-----|
| 14,040 | 3 | 552 | 285 | 137 | 977 |
| 14,041 | 2 | 483 | 209 | 110 | 804 |
| 14,042 | 0 | 94  | 39  | 24  | 157 |
| 14,043 | 0 | 87  | 33  | 22  | 142 |
| 14,044 | 0 | 88  | 30  | 20  | 138 |
| 14,045 | 0 | 89  | 28  | 21  | 138 |
| 14,046 | 0 | 87  | 31  | 22  | 140 |
| 14,047 | 0 | 84  | 33  | 19  | 136 |
| 14,048 | 0 | 85  | 32  | 18  | 135 |
| 14,049 | 0 | 86  | 34  | 19  | 139 |
| 14,050 | 0 | 87  | 37  | 16  | 140 |
| 14,051 | 0 | 91  | 38  | 17  | 146 |
| 14,052 | 0 | 92  | 41  | 19  | 152 |
| 14,053 | 0 | 94  | 44  | 19  | 157 |
| 14,054 | 0 | 92  | 45  | 19  | 156 |
| 14,055 | 0 | 93  | 45  | 18  | 156 |
| 14,056 | 0 | 92  | 44  | 17  | 153 |
| 14,057 | 0 | 92  | 45  | 18  | 155 |
| 14,058 | 0 | 93  | 44  | 19  | 156 |
| 14,059 | 0 | 92  | 43  | 19  | 154 |
| 14,060 | 0 | 90  | 44  | 20  | 154 |
| 14,061 | 0 | 91  | 46  | 22  | 159 |
| 14,062 | 0 | 91  | 45  | 21  | 157 |
| 14,063 | 0 | 91  | 45  | 22  | 158 |
| 14,064 | 0 | 93  | 47  | 23  | 163 |
| 14,065 | 0 | 92  | 47  | 21  | 160 |
| 14,066 | 0 | 91  | 47  | 21  | 159 |
| 14,067 | 0 | 91  | 47  | 20  | 158 |
| 14,068 | 0 | 90  | 48  | 19  | 157 |
| 14,069 | 0 | 90  | 48  | 19  | 157 |
| 14,070 | 0 | 89  | 49  | 19  | 157 |
| 14,071 | 0 | 87  | 48  | 19  | 154 |



|        |   |    |    |    |     |
|--------|---|----|----|----|-----|
| 14,072 | 0 | 86 | 48 | 19 | 153 |
| 14,073 | 0 | 88 | 48 | 19 | 155 |
| 14,074 | 0 | 85 | 49 | 19 | 153 |
| 14,075 | 0 | 85 | 48 | 19 | 152 |
| 14,076 | 0 | 86 | 47 | 19 | 152 |
| 14,077 | 0 | 86 | 47 | 19 | 152 |
| 14,078 | 0 | 85 | 49 | 19 | 153 |
| 14,079 | 1 | 83 | 49 | 20 | 153 |
| 14,080 | 1 | 83 | 49 | 20 | 153 |
| 14,081 | 1 | 84 | 48 | 20 | 153 |
| 14,082 | 1 | 84 | 47 | 20 | 152 |
| 14,083 | 1 | 83 | 45 | 20 | 149 |
| 14,084 | 1 | 81 | 45 | 20 | 147 |
| 14,085 | 1 | 76 | 43 | 20 | 140 |
| 14,086 | 1 | 72 | 45 | 21 | 139 |
| 14,087 | 1 | 72 | 43 | 19 | 135 |
| 14,088 | 1 | 69 | 41 | 19 | 130 |
| 14,089 | 1 | 67 | 40 | 19 | 127 |
| 14,090 | 1 | 66 | 42 | 20 | 129 |
| 14,091 | 1 | 66 | 42 | 20 | 129 |
| 14,092 | 1 | 64 | 43 | 21 | 129 |
| 14,093 | 1 | 66 | 46 | 21 | 134 |
| 14,094 | 1 | 66 | 43 | 21 | 131 |
| 14,095 | 1 | 58 | 39 | 21 | 119 |
| 14,096 | 1 | 59 | 38 | 20 | 118 |
| 14,097 | 1 | 58 | 37 | 19 | 115 |
| 14,098 | 1 | 52 | 36 | 19 | 108 |
| 14,099 | 1 | 51 | 35 | 19 | 106 |
| 14,100 | 1 | 48 | 35 | 19 | 103 |
| 14,101 | 1 | 44 | 34 | 19 | 98  |
| 14,102 | 1 | 41 | 30 | 15 | 87  |
| 14,103 | 1 | 41 | 28 | 15 | 85  |

|        |    |       |       |     |       |
|--------|----|-------|-------|-----|-------|
| 14,104 | 1  | 39    | 27    | 14  | 81    |
| 14,105 | 1  | 39    | 28    | 13  | 81    |
| 14,106 | 1  | 39    | 28    | 13  | 81    |
| 14,107 | 1  | 39    | 27    | 13  | 80    |
| 14,108 | 1  | 39    | 27    | 12  | 79    |
| 14,109 | 1  | 37    | 27    | 11  | 76    |
| 14,110 | 1  | 34    | 26    | 9   | 70    |
| 14,111 | 1  | 34    | 25    | 9   | 69    |
| 14,112 | 1  | 35    | 24    | 8   | 68    |
| 14,113 | 1  | 29    | 21    | 7   | 58    |
| 14,114 | 1  | 30    | 20    | 6   | 57    |
| 14,115 | 1  | 33    | 22    | 6   | 62    |
| 14,116 | 1  | 31    | 22    | 7   | 61    |
| 14,117 | 1  | 32    | 22    | 7   | 62    |
| 14,118 | 1  | 37    | 22    | 7   | 67    |
| 14,119 | 1  | 41    | 23    | 10  | 75    |
| 14,120 | 1  | 47    | 28    | 10  | 86    |
| 14,121 | 1  | 52    | 34    | 10  | 97    |
| 14,122 | 1  | 58    | 37    | 10  | 106   |
| 14,123 | 2  | 64    | 43    | 15  | 124   |
| 14,124 | 2  | 85    | 53    | 20  | 160   |
| 14,125 | 2  | 98    | 60    | 27  | 187   |
| 14,126 | 2  | 109   | 78    | 33  | 222   |
| 14,127 | 8  | 578   | 298   | 114 | 998   |
| 14,128 | 12 | 904   | 510   | 202 | 1,628 |
| 14,129 | 18 | 1,270 | 696   | 275 | 2,259 |
| 14,130 | 17 | 1,709 | 923   | 364 | 3,013 |
| 14,131 | 24 | 2,180 | 1,167 | 462 | 3,833 |
| 14,132 | 25 | 2,614 | 1,378 | 537 | 4,554 |
| 14,133 | 32 | 3,056 | 1,618 | 609 | 5,315 |
| 14,134 | 36 | 3,544 | 1,854 | 730 | 6,164 |
| 14,135 | 42 | 4,564 | 2,282 | 930 | 7,818 |

|        |     |        |        |       |        |
|--------|-----|--------|--------|-------|--------|
| 14,136 | 51  | 5,232  | 2,608  | 1,076 | 8,967  |
| 14,137 | 52  | 5,799  | 2,945  | 1,229 | 10,025 |
| 14,138 | 53  | 6,221  | 3,221  | 1,337 | 10,832 |
| 14,139 | 68  | 7,230  | 3,632  | 1,552 | 12,482 |
| 14,140 | 71  | 7,817  | 3,941  | 1,697 | 13,526 |
| 14,141 | 73  | 8,456  | 4,276  | 1,855 | 14,660 |
| 14,142 | 83  | 9,263  | 4,634  | 1,993 | 15,973 |
| 14,143 | 89  | 9,997  | 4,981  | 2,153 | 17,220 |
| 14,144 | 91  | 10,679 | 5,280  | 2,288 | 18,338 |
| 14,145 | 93  | 11,820 | 5,711  | 2,456 | 20,080 |
| 14,146 | 97  | 12,621 | 6,073  | 2,639 | 21,430 |
| 14,147 | 102 | 13,467 | 6,481  | 2,851 | 22,901 |
| 14,148 | 104 | 14,142 | 6,879  | 3,003 | 24,128 |
| 14,149 | 105 | 14,798 | 7,241  | 3,182 | 25,326 |
| 14,150 | 107 | 15,616 | 7,541  | 3,317 | 26,581 |
| 14,151 | 108 | 16,335 | 7,888  | 3,482 | 27,813 |
| 14,152 | 109 | 17,163 | 8,247  | 3,666 | 29,185 |
| 14,153 | 109 | 18,087 | 8,616  | 3,878 | 30,690 |
| 14,154 | 109 | 18,979 | 8,964  | 4,049 | 32,101 |
| 14,155 | 112 | 19,899 | 9,300  | 4,222 | 33,533 |
| 14,156 | 113 | 20,638 | 9,603  | 4,365 | 34,719 |
| 14,157 | 123 | 21,489 | 9,970  | 4,510 | 36,092 |
| 14,158 | 123 | 22,178 | 10,302 | 4,667 | 37,270 |
| 14,159 | 124 | 22,885 | 10,600 | 4,823 | 38,432 |
| 14,160 | 129 | 23,747 | 10,936 | 4,967 | 39,779 |
| 14,161 | 132 | 24,345 | 11,253 | 5,112 | 40,842 |
| 14,162 | 132 | 24,536 | 11,409 | 5,183 | 41,260 |
| 14,163 | 134 | 24,771 | 11,571 | 5,262 | 41,738 |
| 14,164 | 141 | 24,992 | 11,713 | 5,316 | 42,162 |
| 14,165 | 142 | 25,278 | 11,833 | 5,368 | 42,621 |
| 14,166 | 145 | 25,547 | 11,976 | 5,430 | 43,098 |
| 14,167 | 145 | 25,603 | 12,030 | 5,455 | 43,233 |

|        |     |        |        |       |        |
|--------|-----|--------|--------|-------|--------|
| 14,168 | 147 | 25,803 | 12,190 | 5,523 | 43,663 |
| 14,169 | 147 | 26,070 | 12,300 | 5,570 | 44,087 |
| 14,170 | 147 | 26,283 | 12,413 | 5,612 | 44,455 |
| 14,171 | 147 | 26,394 | 12,521 | 5,660 | 44,722 |
| 14,172 | 147 | 26,658 | 12,637 | 5,723 | 45,165 |
| 14,173 | 147 | 26,821 | 12,738 | 5,767 | 45,473 |
| 14,174 | 146 | 27,013 | 12,809 | 5,798 | 45,766 |
| 14,175 | 146 | 27,305 | 12,909 | 5,851 | 46,211 |
| 14,176 | 148 | 27,358 | 12,904 | 5,839 | 46,249 |
| 14,177 | 149 | 27,566 | 12,991 | 5,867 | 46,573 |
| 14,178 | 143 | 27,512 | 13,003 | 5,886 | 46,544 |
| 14,179 | 142 | 27,353 | 12,886 | 5,843 | 46,224 |
| 14,180 | 135 | 26,648 | 12,537 | 5,717 | 45,037 |
| 14,181 | 137 | 26,560 | 12,528 | 5,705 | 44,930 |
| 14,182 | 129 | 26,322 | 12,379 | 5,669 | 44,499 |
| 14,183 | 129 | 26,271 | 12,311 | 5,665 | 44,376 |
| 14,184 | 123 | 26,087 | 12,228 | 5,653 | 44,091 |
| 14,185 | 119 | 25,668 | 12,034 | 5,575 | 43,396 |
| 14,186 | 116 | 25,328 | 11,869 | 5,489 | 42,802 |
| 14,187 | 107 | 24,978 | 11,665 | 5,398 | 42,148 |
| 14,188 | 106 | 23,977 | 11,156 | 5,143 | 40,382 |
| 14,189 | 105 | 23,884 | 11,088 | 5,100 | 40,177 |
| 14,190 | 94  | 23,730 | 11,031 | 5,083 | 39,938 |
| 14,191 | 91  | 22,644 | 10,552 | 4,841 | 38,128 |
| 14,192 | 90  | 22,580 | 10,452 | 4,797 | 37,919 |
| 14,193 | 81  | 22,468 | 10,343 | 4,779 | 37,671 |
| 14,194 | 74  | 21,613 | 9,997  | 4,610 | 36,294 |
| 14,195 | 73  | 21,520 | 9,895  | 4,588 | 36,076 |
| 14,196 | 72  | 20,752 | 9,588  | 4,481 | 34,893 |
| 14,197 | 71  | 20,245 | 9,303  | 4,329 | 33,948 |
| 14,198 | 66  | 19,803 | 9,034  | 4,213 | 33,116 |
| 14,199 | 64  | 19,132 | 8,644  | 4,064 | 31,904 |

|        |    |        |       |       |        |
|--------|----|--------|-------|-------|--------|
| 14,200 | 64 | 19,260 | 8,577 | 4,041 | 31,942 |
| 14,201 | 63 | 18,755 | 8,342 | 3,958 | 31,118 |
| 14,202 | 61 | 18,141 | 7,992 | 3,806 | 30,000 |
| 14,203 | 64 | 16,981 | 7,520 | 3,526 | 28,091 |
| 14,204 | 65 | 17,184 | 7,525 | 3,540 | 28,314 |
| 14,205 | 65 | 17,064 | 7,437 | 3,494 | 28,060 |
| 14,206 | 63 | 16,300 | 7,170 | 3,332 | 26,865 |
| 14,207 | 67 | 16,413 | 7,135 | 3,348 | 26,963 |
| 14,208 | 57 | 15,938 | 6,896 | 3,262 | 26,153 |
| 14,209 | 55 | 14,384 | 6,254 | 2,955 | 23,648 |
| 14,210 | 55 | 14,398 | 6,261 | 2,925 | 23,639 |
| 14,211 | 52 | 14,416 | 6,258 | 2,944 | 23,670 |
| 14,212 | 56 | 14,575 | 6,237 | 2,942 | 23,810 |
| 14,213 | 56 | 14,759 | 6,234 | 2,922 | 23,971 |
| 14,214 | 49 | 14,801 | 6,166 | 2,899 | 23,915 |
| 14,215 | 49 | 14,855 | 6,128 | 2,909 | 23,941 |
| 14,216 | 50 | 15,090 | 6,249 | 2,962 | 24,351 |
| 14,217 | 47 | 15,241 | 6,269 | 2,970 | 24,527 |
| 14,218 | 46 | 15,328 | 6,205 | 2,945 | 24,524 |
| 14,219 | 50 | 15,562 | 6,277 | 2,979 | 24,868 |
| 14,220 | 50 | 15,711 | 6,302 | 2,998 | 25,061 |
| 14,221 | 50 | 15,788 | 6,237 | 2,974 | 25,049 |
| 14,222 | 51 | 15,978 | 6,275 | 3,012 | 25,316 |
| 14,223 | 51 | 16,084 | 6,256 | 3,027 | 25,418 |
| 14,224 | 51 | 15,923 | 6,137 | 2,969 | 25,080 |
| 14,225 | 51 | 16,187 | 6,204 | 3,018 | 25,460 |
| 14,226 | 51 | 16,551 | 6,295 | 3,056 | 25,953 |
| 14,227 | 49 | 16,755 | 6,290 | 3,083 | 26,177 |
| 14,228 | 49 | 16,527 | 6,131 | 3,017 | 25,724 |
| 14,229 | 49 | 16,810 | 6,216 | 3,067 | 26,142 |
| 14,230 | 46 | 17,038 | 6,242 | 3,110 | 26,436 |
| 14,231 | 47 | 17,220 | 6,274 | 3,155 | 26,696 |

|        |     |        |       |       |        |
|--------|-----|--------|-------|-------|--------|
| 14,232 | 45  | 17,552 | 6,372 | 3,214 | 27,183 |
| 14,233 | 45  | 17,765 | 6,390 | 3,252 | 27,452 |
| 14,234 | 45  | 18,073 | 6,476 | 3,291 | 27,885 |
| 14,235 | 46  | 18,493 | 6,528 | 3,322 | 28,389 |
| 14,236 | 55  | 18,456 | 6,393 | 3,261 | 28,165 |
| 14,237 | 56  | 18,881 | 6,452 | 3,315 | 28,704 |
| 14,238 | 57  | 19,334 | 6,527 | 3,360 | 29,278 |
| 14,239 | 66  | 19,383 | 6,406 | 3,336 | 29,191 |
| 14,240 | 67  | 19,837 | 6,466 | 3,378 | 29,748 |
| 14,241 | 71  | 20,276 | 6,527 | 3,428 | 30,302 |
| 14,242 | 77  | 20,318 | 6,472 | 3,414 | 30,281 |
| 14,243 | 79  | 20,460 | 6,493 | 3,443 | 30,475 |
| 14,244 | 79  | 20,649 | 6,531 | 3,471 | 30,730 |
| 14,245 | 84  | 20,976 | 6,584 | 3,484 | 31,128 |
| 14,246 | 84  | 21,000 | 6,551 | 3,478 | 31,113 |
| 14,247 | 83  | 20,970 | 6,552 | 3,511 | 31,116 |
| 14,248 | 81  | 20,983 | 6,562 | 3,525 | 31,151 |
| 14,249 | 84  | 21,014 | 6,556 | 3,537 | 31,191 |
| 14,250 | 86  | 21,209 | 6,570 | 3,544 | 31,409 |
| 14,251 | 98  | 21,102 | 6,447 | 3,501 | 31,148 |
| 14,252 | 97  | 20,909 | 6,382 | 3,481 | 30,869 |
| 14,253 | 99  | 21,769 | 6,596 | 3,619 | 32,083 |
| 14,254 | 94  | 21,730 | 6,508 | 3,617 | 31,949 |
| 14,255 | 96  | 21,894 | 6,499 | 3,608 | 32,097 |
| 14,256 | 98  | 21,797 | 6,459 | 3,573 | 31,927 |
| 14,257 | 101 | 22,010 | 6,497 | 3,608 | 32,216 |
| 14,258 | 97  | 21,996 | 6,479 | 3,619 | 32,191 |
| 14,259 | 101 | 22,040 | 6,533 | 3,672 | 32,346 |
| 14,260 | 100 | 22,037 | 6,464 | 3,670 | 32,271 |
| 14,261 | 99  | 21,935 | 6,360 | 3,626 | 32,020 |
| 14,262 | 99  | 22,227 | 6,411 | 3,674 | 32,411 |
| 14,263 | 98  | 22,292 | 6,402 | 3,685 | 32,477 |

|        |     |        |       |       |        |
|--------|-----|--------|-------|-------|--------|
| 14,264 | 98  | 22,313 | 6,374 | 3,693 | 32,478 |
| 14,265 | 97  | 22,231 | 6,337 | 3,682 | 32,347 |
| 14,266 | 100 | 22,533 | 6,405 | 3,731 | 32,769 |
| 14,267 | 101 | 22,745 | 6,411 | 3,746 | 33,003 |
| 14,268 | 102 | 22,634 | 6,300 | 3,717 | 32,753 |
| 14,269 | 102 | 23,010 | 6,351 | 3,759 | 33,222 |
| 14,270 | 101 | 22,918 | 6,302 | 3,764 | 33,085 |
| 14,271 | 103 | 23,225 | 6,349 | 3,803 | 33,480 |
| 14,272 | 105 | 23,425 | 6,357 | 3,830 | 33,717 |
| 14,273 | 104 | 22,926 | 6,186 | 3,741 | 32,957 |
| 14,274 | 104 | 23,270 | 6,238 | 3,781 | 33,393 |
| 14,275 | 104 | 23,477 | 6,291 | 3,808 | 33,680 |
| 14,276 | 104 | 23,566 | 6,330 | 3,838 | 33,838 |
| 14,277 | 104 | 23,528 | 6,302 | 3,851 | 33,785 |
| 14,278 | 104 | 23,555 | 6,276 | 3,837 | 33,772 |
| 14,279 | 105 | 23,657 | 6,257 | 3,841 | 33,860 |
| 14,280 | 106 | 23,785 | 6,212 | 3,834 | 33,937 |
| 14,281 | 111 | 23,764 | 6,167 | 3,814 | 33,856 |
| 14,282 | 113 | 23,850 | 6,156 | 3,807 | 33,926 |
| 14,283 | 114 | 24,198 | 6,187 | 3,856 | 34,355 |
| 14,284 | 114 | 23,394 | 5,985 | 3,710 | 33,203 |
| 14,285 | 115 | 23,606 | 5,969 | 3,732 | 33,422 |
| 14,286 | 115 | 23,859 | 5,974 | 3,784 | 33,732 |
| 14,287 | 106 | 23,472 | 5,898 | 3,739 | 33,215 |
| 14,288 | 110 | 23,513 | 5,918 | 3,760 | 33,301 |
| 14,289 | 111 | 23,298 | 5,890 | 3,757 | 33,056 |
| 14,290 | 101 | 22,888 | 5,872 | 3,719 | 32,580 |
| 14,291 | 102 | 22,875 | 5,843 | 3,725 | 32,545 |
| 14,292 | 95  | 22,672 | 5,812 | 3,712 | 32,291 |
| 14,293 | 88  | 22,564 | 5,792 | 3,733 | 32,177 |
| 14,294 | 86  | 22,454 | 5,766 | 3,716 | 32,022 |
| 14,295 | 83  | 22,371 | 5,688 | 3,706 | 31,848 |

|        |    |        |       |       |        |
|--------|----|--------|-------|-------|--------|
| 14,296 | 85 | 22,587 | 5,763 | 3,739 | 32,174 |
| 14,297 | 88 | 22,740 | 5,741 | 3,730 | 32,299 |
| 14,298 | 87 | 22,710 | 5,679 | 3,698 | 32,174 |
| 14,299 | 86 | 22,818 | 5,694 | 3,708 | 32,306 |
| 14,300 | 70 | 22,306 | 5,582 | 3,595 | 31,553 |
| 14,301 | 72 | 22,512 | 5,611 | 3,624 | 31,819 |
| 14,302 | 72 | 22,738 | 5,669 | 3,682 | 32,161 |
| 14,303 | 72 | 22,860 | 5,709 | 3,705 | 32,346 |
| 14,304 | 74 | 22,851 | 5,724 | 3,691 | 32,340 |
| 14,305 | 77 | 22,825 | 5,751 | 3,679 | 32,332 |
| 14,306 | 76 | 22,825 | 5,697 | 3,689 | 32,287 |
| 14,307 | 72 | 22,672 | 5,700 | 3,715 | 32,159 |
| 14,308 | 70 | 22,538 | 5,608 | 3,672 | 31,888 |
| 14,309 | 65 | 22,645 | 5,576 | 3,661 | 31,947 |
| 14,310 | 73 | 22,593 | 5,545 | 3,635 | 31,846 |
| 14,311 | 73 | 22,711 | 5,543 | 3,640 | 31,967 |
| 14,312 | 71 | 22,713 | 5,539 | 3,650 | 31,973 |
| 14,313 | 74 | 22,610 | 5,480 | 3,612 | 31,776 |
| 14,314 | 76 | 22,775 | 5,521 | 3,645 | 32,017 |
| 14,315 | 76 | 22,812 | 5,511 | 3,666 | 32,065 |
| 14,316 | 76 | 23,070 | 5,549 | 3,707 | 32,402 |
| 14,317 | 77 | 23,126 | 5,556 | 3,719 | 32,478 |
| 14,318 | 77 | 23,401 | 5,589 | 3,757 | 32,824 |
| 14,319 | 73 | 22,935 | 5,541 | 3,692 | 32,241 |
| 14,320 | 74 | 23,137 | 5,574 | 3,733 | 32,518 |
| 14,321 | 73 | 23,198 | 5,576 | 3,740 | 32,587 |
| 14,322 | 74 | 23,131 | 5,595 | 3,736 | 32,536 |
| 14,323 | 72 | 23,111 | 5,595 | 3,722 | 32,500 |
| 14,324 | 77 | 22,963 | 5,572 | 3,677 | 32,289 |
| 14,325 | 78 | 22,860 | 5,535 | 3,650 | 32,123 |
| 14,326 | 82 | 22,625 | 5,444 | 3,608 | 31,759 |
| 14,327 | 82 | 22,641 | 5,439 | 3,605 | 31,767 |



|        |     |        |       |       |        |
|--------|-----|--------|-------|-------|--------|
| 14,328 | 86  | 22,403 | 5,386 | 3,572 | 31,447 |
| 14,329 | 86  | 22,098 | 5,353 | 3,554 | 31,091 |
| 14,330 | 91  | 23,371 | 5,685 | 3,735 | 32,882 |
| 14,331 | 92  | 23,520 | 5,717 | 3,777 | 33,106 |
| 14,332 | 87  | 23,415 | 5,697 | 3,778 | 32,977 |
| 14,333 | 88  | 23,434 | 5,711 | 3,792 | 33,025 |
| 14,334 | 90  | 23,146 | 5,666 | 3,764 | 32,666 |
| 14,335 | 90  | 23,191 | 5,657 | 3,762 | 32,700 |
| 14,336 | 93  | 23,163 | 5,686 | 3,791 | 32,733 |
| 14,337 | 95  | 23,266 | 5,753 | 3,823 | 32,937 |
| 14,338 | 94  | 23,353 | 5,767 | 3,820 | 33,034 |
| 14,339 | 94  | 23,131 | 5,733 | 3,794 | 32,752 |
| 14,340 | 93  | 23,295 | 5,730 | 3,815 | 32,933 |
| 14,341 | 97  | 23,281 | 5,693 | 3,786 | 32,857 |
| 14,342 | 97  | 23,546 | 5,721 | 3,799 | 33,163 |
| 14,343 | 97  | 23,809 | 5,763 | 3,820 | 33,489 |
| 14,344 | 97  | 23,681 | 5,712 | 3,770 | 33,260 |
| 14,345 | 100 | 23,807 | 5,697 | 3,779 | 33,383 |
| 14,346 | 96  | 23,720 | 5,685 | 3,775 | 33,276 |
| 14,347 | 96  | 23,764 | 5,667 | 3,774 | 33,301 |
| 14,348 | 97  | 23,908 | 5,715 | 3,812 | 33,532 |
| 14,349 | 99  | 23,964 | 5,714 | 3,808 | 33,585 |
| 14,350 | 99  | 23,433 | 5,559 | 3,728 | 32,819 |
| 14,351 | 101 | 23,571 | 5,582 | 3,754 | 33,008 |
| 14,352 | 102 | 23,793 | 5,642 | 3,794 | 33,331 |
| 14,353 | 102 | 23,518 | 5,561 | 3,753 | 32,934 |
| 14,354 | 101 | 23,237 | 5,494 | 3,726 | 32,558 |
| 14,355 | 101 | 23,580 | 5,531 | 3,787 | 32,999 |
| 14,356 | 99  | 23,522 | 5,469 | 3,755 | 32,845 |
| 14,357 | 100 | 23,497 | 5,475 | 3,749 | 32,821 |
| 14,358 | 100 | 23,535 | 5,430 | 3,741 | 32,806 |
| 14,359 | 99  | 23,358 | 5,357 | 3,706 | 32,520 |

|        |     |        |       |       |        |
|--------|-----|--------|-------|-------|--------|
| 14,360 | 95  | 23,282 | 5,355 | 3,709 | 32,441 |
| 14,361 | 94  | 23,232 | 5,356 | 3,708 | 32,390 |
| 14,362 | 102 | 23,581 | 5,423 | 3,747 | 32,853 |
| 14,363 | 101 | 23,456 | 5,392 | 3,717 | 32,666 |
| 14,364 | 98  | 23,504 | 5,382 | 3,716 | 32,700 |
| 14,365 | 100 | 23,374 | 5,305 | 3,655 | 32,434 |
| 14,366 | 100 | 23,623 | 5,326 | 3,673 | 32,722 |
| 14,367 | 96  | 23,908 | 5,354 | 3,694 | 33,052 |
| 14,368 | 101 | 23,590 | 5,294 | 3,637 | 32,622 |
| 14,369 | 100 | 23,556 | 5,264 | 3,596 | 32,516 |
| 14,370 | 105 | 23,591 | 5,237 | 3,583 | 32,516 |
| 14,371 | 105 | 23,346 | 5,171 | 3,546 | 32,168 |
| 14,372 | 107 | 23,601 | 5,202 | 3,582 | 32,492 |
| 14,373 | 108 | 23,666 | 5,157 | 3,569 | 32,500 |
| 14,374 | 111 | 23,639 | 5,119 | 3,578 | 32,447 |
| 14,375 | 113 | 23,627 | 5,114 | 3,577 | 32,431 |
| 14,376 | 117 | 23,936 | 5,201 | 3,624 | 32,878 |
| 14,377 | 112 | 23,744 | 5,160 | 3,598 | 32,614 |
| 14,378 | 112 | 23,676 | 5,168 | 3,627 | 32,583 |
| 14,379 | 110 | 23,540 | 5,154 | 3,615 | 32,419 |
| 14,380 | 113 | 23,808 | 5,167 | 3,640 | 32,728 |
| 14,381 | 114 | 23,808 | 5,166 | 3,626 | 32,714 |
| 14,382 | 116 | 23,749 | 5,172 | 3,605 | 32,642 |
| 14,383 | 118 | 23,783 | 5,144 | 3,577 | 32,622 |
| 14,384 | 116 | 23,822 | 5,157 | 3,540 | 32,635 |
| 14,385 | 123 | 24,001 | 5,215 | 3,567 | 32,906 |
| 14,386 | 127 | 24,104 | 5,248 | 3,556 | 33,035 |
| 14,387 | 123 | 23,963 | 5,194 | 3,505 | 32,785 |
| 14,388 | 123 | 23,956 | 5,241 | 3,497 | 32,817 |
| 14,389 | 122 | 24,125 | 5,275 | 3,526 | 33,048 |
| 14,390 | 120 | 23,942 | 5,217 | 3,486 | 32,765 |
| 14,391 | 121 | 23,982 | 5,265 | 3,497 | 32,865 |

|        |     |        |       |       |        |
|--------|-----|--------|-------|-------|--------|
| 14,392 | 117 | 23,631 | 5,220 | 3,460 | 32,428 |
| 14,393 | 120 | 23,640 | 5,264 | 3,478 | 32,502 |
| 14,394 | 124 | 23,860 | 5,322 | 3,502 | 32,808 |
| 14,395 | 123 | 23,702 | 5,301 | 3,475 | 32,601 |
| 14,396 | 124 | 23,734 | 5,285 | 3,477 | 32,620 |
| 14,397 | 127 | 23,953 | 5,336 | 3,520 | 32,936 |
| 14,398 | 128 | 23,740 | 5,304 | 3,482 | 32,654 |
| 14,399 | 128 | 23,532 | 5,266 | 3,456 | 32,382 |
| 14,400 | 129 | 23,943 | 5,326 | 3,502 | 32,900 |
| 14,401 | 129 | 23,637 | 5,278 | 3,464 | 32,508 |
| 14,402 | 127 | 23,607 | 5,271 | 3,459 | 32,464 |
| 14,403 | 129 | 23,767 | 5,295 | 3,467 | 32,658 |
| 14,404 | 134 | 23,950 | 5,387 | 3,505 | 32,976 |
| 14,405 | 139 | 24,065 | 5,403 | 3,516 | 33,123 |
| 14,406 | 142 | 23,917 | 5,388 | 3,491 | 32,938 |
| 14,407 | 141 | 23,605 | 5,372 | 3,470 | 32,588 |
| 14,408 | 142 | 23,871 | 5,464 | 3,507 | 32,984 |
| 14,409 | 142 | 23,920 | 5,494 | 3,510 | 33,066 |
| 14,410 | 143 | 24,342 | 5,578 | 3,553 | 33,616 |
| 14,411 | 140 | 23,979 | 5,551 | 3,527 | 33,197 |
| 14,412 | 140 | 24,138 | 5,590 | 3,558 | 33,426 |
| 14,413 | 134 | 24,274 | 5,612 | 3,581 | 33,601 |
| 14,414 | 139 | 23,956 | 5,550 | 3,546 | 33,191 |
| 14,415 | 142 | 23,702 | 5,508 | 3,510 | 32,862 |
| 14,416 | 145 | 23,432 | 5,499 | 3,512 | 32,588 |
| 14,417 | 146 | 23,144 | 5,457 | 3,480 | 32,227 |
| 14,418 | 145 | 23,358 | 5,559 | 3,556 | 32,618 |
| 14,419 | 144 | 23,343 | 5,550 | 3,546 | 32,583 |
| 14,420 | 143 | 23,523 | 5,609 | 3,590 | 32,865 |
| 14,421 | 137 | 23,176 | 5,582 | 3,565 | 32,460 |
| 14,422 | 136 | 23,181 | 5,596 | 3,556 | 32,469 |
| 14,423 | 133 | 23,268 | 5,633 | 3,597 | 32,631 |

|        |     |        |       |       |        |
|--------|-----|--------|-------|-------|--------|
| 14,424 | 133 | 23,396 | 5,676 | 3,648 | 32,853 |
| 14,425 | 130 | 23,653 | 5,807 | 3,712 | 33,302 |
| 14,426 | 127 | 23,559 | 5,845 | 3,760 | 33,291 |
| 14,427 | 128 | 23,556 | 5,859 | 3,794 | 33,337 |
| 14,428 | 127 | 23,414 | 5,877 | 3,786 | 33,204 |
| 14,429 | 128 | 23,548 | 5,912 | 3,783 | 33,371 |
| 14,430 | 125 | 23,294 | 5,906 | 3,771 | 33,096 |
| 14,431 | 130 | 23,159 | 5,905 | 3,762 | 32,956 |
| 14,432 | 130 | 23,075 | 5,886 | 3,753 | 32,844 |
| 14,433 | 133 | 23,188 | 5,942 | 3,800 | 33,063 |
| 14,434 | 131 | 23,168 | 5,926 | 3,816 | 33,041 |
| 14,435 | 131 | 23,095 | 5,919 | 3,841 | 32,986 |
| 14,436 | 122 | 22,890 | 5,861 | 3,809 | 32,682 |
| 14,437 | 118 | 22,719 | 5,797 | 3,794 | 32,428 |
| 14,438 | 124 | 22,865 | 5,793 | 3,802 | 32,584 |
| 14,439 | 131 | 23,107 | 5,851 | 3,860 | 32,949 |
| 14,440 | 132 | 22,989 | 5,777 | 3,810 | 32,708 |
| 14,441 | 133 | 23,080 | 5,772 | 3,813 | 32,798 |
| 14,442 | 136 | 23,512 | 5,871 | 3,860 | 33,379 |
| 14,443 | 133 | 23,155 | 5,773 | 3,811 | 32,872 |
| 14,444 | 137 | 23,372 | 5,814 | 3,858 | 33,181 |
| 14,445 | 133 | 23,346 | 5,815 | 3,866 | 33,160 |
| 14,446 | 134 | 23,567 | 5,861 | 3,912 | 33,474 |
| 14,447 | 135 | 23,334 | 5,840 | 3,880 | 33,189 |
| 14,448 | 132 | 23,133 | 5,802 | 3,837 | 32,904 |
| 14,449 | 140 | 23,483 | 5,896 | 3,910 | 33,429 |
| 14,450 | 142 | 23,380 | 5,898 | 3,892 | 33,312 |
| 14,451 | 142 | 23,106 | 5,885 | 3,876 | 33,009 |
| 14,452 | 141 | 23,104 | 5,898 | 3,884 | 33,027 |
| 14,453 | 141 | 23,117 | 5,915 | 3,875 | 33,048 |
| 14,454 | 142 | 23,452 | 5,958 | 3,893 | 33,445 |
| 14,455 | 139 | 23,288 | 5,877 | 3,866 | 33,170 |

|        |     |        |       |       |        |
|--------|-----|--------|-------|-------|--------|
| 14,456 | 132 | 23,045 | 5,817 | 3,830 | 32,824 |
| 14,457 | 133 | 23,213 | 5,873 | 3,860 | 33,079 |
| 14,458 | 133 | 23,035 | 5,864 | 3,848 | 32,880 |
| 14,459 | 132 | 23,202 | 5,871 | 3,875 | 33,080 |
| 14,460 | 135 | 23,064 | 5,880 | 3,857 | 32,936 |
| 14,461 | 134 | 22,944 | 5,840 | 3,849 | 32,767 |
| 14,462 | 138 | 22,924 | 5,812 | 3,847 | 32,721 |
| 14,463 | 140 | 23,072 | 5,823 | 3,852 | 32,887 |
| 14,464 | 132 | 22,907 | 5,777 | 3,810 | 32,626 |
| 14,465 | 131 | 22,898 | 5,758 | 3,791 | 32,578 |
| 14,466 | 133 | 22,999 | 5,781 | 3,785 | 32,698 |
| 14,467 | 129 | 23,143 | 5,808 | 3,814 | 32,894 |
| 14,468 | 128 | 22,896 | 5,746 | 3,778 | 32,548 |
| 14,469 | 129 | 23,023 | 5,770 | 3,784 | 32,706 |
| 14,470 | 132 | 23,370 | 5,834 | 3,839 | 33,175 |
| 14,471 | 131 | 23,464 | 5,894 | 3,869 | 33,358 |
| 14,472 | 132 | 23,666 | 5,897 | 3,878 | 33,573 |
| 14,473 | 130 | 23,519 | 5,867 | 3,865 | 33,381 |
| 14,474 | 128 | 23,134 | 5,783 | 3,828 | 32,873 |
| 14,475 | 132 | 23,360 | 5,863 | 3,848 | 33,203 |
| 14,476 | 131 | 23,318 | 5,793 | 3,808 | 33,050 |
| 14,477 | 137 | 23,450 | 5,786 | 3,769 | 33,142 |
| 14,478 | 137 | 23,642 | 5,789 | 3,755 | 33,323 |
| 14,479 | 133 | 23,418 | 5,644 | 3,685 | 32,880 |
| 14,480 | 140 | 23,675 | 5,658 | 3,699 | 33,172 |
| 14,481 | 142 | 23,804 | 5,665 | 3,688 | 33,299 |
| 14,482 | 147 | 24,010 | 5,696 | 3,724 | 33,577 |
| 14,483 | 150 | 24,106 | 5,708 | 3,711 | 33,675 |
| 14,484 | 147 | 23,969 | 5,656 | 3,689 | 33,461 |
| 14,485 | 146 | 23,906 | 5,665 | 3,689 | 33,406 |
| 14,486 | 147 | 23,939 | 5,651 | 3,676 | 33,413 |
| 14,487 | 149 | 23,982 | 5,654 | 3,651 | 33,436 |

|        |     |        |       |       |        |
|--------|-----|--------|-------|-------|--------|
| 14,488 | 145 | 24,178 | 5,680 | 3,697 | 33,700 |
| 14,489 | 140 | 24,183 | 5,696 | 3,703 | 33,722 |
| 14,490 | 136 | 24,318 | 5,710 | 3,692 | 33,856 |
| 14,491 | 133 | 24,054 | 5,668 | 3,685 | 33,540 |
| 14,492 | 139 | 24,321 | 5,749 | 3,727 | 33,936 |
| 14,493 | 146 | 24,221 | 5,739 | 3,746 | 33,852 |
| 14,494 | 143 | 23,957 | 5,666 | 3,736 | 33,502 |
| 14,495 | 143 | 23,723 | 5,623 | 3,666 | 33,155 |
| 14,496 | 145 | 23,877 | 5,649 | 3,681 | 33,352 |
| 14,497 | 144 | 23,965 | 5,677 | 3,693 | 33,479 |
| 14,498 | 141 | 23,615 | 5,565 | 3,636 | 32,957 |
| 14,499 | 141 | 23,728 | 5,573 | 3,645 | 33,087 |
| 14,500 | 132 | 23,721 | 5,581 | 3,636 | 33,070 |
| 14,501 | 128 | 23,797 | 5,544 | 3,620 | 33,089 |
| 14,502 | 128 | 23,772 | 5,537 | 3,606 | 33,043 |
| 14,503 | 129 | 23,855 | 5,534 | 3,602 | 33,120 |
| 14,504 | 130 | 23,980 | 5,606 | 3,639 | 33,355 |
| 14,505 | 126 | 23,999 | 5,606 | 3,627 | 33,358 |
| 14,506 | 123 | 23,669 | 5,541 | 3,573 | 32,906 |
| 14,507 | 129 | 23,877 | 5,619 | 3,612 | 33,237 |
| 14,508 | 128 | 23,748 | 5,601 | 3,602 | 33,079 |
| 14,509 | 135 | 23,796 | 5,589 | 3,588 | 33,108 |
| 14,510 | 143 | 23,617 | 5,522 | 3,546 | 32,828 |
| 14,511 | 144 | 23,458 | 5,470 | 3,526 | 32,598 |
| 14,512 | 145 | 23,513 | 5,485 | 3,535 | 32,678 |
| 14,513 | 139 | 23,484 | 5,438 | 3,502 | 32,563 |
| 14,514 | 145 | 23,361 | 5,455 | 3,505 | 32,466 |
| 14,515 | 144 | 23,004 | 5,389 | 3,477 | 32,014 |
| 14,516 | 143 | 22,997 | 5,399 | 3,486 | 32,025 |
| 14,517 | 147 | 22,855 | 5,420 | 3,482 | 31,904 |
| 14,518 | 146 | 22,777 | 5,405 | 3,472 | 31,800 |
| 14,519 | 144 | 22,514 | 5,369 | 3,477 | 31,504 |

|        |     |        |       |       |        |
|--------|-----|--------|-------|-------|--------|
| 14,520 | 145 | 22,718 | 5,406 | 3,489 | 31,758 |
| 14,521 | 143 | 22,667 | 5,386 | 3,491 | 31,687 |
| 14,522 | 147 | 22,664 | 5,371 | 3,464 | 31,646 |
| 14,523 | 147 | 22,453 | 5,312 | 3,431 | 31,343 |
| 14,524 | 157 | 22,484 | 5,314 | 3,399 | 31,354 |
| 14,525 | 156 | 22,362 | 5,290 | 3,405 | 31,213 |
| 14,526 | 155 | 22,571 | 5,306 | 3,427 | 31,459 |
| 14,527 | 154 | 21,800 | 5,144 | 3,339 | 30,437 |
| 14,528 | 153 | 21,891 | 5,164 | 3,365 | 30,573 |
| 14,529 | 150 | 21,821 | 5,157 | 3,348 | 30,476 |
| 14,530 | 149 | 21,666 | 5,142 | 3,353 | 30,310 |
| 14,531 | 141 | 21,575 | 5,136 | 3,358 | 30,210 |
| 14,532 | 140 | 21,658 | 5,159 | 3,365 | 30,322 |
| 14,533 | 129 | 21,385 | 5,088 | 3,314 | 29,916 |
| 14,534 | 130 | 21,472 | 5,095 | 3,305 | 30,002 |
| 14,535 | 127 | 21,540 | 5,184 | 3,347 | 30,198 |
| 14,536 | 129 | 21,401 | 5,198 | 3,340 | 30,068 |
| 14,537 | 128 | 21,123 | 5,167 | 3,316 | 29,734 |
| 14,538 | 124 | 21,237 | 5,218 | 3,364 | 29,943 |
| 14,539 | 126 | 21,266 | 5,259 | 3,369 | 30,020 |
| 14,540 | 130 | 21,167 | 5,231 | 3,374 | 29,902 |
| 14,541 | 129 | 21,084 | 5,218 | 3,376 | 29,807 |
| 14,542 | 130 | 21,020 | 5,207 | 3,374 | 29,731 |
| 14,543 | 128 | 20,953 | 5,161 | 3,339 | 29,581 |
| 14,544 | 118 | 20,585 | 5,052 | 3,249 | 29,004 |
| 14,545 | 118 | 20,699 | 5,059 | 3,260 | 29,136 |
| 14,546 | 119 | 20,939 | 5,078 | 3,278 | 29,414 |
| 14,547 | 119 | 20,941 | 5,081 | 3,295 | 29,436 |
| 14,548 | 122 | 21,315 | 5,186 | 3,357 | 29,980 |
| 14,549 | 127 | 21,135 | 5,177 | 3,359 | 29,798 |
| 14,550 | 134 | 21,503 | 5,265 | 3,421 | 30,323 |
| 14,551 | 142 | 21,666 | 5,297 | 3,449 | 30,554 |

|        |     |        |       |       |        |
|--------|-----|--------|-------|-------|--------|
| 14,552 | 148 | 21,573 | 5,364 | 3,470 | 30,555 |
| 14,553 | 150 | 21,614 | 5,397 | 3,501 | 30,662 |
| 14,554 | 153 | 21,590 | 5,401 | 3,492 | 30,636 |
| 14,555 | 153 | 21,368 | 5,317 | 3,468 | 30,306 |
| 14,556 | 155 | 21,559 | 5,397 | 3,502 | 30,613 |
| 14,557 | 136 | 20,645 | 5,172 | 3,372 | 29,325 |
| 14,558 | 139 | 20,884 | 5,220 | 3,388 | 29,631 |
| 14,559 | 142 | 21,189 | 5,290 | 3,422 | 30,043 |
| 14,560 | 142 | 21,200 | 5,298 | 3,440 | 30,080 |
| 14,561 | 142 | 21,426 | 5,366 | 3,488 | 30,422 |
| 14,562 | 140 | 21,340 | 5,394 | 3,481 | 30,355 |
| 14,563 | 141 | 21,399 | 5,416 | 3,482 | 30,438 |
| 14,564 | 141 | 21,538 | 5,480 | 3,502 | 30,661 |
| 14,565 | 139 | 21,236 | 5,319 | 3,411 | 30,105 |
| 14,566 | 146 | 21,606 | 5,373 | 3,440 | 30,565 |
| 14,567 | 139 | 21,972 | 5,414 | 3,471 | 30,996 |
| 14,568 | 143 | 22,099 | 5,424 | 3,476 | 31,142 |
| 14,569 | 146 | 22,201 | 5,433 | 3,474 | 31,254 |
| 14,570 | 144 | 22,083 | 5,381 | 3,444 | 31,052 |
| 14,571 | 154 | 22,276 | 5,431 | 3,455 | 31,316 |
| 14,572 | 154 | 22,275 | 5,436 | 3,456 | 31,321 |
| 14,573 | 151 | 22,227 | 5,407 | 3,472 | 31,257 |
| 14,574 | 156 | 22,433 | 5,451 | 3,501 | 31,541 |
| 14,575 | 153 | 22,563 | 5,465 | 3,519 | 31,700 |
| 14,576 | 148 | 22,177 | 5,395 | 3,454 | 31,174 |
| 14,577 | 147 | 22,300 | 5,427 | 3,470 | 31,344 |
| 14,578 | 157 | 22,496 | 5,481 | 3,519 | 31,653 |
| 14,579 | 154 | 22,530 | 5,463 | 3,503 | 31,650 |
| 14,580 | 162 | 22,281 | 5,439 | 3,468 | 31,350 |
| 14,581 | 162 | 22,101 | 5,387 | 3,425 | 31,075 |
| 14,582 | 162 | 22,219 | 5,453 | 3,463 | 31,297 |
| 14,583 | 174 | 22,558 | 5,522 | 3,519 | 31,773 |



|        |     |        |       |       |        |
|--------|-----|--------|-------|-------|--------|
| 14,584 | 175 | 22,368 | 5,464 | 3,473 | 31,480 |
| 14,585 | 174 | 22,226 | 5,422 | 3,468 | 31,290 |
| 14,586 | 180 | 22,582 | 5,444 | 3,499 | 31,705 |
| 14,587 | 182 | 22,677 | 5,444 | 3,510 | 31,813 |
| 14,588 | 182 | 23,023 | 5,521 | 3,559 | 32,285 |
| 14,589 | 180 | 22,969 | 5,469 | 3,505 | 32,123 |
| 14,590 | 180 | 23,038 | 5,481 | 3,511 | 32,210 |
| 14,591 | 177 | 23,169 | 5,513 | 3,525 | 32,384 |
| 14,592 | 174 | 22,812 | 5,453 | 3,496 | 31,935 |
| 14,593 | 175 | 22,900 | 5,466 | 3,523 | 32,064 |
| 14,594 | 172 | 22,765 | 5,441 | 3,537 | 31,915 |
| 14,595 | 173 | 22,769 | 5,438 | 3,547 | 31,927 |
| 14,596 | 172 | 22,581 | 5,429 | 3,523 | 31,705 |
| 14,597 | 173 | 22,950 | 5,516 | 3,590 | 32,229 |
| 14,598 | 173 | 23,140 | 5,540 | 3,592 | 32,445 |
| 14,599 | 172 | 23,208 | 5,526 | 3,591 | 32,497 |
| 14,600 | 168 | 23,031 | 5,488 | 3,541 | 32,228 |
| 14,601 | 166 | 23,319 | 5,567 | 3,574 | 32,626 |
| 14,602 | 163 | 23,080 | 5,531 | 3,551 | 32,325 |
| 14,603 | 160 | 23,349 | 5,510 | 3,552 | 32,571 |
| 14,604 | 169 | 23,425 | 5,512 | 3,553 | 32,659 |
| 14,605 | 166 | 23,300 | 5,492 | 3,550 | 32,508 |
| 14,606 | 165 | 23,655 | 5,602 | 3,635 | 33,057 |
| 14,607 | 169 | 23,651 | 5,593 | 3,643 | 33,056 |
| 14,608 | 167 | 23,654 | 5,575 | 3,638 | 33,034 |
| 14,609 | 167 | 23,577 | 5,546 | 3,642 | 32,932 |
| 14,610 | 167 | 23,442 | 5,493 | 3,634 | 32,736 |
| 14,611 | 166 | 23,497 | 5,537 | 3,614 | 32,814 |
| 14,612 | 169 | 23,908 | 5,624 | 3,680 | 33,381 |
| 14,613 | 168 | 23,781 | 5,574 | 3,660 | 33,183 |
| 14,614 | 168 | 23,772 | 5,590 | 3,650 | 33,180 |
| 14,615 | 173 | 23,861 | 5,617 | 3,684 | 33,335 |

|        |     |        |       |       |        |
|--------|-----|--------|-------|-------|--------|
| 14,616 | 173 | 23,825 | 5,659 | 3,690 | 33,347 |
| 14,617 | 168 | 23,930 | 5,693 | 3,724 | 33,515 |
| 14,618 | 170 | 23,923 | 5,725 | 3,754 | 33,572 |
| 14,619 | 175 | 24,214 | 5,820 | 3,840 | 34,049 |
| 14,620 | 183 | 23,992 | 5,817 | 3,820 | 33,812 |
| 14,621 | 180 | 23,820 | 5,795 | 3,823 | 33,618 |
| 14,622 | 198 | 24,157 | 5,879 | 3,849 | 34,083 |
| 14,623 | 198 | 23,981 | 5,874 | 3,849 | 33,902 |
| 14,624 | 198 | 23,836 | 5,903 | 3,840 | 33,777 |
| 14,625 | 197 | 24,118 | 5,971 | 3,871 | 34,157 |
| 14,626 | 195 | 23,817 | 5,884 | 3,843 | 33,739 |
| 14,627 | 201 | 23,934 | 5,882 | 3,823 | 33,840 |
| 14,628 | 203 | 23,985 | 5,889 | 3,834 | 33,911 |
| 14,629 | 197 | 24,141 | 5,913 | 3,842 | 34,093 |
| 14,630 | 200 | 24,223 | 5,950 | 3,874 | 34,247 |
| 14,631 | 193 | 24,563 | 6,018 | 3,911 | 34,685 |
| 14,632 | 192 | 24,637 | 6,026 | 3,917 | 34,772 |
| 14,633 | 196 | 24,992 | 6,148 | 3,987 | 35,323 |
| 14,634 | 191 | 25,054 | 6,148 | 3,990 | 35,383 |
| 14,635 | 184 | 25,096 | 6,174 | 3,997 | 35,451 |
| 14,636 | 195 | 25,140 | 6,203 | 4,006 | 35,544 |
| 14,637 | 201 | 25,177 | 6,218 | 4,005 | 35,601 |
| 14,638 | 203 | 24,765 | 6,142 | 3,937 | 35,047 |
| 14,639 | 204 | 24,870 | 6,161 | 3,944 | 35,179 |
| 14,640 | 206 | 24,949 | 6,213 | 3,981 | 35,349 |
| 14,641 | 213 | 24,849 | 6,223 | 3,972 | 35,257 |
| 14,642 | 211 | 24,564 | 6,168 | 3,931 | 34,874 |
| 14,643 | 221 | 24,519 | 6,143 | 3,917 | 34,800 |
| 14,644 | 222 | 24,593 | 6,159 | 3,902 | 34,876 |
| 14,645 | 221 | 24,574 | 6,159 | 3,894 | 34,848 |
| 14,646 | 217 | 24,556 | 6,166 | 3,892 | 34,831 |
| 14,647 | 220 | 24,263 | 6,104 | 3,846 | 34,433 |

|        |     |        |       |       |        |
|--------|-----|--------|-------|-------|--------|
| 14,648 | 220 | 23,924 | 6,054 | 3,801 | 33,999 |
| 14,649 | 222 | 24,323 | 6,135 | 3,865 | 34,545 |
| 14,650 | 222 | 24,314 | 6,144 | 3,880 | 34,560 |
| 14,651 | 212 | 23,427 | 5,888 | 3,759 | 33,286 |
| 14,652 | 211 | 23,500 | 5,908 | 3,782 | 33,401 |
| 14,653 | 203 | 23,704 | 5,945 | 3,799 | 33,651 |
| 14,654 | 196 | 23,443 | 5,891 | 3,766 | 33,296 |
| 14,655 | 197 | 23,483 | 5,901 | 3,772 | 33,353 |
| 14,656 | 197 | 23,342 | 5,844 | 3,746 | 33,129 |
| 14,657 | 199 | 23,119 | 5,806 | 3,692 | 32,816 |
| 14,658 | 201 | 22,820 | 5,741 | 3,666 | 32,428 |
| 14,659 | 201 | 22,865 | 5,750 | 3,676 | 32,492 |
| 14,660 | 194 | 22,793 | 5,742 | 3,686 | 32,415 |
| 14,661 | 198 | 22,887 | 5,756 | 3,719 | 32,560 |
| 14,662 | 196 | 22,854 | 5,703 | 3,701 | 32,454 |
| 14,663 | 201 | 22,828 | 5,695 | 3,677 | 32,401 |
| 14,664 | 205 | 23,209 | 5,730 | 3,707 | 32,851 |
| 14,665 | 198 | 23,114 | 5,725 | 3,713 | 32,750 |
| 14,666 | 198 | 23,321 | 5,757 | 3,723 | 32,999 |
| 14,667 | 201 | 23,636 | 5,808 | 3,772 | 33,417 |
| 14,668 | 199 | 23,458 | 5,764 | 3,714 | 33,135 |
| 14,669 | 178 | 22,581 | 5,460 | 3,535 | 31,754 |
| 14,670 | 177 | 22,793 | 5,513 | 3,541 | 32,024 |
| 14,671 | 178 | 22,941 | 5,560 | 3,592 | 32,271 |
| 14,672 | 180 | 22,873 | 5,552 | 3,592 | 32,197 |
| 14,673 | 176 | 23,073 | 5,654 | 3,661 | 32,564 |
| 14,674 | 176 | 22,983 | 5,620 | 3,649 | 32,428 |
| 14,675 | 175 | 22,912 | 5,546 | 3,633 | 32,266 |
| 14,676 | 175 | 22,800 | 5,575 | 3,642 | 32,192 |
| 14,677 | 168 | 22,608 | 5,565 | 3,646 | 31,987 |
| 14,678 | 163 | 22,499 | 5,561 | 3,657 | 31,880 |
| 14,679 | 157 | 22,271 | 5,571 | 3,656 | 31,655 |

|        |     |        |       |       |        |
|--------|-----|--------|-------|-------|--------|
| 14,680 | 157 | 22,102 | 5,559 | 3,647 | 31,465 |
| 14,681 | 157 | 21,137 | 5,248 | 3,471 | 30,013 |
| 14,682 | 157 | 21,507 | 5,299 | 3,526 | 30,489 |
| 14,683 | 148 | 21,825 | 5,375 | 3,573 | 30,921 |
| 14,684 | 148 | 21,895 | 5,406 | 3,593 | 31,042 |
| 14,685 | 139 | 21,886 | 5,388 | 3,602 | 31,015 |
| 14,686 | 139 | 22,135 | 5,466 | 3,658 | 31,398 |
| 14,687 | 130 | 22,324 | 5,527 | 3,690 | 31,671 |
| 14,688 | 124 | 22,500 | 5,553 | 3,717 | 31,894 |
| 14,689 | 122 | 22,697 | 5,613 | 3,759 | 32,191 |
| 14,690 | 125 | 22,744 | 5,611 | 3,782 | 32,262 |
| 14,691 | 124 | 22,850 | 5,609 | 3,779 | 32,362 |
| 14,692 | 121 | 22,700 | 5,542 | 3,749 | 32,112 |
| 14,693 | 121 | 22,519 | 5,540 | 3,743 | 31,923 |
| 14,694 | 111 | 22,879 | 5,596 | 3,814 | 32,400 |
| 14,695 | 111 | 23,407 | 5,722 | 3,878 | 33,118 |
| 14,696 | 114 | 23,574 | 5,736 | 3,880 | 33,304 |
| 14,697 | 110 | 23,148 | 5,645 | 3,833 | 32,736 |
| 14,698 | 112 | 23,255 | 5,674 | 3,843 | 32,884 |
| 14,699 | 110 | 23,266 | 5,678 | 3,851 | 32,905 |
| 14,700 | 112 | 23,304 | 5,711 | 3,851 | 32,978 |
| 14,701 | 112 | 23,306 | 5,715 | 3,875 | 33,008 |
| 14,702 | 112 | 23,391 | 5,751 | 3,877 | 33,131 |
| 14,703 | 114 | 23,445 | 5,757 | 3,888 | 33,204 |
| 14,704 | 120 | 23,705 | 5,816 | 3,914 | 33,555 |
| 14,705 | 119 | 23,696 | 5,793 | 3,880 | 33,488 |
| 14,706 | 124 | 23,909 | 5,863 | 3,935 | 33,831 |
| 14,707 | 126 | 23,704 | 5,808 | 3,879 | 33,517 |
| 14,708 | 125 | 23,733 | 5,855 | 3,889 | 33,602 |
| 14,709 | 123 | 23,798 | 5,912 | 3,879 | 33,712 |
| 14,710 | 123 | 23,743 | 5,930 | 3,873 | 33,669 |
| 14,711 | 122 | 23,764 | 5,962 | 3,876 | 33,724 |

|        |     |        |       |       |        |
|--------|-----|--------|-------|-------|--------|
| 14,712 | 123 | 23,772 | 5,988 | 3,887 | 33,770 |
| 14,713 | 117 | 23,680 | 5,927 | 3,893 | 33,617 |
| 14,714 | 122 | 23,832 | 5,993 | 3,944 | 33,891 |
| 14,715 | 122 | 23,804 | 6,067 | 3,980 | 33,973 |
| 14,716 | 119 | 23,870 | 6,108 | 3,973 | 34,070 |
| 14,717 | 120 | 23,741 | 6,101 | 3,967 | 33,929 |
| 14,718 | 125 | 23,752 | 6,116 | 3,991 | 33,984 |
| 14,719 | 129 | 23,686 | 6,108 | 3,977 | 33,900 |
| 14,720 | 121 | 23,648 | 6,134 | 4,005 | 33,908 |
| 14,721 | 126 | 23,712 | 6,161 | 4,031 | 34,030 |
| 14,722 | 122 | 23,844 | 6,182 | 4,023 | 34,171 |
| 14,723 | 118 | 23,795 | 6,141 | 3,988 | 34,042 |
| 14,724 | 118 | 23,891 | 6,163 | 4,006 | 34,178 |
| 14,725 | 118 | 24,116 | 6,218 | 4,047 | 34,499 |
| 14,726 | 116 | 24,151 | 6,210 | 4,039 | 34,516 |
| 14,727 | 119 | 24,115 | 6,138 | 3,975 | 34,347 |
| 14,728 | 121 | 24,111 | 6,128 | 3,953 | 34,313 |
| 14,729 | 122 | 24,068 | 6,140 | 3,942 | 34,272 |
| 14,730 | 127 | 24,135 | 6,148 | 3,955 | 34,365 |
| 14,731 | 127 | 24,401 | 6,199 | 3,962 | 34,689 |
| 14,732 | 127 | 24,294 | 6,181 | 3,962 | 34,564 |
| 14,733 | 136 | 24,211 | 6,231 | 3,935 | 34,513 |
| 14,734 | 135 | 23,816 | 6,131 | 3,883 | 33,965 |
| 14,735 | 146 | 23,509 | 6,054 | 3,826 | 33,535 |
| 14,736 | 146 | 23,176 | 5,951 | 3,763 | 33,036 |
| 14,737 | 155 | 23,611 | 6,039 | 3,836 | 33,641 |
| 14,738 | 158 | 23,749 | 6,100 | 3,847 | 33,854 |
| 14,739 | 157 | 23,590 | 6,079 | 3,837 | 33,663 |
| 14,740 | 159 | 23,417 | 6,024 | 3,820 | 33,420 |
| 14,741 | 159 | 23,336 | 6,014 | 3,783 | 33,292 |
| 14,742 | 164 | 23,373 | 6,023 | 3,773 | 33,333 |
| 14,743 | 163 | 23,137 | 6,008 | 3,746 | 33,054 |

|        |     |        |       |       |        |
|--------|-----|--------|-------|-------|--------|
| 14,744 | 172 | 23,348 | 6,084 | 3,756 | 33,360 |
| 14,745 | 174 | 23,580 | 6,121 | 3,788 | 33,663 |
| 14,746 | 187 | 23,485 | 6,080 | 3,774 | 33,526 |
| 14,747 | 186 | 23,202 | 6,050 | 3,732 | 33,170 |
| 14,748 | 186 | 23,237 | 6,061 | 3,725 | 33,209 |
| 14,749 | 191 | 23,126 | 6,045 | 3,721 | 33,083 |
| 14,750 | 191 | 23,186 | 6,052 | 3,715 | 33,144 |
| 14,751 | 187 | 23,051 | 5,996 | 3,674 | 32,908 |
| 14,752 | 190 | 23,016 | 6,026 | 3,652 | 32,884 |
| 14,753 | 190 | 22,889 | 5,997 | 3,641 | 32,717 |
| 14,754 | 189 | 23,093 | 6,043 | 3,669 | 32,994 |
| 14,755 | 188 | 23,240 | 6,052 | 3,695 | 33,175 |
| 14,756 | 195 | 23,263 | 6,050 | 3,708 | 33,216 |
| 14,757 | 191 | 23,401 | 6,078 | 3,707 | 33,377 |
| 14,758 | 184 | 23,382 | 6,079 | 3,709 | 33,354 |
| 14,759 | 180 | 23,172 | 5,987 | 3,683 | 33,022 |
| 14,760 | 182 | 23,166 | 5,966 | 3,694 | 33,008 |
| 14,761 | 180 | 23,284 | 5,961 | 3,673 | 33,098 |
| 14,762 | 179 | 23,359 | 5,947 | 3,644 | 33,129 |
| 14,763 | 184 | 23,420 | 5,941 | 3,630 | 33,175 |
| 14,764 | 183 | 23,400 | 5,963 | 3,634 | 33,180 |
| 14,765 | 181 | 23,596 | 5,991 | 3,648 | 33,416 |
| 14,766 | 177 | 23,282 | 5,880 | 3,580 | 32,919 |
| 14,767 | 177 | 23,068 | 5,786 | 3,525 | 32,556 |
| 14,768 | 177 | 23,127 | 5,789 | 3,526 | 32,619 |
| 14,769 | 170 | 23,126 | 5,787 | 3,529 | 32,612 |
| 14,770 | 165 | 23,020 | 5,738 | 3,508 | 32,431 |
| 14,771 | 163 | 23,014 | 5,726 | 3,487 | 32,390 |
| 14,772 | 166 | 23,149 | 5,777 | 3,531 | 32,623 |
| 14,773 | 166 | 22,849 | 5,713 | 3,508 | 32,236 |
| 14,774 | 169 | 22,932 | 5,703 | 3,485 | 32,289 |
| 14,775 | 172 | 23,159 | 5,777 | 3,504 | 32,612 |

|        |     |        |       |       |        |
|--------|-----|--------|-------|-------|--------|
| 14,776 | 175 | 23,018 | 5,739 | 3,494 | 32,426 |
| 14,777 | 174 | 23,260 | 5,835 | 3,538 | 32,807 |
| 14,778 | 172 | 23,248 | 5,852 | 3,561 | 32,833 |
| 14,779 | 172 | 23,147 | 5,852 | 3,556 | 32,727 |
| 14,780 | 163 | 23,179 | 5,881 | 3,564 | 32,787 |
| 14,781 | 168 | 23,443 | 5,950 | 3,621 | 33,182 |
| 14,782 | 173 | 23,178 | 5,908 | 3,589 | 32,848 |
| 14,783 | 172 | 23,012 | 5,884 | 3,561 | 32,629 |
| 14,784 | 170 | 23,568 | 6,095 | 3,687 | 33,520 |
| 14,785 | 169 | 23,661 | 6,132 | 3,697 | 33,659 |
| 14,786 | 159 | 23,644 | 6,154 | 3,701 | 33,658 |
| 14,787 | 157 | 23,445 | 6,087 | 3,654 | 33,343 |
| 14,788 | 157 | 23,526 | 6,105 | 3,662 | 33,450 |
| 14,789 | 154 | 23,597 | 6,109 | 3,689 | 33,549 |
| 14,790 | 154 | 23,586 | 6,112 | 3,686 | 33,538 |
| 14,791 | 149 | 23,546 | 6,133 | 3,660 | 33,488 |
| 14,792 | 148 | 23,442 | 6,115 | 3,676 | 33,381 |
| 14,793 | 143 | 23,734 | 6,198 | 3,728 | 33,803 |
| 14,794 | 137 | 23,399 | 6,076 | 3,662 | 33,274 |
| 14,795 | 141 | 23,554 | 6,125 | 3,666 | 33,486 |
| 14,796 | 143 | 23,602 | 6,122 | 3,683 | 33,550 |
| 14,797 | 129 | 23,261 | 6,079 | 3,653 | 33,122 |
| 14,798 | 127 | 23,328 | 6,104 | 3,677 | 33,236 |
| 14,799 | 121 | 23,063 | 6,061 | 3,638 | 32,883 |
| 14,800 | 126 | 23,368 | 6,140 | 3,671 | 33,305 |
| 14,801 | 135 | 23,125 | 6,111 | 3,669 | 33,040 |
| 14,802 | 134 | 22,860 | 6,081 | 3,641 | 32,716 |
| 14,803 | 138 | 23,094 | 6,152 | 3,713 | 33,097 |
| 14,804 | 138 | 23,343 | 6,194 | 3,744 | 33,419 |
| 14,805 | 140 | 23,586 | 6,271 | 3,777 | 33,774 |
| 14,806 | 141 | 23,505 | 6,312 | 3,783 | 33,741 |
| 14,807 | 133 | 23,056 | 6,254 | 3,736 | 33,179 |

|        |     |        |       |       |        |
|--------|-----|--------|-------|-------|--------|
| 14,808 | 133 | 23,180 | 6,300 | 3,763 | 33,376 |
| 14,809 | 134 | 22,907 | 6,203 | 3,716 | 32,960 |
| 14,810 | 134 | 22,736 | 6,141 | 3,686 | 32,697 |
| 14,811 | 134 | 23,020 | 6,273 | 3,743 | 33,170 |
| 14,812 | 133 | 22,746 | 6,217 | 3,717 | 32,813 |
| 14,813 | 138 | 23,116 | 6,293 | 3,802 | 33,349 |
| 14,814 | 136 | 23,157 | 6,325 | 3,832 | 33,450 |
| 14,815 | 140 | 23,135 | 6,354 | 3,841 | 33,470 |
| 14,816 | 138 | 23,112 | 6,380 | 3,854 | 33,484 |
| 14,817 | 144 | 23,196 | 6,440 | 3,862 | 33,642 |
| 14,818 | 142 | 23,001 | 6,396 | 3,838 | 33,377 |
| 14,819 | 143 | 22,683 | 6,320 | 3,781 | 32,927 |
| 14,820 | 145 | 22,954 | 6,359 | 3,809 | 33,267 |
| 14,821 | 149 | 23,236 | 6,432 | 3,824 | 33,641 |
| 14,822 | 143 | 22,907 | 6,327 | 3,753 | 33,130 |
| 14,823 | 143 | 22,849 | 6,323 | 3,740 | 33,055 |
| 14,824 | 140 | 23,116 | 6,384 | 3,781 | 33,421 |
| 14,825 | 144 | 23,034 | 6,378 | 3,795 | 33,351 |
| 14,826 | 142 | 23,050 | 6,346 | 3,803 | 33,341 |
| 14,827 | 140 | 23,095 | 6,392 | 3,827 | 33,454 |
| 14,828 | 149 | 23,161 | 6,396 | 3,808 | 33,514 |
| 14,829 | 147 | 22,933 | 6,335 | 3,761 | 33,176 |
| 14,830 | 147 | 22,917 | 6,326 | 3,745 | 33,135 |
| 14,831 | 143 | 22,829 | 6,290 | 3,749 | 33,011 |
| 14,832 | 140 | 22,834 | 6,270 | 3,756 | 33,000 |
| 14,833 | 138 | 22,973 | 6,259 | 3,775 | 33,145 |
| 14,834 | 136 | 22,959 | 6,178 | 3,749 | 33,022 |
| 14,835 | 135 | 22,919 | 6,106 | 3,714 | 32,874 |
| 14,836 | 135 | 22,570 | 5,975 | 3,650 | 32,330 |
| 14,837 | 134 | 22,593 | 5,957 | 3,647 | 32,331 |
| 14,838 | 138 | 22,740 | 6,033 | 3,691 | 32,602 |
| 14,839 | 143 | 22,578 | 5,988 | 3,649 | 32,358 |



|        |     |        |       |       |        |
|--------|-----|--------|-------|-------|--------|
| 14,840 | 148 | 22,718 | 6,028 | 3,693 | 32,587 |
| 14,841 | 145 | 22,490 | 5,970 | 3,667 | 32,272 |
| 14,842 | 147 | 22,456 | 5,937 | 3,651 | 32,191 |
| 14,843 | 150 | 22,618 | 5,963 | 3,662 | 32,393 |
| 14,844 | 155 | 22,349 | 5,886 | 3,625 | 32,015 |
| 14,845 | 154 | 22,394 | 5,875 | 3,619 | 32,042 |
| 14,846 | 154 | 22,263 | 5,890 | 3,622 | 31,929 |
| 14,847 | 150 | 22,216 | 5,899 | 3,618 | 31,883 |
| 14,848 | 149 | 22,266 | 5,898 | 3,625 | 31,938 |
| 14,849 | 149 | 22,349 | 5,910 | 3,641 | 32,049 |
| 14,850 | 147 | 22,308 | 5,901 | 3,656 | 32,012 |
| 14,851 | 148 | 22,557 | 5,999 | 3,702 | 32,406 |
| 14,852 | 143 | 22,584 | 5,985 | 3,706 | 32,418 |
| 14,853 | 138 | 22,510 | 5,921 | 3,658 | 32,227 |
| 14,854 | 142 | 22,658 | 5,954 | 3,665 | 32,419 |
| 14,855 | 144 | 22,344 | 5,824 | 3,610 | 31,922 |
| 14,856 | 144 | 22,417 | 5,840 | 3,629 | 32,030 |
| 14,857 | 140 | 22,645 | 5,908 | 3,645 | 32,338 |
| 14,858 | 136 | 22,484 | 5,838 | 3,621 | 32,079 |
| 14,859 | 137 | 22,672 | 5,875 | 3,651 | 32,335 |
| 14,860 | 141 | 22,943 | 5,915 | 3,685 | 32,684 |
| 14,861 | 140 | 22,975 | 5,890 | 3,667 | 32,672 |
| 14,862 | 140 | 22,869 | 5,852 | 3,658 | 32,519 |
| 14,863 | 147 | 23,159 | 5,940 | 3,695 | 32,941 |
| 14,864 | 147 | 23,105 | 5,963 | 3,716 | 32,931 |
| 14,865 | 146 | 23,275 | 5,997 | 3,745 | 33,163 |
| 14,866 | 152 | 23,087 | 5,928 | 3,694 | 32,861 |
| 14,867 | 152 | 22,923 | 5,873 | 3,665 | 32,613 |
| 14,868 | 153 | 23,033 | 5,949 | 3,730 | 32,865 |
| 14,869 | 153 | 22,964 | 5,928 | 3,731 | 32,776 |
| 14,870 | 152 | 22,835 | 5,951 | 3,753 | 32,691 |
| 14,871 | 151 | 22,897 | 5,968 | 3,759 | 32,775 |

|        |     |        |       |       |        |
|--------|-----|--------|-------|-------|--------|
| 14,872 | 145 | 22,619 | 5,921 | 3,739 | 32,424 |
| 14,873 | 145 | 22,383 | 5,898 | 3,723 | 32,149 |
| 14,874 | 147 | 22,679 | 5,963 | 3,791 | 32,580 |
| 14,875 | 142 | 22,689 | 5,963 | 3,779 | 32,573 |
| 14,876 | 140 | 22,636 | 5,960 | 3,766 | 32,502 |
| 14,877 | 140 | 22,716 | 6,035 | 3,804 | 32,695 |
| 14,878 | 138 | 22,645 | 5,995 | 3,770 | 32,548 |
| 14,879 | 139 | 22,615 | 5,982 | 3,768 | 32,504 |
| 14,880 | 141 | 22,488 | 5,915 | 3,747 | 32,291 |
| 14,881 | 141 | 22,514 | 5,892 | 3,730 | 32,277 |
| 14,882 | 145 | 22,672 | 5,977 | 3,759 | 32,553 |
| 14,883 | 146 | 22,798 | 6,013 | 3,789 | 32,746 |
| 14,884 | 155 | 23,325 | 6,163 | 3,885 | 33,528 |
| 14,885 | 151 | 23,124 | 6,137 | 3,870 | 33,282 |
| 14,886 | 152 | 23,270 | 6,186 | 3,904 | 33,512 |
| 14,887 | 149 | 22,989 | 6,124 | 3,882 | 33,144 |
| 14,888 | 149 | 23,047 | 6,106 | 3,864 | 33,166 |
| 14,889 | 141 | 23,213 | 6,148 | 3,915 | 33,417 |
| 14,890 | 137 | 23,254 | 6,163 | 3,930 | 33,484 |
| 14,891 | 137 | 22,379 | 5,933 | 3,806 | 32,255 |
| 14,892 | 137 | 22,648 | 5,950 | 3,833 | 32,568 |
| 14,893 | 135 | 22,823 | 5,998 | 3,866 | 32,822 |
| 14,894 | 134 | 22,851 | 6,002 | 3,855 | 32,842 |
| 14,895 | 137 | 23,276 | 6,089 | 3,904 | 33,406 |
| 14,896 | 139 | 23,330 | 6,107 | 3,908 | 33,484 |
| 14,897 | 141 | 23,259 | 6,049 | 3,880 | 33,329 |
| 14,898 | 141 | 23,198 | 6,029 | 3,874 | 33,242 |
| 14,899 | 140 | 23,304 | 6,062 | 3,875 | 33,381 |
| 14,900 | 142 | 23,363 | 6,048 | 3,874 | 33,427 |
| 14,901 | 146 | 23,442 | 6,113 | 3,933 | 33,634 |
| 14,902 | 147 | 23,588 | 6,177 | 3,995 | 33,907 |
| 14,903 | 150 | 23,292 | 6,126 | 3,931 | 33,499 |

|        |     |        |       |       |        |
|--------|-----|--------|-------|-------|--------|
| 14,904 | 149 | 23,184 | 6,143 | 3,934 | 33,410 |
| 14,905 | 145 | 23,164 | 6,157 | 3,970 | 33,436 |
| 14,906 | 145 | 23,150 | 6,187 | 3,993 | 33,475 |
| 14,907 | 146 | 23,110 | 6,185 | 4,018 | 33,459 |
| 14,908 | 147 | 22,990 | 6,148 | 4,022 | 33,307 |
| 14,909 | 149 | 23,180 | 6,195 | 4,036 | 33,560 |
| 14,910 | 148 | 23,023 | 6,141 | 4,004 | 33,316 |
| 14,911 | 147 | 23,097 | 6,134 | 4,016 | 33,394 |
| 14,912 | 143 | 22,684 | 6,046 | 3,919 | 32,792 |
| 14,913 | 145 | 22,877 | 6,067 | 3,940 | 33,029 |
| 14,914 | 138 | 22,995 | 6,105 | 3,995 | 33,233 |
| 14,915 | 138 | 23,069 | 6,130 | 4,028 | 33,365 |
| 14,916 | 138 | 22,990 | 6,100 | 3,997 | 33,225 |
| 14,917 | 123 | 23,055 | 6,048 | 4,010 | 33,236 |
| 14,918 | 122 | 23,152 | 6,024 | 4,000 | 33,298 |
| 14,919 | 121 | 23,279 | 5,984 | 3,982 | 33,366 |
| 14,920 | 129 | 23,365 | 6,022 | 3,986 | 33,502 |
| 14,921 | 131 | 23,163 | 5,977 | 4,004 | 33,275 |
| 14,922 | 138 | 23,205 | 5,950 | 3,994 | 33,287 |
| 14,923 | 139 | 23,263 | 5,973 | 3,991 | 33,366 |
| 14,924 | 143 | 23,100 | 5,962 | 3,997 | 33,202 |
| 14,925 | 146 | 23,276 | 6,036 | 4,037 | 33,495 |
| 14,926 | 146 | 23,130 | 6,020 | 4,017 | 33,313 |
| 14,927 | 147 | 23,084 | 5,962 | 4,006 | 33,199 |
| 14,928 | 152 | 23,074 | 5,961 | 3,985 | 33,172 |
| 14,929 | 152 | 23,000 | 5,937 | 3,981 | 33,070 |
| 14,930 | 142 | 22,866 | 5,913 | 3,980 | 32,901 |
| 14,931 | 142 | 22,662 | 5,866 | 3,948 | 32,618 |
| 14,932 | 138 | 22,721 | 5,856 | 3,958 | 32,673 |
| 14,933 | 140 | 22,877 | 5,907 | 3,964 | 32,888 |
| 14,934 | 136 | 22,799 | 5,903 | 3,948 | 32,786 |
| 14,935 | 142 | 22,797 | 5,894 | 3,957 | 32,790 |

|        |     |        |       |       |        |
|--------|-----|--------|-------|-------|--------|
| 14,936 | 146 | 22,599 | 5,883 | 3,929 | 32,557 |
| 14,937 | 150 | 22,686 | 5,838 | 3,905 | 32,579 |
| 14,938 | 153 | 22,817 | 5,898 | 3,916 | 32,784 |
| 14,939 | 162 | 22,876 | 5,898 | 3,901 | 32,837 |
| 14,940 | 162 | 22,475 | 5,853 | 3,854 | 32,344 |
| 14,941 | 169 | 22,840 | 5,916 | 3,918 | 32,843 |
| 14,942 | 162 | 22,477 | 5,885 | 3,879 | 32,403 |
| 14,943 | 164 | 22,425 | 5,903 | 3,890 | 32,382 |
| 14,944 | 164 | 22,341 | 5,891 | 3,865 | 32,261 |
| 14,945 | 159 | 22,332 | 5,902 | 3,889 | 32,282 |
| 14,946 | 155 | 22,284 | 5,936 | 3,911 | 32,286 |
| 14,947 | 153 | 22,246 | 5,945 | 3,908 | 32,252 |
| 14,948 | 153 | 22,096 | 5,946 | 3,900 | 32,095 |
| 14,949 | 153 | 21,999 | 5,922 | 3,900 | 31,974 |
| 14,950 | 153 | 22,021 | 5,924 | 3,911 | 32,009 |
| 14,951 | 158 | 22,168 | 5,931 | 3,903 | 32,160 |
| 14,952 | 156 | 22,409 | 5,939 | 3,891 | 32,395 |
| 14,953 | 152 | 22,608 | 5,933 | 3,872 | 32,565 |
| 14,954 | 147 | 22,551 | 5,830 | 3,846 | 32,374 |
| 14,955 | 150 | 22,969 | 5,882 | 3,892 | 32,893 |
| 14,956 | 146 | 23,025 | 5,884 | 3,889 | 32,944 |
| 14,957 | 145 | 22,945 | 5,885 | 3,841 | 32,816 |
| 14,958 | 146 | 23,220 | 5,885 | 3,857 | 33,108 |
| 14,959 | 144 | 23,169 | 5,894 | 3,849 | 33,056 |
| 14,960 | 146 | 23,313 | 5,935 | 3,901 | 33,295 |
| 14,961 | 144 | 23,180 | 5,939 | 3,893 | 33,156 |
| 14,962 | 143 | 22,821 | 5,858 | 3,836 | 32,658 |
| 14,963 | 143 | 22,843 | 5,866 | 3,854 | 32,706 |
| 14,964 | 141 | 22,845 | 5,861 | 3,839 | 32,686 |
| 14,965 | 145 | 22,864 | 5,875 | 3,823 | 32,707 |
| 14,966 | 145 | 22,750 | 5,862 | 3,793 | 32,550 |
| 14,967 | 145 | 22,539 | 5,825 | 3,773 | 32,282 |

|        |     |        |       |       |        |
|--------|-----|--------|-------|-------|--------|
| 14,968 | 143 | 22,342 | 5,813 | 3,748 | 32,046 |
| 14,969 | 143 | 22,157 | 5,805 | 3,751 | 31,856 |
| 14,970 | 145 | 22,131 | 5,845 | 3,785 | 31,906 |
| 14,971 | 139 | 22,046 | 5,810 | 3,781 | 31,776 |
| 14,972 | 136 | 21,961 | 5,820 | 3,748 | 31,665 |
| 14,973 | 130 | 22,054 | 5,903 | 3,788 | 31,875 |
| 14,974 | 124 | 22,061 | 5,865 | 3,771 | 31,821 |
| 14,975 | 125 | 22,337 | 5,925 | 3,790 | 32,177 |
| 14,976 | 121 | 22,402 | 5,921 | 3,791 | 32,235 |
| 14,977 | 120 | 22,363 | 5,932 | 3,793 | 32,208 |
| 14,978 | 118 | 22,282 | 5,901 | 3,778 | 32,079 |
| 14,979 | 116 | 22,180 | 5,913 | 3,773 | 31,982 |
| 14,980 | 117 | 22,157 | 5,890 | 3,732 | 31,896 |
| 14,981 | 118 | 22,166 | 5,893 | 3,728 | 31,905 |
| 14,982 | 120 | 22,430 | 5,928 | 3,745 | 32,223 |
| 14,983 | 124 | 22,387 | 5,920 | 3,734 | 32,165 |
| 14,984 | 124 | 21,840 | 5,793 | 3,655 | 31,412 |
| 14,985 | 126 | 21,828 | 5,799 | 3,660 | 31,413 |
| 14,986 | 116 | 21,835 | 5,858 | 3,667 | 31,476 |
| 14,987 | 111 | 21,389 | 5,747 | 3,613 | 30,860 |
| 14,988 | 108 | 21,313 | 5,760 | 3,610 | 30,791 |
| 14,989 | 108 | 21,420 | 5,774 | 3,617 | 30,919 |
| 14,990 | 100 | 21,388 | 5,761 | 3,607 | 30,856 |
| 14,991 | 98  | 21,297 | 5,696 | 3,579 | 30,670 |
| 14,992 | 95  | 21,413 | 5,710 | 3,558 | 30,776 |
| 14,993 | 93  | 21,297 | 5,634 | 3,538 | 30,562 |
| 14,994 | 94  | 21,554 | 5,698 | 3,554 | 30,900 |
| 14,995 | 96  | 21,737 | 5,762 | 3,584 | 31,179 |
| 14,996 | 98  | 21,509 | 5,613 | 3,518 | 30,738 |
| 14,997 | 99  | 21,572 | 5,660 | 3,553 | 30,884 |
| 14,998 | 96  | 21,673 | 5,689 | 3,598 | 31,056 |
| 14,999 | 101 | 21,852 | 5,739 | 3,620 | 31,312 |

|        |     |        |       |       |        |
|--------|-----|--------|-------|-------|--------|
| 15,000 | 103 | 21,904 | 5,729 | 3,598 | 31,334 |
| 15,001 | 103 | 21,336 | 5,589 | 3,519 | 30,547 |
| 15,002 | 101 | 21,286 | 5,593 | 3,513 | 30,493 |
| 15,003 | 101 | 20,845 | 5,497 | 3,464 | 29,907 |
| 15,004 | 100 | 20,309 | 5,421 | 3,415 | 29,245 |
| 15,005 | 99  | 20,673 | 5,573 | 3,494 | 29,839 |
| 15,006 | 98  | 20,578 | 5,598 | 3,479 | 29,753 |
| 15,007 | 103 | 20,383 | 5,602 | 3,468 | 29,556 |
| 15,008 | 103 | 20,328 | 5,585 | 3,433 | 29,449 |
| 15,009 | 104 | 20,293 | 5,566 | 3,434 | 29,397 |
| 15,010 | 103 | 20,246 | 5,541 | 3,428 | 29,318 |
| 15,011 | 101 | 20,070 | 5,465 | 3,373 | 29,009 |
| 15,012 | 101 | 20,087 | 5,465 | 3,375 | 29,028 |
| 15,013 | 100 | 20,105 | 5,474 | 3,396 | 29,075 |
| 15,014 | 101 | 20,293 | 5,506 | 3,388 | 29,288 |
| 15,015 | 104 | 20,453 | 5,570 | 3,425 | 29,552 |
| 15,016 | 101 | 20,451 | 5,543 | 3,430 | 29,525 |
| 15,017 | 99  | 20,360 | 5,504 | 3,416 | 29,379 |
| 15,018 | 102 | 20,626 | 5,575 | 3,467 | 29,770 |
| 15,019 | 106 | 20,949 | 5,600 | 3,482 | 30,137 |
| 15,020 | 107 | 20,395 | 5,373 | 3,328 | 29,203 |
| 15,021 | 107 | 20,692 | 5,462 | 3,385 | 29,646 |
| 15,022 | 107 | 20,934 | 5,509 | 3,427 | 29,977 |
| 15,023 | 109 | 20,606 | 5,405 | 3,368 | 29,488 |
| 15,024 | 111 | 20,815 | 5,446 | 3,388 | 29,760 |
| 15,025 | 112 | 21,066 | 5,486 | 3,425 | 30,089 |
| 15,026 | 113 | 21,143 | 5,479 | 3,452 | 30,187 |
| 15,027 | 111 | 21,223 | 5,515 | 3,472 | 30,321 |
| 15,028 | 112 | 20,988 | 5,458 | 3,436 | 29,994 |
| 15,029 | 109 | 21,094 | 5,515 | 3,445 | 30,163 |
| 15,030 | 114 | 21,358 | 5,544 | 3,465 | 30,481 |
| 15,031 | 112 | 21,304 | 5,529 | 3,499 | 30,444 |

|        |     |        |       |       |        |
|--------|-----|--------|-------|-------|--------|
| 15,032 | 113 | 21,327 | 5,557 | 3,523 | 30,520 |
| 15,033 | 109 | 21,478 | 5,610 | 3,552 | 30,749 |
| 15,034 | 104 | 21,336 | 5,583 | 3,532 | 30,555 |
| 15,035 | 111 | 21,775 | 5,675 | 3,581 | 31,142 |
| 15,036 | 108 | 21,894 | 5,648 | 3,569 | 31,219 |
| 15,037 | 107 | 21,803 | 5,599 | 3,550 | 31,059 |
| 15,038 | 106 | 21,998 | 5,647 | 3,558 | 31,309 |
| 15,039 | 108 | 22,051 | 5,644 | 3,562 | 31,365 |
| 15,040 | 105 | 21,789 | 5,586 | 3,523 | 31,003 |
| 15,041 | 107 | 22,459 | 5,779 | 3,608 | 31,953 |
| 15,042 | 114 | 22,505 | 5,787 | 3,637 | 32,043 |
| 15,043 | 113 | 22,393 | 5,720 | 3,620 | 31,846 |
| 15,044 | 113 | 22,103 | 5,664 | 3,573 | 31,453 |
| 15,045 | 113 | 22,402 | 5,718 | 3,619 | 31,852 |
| 15,046 | 110 | 22,486 | 5,708 | 3,623 | 31,927 |
| 15,047 | 114 | 22,642 | 5,763 | 3,657 | 32,176 |
| 15,048 | 112 | 22,554 | 5,709 | 3,610 | 31,985 |
| 15,049 | 121 | 22,863 | 5,754 | 3,646 | 32,384 |
| 15,050 | 114 | 22,733 | 5,726 | 3,624 | 32,197 |
| 15,051 | 113 | 22,986 | 5,793 | 3,658 | 32,550 |
| 15,052 | 111 | 22,752 | 5,693 | 3,599 | 32,155 |
| 15,053 | 112 | 23,032 | 5,753 | 3,631 | 32,528 |
| 15,054 | 111 | 22,994 | 5,734 | 3,632 | 32,471 |
| 15,055 | 112 | 23,299 | 5,757 | 3,649 | 32,817 |
| 15,056 | 123 | 23,588 | 5,819 | 3,738 | 33,268 |
| 15,057 | 129 | 23,708 | 5,864 | 3,744 | 33,445 |
| 15,058 | 123 | 23,441 | 5,774 | 3,692 | 33,030 |
| 15,059 | 125 | 23,436 | 5,782 | 3,717 | 33,060 |
| 15,060 | 122 | 23,242 | 5,807 | 3,713 | 32,884 |
| 15,061 | 125 | 23,043 | 5,806 | 3,714 | 32,688 |
| 15,062 | 124 | 23,252 | 5,880 | 3,748 | 33,004 |
| 15,063 | 124 | 23,367 | 5,915 | 3,783 | 33,189 |

|        |     |        |       |       |        |
|--------|-----|--------|-------|-------|--------|
| 15,064 | 126 | 23,419 | 5,959 | 3,789 | 33,293 |
| 15,065 | 124 | 23,342 | 5,930 | 3,787 | 33,183 |
| 15,066 | 124 | 23,201 | 5,915 | 3,791 | 33,031 |
| 15,067 | 124 | 23,192 | 5,922 | 3,766 | 33,004 |
| 15,068 | 124 | 23,129 | 5,909 | 3,759 | 32,921 |
| 15,069 | 123 | 23,159 | 5,964 | 3,753 | 32,999 |
| 15,070 | 119 | 23,151 | 5,976 | 3,756 | 33,002 |
| 15,071 | 120 | 23,260 | 6,018 | 3,774 | 33,172 |
| 15,072 | 121 | 23,348 | 6,025 | 3,777 | 33,271 |
| 15,073 | 120 | 23,400 | 6,053 | 3,759 | 33,332 |
| 15,074 | 116 | 23,244 | 6,013 | 3,710 | 33,083 |
| 15,075 | 118 | 23,698 | 6,106 | 3,774 | 33,696 |
| 15,076 | 123 | 23,620 | 6,128 | 3,770 | 33,641 |
| 15,077 | 122 | 23,213 | 6,034 | 3,716 | 33,085 |
| 15,078 | 121 | 23,183 | 5,996 | 3,718 | 33,018 |
| 15,079 | 125 | 23,382 | 6,049 | 3,748 | 33,304 |
| 15,080 | 128 | 23,418 | 6,023 | 3,745 | 33,314 |
| 15,081 | 124 | 23,419 | 6,044 | 3,779 | 33,366 |
| 15,082 | 126 | 23,193 | 5,991 | 3,735 | 33,045 |
| 15,083 | 125 | 23,155 | 5,968 | 3,726 | 32,974 |
| 15,084 | 132 | 23,112 | 5,970 | 3,717 | 32,931 |
| 15,085 | 135 | 23,057 | 5,939 | 3,713 | 32,844 |
| 15,086 | 137 | 23,042 | 5,926 | 3,706 | 32,811 |
| 15,087 | 139 | 22,819 | 5,844 | 3,676 | 32,478 |
| 15,088 | 139 | 22,814 | 5,847 | 3,683 | 32,483 |
| 15,089 | 140 | 22,847 | 5,849 | 3,705 | 32,541 |
| 15,090 | 142 | 22,804 | 5,869 | 3,723 | 32,538 |
| 15,091 | 142 | 22,657 | 5,870 | 3,699 | 32,368 |
| 15,092 | 141 | 22,821 | 5,884 | 3,732 | 32,578 |
| 15,093 | 146 | 22,674 | 5,895 | 3,721 | 32,436 |
| 15,094 | 146 | 22,530 | 5,926 | 3,722 | 32,324 |
| 15,095 | 146 | 22,293 | 5,859 | 3,711 | 32,009 |



|        |     |        |       |       |        |
|--------|-----|--------|-------|-------|--------|
| 15,096 | 152 | 22,413 | 5,942 | 3,735 | 32,242 |
| 15,097 | 153 | 22,294 | 5,959 | 3,737 | 32,143 |
| 15,098 | 149 | 22,041 | 5,886 | 3,701 | 31,777 |
| 15,099 | 148 | 21,860 | 5,885 | 3,723 | 31,616 |
| 15,100 | 139 | 21,797 | 5,895 | 3,724 | 31,555 |
| 15,101 | 139 | 21,631 | 5,863 | 3,722 | 31,355 |
| 15,102 | 140 | 21,451 | 5,853 | 3,720 | 31,164 |
| 15,103 | 134 | 21,240 | 5,828 | 3,716 | 30,918 |
| 15,104 | 133 | 21,284 | 5,826 | 3,727 | 30,970 |
| 15,105 | 135 | 21,504 | 5,874 | 3,735 | 31,248 |
| 15,106 | 129 | 21,699 | 5,880 | 3,746 | 31,454 |
| 15,107 | 124 | 21,889 | 5,907 | 3,753 | 31,673 |
| 15,108 | 116 | 21,771 | 5,838 | 3,738 | 31,463 |
| 15,109 | 116 | 21,761 | 5,825 | 3,726 | 31,428 |
| 15,110 | 119 | 21,933 | 5,832 | 3,711 | 31,595 |
| 15,111 | 116 | 21,937 | 5,782 | 3,690 | 31,525 |
| 15,112 | 116 | 22,066 | 5,777 | 3,677 | 31,636 |
| 15,113 | 118 | 22,306 | 5,816 | 3,703 | 31,943 |
| 15,114 | 123 | 22,384 | 5,803 | 3,664 | 31,974 |
| 15,115 | 129 | 22,226 | 5,724 | 3,641 | 31,720 |
| 15,116 | 133 | 21,893 | 5,646 | 3,579 | 31,251 |
| 15,117 | 133 | 21,972 | 5,649 | 3,573 | 31,327 |
| 15,118 | 138 | 22,101 | 5,653 | 3,586 | 31,478 |
| 15,119 | 138 | 21,978 | 5,619 | 3,578 | 31,313 |
| 15,120 | 136 | 21,924 | 5,586 | 3,579 | 31,225 |
| 15,121 | 138 | 21,698 | 5,548 | 3,568 | 30,952 |
| 15,122 | 133 | 21,560 | 5,498 | 3,519 | 30,710 |
| 15,123 | 136 | 21,529 | 5,477 | 3,512 | 30,654 |
| 15,124 | 136 | 21,579 | 5,484 | 3,512 | 30,711 |
| 15,125 | 141 | 21,476 | 5,454 | 3,492 | 30,563 |
| 15,126 | 143 | 21,465 | 5,456 | 3,488 | 30,552 |
| 15,127 | 136 | 21,283 | 5,377 | 3,457 | 30,253 |

|        |     |        |       |       |        |
|--------|-----|--------|-------|-------|--------|
| 15,128 | 139 | 21,418 | 5,392 | 3,446 | 30,395 |
| 15,129 | 144 | 21,553 | 5,411 | 3,433 | 30,541 |
| 15,130 | 140 | 21,463 | 5,346 | 3,421 | 30,370 |
| 15,131 | 138 | 21,669 | 5,417 | 3,457 | 30,681 |
| 15,132 | 135 | 21,396 | 5,276 | 3,396 | 30,203 |
| 15,133 | 135 | 21,649 | 5,342 | 3,424 | 30,550 |
| 15,134 | 129 | 21,729 | 5,391 | 3,465 | 30,714 |
| 15,135 | 125 | 21,656 | 5,360 | 3,468 | 30,609 |
| 15,136 | 125 | 21,686 | 5,348 | 3,447 | 30,606 |
| 15,137 | 118 | 21,573 | 5,334 | 3,433 | 30,458 |
| 15,138 | 121 | 21,881 | 5,429 | 3,463 | 30,894 |
| 15,139 | 128 | 21,732 | 5,366 | 3,409 | 30,635 |
| 15,140 | 128 | 21,594 | 5,294 | 3,372 | 30,388 |
| 15,141 | 129 | 22,054 | 5,354 | 3,465 | 31,002 |
| 15,142 | 129 | 22,055 | 5,359 | 3,457 | 31,000 |
| 15,143 | 113 | 22,181 | 5,353 | 3,440 | 31,087 |
| 15,144 | 111 | 22,084 | 5,294 | 3,380 | 30,869 |
| 15,145 | 112 | 22,380 | 5,356 | 3,428 | 31,276 |
| 15,146 | 110 | 22,391 | 5,357 | 3,428 | 31,286 |
| 15,147 | 110 | 22,811 | 5,405 | 3,504 | 31,830 |
| 15,148 | 114 | 22,827 | 5,395 | 3,456 | 31,792 |
| 15,149 | 116 | 23,014 | 5,423 | 3,470 | 32,023 |
| 15,150 | 120 | 23,245 | 5,489 | 3,513 | 32,367 |
| 15,151 | 124 | 23,415 | 5,521 | 3,519 | 32,579 |
| 15,152 | 128 | 23,263 | 5,441 | 3,458 | 32,290 |
| 15,153 | 129 | 23,293 | 5,432 | 3,454 | 32,308 |
| 15,154 | 134 | 23,162 | 5,399 | 3,410 | 32,105 |
| 15,155 | 133 | 22,904 | 5,342 | 3,360 | 31,739 |
| 15,156 | 138 | 23,438 | 5,519 | 3,492 | 32,587 |
| 15,157 | 142 | 23,632 | 5,559 | 3,496 | 32,829 |
| 15,158 | 145 | 23,069 | 5,435 | 3,405 | 32,054 |
| 15,159 | 146 | 23,023 | 5,444 | 3,407 | 32,020 |

|        |     |        |       |       |        |
|--------|-----|--------|-------|-------|--------|
| 15,160 | 144 | 22,774 | 5,376 | 3,384 | 31,678 |
| 15,161 | 142 | 22,394 | 5,271 | 3,345 | 31,152 |
| 15,162 | 144 | 22,896 | 5,415 | 3,455 | 31,910 |
| 15,163 | 145 | 22,848 | 5,402 | 3,468 | 31,863 |
| 15,164 | 147 | 23,150 | 5,494 | 3,498 | 32,289 |
| 15,165 | 142 | 23,225 | 5,492 | 3,513 | 32,372 |
| 15,166 | 134 | 22,979 | 5,451 | 3,482 | 32,046 |
| 15,167 | 133 | 23,293 | 5,558 | 3,528 | 32,512 |
| 15,168 | 135 | 23,320 | 5,560 | 3,547 | 32,562 |
| 15,169 | 131 | 23,475 | 5,607 | 3,569 | 32,782 |
| 15,170 | 133 | 23,495 | 5,596 | 3,569 | 32,793 |
| 15,171 | 133 | 23,595 | 5,595 | 3,571 | 32,894 |
| 15,172 | 132 | 23,628 | 5,625 | 3,587 | 32,972 |
| 15,173 | 132 | 23,580 | 5,617 | 3,593 | 32,922 |
| 15,174 | 129 | 23,799 | 5,653 | 3,613 | 33,194 |
| 15,175 | 134 | 23,505 | 5,586 | 3,590 | 32,815 |
| 15,176 | 128 | 23,288 | 5,527 | 3,562 | 32,505 |
| 15,177 | 128 | 23,328 | 5,501 | 3,564 | 32,521 |
| 15,178 | 129 | 23,560 | 5,530 | 3,600 | 32,819 |
| 15,179 | 130 | 23,554 | 5,534 | 3,612 | 32,830 |
| 15,180 | 125 | 23,450 | 5,502 | 3,617 | 32,694 |
| 15,181 | 126 | 23,248 | 5,477 | 3,602 | 32,453 |
| 15,182 | 126 | 22,938 | 5,416 | 3,577 | 32,057 |
| 15,183 | 129 | 23,116 | 5,493 | 3,590 | 32,328 |
| 15,184 | 128 | 22,925 | 5,442 | 3,565 | 32,060 |
| 15,185 | 130 | 23,228 | 5,465 | 3,587 | 32,410 |
| 15,186 | 128 | 23,106 | 5,451 | 3,549 | 32,234 |
| 15,187 | 128 | 23,121 | 5,445 | 3,546 | 32,240 |
| 15,188 | 124 | 23,243 | 5,452 | 3,575 | 32,394 |
| 15,189 | 121 | 23,073 | 5,414 | 3,556 | 32,164 |
| 15,190 | 116 | 22,606 | 5,320 | 3,506 | 31,548 |
| 15,191 | 113 | 22,508 | 5,290 | 3,480 | 31,391 |

|        |     |        |       |       |        |
|--------|-----|--------|-------|-------|--------|
| 15,192 | 113 | 22,472 | 5,290 | 3,439 | 31,314 |
| 15,193 | 112 | 22,204 | 5,223 | 3,405 | 30,944 |
| 15,194 | 112 | 22,311 | 5,265 | 3,451 | 31,139 |
| 15,195 | 116 | 22,433 | 5,271 | 3,486 | 31,306 |
| 15,196 | 119 | 22,523 | 5,251 | 3,470 | 31,363 |
| 15,197 | 124 | 21,801 | 5,103 | 3,330 | 30,358 |
| 15,198 | 125 | 22,090 | 5,160 | 3,360 | 30,735 |
| 15,199 | 121 | 22,194 | 5,146 | 3,355 | 30,816 |
| 15,200 | 123 | 22,319 | 5,139 | 3,347 | 30,928 |
| 15,201 | 123 | 22,348 | 5,129 | 3,335 | 30,935 |
| 15,202 | 121 | 22,427 | 5,156 | 3,381 | 31,085 |
| 15,203 | 120 | 22,290 | 5,119 | 3,360 | 30,889 |
| 15,204 | 119 | 21,993 | 5,062 | 3,321 | 30,495 |
| 15,205 | 113 | 21,897 | 5,084 | 3,323 | 30,417 |
| 15,206 | 114 | 21,843 | 5,102 | 3,320 | 30,379 |
| 15,207 | 114 | 21,829 | 5,126 | 3,325 | 30,394 |
| 15,208 | 111 | 21,733 | 5,134 | 3,348 | 30,326 |
| 15,209 | 109 | 21,639 | 5,148 | 3,353 | 30,249 |
| 15,210 | 109 | 21,628 | 5,148 | 3,352 | 30,237 |
| 15,211 | 106 | 21,654 | 5,164 | 3,367 | 30,291 |
| 15,212 | 105 | 21,628 | 5,165 | 3,372 | 30,270 |
| 15,213 | 107 | 21,640 | 5,182 | 3,368 | 30,297 |
| 15,214 | 108 | 21,784 | 5,176 | 3,376 | 30,444 |
| 15,215 | 107 | 21,545 | 5,143 | 3,379 | 30,174 |
| 15,216 | 109 | 21,971 | 5,232 | 3,426 | 30,738 |
| 15,217 | 111 | 22,273 | 5,226 | 3,450 | 31,060 |
| 15,218 | 109 | 22,254 | 5,193 | 3,436 | 30,992 |
| 15,219 | 112 | 22,451 | 5,273 | 3,448 | 31,284 |
| 15,220 | 117 | 22,723 | 5,323 | 3,478 | 31,641 |
| 15,221 | 116 | 22,752 | 5,309 | 3,469 | 31,646 |
| 15,222 | 121 | 23,072 | 5,344 | 3,507 | 32,044 |
| 15,223 | 124 | 23,070 | 5,316 | 3,487 | 31,997 |

|        |     |        |       |       |        |
|--------|-----|--------|-------|-------|--------|
| 15,224 | 124 | 23,105 | 5,315 | 3,494 | 32,038 |
| 15,225 | 123 | 22,930 | 5,257 | 3,451 | 31,761 |
| 15,226 | 126 | 23,136 | 5,300 | 3,466 | 32,028 |
| 15,227 | 122 | 23,173 | 5,304 | 3,470 | 32,069 |
| 15,228 | 123 | 23,272 | 5,362 | 3,488 | 32,245 |
| 15,229 | 123 | 23,401 | 5,399 | 3,485 | 32,408 |
| 15,230 | 120 | 23,538 | 5,455 | 3,518 | 32,631 |
| 15,231 | 121 | 23,674 | 5,495 | 3,545 | 32,835 |
| 15,232 | 121 | 23,721 | 5,455 | 3,489 | 32,786 |
| 15,233 | 122 | 24,092 | 5,506 | 3,517 | 33,237 |
| 15,234 | 126 | 24,265 | 5,571 | 3,570 | 33,532 |
| 15,235 | 131 | 24,337 | 5,584 | 3,566 | 33,618 |
| 15,236 | 131 | 24,243 | 5,577 | 3,546 | 33,497 |
| 15,237 | 134 | 24,426 | 5,633 | 3,573 | 33,766 |
| 15,238 | 134 | 24,238 | 5,605 | 3,539 | 33,516 |
| 15,239 | 141 | 24,191 | 5,586 | 3,518 | 33,436 |
| 15,240 | 141 | 24,209 | 5,603 | 3,524 | 33,477 |
| 15,241 | 136 | 24,103 | 5,617 | 3,547 | 33,403 |
| 15,242 | 138 | 24,139 | 5,627 | 3,576 | 33,480 |
| 15,243 | 141 | 24,134 | 5,577 | 3,551 | 33,403 |
| 15,244 | 142 | 24,389 | 5,642 | 3,581 | 33,754 |
| 15,245 | 149 | 24,367 | 5,686 | 3,589 | 33,791 |
| 15,246 | 149 | 24,470 | 5,709 | 3,598 | 33,926 |
| 15,247 | 147 | 24,366 | 5,710 | 3,622 | 33,845 |
| 15,248 | 138 | 24,066 | 5,656 | 3,607 | 33,467 |
| 15,249 | 142 | 23,966 | 5,624 | 3,616 | 33,348 |
| 15,250 | 147 | 24,360 | 5,695 | 3,646 | 33,848 |
| 15,251 | 143 | 24,290 | 5,699 | 3,641 | 33,773 |
| 15,252 | 142 | 24,302 | 5,702 | 3,639 | 33,785 |
| 15,253 | 138 | 24,129 | 5,633 | 3,593 | 33,493 |
| 15,254 | 137 | 24,193 | 5,606 | 3,566 | 33,502 |
| 15,255 | 138 | 24,405 | 5,645 | 3,601 | 33,789 |

|        |     |        |       |       |        |
|--------|-----|--------|-------|-------|--------|
| 15,256 | 137 | 24,406 | 5,619 | 3,596 | 33,758 |
| 15,257 | 135 | 24,445 | 5,576 | 3,584 | 33,740 |
| 15,258 | 137 | 24,517 | 5,576 | 3,569 | 33,799 |
| 15,259 | 138 | 24,431 | 5,504 | 3,518 | 33,591 |
| 15,260 | 139 | 24,544 | 5,480 | 3,483 | 33,646 |
| 15,261 | 141 | 24,537 | 5,454 | 3,446 | 33,578 |
| 15,262 | 141 | 24,613 | 5,470 | 3,441 | 33,665 |
| 15,263 | 140 | 24,778 | 5,487 | 3,475 | 33,880 |
| 15,264 | 139 | 24,630 | 5,426 | 3,438 | 33,633 |
| 15,265 | 138 | 24,542 | 5,405 | 3,422 | 33,507 |
| 15,266 | 141 | 23,875 | 5,281 | 3,334 | 32,631 |
| 15,267 | 140 | 23,953 | 5,278 | 3,354 | 32,725 |
| 15,268 | 145 | 24,009 | 5,316 | 3,361 | 32,831 |
| 15,269 | 154 | 23,696 | 5,230 | 3,324 | 32,404 |
| 15,270 | 150 | 23,265 | 5,147 | 3,280 | 31,842 |
| 15,271 | 153 | 23,354 | 5,201 | 3,299 | 32,007 |
| 15,272 | 155 | 22,939 | 5,126 | 3,216 | 31,436 |
| 15,273 | 156 | 22,826 | 5,124 | 3,220 | 31,326 |
| 15,274 | 152 | 22,639 | 5,142 | 3,209 | 31,142 |
| 15,275 | 155 | 22,719 | 5,177 | 3,233 | 31,284 |
| 15,276 | 155 | 22,728 | 5,181 | 3,222 | 31,286 |
| 15,277 | 154 | 22,759 | 5,189 | 3,266 | 31,368 |
| 15,278 | 157 | 22,725 | 5,204 | 3,286 | 31,372 |
| 15,279 | 160 | 22,600 | 5,173 | 3,289 | 31,222 |
| 15,280 | 163 | 22,834 | 5,214 | 3,322 | 31,533 |
| 15,281 | 166 | 22,761 | 5,216 | 3,286 | 31,429 |
| 15,282 | 165 | 22,554 | 5,172 | 3,246 | 31,137 |
| 15,283 | 171 | 22,590 | 5,173 | 3,265 | 31,199 |
| 15,284 | 171 | 22,846 | 5,226 | 3,322 | 31,565 |
| 15,285 | 164 | 22,668 | 5,159 | 3,289 | 31,280 |
| 15,286 | 164 | 22,430 | 5,131 | 3,293 | 31,018 |
| 15,287 | 164 | 22,404 | 5,136 | 3,293 | 30,997 |

|        |     |        |       |       |        |
|--------|-----|--------|-------|-------|--------|
| 15,288 | 165 | 22,694 | 5,172 | 3,323 | 31,354 |
| 15,289 | 164 | 22,456 | 5,147 | 3,320 | 31,087 |
| 15,290 | 158 | 22,476 | 5,155 | 3,357 | 31,146 |
| 15,291 | 163 | 22,638 | 5,116 | 3,328 | 31,245 |
| 15,292 | 173 | 22,557 | 5,138 | 3,321 | 31,189 |
| 15,293 | 170 | 22,354 | 5,131 | 3,304 | 30,959 |
| 15,294 | 171 | 22,348 | 5,148 | 3,321 | 30,988 |
| 15,295 | 170 | 22,093 | 5,081 | 3,307 | 30,651 |
| 15,296 | 180 | 22,915 | 5,221 | 3,417 | 31,733 |
| 15,297 | 178 | 23,145 | 5,250 | 3,460 | 32,033 |
| 15,298 | 180 | 23,284 | 5,268 | 3,458 | 32,190 |
| 15,299 | 177 | 23,029 | 5,214 | 3,428 | 31,848 |
| 15,300 | 173 | 23,342 | 5,348 | 3,481 | 32,344 |
| 15,301 | 168 | 23,317 | 5,343 | 3,490 | 32,318 |
| 15,302 | 171 | 22,821 | 5,216 | 3,399 | 31,607 |
| 15,303 | 174 | 23,076 | 5,237 | 3,433 | 31,920 |
| 15,304 | 172 | 23,370 | 5,309 | 3,486 | 32,337 |
| 15,305 | 173 | 23,235 | 5,270 | 3,455 | 32,133 |
| 15,306 | 179 | 23,151 | 5,243 | 3,442 | 32,015 |
| 15,307 | 179 | 23,163 | 5,233 | 3,445 | 32,020 |
| 15,308 | 176 | 23,336 | 5,265 | 3,455 | 32,232 |
| 15,309 | 173 | 23,025 | 5,217 | 3,436 | 31,851 |
| 15,310 | 171 | 22,927 | 5,211 | 3,442 | 31,751 |
| 15,311 | 172 | 23,147 | 5,258 | 3,485 | 32,062 |
| 15,312 | 173 | 23,032 | 5,247 | 3,456 | 31,908 |
| 15,313 | 175 | 23,117 | 5,275 | 3,465 | 32,032 |
| 15,314 | 175 | 23,091 | 5,279 | 3,460 | 32,005 |
| 15,315 | 175 | 22,954 | 5,272 | 3,456 | 31,857 |
| 15,316 | 174 | 23,365 | 5,354 | 3,527 | 32,420 |
| 15,317 | 167 | 23,109 | 5,315 | 3,493 | 32,084 |
| 15,318 | 162 | 22,754 | 5,213 | 3,427 | 31,556 |
| 15,319 | 161 | 22,752 | 5,234 | 3,428 | 31,575 |

|        |     |        |       |       |        |
|--------|-----|--------|-------|-------|--------|
| 15,320 | 151 | 22,477 | 5,168 | 3,381 | 31,177 |
| 15,321 | 150 | 22,382 | 5,139 | 3,346 | 31,017 |
| 15,322 | 146 | 23,445 | 5,342 | 3,495 | 32,428 |
| 15,323 | 138 | 23,203 | 5,284 | 3,489 | 32,114 |
| 15,324 | 136 | 22,901 | 5,165 | 3,405 | 31,607 |
| 15,325 | 135 | 23,035 | 5,193 | 3,405 | 31,768 |
| 15,326 | 128 | 23,066 | 5,203 | 3,406 | 31,803 |
| 15,327 | 129 | 23,206 | 5,260 | 3,430 | 32,025 |
| 15,328 | 127 | 23,355 | 5,323 | 3,453 | 32,258 |
| 15,329 | 127 | 23,220 | 5,310 | 3,422 | 32,079 |
| 15,330 | 120 | 23,207 | 5,296 | 3,399 | 32,022 |
| 15,331 | 124 | 23,250 | 5,283 | 3,409 | 32,066 |
| 15,332 | 122 | 22,831 | 5,207 | 3,382 | 31,542 |
| 15,333 | 120 | 23,108 | 5,345 | 3,440 | 32,013 |
| 15,334 | 123 | 23,032 | 5,343 | 3,428 | 31,926 |
| 15,335 | 127 | 22,807 | 5,320 | 3,349 | 31,603 |
| 15,336 | 127 | 22,931 | 5,314 | 3,337 | 31,709 |
| 15,337 | 125 | 22,946 | 5,326 | 3,346 | 31,743 |
| 15,338 | 133 | 23,019 | 5,375 | 3,372 | 31,899 |
| 15,339 | 130 | 22,794 | 5,335 | 3,346 | 31,605 |
| 15,340 | 134 | 22,678 | 5,294 | 3,304 | 31,410 |
| 15,341 | 134 | 22,602 | 5,304 | 3,307 | 31,347 |
| 15,342 | 131 | 22,500 | 5,320 | 3,287 | 31,238 |
| 15,343 | 122 | 22,460 | 5,315 | 3,280 | 31,177 |
| 15,344 | 118 | 22,348 | 5,286 | 3,225 | 30,977 |
| 15,345 | 121 | 22,502 | 5,342 | 3,244 | 31,209 |
| 15,346 | 115 | 22,389 | 5,322 | 3,241 | 31,067 |
| 15,347 | 115 | 22,177 | 5,306 | 3,197 | 30,795 |
| 15,348 | 116 | 22,879 | 5,491 | 3,302 | 31,788 |
| 15,349 | 123 | 22,485 | 5,427 | 3,273 | 31,308 |
| 15,350 | 124 | 22,236 | 5,359 | 3,259 | 30,978 |
| 15,351 | 126 | 22,846 | 5,477 | 3,334 | 31,783 |



|        |     |        |       |       |        |
|--------|-----|--------|-------|-------|--------|
| 15,352 | 139 | 22,631 | 5,436 | 3,307 | 31,513 |
| 15,353 | 135 | 22,418 | 5,399 | 3,295 | 31,247 |
| 15,354 | 134 | 22,782 | 5,529 | 3,352 | 31,797 |
| 15,355 | 133 | 22,671 | 5,557 | 3,351 | 31,712 |
| 15,356 | 138 | 22,849 | 5,603 | 3,393 | 31,983 |
| 15,357 | 141 | 22,844 | 5,624 | 3,393 | 32,002 |
| 15,358 | 145 | 22,771 | 5,620 | 3,385 | 31,921 |
| 15,359 | 145 | 22,673 | 5,638 | 3,393 | 31,849 |
| 15,360 | 150 | 22,726 | 5,674 | 3,396 | 31,946 |
| 15,361 | 152 | 22,997 | 5,742 | 3,417 | 32,308 |
| 15,362 | 152 | 23,130 | 5,789 | 3,429 | 32,500 |
| 15,363 | 152 | 23,051 | 5,813 | 3,480 | 32,496 |
| 15,364 | 155 | 23,055 | 5,860 | 3,492 | 32,562 |
| 15,365 | 153 | 22,791 | 5,803 | 3,467 | 32,214 |
| 15,366 | 153 | 22,715 | 5,798 | 3,465 | 32,131 |
| 15,367 | 152 | 22,781 | 5,851 | 3,491 | 32,275 |
| 15,368 | 152 | 22,699 | 5,837 | 3,504 | 32,192 |
| 15,369 | 153 | 22,692 | 5,806 | 3,467 | 32,118 |
| 15,370 | 152 | 22,510 | 5,754 | 3,442 | 31,858 |
| 15,371 | 154 | 22,375 | 5,736 | 3,433 | 31,698 |
| 15,372 | 159 | 22,674 | 5,788 | 3,491 | 32,112 |
| 15,373 | 161 | 22,554 | 5,823 | 3,493 | 32,031 |
| 15,374 | 162 | 22,715 | 5,887 | 3,527 | 32,291 |
| 15,375 | 165 | 22,464 | 5,841 | 3,516 | 31,986 |
| 15,376 | 165 | 22,326 | 5,829 | 3,516 | 31,836 |
| 15,377 | 167 | 22,477 | 5,880 | 3,564 | 32,088 |
| 15,378 | 165 | 22,434 | 5,873 | 3,565 | 32,037 |
| 15,379 | 163 | 22,420 | 5,856 | 3,559 | 31,998 |
| 15,380 | 166 | 22,425 | 5,858 | 3,544 | 31,993 |
| 15,381 | 170 | 22,571 | 5,872 | 3,561 | 32,174 |
| 15,382 | 166 | 22,377 | 5,805 | 3,525 | 31,873 |
| 15,383 | 165 | 22,235 | 5,760 | 3,492 | 31,652 |

|        |     |        |       |       |        |
|--------|-----|--------|-------|-------|--------|
| 15,384 | 164 | 21,998 | 5,704 | 3,461 | 31,327 |
| 15,385 | 164 | 22,644 | 5,849 | 3,573 | 32,230 |
| 15,386 | 159 | 22,392 | 5,773 | 3,570 | 31,894 |
| 15,387 | 158 | 22,547 | 5,815 | 3,585 | 32,105 |
| 15,388 | 151 | 22,418 | 5,732 | 3,551 | 31,852 |
| 15,389 | 153 | 22,232 | 5,677 | 3,514 | 31,576 |
| 15,390 | 153 | 22,212 | 5,690 | 3,503 | 31,558 |
| 15,391 | 150 | 22,092 | 5,658 | 3,481 | 31,381 |
| 15,392 | 150 | 21,928 | 5,622 | 3,469 | 31,169 |
| 15,393 | 159 | 22,497 | 5,782 | 3,542 | 31,980 |
| 15,394 | 161 | 22,177 | 5,705 | 3,502 | 31,545 |
| 15,395 | 178 | 22,861 | 5,914 | 3,622 | 32,575 |
| 15,396 | 180 | 22,806 | 5,899 | 3,625 | 32,510 |
| 15,397 | 184 | 22,894 | 5,866 | 3,596 | 32,540 |
| 15,398 | 191 | 22,573 | 5,793 | 3,525 | 32,082 |
| 15,399 | 191 | 22,328 | 5,731 | 3,495 | 31,745 |
| 15,400 | 184 | 22,510 | 5,739 | 3,477 | 31,910 |
| 15,401 | 184 | 22,430 | 5,720 | 3,483 | 31,817 |
| 15,402 | 183 | 22,460 | 5,718 | 3,487 | 31,848 |
| 15,403 | 174 | 22,651 | 5,722 | 3,470 | 32,017 |
| 15,404 | 181 | 22,579 | 5,691 | 3,458 | 31,909 |
| 15,405 | 179 | 22,399 | 5,630 | 3,427 | 31,635 |
| 15,406 | 182 | 23,130 | 5,789 | 3,527 | 32,628 |
| 15,407 | 182 | 23,134 | 5,809 | 3,527 | 32,652 |
| 15,408 | 179 | 23,377 | 5,850 | 3,568 | 32,974 |
| 15,409 | 178 | 23,263 | 5,836 | 3,561 | 32,838 |
| 15,410 | 174 | 23,304 | 5,854 | 3,589 | 32,921 |
| 15,411 | 173 | 23,318 | 5,839 | 3,611 | 32,941 |
| 15,412 | 171 | 23,319 | 5,849 | 3,632 | 32,971 |
| 15,413 | 174 | 23,230 | 5,840 | 3,624 | 32,868 |
| 15,414 | 173 | 23,350 | 5,813 | 3,593 | 32,929 |
| 15,415 | 168 | 23,068 | 5,736 | 3,541 | 32,513 |

|        |     |        |       |       |        |
|--------|-----|--------|-------|-------|--------|
| 15,416 | 167 | 23,067 | 5,777 | 3,532 | 32,543 |
| 15,417 | 172 | 23,016 | 5,740 | 3,494 | 32,422 |
| 15,418 | 176 | 22,986 | 5,715 | 3,471 | 32,348 |
| 15,419 | 176 | 23,067 | 5,706 | 3,466 | 32,415 |
| 15,420 | 171 | 22,880 | 5,660 | 3,437 | 32,148 |
| 15,421 | 171 | 23,103 | 5,698 | 3,476 | 32,448 |
| 15,422 | 166 | 23,008 | 5,687 | 3,469 | 32,330 |
| 15,423 | 169 | 23,453 | 5,796 | 3,523 | 32,941 |
| 15,424 | 167 | 23,209 | 5,761 | 3,494 | 32,631 |
| 15,425 | 172 | 23,509 | 5,797 | 3,520 | 32,998 |
| 15,426 | 171 | 23,341 | 5,762 | 3,498 | 32,772 |
| 15,427 | 173 | 23,309 | 5,747 | 3,481 | 32,710 |
| 15,428 | 174 | 23,810 | 5,868 | 3,528 | 33,380 |
| 15,429 | 175 | 23,622 | 5,811 | 3,494 | 33,102 |
| 15,430 | 174 | 23,623 | 5,787 | 3,493 | 33,077 |
| 15,431 | 173 | 23,468 | 5,771 | 3,498 | 32,910 |
| 15,432 | 172 | 23,399 | 5,738 | 3,484 | 32,793 |
| 15,433 | 175 | 23,567 | 5,765 | 3,516 | 33,023 |
| 15,434 | 169 | 23,289 | 5,714 | 3,479 | 32,651 |
| 15,435 | 168 | 23,320 | 5,706 | 3,487 | 32,681 |
| 15,436 | 172 | 23,109 | 5,640 | 3,424 | 32,345 |
| 15,437 | 173 | 23,149 | 5,638 | 3,423 | 32,383 |
| 15,438 | 171 | 23,085 | 5,660 | 3,451 | 32,367 |
| 15,439 | 170 | 23,017 | 5,680 | 3,459 | 32,326 |
| 15,440 | 167 | 22,758 | 5,564 | 3,415 | 31,904 |
| 15,441 | 170 | 23,063 | 5,635 | 3,455 | 32,323 |
| 15,442 | 168 | 23,211 | 5,662 | 3,493 | 32,534 |
| 15,443 | 168 | 23,335 | 5,705 | 3,526 | 32,734 |
| 15,444 | 162 | 23,400 | 5,753 | 3,561 | 32,876 |
| 15,445 | 154 | 23,346 | 5,688 | 3,536 | 32,724 |
| 15,446 | 152 | 22,976 | 5,582 | 3,511 | 32,221 |
| 15,447 | 150 | 22,949 | 5,591 | 3,514 | 32,204 |

|        |     |        |       |       |        |
|--------|-----|--------|-------|-------|--------|
| 15,448 | 142 | 22,814 | 5,586 | 3,515 | 32,057 |
| 15,449 | 134 | 22,472 | 5,522 | 3,498 | 31,626 |
| 15,450 | 139 | 22,373 | 5,519 | 3,483 | 31,514 |
| 15,451 | 134 | 22,192 | 5,460 | 3,470 | 31,256 |
| 15,452 | 133 | 22,755 | 5,613 | 3,531 | 32,032 |
| 15,453 | 130 | 22,409 | 5,564 | 3,498 | 31,601 |
| 15,454 | 129 | 22,273 | 5,598 | 3,538 | 31,538 |
| 15,455 | 119 | 22,003 | 5,553 | 3,528 | 31,203 |
| 15,456 | 121 | 22,225 | 5,605 | 3,582 | 31,533 |
| 15,457 | 116 | 22,233 | 5,653 | 3,584 | 31,586 |
| 15,458 | 115 | 21,998 | 5,632 | 3,569 | 31,314 |
| 15,459 | 110 | 22,070 | 5,681 | 3,584 | 31,445 |
| 15,460 | 109 | 21,790 | 5,574 | 3,496 | 30,969 |
| 15,461 | 110 | 22,112 | 5,626 | 3,516 | 31,364 |
| 15,462 | 112 | 22,361 | 5,701 | 3,542 | 31,716 |
| 15,463 | 111 | 22,032 | 5,608 | 3,487 | 31,238 |
| 15,464 | 110 | 22,078 | 5,653 | 3,521 | 31,362 |
| 15,465 | 111 | 22,119 | 5,668 | 3,545 | 31,443 |
| 15,466 | 114 | 21,977 | 5,569 | 3,506 | 31,166 |
| 15,467 | 117 | 22,229 | 5,621 | 3,533 | 31,500 |
| 15,468 | 114 | 21,974 | 5,591 | 3,522 | 31,201 |
| 15,469 | 110 | 21,735 | 5,551 | 3,495 | 30,891 |
| 15,470 | 116 | 21,999 | 5,663 | 3,583 | 31,361 |
| 15,471 | 125 | 21,966 | 5,662 | 3,599 | 31,352 |
| 15,472 | 131 | 21,901 | 5,696 | 3,603 | 31,331 |
| 15,473 | 129 | 21,736 | 5,611 | 3,583 | 31,059 |
| 15,474 | 143 | 21,730 | 5,591 | 3,573 | 31,037 |
| 15,475 | 150 | 21,743 | 5,615 | 3,575 | 31,083 |
| 15,476 | 145 | 21,429 | 5,554 | 3,545 | 30,673 |
| 15,477 | 151 | 21,778 | 5,647 | 3,586 | 31,162 |
| 15,478 | 149 | 21,552 | 5,583 | 3,550 | 30,834 |
| 15,479 | 150 | 21,419 | 5,574 | 3,567 | 30,710 |

|        |     |        |       |       |        |
|--------|-----|--------|-------|-------|--------|
| 15,480 | 148 | 21,337 | 5,573 | 3,560 | 30,618 |
| 15,481 | 150 | 21,656 | 5,611 | 3,593 | 31,010 |
| 15,482 | 146 | 21,402 | 5,548 | 3,558 | 30,654 |
| 15,483 | 150 | 21,616 | 5,623 | 3,578 | 30,967 |
| 15,484 | 144 | 21,335 | 5,589 | 3,514 | 30,582 |
| 15,485 | 144 | 21,365 | 5,608 | 3,522 | 30,639 |
| 15,486 | 144 | 21,400 | 5,619 | 3,526 | 30,689 |
| 15,487 | 144 | 21,678 | 5,739 | 3,610 | 31,171 |
| 15,488 | 145 | 21,493 | 5,683 | 3,587 | 30,908 |
| 15,489 | 143 | 21,354 | 5,670 | 3,576 | 30,743 |
| 15,490 | 145 | 21,669 | 5,789 | 3,664 | 31,267 |
| 15,491 | 148 | 21,912 | 5,858 | 3,721 | 31,639 |
| 15,492 | 146 | 21,957 | 5,895 | 3,742 | 31,740 |
| 15,493 | 142 | 21,895 | 5,869 | 3,733 | 31,639 |
| 15,494 | 136 | 21,834 | 5,848 | 3,719 | 31,537 |
| 15,495 | 138 | 21,925 | 5,838 | 3,715 | 31,616 |
| 15,496 | 142 | 22,024 | 5,834 | 3,731 | 31,731 |
| 15,497 | 139 | 21,929 | 5,817 | 3,712 | 31,597 |
| 15,498 | 147 | 22,102 | 5,893 | 3,747 | 31,889 |
| 15,499 | 147 | 22,105 | 5,902 | 3,763 | 31,917 |
| 15,500 | 145 | 22,020 | 5,876 | 3,771 | 31,812 |
| 15,501 | 143 | 22,182 | 5,891 | 3,813 | 32,029 |
| 15,502 | 146 | 21,880 | 5,900 | 3,782 | 31,708 |
| 15,503 | 151 | 21,594 | 5,847 | 3,745 | 31,337 |
| 15,504 | 157 | 21,863 | 5,920 | 3,780 | 31,720 |
| 15,505 | 157 | 21,336 | 5,785 | 3,675 | 30,953 |
| 15,506 | 164 | 21,551 | 5,844 | 3,707 | 31,266 |
| 15,507 | 162 | 21,477 | 5,805 | 3,687 | 31,131 |
| 15,508 | 168 | 21,319 | 5,696 | 3,645 | 30,828 |
| 15,509 | 168 | 21,138 | 5,612 | 3,612 | 30,530 |
| 15,510 | 168 | 21,167 | 5,593 | 3,620 | 30,548 |
| 15,511 | 178 | 21,132 | 5,611 | 3,637 | 30,558 |

|        |     |        |       |       |        |
|--------|-----|--------|-------|-------|--------|
| 15,512 | 181 | 21,239 | 5,661 | 3,660 | 30,741 |
| 15,513 | 180 | 21,527 | 5,686 | 3,699 | 31,092 |
| 15,514 | 189 | 21,766 | 5,764 | 3,732 | 31,451 |
| 15,515 | 187 | 21,948 | 5,815 | 3,799 | 31,749 |
| 15,516 | 188 | 22,070 | 5,847 | 3,805 | 31,910 |
| 15,517 | 186 | 22,142 | 5,882 | 3,818 | 32,028 |
| 15,518 | 184 | 21,981 | 5,849 | 3,801 | 31,815 |
| 15,519 | 184 | 22,088 | 5,851 | 3,797 | 31,920 |
| 15,520 | 183 | 22,317 | 5,910 | 3,792 | 32,202 |
| 15,521 | 181 | 22,331 | 5,896 | 3,781 | 32,189 |
| 15,522 | 174 | 22,566 | 5,978 | 3,814 | 32,532 |
| 15,523 | 165 | 22,138 | 5,848 | 3,726 | 31,877 |
| 15,524 | 163 | 22,262 | 5,893 | 3,748 | 32,066 |
| 15,525 | 154 | 22,438 | 5,944 | 3,776 | 32,312 |
| 15,526 | 150 | 22,272 | 5,893 | 3,735 | 32,050 |
| 15,527 | 151 | 22,065 | 5,850 | 3,703 | 31,769 |
| 15,528 | 154 | 22,598 | 5,986 | 3,764 | 32,502 |
| 15,529 | 151 | 22,315 | 5,931 | 3,715 | 32,112 |
| 15,530 | 158 | 22,330 | 5,931 | 3,682 | 32,101 |
| 15,531 | 160 | 22,312 | 6,008 | 3,708 | 32,188 |
| 15,532 | 160 | 22,139 | 6,028 | 3,720 | 32,047 |
| 15,533 | 162 | 22,143 | 6,022 | 3,718 | 32,045 |
| 15,534 | 165 | 22,106 | 5,991 | 3,720 | 31,982 |
| 15,535 | 169 | 22,330 | 6,049 | 3,758 | 32,306 |
| 15,536 | 168 | 21,874 | 5,939 | 3,675 | 31,656 |
| 15,537 | 178 | 22,003 | 5,945 | 3,680 | 31,806 |
| 15,538 | 174 | 22,243 | 6,002 | 3,722 | 32,141 |
| 15,539 | 174 | 21,863 | 5,900 | 3,613 | 31,550 |
| 15,540 | 177 | 22,129 | 5,959 | 3,631 | 31,896 |
| 15,541 | 179 | 22,235 | 6,013 | 3,664 | 32,091 |
| 15,542 | 187 | 22,087 | 6,021 | 3,636 | 31,931 |
| 15,543 | 185 | 21,658 | 5,876 | 3,544 | 31,263 |

|        |     |        |       |       |        |
|--------|-----|--------|-------|-------|--------|
| 15,544 | 187 | 21,679 | 5,922 | 3,559 | 31,347 |
| 15,545 | 190 | 21,403 | 5,853 | 3,515 | 30,961 |
| 15,546 | 185 | 21,460 | 5,861 | 3,490 | 30,996 |
| 15,547 | 190 | 21,329 | 5,841 | 3,451 | 30,811 |
| 15,548 | 189 | 21,313 | 5,841 | 3,447 | 30,790 |
| 15,549 | 186 | 21,369 | 5,856 | 3,458 | 30,869 |
| 15,550 | 190 | 21,534 | 5,903 | 3,444 | 31,071 |
| 15,551 | 202 | 21,565 | 5,898 | 3,453 | 31,118 |
| 15,552 | 197 | 21,606 | 5,895 | 3,452 | 31,150 |
| 15,553 | 202 | 21,718 | 5,889 | 3,446 | 31,255 |
| 15,554 | 209 | 21,982 | 5,911 | 3,463 | 31,565 |
| 15,555 | 208 | 21,858 | 5,823 | 3,409 | 31,298 |
| 15,556 | 209 | 21,881 | 5,832 | 3,383 | 31,305 |
| 15,557 | 205 | 21,435 | 5,736 | 3,327 | 30,703 |
| 15,558 | 205 | 21,471 | 5,775 | 3,338 | 30,789 |
| 15,559 | 202 | 21,512 | 5,804 | 3,330 | 30,848 |
| 15,560 | 202 | 21,557 | 5,855 | 3,349 | 30,963 |
| 15,561 | 191 | 21,492 | 5,847 | 3,343 | 30,873 |
| 15,562 | 192 | 21,417 | 5,829 | 3,330 | 30,768 |
| 15,563 | 191 | 21,154 | 5,770 | 3,307 | 30,422 |
| 15,564 | 189 | 21,087 | 5,793 | 3,287 | 30,356 |
| 15,565 | 182 | 20,971 | 5,764 | 3,289 | 30,206 |
| 15,566 | 188 | 20,860 | 5,739 | 3,235 | 30,022 |
| 15,567 | 189 | 20,686 | 5,726 | 3,211 | 29,812 |
| 15,568 | 188 | 20,310 | 5,653 | 3,172 | 29,323 |
| 15,569 | 188 | 20,372 | 5,661 | 3,166 | 29,387 |
| 15,570 | 191 | 20,344 | 5,685 | 3,187 | 29,407 |
| 15,571 | 190 | 20,458 | 5,762 | 3,228 | 29,638 |
| 15,572 | 186 | 20,250 | 5,704 | 3,195 | 29,335 |
| 15,573 | 187 | 20,160 | 5,658 | 3,179 | 29,184 |
| 15,574 | 189 | 20,028 | 5,640 | 3,184 | 29,041 |
| 15,575 | 190 | 19,984 | 5,651 | 3,178 | 29,003 |

|        |     |        |       |       |        |
|--------|-----|--------|-------|-------|--------|
| 15,576 | 181 | 19,845 | 5,617 | 3,179 | 28,822 |
| 15,577 | 183 | 19,647 | 5,556 | 3,164 | 28,550 |
| 15,578 | 186 | 19,794 | 5,586 | 3,175 | 28,741 |
| 15,579 | 181 | 20,017 | 5,642 | 3,215 | 29,055 |
| 15,580 | 176 | 20,056 | 5,629 | 3,207 | 29,068 |
| 15,581 | 176 | 20,147 | 5,619 | 3,197 | 29,139 |
| 15,582 | 180 | 20,045 | 5,515 | 3,146 | 28,886 |
| 15,583 | 179 | 20,271 | 5,546 | 3,168 | 29,164 |
| 15,584 | 175 | 20,257 | 5,566 | 3,157 | 29,155 |
| 15,585 | 172 | 20,394 | 5,599 | 3,170 | 29,335 |
| 15,586 | 173 | 19,892 | 5,422 | 3,079 | 28,566 |
| 15,587 | 180 | 20,097 | 5,471 | 3,131 | 28,879 |
| 15,588 | 170 | 20,246 | 5,529 | 3,157 | 29,102 |
| 15,589 | 172 | 20,188 | 5,533 | 3,170 | 29,063 |
| 15,590 | 175 | 19,971 | 5,494 | 3,156 | 28,796 |
| 15,591 | 176 | 19,738 | 5,437 | 3,131 | 28,482 |
| 15,592 | 162 | 19,469 | 5,280 | 3,071 | 27,982 |
| 15,593 | 162 | 19,438 | 5,274 | 3,060 | 27,934 |
| 15,594 | 160 | 19,315 | 5,267 | 3,072 | 27,814 |
| 15,595 | 157 | 19,354 | 5,233 | 3,068 | 27,812 |
| 15,596 | 157 | 19,111 | 5,159 | 3,017 | 27,444 |
| 15,597 | 153 | 19,034 | 5,113 | 3,003 | 27,303 |
| 15,598 | 153 | 19,090 | 5,107 | 3,001 | 27,351 |
| 15,599 | 151 | 19,209 | 5,138 | 3,028 | 27,526 |
| 15,600 | 148 | 19,394 | 5,166 | 3,053 | 27,761 |
| 15,601 | 134 | 19,192 | 5,125 | 3,018 | 27,469 |
| 15,602 | 134 | 19,338 | 5,171 | 3,067 | 27,710 |
| 15,603 | 129 | 19,038 | 5,135 | 3,015 | 27,317 |
| 15,604 | 128 | 19,071 | 5,167 | 3,052 | 27,418 |
| 15,605 | 119 | 19,069 | 5,204 | 3,060 | 27,452 |
| 15,606 | 115 | 18,900 | 5,185 | 3,078 | 27,278 |
| 15,607 | 114 | 18,872 | 5,148 | 3,084 | 27,218 |



|        |     |        |       |       |        |
|--------|-----|--------|-------|-------|--------|
| 15,608 | 115 | 18,808 | 5,106 | 3,067 | 27,096 |
| 15,609 | 115 | 18,573 | 5,047 | 3,037 | 26,772 |
| 15,610 | 111 | 18,550 | 5,010 | 3,018 | 26,689 |
| 15,611 | 114 | 18,758 | 5,053 | 3,026 | 26,951 |
| 15,612 | 116 | 18,564 | 5,019 | 3,005 | 26,704 |
| 15,613 | 115 | 18,538 | 4,975 | 2,991 | 26,619 |
| 15,614 | 117 | 19,139 | 5,120 | 3,064 | 27,440 |
| 15,615 | 121 | 19,232 | 5,104 | 3,074 | 27,531 |
| 15,616 | 121 | 19,356 | 5,121 | 3,057 | 27,655 |
| 15,617 | 120 | 19,430 | 5,114 | 3,065 | 27,729 |
| 15,618 | 116 | 19,477 | 5,125 | 3,072 | 27,790 |
| 15,619 | 114 | 19,562 | 5,135 | 3,100 | 27,911 |
| 15,620 | 120 | 19,562 | 5,169 | 3,098 | 27,949 |
| 15,621 | 122 | 19,588 | 5,127 | 3,090 | 27,927 |
| 15,622 | 122 | 19,503 | 5,093 | 3,091 | 27,809 |
| 15,623 | 125 | 19,603 | 5,118 | 3,107 | 27,953 |
| 15,624 | 127 | 19,601 | 5,125 | 3,119 | 27,972 |
| 15,625 | 123 | 19,598 | 5,111 | 3,113 | 27,945 |
| 15,626 | 128 | 19,586 | 5,101 | 3,110 | 27,925 |
| 15,627 | 128 | 19,535 | 5,081 | 3,113 | 27,857 |
| 15,628 | 127 | 19,521 | 5,049 | 3,130 | 27,827 |
| 15,629 | 126 | 19,612 | 5,070 | 3,161 | 27,969 |
| 15,630 | 124 | 19,334 | 5,010 | 3,121 | 27,589 |
| 15,631 | 124 | 19,308 | 4,980 | 3,125 | 27,537 |
| 15,632 | 120 | 19,116 | 4,977 | 3,134 | 27,347 |
| 15,633 | 121 | 19,210 | 5,019 | 3,155 | 27,505 |
| 15,634 | 121 | 19,151 | 4,979 | 3,124 | 27,375 |
| 15,635 | 120 | 19,062 | 4,987 | 3,134 | 27,303 |
| 15,636 | 122 | 19,192 | 5,018 | 3,160 | 27,492 |
| 15,637 | 116 | 19,278 | 5,030 | 3,159 | 27,583 |
| 15,638 | 109 | 19,362 | 5,035 | 3,147 | 27,653 |
| 15,639 | 111 | 19,298 | 5,018 | 3,144 | 27,571 |

|        |     |        |       |       |        |
|--------|-----|--------|-------|-------|--------|
| 15,640 | 109 | 19,230 | 4,993 | 3,114 | 27,446 |
| 15,641 | 102 | 19,454 | 4,988 | 3,144 | 27,688 |
| 15,642 | 98  | 19,240 | 4,932 | 3,129 | 27,399 |
| 15,643 | 98  | 19,399 | 4,986 | 3,142 | 27,625 |
| 15,644 | 102 | 19,762 | 5,043 | 3,215 | 28,122 |
| 15,645 | 106 | 19,779 | 5,064 | 3,205 | 28,154 |
| 15,646 | 108 | 19,776 | 5,101 | 3,199 | 28,184 |
| 15,647 | 102 | 19,668 | 5,077 | 3,185 | 28,032 |
| 15,648 | 104 | 19,741 | 5,165 | 3,238 | 28,248 |
| 15,649 | 107 | 19,547 | 5,130 | 3,214 | 27,998 |
| 15,650 | 110 | 19,581 | 5,132 | 3,201 | 28,024 |
| 15,651 | 110 | 19,515 | 5,107 | 3,185 | 27,917 |
| 15,652 | 115 | 19,565 | 5,102 | 3,177 | 27,959 |
| 15,653 | 117 | 19,264 | 5,011 | 3,122 | 27,514 |
| 15,654 | 118 | 19,346 | 4,986 | 3,114 | 27,564 |
| 15,655 | 120 | 19,213 | 4,914 | 3,062 | 27,309 |
| 15,656 | 121 | 19,215 | 4,919 | 3,064 | 27,319 |
| 15,657 | 119 | 19,016 | 4,872 | 3,032 | 27,039 |
| 15,658 | 117 | 18,802 | 4,858 | 2,994 | 26,771 |
| 15,659 | 119 | 19,191 | 4,993 | 3,089 | 27,392 |
| 15,660 | 124 | 18,997 | 4,935 | 3,056 | 27,112 |
| 15,661 | 124 | 18,814 | 4,891 | 3,039 | 26,868 |
| 15,662 | 122 | 19,188 | 4,982 | 3,141 | 27,433 |
| 15,663 | 120 | 19,225 | 5,004 | 3,151 | 27,500 |
| 15,664 | 120 | 19,313 | 5,051 | 3,170 | 27,654 |
| 15,665 | 122 | 19,713 | 5,135 | 3,228 | 28,198 |
| 15,666 | 118 | 19,405 | 5,106 | 3,214 | 27,843 |
| 15,667 | 117 | 19,429 | 5,120 | 3,235 | 27,901 |
| 15,668 | 115 | 19,816 | 5,216 | 3,299 | 28,446 |
| 15,669 | 122 | 19,565 | 5,159 | 3,262 | 28,108 |
| 15,670 | 121 | 19,422 | 5,120 | 3,230 | 27,893 |
| 15,671 | 116 | 19,530 | 5,183 | 3,302 | 28,131 |

|        |     |        |       |       |        |
|--------|-----|--------|-------|-------|--------|
| 15,672 | 116 | 19,129 | 5,131 | 3,247 | 27,623 |
| 15,673 | 115 | 18,814 | 5,082 | 3,214 | 27,225 |
| 15,674 | 123 | 19,063 | 5,168 | 3,242 | 27,596 |
| 15,675 | 122 | 18,788 | 5,120 | 3,211 | 27,241 |
| 15,676 | 128 | 19,646 | 5,331 | 3,349 | 28,454 |
| 15,677 | 125 | 19,836 | 5,377 | 3,378 | 28,716 |
| 15,678 | 127 | 19,968 | 5,466 | 3,380 | 28,941 |
| 15,679 | 129 | 20,008 | 5,506 | 3,391 | 29,034 |
| 15,680 | 127 | 19,859 | 5,476 | 3,356 | 28,818 |
| 15,681 | 133 | 20,111 | 5,583 | 3,380 | 29,207 |
| 15,682 | 131 | 19,861 | 5,576 | 3,357 | 28,925 |
| 15,683 | 132 | 19,669 | 5,527 | 3,321 | 28,649 |
| 15,684 | 137 | 20,192 | 5,658 | 3,421 | 29,408 |
| 15,685 | 138 | 20,030 | 5,621 | 3,407 | 29,196 |
| 15,686 | 139 | 20,015 | 5,627 | 3,415 | 29,196 |
| 15,687 | 137 | 19,805 | 5,571 | 3,370 | 28,883 |
| 15,688 | 142 | 19,600 | 5,567 | 3,377 | 28,686 |
| 15,689 | 144 | 19,745 | 5,620 | 3,407 | 28,916 |
| 15,690 | 142 | 19,543 | 5,567 | 3,386 | 28,638 |
| 15,691 | 149 | 19,691 | 5,630 | 3,429 | 28,899 |
| 15,692 | 153 | 19,894 | 5,695 | 3,470 | 29,212 |
| 15,693 | 154 | 20,018 | 5,704 | 3,456 | 29,332 |
| 15,694 | 152 | 20,193 | 5,750 | 3,459 | 29,554 |
| 15,695 | 153 | 20,043 | 5,742 | 3,392 | 29,330 |
| 15,696 | 154 | 20,448 | 5,818 | 3,448 | 29,868 |
| 15,697 | 152 | 20,802 | 5,888 | 3,492 | 30,334 |
| 15,698 | 158 | 20,858 | 5,881 | 3,501 | 30,398 |
| 15,699 | 158 | 20,858 | 5,855 | 3,485 | 30,356 |
| 15,700 | 160 | 21,323 | 5,955 | 3,515 | 30,953 |
| 15,701 | 156 | 21,130 | 5,903 | 3,499 | 30,688 |
| 15,702 | 156 | 21,195 | 5,915 | 3,524 | 30,790 |
| 15,703 | 160 | 21,665 | 6,044 | 3,579 | 31,448 |

|        |     |        |       |       |        |
|--------|-----|--------|-------|-------|--------|
| 15,704 | 156 | 21,584 | 6,015 | 3,568 | 31,323 |
| 15,705 | 157 | 21,586 | 6,049 | 3,597 | 31,389 |
| 15,706 | 157 | 21,651 | 6,061 | 3,591 | 31,460 |
| 15,707 | 155 | 21,750 | 6,112 | 3,616 | 31,633 |
| 15,708 | 154 | 21,838 | 6,139 | 3,616 | 31,747 |
| 15,709 | 150 | 21,855 | 6,170 | 3,628 | 31,803 |
| 15,710 | 158 | 22,050 | 6,208 | 3,645 | 32,061 |
| 15,711 | 154 | 21,984 | 6,208 | 3,652 | 31,998 |
| 15,712 | 153 | 21,987 | 6,213 | 3,639 | 31,992 |
| 15,713 | 153 | 22,143 | 6,253 | 3,654 | 32,203 |
| 15,714 | 156 | 22,211 | 6,229 | 3,653 | 32,249 |
| 15,715 | 156 | 22,047 | 6,195 | 3,647 | 32,045 |
| 15,716 | 155 | 21,949 | 6,197 | 3,621 | 31,922 |
| 15,717 | 164 | 21,898 | 6,195 | 3,600 | 31,857 |
| 15,718 | 163 | 21,950 | 6,214 | 3,593 | 31,920 |
| 15,719 | 156 | 21,381 | 6,041 | 3,506 | 31,084 |
| 15,720 | 157 | 21,819 | 6,104 | 3,558 | 31,638 |
| 15,721 | 158 | 22,142 | 6,128 | 3,581 | 32,009 |
| 15,722 | 156 | 21,883 | 6,079 | 3,561 | 31,679 |
| 15,723 | 154 | 22,008 | 6,032 | 3,547 | 31,741 |
| 15,724 | 154 | 22,004 | 5,997 | 3,548 | 31,703 |
| 15,725 | 143 | 22,102 | 6,006 | 3,560 | 31,811 |
| 15,726 | 141 | 22,233 | 6,009 | 3,608 | 31,991 |
| 15,727 | 140 | 22,362 | 6,064 | 3,620 | 32,186 |
| 15,728 | 146 | 21,874 | 5,887 | 3,545 | 31,452 |
| 15,729 | 143 | 22,095 | 5,912 | 3,565 | 31,715 |
| 15,730 | 146 | 22,259 | 5,947 | 3,591 | 31,943 |
| 15,731 | 146 | 22,274 | 5,956 | 3,596 | 31,972 |
| 15,732 | 144 | 22,581 | 5,992 | 3,638 | 32,355 |
| 15,733 | 141 | 22,710 | 5,964 | 3,629 | 32,444 |
| 15,734 | 141 | 22,738 | 5,935 | 3,613 | 32,427 |
| 15,735 | 144 | 22,798 | 5,927 | 3,622 | 32,491 |

|        |     |        |       |       |        |
|--------|-----|--------|-------|-------|--------|
| 15,736 | 152 | 22,817 | 5,939 | 3,643 | 32,551 |
| 15,737 | 152 | 22,858 | 5,937 | 3,637 | 32,584 |
| 15,738 | 153 | 22,939 | 5,935 | 3,621 | 32,648 |
| 15,739 | 160 | 22,966 | 5,945 | 3,638 | 32,709 |
| 15,740 | 161 | 22,925 | 5,938 | 3,636 | 32,660 |
| 15,741 | 159 | 23,157 | 5,968 | 3,628 | 32,912 |
| 15,742 | 167 | 23,113 | 5,957 | 3,626 | 32,863 |
| 15,743 | 163 | 22,944 | 5,925 | 3,599 | 32,631 |
| 15,744 | 163 | 23,147 | 5,991 | 3,660 | 32,961 |
| 15,745 | 163 | 23,154 | 5,985 | 3,671 | 32,973 |
| 15,746 | 167 | 23,090 | 6,011 | 3,728 | 32,996 |
| 15,747 | 171 | 23,170 | 5,997 | 3,742 | 33,080 |
| 15,748 | 172 | 23,200 | 6,004 | 3,758 | 33,134 |
| 15,749 | 163 | 23,315 | 6,040 | 3,774 | 33,292 |
| 15,750 | 155 | 23,143 | 6,019 | 3,779 | 33,096 |
| 15,751 | 155 | 23,103 | 6,064 | 3,819 | 33,141 |
| 15,752 | 159 | 23,290 | 6,130 | 3,870 | 33,449 |
| 15,753 | 155 | 23,294 | 6,119 | 3,887 | 33,455 |
| 15,754 | 152 | 23,476 | 6,170 | 3,912 | 33,710 |
| 15,755 | 151 | 23,256 | 6,134 | 3,887 | 33,428 |
| 15,756 | 153 | 23,512 | 6,166 | 3,926 | 33,757 |
| 15,757 | 156 | 23,650 | 6,210 | 3,952 | 33,968 |
| 15,758 | 155 | 23,418 | 6,173 | 3,927 | 33,673 |
| 15,759 | 157 | 23,287 | 6,117 | 3,877 | 33,438 |
| 15,760 | 162 | 23,522 | 6,147 | 3,895 | 33,726 |
| 15,761 | 158 | 23,511 | 6,154 | 3,904 | 33,727 |
| 15,762 | 159 | 23,607 | 6,193 | 3,899 | 33,858 |
| 15,763 | 168 | 23,408 | 6,119 | 3,886 | 33,581 |
| 15,764 | 166 | 23,275 | 6,092 | 3,855 | 33,388 |
| 15,765 | 169 | 23,219 | 6,086 | 3,843 | 33,317 |
| 15,766 | 168 | 23,016 | 6,032 | 3,812 | 33,028 |
| 15,767 | 167 | 23,326 | 6,101 | 3,882 | 33,476 |

|        |     |        |       |       |        |
|--------|-----|--------|-------|-------|--------|
| 15,768 | 159 | 23,346 | 6,070 | 3,875 | 33,450 |
| 15,769 | 161 | 23,124 | 5,967 | 3,833 | 33,085 |
| 15,770 | 165 | 23,134 | 5,994 | 3,851 | 33,144 |
| 15,771 | 165 | 22,981 | 5,956 | 3,817 | 32,919 |
| 15,772 | 166 | 22,705 | 5,903 | 3,772 | 32,546 |
| 15,773 | 163 | 22,446 | 5,842 | 3,725 | 32,176 |
| 15,774 | 160 | 22,587 | 5,900 | 3,756 | 32,403 |
| 15,775 | 161 | 22,232 | 5,840 | 3,688 | 31,921 |
| 15,776 | 166 | 22,466 | 5,931 | 3,704 | 32,267 |
| 15,777 | 171 | 22,306 | 5,941 | 3,686 | 32,104 |
| 15,778 | 172 | 21,945 | 5,880 | 3,645 | 31,642 |
| 15,779 | 175 | 21,809 | 5,881 | 3,637 | 31,502 |
| 15,780 | 172 | 21,719 | 5,840 | 3,617 | 31,348 |
| 15,781 | 179 | 21,785 | 5,830 | 3,620 | 31,414 |
| 15,782 | 178 | 21,591 | 5,770 | 3,576 | 31,115 |
| 15,783 | 181 | 21,600 | 5,781 | 3,612 | 31,174 |
| 15,784 | 178 | 21,454 | 5,772 | 3,625 | 31,029 |
| 15,785 | 177 | 21,385 | 5,742 | 3,606 | 30,910 |
| 15,786 | 170 | 21,266 | 5,756 | 3,576 | 30,768 |
| 15,787 | 168 | 21,447 | 5,800 | 3,586 | 31,001 |
| 15,788 | 170 | 21,330 | 5,775 | 3,562 | 30,837 |
| 15,789 | 169 | 21,238 | 5,759 | 3,572 | 30,738 |
| 15,790 | 162 | 21,238 | 5,816 | 3,599 | 30,815 |
| 15,791 | 164 | 20,974 | 5,781 | 3,558 | 30,477 |
| 15,792 | 160 | 20,696 | 5,735 | 3,521 | 30,112 |
| 15,793 | 149 | 20,745 | 5,782 | 3,552 | 30,228 |
| 15,794 | 150 | 20,594 | 5,755 | 3,536 | 30,035 |
| 15,795 | 150 | 20,633 | 5,774 | 3,535 | 30,092 |
| 15,796 | 153 | 20,663 | 5,789 | 3,539 | 30,144 |
| 15,797 | 148 | 20,556 | 5,735 | 3,530 | 29,969 |
| 15,798 | 144 | 20,187 | 5,614 | 3,461 | 29,406 |
| 15,799 | 147 | 19,978 | 5,613 | 3,428 | 29,166 |

|        |     |        |       |       |        |
|--------|-----|--------|-------|-------|--------|
| 15,800 | 147 | 19,073 | 5,360 | 3,292 | 27,872 |
| 15,801 | 149 | 19,351 | 5,375 | 3,315 | 28,190 |
| 15,802 | 145 | 19,652 | 5,439 | 3,338 | 28,574 |
| 15,803 | 147 | 19,860 | 5,489 | 3,364 | 28,860 |
| 15,804 | 145 | 19,705 | 5,458 | 3,337 | 28,645 |
| 15,805 | 145 | 19,468 | 5,383 | 3,310 | 28,306 |
| 15,806 | 145 | 19,306 | 5,346 | 3,289 | 28,086 |
| 15,807 | 143 | 19,354 | 5,352 | 3,288 | 28,137 |
| 15,808 | 142 | 19,143 | 5,246 | 3,251 | 27,782 |
| 15,809 | 143 | 19,261 | 5,269 | 3,259 | 27,932 |
| 15,810 | 137 | 19,345 | 5,299 | 3,332 | 28,113 |
| 15,811 | 133 | 19,263 | 5,274 | 3,319 | 27,989 |
| 15,812 | 133 | 19,279 | 5,268 | 3,325 | 28,005 |
| 15,813 | 138 | 19,480 | 5,324 | 3,389 | 28,331 |
| 15,814 | 131 | 19,495 | 5,372 | 3,439 | 28,437 |
| 15,815 | 129 | 19,293 | 5,328 | 3,391 | 28,141 |
| 15,816 | 132 | 19,412 | 5,348 | 3,408 | 28,300 |
| 15,817 | 135 | 19,342 | 5,349 | 3,406 | 28,232 |
| 15,818 | 139 | 19,568 | 5,401 | 3,448 | 28,556 |
| 15,819 | 140 | 19,580 | 5,428 | 3,458 | 28,606 |
| 15,820 | 138 | 19,543 | 5,442 | 3,454 | 28,577 |
| 15,821 | 141 | 19,613 | 5,463 | 3,443 | 28,660 |
| 15,822 | 138 | 19,612 | 5,450 | 3,445 | 28,645 |
| 15,823 | 139 | 19,599 | 5,475 | 3,460 | 28,673 |
| 15,824 | 139 | 19,451 | 5,435 | 3,440 | 28,465 |
| 15,825 | 141 | 19,593 | 5,492 | 3,472 | 28,698 |
| 15,826 | 141 | 19,634 | 5,492 | 3,472 | 28,739 |
| 15,827 | 141 | 19,834 | 5,496 | 3,503 | 28,974 |
| 15,828 | 137 | 19,932 | 5,483 | 3,481 | 29,033 |
| 15,829 | 132 | 20,085 | 5,478 | 3,485 | 29,180 |
| 15,830 | 129 | 20,195 | 5,510 | 3,505 | 29,339 |
| 15,831 | 128 | 20,150 | 5,500 | 3,494 | 29,272 |

|        |     |        |       |       |        |
|--------|-----|--------|-------|-------|--------|
| 15,832 | 127 | 20,125 | 5,489 | 3,490 | 29,231 |
| 15,833 | 122 | 20,101 | 5,531 | 3,509 | 29,263 |
| 15,834 | 123 | 20,248 | 5,608 | 3,534 | 29,513 |
| 15,835 | 120 | 20,381 | 5,666 | 3,578 | 29,745 |
| 15,836 | 121 | 20,257 | 5,615 | 3,556 | 29,549 |
| 15,837 | 123 | 20,646 | 5,680 | 3,605 | 30,054 |
| 15,838 | 124 | 20,826 | 5,708 | 3,648 | 30,306 |
| 15,839 | 118 | 20,938 | 5,723 | 3,672 | 30,451 |
| 15,840 | 120 | 21,068 | 5,697 | 3,664 | 30,549 |
| 15,841 | 122 | 21,437 | 5,773 | 3,718 | 31,050 |
| 15,842 | 117 | 21,460 | 5,721 | 3,693 | 30,991 |
| 15,843 | 117 | 21,532 | 5,717 | 3,699 | 31,065 |
| 15,844 | 119 | 21,817 | 5,787 | 3,732 | 31,455 |
| 15,845 | 122 | 21,889 | 5,780 | 3,721 | 31,512 |
| 15,846 | 133 | 21,883 | 5,768 | 3,715 | 31,499 |
| 15,847 | 127 | 21,561 | 5,691 | 3,669 | 31,048 |
| 15,848 | 134 | 21,753 | 5,761 | 3,698 | 31,346 |
| 15,849 | 139 | 21,612 | 5,767 | 3,669 | 31,187 |
| 15,850 | 136 | 21,538 | 5,722 | 3,649 | 31,045 |
| 15,851 | 136 | 21,543 | 5,732 | 3,629 | 31,040 |
| 15,852 | 135 | 21,443 | 5,752 | 3,640 | 30,970 |
| 15,853 | 136 | 21,322 | 5,711 | 3,648 | 30,817 |
| 15,854 | 136 | 21,399 | 5,699 | 3,629 | 30,863 |
| 15,855 | 140 | 21,645 | 5,778 | 3,652 | 31,215 |
| 15,856 | 144 | 21,727 | 5,820 | 3,674 | 31,365 |
| 15,857 | 145 | 21,806 | 5,838 | 3,677 | 31,466 |
| 15,858 | 146 | 21,583 | 5,799 | 3,629 | 31,157 |
| 15,859 | 144 | 21,651 | 5,820 | 3,634 | 31,249 |
| 15,860 | 147 | 21,423 | 5,788 | 3,561 | 30,919 |
| 15,861 | 148 | 21,831 | 5,854 | 3,592 | 31,425 |
| 15,862 | 154 | 21,884 | 5,860 | 3,575 | 31,473 |
| 15,863 | 155 | 22,156 | 5,912 | 3,589 | 31,812 |



|        |     |        |       |       |        |
|--------|-----|--------|-------|-------|--------|
| 15,864 | 156 | 22,434 | 6,006 | 3,629 | 32,225 |
| 15,865 | 154 | 22,214 | 5,950 | 3,573 | 31,891 |
| 15,866 | 156 | 21,982 | 5,853 | 3,506 | 31,497 |
| 15,867 | 158 | 22,110 | 5,891 | 3,514 | 31,673 |
| 15,868 | 154 | 22,333 | 5,918 | 3,543 | 31,948 |
| 15,869 | 155 | 22,612 | 5,990 | 3,586 | 32,343 |
| 15,870 | 150 | 22,259 | 5,867 | 3,513 | 31,789 |
| 15,871 | 153 | 22,446 | 5,900 | 3,530 | 32,029 |
| 15,872 | 148 | 22,679 | 5,918 | 3,553 | 32,298 |
| 15,873 | 151 | 22,578 | 5,872 | 3,528 | 32,129 |
| 15,874 | 151 | 22,561 | 5,877 | 3,531 | 32,120 |
| 15,875 | 152 | 22,445 | 5,792 | 3,475 | 31,864 |
| 15,876 | 153 | 22,667 | 5,849 | 3,523 | 32,192 |
| 15,877 | 150 | 22,583 | 5,858 | 3,537 | 32,128 |
| 15,878 | 148 | 22,440 | 5,837 | 3,536 | 31,961 |
| 15,879 | 146 | 22,510 | 5,869 | 3,573 | 32,098 |
| 15,880 | 142 | 21,987 | 5,728 | 3,508 | 31,365 |
| 15,881 | 142 | 22,135 | 5,752 | 3,534 | 31,563 |
| 15,882 | 143 | 22,334 | 5,818 | 3,565 | 31,860 |
| 15,883 | 144 | 22,462 | 5,814 | 3,539 | 31,959 |
| 15,884 | 150 | 22,474 | 5,779 | 3,530 | 31,933 |
| 15,885 | 149 | 22,417 | 5,788 | 3,514 | 31,868 |
| 15,886 | 152 | 22,551 | 5,837 | 3,523 | 32,063 |
| 15,887 | 149 | 22,367 | 5,831 | 3,503 | 31,850 |
| 15,888 | 156 | 22,345 | 5,865 | 3,511 | 31,877 |
| 15,889 | 160 | 22,065 | 5,825 | 3,472 | 31,522 |
| 15,890 | 159 | 21,751 | 5,779 | 3,430 | 31,119 |
| 15,891 | 160 | 21,521 | 5,822 | 3,412 | 30,915 |
| 15,892 | 160 | 21,446 | 5,820 | 3,412 | 30,838 |
| 15,893 | 158 | 20,880 | 5,737 | 3,330 | 30,105 |
| 15,894 | 162 | 21,006 | 5,790 | 3,359 | 30,317 |
| 15,895 | 165 | 20,572 | 5,649 | 3,267 | 29,653 |

|        |     |        |       |       |        |
|--------|-----|--------|-------|-------|--------|
| 15,896 | 168 | 20,714 | 5,684 | 3,300 | 29,866 |
| 15,897 | 161 | 20,884 | 5,711 | 3,337 | 30,093 |
| 15,898 | 161 | 20,900 | 5,711 | 3,339 | 30,111 |
| 15,899 | 159 | 21,208 | 5,792 | 3,400 | 30,559 |
| 15,900 | 154 | 20,885 | 5,701 | 3,342 | 30,082 |
| 15,901 | 154 | 20,850 | 5,678 | 3,346 | 30,028 |
| 15,902 | 159 | 20,742 | 5,678 | 3,346 | 29,925 |
| 15,903 | 157 | 20,565 | 5,671 | 3,323 | 29,716 |
| 15,904 | 158 | 20,716 | 5,694 | 3,332 | 29,900 |
| 15,905 | 160 | 20,797 | 5,737 | 3,363 | 30,057 |
| 15,906 | 161 | 20,732 | 5,748 | 3,350 | 29,991 |
| 15,907 | 157 | 20,605 | 5,729 | 3,335 | 29,826 |
| 15,908 | 151 | 20,150 | 5,648 | 3,287 | 29,236 |
| 15,909 | 149 | 19,965 | 5,634 | 3,275 | 29,023 |
| 15,910 | 148 | 19,818 | 5,623 | 3,276 | 28,865 |
| 15,911 | 149 | 19,643 | 5,629 | 3,261 | 28,682 |
| 15,912 | 149 | 19,714 | 5,687 | 3,305 | 28,855 |
| 15,913 | 142 | 19,514 | 5,643 | 3,295 | 28,594 |
| 15,914 | 141 | 19,795 | 5,718 | 3,354 | 29,008 |
| 15,915 | 135 | 20,010 | 5,751 | 3,389 | 29,285 |
| 15,916 | 137 | 19,977 | 5,747 | 3,403 | 29,264 |
| 15,917 | 128 | 19,932 | 5,733 | 3,400 | 29,193 |
| 15,918 | 131 | 19,899 | 5,714 | 3,405 | 29,149 |
| 15,919 | 134 | 20,141 | 5,792 | 3,462 | 29,529 |
| 15,920 | 133 | 20,215 | 5,894 | 3,543 | 29,785 |
| 15,921 | 132 | 20,076 | 5,906 | 3,537 | 29,651 |
| 15,922 | 127 | 19,378 | 5,777 | 3,468 | 28,750 |
| 15,923 | 127 | 19,473 | 5,830 | 3,499 | 28,929 |
| 15,924 | 128 | 19,635 | 5,890 | 3,530 | 29,183 |
| 15,925 | 131 | 19,842 | 5,932 | 3,566 | 29,471 |
| 15,926 | 132 | 19,855 | 5,947 | 3,569 | 29,503 |
| 15,927 | 133 | 19,508 | 5,828 | 3,486 | 28,955 |

|        |     |        |       |       |        |
|--------|-----|--------|-------|-------|--------|
| 15,928 | 133 | 19,512 | 5,823 | 3,479 | 28,947 |
| 15,929 | 135 | 19,391 | 5,782 | 3,437 | 28,745 |
| 15,930 | 134 | 19,158 | 5,733 | 3,392 | 28,417 |
| 15,931 | 151 | 19,830 | 5,981 | 3,527 | 29,489 |
| 15,932 | 151 | 19,687 | 5,979 | 3,521 | 29,338 |
| 15,933 | 148 | 19,752 | 6,030 | 3,570 | 29,500 |
| 15,934 | 150 | 19,720 | 6,057 | 3,598 | 29,525 |
| 15,935 | 144 | 19,744 | 6,085 | 3,605 | 29,578 |
| 15,936 | 147 | 19,903 | 6,102 | 3,605 | 29,757 |
| 15,937 | 146 | 19,980 | 6,100 | 3,616 | 29,842 |
| 15,938 | 139 | 19,360 | 5,878 | 3,496 | 28,873 |
| 15,939 | 141 | 19,694 | 5,936 | 3,526 | 29,297 |
| 15,940 | 144 | 19,952 | 5,970 | 3,569 | 29,635 |
| 15,941 | 141 | 19,964 | 5,948 | 3,576 | 29,629 |
| 15,942 | 148 | 20,236 | 6,011 | 3,601 | 29,996 |
| 15,943 | 145 | 19,793 | 5,860 | 3,511 | 29,309 |
| 15,944 | 144 | 20,007 | 5,904 | 3,534 | 29,589 |
| 15,945 | 143 | 20,180 | 5,957 | 3,555 | 29,835 |
| 15,946 | 134 | 20,148 | 5,955 | 3,559 | 29,796 |
| 15,947 | 142 | 20,127 | 5,949 | 3,561 | 29,779 |
| 15,948 | 144 | 19,959 | 5,908 | 3,519 | 29,530 |
| 15,949 | 144 | 19,877 | 5,895 | 3,522 | 29,438 |
| 15,950 | 143 | 19,874 | 5,902 | 3,520 | 29,439 |
| 15,951 | 145 | 20,225 | 6,003 | 3,560 | 29,933 |
| 15,952 | 150 | 20,218 | 6,041 | 3,581 | 29,990 |
| 15,953 | 147 | 20,077 | 5,992 | 3,568 | 29,784 |
| 15,954 | 147 | 19,900 | 5,943 | 3,541 | 29,531 |
| 15,955 | 156 | 20,328 | 6,063 | 3,615 | 30,162 |
| 15,956 | 157 | 20,501 | 6,075 | 3,629 | 30,362 |
| 15,957 | 152 | 20,495 | 6,043 | 3,645 | 30,335 |
| 15,958 | 150 | 20,254 | 5,973 | 3,599 | 29,976 |
| 15,959 | 150 | 20,523 | 6,010 | 3,628 | 30,311 |

|        |     |        |       |       |        |
|--------|-----|--------|-------|-------|--------|
| 15,960 | 154 | 20,669 | 5,955 | 3,617 | 30,395 |
| 15,961 | 154 | 20,621 | 5,880 | 3,592 | 30,247 |
| 15,962 | 157 | 20,905 | 5,920 | 3,619 | 30,601 |
| 15,963 | 159 | 20,725 | 5,850 | 3,564 | 30,298 |
| 15,964 | 159 | 20,490 | 5,768 | 3,529 | 29,946 |
| 15,965 | 155 | 20,152 | 5,707 | 3,500 | 29,514 |
| 15,966 | 154 | 20,055 | 5,692 | 3,500 | 29,401 |
| 15,967 | 150 | 20,110 | 5,712 | 3,540 | 29,512 |
| 15,968 | 149 | 20,027 | 5,734 | 3,532 | 29,442 |
| 15,969 | 144 | 20,004 | 5,717 | 3,522 | 29,387 |
| 15,970 | 147 | 19,814 | 5,645 | 3,445 | 29,051 |
| 15,971 | 150 | 20,022 | 5,632 | 3,437 | 29,241 |
| 15,972 | 150 | 20,145 | 5,610 | 3,447 | 29,352 |
| 15,973 | 157 | 20,119 | 5,555 | 3,418 | 29,249 |
| 15,974 | 157 | 20,261 | 5,538 | 3,415 | 29,371 |
| 15,975 | 157 | 20,140 | 5,507 | 3,397 | 29,201 |
| 15,976 | 154 | 20,079 | 5,475 | 3,366 | 29,074 |
| 15,977 | 162 | 20,887 | 5,720 | 3,509 | 30,278 |
| 15,978 | 163 | 21,239 | 5,793 | 3,576 | 30,771 |
| 15,979 | 160 | 21,214 | 5,768 | 3,566 | 30,708 |
| 15,980 | 148 | 21,434 | 5,825 | 3,627 | 31,034 |
| 15,981 | 148 | 21,568 | 5,843 | 3,628 | 31,187 |
| 15,982 | 147 | 21,605 | 5,798 | 3,604 | 31,154 |
| 15,983 | 154 | 21,776 | 5,792 | 3,604 | 31,326 |
| 15,984 | 154 | 21,829 | 5,802 | 3,605 | 31,390 |
| 15,985 | 157 | 22,027 | 5,795 | 3,620 | 31,599 |
| 15,986 | 156 | 22,270 | 5,875 | 3,659 | 31,960 |
| 15,987 | 153 | 21,836 | 5,770 | 3,615 | 31,374 |
| 15,988 | 153 | 22,142 | 5,846 | 3,664 | 31,805 |
| 15,989 | 152 | 22,383 | 5,908 | 3,701 | 32,144 |
| 15,990 | 146 | 22,112 | 5,864 | 3,683 | 31,805 |
| 15,991 | 147 | 22,172 | 5,864 | 3,677 | 31,860 |

|        |     |        |       |       |        |
|--------|-----|--------|-------|-------|--------|
| 15,992 | 146 | 22,156 | 5,844 | 3,661 | 31,807 |
| 15,993 | 141 | 22,258 | 5,912 | 3,711 | 32,022 |
| 15,994 | 140 | 22,082 | 5,865 | 3,688 | 31,775 |
| 15,995 | 140 | 22,088 | 5,833 | 3,691 | 31,752 |
| 15,996 | 138 | 22,070 | 5,816 | 3,683 | 31,707 |
| 15,997 | 137 | 22,013 | 5,816 | 3,680 | 31,646 |
| 15,998 | 129 | 21,999 | 5,811 | 3,677 | 31,616 |
| 15,999 | 131 | 21,802 | 5,772 | 3,654 | 31,359 |
| 16,000 | 131 | 21,778 | 5,761 | 3,627 | 31,297 |
| 16,001 | 150 | 22,541 | 6,019 | 3,788 | 32,498 |
| 16,002 | 151 | 22,654 | 6,046 | 3,796 | 32,647 |
| 16,003 | 149 | 22,736 | 6,025 | 3,799 | 32,709 |
| 16,004 | 137 | 22,654 | 5,967 | 3,756 | 32,514 |
| 16,005 | 137 | 22,817 | 5,971 | 3,778 | 32,703 |
| 16,006 | 138 | 22,836 | 5,989 | 3,797 | 32,760 |
| 16,007 | 139 | 23,066 | 6,042 | 3,817 | 33,064 |
| 16,008 | 140 | 23,063 | 6,046 | 3,811 | 33,060 |
| 16,009 | 141 | 22,810 | 5,956 | 3,756 | 32,663 |
| 16,010 | 141 | 22,799 | 5,952 | 3,758 | 32,650 |
| 16,011 | 141 | 22,806 | 5,966 | 3,758 | 32,671 |
| 16,012 | 139 | 23,140 | 6,009 | 3,787 | 33,075 |
| 16,013 | 137 | 23,175 | 6,034 | 3,788 | 33,134 |
| 16,014 | 134 | 23,014 | 5,971 | 3,785 | 32,904 |
| 16,015 | 137 | 23,119 | 6,020 | 3,786 | 33,062 |
| 16,016 | 138 | 23,182 | 6,023 | 3,792 | 33,135 |
| 16,017 | 137 | 22,959 | 5,950 | 3,722 | 32,768 |
| 16,018 | 137 | 23,257 | 5,973 | 3,738 | 33,105 |
| 16,019 | 143 | 23,632 | 6,017 | 3,782 | 33,574 |
| 16,020 | 145 | 23,717 | 6,020 | 3,772 | 33,654 |
| 16,021 | 141 | 23,468 | 5,939 | 3,760 | 33,308 |
| 16,022 | 145 | 23,332 | 5,944 | 3,767 | 33,188 |
| 16,023 | 144 | 23,519 | 5,964 | 3,787 | 33,414 |

|        |     |        |       |       |        |
|--------|-----|--------|-------|-------|--------|
| 16,024 | 146 | 23,765 | 6,006 | 3,809 | 33,726 |
| 16,025 | 150 | 23,711 | 5,994 | 3,801 | 33,656 |
| 16,026 | 147 | 23,387 | 5,881 | 3,731 | 33,146 |
| 16,027 | 150 | 23,319 | 5,889 | 3,720 | 33,078 |
| 16,028 | 150 | 23,340 | 5,902 | 3,731 | 33,123 |
| 16,029 | 152 | 23,140 | 5,898 | 3,705 | 32,895 |
| 16,030 | 160 | 23,018 | 5,865 | 3,658 | 32,701 |
| 16,031 | 160 | 23,072 | 5,849 | 3,652 | 32,733 |
| 16,032 | 154 | 22,828 | 5,791 | 3,650 | 32,423 |
| 16,033 | 155 | 22,777 | 5,770 | 3,641 | 32,343 |
| 16,034 | 153 | 22,606 | 5,716 | 3,597 | 32,072 |
| 16,035 | 155 | 22,535 | 5,687 | 3,571 | 31,948 |
| 16,036 | 151 | 22,204 | 5,618 | 3,542 | 31,515 |
| 16,037 | 156 | 22,271 | 5,572 | 3,528 | 31,527 |
| 16,038 | 161 | 22,389 | 5,588 | 3,539 | 31,677 |
| 16,039 | 160 | 22,271 | 5,531 | 3,519 | 31,481 |
| 16,040 | 161 | 22,085 | 5,480 | 3,485 | 31,211 |
| 16,041 | 164 | 22,308 | 5,501 | 3,501 | 31,474 |
| 16,042 | 171 | 22,462 | 5,507 | 3,487 | 31,627 |
| 16,043 | 173 | 22,547 | 5,485 | 3,469 | 31,674 |
| 16,044 | 172 | 22,592 | 5,472 | 3,469 | 31,705 |
| 16,045 | 175 | 22,563 | 5,468 | 3,476 | 31,682 |
| 16,046 | 175 | 22,610 | 5,470 | 3,475 | 31,730 |
| 16,047 | 172 | 22,601 | 5,478 | 3,502 | 31,753 |
| 16,048 | 169 | 22,717 | 5,485 | 3,504 | 31,875 |
| 16,049 | 163 | 22,526 | 5,381 | 3,481 | 31,551 |
| 16,050 | 163 | 22,821 | 5,435 | 3,486 | 31,905 |
| 16,051 | 156 | 23,208 | 5,470 | 3,556 | 32,390 |
| 16,052 | 157 | 23,183 | 5,463 | 3,560 | 32,363 |
| 16,053 | 154 | 22,922 | 5,382 | 3,517 | 31,975 |
| 16,054 | 150 | 22,830 | 5,398 | 3,517 | 31,895 |
| 16,055 | 152 | 22,924 | 5,472 | 3,567 | 32,115 |

|        |     |        |       |       |        |
|--------|-----|--------|-------|-------|--------|
| 16,056 | 150 | 22,674 | 5,427 | 3,528 | 31,779 |
| 16,057 | 159 | 22,928 | 5,504 | 3,578 | 32,169 |
| 16,058 | 156 | 22,589 | 5,471 | 3,565 | 31,781 |
| 16,059 | 157 | 22,596 | 5,455 | 3,554 | 31,762 |
| 16,060 | 168 | 22,547 | 5,501 | 3,588 | 31,804 |
| 16,061 | 168 | 22,571 | 5,536 | 3,616 | 31,891 |
| 16,062 | 172 | 22,552 | 5,543 | 3,622 | 31,889 |
| 16,063 | 172 | 22,626 | 5,592 | 3,631 | 32,021 |
| 16,064 | 176 | 22,629 | 5,632 | 3,653 | 32,090 |
| 16,065 | 181 | 22,602 | 5,646 | 3,647 | 32,076 |
| 16,066 | 182 | 22,874 | 5,697 | 3,669 | 32,422 |
| 16,067 | 184 | 22,640 | 5,660 | 3,636 | 32,120 |
| 16,068 | 183 | 22,693 | 5,632 | 3,649 | 32,157 |
| 16,069 | 184 | 22,769 | 5,692 | 3,675 | 32,320 |
| 16,070 | 180 | 22,307 | 5,619 | 3,606 | 31,712 |
| 16,071 | 181 | 22,427 | 5,654 | 3,626 | 31,888 |
| 16,072 | 175 | 22,635 | 5,694 | 3,644 | 32,148 |
| 16,073 | 174 | 22,312 | 5,625 | 3,600 | 31,711 |
| 16,074 | 176 | 22,361 | 5,621 | 3,580 | 31,738 |
| 16,075 | 174 | 22,485 | 5,621 | 3,609 | 31,889 |
| 16,076 | 171 | 22,221 | 5,574 | 3,574 | 31,540 |
| 16,077 | 168 | 22,362 | 5,589 | 3,563 | 31,682 |
| 16,078 | 172 | 22,411 | 5,562 | 3,566 | 31,711 |
| 16,079 | 167 | 21,905 | 5,412 | 3,468 | 30,952 |
| 16,080 | 167 | 22,195 | 5,464 | 3,491 | 31,317 |
| 16,081 | 165 | 22,515 | 5,530 | 3,512 | 31,722 |
| 16,082 | 167 | 22,612 | 5,517 | 3,520 | 31,816 |
| 16,083 | 166 | 22,860 | 5,566 | 3,560 | 32,152 |
| 16,084 | 168 | 22,863 | 5,603 | 3,573 | 32,207 |
| 16,085 | 164 | 22,605 | 5,574 | 3,559 | 31,902 |
| 16,086 | 160 | 22,624 | 5,607 | 3,566 | 31,957 |
| 16,087 | 157 | 22,672 | 5,628 | 3,577 | 32,034 |

|        |     |        |       |       |        |
|--------|-----|--------|-------|-------|--------|
| 16,088 | 158 | 22,914 | 5,681 | 3,610 | 32,363 |
| 16,089 | 155 | 22,773 | 5,619 | 3,585 | 32,132 |
| 16,090 | 153 | 22,571 | 5,601 | 3,557 | 31,882 |
| 16,091 | 143 | 22,393 | 5,581 | 3,590 | 31,707 |
| 16,092 | 143 | 22,472 | 5,606 | 3,582 | 31,803 |
| 16,093 | 141 | 22,712 | 5,645 | 3,613 | 32,111 |
| 16,094 | 141 | 22,785 | 5,639 | 3,633 | 32,198 |
| 16,095 | 138 | 22,639 | 5,590 | 3,607 | 31,974 |
| 16,096 | 138 | 22,925 | 5,635 | 3,631 | 32,329 |
| 16,097 | 140 | 22,674 | 5,571 | 3,587 | 31,972 |
| 16,098 | 142 | 22,916 | 5,602 | 3,599 | 32,259 |
| 16,099 | 144 | 22,969 | 5,603 | 3,590 | 32,306 |
| 16,100 | 147 | 22,882 | 5,578 | 3,550 | 32,157 |
| 16,101 | 149 | 22,495 | 5,473 | 3,484 | 31,601 |
| 16,102 | 155 | 22,685 | 5,487 | 3,491 | 31,818 |
| 16,103 | 146 | 22,388 | 5,385 | 3,428 | 31,347 |
| 16,104 | 149 | 22,514 | 5,338 | 3,417 | 31,418 |
| 16,105 | 148 | 22,529 | 5,263 | 3,384 | 31,324 |
| 16,106 | 150 | 22,839 | 5,277 | 3,391 | 31,657 |
| 16,107 | 147 | 23,115 | 5,302 | 3,420 | 31,984 |
| 16,108 | 145 | 22,921 | 5,216 | 3,355 | 31,637 |
| 16,109 | 153 | 23,177 | 5,240 | 3,374 | 31,944 |
| 16,110 | 142 | 23,180 | 5,236 | 3,373 | 31,931 |
| 16,111 | 138 | 23,354 | 5,234 | 3,381 | 32,107 |
| 16,112 | 139 | 23,399 | 5,190 | 3,375 | 32,103 |
| 16,113 | 142 | 23,684 | 5,205 | 3,395 | 32,426 |
| 16,114 | 139 | 23,413 | 5,117 | 3,348 | 32,017 |
| 16,115 | 135 | 23,471 | 5,061 | 3,332 | 31,999 |
| 16,116 | 137 | 23,343 | 5,006 | 3,319 | 31,805 |
| 16,117 | 142 | 23,145 | 4,970 | 3,283 | 31,540 |
| 16,118 | 151 | 23,031 | 4,945 | 3,233 | 31,360 |
| 16,119 | 150 | 22,968 | 4,944 | 3,237 | 31,299 |



|        |     |        |       |       |        |
|--------|-----|--------|-------|-------|--------|
| 16,120 | 151 | 22,586 | 4,823 | 3,174 | 30,734 |
| 16,121 | 151 | 22,592 | 4,804 | 3,164 | 30,711 |
| 16,122 | 150 | 22,403 | 4,763 | 3,160 | 30,476 |
| 16,123 | 150 | 22,095 | 4,683 | 3,104 | 30,032 |
| 16,124 | 148 | 22,088 | 4,684 | 3,113 | 30,033 |
| 16,125 | 148 | 21,814 | 4,644 | 3,084 | 29,690 |
| 16,126 | 144 | 21,579 | 4,601 | 3,060 | 29,384 |
| 16,127 | 143 | 21,686 | 4,682 | 3,128 | 29,639 |
| 16,128 | 145 | 21,383 | 4,602 | 3,116 | 29,246 |
| 16,129 | 146 | 21,862 | 4,799 | 3,207 | 30,014 |
| 16,130 | 142 | 21,594 | 4,741 | 3,198 | 29,675 |
| 16,131 | 143 | 21,821 | 4,802 | 3,246 | 30,012 |
| 16,132 | 144 | 21,781 | 4,806 | 3,278 | 30,009 |
| 16,133 | 146 | 21,462 | 4,726 | 3,209 | 29,543 |
| 16,134 | 150 | 21,732 | 4,771 | 3,231 | 29,884 |
| 16,135 | 146 | 22,069 | 4,828 | 3,258 | 30,301 |
| 16,136 | 152 | 22,366 | 4,914 | 3,314 | 30,746 |
| 16,137 | 154 | 22,079 | 4,843 | 3,265 | 30,341 |
| 16,138 | 154 | 21,761 | 4,791 | 3,231 | 29,937 |
| 16,139 | 149 | 22,117 | 4,960 | 3,349 | 30,575 |
| 16,140 | 151 | 22,223 | 5,010 | 3,352 | 30,736 |
| 16,141 | 154 | 22,295 | 5,016 | 3,366 | 30,831 |
| 16,142 | 159 | 22,409 | 5,090 | 3,380 | 31,038 |
| 16,143 | 159 | 22,319 | 5,082 | 3,399 | 30,959 |
| 16,144 | 159 | 22,258 | 5,077 | 3,391 | 30,885 |
| 16,145 | 158 | 22,128 | 5,086 | 3,386 | 30,758 |
| 16,146 | 158 | 22,003 | 5,120 | 3,393 | 30,674 |
| 16,147 | 165 | 22,142 | 5,176 | 3,401 | 30,884 |
| 16,148 | 164 | 22,010 | 5,140 | 3,387 | 30,701 |
| 16,149 | 162 | 22,058 | 5,167 | 3,414 | 30,801 |
| 16,150 | 168 | 22,171 | 5,201 | 3,448 | 30,988 |
| 16,151 | 162 | 22,026 | 5,168 | 3,446 | 30,802 |

|        |     |        |       |       |        |
|--------|-----|--------|-------|-------|--------|
| 16,152 | 169 | 22,267 | 5,280 | 3,512 | 31,228 |
| 16,153 | 163 | 21,980 | 5,250 | 3,490 | 30,883 |
| 16,154 | 164 | 22,260 | 5,323 | 3,555 | 31,302 |
| 16,155 | 161 | 21,969 | 5,289 | 3,504 | 30,923 |
| 16,156 | 162 | 22,222 | 5,378 | 3,536 | 31,298 |
| 16,157 | 160 | 21,817 | 5,337 | 3,499 | 30,813 |
| 16,158 | 162 | 21,704 | 5,336 | 3,495 | 30,697 |
| 16,159 | 159 | 21,888 | 5,389 | 3,542 | 30,978 |
| 16,160 | 151 | 21,519 | 5,327 | 3,508 | 30,505 |
| 16,161 | 153 | 21,890 | 5,431 | 3,556 | 31,030 |
| 16,162 | 151 | 21,566 | 5,373 | 3,512 | 30,602 |
| 16,163 | 152 | 21,542 | 5,425 | 3,535 | 30,654 |
| 16,164 | 145 | 21,396 | 5,427 | 3,554 | 30,522 |
| 16,165 | 145 | 21,338 | 5,413 | 3,543 | 30,439 |
| 16,166 | 146 | 21,223 | 5,414 | 3,522 | 30,305 |
| 16,167 | 141 | 21,166 | 5,426 | 3,534 | 30,267 |
| 16,168 | 138 | 21,256 | 5,436 | 3,530 | 30,360 |
| 16,169 | 129 | 21,047 | 5,389 | 3,513 | 30,078 |
| 16,170 | 131 | 21,449 | 5,472 | 3,557 | 30,609 |
| 16,171 | 134 | 21,501 | 5,476 | 3,569 | 30,680 |
| 16,172 | 134 | 21,523 | 5,473 | 3,572 | 30,702 |
| 16,173 | 132 | 21,343 | 5,437 | 3,539 | 30,451 |
| 16,174 | 131 | 21,788 | 5,502 | 3,625 | 31,046 |
| 16,175 | 125 | 21,521 | 5,439 | 3,580 | 30,665 |
| 16,176 | 126 | 21,826 | 5,462 | 3,590 | 31,004 |
| 16,177 | 123 | 22,047 | 5,486 | 3,639 | 31,295 |
| 16,178 | 117 | 22,031 | 5,437 | 3,621 | 31,206 |
| 16,179 | 117 | 22,004 | 5,433 | 3,624 | 31,178 |
| 16,180 | 123 | 22,268 | 5,545 | 3,684 | 31,620 |
| 16,181 | 122 | 22,114 | 5,490 | 3,666 | 31,392 |
| 16,182 | 124 | 22,041 | 5,480 | 3,640 | 31,285 |
| 16,183 | 125 | 22,337 | 5,547 | 3,661 | 31,670 |

|        |     |        |       |       |        |
|--------|-----|--------|-------|-------|--------|
| 16,184 | 128 | 22,161 | 5,494 | 3,639 | 31,422 |
| 16,185 | 124 | 21,931 | 5,456 | 3,601 | 31,112 |
| 16,186 | 126 | 22,086 | 5,500 | 3,663 | 31,375 |
| 16,187 | 121 | 22,065 | 5,470 | 3,648 | 31,304 |
| 16,188 | 122 | 22,165 | 5,398 | 3,643 | 31,328 |
| 16,189 | 133 | 22,364 | 5,407 | 3,650 | 31,554 |
| 16,190 | 135 | 22,431 | 5,338 | 3,645 | 31,549 |
| 16,191 | 136 | 21,978 | 5,185 | 3,563 | 30,862 |
| 16,192 | 135 | 22,170 | 5,234 | 3,598 | 31,137 |
| 16,193 | 143 | 22,380 | 5,243 | 3,621 | 31,387 |
| 16,194 | 143 | 22,402 | 5,225 | 3,609 | 31,379 |
| 16,195 | 144 | 22,910 | 5,318 | 3,673 | 32,045 |
| 16,196 | 145 | 22,933 | 5,305 | 3,691 | 32,074 |
| 16,197 | 142 | 23,074 | 5,361 | 3,704 | 32,281 |
| 16,198 | 142 | 22,912 | 5,327 | 3,695 | 32,076 |
| 16,199 | 142 | 22,866 | 5,317 | 3,696 | 32,021 |
| 16,200 | 144 | 22,840 | 5,297 | 3,699 | 31,980 |
| 16,201 | 140 | 22,758 | 5,314 | 3,711 | 31,923 |
| 16,202 | 139 | 22,761 | 5,342 | 3,714 | 31,956 |
| 16,203 | 134 | 22,703 | 5,271 | 3,683 | 31,791 |
| 16,204 | 141 | 22,975 | 5,312 | 3,708 | 32,136 |
| 16,205 | 143 | 23,038 | 5,307 | 3,717 | 32,205 |
| 16,206 | 143 | 22,908 | 5,254 | 3,705 | 32,010 |
| 16,207 | 143 | 22,838 | 5,236 | 3,706 | 31,923 |
| 16,208 | 148 | 23,023 | 5,277 | 3,738 | 32,186 |
| 16,209 | 148 | 22,906 | 5,254 | 3,731 | 32,039 |
| 16,210 | 153 | 22,930 | 5,320 | 3,790 | 32,193 |
| 16,211 | 153 | 23,042 | 5,327 | 3,814 | 32,336 |
| 16,212 | 161 | 22,928 | 5,312 | 3,786 | 32,187 |
| 16,213 | 162 | 22,698 | 5,243 | 3,740 | 31,843 |
| 16,214 | 162 | 22,735 | 5,233 | 3,738 | 31,868 |
| 16,215 | 162 | 22,776 | 5,216 | 3,723 | 31,877 |

|        |     |        |       |       |        |
|--------|-----|--------|-------|-------|--------|
| 16,216 | 165 | 22,913 | 5,247 | 3,740 | 32,065 |
| 16,217 | 162 | 22,651 | 5,227 | 3,727 | 31,767 |
| 16,218 | 163 | 22,628 | 5,241 | 3,724 | 31,756 |
| 16,219 | 159 | 22,642 | 5,269 | 3,751 | 31,821 |
| 16,220 | 158 | 22,656 | 5,280 | 3,742 | 31,836 |
| 16,221 | 167 | 22,393 | 5,241 | 3,742 | 31,543 |
| 16,222 | 163 | 22,103 | 5,238 | 3,711 | 31,215 |
| 16,223 | 178 | 22,737 | 5,399 | 3,820 | 32,134 |
| 16,224 | 177 | 22,847 | 5,430 | 3,837 | 32,291 |
| 16,225 | 177 | 22,927 | 5,446 | 3,815 | 32,365 |
| 16,226 | 177 | 22,650 | 5,381 | 3,774 | 31,982 |
| 16,227 | 177 | 22,687 | 5,418 | 3,778 | 32,060 |
| 16,228 | 178 | 22,636 | 5,424 | 3,777 | 32,015 |
| 16,229 | 177 | 22,707 | 5,454 | 3,815 | 32,153 |
| 16,230 | 184 | 22,654 | 5,426 | 3,814 | 32,078 |
| 16,231 | 177 | 22,778 | 5,404 | 3,817 | 32,176 |
| 16,232 | 183 | 22,630 | 5,388 | 3,789 | 31,990 |
| 16,233 | 187 | 22,582 | 5,350 | 3,766 | 31,885 |
| 16,234 | 187 | 22,318 | 5,288 | 3,729 | 31,522 |
| 16,235 | 186 | 22,189 | 5,262 | 3,699 | 31,336 |
| 16,236 | 192 | 22,186 | 5,265 | 3,704 | 31,347 |
| 16,237 | 191 | 21,735 | 5,195 | 3,661 | 30,782 |
| 16,238 | 190 | 21,311 | 5,138 | 3,614 | 30,253 |
| 16,239 | 189 | 21,309 | 5,182 | 3,619 | 30,299 |
| 16,240 | 178 | 20,882 | 5,122 | 3,567 | 29,749 |
| 16,241 | 174 | 20,317 | 4,997 | 3,478 | 28,966 |
| 16,242 | 166 | 19,965 | 4,948 | 3,426 | 28,505 |
| 16,243 | 165 | 19,539 | 4,862 | 3,359 | 27,925 |
| 16,244 | 149 | 18,634 | 4,673 | 3,226 | 26,682 |
| 16,245 | 149 | 18,400 | 4,635 | 3,194 | 26,378 |
| 16,246 | 150 | 18,231 | 4,588 | 3,174 | 26,143 |
| 16,247 | 148 | 17,853 | 4,474 | 3,111 | 25,586 |

|        |     |        |       |       |        |
|--------|-----|--------|-------|-------|--------|
| 16,248 | 143 | 17,379 | 4,357 | 3,038 | 24,917 |
| 16,249 | 143 | 17,371 | 4,327 | 3,012 | 24,853 |
| 16,250 | 142 | 17,066 | 4,280 | 2,961 | 24,449 |
| 16,251 | 140 | 16,643 | 4,149 | 2,873 | 23,805 |
| 16,252 | 139 | 16,529 | 4,124 | 2,858 | 23,650 |
| 16,253 | 130 | 15,234 | 3,875 | 2,681 | 21,920 |
| 16,254 | 130 | 15,077 | 3,842 | 2,667 | 21,716 |
| 16,255 | 126 | 14,929 | 3,828 | 2,659 | 21,542 |
| 16,256 | 121 | 14,478 | 3,729 | 2,575 | 20,903 |
| 16,257 | 121 | 14,322 | 3,689 | 2,546 | 20,678 |
| 16,258 | 118 | 13,831 | 3,591 | 2,468 | 20,008 |
| 16,259 | 113 | 13,520 | 3,500 | 2,419 | 19,552 |
| 16,260 | 115 | 13,188 | 3,409 | 2,332 | 19,044 |
| 16,261 | 106 | 12,980 | 3,316 | 2,273 | 18,675 |
| 16,262 | 97  | 12,314 | 3,149 | 2,175 | 17,735 |
| 16,263 | 97  | 11,964 | 3,070 | 2,128 | 17,259 |
| 16,264 | 96  | 11,600 | 2,985 | 2,059 | 16,740 |
| 16,265 | 96  | 11,488 | 2,964 | 2,036 | 16,584 |
| 16,266 | 95  | 11,199 | 2,896 | 2,002 | 16,192 |
| 16,267 | 92  | 10,872 | 2,829 | 1,951 | 15,744 |
| 16,268 | 91  | 10,803 | 2,769 | 1,928 | 15,591 |
| 16,269 | 90  | 10,354 | 2,634 | 1,850 | 14,928 |
| 16,270 | 90  | 10,219 | 2,610 | 1,835 | 14,754 |
| 16,271 | 83  | 9,929  | 2,540 | 1,790 | 14,342 |
| 16,272 | 64  | 9,550  | 2,389 | 1,692 | 13,695 |
| 16,273 | 64  | 9,390  | 2,346 | 1,660 | 13,460 |
| 16,274 | 62  | 9,048  | 2,268 | 1,599 | 12,977 |
| 16,275 | 62  | 8,606  | 2,166 | 1,532 | 12,366 |
| 16,276 | 60  | 8,098  | 2,074 | 1,473 | 11,705 |
| 16,277 | 59  | 7,523  | 1,899 | 1,383 | 10,864 |
| 16,278 | 59  | 7,365  | 1,875 | 1,344 | 10,643 |
| 16,279 | 57  | 7,198  | 1,839 | 1,312 | 10,406 |

|        |    |       |       |       |       |
|--------|----|-------|-------|-------|-------|
| 16,280 | 57 | 6,886 | 1,754 | 1,243 | 9,940 |
| 16,281 | 50 | 6,327 | 1,621 | 1,147 | 9,145 |
| 16,282 | 38 | 5,527 | 1,405 | 996   | 7,966 |
| 16,283 | 39 | 5,353 | 1,375 | 973   | 7,740 |
| 16,284 | 36 | 5,443 | 1,442 | 1,018 | 7,939 |
| 16,285 | 29 | 5,144 | 1,370 | 977   | 7,520 |
| 16,286 | 26 | 4,755 | 1,274 | 911   | 6,966 |
| 16,287 | 25 | 4,457 | 1,193 | 872   | 6,547 |
| 16,288 | 22 | 4,190 | 1,108 | 831   | 6,151 |
| 16,289 | 19 | 3,819 | 1,002 | 736   | 5,576 |
| 16,290 | 19 | 3,812 | 1,007 | 736   | 5,574 |
| 16,291 | 19 | 3,832 | 1,016 | 739   | 5,606 |
| 16,292 | 19 | 3,820 | 1,011 | 748   | 5,598 |
| 16,293 | 19 | 3,844 | 1,009 | 747   | 5,619 |
| 16,294 | 19 | 3,828 | 1,014 | 753   | 5,614 |
| 16,295 | 18 | 3,885 | 1,020 | 769   | 5,692 |
| 16,296 | 18 | 3,893 | 1,044 | 773   | 5,728 |
| 16,297 | 19 | 3,882 | 1,044 | 768   | 5,713 |
| 16,298 | 19 | 3,883 | 1,053 | 765   | 5,720 |
| 16,299 | 19 | 3,880 | 1,054 | 767   | 5,720 |
| 16,300 | 19 | 3,865 | 1,062 | 772   | 5,718 |
| 16,301 | 19 | 3,894 | 1,071 | 778   | 5,762 |
| 16,302 | 17 | 3,885 | 1,059 | 768   | 5,729 |
| 16,303 | 16 | 3,918 | 1,060 | 773   | 5,767 |
| 16,304 | 16 | 3,975 | 1,067 | 785   | 5,843 |
| 16,305 | 16 | 3,999 | 1,090 | 794   | 5,899 |
| 16,306 | 16 | 3,979 | 1,086 | 777   | 5,858 |
| 16,307 | 16 | 4,032 | 1,099 | 788   | 5,935 |
| 16,308 | 16 | 4,047 | 1,102 | 792   | 5,957 |
| 16,309 | 16 | 4,043 | 1,104 | 791   | 5,954 |
| 16,310 | 17 | 4,025 | 1,101 | 783   | 5,926 |
| 16,311 | 15 | 3,998 | 1,098 | 788   | 5,899 |

|        |    |       |       |     |       |
|--------|----|-------|-------|-----|-------|
| 16,312 | 15 | 3,972 | 1,097 | 795 | 5,879 |
| 16,313 | 15 | 3,972 | 1,103 | 788 | 5,878 |
| 16,314 | 13 | 4,027 | 1,106 | 800 | 5,946 |
| 16,315 | 14 | 4,017 | 1,121 | 811 | 5,963 |
| 16,316 | 14 | 4,023 | 1,109 | 801 | 5,947 |
| 16,317 | 15 | 4,032 | 1,114 | 809 | 5,970 |
| 16,318 | 15 | 4,008 | 1,094 | 802 | 5,919 |
| 16,319 | 16 | 4,054 | 1,099 | 815 | 5,984 |
| 16,320 | 15 | 4,001 | 1,086 | 803 | 5,905 |
| 16,321 | 15 | 3,954 | 1,075 | 796 | 5,840 |
| 16,322 | 15 | 3,975 | 1,093 | 811 | 5,894 |
| 16,323 | 15 | 4,006 | 1,101 | 817 | 5,939 |
| 16,324 | 15 | 4,003 | 1,105 | 819 | 5,942 |
| 16,325 | 14 | 4,009 | 1,107 | 823 | 5,953 |
| 16,326 | 14 | 3,967 | 1,109 | 815 | 5,905 |
| 16,327 | 15 | 3,963 | 1,105 | 807 | 5,890 |
| 16,328 | 14 | 3,948 | 1,104 | 798 | 5,864 |
| 16,329 | 15 | 3,911 | 1,098 | 792 | 5,816 |
| 16,330 | 17 | 3,929 | 1,101 | 797 | 5,844 |
| 16,331 | 16 | 3,932 | 1,106 | 786 | 5,840 |
| 16,332 | 16 | 4,026 | 1,114 | 794 | 5,950 |
| 16,333 | 15 | 4,035 | 1,102 | 794 | 5,946 |
| 16,334 | 14 | 3,988 | 1,083 | 783 | 5,868 |
| 16,335 | 14 | 3,987 | 1,078 | 789 | 5,868 |
| 16,336 | 14 | 3,947 | 1,075 | 777 | 5,813 |
| 16,337 | 14 | 3,961 | 1,070 | 783 | 5,828 |
| 16,338 | 15 | 3,932 | 1,056 | 780 | 5,783 |
| 16,339 | 15 | 3,901 | 1,054 | 771 | 5,741 |
| 16,340 | 15 | 4,003 | 1,082 | 782 | 5,882 |
| 16,341 | 15 | 3,997 | 1,085 | 778 | 5,875 |
| 16,342 | 15 | 3,965 | 1,086 | 778 | 5,844 |
| 16,343 | 16 | 3,972 | 1,085 | 779 | 5,852 |

|        |    |       |       |     |       |
|--------|----|-------|-------|-----|-------|
| 16,344 | 19 | 3,987 | 1,089 | 789 | 5,884 |
| 16,345 | 20 | 4,021 | 1,088 | 792 | 5,921 |
| 16,346 | 21 | 4,004 | 1,094 | 796 | 5,915 |
| 16,347 | 23 | 3,959 | 1,052 | 782 | 5,816 |
| 16,348 | 21 | 3,900 | 1,041 | 775 | 5,737 |
| 16,349 | 22 | 3,925 | 1,049 | 784 | 5,780 |
| 16,350 | 22 | 3,915 | 1,045 | 780 | 5,762 |
| 16,351 | 22 | 3,893 | 1,033 | 780 | 5,728 |
| 16,352 | 21 | 3,819 | 1,018 | 768 | 5,626 |
| 16,353 | 21 | 3,837 | 1,022 | 770 | 5,650 |
| 16,354 | 21 | 3,844 | 1,025 | 776 | 5,666 |
| 16,355 | 22 | 3,810 | 1,018 | 770 | 5,620 |
| 16,356 | 24 | 3,842 | 1,025 | 769 | 5,660 |
| 16,357 | 24 | 3,881 | 1,025 | 774 | 5,704 |
| 16,358 | 24 | 3,861 | 1,007 | 763 | 5,655 |
| 16,359 | 27 | 3,849 | 1,013 | 773 | 5,662 |
| 16,360 | 26 | 3,878 | 1,027 | 787 | 5,718 |
| 16,361 | 28 | 3,907 | 1,047 | 797 | 5,779 |
| 16,362 | 28 | 3,825 | 1,040 | 772 | 5,665 |
| 16,363 | 28 | 3,862 | 1,050 | 780 | 5,720 |
| 16,364 | 28 | 3,903 | 1,053 | 789 | 5,773 |
| 16,365 | 28 | 3,864 | 1,056 | 782 | 5,730 |
| 16,366 | 27 | 3,888 | 1,058 | 775 | 5,748 |
| 16,367 | 28 | 3,855 | 1,059 | 774 | 5,716 |
| 16,368 | 27 | 3,847 | 1,047 | 766 | 5,687 |
| 16,369 | 27 | 3,866 | 1,063 | 782 | 5,738 |
| 16,370 | 26 | 3,837 | 1,055 | 775 | 5,693 |
| 16,371 | 26 | 3,881 | 1,057 | 786 | 5,750 |
| 16,372 | 27 | 3,946 | 1,068 | 805 | 5,846 |
| 16,373 | 31 | 3,955 | 1,063 | 811 | 5,860 |
| 16,374 | 31 | 3,955 | 1,070 | 807 | 5,863 |
| 16,375 | 31 | 3,958 | 1,071 | 807 | 5,867 |



|        |    |       |       |     |       |
|--------|----|-------|-------|-----|-------|
| 16,376 | 32 | 4,042 | 1,082 | 812 | 5,968 |
| 16,377 | 32 | 4,030 | 1,082 | 808 | 5,952 |
| 16,378 | 31 | 3,995 | 1,068 | 802 | 5,896 |
| 16,379 | 31 | 3,992 | 1,065 | 804 | 5,892 |
| 16,380 | 31 | 4,036 | 1,087 | 819 | 5,973 |
| 16,381 | 29 | 3,991 | 1,081 | 807 | 5,908 |
| 16,382 | 31 | 3,911 | 1,068 | 798 | 5,808 |
| 16,383 | 31 | 3,873 | 1,058 | 795 | 5,757 |
| 16,384 | 33 | 3,925 | 1,084 | 814 | 5,856 |
| 16,385 | 34 | 3,910 | 1,087 | 807 | 5,838 |
| 16,386 | 34 | 3,898 | 1,084 | 809 | 5,825 |
| 16,387 | 34 | 3,897 | 1,086 | 811 | 5,828 |
| 16,388 | 35 | 3,927 | 1,096 | 822 | 5,880 |
| 16,389 | 33 | 3,919 | 1,102 | 831 | 5,885 |
| 16,390 | 33 | 3,910 | 1,098 | 833 | 5,874 |
| 16,391 | 33 | 3,934 | 1,090 | 825 | 5,882 |
| 16,392 | 33 | 3,945 | 1,105 | 831 | 5,914 |
| 16,393 | 32 | 3,982 | 1,122 | 837 | 5,973 |
| 16,394 | 32 | 3,974 | 1,127 | 848 | 5,981 |
| 16,395 | 31 | 3,995 | 1,130 | 844 | 6,000 |
| 16,396 | 30 | 3,970 | 1,123 | 838 | 5,961 |
| 16,397 | 30 | 4,008 | 1,124 | 828 | 5,990 |
| 16,398 | 28 | 3,960 | 1,118 | 821 | 5,927 |
| 16,399 | 28 | 3,950 | 1,120 | 816 | 5,914 |
| 16,400 | 27 | 3,982 | 1,119 | 816 | 5,944 |
| 16,401 | 28 | 3,875 | 1,090 | 806 | 5,799 |
| 16,402 | 28 | 3,894 | 1,093 | 799 | 5,814 |
| 16,403 | 28 | 3,860 | 1,086 | 788 | 5,762 |
| 16,404 | 28 | 3,806 | 1,070 | 767 | 5,671 |
| 16,405 | 28 | 3,721 | 1,047 | 752 | 5,548 |
| 16,406 | 27 | 3,679 | 1,028 | 737 | 5,471 |
| 16,407 | 25 | 3,621 | 1,008 | 727 | 5,381 |

|        |    |       |     |     |       |
|--------|----|-------|-----|-----|-------|
| 16,408 | 25 | 3,544 | 989 | 711 | 5,269 |
| 16,409 | 25 | 3,446 | 971 | 697 | 5,139 |
| 16,410 | 22 | 3,282 | 903 | 649 | 4,856 |
| 16,411 | 22 | 3,252 | 890 | 641 | 4,805 |
| 16,412 | 20 | 3,235 | 876 | 637 | 4,768 |
| 16,413 | 20 | 3,216 | 863 | 630 | 4,729 |
| 16,414 | 20 | 3,172 | 851 | 616 | 4,659 |
| 16,415 | 19 | 3,122 | 840 | 605 | 4,586 |
| 16,416 | 19 | 3,070 | 821 | 594 | 4,504 |
| 16,417 | 19 | 2,991 | 790 | 580 | 4,380 |
| 16,418 | 18 | 2,938 | 769 | 567 | 4,292 |
| 16,419 | 18 | 2,900 | 758 | 555 | 4,231 |
| 16,420 | 18 | 2,783 | 731 | 531 | 4,063 |
| 16,421 | 18 | 2,721 | 711 | 515 | 3,965 |
| 16,422 | 16 | 2,621 | 687 | 489 | 3,813 |
| 16,423 | 16 | 2,578 | 678 | 473 | 3,745 |
| 16,424 | 13 | 2,549 | 668 | 458 | 3,688 |
| 16,425 | 13 | 2,454 | 636 | 444 | 3,547 |
| 16,426 | 13 | 2,358 | 609 | 430 | 3,410 |
| 16,427 | 11 | 2,277 | 598 | 422 | 3,308 |
| 16,428 | 11 | 2,207 | 573 | 414 | 3,205 |
| 16,429 | 11 | 2,097 | 548 | 399 | 3,055 |
| 16,430 | 11 | 2,070 | 537 | 390 | 3,008 |
| 16,431 | 10 | 1,993 | 508 | 378 | 2,889 |
| 16,432 | 9  | 1,931 | 489 | 365 | 2,794 |
| 16,433 | 8  | 1,912 | 480 | 359 | 2,759 |
| 16,434 | 7  | 1,801 | 451 | 331 | 2,590 |
| 16,435 | 6  | 1,760 | 434 | 318 | 2,518 |
| 16,436 | 6  | 1,724 | 417 | 302 | 2,449 |
| 16,437 | 6  | 1,581 | 378 | 271 | 2,236 |
| 16,438 | 6  | 1,566 | 368 | 260 | 2,200 |
| 16,439 | 5  | 1,545 | 353 | 257 | 2,160 |

|        |   |       |     |     |       |
|--------|---|-------|-----|-----|-------|
| 16,440 | 5 | 1,520 | 346 | 248 | 2,119 |
| 16,441 | 5 | 1,405 | 322 | 233 | 1,965 |
| 16,442 | 5 | 1,325 | 311 | 225 | 1,866 |
| 16,443 | 5 | 1,281 | 283 | 208 | 1,777 |
| 16,444 | 5 | 1,191 | 249 | 191 | 1,636 |
| 16,445 | 3 | 1,133 | 228 | 175 | 1,539 |
| 16,446 | 3 | 1,027 | 202 | 157 | 1,389 |
| 16,447 | 2 | 854   | 167 | 131 | 1,154 |
| 16,448 | 2 | 732   | 141 | 115 | 990   |
| 16,449 | 2 | 713   | 134 | 107 | 956   |
| 16,450 | 1 | 661   | 115 | 96  | 873   |
| 16,451 | 1 | 642   | 111 | 95  | 849   |
| 16,452 | 1 | 649   | 111 | 96  | 857   |
| 16,453 | 1 | 651   | 107 | 96  | 855   |
| 16,454 | 1 | 649   | 107 | 96  | 853   |
| 16,455 | 1 | 656   | 112 | 99  | 868   |
| 16,456 | 1 | 654   | 112 | 99  | 866   |
| 16,457 | 1 | 662   | 114 | 100 | 877   |
| 16,458 | 1 | 664   | 114 | 101 | 880   |
| 16,459 | 1 | 658   | 114 | 103 | 876   |
| 16,460 | 1 | 666   | 115 | 103 | 885   |
| 16,461 | 1 | 659   | 117 | 100 | 877   |
| 16,462 | 1 | 667   | 118 | 101 | 887   |
| 16,463 | 1 | 666   | 119 | 99  | 885   |
| 16,464 | 1 | 669   | 129 | 98  | 897   |
| 16,465 | 1 | 675   | 132 | 99  | 907   |
| 16,466 | 1 | 689   | 133 | 99  | 922   |
| 16,467 | 1 | 676   | 130 | 96  | 903   |
| 16,468 | 1 | 673   | 130 | 97  | 901   |
| 16,469 | 1 | 657   | 132 | 94  | 884   |
| 16,470 | 1 | 677   | 128 | 92  | 898   |
| 16,471 | 1 | 678   | 131 | 90  | 900   |

|        |   |     |     |    |     |
|--------|---|-----|-----|----|-----|
| 16,472 | 1 | 669 | 132 | 90 | 892 |
| 16,473 | 1 | 679 | 133 | 89 | 902 |
| 16,474 | 2 | 678 | 134 | 90 | 904 |
| 16,475 | 2 | 668 | 135 | 91 | 896 |
| 16,476 | 2 | 665 | 129 | 92 | 888 |
| 16,477 | 2 | 657 | 129 | 91 | 879 |
| 16,478 | 4 | 638 | 129 | 87 | 858 |
| 16,479 | 4 | 648 | 131 | 86 | 869 |
| 16,480 | 4 | 657 | 132 | 90 | 883 |
| 16,481 | 4 | 663 | 133 | 88 | 888 |
| 16,482 | 4 | 655 | 130 | 89 | 878 |
| 16,483 | 4 | 659 | 130 | 90 | 883 |
| 16,484 | 3 | 632 | 132 | 92 | 859 |
| 16,485 | 3 | 645 | 130 | 93 | 871 |
| 16,486 | 3 | 646 | 131 | 92 | 872 |
| 16,487 | 3 | 645 | 138 | 93 | 879 |
| 16,488 | 3 | 631 | 136 | 94 | 864 |
| 16,489 | 3 | 627 | 138 | 92 | 860 |
| 16,490 | 3 | 621 | 139 | 91 | 854 |
| 16,491 | 3 | 611 | 137 | 91 | 842 |
| 16,492 | 3 | 634 | 137 | 90 | 864 |
| 16,493 | 3 | 626 | 133 | 90 | 852 |
| 16,494 | 3 | 619 | 135 | 91 | 848 |
| 16,495 | 3 | 622 | 145 | 93 | 863 |
| 16,496 | 3 | 612 | 147 | 87 | 849 |
| 16,497 | 3 | 611 | 146 | 85 | 845 |
| 16,498 | 3 | 597 | 147 | 81 | 828 |
| 16,499 | 3 | 600 | 145 | 81 | 829 |
| 16,500 | 3 | 591 | 141 | 84 | 819 |
| 16,501 | 3 | 589 | 139 | 82 | 813 |
| 16,502 | 3 | 593 | 142 | 82 | 820 |
| 16,503 | 3 | 591 | 146 | 83 | 823 |

|        |   |     |     |    |     |
|--------|---|-----|-----|----|-----|
| 16,504 | 3 | 595 | 149 | 87 | 834 |
| 16,505 | 3 | 603 | 149 | 87 | 842 |
| 16,506 | 3 | 601 | 146 | 88 | 838 |
| 16,507 | 3 | 605 | 149 | 91 | 848 |
| 16,508 | 3 | 606 | 149 | 91 | 849 |
| 16,509 | 3 | 597 | 150 | 89 | 839 |
| 16,510 | 3 | 600 | 151 | 90 | 844 |
| 16,511 | 4 | 598 | 148 | 91 | 841 |
| 16,512 | 4 | 596 | 149 | 90 | 839 |
| 16,513 | 4 | 598 | 150 | 90 | 842 |
| 16,514 | 4 | 603 | 149 | 90 | 846 |
| 16,515 | 4 | 602 | 141 | 87 | 834 |
| 16,516 | 4 | 602 | 143 | 86 | 835 |
| 16,517 | 4 | 601 | 143 | 85 | 833 |
| 16,518 | 5 | 597 | 141 | 85 | 828 |
| 16,519 | 5 | 598 | 139 | 84 | 826 |
| 16,520 | 5 | 611 | 142 | 88 | 846 |
| 16,521 | 5 | 601 | 143 | 85 | 834 |
| 16,522 | 5 | 605 | 142 | 85 | 837 |
| 16,523 | 5 | 602 | 141 | 85 | 833 |
| 16,524 | 5 | 623 | 142 | 86 | 856 |
| 16,525 | 4 | 629 | 143 | 88 | 864 |
| 16,526 | 4 | 621 | 146 | 86 | 857 |
| 16,527 | 4 | 619 | 146 | 82 | 851 |
| 16,528 | 4 | 629 | 146 | 84 | 863 |
| 16,529 | 2 | 641 | 146 | 86 | 875 |
| 16,530 | 2 | 633 | 146 | 87 | 868 |
| 16,531 | 2 | 647 | 147 | 88 | 884 |
| 16,532 | 2 | 647 | 146 | 88 | 883 |
| 16,533 | 2 | 638 | 144 | 85 | 869 |
| 16,534 | 2 | 629 | 143 | 83 | 857 |
| 16,535 | 2 | 627 | 138 | 81 | 848 |

|        |   |     |     |    |     |
|--------|---|-----|-----|----|-----|
| 16,536 | 2 | 640 | 143 | 88 | 873 |
| 16,537 | 2 | 639 | 142 | 88 | 871 |
| 16,538 | 3 | 637 | 137 | 87 | 864 |
| 16,539 | 3 | 643 | 138 | 87 | 871 |
| 16,540 | 3 | 647 | 136 | 86 | 872 |
| 16,541 | 3 | 658 | 139 | 84 | 884 |
| 16,542 | 4 | 662 | 139 | 88 | 893 |
| 16,543 | 4 | 655 | 134 | 89 | 882 |
| 16,544 | 4 | 653 | 131 | 87 | 875 |
| 16,545 | 4 | 645 | 123 | 86 | 858 |
| 16,546 | 4 | 646 | 118 | 86 | 854 |
| 16,547 | 4 | 650 | 117 | 85 | 856 |
| 16,548 | 4 | 650 | 114 | 86 | 854 |
| 16,549 | 4 | 653 | 114 | 85 | 856 |
| 16,550 | 4 | 649 | 115 | 81 | 849 |
| 16,551 | 4 | 655 | 117 | 79 | 855 |
| 16,552 | 4 | 654 | 118 | 79 | 855 |
| 16,553 | 4 | 666 | 118 | 79 | 867 |
| 16,554 | 4 | 657 | 115 | 76 | 852 |
| 16,555 | 4 | 658 | 114 | 76 | 852 |
| 16,556 | 4 | 653 | 112 | 77 | 846 |
| 16,557 | 4 | 640 | 112 | 71 | 827 |
| 16,558 | 4 | 632 | 109 | 71 | 816 |
| 16,559 | 4 | 638 | 111 | 72 | 825 |
| 16,560 | 4 | 632 | 107 | 71 | 814 |
| 16,561 | 4 | 635 | 109 | 72 | 820 |
| 16,562 | 3 | 636 | 112 | 73 | 824 |
| 16,563 | 4 | 630 | 112 | 74 | 820 |
| 16,564 | 4 | 623 | 109 | 74 | 810 |
| 16,565 | 4 | 622 | 107 | 74 | 807 |
| 16,566 | 4 | 618 | 108 | 75 | 805 |
| 16,567 | 4 | 624 | 107 | 74 | 809 |

|        |   |     |     |    |     |
|--------|---|-----|-----|----|-----|
| 16,568 | 3 | 622 | 106 | 73 | 804 |
| 16,569 | 3 | 619 | 106 | 71 | 799 |
| 16,570 | 3 | 627 | 108 | 76 | 814 |
| 16,571 | 3 | 624 | 112 | 75 | 814 |
| 16,572 | 3 | 612 | 109 | 73 | 797 |
| 16,573 | 3 | 610 | 109 | 73 | 795 |
| 16,574 | 3 | 610 | 112 | 77 | 802 |
| 16,575 | 3 | 603 | 108 | 76 | 790 |
| 16,576 | 3 | 595 | 105 | 77 | 780 |
| 16,577 | 3 | 599 | 100 | 76 | 778 |
| 16,578 | 3 | 588 | 101 | 75 | 767 |
| 16,579 | 3 | 592 | 102 | 76 | 773 |
| 16,580 | 3 | 583 | 99  | 75 | 760 |
| 16,581 | 3 | 580 | 97  | 74 | 754 |
| 16,582 | 3 | 572 | 94  | 71 | 740 |
| 16,583 | 3 | 571 | 94  | 71 | 739 |
| 16,584 | 3 | 586 | 94  | 71 | 754 |
| 16,585 | 3 | 592 | 99  | 70 | 764 |
| 16,586 | 3 | 594 | 98  | 68 | 763 |
| 16,587 | 3 | 602 | 102 | 67 | 774 |
| 16,588 | 2 | 597 | 99  | 67 | 765 |
| 16,589 | 2 | 597 | 99  | 66 | 764 |
| 16,590 | 2 | 600 | 98  | 66 | 766 |
| 16,591 | 2 | 600 | 101 | 69 | 772 |
| 16,592 | 2 | 605 | 99  | 68 | 774 |
| 16,593 | 1 | 607 | 102 | 67 | 777 |
| 16,594 | 1 | 616 | 103 | 68 | 788 |
| 16,595 | 1 | 609 | 103 | 64 | 777 |
| 16,596 | 1 | 622 | 105 | 63 | 791 |
| 16,597 | 1 | 632 | 106 | 66 | 805 |
| 16,598 | 1 | 635 | 105 | 66 | 807 |
| 16,599 | 1 | 651 | 107 | 66 | 825 |

|        |   |     |     |    |     |
|--------|---|-----|-----|----|-----|
| 16,600 | 1 | 648 | 107 | 66 | 822 |
| 16,601 | 2 | 646 | 112 | 68 | 828 |
| 16,602 | 2 | 633 | 110 | 70 | 815 |
| 16,603 | 2 | 643 | 109 | 73 | 827 |
| 16,604 | 2 | 640 | 108 | 73 | 823 |
| 16,605 | 2 | 637 | 107 | 73 | 819 |
| 16,606 | 2 | 636 | 107 | 73 | 818 |
| 16,607 | 2 | 644 | 108 | 74 | 828 |
| 16,608 | 2 | 640 | 106 | 78 | 826 |
| 16,609 | 2 | 652 | 112 | 78 | 844 |
| 16,610 | 2 | 643 | 112 | 79 | 836 |
| 16,611 | 2 | 631 | 111 | 80 | 824 |
| 16,612 | 2 | 651 | 113 | 80 | 846 |
| 16,613 | 2 | 642 | 106 | 75 | 825 |
| 16,614 | 1 | 640 | 105 | 73 | 819 |
| 16,615 | 1 | 635 | 105 | 75 | 816 |
| 16,616 | 1 | 637 | 104 | 75 | 817 |
| 16,617 | 1 | 630 | 101 | 75 | 807 |
| 16,618 | 1 | 625 | 103 | 76 | 805 |
| 16,619 | 1 | 624 | 104 | 78 | 807 |
| 16,620 | 1 | 621 | 100 | 79 | 801 |
| 16,621 | 1 | 616 | 97  | 77 | 791 |
| 16,622 | 1 | 628 | 96  | 77 | 802 |
| 16,623 | 1 | 620 | 94  | 77 | 792 |
| 16,624 | 1 | 632 | 98  | 78 | 809 |
| 16,625 | 1 | 628 | 93  | 74 | 796 |
| 16,626 | 2 | 614 | 94  | 70 | 780 |
| 16,627 | 2 | 613 | 99  | 70 | 784 |
| 16,628 | 3 | 616 | 98  | 73 | 790 |
| 16,629 | 3 | 617 | 96  | 72 | 788 |
| 16,630 | 3 | 610 | 94  | 71 | 778 |
| 16,631 | 3 | 610 | 94  | 70 | 777 |



|        |   |     |    |    |     |
|--------|---|-----|----|----|-----|
| 16,632 | 3 | 606 | 94 | 70 | 773 |
| 16,633 | 3 | 608 | 95 | 71 | 777 |
| 16,634 | 3 | 611 | 94 | 72 | 780 |
| 16,635 | 3 | 595 | 93 | 72 | 763 |
| 16,636 | 3 | 588 | 89 | 72 | 752 |
| 16,637 | 3 | 582 | 91 | 71 | 747 |
| 16,638 | 3 | 582 | 88 | 71 | 744 |
| 16,639 | 3 | 574 | 90 | 72 | 739 |
| 16,640 | 3 | 577 | 88 | 72 | 740 |
| 16,641 | 3 | 575 | 87 | 72 | 737 |
| 16,642 | 3 | 575 | 87 | 72 | 737 |
| 16,643 | 3 | 570 | 88 | 71 | 732 |
| 16,644 | 3 | 554 | 85 | 66 | 708 |
| 16,645 | 3 | 552 | 87 | 66 | 708 |
| 16,646 | 3 | 563 | 89 | 69 | 724 |
| 16,647 | 3 | 548 | 86 | 70 | 707 |
| 16,648 | 3 | 554 | 88 | 67 | 712 |
| 16,649 | 3 | 553 | 86 | 68 | 710 |
| 16,650 | 3 | 547 | 85 | 68 | 703 |
| 16,651 | 3 | 551 | 85 | 69 | 708 |
| 16,652 | 2 | 559 | 83 | 66 | 710 |
| 16,653 | 2 | 568 | 86 | 64 | 720 |
| 16,654 | 2 | 560 | 87 | 65 | 714 |
| 16,655 | 2 | 560 | 89 | 64 | 715 |
| 16,656 | 2 | 567 | 92 | 63 | 724 |
| 16,657 | 2 | 569 | 92 | 65 | 728 |
| 16,658 | 2 | 572 | 94 | 64 | 732 |
| 16,659 | 2 | 595 | 94 | 63 | 754 |
| 16,660 | 2 | 592 | 93 | 62 | 749 |
| 16,661 | 2 | 602 | 94 | 60 | 758 |
| 16,662 | 2 | 596 | 94 | 58 | 750 |
| 16,663 | 2 | 601 | 93 | 60 | 756 |

|        |   |     |     |    |     |
|--------|---|-----|-----|----|-----|
| 16,664 | 2 | 600 | 93  | 61 | 756 |
| 16,665 | 2 | 607 | 95  | 62 | 766 |
| 16,666 | 2 | 612 | 96  | 62 | 772 |
| 16,667 | 2 | 611 | 94  | 62 | 769 |
| 16,668 | 2 | 604 | 98  | 60 | 764 |
| 16,669 | 2 | 638 | 101 | 65 | 806 |
| 16,670 | 3 | 644 | 100 | 61 | 808 |
| 16,671 | 3 | 639 | 100 | 62 | 804 |
| 16,672 | 3 | 630 | 102 | 62 | 797 |
| 16,673 | 3 | 634 | 104 | 63 | 804 |
| 16,674 | 4 | 634 | 104 | 64 | 806 |
| 16,675 | 4 | 640 | 103 | 65 | 812 |
| 16,676 | 3 | 648 | 106 | 67 | 824 |
| 16,677 | 3 | 658 | 106 | 67 | 834 |
| 16,678 | 2 | 666 | 103 | 66 | 837 |
| 16,679 | 2 | 676 | 105 | 67 | 850 |
| 16,680 | 2 | 683 | 108 | 70 | 863 |
| 16,681 | 2 | 686 | 107 | 68 | 863 |
| 16,682 | 2 | 696 | 107 | 70 | 875 |
| 16,683 | 2 | 704 | 108 | 73 | 887 |
| 16,684 | 2 | 698 | 109 | 75 | 884 |
| 16,685 | 2 | 697 | 110 | 75 | 884 |
| 16,686 | 2 | 700 | 112 | 76 | 890 |
| 16,687 | 2 | 707 | 113 | 76 | 898 |
| 16,688 | 2 | 711 | 110 | 75 | 898 |
| 16,689 | 2 | 703 | 111 | 76 | 892 |
| 16,690 | 2 | 710 | 110 | 76 | 898 |
| 16,691 | 2 | 714 | 114 | 75 | 905 |
| 16,692 | 2 | 706 | 113 | 72 | 893 |
| 16,693 | 2 | 698 | 112 | 74 | 886 |
| 16,694 | 2 | 704 | 115 | 74 | 895 |
| 16,695 | 2 | 698 | 115 | 73 | 888 |

|        |   |     |     |    |     |
|--------|---|-----|-----|----|-----|
| 16,696 | 2 | 694 | 111 | 74 | 881 |
| 16,697 | 2 | 691 | 111 | 72 | 876 |
| 16,698 | 2 | 691 | 110 | 71 | 874 |
| 16,699 | 2 | 702 | 108 | 71 | 883 |
| 16,700 | 2 | 692 | 107 | 71 | 872 |
| 16,701 | 2 | 698 | 106 | 71 | 877 |
| 16,702 | 2 | 689 | 105 | 71 | 867 |
| 16,703 | 2 | 693 | 105 | 71 | 871 |
| 16,704 | 2 | 707 | 102 | 74 | 885 |
| 16,705 | 2 | 699 | 97  | 74 | 872 |
| 16,706 | 2 | 710 | 99  | 76 | 887 |
| 16,707 | 2 | 701 | 98  | 70 | 871 |
| 16,708 | 2 | 706 | 99  | 70 | 877 |
| 16,709 | 2 | 717 | 100 | 70 | 889 |
| 16,710 | 2 | 699 | 99  | 74 | 874 |
| 16,711 | 2 | 714 | 100 | 75 | 891 |
| 16,712 | 3 | 730 | 101 | 76 | 910 |
| 16,713 | 3 | 732 | 102 | 77 | 914 |
| 16,714 | 3 | 739 | 104 | 77 | 923 |
| 16,715 | 3 | 738 | 105 | 77 | 923 |
| 16,716 | 3 | 749 | 107 | 72 | 931 |
| 16,717 | 3 | 746 | 109 | 73 | 931 |
| 16,718 | 3 | 755 | 106 | 77 | 941 |
| 16,719 | 3 | 754 | 107 | 77 | 941 |
| 16,720 | 2 | 749 | 106 | 79 | 936 |
| 16,721 | 2 | 749 | 106 | 78 | 935 |
| 16,722 | 2 | 750 | 104 | 76 | 932 |
| 16,723 | 2 | 755 | 102 | 74 | 933 |
| 16,724 | 1 | 761 | 101 | 75 | 938 |
| 16,725 | 1 | 753 | 99  | 75 | 928 |
| 16,726 | 1 | 747 | 99  | 75 | 922 |
| 16,727 | 2 | 761 | 103 | 75 | 941 |

|        |   |     |     |    |       |
|--------|---|-----|-----|----|-------|
| 16,728 | 2 | 761 | 102 | 77 | 942   |
| 16,729 | 2 | 750 | 100 | 74 | 926   |
| 16,730 | 2 | 751 | 102 | 76 | 931   |
| 16,731 | 2 | 753 | 101 | 78 | 934   |
| 16,732 | 2 | 743 | 102 | 79 | 926   |
| 16,733 | 2 | 741 | 104 | 76 | 923   |
| 16,734 | 2 | 755 | 107 | 76 | 940   |
| 16,735 | 2 | 762 | 111 | 73 | 948   |
| 16,736 | 2 | 776 | 114 | 76 | 968   |
| 16,737 | 2 | 777 | 113 | 75 | 967   |
| 16,738 | 2 | 785 | 113 | 73 | 973   |
| 16,739 | 2 | 789 | 117 | 73 | 981   |
| 16,740 | 2 | 794 | 116 | 71 | 983   |
| 16,741 | 2 | 797 | 119 | 72 | 990   |
| 16,742 | 2 | 795 | 117 | 72 | 986   |
| 16,743 | 2 | 801 | 117 | 75 | 995   |
| 16,744 | 2 | 811 | 117 | 75 | 1,005 |
| 16,745 | 2 | 807 | 114 | 75 | 998   |
| 16,746 | 2 | 807 | 113 | 76 | 998   |
| 16,747 | 2 | 806 | 114 | 75 | 997   |
| 16,748 | 2 | 806 | 115 | 75 | 998   |
| 16,749 | 3 | 803 | 118 | 76 | 1,000 |
| 16,750 | 3 | 791 | 119 | 76 | 989   |
| 16,751 | 3 | 791 | 119 | 76 | 989   |
| 16,752 | 4 | 802 | 119 | 78 | 1,003 |
| 16,753 | 4 | 805 | 118 | 78 | 1,005 |
| 16,754 | 4 | 798 | 121 | 80 | 1,003 |
| 16,755 | 4 | 789 | 125 | 77 | 995   |
| 16,756 | 4 | 769 | 124 | 73 | 970   |
| 16,757 | 4 | 772 | 126 | 72 | 974   |
| 16,758 | 4 | 773 | 125 | 73 | 975   |
| 16,759 | 4 | 769 | 124 | 74 | 971   |

|        |   |     |     |    |     |
|--------|---|-----|-----|----|-----|
| 16,760 | 4 | 767 | 129 | 73 | 973 |
| 16,761 | 4 | 768 | 127 | 70 | 969 |
| 16,762 | 4 | 751 | 127 | 69 | 951 |
| 16,763 | 3 | 724 | 121 | 66 | 914 |
| 16,764 | 3 | 730 | 124 | 66 | 923 |
| 16,765 | 3 | 730 | 122 | 69 | 924 |
| 16,766 | 4 | 721 | 119 | 71 | 915 |
| 16,767 | 4 | 712 | 117 | 72 | 905 |
| 16,768 | 4 | 720 | 116 | 69 | 909 |
| 16,769 | 4 | 712 | 119 | 73 | 908 |
| 16,770 | 4 | 708 | 121 | 74 | 907 |
| 16,771 | 4 | 699 | 119 | 73 | 895 |
| 16,772 | 4 | 687 | 120 | 73 | 884 |
| 16,773 | 4 | 690 | 118 | 72 | 884 |
| 16,774 | 4 | 694 | 123 | 72 | 893 |
| 16,775 | 4 | 692 | 122 | 73 | 891 |
| 16,776 | 3 | 693 | 122 | 73 | 891 |
| 16,777 | 3 | 693 | 122 | 73 | 891 |
| 16,778 | 3 | 673 | 117 | 70 | 863 |
| 16,779 | 3 | 673 | 119 | 70 | 865 |
| 16,780 | 3 | 667 | 123 | 70 | 863 |
| 16,781 | 3 | 673 | 123 | 70 | 869 |
| 16,782 | 4 | 672 | 123 | 66 | 865 |
| 16,783 | 4 | 672 | 121 | 65 | 862 |
| 16,784 | 4 | 679 | 118 | 69 | 870 |
| 16,785 | 4 | 662 | 117 | 69 | 852 |
| 16,786 | 4 | 651 | 112 | 68 | 835 |
| 16,787 | 4 | 650 | 112 | 67 | 833 |
| 16,788 | 4 | 641 | 116 | 69 | 830 |
| 16,789 | 4 | 636 | 114 | 70 | 824 |
| 16,790 | 4 | 625 | 112 | 71 | 812 |
| 16,791 | 4 | 629 | 113 | 69 | 815 |

|        |   |     |     |     |     |
|--------|---|-----|-----|-----|-----|
| 16,792 | 5 | 625 | 114 | 71  | 815 |
| 16,793 | 5 | 623 | 113 | 69  | 810 |
| 16,794 | 5 | 632 | 113 | 70  | 820 |
| 16,795 | 5 | 627 | 113 | 72  | 817 |
| 16,796 | 6 | 640 | 120 | 76  | 842 |
| 16,797 | 6 | 640 | 121 | 78  | 845 |
| 16,798 | 6 | 631 | 122 | 79  | 838 |
| 16,799 | 6 | 638 | 121 | 80  | 845 |
| 16,800 | 5 | 644 | 121 | 80  | 850 |
| 16,801 | 5 | 644 | 122 | 78  | 849 |
| 16,802 | 4 | 649 | 129 | 77  | 859 |
| 16,803 | 4 | 644 | 130 | 76  | 854 |
| 16,804 | 4 | 638 | 130 | 77  | 849 |
| 16,805 | 4 | 642 | 125 | 80  | 851 |
| 16,806 | 4 | 645 | 125 | 81  | 855 |
| 16,807 | 4 | 645 | 126 | 84  | 859 |
| 16,808 | 4 | 652 | 124 | 86  | 866 |
| 16,809 | 4 | 682 | 128 | 89  | 903 |
| 16,810 | 4 | 684 | 133 | 91  | 912 |
| 16,811 | 4 | 688 | 132 | 93  | 917 |
| 16,812 | 4 | 685 | 125 | 94  | 908 |
| 16,813 | 4 | 685 | 125 | 96  | 910 |
| 16,814 | 4 | 680 | 128 | 99  | 911 |
| 16,815 | 4 | 667 | 126 | 94  | 891 |
| 16,816 | 4 | 669 | 133 | 96  | 902 |
| 16,817 | 3 | 663 | 139 | 97  | 902 |
| 16,818 | 3 | 667 | 140 | 98  | 908 |
| 16,819 | 3 | 667 | 139 | 99  | 908 |
| 16,820 | 3 | 669 | 137 | 96  | 905 |
| 16,821 | 3 | 669 | 135 | 97  | 904 |
| 16,822 | 3 | 674 | 140 | 99  | 916 |
| 16,823 | 3 | 675 | 140 | 100 | 918 |

|        |   |     |     |     |     |
|--------|---|-----|-----|-----|-----|
| 16,824 | 3 | 677 | 139 | 99  | 918 |
| 16,825 | 3 | 672 | 138 | 99  | 912 |
| 16,826 | 3 | 666 | 139 | 99  | 907 |
| 16,827 | 3 | 683 | 139 | 102 | 927 |
| 16,828 | 3 | 674 | 139 | 103 | 919 |
| 16,829 | 3 | 690 | 142 | 107 | 942 |
| 16,830 | 3 | 683 | 142 | 105 | 933 |
| 16,831 | 3 | 687 | 144 | 107 | 941 |
| 16,832 | 3 | 703 | 145 | 109 | 960 |
| 16,833 | 2 | 690 | 148 | 109 | 949 |
| 16,834 | 3 | 696 | 148 | 111 | 958 |
| 16,835 | 3 | 694 | 147 | 108 | 952 |
| 16,836 | 3 | 692 | 147 | 109 | 951 |
| 16,837 | 3 | 694 | 144 | 108 | 949 |
| 16,838 | 3 | 697 | 146 | 111 | 957 |
| 16,839 | 3 | 696 | 141 | 113 | 953 |
| 16,840 | 3 | 691 | 140 | 112 | 946 |
| 16,841 | 3 | 688 | 141 | 111 | 943 |
| 16,842 | 2 | 673 | 133 | 109 | 917 |
| 16,843 | 2 | 684 | 136 | 110 | 932 |
| 16,844 | 1 | 685 | 141 | 113 | 940 |
| 16,845 | 1 | 678 | 143 | 112 | 934 |
| 16,846 | 1 | 678 | 143 | 111 | 933 |
| 16,847 | 1 | 671 | 141 | 109 | 922 |
| 16,848 | 1 | 672 | 144 | 107 | 924 |
| 16,849 | 1 | 659 | 143 | 105 | 908 |
| 16,850 | 1 | 661 | 146 | 105 | 913 |
| 16,851 | 1 | 665 | 149 | 106 | 921 |
| 16,852 | 2 | 664 | 146 | 107 | 919 |
| 16,853 | 2 | 669 | 149 | 106 | 926 |
| 16,854 | 2 | 675 | 148 | 109 | 934 |
| 16,855 | 2 | 672 | 150 | 105 | 929 |

|        |   |     |     |     |     |
|--------|---|-----|-----|-----|-----|
| 16,856 | 2 | 676 | 153 | 104 | 935 |
| 16,857 | 2 | 663 | 150 | 102 | 917 |
| 16,858 | 2 | 673 | 152 | 102 | 929 |
| 16,859 | 2 | 656 | 154 | 99  | 911 |
| 16,860 | 2 | 643 | 152 | 98  | 895 |
| 16,861 | 2 | 645 | 147 | 96  | 890 |
| 16,862 | 2 | 641 | 149 | 96  | 888 |
| 16,863 | 2 | 640 | 147 | 92  | 881 |
| 16,864 | 2 | 647 | 147 | 96  | 892 |
| 16,865 | 2 | 655 | 146 | 97  | 900 |
| 16,866 | 2 | 664 | 147 | 96  | 909 |
| 16,867 | 2 | 669 | 143 | 97  | 911 |
| 16,868 | 2 | 672 | 140 | 95  | 909 |
| 16,869 | 2 | 669 | 141 | 94  | 906 |
| 16,870 | 2 | 670 | 145 | 94  | 911 |
| 16,871 | 2 | 668 | 147 | 93  | 910 |
| 16,872 | 2 | 668 | 144 | 93  | 907 |
| 16,873 | 2 | 663 | 146 | 91  | 902 |
| 16,874 | 2 | 667 | 147 | 91  | 907 |
| 16,875 | 2 | 677 | 146 | 91  | 916 |
| 16,876 | 2 | 680 | 148 | 91  | 921 |
| 16,877 | 2 | 671 | 146 | 94  | 913 |
| 16,878 | 2 | 671 | 146 | 94  | 913 |
| 16,879 | 2 | 674 | 146 | 94  | 916 |
| 16,880 | 2 | 671 | 151 | 94  | 918 |
| 16,881 | 2 | 667 | 156 | 98  | 923 |
| 16,882 | 2 | 672 | 154 | 97  | 925 |
| 16,883 | 2 | 672 | 160 | 98  | 932 |
| 16,884 | 2 | 668 | 162 | 101 | 933 |
| 16,885 | 2 | 657 | 159 | 93  | 911 |
| 16,886 | 2 | 672 | 161 | 97  | 932 |
| 16,887 | 2 | 669 | 163 | 102 | 936 |



|        |   |     |     |     |     |
|--------|---|-----|-----|-----|-----|
| 16,888 | 2 | 668 | 165 | 101 | 936 |
| 16,889 | 2 | 676 | 170 | 104 | 952 |
| 16,890 | 2 | 674 | 170 | 104 | 950 |
| 16,891 | 2 | 674 | 172 | 104 | 952 |
| 16,892 | 2 | 676 | 175 | 106 | 959 |
| 16,893 | 3 | 671 | 176 | 106 | 956 |
| 16,894 | 3 | 663 | 173 | 105 | 944 |
| 16,895 | 4 | 668 | 169 | 107 | 948 |
| 16,896 | 4 | 672 | 167 | 105 | 948 |
| 16,897 | 4 | 668 | 164 | 103 | 939 |
| 16,898 | 5 | 669 | 164 | 103 | 941 |
| 16,899 | 5 | 671 | 165 | 104 | 945 |
| 16,900 | 5 | 674 | 167 | 106 | 952 |
| 16,901 | 5 | 671 | 167 | 108 | 951 |
| 16,902 | 5 | 666 | 166 | 111 | 948 |
| 16,903 | 4 | 660 | 162 | 112 | 938 |
| 16,904 | 4 | 634 | 157 | 112 | 907 |
| 16,905 | 4 | 643 | 156 | 112 | 915 |
| 16,906 | 4 | 650 | 158 | 112 | 924 |
| 16,907 | 4 | 664 | 157 | 111 | 936 |
| 16,908 | 4 | 671 | 158 | 111 | 944 |
| 16,909 | 4 | 663 | 156 | 113 | 936 |
| 16,910 | 4 | 660 | 153 | 113 | 930 |
| 16,911 | 4 | 641 | 154 | 116 | 915 |
| 16,912 | 4 | 645 | 155 | 115 | 919 |
| 16,913 | 4 | 643 | 158 | 115 | 920 |
| 16,914 | 4 | 647 | 164 | 117 | 932 |
| 16,915 | 4 | 632 | 165 | 113 | 914 |
| 16,916 | 4 | 610 | 167 | 112 | 893 |
| 16,917 | 4 | 610 | 164 | 112 | 890 |
| 16,918 | 4 | 607 | 161 | 112 | 884 |
| 16,919 | 4 | 609 | 163 | 112 | 888 |

|        |   |     |     |     |     |
|--------|---|-----|-----|-----|-----|
| 16,920 | 4 | 608 | 162 | 114 | 888 |
| 16,921 | 4 | 609 | 160 | 112 | 885 |
| 16,922 | 4 | 614 | 163 | 113 | 894 |
| 16,923 | 4 | 618 | 161 | 113 | 896 |
| 16,924 | 4 | 615 | 159 | 114 | 892 |
| 16,925 | 4 | 634 | 160 | 115 | 913 |
| 16,926 | 4 | 620 | 159 | 115 | 898 |
| 16,927 | 4 | 618 | 156 | 109 | 887 |
| 16,928 | 4 | 625 | 157 | 109 | 895 |
| 16,929 | 4 | 623 | 157 | 108 | 892 |
| 16,930 | 4 | 599 | 147 | 96  | 846 |
| 16,931 | 4 | 609 | 150 | 97  | 860 |
| 16,932 | 4 | 621 | 151 | 97  | 873 |
| 16,933 | 4 | 622 | 151 | 98  | 875 |
| 16,934 | 4 | 622 | 144 | 93  | 863 |
| 16,935 | 4 | 619 | 142 | 93  | 858 |
| 16,936 | 3 | 610 | 141 | 93  | 847 |
| 16,937 | 3 | 609 | 147 | 92  | 851 |
| 16,938 | 3 | 605 | 149 | 91  | 848 |
| 16,939 | 3 | 614 | 146 | 89  | 852 |
| 16,940 | 3 | 622 | 149 | 88  | 862 |
| 16,941 | 3 | 617 | 149 | 86  | 855 |
| 16,942 | 3 | 620 | 148 | 87  | 858 |
| 16,943 | 3 | 626 | 149 | 91  | 869 |
| 16,944 | 1 | 632 | 150 | 89  | 872 |
| 16,945 | 1 | 637 | 154 | 90  | 882 |
| 16,946 | 1 | 638 | 153 | 87  | 879 |
| 16,947 | 1 | 636 | 155 | 87  | 879 |
| 16,948 | 1 | 633 | 155 | 88  | 877 |
| 16,949 | 0 | 640 | 152 | 88  | 880 |
| 16,950 | 0 | 629 | 149 | 86  | 864 |
| 16,951 | 0 | 635 | 150 | 85  | 870 |

|        |   |     |     |    |     |
|--------|---|-----|-----|----|-----|
| 16,952 | 0 | 645 | 147 | 82 | 874 |
| 16,953 | 0 | 648 | 147 | 81 | 876 |
| 16,954 | 0 | 643 | 148 | 80 | 871 |
| 16,955 | 0 | 654 | 148 | 85 | 887 |
| 16,956 | 0 | 655 | 151 | 87 | 893 |
| 16,957 | 0 | 647 | 150 | 88 | 885 |
| 16,958 | 0 | 630 | 147 | 87 | 864 |
| 16,959 | 0 | 631 | 145 | 88 | 864 |
| 16,960 | 0 | 639 | 148 | 88 | 875 |
| 16,961 | 0 | 642 | 146 | 88 | 876 |
| 16,962 | 0 | 648 | 143 | 84 | 875 |
| 16,963 | 0 | 651 | 144 | 84 | 879 |
| 16,964 | 0 | 647 | 138 | 84 | 869 |
| 16,965 | 0 | 654 | 131 | 90 | 875 |
| 16,966 | 0 | 651 | 135 | 90 | 876 |
| 16,967 | 0 | 651 | 129 | 87 | 867 |
| 16,968 | 0 | 651 | 129 | 87 | 867 |
| 16,969 | 0 | 660 | 131 | 88 | 879 |
| 16,970 | 0 | 653 | 128 | 87 | 868 |
| 16,971 | 0 | 649 | 129 | 85 | 863 |
| 16,972 | 0 | 647 | 128 | 87 | 862 |
| 16,973 | 0 | 648 | 128 | 86 | 862 |
| 16,974 | 0 | 641 | 132 | 86 | 859 |
| 16,975 | 0 | 635 | 131 | 85 | 851 |
| 16,976 | 0 | 617 | 131 | 86 | 834 |
| 16,977 | 0 | 625 | 135 | 88 | 848 |
| 16,978 | 0 | 613 | 134 | 86 | 833 |
| 16,979 | 0 | 606 | 135 | 89 | 830 |
| 16,980 | 0 | 610 | 142 | 93 | 845 |
| 16,981 | 0 | 620 | 139 | 96 | 855 |
| 16,982 | 0 | 615 | 136 | 96 | 847 |
| 16,983 | 0 | 602 | 134 | 97 | 833 |

|        |   |     |     |     |     |
|--------|---|-----|-----|-----|-----|
| 16,984 | 0 | 604 | 133 | 98  | 835 |
| 16,985 | 0 | 608 | 135 | 98  | 841 |
| 16,986 | 0 | 606 | 136 | 98  | 840 |
| 16,987 | 0 | 614 | 137 | 97  | 848 |
| 16,988 | 0 | 619 | 134 | 97  | 850 |
| 16,989 | 0 | 617 | 130 | 94  | 841 |
| 16,990 | 0 | 614 | 136 | 94  | 844 |
| 16,991 | 0 | 603 | 132 | 93  | 828 |
| 16,992 | 0 | 600 | 128 | 90  | 818 |
| 16,993 | 0 | 604 | 129 | 89  | 822 |
| 16,994 | 0 | 604 | 130 | 88  | 822 |
| 16,995 | 0 | 601 | 133 | 92  | 826 |
| 16,996 | 0 | 599 | 132 | 92  | 823 |
| 16,997 | 0 | 590 | 132 | 93  | 815 |
| 16,998 | 1 | 589 | 132 | 94  | 816 |
| 16,999 | 1 | 596 | 135 | 94  | 826 |
| 17,000 | 1 | 585 | 139 | 96  | 821 |
| 17,001 | 1 | 578 | 138 | 97  | 814 |
| 17,002 | 1 | 573 | 138 | 100 | 812 |
| 17,003 | 1 | 572 | 136 | 99  | 808 |
| 17,004 | 1 | 581 | 136 | 103 | 821 |
| 17,005 | 1 | 574 | 134 | 100 | 809 |
| 17,006 | 1 | 580 | 136 | 98  | 815 |
| 17,007 | 1 | 567 | 134 | 96  | 798 |
| 17,008 | 1 | 577 | 135 | 98  | 811 |
| 17,009 | 1 | 576 | 139 | 98  | 814 |
| 17,010 | 1 | 557 | 137 | 95  | 790 |
| 17,011 | 1 | 561 | 138 | 94  | 794 |
| 17,012 | 1 | 551 | 139 | 94  | 785 |
| 17,013 | 1 | 540 | 141 | 93  | 775 |
| 17,014 | 1 | 568 | 145 | 94  | 808 |
| 17,015 | 1 | 564 | 146 | 87  | 798 |

|        |   |     |     |     |     |
|--------|---|-----|-----|-----|-----|
| 17,016 | 1 | 562 | 147 | 88  | 798 |
| 17,017 | 1 | 562 | 146 | 87  | 796 |
| 17,018 | 1 | 563 | 146 | 87  | 797 |
| 17,019 | 1 | 554 | 145 | 87  | 787 |
| 17,020 | 1 | 555 | 144 | 89  | 789 |
| 17,021 | 2 | 580 | 144 | 90  | 816 |
| 17,022 | 2 | 573 | 143 | 92  | 810 |
| 17,023 | 2 | 572 | 142 | 93  | 809 |
| 17,024 | 2 | 574 | 140 | 94  | 810 |
| 17,025 | 2 | 576 | 141 | 95  | 814 |
| 17,026 | 2 | 575 | 139 | 95  | 811 |
| 17,027 | 2 | 588 | 136 | 96  | 822 |
| 17,028 | 2 | 583 | 138 | 96  | 819 |
| 17,029 | 2 | 584 | 133 | 94  | 813 |
| 17,030 | 2 | 590 | 134 | 97  | 823 |
| 17,031 | 2 | 594 | 135 | 96  | 827 |
| 17,032 | 2 | 585 | 135 | 96  | 818 |
| 17,033 | 2 | 583 | 135 | 96  | 816 |
| 17,034 | 2 | 579 | 137 | 97  | 815 |
| 17,035 | 2 | 584 | 137 | 95  | 818 |
| 17,036 | 2 | 589 | 136 | 99  | 826 |
| 17,037 | 2 | 584 | 139 | 102 | 827 |
| 17,038 | 2 | 573 | 135 | 102 | 812 |
| 17,039 | 2 | 578 | 137 | 102 | 819 |
| 17,040 | 2 | 578 | 137 | 105 | 822 |
| 17,041 | 2 | 581 | 135 | 105 | 823 |
| 17,042 | 2 | 579 | 138 | 108 | 827 |
| 17,043 | 2 | 569 | 144 | 112 | 827 |
| 17,044 | 2 | 567 | 143 | 112 | 824 |
| 17,045 | 2 | 561 | 144 | 113 | 820 |
| 17,046 | 2 | 561 | 143 | 111 | 817 |
| 17,047 | 2 | 560 | 142 | 110 | 814 |

|        |   |     |     |     |     |
|--------|---|-----|-----|-----|-----|
| 17,048 | 2 | 552 | 143 | 110 | 807 |
| 17,049 | 1 | 560 | 144 | 112 | 817 |
| 17,050 | 1 | 561 | 142 | 111 | 815 |
| 17,051 | 1 | 559 | 136 | 108 | 804 |
| 17,052 | 1 | 559 | 137 | 105 | 802 |
| 17,053 | 1 | 553 | 136 | 105 | 795 |
| 17,054 | 2 | 559 | 139 | 108 | 808 |
| 17,055 | 2 | 554 | 139 | 106 | 801 |
| 17,056 | 2 | 549 | 144 | 107 | 802 |
| 17,057 | 2 | 554 | 142 | 104 | 802 |
| 17,058 | 2 | 555 | 142 | 105 | 804 |
| 17,059 | 2 | 552 | 140 | 102 | 796 |
| 17,060 | 2 | 563 | 139 | 104 | 808 |
| 17,061 | 2 | 565 | 139 | 103 | 809 |
| 17,062 | 2 | 532 | 133 | 104 | 771 |
| 17,063 | 2 | 547 | 130 | 107 | 786 |
| 17,064 | 2 | 549 | 130 | 107 | 788 |
| 17,065 | 2 | 553 | 129 | 108 | 792 |
| 17,066 | 2 | 564 | 128 | 111 | 805 |
| 17,067 | 2 | 565 | 128 | 108 | 803 |
| 17,068 | 2 | 567 | 126 | 108 | 803 |
| 17,069 | 2 | 564 | 126 | 111 | 803 |
| 17,070 | 2 | 566 | 126 | 109 | 803 |
| 17,071 | 2 | 566 | 128 | 113 | 809 |
| 17,072 | 1 | 566 | 127 | 112 | 806 |
| 17,073 | 1 | 567 | 124 | 109 | 801 |
| 17,074 | 1 | 584 | 131 | 110 | 826 |
| 17,075 | 1 | 582 | 134 | 110 | 827 |
| 17,076 | 1 | 584 | 134 | 111 | 830 |
| 17,077 | 1 | 585 | 137 | 109 | 832 |
| 17,078 | 1 | 590 | 142 | 111 | 844 |
| 17,079 | 1 | 588 | 141 | 114 | 844 |

|        |   |     |     |     |     |
|--------|---|-----|-----|-----|-----|
| 17,080 | 1 | 584 | 140 | 112 | 837 |
| 17,081 | 1 | 593 | 143 | 113 | 850 |
| 17,082 | 1 | 583 | 139 | 113 | 836 |
| 17,083 | 1 | 588 | 140 | 114 | 843 |
| 17,084 | 1 | 596 | 139 | 114 | 850 |
| 17,085 | 1 | 598 | 143 | 115 | 857 |
| 17,086 | 2 | 598 | 142 | 113 | 855 |
| 17,087 | 2 | 595 | 139 | 109 | 845 |
| 17,088 | 2 | 596 | 140 | 110 | 848 |
| 17,089 | 2 | 598 | 142 | 110 | 852 |
| 17,090 | 2 | 604 | 144 | 111 | 861 |
| 17,091 | 2 | 613 | 146 | 111 | 872 |
| 17,092 | 2 | 618 | 146 | 114 | 880 |
| 17,093 | 2 | 625 | 144 | 113 | 884 |
| 17,094 | 2 | 634 | 138 | 111 | 885 |
| 17,095 | 2 | 634 | 136 | 111 | 883 |
| 17,096 | 2 | 637 | 134 | 110 | 883 |
| 17,097 | 2 | 641 | 134 | 108 | 885 |
| 17,098 | 2 | 639 | 133 | 111 | 885 |
| 17,099 | 2 | 664 | 137 | 114 | 917 |
| 17,100 | 2 | 667 | 138 | 111 | 918 |
| 17,101 | 2 | 665 | 143 | 111 | 921 |
| 17,102 | 2 | 670 | 142 | 114 | 928 |
| 17,103 | 2 | 668 | 142 | 112 | 924 |
| 17,104 | 2 | 662 | 145 | 108 | 917 |
| 17,105 | 1 | 654 | 144 | 109 | 908 |
| 17,106 | 1 | 666 | 143 | 107 | 917 |
| 17,107 | 1 | 661 | 142 | 105 | 909 |
| 17,108 | 1 | 663 | 141 | 107 | 912 |
| 17,109 | 1 | 664 | 144 | 107 | 916 |
| 17,110 | 1 | 654 | 145 | 108 | 908 |
| 17,111 | 1 | 652 | 145 | 107 | 905 |

|        |   |     |     |     |     |
|--------|---|-----|-----|-----|-----|
| 17,112 | 1 | 651 | 145 | 109 | 906 |
| 17,113 | 1 | 658 | 144 | 108 | 911 |
| 17,114 | 1 | 641 | 149 | 108 | 899 |
| 17,115 | 1 | 646 | 154 | 106 | 907 |
| 17,116 | 1 | 640 | 154 | 104 | 899 |
| 17,117 | 1 | 649 | 156 | 103 | 909 |
| 17,118 | 1 | 655 | 161 | 103 | 920 |
| 17,119 | 2 | 647 | 161 | 99  | 909 |
| 17,120 | 2 | 665 | 161 | 99  | 927 |
| 17,121 | 2 | 662 | 169 | 98  | 931 |
| 17,122 | 2 | 654 | 169 | 95  | 920 |
| 17,123 | 2 | 653 | 166 | 97  | 918 |
| 17,124 | 3 | 649 | 172 | 99  | 923 |
| 17,125 | 3 | 653 | 168 | 97  | 921 |
| 17,126 | 3 | 648 | 166 | 98  | 915 |
| 17,127 | 3 | 655 | 170 | 98  | 926 |
| 17,128 | 3 | 654 | 170 | 99  | 926 |
| 17,129 | 4 | 651 | 170 | 96  | 921 |
| 17,130 | 4 | 650 | 166 | 96  | 916 |
| 17,131 | 4 | 660 | 165 | 93  | 922 |
| 17,132 | 4 | 658 | 168 | 94  | 924 |
| 17,133 | 5 | 657 | 169 | 92  | 923 |
| 17,134 | 5 | 641 | 165 | 88  | 899 |
| 17,135 | 5 | 657 | 165 | 89  | 916 |
| 17,136 | 5 | 669 | 168 | 94  | 936 |
| 17,137 | 4 | 657 | 173 | 93  | 927 |
| 17,138 | 4 | 665 | 176 | 95  | 940 |
| 17,139 | 4 | 670 | 179 | 95  | 948 |
| 17,140 | 4 | 667 | 175 | 95  | 941 |
| 17,141 | 4 | 651 | 176 | 96  | 927 |
| 17,142 | 4 | 658 | 178 | 95  | 935 |
| 17,143 | 4 | 644 | 174 | 91  | 913 |



|        |   |     |     |    |     |
|--------|---|-----|-----|----|-----|
| 17,144 | 4 | 633 | 179 | 88 | 904 |
| 17,145 | 4 | 637 | 180 | 86 | 907 |
| 17,146 | 4 | 633 | 180 | 86 | 903 |
| 17,147 | 4 | 647 | 186 | 86 | 923 |
| 17,148 | 4 | 629 | 180 | 84 | 897 |
| 17,149 | 4 | 627 | 179 | 82 | 892 |
| 17,150 | 4 | 608 | 177 | 82 | 871 |
| 17,151 | 4 | 611 | 176 | 84 | 875 |
| 17,152 | 4 | 617 | 177 | 84 | 882 |
| 17,153 | 5 | 630 | 181 | 82 | 898 |
| 17,154 | 5 | 629 | 178 | 85 | 897 |
| 17,155 | 5 | 627 | 174 | 84 | 890 |
| 17,156 | 5 | 638 | 174 | 85 | 902 |
| 17,157 | 5 | 628 | 172 | 87 | 892 |
| 17,158 | 5 | 640 | 175 | 88 | 908 |
| 17,159 | 5 | 645 | 175 | 85 | 910 |
| 17,160 | 5 | 644 | 176 | 85 | 910 |
| 17,161 | 5 | 640 | 172 | 85 | 902 |
| 17,162 | 5 | 658 | 173 | 87 | 923 |
| 17,163 | 5 | 655 | 172 | 85 | 917 |
| 17,164 | 5 | 655 | 169 | 87 | 916 |
| 17,165 | 6 | 648 | 166 | 84 | 904 |
| 17,166 | 6 | 649 | 161 | 87 | 903 |
| 17,167 | 6 | 648 | 163 | 87 | 904 |
| 17,168 | 6 | 637 | 160 | 88 | 891 |
| 17,169 | 6 | 626 | 155 | 90 | 877 |
| 17,170 | 5 | 621 | 156 | 91 | 873 |
| 17,171 | 5 | 607 | 157 | 91 | 860 |
| 17,172 | 5 | 609 | 147 | 92 | 853 |
| 17,173 | 5 | 608 | 147 | 90 | 850 |
| 17,174 | 5 | 606 | 143 | 90 | 844 |
| 17,175 | 5 | 604 | 140 | 89 | 838 |

|        |   |     |     |    |     |
|--------|---|-----|-----|----|-----|
| 17,176 | 5 | 600 | 137 | 88 | 830 |
| 17,177 | 5 | 583 | 133 | 87 | 808 |
| 17,178 | 5 | 587 | 135 | 85 | 812 |
| 17,179 | 5 | 587 | 134 | 86 | 812 |
| 17,180 | 4 | 590 | 132 | 94 | 820 |
| 17,181 | 4 | 588 | 135 | 93 | 820 |
| 17,182 | 4 | 579 | 130 | 92 | 805 |
| 17,183 | 4 | 573 | 130 | 92 | 799 |
| 17,184 | 3 | 577 | 129 | 93 | 802 |
| 17,185 | 3 | 561 | 129 | 95 | 788 |
| 17,186 | 3 | 563 | 129 | 92 | 787 |
| 17,187 | 3 | 565 | 125 | 89 | 782 |
| 17,188 | 3 | 564 | 119 | 88 | 774 |
| 17,189 | 3 | 571 | 116 | 88 | 778 |
| 17,190 | 3 | 579 | 111 | 87 | 780 |
| 17,191 | 3 | 574 | 108 | 82 | 767 |
| 17,192 | 3 | 579 | 110 | 82 | 774 |
| 17,193 | 5 | 581 | 107 | 86 | 779 |
| 17,194 | 5 | 591 | 114 | 88 | 798 |
| 17,195 | 5 | 600 | 112 | 89 | 806 |
| 17,196 | 5 | 591 | 111 | 88 | 795 |
| 17,197 | 5 | 574 | 107 | 91 | 777 |
| 17,198 | 5 | 578 | 106 | 91 | 780 |
| 17,199 | 5 | 578 | 105 | 90 | 778 |
| 17,200 | 5 | 588 | 106 | 93 | 792 |
| 17,201 | 5 | 592 | 105 | 92 | 794 |
| 17,202 | 5 | 594 | 106 | 90 | 795 |
| 17,203 | 5 | 597 | 105 | 91 | 798 |
| 17,204 | 4 | 583 | 101 | 94 | 782 |
| 17,205 | 4 | 576 | 102 | 91 | 773 |
| 17,206 | 4 | 578 | 106 | 94 | 782 |
| 17,207 | 4 | 578 | 110 | 95 | 787 |

|        |   |     |     |     |     |
|--------|---|-----|-----|-----|-----|
| 17,208 | 4 | 578 | 110 | 94  | 786 |
| 17,209 | 4 | 581 | 109 | 96  | 790 |
| 17,210 | 4 | 584 | 112 | 99  | 799 |
| 17,211 | 4 | 585 | 116 | 99  | 804 |
| 17,212 | 4 | 580 | 114 | 94  | 792 |
| 17,213 | 4 | 572 | 117 | 96  | 789 |
| 17,214 | 4 | 571 | 121 | 98  | 794 |
| 17,215 | 3 | 565 | 127 | 97  | 792 |
| 17,216 | 4 | 571 | 126 | 95  | 796 |
| 17,217 | 4 | 578 | 131 | 96  | 809 |
| 17,218 | 4 | 583 | 132 | 97  | 816 |
| 17,219 | 4 | 593 | 135 | 98  | 830 |
| 17,220 | 4 | 603 | 138 | 99  | 844 |
| 17,221 | 4 | 613 | 139 | 98  | 854 |
| 17,222 | 4 | 626 | 141 | 97  | 868 |
| 17,223 | 4 | 633 | 143 | 98  | 878 |
| 17,224 | 4 | 634 | 143 | 100 | 881 |
| 17,225 | 3 | 648 | 148 | 98  | 897 |
| 17,226 | 3 | 651 | 152 | 100 | 906 |
| 17,227 | 3 | 661 | 147 | 104 | 915 |
| 17,228 | 3 | 669 | 148 | 104 | 924 |
| 17,229 | 3 | 671 | 150 | 104 | 928 |
| 17,230 | 3 | 665 | 149 | 96  | 913 |
| 17,231 | 3 | 678 | 151 | 96  | 928 |
| 17,232 | 3 | 684 | 152 | 96  | 935 |
| 17,233 | 3 | 688 | 155 | 95  | 941 |
| 17,234 | 3 | 684 | 159 | 94  | 940 |
| 17,235 | 3 | 683 | 159 | 94  | 939 |
| 17,236 | 3 | 684 | 157 | 95  | 939 |
| 17,237 | 3 | 692 | 157 | 96  | 948 |
| 17,238 | 3 | 676 | 155 | 96  | 930 |
| 17,239 | 3 | 667 | 156 | 95  | 921 |

|        |   |     |     |     |     |
|--------|---|-----|-----|-----|-----|
| 17,240 | 3 | 668 | 159 | 94  | 924 |
| 17,241 | 3 | 662 | 159 | 95  | 919 |
| 17,242 | 3 | 666 | 158 | 96  | 923 |
| 17,243 | 3 | 664 | 158 | 96  | 921 |
| 17,244 | 2 | 661 | 157 | 94  | 914 |
| 17,245 | 2 | 655 | 154 | 96  | 907 |
| 17,246 | 2 | 660 | 152 | 96  | 910 |
| 17,247 | 2 | 656 | 152 | 95  | 905 |
| 17,248 | 2 | 661 | 151 | 96  | 910 |
| 17,249 | 2 | 672 | 154 | 98  | 926 |
| 17,250 | 2 | 674 | 155 | 98  | 929 |
| 17,251 | 2 | 673 | 157 | 99  | 931 |
| 17,252 | 3 | 675 | 158 | 99  | 935 |
| 17,253 | 3 | 672 | 159 | 99  | 933 |
| 17,254 | 3 | 682 | 161 | 106 | 952 |
| 17,255 | 3 | 695 | 160 | 102 | 960 |
| 17,256 | 3 | 694 | 162 | 103 | 962 |
| 17,257 | 3 | 692 | 160 | 103 | 958 |
| 17,258 | 3 | 687 | 156 | 104 | 950 |
| 17,259 | 3 | 690 | 157 | 106 | 956 |
| 17,260 | 3 | 693 | 154 | 108 | 958 |
| 17,261 | 3 | 689 | 153 | 106 | 951 |
| 17,262 | 3 | 680 | 147 | 107 | 937 |
| 17,263 | 4 | 689 | 153 | 106 | 952 |
| 17,264 | 4 | 687 | 152 | 104 | 947 |
| 17,265 | 4 | 691 | 149 | 107 | 951 |
| 17,266 | 4 | 700 | 146 | 105 | 955 |
| 17,267 | 4 | 696 | 149 | 107 | 956 |
| 17,268 | 5 | 682 | 141 | 103 | 931 |
| 17,269 | 5 | 685 | 141 | 102 | 933 |
| 17,270 | 5 | 688 | 139 | 103 | 935 |
| 17,271 | 5 | 678 | 137 | 102 | 922 |

|        |   |     |     |     |     |
|--------|---|-----|-----|-----|-----|
| 17,272 | 5 | 676 | 139 | 104 | 924 |
| 17,273 | 5 | 664 | 137 | 104 | 910 |
| 17,274 | 5 | 656 | 137 | 103 | 901 |
| 17,275 | 5 | 649 | 139 | 104 | 897 |
| 17,276 | 5 | 634 | 134 | 105 | 878 |
| 17,277 | 5 | 631 | 131 | 101 | 868 |
| 17,278 | 5 | 613 | 132 | 96  | 846 |
| 17,279 | 5 | 618 | 136 | 102 | 861 |
| 17,280 | 5 | 615 | 138 | 103 | 861 |
| 17,281 | 5 | 615 | 141 | 105 | 866 |
| 17,282 | 5 | 616 | 143 | 106 | 870 |
| 17,283 | 5 | 609 | 140 | 105 | 859 |
| 17,284 | 5 | 606 | 138 | 104 | 853 |
| 17,285 | 5 | 600 | 134 | 103 | 842 |
| 17,286 | 5 | 610 | 140 | 108 | 863 |
| 17,287 | 5 | 606 | 140 | 105 | 856 |
| 17,288 | 5 | 612 | 142 | 107 | 866 |
| 17,289 | 5 | 616 | 142 | 107 | 870 |
| 17,290 | 5 | 615 | 145 | 109 | 874 |
| 17,291 | 5 | 605 | 145 | 109 | 864 |
| 17,292 | 5 | 605 | 148 | 111 | 869 |
| 17,293 | 5 | 602 | 147 | 111 | 865 |
| 17,294 | 6 | 605 | 146 | 114 | 871 |
| 17,295 | 5 | 606 | 145 | 114 | 870 |
| 17,296 | 5 | 611 | 142 | 110 | 868 |
| 17,297 | 5 | 608 | 144 | 109 | 866 |
| 17,298 | 5 | 606 | 143 | 104 | 858 |
| 17,299 | 5 | 598 | 146 | 106 | 855 |
| 17,300 | 5 | 603 | 145 | 106 | 859 |
| 17,301 | 5 | 597 | 146 | 105 | 853 |
| 17,302 | 5 | 605 | 144 | 107 | 861 |
| 17,303 | 4 | 599 | 142 | 107 | 852 |

|        |   |     |     |     |     |
|--------|---|-----|-----|-----|-----|
| 17,304 | 4 | 602 | 143 | 103 | 852 |
| 17,305 | 4 | 599 | 147 | 101 | 851 |
| 17,306 | 4 | 600 | 146 | 102 | 852 |
| 17,307 | 5 | 603 | 143 | 101 | 852 |
| 17,308 | 5 | 595 | 140 | 98  | 838 |
| 17,309 | 5 | 603 | 142 | 98  | 848 |
| 17,310 | 5 | 595 | 142 | 95  | 837 |
| 17,311 | 5 | 589 | 143 | 93  | 830 |
| 17,312 | 5 | 591 | 149 | 92  | 837 |
| 17,313 | 4 | 597 | 147 | 92  | 840 |
| 17,314 | 4 | 604 | 146 | 93  | 847 |
| 17,315 | 4 | 603 | 145 | 93  | 845 |
| 17,316 | 4 | 605 | 144 | 94  | 847 |
| 17,317 | 4 | 594 | 142 | 96  | 836 |
| 17,318 | 3 | 601 | 138 | 96  | 838 |
| 17,319 | 2 | 601 | 139 | 98  | 840 |
| 17,320 | 2 | 601 | 140 | 100 | 843 |
| 17,321 | 2 | 599 | 139 | 99  | 839 |
| 17,322 | 2 | 595 | 140 | 99  | 836 |
| 17,323 | 2 | 598 | 138 | 99  | 837 |
| 17,324 | 2 | 598 | 140 | 98  | 838 |
| 17,325 | 2 | 590 | 139 | 96  | 827 |
| 17,326 | 2 | 589 | 140 | 94  | 825 |
| 17,327 | 2 | 582 | 139 | 98  | 821 |
| 17,328 | 2 | 584 | 139 | 99  | 824 |
| 17,329 | 2 | 586 | 139 | 96  | 823 |
| 17,330 | 2 | 582 | 139 | 96  | 819 |
| 17,331 | 2 | 581 | 137 | 95  | 815 |
| 17,332 | 2 | 581 | 130 | 90  | 803 |
| 17,333 | 2 | 584 | 130 | 90  | 806 |
| 17,334 | 2 | 583 | 130 | 91  | 806 |
| 17,335 | 2 | 586 | 132 | 93  | 813 |

|        |   |     |     |     |     |
|--------|---|-----|-----|-----|-----|
| 17,336 | 2 | 590 | 129 | 87  | 808 |
| 17,337 | 2 | 591 | 128 | 88  | 809 |
| 17,338 | 2 | 600 | 126 | 89  | 817 |
| 17,339 | 2 | 605 | 125 | 91  | 823 |
| 17,340 | 2 | 599 | 124 | 94  | 819 |
| 17,341 | 2 | 601 | 125 | 96  | 824 |
| 17,342 | 2 | 607 | 124 | 97  | 830 |
| 17,343 | 2 | 602 | 120 | 96  | 820 |
| 17,344 | 1 | 596 | 117 | 95  | 809 |
| 17,345 | 1 | 605 | 121 | 96  | 823 |
| 17,346 | 1 | 601 | 125 | 98  | 825 |
| 17,347 | 1 | 605 | 125 | 98  | 829 |
| 17,348 | 2 | 595 | 125 | 100 | 822 |
| 17,349 | 2 | 598 | 124 | 101 | 825 |
| 17,350 | 2 | 591 | 121 | 101 | 815 |
| 17,351 | 2 | 592 | 123 | 103 | 820 |
| 17,352 | 2 | 587 | 124 | 103 | 816 |
| 17,353 | 2 | 583 | 127 | 99  | 811 |
| 17,354 | 3 | 582 | 123 | 99  | 807 |
| 17,355 | 3 | 583 | 121 | 101 | 808 |
| 17,356 | 3 | 602 | 125 | 101 | 831 |
| 17,357 | 3 | 605 | 129 | 101 | 838 |
| 17,358 | 2 | 599 | 130 | 100 | 831 |
| 17,359 | 2 | 618 | 130 | 101 | 851 |
| 17,360 | 2 | 612 | 128 | 99  | 841 |
| 17,361 | 2 | 611 | 128 | 103 | 844 |
| 17,362 | 2 | 614 | 126 | 106 | 848 |
| 17,363 | 2 | 613 | 126 | 110 | 851 |
| 17,364 | 2 | 608 | 121 | 112 | 843 |
| 17,365 | 2 | 592 | 119 | 110 | 823 |
| 17,366 | 2 | 591 | 120 | 110 | 823 |
| 17,367 | 2 | 596 | 123 | 109 | 830 |

|        |   |     |     |     |     |
|--------|---|-----|-----|-----|-----|
| 17,368 | 2 | 600 | 127 | 111 | 840 |
| 17,369 | 2 | 603 | 128 | 108 | 841 |
| 17,370 | 2 | 601 | 128 | 108 | 839 |
| 17,371 | 2 | 602 | 129 | 108 | 841 |
| 17,372 | 2 | 603 | 133 | 109 | 847 |
| 17,373 | 2 | 606 | 129 | 109 | 846 |
| 17,374 | 2 | 604 | 126 | 109 | 841 |
| 17,375 | 2 | 609 | 129 | 108 | 848 |
| 17,376 | 2 | 610 | 129 | 111 | 852 |
| 17,377 | 2 | 615 | 129 | 111 | 857 |
| 17,378 | 2 | 613 | 128 | 108 | 851 |
| 17,379 | 2 | 614 | 126 | 106 | 848 |
| 17,380 | 2 | 611 | 123 | 103 | 839 |
| 17,381 | 2 | 613 | 121 | 100 | 836 |
| 17,382 | 2 | 614 | 120 | 102 | 838 |
| 17,383 | 2 | 606 | 124 | 103 | 835 |
| 17,384 | 2 | 604 | 124 | 102 | 832 |
| 17,385 | 2 | 588 | 119 | 98  | 807 |
| 17,386 | 2 | 584 | 118 | 99  | 803 |
| 17,387 | 2 | 579 | 117 | 102 | 800 |
| 17,388 | 2 | 577 | 117 | 102 | 798 |
| 17,389 | 2 | 574 | 118 | 102 | 796 |
| 17,390 | 2 | 575 | 121 | 100 | 798 |
| 17,391 | 2 | 575 | 119 | 98  | 794 |
| 17,392 | 2 | 582 | 118 | 97  | 799 |
| 17,393 | 2 | 592 | 119 | 98  | 811 |
| 17,394 | 2 | 595 | 118 | 96  | 811 |
| 17,395 | 2 | 592 | 115 | 95  | 804 |
| 17,396 | 3 | 604 | 115 | 92  | 814 |
| 17,397 | 2 | 594 | 115 | 91  | 802 |
| 17,398 | 2 | 603 | 115 | 91  | 811 |
| 17,399 | 2 | 603 | 120 | 93  | 818 |



|        |   |     |     |    |     |
|--------|---|-----|-----|----|-----|
| 17,400 | 2 | 612 | 120 | 91 | 825 |
| 17,401 | 2 | 616 | 120 | 91 | 829 |
| 17,402 | 2 | 627 | 118 | 89 | 836 |
| 17,403 | 2 | 622 | 111 | 87 | 822 |
| 17,404 | 2 | 621 | 113 | 88 | 824 |
| 17,405 | 1 | 587 | 109 | 86 | 783 |
| 17,406 | 1 | 592 | 108 | 85 | 786 |
| 17,407 | 1 | 606 | 106 | 88 | 801 |
| 17,408 | 1 | 602 | 106 | 86 | 795 |
| 17,409 | 1 | 611 | 108 | 86 | 806 |
| 17,410 | 1 | 590 | 103 | 87 | 781 |
| 17,411 | 1 | 588 | 101 | 84 | 774 |
| 17,412 | 1 | 589 | 102 | 83 | 775 |
| 17,413 | 1 | 603 | 105 | 89 | 798 |
| 17,414 | 1 | 607 | 108 | 86 | 802 |
| 17,415 | 1 | 615 | 113 | 85 | 814 |
| 17,416 | 1 | 614 | 112 | 88 | 815 |
| 17,417 | 1 | 613 | 112 | 86 | 812 |
| 17,418 | 1 | 619 | 111 | 88 | 819 |
| 17,419 | 1 | 605 | 109 | 84 | 799 |
| 17,420 | 1 | 615 | 110 | 86 | 812 |
| 17,421 | 1 | 612 | 109 | 83 | 805 |
| 17,422 | 1 | 623 | 110 | 86 | 820 |
| 17,423 | 1 | 619 | 108 | 82 | 810 |
| 17,424 | 1 | 624 | 113 | 83 | 821 |
| 17,425 | 1 | 621 | 112 | 84 | 818 |
| 17,426 | 1 | 636 | 112 | 85 | 834 |
| 17,427 | 1 | 642 | 112 | 83 | 838 |
| 17,428 | 1 | 646 | 114 | 83 | 844 |
| 17,429 | 1 | 640 | 119 | 85 | 845 |
| 17,430 | 1 | 634 | 119 | 85 | 839 |
| 17,431 | 1 | 636 | 124 | 89 | 850 |

|        |   |     |     |     |     |
|--------|---|-----|-----|-----|-----|
| 17,432 | 1 | 647 | 128 | 91  | 867 |
| 17,433 | 1 | 639 | 126 | 91  | 857 |
| 17,434 | 2 | 646 | 127 | 92  | 867 |
| 17,435 | 2 | 647 | 125 | 95  | 869 |
| 17,436 | 2 | 652 | 125 | 97  | 876 |
| 17,437 | 2 | 650 | 129 | 95  | 876 |
| 17,438 | 2 | 658 | 131 | 94  | 885 |
| 17,439 | 2 | 657 | 131 | 92  | 882 |
| 17,440 | 2 | 657 | 132 | 94  | 885 |
| 17,441 | 2 | 661 | 134 | 95  | 892 |
| 17,442 | 2 | 667 | 134 | 98  | 901 |
| 17,443 | 2 | 666 | 136 | 98  | 902 |
| 17,444 | 2 | 649 | 135 | 97  | 883 |
| 17,445 | 2 | 654 | 136 | 99  | 891 |
| 17,446 | 1 | 660 | 135 | 100 | 896 |
| 17,447 | 1 | 642 | 141 | 98  | 882 |
| 17,448 | 1 | 651 | 140 | 101 | 893 |
| 17,449 | 1 | 660 | 142 | 101 | 904 |
| 17,450 | 1 | 658 | 142 | 99  | 900 |
| 17,451 | 1 | 645 | 146 | 98  | 890 |
| 17,452 | 1 | 650 | 146 | 98  | 895 |
| 17,453 | 1 | 642 | 147 | 98  | 888 |
| 17,454 | 1 | 648 | 146 | 100 | 895 |
| 17,455 | 1 | 655 | 153 | 102 | 911 |
| 17,456 | 1 | 653 | 150 | 102 | 906 |
| 17,457 | 1 | 655 | 155 | 106 | 917 |
| 17,458 | 1 | 646 | 155 | 106 | 908 |
| 17,459 | 1 | 640 | 152 | 108 | 901 |
| 17,460 | 1 | 635 | 150 | 112 | 898 |
| 17,461 | 1 | 630 | 152 | 112 | 895 |
| 17,462 | 1 | 629 | 152 | 113 | 895 |
| 17,463 | 1 | 632 | 152 | 110 | 895 |

|        |   |     |     |     |     |
|--------|---|-----|-----|-----|-----|
| 17,464 | 1 | 623 | 150 | 112 | 886 |
| 17,465 | 1 | 623 | 148 | 113 | 885 |
| 17,466 | 1 | 631 | 146 | 114 | 892 |
| 17,467 | 1 | 633 | 146 | 111 | 891 |
| 17,468 | 1 | 629 | 150 | 112 | 892 |
| 17,469 | 1 | 633 | 151 | 113 | 898 |
| 17,470 | 1 | 643 | 150 | 117 | 911 |
| 17,471 | 1 | 643 | 149 | 115 | 908 |
| 17,472 | 1 | 640 | 147 | 115 | 903 |
| 17,473 | 1 | 654 | 152 | 114 | 921 |
| 17,474 | 1 | 651 | 152 | 114 | 918 |
| 17,475 | 1 | 651 | 149 | 112 | 913 |
| 17,476 | 1 | 651 | 151 | 113 | 916 |
| 17,477 | 1 | 655 | 155 | 114 | 925 |
| 17,478 | 1 | 652 | 149 | 114 | 916 |
| 17,479 | 1 | 657 | 147 | 116 | 921 |
| 17,480 | 1 | 665 | 146 | 122 | 934 |
| 17,481 | 1 | 670 | 145 | 123 | 939 |
| 17,482 | 1 | 667 | 140 | 122 | 930 |
| 17,483 | 1 | 671 | 139 | 121 | 932 |
| 17,484 | 1 | 669 | 143 | 123 | 936 |
| 17,485 | 0 | 673 | 140 | 122 | 935 |
| 17,486 | 0 | 673 | 140 | 120 | 933 |
| 17,487 | 0 | 679 | 141 | 119 | 939 |
| 17,488 | 0 | 682 | 141 | 120 | 943 |
| 17,489 | 0 | 688 | 143 | 120 | 951 |
| 17,490 | 1 | 699 | 142 | 122 | 964 |
| 17,491 | 1 | 700 | 143 | 120 | 964 |
| 17,492 | 1 | 707 | 142 | 124 | 974 |
| 17,493 | 1 | 723 | 143 | 123 | 990 |
| 17,494 | 1 | 720 | 142 | 120 | 983 |
| 17,495 | 1 | 715 | 146 | 121 | 983 |

|        |   |     |     |     |       |
|--------|---|-----|-----|-----|-------|
| 17,496 | 1 | 730 | 147 | 121 | 999   |
| 17,497 | 1 | 724 | 147 | 120 | 992   |
| 17,498 | 1 | 724 | 138 | 121 | 984   |
| 17,499 | 1 | 723 | 140 | 122 | 986   |
| 17,500 | 1 | 707 | 134 | 122 | 964   |
| 17,501 | 1 | 704 | 129 | 124 | 958   |
| 17,502 | 1 | 707 | 128 | 127 | 963   |
| 17,503 | 1 | 712 | 132 | 128 | 973   |
| 17,504 | 1 | 720 | 135 | 132 | 988   |
| 17,505 | 1 | 711 | 135 | 131 | 978   |
| 17,506 | 1 | 718 | 129 | 132 | 980   |
| 17,507 | 1 | 725 | 129 | 128 | 983   |
| 17,508 | 1 | 729 | 127 | 129 | 986   |
| 17,509 | 1 | 732 | 127 | 127 | 987   |
| 17,510 | 1 | 737 | 127 | 124 | 989   |
| 17,511 | 1 | 735 | 126 | 121 | 983   |
| 17,512 | 1 | 749 | 128 | 119 | 997   |
| 17,513 | 1 | 747 | 132 | 121 | 1,001 |
| 17,514 | 1 | 748 | 134 | 120 | 1,003 |
| 17,515 | 1 | 754 | 134 | 118 | 1,007 |
| 17,516 | 1 | 755 | 133 | 115 | 1,004 |
| 17,517 | 1 | 753 | 139 | 117 | 1,010 |
| 17,518 | 1 | 748 | 137 | 119 | 1,005 |
| 17,519 | 1 | 767 | 133 | 118 | 1,019 |
| 17,520 | 2 | 765 | 132 | 119 | 1,018 |
| 17,521 | 2 | 748 | 133 | 116 | 999   |
| 17,522 | 2 | 764 | 136 | 121 | 1,023 |
| 17,523 | 2 | 745 | 130 | 119 | 996   |
| 17,524 | 2 | 753 | 131 | 121 | 1,007 |
| 17,525 | 2 | 766 | 131 | 123 | 1,022 |
| 17,526 | 2 | 759 | 129 | 124 | 1,014 |
| 17,527 | 2 | 755 | 127 | 123 | 1,007 |

|        |   |     |     |     |     |
|--------|---|-----|-----|-----|-----|
| 17,528 | 2 | 742 | 121 | 122 | 987 |
| 17,529 | 2 | 725 | 122 | 119 | 968 |
| 17,530 | 2 | 722 | 127 | 121 | 972 |
| 17,531 | 2 | 720 | 129 | 112 | 963 |
| 17,532 | 2 | 719 | 128 | 111 | 960 |
| 17,533 | 2 | 719 | 126 | 113 | 960 |
| 17,534 | 2 | 718 | 129 | 111 | 960 |
| 17,535 | 2 | 712 | 126 | 109 | 949 |
| 17,536 | 2 | 714 | 129 | 109 | 954 |
| 17,537 | 2 | 693 | 127 | 105 | 927 |
| 17,538 | 2 | 690 | 128 | 105 | 925 |
| 17,539 | 2 | 689 | 127 | 104 | 922 |
| 17,540 | 1 | 682 | 126 | 103 | 912 |
| 17,541 | 1 | 676 | 125 | 103 | 905 |
| 17,542 | 1 | 669 | 125 | 101 | 896 |
| 17,543 | 1 | 672 | 126 | 99  | 898 |
| 17,544 | 1 | 653 | 122 | 98  | 874 |
| 17,545 | 1 | 646 | 120 | 98  | 865 |
| 17,546 | 1 | 653 | 117 | 97  | 868 |
| 17,547 | 1 | 644 | 119 | 94  | 858 |
| 17,548 | 1 | 651 | 119 | 94  | 865 |
| 17,549 | 1 | 660 | 121 | 97  | 879 |
| 17,550 | 1 | 666 | 120 | 96  | 883 |
| 17,551 | 1 | 663 | 119 | 96  | 879 |
| 17,552 | 1 | 690 | 122 | 96  | 909 |
| 17,553 | 1 | 687 | 122 | 93  | 903 |
| 17,554 | 1 | 681 | 121 | 92  | 895 |
| 17,555 | 1 | 677 | 118 | 91  | 887 |
| 17,556 | 1 | 685 | 120 | 90  | 896 |
| 17,557 | 1 | 673 | 118 | 87  | 879 |
| 17,558 | 1 | 678 | 118 | 89  | 886 |
| 17,559 | 1 | 667 | 121 | 85  | 874 |

|        |   |     |     |     |     |
|--------|---|-----|-----|-----|-----|
| 17,560 | 1 | 661 | 120 | 86  | 868 |
| 17,561 | 1 | 668 | 121 | 87  | 877 |
| 17,562 | 1 | 670 | 120 | 90  | 881 |
| 17,563 | 1 | 670 | 115 | 90  | 876 |
| 17,564 | 1 | 647 | 114 | 89  | 851 |
| 17,565 | 1 | 658 | 112 | 90  | 861 |
| 17,566 | 1 | 665 | 113 | 90  | 869 |
| 17,567 | 1 | 672 | 112 | 89  | 874 |
| 17,568 | 1 | 670 | 112 | 88  | 871 |
| 17,569 | 1 | 667 | 111 | 85  | 864 |
| 17,570 | 0 | 653 | 114 | 85  | 852 |
| 17,571 | 0 | 652 | 115 | 84  | 851 |
| 17,572 | 0 | 656 | 110 | 85  | 851 |
| 17,573 | 0 | 650 | 111 | 84  | 845 |
| 17,574 | 0 | 657 | 110 | 87  | 854 |
| 17,575 | 1 | 651 | 110 | 88  | 850 |
| 17,576 | 1 | 637 | 112 | 88  | 838 |
| 17,577 | 1 | 627 | 114 | 84  | 826 |
| 17,578 | 1 | 632 | 111 | 81  | 825 |
| 17,579 | 1 | 643 | 111 | 81  | 836 |
| 17,580 | 1 | 639 | 109 | 82  | 831 |
| 17,581 | 1 | 635 | 108 | 85  | 829 |
| 17,582 | 1 | 631 | 106 | 85  | 823 |
| 17,583 | 1 | 641 | 110 | 89  | 841 |
| 17,584 | 1 | 647 | 114 | 87  | 849 |
| 17,585 | 1 | 632 | 110 | 90  | 833 |
| 17,586 | 3 | 645 | 114 | 93  | 855 |
| 17,587 | 3 | 648 | 114 | 93  | 858 |
| 17,588 | 3 | 653 | 112 | 100 | 868 |
| 17,589 | 3 | 656 | 110 | 100 | 869 |
| 17,590 | 4 | 662 | 112 | 102 | 880 |
| 17,591 | 4 | 658 | 111 | 102 | 875 |

|        |   |     |     |     |     |
|--------|---|-----|-----|-----|-----|
| 17,592 | 4 | 652 | 112 | 103 | 871 |
| 17,593 | 4 | 650 | 112 | 102 | 868 |
| 17,594 | 4 | 662 | 111 | 107 | 884 |
| 17,595 | 4 | 654 | 111 | 106 | 875 |
| 17,596 | 4 | 657 | 109 | 107 | 877 |
| 17,597 | 4 | 659 | 110 | 107 | 880 |
| 17,598 | 4 | 630 | 109 | 108 | 851 |
| 17,599 | 4 | 634 | 110 | 108 | 856 |
| 17,600 | 4 | 647 | 111 | 106 | 868 |
| 17,601 | 4 | 645 | 114 | 104 | 867 |
| 17,602 | 4 | 641 | 113 | 103 | 861 |
| 17,603 | 4 | 645 | 112 | 104 | 865 |
| 17,604 | 4 | 650 | 111 | 104 | 869 |
| 17,605 | 4 | 651 | 109 | 104 | 868 |
| 17,606 | 4 | 635 | 109 | 102 | 850 |
| 17,607 | 4 | 633 | 111 | 104 | 852 |
| 17,608 | 4 | 627 | 112 | 105 | 848 |
| 17,609 | 4 | 639 | 113 | 104 | 860 |
| 17,610 | 5 | 638 | 110 | 110 | 863 |
| 17,611 | 5 | 634 | 109 | 108 | 856 |
| 17,612 | 5 | 628 | 109 | 106 | 848 |
| 17,613 | 5 | 624 | 109 | 104 | 842 |
| 17,614 | 7 | 622 | 110 | 103 | 842 |
| 17,615 | 7 | 643 | 108 | 105 | 863 |
| 17,616 | 8 | 641 | 109 | 104 | 862 |
| 17,617 | 8 | 636 | 107 | 104 | 855 |
| 17,618 | 8 | 640 | 113 | 106 | 867 |
| 17,619 | 8 | 648 | 110 | 107 | 873 |
| 17,620 | 8 | 646 | 107 | 103 | 864 |
| 17,621 | 8 | 646 | 108 | 105 | 867 |
| 17,622 | 8 | 648 | 107 | 103 | 866 |
| 17,623 | 8 | 676 | 115 | 106 | 905 |

|        |   |     |     |     |     |
|--------|---|-----|-----|-----|-----|
| 17,624 | 8 | 679 | 120 | 105 | 912 |
| 17,625 | 8 | 670 | 121 | 104 | 903 |
| 17,626 | 7 | 659 | 116 | 100 | 882 |
| 17,627 | 7 | 659 | 118 | 99  | 883 |
| 17,628 | 7 | 648 | 115 | 100 | 870 |
| 17,629 | 7 | 638 | 114 | 98  | 857 |
| 17,630 | 7 | 680 | 124 | 112 | 923 |
| 17,631 | 7 | 690 | 123 | 111 | 931 |
| 17,632 | 7 | 691 | 123 | 108 | 929 |
| 17,633 | 7 | 694 | 120 | 107 | 928 |
| 17,634 | 7 | 698 | 119 | 105 | 929 |
| 17,635 | 8 | 683 | 112 | 106 | 909 |
| 17,636 | 8 | 685 | 116 | 105 | 914 |
| 17,637 | 6 | 699 | 121 | 102 | 928 |
| 17,638 | 7 | 708 | 121 | 99  | 935 |
| 17,639 | 7 | 703 | 123 | 97  | 930 |
| 17,640 | 7 | 703 | 124 | 101 | 935 |
| 17,641 | 6 | 699 | 121 | 94  | 920 |
| 17,642 | 6 | 716 | 122 | 92  | 936 |
| 17,643 | 6 | 738 | 124 | 92  | 960 |
| 17,644 | 6 | 740 | 122 | 91  | 959 |
| 17,645 | 6 | 751 | 124 | 93  | 974 |
| 17,646 | 6 | 744 | 125 | 93  | 968 |
| 17,647 | 6 | 746 | 126 | 92  | 970 |
| 17,648 | 6 | 750 | 127 | 93  | 976 |
| 17,649 | 6 | 755 | 126 | 93  | 980 |
| 17,650 | 7 | 759 | 125 | 92  | 983 |
| 17,651 | 8 | 741 | 123 | 95  | 967 |
| 17,652 | 9 | 728 | 121 | 97  | 955 |
| 17,653 | 9 | 726 | 121 | 96  | 952 |
| 17,654 | 9 | 719 | 122 | 94  | 944 |
| 17,655 | 9 | 724 | 121 | 92  | 946 |



|        |    |     |     |     |     |
|--------|----|-----|-----|-----|-----|
| 17,656 | 9  | 739 | 118 | 100 | 966 |
| 17,657 | 9  | 748 | 117 | 98  | 972 |
| 17,658 | 10 | 744 | 116 | 99  | 969 |
| 17,659 | 10 | 742 | 117 | 101 | 970 |
| 17,660 | 10 | 739 | 118 | 101 | 968 |
| 17,661 | 9  | 749 | 118 | 101 | 977 |
| 17,662 | 9  | 745 | 119 | 100 | 973 |
| 17,663 | 9  | 750 | 120 | 103 | 982 |
| 17,664 | 7  | 750 | 119 | 103 | 979 |
| 17,665 | 7  | 739 | 119 | 101 | 966 |
| 17,666 | 7  | 723 | 122 | 100 | 952 |
| 17,667 | 6  | 745 | 126 | 102 | 979 |
| 17,668 | 6  | 743 | 124 | 101 | 974 |
| 17,669 | 6  | 741 | 121 | 102 | 970 |
| 17,670 | 6  | 740 | 120 | 101 | 967 |
| 17,671 | 6  | 736 | 120 | 100 | 962 |
| 17,672 | 6  | 724 | 118 | 98  | 946 |
| 17,673 | 6  | 730 | 117 | 99  | 952 |
| 17,674 | 6  | 717 | 117 | 101 | 941 |
| 17,675 | 6  | 716 | 114 | 101 | 937 |
| 17,676 | 6  | 727 | 112 | 100 | 945 |
| 17,677 | 6  | 735 | 112 | 99  | 952 |
| 17,678 | 6  | 726 | 112 | 98  | 942 |
| 17,679 | 6  | 729 | 112 | 97  | 944 |
| 17,680 | 6  | 732 | 111 | 97  | 946 |
| 17,681 | 6  | 731 | 111 | 92  | 940 |
| 17,682 | 6  | 729 | 112 | 93  | 940 |
| 17,683 | 6  | 726 | 111 | 93  | 936 |
| 17,684 | 6  | 724 | 112 | 95  | 937 |
| 17,685 | 6  | 724 | 114 | 95  | 939 |
| 17,686 | 5  | 721 | 110 | 95  | 931 |
| 17,687 | 5  | 719 | 108 | 96  | 928 |

|        |   |     |     |    |     |
|--------|---|-----|-----|----|-----|
| 17,688 | 5 | 700 | 104 | 96 | 905 |
| 17,689 | 4 | 685 | 105 | 95 | 889 |
| 17,690 | 4 | 708 | 111 | 96 | 919 |
| 17,691 | 4 | 700 | 110 | 92 | 906 |
| 17,692 | 4 | 705 | 110 | 93 | 912 |
| 17,693 | 4 | 698 | 108 | 95 | 905 |
| 17,694 | 4 | 677 | 109 | 95 | 885 |
| 17,695 | 5 | 690 | 112 | 94 | 901 |
| 17,696 | 5 | 687 | 115 | 94 | 901 |
| 17,697 | 5 | 686 | 114 | 95 | 900 |
| 17,698 | 5 | 688 | 113 | 93 | 899 |
| 17,699 | 5 | 683 | 112 | 92 | 892 |
| 17,700 | 4 | 687 | 113 | 92 | 896 |
| 17,701 | 4 | 681 | 114 | 92 | 891 |
| 17,702 | 3 | 691 | 114 | 93 | 901 |
| 17,703 | 2 | 693 | 114 | 91 | 900 |
| 17,704 | 2 | 689 | 119 | 92 | 902 |
| 17,705 | 2 | 680 | 120 | 87 | 889 |
| 17,706 | 2 | 684 | 119 | 86 | 891 |
| 17,707 | 2 | 681 | 116 | 87 | 886 |
| 17,708 | 2 | 670 | 118 | 88 | 878 |
| 17,709 | 1 | 681 | 118 | 87 | 887 |
| 17,710 | 1 | 686 | 117 | 84 | 888 |
| 17,711 | 1 | 687 | 119 | 80 | 887 |
| 17,712 | 1 | 687 | 118 | 81 | 887 |
| 17,713 | 1 | 694 | 118 | 81 | 894 |
| 17,714 | 1 | 701 | 120 | 82 | 904 |
| 17,715 | 1 | 691 | 120 | 83 | 895 |
| 17,716 | 1 | 684 | 117 | 84 | 886 |
| 17,717 | 2 | 679 | 114 | 82 | 877 |
| 17,718 | 2 | 679 | 117 | 83 | 881 |
| 17,719 | 2 | 690 | 116 | 84 | 892 |

|        |   |     |     |    |     |
|--------|---|-----|-----|----|-----|
| 17,720 | 2 | 678 | 118 | 83 | 881 |
| 17,721 | 2 | 677 | 118 | 82 | 879 |
| 17,722 | 2 | 677 | 118 | 81 | 878 |
| 17,723 | 2 | 681 | 118 | 83 | 884 |
| 17,724 | 2 | 695 | 120 | 84 | 901 |
| 17,725 | 3 | 676 | 116 | 77 | 872 |
| 17,726 | 3 | 683 | 116 | 77 | 879 |
| 17,727 | 3 | 698 | 120 | 78 | 899 |
| 17,728 | 3 | 692 | 117 | 78 | 890 |
| 17,729 | 3 | 709 | 117 | 82 | 911 |
| 17,730 | 3 | 704 | 117 | 81 | 905 |
| 17,731 | 3 | 701 | 115 | 84 | 903 |
| 17,732 | 3 | 714 | 114 | 85 | 916 |
| 17,733 | 3 | 725 | 117 | 87 | 932 |
| 17,734 | 3 | 722 | 121 | 86 | 932 |
| 17,735 | 3 | 716 | 117 | 83 | 919 |
| 17,736 | 3 | 729 | 116 | 83 | 931 |
| 17,737 | 3 | 733 | 113 | 86 | 935 |
| 17,738 | 3 | 734 | 111 | 85 | 933 |
| 17,739 | 3 | 744 | 111 | 83 | 941 |
| 17,740 | 3 | 741 | 111 | 85 | 940 |
| 17,741 | 3 | 732 | 106 | 85 | 926 |
| 17,742 | 3 | 743 | 108 | 87 | 941 |
| 17,743 | 3 | 743 | 109 | 86 | 941 |
| 17,744 | 3 | 749 | 108 | 86 | 946 |
| 17,745 | 3 | 751 | 113 | 86 | 953 |
| 17,746 | 2 | 735 | 107 | 86 | 930 |
| 17,747 | 2 | 745 | 109 | 87 | 943 |
| 17,748 | 2 | 751 | 111 | 89 | 953 |
| 17,749 | 2 | 752 | 110 | 89 | 953 |
| 17,750 | 2 | 760 | 110 | 90 | 962 |
| 17,751 | 2 | 755 | 110 | 88 | 955 |

|        |   |     |     |    |       |
|--------|---|-----|-----|----|-------|
| 17,752 | 2 | 758 | 113 | 90 | 963   |
| 17,753 | 2 | 762 | 115 | 86 | 965   |
| 17,754 | 2 | 754 | 107 | 86 | 949   |
| 17,755 | 2 | 758 | 107 | 87 | 954   |
| 17,756 | 2 | 764 | 109 | 87 | 962   |
| 17,757 | 2 | 771 | 113 | 85 | 971   |
| 17,758 | 2 | 775 | 111 | 83 | 971   |
| 17,759 | 3 | 780 | 112 | 82 | 977   |
| 17,760 | 3 | 772 | 113 | 83 | 971   |
| 17,761 | 3 | 772 | 113 | 83 | 971   |
| 17,762 | 3 | 749 | 110 | 83 | 945   |
| 17,763 | 3 | 753 | 111 | 82 | 949   |
| 17,764 | 3 | 759 | 112 | 83 | 957   |
| 17,765 | 3 | 765 | 114 | 82 | 964   |
| 17,766 | 4 | 764 | 116 | 81 | 965   |
| 17,767 | 4 | 773 | 120 | 80 | 977   |
| 17,768 | 4 | 783 | 123 | 83 | 993   |
| 17,769 | 5 | 786 | 126 | 81 | 998   |
| 17,770 | 5 | 788 | 130 | 83 | 1,006 |
| 17,771 | 5 | 780 | 130 | 82 | 997   |
| 17,772 | 5 | 777 | 130 | 82 | 994   |
| 17,773 | 5 | 773 | 130 | 82 | 990   |
| 17,774 | 5 | 767 | 128 | 82 | 982   |
| 17,775 | 5 | 749 | 127 | 79 | 960   |
| 17,776 | 4 | 728 | 127 | 78 | 937   |
| 17,777 | 4 | 727 | 129 | 81 | 941   |
| 17,778 | 4 | 702 | 131 | 83 | 920   |
| 17,779 | 4 | 701 | 132 | 87 | 924   |
| 17,780 | 4 | 697 | 128 | 86 | 915   |
| 17,781 | 4 | 694 | 126 | 86 | 910   |
| 17,782 | 5 | 696 | 131 | 85 | 917   |
| 17,783 | 6 | 684 | 133 | 86 | 909   |

|        |   |     |     |     |     |
|--------|---|-----|-----|-----|-----|
| 17,784 | 6 | 683 | 136 | 86  | 911 |
| 17,785 | 6 | 677 | 131 | 85  | 899 |
| 17,786 | 6 | 680 | 134 | 86  | 906 |
| 17,787 | 6 | 682 | 137 | 87  | 912 |
| 17,788 | 6 | 675 | 136 | 83  | 900 |
| 17,789 | 6 | 684 | 136 | 86  | 912 |
| 17,790 | 6 | 676 | 134 | 87  | 903 |
| 17,791 | 6 | 675 | 134 | 85  | 900 |
| 17,792 | 6 | 687 | 135 | 89  | 917 |
| 17,793 | 7 | 684 | 135 | 90  | 916 |
| 17,794 | 7 | 656 | 129 | 89  | 881 |
| 17,795 | 7 | 657 | 131 | 90  | 885 |
| 17,796 | 7 | 669 | 131 | 91  | 898 |
| 17,797 | 7 | 671 | 132 | 93  | 903 |
| 17,798 | 7 | 662 | 128 | 89  | 886 |
| 17,799 | 7 | 673 | 130 | 90  | 900 |
| 17,800 | 7 | 663 | 131 | 92  | 893 |
| 17,801 | 7 | 658 | 132 | 92  | 889 |
| 17,802 | 7 | 666 | 132 | 95  | 900 |
| 17,803 | 7 | 656 | 127 | 94  | 884 |
| 17,804 | 7 | 638 | 124 | 95  | 864 |
| 17,805 | 7 | 632 | 125 | 96  | 860 |
| 17,806 | 7 | 628 | 125 | 96  | 856 |
| 17,807 | 7 | 622 | 124 | 97  | 850 |
| 17,808 | 7 | 613 | 121 | 100 | 841 |
| 17,809 | 7 | 616 | 122 | 99  | 844 |
| 17,810 | 6 | 620 | 125 | 101 | 852 |
| 17,811 | 6 | 616 | 122 | 101 | 845 |
| 17,812 | 6 | 630 | 123 | 104 | 863 |
| 17,813 | 6 | 627 | 123 | 106 | 862 |
| 17,814 | 6 | 631 | 123 | 107 | 867 |
| 17,815 | 6 | 621 | 123 | 105 | 855 |

|        |   |     |     |     |     |
|--------|---|-----|-----|-----|-----|
| 17,816 | 6 | 634 | 121 | 105 | 866 |
| 17,817 | 6 | 618 | 114 | 104 | 842 |
| 17,818 | 6 | 612 | 112 | 106 | 836 |
| 17,819 | 5 | 608 | 113 | 103 | 829 |
| 17,820 | 4 | 601 | 109 | 106 | 820 |
| 17,821 | 6 | 598 | 102 | 107 | 813 |
| 17,822 | 6 | 602 | 104 | 108 | 820 |
| 17,823 | 6 | 609 | 106 | 106 | 827 |
| 17,824 | 6 | 619 | 107 | 108 | 840 |
| 17,825 | 6 | 633 | 106 | 108 | 853 |
| 17,826 | 6 | 640 | 105 | 109 | 860 |
| 17,827 | 7 | 646 | 106 | 110 | 869 |
| 17,828 | 7 | 655 | 108 | 111 | 881 |
| 17,829 | 8 | 657 | 103 | 109 | 877 |
| 17,830 | 8 | 658 | 107 | 105 | 878 |
| 17,831 | 8 | 650 | 108 | 102 | 868 |
| 17,832 | 8 | 673 | 112 | 102 | 895 |
| 17,833 | 7 | 666 | 108 | 101 | 882 |
| 17,834 | 7 | 659 | 102 | 101 | 869 |
| 17,835 | 7 | 651 | 99  | 99  | 856 |
| 17,836 | 7 | 674 | 105 | 104 | 890 |
| 17,837 | 7 | 672 | 102 | 102 | 883 |
| 17,838 | 7 | 670 | 104 | 102 | 883 |
| 17,839 | 7 | 684 | 105 | 100 | 896 |
| 17,840 | 7 | 675 | 106 | 101 | 889 |
| 17,841 | 7 | 673 | 107 | 101 | 888 |
| 17,842 | 7 | 663 | 107 | 104 | 881 |
| 17,843 | 7 | 676 | 109 | 102 | 894 |
| 17,844 | 6 | 688 | 109 | 101 | 904 |
| 17,845 | 6 | 689 | 111 | 99  | 905 |
| 17,846 | 6 | 695 | 108 | 100 | 909 |
| 17,847 | 6 | 686 | 108 | 97  | 897 |

|        |   |     |     |     |     |
|--------|---|-----|-----|-----|-----|
| 17,848 | 6 | 689 | 109 | 97  | 901 |
| 17,849 | 6 | 676 | 108 | 100 | 890 |
| 17,850 | 6 | 683 | 107 | 101 | 897 |
| 17,851 | 6 | 691 | 106 | 102 | 905 |
| 17,852 | 6 | 697 | 108 | 103 | 914 |
| 17,853 | 6 | 692 | 112 | 99  | 909 |
| 17,854 | 6 | 705 | 116 | 100 | 927 |
| 17,855 | 6 | 707 | 114 | 103 | 930 |
| 17,856 | 6 | 707 | 115 | 100 | 928 |
| 17,857 | 6 | 702 | 115 | 100 | 923 |
| 17,858 | 6 | 689 | 116 | 104 | 915 |
| 17,859 | 6 | 689 | 118 | 102 | 915 |
| 17,860 | 6 | 694 | 118 | 102 | 920 |
| 17,861 | 6 | 691 | 116 | 101 | 914 |
| 17,862 | 6 | 680 | 116 | 101 | 903 |
| 17,863 | 6 | 656 | 116 | 98  | 876 |
| 17,864 | 6 | 661 | 119 | 97  | 883 |
| 17,865 | 6 | 659 | 120 | 96  | 881 |
| 17,866 | 7 | 658 | 119 | 100 | 884 |
| 17,867 | 7 | 661 | 122 | 102 | 892 |
| 17,868 | 6 | 667 | 122 | 100 | 895 |
| 17,869 | 6 | 684 | 125 | 100 | 915 |
| 17,870 | 6 | 689 | 123 | 103 | 921 |
| 17,871 | 6 | 681 | 122 | 99  | 908 |
| 17,872 | 4 | 669 | 123 | 97  | 893 |
| 17,873 | 4 | 667 | 121 | 97  | 889 |
| 17,874 | 5 | 684 | 118 | 104 | 911 |
| 17,875 | 5 | 684 | 118 | 103 | 910 |
| 17,876 | 5 | 670 | 117 | 104 | 896 |
| 17,877 | 4 | 678 | 118 | 104 | 904 |
| 17,878 | 4 | 678 | 118 | 103 | 903 |
| 17,879 | 4 | 689 | 118 | 106 | 917 |

|        |   |     |     |     |     |
|--------|---|-----|-----|-----|-----|
| 17,880 | 4 | 677 | 117 | 106 | 904 |
| 17,881 | 4 | 669 | 113 | 106 | 892 |
| 17,882 | 4 | 673 | 113 | 107 | 897 |
| 17,883 | 3 | 671 | 110 | 104 | 888 |
| 17,884 | 3 | 671 | 111 | 104 | 889 |
| 17,885 | 3 | 676 | 112 | 103 | 894 |
| 17,886 | 3 | 655 | 108 | 98  | 864 |
| 17,887 | 3 | 649 | 107 | 98  | 857 |
| 17,888 | 3 | 645 | 110 | 100 | 858 |
| 17,889 | 3 | 638 | 107 | 98  | 846 |
| 17,890 | 3 | 639 | 109 | 98  | 849 |
| 17,891 | 3 | 638 | 109 | 96  | 846 |
| 17,892 | 3 | 639 | 109 | 96  | 847 |
| 17,893 | 3 | 635 | 111 | 91  | 840 |
| 17,894 | 3 | 627 | 109 | 92  | 831 |
| 17,895 | 3 | 626 | 110 | 93  | 832 |
| 17,896 | 3 | 625 | 105 | 93  | 826 |
| 17,897 | 3 | 618 | 106 | 93  | 820 |
| 17,898 | 3 | 622 | 106 | 93  | 824 |
| 17,899 | 3 | 631 | 110 | 95  | 839 |
| 17,900 | 3 | 644 | 112 | 93  | 852 |
| 17,901 | 3 | 636 | 115 | 90  | 844 |
| 17,902 | 3 | 644 | 117 | 90  | 854 |
| 17,903 | 3 | 648 | 116 | 92  | 859 |
| 17,904 | 3 | 648 | 111 | 92  | 854 |
| 17,905 | 3 | 650 | 108 | 92  | 853 |
| 17,906 | 3 | 653 | 110 | 89  | 855 |
| 17,907 | 4 | 652 | 108 | 89  | 853 |
| 17,908 | 4 | 654 | 106 | 87  | 851 |
| 17,909 | 4 | 657 | 105 | 85  | 851 |
| 17,910 | 4 | 658 | 104 | 85  | 851 |
| 17,911 | 4 | 658 | 104 | 87  | 853 |



|        |   |     |     |    |     |
|--------|---|-----|-----|----|-----|
| 17,912 | 4 | 659 | 103 | 87 | 853 |
| 17,913 | 4 | 653 | 103 | 84 | 844 |
| 17,914 | 4 | 651 | 100 | 83 | 838 |
| 17,915 | 4 | 657 | 99  | 84 | 844 |
| 17,916 | 3 | 663 | 106 | 83 | 855 |
| 17,917 | 3 | 665 | 104 | 79 | 851 |
| 17,918 | 3 | 667 | 105 | 77 | 852 |
| 17,919 | 3 | 668 | 102 | 78 | 851 |
| 17,920 | 3 | 659 | 102 | 78 | 842 |
| 17,921 | 3 | 660 | 102 | 76 | 841 |
| 17,922 | 3 | 656 | 101 | 77 | 837 |
| 17,923 | 3 | 652 | 100 | 76 | 831 |
| 17,924 | 3 | 671 | 101 | 77 | 852 |
| 17,925 | 4 | 665 | 106 | 70 | 845 |
| 17,926 | 4 | 658 | 109 | 69 | 840 |
| 17,927 | 4 | 665 | 110 | 70 | 849 |
| 17,928 | 4 | 660 | 111 | 70 | 845 |
| 17,929 | 4 | 658 | 110 | 70 | 842 |
| 17,930 | 4 | 665 | 115 | 70 | 854 |
| 17,931 | 3 | 658 | 116 | 68 | 845 |
| 17,932 | 3 | 668 | 122 | 69 | 862 |
| 17,933 | 3 | 667 | 122 | 69 | 861 |
| 17,934 | 3 | 659 | 125 | 74 | 861 |
| 17,935 | 3 | 659 | 127 | 76 | 865 |
| 17,936 | 3 | 651 | 127 | 75 | 856 |
| 17,937 | 3 | 656 | 127 | 75 | 861 |
| 17,938 | 3 | 670 | 127 | 76 | 876 |
| 17,939 | 3 | 668 | 124 | 77 | 872 |
| 17,940 | 3 | 675 | 125 | 79 | 882 |
| 17,941 | 3 | 680 | 122 | 79 | 884 |
| 17,942 | 3 | 679 | 119 | 81 | 882 |
| 17,943 | 3 | 681 | 120 | 81 | 885 |

|        |   |     |     |    |     |
|--------|---|-----|-----|----|-----|
| 17,944 | 3 | 683 | 120 | 80 | 886 |
| 17,945 | 3 | 671 | 119 | 79 | 872 |
| 17,946 | 3 | 666 | 123 | 78 | 870 |
| 17,947 | 3 | 670 | 124 | 77 | 874 |
| 17,948 | 4 | 673 | 123 | 79 | 879 |
| 17,949 | 4 | 665 | 123 | 76 | 868 |
| 17,950 | 4 | 680 | 119 | 77 | 880 |
| 17,951 | 4 | 669 | 121 | 78 | 872 |
| 17,952 | 5 | 663 | 117 | 77 | 862 |
| 17,953 | 5 | 666 | 117 | 79 | 867 |
| 17,954 | 5 | 611 | 111 | 72 | 799 |
| 17,955 | 5 | 616 | 111 | 75 | 807 |
| 17,956 | 5 | 616 | 112 | 76 | 809 |
| 17,957 | 5 | 616 | 113 | 75 | 809 |
| 17,958 | 4 | 632 | 114 | 77 | 827 |
| 17,959 | 4 | 647 | 116 | 80 | 847 |
| 17,960 | 4 | 655 | 116 | 82 | 857 |
| 17,961 | 4 | 657 | 120 | 84 | 865 |
| 17,962 | 4 | 662 | 119 | 83 | 868 |
| 17,963 | 4 | 655 | 126 | 85 | 870 |
| 17,964 | 4 | 661 | 126 | 87 | 878 |
| 17,965 | 4 | 663 | 127 | 91 | 885 |
| 17,966 | 4 | 674 | 128 | 92 | 898 |
| 17,967 | 4 | 667 | 121 | 94 | 886 |
| 17,968 | 4 | 664 | 119 | 94 | 881 |
| 17,969 | 4 | 681 | 122 | 96 | 903 |
| 17,970 | 5 | 684 | 124 | 97 | 910 |
| 17,971 | 5 | 695 | 121 | 98 | 919 |
| 17,972 | 5 | 688 | 122 | 96 | 911 |
| 17,973 | 5 | 691 | 121 | 99 | 916 |
| 17,974 | 5 | 670 | 119 | 97 | 891 |
| 17,975 | 5 | 667 | 120 | 96 | 888 |

|        |   |     |     |     |     |
|--------|---|-----|-----|-----|-----|
| 17,976 | 3 | 672 | 122 | 98  | 895 |
| 17,977 | 3 | 662 | 119 | 101 | 885 |
| 17,978 | 3 | 659 | 122 | 98  | 882 |
| 17,979 | 3 | 664 | 122 | 99  | 888 |
| 17,980 | 3 | 660 | 123 | 97  | 883 |
| 17,981 | 3 | 664 | 120 | 97  | 884 |
| 17,982 | 3 | 651 | 118 | 95  | 867 |
| 17,983 | 3 | 647 | 113 | 97  | 860 |
| 17,984 | 3 | 654 | 116 | 96  | 869 |
| 17,985 | 3 | 661 | 117 | 96  | 877 |
| 17,986 | 3 | 653 | 113 | 97  | 866 |
| 17,987 | 3 | 652 | 113 | 96  | 864 |
| 17,988 | 3 | 645 | 117 | 96  | 861 |
| 17,989 | 3 | 634 | 122 | 96  | 855 |
| 17,990 | 4 | 640 | 126 | 98  | 868 |
| 17,991 | 4 | 639 | 125 | 96  | 864 |
| 17,992 | 4 | 633 | 129 | 96  | 862 |
| 17,993 | 4 | 631 | 130 | 95  | 860 |
| 17,994 | 4 | 636 | 128 | 97  | 865 |
| 17,995 | 4 | 639 | 126 | 99  | 868 |
| 17,996 | 4 | 650 | 123 | 98  | 875 |
| 17,997 | 4 | 644 | 121 | 98  | 867 |
| 17,998 | 3 | 640 | 120 | 97  | 860 |
| 17,999 | 3 | 645 | 125 | 94  | 867 |
| 18,000 | 3 | 628 | 127 | 98  | 856 |
| 18,001 | 3 | 629 | 129 | 100 | 861 |
| 18,002 | 3 | 634 | 125 | 100 | 862 |
| 18,003 | 2 | 624 | 123 | 100 | 849 |
| 18,004 | 2 | 623 | 123 | 97  | 845 |
| 18,005 | 2 | 629 | 125 | 98  | 854 |
| 18,006 | 2 | 627 | 122 | 100 | 851 |
| 18,007 | 2 | 628 | 122 | 103 | 855 |

|        |   |     |     |     |     |
|--------|---|-----|-----|-----|-----|
| 18,008 | 2 | 639 | 122 | 102 | 865 |
| 18,009 | 2 | 623 | 120 | 99  | 844 |
| 18,010 | 2 | 614 | 119 | 100 | 835 |
| 18,011 | 2 | 623 | 120 | 98  | 843 |
| 18,012 | 2 | 622 | 119 | 97  | 840 |
| 18,013 | 2 | 622 | 112 | 98  | 834 |
| 18,014 | 2 | 628 | 118 | 96  | 844 |
| 18,015 | 2 | 625 | 119 | 96  | 842 |
| 18,016 | 3 | 635 | 115 | 97  | 850 |
| 18,017 | 3 | 636 | 118 | 96  | 853 |
| 18,018 | 3 | 634 | 124 | 95  | 856 |
| 18,019 | 3 | 628 | 126 | 94  | 851 |
| 18,020 | 3 | 625 | 127 | 96  | 851 |
| 18,021 | 2 | 619 | 131 | 96  | 848 |
| 18,022 | 2 | 614 | 132 | 97  | 845 |
| 18,023 | 2 | 611 | 131 | 96  | 840 |
| 18,024 | 2 | 622 | 130 | 97  | 851 |
| 18,025 | 2 | 627 | 131 | 98  | 858 |
| 18,026 | 2 | 637 | 131 | 100 | 870 |
| 18,027 | 2 | 629 | 130 | 98  | 859 |
| 18,028 | 2 | 627 | 126 | 96  | 851 |
| 18,029 | 2 | 639 | 124 | 98  | 863 |
| 18,030 | 2 | 642 | 125 | 97  | 866 |
| 18,031 | 2 | 644 | 126 | 98  | 870 |
| 18,032 | 2 | 644 | 123 | 97  | 866 |
| 18,033 | 2 | 646 | 121 | 96  | 865 |
| 18,034 | 2 | 635 | 119 | 94  | 850 |
| 18,035 | 2 | 640 | 117 | 93  | 852 |
| 18,036 | 2 | 638 | 113 | 92  | 845 |
| 18,037 | 1 | 634 | 114 | 92  | 841 |
| 18,038 | 1 | 640 | 113 | 91  | 845 |
| 18,039 | 1 | 634 | 108 | 89  | 832 |

|        |   |     |     |    |     |
|--------|---|-----|-----|----|-----|
| 18,040 | 1 | 639 | 109 | 88 | 837 |
| 18,041 | 1 | 635 | 107 | 89 | 832 |
| 18,042 | 1 | 639 | 114 | 89 | 843 |
| 18,043 | 1 | 630 | 110 | 88 | 829 |
| 18,044 | 1 | 630 | 108 | 88 | 827 |
| 18,045 | 1 | 624 | 109 | 88 | 822 |
| 18,046 | 1 | 614 | 111 | 87 | 813 |
| 18,047 | 1 | 639 | 116 | 92 | 848 |
| 18,048 | 1 | 653 | 117 | 94 | 865 |
| 18,049 | 1 | 626 | 119 | 90 | 836 |
| 18,050 | 1 | 637 | 118 | 92 | 848 |
| 18,051 | 1 | 646 | 122 | 93 | 862 |
| 18,052 | 1 | 654 | 119 | 92 | 866 |
| 18,053 | 1 | 646 | 118 | 89 | 854 |
| 18,054 | 1 | 643 | 115 | 87 | 846 |
| 18,055 | 1 | 654 | 118 | 89 | 862 |
| 18,056 | 1 | 657 | 116 | 87 | 861 |
| 18,057 | 1 | 656 | 120 | 80 | 857 |
| 18,058 | 1 | 658 | 120 | 79 | 858 |
| 18,059 | 1 | 656 | 124 | 79 | 860 |
| 18,060 | 1 | 652 | 126 | 79 | 858 |
| 18,061 | 1 | 653 | 124 | 77 | 855 |
| 18,062 | 1 | 647 | 122 | 76 | 846 |
| 18,063 | 1 | 647 | 122 | 76 | 846 |
| 18,064 | 1 | 645 | 119 | 75 | 840 |
| 18,065 | 1 | 628 | 114 | 73 | 816 |
| 18,066 | 1 | 638 | 116 | 76 | 831 |
| 18,067 | 0 | 651 | 117 | 76 | 844 |
| 18,068 | 0 | 647 | 113 | 76 | 836 |
| 18,069 | 0 | 643 | 111 | 76 | 830 |
| 18,070 | 0 | 645 | 111 | 79 | 835 |
| 18,071 | 0 | 643 | 110 | 75 | 828 |

|        |   |     |     |    |     |
|--------|---|-----|-----|----|-----|
| 18,072 | 0 | 633 | 109 | 74 | 816 |
| 18,073 | 0 | 644 | 110 | 74 | 828 |
| 18,074 | 0 | 639 | 108 | 75 | 822 |
| 18,075 | 0 | 614 | 106 | 76 | 796 |
| 18,076 | 0 | 615 | 107 | 75 | 797 |
| 18,077 | 0 | 605 | 106 | 74 | 785 |
| 18,078 | 0 | 610 | 105 | 72 | 787 |
| 18,079 | 0 | 617 | 107 | 72 | 796 |
| 18,080 | 0 | 609 | 109 | 72 | 790 |
| 18,081 | 0 | 620 | 107 | 72 | 799 |
| 18,082 | 0 | 617 | 107 | 71 | 795 |
| 18,083 | 0 | 601 | 106 | 71 | 778 |
| 18,084 | 0 | 610 | 110 | 71 | 791 |
| 18,085 | 0 | 606 | 111 | 70 | 787 |
| 18,086 | 0 | 605 | 109 | 70 | 784 |
| 18,087 | 0 | 603 | 111 | 70 | 784 |
| 18,088 | 0 | 581 | 104 | 72 | 757 |
| 18,089 | 0 | 585 | 105 | 72 | 762 |
| 18,090 | 0 | 590 | 107 | 72 | 769 |
| 18,091 | 0 | 604 | 102 | 75 | 781 |
| 18,092 | 0 | 607 | 106 | 76 | 789 |
| 18,093 | 0 | 606 | 106 | 76 | 788 |
| 18,094 | 0 | 609 | 109 | 78 | 796 |
| 18,095 | 0 | 616 | 107 | 77 | 800 |
| 18,096 | 0 | 605 | 105 | 73 | 783 |
| 18,097 | 0 | 607 | 106 | 72 | 785 |
| 18,098 | 0 | 600 | 109 | 71 | 780 |
| 18,099 | 0 | 604 | 109 | 73 | 786 |
| 18,100 | 1 | 588 | 98  | 70 | 757 |
| 18,101 | 1 | 593 | 97  | 71 | 762 |
| 18,102 | 1 | 598 | 96  | 70 | 765 |
| 18,103 | 1 | 605 | 98  | 71 | 775 |

|        |   |     |     |    |     |
|--------|---|-----|-----|----|-----|
| 18,104 | 1 | 593 | 102 | 73 | 769 |
| 18,105 | 1 | 590 | 106 | 73 | 770 |
| 18,106 | 1 | 587 | 108 | 73 | 769 |
| 18,107 | 1 | 591 | 113 | 75 | 780 |
| 18,108 | 1 | 577 | 109 | 79 | 766 |
| 18,109 | 1 | 580 | 111 | 78 | 770 |
| 18,110 | 1 | 570 | 110 | 79 | 760 |
| 18,111 | 1 | 593 | 113 | 79 | 786 |
| 18,112 | 1 | 601 | 113 | 80 | 795 |
| 18,113 | 1 | 597 | 113 | 80 | 791 |
| 18,114 | 1 | 612 | 112 | 81 | 806 |
| 18,115 | 1 | 616 | 113 | 82 | 812 |
| 18,116 | 1 | 620 | 116 | 85 | 822 |
| 18,117 | 1 | 616 | 121 | 81 | 819 |
| 18,118 | 1 | 588 | 115 | 75 | 779 |
| 18,119 | 1 | 592 | 113 | 77 | 783 |
| 18,120 | 1 | 599 | 114 | 78 | 792 |
| 18,121 | 1 | 599 | 113 | 78 | 791 |
| 18,122 | 1 | 601 | 113 | 80 | 795 |
| 18,123 | 1 | 601 | 113 | 80 | 795 |
| 18,124 | 1 | 595 | 113 | 81 | 790 |
| 18,125 | 1 | 598 | 112 | 79 | 790 |
| 18,126 | 1 | 602 | 110 | 78 | 791 |
| 18,127 | 1 | 605 | 108 | 79 | 793 |
| 18,128 | 1 | 619 | 109 | 81 | 810 |
| 18,129 | 1 | 619 | 111 | 84 | 815 |
| 18,130 | 1 | 622 | 112 | 84 | 819 |
| 18,131 | 1 | 632 | 108 | 85 | 826 |
| 18,132 | 1 | 626 | 109 | 85 | 821 |
| 18,133 | 1 | 636 | 110 | 86 | 833 |
| 18,134 | 1 | 639 | 111 | 85 | 836 |
| 18,135 | 1 | 636 | 108 | 86 | 831 |

|        |   |     |     |    |     |
|--------|---|-----|-----|----|-----|
| 18,136 | 1 | 637 | 111 | 87 | 836 |
| 18,137 | 1 | 640 | 115 | 87 | 843 |
| 18,138 | 1 | 637 | 113 | 85 | 836 |
| 18,139 | 1 | 644 | 115 | 79 | 839 |
| 18,140 | 1 | 649 | 121 | 84 | 855 |
| 18,141 | 1 | 652 | 121 | 87 | 861 |
| 18,142 | 1 | 646 | 122 | 85 | 854 |
| 18,143 | 1 | 640 | 118 | 85 | 844 |
| 18,144 | 1 | 633 | 122 | 84 | 840 |
| 18,145 | 1 | 631 | 118 | 84 | 834 |
| 18,146 | 1 | 605 | 113 | 85 | 804 |
| 18,147 | 2 | 614 | 114 | 84 | 814 |
| 18,148 | 3 | 624 | 115 | 87 | 829 |
| 18,149 | 3 | 626 | 117 | 87 | 833 |
| 18,150 | 5 | 637 | 118 | 89 | 849 |
| 18,151 | 4 | 631 | 119 | 90 | 844 |
| 18,152 | 4 | 637 | 120 | 90 | 851 |
| 18,153 | 4 | 636 | 119 | 88 | 847 |
| 18,154 | 4 | 642 | 120 | 87 | 853 |
| 18,155 | 4 | 638 | 116 | 85 | 843 |
| 18,156 | 4 | 647 | 115 | 90 | 856 |
| 18,157 | 4 | 649 | 115 | 93 | 861 |
| 18,158 | 4 | 645 | 113 | 92 | 854 |
| 18,159 | 4 | 653 | 116 | 92 | 865 |
| 18,160 | 4 | 646 | 116 | 92 | 858 |
| 18,161 | 4 | 644 | 109 | 96 | 853 |
| 18,162 | 4 | 641 | 110 | 95 | 850 |
| 18,163 | 4 | 644 | 111 | 95 | 854 |
| 18,164 | 4 | 641 | 111 | 95 | 851 |
| 18,165 | 4 | 649 | 117 | 94 | 864 |
| 18,166 | 4 | 651 | 116 | 89 | 860 |
| 18,167 | 4 | 645 | 115 | 87 | 851 |



|        |   |     |     |     |     |
|--------|---|-----|-----|-----|-----|
| 18,168 | 4 | 648 | 113 | 88  | 853 |
| 18,169 | 4 | 646 | 110 | 89  | 849 |
| 18,170 | 4 | 655 | 115 | 87  | 861 |
| 18,171 | 4 | 662 | 117 | 86  | 869 |
| 18,172 | 4 | 672 | 119 | 89  | 884 |
| 18,173 | 4 | 690 | 120 | 91  | 905 |
| 18,174 | 4 | 694 | 118 | 93  | 909 |
| 18,175 | 5 | 692 | 117 | 96  | 910 |
| 18,176 | 5 | 691 | 117 | 97  | 910 |
| 18,177 | 5 | 695 | 118 | 97  | 915 |
| 18,178 | 5 | 691 | 118 | 95  | 909 |
| 18,179 | 5 | 682 | 115 | 96  | 898 |
| 18,180 | 5 | 689 | 117 | 96  | 907 |
| 18,181 | 5 | 688 | 118 | 98  | 909 |
| 18,182 | 5 | 669 | 120 | 98  | 892 |
| 18,183 | 6 | 670 | 119 | 101 | 896 |
| 18,184 | 6 | 670 | 118 | 102 | 896 |
| 18,185 | 6 | 669 | 120 | 108 | 903 |
| 18,186 | 6 | 667 | 118 | 110 | 901 |
| 18,187 | 6 | 681 | 118 | 114 | 919 |
| 18,188 | 6 | 686 | 114 | 117 | 923 |
| 18,189 | 6 | 685 | 114 | 119 | 924 |
| 18,190 | 6 | 685 | 113 | 117 | 921 |
| 18,191 | 6 | 696 | 107 | 115 | 924 |
| 18,192 | 6 | 685 | 103 | 114 | 908 |
| 18,193 | 6 | 684 | 102 | 114 | 906 |
| 18,194 | 6 | 688 | 103 | 110 | 907 |
| 18,195 | 6 | 681 | 99  | 108 | 894 |
| 18,196 | 6 | 683 | 101 | 109 | 899 |
| 18,197 | 6 | 680 | 102 | 109 | 897 |
| 18,198 | 4 | 675 | 102 | 110 | 891 |
| 18,199 | 4 | 664 | 98  | 105 | 871 |

|        |   |     |     |     |     |
|--------|---|-----|-----|-----|-----|
| 18,200 | 4 | 670 | 102 | 105 | 881 |
| 18,201 | 2 | 674 | 101 | 106 | 883 |
| 18,202 | 3 | 670 | 104 | 104 | 881 |
| 18,203 | 3 | 675 | 105 | 102 | 885 |
| 18,204 | 3 | 658 | 104 | 106 | 871 |
| 18,205 | 3 | 661 | 103 | 107 | 874 |
| 18,206 | 3 | 672 | 107 | 107 | 889 |
| 18,207 | 3 | 676 | 108 | 104 | 891 |
| 18,208 | 3 | 673 | 104 | 101 | 881 |
| 18,209 | 3 | 669 | 102 | 97  | 871 |
| 18,210 | 3 | 674 | 102 | 99  | 878 |
| 18,211 | 3 | 674 | 104 | 101 | 882 |
| 18,212 | 3 | 667 | 105 | 99  | 874 |
| 18,213 | 3 | 668 | 104 | 100 | 875 |
| 18,214 | 3 | 638 | 101 | 100 | 842 |
| 18,215 | 3 | 641 | 102 | 100 | 846 |
| 18,216 | 3 | 654 | 102 | 102 | 861 |
| 18,217 | 3 | 656 | 101 | 103 | 863 |
| 18,218 | 3 | 660 | 98  | 105 | 866 |
| 18,219 | 3 | 662 | 102 | 107 | 874 |
| 18,220 | 3 | 662 | 99  | 107 | 871 |
| 18,221 | 3 | 664 | 97  | 108 | 872 |
| 18,222 | 3 | 652 | 97  | 107 | 859 |
| 18,223 | 3 | 653 | 99  | 107 | 862 |
| 18,224 | 3 | 643 | 99  | 106 | 851 |
| 18,225 | 3 | 647 | 101 | 106 | 857 |
| 18,226 | 2 | 657 | 108 | 103 | 870 |
| 18,227 | 2 | 654 | 108 | 102 | 866 |
| 18,228 | 2 | 651 | 108 | 101 | 862 |
| 18,229 | 2 | 671 | 116 | 100 | 889 |
| 18,230 | 2 | 677 | 117 | 99  | 895 |
| 18,231 | 2 | 670 | 118 | 99  | 889 |

|        |   |     |     |     |     |
|--------|---|-----|-----|-----|-----|
| 18,232 | 2 | 662 | 115 | 97  | 876 |
| 18,233 | 1 | 647 | 119 | 93  | 860 |
| 18,234 | 1 | 651 | 119 | 93  | 864 |
| 18,235 | 1 | 641 | 120 | 90  | 852 |
| 18,236 | 1 | 638 | 119 | 86  | 844 |
| 18,237 | 2 | 631 | 117 | 86  | 836 |
| 18,238 | 2 | 634 | 118 | 86  | 840 |
| 18,239 | 2 | 638 | 119 | 84  | 843 |
| 18,240 | 2 | 640 | 119 | 84  | 845 |
| 18,241 | 2 | 644 | 120 | 86  | 852 |
| 18,242 | 2 | 644 | 121 | 86  | 853 |
| 18,243 | 2 | 644 | 120 | 84  | 850 |
| 18,244 | 2 | 655 | 121 | 87  | 865 |
| 18,245 | 2 | 665 | 119 | 88  | 874 |
| 18,246 | 2 | 667 | 117 | 89  | 875 |
| 18,247 | 2 | 672 | 113 | 90  | 877 |
| 18,248 | 2 | 670 | 116 | 92  | 880 |
| 18,249 | 3 | 668 | 117 | 96  | 884 |
| 18,250 | 3 | 676 | 119 | 97  | 895 |
| 18,251 | 3 | 669 | 115 | 95  | 882 |
| 18,252 | 3 | 681 | 114 | 97  | 895 |
| 18,253 | 2 | 677 | 111 | 99  | 889 |
| 18,254 | 2 | 675 | 112 | 100 | 889 |
| 18,255 | 2 | 694 | 112 | 98  | 906 |
| 18,256 | 4 | 698 | 114 | 98  | 914 |
| 18,257 | 4 | 673 | 110 | 99  | 886 |
| 18,258 | 4 | 687 | 108 | 102 | 901 |
| 18,259 | 4 | 702 | 109 | 104 | 919 |
| 18,260 | 4 | 691 | 107 | 103 | 905 |
| 18,261 | 4 | 682 | 110 | 102 | 898 |
| 18,262 | 4 | 676 | 105 | 100 | 885 |
| 18,263 | 4 | 682 | 102 | 100 | 888 |

|        |   |     |     |     |     |
|--------|---|-----|-----|-----|-----|
| 18,264 | 4 | 674 | 102 | 97  | 877 |
| 18,265 | 4 | 684 | 104 | 97  | 889 |
| 18,266 | 4 | 683 | 103 | 97  | 887 |
| 18,267 | 4 | 674 | 103 | 96  | 877 |
| 18,268 | 4 | 675 | 105 | 98  | 882 |
| 18,269 | 4 | 669 | 107 | 97  | 877 |
| 18,270 | 4 | 676 | 105 | 96  | 881 |
| 18,271 | 4 | 673 | 105 | 97  | 879 |
| 18,272 | 4 | 677 | 108 | 100 | 889 |
| 18,273 | 4 | 672 | 102 | 97  | 875 |
| 18,274 | 4 | 672 | 103 | 97  | 876 |
| 18,275 | 4 | 664 | 107 | 101 | 876 |
| 18,276 | 4 | 663 | 107 | 100 | 874 |
| 18,277 | 4 | 660 | 105 | 99  | 868 |
| 18,278 | 4 | 660 | 102 | 99  | 865 |
| 18,279 | 4 | 649 | 100 | 98  | 851 |
| 18,280 | 5 | 632 | 94  | 99  | 830 |
| 18,281 | 5 | 642 | 98  | 99  | 844 |
| 18,282 | 5 | 652 | 100 | 101 | 858 |
| 18,283 | 5 | 665 | 98  | 99  | 867 |
| 18,284 | 5 | 667 | 99  | 97  | 868 |
| 18,285 | 5 | 676 | 98  | 98  | 877 |
| 18,286 | 5 | 684 | 101 | 98  | 888 |
| 18,287 | 4 | 683 | 101 | 94  | 882 |
| 18,288 | 4 | 689 | 101 | 93  | 887 |
| 18,289 | 4 | 694 | 99  | 92  | 889 |
| 18,290 | 4 | 690 | 99  | 91  | 884 |
| 18,291 | 4 | 683 | 100 | 90  | 877 |
| 18,292 | 4 | 701 | 99  | 90  | 894 |
| 18,293 | 4 | 695 | 100 | 92  | 891 |
| 18,294 | 4 | 698 | 100 | 91  | 893 |
| 18,295 | 4 | 710 | 102 | 91  | 907 |

|        |   |     |     |    |     |
|--------|---|-----|-----|----|-----|
| 18,296 | 4 | 701 | 103 | 91 | 899 |
| 18,297 | 4 | 697 | 103 | 89 | 893 |
| 18,298 | 4 | 694 | 103 | 86 | 887 |
| 18,299 | 3 | 710 | 101 | 86 | 900 |
| 18,300 | 3 | 710 | 103 | 84 | 900 |
| 18,301 | 3 | 710 | 109 | 84 | 906 |
| 18,302 | 3 | 716 | 110 | 83 | 912 |
| 18,303 | 3 | 710 | 111 | 83 | 907 |
| 18,304 | 3 | 705 | 111 | 81 | 900 |
| 18,305 | 3 | 700 | 110 | 80 | 893 |
| 18,306 | 3 | 725 | 117 | 84 | 929 |
| 18,307 | 1 | 716 | 116 | 82 | 915 |
| 18,308 | 1 | 715 | 119 | 82 | 917 |
| 18,309 | 1 | 721 | 124 | 82 | 928 |
| 18,310 | 1 | 717 | 125 | 80 | 923 |
| 18,311 | 1 | 716 | 123 | 83 | 923 |
| 18,312 | 1 | 717 | 124 | 85 | 927 |
| 18,313 | 1 | 729 | 123 | 82 | 935 |
| 18,314 | 4 | 732 | 123 | 83 | 942 |
| 18,315 | 4 | 740 | 124 | 82 | 950 |
| 18,316 | 4 | 735 | 122 | 82 | 943 |
| 18,317 | 4 | 735 | 123 | 86 | 948 |
| 18,318 | 4 | 744 | 122 | 89 | 959 |
| 18,319 | 4 | 741 | 123 | 85 | 953 |
| 18,320 | 4 | 739 | 120 | 87 | 950 |
| 18,321 | 4 | 729 | 117 | 86 | 936 |
| 18,322 | 4 | 758 | 121 | 86 | 969 |
| 18,323 | 4 | 759 | 119 | 85 | 967 |
| 18,324 | 4 | 752 | 118 | 91 | 965 |
| 18,325 | 4 | 751 | 113 | 87 | 955 |
| 18,326 | 4 | 755 | 111 | 82 | 952 |
| 18,327 | 4 | 747 | 108 | 83 | 942 |

|        |   |     |     |    |     |
|--------|---|-----|-----|----|-----|
| 18,328 | 4 | 748 | 110 | 81 | 943 |
| 18,329 | 4 | 748 | 109 | 80 | 941 |
| 18,330 | 4 | 752 | 108 | 80 | 944 |
| 18,331 | 3 | 748 | 104 | 79 | 934 |
| 18,332 | 3 | 755 | 106 | 77 | 941 |
| 18,333 | 3 | 743 | 107 | 82 | 935 |
| 18,334 | 3 | 748 | 109 | 82 | 942 |
| 18,335 | 3 | 757 | 108 | 84 | 952 |
| 18,336 | 3 | 746 | 108 | 84 | 941 |
| 18,337 | 3 | 730 | 105 | 86 | 924 |
| 18,338 | 3 | 726 | 104 | 85 | 918 |
| 18,339 | 3 | 752 | 108 | 91 | 954 |
| 18,340 | 3 | 732 | 108 | 89 | 932 |
| 18,341 | 3 | 733 | 108 | 88 | 932 |
| 18,342 | 3 | 728 | 109 | 90 | 930 |
| 18,343 | 3 | 731 | 111 | 92 | 937 |
| 18,344 | 3 | 732 | 110 | 91 | 936 |
| 18,345 | 3 | 729 | 110 | 91 | 933 |
| 18,346 | 3 | 727 | 110 | 92 | 932 |
| 18,347 | 3 | 730 | 110 | 95 | 938 |
| 18,348 | 3 | 732 | 112 | 95 | 942 |
| 18,349 | 3 | 728 | 111 | 92 | 934 |
| 18,350 | 3 | 718 | 111 | 91 | 923 |
| 18,351 | 3 | 730 | 101 | 94 | 928 |
| 18,352 | 3 | 713 | 100 | 97 | 913 |
| 18,353 | 3 | 716 | 102 | 98 | 919 |
| 18,354 | 3 | 709 | 99  | 96 | 907 |
| 18,355 | 3 | 709 | 98  | 97 | 907 |
| 18,356 | 3 | 701 | 96  | 96 | 896 |
| 18,357 | 3 | 699 | 94  | 95 | 891 |
| 18,358 | 3 | 700 | 91  | 96 | 890 |
| 18,359 | 3 | 700 | 90  | 96 | 889 |

|        |   |     |     |     |     |
|--------|---|-----|-----|-----|-----|
| 18,360 | 3 | 695 | 92  | 93  | 883 |
| 18,361 | 3 | 704 | 91  | 93  | 891 |
| 18,362 | 3 | 719 | 90  | 92  | 904 |
| 18,363 | 3 | 730 | 92  | 96  | 921 |
| 18,364 | 0 | 721 | 93  | 98  | 912 |
| 18,365 | 0 | 714 | 93  | 99  | 906 |
| 18,366 | 0 | 716 | 95  | 99  | 910 |
| 18,367 | 0 | 713 | 93  | 99  | 905 |
| 18,368 | 0 | 720 | 94  | 95  | 909 |
| 18,369 | 1 | 718 | 94  | 97  | 910 |
| 18,370 | 3 | 710 | 91  | 99  | 903 |
| 18,371 | 5 | 728 | 95  | 100 | 928 |
| 18,372 | 6 | 709 | 100 | 100 | 915 |
| 18,373 | 6 | 699 | 101 | 99  | 905 |
| 18,374 | 6 | 701 | 102 | 99  | 908 |
| 18,375 | 6 | 707 | 108 | 93  | 914 |
| 18,376 | 6 | 707 | 112 | 92  | 917 |
| 18,377 | 6 | 708 | 109 | 93  | 916 |
| 18,378 | 6 | 717 | 107 | 95  | 925 |
| 18,379 | 6 | 718 | 109 | 96  | 929 |
| 18,380 | 6 | 714 | 111 | 98  | 929 |
| 18,381 | 7 | 717 | 112 | 102 | 938 |
| 18,382 | 7 | 724 | 115 | 103 | 949 |
| 18,383 | 7 | 725 | 116 | 101 | 949 |
| 18,384 | 7 | 727 | 113 | 100 | 947 |
| 18,385 | 7 | 728 | 112 | 104 | 951 |
| 18,386 | 7 | 748 | 108 | 105 | 968 |
| 18,387 | 7 | 755 | 106 | 99  | 967 |
| 18,388 | 7 | 753 | 108 | 103 | 971 |
| 18,389 | 7 | 761 | 107 | 103 | 978 |
| 18,390 | 7 | 770 | 111 | 103 | 991 |
| 18,391 | 7 | 765 | 113 | 102 | 987 |

|        |    |     |     |     |       |
|--------|----|-----|-----|-----|-------|
| 18,392 | 7  | 778 | 113 | 102 | 1,000 |
| 18,393 | 7  | 781 | 113 | 104 | 1,005 |
| 18,394 | 8  | 790 | 115 | 105 | 1,018 |
| 18,395 | 9  | 782 | 115 | 104 | 1,010 |
| 18,396 | 9  | 779 | 113 | 102 | 1,003 |
| 18,397 | 9  | 777 | 113 | 99  | 998   |
| 18,398 | 9  | 764 | 112 | 96  | 981   |
| 18,399 | 9  | 766 | 110 | 95  | 980   |
| 18,400 | 9  | 768 | 112 | 96  | 985   |
| 18,401 | 9  | 761 | 111 | 96  | 977   |
| 18,402 | 9  | 756 | 113 | 97  | 975   |
| 18,403 | 9  | 765 | 114 | 97  | 985   |
| 18,404 | 9  | 748 | 116 | 99  | 972   |
| 18,405 | 9  | 735 | 114 | 98  | 956   |
| 18,406 | 9  | 744 | 114 | 100 | 967   |
| 18,407 | 9  | 755 | 114 | 100 | 978   |
| 18,408 | 9  | 760 | 115 | 99  | 983   |
| 18,409 | 9  | 772 | 116 | 98  | 995   |
| 18,410 | 9  | 765 | 114 | 97  | 985   |
| 18,411 | 9  | 768 | 116 | 104 | 997   |
| 18,412 | 9  | 752 | 114 | 102 | 977   |
| 18,413 | 9  | 740 | 114 | 101 | 964   |
| 18,414 | 9  | 731 | 115 | 97  | 952   |
| 18,415 | 9  | 721 | 113 | 97  | 940   |
| 18,416 | 9  | 719 | 112 | 98  | 938   |
| 18,417 | 9  | 718 | 113 | 96  | 936   |
| 18,418 | 10 | 716 | 113 | 94  | 933   |
| 18,419 | 10 | 710 | 113 | 94  | 927   |
| 18,420 | 9  | 707 | 114 | 92  | 922   |
| 18,421 | 7  | 701 | 115 | 89  | 912   |
| 18,422 | 4  | 696 | 109 | 88  | 897   |
| 18,423 | 4  | 695 | 107 | 88  | 894   |



|        |    |       |       |       |        |
|--------|----|-------|-------|-------|--------|
| 18,424 | 4  | 703   | 109   | 88    | 904    |
| 18,425 | 6  | 704   | 110   | 88    | 908    |
| 18,426 | 6  | 692   | 107   | 89    | 894    |
| 18,427 | 6  | 691   | 105   | 90    | 892    |
| 18,428 | 6  | 687   | 108   | 89    | 890    |
| 18,429 | 6  | 680   | 108   | 89    | 883    |
| 18,430 | 6  | 674   | 110   | 91    | 881    |
| 18,431 | 5  | 670   | 113   | 90    | 878    |
| 18,432 | 6  | 674   | 108   | 86    | 874    |
| 18,433 | 6  | 681   | 108   | 88    | 883    |
| 18,434 | 8  | 929   | 144   | 113   | 1,194  |
| 18,435 | 12 | 1,448 | 247   | 169   | 1,876  |
| 18,436 | 12 | 1,844 | 328   | 224   | 2,408  |
| 18,437 | 12 | 2,036 | 381   | 259   | 2,688  |
| 18,438 | 12 | 2,041 | 385   | 261   | 2,699  |
| 18,439 | 10 | 1,860 | 354   | 246   | 2,470  |
| 18,440 | 14 | 2,349 | 442   | 324   | 3,129  |
| 18,441 | 16 | 3,082 | 568   | 415   | 4,081  |
| 18,442 | 16 | 3,279 | 606   | 445   | 4,346  |
| 18,443 | 18 | 3,674 | 712   | 529   | 4,933  |
| 18,444 | 18 | 4,003 | 789   | 575   | 5,385  |
| 18,445 | 18 | 4,392 | 858   | 641   | 5,909  |
| 18,446 | 20 | 4,771 | 911   | 683   | 6,385  |
| 18,447 | 20 | 5,168 | 997   | 731   | 6,916  |
| 18,448 | 20 | 5,596 | 1,060 | 798   | 7,474  |
| 18,449 | 25 | 5,776 | 1,097 | 825   | 7,723  |
| 18,450 | 25 | 5,932 | 1,147 | 854   | 7,958  |
| 18,451 | 28 | 6,585 | 1,286 | 941   | 8,840  |
| 18,452 | 35 | 7,283 | 1,398 | 1,033 | 9,749  |
| 18,453 | 35 | 7,428 | 1,426 | 1,064 | 9,953  |
| 18,454 | 41 | 8,087 | 1,561 | 1,151 | 10,840 |
| 18,455 | 42 | 8,530 | 1,639 | 1,210 | 11,421 |

|        |     |        |       |       |        |
|--------|-----|--------|-------|-------|--------|
| 18,456 | 42  | 8,685  | 1,670 | 1,228 | 11,625 |
| 18,457 | 43  | 9,228  | 1,818 | 1,312 | 12,401 |
| 18,458 | 43  | 9,338  | 1,847 | 1,336 | 12,564 |
| 18,459 | 43  | 9,730  | 1,904 | 1,399 | 13,076 |
| 18,460 | 47  | 10,292 | 2,004 | 1,483 | 13,826 |
| 18,461 | 50  | 10,629 | 2,090 | 1,537 | 14,306 |
| 18,462 | 52  | 10,991 | 2,160 | 1,586 | 14,789 |
| 18,463 | 70  | 11,394 | 2,231 | 1,635 | 15,330 |
| 18,464 | 75  | 11,946 | 2,320 | 1,699 | 16,040 |
| 18,465 | 78  | 12,340 | 2,405 | 1,738 | 16,561 |
| 18,466 | 87  | 12,633 | 2,476 | 1,786 | 16,982 |
| 18,467 | 86  | 12,934 | 2,522 | 1,839 | 17,381 |
| 18,468 | 87  | 13,291 | 2,591 | 1,875 | 17,844 |
| 18,469 | 87  | 13,357 | 2,630 | 1,907 | 17,981 |
| 18,470 | 94  | 13,860 | 2,736 | 1,975 | 18,665 |
| 18,471 | 98  | 14,164 | 2,806 | 2,029 | 19,097 |
| 18,472 | 99  | 14,556 | 2,888 | 2,075 | 19,618 |
| 18,473 | 104 | 15,057 | 2,959 | 2,145 | 20,265 |
| 18,474 | 107 | 15,383 | 3,022 | 2,188 | 20,700 |
| 18,475 | 110 | 15,824 | 3,106 | 2,245 | 21,285 |
| 18,476 | 109 | 15,982 | 3,123 | 2,269 | 21,483 |
| 18,477 | 109 | 16,396 | 3,214 | 2,335 | 22,054 |
| 18,478 | 109 | 16,679 | 3,293 | 2,403 | 22,484 |
| 18,479 | 109 | 17,098 | 3,381 | 2,461 | 23,049 |
| 18,480 | 126 | 17,756 | 3,529 | 2,531 | 23,942 |
| 18,481 | 129 | 18,228 | 3,589 | 2,588 | 24,534 |
| 18,482 | 130 | 18,708 | 3,649 | 2,654 | 25,141 |
| 18,483 | 127 | 18,697 | 3,649 | 2,665 | 25,138 |
| 18,484 | 131 | 18,688 | 3,664 | 2,683 | 25,166 |
| 18,485 | 137 | 18,707 | 3,659 | 2,675 | 25,178 |
| 18,486 | 135 | 18,906 | 3,689 | 2,717 | 25,447 |
| 18,487 | 145 | 19,231 | 3,748 | 2,770 | 25,894 |

|        |     |        |       |       |        |
|--------|-----|--------|-------|-------|--------|
| 18,488 | 149 | 19,632 | 3,820 | 2,836 | 26,437 |
| 18,489 | 149 | 20,171 | 3,902 | 2,900 | 27,122 |
| 18,490 | 147 | 20,296 | 3,944 | 2,924 | 27,311 |
| 18,491 | 148 | 20,421 | 3,954 | 2,944 | 27,467 |
| 18,492 | 149 | 20,361 | 3,946 | 2,938 | 27,394 |
| 18,493 | 148 | 20,140 | 3,915 | 2,914 | 27,117 |
| 18,494 | 148 | 20,148 | 3,906 | 2,888 | 27,090 |
| 18,495 | 152 | 20,246 | 3,902 | 2,889 | 27,189 |
| 18,496 | 151 | 20,002 | 3,873 | 2,851 | 26,877 |
| 18,497 | 151 | 20,078 | 3,930 | 2,898 | 27,057 |
| 18,498 | 154 | 20,247 | 3,971 | 2,952 | 27,324 |
| 18,499 | 149 | 19,790 | 3,890 | 2,876 | 26,705 |
| 18,500 | 150 | 19,753 | 3,906 | 2,884 | 26,693 |
| 18,501 | 152 | 19,803 | 3,909 | 2,892 | 26,756 |
| 18,502 | 145 | 19,944 | 3,905 | 2,915 | 26,909 |
| 18,503 | 150 | 19,880 | 3,908 | 2,898 | 26,836 |
| 18,504 | 147 | 19,714 | 3,855 | 2,857 | 26,573 |
| 18,505 | 147 | 19,826 | 3,890 | 2,904 | 26,767 |
| 18,506 | 147 | 19,761 | 3,902 | 2,918 | 26,728 |
| 18,507 | 150 | 19,784 | 3,894 | 2,922 | 26,750 |
| 18,508 | 153 | 19,896 | 3,892 | 2,915 | 26,856 |
| 18,509 | 154 | 19,872 | 3,903 | 2,901 | 26,830 |
| 18,510 | 155 | 20,074 | 3,972 | 2,926 | 27,127 |
| 18,511 | 154 | 19,909 | 3,937 | 2,901 | 26,901 |
| 18,512 | 154 | 19,774 | 3,893 | 2,867 | 26,688 |
| 18,513 | 155 | 20,208 | 3,937 | 2,906 | 27,206 |
| 18,514 | 138 | 20,210 | 3,943 | 2,903 | 27,194 |
| 18,515 | 138 | 20,193 | 3,979 | 2,934 | 27,244 |
| 18,516 | 136 | 20,221 | 3,986 | 2,964 | 27,307 |
| 18,517 | 130 | 20,133 | 3,968 | 2,960 | 27,191 |
| 18,518 | 134 | 20,114 | 3,967 | 2,944 | 27,159 |
| 18,519 | 140 | 20,420 | 4,021 | 3,010 | 27,591 |

|        |     |        |       |       |        |
|--------|-----|--------|-------|-------|--------|
| 18,520 | 135 | 20,343 | 3,978 | 2,981 | 27,437 |
| 18,521 | 135 | 20,348 | 3,981 | 2,985 | 27,449 |
| 18,522 | 134 | 20,392 | 3,966 | 2,994 | 27,486 |
| 18,523 | 135 | 20,361 | 3,970 | 2,999 | 27,465 |
| 18,524 | 130 | 20,214 | 3,981 | 2,978 | 27,303 |
| 18,525 | 129 | 20,260 | 3,971 | 2,993 | 27,353 |
| 18,526 | 126 | 20,144 | 3,964 | 2,993 | 27,227 |
| 18,527 | 125 | 20,165 | 3,985 | 3,003 | 27,278 |
| 18,528 | 128 | 20,185 | 3,990 | 2,977 | 27,280 |
| 18,529 | 130 | 20,384 | 4,018 | 2,993 | 27,525 |
| 18,530 | 122 | 20,664 | 4,055 | 3,026 | 27,867 |
| 18,531 | 119 | 20,512 | 4,043 | 3,022 | 27,696 |
| 18,532 | 118 | 20,523 | 4,090 | 3,016 | 27,747 |
| 18,533 | 118 | 20,496 | 4,105 | 3,008 | 27,727 |
| 18,534 | 116 | 20,721 | 4,165 | 3,037 | 28,039 |
| 18,535 | 114 | 20,716 | 4,166 | 3,054 | 28,050 |
| 18,536 | 114 | 20,413 | 4,110 | 2,987 | 27,624 |
| 18,537 | 122 | 20,574 | 4,140 | 2,997 | 27,833 |
| 18,538 | 113 | 20,454 | 4,143 | 2,993 | 27,703 |
| 18,539 | 111 | 20,332 | 4,142 | 3,000 | 27,585 |
| 18,540 | 113 | 20,393 | 4,190 | 3,027 | 27,723 |
| 18,541 | 117 | 20,511 | 4,183 | 3,014 | 27,825 |
| 18,542 | 117 | 20,506 | 4,185 | 2,990 | 27,798 |
| 18,543 | 117 | 20,195 | 4,143 | 2,947 | 27,402 |
| 18,544 | 119 | 20,388 | 4,175 | 2,979 | 27,661 |
| 18,545 | 118 | 20,375 | 4,169 | 3,004 | 27,666 |
| 18,546 | 118 | 20,430 | 4,200 | 3,039 | 27,787 |
| 18,547 | 117 | 20,431 | 4,206 | 3,021 | 27,775 |
| 18,548 | 116 | 20,655 | 4,219 | 3,021 | 28,011 |
| 18,549 | 120 | 20,634 | 4,236 | 3,016 | 28,006 |
| 18,550 | 120 | 20,530 | 4,205 | 3,005 | 27,860 |
| 18,551 | 120 | 20,548 | 4,196 | 3,004 | 27,868 |

|        |     |        |       |       |        |
|--------|-----|--------|-------|-------|--------|
| 18,552 | 120 | 20,646 | 4,241 | 3,010 | 28,017 |
| 18,553 | 119 | 20,529 | 4,237 | 2,985 | 27,870 |
| 18,554 | 113 | 20,412 | 4,244 | 2,979 | 27,748 |
| 18,555 | 119 | 20,439 | 4,289 | 2,976 | 27,823 |
| 18,556 | 118 | 20,777 | 4,325 | 3,011 | 28,231 |
| 18,557 | 120 | 20,229 | 4,258 | 2,972 | 27,579 |
| 18,558 | 118 | 20,314 | 4,287 | 2,993 | 27,712 |
| 18,559 | 116 | 20,407 | 4,350 | 3,034 | 27,907 |
| 18,560 | 114 | 20,168 | 4,297 | 3,018 | 27,597 |
| 18,561 | 113 | 20,124 | 4,291 | 3,015 | 27,543 |
| 18,562 | 112 | 20,064 | 4,290 | 3,021 | 27,487 |
| 18,563 | 113 | 20,229 | 4,340 | 3,065 | 27,747 |
| 18,564 | 113 | 20,096 | 4,335 | 3,064 | 27,608 |
| 18,565 | 116 | 20,075 | 4,308 | 3,066 | 27,565 |
| 18,566 | 113 | 19,917 | 4,271 | 3,033 | 27,334 |
| 18,567 | 114 | 19,986 | 4,275 | 3,031 | 27,406 |
| 18,568 | 118 | 20,292 | 4,323 | 3,063 | 27,796 |
| 18,569 | 112 | 20,332 | 4,335 | 3,068 | 27,847 |
| 18,570 | 116 | 20,251 | 4,319 | 3,044 | 27,730 |
| 18,571 | 119 | 20,402 | 4,343 | 3,053 | 27,917 |
| 18,572 | 120 | 20,306 | 4,325 | 3,027 | 27,778 |
| 18,573 | 120 | 20,283 | 4,339 | 3,027 | 27,769 |
| 18,574 | 124 | 20,076 | 4,306 | 2,997 | 27,503 |
| 18,575 | 123 | 19,864 | 4,288 | 2,986 | 27,261 |
| 18,576 | 128 | 20,753 | 4,457 | 3,115 | 28,453 |
| 18,577 | 130 | 20,847 | 4,498 | 3,123 | 28,598 |
| 18,578 | 131 | 20,870 | 4,454 | 3,118 | 28,573 |
| 18,579 | 130 | 20,769 | 4,449 | 3,117 | 28,465 |
| 18,580 | 130 | 20,685 | 4,433 | 3,113 | 28,361 |
| 18,581 | 124 | 20,655 | 4,455 | 3,140 | 28,374 |
| 18,582 | 126 | 20,890 | 4,466 | 3,158 | 28,640 |
| 18,583 | 124 | 20,903 | 4,482 | 3,169 | 28,678 |

|        |     |        |       |       |        |
|--------|-----|--------|-------|-------|--------|
| 18,584 | 125 | 20,680 | 4,439 | 3,164 | 28,408 |
| 18,585 | 136 | 20,713 | 4,454 | 3,171 | 28,474 |
| 18,586 | 135 | 20,681 | 4,453 | 3,173 | 28,442 |
| 18,587 | 135 | 20,845 | 4,501 | 3,203 | 28,684 |
| 18,588 | 128 | 20,886 | 4,548 | 3,253 | 28,815 |
| 18,589 | 129 | 20,968 | 4,559 | 3,234 | 28,890 |
| 18,590 | 127 | 20,695 | 4,495 | 3,214 | 28,531 |
| 18,591 | 127 | 20,769 | 4,527 | 3,237 | 28,660 |
| 18,592 | 130 | 20,724 | 4,557 | 3,239 | 28,650 |
| 18,593 | 128 | 20,525 | 4,537 | 3,236 | 28,426 |
| 18,594 | 138 | 21,073 | 4,632 | 3,295 | 29,138 |
| 18,595 | 137 | 21,130 | 4,633 | 3,293 | 29,193 |
| 18,596 | 138 | 21,230 | 4,610 | 3,260 | 29,238 |
| 18,597 | 138 | 21,314 | 4,622 | 3,252 | 29,326 |
| 18,598 | 136 | 21,243 | 4,640 | 3,288 | 29,307 |
| 18,599 | 138 | 21,349 | 4,672 | 3,304 | 29,463 |
| 18,600 | 136 | 21,147 | 4,623 | 3,275 | 29,181 |
| 18,601 | 140 | 21,194 | 4,635 | 3,259 | 29,228 |
| 18,602 | 140 | 21,159 | 4,648 | 3,244 | 29,191 |
| 18,603 | 140 | 21,116 | 4,630 | 3,260 | 29,146 |
| 18,604 | 140 | 21,012 | 4,604 | 3,278 | 29,034 |
| 18,605 | 140 | 21,018 | 4,559 | 3,289 | 29,006 |
| 18,606 | 138 | 21,166 | 4,572 | 3,296 | 29,172 |
| 18,607 | 140 | 21,149 | 4,595 | 3,309 | 29,193 |
| 18,608 | 139 | 21,144 | 4,552 | 3,285 | 29,120 |
| 18,609 | 141 | 21,287 | 4,539 | 3,268 | 29,235 |
| 18,610 | 146 | 21,305 | 4,537 | 3,276 | 29,264 |
| 18,611 | 146 | 21,331 | 4,543 | 3,270 | 29,290 |
| 18,612 | 146 | 21,599 | 4,577 | 3,317 | 29,639 |
| 18,613 | 145 | 21,427 | 4,527 | 3,280 | 29,379 |
| 18,614 | 145 | 21,355 | 4,513 | 3,266 | 29,279 |
| 18,615 | 145 | 21,290 | 4,523 | 3,272 | 29,230 |

|        |     |        |       |       |        |
|--------|-----|--------|-------|-------|--------|
| 18,616 | 145 | 21,203 | 4,534 | 3,272 | 29,154 |
| 18,617 | 145 | 21,081 | 4,524 | 3,250 | 29,000 |
| 18,618 | 146 | 21,209 | 4,547 | 3,276 | 29,178 |
| 18,619 | 151 | 20,960 | 4,510 | 3,239 | 28,860 |
| 18,620 | 148 | 20,677 | 4,480 | 3,217 | 28,522 |
| 18,621 | 150 | 20,500 | 4,470 | 3,210 | 28,330 |
| 18,622 | 148 | 20,273 | 4,435 | 3,174 | 28,030 |
| 18,623 | 146 | 20,619 | 4,526 | 3,247 | 28,538 |
| 18,624 | 149 | 20,643 | 4,517 | 3,270 | 28,579 |
| 18,625 | 144 | 20,605 | 4,523 | 3,272 | 28,544 |
| 18,626 | 140 | 20,592 | 4,498 | 3,239 | 28,469 |
| 18,627 | 139 | 20,624 | 4,476 | 3,215 | 28,454 |
| 18,628 | 142 | 20,614 | 4,503 | 3,203 | 28,462 |
| 18,629 | 143 | 20,529 | 4,481 | 3,199 | 28,352 |
| 18,630 | 144 | 20,972 | 4,531 | 3,245 | 28,892 |
| 18,631 | 149 | 21,261 | 4,594 | 3,269 | 29,273 |
| 18,632 | 148 | 21,103 | 4,562 | 3,230 | 29,043 |
| 18,633 | 146 | 21,076 | 4,566 | 3,243 | 29,031 |
| 18,634 | 150 | 20,749 | 4,491 | 3,190 | 28,580 |
| 18,635 | 147 | 20,843 | 4,534 | 3,216 | 28,740 |
| 18,636 | 143 | 20,865 | 4,591 | 3,247 | 28,846 |
| 18,637 | 146 | 20,894 | 4,589 | 3,271 | 28,900 |
| 18,638 | 143 | 20,643 | 4,545 | 3,235 | 28,566 |
| 18,639 | 142 | 20,599 | 4,532 | 3,219 | 28,492 |
| 18,640 | 139 | 20,232 | 4,444 | 3,177 | 27,992 |
| 18,641 | 138 | 20,050 | 4,459 | 3,152 | 27,799 |
| 18,642 | 138 | 19,965 | 4,429 | 3,148 | 27,680 |
| 18,643 | 132 | 19,950 | 4,437 | 3,140 | 27,659 |
| 18,644 | 131 | 19,841 | 4,435 | 3,135 | 27,542 |
| 18,645 | 123 | 19,677 | 4,414 | 3,117 | 27,331 |
| 18,646 | 122 | 19,790 | 4,445 | 3,131 | 27,488 |
| 18,647 | 119 | 19,911 | 4,487 | 3,152 | 27,669 |

|        |     |        |       |       |        |
|--------|-----|--------|-------|-------|--------|
| 18,648 | 118 | 19,607 | 4,390 | 3,077 | 27,192 |
| 18,649 | 118 | 19,769 | 4,431 | 3,104 | 27,422 |
| 18,650 | 116 | 19,964 | 4,473 | 3,146 | 27,699 |
| 18,651 | 112 | 19,843 | 4,475 | 3,149 | 27,579 |
| 18,652 | 111 | 19,754 | 4,490 | 3,171 | 27,526 |
| 18,653 | 112 | 19,711 | 4,493 | 3,167 | 27,483 |
| 18,654 | 112 | 19,682 | 4,506 | 3,172 | 27,472 |
| 18,655 | 111 | 19,431 | 4,482 | 3,143 | 27,167 |
| 18,656 | 113 | 19,553 | 4,542 | 3,153 | 27,361 |
| 18,657 | 111 | 19,486 | 4,528 | 3,134 | 27,259 |
| 18,658 | 109 | 19,220 | 4,463 | 3,086 | 26,878 |
| 18,659 | 109 | 19,328 | 4,519 | 3,108 | 27,064 |
| 18,660 | 108 | 19,467 | 4,537 | 3,140 | 27,252 |
| 18,661 | 106 | 19,482 | 4,546 | 3,122 | 27,256 |
| 18,662 | 105 | 19,085 | 4,492 | 3,079 | 26,761 |
| 18,663 | 107 | 19,407 | 4,567 | 3,121 | 27,202 |
| 18,664 | 108 | 19,547 | 4,580 | 3,140 | 27,375 |
| 18,665 | 109 | 19,674 | 4,624 | 3,170 | 27,577 |
| 18,666 | 106 | 19,638 | 4,625 | 3,163 | 27,532 |
| 18,667 | 104 | 19,755 | 4,676 | 3,187 | 27,722 |
| 18,668 | 109 | 20,033 | 4,746 | 3,226 | 28,114 |
| 18,669 | 107 | 19,832 | 4,709 | 3,195 | 27,843 |
| 18,670 | 98  | 19,872 | 4,700 | 3,180 | 27,850 |
| 18,671 | 95  | 19,795 | 4,644 | 3,152 | 27,686 |
| 18,672 | 96  | 19,763 | 4,656 | 3,145 | 27,660 |
| 18,673 | 103 | 19,874 | 4,688 | 3,155 | 27,820 |
| 18,674 | 108 | 19,892 | 4,694 | 3,145 | 27,839 |
| 18,675 | 107 | 19,644 | 4,641 | 3,086 | 27,478 |
| 18,676 | 109 | 19,710 | 4,636 | 3,102 | 27,557 |
| 18,677 | 111 | 19,589 | 4,644 | 3,093 | 27,437 |
| 18,678 | 110 | 19,467 | 4,623 | 3,114 | 27,314 |
| 18,679 | 110 | 19,332 | 4,593 | 3,106 | 27,141 |



|        |     |        |       |       |        |
|--------|-----|--------|-------|-------|--------|
| 18,680 | 113 | 19,459 | 4,651 | 3,145 | 27,368 |
| 18,681 | 112 | 19,365 | 4,676 | 3,156 | 27,309 |
| 18,682 | 115 | 19,198 | 4,648 | 3,160 | 27,121 |
| 18,683 | 114 | 18,974 | 4,631 | 3,160 | 26,879 |
| 18,684 | 117 | 19,012 | 4,618 | 3,141 | 26,888 |
| 18,685 | 108 | 19,034 | 4,638 | 3,125 | 26,905 |
| 18,686 | 109 | 19,044 | 4,604 | 3,101 | 26,858 |
| 18,687 | 106 | 18,925 | 4,530 | 3,065 | 26,626 |
| 18,688 | 106 | 19,030 | 4,566 | 3,060 | 26,762 |
| 18,689 | 107 | 19,100 | 4,533 | 3,044 | 26,784 |
| 18,690 | 115 | 19,273 | 4,551 | 3,053 | 26,992 |
| 18,691 | 117 | 19,543 | 4,625 | 3,089 | 27,374 |
| 18,692 | 119 | 19,616 | 4,655 | 3,094 | 27,484 |
| 18,693 | 120 | 19,571 | 4,664 | 3,114 | 27,469 |
| 18,694 | 126 | 19,509 | 4,620 | 3,087 | 27,342 |
| 18,695 | 126 | 19,574 | 4,634 | 3,101 | 27,435 |
| 18,696 | 126 | 19,648 | 4,651 | 3,119 | 27,544 |
| 18,697 | 134 | 19,684 | 4,714 | 3,153 | 27,685 |
| 18,698 | 144 | 19,537 | 4,703 | 3,166 | 27,550 |
| 18,699 | 146 | 19,373 | 4,684 | 3,134 | 27,337 |
| 18,700 | 152 | 19,386 | 4,662 | 3,137 | 27,337 |
| 18,701 | 154 | 19,197 | 4,560 | 3,065 | 26,976 |
| 18,702 | 154 | 19,318 | 4,612 | 3,092 | 27,176 |
| 18,703 | 152 | 19,500 | 4,635 | 3,124 | 27,411 |
| 18,704 | 152 | 19,506 | 4,627 | 3,104 | 27,389 |
| 18,705 | 155 | 19,527 | 4,628 | 3,105 | 27,415 |
| 18,706 | 155 | 19,376 | 4,603 | 3,094 | 27,228 |
| 18,707 | 159 | 19,809 | 4,704 | 3,146 | 27,818 |
| 18,708 | 156 | 19,749 | 4,694 | 3,163 | 27,762 |
| 18,709 | 157 | 19,792 | 4,715 | 3,178 | 27,842 |
| 18,710 | 156 | 19,761 | 4,729 | 3,197 | 27,843 |
| 18,711 | 156 | 19,695 | 4,717 | 3,192 | 27,760 |

|        |     |        |       |       |        |
|--------|-----|--------|-------|-------|--------|
| 18,712 | 162 | 19,467 | 4,659 | 3,149 | 27,437 |
| 18,713 | 158 | 19,475 | 4,663 | 3,139 | 27,435 |
| 18,714 | 165 | 19,817 | 4,792 | 3,176 | 27,950 |
| 18,715 | 165 | 19,949 | 4,800 | 3,143 | 28,057 |
| 18,716 | 169 | 19,492 | 4,701 | 3,073 | 27,435 |
| 18,717 | 179 | 19,669 | 4,723 | 3,088 | 27,659 |
| 18,718 | 184 | 19,814 | 4,753 | 3,100 | 27,851 |
| 18,719 | 184 | 19,829 | 4,751 | 3,111 | 27,875 |
| 18,720 | 187 | 20,063 | 4,813 | 3,150 | 28,213 |
| 18,721 | 187 | 20,054 | 4,824 | 3,145 | 28,210 |
| 18,722 | 179 | 20,208 | 4,845 | 3,177 | 28,409 |
| 18,723 | 184 | 20,472 | 4,897 | 3,235 | 28,788 |
| 18,724 | 173 | 20,389 | 4,843 | 3,220 | 28,625 |
| 18,725 | 175 | 20,523 | 4,889 | 3,246 | 28,833 |
| 18,726 | 177 | 20,379 | 4,847 | 3,216 | 28,619 |
| 18,727 | 175 | 20,373 | 4,857 | 3,214 | 28,619 |
| 18,728 | 172 | 20,430 | 4,839 | 3,208 | 28,649 |
| 18,729 | 172 | 20,346 | 4,850 | 3,202 | 28,570 |
| 18,730 | 168 | 20,604 | 4,925 | 3,231 | 28,928 |
| 18,731 | 173 | 20,533 | 4,942 | 3,210 | 28,858 |
| 18,732 | 176 | 20,448 | 4,933 | 3,191 | 28,748 |
| 18,733 | 176 | 20,204 | 4,872 | 3,128 | 28,380 |
| 18,734 | 178 | 20,237 | 4,885 | 3,127 | 28,427 |
| 18,735 | 183 | 20,054 | 4,866 | 3,121 | 28,224 |
| 18,736 | 183 | 20,071 | 4,867 | 3,132 | 28,253 |
| 18,737 | 193 | 20,321 | 4,912 | 3,135 | 28,561 |
| 18,738 | 193 | 20,261 | 4,910 | 3,124 | 28,488 |
| 18,739 | 191 | 20,393 | 4,938 | 3,128 | 28,650 |
| 18,740 | 197 | 20,520 | 4,994 | 3,153 | 28,864 |
| 18,741 | 191 | 20,536 | 5,000 | 3,151 | 28,878 |
| 18,742 | 192 | 20,517 | 4,976 | 3,170 | 28,855 |
| 18,743 | 189 | 20,235 | 4,918 | 3,114 | 28,456 |

|        |     |        |       |       |        |
|--------|-----|--------|-------|-------|--------|
| 18,744 | 189 | 20,199 | 4,907 | 3,108 | 28,403 |
| 18,745 | 184 | 20,304 | 4,934 | 3,126 | 28,548 |
| 18,746 | 182 | 20,300 | 4,931 | 3,132 | 28,545 |
| 18,747 | 169 | 20,057 | 4,853 | 3,070 | 28,149 |
| 18,748 | 170 | 20,277 | 4,889 | 3,090 | 28,426 |
| 18,749 | 172 | 20,387 | 4,940 | 3,102 | 28,601 |
| 18,750 | 167 | 20,181 | 4,872 | 3,072 | 28,292 |
| 18,751 | 163 | 20,341 | 4,877 | 3,089 | 28,470 |
| 18,752 | 168 | 20,366 | 4,894 | 3,099 | 28,527 |
| 18,753 | 169 | 20,383 | 4,892 | 3,100 | 28,544 |
| 18,754 | 168 | 20,410 | 4,917 | 3,120 | 28,615 |
| 18,755 | 168 | 20,410 | 4,932 | 3,116 | 28,626 |
| 18,756 | 169 | 20,157 | 4,901 | 3,089 | 28,316 |
| 18,757 | 168 | 20,113 | 4,875 | 3,070 | 28,226 |
| 18,758 | 163 | 20,402 | 4,949 | 3,117 | 28,631 |
| 18,759 | 164 | 20,453 | 4,940 | 3,116 | 28,673 |
| 18,760 | 165 | 20,439 | 4,939 | 3,077 | 28,620 |
| 18,761 | 165 | 20,490 | 4,938 | 3,081 | 28,674 |
| 18,762 | 161 | 19,884 | 4,866 | 3,005 | 27,916 |
| 18,763 | 159 | 20,032 | 4,898 | 3,032 | 28,121 |
| 18,764 | 156 | 20,300 | 4,954 | 3,072 | 28,482 |
| 18,765 | 153 | 19,862 | 4,810 | 3,015 | 27,840 |
| 18,766 | 153 | 19,861 | 4,793 | 3,035 | 27,842 |
| 18,767 | 152 | 19,875 | 4,799 | 3,022 | 27,848 |
| 18,768 | 146 | 20,079 | 4,888 | 3,064 | 28,177 |
| 18,769 | 138 | 20,078 | 4,915 | 3,075 | 28,206 |
| 18,770 | 139 | 19,845 | 4,885 | 3,045 | 27,914 |
| 18,771 | 138 | 19,651 | 4,852 | 3,035 | 27,676 |
| 18,772 | 145 | 19,847 | 4,918 | 3,096 | 28,006 |
| 18,773 | 159 | 19,965 | 4,994 | 3,118 | 28,236 |
| 18,774 | 158 | 19,806 | 4,982 | 3,098 | 28,044 |
| 18,775 | 156 | 19,497 | 4,935 | 3,073 | 27,661 |

|        |     |        |       |       |        |
|--------|-----|--------|-------|-------|--------|
| 18,776 | 156 | 19,473 | 4,943 | 3,067 | 27,639 |
| 18,777 | 157 | 19,360 | 4,916 | 3,049 | 27,482 |
| 18,778 | 160 | 19,289 | 4,923 | 3,034 | 27,406 |
| 18,779 | 162 | 19,351 | 4,901 | 3,024 | 27,438 |
| 18,780 | 157 | 18,983 | 4,764 | 2,989 | 26,893 |
| 18,781 | 159 | 19,181 | 4,824 | 3,032 | 27,196 |
| 18,782 | 159 | 19,349 | 4,890 | 3,069 | 27,467 |
| 18,783 | 162 | 19,566 | 4,980 | 3,117 | 27,825 |
| 18,784 | 159 | 19,562 | 4,983 | 3,133 | 27,837 |
| 18,785 | 156 | 19,896 | 5,096 | 3,191 | 28,339 |
| 18,786 | 156 | 19,662 | 5,093 | 3,208 | 28,119 |
| 18,787 | 154 | 19,782 | 5,169 | 3,248 | 28,353 |
| 18,788 | 146 | 19,837 | 5,195 | 3,270 | 28,448 |
| 18,789 | 146 | 19,891 | 5,199 | 3,311 | 28,547 |
| 18,790 | 148 | 19,836 | 5,187 | 3,302 | 28,473 |
| 18,791 | 144 | 19,804 | 5,167 | 3,303 | 28,418 |
| 18,792 | 143 | 19,740 | 5,146 | 3,283 | 28,312 |
| 18,793 | 140 | 19,592 | 5,092 | 3,257 | 28,081 |
| 18,794 | 141 | 19,877 | 5,159 | 3,290 | 28,467 |
| 18,795 | 144 | 19,863 | 5,114 | 3,274 | 28,395 |
| 18,796 | 142 | 19,617 | 5,060 | 3,247 | 28,066 |
| 18,797 | 149 | 19,679 | 5,117 | 3,253 | 28,198 |
| 18,798 | 151 | 19,727 | 5,167 | 3,295 | 28,340 |
| 18,799 | 155 | 19,752 | 5,163 | 3,285 | 28,355 |
| 18,800 | 155 | 19,783 | 5,162 | 3,266 | 28,366 |
| 18,801 | 160 | 19,697 | 5,192 | 3,261 | 28,310 |
| 18,802 | 166 | 19,675 | 5,185 | 3,253 | 28,279 |
| 18,803 | 163 | 19,709 | 5,212 | 3,262 | 28,346 |
| 18,804 | 164 | 19,557 | 5,170 | 3,204 | 28,095 |
| 18,805 | 163 | 19,517 | 5,164 | 3,209 | 28,053 |
| 18,806 | 166 | 19,508 | 5,157 | 3,208 | 28,039 |
| 18,807 | 160 | 19,536 | 5,145 | 3,211 | 28,052 |

|        |     |        |       |       |        |
|--------|-----|--------|-------|-------|--------|
| 18,808 | 161 | 19,537 | 5,141 | 3,238 | 28,077 |
| 18,809 | 161 | 19,694 | 5,176 | 3,255 | 28,286 |
| 18,810 | 159 | 19,663 | 5,168 | 3,246 | 28,236 |
| 18,811 | 157 | 19,637 | 5,135 | 3,239 | 28,168 |
| 18,812 | 157 | 19,348 | 5,058 | 3,193 | 27,756 |
| 18,813 | 153 | 19,073 | 4,989 | 3,173 | 27,388 |
| 18,814 | 153 | 19,101 | 5,015 | 3,207 | 27,476 |
| 18,815 | 153 | 19,169 | 5,036 | 3,218 | 27,576 |
| 18,816 | 151 | 19,254 | 5,060 | 3,224 | 27,689 |
| 18,817 | 146 | 18,893 | 4,963 | 3,170 | 27,172 |
| 18,818 | 145 | 19,107 | 4,988 | 3,196 | 27,436 |
| 18,819 | 145 | 19,123 | 4,976 | 3,190 | 27,434 |
| 18,820 | 153 | 19,381 | 4,997 | 3,253 | 27,784 |
| 18,821 | 149 | 19,311 | 4,965 | 3,243 | 27,668 |
| 18,822 | 129 | 18,631 | 4,793 | 3,131 | 26,684 |
| 18,823 | 130 | 18,824 | 4,833 | 3,144 | 26,931 |
| 18,824 | 126 | 18,999 | 4,835 | 3,153 | 27,113 |
| 18,825 | 128 | 19,110 | 4,854 | 3,164 | 27,256 |
| 18,826 | 130 | 18,912 | 4,792 | 3,121 | 26,955 |
| 18,827 | 129 | 18,883 | 4,770 | 3,111 | 26,893 |
| 18,828 | 125 | 18,781 | 4,757 | 3,120 | 26,783 |
| 18,829 | 123 | 18,736 | 4,729 | 3,116 | 26,704 |
| 18,830 | 123 | 18,633 | 4,704 | 3,101 | 26,561 |
| 18,831 | 122 | 18,601 | 4,716 | 3,092 | 26,531 |
| 18,832 | 120 | 18,645 | 4,703 | 3,093 | 26,561 |
| 18,833 | 121 | 18,416 | 4,597 | 3,023 | 26,157 |
| 18,834 | 118 | 18,636 | 4,610 | 3,032 | 26,396 |
| 18,835 | 113 | 18,721 | 4,618 | 3,053 | 26,505 |
| 18,836 | 114 | 18,886 | 4,585 | 3,070 | 26,655 |
| 18,837 | 111 | 19,057 | 4,575 | 3,049 | 26,792 |
| 18,838 | 110 | 18,687 | 4,461 | 2,992 | 26,250 |
| 18,839 | 117 | 18,708 | 4,456 | 2,973 | 26,254 |

|        |     |        |       |       |        |
|--------|-----|--------|-------|-------|--------|
| 18,840 | 116 | 18,727 | 4,446 | 2,957 | 26,246 |
| 18,841 | 113 | 18,724 | 4,454 | 2,957 | 26,248 |
| 18,842 | 111 | 18,738 | 4,460 | 2,946 | 26,255 |
| 18,843 | 118 | 18,959 | 4,525 | 3,003 | 26,605 |
| 18,844 | 120 | 19,002 | 4,574 | 2,997 | 26,693 |
| 18,845 | 118 | 18,797 | 4,494 | 2,942 | 26,351 |
| 18,846 | 121 | 19,035 | 4,496 | 2,964 | 26,616 |
| 18,847 | 116 | 19,433 | 4,558 | 2,994 | 27,101 |
| 18,848 | 120 | 19,472 | 4,516 | 2,980 | 27,088 |
| 18,849 | 116 | 19,472 | 4,470 | 2,959 | 27,017 |
| 18,850 | 119 | 20,071 | 4,574 | 3,025 | 27,789 |
| 18,851 | 114 | 19,942 | 4,507 | 3,012 | 27,575 |
| 18,852 | 118 | 20,313 | 4,549 | 3,041 | 28,021 |
| 18,853 | 110 | 20,176 | 4,542 | 3,015 | 27,843 |
| 18,854 | 111 | 20,183 | 4,503 | 2,986 | 27,783 |
| 18,855 | 111 | 20,150 | 4,493 | 3,004 | 27,758 |
| 18,856 | 113 | 20,353 | 4,581 | 3,017 | 28,064 |
| 18,857 | 113 | 20,376 | 4,571 | 2,984 | 28,044 |
| 18,858 | 115 | 20,422 | 4,550 | 2,981 | 28,068 |
| 18,859 | 116 | 20,558 | 4,517 | 2,964 | 28,155 |
| 18,860 | 124 | 20,591 | 4,518 | 2,965 | 28,198 |
| 18,861 | 126 | 20,425 | 4,461 | 2,936 | 27,948 |
| 18,862 | 124 | 20,675 | 4,549 | 3,003 | 28,351 |
| 18,863 | 124 | 20,674 | 4,538 | 3,001 | 28,337 |
| 18,864 | 126 | 20,675 | 4,542 | 2,985 | 28,328 |
| 18,865 | 130 | 20,723 | 4,570 | 3,003 | 28,426 |
| 18,866 | 132 | 20,701 | 4,579 | 3,025 | 28,437 |
| 18,867 | 137 | 20,953 | 4,595 | 3,043 | 28,728 |
| 18,868 | 137 | 20,670 | 4,515 | 2,999 | 28,321 |
| 18,869 | 137 | 20,924 | 4,542 | 3,021 | 28,624 |
| 18,870 | 130 | 21,196 | 4,608 | 3,029 | 28,963 |
| 18,871 | 133 | 21,089 | 4,610 | 3,002 | 28,834 |

|        |     |        |       |       |        |
|--------|-----|--------|-------|-------|--------|
| 18,872 | 130 | 20,945 | 4,580 | 2,956 | 28,611 |
| 18,873 | 132 | 21,172 | 4,622 | 2,969 | 28,895 |
| 18,874 | 131 | 21,385 | 4,653 | 2,993 | 29,162 |
| 18,875 | 135 | 21,230 | 4,638 | 2,972 | 28,975 |
| 18,876 | 128 | 21,239 | 4,643 | 2,972 | 28,982 |
| 18,877 | 128 | 21,175 | 4,622 | 2,967 | 28,892 |
| 18,878 | 131 | 21,531 | 4,696 | 3,004 | 29,362 |
| 18,879 | 129 | 21,578 | 4,721 | 2,983 | 29,411 |
| 18,880 | 126 | 21,641 | 4,734 | 2,979 | 29,480 |
| 18,881 | 127 | 21,667 | 4,729 | 2,977 | 29,500 |
| 18,882 | 127 | 21,649 | 4,760 | 3,008 | 29,544 |
| 18,883 | 128 | 21,141 | 4,675 | 2,947 | 28,891 |
| 18,884 | 125 | 21,246 | 4,693 | 2,946 | 29,010 |
| 18,885 | 128 | 21,239 | 4,671 | 2,931 | 28,969 |
| 18,886 | 126 | 20,977 | 4,628 | 2,885 | 28,616 |
| 18,887 | 129 | 21,030 | 4,657 | 2,885 | 28,701 |
| 18,888 | 133 | 20,844 | 4,603 | 2,866 | 28,446 |
| 18,889 | 128 | 20,705 | 4,592 | 2,840 | 28,265 |
| 18,890 | 129 | 20,774 | 4,573 | 2,841 | 28,317 |
| 18,891 | 132 | 20,757 | 4,567 | 2,840 | 28,296 |
| 18,892 | 137 | 20,811 | 4,560 | 2,837 | 28,345 |
| 18,893 | 136 | 20,612 | 4,519 | 2,806 | 28,073 |
| 18,894 | 150 | 20,952 | 4,578 | 2,848 | 28,528 |
| 18,895 | 147 | 20,764 | 4,502 | 2,818 | 28,231 |
| 18,896 | 147 | 20,756 | 4,527 | 2,824 | 28,254 |
| 18,897 | 154 | 20,555 | 4,508 | 2,819 | 28,036 |
| 18,898 | 154 | 20,538 | 4,490 | 2,819 | 28,001 |
| 18,899 | 155 | 19,705 | 4,358 | 2,718 | 26,936 |
| 18,900 | 157 | 19,803 | 4,386 | 2,735 | 27,081 |
| 18,901 | 155 | 19,978 | 4,429 | 2,773 | 27,335 |
| 18,902 | 156 | 19,932 | 4,430 | 2,759 | 27,277 |
| 18,903 | 150 | 20,149 | 4,475 | 2,785 | 27,559 |

|        |     |        |       |       |        |
|--------|-----|--------|-------|-------|--------|
| 18,904 | 157 | 20,409 | 4,515 | 2,809 | 27,890 |
| 18,905 | 154 | 20,347 | 4,496 | 2,783 | 27,780 |
| 18,906 | 150 | 20,294 | 4,458 | 2,783 | 27,685 |
| 18,907 | 150 | 20,307 | 4,438 | 2,790 | 27,685 |
| 18,908 | 154 | 20,184 | 4,432 | 2,829 | 27,599 |
| 18,909 | 159 | 20,096 | 4,507 | 2,837 | 27,599 |
| 18,910 | 151 | 20,060 | 4,507 | 2,831 | 27,549 |
| 18,911 | 152 | 19,967 | 4,485 | 2,800 | 27,404 |
| 18,912 | 156 | 19,972 | 4,472 | 2,797 | 27,397 |
| 18,913 | 158 | 20,127 | 4,533 | 2,823 | 27,641 |
| 18,914 | 160 | 20,028 | 4,515 | 2,797 | 27,500 |
| 18,915 | 155 | 20,098 | 4,514 | 2,787 | 27,554 |
| 18,916 | 157 | 20,206 | 4,510 | 2,764 | 27,637 |
| 18,917 | 158 | 20,578 | 4,557 | 2,805 | 28,098 |
| 18,918 | 154 | 20,544 | 4,559 | 2,809 | 28,066 |
| 18,919 | 153 | 20,473 | 4,573 | 2,819 | 28,018 |
| 18,920 | 152 | 19,563 | 4,394 | 2,701 | 26,810 |
| 18,921 | 154 | 19,745 | 4,416 | 2,733 | 27,048 |
| 18,922 | 154 | 19,972 | 4,465 | 2,766 | 27,357 |
| 18,923 | 154 | 20,070 | 4,483 | 2,777 | 27,484 |
| 18,924 | 153 | 19,967 | 4,459 | 2,757 | 27,336 |
| 18,925 | 156 | 20,172 | 4,489 | 2,775 | 27,592 |
| 18,926 | 157 | 20,391 | 4,531 | 2,812 | 27,891 |
| 18,927 | 158 | 20,406 | 4,550 | 2,827 | 27,941 |
| 18,928 | 157 | 20,506 | 4,546 | 2,847 | 28,056 |
| 18,929 | 159 | 20,222 | 4,493 | 2,810 | 27,684 |
| 18,930 | 160 | 20,435 | 4,517 | 2,829 | 27,941 |
| 18,931 | 162 | 20,472 | 4,542 | 2,835 | 28,011 |
| 18,932 | 163 | 20,436 | 4,526 | 2,809 | 27,934 |
| 18,933 | 166 | 20,550 | 4,525 | 2,797 | 28,038 |
| 18,934 | 170 | 20,599 | 4,531 | 2,795 | 28,095 |
| 18,935 | 169 | 20,709 | 4,549 | 2,818 | 28,245 |



|        |     |        |       |       |        |
|--------|-----|--------|-------|-------|--------|
| 18,936 | 162 | 20,485 | 4,463 | 2,788 | 27,898 |
| 18,937 | 162 | 20,506 | 4,462 | 2,780 | 27,910 |
| 18,938 | 162 | 20,462 | 4,492 | 2,776 | 27,892 |
| 18,939 | 159 | 20,152 | 4,446 | 2,738 | 27,495 |
| 18,940 | 158 | 20,115 | 4,452 | 2,724 | 27,449 |
| 18,941 | 154 | 19,904 | 4,410 | 2,714 | 27,182 |
| 18,942 | 154 | 19,815 | 4,391 | 2,720 | 27,080 |
| 18,943 | 146 | 19,851 | 4,436 | 2,745 | 27,178 |
| 18,944 | 143 | 19,949 | 4,478 | 2,769 | 27,339 |
| 18,945 | 131 | 19,737 | 4,438 | 2,742 | 27,048 |
| 18,946 | 138 | 19,499 | 4,386 | 2,714 | 26,737 |
| 18,947 | 136 | 19,347 | 4,350 | 2,674 | 26,507 |
| 18,948 | 125 | 19,573 | 4,441 | 2,725 | 26,864 |
| 18,949 | 126 | 19,555 | 4,443 | 2,741 | 26,865 |
| 18,950 | 119 | 19,558 | 4,437 | 2,757 | 26,871 |
| 18,951 | 118 | 19,341 | 4,387 | 2,724 | 26,570 |
| 18,952 | 119 | 19,322 | 4,382 | 2,706 | 26,529 |
| 18,953 | 119 | 19,299 | 4,364 | 2,708 | 26,490 |
| 18,954 | 125 | 19,343 | 4,368 | 2,721 | 26,557 |
| 18,955 | 122 | 19,180 | 4,345 | 2,709 | 26,356 |
| 18,956 | 122 | 18,924 | 4,292 | 2,695 | 26,033 |
| 18,957 | 122 | 18,977 | 4,273 | 2,685 | 26,057 |
| 18,958 | 122 | 18,802 | 4,195 | 2,640 | 25,759 |
| 18,959 | 121 | 18,968 | 4,217 | 2,659 | 25,965 |
| 18,960 | 113 | 19,189 | 4,264 | 2,686 | 26,252 |
| 18,961 | 112 | 18,901 | 4,206 | 2,660 | 25,879 |
| 18,962 | 112 | 18,992 | 4,201 | 2,667 | 25,972 |
| 18,963 | 113 | 18,887 | 4,157 | 2,628 | 25,785 |
| 18,964 | 112 | 18,828 | 4,159 | 2,628 | 25,727 |
| 18,965 | 113 | 18,907 | 4,181 | 2,632 | 25,833 |
| 18,966 | 115 | 18,805 | 4,173 | 2,624 | 25,717 |
| 18,967 | 115 | 18,737 | 4,163 | 2,642 | 25,657 |

|        |     |        |       |       |        |
|--------|-----|--------|-------|-------|--------|
| 18,968 | 118 | 18,401 | 4,117 | 2,596 | 25,232 |
| 18,969 | 117 | 18,122 | 4,088 | 2,556 | 24,883 |
| 18,970 | 117 | 18,192 | 4,120 | 2,558 | 24,987 |
| 18,971 | 112 | 17,941 | 4,094 | 2,553 | 24,700 |
| 18,972 | 111 | 17,883 | 4,058 | 2,540 | 24,592 |
| 18,973 | 111 | 17,891 | 4,077 | 2,540 | 24,619 |
| 18,974 | 112 | 17,891 | 4,092 | 2,558 | 24,653 |
| 18,975 | 112 | 17,871 | 4,084 | 2,558 | 24,625 |
| 18,976 | 110 | 17,755 | 4,052 | 2,534 | 24,451 |
| 18,977 | 106 | 17,708 | 3,971 | 2,475 | 24,260 |
| 18,978 | 113 | 17,639 | 3,953 | 2,486 | 24,191 |
| 18,979 | 111 | 17,418 | 3,929 | 2,451 | 23,909 |
| 18,980 | 109 | 17,712 | 3,933 | 2,484 | 24,238 |
| 18,981 | 112 | 17,935 | 3,979 | 2,521 | 24,547 |
| 18,982 | 116 | 17,642 | 3,901 | 2,494 | 24,153 |
| 18,983 | 114 | 17,510 | 3,856 | 2,479 | 23,959 |
| 18,984 | 118 | 18,200 | 3,982 | 2,566 | 24,866 |
| 18,985 | 118 | 18,329 | 3,990 | 2,558 | 24,995 |
| 18,986 | 117 | 18,304 | 3,983 | 2,562 | 24,966 |
| 18,987 | 118 | 18,365 | 3,991 | 2,576 | 25,050 |
| 18,988 | 120 | 18,519 | 4,004 | 2,603 | 25,246 |
| 18,989 | 120 | 18,404 | 3,979 | 2,589 | 25,092 |
| 18,990 | 123 | 18,683 | 4,005 | 2,614 | 25,425 |
| 18,991 | 126 | 18,713 | 3,976 | 2,624 | 25,439 |
| 18,992 | 130 | 18,961 | 4,031 | 2,638 | 25,760 |
| 18,993 | 133 | 19,055 | 3,980 | 2,604 | 25,772 |
| 18,994 | 137 | 19,356 | 4,009 | 2,621 | 26,123 |
| 18,995 | 139 | 19,301 | 3,956 | 2,605 | 26,001 |
| 18,996 | 139 | 19,140 | 3,907 | 2,578 | 25,764 |
| 18,997 | 134 | 19,213 | 3,915 | 2,580 | 25,842 |
| 18,998 | 144 | 19,139 | 3,899 | 2,577 | 25,759 |
| 18,999 | 144 | 19,172 | 3,902 | 2,576 | 25,794 |

|        |     |        |       |       |        |
|--------|-----|--------|-------|-------|--------|
| 19,000 | 147 | 19,330 | 3,957 | 2,609 | 26,043 |
| 19,001 | 145 | 18,996 | 3,915 | 2,583 | 25,639 |
| 19,002 | 144 | 19,240 | 3,939 | 2,612 | 25,935 |
| 19,003 | 139 | 18,863 | 3,867 | 2,576 | 25,445 |
| 19,004 | 142 | 18,994 | 3,922 | 2,609 | 25,667 |
| 19,005 | 139 | 19,002 | 3,938 | 2,615 | 25,694 |
| 19,006 | 136 | 19,023 | 3,936 | 2,619 | 25,714 |
| 19,007 | 139 | 18,813 | 3,941 | 2,595 | 25,488 |
| 19,008 | 139 | 18,672 | 3,943 | 2,595 | 25,349 |
| 19,009 | 136 | 18,641 | 3,918 | 2,588 | 25,283 |
| 19,010 | 136 | 18,851 | 3,966 | 2,632 | 25,585 |
| 19,011 | 139 | 18,883 | 3,977 | 2,649 | 25,648 |
| 19,012 | 137 | 18,741 | 3,976 | 2,636 | 25,490 |
| 19,013 | 138 | 18,782 | 4,019 | 2,657 | 25,596 |
| 19,014 | 136 | 19,041 | 4,064 | 2,714 | 25,955 |
| 19,015 | 137 | 19,202 | 4,090 | 2,723 | 26,152 |
| 19,016 | 135 | 19,132 | 4,073 | 2,733 | 26,073 |
| 19,017 | 135 | 19,272 | 4,076 | 2,761 | 26,244 |
| 19,018 | 133 | 19,265 | 4,101 | 2,772 | 26,271 |
| 19,019 | 134 | 19,626 | 4,196 | 2,815 | 26,771 |
| 19,020 | 135 | 19,703 | 4,212 | 2,827 | 26,877 |
| 19,021 | 139 | 19,734 | 4,209 | 2,832 | 26,914 |
| 19,022 | 139 | 19,535 | 4,183 | 2,824 | 26,681 |
| 19,023 | 139 | 19,705 | 4,253 | 2,856 | 26,953 |
| 19,024 | 136 | 19,578 | 4,211 | 2,835 | 26,760 |
| 19,025 | 137 | 19,668 | 4,176 | 2,843 | 26,824 |
| 19,026 | 138 | 19,653 | 4,201 | 2,854 | 26,846 |
| 19,027 | 138 | 19,624 | 4,226 | 2,866 | 26,854 |
| 19,028 | 131 | 19,730 | 4,273 | 2,877 | 27,011 |
| 19,029 | 131 | 19,626 | 4,289 | 2,878 | 26,924 |
| 19,030 | 132 | 19,820 | 4,320 | 2,938 | 27,210 |
| 19,031 | 133 | 19,576 | 4,337 | 2,922 | 26,968 |

|        |     |        |       |       |        |
|--------|-----|--------|-------|-------|--------|
| 19,032 | 130 | 19,366 | 4,337 | 2,914 | 26,747 |
| 19,033 | 126 | 19,498 | 4,413 | 2,980 | 27,017 |
| 19,034 | 131 | 19,363 | 4,449 | 2,987 | 26,930 |
| 19,035 | 127 | 19,496 | 4,475 | 3,007 | 27,105 |
| 19,036 | 121 | 19,380 | 4,451 | 3,028 | 26,980 |
| 19,037 | 121 | 19,207 | 4,424 | 3,004 | 26,756 |
| 19,038 | 125 | 19,462 | 4,477 | 3,038 | 27,102 |
| 19,039 | 124 | 19,467 | 4,506 | 3,041 | 27,138 |
| 19,040 | 126 | 19,482 | 4,564 | 3,064 | 27,236 |
| 19,041 | 124 | 19,498 | 4,589 | 3,068 | 27,279 |
| 19,042 | 117 | 19,531 | 4,625 | 3,071 | 27,344 |
| 19,043 | 119 | 19,639 | 4,686 | 3,109 | 27,553 |
| 19,044 | 116 | 19,666 | 4,741 | 3,124 | 27,647 |
| 19,045 | 113 | 19,108 | 4,633 | 3,042 | 26,896 |
| 19,046 | 112 | 19,216 | 4,663 | 3,072 | 27,063 |
| 19,047 | 101 | 18,592 | 4,485 | 2,933 | 26,111 |
| 19,048 | 102 | 18,782 | 4,497 | 2,938 | 26,319 |
| 19,049 | 98  | 18,929 | 4,535 | 2,970 | 26,532 |
| 19,050 | 97  | 18,812 | 4,523 | 2,961 | 26,393 |
| 19,051 | 96  | 19,088 | 4,604 | 3,035 | 26,823 |
| 19,052 | 95  | 19,368 | 4,660 | 3,074 | 27,197 |
| 19,053 | 93  | 19,581 | 4,709 | 3,118 | 27,501 |
| 19,054 | 93  | 19,848 | 4,776 | 3,151 | 27,868 |
| 19,055 | 97  | 19,993 | 4,795 | 3,157 | 28,042 |
| 19,056 | 96  | 19,998 | 4,793 | 3,150 | 28,037 |
| 19,057 | 94  | 20,024 | 4,772 | 3,147 | 28,037 |
| 19,058 | 94  | 20,044 | 4,774 | 3,146 | 28,058 |
| 19,059 | 97  | 20,124 | 4,776 | 3,154 | 28,151 |
| 19,060 | 98  | 20,110 | 4,788 | 3,147 | 28,143 |
| 19,061 | 101 | 20,233 | 4,823 | 3,143 | 28,300 |
| 19,062 | 99  | 20,235 | 4,787 | 3,133 | 28,254 |
| 19,063 | 106 | 20,183 | 4,760 | 3,121 | 28,170 |

|        |     |        |       |       |        |
|--------|-----|--------|-------|-------|--------|
| 19,064 | 104 | 20,245 | 4,755 | 3,104 | 28,208 |
| 19,065 | 102 | 20,009 | 4,680 | 3,081 | 27,872 |
| 19,066 | 98  | 19,711 | 4,616 | 3,047 | 27,472 |
| 19,067 | 104 | 19,858 | 4,680 | 3,078 | 27,720 |
| 19,068 | 103 | 20,036 | 4,735 | 3,092 | 27,966 |
| 19,069 | 100 | 20,014 | 4,720 | 3,083 | 27,917 |
| 19,070 | 101 | 19,805 | 4,652 | 3,055 | 27,613 |
| 19,071 | 102 | 19,810 | 4,630 | 3,041 | 27,583 |
| 19,072 | 97  | 19,638 | 4,586 | 3,003 | 27,324 |
| 19,073 | 96  | 19,698 | 4,555 | 2,995 | 27,344 |
| 19,074 | 95  | 19,952 | 4,581 | 3,028 | 27,656 |
| 19,075 | 95  | 19,989 | 4,610 | 3,029 | 27,723 |
| 19,076 | 98  | 20,014 | 4,658 | 3,046 | 27,816 |
| 19,077 | 98  | 19,844 | 4,607 | 3,031 | 27,580 |
| 19,078 | 100 | 19,944 | 4,618 | 3,052 | 27,714 |
| 19,079 | 111 | 20,238 | 4,690 | 3,080 | 28,119 |
| 19,080 | 111 | 20,141 | 4,648 | 3,042 | 27,942 |
| 19,081 | 109 | 20,175 | 4,617 | 3,026 | 27,927 |
| 19,082 | 116 | 20,378 | 4,669 | 3,047 | 28,210 |
| 19,083 | 118 | 20,240 | 4,593 | 2,987 | 27,938 |
| 19,084 | 116 | 20,142 | 4,582 | 2,969 | 27,809 |
| 19,085 | 109 | 20,081 | 4,542 | 2,954 | 27,686 |
| 19,086 | 109 | 20,084 | 4,558 | 2,956 | 27,707 |
| 19,087 | 112 | 19,769 | 4,511 | 2,890 | 27,282 |
| 19,088 | 109 | 19,687 | 4,497 | 2,882 | 27,175 |
| 19,089 | 114 | 20,113 | 4,601 | 2,939 | 27,767 |
| 19,090 | 114 | 20,067 | 4,603 | 2,942 | 27,726 |
| 19,091 | 112 | 19,884 | 4,537 | 2,919 | 27,452 |
| 19,092 | 112 | 19,914 | 4,531 | 2,916 | 27,473 |
| 19,093 | 116 | 19,700 | 4,506 | 2,894 | 27,216 |
| 19,094 | 116 | 19,651 | 4,507 | 2,886 | 27,160 |
| 19,095 | 121 | 19,581 | 4,512 | 2,887 | 27,101 |

|        |     |        |       |       |        |
|--------|-----|--------|-------|-------|--------|
| 19,096 | 124 | 19,401 | 4,485 | 2,870 | 26,880 |
| 19,097 | 127 | 19,231 | 4,444 | 2,818 | 26,620 |
| 19,098 | 130 | 19,163 | 4,432 | 2,802 | 26,527 |
| 19,099 | 130 | 18,987 | 4,412 | 2,798 | 26,327 |
| 19,100 | 129 | 19,159 | 4,429 | 2,834 | 26,551 |
| 19,101 | 132 | 19,106 | 4,391 | 2,805 | 26,434 |
| 19,102 | 132 | 18,919 | 4,372 | 2,769 | 26,192 |
| 19,103 | 142 | 19,051 | 4,439 | 2,787 | 26,419 |
| 19,104 | 149 | 19,045 | 4,466 | 2,764 | 26,424 |
| 19,105 | 153 | 19,209 | 4,495 | 2,779 | 26,636 |
| 19,106 | 152 | 18,991 | 4,424 | 2,749 | 26,316 |
| 19,107 | 152 | 18,874 | 4,409 | 2,749 | 26,184 |
| 19,108 | 156 | 19,123 | 4,465 | 2,768 | 26,512 |
| 19,109 | 162 | 19,330 | 4,510 | 2,782 | 26,784 |
| 19,110 | 161 | 19,244 | 4,480 | 2,770 | 26,655 |
| 19,111 | 161 | 19,246 | 4,471 | 2,774 | 26,652 |
| 19,112 | 168 | 19,087 | 4,455 | 2,770 | 26,480 |
| 19,113 | 170 | 19,259 | 4,505 | 2,784 | 26,718 |
| 19,114 | 160 | 19,291 | 4,503 | 2,801 | 26,755 |
| 19,115 | 166 | 19,117 | 4,477 | 2,758 | 26,518 |
| 19,116 | 168 | 19,226 | 4,517 | 2,777 | 26,688 |
| 19,117 | 164 | 19,424 | 4,559 | 2,814 | 26,961 |
| 19,118 | 165 | 19,468 | 4,555 | 2,821 | 27,009 |
| 19,119 | 166 | 19,529 | 4,544 | 2,833 | 27,072 |
| 19,120 | 169 | 19,390 | 4,522 | 2,823 | 26,904 |
| 19,121 | 169 | 19,523 | 4,536 | 2,823 | 27,051 |
| 19,122 | 167 | 19,519 | 4,544 | 2,828 | 27,058 |
| 19,123 | 167 | 19,269 | 4,503 | 2,801 | 26,740 |
| 19,124 | 166 | 19,248 | 4,514 | 2,800 | 26,728 |
| 19,125 | 171 | 19,191 | 4,500 | 2,781 | 26,643 |
| 19,126 | 174 | 19,401 | 4,533 | 2,803 | 26,911 |
| 19,127 | 170 | 18,950 | 4,464 | 2,735 | 26,319 |

|        |     |        |       |       |        |
|--------|-----|--------|-------|-------|--------|
| 19,128 | 175 | 19,144 | 4,491 | 2,767 | 26,577 |
| 19,129 | 171 | 19,367 | 4,521 | 2,776 | 26,835 |
| 19,130 | 170 | 19,226 | 4,497 | 2,770 | 26,663 |
| 19,131 | 180 | 19,245 | 4,505 | 2,760 | 26,690 |
| 19,132 | 179 | 19,126 | 4,472 | 2,737 | 26,514 |
| 19,133 | 176 | 19,309 | 4,527 | 2,796 | 26,808 |
| 19,134 | 180 | 19,404 | 4,535 | 2,811 | 26,930 |
| 19,135 | 179 | 19,503 | 4,535 | 2,794 | 27,011 |
| 19,136 | 179 | 19,542 | 4,525 | 2,790 | 27,036 |
| 19,137 | 177 | 19,477 | 4,491 | 2,785 | 26,930 |
| 19,138 | 181 | 19,660 | 4,538 | 2,802 | 27,181 |
| 19,139 | 186 | 19,602 | 4,544 | 2,775 | 27,107 |
| 19,140 | 179 | 19,672 | 4,559 | 2,779 | 27,189 |
| 19,141 | 187 | 19,707 | 4,539 | 2,762 | 27,195 |
| 19,142 | 188 | 19,034 | 4,357 | 2,654 | 26,233 |
| 19,143 | 198 | 19,320 | 4,396 | 2,667 | 26,581 |
| 19,144 | 202 | 19,626 | 4,435 | 2,696 | 26,959 |
| 19,145 | 202 | 19,701 | 4,438 | 2,697 | 27,038 |
| 19,146 | 198 | 19,869 | 4,496 | 2,727 | 27,290 |
| 19,147 | 196 | 19,885 | 4,491 | 2,714 | 27,286 |
| 19,148 | 194 | 19,853 | 4,486 | 2,727 | 27,260 |
| 19,149 | 197 | 19,848 | 4,492 | 2,714 | 27,251 |
| 19,150 | 197 | 19,846 | 4,487 | 2,706 | 27,236 |
| 19,151 | 192 | 19,836 | 4,507 | 2,710 | 27,245 |
| 19,152 | 190 | 20,032 | 4,557 | 2,755 | 27,534 |
| 19,153 | 188 | 19,935 | 4,484 | 2,727 | 27,334 |
| 19,154 | 188 | 19,968 | 4,487 | 2,727 | 27,370 |
| 19,155 | 187 | 19,967 | 4,469 | 2,752 | 27,375 |
| 19,156 | 186 | 20,200 | 4,546 | 2,773 | 27,705 |
| 19,157 | 176 | 19,984 | 4,526 | 2,733 | 27,419 |
| 19,158 | 176 | 19,996 | 4,509 | 2,732 | 27,413 |
| 19,159 | 176 | 20,011 | 4,520 | 2,723 | 27,430 |

|        |     |        |       |       |        |
|--------|-----|--------|-------|-------|--------|
| 19,160 | 170 | 20,164 | 4,551 | 2,740 | 27,625 |
| 19,161 | 167 | 20,179 | 4,562 | 2,736 | 27,644 |
| 19,162 | 161 | 20,174 | 4,586 | 2,732 | 27,653 |
| 19,163 | 158 | 20,168 | 4,568 | 2,714 | 27,608 |
| 19,164 | 159 | 20,128 | 4,557 | 2,702 | 27,546 |
| 19,165 | 154 | 20,017 | 4,531 | 2,674 | 27,376 |
| 19,166 | 155 | 20,063 | 4,535 | 2,675 | 27,428 |
| 19,167 | 155 | 20,068 | 4,542 | 2,680 | 27,445 |
| 19,168 | 152 | 20,126 | 4,529 | 2,652 | 27,459 |
| 19,169 | 149 | 19,781 | 4,455 | 2,610 | 26,995 |
| 19,170 | 155 | 20,013 | 4,497 | 2,626 | 27,291 |
| 19,171 | 154 | 19,863 | 4,461 | 2,612 | 27,090 |
| 19,172 | 154 | 19,926 | 4,470 | 2,617 | 27,167 |
| 19,173 | 152 | 20,074 | 4,473 | 2,624 | 27,323 |
| 19,174 | 152 | 20,072 | 4,479 | 2,621 | 27,324 |
| 19,175 | 147 | 19,994 | 4,489 | 2,631 | 27,261 |
| 19,176 | 148 | 19,960 | 4,492 | 2,642 | 27,242 |
| 19,177 | 147 | 19,793 | 4,476 | 2,631 | 27,047 |
| 19,178 | 154 | 19,804 | 4,456 | 2,625 | 27,039 |
| 19,179 | 147 | 19,531 | 4,422 | 2,598 | 26,698 |
| 19,180 | 142 | 19,617 | 4,472 | 2,631 | 26,862 |
| 19,181 | 142 | 19,724 | 4,503 | 2,646 | 27,015 |
| 19,182 | 130 | 19,511 | 4,418 | 2,596 | 26,655 |
| 19,183 | 135 | 19,591 | 4,425 | 2,593 | 26,744 |
| 19,184 | 134 | 19,580 | 4,420 | 2,601 | 26,735 |
| 19,185 | 135 | 19,840 | 4,445 | 2,613 | 27,033 |
| 19,186 | 143 | 19,877 | 4,445 | 2,625 | 27,090 |
| 19,187 | 142 | 19,899 | 4,447 | 2,623 | 27,111 |
| 19,188 | 142 | 20,246 | 4,551 | 2,661 | 27,600 |
| 19,189 | 142 | 20,227 | 4,543 | 2,670 | 27,582 |
| 19,190 | 133 | 19,686 | 4,414 | 2,616 | 26,849 |
| 19,191 | 133 | 19,943 | 4,479 | 2,652 | 27,207 |



|        |     |        |       |       |        |
|--------|-----|--------|-------|-------|--------|
| 19,192 | 126 | 20,246 | 4,527 | 2,703 | 27,602 |
| 19,193 | 126 | 20,190 | 4,545 | 2,715 | 27,576 |
| 19,194 | 121 | 20,584 | 4,618 | 2,778 | 28,101 |
| 19,195 | 120 | 20,450 | 4,588 | 2,762 | 27,920 |
| 19,196 | 118 | 20,291 | 4,551 | 2,763 | 27,723 |
| 19,197 | 117 | 20,566 | 4,666 | 2,814 | 28,163 |
| 19,198 | 116 | 20,567 | 4,655 | 2,835 | 28,173 |
| 19,199 | 112 | 20,660 | 4,715 | 2,858 | 28,345 |
| 19,200 | 111 | 20,759 | 4,731 | 2,863 | 28,464 |
| 19,201 | 111 | 20,940 | 4,756 | 2,869 | 28,676 |
| 19,202 | 116 | 20,728 | 4,724 | 2,856 | 28,424 |
| 19,203 | 116 | 20,891 | 4,759 | 2,888 | 28,654 |
| 19,204 | 115 | 20,873 | 4,759 | 2,900 | 28,647 |
| 19,205 | 110 | 20,925 | 4,782 | 2,939 | 28,756 |
| 19,206 | 111 | 21,111 | 4,805 | 2,937 | 28,964 |
| 19,207 | 114 | 20,725 | 4,736 | 2,901 | 28,476 |
| 19,208 | 115 | 21,041 | 4,783 | 2,953 | 28,892 |
| 19,209 | 113 | 21,065 | 4,790 | 2,963 | 28,931 |
| 19,210 | 113 | 20,994 | 4,768 | 2,944 | 28,819 |
| 19,211 | 113 | 21,034 | 4,772 | 3,013 | 28,932 |
| 19,212 | 112 | 21,211 | 4,784 | 3,027 | 29,134 |
| 19,213 | 120 | 21,192 | 4,780 | 3,017 | 29,109 |
| 19,214 | 120 | 20,973 | 4,745 | 3,005 | 28,843 |
| 19,215 | 125 | 21,308 | 4,839 | 3,059 | 29,331 |
| 19,216 | 123 | 21,232 | 4,802 | 3,047 | 29,204 |
| 19,217 | 130 | 21,147 | 4,745 | 3,016 | 29,038 |
| 19,218 | 131 | 21,210 | 4,759 | 3,022 | 29,122 |
| 19,219 | 139 | 21,333 | 4,776 | 3,065 | 29,313 |
| 19,220 | 143 | 21,359 | 4,777 | 3,053 | 29,332 |
| 19,221 | 148 | 21,307 | 4,803 | 3,051 | 29,309 |
| 19,222 | 153 | 21,192 | 4,784 | 3,035 | 29,164 |
| 19,223 | 158 | 20,949 | 4,753 | 3,033 | 28,893 |

|        |     |        |       |       |        |
|--------|-----|--------|-------|-------|--------|
| 19,224 | 165 | 20,959 | 4,733 | 3,017 | 28,874 |
| 19,225 | 167 | 21,019 | 4,689 | 2,986 | 28,861 |
| 19,226 | 168 | 21,109 | 4,657 | 2,956 | 28,890 |
| 19,227 | 170 | 21,396 | 4,709 | 2,975 | 29,250 |
| 19,228 | 171 | 21,183 | 4,647 | 2,946 | 28,947 |
| 19,229 | 165 | 20,926 | 4,594 | 2,904 | 28,589 |
| 19,230 | 163 | 21,167 | 4,644 | 2,945 | 28,919 |
| 19,231 | 164 | 21,108 | 4,608 | 2,931 | 28,811 |
| 19,232 | 164 | 21,144 | 4,620 | 2,917 | 28,845 |
| 19,233 | 177 | 21,350 | 4,677 | 2,959 | 29,163 |
| 19,234 | 179 | 21,172 | 4,623 | 2,921 | 28,895 |
| 19,235 | 178 | 20,971 | 4,598 | 2,900 | 28,647 |
| 19,236 | 181 | 21,077 | 4,650 | 2,938 | 28,846 |
| 19,237 | 176 | 21,021 | 4,636 | 2,921 | 28,754 |
| 19,238 | 178 | 20,789 | 4,584 | 2,899 | 28,450 |
| 19,239 | 180 | 20,487 | 4,517 | 2,874 | 28,058 |
| 19,240 | 180 | 20,247 | 4,488 | 2,849 | 27,764 |
| 19,241 | 181 | 20,254 | 4,509 | 2,876 | 27,820 |
| 19,242 | 181 | 20,202 | 4,513 | 2,855 | 27,751 |
| 19,243 | 182 | 20,255 | 4,473 | 2,833 | 27,743 |
| 19,244 | 181 | 20,312 | 4,460 | 2,824 | 27,777 |
| 19,245 | 177 | 20,152 | 4,423 | 2,807 | 27,559 |
| 19,246 | 177 | 20,207 | 4,397 | 2,807 | 27,588 |
| 19,247 | 177 | 20,207 | 4,383 | 2,792 | 27,559 |
| 19,248 | 181 | 20,234 | 4,351 | 2,763 | 27,529 |
| 19,249 | 182 | 20,165 | 4,348 | 2,770 | 27,465 |
| 19,250 | 181 | 20,022 | 4,315 | 2,759 | 27,277 |
| 19,251 | 187 | 20,057 | 4,344 | 2,781 | 27,369 |
| 19,252 | 191 | 20,012 | 4,330 | 2,764 | 27,297 |
| 19,253 | 186 | 19,902 | 4,300 | 2,728 | 27,116 |
| 19,254 | 187 | 20,010 | 4,299 | 2,717 | 27,213 |
| 19,255 | 190 | 20,001 | 4,284 | 2,689 | 27,164 |

|        |     |        |       |       |        |
|--------|-----|--------|-------|-------|--------|
| 19,256 | 191 | 20,092 | 4,285 | 2,676 | 27,244 |
| 19,257 | 189 | 20,008 | 4,281 | 2,674 | 27,152 |
| 19,258 | 186 | 19,716 | 4,191 | 2,641 | 26,734 |
| 19,259 | 188 | 19,618 | 4,153 | 2,598 | 26,557 |
| 19,260 | 191 | 19,450 | 4,095 | 2,584 | 26,320 |
| 19,261 | 194 | 19,649 | 4,114 | 2,579 | 26,536 |
| 19,262 | 187 | 19,080 | 3,980 | 2,457 | 25,704 |
| 19,263 | 188 | 19,209 | 4,000 | 2,494 | 25,891 |
| 19,264 | 187 | 19,383 | 4,028 | 2,508 | 26,106 |
| 19,265 | 187 | 19,426 | 4,017 | 2,513 | 26,143 |
| 19,266 | 190 | 19,548 | 4,046 | 2,535 | 26,319 |
| 19,267 | 191 | 19,590 | 4,052 | 2,545 | 26,378 |
| 19,268 | 187 | 19,683 | 4,084 | 2,554 | 26,508 |
| 19,269 | 182 | 19,739 | 4,088 | 2,563 | 26,572 |
| 19,270 | 175 | 19,767 | 4,072 | 2,565 | 26,579 |
| 19,271 | 177 | 19,921 | 4,124 | 2,594 | 26,816 |
| 19,272 | 168 | 20,093 | 4,120 | 2,617 | 26,998 |
| 19,273 | 155 | 19,986 | 4,108 | 2,601 | 26,850 |
| 19,274 | 166 | 20,110 | 4,119 | 2,609 | 27,004 |
| 19,275 | 159 | 19,899 | 4,105 | 2,605 | 26,768 |
| 19,276 | 158 | 20,216 | 4,225 | 2,693 | 27,292 |
| 19,277 | 156 | 20,144 | 4,246 | 2,730 | 27,276 |
| 19,278 | 149 | 20,088 | 4,249 | 2,759 | 27,245 |
| 19,279 | 148 | 20,054 | 4,245 | 2,736 | 27,183 |
| 19,280 | 150 | 20,182 | 4,256 | 2,750 | 27,338 |
| 19,281 | 151 | 20,238 | 4,265 | 2,760 | 27,414 |
| 19,282 | 158 | 20,275 | 4,332 | 2,803 | 27,568 |
| 19,283 | 154 | 20,287 | 4,368 | 2,829 | 27,638 |
| 19,284 | 147 | 20,249 | 4,382 | 2,842 | 27,620 |
| 19,285 | 133 | 20,044 | 4,333 | 2,845 | 27,355 |
| 19,286 | 141 | 20,192 | 4,379 | 2,858 | 27,570 |
| 19,287 | 139 | 20,323 | 4,404 | 2,894 | 27,760 |

|        |     |        |       |       |        |
|--------|-----|--------|-------|-------|--------|
| 19,288 | 140 | 20,127 | 4,368 | 2,877 | 27,512 |
| 19,289 | 140 | 20,177 | 4,376 | 2,879 | 27,572 |
| 19,290 | 137 | 20,116 | 4,358 | 2,880 | 27,491 |
| 19,291 | 138 | 20,164 | 4,353 | 2,895 | 27,550 |
| 19,292 | 136 | 20,147 | 4,334 | 2,888 | 27,505 |
| 19,293 | 135 | 20,322 | 4,372 | 2,936 | 27,765 |
| 19,294 | 133 | 20,033 | 4,340 | 2,908 | 27,414 |
| 19,295 | 132 | 20,196 | 4,377 | 2,934 | 27,639 |
| 19,296 | 130 | 20,280 | 4,394 | 2,956 | 27,760 |
| 19,297 | 129 | 20,076 | 4,352 | 2,935 | 27,492 |
| 19,298 | 132 | 20,350 | 4,405 | 2,957 | 27,844 |
| 19,299 | 133 | 20,575 | 4,429 | 2,979 | 28,116 |
| 19,300 | 135 | 20,539 | 4,381 | 2,952 | 28,007 |
| 19,301 | 135 | 20,625 | 4,362 | 2,941 | 28,063 |
| 19,302 | 137 | 20,819 | 4,372 | 2,961 | 28,289 |
| 19,303 | 137 | 20,652 | 4,356 | 2,950 | 28,095 |
| 19,304 | 134 | 20,239 | 4,281 | 2,897 | 27,551 |
| 19,305 | 134 | 20,233 | 4,280 | 2,908 | 27,555 |
| 19,306 | 132 | 20,215 | 4,287 | 2,910 | 27,544 |
| 19,307 | 131 | 20,175 | 4,270 | 2,910 | 27,486 |
| 19,308 | 133 | 20,021 | 4,271 | 2,918 | 27,343 |
| 19,309 | 138 | 19,974 | 4,269 | 2,937 | 27,318 |
| 19,310 | 138 | 19,952 | 4,259 | 2,931 | 27,280 |
| 19,311 | 140 | 20,302 | 4,314 | 2,939 | 27,695 |
| 19,312 | 139 | 20,340 | 4,340 | 2,966 | 27,785 |
| 19,313 | 136 | 20,166 | 4,347 | 2,952 | 27,601 |
| 19,314 | 138 | 20,473 | 4,400 | 2,973 | 27,984 |
| 19,315 | 136 | 20,322 | 4,357 | 2,945 | 27,760 |
| 19,316 | 135 | 20,127 | 4,321 | 2,894 | 27,477 |
| 19,317 | 136 | 20,497 | 4,409 | 2,974 | 28,016 |
| 19,318 | 142 | 20,510 | 4,386 | 2,978 | 28,016 |
| 19,319 | 137 | 20,431 | 4,377 | 2,977 | 27,922 |

|        |     |        |       |       |        |
|--------|-----|--------|-------|-------|--------|
| 19,320 | 140 | 20,342 | 4,386 | 2,969 | 27,837 |
| 19,321 | 149 | 20,294 | 4,400 | 2,958 | 27,801 |
| 19,322 | 149 | 20,320 | 4,381 | 2,960 | 27,810 |
| 19,323 | 153 | 19,931 | 4,330 | 2,925 | 27,339 |
| 19,324 | 153 | 19,645 | 4,281 | 2,882 | 26,961 |
| 19,325 | 149 | 19,757 | 4,277 | 2,889 | 27,072 |
| 19,326 | 151 | 19,757 | 4,273 | 2,860 | 27,041 |
| 19,327 | 155 | 19,845 | 4,284 | 2,831 | 27,115 |
| 19,328 | 156 | 19,831 | 4,261 | 2,815 | 27,063 |
| 19,329 | 161 | 19,910 | 4,265 | 2,817 | 27,153 |
| 19,330 | 161 | 20,031 | 4,274 | 2,820 | 27,286 |
| 19,331 | 162 | 20,241 | 4,271 | 2,827 | 27,501 |
| 19,332 | 159 | 20,430 | 4,289 | 2,820 | 27,698 |
| 19,333 | 159 | 20,427 | 4,242 | 2,805 | 27,633 |
| 19,334 | 157 | 20,593 | 4,255 | 2,803 | 27,808 |
| 19,335 | 158 | 20,558 | 4,219 | 2,775 | 27,710 |
| 19,336 | 158 | 20,695 | 4,243 | 2,780 | 27,876 |
| 19,337 | 150 | 20,823 | 4,253 | 2,848 | 28,074 |
| 19,338 | 153 | 20,857 | 4,256 | 2,832 | 28,098 |
| 19,339 | 156 | 20,690 | 4,205 | 2,809 | 27,860 |
| 19,340 | 154 | 20,705 | 4,167 | 2,799 | 27,825 |
| 19,341 | 158 | 20,767 | 4,174 | 2,807 | 27,906 |
| 19,342 | 159 | 20,647 | 4,155 | 2,784 | 27,745 |
| 19,343 | 162 | 21,243 | 4,252 | 2,852 | 28,509 |
| 19,344 | 163 | 21,200 | 4,256 | 2,854 | 28,473 |
| 19,345 | 166 | 21,127 | 4,257 | 2,843 | 28,393 |
| 19,346 | 174 | 21,038 | 4,236 | 2,824 | 28,272 |
| 19,347 | 173 | 21,010 | 4,234 | 2,839 | 28,256 |
| 19,348 | 179 | 21,252 | 4,275 | 2,872 | 28,578 |
| 19,349 | 189 | 21,176 | 4,272 | 2,870 | 28,507 |
| 19,350 | 185 | 20,954 | 4,255 | 2,864 | 28,258 |
| 19,351 | 186 | 20,942 | 4,255 | 2,857 | 28,240 |

|        |     |        |       |       |        |
|--------|-----|--------|-------|-------|--------|
| 19,352 | 187 | 20,935 | 4,272 | 2,875 | 28,269 |
| 19,353 | 184 | 20,982 | 4,291 | 2,881 | 28,338 |
| 19,354 | 193 | 21,042 | 4,299 | 2,915 | 28,449 |
| 19,355 | 193 | 21,197 | 4,309 | 2,932 | 28,631 |
| 19,356 | 201 | 21,484 | 4,347 | 2,959 | 28,991 |
| 19,357 | 205 | 21,642 | 4,341 | 2,980 | 29,168 |
| 19,358 | 206 | 21,860 | 4,369 | 2,995 | 29,430 |
| 19,359 | 205 | 21,905 | 4,362 | 2,983 | 29,455 |
| 19,360 | 207 | 22,173 | 4,431 | 2,999 | 29,810 |
| 19,361 | 203 | 21,957 | 4,403 | 3,004 | 29,567 |
| 19,362 | 205 | 22,093 | 4,425 | 3,039 | 29,762 |
| 19,363 | 206 | 22,183 | 4,461 | 3,059 | 29,909 |
| 19,364 | 202 | 22,002 | 4,424 | 3,049 | 29,677 |
| 19,365 | 205 | 22,166 | 4,476 | 3,085 | 29,932 |
| 19,366 | 203 | 22,178 | 4,455 | 3,098 | 29,934 |
| 19,367 | 195 | 22,067 | 4,411 | 3,060 | 29,733 |
| 19,368 | 195 | 22,263 | 4,444 | 3,070 | 29,972 |
| 19,369 | 192 | 22,441 | 4,507 | 3,106 | 30,246 |
| 19,370 | 195 | 22,604 | 4,559 | 3,120 | 30,478 |
| 19,371 | 187 | 22,351 | 4,497 | 3,060 | 30,095 |
| 19,372 | 187 | 22,487 | 4,534 | 3,079 | 30,287 |
| 19,373 | 186 | 22,524 | 4,548 | 3,079 | 30,337 |
| 19,374 | 185 | 21,716 | 4,326 | 2,929 | 29,156 |
| 19,375 | 185 | 21,843 | 4,347 | 2,957 | 29,332 |
| 19,376 | 182 | 22,088 | 4,362 | 2,981 | 29,613 |
| 19,377 | 180 | 22,032 | 4,358 | 2,991 | 29,561 |
| 19,378 | 180 | 22,383 | 4,406 | 3,050 | 30,019 |
| 19,379 | 179 | 22,162 | 4,367 | 3,024 | 29,732 |
| 19,380 | 178 | 22,253 | 4,357 | 3,040 | 29,828 |
| 19,381 | 178 | 21,924 | 4,308 | 3,008 | 29,418 |
| 19,382 | 177 | 21,765 | 4,308 | 3,010 | 29,260 |
| 19,383 | 177 | 21,696 | 4,311 | 3,016 | 29,200 |

|        |     |        |       |       |        |
|--------|-----|--------|-------|-------|--------|
| 19,384 | 174 | 21,537 | 4,297 | 2,995 | 29,003 |
| 19,385 | 176 | 21,502 | 4,259 | 2,988 | 28,925 |
| 19,386 | 175 | 21,357 | 4,188 | 2,946 | 28,666 |
| 19,387 | 177 | 21,449 | 4,181 | 2,929 | 28,736 |
| 19,388 | 177 | 21,473 | 4,175 | 2,905 | 28,730 |
| 19,389 | 179 | 21,555 | 4,200 | 2,939 | 28,873 |
| 19,390 | 172 | 21,329 | 4,134 | 2,893 | 28,528 |
| 19,391 | 166 | 21,145 | 4,168 | 2,840 | 28,319 |
| 19,392 | 168 | 21,010 | 4,148 | 2,828 | 28,154 |
| 19,393 | 168 | 20,953 | 4,130 | 2,814 | 28,065 |
| 19,394 | 172 | 20,925 | 4,112 | 2,796 | 28,005 |
| 19,395 | 170 | 20,895 | 4,086 | 2,790 | 27,941 |
| 19,396 | 166 | 20,785 | 4,078 | 2,761 | 27,790 |
| 19,397 | 162 | 20,784 | 4,050 | 2,741 | 27,737 |
| 19,398 | 161 | 20,753 | 4,050 | 2,724 | 27,688 |
| 19,399 | 160 | 20,859 | 4,052 | 2,746 | 27,817 |
| 19,400 | 150 | 20,680 | 4,020 | 2,720 | 27,570 |
| 19,401 | 148 | 20,757 | 4,033 | 2,721 | 27,659 |
| 19,402 | 146 | 20,746 | 4,029 | 2,716 | 27,637 |
| 19,403 | 145 | 20,765 | 4,038 | 2,726 | 27,674 |
| 19,404 | 136 | 20,952 | 4,049 | 2,724 | 27,861 |
| 19,405 | 139 | 21,137 | 4,125 | 2,762 | 28,163 |
| 19,406 | 133 | 20,948 | 4,102 | 2,756 | 27,939 |
| 19,407 | 133 | 21,117 | 4,136 | 2,782 | 28,168 |
| 19,408 | 126 | 20,457 | 4,030 | 2,712 | 27,325 |
| 19,409 | 127 | 20,611 | 4,088 | 2,757 | 27,583 |
| 19,410 | 119 | 20,928 | 4,151 | 2,816 | 28,014 |
| 19,411 | 121 | 20,948 | 4,177 | 2,845 | 28,091 |
| 19,412 | 117 | 20,863 | 4,170 | 2,827 | 27,977 |
| 19,413 | 115 | 20,739 | 4,162 | 2,798 | 27,814 |
| 19,414 | 114 | 20,794 | 4,167 | 2,802 | 27,877 |
| 19,415 | 112 | 20,544 | 4,099 | 2,755 | 27,510 |

|        |     |        |       |       |        |
|--------|-----|--------|-------|-------|--------|
| 19,416 | 109 | 20,377 | 4,085 | 2,746 | 27,317 |
| 19,417 | 109 | 20,148 | 4,076 | 2,722 | 27,055 |
| 19,418 | 113 | 20,431 | 4,094 | 2,757 | 27,395 |
| 19,419 | 114 | 20,484 | 4,073 | 2,770 | 27,441 |
| 19,420 | 112 | 20,208 | 4,003 | 2,741 | 27,064 |
| 19,421 | 111 | 20,106 | 4,000 | 2,758 | 26,975 |
| 19,422 | 116 | 20,073 | 4,005 | 2,765 | 26,959 |
| 19,423 | 115 | 20,127 | 4,007 | 2,767 | 27,016 |
| 19,424 | 112 | 19,862 | 3,961 | 2,756 | 26,691 |
| 19,425 | 106 | 19,831 | 3,987 | 2,777 | 26,701 |
| 19,426 | 113 | 19,836 | 3,986 | 2,783 | 26,718 |
| 19,427 | 114 | 19,514 | 3,961 | 2,766 | 26,355 |
| 19,428 | 114 | 19,339 | 3,943 | 2,750 | 26,146 |
| 19,429 | 119 | 19,988 | 4,085 | 2,818 | 27,010 |
| 19,430 | 118 | 19,790 | 4,063 | 2,795 | 26,766 |
| 19,431 | 116 | 19,798 | 4,094 | 2,808 | 26,816 |
| 19,432 | 116 | 19,787 | 4,085 | 2,804 | 26,792 |
| 19,433 | 118 | 19,898 | 4,110 | 2,822 | 26,948 |
| 19,434 | 118 | 19,901 | 4,113 | 2,821 | 26,953 |
| 19,435 | 114 | 20,085 | 4,122 | 2,845 | 27,166 |
| 19,436 | 112 | 19,776 | 4,081 | 2,829 | 26,798 |
| 19,437 | 110 | 19,743 | 4,121 | 2,820 | 26,794 |
| 19,438 | 111 | 19,964 | 4,164 | 2,850 | 27,089 |
| 19,439 | 108 | 19,592 | 4,147 | 2,838 | 26,685 |
| 19,440 | 106 | 19,746 | 4,168 | 2,875 | 26,895 |
| 19,441 | 103 | 19,962 | 4,219 | 2,915 | 27,199 |
| 19,442 | 100 | 19,808 | 4,190 | 2,923 | 27,021 |
| 19,443 | 108 | 19,874 | 4,223 | 2,926 | 27,131 |
| 19,444 | 112 | 20,077 | 4,269 | 2,979 | 27,437 |
| 19,445 | 111 | 20,101 | 4,269 | 2,979 | 27,460 |
| 19,446 | 112 | 20,083 | 4,269 | 2,985 | 27,449 |
| 19,447 | 109 | 19,982 | 4,254 | 2,974 | 27,319 |



|        |     |        |       |       |        |
|--------|-----|--------|-------|-------|--------|
| 19,448 | 110 | 19,970 | 4,260 | 2,969 | 27,309 |
| 19,449 | 116 | 20,176 | 4,335 | 2,984 | 27,611 |
| 19,450 | 116 | 20,209 | 4,345 | 2,994 | 27,664 |
| 19,451 | 117 | 20,089 | 4,286 | 2,952 | 27,444 |
| 19,452 | 117 | 20,167 | 4,298 | 2,961 | 27,543 |
| 19,453 | 114 | 20,034 | 4,268 | 2,952 | 27,368 |
| 19,454 | 116 | 20,293 | 4,325 | 2,994 | 27,728 |
| 19,455 | 113 | 20,531 | 4,361 | 3,035 | 28,040 |
| 19,456 | 109 | 20,484 | 4,332 | 3,026 | 27,951 |
| 19,457 | 107 | 20,110 | 4,258 | 2,968 | 27,443 |
| 19,458 | 106 | 19,853 | 4,245 | 2,964 | 27,168 |
| 19,459 | 102 | 19,908 | 4,256 | 2,970 | 27,236 |
| 19,460 | 104 | 19,904 | 4,249 | 2,945 | 27,202 |
| 19,461 | 106 | 19,834 | 4,213 | 2,935 | 27,088 |
| 19,462 | 105 | 19,832 | 4,171 | 2,898 | 27,006 |
| 19,463 | 105 | 19,865 | 4,174 | 2,908 | 27,052 |
| 19,464 | 106 | 19,907 | 4,162 | 2,931 | 27,106 |
| 19,465 | 114 | 19,979 | 4,157 | 2,925 | 27,175 |
| 19,466 | 114 | 19,948 | 4,146 | 2,918 | 27,126 |
| 19,467 | 114 | 19,745 | 4,118 | 2,896 | 26,873 |
| 19,468 | 117 | 20,294 | 4,240 | 2,972 | 27,623 |
| 19,469 | 122 | 20,346 | 4,265 | 2,983 | 27,716 |
| 19,470 | 123 | 20,382 | 4,287 | 2,999 | 27,791 |
| 19,471 | 129 | 20,456 | 4,267 | 2,975 | 27,827 |
| 19,472 | 129 | 20,550 | 4,289 | 2,979 | 27,947 |
| 19,473 | 121 | 20,725 | 4,324 | 3,020 | 28,190 |
| 19,474 | 120 | 20,436 | 4,253 | 2,964 | 27,773 |
| 19,475 | 121 | 20,579 | 4,296 | 2,987 | 27,983 |
| 19,476 | 117 | 20,732 | 4,334 | 2,999 | 28,182 |
| 19,477 | 119 | 20,777 | 4,357 | 3,025 | 28,278 |
| 19,478 | 116 | 20,835 | 4,359 | 3,014 | 28,324 |
| 19,479 | 115 | 20,793 | 4,361 | 3,035 | 28,304 |

|        |     |        |       |       |        |
|--------|-----|--------|-------|-------|--------|
| 19,480 | 118 | 20,736 | 4,328 | 2,999 | 28,181 |
| 19,481 | 122 | 20,720 | 4,331 | 3,006 | 28,179 |
| 19,482 | 122 | 20,727 | 4,345 | 3,008 | 28,202 |
| 19,483 | 123 | 20,975 | 4,382 | 3,050 | 28,530 |
| 19,484 | 120 | 20,784 | 4,344 | 3,027 | 28,275 |
| 19,485 | 129 | 21,034 | 4,428 | 3,065 | 28,656 |
| 19,486 | 144 | 21,050 | 4,455 | 3,083 | 28,732 |
| 19,487 | 153 | 21,140 | 4,487 | 3,106 | 28,886 |
| 19,488 | 154 | 21,088 | 4,467 | 3,078 | 28,787 |
| 19,489 | 154 | 20,900 | 4,436 | 3,044 | 28,534 |
| 19,490 | 154 | 21,080 | 4,452 | 3,048 | 28,734 |
| 19,491 | 154 | 21,335 | 4,478 | 3,042 | 29,009 |
| 19,492 | 157 | 21,104 | 4,393 | 2,993 | 28,647 |
| 19,493 | 157 | 21,188 | 4,377 | 2,986 | 28,708 |
| 19,494 | 150 | 20,735 | 4,249 | 2,902 | 28,036 |
| 19,495 | 149 | 20,874 | 4,270 | 2,923 | 28,216 |
| 19,496 | 155 | 21,056 | 4,314 | 2,966 | 28,491 |
| 19,497 | 155 | 21,077 | 4,310 | 2,959 | 28,501 |
| 19,498 | 157 | 21,286 | 4,331 | 2,992 | 28,766 |
| 19,499 | 155 | 21,180 | 4,305 | 2,992 | 28,632 |
| 19,500 | 154 | 21,372 | 4,340 | 3,028 | 28,894 |
| 19,501 | 149 | 21,075 | 4,298 | 2,987 | 28,509 |
| 19,502 | 150 | 21,213 | 4,333 | 3,003 | 28,699 |
| 19,503 | 149 | 21,097 | 4,312 | 2,978 | 28,536 |
| 19,504 | 159 | 21,200 | 4,344 | 3,000 | 28,703 |
| 19,505 | 159 | 21,171 | 4,354 | 2,994 | 28,678 |
| 19,506 | 161 | 20,932 | 4,321 | 2,966 | 28,380 |
| 19,507 | 167 | 21,013 | 4,325 | 2,972 | 28,477 |
| 19,508 | 167 | 21,134 | 4,321 | 2,964 | 28,586 |
| 19,509 | 170 | 21,306 | 4,323 | 2,974 | 28,773 |
| 19,510 | 170 | 21,233 | 4,309 | 2,984 | 28,696 |
| 19,511 | 170 | 21,183 | 4,303 | 2,987 | 28,643 |

|        |     |        |       |       |        |
|--------|-----|--------|-------|-------|--------|
| 19,512 | 172 | 21,141 | 4,282 | 2,973 | 28,568 |
| 19,513 | 173 | 21,186 | 4,313 | 2,976 | 28,648 |
| 19,514 | 175 | 21,087 | 4,313 | 2,953 | 28,528 |
| 19,515 | 174 | 20,895 | 4,263 | 2,933 | 28,265 |
| 19,516 | 173 | 21,411 | 4,380 | 3,040 | 29,004 |
| 19,517 | 174 | 21,286 | 4,337 | 3,016 | 28,813 |
| 19,518 | 175 | 21,244 | 4,301 | 2,993 | 28,713 |
| 19,519 | 170 | 21,545 | 4,351 | 3,019 | 29,085 |
| 19,520 | 170 | 21,518 | 4,403 | 3,034 | 29,125 |
| 19,521 | 165 | 21,271 | 4,369 | 2,993 | 28,798 |
| 19,522 | 162 | 21,068 | 4,341 | 2,983 | 28,554 |
| 19,523 | 166 | 21,167 | 4,389 | 3,008 | 28,730 |
| 19,524 | 167 | 21,109 | 4,377 | 2,993 | 28,646 |
| 19,525 | 168 | 21,247 | 4,407 | 3,001 | 28,823 |
| 19,526 | 166 | 21,022 | 4,365 | 3,005 | 28,558 |
| 19,527 | 165 | 21,106 | 4,393 | 3,010 | 28,674 |
| 19,528 | 162 | 21,100 | 4,386 | 3,013 | 28,661 |
| 19,529 | 165 | 21,105 | 4,402 | 3,010 | 28,682 |
| 19,530 | 165 | 21,137 | 4,383 | 2,996 | 28,681 |
| 19,531 | 171 | 21,207 | 4,457 | 3,046 | 28,881 |
| 19,532 | 167 | 21,004 | 4,415 | 3,010 | 28,596 |
| 19,533 | 169 | 20,756 | 4,410 | 2,993 | 28,328 |
| 19,534 | 169 | 20,897 | 4,426 | 3,001 | 28,493 |
| 19,535 | 163 | 20,844 | 4,410 | 2,998 | 28,415 |
| 19,536 | 163 | 21,002 | 4,424 | 3,015 | 28,604 |
| 19,537 | 148 | 20,924 | 4,390 | 2,991 | 28,453 |
| 19,538 | 138 | 20,873 | 4,400 | 2,960 | 28,371 |
| 19,539 | 137 | 20,808 | 4,386 | 2,966 | 28,297 |
| 19,540 | 134 | 20,502 | 4,325 | 2,936 | 27,897 |
| 19,541 | 137 | 20,198 | 4,329 | 2,955 | 27,619 |
| 19,542 | 145 | 20,373 | 4,350 | 2,986 | 27,854 |
| 19,543 | 150 | 20,492 | 4,376 | 3,004 | 28,022 |

|        |     |        |       |       |        |
|--------|-----|--------|-------|-------|--------|
| 19,544 | 145 | 20,256 | 4,351 | 2,976 | 27,728 |
| 19,545 | 136 | 19,488 | 4,248 | 2,916 | 26,788 |
| 19,546 | 136 | 19,583 | 4,245 | 2,914 | 26,878 |
| 19,547 | 133 | 19,721 | 4,263 | 2,918 | 27,035 |
| 19,548 | 133 | 19,677 | 4,248 | 2,915 | 26,973 |
| 19,549 | 133 | 19,922 | 4,317 | 2,947 | 27,319 |
| 19,550 | 131 | 19,940 | 4,320 | 2,945 | 27,336 |
| 19,551 | 129 | 19,650 | 4,266 | 2,919 | 26,964 |
| 19,552 | 129 | 19,598 | 4,241 | 2,908 | 26,876 |
| 19,553 | 125 | 19,712 | 4,284 | 2,947 | 27,068 |
| 19,554 | 128 | 19,540 | 4,248 | 2,924 | 26,840 |
| 19,555 | 117 | 19,383 | 4,214 | 2,896 | 26,610 |
| 19,556 | 118 | 19,011 | 4,160 | 2,853 | 26,142 |
| 19,557 | 117 | 19,125 | 4,154 | 2,852 | 26,248 |
| 19,558 | 112 | 19,176 | 4,179 | 2,849 | 26,316 |
| 19,559 | 110 | 18,917 | 4,137 | 2,812 | 25,976 |
| 19,560 | 106 | 18,844 | 4,122 | 2,797 | 25,869 |
| 19,561 | 106 | 18,884 | 4,139 | 2,787 | 25,916 |
| 19,562 | 104 | 18,841 | 4,159 | 2,784 | 25,888 |
| 19,563 | 103 | 18,677 | 4,154 | 2,789 | 25,723 |
| 19,564 | 101 | 18,536 | 4,102 | 2,769 | 25,508 |
| 19,565 | 104 | 18,586 | 4,129 | 2,776 | 25,595 |
| 19,566 | 105 | 18,611 | 4,136 | 2,763 | 25,615 |
| 19,567 | 103 | 18,572 | 4,127 | 2,741 | 25,543 |
| 19,568 | 103 | 18,446 | 4,125 | 2,704 | 25,378 |
| 19,569 | 101 | 18,223 | 4,091 | 2,699 | 25,114 |
| 19,570 | 99  | 18,081 | 4,066 | 2,695 | 24,941 |
| 19,571 | 98  | 17,782 | 3,996 | 2,665 | 24,541 |
| 19,572 | 100 | 17,874 | 3,989 | 2,664 | 24,627 |
| 19,573 | 96  | 18,025 | 3,999 | 2,650 | 24,770 |
| 19,574 | 99  | 17,933 | 3,962 | 2,633 | 24,627 |
| 19,575 | 105 | 18,179 | 3,982 | 2,652 | 24,918 |

|        |     |        |       |       |        |
|--------|-----|--------|-------|-------|--------|
| 19,576 | 104 | 18,129 | 3,958 | 2,649 | 24,840 |
| 19,577 | 103 | 18,254 | 3,924 | 2,639 | 24,920 |
| 19,578 | 104 | 18,130 | 3,878 | 2,615 | 24,727 |
| 19,579 | 104 | 18,299 | 3,901 | 2,633 | 24,937 |
| 19,580 | 100 | 18,530 | 3,917 | 2,653 | 25,200 |
| 19,581 | 97  | 18,726 | 3,911 | 2,671 | 25,405 |
| 19,582 | 94  | 18,530 | 3,888 | 2,640 | 25,152 |
| 19,583 | 91  | 18,450 | 3,854 | 2,644 | 25,039 |
| 19,584 | 91  | 18,458 | 3,829 | 2,626 | 25,004 |
| 19,585 | 91  | 18,377 | 3,821 | 2,640 | 24,929 |
| 19,586 | 88  | 18,372 | 3,822 | 2,650 | 24,932 |
| 19,587 | 88  | 18,313 | 3,816 | 2,652 | 24,869 |
| 19,588 | 88  | 18,272 | 3,818 | 2,669 | 24,847 |
| 19,589 | 88  | 18,464 | 3,822 | 2,696 | 25,070 |
| 19,590 | 86  | 18,198 | 3,800 | 2,669 | 24,753 |
| 19,591 | 87  | 18,691 | 3,828 | 2,679 | 25,285 |
| 19,592 | 86  | 19,099 | 3,867 | 2,714 | 25,766 |
| 19,593 | 79  | 19,248 | 3,898 | 2,726 | 25,951 |
| 19,594 | 74  | 19,136 | 3,891 | 2,701 | 25,802 |
| 19,595 | 76  | 19,489 | 3,982 | 2,747 | 26,294 |
| 19,596 | 79  | 19,703 | 4,020 | 2,771 | 26,573 |
| 19,597 | 80  | 20,025 | 4,094 | 2,802 | 27,001 |
| 19,598 | 81  | 20,201 | 4,154 | 2,831 | 27,267 |
| 19,599 | 82  | 20,005 | 4,101 | 2,803 | 26,991 |
| 19,600 | 83  | 20,023 | 4,090 | 2,801 | 26,997 |
| 19,601 | 84  | 19,898 | 4,047 | 2,789 | 26,818 |
| 19,602 | 84  | 19,779 | 4,026 | 2,763 | 26,652 |
| 19,603 | 92  | 20,000 | 4,102 | 2,821 | 27,015 |
| 19,604 | 93  | 20,176 | 4,118 | 2,838 | 27,225 |
| 19,605 | 92  | 20,438 | 4,145 | 2,872 | 27,547 |
| 19,606 | 93  | 20,491 | 4,135 | 2,876 | 27,595 |
| 19,607 | 91  | 21,122 | 4,224 | 2,959 | 28,396 |

|        |     |        |       |       |        |
|--------|-----|--------|-------|-------|--------|
| 19,608 | 94  | 21,077 | 4,273 | 2,978 | 28,422 |
| 19,609 | 101 | 21,429 | 4,308 | 3,034 | 28,872 |
| 19,610 | 104 | 21,113 | 4,264 | 3,025 | 28,506 |
| 19,611 | 106 | 21,365 | 4,336 | 3,057 | 28,864 |
| 19,612 | 108 | 21,475 | 4,338 | 3,067 | 28,988 |
| 19,613 | 106 | 21,350 | 4,279 | 3,037 | 28,772 |
| 19,614 | 106 | 21,524 | 4,295 | 3,048 | 28,973 |
| 19,615 | 106 | 21,578 | 4,303 | 3,044 | 29,031 |
| 19,616 | 104 | 21,422 | 4,276 | 3,015 | 28,817 |
| 19,617 | 109 | 21,672 | 4,287 | 3,033 | 29,101 |
| 19,618 | 107 | 21,922 | 4,336 | 3,065 | 29,430 |
| 19,619 | 106 | 21,773 | 4,286 | 3,054 | 29,219 |
| 19,620 | 108 | 21,978 | 4,323 | 3,064 | 29,473 |
| 19,621 | 109 | 21,725 | 4,265 | 3,035 | 29,134 |
| 19,622 | 109 | 21,818 | 4,260 | 3,034 | 29,221 |
| 19,623 | 108 | 21,807 | 4,253 | 3,033 | 29,201 |
| 19,624 | 108 | 22,036 | 4,266 | 3,044 | 29,454 |
| 19,625 | 105 | 22,274 | 4,294 | 3,064 | 29,737 |
| 19,626 | 99  | 22,029 | 4,256 | 3,040 | 29,424 |
| 19,627 | 103 | 22,170 | 4,294 | 3,069 | 29,636 |
| 19,628 | 104 | 22,076 | 4,317 | 3,054 | 29,551 |
| 19,629 | 104 | 21,989 | 4,315 | 3,042 | 29,450 |
| 19,630 | 104 | 21,767 | 4,264 | 3,018 | 29,153 |
| 19,631 | 104 | 22,041 | 4,331 | 3,036 | 29,512 |
| 19,632 | 104 | 21,933 | 4,316 | 3,004 | 29,357 |
| 19,633 | 104 | 21,625 | 4,232 | 2,955 | 28,916 |
| 19,634 | 105 | 21,905 | 4,242 | 2,968 | 29,220 |
| 19,635 | 103 | 21,823 | 4,243 | 2,964 | 29,133 |
| 19,636 | 105 | 21,830 | 4,231 | 2,971 | 29,137 |
| 19,637 | 106 | 22,041 | 4,293 | 2,987 | 29,427 |
| 19,638 | 108 | 22,057 | 4,280 | 2,991 | 29,436 |
| 19,639 | 111 | 21,985 | 4,278 | 2,983 | 29,357 |

|        |     |        |       |       |        |
|--------|-----|--------|-------|-------|--------|
| 19,640 | 112 | 21,706 | 4,211 | 2,942 | 28,971 |
| 19,641 | 113 | 21,809 | 4,224 | 2,952 | 29,098 |
| 19,642 | 113 | 21,820 | 4,241 | 2,973 | 29,147 |
| 19,643 | 107 | 21,393 | 4,178 | 2,926 | 28,604 |
| 19,644 | 106 | 21,338 | 4,167 | 2,921 | 28,532 |
| 19,645 | 106 | 21,563 | 4,162 | 2,949 | 28,780 |
| 19,646 | 106 | 21,476 | 4,123 | 2,917 | 28,622 |
| 19,647 | 103 | 21,276 | 4,050 | 2,899 | 28,328 |
| 19,648 | 109 | 21,501 | 4,078 | 2,928 | 28,616 |
| 19,649 | 104 | 21,271 | 4,000 | 2,895 | 28,270 |
| 19,650 | 107 | 20,949 | 3,915 | 2,822 | 27,793 |
| 19,651 | 107 | 21,162 | 3,917 | 2,829 | 28,015 |
| 19,652 | 107 | 21,353 | 3,935 | 2,823 | 28,218 |
| 19,653 | 106 | 21,308 | 3,918 | 2,807 | 28,139 |
| 19,654 | 113 | 21,274 | 3,894 | 2,794 | 28,075 |
| 19,655 | 111 | 21,082 | 3,876 | 2,791 | 27,860 |
| 19,656 | 110 | 21,227 | 3,939 | 2,817 | 28,093 |
| 19,657 | 115 | 21,168 | 3,963 | 2,819 | 28,065 |
| 19,658 | 114 | 21,262 | 3,991 | 2,818 | 28,185 |
| 19,659 | 110 | 21,229 | 3,943 | 2,787 | 28,069 |
| 19,660 | 107 | 21,082 | 3,926 | 2,744 | 27,859 |
| 19,661 | 104 | 21,157 | 3,931 | 2,742 | 27,934 |
| 19,662 | 103 | 21,476 | 3,966 | 2,775 | 28,320 |
| 19,663 | 101 | 21,162 | 3,935 | 2,755 | 27,953 |
| 19,664 | 104 | 21,168 | 3,968 | 2,749 | 27,989 |
| 19,665 | 104 | 21,247 | 4,015 | 2,771 | 28,137 |
| 19,666 | 106 | 21,191 | 4,001 | 2,789 | 28,087 |
| 19,667 | 109 | 21,383 | 4,029 | 2,801 | 28,322 |
| 19,668 | 109 | 21,199 | 4,010 | 2,786 | 28,104 |
| 19,669 | 109 | 21,169 | 4,007 | 2,786 | 28,071 |
| 19,670 | 107 | 21,219 | 4,009 | 2,791 | 28,126 |
| 19,671 | 108 | 21,430 | 4,043 | 2,821 | 28,402 |

|        |     |        |       |       |        |
|--------|-----|--------|-------|-------|--------|
| 19,672 | 114 | 21,407 | 4,083 | 2,825 | 28,429 |
| 19,673 | 120 | 21,400 | 4,099 | 2,841 | 28,460 |
| 19,674 | 120 | 21,179 | 4,060 | 2,823 | 28,182 |
| 19,675 | 120 | 21,042 | 4,078 | 2,849 | 28,089 |
| 19,676 | 121 | 20,955 | 4,098 | 2,868 | 28,042 |
| 19,677 | 126 | 20,965 | 4,133 | 2,864 | 28,088 |
| 19,678 | 122 | 20,796 | 4,098 | 2,831 | 27,847 |
| 19,679 | 119 | 20,698 | 4,102 | 2,826 | 27,745 |
| 19,680 | 116 | 20,567 | 4,073 | 2,809 | 27,565 |
| 19,681 | 117 | 20,694 | 4,103 | 2,817 | 27,731 |
| 19,682 | 119 | 20,812 | 4,124 | 2,835 | 27,890 |
| 19,683 | 118 | 20,664 | 4,104 | 2,818 | 27,704 |
| 19,684 | 119 | 20,710 | 4,097 | 2,831 | 27,757 |
| 19,685 | 122 | 20,990 | 4,165 | 2,892 | 28,169 |
| 19,686 | 120 | 21,120 | 4,166 | 2,877 | 28,283 |
| 19,687 | 123 | 21,362 | 4,189 | 2,907 | 28,581 |
| 19,688 | 122 | 21,251 | 4,149 | 2,901 | 28,423 |
| 19,689 | 123 | 21,428 | 4,212 | 2,932 | 28,695 |
| 19,690 | 118 | 21,219 | 4,158 | 2,911 | 28,406 |
| 19,691 | 119 | 21,445 | 4,193 | 2,935 | 28,692 |
| 19,692 | 118 | 21,458 | 4,224 | 2,931 | 28,731 |
| 19,693 | 121 | 21,435 | 4,257 | 2,943 | 28,756 |
| 19,694 | 125 | 21,509 | 4,260 | 2,943 | 28,837 |
| 19,695 | 127 | 20,972 | 4,170 | 2,907 | 28,176 |
| 19,696 | 129 | 21,011 | 4,184 | 2,905 | 28,229 |
| 19,697 | 127 | 21,030 | 4,160 | 2,912 | 28,229 |
| 19,698 | 122 | 20,609 | 4,117 | 2,884 | 27,732 |
| 19,699 | 122 | 20,197 | 4,070 | 2,825 | 27,214 |
| 19,700 | 123 | 20,231 | 4,083 | 2,819 | 27,256 |
| 19,701 | 122 | 19,977 | 4,050 | 2,781 | 26,930 |
| 19,702 | 124 | 19,737 | 4,029 | 2,761 | 26,651 |
| 19,703 | 131 | 20,194 | 4,193 | 2,831 | 27,349 |



|        |     |        |       |       |        |
|--------|-----|--------|-------|-------|--------|
| 19,704 | 124 | 19,934 | 4,136 | 2,805 | 26,999 |
| 19,705 | 125 | 19,909 | 4,154 | 2,803 | 26,991 |
| 19,706 | 125 | 19,600 | 4,103 | 2,754 | 26,582 |
| 19,707 | 135 | 20,084 | 4,201 | 2,815 | 27,235 |
| 19,708 | 130 | 19,829 | 4,139 | 2,790 | 26,888 |
| 19,709 | 129 | 19,682 | 4,137 | 2,798 | 26,746 |
| 19,710 | 129 | 19,468 | 4,107 | 2,797 | 26,501 |
| 19,711 | 125 | 19,283 | 4,080 | 2,767 | 26,255 |
| 19,712 | 125 | 19,452 | 4,105 | 2,806 | 26,488 |
| 19,713 | 125 | 19,401 | 4,094 | 2,794 | 26,414 |
| 19,714 | 123 | 19,273 | 4,037 | 2,780 | 26,213 |
| 19,715 | 125 | 19,464 | 4,075 | 2,825 | 26,489 |
| 19,716 | 124 | 19,372 | 4,094 | 2,805 | 26,395 |
| 19,717 | 123 | 19,194 | 4,061 | 2,781 | 26,159 |
| 19,718 | 119 | 19,218 | 4,062 | 2,800 | 26,199 |
| 19,719 | 112 | 19,176 | 4,104 | 2,806 | 26,198 |
| 19,720 | 113 | 19,130 | 4,124 | 2,808 | 26,175 |
| 19,721 | 113 | 19,172 | 4,140 | 2,814 | 26,239 |
| 19,722 | 112 | 19,391 | 4,173 | 2,832 | 26,508 |
| 19,723 | 105 | 19,468 | 4,151 | 2,839 | 26,563 |
| 19,724 | 100 | 19,409 | 4,132 | 2,804 | 26,445 |
| 19,725 | 101 | 19,056 | 4,025 | 2,692 | 25,874 |
| 19,726 | 100 | 19,397 | 4,088 | 2,731 | 26,316 |
| 19,727 | 99  | 19,591 | 4,127 | 2,765 | 26,582 |
| 19,728 | 104 | 19,700 | 4,143 | 2,788 | 26,735 |
| 19,729 | 104 | 19,645 | 4,126 | 2,797 | 26,672 |
| 19,730 | 107 | 20,040 | 4,174 | 2,846 | 27,167 |
| 19,731 | 106 | 20,128 | 4,185 | 2,849 | 27,268 |
| 19,732 | 102 | 19,850 | 4,132 | 2,822 | 26,906 |
| 19,733 | 102 | 19,795 | 4,152 | 2,833 | 26,882 |
| 19,734 | 103 | 19,712 | 4,168 | 2,824 | 26,807 |
| 19,735 | 102 | 19,690 | 4,171 | 2,819 | 26,782 |

|        |     |        |       |       |        |
|--------|-----|--------|-------|-------|--------|
| 19,736 | 104 | 19,894 | 4,229 | 2,830 | 27,057 |
| 19,737 | 104 | 19,775 | 4,209 | 2,833 | 26,921 |
| 19,738 | 107 | 19,759 | 4,232 | 2,823 | 26,921 |
| 19,739 | 106 | 19,596 | 4,200 | 2,787 | 26,689 |
| 19,740 | 114 | 19,849 | 4,274 | 2,807 | 27,044 |
| 19,741 | 118 | 19,826 | 4,267 | 2,768 | 26,979 |
| 19,742 | 120 | 19,665 | 4,230 | 2,765 | 26,780 |
| 19,743 | 120 | 19,585 | 4,219 | 2,777 | 26,701 |
| 19,744 | 119 | 19,598 | 4,207 | 2,777 | 26,701 |
| 19,745 | 121 | 19,800 | 4,237 | 2,803 | 26,961 |
| 19,746 | 119 | 19,822 | 4,275 | 2,801 | 27,017 |
| 19,747 | 119 | 19,756 | 4,283 | 2,781 | 26,939 |
| 19,748 | 118 | 19,892 | 4,307 | 2,784 | 27,101 |
| 19,749 | 119 | 20,034 | 4,310 | 2,772 | 27,235 |
| 19,750 | 119 | 20,126 | 4,309 | 2,792 | 27,346 |
| 19,751 | 118 | 20,317 | 4,347 | 2,838 | 27,620 |
| 19,752 | 112 | 20,193 | 4,330 | 2,835 | 27,470 |
| 19,753 | 104 | 20,291 | 4,298 | 2,846 | 27,539 |
| 19,754 | 105 | 20,383 | 4,358 | 2,867 | 27,713 |
| 19,755 | 100 | 20,326 | 4,360 | 2,871 | 27,657 |
| 19,756 | 98  | 20,410 | 4,338 | 2,884 | 27,730 |
| 19,757 | 106 | 20,616 | 4,378 | 2,917 | 28,017 |
| 19,758 | 99  | 20,648 | 4,398 | 2,923 | 28,068 |
| 19,759 | 105 | 20,722 | 4,439 | 2,916 | 28,182 |
| 19,760 | 108 | 20,908 | 4,494 | 2,939 | 28,449 |
| 19,761 | 108 | 20,877 | 4,448 | 2,931 | 28,364 |
| 19,762 | 109 | 21,149 | 4,506 | 2,967 | 28,731 |
| 19,763 | 112 | 21,228 | 4,517 | 2,970 | 28,827 |
| 19,764 | 111 | 21,005 | 4,473 | 2,966 | 28,555 |
| 19,765 | 116 | 21,159 | 4,495 | 2,979 | 28,749 |
| 19,766 | 115 | 21,125 | 4,500 | 2,979 | 28,719 |
| 19,767 | 119 | 21,252 | 4,474 | 2,965 | 28,810 |

|        |     |        |       |       |        |
|--------|-----|--------|-------|-------|--------|
| 19,768 | 120 | 21,063 | 4,435 | 2,933 | 28,551 |
| 19,769 | 125 | 21,170 | 4,446 | 2,943 | 28,684 |
| 19,770 | 123 | 21,041 | 4,406 | 2,938 | 28,508 |
| 19,771 | 126 | 21,116 | 4,459 | 2,961 | 28,662 |
| 19,772 | 131 | 20,795 | 4,414 | 2,927 | 28,267 |
| 19,773 | 131 | 20,739 | 4,409 | 2,930 | 28,209 |
| 19,774 | 131 | 20,573 | 4,390 | 2,920 | 28,014 |
| 19,775 | 129 | 20,314 | 4,377 | 2,922 | 27,742 |
| 19,776 | 124 | 20,046 | 4,372 | 2,938 | 27,480 |
| 19,777 | 125 | 19,968 | 4,372 | 2,951 | 27,416 |
| 19,778 | 127 | 20,082 | 4,393 | 2,952 | 27,554 |
| 19,779 | 126 | 20,080 | 4,405 | 2,953 | 27,564 |
| 19,780 | 130 | 20,182 | 4,412 | 2,944 | 27,668 |
| 19,781 | 128 | 19,978 | 4,396 | 2,915 | 27,417 |
| 19,782 | 135 | 19,951 | 4,387 | 2,898 | 27,371 |
| 19,783 | 139 | 20,114 | 4,415 | 2,924 | 27,592 |
| 19,784 | 143 | 20,002 | 4,359 | 2,895 | 27,399 |
| 19,785 | 140 | 20,086 | 4,369 | 2,896 | 27,491 |
| 19,786 | 140 | 20,111 | 4,340 | 2,895 | 27,486 |
| 19,787 | 144 | 20,051 | 4,331 | 2,898 | 27,424 |
| 19,788 | 144 | 19,922 | 4,305 | 2,860 | 27,231 |
| 19,789 | 140 | 19,882 | 4,305 | 2,879 | 27,206 |
| 19,790 | 141 | 19,891 | 4,320 | 2,866 | 27,218 |
| 19,791 | 137 | 20,058 | 4,331 | 2,906 | 27,432 |
| 19,792 | 134 | 19,825 | 4,290 | 2,890 | 27,139 |
| 19,793 | 138 | 19,880 | 4,331 | 2,908 | 27,257 |
| 19,794 | 135 | 19,775 | 4,298 | 2,882 | 27,090 |
| 19,795 | 140 | 19,937 | 4,342 | 2,907 | 27,326 |
| 19,796 | 142 | 19,910 | 4,359 | 2,897 | 27,308 |
| 19,797 | 153 | 19,753 | 4,323 | 2,867 | 27,096 |
| 19,798 | 153 | 19,692 | 4,313 | 2,861 | 27,019 |
| 19,799 | 158 | 19,949 | 4,388 | 2,917 | 27,412 |

|        |     |        |       |       |        |
|--------|-----|--------|-------|-------|--------|
| 19,800 | 156 | 19,862 | 4,359 | 2,912 | 27,289 |
| 19,801 | 160 | 19,914 | 4,400 | 2,921 | 27,395 |
| 19,802 | 160 | 20,011 | 4,399 | 2,915 | 27,485 |
| 19,803 | 163 | 20,261 | 4,441 | 2,947 | 27,812 |
| 19,804 | 163 | 20,285 | 4,445 | 2,960 | 27,853 |
| 19,805 | 163 | 20,304 | 4,448 | 2,958 | 27,873 |
| 19,806 | 164 | 20,319 | 4,468 | 2,957 | 27,908 |
| 19,807 | 167 | 20,484 | 4,518 | 2,983 | 28,152 |
| 19,808 | 162 | 20,315 | 4,483 | 2,956 | 27,916 |
| 19,809 | 162 | 20,089 | 4,435 | 2,924 | 27,610 |
| 19,810 | 163 | 20,144 | 4,397 | 2,922 | 27,626 |
| 19,811 | 163 | 20,185 | 4,400 | 2,920 | 27,668 |
| 19,812 | 161 | 19,636 | 4,327 | 2,851 | 26,975 |
| 19,813 | 164 | 19,815 | 4,366 | 2,864 | 27,209 |
| 19,814 | 165 | 19,956 | 4,408 | 2,897 | 27,426 |
| 19,815 | 166 | 20,126 | 4,465 | 2,949 | 27,706 |
| 19,816 | 163 | 19,937 | 4,436 | 2,908 | 27,444 |
| 19,817 | 165 | 20,138 | 4,482 | 2,935 | 27,720 |
| 19,818 | 162 | 20,142 | 4,510 | 2,952 | 27,766 |
| 19,819 | 161 | 19,834 | 4,459 | 2,929 | 27,383 |
| 19,820 | 160 | 20,009 | 4,493 | 2,953 | 27,615 |
| 19,821 | 167 | 20,206 | 4,549 | 2,961 | 27,883 |
| 19,822 | 169 | 20,381 | 4,556 | 2,950 | 28,056 |
| 19,823 | 164 | 20,345 | 4,561 | 2,948 | 28,018 |
| 19,824 | 173 | 20,364 | 4,564 | 2,933 | 28,034 |
| 19,825 | 176 | 20,546 | 4,570 | 2,928 | 28,220 |
| 19,826 | 178 | 20,688 | 4,549 | 2,911 | 28,326 |
| 19,827 | 178 | 20,772 | 4,554 | 2,912 | 28,416 |
| 19,828 | 178 | 20,945 | 4,563 | 2,926 | 28,612 |
| 19,829 | 175 | 20,848 | 4,537 | 2,912 | 28,472 |
| 19,830 | 168 | 20,535 | 4,477 | 2,882 | 28,062 |
| 19,831 | 168 | 20,544 | 4,474 | 2,891 | 28,077 |

|        |     |        |       |       |        |
|--------|-----|--------|-------|-------|--------|
| 19,832 | 153 | 20,196 | 4,379 | 2,870 | 27,598 |
| 19,833 | 153 | 20,447 | 4,429 | 2,891 | 27,920 |
| 19,834 | 151 | 20,491 | 4,459 | 2,907 | 28,008 |
| 19,835 | 152 | 20,491 | 4,484 | 2,924 | 28,051 |
| 19,836 | 151 | 20,529 | 4,530 | 2,927 | 28,137 |
| 19,837 | 150 | 20,229 | 4,481 | 2,900 | 27,760 |
| 19,838 | 148 | 20,509 | 4,538 | 2,947 | 28,142 |
| 19,839 | 143 | 20,085 | 4,456 | 2,910 | 27,594 |
| 19,840 | 143 | 20,360 | 4,479 | 2,933 | 27,915 |
| 19,841 | 144 | 20,533 | 4,519 | 2,964 | 28,160 |
| 19,842 | 144 | 20,436 | 4,487 | 2,954 | 28,021 |
| 19,843 | 140 | 20,295 | 4,458 | 2,954 | 27,847 |
| 19,844 | 136 | 20,152 | 4,425 | 2,939 | 27,652 |
| 19,845 | 129 | 19,987 | 4,411 | 2,895 | 27,422 |
| 19,846 | 124 | 19,829 | 4,376 | 2,884 | 27,213 |
| 19,847 | 125 | 20,043 | 4,402 | 2,913 | 27,483 |
| 19,848 | 112 | 19,909 | 4,360 | 2,892 | 27,273 |
| 19,849 | 113 | 19,677 | 4,309 | 2,864 | 26,963 |
| 19,850 | 115 | 20,055 | 4,359 | 2,896 | 27,425 |
| 19,851 | 109 | 19,609 | 4,278 | 2,827 | 26,823 |
| 19,852 | 109 | 19,824 | 4,279 | 2,839 | 27,051 |
| 19,853 | 111 | 19,973 | 4,350 | 2,851 | 27,285 |
| 19,854 | 119 | 19,548 | 4,236 | 2,782 | 26,685 |
| 19,855 | 119 | 19,861 | 4,250 | 2,799 | 27,029 |
| 19,856 | 121 | 20,024 | 4,267 | 2,813 | 27,225 |
| 19,857 | 129 | 19,986 | 4,245 | 2,785 | 27,145 |
| 19,858 | 129 | 19,957 | 4,229 | 2,795 | 27,110 |
| 19,859 | 133 | 19,808 | 4,195 | 2,771 | 26,907 |
| 19,860 | 131 | 19,757 | 4,195 | 2,772 | 26,855 |
| 19,861 | 127 | 19,716 | 4,197 | 2,768 | 26,808 |
| 19,862 | 127 | 19,687 | 4,191 | 2,770 | 26,775 |
| 19,863 | 128 | 19,816 | 4,220 | 2,794 | 26,958 |

|        |     |        |       |       |        |
|--------|-----|--------|-------|-------|--------|
| 19,864 | 129 | 19,542 | 4,153 | 2,740 | 26,564 |
| 19,865 | 127 | 19,681 | 4,174 | 2,736 | 26,718 |
| 19,866 | 131 | 19,636 | 4,125 | 2,725 | 26,617 |
| 19,867 | 130 | 19,671 | 4,125 | 2,738 | 26,664 |
| 19,868 | 128 | 19,839 | 4,151 | 2,763 | 26,881 |
| 19,869 | 123 | 19,512 | 4,079 | 2,710 | 26,424 |
| 19,870 | 124 | 19,753 | 4,120 | 2,741 | 26,738 |
| 19,871 | 122 | 19,704 | 4,074 | 2,746 | 26,646 |
| 19,872 | 121 | 19,930 | 4,115 | 2,775 | 26,941 |
| 19,873 | 116 | 20,079 | 4,153 | 2,806 | 27,154 |
| 19,874 | 121 | 20,271 | 4,180 | 2,818 | 27,390 |
| 19,875 | 112 | 20,474 | 4,204 | 2,851 | 27,641 |
| 19,876 | 113 | 20,574 | 4,233 | 2,886 | 27,806 |
| 19,877 | 112 | 20,698 | 4,237 | 2,893 | 27,940 |
| 19,878 | 114 | 20,499 | 4,207 | 2,873 | 27,693 |
| 19,879 | 114 | 20,452 | 4,216 | 2,868 | 27,650 |
| 19,880 | 113 | 20,639 | 4,264 | 2,896 | 27,912 |
| 19,881 | 112 | 20,598 | 4,267 | 2,899 | 27,876 |
| 19,882 | 112 | 20,587 | 4,263 | 2,882 | 27,844 |
| 19,883 | 112 | 20,466 | 4,235 | 2,870 | 27,683 |
| 19,884 | 115 | 20,266 | 4,211 | 2,847 | 27,439 |
| 19,885 | 120 | 20,491 | 4,231 | 2,843 | 27,685 |
| 19,886 | 120 | 20,575 | 4,243 | 2,860 | 27,798 |
| 19,887 | 122 | 20,755 | 4,289 | 2,895 | 28,061 |
| 19,888 | 124 | 20,806 | 4,272 | 2,884 | 28,086 |
| 19,889 | 125 | 20,558 | 4,222 | 2,829 | 27,734 |
| 19,890 | 125 | 20,592 | 4,219 | 2,834 | 27,770 |
| 19,891 | 124 | 20,667 | 4,246 | 2,827 | 27,864 |
| 19,892 | 130 | 20,680 | 4,239 | 2,825 | 27,874 |
| 19,893 | 131 | 20,632 | 4,232 | 2,809 | 27,804 |
| 19,894 | 130 | 20,617 | 4,217 | 2,767 | 27,731 |
| 19,895 | 132 | 20,764 | 4,228 | 2,780 | 27,904 |

|        |     |        |       |       |        |
|--------|-----|--------|-------|-------|--------|
| 19,896 | 137 | 20,454 | 4,161 | 2,770 | 27,522 |
| 19,897 | 137 | 20,529 | 4,169 | 2,780 | 27,615 |
| 19,898 | 136 | 20,512 | 4,180 | 2,766 | 27,594 |
| 19,899 | 138 | 20,297 | 4,165 | 2,761 | 27,361 |
| 19,900 | 133 | 20,495 | 4,206 | 2,789 | 27,623 |
| 19,901 | 131 | 20,120 | 4,141 | 2,763 | 27,155 |
| 19,902 | 131 | 20,097 | 4,145 | 2,777 | 27,150 |
| 19,903 | 138 | 20,050 | 4,191 | 2,790 | 27,169 |
| 19,904 | 134 | 20,463 | 4,241 | 2,832 | 27,670 |
| 19,905 | 122 | 20,208 | 4,232 | 2,826 | 27,388 |
| 19,906 | 124 | 20,104 | 4,228 | 2,831 | 27,287 |
| 19,907 | 124 | 20,079 | 4,235 | 2,836 | 27,274 |
| 19,908 | 113 | 20,214 | 4,326 | 2,892 | 27,545 |
| 19,909 | 110 | 20,224 | 4,352 | 2,930 | 27,616 |
| 19,910 | 103 | 20,020 | 4,318 | 2,904 | 27,345 |
| 19,911 | 103 | 19,991 | 4,303 | 2,897 | 27,294 |
| 19,912 | 107 | 20,405 | 4,425 | 2,988 | 27,925 |
| 19,913 | 108 | 20,449 | 4,459 | 2,997 | 28,013 |
| 19,914 | 109 | 20,561 | 4,468 | 3,003 | 28,141 |
| 19,915 | 108 | 20,650 | 4,481 | 3,015 | 28,254 |
| 19,916 | 110 | 20,669 | 4,472 | 3,018 | 28,269 |
| 19,917 | 107 | 20,522 | 4,434 | 2,977 | 28,040 |
| 19,918 | 109 | 20,641 | 4,459 | 2,972 | 28,181 |
| 19,919 | 111 | 20,474 | 4,428 | 2,934 | 27,947 |
| 19,920 | 111 | 20,363 | 4,364 | 2,914 | 27,752 |
| 19,921 | 108 | 20,097 | 4,308 | 2,880 | 27,393 |
| 19,922 | 112 | 19,866 | 4,288 | 2,836 | 27,102 |
| 19,923 | 117 | 19,851 | 4,272 | 2,827 | 27,067 |
| 19,924 | 118 | 19,864 | 4,267 | 2,822 | 27,071 |
| 19,925 | 123 | 20,101 | 4,338 | 2,878 | 27,440 |
| 19,926 | 128 | 19,930 | 4,295 | 2,843 | 27,196 |
| 19,927 | 127 | 19,660 | 4,271 | 2,805 | 26,863 |

|        |     |        |       |       |        |
|--------|-----|--------|-------|-------|--------|
| 19,928 | 129 | 19,612 | 4,271 | 2,815 | 26,827 |
| 19,929 | 134 | 19,556 | 4,283 | 2,812 | 26,785 |
| 19,930 | 135 | 19,629 | 4,300 | 2,810 | 26,874 |
| 19,931 | 143 | 20,006 | 4,379 | 2,875 | 27,403 |
| 19,932 | 142 | 19,816 | 4,333 | 2,844 | 27,135 |
| 19,933 | 144 | 19,869 | 4,339 | 2,846 | 27,198 |
| 19,934 | 144 | 19,758 | 4,337 | 2,848 | 27,087 |
| 19,935 | 141 | 19,718 | 4,321 | 2,842 | 27,022 |
| 19,936 | 135 | 19,598 | 4,310 | 2,858 | 26,901 |
| 19,937 | 135 | 19,811 | 4,320 | 2,885 | 27,151 |
| 19,938 | 135 | 19,756 | 4,290 | 2,848 | 27,029 |
| 19,939 | 133 | 19,606 | 4,271 | 2,830 | 26,840 |
| 19,940 | 128 | 20,236 | 4,386 | 2,908 | 27,658 |
| 19,941 | 128 | 20,077 | 4,361 | 2,869 | 27,435 |
| 19,942 | 132 | 20,327 | 4,403 | 2,920 | 27,782 |
| 19,943 | 127 | 20,376 | 4,421 | 2,922 | 27,846 |
| 19,944 | 126 | 20,372 | 4,391 | 2,910 | 27,799 |
| 19,945 | 126 | 20,506 | 4,426 | 2,918 | 27,976 |
| 19,946 | 125 | 20,488 | 4,426 | 2,930 | 27,969 |
| 19,947 | 121 | 20,582 | 4,438 | 2,939 | 28,080 |
| 19,948 | 125 | 20,868 | 4,527 | 2,983 | 28,503 |
| 19,949 | 129 | 21,022 | 4,557 | 2,999 | 28,707 |
| 19,950 | 126 | 20,908 | 4,526 | 2,980 | 28,540 |
| 19,951 | 129 | 21,253 | 4,599 | 3,007 | 28,988 |
| 19,952 | 129 | 21,369 | 4,654 | 3,060 | 29,212 |
| 19,953 | 124 | 21,459 | 4,667 | 3,064 | 29,314 |
| 19,954 | 129 | 21,409 | 4,660 | 3,075 | 29,273 |
| 19,955 | 133 | 21,255 | 4,647 | 3,097 | 29,132 |
| 19,956 | 137 | 21,388 | 4,675 | 3,124 | 29,324 |
| 19,957 | 134 | 21,292 | 4,676 | 3,108 | 29,210 |
| 19,958 | 135 | 21,266 | 4,650 | 3,090 | 29,141 |
| 19,959 | 135 | 21,523 | 4,671 | 3,102 | 29,431 |



|        |     |        |       |       |        |
|--------|-----|--------|-------|-------|--------|
| 19,960 | 132 | 21,648 | 4,664 | 3,088 | 29,532 |
| 19,961 | 134 | 22,055 | 4,732 | 3,098 | 30,019 |
| 19,962 | 141 | 21,948 | 4,679 | 3,061 | 29,829 |
| 19,963 | 138 | 21,983 | 4,664 | 3,044 | 29,829 |
| 19,964 | 142 | 22,169 | 4,677 | 3,038 | 30,026 |
| 19,965 | 143 | 22,123 | 4,701 | 3,053 | 30,020 |
| 19,966 | 149 | 22,003 | 4,678 | 3,049 | 29,879 |
| 19,967 | 143 | 21,867 | 4,671 | 3,036 | 29,717 |
| 19,968 | 147 | 22,251 | 4,779 | 3,128 | 30,305 |
| 19,969 | 147 | 22,299 | 4,802 | 3,140 | 30,388 |
| 19,970 | 146 | 22,301 | 4,789 | 3,148 | 30,384 |
| 19,971 | 148 | 22,365 | 4,785 | 3,155 | 30,453 |
| 19,972 | 144 | 22,477 | 4,771 | 3,160 | 30,552 |
| 19,973 | 141 | 22,494 | 4,772 | 3,161 | 30,568 |
| 19,974 | 141 | 22,500 | 4,769 | 3,165 | 30,575 |
| 19,975 | 139 | 22,878 | 4,829 | 3,224 | 31,070 |
| 19,976 | 136 | 23,017 | 4,811 | 3,222 | 31,186 |
| 19,977 | 132 | 22,880 | 4,748 | 3,210 | 30,970 |
| 19,978 | 132 | 22,846 | 4,718 | 3,211 | 30,907 |
| 19,979 | 123 | 22,974 | 4,714 | 3,214 | 31,025 |
| 19,980 | 122 | 23,139 | 4,767 | 3,242 | 31,270 |
| 19,981 | 119 | 23,164 | 4,755 | 3,256 | 31,294 |
| 19,982 | 118 | 23,123 | 4,742 | 3,220 | 31,203 |
| 19,983 | 122 | 23,010 | 4,722 | 3,196 | 31,050 |
| 19,984 | 126 | 22,991 | 4,728 | 3,182 | 31,027 |
| 19,985 | 133 | 23,097 | 4,732 | 3,189 | 31,151 |
| 19,986 | 133 | 23,031 | 4,733 | 3,188 | 31,085 |
| 19,987 | 137 | 22,997 | 4,714 | 3,185 | 31,033 |
| 19,988 | 138 | 22,763 | 4,682 | 3,142 | 30,725 |
| 19,989 | 135 | 22,439 | 4,619 | 3,104 | 30,297 |
| 19,990 | 138 | 22,637 | 4,645 | 3,148 | 30,568 |
| 19,991 | 141 | 22,611 | 4,673 | 3,155 | 30,580 |

|        |     |        |       |       |        |
|--------|-----|--------|-------|-------|--------|
| 19,992 | 139 | 22,426 | 4,639 | 3,131 | 30,335 |
| 19,993 | 145 | 22,386 | 4,628 | 3,125 | 30,284 |
| 19,994 | 143 | 22,295 | 4,631 | 3,122 | 30,191 |
| 19,995 | 144 | 22,291 | 4,632 | 3,143 | 30,210 |
| 19,996 | 143 | 22,290 | 4,655 | 3,164 | 30,252 |
| 19,997 | 143 | 22,199 | 4,672 | 3,149 | 30,163 |
| 19,998 | 145 | 22,128 | 4,629 | 3,131 | 30,033 |
| 19,999 | 143 | 22,079 | 4,590 | 3,119 | 29,931 |
| 20,000 | 140 | 22,071 | 4,610 | 3,143 | 29,964 |
| 20,001 | 144 | 21,893 | 4,557 | 3,134 | 29,728 |
| 20,002 | 145 | 21,755 | 4,534 | 3,107 | 29,541 |
| 20,003 | 147 | 21,721 | 4,479 | 3,069 | 29,416 |
| 20,004 | 146 | 21,667 | 4,458 | 3,064 | 29,335 |
| 20,005 | 141 | 21,589 | 4,397 | 3,019 | 29,146 |
| 20,006 | 142 | 21,452 | 4,383 | 3,007 | 28,984 |
| 20,007 | 138 | 21,079 | 4,287 | 2,948 | 28,452 |
| 20,008 | 138 | 20,865 | 4,251 | 2,922 | 28,176 |
| 20,009 | 138 | 20,823 | 4,256 | 2,908 | 28,125 |
| 20,010 | 141 | 20,695 | 4,228 | 2,886 | 27,950 |
| 20,011 | 141 | 20,631 | 4,233 | 2,878 | 27,883 |
| 20,012 | 139 | 20,581 | 4,199 | 2,889 | 27,808 |
| 20,013 | 134 | 20,301 | 4,201 | 2,892 | 27,528 |
| 20,014 | 135 | 20,190 | 4,203 | 2,898 | 27,426 |
| 20,015 | 130 | 20,204 | 4,240 | 2,939 | 27,513 |
| 20,016 | 129 | 20,292 | 4,249 | 2,946 | 27,616 |
| 20,017 | 119 | 20,431 | 4,321 | 2,972 | 27,843 |
| 20,018 | 123 | 20,486 | 4,263 | 2,965 | 27,837 |
| 20,019 | 121 | 20,514 | 4,276 | 2,961 | 27,872 |
| 20,020 | 120 | 20,350 | 4,264 | 2,950 | 27,684 |
| 20,021 | 120 | 20,471 | 4,267 | 2,951 | 27,809 |
| 20,022 | 118 | 20,528 | 4,318 | 2,958 | 27,922 |
| 20,023 | 117 | 20,193 | 4,288 | 2,937 | 27,535 |

|        |     |        |       |       |        |
|--------|-----|--------|-------|-------|--------|
| 20,024 | 117 | 20,242 | 4,296 | 2,947 | 27,602 |
| 20,025 | 122 | 20,147 | 4,306 | 2,932 | 27,507 |
| 20,026 | 131 | 20,348 | 4,374 | 2,971 | 27,824 |
| 20,027 | 133 | 20,262 | 4,378 | 2,979 | 27,752 |
| 20,028 | 127 | 19,978 | 4,394 | 2,943 | 27,442 |
| 20,029 | 130 | 19,920 | 4,367 | 2,937 | 27,354 |
| 20,030 | 135 | 19,996 | 4,367 | 2,942 | 27,440 |
| 20,031 | 137 | 20,303 | 4,406 | 2,982 | 27,828 |
| 20,032 | 136 | 20,102 | 4,364 | 2,945 | 27,547 |
| 20,033 | 133 | 19,902 | 4,341 | 2,937 | 27,313 |
| 20,034 | 131 | 20,035 | 4,361 | 2,948 | 27,475 |
| 20,035 | 128 | 20,178 | 4,432 | 2,991 | 27,729 |
| 20,036 | 122 | 20,094 | 4,418 | 2,987 | 27,621 |
| 20,037 | 116 | 20,048 | 4,371 | 2,961 | 27,496 |
| 20,038 | 122 | 20,314 | 4,414 | 2,993 | 27,843 |
| 20,039 | 121 | 20,304 | 4,413 | 2,994 | 27,832 |
| 20,040 | 121 | 20,497 | 4,442 | 3,031 | 28,091 |
| 20,041 | 129 | 20,520 | 4,459 | 3,031 | 28,139 |
| 20,042 | 131 | 20,302 | 4,413 | 3,002 | 27,848 |
| 20,043 | 131 | 20,375 | 4,420 | 3,012 | 27,938 |
| 20,044 | 128 | 20,376 | 4,422 | 3,004 | 27,930 |
| 20,045 | 127 | 20,468 | 4,433 | 3,020 | 28,048 |
| 20,046 | 126 | 20,195 | 4,375 | 2,993 | 27,689 |
| 20,047 | 126 | 20,103 | 4,344 | 2,975 | 27,548 |
| 20,048 | 126 | 20,357 | 4,373 | 2,985 | 27,841 |
| 20,049 | 122 | 20,099 | 4,312 | 2,936 | 27,469 |
| 20,050 | 123 | 20,397 | 4,338 | 2,963 | 27,821 |
| 20,051 | 123 | 20,295 | 4,322 | 2,946 | 27,686 |
| 20,052 | 120 | 20,060 | 4,285 | 2,918 | 27,383 |
| 20,053 | 114 | 19,870 | 4,263 | 2,898 | 27,145 |
| 20,054 | 116 | 20,078 | 4,287 | 2,908 | 27,389 |
| 20,055 | 112 | 19,994 | 4,270 | 2,907 | 27,283 |

|        |     |        |       |       |        |
|--------|-----|--------|-------|-------|--------|
| 20,056 | 109 | 19,944 | 4,282 | 2,915 | 27,250 |
| 20,057 | 108 | 19,776 | 4,223 | 2,862 | 26,969 |
| 20,058 | 108 | 20,088 | 4,251 | 2,878 | 27,325 |
| 20,059 | 107 | 20,014 | 4,241 | 2,876 | 27,238 |
| 20,060 | 109 | 20,110 | 4,260 | 2,898 | 27,377 |
| 20,061 | 106 | 20,170 | 4,270 | 2,919 | 27,465 |
| 20,062 | 107 | 20,230 | 4,237 | 2,922 | 27,496 |
| 20,063 | 108 | 20,354 | 4,207 | 2,924 | 27,593 |
| 20,064 | 110 | 20,254 | 4,165 | 2,912 | 27,441 |
| 20,065 | 108 | 20,352 | 4,159 | 2,928 | 27,547 |
| 20,066 | 109 | 20,301 | 4,124 | 2,896 | 27,430 |
| 20,067 | 118 | 20,104 | 4,017 | 2,815 | 27,054 |
| 20,068 | 118 | 20,106 | 4,031 | 2,822 | 27,077 |
| 20,069 | 119 | 19,810 | 3,994 | 2,798 | 26,721 |
| 20,070 | 120 | 19,728 | 3,950 | 2,779 | 26,577 |
| 20,071 | 120 | 19,717 | 3,939 | 2,780 | 26,556 |
| 20,072 | 119 | 19,551 | 3,903 | 2,777 | 26,350 |
| 20,073 | 122 | 19,556 | 3,908 | 2,784 | 26,370 |
| 20,074 | 119 | 19,385 | 3,857 | 2,760 | 26,121 |
| 20,075 | 117 | 19,614 | 3,898 | 2,801 | 26,430 |
| 20,076 | 119 | 19,577 | 3,887 | 2,800 | 26,383 |
| 20,077 | 112 | 19,963 | 3,894 | 2,826 | 26,795 |
| 20,078 | 107 | 19,559 | 3,822 | 2,773 | 26,261 |
| 20,079 | 107 | 19,626 | 3,816 | 2,771 | 26,320 |
| 20,080 | 103 | 19,691 | 3,881 | 2,811 | 26,486 |
| 20,081 | 100 | 19,849 | 3,918 | 2,847 | 26,714 |
| 20,082 | 103 | 20,079 | 3,962 | 2,853 | 26,997 |
| 20,083 | 99  | 19,868 | 3,915 | 2,832 | 26,714 |
| 20,084 | 103 | 19,898 | 3,954 | 2,849 | 26,804 |
| 20,085 | 101 | 20,054 | 3,973 | 2,896 | 27,024 |
| 20,086 | 102 | 20,333 | 4,005 | 2,945 | 27,385 |
| 20,087 | 105 | 19,955 | 3,951 | 2,912 | 26,923 |

|        |     |        |       |       |        |
|--------|-----|--------|-------|-------|--------|
| 20,088 | 111 | 20,096 | 3,983 | 2,940 | 27,130 |
| 20,089 | 105 | 20,138 | 3,999 | 2,931 | 27,173 |
| 20,090 | 103 | 20,143 | 4,022 | 2,928 | 27,196 |
| 20,091 | 105 | 20,335 | 4,061 | 2,953 | 27,454 |
| 20,092 | 99  | 20,650 | 4,078 | 2,984 | 27,811 |
| 20,093 | 97  | 20,306 | 4,025 | 2,952 | 27,380 |
| 20,094 | 98  | 20,160 | 4,022 | 2,935 | 27,215 |
| 20,095 | 108 | 20,460 | 4,153 | 3,019 | 27,740 |
| 20,096 | 116 | 20,511 | 4,145 | 3,007 | 27,779 |
| 20,097 | 123 | 20,575 | 4,146 | 3,034 | 27,878 |
| 20,098 | 122 | 20,520 | 4,120 | 3,020 | 27,782 |
| 20,099 | 125 | 20,452 | 4,131 | 3,027 | 27,735 |
| 20,100 | 125 | 20,484 | 4,126 | 3,028 | 27,763 |
| 20,101 | 123 | 20,653 | 4,158 | 3,049 | 27,983 |
| 20,102 | 123 | 20,411 | 4,110 | 3,025 | 27,669 |
| 20,103 | 122 | 20,218 | 4,048 | 2,987 | 27,375 |
| 20,104 | 122 | 19,995 | 4,025 | 2,962 | 27,104 |
| 20,105 | 128 | 20,767 | 4,192 | 3,069 | 28,156 |
| 20,106 | 129 | 20,523 | 4,170 | 3,029 | 27,851 |
| 20,107 | 136 | 20,773 | 4,193 | 3,075 | 28,177 |
| 20,108 | 145 | 20,766 | 4,189 | 3,097 | 28,197 |
| 20,109 | 145 | 20,869 | 4,209 | 3,110 | 28,333 |
| 20,110 | 145 | 21,026 | 4,206 | 3,119 | 28,496 |
| 20,111 | 145 | 20,888 | 4,164 | 3,080 | 28,277 |
| 20,112 | 147 | 20,899 | 4,174 | 3,060 | 28,280 |
| 20,113 | 145 | 20,752 | 4,185 | 3,046 | 28,128 |
| 20,114 | 140 | 20,267 | 4,115 | 2,973 | 27,495 |
| 20,115 | 142 | 20,553 | 4,169 | 2,993 | 27,857 |
| 20,116 | 144 | 20,748 | 4,199 | 3,013 | 28,104 |
| 20,117 | 144 | 20,713 | 4,199 | 3,013 | 28,069 |
| 20,118 | 133 | 20,579 | 4,159 | 2,988 | 27,859 |
| 20,119 | 133 | 20,976 | 4,204 | 3,046 | 28,359 |

|        |     |        |       |       |        |
|--------|-----|--------|-------|-------|--------|
| 20,120 | 133 | 20,988 | 4,224 | 3,042 | 28,387 |
| 20,121 | 131 | 20,900 | 4,172 | 3,019 | 28,222 |
| 20,122 | 131 | 20,800 | 4,162 | 3,011 | 28,104 |
| 20,123 | 129 | 21,011 | 4,204 | 3,052 | 28,396 |
| 20,124 | 131 | 20,889 | 4,188 | 3,031 | 28,239 |
| 20,125 | 132 | 20,994 | 4,191 | 3,030 | 28,347 |
| 20,126 | 136 | 21,244 | 4,209 | 3,042 | 28,631 |
| 20,127 | 131 | 21,185 | 4,188 | 3,037 | 28,541 |
| 20,128 | 129 | 21,138 | 4,155 | 3,023 | 28,445 |
| 20,129 | 130 | 21,497 | 4,194 | 3,064 | 28,885 |
| 20,130 | 130 | 21,174 | 4,131 | 3,020 | 28,455 |
| 20,131 | 131 | 21,258 | 4,093 | 3,013 | 28,495 |
| 20,132 | 137 | 21,595 | 4,147 | 3,039 | 28,918 |
| 20,133 | 133 | 21,452 | 4,105 | 3,028 | 28,718 |
| 20,134 | 133 | 21,566 | 4,095 | 3,030 | 28,824 |
| 20,135 | 131 | 21,384 | 4,036 | 2,985 | 28,536 |
| 20,136 | 133 | 21,468 | 4,023 | 2,959 | 28,583 |
| 20,137 | 137 | 21,451 | 3,979 | 2,927 | 28,494 |
| 20,138 | 138 | 21,536 | 3,965 | 2,914 | 28,553 |
| 20,139 | 135 | 21,579 | 3,944 | 2,912 | 28,570 |
| 20,140 | 135 | 21,519 | 3,939 | 2,912 | 28,505 |
| 20,141 | 134 | 21,422 | 3,899 | 2,915 | 28,370 |
| 20,142 | 134 | 21,401 | 3,905 | 2,916 | 28,356 |
| 20,143 | 133 | 21,613 | 3,969 | 2,939 | 28,654 |
| 20,144 | 137 | 21,762 | 3,962 | 2,932 | 28,793 |
| 20,145 | 128 | 21,779 | 3,883 | 2,905 | 28,695 |
| 20,146 | 126 | 21,995 | 3,885 | 2,911 | 28,917 |
| 20,147 | 120 | 21,960 | 3,891 | 2,903 | 28,874 |
| 20,148 | 116 | 21,844 | 3,867 | 2,834 | 28,661 |
| 20,149 | 117 | 22,010 | 3,878 | 2,842 | 28,847 |
| 20,150 | 121 | 22,038 | 3,901 | 2,871 | 28,931 |
| 20,151 | 123 | 22,082 | 3,902 | 2,874 | 28,981 |

|        |     |        |       |       |        |
|--------|-----|--------|-------|-------|--------|
| 20,152 | 123 | 22,064 | 3,893 | 2,874 | 28,954 |
| 20,153 | 128 | 22,126 | 3,881 | 2,866 | 29,001 |
| 20,154 | 127 | 22,216 | 3,889 | 2,867 | 29,099 |
| 20,155 | 125 | 22,432 | 3,878 | 2,879 | 29,314 |
| 20,156 | 122 | 22,275 | 3,839 | 2,866 | 29,102 |
| 20,157 | 122 | 22,494 | 3,862 | 2,885 | 29,363 |
| 20,158 | 122 | 22,803 | 3,909 | 2,902 | 29,736 |
| 20,159 | 112 | 22,699 | 3,881 | 2,882 | 29,574 |
| 20,160 | 112 | 22,656 | 3,862 | 2,877 | 29,507 |
| 20,161 | 116 | 22,602 | 3,881 | 2,879 | 29,478 |
| 20,162 | 118 | 22,618 | 3,862 | 2,887 | 29,485 |
| 20,163 | 119 | 22,493 | 3,824 | 2,869 | 29,305 |
| 20,164 | 123 | 23,007 | 3,907 | 2,950 | 29,987 |
| 20,165 | 121 | 22,825 | 3,871 | 2,920 | 29,737 |
| 20,166 | 118 | 22,878 | 3,861 | 2,918 | 29,775 |
| 20,167 | 122 | 22,816 | 3,842 | 2,907 | 29,687 |
| 20,168 | 124 | 22,813 | 3,827 | 2,900 | 29,664 |
| 20,169 | 125 | 22,637 | 3,806 | 2,884 | 29,452 |
| 20,170 | 132 | 22,568 | 3,801 | 2,872 | 29,373 |
| 20,171 | 129 | 22,375 | 3,759 | 2,836 | 29,099 |
| 20,172 | 130 | 22,666 | 3,861 | 2,880 | 29,537 |
| 20,173 | 130 | 22,550 | 3,847 | 2,842 | 29,369 |
| 20,174 | 135 | 22,819 | 3,897 | 2,853 | 29,704 |
| 20,175 | 129 | 22,493 | 3,852 | 2,816 | 29,290 |
| 20,176 | 126 | 22,338 | 3,836 | 2,804 | 29,104 |
| 20,177 | 121 | 22,323 | 3,835 | 2,815 | 29,094 |
| 20,178 | 124 | 22,153 | 3,812 | 2,792 | 28,881 |
| 20,179 | 128 | 21,933 | 3,811 | 2,768 | 28,640 |
| 20,180 | 128 | 21,603 | 3,760 | 2,702 | 28,193 |
| 20,181 | 130 | 21,682 | 3,754 | 2,700 | 28,266 |
| 20,182 | 126 | 21,502 | 3,745 | 2,673 | 28,046 |
| 20,183 | 124 | 21,404 | 3,742 | 2,660 | 27,930 |

|        |     |        |       |       |        |
|--------|-----|--------|-------|-------|--------|
| 20,184 | 125 | 21,420 | 3,751 | 2,671 | 27,967 |
| 20,185 | 122 | 20,978 | 3,675 | 2,605 | 27,380 |
| 20,186 | 124 | 21,031 | 3,716 | 2,615 | 27,486 |
| 20,187 | 125 | 20,890 | 3,708 | 2,611 | 27,334 |
| 20,188 | 121 | 20,652 | 3,688 | 2,588 | 27,049 |
| 20,189 | 120 | 20,764 | 3,731 | 2,629 | 27,244 |
| 20,190 | 123 | 20,456 | 3,694 | 2,588 | 26,861 |
| 20,191 | 123 | 20,309 | 3,660 | 2,545 | 26,637 |
| 20,192 | 121 | 20,669 | 3,767 | 2,625 | 27,182 |
| 20,193 | 121 | 20,477 | 3,736 | 2,633 | 26,967 |
| 20,194 | 123 | 20,740 | 3,774 | 2,664 | 27,301 |
| 20,195 | 116 | 20,644 | 3,757 | 2,661 | 27,178 |
| 20,196 | 115 | 20,614 | 3,785 | 2,678 | 27,192 |
| 20,197 | 118 | 20,698 | 3,823 | 2,704 | 27,343 |
| 20,198 | 117 | 20,741 | 3,849 | 2,715 | 27,422 |
| 20,199 | 123 | 20,777 | 3,881 | 2,741 | 27,522 |
| 20,200 | 126 | 21,031 | 3,944 | 2,776 | 27,877 |
| 20,201 | 121 | 20,994 | 3,922 | 2,750 | 27,787 |
| 20,202 | 127 | 20,992 | 3,955 | 2,755 | 27,829 |
| 20,203 | 126 | 21,021 | 3,964 | 2,763 | 27,874 |
| 20,204 | 121 | 21,035 | 4,013 | 2,768 | 27,937 |
| 20,205 | 123 | 20,936 | 4,018 | 2,787 | 27,864 |
| 20,206 | 123 | 20,806 | 4,009 | 2,767 | 27,705 |
| 20,207 | 123 | 20,940 | 4,025 | 2,782 | 27,870 |
| 20,208 | 122 | 20,988 | 4,034 | 2,775 | 27,919 |
| 20,209 | 117 | 20,657 | 3,978 | 2,744 | 27,496 |
| 20,210 | 120 | 20,672 | 3,976 | 2,738 | 27,506 |
| 20,211 | 118 | 20,292 | 3,956 | 2,731 | 27,097 |
| 20,212 | 117 | 20,587 | 4,009 | 2,767 | 27,480 |
| 20,213 | 116 | 20,604 | 4,023 | 2,769 | 27,512 |
| 20,214 | 117 | 20,373 | 4,009 | 2,758 | 27,257 |
| 20,215 | 118 | 20,360 | 4,031 | 2,747 | 27,256 |



|        |     |        |       |       |        |
|--------|-----|--------|-------|-------|--------|
| 20,216 | 119 | 20,114 | 3,983 | 2,737 | 26,953 |
| 20,217 | 116 | 20,006 | 3,990 | 2,737 | 26,849 |
| 20,218 | 117 | 20,033 | 3,985 | 2,723 | 26,858 |
| 20,219 | 117 | 20,070 | 3,988 | 2,724 | 26,899 |
| 20,220 | 108 | 20,055 | 3,972 | 2,726 | 26,861 |
| 20,221 | 108 | 20,023 | 3,977 | 2,717 | 26,825 |
| 20,222 | 116 | 19,827 | 3,975 | 2,744 | 26,662 |
| 20,223 | 118 | 19,914 | 3,987 | 2,757 | 26,776 |
| 20,224 | 124 | 20,067 | 4,027 | 2,777 | 26,995 |
| 20,225 | 121 | 19,803 | 3,984 | 2,761 | 26,669 |
| 20,226 | 125 | 19,823 | 3,975 | 2,761 | 26,684 |
| 20,227 | 125 | 20,086 | 4,019 | 2,797 | 27,027 |
| 20,228 | 130 | 20,060 | 4,035 | 2,815 | 27,040 |
| 20,229 | 131 | 19,805 | 4,009 | 2,798 | 26,743 |
| 20,230 | 126 | 19,476 | 3,966 | 2,778 | 26,346 |
| 20,231 | 124 | 19,764 | 4,011 | 2,827 | 26,726 |
| 20,232 | 123 | 19,773 | 4,015 | 2,851 | 26,762 |
| 20,233 | 122 | 19,803 | 3,996 | 2,861 | 26,782 |
| 20,234 | 121 | 19,748 | 3,956 | 2,843 | 26,668 |
| 20,235 | 123 | 19,940 | 3,973 | 2,856 | 26,892 |
| 20,236 | 125 | 19,984 | 3,943 | 2,856 | 26,908 |
| 20,237 | 126 | 19,921 | 3,894 | 2,835 | 26,776 |
| 20,238 | 120 | 19,758 | 3,841 | 2,811 | 26,530 |
| 20,239 | 125 | 19,942 | 3,853 | 2,801 | 26,721 |
| 20,240 | 128 | 20,245 | 3,884 | 2,838 | 27,095 |
| 20,241 | 128 | 20,169 | 3,842 | 2,816 | 26,955 |
| 20,242 | 128 | 20,232 | 3,849 | 2,811 | 27,020 |
| 20,243 | 133 | 20,487 | 3,884 | 2,828 | 27,332 |
| 20,244 | 138 | 20,468 | 3,860 | 2,834 | 27,300 |
| 20,245 | 141 | 20,297 | 3,810 | 2,770 | 27,018 |
| 20,246 | 142 | 20,313 | 3,793 | 2,769 | 27,017 |
| 20,247 | 138 | 19,869 | 3,625 | 2,690 | 26,322 |

|        |     |        |       |       |        |
|--------|-----|--------|-------|-------|--------|
| 20,248 | 139 | 19,942 | 3,627 | 2,700 | 26,408 |
| 20,249 | 135 | 20,100 | 3,629 | 2,718 | 26,582 |
| 20,250 | 135 | 19,992 | 3,628 | 2,708 | 26,463 |
| 20,251 | 133 | 20,110 | 3,646 | 2,739 | 26,628 |
| 20,252 | 127 | 20,126 | 3,662 | 2,744 | 26,659 |
| 20,253 | 132 | 20,143 | 3,609 | 2,712 | 26,596 |
| 20,254 | 132 | 20,139 | 3,565 | 2,717 | 26,553 |
| 20,255 | 132 | 20,193 | 3,563 | 2,721 | 26,609 |
| 20,256 | 130 | 20,231 | 3,559 | 2,709 | 26,629 |
| 20,257 | 130 | 20,473 | 3,588 | 2,764 | 26,955 |
| 20,258 | 130 | 20,277 | 3,568 | 2,740 | 26,715 |
| 20,259 | 128 | 20,139 | 3,553 | 2,726 | 26,546 |
| 20,260 | 125 | 20,312 | 3,594 | 2,744 | 26,775 |
| 20,261 | 131 | 20,598 | 3,649 | 2,790 | 27,168 |
| 20,262 | 129 | 20,259 | 3,539 | 2,677 | 26,604 |
| 20,263 | 130 | 20,431 | 3,572 | 2,704 | 26,837 |
| 20,264 | 131 | 20,731 | 3,613 | 2,732 | 27,207 |
| 20,265 | 129 | 20,673 | 3,602 | 2,740 | 27,144 |
| 20,266 | 130 | 20,683 | 3,624 | 2,731 | 27,168 |
| 20,267 | 130 | 20,758 | 3,647 | 2,719 | 27,254 |
| 20,268 | 130 | 20,853 | 3,652 | 2,720 | 27,355 |
| 20,269 | 130 | 20,886 | 3,646 | 2,725 | 27,387 |
| 20,270 | 131 | 21,142 | 3,721 | 2,745 | 27,739 |
| 20,271 | 127 | 20,771 | 3,660 | 2,685 | 27,243 |
| 20,272 | 127 | 21,027 | 3,694 | 2,702 | 27,550 |
| 20,273 | 121 | 21,309 | 3,722 | 2,725 | 27,877 |
| 20,274 | 131 | 21,500 | 3,760 | 2,754 | 28,145 |
| 20,275 | 126 | 21,442 | 3,744 | 2,769 | 28,081 |
| 20,276 | 122 | 21,350 | 3,703 | 2,750 | 27,925 |
| 20,277 | 124 | 21,388 | 3,702 | 2,746 | 27,960 |
| 20,278 | 127 | 21,647 | 3,745 | 2,776 | 28,295 |
| 20,279 | 122 | 21,533 | 3,722 | 2,751 | 28,128 |

|        |     |        |       |       |        |
|--------|-----|--------|-------|-------|--------|
| 20,280 | 123 | 21,691 | 3,751 | 2,785 | 28,350 |
| 20,281 | 128 | 21,887 | 3,793 | 2,815 | 28,623 |
| 20,282 | 134 | 22,048 | 3,816 | 2,826 | 28,824 |
| 20,283 | 133 | 22,208 | 3,866 | 2,817 | 29,024 |
| 20,284 | 136 | 22,111 | 3,894 | 2,826 | 28,967 |
| 20,285 | 138 | 22,352 | 3,936 | 2,851 | 29,277 |
| 20,286 | 138 | 22,049 | 3,920 | 2,832 | 28,939 |
| 20,287 | 136 | 21,983 | 3,946 | 2,835 | 28,900 |
| 20,288 | 137 | 21,737 | 3,927 | 2,808 | 28,609 |
| 20,289 | 136 | 21,585 | 3,915 | 2,806 | 28,442 |
| 20,290 | 134 | 22,340 | 4,019 | 2,896 | 29,389 |
| 20,291 | 134 | 22,297 | 4,003 | 2,879 | 29,313 |
| 20,292 | 133 | 22,050 | 3,978 | 2,847 | 29,008 |
| 20,293 | 136 | 21,982 | 3,973 | 2,843 | 28,934 |
| 20,294 | 137 | 21,972 | 3,994 | 2,834 | 28,937 |
| 20,295 | 130 | 21,886 | 4,007 | 2,813 | 28,836 |
| 20,296 | 130 | 21,771 | 4,009 | 2,821 | 28,731 |
| 20,297 | 134 | 21,921 | 4,026 | 2,851 | 28,932 |
| 20,298 | 129 | 21,712 | 4,025 | 2,826 | 28,692 |
| 20,299 | 128 | 21,667 | 4,043 | 2,839 | 28,677 |
| 20,300 | 130 | 21,690 | 4,055 | 2,849 | 28,724 |
| 20,301 | 136 | 21,678 | 4,052 | 2,836 | 28,702 |
| 20,302 | 136 | 21,608 | 4,058 | 2,845 | 28,647 |
| 20,303 | 135 | 21,613 | 4,075 | 2,859 | 28,682 |
| 20,304 | 130 | 21,621 | 4,107 | 2,889 | 28,747 |
| 20,305 | 130 | 21,683 | 4,136 | 2,907 | 28,856 |
| 20,306 | 133 | 21,839 | 4,190 | 2,930 | 29,092 |
| 20,307 | 140 | 21,706 | 4,179 | 2,912 | 28,937 |
| 20,308 | 140 | 21,483 | 4,175 | 2,893 | 28,691 |
| 20,309 | 140 | 21,842 | 4,229 | 2,953 | 29,164 |
| 20,310 | 143 | 21,690 | 4,206 | 2,921 | 28,960 |
| 20,311 | 145 | 21,878 | 4,232 | 2,953 | 29,208 |

|        |     |        |       |       |        |
|--------|-----|--------|-------|-------|--------|
| 20,312 | 141 | 22,148 | 4,262 | 2,986 | 29,537 |
| 20,313 | 139 | 22,194 | 4,240 | 2,981 | 29,554 |
| 20,314 | 140 | 22,042 | 4,231 | 2,968 | 29,381 |
| 20,315 | 138 | 22,198 | 4,269 | 2,999 | 29,604 |
| 20,316 | 135 | 21,961 | 4,237 | 2,974 | 29,307 |
| 20,317 | 138 | 22,091 | 4,285 | 3,001 | 29,515 |
| 20,318 | 136 | 21,911 | 4,268 | 2,997 | 29,312 |
| 20,319 | 136 | 22,022 | 4,271 | 3,006 | 29,435 |
| 20,320 | 139 | 21,928 | 4,239 | 3,000 | 29,306 |
| 20,321 | 141 | 21,794 | 4,195 | 2,998 | 29,128 |
| 20,322 | 141 | 21,811 | 4,201 | 3,010 | 29,163 |
| 20,323 | 144 | 21,556 | 4,167 | 2,979 | 28,846 |
| 20,324 | 144 | 21,584 | 4,181 | 2,977 | 28,886 |
| 20,325 | 142 | 21,458 | 4,160 | 2,942 | 28,702 |
| 20,326 | 140 | 21,091 | 4,117 | 2,887 | 28,235 |
| 20,327 | 145 | 22,125 | 4,275 | 3,014 | 29,559 |
| 20,328 | 149 | 21,737 | 4,218 | 2,931 | 29,035 |
| 20,329 | 150 | 21,957 | 4,253 | 2,954 | 29,314 |
| 20,330 | 146 | 22,154 | 4,288 | 2,984 | 29,572 |
| 20,331 | 144 | 22,046 | 4,287 | 2,965 | 29,442 |
| 20,332 | 140 | 21,738 | 4,253 | 2,940 | 29,071 |
| 20,333 | 143 | 21,624 | 4,268 | 2,938 | 28,973 |
| 20,334 | 147 | 21,713 | 4,264 | 2,948 | 29,072 |
| 20,335 | 144 | 21,614 | 4,230 | 2,928 | 28,916 |
| 20,336 | 152 | 21,688 | 4,239 | 2,936 | 29,015 |
| 20,337 | 150 | 21,636 | 4,242 | 2,925 | 28,953 |
| 20,338 | 153 | 21,642 | 4,184 | 2,934 | 28,913 |
| 20,339 | 153 | 21,582 | 4,199 | 2,933 | 28,867 |
| 20,340 | 154 | 21,476 | 4,223 | 2,930 | 28,783 |
| 20,341 | 155 | 21,574 | 4,254 | 2,925 | 28,908 |
| 20,342 | 148 | 21,322 | 4,189 | 2,877 | 28,536 |
| 20,343 | 150 | 21,502 | 4,217 | 2,900 | 28,769 |

|        |     |        |       |       |        |
|--------|-----|--------|-------|-------|--------|
| 20,344 | 144 | 21,545 | 4,227 | 2,932 | 28,848 |
| 20,345 | 142 | 21,499 | 4,226 | 2,949 | 28,816 |
| 20,346 | 138 | 21,442 | 4,231 | 2,967 | 28,778 |
| 20,347 | 137 | 21,497 | 4,240 | 2,940 | 28,814 |
| 20,348 | 139 | 21,585 | 4,257 | 2,941 | 28,922 |
| 20,349 | 140 | 21,664 | 4,253 | 2,963 | 29,020 |
| 20,350 | 139 | 21,613 | 4,269 | 2,968 | 28,989 |
| 20,351 | 140 | 22,116 | 4,332 | 3,030 | 29,618 |
| 20,352 | 134 | 22,290 | 4,340 | 3,028 | 29,792 |
| 20,353 | 135 | 22,329 | 4,350 | 3,043 | 29,857 |
| 20,354 | 138 | 22,616 | 4,381 | 3,046 | 30,181 |
| 20,355 | 141 | 22,660 | 4,379 | 3,018 | 30,198 |
| 20,356 | 142 | 22,769 | 4,389 | 3,030 | 30,330 |
| 20,357 | 143 | 22,620 | 4,391 | 3,007 | 30,161 |
| 20,358 | 144 | 23,037 | 4,419 | 3,051 | 30,651 |
| 20,359 | 144 | 22,790 | 4,402 | 3,015 | 30,351 |
| 20,360 | 147 | 22,713 | 4,391 | 2,990 | 30,241 |
| 20,361 | 147 | 22,852 | 4,413 | 3,024 | 30,436 |
| 20,362 | 154 | 22,659 | 4,390 | 2,997 | 30,200 |
| 20,363 | 152 | 22,458 | 4,361 | 2,972 | 29,943 |
| 20,364 | 152 | 22,407 | 4,361 | 2,976 | 29,896 |
| 20,365 | 152 | 22,429 | 4,355 | 2,986 | 29,922 |
| 20,366 | 158 | 22,388 | 4,367 | 2,976 | 29,889 |
| 20,367 | 157 | 22,412 | 4,376 | 2,987 | 29,932 |
| 20,368 | 155 | 22,380 | 4,319 | 2,962 | 29,816 |
| 20,369 | 154 | 22,434 | 4,347 | 2,974 | 29,909 |
| 20,370 | 158 | 22,616 | 4,392 | 2,999 | 30,165 |
| 20,371 | 152 | 22,601 | 4,390 | 2,998 | 30,141 |
| 20,372 | 151 | 22,601 | 4,425 | 3,019 | 30,196 |
| 20,373 | 145 | 22,716 | 4,435 | 3,034 | 30,330 |
| 20,374 | 144 | 22,665 | 4,430 | 3,032 | 30,271 |
| 20,375 | 149 | 22,813 | 4,476 | 3,071 | 30,509 |

|        |     |        |       |       |        |
|--------|-----|--------|-------|-------|--------|
| 20,376 | 146 | 22,872 | 4,502 | 3,080 | 30,600 |
| 20,377 | 145 | 22,989 | 4,514 | 3,108 | 30,756 |
| 20,378 | 147 | 22,934 | 4,515 | 3,109 | 30,705 |
| 20,379 | 139 | 22,691 | 4,457 | 3,103 | 30,390 |
| 20,380 | 138 | 22,574 | 4,457 | 3,094 | 30,263 |
| 20,381 | 136 | 22,583 | 4,454 | 3,077 | 30,250 |
| 20,382 | 134 | 22,500 | 4,406 | 3,034 | 30,074 |
| 20,383 | 133 | 22,493 | 4,407 | 3,041 | 30,074 |
| 20,384 | 130 | 22,306 | 4,364 | 3,030 | 29,830 |
| 20,385 | 126 | 22,150 | 4,328 | 3,008 | 29,612 |
| 20,386 | 131 | 22,694 | 4,459 | 3,084 | 30,368 |
| 20,387 | 126 | 22,698 | 4,457 | 3,089 | 30,370 |
| 20,388 | 130 | 22,858 | 4,494 | 3,094 | 30,576 |
| 20,389 | 128 | 22,892 | 4,496 | 3,097 | 30,613 |
| 20,390 | 126 | 22,899 | 4,492 | 3,092 | 30,609 |
| 20,391 | 130 | 22,961 | 4,510 | 3,138 | 30,739 |
| 20,392 | 131 | 22,944 | 4,531 | 3,152 | 30,758 |
| 20,393 | 132 | 22,986 | 4,561 | 3,168 | 30,847 |
| 20,394 | 130 | 22,839 | 4,559 | 3,158 | 30,686 |
| 20,395 | 135 | 22,834 | 4,521 | 3,136 | 30,626 |
| 20,396 | 136 | 22,874 | 4,534 | 3,135 | 30,679 |
| 20,397 | 136 | 22,866 | 4,546 | 3,124 | 30,672 |
| 20,398 | 130 | 22,609 | 4,505 | 3,119 | 30,363 |
| 20,399 | 128 | 22,422 | 4,473 | 3,079 | 30,102 |
| 20,400 | 131 | 22,566 | 4,517 | 3,095 | 30,309 |
| 20,401 | 128 | 22,615 | 4,519 | 3,088 | 30,350 |
| 20,402 | 127 | 22,423 | 4,505 | 3,054 | 30,109 |
| 20,403 | 127 | 21,966 | 4,431 | 3,007 | 29,531 |
| 20,404 | 127 | 21,913 | 4,443 | 3,003 | 29,486 |
| 20,405 | 124 | 21,526 | 4,416 | 2,997 | 29,063 |
| 20,406 | 122 | 21,473 | 4,420 | 3,007 | 29,022 |
| 20,407 | 116 | 21,319 | 4,412 | 3,015 | 28,862 |

|        |     |        |       |       |        |
|--------|-----|--------|-------|-------|--------|
| 20,408 | 120 | 21,259 | 4,380 | 3,014 | 28,773 |
| 20,409 | 120 | 21,219 | 4,393 | 3,003 | 28,735 |
| 20,410 | 118 | 20,783 | 4,267 | 2,932 | 28,100 |
| 20,411 | 119 | 20,933 | 4,303 | 2,946 | 28,301 |
| 20,412 | 116 | 20,853 | 4,318 | 2,948 | 28,235 |
| 20,413 | 112 | 20,765 | 4,327 | 2,932 | 28,136 |
| 20,414 | 117 | 20,821 | 4,343 | 2,962 | 28,243 |
| 20,415 | 115 | 20,636 | 4,298 | 2,931 | 27,980 |
| 20,416 | 120 | 20,921 | 4,359 | 2,957 | 28,357 |
| 20,417 | 113 | 20,972 | 4,364 | 2,990 | 28,439 |
| 20,418 | 121 | 20,889 | 4,372 | 2,990 | 28,372 |
| 20,419 | 118 | 20,630 | 4,335 | 2,973 | 28,056 |
| 20,420 | 117 | 20,735 | 4,392 | 3,006 | 28,250 |
| 20,421 | 114 | 20,632 | 4,404 | 3,024 | 28,174 |
| 20,422 | 116 | 20,552 | 4,405 | 3,009 | 28,082 |
| 20,423 | 118 | 20,408 | 4,348 | 2,961 | 27,835 |
| 20,424 | 123 | 19,861 | 4,242 | 2,890 | 27,116 |
| 20,425 | 123 | 19,910 | 4,251 | 2,896 | 27,180 |
| 20,426 | 129 | 19,667 | 4,206 | 2,842 | 26,844 |
| 20,427 | 125 | 19,366 | 4,131 | 2,815 | 26,437 |
| 20,428 | 133 | 20,144 | 4,300 | 2,906 | 27,483 |
| 20,429 | 133 | 20,129 | 4,321 | 2,911 | 27,494 |
| 20,430 | 134 | 19,877 | 4,301 | 2,901 | 27,213 |
| 20,431 | 136 | 19,593 | 4,220 | 2,881 | 26,830 |
| 20,432 | 137 | 19,792 | 4,230 | 2,905 | 27,064 |
| 20,433 | 131 | 20,069 | 4,290 | 2,932 | 27,422 |
| 20,434 | 130 | 19,906 | 4,263 | 2,907 | 27,206 |
| 20,435 | 130 | 20,248 | 4,319 | 2,926 | 27,623 |
| 20,436 | 129 | 20,051 | 4,329 | 2,929 | 27,438 |
| 20,437 | 133 | 20,391 | 4,379 | 2,964 | 27,867 |
| 20,438 | 133 | 20,426 | 4,388 | 2,968 | 27,915 |
| 20,439 | 131 | 20,394 | 4,369 | 2,950 | 27,844 |

|        |     |        |       |       |        |
|--------|-----|--------|-------|-------|--------|
| 20,440 | 126 | 20,426 | 4,394 | 2,969 | 27,915 |
| 20,441 | 121 | 20,343 | 4,364 | 2,947 | 27,775 |
| 20,442 | 119 | 20,464 | 4,383 | 2,933 | 27,899 |
| 20,443 | 121 | 20,441 | 4,370 | 2,921 | 27,853 |
| 20,444 | 120 | 20,346 | 4,340 | 2,896 | 27,702 |
| 20,445 | 130 | 20,522 | 4,373 | 2,924 | 27,949 |
| 20,446 | 128 | 20,510 | 4,384 | 2,930 | 27,952 |
| 20,447 | 127 | 20,370 | 4,324 | 2,922 | 27,743 |
| 20,448 | 128 | 20,319 | 4,313 | 2,916 | 27,676 |
| 20,449 | 130 | 20,366 | 4,330 | 2,910 | 27,736 |
| 20,450 | 133 | 20,411 | 4,318 | 2,907 | 27,769 |
| 20,451 | 132 | 20,177 | 4,280 | 2,881 | 27,470 |
| 20,452 | 136 | 20,116 | 4,325 | 2,906 | 27,483 |
| 20,453 | 140 | 20,269 | 4,323 | 2,936 | 27,668 |
| 20,454 | 143 | 20,047 | 4,264 | 2,896 | 27,350 |
| 20,455 | 147 | 20,225 | 4,248 | 2,884 | 27,504 |
| 20,456 | 147 | 20,282 | 4,250 | 2,891 | 27,570 |
| 20,457 | 147 | 20,452 | 4,255 | 2,889 | 27,743 |
| 20,458 | 145 | 20,468 | 4,241 | 2,876 | 27,730 |
| 20,459 | 141 | 20,934 | 4,341 | 2,939 | 28,355 |
| 20,460 | 139 | 20,815 | 4,315 | 2,947 | 28,216 |
| 20,461 | 139 | 19,790 | 4,094 | 2,814 | 26,837 |
| 20,462 | 140 | 20,104 | 4,160 | 2,869 | 27,273 |
| 20,463 | 137 | 20,435 | 4,199 | 2,907 | 27,678 |
| 20,464 | 135 | 20,277 | 4,170 | 2,898 | 27,480 |
| 20,465 | 135 | 20,877 | 4,332 | 2,978 | 28,322 |
| 20,466 | 135 | 21,292 | 4,421 | 3,056 | 28,904 |
| 20,467 | 132 | 21,610 | 4,507 | 3,099 | 29,348 |
| 20,468 | 137 | 21,879 | 4,550 | 3,109 | 29,675 |
| 20,469 | 129 | 21,922 | 4,545 | 3,118 | 29,714 |
| 20,470 | 133 | 21,941 | 4,566 | 3,128 | 29,768 |
| 20,471 | 144 | 22,056 | 4,571 | 3,135 | 29,906 |



|        |     |        |       |       |        |
|--------|-----|--------|-------|-------|--------|
| 20,472 | 142 | 21,970 | 4,536 | 3,107 | 29,755 |
| 20,473 | 147 | 22,042 | 4,565 | 3,125 | 29,879 |
| 20,474 | 146 | 22,038 | 4,583 | 3,123 | 29,890 |
| 20,475 | 149 | 22,214 | 4,633 | 3,143 | 30,139 |
| 20,476 | 134 | 22,078 | 4,589 | 3,126 | 29,927 |
| 20,477 | 139 | 22,173 | 4,609 | 3,137 | 30,058 |
| 20,478 | 139 | 22,322 | 4,641 | 3,160 | 30,262 |
| 20,479 | 139 | 22,362 | 4,631 | 3,141 | 30,273 |
| 20,480 | 140 | 22,266 | 4,589 | 3,105 | 30,100 |
| 20,481 | 151 | 22,387 | 4,584 | 3,095 | 30,217 |
| 20,482 | 149 | 22,267 | 4,582 | 3,073 | 30,071 |
| 20,483 | 152 | 22,508 | 4,650 | 3,112 | 30,422 |
| 20,484 | 157 | 22,664 | 4,696 | 3,139 | 30,656 |
| 20,485 | 160 | 22,680 | 4,682 | 3,159 | 30,681 |
| 20,486 | 162 | 22,580 | 4,685 | 3,124 | 30,551 |
| 20,487 | 163 | 22,822 | 4,704 | 3,161 | 30,850 |
| 20,488 | 168 | 22,592 | 4,677 | 3,134 | 30,571 |
| 20,489 | 165 | 22,215 | 4,617 | 3,104 | 30,101 |
| 20,490 | 166 | 22,531 | 4,715 | 3,177 | 30,589 |
| 20,491 | 179 | 22,619 | 4,733 | 3,210 | 30,741 |
| 20,492 | 180 | 22,399 | 4,669 | 3,177 | 30,425 |
| 20,493 | 182 | 22,458 | 4,721 | 3,203 | 30,564 |
| 20,494 | 192 | 22,783 | 4,758 | 3,297 | 31,030 |
| 20,495 | 193 | 22,705 | 4,761 | 3,283 | 30,942 |
| 20,496 | 187 | 23,019 | 4,813 | 3,301 | 31,320 |
| 20,497 | 187 | 22,943 | 4,818 | 3,295 | 31,243 |
| 20,498 | 186 | 22,825 | 4,848 | 3,306 | 31,165 |
| 20,499 | 189 | 22,888 | 4,847 | 3,331 | 31,255 |
| 20,500 | 187 | 23,307 | 4,975 | 3,406 | 31,875 |
| 20,501 | 180 | 23,244 | 4,965 | 3,408 | 31,797 |
| 20,502 | 179 | 23,495 | 4,958 | 3,423 | 32,055 |
| 20,503 | 182 | 23,705 | 5,030 | 3,456 | 32,373 |

|        |     |        |       |       |        |
|--------|-----|--------|-------|-------|--------|
| 20,504 | 179 | 23,382 | 5,017 | 3,437 | 32,015 |
| 20,505 | 175 | 23,192 | 5,009 | 3,439 | 31,815 |
| 20,506 | 175 | 23,298 | 5,092 | 3,471 | 32,036 |
| 20,507 | 179 | 23,340 | 5,138 | 3,524 | 32,181 |
| 20,508 | 176 | 23,216 | 5,147 | 3,521 | 32,060 |
| 20,509 | 176 | 23,077 | 5,134 | 3,515 | 31,902 |
| 20,510 | 175 | 22,726 | 5,060 | 3,463 | 31,424 |
| 20,511 | 176 | 22,168 | 5,002 | 3,386 | 30,732 |
| 20,512 | 179 | 22,272 | 4,992 | 3,401 | 30,844 |
| 20,513 | 182 | 21,987 | 4,938 | 3,349 | 30,456 |
| 20,514 | 183 | 21,647 | 4,932 | 3,321 | 30,083 |
| 20,515 | 181 | 22,287 | 5,045 | 3,412 | 30,925 |
| 20,516 | 179 | 21,934 | 4,975 | 3,367 | 30,455 |
| 20,517 | 182 | 21,481 | 4,861 | 3,314 | 29,838 |
| 20,518 | 185 | 21,595 | 4,872 | 3,335 | 29,987 |
| 20,519 | 182 | 21,664 | 4,880 | 3,355 | 30,081 |
| 20,520 | 183 | 21,549 | 4,860 | 3,342 | 29,934 |
| 20,521 | 183 | 21,666 | 4,861 | 3,349 | 30,059 |
| 20,522 | 175 | 21,491 | 4,837 | 3,333 | 29,836 |
| 20,523 | 177 | 21,416 | 4,835 | 3,341 | 29,769 |
| 20,524 | 167 | 21,343 | 4,790 | 3,323 | 29,623 |
| 20,525 | 164 | 21,580 | 4,842 | 3,370 | 29,956 |
| 20,526 | 159 | 21,324 | 4,771 | 3,338 | 29,592 |
| 20,527 | 160 | 21,303 | 4,795 | 3,333 | 29,591 |
| 20,528 | 156 | 21,680 | 4,881 | 3,419 | 30,136 |
| 20,529 | 160 | 21,425 | 4,842 | 3,400 | 29,827 |
| 20,530 | 158 | 21,342 | 4,855 | 3,411 | 29,766 |
| 20,531 | 146 | 21,347 | 4,857 | 3,455 | 29,805 |
| 20,532 | 147 | 21,178 | 4,864 | 3,459 | 29,648 |
| 20,533 | 146 | 21,392 | 4,882 | 3,472 | 29,892 |
| 20,534 | 143 | 21,146 | 4,848 | 3,463 | 29,600 |
| 20,535 | 143 | 21,120 | 4,835 | 3,497 | 29,595 |

|        |     |        |       |       |        |
|--------|-----|--------|-------|-------|--------|
| 20,536 | 139 | 21,047 | 4,845 | 3,511 | 29,542 |
| 20,537 | 137 | 20,964 | 4,837 | 3,546 | 29,484 |
| 20,538 | 137 | 20,803 | 4,847 | 3,541 | 29,328 |
| 20,539 | 124 | 20,844 | 4,849 | 3,548 | 29,365 |
| 20,540 | 130 | 21,055 | 4,925 | 3,600 | 29,710 |
| 20,541 | 122 | 20,886 | 4,885 | 3,586 | 29,479 |
| 20,542 | 123 | 20,980 | 4,984 | 3,617 | 29,704 |
| 20,543 | 121 | 21,003 | 5,045 | 3,659 | 29,828 |
| 20,544 | 119 | 20,663 | 5,013 | 3,649 | 29,444 |
| 20,545 | 112 | 20,424 | 5,009 | 3,615 | 29,160 |
| 20,546 | 115 | 20,976 | 5,146 | 3,714 | 29,951 |
| 20,547 | 119 | 20,711 | 5,119 | 3,702 | 29,651 |
| 20,548 | 118 | 20,693 | 5,123 | 3,711 | 29,645 |
| 20,549 | 118 | 20,926 | 5,173 | 3,736 | 29,953 |
| 20,550 | 118 | 20,864 | 5,161 | 3,751 | 29,894 |
| 20,551 | 118 | 20,850 | 5,163 | 3,740 | 29,871 |
| 20,552 | 121 | 20,707 | 5,101 | 3,701 | 29,630 |
| 20,553 | 121 | 20,906 | 5,142 | 3,724 | 29,893 |
| 20,554 | 125 | 21,051 | 5,168 | 3,774 | 30,118 |
| 20,555 | 120 | 21,057 | 5,154 | 3,763 | 30,094 |
| 20,556 | 123 | 21,063 | 5,147 | 3,758 | 30,091 |
| 20,557 | 120 | 21,068 | 5,156 | 3,740 | 30,084 |
| 20,558 | 120 | 21,152 | 5,159 | 3,746 | 30,177 |
| 20,559 | 122 | 20,986 | 5,116 | 3,721 | 29,945 |
| 20,560 | 123 | 20,726 | 5,065 | 3,681 | 29,595 |
| 20,561 | 127 | 21,012 | 5,154 | 3,751 | 30,044 |
| 20,562 | 120 | 20,760 | 5,097 | 3,707 | 29,684 |
| 20,563 | 119 | 20,760 | 5,143 | 3,708 | 29,730 |
| 20,564 | 125 | 20,943 | 5,209 | 3,756 | 30,033 |
| 20,565 | 123 | 20,658 | 5,134 | 3,710 | 29,625 |
| 20,566 | 132 | 20,767 | 5,180 | 3,744 | 29,823 |
| 20,567 | 134 | 20,649 | 5,193 | 3,719 | 29,695 |

|        |     |        |       |       |        |
|--------|-----|--------|-------|-------|--------|
| 20,568 | 130 | 20,566 | 5,199 | 3,711 | 29,606 |
| 20,569 | 130 | 20,494 | 5,190 | 3,706 | 29,520 |
| 20,570 | 128 | 20,225 | 5,146 | 3,684 | 29,183 |
| 20,571 | 124 | 20,419 | 5,183 | 3,718 | 29,444 |
| 20,572 | 126 | 20,298 | 5,146 | 3,698 | 29,268 |
| 20,573 | 123 | 20,194 | 5,117 | 3,679 | 29,113 |
| 20,574 | 121 | 20,301 | 5,128 | 3,694 | 29,244 |
| 20,575 | 124 | 19,796 | 5,010 | 3,621 | 28,551 |
| 20,576 | 125 | 19,874 | 5,033 | 3,638 | 28,670 |
| 20,577 | 127 | 19,996 | 5,048 | 3,669 | 28,840 |
| 20,578 | 132 | 20,078 | 5,070 | 3,668 | 28,948 |
| 20,579 | 131 | 19,969 | 5,047 | 3,637 | 28,784 |
| 20,580 | 124 | 20,042 | 5,079 | 3,639 | 28,884 |
| 20,581 | 127 | 19,888 | 5,036 | 3,576 | 28,627 |
| 20,582 | 126 | 19,935 | 5,047 | 3,586 | 28,694 |
| 20,583 | 126 | 20,185 | 5,092 | 3,638 | 29,041 |
| 20,584 | 123 | 19,971 | 5,073 | 3,624 | 28,791 |
| 20,585 | 121 | 20,001 | 5,081 | 3,590 | 28,793 |
| 20,586 | 122 | 19,969 | 5,097 | 3,576 | 28,764 |
| 20,587 | 123 | 20,035 | 5,147 | 3,600 | 28,905 |
| 20,588 | 122 | 19,929 | 5,105 | 3,568 | 28,724 |
| 20,589 | 120 | 19,749 | 5,027 | 3,534 | 28,430 |
| 20,590 | 120 | 19,974 | 5,085 | 3,565 | 28,744 |
| 20,591 | 120 | 20,123 | 5,126 | 3,589 | 28,958 |
| 20,592 | 119 | 19,939 | 5,069 | 3,550 | 28,677 |
| 20,593 | 126 | 19,659 | 4,940 | 3,471 | 28,196 |
| 20,594 | 126 | 19,748 | 4,949 | 3,483 | 28,306 |
| 20,595 | 123 | 19,958 | 4,951 | 3,453 | 28,485 |
| 20,596 | 120 | 19,654 | 4,850 | 3,379 | 28,003 |
| 20,597 | 120 | 19,603 | 4,834 | 3,376 | 27,933 |
| 20,598 | 120 | 19,503 | 4,768 | 3,331 | 27,722 |
| 20,599 | 119 | 19,450 | 4,738 | 3,333 | 27,640 |

|        |     |        |       |       |        |
|--------|-----|--------|-------|-------|--------|
| 20,600 | 131 | 19,375 | 4,700 | 3,300 | 27,506 |
| 20,601 | 131 | 19,333 | 4,693 | 3,305 | 27,462 |
| 20,602 | 134 | 19,490 | 4,729 | 3,324 | 27,677 |
| 20,603 | 132 | 19,213 | 4,706 | 3,280 | 27,331 |
| 20,604 | 134 | 19,513 | 4,778 | 3,331 | 27,756 |
| 20,605 | 127 | 19,274 | 4,726 | 3,286 | 27,413 |
| 20,606 | 137 | 19,513 | 4,740 | 3,342 | 27,732 |
| 20,607 | 132 | 19,401 | 4,701 | 3,310 | 27,544 |
| 20,608 | 143 | 19,506 | 4,725 | 3,317 | 27,691 |
| 20,609 | 142 | 19,543 | 4,726 | 3,309 | 27,720 |
| 20,610 | 152 | 19,632 | 4,739 | 3,343 | 27,866 |
| 20,611 | 151 | 19,676 | 4,748 | 3,334 | 27,909 |
| 20,612 | 150 | 19,884 | 4,763 | 3,352 | 28,149 |
| 20,613 | 149 | 20,103 | 4,803 | 3,397 | 28,452 |
| 20,614 | 146 | 20,249 | 4,856 | 3,434 | 28,685 |
| 20,615 | 157 | 20,375 | 4,885 | 3,433 | 28,850 |
| 20,616 | 151 | 20,374 | 4,869 | 3,417 | 28,811 |
| 20,617 | 153 | 20,604 | 4,898 | 3,439 | 29,094 |
| 20,618 | 153 | 20,632 | 4,894 | 3,460 | 29,139 |
| 20,619 | 161 | 20,804 | 4,957 | 3,496 | 29,418 |
| 20,620 | 159 | 20,896 | 4,966 | 3,482 | 29,503 |
| 20,621 | 165 | 20,948 | 4,949 | 3,465 | 29,527 |
| 20,622 | 165 | 20,946 | 4,959 | 3,475 | 29,545 |
| 20,623 | 163 | 20,918 | 4,988 | 3,482 | 29,551 |
| 20,624 | 165 | 21,270 | 5,054 | 3,508 | 29,997 |
| 20,625 | 162 | 21,124 | 5,030 | 3,487 | 29,803 |
| 20,626 | 162 | 21,173 | 5,037 | 3,480 | 29,852 |
| 20,627 | 161 | 21,141 | 5,042 | 3,494 | 29,838 |
| 20,628 | 160 | 21,127 | 5,067 | 3,511 | 29,865 |
| 20,629 | 163 | 21,361 | 5,123 | 3,558 | 30,205 |
| 20,630 | 164 | 21,326 | 5,137 | 3,555 | 30,182 |
| 20,631 | 163 | 21,349 | 5,147 | 3,576 | 30,235 |

|        |     |        |       |       |        |
|--------|-----|--------|-------|-------|--------|
| 20,632 | 165 | 21,408 | 5,159 | 3,594 | 30,326 |
| 20,633 | 168 | 21,468 | 5,154 | 3,621 | 30,411 |
| 20,634 | 169 | 21,441 | 5,159 | 3,604 | 30,373 |
| 20,635 | 169 | 21,318 | 5,133 | 3,574 | 30,194 |
| 20,636 | 170 | 21,495 | 5,156 | 3,601 | 30,422 |
| 20,637 | 170 | 21,472 | 5,104 | 3,559 | 30,305 |
| 20,638 | 172 | 21,621 | 5,064 | 3,542 | 30,399 |
| 20,639 | 176 | 21,819 | 5,117 | 3,573 | 30,685 |
| 20,640 | 176 | 21,628 | 5,097 | 3,528 | 30,429 |
| 20,641 | 178 | 21,709 | 5,093 | 3,521 | 30,501 |
| 20,642 | 171 | 21,537 | 5,028 | 3,477 | 30,213 |
| 20,643 | 171 | 21,586 | 5,058 | 3,496 | 30,311 |
| 20,644 | 168 | 21,453 | 5,037 | 3,478 | 30,136 |
| 20,645 | 170 | 21,388 | 5,032 | 3,489 | 30,079 |
| 20,646 | 166 | 21,187 | 4,999 | 3,470 | 29,822 |
| 20,647 | 172 | 21,024 | 5,017 | 3,443 | 29,656 |
| 20,648 | 170 | 20,933 | 5,031 | 3,430 | 29,564 |
| 20,649 | 167 | 20,877 | 5,035 | 3,431 | 29,510 |
| 20,650 | 168 | 20,783 | 5,036 | 3,431 | 29,418 |
| 20,651 | 156 | 20,758 | 5,062 | 3,438 | 29,414 |
| 20,652 | 154 | 20,781 | 5,092 | 3,440 | 29,467 |
| 20,653 | 156 | 20,697 | 5,086 | 3,443 | 29,382 |
| 20,654 | 157 | 20,813 | 5,133 | 3,459 | 29,562 |
| 20,655 | 158 | 20,619 | 5,062 | 3,427 | 29,266 |
| 20,656 | 157 | 20,616 | 5,091 | 3,425 | 29,289 |
| 20,657 | 151 | 20,646 | 5,117 | 3,419 | 29,333 |
| 20,658 | 151 | 20,640 | 5,117 | 3,440 | 29,348 |
| 20,659 | 145 | 20,307 | 5,037 | 3,387 | 28,876 |
| 20,660 | 146 | 20,405 | 5,106 | 3,426 | 29,083 |
| 20,661 | 133 | 20,529 | 5,179 | 3,463 | 29,304 |
| 20,662 | 133 | 20,347 | 5,199 | 3,474 | 29,153 |
| 20,663 | 136 | 20,276 | 5,199 | 3,472 | 29,083 |

|        |     |        |       |       |        |
|--------|-----|--------|-------|-------|--------|
| 20,664 | 135 | 19,868 | 5,122 | 3,429 | 28,554 |
| 20,665 | 137 | 20,075 | 5,176 | 3,466 | 28,854 |
| 20,666 | 126 | 20,211 | 5,256 | 3,506 | 29,099 |
| 20,667 | 121 | 19,948 | 5,240 | 3,476 | 28,785 |
| 20,668 | 121 | 20,063 | 5,305 | 3,514 | 29,003 |
| 20,669 | 123 | 19,963 | 5,330 | 3,492 | 28,908 |
| 20,670 | 115 | 19,782 | 5,297 | 3,459 | 28,653 |
| 20,671 | 118 | 19,572 | 5,318 | 3,469 | 28,477 |
| 20,672 | 115 | 19,555 | 5,377 | 3,492 | 28,539 |
| 20,673 | 114 | 19,408 | 5,364 | 3,468 | 28,354 |
| 20,674 | 119 | 19,513 | 5,415 | 3,512 | 28,559 |
| 20,675 | 118 | 19,194 | 5,388 | 3,484 | 28,184 |
| 20,676 | 120 | 19,241 | 5,419 | 3,484 | 28,264 |
| 20,677 | 121 | 19,201 | 5,414 | 3,493 | 28,229 |
| 20,678 | 120 | 19,416 | 5,494 | 3,528 | 28,558 |
| 20,679 | 113 | 19,229 | 5,488 | 3,500 | 28,330 |
| 20,680 | 113 | 19,315 | 5,528 | 3,522 | 28,478 |
| 20,681 | 110 | 19,312 | 5,569 | 3,560 | 28,551 |
| 20,682 | 110 | 19,206 | 5,547 | 3,557 | 28,420 |
| 20,683 | 111 | 19,189 | 5,594 | 3,552 | 28,446 |
| 20,684 | 108 | 18,995 | 5,572 | 3,510 | 28,185 |
| 20,685 | 107 | 19,149 | 5,656 | 3,556 | 28,468 |
| 20,686 | 107 | 18,900 | 5,603 | 3,525 | 28,135 |
| 20,687 | 107 | 18,725 | 5,618 | 3,560 | 28,010 |
| 20,688 | 106 | 18,771 | 5,688 | 3,629 | 28,194 |
| 20,689 | 104 | 18,566 | 5,709 | 3,631 | 28,010 |
| 20,690 | 100 | 18,264 | 5,679 | 3,610 | 27,653 |
| 20,691 | 99  | 17,951 | 5,650 | 3,599 | 27,299 |
| 20,692 | 98  | 17,637 | 5,578 | 3,563 | 26,876 |
| 20,693 | 97  | 17,208 | 5,510 | 3,514 | 26,329 |
| 20,694 | 96  | 16,986 | 5,423 | 3,450 | 25,955 |
| 20,695 | 93  | 16,834 | 5,356 | 3,404 | 25,687 |

|        |    |        |       |       |        |
|--------|----|--------|-------|-------|--------|
| 20,696 | 90 | 16,554 | 5,318 | 3,362 | 25,324 |
| 20,697 | 84 | 16,087 | 5,181 | 3,294 | 24,646 |
| 20,698 | 83 | 15,989 | 5,141 | 3,285 | 24,498 |
| 20,699 | 81 | 15,866 | 5,113 | 3,270 | 24,330 |
| 20,700 | 79 | 15,621 | 5,033 | 3,229 | 23,962 |
| 20,701 | 77 | 15,421 | 4,962 | 3,190 | 23,650 |
| 20,702 | 76 | 15,201 | 4,887 | 3,148 | 23,312 |
| 20,703 | 75 | 14,982 | 4,839 | 3,109 | 23,005 |
| 20,704 | 74 | 14,735 | 4,794 | 3,070 | 22,673 |
| 20,705 | 73 | 14,704 | 4,822 | 3,115 | 22,714 |
| 20,706 | 72 | 14,540 | 4,824 | 3,115 | 22,551 |
| 20,707 | 72 | 14,799 | 4,863 | 3,171 | 22,905 |
| 20,708 | 71 | 14,921 | 4,934 | 3,198 | 23,124 |
| 20,709 | 69 | 15,083 | 4,997 | 3,232 | 23,381 |
| 20,710 | 67 | 15,366 | 5,043 | 3,272 | 23,748 |
| 20,711 | 65 | 15,046 | 4,930 | 3,207 | 23,248 |
| 20,712 | 64 | 15,082 | 4,952 | 3,239 | 23,337 |
| 20,713 | 65 | 15,402 | 5,061 | 3,318 | 23,846 |
| 20,714 | 67 | 15,716 | 5,177 | 3,397 | 24,357 |
| 20,715 | 65 | 16,181 | 5,320 | 3,461 | 25,027 |
| 20,716 | 66 | 16,612 | 5,435 | 3,529 | 25,642 |
| 20,717 | 67 | 16,709 | 5,507 | 3,606 | 25,889 |
| 20,718 | 69 | 16,999 | 5,608 | 3,677 | 26,353 |
| 20,719 | 68 | 17,476 | 5,724 | 3,763 | 27,031 |
| 20,720 | 63 | 17,410 | 5,654 | 3,752 | 26,879 |
| 20,721 | 63 | 17,880 | 5,771 | 3,867 | 27,581 |
| 20,722 | 65 | 18,266 | 5,869 | 3,961 | 28,161 |
| 20,723 | 62 | 18,166 | 5,854 | 3,937 | 28,019 |
| 20,724 | 59 | 18,577 | 5,986 | 4,018 | 28,640 |
| 20,725 | 56 | 18,933 | 6,064 | 4,069 | 29,122 |
| 20,726 | 56 | 18,987 | 6,101 | 4,086 | 29,230 |
| 20,727 | 53 | 19,328 | 6,225 | 4,169 | 29,775 |



|        |    |        |       |       |        |
|--------|----|--------|-------|-------|--------|
| 20,728 | 53 | 19,395 | 6,286 | 4,257 | 29,991 |
| 20,729 | 53 | 19,515 | 6,405 | 4,306 | 30,279 |
| 20,730 | 53 | 19,959 | 6,465 | 4,373 | 30,850 |
| 20,731 | 52 | 19,875 | 6,419 | 4,391 | 30,737 |
| 20,732 | 55 | 20,320 | 6,536 | 4,467 | 31,378 |
| 20,733 | 58 | 20,785 | 6,637 | 4,549 | 32,029 |
| 20,734 | 50 | 20,891 | 6,676 | 4,607 | 32,224 |
| 20,735 | 51 | 21,305 | 6,799 | 4,659 | 32,814 |
| 20,736 | 56 | 21,617 | 6,901 | 4,739 | 33,313 |
| 20,737 | 58 | 22,198 | 6,977 | 4,788 | 34,021 |
| 20,738 | 61 | 22,588 | 7,048 | 4,817 | 34,514 |
| 20,739 | 61 | 22,841 | 7,054 | 4,832 | 34,788 |
| 20,740 | 61 | 22,913 | 7,083 | 4,853 | 34,910 |
| 20,741 | 63 | 23,992 | 7,339 | 5,030 | 36,424 |
| 20,742 | 68 | 24,679 | 7,483 | 5,123 | 37,353 |
| 20,743 | 66 | 25,313 | 7,647 | 5,229 | 38,255 |
| 20,744 | 70 | 25,923 | 7,804 | 5,346 | 39,143 |
| 20,745 | 75 | 25,964 | 7,862 | 5,375 | 39,276 |
| 20,746 | 75 | 25,981 | 7,904 | 5,384 | 39,344 |
| 20,747 | 76 | 26,418 | 8,102 | 5,534 | 40,130 |
| 20,748 | 78 | 26,569 | 8,209 | 5,592 | 40,448 |
| 20,749 | 79 | 27,212 | 8,380 | 5,702 | 41,373 |
| 20,750 | 79 | 27,381 | 8,450 | 5,733 | 41,643 |
| 20,751 | 79 | 27,576 | 8,500 | 5,756 | 41,911 |
| 20,752 | 79 | 27,792 | 8,560 | 5,793 | 42,224 |
| 20,753 | 79 | 27,803 | 8,553 | 5,800 | 42,235 |
| 20,754 | 76 | 27,361 | 8,387 | 5,696 | 41,520 |
| 20,755 | 76 | 27,253 | 8,344 | 5,673 | 41,346 |
| 20,756 | 75 | 27,135 | 8,309 | 5,645 | 41,164 |
| 20,757 | 75 | 26,881 | 8,250 | 5,582 | 40,788 |
| 20,758 | 76 | 26,443 | 8,119 | 5,487 | 40,125 |
| 20,759 | 76 | 25,947 | 7,961 | 5,398 | 39,382 |

|        |    |        |       |       |        |
|--------|----|--------|-------|-------|--------|
| 20,760 | 76 | 25,353 | 7,800 | 5,283 | 38,512 |
| 20,761 | 74 | 24,717 | 7,643 | 5,174 | 37,608 |
| 20,762 | 74 | 23,839 | 7,338 | 4,980 | 36,231 |
| 20,763 | 74 | 23,692 | 7,257 | 4,924 | 35,947 |
| 20,764 | 73 | 23,447 | 7,152 | 4,853 | 35,525 |
| 20,765 | 68 | 22,963 | 6,991 | 4,749 | 34,771 |
| 20,766 | 65 | 22,091 | 6,751 | 4,605 | 33,512 |
| 20,767 | 60 | 21,428 | 6,564 | 4,488 | 32,540 |
| 20,768 | 58 | 20,986 | 6,356 | 4,343 | 31,743 |
| 20,769 | 56 | 20,341 | 6,146 | 4,210 | 30,753 |
| 20,770 | 56 | 19,462 | 5,908 | 4,041 | 29,467 |
| 20,771 | 53 | 18,970 | 5,735 | 3,932 | 28,690 |
| 20,772 | 53 | 18,462 | 5,587 | 3,802 | 27,904 |
| 20,773 | 51 | 17,735 | 5,363 | 3,641 | 26,790 |
| 20,774 | 51 | 17,639 | 5,308 | 3,610 | 26,608 |
| 20,775 | 51 | 17,006 | 5,135 | 3,487 | 25,679 |
| 20,776 | 51 | 16,456 | 4,998 | 3,402 | 24,907 |
| 20,777 | 52 | 16,176 | 4,875 | 3,340 | 24,443 |
| 20,778 | 51 | 15,540 | 4,680 | 3,218 | 23,489 |
| 20,779 | 50 | 15,191 | 4,541 | 3,092 | 22,874 |
| 20,780 | 50 | 14,898 | 4,349 | 2,987 | 22,284 |
| 20,781 | 50 | 14,028 | 4,118 | 2,804 | 21,000 |
| 20,782 | 50 | 13,836 | 4,045 | 2,745 | 20,676 |
| 20,783 | 48 | 13,474 | 3,938 | 2,688 | 20,148 |
| 20,784 | 46 | 12,708 | 3,766 | 2,547 | 19,067 |
| 20,785 | 46 | 12,256 | 3,606 | 2,417 | 18,325 |
| 20,786 | 45 | 11,618 | 3,403 | 2,296 | 17,362 |
| 20,787 | 42 | 10,973 | 3,223 | 2,180 | 16,418 |
| 20,788 | 39 | 10,285 | 3,079 | 2,090 | 15,493 |
| 20,789 | 36 | 9,977  | 3,072 | 2,091 | 15,176 |
| 20,790 | 40 | 9,380  | 2,946 | 2,029 | 14,395 |
| 20,791 | 43 | 9,469  | 2,949 | 2,030 | 14,491 |

|        |    |        |       |       |        |
|--------|----|--------|-------|-------|--------|
| 20,792 | 43 | 9,173  | 2,884 | 1,978 | 14,078 |
| 20,793 | 39 | 8,903  | 2,821 | 1,927 | 13,690 |
| 20,794 | 38 | 8,860  | 2,781 | 1,916 | 13,595 |
| 20,795 | 33 | 8,443  | 2,693 | 1,849 | 13,018 |
| 20,796 | 29 | 8,428  | 2,655 | 1,882 | 12,994 |
| 20,797 | 30 | 8,672  | 2,740 | 1,940 | 13,382 |
| 20,798 | 28 | 8,982  | 2,797 | 2,029 | 13,836 |
| 20,799 | 30 | 9,439  | 2,902 | 2,080 | 14,451 |
| 20,800 | 29 | 9,789  | 3,004 | 2,159 | 14,981 |
| 20,801 | 34 | 9,936  | 3,095 | 2,232 | 15,297 |
| 20,802 | 38 | 10,217 | 3,195 | 2,313 | 15,763 |
| 20,803 | 38 | 10,815 | 3,358 | 2,427 | 16,638 |
| 20,804 | 40 | 11,192 | 3,491 | 2,505 | 17,228 |
| 20,805 | 40 | 11,728 | 3,650 | 2,622 | 18,040 |
| 20,806 | 40 | 12,195 | 3,812 | 2,738 | 18,785 |
| 20,807 | 40 | 12,410 | 3,895 | 2,782 | 19,127 |
| 20,808 | 42 | 13,142 | 4,108 | 2,951 | 20,243 |
| 20,809 | 41 | 13,798 | 4,302 | 3,060 | 21,201 |
| 20,810 | 40 | 14,166 | 4,445 | 3,152 | 21,803 |
| 20,811 | 41 | 14,810 | 4,645 | 3,298 | 22,794 |
| 20,812 | 41 | 15,186 | 4,813 | 3,422 | 23,462 |
| 20,813 | 42 | 15,583 | 5,003 | 3,560 | 24,188 |
| 20,814 | 42 | 16,303 | 5,209 | 3,700 | 25,254 |
| 20,815 | 42 | 16,745 | 5,361 | 3,820 | 25,968 |
| 20,816 | 44 | 17,285 | 5,489 | 3,924 | 26,742 |
| 20,817 | 45 | 18,225 | 5,704 | 4,075 | 28,049 |
| 20,818 | 47 | 18,810 | 5,914 | 4,200 | 28,971 |
| 20,819 | 48 | 19,498 | 6,131 | 4,340 | 30,017 |
| 20,820 | 55 | 20,314 | 6,334 | 4,495 | 31,198 |
| 20,821 | 56 | 21,130 | 6,552 | 4,634 | 32,372 |
| 20,822 | 62 | 21,826 | 6,755 | 4,766 | 33,409 |
| 20,823 | 63 | 22,537 | 6,944 | 4,898 | 34,442 |

|        |    |        |       |       |        |
|--------|----|--------|-------|-------|--------|
| 20,824 | 63 | 22,688 | 7,012 | 4,954 | 34,717 |
| 20,825 | 65 | 23,875 | 7,293 | 5,141 | 36,374 |
| 20,826 | 71 | 24,675 | 7,490 | 5,289 | 37,525 |
| 20,827 | 73 | 25,358 | 7,659 | 5,424 | 38,514 |
| 20,828 | 74 | 25,960 | 7,841 | 5,546 | 39,421 |
| 20,829 | 76 | 26,039 | 7,888 | 5,574 | 39,577 |
| 20,830 | 77 | 26,037 | 7,912 | 5,598 | 39,624 |
| 20,831 | 76 | 26,504 | 8,123 | 5,727 | 40,430 |
| 20,832 | 78 | 26,744 | 8,231 | 5,799 | 40,852 |
| 20,833 | 79 | 27,357 | 8,416 | 5,891 | 41,743 |
| 20,834 | 78 | 27,535 | 8,456 | 5,918 | 41,987 |
| 20,835 | 78 | 27,737 | 8,497 | 5,954 | 42,266 |
| 20,836 | 77 | 27,937 | 8,552 | 6,007 | 42,573 |
| 20,837 | 76 | 27,944 | 8,558 | 6,021 | 42,599 |
| 20,838 | 74 | 27,523 | 8,397 | 5,886 | 41,880 |
| 20,839 | 74 | 27,420 | 8,344 | 5,844 | 41,682 |
| 20,840 | 70 | 27,275 | 8,294 | 5,798 | 41,437 |
| 20,841 | 70 | 27,025 | 8,244 | 5,734 | 41,073 |
| 20,842 | 69 | 26,573 | 8,116 | 5,654 | 40,412 |
| 20,843 | 67 | 26,071 | 7,974 | 5,560 | 39,672 |
| 20,844 | 66 | 25,543 | 7,842 | 5,467 | 38,918 |
| 20,845 | 66 | 24,902 | 7,700 | 5,356 | 38,024 |
| 20,846 | 65 | 24,058 | 7,394 | 5,122 | 36,639 |
| 20,847 | 65 | 23,896 | 7,302 | 5,047 | 36,310 |
| 20,848 | 64 | 23,647 | 7,187 | 4,966 | 35,864 |
| 20,849 | 64 | 23,137 | 7,029 | 4,828 | 35,058 |
| 20,850 | 62 | 22,298 | 6,813 | 4,678 | 33,851 |
| 20,851 | 61 | 21,614 | 6,617 | 4,548 | 32,840 |
| 20,852 | 56 | 21,193 | 6,429 | 4,425 | 32,103 |
| 20,853 | 51 | 20,625 | 6,263 | 4,293 | 31,232 |
| 20,854 | 51 | 19,714 | 6,019 | 4,121 | 29,905 |
| 20,855 | 49 | 19,206 | 5,856 | 4,007 | 29,118 |

|        |    |        |       |       |        |
|--------|----|--------|-------|-------|--------|
| 20,856 | 49 | 18,711 | 5,714 | 3,901 | 28,375 |
| 20,857 | 48 | 18,047 | 5,481 | 3,733 | 27,309 |
| 20,858 | 48 | 17,935 | 5,414 | 3,681 | 27,078 |
| 20,859 | 46 | 17,322 | 5,266 | 3,562 | 26,196 |
| 20,860 | 47 | 16,818 | 5,111 | 3,490 | 25,466 |
| 20,861 | 48 | 16,535 | 4,992 | 3,413 | 24,988 |
| 20,862 | 47 | 15,976 | 4,808 | 3,279 | 24,110 |
| 20,863 | 48 | 15,645 | 4,649 | 3,165 | 23,507 |
| 20,864 | 48 | 15,322 | 4,486 | 3,044 | 22,900 |
| 20,865 | 48 | 14,460 | 4,238 | 2,860 | 21,606 |
| 20,866 | 48 | 14,283 | 4,166 | 2,798 | 21,295 |
| 20,867 | 46 | 13,892 | 4,077 | 2,723 | 20,738 |
| 20,868 | 45 | 13,028 | 3,878 | 2,586 | 19,537 |
| 20,869 | 43 | 12,527 | 3,700 | 2,486 | 18,756 |
| 20,870 | 42 | 11,937 | 3,498 | 2,362 | 17,839 |
| 20,871 | 35 | 11,088 | 3,288 | 2,203 | 16,614 |
| 20,872 | 34 | 10,248 | 3,065 | 2,052 | 15,399 |
| 20,873 | 28 | 9,547  | 2,849 | 1,916 | 14,340 |
| 20,874 | 27 | 8,801  | 2,641 | 1,780 | 13,249 |
| 20,875 | 26 | 8,227  | 2,465 | 1,655 | 12,373 |
| 20,876 | 24 | 7,409  | 2,265 | 1,529 | 11,227 |
| 20,877 | 18 | 6,505  | 2,030 | 1,372 | 9,925  |
| 20,878 | 16 | 5,773  | 1,851 | 1,215 | 8,855  |
| 20,879 | 13 | 5,054  | 1,637 | 1,066 | 7,770  |
| 20,880 | 11 | 4,455  | 1,404 | 894   | 6,764  |
| 20,881 | 11 | 4,306  | 1,311 | 848   | 6,476  |
| 20,882 | 9  | 4,077  | 1,244 | 789   | 6,119  |
| 20,883 | 9  | 3,783  | 1,121 | 717   | 5,630  |
| 20,884 | 8  | 3,403  | 998   | 665   | 5,074  |
| 20,885 | 8  | 3,135  | 938   | 617   | 4,698  |
| 20,886 | 6  | 2,850  | 865   | 573   | 4,294  |
| 20,887 | 7  | 2,572  | 799   | 514   | 3,892  |

|        |   |       |     |     |       |
|--------|---|-------|-----|-----|-------|
| 20,888 | 7 | 2,450 | 754 | 479 | 3,690 |
| 20,889 | 7 | 2,466 | 757 | 482 | 3,712 |
| 20,890 | 7 | 2,466 | 761 | 489 | 3,723 |
| 20,891 | 7 | 2,450 | 754 | 487 | 3,698 |
| 20,892 | 7 | 2,439 | 751 | 490 | 3,687 |
| 20,893 | 5 | 2,439 | 750 | 488 | 3,682 |
| 20,894 | 5 | 2,442 | 739 | 488 | 3,674 |
| 20,895 | 5 | 2,443 | 733 | 487 | 3,668 |
| 20,896 | 5 | 2,423 | 725 | 489 | 3,642 |
| 20,897 | 5 | 2,420 | 733 | 487 | 3,645 |
| 20,898 | 5 | 2,426 | 734 | 489 | 3,654 |
| 20,899 | 5 | 2,420 | 733 | 487 | 3,645 |
| 20,900 | 5 | 2,445 | 735 | 493 | 3,678 |
| 20,901 | 5 | 2,467 | 743 | 496 | 3,711 |
| 20,902 | 6 | 2,646 | 779 | 532 | 3,963 |
| 20,903 | 6 | 2,732 | 800 | 558 | 4,096 |
| 20,904 | 8 | 2,814 | 807 | 568 | 4,197 |
| 20,905 | 8 | 2,886 | 825 | 592 | 4,311 |
| 20,906 | 8 | 2,977 | 840 | 598 | 4,423 |
| 20,907 | 8 | 3,044 | 841 | 606 | 4,499 |
| 20,908 | 8 | 3,048 | 842 | 609 | 4,507 |
| 20,909 | 7 | 3,183 | 887 | 625 | 4,702 |
| 20,910 | 8 | 3,203 | 897 | 638 | 4,746 |
| 20,911 | 8 | 3,246 | 896 | 631 | 4,781 |
| 20,912 | 8 | 3,237 | 881 | 626 | 4,752 |
| 20,913 | 9 | 3,116 | 852 | 604 | 4,581 |
| 20,914 | 8 | 3,011 | 826 | 584 | 4,429 |
| 20,915 | 7 | 2,921 | 799 | 567 | 4,294 |
| 20,916 | 7 | 2,787 | 767 | 550 | 4,111 |
| 20,917 | 7 | 2,703 | 743 | 536 | 3,989 |
| 20,918 | 7 | 2,601 | 727 | 518 | 3,853 |
| 20,919 | 7 | 2,495 | 705 | 503 | 3,710 |

|        |    |       |     |     |       |
|--------|----|-------|-----|-----|-------|
| 20,920 | 7  | 2,418 | 679 | 481 | 3,585 |
| 20,921 | 7  | 2,311 | 655 | 461 | 3,434 |
| 20,922 | 7  | 2,344 | 670 | 471 | 3,492 |
| 20,923 | 7  | 2,373 | 676 | 480 | 3,536 |
| 20,924 | 7  | 2,405 | 687 | 483 | 3,582 |
| 20,925 | 7  | 2,429 | 704 | 491 | 3,631 |
| 20,926 | 7  | 2,451 | 717 | 497 | 3,672 |
| 20,927 | 7  | 2,456 | 721 | 501 | 3,685 |
| 20,928 | 7  | 2,470 | 741 | 505 | 3,723 |
| 20,929 | 7  | 2,485 | 744 | 515 | 3,751 |
| 20,930 | 7  | 2,449 | 734 | 512 | 3,702 |
| 20,931 | 7  | 2,472 | 740 | 514 | 3,733 |
| 20,932 | 7  | 2,478 | 749 | 514 | 3,748 |
| 20,933 | 7  | 2,461 | 748 | 507 | 3,723 |
| 20,934 | 7  | 2,440 | 744 | 509 | 3,700 |
| 20,935 | 7  | 2,437 | 739 | 508 | 3,691 |
| 20,936 | 7  | 2,437 | 728 | 504 | 3,676 |
| 20,937 | 7  | 2,439 | 734 | 506 | 3,686 |
| 20,938 | 6  | 2,418 | 736 | 505 | 3,665 |
| 20,939 | 6  | 2,406 | 736 | 503 | 3,651 |
| 20,940 | 6  | 2,423 | 738 | 504 | 3,671 |
| 20,941 | 6  | 2,416 | 728 | 500 | 3,650 |
| 20,942 | 6  | 2,428 | 729 | 501 | 3,664 |
| 20,943 | 6  | 2,436 | 730 | 502 | 3,674 |
| 20,944 | 8  | 2,583 | 773 | 534 | 3,898 |
| 20,945 | 8  | 2,683 | 791 | 556 | 4,038 |
| 20,946 | 9  | 2,780 | 810 | 575 | 4,174 |
| 20,947 | 10 | 2,866 | 822 | 584 | 4,282 |
| 20,948 | 10 | 2,938 | 833 | 591 | 4,372 |
| 20,949 | 10 | 3,007 | 845 | 601 | 4,463 |
| 20,950 | 10 | 3,015 | 843 | 606 | 4,474 |
| 20,951 | 11 | 3,135 | 882 | 618 | 4,646 |

|        |    |        |       |       |        |
|--------|----|--------|-------|-------|--------|
| 20,952 | 13 | 3,144  | 880   | 628   | 4,665  |
| 20,953 | 12 | 3,141  | 879   | 626   | 4,658  |
| 20,954 | 12 | 3,137  | 875   | 620   | 4,644  |
| 20,955 | 11 | 3,127  | 896   | 642   | 4,676  |
| 20,956 | 11 | 3,126  | 923   | 645   | 4,705  |
| 20,957 | 14 | 3,404  | 1,018 | 739   | 5,175  |
| 20,958 | 15 | 3,527  | 1,097 | 786   | 5,425  |
| 20,959 | 16 | 4,189  | 1,214 | 887   | 6,306  |
| 20,960 | 19 | 4,581  | 1,304 | 973   | 6,877  |
| 20,961 | 21 | 5,031  | 1,415 | 1,041 | 7,508  |
| 20,962 | 22 | 5,532  | 1,559 | 1,146 | 8,259  |
| 20,963 | 20 | 5,748  | 1,647 | 1,181 | 8,596  |
| 20,964 | 21 | 6,338  | 1,853 | 1,332 | 9,544  |
| 20,965 | 23 | 6,776  | 2,049 | 1,449 | 10,297 |
| 20,966 | 26 | 7,292  | 2,207 | 1,564 | 11,089 |
| 20,967 | 26 | 8,090  | 2,441 | 1,707 | 12,264 |
| 20,968 | 26 | 8,433  | 2,544 | 1,784 | 12,787 |
| 20,969 | 27 | 8,789  | 2,661 | 1,859 | 13,336 |
| 20,970 | 29 | 9,146  | 2,785 | 1,945 | 13,905 |
| 20,971 | 30 | 9,580  | 2,914 | 2,030 | 14,554 |
| 20,972 | 31 | 9,934  | 3,017 | 2,095 | 15,077 |
| 20,973 | 34 | 10,293 | 3,100 | 2,176 | 15,603 |
| 20,974 | 35 | 10,669 | 3,174 | 2,234 | 16,112 |
| 20,975 | 35 | 10,794 | 3,198 | 2,272 | 16,299 |
| 20,976 | 38 | 11,362 | 3,315 | 2,372 | 17,087 |
| 20,977 | 40 | 11,666 | 3,398 | 2,443 | 17,547 |
| 20,978 | 41 | 11,893 | 3,487 | 2,516 | 17,937 |
| 20,979 | 42 | 12,195 | 3,577 | 2,586 | 18,400 |
| 20,980 | 44 | 12,527 | 3,679 | 2,635 | 18,885 |
| 20,981 | 44 | 12,792 | 3,785 | 2,705 | 19,326 |
| 20,982 | 46 | 13,254 | 3,879 | 2,795 | 19,974 |
| 20,983 | 46 | 13,615 | 3,984 | 2,861 | 20,506 |



|        |    |        |       |       |        |
|--------|----|--------|-------|-------|--------|
| 20,984 | 47 | 13,917 | 4,070 | 2,916 | 20,950 |
| 20,985 | 49 | 14,282 | 4,153 | 2,970 | 21,454 |
| 20,986 | 50 | 14,622 | 4,272 | 3,027 | 21,971 |
| 20,987 | 50 | 15,028 | 4,383 | 3,101 | 22,562 |
| 20,988 | 51 | 15,484 | 4,481 | 3,180 | 23,196 |
| 20,989 | 51 | 15,863 | 4,553 | 3,257 | 23,724 |
| 20,990 | 51 | 16,242 | 4,630 | 3,315 | 24,238 |
| 20,991 | 51 | 16,505 | 4,695 | 3,361 | 24,612 |
| 20,992 | 51 | 16,574 | 4,731 | 3,377 | 24,733 |
| 20,993 | 52 | 17,021 | 4,859 | 3,449 | 25,381 |
| 20,994 | 52 | 17,324 | 4,930 | 3,497 | 25,803 |
| 20,995 | 54 | 17,549 | 4,977 | 3,521 | 26,101 |
| 20,996 | 55 | 17,779 | 5,041 | 3,560 | 26,435 |
| 20,997 | 57 | 17,775 | 5,053 | 3,555 | 26,440 |
| 20,998 | 56 | 17,766 | 5,057 | 3,563 | 26,442 |
| 20,999 | 56 | 18,022 | 5,156 | 3,621 | 26,855 |
| 21,000 | 57 | 18,134 | 5,219 | 3,659 | 27,069 |
| 21,001 | 57 | 18,421 | 5,334 | 3,724 | 27,536 |
| 21,002 | 56 | 18,701 | 5,386 | 3,773 | 27,916 |
| 21,003 | 55 | 18,895 | 5,430 | 3,795 | 28,175 |
| 21,004 | 55 | 19,123 | 5,471 | 3,825 | 28,474 |
| 21,005 | 55 | 19,204 | 5,505 | 3,837 | 28,601 |
| 21,006 | 51 | 19,307 | 5,444 | 3,816 | 28,618 |
| 21,007 | 51 | 19,441 | 5,465 | 3,841 | 28,798 |
| 21,008 | 52 | 19,539 | 5,531 | 3,876 | 28,998 |
| 21,009 | 56 | 19,722 | 5,569 | 3,876 | 29,223 |
| 21,010 | 55 | 19,616 | 5,588 | 3,882 | 29,141 |
| 21,011 | 57 | 19,470 | 5,574 | 3,861 | 28,962 |
| 21,012 | 58 | 19,185 | 5,559 | 3,845 | 28,647 |
| 21,013 | 57 | 19,097 | 5,479 | 3,806 | 28,439 |
| 21,014 | 58 | 18,791 | 5,244 | 3,661 | 27,754 |
| 21,015 | 61 | 19,120 | 5,286 | 3,673 | 28,140 |

|        |     |        |       |       |        |
|--------|-----|--------|-------|-------|--------|
| 21,016 | 61  | 19,341 | 5,268 | 3,677 | 28,347 |
| 21,017 | 61  | 19,186 | 5,159 | 3,586 | 27,992 |
| 21,018 | 72  | 19,039 | 5,048 | 3,524 | 27,683 |
| 21,019 | 75  | 19,044 | 4,994 | 3,499 | 27,612 |
| 21,020 | 76  | 19,191 | 4,967 | 3,486 | 27,720 |
| 21,021 | 77  | 19,183 | 4,942 | 3,466 | 27,668 |
| 21,022 | 81  | 19,133 | 4,901 | 3,424 | 27,539 |
| 21,023 | 82  | 19,208 | 4,898 | 3,403 | 27,591 |
| 21,024 | 81  | 19,155 | 4,868 | 3,379 | 27,483 |
| 21,025 | 80  | 19,124 | 4,889 | 3,373 | 27,466 |
| 21,026 | 81  | 19,724 | 5,039 | 3,455 | 28,299 |
| 21,027 | 86  | 19,552 | 4,992 | 3,425 | 28,055 |
| 21,028 | 90  | 19,844 | 5,064 | 3,464 | 28,462 |
| 21,029 | 89  | 19,908 | 5,052 | 3,433 | 28,482 |
| 21,030 | 88  | 19,911 | 5,028 | 3,418 | 28,445 |
| 21,031 | 94  | 20,469 | 5,079 | 3,484 | 29,126 |
| 21,032 | 95  | 20,463 | 5,055 | 3,459 | 29,072 |
| 21,033 | 96  | 20,916 | 5,153 | 3,509 | 29,674 |
| 21,034 | 106 | 20,922 | 5,116 | 3,506 | 29,650 |
| 21,035 | 106 | 20,763 | 5,079 | 3,479 | 29,427 |
| 21,036 | 106 | 21,281 | 5,228 | 3,591 | 30,206 |
| 21,037 | 105 | 21,581 | 5,269 | 3,661 | 30,616 |
| 21,038 | 105 | 21,787 | 5,302 | 3,685 | 30,879 |
| 21,039 | 105 | 21,910 | 5,315 | 3,660 | 30,990 |
| 21,040 | 106 | 21,933 | 5,305 | 3,643 | 30,987 |
| 21,041 | 107 | 21,926 | 5,314 | 3,634 | 30,981 |
| 21,042 | 107 | 21,779 | 5,270 | 3,603 | 30,759 |
| 21,043 | 107 | 21,939 | 5,287 | 3,646 | 30,979 |
| 21,044 | 107 | 21,835 | 5,236 | 3,614 | 30,792 |
| 21,045 | 109 | 21,965 | 5,248 | 3,637 | 30,959 |
| 21,046 | 107 | 22,104 | 5,244 | 3,670 | 31,125 |
| 21,047 | 110 | 22,181 | 5,231 | 3,658 | 31,180 |

|        |     |        |       |       |        |
|--------|-----|--------|-------|-------|--------|
| 21,048 | 107 | 22,054 | 5,177 | 3,637 | 30,975 |
| 21,049 | 107 | 22,254 | 5,194 | 3,658 | 31,213 |
| 21,050 | 108 | 22,835 | 5,264 | 3,711 | 31,918 |
| 21,051 | 109 | 22,377 | 5,143 | 3,616 | 31,245 |
| 21,052 | 111 | 22,754 | 5,183 | 3,648 | 31,696 |
| 21,053 | 111 | 23,074 | 5,212 | 3,680 | 32,077 |
| 21,054 | 113 | 23,064 | 5,207 | 3,671 | 32,055 |
| 21,055 | 116 | 23,346 | 5,271 | 3,691 | 32,424 |
| 21,056 | 118 | 23,752 | 5,329 | 3,727 | 32,926 |
| 21,057 | 120 | 23,621 | 5,282 | 3,682 | 32,705 |
| 21,058 | 120 | 23,722 | 5,316 | 3,683 | 32,841 |
| 21,059 | 118 | 23,699 | 5,272 | 3,671 | 32,760 |
| 21,060 | 118 | 23,905 | 5,305 | 3,710 | 33,038 |
| 21,061 | 119 | 23,865 | 5,252 | 3,682 | 32,918 |
| 21,062 | 113 | 23,658 | 5,154 | 3,589 | 32,514 |
| 21,063 | 113 | 23,779 | 5,132 | 3,588 | 32,612 |
| 21,064 | 113 | 23,404 | 5,088 | 3,545 | 32,150 |
| 21,065 | 116 | 23,204 | 5,050 | 3,513 | 31,883 |
| 21,066 | 116 | 23,167 | 5,031 | 3,513 | 31,827 |
| 21,067 | 115 | 23,020 | 5,022 | 3,516 | 31,673 |
| 21,068 | 114 | 22,969 | 5,057 | 3,544 | 31,684 |
| 21,069 | 105 | 22,696 | 5,001 | 3,497 | 31,299 |
| 21,070 | 101 | 22,352 | 4,960 | 3,452 | 30,865 |
| 21,071 | 99  | 22,364 | 4,936 | 3,440 | 30,839 |
| 21,072 | 94  | 22,215 | 4,931 | 3,450 | 30,690 |
| 21,073 | 96  | 22,264 | 4,938 | 3,457 | 30,755 |
| 21,074 | 92  | 22,059 | 4,895 | 3,445 | 30,491 |
| 21,075 | 92  | 22,043 | 4,910 | 3,456 | 30,501 |
| 21,076 | 91  | 22,002 | 4,895 | 3,451 | 30,439 |
| 21,077 | 95  | 21,915 | 4,862 | 3,407 | 30,279 |
| 21,078 | 92  | 21,901 | 4,840 | 3,384 | 30,217 |
| 21,079 | 98  | 21,734 | 4,756 | 3,329 | 29,917 |

|        |     |        |       |       |        |
|--------|-----|--------|-------|-------|--------|
| 21,080 | 100 | 21,832 | 4,783 | 3,330 | 30,045 |
| 21,081 | 103 | 21,857 | 4,753 | 3,323 | 30,036 |
| 21,082 | 101 | 21,718 | 4,727 | 3,288 | 29,834 |
| 21,083 | 100 | 21,502 | 4,646 | 3,254 | 29,502 |
| 21,084 | 100 | 21,325 | 4,627 | 3,234 | 29,286 |
| 21,085 | 93  | 21,261 | 4,572 | 3,191 | 29,117 |
| 21,086 | 94  | 21,310 | 4,502 | 3,161 | 29,067 |
| 21,087 | 101 | 21,282 | 4,464 | 3,132 | 28,979 |
| 21,088 | 109 | 21,140 | 4,424 | 3,105 | 28,778 |
| 21,089 | 109 | 21,059 | 4,431 | 3,090 | 28,689 |
| 21,090 | 108 | 20,730 | 4,387 | 3,080 | 28,305 |
| 21,091 | 110 | 20,777 | 4,421 | 3,076 | 28,384 |
| 21,092 | 112 | 20,927 | 4,398 | 3,097 | 28,534 |
| 21,093 | 118 | 21,219 | 4,447 | 3,113 | 28,897 |
| 21,094 | 117 | 21,130 | 4,425 | 3,085 | 28,757 |
| 21,095 | 118 | 21,413 | 4,474 | 3,120 | 29,125 |
| 21,096 | 116 | 21,708 | 4,556 | 3,155 | 29,535 |
| 21,097 | 112 | 21,926 | 4,618 | 3,208 | 29,864 |
| 21,098 | 112 | 21,989 | 4,621 | 3,214 | 29,936 |
| 21,099 | 113 | 22,056 | 4,655 | 3,243 | 30,067 |
| 21,100 | 113 | 22,177 | 4,684 | 3,271 | 30,245 |
| 21,101 | 112 | 22,281 | 4,743 | 3,315 | 30,451 |
| 21,102 | 110 | 22,180 | 4,701 | 3,310 | 30,301 |
| 21,103 | 118 | 22,272 | 4,730 | 3,356 | 30,476 |
| 21,104 | 119 | 22,169 | 4,750 | 3,354 | 30,392 |
| 21,105 | 123 | 22,204 | 4,804 | 3,402 | 30,533 |
| 21,106 | 128 | 22,081 | 4,827 | 3,410 | 30,446 |
| 21,107 | 131 | 22,139 | 4,850 | 3,424 | 30,544 |
| 21,108 | 141 | 21,965 | 4,793 | 3,377 | 30,276 |
| 21,109 | 141 | 21,963 | 4,763 | 3,378 | 30,245 |
| 21,110 | 142 | 22,158 | 4,795 | 3,377 | 30,472 |
| 21,111 | 143 | 22,260 | 4,820 | 3,380 | 30,603 |

|        |     |        |       |       |        |
|--------|-----|--------|-------|-------|--------|
| 21,112 | 149 | 22,044 | 4,773 | 3,360 | 30,326 |
| 21,113 | 149 | 22,002 | 4,762 | 3,349 | 30,262 |
| 21,114 | 159 | 22,163 | 4,809 | 3,382 | 30,513 |
| 21,115 | 164 | 21,931 | 4,777 | 3,363 | 30,235 |
| 21,116 | 160 | 21,740 | 4,746 | 3,346 | 29,992 |
| 21,117 | 158 | 22,118 | 4,787 | 3,425 | 30,488 |
| 21,118 | 160 | 22,076 | 4,752 | 3,410 | 30,398 |
| 21,119 | 158 | 21,896 | 4,684 | 3,376 | 30,114 |
| 21,120 | 157 | 21,870 | 4,682 | 3,386 | 30,095 |
| 21,121 | 157 | 21,936 | 4,714 | 3,384 | 30,191 |
| 21,122 | 157 | 22,029 | 4,737 | 3,374 | 30,297 |
| 21,123 | 159 | 21,970 | 4,716 | 3,378 | 30,223 |
| 21,124 | 160 | 21,749 | 4,691 | 3,378 | 29,978 |
| 21,125 | 160 | 21,719 | 4,677 | 3,370 | 29,926 |
| 21,126 | 160 | 21,682 | 4,632 | 3,353 | 29,827 |
| 21,127 | 161 | 21,729 | 4,618 | 3,363 | 29,871 |
| 21,128 | 152 | 21,225 | 4,517 | 3,306 | 29,200 |
| 21,129 | 153 | 21,435 | 4,551 | 3,318 | 29,457 |
| 21,130 | 140 | 21,039 | 4,447 | 3,260 | 28,886 |
| 21,131 | 141 | 21,152 | 4,483 | 3,287 | 29,063 |
| 21,132 | 136 | 20,577 | 4,397 | 3,228 | 28,338 |
| 21,133 | 136 | 20,573 | 4,394 | 3,218 | 28,321 |
| 21,134 | 139 | 20,464 | 4,352 | 3,182 | 28,137 |
| 21,135 | 139 | 20,251 | 4,287 | 3,152 | 27,829 |
| 21,136 | 138 | 19,701 | 4,183 | 3,082 | 27,104 |
| 21,137 | 141 | 19,798 | 4,192 | 3,078 | 27,209 |
| 21,138 | 137 | 19,711 | 4,159 | 3,040 | 27,047 |
| 21,139 | 138 | 19,468 | 4,081 | 2,986 | 26,673 |
| 21,140 | 138 | 19,375 | 3,997 | 2,944 | 26,454 |
| 21,141 | 143 | 19,662 | 4,051 | 2,991 | 26,847 |
| 21,142 | 151 | 19,650 | 4,001 | 2,981 | 26,783 |
| 21,143 | 161 | 19,636 | 3,966 | 2,959 | 26,722 |

|        |     |        |       |       |        |
|--------|-----|--------|-------|-------|--------|
| 21,144 | 168 | 19,406 | 3,866 | 2,904 | 26,344 |
| 21,145 | 168 | 19,266 | 3,783 | 2,847 | 26,064 |
| 21,146 | 168 | 19,400 | 3,725 | 2,837 | 26,130 |
| 21,147 | 171 | 19,302 | 3,673 | 2,786 | 25,932 |
| 21,148 | 177 | 19,164 | 3,602 | 2,714 | 25,657 |
| 21,149 | 186 | 19,129 | 3,536 | 2,658 | 25,509 |
| 21,150 | 188 | 19,235 | 3,491 | 2,635 | 25,549 |
| 21,151 | 192 | 19,157 | 3,419 | 2,570 | 25,338 |
| 21,152 | 193 | 19,019 | 3,370 | 2,513 | 25,095 |
| 21,153 | 184 | 18,813 | 3,319 | 2,465 | 24,781 |
| 21,154 | 171 | 18,008 | 3,020 | 2,298 | 23,497 |
| 21,155 | 172 | 18,253 | 3,039 | 2,307 | 23,771 |
| 21,156 | 178 | 18,531 | 3,041 | 2,311 | 24,061 |
| 21,157 | 178 | 18,598 | 3,024 | 2,301 | 24,101 |
| 21,158 | 179 | 18,921 | 3,046 | 2,326 | 24,472 |
| 21,159 | 174 | 18,945 | 3,043 | 2,311 | 24,473 |
| 21,160 | 176 | 18,998 | 3,016 | 2,306 | 24,496 |
| 21,161 | 174 | 19,097 | 3,012 | 2,314 | 24,597 |
| 21,162 | 162 | 19,116 | 2,992 | 2,297 | 24,567 |
| 21,163 | 169 | 19,308 | 3,022 | 2,311 | 24,810 |
| 21,164 | 160 | 19,382 | 2,975 | 2,294 | 24,811 |
| 21,165 | 165 | 19,678 | 2,990 | 2,299 | 25,132 |
| 21,166 | 165 | 19,685 | 2,952 | 2,281 | 25,083 |
| 21,167 | 168 | 19,886 | 2,920 | 2,256 | 25,230 |
| 21,168 | 166 | 19,851 | 2,899 | 2,211 | 25,127 |
| 21,169 | 165 | 19,920 | 2,895 | 2,212 | 25,192 |
| 21,170 | 166 | 19,859 | 2,902 | 2,207 | 25,134 |
| 21,171 | 166 | 19,895 | 2,873 | 2,185 | 25,119 |
| 21,172 | 171 | 19,990 | 2,849 | 2,194 | 25,204 |
| 21,173 | 177 | 20,131 | 2,848 | 2,206 | 25,362 |
| 21,174 | 178 | 20,274 | 2,848 | 2,200 | 25,500 |
| 21,175 | 176 | 20,356 | 2,815 | 2,168 | 25,515 |

|        |     |        |       |       |        |
|--------|-----|--------|-------|-------|--------|
| 21,176 | 182 | 20,538 | 2,822 | 2,160 | 25,702 |
| 21,177 | 182 | 20,548 | 2,801 | 2,129 | 25,660 |
| 21,178 | 182 | 20,597 | 2,812 | 2,124 | 25,715 |
| 21,179 | 182 | 20,712 | 2,812 | 2,136 | 25,842 |
| 21,180 | 184 | 21,090 | 2,849 | 2,186 | 26,309 |
| 21,181 | 184 | 21,275 | 2,852 | 2,198 | 26,509 |
| 21,182 | 180 | 21,406 | 2,856 | 2,189 | 26,631 |
| 21,183 | 180 | 21,464 | 2,841 | 2,174 | 26,659 |
| 21,184 | 180 | 21,840 | 2,899 | 2,220 | 27,139 |
| 21,185 | 178 | 21,869 | 2,909 | 2,217 | 27,173 |
| 21,186 | 178 | 21,890 | 2,898 | 2,208 | 27,174 |
| 21,187 | 175 | 22,262 | 2,961 | 2,263 | 27,661 |
| 21,188 | 174 | 22,332 | 2,966 | 2,276 | 27,748 |
| 21,189 | 167 | 22,083 | 2,948 | 2,264 | 27,462 |
| 21,190 | 166 | 22,067 | 2,952 | 2,258 | 27,443 |
| 21,191 | 164 | 21,986 | 2,940 | 2,248 | 27,338 |
| 21,192 | 165 | 22,050 | 2,972 | 2,268 | 27,455 |
| 21,193 | 161 | 21,985 | 2,966 | 2,268 | 27,380 |
| 21,194 | 148 | 21,640 | 2,951 | 2,233 | 26,972 |
| 21,195 | 135 | 21,424 | 2,975 | 2,225 | 26,759 |
| 21,196 | 134 | 21,287 | 2,983 | 2,219 | 26,623 |
| 21,197 | 135 | 21,017 | 2,984 | 2,210 | 26,346 |
| 21,198 | 132 | 20,814 | 2,990 | 2,235 | 26,171 |
| 21,199 | 130 | 20,727 | 3,001 | 2,248 | 26,106 |
| 21,200 | 126 | 20,595 | 3,005 | 2,254 | 25,980 |
| 21,201 | 129 | 20,945 | 3,077 | 2,291 | 26,442 |
| 21,202 | 139 | 20,976 | 3,082 | 2,317 | 26,514 |
| 21,203 | 137 | 20,822 | 3,072 | 2,294 | 26,325 |
| 21,204 | 143 | 21,297 | 3,106 | 2,309 | 26,855 |
| 21,205 | 141 | 21,308 | 3,117 | 2,324 | 26,890 |
| 21,206 | 140 | 21,281 | 3,095 | 2,329 | 26,845 |
| 21,207 | 138 | 21,433 | 3,147 | 2,357 | 27,075 |

|        |     |        |       |       |        |
|--------|-----|--------|-------|-------|--------|
| 21,208 | 144 | 21,604 | 3,179 | 2,375 | 27,302 |
| 21,209 | 140 | 21,621 | 3,170 | 2,361 | 27,292 |
| 21,210 | 140 | 21,705 | 3,187 | 2,368 | 27,400 |
| 21,211 | 138 | 21,472 | 3,188 | 2,347 | 27,145 |
| 21,212 | 144 | 21,279 | 3,151 | 2,328 | 26,902 |
| 21,213 | 148 | 21,403 | 3,120 | 2,327 | 26,998 |
| 21,214 | 143 | 21,130 | 3,107 | 2,332 | 26,712 |
| 21,215 | 140 | 21,004 | 3,113 | 2,315 | 26,572 |
| 21,216 | 139 | 20,993 | 3,085 | 2,307 | 26,524 |
| 21,217 | 131 | 20,872 | 3,109 | 2,292 | 26,404 |
| 21,218 | 135 | 20,756 | 3,128 | 2,293 | 26,312 |
| 21,219 | 137 | 20,731 | 3,129 | 2,298 | 26,295 |
| 21,220 | 140 | 20,841 | 3,128 | 2,299 | 26,408 |
| 21,221 | 140 | 20,750 | 3,106 | 2,301 | 26,297 |
| 21,222 | 145 | 20,896 | 3,108 | 2,312 | 26,461 |
| 21,223 | 141 | 20,865 | 3,098 | 2,325 | 26,429 |
| 21,224 | 135 | 20,912 | 3,083 | 2,331 | 26,461 |
| 21,225 | 135 | 20,710 | 3,057 | 2,303 | 26,205 |
| 21,226 | 135 | 20,519 | 3,031 | 2,291 | 25,976 |
| 21,227 | 130 | 20,681 | 3,078 | 2,338 | 26,227 |
| 21,228 | 129 | 20,633 | 3,071 | 2,347 | 26,180 |
| 21,229 | 131 | 20,500 | 3,074 | 2,343 | 26,048 |
| 21,230 | 133 | 20,657 | 3,104 | 2,356 | 26,250 |
| 21,231 | 147 | 20,522 | 3,119 | 2,354 | 26,142 |
| 21,232 | 158 | 20,446 | 3,108 | 2,348 | 26,060 |
| 21,233 | 169 | 20,515 | 3,145 | 2,384 | 26,213 |
| 21,234 | 179 | 20,534 | 3,140 | 2,372 | 26,225 |
| 21,235 | 181 | 20,358 | 3,109 | 2,356 | 26,004 |
| 21,236 | 193 | 20,934 | 3,222 | 2,428 | 26,777 |
| 21,237 | 193 | 20,947 | 3,246 | 2,443 | 26,829 |
| 21,238 | 193 | 20,995 | 3,289 | 2,477 | 26,954 |
| 21,239 | 192 | 21,180 | 3,300 | 2,495 | 27,167 |



|        |     |        |       |       |        |
|--------|-----|--------|-------|-------|--------|
| 21,240 | 199 | 21,436 | 3,317 | 2,532 | 27,484 |
| 21,241 | 199 | 21,580 | 3,333 | 2,543 | 27,655 |
| 21,242 | 207 | 21,783 | 3,352 | 2,543 | 27,885 |
| 21,243 | 211 | 21,850 | 3,336 | 2,520 | 27,917 |
| 21,244 | 207 | 21,620 | 3,311 | 2,503 | 27,641 |
| 21,245 | 209 | 21,926 | 3,345 | 2,551 | 28,031 |
| 21,246 | 209 | 22,038 | 3,348 | 2,555 | 28,150 |
| 21,247 | 214 | 22,100 | 3,353 | 2,571 | 28,238 |
| 21,248 | 212 | 22,189 | 3,336 | 2,560 | 28,297 |
| 21,249 | 208 | 22,294 | 3,321 | 2,569 | 28,392 |
| 21,250 | 208 | 22,446 | 3,349 | 2,582 | 28,585 |
| 21,251 | 208 | 22,274 | 3,316 | 2,561 | 28,359 |
| 21,252 | 207 | 22,147 | 3,315 | 2,561 | 28,230 |
| 21,253 | 201 | 21,916 | 3,301 | 2,526 | 27,944 |
| 21,254 | 200 | 21,552 | 3,274 | 2,524 | 27,550 |
| 21,255 | 215 | 22,425 | 3,410 | 2,645 | 28,695 |
| 21,256 | 217 | 22,585 | 3,463 | 2,651 | 28,916 |
| 21,257 | 221 | 22,543 | 3,435 | 2,619 | 28,818 |
| 21,258 | 222 | 22,562 | 3,451 | 2,616 | 28,851 |
| 21,259 | 220 | 22,632 | 3,475 | 2,644 | 28,971 |
| 21,260 | 220 | 22,635 | 3,481 | 2,661 | 28,997 |
| 21,261 | 229 | 22,847 | 3,523 | 2,669 | 29,268 |
| 21,262 | 232 | 22,922 | 3,539 | 2,675 | 29,368 |
| 21,263 | 227 | 22,837 | 3,546 | 2,664 | 29,274 |
| 21,264 | 227 | 22,895 | 3,565 | 2,657 | 29,344 |
| 21,265 | 229 | 23,021 | 3,595 | 2,666 | 29,511 |
| 21,266 | 230 | 23,232 | 3,620 | 2,684 | 29,766 |
| 21,267 | 234 | 23,059 | 3,608 | 2,679 | 29,580 |
| 21,268 | 233 | 23,069 | 3,624 | 2,688 | 29,614 |
| 21,269 | 229 | 22,958 | 3,609 | 2,682 | 29,478 |
| 21,270 | 230 | 22,916 | 3,620 | 2,681 | 29,447 |
| 21,271 | 228 | 23,096 | 3,641 | 2,688 | 29,653 |

|        |     |        |       |       |        |
|--------|-----|--------|-------|-------|--------|
| 21,272 | 228 | 22,930 | 3,653 | 2,673 | 29,484 |
| 21,273 | 228 | 22,862 | 3,641 | 2,632 | 29,363 |
| 21,274 | 234 | 22,939 | 3,672 | 2,634 | 29,479 |
| 21,275 | 237 | 22,942 | 3,687 | 2,606 | 29,472 |
| 21,276 | 235 | 22,778 | 3,656 | 2,591 | 29,260 |
| 21,277 | 241 | 22,888 | 3,683 | 2,615 | 29,427 |
| 21,278 | 246 | 22,747 | 3,643 | 2,581 | 29,217 |
| 21,279 | 245 | 22,811 | 3,651 | 2,590 | 29,297 |
| 21,280 | 235 | 22,012 | 3,493 | 2,484 | 28,224 |
| 21,281 | 236 | 22,064 | 3,507 | 2,476 | 28,283 |
| 21,282 | 225 | 22,219 | 3,501 | 2,486 | 28,431 |
| 21,283 | 225 | 22,191 | 3,525 | 2,494 | 28,435 |
| 21,284 | 208 | 22,021 | 3,448 | 2,455 | 28,132 |
| 21,285 | 206 | 22,013 | 3,466 | 2,451 | 28,136 |
| 21,286 | 206 | 22,145 | 3,455 | 2,445 | 28,251 |
| 21,287 | 211 | 21,936 | 3,411 | 2,411 | 27,969 |
| 21,288 | 212 | 21,965 | 3,428 | 2,403 | 28,008 |
| 21,289 | 212 | 21,416 | 3,309 | 2,307 | 27,244 |
| 21,290 | 216 | 21,521 | 3,324 | 2,310 | 27,371 |
| 21,291 | 213 | 21,625 | 3,341 | 2,316 | 27,495 |
| 21,292 | 213 | 21,494 | 3,348 | 2,314 | 27,369 |
| 21,293 | 209 | 21,720 | 3,365 | 2,340 | 27,634 |
| 21,294 | 207 | 21,729 | 3,358 | 2,340 | 27,634 |
| 21,295 | 210 | 21,714 | 3,339 | 2,295 | 27,558 |
| 21,296 | 211 | 21,698 | 3,349 | 2,293 | 27,551 |
| 21,297 | 212 | 21,593 | 3,338 | 2,278 | 27,421 |
| 21,298 | 210 | 21,453 | 3,345 | 2,251 | 27,259 |
| 21,299 | 210 | 21,416 | 3,383 | 2,253 | 27,262 |
| 21,300 | 207 | 21,115 | 3,333 | 2,198 | 26,853 |
| 21,301 | 211 | 20,955 | 3,346 | 2,184 | 26,696 |
| 21,302 | 211 | 20,958 | 3,362 | 2,176 | 26,707 |
| 21,303 | 206 | 20,835 | 3,282 | 2,139 | 26,462 |

|        |     |        |       |       |        |
|--------|-----|--------|-------|-------|--------|
| 21,304 | 203 | 20,843 | 3,303 | 2,135 | 26,484 |
| 21,305 | 191 | 20,680 | 3,246 | 2,089 | 26,206 |
| 21,306 | 190 | 20,545 | 3,211 | 2,092 | 26,038 |
| 21,307 | 184 | 20,462 | 3,181 | 2,097 | 25,924 |
| 21,308 | 189 | 20,663 | 3,230 | 2,127 | 26,209 |
| 21,309 | 185 | 20,480 | 3,175 | 2,078 | 25,918 |
| 21,310 | 189 | 20,688 | 3,227 | 2,113 | 26,217 |
| 21,311 | 179 | 20,417 | 3,196 | 2,090 | 25,882 |
| 21,312 | 180 | 20,584 | 3,217 | 2,112 | 26,093 |
| 21,313 | 170 | 20,393 | 3,159 | 2,108 | 25,830 |
| 21,314 | 172 | 20,471 | 3,217 | 2,133 | 25,993 |
| 21,315 | 176 | 20,524 | 3,207 | 2,153 | 26,060 |
| 21,316 | 177 | 20,372 | 3,200 | 2,132 | 25,881 |
| 21,317 | 182 | 20,516 | 3,192 | 2,137 | 26,027 |
| 21,318 | 179 | 20,354 | 3,163 | 2,102 | 25,798 |
| 21,319 | 179 | 20,469 | 3,187 | 2,094 | 25,929 |
| 21,320 | 178 | 20,644 | 3,161 | 2,082 | 26,065 |
| 21,321 | 179 | 20,588 | 3,185 | 2,099 | 26,051 |
| 21,322 | 188 | 20,642 | 3,146 | 2,101 | 26,077 |
| 21,323 | 189 | 20,663 | 3,170 | 2,106 | 26,128 |
| 21,324 | 184 | 20,541 | 3,165 | 2,113 | 26,003 |
| 21,325 | 181 | 20,750 | 3,174 | 2,135 | 26,240 |
| 21,326 | 177 | 20,671 | 3,184 | 2,136 | 26,168 |
| 21,327 | 172 | 20,431 | 3,120 | 2,074 | 25,797 |
| 21,328 | 173 | 20,663 | 3,135 | 2,084 | 26,055 |
| 21,329 | 168 | 20,749 | 3,179 | 2,101 | 26,197 |
| 21,330 | 168 | 20,888 | 3,174 | 2,106 | 26,336 |
| 21,331 | 169 | 20,685 | 3,135 | 2,087 | 26,076 |
| 21,332 | 170 | 20,749 | 3,169 | 2,104 | 26,192 |
| 21,333 | 171 | 20,755 | 3,131 | 2,080 | 26,137 |
| 21,334 | 171 | 20,732 | 3,154 | 2,092 | 26,149 |
| 21,335 | 166 | 20,715 | 3,163 | 2,086 | 26,130 |

|        |     |        |       |       |        |
|--------|-----|--------|-------|-------|--------|
| 21,336 | 149 | 19,541 | 2,903 | 1,957 | 24,550 |
| 21,337 | 150 | 19,685 | 2,934 | 1,960 | 24,729 |
| 21,338 | 147 | 19,881 | 2,980 | 1,987 | 24,995 |
| 21,339 | 149 | 19,860 | 3,005 | 2,001 | 25,015 |
| 21,340 | 144 | 20,166 | 3,045 | 2,041 | 25,396 |
| 21,341 | 146 | 20,134 | 3,056 | 2,035 | 25,371 |
| 21,342 | 150 | 20,060 | 3,055 | 2,021 | 25,286 |
| 21,343 | 150 | 19,800 | 3,012 | 1,977 | 24,939 |
| 21,344 | 150 | 19,728 | 3,069 | 1,992 | 24,939 |
| 21,345 | 143 | 19,514 | 3,040 | 1,979 | 24,676 |
| 21,346 | 144 | 19,483 | 3,029 | 1,976 | 24,632 |
| 21,347 | 144 | 19,432 | 3,019 | 1,971 | 24,566 |
| 21,348 | 143 | 19,439 | 2,977 | 1,980 | 24,539 |
| 21,349 | 143 | 19,724 | 3,030 | 2,015 | 24,912 |
| 21,350 | 138 | 19,383 | 2,938 | 1,999 | 24,458 |
| 21,351 | 138 | 19,562 | 2,967 | 2,021 | 24,688 |
| 21,352 | 133 | 19,568 | 3,003 | 2,043 | 24,747 |
| 21,353 | 140 | 19,859 | 3,081 | 2,086 | 25,166 |
| 21,354 | 135 | 19,455 | 3,058 | 2,088 | 24,736 |
| 21,355 | 138 | 19,299 | 3,062 | 2,101 | 24,600 |
| 21,356 | 138 | 19,350 | 3,091 | 2,106 | 24,685 |
| 21,357 | 137 | 18,647 | 2,989 | 2,023 | 23,796 |
| 21,358 | 142 | 18,860 | 3,052 | 2,052 | 24,106 |
| 21,359 | 136 | 19,073 | 3,124 | 2,103 | 24,436 |
| 21,360 | 136 | 18,802 | 3,091 | 2,086 | 24,115 |
| 21,361 | 131 | 18,717 | 3,101 | 2,085 | 24,034 |
| 21,362 | 130 | 18,646 | 3,110 | 2,091 | 23,977 |
| 21,363 | 130 | 18,558 | 3,119 | 2,090 | 23,897 |
| 21,364 | 134 | 18,494 | 3,119 | 2,086 | 23,833 |
| 21,365 | 141 | 18,689 | 3,188 | 2,124 | 24,142 |
| 21,366 | 137 | 18,686 | 3,218 | 2,137 | 24,178 |
| 21,367 | 138 | 18,441 | 3,212 | 2,119 | 23,910 |

|        |     |        |       |       |        |
|--------|-----|--------|-------|-------|--------|
| 21,368 | 133 | 18,310 | 3,231 | 2,123 | 23,797 |
| 21,369 | 132 | 18,594 | 3,305 | 2,176 | 24,207 |
| 21,370 | 142 | 18,580 | 3,311 | 2,202 | 24,235 |
| 21,371 | 144 | 18,704 | 3,349 | 2,243 | 24,440 |
| 21,372 | 138 | 18,655 | 3,377 | 2,250 | 24,420 |
| 21,373 | 141 | 18,426 | 3,355 | 2,223 | 24,145 |
| 21,374 | 139 | 18,252 | 3,356 | 2,215 | 23,962 |
| 21,375 | 151 | 18,668 | 3,451 | 2,276 | 24,546 |
| 21,376 | 149 | 18,516 | 3,386 | 2,253 | 24,304 |
| 21,377 | 149 | 18,457 | 3,407 | 2,261 | 24,274 |
| 21,378 | 158 | 18,658 | 3,481 | 2,299 | 24,596 |
| 21,379 | 156 | 18,165 | 3,423 | 2,257 | 24,001 |
| 21,380 | 157 | 18,113 | 3,448 | 2,267 | 23,985 |
| 21,381 | 158 | 17,883 | 3,416 | 2,254 | 23,711 |
| 21,382 | 154 | 17,725 | 3,421 | 2,248 | 23,548 |
| 21,383 | 170 | 18,788 | 3,618 | 2,384 | 24,960 |
| 21,384 | 171 | 18,665 | 3,609 | 2,377 | 24,822 |
| 21,385 | 171 | 18,761 | 3,623 | 2,377 | 24,932 |
| 21,386 | 171 | 18,763 | 3,637 | 2,380 | 24,951 |
| 21,387 | 168 | 18,729 | 3,668 | 2,398 | 24,963 |
| 21,388 | 170 | 18,905 | 3,732 | 2,436 | 25,243 |
| 21,389 | 167 | 18,740 | 3,720 | 2,434 | 25,061 |
| 21,390 | 167 | 18,835 | 3,784 | 2,456 | 25,242 |
| 21,391 | 171 | 18,748 | 3,798 | 2,477 | 25,194 |
| 21,392 | 163 | 18,452 | 3,779 | 2,466 | 24,860 |
| 21,393 | 158 | 18,481 | 3,845 | 2,492 | 24,976 |
| 21,394 | 156 | 18,267 | 3,781 | 2,478 | 24,682 |
| 21,395 | 154 | 18,322 | 3,798 | 2,477 | 24,751 |
| 21,396 | 154 | 18,400 | 3,821 | 2,497 | 24,872 |
| 21,397 | 161 | 18,546 | 3,899 | 2,539 | 25,145 |
| 21,398 | 163 | 18,546 | 3,968 | 2,564 | 25,241 |
| 21,399 | 164 | 18,524 | 3,999 | 2,571 | 25,258 |

|        |     |        |       |       |        |
|--------|-----|--------|-------|-------|--------|
| 21,400 | 164 | 18,322 | 4,022 | 2,580 | 25,088 |
| 21,401 | 164 | 18,122 | 4,032 | 2,572 | 24,890 |
| 21,402 | 168 | 18,066 | 4,075 | 2,575 | 24,884 |
| 21,403 | 169 | 18,001 | 4,032 | 2,567 | 24,769 |
| 21,404 | 167 | 18,012 | 4,048 | 2,579 | 24,806 |
| 21,405 | 172 | 18,025 | 4,017 | 2,571 | 24,785 |
| 21,406 | 173 | 18,132 | 4,009 | 2,572 | 24,886 |
| 21,407 | 178 | 18,212 | 4,027 | 2,582 | 24,999 |
| 21,408 | 177 | 18,047 | 4,016 | 2,576 | 24,816 |
| 21,409 | 180 | 18,372 | 4,087 | 2,618 | 25,257 |
| 21,410 | 180 | 18,100 | 4,054 | 2,579 | 24,913 |
| 21,411 | 189 | 18,103 | 4,087 | 2,577 | 24,956 |
| 21,412 | 190 | 18,249 | 4,111 | 2,588 | 25,138 |
| 21,413 | 193 | 18,052 | 4,051 | 2,548 | 24,844 |
| 21,414 | 194 | 18,073 | 4,051 | 2,553 | 24,871 |
| 21,415 | 191 | 18,267 | 4,082 | 2,567 | 25,107 |
| 21,416 | 185 | 18,099 | 4,047 | 2,539 | 24,870 |
| 21,417 | 182 | 17,913 | 4,033 | 2,525 | 24,653 |
| 21,418 | 178 | 17,366 | 3,886 | 2,444 | 23,874 |
| 21,419 | 178 | 17,407 | 3,900 | 2,442 | 23,927 |
| 21,420 | 173 | 17,413 | 3,921 | 2,455 | 23,962 |
| 21,421 | 174 | 17,254 | 3,904 | 2,449 | 23,781 |
| 21,422 | 175 | 17,249 | 3,921 | 2,447 | 23,792 |
| 21,423 | 174 | 17,157 | 3,927 | 2,445 | 23,703 |
| 21,424 | 166 | 17,179 | 3,944 | 2,451 | 23,740 |
| 21,425 | 166 | 17,209 | 3,940 | 2,453 | 23,768 |
| 21,426 | 158 | 17,173 | 3,972 | 2,467 | 23,770 |
| 21,427 | 165 | 17,199 | 4,005 | 2,465 | 23,834 |
| 21,428 | 165 | 17,179 | 4,021 | 2,469 | 23,834 |
| 21,429 | 159 | 17,159 | 3,986 | 2,451 | 23,755 |
| 21,430 | 161 | 17,470 | 4,108 | 2,497 | 24,236 |
| 21,431 | 151 | 17,367 | 4,124 | 2,507 | 24,149 |

|        |     |        |       |       |        |
|--------|-----|--------|-------|-------|--------|
| 21,432 | 145 | 17,196 | 4,142 | 2,514 | 23,997 |
| 21,433 | 150 | 17,628 | 4,306 | 2,602 | 24,686 |
| 21,434 | 164 | 17,636 | 4,347 | 2,611 | 24,758 |
| 21,435 | 162 | 17,724 | 4,398 | 2,627 | 24,911 |
| 21,436 | 169 | 17,851 | 4,429 | 2,640 | 25,089 |
| 21,437 | 179 | 17,796 | 4,429 | 2,637 | 25,041 |
| 21,438 | 180 | 17,803 | 4,428 | 2,638 | 25,049 |
| 21,439 | 182 | 18,003 | 4,483 | 2,666 | 25,334 |
| 21,440 | 182 | 17,896 | 4,458 | 2,653 | 25,189 |
| 21,441 | 180 | 17,975 | 4,456 | 2,640 | 25,251 |
| 21,442 | 184 | 18,070 | 4,459 | 2,627 | 25,340 |
| 21,443 | 184 | 18,042 | 4,446 | 2,627 | 25,299 |
| 21,444 | 192 | 18,187 | 4,487 | 2,647 | 25,513 |
| 21,445 | 194 | 18,142 | 4,483 | 2,653 | 25,472 |
| 21,446 | 195 | 18,239 | 4,487 | 2,658 | 25,579 |
| 21,447 | 200 | 18,273 | 4,491 | 2,665 | 25,629 |
| 21,448 | 199 | 18,351 | 4,481 | 2,653 | 25,684 |
| 21,449 | 200 | 18,560 | 4,481 | 2,644 | 25,885 |
| 21,450 | 201 | 18,647 | 4,464 | 2,631 | 25,943 |
| 21,451 | 206 | 18,889 | 4,452 | 2,633 | 26,180 |
| 21,452 | 204 | 19,125 | 4,459 | 2,628 | 26,416 |
| 21,453 | 205 | 19,176 | 4,460 | 2,629 | 26,470 |
| 21,454 | 205 | 19,419 | 4,548 | 2,660 | 26,832 |
| 21,455 | 199 | 19,167 | 4,476 | 2,630 | 26,472 |
| 21,456 | 191 | 19,129 | 4,495 | 2,602 | 26,417 |
| 21,457 | 210 | 19,409 | 4,556 | 2,616 | 26,791 |
| 21,458 | 210 | 19,710 | 4,595 | 2,638 | 27,153 |
| 21,459 | 205 | 19,408 | 4,491 | 2,591 | 26,695 |
| 21,460 | 209 | 19,634 | 4,514 | 2,624 | 26,981 |
| 21,461 | 205 | 19,680 | 4,499 | 2,613 | 26,997 |
| 21,462 | 204 | 19,571 | 4,453 | 2,599 | 26,827 |
| 21,463 | 202 | 19,701 | 4,438 | 2,619 | 26,960 |

|        |     |        |       |       |        |
|--------|-----|--------|-------|-------|--------|
| 21,464 | 202 | 19,642 | 4,417 | 2,618 | 26,879 |
| 21,465 | 200 | 19,600 | 4,405 | 2,629 | 26,834 |
| 21,466 | 200 | 19,820 | 4,456 | 2,648 | 27,124 |
| 21,467 | 205 | 19,936 | 4,462 | 2,650 | 27,253 |
| 21,468 | 206 | 19,952 | 4,446 | 2,629 | 27,233 |
| 21,469 | 201 | 20,056 | 4,441 | 2,617 | 27,315 |
| 21,470 | 200 | 19,806 | 4,396 | 2,601 | 27,003 |
| 21,471 | 206 | 20,136 | 4,458 | 2,637 | 27,437 |
| 21,472 | 205 | 20,110 | 4,434 | 2,598 | 27,347 |
| 21,473 | 207 | 20,370 | 4,444 | 2,624 | 27,645 |
| 21,474 | 207 | 20,369 | 4,425 | 2,605 | 27,606 |
| 21,475 | 207 | 20,380 | 4,386 | 2,599 | 27,572 |
| 21,476 | 210 | 20,082 | 4,312 | 2,561 | 27,165 |
| 21,477 | 211 | 20,316 | 4,314 | 2,594 | 27,435 |
| 21,478 | 210 | 20,621 | 4,325 | 2,601 | 27,757 |
| 21,479 | 208 | 20,360 | 4,261 | 2,572 | 27,401 |
| 21,480 | 208 | 20,424 | 4,299 | 2,590 | 27,521 |
| 21,481 | 211 | 20,197 | 4,201 | 2,571 | 27,180 |
| 21,482 | 206 | 20,188 | 4,120 | 2,518 | 27,032 |
| 21,483 | 207 | 20,228 | 4,049 | 2,492 | 26,976 |
| 21,484 | 208 | 20,181 | 4,011 | 2,471 | 26,871 |
| 21,485 | 195 | 20,061 | 3,884 | 2,409 | 26,549 |
| 21,486 | 186 | 19,747 | 3,809 | 2,385 | 26,127 |
| 21,487 | 188 | 19,715 | 3,786 | 2,382 | 26,071 |
| 21,488 | 178 | 19,597 | 3,712 | 2,343 | 25,830 |
| 21,489 | 180 | 19,653 | 3,677 | 2,336 | 25,846 |
| 21,490 | 184 | 19,589 | 3,646 | 2,307 | 25,726 |
| 21,491 | 187 | 19,533 | 3,616 | 2,286 | 25,622 |
| 21,492 | 185 | 19,596 | 3,588 | 2,282 | 25,651 |
| 21,493 | 182 | 19,703 | 3,585 | 2,263 | 25,733 |
| 21,494 | 184 | 19,902 | 3,604 | 2,288 | 25,978 |
| 21,495 | 181 | 19,771 | 3,549 | 2,234 | 25,735 |



|        |     |        |       |       |        |
|--------|-----|--------|-------|-------|--------|
| 21,496 | 182 | 19,705 | 3,524 | 2,214 | 25,625 |
| 21,497 | 182 | 19,679 | 3,495 | 2,208 | 25,564 |
| 21,498 | 176 | 19,578 | 3,476 | 2,172 | 25,402 |
| 21,499 | 168 | 19,263 | 3,428 | 2,164 | 25,023 |
| 21,500 | 170 | 19,263 | 3,406 | 2,171 | 25,010 |
| 21,501 | 171 | 18,943 | 3,349 | 2,129 | 24,592 |
| 21,502 | 173 | 18,777 | 3,335 | 2,098 | 24,383 |
| 21,503 | 178 | 18,475 | 3,283 | 2,082 | 24,018 |
| 21,504 | 178 | 18,395 | 3,236 | 2,059 | 23,868 |
| 21,505 | 178 | 17,980 | 3,160 | 2,001 | 23,319 |
| 21,506 | 181 | 18,006 | 3,160 | 2,001 | 23,348 |
| 21,507 | 176 | 17,886 | 3,130 | 1,981 | 23,173 |
| 21,508 | 161 | 17,174 | 2,982 | 1,897 | 22,214 |
| 21,509 | 164 | 17,199 | 2,987 | 1,894 | 22,244 |
| 21,510 | 159 | 16,969 | 2,944 | 1,852 | 21,924 |
| 21,511 | 158 | 16,741 | 2,927 | 1,826 | 21,652 |
| 21,512 | 152 | 16,473 | 2,902 | 1,805 | 21,332 |
| 21,513 | 154 | 16,233 | 2,869 | 1,762 | 21,018 |
| 21,514 | 152 | 16,036 | 2,863 | 1,746 | 20,797 |
| 21,515 | 152 | 15,974 | 2,877 | 1,726 | 20,729 |
| 21,516 | 152 | 15,861 | 2,890 | 1,714 | 20,617 |
| 21,517 | 154 | 15,767 | 2,858 | 1,703 | 20,482 |
| 21,518 | 152 | 15,556 | 2,805 | 1,678 | 20,191 |
| 21,519 | 152 | 15,385 | 2,770 | 1,664 | 19,971 |
| 21,520 | 150 | 15,560 | 2,804 | 1,693 | 20,207 |
| 21,521 | 149 | 15,629 | 2,797 | 1,692 | 20,267 |
| 21,522 | 146 | 15,420 | 2,776 | 1,662 | 20,004 |
| 21,523 | 146 | 15,464 | 2,750 | 1,658 | 20,018 |
| 21,524 | 145 | 15,451 | 2,781 | 1,680 | 20,057 |
| 21,525 | 144 | 15,480 | 2,766 | 1,692 | 20,082 |
| 21,526 | 141 | 15,282 | 2,785 | 1,713 | 19,921 |
| 21,527 | 138 | 15,287 | 2,784 | 1,712 | 19,921 |

|        |     |        |       |       |        |
|--------|-----|--------|-------|-------|--------|
| 21,528 | 136 | 15,234 | 2,792 | 1,710 | 19,872 |
| 21,529 | 138 | 15,208 | 2,791 | 1,694 | 19,831 |
| 21,530 | 136 | 15,423 | 2,808 | 1,711 | 20,078 |
| 21,531 | 134 | 15,457 | 2,805 | 1,698 | 20,094 |
| 21,532 | 132 | 15,452 | 2,791 | 1,689 | 20,064 |
| 21,533 | 138 | 15,422 | 2,788 | 1,699 | 20,047 |
| 21,534 | 134 | 15,117 | 2,751 | 1,679 | 19,681 |
| 21,535 | 134 | 15,102 | 2,740 | 1,680 | 19,656 |
| 21,536 | 131 | 15,053 | 2,741 | 1,674 | 19,599 |
| 21,537 | 130 | 14,964 | 2,723 | 1,676 | 19,493 |
| 21,538 | 132 | 15,176 | 2,759 | 1,698 | 19,765 |
| 21,539 | 135 | 15,125 | 2,793 | 1,720 | 19,773 |
| 21,540 | 135 | 14,943 | 2,762 | 1,709 | 19,549 |
| 21,541 | 129 | 14,839 | 2,740 | 1,701 | 19,409 |
| 21,542 | 129 | 15,108 | 2,809 | 1,748 | 19,794 |
| 21,543 | 126 | 14,830 | 2,774 | 1,740 | 19,470 |
| 21,544 | 123 | 14,847 | 2,836 | 1,778 | 19,584 |
| 21,545 | 126 | 14,860 | 2,852 | 1,779 | 19,617 |
| 21,546 | 127 | 15,119 | 2,894 | 1,816 | 19,956 |
| 21,547 | 125 | 15,268 | 2,933 | 1,838 | 20,164 |
| 21,548 | 128 | 15,453 | 2,965 | 1,874 | 20,420 |
| 21,549 | 135 | 15,591 | 3,016 | 1,894 | 20,636 |
| 21,550 | 136 | 15,755 | 3,044 | 1,909 | 20,844 |
| 21,551 | 135 | 15,978 | 3,093 | 1,921 | 21,127 |
| 21,552 | 136 | 16,014 | 3,088 | 1,925 | 21,163 |
| 21,553 | 135 | 16,478 | 3,224 | 2,008 | 21,845 |
| 21,554 | 134 | 16,421 | 3,194 | 1,989 | 21,738 |
| 21,555 | 133 | 16,317 | 3,181 | 1,991 | 21,622 |
| 21,556 | 136 | 16,679 | 3,304 | 2,079 | 22,198 |
| 21,557 | 137 | 16,764 | 3,285 | 2,082 | 22,268 |
| 21,558 | 130 | 17,072 | 3,396 | 2,139 | 22,737 |
| 21,559 | 133 | 17,145 | 3,429 | 2,167 | 22,874 |

|        |     |        |       |       |        |
|--------|-----|--------|-------|-------|--------|
| 21,560 | 133 | 17,203 | 3,423 | 2,170 | 22,929 |
| 21,561 | 135 | 17,261 | 3,432 | 2,187 | 23,015 |
| 21,562 | 136 | 17,242 | 3,410 | 2,196 | 22,984 |
| 21,563 | 133 | 17,355 | 3,435 | 2,212 | 23,135 |
| 21,564 | 133 | 17,281 | 3,416 | 2,201 | 23,031 |
| 21,565 | 135 | 17,420 | 3,433 | 2,228 | 23,216 |
| 21,566 | 140 | 17,319 | 3,391 | 2,214 | 23,064 |
| 21,567 | 138 | 17,272 | 3,365 | 2,196 | 22,971 |
| 21,568 | 142 | 17,434 | 3,422 | 2,224 | 23,222 |
| 21,569 | 143 | 17,270 | 3,392 | 2,214 | 23,019 |
| 21,570 | 143 | 17,161 | 3,370 | 2,197 | 22,871 |
| 21,571 | 145 | 17,260 | 3,432 | 2,204 | 23,041 |
| 21,572 | 146 | 17,254 | 3,423 | 2,204 | 23,027 |
| 21,573 | 142 | 17,230 | 3,464 | 2,238 | 23,074 |
| 21,574 | 152 | 17,481 | 3,503 | 2,255 | 23,391 |
| 21,575 | 154 | 17,345 | 3,492 | 2,216 | 23,207 |
| 21,576 | 165 | 17,400 | 3,498 | 2,218 | 23,281 |
| 21,577 | 168 | 17,424 | 3,485 | 2,202 | 23,279 |
| 21,578 | 169 | 17,470 | 3,482 | 2,193 | 23,314 |
| 21,579 | 165 | 17,259 | 3,454 | 2,169 | 23,047 |
| 21,580 | 186 | 17,777 | 3,560 | 2,254 | 23,777 |
| 21,581 | 189 | 17,552 | 3,531 | 2,232 | 23,504 |
| 21,582 | 189 | 17,256 | 3,503 | 2,211 | 23,159 |
| 21,583 | 195 | 17,398 | 3,587 | 2,229 | 23,409 |
| 21,584 | 191 | 17,265 | 3,602 | 2,218 | 23,276 |
| 21,585 | 195 | 17,432 | 3,670 | 2,240 | 23,537 |
| 21,586 | 196 | 17,436 | 3,683 | 2,255 | 23,570 |
| 21,587 | 198 | 17,309 | 3,673 | 2,242 | 23,422 |
| 21,588 | 199 | 17,332 | 3,706 | 2,250 | 23,487 |
| 21,589 | 195 | 17,206 | 3,699 | 2,223 | 23,323 |
| 21,590 | 197 | 17,262 | 3,689 | 2,223 | 23,371 |
| 21,591 | 193 | 17,070 | 3,674 | 2,210 | 23,147 |

|        |     |        |       |       |        |
|--------|-----|--------|-------|-------|--------|
| 21,592 | 191 | 17,190 | 3,707 | 2,244 | 23,332 |
| 21,593 | 196 | 17,143 | 3,712 | 2,229 | 23,280 |
| 21,594 | 192 | 17,072 | 3,700 | 2,201 | 23,165 |
| 21,595 | 193 | 17,073 | 3,703 | 2,208 | 23,177 |
| 21,596 | 192 | 16,905 | 3,683 | 2,206 | 22,986 |
| 21,597 | 191 | 16,868 | 3,653 | 2,201 | 22,913 |
| 21,598 | 193 | 16,587 | 3,606 | 2,170 | 22,556 |
| 21,599 | 196 | 16,772 | 3,631 | 2,189 | 22,788 |
| 21,600 | 188 | 16,756 | 3,617 | 2,196 | 22,757 |
| 21,601 | 190 | 16,757 | 3,653 | 2,228 | 22,828 |
| 21,602 | 193 | 16,799 | 3,681 | 2,248 | 22,921 |
| 21,603 | 196 | 16,949 | 3,700 | 2,247 | 23,092 |
| 21,604 | 198 | 16,809 | 3,676 | 2,220 | 22,903 |
| 21,605 | 200 | 16,954 | 3,693 | 2,236 | 23,083 |
| 21,606 | 195 | 16,953 | 3,696 | 2,233 | 23,077 |
| 21,607 | 200 | 16,960 | 3,680 | 2,215 | 23,055 |
| 21,608 | 202 | 17,001 | 3,648 | 2,194 | 23,045 |
| 21,609 | 203 | 17,055 | 3,634 | 2,188 | 23,080 |
| 21,610 | 210 | 17,124 | 3,640 | 2,180 | 23,154 |
| 21,611 | 218 | 17,306 | 3,667 | 2,202 | 23,393 |
| 21,612 | 220 | 17,310 | 3,689 | 2,192 | 23,411 |
| 21,613 | 221 | 17,361 | 3,700 | 2,201 | 23,483 |
| 21,614 | 226 | 17,405 | 3,709 | 2,203 | 23,543 |
| 21,615 | 227 | 17,491 | 3,713 | 2,220 | 23,651 |
| 21,616 | 230 | 17,489 | 3,710 | 2,218 | 23,647 |
| 21,617 | 234 | 17,471 | 3,684 | 2,223 | 23,612 |
| 21,618 | 232 | 17,490 | 3,678 | 2,221 | 23,621 |
| 21,619 | 230 | 17,471 | 3,680 | 2,213 | 23,594 |
| 21,620 | 225 | 17,543 | 3,694 | 2,215 | 23,677 |
| 21,621 | 229 | 17,495 | 3,680 | 2,201 | 23,605 |
| 21,622 | 235 | 17,581 | 3,686 | 2,213 | 23,715 |
| 21,623 | 236 | 17,697 | 3,700 | 2,217 | 23,850 |

|        |     |        |       |       |        |
|--------|-----|--------|-------|-------|--------|
| 21,624 | 233 | 17,806 | 3,756 | 2,251 | 24,046 |
| 21,625 | 232 | 17,805 | 3,778 | 2,261 | 24,076 |
| 21,626 | 228 | 17,915 | 3,824 | 2,283 | 24,250 |
| 21,627 | 223 | 17,963 | 3,857 | 2,309 | 24,352 |
| 21,628 | 221 | 18,036 | 3,903 | 2,329 | 24,489 |
| 21,629 | 213 | 18,224 | 3,956 | 2,357 | 24,750 |
| 21,630 | 207 | 18,150 | 3,960 | 2,367 | 24,684 |
| 21,631 | 207 | 18,384 | 3,979 | 2,387 | 24,957 |
| 21,632 | 205 | 17,937 | 3,826 | 2,299 | 24,267 |
| 21,633 | 207 | 18,153 | 3,859 | 2,324 | 24,543 |
| 21,634 | 201 | 18,324 | 3,894 | 2,339 | 24,758 |
| 21,635 | 201 | 18,258 | 3,896 | 2,345 | 24,700 |
| 21,636 | 200 | 18,314 | 3,904 | 2,374 | 24,792 |
| 21,637 | 199 | 18,399 | 3,925 | 2,372 | 24,895 |
| 21,638 | 205 | 18,505 | 3,909 | 2,360 | 24,979 |
| 21,639 | 217 | 18,589 | 3,914 | 2,364 | 25,084 |
| 21,640 | 224 | 18,668 | 3,936 | 2,366 | 25,194 |
| 21,641 | 226 | 18,646 | 3,912 | 2,333 | 25,117 |
| 21,642 | 232 | 18,807 | 3,921 | 2,338 | 25,298 |
| 21,643 | 231 | 18,644 | 3,862 | 2,312 | 25,049 |
| 21,644 | 231 | 18,675 | 3,873 | 2,317 | 25,096 |
| 21,645 | 230 | 18,581 | 3,853 | 2,312 | 24,976 |
| 21,646 | 230 | 18,485 | 3,768 | 2,260 | 24,743 |
| 21,647 | 230 | 18,432 | 3,732 | 2,246 | 24,640 |
| 21,648 | 229 | 18,456 | 3,753 | 2,241 | 24,679 |
| 21,649 | 225 | 18,583 | 3,769 | 2,250 | 24,827 |
| 21,650 | 225 | 18,538 | 3,749 | 2,223 | 24,735 |
| 21,651 | 225 | 18,403 | 3,702 | 2,185 | 24,515 |
| 21,652 | 222 | 18,288 | 3,639 | 2,143 | 24,292 |
| 21,653 | 211 | 17,972 | 3,556 | 2,109 | 23,848 |
| 21,654 | 201 | 17,641 | 3,407 | 2,072 | 23,321 |
| 21,655 | 199 | 17,553 | 3,356 | 2,038 | 23,146 |

|        |     |        |       |       |        |
|--------|-----|--------|-------|-------|--------|
| 21,656 | 205 | 17,597 | 3,378 | 2,031 | 23,211 |
| 21,657 | 204 | 17,376 | 3,336 | 1,998 | 22,914 |
| 21,658 | 199 | 17,409 | 3,332 | 1,996 | 22,936 |
| 21,659 | 202 | 17,435 | 3,342 | 2,017 | 22,996 |
| 21,660 | 194 | 17,249 | 3,273 | 1,981 | 22,697 |
| 21,661 | 193 | 17,244 | 3,299 | 1,988 | 22,724 |
| 21,662 | 183 | 17,159 | 3,247 | 1,962 | 22,551 |
| 21,663 | 183 | 17,184 | 3,269 | 1,972 | 22,608 |
| 21,664 | 179 | 17,333 | 3,240 | 1,972 | 22,724 |
| 21,665 | 176 | 17,362 | 3,250 | 1,967 | 22,755 |
| 21,666 | 184 | 17,536 | 3,286 | 1,979 | 22,985 |
| 21,667 | 175 | 17,572 | 3,272 | 1,980 | 22,999 |
| 21,668 | 176 | 17,678 | 3,330 | 2,009 | 23,193 |
| 21,669 | 176 | 17,783 | 3,344 | 2,028 | 23,331 |
| 21,670 | 178 | 17,890 | 3,386 | 2,046 | 23,500 |
| 21,671 | 174 | 17,904 | 3,380 | 2,040 | 23,498 |
| 21,672 | 170 | 17,943 | 3,357 | 2,044 | 23,514 |
| 21,673 | 163 | 17,931 | 3,356 | 2,040 | 23,490 |
| 21,674 | 162 | 17,778 | 3,309 | 2,003 | 23,252 |
| 21,675 | 160 | 17,616 | 3,229 | 1,968 | 22,973 |
| 21,676 | 157 | 17,068 | 3,134 | 1,923 | 22,282 |
| 21,677 | 155 | 17,159 | 3,145 | 1,935 | 22,394 |
| 21,678 | 152 | 16,783 | 3,026 | 1,859 | 21,820 |
| 21,679 | 150 | 16,662 | 2,994 | 1,840 | 21,646 |
| 21,680 | 151 | 16,919 | 3,041 | 1,859 | 21,970 |
| 21,681 | 142 | 15,977 | 2,804 | 1,720 | 20,643 |
| 21,682 | 144 | 16,148 | 2,840 | 1,735 | 20,867 |
| 21,683 | 142 | 16,445 | 2,894 | 1,772 | 21,253 |
| 21,684 | 146 | 16,644 | 2,933 | 1,793 | 21,516 |
| 21,685 | 142 | 16,406 | 2,854 | 1,755 | 21,157 |
| 21,686 | 141 | 16,470 | 2,875 | 1,769 | 21,255 |
| 21,687 | 138 | 16,581 | 2,902 | 1,754 | 21,375 |

|        |     |        |       |       |        |
|--------|-----|--------|-------|-------|--------|
| 21,688 | 141 | 16,552 | 2,895 | 1,746 | 21,334 |
| 21,689 | 142 | 16,508 | 2,910 | 1,754 | 21,314 |
| 21,690 | 122 | 16,418 | 2,879 | 1,764 | 21,183 |
| 21,691 | 127 | 16,514 | 2,910 | 1,803 | 21,354 |
| 21,692 | 125 | 16,530 | 2,925 | 1,795 | 21,375 |
| 21,693 | 120 | 16,329 | 2,890 | 1,792 | 21,131 |
| 21,694 | 125 | 16,447 | 2,904 | 1,806 | 21,282 |
| 21,695 | 130 | 16,466 | 2,925 | 1,810 | 21,331 |
| 21,696 | 129 | 16,515 | 2,922 | 1,825 | 21,391 |
| 21,697 | 133 | 16,661 | 2,990 | 1,842 | 21,626 |
| 21,698 | 136 | 16,532 | 2,993 | 1,832 | 21,493 |
| 21,699 | 136 | 16,402 | 2,980 | 1,836 | 21,354 |
| 21,700 | 133 | 16,572 | 3,023 | 1,852 | 21,580 |
| 21,701 | 130 | 16,533 | 3,038 | 1,879 | 21,580 |
| 21,702 | 125 | 16,728 | 3,074 | 1,899 | 21,826 |
| 21,703 | 125 | 16,755 | 3,116 | 1,912 | 21,908 |
| 21,704 | 125 | 16,853 | 3,162 | 1,936 | 22,076 |
| 21,705 | 127 | 16,898 | 3,259 | 1,976 | 22,260 |
| 21,706 | 120 | 16,791 | 3,245 | 1,997 | 22,153 |
| 21,707 | 124 | 16,921 | 3,305 | 2,034 | 22,384 |
| 21,708 | 125 | 17,020 | 3,343 | 2,068 | 22,556 |
| 21,709 | 124 | 16,913 | 3,381 | 2,095 | 22,513 |
| 21,710 | 124 | 16,988 | 3,416 | 2,127 | 22,655 |
| 21,711 | 121 | 16,925 | 3,416 | 2,126 | 22,588 |
| 21,712 | 120 | 16,996 | 3,445 | 2,143 | 22,704 |
| 21,713 | 117 | 17,075 | 3,449 | 2,169 | 22,810 |
| 21,714 | 121 | 17,061 | 3,486 | 2,179 | 22,847 |
| 21,715 | 119 | 17,034 | 3,496 | 2,162 | 22,811 |
| 21,716 | 125 | 17,175 | 3,529 | 2,188 | 23,017 |
| 21,717 | 118 | 17,389 | 3,569 | 2,221 | 23,297 |
| 21,718 | 116 | 17,336 | 3,571 | 2,209 | 23,232 |
| 21,719 | 114 | 17,144 | 3,527 | 2,190 | 22,975 |

|        |     |        |       |       |        |
|--------|-----|--------|-------|-------|--------|
| 21,720 | 115 | 17,283 | 3,567 | 2,208 | 23,173 |
| 21,721 | 123 | 17,213 | 3,549 | 2,214 | 23,099 |
| 21,722 | 123 | 17,295 | 3,572 | 2,236 | 23,226 |
| 21,723 | 125 | 17,258 | 3,600 | 2,238 | 23,221 |
| 21,724 | 127 | 17,280 | 3,615 | 2,249 | 23,271 |
| 21,725 | 129 | 17,142 | 3,607 | 2,236 | 23,114 |
| 21,726 | 130 | 17,312 | 3,635 | 2,249 | 23,326 |
| 21,727 | 131 | 17,344 | 3,636 | 2,246 | 23,357 |
| 21,728 | 130 | 17,160 | 3,609 | 2,231 | 23,130 |
| 21,729 | 135 | 17,341 | 3,729 | 2,276 | 23,481 |
| 21,730 | 134 | 17,316 | 3,734 | 2,295 | 23,479 |
| 21,731 | 134 | 17,025 | 3,694 | 2,279 | 23,132 |
| 21,732 | 131 | 16,790 | 3,658 | 2,256 | 22,835 |
| 21,733 | 130 | 17,093 | 3,808 | 2,353 | 23,384 |
| 21,734 | 130 | 17,143 | 3,831 | 2,362 | 23,466 |
| 21,735 | 131 | 17,053 | 3,827 | 2,334 | 23,345 |
| 21,736 | 131 | 17,133 | 3,837 | 2,340 | 23,441 |
| 21,737 | 132 | 17,381 | 3,901 | 2,374 | 23,788 |
| 21,738 | 131 | 17,361 | 3,893 | 2,386 | 23,771 |
| 21,739 | 120 | 17,196 | 3,856 | 2,360 | 23,532 |
| 21,740 | 131 | 17,512 | 3,932 | 2,396 | 23,971 |
| 21,741 | 131 | 17,509 | 3,941 | 2,370 | 23,951 |
| 21,742 | 133 | 17,682 | 3,994 | 2,383 | 24,192 |
| 21,743 | 129 | 17,484 | 3,970 | 2,358 | 23,941 |
| 21,744 | 129 | 17,495 | 3,981 | 2,367 | 23,972 |
| 21,745 | 122 | 17,691 | 4,002 | 2,384 | 24,199 |
| 21,746 | 122 | 17,634 | 4,009 | 2,378 | 24,143 |
| 21,747 | 120 | 17,453 | 3,982 | 2,357 | 23,912 |
| 21,748 | 126 | 17,426 | 3,979 | 2,360 | 23,891 |
| 21,749 | 121 | 17,237 | 3,950 | 2,344 | 23,652 |
| 21,750 | 127 | 17,907 | 4,128 | 2,421 | 24,583 |
| 21,751 | 132 | 17,888 | 4,125 | 2,448 | 24,593 |



|        |     |        |       |       |        |
|--------|-----|--------|-------|-------|--------|
| 21,752 | 135 | 17,751 | 4,144 | 2,433 | 24,463 |
| 21,753 | 137 | 17,648 | 4,118 | 2,431 | 24,334 |
| 21,754 | 138 | 17,697 | 4,111 | 2,426 | 24,372 |
| 21,755 | 139 | 17,791 | 4,120 | 2,424 | 24,474 |
| 21,756 | 139 | 17,964 | 4,095 | 2,413 | 24,611 |
| 21,757 | 139 | 17,749 | 4,062 | 2,385 | 24,335 |
| 21,758 | 136 | 18,049 | 4,100 | 2,403 | 24,688 |
| 21,759 | 140 | 17,885 | 4,042 | 2,355 | 24,422 |
| 21,760 | 142 | 17,930 | 4,039 | 2,354 | 24,465 |
| 21,761 | 142 | 17,893 | 4,039 | 2,342 | 24,416 |
| 21,762 | 145 | 17,840 | 4,046 | 2,354 | 24,385 |
| 21,763 | 144 | 17,910 | 4,059 | 2,368 | 24,481 |
| 21,764 | 145 | 18,170 | 4,119 | 2,401 | 24,835 |
| 21,765 | 141 | 18,075 | 4,069 | 2,379 | 24,664 |
| 21,766 | 150 | 18,346 | 4,146 | 2,440 | 25,082 |
| 21,767 | 143 | 18,238 | 4,121 | 2,412 | 24,914 |
| 21,768 | 154 | 18,326 | 4,166 | 2,429 | 25,075 |
| 21,769 | 156 | 18,303 | 4,186 | 2,431 | 25,076 |
| 21,770 | 161 | 18,307 | 4,203 | 2,427 | 25,098 |
| 21,771 | 160 | 18,339 | 4,204 | 2,424 | 25,127 |
| 21,772 | 153 | 18,310 | 4,195 | 2,420 | 25,078 |
| 21,773 | 157 | 18,398 | 4,232 | 2,427 | 25,214 |
| 21,774 | 155 | 18,416 | 4,233 | 2,443 | 25,247 |
| 21,775 | 149 | 18,396 | 4,241 | 2,464 | 25,250 |
| 21,776 | 154 | 18,691 | 4,291 | 2,493 | 25,629 |
| 21,777 | 151 | 18,723 | 4,303 | 2,505 | 25,682 |
| 21,778 | 143 | 18,812 | 4,311 | 2,505 | 25,771 |
| 21,779 | 146 | 18,859 | 4,304 | 2,501 | 25,810 |
| 21,780 | 148 | 18,942 | 4,301 | 2,508 | 25,899 |
| 21,781 | 152 | 19,159 | 4,305 | 2,500 | 26,116 |
| 21,782 | 154 | 19,336 | 4,333 | 2,491 | 26,314 |
| 21,783 | 156 | 19,334 | 4,307 | 2,489 | 26,286 |

|        |     |        |       |       |        |
|--------|-----|--------|-------|-------|--------|
| 21,784 | 162 | 19,648 | 4,385 | 2,531 | 26,726 |
| 21,785 | 167 | 19,319 | 4,325 | 2,505 | 26,316 |
| 21,786 | 162 | 19,116 | 4,280 | 2,488 | 26,046 |
| 21,787 | 171 | 19,500 | 4,348 | 2,564 | 26,583 |
| 21,788 | 175 | 19,534 | 4,334 | 2,578 | 26,621 |
| 21,789 | 180 | 19,411 | 4,301 | 2,558 | 26,450 |
| 21,790 | 179 | 19,440 | 4,275 | 2,554 | 26,448 |
| 21,791 | 171 | 19,266 | 4,229 | 2,527 | 26,193 |
| 21,792 | 168 | 19,081 | 4,162 | 2,507 | 25,918 |
| 21,793 | 172 | 19,932 | 4,318 | 2,627 | 27,049 |
| 21,794 | 169 | 19,774 | 4,287 | 2,621 | 26,851 |
| 21,795 | 171 | 20,019 | 4,335 | 2,654 | 27,179 |
| 21,796 | 170 | 20,009 | 4,353 | 2,648 | 27,180 |
| 21,797 | 160 | 20,063 | 4,375 | 2,675 | 27,273 |
| 21,798 | 159 | 19,954 | 4,340 | 2,643 | 27,096 |
| 21,799 | 162 | 19,987 | 4,345 | 2,646 | 27,140 |
| 21,800 | 163 | 19,931 | 4,331 | 2,635 | 27,060 |
| 21,801 | 164 | 20,167 | 4,374 | 2,671 | 27,376 |
| 21,802 | 159 | 19,990 | 4,327 | 2,642 | 27,118 |
| 21,803 | 158 | 20,033 | 4,326 | 2,647 | 27,164 |
| 21,804 | 157 | 19,948 | 4,327 | 2,645 | 27,077 |
| 21,805 | 159 | 19,733 | 4,314 | 2,625 | 26,831 |
| 21,806 | 170 | 19,566 | 4,283 | 2,622 | 26,641 |
| 21,807 | 169 | 19,468 | 4,275 | 2,622 | 26,534 |
| 21,808 | 167 | 19,486 | 4,277 | 2,628 | 26,558 |
| 21,809 | 169 | 19,475 | 4,321 | 2,660 | 26,625 |
| 21,810 | 168 | 19,248 | 4,288 | 2,632 | 26,336 |
| 21,811 | 166 | 19,150 | 4,283 | 2,625 | 26,224 |
| 21,812 | 161 | 19,330 | 4,308 | 2,653 | 26,452 |
| 21,813 | 162 | 19,472 | 4,315 | 2,644 | 26,593 |
| 21,814 | 162 | 19,413 | 4,288 | 2,626 | 26,489 |
| 21,815 | 161 | 19,415 | 4,320 | 2,673 | 26,569 |

|        |     |        |       |       |        |
|--------|-----|--------|-------|-------|--------|
| 21,816 | 159 | 19,261 | 4,306 | 2,660 | 26,386 |
| 21,817 | 158 | 19,085 | 4,281 | 2,644 | 26,168 |
| 21,818 | 157 | 18,952 | 4,284 | 2,659 | 26,052 |
| 21,819 | 151 | 18,764 | 4,202 | 2,619 | 25,736 |
| 21,820 | 152 | 18,792 | 4,193 | 2,623 | 25,760 |
| 21,821 | 146 | 18,781 | 4,182 | 2,616 | 25,725 |
| 21,822 | 148 | 18,642 | 4,185 | 2,608 | 25,583 |
| 21,823 | 144 | 18,510 | 4,187 | 2,605 | 25,446 |
| 21,824 | 140 | 18,414 | 4,171 | 2,601 | 25,326 |
| 21,825 | 141 | 18,206 | 4,101 | 2,575 | 25,023 |
| 21,826 | 151 | 18,314 | 4,106 | 2,573 | 25,144 |
| 21,827 | 147 | 18,250 | 4,090 | 2,570 | 25,057 |
| 21,828 | 152 | 17,968 | 4,009 | 2,520 | 24,649 |
| 21,829 | 153 | 18,021 | 4,007 | 2,523 | 24,704 |
| 21,830 | 153 | 17,881 | 3,965 | 2,484 | 24,483 |
| 21,831 | 154 | 17,911 | 3,969 | 2,509 | 24,543 |
| 21,832 | 149 | 17,804 | 3,993 | 2,533 | 24,479 |
| 21,833 | 151 | 17,833 | 3,982 | 2,528 | 24,494 |
| 21,834 | 144 | 17,800 | 3,975 | 2,514 | 24,433 |
| 21,835 | 150 | 17,978 | 4,013 | 2,531 | 24,672 |
| 21,836 | 143 | 17,781 | 3,955 | 2,525 | 24,404 |
| 21,837 | 145 | 17,956 | 3,965 | 2,548 | 24,614 |
| 21,838 | 142 | 17,958 | 3,960 | 2,529 | 24,589 |
| 21,839 | 138 | 17,805 | 3,922 | 2,498 | 24,363 |
| 21,840 | 141 | 17,588 | 3,890 | 2,493 | 24,112 |
| 21,841 | 141 | 17,593 | 3,883 | 2,487 | 24,104 |
| 21,842 | 141 | 17,321 | 3,840 | 2,476 | 23,778 |
| 21,843 | 139 | 17,140 | 3,832 | 2,459 | 23,570 |
| 21,844 | 141 | 17,470 | 3,902 | 2,506 | 24,019 |
| 21,845 | 143 | 17,431 | 3,917 | 2,533 | 24,024 |
| 21,846 | 140 | 17,424 | 3,922 | 2,529 | 24,015 |
| 21,847 | 141 | 17,298 | 3,855 | 2,528 | 23,822 |

|        |     |        |       |       |        |
|--------|-----|--------|-------|-------|--------|
| 21,848 | 140 | 17,384 | 3,842 | 2,539 | 23,905 |
| 21,849 | 136 | 17,356 | 3,835 | 2,554 | 23,881 |
| 21,850 | 136 | 17,334 | 3,835 | 2,561 | 23,866 |
| 21,851 | 138 | 17,630 | 3,874 | 2,606 | 24,248 |
| 21,852 | 137 | 17,699 | 3,874 | 2,613 | 24,323 |
| 21,853 | 135 | 17,796 | 3,862 | 2,615 | 24,408 |
| 21,854 | 135 | 17,692 | 3,814 | 2,595 | 24,236 |
| 21,855 | 134 | 17,738 | 3,833 | 2,593 | 24,298 |
| 21,856 | 131 | 17,728 | 3,811 | 2,610 | 24,280 |
| 21,857 | 118 | 17,762 | 3,826 | 2,623 | 24,329 |
| 21,858 | 122 | 17,861 | 3,801 | 2,601 | 24,385 |
| 21,859 | 121 | 17,948 | 3,796 | 2,585 | 24,450 |
| 21,860 | 122 | 18,011 | 3,751 | 2,569 | 24,453 |
| 21,861 | 120 | 17,723 | 3,635 | 2,504 | 23,982 |
| 21,862 | 122 | 17,712 | 3,631 | 2,508 | 23,973 |
| 21,863 | 126 | 17,831 | 3,633 | 2,528 | 24,118 |
| 21,864 | 125 | 17,747 | 3,599 | 2,499 | 23,970 |
| 21,865 | 125 | 17,585 | 3,543 | 2,455 | 23,708 |
| 21,866 | 127 | 17,828 | 3,560 | 2,461 | 23,976 |
| 21,867 | 120 | 17,656 | 3,483 | 2,416 | 23,675 |
| 21,868 | 122 | 17,544 | 3,450 | 2,392 | 23,508 |
| 21,869 | 123 | 17,555 | 3,431 | 2,384 | 23,493 |
| 21,870 | 116 | 17,534 | 3,434 | 2,377 | 23,461 |
| 21,871 | 117 | 17,823 | 3,493 | 2,417 | 23,850 |
| 21,872 | 119 | 17,778 | 3,460 | 2,400 | 23,757 |
| 21,873 | 122 | 17,940 | 3,464 | 2,399 | 23,925 |
| 21,874 | 124 | 18,090 | 3,457 | 2,406 | 24,077 |
| 21,875 | 125 | 18,104 | 3,444 | 2,405 | 24,078 |
| 21,876 | 124 | 17,956 | 3,423 | 2,381 | 23,884 |
| 21,877 | 116 | 17,862 | 3,425 | 2,381 | 23,784 |
| 21,878 | 118 | 18,042 | 3,457 | 2,396 | 24,013 |
| 21,879 | 116 | 18,108 | 3,454 | 2,393 | 24,071 |

|        |     |        |       |       |        |
|--------|-----|--------|-------|-------|--------|
| 21,880 | 119 | 18,368 | 3,478 | 2,408 | 24,373 |
| 21,881 | 114 | 18,253 | 3,438 | 2,389 | 24,194 |
| 21,882 | 120 | 18,429 | 3,448 | 2,383 | 24,380 |
| 21,883 | 117 | 18,300 | 3,386 | 2,353 | 24,156 |
| 21,884 | 123 | 18,522 | 3,423 | 2,375 | 24,443 |
| 21,885 | 118 | 18,256 | 3,355 | 2,355 | 24,084 |
| 21,886 | 126 | 18,136 | 3,308 | 2,324 | 23,894 |
| 21,887 | 127 | 18,213 | 3,315 | 2,320 | 23,975 |
| 21,888 | 121 | 17,467 | 3,201 | 2,215 | 23,004 |
| 21,889 | 120 | 17,624 | 3,233 | 2,237 | 23,214 |
| 21,890 | 120 | 17,798 | 3,273 | 2,238 | 23,429 |
| 21,891 | 120 | 17,843 | 3,261 | 2,236 | 23,460 |
| 21,892 | 116 | 18,121 | 3,295 | 2,253 | 23,785 |
| 21,893 | 116 | 18,180 | 3,287 | 2,254 | 23,837 |
| 21,894 | 121 | 18,310 | 3,341 | 2,270 | 24,042 |
| 21,895 | 128 | 18,530 | 3,367 | 2,292 | 24,317 |
| 21,896 | 124 | 18,383 | 3,331 | 2,245 | 24,083 |
| 21,897 | 130 | 18,607 | 3,348 | 2,278 | 24,363 |
| 21,898 | 131 | 18,363 | 3,302 | 2,231 | 24,027 |
| 21,899 | 131 | 18,309 | 3,308 | 2,229 | 23,977 |
| 21,900 | 132 | 18,374 | 3,317 | 2,227 | 24,050 |
| 21,901 | 134 | 18,695 | 3,369 | 2,223 | 24,421 |
| 21,902 | 137 | 18,774 | 3,378 | 2,219 | 24,508 |
| 21,903 | 138 | 18,490 | 3,322 | 2,187 | 24,137 |
| 21,904 | 142 | 18,525 | 3,335 | 2,185 | 24,187 |
| 21,905 | 142 | 18,640 | 3,347 | 2,189 | 24,318 |
| 21,906 | 142 | 18,697 | 3,354 | 2,196 | 24,389 |
| 21,907 | 143 | 18,358 | 3,304 | 2,167 | 23,972 |
| 21,908 | 143 | 18,514 | 3,315 | 2,176 | 24,148 |
| 21,909 | 141 | 18,725 | 3,344 | 2,208 | 24,418 |
| 21,910 | 140 | 18,658 | 3,330 | 2,200 | 24,328 |
| 21,911 | 146 | 18,813 | 3,369 | 2,207 | 24,535 |

|        |     |        |       |       |        |
|--------|-----|--------|-------|-------|--------|
| 21,912 | 146 | 18,625 | 3,336 | 2,179 | 24,286 |
| 21,913 | 142 | 18,550 | 3,329 | 2,177 | 24,198 |
| 21,914 | 142 | 18,689 | 3,398 | 2,178 | 24,407 |
| 21,915 | 146 | 18,410 | 3,375 | 2,170 | 24,101 |
| 21,916 | 147 | 18,466 | 3,370 | 2,169 | 24,152 |
| 21,917 | 144 | 18,469 | 3,399 | 2,186 | 24,198 |
| 21,918 | 144 | 18,462 | 3,401 | 2,188 | 24,195 |
| 21,919 | 142 | 18,475 | 3,420 | 2,209 | 24,246 |
| 21,920 | 144 | 18,597 | 3,432 | 2,237 | 24,410 |
| 21,921 | 143 | 18,709 | 3,457 | 2,255 | 24,564 |
| 21,922 | 144 | 18,753 | 3,460 | 2,258 | 24,615 |
| 21,923 | 140 | 18,609 | 3,449 | 2,256 | 24,454 |
| 21,924 | 137 | 19,156 | 3,548 | 2,334 | 25,175 |
| 21,925 | 136 | 19,073 | 3,565 | 2,332 | 25,106 |
| 21,926 | 140 | 19,298 | 3,603 | 2,349 | 25,390 |
| 21,927 | 138 | 19,284 | 3,599 | 2,370 | 25,391 |
| 21,928 | 138 | 19,325 | 3,611 | 2,372 | 25,446 |
| 21,929 | 135 | 19,469 | 3,666 | 2,399 | 25,669 |
| 21,930 | 138 | 19,704 | 3,725 | 2,436 | 26,003 |
| 21,931 | 140 | 19,599 | 3,753 | 2,437 | 25,929 |
| 21,932 | 141 | 19,623 | 3,754 | 2,440 | 25,958 |
| 21,933 | 142 | 19,748 | 3,809 | 2,474 | 26,173 |
| 21,934 | 143 | 19,745 | 3,816 | 2,478 | 26,182 |
| 21,935 | 137 | 19,784 | 3,868 | 2,496 | 26,285 |
| 21,936 | 136 | 19,808 | 3,878 | 2,499 | 26,321 |
| 21,937 | 128 | 19,864 | 3,930 | 2,507 | 26,429 |
| 21,938 | 127 | 19,855 | 3,952 | 2,521 | 26,455 |
| 21,939 | 128 | 19,852 | 3,958 | 2,522 | 26,460 |
| 21,940 | 122 | 19,784 | 3,958 | 2,535 | 26,399 |
| 21,941 | 123 | 19,846 | 3,981 | 2,549 | 26,499 |
| 21,942 | 124 | 19,753 | 4,032 | 2,542 | 26,451 |
| 21,943 | 123 | 19,759 | 4,072 | 2,548 | 26,502 |

|        |     |        |       |       |        |
|--------|-----|--------|-------|-------|--------|
| 21,944 | 122 | 19,938 | 4,101 | 2,596 | 26,757 |
| 21,945 | 122 | 20,079 | 4,141 | 2,623 | 26,965 |
| 21,946 | 116 | 20,142 | 4,176 | 2,651 | 27,085 |
| 21,947 | 116 | 20,011 | 4,153 | 2,644 | 26,924 |
| 21,948 | 119 | 20,139 | 4,205 | 2,662 | 27,125 |
| 21,949 | 119 | 20,098 | 4,233 | 2,653 | 27,103 |
| 21,950 | 127 | 20,404 | 4,292 | 2,692 | 27,515 |
| 21,951 | 122 | 20,449 | 4,316 | 2,719 | 27,606 |
| 21,952 | 121 | 20,475 | 4,307 | 2,752 | 27,655 |
| 21,953 | 123 | 20,515 | 4,338 | 2,753 | 27,729 |
| 21,954 | 123 | 20,477 | 4,329 | 2,746 | 27,675 |
| 21,955 | 121 | 20,688 | 4,373 | 2,765 | 27,947 |
| 21,956 | 126 | 20,497 | 4,376 | 2,750 | 27,749 |
| 21,957 | 124 | 20,384 | 4,350 | 2,733 | 27,591 |
| 21,958 | 123 | 20,745 | 4,390 | 2,787 | 28,045 |
| 21,959 | 124 | 20,721 | 4,407 | 2,800 | 28,052 |
| 21,960 | 123 | 20,572 | 4,411 | 2,778 | 27,884 |
| 21,961 | 121 | 20,426 | 4,388 | 2,768 | 27,703 |
| 21,962 | 121 | 20,333 | 4,391 | 2,770 | 27,615 |
| 21,963 | 122 | 20,560 | 4,408 | 2,795 | 27,885 |
| 21,964 | 124 | 20,621 | 4,422 | 2,796 | 27,963 |
| 21,965 | 123 | 20,655 | 4,435 | 2,816 | 28,029 |
| 21,966 | 117 | 20,228 | 4,374 | 2,775 | 27,494 |
| 21,967 | 117 | 20,333 | 4,390 | 2,789 | 27,629 |
| 21,968 | 118 | 20,312 | 4,390 | 2,790 | 27,610 |
| 21,969 | 117 | 20,241 | 4,390 | 2,784 | 27,532 |
| 21,970 | 117 | 20,389 | 4,400 | 2,785 | 27,691 |
| 21,971 | 118 | 20,260 | 4,392 | 2,765 | 27,535 |
| 21,972 | 121 | 20,161 | 4,399 | 2,759 | 27,440 |
| 21,973 | 123 | 19,844 | 4,332 | 2,706 | 27,005 |
| 21,974 | 125 | 19,741 | 4,309 | 2,686 | 26,861 |
| 21,975 | 130 | 20,041 | 4,340 | 2,715 | 27,226 |

|        |     |        |       |       |        |
|--------|-----|--------|-------|-------|--------|
| 21,976 | 129 | 19,655 | 4,266 | 2,674 | 26,724 |
| 21,977 | 129 | 19,712 | 4,277 | 2,684 | 26,802 |
| 21,978 | 134 | 19,868 | 4,271 | 2,675 | 26,948 |
| 21,979 | 137 | 19,676 | 4,206 | 2,659 | 26,678 |
| 21,980 | 137 | 19,699 | 4,208 | 2,685 | 26,729 |
| 21,981 | 134 | 19,703 | 4,148 | 2,663 | 26,648 |
| 21,982 | 133 | 19,571 | 4,108 | 2,648 | 26,460 |
| 21,983 | 138 | 19,745 | 4,134 | 2,653 | 26,670 |
| 21,984 | 140 | 19,675 | 4,096 | 2,631 | 26,542 |
| 21,985 | 138 | 19,686 | 4,097 | 2,638 | 26,559 |
| 21,986 | 139 | 19,689 | 4,067 | 2,623 | 26,518 |
| 21,987 | 140 | 19,719 | 4,035 | 2,620 | 26,514 |
| 21,988 | 144 | 19,675 | 4,023 | 2,618 | 26,460 |
| 21,989 | 149 | 19,647 | 3,994 | 2,599 | 26,389 |
| 21,990 | 154 | 19,674 | 3,971 | 2,594 | 26,393 |
| 21,991 | 155 | 19,703 | 3,989 | 2,600 | 26,447 |
| 21,992 | 152 | 19,685 | 3,902 | 2,576 | 26,315 |
| 21,993 | 151 | 19,645 | 3,870 | 2,555 | 26,221 |
| 21,994 | 157 | 19,629 | 3,839 | 2,543 | 26,168 |
| 21,995 | 156 | 19,741 | 3,870 | 2,550 | 26,317 |
| 21,996 | 150 | 19,522 | 3,770 | 2,495 | 25,937 |
| 21,997 | 150 | 19,448 | 3,799 | 2,503 | 25,900 |
| 21,998 | 148 | 19,375 | 3,810 | 2,497 | 25,830 |
| 21,999 | 147 | 19,431 | 3,796 | 2,509 | 25,883 |
| 22,000 | 145 | 19,492 | 3,819 | 2,523 | 25,979 |
| 22,001 | 138 | 19,514 | 3,796 | 2,527 | 25,975 |
| 22,002 | 136 | 19,290 | 3,753 | 2,504 | 25,683 |
| 22,003 | 140 | 19,446 | 3,793 | 2,505 | 25,884 |
| 22,004 | 146 | 19,453 | 3,779 | 2,502 | 25,880 |
| 22,005 | 145 | 19,323 | 3,766 | 2,501 | 25,735 |
| 22,006 | 145 | 19,289 | 3,766 | 2,512 | 25,712 |
| 22,007 | 142 | 19,328 | 3,767 | 2,519 | 25,756 |



|        |     |        |       |       |        |
|--------|-----|--------|-------|-------|--------|
| 22,008 | 145 | 19,594 | 3,807 | 2,540 | 26,086 |
| 22,009 | 148 | 19,440 | 3,810 | 2,498 | 25,896 |
| 22,010 | 148 | 19,522 | 3,822 | 2,513 | 26,005 |
| 22,011 | 148 | 19,531 | 3,826 | 2,517 | 26,022 |
| 22,012 | 144 | 19,707 | 3,848 | 2,550 | 26,249 |
| 22,013 | 138 | 19,553 | 3,843 | 2,537 | 26,071 |
| 22,014 | 142 | 19,710 | 3,908 | 2,570 | 26,330 |
| 22,015 | 141 | 19,905 | 3,950 | 2,598 | 26,594 |
| 22,016 | 140 | 19,749 | 3,917 | 2,579 | 26,385 |
| 22,017 | 142 | 20,037 | 3,983 | 2,612 | 26,774 |
| 22,018 | 143 | 20,091 | 3,999 | 2,614 | 26,847 |
| 22,019 | 145 | 20,259 | 4,054 | 2,667 | 27,125 |
| 22,020 | 142 | 20,129 | 4,038 | 2,688 | 26,997 |
| 22,021 | 145 | 20,179 | 4,035 | 2,695 | 27,054 |
| 22,022 | 140 | 19,901 | 3,955 | 2,648 | 26,644 |
| 22,023 | 143 | 20,127 | 4,019 | 2,694 | 26,983 |
| 22,024 | 141 | 20,134 | 4,031 | 2,704 | 27,010 |
| 22,025 | 141 | 20,142 | 4,049 | 2,720 | 27,052 |
| 22,026 | 142 | 20,228 | 4,100 | 2,749 | 27,219 |
| 22,027 | 137 | 20,095 | 4,074 | 2,740 | 27,046 |
| 22,028 | 128 | 19,559 | 3,994 | 2,657 | 26,338 |
| 22,029 | 134 | 19,707 | 4,064 | 2,698 | 26,603 |
| 22,030 | 132 | 19,753 | 4,105 | 2,720 | 26,710 |
| 22,031 | 129 | 19,683 | 4,095 | 2,695 | 26,602 |
| 22,032 | 130 | 19,662 | 4,122 | 2,703 | 26,617 |
| 22,033 | 130 | 19,682 | 4,137 | 2,707 | 26,656 |
| 22,034 | 128 | 19,961 | 4,170 | 2,749 | 27,008 |
| 22,035 | 124 | 19,831 | 4,161 | 2,776 | 26,892 |
| 22,036 | 123 | 19,618 | 4,115 | 2,752 | 26,608 |
| 22,037 | 124 | 19,679 | 4,147 | 2,753 | 26,703 |
| 22,038 | 118 | 19,669 | 4,162 | 2,788 | 26,737 |
| 22,039 | 118 | 19,612 | 4,177 | 2,808 | 26,715 |

|        |     |        |       |       |        |
|--------|-----|--------|-------|-------|--------|
| 22,040 | 117 | 19,851 | 4,241 | 2,862 | 27,071 |
| 22,041 | 116 | 19,987 | 4,273 | 2,884 | 27,260 |
| 22,042 | 119 | 19,968 | 4,287 | 2,892 | 27,266 |
| 22,043 | 118 | 20,257 | 4,367 | 2,945 | 27,687 |
| 22,044 | 113 | 19,996 | 4,269 | 2,914 | 27,292 |
| 22,045 | 115 | 20,176 | 4,346 | 2,945 | 27,582 |
| 22,046 | 115 | 20,416 | 4,443 | 2,998 | 27,972 |
| 22,047 | 116 | 20,191 | 4,360 | 2,950 | 27,617 |
| 22,048 | 118 | 20,513 | 4,415 | 2,985 | 28,031 |
| 22,049 | 114 | 20,773 | 4,496 | 3,031 | 28,414 |
| 22,050 | 117 | 20,602 | 4,464 | 3,015 | 28,198 |
| 22,051 | 117 | 20,102 | 4,383 | 2,975 | 27,577 |
| 22,052 | 117 | 20,043 | 4,374 | 2,974 | 27,508 |
| 22,053 | 116 | 19,756 | 4,328 | 2,945 | 27,145 |
| 22,054 | 123 | 19,952 | 4,402 | 3,006 | 27,483 |
| 22,055 | 114 | 19,544 | 4,353 | 2,979 | 26,990 |
| 22,056 | 122 | 19,415 | 4,330 | 2,950 | 26,817 |
| 22,057 | 122 | 19,694 | 4,365 | 2,940 | 27,121 |
| 22,058 | 122 | 19,809 | 4,395 | 2,946 | 27,272 |
| 22,059 | 122 | 19,742 | 4,400 | 2,951 | 27,215 |
| 22,060 | 117 | 19,733 | 4,396 | 2,962 | 27,208 |
| 22,061 | 117 | 19,660 | 4,370 | 2,947 | 27,094 |
| 22,062 | 127 | 19,549 | 4,407 | 2,955 | 27,038 |
| 22,063 | 131 | 19,548 | 4,405 | 2,951 | 27,035 |
| 22,064 | 131 | 19,508 | 4,416 | 2,960 | 27,015 |
| 22,065 | 127 | 19,584 | 4,449 | 2,979 | 27,139 |
| 22,066 | 129 | 19,451 | 4,439 | 2,965 | 26,984 |
| 22,067 | 130 | 19,501 | 4,457 | 2,984 | 27,072 |
| 22,068 | 132 | 19,602 | 4,513 | 3,001 | 27,248 |
| 22,069 | 138 | 19,697 | 4,530 | 3,014 | 27,379 |
| 22,070 | 138 | 19,642 | 4,500 | 2,970 | 27,250 |
| 22,071 | 138 | 19,780 | 4,517 | 2,964 | 27,399 |

|        |     |        |       |       |        |
|--------|-----|--------|-------|-------|--------|
| 22,072 | 140 | 19,592 | 4,523 | 2,967 | 27,222 |
| 22,073 | 141 | 19,641 | 4,517 | 2,974 | 27,273 |
| 22,074 | 140 | 19,863 | 4,567 | 2,988 | 27,558 |
| 22,075 | 140 | 19,940 | 4,593 | 3,008 | 27,681 |
| 22,076 | 134 | 19,760 | 4,563 | 2,973 | 27,430 |
| 22,077 | 134 | 19,794 | 4,570 | 2,961 | 27,459 |
| 22,078 | 136 | 19,992 | 4,590 | 3,005 | 27,723 |
| 22,079 | 138 | 19,984 | 4,598 | 3,017 | 27,737 |
| 22,080 | 135 | 19,977 | 4,582 | 3,018 | 27,712 |
| 22,081 | 141 | 20,099 | 4,644 | 3,044 | 27,928 |
| 22,082 | 142 | 20,117 | 4,667 | 3,078 | 28,004 |
| 22,083 | 139 | 20,133 | 4,679 | 3,101 | 28,052 |
| 22,084 | 138 | 19,693 | 4,622 | 3,030 | 27,483 |
| 22,085 | 139 | 19,804 | 4,661 | 3,042 | 27,646 |
| 22,086 | 133 | 19,866 | 4,672 | 3,057 | 27,728 |
| 22,087 | 138 | 19,835 | 4,677 | 3,054 | 27,704 |
| 22,088 | 135 | 19,789 | 4,676 | 3,016 | 27,616 |
| 22,089 | 135 | 19,820 | 4,686 | 3,005 | 27,646 |
| 22,090 | 133 | 19,951 | 4,707 | 3,012 | 27,803 |
| 22,091 | 140 | 19,733 | 4,674 | 2,971 | 27,518 |
| 22,092 | 134 | 19,466 | 4,619 | 2,930 | 27,149 |
| 22,093 | 141 | 19,703 | 4,699 | 3,002 | 27,545 |
| 22,094 | 141 | 19,810 | 4,750 | 3,033 | 27,734 |
| 22,095 | 141 | 19,541 | 4,734 | 2,993 | 27,409 |
| 22,096 | 139 | 19,487 | 4,729 | 3,003 | 27,358 |
| 22,097 | 145 | 19,413 | 4,721 | 2,992 | 27,271 |
| 22,098 | 145 | 19,427 | 4,725 | 2,988 | 27,285 |
| 22,099 | 144 | 19,674 | 4,807 | 3,023 | 27,648 |
| 22,100 | 144 | 19,747 | 4,791 | 3,031 | 27,713 |
| 22,101 | 138 | 19,514 | 4,771 | 2,990 | 27,413 |
| 22,102 | 137 | 19,185 | 4,630 | 2,896 | 26,848 |
| 22,103 | 137 | 19,382 | 4,658 | 2,912 | 27,089 |

|        |     |        |       |       |        |
|--------|-----|--------|-------|-------|--------|
| 22,104 | 131 | 19,645 | 4,699 | 2,944 | 27,419 |
| 22,105 | 130 | 19,595 | 4,701 | 2,934 | 27,360 |
| 22,106 | 123 | 19,730 | 4,773 | 2,994 | 27,620 |
| 22,107 | 124 | 19,906 | 4,848 | 3,046 | 27,924 |
| 22,108 | 126 | 19,928 | 4,882 | 3,061 | 27,997 |
| 22,109 | 125 | 19,901 | 4,873 | 3,067 | 27,966 |
| 22,110 | 124 | 19,863 | 4,880 | 3,063 | 27,930 |
| 22,111 | 124 | 19,883 | 4,893 | 3,061 | 27,961 |
| 22,112 | 118 | 19,695 | 4,856 | 3,015 | 27,684 |
| 22,113 | 117 | 19,776 | 4,877 | 3,013 | 27,783 |
| 22,114 | 116 | 19,935 | 4,896 | 3,028 | 27,975 |
| 22,115 | 116 | 19,846 | 4,892 | 3,029 | 27,883 |
| 22,116 | 115 | 20,020 | 4,922 | 3,065 | 28,122 |
| 22,117 | 112 | 20,281 | 4,982 | 3,114 | 28,489 |
| 22,118 | 109 | 20,066 | 4,961 | 3,092 | 28,228 |
| 22,119 | 106 | 19,854 | 4,907 | 3,084 | 27,951 |
| 22,120 | 101 | 19,684 | 4,889 | 3,057 | 27,731 |
| 22,121 | 99  | 19,415 | 4,821 | 3,025 | 27,360 |
| 22,122 | 94  | 19,358 | 4,807 | 3,004 | 27,263 |
| 22,123 | 96  | 19,614 | 4,859 | 3,036 | 27,605 |
| 22,124 | 96  | 19,660 | 4,879 | 3,036 | 27,671 |
| 22,125 | 99  | 19,434 | 4,813 | 3,014 | 27,360 |
| 22,126 | 100 | 19,371 | 4,801 | 3,004 | 27,276 |
| 22,127 | 101 | 19,582 | 4,863 | 3,031 | 27,577 |
| 22,128 | 103 | 19,563 | 4,895 | 3,037 | 27,598 |
| 22,129 | 100 | 19,482 | 4,878 | 3,002 | 27,462 |
| 22,130 | 99  | 19,622 | 4,906 | 2,998 | 27,625 |
| 22,131 | 102 | 19,667 | 4,917 | 3,015 | 27,701 |
| 22,132 | 100 | 19,639 | 4,901 | 3,001 | 27,641 |
| 22,133 | 100 | 19,302 | 4,844 | 2,927 | 27,173 |
| 22,134 | 99  | 19,296 | 4,816 | 2,921 | 27,132 |
| 22,135 | 96  | 19,288 | 4,847 | 2,944 | 27,175 |

|        |     |        |       |       |        |
|--------|-----|--------|-------|-------|--------|
| 22,136 | 97  | 19,152 | 4,858 | 2,940 | 27,047 |
| 22,137 | 102 | 19,294 | 4,889 | 2,959 | 27,244 |
| 22,138 | 99  | 19,089 | 4,857 | 2,944 | 26,989 |
| 22,139 | 100 | 19,278 | 4,898 | 2,978 | 27,254 |
| 22,140 | 91  | 18,775 | 4,788 | 2,914 | 26,568 |
| 22,141 | 93  | 18,943 | 4,835 | 2,922 | 26,793 |
| 22,142 | 86  | 19,121 | 4,899 | 2,942 | 27,048 |
| 22,143 | 87  | 18,946 | 4,880 | 2,924 | 26,837 |
| 22,144 | 88  | 18,908 | 4,863 | 2,916 | 26,775 |
| 22,145 | 88  | 18,976 | 4,874 | 2,904 | 26,842 |
| 22,146 | 89  | 18,944 | 4,854 | 2,880 | 26,767 |
| 22,147 | 94  | 19,136 | 4,892 | 2,897 | 27,019 |
| 22,148 | 86  | 19,069 | 4,866 | 2,890 | 26,911 |
| 22,149 | 92  | 19,051 | 4,843 | 2,876 | 26,862 |
| 22,150 | 89  | 18,676 | 4,742 | 2,844 | 26,351 |
| 22,151 | 90  | 18,678 | 4,736 | 2,837 | 26,341 |
| 22,152 | 90  | 18,889 | 4,785 | 2,855 | 26,619 |
| 22,153 | 91  | 18,635 | 4,745 | 2,814 | 26,285 |
| 22,154 | 91  | 18,775 | 4,793 | 2,848 | 26,507 |
| 22,155 | 91  | 18,923 | 4,785 | 2,849 | 26,648 |
| 22,156 | 92  | 18,955 | 4,739 | 2,825 | 26,611 |
| 22,157 | 93  | 19,072 | 4,816 | 2,865 | 26,846 |
| 22,158 | 95  | 19,074 | 4,815 | 2,873 | 26,857 |
| 22,159 | 96  | 18,790 | 4,748 | 2,826 | 26,460 |
| 22,160 | 100 | 18,892 | 4,805 | 2,837 | 26,634 |
| 22,161 | 100 | 18,771 | 4,816 | 2,849 | 26,536 |
| 22,162 | 102 | 18,852 | 4,832 | 2,873 | 26,659 |
| 22,163 | 97  | 18,671 | 4,766 | 2,854 | 26,388 |
| 22,164 | 104 | 18,531 | 4,716 | 2,846 | 26,197 |
| 22,165 | 102 | 18,345 | 4,672 | 2,812 | 25,931 |
| 22,166 | 110 | 19,172 | 4,844 | 2,902 | 27,028 |
| 22,167 | 113 | 19,251 | 4,851 | 2,900 | 27,115 |

|        |     |        |       |       |        |
|--------|-----|--------|-------|-------|--------|
| 22,168 | 116 | 19,138 | 4,798 | 2,885 | 26,937 |
| 22,169 | 120 | 19,299 | 4,779 | 2,868 | 27,066 |
| 22,170 | 118 | 19,343 | 4,772 | 2,862 | 27,095 |
| 22,171 | 119 | 19,545 | 4,825 | 2,888 | 27,377 |
| 22,172 | 119 | 19,376 | 4,806 | 2,878 | 27,179 |
| 22,173 | 118 | 19,330 | 4,795 | 2,890 | 27,133 |
| 22,174 | 119 | 19,582 | 4,836 | 2,920 | 27,457 |
| 22,175 | 119 | 19,562 | 4,832 | 2,930 | 27,443 |
| 22,176 | 113 | 19,292 | 4,799 | 2,899 | 27,103 |
| 22,177 | 120 | 19,555 | 4,881 | 2,927 | 27,483 |
| 22,178 | 123 | 19,507 | 4,884 | 2,934 | 27,448 |
| 22,179 | 123 | 19,348 | 4,862 | 2,935 | 27,268 |
| 22,180 | 120 | 18,996 | 4,840 | 2,911 | 26,867 |
| 22,181 | 119 | 18,848 | 4,794 | 2,907 | 26,668 |
| 22,182 | 119 | 18,887 | 4,796 | 2,898 | 26,700 |
| 22,183 | 114 | 18,887 | 4,791 | 2,927 | 26,719 |
| 22,184 | 114 | 18,765 | 4,770 | 2,931 | 26,580 |
| 22,185 | 114 | 18,569 | 4,763 | 2,922 | 26,368 |
| 22,186 | 115 | 18,748 | 4,814 | 2,955 | 26,632 |
| 22,187 | 119 | 18,763 | 4,759 | 2,932 | 26,573 |
| 22,188 | 118 | 18,720 | 4,725 | 2,938 | 26,501 |
| 22,189 | 119 | 18,709 | 4,752 | 2,929 | 26,509 |
| 22,190 | 122 | 18,805 | 4,763 | 2,947 | 26,637 |
| 22,191 | 122 | 18,817 | 4,751 | 2,946 | 26,636 |
| 22,192 | 122 | 19,017 | 4,780 | 2,963 | 26,882 |
| 22,193 | 119 | 18,760 | 4,698 | 2,926 | 26,503 |
| 22,194 | 119 | 18,996 | 4,728 | 2,973 | 26,816 |
| 22,195 | 117 | 19,077 | 4,742 | 3,009 | 26,945 |
| 22,196 | 117 | 19,074 | 4,722 | 3,021 | 26,934 |
| 22,197 | 115 | 18,919 | 4,681 | 3,013 | 26,728 |
| 22,198 | 114 | 18,395 | 4,600 | 2,951 | 26,060 |
| 22,199 | 115 | 18,511 | 4,637 | 2,970 | 26,233 |

|        |     |        |       |       |        |
|--------|-----|--------|-------|-------|--------|
| 22,200 | 115 | 18,646 | 4,663 | 2,991 | 26,415 |
| 22,201 | 118 | 18,610 | 4,669 | 2,976 | 26,373 |
| 22,202 | 123 | 18,508 | 4,629 | 2,958 | 26,218 |
| 22,203 | 123 | 18,515 | 4,618 | 2,967 | 26,223 |
| 22,204 | 121 | 18,425 | 4,615 | 2,992 | 26,153 |
| 22,205 | 121 | 18,391 | 4,607 | 2,984 | 26,103 |
| 22,206 | 123 | 18,327 | 4,665 | 3,014 | 26,129 |
| 22,207 | 121 | 18,193 | 4,623 | 2,995 | 25,932 |
| 22,208 | 121 | 18,460 | 4,662 | 3,001 | 26,244 |
| 22,209 | 117 | 18,570 | 4,649 | 2,990 | 26,326 |
| 22,210 | 117 | 18,599 | 4,643 | 3,001 | 26,360 |
| 22,211 | 113 | 18,546 | 4,568 | 2,981 | 26,208 |
| 22,212 | 113 | 18,560 | 4,568 | 2,987 | 26,228 |
| 22,213 | 113 | 18,619 | 4,562 | 2,984 | 26,278 |
| 22,214 | 112 | 18,418 | 4,491 | 2,960 | 25,981 |
| 22,215 | 104 | 18,388 | 4,469 | 2,941 | 25,902 |
| 22,216 | 98  | 18,370 | 4,523 | 2,970 | 25,961 |
| 22,217 | 98  | 18,224 | 4,493 | 2,972 | 25,787 |
| 22,218 | 100 | 18,027 | 4,463 | 2,930 | 25,520 |
| 22,219 | 100 | 17,924 | 4,469 | 2,917 | 25,410 |
| 22,220 | 98  | 17,678 | 4,446 | 2,917 | 25,139 |
| 22,221 | 99  | 17,608 | 4,436 | 2,915 | 25,058 |
| 22,222 | 99  | 17,831 | 4,512 | 2,987 | 25,429 |
| 22,223 | 99  | 17,950 | 4,509 | 2,989 | 25,547 |
| 22,224 | 102 | 18,056 | 4,557 | 3,029 | 25,744 |
| 22,225 | 104 | 18,122 | 4,582 | 3,034 | 25,842 |
| 22,226 | 106 | 18,057 | 4,572 | 3,035 | 25,770 |
| 22,227 | 110 | 18,281 | 4,624 | 3,072 | 26,087 |
| 22,228 | 106 | 18,270 | 4,615 | 3,083 | 26,074 |
| 22,229 | 101 | 18,295 | 4,548 | 3,065 | 26,009 |
| 22,230 | 103 | 18,434 | 4,522 | 3,069 | 26,128 |
| 22,231 | 101 | 18,376 | 4,527 | 3,064 | 26,068 |

|        |     |        |       |       |        |
|--------|-----|--------|-------|-------|--------|
| 22,232 | 104 | 18,594 | 4,562 | 3,082 | 26,342 |
| 22,233 | 105 | 18,680 | 4,575 | 3,083 | 26,443 |
| 22,234 | 104 | 18,669 | 4,536 | 3,039 | 26,348 |
| 22,235 | 106 | 18,998 | 4,615 | 3,075 | 26,794 |
| 22,236 | 109 | 19,031 | 4,607 | 3,073 | 26,820 |
| 22,237 | 105 | 18,801 | 4,534 | 3,017 | 26,457 |
| 22,238 | 105 | 18,864 | 4,551 | 3,034 | 26,554 |
| 22,239 | 102 | 18,832 | 4,582 | 3,049 | 26,565 |
| 22,240 | 101 | 18,586 | 4,540 | 3,005 | 26,232 |
| 22,241 | 100 | 18,572 | 4,529 | 2,990 | 26,191 |
| 22,242 | 107 | 18,776 | 4,555 | 3,030 | 26,468 |
| 22,243 | 112 | 18,807 | 4,578 | 3,043 | 26,540 |
| 22,244 | 118 | 18,874 | 4,596 | 3,030 | 26,618 |
| 22,245 | 123 | 18,816 | 4,628 | 3,025 | 26,592 |
| 22,246 | 130 | 18,528 | 4,551 | 2,971 | 26,180 |
| 22,247 | 130 | 18,624 | 4,570 | 2,983 | 26,307 |
| 22,248 | 131 | 18,732 | 4,570 | 3,002 | 26,435 |
| 22,249 | 135 | 18,897 | 4,579 | 3,026 | 26,637 |
| 22,250 | 135 | 18,898 | 4,582 | 3,023 | 26,638 |
| 22,251 | 129 | 18,807 | 4,575 | 2,990 | 26,501 |
| 22,252 | 127 | 19,050 | 4,628 | 3,031 | 26,836 |
| 22,253 | 121 | 19,036 | 4,619 | 3,043 | 26,819 |
| 22,254 | 119 | 18,982 | 4,666 | 3,051 | 26,818 |
| 22,255 | 118 | 19,170 | 4,697 | 3,061 | 27,046 |
| 22,256 | 119 | 19,241 | 4,677 | 3,042 | 27,079 |
| 22,257 | 119 | 19,018 | 4,624 | 2,990 | 26,751 |
| 22,258 | 119 | 19,011 | 4,623 | 3,002 | 26,755 |
| 22,259 | 118 | 18,989 | 4,624 | 3,028 | 26,759 |
| 22,260 | 120 | 19,083 | 4,666 | 3,071 | 26,940 |
| 22,261 | 117 | 18,751 | 4,606 | 3,051 | 26,525 |
| 22,262 | 117 | 18,914 | 4,639 | 3,061 | 26,731 |
| 22,263 | 117 | 19,050 | 4,660 | 3,068 | 26,895 |



|        |     |        |       |       |        |
|--------|-----|--------|-------|-------|--------|
| 22,264 | 115 | 19,084 | 4,669 | 3,077 | 26,945 |
| 22,265 | 115 | 19,205 | 4,695 | 3,093 | 27,108 |
| 22,266 | 119 | 18,759 | 4,592 | 3,000 | 26,470 |
| 22,267 | 120 | 19,010 | 4,583 | 3,022 | 26,735 |
| 22,268 | 125 | 19,045 | 4,579 | 3,020 | 26,769 |
| 22,269 | 120 | 18,750 | 4,533 | 2,998 | 26,401 |
| 22,270 | 118 | 18,818 | 4,575 | 3,043 | 26,554 |
| 22,271 | 115 | 18,925 | 4,591 | 3,061 | 26,692 |
| 22,272 | 118 | 18,939 | 4,540 | 3,029 | 26,626 |
| 22,273 | 117 | 18,971 | 4,542 | 3,023 | 26,653 |
| 22,274 | 113 | 18,551 | 4,453 | 2,941 | 26,058 |
| 22,275 | 113 | 18,792 | 4,458 | 2,949 | 26,312 |
| 22,276 | 110 | 19,072 | 4,503 | 2,972 | 26,657 |
| 22,277 | 111 | 19,318 | 4,556 | 2,993 | 26,978 |
| 22,278 | 106 | 19,272 | 4,534 | 2,979 | 26,891 |
| 22,279 | 104 | 19,167 | 4,486 | 2,960 | 26,717 |
| 22,280 | 106 | 19,158 | 4,518 | 2,968 | 26,750 |
| 22,281 | 111 | 18,930 | 4,530 | 2,921 | 26,492 |
| 22,282 | 112 | 19,079 | 4,524 | 2,938 | 26,653 |
| 22,283 | 111 | 18,865 | 4,509 | 2,934 | 26,419 |
| 22,284 | 110 | 18,822 | 4,494 | 2,927 | 26,353 |
| 22,285 | 111 | 18,692 | 4,512 | 2,928 | 26,243 |
| 22,286 | 110 | 18,814 | 4,528 | 2,937 | 26,389 |
| 22,287 | 108 | 18,502 | 4,477 | 2,918 | 26,005 |
| 22,288 | 107 | 18,512 | 4,485 | 2,909 | 26,013 |
| 22,289 | 107 | 18,668 | 4,510 | 2,930 | 26,215 |
| 22,290 | 108 | 18,719 | 4,474 | 2,932 | 26,233 |
| 22,291 | 109 | 18,798 | 4,500 | 2,956 | 26,363 |
| 22,292 | 108 | 18,756 | 4,494 | 2,966 | 26,324 |
| 22,293 | 103 | 18,603 | 4,534 | 2,971 | 26,211 |
| 22,294 | 92  | 18,449 | 4,520 | 2,990 | 26,051 |
| 22,295 | 89  | 18,506 | 4,506 | 2,996 | 26,097 |

|        |     |        |       |       |        |
|--------|-----|--------|-------|-------|--------|
| 22,296 | 88  | 18,750 | 4,565 | 3,024 | 26,427 |
| 22,297 | 80  | 18,936 | 4,605 | 3,030 | 26,651 |
| 22,298 | 78  | 18,948 | 4,611 | 3,060 | 26,697 |
| 22,299 | 75  | 19,127 | 4,650 | 3,096 | 26,948 |
| 22,300 | 80  | 19,170 | 4,653 | 3,091 | 26,994 |
| 22,301 | 81  | 19,125 | 4,637 | 3,094 | 26,937 |
| 22,302 | 82  | 19,391 | 4,683 | 3,136 | 27,292 |
| 22,303 | 83  | 19,503 | 4,689 | 3,148 | 27,423 |
| 22,304 | 83  | 19,516 | 4,649 | 3,126 | 27,374 |
| 22,305 | 85  | 19,734 | 4,681 | 3,157 | 27,657 |
| 22,306 | 89  | 19,563 | 4,651 | 3,125 | 27,428 |
| 22,307 | 89  | 19,685 | 4,673 | 3,139 | 27,586 |
| 22,308 | 91  | 19,913 | 4,716 | 3,153 | 27,873 |
| 22,309 | 91  | 19,915 | 4,717 | 3,146 | 27,869 |
| 22,310 | 92  | 20,071 | 4,760 | 3,178 | 28,101 |
| 22,311 | 91  | 20,141 | 4,794 | 3,162 | 28,188 |
| 22,312 | 94  | 20,015 | 4,761 | 3,134 | 28,004 |
| 22,313 | 94  | 19,881 | 4,738 | 3,129 | 27,842 |
| 22,314 | 97  | 19,976 | 4,803 | 3,182 | 28,058 |
| 22,315 | 97  | 19,990 | 4,829 | 3,204 | 28,120 |
| 22,316 | 103 | 19,862 | 4,788 | 3,191 | 27,944 |
| 22,317 | 98  | 19,680 | 4,760 | 3,185 | 27,723 |
| 22,318 | 100 | 19,902 | 4,804 | 3,212 | 28,018 |
| 22,319 | 96  | 20,181 | 4,847 | 3,241 | 28,365 |
| 22,320 | 96  | 20,130 | 4,800 | 3,211 | 28,237 |
| 22,321 | 102 | 20,163 | 4,754 | 3,175 | 28,194 |
| 22,322 | 102 | 20,372 | 4,772 | 3,182 | 28,428 |
| 22,323 | 98  | 20,365 | 4,769 | 3,182 | 28,414 |
| 22,324 | 106 | 20,530 | 4,812 | 3,185 | 28,633 |
| 22,325 | 106 | 20,554 | 4,786 | 3,194 | 28,640 |
| 22,326 | 112 | 20,616 | 4,823 | 3,203 | 28,754 |
| 22,327 | 110 | 20,359 | 4,785 | 3,178 | 28,432 |

|        |     |        |       |       |        |
|--------|-----|--------|-------|-------|--------|
| 22,328 | 120 | 20,580 | 4,819 | 3,216 | 28,735 |
| 22,329 | 121 | 20,519 | 4,803 | 3,205 | 28,648 |
| 22,330 | 113 | 19,723 | 4,633 | 3,063 | 27,532 |
| 22,331 | 116 | 20,007 | 4,669 | 3,095 | 27,887 |
| 22,332 | 119 | 20,299 | 4,694 | 3,133 | 28,245 |
| 22,333 | 117 | 20,396 | 4,692 | 3,136 | 28,341 |
| 22,334 | 117 | 20,524 | 4,702 | 3,124 | 28,467 |
| 22,335 | 119 | 20,755 | 4,733 | 3,157 | 28,764 |
| 22,336 | 117 | 20,669 | 4,670 | 3,139 | 28,595 |
| 22,337 | 116 | 20,656 | 4,646 | 3,120 | 28,538 |
| 22,338 | 116 | 20,807 | 4,685 | 3,146 | 28,754 |
| 22,339 | 118 | 20,692 | 4,690 | 3,141 | 28,641 |
| 22,340 | 113 | 20,682 | 4,691 | 3,127 | 28,613 |
| 22,341 | 115 | 20,723 | 4,718 | 3,140 | 28,696 |
| 22,342 | 115 | 20,857 | 4,709 | 3,156 | 28,837 |
| 22,343 | 115 | 20,964 | 4,648 | 3,120 | 28,847 |
| 22,344 | 116 | 21,082 | 4,662 | 3,123 | 28,983 |
| 22,345 | 116 | 21,158 | 4,683 | 3,120 | 29,077 |
| 22,346 | 121 | 20,857 | 4,629 | 3,075 | 28,682 |
| 22,347 | 121 | 20,632 | 4,576 | 3,043 | 28,372 |
| 22,348 | 130 | 20,929 | 4,659 | 3,101 | 28,819 |
| 22,349 | 132 | 20,137 | 4,506 | 2,960 | 27,735 |
| 22,350 | 132 | 20,337 | 4,515 | 2,970 | 27,954 |
| 22,351 | 129 | 20,517 | 4,559 | 2,992 | 28,197 |
| 22,352 | 129 | 20,286 | 4,514 | 2,957 | 27,886 |
| 22,353 | 130 | 20,306 | 4,538 | 2,945 | 27,919 |
| 22,354 | 135 | 20,012 | 4,489 | 2,902 | 27,538 |
| 22,355 | 135 | 20,028 | 4,484 | 2,907 | 27,554 |
| 22,356 | 135 | 20,063 | 4,463 | 2,906 | 27,567 |
| 22,357 | 129 | 20,277 | 4,538 | 2,958 | 27,902 |
| 22,358 | 144 | 20,342 | 4,564 | 2,959 | 28,009 |
| 22,359 | 149 | 20,277 | 4,540 | 2,954 | 27,920 |

|        |     |        |       |       |        |
|--------|-----|--------|-------|-------|--------|
| 22,360 | 156 | 20,566 | 4,596 | 2,994 | 28,312 |
| 22,361 | 154 | 20,473 | 4,552 | 2,972 | 28,151 |
| 22,362 | 155 | 20,514 | 4,597 | 3,015 | 28,281 |
| 22,363 | 151 | 20,529 | 4,590 | 2,994 | 28,264 |
| 22,364 | 154 | 20,377 | 4,515 | 2,929 | 27,975 |
| 22,365 | 162 | 20,423 | 4,505 | 2,915 | 28,005 |
| 22,366 | 162 | 20,510 | 4,492 | 2,919 | 28,083 |
| 22,367 | 155 | 20,442 | 4,494 | 2,898 | 27,989 |
| 22,368 | 154 | 20,365 | 4,471 | 2,882 | 27,872 |
| 22,369 | 156 | 20,416 | 4,487 | 2,886 | 27,945 |
| 22,370 | 168 | 20,234 | 4,456 | 2,849 | 27,707 |
| 22,371 | 168 | 20,197 | 4,481 | 2,838 | 27,684 |
| 22,372 | 163 | 20,172 | 4,479 | 2,846 | 27,660 |
| 22,373 | 165 | 20,042 | 4,470 | 2,837 | 27,514 |
| 22,374 | 162 | 19,865 | 4,443 | 2,821 | 27,291 |
| 22,375 | 173 | 20,427 | 4,548 | 2,904 | 28,052 |
| 22,376 | 176 | 20,722 | 4,617 | 2,947 | 28,462 |
| 22,377 | 168 | 20,335 | 4,493 | 2,900 | 27,896 |
| 22,378 | 169 | 20,593 | 4,533 | 2,924 | 28,219 |
| 22,379 | 164 | 20,868 | 4,582 | 2,953 | 28,567 |
| 22,380 | 166 | 20,747 | 4,555 | 2,928 | 28,396 |
| 22,381 | 162 | 20,477 | 4,490 | 2,912 | 28,041 |
| 22,382 | 159 | 20,420 | 4,499 | 2,923 | 28,001 |
| 22,383 | 156 | 20,325 | 4,510 | 2,924 | 27,915 |
| 22,384 | 156 | 20,445 | 4,562 | 2,957 | 28,120 |
| 22,385 | 162 | 20,493 | 4,586 | 2,960 | 28,201 |
| 22,386 | 160 | 20,620 | 4,608 | 2,959 | 28,347 |
| 22,387 | 162 | 20,437 | 4,565 | 2,925 | 28,089 |
| 22,388 | 165 | 20,712 | 4,606 | 2,969 | 28,452 |
| 22,389 | 162 | 20,647 | 4,547 | 2,948 | 28,304 |
| 22,390 | 164 | 20,764 | 4,571 | 2,968 | 28,467 |
| 22,391 | 163 | 20,396 | 4,463 | 2,910 | 27,932 |

|        |     |        |       |       |        |
|--------|-----|--------|-------|-------|--------|
| 22,392 | 163 | 20,354 | 4,457 | 2,910 | 27,884 |
| 22,393 | 166 | 20,249 | 4,440 | 2,894 | 27,749 |
| 22,394 | 170 | 20,016 | 4,397 | 2,862 | 27,445 |
| 22,395 | 168 | 19,840 | 4,340 | 2,849 | 27,197 |
| 22,396 | 167 | 19,940 | 4,335 | 2,860 | 27,302 |
| 22,397 | 164 | 19,961 | 4,323 | 2,848 | 27,296 |
| 22,398 | 160 | 19,890 | 4,267 | 2,819 | 27,136 |
| 22,399 | 152 | 19,522 | 4,191 | 2,772 | 26,637 |
| 22,400 | 152 | 19,495 | 4,188 | 2,767 | 26,602 |
| 22,401 | 155 | 19,495 | 4,196 | 2,775 | 26,621 |
| 22,402 | 154 | 19,569 | 4,221 | 2,790 | 26,734 |
| 22,403 | 153 | 19,249 | 4,111 | 2,744 | 26,257 |
| 22,404 | 153 | 19,269 | 4,096 | 2,748 | 26,266 |
| 22,405 | 148 | 19,194 | 4,094 | 2,744 | 26,180 |
| 22,406 | 146 | 19,228 | 4,135 | 2,772 | 26,281 |
| 22,407 | 137 | 18,681 | 3,988 | 2,682 | 25,488 |
| 22,408 | 139 | 18,734 | 3,998 | 2,692 | 25,563 |
| 22,409 | 132 | 18,816 | 4,018 | 2,705 | 25,671 |
| 22,410 | 130 | 18,640 | 3,989 | 2,688 | 25,447 |
| 22,411 | 123 | 18,607 | 3,953 | 2,684 | 25,367 |
| 22,412 | 133 | 18,556 | 3,904 | 2,653 | 25,246 |
| 22,413 | 135 | 18,642 | 3,882 | 2,634 | 25,293 |
| 22,414 | 130 | 18,254 | 3,816 | 2,593 | 24,793 |
| 22,415 | 130 | 18,339 | 3,818 | 2,589 | 24,876 |
| 22,416 | 123 | 18,307 | 3,821 | 2,571 | 24,822 |
| 22,417 | 123 | 18,194 | 3,798 | 2,567 | 24,682 |
| 22,418 | 123 | 18,061 | 3,786 | 2,561 | 24,531 |
| 22,419 | 124 | 18,079 | 3,788 | 2,549 | 24,540 |
| 22,420 | 120 | 18,084 | 3,782 | 2,551 | 24,537 |
| 22,421 | 119 | 17,838 | 3,736 | 2,521 | 24,214 |
| 22,422 | 118 | 17,700 | 3,691 | 2,504 | 24,013 |
| 22,423 | 113 | 17,838 | 3,746 | 2,542 | 24,239 |

|        |     |        |       |       |        |
|--------|-----|--------|-------|-------|--------|
| 22,424 | 111 | 17,548 | 3,677 | 2,510 | 23,846 |
| 22,425 | 113 | 18,324 | 3,859 | 2,639 | 24,935 |
| 22,426 | 106 | 18,074 | 3,794 | 2,593 | 24,567 |
| 22,427 | 106 | 17,764 | 3,730 | 2,559 | 24,159 |
| 22,428 | 106 | 17,516 | 3,699 | 2,521 | 23,842 |
| 22,429 | 106 | 18,272 | 3,894 | 2,634 | 24,906 |
| 22,430 | 103 | 18,461 | 3,933 | 2,671 | 25,168 |
| 22,431 | 105 | 18,941 | 4,005 | 2,722 | 25,773 |
| 22,432 | 109 | 19,192 | 4,044 | 2,724 | 26,069 |
| 22,433 | 110 | 19,488 | 4,135 | 2,780 | 26,513 |
| 22,434 | 110 | 19,714 | 4,141 | 2,782 | 26,747 |
| 22,435 | 117 | 20,058 | 4,190 | 2,832 | 27,197 |
| 22,436 | 124 | 20,095 | 4,221 | 2,890 | 27,330 |
| 22,437 | 126 | 20,354 | 4,282 | 2,940 | 27,702 |
| 22,438 | 123 | 20,443 | 4,311 | 2,960 | 27,837 |
| 22,439 | 127 | 20,742 | 4,374 | 3,006 | 28,249 |
| 22,440 | 132 | 21,154 | 4,449 | 3,074 | 28,809 |
| 22,441 | 130 | 21,077 | 4,420 | 3,062 | 28,689 |
| 22,442 | 128 | 21,096 | 4,438 | 3,090 | 28,752 |
| 22,443 | 130 | 21,193 | 4,470 | 3,100 | 28,893 |
| 22,444 | 130 | 21,350 | 4,513 | 3,117 | 29,110 |
| 22,445 | 129 | 21,617 | 4,585 | 3,184 | 29,515 |
| 22,446 | 132 | 21,640 | 4,570 | 3,171 | 29,513 |
| 22,447 | 131 | 21,643 | 4,565 | 3,173 | 29,512 |
| 22,448 | 132 | 21,938 | 4,649 | 3,243 | 29,962 |
| 22,449 | 132 | 21,744 | 4,644 | 3,249 | 29,769 |
| 22,450 | 131 | 21,821 | 4,640 | 3,260 | 29,852 |
| 22,451 | 129 | 22,144 | 4,712 | 3,318 | 30,303 |
| 22,452 | 130 | 22,241 | 4,714 | 3,321 | 30,406 |
| 22,453 | 124 | 22,088 | 4,685 | 3,309 | 30,206 |
| 22,454 | 128 | 22,278 | 4,719 | 3,340 | 30,465 |
| 22,455 | 130 | 22,072 | 4,671 | 3,317 | 30,190 |

|        |     |        |       |       |        |
|--------|-----|--------|-------|-------|--------|
| 22,456 | 134 | 22,331 | 4,695 | 3,345 | 30,505 |
| 22,457 | 139 | 22,377 | 4,694 | 3,331 | 30,541 |
| 22,458 | 140 | 22,224 | 4,670 | 3,311 | 30,345 |
| 22,459 | 140 | 22,365 | 4,670 | 3,320 | 30,495 |
| 22,460 | 136 | 22,212 | 4,623 | 3,304 | 30,275 |
| 22,461 | 146 | 22,767 | 4,801 | 3,407 | 31,121 |
| 22,462 | 147 | 22,717 | 4,805 | 3,424 | 31,093 |
| 22,463 | 147 | 22,965 | 4,899 | 3,489 | 31,500 |
| 22,464 | 144 | 22,914 | 4,904 | 3,506 | 31,468 |
| 22,465 | 146 | 23,111 | 4,945 | 3,561 | 31,763 |
| 22,466 | 151 | 23,284 | 4,971 | 3,586 | 31,992 |
| 22,467 | 153 | 23,241 | 4,992 | 3,588 | 31,974 |
| 22,468 | 153 | 23,229 | 4,984 | 3,588 | 31,954 |
| 22,469 | 155 | 23,301 | 4,992 | 3,601 | 32,049 |
| 22,470 | 159 | 23,810 | 5,073 | 3,667 | 32,709 |
| 22,471 | 147 | 23,717 | 5,022 | 3,630 | 32,516 |
| 22,472 | 153 | 23,942 | 5,058 | 3,660 | 32,813 |
| 22,473 | 148 | 23,961 | 5,071 | 3,666 | 32,846 |
| 22,474 | 144 | 24,020 | 5,078 | 3,667 | 32,909 |
| 22,475 | 151 | 24,101 | 5,090 | 3,649 | 32,991 |
| 22,476 | 156 | 24,146 | 5,100 | 3,650 | 33,052 |
| 22,477 | 157 | 23,910 | 5,033 | 3,609 | 32,709 |
| 22,478 | 159 | 24,001 | 5,034 | 3,616 | 32,810 |
| 22,479 | 162 | 24,042 | 5,035 | 3,643 | 32,882 |
| 22,480 | 160 | 23,799 | 5,000 | 3,620 | 32,579 |
| 22,481 | 170 | 23,585 | 4,959 | 3,595 | 32,309 |
| 22,482 | 169 | 23,384 | 4,943 | 3,599 | 32,095 |
| 22,483 | 167 | 23,700 | 5,015 | 3,667 | 32,549 |
| 22,484 | 171 | 23,810 | 5,045 | 3,681 | 32,707 |
| 22,485 | 174 | 23,584 | 4,989 | 3,631 | 32,378 |
| 22,486 | 178 | 23,723 | 5,018 | 3,629 | 32,548 |
| 22,487 | 169 | 23,670 | 4,999 | 3,603 | 32,441 |

|        |     |        |       |       |        |
|--------|-----|--------|-------|-------|--------|
| 22,488 | 171 | 23,642 | 4,985 | 3,616 | 32,414 |
| 22,489 | 175 | 23,668 | 5,041 | 3,630 | 32,514 |
| 22,490 | 169 | 23,874 | 5,093 | 3,645 | 32,781 |
| 22,491 | 174 | 23,980 | 5,118 | 3,654 | 32,926 |
| 22,492 | 174 | 24,050 | 5,108 | 3,638 | 32,970 |
| 22,493 | 178 | 24,375 | 5,180 | 3,685 | 33,418 |
| 22,494 | 185 | 24,514 | 5,183 | 3,706 | 33,588 |
| 22,495 | 183 | 24,459 | 5,194 | 3,693 | 33,529 |
| 22,496 | 182 | 24,535 | 5,256 | 3,701 | 33,674 |
| 22,497 | 191 | 24,882 | 5,391 | 3,749 | 34,213 |
| 22,498 | 188 | 24,831 | 5,397 | 3,728 | 34,144 |
| 22,499 | 186 | 24,952 | 5,408 | 3,743 | 34,289 |
| 22,500 | 192 | 25,072 | 5,412 | 3,729 | 34,405 |
| 22,501 | 191 | 25,098 | 5,427 | 3,715 | 34,431 |
| 22,502 | 196 | 25,423 | 5,530 | 3,769 | 34,918 |
| 22,503 | 201 | 25,355 | 5,552 | 3,780 | 34,888 |
| 22,504 | 201 | 25,501 | 5,601 | 3,780 | 35,083 |
| 22,505 | 214 | 25,662 | 5,653 | 3,813 | 35,342 |
| 22,506 | 216 | 25,646 | 5,653 | 3,804 | 35,319 |
| 22,507 | 212 | 25,729 | 5,738 | 3,839 | 35,518 |
| 22,508 | 212 | 25,625 | 5,793 | 3,861 | 35,491 |
| 22,509 | 211 | 25,710 | 5,802 | 3,879 | 35,602 |
| 22,510 | 211 | 25,860 | 5,859 | 3,887 | 35,817 |
| 22,511 | 213 | 26,038 | 5,843 | 3,900 | 35,994 |
| 22,512 | 211 | 26,056 | 5,864 | 3,890 | 36,021 |
| 22,513 | 208 | 26,596 | 5,968 | 3,949 | 36,721 |
| 22,514 | 204 | 26,568 | 5,949 | 3,951 | 36,672 |
| 22,515 | 212 | 26,887 | 6,053 | 4,004 | 37,156 |
| 22,516 | 211 | 26,910 | 6,057 | 3,992 | 37,170 |
| 22,517 | 207 | 26,878 | 6,104 | 4,054 | 37,243 |
| 22,518 | 208 | 27,371 | 6,186 | 4,101 | 37,866 |
| 22,519 | 215 | 27,297 | 6,193 | 4,094 | 37,799 |



|        |     |        |       |       |        |
|--------|-----|--------|-------|-------|--------|
| 22,520 | 216 | 27,260 | 6,203 | 4,106 | 37,785 |
| 22,521 | 217 | 27,188 | 6,213 | 4,126 | 37,744 |
| 22,522 | 217 | 27,126 | 6,205 | 4,144 | 37,692 |
| 22,523 | 218 | 27,961 | 6,350 | 4,277 | 38,806 |
| 22,524 | 218 | 27,966 | 6,367 | 4,281 | 38,832 |
| 22,525 | 223 | 28,186 | 6,421 | 4,315 | 39,145 |
| 22,526 | 217 | 28,143 | 6,381 | 4,312 | 39,053 |
| 22,527 | 211 | 27,863 | 6,356 | 4,272 | 38,702 |
| 22,528 | 207 | 27,815 | 6,364 | 4,265 | 38,651 |
| 22,529 | 210 | 28,113 | 6,402 | 4,296 | 39,021 |
| 22,530 | 206 | 27,750 | 6,385 | 4,239 | 38,580 |
| 22,531 | 211 | 28,005 | 6,429 | 4,257 | 38,902 |
| 22,532 | 201 | 27,457 | 6,293 | 4,160 | 38,111 |
| 22,533 | 204 | 27,658 | 6,355 | 4,209 | 38,426 |
| 22,534 | 199 | 26,939 | 6,207 | 4,095 | 37,440 |
| 22,535 | 187 | 26,434 | 6,088 | 4,018 | 36,727 |
| 22,536 | 188 | 26,699 | 6,119 | 4,039 | 37,045 |
| 22,537 | 186 | 26,701 | 6,149 | 4,042 | 37,078 |
| 22,538 | 185 | 26,613 | 6,132 | 4,030 | 36,960 |
| 22,539 | 182 | 26,481 | 6,074 | 4,006 | 36,743 |
| 22,540 | 183 | 26,398 | 6,019 | 3,999 | 36,599 |
| 22,541 | 181 | 26,134 | 5,984 | 3,972 | 36,271 |
| 22,542 | 181 | 25,859 | 5,968 | 3,927 | 35,935 |
| 22,543 | 181 | 25,755 | 5,988 | 3,940 | 35,864 |
| 22,544 | 184 | 25,810 | 5,984 | 3,955 | 35,933 |
| 22,545 | 174 | 25,380 | 5,973 | 3,943 | 35,470 |
| 22,546 | 177 | 25,454 | 5,926 | 3,936 | 35,493 |
| 22,547 | 166 | 25,437 | 5,910 | 3,941 | 35,454 |
| 22,548 | 167 | 25,270 | 5,871 | 3,928 | 35,236 |
| 22,549 | 173 | 25,315 | 5,891 | 3,914 | 35,293 |
| 22,550 | 172 | 25,319 | 5,908 | 3,917 | 35,316 |
| 22,551 | 175 | 25,348 | 5,923 | 3,948 | 35,394 |

|        |     |        |       |       |        |
|--------|-----|--------|-------|-------|--------|
| 22,552 | 175 | 25,385 | 5,947 | 3,961 | 35,468 |
| 22,553 | 167 | 25,214 | 5,886 | 3,934 | 35,201 |
| 22,554 | 164 | 24,951 | 5,848 | 3,883 | 34,846 |
| 22,555 | 161 | 25,057 | 5,873 | 3,925 | 35,016 |
| 22,556 | 149 | 25,326 | 5,946 | 3,961 | 35,382 |
| 22,557 | 147 | 25,223 | 5,879 | 3,929 | 35,178 |
| 22,558 | 150 | 25,316 | 5,851 | 3,918 | 35,235 |
| 22,559 | 142 | 25,411 | 5,837 | 3,908 | 35,298 |
| 22,560 | 140 | 24,961 | 5,722 | 3,817 | 34,640 |
| 22,561 | 149 | 25,131 | 5,755 | 3,831 | 34,866 |
| 22,562 | 145 | 25,141 | 5,767 | 3,836 | 34,889 |
| 22,563 | 146 | 25,017 | 5,726 | 3,821 | 34,710 |
| 22,564 | 147 | 24,961 | 5,732 | 3,811 | 34,651 |
| 22,565 | 149 | 24,948 | 5,704 | 3,777 | 34,578 |
| 22,566 | 147 | 24,525 | 5,601 | 3,706 | 33,979 |
| 22,567 | 150 | 24,656 | 5,624 | 3,708 | 34,138 |
| 22,568 | 150 | 24,376 | 5,559 | 3,652 | 33,737 |
| 22,569 | 155 | 24,556 | 5,576 | 3,645 | 33,932 |
| 22,570 | 152 | 24,349 | 5,500 | 3,570 | 33,571 |
| 22,571 | 152 | 24,350 | 5,514 | 3,565 | 33,581 |
| 22,572 | 150 | 24,235 | 5,474 | 3,525 | 33,384 |
| 22,573 | 150 | 24,192 | 5,493 | 3,509 | 33,344 |
| 22,574 | 154 | 24,112 | 5,447 | 3,458 | 33,171 |
| 22,575 | 156 | 24,142 | 5,430 | 3,456 | 33,184 |
| 22,576 | 156 | 24,260 | 5,467 | 3,451 | 33,334 |
| 22,577 | 154 | 24,112 | 5,452 | 3,416 | 33,134 |
| 22,578 | 160 | 24,641 | 5,490 | 3,477 | 33,768 |
| 22,579 | 161 | 24,507 | 5,462 | 3,452 | 33,582 |
| 22,580 | 160 | 24,530 | 5,417 | 3,419 | 33,526 |
| 22,581 | 166 | 24,630 | 5,461 | 3,448 | 33,705 |
| 22,582 | 162 | 24,472 | 5,414 | 3,450 | 33,498 |
| 22,583 | 163 | 24,516 | 5,449 | 3,446 | 33,574 |

|        |     |        |       |       |        |
|--------|-----|--------|-------|-------|--------|
| 22,584 | 166 | 24,485 | 5,361 | 3,386 | 33,398 |
| 22,585 | 166 | 24,386 | 5,400 | 3,401 | 33,353 |
| 22,586 | 163 | 24,364 | 5,430 | 3,416 | 33,373 |
| 22,587 | 167 | 24,241 | 5,379 | 3,406 | 33,193 |
| 22,588 | 172 | 24,342 | 5,430 | 3,438 | 33,382 |
| 22,589 | 174 | 24,310 | 5,438 | 3,412 | 33,334 |
| 22,590 | 168 | 24,104 | 5,424 | 3,376 | 33,072 |
| 22,591 | 168 | 24,311 | 5,480 | 3,432 | 33,391 |
| 22,592 | 161 | 23,443 | 5,124 | 3,221 | 31,949 |
| 22,593 | 160 | 23,630 | 5,163 | 3,233 | 32,186 |
| 22,594 | 162 | 23,930 | 5,232 | 3,261 | 32,585 |
| 22,595 | 163 | 23,899 | 5,268 | 3,262 | 32,592 |
| 22,596 | 161 | 23,948 | 5,340 | 3,309 | 32,758 |
| 22,597 | 167 | 23,950 | 5,348 | 3,334 | 32,799 |
| 22,598 | 165 | 23,719 | 5,293 | 3,307 | 32,484 |
| 22,599 | 165 | 23,981 | 5,370 | 3,337 | 32,853 |
| 22,600 | 161 | 23,945 | 5,409 | 3,346 | 32,861 |
| 22,601 | 162 | 23,740 | 5,372 | 3,304 | 32,578 |
| 22,602 | 156 | 23,916 | 5,379 | 3,322 | 32,773 |
| 22,603 | 157 | 23,628 | 5,267 | 3,281 | 32,333 |
| 22,604 | 159 | 23,724 | 5,300 | 3,291 | 32,474 |
| 22,605 | 157 | 23,577 | 5,228 | 3,244 | 32,206 |
| 22,606 | 156 | 23,379 | 5,174 | 3,205 | 31,914 |
| 22,607 | 156 | 23,349 | 5,199 | 3,199 | 31,903 |
| 22,608 | 152 | 23,150 | 5,153 | 3,175 | 31,630 |
| 22,609 | 155 | 23,247 | 5,162 | 3,185 | 31,749 |
| 22,610 | 155 | 22,544 | 5,008 | 3,098 | 30,805 |
| 22,611 | 160 | 22,824 | 5,112 | 3,137 | 31,233 |
| 22,612 | 158 | 23,103 | 5,188 | 3,182 | 31,631 |
| 22,613 | 157 | 23,035 | 5,208 | 3,184 | 31,584 |
| 22,614 | 157 | 23,058 | 5,234 | 3,188 | 31,637 |
| 22,615 | 148 | 22,570 | 5,185 | 3,161 | 31,064 |

|        |     |        |       |       |        |
|--------|-----|--------|-------|-------|--------|
| 22,616 | 145 | 22,415 | 5,164 | 3,157 | 30,881 |
| 22,617 | 145 | 22,378 | 5,200 | 3,160 | 30,883 |
| 22,618 | 138 | 22,541 | 5,295 | 3,199 | 31,173 |
| 22,619 | 140 | 22,612 | 5,319 | 3,227 | 31,298 |
| 22,620 | 137 | 22,225 | 5,177 | 3,179 | 30,718 |
| 22,621 | 137 | 22,335 | 5,235 | 3,211 | 30,918 |
| 22,622 | 134 | 22,515 | 5,338 | 3,251 | 31,238 |
| 22,623 | 139 | 22,423 | 5,349 | 3,228 | 31,139 |
| 22,624 | 134 | 22,110 | 5,300 | 3,196 | 30,740 |
| 22,625 | 131 | 22,008 | 5,316 | 3,203 | 30,658 |
| 22,626 | 134 | 22,026 | 5,347 | 3,220 | 30,727 |
| 22,627 | 131 | 21,652 | 5,311 | 3,198 | 30,292 |
| 22,628 | 131 | 21,315 | 5,282 | 3,184 | 29,912 |
| 22,629 | 126 | 21,464 | 5,370 | 3,246 | 30,206 |
| 22,630 | 127 | 21,384 | 5,397 | 3,266 | 30,174 |
| 22,631 | 117 | 20,926 | 5,239 | 3,172 | 29,454 |
| 22,632 | 118 | 21,111 | 5,294 | 3,211 | 29,734 |
| 22,633 | 118 | 21,266 | 5,355 | 3,255 | 29,994 |
| 22,634 | 114 | 21,111 | 5,358 | 3,244 | 29,827 |
| 22,635 | 110 | 20,859 | 5,335 | 3,243 | 29,547 |
| 22,636 | 112 | 21,113 | 5,394 | 3,263 | 29,882 |
| 22,637 | 113 | 21,137 | 5,403 | 3,244 | 29,897 |
| 22,638 | 107 | 20,916 | 5,323 | 3,206 | 29,552 |
| 22,639 | 107 | 20,885 | 5,337 | 3,220 | 29,549 |
| 22,640 | 103 | 20,575 | 5,278 | 3,199 | 29,155 |
| 22,641 | 106 | 20,918 | 5,391 | 3,228 | 29,643 |
| 22,642 | 106 | 20,824 | 5,350 | 3,214 | 29,494 |
| 22,643 | 102 | 20,400 | 5,286 | 3,175 | 28,963 |
| 22,644 | 102 | 20,634 | 5,361 | 3,210 | 29,307 |
| 22,645 | 98  | 20,726 | 5,448 | 3,259 | 29,531 |
| 22,646 | 99  | 20,589 | 5,366 | 3,209 | 29,263 |
| 22,647 | 99  | 20,776 | 5,405 | 3,225 | 29,505 |

|        |     |        |       |       |        |
|--------|-----|--------|-------|-------|--------|
| 22,648 | 98  | 20,871 | 5,521 | 3,256 | 29,746 |
| 22,649 | 111 | 20,767 | 5,493 | 3,254 | 29,625 |
| 22,650 | 110 | 20,472 | 5,399 | 3,225 | 29,206 |
| 22,651 | 117 | 20,622 | 5,448 | 3,231 | 29,418 |
| 22,652 | 116 | 20,421 | 5,416 | 3,211 | 29,164 |
| 22,653 | 119 | 20,699 | 5,482 | 3,234 | 29,534 |
| 22,654 | 120 | 20,608 | 5,437 | 3,212 | 29,377 |
| 22,655 | 126 | 20,669 | 5,485 | 3,248 | 29,528 |
| 22,656 | 126 | 20,673 | 5,487 | 3,262 | 29,548 |
| 22,657 | 131 | 21,185 | 5,607 | 3,346 | 30,269 |
| 22,658 | 131 | 21,070 | 5,611 | 3,346 | 30,158 |
| 22,659 | 128 | 21,355 | 5,692 | 3,404 | 30,579 |
| 22,660 | 127 | 22,047 | 5,947 | 3,536 | 31,657 |
| 22,661 | 125 | 22,212 | 6,009 | 3,612 | 31,958 |
| 22,662 | 120 | 22,344 | 6,067 | 3,655 | 32,186 |
| 22,663 | 116 | 22,632 | 6,146 | 3,698 | 32,592 |
| 22,664 | 117 | 22,605 | 6,126 | 3,681 | 32,529 |
| 22,665 | 120 | 22,680 | 6,121 | 3,697 | 32,618 |
| 22,666 | 120 | 22,716 | 6,119 | 3,704 | 32,659 |
| 22,667 | 125 | 22,746 | 6,162 | 3,726 | 32,759 |
| 22,668 | 139 | 23,111 | 6,314 | 3,818 | 33,382 |
| 22,669 | 143 | 23,158 | 6,324 | 3,832 | 33,457 |
| 22,670 | 142 | 23,105 | 6,370 | 3,843 | 33,460 |
| 22,671 | 137 | 22,685 | 6,293 | 3,804 | 32,919 |
| 22,672 | 137 | 22,678 | 6,287 | 3,790 | 32,892 |
| 22,673 | 135 | 22,642 | 6,285 | 3,804 | 32,866 |
| 22,674 | 130 | 22,801 | 6,383 | 3,856 | 33,170 |
| 22,675 | 137 | 22,870 | 6,404 | 3,863 | 33,274 |
| 22,676 | 144 | 22,645 | 6,334 | 3,819 | 32,942 |
| 22,677 | 138 | 22,439 | 6,302 | 3,797 | 32,676 |
| 22,678 | 144 | 22,852 | 6,416 | 3,856 | 33,268 |
| 22,679 | 144 | 22,619 | 6,352 | 3,819 | 32,934 |

|        |     |        |       |       |        |
|--------|-----|--------|-------|-------|--------|
| 22,680 | 147 | 22,401 | 6,292 | 3,773 | 32,613 |
| 22,681 | 153 | 22,710 | 6,390 | 3,835 | 33,088 |
| 22,682 | 153 | 22,591 | 6,364 | 3,817 | 32,925 |
| 22,683 | 160 | 22,582 | 6,407 | 3,829 | 32,978 |
| 22,684 | 163 | 22,420 | 6,374 | 3,805 | 32,762 |
| 22,685 | 163 | 22,397 | 6,349 | 3,809 | 32,718 |
| 22,686 | 167 | 22,805 | 6,448 | 3,861 | 33,281 |
| 22,687 | 164 | 22,617 | 6,394 | 3,830 | 33,005 |
| 22,688 | 166 | 22,812 | 6,463 | 3,857 | 33,298 |
| 22,689 | 164 | 22,812 | 6,488 | 3,860 | 33,324 |
| 22,690 | 162 | 22,572 | 6,434 | 3,825 | 32,993 |
| 22,691 | 163 | 22,557 | 6,449 | 3,846 | 33,015 |
| 22,692 | 163 | 22,489 | 6,479 | 3,866 | 32,997 |
| 22,693 | 178 | 22,765 | 6,641 | 3,919 | 33,503 |
| 22,694 | 176 | 22,768 | 6,640 | 3,913 | 33,497 |
| 22,695 | 178 | 22,819 | 6,646 | 3,917 | 33,560 |
| 22,696 | 178 | 22,964 | 6,625 | 3,915 | 33,682 |
| 22,697 | 173 | 22,850 | 6,621 | 3,910 | 33,554 |
| 22,698 | 171 | 22,496 | 6,504 | 3,829 | 33,000 |
| 22,699 | 172 | 22,818 | 6,518 | 3,858 | 33,366 |
| 22,700 | 167 | 22,816 | 6,493 | 3,866 | 33,342 |
| 22,701 | 166 | 22,730 | 6,470 | 3,858 | 33,224 |
| 22,702 | 161 | 22,674 | 6,473 | 3,877 | 33,185 |
| 22,703 | 171 | 22,814 | 6,546 | 3,902 | 33,433 |
| 22,704 | 183 | 22,769 | 6,600 | 3,928 | 33,480 |
| 22,705 | 187 | 22,767 | 6,671 | 3,938 | 33,563 |
| 22,706 | 201 | 22,660 | 6,677 | 3,960 | 33,498 |
| 22,707 | 222 | 22,753 | 6,667 | 3,981 | 33,623 |
| 22,708 | 221 | 22,667 | 6,650 | 3,982 | 33,520 |
| 22,709 | 242 | 22,576 | 6,640 | 3,961 | 33,419 |
| 22,710 | 241 | 22,706 | 6,616 | 3,932 | 33,495 |
| 22,711 | 244 | 22,486 | 6,523 | 3,905 | 33,158 |

|        |     |        |       |       |        |
|--------|-----|--------|-------|-------|--------|
| 22,712 | 247 | 22,586 | 6,511 | 3,886 | 33,230 |
| 22,713 | 248 | 22,815 | 6,501 | 3,941 | 33,505 |
| 22,714 | 252 | 22,936 | 6,512 | 3,951 | 33,651 |
| 22,715 | 255 | 23,652 | 6,690 | 4,075 | 34,672 |
| 22,716 | 255 | 23,592 | 6,690 | 4,039 | 34,576 |
| 22,717 | 253 | 23,916 | 6,745 | 4,073 | 34,987 |
| 22,718 | 249 | 24,004 | 6,820 | 4,102 | 35,175 |
| 22,719 | 247 | 24,433 | 6,950 | 4,177 | 35,807 |
| 22,720 | 253 | 24,565 | 6,953 | 4,175 | 35,946 |
| 22,721 | 263 | 24,550 | 6,920 | 4,170 | 35,903 |
| 22,722 | 267 | 24,673 | 6,932 | 4,201 | 36,073 |
| 22,723 | 267 | 24,531 | 6,861 | 4,193 | 35,852 |
| 22,724 | 281 | 24,746 | 6,909 | 4,228 | 36,164 |
| 22,725 | 282 | 24,685 | 6,859 | 4,212 | 36,038 |
| 22,726 | 277 | 24,610 | 6,828 | 4,214 | 35,929 |
| 22,727 | 271 | 24,684 | 6,832 | 4,216 | 36,003 |
| 22,728 | 271 | 24,628 | 6,800 | 4,196 | 35,895 |
| 22,729 | 267 | 24,572 | 6,819 | 4,204 | 35,862 |
| 22,730 | 262 | 24,552 | 6,816 | 4,224 | 35,854 |
| 22,731 | 261 | 24,485 | 6,790 | 4,223 | 35,759 |
| 22,732 | 265 | 24,546 | 6,804 | 4,218 | 35,833 |
| 22,733 | 267 | 24,567 | 6,822 | 4,233 | 35,889 |
| 22,734 | 259 | 24,394 | 6,763 | 4,205 | 35,621 |
| 22,735 | 261 | 24,302 | 6,779 | 4,215 | 35,557 |
| 22,736 | 262 | 24,257 | 6,770 | 4,205 | 35,494 |
| 22,737 | 262 | 23,927 | 6,707 | 4,167 | 35,063 |
| 22,738 | 263 | 23,788 | 6,678 | 4,135 | 34,864 |
| 22,739 | 260 | 24,069 | 6,750 | 4,216 | 35,295 |
| 22,740 | 261 | 23,972 | 6,719 | 4,208 | 35,160 |
| 22,741 | 264 | 23,905 | 6,687 | 4,187 | 35,043 |
| 22,742 | 264 | 23,977 | 6,651 | 4,186 | 35,078 |
| 22,743 | 264 | 24,238 | 6,673 | 4,201 | 35,376 |

|        |     |        |       |       |        |
|--------|-----|--------|-------|-------|--------|
| 22,744 | 253 | 24,092 | 6,582 | 4,154 | 35,081 |
| 22,745 | 261 | 24,008 | 6,547 | 4,147 | 34,963 |
| 22,746 | 260 | 23,953 | 6,543 | 4,159 | 34,915 |
| 22,747 | 262 | 23,948 | 6,519 | 4,157 | 34,886 |
| 22,748 | 262 | 23,977 | 6,490 | 4,159 | 34,888 |
| 22,749 | 256 | 24,164 | 6,533 | 4,200 | 35,153 |
| 22,750 | 256 | 24,244 | 6,571 | 4,186 | 35,257 |
| 22,751 | 257 | 24,213 | 6,549 | 4,177 | 35,196 |
| 22,752 | 256 | 24,120 | 6,529 | 4,165 | 35,070 |
| 22,753 | 253 | 24,026 | 6,509 | 4,162 | 34,950 |
| 22,754 | 246 | 23,974 | 6,524 | 4,190 | 34,934 |
| 22,755 | 244 | 23,881 | 6,475 | 4,185 | 34,785 |
| 22,756 | 244 | 23,711 | 6,401 | 4,144 | 34,500 |
| 22,757 | 225 | 23,477 | 6,325 | 4,080 | 34,107 |
| 22,758 | 210 | 22,999 | 6,285 | 4,011 | 33,505 |
| 22,759 | 203 | 22,561 | 6,147 | 3,922 | 32,833 |
| 22,760 | 196 | 22,875 | 6,215 | 3,958 | 33,244 |
| 22,761 | 203 | 22,545 | 6,184 | 3,947 | 32,879 |
| 22,762 | 199 | 22,230 | 6,129 | 3,918 | 32,476 |
| 22,763 | 197 | 21,767 | 6,074 | 3,864 | 31,902 |
| 22,764 | 199 | 21,427 | 6,025 | 3,797 | 31,448 |
| 22,765 | 197 | 21,145 | 5,960 | 3,770 | 31,072 |
| 22,766 | 199 | 21,044 | 5,867 | 3,721 | 30,831 |
| 22,767 | 201 | 20,914 | 5,758 | 3,690 | 30,563 |
| 22,768 | 206 | 21,128 | 5,706 | 3,657 | 30,697 |
| 22,769 | 205 | 21,236 | 5,695 | 3,658 | 30,794 |
| 22,770 | 200 | 21,479 | 5,677 | 3,681 | 31,037 |
| 22,771 | 190 | 21,375 | 5,666 | 3,689 | 30,920 |
| 22,772 | 179 | 21,189 | 5,590 | 3,649 | 30,607 |
| 22,773 | 176 | 21,208 | 5,575 | 3,641 | 30,600 |
| 22,774 | 172 | 21,099 | 5,534 | 3,596 | 30,401 |
| 22,775 | 164 | 20,925 | 5,458 | 3,558 | 30,105 |



|        |     |        |       |       |        |
|--------|-----|--------|-------|-------|--------|
| 22,776 | 163 | 20,979 | 5,460 | 3,567 | 30,169 |
| 22,777 | 165 | 21,301 | 5,492 | 3,597 | 30,555 |
| 22,778 | 170 | 21,189 | 5,434 | 3,556 | 30,349 |
| 22,779 | 169 | 21,167 | 5,401 | 3,541 | 30,278 |
| 22,780 | 171 | 21,413 | 5,410 | 3,562 | 30,556 |
| 22,781 | 171 | 21,302 | 5,365 | 3,518 | 30,356 |
| 22,782 | 171 | 21,182 | 5,331 | 3,501 | 30,185 |
| 22,783 | 166 | 21,456 | 5,359 | 3,559 | 30,540 |
| 22,784 | 176 | 21,702 | 5,374 | 3,579 | 30,831 |
| 22,785 | 174 | 21,669 | 5,287 | 3,529 | 30,659 |
| 22,786 | 177 | 21,837 | 5,322 | 3,554 | 30,890 |
| 22,787 | 173 | 21,105 | 5,054 | 3,404 | 29,736 |
| 22,788 | 175 | 21,296 | 5,080 | 3,419 | 29,970 |
| 22,789 | 177 | 21,493 | 5,105 | 3,452 | 30,227 |
| 22,790 | 178 | 21,496 | 5,105 | 3,451 | 30,230 |
| 22,791 | 177 | 21,721 | 5,135 | 3,492 | 30,525 |
| 22,792 | 197 | 21,949 | 5,183 | 3,506 | 30,835 |
| 22,793 | 199 | 21,836 | 5,139 | 3,493 | 30,667 |
| 22,794 | 198 | 21,493 | 5,060 | 3,430 | 30,181 |
| 22,795 | 198 | 21,427 | 5,056 | 3,423 | 30,104 |
| 22,796 | 191 | 21,431 | 5,051 | 3,430 | 30,103 |
| 22,797 | 189 | 21,177 | 5,006 | 3,400 | 29,772 |
| 22,798 | 185 | 21,090 | 4,991 | 3,374 | 29,640 |
| 22,799 | 186 | 21,121 | 5,011 | 3,387 | 29,705 |
| 22,800 | 189 | 21,066 | 4,978 | 3,361 | 29,594 |
| 22,801 | 199 | 21,025 | 4,962 | 3,360 | 29,546 |
| 22,802 | 202 | 20,932 | 4,921 | 3,349 | 29,404 |
| 22,803 | 203 | 21,161 | 4,898 | 3,332 | 29,594 |
| 22,804 | 206 | 21,191 | 4,861 | 3,317 | 29,575 |
| 22,805 | 208 | 21,266 | 4,840 | 3,316 | 29,630 |
| 22,806 | 189 | 21,467 | 4,806 | 3,322 | 29,784 |
| 22,807 | 195 | 21,520 | 4,811 | 3,303 | 29,829 |

|        |     |        |       |       |        |
|--------|-----|--------|-------|-------|--------|
| 22,808 | 195 | 21,465 | 4,776 | 3,300 | 29,736 |
| 22,809 | 182 | 21,664 | 4,743 | 3,310 | 29,899 |
| 22,810 | 180 | 21,841 | 4,789 | 3,354 | 30,164 |
| 22,811 | 173 | 21,884 | 4,759 | 3,352 | 30,168 |
| 22,812 | 171 | 21,752 | 4,671 | 3,263 | 29,857 |
| 22,813 | 170 | 21,748 | 4,671 | 3,255 | 29,844 |
| 22,814 | 168 | 21,762 | 4,629 | 3,245 | 29,804 |
| 22,815 | 165 | 21,582 | 4,577 | 3,222 | 29,546 |
| 22,816 | 161 | 20,494 | 4,372 | 3,070 | 28,097 |
| 22,817 | 161 | 20,766 | 4,408 | 3,086 | 28,421 |
| 22,818 | 160 | 20,945 | 4,419 | 3,096 | 28,620 |
| 22,819 | 154 | 20,338 | 4,311 | 3,028 | 27,831 |
| 22,820 | 164 | 19,944 | 4,248 | 2,998 | 27,354 |
| 22,821 | 169 | 19,346 | 4,169 | 2,945 | 26,629 |
| 22,822 | 182 | 19,234 | 4,113 | 2,899 | 26,428 |
| 22,823 | 182 | 19,186 | 4,083 | 2,893 | 26,344 |
| 22,824 | 189 | 19,070 | 4,093 | 2,872 | 26,224 |
| 22,825 | 188 | 19,064 | 4,091 | 2,862 | 26,205 |
| 22,826 | 192 | 19,022 | 4,083 | 2,851 | 26,148 |
| 22,827 | 193 | 19,030 | 4,098 | 2,843 | 26,164 |
| 22,828 | 196 | 18,797 | 4,066 | 2,787 | 25,846 |
| 22,829 | 188 | 18,565 | 4,038 | 2,767 | 25,558 |
| 22,830 | 193 | 19,095 | 4,188 | 2,885 | 26,361 |
| 22,831 | 194 | 19,139 | 4,212 | 2,903 | 26,448 |
| 22,832 | 196 | 19,140 | 4,239 | 2,877 | 26,452 |
| 22,833 | 194 | 18,986 | 4,215 | 2,848 | 26,243 |
| 22,834 | 194 | 19,059 | 4,241 | 2,871 | 26,365 |
| 22,835 | 185 | 19,166 | 4,288 | 2,914 | 26,553 |
| 22,836 | 181 | 18,896 | 4,254 | 2,880 | 26,211 |
| 22,837 | 180 | 18,752 | 4,248 | 2,855 | 26,035 |
| 22,838 | 177 | 18,557 | 4,238 | 2,846 | 25,818 |
| 22,839 | 176 | 18,827 | 4,337 | 2,940 | 26,280 |

|        |     |        |       |       |        |
|--------|-----|--------|-------|-------|--------|
| 22,840 | 172 | 18,862 | 4,356 | 2,940 | 26,330 |
| 22,841 | 177 | 19,124 | 4,402 | 2,961 | 26,664 |
| 22,842 | 174 | 19,130 | 4,412 | 2,961 | 26,677 |
| 22,843 | 164 | 19,172 | 4,387 | 2,960 | 26,683 |
| 22,844 | 161 | 19,006 | 4,354 | 2,933 | 26,454 |
| 22,845 | 164 | 19,008 | 4,348 | 2,941 | 26,461 |
| 22,846 | 165 | 19,009 | 4,323 | 2,924 | 26,421 |
| 22,847 | 167 | 19,129 | 4,370 | 2,954 | 26,620 |
| 22,848 | 173 | 19,268 | 4,373 | 2,956 | 26,770 |
| 22,849 | 162 | 18,874 | 4,244 | 2,891 | 26,171 |
| 22,850 | 163 | 18,963 | 4,251 | 2,890 | 26,267 |
| 22,851 | 166 | 19,190 | 4,297 | 2,915 | 26,568 |
| 22,852 | 162 | 19,069 | 4,274 | 2,905 | 26,410 |
| 22,853 | 162 | 19,274 | 4,332 | 2,920 | 26,688 |
| 22,854 | 162 | 19,176 | 4,364 | 2,926 | 26,628 |
| 22,855 | 158 | 19,043 | 4,346 | 2,911 | 26,458 |
| 22,856 | 156 | 19,009 | 4,378 | 2,923 | 26,466 |
| 22,857 | 156 | 19,085 | 4,416 | 2,925 | 26,582 |
| 22,858 | 148 | 19,111 | 4,412 | 2,925 | 26,596 |
| 22,859 | 155 | 18,978 | 4,388 | 2,889 | 26,410 |
| 22,860 | 158 | 18,967 | 4,388 | 2,893 | 26,406 |
| 22,861 | 156 | 18,850 | 4,433 | 2,894 | 26,333 |
| 22,862 | 158 | 18,949 | 4,456 | 2,929 | 26,492 |
| 22,863 | 164 | 19,094 | 4,477 | 2,936 | 26,671 |
| 22,864 | 166 | 19,110 | 4,493 | 2,953 | 26,722 |
| 22,865 | 170 | 19,041 | 4,509 | 2,963 | 26,683 |
| 22,866 | 175 | 19,067 | 4,537 | 2,951 | 26,730 |
| 22,867 | 178 | 19,166 | 4,556 | 2,948 | 26,848 |
| 22,868 | 176 | 19,019 | 4,483 | 2,928 | 26,606 |
| 22,869 | 177 | 19,307 | 4,567 | 2,970 | 27,021 |
| 22,870 | 174 | 19,695 | 4,633 | 2,981 | 27,483 |
| 22,871 | 178 | 19,944 | 4,677 | 2,989 | 27,788 |

|        |     |        |       |       |        |
|--------|-----|--------|-------|-------|--------|
| 22,872 | 172 | 19,945 | 4,697 | 3,017 | 27,831 |
| 22,873 | 159 | 20,386 | 4,837 | 3,110 | 28,492 |
| 22,874 | 152 | 20,620 | 4,961 | 3,187 | 28,920 |
| 22,875 | 158 | 20,975 | 5,007 | 3,224 | 29,364 |
| 22,876 | 162 | 21,487 | 5,141 | 3,296 | 30,086 |
| 22,877 | 165 | 21,924 | 5,243 | 3,351 | 30,683 |
| 22,878 | 166 | 21,980 | 5,290 | 3,361 | 30,797 |
| 22,879 | 160 | 21,918 | 5,330 | 3,386 | 30,794 |
| 22,880 | 159 | 21,656 | 5,266 | 3,342 | 30,423 |
| 22,881 | 168 | 21,931 | 5,374 | 3,396 | 30,869 |
| 22,882 | 175 | 22,105 | 5,381 | 3,416 | 31,077 |
| 22,883 | 172 | 22,186 | 5,398 | 3,437 | 31,193 |
| 22,884 | 172 | 22,224 | 5,412 | 3,439 | 31,247 |
| 22,885 | 171 | 21,982 | 5,373 | 3,386 | 30,912 |
| 22,886 | 170 | 22,022 | 5,368 | 3,385 | 30,945 |
| 22,887 | 174 | 22,165 | 5,405 | 3,426 | 31,170 |
| 22,888 | 180 | 22,077 | 5,389 | 3,406 | 31,052 |
| 22,889 | 180 | 21,956 | 5,321 | 3,375 | 30,832 |
| 22,890 | 181 | 22,055 | 5,346 | 3,359 | 30,941 |
| 22,891 | 184 | 22,065 | 5,389 | 3,403 | 31,041 |
| 22,892 | 186 | 22,087 | 5,411 | 3,414 | 31,098 |
| 22,893 | 186 | 21,930 | 5,426 | 3,376 | 30,918 |
| 22,894 | 185 | 21,904 | 5,432 | 3,374 | 30,895 |
| 22,895 | 193 | 22,096 | 5,477 | 3,393 | 31,159 |
| 22,896 | 193 | 22,102 | 5,475 | 3,388 | 31,158 |
| 22,897 | 195 | 22,391 | 5,528 | 3,446 | 31,560 |
| 22,898 | 200 | 22,732 | 5,604 | 3,502 | 32,038 |
| 22,899 | 201 | 22,675 | 5,599 | 3,502 | 31,977 |
| 22,900 | 210 | 22,668 | 5,643 | 3,513 | 32,034 |
| 22,901 | 211 | 22,648 | 5,646 | 3,514 | 32,019 |
| 22,902 | 208 | 22,846 | 5,701 | 3,564 | 32,319 |
| 22,903 | 211 | 22,846 | 5,735 | 3,572 | 32,364 |

|        |     |        |       |       |        |
|--------|-----|--------|-------|-------|--------|
| 22,904 | 207 | 22,625 | 5,679 | 3,537 | 32,048 |
| 22,905 | 208 | 22,596 | 5,665 | 3,538 | 32,007 |
| 22,906 | 212 | 22,796 | 5,691 | 3,581 | 32,280 |
| 22,907 | 211 | 22,831 | 5,665 | 3,581 | 32,288 |
| 22,908 | 211 | 22,615 | 5,600 | 3,543 | 31,969 |
| 22,909 | 213 | 22,617 | 5,592 | 3,550 | 31,972 |
| 22,910 | 208 | 22,832 | 5,626 | 3,586 | 32,252 |
| 22,911 | 207 | 22,776 | 5,591 | 3,555 | 32,129 |
| 22,912 | 204 | 22,646 | 5,569 | 3,540 | 31,959 |
| 22,913 | 202 | 22,522 | 5,540 | 3,528 | 31,792 |
| 22,914 | 197 | 22,459 | 5,520 | 3,533 | 31,709 |
| 22,915 | 187 | 22,034 | 5,431 | 3,468 | 31,120 |
| 22,916 | 186 | 22,190 | 5,463 | 3,476 | 31,315 |
| 22,917 | 181 | 22,231 | 5,465 | 3,474 | 31,351 |
| 22,918 | 178 | 22,169 | 5,430 | 3,473 | 31,250 |
| 22,919 | 173 | 21,710 | 5,368 | 3,397 | 30,648 |
| 22,920 | 173 | 21,781 | 5,365 | 3,411 | 30,730 |
| 22,921 | 168 | 21,732 | 5,358 | 3,439 | 30,697 |
| 22,922 | 164 | 21,616 | 5,339 | 3,433 | 30,552 |
| 22,923 | 164 | 21,447 | 5,273 | 3,384 | 30,268 |
| 22,924 | 164 | 20,930 | 5,101 | 3,277 | 29,472 |
| 22,925 | 165 | 21,065 | 5,097 | 3,263 | 29,590 |
| 22,926 | 159 | 21,123 | 5,094 | 3,290 | 29,666 |
| 22,927 | 154 | 21,085 | 5,057 | 3,278 | 29,574 |
| 22,928 | 156 | 20,695 | 4,987 | 3,251 | 29,089 |
| 22,929 | 155 | 20,048 | 4,761 | 3,105 | 28,069 |
| 22,930 | 155 | 20,376 | 4,799 | 3,127 | 28,457 |
| 22,931 | 158 | 20,648 | 4,812 | 3,164 | 28,782 |
| 22,932 | 158 | 20,600 | 4,794 | 3,154 | 28,706 |
| 22,933 | 154 | 20,890 | 4,825 | 3,187 | 29,056 |
| 22,934 | 153 | 20,888 | 4,808 | 3,171 | 29,020 |
| 22,935 | 158 | 20,824 | 4,778 | 3,159 | 28,919 |

|        |     |        |       |       |        |
|--------|-----|--------|-------|-------|--------|
| 22,936 | 160 | 20,871 | 4,764 | 3,152 | 28,947 |
| 22,937 | 157 | 20,886 | 4,750 | 3,134 | 28,927 |
| 22,938 | 157 | 20,906 | 4,744 | 3,119 | 28,926 |
| 22,939 | 151 | 20,905 | 4,725 | 3,111 | 28,892 |
| 22,940 | 154 | 20,849 | 4,708 | 3,115 | 28,826 |
| 22,941 | 153 | 20,855 | 4,690 | 3,107 | 28,805 |
| 22,942 | 154 | 20,942 | 4,703 | 3,090 | 28,889 |
| 22,943 | 145 | 20,776 | 4,664 | 3,100 | 28,685 |
| 22,944 | 143 | 20,834 | 4,684 | 3,124 | 28,785 |
| 22,945 | 139 | 20,933 | 4,700 | 3,131 | 28,903 |
| 22,946 | 137 | 21,062 | 4,722 | 3,157 | 29,078 |
| 22,947 | 140 | 21,373 | 4,784 | 3,139 | 29,436 |
| 22,948 | 135 | 21,279 | 4,798 | 3,127 | 29,339 |
| 22,949 | 136 | 21,521 | 4,842 | 3,140 | 29,639 |
| 22,950 | 136 | 21,653 | 4,852 | 3,173 | 29,814 |
| 22,951 | 126 | 21,640 | 4,823 | 3,166 | 29,755 |
| 22,952 | 126 | 21,566 | 4,804 | 3,143 | 29,639 |
| 22,953 | 125 | 21,430 | 4,793 | 3,125 | 29,473 |
| 22,954 | 134 | 22,263 | 4,939 | 3,238 | 30,574 |
| 22,955 | 137 | 22,209 | 4,889 | 3,231 | 30,466 |
| 22,956 | 136 | 22,133 | 4,902 | 3,223 | 30,394 |
| 22,957 | 139 | 22,600 | 4,997 | 3,258 | 30,994 |
| 22,958 | 139 | 22,692 | 5,039 | 3,269 | 31,139 |
| 22,959 | 140 | 22,740 | 5,051 | 3,274 | 31,205 |
| 22,960 | 141 | 22,791 | 5,092 | 3,287 | 31,311 |
| 22,961 | 142 | 22,610 | 5,048 | 3,255 | 31,055 |
| 22,962 | 140 | 22,779 | 5,090 | 3,285 | 31,294 |
| 22,963 | 140 | 22,624 | 5,029 | 3,247 | 31,040 |
| 22,964 | 142 | 22,679 | 5,063 | 3,257 | 31,141 |
| 22,965 | 145 | 22,586 | 5,052 | 3,253 | 31,036 |
| 22,966 | 146 | 22,656 | 5,048 | 3,238 | 31,088 |
| 22,967 | 149 | 22,666 | 5,043 | 3,234 | 31,092 |

|        |     |        |       |       |        |
|--------|-----|--------|-------|-------|--------|
| 22,968 | 149 | 22,520 | 5,005 | 3,230 | 30,904 |
| 22,969 | 154 | 22,689 | 5,044 | 3,233 | 31,120 |
| 22,970 | 155 | 22,775 | 5,057 | 3,276 | 31,263 |
| 22,971 | 157 | 21,937 | 4,847 | 3,120 | 30,061 |
| 22,972 | 157 | 22,069 | 4,893 | 3,139 | 30,258 |
| 22,973 | 156 | 22,237 | 4,929 | 3,167 | 30,489 |
| 22,974 | 156 | 22,193 | 4,929 | 3,166 | 30,444 |
| 22,975 | 156 | 22,348 | 4,971 | 3,202 | 30,677 |
| 22,976 | 155 | 22,311 | 4,983 | 3,224 | 30,673 |
| 22,977 | 154 | 22,214 | 4,976 | 3,209 | 30,553 |
| 22,978 | 152 | 22,195 | 4,996 | 3,222 | 30,565 |
| 22,979 | 146 | 21,830 | 4,927 | 3,165 | 30,068 |
| 22,980 | 144 | 21,535 | 4,903 | 3,143 | 29,725 |
| 22,981 | 146 | 21,710 | 4,918 | 3,170 | 29,944 |
| 22,982 | 135 | 21,687 | 4,887 | 3,163 | 29,872 |
| 22,983 | 132 | 21,581 | 4,891 | 3,155 | 29,759 |
| 22,984 | 132 | 21,388 | 4,879 | 3,145 | 29,544 |
| 22,985 | 125 | 20,756 | 4,779 | 3,076 | 28,736 |
| 22,986 | 126 | 21,008 | 4,839 | 3,103 | 29,076 |
| 22,987 | 127 | 21,355 | 4,898 | 3,119 | 29,499 |
| 22,988 | 128 | 21,525 | 4,923 | 3,164 | 29,740 |
| 22,989 | 128 | 21,789 | 4,988 | 3,203 | 30,108 |
| 22,990 | 126 | 21,763 | 4,980 | 3,204 | 30,073 |
| 22,991 | 125 | 22,072 | 5,031 | 3,262 | 30,490 |
| 22,992 | 122 | 22,085 | 5,002 | 3,229 | 30,438 |
| 22,993 | 125 | 22,178 | 4,999 | 3,234 | 30,536 |
| 22,994 | 126 | 22,211 | 5,006 | 3,235 | 30,578 |
| 22,995 | 130 | 22,565 | 5,064 | 3,278 | 31,037 |
| 22,996 | 125 | 22,534 | 5,080 | 3,276 | 31,015 |
| 22,997 | 116 | 21,924 | 4,978 | 3,241 | 30,259 |
| 22,998 | 119 | 21,951 | 4,958 | 3,233 | 30,261 |
| 22,999 | 120 | 21,590 | 4,870 | 3,174 | 29,754 |

|        |     |        |       |       |        |
|--------|-----|--------|-------|-------|--------|
| 23,000 | 122 | 21,992 | 4,984 | 3,260 | 30,358 |
| 23,001 | 115 | 21,608 | 4,913 | 3,193 | 29,829 |
| 23,002 | 116 | 21,506 | 4,935 | 3,202 | 29,759 |
| 23,003 | 111 | 21,218 | 4,879 | 3,165 | 29,373 |
| 23,004 | 113 | 21,299 | 4,882 | 3,178 | 29,472 |
| 23,005 | 101 | 20,924 | 4,829 | 3,142 | 28,996 |
| 23,006 | 100 | 20,882 | 4,834 | 3,141 | 28,957 |
| 23,007 | 101 | 20,889 | 4,824 | 3,126 | 28,940 |
| 23,008 | 106 | 21,038 | 4,852 | 3,171 | 29,167 |
| 23,009 | 114 | 21,019 | 4,832 | 3,174 | 29,139 |
| 23,010 | 113 | 20,748 | 4,779 | 3,131 | 28,771 |
| 23,011 | 117 | 20,818 | 4,796 | 3,141 | 28,872 |
| 23,012 | 119 | 20,885 | 4,824 | 3,151 | 28,979 |
| 23,013 | 128 | 21,006 | 4,839 | 3,176 | 29,149 |
| 23,014 | 130 | 20,978 | 4,802 | 3,145 | 29,055 |
| 23,015 | 130 | 20,983 | 4,798 | 3,135 | 29,046 |
| 23,016 | 129 | 21,098 | 4,814 | 3,150 | 29,191 |
| 23,017 | 132 | 21,022 | 4,784 | 3,168 | 29,106 |
| 23,018 | 124 | 20,840 | 4,752 | 3,160 | 28,876 |
| 23,019 | 129 | 21,241 | 4,842 | 3,235 | 29,447 |
| 23,020 | 131 | 21,265 | 4,858 | 3,217 | 29,471 |
| 23,021 | 130 | 21,159 | 4,848 | 3,199 | 29,336 |
| 23,022 | 132 | 21,348 | 4,869 | 3,222 | 29,571 |
| 23,023 | 134 | 21,426 | 4,872 | 3,228 | 29,660 |
| 23,024 | 133 | 21,457 | 4,875 | 3,219 | 29,684 |
| 23,025 | 131 | 21,449 | 4,904 | 3,231 | 29,715 |
| 23,026 | 132 | 21,696 | 4,945 | 3,247 | 30,020 |
| 23,027 | 133 | 21,551 | 4,917 | 3,219 | 29,820 |
| 23,028 | 134 | 21,833 | 4,952 | 3,245 | 30,164 |
| 23,029 | 134 | 21,833 | 4,953 | 3,239 | 30,159 |
| 23,030 | 134 | 22,017 | 4,946 | 3,253 | 30,350 |
| 23,031 | 134 | 21,795 | 4,892 | 3,219 | 30,040 |



|        |     |        |       |       |        |
|--------|-----|--------|-------|-------|--------|
| 23,032 | 133 | 21,882 | 4,907 | 3,218 | 30,140 |
| 23,033 | 137 | 21,634 | 4,874 | 3,169 | 29,814 |
| 23,034 | 139 | 21,562 | 4,864 | 3,170 | 29,735 |
| 23,035 | 137 | 21,338 | 4,822 | 3,142 | 29,439 |
| 23,036 | 138 | 21,738 | 4,951 | 3,210 | 30,037 |
| 23,037 | 145 | 21,772 | 4,952 | 3,225 | 30,094 |
| 23,038 | 146 | 21,797 | 4,962 | 3,255 | 30,160 |
| 23,039 | 148 | 21,744 | 4,970 | 3,227 | 30,089 |
| 23,040 | 149 | 21,530 | 4,933 | 3,209 | 29,821 |
| 23,041 | 148 | 21,325 | 4,912 | 3,185 | 29,570 |
| 23,042 | 153 | 21,551 | 4,971 | 3,211 | 29,886 |
| 23,043 | 155 | 21,527 | 4,959 | 3,213 | 29,854 |
| 23,044 | 153 | 21,729 | 4,989 | 3,217 | 30,088 |
| 23,045 | 151 | 21,537 | 4,937 | 3,196 | 29,821 |
| 23,046 | 151 | 21,512 | 4,935 | 3,187 | 29,785 |
| 23,047 | 152 | 21,516 | 4,946 | 3,189 | 29,803 |
| 23,048 | 152 | 21,483 | 4,923 | 3,161 | 29,719 |
| 23,049 | 152 | 21,503 | 4,892 | 3,137 | 29,684 |
| 23,050 | 164 | 21,733 | 4,952 | 3,142 | 29,991 |
| 23,051 | 161 | 21,516 | 4,910 | 3,118 | 29,705 |
| 23,052 | 172 | 21,681 | 4,895 | 3,132 | 29,880 |
| 23,053 | 183 | 22,052 | 4,947 | 3,124 | 30,306 |
| 23,054 | 191 | 21,911 | 4,926 | 3,092 | 30,120 |
| 23,055 | 193 | 21,982 | 4,922 | 3,101 | 30,198 |
| 23,056 | 191 | 22,094 | 4,945 | 3,108 | 30,338 |
| 23,057 | 196 | 22,129 | 4,906 | 3,082 | 30,313 |
| 23,058 | 194 | 22,093 | 4,905 | 3,086 | 30,278 |
| 23,059 | 185 | 22,050 | 4,920 | 3,080 | 30,235 |
| 23,060 | 177 | 22,071 | 4,922 | 3,083 | 30,253 |
| 23,061 | 175 | 21,708 | 4,819 | 3,021 | 29,723 |
| 23,062 | 174 | 21,830 | 4,844 | 3,042 | 29,890 |
| 23,063 | 182 | 22,107 | 4,898 | 3,073 | 30,260 |

|        |     |        |       |       |        |
|--------|-----|--------|-------|-------|--------|
| 23,064 | 181 | 21,957 | 4,880 | 3,062 | 30,080 |
| 23,065 | 178 | 21,926 | 4,901 | 3,078 | 30,083 |
| 23,066 | 178 | 22,063 | 4,965 | 3,118 | 30,324 |
| 23,067 | 182 | 21,835 | 4,923 | 3,088 | 30,028 |
| 23,068 | 180 | 21,611 | 4,904 | 3,054 | 29,749 |
| 23,069 | 180 | 21,931 | 4,971 | 3,075 | 30,157 |
| 23,070 | 178 | 22,126 | 5,006 | 3,101 | 30,411 |
| 23,071 | 175 | 22,039 | 4,986 | 3,101 | 30,301 |
| 23,072 | 171 | 21,926 | 4,964 | 3,114 | 30,175 |
| 23,073 | 171 | 22,139 | 5,020 | 3,131 | 30,461 |
| 23,074 | 171 | 22,040 | 4,987 | 3,122 | 30,320 |
| 23,075 | 180 | 22,167 | 4,999 | 3,116 | 30,462 |
| 23,076 | 180 | 22,166 | 5,013 | 3,121 | 30,480 |
| 23,077 | 179 | 22,197 | 5,042 | 3,137 | 30,555 |
| 23,078 | 184 | 22,156 | 5,049 | 3,139 | 30,528 |
| 23,079 | 185 | 22,422 | 5,124 | 3,181 | 30,912 |
| 23,080 | 187 | 22,203 | 5,069 | 3,152 | 30,611 |
| 23,081 | 182 | 22,410 | 5,129 | 3,231 | 30,952 |
| 23,082 | 192 | 22,306 | 5,086 | 3,208 | 30,792 |
| 23,083 | 191 | 22,349 | 5,084 | 3,215 | 30,839 |
| 23,084 | 193 | 22,441 | 5,136 | 3,238 | 31,008 |
| 23,085 | 195 | 22,720 | 5,220 | 3,304 | 31,439 |
| 23,086 | 193 | 22,388 | 5,123 | 3,251 | 30,955 |
| 23,087 | 195 | 22,532 | 5,132 | 3,274 | 31,133 |
| 23,088 | 193 | 22,700 | 5,171 | 3,291 | 31,355 |
| 23,089 | 207 | 22,662 | 5,187 | 3,281 | 31,337 |
| 23,090 | 207 | 22,504 | 5,133 | 3,249 | 31,093 |
| 23,091 | 213 | 22,514 | 5,077 | 3,232 | 31,036 |
| 23,092 | 211 | 22,505 | 5,084 | 3,236 | 31,036 |
| 23,093 | 206 | 22,407 | 5,077 | 3,251 | 30,941 |
| 23,094 | 218 | 22,183 | 5,045 | 3,246 | 30,692 |
| 23,095 | 220 | 22,041 | 5,026 | 3,216 | 30,503 |

|        |     |        |       |       |        |
|--------|-----|--------|-------|-------|--------|
| 23,096 | 222 | 22,004 | 5,014 | 3,246 | 30,486 |
| 23,097 | 226 | 22,024 | 4,999 | 3,250 | 30,499 |
| 23,098 | 233 | 22,023 | 4,971 | 3,265 | 30,492 |
| 23,099 | 236 | 21,982 | 4,959 | 3,271 | 30,448 |
| 23,100 | 235 | 22,011 | 4,979 | 3,281 | 30,506 |
| 23,101 | 225 | 22,043 | 4,965 | 3,321 | 30,554 |
| 23,102 | 223 | 22,040 | 4,975 | 3,327 | 30,565 |
| 23,103 | 212 | 22,407 | 5,064 | 3,387 | 31,070 |
| 23,104 | 204 | 22,583 | 5,131 | 3,423 | 31,341 |
| 23,105 | 196 | 22,438 | 5,106 | 3,411 | 31,151 |
| 23,106 | 196 | 22,783 | 5,179 | 3,465 | 31,623 |
| 23,107 | 191 | 22,576 | 5,174 | 3,449 | 31,390 |
| 23,108 | 195 | 22,579 | 5,147 | 3,438 | 31,359 |
| 23,109 | 198 | 22,798 | 5,175 | 3,467 | 31,638 |
| 23,110 | 196 | 22,978 | 5,219 | 3,497 | 31,890 |
| 23,111 | 198 | 22,750 | 5,182 | 3,460 | 31,590 |
| 23,112 | 196 | 22,500 | 5,162 | 3,434 | 31,292 |
| 23,113 | 195 | 22,555 | 5,219 | 3,467 | 31,436 |
| 23,114 | 185 | 22,444 | 5,221 | 3,490 | 31,340 |
| 23,115 | 185 | 22,146 | 5,168 | 3,456 | 30,955 |
| 23,116 | 185 | 21,957 | 5,157 | 3,436 | 30,735 |
| 23,117 | 189 | 21,870 | 5,162 | 3,439 | 30,660 |
| 23,118 | 188 | 21,813 | 5,182 | 3,442 | 30,625 |
| 23,119 | 191 | 21,765 | 5,172 | 3,453 | 30,581 |
| 23,120 | 191 | 21,648 | 5,155 | 3,436 | 30,430 |
| 23,121 | 190 | 21,491 | 5,118 | 3,411 | 30,210 |
| 23,122 | 192 | 21,548 | 5,134 | 3,408 | 30,282 |
| 23,123 | 192 | 21,538 | 5,102 | 3,400 | 30,232 |
| 23,124 | 192 | 21,322 | 5,089 | 3,379 | 29,982 |
| 23,125 | 192 | 21,333 | 5,086 | 3,369 | 29,980 |
| 23,126 | 183 | 21,305 | 5,044 | 3,383 | 29,915 |
| 23,127 | 183 | 21,256 | 5,043 | 3,385 | 29,867 |

|        |     |        |       |       |        |
|--------|-----|--------|-------|-------|--------|
| 23,128 | 181 | 21,323 | 5,031 | 3,382 | 29,917 |
| 23,129 | 188 | 21,428 | 5,034 | 3,371 | 30,021 |
| 23,130 | 183 | 21,180 | 4,959 | 3,331 | 29,653 |
| 23,131 | 184 | 20,814 | 4,902 | 3,282 | 29,182 |
| 23,132 | 186 | 21,026 | 4,926 | 3,277 | 29,415 |
| 23,133 | 181 | 21,287 | 4,968 | 3,320 | 29,756 |
| 23,134 | 176 | 21,123 | 4,907 | 3,294 | 29,500 |
| 23,135 | 175 | 21,171 | 4,897 | 3,283 | 29,526 |
| 23,136 | 173 | 21,185 | 4,881 | 3,283 | 29,522 |
| 23,137 | 179 | 21,364 | 4,938 | 3,322 | 29,803 |
| 23,138 | 176 | 21,165 | 4,879 | 3,273 | 29,493 |
| 23,139 | 174 | 21,223 | 4,885 | 3,281 | 29,563 |
| 23,140 | 163 | 21,244 | 4,893 | 3,304 | 29,604 |
| 23,141 | 157 | 21,133 | 4,914 | 3,314 | 29,518 |
| 23,142 | 156 | 21,195 | 4,905 | 3,299 | 29,555 |
| 23,143 | 156 | 21,389 | 4,920 | 3,292 | 29,757 |
| 23,144 | 154 | 21,473 | 4,924 | 3,291 | 29,842 |
| 23,145 | 141 | 21,655 | 4,992 | 3,321 | 30,109 |
| 23,146 | 122 | 21,033 | 4,839 | 3,213 | 29,207 |
| 23,147 | 126 | 21,191 | 4,885 | 3,207 | 29,409 |
| 23,148 | 125 | 21,386 | 4,941 | 3,236 | 29,688 |
| 23,149 | 125 | 21,410 | 4,963 | 3,246 | 29,744 |
| 23,150 | 127 | 21,516 | 5,050 | 3,320 | 30,013 |
| 23,151 | 135 | 21,566 | 5,058 | 3,345 | 30,104 |
| 23,152 | 136 | 21,607 | 5,080 | 3,338 | 30,161 |
| 23,153 | 141 | 21,468 | 5,057 | 3,312 | 29,978 |
| 23,154 | 146 | 21,695 | 5,135 | 3,370 | 30,346 |
| 23,155 | 147 | 21,523 | 5,076 | 3,377 | 30,123 |
| 23,156 | 146 | 21,234 | 5,003 | 3,341 | 29,724 |
| 23,157 | 146 | 21,404 | 5,050 | 3,371 | 29,971 |
| 23,158 | 149 | 21,345 | 5,085 | 3,376 | 29,955 |
| 23,159 | 147 | 21,303 | 5,099 | 3,382 | 29,931 |

|        |     |        |       |       |        |
|--------|-----|--------|-------|-------|--------|
| 23,160 | 145 | 21,285 | 5,124 | 3,401 | 29,955 |
| 23,161 | 148 | 21,289 | 5,162 | 3,419 | 30,018 |
| 23,162 | 143 | 21,411 | 5,146 | 3,433 | 30,133 |
| 23,163 | 145 | 21,483 | 5,141 | 3,452 | 30,221 |
| 23,164 | 145 | 21,758 | 5,179 | 3,472 | 30,554 |
| 23,165 | 142 | 21,936 | 5,202 | 3,478 | 30,758 |
| 23,166 | 133 | 22,137 | 5,199 | 3,484 | 30,953 |
| 23,167 | 131 | 22,099 | 5,130 | 3,453 | 30,813 |
| 23,168 | 129 | 22,015 | 5,087 | 3,427 | 30,658 |
| 23,169 | 123 | 22,006 | 5,034 | 3,409 | 30,572 |
| 23,170 | 122 | 22,291 | 5,139 | 3,480 | 31,032 |
| 23,171 | 123 | 22,200 | 5,097 | 3,452 | 30,872 |
| 23,172 | 127 | 21,982 | 5,002 | 3,393 | 30,504 |
| 23,173 | 130 | 22,035 | 5,021 | 3,403 | 30,589 |
| 23,174 | 131 | 22,264 | 5,042 | 3,434 | 30,871 |
| 23,175 | 129 | 22,147 | 4,996 | 3,416 | 30,688 |
| 23,176 | 133 | 22,024 | 4,989 | 3,428 | 30,574 |
| 23,177 | 143 | 22,262 | 5,044 | 3,464 | 30,913 |
| 23,178 | 143 | 22,101 | 4,991 | 3,421 | 30,656 |
| 23,179 | 143 | 22,103 | 4,981 | 3,436 | 30,663 |
| 23,180 | 153 | 21,914 | 4,961 | 3,436 | 30,464 |
| 23,181 | 153 | 21,841 | 4,957 | 3,432 | 30,383 |
| 23,182 | 151 | 22,156 | 5,015 | 3,478 | 30,800 |
| 23,183 | 153 | 22,163 | 5,029 | 3,497 | 30,842 |
| 23,184 | 152 | 22,034 | 5,041 | 3,466 | 30,693 |
| 23,185 | 151 | 21,797 | 4,981 | 3,417 | 30,346 |
| 23,186 | 153 | 21,979 | 5,023 | 3,446 | 30,601 |
| 23,187 | 151 | 21,972 | 4,988 | 3,420 | 30,531 |
| 23,188 | 144 | 21,885 | 4,947 | 3,384 | 30,360 |
| 23,189 | 144 | 21,714 | 4,908 | 3,368 | 30,134 |
| 23,190 | 145 | 21,929 | 4,983 | 3,402 | 30,459 |
| 23,191 | 145 | 21,683 | 4,903 | 3,351 | 30,082 |

|        |     |        |       |       |        |
|--------|-----|--------|-------|-------|--------|
| 23,192 | 146 | 21,821 | 4,900 | 3,352 | 30,219 |
| 23,193 | 145 | 21,153 | 4,824 | 3,289 | 29,411 |
| 23,194 | 153 | 21,241 | 4,827 | 3,304 | 29,525 |
| 23,195 | 154 | 21,467 | 4,877 | 3,335 | 29,833 |
| 23,196 | 161 | 21,316 | 4,844 | 3,322 | 29,643 |
| 23,197 | 161 | 21,303 | 4,815 | 3,324 | 29,603 |
| 23,198 | 157 | 21,304 | 4,844 | 3,349 | 29,654 |
| 23,199 | 151 | 20,993 | 4,763 | 3,290 | 29,197 |
| 23,200 | 151 | 20,728 | 4,665 | 3,211 | 28,755 |
| 23,201 | 148 | 20,971 | 4,697 | 3,218 | 29,034 |
| 23,202 | 138 | 21,141 | 4,738 | 3,238 | 29,255 |
| 23,203 | 141 | 20,721 | 4,644 | 3,173 | 28,679 |
| 23,204 | 136 | 20,781 | 4,652 | 3,186 | 28,755 |
| 23,205 | 146 | 21,179 | 4,714 | 3,212 | 29,251 |
| 23,206 | 142 | 20,884 | 4,645 | 3,151 | 28,822 |
| 23,207 | 140 | 20,832 | 4,630 | 3,165 | 28,767 |
| 23,208 | 140 | 20,932 | 4,633 | 3,190 | 28,895 |
| 23,209 | 136 | 20,648 | 4,524 | 3,134 | 28,442 |
| 23,210 | 134 | 20,759 | 4,520 | 3,106 | 28,519 |
| 23,211 | 131 | 20,728 | 4,500 | 3,110 | 28,469 |
| 23,212 | 131 | 20,731 | 4,520 | 3,099 | 28,481 |
| 23,213 | 137 | 20,953 | 4,581 | 3,155 | 28,826 |
| 23,214 | 155 | 21,057 | 4,624 | 3,166 | 29,002 |
| 23,215 | 159 | 21,058 | 4,598 | 3,191 | 29,006 |
| 23,216 | 161 | 20,769 | 4,569 | 3,192 | 28,691 |
| 23,217 | 161 | 20,819 | 4,566 | 3,219 | 28,765 |
| 23,218 | 161 | 20,903 | 4,570 | 3,208 | 28,842 |
| 23,219 | 164 | 20,834 | 4,573 | 3,175 | 28,746 |
| 23,220 | 169 | 21,161 | 4,633 | 3,199 | 29,162 |
| 23,221 | 165 | 21,248 | 4,612 | 3,197 | 29,222 |
| 23,222 | 161 | 21,311 | 4,628 | 3,219 | 29,319 |
| 23,223 | 157 | 21,292 | 4,633 | 3,215 | 29,297 |

|        |     |        |       |       |        |
|--------|-----|--------|-------|-------|--------|
| 23,224 | 153 | 21,405 | 4,657 | 3,221 | 29,436 |
| 23,225 | 158 | 21,543 | 4,724 | 3,253 | 29,678 |
| 23,226 | 156 | 21,530 | 4,703 | 3,244 | 29,633 |
| 23,227 | 159 | 21,920 | 4,774 | 3,272 | 30,125 |
| 23,228 | 149 | 21,973 | 4,783 | 3,263 | 30,168 |
| 23,229 | 148 | 22,032 | 4,833 | 3,271 | 30,284 |
| 23,230 | 149 | 22,322 | 4,887 | 3,317 | 30,675 |
| 23,231 | 136 | 22,195 | 4,861 | 3,302 | 30,494 |
| 23,232 | 137 | 22,520 | 5,006 | 3,366 | 31,029 |
| 23,233 | 140 | 22,575 | 5,027 | 3,364 | 31,106 |
| 23,234 | 141 | 22,450 | 4,998 | 3,323 | 30,912 |
| 23,235 | 140 | 22,253 | 4,944 | 3,309 | 30,646 |
| 23,236 | 141 | 22,757 | 5,073 | 3,381 | 31,352 |
| 23,237 | 139 | 22,562 | 5,043 | 3,343 | 31,087 |
| 23,238 | 146 | 22,575 | 5,075 | 3,370 | 31,166 |
| 23,239 | 148 | 22,493 | 5,072 | 3,363 | 31,076 |
| 23,240 | 145 | 22,558 | 5,103 | 3,360 | 31,166 |
| 23,241 | 146 | 22,877 | 5,125 | 3,418 | 31,566 |
| 23,242 | 143 | 23,000 | 5,151 | 3,434 | 31,728 |
| 23,243 | 146 | 22,955 | 5,166 | 3,425 | 31,692 |
| 23,244 | 146 | 22,932 | 5,173 | 3,409 | 31,660 |
| 23,245 | 139 | 22,786 | 5,169 | 3,394 | 31,488 |
| 23,246 | 137 | 22,902 | 5,222 | 3,425 | 31,686 |
| 23,247 | 132 | 22,838 | 5,209 | 3,428 | 31,607 |
| 23,248 | 136 | 22,817 | 5,197 | 3,408 | 31,558 |
| 23,249 | 136 | 22,847 | 5,187 | 3,411 | 31,581 |
| 23,250 | 138 | 22,843 | 5,187 | 3,416 | 31,584 |
| 23,251 | 138 | 23,005 | 5,258 | 3,444 | 31,845 |
| 23,252 | 142 | 22,769 | 5,178 | 3,397 | 31,486 |
| 23,253 | 142 | 22,700 | 5,197 | 3,398 | 31,437 |
| 23,254 | 146 | 22,875 | 5,263 | 3,428 | 31,712 |
| 23,255 | 144 | 22,811 | 5,247 | 3,409 | 31,611 |

|        |     |        |       |       |        |
|--------|-----|--------|-------|-------|--------|
| 23,256 | 132 | 22,716 | 5,262 | 3,413 | 31,523 |
| 23,257 | 135 | 22,745 | 5,265 | 3,382 | 31,527 |
| 23,258 | 135 | 22,705 | 5,245 | 3,348 | 31,433 |
| 23,259 | 135 | 22,761 | 5,284 | 3,355 | 31,535 |
| 23,260 | 133 | 22,775 | 5,310 | 3,385 | 31,603 |
| 23,261 | 135 | 22,787 | 5,285 | 3,392 | 31,599 |
| 23,262 | 138 | 22,956 | 5,340 | 3,388 | 31,822 |
| 23,263 | 134 | 22,759 | 5,229 | 3,349 | 31,471 |
| 23,264 | 136 | 23,063 | 5,274 | 3,359 | 31,832 |
| 23,265 | 134 | 23,198 | 5,324 | 3,389 | 32,045 |
| 23,266 | 129 | 22,873 | 5,306 | 3,321 | 31,629 |
| 23,267 | 135 | 22,858 | 5,286 | 3,298 | 31,577 |
| 23,268 | 139 | 22,846 | 5,287 | 3,287 | 31,559 |
| 23,269 | 138 | 22,763 | 5,295 | 3,284 | 31,480 |
| 23,270 | 136 | 23,023 | 5,356 | 3,342 | 31,857 |
| 23,271 | 137 | 22,841 | 5,331 | 3,328 | 31,637 |
| 23,272 | 137 | 22,645 | 5,320 | 3,325 | 31,427 |
| 23,273 | 137 | 23,092 | 5,411 | 3,394 | 32,034 |
| 23,274 | 139 | 23,135 | 5,404 | 3,388 | 32,066 |
| 23,275 | 139 | 23,086 | 5,382 | 3,369 | 31,976 |
| 23,276 | 135 | 22,787 | 5,330 | 3,331 | 31,583 |
| 23,277 | 135 | 22,740 | 5,316 | 3,323 | 31,514 |
| 23,278 | 133 | 22,462 | 5,251 | 3,291 | 31,137 |
| 23,279 | 133 | 22,246 | 5,193 | 3,245 | 30,817 |
| 23,280 | 132 | 23,139 | 5,359 | 3,404 | 32,034 |
| 23,281 | 132 | 23,075 | 5,334 | 3,413 | 31,954 |
| 23,282 | 133 | 22,753 | 5,208 | 3,332 | 31,426 |
| 23,283 | 137 | 22,904 | 5,194 | 3,348 | 31,583 |
| 23,284 | 133 | 22,853 | 5,176 | 3,342 | 31,504 |
| 23,285 | 128 | 22,831 | 5,176 | 3,369 | 31,504 |
| 23,286 | 128 | 22,164 | 5,004 | 3,243 | 30,539 |
| 23,287 | 128 | 22,378 | 5,002 | 3,265 | 30,773 |



|        |     |        |       |       |        |
|--------|-----|--------|-------|-------|--------|
| 23,288 | 124 | 22,730 | 5,043 | 3,281 | 31,178 |
| 23,289 | 125 | 22,630 | 5,033 | 3,269 | 31,057 |
| 23,290 | 124 | 22,853 | 5,056 | 3,311 | 31,344 |
| 23,291 | 122 | 22,909 | 5,052 | 3,308 | 31,391 |
| 23,292 | 125 | 23,108 | 5,106 | 3,318 | 31,657 |
| 23,293 | 125 | 23,048 | 5,066 | 3,297 | 31,536 |
| 23,294 | 123 | 23,018 | 4,998 | 3,263 | 31,402 |
| 23,295 | 125 | 23,035 | 4,971 | 3,258 | 31,389 |
| 23,296 | 129 | 23,107 | 4,945 | 3,268 | 31,449 |
| 23,297 | 134 | 23,397 | 4,982 | 3,287 | 31,800 |
| 23,298 | 138 | 23,294 | 4,925 | 3,253 | 31,610 |
| 23,299 | 137 | 23,303 | 4,915 | 3,256 | 31,611 |
| 23,300 | 140 | 23,571 | 4,985 | 3,291 | 31,987 |
| 23,301 | 140 | 23,394 | 4,917 | 3,264 | 31,715 |
| 23,302 | 139 | 23,335 | 4,913 | 3,257 | 31,644 |
| 23,303 | 141 | 23,383 | 4,925 | 3,281 | 31,730 |
| 23,304 | 142 | 23,657 | 4,946 | 3,302 | 32,047 |
| 23,305 | 134 | 23,502 | 4,892 | 3,264 | 31,792 |
| 23,306 | 142 | 23,444 | 4,814 | 3,234 | 31,634 |
| 23,307 | 141 | 23,462 | 4,815 | 3,235 | 31,653 |
| 23,308 | 140 | 23,289 | 4,775 | 3,206 | 31,410 |
| 23,309 | 140 | 23,269 | 4,728 | 3,188 | 31,325 |
| 23,310 | 142 | 23,506 | 4,781 | 3,192 | 31,621 |
| 23,311 | 140 | 23,347 | 4,729 | 3,156 | 31,372 |
| 23,312 | 137 | 22,989 | 4,662 | 3,132 | 30,920 |
| 23,313 | 137 | 23,113 | 4,684 | 3,143 | 31,077 |
| 23,314 | 131 | 23,314 | 4,723 | 3,171 | 31,339 |
| 23,315 | 128 | 23,299 | 4,741 | 3,162 | 31,330 |
| 23,316 | 117 | 22,661 | 4,593 | 3,074 | 30,445 |
| 23,317 | 120 | 22,897 | 4,629 | 3,089 | 30,735 |
| 23,318 | 114 | 22,892 | 4,630 | 3,089 | 30,725 |
| 23,319 | 110 | 22,747 | 4,609 | 3,085 | 30,551 |

|        |     |        |       |       |        |
|--------|-----|--------|-------|-------|--------|
| 23,320 | 115 | 22,847 | 4,598 | 3,097 | 30,657 |
| 23,321 | 109 | 22,483 | 4,505 | 3,029 | 30,126 |
| 23,322 | 111 | 22,524 | 4,516 | 3,030 | 30,181 |
| 23,323 | 110 | 22,354 | 4,460 | 3,004 | 29,928 |
| 23,324 | 110 | 22,047 | 4,403 | 2,975 | 29,535 |
| 23,325 | 108 | 22,003 | 4,423 | 2,963 | 29,497 |
| 23,326 | 106 | 21,980 | 4,414 | 2,968 | 29,468 |
| 23,327 | 101 | 21,952 | 4,395 | 2,953 | 29,401 |
| 23,328 | 99  | 21,713 | 4,361 | 2,907 | 29,080 |
| 23,329 | 102 | 21,823 | 4,394 | 2,925 | 29,244 |
| 23,330 | 102 | 21,260 | 4,316 | 2,887 | 28,565 |
| 23,331 | 99  | 21,065 | 4,295 | 2,850 | 28,309 |
| 23,332 | 106 | 21,011 | 4,294 | 2,822 | 28,233 |
| 23,333 | 103 | 20,674 | 4,243 | 2,804 | 27,824 |
| 23,334 | 101 | 20,821 | 4,322 | 2,864 | 28,108 |
| 23,335 | 100 | 20,984 | 4,363 | 2,870 | 28,317 |
| 23,336 | 99  | 20,733 | 4,295 | 2,843 | 27,970 |
| 23,337 | 97  | 20,640 | 4,298 | 2,853 | 27,888 |
| 23,338 | 100 | 20,587 | 4,339 | 2,842 | 27,868 |
| 23,339 | 101 | 20,696 | 4,406 | 2,895 | 28,098 |
| 23,340 | 96  | 20,537 | 4,394 | 2,878 | 27,905 |
| 23,341 | 99  | 20,486 | 4,399 | 2,886 | 27,870 |
| 23,342 | 95  | 20,444 | 4,389 | 2,887 | 27,815 |
| 23,343 | 99  | 20,694 | 4,444 | 2,914 | 28,151 |
| 23,344 | 104 | 20,320 | 4,392 | 2,893 | 27,709 |
| 23,345 | 103 | 20,238 | 4,405 | 2,903 | 27,649 |
| 23,346 | 100 | 20,250 | 4,413 | 2,906 | 27,669 |
| 23,347 | 98  | 20,548 | 4,514 | 2,956 | 28,116 |
| 23,348 | 93  | 20,339 | 4,485 | 2,935 | 27,852 |
| 23,349 | 92  | 20,353 | 4,572 | 2,981 | 27,998 |
| 23,350 | 94  | 20,319 | 4,549 | 2,972 | 27,934 |
| 23,351 | 92  | 20,088 | 4,533 | 2,968 | 27,681 |

|        |     |        |       |       |        |
|--------|-----|--------|-------|-------|--------|
| 23,352 | 96  | 20,174 | 4,582 | 2,995 | 27,847 |
| 23,353 | 96  | 20,277 | 4,615 | 3,011 | 27,999 |
| 23,354 | 95  | 19,956 | 4,586 | 3,004 | 27,641 |
| 23,355 | 95  | 19,939 | 4,612 | 3,002 | 27,648 |
| 23,356 | 97  | 20,118 | 4,665 | 3,028 | 27,908 |
| 23,357 | 94  | 19,707 | 4,583 | 2,971 | 27,355 |
| 23,358 | 92  | 19,583 | 4,580 | 2,978 | 27,233 |
| 23,359 | 91  | 19,290 | 4,539 | 2,966 | 26,886 |
| 23,360 | 91  | 19,099 | 4,536 | 2,962 | 26,688 |
| 23,361 | 90  | 19,918 | 4,762 | 3,099 | 27,869 |
| 23,362 | 93  | 19,748 | 4,761 | 3,069 | 27,671 |
| 23,363 | 90  | 19,490 | 4,707 | 3,033 | 27,320 |
| 23,364 | 92  | 19,680 | 4,741 | 3,072 | 27,585 |
| 23,365 | 95  | 19,593 | 4,748 | 3,061 | 27,497 |
| 23,366 | 96  | 19,211 | 4,682 | 3,039 | 27,028 |
| 23,367 | 99  | 19,440 | 4,738 | 3,075 | 27,352 |
| 23,368 | 97  | 19,261 | 4,733 | 3,061 | 27,152 |
| 23,369 | 99  | 19,352 | 4,719 | 3,065 | 27,235 |
| 23,370 | 98  | 19,250 | 4,720 | 3,060 | 27,128 |
| 23,371 | 95  | 19,576 | 4,822 | 3,124 | 27,617 |
| 23,372 | 97  | 19,493 | 4,858 | 3,128 | 27,576 |
| 23,373 | 97  | 19,684 | 4,934 | 3,172 | 27,887 |
| 23,374 | 96  | 19,757 | 4,975 | 3,184 | 28,012 |
| 23,375 | 97  | 20,055 | 5,075 | 3,242 | 28,469 |
| 23,376 | 100 | 20,285 | 5,133 | 3,273 | 28,791 |
| 23,377 | 100 | 20,573 | 5,163 | 3,308 | 29,144 |
| 23,378 | 102 | 20,710 | 5,217 | 3,331 | 29,360 |
| 23,379 | 105 | 20,906 | 5,270 | 3,355 | 29,636 |
| 23,380 | 102 | 20,945 | 5,323 | 3,379 | 29,749 |
| 23,381 | 101 | 20,795 | 5,283 | 3,353 | 29,532 |
| 23,382 | 101 | 20,840 | 5,323 | 3,381 | 29,645 |
| 23,383 | 93  | 21,034 | 5,385 | 3,412 | 29,924 |

|        |     |        |       |       |        |
|--------|-----|--------|-------|-------|--------|
| 23,384 | 97  | 21,202 | 5,396 | 3,408 | 30,103 |
| 23,385 | 98  | 21,161 | 5,433 | 3,415 | 30,107 |
| 23,386 | 101 | 20,945 | 5,372 | 3,391 | 29,809 |
| 23,387 | 101 | 20,921 | 5,381 | 3,402 | 29,805 |
| 23,388 | 101 | 20,820 | 5,357 | 3,415 | 29,693 |
| 23,389 | 109 | 21,002 | 5,416 | 3,424 | 29,951 |
| 23,390 | 114 | 20,992 | 5,409 | 3,426 | 29,941 |
| 23,391 | 116 | 20,817 | 5,346 | 3,387 | 29,666 |
| 23,392 | 114 | 20,717 | 5,330 | 3,387 | 29,548 |
| 23,393 | 118 | 21,198 | 5,434 | 3,436 | 30,186 |
| 23,394 | 120 | 21,315 | 5,466 | 3,440 | 30,341 |
| 23,395 | 113 | 21,076 | 5,444 | 3,418 | 30,051 |
| 23,396 | 119 | 21,254 | 5,485 | 3,436 | 30,294 |
| 23,397 | 122 | 21,282 | 5,539 | 3,445 | 30,388 |
| 23,398 | 126 | 21,566 | 5,591 | 3,490 | 30,773 |
| 23,399 | 127 | 21,606 | 5,566 | 3,482 | 30,781 |
| 23,400 | 120 | 21,579 | 5,523 | 3,441 | 30,663 |
| 23,401 | 122 | 21,629 | 5,534 | 3,443 | 30,728 |
| 23,402 | 118 | 21,723 | 5,518 | 3,451 | 30,810 |
| 23,403 | 118 | 21,734 | 5,533 | 3,440 | 30,825 |
| 23,404 | 119 | 21,689 | 5,545 | 3,438 | 30,791 |
| 23,405 | 117 | 21,841 | 5,558 | 3,457 | 30,973 |
| 23,406 | 120 | 21,852 | 5,574 | 3,469 | 31,015 |
| 23,407 | 116 | 21,509 | 5,543 | 3,433 | 30,601 |
| 23,408 | 116 | 21,635 | 5,644 | 3,517 | 30,912 |
| 23,409 | 117 | 21,695 | 5,661 | 3,522 | 30,995 |
| 23,410 | 119 | 21,652 | 5,676 | 3,532 | 30,979 |
| 23,411 | 120 | 21,288 | 5,609 | 3,505 | 30,522 |
| 23,412 | 120 | 21,013 | 5,550 | 3,477 | 30,160 |
| 23,413 | 119 | 21,157 | 5,624 | 3,523 | 30,423 |
| 23,414 | 118 | 21,096 | 5,622 | 3,519 | 30,355 |
| 23,415 | 119 | 21,109 | 5,628 | 3,506 | 30,362 |

|        |     |        |       |       |        |
|--------|-----|--------|-------|-------|--------|
| 23,416 | 117 | 21,110 | 5,601 | 3,501 | 30,329 |
| 23,417 | 116 | 21,143 | 5,560 | 3,489 | 30,308 |
| 23,418 | 117 | 21,218 | 5,597 | 3,489 | 30,421 |
| 23,419 | 122 | 21,278 | 5,597 | 3,467 | 30,464 |
| 23,420 | 120 | 21,095 | 5,581 | 3,450 | 30,246 |
| 23,421 | 121 | 21,145 | 5,614 | 3,463 | 30,343 |
| 23,422 | 125 | 21,286 | 5,629 | 3,480 | 30,520 |
| 23,423 | 121 | 20,973 | 5,551 | 3,445 | 30,090 |
| 23,424 | 129 | 21,368 | 5,620 | 3,487 | 30,604 |
| 23,425 | 133 | 21,439 | 5,617 | 3,491 | 30,680 |
| 23,426 | 136 | 21,187 | 5,540 | 3,462 | 30,325 |
| 23,427 | 137 | 20,883 | 5,493 | 3,426 | 29,939 |
| 23,428 | 137 | 20,515 | 5,471 | 3,380 | 29,503 |
| 23,429 | 137 | 20,381 | 5,440 | 3,353 | 29,311 |
| 23,430 | 142 | 20,317 | 5,393 | 3,337 | 29,189 |
| 23,431 | 147 | 20,477 | 5,433 | 3,328 | 29,385 |
| 23,432 | 149 | 20,393 | 5,417 | 3,314 | 29,273 |
| 23,433 | 149 | 20,392 | 5,408 | 3,310 | 29,259 |
| 23,434 | 151 | 20,249 | 5,411 | 3,321 | 29,132 |
| 23,435 | 149 | 20,188 | 5,402 | 3,323 | 29,062 |
| 23,436 | 149 | 20,233 | 5,409 | 3,309 | 29,100 |
| 23,437 | 151 | 20,196 | 5,407 | 3,289 | 29,043 |
| 23,438 | 153 | 20,286 | 5,401 | 3,267 | 29,107 |
| 23,439 | 152 | 20,311 | 5,411 | 3,254 | 29,128 |
| 23,440 | 137 | 20,503 | 5,423 | 3,289 | 29,352 |
| 23,441 | 137 | 20,415 | 5,435 | 3,290 | 29,277 |
| 23,442 | 139 | 20,666 | 5,472 | 3,315 | 29,592 |
| 23,443 | 138 | 20,631 | 5,467 | 3,336 | 29,572 |
| 23,444 | 140 | 20,581 | 5,531 | 3,375 | 29,627 |
| 23,445 | 141 | 20,402 | 5,561 | 3,405 | 29,509 |
| 23,446 | 139 | 20,510 | 5,558 | 3,429 | 29,636 |
| 23,447 | 137 | 20,384 | 5,519 | 3,414 | 29,454 |

|        |     |        |       |       |        |
|--------|-----|--------|-------|-------|--------|
| 23,448 | 138 | 20,402 | 5,573 | 3,411 | 29,524 |
| 23,449 | 133 | 20,147 | 5,533 | 3,375 | 29,188 |
| 23,450 | 129 | 20,195 | 5,551 | 3,383 | 29,258 |
| 23,451 | 126 | 20,316 | 5,565 | 3,413 | 29,420 |
| 23,452 | 122 | 20,320 | 5,522 | 3,410 | 29,374 |
| 23,453 | 123 | 20,353 | 5,543 | 3,427 | 29,446 |
| 23,454 | 124 | 20,380 | 5,536 | 3,408 | 29,448 |
| 23,455 | 123 | 20,087 | 5,488 | 3,384 | 29,082 |
| 23,456 | 128 | 20,147 | 5,508 | 3,392 | 29,175 |
| 23,457 | 124 | 20,160 | 5,529 | 3,380 | 29,193 |
| 23,458 | 123 | 20,214 | 5,453 | 3,345 | 29,135 |
| 23,459 | 126 | 20,454 | 5,512 | 3,377 | 29,469 |
| 23,460 | 127 | 20,574 | 5,508 | 3,393 | 29,602 |
| 23,461 | 126 | 20,310 | 5,414 | 3,328 | 29,178 |
| 23,462 | 130 | 20,203 | 5,308 | 3,244 | 28,885 |
| 23,463 | 132 | 20,184 | 5,314 | 3,251 | 28,881 |
| 23,464 | 134 | 20,057 | 5,262 | 3,224 | 28,677 |
| 23,465 | 135 | 19,788 | 5,205 | 3,199 | 28,327 |
| 23,466 | 134 | 20,568 | 5,450 | 3,337 | 29,489 |
| 23,467 | 133 | 20,462 | 5,452 | 3,343 | 29,390 |
| 23,468 | 133 | 20,222 | 5,456 | 3,329 | 29,140 |
| 23,469 | 132 | 20,217 | 5,442 | 3,352 | 29,143 |
| 23,470 | 126 | 20,068 | 5,394 | 3,337 | 28,925 |
| 23,471 | 126 | 20,129 | 5,357 | 3,315 | 28,927 |
| 23,472 | 126 | 20,124 | 5,376 | 3,310 | 28,936 |
| 23,473 | 122 | 20,221 | 5,394 | 3,338 | 29,075 |
| 23,474 | 118 | 20,239 | 5,399 | 3,344 | 29,100 |
| 23,475 | 120 | 20,072 | 5,371 | 3,309 | 28,872 |
| 23,476 | 116 | 19,874 | 5,350 | 3,304 | 28,644 |
| 23,477 | 109 | 19,421 | 5,258 | 3,238 | 28,026 |
| 23,478 | 110 | 19,371 | 5,219 | 3,214 | 27,914 |
| 23,479 | 111 | 19,204 | 5,151 | 3,213 | 27,679 |

|        |     |        |       |       |        |
|--------|-----|--------|-------|-------|--------|
| 23,480 | 116 | 19,369 | 5,203 | 3,238 | 27,926 |
| 23,481 | 109 | 19,325 | 5,200 | 3,257 | 27,891 |
| 23,482 | 106 | 19,330 | 5,194 | 3,269 | 27,899 |
| 23,483 | 110 | 19,360 | 5,211 | 3,285 | 27,966 |
| 23,484 | 109 | 19,209 | 5,168 | 3,255 | 27,741 |
| 23,485 | 106 | 19,498 | 5,237 | 3,289 | 28,130 |
| 23,486 | 102 | 19,308 | 5,193 | 3,272 | 27,875 |
| 23,487 | 104 | 19,456 | 5,193 | 3,298 | 28,051 |
| 23,488 | 104 | 19,541 | 5,206 | 3,311 | 28,162 |
| 23,489 | 101 | 19,669 | 5,230 | 3,395 | 28,395 |
| 23,490 | 101 | 19,611 | 5,196 | 3,361 | 28,269 |
| 23,491 | 101 | 19,829 | 5,273 | 3,418 | 28,621 |
| 23,492 | 102 | 20,056 | 5,354 | 3,452 | 28,964 |
| 23,493 | 99  | 20,086 | 5,375 | 3,477 | 29,037 |
| 23,494 | 92  | 19,465 | 5,144 | 3,339 | 28,040 |
| 23,495 | 94  | 19,775 | 5,208 | 3,355 | 28,432 |
| 23,496 | 91  | 20,073 | 5,260 | 3,379 | 28,803 |
| 23,497 | 90  | 19,526 | 5,129 | 3,284 | 28,029 |
| 23,498 | 90  | 19,806 | 5,170 | 3,324 | 28,390 |
| 23,499 | 91  | 19,771 | 5,153 | 3,333 | 28,348 |
| 23,500 | 92  | 19,806 | 5,151 | 3,333 | 28,382 |
| 23,501 | 92  | 19,506 | 5,059 | 3,288 | 27,945 |
| 23,502 | 95  | 19,659 | 5,138 | 3,319 | 28,211 |
| 23,503 | 106 | 19,615 | 5,154 | 3,303 | 28,178 |
| 23,504 | 111 | 19,342 | 5,080 | 3,256 | 27,789 |
| 23,505 | 107 | 19,082 | 5,027 | 3,248 | 27,464 |
| 23,506 | 109 | 19,420 | 5,120 | 3,307 | 27,956 |
| 23,507 | 104 | 19,453 | 5,109 | 3,306 | 27,972 |
| 23,508 | 103 | 19,352 | 5,047 | 3,299 | 27,801 |
| 23,509 | 103 | 19,033 | 4,993 | 3,257 | 27,386 |
| 23,510 | 102 | 18,992 | 4,976 | 3,254 | 27,324 |
| 23,511 | 102 | 18,915 | 4,976 | 3,241 | 27,234 |

|        |     |        |       |       |        |
|--------|-----|--------|-------|-------|--------|
| 23,512 | 101 | 18,884 | 4,962 | 3,239 | 27,186 |
| 23,513 | 94  | 18,829 | 4,974 | 3,235 | 27,132 |
| 23,514 | 95  | 18,913 | 4,968 | 3,235 | 27,211 |
| 23,515 | 96  | 19,009 | 4,994 | 3,257 | 27,356 |
| 23,516 | 96  | 19,196 | 5,009 | 3,281 | 27,582 |
| 23,517 | 98  | 19,110 | 4,952 | 3,248 | 27,408 |
| 23,518 | 99  | 19,517 | 5,016 | 3,277 | 27,909 |
| 23,519 | 96  | 19,637 | 5,014 | 3,278 | 28,025 |
| 23,520 | 96  | 19,649 | 5,022 | 3,287 | 28,054 |
| 23,521 | 98  | 19,802 | 5,073 | 3,314 | 28,287 |
| 23,522 | 100 | 19,746 | 5,071 | 3,289 | 28,206 |
| 23,523 | 102 | 19,857 | 5,083 | 3,282 | 28,324 |
| 23,524 | 109 | 20,168 | 5,173 | 3,319 | 28,769 |
| 23,525 | 110 | 20,243 | 5,173 | 3,318 | 28,844 |
| 23,526 | 108 | 20,010 | 5,067 | 3,285 | 28,470 |
| 23,527 | 108 | 20,017 | 5,062 | 3,286 | 28,473 |
| 23,528 | 107 | 19,898 | 5,027 | 3,265 | 28,297 |
| 23,529 | 107 | 19,713 | 4,979 | 3,249 | 28,048 |
| 23,530 | 104 | 19,526 | 4,955 | 3,213 | 27,798 |
| 23,531 | 105 | 20,129 | 5,103 | 3,324 | 28,661 |
| 23,532 | 104 | 20,191 | 5,090 | 3,296 | 28,681 |
| 23,533 | 104 | 20,186 | 5,052 | 3,271 | 28,613 |
| 23,534 | 106 | 20,214 | 5,026 | 3,248 | 28,594 |
| 23,535 | 108 | 20,275 | 5,008 | 3,245 | 28,636 |
| 23,536 | 110 | 20,371 | 4,983 | 3,236 | 28,700 |
| 23,537 | 113 | 20,070 | 4,842 | 3,143 | 28,168 |
| 23,538 | 116 | 20,171 | 4,868 | 3,151 | 28,306 |
| 23,539 | 116 | 20,197 | 4,844 | 3,138 | 28,295 |
| 23,540 | 121 | 20,287 | 4,891 | 3,132 | 28,431 |
| 23,541 | 125 | 20,251 | 4,880 | 3,124 | 28,380 |
| 23,542 | 126 | 19,983 | 4,763 | 3,035 | 27,907 |
| 23,543 | 134 | 19,744 | 4,667 | 2,988 | 27,533 |



|        |     |        |       |       |        |
|--------|-----|--------|-------|-------|--------|
| 23,544 | 134 | 19,869 | 4,669 | 2,986 | 27,658 |
| 23,545 | 138 | 19,866 | 4,643 | 2,981 | 27,628 |
| 23,546 | 138 | 20,080 | 4,664 | 3,028 | 27,910 |
| 23,547 | 139 | 20,082 | 4,632 | 3,020 | 27,873 |
| 23,548 | 135 | 20,262 | 4,674 | 3,024 | 28,095 |
| 23,549 | 138 | 20,273 | 4,642 | 3,011 | 28,064 |
| 23,550 | 135 | 20,141 | 4,575 | 2,977 | 27,828 |
| 23,551 | 136 | 20,588 | 4,695 | 3,044 | 28,463 |
| 23,552 | 138 | 20,706 | 4,698 | 3,043 | 28,585 |
| 23,553 | 137 | 20,477 | 4,631 | 3,022 | 28,267 |
| 23,554 | 128 | 20,827 | 4,736 | 3,075 | 28,766 |
| 23,555 | 123 | 20,875 | 4,733 | 3,057 | 28,788 |
| 23,556 | 126 | 21,144 | 4,760 | 3,078 | 29,108 |
| 23,557 | 123 | 21,331 | 4,771 | 3,082 | 29,307 |
| 23,558 | 126 | 21,653 | 4,827 | 3,099 | 29,705 |
| 23,559 | 129 | 21,560 | 4,822 | 3,093 | 29,604 |
| 23,560 | 129 | 21,640 | 4,814 | 3,096 | 29,679 |
| 23,561 | 134 | 21,706 | 4,827 | 3,078 | 29,745 |
| 23,562 | 134 | 21,701 | 4,810 | 3,085 | 29,730 |
| 23,563 | 133 | 21,661 | 4,806 | 3,090 | 29,690 |
| 23,564 | 133 | 21,619 | 4,780 | 3,104 | 29,636 |
| 23,565 | 131 | 21,697 | 4,779 | 3,090 | 29,697 |
| 23,566 | 131 | 21,730 | 4,756 | 3,092 | 29,709 |
| 23,567 | 130 | 21,753 | 4,738 | 3,074 | 29,695 |
| 23,568 | 129 | 21,799 | 4,740 | 3,059 | 29,727 |
| 23,569 | 128 | 21,884 | 4,736 | 3,060 | 29,808 |
| 23,570 | 128 | 21,760 | 4,697 | 3,025 | 29,610 |
| 23,571 | 133 | 21,858 | 4,698 | 3,029 | 29,718 |
| 23,572 | 134 | 21,975 | 4,679 | 3,016 | 29,804 |
| 23,573 | 130 | 22,054 | 4,726 | 3,033 | 29,943 |
| 23,574 | 137 | 22,262 | 4,785 | 3,063 | 30,247 |
| 23,575 | 132 | 22,545 | 4,827 | 3,098 | 30,602 |

|        |     |        |       |       |        |
|--------|-----|--------|-------|-------|--------|
| 23,576 | 128 | 22,506 | 4,821 | 3,058 | 30,513 |
| 23,577 | 132 | 22,590 | 4,859 | 3,064 | 30,645 |
| 23,578 | 132 | 22,642 | 4,856 | 3,071 | 30,701 |
| 23,579 | 129 | 22,982 | 4,956 | 3,119 | 31,186 |
| 23,580 | 129 | 22,973 | 4,951 | 3,107 | 31,160 |
| 23,581 | 129 | 23,193 | 5,033 | 3,161 | 31,516 |
| 23,582 | 128 | 23,472 | 5,077 | 3,187 | 31,864 |
| 23,583 | 129 | 23,008 | 5,030 | 3,118 | 31,285 |
| 23,584 | 133 | 23,244 | 5,080 | 3,150 | 31,607 |
| 23,585 | 126 | 23,199 | 5,073 | 3,151 | 31,549 |
| 23,586 | 127 | 23,144 | 5,088 | 3,151 | 31,510 |
| 23,587 | 125 | 23,232 | 5,108 | 3,170 | 31,635 |
| 23,588 | 117 | 22,951 | 5,072 | 3,140 | 31,280 |
| 23,589 | 114 | 22,946 | 5,109 | 3,136 | 31,305 |
| 23,590 | 115 | 22,638 | 5,075 | 3,097 | 30,925 |
| 23,591 | 112 | 22,422 | 5,035 | 3,082 | 30,651 |
| 23,592 | 120 | 22,790 | 5,171 | 3,167 | 31,248 |
| 23,593 | 116 | 22,383 | 5,145 | 3,141 | 30,785 |
| 23,594 | 115 | 22,417 | 5,184 | 3,167 | 30,883 |
| 23,595 | 113 | 22,403 | 5,197 | 3,177 | 30,890 |
| 23,596 | 122 | 22,488 | 5,307 | 3,215 | 31,132 |
| 23,597 | 123 | 22,404 | 5,306 | 3,222 | 31,055 |
| 23,598 | 122 | 22,249 | 5,296 | 3,225 | 30,892 |
| 23,599 | 119 | 22,210 | 5,287 | 3,218 | 30,834 |
| 23,600 | 121 | 22,146 | 5,291 | 3,213 | 30,771 |
| 23,601 | 122 | 22,188 | 5,267 | 3,208 | 30,785 |
| 23,602 | 120 | 21,938 | 5,240 | 3,182 | 30,480 |
| 23,603 | 130 | 22,271 | 5,346 | 3,237 | 30,984 |
| 23,604 | 135 | 22,580 | 5,374 | 3,267 | 31,356 |
| 23,605 | 135 | 21,943 | 5,308 | 3,210 | 30,596 |
| 23,606 | 135 | 22,127 | 5,306 | 3,230 | 30,798 |
| 23,607 | 138 | 22,089 | 5,292 | 3,233 | 30,752 |

|        |     |        |       |       |        |
|--------|-----|--------|-------|-------|--------|
| 23,608 | 142 | 22,170 | 5,328 | 3,251 | 30,891 |
| 23,609 | 139 | 21,844 | 5,247 | 3,221 | 30,451 |
| 23,610 | 143 | 21,966 | 5,271 | 3,231 | 30,611 |
| 23,611 | 143 | 22,023 | 5,272 | 3,235 | 30,673 |
| 23,612 | 139 | 22,019 | 5,271 | 3,234 | 30,663 |
| 23,613 | 141 | 22,130 | 5,254 | 3,225 | 30,750 |
| 23,614 | 141 | 22,119 | 5,254 | 3,223 | 30,737 |
| 23,615 | 141 | 22,298 | 5,289 | 3,247 | 30,975 |
| 23,616 | 145 | 22,109 | 5,282 | 3,232 | 30,768 |
| 23,617 | 148 | 21,865 | 5,273 | 3,212 | 30,498 |
| 23,618 | 149 | 21,903 | 5,271 | 3,200 | 30,523 |
| 23,619 | 150 | 21,997 | 5,327 | 3,232 | 30,706 |
| 23,620 | 155 | 21,647 | 5,290 | 3,223 | 30,315 |
| 23,621 | 150 | 21,452 | 5,277 | 3,214 | 30,093 |
| 23,622 | 150 | 21,343 | 5,318 | 3,228 | 30,039 |
| 23,623 | 149 | 21,338 | 5,316 | 3,239 | 30,042 |
| 23,624 | 147 | 21,187 | 5,296 | 3,256 | 29,886 |
| 23,625 | 140 | 20,795 | 5,234 | 3,230 | 29,399 |
| 23,626 | 148 | 20,902 | 5,282 | 3,246 | 29,578 |
| 23,627 | 147 | 20,913 | 5,266 | 3,262 | 29,588 |
| 23,628 | 157 | 20,710 | 5,239 | 3,235 | 29,341 |
| 23,629 | 160 | 20,689 | 5,221 | 3,216 | 29,286 |
| 23,630 | 166 | 21,019 | 5,265 | 3,286 | 29,736 |
| 23,631 | 166 | 20,782 | 5,209 | 3,230 | 29,387 |
| 23,632 | 171 | 20,665 | 5,163 | 3,215 | 29,214 |
| 23,633 | 174 | 20,669 | 5,146 | 3,201 | 29,190 |
| 23,634 | 175 | 20,593 | 5,122 | 3,185 | 29,075 |
| 23,635 | 173 | 20,556 | 5,098 | 3,193 | 29,020 |
| 23,636 | 174 | 20,505 | 5,085 | 3,187 | 28,951 |
| 23,637 | 172 | 20,606 | 5,089 | 3,207 | 29,074 |
| 23,638 | 180 | 20,676 | 5,094 | 3,224 | 29,174 |
| 23,639 | 184 | 20,683 | 5,049 | 3,221 | 29,137 |

|        |     |        |       |       |        |
|--------|-----|--------|-------|-------|--------|
| 23,640 | 184 | 20,871 | 5,020 | 3,214 | 29,289 |
| 23,641 | 184 | 20,940 | 5,033 | 3,205 | 29,362 |
| 23,642 | 178 | 20,729 | 4,911 | 3,124 | 28,942 |
| 23,643 | 175 | 20,992 | 4,972 | 3,161 | 29,300 |
| 23,644 | 171 | 21,322 | 5,024 | 3,189 | 29,706 |
| 23,645 | 181 | 21,451 | 5,035 | 3,174 | 29,841 |
| 23,646 | 181 | 21,429 | 5,015 | 3,188 | 29,813 |
| 23,647 | 179 | 21,762 | 5,030 | 3,203 | 30,174 |
| 23,648 | 183 | 21,843 | 5,044 | 3,222 | 30,292 |
| 23,649 | 189 | 21,550 | 4,998 | 3,174 | 29,911 |
| 23,650 | 190 | 21,398 | 4,983 | 3,169 | 29,740 |
| 23,651 | 192 | 21,660 | 5,015 | 3,200 | 30,067 |
| 23,652 | 198 | 21,343 | 4,892 | 3,144 | 29,577 |
| 23,653 | 198 | 21,589 | 4,910 | 3,149 | 29,846 |
| 23,654 | 188 | 21,610 | 4,927 | 3,155 | 29,880 |
| 23,655 | 188 | 21,339 | 4,878 | 3,103 | 29,508 |
| 23,656 | 186 | 21,192 | 4,819 | 3,075 | 29,272 |
| 23,657 | 183 | 21,733 | 4,867 | 3,106 | 29,889 |
| 23,658 | 183 | 21,693 | 4,848 | 3,099 | 29,823 |
| 23,659 | 179 | 21,642 | 4,849 | 3,099 | 29,769 |
| 23,660 | 172 | 21,669 | 4,858 | 3,114 | 29,813 |
| 23,661 | 170 | 21,626 | 4,827 | 3,098 | 29,721 |
| 23,662 | 176 | 21,896 | 4,893 | 3,132 | 30,097 |
| 23,663 | 176 | 22,020 | 4,902 | 3,168 | 30,266 |
| 23,664 | 176 | 21,629 | 4,822 | 3,120 | 29,747 |
| 23,665 | 181 | 21,778 | 4,850 | 3,141 | 29,950 |
| 23,666 | 179 | 21,907 | 4,837 | 3,136 | 30,059 |
| 23,667 | 179 | 22,166 | 4,895 | 3,153 | 30,393 |
| 23,668 | 176 | 22,422 | 4,923 | 3,184 | 30,705 |
| 23,669 | 174 | 22,306 | 4,895 | 3,181 | 30,556 |
| 23,670 | 173 | 22,556 | 4,885 | 3,213 | 30,827 |
| 23,671 | 168 | 22,306 | 4,794 | 3,152 | 30,420 |

|        |     |        |       |       |        |
|--------|-----|--------|-------|-------|--------|
| 23,672 | 168 | 22,390 | 4,785 | 3,158 | 30,501 |
| 23,673 | 169 | 22,487 | 4,735 | 3,138 | 30,529 |
| 23,674 | 169 | 22,481 | 4,745 | 3,145 | 30,540 |
| 23,675 | 166 | 21,803 | 4,518 | 2,994 | 29,481 |
| 23,676 | 166 | 21,936 | 4,542 | 3,003 | 29,647 |
| 23,677 | 165 | 22,165 | 4,547 | 3,024 | 29,901 |
| 23,678 | 174 | 22,245 | 4,568 | 3,056 | 30,043 |
| 23,679 | 159 | 22,253 | 4,523 | 3,022 | 29,957 |
| 23,680 | 155 | 21,930 | 4,449 | 2,969 | 29,503 |
| 23,681 | 155 | 21,977 | 4,436 | 2,951 | 29,519 |
| 23,682 | 153 | 22,043 | 4,437 | 2,949 | 29,582 |
| 23,683 | 152 | 22,074 | 4,442 | 2,956 | 29,624 |
| 23,684 | 149 | 22,093 | 4,415 | 2,956 | 29,613 |
| 23,685 | 144 | 21,992 | 4,421 | 2,956 | 29,513 |
| 23,686 | 142 | 22,072 | 4,416 | 2,955 | 29,585 |
| 23,687 | 142 | 21,978 | 4,404 | 2,936 | 29,460 |
| 23,688 | 142 | 22,235 | 4,458 | 2,958 | 29,793 |
| 23,689 | 135 | 22,150 | 4,450 | 2,961 | 29,696 |
| 23,690 | 130 | 21,662 | 4,349 | 2,909 | 29,050 |
| 23,691 | 136 | 21,774 | 4,373 | 2,921 | 29,204 |
| 23,692 | 136 | 21,759 | 4,375 | 2,921 | 29,191 |
| 23,693 | 139 | 21,681 | 4,327 | 2,924 | 29,071 |
| 23,694 | 130 | 21,318 | 4,257 | 2,906 | 28,611 |
| 23,695 | 130 | 21,382 | 4,311 | 2,931 | 28,754 |
| 23,696 | 126 | 21,369 | 4,355 | 2,958 | 28,808 |
| 23,697 | 131 | 21,192 | 4,356 | 2,938 | 28,617 |
| 23,698 | 124 | 20,896 | 4,329 | 2,907 | 28,256 |
| 23,699 | 116 | 20,774 | 4,327 | 2,901 | 28,118 |
| 23,700 | 108 | 20,637 | 4,357 | 2,912 | 28,014 |
| 23,701 | 107 | 20,425 | 4,327 | 2,889 | 27,748 |
| 23,702 | 98  | 20,146 | 4,310 | 2,876 | 27,430 |
| 23,703 | 95  | 19,955 | 4,292 | 2,898 | 27,240 |

|        |     |        |       |       |        |
|--------|-----|--------|-------|-------|--------|
| 23,704 | 101 | 19,945 | 4,345 | 2,922 | 27,313 |
| 23,705 | 104 | 19,889 | 4,319 | 2,921 | 27,233 |
| 23,706 | 102 | 19,786 | 4,325 | 2,947 | 27,160 |
| 23,707 | 100 | 19,508 | 4,292 | 2,929 | 26,829 |
| 23,708 | 97  | 19,488 | 4,322 | 2,959 | 26,866 |
| 23,709 | 100 | 19,637 | 4,344 | 2,973 | 27,054 |
| 23,710 | 102 | 19,666 | 4,354 | 2,959 | 27,081 |
| 23,711 | 104 | 19,740 | 4,377 | 2,963 | 27,184 |
| 23,712 | 99  | 19,759 | 4,349 | 2,942 | 27,149 |
| 23,713 | 100 | 19,959 | 4,415 | 2,980 | 27,454 |
| 23,714 | 100 | 19,447 | 4,315 | 2,894 | 26,756 |
| 23,715 | 99  | 19,656 | 4,365 | 2,934 | 27,054 |
| 23,716 | 96  | 19,746 | 4,414 | 2,952 | 27,208 |
| 23,717 | 92  | 19,493 | 4,377 | 2,946 | 26,908 |
| 23,718 | 103 | 19,372 | 4,381 | 2,962 | 26,818 |
| 23,719 | 104 | 19,121 | 4,343 | 2,930 | 26,498 |
| 23,720 | 103 | 19,432 | 4,439 | 3,004 | 26,978 |
| 23,721 | 107 | 19,331 | 4,422 | 2,997 | 26,857 |
| 23,722 | 108 | 19,252 | 4,430 | 2,992 | 26,782 |
| 23,723 | 108 | 19,273 | 4,443 | 2,998 | 26,822 |
| 23,724 | 111 | 19,131 | 4,414 | 2,982 | 26,638 |
| 23,725 | 111 | 19,149 | 4,429 | 2,984 | 26,673 |
| 23,726 | 108 | 19,080 | 4,435 | 2,989 | 26,612 |
| 23,727 | 109 | 18,979 | 4,428 | 2,999 | 26,515 |
| 23,728 | 110 | 18,680 | 4,398 | 2,978 | 26,166 |
| 23,729 | 102 | 18,532 | 4,366 | 2,939 | 25,939 |
| 23,730 | 104 | 19,049 | 4,518 | 3,055 | 26,726 |
| 23,731 | 101 | 18,879 | 4,513 | 3,049 | 26,542 |
| 23,732 | 101 | 18,754 | 4,517 | 3,061 | 26,433 |
| 23,733 | 100 | 18,731 | 4,512 | 3,085 | 26,428 |
| 23,734 | 104 | 18,818 | 4,574 | 3,119 | 26,615 |
| 23,735 | 105 | 18,890 | 4,584 | 3,138 | 26,717 |

|        |     |        |       |       |        |
|--------|-----|--------|-------|-------|--------|
| 23,736 | 105 | 18,743 | 4,535 | 3,113 | 26,496 |
| 23,737 | 108 | 19,082 | 4,641 | 3,183 | 27,014 |
| 23,738 | 108 | 18,855 | 4,612 | 3,174 | 26,749 |
| 23,739 | 108 | 18,818 | 4,619 | 3,169 | 26,714 |
| 23,740 | 112 | 18,989 | 4,690 | 3,203 | 26,994 |
| 23,741 | 105 | 19,145 | 4,728 | 3,230 | 27,208 |
| 23,742 | 110 | 19,486 | 4,808 | 3,271 | 27,675 |
| 23,743 | 108 | 19,541 | 4,830 | 3,303 | 27,782 |
| 23,744 | 111 | 19,475 | 4,868 | 3,309 | 27,763 |
| 23,745 | 113 | 19,551 | 4,884 | 3,319 | 27,867 |
| 23,746 | 115 | 19,684 | 4,890 | 3,317 | 28,006 |
| 23,747 | 116 | 19,632 | 4,830 | 3,306 | 27,884 |
| 23,748 | 116 | 19,668 | 4,827 | 3,311 | 27,922 |
| 23,749 | 119 | 19,967 | 4,895 | 3,337 | 28,318 |
| 23,750 | 119 | 20,058 | 4,923 | 3,347 | 28,447 |
| 23,751 | 127 | 20,105 | 4,875 | 3,332 | 28,439 |
| 23,752 | 132 | 20,270 | 4,909 | 3,314 | 28,625 |
| 23,753 | 132 | 20,272 | 4,911 | 3,319 | 28,634 |
| 23,754 | 128 | 20,486 | 4,942 | 3,328 | 28,884 |
| 23,755 | 137 | 20,738 | 4,981 | 3,336 | 29,192 |
| 23,756 | 134 | 20,687 | 4,980 | 3,319 | 29,120 |
| 23,757 | 132 | 20,449 | 4,915 | 3,247 | 28,743 |
| 23,758 | 131 | 20,407 | 4,898 | 3,246 | 28,682 |
| 23,759 | 133 | 20,464 | 4,937 | 3,262 | 28,796 |
| 23,760 | 132 | 20,210 | 4,888 | 3,223 | 28,453 |
| 23,761 | 138 | 20,404 | 4,949 | 3,244 | 28,735 |
| 23,762 | 139 | 20,340 | 4,956 | 3,232 | 28,667 |
| 23,763 | 139 | 20,144 | 4,902 | 3,208 | 28,393 |
| 23,764 | 135 | 20,131 | 4,918 | 3,211 | 28,395 |
| 23,765 | 138 | 19,910 | 4,849 | 3,146 | 28,043 |
| 23,766 | 141 | 20,217 | 4,916 | 3,173 | 28,447 |
| 23,767 | 142 | 20,472 | 4,978 | 3,201 | 28,793 |

|        |     |        |       |       |        |
|--------|-----|--------|-------|-------|--------|
| 23,768 | 139 | 20,375 | 4,926 | 3,147 | 28,587 |
| 23,769 | 139 | 20,369 | 4,911 | 3,140 | 28,559 |
| 23,770 | 143 | 20,592 | 5,014 | 3,159 | 28,908 |
| 23,771 | 147 | 20,733 | 5,052 | 3,158 | 29,090 |
| 23,772 | 143 | 20,526 | 5,019 | 3,127 | 28,815 |
| 23,773 | 142 | 20,380 | 4,949 | 3,098 | 28,569 |
| 23,774 | 141 | 20,102 | 4,896 | 3,065 | 28,204 |
| 23,775 | 149 | 20,758 | 5,100 | 3,169 | 29,176 |
| 23,776 | 147 | 20,601 | 5,060 | 3,154 | 28,962 |
| 23,777 | 147 | 20,670 | 5,093 | 3,180 | 29,090 |
| 23,778 | 151 | 20,731 | 5,120 | 3,188 | 29,190 |
| 23,779 | 151 | 20,692 | 5,148 | 3,166 | 29,157 |
| 23,780 | 151 | 20,534 | 5,152 | 3,168 | 29,005 |
| 23,781 | 153 | 20,577 | 5,138 | 3,166 | 29,034 |
| 23,782 | 162 | 20,516 | 5,068 | 3,133 | 28,879 |
| 23,783 | 168 | 20,929 | 5,127 | 3,173 | 29,397 |
| 23,784 | 171 | 20,822 | 5,099 | 3,136 | 29,228 |
| 23,785 | 165 | 20,546 | 5,035 | 3,094 | 28,840 |
| 23,786 | 178 | 20,969 | 5,137 | 3,139 | 29,423 |
| 23,787 | 182 | 20,916 | 5,086 | 3,080 | 29,264 |
| 23,788 | 187 | 21,029 | 5,059 | 3,080 | 29,355 |
| 23,789 | 194 | 21,133 | 5,034 | 3,072 | 29,433 |
| 23,790 | 193 | 21,133 | 5,030 | 3,065 | 29,421 |
| 23,791 | 192 | 21,474 | 5,092 | 3,118 | 29,876 |
| 23,792 | 195 | 21,465 | 5,094 | 3,122 | 29,876 |
| 23,793 | 196 | 21,364 | 5,082 | 3,088 | 29,730 |
| 23,794 | 197 | 21,421 | 5,068 | 3,072 | 29,758 |
| 23,795 | 192 | 21,497 | 5,069 | 3,062 | 29,820 |
| 23,796 | 194 | 21,470 | 5,061 | 3,054 | 29,779 |
| 23,797 | 195 | 21,476 | 5,031 | 3,053 | 29,755 |
| 23,798 | 187 | 21,565 | 5,048 | 3,032 | 29,832 |
| 23,799 | 187 | 21,694 | 5,053 | 3,027 | 29,961 |



|        |     |        |       |       |        |
|--------|-----|--------|-------|-------|--------|
| 23,800 | 193 | 21,606 | 5,022 | 3,023 | 29,844 |
| 23,801 | 207 | 21,610 | 5,000 | 2,994 | 29,811 |
| 23,802 | 199 | 21,416 | 4,965 | 2,964 | 29,544 |
| 23,803 | 200 | 21,761 | 5,011 | 3,000 | 29,972 |
| 23,804 | 210 | 21,680 | 4,976 | 2,994 | 29,860 |
| 23,805 | 208 | 21,498 | 4,930 | 2,971 | 29,607 |
| 23,806 | 199 | 21,906 | 5,077 | 3,070 | 30,252 |
| 23,807 | 199 | 21,988 | 5,108 | 3,083 | 30,378 |
| 23,808 | 201 | 22,026 | 5,129 | 3,095 | 30,451 |
| 23,809 | 203 | 22,060 | 5,120 | 3,079 | 30,462 |
| 23,810 | 207 | 22,065 | 5,104 | 3,060 | 30,436 |
| 23,811 | 207 | 21,999 | 5,083 | 3,057 | 30,346 |
| 23,812 | 207 | 22,136 | 5,084 | 3,063 | 30,490 |
| 23,813 | 206 | 21,943 | 5,035 | 3,055 | 30,239 |
| 23,814 | 208 | 21,812 | 5,017 | 3,035 | 30,072 |
| 23,815 | 207 | 21,845 | 4,997 | 3,028 | 30,077 |
| 23,816 | 208 | 21,933 | 4,995 | 3,045 | 30,181 |
| 23,817 | 220 | 21,917 | 4,980 | 3,038 | 30,155 |
| 23,818 | 216 | 21,832 | 4,946 | 3,027 | 30,021 |
| 23,819 | 220 | 22,299 | 5,006 | 3,057 | 30,582 |
| 23,820 | 220 | 22,330 | 4,980 | 3,061 | 30,591 |
| 23,821 | 214 | 22,221 | 4,929 | 3,038 | 30,402 |
| 23,822 | 213 | 22,445 | 4,965 | 3,072 | 30,695 |
| 23,823 | 210 | 22,831 | 5,015 | 3,115 | 31,171 |
| 23,824 | 214 | 23,022 | 5,003 | 3,130 | 31,369 |
| 23,825 | 215 | 23,151 | 5,043 | 3,146 | 31,555 |
| 23,826 | 214 | 23,373 | 5,047 | 3,157 | 31,791 |
| 23,827 | 215 | 23,228 | 5,025 | 3,117 | 31,585 |
| 23,828 | 217 | 23,504 | 5,034 | 3,140 | 31,895 |
| 23,829 | 215 | 23,659 | 5,058 | 3,149 | 32,081 |
| 23,830 | 213 | 23,858 | 5,031 | 3,144 | 32,246 |
| 23,831 | 209 | 23,807 | 5,033 | 3,136 | 32,185 |

|        |     |        |       |       |        |
|--------|-----|--------|-------|-------|--------|
| 23,832 | 209 | 23,891 | 5,035 | 3,120 | 32,255 |
| 23,833 | 204 | 24,011 | 5,105 | 3,163 | 32,483 |
| 23,834 | 210 | 23,693 | 5,064 | 3,132 | 32,099 |
| 23,835 | 205 | 23,734 | 5,066 | 3,128 | 32,133 |
| 23,836 | 202 | 23,624 | 5,028 | 3,095 | 31,949 |
| 23,837 | 201 | 23,594 | 5,024 | 3,081 | 31,900 |
| 23,838 | 199 | 23,701 | 5,068 | 3,119 | 32,087 |
| 23,839 | 193 | 23,507 | 5,049 | 3,078 | 31,827 |
| 23,840 | 190 | 23,426 | 5,069 | 3,093 | 31,778 |
| 23,841 | 188 | 23,291 | 5,016 | 3,084 | 31,579 |
| 23,842 | 188 | 23,169 | 4,975 | 3,034 | 31,366 |
| 23,843 | 191 | 23,340 | 5,017 | 3,044 | 31,592 |
| 23,844 | 190 | 22,931 | 4,931 | 3,007 | 31,059 |
| 23,845 | 193 | 23,146 | 4,947 | 3,022 | 31,308 |
| 23,846 | 189 | 22,819 | 4,877 | 2,991 | 30,876 |
| 23,847 | 189 | 23,003 | 4,917 | 3,023 | 31,132 |
| 23,848 | 189 | 22,972 | 4,910 | 3,014 | 31,085 |
| 23,849 | 185 | 22,310 | 4,780 | 2,928 | 30,203 |
| 23,850 | 189 | 22,523 | 4,819 | 2,927 | 30,458 |
| 23,851 | 188 | 22,498 | 4,797 | 2,933 | 30,416 |
| 23,852 | 176 | 22,419 | 4,774 | 2,947 | 30,316 |
| 23,853 | 181 | 22,173 | 4,736 | 2,945 | 30,035 |
| 23,854 | 186 | 22,411 | 4,778 | 2,953 | 30,328 |
| 23,855 | 182 | 22,171 | 4,728 | 2,916 | 29,997 |
| 23,856 | 181 | 21,899 | 4,676 | 2,889 | 29,645 |
| 23,857 | 185 | 21,938 | 4,647 | 2,864 | 29,634 |
| 23,858 | 181 | 21,681 | 4,586 | 2,828 | 29,276 |
| 23,859 | 187 | 21,630 | 4,579 | 2,800 | 29,196 |
| 23,860 | 188 | 21,661 | 4,580 | 2,797 | 29,226 |
| 23,861 | 187 | 21,665 | 4,569 | 2,783 | 29,204 |
| 23,862 | 187 | 21,598 | 4,577 | 2,785 | 29,147 |
| 23,863 | 182 | 21,790 | 4,611 | 2,823 | 29,406 |

|        |     |        |       |       |        |
|--------|-----|--------|-------|-------|--------|
| 23,864 | 177 | 21,645 | 4,584 | 2,798 | 29,204 |
| 23,865 | 180 | 21,608 | 4,591 | 2,826 | 29,205 |
| 23,866 | 181 | 21,378 | 4,589 | 2,813 | 28,961 |
| 23,867 | 186 | 21,589 | 4,612 | 2,854 | 29,241 |
| 23,868 | 167 | 21,298 | 4,529 | 2,826 | 28,820 |
| 23,869 | 168 | 21,224 | 4,512 | 2,835 | 28,739 |
| 23,870 | 173 | 21,106 | 4,538 | 2,833 | 28,650 |
| 23,871 | 175 | 21,124 | 4,524 | 2,832 | 28,655 |
| 23,872 | 180 | 21,160 | 4,524 | 2,828 | 28,692 |
| 23,873 | 184 | 21,362 | 4,559 | 2,859 | 28,964 |
| 23,874 | 180 | 21,161 | 4,548 | 2,859 | 28,748 |
| 23,875 | 182 | 21,082 | 4,545 | 2,850 | 28,659 |
| 23,876 | 180 | 21,169 | 4,544 | 2,847 | 28,740 |
| 23,877 | 179 | 20,897 | 4,468 | 2,801 | 28,345 |
| 23,878 | 179 | 20,928 | 4,468 | 2,813 | 28,388 |
| 23,879 | 179 | 21,000 | 4,477 | 2,846 | 28,502 |
| 23,880 | 179 | 20,954 | 4,451 | 2,839 | 28,423 |
| 23,881 | 181 | 20,979 | 4,447 | 2,844 | 28,451 |
| 23,882 | 181 | 20,953 | 4,422 | 2,833 | 28,389 |
| 23,883 | 185 | 20,758 | 4,386 | 2,812 | 28,141 |
| 23,884 | 183 | 20,844 | 4,397 | 2,841 | 28,265 |
| 23,885 | 167 | 20,577 | 4,318 | 2,801 | 27,863 |
| 23,886 | 172 | 20,703 | 4,320 | 2,808 | 28,003 |
| 23,887 | 171 | 20,485 | 4,298 | 2,789 | 27,743 |
| 23,888 | 174 | 20,614 | 4,327 | 2,828 | 27,943 |
| 23,889 | 175 | 20,312 | 4,265 | 2,788 | 27,540 |
| 23,890 | 175 | 19,899 | 4,162 | 2,712 | 26,948 |
| 23,891 | 177 | 20,070 | 4,180 | 2,707 | 27,134 |
| 23,892 | 177 | 20,129 | 4,202 | 2,697 | 27,205 |
| 23,893 | 173 | 20,074 | 4,156 | 2,716 | 27,119 |
| 23,894 | 174 | 20,308 | 4,187 | 2,739 | 27,408 |
| 23,895 | 169 | 20,024 | 4,119 | 2,685 | 26,997 |

|        |     |        |       |       |        |
|--------|-----|--------|-------|-------|--------|
| 23,896 | 169 | 20,081 | 4,144 | 2,701 | 27,095 |
| 23,897 | 170 | 20,098 | 4,158 | 2,690 | 27,116 |
| 23,898 | 171 | 20,012 | 4,132 | 2,674 | 26,989 |
| 23,899 | 167 | 19,966 | 4,128 | 2,662 | 26,923 |
| 23,900 | 167 | 20,160 | 4,167 | 2,686 | 27,180 |
| 23,901 | 160 | 19,902 | 4,094 | 2,646 | 26,802 |
| 23,902 | 162 | 20,075 | 4,119 | 2,652 | 27,008 |
| 23,903 | 157 | 20,407 | 4,161 | 2,675 | 27,400 |
| 23,904 | 158 | 20,449 | 4,159 | 2,691 | 27,457 |
| 23,905 | 154 | 20,212 | 4,132 | 2,676 | 27,174 |
| 23,906 | 156 | 20,333 | 4,139 | 2,680 | 27,308 |
| 23,907 | 158 | 20,406 | 4,137 | 2,704 | 27,405 |
| 23,908 | 162 | 20,229 | 4,108 | 2,680 | 27,179 |
| 23,909 | 163 | 20,275 | 4,107 | 2,687 | 27,232 |
| 23,910 | 157 | 20,256 | 4,079 | 2,692 | 27,184 |
| 23,911 | 156 | 20,240 | 4,074 | 2,705 | 27,175 |
| 23,912 | 150 | 20,176 | 4,100 | 2,708 | 27,134 |
| 23,913 | 151 | 20,261 | 4,133 | 2,717 | 27,262 |
| 23,914 | 156 | 20,390 | 4,170 | 2,765 | 27,481 |
| 23,915 | 158 | 20,158 | 4,115 | 2,709 | 27,140 |
| 23,916 | 157 | 20,417 | 4,137 | 2,724 | 27,435 |
| 23,917 | 156 | 20,423 | 4,130 | 2,732 | 27,441 |
| 23,918 | 153 | 20,092 | 4,099 | 2,690 | 27,034 |
| 23,919 | 151 | 20,313 | 4,146 | 2,726 | 27,336 |
| 23,920 | 141 | 20,267 | 4,146 | 2,741 | 27,295 |
| 23,921 | 139 | 20,291 | 4,111 | 2,739 | 27,280 |
| 23,922 | 136 | 20,403 | 4,168 | 2,762 | 27,469 |
| 23,923 | 133 | 20,441 | 4,178 | 2,791 | 27,543 |
| 23,924 | 128 | 20,464 | 4,182 | 2,789 | 27,563 |
| 23,925 | 133 | 20,438 | 4,157 | 2,763 | 27,491 |
| 23,926 | 130 | 20,473 | 4,151 | 2,758 | 27,512 |
| 23,927 | 131 | 20,448 | 4,149 | 2,756 | 27,484 |

|        |     |        |       |       |        |
|--------|-----|--------|-------|-------|--------|
| 23,928 | 136 | 20,449 | 4,121 | 2,755 | 27,461 |
| 23,929 | 136 | 20,477 | 4,142 | 2,756 | 27,511 |
| 23,930 | 146 | 20,919 | 4,221 | 2,775 | 28,061 |
| 23,931 | 146 | 20,925 | 4,221 | 2,780 | 28,072 |
| 23,932 | 147 | 20,869 | 4,209 | 2,772 | 27,997 |
| 23,933 | 144 | 20,651 | 4,153 | 2,729 | 27,677 |
| 23,934 | 147 | 20,906 | 4,180 | 2,754 | 27,987 |
| 23,935 | 151 | 21,331 | 4,228 | 2,802 | 28,512 |
| 23,936 | 156 | 21,455 | 4,238 | 2,816 | 28,665 |
| 23,937 | 147 | 21,314 | 4,202 | 2,792 | 28,455 |
| 23,938 | 149 | 21,299 | 4,176 | 2,786 | 28,410 |
| 23,939 | 150 | 21,533 | 4,196 | 2,817 | 28,696 |
| 23,940 | 148 | 21,239 | 4,159 | 2,792 | 28,338 |
| 23,941 | 147 | 21,232 | 4,145 | 2,794 | 28,318 |
| 23,942 | 146 | 21,285 | 4,145 | 2,820 | 28,396 |
| 23,943 | 147 | 21,152 | 4,150 | 2,826 | 28,275 |
| 23,944 | 147 | 21,198 | 4,212 | 2,848 | 28,405 |
| 23,945 | 153 | 21,241 | 4,231 | 2,855 | 28,480 |
| 23,946 | 149 | 21,063 | 4,193 | 2,838 | 28,243 |
| 23,947 | 154 | 21,344 | 4,250 | 2,875 | 28,623 |
| 23,948 | 154 | 21,302 | 4,245 | 2,870 | 28,571 |
| 23,949 | 152 | 21,033 | 4,194 | 2,837 | 28,216 |
| 23,950 | 156 | 21,330 | 4,227 | 2,896 | 28,609 |
| 23,951 | 156 | 21,156 | 4,176 | 2,870 | 28,358 |
| 23,952 | 158 | 21,074 | 4,182 | 2,891 | 28,305 |
| 23,953 | 162 | 21,302 | 4,239 | 2,954 | 28,657 |
| 23,954 | 166 | 21,294 | 4,255 | 2,973 | 28,688 |
| 23,955 | 166 | 21,017 | 4,149 | 2,911 | 28,243 |
| 23,956 | 163 | 20,929 | 4,116 | 2,896 | 28,104 |
| 23,957 | 163 | 20,975 | 4,120 | 2,902 | 28,160 |
| 23,958 | 154 | 21,091 | 4,134 | 2,910 | 28,289 |
| 23,959 | 156 | 21,378 | 4,185 | 2,943 | 28,662 |

|        |     |        |       |       |        |
|--------|-----|--------|-------|-------|--------|
| 23,960 | 158 | 21,235 | 4,127 | 2,917 | 28,437 |
| 23,961 | 158 | 21,660 | 4,198 | 2,959 | 28,975 |
| 23,962 | 159 | 21,943 | 4,251 | 3,007 | 29,360 |
| 23,963 | 157 | 22,067 | 4,232 | 3,002 | 29,458 |
| 23,964 | 154 | 22,101 | 4,218 | 2,982 | 29,455 |
| 23,965 | 155 | 22,129 | 4,193 | 2,963 | 29,440 |
| 23,966 | 149 | 21,937 | 4,131 | 2,942 | 29,159 |
| 23,967 | 148 | 22,114 | 4,204 | 2,964 | 29,430 |
| 23,968 | 146 | 21,903 | 4,160 | 2,913 | 29,122 |
| 23,969 | 144 | 21,695 | 4,120 | 2,917 | 28,876 |
| 23,970 | 158 | 21,899 | 4,179 | 2,946 | 29,182 |
| 23,971 | 161 | 21,615 | 4,116 | 2,908 | 28,800 |
| 23,972 | 162 | 21,427 | 4,059 | 2,870 | 28,518 |
| 23,973 | 163 | 21,779 | 4,113 | 2,902 | 28,957 |
| 23,974 | 162 | 21,608 | 4,105 | 2,848 | 28,723 |
| 23,975 | 161 | 21,619 | 4,092 | 2,834 | 28,706 |
| 23,976 | 163 | 21,639 | 4,095 | 2,839 | 28,736 |
| 23,977 | 161 | 21,492 | 4,090 | 2,820 | 28,563 |
| 23,978 | 165 | 21,884 | 4,133 | 2,870 | 29,052 |
| 23,979 | 167 | 22,251 | 4,188 | 2,904 | 29,510 |
| 23,980 | 165 | 22,411 | 4,176 | 2,918 | 29,670 |
| 23,981 | 159 | 22,264 | 4,153 | 2,915 | 29,491 |
| 23,982 | 164 | 22,326 | 4,134 | 2,899 | 29,523 |
| 23,983 | 159 | 22,143 | 4,081 | 2,873 | 29,256 |
| 23,984 | 160 | 22,800 | 4,191 | 2,936 | 30,087 |
| 23,985 | 159 | 22,525 | 4,153 | 2,903 | 29,740 |
| 23,986 | 153 | 22,831 | 4,215 | 2,938 | 30,137 |
| 23,987 | 149 | 22,873 | 4,234 | 2,945 | 30,201 |
| 23,988 | 147 | 22,670 | 4,190 | 2,915 | 29,922 |
| 23,989 | 148 | 22,715 | 4,206 | 2,921 | 29,990 |
| 23,990 | 148 | 22,703 | 4,203 | 2,905 | 29,959 |
| 23,991 | 149 | 22,891 | 4,259 | 2,967 | 30,266 |

|        |     |        |       |       |        |
|--------|-----|--------|-------|-------|--------|
| 23,992 | 160 | 23,003 | 4,276 | 2,974 | 30,413 |
| 23,993 | 158 | 23,055 | 4,279 | 2,977 | 30,469 |
| 23,994 | 166 | 23,215 | 4,264 | 2,984 | 30,629 |
| 23,995 | 165 | 23,223 | 4,244 | 2,981 | 30,613 |
| 23,996 | 165 | 23,322 | 4,260 | 2,963 | 30,710 |
| 23,997 | 168 | 23,644 | 4,291 | 2,996 | 31,099 |
| 23,998 | 170 | 23,854 | 4,289 | 3,020 | 31,333 |
| 23,999 | 166 | 23,750 | 4,249 | 3,007 | 31,172 |
| 24,000 | 164 | 23,972 | 4,269 | 3,005 | 31,410 |
| 24,001 | 165 | 23,753 | 4,225 | 2,947 | 31,090 |
| 24,002 | 163 | 24,138 | 4,235 | 2,958 | 31,494 |
| 24,003 | 157 | 24,455 | 4,254 | 2,978 | 31,844 |
| 24,004 | 153 | 24,229 | 4,222 | 2,954 | 31,558 |
| 24,005 | 152 | 24,439 | 4,234 | 2,962 | 31,787 |
| 24,006 | 144 | 24,381 | 4,240 | 2,963 | 31,728 |
| 24,007 | 149 | 24,512 | 4,261 | 3,000 | 31,922 |
| 24,008 | 154 | 24,711 | 4,316 | 3,002 | 32,183 |
| 24,009 | 155 | 24,974 | 4,352 | 3,012 | 32,493 |
| 24,010 | 156 | 25,019 | 4,381 | 3,044 | 32,600 |
| 24,011 | 154 | 24,110 | 4,233 | 2,952 | 31,449 |
| 24,012 | 157 | 24,276 | 4,263 | 2,984 | 31,680 |
| 24,013 | 160 | 24,609 | 4,322 | 3,020 | 32,111 |
| 24,014 | 160 | 24,601 | 4,321 | 3,034 | 32,116 |
| 24,015 | 162 | 24,808 | 4,352 | 3,055 | 32,377 |
| 24,016 | 158 | 24,923 | 4,390 | 3,071 | 32,542 |
| 24,017 | 160 | 25,138 | 4,402 | 3,090 | 32,790 |
| 24,018 | 164 | 25,205 | 4,383 | 3,083 | 32,835 |
| 24,019 | 165 | 25,289 | 4,383 | 3,070 | 32,907 |
| 24,020 | 160 | 25,597 | 4,460 | 3,117 | 33,334 |
| 24,021 | 153 | 25,452 | 4,427 | 3,102 | 33,134 |
| 24,022 | 152 | 25,660 | 4,477 | 3,126 | 33,415 |
| 24,023 | 157 | 25,606 | 4,476 | 3,127 | 33,366 |

|        |     |        |       |       |        |
|--------|-----|--------|-------|-------|--------|
| 24,024 | 158 | 25,585 | 4,465 | 3,132 | 33,340 |
| 24,025 | 159 | 25,831 | 4,522 | 3,185 | 33,697 |
| 24,026 | 156 | 25,658 | 4,495 | 3,172 | 33,481 |
| 24,027 | 160 | 25,646 | 4,528 | 3,174 | 33,508 |
| 24,028 | 161 | 25,581 | 4,524 | 3,178 | 33,444 |
| 24,029 | 160 | 25,664 | 4,553 | 3,189 | 33,566 |
| 24,030 | 151 | 25,326 | 4,534 | 3,152 | 33,163 |
| 24,031 | 157 | 25,525 | 4,594 | 3,200 | 33,476 |
| 24,032 | 155 | 25,133 | 4,582 | 3,170 | 33,040 |
| 24,033 | 152 | 24,977 | 4,593 | 3,191 | 32,913 |
| 24,034 | 151 | 25,041 | 4,662 | 3,213 | 33,067 |
| 24,035 | 154 | 24,997 | 4,655 | 3,223 | 33,029 |
| 24,036 | 154 | 24,712 | 4,650 | 3,223 | 32,739 |
| 24,037 | 151 | 24,499 | 4,625 | 3,213 | 32,488 |
| 24,038 | 152 | 24,423 | 4,615 | 3,206 | 32,396 |
| 24,039 | 151 | 24,336 | 4,604 | 3,224 | 32,315 |
| 24,040 | 151 | 24,437 | 4,599 | 3,223 | 32,410 |
| 24,041 | 151 | 24,303 | 4,594 | 3,205 | 32,253 |
| 24,042 | 152 | 24,437 | 4,576 | 3,197 | 32,362 |
| 24,043 | 140 | 24,603 | 4,580 | 3,200 | 32,523 |
| 24,044 | 140 | 24,576 | 4,556 | 3,190 | 32,462 |
| 24,045 | 139 | 24,633 | 4,562 | 3,180 | 32,514 |
| 24,046 | 147 | 24,844 | 4,577 | 3,196 | 32,764 |
| 24,047 | 142 | 24,481 | 4,530 | 3,176 | 32,329 |
| 24,048 | 143 | 24,412 | 4,536 | 3,170 | 32,261 |
| 24,049 | 141 | 24,448 | 4,572 | 3,188 | 32,349 |
| 24,050 | 143 | 23,966 | 4,526 | 3,131 | 31,766 |
| 24,051 | 143 | 23,956 | 4,540 | 3,138 | 31,777 |
| 24,052 | 140 | 23,992 | 4,540 | 3,159 | 31,831 |
| 24,053 | 146 | 23,738 | 4,550 | 3,152 | 31,586 |
| 24,054 | 148 | 23,744 | 4,562 | 3,151 | 31,605 |
| 24,055 | 149 | 23,776 | 4,574 | 3,135 | 31,634 |



|        |     |        |       |       |        |
|--------|-----|--------|-------|-------|--------|
| 24,056 | 148 | 23,776 | 4,577 | 3,141 | 31,642 |
| 24,057 | 145 | 23,869 | 4,569 | 3,128 | 31,711 |
| 24,058 | 145 | 23,895 | 4,602 | 3,162 | 31,804 |
| 24,059 | 142 | 23,909 | 4,602 | 3,155 | 31,808 |
| 24,060 | 142 | 23,700 | 4,552 | 3,145 | 31,539 |
| 24,061 | 141 | 23,497 | 4,512 | 3,094 | 31,244 |
| 24,062 | 139 | 23,209 | 4,485 | 3,061 | 30,894 |
| 24,063 | 142 | 23,858 | 4,586 | 3,115 | 31,701 |
| 24,064 | 140 | 23,632 | 4,539 | 3,079 | 31,390 |
| 24,065 | 139 | 23,819 | 4,553 | 3,089 | 31,600 |
| 24,066 | 141 | 23,799 | 4,547 | 3,087 | 31,574 |
| 24,067 | 143 | 23,773 | 4,525 | 3,096 | 31,537 |
| 24,068 | 143 | 23,854 | 4,568 | 3,125 | 31,690 |
| 24,069 | 138 | 23,922 | 4,575 | 3,162 | 31,797 |
| 24,070 | 137 | 23,919 | 4,580 | 3,155 | 31,791 |
| 24,071 | 143 | 24,255 | 4,645 | 3,182 | 32,225 |
| 24,072 | 143 | 24,026 | 4,606 | 3,180 | 31,955 |
| 24,073 | 144 | 24,318 | 4,676 | 3,224 | 32,362 |
| 24,074 | 140 | 24,116 | 4,661 | 3,199 | 32,116 |
| 24,075 | 133 | 22,906 | 4,397 | 3,061 | 30,497 |
| 24,076 | 134 | 23,092 | 4,421 | 3,073 | 30,720 |
| 24,077 | 131 | 23,250 | 4,426 | 3,086 | 30,893 |
| 24,078 | 129 | 23,169 | 4,425 | 3,080 | 30,803 |
| 24,079 | 129 | 23,566 | 4,496 | 3,127 | 31,318 |
| 24,080 | 128 | 23,474 | 4,455 | 3,111 | 31,168 |
| 24,081 | 124 | 23,656 | 4,472 | 3,129 | 31,381 |
| 24,082 | 122 | 23,274 | 4,402 | 3,078 | 30,876 |
| 24,083 | 121 | 23,195 | 4,418 | 3,077 | 30,811 |
| 24,084 | 125 | 23,502 | 4,439 | 3,088 | 31,154 |
| 24,085 | 129 | 23,515 | 4,440 | 3,105 | 31,189 |
| 24,086 | 129 | 23,192 | 4,364 | 3,046 | 30,731 |
| 24,087 | 128 | 22,822 | 4,284 | 2,942 | 30,176 |

|        |     |        |       |       |        |
|--------|-----|--------|-------|-------|--------|
| 24,088 | 130 | 23,186 | 4,319 | 2,963 | 30,598 |
| 24,089 | 129 | 23,373 | 4,364 | 2,995 | 30,861 |
| 24,090 | 132 | 23,388 | 4,338 | 2,973 | 30,831 |
| 24,091 | 132 | 23,376 | 4,330 | 2,968 | 30,806 |
| 24,092 | 132 | 23,426 | 4,339 | 2,966 | 30,863 |
| 24,093 | 131 | 23,364 | 4,337 | 2,972 | 30,804 |
| 24,094 | 133 | 23,341 | 4,351 | 2,980 | 30,805 |
| 24,095 | 131 | 22,997 | 4,332 | 2,958 | 30,418 |
| 24,096 | 129 | 23,356 | 4,366 | 3,002 | 30,853 |
| 24,097 | 117 | 23,106 | 4,337 | 2,991 | 30,551 |
| 24,098 | 118 | 22,968 | 4,307 | 2,954 | 30,347 |
| 24,099 | 118 | 23,169 | 4,338 | 2,947 | 30,572 |
| 24,100 | 119 | 23,327 | 4,362 | 2,980 | 30,788 |
| 24,101 | 121 | 23,392 | 4,374 | 2,995 | 30,882 |
| 24,102 | 123 | 23,391 | 4,373 | 2,995 | 30,882 |
| 24,103 | 125 | 23,223 | 4,332 | 2,967 | 30,647 |
| 24,104 | 121 | 23,118 | 4,315 | 2,939 | 30,493 |
| 24,105 | 119 | 23,450 | 4,340 | 2,973 | 30,882 |
| 24,106 | 121 | 23,243 | 4,311 | 2,963 | 30,638 |
| 24,107 | 122 | 23,391 | 4,338 | 2,975 | 30,826 |
| 24,108 | 122 | 23,147 | 4,272 | 2,940 | 30,481 |
| 24,109 | 122 | 23,067 | 4,244 | 2,911 | 30,344 |
| 24,110 | 121 | 23,066 | 4,229 | 2,911 | 30,327 |
| 24,111 | 128 | 23,324 | 4,274 | 2,925 | 30,651 |
| 24,112 | 129 | 22,958 | 4,220 | 2,879 | 30,186 |
| 24,113 | 126 | 22,742 | 4,188 | 2,857 | 29,913 |
| 24,114 | 122 | 22,827 | 4,194 | 2,905 | 30,048 |
| 24,115 | 119 | 22,567 | 4,172 | 2,893 | 29,751 |
| 24,116 | 126 | 22,696 | 4,214 | 2,897 | 29,933 |
| 24,117 | 121 | 22,367 | 4,163 | 2,840 | 29,491 |
| 24,118 | 125 | 22,519 | 4,223 | 2,855 | 29,722 |
| 24,119 | 124 | 22,326 | 4,174 | 2,796 | 29,420 |

|        |     |        |       |       |        |
|--------|-----|--------|-------|-------|--------|
| 24,120 | 124 | 21,681 | 4,048 | 2,745 | 28,598 |
| 24,121 | 128 | 21,918 | 4,089 | 2,790 | 28,925 |
| 24,122 | 127 | 22,119 | 4,132 | 2,848 | 29,226 |
| 24,123 | 132 | 22,434 | 4,182 | 2,861 | 29,609 |
| 24,124 | 130 | 22,373 | 4,172 | 2,845 | 29,520 |
| 24,125 | 132 | 22,131 | 4,123 | 2,803 | 29,189 |
| 24,126 | 132 | 22,241 | 4,133 | 2,809 | 29,315 |
| 24,127 | 140 | 22,299 | 4,158 | 2,809 | 29,406 |
| 24,128 | 140 | 22,246 | 4,176 | 2,827 | 29,389 |
| 24,129 | 140 | 22,415 | 4,194 | 2,837 | 29,586 |
| 24,130 | 141 | 22,390 | 4,212 | 2,819 | 29,562 |
| 24,131 | 141 | 22,384 | 4,202 | 2,822 | 29,549 |
| 24,132 | 145 | 22,353 | 4,213 | 2,834 | 29,545 |
| 24,133 | 140 | 22,039 | 4,149 | 2,791 | 29,119 |
| 24,134 | 141 | 22,373 | 4,208 | 2,837 | 29,559 |
| 24,135 | 139 | 22,509 | 4,212 | 2,856 | 29,716 |
| 24,136 | 139 | 22,333 | 4,171 | 2,812 | 29,455 |
| 24,137 | 134 | 22,128 | 4,144 | 2,798 | 29,204 |
| 24,138 | 134 | 22,160 | 4,178 | 2,845 | 29,317 |
| 24,139 | 134 | 22,152 | 4,190 | 2,860 | 29,336 |
| 24,140 | 132 | 22,098 | 4,193 | 2,835 | 29,258 |
| 24,141 | 137 | 22,280 | 4,230 | 2,857 | 29,504 |
| 24,142 | 136 | 22,295 | 4,253 | 2,877 | 29,561 |
| 24,143 | 142 | 22,578 | 4,327 | 2,920 | 29,967 |
| 24,144 | 141 | 22,420 | 4,336 | 2,890 | 29,787 |
| 24,145 | 139 | 22,425 | 4,343 | 2,862 | 29,769 |
| 24,146 | 139 | 22,332 | 4,357 | 2,871 | 29,699 |
| 24,147 | 140 | 22,354 | 4,385 | 2,891 | 29,770 |
| 24,148 | 138 | 22,502 | 4,441 | 2,928 | 30,009 |
| 24,149 | 135 | 22,297 | 4,400 | 2,943 | 29,775 |
| 24,150 | 135 | 22,303 | 4,412 | 2,956 | 29,806 |
| 24,151 | 137 | 22,680 | 4,468 | 2,992 | 30,277 |

|        |     |        |       |       |        |
|--------|-----|--------|-------|-------|--------|
| 24,152 | 132 | 22,802 | 4,483 | 2,988 | 30,405 |
| 24,153 | 130 | 22,850 | 4,492 | 2,977 | 30,449 |
| 24,154 | 129 | 22,797 | 4,512 | 3,005 | 30,443 |
| 24,155 | 133 | 22,471 | 4,482 | 2,977 | 30,063 |
| 24,156 | 133 | 22,258 | 4,476 | 2,972 | 29,839 |
| 24,157 | 132 | 22,278 | 4,501 | 2,978 | 29,889 |
| 24,158 | 131 | 22,017 | 4,481 | 2,961 | 29,590 |
| 24,159 | 130 | 22,314 | 4,552 | 2,986 | 29,982 |
| 24,160 | 129 | 22,323 | 4,578 | 2,993 | 30,023 |
| 24,161 | 131 | 22,455 | 4,580 | 2,999 | 30,165 |
| 24,162 | 128 | 22,461 | 4,583 | 3,014 | 30,186 |
| 24,163 | 124 | 22,283 | 4,529 | 2,988 | 29,924 |
| 24,164 | 124 | 22,252 | 4,540 | 2,982 | 29,898 |
| 24,165 | 126 | 22,167 | 4,520 | 2,954 | 29,767 |
| 24,166 | 128 | 22,611 | 4,619 | 3,009 | 30,367 |
| 24,167 | 125 | 22,469 | 4,603 | 2,994 | 30,191 |
| 24,168 | 126 | 22,692 | 4,663 | 3,031 | 30,512 |
| 24,169 | 121 | 22,498 | 4,586 | 3,015 | 30,220 |
| 24,170 | 122 | 22,533 | 4,615 | 3,054 | 30,324 |
| 24,171 | 117 | 22,491 | 4,633 | 3,023 | 30,264 |
| 24,172 | 114 | 22,227 | 4,585 | 2,978 | 29,904 |
| 24,173 | 113 | 22,050 | 4,553 | 2,936 | 29,652 |
| 24,174 | 110 | 22,398 | 4,621 | 2,985 | 30,114 |
| 24,175 | 109 | 22,331 | 4,631 | 2,971 | 30,042 |
| 24,176 | 108 | 22,051 | 4,603 | 2,959 | 29,721 |
| 24,177 | 107 | 21,997 | 4,610 | 2,966 | 29,680 |
| 24,178 | 102 | 22,112 | 4,635 | 2,988 | 29,837 |
| 24,179 | 101 | 22,168 | 4,636 | 2,998 | 29,903 |
| 24,180 | 104 | 21,991 | 4,570 | 2,991 | 29,656 |
| 24,181 | 103 | 21,978 | 4,571 | 3,005 | 29,657 |
| 24,182 | 103 | 22,232 | 4,646 | 3,035 | 30,016 |
| 24,183 | 99  | 22,071 | 4,600 | 3,017 | 29,787 |

|        |     |        |       |       |        |
|--------|-----|--------|-------|-------|--------|
| 24,184 | 101 | 22,159 | 4,615 | 3,018 | 29,893 |
| 24,185 | 103 | 22,351 | 4,631 | 3,036 | 30,121 |
| 24,186 | 100 | 22,054 | 4,611 | 3,005 | 29,770 |
| 24,187 | 100 | 22,020 | 4,620 | 3,006 | 29,746 |
| 24,188 | 99  | 22,112 | 4,612 | 2,965 | 29,788 |
| 24,189 | 97  | 22,027 | 4,601 | 2,954 | 29,679 |
| 24,190 | 96  | 21,959 | 4,594 | 2,950 | 29,599 |
| 24,191 | 99  | 21,845 | 4,573 | 2,949 | 29,466 |
| 24,192 | 95  | 21,604 | 4,546 | 2,925 | 29,170 |
| 24,193 | 94  | 21,793 | 4,605 | 2,984 | 29,476 |
| 24,194 | 91  | 21,651 | 4,587 | 2,970 | 29,299 |
| 24,195 | 89  | 21,440 | 4,533 | 2,953 | 29,015 |
| 24,196 | 89  | 21,277 | 4,509 | 2,976 | 28,851 |
| 24,197 | 87  | 21,400 | 4,526 | 2,984 | 28,997 |
| 24,198 | 89  | 21,364 | 4,506 | 2,968 | 28,927 |
| 24,199 | 91  | 21,364 | 4,483 | 2,974 | 28,912 |
| 24,200 | 98  | 21,688 | 4,584 | 3,018 | 29,388 |
| 24,201 | 100 | 21,732 | 4,594 | 3,003 | 29,429 |
| 24,202 | 101 | 21,708 | 4,606 | 3,006 | 29,421 |
| 24,203 | 108 | 21,184 | 4,507 | 2,940 | 28,739 |
| 24,204 | 121 | 21,323 | 4,566 | 2,969 | 28,979 |
| 24,205 | 125 | 21,612 | 4,596 | 2,983 | 29,316 |
| 24,206 | 122 | 21,568 | 4,555 | 2,943 | 29,188 |
| 24,207 | 122 | 21,584 | 4,558 | 2,951 | 29,215 |
| 24,208 | 123 | 21,759 | 4,604 | 3,005 | 29,491 |
| 24,209 | 124 | 21,848 | 4,640 | 3,016 | 29,628 |
| 24,210 | 124 | 21,793 | 4,623 | 3,023 | 29,563 |
| 24,211 | 127 | 21,755 | 4,634 | 3,041 | 29,557 |
| 24,212 | 125 | 21,688 | 4,685 | 3,045 | 29,543 |
| 24,213 | 123 | 21,829 | 4,742 | 3,069 | 29,763 |
| 24,214 | 123 | 21,760 | 4,740 | 3,054 | 29,677 |
| 24,215 | 123 | 21,701 | 4,727 | 3,053 | 29,604 |

|        |     |        |       |       |        |
|--------|-----|--------|-------|-------|--------|
| 24,216 | 124 | 22,009 | 4,822 | 3,109 | 30,064 |
| 24,217 | 124 | 22,068 | 4,843 | 3,124 | 30,159 |
| 24,218 | 121 | 22,017 | 4,852 | 3,144 | 30,134 |
| 24,219 | 122 | 22,066 | 4,871 | 3,161 | 30,220 |
| 24,220 | 121 | 21,948 | 4,849 | 3,125 | 30,043 |
| 24,221 | 124 | 22,060 | 4,880 | 3,153 | 30,217 |
| 24,222 | 125 | 21,972 | 4,862 | 3,164 | 30,123 |
| 24,223 | 125 | 21,972 | 4,870 | 3,173 | 30,140 |
| 24,224 | 131 | 21,921 | 4,865 | 3,138 | 30,055 |
| 24,225 | 130 | 21,873 | 4,823 | 3,125 | 29,951 |
| 24,226 | 128 | 21,524 | 4,740 | 3,064 | 29,456 |
| 24,227 | 138 | 21,888 | 4,776 | 3,088 | 29,890 |
| 24,228 | 135 | 21,887 | 4,780 | 3,090 | 29,892 |
| 24,229 | 141 | 21,874 | 4,794 | 3,107 | 29,916 |
| 24,230 | 141 | 21,806 | 4,805 | 3,094 | 29,846 |
| 24,231 | 136 | 21,650 | 4,822 | 3,095 | 29,703 |
| 24,232 | 136 | 21,517 | 4,830 | 3,092 | 29,575 |
| 24,233 | 137 | 21,471 | 4,829 | 3,088 | 29,525 |
| 24,234 | 140 | 21,596 | 4,886 | 3,113 | 29,735 |
| 24,235 | 142 | 21,548 | 4,897 | 3,103 | 29,690 |
| 24,236 | 145 | 21,585 | 4,932 | 3,138 | 29,800 |
| 24,237 | 147 | 21,558 | 4,926 | 3,153 | 29,784 |
| 24,238 | 148 | 21,712 | 4,948 | 3,177 | 29,985 |
| 24,239 | 151 | 21,774 | 4,961 | 3,177 | 30,063 |
| 24,240 | 151 | 21,617 | 4,918 | 3,158 | 29,844 |
| 24,241 | 153 | 21,942 | 4,976 | 3,199 | 30,270 |
| 24,242 | 148 | 22,157 | 4,992 | 3,211 | 30,508 |
| 24,243 | 148 | 22,372 | 5,001 | 3,226 | 30,747 |
| 24,244 | 149 | 22,528 | 5,021 | 3,245 | 30,943 |
| 24,245 | 151 | 22,622 | 5,036 | 3,254 | 31,063 |
| 24,246 | 151 | 22,550 | 4,989 | 3,206 | 30,896 |
| 24,247 | 160 | 22,068 | 4,942 | 3,138 | 30,308 |

|        |     |        |       |       |        |
|--------|-----|--------|-------|-------|--------|
| 24,248 | 160 | 22,294 | 4,953 | 3,158 | 30,565 |
| 24,249 | 158 | 22,464 | 4,983 | 3,174 | 30,779 |
| 24,250 | 159 | 22,573 | 5,031 | 3,188 | 30,951 |
| 24,251 | 153 | 22,440 | 4,974 | 3,173 | 30,740 |
| 24,252 | 149 | 22,133 | 4,926 | 3,148 | 30,356 |
| 24,253 | 140 | 22,179 | 4,963 | 3,170 | 30,452 |
| 24,254 | 140 | 22,136 | 4,941 | 3,170 | 30,387 |
| 24,255 | 129 | 22,326 | 4,959 | 3,211 | 30,625 |
| 24,256 | 122 | 22,075 | 4,970 | 3,205 | 30,372 |
| 24,257 | 123 | 21,783 | 4,903 | 3,186 | 29,995 |
| 24,258 | 122 | 21,696 | 4,901 | 3,157 | 29,876 |
| 24,259 | 122 | 21,845 | 4,924 | 3,194 | 30,085 |
| 24,260 | 120 | 21,715 | 4,848 | 3,168 | 29,851 |
| 24,261 | 117 | 21,670 | 4,830 | 3,134 | 29,751 |
| 24,262 | 116 | 21,861 | 4,866 | 3,175 | 30,018 |
| 24,263 | 118 | 21,721 | 4,814 | 3,179 | 29,832 |
| 24,264 | 118 | 21,819 | 4,800 | 3,182 | 29,919 |
| 24,265 | 122 | 21,953 | 4,833 | 3,217 | 30,125 |
| 24,266 | 118 | 21,725 | 4,794 | 3,196 | 29,833 |
| 24,267 | 124 | 21,736 | 4,768 | 3,174 | 29,802 |
| 24,268 | 128 | 21,938 | 4,792 | 3,194 | 30,052 |
| 24,269 | 127 | 21,705 | 4,716 | 3,129 | 29,677 |
| 24,270 | 132 | 21,898 | 4,767 | 3,163 | 29,960 |
| 24,271 | 128 | 21,739 | 4,720 | 3,119 | 29,706 |
| 24,272 | 128 | 21,641 | 4,731 | 3,110 | 29,610 |
| 24,273 | 125 | 21,619 | 4,718 | 3,083 | 29,545 |
| 24,274 | 128 | 21,861 | 4,738 | 3,111 | 29,838 |
| 24,275 | 121 | 21,444 | 4,668 | 3,085 | 29,318 |
| 24,276 | 127 | 21,529 | 4,673 | 3,108 | 29,437 |
| 24,277 | 125 | 21,812 | 4,708 | 3,153 | 29,798 |
| 24,278 | 116 | 21,883 | 4,721 | 3,173 | 29,893 |
| 24,279 | 111 | 21,869 | 4,679 | 3,141 | 29,800 |

|        |     |        |       |       |        |
|--------|-----|--------|-------|-------|--------|
| 24,280 | 115 | 22,010 | 4,678 | 3,139 | 29,942 |
| 24,281 | 117 | 22,189 | 4,710 | 3,175 | 30,191 |
| 24,282 | 123 | 22,169 | 4,677 | 3,178 | 30,147 |
| 24,283 | 125 | 22,048 | 4,649 | 3,160 | 29,982 |
| 24,284 | 128 | 22,006 | 4,671 | 3,158 | 29,963 |
| 24,285 | 125 | 22,081 | 4,642 | 3,163 | 30,011 |
| 24,286 | 117 | 22,063 | 4,608 | 3,148 | 29,936 |
| 24,287 | 117 | 21,981 | 4,607 | 3,145 | 29,850 |
| 24,288 | 119 | 22,069 | 4,598 | 3,136 | 29,922 |
| 24,289 | 127 | 22,239 | 4,650 | 3,177 | 30,193 |
| 24,290 | 130 | 22,222 | 4,633 | 3,196 | 30,181 |
| 24,291 | 128 | 22,024 | 4,591 | 3,175 | 29,918 |
| 24,292 | 127 | 21,786 | 4,540 | 3,147 | 29,600 |
| 24,293 | 134 | 22,299 | 4,649 | 3,216 | 30,298 |
| 24,294 | 133 | 22,063 | 4,613 | 3,188 | 29,997 |
| 24,295 | 141 | 22,302 | 4,656 | 3,226 | 30,325 |
| 24,296 | 137 | 22,367 | 4,662 | 3,229 | 30,395 |
| 24,297 | 135 | 22,388 | 4,661 | 3,241 | 30,425 |
| 24,298 | 128 | 22,234 | 4,618 | 3,205 | 30,185 |
| 24,299 | 127 | 22,352 | 4,641 | 3,238 | 30,358 |
| 24,300 | 124 | 22,455 | 4,691 | 3,267 | 30,537 |
| 24,301 | 126 | 22,531 | 4,668 | 3,277 | 30,602 |
| 24,302 | 130 | 22,686 | 4,726 | 3,302 | 30,844 |
| 24,303 | 136 | 22,623 | 4,730 | 3,295 | 30,784 |
| 24,304 | 140 | 22,660 | 4,740 | 3,296 | 30,836 |
| 24,305 | 144 | 22,842 | 4,769 | 3,315 | 31,070 |
| 24,306 | 144 | 22,474 | 4,695 | 3,273 | 30,586 |
| 24,307 | 148 | 22,795 | 4,737 | 3,303 | 30,983 |
| 24,308 | 145 | 23,221 | 4,814 | 3,336 | 31,516 |
| 24,309 | 147 | 23,299 | 4,805 | 3,316 | 31,567 |
| 24,310 | 147 | 23,305 | 4,786 | 3,312 | 31,550 |
| 24,311 | 147 | 23,350 | 4,818 | 3,341 | 31,656 |



|        |     |        |       |       |        |
|--------|-----|--------|-------|-------|--------|
| 24,312 | 148 | 23,292 | 4,817 | 3,357 | 31,614 |
| 24,313 | 148 | 23,278 | 4,811 | 3,336 | 31,573 |
| 24,314 | 154 | 23,504 | 4,879 | 3,353 | 31,890 |
| 24,315 | 150 | 23,296 | 4,899 | 3,331 | 31,676 |
| 24,316 | 148 | 23,497 | 4,933 | 3,348 | 31,926 |
| 24,317 | 145 | 23,606 | 4,917 | 3,348 | 32,016 |
| 24,318 | 144 | 23,612 | 4,910 | 3,350 | 32,016 |
| 24,319 | 140 | 23,470 | 4,876 | 3,348 | 31,834 |
| 24,320 | 143 | 23,677 | 4,934 | 3,390 | 32,144 |
| 24,321 | 142 | 23,830 | 4,938 | 3,404 | 32,314 |
| 24,322 | 144 | 23,512 | 4,847 | 3,356 | 31,859 |
| 24,323 | 144 | 23,502 | 4,842 | 3,353 | 31,841 |
| 24,324 | 144 | 23,267 | 4,803 | 3,334 | 31,548 |
| 24,325 | 142 | 23,045 | 4,790 | 3,296 | 31,273 |
| 24,326 | 143 | 23,779 | 4,963 | 3,390 | 32,275 |
| 24,327 | 142 | 23,476 | 4,937 | 3,356 | 31,911 |
| 24,328 | 142 | 23,460 | 4,924 | 3,350 | 31,876 |
| 24,329 | 139 | 23,324 | 4,904 | 3,327 | 31,694 |
| 24,330 | 140 | 23,519 | 4,959 | 3,343 | 31,961 |
| 24,331 | 137 | 23,464 | 4,955 | 3,338 | 31,894 |
| 24,332 | 136 | 23,209 | 4,906 | 3,272 | 31,523 |
| 24,333 | 135 | 23,334 | 4,915 | 3,272 | 31,656 |
| 24,334 | 132 | 23,516 | 4,900 | 3,283 | 31,831 |
| 24,335 | 135 | 23,651 | 4,945 | 3,303 | 32,034 |
| 24,336 | 138 | 23,402 | 4,918 | 3,268 | 31,726 |
| 24,337 | 138 | 23,298 | 4,942 | 3,259 | 31,637 |
| 24,338 | 134 | 23,287 | 4,954 | 3,237 | 31,612 |
| 24,339 | 142 | 23,346 | 4,945 | 3,249 | 31,682 |
| 24,340 | 133 | 23,071 | 4,888 | 3,216 | 31,308 |
| 24,341 | 126 | 22,813 | 4,872 | 3,167 | 30,978 |
| 24,342 | 125 | 22,555 | 4,841 | 3,135 | 30,656 |
| 24,343 | 122 | 23,014 | 4,938 | 3,191 | 31,265 |

|        |     |        |       |       |        |
|--------|-----|--------|-------|-------|--------|
| 24,344 | 126 | 23,134 | 4,981 | 3,188 | 31,429 |
| 24,345 | 123 | 23,108 | 4,968 | 3,180 | 31,379 |
| 24,346 | 122 | 22,579 | 4,869 | 3,104 | 30,674 |
| 24,347 | 126 | 22,792 | 4,870 | 3,123 | 30,911 |
| 24,348 | 126 | 22,769 | 4,861 | 3,117 | 30,873 |
| 24,349 | 132 | 22,510 | 4,810 | 3,078 | 30,530 |
| 24,350 | 132 | 22,295 | 4,772 | 3,053 | 30,252 |
| 24,351 | 137 | 22,760 | 4,830 | 3,132 | 30,859 |
| 24,352 | 141 | 22,844 | 4,807 | 3,131 | 30,923 |
| 24,353 | 140 | 22,667 | 4,805 | 3,128 | 30,740 |
| 24,354 | 134 | 22,433 | 4,763 | 3,115 | 30,445 |
| 24,355 | 131 | 22,572 | 4,800 | 3,151 | 30,654 |
| 24,356 | 128 | 22,369 | 4,797 | 3,135 | 30,429 |
| 24,357 | 128 | 22,384 | 4,784 | 3,138 | 30,434 |
| 24,358 | 127 | 22,441 | 4,794 | 3,150 | 30,512 |
| 24,359 | 135 | 22,192 | 4,732 | 3,113 | 30,172 |
| 24,360 | 135 | 22,121 | 4,748 | 3,124 | 30,128 |
| 24,361 | 139 | 22,404 | 4,791 | 3,136 | 30,470 |
| 24,362 | 139 | 22,470 | 4,781 | 3,146 | 30,536 |
| 24,363 | 137 | 22,566 | 4,798 | 3,166 | 30,667 |
| 24,364 | 134 | 22,551 | 4,786 | 3,170 | 30,641 |
| 24,365 | 131 | 22,520 | 4,760 | 3,158 | 30,569 |
| 24,366 | 134 | 22,779 | 4,799 | 3,182 | 30,894 |
| 24,367 | 135 | 22,542 | 4,756 | 3,146 | 30,579 |
| 24,368 | 136 | 22,686 | 4,802 | 3,163 | 30,787 |
| 24,369 | 133 | 22,449 | 4,745 | 3,120 | 30,447 |
| 24,370 | 130 | 22,424 | 4,718 | 3,104 | 30,376 |
| 24,371 | 129 | 22,666 | 4,771 | 3,127 | 30,693 |
| 24,372 | 127 | 22,668 | 4,761 | 3,107 | 30,663 |
| 24,373 | 123 | 22,613 | 4,744 | 3,108 | 30,588 |
| 24,374 | 124 | 22,456 | 4,708 | 3,110 | 30,398 |
| 24,375 | 128 | 22,703 | 4,770 | 3,163 | 30,764 |

|        |     |        |       |       |        |
|--------|-----|--------|-------|-------|--------|
| 24,376 | 133 | 22,428 | 4,716 | 3,123 | 30,400 |
| 24,377 | 135 | 22,524 | 4,737 | 3,127 | 30,523 |
| 24,378 | 141 | 22,397 | 4,704 | 3,122 | 30,364 |
| 24,379 | 145 | 22,402 | 4,714 | 3,115 | 30,376 |
| 24,380 | 145 | 22,220 | 4,691 | 3,111 | 30,167 |
| 24,381 | 155 | 22,311 | 4,714 | 3,150 | 30,330 |
| 24,382 | 155 | 22,225 | 4,713 | 3,154 | 30,247 |
| 24,383 | 153 | 22,412 | 4,797 | 3,185 | 30,547 |
| 24,384 | 157 | 22,419 | 4,828 | 3,213 | 30,617 |
| 24,385 | 156 | 22,319 | 4,819 | 3,222 | 30,516 |
| 24,386 | 160 | 22,232 | 4,769 | 3,213 | 30,374 |
| 24,387 | 160 | 22,350 | 4,794 | 3,233 | 30,537 |
| 24,388 | 168 | 22,641 | 4,825 | 3,263 | 30,897 |
| 24,389 | 168 | 22,652 | 4,843 | 3,265 | 30,928 |
| 24,390 | 160 | 22,491 | 4,844 | 3,262 | 30,757 |
| 24,391 | 159 | 22,376 | 4,845 | 3,271 | 30,651 |
| 24,392 | 160 | 22,464 | 4,854 | 3,300 | 30,778 |
| 24,393 | 161 | 22,248 | 4,816 | 3,280 | 30,505 |
| 24,394 | 158 | 22,184 | 4,792 | 3,298 | 30,432 |
| 24,395 | 158 | 22,154 | 4,787 | 3,307 | 30,406 |
| 24,396 | 163 | 22,076 | 4,782 | 3,290 | 30,311 |
| 24,397 | 156 | 22,350 | 4,867 | 3,334 | 30,707 |
| 24,398 | 156 | 22,406 | 4,905 | 3,341 | 30,808 |
| 24,399 | 147 | 22,257 | 4,876 | 3,314 | 30,594 |
| 24,400 | 146 | 22,246 | 4,895 | 3,302 | 30,589 |
| 24,401 | 147 | 22,470 | 4,944 | 3,323 | 30,884 |
| 24,402 | 147 | 22,490 | 5,007 | 3,343 | 30,987 |
| 24,403 | 142 | 22,293 | 4,963 | 3,313 | 30,711 |
| 24,404 | 143 | 22,512 | 4,999 | 3,317 | 30,971 |
| 24,405 | 142 | 22,778 | 5,054 | 3,337 | 31,311 |
| 24,406 | 138 | 22,611 | 4,990 | 3,303 | 31,042 |
| 24,407 | 137 | 22,398 | 4,931 | 3,251 | 30,717 |

|        |     |        |       |       |        |
|--------|-----|--------|-------|-------|--------|
| 24,408 | 137 | 22,525 | 4,977 | 3,272 | 30,911 |
| 24,409 | 120 | 21,615 | 4,786 | 3,158 | 29,679 |
| 24,410 | 123 | 21,791 | 4,827 | 3,199 | 29,940 |
| 24,411 | 123 | 21,956 | 4,889 | 3,226 | 30,194 |
| 24,412 | 126 | 22,103 | 4,960 | 3,264 | 30,453 |
| 24,413 | 128 | 22,210 | 4,997 | 3,259 | 30,594 |
| 24,414 | 131 | 22,115 | 4,988 | 3,275 | 30,509 |
| 24,415 | 133 | 22,039 | 4,980 | 3,263 | 30,415 |
| 24,416 | 138 | 22,083 | 5,004 | 3,277 | 30,502 |
| 24,417 | 136 | 21,937 | 4,970 | 3,268 | 30,311 |
| 24,418 | 135 | 21,586 | 4,919 | 3,249 | 29,889 |
| 24,419 | 135 | 21,582 | 4,919 | 3,265 | 29,901 |
| 24,420 | 135 | 21,517 | 4,913 | 3,263 | 29,828 |
| 24,421 | 137 | 21,462 | 4,943 | 3,247 | 29,789 |
| 24,422 | 137 | 21,317 | 4,937 | 3,239 | 29,630 |
| 24,423 | 139 | 21,263 | 4,955 | 3,268 | 29,625 |
| 24,424 | 139 | 20,992 | 4,898 | 3,225 | 29,254 |
| 24,425 | 136 | 21,095 | 4,927 | 3,239 | 29,397 |
| 24,426 | 135 | 21,030 | 4,905 | 3,236 | 29,306 |
| 24,427 | 129 | 20,779 | 4,871 | 3,205 | 28,984 |
| 24,428 | 126 | 20,930 | 4,894 | 3,224 | 29,174 |
| 24,429 | 120 | 20,945 | 4,879 | 3,221 | 29,165 |
| 24,430 | 110 | 20,755 | 4,797 | 3,181 | 28,843 |
| 24,431 | 114 | 20,996 | 4,856 | 3,201 | 29,167 |
| 24,432 | 115 | 21,143 | 4,912 | 3,240 | 29,410 |
| 24,433 | 115 | 21,221 | 4,902 | 3,262 | 29,500 |
| 24,434 | 107 | 21,113 | 4,860 | 3,217 | 29,297 |
| 24,435 | 100 | 20,770 | 4,797 | 3,175 | 28,842 |
| 24,436 | 100 | 21,012 | 4,840 | 3,199 | 29,151 |
| 24,437 | 95  | 21,177 | 4,910 | 3,232 | 29,414 |
| 24,438 | 95  | 21,094 | 4,875 | 3,229 | 29,293 |
| 24,439 | 96  | 20,958 | 4,841 | 3,196 | 29,091 |

|        |     |        |       |       |        |
|--------|-----|--------|-------|-------|--------|
| 24,440 | 96  | 21,143 | 4,848 | 3,198 | 29,285 |
| 24,441 | 96  | 21,227 | 4,864 | 3,209 | 29,396 |
| 24,442 | 96  | 21,489 | 4,907 | 3,223 | 29,715 |
| 24,443 | 93  | 21,477 | 4,882 | 3,212 | 29,664 |
| 24,444 | 92  | 21,436 | 4,874 | 3,209 | 29,611 |
| 24,445 | 91  | 21,570 | 4,911 | 3,210 | 29,782 |
| 24,446 | 86  | 21,325 | 4,868 | 3,185 | 29,464 |
| 24,447 | 86  | 21,507 | 4,887 | 3,210 | 29,690 |
| 24,448 | 88  | 21,160 | 4,827 | 3,170 | 29,245 |
| 24,449 | 85  | 21,362 | 4,893 | 3,213 | 29,553 |
| 24,450 | 88  | 21,357 | 4,923 | 3,227 | 29,595 |
| 24,451 | 92  | 21,446 | 4,918 | 3,227 | 29,683 |
| 24,452 | 94  | 21,414 | 4,957 | 3,240 | 29,705 |
| 24,453 | 95  | 21,329 | 4,904 | 3,215 | 29,543 |
| 24,454 | 96  | 21,392 | 4,920 | 3,219 | 29,627 |
| 24,455 | 97  | 21,203 | 4,863 | 3,197 | 29,360 |
| 24,456 | 97  | 21,156 | 4,869 | 3,208 | 29,330 |
| 24,457 | 100 | 21,382 | 4,887 | 3,233 | 29,602 |
| 24,458 | 99  | 21,252 | 4,848 | 3,216 | 29,415 |
| 24,459 | 99  | 21,225 | 4,839 | 3,190 | 29,353 |
| 24,460 | 102 | 21,345 | 4,857 | 3,222 | 29,526 |
| 24,461 | 101 | 21,314 | 4,837 | 3,226 | 29,478 |
| 24,462 | 97  | 21,153 | 4,792 | 3,187 | 29,229 |
| 24,463 | 102 | 21,369 | 4,837 | 3,219 | 29,527 |
| 24,464 | 101 | 21,191 | 4,797 | 3,184 | 29,273 |
| 24,465 | 100 | 20,988 | 4,741 | 3,135 | 28,964 |
| 24,466 | 101 | 21,052 | 4,742 | 3,138 | 29,033 |
| 24,467 | 100 | 21,149 | 4,771 | 3,157 | 29,177 |
| 24,468 | 101 | 21,065 | 4,735 | 3,144 | 29,045 |
| 24,469 | 101 | 21,155 | 4,755 | 3,137 | 29,148 |
| 24,470 | 103 | 21,059 | 4,728 | 3,131 | 29,021 |
| 24,471 | 104 | 21,357 | 4,760 | 3,169 | 29,390 |

|        |     |        |       |       |        |
|--------|-----|--------|-------|-------|--------|
| 24,472 | 103 | 21,658 | 4,794 | 3,213 | 29,768 |
| 24,473 | 105 | 21,903 | 4,797 | 3,223 | 30,028 |
| 24,474 | 102 | 21,992 | 4,835 | 3,222 | 30,151 |
| 24,475 | 101 | 21,942 | 4,805 | 3,207 | 30,055 |
| 24,476 | 101 | 21,956 | 4,796 | 3,191 | 30,044 |
| 24,477 | 106 | 22,326 | 4,843 | 3,227 | 30,502 |
| 24,478 | 107 | 22,112 | 4,801 | 3,196 | 30,216 |
| 24,479 | 107 | 21,865 | 4,748 | 3,170 | 29,890 |
| 24,480 | 111 | 22,329 | 4,881 | 3,234 | 30,555 |
| 24,481 | 109 | 22,195 | 4,874 | 3,212 | 30,390 |
| 24,482 | 110 | 22,185 | 4,856 | 3,202 | 30,353 |
| 24,483 | 107 | 21,974 | 4,799 | 3,155 | 30,035 |
| 24,484 | 114 | 22,054 | 4,782 | 3,155 | 30,105 |
| 24,485 | 113 | 21,767 | 4,699 | 3,119 | 29,698 |
| 24,486 | 116 | 21,952 | 4,754 | 3,165 | 29,987 |
| 24,487 | 117 | 21,968 | 4,775 | 3,179 | 30,039 |
| 24,488 | 115 | 21,818 | 4,697 | 3,157 | 29,787 |
| 24,489 | 119 | 21,993 | 4,721 | 3,177 | 30,010 |
| 24,490 | 114 | 21,978 | 4,715 | 3,185 | 29,992 |
| 24,491 | 119 | 21,868 | 4,736 | 3,184 | 29,907 |
| 24,492 | 122 | 21,896 | 4,738 | 3,178 | 29,934 |
| 24,493 | 123 | 21,666 | 4,681 | 3,160 | 29,630 |
| 24,494 | 128 | 21,981 | 4,751 | 3,178 | 30,038 |
| 24,495 | 128 | 21,876 | 4,701 | 3,161 | 29,866 |
| 24,496 | 130 | 21,897 | 4,720 | 3,178 | 29,925 |
| 24,497 | 139 | 21,737 | 4,667 | 3,134 | 29,677 |
| 24,498 | 139 | 21,604 | 4,630 | 3,125 | 29,498 |
| 24,499 | 142 | 21,741 | 4,708 | 3,176 | 29,767 |
| 24,500 | 144 | 21,686 | 4,684 | 3,156 | 29,670 |
| 24,501 | 141 | 21,386 | 4,618 | 3,096 | 29,241 |
| 24,502 | 139 | 21,349 | 4,615 | 3,095 | 29,198 |
| 24,503 | 139 | 21,332 | 4,595 | 3,074 | 29,140 |

|        |     |        |       |       |        |
|--------|-----|--------|-------|-------|--------|
| 24,504 | 149 | 21,512 | 4,617 | 3,068 | 29,346 |
| 24,505 | 147 | 21,141 | 4,549 | 3,025 | 28,862 |
| 24,506 | 146 | 21,102 | 4,552 | 3,020 | 28,820 |
| 24,507 | 147 | 21,364 | 4,579 | 3,061 | 29,151 |
| 24,508 | 150 | 21,442 | 4,593 | 3,062 | 29,247 |
| 24,509 | 149 | 21,302 | 4,558 | 3,023 | 29,032 |
| 24,510 | 149 | 21,315 | 4,553 | 3,023 | 29,040 |
| 24,511 | 151 | 21,597 | 4,592 | 3,047 | 29,387 |
| 24,512 | 154 | 21,419 | 4,532 | 2,996 | 29,101 |
| 24,513 | 157 | 21,594 | 4,553 | 3,009 | 29,313 |
| 24,514 | 154 | 21,362 | 4,486 | 2,975 | 28,977 |
| 24,515 | 153 | 21,357 | 4,475 | 2,981 | 28,966 |
| 24,516 | 151 | 21,652 | 4,503 | 3,046 | 29,352 |
| 24,517 | 156 | 21,455 | 4,478 | 3,020 | 29,109 |
| 24,518 | 152 | 21,389 | 4,470 | 3,025 | 29,036 |
| 24,519 | 150 | 21,350 | 4,474 | 3,031 | 29,005 |
| 24,520 | 149 | 21,072 | 4,432 | 3,005 | 28,658 |
| 24,521 | 147 | 21,009 | 4,416 | 2,991 | 28,563 |
| 24,522 | 150 | 20,740 | 4,362 | 2,955 | 28,207 |
| 24,523 | 150 | 20,492 | 4,321 | 2,923 | 27,886 |
| 24,524 | 156 | 20,818 | 4,377 | 2,958 | 28,309 |
| 24,525 | 156 | 20,688 | 4,351 | 2,956 | 28,151 |
| 24,526 | 153 | 20,938 | 4,433 | 3,003 | 28,527 |
| 24,527 | 149 | 20,810 | 4,415 | 3,012 | 28,386 |
| 24,528 | 148 | 20,674 | 4,364 | 2,966 | 28,152 |
| 24,529 | 149 | 20,976 | 4,431 | 2,996 | 28,552 |
| 24,530 | 146 | 20,991 | 4,434 | 3,001 | 28,572 |
| 24,531 | 148 | 20,786 | 4,404 | 3,002 | 28,340 |
| 24,532 | 149 | 20,859 | 4,409 | 3,016 | 28,433 |
| 24,533 | 152 | 20,786 | 4,425 | 2,998 | 28,361 |
| 24,534 | 144 | 20,829 | 4,450 | 2,996 | 28,419 |
| 24,535 | 145 | 20,948 | 4,509 | 3,028 | 28,630 |

|        |     |        |       |       |        |
|--------|-----|--------|-------|-------|--------|
| 24,536 | 144 | 20,839 | 4,466 | 2,998 | 28,447 |
| 24,537 | 143 | 20,817 | 4,464 | 2,983 | 28,407 |
| 24,538 | 144 | 20,958 | 4,478 | 2,978 | 28,558 |
| 24,539 | 139 | 21,046 | 4,485 | 2,974 | 28,644 |
| 24,540 | 144 | 21,358 | 4,567 | 3,007 | 29,076 |
| 24,541 | 141 | 21,194 | 4,511 | 2,981 | 28,827 |
| 24,542 | 138 | 21,161 | 4,501 | 2,983 | 28,783 |
| 24,543 | 142 | 21,528 | 4,566 | 3,049 | 29,285 |
| 24,544 | 151 | 21,785 | 4,632 | 3,057 | 29,625 |
| 24,545 | 150 | 22,000 | 4,690 | 3,121 | 29,961 |
| 24,546 | 152 | 21,922 | 4,701 | 3,108 | 29,883 |
| 24,547 | 145 | 21,946 | 4,700 | 3,122 | 29,913 |
| 24,548 | 143 | 21,878 | 4,730 | 3,128 | 29,879 |
| 24,549 | 146 | 22,296 | 4,782 | 3,160 | 30,384 |
| 24,550 | 139 | 22,073 | 4,778 | 3,161 | 30,151 |
| 24,551 | 139 | 22,169 | 4,802 | 3,165 | 30,275 |
| 24,552 | 138 | 22,107 | 4,804 | 3,212 | 30,261 |
| 24,553 | 137 | 22,112 | 4,826 | 3,229 | 30,304 |
| 24,554 | 135 | 22,340 | 4,875 | 3,264 | 30,614 |
| 24,555 | 127 | 22,155 | 4,847 | 3,248 | 30,377 |
| 24,556 | 131 | 22,341 | 4,903 | 3,283 | 30,658 |
| 24,557 | 131 | 21,888 | 4,828 | 3,250 | 30,097 |
| 24,558 | 140 | 22,125 | 4,902 | 3,281 | 30,448 |
| 24,559 | 138 | 22,119 | 4,924 | 3,295 | 30,476 |
| 24,560 | 147 | 22,386 | 5,008 | 3,358 | 30,899 |
| 24,561 | 147 | 22,221 | 4,987 | 3,333 | 30,688 |
| 24,562 | 148 | 22,545 | 5,094 | 3,374 | 31,161 |
| 24,563 | 143 | 22,309 | 5,063 | 3,360 | 30,875 |
| 24,564 | 151 | 22,348 | 5,107 | 3,388 | 30,994 |
| 24,565 | 151 | 22,250 | 5,121 | 3,403 | 30,925 |
| 24,566 | 163 | 22,323 | 5,186 | 3,420 | 31,092 |
| 24,567 | 164 | 22,374 | 5,243 | 3,432 | 31,213 |



|        |     |        |       |       |        |
|--------|-----|--------|-------|-------|--------|
| 24,568 | 159 | 22,351 | 5,233 | 3,412 | 31,155 |
| 24,569 | 161 | 22,506 | 5,263 | 3,420 | 31,350 |
| 24,570 | 163 | 22,560 | 5,291 | 3,406 | 31,420 |
| 24,571 | 168 | 22,566 | 5,308 | 3,412 | 31,454 |
| 24,572 | 169 | 22,334 | 5,294 | 3,383 | 31,180 |
| 24,573 | 172 | 22,257 | 5,318 | 3,408 | 31,155 |
| 24,574 | 172 | 22,029 | 5,267 | 3,390 | 30,858 |
| 24,575 | 172 | 22,777 | 5,405 | 3,499 | 31,853 |
| 24,576 | 182 | 23,075 | 5,492 | 3,552 | 32,301 |
| 24,577 | 183 | 23,051 | 5,504 | 3,565 | 32,303 |
| 24,578 | 180 | 22,843 | 5,498 | 3,543 | 32,064 |
| 24,579 | 180 | 22,910 | 5,564 | 3,585 | 32,239 |
| 24,580 | 179 | 22,796 | 5,581 | 3,598 | 32,154 |
| 24,581 | 180 | 22,268 | 5,455 | 3,500 | 31,403 |
| 24,582 | 180 | 22,623 | 5,531 | 3,539 | 31,873 |
| 24,583 | 173 | 22,673 | 5,528 | 3,554 | 31,928 |
| 24,584 | 172 | 22,576 | 5,529 | 3,570 | 31,847 |
| 24,585 | 175 | 22,696 | 5,546 | 3,592 | 32,009 |
| 24,586 | 174 | 22,527 | 5,490 | 3,565 | 31,756 |
| 24,587 | 174 | 22,468 | 5,519 | 3,585 | 31,746 |
| 24,588 | 174 | 22,434 | 5,507 | 3,581 | 31,696 |
| 24,589 | 173 | 22,398 | 5,526 | 3,597 | 31,694 |
| 24,590 | 174 | 22,450 | 5,573 | 3,643 | 31,840 |
| 24,591 | 170 | 22,240 | 5,520 | 3,608 | 31,538 |
| 24,592 | 168 | 21,997 | 5,474 | 3,593 | 31,232 |
| 24,593 | 165 | 21,716 | 5,430 | 3,600 | 30,911 |
| 24,594 | 165 | 21,684 | 5,443 | 3,581 | 30,873 |
| 24,595 | 162 | 21,786 | 5,480 | 3,627 | 31,055 |
| 24,596 | 163 | 21,725 | 5,450 | 3,598 | 30,936 |
| 24,597 | 158 | 21,472 | 5,377 | 3,551 | 30,558 |
| 24,598 | 160 | 21,031 | 5,275 | 3,484 | 29,950 |
| 24,599 | 163 | 21,367 | 5,290 | 3,513 | 30,333 |

|        |     |        |       |       |        |
|--------|-----|--------|-------|-------|--------|
| 24,600 | 165 | 21,604 | 5,347 | 3,532 | 30,648 |
| 24,601 | 165 | 21,621 | 5,334 | 3,510 | 30,630 |
| 24,602 | 167 | 21,610 | 5,293 | 3,494 | 30,564 |
| 24,603 | 169 | 21,670 | 5,288 | 3,493 | 30,620 |
| 24,604 | 176 | 21,959 | 5,314 | 3,539 | 30,988 |
| 24,605 | 171 | 21,708 | 5,273 | 3,505 | 30,657 |
| 24,606 | 166 | 21,674 | 5,233 | 3,499 | 30,572 |
| 24,607 | 167 | 21,670 | 5,205 | 3,477 | 30,519 |
| 24,608 | 166 | 21,662 | 5,222 | 3,478 | 30,528 |
| 24,609 | 166 | 21,848 | 5,256 | 3,512 | 30,782 |
| 24,610 | 170 | 21,826 | 5,239 | 3,510 | 30,745 |
| 24,611 | 163 | 21,851 | 5,235 | 3,521 | 30,770 |
| 24,612 | 158 | 21,492 | 5,127 | 3,463 | 30,240 |
| 24,613 | 166 | 21,787 | 5,138 | 3,488 | 30,579 |
| 24,614 | 159 | 22,116 | 5,198 | 3,516 | 30,989 |
| 24,615 | 160 | 22,088 | 5,158 | 3,473 | 30,879 |
| 24,616 | 159 | 22,163 | 5,165 | 3,481 | 30,968 |
| 24,617 | 145 | 22,116 | 5,141 | 3,481 | 30,883 |
| 24,618 | 145 | 22,032 | 5,148 | 3,471 | 30,796 |
| 24,619 | 145 | 21,919 | 5,141 | 3,481 | 30,686 |
| 24,620 | 142 | 21,584 | 5,079 | 3,474 | 30,279 |
| 24,621 | 141 | 21,633 | 5,095 | 3,500 | 30,369 |
| 24,622 | 137 | 21,648 | 5,096 | 3,528 | 30,409 |
| 24,623 | 133 | 21,536 | 5,109 | 3,530 | 30,308 |
| 24,624 | 122 | 21,607 | 5,112 | 3,521 | 30,362 |
| 24,625 | 120 | 21,583 | 5,183 | 3,539 | 30,425 |
| 24,626 | 120 | 21,810 | 5,200 | 3,579 | 30,709 |
| 24,627 | 114 | 21,614 | 5,104 | 3,541 | 30,373 |
| 24,628 | 114 | 21,856 | 5,165 | 3,560 | 30,695 |
| 24,629 | 118 | 21,831 | 5,153 | 3,565 | 30,667 |
| 24,630 | 125 | 22,004 | 5,118 | 3,570 | 30,817 |
| 24,631 | 125 | 21,737 | 5,056 | 3,516 | 30,434 |

|        |     |        |       |       |        |
|--------|-----|--------|-------|-------|--------|
| 24,632 | 128 | 21,711 | 5,074 | 3,529 | 30,442 |
| 24,633 | 127 | 21,925 | 5,098 | 3,568 | 30,718 |
| 24,634 | 127 | 21,722 | 5,067 | 3,523 | 30,439 |
| 24,635 | 127 | 21,809 | 5,096 | 3,559 | 30,591 |
| 24,636 | 124 | 21,776 | 5,107 | 3,560 | 30,567 |
| 24,637 | 123 | 21,547 | 5,034 | 3,520 | 30,224 |
| 24,638 | 125 | 21,711 | 5,077 | 3,540 | 30,453 |
| 24,639 | 126 | 21,732 | 5,107 | 3,513 | 30,478 |
| 24,640 | 126 | 21,545 | 5,019 | 3,466 | 30,156 |
| 24,641 | 127 | 21,789 | 5,078 | 3,480 | 30,474 |
| 24,642 | 126 | 21,529 | 5,020 | 3,445 | 30,120 |
| 24,643 | 122 | 21,454 | 4,998 | 3,394 | 29,968 |
| 24,644 | 123 | 21,551 | 4,981 | 3,381 | 30,036 |
| 24,645 | 123 | 21,517 | 4,983 | 3,386 | 30,009 |
| 24,646 | 116 | 21,222 | 4,927 | 3,341 | 29,606 |
| 24,647 | 113 | 21,376 | 4,965 | 3,365 | 29,819 |
| 24,648 | 108 | 20,943 | 4,885 | 3,315 | 29,251 |
| 24,649 | 113 | 21,246 | 4,943 | 3,360 | 29,662 |
| 24,650 | 108 | 20,965 | 4,905 | 3,326 | 29,304 |
| 24,651 | 103 | 20,358 | 4,805 | 3,237 | 28,503 |
| 24,652 | 103 | 20,600 | 4,861 | 3,262 | 28,826 |
| 24,653 | 98  | 20,769 | 4,920 | 3,292 | 29,079 |
| 24,654 | 99  | 20,738 | 4,911 | 3,282 | 29,030 |
| 24,655 | 92  | 20,561 | 4,905 | 3,253 | 28,811 |
| 24,656 | 96  | 20,083 | 4,820 | 3,192 | 28,191 |
| 24,657 | 96  | 20,086 | 4,822 | 3,202 | 28,206 |
| 24,658 | 93  | 19,788 | 4,787 | 3,177 | 27,845 |
| 24,659 | 93  | 19,566 | 4,753 | 3,151 | 27,563 |
| 24,660 | 85  | 20,588 | 5,009 | 3,281 | 28,963 |
| 24,661 | 83  | 20,448 | 5,021 | 3,278 | 28,830 |
| 24,662 | 82  | 20,147 | 4,987 | 3,244 | 28,460 |
| 24,663 | 81  | 19,744 | 4,932 | 3,213 | 27,970 |

|        |     |        |       |       |        |
|--------|-----|--------|-------|-------|--------|
| 24,664 | 75  | 19,576 | 5,024 | 3,254 | 27,929 |
| 24,665 | 73  | 19,261 | 4,986 | 3,256 | 27,576 |
| 24,666 | 68  | 19,179 | 4,983 | 3,251 | 27,481 |
| 24,667 | 68  | 19,140 | 4,984 | 3,243 | 27,435 |
| 24,668 | 69  | 19,277 | 5,044 | 3,236 | 27,626 |
| 24,669 | 70  | 19,464 | 5,056 | 3,227 | 27,817 |
| 24,670 | 71  | 19,772 | 5,157 | 3,278 | 28,278 |
| 24,671 | 79  | 19,975 | 5,179 | 3,265 | 28,498 |
| 24,672 | 81  | 19,928 | 5,153 | 3,217 | 28,379 |
| 24,673 | 84  | 19,969 | 5,154 | 3,217 | 28,424 |
| 24,674 | 85  | 19,978 | 5,144 | 3,203 | 28,410 |
| 24,675 | 84  | 20,116 | 5,131 | 3,214 | 28,545 |
| 24,676 | 95  | 20,388 | 5,178 | 3,243 | 28,904 |
| 24,677 | 101 | 20,077 | 5,153 | 3,200 | 28,531 |
| 24,678 | 100 | 19,950 | 5,109 | 3,144 | 28,303 |
| 24,679 | 105 | 19,819 | 5,103 | 3,123 | 28,150 |
| 24,680 | 107 | 19,775 | 5,102 | 3,124 | 28,108 |
| 24,681 | 102 | 19,832 | 5,180 | 3,140 | 28,254 |
| 24,682 | 97  | 19,930 | 5,160 | 3,154 | 28,341 |
| 24,683 | 104 | 19,647 | 5,078 | 3,098 | 27,927 |
| 24,684 | 111 | 19,822 | 5,120 | 3,118 | 28,171 |
| 24,685 | 111 | 19,909 | 5,145 | 3,129 | 28,294 |
| 24,686 | 119 | 19,793 | 5,114 | 3,098 | 28,124 |
| 24,687 | 120 | 19,576 | 5,066 | 3,079 | 27,841 |
| 24,688 | 122 | 19,992 | 5,180 | 3,135 | 28,429 |
| 24,689 | 122 | 19,840 | 5,178 | 3,120 | 28,260 |
| 24,690 | 131 | 20,025 | 5,212 | 3,154 | 28,522 |
| 24,691 | 132 | 19,887 | 5,180 | 3,130 | 28,329 |
| 24,692 | 133 | 19,814 | 5,177 | 3,130 | 28,254 |
| 24,693 | 134 | 19,820 | 5,161 | 3,121 | 28,236 |
| 24,694 | 133 | 19,716 | 5,141 | 3,126 | 28,116 |
| 24,695 | 135 | 20,292 | 5,310 | 3,206 | 28,943 |

|        |     |        |       |       |        |
|--------|-----|--------|-------|-------|--------|
| 24,696 | 143 | 20,530 | 5,366 | 3,238 | 29,277 |
| 24,697 | 143 | 20,374 | 5,314 | 3,200 | 29,031 |
| 24,698 | 143 | 20,354 | 5,317 | 3,204 | 29,018 |
| 24,699 | 143 | 20,295 | 5,303 | 3,211 | 28,952 |
| 24,700 | 142 | 20,560 | 5,373 | 3,246 | 29,321 |
| 24,701 | 145 | 20,558 | 5,372 | 3,241 | 29,316 |
| 24,702 | 145 | 20,632 | 5,395 | 3,262 | 29,434 |
| 24,703 | 151 | 20,558 | 5,369 | 3,245 | 29,323 |
| 24,704 | 153 | 20,473 | 5,357 | 3,240 | 29,223 |
| 24,705 | 152 | 20,768 | 5,460 | 3,300 | 29,680 |
| 24,706 | 164 | 20,666 | 5,451 | 3,278 | 29,559 |
| 24,707 | 163 | 20,689 | 5,452 | 3,271 | 29,575 |
| 24,708 | 165 | 20,964 | 5,553 | 3,321 | 30,003 |
| 24,709 | 175 | 20,877 | 5,450 | 3,252 | 29,754 |
| 24,710 | 175 | 21,198 | 5,513 | 3,287 | 30,173 |
| 24,711 | 180 | 21,513 | 5,572 | 3,316 | 30,581 |
| 24,712 | 182 | 21,406 | 5,503 | 3,260 | 30,351 |
| 24,713 | 189 | 21,717 | 5,527 | 3,283 | 30,716 |
| 24,714 | 189 | 21,741 | 5,487 | 3,244 | 30,661 |
| 24,715 | 189 | 21,819 | 5,495 | 3,259 | 30,762 |
| 24,716 | 200 | 22,223 | 5,559 | 3,282 | 31,264 |
| 24,717 | 205 | 22,045 | 5,495 | 3,258 | 31,003 |
| 24,718 | 204 | 21,928 | 5,443 | 3,242 | 30,817 |
| 24,719 | 217 | 22,039 | 5,464 | 3,250 | 30,970 |
| 24,720 | 216 | 21,963 | 5,411 | 3,237 | 30,827 |
| 24,721 | 221 | 22,149 | 5,439 | 3,259 | 31,068 |
| 24,722 | 225 | 22,060 | 5,437 | 3,248 | 30,970 |
| 24,723 | 226 | 21,764 | 5,365 | 3,198 | 30,553 |
| 24,724 | 226 | 21,594 | 5,347 | 3,199 | 30,366 |
| 24,725 | 236 | 21,636 | 5,360 | 3,216 | 30,448 |
| 24,726 | 237 | 21,500 | 5,340 | 3,185 | 30,262 |
| 24,727 | 221 | 21,316 | 5,305 | 3,163 | 30,005 |

|        |     |        |       |       |        |
|--------|-----|--------|-------|-------|--------|
| 24,728 | 225 | 21,488 | 5,309 | 3,167 | 30,189 |
| 24,729 | 219 | 21,453 | 5,313 | 3,160 | 30,145 |
| 24,730 | 218 | 21,509 | 5,277 | 3,143 | 30,147 |
| 24,731 | 219 | 21,508 | 5,276 | 3,132 | 30,135 |
| 24,732 | 218 | 21,382 | 5,254 | 3,110 | 29,964 |
| 24,733 | 216 | 21,318 | 5,261 | 3,113 | 29,908 |
| 24,734 | 213 | 21,363 | 5,321 | 3,174 | 30,071 |
| 24,735 | 212 | 21,185 | 5,276 | 3,155 | 29,828 |
| 24,736 | 210 | 21,339 | 5,326 | 3,207 | 30,082 |
| 24,737 | 200 | 21,233 | 5,299 | 3,175 | 29,907 |
| 24,738 | 202 | 21,135 | 5,300 | 3,176 | 29,813 |
| 24,739 | 200 | 21,085 | 5,292 | 3,165 | 29,742 |
| 24,740 | 200 | 21,106 | 5,284 | 3,166 | 29,756 |
| 24,741 | 192 | 21,031 | 5,284 | 3,155 | 29,662 |
| 24,742 | 190 | 20,950 | 5,330 | 3,174 | 29,644 |
| 24,743 | 188 | 20,713 | 5,246 | 3,141 | 29,288 |
| 24,744 | 188 | 20,786 | 5,288 | 3,154 | 29,416 |
| 24,745 | 193 | 20,542 | 5,234 | 3,111 | 29,080 |
| 24,746 | 193 | 20,641 | 5,235 | 3,140 | 29,209 |
| 24,747 | 189 | 20,697 | 5,270 | 3,152 | 29,308 |
| 24,748 | 191 | 20,549 | 5,272 | 3,159 | 29,171 |
| 24,749 | 194 | 20,387 | 5,245 | 3,092 | 28,918 |
| 24,750 | 199 | 20,570 | 5,303 | 3,129 | 29,201 |
| 24,751 | 198 | 20,581 | 5,284 | 3,140 | 29,203 |
| 24,752 | 197 | 20,304 | 5,199 | 3,108 | 28,808 |
| 24,753 | 197 | 20,098 | 5,149 | 3,089 | 28,533 |
| 24,754 | 195 | 20,297 | 5,264 | 3,159 | 28,915 |
| 24,755 | 195 | 20,404 | 5,285 | 3,182 | 29,066 |
| 24,756 | 196 | 20,356 | 5,279 | 3,182 | 29,013 |
| 24,757 | 184 | 20,351 | 5,297 | 3,212 | 29,044 |
| 24,758 | 180 | 19,655 | 5,181 | 3,165 | 28,181 |
| 24,759 | 181 | 19,836 | 5,221 | 3,191 | 28,429 |

|        |     |        |       |       |        |
|--------|-----|--------|-------|-------|--------|
| 24,760 | 176 | 20,120 | 5,315 | 3,250 | 28,861 |
| 24,761 | 176 | 20,067 | 5,320 | 3,246 | 28,809 |
| 24,762 | 174 | 20,603 | 5,475 | 3,332 | 29,584 |
| 24,763 | 169 | 20,717 | 5,507 | 3,367 | 29,760 |
| 24,764 | 162 | 20,774 | 5,533 | 3,400 | 29,869 |
| 24,765 | 163 | 20,773 | 5,528 | 3,405 | 29,869 |
| 24,766 | 167 | 21,327 | 5,674 | 3,460 | 30,628 |
| 24,767 | 162 | 21,381 | 5,712 | 3,486 | 30,741 |
| 24,768 | 155 | 21,398 | 5,723 | 3,523 | 30,799 |
| 24,769 | 150 | 21,373 | 5,691 | 3,515 | 30,729 |
| 24,770 | 144 | 21,122 | 5,632 | 3,483 | 30,381 |
| 24,771 | 144 | 21,039 | 5,614 | 3,459 | 30,256 |
| 24,772 | 144 | 21,013 | 5,622 | 3,454 | 30,233 |
| 24,773 | 132 | 21,150 | 5,646 | 3,491 | 30,419 |
| 24,774 | 130 | 21,084 | 5,632 | 3,482 | 30,328 |
| 24,775 | 121 | 21,065 | 5,580 | 3,441 | 30,207 |
| 24,776 | 120 | 21,131 | 5,589 | 3,443 | 30,283 |
| 24,777 | 122 | 21,048 | 5,577 | 3,442 | 30,189 |
| 24,778 | 126 | 21,195 | 5,624 | 3,483 | 30,428 |
| 24,779 | 122 | 21,224 | 5,669 | 3,504 | 30,519 |
| 24,780 | 120 | 20,878 | 5,614 | 3,484 | 30,096 |
| 24,781 | 123 | 21,224 | 5,718 | 3,532 | 30,597 |
| 24,782 | 124 | 21,366 | 5,759 | 3,574 | 30,823 |
| 24,783 | 121 | 21,293 | 5,723 | 3,551 | 30,688 |
| 24,784 | 121 | 21,508 | 5,754 | 3,566 | 30,949 |
| 24,785 | 120 | 21,620 | 5,790 | 3,586 | 31,116 |
| 24,786 | 113 | 21,594 | 5,795 | 3,566 | 31,068 |
| 24,787 | 113 | 21,767 | 5,789 | 3,567 | 31,236 |
| 24,788 | 112 | 21,690 | 5,782 | 3,563 | 31,147 |
| 24,789 | 110 | 21,598 | 5,751 | 3,539 | 30,998 |
| 24,790 | 109 | 21,683 | 5,755 | 3,564 | 31,111 |
| 24,791 | 110 | 21,957 | 5,808 | 3,616 | 31,491 |

|        |     |        |       |       |        |
|--------|-----|--------|-------|-------|--------|
| 24,792 | 117 | 21,919 | 5,745 | 3,607 | 31,388 |
| 24,793 | 121 | 22,164 | 5,792 | 3,627 | 31,704 |
| 24,794 | 126 | 21,974 | 5,733 | 3,576 | 31,409 |
| 24,795 | 125 | 21,905 | 5,724 | 3,584 | 31,338 |
| 24,796 | 120 | 21,975 | 5,717 | 3,599 | 31,411 |
| 24,797 | 121 | 22,311 | 5,813 | 3,651 | 31,896 |
| 24,798 | 113 | 21,787 | 5,644 | 3,582 | 31,126 |
| 24,799 | 113 | 21,971 | 5,684 | 3,589 | 31,357 |
| 24,800 | 109 | 22,150 | 5,713 | 3,618 | 31,590 |
| 24,801 | 107 | 22,175 | 5,698 | 3,620 | 31,600 |
| 24,802 | 107 | 22,226 | 5,711 | 3,611 | 31,655 |
| 24,803 | 105 | 22,324 | 5,706 | 3,622 | 31,757 |
| 24,804 | 105 | 22,259 | 5,648 | 3,584 | 31,596 |
| 24,805 | 113 | 22,568 | 5,726 | 3,628 | 32,035 |
| 24,806 | 111 | 22,621 | 5,728 | 3,617 | 32,077 |
| 24,807 | 110 | 22,330 | 5,587 | 3,540 | 31,567 |
| 24,808 | 110 | 22,708 | 5,617 | 3,568 | 32,003 |
| 24,809 | 107 | 22,797 | 5,628 | 3,599 | 32,131 |
| 24,810 | 108 | 22,807 | 5,586 | 3,603 | 32,104 |
| 24,811 | 106 | 22,634 | 5,490 | 3,553 | 31,783 |
| 24,812 | 107 | 22,650 | 5,496 | 3,554 | 31,807 |
| 24,813 | 106 | 22,872 | 5,517 | 3,586 | 32,081 |
| 24,814 | 106 | 22,493 | 5,418 | 3,528 | 31,545 |
| 24,815 | 107 | 22,540 | 5,446 | 3,527 | 31,620 |
| 24,816 | 99  | 22,460 | 5,415 | 3,516 | 31,490 |
| 24,817 | 102 | 22,065 | 5,298 | 3,433 | 30,898 |
| 24,818 | 105 | 21,995 | 5,260 | 3,395 | 30,755 |
| 24,819 | 109 | 21,952 | 5,214 | 3,369 | 30,644 |
| 24,820 | 111 | 22,043 | 5,203 | 3,356 | 30,713 |
| 24,821 | 110 | 21,856 | 5,149 | 3,332 | 30,447 |
| 24,822 | 110 | 22,084 | 5,229 | 3,383 | 30,806 |
| 24,823 | 115 | 22,083 | 5,196 | 3,368 | 30,762 |



|        |     |        |       |       |        |
|--------|-----|--------|-------|-------|--------|
| 24,824 | 115 | 22,062 | 5,202 | 3,361 | 30,740 |
| 24,825 | 110 | 22,014 | 5,169 | 3,362 | 30,655 |
| 24,826 | 110 | 21,987 | 5,164 | 3,358 | 30,619 |
| 24,827 | 106 | 22,233 | 5,222 | 3,398 | 30,959 |
| 24,828 | 106 | 22,225 | 5,177 | 3,342 | 30,850 |
| 24,829 | 104 | 22,209 | 5,174 | 3,344 | 30,831 |
| 24,830 | 108 | 22,422 | 5,164 | 3,339 | 31,033 |
| 24,831 | 110 | 22,617 | 5,224 | 3,392 | 31,343 |
| 24,832 | 112 | 22,724 | 5,222 | 3,413 | 31,471 |
| 24,833 | 114 | 22,668 | 5,205 | 3,391 | 31,378 |
| 24,834 | 114 | 22,901 | 5,201 | 3,397 | 31,613 |
| 24,835 | 116 | 22,805 | 5,183 | 3,376 | 31,480 |
| 24,836 | 115 | 22,913 | 5,198 | 3,388 | 31,614 |
| 24,837 | 115 | 23,192 | 5,252 | 3,425 | 31,984 |
| 24,838 | 115 | 22,607 | 5,121 | 3,333 | 31,176 |
| 24,839 | 116 | 22,798 | 5,138 | 3,353 | 31,405 |
| 24,840 | 116 | 22,753 | 5,135 | 3,366 | 31,370 |
| 24,841 | 119 | 22,944 | 5,153 | 3,364 | 31,580 |
| 24,842 | 117 | 22,887 | 5,150 | 3,342 | 31,496 |
| 24,843 | 115 | 22,718 | 5,106 | 3,311 | 31,250 |
| 24,844 | 112 | 22,529 | 5,065 | 3,292 | 30,998 |
| 24,845 | 109 | 22,745 | 5,138 | 3,329 | 31,321 |
| 24,846 | 111 | 22,674 | 5,147 | 3,326 | 31,258 |
| 24,847 | 115 | 22,864 | 5,155 | 3,327 | 31,461 |
| 24,848 | 117 | 22,920 | 5,141 | 3,342 | 31,520 |
| 24,849 | 116 | 22,642 | 5,094 | 3,304 | 31,156 |
| 24,850 | 122 | 22,781 | 5,138 | 3,321 | 31,362 |
| 24,851 | 122 | 22,819 | 5,145 | 3,332 | 31,418 |
| 24,852 | 128 | 22,850 | 5,129 | 3,321 | 31,428 |
| 24,853 | 127 | 22,792 | 5,113 | 3,319 | 31,351 |
| 24,854 | 126 | 22,820 | 5,129 | 3,312 | 31,387 |
| 24,855 | 130 | 22,921 | 5,173 | 3,343 | 31,567 |

|        |     |        |       |       |        |
|--------|-----|--------|-------|-------|--------|
| 24,856 | 124 | 22,987 | 5,152 | 3,335 | 31,598 |
| 24,857 | 122 | 22,643 | 5,078 | 3,282 | 31,125 |
| 24,858 | 123 | 22,958 | 5,133 | 3,313 | 31,527 |
| 24,859 | 126 | 21,708 | 4,928 | 3,149 | 29,911 |
| 24,860 | 131 | 22,087 | 4,949 | 3,188 | 30,355 |
| 24,861 | 131 | 22,356 | 4,982 | 3,206 | 30,675 |
| 24,862 | 131 | 22,372 | 4,976 | 3,217 | 30,696 |
| 24,863 | 142 | 22,439 | 5,001 | 3,216 | 30,798 |
| 24,864 | 145 | 22,317 | 4,974 | 3,208 | 30,644 |
| 24,865 | 145 | 22,119 | 4,921 | 3,186 | 30,371 |
| 24,866 | 147 | 22,599 | 5,028 | 3,259 | 31,033 |
| 24,867 | 144 | 22,217 | 4,953 | 3,233 | 30,547 |
| 24,868 | 145 | 22,233 | 4,968 | 3,234 | 30,580 |
| 24,869 | 141 | 22,178 | 4,977 | 3,240 | 30,536 |
| 24,870 | 139 | 22,175 | 5,015 | 3,235 | 30,564 |
| 24,871 | 136 | 22,166 | 5,025 | 3,233 | 30,560 |
| 24,872 | 141 | 22,133 | 5,013 | 3,221 | 30,508 |
| 24,873 | 139 | 21,973 | 4,981 | 3,199 | 30,292 |
| 24,874 | 137 | 22,022 | 4,999 | 3,221 | 30,379 |
| 24,875 | 136 | 21,862 | 4,963 | 3,225 | 30,186 |
| 24,876 | 135 | 22,282 | 5,064 | 3,296 | 30,777 |
| 24,877 | 142 | 22,434 | 5,108 | 3,324 | 31,008 |
| 24,878 | 139 | 22,132 | 5,048 | 3,319 | 30,638 |
| 24,879 | 138 | 22,091 | 5,057 | 3,329 | 30,615 |
| 24,880 | 137 | 22,277 | 5,126 | 3,351 | 30,891 |
| 24,881 | 136 | 22,062 | 5,114 | 3,331 | 30,643 |
| 24,882 | 137 | 22,050 | 5,081 | 3,297 | 30,565 |
| 24,883 | 138 | 21,720 | 5,025 | 3,251 | 30,134 |
| 24,884 | 135 | 21,385 | 4,958 | 3,217 | 29,695 |
| 24,885 | 140 | 21,712 | 5,070 | 3,264 | 30,186 |
| 24,886 | 138 | 21,503 | 4,990 | 3,231 | 29,862 |
| 24,887 | 143 | 21,810 | 5,063 | 3,287 | 30,303 |

|        |     |        |       |       |        |
|--------|-----|--------|-------|-------|--------|
| 24,888 | 148 | 21,510 | 5,026 | 3,261 | 29,945 |
| 24,889 | 148 | 21,544 | 5,011 | 3,262 | 29,965 |
| 24,890 | 152 | 21,499 | 5,022 | 3,247 | 29,920 |
| 24,891 | 152 | 21,448 | 5,017 | 3,254 | 29,871 |
| 24,892 | 151 | 21,506 | 5,028 | 3,275 | 29,960 |
| 24,893 | 154 | 21,728 | 5,098 | 3,319 | 30,299 |
| 24,894 | 149 | 21,956 | 5,164 | 3,346 | 30,615 |
| 24,895 | 153 | 22,352 | 5,296 | 3,405 | 31,206 |
| 24,896 | 151 | 22,347 | 5,263 | 3,383 | 31,144 |
| 24,897 | 149 | 22,585 | 5,358 | 3,398 | 31,490 |
| 24,898 | 146 | 22,077 | 5,263 | 3,324 | 30,810 |
| 24,899 | 147 | 22,227 | 5,313 | 3,351 | 31,038 |
| 24,900 | 143 | 22,517 | 5,335 | 3,392 | 31,387 |
| 24,901 | 144 | 22,403 | 5,322 | 3,390 | 31,259 |
| 24,902 | 143 | 22,907 | 5,456 | 3,450 | 31,956 |
| 24,903 | 138 | 22,926 | 5,488 | 3,467 | 32,019 |
| 24,904 | 145 | 22,902 | 5,479 | 3,442 | 31,968 |
| 24,905 | 149 | 22,952 | 5,474 | 3,444 | 32,019 |
| 24,906 | 149 | 22,945 | 5,469 | 3,444 | 32,007 |
| 24,907 | 154 | 22,870 | 5,473 | 3,429 | 31,926 |
| 24,908 | 169 | 23,022 | 5,560 | 3,477 | 32,228 |
| 24,909 | 173 | 22,790 | 5,525 | 3,450 | 31,938 |
| 24,910 | 168 | 22,572 | 5,460 | 3,412 | 31,612 |
| 24,911 | 162 | 22,702 | 5,536 | 3,409 | 31,809 |
| 24,912 | 163 | 22,611 | 5,558 | 3,416 | 31,748 |
| 24,913 | 155 | 22,884 | 5,640 | 3,447 | 32,126 |
| 24,914 | 151 | 22,623 | 5,594 | 3,435 | 31,803 |
| 24,915 | 149 | 22,621 | 5,623 | 3,447 | 31,840 |
| 24,916 | 151 | 22,553 | 5,634 | 3,440 | 31,778 |
| 24,917 | 150 | 22,791 | 5,696 | 3,468 | 32,105 |
| 24,918 | 148 | 22,620 | 5,647 | 3,435 | 31,850 |
| 24,919 | 148 | 22,458 | 5,646 | 3,424 | 31,676 |

|        |     |        |       |       |        |
|--------|-----|--------|-------|-------|--------|
| 24,920 | 145 | 23,119 | 5,780 | 3,529 | 32,573 |
| 24,921 | 145 | 23,196 | 5,791 | 3,560 | 32,692 |
| 24,922 | 140 | 22,721 | 5,685 | 3,496 | 32,042 |
| 24,923 | 140 | 22,825 | 5,730 | 3,516 | 32,211 |
| 24,924 | 140 | 22,877 | 5,747 | 3,518 | 32,282 |
| 24,925 | 140 | 22,738 | 5,700 | 3,449 | 32,027 |
| 24,926 | 143 | 22,965 | 5,768 | 3,477 | 32,353 |
| 24,927 | 138 | 22,976 | 5,765 | 3,483 | 32,362 |
| 24,928 | 138 | 22,974 | 5,801 | 3,465 | 32,378 |
| 24,929 | 143 | 23,125 | 5,836 | 3,508 | 32,612 |
| 24,930 | 144 | 23,076 | 5,823 | 3,511 | 32,554 |
| 24,931 | 146 | 22,984 | 5,772 | 3,458 | 32,360 |
| 24,932 | 146 | 23,039 | 5,786 | 3,478 | 32,449 |
| 24,933 | 145 | 23,281 | 5,853 | 3,549 | 32,828 |
| 24,934 | 135 | 22,916 | 5,770 | 3,513 | 32,334 |
| 24,935 | 132 | 23,010 | 5,768 | 3,538 | 32,448 |
| 24,936 | 129 | 22,817 | 5,724 | 3,498 | 32,168 |
| 24,937 | 133 | 22,730 | 5,740 | 3,476 | 32,079 |
| 24,938 | 132 | 22,792 | 5,740 | 3,490 | 32,154 |
| 24,939 | 128 | 22,702 | 5,720 | 3,470 | 32,020 |
| 24,940 | 128 | 22,881 | 5,745 | 3,489 | 32,243 |
| 24,941 | 128 | 22,806 | 5,748 | 3,497 | 32,179 |
| 24,942 | 127 | 22,806 | 5,789 | 3,501 | 32,223 |
| 24,943 | 128 | 23,043 | 5,838 | 3,526 | 32,535 |
| 24,944 | 136 | 22,784 | 5,805 | 3,527 | 32,252 |
| 24,945 | 138 | 22,510 | 5,764 | 3,504 | 31,916 |
| 24,946 | 135 | 22,624 | 5,795 | 3,547 | 32,101 |
| 24,947 | 142 | 22,785 | 5,814 | 3,573 | 32,314 |
| 24,948 | 138 | 22,592 | 5,728 | 3,550 | 32,008 |
| 24,949 | 144 | 22,551 | 5,730 | 3,546 | 31,971 |
| 24,950 | 145 | 22,601 | 5,734 | 3,540 | 32,020 |
| 24,951 | 144 | 22,532 | 5,749 | 3,527 | 31,952 |

|        |     |        |       |       |        |
|--------|-----|--------|-------|-------|--------|
| 24,952 | 144 | 22,428 | 5,750 | 3,522 | 31,844 |
| 24,953 | 143 | 22,357 | 5,759 | 3,526 | 31,785 |
| 24,954 | 140 | 22,415 | 5,777 | 3,532 | 31,864 |
| 24,955 | 125 | 22,063 | 5,716 | 3,502 | 31,406 |
| 24,956 | 129 | 22,195 | 5,750 | 3,515 | 31,589 |
| 24,957 | 126 | 22,458 | 5,815 | 3,563 | 31,962 |
| 24,958 | 117 | 22,348 | 5,761 | 3,558 | 31,784 |
| 24,959 | 114 | 22,349 | 5,742 | 3,565 | 31,770 |
| 24,960 | 113 | 22,412 | 5,744 | 3,576 | 31,845 |
| 24,961 | 112 | 22,428 | 5,771 | 3,607 | 31,918 |
| 24,962 | 112 | 22,409 | 5,770 | 3,609 | 31,900 |
| 24,963 | 115 | 22,643 | 5,823 | 3,639 | 32,220 |
| 24,964 | 118 | 22,544 | 5,797 | 3,627 | 32,086 |
| 24,965 | 118 | 22,500 | 5,815 | 3,630 | 32,063 |
| 24,966 | 118 | 22,694 | 5,795 | 3,645 | 32,252 |
| 24,967 | 125 | 22,915 | 5,857 | 3,709 | 32,606 |
| 24,968 | 131 | 22,964 | 5,852 | 3,717 | 32,664 |
| 24,969 | 134 | 22,468 | 5,795 | 3,681 | 32,078 |
| 24,970 | 133 | 22,193 | 5,728 | 3,664 | 31,718 |
| 24,971 | 142 | 22,483 | 5,850 | 3,725 | 32,200 |
| 24,972 | 140 | 22,217 | 5,805 | 3,693 | 31,855 |
| 24,973 | 141 | 22,396 | 5,832 | 3,717 | 32,086 |
| 24,974 | 141 | 22,383 | 5,816 | 3,732 | 32,072 |
| 24,975 | 144 | 22,460 | 5,836 | 3,757 | 32,197 |
| 24,976 | 145 | 22,462 | 5,871 | 3,780 | 32,258 |
| 24,977 | 144 | 22,470 | 5,858 | 3,787 | 32,259 |
| 24,978 | 143 | 22,499 | 5,865 | 3,792 | 32,299 |
| 24,979 | 142 | 22,674 | 5,885 | 3,837 | 32,538 |
| 24,980 | 139 | 22,845 | 5,910 | 3,844 | 32,738 |
| 24,981 | 136 | 22,619 | 5,878 | 3,815 | 32,448 |
| 24,982 | 137 | 22,446 | 5,904 | 3,846 | 32,333 |
| 24,983 | 138 | 22,652 | 5,937 | 3,863 | 32,590 |

|        |     |        |       |       |        |
|--------|-----|--------|-------|-------|--------|
| 24,984 | 143 | 22,819 | 5,960 | 3,866 | 32,788 |
| 24,985 | 148 | 22,805 | 5,927 | 3,847 | 32,727 |
| 24,986 | 148 | 22,682 | 5,914 | 3,838 | 32,582 |
| 24,987 | 150 | 22,971 | 5,994 | 3,887 | 33,002 |
| 24,988 | 148 | 23,050 | 6,008 | 3,902 | 33,108 |
| 24,989 | 150 | 23,284 | 6,079 | 3,948 | 33,461 |
| 24,990 | 147 | 22,945 | 6,007 | 3,910 | 33,009 |
| 24,991 | 143 | 22,828 | 6,015 | 3,914 | 32,900 |
| 24,992 | 141 | 22,793 | 6,033 | 3,962 | 32,929 |
| 24,993 | 143 | 22,803 | 6,018 | 3,939 | 32,903 |
| 24,994 | 142 | 22,536 | 5,957 | 3,906 | 32,541 |
| 24,995 | 133 | 22,294 | 5,851 | 3,842 | 32,120 |
| 24,996 | 130 | 22,574 | 5,856 | 3,862 | 32,422 |
| 24,997 | 126 | 22,194 | 5,802 | 3,818 | 31,940 |
| 24,998 | 125 | 22,302 | 5,839 | 3,826 | 32,092 |
| 24,999 | 120 | 21,549 | 5,637 | 3,700 | 31,006 |
| 25,000 | 120 | 21,763 | 5,676 | 3,721 | 31,280 |
| 25,001 | 124 | 22,003 | 5,731 | 3,745 | 31,603 |
| 25,002 | 125 | 22,186 | 5,769 | 3,783 | 31,863 |
| 25,003 | 127 | 22,088 | 5,742 | 3,772 | 31,729 |
| 25,004 | 129 | 22,054 | 5,685 | 3,769 | 31,637 |
| 25,005 | 130 | 21,676 | 5,584 | 3,711 | 31,101 |
| 25,006 | 130 | 21,754 | 5,589 | 3,716 | 31,189 |
| 25,007 | 128 | 21,753 | 5,573 | 3,730 | 31,184 |
| 25,008 | 126 | 21,706 | 5,546 | 3,723 | 31,101 |
| 25,009 | 126 | 21,938 | 5,590 | 3,724 | 31,378 |
| 25,010 | 128 | 21,971 | 5,609 | 3,707 | 31,415 |
| 25,011 | 135 | 21,756 | 5,528 | 3,660 | 31,079 |
| 25,012 | 135 | 21,794 | 5,532 | 3,673 | 31,134 |
| 25,013 | 133 | 21,807 | 5,535 | 3,692 | 31,167 |
| 25,014 | 132 | 21,862 | 5,588 | 3,700 | 31,282 |
| 25,015 | 128 | 21,684 | 5,513 | 3,671 | 30,996 |

|        |     |        |       |       |        |
|--------|-----|--------|-------|-------|--------|
| 25,016 | 122 | 21,410 | 5,430 | 3,596 | 30,558 |
| 25,017 | 123 | 21,490 | 5,452 | 3,606 | 30,671 |
| 25,018 | 122 | 21,454 | 5,450 | 3,602 | 30,628 |
| 25,019 | 114 | 21,495 | 5,457 | 3,598 | 30,664 |
| 25,020 | 107 | 21,419 | 5,333 | 3,525 | 30,384 |
| 25,021 | 110 | 21,699 | 5,370 | 3,545 | 30,724 |
| 25,022 | 110 | 21,515 | 5,285 | 3,497 | 30,407 |
| 25,023 | 113 | 21,477 | 5,293 | 3,465 | 30,348 |
| 25,024 | 118 | 21,625 | 5,349 | 3,498 | 30,590 |
| 25,025 | 119 | 21,413 | 5,293 | 3,451 | 30,276 |
| 25,026 | 118 | 21,109 | 5,233 | 3,440 | 29,900 |
| 25,027 | 119 | 21,343 | 5,273 | 3,473 | 30,208 |
| 25,028 | 122 | 21,212 | 5,249 | 3,468 | 30,051 |
| 25,029 | 122 | 21,128 | 5,251 | 3,443 | 29,944 |
| 25,030 | 124 | 20,741 | 5,168 | 3,379 | 29,412 |
| 25,031 | 123 | 20,725 | 5,172 | 3,379 | 29,399 |
| 25,032 | 125 | 20,564 | 5,103 | 3,330 | 29,122 |
| 25,033 | 120 | 20,411 | 5,065 | 3,290 | 28,886 |
| 25,034 | 135 | 21,091 | 5,246 | 3,427 | 29,899 |
| 25,035 | 129 | 20,719 | 5,179 | 3,380 | 29,407 |
| 25,036 | 126 | 20,451 | 5,157 | 3,364 | 29,098 |
| 25,037 | 127 | 20,695 | 5,195 | 3,357 | 29,374 |
| 25,038 | 123 | 20,785 | 5,201 | 3,372 | 29,481 |
| 25,039 | 122 | 20,828 | 5,185 | 3,353 | 29,488 |
| 25,040 | 124 | 20,866 | 5,197 | 3,358 | 29,545 |
| 25,041 | 125 | 21,039 | 5,193 | 3,349 | 29,706 |
| 25,042 | 128 | 20,951 | 5,136 | 3,297 | 29,512 |
| 25,043 | 134 | 21,309 | 5,201 | 3,332 | 29,976 |
| 25,044 | 133 | 21,298 | 5,201 | 3,341 | 29,973 |
| 25,045 | 133 | 21,328 | 5,164 | 3,335 | 29,960 |
| 25,046 | 134 | 21,155 | 5,137 | 3,323 | 29,749 |
| 25,047 | 134 | 21,144 | 5,136 | 3,319 | 29,733 |

|        |     |        |       |       |        |
|--------|-----|--------|-------|-------|--------|
| 25,048 | 138 | 21,132 | 5,098 | 3,318 | 29,686 |
| 25,049 | 137 | 21,275 | 5,131 | 3,346 | 29,889 |
| 25,050 | 133 | 20,899 | 5,095 | 3,301 | 29,428 |
| 25,051 | 133 | 21,105 | 5,145 | 3,330 | 29,713 |
| 25,052 | 128 | 21,368 | 5,191 | 3,360 | 30,047 |
| 25,053 | 128 | 21,239 | 5,155 | 3,341 | 29,863 |
| 25,054 | 127 | 21,285 | 5,156 | 3,342 | 29,910 |
| 25,055 | 126 | 21,171 | 5,179 | 3,313 | 29,789 |
| 25,056 | 126 | 21,292 | 5,250 | 3,356 | 30,024 |
| 25,057 | 128 | 21,207 | 5,286 | 3,360 | 29,981 |
| 25,058 | 128 | 21,358 | 5,336 | 3,399 | 30,221 |
| 25,059 | 127 | 21,329 | 5,300 | 3,397 | 30,153 |
| 25,060 | 126 | 21,235 | 5,293 | 3,391 | 30,045 |
| 25,061 | 125 | 20,984 | 5,237 | 3,366 | 29,712 |
| 25,062 | 119 | 20,778 | 5,207 | 3,331 | 29,435 |
| 25,063 | 120 | 21,002 | 5,307 | 3,383 | 29,812 |
| 25,064 | 120 | 20,848 | 5,258 | 3,369 | 29,595 |
| 25,065 | 119 | 20,898 | 5,255 | 3,351 | 29,623 |
| 25,066 | 117 | 20,693 | 5,221 | 3,302 | 29,333 |
| 25,067 | 123 | 20,785 | 5,266 | 3,327 | 29,501 |
| 25,068 | 120 | 20,835 | 5,262 | 3,332 | 29,549 |
| 25,069 | 119 | 20,858 | 5,303 | 3,335 | 29,615 |
| 25,070 | 122 | 20,917 | 5,370 | 3,375 | 29,784 |
| 25,071 | 121 | 20,886 | 5,375 | 3,392 | 29,774 |
| 25,072 | 119 | 20,613 | 5,338 | 3,354 | 29,424 |
| 25,073 | 122 | 20,815 | 5,398 | 3,374 | 29,709 |
| 25,074 | 116 | 20,701 | 5,353 | 3,364 | 29,534 |
| 25,075 | 116 | 20,641 | 5,347 | 3,363 | 29,467 |
| 25,076 | 115 | 20,986 | 5,463 | 3,434 | 29,998 |
| 25,077 | 114 | 20,852 | 5,440 | 3,370 | 29,776 |
| 25,078 | 111 | 20,683 | 5,427 | 3,349 | 29,570 |
| 25,079 | 120 | 20,799 | 5,481 | 3,375 | 29,775 |



|        |     |        |       |       |        |
|--------|-----|--------|-------|-------|--------|
| 25,080 | 120 | 20,871 | 5,489 | 3,371 | 29,851 |
| 25,081 | 117 | 21,214 | 5,555 | 3,406 | 30,292 |
| 25,082 | 118 | 21,368 | 5,572 | 3,408 | 30,466 |
| 25,083 | 116 | 21,301 | 5,507 | 3,376 | 30,300 |
| 25,084 | 116 | 21,539 | 5,581 | 3,409 | 30,645 |
| 25,085 | 110 | 21,407 | 5,530 | 3,382 | 30,429 |
| 25,086 | 110 | 21,474 | 5,546 | 3,389 | 30,519 |
| 25,087 | 108 | 21,396 | 5,519 | 3,366 | 30,389 |
| 25,088 | 108 | 21,340 | 5,540 | 3,402 | 30,390 |
| 25,089 | 108 | 21,302 | 5,566 | 3,427 | 30,403 |
| 25,090 | 109 | 20,975 | 5,483 | 3,406 | 29,973 |
| 25,091 | 106 | 20,780 | 5,449 | 3,384 | 29,719 |
| 25,092 | 106 | 20,832 | 5,482 | 3,408 | 29,828 |
| 25,093 | 103 | 20,853 | 5,491 | 3,426 | 29,873 |
| 25,094 | 101 | 20,855 | 5,528 | 3,442 | 29,926 |
| 25,095 | 101 | 20,981 | 5,598 | 3,463 | 30,143 |
| 25,096 | 104 | 20,742 | 5,586 | 3,433 | 29,865 |
| 25,097 | 102 | 20,574 | 5,565 | 3,408 | 29,649 |
| 25,098 | 108 | 21,209 | 5,737 | 3,525 | 30,579 |
| 25,099 | 108 | 21,328 | 5,765 | 3,538 | 30,739 |
| 25,100 | 107 | 21,290 | 5,766 | 3,535 | 30,698 |
| 25,101 | 109 | 21,176 | 5,756 | 3,549 | 30,590 |
| 25,102 | 110 | 21,058 | 5,735 | 3,555 | 30,458 |
| 25,103 | 109 | 20,740 | 5,677 | 3,533 | 30,059 |
| 25,104 | 113 | 20,749 | 5,683 | 3,534 | 30,079 |
| 25,105 | 113 | 20,492 | 5,658 | 3,507 | 29,770 |
| 25,106 | 112 | 20,770 | 5,716 | 3,538 | 30,136 |
| 25,107 | 111 | 20,875 | 5,686 | 3,503 | 30,175 |
| 25,108 | 113 | 21,263 | 5,783 | 3,559 | 30,718 |
| 25,109 | 116 | 21,027 | 5,753 | 3,530 | 30,426 |
| 25,110 | 113 | 20,704 | 5,730 | 3,511 | 30,058 |
| 25,111 | 120 | 20,730 | 5,741 | 3,526 | 30,117 |

|        |     |        |       |       |        |
|--------|-----|--------|-------|-------|--------|
| 25,112 | 115 | 20,448 | 5,668 | 3,495 | 29,726 |
| 25,113 | 116 | 20,864 | 5,806 | 3,597 | 30,383 |
| 25,114 | 117 | 20,817 | 5,826 | 3,584 | 30,344 |
| 25,115 | 116 | 20,576 | 5,769 | 3,545 | 30,006 |
| 25,116 | 116 | 20,769 | 5,831 | 3,609 | 30,325 |
| 25,117 | 116 | 20,776 | 5,846 | 3,613 | 30,351 |
| 25,118 | 110 | 20,240 | 5,698 | 3,532 | 29,580 |
| 25,119 | 112 | 20,384 | 5,739 | 3,560 | 29,795 |
| 25,120 | 113 | 20,564 | 5,749 | 3,601 | 30,027 |
| 25,121 | 114 | 20,847 | 5,815 | 3,654 | 30,430 |
| 25,122 | 114 | 20,667 | 5,792 | 3,636 | 30,209 |
| 25,123 | 112 | 20,687 | 5,793 | 3,638 | 30,230 |
| 25,124 | 113 | 20,890 | 5,850 | 3,695 | 30,548 |
| 25,125 | 112 | 20,721 | 5,836 | 3,707 | 30,376 |
| 25,126 | 115 | 20,709 | 5,830 | 3,717 | 30,371 |
| 25,127 | 114 | 20,704 | 5,821 | 3,710 | 30,349 |
| 25,128 | 114 | 20,214 | 5,688 | 3,650 | 29,666 |
| 25,129 | 119 | 20,602 | 5,792 | 3,706 | 30,219 |
| 25,130 | 118 | 20,840 | 5,812 | 3,735 | 30,505 |
| 25,131 | 117 | 20,474 | 5,724 | 3,700 | 30,015 |
| 25,132 | 116 | 20,426 | 5,768 | 3,724 | 30,034 |
| 25,133 | 114 | 20,272 | 5,730 | 3,713 | 29,829 |
| 25,134 | 111 | 20,289 | 5,727 | 3,723 | 29,850 |
| 25,135 | 114 | 20,581 | 5,782 | 3,781 | 30,258 |
| 25,136 | 111 | 20,340 | 5,724 | 3,756 | 29,931 |
| 25,137 | 111 | 20,456 | 5,724 | 3,760 | 30,051 |
| 25,138 | 111 | 20,734 | 5,754 | 3,784 | 30,383 |
| 25,139 | 111 | 20,549 | 5,675 | 3,709 | 30,044 |
| 25,140 | 115 | 20,816 | 5,741 | 3,735 | 30,407 |
| 25,141 | 111 | 20,907 | 5,744 | 3,747 | 30,509 |
| 25,142 | 118 | 20,752 | 5,720 | 3,717 | 30,307 |
| 25,143 | 118 | 20,700 | 5,682 | 3,703 | 30,203 |

|        |     |        |       |       |        |
|--------|-----|--------|-------|-------|--------|
| 25,144 | 121 | 20,892 | 5,794 | 3,761 | 30,568 |
| 25,145 | 121 | 20,813 | 5,752 | 3,754 | 30,440 |
| 25,146 | 122 | 21,131 | 5,796 | 3,791 | 30,840 |
| 25,147 | 118 | 21,251 | 5,800 | 3,783 | 30,952 |
| 25,148 | 115 | 21,394 | 5,810 | 3,821 | 31,140 |
| 25,149 | 113 | 21,272 | 5,753 | 3,821 | 30,959 |
| 25,150 | 118 | 21,285 | 5,712 | 3,796 | 30,911 |
| 25,151 | 121 | 21,486 | 5,734 | 3,804 | 31,145 |
| 25,152 | 120 | 21,604 | 5,803 | 3,817 | 31,344 |
| 25,153 | 121 | 21,761 | 5,848 | 3,827 | 31,557 |
| 25,154 | 125 | 21,590 | 5,784 | 3,790 | 31,289 |
| 25,155 | 127 | 21,844 | 5,835 | 3,827 | 31,633 |
| 25,156 | 126 | 21,869 | 5,822 | 3,834 | 31,651 |
| 25,157 | 124 | 21,594 | 5,777 | 3,805 | 31,300 |
| 25,158 | 126 | 21,741 | 5,833 | 3,861 | 31,561 |
| 25,159 | 123 | 21,744 | 5,823 | 3,846 | 31,536 |
| 25,160 | 122 | 21,830 | 5,795 | 3,832 | 31,579 |
| 25,161 | 126 | 21,871 | 5,801 | 3,817 | 31,615 |
| 25,162 | 120 | 21,747 | 5,771 | 3,785 | 31,423 |
| 25,163 | 119 | 21,808 | 5,772 | 3,786 | 31,485 |
| 25,164 | 125 | 21,782 | 5,755 | 3,765 | 31,427 |
| 25,165 | 126 | 21,820 | 5,746 | 3,738 | 31,430 |
| 25,166 | 130 | 21,801 | 5,728 | 3,721 | 31,380 |
| 25,167 | 131 | 21,887 | 5,765 | 3,748 | 31,531 |
| 25,168 | 129 | 21,360 | 5,630 | 3,677 | 30,796 |
| 25,169 | 130 | 21,648 | 5,689 | 3,704 | 31,171 |
| 25,170 | 130 | 21,903 | 5,773 | 3,734 | 31,540 |
| 25,171 | 127 | 21,911 | 5,776 | 3,715 | 31,529 |
| 25,172 | 127 | 21,904 | 5,774 | 3,697 | 31,502 |
| 25,173 | 123 | 21,906 | 5,734 | 3,674 | 31,437 |
| 25,174 | 122 | 22,198 | 5,772 | 3,719 | 31,811 |
| 25,175 | 125 | 22,328 | 5,819 | 3,736 | 32,008 |

|        |     |        |       |       |        |
|--------|-----|--------|-------|-------|--------|
| 25,176 | 124 | 22,336 | 5,816 | 3,730 | 32,006 |
| 25,177 | 119 | 21,810 | 5,669 | 3,622 | 31,220 |
| 25,178 | 122 | 22,103 | 5,718 | 3,652 | 31,595 |
| 25,179 | 120 | 22,085 | 5,724 | 3,650 | 31,579 |
| 25,180 | 119 | 22,210 | 5,743 | 3,659 | 31,731 |
| 25,181 | 112 | 21,982 | 5,699 | 3,625 | 31,418 |
| 25,182 | 113 | 22,240 | 5,747 | 3,662 | 31,762 |
| 25,183 | 113 | 22,275 | 5,822 | 3,683 | 31,893 |
| 25,184 | 114 | 22,260 | 5,862 | 3,720 | 31,956 |
| 25,185 | 114 | 22,023 | 5,825 | 3,681 | 31,643 |
| 25,186 | 113 | 22,062 | 5,869 | 3,677 | 31,721 |
| 25,187 | 113 | 22,097 | 5,896 | 3,670 | 31,776 |
| 25,188 | 120 | 22,205 | 5,947 | 3,714 | 31,986 |
| 25,189 | 121 | 22,135 | 5,986 | 3,704 | 31,946 |
| 25,190 | 119 | 21,895 | 5,962 | 3,694 | 31,670 |
| 25,191 | 122 | 21,840 | 5,939 | 3,680 | 31,581 |
| 25,192 | 121 | 21,818 | 5,936 | 3,653 | 31,528 |
| 25,193 | 122 | 21,918 | 5,960 | 3,655 | 31,655 |
| 25,194 | 119 | 21,899 | 5,886 | 3,616 | 31,520 |
| 25,195 | 119 | 21,877 | 5,893 | 3,596 | 31,485 |
| 25,196 | 118 | 22,119 | 5,937 | 3,616 | 31,790 |
| 25,197 | 123 | 22,094 | 5,969 | 3,588 | 31,774 |
| 25,198 | 120 | 21,454 | 5,810 | 3,463 | 30,847 |
| 25,199 | 120 | 21,460 | 5,811 | 3,470 | 30,861 |
| 25,200 | 114 | 21,230 | 5,750 | 3,423 | 30,517 |
| 25,201 | 111 | 20,938 | 5,722 | 3,387 | 30,158 |
| 25,202 | 115 | 21,790 | 5,932 | 3,521 | 31,358 |
| 25,203 | 113 | 21,762 | 5,886 | 3,516 | 31,277 |
| 25,204 | 113 | 21,872 | 5,944 | 3,535 | 31,464 |
| 25,205 | 106 | 21,901 | 5,945 | 3,544 | 31,496 |
| 25,206 | 104 | 22,004 | 5,969 | 3,555 | 31,632 |
| 25,207 | 104 | 21,903 | 5,934 | 3,529 | 31,470 |

|        |     |        |       |       |        |
|--------|-----|--------|-------|-------|--------|
| 25,208 | 105 | 21,925 | 5,923 | 3,523 | 31,476 |
| 25,209 | 105 | 21,964 | 5,934 | 3,525 | 31,528 |
| 25,210 | 107 | 22,025 | 5,929 | 3,559 | 31,620 |
| 25,211 | 105 | 22,001 | 5,949 | 3,560 | 31,615 |
| 25,212 | 99  | 21,453 | 5,740 | 3,477 | 30,769 |
| 25,213 | 98  | 21,757 | 5,779 | 3,518 | 31,152 |
| 25,214 | 98  | 21,956 | 5,834 | 3,556 | 31,444 |
| 25,215 | 92  | 21,821 | 5,778 | 3,533 | 31,224 |
| 25,216 | 92  | 22,187 | 5,892 | 3,601 | 31,772 |
| 25,217 | 88  | 22,001 | 5,849 | 3,579 | 31,517 |
| 25,218 | 87  | 22,314 | 5,914 | 3,603 | 31,918 |
| 25,219 | 87  | 21,873 | 5,784 | 3,542 | 31,286 |
| 25,220 | 87  | 22,169 | 5,836 | 3,581 | 31,673 |
| 25,221 | 86  | 22,230 | 5,839 | 3,590 | 31,745 |
| 25,222 | 87  | 21,786 | 5,764 | 3,526 | 31,163 |
| 25,223 | 89  | 21,912 | 5,805 | 3,558 | 31,364 |
| 25,224 | 89  | 22,055 | 5,874 | 3,603 | 31,621 |
| 25,225 | 91  | 22,106 | 5,914 | 3,614 | 31,725 |
| 25,226 | 88  | 21,929 | 5,860 | 3,586 | 31,463 |
| 25,227 | 87  | 21,896 | 5,864 | 3,559 | 31,406 |
| 25,228 | 85  | 21,987 | 5,876 | 3,571 | 31,519 |
| 25,229 | 79  | 21,539 | 5,789 | 3,499 | 30,906 |
| 25,230 | 81  | 21,633 | 5,820 | 3,525 | 31,059 |
| 25,231 | 82  | 21,609 | 5,812 | 3,535 | 31,038 |
| 25,232 | 81  | 21,581 | 5,819 | 3,523 | 31,004 |
| 25,233 | 89  | 21,787 | 5,886 | 3,571 | 31,333 |
| 25,234 | 90  | 21,742 | 5,870 | 3,570 | 31,272 |
| 25,235 | 90  | 21,690 | 5,824 | 3,564 | 31,168 |
| 25,236 | 94  | 21,524 | 5,766 | 3,520 | 30,904 |
| 25,237 | 96  | 21,298 | 5,677 | 3,504 | 30,575 |
| 25,238 | 96  | 21,441 | 5,750 | 3,579 | 30,866 |
| 25,239 | 91  | 21,422 | 5,736 | 3,545 | 30,794 |

|        |     |        |       |       |        |
|--------|-----|--------|-------|-------|--------|
| 25,240 | 93  | 21,345 | 5,686 | 3,543 | 30,667 |
| 25,241 | 96  | 21,355 | 5,689 | 3,541 | 30,681 |
| 25,242 | 91  | 21,342 | 5,673 | 3,536 | 30,642 |
| 25,243 | 98  | 21,498 | 5,701 | 3,593 | 30,890 |
| 25,244 | 104 | 21,254 | 5,663 | 3,562 | 30,583 |
| 25,245 | 102 | 21,061 | 5,624 | 3,549 | 30,336 |
| 25,246 | 104 | 21,222 | 5,667 | 3,614 | 30,607 |
| 25,247 | 104 | 20,875 | 5,615 | 3,562 | 30,156 |
| 25,248 | 98  | 20,612 | 5,520 | 3,537 | 29,767 |
| 25,249 | 94  | 21,008 | 5,637 | 3,635 | 30,374 |
| 25,250 | 95  | 20,944 | 5,649 | 3,619 | 30,307 |
| 25,251 | 100 | 20,844 | 5,678 | 3,614 | 30,236 |
| 25,252 | 108 | 20,663 | 5,591 | 3,584 | 29,946 |
| 25,253 | 112 | 20,903 | 5,649 | 3,601 | 30,265 |
| 25,254 | 116 | 20,931 | 5,682 | 3,610 | 30,339 |
| 25,255 | 122 | 20,769 | 5,602 | 3,569 | 30,062 |
| 25,256 | 121 | 20,523 | 5,564 | 3,524 | 29,732 |
| 25,257 | 130 | 20,966 | 5,720 | 3,620 | 30,436 |
| 25,258 | 133 | 20,859 | 5,660 | 3,590 | 30,242 |
| 25,259 | 133 | 20,847 | 5,676 | 3,592 | 30,248 |
| 25,260 | 137 | 21,127 | 5,740 | 3,624 | 30,628 |
| 25,261 | 143 | 20,661 | 5,666 | 3,547 | 30,017 |
| 25,262 | 141 | 20,399 | 5,619 | 3,523 | 29,682 |
| 25,263 | 147 | 20,684 | 5,727 | 3,575 | 30,133 |
| 25,264 | 154 | 20,658 | 5,735 | 3,575 | 30,122 |
| 25,265 | 156 | 20,728 | 5,735 | 3,574 | 30,193 |
| 25,266 | 160 | 20,581 | 5,729 | 3,555 | 30,025 |
| 25,267 | 164 | 20,309 | 5,627 | 3,499 | 29,599 |
| 25,268 | 165 | 20,261 | 5,636 | 3,493 | 29,555 |
| 25,269 | 167 | 20,293 | 5,637 | 3,486 | 29,583 |
| 25,270 | 170 | 20,428 | 5,640 | 3,485 | 29,723 |
| 25,271 | 171 | 20,353 | 5,626 | 3,479 | 29,629 |

|        |     |        |       |       |        |
|--------|-----|--------|-------|-------|--------|
| 25,272 | 169 | 20,171 | 5,551 | 3,428 | 29,319 |
| 25,273 | 169 | 20,157 | 5,546 | 3,432 | 29,304 |
| 25,274 | 174 | 20,200 | 5,539 | 3,433 | 29,346 |
| 25,275 | 176 | 20,223 | 5,518 | 3,425 | 29,342 |
| 25,276 | 176 | 20,233 | 5,516 | 3,419 | 29,344 |
| 25,277 | 172 | 20,081 | 5,507 | 3,409 | 29,169 |
| 25,278 | 171 | 20,126 | 5,479 | 3,411 | 29,187 |
| 25,279 | 173 | 20,284 | 5,482 | 3,426 | 29,365 |
| 25,280 | 171 | 20,292 | 5,481 | 3,442 | 29,386 |
| 25,281 | 167 | 20,196 | 5,438 | 3,408 | 29,209 |
| 25,282 | 167 | 20,163 | 5,419 | 3,413 | 29,162 |
| 25,283 | 168 | 20,333 | 5,467 | 3,432 | 29,400 |
| 25,284 | 165 | 20,562 | 5,521 | 3,470 | 29,718 |
| 25,285 | 165 | 20,441 | 5,512 | 3,475 | 29,593 |
| 25,286 | 164 | 20,561 | 5,557 | 3,477 | 29,759 |
| 25,287 | 163 | 20,780 | 5,562 | 3,507 | 30,012 |
| 25,288 | 166 | 20,755 | 5,560 | 3,457 | 29,938 |
| 25,289 | 166 | 20,809 | 5,577 | 3,475 | 30,027 |
| 25,290 | 164 | 20,858 | 5,608 | 3,479 | 30,109 |
| 25,291 | 163 | 20,940 | 5,620 | 3,481 | 30,204 |
| 25,292 | 163 | 21,278 | 5,719 | 3,584 | 30,744 |
| 25,293 | 162 | 21,024 | 5,676 | 3,544 | 30,406 |
| 25,294 | 160 | 21,153 | 5,730 | 3,530 | 30,573 |
| 25,295 | 154 | 21,471 | 5,844 | 3,632 | 31,101 |
| 25,296 | 153 | 21,413 | 5,783 | 3,599 | 30,948 |
| 25,297 | 156 | 21,551 | 5,782 | 3,617 | 31,106 |
| 25,298 | 161 | 21,857 | 5,858 | 3,660 | 31,536 |
| 25,299 | 164 | 21,653 | 5,832 | 3,629 | 31,278 |
| 25,300 | 165 | 21,717 | 5,842 | 3,627 | 31,351 |
| 25,301 | 163 | 22,024 | 5,871 | 3,665 | 31,723 |
| 25,302 | 162 | 22,044 | 5,877 | 3,670 | 31,753 |
| 25,303 | 163 | 22,221 | 5,907 | 3,710 | 32,001 |

|        |     |        |       |       |        |
|--------|-----|--------|-------|-------|--------|
| 25,304 | 159 | 22,308 | 5,888 | 3,734 | 32,089 |
| 25,305 | 158 | 22,065 | 5,862 | 3,738 | 31,823 |
| 25,306 | 153 | 22,199 | 5,917 | 3,791 | 32,060 |
| 25,307 | 153 | 22,294 | 5,974 | 3,838 | 32,259 |
| 25,308 | 149 | 22,481 | 5,987 | 3,867 | 32,484 |
| 25,309 | 149 | 22,585 | 6,025 | 3,877 | 32,636 |
| 25,310 | 153 | 22,684 | 6,046 | 3,901 | 32,784 |
| 25,311 | 147 | 22,592 | 6,014 | 3,881 | 32,634 |
| 25,312 | 143 | 22,680 | 6,027 | 3,858 | 32,708 |
| 25,313 | 145 | 22,665 | 6,006 | 3,827 | 32,643 |
| 25,314 | 139 | 22,557 | 5,976 | 3,813 | 32,485 |
| 25,315 | 137 | 22,509 | 5,979 | 3,807 | 32,432 |
| 25,316 | 137 | 22,369 | 5,928 | 3,782 | 32,216 |
| 25,317 | 141 | 22,442 | 5,940 | 3,779 | 32,302 |
| 25,318 | 136 | 22,269 | 5,913 | 3,762 | 32,080 |
| 25,319 | 150 | 22,565 | 5,987 | 3,820 | 32,522 |
| 25,320 | 154 | 22,536 | 5,974 | 3,814 | 32,478 |
| 25,321 | 150 | 22,212 | 5,940 | 3,801 | 32,103 |
| 25,322 | 150 | 22,126 | 5,947 | 3,793 | 32,016 |
| 25,323 | 151 | 22,085 | 5,963 | 3,818 | 32,017 |
| 25,324 | 157 | 22,507 | 6,057 | 3,880 | 32,601 |
| 25,325 | 150 | 22,301 | 6,030 | 3,843 | 32,324 |
| 25,326 | 155 | 22,536 | 6,091 | 3,882 | 32,664 |
| 25,327 | 155 | 22,551 | 6,128 | 3,899 | 32,733 |
| 25,328 | 158 | 22,383 | 6,147 | 3,907 | 32,595 |
| 25,329 | 160 | 22,164 | 6,191 | 3,913 | 32,428 |
| 25,330 | 159 | 22,086 | 6,235 | 3,910 | 32,390 |
| 25,331 | 161 | 22,173 | 6,237 | 3,894 | 32,465 |
| 25,332 | 161 | 22,248 | 6,241 | 3,890 | 32,540 |
| 25,333 | 161 | 21,988 | 6,182 | 3,848 | 32,179 |
| 25,334 | 161 | 22,200 | 6,215 | 3,907 | 32,483 |
| 25,335 | 160 | 21,987 | 6,135 | 3,850 | 32,132 |



|        |     |        |       |       |        |
|--------|-----|--------|-------|-------|--------|
| 25,336 | 162 | 22,227 | 6,142 | 3,858 | 32,389 |
| 25,337 | 171 | 22,048 | 6,073 | 3,800 | 32,092 |
| 25,338 | 164 | 21,790 | 6,027 | 3,752 | 31,733 |
| 25,339 | 174 | 22,066 | 6,017 | 3,777 | 32,034 |
| 25,340 | 178 | 22,204 | 6,003 | 3,773 | 32,158 |
| 25,341 | 188 | 22,101 | 5,948 | 3,730 | 31,967 |
| 25,342 | 197 | 22,330 | 5,988 | 3,741 | 32,256 |
| 25,343 | 189 | 22,322 | 5,994 | 3,728 | 32,233 |
| 25,344 | 191 | 22,535 | 5,982 | 3,746 | 32,454 |
| 25,345 | 196 | 22,527 | 5,953 | 3,717 | 32,393 |
| 25,346 | 207 | 22,583 | 5,934 | 3,708 | 32,432 |
| 25,347 | 209 | 22,700 | 5,932 | 3,692 | 32,533 |
| 25,348 | 205 | 22,995 | 6,021 | 3,745 | 32,966 |
| 25,349 | 201 | 22,876 | 5,949 | 3,706 | 32,732 |
| 25,350 | 199 | 23,053 | 5,926 | 3,716 | 32,894 |
| 25,351 | 197 | 23,132 | 5,892 | 3,709 | 32,930 |
| 25,352 | 199 | 23,340 | 5,921 | 3,708 | 33,168 |
| 25,353 | 200 | 23,318 | 5,893 | 3,721 | 33,132 |
| 25,354 | 194 | 23,158 | 5,841 | 3,687 | 32,880 |
| 25,355 | 201 | 23,335 | 5,900 | 3,704 | 33,140 |
| 25,356 | 202 | 23,344 | 5,863 | 3,678 | 33,087 |
| 25,357 | 203 | 23,349 | 5,768 | 3,578 | 32,898 |
| 25,358 | 213 | 23,187 | 5,700 | 3,535 | 32,635 |
| 25,359 | 215 | 23,078 | 5,651 | 3,498 | 32,442 |
| 25,360 | 215 | 23,109 | 5,652 | 3,507 | 32,483 |
| 25,361 | 216 | 22,999 | 5,648 | 3,487 | 32,350 |
| 25,362 | 216 | 23,040 | 5,658 | 3,498 | 32,412 |
| 25,363 | 212 | 23,219 | 5,682 | 3,532 | 32,645 |
| 25,364 | 214 | 23,315 | 5,694 | 3,553 | 32,776 |
| 25,365 | 213 | 23,225 | 5,680 | 3,536 | 32,654 |
| 25,366 | 211 | 23,459 | 5,726 | 3,574 | 32,970 |
| 25,367 | 211 | 23,553 | 5,778 | 3,619 | 33,161 |

|        |     |        |       |       |        |
|--------|-----|--------|-------|-------|--------|
| 25,368 | 205 | 23,491 | 5,774 | 3,618 | 33,088 |
| 25,369 | 196 | 23,735 | 5,791 | 3,627 | 33,349 |
| 25,370 | 196 | 23,852 | 5,796 | 3,623 | 33,467 |
| 25,371 | 203 | 23,969 | 5,795 | 3,629 | 33,596 |
| 25,372 | 201 | 23,950 | 5,806 | 3,617 | 33,574 |
| 25,373 | 208 | 24,096 | 5,799 | 3,611 | 33,714 |
| 25,374 | 210 | 24,263 | 5,814 | 3,624 | 33,911 |
| 25,375 | 208 | 24,280 | 5,798 | 3,603 | 33,889 |
| 25,376 | 205 | 24,271 | 5,779 | 3,590 | 33,845 |
| 25,377 | 200 | 24,382 | 5,768 | 3,580 | 33,930 |
| 25,378 | 204 | 24,168 | 5,598 | 3,519 | 33,489 |
| 25,379 | 204 | 24,414 | 5,582 | 3,529 | 33,729 |
| 25,380 | 209 | 24,616 | 5,569 | 3,534 | 33,928 |
| 25,381 | 219 | 24,852 | 5,609 | 3,547 | 34,227 |
| 25,382 | 226 | 24,795 | 5,593 | 3,537 | 34,151 |
| 25,383 | 233 | 24,747 | 5,582 | 3,547 | 34,109 |
| 25,384 | 242 | 24,701 | 5,523 | 3,503 | 33,969 |
| 25,385 | 243 | 24,700 | 5,506 | 3,476 | 33,925 |
| 25,386 | 249 | 24,545 | 5,459 | 3,434 | 33,687 |
| 25,387 | 250 | 24,572 | 5,441 | 3,413 | 33,676 |
| 25,388 | 238 | 24,144 | 5,335 | 3,372 | 33,089 |
| 25,389 | 238 | 24,132 | 5,320 | 3,348 | 33,038 |
| 25,390 | 228 | 24,092 | 5,331 | 3,362 | 33,013 |
| 25,391 | 229 | 23,757 | 5,248 | 3,344 | 32,578 |
| 25,392 | 219 | 23,433 | 5,170 | 3,298 | 32,120 |
| 25,393 | 210 | 23,444 | 5,148 | 3,274 | 32,076 |
| 25,394 | 211 | 23,269 | 5,132 | 3,229 | 31,841 |
| 25,395 | 211 | 23,308 | 5,110 | 3,212 | 31,841 |
| 25,396 | 202 | 23,256 | 5,152 | 3,242 | 31,852 |
| 25,397 | 188 | 23,018 | 5,147 | 3,228 | 31,581 |
| 25,398 | 190 | 23,021 | 5,151 | 3,213 | 31,575 |
| 25,399 | 193 | 23,139 | 5,184 | 3,241 | 31,757 |

|        |     |        |       |       |        |
|--------|-----|--------|-------|-------|--------|
| 25,400 | 191 | 22,657 | 5,131 | 3,204 | 31,183 |
| 25,401 | 196 | 22,822 | 5,176 | 3,212 | 31,406 |
| 25,402 | 198 | 22,472 | 5,107 | 3,164 | 30,941 |
| 25,403 | 194 | 22,254 | 5,047 | 3,132 | 30,627 |
| 25,404 | 196 | 22,325 | 5,095 | 3,125 | 30,741 |
| 25,405 | 192 | 22,165 | 5,040 | 3,095 | 30,492 |
| 25,406 | 193 | 22,198 | 5,008 | 3,096 | 30,495 |
| 25,407 | 188 | 21,995 | 4,962 | 3,079 | 30,224 |
| 25,408 | 188 | 21,970 | 4,944 | 3,087 | 30,189 |
| 25,409 | 183 | 22,022 | 4,990 | 3,122 | 30,317 |
| 25,410 | 185 | 21,815 | 4,954 | 3,108 | 30,062 |
| 25,411 | 183 | 21,794 | 4,938 | 3,108 | 30,023 |
| 25,412 | 194 | 21,733 | 4,913 | 3,119 | 29,959 |
| 25,413 | 197 | 21,647 | 4,905 | 3,101 | 29,850 |
| 25,414 | 199 | 21,621 | 4,892 | 3,103 | 29,815 |
| 25,415 | 195 | 21,474 | 4,843 | 3,074 | 29,586 |
| 25,416 | 195 | 21,941 | 4,921 | 3,127 | 30,184 |
| 25,417 | 193 | 22,040 | 4,902 | 3,131 | 30,266 |
| 25,418 | 195 | 22,029 | 4,881 | 3,102 | 30,207 |
| 25,419 | 195 | 21,865 | 4,823 | 3,104 | 29,987 |
| 25,420 | 195 | 22,090 | 4,857 | 3,124 | 30,266 |
| 25,421 | 191 | 22,442 | 4,886 | 3,153 | 30,672 |
| 25,422 | 186 | 22,457 | 4,870 | 3,151 | 30,664 |
| 25,423 | 184 | 22,478 | 4,818 | 3,158 | 30,638 |
| 25,424 | 182 | 22,511 | 4,789 | 3,157 | 30,639 |
| 25,425 | 176 | 22,069 | 4,699 | 3,109 | 30,053 |
| 25,426 | 176 | 22,223 | 4,691 | 3,134 | 30,224 |
| 25,427 | 176 | 22,122 | 4,658 | 3,122 | 30,078 |
| 25,428 | 171 | 22,029 | 4,634 | 3,101 | 29,935 |
| 25,429 | 172 | 22,059 | 4,647 | 3,088 | 29,966 |
| 25,430 | 166 | 22,079 | 4,616 | 3,078 | 29,939 |
| 25,431 | 166 | 22,208 | 4,610 | 3,088 | 30,072 |

|        |     |        |       |       |        |
|--------|-----|--------|-------|-------|--------|
| 25,432 | 156 | 22,357 | 4,611 | 3,103 | 30,227 |
| 25,433 | 147 | 22,430 | 4,618 | 3,096 | 30,291 |
| 25,434 | 143 | 22,269 | 4,574 | 3,075 | 30,061 |
| 25,435 | 132 | 21,986 | 4,544 | 3,059 | 29,721 |
| 25,436 | 128 | 22,383 | 4,635 | 3,137 | 30,283 |
| 25,437 | 122 | 22,279 | 4,614 | 3,141 | 30,156 |
| 25,438 | 117 | 22,301 | 4,593 | 3,149 | 30,160 |
| 25,439 | 128 | 22,470 | 4,604 | 3,143 | 30,345 |
| 25,440 | 131 | 22,235 | 4,574 | 3,123 | 30,063 |
| 25,441 | 130 | 22,246 | 4,551 | 3,130 | 30,057 |
| 25,442 | 132 | 22,332 | 4,554 | 3,120 | 30,138 |
| 25,443 | 133 | 22,436 | 4,587 | 3,136 | 30,292 |
| 25,444 | 135 | 22,637 | 4,598 | 3,179 | 30,549 |
| 25,445 | 132 | 22,585 | 4,556 | 3,192 | 30,465 |
| 25,446 | 142 | 22,682 | 4,570 | 3,179 | 30,573 |
| 25,447 | 143 | 22,617 | 4,492 | 3,139 | 30,391 |
| 25,448 | 147 | 23,009 | 4,564 | 3,169 | 30,889 |
| 25,449 | 147 | 23,060 | 4,535 | 3,180 | 30,922 |
| 25,450 | 144 | 23,040 | 4,490 | 3,145 | 30,819 |
| 25,451 | 143 | 23,059 | 4,474 | 3,131 | 30,807 |
| 25,452 | 145 | 23,088 | 4,451 | 3,126 | 30,810 |
| 25,453 | 138 | 23,044 | 4,445 | 3,114 | 30,741 |
| 25,454 | 138 | 22,972 | 4,428 | 3,130 | 30,668 |
| 25,455 | 140 | 22,951 | 4,419 | 3,138 | 30,648 |
| 25,456 | 143 | 22,924 | 4,403 | 3,127 | 30,597 |
| 25,457 | 149 | 22,920 | 4,420 | 3,133 | 30,622 |
| 25,458 | 153 | 22,937 | 4,419 | 3,107 | 30,616 |
| 25,459 | 155 | 23,029 | 4,430 | 3,111 | 30,725 |
| 25,460 | 160 | 23,261 | 4,460 | 3,146 | 31,027 |
| 25,461 | 157 | 22,726 | 4,316 | 3,064 | 30,263 |
| 25,462 | 157 | 23,000 | 4,337 | 3,086 | 30,580 |
| 25,463 | 150 | 23,045 | 4,326 | 3,088 | 30,609 |

|        |     |        |       |       |        |
|--------|-----|--------|-------|-------|--------|
| 25,464 | 152 | 23,066 | 4,328 | 3,079 | 30,625 |
| 25,465 | 147 | 23,098 | 4,304 | 3,078 | 30,627 |
| 25,466 | 158 | 23,057 | 4,292 | 3,043 | 30,550 |
| 25,467 | 157 | 23,052 | 4,299 | 3,024 | 30,532 |
| 25,468 | 155 | 23,181 | 4,329 | 3,037 | 30,702 |
| 25,469 | 158 | 23,574 | 4,409 | 3,096 | 31,237 |
| 25,470 | 163 | 23,378 | 4,381 | 3,054 | 30,976 |
| 25,471 | 163 | 23,244 | 4,346 | 3,068 | 30,821 |
| 25,472 | 167 | 23,377 | 4,391 | 3,102 | 31,037 |
| 25,473 | 175 | 23,435 | 4,396 | 3,104 | 31,110 |
| 25,474 | 174 | 23,293 | 4,377 | 3,076 | 30,920 |
| 25,475 | 185 | 23,806 | 4,470 | 3,140 | 31,601 |
| 25,476 | 186 | 23,824 | 4,488 | 3,134 | 31,632 |
| 25,477 | 190 | 23,649 | 4,463 | 3,095 | 31,397 |
| 25,478 | 191 | 23,620 | 4,444 | 3,102 | 31,357 |
| 25,479 | 191 | 23,465 | 4,410 | 3,094 | 31,160 |
| 25,480 | 205 | 24,043 | 4,513 | 3,169 | 31,930 |
| 25,481 | 210 | 24,120 | 4,547 | 3,179 | 32,056 |
| 25,482 | 216 | 24,037 | 4,544 | 3,171 | 31,968 |
| 25,483 | 218 | 23,727 | 4,497 | 3,132 | 31,574 |
| 25,484 | 223 | 23,671 | 4,476 | 3,131 | 31,501 |
| 25,485 | 221 | 23,516 | 4,414 | 3,086 | 31,237 |
| 25,486 | 226 | 23,882 | 4,444 | 3,083 | 31,635 |
| 25,487 | 227 | 23,949 | 4,433 | 3,069 | 31,678 |
| 25,488 | 226 | 23,953 | 4,456 | 3,054 | 31,689 |
| 25,489 | 235 | 24,229 | 4,485 | 3,071 | 32,020 |
| 25,490 | 230 | 24,063 | 4,457 | 3,051 | 31,801 |
| 25,491 | 232 | 24,205 | 4,429 | 3,038 | 31,904 |
| 25,492 | 232 | 24,066 | 4,397 | 3,006 | 31,701 |
| 25,493 | 234 | 24,586 | 4,500 | 3,053 | 32,373 |
| 25,494 | 236 | 24,433 | 4,447 | 3,035 | 32,151 |
| 25,495 | 236 | 24,502 | 4,477 | 3,001 | 32,216 |

|        |     |        |       |       |        |
|--------|-----|--------|-------|-------|--------|
| 25,496 | 234 | 24,555 | 4,477 | 2,997 | 32,263 |
| 25,497 | 227 | 24,525 | 4,440 | 3,015 | 32,207 |
| 25,498 | 235 | 24,590 | 4,491 | 3,032 | 32,348 |
| 25,499 | 230 | 24,454 | 4,458 | 3,017 | 32,159 |
| 25,500 | 236 | 24,602 | 4,496 | 3,040 | 32,374 |
| 25,501 | 234 | 24,349 | 4,478 | 3,008 | 32,069 |
| 25,502 | 231 | 24,422 | 4,460 | 3,004 | 32,117 |
| 25,503 | 233 | 24,408 | 4,444 | 2,993 | 32,078 |
| 25,504 | 235 | 24,415 | 4,435 | 2,971 | 32,056 |
| 25,505 | 233 | 24,502 | 4,426 | 2,973 | 32,134 |
| 25,506 | 230 | 24,503 | 4,422 | 2,962 | 32,117 |
| 25,507 | 227 | 24,516 | 4,406 | 2,964 | 32,113 |
| 25,508 | 224 | 24,648 | 4,437 | 2,967 | 32,276 |
| 25,509 | 231 | 24,933 | 4,522 | 3,024 | 32,710 |
| 25,510 | 235 | 25,098 | 4,520 | 3,011 | 32,864 |
| 25,511 | 223 | 25,134 | 4,499 | 2,998 | 32,854 |
| 25,512 | 222 | 25,252 | 4,517 | 2,996 | 32,987 |
| 25,513 | 221 | 25,204 | 4,506 | 2,991 | 32,922 |
| 25,514 | 219 | 25,244 | 4,514 | 3,007 | 32,984 |
| 25,515 | 219 | 25,198 | 4,541 | 2,987 | 32,945 |
| 25,516 | 212 | 25,204 | 4,557 | 3,008 | 32,981 |
| 25,517 | 219 | 25,197 | 4,541 | 3,024 | 32,981 |
| 25,518 | 219 | 25,124 | 4,492 | 3,011 | 32,846 |
| 25,519 | 225 | 25,404 | 4,564 | 3,038 | 33,231 |
| 25,520 | 213 | 24,982 | 4,467 | 2,977 | 32,639 |
| 25,521 | 227 | 25,384 | 4,499 | 3,006 | 33,116 |
| 25,522 | 225 | 25,062 | 4,448 | 2,954 | 32,689 |
| 25,523 | 231 | 25,352 | 4,503 | 2,983 | 33,069 |
| 25,524 | 219 | 25,091 | 4,462 | 2,955 | 32,727 |
| 25,525 | 218 | 25,135 | 4,468 | 2,945 | 32,766 |
| 25,526 | 219 | 25,369 | 4,514 | 2,971 | 33,073 |
| 25,527 | 218 | 25,121 | 4,493 | 2,919 | 32,751 |

|        |     |        |       |       |        |
|--------|-----|--------|-------|-------|--------|
| 25,528 | 217 | 25,415 | 4,556 | 2,967 | 33,155 |
| 25,529 | 215 | 25,589 | 4,594 | 2,990 | 33,388 |
| 25,530 | 221 | 25,827 | 4,658 | 3,016 | 33,722 |
| 25,531 | 217 | 26,125 | 4,695 | 3,071 | 34,108 |
| 25,532 | 216 | 26,191 | 4,702 | 3,095 | 34,204 |
| 25,533 | 207 | 26,244 | 4,692 | 3,097 | 34,240 |
| 25,534 | 215 | 26,328 | 4,705 | 3,098 | 34,346 |
| 25,535 | 207 | 26,190 | 4,680 | 3,092 | 34,169 |
| 25,536 | 212 | 26,628 | 4,738 | 3,127 | 34,705 |
| 25,537 | 220 | 26,671 | 4,755 | 3,121 | 34,767 |
| 25,538 | 220 | 26,633 | 4,711 | 3,121 | 34,685 |
| 25,539 | 221 | 26,699 | 4,686 | 3,128 | 34,734 |
| 25,540 | 215 | 27,051 | 4,732 | 3,164 | 35,162 |
| 25,541 | 213 | 26,946 | 4,728 | 3,164 | 35,051 |
| 25,542 | 212 | 26,653 | 4,684 | 3,147 | 34,696 |
| 25,543 | 206 | 26,634 | 4,687 | 3,147 | 34,674 |
| 25,544 | 217 | 26,866 | 4,709 | 3,171 | 34,963 |
| 25,545 | 221 | 26,363 | 4,643 | 3,129 | 34,356 |
| 25,546 | 222 | 26,275 | 4,637 | 3,140 | 34,274 |
| 25,547 | 223 | 26,085 | 4,621 | 3,122 | 34,051 |
| 25,548 | 223 | 26,225 | 4,629 | 3,134 | 34,211 |
| 25,549 | 213 | 25,798 | 4,558 | 3,094 | 33,663 |
| 25,550 | 213 | 25,570 | 4,528 | 3,079 | 33,390 |
| 25,551 | 208 | 25,343 | 4,492 | 3,071 | 33,114 |
| 25,552 | 204 | 25,093 | 4,449 | 3,059 | 32,805 |
| 25,553 | 206 | 24,862 | 4,436 | 3,060 | 32,564 |
| 25,554 | 205 | 24,815 | 4,428 | 3,060 | 32,508 |
| 25,555 | 206 | 24,679 | 4,399 | 3,070 | 32,354 |
| 25,556 | 201 | 24,603 | 4,405 | 3,067 | 32,276 |
| 25,557 | 204 | 24,447 | 4,415 | 3,069 | 32,135 |
| 25,558 | 209 | 24,408 | 4,431 | 3,078 | 32,126 |
| 25,559 | 202 | 24,206 | 4,379 | 3,056 | 31,843 |

|        |     |        |       |       |        |
|--------|-----|--------|-------|-------|--------|
| 25,560 | 201 | 23,902 | 4,347 | 3,036 | 31,486 |
| 25,561 | 192 | 24,236 | 4,387 | 3,085 | 31,900 |
| 25,562 | 196 | 24,160 | 4,385 | 3,056 | 31,797 |
| 25,563 | 196 | 23,985 | 4,351 | 3,043 | 31,575 |
| 25,564 | 203 | 24,135 | 4,382 | 3,029 | 31,749 |
| 25,565 | 206 | 24,201 | 4,389 | 3,042 | 31,838 |
| 25,566 | 213 | 24,219 | 4,358 | 3,036 | 31,826 |
| 25,567 | 211 | 24,245 | 4,336 | 3,024 | 31,816 |
| 25,568 | 210 | 24,485 | 4,328 | 3,026 | 32,049 |
| 25,569 | 214 | 24,955 | 4,385 | 3,063 | 32,617 |
| 25,570 | 207 | 24,736 | 4,295 | 3,024 | 32,262 |
| 25,571 | 207 | 24,724 | 4,292 | 3,026 | 32,249 |
| 25,572 | 199 | 25,059 | 4,357 | 3,078 | 32,693 |
| 25,573 | 195 | 24,773 | 4,321 | 3,050 | 32,339 |
| 25,574 | 189 | 24,785 | 4,346 | 3,069 | 32,389 |
| 25,575 | 185 | 24,563 | 4,349 | 3,076 | 32,173 |
| 25,576 | 184 | 24,577 | 4,362 | 3,077 | 32,200 |
| 25,577 | 177 | 24,297 | 4,368 | 3,086 | 31,928 |
| 25,578 | 185 | 24,286 | 4,348 | 3,071 | 31,890 |
| 25,579 | 185 | 24,143 | 4,335 | 3,039 | 31,702 |
| 25,580 | 183 | 23,954 | 4,310 | 3,041 | 31,488 |
| 25,581 | 184 | 23,999 | 4,313 | 3,082 | 31,578 |
| 25,582 | 182 | 23,980 | 4,301 | 3,060 | 31,523 |
| 25,583 | 178 | 23,776 | 4,302 | 3,020 | 31,276 |
| 25,584 | 184 | 23,701 | 4,316 | 3,032 | 31,233 |
| 25,585 | 179 | 23,733 | 4,316 | 3,045 | 31,273 |
| 25,586 | 181 | 23,570 | 4,299 | 3,040 | 31,090 |
| 25,587 | 178 | 23,464 | 4,309 | 3,064 | 31,015 |
| 25,588 | 177 | 23,777 | 4,373 | 3,139 | 31,466 |
| 25,589 | 181 | 23,674 | 4,403 | 3,139 | 31,397 |
| 25,590 | 190 | 23,598 | 4,403 | 3,139 | 31,330 |
| 25,591 | 187 | 23,351 | 4,405 | 3,132 | 31,075 |



|        |     |        |       |       |        |
|--------|-----|--------|-------|-------|--------|
| 25,592 | 186 | 23,955 | 4,476 | 3,193 | 31,810 |
| 25,593 | 181 | 23,511 | 4,437 | 3,148 | 31,277 |
| 25,594 | 183 | 23,852 | 4,492 | 3,200 | 31,727 |
| 25,595 | 174 | 23,852 | 4,508 | 3,201 | 31,735 |
| 25,596 | 167 | 23,919 | 4,528 | 3,203 | 31,817 |
| 25,597 | 169 | 24,002 | 4,536 | 3,203 | 31,910 |
| 25,598 | 167 | 24,051 | 4,528 | 3,204 | 31,950 |
| 25,599 | 172 | 24,111 | 4,508 | 3,180 | 31,971 |
| 25,600 | 179 | 24,123 | 4,472 | 3,168 | 31,942 |
| 25,601 | 179 | 24,225 | 4,495 | 3,178 | 32,077 |
| 25,602 | 181 | 24,517 | 4,524 | 3,187 | 32,409 |
| 25,603 | 180 | 24,049 | 4,420 | 3,085 | 31,734 |
| 25,604 | 189 | 24,335 | 4,455 | 3,113 | 32,092 |
| 25,605 | 192 | 24,641 | 4,504 | 3,160 | 32,497 |
| 25,606 | 192 | 24,615 | 4,516 | 3,166 | 32,489 |
| 25,607 | 191 | 25,027 | 4,571 | 3,225 | 33,014 |
| 25,608 | 185 | 24,955 | 4,549 | 3,216 | 32,905 |
| 25,609 | 194 | 25,032 | 4,512 | 3,195 | 32,933 |
| 25,610 | 193 | 25,012 | 4,512 | 3,195 | 32,912 |
| 25,611 | 193 | 24,898 | 4,501 | 3,177 | 32,769 |
| 25,612 | 205 | 25,145 | 4,550 | 3,233 | 33,133 |
| 25,613 | 199 | 24,825 | 4,534 | 3,233 | 32,791 |
| 25,614 | 197 | 24,844 | 4,528 | 3,243 | 32,812 |
| 25,615 | 188 | 24,652 | 4,491 | 3,239 | 32,570 |
| 25,616 | 196 | 24,377 | 4,473 | 3,215 | 32,261 |
| 25,617 | 187 | 24,183 | 4,461 | 3,216 | 32,047 |
| 25,618 | 186 | 24,069 | 4,508 | 3,240 | 32,003 |
| 25,619 | 187 | 23,617 | 4,495 | 3,221 | 31,520 |
| 25,620 | 187 | 23,868 | 4,614 | 3,307 | 31,976 |
| 25,621 | 188 | 23,313 | 4,550 | 3,278 | 31,329 |
| 25,622 | 183 | 23,118 | 4,562 | 3,270 | 31,133 |
| 25,623 | 187 | 23,024 | 4,556 | 3,249 | 31,016 |

|        |     |        |       |       |        |
|--------|-----|--------|-------|-------|--------|
| 25,624 | 188 | 23,038 | 4,534 | 3,245 | 31,005 |
| 25,625 | 194 | 23,143 | 4,530 | 3,236 | 31,103 |
| 25,626 | 194 | 23,105 | 4,510 | 3,205 | 31,014 |
| 25,627 | 204 | 23,120 | 4,496 | 3,197 | 31,017 |
| 25,628 | 205 | 23,164 | 4,512 | 3,207 | 31,088 |
| 25,629 | 199 | 23,045 | 4,540 | 3,233 | 31,017 |
| 25,630 | 205 | 22,882 | 4,553 | 3,257 | 30,897 |
| 25,631 | 209 | 23,292 | 4,631 | 3,290 | 31,422 |
| 25,632 | 201 | 23,077 | 4,615 | 3,273 | 31,166 |
| 25,633 | 204 | 23,356 | 4,722 | 3,326 | 31,608 |
| 25,634 | 197 | 23,116 | 4,650 | 3,304 | 31,267 |
| 25,635 | 200 | 23,221 | 4,666 | 3,335 | 31,422 |
| 25,636 | 202 | 23,283 | 4,714 | 3,349 | 31,548 |
| 25,637 | 197 | 23,477 | 4,745 | 3,376 | 31,795 |
| 25,638 | 208 | 23,598 | 4,781 | 3,357 | 31,944 |
| 25,639 | 209 | 23,344 | 4,719 | 3,304 | 31,576 |
| 25,640 | 208 | 23,277 | 4,738 | 3,319 | 31,542 |
| 25,641 | 198 | 23,007 | 4,713 | 3,294 | 31,212 |
| 25,642 | 200 | 22,703 | 4,684 | 3,260 | 30,847 |
| 25,643 | 208 | 23,916 | 4,965 | 3,405 | 32,494 |
| 25,644 | 213 | 24,151 | 5,013 | 3,452 | 32,829 |
| 25,645 | 220 | 24,008 | 4,960 | 3,429 | 32,617 |
| 25,646 | 227 | 23,999 | 4,952 | 3,437 | 32,615 |
| 25,647 | 227 | 24,006 | 4,978 | 3,445 | 32,656 |
| 25,648 | 227 | 24,445 | 5,101 | 3,490 | 33,263 |
| 25,649 | 224 | 24,381 | 5,102 | 3,497 | 33,204 |
| 25,650 | 224 | 24,315 | 5,114 | 3,505 | 33,158 |
| 25,651 | 228 | 24,322 | 5,173 | 3,518 | 33,241 |
| 25,652 | 229 | 24,338 | 5,182 | 3,527 | 33,276 |
| 25,653 | 228 | 24,467 | 5,183 | 3,555 | 33,433 |
| 25,654 | 228 | 24,399 | 5,195 | 3,551 | 33,373 |
| 25,655 | 221 | 24,669 | 5,274 | 3,611 | 33,775 |

|        |     |        |       |       |        |
|--------|-----|--------|-------|-------|--------|
| 25,656 | 217 | 24,812 | 5,326 | 3,631 | 33,986 |
| 25,657 | 215 | 24,837 | 5,323 | 3,634 | 34,009 |
| 25,658 | 212 | 24,874 | 5,326 | 3,625 | 34,037 |
| 25,659 | 214 | 24,998 | 5,407 | 3,668 | 34,287 |
| 25,660 | 201 | 25,014 | 5,437 | 3,673 | 34,325 |
| 25,661 | 204 | 25,390 | 5,524 | 3,747 | 34,865 |
| 25,662 | 205 | 25,486 | 5,539 | 3,756 | 34,986 |
| 25,663 | 201 | 25,398 | 5,518 | 3,721 | 34,838 |
| 25,664 | 201 | 25,484 | 5,556 | 3,733 | 34,974 |
| 25,665 | 193 | 25,192 | 5,490 | 3,673 | 34,548 |
| 25,666 | 193 | 25,295 | 5,529 | 3,703 | 34,720 |
| 25,667 | 189 | 25,290 | 5,537 | 3,704 | 34,720 |
| 25,668 | 192 | 25,351 | 5,591 | 3,733 | 34,867 |
| 25,669 | 191 | 25,363 | 5,612 | 3,718 | 34,884 |
| 25,670 | 188 | 25,540 | 5,610 | 3,722 | 35,060 |
| 25,671 | 187 | 25,438 | 5,553 | 3,661 | 34,839 |
| 25,672 | 192 | 25,504 | 5,562 | 3,663 | 34,921 |
| 25,673 | 191 | 25,445 | 5,538 | 3,667 | 34,841 |
| 25,674 | 189 | 25,590 | 5,606 | 3,704 | 35,089 |
| 25,675 | 190 | 25,500 | 5,583 | 3,698 | 34,971 |
| 25,676 | 186 | 25,315 | 5,577 | 3,697 | 34,775 |
| 25,677 | 188 | 25,274 | 5,580 | 3,705 | 34,747 |
| 25,678 | 178 | 24,939 | 5,459 | 3,642 | 34,218 |
| 25,679 | 179 | 25,269 | 5,496 | 3,670 | 34,614 |
| 25,680 | 170 | 25,625 | 5,548 | 3,697 | 35,040 |
| 25,681 | 168 | 25,502 | 5,508 | 3,678 | 34,856 |
| 25,682 | 165 | 25,621 | 5,582 | 3,730 | 35,098 |
| 25,683 | 164 | 25,539 | 5,540 | 3,708 | 34,951 |
| 25,684 | 164 | 25,659 | 5,530 | 3,730 | 35,083 |
| 25,685 | 162 | 25,552 | 5,529 | 3,702 | 34,945 |
| 25,686 | 162 | 25,240 | 5,461 | 3,659 | 34,522 |
| 25,687 | 165 | 25,223 | 5,484 | 3,679 | 34,551 |

|        |     |        |       |       |        |
|--------|-----|--------|-------|-------|--------|
| 25,688 | 156 | 24,956 | 5,437 | 3,669 | 34,218 |
| 25,689 | 154 | 24,902 | 5,453 | 3,655 | 34,164 |
| 25,690 | 148 | 24,870 | 5,415 | 3,648 | 34,081 |
| 25,691 | 153 | 24,707 | 5,361 | 3,615 | 33,836 |
| 25,692 | 153 | 24,697 | 5,337 | 3,622 | 33,809 |
| 25,693 | 152 | 24,612 | 5,325 | 3,626 | 33,715 |
| 25,694 | 137 | 24,055 | 5,247 | 3,594 | 33,033 |
| 25,695 | 137 | 24,158 | 5,265 | 3,639 | 33,199 |
| 25,696 | 130 | 24,044 | 5,275 | 3,628 | 33,077 |
| 25,697 | 122 | 23,851 | 5,287 | 3,650 | 32,910 |
| 25,698 | 124 | 23,718 | 5,279 | 3,646 | 32,767 |
| 25,699 | 120 | 23,622 | 5,232 | 3,649 | 32,623 |
| 25,700 | 119 | 23,828 | 5,277 | 3,682 | 32,906 |
| 25,701 | 124 | 23,877 | 5,249 | 3,674 | 32,924 |
| 25,702 | 119 | 23,846 | 5,191 | 3,649 | 32,805 |
| 25,703 | 118 | 23,809 | 5,186 | 3,646 | 32,759 |
| 25,704 | 120 | 24,038 | 5,247 | 3,665 | 33,070 |
| 25,705 | 125 | 23,805 | 5,161 | 3,612 | 32,703 |
| 25,706 | 125 | 23,787 | 5,180 | 3,601 | 32,693 |
| 25,707 | 123 | 23,766 | 5,165 | 3,597 | 32,651 |
| 25,708 | 130 | 23,724 | 5,183 | 3,602 | 32,639 |
| 25,709 | 133 | 23,624 | 5,155 | 3,598 | 32,510 |
| 25,710 | 133 | 23,554 | 5,138 | 3,584 | 32,409 |
| 25,711 | 136 | 23,785 | 5,184 | 3,621 | 32,726 |
| 25,712 | 137 | 23,821 | 5,195 | 3,615 | 32,768 |
| 25,713 | 133 | 23,670 | 5,160 | 3,596 | 32,559 |
| 25,714 | 135 | 23,544 | 5,108 | 3,570 | 32,357 |
| 25,715 | 138 | 23,814 | 5,173 | 3,656 | 32,781 |
| 25,716 | 142 | 23,681 | 5,136 | 3,633 | 32,592 |
| 25,717 | 145 | 23,854 | 5,138 | 3,624 | 32,761 |
| 25,718 | 144 | 24,006 | 5,156 | 3,624 | 32,930 |
| 25,719 | 146 | 24,079 | 5,149 | 3,630 | 33,004 |

|        |     |        |       |       |        |
|--------|-----|--------|-------|-------|--------|
| 25,720 | 147 | 24,032 | 5,130 | 3,626 | 32,935 |
| 25,721 | 150 | 23,885 | 5,073 | 3,600 | 32,708 |
| 25,722 | 148 | 24,058 | 5,111 | 3,628 | 32,945 |
| 25,723 | 148 | 24,326 | 5,176 | 3,650 | 33,300 |
| 25,724 | 149 | 24,321 | 5,148 | 3,629 | 33,247 |
| 25,725 | 148 | 24,047 | 5,111 | 3,601 | 32,907 |
| 25,726 | 152 | 24,350 | 5,218 | 3,664 | 33,384 |
| 25,727 | 151 | 24,074 | 5,158 | 3,632 | 33,015 |
| 25,728 | 155 | 24,172 | 5,212 | 3,680 | 33,219 |
| 25,729 | 151 | 23,956 | 5,191 | 3,683 | 32,981 |
| 25,730 | 151 | 23,833 | 5,196 | 3,681 | 32,861 |
| 25,731 | 157 | 23,683 | 5,180 | 3,662 | 32,682 |
| 25,732 | 158 | 23,808 | 5,173 | 3,642 | 32,781 |
| 25,733 | 161 | 23,596 | 5,118 | 3,615 | 32,490 |
| 25,734 | 161 | 23,440 | 5,107 | 3,586 | 32,294 |
| 25,735 | 168 | 23,856 | 5,223 | 3,658 | 32,905 |
| 25,736 | 162 | 23,566 | 5,146 | 3,613 | 32,487 |
| 25,737 | 160 | 23,641 | 5,115 | 3,600 | 32,516 |
| 25,738 | 160 | 23,630 | 5,127 | 3,594 | 32,511 |
| 25,739 | 158 | 23,570 | 5,089 | 3,591 | 32,408 |
| 25,740 | 155 | 23,270 | 5,057 | 3,575 | 32,057 |
| 25,741 | 161 | 23,588 | 5,155 | 3,620 | 32,524 |
| 25,742 | 155 | 23,419 | 5,138 | 3,600 | 32,312 |
| 25,743 | 159 | 23,735 | 5,204 | 3,624 | 32,722 |
| 25,744 | 160 | 23,763 | 5,209 | 3,620 | 32,752 |
| 25,745 | 160 | 23,620 | 5,136 | 3,574 | 32,490 |
| 25,746 | 167 | 23,699 | 5,144 | 3,561 | 32,571 |
| 25,747 | 167 | 23,659 | 5,131 | 3,558 | 32,515 |
| 25,748 | 165 | 23,739 | 5,125 | 3,553 | 32,582 |
| 25,749 | 166 | 23,993 | 5,193 | 3,575 | 32,927 |
| 25,750 | 165 | 23,649 | 5,117 | 3,528 | 32,459 |
| 25,751 | 168 | 23,725 | 5,181 | 3,545 | 32,619 |

|        |     |        |       |       |        |
|--------|-----|--------|-------|-------|--------|
| 25,752 | 161 | 23,401 | 5,134 | 3,516 | 32,212 |
| 25,753 | 158 | 23,265 | 5,136 | 3,514 | 32,073 |
| 25,754 | 162 | 23,270 | 5,154 | 3,520 | 32,106 |
| 25,755 | 162 | 23,142 | 5,122 | 3,516 | 31,942 |
| 25,756 | 158 | 23,099 | 5,178 | 3,553 | 31,988 |
| 25,757 | 160 | 23,198 | 5,195 | 3,590 | 32,143 |
| 25,758 | 154 | 23,154 | 5,201 | 3,580 | 32,089 |
| 25,759 | 156 | 22,912 | 5,160 | 3,549 | 31,777 |
| 25,760 | 155 | 22,865 | 5,159 | 3,532 | 31,711 |
| 25,761 | 160 | 23,142 | 5,205 | 3,560 | 32,067 |
| 25,762 | 161 | 23,364 | 5,218 | 3,594 | 32,337 |
| 25,763 | 152 | 22,845 | 5,109 | 3,515 | 31,621 |
| 25,764 | 154 | 23,037 | 5,134 | 3,534 | 31,859 |
| 25,765 | 154 | 22,857 | 5,117 | 3,523 | 31,651 |
| 25,766 | 149 | 22,546 | 5,091 | 3,480 | 31,266 |
| 25,767 | 146 | 22,425 | 5,076 | 3,492 | 31,139 |
| 25,768 | 145 | 22,533 | 5,131 | 3,533 | 31,342 |
| 25,769 | 145 | 22,172 | 5,047 | 3,509 | 30,873 |
| 25,770 | 147 | 22,281 | 5,083 | 3,523 | 31,034 |
| 25,771 | 145 | 22,287 | 5,097 | 3,543 | 31,072 |
| 25,772 | 143 | 22,023 | 5,076 | 3,524 | 30,766 |
| 25,773 | 139 | 21,812 | 5,032 | 3,520 | 30,503 |
| 25,774 | 138 | 21,775 | 5,011 | 3,519 | 30,443 |
| 25,775 | 141 | 22,004 | 5,052 | 3,554 | 30,751 |
| 25,776 | 143 | 22,150 | 5,032 | 3,565 | 30,890 |
| 25,777 | 138 | 22,253 | 5,030 | 3,570 | 30,991 |
| 25,778 | 138 | 22,604 | 5,106 | 3,621 | 31,469 |
| 25,779 | 135 | 22,452 | 5,053 | 3,569 | 31,209 |
| 25,780 | 140 | 22,576 | 5,075 | 3,552 | 31,343 |
| 25,781 | 139 | 22,450 | 5,075 | 3,551 | 31,215 |
| 25,782 | 133 | 22,379 | 5,061 | 3,556 | 31,129 |
| 25,783 | 133 | 22,214 | 5,049 | 3,586 | 30,982 |

|        |     |        |       |       |        |
|--------|-----|--------|-------|-------|--------|
| 25,784 | 126 | 22,262 | 5,028 | 3,556 | 30,972 |
| 25,785 | 124 | 22,125 | 4,999 | 3,544 | 30,792 |
| 25,786 | 120 | 21,826 | 4,936 | 3,488 | 30,370 |
| 25,787 | 128 | 21,896 | 4,970 | 3,519 | 30,513 |
| 25,788 | 132 | 21,950 | 4,980 | 3,524 | 30,586 |
| 25,789 | 141 | 21,842 | 4,973 | 3,512 | 30,468 |
| 25,790 | 141 | 21,945 | 4,970 | 3,513 | 30,569 |
| 25,791 | 142 | 22,177 | 5,007 | 3,528 | 30,854 |
| 25,792 | 140 | 22,147 | 4,986 | 3,532 | 30,805 |
| 25,793 | 138 | 22,077 | 4,957 | 3,522 | 30,694 |
| 25,794 | 137 | 21,780 | 4,864 | 3,485 | 30,266 |
| 25,795 | 137 | 21,779 | 4,853 | 3,478 | 30,247 |
| 25,796 | 133 | 21,696 | 4,850 | 3,461 | 30,140 |
| 25,797 | 131 | 21,729 | 4,842 | 3,468 | 30,170 |
| 25,798 | 134 | 21,856 | 4,880 | 3,444 | 30,314 |
| 25,799 | 140 | 22,051 | 4,891 | 3,471 | 30,553 |
| 25,800 | 141 | 22,206 | 4,881 | 3,469 | 30,697 |
| 25,801 | 137 | 22,287 | 4,898 | 3,493 | 30,815 |
| 25,802 | 135 | 22,360 | 4,892 | 3,501 | 30,888 |
| 25,803 | 133 | 22,236 | 4,888 | 3,481 | 30,738 |
| 25,804 | 135 | 22,525 | 4,935 | 3,497 | 31,092 |
| 25,805 | 129 | 22,747 | 4,953 | 3,531 | 31,360 |
| 25,806 | 136 | 23,029 | 4,972 | 3,552 | 31,689 |
| 25,807 | 137 | 23,044 | 4,993 | 3,518 | 31,692 |
| 25,808 | 147 | 23,304 | 5,075 | 3,542 | 32,068 |
| 25,809 | 141 | 22,986 | 5,013 | 3,506 | 31,646 |
| 25,810 | 146 | 23,008 | 4,984 | 3,500 | 31,638 |
| 25,811 | 141 | 22,775 | 4,933 | 3,487 | 31,336 |
| 25,812 | 142 | 23,037 | 5,027 | 3,554 | 31,760 |
| 25,813 | 146 | 22,913 | 5,000 | 3,531 | 31,590 |
| 25,814 | 146 | 22,682 | 4,997 | 3,503 | 31,328 |
| 25,815 | 146 | 22,731 | 4,984 | 3,502 | 31,363 |

|        |     |        |       |       |        |
|--------|-----|--------|-------|-------|--------|
| 25,816 | 144 | 22,734 | 5,008 | 3,488 | 31,374 |
| 25,817 | 144 | 23,010 | 5,043 | 3,519 | 31,716 |
| 25,818 | 155 | 23,324 | 5,120 | 3,603 | 32,202 |
| 25,819 | 155 | 23,249 | 5,116 | 3,605 | 32,125 |
| 25,820 | 151 | 23,446 | 5,131 | 3,625 | 32,353 |
| 25,821 | 151 | 23,593 | 5,195 | 3,676 | 32,615 |
| 25,822 | 152 | 23,659 | 5,194 | 3,682 | 32,687 |
| 25,823 | 150 | 23,604 | 5,177 | 3,669 | 32,600 |
| 25,824 | 155 | 23,384 | 5,149 | 3,635 | 32,323 |
| 25,825 | 154 | 23,154 | 5,105 | 3,617 | 32,030 |
| 25,826 | 152 | 23,542 | 5,199 | 3,666 | 32,559 |
| 25,827 | 154 | 23,648 | 5,222 | 3,697 | 32,721 |
| 25,828 | 155 | 23,613 | 5,237 | 3,705 | 32,710 |
| 25,829 | 153 | 23,435 | 5,171 | 3,680 | 32,439 |
| 25,830 | 151 | 23,424 | 5,130 | 3,667 | 32,372 |
| 25,831 | 155 | 23,636 | 5,146 | 3,675 | 32,612 |
| 25,832 | 160 | 23,856 | 5,182 | 3,684 | 32,882 |
| 25,833 | 161 | 23,950 | 5,161 | 3,682 | 32,954 |
| 25,834 | 164 | 24,301 | 5,212 | 3,709 | 33,386 |
| 25,835 | 163 | 23,863 | 5,106 | 3,672 | 32,804 |
| 25,836 | 166 | 24,196 | 5,130 | 3,697 | 33,189 |
| 25,837 | 158 | 24,148 | 5,106 | 3,686 | 33,098 |
| 25,838 | 166 | 24,134 | 5,109 | 3,678 | 33,087 |
| 25,839 | 161 | 24,412 | 5,178 | 3,710 | 33,461 |
| 25,840 | 157 | 24,122 | 5,094 | 3,655 | 33,028 |
| 25,841 | 159 | 24,129 | 5,076 | 3,637 | 33,001 |
| 25,842 | 159 | 24,343 | 5,163 | 3,691 | 33,356 |
| 25,843 | 152 | 24,024 | 5,112 | 3,642 | 32,930 |
| 25,844 | 153 | 23,946 | 5,131 | 3,654 | 32,884 |
| 25,845 | 151 | 23,787 | 5,118 | 3,633 | 32,689 |
| 25,846 | 152 | 23,693 | 5,141 | 3,640 | 32,626 |
| 25,847 | 152 | 23,404 | 5,107 | 3,605 | 32,268 |



|        |     |        |       |       |        |
|--------|-----|--------|-------|-------|--------|
| 25,848 | 149 | 23,228 | 5,073 | 3,583 | 32,033 |
| 25,849 | 152 | 23,989 | 5,179 | 3,697 | 33,017 |
| 25,850 | 150 | 23,854 | 5,176 | 3,689 | 32,869 |
| 25,851 | 149 | 23,614 | 5,129 | 3,657 | 32,549 |
| 25,852 | 156 | 23,762 | 5,123 | 3,641 | 32,682 |
| 25,853 | 155 | 23,402 | 5,058 | 3,588 | 32,203 |
| 25,854 | 155 | 23,442 | 5,035 | 3,580 | 32,212 |
| 25,855 | 155 | 22,767 | 4,912 | 3,510 | 31,344 |
| 25,856 | 155 | 22,668 | 4,908 | 3,518 | 31,249 |
| 25,857 | 153 | 22,743 | 4,948 | 3,534 | 31,378 |
| 25,858 | 151 | 22,463 | 4,899 | 3,515 | 31,028 |
| 25,859 | 142 | 22,428 | 4,860 | 3,508 | 30,938 |
| 25,860 | 141 | 22,217 | 4,799 | 3,479 | 30,636 |
| 25,861 | 132 | 21,943 | 4,730 | 3,449 | 30,254 |
| 25,862 | 135 | 21,968 | 4,717 | 3,424 | 30,244 |
| 25,863 | 135 | 21,977 | 4,720 | 3,415 | 30,247 |
| 25,864 | 129 | 21,690 | 4,706 | 3,395 | 29,920 |
| 25,865 | 126 | 21,560 | 4,676 | 3,371 | 29,733 |
| 25,866 | 125 | 21,763 | 4,690 | 3,388 | 29,966 |
| 25,867 | 122 | 21,666 | 4,628 | 3,354 | 29,770 |
| 25,868 | 116 | 21,744 | 4,609 | 3,352 | 29,821 |
| 25,869 | 113 | 21,802 | 4,573 | 3,299 | 29,787 |
| 25,870 | 113 | 21,634 | 4,507 | 3,247 | 29,501 |
| 25,871 | 114 | 21,658 | 4,486 | 3,229 | 29,487 |
| 25,872 | 117 | 22,099 | 4,533 | 3,246 | 29,995 |
| 25,873 | 116 | 21,872 | 4,515 | 3,210 | 29,713 |
| 25,874 | 116 | 21,896 | 4,518 | 3,209 | 29,739 |
| 25,875 | 112 | 21,884 | 4,510 | 3,169 | 29,675 |
| 25,876 | 114 | 21,990 | 4,533 | 3,194 | 29,831 |
| 25,877 | 111 | 21,965 | 4,518 | 3,184 | 29,778 |
| 25,878 | 115 | 22,038 | 4,560 | 3,186 | 29,899 |
| 25,879 | 112 | 21,979 | 4,528 | 3,170 | 29,789 |

|        |     |        |       |       |        |
|--------|-----|--------|-------|-------|--------|
| 25,880 | 112 | 21,933 | 4,527 | 3,155 | 29,727 |
| 25,881 | 107 | 21,873 | 4,530 | 3,139 | 29,649 |
| 25,882 | 111 | 22,140 | 4,597 | 3,189 | 30,037 |
| 25,883 | 107 | 21,913 | 4,550 | 3,156 | 29,726 |
| 25,884 | 115 | 21,970 | 4,571 | 3,146 | 29,802 |
| 25,885 | 114 | 21,944 | 4,568 | 3,150 | 29,776 |
| 25,886 | 119 | 21,903 | 4,621 | 3,141 | 29,784 |
| 25,887 | 118 | 21,903 | 4,641 | 3,141 | 29,803 |
| 25,888 | 109 | 22,041 | 4,649 | 3,161 | 29,960 |
| 25,889 | 115 | 22,176 | 4,687 | 3,184 | 30,162 |
| 25,890 | 112 | 22,098 | 4,654 | 3,146 | 30,010 |
| 25,891 | 108 | 22,151 | 4,664 | 3,146 | 30,069 |
| 25,892 | 108 | 22,385 | 4,682 | 3,166 | 30,341 |
| 25,893 | 111 | 22,242 | 4,626 | 3,149 | 30,128 |
| 25,894 | 113 | 22,536 | 4,699 | 3,193 | 30,541 |
| 25,895 | 110 | 22,646 | 4,706 | 3,208 | 30,670 |
| 25,896 | 110 | 22,699 | 4,680 | 3,195 | 30,684 |
| 25,897 | 110 | 22,628 | 4,685 | 3,191 | 30,614 |
| 25,898 | 111 | 22,645 | 4,696 | 3,232 | 30,684 |
| 25,899 | 114 | 22,496 | 4,675 | 3,215 | 30,500 |
| 25,900 | 115 | 22,517 | 4,714 | 3,228 | 30,574 |
| 25,901 | 115 | 22,279 | 4,674 | 3,190 | 30,258 |
| 25,902 | 115 | 22,136 | 4,644 | 3,178 | 30,073 |
| 25,903 | 113 | 22,648 | 4,765 | 3,239 | 30,765 |
| 25,904 | 113 | 22,698 | 4,755 | 3,247 | 30,813 |
| 25,905 | 112 | 22,622 | 4,721 | 3,218 | 30,673 |
| 25,906 | 111 | 22,653 | 4,715 | 3,188 | 30,667 |
| 25,907 | 111 | 22,641 | 4,708 | 3,190 | 30,650 |
| 25,908 | 109 | 22,771 | 4,718 | 3,215 | 30,813 |
| 25,909 | 107 | 22,512 | 4,641 | 3,168 | 30,428 |
| 25,910 | 107 | 22,560 | 4,626 | 3,155 | 30,448 |
| 25,911 | 108 | 22,535 | 4,631 | 3,149 | 30,423 |

|        |     |        |       |       |        |
|--------|-----|--------|-------|-------|--------|
| 25,912 | 116 | 22,850 | 4,704 | 3,187 | 30,857 |
| 25,913 | 116 | 22,958 | 4,690 | 3,188 | 30,952 |
| 25,914 | 120 | 22,876 | 4,654 | 3,150 | 30,800 |
| 25,915 | 121 | 22,888 | 4,624 | 3,134 | 30,767 |
| 25,916 | 123 | 23,309 | 4,711 | 3,177 | 31,320 |
| 25,917 | 125 | 23,493 | 4,751 | 3,193 | 31,562 |
| 25,918 | 129 | 22,833 | 4,644 | 3,125 | 30,731 |
| 25,919 | 129 | 22,748 | 4,629 | 3,105 | 30,611 |
| 25,920 | 129 | 22,435 | 4,589 | 3,081 | 30,234 |
| 25,921 | 127 | 22,019 | 4,529 | 3,040 | 29,715 |
| 25,922 | 133 | 22,898 | 4,726 | 3,160 | 30,917 |
| 25,923 | 131 | 22,894 | 4,739 | 3,163 | 30,927 |
| 25,924 | 131 | 22,704 | 4,671 | 3,129 | 30,635 |
| 25,925 | 137 | 22,458 | 4,578 | 3,079 | 30,252 |
| 25,926 | 136 | 22,270 | 4,533 | 3,055 | 29,994 |
| 25,927 | 134 | 22,421 | 4,566 | 3,081 | 30,202 |
| 25,928 | 129 | 22,240 | 4,536 | 3,082 | 29,987 |
| 25,929 | 130 | 22,208 | 4,538 | 3,071 | 29,947 |
| 25,930 | 133 | 22,330 | 4,533 | 3,057 | 30,053 |
| 25,931 | 133 | 22,135 | 4,502 | 3,031 | 29,801 |
| 25,932 | 139 | 22,369 | 4,535 | 3,046 | 30,089 |
| 25,933 | 136 | 22,597 | 4,526 | 3,072 | 30,331 |
| 25,934 | 132 | 22,188 | 4,470 | 3,045 | 29,835 |
| 25,935 | 128 | 22,297 | 4,503 | 3,067 | 29,995 |
| 25,936 | 130 | 22,269 | 4,473 | 3,056 | 29,928 |
| 25,937 | 123 | 22,140 | 4,437 | 3,034 | 29,734 |
| 25,938 | 124 | 22,248 | 4,456 | 3,038 | 29,866 |
| 25,939 | 128 | 22,162 | 4,467 | 3,056 | 29,813 |
| 25,940 | 129 | 22,209 | 4,463 | 3,059 | 29,860 |
| 25,941 | 131 | 22,222 | 4,474 | 3,060 | 29,887 |
| 25,942 | 132 | 22,155 | 4,475 | 3,065 | 29,827 |
| 25,943 | 130 | 22,216 | 4,503 | 3,085 | 29,934 |

|        |     |        |       |       |        |
|--------|-----|--------|-------|-------|--------|
| 25,944 | 130 | 22,079 | 4,520 | 3,113 | 29,842 |
| 25,945 | 126 | 21,534 | 4,432 | 3,030 | 29,122 |
| 25,946 | 129 | 21,994 | 4,524 | 3,092 | 29,739 |
| 25,947 | 127 | 21,974 | 4,482 | 3,078 | 29,661 |
| 25,948 | 131 | 21,827 | 4,402 | 3,025 | 29,385 |
| 25,949 | 132 | 22,143 | 4,427 | 3,041 | 29,743 |
| 25,950 | 124 | 22,152 | 4,434 | 3,032 | 29,742 |
| 25,951 | 124 | 22,108 | 4,417 | 3,011 | 29,660 |
| 25,952 | 129 | 22,068 | 4,372 | 2,985 | 29,554 |
| 25,953 | 135 | 22,422 | 4,425 | 3,027 | 30,009 |
| 25,954 | 133 | 22,280 | 4,381 | 3,015 | 29,809 |
| 25,955 | 134 | 22,300 | 4,391 | 3,013 | 29,838 |
| 25,956 | 137 | 22,486 | 4,450 | 3,041 | 30,114 |
| 25,957 | 137 | 22,414 | 4,456 | 3,025 | 30,032 |
| 25,958 | 138 | 22,334 | 4,426 | 3,001 | 29,899 |
| 25,959 | 139 | 22,376 | 4,430 | 3,020 | 29,965 |
| 25,960 | 139 | 22,363 | 4,441 | 3,025 | 29,968 |
| 25,961 | 142 | 22,054 | 4,403 | 3,013 | 29,612 |
| 25,962 | 148 | 22,169 | 4,431 | 3,022 | 29,770 |
| 25,963 | 142 | 22,096 | 4,423 | 3,024 | 29,685 |
| 25,964 | 151 | 22,171 | 4,476 | 3,069 | 29,867 |
| 25,965 | 149 | 22,144 | 4,505 | 3,076 | 29,874 |
| 25,966 | 149 | 22,034 | 4,491 | 3,086 | 29,760 |
| 25,967 | 149 | 21,888 | 4,441 | 3,068 | 29,546 |
| 25,968 | 148 | 21,952 | 4,461 | 3,073 | 29,634 |
| 25,969 | 147 | 22,126 | 4,497 | 3,102 | 29,872 |
| 25,970 | 147 | 22,026 | 4,474 | 3,082 | 29,729 |
| 25,971 | 146 | 22,040 | 4,483 | 3,114 | 29,783 |
| 25,972 | 144 | 22,451 | 4,536 | 3,153 | 30,284 |
| 25,973 | 144 | 22,527 | 4,564 | 3,169 | 30,404 |
| 25,974 | 145 | 22,552 | 4,547 | 3,185 | 30,429 |
| 25,975 | 143 | 22,427 | 4,520 | 3,170 | 30,260 |

|        |     |        |       |       |        |
|--------|-----|--------|-------|-------|--------|
| 25,976 | 142 | 22,494 | 4,574 | 3,178 | 30,388 |
| 25,977 | 143 | 22,509 | 4,575 | 3,192 | 30,419 |
| 25,978 | 154 | 22,581 | 4,563 | 3,181 | 30,479 |
| 25,979 | 154 | 22,617 | 4,579 | 3,169 | 30,519 |
| 25,980 | 154 | 22,649 | 4,579 | 3,185 | 30,567 |
| 25,981 | 154 | 22,520 | 4,577 | 3,178 | 30,429 |
| 25,982 | 157 | 22,803 | 4,600 | 3,202 | 30,762 |
| 25,983 | 158 | 22,993 | 4,623 | 3,235 | 31,009 |
| 25,984 | 167 | 22,976 | 4,622 | 3,215 | 30,980 |
| 25,985 | 165 | 23,027 | 4,640 | 3,211 | 31,043 |
| 25,986 | 164 | 23,024 | 4,655 | 3,210 | 31,053 |
| 25,987 | 161 | 22,753 | 4,595 | 3,187 | 30,696 |
| 25,988 | 161 | 22,854 | 4,597 | 3,213 | 30,825 |
| 25,989 | 158 | 23,012 | 4,630 | 3,238 | 31,038 |
| 25,990 | 156 | 22,922 | 4,634 | 3,236 | 30,948 |
| 25,991 | 163 | 22,825 | 4,637 | 3,233 | 30,858 |
| 25,992 | 166 | 22,804 | 4,650 | 3,261 | 30,881 |
| 25,993 | 168 | 22,955 | 4,669 | 3,242 | 31,034 |
| 25,994 | 165 | 22,987 | 4,646 | 3,204 | 31,002 |
| 25,995 | 165 | 23,167 | 4,685 | 3,220 | 31,237 |
| 25,996 | 170 | 23,580 | 4,729 | 3,277 | 31,756 |
| 25,997 | 177 | 23,580 | 4,713 | 3,272 | 31,742 |
| 25,998 | 175 | 23,467 | 4,728 | 3,256 | 31,626 |
| 25,999 | 175 | 23,603 | 4,745 | 3,265 | 31,788 |
| 26,000 | 173 | 23,862 | 4,807 | 3,303 | 32,145 |
| 26,001 | 176 | 23,533 | 4,741 | 3,277 | 31,727 |
| 26,002 | 175 | 23,460 | 4,753 | 3,273 | 31,661 |
| 26,003 | 168 | 23,504 | 4,789 | 3,297 | 31,758 |
| 26,004 | 171 | 23,415 | 4,814 | 3,318 | 31,718 |
| 26,005 | 169 | 22,756 | 4,757 | 3,274 | 30,956 |
| 26,006 | 169 | 22,986 | 4,773 | 3,309 | 31,237 |
| 26,007 | 169 | 22,885 | 4,730 | 3,279 | 31,063 |

|        |     |        |       |       |        |
|--------|-----|--------|-------|-------|--------|
| 26,008 | 170 | 22,944 | 4,723 | 3,287 | 31,124 |
| 26,009 | 174 | 22,924 | 4,728 | 3,276 | 31,102 |
| 26,010 | 175 | 22,936 | 4,707 | 3,251 | 31,069 |
| 26,011 | 170 | 22,970 | 4,679 | 3,229 | 31,048 |
| 26,012 | 165 | 22,866 | 4,678 | 3,216 | 30,925 |
| 26,013 | 165 | 22,758 | 4,684 | 3,221 | 30,828 |
| 26,014 | 164 | 22,906 | 4,694 | 3,220 | 30,984 |
| 26,015 | 162 | 22,952 | 4,693 | 3,216 | 31,023 |
| 26,016 | 162 | 23,061 | 4,662 | 3,227 | 31,112 |
| 26,017 | 166 | 22,788 | 4,627 | 3,193 | 30,774 |
| 26,018 | 165 | 22,622 | 4,610 | 3,169 | 30,566 |
| 26,019 | 168 | 22,542 | 4,601 | 3,141 | 30,452 |
| 26,020 | 168 | 22,349 | 4,580 | 3,103 | 30,200 |
| 26,021 | 177 | 22,820 | 4,661 | 3,159 | 30,817 |
| 26,022 | 177 | 22,793 | 4,648 | 3,157 | 30,775 |
| 26,023 | 170 | 22,704 | 4,651 | 3,136 | 30,661 |
| 26,024 | 170 | 21,958 | 4,501 | 3,047 | 29,676 |
| 26,025 | 170 | 22,057 | 4,541 | 3,054 | 29,822 |
| 26,026 | 169 | 22,175 | 4,547 | 3,050 | 29,941 |
| 26,027 | 176 | 22,102 | 4,530 | 3,026 | 29,834 |
| 26,028 | 178 | 22,136 | 4,517 | 3,014 | 29,845 |
| 26,029 | 177 | 22,447 | 4,584 | 3,042 | 30,250 |
| 26,030 | 177 | 22,304 | 4,531 | 3,017 | 30,029 |
| 26,031 | 177 | 22,300 | 4,541 | 3,024 | 30,042 |
| 26,032 | 173 | 22,428 | 4,536 | 3,036 | 30,173 |
| 26,033 | 169 | 21,905 | 4,470 | 2,978 | 29,522 |
| 26,034 | 174 | 22,053 | 4,508 | 3,012 | 29,747 |
| 26,035 | 166 | 22,050 | 4,514 | 3,011 | 29,741 |
| 26,036 | 168 | 22,011 | 4,472 | 3,006 | 29,657 |
| 26,037 | 169 | 21,999 | 4,470 | 3,002 | 29,640 |
| 26,038 | 174 | 21,936 | 4,469 | 2,981 | 29,560 |
| 26,039 | 174 | 21,902 | 4,497 | 2,983 | 29,556 |

|        |     |        |       |       |        |
|--------|-----|--------|-------|-------|--------|
| 26,040 | 171 | 21,830 | 4,478 | 2,968 | 29,447 |
| 26,041 | 172 | 21,736 | 4,477 | 2,970 | 29,355 |
| 26,042 | 164 | 21,591 | 4,441 | 2,969 | 29,165 |
| 26,043 | 161 | 21,440 | 4,397 | 2,952 | 28,950 |
| 26,044 | 159 | 21,320 | 4,377 | 2,973 | 28,829 |
| 26,045 | 160 | 21,266 | 4,401 | 3,003 | 28,830 |
| 26,046 | 161 | 21,177 | 4,392 | 2,979 | 28,709 |
| 26,047 | 156 | 21,006 | 4,396 | 2,976 | 28,534 |
| 26,048 | 151 | 21,634 | 4,557 | 3,088 | 29,430 |
| 26,049 | 153 | 21,687 | 4,576 | 3,124 | 29,540 |
| 26,050 | 153 | 21,698 | 4,649 | 3,155 | 29,655 |
| 26,051 | 154 | 21,767 | 4,695 | 3,172 | 29,788 |
| 26,052 | 157 | 22,010 | 4,754 | 3,209 | 30,130 |
| 26,053 | 160 | 22,245 | 4,817 | 3,215 | 30,437 |
| 26,054 | 158 | 22,385 | 4,844 | 3,242 | 30,629 |
| 26,055 | 155 | 22,413 | 4,838 | 3,213 | 30,619 |
| 26,056 | 156 | 22,440 | 4,859 | 3,220 | 30,675 |
| 26,057 | 154 | 22,679 | 4,917 | 3,284 | 31,034 |
| 26,058 | 152 | 22,763 | 4,970 | 3,317 | 31,202 |
| 26,059 | 148 | 22,806 | 5,009 | 3,318 | 31,281 |
| 26,060 | 142 | 22,540 | 4,970 | 3,300 | 30,952 |
| 26,061 | 142 | 22,584 | 4,999 | 3,331 | 31,056 |
| 26,062 | 146 | 22,816 | 5,044 | 3,383 | 31,389 |
| 26,063 | 144 | 22,644 | 5,010 | 3,374 | 31,172 |
| 26,064 | 150 | 23,034 | 5,053 | 3,409 | 31,646 |
| 26,065 | 148 | 23,040 | 5,056 | 3,400 | 31,644 |
| 26,066 | 145 | 23,064 | 5,049 | 3,406 | 31,664 |
| 26,067 | 146 | 22,981 | 5,058 | 3,388 | 31,573 |
| 26,068 | 139 | 22,675 | 5,025 | 3,352 | 31,191 |
| 26,069 | 143 | 22,748 | 5,016 | 3,361 | 31,268 |
| 26,070 | 150 | 23,015 | 5,063 | 3,390 | 31,618 |
| 26,071 | 159 | 22,699 | 5,008 | 3,358 | 31,224 |

|        |     |        |       |       |        |
|--------|-----|--------|-------|-------|--------|
| 26,072 | 149 | 22,401 | 4,964 | 3,337 | 30,851 |
| 26,073 | 153 | 22,620 | 4,998 | 3,343 | 31,114 |
| 26,074 | 153 | 22,501 | 4,994 | 3,359 | 31,007 |
| 26,075 | 151 | 22,470 | 4,978 | 3,345 | 30,944 |
| 26,076 | 154 | 22,224 | 4,918 | 3,314 | 30,610 |
| 26,077 | 151 | 21,949 | 4,885 | 3,302 | 30,287 |
| 26,078 | 145 | 22,499 | 4,963 | 3,370 | 30,977 |
| 26,079 | 143 | 22,918 | 5,036 | 3,416 | 31,513 |
| 26,080 | 145 | 22,995 | 5,044 | 3,445 | 31,629 |
| 26,081 | 143 | 22,783 | 5,029 | 3,402 | 31,357 |
| 26,082 | 144 | 22,785 | 5,028 | 3,394 | 31,351 |
| 26,083 | 147 | 22,999 | 5,072 | 3,416 | 31,634 |
| 26,084 | 146 | 23,068 | 5,072 | 3,428 | 31,714 |
| 26,085 | 144 | 22,865 | 5,050 | 3,365 | 31,424 |
| 26,086 | 145 | 22,835 | 5,061 | 3,368 | 31,409 |
| 26,087 | 147 | 22,893 | 5,093 | 3,377 | 31,510 |
| 26,088 | 149 | 23,350 | 5,145 | 3,408 | 32,052 |
| 26,089 | 146 | 23,022 | 5,090 | 3,363 | 31,621 |
| 26,090 | 148 | 23,229 | 5,091 | 3,369 | 31,837 |
| 26,091 | 153 | 23,132 | 5,078 | 3,369 | 31,732 |
| 26,092 | 154 | 22,906 | 5,047 | 3,329 | 31,436 |
| 26,093 | 152 | 23,314 | 5,122 | 3,362 | 31,950 |
| 26,094 | 152 | 23,172 | 5,100 | 3,341 | 31,765 |
| 26,095 | 152 | 22,836 | 5,062 | 3,296 | 31,346 |
| 26,096 | 152 | 22,499 | 4,985 | 3,248 | 30,884 |
| 26,097 | 150 | 22,338 | 4,941 | 3,227 | 30,656 |
| 26,098 | 148 | 21,975 | 4,817 | 3,137 | 30,077 |
| 26,099 | 146 | 21,580 | 4,755 | 3,086 | 29,567 |
| 26,100 | 144 | 21,359 | 4,667 | 3,002 | 29,172 |
| 26,101 | 143 | 20,989 | 4,532 | 2,941 | 28,605 |
| 26,102 | 137 | 20,505 | 4,412 | 2,862 | 27,916 |
| 26,103 | 135 | 20,404 | 4,398 | 2,860 | 27,797 |



|        |     |        |       |       |        |
|--------|-----|--------|-------|-------|--------|
| 26,104 | 134 | 20,193 | 4,354 | 2,856 | 27,537 |
| 26,105 | 135 | 20,130 | 4,322 | 2,832 | 27,419 |
| 26,106 | 128 | 19,927 | 4,256 | 2,787 | 27,098 |
| 26,107 | 128 | 20,271 | 4,307 | 2,799 | 27,505 |
| 26,108 | 130 | 20,310 | 4,326 | 2,791 | 27,557 |
| 26,109 | 130 | 20,347 | 4,306 | 2,791 | 27,574 |
| 26,110 | 138 | 20,345 | 4,332 | 2,796 | 27,611 |
| 26,111 | 141 | 20,336 | 4,338 | 2,787 | 27,602 |
| 26,112 | 143 | 20,426 | 4,353 | 2,799 | 27,721 |
| 26,113 | 147 | 20,503 | 4,390 | 2,795 | 27,835 |
| 26,114 | 147 | 20,461 | 4,382 | 2,791 | 27,781 |
| 26,115 | 141 | 20,564 | 4,415 | 2,821 | 27,941 |
| 26,116 | 142 | 20,490 | 4,423 | 2,844 | 27,899 |
| 26,117 | 142 | 20,418 | 4,426 | 2,821 | 27,807 |
| 26,118 | 144 | 20,358 | 4,404 | 2,820 | 27,726 |
| 26,119 | 142 | 20,201 | 4,390 | 2,810 | 27,543 |
| 26,120 | 142 | 20,342 | 4,422 | 2,823 | 27,729 |
| 26,121 | 139 | 20,307 | 4,424 | 2,827 | 27,697 |
| 26,122 | 134 | 20,602 | 4,471 | 2,864 | 28,071 |
| 26,123 | 130 | 20,469 | 4,416 | 2,854 | 27,869 |
| 26,124 | 136 | 20,642 | 4,457 | 2,875 | 28,110 |
| 26,125 | 147 | 20,515 | 4,436 | 2,860 | 27,958 |
| 26,126 | 147 | 20,429 | 4,454 | 2,864 | 27,894 |
| 26,127 | 143 | 20,285 | 4,474 | 2,864 | 27,766 |
| 26,128 | 143 | 20,230 | 4,471 | 2,871 | 27,715 |
| 26,129 | 143 | 20,163 | 4,449 | 2,874 | 27,629 |
| 26,130 | 148 | 20,232 | 4,480 | 2,905 | 27,765 |
| 26,131 | 143 | 20,155 | 4,528 | 2,877 | 27,703 |
| 26,132 | 142 | 19,933 | 4,509 | 2,872 | 27,456 |
| 26,133 | 141 | 19,784 | 4,523 | 2,876 | 27,324 |
| 26,134 | 141 | 19,738 | 4,524 | 2,871 | 27,274 |
| 26,135 | 139 | 19,594 | 4,508 | 2,878 | 27,119 |

|        |     |        |       |       |        |
|--------|-----|--------|-------|-------|--------|
| 26,136 | 139 | 19,820 | 4,554 | 2,909 | 27,422 |
| 26,137 | 134 | 19,460 | 4,504 | 2,881 | 26,979 |
| 26,138 | 137 | 19,640 | 4,555 | 2,894 | 27,226 |
| 26,139 | 138 | 19,769 | 4,638 | 2,931 | 27,476 |
| 26,140 | 138 | 19,829 | 4,667 | 2,940 | 27,574 |
| 26,141 | 141 | 19,844 | 4,705 | 2,953 | 27,643 |
| 26,142 | 139 | 19,955 | 4,713 | 2,941 | 27,748 |
| 26,143 | 139 | 20,114 | 4,774 | 2,958 | 27,985 |
| 26,144 | 139 | 20,351 | 4,822 | 2,962 | 28,274 |
| 26,145 | 141 | 20,494 | 4,811 | 2,947 | 28,393 |
| 26,146 | 144 | 20,736 | 4,884 | 2,979 | 28,743 |
| 26,147 | 145 | 20,676 | 4,911 | 2,984 | 28,716 |
| 26,148 | 147 | 20,570 | 4,873 | 2,964 | 28,554 |
| 26,149 | 147 | 20,627 | 4,891 | 2,957 | 28,622 |
| 26,150 | 148 | 20,491 | 4,912 | 2,954 | 28,505 |
| 26,151 | 146 | 20,584 | 4,950 | 2,983 | 28,663 |
| 26,152 | 146 | 20,318 | 4,932 | 2,944 | 28,340 |
| 26,153 | 146 | 20,217 | 4,930 | 2,941 | 28,234 |
| 26,154 | 147 | 20,286 | 4,987 | 2,958 | 28,378 |
| 26,155 | 149 | 20,285 | 4,993 | 2,947 | 28,374 |
| 26,156 | 151 | 20,067 | 4,990 | 2,940 | 28,148 |
| 26,157 | 155 | 19,746 | 4,923 | 2,909 | 27,733 |
| 26,158 | 155 | 19,516 | 4,882 | 2,896 | 27,449 |
| 26,159 | 162 | 19,341 | 4,847 | 2,878 | 27,228 |
| 26,160 | 163 | 19,131 | 4,809 | 2,850 | 26,953 |
| 26,161 | 160 | 19,703 | 4,901 | 2,957 | 27,721 |
| 26,162 | 160 | 19,481 | 4,865 | 2,917 | 27,423 |
| 26,163 | 153 | 19,591 | 4,852 | 2,908 | 27,504 |
| 26,164 | 157 | 19,809 | 4,911 | 2,941 | 27,818 |
| 26,165 | 157 | 19,578 | 4,853 | 2,894 | 27,482 |
| 26,166 | 159 | 19,621 | 4,859 | 2,882 | 27,521 |
| 26,167 | 163 | 19,883 | 4,914 | 2,903 | 27,863 |

|        |     |        |       |       |        |
|--------|-----|--------|-------|-------|--------|
| 26,168 | 162 | 19,721 | 4,872 | 2,892 | 27,647 |
| 26,169 | 162 | 19,718 | 4,876 | 2,887 | 27,643 |
| 26,170 | 160 | 19,797 | 4,879 | 2,889 | 27,725 |
| 26,171 | 158 | 19,432 | 4,783 | 2,839 | 27,212 |
| 26,172 | 159 | 19,577 | 4,832 | 2,856 | 27,424 |
| 26,173 | 154 | 19,469 | 4,809 | 2,850 | 27,282 |
| 26,174 | 152 | 19,321 | 4,825 | 2,838 | 27,136 |
| 26,175 | 147 | 19,460 | 4,877 | 2,843 | 27,327 |
| 26,176 | 141 | 19,285 | 4,825 | 2,801 | 27,052 |
| 26,177 | 146 | 19,456 | 4,835 | 2,796 | 27,233 |
| 26,178 | 146 | 19,456 | 4,852 | 2,802 | 27,256 |
| 26,179 | 149 | 19,424 | 4,859 | 2,796 | 27,228 |
| 26,180 | 148 | 19,491 | 4,867 | 2,789 | 27,295 |
| 26,181 | 146 | 19,675 | 4,919 | 2,780 | 27,520 |
| 26,182 | 141 | 19,356 | 4,786 | 2,739 | 27,022 |
| 26,183 | 151 | 19,476 | 4,805 | 2,749 | 27,181 |
| 26,184 | 148 | 19,410 | 4,772 | 2,717 | 27,047 |
| 26,185 | 150 | 19,745 | 4,826 | 2,751 | 27,472 |
| 26,186 | 150 | 19,749 | 4,819 | 2,758 | 27,476 |
| 26,187 | 156 | 19,405 | 4,684 | 2,684 | 26,929 |
| 26,188 | 158 | 19,571 | 4,698 | 2,718 | 27,145 |
| 26,189 | 152 | 19,725 | 4,722 | 2,758 | 27,357 |
| 26,190 | 154 | 19,730 | 4,740 | 2,778 | 27,402 |
| 26,191 | 146 | 19,533 | 4,645 | 2,738 | 27,062 |
| 26,192 | 146 | 19,562 | 4,675 | 2,754 | 27,137 |
| 26,193 | 150 | 19,464 | 4,701 | 2,776 | 27,091 |
| 26,194 | 147 | 19,313 | 4,677 | 2,783 | 26,920 |
| 26,195 | 149 | 19,244 | 4,621 | 2,774 | 26,788 |
| 26,196 | 147 | 19,349 | 4,646 | 2,786 | 26,928 |
| 26,197 | 147 | 19,542 | 4,664 | 2,816 | 27,169 |
| 26,198 | 144 | 19,478 | 4,595 | 2,797 | 27,014 |
| 26,199 | 144 | 19,896 | 4,681 | 2,832 | 27,553 |

|        |     |        |       |       |        |
|--------|-----|--------|-------|-------|--------|
| 26,200 | 147 | 20,094 | 4,677 | 2,864 | 27,782 |
| 26,201 | 150 | 20,136 | 4,639 | 2,869 | 27,794 |
| 26,202 | 156 | 20,281 | 4,691 | 2,887 | 28,015 |
| 26,203 | 155 | 20,302 | 4,658 | 2,877 | 27,992 |
| 26,204 | 153 | 20,337 | 4,657 | 2,872 | 28,019 |
| 26,205 | 155 | 20,555 | 4,689 | 2,889 | 28,288 |
| 26,206 | 155 | 20,387 | 4,632 | 2,860 | 28,034 |
| 26,207 | 151 | 20,127 | 4,567 | 2,832 | 27,677 |
| 26,208 | 155 | 20,408 | 4,645 | 2,892 | 28,100 |
| 26,209 | 167 | 20,247 | 4,562 | 2,844 | 27,820 |
| 26,210 | 160 | 19,968 | 4,476 | 2,794 | 27,398 |
| 26,211 | 161 | 20,025 | 4,489 | 2,797 | 27,472 |
| 26,212 | 164 | 20,067 | 4,519 | 2,782 | 27,532 |
| 26,213 | 168 | 19,975 | 4,502 | 2,785 | 27,430 |
| 26,214 | 172 | 19,760 | 4,432 | 2,760 | 27,124 |
| 26,215 | 173 | 19,778 | 4,443 | 2,753 | 27,147 |
| 26,216 | 172 | 19,615 | 4,401 | 2,721 | 26,909 |
| 26,217 | 174 | 19,592 | 4,389 | 2,728 | 26,883 |
| 26,218 | 167 | 19,421 | 4,333 | 2,714 | 26,635 |
| 26,219 | 164 | 19,722 | 4,429 | 2,763 | 27,078 |
| 26,220 | 168 | 19,955 | 4,471 | 2,783 | 27,377 |
| 26,221 | 167 | 19,741 | 4,431 | 2,763 | 27,102 |
| 26,222 | 165 | 19,802 | 4,471 | 2,797 | 27,235 |
| 26,223 | 183 | 20,076 | 4,525 | 2,842 | 27,626 |
| 26,224 | 189 | 20,153 | 4,499 | 2,818 | 27,659 |
| 26,225 | 194 | 20,222 | 4,493 | 2,847 | 27,756 |
| 26,226 | 195 | 20,277 | 4,492 | 2,847 | 27,811 |
| 26,227 | 193 | 20,538 | 4,542 | 2,901 | 28,174 |
| 26,228 | 186 | 20,327 | 4,488 | 2,873 | 27,874 |
| 26,229 | 186 | 20,160 | 4,414 | 2,849 | 27,609 |
| 26,230 | 187 | 20,292 | 4,453 | 2,855 | 27,787 |
| 26,231 | 184 | 20,293 | 4,433 | 2,879 | 27,789 |

|        |     |        |       |       |        |
|--------|-----|--------|-------|-------|--------|
| 26,232 | 184 | 20,143 | 4,409 | 2,872 | 27,608 |
| 26,233 | 177 | 20,029 | 4,358 | 2,851 | 27,415 |
| 26,234 | 177 | 20,103 | 4,338 | 2,851 | 27,469 |
| 26,235 | 181 | 20,101 | 4,339 | 2,840 | 27,461 |
| 26,236 | 181 | 19,926 | 4,298 | 2,806 | 27,211 |
| 26,237 | 170 | 19,683 | 4,244 | 2,760 | 26,857 |
| 26,238 | 168 | 19,778 | 4,253 | 2,786 | 26,985 |
| 26,239 | 173 | 19,376 | 4,191 | 2,740 | 26,480 |
| 26,240 | 178 | 19,409 | 4,186 | 2,717 | 26,490 |
| 26,241 | 179 | 19,386 | 4,176 | 2,710 | 26,451 |
| 26,242 | 183 | 19,345 | 4,171 | 2,698 | 26,397 |
| 26,243 | 182 | 19,281 | 4,162 | 2,688 | 26,313 |
| 26,244 | 179 | 19,257 | 4,146 | 2,692 | 26,274 |
| 26,245 | 182 | 19,069 | 4,081 | 2,651 | 25,983 |
| 26,246 | 180 | 18,793 | 4,034 | 2,624 | 25,631 |
| 26,247 | 180 | 18,831 | 4,047 | 2,652 | 25,710 |
| 26,248 | 178 | 18,682 | 3,999 | 2,628 | 25,487 |
| 26,249 | 178 | 18,633 | 3,998 | 2,613 | 25,422 |
| 26,250 | 190 | 18,922 | 4,078 | 2,693 | 25,883 |
| 26,251 | 189 | 19,066 | 4,107 | 2,711 | 26,073 |
| 26,252 | 187 | 19,347 | 4,154 | 2,716 | 26,404 |
| 26,253 | 182 | 19,454 | 4,146 | 2,735 | 26,517 |
| 26,254 | 182 | 19,565 | 4,183 | 2,785 | 26,715 |
| 26,255 | 185 | 19,937 | 4,264 | 2,840 | 27,226 |
| 26,256 | 182 | 19,918 | 4,300 | 2,856 | 27,256 |
| 26,257 | 182 | 20,128 | 4,381 | 2,909 | 27,600 |
| 26,258 | 177 | 20,297 | 4,468 | 2,949 | 27,891 |
| 26,259 | 176 | 20,689 | 4,571 | 3,014 | 28,450 |
| 26,260 | 166 | 20,666 | 4,568 | 3,014 | 28,414 |
| 26,261 | 162 | 20,927 | 4,648 | 3,063 | 28,800 |
| 26,262 | 162 | 21,387 | 4,788 | 3,185 | 29,522 |
| 26,263 | 158 | 21,490 | 4,821 | 3,216 | 29,685 |

|        |     |        |       |       |        |
|--------|-----|--------|-------|-------|--------|
| 26,264 | 154 | 21,631 | 4,831 | 3,230 | 29,846 |
| 26,265 | 148 | 21,402 | 4,794 | 3,211 | 29,555 |
| 26,266 | 147 | 21,475 | 4,810 | 3,233 | 29,665 |
| 26,267 | 144 | 21,071 | 4,797 | 3,195 | 29,207 |
| 26,268 | 146 | 21,238 | 4,810 | 3,218 | 29,412 |
| 26,269 | 149 | 21,135 | 4,788 | 3,210 | 29,282 |
| 26,270 | 148 | 21,241 | 4,808 | 3,244 | 29,441 |
| 26,271 | 146 | 21,277 | 4,824 | 3,266 | 29,513 |
| 26,272 | 151 | 21,410 | 4,841 | 3,278 | 29,680 |
| 26,273 | 144 | 21,655 | 4,896 | 3,313 | 30,008 |
| 26,274 | 147 | 21,651 | 4,944 | 3,316 | 30,058 |
| 26,275 | 142 | 21,639 | 4,970 | 3,342 | 30,093 |
| 26,276 | 141 | 21,526 | 4,939 | 3,337 | 29,943 |
| 26,277 | 146 | 21,494 | 4,940 | 3,333 | 29,913 |
| 26,278 | 158 | 21,557 | 4,946 | 3,322 | 29,983 |
| 26,279 | 158 | 21,644 | 4,946 | 3,324 | 30,072 |
| 26,280 | 160 | 21,726 | 5,006 | 3,361 | 30,253 |
| 26,281 | 161 | 21,890 | 5,073 | 3,389 | 30,513 |
| 26,282 | 175 | 22,001 | 5,103 | 3,423 | 30,702 |
| 26,283 | 176 | 22,322 | 5,160 | 3,468 | 31,126 |
| 26,284 | 175 | 22,181 | 5,163 | 3,461 | 30,980 |
| 26,285 | 174 | 22,177 | 5,171 | 3,465 | 30,987 |
| 26,286 | 170 | 22,159 | 5,209 | 3,497 | 31,035 |
| 26,287 | 170 | 22,189 | 5,243 | 3,524 | 31,126 |
| 26,288 | 184 | 22,287 | 5,280 | 3,564 | 31,315 |
| 26,289 | 189 | 22,517 | 5,358 | 3,595 | 31,659 |
| 26,290 | 187 | 22,728 | 5,437 | 3,626 | 31,978 |
| 26,291 | 180 | 22,148 | 5,273 | 3,529 | 31,130 |
| 26,292 | 183 | 22,396 | 5,299 | 3,544 | 31,422 |
| 26,293 | 183 | 22,652 | 5,349 | 3,577 | 31,761 |
| 26,294 | 183 | 22,670 | 5,343 | 3,572 | 31,768 |
| 26,295 | 183 | 23,198 | 5,468 | 3,628 | 32,477 |

|        |     |        |       |       |        |
|--------|-----|--------|-------|-------|--------|
| 26,296 | 183 | 23,076 | 5,446 | 3,607 | 32,312 |
| 26,297 | 182 | 23,069 | 5,463 | 3,609 | 32,323 |
| 26,298 | 181 | 22,848 | 5,429 | 3,588 | 32,046 |
| 26,299 | 181 | 22,621 | 5,401 | 3,563 | 31,766 |
| 26,300 | 177 | 23,531 | 5,567 | 3,702 | 32,977 |
| 26,301 | 174 | 23,302 | 5,543 | 3,670 | 32,689 |
| 26,302 | 171 | 23,100 | 5,533 | 3,653 | 32,457 |
| 26,303 | 170 | 22,821 | 5,508 | 3,655 | 32,154 |
| 26,304 | 172 | 22,714 | 5,503 | 3,650 | 32,039 |
| 26,305 | 183 | 22,746 | 5,502 | 3,652 | 32,083 |
| 26,306 | 184 | 22,534 | 5,441 | 3,630 | 31,789 |
| 26,307 | 185 | 22,407 | 5,391 | 3,618 | 31,601 |
| 26,308 | 186 | 22,610 | 5,401 | 3,611 | 31,808 |
| 26,309 | 189 | 22,611 | 5,367 | 3,609 | 31,776 |
| 26,310 | 189 | 22,666 | 5,351 | 3,601 | 31,807 |
| 26,311 | 194 | 22,666 | 5,296 | 3,579 | 31,735 |
| 26,312 | 197 | 22,704 | 5,235 | 3,544 | 31,680 |
| 26,313 | 202 | 22,756 | 5,211 | 3,514 | 31,683 |
| 26,314 | 204 | 22,774 | 5,194 | 3,503 | 31,675 |
| 26,315 | 202 | 22,937 | 5,244 | 3,537 | 31,920 |
| 26,316 | 202 | 22,846 | 5,211 | 3,517 | 31,776 |
| 26,317 | 202 | 22,816 | 5,203 | 3,533 | 31,754 |
| 26,318 | 205 | 22,902 | 5,197 | 3,547 | 31,851 |
| 26,319 | 205 | 22,947 | 5,172 | 3,528 | 31,852 |
| 26,320 | 206 | 22,935 | 5,156 | 3,508 | 31,805 |
| 26,321 | 205 | 22,829 | 5,142 | 3,469 | 31,645 |
| 26,322 | 204 | 22,832 | 5,134 | 3,454 | 31,624 |
| 26,323 | 199 | 22,731 | 5,096 | 3,441 | 31,467 |
| 26,324 | 189 | 22,692 | 5,025 | 3,414 | 31,320 |
| 26,325 | 190 | 22,424 | 4,931 | 3,359 | 30,904 |
| 26,326 | 190 | 22,481 | 4,926 | 3,363 | 30,960 |
| 26,327 | 186 | 22,215 | 4,873 | 3,310 | 30,584 |

|        |     |        |       |       |        |
|--------|-----|--------|-------|-------|--------|
| 26,328 | 180 | 21,999 | 4,835 | 3,272 | 30,286 |
| 26,329 | 173 | 22,763 | 4,990 | 3,363 | 31,289 |
| 26,330 | 168 | 22,594 | 4,928 | 3,325 | 31,015 |
| 26,331 | 172 | 22,426 | 4,829 | 3,265 | 30,692 |
| 26,332 | 174 | 22,715 | 4,825 | 3,289 | 31,003 |
| 26,333 | 164 | 22,927 | 4,862 | 3,307 | 31,260 |
| 26,334 | 167 | 22,860 | 4,840 | 3,294 | 31,161 |
| 26,335 | 170 | 22,923 | 4,835 | 3,284 | 31,212 |
| 26,336 | 179 | 23,037 | 4,825 | 3,260 | 31,301 |
| 26,337 | 180 | 23,012 | 4,824 | 3,251 | 31,267 |
| 26,338 | 167 | 23,026 | 4,810 | 3,251 | 31,254 |
| 26,339 | 156 | 22,648 | 4,714 | 3,161 | 30,679 |
| 26,340 | 157 | 22,809 | 4,709 | 3,172 | 30,847 |
| 26,341 | 158 | 22,856 | 4,705 | 3,168 | 30,887 |
| 26,342 | 150 | 22,862 | 4,713 | 3,174 | 30,899 |
| 26,343 | 152 | 23,047 | 4,763 | 3,208 | 31,170 |
| 26,344 | 151 | 22,718 | 4,702 | 3,162 | 30,733 |
| 26,345 | 153 | 22,665 | 4,677 | 3,169 | 30,664 |
| 26,346 | 154 | 22,408 | 4,632 | 3,157 | 30,351 |
| 26,347 | 155 | 22,180 | 4,601 | 3,124 | 30,060 |
| 26,348 | 157 | 22,693 | 4,723 | 3,211 | 30,784 |
| 26,349 | 163 | 22,911 | 4,759 | 3,209 | 31,042 |
| 26,350 | 166 | 22,989 | 4,755 | 3,184 | 31,094 |
| 26,351 | 170 | 23,022 | 4,740 | 3,164 | 31,096 |
| 26,352 | 168 | 22,967 | 4,697 | 3,130 | 30,962 |
| 26,353 | 168 | 23,062 | 4,683 | 3,132 | 31,045 |
| 26,354 | 167 | 22,962 | 4,627 | 3,087 | 30,843 |
| 26,355 | 158 | 22,800 | 4,583 | 3,055 | 30,596 |
| 26,356 | 154 | 22,686 | 4,535 | 3,019 | 30,394 |
| 26,357 | 155 | 22,836 | 4,553 | 3,036 | 30,580 |
| 26,358 | 148 | 21,927 | 4,302 | 2,877 | 29,254 |
| 26,359 | 148 | 22,052 | 4,300 | 2,877 | 29,377 |



|        |     |        |       |       |        |
|--------|-----|--------|-------|-------|--------|
| 26,360 | 146 | 22,087 | 4,315 | 2,881 | 29,429 |
| 26,361 | 152 | 21,851 | 4,295 | 2,853 | 29,151 |
| 26,362 | 150 | 21,601 | 4,264 | 2,829 | 28,844 |
| 26,363 | 140 | 21,061 | 4,191 | 2,768 | 28,160 |
| 26,364 | 137 | 20,623 | 4,073 | 2,697 | 27,530 |
| 26,365 | 139 | 20,675 | 4,077 | 2,701 | 27,592 |
| 26,366 | 136 | 20,667 | 4,093 | 2,695 | 27,591 |
| 26,367 | 133 | 20,280 | 4,025 | 2,614 | 27,052 |
| 26,368 | 133 | 20,269 | 4,019 | 2,606 | 27,027 |
| 26,369 | 135 | 20,226 | 3,990 | 2,589 | 26,940 |
| 26,370 | 135 | 20,304 | 4,011 | 2,589 | 27,039 |
| 26,371 | 136 | 20,119 | 3,965 | 2,561 | 26,781 |
| 26,372 | 136 | 20,190 | 3,978 | 2,570 | 26,874 |
| 26,373 | 133 | 20,209 | 3,980 | 2,559 | 26,881 |
| 26,374 | 143 | 20,183 | 3,990 | 2,549 | 26,865 |
| 26,375 | 144 | 20,183 | 4,007 | 2,561 | 26,895 |
| 26,376 | 145 | 20,483 | 4,060 | 2,589 | 27,277 |
| 26,377 | 149 | 20,038 | 3,971 | 2,525 | 26,683 |
| 26,378 | 149 | 20,009 | 3,964 | 2,536 | 26,658 |
| 26,379 | 152 | 19,764 | 3,918 | 2,514 | 26,348 |
| 26,380 | 151 | 19,532 | 3,850 | 2,493 | 26,026 |
| 26,381 | 149 | 20,066 | 4,029 | 2,592 | 26,836 |
| 26,382 | 146 | 19,980 | 4,048 | 2,605 | 26,779 |
| 26,383 | 142 | 19,372 | 3,953 | 2,520 | 25,987 |
| 26,384 | 138 | 19,245 | 3,928 | 2,495 | 25,806 |
| 26,385 | 139 | 19,315 | 3,928 | 2,504 | 25,886 |
| 26,386 | 137 | 19,248 | 3,936 | 2,519 | 25,840 |
| 26,387 | 127 | 18,995 | 3,867 | 2,488 | 25,477 |
| 26,388 | 127 | 18,963 | 3,879 | 2,494 | 25,463 |
| 26,389 | 125 | 18,847 | 3,830 | 2,493 | 25,295 |
| 26,390 | 127 | 18,815 | 3,828 | 2,476 | 25,246 |
| 26,391 | 128 | 18,662 | 3,793 | 2,460 | 25,043 |

|        |     |        |       |       |        |
|--------|-----|--------|-------|-------|--------|
| 26,392 | 139 | 18,542 | 3,770 | 2,452 | 24,903 |
| 26,393 | 139 | 18,516 | 3,772 | 2,453 | 24,880 |
| 26,394 | 146 | 18,518 | 3,811 | 2,463 | 24,938 |
| 26,395 | 144 | 18,516 | 3,780 | 2,460 | 24,900 |
| 26,396 | 143 | 18,390 | 3,749 | 2,441 | 24,723 |
| 26,397 | 141 | 18,329 | 3,736 | 2,430 | 24,636 |
| 26,398 | 140 | 18,754 | 3,774 | 2,472 | 25,140 |
| 26,399 | 144 | 18,777 | 3,758 | 2,493 | 25,172 |
| 26,400 | 138 | 18,562 | 3,708 | 2,474 | 24,882 |
| 26,401 | 135 | 18,305 | 3,678 | 2,463 | 24,581 |
| 26,402 | 131 | 18,417 | 3,718 | 2,490 | 24,756 |
| 26,403 | 132 | 18,345 | 3,714 | 2,472 | 24,663 |
| 26,404 | 135 | 18,517 | 3,768 | 2,496 | 24,916 |
| 26,405 | 139 | 18,558 | 3,787 | 2,504 | 24,988 |
| 26,406 | 142 | 18,629 | 3,836 | 2,526 | 25,133 |
| 26,407 | 141 | 18,634 | 3,859 | 2,517 | 25,151 |
| 26,408 | 143 | 18,927 | 3,936 | 2,565 | 25,571 |
| 26,409 | 144 | 18,947 | 3,970 | 2,573 | 25,634 |
| 26,410 | 147 | 19,064 | 4,000 | 2,586 | 25,797 |
| 26,411 | 147 | 19,084 | 4,025 | 2,607 | 25,863 |
| 26,412 | 140 | 19,198 | 4,063 | 2,621 | 26,022 |
| 26,413 | 139 | 19,478 | 4,173 | 2,660 | 26,450 |
| 26,414 | 138 | 19,603 | 4,238 | 2,701 | 26,680 |
| 26,415 | 136 | 19,484 | 4,258 | 2,716 | 26,594 |
| 26,416 | 136 | 19,583 | 4,294 | 2,730 | 26,743 |
| 26,417 | 133 | 19,552 | 4,311 | 2,751 | 26,747 |
| 26,418 | 133 | 19,530 | 4,322 | 2,758 | 26,743 |
| 26,419 | 131 | 19,624 | 4,420 | 2,790 | 26,965 |
| 26,420 | 132 | 19,415 | 4,414 | 2,775 | 26,736 |
| 26,421 | 131 | 19,222 | 4,415 | 2,770 | 26,538 |
| 26,422 | 130 | 19,527 | 4,495 | 2,828 | 26,980 |
| 26,423 | 127 | 19,177 | 4,470 | 2,815 | 26,589 |

|        |     |        |       |       |        |
|--------|-----|--------|-------|-------|--------|
| 26,424 | 127 | 19,294 | 4,532 | 2,829 | 26,782 |
| 26,425 | 124 | 19,498 | 4,560 | 2,845 | 27,027 |
| 26,426 | 129 | 19,596 | 4,618 | 2,852 | 27,195 |
| 26,427 | 131 | 19,659 | 4,645 | 2,872 | 27,307 |
| 26,428 | 129 | 19,440 | 4,600 | 2,871 | 27,040 |
| 26,429 | 132 | 19,682 | 4,609 | 2,898 | 27,321 |
| 26,430 | 130 | 19,679 | 4,620 | 2,885 | 27,314 |
| 26,431 | 128 | 19,503 | 4,615 | 2,884 | 27,130 |
| 26,432 | 132 | 19,625 | 4,607 | 2,883 | 27,247 |
| 26,433 | 136 | 19,752 | 4,641 | 2,891 | 27,420 |
| 26,434 | 138 | 19,914 | 4,667 | 2,910 | 27,629 |
| 26,435 | 138 | 19,893 | 4,692 | 2,910 | 27,633 |
| 26,436 | 135 | 19,913 | 4,733 | 2,939 | 27,720 |
| 26,437 | 158 | 20,324 | 4,849 | 2,982 | 28,313 |
| 26,438 | 156 | 20,180 | 4,832 | 2,970 | 28,138 |
| 26,439 | 158 | 20,223 | 4,894 | 3,001 | 28,276 |
| 26,440 | 163 | 20,300 | 4,922 | 3,023 | 28,408 |
| 26,441 | 161 | 20,482 | 4,965 | 3,062 | 28,670 |
| 26,442 | 159 | 20,531 | 4,986 | 3,091 | 28,767 |
| 26,443 | 155 | 20,559 | 4,987 | 3,072 | 28,773 |
| 26,444 | 155 | 20,537 | 5,006 | 3,090 | 28,788 |
| 26,445 | 149 | 20,475 | 4,974 | 3,083 | 28,681 |
| 26,446 | 148 | 20,321 | 4,958 | 3,072 | 28,499 |
| 26,447 | 150 | 21,335 | 5,192 | 3,172 | 29,849 |
| 26,448 | 150 | 21,173 | 5,166 | 3,149 | 29,638 |
| 26,449 | 148 | 20,948 | 5,118 | 3,098 | 29,312 |
| 26,450 | 151 | 21,080 | 5,187 | 3,148 | 29,566 |
| 26,451 | 151 | 20,902 | 5,160 | 3,111 | 29,324 |
| 26,452 | 153 | 20,929 | 5,178 | 3,113 | 29,373 |
| 26,453 | 153 | 20,697 | 5,153 | 3,099 | 29,102 |
| 26,454 | 160 | 21,027 | 5,267 | 3,157 | 29,611 |
| 26,455 | 157 | 20,998 | 5,268 | 3,159 | 29,582 |

|        |     |        |       |       |        |
|--------|-----|--------|-------|-------|--------|
| 26,456 | 153 | 21,037 | 5,282 | 3,164 | 29,636 |
| 26,457 | 151 | 20,907 | 5,250 | 3,145 | 29,453 |
| 26,458 | 158 | 21,114 | 5,294 | 3,186 | 29,752 |
| 26,459 | 169 | 21,011 | 5,276 | 3,170 | 29,626 |
| 26,460 | 167 | 20,823 | 5,227 | 3,142 | 29,359 |
| 26,461 | 173 | 21,392 | 5,422 | 3,232 | 30,219 |
| 26,462 | 175 | 21,139 | 5,365 | 3,202 | 29,881 |
| 26,463 | 174 | 21,149 | 5,405 | 3,189 | 29,917 |
| 26,464 | 176 | 21,405 | 5,422 | 3,238 | 30,241 |
| 26,465 | 178 | 21,507 | 5,412 | 3,224 | 30,321 |
| 26,466 | 178 | 21,615 | 5,426 | 3,230 | 30,449 |
| 26,467 | 184 | 21,745 | 5,412 | 3,240 | 30,581 |
| 26,468 | 190 | 22,005 | 5,427 | 3,251 | 30,873 |
| 26,469 | 195 | 22,155 | 5,412 | 3,260 | 31,022 |
| 26,470 | 194 | 22,171 | 5,394 | 3,272 | 31,031 |
| 26,471 | 193 | 22,179 | 5,427 | 3,287 | 31,086 |
| 26,472 | 200 | 22,601 | 5,510 | 3,337 | 31,648 |
| 26,473 | 203 | 22,556 | 5,453 | 3,327 | 31,539 |
| 26,474 | 205 | 22,693 | 5,471 | 3,335 | 31,704 |
| 26,475 | 205 | 22,451 | 5,438 | 3,328 | 31,422 |
| 26,476 | 224 | 23,140 | 5,625 | 3,452 | 32,441 |
| 26,477 | 225 | 23,062 | 5,629 | 3,464 | 32,380 |
| 26,478 | 226 | 22,787 | 5,560 | 3,397 | 31,970 |
| 26,479 | 220 | 22,644 | 5,541 | 3,361 | 31,766 |
| 26,480 | 219 | 22,657 | 5,562 | 3,380 | 31,818 |
| 26,481 | 221 | 22,336 | 5,536 | 3,357 | 31,450 |
| 26,482 | 221 | 22,082 | 5,462 | 3,325 | 31,090 |
| 26,483 | 224 | 22,683 | 5,647 | 3,433 | 31,987 |
| 26,484 | 221 | 22,679 | 5,666 | 3,432 | 31,998 |
| 26,485 | 218 | 22,412 | 5,642 | 3,422 | 31,694 |
| 26,486 | 222 | 22,305 | 5,624 | 3,398 | 31,549 |
| 26,487 | 224 | 22,980 | 5,759 | 3,478 | 32,441 |

|        |     |        |       |       |        |
|--------|-----|--------|-------|-------|--------|
| 26,488 | 213 | 22,798 | 5,683 | 3,453 | 32,147 |
| 26,489 | 213 | 22,848 | 5,686 | 3,449 | 32,196 |
| 26,490 | 214 | 23,052 | 5,743 | 3,456 | 32,465 |
| 26,491 | 216 | 22,946 | 5,757 | 3,444 | 32,363 |
| 26,492 | 219 | 22,731 | 5,720 | 3,408 | 32,078 |
| 26,493 | 217 | 22,659 | 5,712 | 3,412 | 32,000 |
| 26,494 | 212 | 22,523 | 5,710 | 3,421 | 31,866 |
| 26,495 | 211 | 22,526 | 5,726 | 3,418 | 31,881 |
| 26,496 | 209 | 22,414 | 5,703 | 3,412 | 31,738 |
| 26,497 | 216 | 22,573 | 5,712 | 3,423 | 31,924 |
| 26,498 | 217 | 22,654 | 5,710 | 3,443 | 32,024 |
| 26,499 | 218 | 22,418 | 5,675 | 3,390 | 31,701 |
| 26,500 | 216 | 22,497 | 5,670 | 3,388 | 31,771 |
| 26,501 | 218 | 22,514 | 5,662 | 3,398 | 31,792 |
| 26,502 | 219 | 22,411 | 5,555 | 3,357 | 31,542 |
| 26,503 | 217 | 22,583 | 5,574 | 3,383 | 31,757 |
| 26,504 | 213 | 22,579 | 5,570 | 3,394 | 31,756 |
| 26,505 | 212 | 22,675 | 5,593 | 3,417 | 31,897 |
| 26,506 | 213 | 22,728 | 5,588 | 3,428 | 31,957 |
| 26,507 | 212 | 22,625 | 5,601 | 3,433 | 31,871 |
| 26,508 | 212 | 22,489 | 5,607 | 3,425 | 31,733 |
| 26,509 | 207 | 22,196 | 5,598 | 3,394 | 31,395 |
| 26,510 | 194 | 22,040 | 5,536 | 3,366 | 31,136 |
| 26,511 | 191 | 21,715 | 5,455 | 3,334 | 30,695 |
| 26,512 | 196 | 21,657 | 5,467 | 3,355 | 30,675 |
| 26,513 | 192 | 21,430 | 5,379 | 3,311 | 30,312 |
| 26,514 | 191 | 21,161 | 5,297 | 3,302 | 29,951 |
| 26,515 | 190 | 21,180 | 5,311 | 3,305 | 29,986 |
| 26,516 | 194 | 21,069 | 5,305 | 3,300 | 29,868 |
| 26,517 | 197 | 21,079 | 5,314 | 3,302 | 29,892 |
| 26,518 | 192 | 20,987 | 5,333 | 3,304 | 29,816 |
| 26,519 | 191 | 20,990 | 5,365 | 3,303 | 29,849 |

|        |     |        |       |       |        |
|--------|-----|--------|-------|-------|--------|
| 26,520 | 182 | 20,876 | 5,331 | 3,287 | 29,676 |
| 26,521 | 182 | 21,025 | 5,346 | 3,294 | 29,847 |
| 26,522 | 176 | 21,063 | 5,365 | 3,306 | 29,910 |
| 26,523 | 173 | 21,126 | 5,394 | 3,305 | 29,998 |
| 26,524 | 165 | 20,949 | 5,299 | 3,264 | 29,677 |
| 26,525 | 158 | 21,148 | 5,344 | 3,312 | 29,962 |
| 26,526 | 152 | 21,518 | 5,449 | 3,380 | 30,499 |
| 26,527 | 147 | 21,217 | 5,351 | 3,338 | 30,053 |
| 26,528 | 154 | 21,541 | 5,423 | 3,381 | 30,499 |
| 26,529 | 146 | 21,450 | 5,402 | 3,385 | 30,383 |
| 26,530 | 145 | 21,521 | 5,424 | 3,399 | 30,489 |
| 26,531 | 147 | 21,547 | 5,460 | 3,399 | 30,553 |
| 26,532 | 139 | 21,447 | 5,429 | 3,378 | 30,393 |
| 26,533 | 137 | 21,971 | 5,533 | 3,469 | 31,110 |
| 26,534 | 137 | 21,918 | 5,494 | 3,455 | 31,004 |
| 26,535 | 132 | 21,773 | 5,463 | 3,435 | 30,803 |
| 26,536 | 124 | 21,593 | 5,401 | 3,413 | 30,531 |
| 26,537 | 126 | 21,750 | 5,432 | 3,418 | 30,726 |
| 26,538 | 125 | 21,300 | 5,296 | 3,347 | 30,068 |
| 26,539 | 128 | 21,473 | 5,357 | 3,370 | 30,328 |
| 26,540 | 125 | 21,615 | 5,400 | 3,435 | 30,575 |
| 26,541 | 120 | 21,368 | 5,327 | 3,398 | 30,213 |
| 26,542 | 117 | 21,402 | 5,315 | 3,400 | 30,234 |
| 26,543 | 127 | 21,230 | 5,270 | 3,377 | 30,004 |
| 26,544 | 127 | 21,308 | 5,249 | 3,368 | 30,052 |
| 26,545 | 127 | 21,274 | 5,250 | 3,369 | 30,020 |
| 26,546 | 126 | 21,220 | 5,254 | 3,386 | 29,986 |
| 26,547 | 127 | 21,345 | 5,311 | 3,422 | 30,205 |
| 26,548 | 123 | 21,287 | 5,320 | 3,436 | 30,166 |
| 26,549 | 122 | 21,232 | 5,325 | 3,413 | 30,092 |
| 26,550 | 127 | 20,976 | 5,296 | 3,402 | 29,801 |
| 26,551 | 124 | 20,772 | 5,287 | 3,395 | 29,578 |

|        |     |        |       |       |        |
|--------|-----|--------|-------|-------|--------|
| 26,552 | 123 | 21,162 | 5,396 | 3,453 | 30,134 |
| 26,553 | 124 | 21,215 | 5,402 | 3,456 | 30,197 |
| 26,554 | 126 | 21,190 | 5,412 | 3,477 | 30,205 |
| 26,555 | 126 | 21,246 | 5,436 | 3,467 | 30,275 |
| 26,556 | 130 | 21,321 | 5,428 | 3,489 | 30,368 |
| 26,557 | 127 | 21,282 | 5,394 | 3,448 | 30,251 |
| 26,558 | 125 | 21,296 | 5,376 | 3,440 | 30,237 |
| 26,559 | 123 | 21,398 | 5,353 | 3,422 | 30,296 |
| 26,560 | 124 | 21,728 | 5,421 | 3,468 | 30,741 |
| 26,561 | 116 | 21,171 | 5,272 | 3,370 | 29,929 |
| 26,562 | 117 | 21,460 | 5,331 | 3,392 | 30,300 |
| 26,563 | 116 | 21,425 | 5,322 | 3,402 | 30,265 |
| 26,564 | 127 | 21,697 | 5,382 | 3,446 | 30,652 |
| 26,565 | 127 | 21,651 | 5,413 | 3,426 | 30,617 |
| 26,566 | 129 | 21,640 | 5,380 | 3,421 | 30,570 |
| 26,567 | 126 | 21,435 | 5,316 | 3,387 | 30,264 |
| 26,568 | 122 | 21,291 | 5,299 | 3,370 | 30,082 |
| 26,569 | 119 | 21,534 | 5,364 | 3,457 | 30,474 |
| 26,570 | 119 | 21,218 | 5,303 | 3,411 | 30,051 |
| 26,571 | 119 | 21,179 | 5,322 | 3,420 | 30,040 |
| 26,572 | 122 | 21,315 | 5,371 | 3,471 | 30,279 |
| 26,573 | 123 | 21,229 | 5,325 | 3,452 | 30,129 |
| 26,574 | 123 | 20,936 | 5,245 | 3,409 | 29,713 |
| 26,575 | 127 | 20,552 | 5,138 | 3,337 | 29,154 |
| 26,576 | 141 | 20,795 | 5,210 | 3,359 | 29,505 |
| 26,577 | 141 | 20,792 | 5,196 | 3,357 | 29,486 |
| 26,578 | 140 | 20,480 | 5,145 | 3,316 | 29,081 |
| 26,579 | 134 | 20,751 | 5,213 | 3,391 | 29,489 |
| 26,580 | 134 | 20,412 | 5,187 | 3,362 | 29,095 |
| 26,581 | 133 | 20,568 | 5,173 | 3,363 | 29,237 |
| 26,582 | 133 | 20,656 | 5,229 | 3,388 | 29,406 |
| 26,583 | 134 | 20,574 | 5,212 | 3,352 | 29,272 |

|        |     |        |       |       |        |
|--------|-----|--------|-------|-------|--------|
| 26,584 | 135 | 20,357 | 5,173 | 3,318 | 28,983 |
| 26,585 | 138 | 20,420 | 5,219 | 3,352 | 29,129 |
| 26,586 | 138 | 20,448 | 5,218 | 3,366 | 29,170 |
| 26,587 | 139 | 20,558 | 5,265 | 3,384 | 29,346 |
| 26,588 | 160 | 20,638 | 5,291 | 3,431 | 29,520 |
| 26,589 | 158 | 20,620 | 5,322 | 3,443 | 29,543 |
| 26,590 | 155 | 20,488 | 5,350 | 3,468 | 29,461 |
| 26,591 | 155 | 20,659 | 5,398 | 3,484 | 29,696 |
| 26,592 | 158 | 20,348 | 5,318 | 3,431 | 29,255 |
| 26,593 | 162 | 20,696 | 5,379 | 3,472 | 29,709 |
| 26,594 | 148 | 20,692 | 5,392 | 3,478 | 29,710 |
| 26,595 | 147 | 20,709 | 5,378 | 3,466 | 29,700 |
| 26,596 | 148 | 20,919 | 5,436 | 3,496 | 29,999 |
| 26,597 | 146 | 20,928 | 5,407 | 3,486 | 29,967 |
| 26,598 | 151 | 21,029 | 5,385 | 3,489 | 30,054 |
| 26,599 | 157 | 21,274 | 5,452 | 3,520 | 30,403 |
| 26,600 | 154 | 21,149 | 5,366 | 3,475 | 30,144 |
| 26,601 | 153 | 21,098 | 5,365 | 3,461 | 30,077 |
| 26,602 | 160 | 21,541 | 5,416 | 3,538 | 30,655 |
| 26,603 | 172 | 21,698 | 5,522 | 3,595 | 30,987 |
| 26,604 | 181 | 21,653 | 5,602 | 3,638 | 31,074 |
| 26,605 | 187 | 21,616 | 5,645 | 3,642 | 31,090 |
| 26,606 | 206 | 21,634 | 5,675 | 3,669 | 31,184 |
| 26,607 | 202 | 21,370 | 5,631 | 3,617 | 30,820 |
| 26,608 | 207 | 21,377 | 5,659 | 3,647 | 30,890 |
| 26,609 | 209 | 21,442 | 5,672 | 3,664 | 30,987 |
| 26,610 | 216 | 21,352 | 5,676 | 3,682 | 30,926 |
| 26,611 | 218 | 21,226 | 5,701 | 3,691 | 30,836 |
| 26,612 | 218 | 21,088 | 5,655 | 3,660 | 30,621 |
| 26,613 | 219 | 21,161 | 5,709 | 3,697 | 30,786 |
| 26,614 | 212 | 21,285 | 5,737 | 3,713 | 30,947 |
| 26,615 | 211 | 21,269 | 5,749 | 3,705 | 30,934 |



|        |     |        |       |       |        |
|--------|-----|--------|-------|-------|--------|
| 26,616 | 214 | 21,204 | 5,722 | 3,703 | 30,843 |
| 26,617 | 213 | 21,060 | 5,724 | 3,689 | 30,686 |
| 26,618 | 212 | 21,076 | 5,717 | 3,661 | 30,666 |
| 26,619 | 216 | 20,922 | 5,631 | 3,613 | 30,382 |
| 26,620 | 215 | 20,757 | 5,613 | 3,583 | 30,168 |
| 26,621 | 216 | 21,005 | 5,695 | 3,633 | 30,549 |
| 26,622 | 217 | 21,074 | 5,678 | 3,620 | 30,589 |
| 26,623 | 211 | 20,924 | 5,676 | 3,588 | 30,399 |
| 26,624 | 211 | 20,938 | 5,670 | 3,593 | 30,412 |
| 26,625 | 207 | 20,790 | 5,673 | 3,579 | 30,249 |
| 26,626 | 205 | 20,952 | 5,704 | 3,595 | 30,456 |
| 26,627 | 196 | 21,062 | 5,744 | 3,618 | 30,620 |
| 26,628 | 190 | 21,219 | 5,777 | 3,658 | 30,844 |
| 26,629 | 191 | 20,896 | 5,729 | 3,594 | 30,410 |
| 26,630 | 194 | 21,137 | 5,778 | 3,624 | 30,733 |
| 26,631 | 198 | 21,181 | 5,764 | 3,625 | 30,768 |
| 26,632 | 200 | 20,986 | 5,713 | 3,596 | 30,495 |
| 26,633 | 207 | 21,223 | 5,740 | 3,604 | 30,774 |
| 26,634 | 207 | 21,229 | 5,732 | 3,600 | 30,768 |
| 26,635 | 203 | 21,609 | 5,825 | 3,642 | 31,279 |
| 26,636 | 204 | 21,556 | 5,778 | 3,605 | 31,143 |
| 26,637 | 202 | 21,578 | 5,806 | 3,642 | 31,228 |
| 26,638 | 191 | 21,680 | 5,868 | 3,684 | 31,423 |
| 26,639 | 194 | 21,621 | 5,845 | 3,685 | 31,345 |
| 26,640 | 203 | 21,630 | 5,830 | 3,662 | 31,325 |
| 26,641 | 210 | 21,654 | 5,811 | 3,651 | 31,326 |
| 26,642 | 213 | 21,610 | 5,817 | 3,647 | 31,287 |
| 26,643 | 213 | 21,482 | 5,804 | 3,653 | 31,152 |
| 26,644 | 217 | 21,554 | 5,853 | 3,662 | 31,286 |
| 26,645 | 218 | 21,241 | 5,808 | 3,627 | 30,894 |
| 26,646 | 218 | 21,214 | 5,806 | 3,622 | 30,860 |
| 26,647 | 225 | 21,079 | 5,791 | 3,614 | 30,709 |

|        |     |        |       |       |        |
|--------|-----|--------|-------|-------|--------|
| 26,648 | 226 | 20,954 | 5,784 | 3,631 | 30,595 |
| 26,649 | 223 | 20,794 | 5,763 | 3,620 | 30,400 |
| 26,650 | 220 | 20,670 | 5,786 | 3,633 | 30,309 |
| 26,651 | 217 | 20,663 | 5,845 | 3,675 | 30,400 |
| 26,652 | 215 | 20,822 | 5,853 | 3,671 | 30,561 |
| 26,653 | 212 | 21,003 | 5,937 | 3,677 | 30,829 |
| 26,654 | 205 | 21,147 | 5,921 | 3,655 | 30,928 |
| 26,655 | 181 | 21,066 | 5,797 | 3,565 | 30,609 |
| 26,656 | 183 | 21,349 | 5,888 | 3,591 | 31,011 |
| 26,657 | 169 | 21,493 | 5,925 | 3,621 | 31,208 |
| 26,658 | 167 | 21,491 | 5,895 | 3,601 | 31,154 |
| 26,659 | 172 | 21,647 | 5,904 | 3,614 | 31,337 |
| 26,660 | 166 | 21,781 | 5,901 | 3,620 | 31,468 |
| 26,661 | 170 | 21,937 | 5,918 | 3,664 | 31,689 |
| 26,662 | 176 | 21,670 | 5,823 | 3,635 | 31,304 |
| 26,663 | 180 | 21,692 | 5,812 | 3,607 | 31,291 |
| 26,664 | 179 | 21,685 | 5,813 | 3,597 | 31,274 |
| 26,665 | 181 | 21,709 | 5,799 | 3,613 | 31,302 |
| 26,666 | 179 | 21,800 | 5,848 | 3,659 | 31,486 |
| 26,667 | 175 | 21,584 | 5,787 | 3,622 | 31,168 |
| 26,668 | 174 | 21,606 | 5,805 | 3,636 | 31,221 |
| 26,669 | 174 | 21,551 | 5,808 | 3,646 | 31,179 |
| 26,670 | 171 | 21,513 | 5,824 | 3,643 | 31,151 |
| 26,671 | 172 | 21,467 | 5,812 | 3,634 | 31,085 |
| 26,672 | 171 | 21,191 | 5,742 | 3,585 | 30,689 |
| 26,673 | 173 | 20,968 | 5,707 | 3,560 | 30,408 |
| 26,674 | 173 | 20,852 | 5,643 | 3,524 | 30,192 |
| 26,675 | 186 | 21,405 | 5,821 | 3,621 | 31,033 |
| 26,676 | 188 | 21,275 | 5,774 | 3,612 | 30,849 |
| 26,677 | 188 | 21,161 | 5,780 | 3,608 | 30,737 |
| 26,678 | 185 | 21,107 | 5,751 | 3,583 | 30,626 |
| 26,679 | 182 | 20,865 | 5,698 | 3,501 | 30,246 |

|        |     |        |       |       |        |
|--------|-----|--------|-------|-------|--------|
| 26,680 | 182 | 20,766 | 5,631 | 3,447 | 30,026 |
| 26,681 | 182 | 20,758 | 5,603 | 3,448 | 29,991 |
| 26,682 | 178 | 20,871 | 5,639 | 3,473 | 30,161 |
| 26,683 | 185 | 20,520 | 5,562 | 3,419 | 29,686 |
| 26,684 | 179 | 20,231 | 5,481 | 3,376 | 29,267 |
| 26,685 | 183 | 20,513 | 5,603 | 3,434 | 29,733 |
| 26,686 | 183 | 20,062 | 5,491 | 3,352 | 29,088 |
| 26,687 | 189 | 19,928 | 5,471 | 3,324 | 28,912 |
| 26,688 | 190 | 20,031 | 5,451 | 3,301 | 28,973 |
| 26,689 | 174 | 19,871 | 5,351 | 3,238 | 28,634 |
| 26,690 | 167 | 19,885 | 5,316 | 3,231 | 28,599 |
| 26,691 | 163 | 19,841 | 5,304 | 3,203 | 28,511 |
| 26,692 | 163 | 19,843 | 5,296 | 3,204 | 28,506 |
| 26,693 | 159 | 19,990 | 5,283 | 3,206 | 28,638 |
| 26,694 | 161 | 19,964 | 5,272 | 3,201 | 28,598 |
| 26,695 | 158 | 19,857 | 5,192 | 3,151 | 28,358 |
| 26,696 | 162 | 20,079 | 5,224 | 3,151 | 28,616 |
| 26,697 | 156 | 20,101 | 5,223 | 3,161 | 28,641 |
| 26,698 | 160 | 20,304 | 5,274 | 3,171 | 28,909 |
| 26,699 | 160 | 20,127 | 5,225 | 3,139 | 28,651 |
| 26,700 | 159 | 20,141 | 5,211 | 3,127 | 28,638 |
| 26,701 | 154 | 20,026 | 5,145 | 3,098 | 28,423 |
| 26,702 | 160 | 19,904 | 5,114 | 3,076 | 28,254 |
| 26,703 | 163 | 19,238 | 4,957 | 2,983 | 27,341 |
| 26,704 | 163 | 19,205 | 4,941 | 2,971 | 27,280 |
| 26,705 | 160 | 18,925 | 4,899 | 2,958 | 26,942 |
| 26,706 | 159 | 18,794 | 4,867 | 2,948 | 26,768 |
| 26,707 | 158 | 18,457 | 4,720 | 2,888 | 26,223 |
| 26,708 | 163 | 18,482 | 4,698 | 2,880 | 26,223 |
| 26,709 | 162 | 18,176 | 4,630 | 2,852 | 25,820 |
| 26,710 | 155 | 18,226 | 4,670 | 2,882 | 25,933 |
| 26,711 | 155 | 18,253 | 4,695 | 2,883 | 25,986 |

|        |     |        |       |       |        |
|--------|-----|--------|-------|-------|--------|
| 26,712 | 161 | 18,460 | 4,742 | 2,877 | 26,240 |
| 26,713 | 150 | 18,587 | 4,733 | 2,870 | 26,340 |
| 26,714 | 145 | 18,422 | 4,691 | 2,855 | 26,113 |
| 26,715 | 147 | 18,710 | 4,771 | 2,892 | 26,520 |
| 26,716 | 148 | 18,648 | 4,743 | 2,861 | 26,400 |
| 26,717 | 155 | 18,837 | 4,751 | 2,856 | 26,599 |
| 26,718 | 155 | 18,927 | 4,740 | 2,851 | 26,673 |
| 26,719 | 155 | 19,146 | 4,791 | 2,877 | 26,969 |
| 26,720 | 155 | 19,241 | 4,803 | 2,879 | 27,078 |
| 26,721 | 151 | 19,144 | 4,763 | 2,854 | 26,912 |
| 26,722 | 152 | 19,168 | 4,754 | 2,840 | 26,914 |
| 26,723 | 152 | 19,662 | 4,863 | 2,904 | 27,581 |
| 26,724 | 154 | 19,658 | 4,900 | 2,932 | 27,644 |
| 26,725 | 149 | 19,614 | 4,916 | 2,940 | 27,619 |
| 26,726 | 150 | 19,818 | 4,909 | 2,967 | 27,844 |
| 26,727 | 154 | 19,959 | 4,938 | 2,978 | 28,029 |
| 26,728 | 159 | 20,061 | 4,932 | 2,985 | 28,137 |
| 26,729 | 167 | 19,830 | 4,882 | 2,963 | 27,842 |
| 26,730 | 167 | 19,504 | 4,800 | 2,939 | 27,410 |
| 26,731 | 169 | 19,671 | 4,834 | 2,957 | 27,631 |
| 26,732 | 166 | 19,606 | 4,827 | 2,947 | 27,546 |
| 26,733 | 165 | 19,390 | 4,758 | 2,893 | 27,206 |
| 26,734 | 154 | 19,141 | 4,710 | 2,870 | 26,875 |
| 26,735 | 152 | 19,580 | 4,800 | 2,909 | 27,441 |
| 26,736 | 152 | 19,526 | 4,732 | 2,878 | 27,288 |
| 26,737 | 147 | 19,330 | 4,655 | 2,856 | 26,988 |
| 26,738 | 148 | 19,722 | 4,718 | 2,894 | 27,482 |
| 26,739 | 146 | 19,435 | 4,718 | 2,864 | 27,163 |
| 26,740 | 147 | 19,746 | 4,789 | 2,902 | 27,584 |
| 26,741 | 156 | 19,547 | 4,761 | 2,894 | 27,358 |
| 26,742 | 155 | 19,642 | 4,748 | 2,886 | 27,431 |
| 26,743 | 162 | 19,740 | 4,768 | 2,863 | 27,533 |

|        |     |        |       |       |        |
|--------|-----|--------|-------|-------|--------|
| 26,744 | 162 | 19,658 | 4,757 | 2,856 | 27,433 |
| 26,745 | 160 | 19,949 | 4,840 | 2,906 | 27,855 |
| 26,746 | 160 | 19,893 | 4,856 | 2,912 | 27,821 |
| 26,747 | 159 | 19,907 | 4,840 | 2,904 | 27,810 |
| 26,748 | 162 | 20,190 | 4,888 | 2,933 | 28,173 |
| 26,749 | 159 | 20,319 | 4,937 | 2,958 | 28,373 |
| 26,750 | 148 | 19,345 | 4,736 | 2,842 | 27,071 |
| 26,751 | 148 | 19,624 | 4,747 | 2,841 | 27,360 |
| 26,752 | 150 | 19,877 | 4,786 | 2,862 | 27,675 |
| 26,753 | 151 | 19,921 | 4,785 | 2,853 | 27,710 |
| 26,754 | 147 | 20,312 | 4,877 | 2,913 | 28,249 |
| 26,755 | 158 | 20,382 | 4,864 | 2,901 | 28,305 |
| 26,756 | 155 | 20,302 | 4,817 | 2,860 | 28,134 |
| 26,757 | 158 | 20,212 | 4,781 | 2,876 | 28,027 |
| 26,758 | 157 | 19,945 | 4,729 | 2,841 | 27,672 |
| 26,759 | 157 | 20,266 | 4,801 | 2,907 | 28,131 |
| 26,760 | 163 | 20,421 | 4,814 | 2,880 | 28,278 |
| 26,761 | 173 | 20,286 | 4,745 | 2,848 | 28,052 |
| 26,762 | 173 | 20,153 | 4,680 | 2,807 | 27,813 |
| 26,763 | 166 | 20,486 | 4,786 | 2,856 | 28,294 |
| 26,764 | 172 | 20,297 | 4,759 | 2,821 | 28,049 |
| 26,765 | 174 | 20,412 | 4,723 | 2,813 | 28,122 |
| 26,766 | 174 | 20,434 | 4,746 | 2,823 | 28,177 |
| 26,767 | 174 | 20,429 | 4,746 | 2,815 | 28,164 |
| 26,768 | 167 | 20,478 | 4,730 | 2,819 | 28,194 |
| 26,769 | 172 | 20,632 | 4,791 | 2,833 | 28,428 |
| 26,770 | 170 | 20,425 | 4,738 | 2,795 | 28,128 |
| 26,771 | 171 | 20,568 | 4,731 | 2,803 | 28,273 |
| 26,772 | 173 | 20,647 | 4,733 | 2,806 | 28,359 |
| 26,773 | 175 | 20,646 | 4,727 | 2,832 | 28,380 |
| 26,774 | 177 | 20,509 | 4,679 | 2,809 | 28,174 |
| 26,775 | 184 | 20,386 | 4,596 | 2,762 | 27,928 |

|        |     |        |       |       |        |
|--------|-----|--------|-------|-------|--------|
| 26,776 | 183 | 20,213 | 4,535 | 2,723 | 27,654 |
| 26,777 | 184 | 20,404 | 4,597 | 2,751 | 27,936 |
| 26,778 | 177 | 20,146 | 4,529 | 2,705 | 27,557 |
| 26,779 | 175 | 20,017 | 4,532 | 2,703 | 27,427 |
| 26,780 | 171 | 20,008 | 4,505 | 2,708 | 27,392 |
| 26,781 | 173 | 20,046 | 4,506 | 2,700 | 27,425 |
| 26,782 | 183 | 20,049 | 4,524 | 2,719 | 27,475 |
| 26,783 | 183 | 20,060 | 4,499 | 2,710 | 27,452 |
| 26,784 | 191 | 20,083 | 4,508 | 2,710 | 27,492 |
| 26,785 | 192 | 20,107 | 4,502 | 2,706 | 27,507 |
| 26,786 | 190 | 20,103 | 4,515 | 2,727 | 27,535 |
| 26,787 | 193 | 20,117 | 4,545 | 2,759 | 27,614 |
| 26,788 | 188 | 20,124 | 4,539 | 2,773 | 27,624 |
| 26,789 | 188 | 20,093 | 4,517 | 2,766 | 27,564 |
| 26,790 | 188 | 19,991 | 4,458 | 2,723 | 27,360 |
| 26,791 | 189 | 20,349 | 4,482 | 2,761 | 27,781 |
| 26,792 | 184 | 20,597 | 4,511 | 2,782 | 28,074 |
| 26,793 | 185 | 20,836 | 4,540 | 2,807 | 28,368 |
| 26,794 | 177 | 20,991 | 4,546 | 2,824 | 28,538 |
| 26,795 | 177 | 21,417 | 4,590 | 2,843 | 29,027 |
| 26,796 | 174 | 21,535 | 4,591 | 2,844 | 29,144 |
| 26,797 | 173 | 21,588 | 4,537 | 2,839 | 29,137 |
| 26,798 | 170 | 21,396 | 4,496 | 2,818 | 28,880 |
| 26,799 | 173 | 21,587 | 4,497 | 2,851 | 29,108 |
| 26,800 | 173 | 21,334 | 4,415 | 2,835 | 28,757 |
| 26,801 | 179 | 21,455 | 4,404 | 2,826 | 28,864 |
| 26,802 | 181 | 21,407 | 4,396 | 2,834 | 28,818 |
| 26,803 | 187 | 21,757 | 4,503 | 2,905 | 29,352 |
| 26,804 | 187 | 21,800 | 4,493 | 2,891 | 29,371 |
| 26,805 | 186 | 21,918 | 4,478 | 2,899 | 29,481 |
| 26,806 | 180 | 21,534 | 4,431 | 2,835 | 28,980 |
| 26,807 | 182 | 21,720 | 4,459 | 2,849 | 29,210 |

|        |     |        |       |       |        |
|--------|-----|--------|-------|-------|--------|
| 26,808 | 189 | 21,946 | 4,504 | 2,868 | 29,507 |
| 26,809 | 188 | 22,011 | 4,496 | 2,867 | 29,562 |
| 26,810 | 186 | 22,238 | 4,532 | 2,882 | 29,838 |
| 26,811 | 174 | 22,187 | 4,523 | 2,873 | 29,757 |
| 26,812 | 184 | 22,122 | 4,529 | 2,863 | 29,698 |
| 26,813 | 189 | 22,410 | 4,565 | 2,883 | 30,047 |
| 26,814 | 184 | 22,070 | 4,514 | 2,841 | 29,609 |
| 26,815 | 183 | 22,274 | 4,526 | 2,859 | 29,842 |
| 26,816 | 188 | 22,623 | 4,529 | 2,890 | 30,230 |
| 26,817 | 187 | 22,764 | 4,562 | 2,890 | 30,403 |
| 26,818 | 189 | 22,678 | 4,544 | 2,888 | 30,299 |
| 26,819 | 188 | 22,766 | 4,506 | 2,911 | 30,371 |
| 26,820 | 187 | 22,855 | 4,541 | 2,912 | 30,495 |
| 26,821 | 198 | 23,082 | 4,595 | 2,939 | 30,814 |
| 26,822 | 200 | 23,088 | 4,607 | 2,943 | 30,838 |
| 26,823 | 195 | 23,137 | 4,583 | 2,939 | 30,854 |
| 26,824 | 192 | 23,054 | 4,584 | 2,929 | 30,759 |
| 26,825 | 194 | 23,249 | 4,624 | 2,968 | 31,035 |
| 26,826 | 188 | 23,186 | 4,617 | 2,960 | 30,951 |
| 26,827 | 189 | 23,186 | 4,569 | 2,938 | 30,882 |
| 26,828 | 189 | 23,154 | 4,542 | 2,932 | 30,817 |
| 26,829 | 189 | 23,188 | 4,526 | 2,921 | 30,824 |
| 26,830 | 183 | 23,277 | 4,549 | 2,927 | 30,936 |
| 26,831 | 182 | 23,352 | 4,542 | 2,904 | 30,980 |
| 26,832 | 182 | 23,337 | 4,517 | 2,886 | 30,922 |
| 26,833 | 174 | 23,232 | 4,477 | 2,870 | 30,753 |
| 26,834 | 174 | 23,785 | 4,566 | 2,955 | 31,480 |
| 26,835 | 169 | 23,678 | 4,529 | 2,925 | 31,301 |
| 26,836 | 175 | 23,912 | 4,531 | 2,934 | 31,552 |
| 26,837 | 179 | 23,944 | 4,536 | 2,933 | 31,592 |
| 26,838 | 186 | 23,631 | 4,467 | 2,880 | 31,164 |
| 26,839 | 186 | 23,565 | 4,477 | 2,894 | 31,122 |

|        |     |        |       |       |        |
|--------|-----|--------|-------|-------|--------|
| 26,840 | 184 | 23,372 | 4,464 | 2,871 | 30,891 |
| 26,841 | 183 | 23,211 | 4,463 | 2,889 | 30,746 |
| 26,842 | 189 | 23,014 | 4,434 | 2,836 | 30,473 |
| 26,843 | 185 | 22,545 | 4,345 | 2,779 | 29,854 |
| 26,844 | 185 | 22,372 | 4,328 | 2,757 | 29,642 |
| 26,845 | 187 | 22,068 | 4,294 | 2,720 | 29,269 |
| 26,846 | 190 | 21,884 | 4,266 | 2,717 | 29,057 |
| 26,847 | 189 | 21,715 | 4,231 | 2,698 | 28,833 |
| 26,848 | 194 | 21,373 | 4,190 | 2,667 | 28,424 |
| 26,849 | 193 | 21,059 | 4,159 | 2,633 | 28,044 |
| 26,850 | 196 | 21,701 | 4,275 | 2,670 | 28,842 |
| 26,851 | 192 | 21,462 | 4,250 | 2,615 | 28,519 |
| 26,852 | 190 | 21,175 | 4,171 | 2,548 | 28,084 |
| 26,853 | 194 | 21,420 | 4,195 | 2,573 | 28,382 |
| 26,854 | 187 | 21,416 | 4,197 | 2,571 | 28,371 |
| 26,855 | 197 | 21,345 | 4,182 | 2,561 | 28,285 |
| 26,856 | 199 | 21,311 | 4,185 | 2,548 | 28,243 |
| 26,857 | 195 | 21,651 | 4,205 | 2,579 | 28,630 |
| 26,858 | 194 | 21,412 | 4,177 | 2,547 | 28,330 |
| 26,859 | 186 | 21,384 | 4,157 | 2,539 | 28,266 |
| 26,860 | 184 | 21,340 | 4,163 | 2,547 | 28,234 |
| 26,861 | 182 | 21,283 | 4,153 | 2,543 | 28,161 |
| 26,862 | 182 | 21,226 | 4,143 | 2,546 | 28,097 |
| 26,863 | 174 | 21,117 | 4,084 | 2,540 | 27,915 |
| 26,864 | 169 | 20,920 | 4,026 | 2,517 | 27,632 |
| 26,865 | 173 | 20,845 | 4,028 | 2,513 | 27,559 |
| 26,866 | 171 | 20,701 | 4,001 | 2,500 | 27,373 |
| 26,867 | 165 | 20,667 | 4,055 | 2,504 | 27,391 |
| 26,868 | 167 | 20,646 | 4,048 | 2,492 | 27,353 |
| 26,869 | 169 | 20,531 | 4,034 | 2,461 | 27,195 |
| 26,870 | 168 | 20,104 | 3,946 | 2,383 | 26,601 |
| 26,871 | 170 | 20,130 | 3,948 | 2,392 | 26,640 |



|        |     |        |       |       |        |
|--------|-----|--------|-------|-------|--------|
| 26,872 | 162 | 20,031 | 3,925 | 2,398 | 26,516 |
| 26,873 | 166 | 19,893 | 3,928 | 2,416 | 26,403 |
| 26,874 | 169 | 19,738 | 3,905 | 2,409 | 26,221 |
| 26,875 | 168 | 19,611 | 3,881 | 2,381 | 26,041 |
| 26,876 | 170 | 19,661 | 3,898 | 2,382 | 26,111 |
| 26,877 | 166 | 19,463 | 3,874 | 2,368 | 25,871 |
| 26,878 | 164 | 19,296 | 3,874 | 2,362 | 25,696 |
| 26,879 | 162 | 19,201 | 3,863 | 2,366 | 25,592 |
| 26,880 | 164 | 18,985 | 3,814 | 2,351 | 25,314 |
| 26,881 | 162 | 18,839 | 3,793 | 2,321 | 25,115 |
| 26,882 | 162 | 19,057 | 3,810 | 2,358 | 25,387 |
| 26,883 | 162 | 19,166 | 3,826 | 2,360 | 25,514 |
| 26,884 | 167 | 18,896 | 3,768 | 2,340 | 25,171 |
| 26,885 | 172 | 19,040 | 3,775 | 2,353 | 25,340 |
| 26,886 | 172 | 18,777 | 3,734 | 2,321 | 25,004 |
| 26,887 | 174 | 18,802 | 3,764 | 2,340 | 25,080 |
| 26,888 | 166 | 18,798 | 3,751 | 2,331 | 25,046 |
| 26,889 | 168 | 18,582 | 3,700 | 2,281 | 24,731 |
| 26,890 | 169 | 18,611 | 3,688 | 2,275 | 24,743 |
| 26,891 | 169 | 18,674 | 3,694 | 2,279 | 24,816 |
| 26,892 | 163 | 18,645 | 3,664 | 2,299 | 24,771 |
| 26,893 | 164 | 18,768 | 3,697 | 2,322 | 24,951 |
| 26,894 | 167 | 18,743 | 3,676 | 2,327 | 24,913 |
| 26,895 | 165 | 18,769 | 3,685 | 2,332 | 24,951 |
| 26,896 | 162 | 18,657 | 3,643 | 2,329 | 24,791 |
| 26,897 | 162 | 18,595 | 3,655 | 2,342 | 24,754 |
| 26,898 | 167 | 18,381 | 3,639 | 2,334 | 24,521 |
| 26,899 | 160 | 18,242 | 3,629 | 2,334 | 24,365 |
| 26,900 | 165 | 18,542 | 3,702 | 2,384 | 24,793 |
| 26,901 | 163 | 18,303 | 3,678 | 2,367 | 24,511 |
| 26,902 | 163 | 18,719 | 3,762 | 2,426 | 25,070 |
| 26,903 | 155 | 18,784 | 3,767 | 2,445 | 25,151 |

|        |     |        |       |       |        |
|--------|-----|--------|-------|-------|--------|
| 26,904 | 156 | 18,905 | 3,830 | 2,479 | 25,370 |
| 26,905 | 152 | 18,810 | 3,842 | 2,491 | 25,295 |
| 26,906 | 148 | 18,927 | 3,888 | 2,514 | 25,477 |
| 26,907 | 149 | 19,538 | 3,985 | 2,591 | 26,263 |
| 26,908 | 148 | 19,844 | 4,067 | 2,662 | 26,721 |
| 26,909 | 146 | 19,668 | 4,046 | 2,667 | 26,527 |
| 26,910 | 156 | 20,538 | 4,221 | 2,780 | 27,695 |
| 26,911 | 164 | 20,796 | 4,258 | 2,803 | 28,021 |
| 26,912 | 167 | 20,985 | 4,269 | 2,830 | 28,251 |
| 26,913 | 166 | 20,980 | 4,276 | 2,837 | 28,259 |
| 26,914 | 165 | 21,235 | 4,398 | 2,904 | 28,702 |
| 26,915 | 160 | 21,067 | 4,406 | 2,887 | 28,520 |
| 26,916 | 161 | 21,237 | 4,458 | 2,929 | 28,785 |
| 26,917 | 168 | 21,457 | 4,517 | 2,955 | 29,097 |
| 26,918 | 166 | 21,300 | 4,458 | 2,942 | 28,866 |
| 26,919 | 163 | 21,032 | 4,421 | 2,926 | 28,542 |
| 26,920 | 159 | 20,754 | 4,383 | 2,911 | 28,207 |
| 26,921 | 164 | 21,172 | 4,487 | 2,995 | 28,818 |
| 26,922 | 163 | 21,179 | 4,440 | 2,956 | 28,738 |
| 26,923 | 163 | 21,360 | 4,471 | 2,961 | 28,955 |
| 26,924 | 160 | 21,321 | 4,492 | 2,957 | 28,930 |
| 26,925 | 157 | 21,381 | 4,507 | 2,946 | 28,991 |
| 26,926 | 175 | 21,797 | 4,594 | 2,993 | 29,559 |
| 26,927 | 175 | 22,040 | 4,626 | 3,009 | 29,850 |
| 26,928 | 179 | 22,196 | 4,674 | 3,021 | 30,070 |
| 26,929 | 174 | 22,079 | 4,649 | 3,000 | 29,902 |
| 26,930 | 173 | 21,906 | 4,619 | 2,979 | 29,677 |
| 26,931 | 169 | 21,778 | 4,602 | 2,965 | 29,514 |
| 26,932 | 181 | 22,613 | 4,808 | 3,093 | 30,695 |
| 26,933 | 177 | 22,272 | 4,782 | 3,046 | 30,277 |
| 26,934 | 196 | 22,588 | 4,855 | 3,085 | 30,724 |
| 26,935 | 191 | 22,593 | 4,880 | 3,095 | 30,759 |

|        |     |        |       |       |        |
|--------|-----|--------|-------|-------|--------|
| 26,936 | 188 | 22,526 | 4,908 | 3,087 | 30,709 |
| 26,937 | 188 | 22,465 | 4,913 | 3,084 | 30,650 |
| 26,938 | 188 | 22,482 | 4,908 | 3,087 | 30,665 |
| 26,939 | 188 | 22,192 | 4,896 | 3,059 | 30,335 |
| 26,940 | 183 | 22,615 | 5,014 | 3,124 | 30,936 |
| 26,941 | 187 | 22,454 | 4,985 | 3,126 | 30,752 |
| 26,942 | 189 | 22,565 | 5,023 | 3,148 | 30,925 |
| 26,943 | 187 | 22,538 | 5,047 | 3,128 | 30,900 |
| 26,944 | 183 | 22,468 | 5,082 | 3,118 | 30,851 |
| 26,945 | 178 | 22,402 | 5,108 | 3,113 | 30,801 |
| 26,946 | 178 | 22,049 | 5,035 | 3,056 | 30,318 |
| 26,947 | 179 | 22,312 | 5,076 | 3,082 | 30,649 |
| 26,948 | 177 | 22,552 | 5,119 | 3,119 | 30,967 |
| 26,949 | 168 | 22,367 | 5,074 | 3,088 | 30,697 |
| 26,950 | 169 | 22,328 | 5,101 | 3,078 | 30,676 |
| 26,951 | 158 | 22,133 | 5,084 | 3,068 | 30,443 |
| 26,952 | 161 | 21,933 | 5,034 | 3,039 | 30,167 |
| 26,953 | 162 | 21,853 | 5,069 | 3,016 | 30,100 |
| 26,954 | 161 | 21,542 | 5,019 | 2,996 | 29,718 |
| 26,955 | 163 | 21,786 | 5,083 | 3,016 | 30,048 |
| 26,956 | 164 | 21,516 | 5,076 | 2,972 | 29,728 |
| 26,957 | 164 | 21,376 | 5,049 | 2,950 | 29,539 |
| 26,958 | 162 | 21,435 | 5,067 | 2,978 | 29,642 |
| 26,959 | 158 | 21,092 | 5,012 | 2,920 | 29,182 |
| 26,960 | 169 | 20,957 | 5,013 | 2,892 | 29,031 |
| 26,961 | 160 | 20,655 | 4,987 | 2,873 | 28,675 |
| 26,962 | 154 | 20,815 | 5,012 | 2,884 | 28,865 |
| 26,963 | 154 | 20,810 | 5,024 | 2,863 | 28,851 |
| 26,964 | 155 | 20,878 | 5,018 | 2,837 | 28,888 |
| 26,965 | 161 | 21,017 | 5,035 | 2,822 | 29,035 |
| 26,966 | 167 | 20,838 | 4,997 | 2,816 | 28,818 |
| 26,967 | 166 | 20,870 | 5,005 | 2,804 | 28,845 |

|        |     |        |       |       |        |
|--------|-----|--------|-------|-------|--------|
| 26,968 | 164 | 20,754 | 5,003 | 2,788 | 28,709 |
| 26,969 | 163 | 20,700 | 5,030 | 2,784 | 28,677 |
| 26,970 | 161 | 20,701 | 5,036 | 2,788 | 28,686 |
| 26,971 | 158 | 20,624 | 5,009 | 2,761 | 28,552 |
| 26,972 | 159 | 20,590 | 5,030 | 2,754 | 28,533 |
| 26,973 | 157 | 20,575 | 5,031 | 2,760 | 28,523 |
| 26,974 | 158 | 20,634 | 5,055 | 2,800 | 28,647 |
| 26,975 | 158 | 20,471 | 5,067 | 2,804 | 28,500 |
| 26,976 | 152 | 20,438 | 5,074 | 2,809 | 28,473 |
| 26,977 | 144 | 20,445 | 5,073 | 2,841 | 28,503 |
| 26,978 | 152 | 20,504 | 5,090 | 2,832 | 28,578 |
| 26,979 | 150 | 20,486 | 5,115 | 2,849 | 28,600 |
| 26,980 | 152 | 20,707 | 5,183 | 2,875 | 28,917 |
| 26,981 | 161 | 20,914 | 5,257 | 2,930 | 29,262 |
| 26,982 | 156 | 20,890 | 5,263 | 2,943 | 29,252 |
| 26,983 | 156 | 20,642 | 5,196 | 2,880 | 28,874 |
| 26,984 | 155 | 20,932 | 5,257 | 2,899 | 29,243 |
| 26,985 | 145 | 20,906 | 5,252 | 2,896 | 29,199 |
| 26,986 | 143 | 21,224 | 5,306 | 2,912 | 29,585 |
| 26,987 | 143 | 21,518 | 5,400 | 2,983 | 30,044 |
| 26,988 | 145 | 21,739 | 5,444 | 3,009 | 30,337 |
| 26,989 | 143 | 21,785 | 5,437 | 3,013 | 30,378 |
| 26,990 | 144 | 22,008 | 5,484 | 3,068 | 30,704 |
| 26,991 | 145 | 22,195 | 5,528 | 3,108 | 30,976 |
| 26,992 | 143 | 22,042 | 5,496 | 3,069 | 30,750 |
| 26,993 | 141 | 21,920 | 5,506 | 3,055 | 30,622 |
| 26,994 | 147 | 22,315 | 5,581 | 3,141 | 31,184 |
| 26,995 | 148 | 22,197 | 5,514 | 3,129 | 30,988 |
| 26,996 | 148 | 22,228 | 5,498 | 3,128 | 31,002 |
| 26,997 | 146 | 22,054 | 5,440 | 3,095 | 30,735 |
| 26,998 | 153 | 22,549 | 5,570 | 3,165 | 31,437 |
| 26,999 | 159 | 22,601 | 5,590 | 3,178 | 31,528 |

|        |     |        |       |       |        |
|--------|-----|--------|-------|-------|--------|
| 27,000 | 162 | 22,446 | 5,565 | 3,160 | 31,333 |
| 27,001 | 167 | 22,441 | 5,559 | 3,166 | 31,333 |
| 27,002 | 166 | 22,252 | 5,518 | 3,151 | 31,087 |
| 27,003 | 168 | 22,488 | 5,580 | 3,189 | 31,425 |
| 27,004 | 168 | 22,587 | 5,560 | 3,207 | 31,522 |
| 27,005 | 167 | 22,531 | 5,512 | 3,218 | 31,428 |
| 27,006 | 165 | 22,233 | 5,432 | 3,180 | 31,010 |
| 27,007 | 161 | 22,160 | 5,388 | 3,178 | 30,887 |
| 27,008 | 162 | 21,827 | 5,306 | 3,116 | 30,411 |
| 27,009 | 164 | 22,092 | 5,351 | 3,126 | 30,733 |
| 27,010 | 163 | 21,748 | 5,279 | 3,091 | 30,281 |
| 27,011 | 151 | 21,409 | 5,169 | 3,056 | 29,785 |
| 27,012 | 153 | 21,571 | 5,189 | 3,102 | 30,015 |
| 27,013 | 150 | 21,046 | 5,120 | 3,057 | 29,373 |
| 27,014 | 149 | 20,997 | 5,135 | 3,090 | 29,371 |
| 27,015 | 149 | 20,874 | 5,105 | 3,092 | 29,220 |
| 27,016 | 134 | 20,030 | 4,837 | 2,988 | 27,989 |
| 27,017 | 135 | 20,308 | 4,903 | 3,024 | 28,370 |
| 27,018 | 145 | 20,547 | 4,970 | 3,069 | 28,731 |
| 27,019 | 145 | 20,573 | 4,965 | 3,078 | 28,761 |
| 27,020 | 148 | 21,000 | 5,089 | 3,156 | 29,393 |
| 27,021 | 143 | 20,908 | 5,052 | 3,148 | 29,251 |
| 27,022 | 145 | 20,826 | 5,042 | 3,153 | 29,166 |
| 27,023 | 145 | 20,696 | 5,029 | 3,156 | 29,026 |
| 27,024 | 147 | 20,733 | 5,010 | 3,146 | 29,036 |
| 27,025 | 145 | 20,518 | 4,964 | 3,101 | 28,728 |
| 27,026 | 141 | 20,819 | 5,018 | 3,149 | 29,127 |
| 27,027 | 141 | 20,593 | 4,949 | 3,110 | 28,793 |
| 27,028 | 143 | 20,604 | 4,937 | 3,078 | 28,762 |
| 27,029 | 133 | 20,377 | 4,851 | 3,051 | 28,412 |
| 27,030 | 133 | 20,262 | 4,779 | 3,028 | 28,202 |
| 27,031 | 123 | 20,023 | 4,705 | 2,990 | 27,841 |

|        |     |        |       |       |        |
|--------|-----|--------|-------|-------|--------|
| 27,032 | 128 | 19,461 | 4,565 | 2,896 | 27,050 |
| 27,033 | 128 | 19,537 | 4,578 | 2,900 | 27,143 |
| 27,034 | 122 | 19,418 | 4,531 | 2,886 | 26,957 |
| 27,035 | 120 | 19,040 | 4,456 | 2,880 | 26,496 |
| 27,036 | 118 | 18,844 | 4,440 | 2,872 | 26,274 |
| 27,037 | 121 | 18,953 | 4,488 | 2,915 | 26,477 |
| 27,038 | 116 | 18,907 | 4,460 | 2,908 | 26,391 |
| 27,039 | 115 | 18,640 | 4,425 | 2,879 | 26,059 |
| 27,040 | 114 | 18,541 | 4,397 | 2,853 | 25,905 |
| 27,041 | 113 | 18,574 | 4,406 | 2,850 | 25,943 |
| 27,042 | 104 | 18,182 | 4,271 | 2,786 | 25,343 |
| 27,043 | 104 | 18,415 | 4,324 | 2,819 | 25,662 |
| 27,044 | 104 | 18,664 | 4,378 | 2,852 | 25,998 |
| 27,045 | 106 | 18,699 | 4,369 | 2,844 | 26,018 |
| 27,046 | 107 | 18,679 | 4,369 | 2,833 | 25,988 |
| 27,047 | 103 | 18,402 | 4,329 | 2,813 | 25,647 |
| 27,048 | 114 | 19,024 | 4,494 | 2,892 | 26,524 |
| 27,049 | 118 | 19,105 | 4,484 | 2,908 | 26,615 |
| 27,050 | 112 | 19,163 | 4,504 | 2,918 | 26,697 |
| 27,051 | 108 | 19,053 | 4,442 | 2,883 | 26,486 |
| 27,052 | 108 | 19,251 | 4,477 | 2,900 | 26,736 |
| 27,053 | 104 | 19,307 | 4,460 | 2,912 | 26,783 |
| 27,054 | 104 | 19,425 | 4,492 | 2,945 | 26,966 |
| 27,055 | 108 | 19,645 | 4,536 | 2,968 | 27,257 |
| 27,056 | 107 | 19,471 | 4,519 | 2,936 | 27,033 |
| 27,057 | 114 | 19,650 | 4,525 | 2,947 | 27,236 |
| 27,058 | 114 | 19,543 | 4,531 | 2,954 | 27,142 |
| 27,059 | 112 | 19,572 | 4,573 | 2,961 | 27,218 |
| 27,060 | 119 | 19,581 | 4,574 | 2,957 | 27,231 |
| 27,061 | 125 | 19,807 | 4,601 | 2,993 | 27,526 |
| 27,062 | 126 | 19,838 | 4,627 | 3,002 | 27,593 |
| 27,063 | 126 | 19,837 | 4,617 | 2,981 | 27,561 |

|        |     |        |       |       |        |
|--------|-----|--------|-------|-------|--------|
| 27,064 | 129 | 19,811 | 4,585 | 2,956 | 27,481 |
| 27,065 | 130 | 19,802 | 4,565 | 2,948 | 27,445 |
| 27,066 | 125 | 19,838 | 4,598 | 2,964 | 27,525 |
| 27,067 | 136 | 19,794 | 4,564 | 2,946 | 27,440 |
| 27,068 | 140 | 20,000 | 4,593 | 2,962 | 27,695 |
| 27,069 | 149 | 20,180 | 4,652 | 2,975 | 27,956 |
| 27,070 | 149 | 20,332 | 4,680 | 2,984 | 28,145 |
| 27,071 | 144 | 20,451 | 4,709 | 3,005 | 28,309 |
| 27,072 | 153 | 20,407 | 4,683 | 2,998 | 28,241 |
| 27,073 | 151 | 20,561 | 4,688 | 2,983 | 28,383 |
| 27,074 | 151 | 20,716 | 4,705 | 2,987 | 28,559 |
| 27,075 | 151 | 20,803 | 4,705 | 2,983 | 28,642 |
| 27,076 | 152 | 20,700 | 4,695 | 2,981 | 28,528 |
| 27,077 | 152 | 20,701 | 4,693 | 2,984 | 28,530 |
| 27,078 | 156 | 20,933 | 4,748 | 3,025 | 28,862 |
| 27,079 | 161 | 20,596 | 4,688 | 3,006 | 28,451 |
| 27,080 | 159 | 20,539 | 4,679 | 3,005 | 28,382 |
| 27,081 | 158 | 20,287 | 4,647 | 2,961 | 28,053 |
| 27,082 | 157 | 19,976 | 4,602 | 2,938 | 27,673 |
| 27,083 | 159 | 20,566 | 4,775 | 3,019 | 28,519 |
| 27,084 | 159 | 20,631 | 4,792 | 3,031 | 28,613 |
| 27,085 | 158 | 20,707 | 4,829 | 3,051 | 28,745 |
| 27,086 | 163 | 20,656 | 4,807 | 3,003 | 28,629 |
| 27,087 | 173 | 20,918 | 4,852 | 3,032 | 28,975 |
| 27,088 | 171 | 21,059 | 4,874 | 3,040 | 29,144 |
| 27,089 | 171 | 20,939 | 4,859 | 3,012 | 28,981 |
| 27,090 | 166 | 20,706 | 4,777 | 2,991 | 28,640 |
| 27,091 | 165 | 20,599 | 4,772 | 2,984 | 28,520 |
| 27,092 | 172 | 20,786 | 4,794 | 2,990 | 28,742 |
| 27,093 | 174 | 20,614 | 4,770 | 2,972 | 28,530 |
| 27,094 | 176 | 20,826 | 4,811 | 2,982 | 28,795 |
| 27,095 | 177 | 20,903 | 4,817 | 2,992 | 28,889 |

|        |     |        |       |       |        |
|--------|-----|--------|-------|-------|--------|
| 27,096 | 177 | 20,835 | 4,804 | 2,979 | 28,795 |
| 27,097 | 178 | 20,895 | 4,802 | 2,983 | 28,858 |
| 27,098 | 179 | 21,264 | 4,831 | 3,006 | 29,280 |
| 27,099 | 172 | 21,311 | 4,820 | 3,025 | 29,328 |
| 27,100 | 165 | 21,148 | 4,785 | 2,989 | 29,087 |
| 27,101 | 165 | 21,298 | 4,876 | 3,009 | 29,348 |
| 27,102 | 176 | 21,464 | 4,920 | 3,011 | 29,571 |
| 27,103 | 179 | 21,358 | 4,884 | 2,973 | 29,394 |
| 27,104 | 180 | 21,420 | 4,879 | 2,977 | 29,456 |
| 27,105 | 182 | 21,292 | 4,840 | 2,952 | 29,266 |
| 27,106 | 182 | 21,195 | 4,817 | 2,947 | 29,141 |
| 27,107 | 190 | 21,836 | 4,990 | 3,027 | 30,043 |
| 27,108 | 191 | 21,927 | 4,980 | 3,009 | 30,107 |
| 27,109 | 193 | 21,900 | 4,970 | 3,019 | 30,082 |
| 27,110 | 195 | 21,885 | 4,961 | 3,022 | 30,063 |
| 27,111 | 186 | 21,866 | 5,007 | 3,037 | 30,096 |
| 27,112 | 184 | 21,815 | 4,978 | 3,004 | 29,981 |
| 27,113 | 189 | 21,877 | 4,983 | 2,995 | 30,044 |
| 27,114 | 186 | 21,777 | 4,961 | 2,973 | 29,897 |
| 27,115 | 186 | 22,072 | 5,026 | 3,013 | 30,297 |
| 27,116 | 191 | 22,164 | 5,067 | 3,023 | 30,445 |
| 27,117 | 191 | 22,107 | 5,050 | 3,027 | 30,375 |
| 27,118 | 180 | 22,322 | 5,100 | 3,071 | 30,673 |
| 27,119 | 184 | 22,468 | 5,133 | 3,093 | 30,878 |
| 27,120 | 164 | 22,374 | 5,086 | 3,089 | 30,713 |
| 27,121 | 162 | 21,752 | 4,981 | 3,020 | 29,915 |
| 27,122 | 164 | 22,057 | 5,000 | 3,045 | 30,266 |
| 27,123 | 159 | 22,304 | 5,069 | 3,080 | 30,612 |
| 27,124 | 165 | 22,389 | 5,108 | 3,114 | 30,776 |
| 27,125 | 165 | 22,429 | 5,128 | 3,132 | 30,854 |
| 27,126 | 163 | 22,565 | 5,150 | 3,147 | 31,025 |
| 27,127 | 166 | 22,950 | 5,196 | 3,193 | 31,505 |



|        |     |        |       |       |        |
|--------|-----|--------|-------|-------|--------|
| 27,128 | 162 | 23,085 | 5,221 | 3,212 | 31,680 |
| 27,129 | 161 | 23,153 | 5,245 | 3,221 | 31,780 |
| 27,130 | 156 | 22,870 | 5,194 | 3,188 | 31,408 |
| 27,131 | 157 | 22,903 | 5,189 | 3,185 | 31,434 |
| 27,132 | 153 | 22,831 | 5,150 | 3,165 | 31,299 |
| 27,133 | 153 | 22,719 | 5,110 | 3,147 | 31,129 |
| 27,134 | 154 | 23,376 | 5,259 | 3,278 | 32,067 |
| 27,135 | 163 | 23,424 | 5,235 | 3,298 | 32,120 |
| 27,136 | 162 | 23,336 | 5,184 | 3,282 | 31,964 |
| 27,137 | 160 | 23,086 | 5,101 | 3,258 | 31,605 |
| 27,138 | 154 | 23,228 | 5,131 | 3,272 | 31,785 |
| 27,139 | 152 | 23,105 | 5,104 | 3,262 | 31,623 |
| 27,140 | 155 | 23,061 | 5,101 | 3,260 | 31,577 |
| 27,141 | 159 | 23,003 | 5,063 | 3,262 | 31,487 |
| 27,142 | 161 | 23,372 | 5,151 | 3,313 | 31,997 |
| 27,143 | 160 | 23,365 | 5,199 | 3,343 | 32,067 |
| 27,144 | 156 | 23,098 | 5,160 | 3,331 | 31,745 |
| 27,145 | 155 | 23,085 | 5,158 | 3,336 | 31,734 |
| 27,146 | 156 | 23,259 | 5,249 | 3,393 | 32,057 |
| 27,147 | 158 | 23,161 | 5,245 | 3,391 | 31,955 |
| 27,148 | 164 | 22,881 | 5,203 | 3,362 | 31,610 |
| 27,149 | 161 | 22,648 | 5,177 | 3,362 | 31,348 |
| 27,150 | 164 | 22,820 | 5,229 | 3,384 | 31,597 |
| 27,151 | 172 | 22,339 | 5,144 | 3,348 | 31,003 |
| 27,152 | 173 | 22,504 | 5,167 | 3,360 | 31,204 |
| 27,153 | 165 | 22,687 | 5,156 | 3,381 | 31,389 |
| 27,154 | 170 | 22,373 | 5,104 | 3,337 | 30,984 |
| 27,155 | 172 | 22,445 | 5,123 | 3,338 | 31,078 |
| 27,156 | 169 | 22,195 | 5,072 | 3,311 | 30,747 |
| 27,157 | 169 | 22,243 | 5,078 | 3,319 | 30,809 |
| 27,158 | 165 | 22,132 | 5,085 | 3,331 | 30,713 |
| 27,159 | 164 | 22,088 | 5,096 | 3,350 | 30,698 |

|        |     |        |       |       |        |
|--------|-----|--------|-------|-------|--------|
| 27,160 | 161 | 22,172 | 5,105 | 3,352 | 30,790 |
| 27,161 | 166 | 22,101 | 5,091 | 3,351 | 30,709 |
| 27,162 | 166 | 21,793 | 5,041 | 3,326 | 30,326 |
| 27,163 | 162 | 21,866 | 5,112 | 3,361 | 30,501 |
| 27,164 | 159 | 21,825 | 5,101 | 3,384 | 30,469 |
| 27,165 | 163 | 21,961 | 5,160 | 3,425 | 30,709 |
| 27,166 | 164 | 21,937 | 5,148 | 3,415 | 30,664 |
| 27,167 | 161 | 22,000 | 5,159 | 3,419 | 30,739 |
| 27,168 | 161 | 21,988 | 5,160 | 3,418 | 30,727 |
| 27,169 | 158 | 21,610 | 5,146 | 3,375 | 30,289 |
| 27,170 | 156 | 21,458 | 5,107 | 3,346 | 30,067 |
| 27,171 | 158 | 21,379 | 5,082 | 3,327 | 29,946 |
| 27,172 | 160 | 21,259 | 5,073 | 3,304 | 29,796 |
| 27,173 | 164 | 21,506 | 5,110 | 3,334 | 30,114 |
| 27,174 | 170 | 21,521 | 5,096 | 3,330 | 30,117 |
| 27,175 | 169 | 21,336 | 5,044 | 3,314 | 29,863 |
| 27,176 | 167 | 21,202 | 5,028 | 3,297 | 29,694 |
| 27,177 | 169 | 21,467 | 5,086 | 3,326 | 30,048 |
| 27,178 | 170 | 21,447 | 5,074 | 3,299 | 29,990 |
| 27,179 | 171 | 21,519 | 5,054 | 3,280 | 30,024 |
| 27,180 | 173 | 21,496 | 5,036 | 3,268 | 29,973 |
| 27,181 | 173 | 21,840 | 5,100 | 3,319 | 30,432 |
| 27,182 | 169 | 22,077 | 5,115 | 3,343 | 30,704 |
| 27,183 | 169 | 22,219 | 5,126 | 3,345 | 30,859 |
| 27,184 | 171 | 22,489 | 5,145 | 3,354 | 31,159 |
| 27,185 | 173 | 22,501 | 5,143 | 3,358 | 31,175 |
| 27,186 | 168 | 22,336 | 5,140 | 3,327 | 30,971 |
| 27,187 | 165 | 22,272 | 5,125 | 3,323 | 30,885 |
| 27,188 | 160 | 22,458 | 5,170 | 3,369 | 31,157 |
| 27,189 | 160 | 22,248 | 5,100 | 3,339 | 30,847 |
| 27,190 | 162 | 22,417 | 5,145 | 3,365 | 31,089 |
| 27,191 | 161 | 22,542 | 5,188 | 3,394 | 31,285 |

|        |     |        |       |       |        |
|--------|-----|--------|-------|-------|--------|
| 27,192 | 160 | 22,581 | 5,229 | 3,404 | 31,374 |
| 27,193 | 158 | 22,473 | 5,188 | 3,383 | 31,202 |
| 27,194 | 156 | 22,550 | 5,168 | 3,371 | 31,245 |
| 27,195 | 165 | 22,644 | 5,176 | 3,377 | 31,362 |
| 27,196 | 168 | 22,542 | 5,075 | 3,322 | 31,107 |
| 27,197 | 164 | 22,280 | 5,013 | 3,269 | 30,726 |
| 27,198 | 164 | 22,434 | 4,997 | 3,278 | 30,873 |
| 27,199 | 155 | 22,210 | 4,936 | 3,233 | 30,534 |
| 27,200 | 155 | 21,995 | 4,895 | 3,185 | 30,230 |
| 27,201 | 155 | 22,838 | 5,066 | 3,279 | 31,338 |
| 27,202 | 148 | 22,686 | 4,981 | 3,263 | 31,078 |
| 27,203 | 148 | 22,903 | 4,998 | 3,282 | 31,331 |
| 27,204 | 135 | 22,616 | 4,890 | 3,242 | 30,883 |
| 27,205 | 137 | 22,829 | 4,930 | 3,273 | 31,169 |
| 27,206 | 128 | 22,557 | 4,856 | 3,218 | 30,759 |
| 27,207 | 128 | 22,538 | 4,853 | 3,233 | 30,752 |
| 27,208 | 123 | 22,636 | 4,870 | 3,245 | 30,874 |
| 27,209 | 128 | 22,669 | 4,853 | 3,240 | 30,890 |
| 27,210 | 128 | 22,890 | 4,848 | 3,256 | 31,122 |
| 27,211 | 129 | 22,925 | 4,828 | 3,228 | 31,110 |
| 27,212 | 125 | 23,009 | 4,779 | 3,206 | 31,119 |
| 27,213 | 126 | 22,949 | 4,784 | 3,210 | 31,069 |
| 27,214 | 125 | 23,223 | 4,800 | 3,230 | 31,378 |
| 27,215 | 125 | 23,119 | 4,764 | 3,178 | 31,186 |
| 27,216 | 125 | 22,852 | 4,728 | 3,152 | 30,857 |
| 27,217 | 126 | 23,049 | 4,743 | 3,187 | 31,105 |
| 27,218 | 129 | 23,233 | 4,737 | 3,199 | 31,298 |
| 27,219 | 129 | 22,943 | 4,643 | 3,152 | 30,867 |
| 27,220 | 128 | 22,904 | 4,608 | 3,148 | 30,788 |
| 27,221 | 134 | 22,950 | 4,611 | 3,155 | 30,850 |
| 27,222 | 129 | 23,092 | 4,634 | 3,174 | 31,029 |
| 27,223 | 133 | 23,386 | 4,651 | 3,210 | 31,380 |

|        |     |        |       |       |        |
|--------|-----|--------|-------|-------|--------|
| 27,224 | 125 | 23,176 | 4,610 | 3,166 | 31,077 |
| 27,225 | 124 | 23,169 | 4,591 | 3,188 | 31,072 |
| 27,226 | 119 | 23,168 | 4,582 | 3,169 | 31,038 |
| 27,227 | 119 | 23,243 | 4,590 | 3,178 | 31,130 |
| 27,228 | 116 | 23,073 | 4,516 | 3,140 | 30,845 |
| 27,229 | 121 | 22,793 | 4,457 | 3,112 | 30,483 |
| 27,230 | 118 | 22,560 | 4,442 | 3,116 | 30,236 |
| 27,231 | 131 | 23,335 | 4,627 | 3,218 | 31,311 |
| 27,232 | 136 | 22,845 | 4,554 | 3,144 | 30,679 |
| 27,233 | 139 | 22,908 | 4,553 | 3,146 | 30,746 |
| 27,234 | 139 | 22,710 | 4,530 | 3,140 | 30,519 |
| 27,235 | 141 | 22,967 | 4,557 | 3,163 | 30,828 |
| 27,236 | 139 | 22,777 | 4,551 | 3,129 | 30,596 |
| 27,237 | 141 | 22,633 | 4,541 | 3,092 | 30,407 |
| 27,238 | 144 | 22,857 | 4,566 | 3,114 | 30,681 |
| 27,239 | 148 | 22,597 | 4,513 | 3,060 | 30,318 |
| 27,240 | 150 | 22,702 | 4,531 | 3,063 | 30,446 |
| 27,241 | 153 | 22,737 | 4,517 | 3,048 | 30,455 |
| 27,242 | 154 | 22,877 | 4,508 | 3,042 | 30,581 |
| 27,243 | 157 | 22,783 | 4,479 | 3,033 | 30,452 |
| 27,244 | 162 | 22,860 | 4,485 | 3,050 | 30,557 |
| 27,245 | 159 | 22,524 | 4,457 | 3,037 | 30,177 |
| 27,246 | 161 | 22,876 | 4,540 | 3,118 | 30,695 |
| 27,247 | 162 | 22,775 | 4,540 | 3,129 | 30,606 |
| 27,248 | 158 | 22,806 | 4,533 | 3,143 | 30,640 |
| 27,249 | 163 | 22,637 | 4,517 | 3,123 | 30,440 |
| 27,250 | 163 | 22,603 | 4,518 | 3,118 | 30,402 |
| 27,251 | 179 | 22,826 | 4,553 | 3,200 | 30,758 |
| 27,252 | 180 | 22,886 | 4,571 | 3,203 | 30,840 |
| 27,253 | 178 | 22,960 | 4,610 | 3,239 | 30,987 |
| 27,254 | 182 | 22,931 | 4,641 | 3,236 | 30,990 |
| 27,255 | 182 | 22,957 | 4,688 | 3,252 | 31,079 |

|        |     |        |       |       |        |
|--------|-----|--------|-------|-------|--------|
| 27,256 | 180 | 22,874 | 4,662 | 3,245 | 30,961 |
| 27,257 | 181 | 22,845 | 4,700 | 3,249 | 30,975 |
| 27,258 | 192 | 23,031 | 4,754 | 3,272 | 31,249 |
| 27,259 | 188 | 22,717 | 4,707 | 3,239 | 30,851 |
| 27,260 | 188 | 22,697 | 4,730 | 3,232 | 30,847 |
| 27,261 | 187 | 22,688 | 4,760 | 3,258 | 30,893 |
| 27,262 | 192 | 22,646 | 4,808 | 3,287 | 30,933 |
| 27,263 | 190 | 22,694 | 4,799 | 3,275 | 30,958 |
| 27,264 | 189 | 22,647 | 4,794 | 3,281 | 30,911 |
| 27,265 | 189 | 22,835 | 4,849 | 3,311 | 31,184 |
| 27,266 | 185 | 22,720 | 4,853 | 3,318 | 31,076 |
| 27,267 | 184 | 22,822 | 4,838 | 3,346 | 31,190 |
| 27,268 | 181 | 22,631 | 4,847 | 3,326 | 30,985 |
| 27,269 | 181 | 22,377 | 4,832 | 3,304 | 30,694 |
| 27,270 | 179 | 22,280 | 4,815 | 3,291 | 30,565 |
| 27,271 | 180 | 22,557 | 4,877 | 3,318 | 30,932 |
| 27,272 | 181 | 22,745 | 4,910 | 3,335 | 31,171 |
| 27,273 | 177 | 22,705 | 4,950 | 3,371 | 31,203 |
| 27,274 | 174 | 22,527 | 4,946 | 3,364 | 31,011 |
| 27,275 | 178 | 22,935 | 5,038 | 3,420 | 31,571 |
| 27,276 | 177 | 23,021 | 5,070 | 3,408 | 31,676 |
| 27,277 | 177 | 22,820 | 5,029 | 3,386 | 31,412 |
| 27,278 | 176 | 22,802 | 5,054 | 3,407 | 31,439 |
| 27,279 | 177 | 22,841 | 5,097 | 3,438 | 31,553 |
| 27,280 | 171 | 22,909 | 5,096 | 3,434 | 31,610 |
| 27,281 | 173 | 22,944 | 5,052 | 3,410 | 31,579 |
| 27,282 | 161 | 22,665 | 5,023 | 3,381 | 31,230 |
| 27,283 | 164 | 22,334 | 4,950 | 3,332 | 30,780 |
| 27,284 | 165 | 22,649 | 4,984 | 3,351 | 31,149 |
| 27,285 | 161 | 22,639 | 4,976 | 3,346 | 31,122 |
| 27,286 | 159 | 22,503 | 5,006 | 3,351 | 31,019 |
| 27,287 | 158 | 22,513 | 4,977 | 3,360 | 31,008 |

|        |     |        |       |       |        |
|--------|-----|--------|-------|-------|--------|
| 27,288 | 157 | 22,556 | 4,964 | 3,362 | 31,039 |
| 27,289 | 158 | 22,522 | 4,974 | 3,363 | 31,017 |
| 27,290 | 157 | 22,433 | 4,976 | 3,366 | 30,932 |
| 27,291 | 152 | 22,656 | 5,057 | 3,427 | 31,292 |
| 27,292 | 154 | 22,539 | 5,034 | 3,397 | 31,124 |
| 27,293 | 155 | 22,660 | 5,064 | 3,413 | 31,292 |
| 27,294 | 156 | 22,707 | 5,088 | 3,403 | 31,354 |
| 27,295 | 157 | 22,719 | 5,091 | 3,411 | 31,378 |
| 27,296 | 157 | 23,141 | 5,150 | 3,463 | 31,911 |
| 27,297 | 156 | 23,007 | 5,132 | 3,431 | 31,726 |
| 27,298 | 151 | 22,855 | 5,115 | 3,397 | 31,518 |
| 27,299 | 151 | 23,242 | 5,188 | 3,450 | 32,031 |
| 27,300 | 148 | 22,926 | 5,107 | 3,393 | 31,574 |
| 27,301 | 148 | 23,236 | 5,174 | 3,441 | 31,999 |
| 27,302 | 144 | 23,528 | 5,262 | 3,479 | 32,413 |
| 27,303 | 147 | 23,647 | 5,290 | 3,488 | 32,572 |
| 27,304 | 145 | 23,784 | 5,291 | 3,514 | 32,734 |
| 27,305 | 149 | 23,147 | 5,179 | 3,425 | 31,900 |
| 27,306 | 149 | 23,398 | 5,206 | 3,456 | 32,209 |
| 27,307 | 151 | 23,699 | 5,268 | 3,502 | 32,620 |
| 27,308 | 152 | 24,038 | 5,345 | 3,542 | 33,077 |
| 27,309 | 139 | 23,944 | 5,325 | 3,541 | 32,949 |
| 27,310 | 142 | 23,821 | 5,268 | 3,496 | 32,727 |
| 27,311 | 144 | 24,066 | 5,313 | 3,526 | 33,049 |
| 27,312 | 137 | 24,054 | 5,316 | 3,540 | 33,047 |
| 27,313 | 141 | 24,194 | 5,309 | 3,568 | 33,212 |
| 27,314 | 144 | 24,448 | 5,368 | 3,604 | 33,564 |
| 27,315 | 142 | 24,236 | 5,318 | 3,576 | 33,272 |
| 27,316 | 144 | 24,381 | 5,306 | 3,578 | 33,409 |
| 27,317 | 145 | 24,391 | 5,305 | 3,588 | 33,429 |
| 27,318 | 143 | 24,525 | 5,338 | 3,605 | 33,611 |
| 27,319 | 141 | 24,290 | 5,304 | 3,565 | 33,300 |

|        |     |        |       |       |        |
|--------|-----|--------|-------|-------|--------|
| 27,320 | 136 | 24,246 | 5,242 | 3,542 | 33,166 |
| 27,321 | 136 | 24,194 | 5,231 | 3,535 | 33,096 |
| 27,322 | 140 | 24,312 | 5,273 | 3,562 | 33,287 |
| 27,323 | 143 | 24,245 | 5,290 | 3,584 | 33,262 |
| 27,324 | 144 | 24,025 | 5,215 | 3,541 | 32,925 |
| 27,325 | 144 | 23,743 | 5,171 | 3,494 | 32,552 |
| 27,326 | 141 | 23,951 | 5,210 | 3,534 | 32,836 |
| 27,327 | 144 | 24,189 | 5,235 | 3,558 | 33,126 |
| 27,328 | 143 | 24,043 | 5,194 | 3,548 | 32,928 |
| 27,329 | 148 | 24,068 | 5,200 | 3,554 | 32,970 |
| 27,330 | 148 | 24,046 | 5,202 | 3,550 | 32,946 |
| 27,331 | 144 | 24,219 | 5,252 | 3,580 | 33,195 |
| 27,332 | 147 | 24,212 | 5,287 | 3,596 | 33,242 |
| 27,333 | 154 | 24,244 | 5,271 | 3,589 | 33,258 |
| 27,334 | 154 | 24,114 | 5,263 | 3,605 | 33,136 |
| 27,335 | 154 | 24,175 | 5,265 | 3,599 | 33,193 |
| 27,336 | 154 | 24,173 | 5,254 | 3,590 | 33,171 |
| 27,337 | 153 | 24,340 | 5,267 | 3,609 | 33,369 |
| 27,338 | 165 | 24,229 | 5,286 | 3,624 | 33,304 |
| 27,339 | 162 | 24,290 | 5,321 | 3,635 | 33,408 |
| 27,340 | 160 | 24,329 | 5,322 | 3,644 | 33,455 |
| 27,341 | 158 | 24,110 | 5,251 | 3,602 | 33,121 |
| 27,342 | 160 | 24,343 | 5,269 | 3,627 | 33,399 |
| 27,343 | 157 | 24,375 | 5,260 | 3,632 | 33,424 |
| 27,344 | 155 | 24,512 | 5,260 | 3,645 | 33,572 |
| 27,345 | 159 | 24,317 | 5,209 | 3,602 | 33,287 |
| 27,346 | 159 | 24,312 | 5,205 | 3,588 | 33,264 |
| 27,347 | 154 | 24,342 | 5,208 | 3,595 | 33,299 |
| 27,348 | 160 | 24,041 | 5,164 | 3,567 | 32,932 |
| 27,349 | 159 | 23,820 | 5,123 | 3,533 | 32,635 |
| 27,350 | 158 | 23,368 | 5,050 | 3,487 | 32,063 |
| 27,351 | 156 | 23,062 | 5,047 | 3,461 | 31,726 |

|        |     |        |       |       |        |
|--------|-----|--------|-------|-------|--------|
| 27,352 | 157 | 23,084 | 5,067 | 3,478 | 31,786 |
| 27,353 | 149 | 22,737 | 4,988 | 3,438 | 31,312 |
| 27,354 | 146 | 22,508 | 4,970 | 3,417 | 31,041 |
| 27,355 | 145 | 22,393 | 4,959 | 3,380 | 30,877 |
| 27,356 | 140 | 22,389 | 4,956 | 3,408 | 30,893 |
| 27,357 | 141 | 22,513 | 4,964 | 3,413 | 31,031 |
| 27,358 | 136 | 22,639 | 4,947 | 3,431 | 31,153 |
| 27,359 | 138 | 23,087 | 5,013 | 3,490 | 31,728 |
| 27,360 | 142 | 23,359 | 5,077 | 3,531 | 32,109 |
| 27,361 | 138 | 23,376 | 5,095 | 3,535 | 32,144 |
| 27,362 | 139 | 23,689 | 5,198 | 3,573 | 32,599 |
| 27,363 | 145 | 23,443 | 5,167 | 3,526 | 32,281 |
| 27,364 | 144 | 23,223 | 5,147 | 3,491 | 32,005 |
| 27,365 | 142 | 23,473 | 5,248 | 3,538 | 32,401 |
| 27,366 | 147 | 23,391 | 5,248 | 3,536 | 32,322 |
| 27,367 | 148 | 23,283 | 5,260 | 3,535 | 32,226 |
| 27,368 | 154 | 23,288 | 5,289 | 3,555 | 32,286 |
| 27,369 | 157 | 23,041 | 5,240 | 3,512 | 31,950 |
| 27,370 | 160 | 22,936 | 5,245 | 3,521 | 31,862 |
| 27,371 | 162 | 23,033 | 5,308 | 3,551 | 32,054 |
| 27,372 | 158 | 22,806 | 5,242 | 3,541 | 31,747 |
| 27,373 | 159 | 22,768 | 5,251 | 3,543 | 31,721 |
| 27,374 | 160 | 22,721 | 5,257 | 3,541 | 31,679 |
| 27,375 | 165 | 22,628 | 5,283 | 3,536 | 31,612 |
| 27,376 | 171 | 22,570 | 5,294 | 3,555 | 31,590 |
| 27,377 | 178 | 22,637 | 5,304 | 3,582 | 31,701 |
| 27,378 | 181 | 22,781 | 5,342 | 3,617 | 31,921 |
| 27,379 | 178 | 22,718 | 5,360 | 3,616 | 31,872 |
| 27,380 | 181 | 23,080 | 5,442 | 3,648 | 32,351 |
| 27,381 | 184 | 22,975 | 5,407 | 3,604 | 32,170 |
| 27,382 | 185 | 23,078 | 5,446 | 3,627 | 32,336 |
| 27,383 | 183 | 23,452 | 5,560 | 3,686 | 32,881 |



|        |     |        |       |       |        |
|--------|-----|--------|-------|-------|--------|
| 27,384 | 177 | 23,545 | 5,588 | 3,697 | 33,007 |
| 27,385 | 169 | 23,369 | 5,585 | 3,676 | 32,799 |
| 27,386 | 171 | 23,566 | 5,603 | 3,722 | 33,062 |
| 27,387 | 168 | 23,351 | 5,549 | 3,669 | 32,737 |
| 27,388 | 168 | 23,577 | 5,603 | 3,708 | 33,056 |
| 27,389 | 159 | 23,566 | 5,619 | 3,719 | 33,063 |
| 27,390 | 158 | 23,541 | 5,619 | 3,754 | 33,072 |
| 27,391 | 157 | 23,523 | 5,628 | 3,768 | 33,076 |
| 27,392 | 159 | 23,511 | 5,641 | 3,786 | 33,097 |
| 27,393 | 161 | 23,524 | 5,714 | 3,793 | 33,192 |
| 27,394 | 158 | 23,082 | 5,657 | 3,742 | 32,639 |
| 27,395 | 157 | 23,123 | 5,707 | 3,788 | 32,775 |
| 27,396 | 151 | 23,272 | 5,741 | 3,834 | 32,998 |
| 27,397 | 161 | 23,445 | 5,788 | 3,853 | 33,247 |
| 27,398 | 160 | 23,405 | 5,788 | 3,852 | 33,205 |
| 27,399 | 154 | 23,436 | 5,761 | 3,826 | 33,177 |
| 27,400 | 150 | 23,671 | 5,775 | 3,873 | 33,469 |
| 27,401 | 150 | 23,398 | 5,680 | 3,830 | 33,058 |
| 27,402 | 150 | 23,588 | 5,701 | 3,832 | 33,271 |
| 27,403 | 152 | 23,869 | 5,752 | 3,858 | 33,631 |
| 27,404 | 154 | 23,729 | 5,687 | 3,814 | 33,384 |
| 27,405 | 159 | 23,973 | 5,726 | 3,854 | 33,712 |
| 27,406 | 160 | 23,941 | 5,736 | 3,839 | 33,676 |
| 27,407 | 162 | 23,792 | 5,728 | 3,839 | 33,521 |
| 27,408 | 170 | 23,653 | 5,721 | 3,834 | 33,378 |
| 27,409 | 176 | 23,302 | 5,702 | 3,784 | 32,964 |
| 27,410 | 174 | 23,070 | 5,664 | 3,733 | 32,641 |
| 27,411 | 170 | 23,052 | 5,672 | 3,751 | 32,645 |
| 27,412 | 169 | 22,847 | 5,639 | 3,748 | 32,403 |
| 27,413 | 169 | 22,742 | 5,595 | 3,759 | 32,265 |
| 27,414 | 174 | 22,771 | 5,550 | 3,755 | 32,250 |
| 27,415 | 174 | 22,798 | 5,520 | 3,764 | 32,256 |

|        |     |        |       |       |        |
|--------|-----|--------|-------|-------|--------|
| 27,416 | 178 | 22,879 | 5,524 | 3,752 | 32,333 |
| 27,417 | 178 | 22,938 | 5,513 | 3,739 | 32,368 |
| 27,418 | 174 | 22,988 | 5,473 | 3,735 | 32,370 |
| 27,419 | 174 | 23,128 | 5,450 | 3,708 | 32,460 |
| 27,420 | 174 | 23,203 | 5,447 | 3,708 | 32,532 |
| 27,421 | 171 | 23,520 | 5,483 | 3,730 | 32,904 |
| 27,422 | 174 | 23,527 | 5,493 | 3,705 | 32,899 |
| 27,423 | 174 | 23,835 | 5,561 | 3,759 | 33,329 |
| 27,424 | 172 | 23,531 | 5,433 | 3,668 | 32,804 |
| 27,425 | 166 | 23,803 | 5,513 | 3,691 | 33,173 |
| 27,426 | 159 | 23,767 | 5,507 | 3,685 | 33,118 |
| 27,427 | 156 | 23,805 | 5,533 | 3,692 | 33,186 |
| 27,428 | 156 | 23,802 | 5,541 | 3,678 | 33,177 |
| 27,429 | 155 | 23,505 | 5,483 | 3,615 | 32,758 |
| 27,430 | 154 | 23,378 | 5,457 | 3,607 | 32,596 |
| 27,431 | 152 | 23,005 | 5,359 | 3,560 | 32,076 |
| 27,432 | 150 | 22,625 | 5,277 | 3,529 | 31,581 |
| 27,433 | 146 | 22,776 | 5,342 | 3,563 | 31,827 |
| 27,434 | 146 | 22,766 | 5,355 | 3,578 | 31,845 |
| 27,435 | 147 | 22,358 | 5,281 | 3,533 | 31,319 |
| 27,436 | 148 | 22,091 | 5,205 | 3,472 | 30,916 |
| 27,437 | 152 | 22,405 | 5,326 | 3,554 | 31,437 |
| 27,438 | 150 | 22,125 | 5,264 | 3,523 | 31,062 |
| 27,439 | 154 | 22,331 | 5,325 | 3,556 | 31,366 |
| 27,440 | 155 | 22,266 | 5,274 | 3,482 | 31,177 |
| 27,441 | 158 | 22,192 | 5,254 | 3,476 | 31,080 |
| 27,442 | 158 | 22,219 | 5,273 | 3,480 | 31,130 |
| 27,443 | 155 | 22,262 | 5,261 | 3,466 | 31,144 |
| 27,444 | 153 | 22,468 | 5,256 | 3,476 | 31,353 |
| 27,445 | 154 | 22,281 | 5,215 | 3,436 | 31,086 |
| 27,446 | 152 | 22,234 | 5,163 | 3,395 | 30,944 |
| 27,447 | 158 | 22,407 | 5,169 | 3,407 | 31,141 |

|        |     |        |       |       |        |
|--------|-----|--------|-------|-------|--------|
| 27,448 | 152 | 22,442 | 5,172 | 3,408 | 31,174 |
| 27,449 | 150 | 22,182 | 5,124 | 3,371 | 30,827 |
| 27,450 | 158 | 22,283 | 5,213 | 3,428 | 31,082 |
| 27,451 | 170 | 22,210 | 5,235 | 3,396 | 31,011 |
| 27,452 | 168 | 22,082 | 5,200 | 3,369 | 30,819 |
| 27,453 | 171 | 22,197 | 5,263 | 3,380 | 31,011 |
| 27,454 | 172 | 22,178 | 5,256 | 3,399 | 31,005 |
| 27,455 | 171 | 22,385 | 5,281 | 3,407 | 31,244 |
| 27,456 | 172 | 22,382 | 5,278 | 3,411 | 31,243 |
| 27,457 | 170 | 22,333 | 5,239 | 3,394 | 31,136 |
| 27,458 | 170 | 22,367 | 5,244 | 3,386 | 31,167 |
| 27,459 | 162 | 22,292 | 5,238 | 3,374 | 31,066 |
| 27,460 | 158 | 22,027 | 5,150 | 3,356 | 30,691 |
| 27,461 | 159 | 21,877 | 5,105 | 3,309 | 30,450 |
| 27,462 | 166 | 21,850 | 5,072 | 3,287 | 30,375 |
| 27,463 | 167 | 21,914 | 5,082 | 3,283 | 30,446 |
| 27,464 | 157 | 22,097 | 5,116 | 3,299 | 30,669 |
| 27,465 | 154 | 21,827 | 5,095 | 3,284 | 30,360 |
| 27,466 | 156 | 22,066 | 5,165 | 3,294 | 30,681 |
| 27,467 | 149 | 21,941 | 5,147 | 3,303 | 30,540 |
| 27,468 | 147 | 21,972 | 5,162 | 3,311 | 30,592 |
| 27,469 | 143 | 21,988 | 5,192 | 3,309 | 30,632 |
| 27,470 | 159 | 22,614 | 5,379 | 3,443 | 31,595 |
| 27,471 | 159 | 22,594 | 5,402 | 3,448 | 31,603 |
| 27,472 | 160 | 22,547 | 5,399 | 3,449 | 31,555 |
| 27,473 | 160 | 22,479 | 5,411 | 3,449 | 31,499 |
| 27,474 | 165 | 22,236 | 5,379 | 3,403 | 31,183 |
| 27,475 | 160 | 21,993 | 5,320 | 3,377 | 30,850 |
| 27,476 | 163 | 22,131 | 5,330 | 3,400 | 31,024 |
| 27,477 | 163 | 22,195 | 5,324 | 3,403 | 31,085 |
| 27,478 | 163 | 22,413 | 5,325 | 3,405 | 31,306 |
| 27,479 | 156 | 22,163 | 5,280 | 3,360 | 30,959 |

|        |     |        |       |       |        |
|--------|-----|--------|-------|-------|--------|
| 27,480 | 157 | 21,985 | 5,196 | 3,322 | 30,660 |
| 27,481 | 157 | 22,017 | 5,203 | 3,324 | 30,701 |
| 27,482 | 154 | 22,116 | 5,245 | 3,322 | 30,837 |
| 27,483 | 161 | 21,948 | 5,143 | 3,277 | 30,529 |
| 27,484 | 164 | 22,218 | 5,181 | 3,305 | 30,868 |
| 27,485 | 164 | 22,375 | 5,231 | 3,318 | 31,088 |
| 27,486 | 159 | 22,166 | 5,186 | 3,281 | 30,792 |
| 27,487 | 158 | 22,411 | 5,239 | 3,303 | 31,111 |
| 27,488 | 156 | 22,543 | 5,263 | 3,319 | 31,281 |
| 27,489 | 152 | 22,440 | 5,223 | 3,275 | 31,090 |
| 27,490 | 153 | 22,543 | 5,258 | 3,317 | 31,271 |
| 27,491 | 161 | 22,843 | 5,321 | 3,376 | 31,701 |
| 27,492 | 156 | 22,726 | 5,294 | 3,335 | 31,511 |
| 27,493 | 156 | 22,924 | 5,341 | 3,379 | 31,800 |
| 27,494 | 155 | 22,208 | 5,226 | 3,294 | 30,883 |
| 27,495 | 156 | 22,510 | 5,283 | 3,337 | 31,286 |
| 27,496 | 161 | 22,650 | 5,339 | 3,369 | 31,519 |
| 27,497 | 161 | 22,614 | 5,335 | 3,359 | 31,469 |
| 27,498 | 156 | 22,720 | 5,402 | 3,395 | 31,673 |
| 27,499 | 154 | 22,711 | 5,429 | 3,411 | 31,705 |
| 27,500 | 147 | 22,689 | 5,392 | 3,401 | 31,629 |
| 27,501 | 147 | 22,593 | 5,368 | 3,395 | 31,503 |
| 27,502 | 136 | 22,535 | 5,349 | 3,399 | 31,419 |
| 27,503 | 136 | 22,256 | 5,301 | 3,371 | 31,064 |
| 27,504 | 134 | 22,099 | 5,250 | 3,349 | 30,832 |
| 27,505 | 133 | 22,514 | 5,344 | 3,394 | 31,385 |
| 27,506 | 131 | 22,497 | 5,335 | 3,411 | 31,374 |
| 27,507 | 132 | 22,477 | 5,356 | 3,413 | 31,378 |
| 27,508 | 130 | 22,458 | 5,360 | 3,417 | 31,365 |
| 27,509 | 127 | 21,793 | 5,202 | 3,314 | 30,436 |
| 27,510 | 131 | 22,107 | 5,243 | 3,339 | 30,820 |
| 27,511 | 134 | 22,260 | 5,275 | 3,361 | 31,030 |

|        |     |        |       |       |        |
|--------|-----|--------|-------|-------|--------|
| 27,512 | 134 | 22,308 | 5,278 | 3,361 | 31,081 |
| 27,513 | 128 | 22,514 | 5,337 | 3,408 | 31,387 |
| 27,514 | 126 | 22,334 | 5,296 | 3,393 | 31,149 |
| 27,515 | 127 | 22,400 | 5,325 | 3,402 | 31,254 |
| 27,516 | 126 | 22,000 | 5,207 | 3,331 | 30,664 |
| 27,517 | 127 | 22,122 | 5,241 | 3,335 | 30,825 |
| 27,518 | 125 | 21,770 | 5,170 | 3,262 | 30,327 |
| 27,519 | 126 | 21,770 | 5,194 | 3,304 | 30,394 |
| 27,520 | 118 | 21,411 | 5,157 | 3,274 | 29,960 |
| 27,521 | 121 | 21,294 | 5,115 | 3,260 | 29,790 |
| 27,522 | 122 | 21,320 | 5,099 | 3,267 | 29,808 |
| 27,523 | 120 | 21,148 | 5,015 | 3,226 | 29,509 |
| 27,524 | 122 | 21,152 | 5,012 | 3,225 | 29,511 |
| 27,525 | 116 | 21,366 | 5,006 | 3,245 | 29,733 |
| 27,526 | 112 | 21,109 | 4,950 | 3,215 | 29,386 |
| 27,527 | 114 | 21,198 | 4,963 | 3,215 | 29,490 |
| 27,528 | 114 | 21,202 | 5,007 | 3,246 | 29,569 |
| 27,529 | 118 | 21,038 | 4,997 | 3,241 | 29,394 |
| 27,530 | 117 | 21,086 | 5,003 | 3,237 | 29,443 |
| 27,531 | 120 | 21,428 | 5,113 | 3,280 | 29,941 |
| 27,532 | 119 | 21,105 | 5,009 | 3,238 | 29,471 |
| 27,533 | 121 | 21,181 | 5,027 | 3,246 | 29,575 |
| 27,534 | 120 | 21,270 | 5,073 | 3,275 | 29,738 |
| 27,535 | 120 | 21,238 | 5,078 | 3,260 | 29,696 |
| 27,536 | 121 | 21,066 | 5,017 | 3,238 | 29,442 |
| 27,537 | 124 | 20,726 | 4,941 | 3,206 | 28,997 |
| 27,538 | 124 | 20,418 | 4,893 | 3,177 | 28,612 |
| 27,539 | 130 | 20,984 | 5,016 | 3,254 | 29,384 |
| 27,540 | 136 | 21,011 | 4,996 | 3,236 | 29,379 |
| 27,541 | 142 | 20,772 | 4,930 | 3,197 | 29,041 |
| 27,542 | 134 | 20,456 | 4,899 | 3,167 | 28,656 |
| 27,543 | 138 | 20,862 | 5,004 | 3,237 | 29,241 |

|        |     |        |       |       |        |
|--------|-----|--------|-------|-------|--------|
| 27,544 | 144 | 20,796 | 5,006 | 3,227 | 29,173 |
| 27,545 | 144 | 20,809 | 5,008 | 3,254 | 29,215 |
| 27,546 | 145 | 20,972 | 5,051 | 3,294 | 29,462 |
| 27,547 | 139 | 20,992 | 5,024 | 3,270 | 29,425 |
| 27,548 | 140 | 21,159 | 5,019 | 3,265 | 29,583 |
| 27,549 | 141 | 21,371 | 5,063 | 3,292 | 29,867 |
| 27,550 | 141 | 21,257 | 5,030 | 3,286 | 29,714 |
| 27,551 | 145 | 21,364 | 5,035 | 3,283 | 29,827 |
| 27,552 | 144 | 21,326 | 5,040 | 3,290 | 29,800 |
| 27,553 | 152 | 21,279 | 5,036 | 3,288 | 29,755 |
| 27,554 | 148 | 21,274 | 5,001 | 3,286 | 29,709 |
| 27,555 | 151 | 21,393 | 5,030 | 3,302 | 29,876 |
| 27,556 | 153 | 21,426 | 5,047 | 3,313 | 29,939 |
| 27,557 | 152 | 21,371 | 5,060 | 3,308 | 29,891 |
| 27,558 | 149 | 21,151 | 4,980 | 3,251 | 29,531 |
| 27,559 | 152 | 21,004 | 4,967 | 3,230 | 29,353 |
| 27,560 | 154 | 21,293 | 5,032 | 3,254 | 29,733 |
| 27,561 | 150 | 21,241 | 5,020 | 3,261 | 29,672 |
| 27,562 | 152 | 21,325 | 5,075 | 3,278 | 29,830 |
| 27,563 | 152 | 21,119 | 5,032 | 3,244 | 29,547 |
| 27,564 | 155 | 21,087 | 5,031 | 3,237 | 29,510 |
| 27,565 | 159 | 21,086 | 5,009 | 3,249 | 29,503 |
| 27,566 | 159 | 21,056 | 4,989 | 3,248 | 29,452 |
| 27,567 | 157 | 20,976 | 4,997 | 3,256 | 29,386 |
| 27,568 | 155 | 20,951 | 5,019 | 3,281 | 29,406 |
| 27,569 | 160 | 21,271 | 5,067 | 3,331 | 29,829 |
| 27,570 | 161 | 21,214 | 5,006 | 3,275 | 29,656 |
| 27,571 | 165 | 21,577 | 5,062 | 3,321 | 30,125 |
| 27,572 | 163 | 21,453 | 5,095 | 3,316 | 30,027 |
| 27,573 | 163 | 21,413 | 5,093 | 3,302 | 29,971 |
| 27,574 | 160 | 21,384 | 5,106 | 3,309 | 29,959 |
| 27,575 | 159 | 21,427 | 5,090 | 3,311 | 29,987 |

|        |     |        |       |       |        |
|--------|-----|--------|-------|-------|--------|
| 27,576 | 160 | 21,278 | 5,096 | 3,278 | 29,812 |
| 27,577 | 163 | 21,774 | 5,191 | 3,350 | 30,478 |
| 27,578 | 164 | 21,628 | 5,170 | 3,321 | 30,283 |
| 27,579 | 164 | 21,768 | 5,162 | 3,313 | 30,407 |
| 27,580 | 165 | 21,670 | 5,130 | 3,323 | 30,288 |
| 27,581 | 167 | 21,768 | 5,167 | 3,355 | 30,457 |
| 27,582 | 164 | 21,878 | 5,209 | 3,386 | 30,637 |
| 27,583 | 165 | 21,756 | 5,174 | 3,381 | 30,476 |
| 27,584 | 165 | 21,694 | 5,176 | 3,381 | 30,416 |
| 27,585 | 161 | 21,663 | 5,183 | 3,374 | 30,381 |
| 27,586 | 159 | 21,561 | 5,171 | 3,390 | 30,281 |
| 27,587 | 156 | 21,679 | 5,235 | 3,436 | 30,506 |
| 27,588 | 153 | 21,488 | 5,180 | 3,385 | 30,206 |
| 27,589 | 152 | 21,252 | 5,161 | 3,364 | 29,929 |
| 27,590 | 154 | 21,436 | 5,249 | 3,390 | 30,229 |
| 27,591 | 157 | 21,497 | 5,264 | 3,395 | 30,313 |
| 27,592 | 156 | 21,394 | 5,229 | 3,375 | 30,154 |
| 27,593 | 166 | 21,293 | 5,184 | 3,354 | 29,997 |
| 27,594 | 161 | 21,068 | 5,112 | 3,320 | 29,661 |
| 27,595 | 168 | 21,019 | 5,101 | 3,290 | 29,578 |
| 27,596 | 168 | 21,028 | 5,076 | 3,260 | 29,532 |
| 27,597 | 165 | 21,046 | 5,102 | 3,271 | 29,584 |
| 27,598 | 169 | 21,191 | 5,127 | 3,286 | 29,773 |
| 27,599 | 182 | 21,070 | 5,075 | 3,267 | 29,594 |
| 27,600 | 186 | 21,067 | 5,079 | 3,254 | 29,586 |
| 27,601 | 183 | 21,053 | 5,068 | 3,239 | 29,543 |
| 27,602 | 185 | 21,036 | 5,071 | 3,223 | 29,515 |
| 27,603 | 181 | 21,371 | 5,110 | 3,263 | 29,925 |
| 27,604 | 181 | 21,318 | 5,083 | 3,211 | 29,793 |
| 27,605 | 182 | 21,319 | 5,072 | 3,205 | 29,778 |
| 27,606 | 185 | 21,261 | 5,025 | 3,194 | 29,665 |
| 27,607 | 185 | 21,083 | 4,991 | 3,162 | 29,421 |

|        |     |        |       |       |        |
|--------|-----|--------|-------|-------|--------|
| 27,608 | 183 | 21,008 | 4,987 | 3,167 | 29,345 |
| 27,609 | 180 | 20,947 | 5,004 | 3,194 | 29,325 |
| 27,610 | 178 | 20,977 | 5,031 | 3,215 | 29,401 |
| 27,611 | 179 | 21,063 | 5,074 | 3,260 | 29,576 |
| 27,612 | 179 | 21,056 | 5,066 | 3,245 | 29,546 |
| 27,613 | 177 | 20,995 | 5,024 | 3,221 | 29,417 |
| 27,614 | 177 | 21,032 | 5,037 | 3,235 | 29,481 |
| 27,615 | 175 | 21,174 | 5,068 | 3,255 | 29,672 |
| 27,616 | 173 | 21,261 | 5,172 | 3,284 | 29,890 |
| 27,617 | 173 | 21,441 | 5,227 | 3,321 | 30,162 |
| 27,618 | 178 | 21,182 | 5,139 | 3,254 | 29,753 |
| 27,619 | 185 | 21,356 | 5,173 | 3,282 | 29,996 |
| 27,620 | 182 | 21,526 | 5,229 | 3,301 | 30,238 |
| 27,621 | 176 | 21,423 | 5,258 | 3,293 | 30,150 |
| 27,622 | 172 | 21,109 | 5,128 | 3,222 | 29,631 |
| 27,623 | 171 | 21,205 | 5,118 | 3,221 | 29,715 |
| 27,624 | 175 | 20,945 | 5,061 | 3,190 | 29,371 |
| 27,625 | 173 | 20,677 | 5,000 | 3,152 | 29,002 |
| 27,626 | 180 | 21,216 | 5,123 | 3,207 | 29,726 |
| 27,627 | 181 | 21,035 | 5,064 | 3,195 | 29,475 |
| 27,628 | 178 | 21,081 | 5,068 | 3,191 | 29,518 |
| 27,629 | 180 | 20,894 | 5,025 | 3,189 | 29,288 |
| 27,630 | 176 | 20,979 | 5,032 | 3,171 | 29,358 |
| 27,631 | 182 | 21,282 | 5,094 | 3,208 | 29,766 |
| 27,632 | 187 | 21,037 | 5,031 | 3,172 | 29,427 |
| 27,633 | 186 | 21,057 | 5,041 | 3,170 | 29,454 |
| 27,634 | 183 | 20,976 | 5,043 | 3,190 | 29,392 |
| 27,635 | 183 | 21,122 | 5,055 | 3,188 | 29,548 |
| 27,636 | 186 | 21,226 | 5,060 | 3,192 | 29,664 |
| 27,637 | 185 | 21,313 | 5,041 | 3,190 | 29,729 |
| 27,638 | 186 | 21,348 | 4,999 | 3,181 | 29,714 |
| 27,639 | 184 | 21,298 | 4,943 | 3,154 | 29,579 |



|        |     |        |       |       |        |
|--------|-----|--------|-------|-------|--------|
| 27,640 | 187 | 21,604 | 4,982 | 3,201 | 29,974 |
| 27,641 | 183 | 21,881 | 5,037 | 3,251 | 30,352 |
| 27,642 | 181 | 21,792 | 5,055 | 3,270 | 30,298 |
| 27,643 | 179 | 21,834 | 5,070 | 3,250 | 30,333 |
| 27,644 | 172 | 21,538 | 5,021 | 3,207 | 29,938 |
| 27,645 | 173 | 21,299 | 5,000 | 3,174 | 29,646 |
| 27,646 | 167 | 21,533 | 5,086 | 3,202 | 29,988 |
| 27,647 | 172 | 21,714 | 5,144 | 3,247 | 30,277 |
| 27,648 | 175 | 21,433 | 5,069 | 3,208 | 29,885 |
| 27,649 | 169 | 21,250 | 5,025 | 3,187 | 29,631 |
| 27,650 | 158 | 21,522 | 5,114 | 3,267 | 30,061 |
| 27,651 | 153 | 21,299 | 5,074 | 3,236 | 29,762 |
| 27,652 | 151 | 21,303 | 5,099 | 3,230 | 29,783 |
| 27,653 | 148 | 21,206 | 5,081 | 3,215 | 29,650 |
| 27,654 | 154 | 21,314 | 5,113 | 3,235 | 29,816 |
| 27,655 | 150 | 20,799 | 5,046 | 3,186 | 29,181 |
| 27,656 | 150 | 20,913 | 5,076 | 3,194 | 29,333 |
| 27,657 | 146 | 20,968 | 5,119 | 3,231 | 29,464 |
| 27,658 | 152 | 20,819 | 5,039 | 3,191 | 29,201 |
| 27,659 | 155 | 21,026 | 5,083 | 3,200 | 29,464 |
| 27,660 | 160 | 21,318 | 5,124 | 3,228 | 29,830 |
| 27,661 | 159 | 21,100 | 5,033 | 3,177 | 29,469 |
| 27,662 | 162 | 21,054 | 5,037 | 3,167 | 29,420 |
| 27,663 | 159 | 20,642 | 4,984 | 3,131 | 28,916 |
| 27,664 | 159 | 20,914 | 5,043 | 3,196 | 29,312 |
| 27,665 | 165 | 20,866 | 5,035 | 3,176 | 29,242 |
| 27,666 | 168 | 20,868 | 5,030 | 3,143 | 29,209 |
| 27,667 | 165 | 20,820 | 4,960 | 3,116 | 29,061 |
| 27,668 | 166 | 20,748 | 4,937 | 3,103 | 28,954 |
| 27,669 | 167 | 20,768 | 4,928 | 3,095 | 28,958 |
| 27,670 | 160 | 20,941 | 4,976 | 3,120 | 29,197 |
| 27,671 | 165 | 20,619 | 4,860 | 3,073 | 28,717 |

|        |     |        |       |       |        |
|--------|-----|--------|-------|-------|--------|
| 27,672 | 166 | 20,593 | 4,858 | 3,070 | 28,687 |
| 27,673 | 158 | 20,532 | 4,865 | 3,052 | 28,607 |
| 27,674 | 161 | 20,814 | 4,934 | 3,097 | 29,006 |
| 27,675 | 156 | 20,574 | 4,886 | 3,076 | 28,692 |
| 27,676 | 155 | 20,977 | 4,963 | 3,129 | 29,224 |
| 27,677 | 155 | 20,888 | 4,953 | 3,105 | 29,101 |
| 27,678 | 158 | 20,944 | 4,946 | 3,109 | 29,157 |
| 27,679 | 158 | 20,834 | 4,946 | 3,105 | 29,043 |
| 27,680 | 151 | 20,855 | 4,989 | 3,105 | 29,100 |
| 27,681 | 155 | 20,847 | 4,998 | 3,139 | 29,139 |
| 27,682 | 150 | 20,771 | 4,999 | 3,124 | 29,044 |
| 27,683 | 144 | 20,645 | 4,922 | 3,085 | 28,796 |
| 27,684 | 146 | 20,677 | 4,923 | 3,082 | 28,828 |
| 27,685 | 149 | 20,334 | 4,838 | 3,025 | 28,346 |
| 27,686 | 149 | 20,322 | 4,828 | 3,018 | 28,317 |
| 27,687 | 152 | 20,068 | 4,763 | 2,964 | 27,947 |
| 27,688 | 152 | 19,748 | 4,717 | 2,929 | 27,546 |
| 27,689 | 154 | 20,161 | 4,871 | 3,020 | 28,206 |
| 27,690 | 170 | 20,304 | 4,908 | 3,039 | 28,421 |
| 27,691 | 167 | 19,933 | 4,824 | 2,964 | 27,888 |
| 27,692 | 168 | 19,951 | 4,797 | 2,936 | 27,852 |
| 27,693 | 167 | 20,066 | 4,796 | 2,931 | 27,960 |
| 27,694 | 169 | 20,070 | 4,803 | 2,959 | 28,001 |
| 27,695 | 164 | 20,135 | 4,781 | 2,963 | 28,043 |
| 27,696 | 160 | 20,091 | 4,720 | 2,962 | 27,933 |
| 27,697 | 157 | 19,991 | 4,669 | 2,923 | 27,740 |
| 27,698 | 154 | 19,964 | 4,664 | 2,901 | 27,683 |
| 27,699 | 154 | 20,141 | 4,691 | 2,925 | 27,911 |
| 27,700 | 159 | 19,492 | 4,555 | 2,832 | 27,038 |
| 27,701 | 159 | 19,762 | 4,603 | 2,845 | 27,369 |
| 27,702 | 164 | 20,065 | 4,642 | 2,873 | 27,744 |
| 27,703 | 163 | 19,773 | 4,588 | 2,816 | 27,340 |

|        |     |        |       |       |        |
|--------|-----|--------|-------|-------|--------|
| 27,704 | 163 | 19,932 | 4,611 | 2,818 | 27,524 |
| 27,705 | 158 | 20,167 | 4,657 | 2,831 | 27,813 |
| 27,706 | 157 | 20,369 | 4,671 | 2,843 | 28,040 |
| 27,707 | 157 | 20,377 | 4,691 | 2,844 | 28,069 |
| 27,708 | 162 | 20,638 | 4,736 | 2,870 | 28,406 |
| 27,709 | 157 | 20,765 | 4,784 | 2,890 | 28,596 |
| 27,710 | 155 | 20,946 | 4,782 | 2,911 | 28,794 |
| 27,711 | 158 | 20,780 | 4,734 | 2,881 | 28,553 |
| 27,712 | 157 | 20,585 | 4,717 | 2,860 | 28,319 |
| 27,713 | 156 | 20,872 | 4,722 | 2,876 | 28,626 |
| 27,714 | 164 | 20,798 | 4,713 | 2,860 | 28,535 |
| 27,715 | 165 | 20,825 | 4,712 | 2,846 | 28,548 |
| 27,716 | 160 | 20,984 | 4,715 | 2,865 | 28,724 |
| 27,717 | 162 | 20,740 | 4,631 | 2,832 | 28,365 |
| 27,718 | 159 | 20,467 | 4,585 | 2,795 | 28,006 |
| 27,719 | 158 | 20,633 | 4,591 | 2,832 | 28,214 |
| 27,720 | 160 | 20,382 | 4,538 | 2,795 | 27,875 |
| 27,721 | 160 | 20,197 | 4,492 | 2,791 | 27,640 |
| 27,722 | 158 | 20,474 | 4,520 | 2,804 | 27,956 |
| 27,723 | 157 | 20,338 | 4,498 | 2,787 | 27,780 |
| 27,724 | 158 | 20,471 | 4,516 | 2,820 | 27,965 |
| 27,725 | 157 | 20,345 | 4,491 | 2,790 | 27,783 |
| 27,726 | 163 | 20,420 | 4,532 | 2,809 | 27,924 |
| 27,727 | 163 | 20,205 | 4,472 | 2,783 | 27,623 |
| 27,728 | 168 | 20,512 | 4,521 | 2,837 | 28,038 |
| 27,729 | 170 | 20,616 | 4,522 | 2,840 | 28,148 |
| 27,730 | 171 | 20,784 | 4,513 | 2,855 | 28,323 |
| 27,731 | 179 | 21,031 | 4,550 | 2,883 | 28,643 |
| 27,732 | 174 | 21,031 | 4,524 | 2,867 | 28,596 |
| 27,733 | 173 | 20,829 | 4,460 | 2,848 | 28,310 |
| 27,734 | 172 | 20,935 | 4,514 | 2,854 | 28,475 |
| 27,735 | 167 | 21,029 | 4,531 | 2,857 | 28,584 |

|        |     |        |       |       |        |
|--------|-----|--------|-------|-------|--------|
| 27,736 | 170 | 21,296 | 4,576 | 2,917 | 28,959 |
| 27,737 | 170 | 21,348 | 4,572 | 2,915 | 29,005 |
| 27,738 | 161 | 21,415 | 4,540 | 2,885 | 29,001 |
| 27,739 | 164 | 21,638 | 4,574 | 2,917 | 29,293 |
| 27,740 | 155 | 21,954 | 4,616 | 2,961 | 29,686 |
| 27,741 | 148 | 21,637 | 4,543 | 2,939 | 29,267 |
| 27,742 | 145 | 21,639 | 4,556 | 2,961 | 29,301 |
| 27,743 | 142 | 21,892 | 4,601 | 2,986 | 29,621 |
| 27,744 | 138 | 21,694 | 4,564 | 2,981 | 29,377 |
| 27,745 | 136 | 21,394 | 4,479 | 2,929 | 28,938 |
| 27,746 | 137 | 21,618 | 4,511 | 2,963 | 29,229 |
| 27,747 | 134 | 21,655 | 4,537 | 2,973 | 29,299 |
| 27,748 | 136 | 21,740 | 4,577 | 3,026 | 29,479 |
| 27,749 | 137 | 21,461 | 4,523 | 3,005 | 29,126 |
| 27,750 | 149 | 21,410 | 4,505 | 3,002 | 29,066 |
| 27,751 | 148 | 21,375 | 4,485 | 3,000 | 29,008 |
| 27,752 | 151 | 21,526 | 4,527 | 3,059 | 29,263 |
| 27,753 | 146 | 21,492 | 4,543 | 3,083 | 29,264 |
| 27,754 | 147 | 21,231 | 4,483 | 3,064 | 28,925 |
| 27,755 | 146 | 21,006 | 4,454 | 3,061 | 28,667 |
| 27,756 | 150 | 21,358 | 4,537 | 3,123 | 29,168 |
| 27,757 | 156 | 21,346 | 4,549 | 3,129 | 29,180 |
| 27,758 | 157 | 21,313 | 4,535 | 3,135 | 29,140 |
| 27,759 | 154 | 21,281 | 4,521 | 3,122 | 29,078 |
| 27,760 | 156 | 21,053 | 4,455 | 3,093 | 28,757 |
| 27,761 | 158 | 20,712 | 4,414 | 3,056 | 28,340 |
| 27,762 | 150 | 20,774 | 4,475 | 3,070 | 28,469 |
| 27,763 | 152 | 20,583 | 4,406 | 3,025 | 28,166 |
| 27,764 | 145 | 20,691 | 4,401 | 3,058 | 28,295 |
| 27,765 | 144 | 20,707 | 4,382 | 3,052 | 28,285 |
| 27,766 | 145 | 20,684 | 4,378 | 3,056 | 28,263 |
| 27,767 | 147 | 20,982 | 4,421 | 3,096 | 28,646 |

|        |     |        |       |       |        |
|--------|-----|--------|-------|-------|--------|
| 27,768 | 139 | 20,695 | 4,396 | 3,065 | 28,295 |
| 27,769 | 143 | 20,657 | 4,397 | 3,081 | 28,278 |
| 27,770 | 148 | 20,903 | 4,481 | 3,133 | 28,665 |
| 27,771 | 145 | 21,050 | 4,533 | 3,162 | 28,890 |
| 27,772 | 139 | 20,903 | 4,501 | 3,134 | 28,677 |
| 27,773 | 133 | 20,812 | 4,438 | 3,095 | 28,478 |
| 27,774 | 133 | 21,071 | 4,482 | 3,118 | 28,804 |
| 27,775 | 131 | 21,311 | 4,509 | 3,137 | 29,088 |
| 27,776 | 125 | 20,944 | 4,457 | 3,088 | 28,614 |
| 27,777 | 125 | 20,936 | 4,455 | 3,092 | 28,608 |
| 27,778 | 127 | 20,860 | 4,456 | 3,079 | 28,522 |
| 27,779 | 127 | 20,768 | 4,450 | 3,069 | 28,414 |
| 27,780 | 132 | 20,950 | 4,513 | 3,087 | 28,682 |
| 27,781 | 134 | 20,965 | 4,551 | 3,090 | 28,740 |
| 27,782 | 136 | 21,045 | 4,565 | 3,104 | 28,850 |
| 27,783 | 141 | 20,802 | 4,514 | 3,041 | 28,498 |
| 27,784 | 143 | 20,596 | 4,457 | 3,015 | 28,211 |
| 27,785 | 141 | 20,550 | 4,435 | 3,021 | 28,147 |
| 27,786 | 141 | 20,393 | 4,376 | 2,996 | 27,906 |
| 27,787 | 153 | 21,298 | 4,576 | 3,120 | 29,147 |
| 27,788 | 155 | 21,079 | 4,526 | 3,104 | 28,864 |
| 27,789 | 160 | 21,193 | 4,550 | 3,119 | 29,022 |
| 27,790 | 155 | 21,208 | 4,579 | 3,112 | 29,054 |
| 27,791 | 155 | 21,072 | 4,560 | 3,106 | 28,893 |
| 27,792 | 162 | 21,425 | 4,645 | 3,122 | 29,354 |
| 27,793 | 165 | 21,330 | 4,641 | 3,093 | 29,229 |
| 27,794 | 164 | 21,433 | 4,659 | 3,085 | 29,341 |
| 27,795 | 167 | 21,708 | 4,664 | 3,114 | 29,653 |
| 27,796 | 169 | 21,812 | 4,699 | 3,122 | 29,802 |
| 27,797 | 170 | 21,500 | 4,636 | 3,063 | 29,369 |
| 27,798 | 170 | 21,731 | 4,675 | 3,084 | 29,660 |
| 27,799 | 164 | 21,841 | 4,699 | 3,093 | 29,797 |

|        |     |        |       |       |        |
|--------|-----|--------|-------|-------|--------|
| 27,800 | 165 | 22,093 | 4,738 | 3,107 | 30,103 |
| 27,801 | 151 | 22,146 | 4,759 | 3,120 | 30,176 |
| 27,802 | 150 | 22,345 | 4,833 | 3,164 | 30,492 |
| 27,803 | 157 | 22,438 | 4,843 | 3,160 | 30,598 |
| 27,804 | 157 | 22,284 | 4,801 | 3,122 | 30,364 |
| 27,805 | 156 | 22,259 | 4,767 | 3,111 | 30,293 |
| 27,806 | 156 | 22,242 | 4,753 | 3,098 | 30,249 |
| 27,807 | 165 | 22,641 | 4,855 | 3,147 | 30,808 |
| 27,808 | 162 | 22,505 | 4,806 | 3,110 | 30,583 |
| 27,809 | 169 | 22,560 | 4,820 | 3,113 | 30,662 |
| 27,810 | 175 | 22,885 | 4,875 | 3,155 | 31,090 |
| 27,811 | 175 | 22,692 | 4,835 | 3,139 | 30,841 |
| 27,812 | 175 | 22,712 | 4,832 | 3,153 | 30,872 |
| 27,813 | 185 | 22,812 | 4,852 | 3,168 | 31,017 |
| 27,814 | 190 | 22,925 | 4,909 | 3,187 | 31,211 |
| 27,815 | 191 | 22,913 | 4,916 | 3,187 | 31,207 |
| 27,816 | 191 | 22,801 | 4,937 | 3,195 | 31,124 |
| 27,817 | 193 | 23,150 | 5,020 | 3,232 | 31,595 |
| 27,818 | 194 | 23,269 | 5,039 | 3,245 | 31,747 |
| 27,819 | 192 | 23,460 | 5,090 | 3,272 | 32,014 |
| 27,820 | 194 | 23,555 | 5,153 | 3,283 | 32,185 |
| 27,821 | 193 | 23,533 | 5,139 | 3,299 | 32,164 |
| 27,822 | 197 | 23,163 | 5,070 | 3,256 | 31,686 |
| 27,823 | 195 | 22,921 | 5,039 | 3,240 | 31,395 |
| 27,824 | 196 | 23,014 | 5,087 | 3,270 | 31,567 |
| 27,825 | 197 | 22,844 | 5,078 | 3,273 | 31,392 |
| 27,826 | 198 | 22,886 | 5,117 | 3,288 | 31,489 |
| 27,827 | 199 | 22,383 | 5,054 | 3,250 | 30,886 |
| 27,828 | 198 | 22,531 | 5,087 | 3,273 | 31,089 |
| 27,829 | 204 | 22,708 | 5,109 | 3,288 | 31,309 |
| 27,830 | 204 | 22,701 | 5,109 | 3,290 | 31,304 |
| 27,831 | 208 | 22,601 | 5,088 | 3,285 | 31,182 |

|        |     |        |       |       |        |
|--------|-----|--------|-------|-------|--------|
| 27,832 | 212 | 22,779 | 5,101 | 3,316 | 31,408 |
| 27,833 | 206 | 22,762 | 5,088 | 3,314 | 31,370 |
| 27,834 | 200 | 22,478 | 5,039 | 3,304 | 31,021 |
| 27,835 | 200 | 22,759 | 5,092 | 3,353 | 31,404 |
| 27,836 | 200 | 22,539 | 5,066 | 3,314 | 31,119 |
| 27,837 | 217 | 22,801 | 5,097 | 3,317 | 31,432 |
| 27,838 | 217 | 22,936 | 5,101 | 3,312 | 31,566 |
| 27,839 | 209 | 22,658 | 5,078 | 3,255 | 31,200 |
| 27,840 | 217 | 22,505 | 5,004 | 3,233 | 30,959 |
| 27,841 | 218 | 22,466 | 4,997 | 3,221 | 30,902 |
| 27,842 | 228 | 22,302 | 4,935 | 3,193 | 30,658 |
| 27,843 | 223 | 22,150 | 4,908 | 3,159 | 30,440 |
| 27,844 | 227 | 23,030 | 5,051 | 3,267 | 31,575 |
| 27,845 | 226 | 22,836 | 5,070 | 3,269 | 31,401 |
| 27,846 | 228 | 22,566 | 5,097 | 3,312 | 31,203 |
| 27,847 | 222 | 22,278 | 5,049 | 3,273 | 30,822 |
| 27,848 | 227 | 22,323 | 5,075 | 3,273 | 30,898 |
| 27,849 | 226 | 22,368 | 5,076 | 3,282 | 30,952 |
| 27,850 | 236 | 22,425 | 5,059 | 3,293 | 31,013 |
| 27,851 | 238 | 22,423 | 5,019 | 3,268 | 30,948 |
| 27,852 | 241 | 22,510 | 5,008 | 3,247 | 31,006 |
| 27,853 | 241 | 22,538 | 5,013 | 3,245 | 31,037 |
| 27,854 | 235 | 22,347 | 4,999 | 3,242 | 30,823 |
| 27,855 | 236 | 22,525 | 5,016 | 3,246 | 31,023 |
| 27,856 | 239 | 22,300 | 4,973 | 3,207 | 30,719 |
| 27,857 | 237 | 22,337 | 4,985 | 3,236 | 30,795 |
| 27,858 | 236 | 22,195 | 4,961 | 3,233 | 30,625 |
| 27,859 | 234 | 22,032 | 4,908 | 3,216 | 30,390 |
| 27,860 | 229 | 23,012 | 5,066 | 3,309 | 31,616 |
| 27,861 | 222 | 22,961 | 5,048 | 3,316 | 31,547 |
| 27,862 | 215 | 23,107 | 5,054 | 3,299 | 31,675 |
| 27,863 | 208 | 23,171 | 5,047 | 3,282 | 31,708 |

|        |     |        |       |       |        |
|--------|-----|--------|-------|-------|--------|
| 27,864 | 200 | 23,017 | 4,997 | 3,263 | 31,477 |
| 27,865 | 201 | 23,132 | 5,029 | 3,277 | 31,639 |
| 27,866 | 203 | 23,089 | 5,000 | 3,257 | 31,549 |
| 27,867 | 205 | 22,849 | 4,926 | 3,217 | 31,197 |
| 27,868 | 205 | 22,868 | 4,926 | 3,234 | 31,233 |
| 27,869 | 206 | 22,821 | 4,886 | 3,223 | 31,136 |
| 27,870 | 204 | 22,810 | 4,825 | 3,174 | 31,013 |
| 27,871 | 205 | 22,819 | 4,812 | 3,139 | 30,975 |
| 27,872 | 208 | 23,061 | 4,862 | 3,174 | 31,305 |
| 27,873 | 202 | 23,025 | 4,771 | 3,132 | 31,130 |
| 27,874 | 204 | 23,035 | 4,759 | 3,128 | 31,126 |
| 27,875 | 208 | 23,240 | 4,827 | 3,152 | 31,427 |
| 27,876 | 208 | 23,060 | 4,773 | 3,117 | 31,158 |
| 27,877 | 204 | 23,164 | 4,774 | 3,117 | 31,259 |
| 27,878 | 204 | 23,294 | 4,755 | 3,115 | 31,368 |
| 27,879 | 207 | 23,313 | 4,738 | 3,129 | 31,387 |
| 27,880 | 207 | 23,454 | 4,750 | 3,127 | 31,538 |
| 27,881 | 204 | 23,566 | 4,765 | 3,128 | 31,663 |
| 27,882 | 202 | 23,567 | 4,770 | 3,144 | 31,683 |
| 27,883 | 197 | 23,559 | 4,797 | 3,162 | 31,715 |
| 27,884 | 189 | 23,346 | 4,749 | 3,120 | 31,404 |
| 27,885 | 187 | 23,320 | 4,745 | 3,105 | 31,357 |
| 27,886 | 183 | 22,981 | 4,682 | 3,057 | 30,903 |
| 27,887 | 181 | 22,942 | 4,678 | 3,060 | 30,861 |
| 27,888 | 174 | 22,917 | 4,717 | 3,076 | 30,884 |
| 27,889 | 171 | 22,574 | 4,631 | 3,051 | 30,427 |
| 27,890 | 177 | 22,724 | 4,681 | 3,056 | 30,638 |
| 27,891 | 168 | 22,504 | 4,663 | 3,030 | 30,365 |
| 27,892 | 169 | 22,332 | 4,660 | 3,029 | 30,190 |
| 27,893 | 163 | 22,252 | 4,675 | 3,040 | 30,130 |
| 27,894 | 164 | 22,280 | 4,688 | 3,072 | 30,204 |
| 27,895 | 166 | 22,161 | 4,592 | 3,026 | 29,945 |



|        |     |        |       |       |        |
|--------|-----|--------|-------|-------|--------|
| 27,896 | 160 | 22,315 | 4,565 | 2,984 | 30,024 |
| 27,897 | 167 | 22,301 | 4,553 | 2,961 | 29,982 |
| 27,898 | 168 | 22,413 | 4,567 | 2,983 | 30,131 |
| 27,899 | 169 | 22,286 | 4,574 | 2,964 | 29,993 |
| 27,900 | 169 | 22,297 | 4,590 | 2,978 | 30,034 |
| 27,901 | 159 | 22,150 | 4,620 | 2,989 | 29,918 |
| 27,902 | 158 | 22,162 | 4,651 | 3,012 | 29,983 |
| 27,903 | 158 | 22,425 | 4,703 | 3,050 | 30,336 |
| 27,904 | 159 | 22,278 | 4,643 | 3,002 | 30,082 |
| 27,905 | 156 | 22,334 | 4,656 | 3,023 | 30,169 |
| 27,906 | 154 | 22,451 | 4,667 | 3,037 | 30,309 |
| 27,907 | 150 | 22,299 | 4,643 | 3,020 | 30,112 |
| 27,908 | 151 | 22,538 | 4,753 | 3,071 | 30,513 |
| 27,909 | 147 | 22,698 | 4,769 | 3,089 | 30,703 |
| 27,910 | 148 | 22,406 | 4,724 | 3,052 | 30,330 |
| 27,911 | 152 | 22,459 | 4,729 | 3,031 | 30,371 |
| 27,912 | 155 | 22,824 | 4,775 | 3,079 | 30,833 |
| 27,913 | 156 | 22,773 | 4,777 | 3,101 | 30,807 |
| 27,914 | 155 | 22,449 | 4,738 | 3,065 | 30,407 |
| 27,915 | 156 | 22,359 | 4,683 | 3,076 | 30,274 |
| 27,916 | 160 | 22,689 | 4,735 | 3,097 | 30,681 |
| 27,917 | 153 | 22,340 | 4,679 | 3,048 | 30,220 |
| 27,918 | 152 | 22,359 | 4,683 | 3,035 | 30,229 |
| 27,919 | 152 | 22,314 | 4,669 | 3,018 | 30,153 |
| 27,920 | 152 | 22,368 | 4,724 | 3,039 | 30,283 |
| 27,921 | 152 | 22,300 | 4,724 | 3,060 | 30,236 |
| 27,922 | 148 | 21,986 | 4,678 | 3,017 | 29,829 |
| 27,923 | 151 | 22,182 | 4,708 | 3,050 | 30,091 |
| 27,924 | 153 | 22,069 | 4,720 | 3,049 | 29,991 |
| 27,925 | 151 | 21,832 | 4,670 | 3,020 | 29,673 |
| 27,926 | 148 | 22,062 | 4,666 | 3,066 | 29,942 |
| 27,927 | 146 | 21,824 | 4,602 | 3,015 | 29,587 |

|        |     |        |       |       |        |
|--------|-----|--------|-------|-------|--------|
| 27,928 | 145 | 21,960 | 4,617 | 3,051 | 29,773 |
| 27,929 | 143 | 21,915 | 4,641 | 3,047 | 29,746 |
| 27,930 | 134 | 21,860 | 4,624 | 3,054 | 29,672 |
| 27,931 | 139 | 21,764 | 4,645 | 3,077 | 29,625 |
| 27,932 | 134 | 21,655 | 4,598 | 3,037 | 29,424 |
| 27,933 | 137 | 21,659 | 4,589 | 3,020 | 29,405 |
| 27,934 | 139 | 21,694 | 4,583 | 3,000 | 29,416 |
| 27,935 | 139 | 21,742 | 4,584 | 3,001 | 29,466 |
| 27,936 | 139 | 21,962 | 4,642 | 3,027 | 29,770 |
| 27,937 | 129 | 21,369 | 4,511 | 2,949 | 28,958 |
| 27,938 | 131 | 21,664 | 4,559 | 2,975 | 29,329 |
| 27,939 | 129 | 21,682 | 4,573 | 2,981 | 29,365 |
| 27,940 | 127 | 21,730 | 4,600 | 2,997 | 29,454 |
| 27,941 | 120 | 21,542 | 4,589 | 3,017 | 29,268 |
| 27,942 | 123 | 21,557 | 4,599 | 3,029 | 29,308 |
| 27,943 | 117 | 21,557 | 4,583 | 3,009 | 29,266 |
| 27,944 | 105 | 20,251 | 4,244 | 2,816 | 27,416 |
| 27,945 | 109 | 20,537 | 4,307 | 2,850 | 27,803 |
| 27,946 | 107 | 20,751 | 4,359 | 2,876 | 28,093 |
| 27,947 | 107 | 20,614 | 4,352 | 2,878 | 27,951 |
| 27,948 | 106 | 20,895 | 4,445 | 2,926 | 28,372 |
| 27,949 | 109 | 21,244 | 4,525 | 2,986 | 28,864 |
| 27,950 | 107 | 21,266 | 4,518 | 2,980 | 28,871 |
| 27,951 | 107 | 21,547 | 4,547 | 3,009 | 29,210 |
| 27,952 | 108 | 21,682 | 4,563 | 3,007 | 29,360 |
| 27,953 | 107 | 21,429 | 4,513 | 2,980 | 29,029 |
| 27,954 | 108 | 21,506 | 4,519 | 3,010 | 29,143 |
| 27,955 | 108 | 21,431 | 4,525 | 3,002 | 29,066 |
| 27,956 | 109 | 21,619 | 4,531 | 2,994 | 29,253 |
| 27,957 | 107 | 21,211 | 4,499 | 2,940 | 28,757 |
| 27,958 | 107 | 21,179 | 4,485 | 2,936 | 28,707 |
| 27,959 | 118 | 21,317 | 4,493 | 2,940 | 28,868 |

|        |     |        |       |       |        |
|--------|-----|--------|-------|-------|--------|
| 27,960 | 118 | 21,112 | 4,474 | 2,920 | 28,624 |
| 27,961 | 115 | 20,793 | 4,410 | 2,883 | 28,201 |
| 27,962 | 111 | 20,824 | 4,444 | 2,900 | 28,279 |
| 27,963 | 111 | 20,526 | 4,391 | 2,851 | 27,879 |
| 27,964 | 108 | 20,267 | 4,328 | 2,809 | 27,512 |
| 27,965 | 111 | 20,767 | 4,423 | 2,830 | 28,131 |
| 27,966 | 112 | 20,749 | 4,429 | 2,810 | 28,100 |
| 27,967 | 112 | 21,078 | 4,511 | 2,854 | 28,555 |
| 27,968 | 106 | 20,861 | 4,462 | 2,836 | 28,265 |
| 27,969 | 109 | 21,122 | 4,530 | 2,861 | 28,622 |
| 27,970 | 112 | 21,407 | 4,577 | 2,865 | 28,961 |
| 27,971 | 114 | 21,621 | 4,614 | 2,887 | 29,236 |
| 27,972 | 116 | 21,919 | 4,675 | 2,933 | 29,643 |
| 27,973 | 112 | 21,766 | 4,657 | 2,976 | 29,511 |
| 27,974 | 115 | 22,043 | 4,732 | 2,986 | 29,876 |
| 27,975 | 114 | 22,082 | 4,710 | 2,969 | 29,875 |
| 27,976 | 123 | 22,230 | 4,737 | 2,983 | 30,073 |
| 27,977 | 131 | 22,343 | 4,753 | 3,003 | 30,230 |
| 27,978 | 132 | 22,335 | 4,756 | 3,004 | 30,227 |
| 27,979 | 130 | 22,055 | 4,736 | 2,981 | 29,902 |
| 27,980 | 133 | 22,484 | 4,850 | 3,055 | 30,522 |
| 27,981 | 131 | 22,547 | 4,868 | 3,055 | 30,601 |
| 27,982 | 134 | 22,054 | 4,782 | 2,985 | 29,955 |
| 27,983 | 135 | 22,216 | 4,824 | 3,002 | 30,177 |
| 27,984 | 135 | 22,202 | 4,831 | 3,009 | 30,177 |
| 27,985 | 133 | 22,217 | 4,852 | 3,025 | 30,227 |
| 27,986 | 136 | 22,492 | 4,925 | 3,048 | 30,601 |
| 27,987 | 138 | 22,511 | 4,919 | 3,052 | 30,620 |
| 27,988 | 138 | 22,291 | 4,884 | 3,035 | 30,348 |
| 27,989 | 138 | 22,458 | 4,973 | 3,095 | 30,664 |
| 27,990 | 139 | 22,545 | 4,961 | 3,110 | 30,755 |
| 27,991 | 139 | 22,467 | 4,930 | 3,080 | 30,616 |

|        |     |        |       |       |        |
|--------|-----|--------|-------|-------|--------|
| 27,992 | 140 | 22,553 | 4,947 | 3,095 | 30,735 |
| 27,993 | 150 | 22,962 | 5,004 | 3,162 | 31,278 |
| 27,994 | 149 | 22,763 | 4,990 | 3,152 | 31,054 |
| 27,995 | 155 | 22,878 | 5,018 | 3,182 | 31,233 |
| 27,996 | 150 | 22,548 | 4,978 | 3,154 | 30,830 |
| 27,997 | 157 | 22,647 | 4,990 | 3,149 | 30,943 |
| 27,998 | 157 | 22,604 | 4,982 | 3,149 | 30,892 |
| 27,999 | 159 | 22,794 | 5,054 | 3,192 | 31,199 |
| 28,000 | 159 | 22,462 | 4,961 | 3,118 | 30,700 |
| 28,001 | 165 | 22,404 | 4,954 | 3,110 | 30,633 |
| 28,002 | 169 | 22,275 | 4,947 | 3,096 | 30,487 |
| 28,003 | 171 | 22,600 | 5,009 | 3,153 | 30,933 |
| 28,004 | 168 | 22,429 | 4,988 | 3,126 | 30,711 |
| 28,005 | 168 | 22,434 | 4,999 | 3,149 | 30,750 |
| 28,006 | 167 | 22,481 | 5,016 | 3,167 | 30,831 |
| 28,007 | 169 | 22,555 | 5,034 | 3,185 | 30,943 |
| 28,008 | 169 | 22,471 | 5,012 | 3,181 | 30,833 |
| 28,009 | 164 | 22,504 | 5,071 | 3,181 | 30,920 |
| 28,010 | 161 | 22,708 | 5,125 | 3,217 | 31,211 |
| 28,011 | 164 | 22,704 | 5,164 | 3,233 | 31,265 |
| 28,012 | 172 | 22,743 | 5,149 | 3,251 | 31,315 |
| 28,013 | 168 | 22,512 | 5,169 | 3,248 | 31,097 |
| 28,014 | 168 | 22,488 | 5,201 | 3,264 | 31,121 |
| 28,015 | 166 | 22,444 | 5,195 | 3,281 | 31,086 |
| 28,016 | 166 | 22,392 | 5,195 | 3,281 | 31,034 |
| 28,017 | 169 | 22,684 | 5,281 | 3,332 | 31,466 |
| 28,018 | 171 | 22,687 | 5,304 | 3,356 | 31,518 |
| 28,019 | 171 | 22,623 | 5,313 | 3,368 | 31,475 |
| 28,020 | 171 | 22,492 | 5,303 | 3,364 | 31,330 |
| 28,021 | 169 | 22,648 | 5,356 | 3,439 | 31,612 |
| 28,022 | 167 | 22,609 | 5,384 | 3,474 | 31,634 |
| 28,023 | 179 | 22,466 | 5,372 | 3,441 | 31,458 |

|        |     |        |       |       |        |
|--------|-----|--------|-------|-------|--------|
| 28,024 | 176 | 22,334 | 5,337 | 3,397 | 31,244 |
| 28,025 | 179 | 22,305 | 5,325 | 3,412 | 31,221 |
| 28,026 | 185 | 21,885 | 5,309 | 3,374 | 30,753 |
| 28,027 | 176 | 21,582 | 5,288 | 3,362 | 30,408 |
| 28,028 | 173 | 22,419 | 5,490 | 3,471 | 31,553 |
| 28,029 | 174 | 22,503 | 5,510 | 3,486 | 31,673 |
| 28,030 | 171 | 22,667 | 5,499 | 3,494 | 31,831 |
| 28,031 | 172 | 22,326 | 5,446 | 3,473 | 31,417 |
| 28,032 | 180 | 22,516 | 5,477 | 3,512 | 31,685 |
| 28,033 | 167 | 22,565 | 5,483 | 3,521 | 31,736 |
| 28,034 | 168 | 22,639 | 5,493 | 3,539 | 31,839 |
| 28,035 | 168 | 22,728 | 5,531 | 3,549 | 31,976 |
| 28,036 | 169 | 22,766 | 5,552 | 3,603 | 32,090 |
| 28,037 | 178 | 22,964 | 5,626 | 3,689 | 32,457 |
| 28,038 | 180 | 23,209 | 5,678 | 3,723 | 32,790 |
| 28,039 | 183 | 23,508 | 5,707 | 3,728 | 33,126 |
| 28,040 | 180 | 23,533 | 5,701 | 3,759 | 33,173 |
| 28,041 | 184 | 23,559 | 5,739 | 3,785 | 33,267 |
| 28,042 | 180 | 23,373 | 5,713 | 3,755 | 33,021 |
| 28,043 | 176 | 24,119 | 5,878 | 3,908 | 34,081 |
| 28,044 | 179 | 24,337 | 5,985 | 3,922 | 34,423 |
| 28,045 | 184 | 24,321 | 6,030 | 3,931 | 34,466 |
| 28,046 | 184 | 24,219 | 5,999 | 3,926 | 34,328 |
| 28,047 | 189 | 24,474 | 6,046 | 3,951 | 34,660 |
| 28,048 | 182 | 24,735 | 6,138 | 4,015 | 35,070 |
| 28,049 | 171 | 24,348 | 6,057 | 3,970 | 34,546 |
| 28,050 | 171 | 24,566 | 6,095 | 4,000 | 34,832 |
| 28,051 | 171 | 24,787 | 6,153 | 4,019 | 35,130 |
| 28,052 | 177 | 25,001 | 6,206 | 4,047 | 35,431 |
| 28,053 | 183 | 24,711 | 6,186 | 4,004 | 35,084 |
| 28,054 | 180 | 24,487 | 6,159 | 3,991 | 34,817 |
| 28,055 | 179 | 24,703 | 6,202 | 4,038 | 35,122 |

|        |     |        |       |       |        |
|--------|-----|--------|-------|-------|--------|
| 28,056 | 177 | 24,667 | 6,195 | 4,020 | 35,059 |
| 28,057 | 183 | 24,692 | 6,248 | 4,050 | 35,173 |
| 28,058 | 189 | 24,624 | 6,254 | 4,027 | 35,094 |
| 28,059 | 185 | 24,490 | 6,215 | 4,020 | 34,910 |
| 28,060 | 185 | 24,352 | 6,183 | 4,029 | 34,749 |
| 28,061 | 184 | 24,292 | 6,183 | 4,028 | 34,687 |
| 28,062 | 179 | 24,404 | 6,197 | 4,014 | 34,794 |
| 28,063 | 177 | 24,053 | 6,140 | 3,946 | 34,316 |
| 28,064 | 177 | 24,001 | 6,121 | 3,952 | 34,251 |
| 28,065 | 175 | 23,927 | 6,111 | 3,959 | 34,172 |
| 28,066 | 173 | 23,893 | 6,147 | 3,982 | 34,195 |
| 28,067 | 171 | 23,740 | 6,132 | 3,991 | 34,034 |
| 28,068 | 168 | 23,676 | 6,118 | 3,984 | 33,946 |
| 28,069 | 164 | 23,585 | 6,105 | 3,968 | 33,822 |
| 28,070 | 165 | 23,409 | 6,068 | 3,956 | 33,598 |
| 28,071 | 163 | 23,306 | 6,029 | 3,933 | 33,431 |
| 28,072 | 166 | 22,736 | 5,924 | 3,838 | 32,664 |
| 28,073 | 165 | 22,936 | 5,947 | 3,852 | 32,900 |
| 28,074 | 157 | 23,092 | 5,972 | 3,882 | 33,103 |
| 28,075 | 156 | 22,800 | 5,882 | 3,837 | 32,675 |
| 28,076 | 149 | 22,651 | 5,800 | 3,805 | 32,405 |
| 28,077 | 150 | 22,600 | 5,817 | 3,810 | 32,377 |
| 28,078 | 150 | 22,496 | 5,789 | 3,778 | 32,213 |
| 28,079 | 151 | 22,329 | 5,760 | 3,750 | 31,990 |
| 28,080 | 151 | 22,262 | 5,729 | 3,738 | 31,880 |
| 28,081 | 150 | 22,202 | 5,732 | 3,721 | 31,805 |
| 28,082 | 151 | 22,181 | 5,746 | 3,718 | 31,796 |
| 28,083 | 143 | 22,099 | 5,769 | 3,708 | 31,719 |
| 28,084 | 143 | 22,286 | 5,815 | 3,748 | 31,992 |
| 28,085 | 144 | 21,734 | 5,618 | 3,605 | 31,101 |
| 28,086 | 142 | 21,880 | 5,678 | 3,623 | 31,323 |
| 28,087 | 133 | 22,132 | 5,709 | 3,637 | 31,611 |

|        |     |        |       |       |        |
|--------|-----|--------|-------|-------|--------|
| 28,088 | 139 | 22,047 | 5,747 | 3,637 | 31,570 |
| 28,089 | 135 | 21,781 | 5,693 | 3,596 | 31,205 |
| 28,090 | 135 | 21,541 | 5,696 | 3,584 | 30,956 |
| 28,091 | 135 | 21,336 | 5,662 | 3,524 | 30,657 |
| 28,092 | 131 | 21,749 | 5,754 | 3,576 | 31,210 |
| 28,093 | 128 | 21,471 | 5,694 | 3,520 | 30,813 |
| 28,094 | 118 | 20,455 | 5,435 | 3,356 | 29,364 |
| 28,095 | 121 | 20,531 | 5,465 | 3,381 | 29,498 |
| 28,096 | 116 | 20,149 | 5,368 | 3,325 | 28,958 |
| 28,097 | 117 | 20,254 | 5,404 | 3,344 | 29,119 |
| 28,098 | 113 | 20,384 | 5,457 | 3,362 | 29,316 |
| 28,099 | 116 | 20,401 | 5,454 | 3,339 | 29,310 |
| 28,100 | 121 | 20,456 | 5,446 | 3,340 | 29,363 |
| 28,101 | 121 | 20,389 | 5,445 | 3,340 | 29,295 |
| 28,102 | 128 | 20,342 | 5,453 | 3,350 | 29,273 |
| 28,103 | 129 | 20,469 | 5,496 | 3,363 | 29,457 |
| 28,104 | 118 | 20,457 | 5,501 | 3,371 | 29,447 |
| 28,105 | 124 | 20,389 | 5,489 | 3,367 | 29,369 |
| 28,106 | 124 | 20,176 | 5,456 | 3,339 | 29,095 |
| 28,107 | 127 | 20,163 | 5,465 | 3,329 | 29,084 |
| 28,108 | 120 | 20,099 | 5,427 | 3,307 | 28,953 |
| 28,109 | 114 | 20,114 | 5,470 | 3,352 | 29,050 |
| 28,110 | 124 | 20,179 | 5,442 | 3,346 | 29,091 |
| 28,111 | 124 | 20,029 | 5,383 | 3,286 | 28,822 |
| 28,112 | 129 | 20,175 | 5,404 | 3,298 | 29,006 |
| 28,113 | 133 | 19,937 | 5,354 | 3,299 | 28,723 |
| 28,114 | 127 | 19,609 | 5,289 | 3,277 | 28,302 |
| 28,115 | 131 | 19,951 | 5,373 | 3,316 | 28,771 |
| 28,116 | 133 | 19,971 | 5,345 | 3,288 | 28,737 |
| 28,117 | 134 | 20,112 | 5,346 | 3,255 | 28,847 |
| 28,118 | 141 | 20,253 | 5,390 | 3,267 | 29,051 |
| 28,119 | 140 | 20,031 | 5,342 | 3,245 | 28,758 |

|        |     |        |       |       |        |
|--------|-----|--------|-------|-------|--------|
| 28,120 | 141 | 20,185 | 5,377 | 3,271 | 28,974 |
| 28,121 | 138 | 20,128 | 5,358 | 3,248 | 28,872 |
| 28,122 | 137 | 20,113 | 5,368 | 3,249 | 28,867 |
| 28,123 | 131 | 20,026 | 5,326 | 3,221 | 28,704 |
| 28,124 | 132 | 19,920 | 5,307 | 3,200 | 28,559 |
| 28,125 | 129 | 19,753 | 5,302 | 3,187 | 28,371 |
| 28,126 | 129 | 19,797 | 5,299 | 3,193 | 28,418 |
| 28,127 | 133 | 19,853 | 5,276 | 3,173 | 28,435 |
| 28,128 | 138 | 20,018 | 5,330 | 3,216 | 28,702 |
| 28,129 | 136 | 19,980 | 5,347 | 3,216 | 28,679 |
| 28,130 | 138 | 20,022 | 5,353 | 3,213 | 28,726 |
| 28,131 | 138 | 19,699 | 5,335 | 3,192 | 28,364 |
| 28,132 | 138 | 19,684 | 5,331 | 3,208 | 28,361 |
| 28,133 | 142 | 19,959 | 5,437 | 3,262 | 28,800 |
| 28,134 | 146 | 20,005 | 5,483 | 3,282 | 28,916 |
| 28,135 | 153 | 20,017 | 5,488 | 3,269 | 28,927 |
| 28,136 | 155 | 19,630 | 5,393 | 3,235 | 28,413 |
| 28,137 | 160 | 19,892 | 5,465 | 3,271 | 28,788 |
| 28,138 | 152 | 19,595 | 5,414 | 3,248 | 28,409 |
| 28,139 | 152 | 19,509 | 5,424 | 3,255 | 28,340 |
| 28,140 | 154 | 19,641 | 5,487 | 3,274 | 28,556 |
| 28,141 | 153 | 19,599 | 5,466 | 3,272 | 28,490 |
| 28,142 | 159 | 19,540 | 5,437 | 3,272 | 28,408 |
| 28,143 | 161 | 19,385 | 5,395 | 3,247 | 28,188 |
| 28,144 | 161 | 19,080 | 5,335 | 3,205 | 27,781 |
| 28,145 | 162 | 19,308 | 5,389 | 3,269 | 28,128 |
| 28,146 | 160 | 19,139 | 5,343 | 3,226 | 27,868 |
| 28,147 | 162 | 19,303 | 5,373 | 3,262 | 28,100 |
| 28,148 | 164 | 19,102 | 5,349 | 3,236 | 27,851 |
| 28,149 | 164 | 19,182 | 5,346 | 3,253 | 27,945 |
| 28,150 | 165 | 19,216 | 5,297 | 3,250 | 27,928 |
| 28,151 | 164 | 19,430 | 5,366 | 3,283 | 28,243 |



|        |     |        |       |       |        |
|--------|-----|--------|-------|-------|--------|
| 28,152 | 154 | 19,410 | 5,391 | 3,291 | 28,246 |
| 28,153 | 154 | 19,161 | 5,360 | 3,292 | 27,967 |
| 28,154 | 160 | 19,802 | 5,509 | 3,404 | 28,875 |
| 28,155 | 166 | 19,931 | 5,523 | 3,409 | 29,029 |
| 28,156 | 163 | 19,777 | 5,445 | 3,341 | 28,726 |
| 28,157 | 163 | 19,934 | 5,475 | 3,358 | 28,930 |
| 28,158 | 163 | 20,192 | 5,553 | 3,390 | 29,298 |
| 28,159 | 161 | 19,863 | 5,466 | 3,338 | 28,828 |
| 28,160 | 159 | 20,159 | 5,549 | 3,365 | 29,232 |
| 28,161 | 153 | 20,134 | 5,573 | 3,366 | 29,226 |
| 28,162 | 152 | 19,963 | 5,540 | 3,349 | 29,004 |
| 28,163 | 150 | 19,869 | 5,570 | 3,363 | 28,952 |
| 28,164 | 145 | 19,660 | 5,524 | 3,329 | 28,658 |
| 28,165 | 145 | 20,206 | 5,639 | 3,397 | 29,387 |
| 28,166 | 146 | 20,333 | 5,672 | 3,401 | 29,552 |
| 28,167 | 144 | 20,170 | 5,669 | 3,414 | 29,397 |
| 28,168 | 137 | 19,876 | 5,559 | 3,377 | 28,949 |
| 28,169 | 139 | 19,836 | 5,552 | 3,360 | 28,887 |
| 28,170 | 139 | 20,094 | 5,612 | 3,382 | 29,227 |
| 28,171 | 139 | 19,722 | 5,520 | 3,305 | 28,686 |
| 28,172 | 142 | 19,980 | 5,591 | 3,353 | 29,066 |
| 28,173 | 144 | 20,056 | 5,589 | 3,351 | 29,140 |
| 28,174 | 149 | 20,650 | 5,725 | 3,455 | 29,979 |
| 28,175 | 144 | 20,439 | 5,699 | 3,444 | 29,726 |
| 28,176 | 144 | 20,489 | 5,683 | 3,445 | 29,761 |
| 28,177 | 142 | 21,116 | 5,870 | 3,527 | 30,655 |
| 28,178 | 136 | 21,203 | 5,914 | 3,540 | 30,793 |
| 28,179 | 135 | 21,087 | 5,872 | 3,508 | 30,602 |
| 28,180 | 135 | 21,045 | 5,867 | 3,506 | 30,553 |
| 28,181 | 131 | 20,811 | 5,855 | 3,486 | 30,283 |
| 28,182 | 132 | 21,024 | 5,927 | 3,518 | 30,601 |
| 28,183 | 131 | 20,964 | 5,930 | 3,482 | 30,507 |

|        |     |        |       |       |        |
|--------|-----|--------|-------|-------|--------|
| 28,184 | 129 | 20,884 | 5,896 | 3,451 | 30,360 |
| 28,185 | 125 | 20,808 | 5,834 | 3,424 | 30,191 |
| 28,186 | 128 | 20,724 | 5,811 | 3,426 | 30,089 |
| 28,187 | 127 | 20,549 | 5,759 | 3,378 | 29,813 |
| 28,188 | 132 | 20,683 | 5,833 | 3,409 | 30,057 |
| 28,189 | 140 | 20,676 | 5,822 | 3,377 | 30,015 |
| 28,190 | 146 | 20,731 | 5,774 | 3,335 | 29,986 |
| 28,191 | 148 | 20,765 | 5,771 | 3,349 | 30,033 |
| 28,192 | 146 | 20,754 | 5,794 | 3,368 | 30,062 |
| 28,193 | 146 | 20,671 | 5,781 | 3,345 | 29,943 |
| 28,194 | 147 | 20,685 | 5,774 | 3,317 | 29,923 |
| 28,195 | 148 | 20,667 | 5,751 | 3,293 | 29,859 |
| 28,196 | 147 | 20,728 | 5,755 | 3,297 | 29,927 |
| 28,197 | 149 | 20,642 | 5,770 | 3,250 | 29,811 |
| 28,198 | 150 | 20,667 | 5,760 | 3,259 | 29,836 |
| 28,199 | 147 | 20,951 | 5,821 | 3,308 | 30,227 |
| 28,200 | 151 | 20,830 | 5,809 | 3,277 | 30,067 |
| 28,201 | 145 | 20,789 | 5,822 | 3,281 | 30,037 |
| 28,202 | 146 | 20,857 | 5,829 | 3,291 | 30,123 |
| 28,203 | 140 | 20,730 | 5,797 | 3,254 | 29,921 |
| 28,204 | 135 | 21,312 | 5,995 | 3,343 | 30,785 |
| 28,205 | 136 | 21,321 | 6,033 | 3,346 | 30,836 |
| 28,206 | 129 | 21,096 | 6,014 | 3,338 | 30,577 |
| 28,207 | 126 | 21,205 | 6,063 | 3,354 | 30,748 |
| 28,208 | 124 | 21,322 | 6,097 | 3,385 | 30,928 |
| 28,209 | 124 | 21,049 | 6,023 | 3,360 | 30,556 |
| 28,210 | 123 | 20,783 | 5,990 | 3,358 | 30,254 |
| 28,211 | 130 | 20,877 | 5,987 | 3,381 | 30,375 |
| 28,212 | 131 | 20,920 | 5,973 | 3,386 | 30,410 |
| 28,213 | 131 | 20,929 | 5,993 | 3,409 | 30,462 |
| 28,214 | 129 | 20,983 | 6,012 | 3,425 | 30,549 |
| 28,215 | 132 | 21,071 | 6,068 | 3,411 | 30,682 |

|        |     |        |       |       |        |
|--------|-----|--------|-------|-------|--------|
| 28,216 | 132 | 21,105 | 6,086 | 3,422 | 30,745 |
| 28,217 | 129 | 20,915 | 6,045 | 3,417 | 30,506 |
| 28,218 | 129 | 20,738 | 5,985 | 3,366 | 30,218 |
| 28,219 | 134 | 20,506 | 5,946 | 3,331 | 29,917 |
| 28,220 | 131 | 20,276 | 5,865 | 3,306 | 29,578 |
| 28,221 | 135 | 20,394 | 5,947 | 3,351 | 29,827 |
| 28,222 | 132 | 20,021 | 5,887 | 3,330 | 29,370 |
| 28,223 | 135 | 20,602 | 6,111 | 3,439 | 30,287 |
| 28,224 | 131 | 20,454 | 6,094 | 3,413 | 30,092 |
| 28,225 | 126 | 20,288 | 6,093 | 3,380 | 29,887 |
| 28,226 | 131 | 20,773 | 6,229 | 3,439 | 30,572 |
| 28,227 | 148 | 20,567 | 6,166 | 3,424 | 30,305 |
| 28,228 | 149 | 20,259 | 6,100 | 3,393 | 29,901 |
| 28,229 | 154 | 20,461 | 6,197 | 3,451 | 30,263 |
| 28,230 | 155 | 20,557 | 6,218 | 3,467 | 30,397 |
| 28,231 | 154 | 20,771 | 6,220 | 3,479 | 30,624 |
| 28,232 | 156 | 20,848 | 6,241 | 3,468 | 30,713 |
| 28,233 | 155 | 20,767 | 6,194 | 3,472 | 30,588 |
| 28,234 | 158 | 20,936 | 6,221 | 3,491 | 30,806 |
| 28,235 | 161 | 20,604 | 6,140 | 3,432 | 30,337 |
| 28,236 | 162 | 20,662 | 6,159 | 3,440 | 30,423 |
| 28,237 | 152 | 20,657 | 6,189 | 3,467 | 30,465 |
| 28,238 | 146 | 20,410 | 6,096 | 3,427 | 30,079 |
| 28,239 | 142 | 20,360 | 6,113 | 3,436 | 30,051 |
| 28,240 | 135 | 20,315 | 6,116 | 3,466 | 30,032 |
| 28,241 | 134 | 20,275 | 6,126 | 3,473 | 30,008 |
| 28,242 | 137 | 20,486 | 6,165 | 3,491 | 30,279 |
| 28,243 | 135 | 20,522 | 6,174 | 3,509 | 30,340 |
| 28,244 | 129 | 20,499 | 6,188 | 3,521 | 30,337 |
| 28,245 | 128 | 20,496 | 6,181 | 3,547 | 30,352 |
| 28,246 | 126 | 20,327 | 6,141 | 3,523 | 30,117 |
| 28,247 | 126 | 20,404 | 6,192 | 3,575 | 30,297 |

|        |     |        |       |       |        |
|--------|-----|--------|-------|-------|--------|
| 28,248 | 120 | 20,203 | 6,151 | 3,556 | 30,030 |
| 28,249 | 118 | 19,853 | 6,085 | 3,504 | 29,560 |
| 28,250 | 123 | 19,916 | 6,097 | 3,522 | 29,658 |
| 28,251 | 118 | 20,139 | 6,136 | 3,556 | 29,949 |
| 28,252 | 121 | 20,121 | 6,174 | 3,553 | 29,969 |
| 28,253 | 121 | 20,004 | 6,131 | 3,532 | 29,788 |
| 28,254 | 126 | 19,915 | 6,069 | 3,506 | 29,616 |
| 28,255 | 131 | 19,885 | 6,008 | 3,462 | 29,486 |
| 28,256 | 129 | 19,596 | 5,876 | 3,390 | 28,991 |
| 28,257 | 136 | 19,893 | 5,940 | 3,444 | 29,413 |
| 28,258 | 134 | 19,334 | 5,806 | 3,391 | 28,665 |
| 28,259 | 140 | 19,626 | 5,846 | 3,400 | 29,012 |
| 28,260 | 140 | 19,648 | 5,869 | 3,397 | 29,054 |
| 28,261 | 141 | 19,777 | 5,877 | 3,416 | 29,211 |
| 28,262 | 136 | 19,816 | 5,923 | 3,437 | 29,312 |
| 28,263 | 132 | 19,874 | 5,929 | 3,443 | 29,378 |
| 28,264 | 134 | 19,725 | 5,846 | 3,399 | 29,104 |
| 28,265 | 135 | 19,608 | 5,800 | 3,374 | 28,917 |
| 28,266 | 137 | 20,527 | 6,037 | 3,530 | 30,231 |
| 28,267 | 137 | 20,378 | 5,995 | 3,516 | 30,026 |
| 28,268 | 139 | 20,704 | 6,059 | 3,538 | 30,440 |
| 28,269 | 137 | 20,703 | 6,043 | 3,537 | 30,420 |
| 28,270 | 137 | 20,640 | 6,025 | 3,540 | 30,342 |
| 28,271 | 143 | 20,885 | 6,103 | 3,571 | 30,702 |
| 28,272 | 144 | 20,994 | 6,097 | 3,554 | 30,789 |
| 28,273 | 145 | 21,112 | 6,094 | 3,555 | 30,906 |
| 28,274 | 145 | 20,921 | 6,016 | 3,544 | 30,626 |
| 28,275 | 146 | 20,794 | 5,971 | 3,522 | 30,433 |
| 28,276 | 150 | 20,987 | 6,017 | 3,565 | 30,719 |
| 28,277 | 147 | 20,851 | 5,965 | 3,560 | 30,523 |
| 28,278 | 131 | 20,598 | 5,865 | 3,493 | 30,087 |
| 28,279 | 131 | 20,334 | 5,802 | 3,442 | 29,709 |

|        |     |        |       |       |        |
|--------|-----|--------|-------|-------|--------|
| 28,280 | 137 | 20,824 | 5,929 | 3,531 | 30,421 |
| 28,281 | 137 | 20,539 | 5,871 | 3,490 | 30,037 |
| 28,282 | 140 | 20,714 | 5,946 | 3,537 | 30,337 |
| 28,283 | 138 | 20,525 | 5,915 | 3,522 | 30,100 |
| 28,284 | 136 | 20,555 | 5,940 | 3,536 | 30,167 |
| 28,285 | 137 | 20,615 | 5,967 | 3,559 | 30,278 |
| 28,286 | 136 | 20,701 | 5,980 | 3,554 | 30,371 |
| 28,287 | 135 | 20,814 | 5,999 | 3,576 | 30,524 |
| 28,288 | 135 | 20,795 | 5,998 | 3,577 | 30,505 |
| 28,289 | 141 | 21,011 | 6,001 | 3,573 | 30,726 |
| 28,290 | 147 | 21,197 | 6,055 | 3,598 | 30,997 |
| 28,291 | 145 | 21,186 | 6,071 | 3,584 | 30,986 |
| 28,292 | 144 | 21,288 | 6,097 | 3,566 | 31,095 |
| 28,293 | 149 | 21,432 | 6,143 | 3,605 | 31,329 |
| 28,294 | 150 | 21,130 | 6,078 | 3,563 | 30,921 |
| 28,295 | 157 | 21,504 | 6,131 | 3,619 | 31,411 |
| 28,296 | 157 | 21,048 | 5,998 | 3,533 | 30,736 |
| 28,297 | 161 | 21,283 | 6,021 | 3,553 | 31,018 |
| 28,298 | 163 | 21,579 | 6,091 | 3,580 | 31,413 |
| 28,299 | 168 | 21,855 | 6,140 | 3,623 | 31,786 |
| 28,300 | 168 | 21,816 | 6,119 | 3,600 | 31,703 |
| 28,301 | 164 | 21,721 | 6,127 | 3,614 | 31,626 |
| 28,302 | 176 | 22,097 | 6,290 | 3,684 | 32,247 |
| 28,303 | 175 | 21,784 | 6,195 | 3,667 | 31,821 |
| 28,304 | 173 | 21,950 | 6,231 | 3,697 | 32,051 |
| 28,305 | 171 | 21,943 | 6,250 | 3,700 | 32,064 |
| 28,306 | 174 | 22,027 | 6,339 | 3,761 | 32,301 |
| 28,307 | 178 | 22,030 | 6,376 | 3,763 | 32,347 |
| 28,308 | 174 | 21,936 | 6,333 | 3,749 | 32,192 |
| 28,309 | 174 | 21,967 | 6,334 | 3,745 | 32,220 |
| 28,310 | 176 | 22,205 | 6,390 | 3,794 | 32,565 |
| 28,311 | 174 | 22,161 | 6,341 | 3,777 | 32,453 |

|        |     |        |       |       |        |
|--------|-----|--------|-------|-------|--------|
| 28,312 | 177 | 22,506 | 6,371 | 3,804 | 32,858 |
| 28,313 | 178 | 22,454 | 6,379 | 3,816 | 32,827 |
| 28,314 | 177 | 22,526 | 6,413 | 3,840 | 32,956 |
| 28,315 | 182 | 22,481 | 6,382 | 3,817 | 32,862 |
| 28,316 | 189 | 22,658 | 6,419 | 3,829 | 33,095 |
| 28,317 | 191 | 22,695 | 6,432 | 3,837 | 33,155 |
| 28,318 | 193 | 22,533 | 6,386 | 3,790 | 32,902 |
| 28,319 | 199 | 22,469 | 6,390 | 3,802 | 32,860 |
| 28,320 | 203 | 22,709 | 6,430 | 3,833 | 33,175 |
| 28,321 | 205 | 22,568 | 6,353 | 3,809 | 32,935 |
| 28,322 | 203 | 22,528 | 6,355 | 3,814 | 32,900 |
| 28,323 | 202 | 22,465 | 6,340 | 3,822 | 32,829 |
| 28,324 | 205 | 22,397 | 6,322 | 3,823 | 32,747 |
| 28,325 | 202 | 22,275 | 6,298 | 3,798 | 32,573 |
| 28,326 | 202 | 22,110 | 6,275 | 3,809 | 32,396 |
| 28,327 | 198 | 22,066 | 6,290 | 3,791 | 32,345 |
| 28,328 | 205 | 22,177 | 6,309 | 3,789 | 32,480 |
| 28,329 | 198 | 22,072 | 6,316 | 3,780 | 32,366 |
| 28,330 | 195 | 22,109 | 6,292 | 3,747 | 32,343 |
| 28,331 | 192 | 22,076 | 6,273 | 3,742 | 32,283 |
| 28,332 | 194 | 22,006 | 6,254 | 3,734 | 32,188 |
| 28,333 | 194 | 21,830 | 6,162 | 3,686 | 31,872 |
| 28,334 | 196 | 21,978 | 6,194 | 3,712 | 32,080 |
| 28,335 | 196 | 22,091 | 6,187 | 3,716 | 32,190 |
| 28,336 | 191 | 22,045 | 6,226 | 3,724 | 32,186 |
| 28,337 | 194 | 21,798 | 6,111 | 3,670 | 31,773 |
| 28,338 | 194 | 21,997 | 6,186 | 3,699 | 32,076 |
| 28,339 | 189 | 22,025 | 6,211 | 3,705 | 32,130 |
| 28,340 | 190 | 22,299 | 6,274 | 3,754 | 32,517 |
| 28,341 | 184 | 22,189 | 6,270 | 3,752 | 32,395 |
| 28,342 | 181 | 22,103 | 6,226 | 3,751 | 32,261 |
| 28,343 | 182 | 22,248 | 6,260 | 3,801 | 32,491 |

|        |     |        |       |       |        |
|--------|-----|--------|-------|-------|--------|
| 28,344 | 177 | 22,061 | 6,264 | 3,787 | 32,289 |
| 28,345 | 177 | 22,014 | 6,272 | 3,766 | 32,229 |
| 28,346 | 172 | 21,730 | 6,261 | 3,728 | 31,891 |
| 28,347 | 172 | 21,812 | 6,260 | 3,729 | 31,973 |
| 28,348 | 169 | 21,802 | 6,279 | 3,732 | 31,982 |
| 28,349 | 166 | 21,630 | 6,283 | 3,732 | 31,811 |
| 28,350 | 169 | 21,566 | 6,306 | 3,732 | 31,773 |
| 28,351 | 172 | 21,275 | 6,247 | 3,698 | 31,392 |
| 28,352 | 179 | 21,509 | 6,257 | 3,707 | 31,652 |
| 28,353 | 171 | 21,655 | 6,288 | 3,725 | 31,839 |
| 28,354 | 180 | 21,731 | 6,315 | 3,715 | 31,941 |
| 28,355 | 182 | 21,336 | 6,219 | 3,664 | 31,401 |
| 28,356 | 182 | 21,593 | 6,245 | 3,685 | 31,705 |
| 28,357 | 181 | 21,838 | 6,301 | 3,706 | 32,026 |
| 28,358 | 178 | 21,524 | 6,221 | 3,660 | 31,583 |
| 28,359 | 179 | 21,289 | 6,205 | 3,646 | 31,319 |
| 28,360 | 175 | 21,127 | 6,200 | 3,641 | 31,143 |
| 28,361 | 174 | 20,959 | 6,199 | 3,618 | 30,950 |
| 28,362 | 176 | 20,984 | 6,252 | 3,646 | 31,058 |
| 28,363 | 175 | 20,794 | 6,206 | 3,644 | 30,819 |
| 28,364 | 175 | 20,442 | 6,116 | 3,576 | 30,309 |
| 28,365 | 174 | 20,443 | 6,110 | 3,568 | 30,295 |
| 28,366 | 168 | 20,324 | 6,100 | 3,578 | 30,170 |
| 28,367 | 160 | 20,210 | 6,088 | 3,567 | 30,025 |
| 28,368 | 160 | 19,868 | 6,009 | 3,511 | 29,548 |
| 28,369 | 156 | 19,541 | 5,949 | 3,484 | 29,130 |
| 28,370 | 151 | 20,005 | 6,066 | 3,549 | 29,771 |
| 28,371 | 143 | 19,658 | 5,984 | 3,508 | 29,293 |
| 28,372 | 136 | 19,646 | 5,974 | 3,496 | 29,252 |
| 28,373 | 132 | 19,719 | 5,999 | 3,528 | 29,378 |
| 28,374 | 127 | 19,396 | 5,920 | 3,476 | 28,919 |
| 28,375 | 128 | 19,512 | 5,989 | 3,520 | 29,149 |

|        |     |        |       |       |        |
|--------|-----|--------|-------|-------|--------|
| 28,376 | 128 | 19,404 | 5,938 | 3,457 | 28,927 |
| 28,377 | 128 | 19,463 | 5,950 | 3,472 | 29,013 |
| 28,378 | 129 | 19,661 | 5,966 | 3,481 | 29,237 |
| 28,379 | 120 | 19,649 | 5,956 | 3,472 | 29,197 |
| 28,380 | 118 | 19,333 | 5,871 | 3,433 | 28,755 |
| 28,381 | 124 | 19,533 | 5,902 | 3,489 | 29,048 |
| 28,382 | 124 | 19,518 | 5,885 | 3,477 | 29,004 |
| 28,383 | 122 | 19,552 | 5,901 | 3,472 | 29,047 |
| 28,384 | 121 | 19,482 | 5,917 | 3,482 | 29,002 |
| 28,385 | 119 | 19,433 | 5,882 | 3,465 | 28,899 |
| 28,386 | 121 | 19,563 | 5,875 | 3,467 | 29,026 |
| 28,387 | 122 | 19,809 | 5,907 | 3,486 | 29,324 |
| 28,388 | 120 | 19,428 | 5,810 | 3,445 | 28,803 |
| 28,389 | 130 | 19,609 | 5,827 | 3,461 | 29,027 |
| 28,390 | 130 | 19,684 | 5,803 | 3,447 | 29,064 |
| 28,391 | 133 | 19,430 | 5,738 | 3,413 | 28,714 |
| 28,392 | 132 | 19,303 | 5,685 | 3,378 | 28,498 |
| 28,393 | 132 | 19,898 | 5,800 | 3,450 | 29,280 |
| 28,394 | 131 | 19,935 | 5,764 | 3,427 | 29,257 |
| 28,395 | 136 | 19,871 | 5,681 | 3,408 | 29,096 |
| 28,396 | 134 | 19,825 | 5,649 | 3,370 | 28,978 |
| 28,397 | 135 | 19,873 | 5,654 | 3,373 | 29,035 |
| 28,398 | 140 | 19,515 | 5,534 | 3,275 | 28,464 |
| 28,399 | 142 | 19,858 | 5,595 | 3,315 | 28,910 |
| 28,400 | 139 | 20,138 | 5,636 | 3,354 | 29,267 |
| 28,401 | 140 | 20,164 | 5,627 | 3,341 | 29,272 |
| 28,402 | 136 | 20,165 | 5,579 | 3,345 | 29,225 |
| 28,403 | 127 | 20,181 | 5,602 | 3,352 | 29,262 |
| 28,404 | 131 | 20,493 | 5,622 | 3,380 | 29,626 |
| 28,405 | 119 | 20,492 | 5,586 | 3,400 | 29,597 |
| 28,406 | 131 | 20,679 | 5,563 | 3,393 | 29,766 |
| 28,407 | 131 | 20,615 | 5,538 | 3,392 | 29,676 |



|        |     |        |       |       |        |
|--------|-----|--------|-------|-------|--------|
| 28,408 | 132 | 20,799 | 5,537 | 3,403 | 29,871 |
| 28,409 | 132 | 20,876 | 5,473 | 3,347 | 29,828 |
| 28,410 | 132 | 21,074 | 5,468 | 3,362 | 30,036 |
| 28,411 | 132 | 21,358 | 5,512 | 3,384 | 30,386 |
| 28,412 | 133 | 21,459 | 5,556 | 3,393 | 30,541 |
| 28,413 | 130 | 21,289 | 5,493 | 3,344 | 30,256 |
| 28,414 | 137 | 21,431 | 5,501 | 3,326 | 30,395 |
| 28,415 | 133 | 21,291 | 5,443 | 3,314 | 30,181 |
| 28,416 | 141 | 21,380 | 5,437 | 3,308 | 30,266 |
| 28,417 | 142 | 21,239 | 5,392 | 3,281 | 30,054 |
| 28,418 | 150 | 21,715 | 5,474 | 3,416 | 30,755 |
| 28,419 | 158 | 21,710 | 5,441 | 3,394 | 30,703 |
| 28,420 | 158 | 21,756 | 5,451 | 3,382 | 30,747 |
| 28,421 | 158 | 21,726 | 5,447 | 3,377 | 30,708 |
| 28,422 | 161 | 21,802 | 5,470 | 3,381 | 30,814 |
| 28,423 | 166 | 21,837 | 5,490 | 3,346 | 30,839 |
| 28,424 | 169 | 22,126 | 5,506 | 3,369 | 31,170 |
| 28,425 | 173 | 21,988 | 5,461 | 3,336 | 30,958 |
| 28,426 | 172 | 21,917 | 5,413 | 3,308 | 30,810 |
| 28,427 | 177 | 22,169 | 5,505 | 3,343 | 31,194 |
| 28,428 | 183 | 22,563 | 5,580 | 3,401 | 31,727 |
| 28,429 | 188 | 22,350 | 5,539 | 3,367 | 31,444 |
| 28,430 | 188 | 22,203 | 5,485 | 3,342 | 31,218 |
| 28,431 | 187 | 22,261 | 5,490 | 3,344 | 31,282 |
| 28,432 | 189 | 22,042 | 5,469 | 3,326 | 31,026 |
| 28,433 | 197 | 22,592 | 5,585 | 3,422 | 31,796 |
| 28,434 | 197 | 22,548 | 5,539 | 3,413 | 31,697 |
| 28,435 | 201 | 22,608 | 5,529 | 3,420 | 31,758 |
| 28,436 | 201 | 22,418 | 5,492 | 3,386 | 31,497 |
| 28,437 | 200 | 22,584 | 5,563 | 3,439 | 31,786 |
| 28,438 | 203 | 22,251 | 5,484 | 3,406 | 31,344 |
| 28,439 | 204 | 22,524 | 5,516 | 3,422 | 31,666 |

|        |     |        |       |       |        |
|--------|-----|--------|-------|-------|--------|
| 28,440 | 197 | 22,512 | 5,504 | 3,421 | 31,634 |
| 28,441 | 195 | 22,447 | 5,506 | 3,455 | 31,603 |
| 28,442 | 193 | 22,296 | 5,530 | 3,452 | 31,471 |
| 28,443 | 197 | 22,258 | 5,487 | 3,417 | 31,359 |
| 28,444 | 201 | 22,330 | 5,498 | 3,417 | 31,446 |
| 28,445 | 201 | 22,366 | 5,509 | 3,420 | 31,496 |
| 28,446 | 202 | 22,212 | 5,581 | 3,469 | 31,464 |
| 28,447 | 205 | 22,242 | 5,594 | 3,487 | 31,528 |
| 28,448 | 211 | 22,236 | 5,625 | 3,512 | 31,584 |
| 28,449 | 209 | 22,075 | 5,563 | 3,500 | 31,347 |
| 28,450 | 211 | 22,262 | 5,635 | 3,524 | 31,632 |
| 28,451 | 207 | 22,301 | 5,648 | 3,527 | 31,683 |
| 28,452 | 218 | 22,078 | 5,622 | 3,513 | 31,431 |
| 28,453 | 218 | 21,958 | 5,617 | 3,493 | 31,286 |
| 28,454 | 217 | 22,432 | 5,770 | 3,555 | 31,974 |
| 28,455 | 225 | 22,501 | 5,844 | 3,585 | 32,155 |
| 28,456 | 224 | 22,447 | 5,848 | 3,562 | 32,081 |
| 28,457 | 205 | 22,062 | 5,794 | 3,518 | 31,579 |
| 28,458 | 202 | 21,984 | 5,770 | 3,509 | 31,465 |
| 28,459 | 212 | 22,018 | 5,788 | 3,515 | 31,533 |
| 28,460 | 209 | 21,820 | 5,759 | 3,520 | 31,308 |
| 28,461 | 213 | 22,254 | 5,888 | 3,579 | 31,934 |
| 28,462 | 212 | 22,238 | 5,884 | 3,598 | 31,932 |
| 28,463 | 208 | 22,076 | 5,854 | 3,591 | 31,729 |
| 28,464 | 201 | 22,073 | 5,871 | 3,605 | 31,750 |
| 28,465 | 194 | 21,851 | 5,859 | 3,578 | 31,482 |
| 28,466 | 195 | 22,068 | 5,947 | 3,610 | 31,820 |
| 28,467 | 190 | 22,241 | 6,038 | 3,656 | 32,125 |
| 28,468 | 181 | 21,775 | 5,939 | 3,596 | 31,491 |
| 28,469 | 182 | 22,029 | 5,975 | 3,603 | 31,789 |
| 28,470 | 182 | 22,330 | 6,047 | 3,658 | 32,217 |
| 28,471 | 190 | 22,365 | 6,039 | 3,671 | 32,265 |

|        |     |        |       |       |        |
|--------|-----|--------|-------|-------|--------|
| 28,472 | 189 | 22,221 | 6,017 | 3,658 | 32,085 |
| 28,473 | 192 | 22,680 | 6,113 | 3,729 | 32,714 |
| 28,474 | 190 | 22,438 | 6,077 | 3,705 | 32,410 |
| 28,475 | 188 | 22,297 | 6,029 | 3,663 | 32,177 |
| 28,476 | 190 | 22,506 | 6,065 | 3,704 | 32,465 |
| 28,477 | 184 | 22,431 | 6,063 | 3,712 | 32,390 |
| 28,478 | 196 | 22,900 | 6,139 | 3,801 | 33,036 |
| 28,479 | 202 | 22,977 | 6,170 | 3,804 | 33,153 |
| 28,480 | 195 | 22,793 | 6,099 | 3,785 | 32,872 |
| 28,481 | 191 | 22,598 | 6,035 | 3,706 | 32,530 |
| 28,482 | 191 | 22,988 | 6,116 | 3,760 | 33,055 |
| 28,483 | 189 | 23,156 | 6,152 | 3,793 | 33,290 |
| 28,484 | 183 | 22,967 | 6,112 | 3,789 | 33,051 |
| 28,485 | 182 | 22,805 | 6,067 | 3,753 | 32,807 |
| 28,486 | 180 | 22,393 | 5,980 | 3,704 | 32,257 |
| 28,487 | 180 | 22,407 | 5,974 | 3,707 | 32,268 |
| 28,488 | 177 | 22,383 | 5,955 | 3,700 | 32,215 |
| 28,489 | 172 | 22,184 | 5,928 | 3,676 | 31,960 |
| 28,490 | 170 | 22,119 | 5,933 | 3,682 | 31,904 |
| 28,491 | 170 | 22,107 | 5,929 | 3,644 | 31,850 |
| 28,492 | 166 | 21,987 | 5,875 | 3,620 | 31,648 |
| 28,493 | 167 | 21,971 | 5,887 | 3,644 | 31,669 |
| 28,494 | 165 | 22,134 | 5,931 | 3,675 | 31,905 |
| 28,495 | 163 | 22,069 | 5,929 | 3,675 | 31,836 |
| 28,496 | 161 | 22,187 | 5,891 | 3,670 | 31,909 |
| 28,497 | 158 | 22,192 | 5,835 | 3,649 | 31,834 |
| 28,498 | 160 | 22,189 | 5,821 | 3,618 | 31,788 |
| 28,499 | 150 | 22,066 | 5,744 | 3,584 | 31,544 |
| 28,500 | 154 | 22,145 | 5,743 | 3,592 | 31,634 |
| 28,501 | 152 | 22,081 | 5,710 | 3,590 | 31,533 |
| 28,502 | 150 | 22,021 | 5,692 | 3,582 | 31,445 |
| 28,503 | 139 | 21,921 | 5,655 | 3,564 | 31,279 |

|        |     |        |       |       |        |
|--------|-----|--------|-------|-------|--------|
| 28,504 | 141 | 21,427 | 5,473 | 3,475 | 30,516 |
| 28,505 | 142 | 21,463 | 5,470 | 3,478 | 30,553 |
| 28,506 | 137 | 21,206 | 5,394 | 3,432 | 30,169 |
| 28,507 | 134 | 20,870 | 5,298 | 3,386 | 29,688 |
| 28,508 | 131 | 21,693 | 5,543 | 3,503 | 30,870 |
| 28,509 | 131 | 21,555 | 5,526 | 3,494 | 30,706 |
| 28,510 | 122 | 21,457 | 5,525 | 3,496 | 30,600 |
| 28,511 | 122 | 21,164 | 5,424 | 3,436 | 30,146 |
| 28,512 | 127 | 21,218 | 5,408 | 3,436 | 30,189 |
| 28,513 | 129 | 21,223 | 5,382 | 3,410 | 30,144 |
| 28,514 | 129 | 21,170 | 5,400 | 3,395 | 30,094 |
| 28,515 | 128 | 21,195 | 5,367 | 3,401 | 30,091 |
| 28,516 | 131 | 21,526 | 5,405 | 3,442 | 30,504 |
| 28,517 | 133 | 21,571 | 5,388 | 3,424 | 30,516 |
| 28,518 | 130 | 21,644 | 5,381 | 3,412 | 30,567 |
| 28,519 | 129 | 21,435 | 5,338 | 3,379 | 30,281 |
| 28,520 | 129 | 21,397 | 5,366 | 3,387 | 30,279 |
| 28,521 | 131 | 21,169 | 5,323 | 3,352 | 29,975 |
| 28,522 | 122 | 21,017 | 5,314 | 3,345 | 29,798 |
| 28,523 | 120 | 21,215 | 5,385 | 3,402 | 30,122 |
| 28,524 | 121 | 21,398 | 5,397 | 3,435 | 30,351 |
| 28,525 | 120 | 21,444 | 5,410 | 3,456 | 30,430 |
| 28,526 | 114 | 21,505 | 5,453 | 3,509 | 30,581 |
| 28,527 | 115 | 21,501 | 5,470 | 3,510 | 30,596 |
| 28,528 | 111 | 21,568 | 5,457 | 3,518 | 30,654 |
| 28,529 | 110 | 21,625 | 5,543 | 3,565 | 30,843 |
| 28,530 | 110 | 21,835 | 5,603 | 3,612 | 31,160 |
| 28,531 | 113 | 21,826 | 5,642 | 3,628 | 31,209 |
| 28,532 | 120 | 21,769 | 5,665 | 3,671 | 31,225 |
| 28,533 | 121 | 21,883 | 5,699 | 3,687 | 31,390 |
| 28,534 | 119 | 21,716 | 5,688 | 3,680 | 31,203 |
| 28,535 | 120 | 22,012 | 5,757 | 3,703 | 31,592 |

|        |     |        |       |       |        |
|--------|-----|--------|-------|-------|--------|
| 28,536 | 119 | 22,135 | 5,788 | 3,716 | 31,758 |
| 28,537 | 117 | 22,016 | 5,759 | 3,674 | 31,566 |
| 28,538 | 124 | 22,137 | 5,790 | 3,681 | 31,732 |
| 28,539 | 124 | 22,088 | 5,798 | 3,675 | 31,685 |
| 28,540 | 125 | 22,052 | 5,806 | 3,676 | 31,659 |
| 28,541 | 127 | 21,939 | 5,811 | 3,667 | 31,544 |
| 28,542 | 128 | 21,972 | 5,844 | 3,709 | 31,653 |
| 28,543 | 133 | 22,027 | 5,857 | 3,705 | 31,722 |
| 28,544 | 132 | 21,946 | 5,821 | 3,684 | 31,583 |
| 28,545 | 138 | 22,262 | 5,880 | 3,711 | 31,991 |
| 28,546 | 140 | 22,142 | 5,885 | 3,713 | 31,880 |
| 28,547 | 144 | 21,897 | 5,841 | 3,677 | 31,559 |
| 28,548 | 142 | 21,639 | 5,820 | 3,643 | 31,244 |
| 28,549 | 147 | 21,907 | 5,909 | 3,730 | 31,693 |
| 28,550 | 149 | 21,741 | 5,894 | 3,731 | 31,515 |
| 28,551 | 145 | 21,524 | 5,874 | 3,719 | 31,262 |
| 28,552 | 146 | 21,541 | 5,884 | 3,707 | 31,278 |
| 28,553 | 151 | 21,705 | 5,907 | 3,716 | 31,479 |
| 28,554 | 155 | 21,509 | 5,871 | 3,682 | 31,217 |
| 28,555 | 153 | 21,227 | 5,830 | 3,661 | 30,871 |
| 28,556 | 153 | 21,296 | 5,867 | 3,700 | 31,016 |
| 28,557 | 152 | 21,553 | 5,919 | 3,743 | 31,367 |
| 28,558 | 156 | 21,389 | 5,856 | 3,718 | 31,119 |
| 28,559 | 158 | 21,560 | 5,849 | 3,721 | 31,288 |
| 28,560 | 158 | 21,490 | 5,858 | 3,714 | 31,220 |
| 28,561 | 157 | 21,445 | 5,858 | 3,717 | 31,177 |
| 28,562 | 153 | 21,500 | 5,886 | 3,735 | 31,274 |
| 28,563 | 148 | 21,218 | 5,830 | 3,677 | 30,873 |
| 28,564 | 146 | 20,901 | 5,787 | 3,658 | 30,492 |
| 28,565 | 147 | 21,192 | 5,808 | 3,707 | 30,854 |
| 28,566 | 147 | 21,379 | 5,837 | 3,715 | 31,078 |
| 28,567 | 145 | 21,243 | 5,814 | 3,685 | 30,887 |

|        |     |        |       |       |        |
|--------|-----|--------|-------|-------|--------|
| 28,568 | 141 | 21,103 | 5,786 | 3,679 | 30,709 |
| 28,569 | 146 | 21,120 | 5,747 | 3,676 | 30,689 |
| 28,570 | 145 | 21,045 | 5,702 | 3,655 | 30,547 |
| 28,571 | 141 | 20,901 | 5,610 | 3,601 | 30,253 |
| 28,572 | 141 | 20,919 | 5,609 | 3,589 | 30,258 |
| 28,573 | 141 | 20,548 | 5,526 | 3,534 | 29,749 |
| 28,574 | 145 | 20,914 | 5,662 | 3,604 | 30,325 |
| 28,575 | 145 | 20,682 | 5,659 | 3,582 | 30,068 |
| 28,576 | 146 | 20,540 | 5,614 | 3,539 | 29,839 |
| 28,577 | 147 | 20,553 | 5,611 | 3,510 | 29,821 |
| 28,578 | 145 | 20,563 | 5,585 | 3,517 | 29,810 |
| 28,579 | 144 | 19,899 | 5,395 | 3,373 | 28,811 |
| 28,580 | 145 | 20,167 | 5,432 | 3,380 | 29,124 |
| 28,581 | 139 | 20,140 | 5,424 | 3,374 | 29,077 |
| 28,582 | 136 | 20,076 | 5,406 | 3,350 | 28,968 |
| 28,583 | 141 | 20,029 | 5,374 | 3,298 | 28,842 |
| 28,584 | 142 | 20,010 | 5,369 | 3,283 | 28,804 |
| 28,585 | 141 | 20,049 | 5,362 | 3,278 | 28,830 |
| 28,586 | 140 | 20,151 | 5,390 | 3,313 | 28,994 |
| 28,587 | 142 | 19,547 | 5,221 | 3,252 | 28,162 |
| 28,588 | 139 | 19,771 | 5,230 | 3,271 | 28,411 |
| 28,589 | 132 | 19,795 | 5,172 | 3,253 | 28,352 |
| 28,590 | 137 | 20,079 | 5,246 | 3,289 | 28,751 |
| 28,591 | 143 | 20,342 | 5,327 | 3,326 | 29,138 |
| 28,592 | 146 | 20,523 | 5,327 | 3,336 | 29,332 |
| 28,593 | 145 | 20,481 | 5,328 | 3,324 | 29,278 |
| 28,594 | 140 | 20,496 | 5,341 | 3,331 | 29,308 |
| 28,595 | 138 | 20,546 | 5,400 | 3,367 | 29,451 |
| 28,596 | 137 | 20,637 | 5,391 | 3,369 | 29,534 |
| 28,597 | 137 | 20,870 | 5,383 | 3,362 | 29,752 |
| 28,598 | 125 | 20,900 | 5,393 | 3,374 | 29,792 |
| 28,599 | 122 | 20,821 | 5,360 | 3,341 | 29,644 |

|        |     |        |       |       |        |
|--------|-----|--------|-------|-------|--------|
| 28,600 | 122 | 20,741 | 5,304 | 3,293 | 29,460 |
| 28,601 | 122 | 20,914 | 5,337 | 3,299 | 29,672 |
| 28,602 | 119 | 20,900 | 5,327 | 3,291 | 29,637 |
| 28,603 | 126 | 21,081 | 5,349 | 3,345 | 29,901 |
| 28,604 | 115 | 20,742 | 5,250 | 3,306 | 29,413 |
| 28,605 | 113 | 20,853 | 5,221 | 3,265 | 29,452 |
| 28,606 | 116 | 20,988 | 5,278 | 3,287 | 29,669 |
| 28,607 | 123 | 21,067 | 5,278 | 3,274 | 29,742 |
| 28,608 | 118 | 20,925 | 5,207 | 3,261 | 29,511 |
| 28,609 | 122 | 21,064 | 5,243 | 3,273 | 29,702 |
| 28,610 | 127 | 21,035 | 5,246 | 3,274 | 29,682 |
| 28,611 | 126 | 20,905 | 5,189 | 3,246 | 29,466 |
| 28,612 | 127 | 21,000 | 5,213 | 3,246 | 29,586 |
| 28,613 | 128 | 20,969 | 5,217 | 3,243 | 29,557 |
| 28,614 | 125 | 20,999 | 5,262 | 3,271 | 29,657 |
| 28,615 | 129 | 21,097 | 5,245 | 3,254 | 29,725 |
| 28,616 | 130 | 20,985 | 5,223 | 3,217 | 29,555 |
| 28,617 | 130 | 20,952 | 5,217 | 3,217 | 29,516 |
| 28,618 | 137 | 21,263 | 5,304 | 3,279 | 29,983 |
| 28,619 | 137 | 21,210 | 5,285 | 3,273 | 29,905 |
| 28,620 | 133 | 20,999 | 5,260 | 3,233 | 29,625 |
| 28,621 | 132 | 21,038 | 5,266 | 3,228 | 29,664 |
| 28,622 | 131 | 21,115 | 5,253 | 3,221 | 29,720 |
| 28,623 | 131 | 21,383 | 5,294 | 3,250 | 30,058 |
| 28,624 | 128 | 21,605 | 5,299 | 3,245 | 30,277 |
| 28,625 | 128 | 21,744 | 5,266 | 3,241 | 30,379 |
| 28,626 | 125 | 21,747 | 5,202 | 3,216 | 30,290 |
| 28,627 | 126 | 21,720 | 5,191 | 3,221 | 30,258 |
| 28,628 | 129 | 21,827 | 5,236 | 3,245 | 30,437 |
| 28,629 | 127 | 21,821 | 5,255 | 3,245 | 30,448 |
| 28,630 | 118 | 21,646 | 5,208 | 3,220 | 30,192 |
| 28,631 | 119 | 21,376 | 5,125 | 3,188 | 29,808 |

|        |     |        |       |       |        |
|--------|-----|--------|-------|-------|--------|
| 28,632 | 120 | 21,578 | 5,138 | 3,195 | 30,031 |
| 28,633 | 114 | 21,658 | 5,140 | 3,200 | 30,112 |
| 28,634 | 104 | 21,360 | 5,077 | 3,172 | 29,713 |
| 28,635 | 105 | 21,318 | 5,073 | 3,162 | 29,658 |
| 28,636 | 108 | 21,323 | 5,109 | 3,172 | 29,712 |
| 28,637 | 105 | 21,401 | 5,084 | 3,165 | 29,755 |
| 28,638 | 105 | 21,414 | 5,078 | 3,153 | 29,750 |
| 28,639 | 106 | 21,497 | 5,124 | 3,166 | 29,893 |
| 28,640 | 106 | 21,709 | 5,167 | 3,200 | 30,182 |
| 28,641 | 101 | 21,629 | 5,138 | 3,178 | 30,046 |
| 28,642 | 93  | 21,641 | 5,100 | 3,173 | 30,007 |
| 28,643 | 99  | 21,651 | 5,115 | 3,185 | 30,050 |
| 28,644 | 100 | 21,604 | 5,082 | 3,159 | 29,945 |
| 28,645 | 101 | 21,642 | 5,056 | 3,140 | 29,939 |
| 28,646 | 102 | 21,842 | 5,052 | 3,150 | 30,146 |
| 28,647 | 103 | 22,211 | 5,179 | 3,207 | 30,700 |
| 28,648 | 100 | 22,137 | 5,197 | 3,221 | 30,655 |
| 28,649 | 104 | 22,035 | 5,131 | 3,203 | 30,473 |
| 28,650 | 104 | 22,068 | 5,129 | 3,209 | 30,510 |
| 28,651 | 103 | 22,416 | 5,244 | 3,270 | 31,033 |
| 28,652 | 103 | 22,367 | 5,191 | 3,234 | 30,895 |
| 28,653 | 105 | 22,582 | 5,238 | 3,255 | 31,180 |
| 28,654 | 99  | 22,519 | 5,253 | 3,255 | 31,126 |
| 28,655 | 103 | 22,441 | 5,270 | 3,257 | 31,071 |
| 28,656 | 106 | 22,268 | 5,221 | 3,244 | 30,839 |
| 28,657 | 103 | 22,215 | 5,193 | 3,243 | 30,754 |
| 28,658 | 102 | 22,881 | 5,376 | 3,365 | 31,724 |
| 28,659 | 106 | 22,881 | 5,410 | 3,366 | 31,763 |
| 28,660 | 95  | 22,736 | 5,382 | 3,364 | 31,577 |
| 28,661 | 103 | 22,908 | 5,432 | 3,393 | 31,836 |
| 28,662 | 102 | 22,921 | 5,386 | 3,389 | 31,798 |
| 28,663 | 108 | 23,076 | 5,397 | 3,381 | 31,962 |



|        |     |        |       |       |        |
|--------|-----|--------|-------|-------|--------|
| 28,664 | 110 | 23,407 | 5,475 | 3,407 | 32,399 |
| 28,665 | 107 | 23,147 | 5,436 | 3,386 | 32,076 |
| 28,666 | 107 | 23,095 | 5,420 | 3,388 | 32,010 |
| 28,667 | 112 | 23,331 | 5,518 | 3,443 | 32,404 |
| 28,668 | 125 | 23,516 | 5,538 | 3,450 | 32,629 |
| 28,669 | 124 | 23,651 | 5,537 | 3,462 | 32,774 |
| 28,670 | 123 | 23,536 | 5,498 | 3,430 | 32,587 |
| 28,671 | 129 | 23,673 | 5,514 | 3,460 | 32,776 |
| 28,672 | 136 | 23,884 | 5,562 | 3,496 | 33,078 |
| 28,673 | 136 | 23,799 | 5,537 | 3,491 | 32,963 |
| 28,674 | 143 | 23,703 | 5,537 | 3,485 | 32,868 |
| 28,675 | 142 | 23,250 | 5,468 | 3,438 | 32,298 |
| 28,676 | 144 | 23,468 | 5,572 | 3,504 | 32,688 |
| 28,677 | 145 | 23,380 | 5,554 | 3,514 | 32,593 |
| 28,678 | 147 | 23,241 | 5,520 | 3,466 | 32,374 |
| 28,679 | 144 | 23,080 | 5,485 | 3,458 | 32,167 |
| 28,680 | 152 | 23,297 | 5,500 | 3,497 | 32,446 |
| 28,681 | 151 | 22,786 | 5,382 | 3,419 | 31,738 |
| 28,682 | 151 | 22,803 | 5,366 | 3,413 | 31,733 |
| 28,683 | 152 | 22,575 | 5,317 | 3,399 | 31,443 |
| 28,684 | 152 | 22,292 | 5,288 | 3,365 | 31,097 |
| 28,685 | 151 | 23,002 | 5,438 | 3,475 | 32,066 |
| 28,686 | 151 | 23,193 | 5,445 | 3,505 | 32,294 |
| 28,687 | 148 | 22,834 | 5,360 | 3,457 | 31,799 |
| 28,688 | 149 | 22,945 | 5,451 | 3,498 | 32,043 |
| 28,689 | 148 | 22,889 | 5,451 | 3,503 | 31,991 |
| 28,690 | 153 | 22,964 | 5,458 | 3,504 | 32,079 |
| 28,691 | 157 | 22,985 | 5,450 | 3,485 | 32,077 |
| 28,692 | 156 | 22,668 | 5,382 | 3,455 | 31,661 |
| 28,693 | 159 | 22,920 | 5,440 | 3,502 | 32,021 |
| 28,694 | 150 | 22,531 | 5,336 | 3,438 | 31,455 |
| 28,695 | 151 | 22,666 | 5,401 | 3,462 | 31,680 |

|        |     |        |       |       |        |
|--------|-----|--------|-------|-------|--------|
| 28,696 | 152 | 22,482 | 5,402 | 3,479 | 31,515 |
| 28,697 | 153 | 22,241 | 5,375 | 3,456 | 31,225 |
| 28,698 | 156 | 22,141 | 5,341 | 3,462 | 31,100 |
| 28,699 | 165 | 21,901 | 5,267 | 3,433 | 30,766 |
| 28,700 | 161 | 21,541 | 5,223 | 3,391 | 30,316 |
| 28,701 | 163 | 21,590 | 5,231 | 3,396 | 30,380 |
| 28,702 | 160 | 21,383 | 5,178 | 3,374 | 30,095 |
| 28,703 | 160 | 21,156 | 5,126 | 3,313 | 29,755 |
| 28,704 | 163 | 21,280 | 5,154 | 3,332 | 29,929 |
| 28,705 | 159 | 21,244 | 5,152 | 3,326 | 29,881 |
| 28,706 | 158 | 21,145 | 5,116 | 3,316 | 29,735 |
| 28,707 | 156 | 20,984 | 5,092 | 3,289 | 29,521 |
| 28,708 | 154 | 20,916 | 5,056 | 3,259 | 29,385 |
| 28,709 | 152 | 21,217 | 5,089 | 3,297 | 29,755 |
| 28,710 | 145 | 20,311 | 4,934 | 3,201 | 28,591 |
| 28,711 | 146 | 20,653 | 5,004 | 3,220 | 29,023 |
| 28,712 | 144 | 21,086 | 5,070 | 3,299 | 29,599 |
| 28,713 | 150 | 21,257 | 5,110 | 3,330 | 29,847 |
| 28,714 | 144 | 21,178 | 5,141 | 3,360 | 29,823 |
| 28,715 | 142 | 20,810 | 5,062 | 3,338 | 29,352 |
| 28,716 | 142 | 20,875 | 5,071 | 3,349 | 29,437 |
| 28,717 | 136 | 20,480 | 4,980 | 3,299 | 28,895 |
| 28,718 | 141 | 20,616 | 4,996 | 3,303 | 29,056 |
| 28,719 | 130 | 20,638 | 5,001 | 3,301 | 29,070 |
| 28,720 | 129 | 20,639 | 5,032 | 3,287 | 29,087 |
| 28,721 | 129 | 20,431 | 4,967 | 3,249 | 28,776 |
| 28,722 | 128 | 20,269 | 4,952 | 3,246 | 28,595 |
| 28,723 | 131 | 20,307 | 4,954 | 3,255 | 28,647 |
| 28,724 | 129 | 20,347 | 4,940 | 3,236 | 28,652 |
| 28,725 | 129 | 20,442 | 4,924 | 3,240 | 28,735 |
| 28,726 | 132 | 20,644 | 4,914 | 3,246 | 28,936 |
| 28,727 | 132 | 20,639 | 4,903 | 3,235 | 28,909 |

|        |     |        |       |       |        |
|--------|-----|--------|-------|-------|--------|
| 28,728 | 132 | 20,669 | 4,893 | 3,225 | 28,919 |
| 28,729 | 136 | 20,685 | 4,914 | 3,205 | 28,940 |
| 28,730 | 135 | 20,587 | 4,868 | 3,169 | 28,759 |
| 28,731 | 143 | 21,198 | 5,032 | 3,274 | 29,647 |
| 28,732 | 144 | 21,361 | 5,069 | 3,293 | 29,867 |
| 28,733 | 152 | 21,352 | 5,086 | 3,284 | 29,874 |
| 28,734 | 151 | 21,393 | 5,076 | 3,273 | 29,893 |
| 28,735 | 152 | 21,681 | 5,125 | 3,316 | 30,274 |
| 28,736 | 152 | 21,879 | 5,183 | 3,344 | 30,558 |
| 28,737 | 157 | 22,005 | 5,182 | 3,367 | 30,711 |
| 28,738 | 159 | 22,167 | 5,201 | 3,369 | 30,896 |
| 28,739 | 158 | 22,334 | 5,210 | 3,392 | 31,094 |
| 28,740 | 161 | 22,691 | 5,292 | 3,454 | 31,598 |
| 28,741 | 159 | 22,723 | 5,313 | 3,471 | 31,666 |
| 28,742 | 158 | 22,701 | 5,313 | 3,488 | 31,660 |
| 28,743 | 162 | 22,843 | 5,341 | 3,508 | 31,854 |
| 28,744 | 159 | 22,907 | 5,380 | 3,528 | 31,974 |
| 28,745 | 160 | 23,032 | 5,396 | 3,530 | 32,118 |
| 28,746 | 160 | 23,207 | 5,389 | 3,551 | 32,307 |
| 28,747 | 156 | 23,134 | 5,343 | 3,503 | 32,136 |
| 28,748 | 159 | 23,371 | 5,373 | 3,542 | 32,445 |
| 28,749 | 152 | 23,125 | 5,313 | 3,500 | 32,090 |
| 28,750 | 143 | 23,466 | 5,407 | 3,507 | 32,523 |
| 28,751 | 145 | 23,380 | 5,382 | 3,510 | 32,417 |
| 28,752 | 142 | 23,107 | 5,299 | 3,468 | 32,016 |
| 28,753 | 144 | 23,049 | 5,287 | 3,457 | 31,937 |
| 28,754 | 146 | 23,270 | 5,313 | 3,490 | 32,219 |
| 28,755 | 143 | 23,120 | 5,251 | 3,464 | 31,978 |
| 28,756 | 144 | 23,094 | 5,233 | 3,454 | 31,925 |
| 28,757 | 143 | 22,975 | 5,242 | 3,455 | 31,815 |
| 28,758 | 146 | 23,238 | 5,311 | 3,493 | 32,188 |
| 28,759 | 147 | 23,242 | 5,307 | 3,493 | 32,189 |

|        |     |        |       |       |        |
|--------|-----|--------|-------|-------|--------|
| 28,760 | 149 | 23,138 | 5,285 | 3,487 | 32,059 |
| 28,761 | 149 | 23,082 | 5,255 | 3,467 | 31,953 |
| 28,762 | 156 | 23,142 | 5,227 | 3,455 | 31,980 |
| 28,763 | 156 | 23,032 | 5,186 | 3,411 | 31,785 |
| 28,764 | 154 | 23,180 | 5,171 | 3,400 | 31,905 |
| 28,765 | 155 | 22,978 | 5,062 | 3,322 | 31,517 |
| 28,766 | 157 | 23,284 | 5,095 | 3,329 | 31,865 |
| 28,767 | 158 | 23,375 | 5,089 | 3,327 | 31,949 |
| 28,768 | 161 | 23,731 | 5,163 | 3,373 | 32,428 |
| 28,769 | 154 | 23,707 | 5,139 | 3,365 | 32,365 |
| 28,770 | 156 | 23,737 | 5,138 | 3,366 | 32,397 |
| 28,771 | 157 | 24,129 | 5,181 | 3,410 | 32,877 |
| 28,772 | 151 | 23,862 | 5,128 | 3,379 | 32,520 |
| 28,773 | 151 | 23,889 | 5,104 | 3,352 | 32,496 |
| 28,774 | 146 | 23,851 | 5,086 | 3,364 | 32,447 |
| 28,775 | 143 | 23,806 | 5,099 | 3,379 | 32,427 |
| 28,776 | 147 | 23,986 | 5,158 | 3,410 | 32,701 |
| 28,777 | 148 | 23,788 | 5,104 | 3,378 | 32,418 |
| 28,778 | 146 | 23,608 | 5,062 | 3,354 | 32,170 |
| 28,779 | 143 | 23,783 | 5,096 | 3,380 | 32,402 |
| 28,780 | 145 | 23,786 | 5,057 | 3,393 | 32,381 |
| 28,781 | 146 | 23,539 | 5,019 | 3,357 | 32,061 |
| 28,782 | 129 | 23,302 | 4,998 | 3,322 | 31,751 |
| 28,783 | 132 | 23,469 | 4,994 | 3,325 | 31,920 |
| 28,784 | 129 | 23,749 | 5,013 | 3,346 | 32,237 |
| 28,785 | 131 | 23,904 | 5,004 | 3,347 | 32,386 |
| 28,786 | 140 | 23,645 | 4,968 | 3,301 | 32,054 |
| 28,787 | 140 | 23,659 | 4,945 | 3,291 | 32,035 |
| 28,788 | 147 | 23,977 | 5,016 | 3,303 | 32,443 |
| 28,789 | 144 | 23,668 | 4,944 | 3,267 | 32,023 |
| 28,790 | 145 | 23,723 | 4,927 | 3,258 | 32,053 |
| 28,791 | 144 | 23,984 | 4,927 | 3,257 | 32,312 |

|        |     |        |       |       |        |
|--------|-----|--------|-------|-------|--------|
| 28,792 | 143 | 23,622 | 4,823 | 3,182 | 31,770 |
| 28,793 | 143 | 23,950 | 4,860 | 3,197 | 32,150 |
| 28,794 | 139 | 23,741 | 4,784 | 3,138 | 31,802 |
| 28,795 | 142 | 23,778 | 4,781 | 3,122 | 31,823 |
| 28,796 | 143 | 23,725 | 4,784 | 3,115 | 31,767 |
| 28,797 | 145 | 23,753 | 4,797 | 3,124 | 31,819 |
| 28,798 | 145 | 23,627 | 4,778 | 3,091 | 31,641 |
| 28,799 | 143 | 23,826 | 4,818 | 3,134 | 31,921 |
| 28,800 | 148 | 23,754 | 4,808 | 3,117 | 31,827 |
| 28,801 | 147 | 23,608 | 4,795 | 3,123 | 31,673 |
| 28,802 | 143 | 23,516 | 4,773 | 3,080 | 31,512 |
| 28,803 | 142 | 23,656 | 4,789 | 3,092 | 31,679 |
| 28,804 | 146 | 23,605 | 4,784 | 3,110 | 31,645 |
| 28,805 | 146 | 23,739 | 4,830 | 3,119 | 31,834 |
| 28,806 | 147 | 23,763 | 4,822 | 3,113 | 31,845 |
| 28,807 | 151 | 24,119 | 4,844 | 3,110 | 32,224 |
| 28,808 | 149 | 24,113 | 4,825 | 3,107 | 32,194 |
| 28,809 | 149 | 24,073 | 4,819 | 3,105 | 32,146 |
| 28,810 | 157 | 24,126 | 4,806 | 3,084 | 32,173 |
| 28,811 | 154 | 23,963 | 4,776 | 3,051 | 31,944 |
| 28,812 | 157 | 24,354 | 4,829 | 3,088 | 32,428 |
| 28,813 | 159 | 24,112 | 4,792 | 3,055 | 32,118 |
| 28,814 | 158 | 24,121 | 4,791 | 3,058 | 32,128 |
| 28,815 | 159 | 24,305 | 4,835 | 3,091 | 32,390 |
| 28,816 | 163 | 24,144 | 4,794 | 3,096 | 32,197 |
| 28,817 | 163 | 24,251 | 4,792 | 3,102 | 32,308 |
| 28,818 | 167 | 24,677 | 4,849 | 3,149 | 32,842 |
| 28,819 | 162 | 24,805 | 4,877 | 3,177 | 33,021 |
| 28,820 | 174 | 24,763 | 4,862 | 3,181 | 32,980 |
| 28,821 | 177 | 24,668 | 4,839 | 3,152 | 32,836 |
| 28,822 | 178 | 24,481 | 4,859 | 3,158 | 32,676 |
| 28,823 | 180 | 24,417 | 4,859 | 3,161 | 32,617 |

|        |     |        |       |       |        |
|--------|-----|--------|-------|-------|--------|
| 28,824 | 175 | 24,310 | 4,869 | 3,179 | 32,533 |
| 28,825 | 175 | 24,435 | 4,924 | 3,173 | 32,707 |
| 28,826 | 173 | 24,410 | 4,945 | 3,174 | 32,702 |
| 28,827 | 172 | 24,376 | 4,957 | 3,169 | 32,674 |
| 28,828 | 174 | 24,352 | 4,952 | 3,162 | 32,640 |
| 28,829 | 173 | 24,342 | 4,937 | 3,156 | 32,608 |
| 28,830 | 170 | 24,337 | 4,939 | 3,155 | 32,601 |
| 28,831 | 167 | 24,337 | 4,957 | 3,166 | 32,627 |
| 28,832 | 171 | 24,075 | 4,871 | 3,130 | 32,247 |
| 28,833 | 171 | 23,783 | 4,827 | 3,098 | 31,879 |
| 28,834 | 172 | 24,303 | 4,995 | 3,180 | 32,650 |
| 28,835 | 168 | 24,263 | 4,987 | 3,189 | 32,607 |
| 28,836 | 169 | 24,199 | 4,991 | 3,181 | 32,540 |
| 28,837 | 164 | 24,473 | 5,036 | 3,219 | 32,892 |
| 28,838 | 156 | 24,361 | 5,020 | 3,199 | 32,736 |
| 28,839 | 156 | 24,466 | 5,007 | 3,204 | 32,833 |
| 28,840 | 162 | 24,463 | 5,025 | 3,213 | 32,863 |
| 28,841 | 160 | 24,410 | 5,036 | 3,207 | 32,813 |
| 28,842 | 167 | 24,754 | 5,133 | 3,287 | 33,341 |
| 28,843 | 165 | 24,764 | 5,152 | 3,285 | 33,366 |
| 28,844 | 172 | 24,519 | 5,114 | 3,258 | 33,063 |
| 28,845 | 172 | 24,451 | 5,137 | 3,266 | 33,026 |
| 28,846 | 166 | 24,425 | 5,167 | 3,279 | 33,037 |
| 28,847 | 164 | 24,321 | 5,161 | 3,264 | 32,910 |
| 28,848 | 170 | 24,526 | 5,200 | 3,275 | 33,171 |
| 28,849 | 176 | 24,708 | 5,226 | 3,293 | 33,403 |
| 28,850 | 176 | 24,798 | 5,216 | 3,300 | 33,490 |
| 28,851 | 175 | 24,507 | 5,132 | 3,277 | 33,091 |
| 28,852 | 176 | 24,527 | 5,131 | 3,280 | 33,114 |
| 28,853 | 177 | 24,403 | 5,095 | 3,267 | 32,942 |
| 28,854 | 174 | 24,371 | 5,080 | 3,236 | 32,861 |
| 28,855 | 175 | 24,511 | 5,120 | 3,258 | 33,064 |

|        |     |        |       |       |        |
|--------|-----|--------|-------|-------|--------|
| 28,856 | 172 | 24,489 | 5,139 | 3,259 | 33,059 |
| 28,857 | 168 | 24,270 | 5,123 | 3,254 | 32,815 |
| 28,858 | 175 | 24,147 | 5,107 | 3,250 | 32,679 |
| 28,859 | 175 | 24,154 | 5,115 | 3,250 | 32,694 |
| 28,860 | 173 | 24,112 | 5,113 | 3,267 | 32,665 |
| 28,861 | 169 | 24,095 | 5,130 | 3,278 | 32,672 |
| 28,862 | 166 | 23,637 | 5,081 | 3,228 | 32,112 |
| 28,863 | 167 | 23,796 | 5,111 | 3,239 | 32,313 |
| 28,864 | 155 | 23,882 | 5,147 | 3,269 | 32,453 |
| 28,865 | 158 | 23,611 | 5,096 | 3,228 | 32,093 |
| 28,866 | 156 | 23,311 | 5,085 | 3,197 | 31,749 |
| 28,867 | 153 | 23,419 | 5,125 | 3,203 | 31,900 |
| 28,868 | 155 | 23,280 | 5,105 | 3,185 | 31,725 |
| 28,869 | 151 | 23,092 | 5,072 | 3,147 | 31,462 |
| 28,870 | 154 | 22,893 | 5,058 | 3,100 | 31,205 |
| 28,871 | 136 | 22,322 | 4,929 | 3,039 | 30,426 |
| 28,872 | 138 | 22,332 | 4,898 | 3,031 | 30,399 |
| 28,873 | 139 | 22,462 | 4,911 | 3,032 | 30,544 |
| 28,874 | 146 | 22,485 | 4,876 | 3,007 | 30,514 |
| 28,875 | 150 | 22,469 | 4,825 | 3,002 | 30,446 |
| 28,876 | 149 | 22,470 | 4,804 | 2,969 | 30,392 |
| 28,877 | 153 | 22,715 | 4,816 | 3,003 | 30,687 |
| 28,878 | 155 | 22,555 | 4,771 | 2,986 | 30,467 |
| 28,879 | 153 | 22,400 | 4,753 | 2,973 | 30,279 |
| 28,880 | 152 | 22,670 | 4,826 | 2,992 | 30,640 |
| 28,881 | 155 | 22,731 | 4,855 | 2,988 | 30,729 |
| 28,882 | 147 | 22,682 | 4,821 | 2,967 | 30,617 |
| 28,883 | 147 | 22,611 | 4,791 | 2,960 | 30,509 |
| 28,884 | 148 | 22,511 | 4,754 | 2,940 | 30,353 |
| 28,885 | 153 | 22,717 | 4,803 | 2,967 | 30,640 |
| 28,886 | 155 | 22,697 | 4,793 | 2,969 | 30,614 |
| 28,887 | 159 | 22,438 | 4,730 | 2,936 | 30,263 |

|        |     |        |       |       |        |
|--------|-----|--------|-------|-------|--------|
| 28,888 | 158 | 22,133 | 4,688 | 2,919 | 29,898 |
| 28,889 | 173 | 22,075 | 4,682 | 2,879 | 29,809 |
| 28,890 | 166 | 21,922 | 4,630 | 2,849 | 29,567 |
| 28,891 | 171 | 21,748 | 4,580 | 2,806 | 29,305 |
| 28,892 | 171 | 21,827 | 4,588 | 2,803 | 29,389 |
| 28,893 | 165 | 21,479 | 4,535 | 2,765 | 28,944 |
| 28,894 | 170 | 21,743 | 4,552 | 2,811 | 29,276 |
| 28,895 | 163 | 21,450 | 4,444 | 2,781 | 28,838 |
| 28,896 | 164 | 21,696 | 4,458 | 2,813 | 29,131 |
| 28,897 | 164 | 21,131 | 4,326 | 2,733 | 28,354 |
| 28,898 | 164 | 21,335 | 4,337 | 2,765 | 28,601 |
| 28,899 | 160 | 21,319 | 4,328 | 2,769 | 28,576 |
| 28,900 | 153 | 21,002 | 4,261 | 2,724 | 28,140 |
| 28,901 | 156 | 21,265 | 4,293 | 2,738 | 28,452 |
| 28,902 | 153 | 20,927 | 4,174 | 2,661 | 27,915 |
| 28,903 | 153 | 21,184 | 4,213 | 2,675 | 28,225 |
| 28,904 | 152 | 21,184 | 4,226 | 2,684 | 28,246 |
| 28,905 | 150 | 21,150 | 4,208 | 2,686 | 28,194 |
| 28,906 | 149 | 20,881 | 4,083 | 2,631 | 27,744 |
| 28,907 | 149 | 21,099 | 4,096 | 2,658 | 28,002 |
| 28,908 | 143 | 21,082 | 4,087 | 2,664 | 27,976 |
| 28,909 | 141 | 21,209 | 4,082 | 2,683 | 28,115 |
| 28,910 | 141 | 21,033 | 4,065 | 2,645 | 27,884 |
| 28,911 | 138 | 20,884 | 4,035 | 2,634 | 27,691 |
| 28,912 | 146 | 21,782 | 4,174 | 2,751 | 28,853 |
| 28,913 | 146 | 22,136 | 4,232 | 2,798 | 29,312 |
| 28,914 | 146 | 21,928 | 4,196 | 2,759 | 29,029 |
| 28,915 | 142 | 21,994 | 4,192 | 2,756 | 29,084 |
| 28,916 | 146 | 21,994 | 4,209 | 2,755 | 29,104 |
| 28,917 | 144 | 22,050 | 4,198 | 2,768 | 29,160 |
| 28,918 | 146 | 22,013 | 4,203 | 2,769 | 29,131 |
| 28,919 | 145 | 21,966 | 4,180 | 2,757 | 29,048 |



|        |     |        |       |       |        |
|--------|-----|--------|-------|-------|--------|
| 28,920 | 145 | 22,037 | 4,215 | 2,774 | 29,171 |
| 28,921 | 142 | 21,763 | 4,141 | 2,759 | 28,805 |
| 28,922 | 137 | 21,165 | 4,065 | 2,714 | 28,081 |
| 28,923 | 141 | 21,333 | 4,103 | 2,722 | 28,299 |
| 28,924 | 144 | 21,535 | 4,148 | 2,746 | 28,573 |
| 28,925 | 146 | 21,464 | 4,154 | 2,740 | 28,504 |
| 28,926 | 142 | 21,175 | 4,153 | 2,709 | 28,179 |
| 28,927 | 149 | 21,682 | 4,245 | 2,805 | 28,881 |
| 28,928 | 153 | 21,683 | 4,286 | 2,798 | 28,920 |
| 28,929 | 154 | 21,355 | 4,236 | 2,759 | 28,504 |
| 28,930 | 154 | 21,084 | 4,190 | 2,731 | 28,159 |
| 28,931 | 151 | 21,091 | 4,274 | 2,744 | 28,260 |
| 28,932 | 152 | 20,771 | 4,231 | 2,738 | 27,892 |
| 28,933 | 152 | 20,750 | 4,228 | 2,729 | 27,859 |
| 28,934 | 155 | 20,597 | 4,210 | 2,715 | 27,677 |
| 28,935 | 155 | 20,571 | 4,208 | 2,720 | 27,654 |
| 28,936 | 151 | 20,314 | 4,190 | 2,687 | 27,342 |
| 28,937 | 151 | 20,281 | 4,194 | 2,685 | 27,311 |
| 28,938 | 147 | 20,421 | 4,317 | 2,760 | 27,645 |
| 28,939 | 152 | 20,334 | 4,347 | 2,760 | 27,593 |
| 28,940 | 143 | 19,900 | 4,259 | 2,738 | 27,040 |
| 28,941 | 143 | 19,827 | 4,290 | 2,762 | 27,022 |
| 28,942 | 136 | 19,819 | 4,343 | 2,783 | 27,081 |
| 28,943 | 136 | 20,087 | 4,404 | 2,815 | 27,442 |
| 28,944 | 136 | 20,270 | 4,488 | 2,810 | 27,704 |
| 28,945 | 130 | 20,018 | 4,464 | 2,777 | 27,389 |
| 28,946 | 131 | 20,058 | 4,507 | 2,783 | 27,479 |
| 28,947 | 130 | 20,256 | 4,567 | 2,825 | 27,778 |
| 28,948 | 128 | 19,843 | 4,528 | 2,771 | 27,270 |
| 28,949 | 129 | 19,936 | 4,584 | 2,801 | 27,450 |
| 28,950 | 128 | 20,093 | 4,652 | 2,823 | 27,696 |
| 28,951 | 128 | 19,792 | 4,632 | 2,789 | 27,341 |

|        |     |        |       |       |        |
|--------|-----|--------|-------|-------|--------|
| 28,952 | 126 | 19,516 | 4,620 | 2,771 | 27,033 |
| 28,953 | 126 | 19,879 | 4,746 | 2,820 | 27,571 |
| 28,954 | 130 | 19,807 | 4,757 | 2,837 | 27,531 |
| 28,955 | 136 | 19,927 | 4,785 | 2,837 | 27,685 |
| 28,956 | 140 | 19,928 | 4,804 | 2,843 | 27,715 |
| 28,957 | 148 | 19,697 | 4,789 | 2,832 | 27,466 |
| 28,958 | 148 | 19,408 | 4,777 | 2,805 | 27,138 |
| 28,959 | 155 | 19,884 | 4,897 | 2,872 | 27,808 |
| 28,960 | 160 | 19,815 | 4,922 | 2,854 | 27,751 |
| 28,961 | 158 | 19,874 | 4,956 | 2,851 | 27,839 |
| 28,962 | 159 | 19,861 | 4,955 | 2,860 | 27,835 |
| 28,963 | 160 | 19,513 | 4,922 | 2,825 | 27,420 |
| 28,964 | 166 | 19,661 | 4,955 | 2,838 | 27,620 |
| 28,965 | 164 | 19,698 | 4,934 | 2,845 | 27,641 |
| 28,966 | 173 | 19,798 | 4,983 | 2,851 | 27,805 |
| 28,967 | 174 | 19,786 | 4,981 | 2,849 | 27,790 |
| 28,968 | 174 | 20,172 | 5,038 | 2,896 | 28,280 |
| 28,969 | 174 | 20,141 | 5,058 | 2,897 | 28,270 |
| 28,970 | 182 | 20,432 | 5,107 | 2,935 | 28,656 |
| 28,971 | 190 | 20,668 | 5,142 | 2,964 | 28,964 |
| 28,972 | 193 | 20,681 | 5,147 | 2,966 | 28,987 |
| 28,973 | 190 | 20,957 | 5,159 | 2,975 | 29,281 |
| 28,974 | 186 | 20,896 | 5,147 | 2,972 | 29,201 |
| 28,975 | 178 | 21,233 | 5,241 | 3,040 | 29,692 |
| 28,976 | 170 | 21,306 | 5,208 | 3,036 | 29,720 |
| 28,977 | 169 | 21,401 | 5,243 | 3,053 | 29,866 |
| 28,978 | 167 | 21,389 | 5,289 | 3,062 | 29,907 |
| 28,979 | 165 | 21,436 | 5,290 | 3,078 | 29,969 |
| 28,980 | 161 | 21,408 | 5,254 | 3,075 | 29,898 |
| 28,981 | 165 | 21,576 | 5,234 | 3,098 | 30,073 |
| 28,982 | 165 | 21,793 | 5,256 | 3,111 | 30,325 |
| 28,983 | 165 | 22,023 | 5,292 | 3,119 | 30,599 |

|        |     |        |       |       |        |
|--------|-----|--------|-------|-------|--------|
| 28,984 | 175 | 22,287 | 5,355 | 3,154 | 30,971 |
| 28,985 | 175 | 22,339 | 5,387 | 3,166 | 31,067 |
| 28,986 | 188 | 22,379 | 5,394 | 3,177 | 31,138 |
| 28,987 | 189 | 22,411 | 5,379 | 3,167 | 31,146 |
| 28,988 | 193 | 22,828 | 5,434 | 3,206 | 31,661 |
| 28,989 | 193 | 22,940 | 5,449 | 3,216 | 31,798 |
| 28,990 | 188 | 22,810 | 5,375 | 3,177 | 31,550 |
| 28,991 | 189 | 22,825 | 5,346 | 3,151 | 31,511 |
| 28,992 | 202 | 23,495 | 5,438 | 3,234 | 32,369 |
| 28,993 | 204 | 23,547 | 5,432 | 3,225 | 32,408 |
| 28,994 | 212 | 23,884 | 5,550 | 3,272 | 32,918 |
| 28,995 | 211 | 23,612 | 5,465 | 3,257 | 32,545 |
| 28,996 | 212 | 23,717 | 5,496 | 3,263 | 32,688 |
| 28,997 | 215 | 23,944 | 5,550 | 3,296 | 33,005 |
| 28,998 | 222 | 23,896 | 5,519 | 3,295 | 32,932 |
| 28,999 | 230 | 24,013 | 5,496 | 3,304 | 33,043 |
| 29,000 | 232 | 23,991 | 5,496 | 3,309 | 33,028 |
| 29,001 | 234 | 24,002 | 5,490 | 3,309 | 33,035 |
| 29,002 | 236 | 24,387 | 5,560 | 3,355 | 33,538 |
| 29,003 | 241 | 24,304 | 5,508 | 3,347 | 33,400 |
| 29,004 | 247 | 24,579 | 5,542 | 3,373 | 33,741 |
| 29,005 | 244 | 24,628 | 5,539 | 3,377 | 33,788 |
| 29,006 | 241 | 24,719 | 5,532 | 3,405 | 33,897 |
| 29,007 | 239 | 24,789 | 5,540 | 3,402 | 33,970 |
| 29,008 | 231 | 24,890 | 5,548 | 3,414 | 34,083 |
| 29,009 | 230 | 24,856 | 5,536 | 3,415 | 34,037 |
| 29,010 | 225 | 24,803 | 5,536 | 3,416 | 33,980 |
| 29,011 | 218 | 24,820 | 5,533 | 3,424 | 33,995 |
| 29,012 | 216 | 24,728 | 5,489 | 3,420 | 33,853 |
| 29,013 | 211 | 24,433 | 5,427 | 3,369 | 33,440 |
| 29,014 | 213 | 24,549 | 5,433 | 3,385 | 33,580 |
| 29,015 | 214 | 24,133 | 5,324 | 3,323 | 32,994 |

|        |     |        |       |       |        |
|--------|-----|--------|-------|-------|--------|
| 29,016 | 213 | 24,244 | 5,328 | 3,342 | 33,127 |
| 29,017 | 203 | 23,963 | 5,272 | 3,321 | 32,759 |
| 29,018 | 204 | 24,045 | 5,274 | 3,326 | 32,849 |
| 29,019 | 203 | 23,706 | 5,220 | 3,280 | 32,409 |
| 29,020 | 207 | 23,558 | 5,239 | 3,277 | 32,281 |
| 29,021 | 197 | 23,625 | 5,293 | 3,306 | 32,421 |
| 29,022 | 201 | 23,315 | 5,266 | 3,269 | 32,051 |
| 29,023 | 198 | 23,102 | 5,239 | 3,251 | 31,790 |
| 29,024 | 198 | 23,218 | 5,341 | 3,308 | 32,065 |
| 29,025 | 199 | 23,349 | 5,367 | 3,342 | 32,257 |
| 29,026 | 202 | 23,321 | 5,335 | 3,313 | 32,171 |
| 29,027 | 201 | 23,279 | 5,311 | 3,307 | 32,098 |
| 29,028 | 202 | 23,276 | 5,325 | 3,305 | 32,108 |
| 29,029 | 200 | 23,180 | 5,284 | 3,267 | 31,931 |
| 29,030 | 199 | 22,973 | 5,217 | 3,244 | 31,633 |
| 29,031 | 196 | 22,941 | 5,241 | 3,238 | 31,616 |
| 29,032 | 193 | 22,689 | 5,247 | 3,212 | 31,341 |
| 29,033 | 195 | 22,597 | 5,198 | 3,219 | 31,209 |
| 29,034 | 196 | 22,652 | 5,239 | 3,236 | 31,323 |
| 29,035 | 191 | 22,447 | 5,178 | 3,179 | 30,995 |
| 29,036 | 191 | 22,293 | 5,182 | 3,185 | 30,851 |
| 29,037 | 175 | 22,123 | 5,190 | 3,159 | 30,647 |
| 29,038 | 176 | 22,059 | 5,220 | 3,161 | 30,616 |
| 29,039 | 177 | 21,811 | 5,212 | 3,136 | 30,336 |
| 29,040 | 170 | 21,381 | 5,124 | 3,086 | 29,761 |
| 29,041 | 165 | 21,099 | 5,117 | 3,065 | 29,446 |
| 29,042 | 167 | 20,840 | 5,141 | 3,084 | 29,232 |
| 29,043 | 158 | 20,524 | 5,091 | 3,038 | 28,811 |
| 29,044 | 153 | 20,027 | 4,986 | 2,985 | 28,151 |
| 29,045 | 153 | 19,829 | 4,950 | 2,973 | 27,905 |
| 29,046 | 153 | 19,680 | 4,942 | 2,956 | 27,731 |
| 29,047 | 151 | 19,303 | 4,873 | 2,899 | 27,226 |

|        |     |        |       |       |        |
|--------|-----|--------|-------|-------|--------|
| 29,048 | 144 | 19,018 | 4,829 | 2,863 | 26,854 |
| 29,049 | 141 | 18,897 | 4,819 | 2,847 | 26,704 |
| 29,050 | 134 | 18,724 | 4,809 | 2,831 | 26,498 |
| 29,051 | 129 | 18,615 | 4,815 | 2,829 | 26,388 |
| 29,052 | 128 | 18,719 | 4,824 | 2,839 | 26,510 |
| 29,053 | 123 | 18,384 | 4,766 | 2,804 | 26,077 |
| 29,054 | 112 | 18,263 | 4,761 | 2,810 | 25,946 |
| 29,055 | 114 | 18,194 | 4,797 | 2,821 | 25,926 |
| 29,056 | 117 | 18,111 | 4,818 | 2,820 | 25,866 |
| 29,057 | 120 | 17,972 | 4,835 | 2,822 | 25,749 |
| 29,058 | 124 | 18,071 | 4,841 | 2,834 | 25,870 |
| 29,059 | 125 | 18,169 | 4,846 | 2,833 | 25,973 |
| 29,060 | 127 | 18,188 | 4,849 | 2,826 | 25,990 |
| 29,061 | 128 | 18,103 | 4,833 | 2,799 | 25,863 |
| 29,062 | 127 | 17,841 | 4,758 | 2,760 | 25,486 |
| 29,063 | 128 | 17,929 | 4,792 | 2,788 | 25,637 |
| 29,064 | 127 | 17,638 | 4,728 | 2,755 | 25,248 |
| 29,065 | 130 | 17,729 | 4,775 | 2,778 | 25,412 |
| 29,066 | 126 | 17,487 | 4,748 | 2,747 | 25,108 |
| 29,067 | 123 | 17,394 | 4,751 | 2,734 | 25,002 |
| 29,068 | 125 | 17,621 | 4,822 | 2,775 | 25,343 |
| 29,069 | 127 | 17,522 | 4,831 | 2,781 | 25,261 |
| 29,070 | 124 | 17,406 | 4,821 | 2,774 | 25,125 |
| 29,071 | 122 | 17,426 | 4,779 | 2,764 | 25,091 |
| 29,072 | 124 | 17,176 | 4,710 | 2,720 | 24,730 |
| 29,073 | 113 | 16,877 | 4,619 | 2,669 | 24,278 |
| 29,074 | 115 | 16,797 | 4,558 | 2,652 | 24,122 |
| 29,075 | 115 | 16,523 | 4,491 | 2,603 | 23,732 |
| 29,076 | 115 | 16,835 | 4,565 | 2,639 | 24,154 |
| 29,077 | 119 | 16,736 | 4,555 | 2,626 | 24,036 |
| 29,078 | 119 | 16,850 | 4,599 | 2,663 | 24,231 |
| 29,079 | 122 | 16,800 | 4,608 | 2,676 | 24,206 |

|        |     |        |       |       |        |
|--------|-----|--------|-------|-------|--------|
| 29,080 | 121 | 16,811 | 4,609 | 2,680 | 24,221 |
| 29,081 | 121 | 16,757 | 4,602 | 2,674 | 24,154 |
| 29,082 | 119 | 16,825 | 4,593 | 2,666 | 24,203 |
| 29,083 | 119 | 16,862 | 4,609 | 2,676 | 24,266 |
| 29,084 | 115 | 16,666 | 4,563 | 2,646 | 23,990 |
| 29,085 | 116 | 16,826 | 4,596 | 2,675 | 24,213 |
| 29,086 | 107 | 16,737 | 4,569 | 2,670 | 24,083 |
| 29,087 | 108 | 16,945 | 4,562 | 2,678 | 24,293 |
| 29,088 | 111 | 17,159 | 4,583 | 2,702 | 24,555 |
| 29,089 | 108 | 17,311 | 4,568 | 2,707 | 24,694 |
| 29,090 | 104 | 17,353 | 4,542 | 2,704 | 24,703 |
| 29,091 | 109 | 17,398 | 4,442 | 2,684 | 24,633 |
| 29,092 | 112 | 17,722 | 4,516 | 2,721 | 25,071 |
| 29,093 | 109 | 17,786 | 4,512 | 2,703 | 25,110 |
| 29,094 | 106 | 17,698 | 4,473 | 2,693 | 24,970 |
| 29,095 | 110 | 17,879 | 4,465 | 2,700 | 25,154 |
| 29,096 | 119 | 18,158 | 4,497 | 2,707 | 25,481 |
| 29,097 | 119 | 18,155 | 4,494 | 2,705 | 25,473 |
| 29,098 | 119 | 18,353 | 4,491 | 2,724 | 25,687 |
| 29,099 | 123 | 18,407 | 4,508 | 2,734 | 25,772 |
| 29,100 | 124 | 18,545 | 4,564 | 2,757 | 25,990 |
| 29,101 | 123 | 18,540 | 4,548 | 2,745 | 25,956 |
| 29,102 | 123 | 18,444 | 4,527 | 2,750 | 25,844 |
| 29,103 | 124 | 18,842 | 4,611 | 2,802 | 26,379 |
| 29,104 | 126 | 18,997 | 4,609 | 2,812 | 26,544 |
| 29,105 | 127 | 19,137 | 4,616 | 2,822 | 26,702 |
| 29,106 | 120 | 19,075 | 4,551 | 2,781 | 26,527 |
| 29,107 | 115 | 19,072 | 4,548 | 2,783 | 26,518 |
| 29,108 | 118 | 19,352 | 4,602 | 2,812 | 26,884 |
| 29,109 | 117 | 19,204 | 4,584 | 2,791 | 26,696 |
| 29,110 | 117 | 19,192 | 4,591 | 2,792 | 26,692 |
| 29,111 | 115 | 18,958 | 4,556 | 2,771 | 26,400 |

|        |     |        |       |       |        |
|--------|-----|--------|-------|-------|--------|
| 29,112 | 114 | 18,999 | 4,577 | 2,801 | 26,491 |
| 29,113 | 119 | 19,430 | 4,663 | 2,857 | 27,069 |
| 29,114 | 123 | 19,501 | 4,676 | 2,868 | 27,168 |
| 29,115 | 119 | 19,417 | 4,641 | 2,839 | 27,016 |
| 29,116 | 120 | 19,349 | 4,622 | 2,838 | 26,929 |
| 29,117 | 126 | 19,520 | 4,650 | 2,862 | 27,158 |
| 29,118 | 141 | 19,604 | 4,677 | 2,896 | 27,318 |
| 29,119 | 147 | 19,758 | 4,677 | 2,896 | 27,478 |
| 29,120 | 144 | 19,580 | 4,646 | 2,873 | 27,243 |
| 29,121 | 146 | 19,459 | 4,587 | 2,855 | 27,047 |
| 29,122 | 143 | 19,276 | 4,547 | 2,836 | 26,802 |
| 29,123 | 145 | 19,986 | 4,719 | 2,924 | 27,774 |
| 29,124 | 148 | 20,037 | 4,772 | 2,971 | 27,928 |
| 29,125 | 147 | 19,840 | 4,738 | 2,941 | 27,666 |
| 29,126 | 150 | 19,906 | 4,740 | 2,933 | 27,729 |
| 29,127 | 148 | 19,861 | 4,752 | 2,930 | 27,691 |
| 29,128 | 146 | 20,122 | 4,770 | 2,922 | 27,960 |
| 29,129 | 146 | 20,144 | 4,761 | 2,926 | 27,977 |
| 29,130 | 152 | 20,466 | 4,816 | 2,963 | 28,397 |
| 29,131 | 151 | 20,446 | 4,814 | 2,974 | 28,385 |
| 29,132 | 154 | 20,527 | 4,823 | 2,996 | 28,500 |
| 29,133 | 157 | 20,544 | 4,811 | 2,992 | 28,504 |
| 29,134 | 163 | 20,922 | 4,907 | 3,054 | 29,046 |
| 29,135 | 162 | 20,392 | 4,801 | 2,969 | 28,324 |
| 29,136 | 167 | 20,573 | 4,838 | 2,996 | 28,574 |
| 29,137 | 165 | 20,724 | 4,912 | 3,039 | 28,840 |
| 29,138 | 165 | 20,750 | 4,907 | 3,046 | 28,868 |
| 29,139 | 163 | 20,547 | 4,902 | 3,035 | 28,647 |
| 29,140 | 164 | 20,485 | 4,921 | 3,046 | 28,616 |
| 29,141 | 163 | 20,311 | 4,889 | 3,037 | 28,400 |
| 29,142 | 172 | 21,057 | 5,074 | 3,121 | 29,424 |
| 29,143 | 181 | 20,851 | 5,020 | 3,088 | 29,140 |

|        |     |        |       |       |        |
|--------|-----|--------|-------|-------|--------|
| 29,144 | 181 | 20,814 | 5,009 | 3,091 | 29,095 |
| 29,145 | 185 | 21,141 | 5,083 | 3,115 | 29,524 |
| 29,146 | 180 | 21,171 | 5,087 | 3,130 | 29,568 |
| 29,147 | 184 | 21,027 | 5,032 | 3,114 | 29,357 |
| 29,148 | 185 | 20,992 | 5,032 | 3,094 | 29,303 |
| 29,149 | 185 | 20,913 | 5,033 | 3,088 | 29,219 |
| 29,150 | 181 | 20,843 | 5,058 | 3,097 | 29,179 |
| 29,151 | 189 | 21,016 | 5,100 | 3,127 | 29,432 |
| 29,152 | 189 | 20,763 | 5,032 | 3,109 | 29,093 |
| 29,153 | 190 | 20,802 | 5,052 | 3,106 | 29,150 |
| 29,154 | 191 | 21,070 | 5,116 | 3,133 | 29,510 |
| 29,155 | 192 | 21,118 | 5,150 | 3,137 | 29,597 |
| 29,156 | 194 | 20,787 | 5,117 | 3,089 | 29,187 |
| 29,157 | 194 | 20,562 | 5,066 | 3,074 | 28,896 |
| 29,158 | 194 | 20,543 | 5,056 | 3,069 | 28,862 |
| 29,159 | 192 | 20,321 | 5,063 | 3,071 | 28,647 |
| 29,160 | 187 | 20,072 | 5,050 | 3,069 | 28,378 |
| 29,161 | 192 | 20,003 | 5,039 | 3,050 | 28,284 |
| 29,162 | 194 | 20,298 | 5,126 | 3,082 | 28,700 |
| 29,163 | 203 | 20,285 | 5,170 | 3,075 | 28,733 |
| 29,164 | 199 | 20,023 | 5,131 | 3,054 | 28,407 |
| 29,165 | 198 | 20,057 | 5,182 | 3,094 | 28,531 |
| 29,166 | 198 | 20,023 | 5,199 | 3,094 | 28,514 |
| 29,167 | 195 | 20,045 | 5,275 | 3,123 | 28,638 |
| 29,168 | 194 | 19,897 | 5,253 | 3,115 | 28,459 |
| 29,169 | 178 | 20,124 | 5,293 | 3,150 | 28,745 |
| 29,170 | 171 | 20,032 | 5,313 | 3,163 | 28,679 |
| 29,171 | 171 | 19,941 | 5,326 | 3,172 | 28,610 |
| 29,172 | 170 | 19,846 | 5,313 | 3,156 | 28,485 |
| 29,173 | 167 | 19,777 | 5,297 | 3,152 | 28,393 |
| 29,174 | 166 | 19,646 | 5,268 | 3,106 | 28,186 |
| 29,175 | 166 | 19,692 | 5,273 | 3,113 | 28,244 |



|        |     |        |       |       |        |
|--------|-----|--------|-------|-------|--------|
| 29,176 | 164 | 19,540 | 5,246 | 3,117 | 28,067 |
| 29,177 | 164 | 19,697 | 5,296 | 3,123 | 28,280 |
| 29,178 | 160 | 19,464 | 5,238 | 3,096 | 27,958 |
| 29,179 | 161 | 19,331 | 5,213 | 3,105 | 27,810 |
| 29,180 | 156 | 19,363 | 5,240 | 3,126 | 27,885 |
| 29,181 | 151 | 19,371 | 5,261 | 3,135 | 27,918 |
| 29,182 | 155 | 18,971 | 5,183 | 3,057 | 27,366 |
| 29,183 | 159 | 19,155 | 5,235 | 3,087 | 27,636 |
| 29,184 | 155 | 19,213 | 5,270 | 3,120 | 27,758 |
| 29,185 | 152 | 19,008 | 5,228 | 3,089 | 27,477 |
| 29,186 | 152 | 18,999 | 5,246 | 3,080 | 27,477 |
| 29,187 | 148 | 19,139 | 5,256 | 3,089 | 27,632 |
| 29,188 | 151 | 19,120 | 5,244 | 3,066 | 27,581 |
| 29,189 | 151 | 19,028 | 5,235 | 3,052 | 27,466 |
| 29,190 | 150 | 19,104 | 5,284 | 3,077 | 27,615 |
| 29,191 | 141 | 19,560 | 5,393 | 3,152 | 28,246 |
| 29,192 | 133 | 19,231 | 5,334 | 3,114 | 27,812 |
| 29,193 | 133 | 19,597 | 5,402 | 3,165 | 28,297 |
| 29,194 | 121 | 19,499 | 5,397 | 3,162 | 28,179 |
| 29,195 | 117 | 19,803 | 5,506 | 3,220 | 28,646 |
| 29,196 | 113 | 19,950 | 5,522 | 3,238 | 28,823 |
| 29,197 | 111 | 19,978 | 5,553 | 3,251 | 28,893 |
| 29,198 | 103 | 20,058 | 5,582 | 3,277 | 29,020 |
| 29,199 | 104 | 20,170 | 5,578 | 3,293 | 29,145 |
| 29,200 | 105 | 20,535 | 5,640 | 3,334 | 29,614 |
| 29,201 | 97  | 20,456 | 5,639 | 3,335 | 29,527 |
| 29,202 | 99  | 20,588 | 5,721 | 3,394 | 29,802 |
| 29,203 | 105 | 20,526 | 5,720 | 3,380 | 29,731 |
| 29,204 | 107 | 20,485 | 5,699 | 3,367 | 29,658 |
| 29,205 | 110 | 20,436 | 5,729 | 3,388 | 29,663 |
| 29,206 | 107 | 20,298 | 5,709 | 3,416 | 29,530 |
| 29,207 | 104 | 20,172 | 5,663 | 3,414 | 29,353 |

|        |     |        |       |       |        |
|--------|-----|--------|-------|-------|--------|
| 29,208 | 107 | 20,400 | 5,723 | 3,421 | 29,651 |
| 29,209 | 106 | 20,767 | 5,749 | 3,430 | 30,052 |
| 29,210 | 106 | 20,902 | 5,755 | 3,445 | 30,208 |
| 29,211 | 106 | 20,871 | 5,770 | 3,446 | 30,193 |
| 29,212 | 106 | 21,202 | 5,850 | 3,491 | 30,649 |
| 29,213 | 105 | 21,143 | 5,827 | 3,484 | 30,559 |
| 29,214 | 95  | 21,120 | 5,828 | 3,476 | 30,519 |
| 29,215 | 97  | 21,142 | 5,865 | 3,487 | 30,591 |
| 29,216 | 94  | 21,207 | 5,881 | 3,473 | 30,655 |
| 29,217 | 99  | 21,352 | 5,859 | 3,474 | 30,784 |
| 29,218 | 95  | 21,250 | 5,828 | 3,434 | 30,607 |
| 29,219 | 98  | 21,753 | 5,974 | 3,512 | 31,337 |
| 29,220 | 104 | 21,728 | 6,006 | 3,514 | 31,352 |
| 29,221 | 102 | 21,556 | 5,938 | 3,478 | 31,074 |
| 29,222 | 102 | 21,497 | 5,937 | 3,482 | 31,018 |
| 29,223 | 101 | 21,539 | 5,979 | 3,502 | 31,121 |
| 29,224 | 102 | 21,658 | 6,018 | 3,530 | 31,308 |
| 29,225 | 102 | 21,511 | 5,949 | 3,516 | 31,078 |
| 29,226 | 103 | 21,545 | 5,980 | 3,522 | 31,150 |
| 29,227 | 101 | 21,736 | 5,991 | 3,575 | 31,403 |
| 29,228 | 103 | 21,891 | 6,037 | 3,604 | 31,635 |
| 29,229 | 102 | 21,859 | 6,037 | 3,608 | 31,606 |
| 29,230 | 106 | 21,938 | 6,045 | 3,605 | 31,694 |
| 29,231 | 106 | 21,870 | 6,043 | 3,604 | 31,623 |
| 29,232 | 108 | 21,907 | 6,113 | 3,641 | 31,769 |
| 29,233 | 102 | 21,972 | 6,129 | 3,674 | 31,877 |
| 29,234 | 99  | 21,723 | 6,086 | 3,648 | 31,556 |
| 29,235 | 99  | 21,645 | 6,059 | 3,610 | 31,413 |
| 29,236 | 100 | 21,880 | 6,151 | 3,665 | 31,796 |
| 29,237 | 101 | 21,655 | 6,100 | 3,658 | 31,514 |
| 29,238 | 100 | 21,477 | 6,080 | 3,645 | 31,302 |
| 29,239 | 97  | 21,309 | 6,050 | 3,656 | 31,112 |

|        |     |        |       |       |        |
|--------|-----|--------|-------|-------|--------|
| 29,240 | 115 | 21,319 | 6,082 | 3,653 | 31,169 |
| 29,241 | 115 | 21,412 | 6,083 | 3,682 | 31,292 |
| 29,242 | 119 | 21,548 | 6,139 | 3,709 | 31,515 |
| 29,243 | 125 | 21,515 | 6,139 | 3,699 | 31,478 |
| 29,244 | 123 | 21,153 | 6,056 | 3,660 | 30,992 |
| 29,245 | 124 | 20,597 | 5,942 | 3,609 | 30,272 |
| 29,246 | 126 | 20,830 | 6,024 | 3,629 | 30,609 |
| 29,247 | 126 | 20,793 | 6,041 | 3,628 | 30,588 |
| 29,248 | 126 | 20,606 | 6,014 | 3,617 | 30,363 |
| 29,249 | 127 | 20,520 | 6,078 | 3,623 | 30,348 |
| 29,250 | 132 | 20,337 | 6,081 | 3,630 | 30,180 |
| 29,251 | 134 | 20,249 | 6,026 | 3,601 | 30,010 |
| 29,252 | 136 | 20,368 | 6,034 | 3,571 | 30,109 |
| 29,253 | 136 | 20,403 | 6,041 | 3,572 | 30,152 |
| 29,254 | 134 | 20,551 | 6,074 | 3,583 | 30,342 |
| 29,255 | 133 | 20,575 | 6,066 | 3,609 | 30,383 |
| 29,256 | 131 | 20,540 | 6,053 | 3,603 | 30,327 |
| 29,257 | 142 | 20,541 | 6,068 | 3,584 | 30,335 |
| 29,258 | 140 | 20,371 | 6,046 | 3,559 | 30,116 |
| 29,259 | 141 | 20,746 | 6,121 | 3,631 | 30,639 |
| 29,260 | 149 | 20,540 | 6,082 | 3,626 | 30,397 |
| 29,261 | 149 | 20,361 | 6,060 | 3,603 | 30,173 |
| 29,262 | 150 | 21,029 | 6,176 | 3,702 | 31,057 |
| 29,263 | 149 | 20,865 | 6,158 | 3,672 | 30,844 |
| 29,264 | 152 | 20,740 | 6,113 | 3,651 | 30,656 |
| 29,265 | 151 | 20,705 | 6,064 | 3,644 | 30,564 |
| 29,266 | 152 | 20,651 | 6,046 | 3,630 | 30,479 |
| 29,267 | 150 | 20,505 | 5,994 | 3,633 | 30,282 |
| 29,268 | 147 | 20,338 | 5,999 | 3,629 | 30,113 |
| 29,269 | 147 | 20,458 | 6,043 | 3,688 | 30,336 |
| 29,270 | 145 | 20,433 | 6,036 | 3,680 | 30,294 |
| 29,271 | 142 | 20,533 | 6,034 | 3,691 | 30,400 |

|        |     |        |       |       |        |
|--------|-----|--------|-------|-------|--------|
| 29,272 | 146 | 20,626 | 6,039 | 3,707 | 30,518 |
| 29,273 | 143 | 20,362 | 5,970 | 3,647 | 30,122 |
| 29,274 | 146 | 20,505 | 6,014 | 3,664 | 30,329 |
| 29,275 | 147 | 20,651 | 6,042 | 3,663 | 30,503 |
| 29,276 | 145 | 20,715 | 6,057 | 3,652 | 30,569 |
| 29,277 | 152 | 20,705 | 6,063 | 3,639 | 30,559 |
| 29,278 | 153 | 20,621 | 6,056 | 3,620 | 30,450 |
| 29,279 | 154 | 21,131 | 6,187 | 3,709 | 31,181 |
| 29,280 | 157 | 21,490 | 6,277 | 3,735 | 31,659 |
| 29,281 | 154 | 21,499 | 6,262 | 3,720 | 31,635 |
| 29,282 | 151 | 21,424 | 6,253 | 3,714 | 31,542 |
| 29,283 | 156 | 21,757 | 6,324 | 3,734 | 31,971 |
| 29,284 | 156 | 21,792 | 6,319 | 3,723 | 31,990 |
| 29,285 | 153 | 21,373 | 6,191 | 3,646 | 31,363 |
| 29,286 | 153 | 21,709 | 6,244 | 3,685 | 31,791 |
| 29,287 | 155 | 22,002 | 6,299 | 3,711 | 32,167 |
| 29,288 | 152 | 22,052 | 6,285 | 3,713 | 32,202 |
| 29,289 | 147 | 21,905 | 6,224 | 3,667 | 31,943 |
| 29,290 | 146 | 21,666 | 6,168 | 3,616 | 31,596 |
| 29,291 | 154 | 21,972 | 6,256 | 3,658 | 32,040 |
| 29,292 | 161 | 22,207 | 6,343 | 3,692 | 32,403 |
| 29,293 | 158 | 21,816 | 6,252 | 3,629 | 31,855 |
| 29,294 | 156 | 22,113 | 6,309 | 3,642 | 32,220 |
| 29,295 | 157 | 21,946 | 6,250 | 3,621 | 31,974 |
| 29,296 | 155 | 21,972 | 6,243 | 3,624 | 31,994 |
| 29,297 | 156 | 22,095 | 6,227 | 3,612 | 32,090 |
| 29,298 | 154 | 21,884 | 6,163 | 3,577 | 31,778 |
| 29,299 | 164 | 22,104 | 6,231 | 3,620 | 32,119 |
| 29,300 | 161 | 22,009 | 6,127 | 3,574 | 31,871 |
| 29,301 | 161 | 22,036 | 6,126 | 3,569 | 31,892 |
| 29,302 | 159 | 21,917 | 6,111 | 3,572 | 31,759 |
| 29,303 | 155 | 22,118 | 6,169 | 3,615 | 32,057 |

|        |     |        |       |       |        |
|--------|-----|--------|-------|-------|--------|
| 29,304 | 148 | 22,245 | 6,144 | 3,649 | 32,186 |
| 29,305 | 150 | 22,103 | 6,125 | 3,593 | 31,971 |
| 29,306 | 150 | 22,143 | 6,112 | 3,598 | 32,003 |
| 29,307 | 138 | 22,212 | 6,081 | 3,616 | 32,047 |
| 29,308 | 138 | 22,149 | 6,071 | 3,604 | 31,962 |
| 29,309 | 138 | 22,157 | 6,050 | 3,604 | 31,949 |
| 29,310 | 135 | 21,866 | 6,009 | 3,564 | 31,574 |
| 29,311 | 131 | 22,280 | 6,102 | 3,629 | 32,142 |
| 29,312 | 128 | 22,268 | 6,071 | 3,610 | 32,077 |
| 29,313 | 128 | 22,114 | 6,022 | 3,580 | 31,844 |
| 29,314 | 129 | 22,356 | 6,086 | 3,616 | 32,187 |
| 29,315 | 124 | 22,303 | 6,080 | 3,601 | 32,108 |
| 29,316 | 125 | 22,342 | 6,097 | 3,574 | 32,138 |
| 29,317 | 131 | 22,389 | 6,126 | 3,590 | 32,236 |
| 29,318 | 129 | 22,598 | 6,174 | 3,639 | 32,540 |
| 29,319 | 130 | 22,695 | 6,181 | 3,639 | 32,645 |
| 29,320 | 128 | 22,730 | 6,162 | 3,607 | 32,627 |
| 29,321 | 129 | 22,654 | 6,137 | 3,581 | 32,501 |
| 29,322 | 122 | 22,252 | 6,041 | 3,514 | 31,929 |
| 29,323 | 123 | 22,207 | 5,991 | 3,503 | 31,824 |
| 29,324 | 123 | 22,503 | 6,065 | 3,543 | 32,234 |
| 29,325 | 120 | 22,366 | 6,053 | 3,544 | 32,083 |
| 29,326 | 125 | 22,302 | 6,049 | 3,572 | 32,048 |
| 29,327 | 125 | 22,447 | 6,097 | 3,604 | 32,273 |
| 29,328 | 120 | 22,063 | 6,019 | 3,560 | 31,762 |
| 29,329 | 119 | 21,661 | 5,930 | 3,505 | 31,215 |
| 29,330 | 128 | 21,532 | 5,978 | 3,547 | 31,185 |
| 29,331 | 125 | 21,593 | 6,003 | 3,589 | 31,310 |
| 29,332 | 124 | 21,280 | 5,921 | 3,545 | 30,870 |
| 29,333 | 128 | 21,484 | 5,948 | 3,565 | 31,125 |
| 29,334 | 123 | 21,306 | 5,856 | 3,558 | 30,843 |
| 29,335 | 122 | 21,113 | 5,821 | 3,517 | 30,573 |

|        |     |        |       |       |        |
|--------|-----|--------|-------|-------|--------|
| 29,336 | 127 | 21,136 | 5,829 | 3,528 | 30,620 |
| 29,337 | 127 | 21,075 | 5,822 | 3,526 | 30,550 |
| 29,338 | 127 | 21,031 | 5,839 | 3,552 | 30,549 |
| 29,339 | 126 | 20,971 | 5,814 | 3,547 | 30,458 |
| 29,340 | 116 | 21,195 | 5,900 | 3,575 | 30,786 |
| 29,341 | 109 | 21,305 | 5,913 | 3,589 | 30,916 |
| 29,342 | 104 | 21,091 | 5,837 | 3,554 | 30,586 |
| 29,343 | 103 | 21,018 | 5,814 | 3,538 | 30,473 |
| 29,344 | 101 | 21,400 | 5,899 | 3,616 | 31,016 |
| 29,345 | 107 | 21,475 | 5,918 | 3,614 | 31,114 |
| 29,346 | 106 | 21,316 | 5,894 | 3,581 | 30,897 |
| 29,347 | 109 | 21,573 | 5,999 | 3,637 | 31,318 |
| 29,348 | 109 | 21,429 | 5,998 | 3,628 | 31,164 |
| 29,349 | 109 | 21,528 | 5,971 | 3,612 | 31,220 |
| 29,350 | 101 | 21,296 | 5,911 | 3,587 | 30,895 |
| 29,351 | 96  | 21,302 | 5,911 | 3,570 | 30,879 |
| 29,352 | 96  | 21,280 | 5,888 | 3,560 | 30,824 |
| 29,353 | 94  | 21,154 | 5,894 | 3,569 | 30,711 |
| 29,354 | 94  | 21,098 | 5,896 | 3,562 | 30,650 |
| 29,355 | 95  | 21,059 | 5,944 | 3,568 | 30,666 |
| 29,356 | 94  | 20,928 | 5,945 | 3,560 | 30,527 |
| 29,357 | 93  | 20,716 | 5,955 | 3,511 | 30,275 |
| 29,358 | 94  | 20,778 | 5,967 | 3,515 | 30,354 |
| 29,359 | 97  | 20,872 | 6,040 | 3,549 | 30,558 |
| 29,360 | 98  | 20,910 | 6,102 | 3,555 | 30,665 |
| 29,361 | 100 | 20,876 | 6,080 | 3,570 | 30,626 |
| 29,362 | 101 | 20,680 | 6,047 | 3,538 | 30,366 |
| 29,363 | 101 | 20,361 | 5,998 | 3,512 | 29,972 |
| 29,364 | 105 | 20,396 | 6,029 | 3,550 | 30,080 |
| 29,365 | 104 | 20,524 | 6,091 | 3,571 | 30,290 |
| 29,366 | 108 | 20,064 | 5,954 | 3,511 | 29,637 |
| 29,367 | 107 | 20,290 | 5,995 | 3,546 | 29,938 |

|        |     |        |       |       |        |
|--------|-----|--------|-------|-------|--------|
| 29,368 | 101 | 20,232 | 6,006 | 3,546 | 29,885 |
| 29,369 | 109 | 20,416 | 6,070 | 3,565 | 30,160 |
| 29,370 | 111 | 20,473 | 6,075 | 3,575 | 30,234 |
| 29,371 | 117 | 20,724 | 6,120 | 3,611 | 30,572 |
| 29,372 | 119 | 20,703 | 6,137 | 3,654 | 30,613 |
| 29,373 | 119 | 20,586 | 6,135 | 3,652 | 30,492 |
| 29,374 | 118 | 20,483 | 6,118 | 3,618 | 30,337 |
| 29,375 | 120 | 20,676 | 6,130 | 3,655 | 30,581 |
| 29,376 | 121 | 20,872 | 6,156 | 3,682 | 30,831 |
| 29,377 | 117 | 20,903 | 6,169 | 3,665 | 30,854 |
| 29,378 | 115 | 20,724 | 6,133 | 3,651 | 30,623 |
| 29,379 | 105 | 20,796 | 6,136 | 3,629 | 30,666 |
| 29,380 | 109 | 20,828 | 6,121 | 3,628 | 30,686 |
| 29,381 | 111 | 20,504 | 6,072 | 3,566 | 30,253 |
| 29,382 | 112 | 20,540 | 6,071 | 3,564 | 30,287 |
| 29,383 | 109 | 20,522 | 6,065 | 3,557 | 30,253 |
| 29,384 | 112 | 20,479 | 6,088 | 3,566 | 30,245 |
| 29,385 | 129 | 20,315 | 6,091 | 3,549 | 30,084 |
| 29,386 | 136 | 20,535 | 6,133 | 3,568 | 30,372 |
| 29,387 | 134 | 20,212 | 6,061 | 3,517 | 29,924 |
| 29,388 | 140 | 20,447 | 6,108 | 3,548 | 30,243 |
| 29,389 | 146 | 20,528 | 6,110 | 3,544 | 30,328 |
| 29,390 | 146 | 20,310 | 6,061 | 3,511 | 30,028 |
| 29,391 | 151 | 20,650 | 6,168 | 3,582 | 30,551 |
| 29,392 | 154 | 20,698 | 6,166 | 3,575 | 30,593 |
| 29,393 | 154 | 20,567 | 6,113 | 3,529 | 30,363 |
| 29,394 | 164 | 20,603 | 6,099 | 3,533 | 30,399 |
| 29,395 | 164 | 20,528 | 6,101 | 3,535 | 30,328 |
| 29,396 | 166 | 20,676 | 6,227 | 3,610 | 30,679 |
| 29,397 | 171 | 20,579 | 6,273 | 3,613 | 30,636 |
| 29,398 | 170 | 20,612 | 6,255 | 3,620 | 30,657 |
| 29,399 | 167 | 20,475 | 6,201 | 3,609 | 30,452 |

|        |     |        |       |       |        |
|--------|-----|--------|-------|-------|--------|
| 29,400 | 166 | 20,750 | 6,282 | 3,661 | 30,859 |
| 29,401 | 166 | 20,586 | 6,233 | 3,641 | 30,626 |
| 29,402 | 166 | 20,413 | 6,185 | 3,606 | 30,370 |
| 29,403 | 172 | 20,823 | 6,291 | 3,656 | 30,942 |
| 29,404 | 172 | 20,907 | 6,281 | 3,678 | 31,038 |
| 29,405 | 172 | 21,216 | 6,348 | 3,730 | 31,466 |
| 29,406 | 171 | 20,786 | 6,187 | 3,657 | 30,801 |
| 29,407 | 173 | 20,971 | 6,220 | 3,698 | 31,062 |
| 29,408 | 179 | 21,250 | 6,274 | 3,727 | 31,430 |
| 29,409 | 175 | 21,158 | 6,213 | 3,682 | 31,228 |
| 29,410 | 172 | 20,958 | 6,134 | 3,627 | 30,891 |
| 29,411 | 175 | 21,199 | 6,165 | 3,650 | 31,189 |
| 29,412 | 174 | 21,496 | 6,211 | 3,697 | 31,578 |
| 29,413 | 173 | 21,530 | 6,191 | 3,698 | 31,592 |
| 29,414 | 176 | 21,399 | 6,112 | 3,631 | 31,318 |
| 29,415 | 180 | 21,446 | 6,083 | 3,648 | 31,357 |
| 29,416 | 180 | 21,511 | 6,083 | 3,650 | 31,424 |
| 29,417 | 176 | 21,483 | 6,046 | 3,630 | 31,335 |
| 29,418 | 178 | 21,595 | 6,098 | 3,650 | 31,521 |
| 29,419 | 172 | 21,703 | 6,099 | 3,656 | 31,630 |
| 29,420 | 167 | 21,494 | 6,033 | 3,612 | 31,306 |
| 29,421 | 174 | 21,637 | 6,100 | 3,644 | 31,555 |
| 29,422 | 169 | 21,576 | 6,092 | 3,663 | 31,500 |
| 29,423 | 172 | 21,380 | 5,980 | 3,606 | 31,138 |
| 29,424 | 174 | 21,649 | 6,055 | 3,638 | 31,516 |
| 29,425 | 180 | 21,545 | 6,044 | 3,645 | 31,414 |
| 29,426 | 177 | 21,321 | 5,967 | 3,615 | 31,080 |
| 29,427 | 175 | 21,356 | 5,941 | 3,605 | 31,077 |
| 29,428 | 176 | 21,370 | 5,921 | 3,597 | 31,064 |
| 29,429 | 179 | 21,382 | 5,896 | 3,566 | 31,023 |
| 29,430 | 183 | 21,599 | 5,922 | 3,589 | 31,293 |
| 29,431 | 180 | 21,420 | 5,848 | 3,538 | 30,986 |



|        |     |        |       |       |        |
|--------|-----|--------|-------|-------|--------|
| 29,432 | 176 | 21,492 | 5,836 | 3,547 | 31,051 |
| 29,433 | 182 | 21,508 | 5,841 | 3,576 | 31,107 |
| 29,434 | 181 | 21,806 | 5,944 | 3,639 | 31,570 |
| 29,435 | 163 | 21,577 | 5,856 | 3,625 | 31,221 |
| 29,436 | 161 | 21,519 | 5,863 | 3,650 | 31,193 |
| 29,437 | 161 | 21,839 | 5,968 | 3,725 | 31,693 |
| 29,438 | 158 | 21,824 | 5,980 | 3,740 | 31,702 |
| 29,439 | 152 | 21,570 | 5,940 | 3,705 | 31,367 |
| 29,440 | 144 | 21,470 | 5,915 | 3,735 | 31,264 |
| 29,441 | 145 | 21,713 | 5,968 | 3,750 | 31,576 |
| 29,442 | 139 | 21,683 | 5,908 | 3,739 | 31,469 |
| 29,443 | 143 | 21,989 | 5,965 | 3,781 | 31,878 |
| 29,444 | 133 | 21,890 | 5,973 | 3,782 | 31,778 |
| 29,445 | 132 | 21,900 | 5,996 | 3,817 | 31,845 |
| 29,446 | 129 | 22,287 | 6,040 | 3,855 | 32,311 |
| 29,447 | 124 | 22,459 | 6,012 | 3,865 | 32,460 |
| 29,448 | 122 | 22,351 | 5,900 | 3,829 | 32,202 |
| 29,449 | 122 | 22,094 | 5,839 | 3,802 | 31,857 |
| 29,450 | 125 | 22,415 | 5,939 | 3,851 | 32,330 |
| 29,451 | 133 | 22,347 | 5,887 | 3,826 | 32,193 |
| 29,452 | 134 | 22,282 | 5,899 | 3,827 | 32,142 |
| 29,453 | 137 | 22,328 | 5,913 | 3,851 | 32,229 |
| 29,454 | 132 | 22,365 | 5,935 | 3,893 | 32,325 |
| 29,455 | 135 | 22,344 | 5,940 | 3,885 | 32,304 |
| 29,456 | 138 | 22,215 | 5,911 | 3,858 | 32,122 |
| 29,457 | 142 | 21,613 | 5,743 | 3,763 | 31,261 |
| 29,458 | 143 | 21,794 | 5,785 | 3,780 | 31,502 |
| 29,459 | 139 | 21,936 | 5,834 | 3,812 | 31,721 |
| 29,460 | 137 | 21,851 | 5,840 | 3,816 | 31,644 |
| 29,461 | 136 | 22,140 | 5,943 | 3,870 | 32,089 |
| 29,462 | 136 | 22,143 | 5,959 | 3,885 | 32,123 |
| 29,463 | 137 | 21,662 | 5,886 | 3,812 | 31,497 |

|        |     |        |       |       |        |
|--------|-----|--------|-------|-------|--------|
| 29,464 | 137 | 21,810 | 5,906 | 3,842 | 31,695 |
| 29,465 | 133 | 21,851 | 5,902 | 3,853 | 31,739 |
| 29,466 | 138 | 21,656 | 5,863 | 3,821 | 31,478 |
| 29,467 | 137 | 21,444 | 5,850 | 3,786 | 31,217 |
| 29,468 | 147 | 21,782 | 5,980 | 3,870 | 31,779 |
| 29,469 | 152 | 21,819 | 5,960 | 3,875 | 31,806 |
| 29,470 | 157 | 21,974 | 5,989 | 3,880 | 32,000 |
| 29,471 | 154 | 21,824 | 5,938 | 3,855 | 31,771 |
| 29,472 | 151 | 21,947 | 5,996 | 3,879 | 31,973 |
| 29,473 | 160 | 21,643 | 5,913 | 3,816 | 31,532 |
| 29,474 | 153 | 21,405 | 5,884 | 3,782 | 31,224 |
| 29,475 | 155 | 21,471 | 5,888 | 3,797 | 31,311 |
| 29,476 | 152 | 21,191 | 5,810 | 3,732 | 30,885 |
| 29,477 | 152 | 20,799 | 5,774 | 3,676 | 30,401 |
| 29,478 | 152 | 21,234 | 5,916 | 3,754 | 31,056 |
| 29,479 | 152 | 21,182 | 5,910 | 3,746 | 30,990 |
| 29,480 | 149 | 20,966 | 5,867 | 3,734 | 30,716 |
| 29,481 | 144 | 20,970 | 5,874 | 3,748 | 30,736 |
| 29,482 | 145 | 21,351 | 5,986 | 3,830 | 31,312 |
| 29,483 | 140 | 21,362 | 6,034 | 3,830 | 31,366 |
| 29,484 | 139 | 21,357 | 6,038 | 3,859 | 31,393 |
| 29,485 | 138 | 21,313 | 6,052 | 3,874 | 31,377 |
| 29,486 | 136 | 21,144 | 6,006 | 3,821 | 31,107 |
| 29,487 | 138 | 21,286 | 6,110 | 3,873 | 31,407 |
| 29,488 | 134 | 21,056 | 6,064 | 3,844 | 31,098 |
| 29,489 | 137 | 20,889 | 5,998 | 3,805 | 30,829 |
| 29,490 | 137 | 20,937 | 5,981 | 3,782 | 30,837 |
| 29,491 | 152 | 21,155 | 6,073 | 3,828 | 31,208 |
| 29,492 | 153 | 21,008 | 6,022 | 3,764 | 30,947 |
| 29,493 | 159 | 21,039 | 6,040 | 3,765 | 31,003 |
| 29,494 | 156 | 20,783 | 5,988 | 3,737 | 30,664 |
| 29,495 | 162 | 20,732 | 5,944 | 3,725 | 30,563 |

|        |     |        |       |       |        |
|--------|-----|--------|-------|-------|--------|
| 29,496 | 161 | 20,719 | 5,951 | 3,731 | 30,562 |
| 29,497 | 164 | 20,533 | 5,899 | 3,684 | 30,280 |
| 29,498 | 164 | 20,515 | 5,897 | 3,697 | 30,273 |
| 29,499 | 162 | 20,494 | 5,859 | 3,676 | 30,191 |
| 29,500 | 167 | 20,667 | 5,901 | 3,703 | 30,438 |
| 29,501 | 161 | 20,557 | 5,865 | 3,681 | 30,264 |
| 29,502 | 168 | 20,675 | 5,857 | 3,666 | 30,366 |
| 29,503 | 168 | 20,885 | 5,843 | 3,680 | 30,576 |
| 29,504 | 169 | 20,913 | 5,870 | 3,657 | 30,609 |
| 29,505 | 165 | 20,988 | 5,876 | 3,654 | 30,683 |
| 29,506 | 170 | 21,311 | 5,947 | 3,713 | 31,141 |
| 29,507 | 167 | 21,384 | 5,946 | 3,710 | 31,207 |
| 29,508 | 163 | 21,365 | 5,979 | 3,727 | 31,234 |
| 29,509 | 166 | 21,223 | 5,853 | 3,665 | 30,907 |
| 29,510 | 165 | 21,624 | 5,939 | 3,721 | 31,449 |
| 29,511 | 168 | 22,050 | 5,998 | 3,757 | 31,973 |
| 29,512 | 167 | 22,052 | 5,960 | 3,759 | 31,938 |
| 29,513 | 169 | 22,362 | 6,026 | 3,788 | 32,345 |
| 29,514 | 163 | 22,133 | 5,990 | 3,732 | 32,018 |
| 29,515 | 169 | 22,332 | 6,032 | 3,766 | 32,299 |
| 29,516 | 156 | 22,188 | 5,995 | 3,712 | 32,051 |
| 29,517 | 160 | 22,172 | 5,998 | 3,722 | 32,052 |
| 29,518 | 158 | 22,371 | 6,099 | 3,783 | 32,411 |
| 29,519 | 159 | 22,246 | 6,076 | 3,761 | 32,242 |
| 29,520 | 155 | 22,064 | 6,071 | 3,744 | 32,034 |
| 29,521 | 153 | 22,285 | 6,151 | 3,828 | 32,417 |
| 29,522 | 154 | 22,408 | 6,172 | 3,871 | 32,605 |
| 29,523 | 148 | 22,045 | 6,067 | 3,811 | 32,071 |
| 29,524 | 150 | 22,245 | 6,108 | 3,832 | 32,335 |
| 29,525 | 147 | 22,222 | 6,119 | 3,836 | 32,324 |
| 29,526 | 148 | 22,521 | 6,209 | 3,886 | 32,764 |
| 29,527 | 144 | 22,423 | 6,240 | 3,908 | 32,715 |

|        |     |        |       |       |        |
|--------|-----|--------|-------|-------|--------|
| 29,528 | 145 | 22,519 | 6,263 | 3,896 | 32,823 |
| 29,529 | 144 | 22,297 | 6,191 | 3,852 | 32,484 |
| 29,530 | 143 | 22,249 | 6,228 | 3,859 | 32,479 |
| 29,531 | 145 | 22,217 | 6,240 | 3,850 | 32,452 |
| 29,532 | 146 | 22,034 | 6,190 | 3,821 | 32,191 |
| 29,533 | 145 | 22,082 | 6,180 | 3,789 | 32,196 |
| 29,534 | 145 | 22,301 | 6,163 | 3,792 | 32,401 |
| 29,535 | 149 | 22,483 | 6,207 | 3,767 | 32,606 |
| 29,536 | 153 | 22,492 | 6,131 | 3,709 | 32,485 |
| 29,537 | 151 | 22,695 | 6,104 | 3,692 | 32,642 |
| 29,538 | 150 | 21,651 | 5,809 | 3,507 | 31,117 |
| 29,539 | 151 | 21,915 | 5,864 | 3,527 | 31,457 |
| 29,540 | 147 | 22,221 | 5,913 | 3,566 | 31,847 |
| 29,541 | 149 | 22,247 | 5,909 | 3,553 | 31,858 |
| 29,542 | 147 | 22,527 | 5,994 | 3,615 | 32,283 |
| 29,543 | 142 | 22,239 | 5,933 | 3,592 | 31,906 |
| 29,544 | 138 | 21,983 | 5,877 | 3,578 | 31,576 |
| 29,545 | 134 | 21,943 | 5,877 | 3,551 | 31,505 |
| 29,546 | 140 | 21,720 | 5,803 | 3,496 | 31,159 |
| 29,547 | 142 | 21,732 | 5,805 | 3,489 | 31,168 |
| 29,548 | 140 | 21,434 | 5,777 | 3,460 | 30,811 |
| 29,549 | 138 | 21,182 | 5,727 | 3,407 | 30,454 |
| 29,550 | 133 | 21,971 | 5,964 | 3,545 | 31,613 |
| 29,551 | 128 | 21,811 | 5,959 | 3,541 | 31,439 |
| 29,552 | 132 | 21,737 | 5,941 | 3,561 | 31,371 |
| 29,553 | 124 | 21,445 | 5,902 | 3,555 | 31,026 |
| 29,554 | 128 | 21,574 | 5,962 | 3,578 | 31,242 |
| 29,555 | 127 | 21,265 | 5,881 | 3,546 | 30,819 |
| 29,556 | 123 | 21,106 | 5,828 | 3,522 | 30,579 |
| 29,557 | 128 | 21,182 | 5,841 | 3,537 | 30,688 |
| 29,558 | 131 | 20,971 | 5,833 | 3,521 | 30,456 |
| 29,559 | 130 | 20,588 | 5,742 | 3,476 | 29,936 |

|        |     |        |       |       |        |
|--------|-----|--------|-------|-------|--------|
| 29,560 | 129 | 20,554 | 5,785 | 3,507 | 29,975 |
| 29,561 | 131 | 20,439 | 5,787 | 3,491 | 29,848 |
| 29,562 | 130 | 20,187 | 5,803 | 3,506 | 29,626 |
| 29,563 | 128 | 20,003 | 5,767 | 3,481 | 29,379 |
| 29,564 | 128 | 19,869 | 5,722 | 3,456 | 29,175 |
| 29,565 | 124 | 19,876 | 5,740 | 3,447 | 29,187 |
| 29,566 | 123 | 19,801 | 5,716 | 3,441 | 29,081 |
| 29,567 | 123 | 19,786 | 5,731 | 3,448 | 29,088 |
| 29,568 | 118 | 19,801 | 5,659 | 3,415 | 28,993 |
| 29,569 | 120 | 20,035 | 5,694 | 3,441 | 29,290 |
| 29,570 | 119 | 19,936 | 5,692 | 3,418 | 29,165 |
| 29,571 | 117 | 20,053 | 5,682 | 3,393 | 29,245 |
| 29,572 | 117 | 19,667 | 5,573 | 3,332 | 28,689 |
| 29,573 | 117 | 19,925 | 5,636 | 3,361 | 29,039 |
| 29,574 | 114 | 20,108 | 5,683 | 3,386 | 29,291 |
| 29,575 | 115 | 20,078 | 5,710 | 3,399 | 29,302 |
| 29,576 | 114 | 20,197 | 5,713 | 3,408 | 29,432 |
| 29,577 | 116 | 20,214 | 5,698 | 3,395 | 29,423 |
| 29,578 | 118 | 20,409 | 5,672 | 3,386 | 29,585 |
| 29,579 | 117 | 20,297 | 5,620 | 3,388 | 29,422 |
| 29,580 | 119 | 20,317 | 5,584 | 3,377 | 29,397 |
| 29,581 | 119 | 20,358 | 5,599 | 3,385 | 29,461 |
| 29,582 | 120 | 20,657 | 5,639 | 3,442 | 29,858 |
| 29,583 | 118 | 20,381 | 5,573 | 3,406 | 29,478 |
| 29,584 | 118 | 20,245 | 5,575 | 3,404 | 29,342 |
| 29,585 | 123 | 20,325 | 5,622 | 3,427 | 29,497 |
| 29,586 | 120 | 20,137 | 5,567 | 3,416 | 29,240 |
| 29,587 | 117 | 19,807 | 5,514 | 3,373 | 28,811 |
| 29,588 | 117 | 19,567 | 5,449 | 3,330 | 28,463 |
| 29,589 | 109 | 19,876 | 5,510 | 3,389 | 28,884 |
| 29,590 | 108 | 19,629 | 5,449 | 3,359 | 28,545 |
| 29,591 | 104 | 19,821 | 5,515 | 3,408 | 28,848 |

|        |     |        |       |       |        |
|--------|-----|--------|-------|-------|--------|
| 29,592 | 101 | 19,794 | 5,483 | 3,388 | 28,766 |
| 29,593 | 106 | 20,114 | 5,554 | 3,432 | 29,206 |
| 29,594 | 109 | 20,131 | 5,565 | 3,426 | 29,231 |
| 29,595 | 111 | 19,908 | 5,517 | 3,384 | 28,920 |
| 29,596 | 109 | 19,626 | 5,446 | 3,353 | 28,534 |
| 29,597 | 104 | 20,175 | 5,606 | 3,465 | 29,350 |
| 29,598 | 107 | 20,329 | 5,682 | 3,505 | 29,623 |
| 29,599 | 104 | 20,580 | 5,726 | 3,553 | 29,963 |
| 29,600 | 108 | 20,572 | 5,681 | 3,577 | 29,938 |
| 29,601 | 111 | 20,878 | 5,798 | 3,624 | 30,411 |
| 29,602 | 109 | 20,851 | 5,811 | 3,611 | 30,382 |
| 29,603 | 106 | 20,775 | 5,897 | 3,630 | 30,408 |
| 29,604 | 108 | 21,200 | 6,020 | 3,684 | 31,012 |
| 29,605 | 100 | 20,877 | 5,948 | 3,657 | 30,582 |
| 29,606 | 103 | 20,818 | 5,922 | 3,641 | 30,484 |
| 29,607 | 103 | 21,073 | 5,971 | 3,691 | 30,838 |
| 29,608 | 98  | 21,011 | 5,978 | 3,679 | 30,766 |
| 29,609 | 96  | 20,992 | 5,954 | 3,669 | 30,711 |
| 29,610 | 98  | 20,996 | 5,943 | 3,645 | 30,682 |
| 29,611 | 104 | 21,213 | 5,977 | 3,667 | 30,961 |
| 29,612 | 106 | 21,379 | 6,012 | 3,716 | 31,213 |
| 29,613 | 101 | 21,205 | 5,937 | 3,662 | 30,905 |
| 29,614 | 99  | 20,878 | 5,878 | 3,620 | 30,475 |
| 29,615 | 100 | 20,666 | 5,813 | 3,600 | 30,179 |
| 29,616 | 104 | 21,437 | 5,982 | 3,735 | 31,258 |
| 29,617 | 105 | 21,245 | 5,932 | 3,700 | 30,982 |
| 29,618 | 110 | 21,365 | 5,966 | 3,737 | 31,178 |
| 29,619 | 113 | 21,537 | 6,054 | 3,760 | 31,464 |
| 29,620 | 115 | 21,739 | 6,121 | 3,773 | 31,748 |
| 29,621 | 111 | 21,439 | 6,024 | 3,730 | 31,304 |
| 29,622 | 114 | 21,705 | 6,089 | 3,752 | 31,660 |
| 29,623 | 123 | 21,607 | 6,072 | 3,738 | 31,540 |

|        |     |        |       |       |        |
|--------|-----|--------|-------|-------|--------|
| 29,624 | 123 | 21,492 | 5,998 | 3,706 | 31,319 |
| 29,625 | 122 | 21,642 | 6,043 | 3,744 | 31,551 |
| 29,626 | 120 | 21,569 | 6,047 | 3,735 | 31,471 |
| 29,627 | 121 | 21,320 | 5,998 | 3,708 | 31,147 |
| 29,628 | 120 | 21,443 | 6,047 | 3,753 | 31,363 |
| 29,629 | 118 | 21,135 | 5,991 | 3,726 | 30,970 |
| 29,630 | 118 | 20,903 | 5,951 | 3,698 | 30,670 |
| 29,631 | 116 | 21,425 | 6,118 | 3,771 | 31,430 |
| 29,632 | 117 | 21,645 | 6,141 | 3,787 | 31,690 |
| 29,633 | 115 | 21,697 | 6,145 | 3,774 | 31,731 |
| 29,634 | 118 | 21,760 | 6,118 | 3,779 | 31,775 |
| 29,635 | 116 | 21,748 | 6,107 | 3,772 | 31,743 |
| 29,636 | 113 | 21,481 | 6,027 | 3,716 | 31,337 |
| 29,637 | 112 | 21,745 | 6,077 | 3,747 | 31,681 |
| 29,638 | 116 | 21,514 | 6,022 | 3,713 | 31,365 |
| 29,639 | 115 | 21,240 | 5,982 | 3,685 | 31,022 |
| 29,640 | 118 | 21,483 | 6,109 | 3,749 | 31,459 |
| 29,641 | 119 | 21,522 | 6,102 | 3,752 | 31,495 |
| 29,642 | 121 | 21,645 | 6,158 | 3,793 | 31,717 |
| 29,643 | 125 | 21,562 | 6,182 | 3,789 | 31,658 |
| 29,644 | 122 | 21,469 | 6,232 | 3,810 | 31,633 |
| 29,645 | 120 | 21,516 | 6,287 | 3,846 | 31,769 |
| 29,646 | 117 | 21,542 | 6,268 | 3,856 | 31,783 |
| 29,647 | 119 | 21,859 | 6,354 | 3,890 | 32,222 |
| 29,648 | 121 | 21,920 | 6,401 | 3,865 | 32,307 |
| 29,649 | 116 | 21,969 | 6,375 | 3,872 | 32,332 |
| 29,650 | 116 | 21,842 | 6,369 | 3,866 | 32,193 |
| 29,651 | 114 | 21,722 | 6,349 | 3,820 | 32,005 |
| 29,652 | 118 | 21,874 | 6,352 | 3,830 | 32,174 |
| 29,653 | 118 | 21,993 | 6,295 | 3,801 | 32,207 |
| 29,654 | 114 | 22,009 | 6,289 | 3,785 | 32,197 |
| 29,655 | 121 | 21,906 | 6,270 | 3,796 | 32,093 |

|        |     |        |       |       |        |
|--------|-----|--------|-------|-------|--------|
| 29,656 | 123 | 22,017 | 6,270 | 3,785 | 32,195 |
| 29,657 | 126 | 22,051 | 6,326 | 3,782 | 32,285 |
| 29,658 | 126 | 21,982 | 6,314 | 3,764 | 32,186 |
| 29,659 | 127 | 21,990 | 6,319 | 3,779 | 32,215 |
| 29,660 | 130 | 22,239 | 6,400 | 3,835 | 32,604 |
| 29,661 | 129 | 22,258 | 6,415 | 3,848 | 32,650 |
| 29,662 | 129 | 22,281 | 6,395 | 3,839 | 32,644 |
| 29,663 | 129 | 22,360 | 6,414 | 3,833 | 32,736 |
| 29,664 | 129 | 22,534 | 6,458 | 3,833 | 32,954 |
| 29,665 | 132 | 22,595 | 6,467 | 3,835 | 33,029 |
| 29,666 | 137 | 22,541 | 6,458 | 3,832 | 32,968 |
| 29,667 | 137 | 22,534 | 6,482 | 3,830 | 32,983 |
| 29,668 | 131 | 22,472 | 6,509 | 3,845 | 32,957 |
| 29,669 | 147 | 22,628 | 6,539 | 3,838 | 33,152 |
| 29,670 | 146 | 22,628 | 6,538 | 3,851 | 33,163 |
| 29,671 | 154 | 22,854 | 6,563 | 3,883 | 33,454 |
| 29,672 | 161 | 22,706 | 6,543 | 3,872 | 33,282 |
| 29,673 | 161 | 22,574 | 6,508 | 3,851 | 33,094 |
| 29,674 | 151 | 23,086 | 6,649 | 3,966 | 33,852 |
| 29,675 | 149 | 22,818 | 6,607 | 3,929 | 33,503 |
| 29,676 | 155 | 23,036 | 6,598 | 3,926 | 33,715 |
| 29,677 | 157 | 23,077 | 6,579 | 3,918 | 33,731 |
| 29,678 | 161 | 23,327 | 6,650 | 3,942 | 34,080 |
| 29,679 | 168 | 23,409 | 6,675 | 3,952 | 34,204 |
| 29,680 | 167 | 23,335 | 6,629 | 3,914 | 34,045 |
| 29,681 | 172 | 23,525 | 6,638 | 3,928 | 34,263 |
| 29,682 | 172 | 23,452 | 6,646 | 3,918 | 34,188 |
| 29,683 | 173 | 23,421 | 6,705 | 3,950 | 34,249 |
| 29,684 | 173 | 23,389 | 6,703 | 3,940 | 34,205 |
| 29,685 | 168 | 23,332 | 6,737 | 3,929 | 34,166 |
| 29,686 | 170 | 23,624 | 6,817 | 3,970 | 34,581 |
| 29,687 | 173 | 23,692 | 6,855 | 4,000 | 34,720 |



|        |     |        |       |       |        |
|--------|-----|--------|-------|-------|--------|
| 29,688 | 168 | 23,516 | 6,797 | 3,957 | 34,438 |
| 29,689 | 168 | 23,689 | 6,829 | 3,995 | 34,681 |
| 29,690 | 168 | 23,907 | 6,914 | 4,035 | 35,024 |
| 29,691 | 169 | 23,736 | 6,848 | 3,970 | 34,723 |
| 29,692 | 170 | 23,940 | 6,849 | 3,994 | 34,953 |
| 29,693 | 167 | 24,214 | 6,928 | 4,018 | 35,327 |
| 29,694 | 162 | 24,249 | 6,940 | 4,027 | 35,378 |
| 29,695 | 163 | 24,186 | 6,834 | 3,954 | 35,137 |
| 29,696 | 164 | 24,328 | 6,873 | 3,986 | 35,351 |
| 29,697 | 163 | 24,028 | 6,854 | 3,980 | 35,025 |
| 29,698 | 162 | 23,881 | 6,845 | 3,983 | 34,871 |
| 29,699 | 162 | 23,295 | 6,703 | 3,911 | 34,071 |
| 29,700 | 165 | 23,103 | 6,626 | 3,832 | 33,726 |
| 29,701 | 166 | 22,842 | 6,525 | 3,817 | 33,350 |
| 29,702 | 160 | 22,686 | 6,465 | 3,797 | 33,108 |
| 29,703 | 161 | 22,480 | 6,375 | 3,773 | 32,789 |
| 29,704 | 165 | 22,348 | 6,324 | 3,765 | 32,602 |
| 29,705 | 157 | 22,187 | 6,282 | 3,743 | 32,369 |
| 29,706 | 164 | 22,229 | 6,299 | 3,738 | 32,430 |
| 29,707 | 158 | 22,031 | 6,220 | 3,703 | 32,112 |
| 29,708 | 156 | 22,187 | 6,278 | 3,723 | 32,344 |
| 29,709 | 158 | 22,278 | 6,277 | 3,707 | 32,420 |
| 29,710 | 157 | 22,378 | 6,271 | 3,696 | 32,502 |
| 29,711 | 153 | 22,039 | 6,203 | 3,661 | 32,056 |
| 29,712 | 148 | 21,827 | 6,154 | 3,615 | 31,744 |
| 29,713 | 150 | 21,746 | 6,123 | 3,624 | 31,643 |
| 29,714 | 150 | 21,584 | 6,110 | 3,614 | 31,458 |
| 29,715 | 150 | 21,574 | 6,126 | 3,638 | 31,488 |
| 29,716 | 148 | 21,589 | 6,149 | 3,651 | 31,537 |
| 29,717 | 146 | 21,504 | 6,088 | 3,620 | 31,358 |
| 29,718 | 145 | 21,605 | 6,091 | 3,619 | 31,460 |
| 29,719 | 141 | 21,733 | 6,124 | 3,630 | 31,628 |

|        |     |        |       |       |        |
|--------|-----|--------|-------|-------|--------|
| 29,720 | 130 | 21,571 | 6,085 | 3,604 | 31,390 |
| 29,721 | 138 | 21,671 | 6,113 | 3,611 | 31,533 |
| 29,722 | 130 | 21,674 | 6,105 | 3,619 | 31,528 |
| 29,723 | 124 | 21,366 | 5,952 | 3,561 | 31,003 |
| 29,724 | 124 | 21,242 | 5,911 | 3,545 | 30,822 |
| 29,725 | 128 | 21,162 | 5,885 | 3,524 | 30,699 |
| 29,726 | 129 | 21,223 | 5,900 | 3,507 | 30,759 |
| 29,727 | 121 | 20,968 | 5,918 | 3,512 | 30,519 |
| 29,728 | 124 | 21,042 | 5,942 | 3,503 | 30,611 |
| 29,729 | 113 | 20,706 | 5,849 | 3,471 | 30,139 |
| 29,730 | 113 | 20,688 | 5,836 | 3,463 | 30,100 |
| 29,731 | 109 | 20,695 | 5,848 | 3,454 | 30,106 |
| 29,732 | 108 | 20,504 | 5,809 | 3,430 | 29,851 |
| 29,733 | 112 | 20,710 | 5,831 | 3,442 | 30,095 |
| 29,734 | 111 | 20,563 | 5,762 | 3,409 | 29,845 |
| 29,735 | 111 | 20,529 | 5,770 | 3,412 | 29,822 |
| 29,736 | 116 | 20,578 | 5,782 | 3,409 | 29,885 |
| 29,737 | 118 | 20,783 | 5,807 | 3,441 | 30,149 |
| 29,738 | 115 | 20,555 | 5,756 | 3,413 | 29,839 |
| 29,739 | 117 | 20,415 | 5,717 | 3,401 | 29,650 |
| 29,740 | 117 | 20,538 | 5,746 | 3,404 | 29,805 |
| 29,741 | 118 | 20,551 | 5,702 | 3,370 | 29,741 |
| 29,742 | 118 | 20,363 | 5,668 | 3,356 | 29,505 |
| 29,743 | 116 | 20,249 | 5,662 | 3,332 | 29,359 |
| 29,744 | 117 | 20,157 | 5,662 | 3,354 | 29,290 |
| 29,745 | 116 | 20,134 | 5,628 | 3,356 | 29,234 |
| 29,746 | 114 | 20,086 | 5,625 | 3,360 | 29,185 |
| 29,747 | 112 | 19,997 | 5,541 | 3,313 | 28,963 |
| 29,748 | 112 | 20,278 | 5,588 | 3,332 | 29,310 |
| 29,749 | 113 | 20,311 | 5,564 | 3,321 | 29,309 |
| 29,750 | 111 | 20,125 | 5,508 | 3,296 | 29,040 |
| 29,751 | 119 | 20,243 | 5,576 | 3,337 | 29,275 |

|        |     |        |       |       |        |
|--------|-----|--------|-------|-------|--------|
| 29,752 | 124 | 20,389 | 5,579 | 3,311 | 29,403 |
| 29,753 | 123 | 20,449 | 5,587 | 3,290 | 29,449 |
| 29,754 | 124 | 20,609 | 5,640 | 3,309 | 29,682 |
| 29,755 | 127 | 20,369 | 5,600 | 3,272 | 29,368 |
| 29,756 | 129 | 20,392 | 5,613 | 3,273 | 29,407 |
| 29,757 | 122 | 20,190 | 5,564 | 3,248 | 29,124 |
| 29,758 | 123 | 20,288 | 5,622 | 3,309 | 29,342 |
| 29,759 | 124 | 20,184 | 5,631 | 3,313 | 29,252 |
| 29,760 | 122 | 20,063 | 5,613 | 3,313 | 29,111 |
| 29,761 | 116 | 19,719 | 5,543 | 3,266 | 28,644 |
| 29,762 | 117 | 19,739 | 5,535 | 3,263 | 28,654 |
| 29,763 | 121 | 19,745 | 5,495 | 3,241 | 28,602 |
| 29,764 | 125 | 19,950 | 5,529 | 3,243 | 28,847 |
| 29,765 | 127 | 20,258 | 5,599 | 3,273 | 29,257 |
| 29,766 | 124 | 20,031 | 5,550 | 3,217 | 28,922 |
| 29,767 | 122 | 19,770 | 5,478 | 3,177 | 28,547 |
| 29,768 | 125 | 19,942 | 5,544 | 3,215 | 28,826 |
| 29,769 | 128 | 19,882 | 5,508 | 3,202 | 28,720 |
| 29,770 | 129 | 19,946 | 5,522 | 3,208 | 28,805 |
| 29,771 | 123 | 20,071 | 5,571 | 3,243 | 29,008 |
| 29,772 | 117 | 19,512 | 5,440 | 3,165 | 28,234 |
| 29,773 | 119 | 19,648 | 5,490 | 3,176 | 28,433 |
| 29,774 | 117 | 19,828 | 5,562 | 3,226 | 28,733 |
| 29,775 | 122 | 19,792 | 5,594 | 3,247 | 28,755 |
| 29,776 | 121 | 19,811 | 5,626 | 3,237 | 28,795 |
| 29,777 | 122 | 19,749 | 5,623 | 3,247 | 28,741 |
| 29,778 | 123 | 19,729 | 5,621 | 3,232 | 28,705 |
| 29,779 | 119 | 19,545 | 5,577 | 3,214 | 28,455 |
| 29,780 | 120 | 19,498 | 5,573 | 3,214 | 28,405 |
| 29,781 | 120 | 19,515 | 5,590 | 3,223 | 28,448 |
| 29,782 | 121 | 19,822 | 5,689 | 3,274 | 28,906 |
| 29,783 | 123 | 19,737 | 5,665 | 3,270 | 28,795 |

|        |     |        |       |       |        |
|--------|-----|--------|-------|-------|--------|
| 29,784 | 122 | 19,638 | 5,660 | 3,261 | 28,681 |
| 29,785 | 122 | 19,651 | 5,679 | 3,263 | 28,715 |
| 29,786 | 116 | 19,818 | 5,679 | 3,305 | 28,918 |
| 29,787 | 117 | 20,039 | 5,746 | 3,352 | 29,254 |
| 29,788 | 115 | 20,127 | 5,813 | 3,380 | 29,435 |
| 29,789 | 111 | 19,971 | 5,771 | 3,339 | 29,192 |
| 29,790 | 111 | 20,027 | 5,774 | 3,341 | 29,253 |
| 29,791 | 112 | 19,776 | 5,729 | 3,314 | 28,931 |
| 29,792 | 109 | 20,183 | 5,867 | 3,404 | 29,563 |
| 29,793 | 109 | 20,163 | 5,873 | 3,393 | 29,538 |
| 29,794 | 118 | 20,239 | 5,875 | 3,365 | 29,597 |
| 29,795 | 117 | 20,350 | 5,877 | 3,372 | 29,716 |
| 29,796 | 125 | 20,621 | 5,932 | 3,405 | 30,083 |
| 29,797 | 128 | 20,636 | 5,906 | 3,406 | 30,076 |
| 29,798 | 128 | 20,502 | 5,834 | 3,384 | 29,848 |
| 29,799 | 130 | 20,532 | 5,853 | 3,390 | 29,905 |
| 29,800 | 130 | 20,311 | 5,766 | 3,329 | 29,536 |
| 29,801 | 130 | 20,446 | 5,787 | 3,331 | 29,694 |
| 29,802 | 124 | 20,629 | 5,830 | 3,364 | 29,947 |
| 29,803 | 120 | 20,653 | 5,862 | 3,379 | 30,014 |
| 29,804 | 120 | 20,219 | 5,781 | 3,305 | 29,425 |
| 29,805 | 126 | 20,592 | 5,832 | 3,351 | 29,901 |
| 29,806 | 123 | 21,101 | 5,916 | 3,401 | 30,541 |
| 29,807 | 125 | 21,285 | 5,902 | 3,408 | 30,720 |
| 29,808 | 128 | 21,477 | 5,950 | 3,390 | 30,945 |
| 29,809 | 130 | 21,880 | 6,024 | 3,450 | 31,484 |
| 29,810 | 133 | 21,763 | 5,974 | 3,403 | 31,273 |
| 29,811 | 131 | 21,796 | 5,941 | 3,384 | 31,252 |
| 29,812 | 132 | 21,825 | 5,949 | 3,385 | 31,291 |
| 29,813 | 132 | 21,854 | 5,963 | 3,399 | 31,348 |
| 29,814 | 125 | 22,080 | 6,071 | 3,466 | 31,742 |
| 29,815 | 122 | 21,889 | 6,031 | 3,442 | 31,484 |

|        |     |        |       |       |        |
|--------|-----|--------|-------|-------|--------|
| 29,816 | 122 | 21,657 | 5,987 | 3,422 | 31,188 |
| 29,817 | 118 | 21,880 | 6,117 | 3,496 | 31,611 |
| 29,818 | 117 | 21,575 | 6,042 | 3,439 | 31,173 |
| 29,819 | 116 | 21,614 | 6,059 | 3,470 | 31,259 |
| 29,820 | 115 | 21,320 | 6,042 | 3,428 | 30,905 |
| 29,821 | 116 | 21,146 | 5,981 | 3,424 | 30,667 |
| 29,822 | 120 | 21,961 | 6,242 | 3,564 | 31,887 |
| 29,823 | 118 | 21,650 | 6,176 | 3,534 | 31,478 |
| 29,824 | 118 | 21,636 | 6,215 | 3,550 | 31,519 |
| 29,825 | 116 | 21,857 | 6,245 | 3,574 | 31,792 |
| 29,826 | 112 | 21,927 | 6,262 | 3,546 | 31,847 |
| 29,827 | 110 | 21,813 | 6,240 | 3,530 | 31,693 |
| 29,828 | 108 | 21,777 | 6,172 | 3,510 | 31,567 |
| 29,829 | 108 | 21,741 | 6,153 | 3,511 | 31,513 |
| 29,830 | 111 | 21,885 | 6,233 | 3,524 | 31,753 |
| 29,831 | 114 | 21,847 | 6,230 | 3,522 | 31,713 |
| 29,832 | 113 | 21,843 | 6,211 | 3,523 | 31,690 |
| 29,833 | 116 | 21,590 | 6,166 | 3,508 | 31,380 |
| 29,834 | 115 | 21,411 | 6,132 | 3,480 | 31,138 |
| 29,835 | 118 | 21,640 | 6,204 | 3,535 | 31,497 |
| 29,836 | 129 | 21,624 | 6,166 | 3,525 | 31,444 |
| 29,837 | 135 | 21,420 | 6,154 | 3,499 | 31,208 |
| 29,838 | 133 | 21,258 | 6,106 | 3,469 | 30,966 |
| 29,839 | 141 | 21,520 | 6,182 | 3,539 | 31,382 |
| 29,840 | 140 | 21,279 | 6,091 | 3,515 | 31,025 |
| 29,841 | 140 | 21,349 | 6,108 | 3,514 | 31,111 |
| 29,842 | 139 | 21,394 | 6,112 | 3,522 | 31,167 |
| 29,843 | 142 | 21,294 | 6,072 | 3,514 | 31,022 |
| 29,844 | 141 | 21,213 | 6,058 | 3,526 | 30,938 |
| 29,845 | 136 | 21,363 | 6,085 | 3,571 | 31,155 |
| 29,846 | 137 | 21,406 | 6,106 | 3,590 | 31,239 |
| 29,847 | 144 | 21,486 | 6,141 | 3,579 | 31,350 |

|        |     |        |       |       |        |
|--------|-----|--------|-------|-------|--------|
| 29,848 | 143 | 21,249 | 6,110 | 3,539 | 31,041 |
| 29,849 | 152 | 21,263 | 6,135 | 3,524 | 31,074 |
| 29,850 | 153 | 21,275 | 6,128 | 3,501 | 31,057 |
| 29,851 | 152 | 21,193 | 6,153 | 3,492 | 30,990 |
| 29,852 | 154 | 21,118 | 6,147 | 3,494 | 30,913 |
| 29,853 | 151 | 20,958 | 6,152 | 3,484 | 30,745 |
| 29,854 | 153 | 20,616 | 6,065 | 3,454 | 30,288 |
| 29,855 | 149 | 20,337 | 5,975 | 3,435 | 29,896 |
| 29,856 | 153 | 20,587 | 6,131 | 3,514 | 30,385 |
| 29,857 | 151 | 20,160 | 6,060 | 3,482 | 29,853 |
| 29,858 | 149 | 19,757 | 6,013 | 3,451 | 29,370 |
| 29,859 | 148 | 20,310 | 6,136 | 3,540 | 30,134 |
| 29,860 | 149 | 20,202 | 6,130 | 3,523 | 30,004 |
| 29,861 | 144 | 20,179 | 6,127 | 3,538 | 29,988 |
| 29,862 | 144 | 20,283 | 6,163 | 3,572 | 30,162 |
| 29,863 | 143 | 20,369 | 6,179 | 3,576 | 30,267 |
| 29,864 | 141 | 20,336 | 6,172 | 3,566 | 30,215 |
| 29,865 | 145 | 20,365 | 6,150 | 3,564 | 30,224 |
| 29,866 | 142 | 20,323 | 6,068 | 3,533 | 30,066 |
| 29,867 | 142 | 20,349 | 6,064 | 3,537 | 30,092 |
| 29,868 | 141 | 20,375 | 6,062 | 3,560 | 30,138 |
| 29,869 | 142 | 20,343 | 6,035 | 3,535 | 30,055 |
| 29,870 | 142 | 20,334 | 6,002 | 3,505 | 29,983 |
| 29,871 | 139 | 20,346 | 5,931 | 3,491 | 29,907 |
| 29,872 | 140 | 20,253 | 5,877 | 3,479 | 29,749 |
| 29,873 | 139 | 20,179 | 5,848 | 3,467 | 29,633 |
| 29,874 | 140 | 20,058 | 5,755 | 3,424 | 29,377 |
| 29,875 | 140 | 20,160 | 5,771 | 3,428 | 29,499 |
| 29,876 | 145 | 20,122 | 5,832 | 3,429 | 29,528 |
| 29,877 | 143 | 19,916 | 5,725 | 3,411 | 29,195 |
| 29,878 | 143 | 19,764 | 5,677 | 3,385 | 28,969 |
| 29,879 | 145 | 19,784 | 5,669 | 3,386 | 28,984 |

|        |     |        |       |       |        |
|--------|-----|--------|-------|-------|--------|
| 29,880 | 148 | 19,820 | 5,652 | 3,382 | 29,002 |
| 29,881 | 144 | 19,689 | 5,591 | 3,369 | 28,793 |
| 29,882 | 144 | 19,840 | 5,634 | 3,395 | 29,013 |
| 29,883 | 146 | 19,749 | 5,598 | 3,397 | 28,890 |
| 29,884 | 149 | 19,687 | 5,569 | 3,377 | 28,782 |
| 29,885 | 149 | 19,658 | 5,579 | 3,373 | 28,759 |
| 29,886 | 142 | 19,833 | 5,616 | 3,417 | 29,008 |
| 29,887 | 125 | 19,607 | 5,538 | 3,348 | 28,618 |
| 29,888 | 128 | 19,865 | 5,600 | 3,382 | 28,975 |
| 29,889 | 130 | 19,843 | 5,573 | 3,365 | 28,911 |
| 29,890 | 126 | 19,629 | 5,528 | 3,345 | 28,628 |
| 29,891 | 126 | 19,565 | 5,551 | 3,345 | 28,587 |
| 29,892 | 128 | 19,502 | 5,601 | 3,349 | 28,580 |
| 29,893 | 130 | 19,858 | 5,679 | 3,416 | 29,083 |
| 29,894 | 135 | 19,799 | 5,672 | 3,380 | 28,986 |
| 29,895 | 136 | 19,770 | 5,700 | 3,396 | 29,002 |
| 29,896 | 132 | 19,686 | 5,729 | 3,392 | 28,939 |
| 29,897 | 133 | 19,518 | 5,714 | 3,382 | 28,747 |
| 29,898 | 126 | 19,662 | 5,791 | 3,456 | 29,035 |
| 29,899 | 125 | 19,441 | 5,751 | 3,443 | 28,760 |
| 29,900 | 119 | 19,379 | 5,709 | 3,443 | 28,650 |
| 29,901 | 121 | 19,358 | 5,721 | 3,466 | 28,666 |
| 29,902 | 118 | 19,261 | 5,682 | 3,477 | 28,538 |
| 29,903 | 128 | 19,920 | 5,801 | 3,585 | 29,434 |
| 29,904 | 132 | 19,696 | 5,748 | 3,534 | 29,110 |
| 29,905 | 134 | 19,913 | 5,793 | 3,557 | 29,397 |
| 29,906 | 128 | 20,084 | 5,862 | 3,600 | 29,674 |
| 29,907 | 133 | 20,157 | 5,878 | 3,626 | 29,794 |
| 29,908 | 132 | 20,240 | 5,889 | 3,629 | 29,890 |
| 29,909 | 139 | 20,348 | 5,908 | 3,631 | 30,026 |
| 29,910 | 139 | 20,247 | 5,944 | 3,636 | 29,966 |
| 29,911 | 142 | 20,155 | 5,934 | 3,640 | 29,871 |

|        |     |        |       |       |        |
|--------|-----|--------|-------|-------|--------|
| 29,912 | 143 | 19,767 | 5,862 | 3,594 | 29,366 |
| 29,913 | 145 | 19,926 | 5,918 | 3,623 | 29,612 |
| 29,914 | 148 | 19,640 | 5,865 | 3,595 | 29,248 |
| 29,915 | 149 | 19,428 | 5,795 | 3,565 | 28,937 |
| 29,916 | 148 | 19,619 | 5,873 | 3,601 | 29,241 |
| 29,917 | 155 | 19,374 | 5,805 | 3,555 | 28,889 |
| 29,918 | 155 | 19,318 | 5,779 | 3,534 | 28,786 |
| 29,919 | 162 | 19,999 | 5,936 | 3,643 | 29,740 |
| 29,920 | 161 | 20,091 | 5,986 | 3,670 | 29,908 |
| 29,921 | 164 | 19,879 | 5,980 | 3,650 | 29,673 |
| 29,922 | 159 | 19,816 | 5,981 | 3,627 | 29,583 |
| 29,923 | 159 | 20,079 | 6,039 | 3,663 | 29,940 |
| 29,924 | 161 | 20,019 | 6,020 | 3,666 | 29,866 |
| 29,925 | 160 | 20,014 | 6,009 | 3,656 | 29,839 |
| 29,926 | 161 | 19,920 | 5,952 | 3,645 | 29,678 |
| 29,927 | 163 | 20,055 | 6,007 | 3,682 | 29,907 |
| 29,928 | 163 | 20,065 | 6,020 | 3,679 | 29,927 |
| 29,929 | 165 | 20,021 | 6,032 | 3,681 | 29,899 |
| 29,930 | 163 | 19,983 | 6,005 | 3,660 | 29,811 |
| 29,931 | 167 | 20,243 | 6,070 | 3,688 | 30,168 |
| 29,932 | 167 | 20,422 | 6,130 | 3,736 | 30,455 |
| 29,933 | 165 | 20,088 | 6,072 | 3,682 | 30,007 |
| 29,934 | 168 | 20,213 | 6,084 | 3,694 | 30,159 |
| 29,935 | 163 | 20,419 | 6,123 | 3,718 | 30,423 |
| 29,936 | 171 | 20,508 | 6,122 | 3,711 | 30,512 |
| 29,937 | 171 | 20,357 | 6,118 | 3,687 | 30,333 |
| 29,938 | 171 | 20,104 | 6,068 | 3,653 | 29,996 |
| 29,939 | 169 | 20,288 | 6,077 | 3,645 | 30,179 |
| 29,940 | 164 | 20,227 | 6,057 | 3,665 | 30,113 |
| 29,941 | 162 | 19,942 | 5,914 | 3,555 | 29,573 |
| 29,942 | 166 | 20,206 | 5,956 | 3,576 | 29,904 |
| 29,943 | 165 | 20,487 | 6,031 | 3,610 | 30,293 |



|        |     |        |       |       |        |
|--------|-----|--------|-------|-------|--------|
| 29,944 | 172 | 20,523 | 6,029 | 3,584 | 30,308 |
| 29,945 | 164 | 20,437 | 5,962 | 3,550 | 30,113 |
| 29,946 | 165 | 20,472 | 5,939 | 3,567 | 30,143 |
| 29,947 | 162 | 20,583 | 5,940 | 3,556 | 30,241 |
| 29,948 | 160 | 21,039 | 6,012 | 3,595 | 30,806 |
| 29,949 | 155 | 20,682 | 5,879 | 3,512 | 30,228 |
| 29,950 | 161 | 20,603 | 5,839 | 3,487 | 30,090 |
| 29,951 | 161 | 20,642 | 5,835 | 3,478 | 30,116 |
| 29,952 | 149 | 20,200 | 5,741 | 3,381 | 29,471 |
| 29,953 | 153 | 20,385 | 5,786 | 3,425 | 29,749 |
| 29,954 | 151 | 20,554 | 5,848 | 3,443 | 29,996 |
| 29,955 | 144 | 20,222 | 5,757 | 3,379 | 29,502 |
| 29,956 | 146 | 20,165 | 5,738 | 3,378 | 29,427 |
| 29,957 | 144 | 20,064 | 5,712 | 3,355 | 29,275 |
| 29,958 | 142 | 20,247 | 5,730 | 3,359 | 29,478 |
| 29,959 | 146 | 20,301 | 5,700 | 3,342 | 29,489 |
| 29,960 | 139 | 20,204 | 5,635 | 3,312 | 29,290 |
| 29,961 | 136 | 20,498 | 5,648 | 3,315 | 29,597 |
| 29,962 | 139 | 20,564 | 5,681 | 3,337 | 29,721 |
| 29,963 | 141 | 20,694 | 5,710 | 3,329 | 29,874 |
| 29,964 | 151 | 20,878 | 5,745 | 3,358 | 30,132 |
| 29,965 | 153 | 21,010 | 5,736 | 3,368 | 30,267 |
| 29,966 | 158 | 20,930 | 5,725 | 3,333 | 30,146 |
| 29,967 | 158 | 20,863 | 5,700 | 3,318 | 30,039 |
| 29,968 | 157 | 20,914 | 5,714 | 3,322 | 30,107 |
| 29,969 | 156 | 20,743 | 5,678 | 3,295 | 29,872 |
| 29,970 | 154 | 21,094 | 5,718 | 3,336 | 30,302 |
| 29,971 | 155 | 21,263 | 5,760 | 3,357 | 30,535 |
| 29,972 | 153 | 21,321 | 5,755 | 3,353 | 30,582 |
| 29,973 | 157 | 21,124 | 5,685 | 3,311 | 30,277 |
| 29,974 | 157 | 21,316 | 5,709 | 3,322 | 30,504 |
| 29,975 | 154 | 21,417 | 5,696 | 3,323 | 30,590 |

|        |     |        |       |       |        |
|--------|-----|--------|-------|-------|--------|
| 29,976 | 154 | 21,414 | 5,683 | 3,314 | 30,565 |
| 29,977 | 154 | 21,601 | 5,706 | 3,329 | 30,790 |
| 29,978 | 149 | 21,516 | 5,640 | 3,302 | 30,607 |
| 29,979 | 149 | 21,404 | 5,624 | 3,299 | 30,476 |
| 29,980 | 145 | 21,546 | 5,669 | 3,306 | 30,666 |
| 29,981 | 145 | 21,640 | 5,678 | 3,305 | 30,768 |
| 29,982 | 145 | 21,713 | 5,679 | 3,311 | 30,848 |
| 29,983 | 151 | 21,806 | 5,682 | 3,291 | 30,930 |
| 29,984 | 153 | 21,791 | 5,625 | 3,269 | 30,838 |
| 29,985 | 150 | 21,558 | 5,584 | 3,245 | 30,537 |
| 29,986 | 154 | 21,720 | 5,637 | 3,283 | 30,794 |
| 29,987 | 148 | 21,440 | 5,549 | 3,257 | 30,394 |
| 29,988 | 148 | 21,636 | 5,594 | 3,296 | 30,674 |
| 29,989 | 152 | 21,756 | 5,589 | 3,327 | 30,824 |
| 29,990 | 151 | 21,509 | 5,534 | 3,300 | 30,494 |
| 29,991 | 154 | 21,552 | 5,569 | 3,301 | 30,576 |
| 29,992 | 156 | 21,425 | 5,581 | 3,303 | 30,465 |
| 29,993 | 159 | 20,871 | 5,426 | 3,251 | 29,707 |
| 29,994 | 162 | 21,000 | 5,436 | 3,238 | 29,836 |
| 29,995 | 157 | 21,204 | 5,479 | 3,273 | 30,113 |
| 29,996 | 160 | 20,948 | 5,417 | 3,248 | 29,773 |
| 29,997 | 159 | 20,834 | 5,366 | 3,195 | 29,554 |
| 29,998 | 164 | 21,064 | 5,385 | 3,221 | 29,834 |
| 29,999 | 164 | 20,866 | 5,340 | 3,186 | 29,556 |
| 30,000 | 171 | 21,079 | 5,371 | 3,224 | 29,845 |
| 30,001 | 164 | 20,896 | 5,370 | 3,182 | 29,612 |
| 30,002 | 173 | 20,997 | 5,386 | 3,220 | 29,776 |
| 30,003 | 171 | 20,714 | 5,297 | 3,157 | 29,339 |
| 30,004 | 174 | 20,847 | 5,313 | 3,158 | 29,492 |
| 30,005 | 173 | 20,877 | 5,306 | 3,174 | 29,530 |
| 30,006 | 179 | 21,112 | 5,305 | 3,165 | 29,761 |
| 30,007 | 176 | 21,029 | 5,256 | 3,130 | 29,591 |

|        |     |        |       |       |        |
|--------|-----|--------|-------|-------|--------|
| 30,008 | 180 | 21,073 | 5,230 | 3,135 | 29,618 |
| 30,009 | 180 | 21,081 | 5,214 | 3,146 | 29,621 |
| 30,010 | 175 | 20,946 | 5,182 | 3,136 | 29,439 |
| 30,011 | 171 | 20,727 | 5,096 | 3,092 | 29,086 |
| 30,012 | 171 | 20,951 | 5,113 | 3,132 | 29,367 |
| 30,013 | 171 | 20,909 | 5,062 | 3,108 | 29,250 |
| 30,014 | 167 | 20,734 | 5,013 | 3,083 | 28,997 |
| 30,015 | 159 | 20,877 | 5,066 | 3,116 | 29,218 |
| 30,016 | 156 | 20,577 | 4,964 | 3,078 | 28,775 |
| 30,017 | 151 | 20,259 | 4,892 | 3,035 | 28,337 |
| 30,018 | 150 | 20,738 | 5,049 | 3,098 | 29,035 |
| 30,019 | 145 | 20,717 | 5,035 | 3,112 | 29,009 |
| 30,020 | 145 | 20,423 | 4,927 | 3,048 | 28,543 |
| 30,021 | 146 | 20,390 | 4,897 | 3,026 | 28,459 |
| 30,022 | 146 | 20,385 | 4,895 | 3,016 | 28,442 |
| 30,023 | 148 | 20,476 | 4,949 | 3,042 | 28,615 |
| 30,024 | 148 | 20,300 | 4,906 | 3,011 | 28,365 |
| 30,025 | 149 | 20,299 | 4,905 | 3,006 | 28,359 |
| 30,026 | 151 | 20,528 | 4,952 | 3,030 | 28,661 |
| 30,027 | 149 | 20,226 | 4,903 | 3,006 | 28,284 |
| 30,028 | 152 | 20,725 | 5,037 | 3,080 | 28,994 |
| 30,029 | 153 | 19,895 | 4,798 | 2,961 | 27,807 |
| 30,030 | 153 | 20,046 | 4,855 | 2,998 | 28,052 |
| 30,031 | 153 | 20,382 | 4,928 | 3,057 | 28,520 |
| 30,032 | 153 | 20,454 | 4,936 | 3,061 | 28,604 |
| 30,033 | 152 | 20,651 | 5,016 | 3,126 | 28,945 |
| 30,034 | 146 | 20,572 | 4,990 | 3,128 | 28,836 |
| 30,035 | 139 | 20,489 | 4,960 | 3,116 | 28,704 |
| 30,036 | 139 | 20,502 | 4,959 | 3,107 | 28,707 |
| 30,037 | 136 | 20,615 | 4,981 | 3,147 | 28,879 |
| 30,038 | 134 | 20,528 | 4,935 | 3,124 | 28,721 |
| 30,039 | 138 | 20,658 | 4,951 | 3,145 | 28,892 |

|        |     |        |       |       |        |
|--------|-----|--------|-------|-------|--------|
| 30,040 | 136 | 20,697 | 4,960 | 3,149 | 28,942 |
| 30,041 | 135 | 20,626 | 4,949 | 3,144 | 28,854 |
| 30,042 | 140 | 20,398 | 4,899 | 3,109 | 28,546 |
| 30,043 | 142 | 20,474 | 4,909 | 3,130 | 28,655 |
| 30,044 | 134 | 20,653 | 4,928 | 3,151 | 28,866 |
| 30,045 | 137 | 20,323 | 4,835 | 3,122 | 28,417 |
| 30,046 | 137 | 20,360 | 4,827 | 3,129 | 28,453 |
| 30,047 | 131 | 20,217 | 4,815 | 3,113 | 28,276 |
| 30,048 | 132 | 20,040 | 4,794 | 3,088 | 28,054 |
| 30,049 | 129 | 19,408 | 4,637 | 3,001 | 27,175 |
| 30,050 | 128 | 19,591 | 4,668 | 3,013 | 27,400 |
| 30,051 | 120 | 19,829 | 4,705 | 3,041 | 27,695 |
| 30,052 | 123 | 19,984 | 4,720 | 3,047 | 27,874 |
| 30,053 | 118 | 19,999 | 4,679 | 3,040 | 27,836 |
| 30,054 | 113 | 19,748 | 4,620 | 2,993 | 27,474 |
| 30,055 | 113 | 19,728 | 4,603 | 2,997 | 27,441 |
| 30,056 | 107 | 19,687 | 4,595 | 3,011 | 27,400 |
| 30,057 | 103 | 19,830 | 4,645 | 3,064 | 27,642 |
| 30,058 | 97  | 19,616 | 4,619 | 3,032 | 27,364 |
| 30,059 | 102 | 19,850 | 4,659 | 3,052 | 27,663 |
| 30,060 | 103 | 19,887 | 4,672 | 3,071 | 27,733 |
| 30,061 | 104 | 19,842 | 4,691 | 3,064 | 27,701 |
| 30,062 | 102 | 19,342 | 4,599 | 2,979 | 27,022 |
| 30,063 | 103 | 19,455 | 4,604 | 3,005 | 27,167 |
| 30,064 | 103 | 19,889 | 4,662 | 3,046 | 27,700 |
| 30,065 | 105 | 19,781 | 4,630 | 3,017 | 27,533 |
| 30,066 | 105 | 19,724 | 4,621 | 3,011 | 27,461 |
| 30,067 | 102 | 20,054 | 4,711 | 3,044 | 27,911 |
| 30,068 | 105 | 19,876 | 4,635 | 3,009 | 27,625 |
| 30,069 | 104 | 19,732 | 4,587 | 2,985 | 27,408 |
| 30,070 | 113 | 20,509 | 4,808 | 3,095 | 28,525 |
| 30,071 | 110 | 20,470 | 4,834 | 3,117 | 28,531 |

|        |     |        |       |       |        |
|--------|-----|--------|-------|-------|--------|
| 30,072 | 113 | 20,798 | 4,851 | 3,145 | 28,907 |
| 30,073 | 113 | 20,791 | 4,843 | 3,137 | 28,884 |
| 30,074 | 119 | 21,519 | 4,978 | 3,250 | 29,866 |
| 30,075 | 116 | 21,136 | 4,903 | 3,229 | 29,384 |
| 30,076 | 119 | 21,824 | 5,074 | 3,360 | 30,377 |
| 30,077 | 121 | 21,860 | 5,147 | 3,374 | 30,502 |
| 30,078 | 124 | 22,059 | 5,149 | 3,396 | 30,728 |
| 30,079 | 121 | 22,107 | 5,132 | 3,385 | 30,745 |
| 30,080 | 119 | 21,903 | 5,065 | 3,366 | 30,453 |
| 30,081 | 122 | 22,136 | 5,094 | 3,398 | 30,750 |
| 30,082 | 121 | 22,047 | 5,055 | 3,390 | 30,613 |
| 30,083 | 120 | 21,955 | 5,006 | 3,351 | 30,432 |
| 30,084 | 121 | 22,106 | 5,034 | 3,373 | 30,634 |
| 30,085 | 125 | 22,152 | 5,036 | 3,361 | 30,674 |
| 30,086 | 126 | 22,334 | 5,035 | 3,369 | 30,864 |
| 30,087 | 127 | 22,428 | 5,044 | 3,364 | 30,963 |
| 30,088 | 128 | 22,549 | 5,064 | 3,356 | 31,097 |
| 30,089 | 129 | 22,702 | 5,075 | 3,347 | 31,253 |
| 30,090 | 129 | 22,716 | 5,067 | 3,340 | 31,252 |
| 30,091 | 140 | 23,199 | 5,173 | 3,401 | 31,913 |
| 30,092 | 141 | 23,465 | 5,228 | 3,433 | 32,267 |
| 30,093 | 139 | 23,794 | 5,260 | 3,477 | 32,670 |
| 30,094 | 137 | 23,779 | 5,217 | 3,457 | 32,590 |
| 30,095 | 147 | 24,087 | 5,270 | 3,490 | 32,994 |
| 30,096 | 151 | 24,535 | 5,341 | 3,518 | 33,545 |
| 30,097 | 151 | 24,648 | 5,343 | 3,520 | 33,662 |
| 30,098 | 151 | 24,700 | 5,311 | 3,532 | 33,694 |
| 30,099 | 156 | 24,978 | 5,396 | 3,589 | 34,119 |
| 30,100 | 158 | 24,829 | 5,352 | 3,578 | 33,917 |
| 30,101 | 168 | 25,093 | 5,415 | 3,626 | 34,302 |
| 30,102 | 160 | 25,015 | 5,380 | 3,613 | 34,168 |
| 30,103 | 160 | 24,978 | 5,383 | 3,604 | 34,125 |

|        |     |        |       |       |        |
|--------|-----|--------|-------|-------|--------|
| 30,104 | 159 | 24,602 | 5,345 | 3,567 | 33,673 |
| 30,105 | 162 | 24,860 | 5,375 | 3,641 | 34,038 |
| 30,106 | 171 | 25,223 | 5,445 | 3,678 | 34,517 |
| 30,107 | 169 | 25,043 | 5,400 | 3,630 | 34,242 |
| 30,108 | 170 | 25,041 | 5,409 | 3,626 | 34,246 |
| 30,109 | 173 | 25,166 | 5,444 | 3,652 | 34,435 |
| 30,110 | 171 | 25,107 | 5,414 | 3,661 | 34,353 |
| 30,111 | 170 | 24,758 | 5,312 | 3,602 | 33,842 |
| 30,112 | 169 | 24,741 | 5,310 | 3,606 | 33,826 |
| 30,113 | 165 | 24,839 | 5,365 | 3,651 | 34,020 |
| 30,114 | 165 | 24,657 | 5,353 | 3,648 | 33,823 |
| 30,115 | 166 | 24,685 | 5,371 | 3,648 | 33,870 |
| 30,116 | 169 | 24,697 | 5,353 | 3,664 | 33,883 |
| 30,117 | 168 | 24,731 | 5,330 | 3,640 | 33,869 |
| 30,118 | 170 | 24,850 | 5,376 | 3,706 | 34,102 |
| 30,119 | 166 | 24,525 | 5,275 | 3,677 | 33,643 |
| 30,120 | 170 | 24,643 | 5,318 | 3,709 | 33,840 |
| 30,121 | 159 | 24,202 | 5,241 | 3,671 | 33,273 |
| 30,122 | 164 | 24,416 | 5,260 | 3,677 | 33,517 |
| 30,123 | 162 | 24,298 | 5,264 | 3,679 | 33,403 |
| 30,124 | 153 | 24,042 | 5,194 | 3,632 | 33,021 |
| 30,125 | 155 | 23,952 | 5,186 | 3,636 | 32,929 |
| 30,126 | 159 | 24,191 | 5,252 | 3,652 | 33,254 |
| 30,127 | 161 | 23,911 | 5,137 | 3,595 | 32,804 |
| 30,128 | 162 | 23,869 | 5,075 | 3,577 | 32,683 |
| 30,129 | 159 | 23,528 | 5,048 | 3,584 | 32,319 |
| 30,130 | 160 | 23,259 | 5,051 | 3,612 | 32,082 |
| 30,131 | 163 | 23,339 | 5,049 | 3,629 | 32,180 |
| 30,132 | 166 | 23,357 | 5,063 | 3,603 | 32,189 |
| 30,133 | 171 | 23,256 | 5,046 | 3,590 | 32,063 |
| 30,134 | 168 | 23,184 | 5,054 | 3,586 | 31,992 |
| 30,135 | 168 | 23,199 | 5,050 | 3,579 | 31,996 |

|        |     |        |       |       |        |
|--------|-----|--------|-------|-------|--------|
| 30,136 | 166 | 23,202 | 5,054 | 3,602 | 32,024 |
| 30,137 | 167 | 23,164 | 5,067 | 3,596 | 31,994 |
| 30,138 | 168 | 23,158 | 5,067 | 3,593 | 31,986 |
| 30,139 | 166 | 23,097 | 5,108 | 3,612 | 31,983 |
| 30,140 | 161 | 23,084 | 5,138 | 3,662 | 32,045 |
| 30,141 | 157 | 23,175 | 5,187 | 3,675 | 32,194 |
| 30,142 | 154 | 23,246 | 5,174 | 3,695 | 32,269 |
| 30,143 | 155 | 23,632 | 5,251 | 3,741 | 32,779 |
| 30,144 | 148 | 23,612 | 5,300 | 3,721 | 32,781 |
| 30,145 | 138 | 23,627 | 5,335 | 3,726 | 32,826 |
| 30,146 | 136 | 23,625 | 5,326 | 3,729 | 32,816 |
| 30,147 | 138 | 23,269 | 5,284 | 3,690 | 32,381 |
| 30,148 | 141 | 23,529 | 5,289 | 3,716 | 32,675 |
| 30,149 | 137 | 23,607 | 5,302 | 3,723 | 32,769 |
| 30,150 | 146 | 23,447 | 5,291 | 3,706 | 32,590 |
| 30,151 | 144 | 23,282 | 5,264 | 3,686 | 32,376 |
| 30,152 | 142 | 23,956 | 5,350 | 3,775 | 33,223 |
| 30,153 | 145 | 24,019 | 5,345 | 3,767 | 33,276 |
| 30,154 | 146 | 24,017 | 5,347 | 3,758 | 33,268 |
| 30,155 | 151 | 24,483 | 5,433 | 3,809 | 33,876 |
| 30,156 | 148 | 24,660 | 5,453 | 3,811 | 34,072 |
| 30,157 | 144 | 24,473 | 5,427 | 3,792 | 33,836 |
| 30,158 | 146 | 24,865 | 5,473 | 3,824 | 34,308 |
| 30,159 | 142 | 24,782 | 5,458 | 3,807 | 34,189 |
| 30,160 | 143 | 24,737 | 5,432 | 3,811 | 34,123 |
| 30,161 | 140 | 24,486 | 5,426 | 3,779 | 33,831 |
| 30,162 | 140 | 24,750 | 5,483 | 3,813 | 34,186 |
| 30,163 | 140 | 24,919 | 5,502 | 3,834 | 34,395 |
| 30,164 | 143 | 24,907 | 5,457 | 3,791 | 34,298 |
| 30,165 | 143 | 25,019 | 5,452 | 3,790 | 34,404 |
| 30,166 | 145 | 25,205 | 5,451 | 3,797 | 34,598 |
| 30,167 | 143 | 25,176 | 5,413 | 3,767 | 34,499 |

|        |     |        |       |       |        |
|--------|-----|--------|-------|-------|--------|
| 30,168 | 142 | 24,861 | 5,359 | 3,733 | 34,095 |
| 30,169 | 141 | 24,931 | 5,379 | 3,724 | 34,175 |
| 30,170 | 143 | 24,923 | 5,339 | 3,687 | 34,092 |
| 30,171 | 151 | 25,223 | 5,350 | 3,714 | 34,438 |
| 30,172 | 152 | 25,386 | 5,356 | 3,707 | 34,601 |
| 30,173 | 150 | 24,877 | 5,276 | 3,664 | 33,967 |
| 30,174 | 153 | 24,810 | 5,222 | 3,637 | 33,822 |
| 30,175 | 152 | 24,809 | 5,213 | 3,642 | 33,816 |
| 30,176 | 156 | 24,678 | 5,163 | 3,639 | 33,636 |
| 30,177 | 158 | 24,760 | 5,210 | 3,636 | 33,764 |
| 30,178 | 152 | 24,445 | 5,152 | 3,587 | 33,336 |
| 30,179 | 157 | 24,471 | 5,081 | 3,516 | 33,225 |
| 30,180 | 161 | 24,696 | 5,092 | 3,539 | 33,488 |
| 30,181 | 156 | 24,551 | 5,092 | 3,533 | 33,332 |
| 30,182 | 156 | 24,467 | 5,097 | 3,514 | 33,234 |
| 30,183 | 154 | 24,539 | 5,125 | 3,529 | 33,347 |
| 30,184 | 153 | 24,597 | 5,114 | 3,529 | 33,393 |
| 30,185 | 157 | 24,428 | 5,032 | 3,484 | 33,101 |
| 30,186 | 156 | 24,365 | 5,044 | 3,469 | 33,034 |
| 30,187 | 158 | 24,394 | 5,018 | 3,467 | 33,037 |
| 30,188 | 160 | 24,468 | 5,041 | 3,478 | 33,147 |
| 30,189 | 166 | 24,366 | 4,952 | 3,448 | 32,932 |
| 30,190 | 167 | 24,304 | 4,943 | 3,450 | 32,864 |
| 30,191 | 163 | 24,143 | 4,885 | 3,413 | 32,604 |
| 30,192 | 166 | 23,940 | 4,816 | 3,364 | 32,286 |
| 30,193 | 174 | 23,947 | 4,802 | 3,345 | 32,268 |
| 30,194 | 172 | 23,117 | 4,595 | 3,235 | 31,119 |
| 30,195 | 175 | 23,024 | 4,545 | 3,183 | 30,927 |
| 30,196 | 175 | 23,031 | 4,537 | 3,184 | 30,927 |
| 30,197 | 175 | 23,191 | 4,532 | 3,192 | 31,090 |
| 30,198 | 165 | 22,765 | 4,463 | 3,160 | 30,553 |
| 30,199 | 164 | 22,654 | 4,498 | 3,166 | 30,482 |



|        |     |        |       |       |        |
|--------|-----|--------|-------|-------|--------|
| 30,200 | 165 | 22,583 | 4,498 | 3,151 | 30,397 |
| 30,201 | 154 | 22,209 | 4,411 | 3,103 | 29,877 |
| 30,202 | 153 | 22,129 | 4,414 | 3,086 | 29,782 |
| 30,203 | 154 | 22,334 | 4,449 | 3,121 | 30,058 |
| 30,204 | 169 | 22,241 | 4,393 | 3,125 | 29,928 |
| 30,205 | 168 | 22,163 | 4,406 | 3,115 | 29,852 |
| 30,206 | 161 | 22,158 | 4,395 | 3,126 | 29,840 |
| 30,207 | 166 | 22,328 | 4,414 | 3,159 | 30,067 |
| 30,208 | 169 | 22,393 | 4,421 | 3,161 | 30,144 |
| 30,209 | 169 | 22,155 | 4,370 | 3,139 | 29,833 |
| 30,210 | 171 | 22,207 | 4,398 | 3,162 | 29,938 |
| 30,211 | 169 | 22,253 | 4,425 | 3,163 | 30,010 |
| 30,212 | 172 | 22,426 | 4,423 | 3,150 | 30,171 |
| 30,213 | 176 | 22,513 | 4,438 | 3,163 | 30,290 |
| 30,214 | 176 | 22,484 | 4,433 | 3,169 | 30,262 |
| 30,215 | 174 | 22,501 | 4,454 | 3,179 | 30,308 |
| 30,216 | 174 | 22,450 | 4,453 | 3,172 | 30,249 |
| 30,217 | 182 | 22,771 | 4,499 | 3,213 | 30,665 |
| 30,218 | 185 | 22,629 | 4,492 | 3,184 | 30,490 |
| 30,219 | 185 | 22,606 | 4,467 | 3,171 | 30,429 |
| 30,220 | 186 | 22,573 | 4,478 | 3,185 | 30,422 |
| 30,221 | 178 | 22,612 | 4,503 | 3,219 | 30,512 |
| 30,222 | 170 | 22,898 | 4,575 | 3,222 | 30,865 |
| 30,223 | 165 | 22,673 | 4,521 | 3,208 | 30,567 |
| 30,224 | 163 | 22,740 | 4,523 | 3,196 | 30,622 |
| 30,225 | 162 | 22,942 | 4,587 | 3,244 | 30,935 |
| 30,226 | 161 | 23,169 | 4,635 | 3,256 | 31,221 |
| 30,227 | 157 | 23,336 | 4,667 | 3,273 | 31,433 |
| 30,228 | 157 | 23,517 | 4,656 | 3,291 | 31,621 |
| 30,229 | 153 | 23,605 | 4,669 | 3,294 | 31,721 |
| 30,230 | 150 | 23,665 | 4,691 | 3,280 | 31,786 |
| 30,231 | 148 | 23,702 | 4,691 | 3,257 | 31,798 |

|        |     |        |       |       |        |
|--------|-----|--------|-------|-------|--------|
| 30,232 | 146 | 23,575 | 4,659 | 3,240 | 31,620 |
| 30,233 | 148 | 23,682 | 4,658 | 3,244 | 31,732 |
| 30,234 | 142 | 23,642 | 4,631 | 3,239 | 31,654 |
| 30,235 | 145 | 23,675 | 4,634 | 3,241 | 31,695 |
| 30,236 | 140 | 23,396 | 4,624 | 3,230 | 31,390 |
| 30,237 | 143 | 23,815 | 4,675 | 3,274 | 31,907 |
| 30,238 | 140 | 24,016 | 4,715 | 3,286 | 32,157 |
| 30,239 | 133 | 23,895 | 4,679 | 3,240 | 31,947 |
| 30,240 | 134 | 24,112 | 4,699 | 3,231 | 32,176 |
| 30,241 | 134 | 24,144 | 4,708 | 3,242 | 32,228 |
| 30,242 | 135 | 24,008 | 4,631 | 3,202 | 31,976 |
| 30,243 | 135 | 24,093 | 4,666 | 3,225 | 32,119 |
| 30,244 | 126 | 24,310 | 4,708 | 3,259 | 32,403 |
| 30,245 | 127 | 24,410 | 4,733 | 3,291 | 32,561 |
| 30,246 | 125 | 24,511 | 4,755 | 3,319 | 32,710 |
| 30,247 | 122 | 24,450 | 4,765 | 3,343 | 32,680 |
| 30,248 | 125 | 24,448 | 4,768 | 3,336 | 32,677 |
| 30,249 | 124 | 24,518 | 4,771 | 3,324 | 32,737 |
| 30,250 | 123 | 24,372 | 4,712 | 3,296 | 32,503 |
| 30,251 | 120 | 24,268 | 4,715 | 3,302 | 32,405 |
| 30,252 | 119 | 24,167 | 4,712 | 3,309 | 32,307 |
| 30,253 | 125 | 23,859 | 4,654 | 3,250 | 31,888 |
| 30,254 | 124 | 23,563 | 4,609 | 3,213 | 31,509 |
| 30,255 | 112 | 23,864 | 4,734 | 3,263 | 31,973 |
| 30,256 | 110 | 23,617 | 4,663 | 3,223 | 31,613 |
| 30,257 | 109 | 23,595 | 4,647 | 3,219 | 31,570 |
| 30,258 | 116 | 23,641 | 4,709 | 3,256 | 31,722 |
| 30,259 | 112 | 23,568 | 4,706 | 3,249 | 31,635 |
| 30,260 | 111 | 23,292 | 4,663 | 3,204 | 31,270 |
| 30,261 | 109 | 23,274 | 4,663 | 3,203 | 31,249 |
| 30,262 | 110 | 23,215 | 4,654 | 3,212 | 31,191 |
| 30,263 | 107 | 23,220 | 4,650 | 3,217 | 31,194 |

|        |     |        |       |       |        |
|--------|-----|--------|-------|-------|--------|
| 30,264 | 104 | 23,409 | 4,705 | 3,213 | 31,431 |
| 30,265 | 105 | 23,391 | 4,697 | 3,217 | 31,410 |
| 30,266 | 102 | 23,218 | 4,636 | 3,186 | 31,142 |
| 30,267 | 102 | 23,385 | 4,680 | 3,218 | 31,385 |
| 30,268 | 96  | 23,252 | 4,672 | 3,206 | 31,226 |
| 30,269 | 91  | 23,100 | 4,614 | 3,178 | 30,983 |
| 30,270 | 92  | 23,122 | 4,624 | 3,174 | 31,012 |
| 30,271 | 96  | 23,408 | 4,675 | 3,203 | 31,382 |
| 30,272 | 100 | 23,218 | 4,616 | 3,148 | 31,082 |
| 30,273 | 100 | 23,200 | 4,615 | 3,156 | 31,071 |
| 30,274 | 103 | 23,328 | 4,652 | 3,194 | 31,277 |
| 30,275 | 103 | 23,036 | 4,618 | 3,160 | 30,917 |
| 30,276 | 100 | 22,471 | 4,547 | 3,093 | 30,211 |
| 30,277 | 100 | 22,376 | 4,567 | 3,092 | 30,135 |
| 30,278 | 101 | 22,379 | 4,582 | 3,103 | 30,165 |
| 30,279 | 101 | 22,198 | 4,573 | 3,096 | 29,968 |
| 30,280 | 100 | 22,120 | 4,560 | 3,094 | 29,874 |
| 30,281 | 99  | 21,793 | 4,506 | 3,077 | 29,475 |
| 30,282 | 99  | 21,717 | 4,521 | 3,087 | 29,424 |
| 30,283 | 103 | 21,702 | 4,528 | 3,102 | 29,435 |
| 30,284 | 102 | 21,505 | 4,486 | 3,063 | 29,156 |
| 30,285 | 103 | 21,411 | 4,482 | 3,078 | 29,074 |
| 30,286 | 101 | 21,383 | 4,520 | 3,116 | 29,120 |
| 30,287 | 98  | 21,714 | 4,579 | 3,162 | 29,553 |
| 30,288 | 97  | 21,433 | 4,514 | 3,134 | 29,178 |
| 30,289 | 98  | 21,308 | 4,531 | 3,149 | 29,086 |
| 30,290 | 96  | 21,247 | 4,578 | 3,203 | 29,124 |
| 30,291 | 97  | 20,589 | 4,437 | 3,142 | 28,265 |
| 30,292 | 98  | 20,587 | 4,505 | 3,174 | 28,364 |
| 30,293 | 91  | 20,830 | 4,594 | 3,209 | 28,724 |
| 30,294 | 97  | 20,998 | 4,646 | 3,238 | 28,979 |
| 30,295 | 101 | 20,825 | 4,611 | 3,208 | 28,745 |

|        |     |        |       |       |        |
|--------|-----|--------|-------|-------|--------|
| 30,296 | 99  | 20,813 | 4,600 | 3,190 | 28,702 |
| 30,297 | 103 | 21,054 | 4,682 | 3,244 | 29,083 |
| 30,298 | 106 | 21,120 | 4,714 | 3,271 | 29,211 |
| 30,299 | 104 | 20,844 | 4,661 | 3,254 | 28,863 |
| 30,300 | 104 | 20,778 | 4,698 | 3,259 | 28,839 |
| 30,301 | 107 | 20,713 | 4,694 | 3,252 | 28,766 |
| 30,302 | 109 | 20,932 | 4,737 | 3,284 | 29,062 |
| 30,303 | 105 | 20,969 | 4,776 | 3,318 | 29,168 |
| 30,304 | 98  | 20,970 | 4,774 | 3,341 | 29,183 |
| 30,305 | 93  | 20,739 | 4,717 | 3,289 | 28,838 |
| 30,306 | 93  | 21,057 | 4,754 | 3,340 | 29,244 |
| 30,307 | 94  | 21,283 | 4,803 | 3,364 | 29,544 |
| 30,308 | 93  | 21,131 | 4,805 | 3,339 | 29,368 |
| 30,309 | 89  | 21,194 | 4,795 | 3,324 | 29,402 |
| 30,310 | 92  | 21,034 | 4,790 | 3,308 | 29,224 |
| 30,311 | 94  | 21,009 | 4,768 | 3,294 | 29,165 |
| 30,312 | 95  | 21,012 | 4,759 | 3,273 | 29,139 |
| 30,313 | 95  | 21,000 | 4,775 | 3,273 | 29,143 |
| 30,314 | 101 | 21,020 | 4,777 | 3,292 | 29,190 |
| 30,315 | 105 | 21,164 | 4,805 | 3,341 | 29,415 |
| 30,316 | 103 | 20,842 | 4,751 | 3,299 | 28,995 |
| 30,317 | 104 | 20,835 | 4,775 | 3,304 | 29,018 |
| 30,318 | 103 | 20,856 | 4,801 | 3,331 | 29,091 |
| 30,319 | 103 | 20,777 | 4,811 | 3,337 | 29,028 |
| 30,320 | 104 | 20,951 | 4,873 | 3,367 | 29,295 |
| 30,321 | 104 | 20,803 | 4,847 | 3,355 | 29,109 |
| 30,322 | 100 | 20,988 | 4,915 | 3,421 | 29,424 |
| 30,323 | 96  | 20,998 | 4,903 | 3,443 | 29,440 |
| 30,324 | 96  | 21,119 | 4,974 | 3,473 | 29,662 |
| 30,325 | 96  | 21,533 | 5,059 | 3,504 | 30,192 |
| 30,326 | 98  | 21,636 | 5,027 | 3,483 | 30,244 |
| 30,327 | 114 | 21,714 | 5,037 | 3,483 | 30,348 |

|        |     |        |       |       |        |
|--------|-----|--------|-------|-------|--------|
| 30,328 | 114 | 21,677 | 5,007 | 3,488 | 30,286 |
| 30,329 | 116 | 22,945 | 5,246 | 3,694 | 32,001 |
| 30,330 | 117 | 23,083 | 5,269 | 3,702 | 32,171 |
| 30,331 | 116 | 23,124 | 5,277 | 3,691 | 32,208 |
| 30,332 | 121 | 23,288 | 5,317 | 3,725 | 32,451 |
| 30,333 | 121 | 23,200 | 5,315 | 3,722 | 32,358 |
| 30,334 | 116 | 23,050 | 5,345 | 3,742 | 32,253 |
| 30,335 | 116 | 23,068 | 5,361 | 3,748 | 32,293 |
| 30,336 | 124 | 23,290 | 5,411 | 3,793 | 32,618 |
| 30,337 | 124 | 23,361 | 5,418 | 3,795 | 32,698 |
| 30,338 | 124 | 23,389 | 5,450 | 3,795 | 32,758 |
| 30,339 | 123 | 23,408 | 5,437 | 3,784 | 32,752 |
| 30,340 | 125 | 23,044 | 5,363 | 3,699 | 32,231 |
| 30,341 | 128 | 23,297 | 5,386 | 3,716 | 32,527 |
| 30,342 | 127 | 23,498 | 5,453 | 3,757 | 32,835 |
| 30,343 | 127 | 23,294 | 5,363 | 3,705 | 32,489 |
| 30,344 | 127 | 23,446 | 5,376 | 3,724 | 32,673 |
| 30,345 | 124 | 23,599 | 5,425 | 3,757 | 32,905 |
| 30,346 | 123 | 23,577 | 5,426 | 3,762 | 32,888 |
| 30,347 | 125 | 23,518 | 5,405 | 3,747 | 32,795 |
| 30,348 | 122 | 23,588 | 5,421 | 3,759 | 32,890 |
| 30,349 | 121 | 23,664 | 5,414 | 3,736 | 32,935 |
| 30,350 | 122 | 23,213 | 5,308 | 3,657 | 32,300 |
| 30,351 | 124 | 23,529 | 5,329 | 3,686 | 32,668 |
| 30,352 | 122 | 23,847 | 5,379 | 3,701 | 33,049 |
| 30,353 | 122 | 23,823 | 5,362 | 3,678 | 32,985 |
| 30,354 | 122 | 23,928 | 5,362 | 3,690 | 33,102 |
| 30,355 | 121 | 23,955 | 5,389 | 3,720 | 33,185 |
| 30,356 | 130 | 23,633 | 5,370 | 3,684 | 32,817 |
| 30,357 | 130 | 23,792 | 5,421 | 3,711 | 33,054 |
| 30,358 | 127 | 23,773 | 5,404 | 3,699 | 33,003 |
| 30,359 | 134 | 24,035 | 5,443 | 3,737 | 33,349 |

|        |     |        |       |       |        |
|--------|-----|--------|-------|-------|--------|
| 30,360 | 138 | 23,791 | 5,371 | 3,692 | 32,992 |
| 30,361 | 135 | 23,858 | 5,360 | 3,688 | 33,041 |
| 30,362 | 138 | 23,666 | 5,354 | 3,687 | 32,845 |
| 30,363 | 139 | 23,673 | 5,357 | 3,691 | 32,860 |
| 30,364 | 137 | 23,970 | 5,424 | 3,708 | 33,239 |
| 30,365 | 134 | 23,818 | 5,378 | 3,693 | 33,023 |
| 30,366 | 133 | 23,788 | 5,354 | 3,658 | 32,933 |
| 30,367 | 136 | 23,977 | 5,370 | 3,687 | 33,170 |
| 30,368 | 138 | 24,115 | 5,417 | 3,711 | 33,381 |
| 30,369 | 142 | 24,154 | 5,440 | 3,717 | 33,453 |
| 30,370 | 146 | 24,177 | 5,449 | 3,725 | 33,497 |
| 30,371 | 144 | 24,081 | 5,412 | 3,716 | 33,353 |
| 30,372 | 144 | 23,880 | 5,386 | 3,686 | 33,096 |
| 30,373 | 148 | 23,889 | 5,378 | 3,679 | 33,094 |
| 30,374 | 154 | 23,900 | 5,384 | 3,693 | 33,131 |
| 30,375 | 158 | 23,887 | 5,343 | 3,683 | 33,071 |
| 30,376 | 170 | 23,392 | 5,230 | 3,614 | 32,406 |
| 30,377 | 173 | 23,140 | 5,196 | 3,585 | 32,094 |
| 30,378 | 167 | 23,617 | 5,257 | 3,616 | 32,657 |
| 30,379 | 167 | 23,422 | 5,237 | 3,580 | 32,406 |
| 30,380 | 167 | 23,263 | 5,210 | 3,566 | 32,206 |
| 30,381 | 171 | 23,264 | 5,202 | 3,573 | 32,210 |
| 30,382 | 172 | 23,448 | 5,240 | 3,629 | 32,489 |
| 30,383 | 174 | 23,377 | 5,179 | 3,566 | 32,296 |
| 30,384 | 176 | 23,725 | 5,175 | 3,553 | 32,629 |
| 30,385 | 176 | 23,813 | 5,177 | 3,545 | 32,711 |
| 30,386 | 175 | 24,211 | 5,223 | 3,582 | 33,191 |
| 30,387 | 177 | 24,348 | 5,237 | 3,578 | 33,340 |
| 30,388 | 176 | 24,294 | 5,203 | 3,555 | 33,228 |
| 30,389 | 181 | 24,340 | 5,208 | 3,548 | 33,277 |
| 30,390 | 190 | 24,582 | 5,220 | 3,572 | 33,564 |
| 30,391 | 188 | 24,651 | 5,236 | 3,590 | 33,665 |

|        |     |        |       |       |        |
|--------|-----|--------|-------|-------|--------|
| 30,392 | 189 | 24,829 | 5,267 | 3,607 | 33,892 |
| 30,393 | 187 | 24,726 | 5,197 | 3,578 | 33,688 |
| 30,394 | 188 | 24,805 | 5,233 | 3,599 | 33,825 |
| 30,395 | 194 | 24,850 | 5,258 | 3,599 | 33,901 |
| 30,396 | 195 | 24,800 | 5,261 | 3,591 | 33,847 |
| 30,397 | 193 | 24,745 | 5,262 | 3,588 | 33,788 |
| 30,398 | 191 | 24,734 | 5,294 | 3,608 | 33,827 |
| 30,399 | 196 | 24,917 | 5,301 | 3,652 | 34,066 |
| 30,400 | 200 | 24,741 | 5,265 | 3,624 | 33,830 |
| 30,401 | 198 | 24,713 | 5,240 | 3,633 | 33,784 |
| 30,402 | 213 | 25,234 | 5,320 | 3,687 | 34,454 |
| 30,403 | 213 | 25,118 | 5,296 | 3,701 | 34,328 |
| 30,404 | 213 | 25,200 | 5,302 | 3,686 | 34,401 |
| 30,405 | 222 | 24,919 | 5,240 | 3,627 | 34,008 |
| 30,406 | 228 | 25,116 | 5,262 | 3,630 | 34,236 |
| 30,407 | 228 | 25,508 | 5,305 | 3,666 | 34,707 |
| 30,408 | 230 | 25,607 | 5,294 | 3,669 | 34,800 |
| 30,409 | 225 | 25,561 | 5,279 | 3,665 | 34,730 |
| 30,410 | 229 | 25,996 | 5,349 | 3,732 | 35,306 |
| 30,411 | 234 | 25,931 | 5,330 | 3,716 | 35,211 |
| 30,412 | 237 | 26,014 | 5,321 | 3,719 | 35,291 |
| 30,413 | 234 | 26,033 | 5,294 | 3,718 | 35,279 |
| 30,414 | 232 | 25,988 | 5,290 | 3,713 | 35,223 |
| 30,415 | 229 | 25,941 | 5,291 | 3,728 | 35,189 |
| 30,416 | 233 | 25,680 | 5,272 | 3,715 | 34,900 |
| 30,417 | 234 | 25,784 | 5,280 | 3,737 | 35,035 |
| 30,418 | 232 | 25,796 | 5,285 | 3,729 | 35,042 |
| 30,419 | 226 | 25,872 | 5,254 | 3,713 | 35,065 |
| 30,420 | 223 | 26,010 | 5,244 | 3,725 | 35,202 |
| 30,421 | 221 | 26,116 | 5,197 | 3,724 | 35,258 |
| 30,422 | 218 | 26,001 | 5,126 | 3,685 | 35,030 |
| 30,423 | 221 | 26,265 | 5,149 | 3,702 | 35,337 |

|        |     |        |       |       |        |
|--------|-----|--------|-------|-------|--------|
| 30,424 | 215 | 26,068 | 5,100 | 3,665 | 35,048 |
| 30,425 | 215 | 26,071 | 5,116 | 3,663 | 35,065 |
| 30,426 | 190 | 25,454 | 5,001 | 3,600 | 34,245 |
| 30,427 | 192 | 25,602 | 5,014 | 3,613 | 34,421 |
| 30,428 | 194 | 25,767 | 5,054 | 3,630 | 34,645 |
| 30,429 | 191 | 25,617 | 5,037 | 3,636 | 34,481 |
| 30,430 | 188 | 25,300 | 4,965 | 3,583 | 34,036 |
| 30,431 | 187 | 25,190 | 4,976 | 3,566 | 33,919 |
| 30,432 | 181 | 24,824 | 4,943 | 3,548 | 33,496 |
| 30,433 | 199 | 24,957 | 4,951 | 3,542 | 33,649 |
| 30,434 | 190 | 24,574 | 4,889 | 3,512 | 33,165 |
| 30,435 | 191 | 24,402 | 4,929 | 3,522 | 33,044 |
| 30,436 | 193 | 24,406 | 4,948 | 3,543 | 33,090 |
| 30,437 | 196 | 24,237 | 4,926 | 3,524 | 32,883 |
| 30,438 | 192 | 23,922 | 4,855 | 3,478 | 32,447 |
| 30,439 | 193 | 23,790 | 4,844 | 3,501 | 32,328 |
| 30,440 | 189 | 23,629 | 4,826 | 3,512 | 32,156 |
| 30,441 | 180 | 23,316 | 4,772 | 3,463 | 31,731 |
| 30,442 | 179 | 23,228 | 4,735 | 3,459 | 31,601 |
| 30,443 | 178 | 22,902 | 4,663 | 3,404 | 31,147 |
| 30,444 | 179 | 23,102 | 4,690 | 3,432 | 31,403 |
| 30,445 | 176 | 23,062 | 4,684 | 3,454 | 31,376 |
| 30,446 | 171 | 23,149 | 4,674 | 3,473 | 31,467 |
| 30,447 | 173 | 23,242 | 4,658 | 3,476 | 31,549 |
| 30,448 | 174 | 23,200 | 4,623 | 3,462 | 31,459 |
| 30,449 | 173 | 23,127 | 4,640 | 3,455 | 31,395 |
| 30,450 | 171 | 22,991 | 4,639 | 3,427 | 31,228 |
| 30,451 | 156 | 23,031 | 4,642 | 3,447 | 31,276 |
| 30,452 | 152 | 22,865 | 4,661 | 3,430 | 31,108 |
| 30,453 | 152 | 22,767 | 4,688 | 3,461 | 31,068 |
| 30,454 | 144 | 22,046 | 4,549 | 3,360 | 30,099 |
| 30,455 | 150 | 22,327 | 4,580 | 3,385 | 30,442 |



|        |     |        |       |       |        |
|--------|-----|--------|-------|-------|--------|
| 30,456 | 144 | 22,251 | 4,587 | 3,390 | 30,372 |
| 30,457 | 142 | 22,324 | 4,609 | 3,393 | 30,468 |
| 30,458 | 139 | 22,435 | 4,626 | 3,389 | 30,589 |
| 30,459 | 135 | 22,293 | 4,610 | 3,363 | 30,401 |
| 30,460 | 132 | 21,906 | 4,541 | 3,302 | 29,881 |
| 30,461 | 129 | 21,794 | 4,544 | 3,318 | 29,785 |
| 30,462 | 120 | 21,923 | 4,547 | 3,342 | 29,932 |
| 30,463 | 117 | 21,914 | 4,558 | 3,340 | 29,929 |
| 30,464 | 113 | 21,661 | 4,509 | 3,307 | 29,590 |
| 30,465 | 116 | 21,783 | 4,521 | 3,319 | 29,739 |
| 30,466 | 118 | 21,873 | 4,526 | 3,336 | 29,853 |
| 30,467 | 115 | 21,666 | 4,455 | 3,269 | 29,505 |
| 30,468 | 117 | 21,610 | 4,470 | 3,272 | 29,469 |
| 30,469 | 118 | 21,330 | 4,443 | 3,245 | 29,136 |
| 30,470 | 123 | 21,734 | 4,549 | 3,328 | 29,734 |
| 30,471 | 125 | 21,762 | 4,540 | 3,297 | 29,724 |
| 30,472 | 123 | 21,694 | 4,552 | 3,276 | 29,645 |
| 30,473 | 126 | 21,682 | 4,548 | 3,256 | 29,612 |
| 30,474 | 122 | 21,364 | 4,497 | 3,225 | 29,208 |
| 30,475 | 122 | 21,353 | 4,487 | 3,220 | 29,182 |
| 30,476 | 122 | 21,086 | 4,411 | 3,204 | 28,823 |
| 30,477 | 122 | 21,130 | 4,420 | 3,198 | 28,870 |
| 30,478 | 121 | 21,078 | 4,417 | 3,190 | 28,806 |
| 30,479 | 115 | 20,944 | 4,382 | 3,159 | 28,600 |
| 30,480 | 121 | 21,270 | 4,434 | 3,177 | 29,002 |
| 30,481 | 121 | 21,174 | 4,326 | 3,106 | 28,727 |
| 30,482 | 125 | 21,565 | 4,371 | 3,137 | 29,198 |
| 30,483 | 112 | 21,869 | 4,381 | 3,157 | 29,519 |
| 30,484 | 110 | 21,911 | 4,385 | 3,144 | 29,550 |
| 30,485 | 109 | 22,101 | 4,357 | 3,133 | 29,700 |
| 30,486 | 107 | 21,982 | 4,331 | 3,104 | 29,524 |
| 30,487 | 107 | 22,073 | 4,347 | 3,131 | 29,658 |

|        |     |        |       |       |        |
|--------|-----|--------|-------|-------|--------|
| 30,488 | 104 | 22,174 | 4,379 | 3,120 | 29,777 |
| 30,489 | 107 | 22,286 | 4,374 | 3,088 | 29,855 |
| 30,490 | 108 | 22,381 | 4,368 | 3,063 | 29,920 |
| 30,491 | 109 | 22,385 | 4,361 | 3,051 | 29,906 |
| 30,492 | 108 | 22,324 | 4,361 | 3,069 | 29,862 |
| 30,493 | 105 | 22,694 | 4,392 | 3,091 | 30,282 |
| 30,494 | 103 | 22,620 | 4,360 | 3,068 | 30,151 |
| 30,495 | 107 | 22,953 | 4,394 | 3,092 | 30,546 |
| 30,496 | 107 | 22,943 | 4,323 | 3,032 | 30,405 |
| 30,497 | 109 | 23,281 | 4,366 | 3,061 | 30,817 |
| 30,498 | 105 | 23,136 | 4,306 | 3,031 | 30,578 |
| 30,499 | 104 | 23,200 | 4,290 | 3,008 | 30,602 |
| 30,500 | 104 | 23,134 | 4,271 | 3,003 | 30,512 |
| 30,501 | 106 | 23,512 | 4,302 | 3,020 | 30,940 |
| 30,502 | 109 | 23,641 | 4,322 | 3,015 | 31,087 |
| 30,503 | 106 | 23,341 | 4,171 | 2,945 | 30,563 |
| 30,504 | 109 | 23,461 | 4,167 | 2,940 | 30,677 |
| 30,505 | 109 | 23,393 | 4,137 | 2,927 | 30,566 |
| 30,506 | 109 | 23,707 | 4,175 | 2,962 | 30,953 |
| 30,507 | 107 | 23,847 | 4,144 | 2,962 | 31,060 |
| 30,508 | 107 | 23,520 | 4,067 | 2,947 | 30,641 |
| 30,509 | 110 | 23,791 | 4,121 | 2,984 | 31,006 |
| 30,510 | 111 | 23,673 | 4,079 | 2,955 | 30,818 |
| 30,511 | 115 | 24,065 | 4,123 | 2,974 | 31,277 |
| 30,512 | 114 | 24,109 | 4,140 | 2,972 | 31,335 |
| 30,513 | 112 | 23,938 | 4,099 | 2,941 | 31,090 |
| 30,514 | 113 | 24,367 | 4,144 | 2,965 | 31,589 |
| 30,515 | 115 | 24,437 | 4,137 | 2,975 | 31,664 |
| 30,516 | 112 | 24,380 | 4,114 | 2,941 | 31,547 |
| 30,517 | 112 | 24,624 | 4,147 | 2,976 | 31,859 |
| 30,518 | 121 | 24,520 | 4,142 | 2,959 | 31,742 |
| 30,519 | 118 | 24,470 | 4,087 | 2,911 | 31,586 |

|        |     |        |       |       |        |
|--------|-----|--------|-------|-------|--------|
| 30,520 | 116 | 24,896 | 4,092 | 2,950 | 32,054 |
| 30,521 | 117 | 24,879 | 4,082 | 2,925 | 32,003 |
| 30,522 | 117 | 24,609 | 4,044 | 2,912 | 31,682 |
| 30,523 | 125 | 24,353 | 4,001 | 2,879 | 31,358 |
| 30,524 | 122 | 25,417 | 4,207 | 2,999 | 32,745 |
| 30,525 | 120 | 25,250 | 4,186 | 2,955 | 32,511 |
| 30,526 | 120 | 25,273 | 4,186 | 2,921 | 32,500 |
| 30,527 | 131 | 25,297 | 4,171 | 2,899 | 32,498 |
| 30,528 | 132 | 25,334 | 4,159 | 2,893 | 32,518 |
| 30,529 | 124 | 25,543 | 4,199 | 2,899 | 32,765 |
| 30,530 | 122 | 25,149 | 4,123 | 2,849 | 32,243 |
| 30,531 | 131 | 24,950 | 4,118 | 2,847 | 32,046 |
| 30,532 | 137 | 25,010 | 4,135 | 2,857 | 32,139 |
| 30,533 | 137 | 25,042 | 4,131 | 2,853 | 32,163 |
| 30,534 | 138 | 24,728 | 4,094 | 2,824 | 31,784 |
| 30,535 | 136 | 24,494 | 4,040 | 2,795 | 31,465 |
| 30,536 | 151 | 25,097 | 4,104 | 2,853 | 32,205 |
| 30,537 | 155 | 25,092 | 4,047 | 2,838 | 32,132 |
| 30,538 | 154 | 25,122 | 4,012 | 2,809 | 32,097 |
| 30,539 | 161 | 25,047 | 3,983 | 2,807 | 31,998 |
| 30,540 | 157 | 24,797 | 3,922 | 2,786 | 31,662 |
| 30,541 | 158 | 24,929 | 3,913 | 2,790 | 31,790 |
| 30,542 | 158 | 24,989 | 3,887 | 2,773 | 31,807 |
| 30,543 | 173 | 25,102 | 3,928 | 2,803 | 32,006 |
| 30,544 | 173 | 24,828 | 3,899 | 2,778 | 31,678 |
| 30,545 | 185 | 25,018 | 3,983 | 2,822 | 32,008 |
| 30,546 | 183 | 24,771 | 3,934 | 2,778 | 31,666 |
| 30,547 | 181 | 24,783 | 3,976 | 2,815 | 31,755 |
| 30,548 | 185 | 25,065 | 4,027 | 2,821 | 32,098 |
| 30,549 | 185 | 24,975 | 4,033 | 2,794 | 31,987 |
| 30,550 | 191 | 25,159 | 4,068 | 2,834 | 32,252 |
| 30,551 | 189 | 24,962 | 4,042 | 2,816 | 32,009 |

|        |     |        |       |       |        |
|--------|-----|--------|-------|-------|--------|
| 30,552 | 189 | 25,006 | 4,020 | 2,818 | 32,033 |
| 30,553 | 186 | 24,926 | 3,994 | 2,817 | 31,923 |
| 30,554 | 181 | 24,669 | 4,014 | 2,804 | 31,668 |
| 30,555 | 181 | 24,587 | 3,990 | 2,790 | 31,548 |
| 30,556 | 178 | 24,492 | 4,040 | 2,789 | 31,499 |
| 30,557 | 177 | 24,593 | 4,062 | 2,795 | 31,627 |
| 30,558 | 182 | 24,179 | 4,012 | 2,727 | 31,100 |
| 30,559 | 183 | 24,293 | 4,033 | 2,738 | 31,247 |
| 30,560 | 180 | 24,148 | 3,993 | 2,722 | 31,043 |
| 30,561 | 189 | 24,506 | 4,080 | 2,768 | 31,543 |
| 30,562 | 186 | 24,456 | 4,123 | 2,785 | 31,550 |
| 30,563 | 185 | 24,119 | 4,065 | 2,738 | 31,107 |
| 30,564 | 196 | 23,695 | 4,061 | 2,728 | 30,680 |
| 30,565 | 199 | 23,906 | 4,090 | 2,726 | 30,921 |
| 30,566 | 196 | 23,866 | 4,074 | 2,711 | 30,847 |
| 30,567 | 204 | 24,118 | 4,147 | 2,754 | 31,223 |
| 30,568 | 207 | 24,261 | 4,171 | 2,782 | 31,421 |
| 30,569 | 204 | 24,248 | 4,144 | 2,801 | 31,397 |
| 30,570 | 205 | 24,038 | 4,167 | 2,791 | 31,201 |
| 30,571 | 205 | 23,639 | 4,118 | 2,770 | 30,732 |
| 30,572 | 206 | 23,722 | 4,152 | 2,797 | 30,877 |
| 30,573 | 204 | 23,608 | 4,134 | 2,792 | 30,738 |
| 30,574 | 200 | 23,522 | 4,121 | 2,800 | 30,643 |
| 30,575 | 201 | 23,493 | 4,103 | 2,786 | 30,583 |
| 30,576 | 204 | 23,426 | 4,128 | 2,805 | 30,563 |
| 30,577 | 206 | 23,403 | 4,134 | 2,798 | 30,541 |
| 30,578 | 198 | 23,419 | 4,157 | 2,831 | 30,605 |
| 30,579 | 203 | 23,432 | 4,160 | 2,828 | 30,623 |
| 30,580 | 205 | 23,405 | 4,143 | 2,841 | 30,594 |
| 30,581 | 205 | 23,707 | 4,159 | 2,866 | 30,937 |
| 30,582 | 200 | 23,483 | 4,117 | 2,840 | 30,640 |
| 30,583 | 201 | 23,514 | 4,148 | 2,853 | 30,716 |

|        |     |        |       |       |        |
|--------|-----|--------|-------|-------|--------|
| 30,584 | 196 | 23,125 | 4,103 | 2,832 | 30,256 |
| 30,585 | 198 | 23,221 | 4,121 | 2,849 | 30,389 |
| 30,586 | 190 | 23,361 | 4,150 | 2,866 | 30,567 |
| 30,587 | 185 | 23,108 | 4,134 | 2,835 | 30,262 |
| 30,588 | 184 | 22,798 | 4,137 | 2,843 | 29,962 |
| 30,589 | 184 | 23,025 | 4,163 | 2,871 | 30,243 |
| 30,590 | 173 | 23,285 | 4,202 | 2,897 | 30,557 |
| 30,591 | 171 | 22,899 | 4,195 | 2,884 | 30,149 |
| 30,592 | 171 | 23,072 | 4,233 | 2,904 | 30,380 |
| 30,593 | 162 | 23,373 | 4,280 | 2,923 | 30,738 |
| 30,594 | 159 | 23,005 | 4,235 | 2,887 | 30,286 |
| 30,595 | 160 | 23,065 | 4,231 | 2,881 | 30,337 |
| 30,596 | 155 | 23,481 | 4,277 | 2,920 | 30,833 |
| 30,597 | 171 | 23,249 | 4,221 | 2,890 | 30,531 |
| 30,598 | 172 | 22,990 | 4,187 | 2,863 | 30,212 |
| 30,599 | 179 | 23,549 | 4,267 | 2,967 | 30,962 |
| 30,600 | 180 | 23,337 | 4,228 | 2,951 | 30,696 |
| 30,601 | 178 | 23,729 | 4,274 | 2,983 | 31,164 |
| 30,602 | 178 | 23,890 | 4,290 | 2,995 | 31,353 |
| 30,603 | 185 | 23,960 | 4,286 | 2,993 | 31,424 |
| 30,604 | 187 | 24,057 | 4,322 | 3,013 | 31,579 |
| 30,605 | 190 | 24,166 | 4,309 | 3,042 | 31,707 |
| 30,606 | 191 | 24,210 | 4,299 | 3,037 | 31,737 |
| 30,607 | 197 | 24,310 | 4,305 | 3,077 | 31,889 |
| 30,608 | 197 | 24,328 | 4,295 | 3,081 | 31,901 |
| 30,609 | 190 | 24,224 | 4,274 | 3,073 | 31,761 |
| 30,610 | 189 | 24,234 | 4,280 | 3,088 | 31,791 |
| 30,611 | 186 | 24,356 | 4,293 | 3,091 | 31,926 |
| 30,612 | 185 | 24,603 | 4,304 | 3,123 | 32,215 |
| 30,613 | 192 | 24,654 | 4,258 | 3,125 | 32,229 |
| 30,614 | 191 | 24,709 | 4,246 | 3,126 | 32,272 |
| 30,615 | 182 | 24,923 | 4,269 | 3,136 | 32,510 |

|        |     |        |       |       |        |
|--------|-----|--------|-------|-------|--------|
| 30,616 | 183 | 25,335 | 4,342 | 3,211 | 33,071 |
| 30,617 | 175 | 25,352 | 4,298 | 3,202 | 33,027 |
| 30,618 | 176 | 25,335 | 4,268 | 3,184 | 32,963 |
| 30,619 | 179 | 25,470 | 4,286 | 3,186 | 33,121 |
| 30,620 | 172 | 25,218 | 4,238 | 3,140 | 32,768 |
| 30,621 | 169 | 25,212 | 4,227 | 3,168 | 32,776 |
| 30,622 | 167 | 25,179 | 4,205 | 3,145 | 32,696 |
| 30,623 | 168 | 25,290 | 4,208 | 3,141 | 32,807 |
| 30,624 | 165 | 25,416 | 4,209 | 3,144 | 32,934 |
| 30,625 | 173 | 25,303 | 4,135 | 3,121 | 32,732 |
| 30,626 | 176 | 25,465 | 4,131 | 3,153 | 32,925 |
| 30,627 | 177 | 25,781 | 4,144 | 3,173 | 33,275 |
| 30,628 | 174 | 25,604 | 4,102 | 3,130 | 33,010 |
| 30,629 | 176 | 25,660 | 4,096 | 3,139 | 33,071 |
| 30,630 | 176 | 25,402 | 4,040 | 3,126 | 32,744 |
| 30,631 | 172 | 25,178 | 4,009 | 3,090 | 32,449 |
| 30,632 | 165 | 25,706 | 4,092 | 3,143 | 33,106 |
| 30,633 | 167 | 25,948 | 4,096 | 3,152 | 33,363 |
| 30,634 | 168 | 25,660 | 3,998 | 3,111 | 32,937 |
| 30,635 | 165 | 25,636 | 3,996 | 3,091 | 32,888 |
| 30,636 | 167 | 25,647 | 3,979 | 3,067 | 32,860 |
| 30,637 | 165 | 25,243 | 3,912 | 3,032 | 32,352 |
| 30,638 | 164 | 25,436 | 3,944 | 3,058 | 32,602 |
| 30,639 | 168 | 25,504 | 3,912 | 3,043 | 32,627 |
| 30,640 | 172 | 25,759 | 3,935 | 3,054 | 32,920 |
| 30,641 | 172 | 25,798 | 3,923 | 3,038 | 32,931 |
| 30,642 | 174 | 25,767 | 3,875 | 2,985 | 32,801 |
| 30,643 | 175 | 25,465 | 3,824 | 2,960 | 32,424 |
| 30,644 | 178 | 25,833 | 3,838 | 2,998 | 32,847 |
| 30,645 | 174 | 25,757 | 3,776 | 2,972 | 32,679 |
| 30,646 | 182 | 26,062 | 3,790 | 2,994 | 33,028 |
| 30,647 | 185 | 25,947 | 3,733 | 2,967 | 32,832 |

|        |     |        |       |       |        |
|--------|-----|--------|-------|-------|--------|
| 30,648 | 166 | 25,492 | 3,673 | 2,913 | 32,244 |
| 30,649 | 173 | 25,683 | 3,686 | 2,912 | 32,454 |
| 30,650 | 175 | 25,094 | 3,609 | 2,869 | 31,747 |
| 30,651 | 174 | 24,776 | 3,561 | 2,827 | 31,338 |
| 30,652 | 171 | 24,989 | 3,565 | 2,835 | 31,560 |
| 30,653 | 171 | 24,840 | 3,526 | 2,809 | 31,346 |
| 30,654 | 167 | 24,775 | 3,511 | 2,800 | 31,253 |
| 30,655 | 167 | 24,699 | 3,482 | 2,764 | 31,112 |
| 30,656 | 168 | 24,619 | 3,474 | 2,752 | 31,013 |
| 30,657 | 167 | 24,604 | 3,447 | 2,743 | 30,961 |
| 30,658 | 160 | 24,487 | 3,449 | 2,720 | 30,816 |
| 30,659 | 159 | 24,583 | 3,448 | 2,699 | 30,889 |
| 30,660 | 161 | 24,533 | 3,428 | 2,682 | 30,804 |
| 30,661 | 166 | 24,703 | 3,437 | 2,697 | 31,003 |
| 30,662 | 166 | 24,479 | 3,385 | 2,661 | 30,691 |
| 30,663 | 163 | 24,302 | 3,365 | 2,641 | 30,471 |
| 30,664 | 159 | 24,296 | 3,367 | 2,632 | 30,454 |
| 30,665 | 161 | 24,122 | 3,325 | 2,614 | 30,222 |
| 30,666 | 167 | 23,929 | 3,303 | 2,608 | 30,007 |
| 30,667 | 163 | 23,532 | 3,246 | 2,559 | 29,500 |
| 30,668 | 165 | 23,331 | 3,228 | 2,537 | 29,261 |
| 30,669 | 162 | 23,180 | 3,191 | 2,521 | 29,054 |
| 30,670 | 154 | 22,957 | 3,153 | 2,497 | 28,761 |
| 30,671 | 156 | 22,891 | 3,136 | 2,484 | 28,667 |
| 30,672 | 161 | 22,678 | 3,111 | 2,475 | 28,425 |
| 30,673 | 161 | 22,614 | 3,101 | 2,475 | 28,351 |
| 30,674 | 162 | 22,537 | 3,104 | 2,470 | 28,273 |
| 30,675 | 168 | 22,759 | 3,105 | 2,499 | 28,531 |
| 30,676 | 163 | 22,667 | 3,112 | 2,490 | 28,432 |
| 30,677 | 161 | 22,680 | 3,118 | 2,474 | 28,433 |
| 30,678 | 160 | 22,925 | 3,177 | 2,510 | 28,772 |
| 30,679 | 156 | 22,703 | 3,140 | 2,497 | 28,496 |

|        |     |        |       |       |        |
|--------|-----|--------|-------|-------|--------|
| 30,680 | 158 | 22,846 | 3,162 | 2,519 | 28,685 |
| 30,681 | 154 | 22,825 | 3,170 | 2,518 | 28,667 |
| 30,682 | 157 | 22,951 | 3,187 | 2,524 | 28,819 |
| 30,683 | 162 | 22,923 | 3,151 | 2,509 | 28,745 |
| 30,684 | 159 | 22,922 | 3,155 | 2,507 | 28,743 |
| 30,685 | 159 | 22,897 | 3,198 | 2,511 | 28,765 |
| 30,686 | 160 | 22,945 | 3,189 | 2,519 | 28,813 |
| 30,687 | 164 | 23,005 | 3,206 | 2,513 | 28,888 |
| 30,688 | 165 | 22,892 | 3,208 | 2,517 | 28,782 |
| 30,689 | 161 | 22,954 | 3,273 | 2,538 | 28,926 |
| 30,690 | 161 | 22,658 | 3,258 | 2,537 | 28,614 |
| 30,691 | 163 | 22,362 | 3,234 | 2,523 | 28,282 |
| 30,692 | 164 | 22,080 | 3,226 | 2,518 | 27,988 |
| 30,693 | 167 | 22,537 | 3,314 | 2,606 | 28,624 |
| 30,694 | 168 | 22,566 | 3,323 | 2,609 | 28,666 |
| 30,695 | 169 | 22,392 | 3,343 | 2,603 | 28,507 |
| 30,696 | 170 | 22,680 | 3,426 | 2,646 | 28,922 |
| 30,697 | 163 | 22,493 | 3,428 | 2,633 | 28,717 |
| 30,698 | 158 | 22,317 | 3,455 | 2,636 | 28,566 |
| 30,699 | 157 | 22,200 | 3,459 | 2,662 | 28,478 |
| 30,700 | 150 | 22,312 | 3,509 | 2,696 | 28,667 |
| 30,701 | 140 | 22,311 | 3,522 | 2,698 | 28,671 |
| 30,702 | 137 | 22,265 | 3,543 | 2,694 | 28,639 |
| 30,703 | 140 | 22,098 | 3,523 | 2,674 | 28,435 |
| 30,704 | 135 | 21,744 | 3,500 | 2,649 | 28,028 |
| 30,705 | 137 | 22,053 | 3,543 | 2,680 | 28,413 |
| 30,706 | 136 | 21,975 | 3,546 | 2,670 | 28,327 |
| 30,707 | 135 | 22,052 | 3,545 | 2,664 | 28,396 |
| 30,708 | 140 | 21,906 | 3,501 | 2,625 | 28,172 |
| 30,709 | 140 | 21,952 | 3,505 | 2,637 | 28,234 |
| 30,710 | 140 | 22,196 | 3,528 | 2,669 | 28,533 |
| 30,711 | 137 | 21,988 | 3,527 | 2,651 | 28,303 |



|        |     |        |       |       |        |
|--------|-----|--------|-------|-------|--------|
| 30,712 | 133 | 21,962 | 3,535 | 2,640 | 28,270 |
| 30,713 | 133 | 22,005 | 3,563 | 2,654 | 28,355 |
| 30,714 | 131 | 21,846 | 3,550 | 2,655 | 28,182 |
| 30,715 | 130 | 21,574 | 3,529 | 2,640 | 27,873 |
| 30,716 | 130 | 21,763 | 3,571 | 2,677 | 28,141 |
| 30,717 | 124 | 21,576 | 3,559 | 2,669 | 27,928 |
| 30,718 | 126 | 21,561 | 3,554 | 2,674 | 27,915 |
| 30,719 | 125 | 21,528 | 3,548 | 2,679 | 27,880 |
| 30,720 | 126 | 21,764 | 3,604 | 2,696 | 28,190 |
| 30,721 | 126 | 21,473 | 3,561 | 2,662 | 27,822 |
| 30,722 | 127 | 21,530 | 3,552 | 2,656 | 27,865 |
| 30,723 | 124 | 21,554 | 3,528 | 2,637 | 27,843 |
| 30,724 | 125 | 21,453 | 3,546 | 2,634 | 27,758 |
| 30,725 | 123 | 21,595 | 3,583 | 2,665 | 27,966 |
| 30,726 | 119 | 21,337 | 3,571 | 2,630 | 27,657 |
| 30,727 | 122 | 21,494 | 3,596 | 2,647 | 27,859 |
| 30,728 | 124 | 21,473 | 3,624 | 2,637 | 27,858 |
| 30,729 | 123 | 21,297 | 3,606 | 2,628 | 27,654 |
| 30,730 | 127 | 21,326 | 3,624 | 2,618 | 27,695 |
| 30,731 | 131 | 21,302 | 3,638 | 2,625 | 27,696 |
| 30,732 | 133 | 21,358 | 3,630 | 2,619 | 27,740 |
| 30,733 | 134 | 21,501 | 3,640 | 2,636 | 27,911 |
| 30,734 | 135 | 21,521 | 3,649 | 2,626 | 27,931 |
| 30,735 | 138 | 21,317 | 3,597 | 2,589 | 27,641 |
| 30,736 | 140 | 21,522 | 3,632 | 2,623 | 27,917 |
| 30,737 | 136 | 21,511 | 3,648 | 2,624 | 27,919 |
| 30,738 | 134 | 21,584 | 3,657 | 2,653 | 28,028 |
| 30,739 | 131 | 21,589 | 3,639 | 2,640 | 27,999 |
| 30,740 | 124 | 21,472 | 3,583 | 2,576 | 27,755 |
| 30,741 | 125 | 21,546 | 3,606 | 2,596 | 27,873 |
| 30,742 | 122 | 21,442 | 3,610 | 2,601 | 27,775 |
| 30,743 | 120 | 21,546 | 3,620 | 2,610 | 27,896 |

|        |     |        |       |       |        |
|--------|-----|--------|-------|-------|--------|
| 30,744 | 119 | 21,245 | 3,561 | 2,570 | 27,495 |
| 30,745 | 116 | 21,461 | 3,569 | 2,587 | 27,733 |
| 30,746 | 118 | 21,772 | 3,623 | 2,623 | 28,136 |
| 30,747 | 123 | 21,735 | 3,629 | 2,632 | 28,119 |
| 30,748 | 118 | 21,474 | 3,589 | 2,612 | 27,793 |
| 30,749 | 129 | 21,051 | 3,468 | 2,510 | 27,158 |
| 30,750 | 136 | 21,341 | 3,493 | 2,541 | 27,511 |
| 30,751 | 137 | 21,532 | 3,519 | 2,566 | 27,754 |
| 30,752 | 138 | 21,367 | 3,495 | 2,536 | 27,536 |
| 30,753 | 138 | 21,337 | 3,507 | 2,536 | 27,518 |
| 30,754 | 138 | 21,303 | 3,470 | 2,524 | 27,435 |
| 30,755 | 138 | 21,330 | 3,481 | 2,517 | 27,466 |
| 30,756 | 138 | 21,302 | 3,451 | 2,542 | 27,433 |
| 30,757 | 141 | 21,486 | 3,495 | 2,584 | 27,706 |
| 30,758 | 141 | 21,634 | 3,518 | 2,601 | 27,894 |
| 30,759 | 140 | 21,583 | 3,514 | 2,603 | 27,840 |
| 30,760 | 141 | 21,530 | 3,541 | 2,609 | 27,821 |
| 30,761 | 141 | 21,751 | 3,561 | 2,640 | 28,093 |
| 30,762 | 138 | 21,806 | 3,537 | 2,653 | 28,134 |
| 30,763 | 140 | 21,720 | 3,480 | 2,642 | 27,982 |
| 30,764 | 142 | 21,649 | 3,400 | 2,565 | 27,756 |
| 30,765 | 148 | 21,820 | 3,417 | 2,583 | 27,968 |
| 30,766 | 147 | 22,042 | 3,459 | 2,596 | 28,244 |
| 30,767 | 148 | 22,159 | 3,467 | 2,570 | 28,344 |
| 30,768 | 150 | 22,326 | 3,493 | 2,594 | 28,563 |
| 30,769 | 160 | 22,283 | 3,513 | 2,609 | 28,565 |
| 30,770 | 162 | 22,204 | 3,508 | 2,598 | 28,472 |
| 30,771 | 161 | 22,185 | 3,505 | 2,597 | 28,448 |
| 30,772 | 161 | 22,185 | 3,514 | 2,600 | 28,460 |
| 30,773 | 161 | 22,149 | 3,533 | 2,600 | 28,443 |
| 30,774 | 160 | 22,194 | 3,568 | 2,604 | 28,526 |
| 30,775 | 171 | 22,465 | 3,583 | 2,632 | 28,851 |

|        |     |        |       |       |        |
|--------|-----|--------|-------|-------|--------|
| 30,776 | 165 | 22,382 | 3,556 | 2,620 | 28,723 |
| 30,777 | 163 | 22,369 | 3,550 | 2,618 | 28,700 |
| 30,778 | 160 | 22,270 | 3,517 | 2,622 | 28,569 |
| 30,779 | 161 | 22,234 | 3,518 | 2,627 | 28,540 |
| 30,780 | 155 | 22,332 | 3,511 | 2,617 | 28,615 |
| 30,781 | 153 | 21,985 | 3,457 | 2,563 | 28,158 |
| 30,782 | 153 | 21,944 | 3,471 | 2,564 | 28,132 |
| 30,783 | 142 | 21,835 | 3,439 | 2,578 | 27,994 |
| 30,784 | 144 | 21,795 | 3,459 | 2,606 | 28,004 |
| 30,785 | 144 | 21,573 | 3,454 | 2,599 | 27,770 |
| 30,786 | 148 | 21,587 | 3,470 | 2,636 | 27,841 |
| 30,787 | 150 | 21,392 | 3,456 | 2,616 | 27,614 |
| 30,788 | 149 | 21,255 | 3,439 | 2,603 | 27,446 |
| 30,789 | 149 | 21,193 | 3,446 | 2,605 | 27,393 |
| 30,790 | 147 | 21,050 | 3,434 | 2,603 | 27,234 |
| 30,791 | 152 | 20,993 | 3,431 | 2,600 | 27,176 |
| 30,792 | 155 | 21,000 | 3,452 | 2,599 | 27,206 |
| 30,793 | 154 | 20,874 | 3,432 | 2,580 | 27,040 |
| 30,794 | 159 | 20,945 | 3,446 | 2,584 | 27,134 |
| 30,795 | 163 | 20,800 | 3,422 | 2,572 | 26,957 |
| 30,796 | 162 | 20,725 | 3,443 | 2,571 | 26,901 |
| 30,797 | 165 | 20,805 | 3,464 | 2,570 | 27,004 |
| 30,798 | 162 | 20,805 | 3,436 | 2,554 | 26,957 |
| 30,799 | 158 | 20,786 | 3,408 | 2,506 | 26,858 |
| 30,800 | 159 | 20,800 | 3,432 | 2,507 | 26,898 |
| 30,801 | 155 | 20,932 | 3,483 | 2,516 | 27,086 |
| 30,802 | 153 | 20,910 | 3,474 | 2,518 | 27,055 |
| 30,803 | 153 | 20,903 | 3,492 | 2,528 | 27,076 |
| 30,804 | 154 | 21,033 | 3,531 | 2,566 | 27,284 |
| 30,805 | 153 | 21,250 | 3,600 | 2,603 | 27,606 |
| 30,806 | 153 | 21,349 | 3,626 | 2,640 | 27,768 |
| 30,807 | 156 | 21,134 | 3,595 | 2,601 | 27,486 |

|        |     |        |       |       |        |
|--------|-----|--------|-------|-------|--------|
| 30,808 | 156 | 21,426 | 3,647 | 2,621 | 27,850 |
| 30,809 | 153 | 21,391 | 3,695 | 2,646 | 27,885 |
| 30,810 | 148 | 21,221 | 3,705 | 2,639 | 27,713 |
| 30,811 | 148 | 21,135 | 3,731 | 2,647 | 27,661 |
| 30,812 | 152 | 21,126 | 3,766 | 2,640 | 27,684 |
| 30,813 | 152 | 20,810 | 3,768 | 2,615 | 27,345 |
| 30,814 | 150 | 20,789 | 3,839 | 2,658 | 27,436 |
| 30,815 | 150 | 20,778 | 3,881 | 2,699 | 27,508 |
| 30,816 | 148 | 20,550 | 3,870 | 2,699 | 27,267 |
| 30,817 | 149 | 20,575 | 3,874 | 2,727 | 27,325 |
| 30,818 | 144 | 20,447 | 3,823 | 2,689 | 27,103 |
| 30,819 | 148 | 20,743 | 3,906 | 2,734 | 27,531 |
| 30,820 | 143 | 20,833 | 3,946 | 2,749 | 27,671 |
| 30,821 | 146 | 20,799 | 3,937 | 2,743 | 27,625 |
| 30,822 | 147 | 21,071 | 4,014 | 2,772 | 28,004 |
| 30,823 | 146 | 21,211 | 4,060 | 2,800 | 28,217 |
| 30,824 | 149 | 20,792 | 3,988 | 2,763 | 27,692 |
| 30,825 | 149 | 20,949 | 4,053 | 2,812 | 27,963 |
| 30,826 | 143 | 21,209 | 4,140 | 2,848 | 28,340 |
| 30,827 | 144 | 20,999 | 4,122 | 2,826 | 28,091 |
| 30,828 | 144 | 21,158 | 4,167 | 2,859 | 28,328 |
| 30,829 | 138 | 21,389 | 4,241 | 2,905 | 28,673 |
| 30,830 | 136 | 21,489 | 4,278 | 2,947 | 28,850 |
| 30,831 | 146 | 21,593 | 4,319 | 2,958 | 29,016 |
| 30,832 | 144 | 21,392 | 4,284 | 2,950 | 28,770 |
| 30,833 | 149 | 21,598 | 4,358 | 2,993 | 29,098 |
| 30,834 | 148 | 21,445 | 4,377 | 2,968 | 28,938 |
| 30,835 | 155 | 21,401 | 4,383 | 2,973 | 28,912 |
| 30,836 | 159 | 21,634 | 4,430 | 2,995 | 29,218 |
| 30,837 | 155 | 21,743 | 4,450 | 2,989 | 29,337 |
| 30,838 | 151 | 21,430 | 4,413 | 2,958 | 28,952 |
| 30,839 | 151 | 21,474 | 4,415 | 2,978 | 29,018 |

|        |     |        |       |       |        |
|--------|-----|--------|-------|-------|--------|
| 30,840 | 155 | 21,142 | 4,337 | 2,926 | 28,560 |
| 30,841 | 157 | 21,334 | 4,370 | 2,960 | 28,821 |
| 30,842 | 154 | 21,542 | 4,403 | 2,996 | 29,095 |
| 30,843 | 154 | 21,754 | 4,444 | 3,042 | 29,394 |
| 30,844 | 151 | 21,809 | 4,451 | 3,032 | 29,443 |
| 30,845 | 145 | 21,697 | 4,433 | 3,004 | 29,279 |
| 30,846 | 145 | 21,704 | 4,444 | 3,001 | 29,294 |
| 30,847 | 148 | 21,931 | 4,500 | 3,062 | 29,641 |
| 30,848 | 144 | 21,861 | 4,511 | 3,069 | 29,585 |
| 30,849 | 141 | 21,422 | 4,483 | 3,045 | 29,091 |
| 30,850 | 137 | 21,373 | 4,506 | 3,066 | 29,082 |
| 30,851 | 134 | 21,098 | 4,457 | 3,056 | 28,745 |
| 30,852 | 140 | 21,367 | 4,484 | 3,094 | 29,085 |
| 30,853 | 137 | 21,384 | 4,509 | 3,094 | 29,124 |
| 30,854 | 135 | 20,719 | 4,338 | 2,948 | 28,140 |
| 30,855 | 135 | 20,805 | 4,361 | 2,968 | 28,269 |
| 30,856 | 134 | 20,549 | 4,325 | 2,954 | 27,962 |
| 30,857 | 134 | 20,853 | 4,378 | 2,979 | 28,344 |
| 30,858 | 129 | 20,988 | 4,416 | 3,000 | 28,533 |
| 30,859 | 129 | 20,850 | 4,403 | 2,962 | 28,344 |
| 30,860 | 129 | 20,763 | 4,374 | 2,963 | 28,229 |
| 30,861 | 129 | 20,641 | 4,357 | 2,963 | 28,090 |
| 30,862 | 129 | 20,774 | 4,391 | 2,979 | 28,273 |
| 30,863 | 126 | 20,155 | 4,242 | 2,881 | 27,404 |
| 30,864 | 125 | 20,434 | 4,266 | 2,894 | 27,719 |
| 30,865 | 121 | 20,701 | 4,310 | 2,935 | 28,067 |
| 30,866 | 123 | 20,647 | 4,286 | 2,937 | 27,993 |
| 30,867 | 122 | 20,565 | 4,299 | 2,945 | 27,931 |
| 30,868 | 120 | 20,472 | 4,301 | 2,936 | 27,829 |
| 30,869 | 122 | 20,617 | 4,368 | 3,005 | 28,112 |
| 30,870 | 121 | 20,560 | 4,384 | 3,006 | 28,071 |
| 30,871 | 117 | 20,545 | 4,415 | 3,026 | 28,103 |

|        |     |        |       |       |        |
|--------|-----|--------|-------|-------|--------|
| 30,872 | 116 | 20,518 | 4,430 | 3,050 | 28,114 |
| 30,873 | 112 | 19,593 | 4,251 | 2,924 | 26,880 |
| 30,874 | 114 | 19,662 | 4,262 | 2,925 | 26,963 |
| 30,875 | 115 | 19,631 | 4,249 | 2,918 | 26,913 |
| 30,876 | 118 | 19,777 | 4,296 | 2,937 | 27,128 |
| 30,877 | 117 | 19,737 | 4,297 | 2,933 | 27,084 |
| 30,878 | 117 | 19,647 | 4,304 | 2,940 | 27,008 |
| 30,879 | 120 | 19,723 | 4,307 | 2,930 | 27,080 |
| 30,880 | 124 | 19,341 | 4,273 | 2,894 | 26,632 |
| 30,881 | 125 | 19,528 | 4,324 | 2,911 | 26,888 |
| 30,882 | 115 | 19,746 | 4,392 | 2,930 | 27,183 |
| 30,883 | 110 | 19,604 | 4,365 | 2,932 | 27,011 |
| 30,884 | 108 | 19,580 | 4,302 | 2,894 | 26,884 |
| 30,885 | 114 | 19,758 | 4,331 | 2,928 | 27,131 |
| 30,886 | 107 | 19,689 | 4,342 | 2,933 | 27,071 |
| 30,887 | 103 | 19,687 | 4,358 | 2,948 | 27,096 |
| 30,888 | 107 | 19,658 | 4,363 | 2,962 | 27,090 |
| 30,889 | 108 | 19,584 | 4,346 | 2,918 | 26,956 |
| 30,890 | 109 | 19,773 | 4,413 | 2,945 | 27,240 |
| 30,891 | 104 | 19,749 | 4,425 | 2,951 | 27,229 |
| 30,892 | 104 | 19,838 | 4,457 | 2,962 | 27,361 |
| 30,893 | 103 | 19,840 | 4,478 | 2,972 | 27,393 |
| 30,894 | 102 | 19,782 | 4,480 | 2,967 | 27,331 |
| 30,895 | 100 | 19,649 | 4,503 | 2,978 | 27,230 |
| 30,896 | 102 | 19,662 | 4,503 | 2,991 | 27,258 |
| 30,897 | 104 | 19,674 | 4,524 | 2,996 | 27,298 |
| 30,898 | 103 | 19,576 | 4,480 | 2,992 | 27,151 |
| 30,899 | 101 | 19,352 | 4,382 | 2,941 | 26,776 |
| 30,900 | 101 | 19,449 | 4,404 | 2,965 | 26,919 |
| 30,901 | 101 | 19,202 | 4,384 | 2,962 | 26,649 |
| 30,902 | 99  | 19,054 | 4,373 | 2,943 | 26,469 |
| 30,903 | 103 | 20,191 | 4,692 | 3,104 | 28,090 |

|        |     |        |       |       |        |
|--------|-----|--------|-------|-------|--------|
| 30,904 | 106 | 20,493 | 4,771 | 3,130 | 28,500 |
| 30,905 | 108 | 20,468 | 4,819 | 3,177 | 28,572 |
| 30,906 | 108 | 20,464 | 4,863 | 3,204 | 28,639 |
| 30,907 | 108 | 19,805 | 4,710 | 3,111 | 27,734 |
| 30,908 | 108 | 19,873 | 4,783 | 3,142 | 27,906 |
| 30,909 | 109 | 20,138 | 4,841 | 3,184 | 28,272 |
| 30,910 | 110 | 20,266 | 4,853 | 3,202 | 28,431 |
| 30,911 | 115 | 20,443 | 4,859 | 3,205 | 28,622 |
| 30,912 | 120 | 20,540 | 4,893 | 3,191 | 28,744 |
| 30,913 | 120 | 20,600 | 4,910 | 3,203 | 28,833 |
| 30,914 | 119 | 20,652 | 4,910 | 3,189 | 28,870 |
| 30,915 | 124 | 20,970 | 4,990 | 3,248 | 29,332 |
| 30,916 | 127 | 21,089 | 5,050 | 3,254 | 29,520 |
| 30,917 | 127 | 21,040 | 5,018 | 3,207 | 29,392 |
| 30,918 | 127 | 21,417 | 5,088 | 3,239 | 29,871 |
| 30,919 | 135 | 21,514 | 5,123 | 3,264 | 30,036 |
| 30,920 | 136 | 21,506 | 5,123 | 3,249 | 30,014 |
| 30,921 | 137 | 21,747 | 5,129 | 3,253 | 30,266 |
| 30,922 | 141 | 21,737 | 5,094 | 3,223 | 30,195 |
| 30,923 | 141 | 21,843 | 5,089 | 3,233 | 30,306 |
| 30,924 | 145 | 22,058 | 5,139 | 3,252 | 30,594 |
| 30,925 | 145 | 21,939 | 5,109 | 3,244 | 30,437 |
| 30,926 | 147 | 21,988 | 5,107 | 3,266 | 30,508 |
| 30,927 | 146 | 22,173 | 5,125 | 3,278 | 30,722 |
| 30,928 | 147 | 22,322 | 5,149 | 3,291 | 30,909 |
| 30,929 | 146 | 22,423 | 5,146 | 3,298 | 31,013 |
| 30,930 | 148 | 22,404 | 5,124 | 3,299 | 30,975 |
| 30,931 | 149 | 22,454 | 5,158 | 3,318 | 31,079 |
| 30,932 | 151 | 22,480 | 5,183 | 3,347 | 31,161 |
| 30,933 | 155 | 22,819 | 5,249 | 3,436 | 31,659 |
| 30,934 | 152 | 22,261 | 5,073 | 3,302 | 30,788 |
| 30,935 | 151 | 22,598 | 5,133 | 3,329 | 31,211 |

|        |     |        |       |       |        |
|--------|-----|--------|-------|-------|--------|
| 30,936 | 152 | 23,084 | 5,235 | 3,386 | 31,857 |
| 30,937 | 152 | 23,138 | 5,258 | 3,412 | 31,960 |
| 30,938 | 151 | 23,791 | 5,377 | 3,472 | 32,791 |
| 30,939 | 149 | 23,828 | 5,399 | 3,485 | 32,861 |
| 30,940 | 150 | 24,164 | 5,513 | 3,578 | 33,405 |
| 30,941 | 152 | 24,307 | 5,526 | 3,596 | 33,581 |
| 30,942 | 152 | 24,372 | 5,547 | 3,611 | 33,682 |
| 30,943 | 149 | 24,176 | 5,505 | 3,563 | 33,393 |
| 30,944 | 149 | 24,131 | 5,526 | 3,558 | 33,364 |
| 30,945 | 154 | 24,375 | 5,564 | 3,594 | 33,687 |
| 30,946 | 160 | 24,420 | 5,568 | 3,596 | 33,744 |
| 30,947 | 161 | 24,447 | 5,573 | 3,597 | 33,778 |
| 30,948 | 163 | 24,271 | 5,535 | 3,567 | 33,536 |
| 30,949 | 166 | 23,851 | 5,471 | 3,512 | 33,000 |
| 30,950 | 163 | 23,965 | 5,532 | 3,547 | 33,207 |
| 30,951 | 166 | 23,858 | 5,515 | 3,516 | 33,055 |
| 30,952 | 170 | 23,732 | 5,414 | 3,481 | 32,797 |
| 30,953 | 171 | 23,822 | 5,435 | 3,494 | 32,922 |
| 30,954 | 168 | 23,767 | 5,422 | 3,498 | 32,855 |
| 30,955 | 168 | 23,505 | 5,368 | 3,475 | 32,516 |
| 30,956 | 164 | 23,331 | 5,294 | 3,437 | 32,226 |
| 30,957 | 165 | 23,855 | 5,423 | 3,483 | 32,926 |
| 30,958 | 168 | 23,960 | 5,405 | 3,509 | 33,042 |
| 30,959 | 170 | 24,044 | 5,393 | 3,509 | 33,116 |
| 30,960 | 179 | 23,875 | 5,385 | 3,483 | 32,922 |
| 30,961 | 179 | 23,845 | 5,414 | 3,486 | 32,924 |
| 30,962 | 178 | 23,561 | 5,380 | 3,471 | 32,590 |
| 30,963 | 175 | 23,332 | 5,357 | 3,453 | 32,317 |
| 30,964 | 180 | 23,862 | 5,565 | 3,607 | 33,214 |
| 30,965 | 180 | 23,538 | 5,524 | 3,587 | 32,829 |
| 30,966 | 176 | 23,436 | 5,514 | 3,590 | 32,716 |
| 30,967 | 175 | 23,273 | 5,463 | 3,578 | 32,489 |



|        |     |        |       |       |        |
|--------|-----|--------|-------|-------|--------|
| 30,968 | 174 | 23,146 | 5,453 | 3,586 | 32,359 |
| 30,969 | 176 | 23,126 | 5,436 | 3,593 | 32,331 |
| 30,970 | 159 | 22,868 | 5,362 | 3,555 | 31,944 |
| 30,971 | 157 | 22,580 | 5,318 | 3,523 | 31,578 |
| 30,972 | 157 | 22,522 | 5,324 | 3,522 | 31,525 |
| 30,973 | 156 | 22,506 | 5,360 | 3,548 | 31,570 |
| 30,974 | 157 | 22,487 | 5,394 | 3,555 | 31,593 |
| 30,975 | 155 | 22,451 | 5,442 | 3,590 | 31,638 |
| 30,976 | 152 | 22,482 | 5,475 | 3,637 | 31,746 |
| 30,977 | 155 | 22,492 | 5,492 | 3,619 | 31,758 |
| 30,978 | 156 | 22,222 | 5,447 | 3,586 | 31,411 |
| 30,979 | 160 | 22,182 | 5,428 | 3,590 | 31,360 |
| 30,980 | 160 | 22,163 | 5,441 | 3,606 | 31,370 |
| 30,981 | 155 | 22,153 | 5,445 | 3,587 | 31,340 |
| 30,982 | 155 | 22,174 | 5,488 | 3,631 | 31,448 |
| 30,983 | 161 | 21,929 | 5,394 | 3,542 | 31,026 |
| 30,984 | 160 | 21,806 | 5,422 | 3,551 | 30,939 |
| 30,985 | 154 | 21,614 | 5,435 | 3,555 | 30,758 |
| 30,986 | 156 | 21,452 | 5,439 | 3,581 | 30,628 |
| 30,987 | 157 | 21,111 | 5,445 | 3,576 | 30,289 |
| 30,988 | 160 | 20,991 | 5,468 | 3,582 | 30,201 |
| 30,989 | 160 | 20,994 | 5,489 | 3,606 | 30,249 |
| 30,990 | 157 | 20,924 | 5,488 | 3,606 | 30,175 |
| 30,991 | 158 | 21,010 | 5,501 | 3,592 | 30,261 |
| 30,992 | 156 | 21,100 | 5,528 | 3,606 | 30,390 |
| 30,993 | 156 | 21,154 | 5,540 | 3,622 | 30,472 |
| 30,994 | 152 | 20,922 | 5,471 | 3,576 | 30,121 |
| 30,995 | 153 | 21,188 | 5,498 | 3,612 | 30,451 |
| 30,996 | 153 | 21,349 | 5,545 | 3,647 | 30,694 |
| 30,997 | 150 | 21,116 | 5,504 | 3,625 | 30,395 |
| 30,998 | 148 | 20,818 | 5,469 | 3,599 | 30,034 |
| 30,999 | 142 | 21,130 | 5,543 | 3,626 | 30,441 |

|        |     |        |       |       |        |
|--------|-----|--------|-------|-------|--------|
| 31,000 | 143 | 20,960 | 5,490 | 3,603 | 30,196 |
| 31,001 | 143 | 20,805 | 5,454 | 3,567 | 29,969 |
| 31,002 | 142 | 20,988 | 5,515 | 3,600 | 30,245 |
| 31,003 | 135 | 20,827 | 5,521 | 3,566 | 30,049 |
| 31,004 | 138 | 20,924 | 5,516 | 3,591 | 30,169 |
| 31,005 | 134 | 20,543 | 5,400 | 3,525 | 29,602 |
| 31,006 | 133 | 20,551 | 5,449 | 3,554 | 29,687 |
| 31,007 | 135 | 20,457 | 5,433 | 3,525 | 29,550 |
| 31,008 | 133 | 20,238 | 5,384 | 3,515 | 29,270 |
| 31,009 | 132 | 19,853 | 5,384 | 3,495 | 28,864 |
| 31,010 | 135 | 19,644 | 5,400 | 3,484 | 28,663 |
| 31,011 | 126 | 19,471 | 5,394 | 3,481 | 28,472 |
| 31,012 | 120 | 19,385 | 5,330 | 3,433 | 28,268 |
| 31,013 | 117 | 19,566 | 5,309 | 3,430 | 28,422 |
| 31,014 | 121 | 19,590 | 5,283 | 3,394 | 28,388 |
| 31,015 | 126 | 19,661 | 5,275 | 3,368 | 28,430 |
| 31,016 | 126 | 19,690 | 5,273 | 3,366 | 28,455 |
| 31,017 | 126 | 19,586 | 5,284 | 3,376 | 28,372 |
| 31,018 | 129 | 19,572 | 5,298 | 3,378 | 28,377 |
| 31,019 | 125 | 19,648 | 5,332 | 3,388 | 28,493 |
| 31,020 | 128 | 20,035 | 5,449 | 3,447 | 29,059 |
| 31,021 | 131 | 20,115 | 5,484 | 3,409 | 29,139 |
| 31,022 | 130 | 20,281 | 5,506 | 3,444 | 29,361 |
| 31,023 | 129 | 20,394 | 5,553 | 3,457 | 29,533 |
| 31,024 | 125 | 20,461 | 5,605 | 3,460 | 29,651 |
| 31,025 | 120 | 20,227 | 5,505 | 3,407 | 29,259 |
| 31,026 | 127 | 20,301 | 5,502 | 3,399 | 29,329 |
| 31,027 | 125 | 20,057 | 5,457 | 3,355 | 28,994 |
| 31,028 | 126 | 20,807 | 5,664 | 3,477 | 30,074 |
| 31,029 | 124 | 20,477 | 5,579 | 3,434 | 29,614 |
| 31,030 | 121 | 20,386 | 5,619 | 3,440 | 29,566 |
| 31,031 | 123 | 20,723 | 5,714 | 3,482 | 30,042 |

|        |     |        |       |       |        |
|--------|-----|--------|-------|-------|--------|
| 31,032 | 120 | 20,393 | 5,643 | 3,437 | 29,593 |
| 31,033 | 117 | 20,394 | 5,655 | 3,416 | 29,582 |
| 31,034 | 108 | 20,300 | 5,630 | 3,416 | 29,454 |
| 31,035 | 110 | 20,371 | 5,598 | 3,403 | 29,482 |
| 31,036 | 107 | 20,581 | 5,640 | 3,420 | 29,748 |
| 31,037 | 106 | 20,640 | 5,633 | 3,411 | 29,790 |
| 31,038 | 103 | 19,808 | 5,336 | 3,209 | 28,456 |
| 31,039 | 103 | 20,043 | 5,396 | 3,258 | 28,800 |
| 31,040 | 101 | 20,265 | 5,473 | 3,304 | 29,143 |
| 31,041 | 103 | 20,307 | 5,471 | 3,309 | 29,190 |
| 31,042 | 101 | 20,010 | 5,377 | 3,274 | 28,762 |
| 31,043 | 104 | 19,006 | 5,224 | 3,207 | 27,541 |
| 31,044 | 104 | 19,009 | 5,200 | 3,202 | 27,515 |
| 31,045 | 105 | 19,007 | 5,195 | 3,183 | 27,490 |
| 31,046 | 106 | 19,013 | 5,192 | 3,175 | 27,486 |
| 31,047 | 106 | 19,034 | 5,181 | 3,178 | 27,499 |
| 31,048 | 107 | 19,072 | 5,192 | 3,195 | 27,566 |
| 31,049 | 108 | 20,193 | 5,489 | 3,355 | 29,145 |
| 31,050 | 108 | 20,321 | 5,532 | 3,406 | 29,367 |
| 31,051 | 105 | 20,579 | 5,590 | 3,437 | 29,711 |
| 31,052 | 107 | 20,570 | 5,549 | 3,421 | 29,647 |
| 31,053 | 108 | 20,442 | 5,504 | 3,406 | 29,460 |
| 31,054 | 109 | 20,953 | 5,575 | 3,478 | 30,115 |
| 31,055 | 107 | 21,047 | 5,619 | 3,471 | 30,244 |
| 31,056 | 108 | 21,075 | 5,602 | 3,455 | 30,240 |
| 31,057 | 113 | 21,307 | 5,621 | 3,490 | 30,531 |
| 31,058 | 111 | 21,317 | 5,637 | 3,495 | 30,560 |
| 31,059 | 112 | 21,387 | 5,566 | 3,468 | 30,533 |
| 31,060 | 112 | 21,513 | 5,575 | 3,471 | 30,671 |
| 31,061 | 114 | 21,236 | 5,445 | 3,377 | 30,172 |
| 31,062 | 113 | 21,443 | 5,481 | 3,406 | 30,443 |
| 31,063 | 111 | 21,550 | 5,497 | 3,413 | 30,571 |

|        |     |        |       |       |        |
|--------|-----|--------|-------|-------|--------|
| 31,064 | 114 | 21,692 | 5,533 | 3,433 | 30,772 |
| 31,065 | 110 | 21,856 | 5,567 | 3,472 | 31,005 |
| 31,066 | 105 | 21,789 | 5,513 | 3,444 | 30,851 |
| 31,067 | 106 | 21,912 | 5,503 | 3,444 | 30,965 |
| 31,068 | 109 | 22,050 | 5,541 | 3,480 | 31,180 |
| 31,069 | 110 | 22,347 | 5,566 | 3,494 | 31,517 |
| 31,070 | 107 | 21,973 | 5,516 | 3,435 | 31,031 |
| 31,071 | 109 | 22,186 | 5,533 | 3,462 | 31,290 |
| 31,072 | 107 | 22,404 | 5,572 | 3,507 | 31,590 |
| 31,073 | 106 | 22,227 | 5,517 | 3,483 | 31,333 |
| 31,074 | 111 | 21,988 | 5,492 | 3,466 | 31,057 |
| 31,075 | 111 | 21,944 | 5,450 | 3,460 | 30,965 |
| 31,076 | 112 | 22,069 | 5,452 | 3,452 | 31,085 |
| 31,077 | 107 | 22,113 | 5,452 | 3,431 | 31,103 |
| 31,078 | 104 | 22,110 | 5,439 | 3,453 | 31,106 |
| 31,079 | 107 | 22,014 | 5,400 | 3,459 | 30,980 |
| 31,080 | 107 | 21,840 | 5,361 | 3,466 | 30,774 |
| 31,081 | 107 | 22,017 | 5,382 | 3,498 | 31,004 |
| 31,082 | 110 | 22,054 | 5,393 | 3,508 | 31,065 |
| 31,083 | 112 | 22,191 | 5,383 | 3,531 | 31,217 |
| 31,084 | 114 | 22,398 | 5,402 | 3,564 | 31,478 |
| 31,085 | 114 | 22,400 | 5,397 | 3,558 | 31,469 |
| 31,086 | 122 | 22,252 | 5,389 | 3,542 | 31,305 |
| 31,087 | 121 | 22,310 | 5,396 | 3,549 | 31,376 |
| 31,088 | 120 | 22,316 | 5,386 | 3,564 | 31,386 |
| 31,089 | 118 | 22,288 | 5,379 | 3,580 | 31,365 |
| 31,090 | 118 | 22,236 | 5,389 | 3,600 | 31,343 |
| 31,091 | 120 | 22,410 | 5,422 | 3,602 | 31,554 |
| 31,092 | 129 | 22,633 | 5,466 | 3,595 | 31,823 |
| 31,093 | 135 | 23,120 | 5,565 | 3,649 | 32,469 |
| 31,094 | 126 | 23,179 | 5,617 | 3,665 | 32,587 |
| 31,095 | 123 | 23,291 | 5,659 | 3,709 | 32,782 |

|        |     |        |       |       |        |
|--------|-----|--------|-------|-------|--------|
| 31,096 | 126 | 23,192 | 5,637 | 3,720 | 32,675 |
| 31,097 | 126 | 23,228 | 5,640 | 3,719 | 32,713 |
| 31,098 | 145 | 23,166 | 5,602 | 3,694 | 32,607 |
| 31,099 | 145 | 23,110 | 5,572 | 3,684 | 32,511 |
| 31,100 | 147 | 23,270 | 5,572 | 3,704 | 32,693 |
| 31,101 | 147 | 23,187 | 5,550 | 3,699 | 32,583 |
| 31,102 | 145 | 23,252 | 5,583 | 3,733 | 32,713 |
| 31,103 | 144 | 23,131 | 5,574 | 3,719 | 32,568 |
| 31,104 | 144 | 22,798 | 5,546 | 3,696 | 32,184 |
| 31,105 | 148 | 23,088 | 5,613 | 3,740 | 32,589 |
| 31,106 | 148 | 23,122 | 5,605 | 3,743 | 32,618 |
| 31,107 | 148 | 23,176 | 5,642 | 3,769 | 32,735 |
| 31,108 | 143 | 23,024 | 5,620 | 3,745 | 32,532 |
| 31,109 | 147 | 22,666 | 5,550 | 3,720 | 32,083 |
| 31,110 | 147 | 22,840 | 5,586 | 3,731 | 32,304 |
| 31,111 | 143 | 22,861 | 5,570 | 3,745 | 32,319 |
| 31,112 | 144 | 23,000 | 5,612 | 3,774 | 32,530 |
| 31,113 | 151 | 23,196 | 5,653 | 3,804 | 32,804 |
| 31,114 | 150 | 23,052 | 5,644 | 3,813 | 32,659 |
| 31,115 | 143 | 22,468 | 5,514 | 3,716 | 31,841 |
| 31,116 | 147 | 22,639 | 5,558 | 3,740 | 32,084 |
| 31,117 | 148 | 22,849 | 5,609 | 3,764 | 32,370 |
| 31,118 | 149 | 22,811 | 5,612 | 3,767 | 32,339 |
| 31,119 | 144 | 22,901 | 5,642 | 3,790 | 32,477 |
| 31,120 | 147 | 22,726 | 5,607 | 3,796 | 32,276 |
| 31,121 | 149 | 22,672 | 5,559 | 3,819 | 32,199 |
| 31,122 | 148 | 22,770 | 5,537 | 3,818 | 32,273 |
| 31,123 | 146 | 21,787 | 5,337 | 3,692 | 30,962 |
| 31,124 | 149 | 21,988 | 5,378 | 3,718 | 31,233 |
| 31,125 | 147 | 22,185 | 5,416 | 3,761 | 31,509 |
| 31,126 | 158 | 22,466 | 5,478 | 3,791 | 31,893 |
| 31,127 | 159 | 22,450 | 5,466 | 3,796 | 31,871 |

|        |     |        |       |       |        |
|--------|-----|--------|-------|-------|--------|
| 31,128 | 154 | 22,197 | 5,408 | 3,766 | 31,525 |
| 31,129 | 155 | 22,380 | 5,474 | 3,800 | 31,809 |
| 31,130 | 145 | 22,273 | 5,387 | 3,733 | 31,538 |
| 31,131 | 149 | 22,486 | 5,422 | 3,748 | 31,805 |
| 31,132 | 149 | 22,365 | 5,370 | 3,725 | 31,609 |
| 31,133 | 148 | 22,249 | 5,363 | 3,702 | 31,462 |
| 31,134 | 151 | 22,585 | 5,471 | 3,741 | 31,948 |
| 31,135 | 149 | 22,361 | 5,454 | 3,715 | 31,679 |
| 31,136 | 146 | 22,170 | 5,413 | 3,702 | 31,431 |
| 31,137 | 142 | 22,348 | 5,420 | 3,705 | 31,615 |
| 31,138 | 141 | 22,360 | 5,415 | 3,703 | 31,619 |
| 31,139 | 141 | 22,408 | 5,407 | 3,684 | 31,640 |
| 31,140 | 141 | 22,310 | 5,381 | 3,663 | 31,495 |
| 31,141 | 143 | 22,523 | 5,407 | 3,685 | 31,758 |
| 31,142 | 142 | 22,623 | 5,399 | 3,694 | 31,858 |
| 31,143 | 134 | 22,628 | 5,385 | 3,686 | 31,833 |
| 31,144 | 134 | 22,446 | 5,343 | 3,649 | 31,572 |
| 31,145 | 140 | 22,410 | 5,312 | 3,616 | 31,478 |
| 31,146 | 142 | 21,820 | 5,194 | 3,506 | 30,662 |
| 31,147 | 140 | 21,782 | 5,202 | 3,498 | 30,622 |
| 31,148 | 140 | 21,804 | 5,203 | 3,493 | 30,640 |
| 31,149 | 128 | 21,621 | 5,173 | 3,454 | 30,376 |
| 31,150 | 128 | 21,593 | 5,171 | 3,438 | 30,330 |
| 31,151 | 134 | 21,753 | 5,197 | 3,439 | 30,523 |
| 31,152 | 134 | 21,737 | 5,229 | 3,438 | 30,538 |
| 31,153 | 135 | 21,790 | 5,241 | 3,438 | 30,604 |
| 31,154 | 134 | 21,655 | 5,272 | 3,440 | 30,501 |
| 31,155 | 140 | 21,970 | 5,275 | 3,449 | 30,834 |
| 31,156 | 137 | 22,080 | 5,294 | 3,444 | 30,955 |
| 31,157 | 135 | 22,031 | 5,276 | 3,434 | 30,876 |
| 31,158 | 139 | 22,128 | 5,254 | 3,417 | 30,938 |
| 31,159 | 142 | 22,322 | 5,290 | 3,445 | 31,199 |

|        |     |        |       |       |        |
|--------|-----|--------|-------|-------|--------|
| 31,160 | 140 | 22,180 | 5,281 | 3,425 | 31,026 |
| 31,161 | 141 | 21,899 | 5,248 | 3,407 | 30,695 |
| 31,162 | 147 | 22,192 | 5,338 | 3,450 | 31,127 |
| 31,163 | 151 | 22,187 | 5,325 | 3,452 | 31,115 |
| 31,164 | 145 | 21,982 | 5,288 | 3,419 | 30,834 |
| 31,165 | 147 | 21,649 | 5,242 | 3,388 | 30,426 |
| 31,166 | 147 | 21,322 | 5,195 | 3,358 | 30,022 |
| 31,167 | 158 | 21,888 | 5,332 | 3,435 | 30,813 |
| 31,168 | 157 | 22,075 | 5,335 | 3,458 | 31,025 |
| 31,169 | 157 | 22,291 | 5,336 | 3,467 | 31,251 |
| 31,170 | 157 | 22,284 | 5,344 | 3,458 | 31,243 |
| 31,171 | 159 | 22,426 | 5,356 | 3,476 | 31,417 |
| 31,172 | 160 | 22,389 | 5,374 | 3,437 | 31,360 |
| 31,173 | 166 | 22,432 | 5,419 | 3,434 | 31,451 |
| 31,174 | 171 | 22,469 | 5,391 | 3,424 | 31,455 |
| 31,175 | 168 | 22,366 | 5,314 | 3,382 | 31,230 |
| 31,176 | 172 | 22,773 | 5,384 | 3,421 | 31,750 |
| 31,177 | 165 | 22,629 | 5,346 | 3,417 | 31,557 |
| 31,178 | 163 | 22,433 | 5,318 | 3,417 | 31,331 |
| 31,179 | 165 | 22,420 | 5,260 | 3,380 | 31,225 |
| 31,180 | 165 | 22,071 | 5,213 | 3,319 | 30,768 |
| 31,181 | 163 | 22,104 | 5,251 | 3,332 | 30,850 |
| 31,182 | 159 | 22,057 | 5,296 | 3,349 | 30,861 |
| 31,183 | 159 | 22,262 | 5,322 | 3,371 | 31,114 |
| 31,184 | 160 | 22,234 | 5,289 | 3,378 | 31,061 |
| 31,185 | 160 | 22,004 | 5,227 | 3,347 | 30,738 |
| 31,186 | 162 | 22,185 | 5,249 | 3,342 | 30,938 |
| 31,187 | 165 | 21,971 | 5,234 | 3,315 | 30,685 |
| 31,188 | 168 | 22,187 | 5,255 | 3,322 | 30,932 |
| 31,189 | 171 | 21,918 | 5,204 | 3,269 | 30,562 |
| 31,190 | 174 | 21,866 | 5,181 | 3,248 | 30,469 |
| 31,191 | 171 | 21,702 | 5,172 | 3,230 | 30,275 |

|        |     |        |       |       |        |
|--------|-----|--------|-------|-------|--------|
| 31,192 | 171 | 21,891 | 5,193 | 3,246 | 30,501 |
| 31,193 | 176 | 21,850 | 5,206 | 3,227 | 30,459 |
| 31,194 | 174 | 21,333 | 5,054 | 3,168 | 29,729 |
| 31,195 | 173 | 21,370 | 5,061 | 3,168 | 29,772 |
| 31,196 | 165 | 21,202 | 5,029 | 3,143 | 29,539 |
| 31,197 | 160 | 21,172 | 5,030 | 3,173 | 29,535 |
| 31,198 | 160 | 21,143 | 5,031 | 3,183 | 29,517 |
| 31,199 | 164 | 21,257 | 5,045 | 3,222 | 29,688 |
| 31,200 | 162 | 21,276 | 5,043 | 3,227 | 29,708 |
| 31,201 | 162 | 21,377 | 5,093 | 3,249 | 29,881 |
| 31,202 | 158 | 21,450 | 5,096 | 3,255 | 29,959 |
| 31,203 | 159 | 21,536 | 5,075 | 3,255 | 30,025 |
| 31,204 | 161 | 21,394 | 5,000 | 3,215 | 29,770 |
| 31,205 | 165 | 21,483 | 4,991 | 3,217 | 29,856 |
| 31,206 | 158 | 21,260 | 4,980 | 3,217 | 29,615 |
| 31,207 | 164 | 21,407 | 4,998 | 3,248 | 29,817 |
| 31,208 | 165 | 21,278 | 4,953 | 3,231 | 29,627 |
| 31,209 | 162 | 21,152 | 4,925 | 3,224 | 29,463 |
| 31,210 | 164 | 21,183 | 4,929 | 3,223 | 29,499 |
| 31,211 | 161 | 21,213 | 4,899 | 3,211 | 29,484 |
| 31,212 | 158 | 21,175 | 4,866 | 3,190 | 29,389 |
| 31,213 | 157 | 20,958 | 4,819 | 3,172 | 29,106 |
| 31,214 | 157 | 21,001 | 4,821 | 3,170 | 29,149 |
| 31,215 | 152 | 21,005 | 4,793 | 3,138 | 29,088 |
| 31,216 | 149 | 20,916 | 4,802 | 3,130 | 28,997 |
| 31,217 | 145 | 21,186 | 4,846 | 3,153 | 29,330 |
| 31,218 | 144 | 20,960 | 4,807 | 3,126 | 29,037 |
| 31,219 | 143 | 20,968 | 4,810 | 3,113 | 29,034 |
| 31,220 | 142 | 21,008 | 4,872 | 3,129 | 29,151 |
| 31,221 | 136 | 21,265 | 4,974 | 3,148 | 29,523 |
| 31,222 | 135 | 20,848 | 4,861 | 3,111 | 28,955 |
| 31,223 | 137 | 21,031 | 4,882 | 3,141 | 29,191 |



|        |     |        |       |       |        |
|--------|-----|--------|-------|-------|--------|
| 31,224 | 132 | 21,242 | 4,924 | 3,172 | 29,470 |
| 31,225 | 128 | 20,894 | 4,894 | 3,125 | 29,041 |
| 31,226 | 132 | 21,017 | 4,983 | 3,167 | 29,299 |
| 31,227 | 127 | 20,983 | 5,005 | 3,152 | 29,267 |
| 31,228 | 125 | 21,083 | 5,022 | 3,165 | 29,395 |
| 31,229 | 135 | 20,971 | 4,985 | 3,128 | 29,219 |
| 31,230 | 134 | 20,704 | 4,965 | 3,104 | 28,907 |
| 31,231 | 139 | 20,911 | 4,996 | 3,142 | 29,188 |
| 31,232 | 142 | 21,101 | 4,965 | 3,131 | 29,339 |
| 31,233 | 141 | 21,031 | 4,954 | 3,139 | 29,265 |
| 31,234 | 138 | 20,726 | 4,899 | 3,086 | 28,849 |
| 31,235 | 138 | 20,860 | 4,927 | 3,083 | 29,008 |
| 31,236 | 139 | 20,993 | 4,924 | 3,102 | 29,158 |
| 31,237 | 132 | 20,732 | 4,865 | 3,073 | 28,802 |
| 31,238 | 130 | 20,742 | 4,878 | 3,076 | 28,826 |
| 31,239 | 127 | 20,963 | 4,950 | 3,115 | 29,155 |
| 31,240 | 128 | 21,067 | 4,949 | 3,145 | 29,289 |
| 31,241 | 126 | 20,927 | 4,890 | 3,104 | 29,047 |
| 31,242 | 126 | 20,986 | 4,903 | 3,118 | 29,133 |
| 31,243 | 132 | 21,195 | 4,940 | 3,146 | 29,413 |
| 31,244 | 128 | 21,043 | 4,914 | 3,154 | 29,239 |
| 31,245 | 127 | 21,147 | 4,932 | 3,159 | 29,365 |
| 31,246 | 128 | 21,334 | 5,005 | 3,190 | 29,657 |
| 31,247 | 130 | 21,059 | 4,922 | 3,125 | 29,236 |
| 31,248 | 133 | 21,280 | 4,967 | 3,130 | 29,510 |
| 31,249 | 131 | 21,526 | 5,008 | 3,162 | 29,827 |
| 31,250 | 138 | 21,594 | 4,995 | 3,170 | 29,897 |
| 31,251 | 139 | 21,573 | 4,967 | 3,155 | 29,834 |
| 31,252 | 139 | 21,491 | 4,952 | 3,148 | 29,730 |
| 31,253 | 139 | 21,541 | 4,937 | 3,178 | 29,795 |
| 31,254 | 139 | 21,872 | 5,063 | 3,241 | 30,315 |
| 31,255 | 137 | 21,742 | 5,045 | 3,252 | 30,176 |

|        |     |        |       |       |        |
|--------|-----|--------|-------|-------|--------|
| 31,256 | 141 | 21,809 | 5,040 | 3,236 | 30,226 |
| 31,257 | 142 | 21,796 | 5,039 | 3,229 | 30,206 |
| 31,258 | 140 | 22,215 | 5,153 | 3,294 | 30,802 |
| 31,259 | 134 | 22,069 | 5,136 | 3,276 | 30,615 |
| 31,260 | 136 | 22,302 | 5,216 | 3,332 | 30,986 |
| 31,261 | 136 | 22,373 | 5,244 | 3,333 | 31,086 |
| 31,262 | 133 | 22,257 | 5,220 | 3,336 | 30,946 |
| 31,263 | 131 | 22,200 | 5,233 | 3,318 | 30,882 |
| 31,264 | 126 | 22,311 | 5,273 | 3,333 | 31,043 |
| 31,265 | 127 | 22,592 | 5,360 | 3,399 | 31,478 |
| 31,266 | 128 | 22,553 | 5,296 | 3,424 | 31,401 |
| 31,267 | 132 | 22,545 | 5,280 | 3,414 | 31,371 |
| 31,268 | 130 | 22,230 | 5,215 | 3,365 | 30,940 |
| 31,269 | 135 | 22,598 | 5,280 | 3,445 | 31,458 |
| 31,270 | 135 | 22,420 | 5,222 | 3,412 | 31,189 |
| 31,271 | 138 | 22,501 | 5,251 | 3,449 | 31,339 |
| 31,272 | 139 | 22,213 | 5,155 | 3,422 | 30,929 |
| 31,273 | 141 | 21,970 | 5,121 | 3,388 | 30,620 |
| 31,274 | 139 | 21,769 | 5,087 | 3,365 | 30,360 |
| 31,275 | 147 | 22,274 | 5,224 | 3,466 | 31,111 |
| 31,276 | 149 | 22,326 | 5,218 | 3,490 | 31,183 |
| 31,277 | 147 | 22,256 | 5,183 | 3,464 | 31,050 |
| 31,278 | 151 | 22,001 | 5,178 | 3,476 | 30,806 |
| 31,279 | 151 | 22,027 | 5,174 | 3,483 | 30,835 |
| 31,280 | 137 | 21,849 | 5,173 | 3,471 | 30,630 |
| 31,281 | 136 | 22,032 | 5,187 | 3,511 | 30,866 |
| 31,282 | 135 | 22,033 | 5,169 | 3,511 | 30,848 |
| 31,283 | 133 | 21,758 | 5,107 | 3,456 | 30,454 |
| 31,284 | 131 | 21,777 | 5,089 | 3,448 | 30,445 |
| 31,285 | 132 | 21,778 | 5,080 | 3,452 | 30,442 |
| 31,286 | 133 | 22,161 | 5,165 | 3,482 | 30,941 |
| 31,287 | 131 | 21,933 | 5,132 | 3,459 | 30,655 |

|        |     |        |       |       |        |
|--------|-----|--------|-------|-------|--------|
| 31,288 | 131 | 22,091 | 5,139 | 3,471 | 30,832 |
| 31,289 | 131 | 22,331 | 5,224 | 3,520 | 31,206 |
| 31,290 | 133 | 22,335 | 5,214 | 3,532 | 31,214 |
| 31,291 | 128 | 21,998 | 5,184 | 3,481 | 30,791 |
| 31,292 | 131 | 22,121 | 5,217 | 3,493 | 30,962 |
| 31,293 | 134 | 21,935 | 5,184 | 3,472 | 30,725 |
| 31,294 | 129 | 22,200 | 5,238 | 3,499 | 31,066 |
| 31,295 | 128 | 22,396 | 5,285 | 3,516 | 31,325 |
| 31,296 | 129 | 22,442 | 5,301 | 3,529 | 31,401 |
| 31,297 | 135 | 22,612 | 5,282 | 3,558 | 31,587 |
| 31,298 | 133 | 22,593 | 5,257 | 3,550 | 31,533 |
| 31,299 | 134 | 22,364 | 5,217 | 3,522 | 31,237 |
| 31,300 | 133 | 22,290 | 5,216 | 3,521 | 31,160 |
| 31,301 | 124 | 22,129 | 5,215 | 3,503 | 30,971 |
| 31,302 | 123 | 22,291 | 5,271 | 3,512 | 31,197 |
| 31,303 | 129 | 22,337 | 5,262 | 3,503 | 31,231 |
| 31,304 | 136 | 21,998 | 5,172 | 3,441 | 30,747 |
| 31,305 | 137 | 22,146 | 5,179 | 3,463 | 30,925 |
| 31,306 | 141 | 22,126 | 5,164 | 3,435 | 30,866 |
| 31,307 | 137 | 21,966 | 5,133 | 3,441 | 30,677 |
| 31,308 | 141 | 22,172 | 5,209 | 3,474 | 30,996 |
| 31,309 | 150 | 22,247 | 5,191 | 3,471 | 31,059 |
| 31,310 | 154 | 22,274 | 5,261 | 3,486 | 31,175 |
| 31,311 | 155 | 22,191 | 5,218 | 3,455 | 31,019 |
| 31,312 | 159 | 22,255 | 5,264 | 3,470 | 31,148 |
| 31,313 | 164 | 22,176 | 5,217 | 3,453 | 31,010 |
| 31,314 | 170 | 22,348 | 5,230 | 3,466 | 31,214 |
| 31,315 | 172 | 22,513 | 5,187 | 3,468 | 31,340 |
| 31,316 | 178 | 22,438 | 5,184 | 3,451 | 31,251 |
| 31,317 | 177 | 22,709 | 5,230 | 3,449 | 31,565 |
| 31,318 | 180 | 22,666 | 5,219 | 3,438 | 31,503 |
| 31,319 | 180 | 22,556 | 5,216 | 3,446 | 31,398 |

|        |     |        |       |       |        |
|--------|-----|--------|-------|-------|--------|
| 31,320 | 182 | 22,654 | 5,246 | 3,437 | 31,519 |
| 31,321 | 185 | 22,778 | 5,242 | 3,434 | 31,639 |
| 31,322 | 189 | 22,747 | 5,258 | 3,432 | 31,626 |
| 31,323 | 188 | 22,706 | 5,254 | 3,420 | 31,568 |
| 31,324 | 181 | 22,621 | 5,235 | 3,424 | 31,461 |
| 31,325 | 180 | 22,489 | 5,203 | 3,426 | 31,298 |
| 31,326 | 181 | 22,694 | 5,250 | 3,443 | 31,568 |
| 31,327 | 182 | 22,813 | 5,232 | 3,405 | 31,632 |
| 31,328 | 179 | 22,920 | 5,199 | 3,388 | 31,686 |
| 31,329 | 182 | 22,869 | 5,128 | 3,340 | 31,519 |
| 31,330 | 182 | 22,925 | 5,125 | 3,329 | 31,561 |
| 31,331 | 187 | 23,121 | 5,193 | 3,373 | 31,874 |
| 31,332 | 199 | 23,001 | 5,178 | 3,365 | 31,743 |
| 31,333 | 197 | 22,917 | 5,169 | 3,344 | 31,627 |
| 31,334 | 204 | 22,899 | 5,170 | 3,355 | 31,628 |
| 31,335 | 206 | 22,927 | 5,206 | 3,354 | 31,693 |
| 31,336 | 210 | 22,969 | 5,227 | 3,380 | 31,786 |
| 31,337 | 222 | 23,156 | 5,255 | 3,404 | 32,037 |
| 31,338 | 225 | 23,153 | 5,265 | 3,393 | 32,036 |
| 31,339 | 236 | 22,991 | 5,209 | 3,364 | 31,800 |
| 31,340 | 237 | 23,063 | 5,222 | 3,355 | 31,877 |
| 31,341 | 244 | 23,025 | 5,229 | 3,358 | 31,856 |
| 31,342 | 246 | 22,962 | 5,211 | 3,351 | 31,770 |
| 31,343 | 250 | 23,080 | 5,219 | 3,377 | 31,926 |
| 31,344 | 252 | 23,169 | 5,225 | 3,387 | 32,033 |
| 31,345 | 259 | 23,233 | 5,236 | 3,404 | 32,132 |
| 31,346 | 263 | 23,091 | 5,166 | 3,356 | 31,876 |
| 31,347 | 263 | 22,998 | 5,141 | 3,350 | 31,752 |
| 31,348 | 255 | 22,930 | 5,156 | 3,334 | 31,675 |
| 31,349 | 256 | 22,908 | 5,167 | 3,347 | 31,678 |
| 31,350 | 258 | 23,277 | 5,258 | 3,398 | 32,191 |
| 31,351 | 256 | 23,109 | 5,209 | 3,366 | 31,940 |

|        |     |        |       |       |        |
|--------|-----|--------|-------|-------|--------|
| 31,352 | 253 | 23,134 | 5,214 | 3,386 | 31,987 |
| 31,353 | 256 | 23,334 | 5,270 | 3,426 | 32,286 |
| 31,354 | 241 | 23,010 | 5,221 | 3,389 | 31,861 |
| 31,355 | 231 | 22,265 | 5,077 | 3,264 | 30,837 |
| 31,356 | 231 | 22,535 | 5,104 | 3,279 | 31,149 |
| 31,357 | 227 | 22,545 | 5,096 | 3,263 | 31,131 |
| 31,358 | 229 | 22,703 | 5,104 | 3,273 | 31,309 |
| 31,359 | 217 | 22,932 | 5,145 | 3,289 | 31,583 |
| 31,360 | 216 | 22,789 | 5,082 | 3,275 | 31,362 |
| 31,361 | 215 | 22,804 | 5,074 | 3,255 | 31,348 |
| 31,362 | 213 | 22,568 | 5,003 | 3,229 | 31,013 |
| 31,363 | 214 | 22,590 | 4,992 | 3,220 | 31,016 |
| 31,364 | 210 | 22,518 | 4,986 | 3,215 | 30,929 |
| 31,365 | 214 | 22,645 | 5,026 | 3,239 | 31,124 |
| 31,366 | 210 | 22,457 | 5,024 | 3,213 | 30,904 |
| 31,367 | 204 | 22,226 | 4,969 | 3,181 | 30,580 |
| 31,368 | 214 | 22,317 | 5,008 | 3,195 | 30,734 |
| 31,369 | 204 | 22,057 | 4,951 | 3,150 | 30,362 |
| 31,370 | 206 | 22,169 | 4,931 | 3,148 | 30,454 |
| 31,371 | 205 | 22,200 | 4,916 | 3,153 | 30,474 |
| 31,372 | 204 | 22,132 | 4,892 | 3,154 | 30,382 |
| 31,373 | 206 | 22,175 | 4,871 | 3,147 | 30,399 |
| 31,374 | 210 | 22,279 | 4,873 | 3,113 | 30,475 |
| 31,375 | 213 | 22,500 | 4,910 | 3,125 | 30,748 |
| 31,376 | 208 | 22,355 | 4,853 | 3,078 | 30,494 |
| 31,377 | 208 | 22,426 | 4,869 | 3,079 | 30,582 |
| 31,378 | 202 | 21,939 | 4,799 | 3,042 | 29,982 |
| 31,379 | 200 | 21,896 | 4,795 | 3,037 | 29,928 |
| 31,380 | 199 | 21,921 | 4,792 | 3,036 | 29,948 |
| 31,381 | 200 | 22,086 | 4,789 | 3,051 | 30,126 |
| 31,382 | 197 | 22,017 | 4,768 | 3,031 | 30,013 |
| 31,383 | 191 | 22,106 | 4,810 | 3,041 | 30,148 |

|        |     |        |       |       |        |
|--------|-----|--------|-------|-------|--------|
| 31,384 | 190 | 22,298 | 4,841 | 3,059 | 30,388 |
| 31,385 | 186 | 22,111 | 4,751 | 3,006 | 30,054 |
| 31,386 | 188 | 22,319 | 4,793 | 3,036 | 30,336 |
| 31,387 | 189 | 22,486 | 4,835 | 3,047 | 30,557 |
| 31,388 | 181 | 22,052 | 4,740 | 2,996 | 29,969 |
| 31,389 | 181 | 22,093 | 4,749 | 2,994 | 30,017 |
| 31,390 | 169 | 22,174 | 4,747 | 2,993 | 30,083 |
| 31,391 | 165 | 22,115 | 4,686 | 2,963 | 29,929 |
| 31,392 | 163 | 21,796 | 4,615 | 2,920 | 29,494 |
| 31,393 | 158 | 21,628 | 4,586 | 2,894 | 29,266 |
| 31,394 | 154 | 21,691 | 4,601 | 2,903 | 29,349 |
| 31,395 | 150 | 21,307 | 4,527 | 2,851 | 28,835 |
| 31,396 | 144 | 20,939 | 4,462 | 2,799 | 28,344 |
| 31,397 | 136 | 21,120 | 4,504 | 2,818 | 28,578 |
| 31,398 | 141 | 21,267 | 4,518 | 2,827 | 28,753 |
| 31,399 | 143 | 21,109 | 4,500 | 2,797 | 28,549 |
| 31,400 | 140 | 20,972 | 4,463 | 2,752 | 28,327 |
| 31,401 | 137 | 20,760 | 4,416 | 2,737 | 28,050 |
| 31,402 | 139 | 20,795 | 4,403 | 2,717 | 28,054 |
| 31,403 | 140 | 20,891 | 4,393 | 2,713 | 28,137 |
| 31,404 | 135 | 20,584 | 4,369 | 2,693 | 27,781 |
| 31,405 | 139 | 20,504 | 4,383 | 2,698 | 27,724 |
| 31,406 | 140 | 20,524 | 4,382 | 2,688 | 27,734 |
| 31,407 | 141 | 20,898 | 4,453 | 2,731 | 28,223 |
| 31,408 | 139 | 20,592 | 4,401 | 2,708 | 27,840 |
| 31,409 | 139 | 20,709 | 4,439 | 2,730 | 28,017 |
| 31,410 | 139 | 20,695 | 4,436 | 2,756 | 28,026 |
| 31,411 | 139 | 20,708 | 4,425 | 2,761 | 28,033 |
| 31,412 | 143 | 20,881 | 4,463 | 2,779 | 28,266 |
| 31,413 | 140 | 20,684 | 4,432 | 2,753 | 28,009 |
| 31,414 | 144 | 20,903 | 4,495 | 2,789 | 28,331 |
| 31,415 | 141 | 20,999 | 4,501 | 2,781 | 28,422 |

|        |     |        |       |       |        |
|--------|-----|--------|-------|-------|--------|
| 31,416 | 139 | 20,741 | 4,448 | 2,738 | 28,066 |
| 31,417 | 143 | 20,692 | 4,422 | 2,742 | 27,999 |
| 31,418 | 143 | 20,644 | 4,390 | 2,744 | 27,921 |
| 31,419 | 136 | 20,745 | 4,424 | 2,777 | 28,082 |
| 31,420 | 133 | 19,850 | 4,280 | 2,661 | 26,924 |
| 31,421 | 131 | 19,997 | 4,321 | 2,673 | 27,122 |
| 31,422 | 138 | 20,285 | 4,367 | 2,698 | 27,488 |
| 31,423 | 138 | 20,233 | 4,374 | 2,694 | 27,439 |
| 31,424 | 138 | 20,370 | 4,416 | 2,720 | 27,644 |
| 31,425 | 146 | 20,499 | 4,461 | 2,760 | 27,866 |
| 31,426 | 143 | 20,216 | 4,441 | 2,740 | 27,540 |
| 31,427 | 144 | 20,288 | 4,438 | 2,736 | 27,606 |
| 31,428 | 146 | 20,325 | 4,446 | 2,717 | 27,634 |
| 31,429 | 144 | 20,322 | 4,416 | 2,733 | 27,615 |
| 31,430 | 144 | 20,342 | 4,423 | 2,736 | 27,645 |
| 31,431 | 142 | 20,056 | 4,371 | 2,710 | 27,279 |
| 31,432 | 143 | 20,168 | 4,407 | 2,734 | 27,452 |
| 31,433 | 144 | 20,158 | 4,407 | 2,729 | 27,438 |
| 31,434 | 143 | 19,921 | 4,352 | 2,719 | 27,135 |
| 31,435 | 143 | 19,979 | 4,366 | 2,740 | 27,228 |
| 31,436 | 144 | 19,533 | 4,323 | 2,686 | 26,686 |
| 31,437 | 150 | 19,542 | 4,301 | 2,673 | 26,666 |
| 31,438 | 146 | 19,302 | 4,255 | 2,664 | 26,367 |
| 31,439 | 150 | 19,577 | 4,312 | 2,689 | 26,728 |
| 31,440 | 152 | 19,416 | 4,298 | 2,681 | 26,547 |
| 31,441 | 157 | 19,377 | 4,302 | 2,686 | 26,522 |
| 31,442 | 157 | 19,147 | 4,279 | 2,680 | 26,263 |
| 31,443 | 156 | 19,495 | 4,411 | 2,726 | 26,788 |
| 31,444 | 164 | 19,315 | 4,354 | 2,701 | 26,534 |
| 31,445 | 164 | 19,212 | 4,331 | 2,678 | 26,385 |
| 31,446 | 161 | 19,156 | 4,331 | 2,689 | 26,337 |
| 31,447 | 161 | 19,071 | 4,297 | 2,669 | 26,198 |

|        |     |        |       |       |        |
|--------|-----|--------|-------|-------|--------|
| 31,448 | 159 | 19,272 | 4,379 | 2,712 | 26,522 |
| 31,449 | 155 | 19,252 | 4,370 | 2,712 | 26,489 |
| 31,450 | 155 | 19,442 | 4,418 | 2,725 | 26,740 |
| 31,451 | 150 | 19,234 | 4,345 | 2,682 | 26,411 |
| 31,452 | 148 | 19,397 | 4,421 | 2,703 | 26,669 |
| 31,453 | 154 | 19,276 | 4,427 | 2,688 | 26,545 |
| 31,454 | 156 | 18,937 | 4,355 | 2,645 | 26,093 |
| 31,455 | 157 | 19,155 | 4,390 | 2,673 | 26,375 |
| 31,456 | 164 | 19,394 | 4,429 | 2,689 | 26,676 |
| 31,457 | 163 | 19,383 | 4,451 | 2,693 | 26,690 |
| 31,458 | 168 | 18,994 | 4,407 | 2,662 | 26,231 |
| 31,459 | 165 | 18,766 | 4,362 | 2,634 | 25,927 |
| 31,460 | 168 | 19,162 | 4,464 | 2,696 | 26,490 |
| 31,461 | 175 | 19,321 | 4,506 | 2,721 | 26,723 |
| 31,462 | 175 | 19,424 | 4,564 | 2,741 | 26,904 |
| 31,463 | 171 | 19,418 | 4,534 | 2,764 | 26,887 |
| 31,464 | 171 | 19,565 | 4,557 | 2,781 | 27,074 |
| 31,465 | 171 | 19,563 | 4,552 | 2,785 | 27,071 |
| 31,466 | 178 | 19,670 | 4,558 | 2,793 | 27,199 |
| 31,467 | 172 | 19,510 | 4,538 | 2,778 | 26,998 |
| 31,468 | 171 | 19,458 | 4,533 | 2,783 | 26,945 |
| 31,469 | 175 | 19,334 | 4,519 | 2,770 | 26,798 |
| 31,470 | 177 | 19,184 | 4,483 | 2,739 | 26,583 |
| 31,471 | 189 | 20,275 | 4,739 | 2,924 | 28,127 |
| 31,472 | 189 | 20,138 | 4,716 | 2,932 | 27,975 |
| 31,473 | 184 | 20,239 | 4,761 | 2,958 | 28,142 |
| 31,474 | 183 | 20,234 | 4,765 | 2,962 | 28,144 |
| 31,475 | 177 | 20,567 | 4,812 | 2,996 | 28,552 |
| 31,476 | 181 | 20,510 | 4,796 | 2,978 | 28,465 |
| 31,477 | 181 | 20,484 | 4,801 | 2,969 | 28,435 |
| 31,478 | 188 | 20,544 | 4,849 | 3,021 | 28,602 |
| 31,479 | 187 | 20,796 | 4,928 | 3,058 | 28,969 |



|        |     |        |       |       |        |
|--------|-----|--------|-------|-------|--------|
| 31,480 | 191 | 20,644 | 4,921 | 3,028 | 28,784 |
| 31,481 | 191 | 20,689 | 4,911 | 3,025 | 28,816 |
| 31,482 | 198 | 20,983 | 5,005 | 3,090 | 29,276 |
| 31,483 | 191 | 20,881 | 4,973 | 3,062 | 29,107 |
| 31,484 | 191 | 20,960 | 4,967 | 3,044 | 29,162 |
| 31,485 | 192 | 20,949 | 4,987 | 3,064 | 29,192 |
| 31,486 | 186 | 20,784 | 4,945 | 3,032 | 28,947 |
| 31,487 | 186 | 20,770 | 4,939 | 3,038 | 28,933 |
| 31,488 | 176 | 20,636 | 4,934 | 3,037 | 28,783 |
| 31,489 | 174 | 20,420 | 4,926 | 3,013 | 28,533 |
| 31,490 | 172 | 21,469 | 5,208 | 3,175 | 30,024 |
| 31,491 | 164 | 21,438 | 5,153 | 3,177 | 29,932 |
| 31,492 | 164 | 21,692 | 5,188 | 3,223 | 30,267 |
| 31,493 | 164 | 22,033 | 5,249 | 3,246 | 30,692 |
| 31,494 | 161 | 22,151 | 5,291 | 3,288 | 30,891 |
| 31,495 | 152 | 21,987 | 5,277 | 3,294 | 30,710 |
| 31,496 | 154 | 22,220 | 5,310 | 3,310 | 30,994 |
| 31,497 | 155 | 22,352 | 5,309 | 3,313 | 31,129 |
| 31,498 | 164 | 22,852 | 5,409 | 3,380 | 31,805 |
| 31,499 | 162 | 23,116 | 5,464 | 3,421 | 32,163 |
| 31,500 | 165 | 23,471 | 5,522 | 3,490 | 32,648 |
| 31,501 | 180 | 23,891 | 5,583 | 3,534 | 33,188 |
| 31,502 | 185 | 23,671 | 5,513 | 3,536 | 32,905 |
| 31,503 | 198 | 24,011 | 5,569 | 3,582 | 33,360 |
| 31,504 | 192 | 24,076 | 5,584 | 3,598 | 33,450 |
| 31,505 | 188 | 24,398 | 5,623 | 3,646 | 33,855 |
| 31,506 | 210 | 24,740 | 5,671 | 3,670 | 34,291 |
| 31,507 | 205 | 24,695 | 5,631 | 3,678 | 34,209 |
| 31,508 | 204 | 24,661 | 5,642 | 3,692 | 34,199 |
| 31,509 | 206 | 24,620 | 5,595 | 3,673 | 34,094 |
| 31,510 | 205 | 24,638 | 5,596 | 3,678 | 34,117 |
| 31,511 | 202 | 24,848 | 5,632 | 3,705 | 34,387 |

|        |     |        |       |       |        |
|--------|-----|--------|-------|-------|--------|
| 31,512 | 203 | 24,732 | 5,567 | 3,662 | 34,164 |
| 31,513 | 204 | 24,774 | 5,574 | 3,663 | 34,215 |
| 31,514 | 205 | 24,834 | 5,568 | 3,655 | 34,262 |
| 31,515 | 203 | 24,696 | 5,562 | 3,667 | 34,128 |
| 31,516 | 205 | 24,768 | 5,609 | 3,680 | 34,262 |
| 31,517 | 204 | 24,310 | 5,494 | 3,578 | 33,586 |
| 31,518 | 207 | 24,474 | 5,531 | 3,580 | 33,792 |
| 31,519 | 204 | 24,663 | 5,551 | 3,595 | 34,013 |
| 31,520 | 204 | 24,636 | 5,511 | 3,584 | 33,935 |
| 31,521 | 206 | 24,627 | 5,514 | 3,573 | 33,920 |
| 31,522 | 196 | 24,614 | 5,510 | 3,585 | 33,905 |
| 31,523 | 194 | 24,441 | 5,445 | 3,555 | 33,635 |
| 31,524 | 194 | 24,355 | 5,439 | 3,543 | 33,531 |
| 31,525 | 191 | 24,172 | 5,449 | 3,537 | 33,349 |
| 31,526 | 194 | 24,030 | 5,439 | 3,532 | 33,195 |
| 31,527 | 189 | 24,092 | 5,446 | 3,573 | 33,300 |
| 31,528 | 189 | 24,172 | 5,465 | 3,586 | 33,412 |
| 31,529 | 181 | 23,333 | 5,266 | 3,449 | 32,229 |
| 31,530 | 183 | 23,533 | 5,304 | 3,483 | 32,503 |
| 31,531 | 187 | 23,658 | 5,356 | 3,512 | 32,713 |
| 31,532 | 187 | 23,688 | 5,369 | 3,506 | 32,750 |
| 31,533 | 185 | 23,858 | 5,402 | 3,547 | 32,992 |
| 31,534 | 192 | 23,794 | 5,400 | 3,539 | 32,925 |
| 31,535 | 194 | 23,549 | 5,375 | 3,520 | 32,638 |
| 31,536 | 197 | 23,843 | 5,457 | 3,552 | 33,049 |
| 31,537 | 196 | 23,586 | 5,392 | 3,518 | 32,692 |
| 31,538 | 195 | 23,470 | 5,385 | 3,512 | 32,562 |
| 31,539 | 201 | 23,527 | 5,331 | 3,498 | 32,557 |
| 31,540 | 205 | 23,497 | 5,281 | 3,490 | 32,473 |
| 31,541 | 205 | 23,468 | 5,298 | 3,493 | 32,464 |
| 31,542 | 205 | 23,366 | 5,289 | 3,480 | 32,340 |
| 31,543 | 206 | 23,337 | 5,320 | 3,492 | 32,355 |

|        |     |        |       |       |        |
|--------|-----|--------|-------|-------|--------|
| 31,544 | 206 | 23,015 | 5,228 | 3,456 | 31,905 |
| 31,545 | 209 | 22,968 | 5,193 | 3,439 | 31,809 |
| 31,546 | 209 | 23,064 | 5,209 | 3,454 | 31,936 |
| 31,547 | 208 | 23,013 | 5,208 | 3,484 | 31,913 |
| 31,548 | 210 | 23,090 | 5,268 | 3,516 | 32,084 |
| 31,549 | 202 | 22,996 | 5,277 | 3,519 | 31,994 |
| 31,550 | 203 | 22,280 | 5,128 | 3,391 | 31,002 |
| 31,551 | 205 | 22,421 | 5,183 | 3,419 | 31,228 |
| 31,552 | 195 | 22,709 | 5,257 | 3,493 | 31,654 |
| 31,553 | 195 | 22,822 | 5,311 | 3,503 | 31,831 |
| 31,554 | 186 | 23,235 | 5,455 | 3,589 | 32,465 |
| 31,555 | 181 | 22,796 | 5,384 | 3,560 | 31,921 |
| 31,556 | 182 | 22,843 | 5,404 | 3,581 | 32,010 |
| 31,557 | 170 | 22,964 | 5,476 | 3,640 | 32,250 |
| 31,558 | 168 | 22,727 | 5,443 | 3,612 | 31,950 |
| 31,559 | 169 | 22,785 | 5,428 | 3,630 | 32,012 |
| 31,560 | 160 | 22,518 | 5,364 | 3,585 | 31,627 |
| 31,561 | 161 | 22,444 | 5,372 | 3,586 | 31,563 |
| 31,562 | 162 | 22,421 | 5,376 | 3,591 | 31,550 |
| 31,563 | 160 | 22,195 | 5,338 | 3,574 | 31,267 |
| 31,564 | 159 | 21,951 | 5,281 | 3,522 | 30,913 |
| 31,565 | 158 | 21,649 | 5,218 | 3,494 | 30,519 |
| 31,566 | 157 | 21,704 | 5,226 | 3,516 | 30,603 |
| 31,567 | 147 | 21,756 | 5,225 | 3,510 | 30,638 |
| 31,568 | 142 | 21,642 | 5,214 | 3,525 | 30,523 |
| 31,569 | 139 | 21,239 | 5,160 | 3,510 | 30,048 |
| 31,570 | 139 | 21,130 | 5,151 | 3,517 | 29,937 |
| 31,571 | 139 | 21,301 | 5,225 | 3,553 | 30,218 |
| 31,572 | 139 | 21,366 | 5,238 | 3,565 | 30,308 |
| 31,573 | 139 | 21,112 | 5,180 | 3,529 | 29,960 |
| 31,574 | 141 | 20,863 | 5,114 | 3,452 | 29,570 |
| 31,575 | 141 | 21,119 | 5,164 | 3,497 | 29,921 |

|        |     |        |       |       |        |
|--------|-----|--------|-------|-------|--------|
| 31,576 | 138 | 21,331 | 5,208 | 3,525 | 30,202 |
| 31,577 | 137 | 21,054 | 5,127 | 3,433 | 29,751 |
| 31,578 | 134 | 21,210 | 5,175 | 3,461 | 29,980 |
| 31,579 | 129 | 21,509 | 5,231 | 3,516 | 30,385 |
| 31,580 | 132 | 21,497 | 5,212 | 3,517 | 30,358 |
| 31,581 | 131 | 21,542 | 5,225 | 3,539 | 30,437 |
| 31,582 | 124 | 21,362 | 5,169 | 3,512 | 30,167 |
| 31,583 | 119 | 21,301 | 5,168 | 3,532 | 30,120 |
| 31,584 | 112 | 21,221 | 5,125 | 3,507 | 29,965 |
| 31,585 | 113 | 21,509 | 5,213 | 3,542 | 30,377 |
| 31,586 | 112 | 21,590 | 5,220 | 3,552 | 30,474 |
| 31,587 | 109 | 21,323 | 5,149 | 3,538 | 30,119 |
| 31,588 | 112 | 21,271 | 5,149 | 3,547 | 30,079 |
| 31,589 | 112 | 21,269 | 5,168 | 3,554 | 30,103 |
| 31,590 | 110 | 21,434 | 5,236 | 3,603 | 30,383 |
| 31,591 | 106 | 21,560 | 5,299 | 3,613 | 30,578 |
| 31,592 | 106 | 21,414 | 5,256 | 3,582 | 30,358 |
| 31,593 | 107 | 21,644 | 5,322 | 3,619 | 30,692 |
| 31,594 | 108 | 21,642 | 5,331 | 3,614 | 30,695 |
| 31,595 | 104 | 21,428 | 5,283 | 3,582 | 30,397 |
| 31,596 | 110 | 21,398 | 5,278 | 3,550 | 30,336 |
| 31,597 | 111 | 21,713 | 5,327 | 3,584 | 30,735 |
| 31,598 | 110 | 21,594 | 5,265 | 3,556 | 30,525 |
| 31,599 | 108 | 21,546 | 5,222 | 3,544 | 30,420 |
| 31,600 | 109 | 21,033 | 5,129 | 3,459 | 29,730 |
| 31,601 | 102 | 20,980 | 5,083 | 3,483 | 29,648 |
| 31,602 | 100 | 20,821 | 5,032 | 3,468 | 29,421 |
| 31,603 | 93  | 19,955 | 4,875 | 3,362 | 28,285 |
| 31,604 | 93  | 20,142 | 4,948 | 3,395 | 28,578 |
| 31,605 | 95  | 19,877 | 4,892 | 3,339 | 28,203 |
| 31,606 | 95  | 19,063 | 4,671 | 3,163 | 26,992 |
| 31,607 | 96  | 19,322 | 4,718 | 3,190 | 27,326 |

|        |     |        |       |       |        |
|--------|-----|--------|-------|-------|--------|
| 31,608 | 90  | 19,248 | 4,723 | 3,189 | 27,250 |
| 31,609 | 96  | 19,450 | 4,741 | 3,208 | 27,495 |
| 31,610 | 94  | 19,026 | 4,704 | 3,138 | 26,962 |
| 31,611 | 97  | 19,240 | 4,753 | 3,173 | 27,263 |
| 31,612 | 98  | 19,380 | 4,784 | 3,202 | 27,464 |
| 31,613 | 94  | 19,230 | 4,725 | 3,173 | 27,222 |
| 31,614 | 94  | 19,254 | 4,756 | 3,175 | 27,279 |
| 31,615 | 94  | 19,241 | 4,770 | 3,177 | 27,282 |
| 31,616 | 91  | 19,187 | 4,776 | 3,205 | 27,259 |
| 31,617 | 92  | 19,075 | 4,794 | 3,217 | 27,178 |
| 31,618 | 91  | 19,015 | 4,833 | 3,235 | 27,174 |
| 31,619 | 95  | 18,851 | 4,785 | 3,197 | 26,928 |
| 31,620 | 90  | 18,611 | 4,760 | 3,167 | 26,628 |
| 31,621 | 91  | 19,114 | 4,865 | 3,221 | 27,291 |
| 31,622 | 88  | 18,685 | 4,758 | 3,158 | 26,689 |
| 31,623 | 87  | 18,961 | 4,808 | 3,217 | 27,073 |
| 31,624 | 87  | 18,957 | 4,811 | 3,222 | 27,077 |
| 31,625 | 85  | 18,858 | 4,779 | 3,211 | 26,933 |
| 31,626 | 86  | 18,910 | 4,815 | 3,197 | 27,008 |
| 31,627 | 87  | 18,756 | 4,796 | 3,187 | 26,826 |
| 31,628 | 89  | 19,481 | 4,998 | 3,298 | 27,866 |
| 31,629 | 92  | 19,521 | 5,012 | 3,312 | 27,937 |
| 31,630 | 94  | 19,259 | 4,969 | 3,257 | 27,579 |
| 31,631 | 92  | 18,985 | 4,919 | 3,239 | 27,235 |
| 31,632 | 99  | 19,272 | 4,988 | 3,266 | 27,625 |
| 31,633 | 104 | 19,223 | 4,971 | 3,225 | 27,523 |
| 31,634 | 104 | 19,170 | 4,979 | 3,226 | 27,479 |
| 31,635 | 104 | 19,487 | 5,087 | 3,292 | 27,970 |
| 31,636 | 104 | 19,580 | 5,116 | 3,314 | 28,114 |
| 31,637 | 109 | 19,182 | 4,997 | 3,243 | 27,531 |
| 31,638 | 110 | 19,462 | 5,026 | 3,275 | 27,873 |
| 31,639 | 117 | 19,731 | 5,080 | 3,287 | 28,215 |

|        |     |        |       |       |        |
|--------|-----|--------|-------|-------|--------|
| 31,640 | 125 | 19,991 | 5,143 | 3,295 | 28,554 |
| 31,641 | 129 | 20,150 | 5,200 | 3,319 | 28,798 |
| 31,642 | 135 | 19,896 | 5,126 | 3,291 | 28,448 |
| 31,643 | 138 | 19,683 | 5,107 | 3,268 | 28,196 |
| 31,644 | 142 | 20,011 | 5,206 | 3,296 | 28,655 |
| 31,645 | 144 | 19,980 | 5,234 | 3,295 | 28,653 |
| 31,646 | 145 | 19,863 | 5,217 | 3,307 | 28,532 |
| 31,647 | 145 | 20,064 | 5,275 | 3,354 | 28,838 |
| 31,648 | 143 | 19,789 | 5,244 | 3,332 | 28,508 |
| 31,649 | 150 | 19,809 | 5,283 | 3,323 | 28,565 |
| 31,650 | 158 | 19,810 | 5,324 | 3,329 | 28,621 |
| 31,651 | 157 | 19,857 | 5,347 | 3,350 | 28,711 |
| 31,652 | 159 | 19,958 | 5,384 | 3,351 | 28,852 |
| 31,653 | 167 | 20,287 | 5,495 | 3,395 | 29,344 |
| 31,654 | 173 | 19,992 | 5,354 | 3,333 | 28,852 |
| 31,655 | 179 | 20,401 | 5,406 | 3,351 | 29,337 |
| 31,656 | 188 | 20,743 | 5,480 | 3,377 | 29,788 |
| 31,657 | 197 | 20,941 | 5,527 | 3,407 | 30,072 |
| 31,658 | 196 | 21,011 | 5,548 | 3,424 | 30,179 |
| 31,659 | 196 | 20,871 | 5,550 | 3,421 | 30,038 |
| 31,660 | 190 | 21,010 | 5,661 | 3,484 | 30,345 |
| 31,661 | 195 | 21,030 | 5,695 | 3,516 | 30,436 |
| 31,662 | 193 | 21,139 | 5,760 | 3,545 | 30,637 |
| 31,663 | 195 | 21,038 | 5,775 | 3,525 | 30,533 |
| 31,664 | 194 | 21,052 | 5,834 | 3,551 | 30,631 |
| 31,665 | 200 | 21,068 | 5,848 | 3,558 | 30,674 |
| 31,666 | 201 | 21,251 | 5,855 | 3,526 | 30,833 |
| 31,667 | 202 | 21,365 | 5,839 | 3,488 | 30,894 |
| 31,668 | 203 | 21,492 | 5,839 | 3,499 | 31,033 |
| 31,669 | 205 | 21,523 | 5,840 | 3,512 | 31,080 |
| 31,670 | 200 | 21,766 | 5,922 | 3,558 | 31,446 |
| 31,671 | 203 | 21,683 | 5,850 | 3,534 | 31,270 |

|        |     |        |       |       |        |
|--------|-----|--------|-------|-------|--------|
| 31,672 | 203 | 21,390 | 5,820 | 3,520 | 30,933 |
| 31,673 | 204 | 21,573 | 5,941 | 3,549 | 31,267 |
| 31,674 | 210 | 21,725 | 6,002 | 3,563 | 31,500 |
| 31,675 | 212 | 21,556 | 5,957 | 3,550 | 31,275 |
| 31,676 | 212 | 21,458 | 5,897 | 3,535 | 31,102 |
| 31,677 | 210 | 21,559 | 5,945 | 3,552 | 31,266 |
| 31,678 | 212 | 21,764 | 5,984 | 3,577 | 31,537 |
| 31,679 | 217 | 21,987 | 6,026 | 3,616 | 31,846 |
| 31,680 | 210 | 21,445 | 5,865 | 3,514 | 31,034 |
| 31,681 | 213 | 21,654 | 5,902 | 3,542 | 31,311 |
| 31,682 | 205 | 21,921 | 5,952 | 3,584 | 31,662 |
| 31,683 | 207 | 22,066 | 5,960 | 3,579 | 31,812 |
| 31,684 | 203 | 21,898 | 5,950 | 3,573 | 31,624 |
| 31,685 | 202 | 22,318 | 6,018 | 3,619 | 32,157 |
| 31,686 | 198 | 21,874 | 5,923 | 3,517 | 31,512 |
| 31,687 | 198 | 22,068 | 5,945 | 3,541 | 31,752 |
| 31,688 | 191 | 22,219 | 6,001 | 3,589 | 32,000 |
| 31,689 | 191 | 22,183 | 6,011 | 3,592 | 31,977 |
| 31,690 | 183 | 22,281 | 6,065 | 3,639 | 32,168 |
| 31,691 | 164 | 21,605 | 5,866 | 3,531 | 31,166 |
| 31,692 | 165 | 21,789 | 5,901 | 3,562 | 31,417 |
| 31,693 | 163 | 22,030 | 5,935 | 3,606 | 31,734 |
| 31,694 | 168 | 22,215 | 5,975 | 3,660 | 32,018 |
| 31,695 | 164 | 21,971 | 5,890 | 3,608 | 31,633 |
| 31,696 | 161 | 22,142 | 5,873 | 3,605 | 31,781 |
| 31,697 | 161 | 22,237 | 5,881 | 3,603 | 31,882 |
| 31,698 | 163 | 22,505 | 5,942 | 3,649 | 32,259 |
| 31,699 | 162 | 22,588 | 5,972 | 3,653 | 32,375 |
| 31,700 | 153 | 22,485 | 5,922 | 3,622 | 32,182 |
| 31,701 | 160 | 22,602 | 5,930 | 3,621 | 32,313 |
| 31,702 | 157 | 22,565 | 5,922 | 3,633 | 32,277 |
| 31,703 | 159 | 22,625 | 5,945 | 3,631 | 32,360 |

|        |     |        |       |       |        |
|--------|-----|--------|-------|-------|--------|
| 31,704 | 158 | 22,668 | 5,934 | 3,637 | 32,397 |
| 31,705 | 150 | 22,697 | 5,996 | 3,673 | 32,516 |
| 31,706 | 149 | 22,717 | 6,037 | 3,724 | 32,627 |
| 31,707 | 138 | 22,691 | 6,016 | 3,741 | 32,586 |
| 31,708 | 131 | 22,484 | 5,946 | 3,709 | 32,270 |
| 31,709 | 132 | 22,747 | 5,972 | 3,724 | 32,575 |
| 31,710 | 128 | 22,589 | 5,822 | 3,640 | 32,179 |
| 31,711 | 128 | 22,874 | 5,872 | 3,675 | 32,549 |
| 31,712 | 135 | 23,027 | 5,930 | 3,706 | 32,798 |
| 31,713 | 132 | 22,741 | 5,799 | 3,657 | 32,329 |
| 31,714 | 134 | 22,628 | 5,746 | 3,606 | 32,114 |
| 31,715 | 135 | 22,908 | 5,805 | 3,636 | 32,484 |
| 31,716 | 134 | 22,783 | 5,759 | 3,615 | 32,291 |
| 31,717 | 133 | 22,623 | 5,730 | 3,608 | 32,094 |
| 31,718 | 136 | 22,619 | 5,766 | 3,626 | 32,147 |
| 31,719 | 135 | 22,470 | 5,737 | 3,602 | 31,944 |
| 31,720 | 134 | 23,014 | 5,869 | 3,685 | 32,702 |
| 31,721 | 131 | 23,082 | 5,879 | 3,666 | 32,758 |
| 31,722 | 131 | 22,993 | 5,853 | 3,669 | 32,646 |
| 31,723 | 132 | 23,317 | 5,894 | 3,696 | 33,039 |
| 31,724 | 131 | 23,493 | 5,910 | 3,715 | 33,249 |
| 31,725 | 125 | 23,183 | 5,853 | 3,667 | 32,828 |
| 31,726 | 119 | 23,210 | 5,853 | 3,685 | 32,867 |
| 31,727 | 120 | 23,225 | 5,903 | 3,717 | 32,965 |
| 31,728 | 121 | 23,037 | 5,816 | 3,690 | 32,664 |
| 31,729 | 123 | 23,150 | 5,859 | 3,734 | 32,866 |
| 31,730 | 118 | 23,056 | 5,852 | 3,732 | 32,758 |
| 31,731 | 113 | 22,824 | 5,815 | 3,696 | 32,448 |
| 31,732 | 117 | 22,772 | 5,848 | 3,738 | 32,475 |
| 31,733 | 119 | 22,607 | 5,845 | 3,740 | 32,311 |
| 31,734 | 122 | 22,432 | 5,847 | 3,770 | 32,171 |
| 31,735 | 123 | 22,351 | 5,811 | 3,776 | 32,061 |



|        |     |        |       |       |        |
|--------|-----|--------|-------|-------|--------|
| 31,736 | 123 | 22,436 | 5,816 | 3,795 | 32,170 |
| 31,737 | 123 | 22,290 | 5,832 | 3,793 | 32,038 |
| 31,738 | 124 | 22,295 | 5,861 | 3,797 | 32,077 |
| 31,739 | 125 | 22,083 | 5,788 | 3,742 | 31,738 |
| 31,740 | 129 | 22,158 | 5,782 | 3,726 | 31,795 |
| 31,741 | 130 | 22,297 | 5,790 | 3,744 | 31,961 |
| 31,742 | 122 | 22,141 | 5,785 | 3,760 | 31,808 |
| 31,743 | 131 | 22,316 | 5,836 | 3,815 | 32,098 |
| 31,744 | 130 | 22,002 | 5,772 | 3,764 | 31,668 |
| 31,745 | 130 | 22,118 | 5,784 | 3,753 | 31,785 |
| 31,746 | 130 | 22,027 | 5,769 | 3,726 | 31,652 |
| 31,747 | 130 | 21,956 | 5,767 | 3,717 | 31,570 |
| 31,748 | 131 | 21,962 | 5,769 | 3,735 | 31,597 |
| 31,749 | 134 | 22,172 | 5,819 | 3,752 | 31,877 |
| 31,750 | 126 | 21,676 | 5,661 | 3,687 | 31,150 |
| 31,751 | 131 | 21,984 | 5,719 | 3,727 | 31,561 |
| 31,752 | 126 | 22,239 | 5,765 | 3,771 | 31,901 |
| 31,753 | 125 | 22,221 | 5,786 | 3,784 | 31,916 |
| 31,754 | 125 | 22,157 | 5,768 | 3,783 | 31,833 |
| 31,755 | 129 | 21,979 | 5,731 | 3,752 | 31,591 |
| 31,756 | 131 | 21,880 | 5,718 | 3,729 | 31,458 |
| 31,757 | 130 | 22,095 | 5,754 | 3,748 | 31,727 |
| 31,758 | 133 | 21,789 | 5,725 | 3,726 | 31,373 |
| 31,759 | 131 | 21,723 | 5,714 | 3,700 | 31,268 |
| 31,760 | 129 | 21,665 | 5,688 | 3,690 | 31,172 |
| 31,761 | 129 | 21,949 | 5,774 | 3,735 | 31,587 |
| 31,762 | 135 | 21,876 | 5,720 | 3,701 | 31,432 |
| 31,763 | 135 | 21,895 | 5,719 | 3,715 | 31,464 |
| 31,764 | 135 | 21,837 | 5,733 | 3,712 | 31,417 |
| 31,765 | 134 | 21,942 | 5,720 | 3,733 | 31,529 |
| 31,766 | 129 | 21,805 | 5,696 | 3,730 | 31,360 |
| 31,767 | 136 | 21,904 | 5,683 | 3,740 | 31,463 |

|        |     |        |       |       |        |
|--------|-----|--------|-------|-------|--------|
| 31,768 | 132 | 21,739 | 5,630 | 3,721 | 31,222 |
| 31,769 | 134 | 21,899 | 5,702 | 3,761 | 31,496 |
| 31,770 | 135 | 21,978 | 5,700 | 3,762 | 31,575 |
| 31,771 | 132 | 21,925 | 5,690 | 3,776 | 31,523 |
| 31,772 | 134 | 21,971 | 5,705 | 3,778 | 31,588 |
| 31,773 | 134 | 21,900 | 5,687 | 3,772 | 31,493 |
| 31,774 | 133 | 22,415 | 5,848 | 3,858 | 32,254 |
| 31,775 | 134 | 22,195 | 5,842 | 3,837 | 32,008 |
| 31,776 | 135 | 22,352 | 5,908 | 3,916 | 32,311 |
| 31,777 | 133 | 22,231 | 5,856 | 3,875 | 32,095 |
| 31,778 | 136 | 22,420 | 5,935 | 3,921 | 32,412 |
| 31,779 | 135 | 22,601 | 5,954 | 3,953 | 32,643 |
| 31,780 | 131 | 22,692 | 5,969 | 3,955 | 32,747 |
| 31,781 | 131 | 22,900 | 5,994 | 3,951 | 32,976 |
| 31,782 | 131 | 22,913 | 5,982 | 3,963 | 32,989 |
| 31,783 | 126 | 23,114 | 5,978 | 3,946 | 33,164 |
| 31,784 | 120 | 22,954 | 5,939 | 3,895 | 32,908 |
| 31,785 | 122 | 23,205 | 5,986 | 3,916 | 33,229 |
| 31,786 | 124 | 23,536 | 6,049 | 3,965 | 33,674 |
| 31,787 | 126 | 23,438 | 6,043 | 3,943 | 33,550 |
| 31,788 | 125 | 23,315 | 5,977 | 3,948 | 33,365 |
| 31,789 | 123 | 23,002 | 5,898 | 3,922 | 32,945 |
| 31,790 | 120 | 23,004 | 5,881 | 3,918 | 32,923 |
| 31,791 | 127 | 23,064 | 5,890 | 3,907 | 32,988 |
| 31,792 | 130 | 23,339 | 5,961 | 3,937 | 33,367 |
| 31,793 | 129 | 23,418 | 5,970 | 3,934 | 33,451 |
| 31,794 | 122 | 23,285 | 5,920 | 3,903 | 33,230 |
| 31,795 | 126 | 23,513 | 5,968 | 3,925 | 33,532 |
| 31,796 | 127 | 23,088 | 5,860 | 3,886 | 32,961 |
| 31,797 | 127 | 23,084 | 5,864 | 3,898 | 32,973 |
| 31,798 | 122 | 22,968 | 5,811 | 3,862 | 32,763 |
| 31,799 | 120 | 22,817 | 5,762 | 3,830 | 32,529 |

|        |     |        |       |       |        |
|--------|-----|--------|-------|-------|--------|
| 31,800 | 128 | 23,941 | 6,106 | 3,968 | 34,143 |
| 31,801 | 128 | 23,914 | 6,109 | 3,973 | 34,124 |
| 31,802 | 124 | 23,701 | 6,048 | 3,935 | 33,808 |
| 31,803 | 121 | 23,239 | 5,927 | 3,864 | 33,151 |
| 31,804 | 120 | 23,500 | 5,993 | 3,883 | 33,496 |
| 31,805 | 117 | 23,618 | 6,009 | 3,891 | 33,635 |
| 31,806 | 112 | 23,454 | 5,918 | 3,858 | 33,342 |
| 31,807 | 112 | 23,478 | 5,939 | 3,864 | 33,393 |
| 31,808 | 113 | 23,532 | 5,956 | 3,856 | 33,457 |
| 31,809 | 114 | 24,012 | 6,065 | 3,936 | 34,127 |
| 31,810 | 115 | 23,766 | 6,014 | 3,911 | 33,806 |
| 31,811 | 108 | 23,631 | 6,024 | 3,892 | 33,655 |
| 31,812 | 109 | 23,914 | 6,115 | 3,917 | 34,055 |
| 31,813 | 103 | 24,242 | 6,216 | 3,979 | 34,540 |
| 31,814 | 106 | 23,723 | 6,099 | 3,892 | 33,820 |
| 31,815 | 106 | 24,057 | 6,174 | 3,932 | 34,269 |
| 31,816 | 103 | 24,412 | 6,233 | 3,976 | 34,724 |
| 31,817 | 95  | 24,394 | 6,216 | 3,963 | 34,668 |
| 31,818 | 98  | 24,649 | 6,303 | 4,004 | 35,054 |
| 31,819 | 94  | 24,336 | 6,191 | 3,931 | 34,552 |
| 31,820 | 95  | 24,531 | 6,238 | 3,966 | 34,830 |
| 31,821 | 97  | 24,224 | 6,166 | 3,929 | 34,416 |
| 31,822 | 99  | 24,443 | 6,232 | 3,960 | 34,734 |
| 31,823 | 103 | 24,439 | 6,250 | 3,968 | 34,760 |
| 31,824 | 104 | 24,466 | 6,236 | 3,970 | 34,776 |
| 31,825 | 109 | 24,548 | 6,246 | 3,973 | 34,876 |
| 31,826 | 108 | 24,448 | 6,164 | 3,935 | 34,655 |
| 31,827 | 114 | 24,734 | 6,174 | 3,930 | 34,952 |
| 31,828 | 115 | 24,668 | 6,162 | 3,916 | 34,861 |
| 31,829 | 117 | 24,850 | 6,154 | 3,902 | 35,023 |
| 31,830 | 118 | 24,588 | 6,088 | 3,832 | 34,626 |
| 31,831 | 118 | 24,510 | 6,092 | 3,822 | 34,542 |

|        |     |        |       |       |        |
|--------|-----|--------|-------|-------|--------|
| 31,832 | 118 | 24,300 | 6,024 | 3,808 | 34,250 |
| 31,833 | 120 | 24,313 | 6,029 | 3,797 | 34,259 |
| 31,834 | 122 | 24,500 | 6,093 | 3,814 | 34,529 |
| 31,835 | 126 | 24,555 | 6,082 | 3,820 | 34,583 |
| 31,836 | 127 | 24,737 | 6,094 | 3,825 | 34,783 |
| 31,837 | 125 | 24,414 | 6,016 | 3,775 | 34,330 |
| 31,838 | 125 | 24,398 | 6,013 | 3,785 | 34,321 |
| 31,839 | 124 | 24,332 | 6,014 | 3,778 | 34,248 |
| 31,840 | 122 | 24,235 | 5,990 | 3,773 | 34,120 |
| 31,841 | 122 | 24,584 | 6,077 | 3,816 | 34,599 |
| 31,842 | 119 | 25,101 | 6,152 | 3,880 | 35,252 |
| 31,843 | 116 | 24,920 | 6,089 | 3,835 | 34,960 |
| 31,844 | 115 | 24,834 | 6,126 | 3,862 | 34,937 |
| 31,845 | 117 | 25,168 | 6,289 | 3,947 | 35,521 |
| 31,846 | 114 | 24,873 | 6,240 | 3,897 | 35,124 |
| 31,847 | 113 | 25,096 | 6,289 | 3,951 | 35,449 |
| 31,848 | 110 | 25,394 | 6,358 | 3,983 | 35,845 |
| 31,849 | 112 | 25,188 | 6,289 | 3,971 | 35,560 |
| 31,850 | 112 | 24,986 | 6,230 | 3,950 | 35,278 |
| 31,851 | 114 | 25,029 | 6,237 | 4,010 | 35,390 |
| 31,852 | 116 | 25,242 | 6,255 | 4,031 | 35,644 |
| 31,853 | 116 | 25,288 | 6,254 | 4,024 | 35,682 |
| 31,854 | 124 | 25,351 | 6,285 | 4,014 | 35,774 |
| 31,855 | 128 | 25,569 | 6,318 | 4,063 | 36,078 |
| 31,856 | 127 | 25,308 | 6,248 | 4,016 | 35,699 |
| 31,857 | 126 | 25,188 | 6,241 | 4,006 | 35,561 |
| 31,858 | 129 | 25,327 | 6,316 | 4,043 | 35,815 |
| 31,859 | 130 | 25,217 | 6,316 | 4,024 | 35,687 |
| 31,860 | 126 | 25,162 | 6,310 | 4,028 | 35,626 |
| 31,861 | 128 | 25,030 | 6,262 | 3,979 | 35,399 |
| 31,862 | 127 | 24,773 | 6,207 | 3,970 | 35,077 |
| 31,863 | 133 | 24,756 | 6,147 | 3,940 | 34,976 |

|        |     |        |       |       |        |
|--------|-----|--------|-------|-------|--------|
| 31,864 | 142 | 24,821 | 6,177 | 3,942 | 35,082 |
| 31,865 | 141 | 24,815 | 6,156 | 3,923 | 35,035 |
| 31,866 | 139 | 24,686 | 6,156 | 3,942 | 34,923 |
| 31,867 | 142 | 24,637 | 6,156 | 3,930 | 34,865 |
| 31,868 | 151 | 24,993 | 6,263 | 3,985 | 35,392 |
| 31,869 | 149 | 24,743 | 6,197 | 3,950 | 35,039 |
| 31,870 | 153 | 24,782 | 6,263 | 3,989 | 35,187 |
| 31,871 | 151 | 24,936 | 6,244 | 4,012 | 35,343 |
| 31,872 | 152 | 25,060 | 6,257 | 4,029 | 35,498 |
| 31,873 | 152 | 25,036 | 6,256 | 4,032 | 35,476 |
| 31,874 | 150 | 25,303 | 6,288 | 4,068 | 35,809 |
| 31,875 | 149 | 24,964 | 6,202 | 4,008 | 35,323 |
| 31,876 | 146 | 25,210 | 6,266 | 4,069 | 35,691 |
| 31,877 | 143 | 25,253 | 6,330 | 4,113 | 35,839 |
| 31,878 | 149 | 25,051 | 6,324 | 4,088 | 35,612 |
| 31,879 | 150 | 25,337 | 6,390 | 4,121 | 35,998 |
| 31,880 | 146 | 25,370 | 6,370 | 4,134 | 36,020 |
| 31,881 | 146 | 25,062 | 6,331 | 4,095 | 35,634 |
| 31,882 | 145 | 24,798 | 6,298 | 4,084 | 35,325 |
| 31,883 | 144 | 24,990 | 6,360 | 4,140 | 35,634 |
| 31,884 | 146 | 25,153 | 6,350 | 4,166 | 35,815 |
| 31,885 | 155 | 25,163 | 6,338 | 4,177 | 35,833 |
| 31,886 | 152 | 25,047 | 6,319 | 4,149 | 35,667 |
| 31,887 | 151 | 24,982 | 6,321 | 4,146 | 35,600 |
| 31,888 | 148 | 24,715 | 6,244 | 4,078 | 35,185 |
| 31,889 | 153 | 24,808 | 6,258 | 4,061 | 35,280 |
| 31,890 | 154 | 24,789 | 6,257 | 4,055 | 35,255 |
| 31,891 | 152 | 24,947 | 6,309 | 4,083 | 35,491 |
| 31,892 | 157 | 24,956 | 6,295 | 4,071 | 35,479 |
| 31,893 | 158 | 24,746 | 6,253 | 4,046 | 35,203 |
| 31,894 | 159 | 24,754 | 6,225 | 4,031 | 35,169 |
| 31,895 | 160 | 24,751 | 6,172 | 4,027 | 35,110 |

|        |     |        |       |       |        |
|--------|-----|--------|-------|-------|--------|
| 31,896 | 159 | 24,575 | 6,072 | 3,961 | 34,767 |
| 31,897 | 157 | 24,457 | 6,040 | 3,968 | 34,622 |
| 31,898 | 158 | 24,405 | 6,001 | 3,959 | 34,523 |
| 31,899 | 149 | 24,366 | 5,951 | 3,957 | 34,423 |
| 31,900 | 152 | 24,476 | 6,031 | 3,994 | 34,653 |
| 31,901 | 150 | 24,158 | 5,979 | 3,939 | 34,226 |
| 31,902 | 145 | 23,596 | 5,844 | 3,835 | 33,420 |
| 31,903 | 150 | 23,759 | 5,918 | 3,865 | 33,692 |
| 31,904 | 148 | 23,855 | 5,955 | 3,891 | 33,849 |
| 31,905 | 147 | 23,835 | 5,950 | 3,888 | 33,820 |
| 31,906 | 145 | 24,009 | 5,993 | 3,911 | 34,058 |
| 31,907 | 144 | 23,892 | 5,991 | 3,938 | 33,965 |
| 31,908 | 144 | 23,977 | 5,993 | 3,945 | 34,059 |
| 31,909 | 140 | 24,114 | 6,017 | 3,960 | 34,231 |
| 31,910 | 141 | 23,821 | 5,892 | 3,897 | 33,751 |
| 31,911 | 142 | 23,721 | 5,866 | 3,879 | 33,608 |
| 31,912 | 137 | 23,718 | 5,853 | 3,888 | 33,596 |
| 31,913 | 136 | 23,603 | 5,814 | 3,869 | 33,422 |
| 31,914 | 127 | 23,535 | 5,791 | 3,868 | 33,321 |
| 31,915 | 126 | 23,485 | 5,761 | 3,871 | 33,243 |
| 31,916 | 132 | 23,426 | 5,731 | 3,849 | 33,138 |
| 31,917 | 132 | 23,341 | 5,723 | 3,843 | 33,039 |
| 31,918 | 123 | 23,298 | 5,709 | 3,864 | 32,994 |
| 31,919 | 120 | 23,295 | 5,757 | 3,895 | 33,067 |
| 31,920 | 118 | 23,087 | 5,679 | 3,839 | 32,723 |
| 31,921 | 117 | 22,977 | 5,663 | 3,809 | 32,566 |
| 31,922 | 114 | 23,116 | 5,721 | 3,839 | 32,790 |
| 31,923 | 120 | 23,264 | 5,759 | 3,842 | 32,985 |
| 31,924 | 121 | 23,171 | 5,739 | 3,834 | 32,865 |
| 31,925 | 118 | 22,689 | 5,642 | 3,768 | 32,217 |
| 31,926 | 117 | 22,947 | 5,706 | 3,805 | 32,575 |
| 31,927 | 119 | 22,917 | 5,676 | 3,779 | 32,491 |

|        |     |        |       |       |        |
|--------|-----|--------|-------|-------|--------|
| 31,928 | 118 | 23,041 | 5,640 | 3,773 | 32,572 |
| 31,929 | 112 | 22,662 | 5,531 | 3,715 | 32,020 |
| 31,930 | 111 | 22,711 | 5,539 | 3,717 | 32,078 |
| 31,931 | 113 | 22,603 | 5,561 | 3,726 | 32,003 |
| 31,932 | 113 | 22,784 | 5,555 | 3,753 | 32,205 |
| 31,933 | 113 | 22,698 | 5,540 | 3,724 | 32,075 |
| 31,934 | 110 | 22,700 | 5,580 | 3,746 | 32,136 |
| 31,935 | 116 | 22,904 | 5,715 | 3,815 | 32,550 |
| 31,936 | 110 | 22,697 | 5,657 | 3,758 | 32,222 |
| 31,937 | 108 | 22,439 | 5,634 | 3,741 | 31,922 |
| 31,938 | 113 | 23,003 | 5,790 | 3,883 | 32,789 |
| 31,939 | 112 | 22,774 | 5,712 | 3,874 | 32,472 |
| 31,940 | 124 | 22,984 | 5,766 | 3,898 | 32,772 |
| 31,941 | 124 | 23,141 | 5,783 | 3,878 | 32,926 |
| 31,942 | 122 | 23,071 | 5,738 | 3,890 | 32,821 |
| 31,943 | 123 | 23,250 | 5,787 | 3,925 | 33,085 |
| 31,944 | 118 | 22,857 | 5,709 | 3,900 | 32,584 |
| 31,945 | 124 | 23,096 | 5,741 | 3,924 | 32,885 |
| 31,946 | 119 | 22,720 | 5,662 | 3,870 | 32,371 |
| 31,947 | 120 | 22,665 | 5,654 | 3,845 | 32,284 |
| 31,948 | 118 | 22,236 | 5,580 | 3,799 | 31,733 |
| 31,949 | 128 | 22,670 | 5,698 | 3,867 | 32,363 |
| 31,950 | 127 | 22,573 | 5,688 | 3,861 | 32,249 |
| 31,951 | 130 | 22,601 | 5,662 | 3,858 | 32,251 |
| 31,952 | 131 | 22,514 | 5,656 | 3,889 | 32,190 |
| 31,953 | 131 | 22,270 | 5,655 | 3,888 | 31,944 |
| 31,954 | 128 | 22,288 | 5,627 | 3,895 | 31,938 |
| 31,955 | 123 | 22,136 | 5,573 | 3,859 | 31,691 |
| 31,956 | 122 | 22,150 | 5,596 | 3,880 | 31,748 |
| 31,957 | 122 | 22,136 | 5,605 | 3,870 | 31,733 |
| 31,958 | 122 | 22,168 | 5,603 | 3,872 | 31,765 |
| 31,959 | 124 | 22,220 | 5,602 | 3,882 | 31,828 |

|        |     |        |       |       |        |
|--------|-----|--------|-------|-------|--------|
| 31,960 | 123 | 22,249 | 5,570 | 3,875 | 31,817 |
| 31,961 | 120 | 22,113 | 5,588 | 3,875 | 31,696 |
| 31,962 | 123 | 22,508 | 5,683 | 3,932 | 32,246 |
| 31,963 | 126 | 22,351 | 5,655 | 3,897 | 32,029 |
| 31,964 | 128 | 22,552 | 5,713 | 3,927 | 32,320 |
| 31,965 | 130 | 22,413 | 5,693 | 3,904 | 32,140 |
| 31,966 | 132 | 22,421 | 5,695 | 3,887 | 32,135 |
| 31,967 | 126 | 22,332 | 5,635 | 3,873 | 31,966 |
| 31,968 | 127 | 22,142 | 5,556 | 3,799 | 31,624 |
| 31,969 | 127 | 22,335 | 5,567 | 3,816 | 31,845 |
| 31,970 | 135 | 22,608 | 5,613 | 3,839 | 32,195 |
| 31,971 | 133 | 22,771 | 5,607 | 3,833 | 32,344 |
| 31,972 | 131 | 22,422 | 5,527 | 3,788 | 31,868 |
| 31,973 | 132 | 22,445 | 5,531 | 3,784 | 31,892 |
| 31,974 | 126 | 22,639 | 5,588 | 3,830 | 32,183 |
| 31,975 | 122 | 22,386 | 5,514 | 3,785 | 31,807 |
| 31,976 | 122 | 22,298 | 5,479 | 3,766 | 31,665 |
| 31,977 | 122 | 22,388 | 5,532 | 3,798 | 31,840 |
| 31,978 | 127 | 22,590 | 5,599 | 3,836 | 32,152 |
| 31,979 | 126 | 22,038 | 5,440 | 3,714 | 31,318 |
| 31,980 | 129 | 22,105 | 5,468 | 3,736 | 31,438 |
| 31,981 | 129 | 22,290 | 5,520 | 3,759 | 31,698 |
| 31,982 | 132 | 22,481 | 5,568 | 3,767 | 31,948 |
| 31,983 | 131 | 22,419 | 5,556 | 3,748 | 31,854 |
| 31,984 | 135 | 22,118 | 5,422 | 3,657 | 31,332 |
| 31,985 | 136 | 22,313 | 5,469 | 3,676 | 31,594 |
| 31,986 | 133 | 22,436 | 5,509 | 3,702 | 31,780 |
| 31,987 | 134 | 22,143 | 5,434 | 3,632 | 31,343 |
| 31,988 | 133 | 22,276 | 5,449 | 3,641 | 31,499 |
| 31,989 | 130 | 22,380 | 5,470 | 3,626 | 31,606 |
| 31,990 | 129 | 22,323 | 5,486 | 3,626 | 31,564 |
| 31,991 | 121 | 22,303 | 5,523 | 3,652 | 31,599 |



|        |     |        |       |       |        |
|--------|-----|--------|-------|-------|--------|
| 31,992 | 119 | 22,371 | 5,524 | 3,670 | 31,684 |
| 31,993 | 118 | 22,541 | 5,590 | 3,677 | 31,926 |
| 31,994 | 119 | 21,910 | 5,460 | 3,577 | 31,066 |
| 31,995 | 122 | 22,208 | 5,519 | 3,614 | 31,463 |
| 31,996 | 118 | 22,449 | 5,572 | 3,641 | 31,780 |
| 31,997 | 118 | 22,389 | 5,567 | 3,632 | 31,706 |
| 31,998 | 113 | 22,645 | 5,662 | 3,671 | 32,091 |
| 31,999 | 111 | 22,716 | 5,669 | 3,685 | 32,181 |
| 32,000 | 117 | 23,022 | 5,717 | 3,716 | 32,572 |
| 32,001 | 121 | 23,104 | 5,729 | 3,717 | 32,671 |
| 32,002 | 119 | 23,014 | 5,664 | 3,669 | 32,466 |
| 32,003 | 118 | 23,050 | 5,639 | 3,664 | 32,471 |
| 32,004 | 121 | 23,447 | 5,732 | 3,719 | 33,019 |
| 32,005 | 122 | 23,214 | 5,709 | 3,677 | 32,722 |
| 32,006 | 124 | 23,208 | 5,682 | 3,664 | 32,678 |
| 32,007 | 124 | 23,312 | 5,681 | 3,687 | 32,804 |
| 32,008 | 126 | 23,517 | 5,744 | 3,725 | 33,112 |
| 32,009 | 130 | 23,508 | 5,776 | 3,719 | 33,133 |
| 32,010 | 128 | 23,544 | 5,777 | 3,722 | 33,171 |
| 32,011 | 127 | 23,525 | 5,764 | 3,730 | 33,146 |
| 32,012 | 126 | 23,675 | 5,759 | 3,724 | 33,284 |
| 32,013 | 129 | 23,866 | 5,817 | 3,734 | 33,546 |
| 32,014 | 129 | 24,064 | 5,860 | 3,768 | 33,821 |
| 32,015 | 121 | 23,602 | 5,763 | 3,725 | 33,211 |
| 32,016 | 121 | 23,623 | 5,775 | 3,728 | 33,247 |
| 32,017 | 120 | 23,781 | 5,830 | 3,776 | 33,507 |
| 32,018 | 120 | 23,521 | 5,808 | 3,737 | 33,186 |
| 32,019 | 124 | 23,164 | 5,760 | 3,699 | 32,747 |
| 32,020 | 124 | 22,881 | 5,714 | 3,682 | 32,401 |
| 32,021 | 119 | 23,490 | 5,869 | 3,800 | 33,278 |
| 32,022 | 123 | 23,322 | 5,875 | 3,793 | 33,113 |
| 32,023 | 126 | 23,146 | 5,823 | 3,754 | 32,849 |

|        |     |        |       |       |        |
|--------|-----|--------|-------|-------|--------|
| 32,024 | 126 | 22,966 | 5,791 | 3,726 | 32,609 |
| 32,025 | 125 | 23,194 | 5,909 | 3,807 | 33,035 |
| 32,026 | 126 | 23,382 | 5,958 | 3,838 | 33,304 |
| 32,027 | 126 | 23,096 | 5,921 | 3,793 | 32,936 |
| 32,028 | 128 | 23,196 | 5,983 | 3,834 | 33,141 |
| 32,029 | 125 | 23,209 | 5,994 | 3,830 | 33,158 |
| 32,030 | 123 | 23,302 | 6,054 | 3,884 | 33,363 |
| 32,031 | 123 | 23,369 | 6,079 | 3,889 | 33,460 |
| 32,032 | 122 | 23,387 | 6,035 | 3,871 | 33,415 |
| 32,033 | 119 | 23,171 | 5,976 | 3,856 | 33,122 |
| 32,034 | 123 | 23,370 | 6,043 | 3,907 | 33,443 |
| 32,035 | 121 | 23,288 | 6,034 | 3,911 | 33,354 |
| 32,036 | 118 | 23,050 | 5,934 | 3,853 | 32,955 |
| 32,037 | 120 | 23,068 | 5,923 | 3,837 | 32,948 |
| 32,038 | 113 | 22,772 | 5,847 | 3,797 | 32,529 |
| 32,039 | 115 | 22,906 | 5,916 | 3,832 | 32,769 |
| 32,040 | 113 | 22,755 | 5,878 | 3,817 | 32,563 |
| 32,041 | 117 | 22,763 | 5,842 | 3,791 | 32,513 |
| 32,042 | 119 | 22,553 | 5,782 | 3,743 | 32,197 |
| 32,043 | 119 | 22,524 | 5,792 | 3,737 | 32,172 |
| 32,044 | 123 | 22,466 | 5,724 | 3,740 | 32,053 |
| 32,045 | 133 | 22,594 | 5,779 | 3,762 | 32,268 |
| 32,046 | 131 | 22,582 | 5,799 | 3,740 | 32,252 |
| 32,047 | 134 | 22,456 | 5,775 | 3,707 | 32,072 |
| 32,048 | 135 | 22,447 | 5,751 | 3,691 | 32,024 |
| 32,049 | 135 | 22,422 | 5,759 | 3,670 | 31,986 |
| 32,050 | 135 | 22,313 | 5,781 | 3,682 | 31,911 |
| 32,051 | 129 | 21,850 | 5,680 | 3,615 | 31,274 |
| 32,052 | 131 | 21,919 | 5,716 | 3,628 | 31,394 |
| 32,053 | 127 | 21,926 | 5,724 | 3,616 | 31,393 |
| 32,054 | 126 | 22,008 | 5,759 | 3,635 | 31,528 |
| 32,055 | 124 | 21,867 | 5,735 | 3,619 | 31,345 |

|        |     |        |       |       |        |
|--------|-----|--------|-------|-------|--------|
| 32,056 | 121 | 21,661 | 5,666 | 3,576 | 31,024 |
| 32,057 | 119 | 21,706 | 5,677 | 3,556 | 31,058 |
| 32,058 | 119 | 21,692 | 5,665 | 3,529 | 31,005 |
| 32,059 | 124 | 21,834 | 5,691 | 3,543 | 31,192 |
| 32,060 | 122 | 21,715 | 5,658 | 3,537 | 31,032 |
| 32,061 | 117 | 21,451 | 5,597 | 3,498 | 30,663 |
| 32,062 | 122 | 21,171 | 5,558 | 3,470 | 30,321 |
| 32,063 | 125 | 21,321 | 5,613 | 3,512 | 30,571 |
| 32,064 | 126 | 21,478 | 5,663 | 3,562 | 30,829 |
| 32,065 | 126 | 21,203 | 5,591 | 3,511 | 30,431 |
| 32,066 | 125 | 21,093 | 5,563 | 3,489 | 30,270 |
| 32,067 | 127 | 21,290 | 5,650 | 3,573 | 30,640 |
| 32,068 | 132 | 21,101 | 5,597 | 3,516 | 30,346 |
| 32,069 | 132 | 20,973 | 5,565 | 3,482 | 30,152 |
| 32,070 | 129 | 21,130 | 5,628 | 3,524 | 30,411 |
| 32,071 | 131 | 21,041 | 5,628 | 3,515 | 30,315 |
| 32,072 | 128 | 20,930 | 5,587 | 3,493 | 30,138 |
| 32,073 | 123 | 20,939 | 5,572 | 3,509 | 30,143 |
| 32,074 | 126 | 21,052 | 5,595 | 3,534 | 30,307 |
| 32,075 | 126 | 20,965 | 5,543 | 3,500 | 30,134 |
| 32,076 | 129 | 20,879 | 5,480 | 3,466 | 29,954 |
| 32,077 | 129 | 20,461 | 5,334 | 3,376 | 29,300 |
| 32,078 | 135 | 20,717 | 5,327 | 3,390 | 29,569 |
| 32,079 | 135 | 20,835 | 5,297 | 3,371 | 29,638 |
| 32,080 | 137 | 20,883 | 5,283 | 3,359 | 29,662 |
| 32,081 | 137 | 20,920 | 5,264 | 3,352 | 29,673 |
| 32,082 | 142 | 21,090 | 5,297 | 3,409 | 29,938 |
| 32,083 | 141 | 20,930 | 5,257 | 3,390 | 29,718 |
| 32,084 | 143 | 21,083 | 5,314 | 3,394 | 29,934 |
| 32,085 | 140 | 20,832 | 5,254 | 3,353 | 29,579 |
| 32,086 | 137 | 20,849 | 5,261 | 3,346 | 29,593 |
| 32,087 | 137 | 20,918 | 5,265 | 3,348 | 29,668 |

|        |     |        |       |       |        |
|--------|-----|--------|-------|-------|--------|
| 32,088 | 136 | 20,950 | 5,266 | 3,348 | 29,700 |
| 32,089 | 138 | 21,170 | 5,296 | 3,371 | 29,975 |
| 32,090 | 142 | 21,059 | 5,236 | 3,340 | 29,777 |
| 32,091 | 141 | 21,068 | 5,258 | 3,333 | 29,800 |
| 32,092 | 132 | 21,173 | 5,266 | 3,326 | 29,897 |
| 32,093 | 133 | 21,116 | 5,257 | 3,330 | 29,836 |
| 32,094 | 124 | 21,064 | 5,229 | 3,329 | 29,746 |
| 32,095 | 125 | 21,231 | 5,285 | 3,360 | 30,001 |
| 32,096 | 115 | 21,129 | 5,245 | 3,362 | 29,851 |
| 32,097 | 115 | 21,326 | 5,285 | 3,384 | 30,110 |
| 32,098 | 112 | 21,385 | 5,281 | 3,408 | 30,186 |
| 32,099 | 117 | 21,383 | 5,274 | 3,415 | 30,189 |
| 32,100 | 115 | 21,280 | 5,188 | 3,368 | 29,951 |
| 32,101 | 122 | 21,478 | 5,233 | 3,400 | 30,233 |
| 32,102 | 117 | 20,949 | 5,108 | 3,326 | 29,500 |
| 32,103 | 116 | 21,236 | 5,149 | 3,356 | 29,857 |
| 32,104 | 119 | 21,235 | 5,146 | 3,370 | 29,870 |
| 32,105 | 120 | 21,187 | 5,132 | 3,342 | 29,781 |
| 32,106 | 120 | 21,164 | 5,115 | 3,352 | 29,751 |
| 32,107 | 121 | 21,082 | 5,086 | 3,342 | 29,631 |
| 32,108 | 121 | 21,305 | 5,106 | 3,366 | 29,898 |
| 32,109 | 119 | 21,301 | 5,134 | 3,368 | 29,922 |
| 32,110 | 114 | 20,650 | 4,977 | 3,263 | 29,004 |
| 32,111 | 114 | 20,813 | 5,027 | 3,290 | 29,244 |
| 32,112 | 109 | 20,930 | 5,070 | 3,324 | 29,433 |
| 32,113 | 112 | 21,060 | 5,105 | 3,324 | 29,601 |
| 32,114 | 120 | 21,088 | 5,119 | 3,331 | 29,658 |
| 32,115 | 116 | 20,958 | 5,057 | 3,298 | 29,429 |
| 32,116 | 113 | 20,841 | 5,002 | 3,270 | 29,226 |
| 32,117 | 112 | 21,142 | 5,046 | 3,292 | 29,592 |
| 32,118 | 105 | 21,342 | 5,087 | 3,314 | 29,848 |
| 32,119 | 106 | 21,427 | 5,129 | 3,352 | 30,014 |

|        |     |        |       |       |        |
|--------|-----|--------|-------|-------|--------|
| 32,120 | 108 | 21,484 | 5,135 | 3,359 | 30,086 |
| 32,121 | 110 | 21,825 | 5,215 | 3,397 | 30,547 |
| 32,122 | 109 | 21,945 | 5,237 | 3,416 | 30,707 |
| 32,123 | 113 | 21,928 | 5,254 | 3,385 | 30,680 |
| 32,124 | 112 | 21,814 | 5,223 | 3,365 | 30,514 |
| 32,125 | 111 | 21,704 | 5,206 | 3,354 | 30,375 |
| 32,126 | 113 | 21,757 | 5,190 | 3,352 | 30,412 |
| 32,127 | 110 | 21,733 | 5,242 | 3,384 | 30,469 |
| 32,128 | 103 | 21,464 | 5,235 | 3,380 | 30,182 |
| 32,129 | 101 | 21,493 | 5,264 | 3,375 | 30,233 |
| 32,130 | 101 | 21,423 | 5,277 | 3,369 | 30,170 |
| 32,131 | 104 | 21,641 | 5,323 | 3,408 | 30,476 |
| 32,132 | 107 | 21,704 | 5,398 | 3,414 | 30,623 |
| 32,133 | 107 | 21,551 | 5,362 | 3,390 | 30,410 |
| 32,134 | 107 | 21,416 | 5,341 | 3,361 | 30,225 |
| 32,135 | 110 | 21,539 | 5,415 | 3,425 | 30,489 |
| 32,136 | 110 | 21,519 | 5,418 | 3,419 | 30,466 |
| 32,137 | 108 | 21,318 | 5,405 | 3,409 | 30,240 |
| 32,138 | 108 | 21,208 | 5,390 | 3,427 | 30,133 |
| 32,139 | 112 | 21,216 | 5,420 | 3,432 | 30,180 |
| 32,140 | 114 | 21,101 | 5,434 | 3,443 | 30,092 |
| 32,141 | 112 | 20,973 | 5,454 | 3,441 | 29,980 |
| 32,142 | 112 | 20,923 | 5,467 | 3,448 | 29,950 |
| 32,143 | 114 | 20,878 | 5,496 | 3,456 | 29,944 |
| 32,144 | 120 | 20,756 | 5,472 | 3,441 | 29,789 |
| 32,145 | 121 | 20,574 | 5,447 | 3,425 | 29,567 |
| 32,146 | 120 | 20,687 | 5,481 | 3,430 | 29,718 |
| 32,147 | 117 | 20,177 | 5,360 | 3,343 | 28,997 |
| 32,148 | 118 | 20,343 | 5,418 | 3,358 | 29,237 |
| 32,149 | 119 | 20,545 | 5,479 | 3,390 | 29,533 |
| 32,150 | 112 | 20,203 | 5,415 | 3,360 | 29,090 |
| 32,151 | 112 | 20,163 | 5,427 | 3,367 | 29,069 |

|        |     |        |       |       |        |
|--------|-----|--------|-------|-------|--------|
| 32,152 | 104 | 20,031 | 5,431 | 3,356 | 28,922 |
| 32,153 | 106 | 19,953 | 5,448 | 3,368 | 28,875 |
| 32,154 | 106 | 20,045 | 5,498 | 3,394 | 29,043 |
| 32,155 | 104 | 20,065 | 5,522 | 3,399 | 29,090 |
| 32,156 | 103 | 19,898 | 5,520 | 3,400 | 28,921 |
| 32,157 | 103 | 20,012 | 5,576 | 3,413 | 29,104 |
| 32,158 | 102 | 20,005 | 5,607 | 3,432 | 29,146 |
| 32,159 | 103 | 20,022 | 5,613 | 3,435 | 29,173 |
| 32,160 | 104 | 19,897 | 5,567 | 3,405 | 28,973 |
| 32,161 | 106 | 19,884 | 5,563 | 3,391 | 28,944 |
| 32,162 | 104 | 19,489 | 5,452 | 3,338 | 28,383 |
| 32,163 | 105 | 19,620 | 5,487 | 3,356 | 28,568 |
| 32,164 | 104 | 19,798 | 5,512 | 3,388 | 28,802 |
| 32,165 | 98  | 19,710 | 5,491 | 3,364 | 28,663 |
| 32,166 | 99  | 19,427 | 5,453 | 3,319 | 28,298 |
| 32,167 | 96  | 19,169 | 5,409 | 3,276 | 27,950 |
| 32,168 | 100 | 19,177 | 5,444 | 3,311 | 28,032 |
| 32,169 | 102 | 19,068 | 5,386 | 3,300 | 27,856 |
| 32,170 | 103 | 19,010 | 5,357 | 3,258 | 27,728 |
| 32,171 | 98  | 18,839 | 5,292 | 3,212 | 27,441 |
| 32,172 | 101 | 18,946 | 5,338 | 3,231 | 27,616 |
| 32,173 | 99  | 18,693 | 5,270 | 3,185 | 27,247 |
| 32,174 | 99  | 18,772 | 5,254 | 3,187 | 27,312 |
| 32,175 | 100 | 18,767 | 5,254 | 3,170 | 27,291 |
| 32,176 | 100 | 18,766 | 5,272 | 3,152 | 27,290 |
| 32,177 | 98  | 18,656 | 5,268 | 3,152 | 27,174 |
| 32,178 | 99  | 18,619 | 5,219 | 3,164 | 27,101 |
| 32,179 | 98  | 18,528 | 5,209 | 3,144 | 26,979 |
| 32,180 | 97  | 18,710 | 5,283 | 3,196 | 27,286 |
| 32,181 | 94  | 18,752 | 5,271 | 3,196 | 27,313 |
| 32,182 | 93  | 18,711 | 5,279 | 3,204 | 27,287 |
| 32,183 | 88  | 18,570 | 5,210 | 3,176 | 27,044 |

|        |     |        |       |       |        |
|--------|-----|--------|-------|-------|--------|
| 32,184 | 82  | 18,352 | 5,190 | 3,159 | 26,783 |
| 32,185 | 82  | 18,241 | 5,169 | 3,136 | 26,628 |
| 32,186 | 80  | 18,059 | 5,128 | 3,101 | 26,368 |
| 32,187 | 80  | 17,948 | 5,097 | 3,086 | 26,211 |
| 32,188 | 83  | 18,498 | 5,188 | 3,130 | 26,899 |
| 32,189 | 82  | 18,268 | 5,135 | 3,089 | 26,574 |
| 32,190 | 79  | 18,295 | 5,120 | 3,100 | 26,594 |
| 32,191 | 75  | 18,340 | 5,122 | 3,100 | 26,637 |
| 32,192 | 71  | 18,372 | 5,118 | 3,096 | 26,657 |
| 32,193 | 76  | 18,475 | 5,123 | 3,112 | 26,786 |
| 32,194 | 76  | 18,325 | 5,046 | 3,078 | 26,525 |
| 32,195 | 68  | 18,131 | 4,986 | 3,032 | 26,217 |
| 32,196 | 73  | 18,426 | 5,059 | 3,065 | 26,623 |
| 32,197 | 77  | 18,422 | 5,035 | 3,047 | 26,581 |
| 32,198 | 77  | 18,112 | 4,958 | 3,023 | 26,170 |
| 32,199 | 78  | 18,151 | 4,982 | 3,047 | 26,258 |
| 32,200 | 77  | 18,069 | 4,968 | 3,023 | 26,137 |
| 32,201 | 85  | 17,959 | 4,910 | 2,975 | 25,929 |
| 32,202 | 93  | 18,142 | 4,976 | 2,983 | 26,194 |
| 32,203 | 98  | 18,216 | 4,967 | 2,978 | 26,259 |
| 32,204 | 98  | 18,220 | 4,969 | 2,972 | 26,259 |
| 32,205 | 104 | 18,140 | 4,930 | 2,928 | 26,102 |
| 32,206 | 103 | 17,975 | 4,877 | 2,890 | 25,845 |
| 32,207 | 102 | 18,109 | 4,875 | 2,903 | 25,989 |
| 32,208 | 112 | 18,156 | 4,880 | 2,896 | 26,044 |
| 32,209 | 112 | 18,082 | 4,856 | 2,867 | 25,917 |
| 32,210 | 115 | 18,035 | 4,882 | 2,859 | 25,891 |
| 32,211 | 114 | 18,275 | 4,966 | 2,912 | 26,267 |
| 32,212 | 113 | 18,184 | 4,932 | 2,892 | 26,121 |
| 32,213 | 113 | 18,300 | 4,938 | 2,899 | 26,250 |
| 32,214 | 113 | 18,235 | 4,897 | 2,880 | 26,125 |
| 32,215 | 116 | 18,408 | 4,930 | 2,904 | 26,358 |

|        |     |        |       |       |        |
|--------|-----|--------|-------|-------|--------|
| 32,216 | 111 | 18,465 | 4,940 | 2,896 | 26,412 |
| 32,217 | 115 | 18,447 | 4,903 | 2,884 | 26,349 |
| 32,218 | 115 | 18,460 | 4,903 | 2,875 | 26,353 |
| 32,219 | 111 | 18,509 | 4,966 | 2,914 | 26,500 |
| 32,220 | 111 | 18,744 | 5,062 | 2,941 | 26,858 |
| 32,221 | 111 | 18,633 | 5,058 | 2,913 | 26,715 |
| 32,222 | 108 | 18,561 | 5,038 | 2,891 | 26,598 |
| 32,223 | 122 | 18,658 | 5,057 | 2,911 | 26,748 |
| 32,224 | 119 | 18,894 | 5,120 | 2,946 | 27,079 |
| 32,225 | 119 | 18,938 | 5,127 | 2,925 | 27,109 |
| 32,226 | 117 | 18,943 | 5,084 | 2,921 | 27,065 |
| 32,227 | 119 | 19,164 | 5,151 | 2,952 | 27,386 |
| 32,228 | 120 | 19,035 | 5,139 | 2,946 | 27,240 |
| 32,229 | 123 | 19,131 | 5,200 | 2,949 | 27,403 |
| 32,230 | 123 | 19,165 | 5,204 | 2,967 | 27,459 |
| 32,231 | 125 | 19,207 | 5,204 | 2,949 | 27,485 |
| 32,232 | 125 | 19,211 | 5,198 | 2,948 | 27,482 |
| 32,233 | 123 | 19,042 | 5,139 | 2,915 | 27,219 |
| 32,234 | 127 | 19,136 | 5,148 | 2,907 | 27,318 |
| 32,235 | 132 | 19,166 | 5,100 | 2,870 | 27,268 |
| 32,236 | 132 | 19,198 | 5,094 | 2,876 | 27,300 |
| 32,237 | 134 | 19,346 | 5,143 | 2,911 | 27,534 |
| 32,238 | 144 | 19,297 | 5,118 | 2,907 | 27,466 |
| 32,239 | 144 | 19,183 | 5,124 | 2,902 | 27,353 |
| 32,240 | 151 | 19,611 | 5,255 | 2,984 | 28,001 |
| 32,241 | 158 | 19,633 | 5,267 | 2,988 | 28,046 |
| 32,242 | 157 | 19,543 | 5,245 | 2,968 | 27,913 |
| 32,243 | 154 | 19,913 | 5,357 | 3,025 | 28,449 |
| 32,244 | 155 | 19,934 | 5,365 | 3,037 | 28,491 |
| 32,245 | 154 | 19,939 | 5,389 | 3,051 | 28,533 |
| 32,246 | 155 | 19,909 | 5,387 | 3,061 | 28,512 |
| 32,247 | 155 | 20,120 | 5,470 | 3,105 | 28,850 |



|        |     |        |       |       |        |
|--------|-----|--------|-------|-------|--------|
| 32,248 | 153 | 20,062 | 5,493 | 3,108 | 28,816 |
| 32,249 | 153 | 20,183 | 5,502 | 3,112 | 28,950 |
| 32,250 | 156 | 20,209 | 5,501 | 3,129 | 28,995 |
| 32,251 | 156 | 20,232 | 5,510 | 3,136 | 29,034 |
| 32,252 | 151 | 20,302 | 5,553 | 3,140 | 29,146 |
| 32,253 | 143 | 20,440 | 5,560 | 3,168 | 29,311 |
| 32,254 | 139 | 20,542 | 5,588 | 3,207 | 29,476 |
| 32,255 | 132 | 20,463 | 5,535 | 3,225 | 29,355 |
| 32,256 | 135 | 20,786 | 5,594 | 3,257 | 29,772 |
| 32,257 | 136 | 20,629 | 5,588 | 3,238 | 29,591 |
| 32,258 | 135 | 20,637 | 5,582 | 3,241 | 29,595 |
| 32,259 | 128 | 20,850 | 5,677 | 3,299 | 29,954 |
| 32,260 | 129 | 21,039 | 5,748 | 3,335 | 30,251 |
| 32,261 | 129 | 20,602 | 5,602 | 3,273 | 29,606 |
| 32,262 | 131 | 20,884 | 5,680 | 3,325 | 30,020 |
| 32,263 | 131 | 21,157 | 5,764 | 3,365 | 30,417 |
| 32,264 | 132 | 21,079 | 5,766 | 3,358 | 30,335 |
| 32,265 | 132 | 21,180 | 5,791 | 3,365 | 30,468 |
| 32,266 | 132 | 21,269 | 5,806 | 3,372 | 30,579 |
| 32,267 | 132 | 21,250 | 5,795 | 3,372 | 30,549 |
| 32,268 | 127 | 20,994 | 5,739 | 3,329 | 30,189 |
| 32,269 | 127 | 21,104 | 5,762 | 3,329 | 30,322 |
| 32,270 | 124 | 20,854 | 5,643 | 3,294 | 29,915 |
| 32,271 | 124 | 21,016 | 5,674 | 3,303 | 30,117 |
| 32,272 | 127 | 20,886 | 5,629 | 3,276 | 29,918 |
| 32,273 | 128 | 21,060 | 5,632 | 3,289 | 30,109 |
| 32,274 | 114 | 21,415 | 5,664 | 3,326 | 30,519 |
| 32,275 | 124 | 21,563 | 5,721 | 3,370 | 30,778 |
| 32,276 | 129 | 21,271 | 5,704 | 3,337 | 30,441 |
| 32,277 | 126 | 21,276 | 5,722 | 3,347 | 30,471 |
| 32,278 | 130 | 21,539 | 5,759 | 3,386 | 30,814 |
| 32,279 | 130 | 21,500 | 5,731 | 3,364 | 30,725 |

|        |     |        |       |       |        |
|--------|-----|--------|-------|-------|--------|
| 32,280 | 131 | 21,567 | 5,722 | 3,376 | 30,796 |
| 32,281 | 137 | 21,394 | 5,683 | 3,353 | 30,567 |
| 32,282 | 137 | 21,411 | 5,691 | 3,362 | 30,601 |
| 32,283 | 138 | 21,342 | 5,661 | 3,353 | 30,494 |
| 32,284 | 137 | 21,278 | 5,646 | 3,370 | 30,431 |
| 32,285 | 131 | 21,355 | 5,652 | 3,374 | 30,512 |
| 32,286 | 127 | 21,217 | 5,697 | 3,406 | 30,447 |
| 32,287 | 121 | 21,176 | 5,649 | 3,400 | 30,346 |
| 32,288 | 128 | 21,421 | 5,699 | 3,412 | 30,660 |
| 32,289 | 130 | 21,833 | 5,781 | 3,451 | 31,195 |
| 32,290 | 134 | 21,635 | 5,769 | 3,412 | 30,950 |
| 32,291 | 128 | 21,738 | 5,755 | 3,408 | 31,029 |
| 32,292 | 128 | 21,770 | 5,718 | 3,401 | 31,017 |
| 32,293 | 132 | 22,034 | 5,784 | 3,433 | 31,383 |
| 32,294 | 130 | 21,826 | 5,752 | 3,408 | 31,116 |
| 32,295 | 134 | 22,061 | 5,809 | 3,426 | 31,430 |
| 32,296 | 140 | 22,079 | 5,781 | 3,398 | 31,398 |
| 32,297 | 140 | 22,202 | 5,789 | 3,404 | 31,535 |
| 32,298 | 135 | 22,168 | 5,792 | 3,412 | 31,507 |
| 32,299 | 137 | 22,067 | 5,773 | 3,406 | 31,383 |
| 32,300 | 137 | 22,057 | 5,790 | 3,391 | 31,375 |
| 32,301 | 135 | 22,094 | 5,843 | 3,418 | 31,490 |
| 32,302 | 142 | 21,985 | 5,825 | 3,421 | 31,373 |
| 32,303 | 150 | 22,058 | 5,833 | 3,435 | 31,476 |
| 32,304 | 150 | 22,171 | 5,864 | 3,465 | 31,650 |
| 32,305 | 158 | 22,548 | 5,985 | 3,536 | 32,227 |
| 32,306 | 162 | 22,374 | 5,972 | 3,493 | 32,001 |
| 32,307 | 159 | 22,096 | 5,941 | 3,459 | 31,655 |
| 32,308 | 161 | 22,496 | 6,042 | 3,503 | 32,202 |
| 32,309 | 162 | 22,134 | 5,879 | 3,440 | 31,615 |
| 32,310 | 162 | 22,283 | 5,948 | 3,463 | 31,856 |
| 32,311 | 159 | 22,482 | 6,004 | 3,500 | 32,145 |

|        |     |        |       |       |        |
|--------|-----|--------|-------|-------|--------|
| 32,312 | 156 | 22,037 | 5,949 | 3,466 | 31,608 |
| 32,313 | 158 | 22,219 | 5,991 | 3,493 | 31,861 |
| 32,314 | 159 | 22,221 | 5,965 | 3,485 | 31,830 |
| 32,315 | 160 | 22,325 | 5,966 | 3,504 | 31,955 |
| 32,316 | 160 | 22,262 | 5,948 | 3,489 | 31,859 |
| 32,317 | 161 | 22,286 | 6,001 | 3,503 | 31,951 |
| 32,318 | 162 | 22,113 | 5,916 | 3,455 | 31,646 |
| 32,319 | 162 | 22,127 | 5,917 | 3,461 | 31,667 |
| 32,320 | 163 | 22,242 | 5,915 | 3,502 | 31,822 |
| 32,321 | 165 | 22,055 | 5,910 | 3,526 | 31,656 |
| 32,322 | 166 | 22,279 | 5,955 | 3,547 | 31,947 |
| 32,323 | 163 | 22,290 | 5,963 | 3,542 | 31,958 |
| 32,324 | 164 | 22,043 | 5,962 | 3,534 | 31,703 |
| 32,325 | 166 | 22,270 | 6,042 | 3,575 | 32,053 |
| 32,326 | 152 | 22,295 | 6,001 | 3,574 | 32,022 |
| 32,327 | 153 | 22,127 | 5,922 | 3,541 | 31,743 |
| 32,328 | 153 | 22,350 | 5,960 | 3,587 | 32,050 |
| 32,329 | 152 | 22,609 | 6,040 | 3,626 | 32,427 |
| 32,330 | 143 | 22,314 | 5,957 | 3,566 | 31,980 |
| 32,331 | 144 | 22,703 | 6,041 | 3,606 | 32,494 |
| 32,332 | 144 | 23,048 | 6,104 | 3,663 | 32,959 |
| 32,333 | 143 | 22,883 | 6,064 | 3,630 | 32,720 |
| 32,334 | 150 | 23,159 | 6,130 | 3,662 | 33,101 |
| 32,335 | 150 | 22,973 | 6,090 | 3,628 | 32,841 |
| 32,336 | 150 | 23,029 | 6,035 | 3,607 | 32,821 |
| 32,337 | 143 | 22,805 | 5,941 | 3,561 | 32,450 |
| 32,338 | 146 | 22,931 | 5,986 | 3,581 | 32,644 |
| 32,339 | 138 | 22,864 | 6,007 | 3,585 | 32,594 |
| 32,340 | 133 | 22,929 | 6,003 | 3,613 | 32,678 |
| 32,341 | 130 | 22,931 | 5,955 | 3,623 | 32,639 |
| 32,342 | 132 | 22,903 | 5,986 | 3,643 | 32,664 |
| 32,343 | 135 | 23,062 | 6,041 | 3,675 | 32,913 |

|        |     |        |       |       |        |
|--------|-----|--------|-------|-------|--------|
| 32,344 | 131 | 22,772 | 5,972 | 3,643 | 32,518 |
| 32,345 | 129 | 22,742 | 5,936 | 3,638 | 32,445 |
| 32,346 | 131 | 22,938 | 6,009 | 3,646 | 32,724 |
| 32,347 | 124 | 22,823 | 6,015 | 3,646 | 32,608 |
| 32,348 | 125 | 22,824 | 6,010 | 3,656 | 32,615 |
| 32,349 | 124 | 22,987 | 6,028 | 3,644 | 32,783 |
| 32,350 | 120 | 23,018 | 6,001 | 3,645 | 32,784 |
| 32,351 | 117 | 22,834 | 5,906 | 3,598 | 32,455 |
| 32,352 | 121 | 23,139 | 5,961 | 3,620 | 32,841 |
| 32,353 | 114 | 23,416 | 6,002 | 3,670 | 33,202 |
| 32,354 | 108 | 23,464 | 6,004 | 3,659 | 33,235 |
| 32,355 | 111 | 23,488 | 5,984 | 3,639 | 33,222 |
| 32,356 | 103 | 23,268 | 5,904 | 3,584 | 32,859 |
| 32,357 | 101 | 23,376 | 5,864 | 3,601 | 32,942 |
| 32,358 | 103 | 23,398 | 5,873 | 3,605 | 32,979 |
| 32,359 | 100 | 22,973 | 5,793 | 3,566 | 32,432 |
| 32,360 | 100 | 23,146 | 5,823 | 3,612 | 32,681 |
| 32,361 | 100 | 23,106 | 5,806 | 3,596 | 32,608 |
| 32,362 | 103 | 23,310 | 5,866 | 3,635 | 32,914 |
| 32,363 | 105 | 23,158 | 5,814 | 3,579 | 32,656 |
| 32,364 | 103 | 22,952 | 5,756 | 3,542 | 32,353 |
| 32,365 | 108 | 23,292 | 5,823 | 3,586 | 32,809 |
| 32,366 | 107 | 23,224 | 5,815 | 3,579 | 32,725 |
| 32,367 | 106 | 22,945 | 5,727 | 3,552 | 32,330 |
| 32,368 | 109 | 22,891 | 5,722 | 3,560 | 32,282 |
| 32,369 | 109 | 22,795 | 5,744 | 3,588 | 32,236 |
| 32,370 | 116 | 23,127 | 5,814 | 3,608 | 32,665 |
| 32,371 | 111 | 22,911 | 5,768 | 3,563 | 32,353 |
| 32,372 | 120 | 23,222 | 5,852 | 3,589 | 32,783 |
| 32,373 | 127 | 22,946 | 5,800 | 3,564 | 32,437 |
| 32,374 | 124 | 22,631 | 5,730 | 3,530 | 32,015 |
| 32,375 | 122 | 22,703 | 5,746 | 3,524 | 32,095 |

|        |     |        |       |       |        |
|--------|-----|--------|-------|-------|--------|
| 32,376 | 124 | 22,895 | 5,790 | 3,549 | 32,358 |
| 32,377 | 132 | 22,738 | 5,730 | 3,514 | 32,114 |
| 32,378 | 128 | 22,519 | 5,703 | 3,476 | 31,826 |
| 32,379 | 130 | 22,585 | 5,690 | 3,445 | 31,850 |
| 32,380 | 131 | 22,591 | 5,688 | 3,438 | 31,848 |
| 32,381 | 128 | 22,852 | 5,745 | 3,453 | 32,178 |
| 32,382 | 127 | 22,891 | 5,748 | 3,462 | 32,228 |
| 32,383 | 127 | 22,592 | 5,686 | 3,390 | 31,795 |
| 32,384 | 126 | 22,586 | 5,715 | 3,397 | 31,824 |
| 32,385 | 119 | 22,521 | 5,676 | 3,386 | 31,702 |
| 32,386 | 125 | 22,704 | 5,689 | 3,396 | 31,914 |
| 32,387 | 125 | 22,523 | 5,686 | 3,363 | 31,697 |
| 32,388 | 128 | 21,971 | 5,497 | 3,240 | 30,836 |
| 32,389 | 128 | 22,210 | 5,573 | 3,270 | 31,181 |
| 32,390 | 129 | 22,439 | 5,632 | 3,310 | 31,510 |
| 32,391 | 129 | 22,436 | 5,621 | 3,298 | 31,484 |
| 32,392 | 126 | 22,950 | 5,738 | 3,353 | 32,167 |
| 32,393 | 123 | 22,903 | 5,704 | 3,331 | 32,061 |
| 32,394 | 123 | 22,778 | 5,665 | 3,283 | 31,849 |
| 32,395 | 123 | 22,814 | 5,658 | 3,280 | 31,875 |
| 32,396 | 120 | 22,621 | 5,632 | 3,256 | 31,629 |
| 32,397 | 120 | 22,647 | 5,573 | 3,256 | 31,596 |
| 32,398 | 120 | 22,643 | 5,584 | 3,255 | 31,602 |
| 32,399 | 121 | 22,596 | 5,564 | 3,257 | 31,538 |
| 32,400 | 123 | 22,549 | 5,550 | 3,277 | 31,499 |
| 32,401 | 125 | 22,424 | 5,543 | 3,283 | 31,375 |
| 32,402 | 124 | 22,198 | 5,519 | 3,260 | 31,101 |
| 32,403 | 121 | 22,455 | 5,674 | 3,348 | 31,598 |
| 32,404 | 123 | 22,355 | 5,707 | 3,357 | 31,542 |
| 32,405 | 122 | 22,207 | 5,690 | 3,358 | 31,377 |
| 32,406 | 118 | 22,026 | 5,679 | 3,348 | 31,171 |
| 32,407 | 120 | 22,040 | 5,687 | 3,332 | 31,179 |

|        |     |        |       |       |        |
|--------|-----|--------|-------|-------|--------|
| 32,408 | 120 | 22,027 | 5,689 | 3,315 | 31,151 |
| 32,409 | 121 | 21,910 | 5,689 | 3,301 | 31,021 |
| 32,410 | 121 | 21,917 | 5,646 | 3,262 | 30,946 |
| 32,411 | 119 | 22,093 | 5,676 | 3,275 | 31,163 |
| 32,412 | 119 | 22,062 | 5,664 | 3,280 | 31,125 |
| 32,413 | 115 | 21,995 | 5,599 | 3,254 | 30,963 |
| 32,414 | 115 | 22,028 | 5,595 | 3,251 | 30,989 |
| 32,415 | 114 | 22,259 | 5,673 | 3,308 | 31,354 |
| 32,416 | 108 | 22,068 | 5,633 | 3,296 | 31,105 |
| 32,417 | 113 | 22,260 | 5,705 | 3,328 | 31,406 |
| 32,418 | 109 | 22,432 | 5,699 | 3,331 | 31,571 |
| 32,419 | 111 | 22,537 | 5,732 | 3,323 | 31,703 |
| 32,420 | 107 | 22,440 | 5,681 | 3,282 | 31,510 |
| 32,421 | 106 | 22,616 | 5,718 | 3,315 | 31,755 |
| 32,422 | 106 | 22,673 | 5,710 | 3,301 | 31,790 |
| 32,423 | 100 | 22,929 | 5,773 | 3,338 | 32,140 |
| 32,424 | 95  | 22,887 | 5,747 | 3,307 | 32,036 |
| 32,425 | 98  | 23,079 | 5,799 | 3,351 | 32,327 |
| 32,426 | 98  | 22,946 | 5,751 | 3,321 | 32,116 |
| 32,427 | 100 | 23,148 | 5,825 | 3,351 | 32,424 |
| 32,428 | 98  | 22,828 | 5,767 | 3,305 | 31,998 |
| 32,429 | 97  | 22,575 | 5,720 | 3,282 | 31,674 |
| 32,430 | 106 | 23,085 | 5,825 | 3,364 | 32,380 |
| 32,431 | 109 | 22,788 | 5,760 | 3,340 | 31,997 |
| 32,432 | 110 | 22,458 | 5,704 | 3,319 | 31,591 |
| 32,433 | 128 | 22,790 | 5,787 | 3,407 | 32,112 |
| 32,434 | 126 | 22,733 | 5,777 | 3,414 | 32,050 |
| 32,435 | 134 | 22,810 | 5,829 | 3,451 | 32,224 |
| 32,436 | 134 | 22,914 | 5,902 | 3,506 | 32,456 |
| 32,437 | 129 | 23,162 | 6,019 | 3,556 | 32,866 |
| 32,438 | 128 | 22,885 | 5,930 | 3,516 | 32,459 |
| 32,439 | 126 | 23,098 | 5,987 | 3,545 | 32,756 |

|        |     |        |       |       |        |
|--------|-----|--------|-------|-------|--------|
| 32,440 | 123 | 22,854 | 5,908 | 3,506 | 32,391 |
| 32,441 | 122 | 22,811 | 5,909 | 3,508 | 32,350 |
| 32,442 | 131 | 23,013 | 6,033 | 3,551 | 32,728 |
| 32,443 | 132 | 22,637 | 5,956 | 3,506 | 32,231 |
| 32,444 | 132 | 22,631 | 5,950 | 3,501 | 32,214 |
| 32,445 | 140 | 22,751 | 6,028 | 3,541 | 32,460 |
| 32,446 | 144 | 22,816 | 6,073 | 3,569 | 32,602 |
| 32,447 | 144 | 22,711 | 6,059 | 3,564 | 32,478 |
| 32,448 | 144 | 22,723 | 6,092 | 3,591 | 32,550 |
| 32,449 | 144 | 22,842 | 6,122 | 3,599 | 32,707 |
| 32,450 | 144 | 22,989 | 6,122 | 3,601 | 32,856 |
| 32,451 | 148 | 22,931 | 6,133 | 3,597 | 32,809 |
| 32,452 | 146 | 22,785 | 6,074 | 3,537 | 32,542 |
| 32,453 | 146 | 22,661 | 6,035 | 3,510 | 32,352 |
| 32,454 | 144 | 23,142 | 6,037 | 3,533 | 32,856 |
| 32,455 | 145 | 23,519 | 6,130 | 3,571 | 33,365 |
| 32,456 | 146 | 23,249 | 6,068 | 3,537 | 33,000 |
| 32,457 | 148 | 23,558 | 6,115 | 3,565 | 33,386 |
| 32,458 | 147 | 23,823 | 6,159 | 3,609 | 33,738 |
| 32,459 | 145 | 23,467 | 6,124 | 3,601 | 33,337 |
| 32,460 | 143 | 23,254 | 6,059 | 3,566 | 33,022 |
| 32,461 | 143 | 23,081 | 6,042 | 3,572 | 32,838 |
| 32,462 | 148 | 23,129 | 6,087 | 3,617 | 32,981 |
| 32,463 | 154 | 23,175 | 6,089 | 3,599 | 33,017 |
| 32,464 | 152 | 23,072 | 6,067 | 3,574 | 32,865 |
| 32,465 | 156 | 22,904 | 6,015 | 3,552 | 32,627 |
| 32,466 | 164 | 23,037 | 6,065 | 3,592 | 32,858 |
| 32,467 | 162 | 23,055 | 6,046 | 3,589 | 32,852 |
| 32,468 | 160 | 22,898 | 5,995 | 3,569 | 32,622 |
| 32,469 | 169 | 23,331 | 6,155 | 3,642 | 33,297 |
| 32,470 | 166 | 23,141 | 6,095 | 3,604 | 33,006 |
| 32,471 | 171 | 23,400 | 6,180 | 3,658 | 33,409 |

|        |     |        |       |       |        |
|--------|-----|--------|-------|-------|--------|
| 32,472 | 174 | 23,166 | 6,117 | 3,623 | 33,080 |
| 32,473 | 175 | 23,212 | 6,108 | 3,631 | 33,126 |
| 32,474 | 172 | 23,647 | 6,222 | 3,717 | 33,758 |
| 32,475 | 168 | 23,515 | 6,180 | 3,732 | 33,595 |
| 32,476 | 168 | 23,488 | 6,156 | 3,729 | 33,541 |
| 32,477 | 168 | 23,611 | 6,163 | 3,756 | 33,698 |
| 32,478 | 163 | 23,453 | 6,136 | 3,760 | 33,512 |
| 32,479 | 163 | 23,614 | 6,162 | 3,784 | 33,723 |
| 32,480 | 158 | 22,962 | 6,006 | 3,683 | 32,809 |
| 32,481 | 155 | 23,185 | 6,058 | 3,709 | 33,107 |
| 32,482 | 151 | 23,429 | 6,115 | 3,751 | 33,446 |
| 32,483 | 143 | 23,229 | 6,055 | 3,693 | 33,120 |
| 32,484 | 137 | 23,419 | 6,058 | 3,702 | 33,316 |
| 32,485 | 134 | 23,579 | 6,105 | 3,716 | 33,534 |
| 32,486 | 139 | 23,433 | 6,048 | 3,687 | 33,307 |
| 32,487 | 148 | 23,514 | 6,058 | 3,687 | 33,407 |
| 32,488 | 147 | 23,371 | 6,017 | 3,669 | 33,204 |
| 32,489 | 147 | 23,662 | 6,170 | 3,762 | 33,741 |
| 32,490 | 147 | 23,707 | 6,152 | 3,796 | 33,802 |
| 32,491 | 146 | 23,153 | 5,984 | 3,706 | 32,989 |
| 32,492 | 146 | 23,538 | 6,038 | 3,767 | 33,489 |
| 32,493 | 146 | 23,672 | 6,048 | 3,799 | 33,665 |
| 32,494 | 145 | 23,632 | 6,065 | 3,794 | 33,636 |
| 32,495 | 135 | 23,818 | 6,115 | 3,832 | 33,900 |
| 32,496 | 138 | 24,218 | 6,164 | 3,907 | 34,427 |
| 32,497 | 137 | 24,310 | 6,149 | 3,906 | 34,502 |
| 32,498 | 138 | 24,254 | 6,108 | 3,884 | 34,384 |
| 32,499 | 139 | 24,333 | 6,103 | 3,898 | 34,473 |
| 32,500 | 142 | 24,328 | 6,146 | 3,890 | 34,506 |
| 32,501 | 142 | 24,247 | 6,147 | 3,895 | 34,431 |
| 32,502 | 143 | 24,696 | 6,236 | 3,947 | 35,022 |
| 32,503 | 149 | 24,505 | 6,198 | 3,917 | 34,769 |



|        |     |        |       |       |        |
|--------|-----|--------|-------|-------|--------|
| 32,504 | 149 | 24,262 | 6,169 | 3,891 | 34,471 |
| 32,505 | 150 | 24,520 | 6,262 | 3,957 | 34,889 |
| 32,506 | 151 | 24,535 | 6,286 | 3,986 | 34,958 |
| 32,507 | 154 | 24,486 | 6,270 | 3,949 | 34,859 |
| 32,508 | 154 | 24,522 | 6,295 | 3,970 | 34,941 |
| 32,509 | 157 | 24,316 | 6,254 | 3,956 | 34,683 |
| 32,510 | 163 | 24,594 | 6,268 | 3,978 | 35,003 |
| 32,511 | 166 | 24,773 | 6,278 | 3,965 | 35,182 |
| 32,512 | 179 | 25,013 | 6,303 | 3,971 | 35,466 |
| 32,513 | 177 | 25,065 | 6,296 | 3,990 | 35,528 |
| 32,514 | 171 | 25,073 | 6,274 | 4,031 | 35,549 |
| 32,515 | 169 | 25,079 | 6,291 | 4,055 | 35,594 |
| 32,516 | 168 | 24,943 | 6,296 | 4,036 | 35,443 |
| 32,517 | 161 | 25,154 | 6,368 | 4,074 | 35,757 |
| 32,518 | 156 | 25,165 | 6,391 | 4,099 | 35,811 |
| 32,519 | 157 | 24,972 | 6,327 | 4,080 | 35,536 |
| 32,520 | 158 | 24,931 | 6,293 | 4,074 | 35,456 |
| 32,521 | 161 | 24,950 | 6,305 | 4,083 | 35,499 |
| 32,522 | 160 | 24,773 | 6,279 | 4,064 | 35,276 |
| 32,523 | 161 | 24,970 | 6,356 | 4,103 | 35,590 |
| 32,524 | 161 | 24,969 | 6,357 | 4,107 | 35,594 |
| 32,525 | 164 | 25,049 | 6,375 | 4,121 | 35,709 |
| 32,526 | 165 | 25,086 | 6,373 | 4,109 | 35,733 |
| 32,527 | 165 | 24,814 | 6,345 | 4,075 | 35,399 |
| 32,528 | 165 | 24,827 | 6,355 | 4,101 | 35,448 |
| 32,529 | 162 | 24,572 | 6,302 | 4,057 | 35,093 |
| 32,530 | 164 | 24,516 | 6,301 | 4,061 | 35,042 |
| 32,531 | 160 | 24,384 | 6,274 | 4,045 | 34,863 |
| 32,532 | 163 | 24,546 | 6,298 | 4,072 | 35,079 |
| 32,533 | 163 | 24,214 | 6,216 | 4,019 | 34,612 |
| 32,534 | 164 | 24,376 | 6,249 | 4,022 | 34,811 |
| 32,535 | 168 | 24,297 | 6,265 | 4,009 | 34,739 |

|        |     |        |       |       |        |
|--------|-----|--------|-------|-------|--------|
| 32,536 | 158 | 23,949 | 6,157 | 3,938 | 34,202 |
| 32,537 | 153 | 23,992 | 6,168 | 3,943 | 34,256 |
| 32,538 | 154 | 24,234 | 6,248 | 3,994 | 34,630 |
| 32,539 | 158 | 24,041 | 6,232 | 3,988 | 34,419 |
| 32,540 | 158 | 23,901 | 6,183 | 3,970 | 34,212 |
| 32,541 | 158 | 23,552 | 6,143 | 3,919 | 33,772 |
| 32,542 | 159 | 23,450 | 6,208 | 3,975 | 33,792 |
| 32,543 | 161 | 23,329 | 6,175 | 3,938 | 33,603 |
| 32,544 | 154 | 23,142 | 6,136 | 3,907 | 33,339 |
| 32,545 | 153 | 23,165 | 6,137 | 3,919 | 33,374 |
| 32,546 | 153 | 23,083 | 6,117 | 3,892 | 33,245 |
| 32,547 | 154 | 23,238 | 6,192 | 3,900 | 33,484 |
| 32,548 | 150 | 22,734 | 6,106 | 3,847 | 32,837 |
| 32,549 | 155 | 22,745 | 6,159 | 3,874 | 32,933 |
| 32,550 | 154 | 22,766 | 6,164 | 3,864 | 32,948 |
| 32,551 | 160 | 22,544 | 6,106 | 3,844 | 32,654 |
| 32,552 | 161 | 22,379 | 6,090 | 3,819 | 32,449 |
| 32,553 | 155 | 22,615 | 6,152 | 3,857 | 32,779 |
| 32,554 | 159 | 22,548 | 6,104 | 3,821 | 32,632 |
| 32,555 | 160 | 22,591 | 6,104 | 3,823 | 32,678 |
| 32,556 | 161 | 22,536 | 6,042 | 3,775 | 32,514 |
| 32,557 | 161 | 22,539 | 6,049 | 3,760 | 32,509 |
| 32,558 | 158 | 22,513 | 6,048 | 3,760 | 32,479 |
| 32,559 | 158 | 22,517 | 6,076 | 3,769 | 32,520 |
| 32,560 | 154 | 22,466 | 6,065 | 3,770 | 32,455 |
| 32,561 | 153 | 22,378 | 6,067 | 3,767 | 32,365 |
| 32,562 | 151 | 22,511 | 6,135 | 3,812 | 32,609 |
| 32,563 | 143 | 22,658 | 6,186 | 3,837 | 32,824 |
| 32,564 | 142 | 22,583 | 6,195 | 3,789 | 32,709 |
| 32,565 | 141 | 22,779 | 6,245 | 3,785 | 32,950 |
| 32,566 | 143 | 23,122 | 6,297 | 3,806 | 33,368 |
| 32,567 | 143 | 23,310 | 6,261 | 3,772 | 33,486 |

|        |     |        |       |       |        |
|--------|-----|--------|-------|-------|--------|
| 32,568 | 141 | 22,738 | 6,125 | 3,668 | 32,672 |
| 32,569 | 143 | 23,036 | 6,191 | 3,710 | 33,080 |
| 32,570 | 143 | 23,108 | 6,251 | 3,738 | 33,240 |
| 32,571 | 141 | 22,683 | 6,155 | 3,700 | 32,679 |
| 32,572 | 148 | 22,760 | 6,197 | 3,745 | 32,850 |
| 32,573 | 148 | 22,710 | 6,197 | 3,719 | 32,774 |
| 32,574 | 144 | 22,465 | 6,114 | 3,686 | 32,409 |
| 32,575 | 144 | 22,306 | 6,077 | 3,656 | 32,183 |
| 32,576 | 143 | 22,543 | 6,120 | 3,688 | 32,494 |
| 32,577 | 148 | 22,601 | 6,176 | 3,668 | 32,593 |
| 32,578 | 147 | 22,522 | 6,109 | 3,622 | 32,400 |
| 32,579 | 147 | 22,434 | 6,112 | 3,613 | 32,306 |
| 32,580 | 144 | 22,632 | 6,181 | 3,649 | 32,606 |
| 32,581 | 144 | 22,642 | 6,188 | 3,648 | 32,622 |
| 32,582 | 143 | 22,745 | 6,204 | 3,667 | 32,759 |
| 32,583 | 143 | 22,434 | 6,183 | 3,631 | 32,391 |
| 32,584 | 143 | 22,145 | 6,163 | 3,619 | 32,070 |
| 32,585 | 146 | 22,252 | 6,206 | 3,653 | 32,257 |
| 32,586 | 144 | 22,204 | 6,212 | 3,662 | 32,222 |
| 32,587 | 145 | 22,462 | 6,272 | 3,715 | 32,594 |
| 32,588 | 142 | 22,479 | 6,227 | 3,689 | 32,537 |
| 32,589 | 141 | 22,568 | 6,188 | 3,686 | 32,583 |
| 32,590 | 137 | 22,781 | 6,203 | 3,700 | 32,821 |
| 32,591 | 141 | 22,766 | 6,139 | 3,630 | 32,676 |
| 32,592 | 140 | 22,956 | 6,119 | 3,620 | 32,835 |
| 32,593 | 145 | 23,334 | 6,186 | 3,644 | 33,309 |
| 32,594 | 148 | 23,140 | 6,124 | 3,592 | 33,004 |
| 32,595 | 149 | 23,252 | 6,140 | 3,582 | 33,123 |
| 32,596 | 149 | 23,275 | 6,159 | 3,587 | 33,170 |
| 32,597 | 145 | 23,292 | 6,119 | 3,605 | 33,161 |
| 32,598 | 144 | 23,428 | 6,158 | 3,615 | 33,345 |
| 32,599 | 142 | 23,370 | 6,165 | 3,602 | 33,279 |

|        |     |        |       |       |        |
|--------|-----|--------|-------|-------|--------|
| 32,600 | 139 | 23,210 | 6,090 | 3,570 | 33,009 |
| 32,601 | 142 | 23,436 | 6,156 | 3,604 | 33,338 |
| 32,602 | 138 | 23,221 | 6,144 | 3,607 | 33,110 |
| 32,603 | 143 | 23,236 | 6,118 | 3,622 | 33,119 |
| 32,604 | 140 | 22,918 | 6,036 | 3,587 | 32,681 |
| 32,605 | 143 | 22,580 | 5,955 | 3,553 | 32,231 |
| 32,606 | 142 | 22,315 | 5,901 | 3,528 | 31,886 |
| 32,607 | 138 | 22,756 | 6,048 | 3,622 | 32,564 |
| 32,608 | 138 | 22,601 | 6,040 | 3,645 | 32,424 |
| 32,609 | 137 | 22,455 | 6,029 | 3,614 | 32,235 |
| 32,610 | 136 | 22,419 | 6,002 | 3,608 | 32,165 |
| 32,611 | 130 | 22,255 | 5,924 | 3,540 | 31,849 |
| 32,612 | 130 | 22,286 | 5,934 | 3,533 | 31,883 |
| 32,613 | 120 | 21,970 | 5,867 | 3,486 | 31,443 |
| 32,614 | 125 | 22,054 | 5,933 | 3,514 | 31,626 |
| 32,615 | 124 | 21,536 | 5,811 | 3,456 | 30,927 |
| 32,616 | 125 | 21,602 | 5,847 | 3,475 | 31,049 |
| 32,617 | 124 | 21,623 | 5,870 | 3,473 | 31,090 |
| 32,618 | 127 | 21,376 | 5,815 | 3,453 | 30,771 |
| 32,619 | 122 | 21,362 | 5,832 | 3,450 | 30,766 |
| 32,620 | 120 | 21,294 | 5,831 | 3,422 | 30,667 |
| 32,621 | 113 | 20,873 | 5,711 | 3,343 | 30,040 |
| 32,622 | 108 | 20,948 | 5,690 | 3,314 | 30,060 |
| 32,623 | 108 | 20,979 | 5,680 | 3,308 | 30,075 |
| 32,624 | 105 | 20,606 | 5,595 | 3,296 | 29,602 |
| 32,625 | 108 | 20,833 | 5,659 | 3,310 | 29,910 |
| 32,626 | 109 | 20,399 | 5,562 | 3,265 | 29,335 |
| 32,627 | 108 | 20,646 | 5,635 | 3,313 | 29,702 |
| 32,628 | 106 | 20,856 | 5,677 | 3,358 | 29,997 |
| 32,629 | 103 | 20,889 | 5,677 | 3,352 | 30,021 |
| 32,630 | 106 | 20,790 | 5,605 | 3,321 | 29,822 |
| 32,631 | 108 | 21,059 | 5,643 | 3,334 | 30,144 |

|        |     |        |       |       |        |
|--------|-----|--------|-------|-------|--------|
| 32,632 | 107 | 21,297 | 5,714 | 3,371 | 30,489 |
| 32,633 | 110 | 21,036 | 5,699 | 3,333 | 30,178 |
| 32,634 | 106 | 20,834 | 5,638 | 3,323 | 29,901 |
| 32,635 | 109 | 21,116 | 5,731 | 3,369 | 30,325 |
| 32,636 | 112 | 21,487 | 5,831 | 3,434 | 30,864 |
| 32,637 | 111 | 21,372 | 5,793 | 3,400 | 30,676 |
| 32,638 | 118 | 21,093 | 5,732 | 3,360 | 30,303 |
| 32,639 | 117 | 20,741 | 5,664 | 3,331 | 29,853 |
| 32,640 | 139 | 20,971 | 5,790 | 3,361 | 30,261 |
| 32,641 | 139 | 20,887 | 5,776 | 3,355 | 30,157 |
| 32,642 | 135 | 20,734 | 5,760 | 3,367 | 29,996 |
| 32,643 | 135 | 20,477 | 5,708 | 3,332 | 29,652 |
| 32,644 | 131 | 20,138 | 5,652 | 3,297 | 29,218 |
| 32,645 | 131 | 20,407 | 5,792 | 3,397 | 29,727 |
| 32,646 | 135 | 20,554 | 5,871 | 3,430 | 29,990 |
| 32,647 | 135 | 20,294 | 5,763 | 3,371 | 29,563 |
| 32,648 | 139 | 20,494 | 5,847 | 3,402 | 29,882 |
| 32,649 | 140 | 20,453 | 5,845 | 3,393 | 29,831 |
| 32,650 | 135 | 20,616 | 5,924 | 3,441 | 30,116 |
| 32,651 | 133 | 20,507 | 5,897 | 3,422 | 29,959 |
| 32,652 | 130 | 20,420 | 5,858 | 3,416 | 29,824 |
| 32,653 | 132 | 20,181 | 5,786 | 3,385 | 29,484 |
| 32,654 | 129 | 19,843 | 5,733 | 3,343 | 29,048 |
| 32,655 | 126 | 20,041 | 5,855 | 3,410 | 29,432 |
| 32,656 | 122 | 19,954 | 5,833 | 3,392 | 29,301 |
| 32,657 | 127 | 19,980 | 5,811 | 3,370 | 29,288 |
| 32,658 | 128 | 20,033 | 5,821 | 3,374 | 29,356 |
| 32,659 | 127 | 19,952 | 5,728 | 3,358 | 29,165 |
| 32,660 | 127 | 19,993 | 5,747 | 3,362 | 29,229 |
| 32,661 | 128 | 19,970 | 5,744 | 3,375 | 29,217 |
| 32,662 | 141 | 20,140 | 5,819 | 3,441 | 29,541 |
| 32,663 | 141 | 20,256 | 5,871 | 3,469 | 29,737 |

|        |     |        |       |       |        |
|--------|-----|--------|-------|-------|--------|
| 32,664 | 143 | 20,430 | 5,905 | 3,477 | 29,955 |
| 32,665 | 139 | 20,585 | 5,915 | 3,483 | 30,122 |
| 32,666 | 141 | 20,391 | 5,864 | 3,477 | 29,873 |
| 32,667 | 142 | 20,354 | 5,879 | 3,467 | 29,842 |
| 32,668 | 145 | 20,468 | 5,948 | 3,541 | 30,102 |
| 32,669 | 143 | 20,456 | 5,974 | 3,547 | 30,120 |
| 32,670 | 145 | 20,554 | 5,997 | 3,561 | 30,257 |
| 32,671 | 144 | 20,632 | 6,021 | 3,569 | 30,366 |
| 32,672 | 142 | 20,539 | 5,987 | 3,562 | 30,230 |
| 32,673 | 145 | 20,633 | 6,004 | 3,550 | 30,332 |
| 32,674 | 147 | 20,862 | 6,053 | 3,579 | 30,641 |
| 32,675 | 151 | 20,874 | 6,092 | 3,569 | 30,686 |
| 32,676 | 150 | 20,885 | 6,074 | 3,571 | 30,680 |
| 32,677 | 147 | 20,607 | 6,017 | 3,527 | 30,298 |
| 32,678 | 153 | 20,762 | 6,048 | 3,529 | 30,492 |
| 32,679 | 154 | 20,749 | 6,075 | 3,548 | 30,526 |
| 32,680 | 158 | 20,708 | 6,071 | 3,566 | 30,503 |
| 32,681 | 157 | 20,776 | 6,134 | 3,599 | 30,666 |
| 32,682 | 158 | 20,654 | 6,083 | 3,588 | 30,483 |
| 32,683 | 159 | 20,700 | 6,105 | 3,592 | 30,556 |
| 32,684 | 159 | 20,707 | 6,094 | 3,586 | 30,546 |
| 32,685 | 160 | 20,920 | 6,173 | 3,585 | 30,838 |
| 32,686 | 156 | 20,951 | 6,161 | 3,605 | 30,873 |
| 32,687 | 148 | 20,297 | 5,950 | 3,473 | 29,868 |
| 32,688 | 153 | 20,608 | 5,991 | 3,503 | 30,255 |
| 32,689 | 154 | 20,890 | 6,073 | 3,525 | 30,642 |
| 32,690 | 153 | 20,962 | 6,071 | 3,527 | 30,713 |
| 32,691 | 151 | 21,428 | 6,181 | 3,581 | 31,341 |
| 32,692 | 150 | 21,503 | 6,146 | 3,581 | 31,380 |
| 32,693 | 147 | 21,374 | 6,090 | 3,539 | 31,150 |
| 32,694 | 146 | 21,362 | 6,060 | 3,528 | 31,096 |
| 32,695 | 141 | 21,443 | 6,077 | 3,527 | 31,188 |

|        |     |        |       |       |        |
|--------|-----|--------|-------|-------|--------|
| 32,696 | 140 | 21,349 | 6,043 | 3,515 | 31,047 |
| 32,697 | 137 | 21,414 | 6,083 | 3,524 | 31,158 |
| 32,698 | 138 | 21,298 | 6,062 | 3,527 | 31,025 |
| 32,699 | 137 | 21,202 | 6,046 | 3,516 | 30,901 |
| 32,700 | 138 | 21,082 | 5,967 | 3,482 | 30,669 |
| 32,701 | 140 | 21,371 | 6,029 | 3,511 | 31,051 |
| 32,702 | 142 | 21,263 | 5,975 | 3,477 | 30,857 |
| 32,703 | 137 | 21,495 | 5,978 | 3,476 | 31,086 |
| 32,704 | 139 | 21,694 | 5,979 | 3,467 | 31,279 |
| 32,705 | 139 | 21,872 | 6,016 | 3,466 | 31,493 |
| 32,706 | 145 | 21,918 | 6,022 | 3,473 | 31,558 |
| 32,707 | 141 | 21,833 | 5,976 | 3,442 | 31,392 |
| 32,708 | 134 | 21,849 | 6,012 | 3,471 | 31,466 |
| 32,709 | 135 | 21,878 | 5,996 | 3,448 | 31,457 |
| 32,710 | 141 | 21,688 | 5,969 | 3,409 | 31,207 |
| 32,711 | 143 | 21,534 | 5,940 | 3,397 | 31,014 |
| 32,712 | 141 | 22,138 | 6,102 | 3,512 | 31,893 |
| 32,713 | 143 | 21,952 | 6,046 | 3,465 | 31,606 |
| 32,714 | 143 | 21,950 | 6,032 | 3,468 | 31,593 |
| 32,715 | 144 | 21,831 | 6,036 | 3,468 | 31,479 |
| 32,716 | 143 | 21,674 | 5,984 | 3,452 | 31,253 |
| 32,717 | 146 | 22,073 | 6,104 | 3,506 | 31,829 |
| 32,718 | 152 | 22,178 | 6,067 | 3,480 | 31,877 |
| 32,719 | 152 | 22,157 | 6,075 | 3,458 | 31,842 |
| 32,720 | 151 | 22,065 | 6,019 | 3,424 | 31,659 |
| 32,721 | 151 | 21,998 | 6,007 | 3,408 | 31,564 |
| 32,722 | 153 | 22,134 | 6,026 | 3,447 | 31,760 |
| 32,723 | 155 | 22,024 | 6,034 | 3,439 | 31,652 |
| 32,724 | 156 | 22,135 | 6,073 | 3,469 | 31,833 |
| 32,725 | 156 | 22,245 | 6,081 | 3,474 | 31,956 |
| 32,726 | 152 | 22,192 | 6,054 | 3,467 | 31,865 |
| 32,727 | 152 | 22,223 | 6,055 | 3,473 | 31,903 |

|        |     |        |       |       |        |
|--------|-----|--------|-------|-------|--------|
| 32,728 | 150 | 22,365 | 6,074 | 3,481 | 32,070 |
| 32,729 | 149 | 21,920 | 5,959 | 3,395 | 31,423 |
| 32,730 | 153 | 22,149 | 6,000 | 3,420 | 31,722 |
| 32,731 | 153 | 22,411 | 6,078 | 3,448 | 32,090 |
| 32,732 | 158 | 22,413 | 6,051 | 3,436 | 32,058 |
| 32,733 | 156 | 22,566 | 6,152 | 3,465 | 32,339 |
| 32,734 | 156 | 22,363 | 6,071 | 3,440 | 32,030 |
| 32,735 | 153 | 22,224 | 6,011 | 3,436 | 31,824 |
| 32,736 | 154 | 22,337 | 6,029 | 3,483 | 32,003 |
| 32,737 | 153 | 22,138 | 6,048 | 3,464 | 31,803 |
| 32,738 | 149 | 21,981 | 6,040 | 3,459 | 31,629 |
| 32,739 | 144 | 21,808 | 6,015 | 3,448 | 31,415 |
| 32,740 | 144 | 21,944 | 6,078 | 3,487 | 31,653 |
| 32,741 | 143 | 21,995 | 6,081 | 3,505 | 31,724 |
| 32,742 | 137 | 22,032 | 6,106 | 3,559 | 31,834 |
| 32,743 | 139 | 22,085 | 6,143 | 3,550 | 31,917 |
| 32,744 | 140 | 21,888 | 6,078 | 3,541 | 31,647 |
| 32,745 | 142 | 21,935 | 6,116 | 3,536 | 31,729 |
| 32,746 | 146 | 22,231 | 6,185 | 3,567 | 32,129 |
| 32,747 | 146 | 22,188 | 6,135 | 3,576 | 32,045 |
| 32,748 | 148 | 22,356 | 6,196 | 3,602 | 32,302 |
| 32,749 | 148 | 22,081 | 6,119 | 3,568 | 31,916 |
| 32,750 | 152 | 22,241 | 6,178 | 3,577 | 32,148 |
| 32,751 | 152 | 22,186 | 6,188 | 3,591 | 32,117 |
| 32,752 | 151 | 22,157 | 6,161 | 3,585 | 32,054 |
| 32,753 | 151 | 21,928 | 6,136 | 3,571 | 31,786 |
| 32,754 | 151 | 21,757 | 6,142 | 3,569 | 31,619 |
| 32,755 | 150 | 21,742 | 6,100 | 3,566 | 31,558 |
| 32,756 | 155 | 21,219 | 5,913 | 3,475 | 30,762 |
| 32,757 | 158 | 21,374 | 5,942 | 3,490 | 30,964 |
| 32,758 | 158 | 21,403 | 5,929 | 3,495 | 30,985 |
| 32,759 | 159 | 21,389 | 5,888 | 3,482 | 30,918 |



|        |     |        |       |       |        |
|--------|-----|--------|-------|-------|--------|
| 32,760 | 167 | 21,405 | 5,889 | 3,479 | 30,940 |
| 32,761 | 160 | 21,227 | 5,847 | 3,449 | 30,683 |
| 32,762 | 155 | 21,525 | 5,881 | 3,481 | 31,042 |
| 32,763 | 153 | 21,543 | 5,888 | 3,481 | 31,065 |
| 32,764 | 149 | 21,401 | 5,835 | 3,464 | 30,849 |
| 32,765 | 146 | 21,042 | 5,758 | 3,403 | 30,349 |
| 32,766 | 150 | 21,255 | 5,792 | 3,427 | 30,624 |
| 32,767 | 150 | 21,124 | 5,730 | 3,395 | 30,399 |
| 32,768 | 144 | 20,597 | 5,590 | 3,334 | 29,665 |
| 32,769 | 144 | 20,628 | 5,597 | 3,344 | 29,713 |
| 32,770 | 142 | 20,366 | 5,504 | 3,306 | 29,318 |
| 32,771 | 142 | 20,040 | 5,466 | 3,275 | 28,923 |
| 32,772 | 151 | 20,814 | 5,618 | 3,403 | 29,986 |
| 32,773 | 148 | 20,436 | 5,525 | 3,343 | 29,452 |
| 32,774 | 154 | 20,568 | 5,564 | 3,359 | 29,645 |
| 32,775 | 150 | 20,583 | 5,538 | 3,365 | 29,636 |
| 32,776 | 146 | 20,303 | 5,479 | 3,325 | 29,253 |
| 32,777 | 145 | 20,407 | 5,493 | 3,346 | 29,391 |
| 32,778 | 144 | 20,344 | 5,483 | 3,340 | 29,311 |
| 32,779 | 145 | 20,033 | 5,398 | 3,315 | 28,891 |
| 32,780 | 140 | 19,895 | 5,315 | 3,287 | 28,637 |
| 32,781 | 132 | 20,144 | 5,356 | 3,316 | 28,948 |
| 32,782 | 135 | 20,147 | 5,357 | 3,313 | 28,952 |
| 32,783 | 132 | 19,935 | 5,312 | 3,276 | 28,655 |
| 32,784 | 131 | 19,836 | 5,281 | 3,265 | 28,513 |
| 32,785 | 132 | 19,885 | 5,279 | 3,271 | 28,567 |
| 32,786 | 133 | 19,307 | 5,024 | 3,067 | 27,531 |
| 32,787 | 134 | 19,457 | 5,050 | 3,089 | 27,730 |
| 32,788 | 135 | 19,585 | 5,086 | 3,118 | 27,924 |
| 32,789 | 134 | 19,538 | 5,115 | 3,120 | 27,907 |
| 32,790 | 134 | 19,686 | 5,152 | 3,150 | 28,122 |
| 32,791 | 133 | 19,880 | 5,158 | 3,176 | 28,347 |

|        |     |        |       |       |        |
|--------|-----|--------|-------|-------|--------|
| 32,792 | 135 | 19,678 | 5,156 | 3,153 | 28,122 |
| 32,793 | 144 | 19,395 | 5,086 | 3,094 | 27,719 |
| 32,794 | 141 | 19,189 | 5,036 | 3,084 | 27,450 |
| 32,795 | 140 | 19,347 | 5,078 | 3,112 | 27,677 |
| 32,796 | 139 | 19,271 | 5,039 | 3,106 | 27,555 |
| 32,797 | 138 | 19,297 | 5,026 | 3,120 | 27,581 |
| 32,798 | 136 | 19,158 | 5,005 | 3,117 | 27,416 |
| 32,799 | 136 | 19,061 | 5,000 | 3,123 | 27,320 |
| 32,800 | 132 | 19,136 | 4,991 | 3,124 | 27,383 |
| 32,801 | 130 | 19,140 | 4,975 | 3,143 | 27,388 |
| 32,802 | 130 | 19,223 | 4,976 | 3,157 | 27,486 |
| 32,803 | 128 | 19,106 | 4,924 | 3,132 | 27,290 |
| 32,804 | 128 | 19,115 | 4,906 | 3,122 | 27,271 |
| 32,805 | 133 | 19,192 | 4,917 | 3,109 | 27,351 |
| 32,806 | 132 | 18,950 | 4,906 | 3,088 | 27,076 |
| 32,807 | 122 | 19,069 | 4,988 | 3,127 | 27,306 |
| 32,808 | 129 | 19,267 | 5,042 | 3,160 | 27,598 |
| 32,809 | 133 | 19,132 | 4,995 | 3,128 | 27,388 |
| 32,810 | 131 | 19,043 | 4,979 | 3,136 | 27,289 |
| 32,811 | 129 | 19,293 | 5,084 | 3,188 | 27,694 |
| 32,812 | 132 | 19,321 | 5,083 | 3,191 | 27,727 |
| 32,813 | 129 | 19,320 | 5,079 | 3,186 | 27,714 |
| 32,814 | 128 | 19,232 | 5,017 | 3,174 | 27,551 |
| 32,815 | 132 | 19,273 | 5,026 | 3,178 | 27,609 |
| 32,816 | 131 | 19,139 | 4,977 | 3,160 | 27,407 |
| 32,817 | 129 | 19,574 | 5,080 | 3,233 | 28,016 |
| 32,818 | 126 | 19,340 | 5,067 | 3,214 | 27,747 |
| 32,819 | 123 | 19,388 | 5,097 | 3,228 | 27,836 |
| 32,820 | 121 | 19,536 | 5,154 | 3,249 | 28,060 |
| 32,821 | 117 | 19,695 | 5,185 | 3,270 | 28,267 |
| 32,822 | 119 | 19,811 | 5,207 | 3,273 | 28,410 |
| 32,823 | 112 | 19,735 | 5,172 | 3,279 | 28,298 |

|        |     |        |       |       |        |
|--------|-----|--------|-------|-------|--------|
| 32,824 | 112 | 19,709 | 5,167 | 3,280 | 28,268 |
| 32,825 | 106 | 19,762 | 5,201 | 3,294 | 28,363 |
| 32,826 | 106 | 20,003 | 5,300 | 3,323 | 28,732 |
| 32,827 | 111 | 20,260 | 5,405 | 3,355 | 29,131 |
| 32,828 | 114 | 20,467 | 5,441 | 3,369 | 29,391 |
| 32,829 | 116 | 20,648 | 5,467 | 3,392 | 29,623 |
| 32,830 | 114 | 20,365 | 5,412 | 3,359 | 29,250 |
| 32,831 | 114 | 20,396 | 5,471 | 3,396 | 29,377 |
| 32,832 | 121 | 20,718 | 5,548 | 3,458 | 29,845 |
| 32,833 | 117 | 20,728 | 5,518 | 3,463 | 29,826 |
| 32,834 | 122 | 21,077 | 5,607 | 3,521 | 30,327 |
| 32,835 | 120 | 20,851 | 5,550 | 3,492 | 30,013 |
| 32,836 | 119 | 20,632 | 5,523 | 3,488 | 29,762 |
| 32,837 | 116 | 21,007 | 5,673 | 3,605 | 30,401 |
| 32,838 | 120 | 20,824 | 5,627 | 3,583 | 30,154 |
| 32,839 | 115 | 20,660 | 5,577 | 3,569 | 29,921 |
| 32,840 | 128 | 20,996 | 5,698 | 3,629 | 30,451 |
| 32,841 | 141 | 21,394 | 5,830 | 3,673 | 31,038 |
| 32,842 | 143 | 21,395 | 5,873 | 3,666 | 31,077 |
| 32,843 | 140 | 21,440 | 5,860 | 3,673 | 31,113 |
| 32,844 | 132 | 21,399 | 5,852 | 3,646 | 31,029 |
| 32,845 | 129 | 20,857 | 5,705 | 3,553 | 30,244 |
| 32,846 | 130 | 20,989 | 5,724 | 3,580 | 30,423 |
| 32,847 | 131 | 21,318 | 5,776 | 3,609 | 30,834 |
| 32,848 | 132 | 21,194 | 5,739 | 3,558 | 30,623 |
| 32,849 | 137 | 21,489 | 5,813 | 3,591 | 31,030 |
| 32,850 | 139 | 21,664 | 5,878 | 3,597 | 31,278 |
| 32,851 | 138 | 21,539 | 5,861 | 3,572 | 31,110 |
| 32,852 | 147 | 21,813 | 5,925 | 3,621 | 31,506 |
| 32,853 | 146 | 21,629 | 5,925 | 3,607 | 31,307 |
| 32,854 | 144 | 21,563 | 5,913 | 3,606 | 31,226 |
| 32,855 | 142 | 21,424 | 5,890 | 3,568 | 31,024 |

|        |     |        |       |       |        |
|--------|-----|--------|-------|-------|--------|
| 32,856 | 146 | 21,713 | 5,930 | 3,625 | 31,414 |
| 32,857 | 148 | 21,569 | 5,880 | 3,572 | 31,169 |
| 32,858 | 146 | 21,420 | 5,822 | 3,547 | 30,935 |
| 32,859 | 140 | 21,630 | 5,882 | 3,597 | 31,249 |
| 32,860 | 136 | 21,634 | 5,903 | 3,597 | 31,270 |
| 32,861 | 139 | 21,999 | 6,006 | 3,636 | 31,780 |
| 32,862 | 137 | 22,018 | 5,973 | 3,613 | 31,741 |
| 32,863 | 135 | 21,685 | 5,917 | 3,563 | 31,300 |
| 32,864 | 139 | 21,680 | 5,922 | 3,552 | 31,293 |
| 32,865 | 148 | 21,956 | 5,984 | 3,564 | 31,652 |
| 32,866 | 144 | 21,792 | 5,924 | 3,534 | 31,394 |
| 32,867 | 143 | 21,568 | 5,865 | 3,510 | 31,086 |
| 32,868 | 155 | 21,857 | 5,950 | 3,521 | 31,483 |
| 32,869 | 161 | 21,578 | 5,873 | 3,475 | 31,087 |
| 32,870 | 161 | 21,835 | 5,937 | 3,508 | 31,441 |
| 32,871 | 162 | 21,702 | 5,937 | 3,517 | 31,318 |
| 32,872 | 164 | 21,601 | 5,911 | 3,489 | 31,165 |
| 32,873 | 162 | 21,415 | 5,833 | 3,446 | 30,856 |
| 32,874 | 168 | 21,493 | 5,875 | 3,434 | 30,970 |
| 32,875 | 169 | 21,418 | 5,835 | 3,411 | 30,833 |
| 32,876 | 168 | 21,427 | 5,755 | 3,411 | 30,761 |
| 32,877 | 168 | 21,663 | 5,821 | 3,438 | 31,090 |
| 32,878 | 179 | 21,407 | 5,703 | 3,388 | 30,677 |
| 32,879 | 177 | 21,180 | 5,629 | 3,352 | 30,338 |
| 32,880 | 187 | 21,547 | 5,759 | 3,404 | 30,897 |
| 32,881 | 186 | 21,542 | 5,737 | 3,393 | 30,858 |
| 32,882 | 182 | 21,705 | 5,692 | 3,382 | 30,961 |
| 32,883 | 181 | 21,598 | 5,652 | 3,352 | 30,783 |
| 32,884 | 186 | 21,785 | 5,664 | 3,359 | 30,994 |
| 32,885 | 184 | 21,672 | 5,578 | 3,291 | 30,725 |
| 32,886 | 187 | 21,681 | 5,523 | 3,265 | 30,656 |
| 32,887 | 193 | 21,663 | 5,491 | 3,217 | 30,564 |

|        |     |        |       |       |        |
|--------|-----|--------|-------|-------|--------|
| 32,888 | 193 | 21,646 | 5,473 | 3,212 | 30,524 |
| 32,889 | 181 | 21,551 | 5,415 | 3,180 | 30,327 |
| 32,890 | 181 | 21,754 | 5,461 | 3,201 | 30,597 |
| 32,891 | 171 | 21,812 | 5,498 | 3,234 | 30,715 |
| 32,892 | 169 | 21,687 | 5,487 | 3,262 | 30,605 |
| 32,893 | 164 | 21,466 | 5,394 | 3,233 | 30,257 |
| 32,894 | 163 | 21,478 | 5,369 | 3,221 | 30,231 |
| 32,895 | 167 | 21,475 | 5,400 | 3,247 | 30,289 |
| 32,896 | 167 | 21,426 | 5,414 | 3,242 | 30,249 |
| 32,897 | 167 | 21,491 | 5,433 | 3,240 | 30,331 |
| 32,898 | 166 | 21,319 | 5,456 | 3,252 | 30,193 |
| 32,899 | 166 | 21,272 | 5,435 | 3,238 | 30,111 |
| 32,900 | 162 | 21,110 | 5,354 | 3,202 | 29,828 |
| 32,901 | 161 | 21,201 | 5,346 | 3,222 | 29,930 |
| 32,902 | 153 | 21,547 | 5,380 | 3,262 | 30,342 |
| 32,903 | 156 | 21,568 | 5,350 | 3,232 | 30,306 |
| 32,904 | 158 | 21,495 | 5,315 | 3,225 | 30,193 |
| 32,905 | 167 | 21,531 | 5,316 | 3,214 | 30,228 |
| 32,906 | 165 | 21,463 | 5,281 | 3,206 | 30,115 |
| 32,907 | 174 | 21,449 | 5,287 | 3,198 | 30,108 |
| 32,908 | 172 | 21,287 | 5,212 | 3,194 | 29,865 |
| 32,909 | 187 | 21,505 | 5,282 | 3,224 | 30,198 |
| 32,910 | 191 | 21,466 | 5,237 | 3,210 | 30,104 |
| 32,911 | 201 | 21,741 | 5,362 | 3,332 | 30,636 |
| 32,912 | 201 | 21,789 | 5,343 | 3,339 | 30,672 |
| 32,913 | 196 | 22,022 | 5,370 | 3,372 | 30,960 |
| 32,914 | 197 | 22,029 | 5,371 | 3,388 | 30,985 |
| 32,915 | 196 | 22,020 | 5,373 | 3,402 | 30,991 |
| 32,916 | 191 | 22,376 | 5,472 | 3,436 | 31,475 |
| 32,917 | 194 | 22,338 | 5,456 | 3,406 | 31,394 |
| 32,918 | 196 | 22,334 | 5,449 | 3,418 | 31,397 |
| 32,919 | 183 | 22,724 | 5,529 | 3,468 | 31,904 |

|        |     |        |       |       |        |
|--------|-----|--------|-------|-------|--------|
| 32,920 | 180 | 22,659 | 5,503 | 3,452 | 31,794 |
| 32,921 | 179 | 22,702 | 5,498 | 3,431 | 31,810 |
| 32,922 | 181 | 22,737 | 5,497 | 3,442 | 31,857 |
| 32,923 | 179 | 22,492 | 5,460 | 3,438 | 31,569 |
| 32,924 | 174 | 22,588 | 5,500 | 3,504 | 31,766 |
| 32,925 | 171 | 22,446 | 5,444 | 3,511 | 31,572 |
| 32,926 | 172 | 22,155 | 5,395 | 3,504 | 31,226 |
| 32,927 | 174 | 22,417 | 5,417 | 3,521 | 31,529 |
| 32,928 | 173 | 22,522 | 5,426 | 3,514 | 31,635 |
| 32,929 | 152 | 22,304 | 5,405 | 3,511 | 31,372 |
| 32,930 | 150 | 21,809 | 5,339 | 3,464 | 30,762 |
| 32,931 | 155 | 21,947 | 5,398 | 3,504 | 31,004 |
| 32,932 | 158 | 21,985 | 5,389 | 3,524 | 31,056 |
| 32,933 | 156 | 21,666 | 5,339 | 3,493 | 30,654 |
| 32,934 | 159 | 21,612 | 5,354 | 3,501 | 30,626 |
| 32,935 | 155 | 21,799 | 5,406 | 3,553 | 30,913 |
| 32,936 | 150 | 21,684 | 5,394 | 3,572 | 30,800 |
| 32,937 | 145 | 21,533 | 5,369 | 3,588 | 30,635 |
| 32,938 | 146 | 21,741 | 5,427 | 3,641 | 30,955 |
| 32,939 | 146 | 21,773 | 5,421 | 3,660 | 31,000 |
| 32,940 | 140 | 21,659 | 5,419 | 3,649 | 30,867 |
| 32,941 | 140 | 21,602 | 5,375 | 3,631 | 30,748 |
| 32,942 | 140 | 21,493 | 5,252 | 3,587 | 30,472 |
| 32,943 | 145 | 21,681 | 5,250 | 3,584 | 30,660 |
| 32,944 | 145 | 21,587 | 5,220 | 3,567 | 30,519 |
| 32,945 | 147 | 22,012 | 5,257 | 3,600 | 31,016 |
| 32,946 | 149 | 22,105 | 5,225 | 3,589 | 31,068 |
| 32,947 | 152 | 21,919 | 5,172 | 3,565 | 30,808 |
| 32,948 | 152 | 22,013 | 5,162 | 3,551 | 30,878 |
| 32,949 | 152 | 21,980 | 5,122 | 3,543 | 30,797 |
| 32,950 | 153 | 21,877 | 5,089 | 3,542 | 30,661 |
| 32,951 | 154 | 21,846 | 5,080 | 3,533 | 30,613 |

|        |     |        |       |       |        |
|--------|-----|--------|-------|-------|--------|
| 32,952 | 154 | 21,658 | 5,019 | 3,505 | 30,336 |
| 32,953 | 157 | 22,087 | 5,130 | 3,574 | 30,948 |
| 32,954 | 155 | 21,824 | 5,105 | 3,537 | 30,621 |
| 32,955 | 153 | 21,835 | 5,109 | 3,546 | 30,643 |
| 32,956 | 140 | 22,113 | 5,174 | 3,618 | 31,045 |
| 32,957 | 137 | 22,109 | 5,159 | 3,649 | 31,054 |
| 32,958 | 122 | 22,260 | 5,160 | 3,649 | 31,191 |
| 32,959 | 109 | 21,818 | 5,057 | 3,545 | 30,529 |
| 32,960 | 111 | 22,260 | 5,117 | 3,582 | 31,070 |
| 32,961 | 109 | 22,608 | 5,157 | 3,611 | 31,485 |
| 32,962 | 102 | 22,739 | 5,173 | 3,580 | 31,594 |
| 32,963 | 109 | 22,747 | 5,166 | 3,581 | 31,603 |
| 32,964 | 106 | 22,517 | 5,114 | 3,539 | 31,276 |
| 32,965 | 102 | 22,668 | 5,138 | 3,570 | 31,478 |
| 32,966 | 109 | 22,861 | 5,127 | 3,610 | 31,707 |
| 32,967 | 108 | 22,897 | 5,115 | 3,604 | 31,724 |
| 32,968 | 104 | 22,478 | 5,023 | 3,562 | 31,167 |
| 32,969 | 107 | 22,440 | 5,020 | 3,591 | 31,158 |
| 32,970 | 109 | 22,671 | 5,073 | 3,619 | 31,472 |
| 32,971 | 108 | 22,436 | 5,016 | 3,601 | 31,161 |
| 32,972 | 110 | 22,539 | 4,996 | 3,583 | 31,228 |
| 32,973 | 110 | 22,565 | 4,968 | 3,548 | 31,191 |
| 32,974 | 112 | 22,591 | 4,961 | 3,533 | 31,197 |
| 32,975 | 113 | 22,636 | 4,970 | 3,533 | 31,252 |
| 32,976 | 112 | 22,682 | 4,994 | 3,517 | 31,305 |
| 32,977 | 112 | 22,577 | 4,981 | 3,500 | 31,170 |
| 32,978 | 112 | 22,538 | 4,982 | 3,506 | 31,138 |
| 32,979 | 110 | 22,289 | 4,930 | 3,468 | 30,797 |
| 32,980 | 111 | 22,665 | 4,973 | 3,499 | 31,248 |
| 32,981 | 110 | 22,534 | 4,902 | 3,467 | 31,013 |
| 32,982 | 107 | 22,686 | 4,912 | 3,469 | 31,174 |
| 32,983 | 114 | 22,755 | 5,011 | 3,518 | 31,398 |

|        |     |        |       |       |        |
|--------|-----|--------|-------|-------|--------|
| 32,984 | 118 | 22,930 | 5,075 | 3,552 | 31,675 |
| 32,985 | 117 | 22,727 | 5,052 | 3,518 | 31,414 |
| 32,986 | 115 | 22,818 | 5,041 | 3,509 | 31,483 |
| 32,987 | 120 | 22,965 | 5,088 | 3,547 | 31,720 |
| 32,988 | 117 | 23,127 | 5,133 | 3,575 | 31,952 |
| 32,989 | 117 | 23,287 | 5,127 | 3,570 | 32,101 |
| 32,990 | 122 | 23,572 | 5,133 | 3,567 | 32,394 |
| 32,991 | 122 | 23,464 | 5,080 | 3,525 | 32,191 |
| 32,992 | 121 | 23,456 | 5,056 | 3,514 | 32,147 |
| 32,993 | 115 | 23,117 | 4,974 | 3,446 | 31,652 |
| 32,994 | 116 | 23,359 | 4,991 | 3,491 | 31,957 |
| 32,995 | 111 | 23,380 | 5,004 | 3,494 | 31,989 |
| 32,996 | 111 | 23,601 | 5,075 | 3,558 | 32,345 |
| 32,997 | 115 | 23,636 | 5,084 | 3,560 | 32,395 |
| 32,998 | 111 | 23,384 | 5,026 | 3,529 | 32,050 |
| 32,999 | 113 | 23,445 | 5,024 | 3,548 | 32,130 |
| 33,000 | 114 | 23,393 | 5,033 | 3,540 | 32,080 |
| 33,001 | 113 | 23,126 | 5,011 | 3,515 | 31,765 |
| 33,002 | 112 | 22,869 | 4,971 | 3,493 | 31,445 |
| 33,003 | 117 | 23,873 | 5,208 | 3,646 | 32,844 |
| 33,004 | 114 | 23,852 | 5,165 | 3,621 | 32,752 |
| 33,005 | 112 | 23,884 | 5,172 | 3,618 | 32,786 |
| 33,006 | 112 | 23,857 | 5,123 | 3,602 | 32,694 |
| 33,007 | 115 | 23,904 | 5,129 | 3,570 | 32,718 |
| 33,008 | 118 | 24,033 | 5,158 | 3,577 | 32,886 |
| 33,009 | 127 | 23,654 | 5,107 | 3,544 | 32,432 |
| 33,010 | 129 | 23,612 | 5,103 | 3,550 | 32,394 |
| 33,011 | 133 | 23,726 | 5,115 | 3,561 | 32,535 |
| 33,012 | 132 | 23,430 | 5,074 | 3,524 | 32,160 |
| 33,013 | 132 | 23,438 | 5,088 | 3,544 | 32,202 |
| 33,014 | 130 | 23,485 | 5,047 | 3,532 | 32,194 |
| 33,015 | 142 | 23,386 | 5,024 | 3,512 | 32,064 |



|        |     |        |       |       |        |
|--------|-----|--------|-------|-------|--------|
| 33,016 | 142 | 23,373 | 5,046 | 3,491 | 32,052 |
| 33,017 | 141 | 23,684 | 5,111 | 3,549 | 32,485 |
| 33,018 | 138 | 23,425 | 5,086 | 3,526 | 32,175 |
| 33,019 | 140 | 23,584 | 5,106 | 3,554 | 32,384 |
| 33,020 | 139 | 23,649 | 5,114 | 3,552 | 32,454 |
| 33,021 | 145 | 23,693 | 5,167 | 3,582 | 32,587 |
| 33,022 | 148 | 23,420 | 5,147 | 3,564 | 32,279 |
| 33,023 | 148 | 23,428 | 5,170 | 3,582 | 32,328 |
| 33,024 | 149 | 23,508 | 5,180 | 3,600 | 32,437 |
| 33,025 | 150 | 23,538 | 5,177 | 3,591 | 32,456 |
| 33,026 | 152 | 23,605 | 5,164 | 3,602 | 32,523 |
| 33,027 | 152 | 23,590 | 5,185 | 3,608 | 32,535 |
| 33,028 | 151 | 23,571 | 5,165 | 3,612 | 32,499 |
| 33,029 | 152 | 23,631 | 5,175 | 3,632 | 32,590 |
| 33,030 | 152 | 23,615 | 5,189 | 3,650 | 32,606 |
| 33,031 | 152 | 23,552 | 5,207 | 3,659 | 32,570 |
| 33,032 | 150 | 23,589 | 5,216 | 3,658 | 32,613 |
| 33,033 | 145 | 23,738 | 5,267 | 3,722 | 32,872 |
| 33,034 | 144 | 24,055 | 5,276 | 3,714 | 33,189 |
| 33,035 | 142 | 24,191 | 5,240 | 3,691 | 33,264 |
| 33,036 | 140 | 23,874 | 5,182 | 3,682 | 32,878 |
| 33,037 | 142 | 24,056 | 5,272 | 3,728 | 33,198 |
| 33,038 | 137 | 23,774 | 5,227 | 3,682 | 32,820 |
| 33,039 | 139 | 23,667 | 5,257 | 3,674 | 32,737 |
| 33,040 | 143 | 23,597 | 5,298 | 3,683 | 32,721 |
| 33,041 | 138 | 23,161 | 5,274 | 3,654 | 32,227 |
| 33,042 | 140 | 23,157 | 5,322 | 3,692 | 32,311 |
| 33,043 | 140 | 23,151 | 5,352 | 3,715 | 32,358 |
| 33,044 | 144 | 23,067 | 5,384 | 3,739 | 32,334 |
| 33,045 | 143 | 23,033 | 5,420 | 3,758 | 32,354 |
| 33,046 | 147 | 23,187 | 5,448 | 3,773 | 32,555 |
| 33,047 | 147 | 23,219 | 5,474 | 3,780 | 32,620 |

|        |     |        |       |       |        |
|--------|-----|--------|-------|-------|--------|
| 33,048 | 145 | 23,521 | 5,586 | 3,862 | 33,114 |
| 33,049 | 144 | 23,498 | 5,668 | 3,896 | 33,206 |
| 33,050 | 141 | 23,491 | 5,653 | 3,902 | 33,187 |
| 33,051 | 140 | 23,521 | 5,618 | 3,899 | 33,178 |
| 33,052 | 146 | 23,689 | 5,676 | 3,940 | 33,451 |
| 33,053 | 145 | 23,711 | 5,692 | 3,955 | 33,503 |
| 33,054 | 144 | 23,696 | 5,707 | 3,963 | 33,510 |
| 33,055 | 147 | 23,652 | 5,741 | 3,973 | 33,513 |
| 33,056 | 130 | 22,146 | 5,405 | 3,743 | 31,424 |
| 33,057 | 130 | 22,064 | 5,418 | 3,728 | 31,340 |
| 33,058 | 131 | 22,057 | 5,414 | 3,741 | 31,343 |
| 33,059 | 131 | 22,044 | 5,409 | 3,744 | 31,328 |
| 33,060 | 132 | 21,981 | 5,418 | 3,745 | 31,276 |
| 33,061 | 130 | 21,908 | 5,413 | 3,759 | 31,210 |
| 33,062 | 136 | 22,660 | 5,652 | 3,910 | 32,358 |
| 33,063 | 145 | 22,739 | 5,687 | 3,954 | 32,525 |
| 33,064 | 142 | 22,144 | 5,594 | 3,883 | 31,763 |
| 33,065 | 144 | 22,276 | 5,653 | 3,892 | 31,965 |
| 33,066 | 134 | 22,462 | 5,691 | 3,920 | 32,207 |
| 33,067 | 130 | 22,099 | 5,628 | 3,886 | 31,743 |
| 33,068 | 129 | 21,863 | 5,614 | 3,835 | 31,441 |
| 33,069 | 134 | 22,596 | 5,754 | 3,913 | 32,397 |
| 33,070 | 131 | 22,374 | 5,681 | 3,879 | 32,065 |
| 33,071 | 132 | 22,579 | 5,696 | 3,902 | 32,309 |
| 33,072 | 126 | 22,830 | 5,701 | 3,936 | 32,593 |
| 33,073 | 121 | 22,887 | 5,686 | 3,940 | 32,634 |
| 33,074 | 119 | 22,699 | 5,658 | 3,903 | 32,379 |
| 33,075 | 118 | 22,537 | 5,611 | 3,891 | 32,157 |
| 33,076 | 118 | 22,518 | 5,606 | 3,886 | 32,128 |
| 33,077 | 118 | 22,284 | 5,565 | 3,842 | 31,809 |
| 33,078 | 119 | 22,114 | 5,508 | 3,804 | 31,545 |
| 33,079 | 121 | 23,196 | 5,742 | 3,948 | 33,007 |

|        |     |        |       |       |        |
|--------|-----|--------|-------|-------|--------|
| 33,080 | 120 | 22,909 | 5,674 | 3,900 | 32,603 |
| 33,081 | 122 | 22,823 | 5,605 | 3,858 | 32,408 |
| 33,082 | 123 | 22,750 | 5,581 | 3,834 | 32,288 |
| 33,083 | 130 | 22,937 | 5,611 | 3,837 | 32,515 |
| 33,084 | 136 | 23,044 | 5,610 | 3,844 | 32,634 |
| 33,085 | 134 | 22,827 | 5,576 | 3,832 | 32,369 |
| 33,086 | 132 | 22,477 | 5,514 | 3,767 | 31,890 |
| 33,087 | 131 | 22,418 | 5,476 | 3,758 | 31,783 |
| 33,088 | 133 | 22,465 | 5,409 | 3,731 | 31,738 |
| 33,089 | 133 | 22,626 | 5,436 | 3,744 | 31,939 |
| 33,090 | 137 | 22,925 | 5,457 | 3,797 | 32,316 |
| 33,091 | 132 | 22,625 | 5,363 | 3,746 | 31,866 |
| 33,092 | 131 | 22,670 | 5,348 | 3,743 | 31,892 |
| 33,093 | 133 | 22,904 | 5,354 | 3,731 | 32,122 |
| 33,094 | 129 | 22,740 | 5,295 | 3,657 | 31,821 |
| 33,095 | 131 | 22,651 | 5,261 | 3,611 | 31,654 |
| 33,096 | 132 | 22,947 | 5,281 | 3,647 | 32,007 |
| 33,097 | 126 | 22,802 | 5,300 | 3,638 | 31,866 |
| 33,098 | 128 | 22,791 | 5,280 | 3,632 | 31,831 |
| 33,099 | 128 | 22,791 | 5,236 | 3,590 | 31,745 |
| 33,100 | 128 | 22,547 | 5,120 | 3,507 | 31,302 |
| 33,101 | 129 | 22,632 | 5,137 | 3,503 | 31,401 |
| 33,102 | 130 | 22,730 | 5,172 | 3,518 | 31,550 |
| 33,103 | 125 | 22,408 | 5,055 | 3,436 | 31,024 |
| 33,104 | 127 | 22,357 | 5,011 | 3,390 | 30,885 |
| 33,105 | 128 | 22,502 | 5,048 | 3,414 | 31,092 |
| 33,106 | 126 | 22,244 | 4,927 | 3,362 | 30,659 |
| 33,107 | 125 | 22,337 | 4,939 | 3,370 | 30,771 |
| 33,108 | 125 | 22,281 | 4,912 | 3,361 | 30,679 |
| 33,109 | 122 | 22,302 | 4,931 | 3,365 | 30,720 |
| 33,110 | 124 | 22,389 | 4,999 | 3,385 | 30,897 |
| 33,111 | 125 | 22,697 | 5,016 | 3,436 | 31,274 |

|        |     |        |       |       |        |
|--------|-----|--------|-------|-------|--------|
| 33,112 | 123 | 22,876 | 5,027 | 3,440 | 31,466 |
| 33,113 | 123 | 23,177 | 5,000 | 3,427 | 31,727 |
| 33,114 | 117 | 23,192 | 4,988 | 3,438 | 31,735 |
| 33,115 | 115 | 22,977 | 4,941 | 3,397 | 31,430 |
| 33,116 | 111 | 22,888 | 4,944 | 3,393 | 31,336 |
| 33,117 | 111 | 22,899 | 4,949 | 3,388 | 31,347 |
| 33,118 | 114 | 23,153 | 4,967 | 3,418 | 31,652 |
| 33,119 | 111 | 23,064 | 4,938 | 3,419 | 31,532 |
| 33,120 | 107 | 22,906 | 4,938 | 3,404 | 31,355 |
| 33,121 | 112 | 22,911 | 4,961 | 3,401 | 31,385 |
| 33,122 | 112 | 22,683 | 4,926 | 3,358 | 31,079 |
| 33,123 | 115 | 22,717 | 4,980 | 3,382 | 31,194 |
| 33,124 | 116 | 22,629 | 4,987 | 3,371 | 31,103 |
| 33,125 | 117 | 22,512 | 4,945 | 3,369 | 30,943 |
| 33,126 | 117 | 22,528 | 4,980 | 3,377 | 31,002 |
| 33,127 | 117 | 22,596 | 4,984 | 3,383 | 31,080 |
| 33,128 | 120 | 22,523 | 4,990 | 3,383 | 31,016 |
| 33,129 | 119 | 22,327 | 4,962 | 3,356 | 30,764 |
| 33,130 | 121 | 22,008 | 4,860 | 3,307 | 30,296 |
| 33,131 | 120 | 22,081 | 4,868 | 3,308 | 30,377 |
| 33,132 | 120 | 21,815 | 4,850 | 3,299 | 30,084 |
| 33,133 | 119 | 21,613 | 4,841 | 3,304 | 29,877 |
| 33,134 | 120 | 22,568 | 5,135 | 3,542 | 31,365 |
| 33,135 | 113 | 22,444 | 5,160 | 3,557 | 31,274 |
| 33,136 | 111 | 22,186 | 5,118 | 3,513 | 30,928 |
| 33,137 | 110 | 22,036 | 5,080 | 3,476 | 30,702 |
| 33,138 | 114 | 22,354 | 5,174 | 3,484 | 31,126 |
| 33,139 | 113 | 22,168 | 5,132 | 3,489 | 30,902 |
| 33,140 | 113 | 22,091 | 5,138 | 3,486 | 30,828 |
| 33,141 | 111 | 22,158 | 5,230 | 3,501 | 31,000 |
| 33,142 | 117 | 22,199 | 5,262 | 3,503 | 31,081 |
| 33,143 | 118 | 22,334 | 5,303 | 3,512 | 31,267 |

|        |     |        |       |       |        |
|--------|-----|--------|-------|-------|--------|
| 33,144 | 121 | 22,361 | 5,300 | 3,529 | 31,311 |
| 33,145 | 121 | 22,145 | 5,249 | 3,518 | 31,033 |
| 33,146 | 121 | 22,263 | 5,313 | 3,535 | 31,232 |
| 33,147 | 130 | 22,340 | 5,372 | 3,543 | 31,385 |
| 33,148 | 132 | 22,218 | 5,346 | 3,521 | 31,217 |
| 33,149 | 127 | 21,922 | 5,295 | 3,483 | 30,827 |
| 33,150 | 133 | 21,881 | 5,309 | 3,504 | 30,827 |
| 33,151 | 135 | 21,606 | 5,241 | 3,477 | 30,459 |
| 33,152 | 134 | 21,707 | 5,260 | 3,477 | 30,578 |
| 33,153 | 138 | 21,525 | 5,246 | 3,447 | 30,356 |
| 33,154 | 138 | 21,439 | 5,254 | 3,443 | 30,274 |
| 33,155 | 136 | 21,556 | 5,300 | 3,474 | 30,466 |
| 33,156 | 141 | 21,784 | 5,358 | 3,508 | 30,791 |
| 33,157 | 138 | 21,441 | 5,330 | 3,484 | 30,393 |
| 33,158 | 137 | 21,418 | 5,334 | 3,501 | 30,390 |
| 33,159 | 137 | 21,839 | 5,410 | 3,535 | 30,921 |
| 33,160 | 132 | 21,958 | 5,414 | 3,552 | 31,056 |
| 33,161 | 133 | 21,928 | 5,410 | 3,559 | 31,030 |
| 33,162 | 128 | 21,505 | 5,343 | 3,501 | 30,477 |
| 33,163 | 132 | 21,576 | 5,421 | 3,536 | 30,665 |
| 33,164 | 131 | 21,219 | 5,374 | 3,481 | 30,205 |
| 33,165 | 134 | 21,043 | 5,355 | 3,470 | 30,002 |
| 33,166 | 134 | 21,117 | 5,387 | 3,468 | 30,106 |
| 33,167 | 135 | 20,984 | 5,362 | 3,475 | 29,956 |
| 33,168 | 140 | 21,122 | 5,422 | 3,492 | 30,176 |
| 33,169 | 139 | 20,879 | 5,372 | 3,436 | 29,826 |
| 33,170 | 138 | 20,583 | 5,303 | 3,393 | 29,417 |
| 33,171 | 142 | 20,827 | 5,376 | 3,422 | 29,767 |
| 33,172 | 140 | 21,065 | 5,454 | 3,456 | 30,115 |
| 33,173 | 138 | 20,753 | 5,355 | 3,395 | 29,641 |
| 33,174 | 138 | 20,779 | 5,352 | 3,386 | 29,655 |
| 33,175 | 137 | 20,750 | 5,345 | 3,374 | 29,606 |

|        |     |        |       |       |        |
|--------|-----|--------|-------|-------|--------|
| 33,176 | 136 | 20,738 | 5,397 | 3,398 | 29,669 |
| 33,177 | 137 | 20,681 | 5,379 | 3,398 | 29,595 |
| 33,178 | 137 | 20,674 | 5,389 | 3,395 | 29,595 |
| 33,179 | 131 | 20,329 | 5,320 | 3,329 | 29,109 |
| 33,180 | 128 | 20,299 | 5,313 | 3,310 | 29,050 |
| 33,181 | 134 | 20,458 | 5,347 | 3,330 | 29,269 |
| 33,182 | 130 | 20,432 | 5,361 | 3,299 | 29,222 |
| 33,183 | 126 | 20,492 | 5,333 | 3,297 | 29,248 |
| 33,184 | 127 | 20,436 | 5,281 | 3,255 | 29,099 |
| 33,185 | 128 | 20,511 | 5,275 | 3,254 | 29,168 |
| 33,186 | 129 | 20,577 | 5,276 | 3,247 | 29,229 |
| 33,187 | 129 | 20,625 | 5,284 | 3,251 | 29,289 |
| 33,188 | 127 | 20,640 | 5,334 | 3,281 | 29,382 |
| 33,189 | 130 | 20,281 | 5,196 | 3,227 | 28,834 |
| 33,190 | 129 | 20,527 | 5,251 | 3,245 | 29,152 |
| 33,191 | 128 | 20,632 | 5,246 | 3,253 | 29,259 |
| 33,192 | 131 | 20,966 | 5,343 | 3,293 | 29,733 |
| 33,193 | 126 | 20,914 | 5,334 | 3,296 | 29,670 |
| 33,194 | 138 | 21,331 | 5,450 | 3,397 | 30,316 |
| 33,195 | 139 | 21,548 | 5,558 | 3,429 | 30,674 |
| 33,196 | 140 | 21,774 | 5,601 | 3,461 | 30,976 |
| 33,197 | 133 | 21,542 | 5,570 | 3,467 | 30,712 |
| 33,198 | 128 | 21,453 | 5,583 | 3,483 | 30,647 |
| 33,199 | 128 | 21,514 | 5,588 | 3,492 | 30,722 |
| 33,200 | 126 | 21,725 | 5,617 | 3,535 | 31,003 |
| 33,201 | 127 | 21,700 | 5,633 | 3,538 | 30,998 |
| 33,202 | 132 | 21,973 | 5,728 | 3,599 | 31,432 |
| 33,203 | 135 | 21,996 | 5,770 | 3,644 | 31,545 |
| 33,204 | 128 | 21,865 | 5,727 | 3,627 | 31,347 |
| 33,205 | 127 | 22,013 | 5,790 | 3,655 | 31,585 |
| 33,206 | 124 | 22,172 | 5,862 | 3,696 | 31,854 |
| 33,207 | 123 | 22,043 | 5,835 | 3,667 | 31,668 |

|        |     |        |       |       |        |
|--------|-----|--------|-------|-------|--------|
| 33,208 | 125 | 21,828 | 5,800 | 3,638 | 31,391 |
| 33,209 | 130 | 22,020 | 5,867 | 3,695 | 31,712 |
| 33,210 | 138 | 21,804 | 5,891 | 3,696 | 31,529 |
| 33,211 | 138 | 21,683 | 5,898 | 3,678 | 31,397 |
| 33,212 | 142 | 21,654 | 5,926 | 3,664 | 31,386 |
| 33,213 | 141 | 21,481 | 5,888 | 3,619 | 31,129 |
| 33,214 | 143 | 21,862 | 5,972 | 3,671 | 31,648 |
| 33,215 | 139 | 21,620 | 5,942 | 3,646 | 31,347 |
| 33,216 | 148 | 21,711 | 5,938 | 3,649 | 31,446 |
| 33,217 | 148 | 21,739 | 5,947 | 3,648 | 31,482 |
| 33,218 | 146 | 21,721 | 5,954 | 3,648 | 31,469 |
| 33,219 | 144 | 21,701 | 5,929 | 3,666 | 31,440 |
| 33,220 | 145 | 21,678 | 5,940 | 3,675 | 31,438 |
| 33,221 | 143 | 21,909 | 6,003 | 3,733 | 31,788 |
| 33,222 | 140 | 21,955 | 6,026 | 3,763 | 31,884 |
| 33,223 | 145 | 21,711 | 5,979 | 3,722 | 31,557 |
| 33,224 | 147 | 21,633 | 5,992 | 3,710 | 31,482 |
| 33,225 | 148 | 22,227 | 6,097 | 3,792 | 32,264 |
| 33,226 | 150 | 22,190 | 6,090 | 3,779 | 32,209 |
| 33,227 | 150 | 22,221 | 6,093 | 3,762 | 32,226 |
| 33,228 | 154 | 22,452 | 6,145 | 3,788 | 32,539 |
| 33,229 | 154 | 22,062 | 6,101 | 3,744 | 32,061 |
| 33,230 | 154 | 21,881 | 6,047 | 3,729 | 31,811 |
| 33,231 | 155 | 22,112 | 6,105 | 3,772 | 32,144 |
| 33,232 | 155 | 22,460 | 6,183 | 3,855 | 32,653 |
| 33,233 | 159 | 22,168 | 6,108 | 3,825 | 32,260 |
| 33,234 | 158 | 21,903 | 6,047 | 3,775 | 31,883 |
| 33,235 | 157 | 22,146 | 6,117 | 3,797 | 32,217 |
| 33,236 | 158 | 21,766 | 6,030 | 3,735 | 31,689 |
| 33,237 | 159 | 21,849 | 6,074 | 3,753 | 31,835 |
| 33,238 | 162 | 22,062 | 6,148 | 3,790 | 32,162 |
| 33,239 | 169 | 22,126 | 6,161 | 3,796 | 32,252 |

|        |     |        |       |       |        |
|--------|-----|--------|-------|-------|--------|
| 33,240 | 179 | 21,841 | 6,102 | 3,754 | 31,876 |
| 33,241 | 179 | 21,564 | 6,054 | 3,713 | 31,510 |
| 33,242 | 179 | 21,693 | 6,188 | 3,756 | 31,816 |
| 33,243 | 180 | 21,347 | 6,120 | 3,729 | 31,376 |
| 33,244 | 178 | 21,416 | 6,121 | 3,728 | 31,443 |
| 33,245 | 168 | 21,537 | 6,149 | 3,706 | 31,560 |
| 33,246 | 162 | 21,424 | 6,066 | 3,675 | 31,327 |
| 33,247 | 159 | 21,107 | 5,984 | 3,612 | 30,862 |
| 33,248 | 163 | 21,167 | 5,966 | 3,578 | 30,874 |
| 33,249 | 163 | 21,186 | 5,970 | 3,574 | 30,893 |
| 33,250 | 163 | 21,447 | 6,036 | 3,584 | 31,230 |
| 33,251 | 159 | 21,140 | 6,000 | 3,554 | 30,853 |
| 33,252 | 154 | 21,280 | 6,068 | 3,588 | 31,090 |
| 33,253 | 147 | 21,053 | 6,016 | 3,565 | 30,781 |
| 33,254 | 150 | 21,036 | 5,968 | 3,541 | 30,695 |
| 33,255 | 153 | 20,968 | 5,923 | 3,542 | 30,586 |
| 33,256 | 155 | 20,789 | 5,895 | 3,521 | 30,360 |
| 33,257 | 156 | 20,837 | 5,893 | 3,514 | 30,400 |
| 33,258 | 151 | 20,741 | 5,900 | 3,509 | 30,301 |
| 33,259 | 150 | 20,861 | 5,920 | 3,520 | 30,451 |
| 33,260 | 148 | 20,928 | 5,915 | 3,496 | 30,487 |
| 33,261 | 151 | 20,857 | 5,867 | 3,490 | 30,365 |
| 33,262 | 152 | 20,926 | 5,898 | 3,473 | 30,449 |
| 33,263 | 146 | 21,068 | 5,919 | 3,500 | 30,633 |
| 33,264 | 144 | 20,815 | 5,830 | 3,459 | 30,248 |
| 33,265 | 154 | 20,786 | 5,812 | 3,450 | 30,202 |
| 33,266 | 152 | 20,651 | 5,793 | 3,421 | 30,017 |
| 33,267 | 146 | 20,874 | 5,859 | 3,447 | 30,326 |
| 33,268 | 146 | 20,908 | 5,860 | 3,446 | 30,360 |
| 33,269 | 144 | 20,791 | 5,866 | 3,439 | 30,240 |
| 33,270 | 144 | 20,808 | 5,854 | 3,434 | 30,240 |
| 33,271 | 148 | 20,988 | 5,919 | 3,458 | 30,513 |



|        |     |        |       |       |        |
|--------|-----|--------|-------|-------|--------|
| 33,272 | 155 | 20,779 | 5,864 | 3,418 | 30,216 |
| 33,273 | 156 | 20,549 | 5,779 | 3,393 | 29,877 |
| 33,274 | 157 | 20,835 | 5,887 | 3,483 | 30,362 |
| 33,275 | 157 | 20,736 | 5,837 | 3,460 | 30,190 |
| 33,276 | 153 | 20,554 | 5,829 | 3,446 | 29,982 |
| 33,277 | 162 | 20,490 | 5,810 | 3,430 | 29,892 |
| 33,278 | 159 | 20,406 | 5,771 | 3,421 | 29,757 |
| 33,279 | 156 | 20,482 | 5,845 | 3,461 | 29,944 |
| 33,280 | 153 | 20,348 | 5,808 | 3,452 | 29,761 |
| 33,281 | 154 | 20,107 | 5,767 | 3,425 | 29,453 |
| 33,282 | 157 | 20,787 | 5,988 | 3,539 | 30,471 |
| 33,283 | 164 | 20,617 | 5,948 | 3,494 | 30,223 |
| 33,284 | 163 | 20,514 | 5,934 | 3,480 | 30,091 |
| 33,285 | 169 | 21,045 | 6,022 | 3,555 | 30,791 |
| 33,286 | 169 | 20,980 | 6,010 | 3,564 | 30,723 |
| 33,287 | 168 | 21,050 | 6,037 | 3,580 | 30,835 |
| 33,288 | 168 | 21,342 | 6,062 | 3,610 | 31,182 |
| 33,289 | 165 | 21,360 | 6,006 | 3,592 | 31,123 |
| 33,290 | 162 | 21,274 | 5,971 | 3,601 | 31,008 |
| 33,291 | 151 | 21,173 | 5,930 | 3,611 | 30,865 |
| 33,292 | 161 | 20,939 | 5,856 | 3,574 | 30,530 |
| 33,293 | 161 | 20,682 | 5,775 | 3,536 | 30,154 |
| 33,294 | 166 | 20,486 | 5,712 | 3,504 | 29,868 |
| 33,295 | 166 | 20,147 | 5,673 | 3,460 | 29,446 |
| 33,296 | 177 | 20,445 | 5,760 | 3,531 | 29,913 |
| 33,297 | 179 | 20,187 | 5,738 | 3,531 | 29,635 |
| 33,298 | 180 | 20,051 | 5,708 | 3,524 | 29,463 |
| 33,299 | 176 | 19,926 | 5,687 | 3,525 | 29,314 |
| 33,300 | 175 | 19,862 | 5,654 | 3,503 | 29,194 |
| 33,301 | 177 | 19,928 | 5,699 | 3,540 | 29,344 |
| 33,302 | 178 | 19,916 | 5,627 | 3,466 | 29,187 |
| 33,303 | 177 | 19,855 | 5,616 | 3,485 | 29,133 |

|        |     |        |       |       |        |
|--------|-----|--------|-------|-------|--------|
| 33,304 | 182 | 20,202 | 5,678 | 3,511 | 29,573 |
| 33,305 | 183 | 20,323 | 5,718 | 3,528 | 29,752 |
| 33,306 | 178 | 20,278 | 5,685 | 3,503 | 29,644 |
| 33,307 | 178 | 20,366 | 5,683 | 3,509 | 29,736 |
| 33,308 | 180 | 20,603 | 5,775 | 3,564 | 30,122 |
| 33,309 | 179 | 20,613 | 5,754 | 3,535 | 30,081 |
| 33,310 | 179 | 20,333 | 5,686 | 3,508 | 29,706 |
| 33,311 | 176 | 20,077 | 5,643 | 3,479 | 29,375 |
| 33,312 | 173 | 20,231 | 5,702 | 3,503 | 29,609 |
| 33,313 | 175 | 20,468 | 5,757 | 3,534 | 29,934 |
| 33,314 | 176 | 20,437 | 5,764 | 3,538 | 29,915 |
| 33,315 | 179 | 20,448 | 5,756 | 3,528 | 29,911 |
| 33,316 | 167 | 20,452 | 5,741 | 3,519 | 29,879 |
| 33,317 | 170 | 20,294 | 5,710 | 3,527 | 29,701 |
| 33,318 | 169 | 20,070 | 5,616 | 3,489 | 29,344 |
| 33,319 | 170 | 20,004 | 5,594 | 3,477 | 29,245 |
| 33,320 | 170 | 19,953 | 5,588 | 3,470 | 29,181 |
| 33,321 | 168 | 20,078 | 5,619 | 3,469 | 29,334 |
| 33,322 | 167 | 19,966 | 5,609 | 3,461 | 29,203 |
| 33,323 | 156 | 19,655 | 5,553 | 3,371 | 28,735 |
| 33,324 | 157 | 19,871 | 5,599 | 3,405 | 29,032 |
| 33,325 | 150 | 19,792 | 5,555 | 3,387 | 28,884 |
| 33,326 | 150 | 19,781 | 5,556 | 3,395 | 28,882 |
| 33,327 | 148 | 19,549 | 5,497 | 3,360 | 28,554 |
| 33,328 | 137 | 19,626 | 5,502 | 3,393 | 28,658 |
| 33,329 | 142 | 19,648 | 5,506 | 3,385 | 28,681 |
| 33,330 | 144 | 19,681 | 5,481 | 3,351 | 28,657 |
| 33,331 | 154 | 19,840 | 5,533 | 3,343 | 28,870 |
| 33,332 | 155 | 19,680 | 5,435 | 3,291 | 28,561 |
| 33,333 | 153 | 19,840 | 5,483 | 3,314 | 28,790 |
| 33,334 | 137 | 19,323 | 5,340 | 3,218 | 28,018 |
| 33,335 | 137 | 19,366 | 5,379 | 3,226 | 28,108 |

|        |     |        |       |       |        |
|--------|-----|--------|-------|-------|--------|
| 33,336 | 137 | 19,470 | 5,403 | 3,233 | 28,243 |
| 33,337 | 142 | 19,265 | 5,328 | 3,192 | 27,927 |
| 33,338 | 143 | 19,221 | 5,337 | 3,194 | 27,895 |
| 33,339 | 149 | 19,388 | 5,386 | 3,237 | 28,160 |
| 33,340 | 149 | 19,249 | 5,402 | 3,224 | 28,024 |
| 33,341 | 146 | 19,257 | 5,366 | 3,205 | 27,974 |
| 33,342 | 142 | 19,528 | 5,356 | 3,192 | 28,218 |
| 33,343 | 141 | 19,599 | 5,358 | 3,205 | 28,303 |
| 33,344 | 143 | 19,877 | 5,400 | 3,239 | 28,659 |
| 33,345 | 132 | 19,986 | 5,407 | 3,259 | 28,784 |
| 33,346 | 129 | 19,946 | 5,384 | 3,223 | 28,682 |
| 33,347 | 133 | 20,194 | 5,438 | 3,232 | 28,997 |
| 33,348 | 137 | 20,297 | 5,442 | 3,243 | 29,119 |
| 33,349 | 137 | 20,335 | 5,437 | 3,236 | 29,145 |
| 33,350 | 139 | 20,456 | 5,469 | 3,265 | 29,329 |
| 33,351 | 138 | 20,495 | 5,502 | 3,279 | 29,414 |
| 33,352 | 138 | 20,513 | 5,525 | 3,282 | 29,458 |
| 33,353 | 138 | 20,302 | 5,492 | 3,270 | 29,202 |
| 33,354 | 140 | 20,364 | 5,511 | 3,262 | 29,277 |
| 33,355 | 141 | 20,298 | 5,491 | 3,255 | 29,185 |
| 33,356 | 139 | 20,414 | 5,549 | 3,303 | 29,405 |
| 33,357 | 139 | 20,548 | 5,625 | 3,329 | 29,641 |
| 33,358 | 151 | 20,747 | 5,675 | 3,347 | 29,920 |
| 33,359 | 150 | 20,663 | 5,638 | 3,323 | 29,774 |
| 33,360 | 162 | 21,042 | 5,756 | 3,385 | 30,345 |
| 33,361 | 158 | 20,830 | 5,695 | 3,356 | 30,039 |
| 33,362 | 160 | 20,999 | 5,699 | 3,378 | 30,236 |
| 33,363 | 162 | 21,267 | 5,746 | 3,409 | 30,584 |
| 33,364 | 160 | 21,244 | 5,684 | 3,380 | 30,468 |
| 33,365 | 163 | 21,504 | 5,695 | 3,399 | 30,761 |
| 33,366 | 159 | 21,322 | 5,684 | 3,406 | 30,571 |
| 33,367 | 156 | 21,400 | 5,721 | 3,401 | 30,678 |

|        |     |        |       |       |        |
|--------|-----|--------|-------|-------|--------|
| 33,368 | 160 | 21,572 | 5,772 | 3,402 | 30,906 |
| 33,369 | 162 | 21,606 | 5,778 | 3,407 | 30,953 |
| 33,370 | 160 | 21,439 | 5,731 | 3,386 | 30,716 |
| 33,371 | 162 | 21,909 | 5,873 | 3,504 | 31,448 |
| 33,372 | 164 | 22,022 | 5,885 | 3,515 | 31,586 |
| 33,373 | 168 | 22,402 | 5,967 | 3,556 | 32,093 |
| 33,374 | 192 | 22,456 | 5,969 | 3,553 | 32,170 |
| 33,375 | 195 | 22,473 | 6,021 | 3,569 | 32,258 |
| 33,376 | 199 | 22,893 | 6,103 | 3,603 | 32,798 |
| 33,377 | 203 | 22,623 | 5,977 | 3,519 | 32,322 |
| 33,378 | 210 | 22,824 | 6,048 | 3,547 | 32,629 |
| 33,379 | 206 | 23,015 | 6,118 | 3,578 | 32,917 |
| 33,380 | 199 | 22,400 | 5,989 | 3,519 | 32,107 |
| 33,381 | 200 | 22,504 | 6,008 | 3,563 | 32,275 |
| 33,382 | 196 | 22,806 | 6,092 | 3,620 | 32,714 |
| 33,383 | 198 | 22,770 | 6,096 | 3,619 | 32,683 |
| 33,384 | 198 | 22,589 | 6,063 | 3,621 | 32,471 |
| 33,385 | 200 | 22,537 | 6,064 | 3,618 | 32,419 |
| 33,386 | 199 | 22,568 | 6,066 | 3,616 | 32,449 |
| 33,387 | 201 | 22,548 | 6,077 | 3,617 | 32,443 |
| 33,388 | 201 | 22,504 | 6,072 | 3,612 | 32,389 |
| 33,389 | 210 | 22,563 | 6,076 | 3,620 | 32,469 |
| 33,390 | 213 | 22,682 | 6,129 | 3,633 | 32,657 |
| 33,391 | 207 | 22,539 | 6,126 | 3,626 | 32,498 |
| 33,392 | 207 | 22,543 | 6,169 | 3,637 | 32,556 |
| 33,393 | 206 | 22,525 | 6,219 | 3,659 | 32,609 |
| 33,394 | 208 | 22,371 | 6,222 | 3,616 | 32,417 |
| 33,395 | 203 | 22,199 | 6,179 | 3,593 | 32,174 |
| 33,396 | 210 | 21,924 | 6,155 | 3,542 | 31,831 |
| 33,397 | 209 | 21,637 | 6,075 | 3,519 | 31,440 |
| 33,398 | 210 | 22,026 | 6,193 | 3,581 | 32,010 |
| 33,399 | 209 | 22,049 | 6,211 | 3,593 | 32,062 |

|        |     |        |       |       |        |
|--------|-----|--------|-------|-------|--------|
| 33,400 | 209 | 22,074 | 6,216 | 3,602 | 32,101 |
| 33,401 | 211 | 22,034 | 6,164 | 3,577 | 31,986 |
| 33,402 | 212 | 22,060 | 6,120 | 3,562 | 31,954 |
| 33,403 | 219 | 22,064 | 6,111 | 3,558 | 31,952 |
| 33,404 | 220 | 22,141 | 6,129 | 3,563 | 32,053 |
| 33,405 | 212 | 22,155 | 6,147 | 3,569 | 32,083 |
| 33,406 | 210 | 22,010 | 6,096 | 3,519 | 31,835 |
| 33,407 | 210 | 21,141 | 5,848 | 3,364 | 30,563 |
| 33,408 | 215 | 21,216 | 5,847 | 3,363 | 30,641 |
| 33,409 | 202 | 20,766 | 5,716 | 3,288 | 29,972 |
| 33,410 | 201 | 20,851 | 5,703 | 3,281 | 30,036 |
| 33,411 | 199 | 20,962 | 5,770 | 3,290 | 30,221 |
| 33,412 | 198 | 20,896 | 5,751 | 3,276 | 30,121 |
| 33,413 | 197 | 20,964 | 5,789 | 3,309 | 30,259 |
| 33,414 | 199 | 20,778 | 5,783 | 3,289 | 30,049 |
| 33,415 | 197 | 20,527 | 5,777 | 3,266 | 29,767 |
| 33,416 | 194 | 20,305 | 5,783 | 3,268 | 29,550 |
| 33,417 | 194 | 20,125 | 5,739 | 3,261 | 29,319 |
| 33,418 | 193 | 20,009 | 5,722 | 3,265 | 29,189 |
| 33,419 | 188 | 20,024 | 5,711 | 3,269 | 29,192 |
| 33,420 | 188 | 20,023 | 5,730 | 3,254 | 29,195 |
| 33,421 | 189 | 20,030 | 5,721 | 3,244 | 29,184 |
| 33,422 | 190 | 20,093 | 5,749 | 3,278 | 29,310 |
| 33,423 | 182 | 19,941 | 5,759 | 3,289 | 29,171 |
| 33,424 | 181 | 20,044 | 5,815 | 3,370 | 29,410 |
| 33,425 | 157 | 20,277 | 5,901 | 3,424 | 29,759 |
| 33,426 | 154 | 20,168 | 5,845 | 3,399 | 29,566 |
| 33,427 | 151 | 20,396 | 5,931 | 3,464 | 29,942 |
| 33,428 | 144 | 20,226 | 5,942 | 3,460 | 29,772 |
| 33,429 | 137 | 20,104 | 5,918 | 3,460 | 29,619 |
| 33,430 | 136 | 19,866 | 5,835 | 3,417 | 29,254 |
| 33,431 | 140 | 19,910 | 5,816 | 3,404 | 29,270 |

|        |     |        |       |       |        |
|--------|-----|--------|-------|-------|--------|
| 33,432 | 141 | 20,134 | 5,874 | 3,432 | 29,581 |
| 33,433 | 143 | 20,117 | 5,885 | 3,412 | 29,557 |
| 33,434 | 140 | 20,038 | 5,832 | 3,394 | 29,404 |
| 33,435 | 141 | 20,186 | 5,839 | 3,392 | 29,558 |
| 33,436 | 143 | 20,243 | 5,837 | 3,392 | 29,615 |
| 33,437 | 156 | 20,297 | 5,842 | 3,383 | 29,678 |
| 33,438 | 150 | 20,363 | 5,902 | 3,422 | 29,837 |
| 33,439 | 142 | 20,551 | 5,973 | 3,467 | 30,133 |
| 33,440 | 136 | 20,492 | 5,922 | 3,448 | 29,998 |
| 33,441 | 137 | 20,546 | 5,953 | 3,471 | 30,107 |
| 33,442 | 138 | 20,725 | 6,018 | 3,488 | 30,369 |
| 33,443 | 135 | 20,278 | 5,875 | 3,408 | 29,696 |
| 33,444 | 132 | 20,345 | 5,917 | 3,412 | 29,806 |
| 33,445 | 132 | 20,409 | 5,926 | 3,435 | 29,902 |
| 33,446 | 132 | 20,199 | 5,898 | 3,423 | 29,652 |
| 33,447 | 118 | 20,458 | 5,959 | 3,475 | 30,010 |
| 33,448 | 120 | 20,633 | 6,008 | 3,510 | 30,271 |
| 33,449 | 115 | 20,545 | 5,943 | 3,487 | 30,090 |
| 33,450 | 118 | 20,146 | 5,879 | 3,406 | 29,549 |
| 33,451 | 117 | 20,324 | 5,921 | 3,433 | 29,795 |
| 33,452 | 115 | 20,457 | 5,993 | 3,460 | 30,025 |
| 33,453 | 115 | 20,394 | 5,983 | 3,441 | 29,933 |
| 33,454 | 107 | 20,245 | 5,938 | 3,398 | 29,688 |
| 33,455 | 107 | 20,284 | 5,943 | 3,399 | 29,733 |
| 33,456 | 118 | 20,423 | 5,974 | 3,430 | 29,945 |
| 33,457 | 121 | 20,249 | 5,985 | 3,436 | 29,791 |
| 33,458 | 126 | 20,347 | 6,002 | 3,460 | 29,935 |
| 33,459 | 124 | 20,245 | 5,982 | 3,454 | 29,805 |
| 33,460 | 125 | 20,569 | 6,080 | 3,496 | 30,270 |
| 33,461 | 135 | 20,650 | 6,112 | 3,535 | 30,432 |
| 33,462 | 128 | 20,670 | 6,118 | 3,584 | 30,500 |
| 33,463 | 129 | 20,771 | 6,155 | 3,594 | 30,649 |

|        |     |        |       |       |        |
|--------|-----|--------|-------|-------|--------|
| 33,464 | 133 | 20,755 | 6,081 | 3,569 | 30,538 |
| 33,465 | 134 | 21,123 | 6,124 | 3,591 | 30,972 |
| 33,466 | 134 | 21,113 | 6,124 | 3,589 | 30,960 |
| 33,467 | 137 | 21,540 | 6,228 | 3,635 | 31,540 |
| 33,468 | 138 | 21,669 | 6,240 | 3,650 | 31,697 |
| 33,469 | 138 | 21,646 | 6,203 | 3,639 | 31,626 |
| 33,470 | 138 | 21,525 | 6,178 | 3,622 | 31,463 |
| 33,471 | 138 | 21,156 | 6,071 | 3,567 | 30,932 |
| 33,472 | 135 | 21,209 | 6,106 | 3,591 | 31,041 |
| 33,473 | 135 | 20,953 | 6,033 | 3,537 | 30,658 |
| 33,474 | 136 | 20,886 | 5,964 | 3,487 | 30,473 |
| 33,475 | 139 | 20,715 | 5,947 | 3,445 | 30,246 |
| 33,476 | 147 | 20,657 | 5,881 | 3,420 | 30,105 |
| 33,477 | 149 | 20,465 | 5,819 | 3,387 | 29,820 |
| 33,478 | 159 | 20,294 | 5,748 | 3,324 | 29,525 |
| 33,479 | 166 | 20,057 | 5,676 | 3,274 | 29,173 |
| 33,480 | 166 | 20,174 | 5,662 | 3,264 | 29,266 |
| 33,481 | 166 | 19,902 | 5,594 | 3,213 | 28,875 |
| 33,482 | 163 | 19,630 | 5,541 | 3,174 | 28,508 |
| 33,483 | 193 | 20,534 | 5,770 | 3,299 | 29,796 |
| 33,484 | 192 | 20,468 | 5,750 | 3,296 | 29,706 |
| 33,485 | 191 | 20,409 | 5,761 | 3,289 | 29,650 |
| 33,486 | 199 | 20,638 | 5,850 | 3,348 | 30,035 |
| 33,487 | 186 | 20,621 | 5,853 | 3,352 | 30,012 |
| 33,488 | 185 | 20,534 | 5,782 | 3,305 | 29,806 |
| 33,489 | 181 | 20,559 | 5,758 | 3,293 | 29,791 |
| 33,490 | 182 | 20,726 | 5,791 | 3,315 | 30,014 |
| 33,491 | 182 | 20,721 | 5,778 | 3,276 | 29,957 |
| 33,492 | 181 | 20,718 | 5,741 | 3,259 | 29,899 |
| 33,493 | 181 | 20,525 | 5,676 | 3,232 | 29,614 |
| 33,494 | 178 | 20,617 | 5,700 | 3,246 | 29,741 |
| 33,495 | 178 | 20,463 | 5,636 | 3,216 | 29,493 |

|        |     |        |       |       |        |
|--------|-----|--------|-------|-------|--------|
| 33,496 | 182 | 20,705 | 5,688 | 3,247 | 29,822 |
| 33,497 | 182 | 20,537 | 5,622 | 3,206 | 29,547 |
| 33,498 | 184 | 20,535 | 5,586 | 3,186 | 29,491 |
| 33,499 | 186 | 20,495 | 5,562 | 3,164 | 29,407 |
| 33,500 | 187 | 20,453 | 5,546 | 3,159 | 29,345 |
| 33,501 | 183 | 20,729 | 5,604 | 3,203 | 29,719 |
| 33,502 | 187 | 20,426 | 5,543 | 3,168 | 29,324 |
| 33,503 | 189 | 20,418 | 5,556 | 3,170 | 29,333 |
| 33,504 | 187 | 20,370 | 5,544 | 3,164 | 29,265 |
| 33,505 | 186 | 20,314 | 5,541 | 3,182 | 29,223 |
| 33,506 | 182 | 20,634 | 5,596 | 3,241 | 29,653 |
| 33,507 | 175 | 20,298 | 5,515 | 3,183 | 29,171 |
| 33,508 | 179 | 20,504 | 5,526 | 3,196 | 29,405 |
| 33,509 | 168 | 20,623 | 5,556 | 3,219 | 29,566 |
| 33,510 | 168 | 20,442 | 5,561 | 3,206 | 29,377 |
| 33,511 | 167 | 20,321 | 5,512 | 3,194 | 29,194 |
| 33,512 | 163 | 20,317 | 5,541 | 3,178 | 29,199 |
| 33,513 | 165 | 20,398 | 5,494 | 3,153 | 29,210 |
| 33,514 | 166 | 20,390 | 5,469 | 3,150 | 29,175 |
| 33,515 | 161 | 20,040 | 5,403 | 3,105 | 28,709 |
| 33,516 | 164 | 19,882 | 5,401 | 3,117 | 28,564 |
| 33,517 | 165 | 19,746 | 5,389 | 3,116 | 28,416 |
| 33,518 | 164 | 19,773 | 5,402 | 3,105 | 28,444 |
| 33,519 | 163 | 19,792 | 5,376 | 3,118 | 28,449 |
| 33,520 | 166 | 19,761 | 5,368 | 3,123 | 28,418 |
| 33,521 | 167 | 19,775 | 5,368 | 3,109 | 28,419 |
| 33,522 | 167 | 19,829 | 5,376 | 3,096 | 28,468 |
| 33,523 | 170 | 19,865 | 5,376 | 3,092 | 28,503 |
| 33,524 | 169 | 19,854 | 5,357 | 3,081 | 28,461 |
| 33,525 | 166 | 19,716 | 5,308 | 3,066 | 28,256 |
| 33,526 | 165 | 19,692 | 5,290 | 3,039 | 28,186 |
| 33,527 | 155 | 19,243 | 5,205 | 3,001 | 27,604 |



|        |     |        |       |       |        |
|--------|-----|--------|-------|-------|--------|
| 33,528 | 159 | 19,320 | 5,247 | 2,992 | 27,718 |
| 33,529 | 144 | 19,084 | 5,191 | 2,962 | 27,381 |
| 33,530 | 136 | 18,766 | 5,105 | 2,908 | 26,915 |
| 33,531 | 136 | 18,823 | 5,107 | 2,896 | 26,962 |
| 33,532 | 129 | 18,813 | 5,103 | 2,922 | 26,967 |
| 33,533 | 128 | 18,896 | 5,108 | 2,920 | 27,052 |
| 33,534 | 116 | 18,975 | 5,148 | 2,949 | 27,188 |
| 33,535 | 119 | 18,843 | 5,107 | 2,919 | 26,988 |
| 33,536 | 118 | 18,694 | 5,087 | 2,905 | 26,804 |
| 33,537 | 111 | 18,710 | 5,114 | 2,918 | 26,853 |
| 33,538 | 114 | 18,710 | 5,109 | 2,911 | 26,844 |
| 33,539 | 111 | 18,419 | 5,067 | 2,889 | 26,486 |
| 33,540 | 112 | 18,670 | 5,109 | 2,924 | 26,815 |
| 33,541 | 110 | 18,531 | 5,108 | 2,907 | 26,656 |
| 33,542 | 112 | 18,476 | 5,139 | 2,931 | 26,658 |
| 33,543 | 118 | 18,536 | 5,150 | 2,944 | 26,748 |
| 33,544 | 125 | 18,622 | 5,166 | 2,945 | 26,858 |
| 33,545 | 125 | 18,537 | 5,163 | 2,935 | 26,760 |
| 33,546 | 124 | 18,645 | 5,243 | 3,001 | 27,013 |
| 33,547 | 127 | 18,637 | 5,272 | 3,027 | 27,063 |
| 33,548 | 129 | 18,722 | 5,277 | 3,022 | 27,150 |
| 33,549 | 130 | 18,840 | 5,298 | 3,042 | 27,310 |
| 33,550 | 132 | 18,755 | 5,340 | 3,046 | 27,273 |
| 33,551 | 133 | 18,616 | 5,317 | 3,026 | 27,092 |
| 33,552 | 132 | 18,555 | 5,300 | 2,998 | 26,985 |
| 33,553 | 134 | 18,815 | 5,322 | 3,041 | 27,312 |
| 33,554 | 140 | 18,679 | 5,264 | 3,011 | 27,094 |
| 33,555 | 139 | 18,586 | 5,224 | 3,003 | 26,952 |
| 33,556 | 144 | 18,932 | 5,290 | 3,068 | 27,434 |
| 33,557 | 152 | 18,729 | 5,245 | 3,011 | 27,137 |
| 33,558 | 151 | 18,833 | 5,252 | 3,018 | 27,254 |
| 33,559 | 151 | 18,952 | 5,275 | 3,030 | 27,408 |

|        |     |        |       |       |        |
|--------|-----|--------|-------|-------|--------|
| 33,560 | 151 | 18,965 | 5,285 | 3,039 | 27,440 |
| 33,561 | 147 | 18,997 | 5,225 | 3,039 | 27,408 |
| 33,562 | 149 | 18,981 | 5,230 | 3,031 | 27,391 |
| 33,563 | 145 | 19,122 | 5,259 | 3,060 | 27,586 |
| 33,564 | 145 | 18,822 | 5,175 | 3,004 | 27,146 |
| 33,565 | 147 | 18,933 | 5,183 | 3,008 | 27,271 |
| 33,566 | 143 | 18,892 | 5,182 | 3,011 | 27,228 |
| 33,567 | 149 | 19,082 | 5,221 | 3,027 | 27,479 |
| 33,568 | 148 | 19,022 | 5,159 | 2,999 | 27,328 |
| 33,569 | 147 | 19,072 | 5,175 | 3,014 | 27,408 |
| 33,570 | 148 | 19,172 | 5,236 | 3,044 | 27,600 |
| 33,571 | 146 | 19,278 | 5,275 | 3,072 | 27,771 |
| 33,572 | 148 | 19,446 | 5,339 | 3,119 | 28,052 |
| 33,573 | 154 | 19,472 | 5,373 | 3,138 | 28,137 |
| 33,574 | 152 | 19,525 | 5,383 | 3,138 | 28,198 |
| 33,575 | 151 | 19,449 | 5,424 | 3,156 | 28,180 |
| 33,576 | 151 | 19,479 | 5,430 | 3,142 | 28,202 |
| 33,577 | 152 | 19,426 | 5,387 | 3,126 | 28,091 |
| 33,578 | 152 | 19,468 | 5,386 | 3,135 | 28,141 |
| 33,579 | 149 | 19,246 | 5,322 | 3,110 | 27,827 |
| 33,580 | 148 | 19,014 | 5,264 | 3,099 | 27,525 |
| 33,581 | 149 | 19,754 | 5,473 | 3,240 | 28,616 |
| 33,582 | 147 | 19,794 | 5,466 | 3,258 | 28,665 |
| 33,583 | 143 | 19,650 | 5,429 | 3,226 | 28,448 |
| 33,584 | 138 | 19,084 | 5,232 | 3,098 | 27,552 |
| 33,585 | 143 | 19,305 | 5,239 | 3,108 | 27,795 |
| 33,586 | 146 | 19,579 | 5,281 | 3,146 | 28,152 |
| 33,587 | 147 | 19,590 | 5,279 | 3,139 | 28,155 |
| 33,588 | 154 | 19,933 | 5,359 | 3,202 | 28,648 |
| 33,589 | 151 | 19,923 | 5,356 | 3,202 | 28,632 |
| 33,590 | 152 | 19,977 | 5,367 | 3,216 | 28,712 |
| 33,591 | 156 | 19,863 | 5,325 | 3,179 | 28,523 |

|        |     |        |       |       |        |
|--------|-----|--------|-------|-------|--------|
| 33,592 | 156 | 19,790 | 5,244 | 3,165 | 28,355 |
| 33,593 | 156 | 19,936 | 5,292 | 3,179 | 28,563 |
| 33,594 | 151 | 20,097 | 5,348 | 3,221 | 28,817 |
| 33,595 | 148 | 20,147 | 5,372 | 3,221 | 28,888 |
| 33,596 | 142 | 19,826 | 5,277 | 3,139 | 28,384 |
| 33,597 | 142 | 20,007 | 5,256 | 3,154 | 28,559 |
| 33,598 | 143 | 20,271 | 5,302 | 3,196 | 28,912 |
| 33,599 | 140 | 19,689 | 5,129 | 3,106 | 28,064 |
| 33,600 | 140 | 19,857 | 5,148 | 3,123 | 28,268 |
| 33,601 | 138 | 19,875 | 5,129 | 3,126 | 28,268 |
| 33,602 | 135 | 19,739 | 5,099 | 3,125 | 28,098 |
| 33,603 | 134 | 19,660 | 5,102 | 3,124 | 28,020 |
| 33,604 | 139 | 19,696 | 5,133 | 3,109 | 28,077 |
| 33,605 | 134 | 19,445 | 5,054 | 3,049 | 27,682 |
| 33,606 | 134 | 19,402 | 5,071 | 3,048 | 27,655 |
| 33,607 | 129 | 19,260 | 5,074 | 3,041 | 27,504 |
| 33,608 | 132 | 19,471 | 5,173 | 3,082 | 27,858 |
| 33,609 | 136 | 19,567 | 5,175 | 3,116 | 27,994 |
| 33,610 | 132 | 19,400 | 5,134 | 3,089 | 27,755 |
| 33,611 | 134 | 19,416 | 5,183 | 3,107 | 27,840 |
| 33,612 | 133 | 19,395 | 5,283 | 3,175 | 27,986 |
| 33,613 | 135 | 19,380 | 5,276 | 3,172 | 27,963 |
| 33,614 | 133 | 19,645 | 5,368 | 3,226 | 28,372 |
| 33,615 | 129 | 19,671 | 5,387 | 3,243 | 28,430 |
| 33,616 | 126 | 19,664 | 5,365 | 3,246 | 28,401 |
| 33,617 | 127 | 19,655 | 5,362 | 3,257 | 28,401 |
| 33,618 | 121 | 19,521 | 5,320 | 3,240 | 28,202 |
| 33,619 | 122 | 19,882 | 5,463 | 3,315 | 28,782 |
| 33,620 | 123 | 20,118 | 5,511 | 3,332 | 29,084 |
| 33,621 | 124 | 19,631 | 5,331 | 3,212 | 28,298 |
| 33,622 | 128 | 19,781 | 5,364 | 3,238 | 28,511 |
| 33,623 | 127 | 19,949 | 5,372 | 3,256 | 28,704 |

|        |     |        |       |       |        |
|--------|-----|--------|-------|-------|--------|
| 33,624 | 126 | 20,025 | 5,373 | 3,250 | 28,774 |
| 33,625 | 127 | 19,804 | 5,291 | 3,217 | 28,439 |
| 33,626 | 127 | 19,924 | 5,269 | 3,224 | 28,544 |
| 33,627 | 130 | 20,217 | 5,332 | 3,268 | 28,947 |
| 33,628 | 130 | 19,968 | 5,265 | 3,199 | 28,562 |
| 33,629 | 132 | 20,119 | 5,290 | 3,225 | 28,766 |
| 33,630 | 133 | 20,114 | 5,277 | 3,230 | 28,754 |
| 33,631 | 132 | 20,059 | 5,276 | 3,237 | 28,704 |
| 33,632 | 132 | 19,998 | 5,271 | 3,263 | 28,664 |
| 33,633 | 133 | 19,743 | 5,266 | 3,235 | 28,377 |
| 33,634 | 133 | 19,684 | 5,249 | 3,227 | 28,293 |
| 33,635 | 130 | 19,677 | 5,246 | 3,235 | 28,288 |
| 33,636 | 130 | 19,985 | 5,326 | 3,278 | 28,719 |
| 33,637 | 125 | 19,804 | 5,292 | 3,253 | 28,474 |
| 33,638 | 140 | 20,240 | 5,373 | 3,313 | 29,066 |
| 33,639 | 138 | 20,415 | 5,409 | 3,324 | 29,286 |
| 33,640 | 140 | 20,295 | 5,398 | 3,310 | 29,143 |
| 33,641 | 140 | 20,258 | 5,392 | 3,314 | 29,104 |
| 33,642 | 135 | 20,122 | 5,365 | 3,312 | 28,934 |
| 33,643 | 135 | 19,894 | 5,344 | 3,281 | 28,654 |
| 33,644 | 134 | 19,806 | 5,321 | 3,260 | 28,521 |
| 33,645 | 137 | 20,495 | 5,451 | 3,339 | 29,422 |
| 33,646 | 138 | 20,507 | 5,431 | 3,355 | 29,431 |
| 33,647 | 138 | 20,275 | 5,375 | 3,314 | 29,102 |
| 33,648 | 142 | 20,498 | 5,429 | 3,325 | 29,394 |
| 33,649 | 147 | 20,293 | 5,363 | 3,293 | 29,096 |
| 33,650 | 142 | 20,028 | 5,338 | 3,261 | 28,769 |
| 33,651 | 142 | 20,318 | 5,445 | 3,331 | 29,236 |
| 33,652 | 140 | 19,876 | 5,310 | 3,241 | 28,567 |
| 33,653 | 141 | 20,032 | 5,356 | 3,259 | 28,788 |
| 33,654 | 138 | 20,295 | 5,417 | 3,295 | 29,145 |
| 33,655 | 138 | 20,273 | 5,417 | 3,304 | 29,132 |

|        |     |        |       |       |        |
|--------|-----|--------|-------|-------|--------|
| 33,656 | 138 | 20,702 | 5,536 | 3,353 | 29,729 |
| 33,657 | 142 | 20,800 | 5,539 | 3,366 | 29,847 |
| 33,658 | 145 | 20,943 | 5,540 | 3,381 | 30,009 |
| 33,659 | 141 | 20,843 | 5,550 | 3,378 | 29,912 |
| 33,660 | 136 | 20,662 | 5,556 | 3,359 | 29,713 |
| 33,661 | 138 | 20,755 | 5,541 | 3,358 | 29,792 |
| 33,662 | 143 | 20,969 | 5,527 | 3,358 | 29,997 |
| 33,663 | 152 | 21,108 | 5,525 | 3,350 | 30,135 |
| 33,664 | 151 | 21,027 | 5,486 | 3,325 | 29,989 |
| 33,665 | 150 | 20,991 | 5,468 | 3,309 | 29,918 |
| 33,666 | 149 | 21,064 | 5,472 | 3,298 | 29,983 |
| 33,667 | 149 | 21,062 | 5,509 | 3,300 | 30,020 |
| 33,668 | 152 | 21,250 | 5,528 | 3,325 | 30,255 |
| 33,669 | 152 | 21,391 | 5,544 | 3,339 | 30,426 |
| 33,670 | 164 | 21,393 | 5,555 | 3,329 | 30,441 |
| 33,671 | 163 | 21,163 | 5,477 | 3,302 | 30,105 |
| 33,672 | 161 | 21,512 | 5,574 | 3,350 | 30,597 |
| 33,673 | 164 | 21,931 | 5,689 | 3,386 | 31,170 |
| 33,674 | 161 | 21,620 | 5,612 | 3,353 | 30,746 |
| 33,675 | 162 | 21,874 | 5,641 | 3,381 | 31,058 |
| 33,676 | 163 | 21,560 | 5,572 | 3,349 | 30,644 |
| 33,677 | 165 | 21,596 | 5,584 | 3,358 | 30,703 |
| 33,678 | 166 | 21,571 | 5,585 | 3,358 | 30,680 |
| 33,679 | 165 | 21,758 | 5,636 | 3,393 | 30,952 |
| 33,680 | 163 | 21,649 | 5,594 | 3,363 | 30,769 |
| 33,681 | 167 | 21,811 | 5,590 | 3,334 | 30,902 |
| 33,682 | 175 | 21,855 | 5,592 | 3,322 | 30,944 |
| 33,683 | 175 | 21,883 | 5,591 | 3,329 | 30,978 |
| 33,684 | 176 | 22,144 | 5,638 | 3,368 | 31,326 |
| 33,685 | 176 | 22,154 | 5,627 | 3,385 | 31,342 |
| 33,686 | 175 | 22,036 | 5,621 | 3,368 | 31,200 |
| 33,687 | 176 | 22,360 | 5,682 | 3,434 | 31,652 |

|        |     |        |       |       |        |
|--------|-----|--------|-------|-------|--------|
| 33,688 | 167 | 22,651 | 5,779 | 3,489 | 32,086 |
| 33,689 | 162 | 22,474 | 5,727 | 3,469 | 31,832 |
| 33,690 | 163 | 22,508 | 5,723 | 3,459 | 31,853 |
| 33,691 | 163 | 22,731 | 5,757 | 3,504 | 32,155 |
| 33,692 | 169 | 22,712 | 5,745 | 3,464 | 32,090 |
| 33,693 | 168 | 22,766 | 5,724 | 3,470 | 32,128 |
| 33,694 | 171 | 22,942 | 5,792 | 3,504 | 32,409 |
| 33,695 | 168 | 22,951 | 5,806 | 3,524 | 32,449 |
| 33,696 | 172 | 22,898 | 5,793 | 3,522 | 32,385 |
| 33,697 | 157 | 22,315 | 5,646 | 3,430 | 31,548 |
| 33,698 | 159 | 22,551 | 5,678 | 3,465 | 31,853 |
| 33,699 | 163 | 22,839 | 5,692 | 3,485 | 32,179 |
| 33,700 | 167 | 22,936 | 5,688 | 3,498 | 32,289 |
| 33,701 | 167 | 23,018 | 5,668 | 3,492 | 32,345 |
| 33,702 | 168 | 23,231 | 5,742 | 3,523 | 32,664 |
| 33,703 | 161 | 23,030 | 5,704 | 3,504 | 32,399 |
| 33,704 | 166 | 23,155 | 5,723 | 3,522 | 32,566 |
| 33,705 | 168 | 23,273 | 5,700 | 3,510 | 32,651 |
| 33,706 | 169 | 23,211 | 5,687 | 3,514 | 32,581 |
| 33,707 | 170 | 23,202 | 5,666 | 3,524 | 32,562 |
| 33,708 | 167 | 23,433 | 5,685 | 3,544 | 32,829 |
| 33,709 | 169 | 23,222 | 5,665 | 3,553 | 32,609 |
| 33,710 | 169 | 23,084 | 5,545 | 3,506 | 32,304 |
| 33,711 | 167 | 23,106 | 5,487 | 3,474 | 32,234 |
| 33,712 | 170 | 23,219 | 5,523 | 3,490 | 32,402 |
| 33,713 | 166 | 23,059 | 5,486 | 3,464 | 32,175 |
| 33,714 | 156 | 22,788 | 5,410 | 3,425 | 31,779 |
| 33,715 | 155 | 22,765 | 5,379 | 3,426 | 31,725 |
| 33,716 | 157 | 22,628 | 5,364 | 3,419 | 31,568 |
| 33,717 | 159 | 22,488 | 5,339 | 3,430 | 31,416 |
| 33,718 | 168 | 22,546 | 5,359 | 3,420 | 31,493 |
| 33,719 | 165 | 22,409 | 5,367 | 3,426 | 31,367 |

|        |     |        |       |       |        |
|--------|-----|--------|-------|-------|--------|
| 33,720 | 171 | 22,611 | 5,383 | 3,460 | 31,625 |
| 33,721 | 157 | 22,421 | 5,333 | 3,415 | 31,326 |
| 33,722 | 164 | 22,771 | 5,401 | 3,469 | 31,805 |
| 33,723 | 166 | 22,760 | 5,366 | 3,465 | 31,757 |
| 33,724 | 166 | 22,468 | 5,306 | 3,432 | 31,372 |
| 33,725 | 166 | 22,629 | 5,315 | 3,434 | 31,544 |
| 33,726 | 166 | 22,695 | 5,332 | 3,454 | 31,647 |
| 33,727 | 163 | 22,597 | 5,324 | 3,432 | 31,516 |
| 33,728 | 163 | 22,610 | 5,312 | 3,416 | 31,501 |
| 33,729 | 164 | 22,939 | 5,370 | 3,477 | 31,950 |
| 33,730 | 161 | 22,759 | 5,339 | 3,465 | 31,724 |
| 33,731 | 159 | 22,616 | 5,344 | 3,470 | 31,589 |
| 33,732 | 153 | 22,574 | 5,349 | 3,487 | 31,563 |
| 33,733 | 153 | 22,572 | 5,336 | 3,497 | 31,558 |
| 33,734 | 159 | 22,590 | 5,319 | 3,475 | 31,543 |
| 33,735 | 164 | 22,664 | 5,346 | 3,455 | 31,629 |
| 33,736 | 164 | 22,664 | 5,360 | 3,473 | 31,661 |
| 33,737 | 167 | 22,636 | 5,339 | 3,458 | 31,600 |
| 33,738 | 165 | 22,554 | 5,329 | 3,459 | 31,507 |
| 33,739 | 165 | 22,719 | 5,358 | 3,470 | 31,712 |
| 33,740 | 166 | 22,771 | 5,390 | 3,491 | 31,818 |
| 33,741 | 160 | 22,661 | 5,394 | 3,477 | 31,692 |
| 33,742 | 162 | 22,905 | 5,469 | 3,519 | 32,055 |
| 33,743 | 163 | 22,779 | 5,438 | 3,504 | 31,884 |
| 33,744 | 159 | 22,719 | 5,423 | 3,502 | 31,803 |
| 33,745 | 161 | 23,016 | 5,470 | 3,527 | 32,174 |
| 33,746 | 165 | 23,045 | 5,478 | 3,532 | 32,220 |
| 33,747 | 166 | 22,999 | 5,492 | 3,532 | 32,189 |
| 33,748 | 166 | 22,707 | 5,449 | 3,503 | 31,825 |
| 33,749 | 167 | 22,812 | 5,484 | 3,541 | 32,004 |
| 33,750 | 158 | 22,177 | 5,404 | 3,480 | 31,219 |
| 33,751 | 158 | 22,649 | 5,481 | 3,553 | 31,841 |

|        |     |        |       |       |        |
|--------|-----|--------|-------|-------|--------|
| 33,752 | 159 | 22,444 | 5,418 | 3,510 | 31,531 |
| 33,753 | 160 | 22,690 | 5,438 | 3,543 | 31,831 |
| 33,754 | 158 | 22,975 | 5,505 | 3,590 | 32,228 |
| 33,755 | 159 | 23,185 | 5,573 | 3,630 | 32,547 |
| 33,756 | 158 | 23,290 | 5,634 | 3,689 | 32,771 |
| 33,757 | 158 | 23,108 | 5,595 | 3,670 | 32,531 |
| 33,758 | 159 | 23,074 | 5,625 | 3,658 | 32,516 |
| 33,759 | 150 | 23,219 | 5,616 | 3,643 | 32,628 |
| 33,760 | 150 | 23,241 | 5,627 | 3,645 | 32,663 |
| 33,761 | 148 | 23,179 | 5,641 | 3,633 | 32,601 |
| 33,762 | 148 | 23,068 | 5,645 | 3,653 | 32,514 |
| 33,763 | 148 | 23,297 | 5,705 | 3,670 | 32,820 |
| 33,764 | 151 | 22,523 | 5,554 | 3,554 | 31,782 |
| 33,765 | 151 | 22,779 | 5,556 | 3,584 | 32,070 |
| 33,766 | 148 | 22,852 | 5,543 | 3,605 | 32,148 |
| 33,767 | 148 | 23,145 | 5,586 | 3,616 | 32,495 |
| 33,768 | 138 | 23,289 | 5,628 | 3,653 | 32,708 |
| 33,769 | 139 | 23,011 | 5,533 | 3,598 | 32,281 |
| 33,770 | 139 | 22,829 | 5,499 | 3,558 | 32,025 |
| 33,771 | 140 | 23,075 | 5,576 | 3,593 | 32,384 |
| 33,772 | 140 | 22,959 | 5,550 | 3,582 | 32,231 |
| 33,773 | 132 | 22,800 | 5,522 | 3,578 | 32,032 |
| 33,774 | 128 | 22,392 | 5,439 | 3,522 | 31,481 |
| 33,775 | 133 | 22,669 | 5,485 | 3,544 | 31,831 |
| 33,776 | 136 | 22,520 | 5,475 | 3,514 | 31,645 |
| 33,777 | 136 | 22,316 | 5,408 | 3,502 | 31,362 |
| 33,778 | 131 | 22,280 | 5,385 | 3,494 | 31,290 |
| 33,779 | 139 | 22,697 | 5,461 | 3,532 | 31,829 |
| 33,780 | 143 | 22,508 | 5,392 | 3,471 | 31,514 |
| 33,781 | 143 | 22,618 | 5,395 | 3,472 | 31,628 |
| 33,782 | 141 | 22,739 | 5,404 | 3,469 | 31,753 |
| 33,783 | 144 | 22,856 | 5,422 | 3,468 | 31,890 |



|        |     |        |       |       |        |
|--------|-----|--------|-------|-------|--------|
| 33,784 | 144 | 22,894 | 5,414 | 3,464 | 31,916 |
| 33,785 | 132 | 22,590 | 5,331 | 3,438 | 31,491 |
| 33,786 | 133 | 22,790 | 5,370 | 3,450 | 31,743 |
| 33,787 | 133 | 23,005 | 5,401 | 3,477 | 32,016 |
| 33,788 | 133 | 22,621 | 5,307 | 3,399 | 31,460 |
| 33,789 | 136 | 22,933 | 5,359 | 3,436 | 31,864 |
| 33,790 | 127 | 22,510 | 5,242 | 3,379 | 31,258 |
| 33,791 | 130 | 22,444 | 5,194 | 3,363 | 31,131 |
| 33,792 | 133 | 21,579 | 4,930 | 3,187 | 29,829 |
| 33,793 | 132 | 21,766 | 4,965 | 3,212 | 30,075 |
| 33,794 | 125 | 21,979 | 5,008 | 3,238 | 30,350 |
| 33,795 | 126 | 21,980 | 5,003 | 3,233 | 30,342 |
| 33,796 | 127 | 22,330 | 5,057 | 3,309 | 30,823 |
| 33,797 | 124 | 22,154 | 4,970 | 3,267 | 30,515 |
| 33,798 | 120 | 21,866 | 4,897 | 3,221 | 30,104 |
| 33,799 | 119 | 21,649 | 4,870 | 3,202 | 29,840 |
| 33,800 | 116 | 21,769 | 4,925 | 3,218 | 30,028 |
| 33,801 | 115 | 21,636 | 4,941 | 3,234 | 29,926 |
| 33,802 | 115 | 21,398 | 4,906 | 3,185 | 29,604 |
| 33,803 | 111 | 21,173 | 4,847 | 3,184 | 29,315 |
| 33,804 | 110 | 21,253 | 4,870 | 3,194 | 29,427 |
| 33,805 | 111 | 21,239 | 4,876 | 3,196 | 29,422 |
| 33,806 | 108 | 20,420 | 4,626 | 3,038 | 28,192 |
| 33,807 | 108 | 20,559 | 4,625 | 3,021 | 28,313 |
| 33,808 | 108 | 20,757 | 4,684 | 3,042 | 28,591 |
| 33,809 | 109 | 20,806 | 4,691 | 3,054 | 28,660 |
| 33,810 | 116 | 21,162 | 4,760 | 3,099 | 29,137 |
| 33,811 | 121 | 20,509 | 4,581 | 2,975 | 28,186 |
| 33,812 | 126 | 20,664 | 4,638 | 3,014 | 28,442 |
| 33,813 | 126 | 20,895 | 4,716 | 3,059 | 28,796 |
| 33,814 | 126 | 20,943 | 4,698 | 3,048 | 28,815 |
| 33,815 | 125 | 21,203 | 4,764 | 3,095 | 29,187 |

|        |     |        |       |       |        |
|--------|-----|--------|-------|-------|--------|
| 33,816 | 127 | 21,142 | 4,792 | 3,081 | 29,142 |
| 33,817 | 129 | 21,209 | 4,800 | 3,058 | 29,196 |
| 33,818 | 130 | 20,926 | 4,757 | 3,023 | 28,836 |
| 33,819 | 130 | 21,002 | 4,753 | 3,014 | 28,899 |
| 33,820 | 128 | 20,849 | 4,725 | 2,977 | 28,679 |
| 33,821 | 125 | 20,712 | 4,688 | 2,956 | 28,481 |
| 33,822 | 129 | 21,965 | 4,909 | 3,107 | 30,110 |
| 33,823 | 137 | 22,006 | 4,947 | 3,117 | 30,207 |
| 33,824 | 137 | 22,053 | 4,940 | 3,108 | 30,238 |
| 33,825 | 131 | 22,467 | 5,054 | 3,181 | 30,833 |
| 33,826 | 126 | 22,297 | 5,021 | 3,181 | 30,625 |
| 33,827 | 122 | 21,594 | 4,884 | 3,060 | 29,660 |
| 33,828 | 126 | 21,819 | 4,918 | 3,102 | 29,965 |
| 33,829 | 126 | 22,074 | 4,958 | 3,142 | 30,300 |
| 33,830 | 124 | 21,977 | 4,983 | 3,150 | 30,234 |
| 33,831 | 120 | 22,062 | 5,024 | 3,197 | 30,403 |
| 33,832 | 124 | 21,994 | 5,065 | 3,226 | 30,409 |
| 33,833 | 127 | 22,165 | 5,139 | 3,294 | 30,725 |
| 33,834 | 127 | 21,976 | 5,199 | 3,314 | 30,616 |
| 33,835 | 134 | 22,154 | 5,304 | 3,358 | 30,950 |
| 33,836 | 131 | 21,950 | 5,250 | 3,336 | 30,667 |
| 33,837 | 133 | 21,759 | 5,208 | 3,323 | 30,423 |
| 33,838 | 130 | 21,428 | 5,162 | 3,304 | 30,024 |
| 33,839 | 138 | 22,018 | 5,404 | 3,427 | 30,987 |
| 33,840 | 139 | 22,269 | 5,463 | 3,461 | 31,332 |
| 33,841 | 140 | 22,056 | 5,434 | 3,435 | 31,065 |
| 33,842 | 138 | 22,042 | 5,441 | 3,427 | 31,048 |
| 33,843 | 137 | 22,164 | 5,483 | 3,459 | 31,243 |
| 33,844 | 138 | 21,918 | 5,448 | 3,446 | 30,950 |
| 33,845 | 144 | 22,098 | 5,480 | 3,467 | 31,189 |
| 33,846 | 149 | 22,404 | 5,543 | 3,495 | 31,591 |
| 33,847 | 148 | 22,408 | 5,575 | 3,504 | 31,635 |

|        |     |        |       |       |        |
|--------|-----|--------|-------|-------|--------|
| 33,848 | 149 | 22,606 | 5,627 | 3,568 | 31,950 |
| 33,849 | 147 | 22,722 | 5,580 | 3,565 | 32,014 |
| 33,850 | 147 | 22,856 | 5,561 | 3,548 | 32,112 |
| 33,851 | 148 | 23,108 | 5,577 | 3,550 | 32,383 |
| 33,852 | 150 | 22,989 | 5,493 | 3,500 | 32,132 |
| 33,853 | 152 | 23,121 | 5,512 | 3,494 | 32,279 |
| 33,854 | 152 | 23,242 | 5,513 | 3,508 | 32,415 |
| 33,855 | 151 | 23,127 | 5,514 | 3,517 | 32,309 |
| 33,856 | 158 | 23,407 | 5,553 | 3,552 | 32,670 |
| 33,857 | 155 | 23,218 | 5,516 | 3,538 | 32,427 |
| 33,858 | 155 | 22,954 | 5,478 | 3,517 | 32,104 |
| 33,859 | 155 | 23,131 | 5,520 | 3,524 | 32,330 |
| 33,860 | 152 | 23,154 | 5,502 | 3,531 | 32,339 |
| 33,861 | 153 | 23,552 | 5,541 | 3,560 | 32,806 |
| 33,862 | 150 | 23,610 | 5,555 | 3,570 | 32,885 |
| 33,863 | 145 | 23,899 | 5,571 | 3,585 | 33,200 |
| 33,864 | 144 | 23,672 | 5,457 | 3,522 | 32,795 |
| 33,865 | 145 | 23,913 | 5,520 | 3,554 | 33,132 |
| 33,866 | 145 | 23,906 | 5,499 | 3,558 | 33,108 |
| 33,867 | 147 | 24,271 | 5,535 | 3,591 | 33,544 |
| 33,868 | 145 | 24,221 | 5,501 | 3,583 | 33,450 |
| 33,869 | 146 | 24,558 | 5,570 | 3,611 | 33,885 |
| 33,870 | 150 | 24,792 | 5,624 | 3,662 | 34,228 |
| 33,871 | 151 | 24,435 | 5,550 | 3,609 | 33,745 |
| 33,872 | 151 | 24,175 | 5,493 | 3,563 | 33,382 |
| 33,873 | 149 | 24,575 | 5,578 | 3,646 | 33,948 |
| 33,874 | 150 | 24,683 | 5,593 | 3,672 | 34,098 |
| 33,875 | 156 | 24,650 | 5,576 | 3,681 | 34,063 |
| 33,876 | 158 | 24,669 | 5,562 | 3,676 | 34,065 |
| 33,877 | 161 | 24,825 | 5,570 | 3,703 | 34,259 |
| 33,878 | 158 | 24,798 | 5,558 | 3,715 | 34,229 |
| 33,879 | 152 | 25,099 | 5,645 | 3,738 | 34,634 |

|        |     |        |       |       |        |
|--------|-----|--------|-------|-------|--------|
| 33,880 | 157 | 25,279 | 5,654 | 3,768 | 34,858 |
| 33,881 | 157 | 25,592 | 5,707 | 3,768 | 35,224 |
| 33,882 | 154 | 25,600 | 5,676 | 3,746 | 35,176 |
| 33,883 | 151 | 25,841 | 5,735 | 3,764 | 35,491 |
| 33,884 | 150 | 25,197 | 5,519 | 3,627 | 34,493 |
| 33,885 | 147 | 25,623 | 5,582 | 3,667 | 35,019 |
| 33,886 | 143 | 26,052 | 5,611 | 3,700 | 35,506 |
| 33,887 | 144 | 26,029 | 5,594 | 3,675 | 35,442 |
| 33,888 | 139 | 25,945 | 5,536 | 3,656 | 35,276 |
| 33,889 | 132 | 25,925 | 5,473 | 3,606 | 35,136 |
| 33,890 | 136 | 26,181 | 5,553 | 3,627 | 35,497 |
| 33,891 | 133 | 25,924 | 5,495 | 3,590 | 35,142 |
| 33,892 | 134 | 26,020 | 5,519 | 3,606 | 35,279 |
| 33,893 | 134 | 26,032 | 5,521 | 3,610 | 35,297 |
| 33,894 | 135 | 26,015 | 5,477 | 3,580 | 35,207 |
| 33,895 | 138 | 26,034 | 5,480 | 3,574 | 35,226 |
| 33,896 | 132 | 26,323 | 5,532 | 3,610 | 35,597 |
| 33,897 | 127 | 26,211 | 5,490 | 3,584 | 35,412 |
| 33,898 | 129 | 26,439 | 5,520 | 3,582 | 35,670 |
| 33,899 | 135 | 26,503 | 5,534 | 3,580 | 35,752 |
| 33,900 | 139 | 26,270 | 5,524 | 3,550 | 35,483 |
| 33,901 | 140 | 26,272 | 5,532 | 3,561 | 35,505 |
| 33,902 | 142 | 26,254 | 5,535 | 3,570 | 35,501 |
| 33,903 | 145 | 26,375 | 5,563 | 3,629 | 35,712 |
| 33,904 | 146 | 26,441 | 5,568 | 3,636 | 35,791 |
| 33,905 | 146 | 26,294 | 5,534 | 3,609 | 35,583 |
| 33,906 | 152 | 26,637 | 5,595 | 3,632 | 36,016 |
| 33,907 | 146 | 26,662 | 5,594 | 3,638 | 36,040 |
| 33,908 | 148 | 26,815 | 5,644 | 3,677 | 36,284 |
| 33,909 | 145 | 26,837 | 5,629 | 3,682 | 36,293 |
| 33,910 | 147 | 26,942 | 5,662 | 3,703 | 36,454 |
| 33,911 | 148 | 26,995 | 5,719 | 3,730 | 36,592 |

|        |     |        |       |       |        |
|--------|-----|--------|-------|-------|--------|
| 33,912 | 150 | 27,193 | 5,802 | 3,805 | 36,950 |
| 33,913 | 148 | 26,864 | 5,744 | 3,777 | 36,533 |
| 33,914 | 152 | 26,990 | 5,782 | 3,775 | 36,699 |
| 33,915 | 155 | 26,874 | 5,783 | 3,793 | 36,605 |
| 33,916 | 154 | 26,649 | 5,750 | 3,774 | 36,327 |
| 33,917 | 152 | 26,630 | 5,782 | 3,795 | 36,359 |
| 33,918 | 150 | 26,601 | 5,828 | 3,828 | 36,407 |
| 33,919 | 149 | 26,537 | 5,833 | 3,819 | 36,338 |
| 33,920 | 149 | 26,520 | 5,842 | 3,832 | 36,343 |
| 33,921 | 142 | 26,416 | 5,790 | 3,841 | 36,189 |
| 33,922 | 142 | 26,210 | 5,775 | 3,844 | 35,971 |
| 33,923 | 143 | 26,187 | 5,789 | 3,856 | 35,975 |
| 33,924 | 146 | 26,435 | 5,850 | 3,891 | 36,322 |
| 33,925 | 133 | 26,317 | 5,811 | 3,868 | 36,129 |
| 33,926 | 136 | 26,427 | 5,835 | 3,861 | 36,259 |
| 33,927 | 133 | 26,281 | 5,834 | 3,863 | 36,111 |
| 33,928 | 135 | 26,823 | 5,903 | 3,942 | 36,803 |
| 33,929 | 135 | 26,814 | 5,870 | 3,944 | 36,763 |
| 33,930 | 134 | 26,599 | 5,870 | 3,932 | 36,535 |
| 33,931 | 131 | 26,510 | 5,864 | 3,914 | 36,419 |
| 33,932 | 132 | 26,375 | 5,820 | 3,895 | 36,222 |
| 33,933 | 131 | 26,101 | 5,764 | 3,868 | 35,864 |
| 33,934 | 132 | 26,089 | 5,763 | 3,861 | 35,845 |
| 33,935 | 127 | 25,890 | 5,730 | 3,860 | 35,607 |
| 33,936 | 130 | 26,041 | 5,752 | 3,863 | 35,786 |
| 33,937 | 135 | 25,815 | 5,739 | 3,848 | 35,537 |
| 33,938 | 131 | 25,494 | 5,671 | 3,810 | 35,106 |
| 33,939 | 137 | 25,316 | 5,672 | 3,796 | 34,921 |
| 33,940 | 136 | 25,241 | 5,654 | 3,811 | 34,842 |
| 33,941 | 143 | 25,344 | 5,636 | 3,804 | 34,927 |
| 33,942 | 142 | 25,156 | 5,582 | 3,779 | 34,659 |
| 33,943 | 141 | 25,092 | 5,558 | 3,785 | 34,576 |

|        |     |        |       |       |        |
|--------|-----|--------|-------|-------|--------|
| 33,944 | 141 | 25,062 | 5,565 | 3,781 | 34,549 |
| 33,945 | 139 | 25,056 | 5,581 | 3,778 | 34,554 |
| 33,946 | 138 | 24,988 | 5,595 | 3,788 | 34,509 |
| 33,947 | 140 | 25,049 | 5,660 | 3,789 | 34,638 |
| 33,948 | 141 | 24,936 | 5,700 | 3,766 | 34,543 |
| 33,949 | 145 | 24,628 | 5,658 | 3,746 | 34,177 |
| 33,950 | 138 | 24,436 | 5,644 | 3,727 | 33,945 |
| 33,951 | 134 | 24,715 | 5,702 | 3,797 | 34,348 |
| 33,952 | 130 | 24,414 | 5,675 | 3,765 | 33,984 |
| 33,953 | 128 | 24,463 | 5,673 | 3,772 | 34,036 |
| 33,954 | 122 | 24,567 | 5,666 | 3,763 | 34,118 |
| 33,955 | 121 | 24,212 | 5,627 | 3,737 | 33,697 |
| 33,956 | 123 | 24,129 | 5,623 | 3,731 | 33,606 |
| 33,957 | 120 | 24,228 | 5,636 | 3,758 | 33,742 |
| 33,958 | 121 | 23,858 | 5,578 | 3,718 | 33,275 |
| 33,959 | 118 | 23,688 | 5,578 | 3,681 | 33,065 |
| 33,960 | 116 | 23,639 | 5,510 | 3,691 | 32,956 |
| 33,961 | 117 | 23,668 | 5,548 | 3,703 | 33,036 |
| 33,962 | 117 | 23,551 | 5,575 | 3,692 | 32,935 |
| 33,963 | 113 | 23,533 | 5,522 | 3,651 | 32,819 |
| 33,964 | 114 | 23,446 | 5,528 | 3,655 | 32,743 |
| 33,965 | 111 | 23,324 | 5,482 | 3,650 | 32,567 |
| 33,966 | 103 | 23,263 | 5,494 | 3,639 | 32,499 |
| 33,967 | 102 | 23,279 | 5,475 | 3,636 | 32,492 |
| 33,968 | 107 | 23,467 | 5,513 | 3,656 | 32,743 |
| 33,969 | 109 | 23,116 | 5,414 | 3,585 | 32,224 |
| 33,970 | 110 | 23,097 | 5,419 | 3,598 | 32,224 |
| 33,971 | 113 | 22,843 | 5,391 | 3,526 | 31,873 |
| 33,972 | 115 | 22,806 | 5,383 | 3,488 | 31,792 |
| 33,973 | 118 | 22,954 | 5,425 | 3,503 | 32,000 |
| 33,974 | 119 | 22,662 | 5,347 | 3,424 | 31,552 |
| 33,975 | 115 | 22,214 | 5,298 | 3,410 | 31,037 |

|        |     |        |       |       |        |
|--------|-----|--------|-------|-------|--------|
| 33,976 | 120 | 22,143 | 5,341 | 3,425 | 31,029 |
| 33,977 | 121 | 21,635 | 5,276 | 3,367 | 30,399 |
| 33,978 | 120 | 21,263 | 5,202 | 3,314 | 29,899 |
| 33,979 | 122 | 20,975 | 5,144 | 3,241 | 29,482 |
| 33,980 | 122 | 21,123 | 5,178 | 3,276 | 29,699 |
| 33,981 | 121 | 21,329 | 5,211 | 3,305 | 29,966 |
| 33,982 | 118 | 20,972 | 5,134 | 3,260 | 29,484 |
| 33,983 | 121 | 20,892 | 5,139 | 3,253 | 29,405 |
| 33,984 | 121 | 20,893 | 5,133 | 3,242 | 29,389 |
| 33,985 | 120 | 20,817 | 5,137 | 3,255 | 29,329 |
| 33,986 | 119 | 20,907 | 5,152 | 3,276 | 29,454 |
| 33,987 | 118 | 21,236 | 5,219 | 3,335 | 29,908 |
| 33,988 | 115 | 21,213 | 5,214 | 3,342 | 29,884 |
| 33,989 | 109 | 20,998 | 5,102 | 3,296 | 29,505 |
| 33,990 | 109 | 21,207 | 5,147 | 3,317 | 29,780 |
| 33,991 | 104 | 21,252 | 5,165 | 3,322 | 29,843 |
| 33,992 | 101 | 21,136 | 5,140 | 3,314 | 29,691 |
| 33,993 | 109 | 21,324 | 5,174 | 3,308 | 29,915 |
| 33,994 | 110 | 21,469 | 5,217 | 3,329 | 30,125 |
| 33,995 | 106 | 21,341 | 5,170 | 3,319 | 29,936 |
| 33,996 | 105 | 21,475 | 5,215 | 3,341 | 30,136 |
| 33,997 | 106 | 21,444 | 5,188 | 3,323 | 30,061 |
| 33,998 | 104 | 21,291 | 5,115 | 3,301 | 29,811 |
| 33,999 | 105 | 21,416 | 5,107 | 3,337 | 29,965 |
| 34,000 | 101 | 21,149 | 5,024 | 3,297 | 29,571 |
| 34,001 | 102 | 21,004 | 4,984 | 3,260 | 29,350 |
| 34,002 | 106 | 21,297 | 5,013 | 3,293 | 29,709 |
| 34,003 | 105 | 21,292 | 4,999 | 3,254 | 29,650 |
| 34,004 | 107 | 21,277 | 5,018 | 3,251 | 29,653 |
| 34,005 | 106 | 21,186 | 5,051 | 3,253 | 29,596 |
| 34,006 | 108 | 21,551 | 5,137 | 3,294 | 30,090 |
| 34,007 | 106 | 21,250 | 5,106 | 3,267 | 29,729 |

|        |     |        |       |       |        |
|--------|-----|--------|-------|-------|--------|
| 34,008 | 113 | 21,258 | 5,089 | 3,278 | 29,738 |
| 34,009 | 119 | 21,667 | 5,174 | 3,336 | 30,296 |
| 34,010 | 120 | 21,531 | 5,171 | 3,363 | 30,185 |
| 34,011 | 123 | 21,288 | 5,129 | 3,325 | 29,865 |
| 34,012 | 122 | 21,047 | 5,095 | 3,314 | 29,578 |
| 34,013 | 123 | 21,112 | 5,100 | 3,334 | 29,669 |
| 34,014 | 123 | 20,803 | 5,075 | 3,313 | 29,314 |
| 34,015 | 122 | 21,172 | 5,224 | 3,406 | 29,924 |
| 34,016 | 122 | 21,197 | 5,228 | 3,438 | 29,985 |
| 34,017 | 128 | 21,493 | 5,247 | 3,459 | 30,327 |
| 34,018 | 125 | 21,627 | 5,265 | 3,468 | 30,485 |
| 34,019 | 126 | 21,838 | 5,314 | 3,481 | 30,759 |
| 34,020 | 127 | 21,765 | 5,286 | 3,479 | 30,657 |
| 34,021 | 127 | 21,760 | 5,303 | 3,491 | 30,681 |
| 34,022 | 125 | 21,615 | 5,294 | 3,518 | 30,552 |
| 34,023 | 124 | 21,690 | 5,321 | 3,529 | 30,664 |
| 34,024 | 123 | 21,927 | 5,464 | 3,591 | 31,105 |
| 34,025 | 129 | 21,914 | 5,402 | 3,569 | 31,014 |
| 34,026 | 127 | 21,990 | 5,380 | 3,553 | 31,050 |
| 34,027 | 127 | 21,966 | 5,380 | 3,545 | 31,018 |
| 34,028 | 121 | 22,118 | 5,446 | 3,590 | 31,275 |
| 34,029 | 117 | 21,889 | 5,381 | 3,560 | 30,947 |
| 34,030 | 117 | 21,794 | 5,371 | 3,558 | 30,840 |
| 34,031 | 120 | 21,988 | 5,443 | 3,600 | 31,151 |
| 34,032 | 123 | 22,022 | 5,488 | 3,591 | 31,224 |
| 34,033 | 119 | 21,872 | 5,438 | 3,569 | 30,998 |
| 34,034 | 126 | 22,009 | 5,466 | 3,591 | 31,192 |
| 34,035 | 129 | 22,091 | 5,501 | 3,563 | 31,284 |
| 34,036 | 132 | 22,022 | 5,520 | 3,566 | 31,240 |
| 34,037 | 135 | 22,204 | 5,546 | 3,605 | 31,490 |
| 34,038 | 138 | 22,285 | 5,550 | 3,608 | 31,581 |
| 34,039 | 136 | 22,121 | 5,517 | 3,571 | 31,345 |



|        |     |        |       |       |        |
|--------|-----|--------|-------|-------|--------|
| 34,040 | 144 | 21,986 | 5,508 | 3,550 | 31,188 |
| 34,041 | 145 | 22,285 | 5,575 | 3,599 | 31,604 |
| 34,042 | 142 | 22,653 | 5,709 | 3,661 | 32,165 |
| 34,043 | 146 | 22,717 | 5,742 | 3,678 | 32,283 |
| 34,044 | 144 | 22,499 | 5,714 | 3,665 | 32,022 |
| 34,045 | 149 | 23,188 | 5,865 | 3,756 | 32,958 |
| 34,046 | 152 | 23,563 | 5,927 | 3,798 | 33,440 |
| 34,047 | 156 | 23,321 | 5,886 | 3,764 | 33,127 |
| 34,048 | 155 | 23,112 | 5,854 | 3,747 | 32,868 |
| 34,049 | 156 | 23,848 | 6,058 | 3,894 | 33,956 |
| 34,050 | 157 | 24,188 | 6,160 | 3,933 | 34,438 |
| 34,051 | 150 | 24,328 | 6,234 | 3,956 | 34,668 |
| 34,052 | 149 | 24,006 | 6,214 | 3,919 | 34,288 |
| 34,053 | 149 | 24,282 | 6,272 | 3,962 | 34,665 |
| 34,054 | 148 | 24,290 | 6,297 | 3,974 | 34,709 |
| 34,055 | 156 | 24,416 | 6,319 | 4,002 | 34,893 |
| 34,056 | 158 | 24,769 | 6,379 | 4,043 | 35,349 |
| 34,057 | 156 | 24,524 | 6,275 | 3,980 | 34,935 |
| 34,058 | 156 | 24,754 | 6,311 | 4,011 | 35,232 |
| 34,059 | 149 | 24,841 | 6,367 | 4,022 | 35,379 |
| 34,060 | 143 | 24,814 | 6,368 | 4,005 | 35,330 |
| 34,061 | 140 | 24,763 | 6,389 | 3,993 | 35,285 |
| 34,062 | 139 | 24,911 | 6,415 | 3,978 | 35,443 |
| 34,063 | 142 | 24,972 | 6,390 | 3,941 | 35,445 |
| 34,064 | 142 | 25,132 | 6,400 | 3,946 | 35,620 |
| 34,065 | 149 | 25,314 | 6,422 | 3,945 | 35,830 |
| 34,066 | 149 | 25,180 | 6,415 | 3,924 | 35,668 |
| 34,067 | 148 | 25,135 | 6,458 | 3,932 | 35,673 |
| 34,068 | 144 | 25,059 | 6,474 | 3,916 | 35,593 |
| 34,069 | 147 | 24,728 | 6,464 | 3,896 | 35,235 |
| 34,070 | 147 | 24,718 | 6,461 | 3,923 | 35,249 |
| 34,071 | 145 | 24,662 | 6,455 | 3,926 | 35,188 |

|        |     |        |       |       |        |
|--------|-----|--------|-------|-------|--------|
| 34,072 | 142 | 24,638 | 6,427 | 3,901 | 35,108 |
| 34,073 | 144 | 24,674 | 6,460 | 3,910 | 35,188 |
| 34,074 | 144 | 24,549 | 6,409 | 3,876 | 34,978 |
| 34,075 | 144 | 24,719 | 6,402 | 3,910 | 35,175 |
| 34,076 | 145 | 24,793 | 6,453 | 3,940 | 35,331 |
| 34,077 | 146 | 24,687 | 6,444 | 3,919 | 35,196 |
| 34,078 | 147 | 24,820 | 6,470 | 3,934 | 35,371 |
| 34,079 | 147 | 24,783 | 6,479 | 3,944 | 35,353 |
| 34,080 | 152 | 24,830 | 6,520 | 3,971 | 35,473 |
| 34,081 | 150 | 24,985 | 6,577 | 3,985 | 35,697 |
| 34,082 | 155 | 24,848 | 6,538 | 3,966 | 35,507 |
| 34,083 | 157 | 24,808 | 6,543 | 3,961 | 35,469 |
| 34,084 | 155 | 24,805 | 6,552 | 3,956 | 35,468 |
| 34,085 | 154 | 24,752 | 6,565 | 3,937 | 35,408 |
| 34,086 | 158 | 24,743 | 6,545 | 3,953 | 35,399 |
| 34,087 | 165 | 24,583 | 6,493 | 3,902 | 35,143 |
| 34,088 | 166 | 24,635 | 6,505 | 3,906 | 35,212 |
| 34,089 | 164 | 24,170 | 6,432 | 3,866 | 34,632 |
| 34,090 | 163 | 24,139 | 6,438 | 3,873 | 34,613 |
| 34,091 | 163 | 23,938 | 6,404 | 3,844 | 34,349 |
| 34,092 | 165 | 23,889 | 6,391 | 3,854 | 34,299 |
| 34,093 | 162 | 23,709 | 6,384 | 3,863 | 34,118 |
| 34,094 | 163 | 23,461 | 6,411 | 3,893 | 33,928 |
| 34,095 | 163 | 23,322 | 6,492 | 3,919 | 33,896 |
| 34,096 | 170 | 23,160 | 6,496 | 3,946 | 33,772 |
| 34,097 | 169 | 22,955 | 6,501 | 3,932 | 33,557 |
| 34,098 | 171 | 23,107 | 6,512 | 3,947 | 33,737 |
| 34,099 | 186 | 23,074 | 6,529 | 3,916 | 33,705 |
| 34,100 | 187 | 22,944 | 6,515 | 3,909 | 33,555 |
| 34,101 | 188 | 22,865 | 6,493 | 3,932 | 33,478 |
| 34,102 | 188 | 22,855 | 6,502 | 3,923 | 33,468 |
| 34,103 | 188 | 22,472 | 6,382 | 3,884 | 32,926 |

|        |     |        |       |       |        |
|--------|-----|--------|-------|-------|--------|
| 34,104 | 190 | 22,513 | 6,425 | 3,876 | 33,004 |
| 34,105 | 183 | 22,485 | 6,417 | 3,863 | 32,948 |
| 34,106 | 183 | 22,356 | 6,380 | 3,846 | 32,765 |
| 34,107 | 186 | 22,311 | 6,402 | 3,880 | 32,779 |
| 34,108 | 184 | 21,972 | 6,376 | 3,835 | 32,367 |
| 34,109 | 188 | 22,044 | 6,412 | 3,839 | 32,483 |
| 34,110 | 185 | 21,668 | 6,327 | 3,776 | 31,956 |
| 34,111 | 187 | 21,581 | 6,310 | 3,780 | 31,858 |
| 34,112 | 185 | 21,384 | 6,195 | 3,733 | 31,497 |
| 34,113 | 183 | 21,433 | 6,262 | 3,842 | 31,720 |
| 34,114 | 180 | 20,989 | 6,136 | 3,774 | 31,079 |
| 34,115 | 177 | 20,692 | 6,105 | 3,770 | 30,744 |
| 34,116 | 170 | 20,721 | 6,203 | 3,832 | 30,926 |
| 34,117 | 171 | 20,794 | 6,238 | 3,850 | 31,053 |
| 34,118 | 171 | 20,913 | 6,260 | 3,871 | 31,215 |
| 34,119 | 170 | 21,029 | 6,252 | 3,869 | 31,320 |
| 34,120 | 169 | 21,082 | 6,249 | 3,855 | 31,355 |
| 34,121 | 169 | 20,464 | 6,140 | 3,743 | 30,516 |
| 34,122 | 169 | 20,681 | 6,197 | 3,775 | 30,822 |
| 34,123 | 168 | 20,762 | 6,214 | 3,784 | 30,928 |
| 34,124 | 167 | 20,931 | 6,244 | 3,807 | 31,149 |
| 34,125 | 166 | 20,896 | 6,225 | 3,828 | 31,115 |
| 34,126 | 165 | 20,931 | 6,214 | 3,822 | 31,132 |
| 34,127 | 154 | 20,533 | 6,093 | 3,781 | 30,561 |
| 34,128 | 152 | 20,291 | 6,062 | 3,740 | 30,245 |
| 34,129 | 158 | 20,593 | 6,091 | 3,749 | 30,591 |
| 34,130 | 156 | 20,977 | 6,171 | 3,795 | 31,099 |
| 34,131 | 159 | 20,985 | 6,187 | 3,812 | 31,143 |
| 34,132 | 160 | 20,846 | 6,166 | 3,814 | 30,986 |
| 34,133 | 154 | 20,694 | 6,106 | 3,787 | 30,741 |
| 34,134 | 161 | 20,709 | 6,123 | 3,818 | 30,811 |
| 34,135 | 164 | 20,751 | 6,149 | 3,840 | 30,904 |

|        |     |        |       |       |        |
|--------|-----|--------|-------|-------|--------|
| 34,136 | 163 | 20,716 | 6,123 | 3,825 | 30,827 |
| 34,137 | 160 | 20,832 | 6,152 | 3,852 | 30,996 |
| 34,138 | 149 | 20,579 | 6,063 | 3,811 | 30,602 |
| 34,139 | 150 | 20,601 | 6,062 | 3,811 | 30,624 |
| 34,140 | 150 | 20,641 | 6,067 | 3,808 | 30,666 |
| 34,141 | 150 | 20,541 | 6,025 | 3,786 | 30,502 |
| 34,142 | 144 | 20,450 | 6,027 | 3,776 | 30,397 |
| 34,143 | 140 | 20,609 | 6,051 | 3,784 | 30,584 |
| 34,144 | 140 | 20,493 | 5,907 | 3,669 | 30,209 |
| 34,145 | 145 | 20,912 | 5,978 | 3,710 | 30,745 |
| 34,146 | 152 | 21,073 | 5,961 | 3,701 | 30,887 |
| 34,147 | 145 | 21,079 | 5,927 | 3,666 | 30,817 |
| 34,148 | 143 | 20,542 | 5,802 | 3,598 | 30,085 |
| 34,149 | 134 | 20,536 | 5,765 | 3,583 | 30,018 |
| 34,150 | 119 | 20,284 | 5,679 | 3,566 | 29,648 |
| 34,151 | 121 | 20,286 | 5,688 | 3,560 | 29,655 |
| 34,152 | 122 | 20,026 | 5,652 | 3,516 | 29,316 |
| 34,153 | 121 | 19,790 | 5,581 | 3,476 | 28,968 |
| 34,154 | 121 | 20,207 | 5,720 | 3,560 | 29,608 |
| 34,155 | 123 | 20,237 | 5,699 | 3,564 | 29,623 |
| 34,156 | 121 | 20,260 | 5,698 | 3,550 | 29,629 |
| 34,157 | 123 | 20,030 | 5,644 | 3,500 | 29,297 |
| 34,158 | 125 | 20,322 | 5,704 | 3,531 | 29,682 |
| 34,159 | 125 | 20,486 | 5,689 | 3,541 | 29,841 |
| 34,160 | 121 | 20,505 | 5,679 | 3,529 | 29,834 |
| 34,161 | 121 | 20,438 | 5,668 | 3,521 | 29,748 |
| 34,162 | 125 | 20,619 | 5,686 | 3,503 | 29,933 |
| 34,163 | 128 | 20,645 | 5,660 | 3,450 | 29,883 |
| 34,164 | 128 | 20,445 | 5,608 | 3,394 | 29,575 |
| 34,165 | 137 | 21,082 | 5,739 | 3,475 | 30,433 |
| 34,166 | 137 | 21,052 | 5,670 | 3,447 | 30,306 |
| 34,167 | 140 | 21,317 | 5,717 | 3,451 | 30,625 |

|        |     |        |       |       |        |
|--------|-----|--------|-------|-------|--------|
| 34,168 | 141 | 21,480 | 5,736 | 3,470 | 30,827 |
| 34,169 | 140 | 21,152 | 5,631 | 3,406 | 30,329 |
| 34,170 | 141 | 20,966 | 5,587 | 3,373 | 30,067 |
| 34,171 | 144 | 20,820 | 5,529 | 3,348 | 29,841 |
| 34,172 | 154 | 21,472 | 5,670 | 3,482 | 30,778 |
| 34,173 | 153 | 21,350 | 5,619 | 3,454 | 30,576 |
| 34,174 | 155 | 21,524 | 5,639 | 3,462 | 30,780 |
| 34,175 | 154 | 21,409 | 5,606 | 3,436 | 30,605 |
| 34,176 | 154 | 21,346 | 5,592 | 3,412 | 30,504 |
| 34,177 | 157 | 21,582 | 5,670 | 3,423 | 30,832 |
| 34,178 | 153 | 21,371 | 5,615 | 3,363 | 30,502 |
| 34,179 | 152 | 21,383 | 5,617 | 3,383 | 30,535 |
| 34,180 | 147 | 21,475 | 5,639 | 3,384 | 30,645 |
| 34,181 | 145 | 21,596 | 5,637 | 3,375 | 30,753 |
| 34,182 | 146 | 21,206 | 5,533 | 3,290 | 30,175 |
| 34,183 | 147 | 21,460 | 5,547 | 3,304 | 30,458 |
| 34,184 | 144 | 21,722 | 5,577 | 3,326 | 30,769 |
| 34,185 | 141 | 21,873 | 5,581 | 3,326 | 30,921 |
| 34,186 | 145 | 22,087 | 5,590 | 3,345 | 31,167 |
| 34,187 | 150 | 21,948 | 5,536 | 3,314 | 30,948 |
| 34,188 | 149 | 21,998 | 5,556 | 3,304 | 31,007 |
| 34,189 | 151 | 21,805 | 5,519 | 3,267 | 30,742 |
| 34,190 | 147 | 21,654 | 5,509 | 3,247 | 30,557 |
| 34,191 | 147 | 22,633 | 5,774 | 3,420 | 31,974 |
| 34,192 | 150 | 22,689 | 5,789 | 3,442 | 32,070 |
| 34,193 | 151 | 22,831 | 5,825 | 3,475 | 32,282 |
| 34,194 | 151 | 22,674 | 5,816 | 3,460 | 32,101 |
| 34,195 | 147 | 22,787 | 5,892 | 3,492 | 32,318 |
| 34,196 | 143 | 22,709 | 5,918 | 3,498 | 32,268 |
| 34,197 | 131 | 22,300 | 5,831 | 3,463 | 31,725 |
| 34,198 | 131 | 22,209 | 5,817 | 3,442 | 31,599 |
| 34,199 | 130 | 22,200 | 5,844 | 3,440 | 31,614 |

|        |     |        |       |       |        |
|--------|-----|--------|-------|-------|--------|
| 34,200 | 130 | 22,162 | 5,882 | 3,419 | 31,593 |
| 34,201 | 131 | 22,108 | 5,839 | 3,391 | 31,469 |
| 34,202 | 129 | 22,082 | 5,822 | 3,396 | 31,429 |
| 34,203 | 132 | 22,145 | 5,775 | 3,370 | 31,422 |
| 34,204 | 143 | 22,024 | 5,759 | 3,356 | 31,282 |
| 34,205 | 142 | 22,149 | 5,784 | 3,373 | 31,448 |
| 34,206 | 149 | 22,194 | 5,818 | 3,376 | 31,537 |
| 34,207 | 149 | 22,158 | 5,826 | 3,384 | 31,517 |
| 34,208 | 150 | 22,485 | 5,913 | 3,434 | 31,982 |
| 34,209 | 151 | 22,488 | 5,888 | 3,424 | 31,951 |
| 34,210 | 154 | 22,631 | 5,934 | 3,443 | 32,162 |
| 34,211 | 162 | 22,605 | 5,911 | 3,447 | 32,125 |
| 34,212 | 162 | 22,619 | 5,905 | 3,436 | 32,122 |
| 34,213 | 156 | 22,599 | 5,922 | 3,436 | 32,113 |
| 34,214 | 156 | 22,428 | 5,912 | 3,428 | 31,924 |
| 34,215 | 153 | 22,731 | 5,995 | 3,468 | 32,347 |
| 34,216 | 152 | 22,621 | 6,036 | 3,477 | 32,286 |
| 34,217 | 153 | 22,614 | 6,029 | 3,496 | 32,292 |
| 34,218 | 152 | 22,764 | 6,053 | 3,505 | 32,474 |
| 34,219 | 161 | 22,678 | 6,063 | 3,487 | 32,389 |
| 34,220 | 160 | 22,771 | 6,067 | 3,493 | 32,491 |
| 34,221 | 163 | 22,906 | 6,100 | 3,513 | 32,682 |
| 34,222 | 159 | 22,816 | 6,112 | 3,510 | 32,597 |
| 34,223 | 154 | 22,506 | 6,066 | 3,450 | 32,176 |
| 34,224 | 157 | 22,542 | 6,082 | 3,432 | 32,213 |
| 34,225 | 156 | 22,492 | 6,067 | 3,446 | 32,161 |
| 34,226 | 160 | 22,391 | 6,085 | 3,431 | 32,067 |
| 34,227 | 156 | 22,333 | 6,091 | 3,442 | 32,022 |
| 34,228 | 160 | 22,275 | 6,075 | 3,427 | 31,937 |
| 34,229 | 160 | 22,249 | 6,072 | 3,412 | 31,893 |
| 34,230 | 158 | 22,242 | 6,106 | 3,435 | 31,941 |
| 34,231 | 159 | 22,085 | 6,118 | 3,470 | 31,832 |

|        |     |        |       |       |        |
|--------|-----|--------|-------|-------|--------|
| 34,232 | 158 | 21,823 | 6,080 | 3,450 | 31,511 |
| 34,233 | 158 | 21,869 | 6,098 | 3,454 | 31,579 |
| 34,234 | 161 | 22,012 | 6,164 | 3,485 | 31,822 |
| 34,235 | 162 | 21,982 | 6,195 | 3,482 | 31,821 |
| 34,236 | 163 | 21,688 | 6,145 | 3,449 | 31,445 |
| 34,237 | 159 | 21,478 | 6,100 | 3,429 | 31,166 |
| 34,238 | 155 | 21,849 | 6,192 | 3,480 | 31,676 |
| 34,239 | 154 | 21,625 | 6,138 | 3,454 | 31,371 |
| 34,240 | 155 | 21,757 | 6,184 | 3,490 | 31,586 |
| 34,241 | 160 | 21,433 | 6,098 | 3,437 | 31,128 |
| 34,242 | 159 | 21,389 | 6,088 | 3,440 | 31,076 |
| 34,243 | 157 | 21,570 | 6,100 | 3,443 | 31,270 |
| 34,244 | 157 | 21,249 | 5,936 | 3,337 | 30,679 |
| 34,245 | 157 | 21,395 | 5,978 | 3,367 | 30,897 |
| 34,246 | 156 | 21,687 | 6,029 | 3,412 | 31,284 |
| 34,247 | 159 | 21,911 | 6,078 | 3,419 | 31,567 |
| 34,248 | 164 | 21,821 | 6,016 | 3,362 | 31,363 |
| 34,249 | 164 | 21,842 | 6,020 | 3,361 | 31,387 |
| 34,250 | 165 | 21,930 | 6,028 | 3,391 | 31,514 |
| 34,251 | 164 | 21,717 | 5,963 | 3,358 | 31,202 |
| 34,252 | 163 | 21,661 | 5,963 | 3,365 | 31,152 |
| 34,253 | 167 | 21,673 | 5,972 | 3,372 | 31,184 |
| 34,254 | 171 | 21,831 | 6,036 | 3,394 | 31,432 |
| 34,255 | 169 | 21,505 | 5,938 | 3,349 | 30,961 |
| 34,256 | 169 | 21,570 | 5,935 | 3,347 | 31,021 |
| 34,257 | 167 | 21,681 | 5,983 | 3,365 | 31,196 |
| 34,258 | 161 | 21,597 | 5,969 | 3,375 | 31,102 |
| 34,259 | 168 | 21,245 | 5,906 | 3,343 | 30,662 |
| 34,260 | 165 | 21,171 | 5,919 | 3,353 | 30,608 |
| 34,261 | 165 | 21,250 | 5,949 | 3,400 | 30,764 |
| 34,262 | 157 | 20,931 | 5,907 | 3,353 | 30,348 |
| 34,263 | 159 | 20,864 | 5,916 | 3,369 | 30,308 |

|        |     |        |       |       |        |
|--------|-----|--------|-------|-------|--------|
| 34,264 | 157 | 20,898 | 5,927 | 3,380 | 30,362 |
| 34,265 | 162 | 20,922 | 5,897 | 3,371 | 30,352 |
| 34,266 | 164 | 21,122 | 5,938 | 3,401 | 30,625 |
| 34,267 | 159 | 20,889 | 5,790 | 3,329 | 30,167 |
| 34,268 | 152 | 20,297 | 5,605 | 3,235 | 29,289 |
| 34,269 | 154 | 20,552 | 5,699 | 3,290 | 29,695 |
| 34,270 | 149 | 20,599 | 5,700 | 3,300 | 29,748 |
| 34,271 | 149 | 20,727 | 5,764 | 3,327 | 29,967 |
| 34,272 | 147 | 20,935 | 5,807 | 3,371 | 30,260 |
| 34,273 | 147 | 20,874 | 5,780 | 3,363 | 30,164 |
| 34,274 | 144 | 20,640 | 5,731 | 3,324 | 29,839 |
| 34,275 | 142 | 20,719 | 5,796 | 3,375 | 30,032 |
| 34,276 | 139 | 20,902 | 5,838 | 3,398 | 30,277 |
| 34,277 | 138 | 20,487 | 5,721 | 3,340 | 29,686 |
| 34,278 | 138 | 20,768 | 5,786 | 3,377 | 30,069 |
| 34,279 | 146 | 20,981 | 5,837 | 3,412 | 30,376 |
| 34,280 | 146 | 20,853 | 5,780 | 3,388 | 30,167 |
| 34,281 | 146 | 20,934 | 5,799 | 3,397 | 30,276 |
| 34,282 | 144 | 21,090 | 5,810 | 3,399 | 30,443 |
| 34,283 | 141 | 20,980 | 5,787 | 3,372 | 30,280 |
| 34,284 | 139 | 20,785 | 5,713 | 3,336 | 29,973 |
| 34,285 | 147 | 20,805 | 5,716 | 3,342 | 30,010 |
| 34,286 | 142 | 20,558 | 5,647 | 3,304 | 29,651 |
| 34,287 | 138 | 20,704 | 5,693 | 3,303 | 29,838 |
| 34,288 | 142 | 20,889 | 5,736 | 3,316 | 30,083 |
| 34,289 | 139 | 20,767 | 5,681 | 3,311 | 29,898 |
| 34,290 | 139 | 20,580 | 5,622 | 3,253 | 29,594 |
| 34,291 | 133 | 20,118 | 5,512 | 3,189 | 28,952 |
| 34,292 | 133 | 20,159 | 5,525 | 3,192 | 29,009 |
| 34,293 | 137 | 19,988 | 5,482 | 3,151 | 28,758 |
| 34,294 | 139 | 19,748 | 5,435 | 3,118 | 28,440 |
| 34,295 | 145 | 20,911 | 5,699 | 3,273 | 30,028 |



|        |     |        |       |       |        |
|--------|-----|--------|-------|-------|--------|
| 34,296 | 144 | 20,653 | 5,655 | 3,244 | 29,696 |
| 34,297 | 148 | 20,415 | 5,603 | 3,208 | 29,374 |
| 34,298 | 144 | 20,268 | 5,566 | 3,205 | 29,183 |
| 34,299 | 141 | 21,156 | 5,806 | 3,385 | 30,488 |
| 34,300 | 142 | 21,392 | 5,870 | 3,431 | 30,835 |
| 34,301 | 142 | 21,425 | 5,866 | 3,431 | 30,864 |
| 34,302 | 146 | 21,489 | 5,941 | 3,456 | 31,032 |
| 34,303 | 146 | 21,456 | 5,943 | 3,459 | 31,004 |
| 34,304 | 144 | 21,715 | 6,030 | 3,489 | 31,378 |
| 34,305 | 141 | 21,832 | 6,025 | 3,497 | 31,495 |
| 34,306 | 133 | 21,934 | 6,034 | 3,502 | 31,603 |
| 34,307 | 130 | 21,935 | 6,047 | 3,514 | 31,626 |
| 34,308 | 123 | 21,424 | 5,933 | 3,427 | 30,907 |
| 34,309 | 125 | 21,651 | 5,977 | 3,440 | 31,193 |
| 34,310 | 119 | 21,939 | 6,020 | 3,463 | 31,541 |
| 34,311 | 119 | 22,054 | 6,006 | 3,442 | 31,621 |
| 34,312 | 116 | 22,092 | 6,000 | 3,425 | 31,633 |
| 34,313 | 112 | 21,923 | 5,936 | 3,411 | 31,382 |
| 34,314 | 122 | 22,139 | 5,963 | 3,433 | 31,657 |
| 34,315 | 119 | 21,912 | 5,904 | 3,400 | 31,335 |
| 34,316 | 124 | 22,337 | 6,030 | 3,467 | 31,958 |
| 34,317 | 124 | 22,263 | 6,066 | 3,500 | 31,953 |
| 34,318 | 129 | 22,261 | 6,053 | 3,497 | 31,940 |
| 34,319 | 129 | 21,310 | 5,794 | 3,311 | 30,544 |
| 34,320 | 136 | 21,629 | 5,857 | 3,344 | 30,966 |
| 34,321 | 139 | 21,964 | 5,969 | 3,388 | 31,460 |
| 34,322 | 139 | 22,076 | 5,961 | 3,389 | 31,565 |
| 34,323 | 140 | 22,367 | 6,048 | 3,424 | 31,979 |
| 34,324 | 141 | 22,416 | 6,051 | 3,420 | 32,028 |
| 34,325 | 144 | 22,554 | 6,078 | 3,461 | 32,237 |
| 34,326 | 141 | 22,410 | 6,020 | 3,418 | 31,989 |
| 34,327 | 143 | 22,529 | 6,038 | 3,429 | 32,139 |

|        |     |        |       |       |        |
|--------|-----|--------|-------|-------|--------|
| 34,328 | 140 | 22,210 | 5,973 | 3,390 | 31,713 |
| 34,329 | 142 | 22,300 | 6,002 | 3,407 | 31,851 |
| 34,330 | 141 | 22,136 | 5,949 | 3,369 | 31,595 |
| 34,331 | 141 | 21,940 | 5,893 | 3,334 | 31,308 |
| 34,332 | 145 | 21,889 | 5,891 | 3,315 | 31,240 |
| 34,333 | 144 | 21,704 | 5,850 | 3,297 | 30,995 |
| 34,334 | 146 | 22,099 | 5,919 | 3,341 | 31,505 |
| 34,335 | 150 | 22,174 | 5,938 | 3,349 | 31,611 |
| 34,336 | 140 | 21,926 | 5,881 | 3,321 | 31,268 |
| 34,337 | 142 | 21,914 | 5,893 | 3,328 | 31,277 |
| 34,338 | 146 | 21,905 | 5,902 | 3,351 | 31,304 |
| 34,339 | 143 | 21,394 | 5,793 | 3,277 | 30,607 |
| 34,340 | 143 | 21,368 | 5,801 | 3,283 | 30,595 |
| 34,341 | 145 | 21,127 | 5,761 | 3,268 | 30,301 |
| 34,342 | 142 | 20,908 | 5,732 | 3,255 | 30,037 |
| 34,343 | 143 | 22,100 | 6,033 | 3,438 | 31,714 |
| 34,344 | 144 | 22,238 | 6,075 | 3,461 | 31,918 |
| 34,345 | 148 | 22,198 | 6,081 | 3,481 | 31,908 |
| 34,346 | 154 | 22,142 | 6,098 | 3,474 | 31,868 |
| 34,347 | 158 | 21,963 | 6,036 | 3,424 | 31,581 |
| 34,348 | 166 | 21,844 | 5,980 | 3,410 | 31,400 |
| 34,349 | 166 | 21,817 | 5,959 | 3,410 | 31,352 |
| 34,350 | 172 | 22,031 | 6,086 | 3,446 | 31,735 |
| 34,351 | 171 | 22,142 | 6,112 | 3,447 | 31,872 |
| 34,352 | 172 | 22,185 | 6,033 | 3,399 | 31,789 |
| 34,353 | 185 | 22,471 | 6,035 | 3,397 | 32,088 |
| 34,354 | 187 | 22,571 | 6,044 | 3,400 | 32,202 |
| 34,355 | 180 | 22,558 | 6,051 | 3,434 | 32,223 |
| 34,356 | 187 | 22,478 | 6,078 | 3,451 | 32,194 |
| 34,357 | 192 | 22,608 | 6,142 | 3,498 | 32,440 |
| 34,358 | 197 | 22,403 | 6,079 | 3,453 | 32,132 |
| 34,359 | 197 | 22,514 | 6,070 | 3,449 | 32,230 |

|        |     |        |       |       |        |
|--------|-----|--------|-------|-------|--------|
| 34,360 | 205 | 22,591 | 6,085 | 3,479 | 32,360 |
| 34,361 | 206 | 22,659 | 6,078 | 3,479 | 32,422 |
| 34,362 | 215 | 22,813 | 6,156 | 3,514 | 32,698 |
| 34,363 | 215 | 22,769 | 6,155 | 3,519 | 32,658 |
| 34,364 | 212 | 22,905 | 6,199 | 3,554 | 32,870 |
| 34,365 | 212 | 23,203 | 6,331 | 3,606 | 33,352 |
| 34,366 | 204 | 23,124 | 6,331 | 3,627 | 33,286 |
| 34,367 | 202 | 23,036 | 6,299 | 3,619 | 33,156 |
| 34,368 | 203 | 23,248 | 6,326 | 3,632 | 33,409 |
| 34,369 | 199 | 23,143 | 6,318 | 3,641 | 33,301 |
| 34,370 | 200 | 23,927 | 6,512 | 3,779 | 34,418 |
| 34,371 | 192 | 24,194 | 6,557 | 3,833 | 34,776 |
| 34,372 | 191 | 24,323 | 6,524 | 3,847 | 34,885 |
| 34,373 | 191 | 24,477 | 6,516 | 3,848 | 35,032 |
| 34,374 | 189 | 24,478 | 6,484 | 3,862 | 35,013 |
| 34,375 | 182 | 24,372 | 6,433 | 3,844 | 34,831 |
| 34,376 | 186 | 24,752 | 6,494 | 3,885 | 35,317 |
| 34,377 | 185 | 24,635 | 6,493 | 3,859 | 35,172 |
| 34,378 | 190 | 24,653 | 6,491 | 3,861 | 35,195 |
| 34,379 | 192 | 24,667 | 6,498 | 3,870 | 35,227 |
| 34,380 | 187 | 24,979 | 6,540 | 3,917 | 35,623 |
| 34,381 | 190 | 25,178 | 6,608 | 3,990 | 35,966 |
| 34,382 | 193 | 25,348 | 6,674 | 4,013 | 36,228 |
| 34,383 | 190 | 25,079 | 6,569 | 3,945 | 35,783 |
| 34,384 | 196 | 25,351 | 6,636 | 3,993 | 36,176 |
| 34,385 | 194 | 25,388 | 6,661 | 4,001 | 36,244 |
| 34,386 | 194 | 25,500 | 6,717 | 4,027 | 36,438 |
| 34,387 | 193 | 25,726 | 6,793 | 4,063 | 36,775 |
| 34,388 | 186 | 25,783 | 6,786 | 4,075 | 36,830 |
| 34,389 | 183 | 25,674 | 6,748 | 4,046 | 36,651 |
| 34,390 | 186 | 26,002 | 6,820 | 4,120 | 37,128 |
| 34,391 | 192 | 25,857 | 6,784 | 4,102 | 36,935 |

|        |     |        |       |       |        |
|--------|-----|--------|-------|-------|--------|
| 34,392 | 187 | 25,697 | 6,736 | 4,089 | 36,709 |
| 34,393 | 188 | 26,076 | 6,873 | 4,160 | 37,297 |
| 34,394 | 191 | 25,789 | 6,833 | 4,149 | 36,962 |
| 34,395 | 188 | 25,822 | 6,831 | 4,152 | 36,993 |
| 34,396 | 182 | 25,591 | 6,772 | 4,109 | 36,654 |
| 34,397 | 180 | 25,601 | 6,782 | 4,135 | 36,698 |
| 34,398 | 178 | 25,365 | 6,768 | 4,132 | 36,443 |
| 34,399 | 176 | 25,260 | 6,754 | 4,119 | 36,309 |
| 34,400 | 186 | 25,508 | 6,782 | 4,141 | 36,617 |
| 34,401 | 177 | 25,276 | 6,666 | 4,099 | 36,218 |
| 34,402 | 179 | 24,872 | 6,558 | 4,041 | 35,650 |
| 34,403 | 173 | 24,521 | 6,500 | 4,018 | 35,212 |
| 34,404 | 159 | 24,376 | 6,456 | 3,990 | 34,981 |
| 34,405 | 162 | 24,670 | 6,495 | 4,017 | 35,344 |
| 34,406 | 161 | 24,989 | 6,547 | 4,042 | 35,739 |
| 34,407 | 163 | 25,017 | 6,532 | 4,035 | 35,747 |
| 34,408 | 163 | 25,069 | 6,526 | 4,029 | 35,787 |
| 34,409 | 156 | 25,083 | 6,532 | 4,053 | 35,824 |
| 34,410 | 155 | 25,126 | 6,537 | 4,055 | 35,873 |
| 34,411 | 145 | 25,165 | 6,559 | 4,077 | 35,946 |
| 34,412 | 144 | 25,322 | 6,594 | 4,098 | 36,158 |
| 34,413 | 136 | 25,403 | 6,575 | 4,105 | 36,219 |
| 34,414 | 130 | 25,344 | 6,585 | 4,076 | 36,135 |
| 34,415 | 138 | 25,400 | 6,533 | 4,058 | 36,129 |
| 34,416 | 141 | 25,427 | 6,502 | 4,050 | 36,120 |
| 34,417 | 143 | 25,121 | 6,390 | 3,951 | 35,605 |
| 34,418 | 143 | 25,298 | 6,417 | 3,962 | 35,820 |
| 34,419 | 141 | 24,635 | 6,223 | 3,813 | 34,812 |
| 34,420 | 144 | 24,809 | 6,297 | 3,843 | 35,093 |
| 34,421 | 147 | 24,801 | 6,330 | 3,884 | 35,162 |
| 34,422 | 151 | 24,374 | 6,282 | 3,833 | 34,640 |
| 34,423 | 148 | 23,833 | 6,197 | 3,778 | 33,956 |

|        |     |        |       |       |        |
|--------|-----|--------|-------|-------|--------|
| 34,424 | 148 | 23,764 | 6,165 | 3,763 | 33,840 |
| 34,425 | 147 | 23,667 | 6,184 | 3,768 | 33,766 |
| 34,426 | 147 | 23,607 | 6,215 | 3,754 | 33,723 |
| 34,427 | 147 | 23,560 | 6,228 | 3,751 | 33,686 |
| 34,428 | 145 | 23,601 | 6,206 | 3,784 | 33,736 |
| 34,429 | 141 | 23,434 | 6,199 | 3,778 | 33,552 |
| 34,430 | 139 | 23,363 | 6,162 | 3,760 | 33,424 |
| 34,431 | 138 | 23,367 | 6,163 | 3,758 | 33,426 |
| 34,432 | 138 | 23,590 | 6,233 | 3,763 | 33,724 |
| 34,433 | 138 | 23,435 | 6,218 | 3,749 | 33,540 |
| 34,434 | 137 | 23,595 | 6,295 | 3,809 | 33,836 |
| 34,435 | 131 | 23,360 | 6,227 | 3,773 | 33,491 |
| 34,436 | 133 | 23,392 | 6,230 | 3,797 | 33,552 |
| 34,437 | 134 | 23,544 | 6,257 | 3,823 | 33,758 |
| 34,438 | 136 | 23,614 | 6,234 | 3,821 | 33,805 |
| 34,439 | 125 | 22,927 | 6,074 | 3,680 | 32,806 |
| 34,440 | 127 | 23,151 | 6,094 | 3,698 | 33,070 |
| 34,441 | 126 | 23,429 | 6,119 | 3,717 | 33,391 |
| 34,442 | 133 | 23,657 | 6,171 | 3,737 | 33,698 |
| 34,443 | 139 | 23,796 | 6,130 | 3,725 | 33,790 |
| 34,444 | 135 | 23,431 | 5,961 | 3,648 | 33,175 |
| 34,445 | 136 | 23,871 | 6,006 | 3,664 | 33,677 |
| 34,446 | 137 | 24,084 | 6,023 | 3,696 | 33,940 |
| 34,447 | 133 | 24,060 | 5,969 | 3,701 | 33,863 |
| 34,448 | 126 | 23,800 | 5,898 | 3,656 | 33,480 |
| 34,449 | 131 | 23,869 | 5,895 | 3,651 | 33,546 |
| 34,450 | 130 | 23,909 | 5,894 | 3,650 | 33,583 |
| 34,451 | 126 | 23,809 | 5,862 | 3,632 | 33,429 |
| 34,452 | 125 | 23,641 | 5,762 | 3,599 | 33,127 |
| 34,453 | 124 | 23,656 | 5,767 | 3,586 | 33,133 |
| 34,454 | 126 | 23,888 | 5,795 | 3,605 | 33,414 |
| 34,455 | 124 | 23,596 | 5,744 | 3,561 | 33,025 |

|        |     |        |       |       |        |
|--------|-----|--------|-------|-------|--------|
| 34,456 | 123 | 23,693 | 5,779 | 3,604 | 33,199 |
| 34,457 | 123 | 23,486 | 5,760 | 3,587 | 32,956 |
| 34,458 | 115 | 23,327 | 5,703 | 3,565 | 32,710 |
| 34,459 | 121 | 23,575 | 5,745 | 3,591 | 33,032 |
| 34,460 | 123 | 23,352 | 5,721 | 3,557 | 32,753 |
| 34,461 | 132 | 23,505 | 5,781 | 3,597 | 33,015 |
| 34,462 | 133 | 23,323 | 5,716 | 3,570 | 32,742 |
| 34,463 | 134 | 23,469 | 5,754 | 3,588 | 32,945 |
| 34,464 | 145 | 23,552 | 5,721 | 3,591 | 33,009 |
| 34,465 | 145 | 23,460 | 5,717 | 3,582 | 32,904 |
| 34,466 | 138 | 23,357 | 5,711 | 3,591 | 32,797 |
| 34,467 | 140 | 23,398 | 5,735 | 3,612 | 32,885 |
| 34,468 | 138 | 23,426 | 5,758 | 3,649 | 32,971 |
| 34,469 | 143 | 23,416 | 5,769 | 3,639 | 32,967 |
| 34,470 | 142 | 23,391 | 5,753 | 3,634 | 32,920 |
| 34,471 | 140 | 23,159 | 5,678 | 3,605 | 32,582 |
| 34,472 | 136 | 23,109 | 5,627 | 3,556 | 32,428 |
| 34,473 | 139 | 22,868 | 5,514 | 3,488 | 32,009 |
| 34,474 | 139 | 23,006 | 5,548 | 3,517 | 32,210 |
| 34,475 | 140 | 23,039 | 5,528 | 3,512 | 32,219 |
| 34,476 | 140 | 23,163 | 5,550 | 3,541 | 32,394 |
| 34,477 | 139 | 23,268 | 5,589 | 3,563 | 32,559 |
| 34,478 | 144 | 23,220 | 5,558 | 3,557 | 32,479 |
| 34,479 | 142 | 23,028 | 5,524 | 3,520 | 32,214 |
| 34,480 | 148 | 23,066 | 5,517 | 3,520 | 32,251 |
| 34,481 | 148 | 22,974 | 5,486 | 3,520 | 32,128 |
| 34,482 | 147 | 22,877 | 5,457 | 3,517 | 31,998 |
| 34,483 | 145 | 22,832 | 5,425 | 3,514 | 31,916 |
| 34,484 | 147 | 23,136 | 5,443 | 3,551 | 32,277 |
| 34,485 | 147 | 22,903 | 5,339 | 3,506 | 31,895 |
| 34,486 | 146 | 22,711 | 5,238 | 3,453 | 31,548 |
| 34,487 | 148 | 22,818 | 5,248 | 3,456 | 31,670 |

|        |     |        |       |       |        |
|--------|-----|--------|-------|-------|--------|
| 34,488 | 146 | 22,919 | 5,297 | 3,467 | 31,829 |
| 34,489 | 146 | 22,539 | 5,203 | 3,424 | 31,312 |
| 34,490 | 147 | 22,500 | 5,176 | 3,419 | 31,242 |
| 34,491 | 147 | 22,653 | 5,224 | 3,441 | 31,465 |
| 34,492 | 147 | 22,321 | 5,160 | 3,401 | 31,029 |
| 34,493 | 144 | 22,366 | 5,191 | 3,444 | 31,145 |
| 34,494 | 138 | 21,973 | 5,140 | 3,403 | 30,654 |
| 34,495 | 137 | 21,871 | 5,171 | 3,396 | 30,575 |
| 34,496 | 140 | 21,778 | 5,169 | 3,386 | 30,473 |
| 34,497 | 141 | 21,497 | 5,126 | 3,324 | 30,088 |
| 34,498 | 141 | 21,499 | 5,122 | 3,321 | 30,083 |
| 34,499 | 140 | 21,678 | 5,165 | 3,361 | 30,344 |
| 34,500 | 136 | 21,692 | 5,169 | 3,367 | 30,364 |
| 34,501 | 131 | 21,695 | 5,137 | 3,356 | 30,319 |
| 34,502 | 132 | 21,464 | 5,123 | 3,331 | 30,050 |
| 34,503 | 132 | 21,621 | 5,176 | 3,349 | 30,278 |
| 34,504 | 131 | 21,580 | 5,173 | 3,352 | 30,236 |
| 34,505 | 130 | 21,385 | 5,112 | 3,339 | 29,966 |
| 34,506 | 133 | 21,691 | 5,160 | 3,371 | 30,355 |
| 34,507 | 128 | 21,626 | 5,114 | 3,370 | 30,238 |
| 34,508 | 130 | 21,265 | 5,032 | 3,315 | 29,742 |
| 34,509 | 131 | 21,492 | 5,097 | 3,354 | 30,074 |
| 34,510 | 127 | 21,727 | 5,110 | 3,381 | 30,345 |
| 34,511 | 126 | 21,941 | 5,202 | 3,429 | 30,698 |
| 34,512 | 119 | 21,858 | 5,201 | 3,429 | 30,607 |
| 34,513 | 134 | 22,434 | 5,385 | 3,536 | 31,489 |
| 34,514 | 143 | 22,436 | 5,425 | 3,553 | 31,557 |
| 34,515 | 134 | 22,259 | 5,410 | 3,519 | 31,322 |
| 34,516 | 138 | 22,571 | 5,544 | 3,606 | 31,859 |
| 34,517 | 139 | 22,486 | 5,551 | 3,605 | 31,781 |
| 34,518 | 136 | 22,654 | 5,582 | 3,626 | 31,998 |
| 34,519 | 137 | 22,809 | 5,626 | 3,649 | 32,221 |

|        |     |        |       |       |        |
|--------|-----|--------|-------|-------|--------|
| 34,520 | 132 | 22,422 | 5,528 | 3,604 | 31,686 |
| 34,521 | 134 | 22,416 | 5,523 | 3,590 | 31,663 |
| 34,522 | 134 | 22,392 | 5,520 | 3,579 | 31,625 |
| 34,523 | 136 | 22,357 | 5,518 | 3,572 | 31,583 |
| 34,524 | 148 | 22,383 | 5,527 | 3,577 | 31,635 |
| 34,525 | 149 | 22,366 | 5,530 | 3,573 | 31,618 |
| 34,526 | 151 | 22,629 | 5,618 | 3,618 | 32,016 |
| 34,527 | 150 | 22,769 | 5,617 | 3,636 | 32,172 |
| 34,528 | 151 | 22,768 | 5,597 | 3,629 | 32,145 |
| 34,529 | 148 | 22,546 | 5,563 | 3,586 | 31,843 |
| 34,530 | 153 | 23,353 | 5,704 | 3,684 | 32,894 |
| 34,531 | 154 | 23,244 | 5,663 | 3,640 | 32,701 |
| 34,532 | 157 | 23,590 | 5,722 | 3,662 | 33,131 |
| 34,533 | 157 | 24,008 | 5,802 | 3,725 | 33,692 |
| 34,534 | 161 | 24,318 | 5,876 | 3,780 | 34,135 |
| 34,535 | 165 | 24,240 | 5,880 | 3,778 | 34,063 |
| 34,536 | 162 | 23,908 | 5,854 | 3,739 | 33,663 |
| 34,537 | 163 | 24,449 | 6,062 | 3,849 | 34,523 |
| 34,538 | 161 | 24,507 | 6,051 | 3,841 | 34,560 |
| 34,539 | 160 | 24,588 | 6,098 | 3,838 | 34,684 |
| 34,540 | 159 | 24,897 | 6,157 | 3,860 | 35,073 |
| 34,541 | 160 | 25,041 | 6,205 | 3,899 | 35,305 |
| 34,542 | 163 | 25,159 | 6,291 | 3,909 | 35,522 |
| 34,543 | 164 | 25,341 | 6,337 | 3,927 | 35,769 |
| 34,544 | 166 | 25,242 | 6,305 | 3,920 | 35,633 |
| 34,545 | 167 | 25,267 | 6,319 | 3,950 | 35,703 |
| 34,546 | 166 | 25,296 | 6,310 | 3,955 | 35,727 |
| 34,547 | 161 | 25,476 | 6,392 | 3,991 | 36,020 |
| 34,548 | 156 | 25,531 | 6,364 | 4,002 | 36,053 |
| 34,549 | 155 | 25,494 | 6,375 | 4,019 | 36,043 |
| 34,550 | 160 | 25,473 | 6,372 | 4,035 | 36,040 |
| 34,551 | 166 | 25,067 | 6,303 | 3,949 | 35,485 |



|        |     |        |       |       |        |
|--------|-----|--------|-------|-------|--------|
| 34,552 | 168 | 25,018 | 6,307 | 3,941 | 35,434 |
| 34,553 | 167 | 24,840 | 6,263 | 3,912 | 35,182 |
| 34,554 | 168 | 24,619 | 6,209 | 3,888 | 34,884 |
| 34,555 | 181 | 24,950 | 6,331 | 3,913 | 35,375 |
| 34,556 | 179 | 24,769 | 6,319 | 3,909 | 35,176 |
| 34,557 | 179 | 24,925 | 6,392 | 3,929 | 35,425 |
| 34,558 | 182 | 24,750 | 6,394 | 3,916 | 35,242 |
| 34,559 | 178 | 24,415 | 6,347 | 3,872 | 34,812 |
| 34,560 | 182 | 24,542 | 6,424 | 3,923 | 35,071 |
| 34,561 | 183 | 24,071 | 6,337 | 3,834 | 34,425 |
| 34,562 | 186 | 24,120 | 6,319 | 3,845 | 34,470 |
| 34,563 | 182 | 24,282 | 6,369 | 3,878 | 34,711 |
| 34,564 | 179 | 24,140 | 6,347 | 3,875 | 34,541 |
| 34,565 | 172 | 23,717 | 6,265 | 3,818 | 33,972 |
| 34,566 | 173 | 23,687 | 6,236 | 3,777 | 33,873 |
| 34,567 | 176 | 23,754 | 6,174 | 3,745 | 33,849 |
| 34,568 | 177 | 24,026 | 6,199 | 3,770 | 34,172 |
| 34,569 | 181 | 23,728 | 6,124 | 3,716 | 33,749 |
| 34,570 | 181 | 23,747 | 6,138 | 3,702 | 33,768 |
| 34,571 | 188 | 23,480 | 6,090 | 3,649 | 33,407 |
| 34,572 | 187 | 23,300 | 6,086 | 3,644 | 33,217 |
| 34,573 | 191 | 23,021 | 6,039 | 3,616 | 32,867 |
| 34,574 | 191 | 22,773 | 6,017 | 3,587 | 32,568 |
| 34,575 | 176 | 23,306 | 6,166 | 3,671 | 33,319 |
| 34,576 | 176 | 23,282 | 6,202 | 3,689 | 33,349 |
| 34,577 | 173 | 23,177 | 6,166 | 3,696 | 33,212 |
| 34,578 | 178 | 23,067 | 6,168 | 3,708 | 33,121 |
| 34,579 | 180 | 22,959 | 6,165 | 3,707 | 33,011 |
| 34,580 | 173 | 22,878 | 6,163 | 3,728 | 32,942 |
| 34,581 | 170 | 22,793 | 6,213 | 3,768 | 32,944 |
| 34,582 | 167 | 22,402 | 6,190 | 3,763 | 32,522 |
| 34,583 | 167 | 22,147 | 6,191 | 3,760 | 32,265 |

|        |     |        |       |       |        |
|--------|-----|--------|-------|-------|--------|
| 34,584 | 173 | 22,045 | 6,233 | 3,756 | 32,207 |
| 34,585 | 176 | 21,959 | 6,167 | 3,728 | 32,030 |
| 34,586 | 176 | 22,173 | 6,201 | 3,749 | 32,299 |
| 34,587 | 184 | 22,537 | 6,282 | 3,813 | 32,816 |
| 34,588 | 192 | 22,768 | 6,294 | 3,824 | 33,078 |
| 34,589 | 191 | 22,677 | 6,288 | 3,829 | 32,985 |
| 34,590 | 194 | 22,819 | 6,341 | 3,890 | 33,244 |
| 34,591 | 192 | 22,608 | 6,317 | 3,895 | 33,012 |
| 34,592 | 192 | 22,592 | 6,323 | 3,892 | 32,999 |
| 34,593 | 190 | 22,757 | 6,358 | 3,919 | 33,224 |
| 34,594 | 189 | 22,671 | 6,347 | 3,932 | 33,139 |
| 34,595 | 192 | 22,825 | 6,400 | 3,934 | 33,351 |
| 34,596 | 196 | 22,993 | 6,432 | 3,941 | 33,562 |
| 34,597 | 198 | 22,899 | 6,389 | 3,954 | 33,440 |
| 34,598 | 198 | 22,927 | 6,381 | 3,946 | 33,452 |
| 34,599 | 201 | 23,171 | 6,452 | 3,971 | 33,795 |
| 34,600 | 199 | 23,244 | 6,451 | 3,973 | 33,867 |
| 34,601 | 195 | 23,281 | 6,456 | 3,969 | 33,901 |
| 34,602 | 186 | 23,155 | 6,403 | 3,963 | 33,707 |
| 34,603 | 189 | 23,143 | 6,413 | 3,953 | 33,698 |
| 34,604 | 181 | 23,005 | 6,369 | 3,938 | 33,493 |
| 34,605 | 182 | 23,371 | 6,434 | 4,005 | 33,992 |
| 34,606 | 182 | 23,432 | 6,426 | 4,006 | 34,046 |
| 34,607 | 186 | 23,380 | 6,392 | 3,981 | 33,939 |
| 34,608 | 188 | 23,638 | 6,450 | 4,018 | 34,294 |
| 34,609 | 189 | 23,944 | 6,519 | 4,076 | 34,728 |
| 34,610 | 185 | 23,640 | 6,401 | 4,013 | 34,239 |
| 34,611 | 184 | 23,752 | 6,431 | 4,032 | 34,399 |
| 34,612 | 175 | 23,172 | 6,278 | 3,931 | 33,556 |
| 34,613 | 174 | 23,513 | 6,320 | 3,968 | 33,975 |
| 34,614 | 171 | 23,787 | 6,352 | 4,004 | 34,314 |
| 34,615 | 174 | 23,394 | 6,231 | 3,925 | 33,724 |

|        |     |        |       |       |        |
|--------|-----|--------|-------|-------|--------|
| 34,616 | 169 | 22,992 | 6,109 | 3,870 | 33,140 |
| 34,617 | 165 | 23,106 | 6,136 | 3,941 | 33,348 |
| 34,618 | 161 | 22,792 | 6,079 | 3,896 | 32,928 |
| 34,619 | 152 | 22,329 | 5,983 | 3,825 | 32,289 |
| 34,620 | 154 | 22,525 | 6,006 | 3,861 | 32,546 |
| 34,621 | 150 | 22,451 | 6,014 | 3,858 | 32,473 |
| 34,622 | 145 | 22,342 | 6,009 | 3,875 | 32,371 |
| 34,623 | 150 | 22,573 | 6,031 | 3,896 | 32,650 |
| 34,624 | 140 | 22,311 | 5,957 | 3,846 | 32,254 |
| 34,625 | 139 | 22,232 | 5,906 | 3,851 | 32,128 |
| 34,626 | 139 | 22,435 | 5,939 | 3,892 | 32,405 |
| 34,627 | 139 | 22,634 | 5,942 | 3,897 | 32,612 |
| 34,628 | 138 | 22,682 | 5,942 | 3,867 | 32,629 |
| 34,629 | 132 | 22,536 | 5,907 | 3,844 | 32,419 |
| 34,630 | 127 | 22,299 | 5,847 | 3,794 | 32,067 |
| 34,631 | 128 | 22,435 | 5,859 | 3,810 | 32,232 |
| 34,632 | 127 | 22,416 | 5,745 | 3,731 | 32,019 |
| 34,633 | 125 | 22,367 | 5,668 | 3,679 | 31,839 |
| 34,634 | 126 | 22,409 | 5,670 | 3,693 | 31,898 |
| 34,635 | 107 | 21,900 | 5,563 | 3,643 | 31,213 |
| 34,636 | 107 | 21,966 | 5,623 | 3,665 | 31,361 |
| 34,637 | 105 | 21,701 | 5,561 | 3,635 | 31,002 |
| 34,638 | 87  | 21,110 | 5,394 | 3,544 | 30,135 |
| 34,639 | 87  | 21,191 | 5,437 | 3,578 | 30,293 |
| 34,640 | 87  | 20,933 | 5,348 | 3,532 | 29,900 |
| 34,641 | 86  | 20,814 | 5,325 | 3,510 | 29,735 |
| 34,642 | 95  | 20,394 | 5,206 | 3,423 | 29,118 |
| 34,643 | 95  | 20,455 | 5,216 | 3,420 | 29,186 |
| 34,644 | 92  | 20,387 | 5,197 | 3,430 | 29,106 |
| 34,645 | 92  | 20,123 | 5,129 | 3,380 | 28,724 |
| 34,646 | 97  | 20,143 | 5,100 | 3,394 | 28,734 |
| 34,647 | 91  | 19,828 | 5,013 | 3,347 | 28,279 |

|        |     |        |       |       |        |
|--------|-----|--------|-------|-------|--------|
| 34,648 | 91  | 19,781 | 5,007 | 3,334 | 28,213 |
| 34,649 | 92  | 19,714 | 4,994 | 3,334 | 28,134 |
| 34,650 | 90  | 19,466 | 4,971 | 3,311 | 27,838 |
| 34,651 | 91  | 19,414 | 4,982 | 3,302 | 27,789 |
| 34,652 | 90  | 19,259 | 4,942 | 3,271 | 27,562 |
| 34,653 | 98  | 19,682 | 5,023 | 3,330 | 28,133 |
| 34,654 | 100 | 19,642 | 5,000 | 3,335 | 28,077 |
| 34,655 | 100 | 19,652 | 4,997 | 3,330 | 28,079 |
| 34,656 | 101 | 19,889 | 5,053 | 3,370 | 28,413 |
| 34,657 | 102 | 19,771 | 5,047 | 3,353 | 28,273 |
| 34,658 | 99  | 19,875 | 5,123 | 3,389 | 28,486 |
| 34,659 | 97  | 20,182 | 5,201 | 3,431 | 28,911 |
| 34,660 | 94  | 20,301 | 5,302 | 3,435 | 29,132 |
| 34,661 | 98  | 20,280 | 5,321 | 3,456 | 29,155 |
| 34,662 | 98  | 20,300 | 5,326 | 3,464 | 29,188 |
| 34,663 | 98  | 20,461 | 5,412 | 3,522 | 29,493 |
| 34,664 | 100 | 20,629 | 5,478 | 3,538 | 29,745 |
| 34,665 | 101 | 20,703 | 5,503 | 3,555 | 29,862 |
| 34,666 | 98  | 20,389 | 5,434 | 3,483 | 29,404 |
| 34,667 | 99  | 20,616 | 5,470 | 3,500 | 29,685 |
| 34,668 | 99  | 20,664 | 5,468 | 3,506 | 29,737 |
| 34,669 | 107 | 20,770 | 5,512 | 3,525 | 29,914 |
| 34,670 | 107 | 20,772 | 5,510 | 3,524 | 29,913 |
| 34,671 | 107 | 21,048 | 5,546 | 3,543 | 30,244 |
| 34,672 | 110 | 21,303 | 5,615 | 3,584 | 30,612 |
| 34,673 | 110 | 21,461 | 5,644 | 3,611 | 30,826 |
| 34,674 | 110 | 21,705 | 5,727 | 3,665 | 31,207 |
| 34,675 | 118 | 21,850 | 5,746 | 3,669 | 31,383 |
| 34,676 | 119 | 22,035 | 5,836 | 3,718 | 31,708 |
| 34,677 | 122 | 22,068 | 5,847 | 3,728 | 31,765 |
| 34,678 | 122 | 22,013 | 5,857 | 3,707 | 31,699 |
| 34,679 | 127 | 22,137 | 5,887 | 3,713 | 31,864 |

|        |     |        |       |       |        |
|--------|-----|--------|-------|-------|--------|
| 34,680 | 130 | 22,403 | 5,950 | 3,741 | 32,224 |
| 34,681 | 130 | 22,596 | 5,994 | 3,786 | 32,506 |
| 34,682 | 133 | 22,570 | 6,016 | 3,754 | 32,473 |
| 34,683 | 135 | 22,364 | 6,015 | 3,727 | 32,241 |
| 34,684 | 135 | 22,158 | 5,984 | 3,715 | 31,992 |
| 34,685 | 135 | 22,237 | 6,012 | 3,728 | 32,112 |
| 34,686 | 132 | 22,298 | 5,991 | 3,731 | 32,152 |
| 34,687 | 134 | 22,176 | 5,954 | 3,721 | 31,985 |
| 34,688 | 135 | 22,296 | 6,001 | 3,737 | 32,169 |
| 34,689 | 136 | 22,311 | 6,003 | 3,725 | 32,175 |
| 34,690 | 136 | 22,147 | 5,953 | 3,694 | 31,930 |
| 34,691 | 140 | 21,566 | 5,839 | 3,613 | 31,158 |
| 34,692 | 142 | 21,747 | 5,879 | 3,625 | 31,393 |
| 34,693 | 139 | 21,898 | 5,914 | 3,646 | 31,597 |
| 34,694 | 139 | 21,873 | 5,905 | 3,624 | 31,541 |
| 34,695 | 139 | 21,854 | 5,901 | 3,620 | 31,514 |
| 34,696 | 133 | 22,067 | 5,945 | 3,662 | 31,807 |
| 34,697 | 132 | 22,004 | 5,956 | 3,647 | 31,739 |
| 34,698 | 134 | 21,864 | 5,974 | 3,636 | 31,608 |
| 34,699 | 132 | 21,691 | 5,946 | 3,606 | 31,375 |
| 34,700 | 134 | 21,670 | 5,924 | 3,593 | 31,321 |
| 34,701 | 133 | 21,715 | 5,928 | 3,593 | 31,369 |
| 34,702 | 129 | 21,868 | 5,969 | 3,620 | 31,586 |
| 34,703 | 122 | 21,696 | 5,974 | 3,610 | 31,402 |
| 34,704 | 120 | 21,565 | 5,940 | 3,599 | 31,224 |
| 34,705 | 122 | 21,433 | 5,935 | 3,582 | 31,072 |
| 34,706 | 124 | 21,315 | 5,953 | 3,596 | 30,988 |
| 34,707 | 118 | 21,185 | 5,926 | 3,578 | 30,807 |
| 34,708 | 118 | 21,272 | 5,894 | 3,589 | 30,873 |
| 34,709 | 124 | 21,362 | 5,904 | 3,573 | 30,963 |
| 34,710 | 136 | 21,229 | 5,890 | 3,569 | 30,824 |
| 34,711 | 140 | 21,110 | 5,800 | 3,545 | 30,595 |

|        |     |        |       |       |        |
|--------|-----|--------|-------|-------|--------|
| 34,712 | 143 | 20,981 | 5,739 | 3,491 | 30,354 |
| 34,713 | 145 | 20,972 | 5,744 | 3,483 | 30,344 |
| 34,714 | 144 | 20,800 | 5,718 | 3,468 | 30,130 |
| 34,715 | 147 | 20,215 | 5,560 | 3,378 | 29,300 |
| 34,716 | 147 | 20,297 | 5,590 | 3,395 | 29,429 |
| 34,717 | 144 | 20,202 | 5,562 | 3,393 | 29,301 |
| 34,718 | 144 | 20,322 | 5,592 | 3,421 | 29,479 |
| 34,719 | 143 | 20,350 | 5,620 | 3,429 | 29,542 |
| 34,720 | 139 | 20,392 | 5,587 | 3,451 | 29,569 |
| 34,721 | 141 | 20,254 | 5,653 | 3,478 | 29,526 |
| 34,722 | 139 | 20,208 | 5,646 | 3,505 | 29,498 |
| 34,723 | 135 | 20,080 | 5,652 | 3,501 | 29,368 |
| 34,724 | 132 | 20,058 | 5,641 | 3,489 | 29,320 |
| 34,725 | 128 | 20,166 | 5,665 | 3,503 | 29,462 |
| 34,726 | 119 | 19,838 | 5,622 | 3,478 | 29,057 |
| 34,727 | 125 | 20,322 | 5,739 | 3,517 | 29,703 |
| 34,728 | 124 | 20,312 | 5,708 | 3,489 | 29,633 |
| 34,729 | 124 | 20,472 | 5,775 | 3,541 | 29,912 |
| 34,730 | 122 | 20,376 | 5,758 | 3,550 | 29,806 |
| 34,731 | 120 | 20,531 | 5,793 | 3,576 | 30,020 |
| 34,732 | 119 | 20,507 | 5,799 | 3,570 | 29,995 |
| 34,733 | 122 | 20,454 | 5,764 | 3,554 | 29,894 |
| 34,734 | 122 | 20,587 | 5,758 | 3,556 | 30,023 |
| 34,735 | 125 | 20,801 | 5,751 | 3,544 | 30,221 |
| 34,736 | 126 | 21,085 | 5,814 | 3,598 | 30,623 |
| 34,737 | 125 | 21,363 | 5,876 | 3,611 | 30,975 |
| 34,738 | 126 | 21,348 | 5,851 | 3,596 | 30,921 |
| 34,739 | 131 | 21,618 | 5,921 | 3,627 | 31,297 |
| 34,740 | 130 | 21,643 | 5,939 | 3,641 | 31,353 |
| 34,741 | 123 | 21,616 | 5,964 | 3,655 | 31,358 |
| 34,742 | 119 | 21,397 | 5,904 | 3,645 | 31,065 |
| 34,743 | 124 | 21,613 | 5,979 | 3,727 | 31,443 |

|        |     |        |       |       |        |
|--------|-----|--------|-------|-------|--------|
| 34,744 | 124 | 21,811 | 6,021 | 3,759 | 31,715 |
| 34,745 | 126 | 21,934 | 6,053 | 3,802 | 31,915 |
| 34,746 | 126 | 22,029 | 6,088 | 3,804 | 32,047 |
| 34,747 | 122 | 21,972 | 6,075 | 3,772 | 31,941 |
| 34,748 | 119 | 22,158 | 6,104 | 3,803 | 32,184 |
| 34,749 | 123 | 22,100 | 6,072 | 3,796 | 32,091 |
| 34,750 | 125 | 22,370 | 6,098 | 3,840 | 32,433 |
| 34,751 | 123 | 22,676 | 6,134 | 3,865 | 32,798 |
| 34,752 | 126 | 22,742 | 6,142 | 3,873 | 32,883 |
| 34,753 | 126 | 22,710 | 6,101 | 3,864 | 32,801 |
| 34,754 | 124 | 22,534 | 5,999 | 3,803 | 32,460 |
| 34,755 | 126 | 22,763 | 6,037 | 3,825 | 32,751 |
| 34,756 | 121 | 22,997 | 6,092 | 3,845 | 33,055 |
| 34,757 | 126 | 22,725 | 6,032 | 3,802 | 32,685 |
| 34,758 | 125 | 22,877 | 6,092 | 3,830 | 32,924 |
| 34,759 | 120 | 23,004 | 6,167 | 3,867 | 33,158 |
| 34,760 | 113 | 22,982 | 6,127 | 3,866 | 33,088 |
| 34,761 | 112 | 22,701 | 6,046 | 3,820 | 32,679 |
| 34,762 | 107 | 22,441 | 5,960 | 3,782 | 32,290 |
| 34,763 | 107 | 22,359 | 5,883 | 3,762 | 32,111 |
| 34,764 | 107 | 22,314 | 5,862 | 3,750 | 32,033 |
| 34,765 | 105 | 22,111 | 5,800 | 3,714 | 31,730 |
| 34,766 | 103 | 21,891 | 5,756 | 3,688 | 31,438 |
| 34,767 | 112 | 22,454 | 5,935 | 3,820 | 32,321 |
| 34,768 | 112 | 22,607 | 5,988 | 3,854 | 32,561 |
| 34,769 | 115 | 22,580 | 5,987 | 3,837 | 32,519 |
| 34,770 | 115 | 22,465 | 5,976 | 3,815 | 32,371 |
| 34,771 | 116 | 22,597 | 5,939 | 3,811 | 32,463 |
| 34,772 | 120 | 22,282 | 5,835 | 3,709 | 31,946 |
| 34,773 | 123 | 22,636 | 5,839 | 3,728 | 32,326 |
| 34,774 | 123 | 22,732 | 5,862 | 3,726 | 32,443 |
| 34,775 | 133 | 22,720 | 5,869 | 3,706 | 32,428 |

|        |     |        |       |       |        |
|--------|-----|--------|-------|-------|--------|
| 34,776 | 133 | 22,873 | 5,851 | 3,694 | 32,551 |
| 34,777 | 139 | 22,901 | 5,901 | 3,726 | 32,667 |
| 34,778 | 133 | 22,671 | 5,818 | 3,693 | 32,315 |
| 34,779 | 134 | 22,330 | 5,716 | 3,644 | 31,824 |
| 34,780 | 135 | 22,090 | 5,645 | 3,584 | 31,454 |
| 34,781 | 132 | 22,116 | 5,679 | 3,577 | 31,504 |
| 34,782 | 131 | 21,570 | 5,580 | 3,518 | 30,799 |
| 34,783 | 131 | 21,580 | 5,557 | 3,502 | 30,770 |
| 34,784 | 126 | 21,354 | 5,501 | 3,477 | 30,458 |
| 34,785 | 126 | 21,329 | 5,496 | 3,477 | 30,428 |
| 34,786 | 123 | 21,378 | 5,522 | 3,502 | 30,525 |
| 34,787 | 128 | 21,559 | 5,555 | 3,515 | 30,757 |
| 34,788 | 128 | 21,442 | 5,514 | 3,503 | 30,587 |
| 34,789 | 125 | 21,444 | 5,546 | 3,520 | 30,635 |
| 34,790 | 123 | 21,264 | 5,486 | 3,486 | 30,359 |
| 34,791 | 124 | 21,352 | 5,467 | 3,454 | 30,397 |
| 34,792 | 125 | 21,707 | 5,493 | 3,485 | 30,810 |
| 34,793 | 123 | 21,803 | 5,467 | 3,484 | 30,877 |
| 34,794 | 124 | 21,741 | 5,447 | 3,453 | 30,765 |
| 34,795 | 126 | 22,180 | 5,497 | 3,507 | 31,310 |
| 34,796 | 125 | 22,009 | 5,430 | 3,464 | 31,028 |
| 34,797 | 127 | 22,045 | 5,445 | 3,473 | 31,090 |
| 34,798 | 129 | 21,701 | 5,347 | 3,427 | 30,604 |
| 34,799 | 129 | 21,747 | 5,346 | 3,408 | 30,630 |
| 34,800 | 128 | 21,757 | 5,358 | 3,384 | 30,627 |
| 34,801 | 132 | 21,895 | 5,375 | 3,410 | 30,812 |
| 34,802 | 138 | 21,591 | 5,338 | 3,396 | 30,463 |
| 34,803 | 137 | 21,590 | 5,338 | 3,387 | 30,452 |
| 34,804 | 136 | 21,530 | 5,359 | 3,381 | 30,406 |
| 34,805 | 135 | 21,486 | 5,339 | 3,378 | 30,338 |
| 34,806 | 133 | 21,562 | 5,359 | 3,392 | 30,446 |
| 34,807 | 135 | 21,501 | 5,374 | 3,413 | 30,423 |



|        |     |        |       |       |        |
|--------|-----|--------|-------|-------|--------|
| 34,808 | 130 | 21,517 | 5,383 | 3,417 | 30,447 |
| 34,809 | 128 | 21,631 | 5,357 | 3,431 | 30,547 |
| 34,810 | 129 | 21,963 | 5,360 | 3,438 | 30,890 |
| 34,811 | 126 | 21,092 | 5,176 | 3,309 | 29,703 |
| 34,812 | 126 | 21,375 | 5,214 | 3,325 | 30,040 |
| 34,813 | 125 | 21,602 | 5,290 | 3,349 | 30,366 |
| 34,814 | 125 | 21,629 | 5,274 | 3,352 | 30,380 |
| 34,815 | 120 | 22,048 | 5,371 | 3,398 | 30,937 |
| 34,816 | 115 | 22,004 | 5,342 | 3,361 | 30,822 |
| 34,817 | 118 | 22,155 | 5,337 | 3,360 | 30,970 |
| 34,818 | 122 | 22,423 | 5,404 | 3,385 | 31,334 |
| 34,819 | 123 | 22,244 | 5,372 | 3,347 | 31,086 |
| 34,820 | 124 | 22,313 | 5,371 | 3,359 | 31,167 |
| 34,821 | 125 | 22,459 | 5,340 | 3,371 | 31,295 |
| 34,822 | 119 | 22,423 | 5,324 | 3,383 | 31,249 |
| 34,823 | 118 | 22,314 | 5,319 | 3,391 | 31,142 |
| 34,824 | 115 | 22,085 | 5,341 | 3,399 | 30,940 |
| 34,825 | 113 | 22,237 | 5,369 | 3,440 | 31,159 |
| 34,826 | 113 | 22,125 | 5,368 | 3,478 | 31,084 |
| 34,827 | 119 | 22,290 | 5,385 | 3,508 | 31,302 |
| 34,828 | 112 | 22,292 | 5,350 | 3,508 | 31,262 |
| 34,829 | 109 | 22,391 | 5,390 | 3,519 | 31,409 |
| 34,830 | 108 | 22,498 | 5,408 | 3,529 | 31,543 |
| 34,831 | 109 | 22,486 | 5,407 | 3,561 | 31,563 |
| 34,832 | 112 | 22,638 | 5,418 | 3,561 | 31,729 |
| 34,833 | 116 | 22,662 | 5,407 | 3,560 | 31,745 |
| 34,834 | 115 | 22,591 | 5,416 | 3,550 | 31,672 |
| 34,835 | 115 | 22,868 | 5,496 | 3,586 | 32,065 |
| 34,836 | 116 | 22,955 | 5,480 | 3,589 | 32,140 |
| 34,837 | 114 | 22,858 | 5,473 | 3,577 | 32,022 |
| 34,838 | 111 | 22,966 | 5,513 | 3,596 | 32,186 |
| 34,839 | 120 | 22,856 | 5,553 | 3,599 | 32,128 |

|        |     |        |       |       |        |
|--------|-----|--------|-------|-------|--------|
| 34,840 | 120 | 23,211 | 5,606 | 3,640 | 32,577 |
| 34,841 | 118 | 22,724 | 5,505 | 3,566 | 31,913 |
| 34,842 | 118 | 22,937 | 5,538 | 3,589 | 32,182 |
| 34,843 | 121 | 22,965 | 5,536 | 3,589 | 32,211 |
| 34,844 | 118 | 22,753 | 5,509 | 3,573 | 31,953 |
| 34,845 | 121 | 22,979 | 5,588 | 3,603 | 32,291 |
| 34,846 | 118 | 22,680 | 5,553 | 3,560 | 31,911 |
| 34,847 | 117 | 22,709 | 5,579 | 3,568 | 31,973 |
| 34,848 | 116 | 22,917 | 5,612 | 3,609 | 32,254 |
| 34,849 | 118 | 22,762 | 5,589 | 3,607 | 32,076 |
| 34,850 | 116 | 22,722 | 5,593 | 3,614 | 32,045 |
| 34,851 | 122 | 22,975 | 5,638 | 3,658 | 32,393 |
| 34,852 | 120 | 23,107 | 5,684 | 3,657 | 32,568 |
| 34,853 | 111 | 23,098 | 5,690 | 3,638 | 32,537 |
| 34,854 | 111 | 22,811 | 5,617 | 3,597 | 32,136 |
| 34,855 | 119 | 22,813 | 5,624 | 3,594 | 32,150 |
| 34,856 | 122 | 23,111 | 5,681 | 3,615 | 32,529 |
| 34,857 | 125 | 22,974 | 5,639 | 3,592 | 32,330 |
| 34,858 | 126 | 22,750 | 5,602 | 3,549 | 32,027 |
| 34,859 | 129 | 23,005 | 5,672 | 3,594 | 32,400 |
| 34,860 | 130 | 22,680 | 5,608 | 3,557 | 31,975 |
| 34,861 | 129 | 22,389 | 5,576 | 3,518 | 31,612 |
| 34,862 | 124 | 22,886 | 5,699 | 3,588 | 32,297 |
| 34,863 | 126 | 22,731 | 5,691 | 3,589 | 32,137 |
| 34,864 | 127 | 22,941 | 5,720 | 3,613 | 32,401 |
| 34,865 | 127 | 22,751 | 5,669 | 3,586 | 32,133 |
| 34,866 | 129 | 22,978 | 5,697 | 3,638 | 32,442 |
| 34,867 | 133 | 22,694 | 5,654 | 3,611 | 32,092 |
| 34,868 | 130 | 22,488 | 5,628 | 3,585 | 31,831 |
| 34,869 | 130 | 22,981 | 5,740 | 3,673 | 32,524 |
| 34,870 | 131 | 22,729 | 5,681 | 3,648 | 32,189 |
| 34,871 | 125 | 22,552 | 5,648 | 3,624 | 31,949 |

|        |     |        |       |       |        |
|--------|-----|--------|-------|-------|--------|
| 34,872 | 128 | 22,587 | 5,681 | 3,612 | 32,008 |
| 34,873 | 130 | 22,605 | 5,653 | 3,595 | 31,983 |
| 34,874 | 130 | 22,660 | 5,664 | 3,598 | 32,052 |
| 34,875 | 128 | 22,643 | 5,653 | 3,620 | 32,044 |
| 34,876 | 130 | 22,751 | 5,686 | 3,643 | 32,210 |
| 34,877 | 129 | 22,775 | 5,631 | 3,605 | 32,140 |
| 34,878 | 123 | 22,321 | 5,566 | 3,504 | 31,514 |
| 34,879 | 127 | 22,437 | 5,600 | 3,544 | 31,708 |
| 34,880 | 131 | 22,391 | 5,570 | 3,535 | 31,627 |
| 34,881 | 134 | 22,127 | 5,512 | 3,481 | 31,254 |
| 34,882 | 138 | 22,427 | 5,602 | 3,505 | 31,672 |
| 34,883 | 130 | 22,109 | 5,538 | 3,452 | 31,229 |
| 34,884 | 129 | 22,062 | 5,471 | 3,452 | 31,114 |
| 34,885 | 129 | 22,140 | 5,481 | 3,456 | 31,206 |
| 34,886 | 129 | 22,015 | 5,494 | 3,466 | 31,104 |
| 34,887 | 132 | 22,143 | 5,497 | 3,476 | 31,248 |
| 34,888 | 133 | 21,817 | 5,423 | 3,429 | 30,802 |
| 34,889 | 136 | 21,772 | 5,416 | 3,410 | 30,734 |
| 34,890 | 134 | 21,546 | 5,366 | 3,372 | 30,418 |
| 34,891 | 134 | 21,285 | 5,316 | 3,340 | 30,075 |
| 34,892 | 137 | 21,504 | 5,377 | 3,363 | 30,381 |
| 34,893 | 142 | 21,434 | 5,334 | 3,312 | 30,222 |
| 34,894 | 146 | 21,446 | 5,309 | 3,294 | 30,195 |
| 34,895 | 145 | 21,481 | 5,297 | 3,298 | 30,221 |
| 34,896 | 144 | 21,613 | 5,331 | 3,315 | 30,403 |
| 34,897 | 147 | 21,722 | 5,301 | 3,321 | 30,491 |
| 34,898 | 148 | 21,794 | 5,310 | 3,341 | 30,593 |
| 34,899 | 148 | 21,681 | 5,299 | 3,325 | 30,453 |
| 34,900 | 147 | 21,890 | 5,383 | 3,371 | 30,791 |
| 34,901 | 148 | 22,019 | 5,441 | 3,396 | 31,004 |
| 34,902 | 142 | 21,998 | 5,414 | 3,375 | 30,929 |
| 34,903 | 144 | 21,811 | 5,383 | 3,360 | 30,698 |

|        |     |        |       |       |        |
|--------|-----|--------|-------|-------|--------|
| 34,904 | 145 | 21,644 | 5,378 | 3,357 | 30,524 |
| 34,905 | 139 | 22,225 | 5,500 | 3,451 | 31,315 |
| 34,906 | 139 | 22,232 | 5,503 | 3,475 | 31,349 |
| 34,907 | 134 | 22,269 | 5,466 | 3,460 | 31,329 |
| 34,908 | 138 | 22,471 | 5,505 | 3,467 | 31,581 |
| 34,909 | 137 | 22,552 | 5,525 | 3,476 | 31,690 |
| 34,910 | 139 | 22,638 | 5,522 | 3,503 | 31,802 |
| 34,911 | 150 | 22,762 | 5,586 | 3,527 | 32,025 |
| 34,912 | 158 | 22,564 | 5,567 | 3,508 | 31,797 |
| 34,913 | 156 | 22,436 | 5,548 | 3,499 | 31,639 |
| 34,914 | 158 | 22,480 | 5,556 | 3,516 | 31,710 |
| 34,915 | 154 | 22,304 | 5,515 | 3,487 | 31,460 |
| 34,916 | 153 | 22,461 | 5,625 | 3,544 | 31,783 |
| 34,917 | 151 | 22,655 | 5,713 | 3,589 | 32,108 |
| 34,918 | 149 | 22,427 | 5,648 | 3,528 | 31,752 |
| 34,919 | 152 | 22,490 | 5,678 | 3,554 | 31,874 |
| 34,920 | 149 | 22,394 | 5,690 | 3,576 | 31,809 |
| 34,921 | 148 | 22,144 | 5,654 | 3,546 | 31,492 |
| 34,922 | 149 | 22,152 | 5,648 | 3,556 | 31,505 |
| 34,923 | 147 | 22,231 | 5,668 | 3,567 | 31,613 |
| 34,924 | 148 | 22,308 | 5,657 | 3,541 | 31,654 |
| 34,925 | 148 | 22,540 | 5,704 | 3,570 | 31,962 |
| 34,926 | 148 | 22,557 | 5,688 | 3,553 | 31,946 |
| 34,927 | 145 | 22,460 | 5,669 | 3,516 | 31,790 |
| 34,928 | 141 | 22,439 | 5,702 | 3,522 | 31,804 |
| 34,929 | 144 | 22,640 | 5,692 | 3,545 | 32,021 |
| 34,930 | 142 | 22,700 | 5,680 | 3,529 | 32,051 |
| 34,931 | 138 | 22,471 | 5,634 | 3,504 | 31,747 |
| 34,932 | 136 | 22,660 | 5,671 | 3,530 | 31,997 |
| 34,933 | 139 | 22,402 | 5,609 | 3,507 | 31,657 |
| 34,934 | 139 | 22,526 | 5,596 | 3,500 | 31,761 |
| 34,935 | 139 | 22,252 | 5,544 | 3,470 | 31,405 |

|        |     |        |       |       |        |
|--------|-----|--------|-------|-------|--------|
| 34,936 | 139 | 22,438 | 5,572 | 3,486 | 31,635 |
| 34,937 | 139 | 22,443 | 5,588 | 3,491 | 31,661 |
| 34,938 | 136 | 22,679 | 5,653 | 3,530 | 31,998 |
| 34,939 | 134 | 22,569 | 5,607 | 3,520 | 31,830 |
| 34,940 | 129 | 22,399 | 5,581 | 3,528 | 31,637 |
| 34,941 | 128 | 22,322 | 5,594 | 3,544 | 31,588 |
| 34,942 | 131 | 22,622 | 5,619 | 3,557 | 31,929 |
| 34,943 | 133 | 22,352 | 5,580 | 3,553 | 31,618 |
| 34,944 | 127 | 22,109 | 5,557 | 3,544 | 31,337 |
| 34,945 | 124 | 22,446 | 5,625 | 3,580 | 31,775 |
| 34,946 | 128 | 22,714 | 5,716 | 3,637 | 32,195 |
| 34,947 | 125 | 22,709 | 5,693 | 3,625 | 32,152 |
| 34,948 | 124 | 22,579 | 5,687 | 3,579 | 31,969 |
| 34,949 | 129 | 22,460 | 5,596 | 3,535 | 31,720 |
| 34,950 | 129 | 22,601 | 5,643 | 3,553 | 31,926 |
| 34,951 | 127 | 22,889 | 5,722 | 3,583 | 32,321 |
| 34,952 | 131 | 22,417 | 5,626 | 3,518 | 31,692 |
| 34,953 | 127 | 22,310 | 5,578 | 3,481 | 31,496 |
| 34,954 | 130 | 22,637 | 5,632 | 3,512 | 31,911 |
| 34,955 | 135 | 22,522 | 5,619 | 3,505 | 31,781 |
| 34,956 | 140 | 22,171 | 5,527 | 3,470 | 31,308 |
| 34,957 | 141 | 21,890 | 5,512 | 3,414 | 30,957 |
| 34,958 | 146 | 22,190 | 5,577 | 3,466 | 31,379 |
| 34,959 | 152 | 22,476 | 5,649 | 3,511 | 31,788 |
| 34,960 | 151 | 22,017 | 5,570 | 3,460 | 31,198 |
| 34,961 | 150 | 22,054 | 5,583 | 3,469 | 31,256 |
| 34,962 | 138 | 21,896 | 5,552 | 3,461 | 31,047 |
| 34,963 | 142 | 21,923 | 5,540 | 3,497 | 31,102 |
| 34,964 | 139 | 21,655 | 5,473 | 3,428 | 30,695 |
| 34,965 | 139 | 21,708 | 5,451 | 3,426 | 30,724 |
| 34,966 | 142 | 21,949 | 5,533 | 3,460 | 31,084 |
| 34,967 | 142 | 22,020 | 5,518 | 3,452 | 31,132 |

|        |     |        |       |       |        |
|--------|-----|--------|-------|-------|--------|
| 34,968 | 143 | 21,836 | 5,456 | 3,418 | 30,853 |
| 34,969 | 145 | 21,812 | 5,475 | 3,422 | 30,854 |
| 34,970 | 147 | 21,886 | 5,425 | 3,379 | 30,837 |
| 34,971 | 149 | 21,969 | 5,410 | 3,347 | 30,875 |
| 34,972 | 149 | 22,273 | 5,498 | 3,398 | 31,318 |
| 34,973 | 148 | 22,441 | 5,560 | 3,431 | 31,580 |
| 34,974 | 154 | 22,409 | 5,546 | 3,447 | 31,556 |
| 34,975 | 153 | 22,414 | 5,555 | 3,469 | 31,591 |
| 34,976 | 156 | 22,597 | 5,655 | 3,522 | 31,930 |
| 34,977 | 156 | 22,569 | 5,614 | 3,526 | 31,865 |
| 34,978 | 160 | 22,840 | 5,652 | 3,571 | 32,223 |
| 34,979 | 160 | 22,975 | 5,705 | 3,607 | 32,447 |
| 34,980 | 161 | 22,908 | 5,734 | 3,635 | 32,438 |
| 34,981 | 159 | 22,620 | 5,684 | 3,618 | 32,081 |
| 34,982 | 159 | 22,555 | 5,690 | 3,615 | 32,019 |
| 34,983 | 163 | 22,772 | 5,723 | 3,663 | 32,321 |
| 34,984 | 158 | 22,832 | 5,733 | 3,676 | 32,399 |
| 34,985 | 159 | 22,790 | 5,720 | 3,681 | 32,350 |
| 34,986 | 161 | 22,875 | 5,729 | 3,705 | 32,470 |
| 34,987 | 161 | 22,729 | 5,738 | 3,691 | 32,319 |
| 34,988 | 170 | 23,271 | 5,842 | 3,789 | 33,072 |
| 34,989 | 172 | 23,201 | 5,856 | 3,774 | 33,003 |
| 34,990 | 169 | 23,043 | 5,784 | 3,737 | 32,733 |
| 34,991 | 171 | 23,307 | 5,839 | 3,762 | 33,079 |
| 34,992 | 175 | 23,334 | 5,834 | 3,762 | 33,105 |
| 34,993 | 175 | 23,051 | 5,805 | 3,736 | 32,767 |
| 34,994 | 168 | 22,850 | 5,757 | 3,701 | 32,476 |
| 34,995 | 170 | 21,958 | 5,568 | 3,624 | 31,320 |
| 34,996 | 171 | 22,157 | 5,600 | 3,649 | 31,577 |
| 34,997 | 169 | 22,479 | 5,688 | 3,685 | 32,021 |
| 34,998 | 173 | 22,454 | 5,727 | 3,679 | 32,033 |
| 34,999 | 174 | 22,728 | 5,799 | 3,764 | 32,465 |

|        |     |        |       |       |        |
|--------|-----|--------|-------|-------|--------|
| 35,000 | 169 | 22,472 | 5,766 | 3,729 | 32,136 |
| 35,001 | 172 | 22,247 | 5,639 | 3,685 | 31,743 |
| 35,002 | 174 | 22,441 | 5,670 | 3,717 | 32,002 |
| 35,003 | 169 | 22,397 | 5,683 | 3,728 | 31,977 |
| 35,004 | 168 | 22,535 | 5,713 | 3,737 | 32,153 |
| 35,005 | 160 | 22,388 | 5,693 | 3,724 | 31,965 |
| 35,006 | 159 | 22,636 | 5,729 | 3,754 | 32,278 |
| 35,007 | 153 | 22,229 | 5,612 | 3,668 | 31,662 |
| 35,008 | 154 | 22,310 | 5,656 | 3,720 | 31,840 |
| 35,009 | 150 | 22,374 | 5,722 | 3,773 | 32,019 |
| 35,010 | 145 | 22,648 | 5,810 | 3,844 | 32,447 |
| 35,011 | 141 | 22,338 | 5,697 | 3,764 | 31,940 |
| 35,012 | 146 | 22,572 | 5,744 | 3,802 | 32,264 |
| 35,013 | 140 | 22,822 | 5,812 | 3,822 | 32,596 |
| 35,014 | 134 | 22,628 | 5,751 | 3,786 | 32,299 |
| 35,015 | 135 | 22,613 | 5,776 | 3,811 | 32,335 |
| 35,016 | 144 | 22,848 | 5,849 | 3,842 | 32,683 |
| 35,017 | 145 | 22,561 | 5,756 | 3,788 | 32,250 |
| 35,018 | 145 | 22,560 | 5,761 | 3,790 | 32,256 |
| 35,019 | 150 | 22,725 | 5,806 | 3,806 | 32,487 |
| 35,020 | 153 | 22,533 | 5,747 | 3,779 | 32,212 |
| 35,021 | 150 | 22,230 | 5,713 | 3,759 | 31,852 |
| 35,022 | 151 | 22,413 | 5,750 | 3,805 | 32,119 |
| 35,023 | 150 | 22,671 | 5,743 | 3,821 | 32,385 |
| 35,024 | 148 | 22,641 | 5,733 | 3,799 | 32,321 |
| 35,025 | 145 | 22,661 | 5,759 | 3,784 | 32,349 |
| 35,026 | 146 | 22,713 | 5,728 | 3,754 | 32,341 |
| 35,027 | 145 | 22,628 | 5,720 | 3,749 | 32,242 |
| 35,028 | 145 | 22,582 | 5,750 | 3,752 | 32,229 |
| 35,029 | 141 | 22,599 | 5,790 | 3,763 | 32,293 |
| 35,030 | 147 | 22,542 | 5,763 | 3,741 | 32,193 |
| 35,031 | 144 | 22,612 | 5,745 | 3,738 | 32,239 |

|        |     |        |       |       |        |
|--------|-----|--------|-------|-------|--------|
| 35,032 | 144 | 22,456 | 5,705 | 3,714 | 32,019 |
| 35,033 | 147 | 22,661 | 5,733 | 3,739 | 32,280 |
| 35,034 | 144 | 22,442 | 5,673 | 3,694 | 31,953 |
| 35,035 | 142 | 22,226 | 5,615 | 3,656 | 31,639 |
| 35,036 | 144 | 21,991 | 5,608 | 3,641 | 31,384 |
| 35,037 | 144 | 22,137 | 5,643 | 3,671 | 31,595 |
| 35,038 | 140 | 22,386 | 5,703 | 3,703 | 31,932 |
| 35,039 | 138 | 22,404 | 5,718 | 3,685 | 31,945 |
| 35,040 | 138 | 22,454 | 5,697 | 3,684 | 31,973 |
| 35,041 | 140 | 22,643 | 5,778 | 3,733 | 32,294 |
| 35,042 | 133 | 22,399 | 5,761 | 3,719 | 32,012 |
| 35,043 | 127 | 22,405 | 5,711 | 3,715 | 31,958 |
| 35,044 | 130 | 22,807 | 5,763 | 3,746 | 32,446 |
| 35,045 | 131 | 22,543 | 5,718 | 3,706 | 32,098 |
| 35,046 | 125 | 22,129 | 5,660 | 3,677 | 31,591 |
| 35,047 | 126 | 22,481 | 5,766 | 3,752 | 32,125 |
| 35,048 | 130 | 22,480 | 5,737 | 3,760 | 32,107 |
| 35,049 | 125 | 22,347 | 5,696 | 3,732 | 31,900 |
| 35,050 | 125 | 22,417 | 5,718 | 3,734 | 31,994 |
| 35,051 | 122 | 22,350 | 5,690 | 3,713 | 31,875 |
| 35,052 | 119 | 22,767 | 5,796 | 3,777 | 32,459 |
| 35,053 | 118 | 22,775 | 5,814 | 3,796 | 32,503 |
| 35,054 | 120 | 22,822 | 5,837 | 3,793 | 32,572 |
| 35,055 | 121 | 22,539 | 5,781 | 3,772 | 32,213 |
| 35,056 | 119 | 22,254 | 5,727 | 3,733 | 31,833 |
| 35,057 | 119 | 21,998 | 5,689 | 3,704 | 31,510 |
| 35,058 | 120 | 22,811 | 5,876 | 3,838 | 32,645 |
| 35,059 | 119 | 22,792 | 5,888 | 3,848 | 32,647 |
| 35,060 | 120 | 22,848 | 5,905 | 3,853 | 32,726 |
| 35,061 | 119 | 22,723 | 5,867 | 3,815 | 32,524 |
| 35,062 | 118 | 22,495 | 5,797 | 3,781 | 32,191 |
| 35,063 | 116 | 22,478 | 5,866 | 3,792 | 32,252 |



|        |     |        |       |       |        |
|--------|-----|--------|-------|-------|--------|
| 35,064 | 115 | 22,318 | 5,841 | 3,803 | 32,077 |
| 35,065 | 121 | 22,366 | 5,872 | 3,803 | 32,162 |
| 35,066 | 123 | 22,528 | 5,939 | 3,849 | 32,439 |
| 35,067 | 118 | 22,494 | 5,942 | 3,857 | 32,411 |
| 35,068 | 115 | 22,271 | 5,881 | 3,823 | 32,090 |
| 35,069 | 114 | 22,220 | 5,869 | 3,821 | 32,024 |
| 35,070 | 106 | 22,084 | 5,829 | 3,822 | 31,841 |
| 35,071 | 104 | 22,230 | 5,862 | 3,842 | 32,038 |
| 35,072 | 102 | 21,926 | 5,789 | 3,787 | 31,604 |
| 35,073 | 103 | 21,998 | 5,852 | 3,859 | 31,812 |
| 35,074 | 112 | 21,974 | 5,929 | 3,888 | 31,903 |
| 35,075 | 110 | 21,534 | 5,819 | 3,839 | 31,302 |
| 35,076 | 111 | 21,675 | 5,854 | 3,859 | 31,499 |
| 35,077 | 113 | 21,773 | 5,869 | 3,880 | 31,635 |
| 35,078 | 112 | 21,738 | 5,814 | 3,856 | 31,520 |
| 35,079 | 112 | 21,180 | 5,698 | 3,749 | 30,739 |
| 35,080 | 112 | 21,317 | 5,727 | 3,786 | 30,942 |
| 35,081 | 113 | 21,530 | 5,769 | 3,799 | 31,211 |
| 35,082 | 118 | 21,685 | 5,832 | 3,825 | 31,460 |
| 35,083 | 114 | 21,766 | 5,818 | 3,817 | 31,515 |
| 35,084 | 113 | 21,666 | 5,798 | 3,819 | 31,396 |
| 35,085 | 112 | 21,665 | 5,811 | 3,818 | 31,406 |
| 35,086 | 120 | 21,456 | 5,795 | 3,797 | 31,168 |
| 35,087 | 116 | 21,276 | 5,750 | 3,753 | 30,895 |
| 35,088 | 122 | 21,419 | 5,816 | 3,782 | 31,139 |
| 35,089 | 121 | 21,107 | 5,739 | 3,756 | 30,723 |
| 35,090 | 121 | 20,830 | 5,686 | 3,732 | 30,369 |
| 35,091 | 126 | 21,096 | 5,783 | 3,802 | 30,807 |
| 35,092 | 128 | 21,496 | 5,833 | 3,827 | 31,284 |
| 35,093 | 126 | 21,414 | 5,823 | 3,801 | 31,164 |
| 35,094 | 126 | 21,427 | 5,831 | 3,798 | 31,182 |
| 35,095 | 137 | 21,748 | 5,988 | 3,843 | 31,716 |

|        |     |        |       |       |        |
|--------|-----|--------|-------|-------|--------|
| 35,096 | 132 | 21,727 | 6,008 | 3,851 | 31,718 |
| 35,097 | 133 | 21,750 | 6,010 | 3,822 | 31,715 |
| 35,098 | 135 | 21,716 | 5,981 | 3,808 | 31,640 |
| 35,099 | 131 | 21,354 | 5,919 | 3,747 | 31,151 |
| 35,100 | 135 | 21,636 | 5,999 | 3,808 | 31,578 |
| 35,101 | 142 | 21,433 | 5,950 | 3,768 | 31,293 |
| 35,102 | 142 | 21,133 | 5,875 | 3,721 | 30,871 |
| 35,103 | 145 | 21,497 | 5,940 | 3,791 | 31,373 |
| 35,104 | 148 | 21,273 | 5,885 | 3,742 | 31,048 |
| 35,105 | 146 | 21,059 | 5,787 | 3,712 | 30,704 |
| 35,106 | 143 | 21,361 | 5,844 | 3,751 | 31,099 |
| 35,107 | 153 | 21,601 | 5,934 | 3,773 | 31,461 |
| 35,108 | 154 | 21,391 | 5,897 | 3,741 | 31,183 |
| 35,109 | 159 | 21,329 | 5,793 | 3,672 | 30,953 |
| 35,110 | 161 | 21,528 | 5,811 | 3,691 | 31,191 |
| 35,111 | 158 | 21,834 | 5,850 | 3,730 | 31,572 |
| 35,112 | 158 | 21,834 | 5,820 | 3,725 | 31,537 |
| 35,113 | 162 | 21,885 | 5,777 | 3,668 | 31,492 |
| 35,114 | 166 | 22,339 | 5,874 | 3,726 | 32,105 |
| 35,115 | 165 | 22,573 | 5,920 | 3,776 | 32,434 |
| 35,116 | 163 | 22,372 | 5,860 | 3,750 | 32,145 |
| 35,117 | 163 | 22,333 | 5,864 | 3,742 | 32,102 |
| 35,118 | 162 | 22,374 | 5,862 | 3,750 | 32,148 |
| 35,119 | 163 | 22,560 | 5,879 | 3,766 | 32,368 |
| 35,120 | 163 | 22,587 | 5,877 | 3,761 | 32,388 |
| 35,121 | 159 | 22,637 | 5,869 | 3,780 | 32,445 |
| 35,122 | 161 | 22,620 | 5,860 | 3,780 | 32,421 |
| 35,123 | 164 | 22,570 | 5,800 | 3,713 | 32,247 |
| 35,124 | 166 | 22,778 | 5,861 | 3,739 | 32,544 |
| 35,125 | 161 | 22,952 | 5,860 | 3,737 | 32,710 |
| 35,126 | 160 | 22,795 | 5,833 | 3,719 | 32,507 |
| 35,127 | 158 | 23,052 | 5,916 | 3,765 | 32,891 |

|        |     |        |       |       |        |
|--------|-----|--------|-------|-------|--------|
| 35,128 | 157 | 22,996 | 5,916 | 3,757 | 32,826 |
| 35,129 | 155 | 22,789 | 5,840 | 3,702 | 32,486 |
| 35,130 | 157 | 22,809 | 5,884 | 3,731 | 32,581 |
| 35,131 | 157 | 22,688 | 5,859 | 3,714 | 32,418 |
| 35,132 | 157 | 22,973 | 5,945 | 3,789 | 32,864 |
| 35,133 | 156 | 23,399 | 5,995 | 3,855 | 33,405 |
| 35,134 | 158 | 23,228 | 5,990 | 3,836 | 33,212 |
| 35,135 | 160 | 23,585 | 6,055 | 3,880 | 33,680 |
| 35,136 | 159 | 23,797 | 6,044 | 3,899 | 33,899 |
| 35,137 | 152 | 23,715 | 5,971 | 3,885 | 33,723 |
| 35,138 | 153 | 23,828 | 5,980 | 3,890 | 33,851 |
| 35,139 | 148 | 23,913 | 6,036 | 3,945 | 34,042 |
| 35,140 | 145 | 23,885 | 6,018 | 3,933 | 33,981 |
| 35,141 | 145 | 23,664 | 5,941 | 3,890 | 33,640 |
| 35,142 | 144 | 23,526 | 5,886 | 3,881 | 33,437 |
| 35,143 | 147 | 23,728 | 5,968 | 3,935 | 33,778 |
| 35,144 | 149 | 23,839 | 5,995 | 3,959 | 33,942 |
| 35,145 | 144 | 23,854 | 5,952 | 3,975 | 33,925 |
| 35,146 | 137 | 23,674 | 5,885 | 3,957 | 33,653 |
| 35,147 | 146 | 23,819 | 5,888 | 3,969 | 33,822 |
| 35,148 | 145 | 23,882 | 5,858 | 3,956 | 33,841 |
| 35,149 | 149 | 24,064 | 5,856 | 3,965 | 34,034 |
| 35,150 | 149 | 24,110 | 5,866 | 3,991 | 34,116 |
| 35,151 | 138 | 24,236 | 5,898 | 4,020 | 34,292 |
| 35,152 | 140 | 24,267 | 5,928 | 4,030 | 34,365 |
| 35,153 | 138 | 24,292 | 5,916 | 4,035 | 34,381 |
| 35,154 | 134 | 24,404 | 5,979 | 4,039 | 34,556 |
| 35,155 | 138 | 24,492 | 6,017 | 4,054 | 34,701 |
| 35,156 | 135 | 24,269 | 5,989 | 4,012 | 34,405 |
| 35,157 | 135 | 24,497 | 6,043 | 4,047 | 34,722 |
| 35,158 | 132 | 24,292 | 5,988 | 4,001 | 34,413 |
| 35,159 | 130 | 24,308 | 5,998 | 4,001 | 34,437 |

|        |     |        |       |       |        |
|--------|-----|--------|-------|-------|--------|
| 35,160 | 127 | 24,300 | 6,027 | 4,004 | 34,458 |
| 35,161 | 128 | 24,487 | 6,130 | 4,047 | 34,792 |
| 35,162 | 126 | 24,371 | 6,101 | 4,029 | 34,627 |
| 35,163 | 121 | 23,952 | 6,024 | 3,985 | 34,082 |
| 35,164 | 125 | 24,136 | 6,029 | 4,013 | 34,303 |
| 35,165 | 127 | 24,169 | 6,029 | 4,003 | 34,328 |
| 35,166 | 125 | 24,242 | 6,030 | 4,002 | 34,399 |
| 35,167 | 133 | 24,118 | 5,977 | 3,984 | 34,212 |
| 35,168 | 133 | 24,239 | 5,994 | 3,985 | 34,351 |
| 35,169 | 133 | 24,308 | 6,064 | 4,001 | 34,506 |
| 35,170 | 136 | 24,302 | 6,050 | 3,993 | 34,481 |
| 35,171 | 137 | 24,291 | 6,045 | 3,989 | 34,462 |
| 35,172 | 136 | 24,418 | 6,100 | 4,016 | 34,670 |
| 35,173 | 134 | 24,513 | 6,134 | 4,039 | 34,820 |
| 35,174 | 133 | 24,524 | 6,093 | 4,046 | 34,796 |
| 35,175 | 135 | 24,855 | 6,150 | 4,084 | 35,224 |
| 35,176 | 131 | 24,418 | 6,062 | 4,020 | 34,631 |
| 35,177 | 130 | 24,483 | 6,079 | 4,019 | 34,711 |
| 35,178 | 127 | 24,319 | 6,081 | 4,036 | 34,563 |
| 35,179 | 131 | 24,257 | 6,067 | 4,031 | 34,486 |
| 35,180 | 129 | 24,168 | 6,029 | 4,013 | 34,339 |
| 35,181 | 131 | 24,274 | 6,051 | 4,050 | 34,506 |
| 35,182 | 129 | 24,339 | 6,069 | 4,071 | 34,608 |
| 35,183 | 130 | 24,384 | 6,060 | 4,062 | 34,636 |
| 35,184 | 127 | 24,042 | 6,043 | 4,007 | 34,219 |
| 35,185 | 135 | 23,745 | 5,996 | 3,942 | 33,818 |
| 35,186 | 136 | 23,645 | 5,965 | 3,913 | 33,659 |
| 35,187 | 138 | 23,630 | 5,988 | 3,953 | 33,709 |
| 35,188 | 142 | 23,766 | 5,984 | 3,974 | 33,866 |
| 35,189 | 143 | 23,921 | 6,007 | 3,965 | 34,036 |
| 35,190 | 144 | 23,979 | 6,049 | 3,961 | 34,133 |
| 35,191 | 145 | 23,671 | 6,024 | 3,907 | 33,747 |

|        |     |        |       |       |        |
|--------|-----|--------|-------|-------|--------|
| 35,192 | 145 | 23,911 | 6,062 | 3,925 | 34,043 |
| 35,193 | 140 | 24,210 | 6,123 | 3,958 | 34,431 |
| 35,194 | 141 | 23,917 | 6,060 | 3,904 | 34,022 |
| 35,195 | 142 | 23,882 | 6,045 | 3,920 | 33,989 |
| 35,196 | 152 | 23,540 | 5,980 | 3,872 | 33,544 |
| 35,197 | 153 | 23,056 | 5,913 | 3,824 | 32,946 |
| 35,198 | 152 | 23,608 | 6,076 | 3,923 | 33,759 |
| 35,199 | 149 | 23,386 | 6,014 | 3,912 | 33,461 |
| 35,200 | 150 | 23,376 | 5,955 | 3,866 | 33,347 |
| 35,201 | 159 | 23,363 | 5,934 | 3,858 | 33,314 |
| 35,202 | 159 | 23,396 | 5,925 | 3,841 | 33,321 |
| 35,203 | 157 | 23,452 | 5,930 | 3,876 | 33,415 |
| 35,204 | 156 | 23,494 | 5,958 | 3,918 | 33,526 |
| 35,205 | 157 | 23,516 | 5,943 | 3,934 | 33,550 |
| 35,206 | 156 | 23,750 | 5,973 | 3,962 | 33,841 |
| 35,207 | 152 | 23,899 | 5,985 | 3,969 | 34,005 |
| 35,208 | 157 | 24,041 | 6,013 | 4,018 | 34,229 |
| 35,209 | 155 | 23,919 | 6,000 | 4,046 | 34,120 |
| 35,210 | 155 | 23,795 | 5,949 | 4,023 | 33,922 |
| 35,211 | 152 | 23,854 | 5,912 | 4,023 | 33,941 |
| 35,212 | 155 | 23,937 | 5,918 | 4,008 | 34,018 |
| 35,213 | 155 | 23,751 | 5,869 | 3,980 | 33,755 |
| 35,214 | 155 | 23,954 | 5,922 | 4,014 | 34,045 |
| 35,215 | 151 | 23,688 | 5,848 | 3,975 | 33,662 |
| 35,216 | 143 | 22,669 | 5,633 | 3,852 | 32,297 |
| 35,217 | 142 | 22,862 | 5,661 | 3,868 | 32,533 |
| 35,218 | 140 | 22,933 | 5,694 | 3,890 | 32,657 |
| 35,219 | 141 | 23,085 | 5,735 | 3,913 | 32,874 |
| 35,220 | 136 | 23,276 | 5,753 | 3,922 | 33,087 |
| 35,221 | 133 | 22,974 | 5,723 | 3,898 | 32,728 |
| 35,222 | 135 | 23,012 | 5,758 | 3,921 | 32,826 |
| 35,223 | 134 | 23,039 | 5,736 | 3,919 | 32,828 |

|        |     |        |       |       |        |
|--------|-----|--------|-------|-------|--------|
| 35,224 | 133 | 23,049 | 5,765 | 3,914 | 32,861 |
| 35,225 | 132 | 22,931 | 5,776 | 3,912 | 32,751 |
| 35,226 | 132 | 22,826 | 5,755 | 3,884 | 32,597 |
| 35,227 | 133 | 22,656 | 5,661 | 3,837 | 32,287 |
| 35,228 | 134 | 22,762 | 5,667 | 3,829 | 32,392 |
| 35,229 | 131 | 22,681 | 5,622 | 3,820 | 32,254 |
| 35,230 | 130 | 22,734 | 5,631 | 3,819 | 32,314 |
| 35,231 | 129 | 22,805 | 5,651 | 3,793 | 32,378 |
| 35,232 | 128 | 22,953 | 5,640 | 3,781 | 32,502 |
| 35,233 | 133 | 23,147 | 5,712 | 3,816 | 32,808 |
| 35,234 | 129 | 22,685 | 5,615 | 3,761 | 32,190 |
| 35,235 | 128 | 23,205 | 5,713 | 3,827 | 32,873 |
| 35,236 | 115 | 22,697 | 5,591 | 3,757 | 32,160 |
| 35,237 | 107 | 22,409 | 5,547 | 3,691 | 31,754 |
| 35,238 | 106 | 22,739 | 5,568 | 3,713 | 32,126 |
| 35,239 | 104 | 22,773 | 5,571 | 3,701 | 32,149 |
| 35,240 | 102 | 22,934 | 5,606 | 3,712 | 32,354 |
| 35,241 | 101 | 22,928 | 5,567 | 3,724 | 32,320 |
| 35,242 | 98  | 22,936 | 5,555 | 3,693 | 32,282 |
| 35,243 | 104 | 22,708 | 5,507 | 3,675 | 31,994 |
| 35,244 | 109 | 22,867 | 5,556 | 3,716 | 32,248 |
| 35,245 | 110 | 22,647 | 5,472 | 3,662 | 31,891 |
| 35,246 | 113 | 22,609 | 5,440 | 3,650 | 31,812 |
| 35,247 | 105 | 22,691 | 5,455 | 3,646 | 31,897 |
| 35,248 | 102 | 22,588 | 5,399 | 3,612 | 31,701 |
| 35,249 | 102 | 22,406 | 5,351 | 3,565 | 31,424 |
| 35,250 | 102 | 22,272 | 5,349 | 3,559 | 31,282 |
| 35,251 | 100 | 22,199 | 5,384 | 3,590 | 31,273 |
| 35,252 | 93  | 22,255 | 5,394 | 3,588 | 31,330 |
| 35,253 | 95  | 22,468 | 5,438 | 3,604 | 31,605 |
| 35,254 | 100 | 22,551 | 5,452 | 3,602 | 31,705 |
| 35,255 | 99  | 22,395 | 5,434 | 3,576 | 31,504 |

|        |     |        |       |       |        |
|--------|-----|--------|-------|-------|--------|
| 35,256 | 98  | 22,263 | 5,442 | 3,556 | 31,359 |
| 35,257 | 103 | 22,212 | 5,418 | 3,536 | 31,269 |
| 35,258 | 104 | 22,203 | 5,379 | 3,547 | 31,233 |
| 35,259 | 104 | 22,163 | 5,333 | 3,499 | 31,099 |
| 35,260 | 104 | 21,923 | 5,259 | 3,435 | 30,721 |
| 35,261 | 105 | 21,928 | 5,279 | 3,437 | 30,749 |
| 35,262 | 110 | 22,183 | 5,307 | 3,452 | 31,052 |
| 35,263 | 108 | 22,260 | 5,337 | 3,476 | 31,181 |
| 35,264 | 105 | 21,507 | 5,181 | 3,359 | 30,152 |
| 35,265 | 105 | 21,875 | 5,260 | 3,396 | 30,636 |
| 35,266 | 103 | 22,173 | 5,315 | 3,443 | 31,034 |
| 35,267 | 105 | 22,118 | 5,263 | 3,405 | 30,891 |
| 35,268 | 109 | 22,406 | 5,299 | 3,423 | 31,237 |
| 35,269 | 108 | 22,369 | 5,288 | 3,424 | 31,189 |
| 35,270 | 108 | 22,519 | 5,336 | 3,452 | 31,415 |
| 35,271 | 108 | 22,304 | 5,263 | 3,425 | 31,100 |
| 35,272 | 110 | 22,381 | 5,213 | 3,387 | 31,091 |
| 35,273 | 109 | 22,276 | 5,178 | 3,342 | 30,905 |
| 35,274 | 115 | 22,460 | 5,165 | 3,346 | 31,086 |
| 35,275 | 113 | 22,421 | 5,193 | 3,324 | 31,051 |
| 35,276 | 115 | 22,642 | 5,237 | 3,354 | 31,348 |
| 35,277 | 114 | 22,424 | 5,168 | 3,334 | 31,040 |
| 35,278 | 116 | 22,651 | 5,211 | 3,397 | 31,375 |
| 35,279 | 115 | 22,809 | 5,243 | 3,419 | 31,586 |
| 35,280 | 120 | 22,864 | 5,267 | 3,418 | 31,669 |
| 35,281 | 120 | 22,963 | 5,275 | 3,412 | 31,770 |
| 35,282 | 120 | 22,374 | 5,111 | 3,335 | 30,940 |
| 35,283 | 124 | 22,525 | 5,116 | 3,332 | 31,097 |
| 35,284 | 123 | 22,805 | 5,146 | 3,347 | 31,421 |
| 35,285 | 126 | 23,157 | 5,195 | 3,381 | 31,859 |
| 35,286 | 126 | 23,055 | 5,168 | 3,370 | 31,719 |
| 35,287 | 126 | 22,936 | 5,111 | 3,329 | 31,502 |

|        |     |        |       |       |        |
|--------|-----|--------|-------|-------|--------|
| 35,288 | 127 | 23,001 | 5,109 | 3,354 | 31,591 |
| 35,289 | 128 | 23,125 | 5,186 | 3,382 | 31,821 |
| 35,290 | 129 | 22,996 | 5,103 | 3,333 | 31,561 |
| 35,291 | 135 | 23,205 | 5,220 | 3,384 | 31,944 |
| 35,292 | 135 | 22,892 | 5,150 | 3,340 | 31,517 |
| 35,293 | 133 | 22,883 | 5,145 | 3,354 | 31,515 |
| 35,294 | 125 | 22,673 | 5,128 | 3,342 | 31,268 |
| 35,295 | 120 | 22,665 | 5,118 | 3,329 | 31,232 |
| 35,296 | 117 | 22,687 | 5,107 | 3,329 | 31,240 |
| 35,297 | 119 | 22,682 | 5,092 | 3,329 | 31,222 |
| 35,298 | 121 | 22,908 | 5,117 | 3,369 | 31,515 |
| 35,299 | 120 | 22,697 | 5,078 | 3,344 | 31,239 |
| 35,300 | 121 | 22,851 | 5,082 | 3,345 | 31,399 |
| 35,301 | 120 | 22,808 | 5,071 | 3,340 | 31,339 |
| 35,302 | 128 | 23,005 | 5,135 | 3,359 | 31,627 |
| 35,303 | 131 | 23,061 | 5,139 | 3,359 | 31,690 |
| 35,304 | 128 | 22,815 | 5,060 | 3,323 | 31,326 |
| 35,305 | 137 | 22,861 | 5,058 | 3,320 | 31,376 |
| 35,306 | 137 | 22,904 | 5,041 | 3,330 | 31,412 |
| 35,307 | 137 | 23,250 | 5,100 | 3,368 | 31,855 |
| 35,308 | 132 | 22,903 | 5,033 | 3,326 | 31,394 |
| 35,309 | 127 | 22,036 | 4,931 | 3,228 | 30,322 |
| 35,310 | 127 | 22,218 | 4,953 | 3,266 | 30,564 |
| 35,311 | 127 | 22,416 | 5,018 | 3,312 | 30,873 |
| 35,312 | 126 | 22,353 | 5,017 | 3,314 | 30,810 |
| 35,313 | 130 | 22,348 | 5,054 | 3,321 | 30,853 |
| 35,314 | 130 | 22,392 | 5,070 | 3,319 | 30,911 |
| 35,315 | 127 | 22,510 | 5,094 | 3,339 | 31,070 |
| 35,316 | 134 | 22,567 | 5,090 | 3,344 | 31,135 |
| 35,317 | 144 | 22,363 | 5,065 | 3,302 | 30,874 |
| 35,318 | 142 | 22,153 | 5,058 | 3,282 | 30,635 |
| 35,319 | 138 | 22,454 | 5,175 | 3,369 | 31,136 |



|        |     |        |       |       |        |
|--------|-----|--------|-------|-------|--------|
| 35,320 | 144 | 22,385 | 5,162 | 3,350 | 31,041 |
| 35,321 | 148 | 22,431 | 5,163 | 3,336 | 31,078 |
| 35,322 | 148 | 22,466 | 5,167 | 3,345 | 31,126 |
| 35,323 | 151 | 22,802 | 5,245 | 3,393 | 31,591 |
| 35,324 | 155 | 22,796 | 5,239 | 3,398 | 31,588 |
| 35,325 | 152 | 22,487 | 5,182 | 3,365 | 31,186 |
| 35,326 | 154 | 22,518 | 5,192 | 3,399 | 31,263 |
| 35,327 | 154 | 22,519 | 5,197 | 3,399 | 31,269 |
| 35,328 | 162 | 22,622 | 5,349 | 3,477 | 31,610 |
| 35,329 | 165 | 22,658 | 5,396 | 3,469 | 31,688 |
| 35,330 | 169 | 22,584 | 5,384 | 3,481 | 31,618 |
| 35,331 | 167 | 22,298 | 5,328 | 3,446 | 31,239 |
| 35,332 | 172 | 22,135 | 5,318 | 3,455 | 31,080 |
| 35,333 | 170 | 21,843 | 5,274 | 3,411 | 30,698 |
| 35,334 | 167 | 21,968 | 5,328 | 3,459 | 30,922 |
| 35,335 | 166 | 21,968 | 5,330 | 3,468 | 30,932 |
| 35,336 | 163 | 21,922 | 5,334 | 3,458 | 30,877 |
| 35,337 | 167 | 21,787 | 5,318 | 3,439 | 30,711 |
| 35,338 | 171 | 21,874 | 5,350 | 3,476 | 30,871 |
| 35,339 | 170 | 21,541 | 5,295 | 3,436 | 30,442 |
| 35,340 | 175 | 21,899 | 5,342 | 3,462 | 30,878 |
| 35,341 | 173 | 21,946 | 5,378 | 3,481 | 30,978 |
| 35,342 | 169 | 21,862 | 5,332 | 3,498 | 30,861 |
| 35,343 | 171 | 21,735 | 5,267 | 3,451 | 30,624 |
| 35,344 | 176 | 21,763 | 5,260 | 3,433 | 30,632 |
| 35,345 | 177 | 22,070 | 5,318 | 3,470 | 31,035 |
| 35,346 | 183 | 21,911 | 5,289 | 3,443 | 30,826 |
| 35,347 | 183 | 21,931 | 5,284 | 3,453 | 30,851 |
| 35,348 | 190 | 22,216 | 5,348 | 3,484 | 31,238 |
| 35,349 | 184 | 22,080 | 5,325 | 3,465 | 31,054 |
| 35,350 | 185 | 22,086 | 5,335 | 3,473 | 31,079 |
| 35,351 | 184 | 22,085 | 5,326 | 3,475 | 31,070 |

|        |     |        |       |       |        |
|--------|-----|--------|-------|-------|--------|
| 35,352 | 181 | 22,293 | 5,380 | 3,503 | 31,357 |
| 35,353 | 176 | 22,087 | 5,312 | 3,470 | 31,045 |
| 35,354 | 174 | 21,526 | 5,224 | 3,400 | 30,324 |
| 35,355 | 175 | 21,708 | 5,262 | 3,418 | 30,563 |
| 35,356 | 166 | 21,931 | 5,313 | 3,440 | 30,850 |
| 35,357 | 164 | 21,740 | 5,234 | 3,410 | 30,548 |
| 35,358 | 164 | 21,400 | 5,169 | 3,386 | 30,119 |
| 35,359 | 165 | 21,553 | 5,156 | 3,396 | 30,270 |
| 35,360 | 162 | 21,792 | 5,190 | 3,428 | 30,572 |
| 35,361 | 161 | 21,448 | 5,132 | 3,356 | 30,097 |
| 35,362 | 162 | 21,649 | 5,179 | 3,366 | 30,356 |
| 35,363 | 158 | 21,695 | 5,194 | 3,383 | 30,430 |
| 35,364 | 161 | 21,746 | 5,194 | 3,396 | 30,497 |
| 35,365 | 160 | 21,945 | 5,201 | 3,443 | 30,749 |
| 35,366 | 163 | 22,047 | 5,183 | 3,437 | 30,830 |
| 35,367 | 150 | 21,854 | 5,118 | 3,411 | 30,533 |
| 35,368 | 151 | 21,959 | 5,117 | 3,413 | 30,640 |
| 35,369 | 137 | 20,084 | 4,648 | 3,094 | 27,963 |
| 35,370 | 139 | 20,384 | 4,695 | 3,115 | 28,333 |
| 35,371 | 135 | 20,647 | 4,736 | 3,159 | 28,677 |
| 35,372 | 130 | 20,568 | 4,721 | 3,159 | 28,578 |
| 35,373 | 128 | 20,835 | 4,838 | 3,228 | 29,029 |
| 35,374 | 127 | 21,011 | 4,871 | 3,261 | 29,270 |
| 35,375 | 121 | 21,145 | 4,901 | 3,300 | 29,467 |
| 35,376 | 121 | 21,363 | 4,934 | 3,333 | 29,751 |
| 35,377 | 128 | 21,662 | 4,970 | 3,367 | 30,127 |
| 35,378 | 129 | 21,907 | 4,960 | 3,357 | 30,353 |
| 35,379 | 125 | 22,117 | 4,986 | 3,389 | 30,617 |
| 35,380 | 129 | 22,342 | 5,021 | 3,405 | 30,897 |
| 35,381 | 134 | 22,139 | 4,960 | 3,342 | 30,575 |
| 35,382 | 136 | 22,067 | 4,953 | 3,341 | 30,497 |
| 35,383 | 133 | 22,189 | 4,969 | 3,317 | 30,608 |

|        |     |        |       |       |        |
|--------|-----|--------|-------|-------|--------|
| 35,384 | 134 | 22,260 | 4,964 | 3,322 | 30,680 |
| 35,385 | 145 | 22,074 | 4,924 | 3,282 | 30,425 |
| 35,386 | 145 | 21,875 | 4,894 | 3,263 | 30,177 |
| 35,387 | 148 | 22,439 | 4,996 | 3,337 | 30,920 |
| 35,388 | 148 | 22,410 | 4,982 | 3,330 | 30,870 |
| 35,389 | 148 | 22,474 | 5,015 | 3,321 | 30,958 |
| 35,390 | 151 | 22,661 | 5,033 | 3,328 | 31,173 |
| 35,391 | 151 | 23,044 | 5,139 | 3,410 | 31,744 |
| 35,392 | 152 | 22,722 | 5,066 | 3,369 | 31,309 |
| 35,393 | 151 | 22,758 | 5,050 | 3,358 | 31,317 |
| 35,394 | 148 | 22,959 | 5,115 | 3,378 | 31,600 |
| 35,395 | 137 | 22,503 | 5,031 | 3,302 | 30,973 |
| 35,396 | 136 | 22,702 | 5,041 | 3,316 | 31,195 |
| 35,397 | 135 | 22,745 | 5,051 | 3,308 | 31,239 |
| 35,398 | 135 | 22,911 | 5,082 | 3,320 | 31,448 |
| 35,399 | 125 | 23,015 | 5,083 | 3,331 | 31,554 |
| 35,400 | 126 | 23,245 | 5,128 | 3,356 | 31,855 |
| 35,401 | 123 | 23,337 | 5,152 | 3,371 | 31,983 |
| 35,402 | 122 | 23,183 | 5,109 | 3,354 | 31,768 |
| 35,403 | 125 | 23,543 | 5,183 | 3,400 | 32,251 |
| 35,404 | 124 | 23,254 | 5,136 | 3,358 | 31,872 |
| 35,405 | 124 | 23,356 | 5,146 | 3,369 | 31,995 |
| 35,406 | 124 | 23,549 | 5,168 | 3,396 | 32,237 |
| 35,407 | 123 | 23,256 | 5,093 | 3,366 | 31,838 |
| 35,408 | 130 | 23,454 | 5,178 | 3,361 | 32,123 |
| 35,409 | 135 | 23,350 | 5,145 | 3,325 | 31,955 |
| 35,410 | 137 | 23,344 | 5,125 | 3,307 | 31,913 |
| 35,411 | 142 | 23,615 | 5,169 | 3,328 | 32,254 |
| 35,412 | 141 | 23,512 | 5,108 | 3,301 | 32,062 |
| 35,413 | 140 | 23,546 | 5,095 | 3,310 | 32,091 |
| 35,414 | 140 | 23,755 | 5,114 | 3,322 | 32,331 |
| 35,415 | 142 | 23,862 | 5,143 | 3,319 | 32,466 |

|        |     |        |       |       |        |
|--------|-----|--------|-------|-------|--------|
| 35,416 | 140 | 23,549 | 5,103 | 3,280 | 32,072 |
| 35,417 | 139 | 23,507 | 5,148 | 3,289 | 32,083 |
| 35,418 | 138 | 23,640 | 5,174 | 3,310 | 32,262 |
| 35,419 | 137 | 23,335 | 5,099 | 3,281 | 31,852 |
| 35,420 | 136 | 23,366 | 5,173 | 3,322 | 31,997 |
| 35,421 | 134 | 23,564 | 5,219 | 3,339 | 32,256 |
| 35,422 | 136 | 23,516 | 5,212 | 3,315 | 32,179 |
| 35,423 | 136 | 23,711 | 5,208 | 3,315 | 32,370 |
| 35,424 | 141 | 23,510 | 5,209 | 3,306 | 32,166 |
| 35,425 | 142 | 23,555 | 5,192 | 3,315 | 32,204 |
| 35,426 | 144 | 23,609 | 5,168 | 3,293 | 32,214 |
| 35,427 | 145 | 23,674 | 5,182 | 3,308 | 32,309 |
| 35,428 | 139 | 23,583 | 5,140 | 3,281 | 32,143 |
| 35,429 | 141 | 23,743 | 5,164 | 3,297 | 32,345 |
| 35,430 | 147 | 23,851 | 5,172 | 3,286 | 32,456 |
| 35,431 | 143 | 23,567 | 5,099 | 3,263 | 32,072 |
| 35,432 | 129 | 24,011 | 5,181 | 3,325 | 32,646 |
| 35,433 | 131 | 24,258 | 5,241 | 3,375 | 33,005 |
| 35,434 | 129 | 24,063 | 5,187 | 3,363 | 32,742 |
| 35,435 | 116 | 24,197 | 5,189 | 3,376 | 32,878 |
| 35,436 | 119 | 24,445 | 5,226 | 3,432 | 33,222 |
| 35,437 | 116 | 24,262 | 5,172 | 3,415 | 32,965 |
| 35,438 | 115 | 24,271 | 5,179 | 3,420 | 32,985 |
| 35,439 | 114 | 24,508 | 5,206 | 3,458 | 33,286 |
| 35,440 | 111 | 24,633 | 5,181 | 3,467 | 33,392 |
| 35,441 | 109 | 24,576 | 5,155 | 3,455 | 33,295 |
| 35,442 | 109 | 24,535 | 5,126 | 3,438 | 33,208 |
| 35,443 | 108 | 24,328 | 5,140 | 3,389 | 32,965 |
| 35,444 | 110 | 24,421 | 5,156 | 3,388 | 33,075 |
| 35,445 | 112 | 24,629 | 5,156 | 3,402 | 33,299 |
| 35,446 | 113 | 24,297 | 5,072 | 3,373 | 32,855 |
| 35,447 | 118 | 24,221 | 5,066 | 3,381 | 32,786 |

|        |     |        |       |       |        |
|--------|-----|--------|-------|-------|--------|
| 35,448 | 124 | 24,150 | 5,027 | 3,363 | 32,664 |
| 35,449 | 125 | 24,180 | 5,044 | 3,366 | 32,715 |
| 35,450 | 124 | 24,187 | 5,046 | 3,371 | 32,728 |
| 35,451 | 123 | 24,073 | 5,021 | 3,368 | 32,585 |
| 35,452 | 124 | 24,425 | 5,061 | 3,417 | 33,027 |
| 35,453 | 125 | 24,699 | 5,119 | 3,457 | 33,400 |
| 35,454 | 122 | 24,639 | 5,080 | 3,448 | 33,289 |
| 35,455 | 118 | 24,774 | 5,072 | 3,475 | 33,439 |
| 35,456 | 118 | 24,860 | 5,079 | 3,491 | 33,548 |
| 35,457 | 117 | 25,030 | 5,138 | 3,520 | 33,805 |
| 35,458 | 115 | 25,112 | 5,131 | 3,516 | 33,874 |
| 35,459 | 112 | 24,890 | 5,049 | 3,517 | 33,568 |
| 35,460 | 109 | 24,830 | 5,042 | 3,521 | 33,502 |
| 35,461 | 103 | 24,838 | 5,031 | 3,538 | 33,510 |
| 35,462 | 103 | 24,971 | 5,066 | 3,557 | 33,697 |
| 35,463 | 107 | 24,969 | 5,055 | 3,574 | 33,705 |
| 35,464 | 106 | 24,754 | 5,028 | 3,552 | 33,440 |
| 35,465 | 105 | 24,603 | 4,965 | 3,517 | 33,190 |
| 35,466 | 111 | 24,760 | 5,014 | 3,555 | 33,440 |
| 35,467 | 111 | 24,711 | 4,937 | 3,535 | 33,294 |
| 35,468 | 110 | 24,724 | 4,945 | 3,539 | 33,318 |
| 35,469 | 113 | 24,902 | 4,960 | 3,530 | 33,505 |
| 35,470 | 113 | 24,965 | 4,932 | 3,538 | 33,548 |
| 35,471 | 113 | 24,876 | 4,919 | 3,526 | 33,434 |
| 35,472 | 113 | 24,810 | 4,922 | 3,541 | 33,386 |
| 35,473 | 107 | 24,847 | 4,925 | 3,544 | 33,423 |
| 35,474 | 106 | 24,945 | 4,910 | 3,576 | 33,537 |
| 35,475 | 105 | 25,071 | 4,885 | 3,588 | 33,649 |
| 35,476 | 104 | 24,850 | 4,854 | 3,563 | 33,371 |
| 35,477 | 107 | 25,064 | 4,899 | 3,604 | 33,674 |
| 35,478 | 104 | 24,993 | 4,883 | 3,600 | 33,580 |
| 35,479 | 101 | 24,892 | 4,852 | 3,579 | 33,424 |

|        |     |        |       |       |        |
|--------|-----|--------|-------|-------|--------|
| 35,480 | 99  | 24,628 | 4,809 | 3,551 | 33,087 |
| 35,481 | 92  | 24,465 | 4,773 | 3,535 | 32,865 |
| 35,482 | 94  | 24,633 | 4,802 | 3,580 | 33,109 |
| 35,483 | 98  | 24,542 | 4,784 | 3,580 | 33,004 |
| 35,484 | 94  | 24,240 | 4,718 | 3,538 | 32,590 |
| 35,485 | 94  | 24,288 | 4,758 | 3,539 | 32,679 |
| 35,486 | 95  | 24,468 | 4,781 | 3,548 | 32,892 |
| 35,487 | 94  | 24,454 | 4,776 | 3,525 | 32,849 |
| 35,488 | 104 | 24,148 | 4,713 | 3,477 | 32,442 |
| 35,489 | 105 | 24,135 | 4,717 | 3,474 | 32,431 |
| 35,490 | 104 | 23,983 | 4,748 | 3,462 | 32,297 |
| 35,491 | 109 | 23,953 | 4,760 | 3,456 | 32,278 |
| 35,492 | 112 | 23,660 | 4,704 | 3,423 | 31,899 |
| 35,493 | 117 | 24,026 | 4,776 | 3,481 | 32,400 |
| 35,494 | 116 | 23,663 | 4,666 | 3,458 | 31,903 |
| 35,495 | 114 | 23,677 | 4,692 | 3,486 | 31,969 |
| 35,496 | 114 | 23,775 | 4,714 | 3,492 | 32,095 |
| 35,497 | 113 | 23,675 | 4,718 | 3,496 | 32,002 |
| 35,498 | 107 | 23,734 | 4,745 | 3,504 | 32,090 |
| 35,499 | 102 | 23,953 | 4,760 | 3,525 | 32,340 |
| 35,500 | 103 | 24,131 | 4,823 | 3,563 | 32,620 |
| 35,501 | 101 | 24,130 | 4,836 | 3,576 | 32,643 |
| 35,502 | 101 | 24,185 | 4,856 | 3,580 | 32,722 |
| 35,503 | 103 | 23,953 | 4,827 | 3,557 | 32,440 |
| 35,504 | 99  | 23,643 | 4,771 | 3,527 | 32,040 |
| 35,505 | 104 | 23,476 | 4,775 | 3,509 | 31,864 |
| 35,506 | 105 | 23,044 | 4,714 | 3,444 | 31,307 |
| 35,507 | 105 | 23,153 | 4,693 | 3,437 | 31,388 |
| 35,508 | 108 | 22,989 | 4,727 | 3,456 | 31,280 |
| 35,509 | 113 | 23,134 | 4,786 | 3,513 | 31,546 |
| 35,510 | 109 | 22,931 | 4,775 | 3,470 | 31,285 |
| 35,511 | 116 | 22,912 | 4,773 | 3,444 | 31,245 |

|        |     |        |       |       |        |
|--------|-----|--------|-------|-------|--------|
| 35,512 | 120 | 22,867 | 4,776 | 3,428 | 31,191 |
| 35,513 | 121 | 22,852 | 4,777 | 3,429 | 31,179 |
| 35,514 | 122 | 23,020 | 4,829 | 3,442 | 31,413 |
| 35,515 | 118 | 22,773 | 4,777 | 3,414 | 31,082 |
| 35,516 | 121 | 22,713 | 4,805 | 3,434 | 31,073 |
| 35,517 | 128 | 23,160 | 4,881 | 3,489 | 31,658 |
| 35,518 | 138 | 23,135 | 4,907 | 3,498 | 31,678 |
| 35,519 | 137 | 23,175 | 4,929 | 3,540 | 31,781 |
| 35,520 | 138 | 23,140 | 4,971 | 3,530 | 31,779 |
| 35,521 | 138 | 23,023 | 4,989 | 3,520 | 31,670 |
| 35,522 | 141 | 23,183 | 5,002 | 3,565 | 31,891 |
| 35,523 | 141 | 23,323 | 5,003 | 3,561 | 32,028 |
| 35,524 | 141 | 23,642 | 5,067 | 3,596 | 32,446 |
| 35,525 | 146 | 23,498 | 5,080 | 3,574 | 32,298 |
| 35,526 | 142 | 23,530 | 5,087 | 3,587 | 32,346 |
| 35,527 | 139 | 23,345 | 5,056 | 3,567 | 32,107 |
| 35,528 | 143 | 23,373 | 5,092 | 3,568 | 32,176 |
| 35,529 | 144 | 23,370 | 5,096 | 3,560 | 32,170 |
| 35,530 | 147 | 23,782 | 5,192 | 3,608 | 32,729 |
| 35,531 | 148 | 23,799 | 5,233 | 3,613 | 32,793 |
| 35,532 | 147 | 23,653 | 5,192 | 3,559 | 32,551 |
| 35,533 | 148 | 23,921 | 5,235 | 3,593 | 32,897 |
| 35,534 | 151 | 24,196 | 5,284 | 3,632 | 33,263 |
| 35,535 | 159 | 24,200 | 5,284 | 3,626 | 33,269 |
| 35,536 | 161 | 24,277 | 5,358 | 3,634 | 33,430 |
| 35,537 | 170 | 23,976 | 5,331 | 3,625 | 33,102 |
| 35,538 | 167 | 23,662 | 5,299 | 3,607 | 32,735 |
| 35,539 | 157 | 24,008 | 5,341 | 3,644 | 33,150 |
| 35,540 | 160 | 24,207 | 5,368 | 3,663 | 33,398 |
| 35,541 | 157 | 24,159 | 5,365 | 3,671 | 33,352 |
| 35,542 | 150 | 23,951 | 5,322 | 3,633 | 33,056 |
| 35,543 | 142 | 24,050 | 5,317 | 3,638 | 33,147 |

|        |     |        |       |       |        |
|--------|-----|--------|-------|-------|--------|
| 35,544 | 147 | 24,073 | 5,356 | 3,667 | 33,243 |
| 35,545 | 148 | 24,047 | 5,356 | 3,650 | 33,201 |
| 35,546 | 147 | 24,051 | 5,400 | 3,699 | 33,297 |
| 35,547 | 144 | 24,097 | 5,414 | 3,712 | 33,367 |
| 35,548 | 147 | 24,252 | 5,430 | 3,738 | 33,567 |
| 35,549 | 145 | 23,597 | 5,294 | 3,591 | 32,627 |
| 35,550 | 147 | 23,751 | 5,326 | 3,624 | 32,848 |
| 35,551 | 146 | 24,081 | 5,375 | 3,666 | 33,268 |
| 35,552 | 146 | 24,388 | 5,436 | 3,705 | 33,675 |
| 35,553 | 151 | 24,393 | 5,440 | 3,708 | 33,692 |
| 35,554 | 150 | 24,262 | 5,406 | 3,636 | 33,454 |
| 35,555 | 150 | 24,333 | 5,435 | 3,655 | 33,573 |
| 35,556 | 151 | 24,325 | 5,426 | 3,662 | 33,564 |
| 35,557 | 154 | 24,122 | 5,372 | 3,635 | 33,283 |
| 35,558 | 155 | 24,345 | 5,388 | 3,642 | 33,530 |
| 35,559 | 156 | 24,610 | 5,426 | 3,685 | 33,877 |
| 35,560 | 156 | 24,386 | 5,357 | 3,605 | 33,504 |
| 35,561 | 156 | 24,357 | 5,367 | 3,610 | 33,490 |
| 35,562 | 152 | 24,802 | 5,447 | 3,687 | 34,088 |
| 35,563 | 148 | 24,845 | 5,482 | 3,705 | 34,180 |
| 35,564 | 147 | 24,803 | 5,447 | 3,701 | 34,098 |
| 35,565 | 147 | 24,706 | 5,436 | 3,697 | 33,986 |
| 35,566 | 150 | 24,878 | 5,460 | 3,693 | 34,181 |
| 35,567 | 149 | 24,949 | 5,476 | 3,714 | 34,288 |
| 35,568 | 143 | 24,920 | 5,469 | 3,724 | 34,256 |
| 35,569 | 138 | 24,360 | 5,311 | 3,625 | 33,434 |
| 35,570 | 138 | 24,360 | 5,336 | 3,650 | 33,484 |
| 35,571 | 146 | 24,129 | 5,327 | 3,647 | 33,249 |
| 35,572 | 144 | 23,986 | 5,285 | 3,609 | 33,024 |
| 35,573 | 145 | 24,201 | 5,343 | 3,629 | 33,318 |
| 35,574 | 145 | 24,079 | 5,335 | 3,617 | 33,176 |
| 35,575 | 149 | 23,922 | 5,302 | 3,596 | 32,969 |



|        |     |        |       |       |        |
|--------|-----|--------|-------|-------|--------|
| 35,576 | 144 | 23,805 | 5,291 | 3,589 | 32,829 |
| 35,577 | 146 | 23,653 | 5,280 | 3,524 | 32,603 |
| 35,578 | 146 | 23,621 | 5,269 | 3,536 | 32,572 |
| 35,579 | 140 | 23,602 | 5,299 | 3,547 | 32,588 |
| 35,580 | 140 | 23,660 | 5,293 | 3,548 | 32,641 |
| 35,581 | 139 | 23,468 | 5,231 | 3,520 | 32,358 |
| 35,582 | 147 | 23,702 | 5,282 | 3,535 | 32,666 |
| 35,583 | 160 | 23,417 | 5,233 | 3,519 | 32,329 |
| 35,584 | 159 | 23,068 | 5,198 | 3,482 | 31,907 |
| 35,585 | 161 | 23,393 | 5,269 | 3,513 | 32,336 |
| 35,586 | 151 | 23,099 | 5,172 | 3,488 | 31,910 |
| 35,587 | 154 | 23,129 | 5,162 | 3,514 | 31,959 |
| 35,588 | 146 | 22,960 | 5,147 | 3,484 | 31,737 |
| 35,589 | 149 | 22,882 | 5,133 | 3,459 | 31,623 |
| 35,590 | 149 | 22,783 | 5,128 | 3,454 | 31,514 |
| 35,591 | 151 | 22,803 | 5,152 | 3,449 | 31,555 |
| 35,592 | 154 | 22,683 | 5,152 | 3,444 | 31,433 |
| 35,593 | 155 | 22,566 | 5,154 | 3,442 | 31,317 |
| 35,594 | 156 | 22,626 | 5,189 | 3,440 | 31,411 |
| 35,595 | 160 | 22,727 | 5,185 | 3,423 | 31,495 |
| 35,596 | 160 | 22,933 | 5,200 | 3,434 | 31,727 |
| 35,597 | 161 | 22,817 | 5,146 | 3,398 | 31,522 |
| 35,598 | 161 | 22,737 | 5,124 | 3,400 | 31,422 |
| 35,599 | 161 | 22,611 | 5,143 | 3,386 | 31,301 |
| 35,600 | 169 | 22,600 | 5,125 | 3,391 | 31,285 |
| 35,601 | 170 | 22,657 | 5,157 | 3,419 | 31,403 |
| 35,602 | 172 | 22,674 | 5,207 | 3,432 | 31,485 |
| 35,603 | 172 | 22,781 | 5,232 | 3,421 | 31,606 |
| 35,604 | 169 | 22,769 | 5,235 | 3,420 | 31,593 |
| 35,605 | 173 | 22,721 | 5,220 | 3,439 | 31,553 |
| 35,606 | 169 | 22,623 | 5,188 | 3,424 | 31,404 |
| 35,607 | 169 | 22,631 | 5,204 | 3,413 | 31,417 |

|        |     |        |       |       |        |
|--------|-----|--------|-------|-------|--------|
| 35,608 | 165 | 22,687 | 5,210 | 3,406 | 31,468 |
| 35,609 | 166 | 22,702 | 5,238 | 3,426 | 31,532 |
| 35,610 | 165 | 22,960 | 5,299 | 3,443 | 31,867 |
| 35,611 | 158 | 22,775 | 5,263 | 3,437 | 31,633 |
| 35,612 | 160 | 23,032 | 5,312 | 3,465 | 31,969 |
| 35,613 | 158 | 22,921 | 5,304 | 3,453 | 31,836 |
| 35,614 | 156 | 22,693 | 5,261 | 3,432 | 31,542 |
| 35,615 | 150 | 22,861 | 5,260 | 3,448 | 31,719 |
| 35,616 | 150 | 22,860 | 5,278 | 3,433 | 31,721 |
| 35,617 | 144 | 22,566 | 5,203 | 3,399 | 31,312 |
| 35,618 | 147 | 22,603 | 5,182 | 3,368 | 31,300 |
| 35,619 | 142 | 22,604 | 5,168 | 3,352 | 31,266 |
| 35,620 | 145 | 22,683 | 5,158 | 3,332 | 31,318 |
| 35,621 | 145 | 22,736 | 5,160 | 3,310 | 31,351 |
| 35,622 | 135 | 22,954 | 5,190 | 3,316 | 31,595 |
| 35,623 | 134 | 23,075 | 5,180 | 3,296 | 31,685 |
| 35,624 | 134 | 22,921 | 5,094 | 3,259 | 31,408 |
| 35,625 | 131 | 22,909 | 5,070 | 3,273 | 31,383 |
| 35,626 | 132 | 23,190 | 5,105 | 3,282 | 31,709 |
| 35,627 | 128 | 23,039 | 5,080 | 3,297 | 31,544 |
| 35,628 | 129 | 23,483 | 5,153 | 3,359 | 32,124 |
| 35,629 | 134 | 23,606 | 5,185 | 3,369 | 32,294 |
| 35,630 | 132 | 23,492 | 5,136 | 3,333 | 32,093 |
| 35,631 | 136 | 23,539 | 5,192 | 3,400 | 32,267 |
| 35,632 | 138 | 23,811 | 5,246 | 3,437 | 32,632 |
| 35,633 | 117 | 23,342 | 5,154 | 3,397 | 32,010 |
| 35,634 | 121 | 23,486 | 5,191 | 3,431 | 32,229 |
| 35,635 | 116 | 23,163 | 5,119 | 3,393 | 31,791 |
| 35,636 | 116 | 23,105 | 5,120 | 3,395 | 31,736 |
| 35,637 | 120 | 23,198 | 5,148 | 3,407 | 31,873 |
| 35,638 | 117 | 23,175 | 5,079 | 3,343 | 31,714 |
| 35,639 | 117 | 23,179 | 5,081 | 3,343 | 31,720 |

|        |     |        |       |       |        |
|--------|-----|--------|-------|-------|--------|
| 35,640 | 115 | 23,254 | 5,116 | 3,368 | 31,853 |
| 35,641 | 112 | 23,227 | 5,136 | 3,404 | 31,879 |
| 35,642 | 108 | 23,051 | 5,111 | 3,380 | 31,650 |
| 35,643 | 107 | 23,353 | 5,137 | 3,428 | 32,025 |
| 35,644 | 117 | 23,246 | 5,096 | 3,411 | 31,870 |
| 35,645 | 116 | 23,109 | 5,077 | 3,389 | 31,691 |
| 35,646 | 116 | 23,191 | 5,118 | 3,389 | 31,814 |
| 35,647 | 121 | 23,347 | 5,156 | 3,416 | 32,040 |
| 35,648 | 123 | 23,231 | 5,119 | 3,358 | 31,831 |
| 35,649 | 119 | 23,078 | 5,069 | 3,336 | 31,602 |
| 35,650 | 119 | 23,350 | 5,110 | 3,361 | 31,940 |
| 35,651 | 115 | 23,535 | 5,177 | 3,415 | 32,242 |
| 35,652 | 114 | 23,468 | 5,184 | 3,402 | 32,168 |
| 35,653 | 112 | 23,317 | 5,117 | 3,379 | 31,925 |
| 35,654 | 114 | 23,256 | 5,107 | 3,388 | 31,865 |
| 35,655 | 114 | 23,366 | 5,148 | 3,410 | 32,038 |
| 35,656 | 110 | 23,109 | 5,106 | 3,358 | 31,683 |
| 35,657 | 109 | 23,060 | 5,080 | 3,341 | 31,590 |
| 35,658 | 109 | 22,898 | 5,079 | 3,345 | 31,431 |
| 35,659 | 115 | 23,222 | 5,185 | 3,417 | 31,939 |
| 35,660 | 115 | 22,568 | 5,072 | 3,319 | 31,074 |
| 35,661 | 114 | 22,529 | 5,121 | 3,355 | 31,119 |
| 35,662 | 114 | 22,677 | 5,176 | 3,396 | 31,363 |
| 35,663 | 120 | 22,659 | 5,170 | 3,397 | 31,346 |
| 35,664 | 119 | 22,402 | 5,126 | 3,365 | 31,012 |
| 35,665 | 119 | 22,419 | 5,196 | 3,406 | 31,140 |
| 35,666 | 121 | 22,316 | 5,225 | 3,407 | 31,069 |
| 35,667 | 123 | 22,213 | 5,233 | 3,398 | 30,967 |
| 35,668 | 123 | 22,248 | 5,225 | 3,391 | 30,987 |
| 35,669 | 120 | 22,018 | 5,223 | 3,383 | 30,744 |
| 35,670 | 120 | 22,241 | 5,268 | 3,425 | 31,054 |
| 35,671 | 120 | 22,567 | 5,366 | 3,481 | 31,534 |

|        |     |        |       |       |        |
|--------|-----|--------|-------|-------|--------|
| 35,672 | 119 | 22,250 | 5,312 | 3,483 | 31,164 |
| 35,673 | 127 | 22,617 | 5,440 | 3,558 | 31,742 |
| 35,674 | 131 | 22,452 | 5,449 | 3,575 | 31,607 |
| 35,675 | 131 | 22,407 | 5,502 | 3,593 | 31,633 |
| 35,676 | 131 | 22,225 | 5,466 | 3,557 | 31,379 |
| 35,677 | 130 | 21,961 | 5,457 | 3,551 | 31,099 |
| 35,678 | 132 | 22,211 | 5,521 | 3,604 | 31,468 |
| 35,679 | 131 | 22,417 | 5,556 | 3,604 | 31,708 |
| 35,680 | 126 | 22,287 | 5,545 | 3,606 | 31,564 |
| 35,681 | 132 | 22,262 | 5,522 | 3,582 | 31,498 |
| 35,682 | 129 | 22,210 | 5,518 | 3,569 | 31,426 |
| 35,683 | 127 | 22,142 | 5,484 | 3,561 | 31,314 |
| 35,684 | 124 | 22,323 | 5,530 | 3,575 | 31,552 |
| 35,685 | 125 | 22,399 | 5,524 | 3,584 | 31,632 |
| 35,686 | 125 | 22,509 | 5,543 | 3,589 | 31,766 |
| 35,687 | 123 | 22,487 | 5,561 | 3,600 | 31,771 |
| 35,688 | 119 | 22,481 | 5,556 | 3,595 | 31,751 |
| 35,689 | 120 | 22,401 | 5,557 | 3,596 | 31,674 |
| 35,690 | 127 | 22,297 | 5,554 | 3,585 | 31,563 |
| 35,691 | 126 | 22,424 | 5,543 | 3,569 | 31,662 |
| 35,692 | 127 | 22,818 | 5,598 | 3,619 | 32,162 |
| 35,693 | 119 | 22,474 | 5,487 | 3,545 | 31,625 |
| 35,694 | 126 | 22,735 | 5,524 | 3,569 | 31,954 |
| 35,695 | 122 | 22,904 | 5,580 | 3,605 | 32,211 |
| 35,696 | 121 | 22,594 | 5,478 | 3,565 | 31,758 |
| 35,697 | 120 | 22,550 | 5,469 | 3,578 | 31,717 |
| 35,698 | 116 | 22,512 | 5,478 | 3,597 | 31,703 |
| 35,699 | 116 | 22,363 | 5,479 | 3,607 | 31,565 |
| 35,700 | 122 | 22,785 | 5,556 | 3,659 | 32,122 |
| 35,701 | 122 | 22,855 | 5,593 | 3,683 | 32,253 |
| 35,702 | 121 | 22,626 | 5,537 | 3,648 | 31,932 |
| 35,703 | 120 | 22,304 | 5,480 | 3,616 | 31,520 |

|        |     |        |       |       |        |
|--------|-----|--------|-------|-------|--------|
| 35,704 | 120 | 22,683 | 5,611 | 3,663 | 32,077 |
| 35,705 | 123 | 22,553 | 5,608 | 3,672 | 31,956 |
| 35,706 | 122 | 22,466 | 5,608 | 3,694 | 31,890 |
| 35,707 | 127 | 22,382 | 5,620 | 3,710 | 31,839 |
| 35,708 | 125 | 22,520 | 5,679 | 3,757 | 32,081 |
| 35,709 | 126 | 22,474 | 5,687 | 3,741 | 32,028 |
| 35,710 | 118 | 22,478 | 5,705 | 3,749 | 32,050 |
| 35,711 | 121 | 22,559 | 5,719 | 3,759 | 32,158 |
| 35,712 | 119 | 22,653 | 5,713 | 3,773 | 32,258 |
| 35,713 | 117 | 22,568 | 5,669 | 3,738 | 32,092 |
| 35,714 | 119 | 22,785 | 5,675 | 3,740 | 32,319 |
| 35,715 | 123 | 22,813 | 5,675 | 3,735 | 32,346 |
| 35,716 | 122 | 22,658 | 5,607 | 3,706 | 32,093 |
| 35,717 | 125 | 23,082 | 5,707 | 3,807 | 32,721 |
| 35,718 | 123 | 23,292 | 5,742 | 3,820 | 32,977 |
| 35,719 | 123 | 23,261 | 5,745 | 3,828 | 32,957 |
| 35,720 | 123 | 23,288 | 5,765 | 3,824 | 33,000 |
| 35,721 | 127 | 23,373 | 5,803 | 3,837 | 33,140 |
| 35,722 | 123 | 23,259 | 5,780 | 3,849 | 33,011 |
| 35,723 | 119 | 23,444 | 5,778 | 3,846 | 33,187 |
| 35,724 | 119 | 23,439 | 5,769 | 3,861 | 33,188 |
| 35,725 | 116 | 23,346 | 5,721 | 3,854 | 33,037 |
| 35,726 | 120 | 23,402 | 5,707 | 3,851 | 33,080 |
| 35,727 | 127 | 23,480 | 5,707 | 3,826 | 33,140 |
| 35,728 | 128 | 23,621 | 5,746 | 3,857 | 33,352 |
| 35,729 | 127 | 23,397 | 5,720 | 3,841 | 33,085 |
| 35,730 | 130 | 23,104 | 5,642 | 3,785 | 32,661 |
| 35,731 | 132 | 23,370 | 5,689 | 3,802 | 32,993 |
| 35,732 | 125 | 23,282 | 5,717 | 3,796 | 32,920 |
| 35,733 | 137 | 23,257 | 5,684 | 3,790 | 32,868 |
| 35,734 | 134 | 23,238 | 5,680 | 3,790 | 32,842 |
| 35,735 | 137 | 23,619 | 5,758 | 3,857 | 33,371 |

|        |     |        |       |       |        |
|--------|-----|--------|-------|-------|--------|
| 35,736 | 132 | 23,490 | 5,735 | 3,832 | 33,189 |
| 35,737 | 134 | 23,608 | 5,738 | 3,836 | 33,316 |
| 35,738 | 139 | 23,431 | 5,747 | 3,855 | 33,172 |
| 35,739 | 139 | 23,434 | 5,759 | 3,853 | 33,185 |
| 35,740 | 135 | 23,310 | 5,772 | 3,874 | 33,091 |
| 35,741 | 134 | 23,116 | 5,805 | 3,890 | 32,945 |
| 35,742 | 135 | 22,923 | 5,793 | 3,869 | 32,720 |
| 35,743 | 137 | 23,120 | 5,864 | 3,929 | 33,050 |
| 35,744 | 135 | 22,714 | 5,865 | 3,913 | 32,627 |
| 35,745 | 132 | 22,655 | 5,856 | 3,883 | 32,526 |
| 35,746 | 130 | 22,685 | 5,884 | 3,910 | 32,609 |
| 35,747 | 135 | 22,921 | 5,962 | 3,941 | 32,959 |
| 35,748 | 144 | 22,914 | 5,944 | 3,900 | 32,902 |
| 35,749 | 141 | 22,783 | 5,953 | 3,893 | 32,770 |
| 35,750 | 137 | 22,956 | 6,010 | 3,934 | 33,037 |
| 35,751 | 138 | 22,902 | 6,011 | 3,945 | 32,996 |
| 35,752 | 143 | 23,046 | 6,045 | 3,957 | 33,191 |
| 35,753 | 142 | 23,043 | 6,134 | 3,980 | 33,299 |
| 35,754 | 144 | 23,089 | 6,114 | 3,993 | 33,340 |
| 35,755 | 144 | 23,190 | 6,116 | 4,021 | 33,471 |
| 35,756 | 144 | 23,342 | 6,123 | 4,019 | 33,628 |
| 35,757 | 148 | 23,401 | 6,104 | 4,004 | 33,657 |
| 35,758 | 142 | 23,457 | 6,126 | 4,009 | 33,734 |
| 35,759 | 144 | 23,555 | 6,110 | 4,011 | 33,820 |
| 35,760 | 143 | 23,705 | 6,111 | 4,020 | 33,979 |
| 35,761 | 144 | 23,427 | 6,029 | 3,963 | 33,563 |
| 35,762 | 151 | 23,463 | 6,003 | 3,952 | 33,569 |
| 35,763 | 151 | 23,473 | 5,992 | 3,937 | 33,553 |
| 35,764 | 149 | 23,438 | 6,009 | 3,964 | 33,560 |
| 35,765 | 149 | 23,335 | 5,996 | 3,946 | 33,426 |
| 35,766 | 150 | 23,618 | 6,073 | 3,984 | 33,825 |
| 35,767 | 157 | 23,340 | 6,052 | 3,945 | 33,494 |

|        |     |        |       |       |        |
|--------|-----|--------|-------|-------|--------|
| 35,768 | 158 | 23,170 | 6,012 | 3,906 | 33,246 |
| 35,769 | 164 | 23,498 | 6,126 | 3,960 | 33,748 |
| 35,770 | 164 | 23,438 | 6,113 | 3,945 | 33,660 |
| 35,771 | 161 | 23,443 | 6,120 | 3,955 | 33,679 |
| 35,772 | 163 | 23,464 | 6,114 | 3,960 | 33,701 |
| 35,773 | 160 | 23,326 | 6,113 | 3,919 | 33,518 |
| 35,774 | 161 | 23,225 | 6,090 | 3,888 | 33,364 |
| 35,775 | 165 | 23,258 | 6,065 | 3,857 | 33,345 |
| 35,776 | 168 | 23,234 | 6,068 | 3,859 | 33,329 |
| 35,777 | 162 | 22,946 | 6,013 | 3,819 | 32,940 |
| 35,778 | 162 | 23,286 | 6,116 | 3,938 | 33,502 |
| 35,779 | 161 | 23,065 | 6,095 | 3,908 | 33,229 |
| 35,780 | 163 | 22,862 | 6,049 | 3,910 | 32,984 |
| 35,781 | 161 | 22,570 | 6,032 | 3,885 | 32,648 |
| 35,782 | 160 | 22,190 | 6,004 | 3,870 | 32,224 |
| 35,783 | 152 | 22,920 | 6,143 | 3,961 | 33,176 |
| 35,784 | 156 | 22,971 | 6,186 | 3,952 | 33,265 |
| 35,785 | 161 | 22,948 | 6,212 | 3,954 | 33,275 |
| 35,786 | 158 | 22,893 | 6,244 | 3,936 | 33,231 |
| 35,787 | 156 | 22,690 | 6,165 | 3,867 | 32,878 |
| 35,788 | 152 | 22,891 | 6,226 | 3,881 | 33,150 |
| 35,789 | 152 | 23,103 | 6,243 | 3,903 | 33,401 |
| 35,790 | 152 | 23,326 | 6,254 | 3,904 | 33,636 |
| 35,791 | 151 | 23,445 | 6,245 | 3,898 | 33,739 |
| 35,792 | 156 | 23,518 | 6,215 | 3,887 | 33,776 |
| 35,793 | 159 | 23,590 | 6,228 | 3,886 | 33,863 |
| 35,794 | 159 | 23,730 | 6,267 | 3,893 | 34,049 |
| 35,795 | 150 | 23,581 | 6,215 | 3,835 | 33,781 |
| 35,796 | 153 | 23,537 | 6,207 | 3,864 | 33,761 |
| 35,797 | 153 | 23,801 | 6,261 | 3,912 | 34,127 |
| 35,798 | 151 | 23,560 | 6,219 | 3,853 | 33,783 |
| 35,799 | 147 | 23,710 | 6,228 | 3,850 | 33,935 |

|        |     |        |       |       |        |
|--------|-----|--------|-------|-------|--------|
| 35,800 | 147 | 23,601 | 6,220 | 3,862 | 33,830 |
| 35,801 | 148 | 23,593 | 6,224 | 3,858 | 33,823 |
| 35,802 | 148 | 23,650 | 6,231 | 3,865 | 33,894 |
| 35,803 | 143 | 23,422 | 6,195 | 3,832 | 33,592 |
| 35,804 | 144 | 23,312 | 6,099 | 3,797 | 33,352 |
| 35,805 | 148 | 23,095 | 6,077 | 3,733 | 33,053 |
| 35,806 | 148 | 23,029 | 6,087 | 3,729 | 32,993 |
| 35,807 | 144 | 23,135 | 6,125 | 3,740 | 33,144 |
| 35,808 | 146 | 22,875 | 6,106 | 3,698 | 32,825 |
| 35,809 | 145 | 22,722 | 6,038 | 3,660 | 32,565 |
| 35,810 | 148 | 23,074 | 6,136 | 3,728 | 33,086 |
| 35,811 | 146 | 22,866 | 6,053 | 3,679 | 32,744 |
| 35,812 | 147 | 22,827 | 6,064 | 3,673 | 32,711 |
| 35,813 | 140 | 22,780 | 6,084 | 3,673 | 32,677 |
| 35,814 | 136 | 22,676 | 6,084 | 3,654 | 32,550 |
| 35,815 | 135 | 22,533 | 6,065 | 3,656 | 32,389 |
| 35,816 | 131 | 22,692 | 6,110 | 3,688 | 32,621 |
| 35,817 | 128 | 22,682 | 6,103 | 3,669 | 32,582 |
| 35,818 | 122 | 22,391 | 6,006 | 3,640 | 32,159 |
| 35,819 | 121 | 22,034 | 5,946 | 3,622 | 31,723 |
| 35,820 | 118 | 22,328 | 5,974 | 3,640 | 32,060 |
| 35,821 | 122 | 22,058 | 5,885 | 3,613 | 31,678 |
| 35,822 | 124 | 22,279 | 5,932 | 3,641 | 31,976 |
| 35,823 | 118 | 22,210 | 5,956 | 3,640 | 31,924 |
| 35,824 | 120 | 22,181 | 5,933 | 3,636 | 31,870 |
| 35,825 | 118 | 22,122 | 5,953 | 3,641 | 31,834 |
| 35,826 | 114 | 21,973 | 5,951 | 3,647 | 31,685 |
| 35,827 | 111 | 21,953 | 5,921 | 3,636 | 31,621 |
| 35,828 | 110 | 21,803 | 5,862 | 3,600 | 31,375 |
| 35,829 | 108 | 21,559 | 5,827 | 3,540 | 31,034 |
| 35,830 | 106 | 21,411 | 5,769 | 3,499 | 30,785 |
| 35,831 | 107 | 21,731 | 5,774 | 3,480 | 31,092 |



|        |     |        |       |       |        |
|--------|-----|--------|-------|-------|--------|
| 35,832 | 108 | 21,857 | 5,824 | 3,521 | 31,310 |
| 35,833 | 108 | 21,723 | 5,829 | 3,512 | 31,172 |
| 35,834 | 107 | 21,709 | 5,815 | 3,516 | 31,147 |
| 35,835 | 108 | 21,785 | 5,813 | 3,522 | 31,228 |
| 35,836 | 105 | 21,668 | 5,790 | 3,500 | 31,063 |
| 35,837 | 106 | 21,647 | 5,762 | 3,508 | 31,023 |
| 35,838 | 107 | 21,390 | 5,710 | 3,512 | 30,719 |
| 35,839 | 107 | 21,252 | 5,684 | 3,506 | 30,549 |
| 35,840 | 110 | 21,326 | 5,709 | 3,521 | 30,666 |
| 35,841 | 110 | 21,290 | 5,727 | 3,533 | 30,660 |
| 35,842 | 119 | 21,387 | 5,746 | 3,549 | 30,801 |
| 35,843 | 112 | 21,447 | 5,755 | 3,574 | 30,888 |
| 35,844 | 112 | 21,362 | 5,724 | 3,581 | 30,779 |
| 35,845 | 111 | 21,141 | 5,683 | 3,547 | 30,482 |
| 35,846 | 109 | 20,929 | 5,639 | 3,550 | 30,227 |
| 35,847 | 109 | 20,930 | 5,659 | 3,580 | 30,278 |
| 35,848 | 102 | 20,361 | 5,475 | 3,486 | 29,424 |
| 35,849 | 103 | 20,532 | 5,500 | 3,522 | 29,657 |
| 35,850 | 102 | 20,689 | 5,532 | 3,559 | 29,882 |
| 35,851 | 107 | 20,466 | 5,458 | 3,481 | 29,512 |
| 35,852 | 107 | 20,464 | 5,466 | 3,478 | 29,515 |
| 35,853 | 105 | 20,290 | 5,405 | 3,461 | 29,261 |
| 35,854 | 111 | 20,431 | 5,440 | 3,491 | 29,473 |
| 35,855 | 103 | 20,009 | 5,327 | 3,443 | 28,882 |
| 35,856 | 105 | 19,978 | 5,299 | 3,431 | 28,813 |
| 35,857 | 105 | 20,111 | 5,337 | 3,461 | 29,014 |
| 35,858 | 108 | 20,121 | 5,332 | 3,464 | 29,025 |
| 35,859 | 102 | 20,045 | 5,320 | 3,440 | 28,907 |
| 35,860 | 101 | 19,831 | 5,289 | 3,416 | 28,637 |
| 35,861 | 98  | 19,889 | 5,325 | 3,430 | 28,742 |
| 35,862 | 97  | 19,730 | 5,355 | 3,459 | 28,641 |
| 35,863 | 107 | 19,653 | 5,312 | 3,426 | 28,498 |

|        |     |        |       |       |        |
|--------|-----|--------|-------|-------|--------|
| 35,864 | 107 | 19,519 | 5,277 | 3,410 | 28,313 |
| 35,865 | 108 | 19,710 | 5,332 | 3,458 | 28,608 |
| 35,866 | 108 | 19,774 | 5,340 | 3,449 | 28,671 |
| 35,867 | 107 | 19,707 | 5,292 | 3,463 | 28,569 |
| 35,868 | 108 | 19,882 | 5,354 | 3,490 | 28,834 |
| 35,869 | 105 | 19,604 | 5,254 | 3,429 | 28,392 |
| 35,870 | 105 | 19,493 | 5,242 | 3,427 | 28,267 |
| 35,871 | 105 | 19,528 | 5,285 | 3,457 | 28,375 |
| 35,872 | 104 | 19,468 | 5,302 | 3,450 | 28,324 |
| 35,873 | 103 | 19,431 | 5,303 | 3,456 | 28,293 |
| 35,874 | 102 | 19,519 | 5,335 | 3,472 | 28,428 |
| 35,875 | 104 | 19,402 | 5,285 | 3,444 | 28,235 |
| 35,876 | 103 | 19,452 | 5,271 | 3,448 | 28,274 |
| 35,877 | 107 | 19,528 | 5,281 | 3,452 | 28,368 |
| 35,878 | 105 | 19,260 | 5,262 | 3,421 | 28,048 |
| 35,879 | 108 | 18,648 | 5,056 | 3,292 | 27,104 |
| 35,880 | 110 | 18,800 | 5,099 | 3,330 | 27,339 |
| 35,881 | 110 | 19,035 | 5,183 | 3,350 | 27,678 |
| 35,882 | 110 | 18,977 | 5,174 | 3,339 | 27,600 |
| 35,883 | 111 | 19,315 | 5,311 | 3,386 | 28,123 |
| 35,884 | 109 | 19,196 | 5,264 | 3,373 | 27,942 |
| 35,885 | 109 | 19,376 | 5,323 | 3,411 | 28,219 |
| 35,886 | 107 | 19,124 | 5,276 | 3,381 | 27,888 |
| 35,887 | 106 | 19,067 | 5,286 | 3,381 | 27,840 |
| 35,888 | 107 | 18,929 | 5,221 | 3,311 | 27,568 |
| 35,889 | 110 | 19,118 | 5,295 | 3,332 | 27,855 |
| 35,890 | 108 | 19,230 | 5,371 | 3,375 | 28,084 |
| 35,891 | 108 | 18,937 | 5,312 | 3,354 | 27,711 |
| 35,892 | 107 | 18,998 | 5,357 | 3,395 | 27,857 |
| 35,893 | 98  | 19,234 | 5,449 | 3,443 | 28,224 |
| 35,894 | 100 | 19,434 | 5,508 | 3,475 | 28,517 |
| 35,895 | 97  | 19,274 | 5,455 | 3,432 | 28,258 |

|        |     |        |       |       |        |
|--------|-----|--------|-------|-------|--------|
| 35,896 | 97  | 19,067 | 5,357 | 3,369 | 27,890 |
| 35,897 | 97  | 19,076 | 5,368 | 3,365 | 27,906 |
| 35,898 | 100 | 18,880 | 5,326 | 3,327 | 27,633 |
| 35,899 | 98  | 18,760 | 5,294 | 3,312 | 27,464 |
| 35,900 | 110 | 20,250 | 5,740 | 3,546 | 29,646 |
| 35,901 | 115 | 20,601 | 5,845 | 3,593 | 30,154 |
| 35,902 | 111 | 20,924 | 5,944 | 3,644 | 30,623 |
| 35,903 | 118 | 20,806 | 5,946 | 3,607 | 30,477 |
| 35,904 | 121 | 21,035 | 6,011 | 3,641 | 30,808 |
| 35,905 | 118 | 21,264 | 6,071 | 3,678 | 31,131 |
| 35,906 | 115 | 21,074 | 6,001 | 3,632 | 30,822 |
| 35,907 | 120 | 21,045 | 6,013 | 3,640 | 30,818 |
| 35,908 | 128 | 21,427 | 6,136 | 3,684 | 31,375 |
| 35,909 | 125 | 21,401 | 6,142 | 3,674 | 31,342 |
| 35,910 | 124 | 21,037 | 6,058 | 3,641 | 30,860 |
| 35,911 | 126 | 21,186 | 6,143 | 3,685 | 31,140 |
| 35,912 | 126 | 21,139 | 6,120 | 3,685 | 31,070 |
| 35,913 | 131 | 21,205 | 6,096 | 3,668 | 31,100 |
| 35,914 | 122 | 21,337 | 6,107 | 3,678 | 31,244 |
| 35,915 | 124 | 21,361 | 6,148 | 3,664 | 31,297 |
| 35,916 | 125 | 21,211 | 6,165 | 3,662 | 31,163 |
| 35,917 | 125 | 21,241 | 6,161 | 3,656 | 31,183 |
| 35,918 | 125 | 21,027 | 6,128 | 3,625 | 30,905 |
| 35,919 | 131 | 21,287 | 6,179 | 3,643 | 31,240 |
| 35,920 | 129 | 21,509 | 6,232 | 3,673 | 31,543 |
| 35,921 | 136 | 21,757 | 6,303 | 3,714 | 31,910 |
| 35,922 | 140 | 21,586 | 6,249 | 3,668 | 31,643 |
| 35,923 | 137 | 21,423 | 6,190 | 3,629 | 31,379 |
| 35,924 | 141 | 21,493 | 6,198 | 3,640 | 31,472 |
| 35,925 | 140 | 21,162 | 6,153 | 3,583 | 31,038 |
| 35,926 | 142 | 21,839 | 6,327 | 3,663 | 31,971 |
| 35,927 | 142 | 21,840 | 6,354 | 3,656 | 31,992 |

|        |     |        |       |       |        |
|--------|-----|--------|-------|-------|--------|
| 35,928 | 136 | 21,910 | 6,396 | 3,679 | 32,121 |
| 35,929 | 136 | 21,689 | 6,358 | 3,655 | 31,838 |
| 35,930 | 131 | 21,557 | 6,324 | 3,653 | 31,665 |
| 35,931 | 138 | 22,016 | 6,493 | 3,738 | 32,385 |
| 35,932 | 139 | 22,250 | 6,548 | 3,787 | 32,724 |
| 35,933 | 139 | 22,521 | 6,602 | 3,831 | 33,093 |
| 35,934 | 140 | 22,541 | 6,592 | 3,828 | 33,101 |
| 35,935 | 140 | 22,391 | 6,552 | 3,802 | 32,885 |
| 35,936 | 141 | 22,897 | 6,705 | 3,897 | 33,640 |
| 35,937 | 140 | 22,620 | 6,652 | 3,877 | 33,289 |
| 35,938 | 142 | 22,626 | 6,717 | 3,935 | 33,420 |
| 35,939 | 144 | 22,549 | 6,705 | 3,912 | 33,310 |
| 35,940 | 143 | 22,252 | 6,622 | 3,862 | 32,879 |
| 35,941 | 143 | 22,618 | 6,711 | 3,903 | 33,375 |
| 35,942 | 147 | 22,318 | 6,632 | 3,816 | 32,913 |
| 35,943 | 150 | 22,636 | 6,745 | 3,870 | 33,401 |
| 35,944 | 156 | 22,798 | 6,817 | 3,918 | 33,689 |
| 35,945 | 155 | 22,431 | 6,743 | 3,859 | 33,188 |
| 35,946 | 164 | 22,225 | 6,739 | 3,839 | 32,967 |
| 35,947 | 162 | 22,025 | 6,720 | 3,808 | 32,715 |
| 35,948 | 162 | 22,567 | 6,915 | 3,894 | 33,538 |
| 35,949 | 162 | 22,451 | 6,935 | 3,927 | 33,475 |
| 35,950 | 161 | 22,434 | 6,914 | 3,941 | 33,450 |
| 35,951 | 153 | 22,430 | 6,896 | 3,957 | 33,436 |
| 35,952 | 152 | 22,255 | 6,830 | 3,910 | 33,147 |
| 35,953 | 154 | 22,378 | 6,846 | 3,941 | 33,319 |
| 35,954 | 149 | 22,401 | 6,841 | 3,949 | 33,340 |
| 35,955 | 154 | 22,494 | 6,862 | 3,935 | 33,445 |
| 35,956 | 154 | 22,570 | 6,880 | 3,944 | 33,548 |
| 35,957 | 151 | 22,861 | 6,928 | 3,980 | 33,920 |
| 35,958 | 156 | 22,882 | 6,902 | 3,984 | 33,924 |
| 35,959 | 150 | 22,723 | 6,893 | 3,980 | 33,746 |

|        |     |        |       |       |        |
|--------|-----|--------|-------|-------|--------|
| 35,960 | 152 | 23,172 | 6,974 | 4,054 | 34,352 |
| 35,961 | 151 | 23,345 | 6,991 | 4,041 | 34,528 |
| 35,962 | 153 | 23,313 | 6,948 | 4,032 | 34,446 |
| 35,963 | 154 | 23,332 | 6,938 | 4,029 | 34,453 |
| 35,964 | 147 | 23,107 | 6,951 | 4,033 | 34,238 |
| 35,965 | 147 | 23,044 | 6,985 | 4,055 | 34,231 |
| 35,966 | 146 | 22,953 | 6,948 | 4,065 | 34,112 |
| 35,967 | 150 | 22,992 | 6,931 | 4,057 | 34,130 |
| 35,968 | 163 | 22,886 | 6,905 | 4,040 | 33,994 |
| 35,969 | 161 | 22,735 | 6,852 | 4,016 | 33,764 |
| 35,970 | 163 | 22,787 | 6,927 | 4,037 | 33,914 |
| 35,971 | 163 | 22,790 | 6,941 | 4,057 | 33,951 |
| 35,972 | 158 | 22,741 | 6,929 | 4,069 | 33,897 |
| 35,973 | 159 | 22,621 | 6,946 | 4,083 | 33,809 |
| 35,974 | 160 | 22,594 | 6,951 | 4,088 | 33,793 |
| 35,975 | 154 | 22,678 | 6,956 | 4,130 | 33,918 |
| 35,976 | 151 | 22,825 | 7,011 | 4,192 | 34,179 |
| 35,977 | 157 | 22,684 | 6,990 | 4,151 | 33,982 |
| 35,978 | 157 | 22,546 | 6,941 | 4,150 | 33,794 |
| 35,979 | 158 | 23,295 | 7,140 | 4,288 | 34,881 |
| 35,980 | 159 | 23,238 | 7,086 | 4,228 | 34,711 |
| 35,981 | 158 | 23,159 | 7,101 | 4,234 | 34,652 |
| 35,982 | 165 | 23,099 | 7,116 | 4,268 | 34,648 |
| 35,983 | 169 | 23,112 | 7,152 | 4,313 | 34,746 |
| 35,984 | 169 | 22,991 | 7,185 | 4,334 | 34,679 |
| 35,985 | 168 | 22,933 | 7,188 | 4,337 | 34,626 |
| 35,986 | 167 | 22,797 | 7,148 | 4,314 | 34,426 |
| 35,987 | 170 | 22,739 | 7,103 | 4,273 | 34,285 |
| 35,988 | 177 | 22,837 | 7,117 | 4,263 | 34,394 |
| 35,989 | 173 | 22,641 | 7,079 | 4,241 | 34,134 |
| 35,990 | 173 | 22,751 | 7,148 | 4,298 | 34,370 |
| 35,991 | 170 | 22,629 | 7,089 | 4,294 | 34,182 |

|        |     |        |       |       |        |
|--------|-----|--------|-------|-------|--------|
| 35,992 | 170 | 22,357 | 7,025 | 4,268 | 33,820 |
| 35,993 | 166 | 22,180 | 6,973 | 4,268 | 33,587 |
| 35,994 | 166 | 22,264 | 6,958 | 4,268 | 33,656 |
| 35,995 | 160 | 22,297 | 6,957 | 4,259 | 33,673 |
| 35,996 | 167 | 22,240 | 6,943 | 4,220 | 33,570 |
| 35,997 | 157 | 22,216 | 6,892 | 4,202 | 33,467 |
| 35,998 | 157 | 21,405 | 6,609 | 4,064 | 32,235 |
| 35,999 | 158 | 21,651 | 6,661 | 4,078 | 32,548 |
| 36,000 | 156 | 21,709 | 6,658 | 4,074 | 32,597 |
| 36,001 | 155 | 21,488 | 6,598 | 4,017 | 32,258 |
| 36,002 | 155 | 21,536 | 6,597 | 4,008 | 32,296 |
| 36,003 | 148 | 21,163 | 6,549 | 3,951 | 31,811 |
| 36,004 | 148 | 21,160 | 6,539 | 3,952 | 31,799 |
| 36,005 | 144 | 20,983 | 6,518 | 3,941 | 31,586 |
| 36,006 | 142 | 21,241 | 6,587 | 4,028 | 31,998 |
| 36,007 | 142 | 21,012 | 6,613 | 4,011 | 31,778 |
| 36,008 | 135 | 20,681 | 6,534 | 3,960 | 31,310 |
| 36,009 | 135 | 20,664 | 6,494 | 3,940 | 31,233 |
| 36,010 | 142 | 20,957 | 6,554 | 3,981 | 31,634 |
| 36,011 | 141 | 20,999 | 6,566 | 3,974 | 31,680 |
| 36,012 | 142 | 21,029 | 6,582 | 4,026 | 31,779 |
| 36,013 | 144 | 21,058 | 6,603 | 4,037 | 31,842 |
| 36,014 | 143 | 20,989 | 6,555 | 3,996 | 31,683 |
| 36,015 | 140 | 21,136 | 6,518 | 3,981 | 31,775 |
| 36,016 | 142 | 21,403 | 6,573 | 4,010 | 32,128 |
| 36,017 | 123 | 20,744 | 6,357 | 3,870 | 31,094 |
| 36,018 | 123 | 20,907 | 6,419 | 3,899 | 31,348 |
| 36,019 | 123 | 21,041 | 6,465 | 3,934 | 31,563 |
| 36,020 | 122 | 20,820 | 6,426 | 3,899 | 31,267 |
| 36,021 | 113 | 20,603 | 6,358 | 3,871 | 30,945 |
| 36,022 | 118 | 20,526 | 6,370 | 3,853 | 30,867 |
| 36,023 | 120 | 20,533 | 6,324 | 3,850 | 30,827 |

|        |     |        |       |       |        |
|--------|-----|--------|-------|-------|--------|
| 36,024 | 118 | 20,331 | 6,256 | 3,793 | 30,498 |
| 36,025 | 116 | 20,068 | 6,182 | 3,743 | 30,109 |
| 36,026 | 124 | 20,435 | 6,221 | 3,738 | 30,518 |
| 36,027 | 123 | 20,036 | 6,113 | 3,684 | 29,956 |
| 36,028 | 120 | 19,649 | 6,021 | 3,620 | 29,410 |
| 36,029 | 119 | 19,426 | 5,940 | 3,560 | 29,045 |
| 36,030 | 117 | 19,877 | 6,045 | 3,631 | 29,670 |
| 36,031 | 118 | 19,569 | 5,899 | 3,575 | 29,161 |
| 36,032 | 112 | 19,713 | 5,856 | 3,563 | 29,244 |
| 36,033 | 114 | 19,972 | 5,934 | 3,594 | 29,614 |
| 36,034 | 110 | 20,035 | 5,896 | 3,548 | 29,589 |
| 36,035 | 106 | 19,692 | 5,745 | 3,461 | 29,004 |
| 36,036 | 111 | 19,769 | 5,737 | 3,452 | 29,069 |
| 36,037 | 111 | 19,867 | 5,755 | 3,450 | 29,183 |
| 36,038 | 99  | 19,714 | 5,716 | 3,444 | 28,973 |
| 36,039 | 103 | 19,765 | 5,766 | 3,469 | 29,103 |
| 36,040 | 101 | 19,786 | 5,719 | 3,424 | 29,030 |
| 36,041 | 101 | 19,704 | 5,680 | 3,403 | 28,888 |
| 36,042 | 105 | 19,559 | 5,651 | 3,376 | 28,691 |
| 36,043 | 106 | 19,454 | 5,624 | 3,349 | 28,533 |
| 36,044 | 104 | 19,909 | 5,734 | 3,405 | 29,152 |
| 36,045 | 107 | 19,640 | 5,659 | 3,360 | 28,766 |
| 36,046 | 106 | 19,338 | 5,555 | 3,312 | 28,311 |
| 36,047 | 101 | 19,854 | 5,688 | 3,412 | 29,055 |
| 36,048 | 101 | 19,755 | 5,682 | 3,427 | 28,965 |
| 36,049 | 101 | 19,765 | 5,757 | 3,483 | 29,106 |
| 36,050 | 101 | 19,570 | 5,682 | 3,441 | 28,794 |
| 36,051 | 107 | 19,930 | 5,791 | 3,486 | 29,314 |
| 36,052 | 105 | 19,649 | 5,754 | 3,439 | 28,947 |
| 36,053 | 109 | 19,724 | 5,730 | 3,442 | 29,005 |
| 36,054 | 109 | 19,747 | 5,745 | 3,443 | 29,044 |
| 36,055 | 109 | 19,802 | 5,746 | 3,457 | 29,114 |

|        |     |        |       |       |        |
|--------|-----|--------|-------|-------|--------|
| 36,056 | 110 | 19,829 | 5,644 | 3,424 | 29,007 |
| 36,057 | 116 | 20,090 | 5,708 | 3,446 | 29,360 |
| 36,058 | 114 | 20,045 | 5,700 | 3,421 | 29,280 |
| 36,059 | 112 | 19,782 | 5,626 | 3,384 | 28,904 |
| 36,060 | 112 | 19,462 | 5,600 | 3,382 | 28,556 |
| 36,061 | 109 | 20,242 | 5,818 | 3,517 | 29,686 |
| 36,062 | 108 | 20,175 | 5,853 | 3,557 | 29,693 |
| 36,063 | 106 | 20,088 | 5,830 | 3,528 | 29,552 |
| 36,064 | 103 | 20,000 | 5,854 | 3,514 | 29,471 |
| 36,065 | 103 | 20,127 | 5,892 | 3,559 | 29,681 |
| 36,066 | 116 | 20,282 | 5,956 | 3,575 | 29,929 |
| 36,067 | 120 | 20,484 | 6,029 | 3,606 | 30,239 |
| 36,068 | 123 | 20,486 | 6,006 | 3,597 | 30,212 |
| 36,069 | 127 | 20,566 | 6,018 | 3,594 | 30,305 |
| 36,070 | 131 | 20,318 | 5,930 | 3,514 | 29,893 |
| 36,071 | 132 | 20,618 | 5,969 | 3,544 | 30,263 |
| 36,072 | 128 | 21,021 | 6,056 | 3,580 | 30,785 |
| 36,073 | 135 | 21,308 | 6,129 | 3,634 | 31,206 |
| 36,074 | 130 | 21,232 | 6,119 | 3,615 | 31,096 |
| 36,075 | 135 | 21,389 | 6,185 | 3,644 | 31,353 |
| 36,076 | 132 | 21,395 | 6,183 | 3,652 | 31,362 |
| 36,077 | 137 | 21,222 | 6,113 | 3,653 | 31,125 |
| 36,078 | 137 | 21,148 | 6,056 | 3,613 | 30,954 |
| 36,079 | 144 | 21,291 | 6,141 | 3,637 | 31,213 |
| 36,080 | 144 | 21,297 | 6,135 | 3,645 | 31,221 |
| 36,081 | 147 | 21,254 | 6,181 | 3,648 | 31,230 |
| 36,082 | 144 | 21,117 | 6,175 | 3,640 | 31,076 |
| 36,083 | 144 | 21,274 | 6,232 | 3,658 | 31,308 |
| 36,084 | 142 | 21,391 | 6,285 | 3,679 | 31,497 |
| 36,085 | 146 | 21,423 | 6,288 | 3,691 | 31,548 |
| 36,086 | 146 | 21,260 | 6,252 | 3,671 | 31,329 |
| 36,087 | 148 | 21,573 | 6,303 | 3,730 | 31,754 |



|        |     |        |       |       |        |
|--------|-----|--------|-------|-------|--------|
| 36,088 | 151 | 21,495 | 6,262 | 3,693 | 31,601 |
| 36,089 | 147 | 21,723 | 6,242 | 3,716 | 31,828 |
| 36,090 | 149 | 22,043 | 6,310 | 3,742 | 32,244 |
| 36,091 | 147 | 21,903 | 6,280 | 3,722 | 32,052 |
| 36,092 | 149 | 22,159 | 6,339 | 3,750 | 32,397 |
| 36,093 | 145 | 22,130 | 6,284 | 3,722 | 32,281 |
| 36,094 | 147 | 22,559 | 6,375 | 3,801 | 32,882 |
| 36,095 | 149 | 22,697 | 6,439 | 3,836 | 33,121 |
| 36,096 | 142 | 22,648 | 6,440 | 3,843 | 33,073 |
| 36,097 | 148 | 22,450 | 6,424 | 3,852 | 32,874 |
| 36,098 | 152 | 22,395 | 6,413 | 3,832 | 32,792 |
| 36,099 | 158 | 22,361 | 6,343 | 3,780 | 32,642 |
| 36,100 | 156 | 22,163 | 6,313 | 3,756 | 32,388 |
| 36,101 | 154 | 22,413 | 6,381 | 3,816 | 32,764 |
| 36,102 | 155 | 22,418 | 6,403 | 3,844 | 32,820 |
| 36,103 | 154 | 22,235 | 6,339 | 3,820 | 32,548 |
| 36,104 | 149 | 22,232 | 6,358 | 3,831 | 32,570 |
| 36,105 | 154 | 22,229 | 6,344 | 3,838 | 32,565 |
| 36,106 | 158 | 22,023 | 6,293 | 3,789 | 32,263 |
| 36,107 | 154 | 21,774 | 6,218 | 3,758 | 31,904 |
| 36,108 | 158 | 21,820 | 6,296 | 3,830 | 32,104 |
| 36,109 | 166 | 22,017 | 6,351 | 3,853 | 32,387 |
| 36,110 | 165 | 21,956 | 6,335 | 3,840 | 32,296 |
| 36,111 | 169 | 22,307 | 6,397 | 3,861 | 32,734 |
| 36,112 | 170 | 22,162 | 6,357 | 3,826 | 32,515 |
| 36,113 | 170 | 22,235 | 6,289 | 3,781 | 32,475 |
| 36,114 | 171 | 22,383 | 6,327 | 3,788 | 32,669 |
| 36,115 | 173 | 22,165 | 6,201 | 3,759 | 32,298 |
| 36,116 | 173 | 22,329 | 6,238 | 3,776 | 32,516 |
| 36,117 | 163 | 22,485 | 6,282 | 3,817 | 32,747 |
| 36,118 | 169 | 22,181 | 6,176 | 3,779 | 32,305 |
| 36,119 | 167 | 22,035 | 6,147 | 3,766 | 32,115 |

|        |     |        |       |       |        |
|--------|-----|--------|-------|-------|--------|
| 36,120 | 171 | 22,361 | 6,223 | 3,833 | 32,588 |
| 36,121 | 166 | 22,402 | 6,246 | 3,850 | 32,664 |
| 36,122 | 163 | 22,286 | 6,217 | 3,815 | 32,481 |
| 36,123 | 163 | 22,510 | 6,269 | 3,865 | 32,807 |
| 36,124 | 163 | 22,332 | 6,211 | 3,849 | 32,555 |
| 36,125 | 163 | 22,400 | 6,252 | 3,861 | 32,676 |
| 36,126 | 164 | 22,568 | 6,274 | 3,897 | 32,903 |
| 36,127 | 163 | 22,439 | 6,274 | 3,871 | 32,747 |
| 36,128 | 163 | 22,367 | 6,253 | 3,851 | 32,634 |
| 36,129 | 162 | 22,535 | 6,354 | 3,900 | 32,951 |
| 36,130 | 155 | 22,684 | 6,356 | 3,917 | 33,112 |
| 36,131 | 160 | 22,521 | 6,308 | 3,874 | 32,863 |
| 36,132 | 159 | 22,529 | 6,292 | 3,873 | 32,853 |
| 36,133 | 157 | 22,666 | 6,337 | 3,911 | 33,071 |
| 36,134 | 154 | 22,663 | 6,323 | 3,919 | 33,059 |
| 36,135 | 155 | 22,774 | 6,301 | 3,946 | 33,176 |
| 36,136 | 152 | 22,671 | 6,306 | 3,917 | 33,046 |
| 36,137 | 150 | 22,541 | 6,261 | 3,880 | 32,832 |
| 36,138 | 148 | 22,325 | 6,232 | 3,841 | 32,546 |
| 36,139 | 147 | 22,044 | 6,182 | 3,817 | 32,190 |
| 36,140 | 147 | 21,777 | 6,143 | 3,786 | 31,853 |
| 36,141 | 146 | 22,038 | 6,210 | 3,859 | 32,253 |
| 36,142 | 149 | 22,069 | 6,227 | 3,860 | 32,305 |
| 36,143 | 148 | 22,220 | 6,298 | 3,887 | 32,553 |
| 36,144 | 156 | 22,130 | 6,336 | 3,896 | 32,518 |
| 36,145 | 156 | 21,928 | 6,330 | 3,875 | 32,289 |
| 36,146 | 162 | 21,800 | 6,282 | 3,839 | 32,083 |
| 36,147 | 155 | 21,595 | 6,232 | 3,778 | 31,760 |
| 36,148 | 156 | 21,528 | 6,240 | 3,750 | 31,674 |
| 36,149 | 157 | 21,564 | 6,238 | 3,768 | 31,727 |
| 36,150 | 149 | 21,455 | 6,233 | 3,751 | 31,588 |
| 36,151 | 147 | 21,387 | 6,236 | 3,739 | 31,509 |

|        |     |        |       |       |        |
|--------|-----|--------|-------|-------|--------|
| 36,152 | 145 | 21,416 | 6,230 | 3,713 | 31,504 |
| 36,153 | 150 | 21,510 | 6,225 | 3,710 | 31,595 |
| 36,154 | 150 | 21,431 | 6,210 | 3,706 | 31,497 |
| 36,155 | 148 | 21,341 | 6,211 | 3,702 | 31,402 |
| 36,156 | 147 | 21,353 | 6,244 | 3,718 | 31,462 |
| 36,157 | 142 | 21,052 | 6,189 | 3,660 | 31,043 |
| 36,158 | 144 | 21,163 | 6,186 | 3,655 | 31,148 |
| 36,159 | 140 | 21,248 | 6,179 | 3,658 | 31,225 |
| 36,160 | 136 | 21,259 | 6,180 | 3,674 | 31,249 |
| 36,161 | 140 | 21,228 | 6,183 | 3,664 | 31,215 |
| 36,162 | 135 | 21,032 | 6,119 | 3,621 | 30,907 |
| 36,163 | 136 | 20,979 | 6,131 | 3,613 | 30,859 |
| 36,164 | 136 | 20,867 | 6,162 | 3,630 | 30,795 |
| 36,165 | 140 | 21,153 | 6,231 | 3,703 | 31,227 |
| 36,166 | 140 | 20,984 | 6,237 | 3,673 | 31,034 |
| 36,167 | 137 | 20,707 | 6,224 | 3,642 | 30,710 |
| 36,168 | 128 | 20,571 | 6,211 | 3,638 | 30,548 |
| 36,169 | 129 | 20,610 | 6,217 | 3,653 | 30,609 |
| 36,170 | 125 | 20,343 | 6,164 | 3,646 | 30,278 |
| 36,171 | 132 | 20,445 | 6,208 | 3,682 | 30,467 |
| 36,172 | 135 | 20,369 | 6,215 | 3,685 | 30,404 |
| 36,173 | 137 | 19,663 | 6,055 | 3,566 | 29,421 |
| 36,174 | 139 | 19,786 | 6,111 | 3,608 | 29,644 |
| 36,175 | 135 | 19,925 | 6,154 | 3,628 | 29,842 |
| 36,176 | 136 | 19,727 | 6,072 | 3,594 | 29,529 |
| 36,177 | 139 | 19,922 | 6,128 | 3,588 | 29,777 |
| 36,178 | 131 | 19,870 | 6,122 | 3,586 | 29,709 |
| 36,179 | 130 | 19,939 | 6,162 | 3,639 | 29,870 |
| 36,180 | 135 | 20,146 | 6,236 | 3,679 | 30,196 |
| 36,181 | 135 | 20,173 | 6,290 | 3,718 | 30,316 |
| 36,182 | 133 | 20,067 | 6,296 | 3,716 | 30,212 |
| 36,183 | 131 | 20,163 | 6,321 | 3,731 | 30,346 |

|        |     |        |       |       |        |
|--------|-----|--------|-------|-------|--------|
| 36,184 | 132 | 19,899 | 6,271 | 3,666 | 29,968 |
| 36,185 | 132 | 20,061 | 6,289 | 3,691 | 30,173 |
| 36,186 | 131 | 20,240 | 6,347 | 3,701 | 30,419 |
| 36,187 | 130 | 19,986 | 6,266 | 3,679 | 30,061 |
| 36,188 | 131 | 20,050 | 6,262 | 3,695 | 30,138 |
| 36,189 | 135 | 20,235 | 6,331 | 3,711 | 30,412 |
| 36,190 | 134 | 20,338 | 6,329 | 3,722 | 30,523 |
| 36,191 | 136 | 20,362 | 6,359 | 3,708 | 30,565 |
| 36,192 | 140 | 20,360 | 6,360 | 3,697 | 30,557 |
| 36,193 | 138 | 20,392 | 6,391 | 3,719 | 30,640 |
| 36,194 | 148 | 20,310 | 6,336 | 3,696 | 30,490 |
| 36,195 | 139 | 20,357 | 6,295 | 3,696 | 30,487 |
| 36,196 | 129 | 20,157 | 6,193 | 3,658 | 30,137 |
| 36,197 | 124 | 19,888 | 6,052 | 3,603 | 29,667 |
| 36,198 | 124 | 20,126 | 6,078 | 3,626 | 29,954 |
| 36,199 | 125 | 20,479 | 6,117 | 3,669 | 30,390 |
| 36,200 | 126 | 20,499 | 6,107 | 3,664 | 30,396 |
| 36,201 | 129 | 20,633 | 6,107 | 3,676 | 30,545 |
| 36,202 | 130 | 20,958 | 6,170 | 3,701 | 30,959 |
| 36,203 | 130 | 20,893 | 6,165 | 3,706 | 30,894 |
| 36,204 | 126 | 20,816 | 6,164 | 3,726 | 30,832 |
| 36,205 | 124 | 20,734 | 6,131 | 3,677 | 30,666 |
| 36,206 | 132 | 20,998 | 6,193 | 3,684 | 31,007 |
| 36,207 | 131 | 20,870 | 6,114 | 3,658 | 30,773 |
| 36,208 | 131 | 20,914 | 6,110 | 3,659 | 30,814 |
| 36,209 | 128 | 20,856 | 6,126 | 3,660 | 30,770 |
| 36,210 | 129 | 20,939 | 6,172 | 3,679 | 30,919 |
| 36,211 | 126 | 20,788 | 6,130 | 3,655 | 30,699 |
| 36,212 | 123 | 20,460 | 6,056 | 3,628 | 30,267 |
| 36,213 | 127 | 20,667 | 6,131 | 3,648 | 30,573 |
| 36,214 | 128 | 20,691 | 6,106 | 3,621 | 30,546 |
| 36,215 | 137 | 20,729 | 6,126 | 3,621 | 30,613 |

|        |     |        |       |       |        |
|--------|-----|--------|-------|-------|--------|
| 36,216 | 131 | 20,669 | 6,090 | 3,596 | 30,486 |
| 36,217 | 131 | 20,422 | 5,950 | 3,542 | 30,045 |
| 36,218 | 130 | 20,064 | 5,829 | 3,446 | 29,469 |
| 36,219 | 131 | 20,454 | 5,878 | 3,463 | 29,926 |
| 36,220 | 132 | 20,398 | 5,824 | 3,421 | 29,775 |
| 36,221 | 139 | 20,633 | 5,832 | 3,416 | 30,020 |
| 36,222 | 130 | 20,576 | 5,830 | 3,402 | 29,938 |
| 36,223 | 127 | 20,496 | 5,772 | 3,391 | 29,786 |
| 36,224 | 120 | 20,491 | 5,714 | 3,374 | 29,699 |
| 36,225 | 121 | 20,423 | 5,713 | 3,359 | 29,616 |
| 36,226 | 121 | 20,349 | 5,710 | 3,347 | 29,527 |
| 36,227 | 118 | 20,314 | 5,748 | 3,348 | 29,528 |
| 36,228 | 116 | 20,566 | 5,846 | 3,432 | 29,960 |
| 36,229 | 116 | 20,594 | 5,840 | 3,433 | 29,983 |
| 36,230 | 113 | 20,740 | 5,821 | 3,412 | 30,086 |
| 36,231 | 113 | 20,806 | 5,830 | 3,423 | 30,172 |
| 36,232 | 112 | 20,786 | 5,790 | 3,405 | 30,093 |
| 36,233 | 110 | 20,632 | 5,735 | 3,359 | 29,836 |
| 36,234 | 112 | 20,763 | 5,757 | 3,363 | 29,995 |
| 36,235 | 111 | 20,479 | 5,670 | 3,320 | 29,580 |
| 36,236 | 117 | 20,420 | 5,687 | 3,329 | 29,553 |
| 36,237 | 118 | 20,411 | 5,686 | 3,332 | 29,547 |
| 36,238 | 117 | 20,353 | 5,685 | 3,300 | 29,455 |
| 36,239 | 116 | 20,320 | 5,683 | 3,313 | 29,432 |
| 36,240 | 116 | 20,623 | 5,688 | 3,341 | 29,768 |
| 36,241 | 110 | 19,706 | 5,404 | 3,202 | 28,422 |
| 36,242 | 111 | 19,930 | 5,431 | 3,216 | 28,688 |
| 36,243 | 111 | 20,151 | 5,478 | 3,242 | 28,982 |
| 36,244 | 111 | 20,154 | 5,473 | 3,239 | 28,977 |
| 36,245 | 104 | 20,377 | 5,509 | 3,266 | 29,256 |
| 36,246 | 104 | 20,572 | 5,543 | 3,276 | 29,495 |
| 36,247 | 104 | 20,651 | 5,582 | 3,263 | 29,600 |

|        |     |        |       |       |        |
|--------|-----|--------|-------|-------|--------|
| 36,248 | 108 | 20,536 | 5,565 | 3,217 | 29,426 |
| 36,249 | 108 | 20,522 | 5,578 | 3,219 | 29,427 |
| 36,250 | 109 | 20,550 | 5,666 | 3,270 | 29,595 |
| 36,251 | 113 | 20,438 | 5,679 | 3,289 | 29,519 |
| 36,252 | 110 | 20,364 | 5,727 | 3,303 | 29,504 |
| 36,253 | 116 | 20,136 | 5,663 | 3,285 | 29,200 |
| 36,254 | 116 | 20,032 | 5,593 | 3,242 | 28,983 |
| 36,255 | 120 | 20,262 | 5,603 | 3,251 | 29,236 |
| 36,256 | 119 | 20,297 | 5,597 | 3,257 | 29,270 |
| 36,257 | 112 | 20,296 | 5,596 | 3,282 | 29,286 |
| 36,258 | 109 | 20,306 | 5,615 | 3,278 | 29,308 |
| 36,259 | 118 | 20,526 | 5,662 | 3,298 | 29,604 |
| 36,260 | 117 | 20,480 | 5,641 | 3,270 | 29,508 |
| 36,261 | 124 | 20,590 | 5,618 | 3,265 | 29,597 |
| 36,262 | 123 | 20,542 | 5,633 | 3,264 | 29,562 |
| 36,263 | 132 | 20,839 | 5,728 | 3,314 | 30,013 |
| 36,264 | 133 | 20,651 | 5,646 | 3,289 | 29,719 |
| 36,265 | 132 | 20,460 | 5,587 | 3,255 | 29,434 |
| 36,266 | 130 | 20,532 | 5,576 | 3,247 | 29,485 |
| 36,267 | 130 | 20,482 | 5,595 | 3,238 | 29,445 |
| 36,268 | 128 | 20,234 | 5,591 | 3,250 | 29,203 |
| 36,269 | 124 | 20,548 | 5,673 | 3,306 | 29,651 |
| 36,270 | 120 | 20,332 | 5,620 | 3,284 | 29,356 |
| 36,271 | 122 | 20,516 | 5,693 | 3,321 | 29,652 |
| 36,272 | 119 | 20,322 | 5,695 | 3,319 | 29,455 |
| 36,273 | 119 | 20,083 | 5,652 | 3,295 | 29,149 |
| 36,274 | 120 | 20,403 | 5,786 | 3,351 | 29,660 |
| 36,275 | 122 | 20,498 | 5,811 | 3,362 | 29,793 |
| 36,276 | 120 | 20,584 | 5,818 | 3,355 | 29,877 |
| 36,277 | 122 | 20,512 | 5,789 | 3,352 | 29,775 |
| 36,278 | 123 | 20,521 | 5,760 | 3,340 | 29,744 |
| 36,279 | 125 | 21,005 | 5,840 | 3,365 | 30,335 |

|        |     |        |       |       |        |
|--------|-----|--------|-------|-------|--------|
| 36,280 | 124 | 20,762 | 5,764 | 3,322 | 29,972 |
| 36,281 | 130 | 20,763 | 5,756 | 3,309 | 29,958 |
| 36,282 | 129 | 20,583 | 5,698 | 3,257 | 29,667 |
| 36,283 | 132 | 20,683 | 5,764 | 3,256 | 29,835 |
| 36,284 | 131 | 19,956 | 5,564 | 3,130 | 28,781 |
| 36,285 | 131 | 20,127 | 5,612 | 3,160 | 29,030 |
| 36,286 | 129 | 20,269 | 5,640 | 3,176 | 29,214 |
| 36,287 | 131 | 20,238 | 5,613 | 3,158 | 29,140 |
| 36,288 | 133 | 20,250 | 5,615 | 3,153 | 29,151 |
| 36,289 | 135 | 20,173 | 5,576 | 3,157 | 29,041 |
| 36,290 | 136 | 20,185 | 5,586 | 3,159 | 29,066 |
| 36,291 | 134 | 19,915 | 5,559 | 3,133 | 28,741 |
| 36,292 | 135 | 20,121 | 5,691 | 3,160 | 29,107 |
| 36,293 | 137 | 20,241 | 5,770 | 3,215 | 29,363 |
| 36,294 | 135 | 20,081 | 5,740 | 3,196 | 29,152 |
| 36,295 | 137 | 20,220 | 5,804 | 3,230 | 29,391 |
| 36,296 | 138 | 20,156 | 5,843 | 3,261 | 29,398 |
| 36,297 | 142 | 20,059 | 5,899 | 3,285 | 29,385 |
| 36,298 | 142 | 19,865 | 5,873 | 3,278 | 29,158 |
| 36,299 | 144 | 19,702 | 5,858 | 3,287 | 28,991 |
| 36,300 | 143 | 19,851 | 5,855 | 3,269 | 29,118 |
| 36,301 | 144 | 19,974 | 5,836 | 3,267 | 29,221 |
| 36,302 | 139 | 19,515 | 5,647 | 3,149 | 28,450 |
| 36,303 | 139 | 19,948 | 5,698 | 3,182 | 28,967 |
| 36,304 | 137 | 19,934 | 5,708 | 3,185 | 28,964 |
| 36,305 | 141 | 20,177 | 5,803 | 3,254 | 29,375 |
| 36,306 | 139 | 20,013 | 5,815 | 3,240 | 29,207 |
| 36,307 | 140 | 20,089 | 5,865 | 3,264 | 29,358 |
| 36,308 | 144 | 20,177 | 5,864 | 3,273 | 29,458 |
| 36,309 | 145 | 20,167 | 5,866 | 3,269 | 29,447 |
| 36,310 | 140 | 20,141 | 5,911 | 3,308 | 29,500 |
| 36,311 | 139 | 20,133 | 5,922 | 3,310 | 29,504 |

|        |     |        |       |       |        |
|--------|-----|--------|-------|-------|--------|
| 36,312 | 135 | 19,898 | 5,860 | 3,277 | 29,170 |
| 36,313 | 134 | 19,926 | 5,895 | 3,293 | 29,248 |
| 36,314 | 126 | 20,093 | 5,923 | 3,314 | 29,456 |
| 36,315 | 121 | 19,880 | 5,912 | 3,300 | 29,213 |
| 36,316 | 123 | 20,041 | 5,962 | 3,344 | 29,470 |
| 36,317 | 117 | 19,894 | 5,906 | 3,334 | 29,251 |
| 36,318 | 117 | 20,009 | 5,941 | 3,359 | 29,426 |
| 36,319 | 118 | 19,990 | 5,980 | 3,354 | 29,442 |
| 36,320 | 121 | 19,916 | 5,960 | 3,348 | 29,345 |
| 36,321 | 123 | 19,903 | 5,992 | 3,342 | 29,360 |
| 36,322 | 120 | 19,885 | 6,002 | 3,341 | 29,348 |
| 36,323 | 120 | 19,703 | 5,918 | 3,312 | 29,053 |
| 36,324 | 120 | 19,619 | 5,878 | 3,291 | 28,908 |
| 36,325 | 124 | 19,900 | 5,931 | 3,344 | 29,299 |
| 36,326 | 127 | 19,823 | 5,953 | 3,362 | 29,265 |
| 36,327 | 125 | 19,408 | 5,852 | 3,312 | 28,697 |
| 36,328 | 125 | 19,330 | 5,846 | 3,313 | 28,614 |
| 36,329 | 122 | 19,424 | 5,927 | 3,360 | 28,833 |
| 36,330 | 122 | 19,261 | 5,937 | 3,359 | 28,679 |
| 36,331 | 120 | 19,050 | 5,915 | 3,319 | 28,404 |
| 36,332 | 119 | 18,924 | 5,865 | 3,319 | 28,227 |
| 36,333 | 119 | 19,261 | 5,953 | 3,383 | 28,716 |
| 36,334 | 111 | 19,069 | 5,891 | 3,372 | 28,443 |
| 36,335 | 111 | 19,153 | 5,915 | 3,385 | 28,564 |
| 36,336 | 113 | 19,237 | 5,941 | 3,408 | 28,699 |
| 36,337 | 109 | 19,198 | 5,949 | 3,404 | 28,660 |
| 36,338 | 119 | 19,284 | 5,979 | 3,410 | 28,792 |
| 36,339 | 119 | 19,248 | 5,972 | 3,414 | 28,753 |
| 36,340 | 120 | 19,514 | 6,071 | 3,455 | 29,160 |
| 36,341 | 121 | 19,573 | 6,131 | 3,462 | 29,287 |
| 36,342 | 123 | 19,669 | 6,151 | 3,496 | 29,439 |
| 36,343 | 127 | 19,609 | 6,085 | 3,477 | 29,298 |



|        |     |        |       |       |        |
|--------|-----|--------|-------|-------|--------|
| 36,344 | 125 | 19,548 | 6,062 | 3,464 | 29,199 |
| 36,345 | 124 | 19,652 | 6,060 | 3,453 | 29,289 |
| 36,346 | 130 | 19,820 | 6,122 | 3,477 | 29,549 |
| 36,347 | 130 | 19,925 | 6,144 | 3,490 | 29,689 |
| 36,348 | 132 | 19,828 | 6,092 | 3,453 | 29,505 |
| 36,349 | 136 | 19,826 | 6,071 | 3,448 | 29,481 |
| 36,350 | 130 | 19,596 | 6,001 | 3,407 | 29,134 |
| 36,351 | 131 | 19,441 | 6,002 | 3,394 | 28,968 |
| 36,352 | 128 | 19,356 | 6,002 | 3,381 | 28,867 |
| 36,353 | 127 | 19,165 | 5,998 | 3,381 | 28,671 |
| 36,354 | 131 | 19,268 | 6,085 | 3,405 | 28,889 |
| 36,355 | 125 | 19,252 | 6,067 | 3,416 | 28,860 |
| 36,356 | 123 | 19,400 | 6,105 | 3,426 | 29,054 |
| 36,357 | 124 | 19,422 | 6,074 | 3,404 | 29,024 |
| 36,358 | 121 | 19,095 | 6,005 | 3,366 | 28,587 |
| 36,359 | 119 | 19,047 | 6,021 | 3,391 | 28,578 |
| 36,360 | 117 | 18,888 | 6,006 | 3,390 | 28,401 |
| 36,361 | 116 | 18,845 | 5,960 | 3,384 | 28,305 |
| 36,362 | 117 | 18,979 | 5,990 | 3,381 | 28,467 |
| 36,363 | 114 | 18,826 | 5,896 | 3,362 | 28,198 |
| 36,364 | 118 | 19,044 | 5,974 | 3,394 | 28,530 |
| 36,365 | 117 | 18,888 | 6,018 | 3,389 | 28,412 |
| 36,366 | 118 | 18,823 | 5,998 | 3,383 | 28,322 |
| 36,367 | 123 | 18,921 | 6,026 | 3,400 | 28,470 |
| 36,368 | 123 | 18,864 | 5,999 | 3,383 | 28,369 |
| 36,369 | 121 | 18,759 | 5,941 | 3,324 | 28,145 |
| 36,370 | 121 | 18,990 | 5,991 | 3,365 | 28,467 |
| 36,371 | 120 | 19,006 | 5,970 | 3,376 | 28,472 |
| 36,372 | 118 | 18,916 | 5,935 | 3,394 | 28,363 |
| 36,373 | 119 | 19,139 | 5,948 | 3,424 | 28,630 |
| 36,374 | 113 | 19,099 | 5,930 | 3,387 | 28,529 |
| 36,375 | 111 | 19,060 | 5,918 | 3,380 | 28,469 |

|        |     |        |       |       |        |
|--------|-----|--------|-------|-------|--------|
| 36,376 | 109 | 19,075 | 5,909 | 3,377 | 28,470 |
| 36,377 | 115 | 19,117 | 5,910 | 3,373 | 28,515 |
| 36,378 | 125 | 19,424 | 5,982 | 3,400 | 28,931 |
| 36,379 | 138 | 19,553 | 6,029 | 3,424 | 29,144 |
| 36,380 | 141 | 19,651 | 6,012 | 3,423 | 29,227 |
| 36,381 | 139 | 19,293 | 5,867 | 3,379 | 28,678 |
| 36,382 | 137 | 19,309 | 5,848 | 3,374 | 28,668 |
| 36,383 | 136 | 19,064 | 5,826 | 3,354 | 28,380 |
| 36,384 | 140 | 19,161 | 5,873 | 3,383 | 28,557 |
| 36,385 | 141 | 18,961 | 5,821 | 3,354 | 28,277 |
| 36,386 | 142 | 19,015 | 5,820 | 3,356 | 28,333 |
| 36,387 | 144 | 19,233 | 5,877 | 3,375 | 28,629 |
| 36,388 | 156 | 19,237 | 5,875 | 3,374 | 28,642 |
| 36,389 | 147 | 19,348 | 5,904 | 3,392 | 28,791 |
| 36,390 | 155 | 19,247 | 5,863 | 3,350 | 28,615 |
| 36,391 | 151 | 19,117 | 5,829 | 3,331 | 28,428 |
| 36,392 | 150 | 19,268 | 5,834 | 3,383 | 28,635 |
| 36,393 | 148 | 19,211 | 5,819 | 3,378 | 28,556 |
| 36,394 | 145 | 19,188 | 5,797 | 3,365 | 28,495 |
| 36,395 | 141 | 18,751 | 5,582 | 3,251 | 27,725 |
| 36,396 | 145 | 18,906 | 5,623 | 3,261 | 27,935 |
| 36,397 | 143 | 19,063 | 5,657 | 3,270 | 28,133 |
| 36,398 | 141 | 19,064 | 5,646 | 3,269 | 28,120 |
| 36,399 | 140 | 19,220 | 5,710 | 3,317 | 28,387 |
| 36,400 | 139 | 18,952 | 5,631 | 3,275 | 27,997 |
| 36,401 | 138 | 18,793 | 5,592 | 3,246 | 27,769 |
| 36,402 | 143 | 18,921 | 5,613 | 3,280 | 27,957 |
| 36,403 | 143 | 18,739 | 5,572 | 3,264 | 27,718 |
| 36,404 | 143 | 19,069 | 5,670 | 3,333 | 28,215 |
| 36,405 | 142 | 19,186 | 5,677 | 3,362 | 28,367 |
| 36,406 | 146 | 19,144 | 5,674 | 3,358 | 28,322 |
| 36,407 | 144 | 19,038 | 5,638 | 3,334 | 28,154 |

|        |     |        |       |       |        |
|--------|-----|--------|-------|-------|--------|
| 36,408 | 142 | 19,002 | 5,619 | 3,327 | 28,090 |
| 36,409 | 141 | 18,991 | 5,564 | 3,269 | 27,965 |
| 36,410 | 142 | 19,051 | 5,560 | 3,252 | 28,005 |
| 36,411 | 142 | 19,119 | 5,556 | 3,241 | 28,058 |
| 36,412 | 142 | 19,150 | 5,556 | 3,258 | 28,106 |
| 36,413 | 143 | 19,234 | 5,602 | 3,293 | 28,272 |
| 36,414 | 143 | 19,298 | 5,643 | 3,316 | 28,400 |
| 36,415 | 138 | 19,292 | 5,583 | 3,303 | 28,316 |
| 36,416 | 145 | 19,418 | 5,610 | 3,332 | 28,505 |
| 36,417 | 147 | 19,359 | 5,584 | 3,315 | 28,405 |
| 36,418 | 153 | 19,197 | 5,557 | 3,282 | 28,189 |
| 36,419 | 153 | 18,995 | 5,487 | 3,251 | 27,886 |
| 36,420 | 156 | 19,183 | 5,549 | 3,319 | 28,207 |
| 36,421 | 157 | 19,241 | 5,552 | 3,311 | 28,261 |
| 36,422 | 158 | 19,233 | 5,514 | 3,296 | 28,201 |
| 36,423 | 158 | 19,168 | 5,524 | 3,275 | 28,125 |
| 36,424 | 157 | 19,114 | 5,554 | 3,289 | 28,114 |
| 36,425 | 157 | 18,979 | 5,560 | 3,289 | 27,985 |
| 36,426 | 155 | 18,879 | 5,527 | 3,256 | 27,817 |
| 36,427 | 156 | 19,066 | 5,558 | 3,268 | 28,048 |
| 36,428 | 149 | 18,873 | 5,531 | 3,240 | 27,793 |
| 36,429 | 139 | 18,866 | 5,529 | 3,259 | 27,793 |
| 36,430 | 129 | 18,901 | 5,492 | 3,238 | 27,760 |
| 36,431 | 128 | 18,636 | 5,464 | 3,205 | 27,433 |
| 36,432 | 134 | 18,712 | 5,478 | 3,192 | 27,516 |
| 36,433 | 134 | 18,777 | 5,486 | 3,189 | 27,586 |
| 36,434 | 133 | 19,016 | 5,552 | 3,220 | 27,921 |
| 36,435 | 142 | 18,909 | 5,517 | 3,181 | 27,749 |
| 36,436 | 142 | 18,930 | 5,501 | 3,182 | 27,755 |
| 36,437 | 141 | 18,883 | 5,524 | 3,181 | 27,729 |
| 36,438 | 141 | 18,744 | 5,489 | 3,183 | 27,557 |
| 36,439 | 131 | 18,765 | 5,551 | 3,223 | 27,670 |

|        |     |        |       |       |        |
|--------|-----|--------|-------|-------|--------|
| 36,440 | 130 | 18,723 | 5,573 | 3,223 | 27,649 |
| 36,441 | 114 | 18,516 | 5,542 | 3,184 | 27,356 |
| 36,442 | 117 | 18,583 | 5,555 | 3,187 | 27,442 |
| 36,443 | 120 | 18,596 | 5,513 | 3,168 | 27,397 |
| 36,444 | 126 | 18,287 | 5,479 | 3,140 | 27,032 |
| 36,445 | 127 | 18,095 | 5,456 | 3,137 | 26,815 |
| 36,446 | 134 | 18,577 | 5,580 | 3,230 | 27,521 |
| 36,447 | 130 | 18,412 | 5,551 | 3,215 | 27,308 |
| 36,448 | 129 | 18,315 | 5,520 | 3,204 | 27,168 |
| 36,449 | 131 | 18,236 | 5,472 | 3,178 | 27,017 |
| 36,450 | 125 | 18,780 | 5,649 | 3,239 | 27,793 |
| 36,451 | 125 | 18,758 | 5,665 | 3,230 | 27,778 |
| 36,452 | 122 | 18,932 | 5,666 | 3,226 | 27,946 |
| 36,453 | 123 | 19,051 | 5,721 | 3,258 | 28,153 |
| 36,454 | 136 | 19,063 | 5,671 | 3,236 | 28,106 |
| 36,455 | 139 | 19,273 | 5,741 | 3,283 | 28,436 |
| 36,456 | 147 | 19,274 | 5,812 | 3,294 | 28,527 |
| 36,457 | 154 | 19,017 | 5,749 | 3,253 | 28,173 |
| 36,458 | 154 | 18,749 | 5,671 | 3,212 | 27,786 |
| 36,459 | 159 | 19,031 | 5,788 | 3,259 | 28,237 |
| 36,460 | 161 | 18,823 | 5,744 | 3,245 | 27,973 |
| 36,461 | 160 | 18,656 | 5,706 | 3,234 | 27,756 |
| 36,462 | 164 | 18,985 | 5,837 | 3,284 | 28,270 |
| 36,463 | 173 | 18,867 | 5,791 | 3,248 | 28,079 |
| 36,464 | 171 | 18,783 | 5,744 | 3,217 | 27,915 |
| 36,465 | 175 | 19,083 | 5,829 | 3,258 | 28,345 |
| 36,466 | 163 | 18,457 | 5,627 | 3,127 | 27,374 |
| 36,467 | 163 | 18,753 | 5,656 | 3,170 | 27,742 |
| 36,468 | 162 | 18,968 | 5,726 | 3,219 | 28,075 |
| 36,469 | 170 | 19,005 | 5,729 | 3,201 | 28,105 |
| 36,470 | 171 | 18,755 | 5,689 | 3,149 | 27,764 |
| 36,471 | 182 | 19,041 | 5,846 | 3,181 | 28,250 |

|        |     |        |       |       |        |
|--------|-----|--------|-------|-------|--------|
| 36,472 | 183 | 19,041 | 5,849 | 3,185 | 28,258 |
| 36,473 | 191 | 19,114 | 5,875 | 3,201 | 28,381 |
| 36,474 | 195 | 19,182 | 5,941 | 3,237 | 28,555 |
| 36,475 | 196 | 19,100 | 5,909 | 3,198 | 28,403 |
| 36,476 | 196 | 19,137 | 5,897 | 3,195 | 28,425 |
| 36,477 | 199 | 19,132 | 5,864 | 3,198 | 28,393 |
| 36,478 | 201 | 18,912 | 5,792 | 3,165 | 28,070 |
| 36,479 | 201 | 18,911 | 5,794 | 3,177 | 28,083 |
| 36,480 | 202 | 18,709 | 5,713 | 3,124 | 27,748 |
| 36,481 | 199 | 18,422 | 5,658 | 3,085 | 27,364 |
| 36,482 | 201 | 19,123 | 5,884 | 3,205 | 28,413 |
| 36,483 | 200 | 19,238 | 5,883 | 3,202 | 28,523 |
| 36,484 | 203 | 19,292 | 5,903 | 3,216 | 28,614 |
| 36,485 | 206 | 19,232 | 5,908 | 3,234 | 28,580 |
| 36,486 | 195 | 19,272 | 5,919 | 3,256 | 28,642 |
| 36,487 | 193 | 19,073 | 5,880 | 3,246 | 28,392 |
| 36,488 | 196 | 19,383 | 5,923 | 3,275 | 28,777 |
| 36,489 | 199 | 19,536 | 5,918 | 3,268 | 28,921 |
| 36,490 | 199 | 19,509 | 5,855 | 3,244 | 28,807 |
| 36,491 | 206 | 19,225 | 5,745 | 3,195 | 28,371 |
| 36,492 | 206 | 19,234 | 5,744 | 3,196 | 28,380 |
| 36,493 | 207 | 19,054 | 5,694 | 3,161 | 28,116 |
| 36,494 | 204 | 18,834 | 5,668 | 3,139 | 27,845 |
| 36,495 | 205 | 19,264 | 5,773 | 3,197 | 28,439 |
| 36,496 | 201 | 19,099 | 5,710 | 3,160 | 28,170 |
| 36,497 | 200 | 19,441 | 5,800 | 3,227 | 28,668 |
| 36,498 | 200 | 19,259 | 5,719 | 3,193 | 28,371 |
| 36,499 | 199 | 19,287 | 5,732 | 3,198 | 28,416 |
| 36,500 | 203 | 19,224 | 5,753 | 3,204 | 28,384 |
| 36,501 | 202 | 19,191 | 5,702 | 3,190 | 28,285 |
| 36,502 | 204 | 19,205 | 5,699 | 3,169 | 28,277 |
| 36,503 | 201 | 18,979 | 5,598 | 3,116 | 27,894 |

|        |     |        |       |       |        |
|--------|-----|--------|-------|-------|--------|
| 36,504 | 207 | 19,153 | 5,636 | 3,139 | 28,135 |
| 36,505 | 196 | 19,202 | 5,619 | 3,110 | 28,127 |
| 36,506 | 195 | 19,337 | 5,667 | 3,109 | 28,308 |
| 36,507 | 201 | 19,351 | 5,626 | 3,114 | 28,292 |
| 36,508 | 189 | 19,276 | 5,585 | 3,102 | 28,152 |
| 36,509 | 192 | 19,405 | 5,620 | 3,116 | 28,333 |
| 36,510 | 192 | 19,326 | 5,586 | 3,124 | 28,228 |
| 36,511 | 192 | 19,324 | 5,584 | 3,137 | 28,237 |
| 36,512 | 191 | 19,334 | 5,575 | 3,123 | 28,223 |
| 36,513 | 185 | 19,305 | 5,556 | 3,130 | 28,176 |
| 36,514 | 185 | 19,272 | 5,534 | 3,109 | 28,100 |
| 36,515 | 184 | 18,839 | 5,449 | 3,032 | 27,504 |
| 36,516 | 182 | 19,041 | 5,524 | 3,064 | 27,811 |
| 36,517 | 178 | 19,295 | 5,587 | 3,096 | 28,156 |
| 36,518 | 171 | 19,198 | 5,538 | 3,108 | 28,015 |
| 36,519 | 171 | 19,501 | 5,574 | 3,145 | 28,391 |
| 36,520 | 172 | 19,728 | 5,598 | 3,165 | 28,663 |
| 36,521 | 171 | 19,623 | 5,555 | 3,168 | 28,517 |
| 36,522 | 165 | 19,607 | 5,505 | 3,185 | 28,462 |
| 36,523 | 159 | 19,477 | 5,461 | 3,168 | 28,265 |
| 36,524 | 155 | 18,922 | 5,318 | 3,068 | 27,463 |
| 36,525 | 154 | 19,070 | 5,331 | 3,091 | 27,646 |
| 36,526 | 164 | 19,200 | 5,372 | 3,135 | 27,871 |
| 36,527 | 164 | 19,238 | 5,373 | 3,143 | 27,918 |
| 36,528 | 161 | 19,400 | 5,434 | 3,170 | 28,165 |
| 36,529 | 155 | 19,493 | 5,469 | 3,218 | 28,335 |
| 36,530 | 151 | 19,593 | 5,513 | 3,226 | 28,483 |
| 36,531 | 153 | 19,592 | 5,513 | 3,227 | 28,485 |
| 36,532 | 153 | 19,688 | 5,509 | 3,220 | 28,570 |
| 36,533 | 161 | 19,941 | 5,595 | 3,267 | 28,964 |
| 36,534 | 156 | 19,766 | 5,543 | 3,247 | 28,712 |
| 36,535 | 155 | 20,064 | 5,624 | 3,301 | 29,144 |

|        |     |        |       |       |        |
|--------|-----|--------|-------|-------|--------|
| 36,536 | 152 | 19,479 | 5,445 | 3,174 | 28,250 |
| 36,537 | 156 | 19,588 | 5,480 | 3,202 | 28,426 |
| 36,538 | 154 | 19,765 | 5,547 | 3,251 | 28,717 |
| 36,539 | 155 | 19,889 | 5,626 | 3,296 | 28,966 |
| 36,540 | 150 | 19,605 | 5,595 | 3,288 | 28,638 |
| 36,541 | 148 | 19,790 | 5,640 | 3,322 | 28,900 |
| 36,542 | 135 | 19,781 | 5,638 | 3,328 | 28,882 |
| 36,543 | 134 | 19,701 | 5,627 | 3,317 | 28,779 |
| 36,544 | 135 | 19,526 | 5,584 | 3,283 | 28,528 |
| 36,545 | 135 | 19,297 | 5,550 | 3,264 | 28,246 |
| 36,546 | 130 | 19,208 | 5,533 | 3,246 | 28,117 |
| 36,547 | 130 | 18,952 | 5,454 | 3,198 | 27,734 |
| 36,548 | 134 | 19,434 | 5,580 | 3,280 | 28,428 |
| 36,549 | 135 | 19,300 | 5,560 | 3,267 | 28,262 |
| 36,550 | 131 | 19,063 | 5,481 | 3,236 | 27,911 |
| 36,551 | 136 | 19,024 | 5,481 | 3,233 | 27,874 |
| 36,552 | 136 | 18,980 | 5,489 | 3,246 | 27,851 |
| 36,553 | 139 | 19,133 | 5,538 | 3,318 | 28,128 |
| 36,554 | 141 | 19,040 | 5,542 | 3,328 | 28,051 |
| 36,555 | 135 | 18,886 | 5,504 | 3,308 | 27,833 |
| 36,556 | 136 | 18,908 | 5,533 | 3,344 | 27,921 |
| 36,557 | 141 | 18,858 | 5,506 | 3,377 | 27,882 |
| 36,558 | 131 | 18,677 | 5,473 | 3,343 | 27,624 |
| 36,559 | 134 | 18,620 | 5,464 | 3,330 | 27,548 |
| 36,560 | 130 | 18,380 | 5,451 | 3,294 | 27,255 |
| 36,561 | 130 | 18,424 | 5,456 | 3,292 | 27,302 |
| 36,562 | 134 | 18,245 | 5,388 | 3,257 | 27,024 |
| 36,563 | 132 | 18,045 | 5,338 | 3,225 | 26,740 |
| 36,564 | 135 | 19,085 | 5,610 | 3,381 | 28,211 |
| 36,565 | 134 | 18,805 | 5,554 | 3,373 | 27,866 |
| 36,566 | 139 | 18,536 | 5,486 | 3,353 | 27,514 |
| 36,567 | 141 | 18,699 | 5,539 | 3,395 | 27,774 |

|        |     |        |       |       |        |
|--------|-----|--------|-------|-------|--------|
| 36,568 | 137 | 18,564 | 5,529 | 3,394 | 27,624 |
| 36,569 | 139 | 18,702 | 5,550 | 3,374 | 27,765 |
| 36,570 | 137 | 18,813 | 5,558 | 3,402 | 27,910 |
| 36,571 | 135 | 18,798 | 5,533 | 3,409 | 27,875 |
| 36,572 | 135 | 18,825 | 5,527 | 3,389 | 27,876 |
| 36,573 | 135 | 18,893 | 5,550 | 3,388 | 27,966 |
| 36,574 | 134 | 18,824 | 5,507 | 3,375 | 27,840 |
| 36,575 | 141 | 18,858 | 5,501 | 3,351 | 27,851 |
| 36,576 | 143 | 19,136 | 5,600 | 3,380 | 28,259 |
| 36,577 | 140 | 19,170 | 5,592 | 3,377 | 28,279 |
| 36,578 | 139 | 18,958 | 5,573 | 3,347 | 28,017 |
| 36,579 | 142 | 19,552 | 5,726 | 3,428 | 28,848 |
| 36,580 | 141 | 19,358 | 5,666 | 3,403 | 28,568 |
| 36,581 | 142 | 19,378 | 5,599 | 3,397 | 28,516 |
| 36,582 | 142 | 19,358 | 5,553 | 3,384 | 28,437 |
| 36,583 | 144 | 19,516 | 5,627 | 3,433 | 28,720 |
| 36,584 | 137 | 19,320 | 5,593 | 3,421 | 28,471 |
| 36,585 | 137 | 19,185 | 5,587 | 3,418 | 28,327 |
| 36,586 | 140 | 19,202 | 5,585 | 3,409 | 28,336 |
| 36,587 | 140 | 18,853 | 5,496 | 3,350 | 27,839 |
| 36,588 | 145 | 19,183 | 5,555 | 3,374 | 28,257 |
| 36,589 | 149 | 19,443 | 5,608 | 3,406 | 28,606 |
| 36,590 | 147 | 19,238 | 5,537 | 3,366 | 28,288 |
| 36,591 | 151 | 19,314 | 5,556 | 3,331 | 28,352 |
| 36,592 | 163 | 19,412 | 5,499 | 3,330 | 28,404 |
| 36,593 | 169 | 19,449 | 5,503 | 3,341 | 28,462 |
| 36,594 | 170 | 19,256 | 5,467 | 3,331 | 28,224 |
| 36,595 | 174 | 19,685 | 5,586 | 3,396 | 28,841 |
| 36,596 | 185 | 20,111 | 5,650 | 3,421 | 29,367 |
| 36,597 | 185 | 20,070 | 5,649 | 3,421 | 29,325 |
| 36,598 | 195 | 20,821 | 5,833 | 3,511 | 30,360 |
| 36,599 | 202 | 21,130 | 5,892 | 3,558 | 30,782 |



|        |     |        |       |       |        |
|--------|-----|--------|-------|-------|--------|
| 36,600 | 201 | 20,919 | 5,811 | 3,484 | 30,415 |
| 36,601 | 204 | 21,102 | 5,880 | 3,539 | 30,725 |
| 36,602 | 199 | 21,272 | 5,937 | 3,571 | 30,979 |
| 36,603 | 202 | 21,432 | 6,006 | 3,618 | 31,258 |
| 36,604 | 197 | 21,582 | 6,043 | 3,617 | 31,439 |
| 36,605 | 189 | 21,202 | 5,900 | 3,512 | 30,803 |
| 36,606 | 192 | 21,584 | 5,973 | 3,531 | 31,280 |
| 36,607 | 189 | 21,523 | 5,939 | 3,534 | 31,185 |
| 36,608 | 188 | 21,705 | 5,993 | 3,537 | 31,423 |
| 36,609 | 182 | 21,664 | 6,004 | 3,550 | 31,400 |
| 36,610 | 181 | 21,551 | 5,978 | 3,549 | 31,259 |
| 36,611 | 191 | 21,791 | 6,035 | 3,570 | 31,587 |
| 36,612 | 190 | 21,669 | 5,999 | 3,561 | 31,419 |
| 36,613 | 188 | 21,603 | 5,971 | 3,543 | 31,305 |
| 36,614 | 189 | 21,664 | 6,001 | 3,557 | 31,411 |
| 36,615 | 189 | 21,663 | 6,023 | 3,559 | 31,434 |
| 36,616 | 186 | 21,432 | 5,954 | 3,504 | 31,076 |
| 36,617 | 194 | 21,394 | 5,921 | 3,493 | 31,002 |
| 36,618 | 192 | 21,379 | 5,910 | 3,477 | 30,958 |
| 36,619 | 193 | 21,657 | 5,958 | 3,505 | 31,313 |
| 36,620 | 197 | 21,557 | 5,947 | 3,466 | 31,167 |
| 36,621 | 198 | 21,375 | 5,932 | 3,449 | 30,954 |
| 36,622 | 199 | 21,416 | 5,996 | 3,483 | 31,094 |
| 36,623 | 196 | 21,102 | 5,969 | 3,467 | 30,734 |
| 36,624 | 199 | 21,247 | 6,025 | 3,498 | 30,969 |
| 36,625 | 203 | 21,139 | 6,046 | 3,502 | 30,890 |
| 36,626 | 194 | 21,037 | 6,010 | 3,476 | 30,717 |
| 36,627 | 190 | 21,165 | 6,048 | 3,514 | 30,917 |
| 36,628 | 206 | 21,317 | 6,104 | 3,544 | 31,171 |
| 36,629 | 208 | 21,275 | 6,076 | 3,513 | 31,072 |
| 36,630 | 221 | 21,266 | 6,065 | 3,464 | 31,016 |
| 36,631 | 220 | 21,261 | 6,083 | 3,466 | 31,030 |

|        |     |        |       |       |        |
|--------|-----|--------|-------|-------|--------|
| 36,632 | 218 | 21,195 | 6,124 | 3,471 | 31,008 |
| 36,633 | 221 | 21,258 | 6,170 | 3,486 | 31,135 |
| 36,634 | 222 | 21,362 | 6,150 | 3,490 | 31,224 |
| 36,635 | 222 | 21,421 | 6,109 | 3,448 | 31,200 |
| 36,636 | 225 | 21,414 | 6,085 | 3,435 | 31,159 |
| 36,637 | 230 | 21,680 | 6,143 | 3,485 | 31,538 |
| 36,638 | 232 | 21,667 | 6,126 | 3,481 | 31,506 |
| 36,639 | 224 | 21,483 | 6,076 | 3,465 | 31,248 |
| 36,640 | 225 | 21,486 | 6,087 | 3,477 | 31,275 |
| 36,641 | 224 | 21,545 | 6,104 | 3,494 | 31,367 |
| 36,642 | 215 | 21,582 | 6,148 | 3,508 | 31,453 |
| 36,643 | 211 | 21,588 | 6,191 | 3,495 | 31,485 |
| 36,644 | 211 | 21,639 | 6,213 | 3,506 | 31,569 |
| 36,645 | 205 | 21,764 | 6,209 | 3,498 | 31,676 |
| 36,646 | 208 | 21,938 | 6,328 | 3,523 | 31,997 |
| 36,647 | 199 | 21,966 | 6,304 | 3,536 | 32,005 |
| 36,648 | 200 | 22,029 | 6,410 | 3,564 | 32,203 |
| 36,649 | 191 | 21,900 | 6,413 | 3,608 | 32,112 |
| 36,650 | 187 | 21,849 | 6,435 | 3,625 | 32,096 |
| 36,651 | 184 | 21,944 | 6,445 | 3,688 | 32,261 |
| 36,652 | 187 | 22,099 | 6,492 | 3,710 | 32,488 |
| 36,653 | 193 | 22,156 | 6,473 | 3,708 | 32,530 |
| 36,654 | 193 | 22,152 | 6,424 | 3,699 | 32,468 |
| 36,655 | 194 | 22,334 | 6,463 | 3,745 | 32,736 |
| 36,656 | 192 | 22,318 | 6,488 | 3,768 | 32,766 |
| 36,657 | 192 | 22,185 | 6,526 | 3,774 | 32,677 |
| 36,658 | 189 | 22,155 | 6,502 | 3,761 | 32,607 |
| 36,659 | 189 | 22,195 | 6,494 | 3,765 | 32,643 |
| 36,660 | 190 | 22,523 | 6,578 | 3,795 | 33,086 |
| 36,661 | 189 | 22,506 | 6,589 | 3,807 | 33,091 |
| 36,662 | 178 | 22,447 | 6,569 | 3,800 | 32,994 |
| 36,663 | 179 | 22,333 | 6,550 | 3,794 | 32,856 |

|        |     |        |       |       |        |
|--------|-----|--------|-------|-------|--------|
| 36,664 | 173 | 21,994 | 6,490 | 3,748 | 32,405 |
| 36,665 | 173 | 21,827 | 6,440 | 3,728 | 32,168 |
| 36,666 | 172 | 21,840 | 6,475 | 3,744 | 32,231 |
| 36,667 | 168 | 21,938 | 6,492 | 3,757 | 32,355 |
| 36,668 | 162 | 21,893 | 6,515 | 3,770 | 32,340 |
| 36,669 | 161 | 21,750 | 6,508 | 3,765 | 32,184 |
| 36,670 | 168 | 21,609 | 6,482 | 3,753 | 32,012 |
| 36,671 | 167 | 21,590 | 6,494 | 3,758 | 32,009 |
| 36,672 | 167 | 21,943 | 6,526 | 3,785 | 32,421 |
| 36,673 | 164 | 21,700 | 6,482 | 3,747 | 32,093 |
| 36,674 | 160 | 21,419 | 6,374 | 3,676 | 31,629 |
| 36,675 | 161 | 21,583 | 6,398 | 3,707 | 31,849 |
| 36,676 | 162 | 21,827 | 6,456 | 3,752 | 32,197 |
| 36,677 | 143 | 20,846 | 6,239 | 3,660 | 30,888 |
| 36,678 | 147 | 21,135 | 6,316 | 3,698 | 31,296 |
| 36,679 | 140 | 21,241 | 6,319 | 3,722 | 31,422 |
| 36,680 | 138 | 21,361 | 6,343 | 3,753 | 31,595 |
| 36,681 | 133 | 21,257 | 6,325 | 3,762 | 31,477 |
| 36,682 | 135 | 21,249 | 6,337 | 3,749 | 31,470 |
| 36,683 | 138 | 21,493 | 6,373 | 3,769 | 31,773 |
| 36,684 | 137 | 21,322 | 6,290 | 3,725 | 31,474 |
| 36,685 | 137 | 21,086 | 6,227 | 3,683 | 31,133 |
| 36,686 | 136 | 20,754 | 6,184 | 3,677 | 30,751 |
| 36,687 | 140 | 21,128 | 6,325 | 3,760 | 31,353 |
| 36,688 | 137 | 21,169 | 6,367 | 3,763 | 31,436 |
| 36,689 | 136 | 20,892 | 6,286 | 3,725 | 31,039 |
| 36,690 | 136 | 20,678 | 6,226 | 3,703 | 30,743 |
| 36,691 | 134 | 20,745 | 6,239 | 3,714 | 30,832 |
| 36,692 | 135 | 20,612 | 6,193 | 3,689 | 30,629 |
| 36,693 | 141 | 20,364 | 6,106 | 3,666 | 30,277 |
| 36,694 | 145 | 20,200 | 6,016 | 3,639 | 30,000 |
| 36,695 | 145 | 20,153 | 6,012 | 3,645 | 29,955 |

|        |     |        |       |       |        |
|--------|-----|--------|-------|-------|--------|
| 36,696 | 143 | 19,946 | 5,897 | 3,636 | 29,622 |
| 36,697 | 145 | 20,118 | 5,933 | 3,676 | 29,872 |
| 36,698 | 141 | 19,971 | 5,904 | 3,644 | 29,660 |
| 36,699 | 140 | 19,738 | 5,744 | 3,598 | 29,220 |
| 36,700 | 140 | 19,507 | 5,684 | 3,513 | 28,844 |
| 36,701 | 148 | 19,442 | 5,684 | 3,475 | 28,749 |
| 36,702 | 144 | 18,880 | 5,537 | 3,369 | 27,930 |
| 36,703 | 148 | 18,941 | 5,541 | 3,395 | 28,025 |
| 36,704 | 143 | 18,970 | 5,561 | 3,432 | 28,106 |
| 36,705 | 146 | 18,872 | 5,566 | 3,405 | 27,989 |
| 36,706 | 149 | 18,867 | 5,565 | 3,377 | 27,958 |
| 36,707 | 149 | 18,807 | 5,534 | 3,342 | 27,832 |
| 36,708 | 146 | 18,855 | 5,461 | 3,333 | 27,795 |
| 36,709 | 146 | 18,721 | 5,415 | 3,329 | 27,611 |
| 36,710 | 147 | 18,737 | 5,413 | 3,342 | 27,639 |
| 36,711 | 146 | 18,683 | 5,387 | 3,335 | 27,551 |
| 36,712 | 145 | 18,528 | 5,311 | 3,292 | 27,276 |
| 36,713 | 143 | 18,376 | 5,213 | 3,235 | 26,967 |
| 36,714 | 145 | 18,653 | 5,243 | 3,256 | 27,297 |
| 36,715 | 148 | 18,870 | 5,281 | 3,284 | 27,583 |
| 36,716 | 153 | 19,040 | 5,320 | 3,294 | 27,807 |
| 36,717 | 154 | 19,214 | 5,334 | 3,284 | 27,986 |
| 36,718 | 155 | 19,268 | 5,289 | 3,260 | 27,972 |
| 36,719 | 153 | 19,036 | 5,214 | 3,228 | 27,631 |
| 36,720 | 154 | 19,173 | 5,251 | 3,254 | 27,832 |
| 36,721 | 146 | 19,387 | 5,275 | 3,295 | 28,103 |
| 36,722 | 151 | 19,398 | 5,265 | 3,292 | 28,106 |
| 36,723 | 152 | 19,312 | 5,237 | 3,287 | 27,988 |
| 36,724 | 150 | 19,189 | 5,161 | 3,251 | 27,751 |
| 36,725 | 144 | 19,324 | 5,210 | 3,277 | 27,955 |
| 36,726 | 141 | 19,409 | 5,225 | 3,282 | 28,057 |
| 36,727 | 142 | 19,372 | 5,151 | 3,237 | 27,902 |

|        |     |        |       |       |        |
|--------|-----|--------|-------|-------|--------|
| 36,728 | 142 | 19,634 | 5,161 | 3,258 | 28,195 |
| 36,729 | 144 | 19,868 | 5,195 | 3,276 | 28,483 |
| 36,730 | 146 | 19,683 | 5,163 | 3,236 | 28,228 |
| 36,731 | 153 | 19,748 | 5,145 | 3,212 | 28,258 |
| 36,732 | 151 | 19,712 | 5,096 | 3,183 | 28,142 |
| 36,733 | 157 | 20,002 | 5,158 | 3,237 | 28,554 |
| 36,734 | 159 | 19,943 | 5,149 | 3,234 | 28,485 |
| 36,735 | 155 | 20,107 | 5,197 | 3,264 | 28,723 |
| 36,736 | 148 | 20,033 | 5,127 | 3,215 | 28,523 |
| 36,737 | 147 | 20,135 | 5,117 | 3,210 | 28,609 |
| 36,738 | 148 | 20,153 | 5,100 | 3,202 | 28,603 |
| 36,739 | 149 | 20,375 | 5,115 | 3,238 | 28,877 |
| 36,740 | 146 | 20,222 | 5,063 | 3,180 | 28,611 |
| 36,741 | 147 | 20,278 | 5,061 | 3,185 | 28,671 |
| 36,742 | 159 | 20,542 | 5,128 | 3,201 | 29,030 |
| 36,743 | 159 | 20,564 | 5,126 | 3,192 | 29,041 |
| 36,744 | 147 | 20,733 | 5,170 | 3,209 | 29,259 |
| 36,745 | 147 | 20,758 | 5,192 | 3,213 | 29,310 |
| 36,746 | 149 | 20,997 | 5,251 | 3,244 | 29,641 |
| 36,747 | 149 | 20,813 | 5,229 | 3,188 | 29,379 |
| 36,748 | 149 | 20,634 | 5,209 | 3,163 | 29,155 |
| 36,749 | 150 | 20,666 | 5,197 | 3,166 | 29,179 |
| 36,750 | 138 | 21,046 | 5,231 | 3,171 | 29,586 |
| 36,751 | 141 | 21,130 | 5,189 | 3,175 | 29,635 |
| 36,752 | 140 | 20,823 | 5,130 | 3,129 | 29,222 |
| 36,753 | 135 | 21,190 | 5,229 | 3,208 | 29,762 |
| 36,754 | 135 | 21,201 | 5,184 | 3,161 | 29,681 |
| 36,755 | 137 | 21,513 | 5,233 | 3,179 | 30,062 |
| 36,756 | 134 | 21,833 | 5,303 | 3,233 | 30,503 |
| 36,757 | 130 | 21,592 | 5,262 | 3,218 | 30,202 |
| 36,758 | 131 | 21,851 | 5,372 | 3,287 | 30,641 |
| 36,759 | 133 | 21,846 | 5,388 | 3,277 | 30,644 |

|        |     |        |       |       |        |
|--------|-----|--------|-------|-------|--------|
| 36,760 | 136 | 21,840 | 5,370 | 3,232 | 30,578 |
| 36,761 | 136 | 22,043 | 5,404 | 3,251 | 30,834 |
| 36,762 | 136 | 22,035 | 5,400 | 3,261 | 30,832 |
| 36,763 | 140 | 22,068 | 5,443 | 3,270 | 30,921 |
| 36,764 | 140 | 22,042 | 5,418 | 3,269 | 30,869 |
| 36,765 | 141 | 22,221 | 5,481 | 3,315 | 31,158 |
| 36,766 | 138 | 22,072 | 5,452 | 3,300 | 30,962 |
| 36,767 | 134 | 21,969 | 5,439 | 3,298 | 30,840 |
| 36,768 | 134 | 22,115 | 5,521 | 3,341 | 31,111 |
| 36,769 | 133 | 21,919 | 5,484 | 3,307 | 30,843 |
| 36,770 | 136 | 22,093 | 5,525 | 3,337 | 31,091 |
| 36,771 | 136 | 22,197 | 5,534 | 3,348 | 31,215 |
| 36,772 | 136 | 22,256 | 5,545 | 3,343 | 31,280 |
| 36,773 | 133 | 22,262 | 5,584 | 3,338 | 31,317 |
| 36,774 | 135 | 22,308 | 5,604 | 3,341 | 31,388 |
| 36,775 | 136 | 22,687 | 5,732 | 3,401 | 31,956 |
| 36,776 | 137 | 22,398 | 5,701 | 3,393 | 31,629 |
| 36,777 | 142 | 22,536 | 5,786 | 3,444 | 31,908 |
| 36,778 | 142 | 22,572 | 5,780 | 3,471 | 31,965 |
| 36,779 | 145 | 22,727 | 5,834 | 3,493 | 32,199 |
| 36,780 | 141 | 22,746 | 5,853 | 3,506 | 32,246 |
| 36,781 | 130 | 22,597 | 5,821 | 3,517 | 32,065 |
| 36,782 | 135 | 22,594 | 5,812 | 3,497 | 32,038 |
| 36,783 | 134 | 22,796 | 5,833 | 3,536 | 32,299 |
| 36,784 | 127 | 22,583 | 5,840 | 3,517 | 32,067 |
| 36,785 | 128 | 22,569 | 5,822 | 3,518 | 32,037 |
| 36,786 | 126 | 22,534 | 5,860 | 3,529 | 32,049 |
| 36,787 | 127 | 22,470 | 5,859 | 3,543 | 31,999 |
| 36,788 | 127 | 22,360 | 5,850 | 3,536 | 31,873 |
| 36,789 | 127 | 22,306 | 5,834 | 3,545 | 31,812 |
| 36,790 | 124 | 22,308 | 5,857 | 3,544 | 31,833 |
| 36,791 | 114 | 22,138 | 5,859 | 3,544 | 31,655 |

|        |     |        |       |       |        |
|--------|-----|--------|-------|-------|--------|
| 36,792 | 109 | 22,132 | 5,902 | 3,564 | 31,707 |
| 36,793 | 111 | 22,288 | 5,979 | 3,628 | 32,006 |
| 36,794 | 121 | 22,159 | 5,956 | 3,620 | 31,856 |
| 36,795 | 124 | 22,243 | 5,961 | 3,627 | 31,955 |
| 36,796 | 131 | 22,509 | 6,016 | 3,655 | 32,311 |
| 36,797 | 127 | 22,242 | 5,942 | 3,609 | 31,920 |
| 36,798 | 126 | 22,260 | 5,918 | 3,597 | 31,901 |
| 36,799 | 125 | 22,287 | 5,909 | 3,595 | 31,916 |
| 36,800 | 125 | 22,281 | 5,927 | 3,597 | 31,930 |
| 36,801 | 127 | 22,434 | 5,991 | 3,632 | 32,184 |
| 36,802 | 122 | 22,065 | 5,947 | 3,604 | 31,738 |
| 36,803 | 122 | 21,995 | 5,905 | 3,590 | 31,612 |
| 36,804 | 127 | 22,127 | 5,933 | 3,602 | 31,789 |
| 36,805 | 124 | 22,078 | 5,938 | 3,624 | 31,764 |
| 36,806 | 121 | 21,865 | 5,924 | 3,616 | 31,526 |
| 36,807 | 123 | 21,963 | 5,924 | 3,614 | 31,624 |
| 36,808 | 130 | 21,907 | 5,847 | 3,564 | 31,448 |
| 36,809 | 130 | 21,779 | 5,801 | 3,544 | 31,254 |
| 36,810 | 127 | 21,869 | 5,842 | 3,587 | 31,425 |
| 36,811 | 131 | 21,987 | 5,851 | 3,592 | 31,561 |
| 36,812 | 132 | 21,502 | 5,754 | 3,495 | 30,883 |
| 36,813 | 132 | 21,737 | 5,808 | 3,520 | 31,197 |
| 36,814 | 132 | 21,940 | 5,826 | 3,555 | 31,453 |
| 36,815 | 138 | 22,068 | 5,882 | 3,583 | 31,671 |
| 36,816 | 136 | 22,041 | 5,884 | 3,581 | 31,642 |
| 36,817 | 141 | 21,828 | 5,793 | 3,546 | 31,308 |
| 36,818 | 141 | 21,883 | 5,793 | 3,552 | 31,369 |
| 36,819 | 142 | 21,746 | 5,750 | 3,539 | 31,177 |
| 36,820 | 140 | 21,688 | 5,759 | 3,544 | 31,131 |
| 36,821 | 139 | 21,885 | 5,764 | 3,555 | 31,343 |
| 36,822 | 137 | 21,835 | 5,761 | 3,535 | 31,268 |
| 36,823 | 136 | 21,636 | 5,699 | 3,514 | 30,985 |

|        |     |        |       |       |        |
|--------|-----|--------|-------|-------|--------|
| 36,824 | 134 | 21,715 | 5,722 | 3,541 | 31,112 |
| 36,825 | 135 | 21,737 | 5,691 | 3,553 | 31,116 |
| 36,826 | 134 | 21,711 | 5,640 | 3,528 | 31,013 |
| 36,827 | 133 | 21,765 | 5,575 | 3,486 | 30,959 |
| 36,828 | 137 | 22,068 | 5,617 | 3,530 | 31,352 |
| 36,829 | 127 | 20,902 | 5,407 | 3,361 | 29,797 |
| 36,830 | 133 | 21,033 | 5,407 | 3,356 | 29,929 |
| 36,831 | 136 | 21,217 | 5,388 | 3,374 | 30,115 |
| 36,832 | 136 | 21,017 | 5,366 | 3,376 | 29,895 |
| 36,833 | 136 | 21,100 | 5,424 | 3,431 | 30,091 |
| 36,834 | 134 | 20,955 | 5,421 | 3,446 | 29,956 |
| 36,835 | 134 | 21,048 | 5,394 | 3,448 | 30,024 |
| 36,836 | 138 | 21,063 | 5,362 | 3,437 | 30,000 |
| 36,837 | 141 | 21,063 | 5,360 | 3,452 | 30,016 |
| 36,838 | 141 | 21,068 | 5,338 | 3,463 | 30,010 |
| 36,839 | 138 | 21,165 | 5,350 | 3,511 | 30,164 |
| 36,840 | 138 | 21,165 | 5,348 | 3,514 | 30,165 |
| 36,841 | 138 | 21,099 | 5,363 | 3,514 | 30,114 |
| 36,842 | 140 | 21,117 | 5,337 | 3,509 | 30,103 |
| 36,843 | 138 | 20,980 | 5,245 | 3,436 | 29,799 |
| 36,844 | 142 | 21,354 | 5,279 | 3,464 | 30,239 |
| 36,845 | 133 | 21,509 | 5,318 | 3,460 | 30,420 |
| 36,846 | 129 | 21,613 | 5,363 | 3,481 | 30,586 |
| 36,847 | 126 | 21,349 | 5,293 | 3,469 | 30,237 |
| 36,848 | 127 | 21,397 | 5,296 | 3,479 | 30,299 |
| 36,849 | 130 | 21,580 | 5,382 | 3,547 | 30,639 |
| 36,850 | 134 | 21,638 | 5,402 | 3,575 | 30,749 |
| 36,851 | 139 | 21,490 | 5,328 | 3,547 | 30,504 |
| 36,852 | 143 | 21,539 | 5,353 | 3,550 | 30,585 |
| 36,853 | 142 | 21,573 | 5,378 | 3,546 | 30,639 |
| 36,854 | 152 | 21,791 | 5,412 | 3,554 | 30,909 |
| 36,855 | 147 | 21,460 | 5,302 | 3,484 | 30,393 |



|        |     |        |       |       |        |
|--------|-----|--------|-------|-------|--------|
| 36,856 | 148 | 21,477 | 5,293 | 3,480 | 30,398 |
| 36,857 | 148 | 21,687 | 5,349 | 3,511 | 30,695 |
| 36,858 | 153 | 21,681 | 5,367 | 3,527 | 30,728 |
| 36,859 | 154 | 21,347 | 5,279 | 3,476 | 30,256 |
| 36,860 | 157 | 21,305 | 5,255 | 3,460 | 30,177 |
| 36,861 | 157 | 21,256 | 5,259 | 3,462 | 30,134 |
| 36,862 | 158 | 21,429 | 5,292 | 3,505 | 30,384 |
| 36,863 | 158 | 21,374 | 5,292 | 3,512 | 30,336 |
| 36,864 | 161 | 21,381 | 5,284 | 3,525 | 30,351 |
| 36,865 | 166 | 21,402 | 5,285 | 3,515 | 30,368 |
| 36,866 | 161 | 21,286 | 5,243 | 3,486 | 30,176 |
| 36,867 | 163 | 21,378 | 5,244 | 3,512 | 30,297 |
| 36,868 | 158 | 21,375 | 5,258 | 3,522 | 30,313 |
| 36,869 | 158 | 21,694 | 5,321 | 3,558 | 30,731 |
| 36,870 | 160 | 21,811 | 5,355 | 3,581 | 30,907 |
| 36,871 | 162 | 21,689 | 5,352 | 3,554 | 30,757 |
| 36,872 | 160 | 21,582 | 5,356 | 3,554 | 30,652 |
| 36,873 | 169 | 21,782 | 5,408 | 3,585 | 30,944 |
| 36,874 | 177 | 21,621 | 5,356 | 3,539 | 30,693 |
| 36,875 | 176 | 21,355 | 5,318 | 3,510 | 30,359 |
| 36,876 | 175 | 21,416 | 5,342 | 3,517 | 30,450 |
| 36,877 | 180 | 21,388 | 5,349 | 3,509 | 30,426 |
| 36,878 | 176 | 21,094 | 5,303 | 3,476 | 30,049 |
| 36,879 | 169 | 20,821 | 5,221 | 3,446 | 29,657 |
| 36,880 | 169 | 20,904 | 5,257 | 3,455 | 29,785 |
| 36,881 | 168 | 20,771 | 5,273 | 3,472 | 29,684 |
| 36,882 | 169 | 20,643 | 5,264 | 3,453 | 29,529 |
| 36,883 | 173 | 20,650 | 5,247 | 3,415 | 29,485 |
| 36,884 | 171 | 20,655 | 5,226 | 3,382 | 29,434 |
| 36,885 | 171 | 20,399 | 5,153 | 3,318 | 29,041 |
| 36,886 | 171 | 20,605 | 5,206 | 3,314 | 29,296 |
| 36,887 | 168 | 20,783 | 5,246 | 3,348 | 29,545 |

|        |     |        |       |       |        |
|--------|-----|--------|-------|-------|--------|
| 36,888 | 169 | 20,855 | 5,303 | 3,376 | 29,703 |
| 36,889 | 170 | 20,791 | 5,326 | 3,352 | 29,639 |
| 36,890 | 173 | 20,727 | 5,307 | 3,308 | 29,515 |
| 36,891 | 173 | 20,754 | 5,303 | 3,303 | 29,533 |
| 36,892 | 169 | 20,771 | 5,310 | 3,303 | 29,553 |
| 36,893 | 167 | 20,931 | 5,346 | 3,329 | 29,773 |
| 36,894 | 160 | 20,878 | 5,353 | 3,352 | 29,743 |
| 36,895 | 158 | 20,464 | 5,238 | 3,290 | 29,150 |
| 36,896 | 158 | 20,444 | 5,225 | 3,290 | 29,117 |
| 36,897 | 156 | 20,448 | 5,208 | 3,302 | 29,114 |
| 36,898 | 159 | 20,752 | 5,289 | 3,333 | 29,533 |
| 36,899 | 154 | 20,484 | 5,239 | 3,277 | 29,154 |
| 36,900 | 151 | 20,159 | 5,189 | 3,233 | 28,732 |
| 36,901 | 149 | 20,334 | 5,291 | 3,254 | 29,028 |
| 36,902 | 144 | 20,590 | 5,330 | 3,297 | 29,361 |
| 36,903 | 150 | 20,352 | 5,254 | 3,256 | 29,012 |
| 36,904 | 148 | 20,212 | 5,238 | 3,252 | 28,850 |
| 36,905 | 141 | 20,352 | 5,316 | 3,308 | 29,117 |
| 36,906 | 145 | 20,457 | 5,385 | 3,310 | 29,297 |
| 36,907 | 143 | 20,512 | 5,385 | 3,311 | 29,351 |
| 36,908 | 135 | 20,050 | 5,280 | 3,253 | 28,718 |
| 36,909 | 135 | 20,296 | 5,344 | 3,269 | 29,044 |
| 36,910 | 128 | 20,503 | 5,375 | 3,283 | 29,289 |
| 36,911 | 132 | 20,648 | 5,411 | 3,324 | 29,515 |
| 36,912 | 134 | 20,870 | 5,491 | 3,357 | 29,852 |
| 36,913 | 131 | 20,733 | 5,458 | 3,344 | 29,666 |
| 36,914 | 130 | 20,790 | 5,479 | 3,359 | 29,758 |
| 36,915 | 131 | 20,771 | 5,549 | 3,371 | 29,822 |
| 36,916 | 127 | 20,236 | 5,407 | 3,282 | 29,052 |
| 36,917 | 125 | 20,255 | 5,436 | 3,305 | 29,121 |
| 36,918 | 122 | 20,410 | 5,482 | 3,336 | 29,350 |
| 36,919 | 125 | 20,580 | 5,545 | 3,363 | 29,613 |

|        |     |        |       |       |        |
|--------|-----|--------|-------|-------|--------|
| 36,920 | 125 | 20,578 | 5,578 | 3,395 | 29,676 |
| 36,921 | 122 | 20,479 | 5,556 | 3,373 | 29,530 |
| 36,922 | 130 | 20,547 | 5,575 | 3,446 | 29,698 |
| 36,923 | 130 | 20,469 | 5,567 | 3,442 | 29,608 |
| 36,924 | 128 | 20,809 | 5,667 | 3,518 | 30,122 |
| 36,925 | 123 | 20,686 | 5,721 | 3,556 | 30,086 |
| 36,926 | 124 | 20,761 | 5,665 | 3,538 | 30,088 |
| 36,927 | 120 | 20,797 | 5,672 | 3,546 | 30,135 |
| 36,928 | 121 | 20,762 | 5,673 | 3,547 | 30,103 |
| 36,929 | 124 | 20,996 | 5,761 | 3,599 | 30,480 |
| 36,930 | 121 | 21,071 | 5,783 | 3,601 | 30,576 |
| 36,931 | 115 | 20,838 | 5,656 | 3,520 | 30,129 |
| 36,932 | 116 | 21,123 | 5,749 | 3,559 | 30,547 |
| 36,933 | 117 | 21,416 | 5,799 | 3,606 | 30,938 |
| 36,934 | 116 | 21,525 | 5,825 | 3,621 | 31,087 |
| 36,935 | 117 | 21,631 | 5,896 | 3,669 | 31,313 |
| 36,936 | 115 | 21,616 | 5,921 | 3,694 | 31,346 |
| 36,937 | 116 | 21,642 | 5,955 | 3,730 | 31,443 |
| 36,938 | 121 | 21,582 | 5,941 | 3,696 | 31,340 |
| 36,939 | 119 | 21,749 | 5,930 | 3,699 | 31,497 |
| 36,940 | 125 | 22,112 | 6,039 | 3,740 | 32,016 |
| 36,941 | 130 | 22,123 | 6,051 | 3,751 | 32,055 |
| 36,942 | 132 | 21,875 | 5,982 | 3,711 | 31,700 |
| 36,943 | 136 | 22,084 | 6,043 | 3,741 | 32,004 |
| 36,944 | 139 | 21,724 | 5,986 | 3,703 | 31,552 |
| 36,945 | 143 | 21,890 | 6,020 | 3,744 | 31,797 |
| 36,946 | 140 | 21,435 | 5,900 | 3,692 | 31,167 |
| 36,947 | 141 | 21,660 | 5,947 | 3,711 | 31,459 |
| 36,948 | 139 | 21,825 | 6,001 | 3,730 | 31,695 |
| 36,949 | 136 | 21,498 | 5,902 | 3,690 | 31,226 |
| 36,950 | 138 | 21,661 | 5,968 | 3,715 | 31,482 |
| 36,951 | 138 | 21,506 | 5,894 | 3,698 | 31,236 |

|        |     |        |       |       |        |
|--------|-----|--------|-------|-------|--------|
| 36,952 | 142 | 21,870 | 5,952 | 3,723 | 31,687 |
| 36,953 | 138 | 21,447 | 5,890 | 3,688 | 31,163 |
| 36,954 | 144 | 21,294 | 5,842 | 3,653 | 30,933 |
| 36,955 | 145 | 21,368 | 5,829 | 3,663 | 31,005 |
| 36,956 | 146 | 21,387 | 5,784 | 3,663 | 30,980 |
| 36,957 | 144 | 21,294 | 5,801 | 3,661 | 30,900 |
| 36,958 | 144 | 20,781 | 5,683 | 3,606 | 30,214 |
| 36,959 | 143 | 20,972 | 5,726 | 3,631 | 30,472 |
| 36,960 | 140 | 21,019 | 5,760 | 3,636 | 30,555 |
| 36,961 | 140 | 21,104 | 5,819 | 3,665 | 30,728 |
| 36,962 | 135 | 21,047 | 5,827 | 3,669 | 30,678 |
| 36,963 | 133 | 21,271 | 5,904 | 3,712 | 31,020 |
| 36,964 | 132 | 21,349 | 5,918 | 3,712 | 31,111 |
| 36,965 | 130 | 21,292 | 5,847 | 3,684 | 30,953 |
| 36,966 | 129 | 21,381 | 5,827 | 3,711 | 31,048 |
| 36,967 | 129 | 21,454 | 5,836 | 3,708 | 31,127 |
| 36,968 | 130 | 21,481 | 5,852 | 3,690 | 31,153 |
| 36,969 | 130 | 21,803 | 5,915 | 3,720 | 31,568 |
| 36,970 | 126 | 21,307 | 5,790 | 3,652 | 30,875 |
| 36,971 | 127 | 21,596 | 5,817 | 3,667 | 31,207 |
| 36,972 | 125 | 21,795 | 5,873 | 3,676 | 31,469 |
| 36,973 | 126 | 21,800 | 5,927 | 3,654 | 31,507 |
| 36,974 | 132 | 21,859 | 5,962 | 3,649 | 31,602 |
| 36,975 | 127 | 21,893 | 5,963 | 3,632 | 31,615 |
| 36,976 | 126 | 21,993 | 5,912 | 3,582 | 31,613 |
| 36,977 | 129 | 21,686 | 5,876 | 3,526 | 31,217 |
| 36,978 | 129 | 21,799 | 5,896 | 3,552 | 31,376 |
| 36,979 | 131 | 21,878 | 5,913 | 3,544 | 31,466 |
| 36,980 | 136 | 21,906 | 5,905 | 3,538 | 31,485 |
| 36,981 | 151 | 21,880 | 5,939 | 3,539 | 31,509 |
| 36,982 | 155 | 21,971 | 5,967 | 3,541 | 31,634 |
| 36,983 | 155 | 21,911 | 5,972 | 3,558 | 31,596 |

|        |     |        |       |       |        |
|--------|-----|--------|-------|-------|--------|
| 36,984 | 152 | 22,061 | 6,010 | 3,585 | 31,808 |
| 36,985 | 151 | 22,178 | 6,016 | 3,603 | 31,948 |
| 36,986 | 150 | 22,201 | 6,023 | 3,599 | 31,973 |
| 36,987 | 151 | 22,197 | 6,058 | 3,612 | 32,018 |
| 36,988 | 150 | 21,801 | 5,987 | 3,581 | 31,519 |
| 36,989 | 149 | 22,359 | 6,148 | 3,694 | 32,350 |
| 36,990 | 149 | 22,599 | 6,214 | 3,728 | 32,690 |
| 36,991 | 148 | 22,814 | 6,250 | 3,765 | 32,977 |
| 36,992 | 140 | 22,886 | 6,263 | 3,786 | 33,075 |
| 36,993 | 138 | 23,029 | 6,296 | 3,806 | 33,269 |
| 36,994 | 135 | 23,090 | 6,279 | 3,793 | 33,297 |
| 36,995 | 132 | 23,172 | 6,269 | 3,789 | 33,362 |
| 36,996 | 128 | 22,952 | 6,238 | 3,747 | 33,065 |
| 36,997 | 131 | 22,982 | 6,244 | 3,766 | 33,123 |
| 36,998 | 139 | 22,932 | 6,269 | 3,765 | 33,105 |
| 36,999 | 144 | 22,969 | 6,273 | 3,745 | 33,131 |
| 37,000 | 144 | 22,669 | 6,241 | 3,709 | 32,763 |
| 37,001 | 144 | 22,959 | 6,315 | 3,744 | 33,162 |
| 37,002 | 149 | 23,045 | 6,327 | 3,743 | 33,264 |
| 37,003 | 146 | 22,957 | 6,298 | 3,752 | 33,153 |
| 37,004 | 139 | 22,866 | 6,319 | 3,757 | 33,081 |
| 37,005 | 134 | 22,919 | 6,348 | 3,769 | 33,170 |
| 37,006 | 133 | 22,879 | 6,396 | 3,774 | 33,182 |
| 37,007 | 129 | 22,785 | 6,351 | 3,765 | 33,030 |
| 37,008 | 130 | 22,864 | 6,344 | 3,797 | 33,135 |
| 37,009 | 130 | 22,589 | 6,293 | 3,756 | 32,768 |
| 37,010 | 133 | 22,679 | 6,327 | 3,759 | 32,898 |
| 37,011 | 135 | 22,632 | 6,316 | 3,747 | 32,830 |
| 37,012 | 136 | 22,891 | 6,380 | 3,795 | 33,202 |
| 37,013 | 136 | 22,948 | 6,401 | 3,811 | 33,296 |
| 37,014 | 138 | 23,013 | 6,395 | 3,804 | 33,350 |
| 37,015 | 137 | 22,895 | 6,369 | 3,790 | 33,191 |

|        |     |        |       |       |        |
|--------|-----|--------|-------|-------|--------|
| 37,016 | 134 | 22,556 | 6,317 | 3,744 | 32,751 |
| 37,017 | 133 | 22,440 | 6,338 | 3,740 | 32,651 |
| 37,018 | 139 | 22,328 | 6,304 | 3,747 | 32,518 |
| 37,019 | 138 | 22,265 | 6,311 | 3,745 | 32,459 |
| 37,020 | 139 | 22,445 | 6,386 | 3,782 | 32,752 |
| 37,021 | 139 | 22,239 | 6,310 | 3,743 | 32,431 |
| 37,022 | 140 | 22,413 | 6,351 | 3,774 | 32,678 |
| 37,023 | 142 | 22,468 | 6,329 | 3,783 | 32,722 |
| 37,024 | 139 | 22,377 | 6,297 | 3,761 | 32,574 |
| 37,025 | 132 | 22,051 | 6,163 | 3,713 | 32,059 |
| 37,026 | 136 | 22,066 | 6,160 | 3,726 | 32,088 |
| 37,027 | 132 | 21,765 | 6,116 | 3,715 | 31,728 |
| 37,028 | 126 | 21,972 | 6,158 | 3,750 | 32,006 |
| 37,029 | 116 | 21,718 | 6,102 | 3,723 | 31,659 |
| 37,030 | 117 | 21,876 | 6,128 | 3,757 | 31,878 |
| 37,031 | 110 | 22,107 | 6,170 | 3,799 | 32,186 |
| 37,032 | 101 | 22,047 | 6,193 | 3,804 | 32,145 |
| 37,033 | 98  | 21,824 | 6,127 | 3,780 | 31,829 |
| 37,034 | 98  | 21,582 | 6,058 | 3,747 | 31,485 |
| 37,035 | 100 | 21,857 | 6,103 | 3,772 | 31,832 |
| 37,036 | 103 | 21,829 | 6,093 | 3,756 | 31,781 |
| 37,037 | 103 | 21,563 | 5,880 | 3,619 | 31,165 |
| 37,038 | 106 | 21,819 | 5,945 | 3,645 | 31,515 |
| 37,039 | 105 | 21,858 | 5,958 | 3,649 | 31,570 |
| 37,040 | 107 | 20,449 | 5,594 | 3,430 | 29,580 |
| 37,041 | 109 | 20,581 | 5,657 | 3,457 | 29,804 |
| 37,042 | 106 | 20,629 | 5,697 | 3,485 | 29,917 |
| 37,043 | 108 | 20,613 | 5,695 | 3,470 | 29,886 |
| 37,044 | 108 | 20,754 | 5,741 | 3,514 | 30,117 |
| 37,045 | 108 | 20,720 | 5,763 | 3,516 | 30,107 |
| 37,046 | 109 | 20,738 | 5,734 | 3,500 | 30,081 |
| 37,047 | 107 | 20,665 | 5,735 | 3,489 | 29,996 |

|        |     |        |       |       |        |
|--------|-----|--------|-------|-------|--------|
| 37,048 | 99  | 20,637 | 5,756 | 3,484 | 29,976 |
| 37,049 | 96  | 20,617 | 5,792 | 3,538 | 30,043 |
| 37,050 | 105 | 20,786 | 5,843 | 3,576 | 30,310 |
| 37,051 | 106 | 20,901 | 5,885 | 3,607 | 30,499 |
| 37,052 | 105 | 21,142 | 5,947 | 3,657 | 30,851 |
| 37,053 | 101 | 21,313 | 5,983 | 3,692 | 31,089 |
| 37,054 | 101 | 21,132 | 5,922 | 3,634 | 30,789 |
| 37,055 | 101 | 21,111 | 5,888 | 3,610 | 30,710 |
| 37,056 | 110 | 21,192 | 5,876 | 3,608 | 30,786 |
| 37,057 | 110 | 20,888 | 5,800 | 3,578 | 30,376 |
| 37,058 | 113 | 20,993 | 5,886 | 3,594 | 30,586 |
| 37,059 | 117 | 21,074 | 5,913 | 3,585 | 30,689 |
| 37,060 | 123 | 20,903 | 5,844 | 3,547 | 30,417 |
| 37,061 | 122 | 20,636 | 5,809 | 3,540 | 30,107 |
| 37,062 | 121 | 21,015 | 5,913 | 3,596 | 30,645 |
| 37,063 | 123 | 20,843 | 5,866 | 3,577 | 30,409 |
| 37,064 | 123 | 20,657 | 5,810 | 3,538 | 30,128 |
| 37,065 | 136 | 21,458 | 6,017 | 3,664 | 31,275 |
| 37,066 | 136 | 21,256 | 5,938 | 3,603 | 30,933 |
| 37,067 | 140 | 21,527 | 5,989 | 3,648 | 31,304 |
| 37,068 | 133 | 21,538 | 6,007 | 3,647 | 31,325 |
| 37,069 | 134 | 21,633 | 6,042 | 3,654 | 31,463 |
| 37,070 | 132 | 21,035 | 5,862 | 3,539 | 30,568 |
| 37,071 | 133 | 21,215 | 5,928 | 3,594 | 30,870 |
| 37,072 | 133 | 21,322 | 5,997 | 3,615 | 31,067 |
| 37,073 | 133 | 21,203 | 6,014 | 3,616 | 30,966 |
| 37,074 | 129 | 21,506 | 6,141 | 3,683 | 31,459 |
| 37,075 | 126 | 21,338 | 6,054 | 3,652 | 31,170 |
| 37,076 | 130 | 21,448 | 6,150 | 3,705 | 31,433 |
| 37,077 | 129 | 21,438 | 6,174 | 3,720 | 31,461 |
| 37,078 | 130 | 21,315 | 6,141 | 3,680 | 31,266 |
| 37,079 | 134 | 21,008 | 6,061 | 3,631 | 30,834 |

|        |     |        |       |       |        |
|--------|-----|--------|-------|-------|--------|
| 37,080 | 136 | 21,201 | 6,080 | 3,649 | 31,066 |
| 37,081 | 138 | 21,514 | 6,167 | 3,700 | 31,519 |
| 37,082 | 136 | 20,966 | 6,042 | 3,611 | 30,755 |
| 37,083 | 136 | 21,150 | 6,084 | 3,615 | 30,985 |
| 37,084 | 134 | 21,445 | 6,128 | 3,648 | 31,355 |
| 37,085 | 133 | 21,557 | 6,152 | 3,654 | 31,496 |
| 37,086 | 138 | 21,332 | 6,102 | 3,603 | 31,175 |
| 37,087 | 136 | 21,043 | 6,037 | 3,580 | 30,796 |
| 37,088 | 134 | 21,348 | 6,145 | 3,661 | 31,288 |
| 37,089 | 131 | 21,260 | 6,107 | 3,650 | 31,148 |
| 37,090 | 126 | 20,968 | 6,026 | 3,597 | 30,717 |
| 37,091 | 126 | 20,929 | 6,009 | 3,576 | 30,640 |
| 37,092 | 125 | 20,924 | 5,990 | 3,599 | 30,638 |
| 37,093 | 124 | 20,828 | 5,928 | 3,568 | 30,448 |
| 37,094 | 124 | 20,853 | 5,932 | 3,552 | 30,461 |
| 37,095 | 125 | 20,589 | 5,866 | 3,512 | 30,092 |
| 37,096 | 124 | 20,284 | 5,815 | 3,492 | 29,715 |
| 37,097 | 134 | 21,336 | 6,157 | 3,712 | 31,339 |
| 37,098 | 135 | 21,095 | 6,030 | 3,662 | 30,922 |
| 37,099 | 135 | 21,271 | 6,069 | 3,693 | 31,168 |
| 37,100 | 131 | 21,379 | 6,101 | 3,714 | 31,325 |
| 37,101 | 121 | 21,006 | 5,939 | 3,626 | 30,692 |
| 37,102 | 124 | 21,202 | 5,978 | 3,648 | 30,952 |
| 37,103 | 128 | 21,096 | 5,965 | 3,619 | 30,808 |
| 37,104 | 128 | 20,860 | 5,883 | 3,574 | 30,445 |
| 37,105 | 130 | 20,976 | 5,908 | 3,592 | 30,606 |
| 37,106 | 122 | 21,054 | 5,891 | 3,566 | 30,633 |
| 37,107 | 129 | 21,355 | 5,999 | 3,638 | 31,121 |
| 37,108 | 127 | 21,356 | 5,977 | 3,641 | 31,101 |
| 37,109 | 130 | 21,261 | 5,928 | 3,600 | 30,919 |
| 37,110 | 126 | 21,090 | 5,891 | 3,585 | 30,692 |
| 37,111 | 123 | 21,686 | 6,119 | 3,728 | 31,656 |



|        |     |        |       |       |        |
|--------|-----|--------|-------|-------|--------|
| 37,112 | 119 | 21,395 | 6,047 | 3,636 | 31,197 |
| 37,113 | 119 | 21,664 | 6,086 | 3,674 | 31,543 |
| 37,114 | 115 | 21,746 | 6,057 | 3,677 | 31,595 |
| 37,115 | 115 | 21,900 | 6,099 | 3,696 | 31,810 |
| 37,116 | 107 | 21,986 | 6,146 | 3,744 | 31,983 |
| 37,117 | 105 | 21,916 | 6,170 | 3,760 | 31,951 |
| 37,118 | 102 | 21,964 | 6,206 | 3,802 | 32,074 |
| 37,119 | 103 | 22,113 | 6,243 | 3,836 | 32,295 |
| 37,120 | 106 | 22,262 | 6,214 | 3,848 | 32,430 |
| 37,121 | 104 | 22,281 | 6,251 | 3,874 | 32,510 |
| 37,122 | 104 | 22,292 | 6,223 | 3,865 | 32,484 |
| 37,123 | 103 | 22,203 | 6,183 | 3,833 | 32,322 |
| 37,124 | 103 | 22,012 | 6,096 | 3,808 | 32,019 |
| 37,125 | 106 | 22,245 | 6,146 | 3,828 | 32,325 |
| 37,126 | 99  | 21,677 | 5,968 | 3,715 | 31,459 |
| 37,127 | 99  | 21,833 | 5,996 | 3,730 | 31,658 |
| 37,128 | 100 | 21,980 | 6,051 | 3,779 | 31,910 |
| 37,129 | 99  | 21,942 | 6,030 | 3,769 | 31,840 |
| 37,130 | 101 | 22,277 | 6,156 | 3,856 | 32,390 |
| 37,131 | 104 | 22,427 | 6,187 | 3,899 | 32,617 |
| 37,132 | 101 | 22,422 | 6,178 | 3,877 | 32,578 |
| 37,133 | 101 | 22,203 | 6,095 | 3,831 | 32,230 |
| 37,134 | 100 | 22,253 | 6,074 | 3,853 | 32,280 |
| 37,135 | 99  | 21,968 | 6,010 | 3,818 | 31,895 |
| 37,136 | 99  | 21,668 | 5,929 | 3,764 | 31,460 |
| 37,137 | 97  | 22,503 | 6,174 | 3,903 | 32,677 |
| 37,138 | 98  | 22,283 | 6,127 | 3,903 | 32,411 |
| 37,139 | 100 | 22,260 | 6,072 | 3,925 | 32,357 |
| 37,140 | 101 | 22,247 | 6,080 | 3,926 | 32,354 |
| 37,141 | 101 | 22,003 | 6,039 | 3,901 | 32,044 |
| 37,142 | 99  | 22,223 | 6,120 | 3,975 | 32,417 |
| 37,143 | 100 | 22,298 | 6,163 | 3,978 | 32,539 |

|        |     |        |       |       |        |
|--------|-----|--------|-------|-------|--------|
| 37,144 | 100 | 22,539 | 6,213 | 4,012 | 32,864 |
| 37,145 | 102 | 22,607 | 6,216 | 4,026 | 32,951 |
| 37,146 | 100 | 22,746 | 6,192 | 4,028 | 33,066 |
| 37,147 | 103 | 22,835 | 6,218 | 4,025 | 33,181 |
| 37,148 | 101 | 22,640 | 6,161 | 3,983 | 32,885 |
| 37,149 | 101 | 22,551 | 6,176 | 3,979 | 32,807 |
| 37,150 | 102 | 22,277 | 6,120 | 3,956 | 32,455 |
| 37,151 | 102 | 22,311 | 6,119 | 3,955 | 32,487 |
| 37,152 | 101 | 22,136 | 6,147 | 3,978 | 32,362 |
| 37,153 | 99  | 22,148 | 6,154 | 4,001 | 32,402 |
| 37,154 | 93  | 21,880 | 6,075 | 3,961 | 32,009 |
| 37,155 | 91  | 21,640 | 6,027 | 3,916 | 31,674 |
| 37,156 | 89  | 22,105 | 6,169 | 4,036 | 32,399 |
| 37,157 | 89  | 22,013 | 6,159 | 4,033 | 32,294 |
| 37,158 | 81  | 21,954 | 6,117 | 4,024 | 32,176 |
| 37,159 | 81  | 21,710 | 6,083 | 3,990 | 31,864 |
| 37,160 | 74  | 21,532 | 6,012 | 3,986 | 31,604 |
| 37,161 | 75  | 21,496 | 5,904 | 3,944 | 31,419 |
| 37,162 | 75  | 21,483 | 5,840 | 3,910 | 31,308 |
| 37,163 | 77  | 21,096 | 5,734 | 3,861 | 30,768 |
| 37,164 | 77  | 21,024 | 5,720 | 3,875 | 30,696 |
| 37,165 | 78  | 20,878 | 5,716 | 3,857 | 30,529 |
| 37,166 | 80  | 20,784 | 5,719 | 3,898 | 30,481 |
| 37,167 | 82  | 20,962 | 5,696 | 3,857 | 30,597 |
| 37,168 | 86  | 20,805 | 5,647 | 3,830 | 30,368 |
| 37,169 | 88  | 21,114 | 5,651 | 3,837 | 30,690 |
| 37,170 | 89  | 21,174 | 5,649 | 3,827 | 30,739 |
| 37,171 | 89  | 20,916 | 5,608 | 3,798 | 30,411 |
| 37,172 | 93  | 20,900 | 5,576 | 3,796 | 30,365 |
| 37,173 | 94  | 20,945 | 5,585 | 3,790 | 30,414 |
| 37,174 | 97  | 20,916 | 5,535 | 3,797 | 30,345 |
| 37,175 | 97  | 20,762 | 5,489 | 3,773 | 30,121 |

|        |     |        |       |       |        |
|--------|-----|--------|-------|-------|--------|
| 37,176 | 99  | 20,837 | 5,553 | 3,794 | 30,283 |
| 37,177 | 99  | 20,822 | 5,570 | 3,800 | 30,291 |
| 37,178 | 102 | 20,499 | 5,466 | 3,725 | 29,792 |
| 37,179 | 102 | 20,798 | 5,514 | 3,746 | 30,160 |
| 37,180 | 100 | 21,126 | 5,566 | 3,790 | 30,582 |
| 37,181 | 102 | 21,302 | 5,645 | 3,827 | 30,876 |
| 37,182 | 103 | 21,285 | 5,633 | 3,822 | 30,843 |
| 37,183 | 103 | 21,201 | 5,636 | 3,827 | 30,767 |
| 37,184 | 110 | 21,206 | 5,667 | 3,857 | 30,840 |
| 37,185 | 110 | 21,198 | 5,665 | 3,887 | 30,860 |
| 37,186 | 109 | 21,218 | 5,710 | 3,922 | 30,959 |
| 37,187 | 107 | 21,027 | 5,710 | 3,863 | 30,707 |
| 37,188 | 109 | 21,284 | 5,737 | 3,886 | 31,016 |
| 37,189 | 107 | 21,598 | 5,783 | 3,896 | 31,384 |
| 37,190 | 105 | 21,650 | 5,799 | 3,898 | 31,452 |
| 37,191 | 109 | 21,843 | 5,856 | 3,921 | 31,729 |
| 37,192 | 109 | 21,830 | 5,833 | 3,886 | 31,658 |
| 37,193 | 106 | 21,789 | 5,832 | 3,879 | 31,606 |
| 37,194 | 110 | 21,985 | 5,908 | 3,938 | 31,941 |
| 37,195 | 115 | 22,108 | 5,942 | 3,946 | 32,111 |
| 37,196 | 114 | 22,104 | 5,973 | 3,953 | 32,144 |
| 37,197 | 112 | 22,149 | 6,023 | 3,981 | 32,265 |
| 37,198 | 109 | 22,084 | 5,995 | 3,974 | 32,162 |
| 37,199 | 108 | 21,998 | 5,945 | 3,952 | 32,003 |
| 37,200 | 108 | 22,109 | 5,955 | 3,950 | 32,122 |
| 37,201 | 109 | 22,290 | 5,947 | 3,928 | 32,274 |
| 37,202 | 117 | 22,564 | 6,001 | 3,957 | 32,639 |
| 37,203 | 117 | 22,586 | 5,973 | 3,941 | 32,617 |
| 37,204 | 119 | 22,721 | 6,000 | 3,925 | 32,765 |
| 37,205 | 121 | 22,425 | 5,961 | 3,883 | 32,390 |
| 37,206 | 122 | 22,559 | 6,010 | 3,916 | 32,607 |
| 37,207 | 122 | 22,390 | 5,974 | 3,919 | 32,405 |

|        |     |        |       |       |        |
|--------|-----|--------|-------|-------|--------|
| 37,208 | 133 | 22,339 | 5,951 | 3,909 | 32,332 |
| 37,209 | 132 | 22,130 | 5,889 | 3,853 | 32,004 |
| 37,210 | 133 | 22,387 | 5,958 | 3,894 | 32,372 |
| 37,211 | 136 | 21,825 | 5,837 | 3,780 | 31,578 |
| 37,212 | 136 | 21,843 | 5,832 | 3,786 | 31,597 |
| 37,213 | 137 | 21,507 | 5,777 | 3,724 | 31,145 |
| 37,214 | 136 | 21,230 | 5,724 | 3,687 | 30,777 |
| 37,215 | 135 | 22,288 | 6,048 | 3,813 | 32,284 |
| 37,216 | 134 | 22,013 | 5,980 | 3,756 | 31,883 |
| 37,217 | 139 | 21,833 | 5,912 | 3,705 | 31,589 |
| 37,218 | 136 | 21,504 | 5,854 | 3,660 | 31,154 |
| 37,219 | 131 | 21,804 | 5,943 | 3,710 | 31,588 |
| 37,220 | 130 | 21,277 | 5,844 | 3,635 | 30,886 |
| 37,221 | 131 | 21,486 | 5,891 | 3,658 | 31,166 |
| 37,222 | 127 | 21,694 | 5,965 | 3,701 | 31,487 |
| 37,223 | 120 | 21,233 | 5,890 | 3,624 | 30,867 |
| 37,224 | 121 | 21,418 | 5,950 | 3,653 | 31,142 |
| 37,225 | 117 | 21,602 | 5,986 | 3,661 | 31,366 |
| 37,226 | 114 | 21,420 | 5,913 | 3,619 | 31,066 |
| 37,227 | 114 | 21,471 | 5,885 | 3,611 | 31,081 |
| 37,228 | 114 | 21,250 | 5,803 | 3,560 | 30,727 |
| 37,229 | 115 | 21,487 | 5,907 | 3,620 | 31,129 |
| 37,230 | 117 | 21,455 | 5,879 | 3,599 | 31,050 |
| 37,231 | 114 | 21,380 | 5,870 | 3,583 | 30,947 |
| 37,232 | 112 | 20,972 | 5,738 | 3,491 | 30,313 |
| 37,233 | 114 | 21,096 | 5,783 | 3,496 | 30,489 |
| 37,234 | 116 | 21,094 | 5,775 | 3,472 | 30,457 |
| 37,235 | 114 | 20,793 | 5,709 | 3,419 | 30,035 |
| 37,236 | 121 | 20,947 | 5,760 | 3,444 | 30,272 |
| 37,237 | 123 | 20,966 | 5,719 | 3,436 | 30,244 |
| 37,238 | 120 | 20,687 | 5,625 | 3,394 | 29,826 |
| 37,239 | 118 | 20,595 | 5,602 | 3,385 | 29,700 |

|        |     |        |       |       |        |
|--------|-----|--------|-------|-------|--------|
| 37,240 | 119 | 20,394 | 5,564 | 3,367 | 29,444 |
| 37,241 | 119 | 20,358 | 5,552 | 3,344 | 29,373 |
| 37,242 | 123 | 20,413 | 5,528 | 3,331 | 29,395 |
| 37,243 | 124 | 20,616 | 5,538 | 3,359 | 29,637 |
| 37,244 | 123 | 20,133 | 5,381 | 3,251 | 28,888 |
| 37,245 | 124 | 20,383 | 5,425 | 3,274 | 29,206 |
| 37,246 | 124 | 20,303 | 5,391 | 3,269 | 29,087 |
| 37,247 | 124 | 20,054 | 5,293 | 3,234 | 28,705 |
| 37,248 | 126 | 20,113 | 5,316 | 3,289 | 28,844 |
| 37,249 | 126 | 20,122 | 5,312 | 3,285 | 28,845 |
| 37,250 | 125 | 20,065 | 5,289 | 3,288 | 28,767 |
| 37,251 | 125 | 20,123 | 5,293 | 3,298 | 28,839 |
| 37,252 | 124 | 19,948 | 5,281 | 3,286 | 28,639 |
| 37,253 | 120 | 20,182 | 5,351 | 3,309 | 28,962 |
| 37,254 | 120 | 20,301 | 5,389 | 3,318 | 29,128 |
| 37,255 | 118 | 20,161 | 5,351 | 3,307 | 28,937 |
| 37,256 | 117 | 20,296 | 5,356 | 3,315 | 29,084 |
| 37,257 | 119 | 20,391 | 5,331 | 3,305 | 29,146 |
| 37,258 | 119 | 20,366 | 5,336 | 3,301 | 29,122 |
| 37,259 | 108 | 20,437 | 5,352 | 3,301 | 29,198 |
| 37,260 | 107 | 20,565 | 5,383 | 3,328 | 29,383 |
| 37,261 | 107 | 20,374 | 5,345 | 3,303 | 29,129 |
| 37,262 | 108 | 20,595 | 5,407 | 3,355 | 29,465 |
| 37,263 | 113 | 20,763 | 5,437 | 3,397 | 29,710 |
| 37,264 | 111 | 20,817 | 5,442 | 3,421 | 29,791 |
| 37,265 | 112 | 21,056 | 5,475 | 3,448 | 30,091 |
| 37,266 | 114 | 20,931 | 5,436 | 3,431 | 29,912 |
| 37,267 | 114 | 20,994 | 5,444 | 3,452 | 30,004 |
| 37,268 | 108 | 20,971 | 5,418 | 3,469 | 29,966 |
| 37,269 | 112 | 21,170 | 5,477 | 3,528 | 30,287 |
| 37,270 | 117 | 20,943 | 5,444 | 3,505 | 30,009 |
| 37,271 | 113 | 20,710 | 5,388 | 3,481 | 29,692 |

|        |     |        |       |       |        |
|--------|-----|--------|-------|-------|--------|
| 37,272 | 114 | 20,948 | 5,429 | 3,542 | 30,033 |
| 37,273 | 114 | 21,008 | 5,439 | 3,556 | 30,117 |
| 37,274 | 113 | 21,103 | 5,445 | 3,567 | 30,228 |
| 37,275 | 113 | 21,300 | 5,446 | 3,588 | 30,447 |
| 37,276 | 116 | 21,098 | 5,430 | 3,574 | 30,218 |
| 37,277 | 117 | 21,369 | 5,475 | 3,612 | 30,573 |
| 37,278 | 113 | 21,437 | 5,493 | 3,601 | 30,644 |
| 37,279 | 114 | 21,441 | 5,498 | 3,591 | 30,644 |
| 37,280 | 114 | 21,452 | 5,502 | 3,577 | 30,645 |
| 37,281 | 114 | 21,119 | 5,402 | 3,539 | 30,174 |
| 37,282 | 117 | 21,291 | 5,433 | 3,576 | 30,417 |
| 37,283 | 114 | 21,396 | 5,452 | 3,600 | 30,562 |
| 37,284 | 121 | 21,621 | 5,474 | 3,608 | 30,824 |
| 37,285 | 113 | 21,538 | 5,449 | 3,579 | 30,679 |
| 37,286 | 114 | 21,390 | 5,402 | 3,515 | 30,421 |
| 37,287 | 114 | 21,424 | 5,412 | 3,501 | 30,451 |
| 37,288 | 116 | 21,746 | 5,478 | 3,539 | 30,879 |
| 37,289 | 120 | 21,578 | 5,459 | 3,524 | 30,681 |
| 37,290 | 119 | 21,534 | 5,465 | 3,503 | 30,621 |
| 37,291 | 119 | 21,402 | 5,462 | 3,496 | 30,479 |
| 37,292 | 120 | 21,365 | 5,491 | 3,532 | 30,508 |
| 37,293 | 123 | 21,054 | 5,415 | 3,491 | 30,083 |
| 37,294 | 122 | 20,728 | 5,363 | 3,455 | 29,668 |
| 37,295 | 120 | 20,894 | 5,429 | 3,519 | 29,962 |
| 37,296 | 119 | 20,887 | 5,441 | 3,540 | 29,987 |
| 37,297 | 114 | 20,687 | 5,394 | 3,491 | 29,686 |
| 37,298 | 114 | 20,558 | 5,391 | 3,450 | 29,513 |
| 37,299 | 112 | 20,360 | 5,363 | 3,398 | 29,233 |
| 37,300 | 112 | 20,337 | 5,367 | 3,398 | 29,214 |
| 37,301 | 112 | 20,213 | 5,362 | 3,384 | 29,071 |
| 37,302 | 112 | 20,148 | 5,348 | 3,394 | 29,002 |
| 37,303 | 114 | 20,151 | 5,329 | 3,394 | 28,988 |

|        |     |        |       |       |        |
|--------|-----|--------|-------|-------|--------|
| 37,304 | 111 | 20,247 | 5,316 | 3,406 | 29,080 |
| 37,305 | 112 | 20,349 | 5,325 | 3,429 | 29,215 |
| 37,306 | 110 | 20,463 | 5,304 | 3,423 | 29,300 |
| 37,307 | 109 | 20,242 | 5,269 | 3,386 | 29,006 |
| 37,308 | 106 | 20,429 | 5,368 | 3,448 | 29,351 |
| 37,309 | 106 | 20,158 | 5,296 | 3,426 | 28,986 |
| 37,310 | 107 | 20,291 | 5,339 | 3,438 | 29,175 |
| 37,311 | 106 | 20,210 | 5,342 | 3,442 | 29,100 |
| 37,312 | 102 | 20,068 | 5,293 | 3,388 | 28,851 |
| 37,313 | 101 | 20,036 | 5,285 | 3,397 | 28,819 |
| 37,314 | 96  | 19,895 | 5,241 | 3,360 | 28,592 |
| 37,315 | 95  | 19,828 | 5,199 | 3,338 | 28,460 |
| 37,316 | 92  | 18,929 | 4,994 | 3,176 | 27,191 |
| 37,317 | 95  | 19,076 | 5,001 | 3,198 | 27,370 |
| 37,318 | 101 | 19,342 | 5,031 | 3,219 | 27,693 |
| 37,319 | 101 | 19,340 | 5,022 | 3,217 | 27,680 |
| 37,320 | 102 | 19,868 | 5,166 | 3,268 | 28,404 |
| 37,321 | 96  | 19,531 | 5,111 | 3,220 | 27,958 |
| 37,322 | 97  | 19,747 | 5,181 | 3,266 | 28,291 |
| 37,323 | 100 | 19,572 | 5,143 | 3,219 | 28,034 |
| 37,324 | 100 | 19,468 | 5,122 | 3,196 | 27,886 |
| 37,325 | 101 | 19,511 | 5,158 | 3,229 | 27,999 |
| 37,326 | 100 | 19,586 | 5,206 | 3,240 | 28,132 |
| 37,327 | 96  | 19,446 | 5,192 | 3,233 | 27,967 |
| 37,328 | 99  | 19,323 | 5,137 | 3,199 | 27,758 |
| 37,329 | 99  | 19,310 | 5,138 | 3,204 | 27,751 |
| 37,330 | 105 | 19,496 | 5,241 | 3,258 | 28,100 |
| 37,331 | 106 | 19,415 | 5,234 | 3,248 | 28,003 |
| 37,332 | 104 | 19,485 | 5,230 | 3,231 | 28,050 |
| 37,333 | 102 | 19,217 | 5,193 | 3,185 | 27,697 |
| 37,334 | 103 | 19,491 | 5,224 | 3,202 | 28,020 |
| 37,335 | 96  | 19,235 | 5,174 | 3,179 | 27,684 |

|        |     |        |       |       |        |
|--------|-----|--------|-------|-------|--------|
| 37,336 | 96  | 19,160 | 5,141 | 3,175 | 27,572 |
| 37,337 | 91  | 19,218 | 5,168 | 3,215 | 27,692 |
| 37,338 | 97  | 19,142 | 5,161 | 3,218 | 27,618 |
| 37,339 | 98  | 19,106 | 5,187 | 3,231 | 27,622 |
| 37,340 | 95  | 19,186 | 5,195 | 3,227 | 27,703 |
| 37,341 | 95  | 19,134 | 5,141 | 3,212 | 27,582 |
| 37,342 | 96  | 19,375 | 5,193 | 3,236 | 27,900 |
| 37,343 | 96  | 19,381 | 5,168 | 3,224 | 27,869 |
| 37,344 | 88  | 19,299 | 5,127 | 3,202 | 27,716 |
| 37,345 | 89  | 19,258 | 5,094 | 3,169 | 27,610 |
| 37,346 | 92  | 19,177 | 5,069 | 3,110 | 27,448 |
| 37,347 | 92  | 19,207 | 5,056 | 3,107 | 27,462 |
| 37,348 | 95  | 19,073 | 4,995 | 3,069 | 27,232 |
| 37,349 | 95  | 18,884 | 4,913 | 3,026 | 26,918 |
| 37,350 | 102 | 19,686 | 5,081 | 3,116 | 27,985 |
| 37,351 | 102 | 19,711 | 5,060 | 3,116 | 27,989 |
| 37,352 | 100 | 19,510 | 5,028 | 3,083 | 27,721 |
| 37,353 | 98  | 19,918 | 5,121 | 3,125 | 28,262 |
| 37,354 | 104 | 19,892 | 5,112 | 3,118 | 28,226 |
| 37,355 | 105 | 20,124 | 5,199 | 3,147 | 28,575 |
| 37,356 | 108 | 19,940 | 5,207 | 3,155 | 28,410 |
| 37,357 | 112 | 19,702 | 5,215 | 3,149 | 28,178 |
| 37,358 | 117 | 19,851 | 5,180 | 3,158 | 28,306 |
| 37,359 | 119 | 19,812 | 5,116 | 3,143 | 28,190 |
| 37,360 | 116 | 19,689 | 5,038 | 3,104 | 27,947 |
| 37,361 | 118 | 19,731 | 5,039 | 3,087 | 27,975 |
| 37,362 | 118 | 19,494 | 4,967 | 3,050 | 27,629 |
| 37,363 | 124 | 19,769 | 4,993 | 3,050 | 27,936 |
| 37,364 | 124 | 19,831 | 4,995 | 3,054 | 28,004 |
| 37,365 | 122 | 19,910 | 4,985 | 3,078 | 28,095 |
| 37,366 | 119 | 19,468 | 4,852 | 2,999 | 27,438 |
| 37,367 | 120 | 19,685 | 4,872 | 3,017 | 27,694 |



|        |     |        |       |       |        |
|--------|-----|--------|-------|-------|--------|
| 37,368 | 117 | 19,615 | 4,867 | 3,023 | 27,622 |
| 37,369 | 113 | 19,638 | 4,908 | 3,033 | 27,692 |
| 37,370 | 114 | 19,602 | 4,893 | 3,038 | 27,647 |
| 37,371 | 116 | 19,486 | 4,861 | 3,011 | 27,474 |
| 37,372 | 117 | 19,634 | 4,849 | 3,009 | 27,609 |
| 37,373 | 117 | 19,735 | 4,823 | 2,993 | 27,668 |
| 37,374 | 121 | 19,475 | 4,733 | 2,968 | 27,297 |
| 37,375 | 121 | 19,481 | 4,729 | 2,952 | 27,283 |
| 37,376 | 122 | 19,571 | 4,737 | 2,955 | 27,385 |
| 37,377 | 126 | 19,597 | 4,730 | 2,940 | 27,393 |
| 37,378 | 124 | 19,547 | 4,705 | 2,936 | 27,312 |
| 37,379 | 123 | 19,641 | 4,711 | 2,964 | 27,439 |
| 37,380 | 125 | 19,724 | 4,704 | 2,974 | 27,527 |
| 37,381 | 124 | 19,542 | 4,626 | 2,943 | 27,235 |
| 37,382 | 122 | 19,413 | 4,574 | 2,942 | 27,051 |
| 37,383 | 123 | 19,646 | 4,652 | 3,021 | 27,442 |
| 37,384 | 121 | 19,412 | 4,603 | 2,986 | 27,122 |
| 37,385 | 120 | 19,495 | 4,591 | 2,994 | 27,200 |
| 37,386 | 121 | 19,688 | 4,641 | 3,033 | 27,483 |
| 37,387 | 120 | 19,600 | 4,610 | 2,992 | 27,322 |
| 37,388 | 121 | 19,657 | 4,602 | 2,981 | 27,361 |
| 37,389 | 118 | 19,807 | 4,643 | 2,993 | 27,561 |
| 37,390 | 117 | 19,812 | 4,634 | 2,975 | 27,538 |
| 37,391 | 118 | 19,603 | 4,576 | 2,949 | 27,246 |
| 37,392 | 122 | 19,725 | 4,603 | 2,948 | 27,398 |
| 37,393 | 129 | 19,742 | 4,602 | 2,947 | 27,420 |
| 37,394 | 126 | 19,545 | 4,547 | 2,917 | 27,135 |
| 37,395 | 129 | 19,500 | 4,579 | 2,924 | 27,132 |
| 37,396 | 129 | 19,288 | 4,520 | 2,895 | 26,832 |
| 37,397 | 128 | 19,921 | 4,670 | 3,004 | 27,723 |
| 37,398 | 130 | 19,949 | 4,723 | 3,037 | 27,839 |
| 37,399 | 132 | 20,317 | 4,788 | 3,074 | 28,311 |

|        |     |        |       |       |        |
|--------|-----|--------|-------|-------|--------|
| 37,400 | 125 | 20,353 | 4,780 | 3,075 | 28,333 |
| 37,401 | 124 | 20,739 | 4,857 | 3,125 | 28,845 |
| 37,402 | 124 | 20,894 | 4,867 | 3,122 | 29,007 |
| 37,403 | 123 | 20,858 | 4,830 | 3,134 | 28,945 |
| 37,404 | 124 | 20,950 | 4,892 | 3,159 | 29,125 |
| 37,405 | 122 | 21,068 | 4,947 | 3,185 | 29,322 |
| 37,406 | 125 | 21,282 | 4,923 | 3,214 | 29,544 |
| 37,407 | 121 | 21,223 | 4,839 | 3,161 | 29,344 |
| 37,408 | 125 | 21,529 | 4,903 | 3,183 | 29,740 |
| 37,409 | 125 | 21,413 | 4,895 | 3,155 | 29,588 |
| 37,410 | 124 | 21,198 | 4,859 | 3,110 | 29,291 |
| 37,411 | 125 | 21,173 | 4,870 | 3,112 | 29,280 |
| 37,412 | 128 | 20,791 | 4,825 | 3,105 | 28,849 |
| 37,413 | 133 | 20,877 | 4,834 | 3,120 | 28,964 |
| 37,414 | 127 | 20,859 | 4,833 | 3,116 | 28,935 |
| 37,415 | 129 | 20,884 | 4,834 | 3,112 | 28,959 |
| 37,416 | 130 | 20,809 | 4,856 | 3,126 | 28,921 |
| 37,417 | 137 | 21,039 | 4,928 | 3,171 | 29,275 |
| 37,418 | 139 | 20,793 | 4,850 | 3,119 | 28,901 |
| 37,419 | 139 | 20,816 | 4,851 | 3,123 | 28,929 |
| 37,420 | 141 | 20,729 | 4,820 | 3,107 | 28,797 |
| 37,421 | 138 | 20,688 | 4,788 | 3,083 | 28,697 |
| 37,422 | 155 | 21,363 | 4,998 | 3,241 | 29,757 |
| 37,423 | 156 | 21,622 | 5,043 | 3,274 | 30,095 |
| 37,424 | 149 | 21,178 | 4,965 | 3,208 | 29,500 |
| 37,425 | 149 | 21,429 | 5,013 | 3,223 | 29,814 |
| 37,426 | 147 | 21,381 | 5,019 | 3,208 | 29,755 |
| 37,427 | 149 | 21,569 | 5,064 | 3,218 | 30,000 |
| 37,428 | 147 | 21,526 | 5,063 | 3,242 | 29,978 |
| 37,429 | 147 | 21,601 | 5,087 | 3,243 | 30,078 |
| 37,430 | 143 | 21,197 | 4,999 | 3,189 | 29,528 |
| 37,431 | 143 | 21,253 | 4,999 | 3,182 | 29,577 |

|        |     |        |       |       |        |
|--------|-----|--------|-------|-------|--------|
| 37,432 | 151 | 21,438 | 5,028 | 3,191 | 29,808 |
| 37,433 | 156 | 21,223 | 4,964 | 3,124 | 29,467 |
| 37,434 | 158 | 21,043 | 4,932 | 3,087 | 29,220 |
| 37,435 | 161 | 21,205 | 4,973 | 3,110 | 29,449 |
| 37,436 | 164 | 20,932 | 4,945 | 3,080 | 29,121 |
| 37,437 | 164 | 20,873 | 4,926 | 3,062 | 29,025 |
| 37,438 | 170 | 21,109 | 4,978 | 3,103 | 29,360 |
| 37,439 | 176 | 20,939 | 4,908 | 3,083 | 29,106 |
| 37,440 | 173 | 20,726 | 4,846 | 3,059 | 28,804 |
| 37,441 | 172 | 20,825 | 4,860 | 3,088 | 28,945 |
| 37,442 | 171 | 20,670 | 4,821 | 3,067 | 28,729 |
| 37,443 | 172 | 20,665 | 4,841 | 3,089 | 28,767 |
| 37,444 | 159 | 20,512 | 4,776 | 3,048 | 28,495 |
| 37,445 | 159 | 20,624 | 4,795 | 3,048 | 28,626 |
| 37,446 | 159 | 20,414 | 4,750 | 3,021 | 28,344 |
| 37,447 | 160 | 20,339 | 4,741 | 3,024 | 28,264 |
| 37,448 | 163 | 20,448 | 4,736 | 3,042 | 28,389 |
| 37,449 | 156 | 20,079 | 4,666 | 3,003 | 27,904 |
| 37,450 | 162 | 20,151 | 4,698 | 3,006 | 28,017 |
| 37,451 | 167 | 19,973 | 4,674 | 3,000 | 27,814 |
| 37,452 | 169 | 19,777 | 4,625 | 2,952 | 27,523 |
| 37,453 | 172 | 19,723 | 4,657 | 2,953 | 27,505 |
| 37,454 | 175 | 19,669 | 4,646 | 2,919 | 27,409 |
| 37,455 | 175 | 19,709 | 4,608 | 2,912 | 27,404 |
| 37,456 | 173 | 19,514 | 4,585 | 2,894 | 27,166 |
| 37,457 | 172 | 19,361 | 4,587 | 2,867 | 26,987 |
| 37,458 | 171 | 19,348 | 4,563 | 2,889 | 26,971 |
| 37,459 | 169 | 19,358 | 4,551 | 2,879 | 26,957 |
| 37,460 | 167 | 19,371 | 4,557 | 2,877 | 26,972 |
| 37,461 | 167 | 19,406 | 4,575 | 2,865 | 27,013 |
| 37,462 | 165 | 19,481 | 4,603 | 2,866 | 27,115 |
| 37,463 | 160 | 19,530 | 4,591 | 2,869 | 27,150 |

|        |     |        |       |       |        |
|--------|-----|--------|-------|-------|--------|
| 37,464 | 160 | 19,677 | 4,608 | 2,861 | 27,306 |
| 37,465 | 164 | 19,798 | 4,626 | 2,862 | 27,450 |
| 37,466 | 163 | 19,816 | 4,628 | 2,859 | 27,466 |
| 37,467 | 164 | 20,046 | 4,643 | 2,869 | 27,722 |
| 37,468 | 157 | 19,771 | 4,625 | 2,837 | 27,390 |
| 37,469 | 154 | 19,947 | 4,641 | 2,838 | 27,580 |
| 37,470 | 148 | 20,173 | 4,676 | 2,864 | 27,861 |
| 37,471 | 144 | 20,074 | 4,640 | 2,834 | 27,692 |
| 37,472 | 143 | 19,910 | 4,581 | 2,835 | 27,469 |
| 37,473 | 139 | 20,019 | 4,642 | 2,884 | 27,684 |
| 37,474 | 139 | 19,952 | 4,621 | 2,876 | 27,588 |
| 37,475 | 148 | 19,868 | 4,582 | 2,868 | 27,466 |
| 37,476 | 154 | 20,176 | 4,638 | 2,897 | 27,865 |
| 37,477 | 163 | 20,086 | 4,591 | 2,883 | 27,723 |
| 37,478 | 164 | 20,091 | 4,587 | 2,885 | 27,727 |
| 37,479 | 169 | 20,273 | 4,598 | 2,896 | 27,936 |
| 37,480 | 170 | 20,065 | 4,564 | 2,881 | 27,680 |
| 37,481 | 160 | 19,716 | 4,510 | 2,850 | 27,236 |
| 37,482 | 164 | 19,989 | 4,547 | 2,858 | 27,558 |
| 37,483 | 160 | 20,250 | 4,574 | 2,875 | 27,859 |
| 37,484 | 159 | 20,220 | 4,551 | 2,886 | 27,816 |
| 37,485 | 162 | 20,239 | 4,513 | 2,864 | 27,778 |
| 37,486 | 162 | 20,242 | 4,498 | 2,877 | 27,779 |
| 37,487 | 155 | 20,226 | 4,510 | 2,887 | 27,778 |
| 37,488 | 151 | 20,323 | 4,517 | 2,915 | 27,906 |
| 37,489 | 153 | 20,540 | 4,534 | 2,917 | 28,144 |
| 37,490 | 146 | 20,572 | 4,547 | 2,918 | 28,183 |
| 37,491 | 144 | 20,519 | 4,495 | 2,868 | 28,026 |
| 37,492 | 144 | 20,530 | 4,509 | 2,854 | 28,037 |
| 37,493 | 145 | 20,612 | 4,511 | 2,849 | 28,117 |
| 37,494 | 144 | 20,618 | 4,467 | 2,849 | 28,078 |
| 37,495 | 150 | 20,784 | 4,488 | 2,864 | 28,286 |

|        |     |        |       |       |        |
|--------|-----|--------|-------|-------|--------|
| 37,496 | 156 | 20,791 | 4,482 | 2,867 | 28,296 |
| 37,497 | 159 | 20,864 | 4,495 | 2,864 | 28,382 |
| 37,498 | 158 | 20,638 | 4,448 | 2,811 | 28,055 |
| 37,499 | 158 | 20,682 | 4,438 | 2,808 | 28,086 |
| 37,500 | 151 | 20,672 | 4,397 | 2,814 | 28,034 |
| 37,501 | 144 | 20,130 | 4,285 | 2,757 | 27,316 |
| 37,502 | 144 | 20,248 | 4,287 | 2,759 | 27,438 |
| 37,503 | 144 | 20,211 | 4,275 | 2,766 | 27,396 |
| 37,504 | 139 | 20,076 | 4,220 | 2,770 | 27,205 |
| 37,505 | 140 | 20,171 | 4,256 | 2,792 | 27,359 |
| 37,506 | 138 | 19,962 | 4,180 | 2,748 | 27,028 |
| 37,507 | 140 | 19,965 | 4,189 | 2,743 | 27,037 |
| 37,508 | 138 | 19,837 | 4,157 | 2,732 | 26,864 |
| 37,509 | 135 | 20,161 | 4,221 | 2,759 | 27,276 |
| 37,510 | 134 | 19,933 | 4,168 | 2,742 | 26,977 |
| 37,511 | 135 | 19,907 | 4,153 | 2,750 | 26,945 |
| 37,512 | 135 | 19,941 | 4,156 | 2,751 | 26,983 |
| 37,513 | 133 | 19,981 | 4,169 | 2,764 | 27,047 |
| 37,514 | 132 | 19,970 | 4,207 | 2,779 | 27,088 |
| 37,515 | 132 | 20,114 | 4,259 | 2,812 | 27,317 |
| 37,516 | 131 | 19,976 | 4,242 | 2,817 | 27,166 |
| 37,517 | 129 | 19,985 | 4,258 | 2,840 | 27,212 |
| 37,518 | 134 | 19,983 | 4,253 | 2,849 | 27,219 |
| 37,519 | 133 | 19,941 | 4,262 | 2,846 | 27,182 |
| 37,520 | 132 | 19,828 | 4,231 | 2,842 | 27,033 |
| 37,521 | 142 | 20,003 | 4,300 | 2,859 | 27,304 |
| 37,522 | 138 | 19,561 | 4,249 | 2,789 | 26,737 |
| 37,523 | 140 | 19,600 | 4,223 | 2,784 | 26,747 |
| 37,524 | 142 | 19,700 | 4,228 | 2,785 | 26,855 |
| 37,525 | 139 | 19,460 | 4,204 | 2,772 | 26,575 |
| 37,526 | 133 | 19,680 | 4,269 | 2,803 | 26,885 |
| 37,527 | 131 | 19,780 | 4,297 | 2,823 | 27,031 |

|        |     |        |       |       |        |
|--------|-----|--------|-------|-------|--------|
| 37,528 | 125 | 19,830 | 4,310 | 2,832 | 27,097 |
| 37,529 | 117 | 18,936 | 4,091 | 2,710 | 25,854 |
| 37,530 | 116 | 19,148 | 4,143 | 2,726 | 26,133 |
| 37,531 | 114 | 19,463 | 4,191 | 2,770 | 26,538 |
| 37,532 | 114 | 19,455 | 4,194 | 2,775 | 26,538 |
| 37,533 | 113 | 19,842 | 4,259 | 2,829 | 27,043 |
| 37,534 | 111 | 19,694 | 4,254 | 2,832 | 26,891 |
| 37,535 | 113 | 19,687 | 4,253 | 2,818 | 26,871 |
| 37,536 | 108 | 19,533 | 4,258 | 2,832 | 26,731 |
| 37,537 | 110 | 19,833 | 4,327 | 2,871 | 27,141 |
| 37,538 | 111 | 19,639 | 4,303 | 2,832 | 26,885 |
| 37,539 | 111 | 19,428 | 4,275 | 2,807 | 26,621 |
| 37,540 | 115 | 19,959 | 4,423 | 2,912 | 27,409 |
| 37,541 | 119 | 19,835 | 4,414 | 2,916 | 27,284 |
| 37,542 | 119 | 19,691 | 4,424 | 2,922 | 27,156 |
| 37,543 | 127 | 20,004 | 4,459 | 2,967 | 27,557 |
| 37,544 | 126 | 20,109 | 4,482 | 2,969 | 27,686 |
| 37,545 | 124 | 19,893 | 4,441 | 2,938 | 27,396 |
| 37,546 | 117 | 19,754 | 4,423 | 2,919 | 27,213 |
| 37,547 | 115 | 19,548 | 4,396 | 2,912 | 26,971 |
| 37,548 | 122 | 19,686 | 4,420 | 2,921 | 27,149 |
| 37,549 | 123 | 19,658 | 4,426 | 2,923 | 27,130 |
| 37,550 | 124 | 19,482 | 4,389 | 2,888 | 26,883 |
| 37,551 | 127 | 19,824 | 4,449 | 2,900 | 27,300 |
| 37,552 | 127 | 19,666 | 4,405 | 2,872 | 27,070 |
| 37,553 | 128 | 19,530 | 4,390 | 2,855 | 26,903 |
| 37,554 | 127 | 19,396 | 4,368 | 2,828 | 26,719 |
| 37,555 | 133 | 19,923 | 4,452 | 2,895 | 27,403 |
| 37,556 | 135 | 19,507 | 4,359 | 2,826 | 26,827 |
| 37,557 | 135 | 19,487 | 4,361 | 2,818 | 26,801 |
| 37,558 | 133 | 19,321 | 4,329 | 2,797 | 26,580 |
| 37,559 | 133 | 19,173 | 4,286 | 2,756 | 26,348 |

|        |     |        |       |       |        |
|--------|-----|--------|-------|-------|--------|
| 37,560 | 144 | 19,932 | 4,473 | 2,843 | 27,392 |
| 37,561 | 145 | 19,919 | 4,463 | 2,834 | 27,361 |
| 37,562 | 143 | 19,711 | 4,438 | 2,796 | 27,088 |
| 37,563 | 151 | 19,991 | 4,477 | 2,822 | 27,441 |
| 37,564 | 161 | 19,837 | 4,393 | 2,790 | 27,181 |
| 37,565 | 165 | 19,910 | 4,363 | 2,775 | 27,213 |
| 37,566 | 164 | 19,754 | 4,318 | 2,748 | 26,984 |
| 37,567 | 168 | 20,007 | 4,368 | 2,760 | 27,303 |
| 37,568 | 172 | 20,160 | 4,395 | 2,762 | 27,489 |
| 37,569 | 167 | 20,049 | 4,295 | 2,708 | 27,219 |
| 37,570 | 174 | 20,025 | 4,215 | 2,668 | 27,082 |
| 37,571 | 181 | 20,205 | 4,249 | 2,666 | 27,301 |
| 37,572 | 175 | 20,212 | 4,224 | 2,663 | 27,274 |
| 37,573 | 174 | 20,205 | 4,200 | 2,662 | 27,241 |
| 37,574 | 181 | 20,227 | 4,197 | 2,665 | 27,270 |
| 37,575 | 183 | 20,235 | 4,161 | 2,651 | 27,230 |
| 37,576 | 190 | 20,249 | 4,149 | 2,642 | 27,230 |
| 37,577 | 194 | 20,020 | 4,082 | 2,630 | 26,926 |
| 37,578 | 194 | 20,049 | 4,086 | 2,625 | 26,954 |
| 37,579 | 202 | 20,242 | 4,111 | 2,639 | 27,194 |
| 37,580 | 203 | 19,826 | 4,054 | 2,603 | 26,686 |
| 37,581 | 206 | 19,833 | 4,066 | 2,602 | 26,707 |
| 37,582 | 212 | 19,580 | 4,022 | 2,562 | 26,376 |
| 37,583 | 212 | 19,486 | 3,992 | 2,532 | 26,222 |
| 37,584 | 213 | 20,066 | 4,137 | 2,611 | 27,027 |
| 37,585 | 217 | 20,073 | 4,174 | 2,630 | 27,094 |
| 37,586 | 213 | 19,954 | 4,129 | 2,593 | 26,889 |
| 37,587 | 220 | 20,052 | 4,147 | 2,608 | 27,027 |
| 37,588 | 226 | 20,154 | 4,134 | 2,596 | 27,110 |
| 37,589 | 226 | 20,175 | 4,141 | 2,605 | 27,147 |
| 37,590 | 229 | 20,513 | 4,188 | 2,617 | 27,547 |
| 37,591 | 223 | 20,406 | 4,164 | 2,601 | 27,394 |

|        |     |        |       |       |        |
|--------|-----|--------|-------|-------|--------|
| 37,592 | 217 | 19,904 | 4,022 | 2,504 | 26,647 |
| 37,593 | 222 | 20,197 | 4,084 | 2,536 | 27,039 |
| 37,594 | 225 | 20,414 | 4,139 | 2,562 | 27,340 |
| 37,595 | 226 | 20,402 | 4,122 | 2,564 | 27,314 |
| 37,596 | 219 | 20,723 | 4,208 | 2,604 | 27,754 |
| 37,597 | 217 | 20,489 | 4,143 | 2,588 | 27,437 |
| 37,598 | 218 | 20,580 | 4,145 | 2,590 | 27,533 |
| 37,599 | 211 | 20,692 | 4,171 | 2,621 | 27,695 |
| 37,600 | 211 | 20,716 | 4,178 | 2,632 | 27,737 |
| 37,601 | 211 | 20,673 | 4,184 | 2,629 | 27,697 |
| 37,602 | 210 | 20,875 | 4,233 | 2,655 | 27,973 |
| 37,603 | 215 | 20,760 | 4,235 | 2,655 | 27,865 |
| 37,604 | 217 | 20,745 | 4,232 | 2,629 | 27,823 |
| 37,605 | 222 | 20,801 | 4,252 | 2,633 | 27,908 |
| 37,606 | 221 | 20,847 | 4,269 | 2,643 | 27,980 |
| 37,607 | 217 | 21,058 | 4,309 | 2,674 | 28,258 |
| 37,608 | 219 | 21,108 | 4,304 | 2,689 | 28,320 |
| 37,609 | 223 | 21,053 | 4,275 | 2,693 | 28,244 |
| 37,610 | 224 | 21,310 | 4,314 | 2,726 | 28,574 |
| 37,611 | 221 | 21,333 | 4,300 | 2,728 | 28,582 |
| 37,612 | 230 | 21,104 | 4,278 | 2,726 | 28,338 |
| 37,613 | 231 | 21,092 | 4,281 | 2,735 | 28,339 |
| 37,614 | 223 | 21,149 | 4,301 | 2,763 | 28,436 |
| 37,615 | 215 | 21,077 | 4,302 | 2,759 | 28,353 |
| 37,616 | 214 | 20,970 | 4,266 | 2,763 | 28,213 |
| 37,617 | 212 | 20,836 | 4,221 | 2,719 | 27,988 |
| 37,618 | 213 | 20,901 | 4,234 | 2,720 | 28,068 |
| 37,619 | 211 | 20,682 | 4,228 | 2,726 | 27,847 |
| 37,620 | 209 | 20,658 | 4,242 | 2,723 | 27,832 |
| 37,621 | 201 | 20,702 | 4,252 | 2,731 | 27,886 |
| 37,622 | 199 | 20,591 | 4,263 | 2,743 | 27,796 |
| 37,623 | 198 | 20,549 | 4,270 | 2,742 | 27,759 |



|        |     |        |       |       |        |
|--------|-----|--------|-------|-------|--------|
| 37,624 | 195 | 20,718 | 4,332 | 2,754 | 27,999 |
| 37,625 | 194 | 20,528 | 4,296 | 2,717 | 27,735 |
| 37,626 | 188 | 20,474 | 4,312 | 2,710 | 27,684 |
| 37,627 | 188 | 20,600 | 4,348 | 2,711 | 27,847 |
| 37,628 | 183 | 20,588 | 4,386 | 2,734 | 27,891 |
| 37,629 | 182 | 20,772 | 4,414 | 2,782 | 28,150 |
| 37,630 | 172 | 20,591 | 4,373 | 2,763 | 27,899 |
| 37,631 | 175 | 20,710 | 4,383 | 2,766 | 28,034 |
| 37,632 | 169 | 20,838 | 4,403 | 2,789 | 28,199 |
| 37,633 | 171 | 21,048 | 4,460 | 2,823 | 28,502 |
| 37,634 | 174 | 20,963 | 4,435 | 2,801 | 28,373 |
| 37,635 | 169 | 20,972 | 4,412 | 2,799 | 28,352 |
| 37,636 | 171 | 20,936 | 4,410 | 2,793 | 28,310 |
| 37,637 | 171 | 20,939 | 4,419 | 2,803 | 28,332 |
| 37,638 | 170 | 21,077 | 4,497 | 2,844 | 28,588 |
| 37,639 | 163 | 20,791 | 4,466 | 2,819 | 28,239 |
| 37,640 | 165 | 20,894 | 4,480 | 2,840 | 28,379 |
| 37,641 | 162 | 20,910 | 4,484 | 2,841 | 28,397 |
| 37,642 | 162 | 20,719 | 4,444 | 2,832 | 28,157 |
| 37,643 | 165 | 20,812 | 4,494 | 2,874 | 28,345 |
| 37,644 | 162 | 20,857 | 4,507 | 2,897 | 28,423 |
| 37,645 | 158 | 20,923 | 4,523 | 2,889 | 28,493 |
| 37,646 | 162 | 21,026 | 4,563 | 2,922 | 28,673 |
| 37,647 | 171 | 20,861 | 4,516 | 2,899 | 28,447 |
| 37,648 | 168 | 20,736 | 4,494 | 2,884 | 28,282 |
| 37,649 | 171 | 20,892 | 4,525 | 2,902 | 28,490 |
| 37,650 | 172 | 20,848 | 4,505 | 2,885 | 28,410 |
| 37,651 | 171 | 20,937 | 4,526 | 2,902 | 28,536 |
| 37,652 | 175 | 21,156 | 4,563 | 2,958 | 28,852 |
| 37,653 | 174 | 21,116 | 4,545 | 2,965 | 28,800 |
| 37,654 | 163 | 20,856 | 4,487 | 2,925 | 28,431 |
| 37,655 | 163 | 20,889 | 4,485 | 2,935 | 28,472 |

|        |     |        |       |       |        |
|--------|-----|--------|-------|-------|--------|
| 37,656 | 156 | 20,925 | 4,484 | 2,931 | 28,496 |
| 37,657 | 160 | 21,195 | 4,538 | 2,977 | 28,870 |
| 37,658 | 160 | 21,122 | 4,545 | 2,963 | 28,790 |
| 37,659 | 162 | 21,121 | 4,543 | 2,942 | 28,768 |
| 37,660 | 160 | 20,913 | 4,519 | 2,943 | 28,535 |
| 37,661 | 160 | 20,861 | 4,516 | 2,952 | 28,489 |
| 37,662 | 156 | 20,683 | 4,487 | 2,951 | 28,277 |
| 37,663 | 156 | 20,820 | 4,486 | 2,934 | 28,396 |
| 37,664 | 156 | 20,788 | 4,465 | 2,919 | 28,328 |
| 37,665 | 157 | 20,824 | 4,482 | 2,919 | 28,382 |
| 37,666 | 154 | 20,546 | 4,452 | 2,911 | 28,063 |
| 37,667 | 154 | 20,624 | 4,494 | 2,933 | 28,205 |
| 37,668 | 150 | 20,702 | 4,524 | 2,959 | 28,335 |
| 37,669 | 150 | 20,451 | 4,488 | 2,946 | 28,035 |
| 37,670 | 150 | 20,521 | 4,502 | 2,940 | 28,113 |
| 37,671 | 148 | 20,822 | 4,541 | 3,003 | 28,514 |
| 37,672 | 143 | 20,715 | 4,524 | 2,995 | 28,377 |
| 37,673 | 145 | 20,562 | 4,471 | 2,953 | 28,131 |
| 37,674 | 147 | 20,709 | 4,480 | 2,971 | 28,307 |
| 37,675 | 144 | 20,656 | 4,490 | 2,976 | 28,266 |
| 37,676 | 142 | 20,707 | 4,524 | 3,011 | 28,384 |
| 37,677 | 140 | 20,844 | 4,568 | 3,030 | 28,582 |
| 37,678 | 139 | 20,763 | 4,516 | 3,009 | 28,427 |
| 37,679 | 138 | 20,665 | 4,522 | 2,998 | 28,323 |
| 37,680 | 140 | 20,636 | 4,541 | 3,001 | 28,318 |
| 37,681 | 139 | 20,301 | 4,507 | 2,967 | 27,914 |
| 37,682 | 139 | 20,502 | 4,586 | 3,042 | 28,269 |
| 37,683 | 139 | 20,301 | 4,590 | 3,051 | 28,081 |
| 37,684 | 137 | 20,104 | 4,551 | 3,028 | 27,820 |
| 37,685 | 134 | 20,173 | 4,551 | 3,023 | 27,881 |
| 37,686 | 133 | 20,279 | 4,577 | 3,041 | 28,030 |
| 37,687 | 133 | 20,107 | 4,496 | 3,018 | 27,754 |

|        |     |        |       |       |        |
|--------|-----|--------|-------|-------|--------|
| 37,688 | 132 | 20,281 | 4,543 | 3,032 | 27,988 |
| 37,689 | 129 | 20,316 | 4,528 | 3,024 | 27,997 |
| 37,690 | 128 | 20,247 | 4,511 | 3,016 | 27,902 |
| 37,691 | 138 | 20,316 | 4,561 | 3,034 | 28,049 |
| 37,692 | 149 | 20,318 | 4,595 | 3,036 | 28,098 |
| 37,693 | 155 | 20,124 | 4,577 | 3,014 | 27,870 |
| 37,694 | 154 | 20,153 | 4,557 | 2,990 | 27,854 |
| 37,695 | 164 | 20,029 | 4,508 | 2,962 | 27,663 |
| 37,696 | 167 | 19,851 | 4,492 | 2,957 | 27,467 |
| 37,697 | 165 | 19,800 | 4,470 | 2,929 | 27,364 |
| 37,698 | 160 | 19,731 | 4,448 | 2,919 | 27,258 |
| 37,699 | 156 | 19,416 | 4,392 | 2,864 | 26,828 |
| 37,700 | 158 | 19,446 | 4,402 | 2,864 | 26,870 |
| 37,701 | 155 | 19,410 | 4,427 | 2,868 | 26,860 |
| 37,702 | 157 | 19,611 | 4,455 | 2,876 | 27,099 |
| 37,703 | 154 | 19,434 | 4,410 | 2,847 | 26,845 |
| 37,704 | 156 | 19,563 | 4,445 | 2,844 | 27,008 |
| 37,705 | 156 | 19,498 | 4,448 | 2,846 | 26,948 |
| 37,706 | 162 | 19,415 | 4,450 | 2,855 | 26,882 |
| 37,707 | 162 | 19,549 | 4,494 | 2,880 | 27,085 |
| 37,708 | 162 | 19,360 | 4,448 | 2,857 | 26,827 |
| 37,709 | 160 | 19,211 | 4,403 | 2,861 | 26,635 |
| 37,710 | 155 | 19,545 | 4,481 | 2,912 | 27,093 |
| 37,711 | 153 | 19,509 | 4,450 | 2,876 | 26,988 |
| 37,712 | 155 | 19,577 | 4,460 | 2,875 | 27,067 |
| 37,713 | 153 | 19,435 | 4,454 | 2,840 | 26,882 |
| 37,714 | 157 | 19,645 | 4,496 | 2,860 | 27,158 |
| 37,715 | 158 | 19,365 | 4,450 | 2,818 | 26,791 |
| 37,716 | 156 | 19,393 | 4,460 | 2,834 | 26,843 |
| 37,717 | 162 | 19,220 | 4,403 | 2,789 | 26,574 |
| 37,718 | 160 | 19,080 | 4,364 | 2,753 | 26,357 |
| 37,719 | 163 | 19,531 | 4,538 | 2,819 | 27,051 |

|        |     |        |       |       |        |
|--------|-----|--------|-------|-------|--------|
| 37,720 | 168 | 19,676 | 4,580 | 2,847 | 27,271 |
| 37,721 | 176 | 19,438 | 4,567 | 2,809 | 26,990 |
| 37,722 | 176 | 19,213 | 4,533 | 2,789 | 26,711 |
| 37,723 | 182 | 19,365 | 4,555 | 2,789 | 26,891 |
| 37,724 | 181 | 19,094 | 4,513 | 2,764 | 26,552 |
| 37,725 | 181 | 19,056 | 4,525 | 2,758 | 26,520 |
| 37,726 | 182 | 18,892 | 4,477 | 2,720 | 26,271 |
| 37,727 | 182 | 18,563 | 4,421 | 2,697 | 25,863 |
| 37,728 | 196 | 19,342 | 4,629 | 2,831 | 26,998 |
| 37,729 | 205 | 19,248 | 4,619 | 2,824 | 26,896 |
| 37,730 | 202 | 18,978 | 4,530 | 2,755 | 26,465 |
| 37,731 | 206 | 19,169 | 4,596 | 2,781 | 26,752 |
| 37,732 | 203 | 19,229 | 4,588 | 2,795 | 26,815 |
| 37,733 | 209 | 18,974 | 4,524 | 2,713 | 26,420 |
| 37,734 | 229 | 19,314 | 4,577 | 2,741 | 26,861 |
| 37,735 | 226 | 19,350 | 4,586 | 2,747 | 26,909 |
| 37,736 | 233 | 19,628 | 4,710 | 2,790 | 27,361 |
| 37,737 | 234 | 19,554 | 4,719 | 2,792 | 27,299 |
| 37,738 | 238 | 19,331 | 4,684 | 2,766 | 27,019 |
| 37,739 | 241 | 19,488 | 4,716 | 2,789 | 27,234 |
| 37,740 | 237 | 19,473 | 4,706 | 2,785 | 27,201 |
| 37,741 | 236 | 18,982 | 4,580 | 2,709 | 26,507 |
| 37,742 | 235 | 19,013 | 4,568 | 2,711 | 26,527 |
| 37,743 | 226 | 18,931 | 4,534 | 2,705 | 26,396 |
| 37,744 | 218 | 18,848 | 4,491 | 2,701 | 26,258 |
| 37,745 | 226 | 19,715 | 4,674 | 2,823 | 27,438 |
| 37,746 | 218 | 19,897 | 4,749 | 2,829 | 27,693 |
| 37,747 | 209 | 19,664 | 4,718 | 2,818 | 27,409 |
| 37,748 | 208 | 19,638 | 4,714 | 2,817 | 27,377 |
| 37,749 | 209 | 19,685 | 4,713 | 2,802 | 27,409 |
| 37,750 | 208 | 19,837 | 4,732 | 2,810 | 27,587 |
| 37,751 | 212 | 19,931 | 4,713 | 2,824 | 27,680 |

|        |     |        |       |       |        |
|--------|-----|--------|-------|-------|--------|
| 37,752 | 215 | 19,921 | 4,713 | 2,822 | 27,671 |
| 37,753 | 213 | 19,602 | 4,665 | 2,797 | 27,277 |
| 37,754 | 216 | 20,035 | 4,788 | 2,866 | 27,905 |
| 37,755 | 218 | 20,067 | 4,797 | 2,879 | 27,961 |
| 37,756 | 212 | 19,998 | 4,759 | 2,861 | 27,830 |
| 37,757 | 213 | 20,352 | 4,825 | 2,882 | 28,272 |
| 37,758 | 210 | 20,161 | 4,780 | 2,839 | 27,990 |
| 37,759 | 215 | 20,396 | 4,782 | 2,875 | 28,268 |
| 37,760 | 213 | 20,100 | 4,744 | 2,833 | 27,890 |
| 37,761 | 212 | 20,105 | 4,767 | 2,843 | 27,927 |
| 37,762 | 212 | 20,156 | 4,796 | 2,837 | 28,001 |
| 37,763 | 209 | 20,335 | 4,855 | 2,863 | 28,262 |
| 37,764 | 201 | 20,367 | 4,866 | 2,890 | 28,324 |
| 37,765 | 201 | 20,411 | 4,881 | 2,917 | 28,410 |
| 37,766 | 198 | 20,308 | 4,830 | 2,903 | 28,239 |
| 37,767 | 200 | 20,496 | 4,854 | 2,919 | 28,469 |
| 37,768 | 196 | 20,429 | 4,816 | 2,919 | 28,360 |
| 37,769 | 195 | 20,487 | 4,813 | 2,929 | 28,424 |
| 37,770 | 191 | 20,647 | 4,812 | 2,954 | 28,604 |
| 37,771 | 179 | 20,048 | 4,641 | 2,851 | 27,719 |
| 37,772 | 180 | 20,183 | 4,661 | 2,873 | 27,897 |
| 37,773 | 174 | 20,380 | 4,698 | 2,906 | 28,158 |
| 37,774 | 173 | 20,174 | 4,621 | 2,835 | 27,803 |
| 37,775 | 174 | 20,327 | 4,656 | 2,850 | 28,007 |
| 37,776 | 172 | 20,469 | 4,679 | 2,876 | 28,196 |
| 37,777 | 175 | 20,467 | 4,647 | 2,845 | 28,134 |
| 37,778 | 174 | 20,521 | 4,678 | 2,866 | 28,239 |
| 37,779 | 164 | 20,730 | 4,701 | 2,899 | 28,494 |
| 37,780 | 151 | 20,546 | 4,635 | 2,875 | 28,207 |
| 37,781 | 148 | 20,624 | 4,639 | 2,874 | 28,285 |
| 37,782 | 148 | 20,873 | 4,664 | 2,894 | 28,579 |
| 37,783 | 137 | 20,365 | 4,560 | 2,829 | 27,891 |

|        |     |        |       |       |        |
|--------|-----|--------|-------|-------|--------|
| 37,784 | 136 | 20,498 | 4,563 | 2,842 | 28,039 |
| 37,785 | 120 | 20,667 | 4,579 | 2,862 | 28,228 |
| 37,786 | 116 | 20,583 | 4,538 | 2,874 | 28,111 |
| 37,787 | 119 | 20,341 | 4,464 | 2,823 | 27,747 |
| 37,788 | 116 | 20,386 | 4,478 | 2,819 | 27,799 |
| 37,789 | 117 | 20,503 | 4,478 | 2,815 | 27,913 |
| 37,790 | 113 | 20,296 | 4,396 | 2,772 | 27,577 |
| 37,791 | 115 | 20,420 | 4,411 | 2,789 | 27,735 |
| 37,792 | 111 | 20,472 | 4,396 | 2,786 | 27,765 |
| 37,793 | 113 | 20,643 | 4,438 | 2,830 | 28,024 |
| 37,794 | 110 | 20,519 | 4,427 | 2,812 | 27,868 |
| 37,795 | 114 | 20,459 | 4,438 | 2,804 | 27,815 |
| 37,796 | 111 | 20,406 | 4,422 | 2,806 | 27,745 |
| 37,797 | 115 | 20,403 | 4,382 | 2,791 | 27,691 |
| 37,798 | 115 | 20,376 | 4,367 | 2,801 | 27,659 |
| 37,799 | 114 | 20,414 | 4,380 | 2,806 | 27,714 |
| 37,800 | 119 | 20,463 | 4,378 | 2,821 | 27,781 |
| 37,801 | 120 | 20,615 | 4,421 | 2,874 | 28,030 |
| 37,802 | 120 | 20,545 | 4,455 | 2,890 | 28,010 |
| 37,803 | 115 | 20,684 | 4,482 | 2,906 | 28,187 |
| 37,804 | 118 | 20,678 | 4,457 | 2,888 | 28,141 |
| 37,805 | 118 | 20,732 | 4,466 | 2,891 | 28,207 |
| 37,806 | 116 | 20,694 | 4,451 | 2,890 | 28,151 |
| 37,807 | 120 | 20,990 | 4,503 | 2,923 | 28,536 |
| 37,808 | 118 | 20,818 | 4,468 | 2,898 | 28,302 |
| 37,809 | 117 | 21,014 | 4,503 | 2,928 | 28,562 |
| 37,810 | 112 | 20,975 | 4,500 | 2,918 | 28,505 |
| 37,811 | 113 | 20,941 | 4,509 | 2,911 | 28,474 |
| 37,812 | 115 | 21,118 | 4,541 | 2,939 | 28,713 |
| 37,813 | 114 | 21,212 | 4,529 | 2,948 | 28,803 |
| 37,814 | 114 | 21,065 | 4,513 | 2,934 | 28,626 |
| 37,815 | 119 | 21,113 | 4,528 | 2,932 | 28,692 |

|        |     |        |       |       |        |
|--------|-----|--------|-------|-------|--------|
| 37,816 | 116 | 21,158 | 4,510 | 2,926 | 28,710 |
| 37,817 | 120 | 21,003 | 4,477 | 2,873 | 28,473 |
| 37,818 | 124 | 21,204 | 4,531 | 2,899 | 28,758 |
| 37,819 | 128 | 20,988 | 4,509 | 2,863 | 28,488 |
| 37,820 | 128 | 21,040 | 4,514 | 2,868 | 28,550 |
| 37,821 | 134 | 21,099 | 4,546 | 2,885 | 28,664 |
| 37,822 | 146 | 21,190 | 4,601 | 2,885 | 28,822 |
| 37,823 | 146 | 21,147 | 4,603 | 2,877 | 28,773 |
| 37,824 | 148 | 21,360 | 4,665 | 2,905 | 29,078 |
| 37,825 | 147 | 21,178 | 4,651 | 2,915 | 28,891 |
| 37,826 | 151 | 21,186 | 4,650 | 2,920 | 28,907 |
| 37,827 | 151 | 21,512 | 4,703 | 2,967 | 29,333 |
| 37,828 | 148 | 21,360 | 4,668 | 2,930 | 29,106 |
| 37,829 | 148 | 21,389 | 4,661 | 2,947 | 29,145 |
| 37,830 | 151 | 21,326 | 4,663 | 2,955 | 29,095 |
| 37,831 | 152 | 21,475 | 4,724 | 2,978 | 29,329 |
| 37,832 | 153 | 21,535 | 4,756 | 2,991 | 29,435 |
| 37,833 | 154 | 21,316 | 4,733 | 2,978 | 29,181 |
| 37,834 | 158 | 21,314 | 4,750 | 3,002 | 29,224 |
| 37,835 | 157 | 21,014 | 4,718 | 2,975 | 28,864 |
| 37,836 | 162 | 21,268 | 4,809 | 3,063 | 29,302 |
| 37,837 | 165 | 21,139 | 4,832 | 3,051 | 29,187 |
| 37,838 | 158 | 20,959 | 4,803 | 3,073 | 28,993 |
| 37,839 | 157 | 20,969 | 4,762 | 3,066 | 28,954 |
| 37,840 | 153 | 20,649 | 4,728 | 3,054 | 28,584 |
| 37,841 | 153 | 20,668 | 4,734 | 3,071 | 28,626 |
| 37,842 | 151 | 20,694 | 4,747 | 3,084 | 28,676 |
| 37,843 | 149 | 20,596 | 4,755 | 3,083 | 28,583 |
| 37,844 | 153 | 20,904 | 4,840 | 3,110 | 29,007 |
| 37,845 | 148 | 20,707 | 4,796 | 3,088 | 28,739 |
| 37,846 | 152 | 20,822 | 4,856 | 3,126 | 28,956 |
| 37,847 | 152 | 20,811 | 4,859 | 3,147 | 28,969 |

|        |     |        |       |       |        |
|--------|-----|--------|-------|-------|--------|
| 37,848 | 147 | 21,101 | 4,982 | 3,221 | 29,451 |
| 37,849 | 147 | 20,763 | 4,926 | 3,156 | 28,992 |
| 37,850 | 147 | 20,891 | 4,998 | 3,171 | 29,207 |
| 37,851 | 138 | 21,097 | 5,045 | 3,216 | 29,496 |
| 37,852 | 136 | 21,109 | 5,052 | 3,208 | 29,505 |
| 37,853 | 132 | 20,865 | 4,992 | 3,162 | 29,151 |
| 37,854 | 136 | 20,710 | 4,965 | 3,139 | 28,950 |
| 37,855 | 136 | 20,745 | 4,970 | 3,142 | 28,993 |
| 37,856 | 137 | 20,742 | 4,956 | 3,125 | 28,960 |
| 37,857 | 134 | 20,531 | 4,895 | 3,102 | 28,662 |
| 37,858 | 137 | 20,693 | 4,965 | 3,132 | 28,927 |
| 37,859 | 138 | 20,419 | 4,935 | 3,135 | 28,627 |
| 37,860 | 146 | 20,654 | 5,029 | 3,173 | 29,002 |
| 37,861 | 152 | 20,591 | 5,023 | 3,179 | 28,945 |
| 37,862 | 153 | 20,490 | 4,987 | 3,168 | 28,798 |
| 37,863 | 163 | 20,741 | 5,054 | 3,205 | 29,163 |
| 37,864 | 163 | 20,334 | 4,973 | 3,171 | 28,641 |
| 37,865 | 164 | 20,416 | 4,986 | 3,161 | 28,727 |
| 37,866 | 161 | 20,278 | 4,994 | 3,159 | 28,592 |
| 37,867 | 161 | 20,236 | 5,004 | 3,164 | 28,565 |
| 37,868 | 157 | 20,157 | 4,984 | 3,184 | 28,482 |
| 37,869 | 149 | 20,166 | 4,985 | 3,197 | 28,497 |
| 37,870 | 148 | 20,177 | 4,997 | 3,208 | 28,530 |
| 37,871 | 146 | 20,096 | 4,972 | 3,188 | 28,402 |
| 37,872 | 142 | 20,278 | 5,027 | 3,233 | 28,680 |
| 37,873 | 132 | 20,489 | 5,090 | 3,289 | 29,000 |
| 37,874 | 136 | 20,447 | 5,074 | 3,286 | 28,943 |
| 37,875 | 135 | 20,412 | 5,088 | 3,295 | 28,930 |
| 37,876 | 131 | 20,578 | 5,142 | 3,335 | 29,186 |
| 37,877 | 126 | 20,340 | 5,100 | 3,304 | 28,870 |
| 37,878 | 126 | 20,152 | 5,076 | 3,273 | 28,627 |
| 37,879 | 126 | 19,989 | 5,046 | 3,263 | 28,424 |



|        |     |        |       |       |        |
|--------|-----|--------|-------|-------|--------|
| 37,880 | 127 | 20,739 | 5,242 | 3,380 | 29,488 |
| 37,881 | 129 | 20,793 | 5,272 | 3,403 | 29,597 |
| 37,882 | 127 | 20,450 | 5,163 | 3,355 | 29,095 |
| 37,883 | 126 | 20,519 | 5,209 | 3,381 | 29,235 |
| 37,884 | 122 | 20,624 | 5,254 | 3,406 | 29,406 |
| 37,885 | 121 | 20,686 | 5,267 | 3,386 | 29,460 |
| 37,886 | 125 | 20,624 | 5,224 | 3,352 | 29,325 |
| 37,887 | 121 | 20,662 | 5,183 | 3,317 | 29,283 |
| 37,888 | 120 | 20,807 | 5,169 | 3,321 | 29,417 |
| 37,889 | 126 | 21,066 | 5,217 | 3,351 | 29,760 |
| 37,890 | 126 | 21,147 | 5,247 | 3,358 | 29,878 |
| 37,891 | 124 | 21,186 | 5,247 | 3,337 | 29,894 |
| 37,892 | 124 | 21,278 | 5,278 | 3,337 | 30,017 |
| 37,893 | 125 | 21,382 | 5,278 | 3,355 | 30,140 |
| 37,894 | 127 | 21,468 | 5,309 | 3,373 | 30,277 |
| 37,895 | 119 | 21,312 | 5,328 | 3,360 | 30,119 |
| 37,896 | 120 | 21,431 | 5,339 | 3,408 | 30,298 |
| 37,897 | 120 | 21,414 | 5,356 | 3,396 | 30,286 |
| 37,898 | 121 | 21,590 | 5,421 | 3,396 | 30,528 |
| 37,899 | 129 | 21,659 | 5,410 | 3,395 | 30,593 |
| 37,900 | 139 | 21,580 | 5,380 | 3,381 | 30,480 |
| 37,901 | 139 | 21,634 | 5,366 | 3,396 | 30,535 |
| 37,902 | 143 | 21,581 | 5,383 | 3,394 | 30,501 |
| 37,903 | 145 | 21,634 | 5,397 | 3,384 | 30,560 |
| 37,904 | 147 | 21,702 | 5,461 | 3,443 | 30,753 |
| 37,905 | 147 | 21,681 | 5,474 | 3,449 | 30,751 |
| 37,906 | 145 | 21,679 | 5,520 | 3,483 | 30,827 |
| 37,907 | 143 | 21,722 | 5,581 | 3,506 | 30,952 |
| 37,908 | 141 | 21,945 | 5,621 | 3,535 | 31,242 |
| 37,909 | 140 | 21,936 | 5,656 | 3,532 | 31,264 |
| 37,910 | 139 | 22,261 | 5,725 | 3,565 | 31,690 |
| 37,911 | 132 | 22,466 | 5,723 | 3,582 | 31,903 |

|        |     |        |       |       |        |
|--------|-----|--------|-------|-------|--------|
| 37,912 | 127 | 22,590 | 5,770 | 3,583 | 32,070 |
| 37,913 | 123 | 22,612 | 5,769 | 3,575 | 32,079 |
| 37,914 | 113 | 22,519 | 5,713 | 3,561 | 31,906 |
| 37,915 | 119 | 22,871 | 5,765 | 3,606 | 32,361 |
| 37,916 | 116 | 22,591 | 5,672 | 3,570 | 31,949 |
| 37,917 | 116 | 22,971 | 5,744 | 3,637 | 32,468 |
| 37,918 | 118 | 23,345 | 5,845 | 3,694 | 33,002 |
| 37,919 | 117 | 23,357 | 5,853 | 3,714 | 33,041 |
| 37,920 | 117 | 23,377 | 5,857 | 3,710 | 33,061 |
| 37,921 | 115 | 23,272 | 5,824 | 3,705 | 32,916 |
| 37,922 | 115 | 23,473 | 5,853 | 3,763 | 33,204 |
| 37,923 | 115 | 23,408 | 5,869 | 3,757 | 33,149 |
| 37,924 | 117 | 23,359 | 5,874 | 3,739 | 33,089 |
| 37,925 | 112 | 23,199 | 5,820 | 3,715 | 32,846 |
| 37,926 | 113 | 23,432 | 5,864 | 3,747 | 33,156 |
| 37,927 | 113 | 23,505 | 5,848 | 3,749 | 33,215 |
| 37,928 | 113 | 23,660 | 5,839 | 3,757 | 33,369 |
| 37,929 | 110 | 23,385 | 5,773 | 3,721 | 32,989 |
| 37,930 | 111 | 23,219 | 5,754 | 3,696 | 32,780 |
| 37,931 | 109 | 23,155 | 5,758 | 3,683 | 32,705 |
| 37,932 | 110 | 23,050 | 5,760 | 3,661 | 32,581 |
| 37,933 | 110 | 22,954 | 5,750 | 3,656 | 32,470 |
| 37,934 | 105 | 22,139 | 5,525 | 3,519 | 31,288 |
| 37,935 | 105 | 22,280 | 5,577 | 3,535 | 31,497 |
| 37,936 | 108 | 22,577 | 5,654 | 3,584 | 31,923 |
| 37,937 | 106 | 22,618 | 5,682 | 3,585 | 31,991 |
| 37,938 | 109 | 22,652 | 5,719 | 3,626 | 32,106 |
| 37,939 | 109 | 22,527 | 5,728 | 3,629 | 31,993 |
| 37,940 | 104 | 22,716 | 5,771 | 3,631 | 32,222 |
| 37,941 | 102 | 22,635 | 5,790 | 3,650 | 32,177 |
| 37,942 | 101 | 22,436 | 5,755 | 3,648 | 31,940 |
| 37,943 | 101 | 22,311 | 5,746 | 3,656 | 31,814 |

|        |     |        |       |       |        |
|--------|-----|--------|-------|-------|--------|
| 37,944 | 101 | 22,340 | 5,761 | 3,646 | 31,848 |
| 37,945 | 99  | 22,224 | 5,720 | 3,626 | 31,669 |
| 37,946 | 99  | 21,948 | 5,666 | 3,601 | 31,314 |
| 37,947 | 97  | 22,131 | 5,717 | 3,605 | 31,550 |
| 37,948 | 102 | 22,029 | 5,673 | 3,583 | 31,387 |
| 37,949 | 98  | 22,093 | 5,658 | 3,590 | 31,439 |
| 37,950 | 91  | 22,053 | 5,638 | 3,577 | 31,359 |
| 37,951 | 82  | 21,911 | 5,644 | 3,582 | 31,219 |
| 37,952 | 75  | 21,487 | 5,540 | 3,544 | 30,646 |
| 37,953 | 76  | 21,617 | 5,576 | 3,563 | 30,832 |
| 37,954 | 74  | 21,966 | 5,625 | 3,612 | 31,277 |
| 37,955 | 77  | 21,947 | 5,603 | 3,575 | 31,202 |
| 37,956 | 74  | 21,761 | 5,549 | 3,547 | 30,931 |
| 37,957 | 75  | 21,793 | 5,544 | 3,548 | 30,960 |
| 37,958 | 75  | 21,751 | 5,501 | 3,538 | 30,865 |
| 37,959 | 74  | 21,741 | 5,483 | 3,542 | 30,840 |
| 37,960 | 77  | 21,302 | 5,357 | 3,495 | 30,231 |
| 37,961 | 78  | 21,402 | 5,350 | 3,495 | 30,325 |
| 37,962 | 81  | 21,055 | 5,260 | 3,440 | 29,836 |
| 37,963 | 81  | 21,009 | 5,256 | 3,437 | 29,783 |
| 37,964 | 81  | 20,872 | 5,240 | 3,433 | 29,626 |
| 37,965 | 82  | 21,072 | 5,322 | 3,463 | 29,939 |
| 37,966 | 82  | 20,792 | 5,253 | 3,405 | 29,532 |
| 37,967 | 87  | 20,917 | 5,335 | 3,454 | 29,793 |
| 37,968 | 89  | 20,990 | 5,339 | 3,454 | 29,872 |
| 37,969 | 89  | 20,956 | 5,321 | 3,449 | 29,815 |
| 37,970 | 95  | 20,508 | 5,201 | 3,346 | 29,150 |
| 37,971 | 97  | 20,835 | 5,292 | 3,380 | 29,604 |
| 37,972 | 96  | 20,909 | 5,296 | 3,380 | 29,681 |
| 37,973 | 96  | 20,821 | 5,318 | 3,392 | 29,627 |
| 37,974 | 95  | 20,911 | 5,319 | 3,406 | 29,731 |
| 37,975 | 96  | 21,024 | 5,325 | 3,424 | 29,869 |

|        |     |        |       |       |        |
|--------|-----|--------|-------|-------|--------|
| 37,976 | 99  | 21,362 | 5,369 | 3,461 | 30,291 |
| 37,977 | 102 | 21,391 | 5,433 | 3,466 | 30,392 |
| 37,978 | 103 | 21,370 | 5,433 | 3,457 | 30,363 |
| 37,979 | 103 | 21,318 | 5,415 | 3,438 | 30,274 |
| 37,980 | 105 | 21,564 | 5,475 | 3,491 | 30,635 |
| 37,981 | 105 | 21,642 | 5,427 | 3,495 | 30,669 |
| 37,982 | 102 | 21,478 | 5,348 | 3,436 | 30,364 |
| 37,983 | 103 | 21,699 | 5,404 | 3,471 | 30,677 |
| 37,984 | 103 | 21,942 | 5,467 | 3,501 | 31,013 |
| 37,985 | 105 | 21,831 | 5,435 | 3,493 | 30,864 |
| 37,986 | 109 | 22,159 | 5,467 | 3,521 | 31,256 |
| 37,987 | 105 | 22,294 | 5,451 | 3,520 | 31,370 |
| 37,988 | 100 | 22,083 | 5,389 | 3,501 | 31,073 |
| 37,989 | 107 | 22,382 | 5,500 | 3,536 | 31,525 |
| 37,990 | 110 | 22,014 | 5,391 | 3,456 | 30,971 |
| 37,991 | 110 | 22,365 | 5,440 | 3,487 | 31,402 |
| 37,992 | 113 | 22,705 | 5,499 | 3,532 | 31,849 |
| 37,993 | 113 | 22,551 | 5,449 | 3,494 | 31,607 |
| 37,994 | 114 | 22,792 | 5,489 | 3,501 | 31,896 |
| 37,995 | 116 | 23,005 | 5,565 | 3,555 | 32,241 |
| 37,996 | 114 | 22,912 | 5,510 | 3,529 | 32,065 |
| 37,997 | 113 | 23,053 | 5,455 | 3,512 | 32,133 |
| 37,998 | 113 | 23,173 | 5,478 | 3,544 | 32,308 |
| 37,999 | 106 | 23,478 | 5,543 | 3,571 | 32,698 |
| 38,000 | 106 | 23,271 | 5,482 | 3,536 | 32,395 |
| 38,001 | 109 | 23,244 | 5,489 | 3,536 | 32,378 |
| 38,002 | 112 | 23,399 | 5,462 | 3,542 | 32,515 |
| 38,003 | 112 | 23,221 | 5,387 | 3,516 | 32,236 |
| 38,004 | 112 | 23,253 | 5,385 | 3,510 | 32,260 |
| 38,005 | 111 | 23,414 | 5,420 | 3,528 | 32,473 |
| 38,006 | 109 | 23,134 | 5,354 | 3,501 | 32,098 |
| 38,007 | 115 | 23,422 | 5,406 | 3,524 | 32,467 |

|        |     |        |       |       |        |
|--------|-----|--------|-------|-------|--------|
| 38,008 | 114 | 23,327 | 5,391 | 3,496 | 32,328 |
| 38,009 | 120 | 23,498 | 5,448 | 3,502 | 32,568 |
| 38,010 | 116 | 23,584 | 5,447 | 3,492 | 32,639 |
| 38,011 | 118 | 23,643 | 5,449 | 3,473 | 32,683 |
| 38,012 | 116 | 23,445 | 5,411 | 3,465 | 32,437 |
| 38,013 | 118 | 24,220 | 5,571 | 3,582 | 33,491 |
| 38,014 | 118 | 24,529 | 5,647 | 3,633 | 33,927 |
| 38,015 | 119 | 23,961 | 5,541 | 3,566 | 33,187 |
| 38,016 | 118 | 24,021 | 5,579 | 3,594 | 33,312 |
| 38,017 | 112 | 24,036 | 5,612 | 3,626 | 33,386 |
| 38,018 | 109 | 24,071 | 5,592 | 3,602 | 33,374 |
| 38,019 | 108 | 23,956 | 5,560 | 3,575 | 33,199 |
| 38,020 | 105 | 23,554 | 5,496 | 3,529 | 32,684 |
| 38,021 | 99  | 23,442 | 5,505 | 3,543 | 32,589 |
| 38,022 | 98  | 23,421 | 5,508 | 3,516 | 32,543 |
| 38,023 | 100 | 23,634 | 5,546 | 3,569 | 32,849 |
| 38,024 | 101 | 23,659 | 5,566 | 3,567 | 32,893 |
| 38,025 | 98  | 23,675 | 5,550 | 3,555 | 32,878 |
| 38,026 | 101 | 23,633 | 5,571 | 3,546 | 32,851 |
| 38,027 | 103 | 23,306 | 5,510 | 3,507 | 32,426 |
| 38,028 | 102 | 23,433 | 5,505 | 3,502 | 32,542 |
| 38,029 | 102 | 23,462 | 5,481 | 3,501 | 32,546 |
| 38,030 | 106 | 22,876 | 5,362 | 3,413 | 31,757 |
| 38,031 | 108 | 23,080 | 5,439 | 3,430 | 32,057 |
| 38,032 | 111 | 23,403 | 5,511 | 3,469 | 32,494 |
| 38,033 | 110 | 23,372 | 5,515 | 3,465 | 32,462 |
| 38,034 | 108 | 23,800 | 5,596 | 3,501 | 33,005 |
| 38,035 | 114 | 23,802 | 5,583 | 3,505 | 33,004 |
| 38,036 | 110 | 23,565 | 5,518 | 3,461 | 32,654 |
| 38,037 | 107 | 24,087 | 5,690 | 3,537 | 33,421 |
| 38,038 | 108 | 23,717 | 5,656 | 3,497 | 32,978 |
| 38,039 | 109 | 24,132 | 5,726 | 3,559 | 33,526 |

|        |     |        |       |       |        |
|--------|-----|--------|-------|-------|--------|
| 38,040 | 103 | 23,868 | 5,645 | 3,536 | 33,152 |
| 38,041 | 100 | 23,742 | 5,672 | 3,558 | 33,072 |
| 38,042 | 102 | 23,564 | 5,709 | 3,585 | 32,960 |
| 38,043 | 101 | 23,649 | 5,765 | 3,616 | 33,131 |
| 38,044 | 101 | 23,761 | 5,763 | 3,613 | 33,238 |
| 38,045 | 100 | 23,800 | 5,771 | 3,638 | 33,309 |
| 38,046 | 108 | 23,845 | 5,802 | 3,638 | 33,393 |
| 38,047 | 111 | 23,628 | 5,764 | 3,621 | 33,124 |
| 38,048 | 113 | 23,735 | 5,816 | 3,655 | 33,319 |
| 38,049 | 116 | 23,563 | 5,771 | 3,631 | 33,081 |
| 38,050 | 117 | 23,507 | 5,781 | 3,644 | 33,049 |
| 38,051 | 118 | 23,580 | 5,799 | 3,648 | 33,145 |
| 38,052 | 123 | 23,818 | 5,848 | 3,694 | 33,483 |
| 38,053 | 124 | 23,732 | 5,870 | 3,691 | 33,417 |
| 38,054 | 127 | 23,548 | 5,855 | 3,663 | 33,193 |
| 38,055 | 127 | 23,582 | 5,840 | 3,653 | 33,202 |
| 38,056 | 127 | 23,494 | 5,850 | 3,625 | 33,096 |
| 38,057 | 126 | 23,388 | 5,844 | 3,613 | 32,971 |
| 38,058 | 125 | 23,323 | 5,869 | 3,619 | 32,936 |
| 38,059 | 127 | 23,240 | 5,915 | 3,631 | 32,913 |
| 38,060 | 123 | 23,162 | 5,896 | 3,644 | 32,825 |
| 38,061 | 133 | 23,112 | 5,918 | 3,664 | 32,827 |
| 38,062 | 136 | 23,010 | 5,916 | 3,687 | 32,749 |
| 38,063 | 142 | 22,980 | 5,934 | 3,657 | 32,713 |
| 38,064 | 143 | 22,954 | 5,951 | 3,647 | 32,695 |
| 38,065 | 144 | 22,712 | 5,868 | 3,649 | 32,373 |
| 38,066 | 147 | 22,938 | 5,871 | 3,641 | 32,597 |
| 38,067 | 154 | 23,223 | 5,898 | 3,617 | 32,892 |
| 38,068 | 163 | 23,213 | 5,912 | 3,603 | 32,891 |
| 38,069 | 162 | 23,315 | 5,904 | 3,601 | 32,982 |
| 38,070 | 164 | 23,255 | 5,877 | 3,609 | 32,905 |
| 38,071 | 168 | 23,491 | 5,922 | 3,610 | 33,191 |

|        |     |        |       |       |        |
|--------|-----|--------|-------|-------|--------|
| 38,072 | 171 | 23,328 | 5,858 | 3,595 | 32,952 |
| 38,073 | 176 | 23,344 | 5,803 | 3,580 | 32,903 |
| 38,074 | 176 | 23,242 | 5,796 | 3,536 | 32,750 |
| 38,075 | 178 | 23,283 | 5,773 | 3,516 | 32,750 |
| 38,076 | 174 | 23,259 | 5,755 | 3,513 | 32,701 |
| 38,077 | 174 | 23,247 | 5,748 | 3,500 | 32,669 |
| 38,078 | 168 | 23,263 | 5,757 | 3,510 | 32,698 |
| 38,079 | 168 | 23,399 | 5,843 | 3,568 | 32,978 |
| 38,080 | 170 | 23,231 | 5,821 | 3,563 | 32,785 |
| 38,081 | 167 | 23,102 | 5,765 | 3,537 | 32,571 |
| 38,082 | 168 | 23,322 | 5,790 | 3,581 | 32,861 |
| 38,083 | 170 | 23,394 | 5,806 | 3,593 | 32,963 |
| 38,084 | 170 | 23,401 | 5,782 | 3,576 | 32,929 |
| 38,085 | 178 | 23,559 | 5,837 | 3,616 | 33,190 |
| 38,086 | 183 | 23,357 | 5,782 | 3,605 | 32,927 |
| 38,087 | 184 | 23,100 | 5,749 | 3,592 | 32,625 |
| 38,088 | 183 | 23,248 | 5,773 | 3,634 | 32,838 |
| 38,089 | 184 | 23,208 | 5,758 | 3,610 | 32,760 |
| 38,090 | 183 | 23,402 | 5,798 | 3,635 | 33,018 |
| 38,091 | 183 | 23,563 | 5,781 | 3,622 | 33,149 |
| 38,092 | 184 | 23,488 | 5,726 | 3,567 | 32,965 |
| 38,093 | 182 | 23,450 | 5,676 | 3,539 | 32,847 |
| 38,094 | 183 | 23,605 | 5,674 | 3,556 | 33,018 |
| 38,095 | 182 | 23,337 | 5,642 | 3,551 | 32,712 |
| 38,096 | 182 | 23,401 | 5,606 | 3,523 | 32,712 |
| 38,097 | 173 | 23,104 | 5,526 | 3,469 | 32,272 |
| 38,098 | 171 | 23,058 | 5,539 | 3,454 | 32,222 |
| 38,099 | 167 | 23,110 | 5,563 | 3,472 | 32,312 |
| 38,100 | 164 | 22,784 | 5,473 | 3,406 | 31,827 |
| 38,101 | 165 | 22,995 | 5,499 | 3,421 | 32,080 |
| 38,102 | 157 | 22,993 | 5,476 | 3,426 | 32,052 |
| 38,103 | 158 | 23,154 | 5,510 | 3,430 | 32,252 |

|        |     |        |       |       |        |
|--------|-----|--------|-------|-------|--------|
| 38,104 | 155 | 23,256 | 5,520 | 3,448 | 32,379 |
| 38,105 | 152 | 23,134 | 5,496 | 3,415 | 32,197 |
| 38,106 | 150 | 22,861 | 5,427 | 3,388 | 31,826 |
| 38,107 | 152 | 22,859 | 5,437 | 3,405 | 31,853 |
| 38,108 | 148 | 22,823 | 5,365 | 3,395 | 31,731 |
| 38,109 | 149 | 22,910 | 5,313 | 3,367 | 31,739 |
| 38,110 | 151 | 23,150 | 5,350 | 3,384 | 32,035 |
| 38,111 | 145 | 22,889 | 5,230 | 3,307 | 31,571 |
| 38,112 | 144 | 22,862 | 5,242 | 3,298 | 31,546 |
| 38,113 | 143 | 23,072 | 5,284 | 3,323 | 31,822 |
| 38,114 | 138 | 22,921 | 5,222 | 3,300 | 31,581 |
| 38,115 | 133 | 22,462 | 5,112 | 3,257 | 30,964 |
| 38,116 | 131 | 22,339 | 5,118 | 3,216 | 30,804 |
| 38,117 | 130 | 22,215 | 5,105 | 3,220 | 30,670 |
| 38,118 | 124 | 22,331 | 5,118 | 3,260 | 30,833 |
| 38,119 | 115 | 22,180 | 5,056 | 3,234 | 30,585 |
| 38,120 | 115 | 22,216 | 5,051 | 3,224 | 30,606 |
| 38,121 | 121 | 22,379 | 5,114 | 3,237 | 30,851 |
| 38,122 | 113 | 22,113 | 5,063 | 3,212 | 30,501 |
| 38,123 | 112 | 22,067 | 5,049 | 3,212 | 30,440 |
| 38,124 | 112 | 22,002 | 5,058 | 3,232 | 30,404 |
| 38,125 | 109 | 21,985 | 5,063 | 3,252 | 30,409 |
| 38,126 | 107 | 21,900 | 5,081 | 3,270 | 30,358 |
| 38,127 | 107 | 21,705 | 5,042 | 3,255 | 30,109 |
| 38,128 | 112 | 21,838 | 5,067 | 3,292 | 30,309 |
| 38,129 | 118 | 21,838 | 5,055 | 3,288 | 30,299 |
| 38,130 | 118 | 21,539 | 4,960 | 3,225 | 29,842 |
| 38,131 | 118 | 21,591 | 4,973 | 3,230 | 29,912 |
| 38,132 | 115 | 21,436 | 4,960 | 3,217 | 29,728 |
| 38,133 | 109 | 21,297 | 4,941 | 3,185 | 29,532 |
| 38,134 | 108 | 21,480 | 4,977 | 3,206 | 29,771 |
| 38,135 | 106 | 21,416 | 4,955 | 3,213 | 29,690 |



|        |     |        |       |       |        |
|--------|-----|--------|-------|-------|--------|
| 38,136 | 98  | 21,392 | 4,951 | 3,203 | 29,644 |
| 38,137 | 91  | 20,956 | 4,882 | 3,133 | 29,062 |
| 38,138 | 90  | 20,717 | 4,829 | 3,094 | 28,730 |
| 38,139 | 90  | 21,376 | 4,989 | 3,164 | 29,619 |
| 38,140 | 91  | 21,395 | 4,971 | 3,169 | 29,626 |
| 38,141 | 91  | 21,355 | 4,976 | 3,154 | 29,576 |
| 38,142 | 96  | 21,259 | 4,973 | 3,139 | 29,467 |
| 38,143 | 92  | 21,078 | 4,932 | 3,106 | 29,208 |
| 38,144 | 100 | 21,214 | 4,975 | 3,110 | 29,399 |
| 38,145 | 100 | 21,276 | 4,980 | 3,093 | 29,449 |
| 38,146 | 100 | 21,222 | 5,017 | 3,101 | 29,440 |
| 38,147 | 103 | 21,443 | 5,095 | 3,163 | 29,804 |
| 38,148 | 103 | 21,243 | 5,040 | 3,163 | 29,549 |
| 38,149 | 104 | 21,312 | 5,070 | 3,160 | 29,646 |
| 38,150 | 112 | 21,249 | 5,035 | 3,150 | 29,546 |
| 38,151 | 112 | 21,128 | 5,017 | 3,145 | 29,402 |
| 38,152 | 112 | 20,935 | 4,990 | 3,126 | 29,163 |
| 38,153 | 114 | 21,000 | 5,019 | 3,138 | 29,271 |
| 38,154 | 113 | 21,066 | 5,078 | 3,177 | 29,434 |
| 38,155 | 113 | 21,063 | 5,076 | 3,170 | 29,422 |
| 38,156 | 113 | 21,180 | 5,151 | 3,233 | 29,677 |
| 38,157 | 109 | 20,945 | 5,098 | 3,203 | 29,355 |
| 38,158 | 110 | 20,833 | 5,139 | 3,191 | 29,273 |
| 38,159 | 111 | 20,847 | 5,156 | 3,219 | 29,333 |
| 38,160 | 110 | 21,092 | 5,208 | 3,253 | 29,663 |
| 38,161 | 109 | 21,144 | 5,225 | 3,276 | 29,754 |
| 38,162 | 100 | 20,819 | 5,134 | 3,228 | 29,281 |
| 38,163 | 102 | 21,021 | 5,180 | 3,240 | 29,543 |
| 38,164 | 101 | 21,205 | 5,225 | 3,254 | 29,785 |
| 38,165 | 98  | 20,981 | 5,181 | 3,220 | 29,480 |
| 38,166 | 105 | 21,101 | 5,190 | 3,207 | 29,603 |
| 38,167 | 104 | 20,936 | 5,145 | 3,178 | 29,363 |

|        |     |        |       |       |        |
|--------|-----|--------|-------|-------|--------|
| 38,168 | 102 | 20,859 | 5,127 | 3,173 | 29,261 |
| 38,169 | 104 | 20,677 | 5,082 | 3,143 | 29,006 |
| 38,170 | 112 | 20,797 | 5,141 | 3,175 | 29,225 |
| 38,171 | 106 | 20,826 | 5,140 | 3,192 | 29,264 |
| 38,172 | 109 | 21,019 | 5,168 | 3,201 | 29,497 |
| 38,173 | 109 | 20,925 | 5,145 | 3,191 | 29,370 |
| 38,174 | 107 | 20,989 | 5,192 | 3,211 | 29,499 |
| 38,175 | 104 | 21,447 | 5,261 | 3,262 | 30,074 |
| 38,176 | 109 | 21,308 | 5,167 | 3,212 | 29,796 |
| 38,177 | 109 | 21,410 | 5,196 | 3,229 | 29,944 |
| 38,178 | 106 | 21,727 | 5,244 | 3,250 | 30,327 |
| 38,179 | 103 | 21,719 | 5,227 | 3,224 | 30,273 |
| 38,180 | 95  | 21,456 | 5,142 | 3,197 | 29,890 |
| 38,181 | 101 | 21,392 | 5,129 | 3,186 | 29,808 |
| 38,182 | 101 | 21,286 | 5,091 | 3,166 | 29,644 |
| 38,183 | 101 | 21,702 | 5,179 | 3,238 | 30,220 |
| 38,184 | 112 | 21,425 | 5,116 | 3,194 | 29,847 |
| 38,185 | 112 | 21,119 | 5,063 | 3,157 | 29,451 |
| 38,186 | 119 | 21,200 | 5,078 | 3,161 | 29,558 |
| 38,187 | 125 | 20,845 | 5,013 | 3,118 | 29,101 |
| 38,188 | 124 | 20,624 | 4,933 | 3,107 | 28,788 |
| 38,189 | 127 | 21,244 | 5,066 | 3,176 | 29,613 |
| 38,190 | 133 | 20,936 | 4,995 | 3,146 | 29,210 |
| 38,191 | 133 | 20,760 | 4,964 | 3,110 | 28,967 |
| 38,192 | 141 | 21,027 | 5,004 | 3,123 | 29,295 |
| 38,193 | 143 | 20,911 | 5,009 | 3,123 | 29,186 |
| 38,194 | 139 | 20,883 | 4,976 | 3,116 | 29,114 |
| 38,195 | 146 | 20,962 | 4,991 | 3,154 | 29,253 |
| 38,196 | 148 | 20,948 | 4,978 | 3,162 | 29,236 |
| 38,197 | 155 | 21,088 | 5,004 | 3,159 | 29,406 |
| 38,198 | 153 | 20,992 | 4,920 | 3,130 | 29,195 |
| 38,199 | 156 | 21,079 | 4,935 | 3,108 | 29,278 |

|        |     |        |       |       |        |
|--------|-----|--------|-------|-------|--------|
| 38,200 | 157 | 20,966 | 4,924 | 3,102 | 29,149 |
| 38,201 | 148 | 20,884 | 4,913 | 3,094 | 29,039 |
| 38,202 | 152 | 20,886 | 4,954 | 3,124 | 29,116 |
| 38,203 | 152 | 20,752 | 4,930 | 3,098 | 28,932 |
| 38,204 | 153 | 20,696 | 4,908 | 3,105 | 28,862 |
| 38,205 | 155 | 20,690 | 4,906 | 3,100 | 28,851 |
| 38,206 | 156 | 20,986 | 4,922 | 3,128 | 29,192 |
| 38,207 | 161 | 21,138 | 4,901 | 3,124 | 29,324 |
| 38,208 | 163 | 21,281 | 4,881 | 3,133 | 29,458 |
| 38,209 | 163 | 21,082 | 4,830 | 3,096 | 29,171 |
| 38,210 | 167 | 21,027 | 4,860 | 3,111 | 29,165 |
| 38,211 | 171 | 21,091 | 4,875 | 3,130 | 29,267 |
| 38,212 | 171 | 20,848 | 4,815 | 3,091 | 28,925 |
| 38,213 | 174 | 20,857 | 4,829 | 3,095 | 28,955 |
| 38,214 | 172 | 20,609 | 4,772 | 3,070 | 28,623 |
| 38,215 | 176 | 20,558 | 4,756 | 3,060 | 28,550 |
| 38,216 | 171 | 20,451 | 4,746 | 3,057 | 28,425 |
| 38,217 | 171 | 20,404 | 4,756 | 3,066 | 28,397 |
| 38,218 | 172 | 20,340 | 4,736 | 3,061 | 28,309 |
| 38,219 | 171 | 20,369 | 4,740 | 3,070 | 28,350 |
| 38,220 | 170 | 20,235 | 4,723 | 3,057 | 28,185 |
| 38,221 | 167 | 20,468 | 4,792 | 3,099 | 28,526 |
| 38,222 | 166 | 20,305 | 4,794 | 3,107 | 28,372 |
| 38,223 | 161 | 20,195 | 4,785 | 3,120 | 28,261 |
| 38,224 | 161 | 20,127 | 4,788 | 3,130 | 28,206 |
| 38,225 | 171 | 20,189 | 4,795 | 3,100 | 28,255 |
| 38,226 | 172 | 20,060 | 4,774 | 3,057 | 28,063 |
| 38,227 | 167 | 19,841 | 4,732 | 3,026 | 27,766 |
| 38,228 | 168 | 19,953 | 4,726 | 3,025 | 27,872 |
| 38,229 | 170 | 19,963 | 4,767 | 3,051 | 27,951 |
| 38,230 | 173 | 20,227 | 4,811 | 3,095 | 28,306 |
| 38,231 | 177 | 20,156 | 4,836 | 3,101 | 28,270 |

|        |     |        |       |       |        |
|--------|-----|--------|-------|-------|--------|
| 38,232 | 170 | 20,027 | 4,801 | 3,076 | 28,074 |
| 38,233 | 179 | 19,815 | 4,765 | 3,035 | 27,794 |
| 38,234 | 179 | 19,650 | 4,711 | 3,020 | 27,560 |
| 38,235 | 172 | 19,847 | 4,827 | 3,116 | 27,962 |
| 38,236 | 173 | 19,783 | 4,815 | 3,104 | 27,875 |
| 38,237 | 170 | 19,798 | 4,811 | 3,116 | 27,895 |
| 38,238 | 163 | 20,002 | 4,806 | 3,103 | 28,074 |
| 38,239 | 164 | 19,947 | 4,774 | 3,101 | 27,986 |
| 38,240 | 163 | 19,954 | 4,759 | 3,106 | 27,982 |
| 38,241 | 151 | 20,134 | 4,848 | 3,147 | 28,280 |
| 38,242 | 147 | 20,052 | 4,815 | 3,157 | 28,171 |
| 38,243 | 142 | 19,743 | 4,729 | 3,132 | 27,746 |
| 38,244 | 143 | 19,714 | 4,724 | 3,138 | 27,719 |
| 38,245 | 141 | 19,689 | 4,719 | 3,134 | 27,683 |
| 38,246 | 132 | 19,630 | 4,701 | 3,113 | 27,576 |
| 38,247 | 135 | 19,876 | 4,769 | 3,145 | 27,925 |
| 38,248 | 133 | 19,619 | 4,720 | 3,122 | 27,594 |
| 38,249 | 132 | 19,495 | 4,722 | 3,111 | 27,460 |
| 38,250 | 134 | 19,993 | 4,826 | 3,178 | 28,131 |
| 38,251 | 134 | 20,156 | 4,858 | 3,180 | 28,328 |
| 38,252 | 135 | 20,159 | 4,869 | 3,182 | 28,345 |
| 38,253 | 131 | 20,152 | 4,862 | 3,167 | 28,312 |
| 38,254 | 127 | 20,320 | 4,871 | 3,197 | 28,515 |
| 38,255 | 135 | 20,523 | 4,931 | 3,222 | 28,811 |
| 38,256 | 136 | 20,540 | 4,916 | 3,208 | 28,800 |
| 38,257 | 136 | 20,484 | 4,908 | 3,195 | 28,723 |
| 38,258 | 129 | 19,572 | 4,719 | 3,058 | 27,478 |
| 38,259 | 135 | 19,920 | 4,765 | 3,084 | 27,904 |
| 38,260 | 136 | 20,238 | 4,815 | 3,130 | 28,319 |
| 38,261 | 135 | 20,292 | 4,811 | 3,130 | 28,368 |
| 38,262 | 137 | 20,552 | 4,917 | 3,202 | 28,808 |
| 38,263 | 136 | 20,530 | 4,929 | 3,198 | 28,793 |

|        |     |        |       |       |        |
|--------|-----|--------|-------|-------|--------|
| 38,264 | 136 | 20,799 | 5,001 | 3,251 | 29,187 |
| 38,265 | 133 | 20,654 | 4,995 | 3,241 | 29,023 |
| 38,266 | 134 | 20,663 | 4,996 | 3,241 | 29,034 |
| 38,267 | 133 | 20,764 | 4,997 | 3,244 | 29,138 |
| 38,268 | 131 | 20,732 | 4,999 | 3,268 | 29,130 |
| 38,269 | 129 | 20,824 | 5,005 | 3,282 | 29,240 |
| 38,270 | 131 | 20,877 | 5,017 | 3,294 | 29,319 |
| 38,271 | 139 | 21,026 | 5,055 | 3,327 | 29,547 |
| 38,272 | 137 | 21,171 | 5,033 | 3,321 | 29,662 |
| 38,273 | 138 | 20,988 | 4,972 | 3,279 | 29,377 |
| 38,274 | 141 | 21,084 | 4,964 | 3,253 | 29,442 |
| 38,275 | 142 | 21,371 | 5,015 | 3,309 | 29,837 |
| 38,276 | 132 | 21,033 | 4,980 | 3,297 | 29,442 |
| 38,277 | 131 | 20,676 | 4,956 | 3,286 | 29,049 |
| 38,278 | 133 | 21,000 | 5,065 | 3,361 | 29,559 |
| 38,279 | 137 | 21,057 | 5,074 | 3,370 | 29,638 |
| 38,280 | 138 | 21,089 | 5,089 | 3,380 | 29,696 |
| 38,281 | 139 | 21,145 | 5,114 | 3,379 | 29,777 |
| 38,282 | 133 | 21,172 | 5,087 | 3,360 | 29,752 |
| 38,283 | 131 | 20,993 | 5,023 | 3,313 | 29,460 |
| 38,284 | 122 | 20,626 | 4,913 | 3,246 | 28,907 |
| 38,285 | 122 | 20,674 | 4,906 | 3,250 | 28,952 |
| 38,286 | 121 | 20,522 | 4,875 | 3,220 | 28,738 |
| 38,287 | 123 | 20,373 | 4,850 | 3,207 | 28,553 |
| 38,288 | 125 | 21,171 | 5,027 | 3,332 | 29,655 |
| 38,289 | 125 | 21,157 | 5,018 | 3,334 | 29,634 |
| 38,290 | 130 | 21,166 | 5,035 | 3,336 | 29,667 |
| 38,291 | 136 | 21,176 | 5,010 | 3,323 | 29,645 |
| 38,292 | 140 | 21,317 | 5,025 | 3,347 | 29,829 |
| 38,293 | 139 | 21,102 | 4,999 | 3,284 | 29,524 |
| 38,294 | 135 | 21,200 | 5,024 | 3,295 | 29,654 |
| 38,295 | 146 | 21,204 | 5,038 | 3,286 | 29,674 |

|        |     |        |       |       |        |
|--------|-----|--------|-------|-------|--------|
| 38,296 | 146 | 21,120 | 5,037 | 3,289 | 29,592 |
| 38,297 | 146 | 21,061 | 5,017 | 3,293 | 29,517 |
| 38,298 | 151 | 21,235 | 5,070 | 3,313 | 29,769 |
| 38,299 | 144 | 21,137 | 5,057 | 3,321 | 29,659 |
| 38,300 | 141 | 20,995 | 5,056 | 3,305 | 29,497 |
| 38,301 | 139 | 20,991 | 5,036 | 3,307 | 29,473 |
| 38,302 | 144 | 21,058 | 5,032 | 3,325 | 29,559 |
| 38,303 | 149 | 20,902 | 4,957 | 3,279 | 29,287 |
| 38,304 | 148 | 20,917 | 4,960 | 3,270 | 29,295 |
| 38,305 | 149 | 20,937 | 4,983 | 3,277 | 29,346 |
| 38,306 | 141 | 20,967 | 5,016 | 3,307 | 29,431 |
| 38,307 | 138 | 20,776 | 4,986 | 3,287 | 29,187 |
| 38,308 | 136 | 20,415 | 4,922 | 3,245 | 28,718 |
| 38,309 | 132 | 20,282 | 4,889 | 3,217 | 28,520 |
| 38,310 | 136 | 20,512 | 4,960 | 3,272 | 28,880 |
| 38,311 | 134 | 20,440 | 4,924 | 3,229 | 28,727 |
| 38,312 | 134 | 20,446 | 4,914 | 3,234 | 28,728 |
| 38,313 | 130 | 20,281 | 4,855 | 3,184 | 28,450 |
| 38,314 | 134 | 20,415 | 4,835 | 3,179 | 28,563 |
| 38,315 | 136 | 20,368 | 4,820 | 3,171 | 28,495 |
| 38,316 | 143 | 20,563 | 4,814 | 3,214 | 28,734 |
| 38,317 | 141 | 20,264 | 4,752 | 3,175 | 28,332 |
| 38,318 | 141 | 20,220 | 4,766 | 3,191 | 28,318 |
| 38,319 | 143 | 20,425 | 4,818 | 3,189 | 28,575 |
| 38,320 | 142 | 20,196 | 4,770 | 3,153 | 28,261 |
| 38,321 | 142 | 20,152 | 4,761 | 3,146 | 28,201 |
| 38,322 | 138 | 20,121 | 4,743 | 3,142 | 28,144 |
| 38,323 | 137 | 19,949 | 4,723 | 3,120 | 27,929 |
| 38,324 | 137 | 19,827 | 4,690 | 3,101 | 27,755 |
| 38,325 | 135 | 19,702 | 4,637 | 3,093 | 27,567 |
| 38,326 | 137 | 19,676 | 4,567 | 3,051 | 27,431 |
| 38,327 | 138 | 19,855 | 4,572 | 3,062 | 27,627 |

|        |     |        |       |       |        |
|--------|-----|--------|-------|-------|--------|
| 38,328 | 138 | 19,799 | 4,530 | 3,033 | 27,500 |
| 38,329 | 138 | 19,969 | 4,586 | 3,068 | 27,761 |
| 38,330 | 134 | 19,645 | 4,538 | 3,011 | 27,328 |
| 38,331 | 134 | 19,868 | 4,568 | 3,029 | 27,599 |
| 38,332 | 139 | 19,849 | 4,553 | 3,030 | 27,571 |
| 38,333 | 143 | 19,795 | 4,543 | 3,031 | 27,512 |
| 38,334 | 140 | 19,567 | 4,497 | 3,006 | 27,210 |
| 38,335 | 144 | 19,361 | 4,450 | 2,954 | 26,909 |
| 38,336 | 144 | 19,232 | 4,430 | 2,925 | 26,731 |
| 38,337 | 143 | 19,408 | 4,456 | 2,945 | 26,952 |
| 38,338 | 140 | 19,248 | 4,371 | 2,914 | 26,673 |
| 38,339 | 140 | 19,255 | 4,370 | 2,907 | 26,672 |
| 38,340 | 135 | 19,393 | 4,408 | 2,916 | 26,852 |
| 38,341 | 134 | 19,192 | 4,348 | 2,877 | 26,551 |
| 38,342 | 134 | 19,080 | 4,355 | 2,879 | 26,448 |
| 38,343 | 134 | 19,212 | 4,382 | 2,881 | 26,609 |
| 38,344 | 136 | 18,847 | 4,280 | 2,820 | 26,083 |
| 38,345 | 137 | 18,932 | 4,312 | 2,833 | 26,214 |
| 38,346 | 129 | 18,992 | 4,302 | 2,846 | 26,269 |
| 38,347 | 129 | 19,126 | 4,332 | 2,862 | 26,449 |
| 38,348 | 128 | 19,146 | 4,333 | 2,844 | 26,451 |
| 38,349 | 129 | 19,116 | 4,293 | 2,811 | 26,349 |
| 38,350 | 129 | 19,059 | 4,320 | 2,807 | 26,315 |
| 38,351 | 128 | 18,927 | 4,282 | 2,786 | 26,123 |
| 38,352 | 124 | 18,922 | 4,256 | 2,774 | 26,076 |
| 38,353 | 126 | 19,057 | 4,313 | 2,830 | 26,326 |
| 38,354 | 123 | 19,085 | 4,314 | 2,846 | 26,368 |
| 38,355 | 127 | 19,367 | 4,368 | 2,882 | 26,744 |
| 38,356 | 128 | 19,208 | 4,343 | 2,869 | 26,548 |
| 38,357 | 128 | 19,364 | 4,385 | 2,915 | 26,792 |
| 38,358 | 127 | 19,365 | 4,369 | 2,895 | 26,756 |
| 38,359 | 129 | 19,662 | 4,455 | 2,930 | 27,176 |

|        |     |        |       |       |        |
|--------|-----|--------|-------|-------|--------|
| 38,360 | 124 | 19,765 | 4,476 | 2,930 | 27,295 |
| 38,361 | 123 | 19,969 | 4,535 | 2,972 | 27,599 |
| 38,362 | 120 | 19,735 | 4,532 | 2,969 | 27,356 |
| 38,363 | 123 | 19,764 | 4,500 | 2,961 | 27,348 |
| 38,364 | 117 | 19,734 | 4,519 | 2,963 | 27,333 |
| 38,365 | 120 | 19,987 | 4,587 | 3,001 | 27,695 |
| 38,366 | 119 | 20,147 | 4,637 | 3,024 | 27,927 |
| 38,367 | 113 | 19,991 | 4,642 | 3,015 | 27,761 |
| 38,368 | 113 | 20,200 | 4,693 | 3,045 | 28,051 |
| 38,369 | 125 | 20,413 | 4,732 | 3,090 | 28,360 |
| 38,370 | 126 | 20,379 | 4,730 | 3,072 | 28,307 |
| 38,371 | 131 | 20,645 | 4,827 | 3,112 | 28,715 |
| 38,372 | 127 | 20,625 | 4,858 | 3,120 | 28,730 |
| 38,373 | 130 | 20,807 | 4,952 | 3,152 | 29,041 |
| 38,374 | 129 | 20,666 | 4,976 | 3,131 | 28,902 |
| 38,375 | 131 | 20,712 | 5,002 | 3,142 | 28,987 |
| 38,376 | 131 | 20,766 | 5,021 | 3,136 | 29,054 |
| 38,377 | 128 | 20,601 | 5,011 | 3,115 | 28,855 |
| 38,378 | 130 | 20,997 | 5,112 | 3,170 | 29,409 |
| 38,379 | 133 | 20,816 | 5,044 | 3,137 | 29,130 |
| 38,380 | 135 | 21,174 | 5,137 | 3,195 | 29,641 |
| 38,381 | 132 | 21,136 | 5,141 | 3,201 | 29,610 |
| 38,382 | 136 | 21,280 | 5,183 | 3,235 | 29,834 |
| 38,383 | 134 | 21,546 | 5,260 | 3,264 | 30,204 |
| 38,384 | 126 | 21,025 | 5,137 | 3,199 | 29,487 |
| 38,385 | 129 | 21,364 | 5,203 | 3,240 | 29,936 |
| 38,386 | 128 | 21,582 | 5,285 | 3,283 | 30,278 |
| 38,387 | 128 | 21,874 | 5,354 | 3,314 | 30,670 |
| 38,388 | 134 | 21,670 | 5,370 | 3,290 | 30,464 |
| 38,389 | 134 | 21,640 | 5,364 | 3,284 | 30,422 |
| 38,390 | 137 | 21,806 | 5,435 | 3,310 | 30,688 |
| 38,391 | 134 | 21,332 | 5,325 | 3,247 | 30,038 |



|        |     |        |       |       |        |
|--------|-----|--------|-------|-------|--------|
| 38,392 | 138 | 21,447 | 5,379 | 3,273 | 30,237 |
| 38,393 | 138 | 21,608 | 5,434 | 3,315 | 30,495 |
| 38,394 | 139 | 21,868 | 5,489 | 3,335 | 30,831 |
| 38,395 | 132 | 21,527 | 5,412 | 3,303 | 30,374 |
| 38,396 | 134 | 21,712 | 5,450 | 3,322 | 30,618 |
| 38,397 | 134 | 21,921 | 5,482 | 3,335 | 30,872 |
| 38,398 | 133 | 21,636 | 5,413 | 3,323 | 30,505 |
| 38,399 | 133 | 21,343 | 5,380 | 3,304 | 30,160 |
| 38,400 | 131 | 21,629 | 5,487 | 3,365 | 30,612 |
| 38,401 | 131 | 21,655 | 5,444 | 3,349 | 30,579 |
| 38,402 | 134 | 21,702 | 5,436 | 3,343 | 30,615 |
| 38,403 | 133 | 21,700 | 5,457 | 3,332 | 30,622 |
| 38,404 | 132 | 21,845 | 5,440 | 3,314 | 30,731 |
| 38,405 | 134 | 21,806 | 5,452 | 3,297 | 30,689 |
| 38,406 | 130 | 21,570 | 5,419 | 3,282 | 30,401 |
| 38,407 | 131 | 21,379 | 5,344 | 3,236 | 30,090 |
| 38,408 | 132 | 21,321 | 5,290 | 3,191 | 29,934 |
| 38,409 | 135 | 21,371 | 5,325 | 3,202 | 30,033 |
| 38,410 | 133 | 21,370 | 5,291 | 3,188 | 29,982 |
| 38,411 | 132 | 21,275 | 5,271 | 3,206 | 29,884 |
| 38,412 | 134 | 21,277 | 5,277 | 3,186 | 29,874 |
| 38,413 | 132 | 21,089 | 5,225 | 3,151 | 29,597 |
| 38,414 | 128 | 21,312 | 5,300 | 3,207 | 29,947 |
| 38,415 | 126 | 21,037 | 5,273 | 3,214 | 29,650 |
| 38,416 | 126 | 21,150 | 5,293 | 3,226 | 29,795 |
| 38,417 | 134 | 20,459 | 5,082 | 3,084 | 28,759 |
| 38,418 | 139 | 20,683 | 5,145 | 3,120 | 29,087 |
| 38,419 | 128 | 20,847 | 5,230 | 3,158 | 29,363 |
| 38,420 | 131 | 20,733 | 5,185 | 3,135 | 29,184 |
| 38,421 | 133 | 20,966 | 5,211 | 3,162 | 29,472 |
| 38,422 | 134 | 21,164 | 5,255 | 3,201 | 29,754 |
| 38,423 | 133 | 20,979 | 5,163 | 3,171 | 29,446 |

|        |     |        |       |       |        |
|--------|-----|--------|-------|-------|--------|
| 38,424 | 131 | 20,958 | 5,098 | 3,158 | 29,345 |
| 38,425 | 134 | 21,069 | 5,084 | 3,147 | 29,434 |
| 38,426 | 134 | 21,089 | 5,106 | 3,130 | 29,459 |
| 38,427 | 135 | 21,128 | 5,139 | 3,140 | 29,542 |
| 38,428 | 135 | 20,776 | 5,089 | 3,097 | 29,097 |
| 38,429 | 136 | 20,945 | 5,120 | 3,118 | 29,319 |
| 38,430 | 131 | 21,084 | 5,166 | 3,130 | 29,511 |
| 38,431 | 132 | 20,793 | 5,070 | 3,085 | 29,080 |
| 38,432 | 128 | 20,489 | 5,017 | 3,053 | 28,687 |
| 38,433 | 125 | 20,735 | 5,115 | 3,082 | 29,057 |
| 38,434 | 123 | 20,698 | 5,092 | 3,096 | 29,009 |
| 38,435 | 120 | 20,743 | 5,106 | 3,116 | 29,085 |
| 38,436 | 116 | 20,800 | 5,113 | 3,106 | 29,135 |
| 38,437 | 122 | 20,573 | 5,005 | 3,064 | 28,764 |
| 38,438 | 126 | 20,705 | 5,030 | 3,101 | 28,962 |
| 38,439 | 124 | 20,861 | 5,068 | 3,136 | 29,189 |
| 38,440 | 128 | 20,814 | 5,035 | 3,133 | 29,110 |
| 38,441 | 131 | 20,627 | 4,973 | 3,101 | 28,832 |
| 38,442 | 139 | 20,902 | 5,023 | 3,145 | 29,209 |
| 38,443 | 137 | 20,936 | 5,018 | 3,141 | 29,232 |
| 38,444 | 141 | 20,946 | 5,017 | 3,116 | 29,220 |
| 38,445 | 144 | 20,792 | 4,981 | 3,094 | 29,011 |
| 38,446 | 149 | 20,825 | 4,998 | 3,085 | 29,057 |
| 38,447 | 147 | 20,681 | 4,960 | 3,075 | 28,863 |
| 38,448 | 148 | 21,191 | 5,046 | 3,132 | 29,517 |
| 38,449 | 150 | 21,199 | 4,977 | 3,101 | 29,427 |
| 38,450 | 152 | 21,130 | 4,975 | 3,096 | 29,353 |
| 38,451 | 153 | 21,347 | 4,999 | 3,124 | 29,623 |
| 38,452 | 153 | 21,079 | 4,968 | 3,105 | 29,305 |
| 38,453 | 151 | 21,035 | 4,962 | 3,132 | 29,280 |
| 38,454 | 151 | 21,121 | 5,005 | 3,157 | 29,434 |
| 38,455 | 150 | 21,114 | 5,016 | 3,164 | 29,444 |

|        |     |        |       |       |        |
|--------|-----|--------|-------|-------|--------|
| 38,456 | 147 | 21,056 | 4,961 | 3,145 | 29,309 |
| 38,457 | 147 | 21,083 | 4,936 | 3,117 | 29,283 |
| 38,458 | 140 | 21,043 | 4,936 | 3,140 | 29,259 |
| 38,459 | 139 | 20,537 | 4,839 | 3,080 | 28,595 |
| 38,460 | 142 | 20,872 | 4,896 | 3,130 | 29,040 |
| 38,461 | 142 | 20,591 | 4,870 | 3,097 | 28,700 |
| 38,462 | 147 | 20,859 | 4,939 | 3,125 | 29,070 |
| 38,463 | 144 | 20,884 | 4,958 | 3,121 | 29,107 |
| 38,464 | 146 | 20,625 | 4,902 | 3,088 | 28,761 |
| 38,465 | 145 | 20,585 | 4,893 | 3,066 | 28,689 |
| 38,466 | 145 | 20,536 | 4,876 | 3,067 | 28,624 |
| 38,467 | 149 | 20,788 | 4,933 | 3,113 | 28,983 |
| 38,468 | 138 | 20,683 | 4,921 | 3,089 | 28,831 |
| 38,469 | 136 | 20,625 | 4,890 | 3,067 | 28,718 |
| 38,470 | 141 | 20,391 | 4,801 | 3,016 | 28,349 |
| 38,471 | 138 | 20,130 | 4,750 | 2,985 | 28,003 |
| 38,472 | 132 | 20,161 | 4,743 | 2,971 | 28,007 |
| 38,473 | 134 | 20,091 | 4,712 | 2,935 | 27,872 |
| 38,474 | 136 | 20,122 | 4,720 | 2,917 | 27,895 |
| 38,475 | 140 | 20,125 | 4,710 | 2,916 | 27,891 |
| 38,476 | 135 | 19,915 | 4,675 | 2,903 | 27,628 |
| 38,477 | 138 | 20,072 | 4,704 | 2,943 | 27,857 |
| 38,478 | 139 | 20,128 | 4,671 | 2,957 | 27,895 |
| 38,479 | 141 | 20,178 | 4,646 | 2,946 | 27,911 |
| 38,480 | 142 | 19,993 | 4,576 | 2,918 | 27,629 |
| 38,481 | 148 | 20,046 | 4,576 | 2,909 | 27,679 |
| 38,482 | 145 | 19,775 | 4,506 | 2,857 | 27,283 |
| 38,483 | 150 | 20,149 | 4,582 | 2,933 | 27,814 |
| 38,484 | 152 | 20,250 | 4,590 | 2,945 | 27,937 |
| 38,485 | 152 | 20,264 | 4,624 | 2,947 | 27,987 |
| 38,486 | 150 | 19,783 | 4,542 | 2,889 | 27,364 |
| 38,487 | 152 | 20,113 | 4,617 | 2,940 | 27,822 |

|        |     |        |       |       |        |
|--------|-----|--------|-------|-------|--------|
| 38,488 | 148 | 20,397 | 4,683 | 2,961 | 28,189 |
| 38,489 | 149 | 20,273 | 4,661 | 2,955 | 28,038 |
| 38,490 | 153 | 20,543 | 4,687 | 2,986 | 28,369 |
| 38,491 | 148 | 20,776 | 4,708 | 3,010 | 28,642 |
| 38,492 | 140 | 20,563 | 4,692 | 2,985 | 28,380 |
| 38,493 | 136 | 20,621 | 4,755 | 2,979 | 28,491 |
| 38,494 | 129 | 20,517 | 4,721 | 2,976 | 28,343 |
| 38,495 | 134 | 20,325 | 4,683 | 2,963 | 28,105 |
| 38,496 | 131 | 20,106 | 4,653 | 2,946 | 27,836 |
| 38,497 | 129 | 20,471 | 4,752 | 3,027 | 28,379 |
| 38,498 | 140 | 20,628 | 4,803 | 3,059 | 28,630 |
| 38,499 | 136 | 20,450 | 4,790 | 3,040 | 28,416 |
| 38,500 | 136 | 20,424 | 4,798 | 3,036 | 28,394 |
| 38,501 | 131 | 20,606 | 4,825 | 3,065 | 28,627 |
| 38,502 | 133 | 20,740 | 4,853 | 3,055 | 28,781 |
| 38,503 | 134 | 20,881 | 4,895 | 3,070 | 28,980 |
| 38,504 | 132 | 20,882 | 4,874 | 3,055 | 28,943 |
| 38,505 | 132 | 20,855 | 4,864 | 3,057 | 28,908 |
| 38,506 | 133 | 20,932 | 4,882 | 3,080 | 29,027 |
| 38,507 | 138 | 20,917 | 4,914 | 3,107 | 29,076 |
| 38,508 | 138 | 21,135 | 4,989 | 3,147 | 29,409 |
| 38,509 | 138 | 21,185 | 5,006 | 3,121 | 29,450 |
| 38,510 | 136 | 21,099 | 5,003 | 3,092 | 29,330 |
| 38,511 | 138 | 20,951 | 4,965 | 3,065 | 29,119 |
| 38,512 | 139 | 21,143 | 4,981 | 3,101 | 29,364 |
| 38,513 | 136 | 21,347 | 4,999 | 3,130 | 29,612 |
| 38,514 | 137 | 21,378 | 4,985 | 3,160 | 29,660 |
| 38,515 | 139 | 21,321 | 4,952 | 3,131 | 29,543 |
| 38,516 | 143 | 21,242 | 4,911 | 3,106 | 29,402 |
| 38,517 | 144 | 21,290 | 4,924 | 3,130 | 29,488 |
| 38,518 | 141 | 21,441 | 4,938 | 3,140 | 29,660 |
| 38,519 | 140 | 21,145 | 4,884 | 3,113 | 29,282 |

|        |     |        |       |       |        |
|--------|-----|--------|-------|-------|--------|
| 38,520 | 138 | 21,123 | 4,871 | 3,103 | 29,235 |
| 38,521 | 137 | 21,088 | 4,859 | 3,099 | 29,183 |
| 38,522 | 140 | 20,987 | 4,832 | 3,080 | 29,039 |
| 38,523 | 140 | 20,873 | 4,812 | 3,079 | 28,904 |
| 38,524 | 140 | 20,954 | 4,816 | 3,101 | 29,011 |
| 38,525 | 155 | 21,283 | 4,877 | 3,152 | 29,467 |
| 38,526 | 151 | 21,078 | 4,877 | 3,134 | 29,240 |
| 38,527 | 151 | 20,970 | 4,870 | 3,131 | 29,122 |
| 38,528 | 151 | 20,911 | 4,864 | 3,148 | 29,074 |
| 38,529 | 159 | 21,190 | 4,961 | 3,189 | 29,499 |
| 38,530 | 156 | 21,181 | 5,006 | 3,199 | 29,542 |
| 38,531 | 153 | 21,238 | 4,990 | 3,210 | 29,591 |
| 38,532 | 144 | 21,204 | 4,971 | 3,217 | 29,536 |
| 38,533 | 151 | 20,928 | 4,930 | 3,183 | 29,192 |
| 38,534 | 153 | 20,800 | 4,899 | 3,127 | 28,979 |
| 38,535 | 159 | 21,049 | 4,941 | 3,169 | 29,318 |
| 38,536 | 159 | 20,992 | 4,937 | 3,163 | 29,251 |
| 38,537 | 162 | 20,611 | 4,838 | 3,102 | 28,713 |
| 38,538 | 160 | 20,740 | 4,852 | 3,113 | 28,865 |
| 38,539 | 156 | 20,699 | 4,877 | 3,123 | 28,855 |
| 38,540 | 161 | 20,785 | 4,902 | 3,133 | 28,981 |
| 38,541 | 157 | 20,741 | 4,904 | 3,126 | 28,928 |
| 38,542 | 162 | 20,761 | 4,880 | 3,110 | 28,913 |
| 38,543 | 161 | 20,805 | 4,858 | 3,115 | 28,939 |
| 38,544 | 160 | 20,800 | 4,843 | 3,121 | 28,924 |
| 38,545 | 162 | 20,769 | 4,840 | 3,132 | 28,903 |
| 38,546 | 156 | 20,719 | 4,843 | 3,119 | 28,837 |
| 38,547 | 155 | 20,908 | 4,825 | 3,105 | 28,993 |
| 38,548 | 157 | 21,170 | 4,894 | 3,135 | 29,356 |
| 38,549 | 149 | 21,016 | 4,876 | 3,111 | 29,152 |
| 38,550 | 151 | 21,010 | 4,861 | 3,107 | 29,129 |
| 38,551 | 159 | 20,946 | 4,860 | 3,097 | 29,062 |

|        |     |        |       |       |        |
|--------|-----|--------|-------|-------|--------|
| 38,552 | 158 | 20,712 | 4,811 | 3,068 | 28,749 |
| 38,553 | 156 | 20,841 | 4,836 | 3,115 | 28,948 |
| 38,554 | 155 | 20,722 | 4,823 | 3,115 | 28,815 |
| 38,555 | 165 | 20,835 | 4,857 | 3,144 | 29,001 |
| 38,556 | 173 | 20,871 | 4,857 | 3,125 | 29,026 |
| 38,557 | 170 | 20,642 | 4,796 | 3,095 | 28,703 |
| 38,558 | 170 | 20,788 | 4,813 | 3,098 | 28,869 |
| 38,559 | 181 | 21,041 | 4,837 | 3,113 | 29,172 |
| 38,560 | 189 | 20,798 | 4,728 | 3,090 | 28,805 |
| 38,561 | 189 | 20,763 | 4,727 | 3,090 | 28,769 |
| 38,562 | 191 | 20,826 | 4,712 | 3,097 | 28,826 |
| 38,563 | 189 | 20,872 | 4,733 | 3,096 | 28,890 |
| 38,564 | 190 | 20,675 | 4,722 | 3,067 | 28,654 |
| 38,565 | 192 | 20,718 | 4,766 | 3,092 | 28,768 |
| 38,566 | 190 | 20,627 | 4,766 | 3,079 | 28,662 |
| 38,567 | 186 | 20,409 | 4,739 | 3,048 | 28,382 |
| 38,568 | 186 | 20,513 | 4,762 | 3,036 | 28,497 |
| 38,569 | 185 | 20,509 | 4,775 | 3,043 | 28,512 |
| 38,570 | 184 | 20,550 | 4,782 | 3,047 | 28,563 |
| 38,571 | 178 | 20,610 | 4,775 | 3,060 | 28,623 |
| 38,572 | 177 | 20,599 | 4,798 | 3,066 | 28,640 |
| 38,573 | 175 | 20,569 | 4,803 | 3,051 | 28,598 |
| 38,574 | 173 | 20,718 | 4,826 | 3,065 | 28,782 |
| 38,575 | 163 | 20,849 | 4,871 | 3,088 | 28,971 |
| 38,576 | 151 | 20,617 | 4,813 | 3,055 | 28,636 |
| 38,577 | 153 | 20,706 | 4,824 | 3,052 | 28,735 |
| 38,578 | 155 | 20,874 | 4,874 | 3,096 | 28,999 |
| 38,579 | 155 | 20,975 | 4,868 | 3,088 | 29,086 |
| 38,580 | 150 | 20,994 | 4,857 | 3,081 | 29,082 |
| 38,581 | 152 | 20,895 | 4,811 | 3,072 | 28,930 |
| 38,582 | 154 | 20,454 | 4,737 | 3,013 | 28,358 |
| 38,583 | 154 | 20,524 | 4,734 | 2,994 | 28,406 |

|        |     |        |       |       |        |
|--------|-----|--------|-------|-------|--------|
| 38,584 | 144 | 20,342 | 4,694 | 2,989 | 28,169 |
| 38,585 | 145 | 20,279 | 4,695 | 2,978 | 28,097 |
| 38,586 | 141 | 20,288 | 4,720 | 3,007 | 28,156 |
| 38,587 | 138 | 20,000 | 4,652 | 2,980 | 27,770 |
| 38,588 | 142 | 19,939 | 4,657 | 2,977 | 27,715 |
| 38,589 | 140 | 19,532 | 4,560 | 2,908 | 27,140 |
| 38,590 | 140 | 19,668 | 4,596 | 2,924 | 27,328 |
| 38,591 | 144 | 19,668 | 4,612 | 2,919 | 27,343 |
| 38,592 | 144 | 19,941 | 4,705 | 2,992 | 27,782 |
| 38,593 | 143 | 19,985 | 4,718 | 3,016 | 27,862 |
| 38,594 | 143 | 20,034 | 4,752 | 3,047 | 27,976 |
| 38,595 | 141 | 20,073 | 4,760 | 3,059 | 28,033 |
| 38,596 | 140 | 20,022 | 4,756 | 3,052 | 27,970 |
| 38,597 | 144 | 20,033 | 4,747 | 3,075 | 27,999 |
| 38,598 | 147 | 20,211 | 4,796 | 3,122 | 28,276 |
| 38,599 | 143 | 19,940 | 4,698 | 3,077 | 27,858 |
| 38,600 | 141 | 19,995 | 4,702 | 3,083 | 27,921 |
| 38,601 | 134 | 20,086 | 4,711 | 3,110 | 28,041 |
| 38,602 | 137 | 20,393 | 4,789 | 3,162 | 28,481 |
| 38,603 | 140 | 20,366 | 4,786 | 3,144 | 28,436 |
| 38,604 | 140 | 20,470 | 4,807 | 3,146 | 28,563 |
| 38,605 | 139 | 20,573 | 4,843 | 3,170 | 28,725 |
| 38,606 | 132 | 20,752 | 4,867 | 3,194 | 28,945 |
| 38,607 | 124 | 20,724 | 4,910 | 3,199 | 28,957 |
| 38,608 | 121 | 20,574 | 4,901 | 3,179 | 28,775 |
| 38,609 | 111 | 20,090 | 4,813 | 3,123 | 28,137 |
| 38,610 | 113 | 20,241 | 4,876 | 3,149 | 28,379 |
| 38,611 | 107 | 20,442 | 4,938 | 3,189 | 28,676 |
| 38,612 | 112 | 20,552 | 4,998 | 3,212 | 28,874 |
| 38,613 | 108 | 20,356 | 5,002 | 3,226 | 28,692 |
| 38,614 | 108 | 20,302 | 4,998 | 3,220 | 28,628 |
| 38,615 | 111 | 20,145 | 4,957 | 3,199 | 28,412 |

|        |     |        |       |       |        |
|--------|-----|--------|-------|-------|--------|
| 38,616 | 109 | 20,135 | 4,944 | 3,181 | 28,369 |
| 38,617 | 112 | 19,764 | 4,835 | 3,124 | 27,835 |
| 38,618 | 112 | 19,895 | 4,867 | 3,138 | 28,012 |
| 38,619 | 118 | 19,751 | 4,844 | 3,127 | 27,840 |
| 38,620 | 118 | 19,575 | 4,807 | 3,121 | 27,621 |
| 38,621 | 127 | 20,675 | 5,110 | 3,323 | 29,235 |
| 38,622 | 130 | 20,764 | 5,082 | 3,329 | 29,305 |
| 38,623 | 127 | 20,549 | 5,047 | 3,307 | 29,030 |
| 38,624 | 129 | 20,755 | 5,118 | 3,347 | 29,349 |
| 38,625 | 139 | 21,032 | 5,201 | 3,397 | 29,769 |
| 38,626 | 138 | 20,619 | 5,091 | 3,342 | 29,190 |
| 38,627 | 139 | 20,848 | 5,179 | 3,388 | 29,554 |
| 38,628 | 140 | 21,157 | 5,235 | 3,424 | 29,956 |
| 38,629 | 143 | 21,347 | 5,264 | 3,441 | 30,195 |
| 38,630 | 147 | 21,348 | 5,294 | 3,473 | 30,262 |
| 38,631 | 142 | 21,304 | 5,284 | 3,480 | 30,210 |
| 38,632 | 143 | 21,350 | 5,307 | 3,475 | 30,275 |
| 38,633 | 146 | 21,653 | 5,417 | 3,549 | 30,765 |
| 38,634 | 147 | 21,606 | 5,466 | 3,574 | 30,793 |
| 38,635 | 149 | 21,654 | 5,477 | 3,598 | 30,878 |
| 38,636 | 140 | 21,186 | 5,357 | 3,486 | 30,169 |
| 38,637 | 140 | 21,677 | 5,423 | 3,526 | 30,766 |
| 38,638 | 144 | 21,884 | 5,428 | 3,525 | 30,981 |
| 38,639 | 144 | 22,093 | 5,475 | 3,577 | 31,289 |
| 38,640 | 139 | 22,096 | 5,479 | 3,589 | 31,303 |
| 38,641 | 139 | 21,983 | 5,435 | 3,552 | 31,109 |
| 38,642 | 132 | 22,140 | 5,478 | 3,598 | 31,348 |
| 38,643 | 137 | 22,348 | 5,492 | 3,571 | 31,548 |
| 38,644 | 134 | 22,415 | 5,465 | 3,550 | 31,564 |
| 38,645 | 134 | 22,257 | 5,452 | 3,506 | 31,349 |
| 38,646 | 135 | 22,445 | 5,525 | 3,569 | 31,674 |
| 38,647 | 133 | 22,031 | 5,402 | 3,457 | 31,023 |



|        |     |        |       |       |        |
|--------|-----|--------|-------|-------|--------|
| 38,648 | 136 | 22,127 | 5,454 | 3,487 | 31,204 |
| 38,649 | 136 | 22,011 | 5,459 | 3,483 | 31,089 |
| 38,650 | 135 | 21,888 | 5,463 | 3,481 | 30,967 |
| 38,651 | 135 | 21,741 | 5,459 | 3,484 | 30,819 |
| 38,652 | 135 | 21,801 | 5,478 | 3,486 | 30,900 |
| 38,653 | 134 | 21,671 | 5,440 | 3,479 | 30,724 |
| 38,654 | 131 | 21,479 | 5,377 | 3,426 | 30,413 |
| 38,655 | 134 | 21,612 | 5,355 | 3,437 | 30,538 |
| 38,656 | 134 | 21,677 | 5,363 | 3,433 | 30,607 |
| 38,657 | 142 | 21,980 | 5,424 | 3,472 | 31,018 |
| 38,658 | 144 | 21,998 | 5,370 | 3,470 | 30,982 |
| 38,659 | 136 | 21,710 | 5,302 | 3,427 | 30,575 |
| 38,660 | 140 | 21,926 | 5,343 | 3,457 | 30,866 |
| 38,661 | 138 | 21,684 | 5,292 | 3,422 | 30,536 |
| 38,662 | 152 | 22,114 | 5,360 | 3,464 | 31,090 |
| 38,663 | 147 | 21,922 | 5,301 | 3,429 | 30,799 |
| 38,664 | 150 | 22,515 | 5,373 | 3,485 | 31,523 |
| 38,665 | 146 | 22,118 | 5,249 | 3,429 | 30,942 |
| 38,666 | 147 | 22,339 | 5,295 | 3,450 | 31,231 |
| 38,667 | 142 | 22,480 | 5,353 | 3,457 | 31,432 |
| 38,668 | 136 | 22,391 | 5,364 | 3,456 | 31,347 |
| 38,669 | 130 | 22,198 | 5,293 | 3,427 | 31,048 |
| 38,670 | 130 | 22,379 | 5,280 | 3,430 | 31,219 |
| 38,671 | 140 | 22,715 | 5,334 | 3,468 | 31,657 |
| 38,672 | 142 | 22,476 | 5,288 | 3,453 | 31,359 |
| 38,673 | 142 | 22,444 | 5,285 | 3,441 | 31,312 |
| 38,674 | 141 | 22,057 | 5,197 | 3,367 | 30,762 |
| 38,675 | 141 | 22,276 | 5,228 | 3,397 | 31,042 |
| 38,676 | 134 | 22,644 | 5,263 | 3,452 | 31,493 |
| 38,677 | 134 | 22,699 | 5,257 | 3,448 | 31,538 |
| 38,678 | 133 | 22,925 | 5,313 | 3,477 | 31,848 |
| 38,679 | 132 | 22,905 | 5,331 | 3,501 | 31,869 |

|        |     |        |       |       |        |
|--------|-----|--------|-------|-------|--------|
| 38,680 | 128 | 22,926 | 5,352 | 3,487 | 31,893 |
| 38,681 | 123 | 22,750 | 5,283 | 3,442 | 31,598 |
| 38,682 | 124 | 22,698 | 5,286 | 3,446 | 31,554 |
| 38,683 | 130 | 22,823 | 5,286 | 3,469 | 31,708 |
| 38,684 | 130 | 22,719 | 5,196 | 3,408 | 31,453 |
| 38,685 | 134 | 22,759 | 5,148 | 3,410 | 31,451 |
| 38,686 | 136 | 22,724 | 5,149 | 3,412 | 31,421 |
| 38,687 | 135 | 22,541 | 5,134 | 3,414 | 31,224 |
| 38,688 | 136 | 22,512 | 5,192 | 3,433 | 31,273 |
| 38,689 | 138 | 22,357 | 5,164 | 3,430 | 31,089 |
| 38,690 | 139 | 22,367 | 5,167 | 3,423 | 31,096 |
| 38,691 | 147 | 22,451 | 5,176 | 3,450 | 31,224 |
| 38,692 | 147 | 22,468 | 5,176 | 3,467 | 31,258 |
| 38,693 | 144 | 22,467 | 5,184 | 3,488 | 31,283 |
| 38,694 | 141 | 22,455 | 5,191 | 3,513 | 31,300 |
| 38,695 | 140 | 22,503 | 5,229 | 3,513 | 31,385 |
| 38,696 | 139 | 22,333 | 5,191 | 3,486 | 31,149 |
| 38,697 | 141 | 22,592 | 5,241 | 3,499 | 31,473 |
| 38,698 | 136 | 22,462 | 5,230 | 3,505 | 31,333 |
| 38,699 | 141 | 22,790 | 5,275 | 3,519 | 31,725 |
| 38,700 | 146 | 22,967 | 5,264 | 3,534 | 31,911 |
| 38,701 | 148 | 23,108 | 5,269 | 3,553 | 32,078 |
| 38,702 | 152 | 23,461 | 5,343 | 3,585 | 32,541 |
| 38,703 | 155 | 23,330 | 5,325 | 3,565 | 32,375 |
| 38,704 | 154 | 23,356 | 5,355 | 3,567 | 32,432 |
| 38,705 | 152 | 23,456 | 5,372 | 3,595 | 32,575 |
| 38,706 | 154 | 23,755 | 5,458 | 3,664 | 33,031 |
| 38,707 | 146 | 23,439 | 5,417 | 3,656 | 32,658 |
| 38,708 | 146 | 23,635 | 5,503 | 3,726 | 33,010 |
| 38,709 | 144 | 24,081 | 5,596 | 3,781 | 33,602 |
| 38,710 | 140 | 23,866 | 5,578 | 3,776 | 33,360 |
| 38,711 | 140 | 23,844 | 5,596 | 3,774 | 33,354 |

|        |     |        |       |       |        |
|--------|-----|--------|-------|-------|--------|
| 38,712 | 135 | 24,086 | 5,667 | 3,833 | 33,721 |
| 38,713 | 134 | 24,268 | 5,769 | 3,882 | 34,053 |
| 38,714 | 137 | 24,884 | 5,874 | 3,982 | 34,877 |
| 38,715 | 139 | 24,848 | 5,889 | 3,983 | 34,859 |
| 38,716 | 142 | 24,858 | 5,910 | 3,978 | 34,888 |
| 38,717 | 145 | 25,037 | 5,948 | 3,996 | 35,126 |
| 38,718 | 143 | 24,781 | 5,849 | 3,998 | 34,771 |
| 38,719 | 145 | 24,819 | 5,825 | 3,975 | 34,764 |
| 38,720 | 146 | 24,874 | 5,834 | 3,978 | 34,832 |
| 38,721 | 146 | 24,989 | 5,868 | 3,980 | 34,983 |
| 38,722 | 140 | 24,959 | 5,889 | 3,969 | 34,957 |
| 38,723 | 138 | 24,918 | 5,878 | 3,969 | 34,903 |
| 38,724 | 135 | 24,679 | 5,852 | 3,936 | 34,602 |
| 38,725 | 138 | 24,645 | 5,852 | 3,928 | 34,563 |
| 38,726 | 138 | 24,453 | 5,823 | 3,902 | 34,316 |
| 38,727 | 141 | 24,727 | 5,934 | 3,927 | 34,729 |
| 38,728 | 143 | 24,190 | 5,827 | 3,853 | 34,013 |
| 38,729 | 143 | 24,424 | 5,842 | 3,900 | 34,309 |
| 38,730 | 144 | 24,754 | 5,900 | 3,935 | 34,733 |
| 38,731 | 146 | 24,439 | 5,819 | 3,890 | 34,294 |
| 38,732 | 149 | 24,448 | 5,812 | 3,871 | 34,280 |
| 38,733 | 151 | 24,726 | 5,867 | 3,911 | 34,655 |
| 38,734 | 139 | 24,306 | 5,790 | 3,852 | 34,087 |
| 38,735 | 131 | 23,710 | 5,654 | 3,762 | 33,257 |
| 38,736 | 131 | 24,038 | 5,699 | 3,785 | 33,653 |
| 38,737 | 129 | 24,322 | 5,782 | 3,831 | 34,064 |
| 38,738 | 128 | 23,840 | 5,652 | 3,727 | 33,347 |
| 38,739 | 129 | 24,085 | 5,686 | 3,769 | 33,669 |
| 38,740 | 122 | 24,305 | 5,717 | 3,798 | 33,942 |
| 38,741 | 122 | 24,340 | 5,724 | 3,826 | 34,012 |
| 38,742 | 116 | 24,143 | 5,685 | 3,801 | 33,745 |
| 38,743 | 114 | 23,986 | 5,657 | 3,758 | 33,515 |

|        |     |        |       |       |        |
|--------|-----|--------|-------|-------|--------|
| 38,744 | 114 | 23,898 | 5,691 | 3,775 | 33,478 |
| 38,745 | 115 | 23,712 | 5,650 | 3,740 | 33,217 |
| 38,746 | 116 | 23,336 | 5,548 | 3,716 | 32,716 |
| 38,747 | 116 | 23,325 | 5,558 | 3,715 | 32,714 |
| 38,748 | 119 | 23,224 | 5,515 | 3,700 | 32,558 |
| 38,749 | 117 | 22,996 | 5,478 | 3,674 | 32,265 |
| 38,750 | 117 | 23,100 | 5,491 | 3,700 | 32,408 |
| 38,751 | 112 | 22,631 | 5,438 | 3,627 | 31,808 |
| 38,752 | 112 | 22,644 | 5,442 | 3,629 | 31,827 |
| 38,753 | 108 | 22,269 | 5,401 | 3,601 | 31,379 |
| 38,754 | 118 | 22,507 | 5,423 | 3,625 | 31,673 |
| 38,755 | 125 | 22,323 | 5,413 | 3,593 | 31,454 |
| 38,756 | 128 | 22,557 | 5,458 | 3,615 | 31,758 |
| 38,757 | 129 | 22,203 | 5,423 | 3,560 | 31,315 |
| 38,758 | 131 | 21,977 | 5,358 | 3,487 | 30,953 |
| 38,759 | 132 | 22,100 | 5,396 | 3,505 | 31,133 |
| 38,760 | 134 | 21,584 | 5,302 | 3,443 | 30,463 |
| 38,761 | 138 | 21,098 | 5,121 | 3,315 | 29,672 |
| 38,762 | 138 | 21,169 | 5,138 | 3,327 | 29,772 |
| 38,763 | 132 | 21,265 | 5,171 | 3,353 | 29,921 |
| 38,764 | 133 | 21,482 | 5,186 | 3,362 | 30,163 |
| 38,765 | 140 | 20,893 | 5,111 | 3,269 | 29,413 |
| 38,766 | 135 | 20,640 | 5,035 | 3,211 | 29,021 |
| 38,767 | 134 | 20,547 | 4,987 | 3,198 | 28,866 |
| 38,768 | 130 | 20,207 | 4,970 | 3,170 | 28,477 |
| 38,769 | 130 | 20,232 | 4,974 | 3,170 | 28,506 |
| 38,770 | 132 | 20,148 | 4,982 | 3,165 | 28,427 |
| 38,771 | 131 | 20,299 | 5,017 | 3,195 | 28,642 |
| 38,772 | 128 | 20,295 | 5,005 | 3,185 | 28,613 |
| 38,773 | 132 | 20,261 | 5,000 | 3,197 | 28,590 |
| 38,774 | 131 | 20,293 | 5,000 | 3,166 | 28,590 |
| 38,775 | 135 | 20,260 | 5,004 | 3,166 | 28,565 |

|        |     |        |       |       |        |
|--------|-----|--------|-------|-------|--------|
| 38,776 | 127 | 20,021 | 4,962 | 3,139 | 28,249 |
| 38,777 | 126 | 20,440 | 5,063 | 3,220 | 28,849 |
| 38,778 | 126 | 20,428 | 5,055 | 3,222 | 28,831 |
| 38,779 | 127 | 20,545 | 5,121 | 3,227 | 29,020 |
| 38,780 | 127 | 20,765 | 5,182 | 3,239 | 29,313 |
| 38,781 | 132 | 20,688 | 5,213 | 3,246 | 29,279 |
| 38,782 | 132 | 20,669 | 5,201 | 3,256 | 29,258 |
| 38,783 | 128 | 20,654 | 5,232 | 3,281 | 29,295 |
| 38,784 | 131 | 20,706 | 5,243 | 3,299 | 29,379 |
| 38,785 | 133 | 20,375 | 5,197 | 3,280 | 28,985 |
| 38,786 | 130 | 20,233 | 5,178 | 3,253 | 28,794 |
| 38,787 | 132 | 20,536 | 5,252 | 3,308 | 29,228 |
| 38,788 | 137 | 20,543 | 5,258 | 3,297 | 29,235 |
| 38,789 | 148 | 20,558 | 5,270 | 3,308 | 29,284 |
| 38,790 | 153 | 20,503 | 5,247 | 3,278 | 29,181 |
| 38,791 | 155 | 20,617 | 5,309 | 3,274 | 29,355 |
| 38,792 | 156 | 20,871 | 5,330 | 3,283 | 29,640 |
| 38,793 | 162 | 21,137 | 5,355 | 3,304 | 29,958 |
| 38,794 | 164 | 21,447 | 5,428 | 3,343 | 30,382 |
| 38,795 | 163 | 21,306 | 5,400 | 3,330 | 30,199 |
| 38,796 | 161 | 21,403 | 5,400 | 3,325 | 30,289 |
| 38,797 | 161 | 21,508 | 5,417 | 3,334 | 30,420 |
| 38,798 | 158 | 21,584 | 5,463 | 3,362 | 30,567 |
| 38,799 | 161 | 22,135 | 5,563 | 3,426 | 31,285 |
| 38,800 | 165 | 22,361 | 5,600 | 3,469 | 31,595 |
| 38,801 | 162 | 22,287 | 5,582 | 3,472 | 31,503 |
| 38,802 | 161 | 22,361 | 5,592 | 3,483 | 31,597 |
| 38,803 | 153 | 22,321 | 5,590 | 3,475 | 31,539 |
| 38,804 | 154 | 22,765 | 5,625 | 3,529 | 32,073 |
| 38,805 | 156 | 22,896 | 5,639 | 3,538 | 32,229 |
| 38,806 | 152 | 23,023 | 5,623 | 3,534 | 32,332 |
| 38,807 | 153 | 23,174 | 5,659 | 3,547 | 32,533 |

|        |     |        |       |       |        |
|--------|-----|--------|-------|-------|--------|
| 38,808 | 152 | 23,031 | 5,577 | 3,507 | 32,267 |
| 38,809 | 151 | 22,979 | 5,578 | 3,513 | 32,221 |
| 38,810 | 153 | 23,017 | 5,574 | 3,522 | 32,266 |
| 38,811 | 155 | 23,314 | 5,648 | 3,558 | 32,675 |
| 38,812 | 155 | 23,187 | 5,616 | 3,544 | 32,502 |
| 38,813 | 155 | 23,240 | 5,619 | 3,540 | 32,554 |
| 38,814 | 158 | 22,385 | 5,388 | 3,392 | 31,323 |
| 38,815 | 159 | 22,339 | 5,393 | 3,392 | 31,283 |
| 38,816 | 157 | 22,345 | 5,396 | 3,390 | 31,288 |
| 38,817 | 156 | 22,328 | 5,403 | 3,387 | 31,274 |
| 38,818 | 164 | 22,321 | 5,384 | 3,369 | 31,238 |
| 38,819 | 165 | 22,337 | 5,404 | 3,374 | 31,280 |
| 38,820 | 166 | 23,475 | 5,684 | 3,545 | 32,870 |
| 38,821 | 169 | 23,363 | 5,694 | 3,544 | 32,770 |
| 38,822 | 168 | 23,087 | 5,664 | 3,522 | 32,441 |
| 38,823 | 169 | 23,268 | 5,728 | 3,564 | 32,729 |
| 38,824 | 172 | 23,373 | 5,778 | 3,620 | 32,943 |
| 38,825 | 173 | 23,182 | 5,790 | 3,629 | 32,774 |
| 38,826 | 170 | 23,085 | 5,802 | 3,631 | 32,688 |
| 38,827 | 170 | 22,864 | 5,758 | 3,613 | 32,405 |
| 38,828 | 177 | 22,699 | 5,747 | 3,618 | 32,241 |
| 38,829 | 178 | 22,928 | 5,799 | 3,651 | 32,556 |
| 38,830 | 170 | 22,469 | 5,619 | 3,579 | 31,837 |
| 38,831 | 176 | 22,644 | 5,650 | 3,608 | 32,078 |
| 38,832 | 175 | 22,891 | 5,681 | 3,651 | 32,398 |
| 38,833 | 172 | 22,630 | 5,615 | 3,595 | 32,012 |
| 38,834 | 177 | 22,793 | 5,669 | 3,624 | 32,263 |
| 38,835 | 175 | 22,581 | 5,589 | 3,557 | 31,902 |
| 38,836 | 175 | 22,620 | 5,586 | 3,553 | 31,934 |
| 38,837 | 177 | 22,656 | 5,617 | 3,555 | 32,005 |
| 38,838 | 177 | 22,857 | 5,666 | 3,591 | 32,291 |
| 38,839 | 171 | 22,514 | 5,582 | 3,552 | 31,819 |

|        |     |        |       |       |        |
|--------|-----|--------|-------|-------|--------|
| 38,840 | 162 | 22,631 | 5,628 | 3,578 | 31,999 |
| 38,841 | 160 | 22,181 | 5,544 | 3,552 | 31,437 |
| 38,842 | 164 | 22,302 | 5,584 | 3,577 | 31,627 |
| 38,843 | 161 | 22,119 | 5,569 | 3,574 | 31,423 |
| 38,844 | 156 | 22,014 | 5,585 | 3,558 | 31,313 |
| 38,845 | 155 | 21,611 | 5,475 | 3,485 | 30,726 |
| 38,846 | 157 | 21,864 | 5,537 | 3,506 | 31,064 |
| 38,847 | 157 | 21,872 | 5,525 | 3,506 | 31,060 |
| 38,848 | 158 | 21,907 | 5,515 | 3,503 | 31,083 |
| 38,849 | 157 | 21,826 | 5,480 | 3,507 | 30,970 |
| 38,850 | 156 | 22,022 | 5,547 | 3,524 | 31,249 |
| 38,851 | 154 | 21,991 | 5,548 | 3,476 | 31,169 |
| 38,852 | 155 | 21,811 | 5,515 | 3,433 | 30,914 |
| 38,853 | 155 | 21,809 | 5,549 | 3,441 | 30,954 |
| 38,854 | 158 | 21,588 | 5,551 | 3,444 | 30,741 |
| 38,855 | 157 | 21,485 | 5,558 | 3,457 | 30,657 |
| 38,856 | 153 | 21,072 | 5,496 | 3,418 | 30,139 |
| 38,857 | 151 | 20,820 | 5,467 | 3,387 | 29,825 |
| 38,858 | 152 | 21,050 | 5,529 | 3,458 | 30,189 |
| 38,859 | 146 | 20,639 | 5,463 | 3,417 | 29,665 |
| 38,860 | 149 | 20,723 | 5,467 | 3,425 | 29,764 |
| 38,861 | 142 | 20,577 | 5,418 | 3,397 | 29,534 |
| 38,862 | 143 | 20,829 | 5,437 | 3,417 | 29,826 |
| 38,863 | 140 | 20,944 | 5,462 | 3,433 | 29,979 |
| 38,864 | 135 | 20,863 | 5,468 | 3,437 | 29,903 |
| 38,865 | 131 | 20,757 | 5,498 | 3,436 | 29,822 |
| 38,866 | 133 | 20,738 | 5,473 | 3,447 | 29,791 |
| 38,867 | 129 | 20,614 | 5,436 | 3,431 | 29,610 |
| 38,868 | 135 | 20,490 | 5,397 | 3,414 | 29,436 |
| 38,869 | 127 | 20,282 | 5,352 | 3,403 | 29,164 |
| 38,870 | 126 | 21,052 | 5,448 | 3,519 | 30,145 |
| 38,871 | 124 | 20,959 | 5,440 | 3,549 | 30,072 |

|        |     |        |       |       |        |
|--------|-----|--------|-------|-------|--------|
| 38,872 | 121 | 20,886 | 5,394 | 3,501 | 29,902 |
| 38,873 | 121 | 20,705 | 5,287 | 3,439 | 29,552 |
| 38,874 | 120 | 20,995 | 5,337 | 3,445 | 29,897 |
| 38,875 | 118 | 21,538 | 5,452 | 3,500 | 30,608 |
| 38,876 | 118 | 21,283 | 5,320 | 3,422 | 30,143 |
| 38,877 | 118 | 21,488 | 5,356 | 3,462 | 30,424 |
| 38,878 | 114 | 21,699 | 5,438 | 3,501 | 30,752 |
| 38,879 | 112 | 21,568 | 5,412 | 3,483 | 30,575 |
| 38,880 | 111 | 21,412 | 5,382 | 3,465 | 30,370 |
| 38,881 | 111 | 21,385 | 5,367 | 3,448 | 30,311 |
| 38,882 | 106 | 21,196 | 5,332 | 3,421 | 30,055 |
| 38,883 | 108 | 21,510 | 5,407 | 3,460 | 30,485 |
| 38,884 | 110 | 21,516 | 5,391 | 3,443 | 30,460 |
| 38,885 | 106 | 21,298 | 5,328 | 3,410 | 30,142 |
| 38,886 | 108 | 21,318 | 5,339 | 3,418 | 30,183 |
| 38,887 | 113 | 21,451 | 5,372 | 3,441 | 30,377 |
| 38,888 | 115 | 21,331 | 5,382 | 3,442 | 30,270 |
| 38,889 | 115 | 21,068 | 5,337 | 3,420 | 29,940 |
| 38,890 | 115 | 21,194 | 5,335 | 3,420 | 30,064 |
| 38,891 | 119 | 21,462 | 5,359 | 3,448 | 30,388 |
| 38,892 | 114 | 21,551 | 5,390 | 3,447 | 30,502 |
| 38,893 | 109 | 21,396 | 5,313 | 3,403 | 30,221 |
| 38,894 | 109 | 21,587 | 5,376 | 3,431 | 30,503 |
| 38,895 | 113 | 21,342 | 5,287 | 3,426 | 30,168 |
| 38,896 | 112 | 21,291 | 5,281 | 3,433 | 30,117 |
| 38,897 | 110 | 21,202 | 5,277 | 3,428 | 30,017 |
| 38,898 | 107 | 21,417 | 5,378 | 3,460 | 30,362 |
| 38,899 | 106 | 21,154 | 5,315 | 3,422 | 29,997 |
| 38,900 | 108 | 21,234 | 5,350 | 3,442 | 30,134 |
| 38,901 | 105 | 21,238 | 5,383 | 3,486 | 30,212 |
| 38,902 | 102 | 21,006 | 5,398 | 3,488 | 29,994 |
| 38,903 | 108 | 20,969 | 5,395 | 3,489 | 29,961 |



|        |     |        |       |       |        |
|--------|-----|--------|-------|-------|--------|
| 38,904 | 103 | 21,130 | 5,393 | 3,482 | 30,108 |
| 38,905 | 103 | 20,986 | 5,328 | 3,436 | 29,853 |
| 38,906 | 110 | 20,926 | 5,323 | 3,440 | 29,799 |
| 38,907 | 109 | 21,048 | 5,333 | 3,463 | 29,953 |
| 38,908 | 103 | 20,786 | 5,244 | 3,413 | 29,546 |
| 38,909 | 104 | 20,725 | 5,232 | 3,386 | 29,447 |
| 38,910 | 101 | 20,590 | 5,191 | 3,343 | 29,225 |
| 38,911 | 102 | 20,687 | 5,267 | 3,410 | 29,466 |
| 38,912 | 103 | 20,484 | 5,253 | 3,387 | 29,227 |
| 38,913 | 105 | 20,110 | 5,202 | 3,352 | 28,769 |
| 38,914 | 105 | 20,122 | 5,199 | 3,345 | 28,771 |
| 38,915 | 108 | 20,323 | 5,211 | 3,351 | 28,993 |
| 38,916 | 105 | 20,132 | 5,121 | 3,316 | 28,674 |
| 38,917 | 108 | 19,977 | 5,116 | 3,262 | 28,463 |
| 38,918 | 110 | 19,928 | 5,134 | 3,259 | 28,431 |
| 38,919 | 104 | 19,703 | 5,127 | 3,229 | 28,163 |
| 38,920 | 103 | 19,370 | 5,106 | 3,182 | 27,761 |
| 38,921 | 105 | 18,934 | 4,974 | 3,092 | 27,105 |
| 38,922 | 106 | 19,146 | 5,023 | 3,097 | 27,372 |
| 38,923 | 107 | 19,078 | 5,007 | 3,086 | 27,278 |
| 38,924 | 106 | 18,797 | 4,956 | 3,056 | 26,915 |
| 38,925 | 112 | 18,968 | 5,084 | 3,155 | 27,319 |
| 38,926 | 111 | 18,763 | 5,063 | 3,164 | 27,101 |
| 38,927 | 118 | 18,838 | 5,078 | 3,182 | 27,216 |
| 38,928 | 118 | 18,759 | 5,067 | 3,137 | 27,081 |
| 38,929 | 125 | 18,972 | 5,078 | 3,148 | 27,323 |
| 38,930 | 126 | 19,049 | 5,074 | 3,127 | 27,376 |
| 38,931 | 130 | 19,700 | 5,277 | 3,217 | 28,324 |
| 38,932 | 130 | 19,657 | 5,274 | 3,211 | 28,272 |
| 38,933 | 127 | 19,660 | 5,274 | 3,234 | 28,295 |
| 38,934 | 125 | 19,633 | 5,341 | 3,283 | 28,382 |
| 38,935 | 124 | 19,541 | 5,332 | 3,277 | 28,274 |

|        |     |        |       |       |        |
|--------|-----|--------|-------|-------|--------|
| 38,936 | 117 | 19,597 | 5,387 | 3,282 | 28,383 |
| 38,937 | 122 | 20,028 | 5,506 | 3,364 | 29,020 |
| 38,938 | 114 | 19,900 | 5,485 | 3,338 | 28,837 |
| 38,939 | 117 | 19,966 | 5,484 | 3,338 | 28,905 |
| 38,940 | 115 | 19,800 | 5,457 | 3,320 | 28,692 |
| 38,941 | 121 | 20,154 | 5,598 | 3,398 | 29,271 |
| 38,942 | 122 | 20,185 | 5,650 | 3,420 | 29,377 |
| 38,943 | 124 | 20,097 | 5,666 | 3,409 | 29,296 |
| 38,944 | 132 | 19,990 | 5,656 | 3,417 | 29,195 |
| 38,945 | 133 | 19,914 | 5,655 | 3,406 | 29,108 |
| 38,946 | 139 | 20,038 | 5,733 | 3,405 | 29,315 |
| 38,947 | 147 | 20,215 | 5,753 | 3,414 | 29,529 |
| 38,948 | 160 | 20,187 | 5,725 | 3,426 | 29,498 |
| 38,949 | 168 | 20,181 | 5,711 | 3,417 | 29,477 |
| 38,950 | 168 | 19,930 | 5,669 | 3,362 | 29,129 |
| 38,951 | 184 | 20,434 | 5,830 | 3,420 | 29,868 |
| 38,952 | 186 | 20,092 | 5,699 | 3,350 | 29,327 |
| 38,953 | 188 | 20,277 | 5,727 | 3,363 | 29,555 |
| 38,954 | 184 | 20,202 | 5,725 | 3,367 | 29,478 |
| 38,955 | 190 | 20,323 | 5,787 | 3,410 | 29,710 |
| 38,956 | 184 | 20,192 | 5,733 | 3,384 | 29,493 |
| 38,957 | 182 | 20,326 | 5,782 | 3,409 | 29,699 |
| 38,958 | 185 | 20,280 | 5,784 | 3,402 | 29,651 |
| 38,959 | 187 | 20,268 | 5,790 | 3,388 | 29,633 |
| 38,960 | 185 | 20,200 | 5,771 | 3,373 | 29,529 |
| 38,961 | 184 | 20,111 | 5,754 | 3,330 | 29,379 |
| 38,962 | 184 | 20,137 | 5,742 | 3,330 | 29,393 |
| 38,963 | 181 | 19,824 | 5,687 | 3,311 | 29,003 |
| 38,964 | 184 | 20,052 | 5,796 | 3,346 | 29,378 |
| 38,965 | 187 | 20,216 | 5,830 | 3,386 | 29,619 |
| 38,966 | 188 | 20,551 | 5,890 | 3,436 | 30,065 |
| 38,967 | 187 | 20,636 | 5,911 | 3,450 | 30,184 |

|        |     |        |       |       |        |
|--------|-----|--------|-------|-------|--------|
| 38,968 | 181 | 20,703 | 5,921 | 3,475 | 30,280 |
| 38,969 | 179 | 20,630 | 5,880 | 3,461 | 30,150 |
| 38,970 | 177 | 20,843 | 5,913 | 3,514 | 30,447 |
| 38,971 | 177 | 21,123 | 5,954 | 3,549 | 30,803 |
| 38,972 | 179 | 21,188 | 6,016 | 3,585 | 30,968 |
| 38,973 | 179 | 21,090 | 6,012 | 3,597 | 30,878 |
| 38,974 | 178 | 21,067 | 6,011 | 3,593 | 30,849 |
| 38,975 | 178 | 20,990 | 5,997 | 3,585 | 30,750 |
| 38,976 | 179 | 21,123 | 5,971 | 3,570 | 30,843 |
| 38,977 | 181 | 21,020 | 5,938 | 3,526 | 30,665 |
| 38,978 | 176 | 20,889 | 5,877 | 3,508 | 30,450 |
| 38,979 | 178 | 20,565 | 5,804 | 3,479 | 30,026 |
| 38,980 | 170 | 20,229 | 5,741 | 3,444 | 29,584 |
| 38,981 | 172 | 20,421 | 5,747 | 3,477 | 29,817 |
| 38,982 | 174 | 20,296 | 5,708 | 3,459 | 29,637 |
| 38,983 | 182 | 20,251 | 5,687 | 3,401 | 29,521 |
| 38,984 | 182 | 20,346 | 5,694 | 3,376 | 29,598 |
| 38,985 | 192 | 20,384 | 5,715 | 3,362 | 29,653 |
| 38,986 | 196 | 20,285 | 5,686 | 3,332 | 29,499 |
| 38,987 | 193 | 20,083 | 5,599 | 3,286 | 29,161 |
| 38,988 | 191 | 20,206 | 5,628 | 3,291 | 29,316 |
| 38,989 | 193 | 20,147 | 5,634 | 3,295 | 29,269 |
| 38,990 | 192 | 20,176 | 5,627 | 3,296 | 29,291 |
| 38,991 | 186 | 20,328 | 5,619 | 3,312 | 29,445 |
| 38,992 | 183 | 20,341 | 5,590 | 3,292 | 29,406 |
| 38,993 | 177 | 19,728 | 5,414 | 3,200 | 28,519 |
| 38,994 | 177 | 19,810 | 5,429 | 3,223 | 28,639 |
| 38,995 | 173 | 20,098 | 5,468 | 3,268 | 29,007 |
| 38,996 | 171 | 20,093 | 5,484 | 3,276 | 29,024 |
| 38,997 | 157 | 19,882 | 5,471 | 3,275 | 28,785 |
| 38,998 | 157 | 20,089 | 5,546 | 3,316 | 29,108 |
| 38,999 | 146 | 20,172 | 5,577 | 3,332 | 29,227 |

|        |     |        |       |       |        |
|--------|-----|--------|-------|-------|--------|
| 39,000 | 128 | 19,986 | 5,509 | 3,288 | 28,911 |
| 39,001 | 121 | 19,814 | 5,446 | 3,264 | 28,645 |
| 39,002 | 123 | 19,867 | 5,435 | 3,275 | 28,700 |
| 39,003 | 118 | 19,967 | 5,442 | 3,271 | 28,798 |
| 39,004 | 119 | 19,899 | 5,379 | 3,250 | 28,647 |
| 39,005 | 119 | 19,877 | 5,374 | 3,249 | 28,619 |
| 39,006 | 117 | 19,920 | 5,345 | 3,227 | 28,609 |
| 39,007 | 120 | 19,861 | 5,333 | 3,189 | 28,503 |
| 39,008 | 119 | 19,817 | 5,325 | 3,194 | 28,455 |
| 39,009 | 120 | 19,855 | 5,326 | 3,177 | 28,478 |
| 39,010 | 118 | 19,636 | 5,281 | 3,163 | 28,198 |
| 39,011 | 119 | 19,865 | 5,327 | 3,209 | 28,520 |
| 39,012 | 120 | 19,854 | 5,350 | 3,215 | 28,539 |
| 39,013 | 124 | 19,813 | 5,336 | 3,217 | 28,490 |
| 39,014 | 123 | 19,809 | 5,321 | 3,221 | 28,474 |
| 39,015 | 124 | 19,743 | 5,308 | 3,234 | 28,409 |
| 39,016 | 121 | 19,791 | 5,348 | 3,244 | 28,504 |
| 39,017 | 120 | 19,678 | 5,340 | 3,222 | 28,360 |
| 39,018 | 119 | 19,455 | 5,314 | 3,179 | 28,067 |
| 39,019 | 120 | 19,472 | 5,310 | 3,183 | 28,085 |
| 39,020 | 122 | 19,453 | 5,314 | 3,181 | 28,070 |
| 39,021 | 127 | 19,609 | 5,341 | 3,181 | 28,258 |
| 39,022 | 128 | 19,720 | 5,363 | 3,186 | 28,397 |
| 39,023 | 125 | 19,574 | 5,279 | 3,143 | 28,121 |
| 39,024 | 127 | 19,609 | 5,306 | 3,152 | 28,194 |
| 39,025 | 132 | 19,643 | 5,312 | 3,147 | 28,234 |
| 39,026 | 128 | 19,524 | 5,275 | 3,131 | 28,058 |
| 39,027 | 127 | 19,828 | 5,358 | 3,182 | 28,495 |
| 39,028 | 125 | 19,754 | 5,341 | 3,155 | 28,375 |
| 39,029 | 124 | 19,620 | 5,288 | 3,122 | 28,154 |
| 39,030 | 124 | 19,603 | 5,292 | 3,120 | 28,139 |
| 39,031 | 122 | 19,735 | 5,322 | 3,127 | 28,306 |

|        |     |        |       |       |        |
|--------|-----|--------|-------|-------|--------|
| 39,032 | 114 | 18,637 | 5,054 | 2,998 | 26,803 |
| 39,033 | 113 | 18,642 | 5,054 | 3,007 | 26,816 |
| 39,034 | 111 | 18,644 | 5,044 | 3,013 | 26,812 |
| 39,035 | 113 | 18,589 | 5,037 | 3,027 | 26,766 |
| 39,036 | 107 | 18,538 | 5,044 | 3,047 | 26,736 |
| 39,037 | 107 | 18,653 | 5,085 | 3,068 | 26,913 |
| 39,038 | 113 | 20,016 | 5,381 | 3,268 | 28,778 |
| 39,039 | 112 | 19,748 | 5,329 | 3,249 | 28,438 |
| 39,040 | 105 | 19,603 | 5,274 | 3,222 | 28,204 |
| 39,041 | 105 | 19,612 | 5,345 | 3,226 | 28,288 |
| 39,042 | 107 | 19,623 | 5,364 | 3,250 | 28,344 |
| 39,043 | 106 | 19,657 | 5,372 | 3,262 | 28,397 |
| 39,044 | 105 | 19,529 | 5,336 | 3,227 | 28,197 |
| 39,045 | 107 | 19,752 | 5,383 | 3,262 | 28,504 |
| 39,046 | 107 | 19,733 | 5,394 | 3,251 | 28,485 |
| 39,047 | 103 | 19,568 | 5,293 | 3,202 | 28,166 |
| 39,048 | 105 | 19,825 | 5,369 | 3,231 | 28,530 |
| 39,049 | 107 | 19,805 | 5,351 | 3,219 | 28,482 |
| 39,050 | 109 | 19,540 | 5,286 | 3,179 | 28,114 |
| 39,051 | 110 | 19,521 | 5,248 | 3,184 | 28,063 |
| 39,052 | 110 | 19,525 | 5,260 | 3,178 | 28,073 |
| 39,053 | 112 | 19,091 | 5,155 | 3,102 | 27,460 |
| 39,054 | 113 | 19,309 | 5,228 | 3,120 | 27,770 |
| 39,055 | 110 | 19,579 | 5,321 | 3,163 | 28,173 |
| 39,056 | 109 | 19,648 | 5,335 | 3,178 | 28,270 |
| 39,057 | 115 | 19,634 | 5,370 | 3,185 | 28,304 |
| 39,058 | 114 | 19,767 | 5,418 | 3,223 | 28,522 |
| 39,059 | 115 | 19,836 | 5,460 | 3,224 | 28,635 |
| 39,060 | 117 | 19,844 | 5,486 | 3,245 | 28,692 |
| 39,061 | 119 | 19,903 | 5,504 | 3,236 | 28,762 |
| 39,062 | 118 | 19,722 | 5,464 | 3,231 | 28,535 |
| 39,063 | 118 | 19,853 | 5,489 | 3,247 | 28,707 |

|        |     |        |       |       |        |
|--------|-----|--------|-------|-------|--------|
| 39,064 | 113 | 19,636 | 5,404 | 3,151 | 28,304 |
| 39,065 | 116 | 19,936 | 5,448 | 3,170 | 28,670 |
| 39,066 | 118 | 20,149 | 5,502 | 3,195 | 28,964 |
| 39,067 | 114 | 19,778 | 5,437 | 3,144 | 28,473 |
| 39,068 | 115 | 19,638 | 5,398 | 3,138 | 28,289 |
| 39,069 | 120 | 19,621 | 5,374 | 3,123 | 28,238 |
| 39,070 | 127 | 19,908 | 5,436 | 3,147 | 28,618 |
| 39,071 | 126 | 19,926 | 5,433 | 3,132 | 28,617 |
| 39,072 | 121 | 19,766 | 5,394 | 3,110 | 28,391 |
| 39,073 | 122 | 19,773 | 5,407 | 3,132 | 28,434 |
| 39,074 | 122 | 19,828 | 5,407 | 3,141 | 28,498 |
| 39,075 | 119 | 19,925 | 5,405 | 3,151 | 28,600 |
| 39,076 | 112 | 19,704 | 5,369 | 3,115 | 28,300 |
| 39,077 | 115 | 19,889 | 5,424 | 3,116 | 28,544 |
| 39,078 | 112 | 19,796 | 5,390 | 3,111 | 28,409 |
| 39,079 | 109 | 19,639 | 5,360 | 3,125 | 28,233 |
| 39,080 | 109 | 19,759 | 5,388 | 3,131 | 28,387 |
| 39,081 | 107 | 19,762 | 5,399 | 3,154 | 28,422 |
| 39,082 | 105 | 19,715 | 5,387 | 3,138 | 28,345 |
| 39,083 | 107 | 19,562 | 5,321 | 3,108 | 28,098 |
| 39,084 | 108 | 19,594 | 5,335 | 3,113 | 28,150 |
| 39,085 | 105 | 19,668 | 5,353 | 3,121 | 28,247 |
| 39,086 | 105 | 19,713 | 5,347 | 3,110 | 28,275 |
| 39,087 | 100 | 19,488 | 5,286 | 3,050 | 27,924 |
| 39,088 | 105 | 19,682 | 5,353 | 3,082 | 28,222 |
| 39,089 | 104 | 19,446 | 5,254 | 3,022 | 27,826 |
| 39,090 | 108 | 19,433 | 5,227 | 3,005 | 27,773 |
| 39,091 | 112 | 19,647 | 5,257 | 3,039 | 28,055 |
| 39,092 | 111 | 19,534 | 5,187 | 3,003 | 27,835 |
| 39,093 | 111 | 19,574 | 5,197 | 3,011 | 27,893 |
| 39,094 | 114 | 19,454 | 5,189 | 2,974 | 27,731 |
| 39,095 | 113 | 19,472 | 5,200 | 2,972 | 27,757 |

|        |     |        |       |       |        |
|--------|-----|--------|-------|-------|--------|
| 39,096 | 114 | 19,770 | 5,260 | 3,011 | 28,155 |
| 39,097 | 115 | 19,849 | 5,323 | 3,034 | 28,321 |
| 39,098 | 115 | 19,986 | 5,316 | 3,050 | 28,467 |
| 39,099 | 115 | 19,681 | 5,259 | 3,016 | 28,071 |
| 39,100 | 122 | 19,874 | 5,302 | 3,071 | 28,369 |
| 39,101 | 120 | 19,858 | 5,308 | 3,079 | 28,365 |
| 39,102 | 123 | 20,112 | 5,354 | 3,111 | 28,700 |
| 39,103 | 116 | 20,430 | 5,422 | 3,169 | 29,137 |
| 39,104 | 126 | 20,529 | 5,447 | 3,175 | 29,277 |
| 39,105 | 127 | 20,477 | 5,435 | 3,179 | 29,218 |
| 39,106 | 127 | 20,688 | 5,459 | 3,237 | 29,511 |
| 39,107 | 132 | 20,834 | 5,488 | 3,265 | 29,719 |
| 39,108 | 127 | 21,009 | 5,505 | 3,293 | 29,934 |
| 39,109 | 128 | 21,276 | 5,522 | 3,330 | 30,256 |
| 39,110 | 130 | 21,356 | 5,503 | 3,334 | 30,323 |
| 39,111 | 135 | 21,445 | 5,506 | 3,335 | 30,421 |
| 39,112 | 138 | 21,414 | 5,467 | 3,308 | 30,327 |
| 39,113 | 139 | 21,508 | 5,483 | 3,321 | 30,451 |
| 39,114 | 145 | 21,456 | 5,496 | 3,344 | 30,441 |
| 39,115 | 146 | 21,401 | 5,489 | 3,350 | 30,386 |
| 39,116 | 146 | 21,612 | 5,542 | 3,382 | 30,682 |
| 39,117 | 142 | 21,428 | 5,486 | 3,393 | 30,449 |
| 39,118 | 142 | 21,623 | 5,493 | 3,419 | 30,677 |
| 39,119 | 142 | 21,952 | 5,546 | 3,453 | 31,093 |
| 39,120 | 138 | 22,072 | 5,562 | 3,486 | 31,258 |
| 39,121 | 135 | 22,096 | 5,581 | 3,502 | 31,314 |
| 39,122 | 136 | 21,879 | 5,552 | 3,496 | 31,063 |
| 39,123 | 137 | 21,811 | 5,547 | 3,490 | 30,985 |
| 39,124 | 137 | 21,841 | 5,581 | 3,514 | 31,073 |
| 39,125 | 135 | 21,937 | 5,638 | 3,529 | 31,239 |
| 39,126 | 136 | 21,945 | 5,637 | 3,518 | 31,236 |
| 39,127 | 139 | 21,880 | 5,591 | 3,520 | 31,130 |

|        |     |        |       |       |        |
|--------|-----|--------|-------|-------|--------|
| 39,128 | 136 | 21,992 | 5,612 | 3,549 | 31,289 |
| 39,129 | 136 | 21,850 | 5,592 | 3,523 | 31,101 |
| 39,130 | 135 | 21,684 | 5,528 | 3,480 | 30,827 |
| 39,131 | 135 | 21,912 | 5,576 | 3,509 | 31,132 |
| 39,132 | 133 | 21,766 | 5,558 | 3,489 | 30,946 |
| 39,133 | 137 | 21,965 | 5,578 | 3,507 | 31,187 |
| 39,134 | 136 | 21,889 | 5,602 | 3,520 | 31,147 |
| 39,135 | 135 | 21,630 | 5,556 | 3,499 | 30,820 |
| 39,136 | 136 | 21,477 | 5,565 | 3,474 | 30,652 |
| 39,137 | 136 | 21,637 | 5,592 | 3,489 | 30,854 |
| 39,138 | 135 | 21,617 | 5,562 | 3,478 | 30,792 |
| 39,139 | 139 | 21,368 | 5,496 | 3,437 | 30,440 |
| 39,140 | 138 | 21,128 | 5,448 | 3,411 | 30,125 |
| 39,141 | 136 | 21,168 | 5,497 | 3,444 | 30,245 |
| 39,142 | 141 | 21,151 | 5,513 | 3,450 | 30,255 |
| 39,143 | 140 | 20,843 | 5,473 | 3,419 | 29,875 |
| 39,144 | 138 | 20,947 | 5,526 | 3,454 | 30,065 |
| 39,145 | 140 | 21,169 | 5,550 | 3,489 | 30,348 |
| 39,146 | 145 | 21,118 | 5,535 | 3,463 | 30,261 |
| 39,147 | 141 | 20,969 | 5,485 | 3,461 | 30,056 |
| 39,148 | 140 | 20,791 | 5,434 | 3,444 | 29,809 |
| 39,149 | 142 | 20,161 | 5,285 | 3,316 | 28,904 |
| 39,150 | 144 | 20,412 | 5,291 | 3,353 | 29,200 |
| 39,151 | 138 | 20,733 | 5,369 | 3,386 | 29,626 |
| 39,152 | 138 | 20,765 | 5,354 | 3,387 | 29,644 |
| 39,153 | 135 | 20,959 | 5,332 | 3,392 | 29,818 |
| 39,154 | 144 | 21,251 | 5,408 | 3,433 | 30,236 |
| 39,155 | 135 | 21,320 | 5,415 | 3,446 | 30,316 |
| 39,156 | 139 | 21,283 | 5,460 | 3,472 | 30,354 |
| 39,157 | 139 | 21,302 | 5,491 | 3,482 | 30,414 |
| 39,158 | 135 | 21,535 | 5,554 | 3,498 | 30,722 |
| 39,159 | 133 | 21,729 | 5,610 | 3,551 | 31,023 |



|        |     |        |       |       |        |
|--------|-----|--------|-------|-------|--------|
| 39,160 | 128 | 21,556 | 5,617 | 3,536 | 30,837 |
| 39,161 | 128 | 21,692 | 5,641 | 3,555 | 31,016 |
| 39,162 | 119 | 21,857 | 5,708 | 3,614 | 31,298 |
| 39,163 | 118 | 21,883 | 5,722 | 3,615 | 31,338 |
| 39,164 | 115 | 21,847 | 5,682 | 3,598 | 31,242 |
| 39,165 | 113 | 21,961 | 5,670 | 3,604 | 31,348 |
| 39,166 | 108 | 21,807 | 5,658 | 3,616 | 31,189 |
| 39,167 | 111 | 22,161 | 5,764 | 3,696 | 31,732 |
| 39,168 | 112 | 22,255 | 5,768 | 3,697 | 31,832 |
| 39,169 | 112 | 21,709 | 5,663 | 3,618 | 31,102 |
| 39,170 | 114 | 21,934 | 5,706 | 3,649 | 31,403 |
| 39,171 | 112 | 22,156 | 5,741 | 3,685 | 31,694 |
| 39,172 | 110 | 22,220 | 5,750 | 3,681 | 31,761 |
| 39,173 | 112 | 22,191 | 5,678 | 3,627 | 31,608 |
| 39,174 | 112 | 22,209 | 5,663 | 3,637 | 31,621 |
| 39,175 | 114 | 22,647 | 5,798 | 3,686 | 32,245 |
| 39,176 | 114 | 22,609 | 5,738 | 3,676 | 32,137 |
| 39,177 | 114 | 22,664 | 5,737 | 3,701 | 32,216 |
| 39,178 | 113 | 22,758 | 5,763 | 3,726 | 32,360 |
| 39,179 | 114 | 22,800 | 5,749 | 3,711 | 32,374 |
| 39,180 | 114 | 22,775 | 5,707 | 3,703 | 32,299 |
| 39,181 | 114 | 22,671 | 5,674 | 3,676 | 32,135 |
| 39,182 | 114 | 22,519 | 5,629 | 3,646 | 31,908 |
| 39,183 | 116 | 23,206 | 5,761 | 3,763 | 32,846 |
| 39,184 | 112 | 23,131 | 5,742 | 3,755 | 32,740 |
| 39,185 | 112 | 23,349 | 5,774 | 3,778 | 33,013 |
| 39,186 | 112 | 23,389 | 5,757 | 3,788 | 33,046 |
| 39,187 | 110 | 23,186 | 5,683 | 3,770 | 32,749 |
| 39,188 | 110 | 23,175 | 5,693 | 3,780 | 32,758 |
| 39,189 | 108 | 23,139 | 5,671 | 3,813 | 32,731 |
| 39,190 | 97  | 22,912 | 5,610 | 3,767 | 32,386 |
| 39,191 | 101 | 23,131 | 5,661 | 3,804 | 32,697 |

|        |     |        |       |       |        |
|--------|-----|--------|-------|-------|--------|
| 39,192 | 98  | 23,024 | 5,615 | 3,773 | 32,510 |
| 39,193 | 99  | 22,966 | 5,611 | 3,788 | 32,464 |
| 39,194 | 100 | 23,322 | 5,700 | 3,840 | 32,962 |
| 39,195 | 102 | 23,223 | 5,651 | 3,803 | 32,779 |
| 39,196 | 100 | 23,039 | 5,622 | 3,794 | 32,555 |
| 39,197 | 98  | 23,133 | 5,645 | 3,808 | 32,684 |
| 39,198 | 104 | 23,108 | 5,599 | 3,779 | 32,590 |
| 39,199 | 104 | 23,317 | 5,595 | 3,777 | 32,793 |
| 39,200 | 96  | 23,033 | 5,544 | 3,753 | 32,426 |
| 39,201 | 94  | 23,059 | 5,589 | 3,766 | 32,508 |
| 39,202 | 92  | 23,171 | 5,583 | 3,788 | 32,634 |
| 39,203 | 92  | 23,088 | 5,580 | 3,787 | 32,547 |
| 39,204 | 91  | 22,952 | 5,570 | 3,779 | 32,392 |
| 39,205 | 84  | 22,641 | 5,507 | 3,736 | 31,968 |
| 39,206 | 79  | 22,739 | 5,476 | 3,735 | 32,029 |
| 39,207 | 89  | 22,891 | 5,543 | 3,790 | 32,313 |
| 39,208 | 93  | 22,656 | 5,517 | 3,780 | 32,046 |
| 39,209 | 94  | 22,156 | 5,457 | 3,764 | 31,471 |
| 39,210 | 97  | 21,896 | 5,430 | 3,718 | 31,141 |
| 39,211 | 101 | 21,636 | 5,351 | 3,696 | 30,784 |
| 39,212 | 107 | 21,783 | 5,351 | 3,670 | 30,911 |
| 39,213 | 107 | 21,794 | 5,293 | 3,649 | 30,843 |
| 39,214 | 110 | 21,858 | 5,257 | 3,651 | 30,876 |
| 39,215 | 109 | 21,684 | 5,249 | 3,645 | 30,687 |
| 39,216 | 107 | 21,637 | 5,231 | 3,646 | 30,621 |
| 39,217 | 107 | 21,701 | 5,204 | 3,617 | 30,629 |
| 39,218 | 107 | 21,787 | 5,200 | 3,622 | 30,716 |
| 39,219 | 108 | 21,673 | 5,200 | 3,612 | 30,593 |
| 39,220 | 108 | 21,602 | 5,193 | 3,610 | 30,513 |
| 39,221 | 109 | 21,495 | 5,187 | 3,600 | 30,391 |
| 39,222 | 109 | 21,472 | 5,183 | 3,596 | 30,360 |
| 39,223 | 107 | 21,359 | 5,170 | 3,614 | 30,250 |

|        |     |        |       |       |        |
|--------|-----|--------|-------|-------|--------|
| 39,224 | 106 | 21,801 | 5,257 | 3,705 | 30,869 |
| 39,225 | 110 | 22,083 | 5,284 | 3,752 | 31,229 |
| 39,226 | 115 | 22,080 | 5,263 | 3,742 | 31,200 |
| 39,227 | 117 | 21,943 | 5,266 | 3,728 | 31,054 |
| 39,228 | 124 | 22,425 | 5,389 | 3,816 | 31,754 |
| 39,229 | 122 | 22,359 | 5,352 | 3,762 | 31,595 |
| 39,230 | 124 | 22,590 | 5,428 | 3,810 | 31,952 |
| 39,231 | 127 | 22,669 | 5,461 | 3,807 | 32,064 |
| 39,232 | 129 | 22,525 | 5,414 | 3,797 | 31,865 |
| 39,233 | 131 | 22,516 | 5,408 | 3,777 | 31,832 |
| 39,234 | 131 | 22,574 | 5,402 | 3,780 | 31,887 |
| 39,235 | 134 | 22,826 | 5,446 | 3,815 | 32,221 |
| 39,236 | 133 | 22,927 | 5,454 | 3,836 | 32,350 |
| 39,237 | 130 | 22,947 | 5,450 | 3,823 | 32,350 |
| 39,238 | 135 | 23,106 | 5,445 | 3,813 | 32,499 |
| 39,239 | 135 | 23,293 | 5,469 | 3,823 | 32,720 |
| 39,240 | 135 | 23,428 | 5,475 | 3,817 | 32,855 |
| 39,241 | 132 | 23,603 | 5,480 | 3,825 | 33,040 |
| 39,242 | 133 | 23,983 | 5,562 | 3,861 | 33,539 |
| 39,243 | 133 | 24,198 | 5,592 | 3,877 | 33,800 |
| 39,244 | 135 | 24,391 | 5,586 | 3,882 | 33,994 |
| 39,245 | 136 | 24,210 | 5,551 | 3,852 | 33,749 |
| 39,246 | 135 | 24,055 | 5,525 | 3,827 | 33,542 |
| 39,247 | 135 | 23,827 | 5,465 | 3,796 | 33,223 |
| 39,248 | 134 | 24,341 | 5,629 | 3,917 | 34,021 |
| 39,249 | 135 | 24,251 | 5,658 | 3,915 | 33,959 |
| 39,250 | 135 | 24,006 | 5,574 | 3,861 | 33,576 |
| 39,251 | 139 | 24,050 | 5,594 | 3,866 | 33,649 |
| 39,252 | 143 | 24,001 | 5,597 | 3,879 | 33,620 |
| 39,253 | 146 | 24,029 | 5,635 | 3,891 | 33,701 |
| 39,254 | 153 | 23,986 | 5,628 | 3,883 | 33,650 |
| 39,255 | 153 | 23,925 | 5,635 | 3,905 | 33,618 |

|        |     |        |       |       |        |
|--------|-----|--------|-------|-------|--------|
| 39,256 | 150 | 23,847 | 5,567 | 3,837 | 33,401 |
| 39,257 | 150 | 24,117 | 5,610 | 3,881 | 33,758 |
| 39,258 | 152 | 24,604 | 5,673 | 3,923 | 34,352 |
| 39,259 | 146 | 24,674 | 5,585 | 3,848 | 34,253 |
| 39,260 | 147 | 24,812 | 5,554 | 3,834 | 34,347 |
| 39,261 | 145 | 25,334 | 5,636 | 3,886 | 35,001 |
| 39,262 | 142 | 24,807 | 5,554 | 3,805 | 34,308 |
| 39,263 | 140 | 24,986 | 5,599 | 3,852 | 34,577 |
| 39,264 | 133 | 25,289 | 5,665 | 3,900 | 34,987 |
| 39,265 | 134 | 25,198 | 5,606 | 3,861 | 34,799 |
| 39,266 | 135 | 25,243 | 5,612 | 3,872 | 34,862 |
| 39,267 | 139 | 25,416 | 5,648 | 3,903 | 35,106 |
| 39,268 | 140 | 25,478 | 5,661 | 3,923 | 35,202 |
| 39,269 | 138 | 25,422 | 5,636 | 3,892 | 35,088 |
| 39,270 | 140 | 25,499 | 5,628 | 3,872 | 35,139 |
| 39,271 | 138 | 25,527 | 5,650 | 3,875 | 35,190 |
| 39,272 | 138 | 25,666 | 5,622 | 3,884 | 35,310 |
| 39,273 | 139 | 25,560 | 5,579 | 3,849 | 35,127 |
| 39,274 | 138 | 25,611 | 5,604 | 3,867 | 35,220 |
| 39,275 | 136 | 25,359 | 5,556 | 3,826 | 34,877 |
| 39,276 | 128 | 25,072 | 5,491 | 3,785 | 34,476 |
| 39,277 | 124 | 25,018 | 5,429 | 3,754 | 34,325 |
| 39,278 | 123 | 24,854 | 5,395 | 3,706 | 34,078 |
| 39,279 | 116 | 24,670 | 5,337 | 3,650 | 33,773 |
| 39,280 | 116 | 24,612 | 5,321 | 3,640 | 33,689 |
| 39,281 | 115 | 24,771 | 5,367 | 3,687 | 33,940 |
| 39,282 | 110 | 24,704 | 5,366 | 3,692 | 33,872 |
| 39,283 | 115 | 24,639 | 5,345 | 3,676 | 33,775 |
| 39,284 | 120 | 24,624 | 5,333 | 3,687 | 33,764 |
| 39,285 | 125 | 24,865 | 5,411 | 3,710 | 34,111 |
| 39,286 | 124 | 24,661 | 5,353 | 3,693 | 33,831 |
| 39,287 | 125 | 24,536 | 5,357 | 3,674 | 33,692 |

|        |     |        |       |       |        |
|--------|-----|--------|-------|-------|--------|
| 39,288 | 125 | 24,670 | 5,391 | 3,702 | 33,888 |
| 39,289 | 120 | 24,493 | 5,357 | 3,688 | 33,658 |
| 39,290 | 122 | 24,631 | 5,425 | 3,724 | 33,902 |
| 39,291 | 118 | 24,356 | 5,393 | 3,698 | 33,565 |
| 39,292 | 117 | 24,267 | 5,373 | 3,705 | 33,462 |
| 39,293 | 118 | 24,365 | 5,362 | 3,725 | 33,570 |
| 39,294 | 120 | 24,186 | 5,342 | 3,733 | 33,381 |
| 39,295 | 120 | 23,904 | 5,243 | 3,678 | 32,945 |
| 39,296 | 116 | 23,907 | 5,210 | 3,679 | 32,912 |
| 39,297 | 119 | 24,003 | 5,231 | 3,682 | 33,035 |
| 39,298 | 120 | 24,175 | 5,252 | 3,680 | 33,227 |
| 39,299 | 121 | 24,104 | 5,231 | 3,643 | 33,099 |
| 39,300 | 123 | 24,421 | 5,271 | 3,676 | 33,491 |
| 39,301 | 119 | 24,038 | 5,235 | 3,639 | 33,031 |
| 39,302 | 118 | 24,094 | 5,200 | 3,631 | 33,043 |
| 39,303 | 116 | 23,649 | 5,071 | 3,549 | 32,385 |
| 39,304 | 120 | 23,979 | 5,125 | 3,581 | 32,805 |
| 39,305 | 114 | 24,377 | 5,169 | 3,618 | 33,278 |
| 39,306 | 113 | 24,737 | 5,216 | 3,647 | 33,713 |
| 39,307 | 110 | 24,091 | 5,099 | 3,582 | 32,882 |
| 39,308 | 109 | 24,498 | 5,148 | 3,610 | 33,365 |
| 39,309 | 106 | 24,503 | 5,134 | 3,606 | 33,349 |
| 39,310 | 108 | 24,347 | 5,127 | 3,626 | 33,208 |
| 39,311 | 106 | 24,305 | 5,123 | 3,639 | 33,173 |
| 39,312 | 108 | 24,277 | 5,128 | 3,655 | 33,168 |
| 39,313 | 102 | 23,963 | 5,086 | 3,610 | 32,761 |
| 39,314 | 104 | 23,494 | 5,001 | 3,540 | 32,139 |
| 39,315 | 104 | 23,712 | 5,053 | 3,583 | 32,452 |
| 39,316 | 96  | 23,345 | 5,000 | 3,531 | 31,972 |
| 39,317 | 95  | 23,616 | 5,050 | 3,548 | 32,309 |
| 39,318 | 93  | 23,880 | 5,060 | 3,566 | 32,599 |
| 39,319 | 93  | 24,042 | 5,112 | 3,590 | 32,837 |

|        |     |        |       |       |        |
|--------|-----|--------|-------|-------|--------|
| 39,320 | 96  | 23,959 | 5,122 | 3,600 | 32,777 |
| 39,321 | 98  | 23,972 | 5,135 | 3,606 | 32,811 |
| 39,322 | 99  | 23,950 | 5,146 | 3,609 | 32,804 |
| 39,323 | 100 | 23,952 | 5,168 | 3,606 | 32,826 |
| 39,324 | 98  | 23,815 | 5,115 | 3,586 | 32,614 |
| 39,325 | 101 | 23,652 | 5,071 | 3,552 | 32,376 |
| 39,326 | 101 | 23,286 | 5,019 | 3,505 | 31,911 |
| 39,327 | 108 | 24,051 | 5,176 | 3,628 | 32,963 |
| 39,328 | 109 | 23,914 | 5,166 | 3,621 | 32,810 |
| 39,329 | 110 | 23,552 | 5,071 | 3,587 | 32,320 |
| 39,330 | 110 | 23,357 | 5,039 | 3,571 | 32,077 |
| 39,331 | 113 | 23,612 | 5,089 | 3,608 | 32,422 |
| 39,332 | 115 | 23,830 | 5,112 | 3,636 | 32,693 |
| 39,333 | 118 | 24,055 | 5,136 | 3,665 | 32,974 |
| 39,334 | 109 | 23,884 | 5,117 | 3,659 | 32,769 |
| 39,335 | 104 | 23,618 | 5,020 | 3,586 | 32,328 |
| 39,336 | 104 | 23,753 | 5,048 | 3,607 | 32,512 |
| 39,337 | 108 | 23,775 | 5,010 | 3,590 | 32,483 |
| 39,338 | 108 | 23,528 | 4,934 | 3,572 | 32,142 |
| 39,339 | 109 | 23,779 | 5,001 | 3,615 | 32,504 |
| 39,340 | 109 | 23,714 | 4,981 | 3,612 | 32,416 |
| 39,341 | 112 | 23,674 | 4,965 | 3,582 | 32,333 |
| 39,342 | 113 | 23,796 | 4,981 | 3,597 | 32,487 |
| 39,343 | 113 | 23,747 | 4,964 | 3,588 | 32,412 |
| 39,344 | 113 | 23,866 | 5,001 | 3,595 | 32,575 |
| 39,345 | 111 | 24,112 | 5,049 | 3,605 | 32,877 |
| 39,346 | 108 | 23,749 | 5,024 | 3,564 | 32,445 |
| 39,347 | 105 | 23,584 | 4,992 | 3,540 | 32,221 |
| 39,348 | 107 | 23,726 | 5,034 | 3,557 | 32,424 |
| 39,349 | 102 | 23,760 | 5,027 | 3,575 | 32,464 |
| 39,350 | 100 | 23,616 | 4,959 | 3,553 | 32,228 |
| 39,351 | 101 | 23,845 | 4,997 | 3,569 | 32,512 |

|        |     |        |       |       |        |
|--------|-----|--------|-------|-------|--------|
| 39,352 | 101 | 23,832 | 4,979 | 3,568 | 32,480 |
| 39,353 | 104 | 23,761 | 4,982 | 3,559 | 32,406 |
| 39,354 | 105 | 23,949 | 5,004 | 3,602 | 32,660 |
| 39,355 | 100 | 23,862 | 4,976 | 3,613 | 32,551 |
| 39,356 | 99  | 23,621 | 4,937 | 3,601 | 32,258 |
| 39,357 | 96  | 23,443 | 4,906 | 3,590 | 32,035 |
| 39,358 | 98  | 23,705 | 4,947 | 3,598 | 32,348 |
| 39,359 | 102 | 23,753 | 4,974 | 3,583 | 32,412 |
| 39,360 | 101 | 23,800 | 4,968 | 3,572 | 32,441 |
| 39,361 | 99  | 22,913 | 4,788 | 3,452 | 31,252 |
| 39,362 | 99  | 23,187 | 4,815 | 3,475 | 31,576 |
| 39,363 | 96  | 23,113 | 4,793 | 3,445 | 31,447 |
| 39,364 | 98  | 23,391 | 4,823 | 3,466 | 31,778 |
| 39,365 | 98  | 23,363 | 4,810 | 3,465 | 31,736 |
| 39,366 | 105 | 23,532 | 4,828 | 3,466 | 31,931 |
| 39,367 | 106 | 23,262 | 4,749 | 3,435 | 31,552 |
| 39,368 | 108 | 23,649 | 4,813 | 3,471 | 32,041 |
| 39,369 | 115 | 23,757 | 4,877 | 3,496 | 32,245 |
| 39,370 | 110 | 23,633 | 4,829 | 3,495 | 32,067 |
| 39,371 | 110 | 23,566 | 4,819 | 3,494 | 31,989 |
| 39,372 | 111 | 23,841 | 4,827 | 3,516 | 32,295 |
| 39,373 | 109 | 23,698 | 4,763 | 3,495 | 32,065 |
| 39,374 | 111 | 23,989 | 4,810 | 3,536 | 32,446 |
| 39,375 | 107 | 24,043 | 4,828 | 3,551 | 32,529 |
| 39,376 | 104 | 23,877 | 4,786 | 3,530 | 32,297 |
| 39,377 | 106 | 24,131 | 4,815 | 3,537 | 32,589 |
| 39,378 | 104 | 23,881 | 4,770 | 3,489 | 32,244 |
| 39,379 | 100 | 23,584 | 4,740 | 3,452 | 31,876 |
| 39,380 | 105 | 24,231 | 4,863 | 3,543 | 32,742 |
| 39,381 | 106 | 24,411 | 4,871 | 3,565 | 32,953 |
| 39,382 | 111 | 24,263 | 4,842 | 3,536 | 32,752 |
| 39,383 | 108 | 23,972 | 4,785 | 3,499 | 32,364 |

|        |     |        |       |       |        |
|--------|-----|--------|-------|-------|--------|
| 39,384 | 105 | 23,880 | 4,796 | 3,519 | 32,300 |
| 39,385 | 106 | 23,862 | 4,771 | 3,522 | 32,261 |
| 39,386 | 102 | 23,970 | 4,812 | 3,555 | 32,439 |
| 39,387 | 102 | 23,759 | 4,779 | 3,507 | 32,147 |
| 39,388 | 99  | 23,655 | 4,810 | 3,525 | 32,089 |
| 39,389 | 105 | 23,675 | 4,828 | 3,486 | 32,094 |
| 39,390 | 105 | 23,612 | 4,824 | 3,497 | 32,038 |
| 39,391 | 109 | 23,604 | 4,823 | 3,512 | 32,048 |
| 39,392 | 113 | 23,791 | 4,872 | 3,575 | 32,351 |
| 39,393 | 119 | 23,987 | 4,912 | 3,563 | 32,581 |
| 39,394 | 117 | 24,063 | 4,921 | 3,565 | 32,666 |
| 39,395 | 114 | 23,850 | 4,900 | 3,543 | 32,407 |
| 39,396 | 118 | 24,240 | 4,957 | 3,602 | 32,917 |
| 39,397 | 115 | 24,114 | 4,910 | 3,585 | 32,724 |
| 39,398 | 115 | 24,165 | 4,902 | 3,576 | 32,758 |
| 39,399 | 115 | 24,242 | 4,912 | 3,611 | 32,880 |
| 39,400 | 115 | 24,100 | 4,906 | 3,620 | 32,741 |
| 39,401 | 124 | 24,355 | 4,972 | 3,657 | 33,108 |
| 39,402 | 123 | 24,409 | 4,973 | 3,669 | 33,174 |
| 39,403 | 120 | 24,498 | 4,986 | 3,653 | 33,257 |
| 39,404 | 120 | 24,505 | 5,013 | 3,670 | 33,308 |
| 39,405 | 125 | 24,533 | 5,069 | 3,717 | 33,444 |
| 39,406 | 125 | 24,152 | 5,011 | 3,675 | 32,963 |
| 39,407 | 125 | 24,005 | 5,024 | 3,664 | 32,818 |
| 39,408 | 125 | 24,028 | 5,039 | 3,660 | 32,852 |
| 39,409 | 123 | 23,981 | 5,072 | 3,677 | 32,853 |
| 39,410 | 120 | 23,788 | 5,048 | 3,669 | 32,625 |
| 39,411 | 122 | 23,794 | 5,065 | 3,676 | 32,657 |
| 39,412 | 121 | 24,037 | 5,114 | 3,701 | 32,973 |
| 39,413 | 124 | 23,969 | 5,104 | 3,699 | 32,896 |
| 39,414 | 126 | 24,242 | 5,171 | 3,725 | 33,264 |
| 39,415 | 131 | 24,185 | 5,180 | 3,720 | 33,216 |



|        |     |        |       |       |        |
|--------|-----|--------|-------|-------|--------|
| 39,416 | 132 | 24,141 | 5,185 | 3,730 | 33,188 |
| 39,417 | 126 | 24,093 | 5,196 | 3,739 | 33,154 |
| 39,418 | 128 | 24,153 | 5,235 | 3,781 | 33,297 |
| 39,419 | 133 | 24,289 | 5,289 | 3,818 | 33,529 |
| 39,420 | 127 | 24,356 | 5,312 | 3,841 | 33,636 |
| 39,421 | 137 | 24,186 | 5,293 | 3,787 | 33,403 |
| 39,422 | 138 | 24,076 | 5,306 | 3,767 | 33,287 |
| 39,423 | 143 | 24,383 | 5,340 | 3,834 | 33,700 |
| 39,424 | 143 | 24,288 | 5,360 | 3,829 | 33,620 |
| 39,425 | 143 | 24,260 | 5,359 | 3,833 | 33,595 |
| 39,426 | 144 | 24,199 | 5,364 | 3,831 | 33,538 |
| 39,427 | 145 | 24,448 | 5,395 | 3,895 | 33,883 |
| 39,428 | 148 | 24,537 | 5,393 | 3,885 | 33,963 |
| 39,429 | 149 | 24,402 | 5,352 | 3,855 | 33,758 |
| 39,430 | 149 | 24,320 | 5,360 | 3,868 | 33,697 |
| 39,431 | 155 | 24,509 | 5,447 | 3,904 | 34,015 |
| 39,432 | 149 | 24,435 | 5,438 | 3,898 | 33,920 |
| 39,433 | 148 | 24,427 | 5,437 | 3,903 | 33,915 |
| 39,434 | 151 | 24,461 | 5,451 | 3,883 | 33,946 |
| 39,435 | 155 | 24,573 | 5,471 | 3,869 | 34,068 |
| 39,436 | 163 | 24,781 | 5,537 | 3,906 | 34,387 |
| 39,437 | 162 | 24,727 | 5,511 | 3,925 | 34,325 |
| 39,438 | 160 | 25,030 | 5,550 | 3,971 | 34,711 |
| 39,439 | 157 | 24,653 | 5,499 | 3,919 | 34,228 |
| 39,440 | 157 | 24,911 | 5,524 | 3,959 | 34,551 |
| 39,441 | 150 | 24,931 | 5,557 | 3,967 | 34,605 |
| 39,442 | 148 | 24,974 | 5,595 | 3,965 | 34,682 |
| 39,443 | 148 | 24,956 | 5,618 | 3,958 | 34,680 |
| 39,444 | 152 | 24,826 | 5,606 | 3,991 | 34,575 |
| 39,445 | 155 | 24,722 | 5,620 | 4,008 | 34,505 |
| 39,446 | 154 | 24,966 | 5,658 | 4,011 | 34,789 |
| 39,447 | 154 | 24,766 | 5,605 | 3,973 | 34,498 |

|        |     |        |       |       |        |
|--------|-----|--------|-------|-------|--------|
| 39,448 | 159 | 24,949 | 5,659 | 4,000 | 34,767 |
| 39,449 | 163 | 24,814 | 5,620 | 3,969 | 34,566 |
| 39,450 | 162 | 24,702 | 5,628 | 3,961 | 34,453 |
| 39,451 | 169 | 24,507 | 5,640 | 3,952 | 34,268 |
| 39,452 | 162 | 24,291 | 5,602 | 3,960 | 34,015 |
| 39,453 | 168 | 24,137 | 5,608 | 3,962 | 33,875 |
| 39,454 | 165 | 24,121 | 5,624 | 3,996 | 33,906 |
| 39,455 | 162 | 24,184 | 5,581 | 3,968 | 33,895 |
| 39,456 | 163 | 24,289 | 5,635 | 3,977 | 34,064 |
| 39,457 | 166 | 24,432 | 5,638 | 3,976 | 34,212 |
| 39,458 | 166 | 24,462 | 5,653 | 3,990 | 34,271 |
| 39,459 | 166 | 24,505 | 5,688 | 4,009 | 34,368 |
| 39,460 | 165 | 24,554 | 5,698 | 4,052 | 34,469 |
| 39,461 | 165 | 24,591 | 5,707 | 4,048 | 34,511 |
| 39,462 | 173 | 24,582 | 5,730 | 4,064 | 34,549 |
| 39,463 | 173 | 24,334 | 5,736 | 4,061 | 34,304 |
| 39,464 | 169 | 24,842 | 5,886 | 4,168 | 35,065 |
| 39,465 | 165 | 24,556 | 5,830 | 4,148 | 34,699 |
| 39,466 | 161 | 24,559 | 5,859 | 4,148 | 34,727 |
| 39,467 | 159 | 24,662 | 5,877 | 4,154 | 34,852 |
| 39,468 | 158 | 24,792 | 5,906 | 4,160 | 35,016 |
| 39,469 | 150 | 24,584 | 5,864 | 4,121 | 34,719 |
| 39,470 | 149 | 24,424 | 5,817 | 4,090 | 34,480 |
| 39,471 | 150 | 24,549 | 5,881 | 4,123 | 34,703 |
| 39,472 | 144 | 24,475 | 5,873 | 4,143 | 34,635 |
| 39,473 | 143 | 24,270 | 5,842 | 4,113 | 34,368 |
| 39,474 | 136 | 23,975 | 5,819 | 4,060 | 33,990 |
| 39,475 | 136 | 24,027 | 5,819 | 4,062 | 34,044 |
| 39,476 | 135 | 23,478 | 5,756 | 4,002 | 33,371 |
| 39,477 | 135 | 23,570 | 5,795 | 4,021 | 33,521 |
| 39,478 | 139 | 23,612 | 5,857 | 4,057 | 33,665 |
| 39,479 | 137 | 23,240 | 5,836 | 4,011 | 33,224 |

|        |     |        |       |       |        |
|--------|-----|--------|-------|-------|--------|
| 39,480 | 130 | 22,973 | 5,797 | 3,983 | 32,883 |
| 39,481 | 129 | 23,071 | 5,860 | 4,012 | 33,072 |
| 39,482 | 129 | 23,016 | 5,814 | 3,976 | 32,935 |
| 39,483 | 129 | 22,772 | 5,779 | 3,946 | 32,626 |
| 39,484 | 134 | 22,845 | 5,784 | 3,935 | 32,698 |
| 39,485 | 133 | 22,714 | 5,781 | 3,927 | 32,555 |
| 39,486 | 135 | 22,824 | 5,812 | 3,944 | 32,715 |
| 39,487 | 130 | 22,844 | 5,823 | 3,956 | 32,753 |
| 39,488 | 130 | 22,472 | 5,784 | 3,876 | 32,262 |
| 39,489 | 129 | 22,256 | 5,726 | 3,817 | 31,928 |
| 39,490 | 134 | 22,481 | 5,750 | 3,857 | 32,222 |
| 39,491 | 132 | 22,431 | 5,778 | 3,881 | 32,222 |
| 39,492 | 133 | 22,349 | 5,750 | 3,866 | 32,098 |
| 39,493 | 128 | 22,306 | 5,679 | 3,844 | 31,957 |
| 39,494 | 130 | 22,363 | 5,691 | 3,840 | 32,024 |
| 39,495 | 123 | 22,613 | 5,781 | 3,894 | 32,411 |
| 39,496 | 127 | 22,308 | 5,763 | 3,865 | 32,063 |
| 39,497 | 128 | 22,006 | 5,756 | 3,881 | 31,771 |
| 39,498 | 128 | 22,314 | 5,889 | 3,922 | 32,253 |
| 39,499 | 119 | 21,641 | 5,649 | 3,773 | 31,182 |
| 39,500 | 118 | 21,916 | 5,711 | 3,822 | 31,567 |
| 39,501 | 111 | 22,142 | 5,783 | 3,856 | 31,892 |
| 39,502 | 111 | 22,049 | 5,809 | 3,856 | 31,825 |
| 39,503 | 110 | 22,185 | 5,862 | 3,898 | 32,055 |
| 39,504 | 104 | 22,328 | 5,879 | 3,921 | 32,232 |
| 39,505 | 105 | 22,179 | 5,854 | 3,875 | 32,013 |
| 39,506 | 101 | 21,978 | 5,878 | 3,862 | 31,819 |
| 39,507 | 103 | 22,112 | 5,941 | 3,899 | 32,055 |
| 39,508 | 102 | 21,904 | 5,967 | 3,910 | 31,883 |
| 39,509 | 105 | 21,804 | 5,936 | 3,867 | 31,712 |
| 39,510 | 107 | 21,881 | 6,008 | 3,895 | 31,891 |
| 39,511 | 109 | 21,780 | 6,036 | 3,868 | 31,793 |

|        |     |        |       |       |        |
|--------|-----|--------|-------|-------|--------|
| 39,512 | 109 | 21,734 | 6,040 | 3,874 | 31,757 |
| 39,513 | 100 | 21,650 | 6,021 | 3,864 | 31,635 |
| 39,514 | 101 | 21,568 | 5,989 | 3,838 | 31,496 |
| 39,515 | 107 | 21,618 | 5,980 | 3,809 | 31,514 |
| 39,516 | 106 | 21,331 | 5,902 | 3,785 | 31,124 |
| 39,517 | 120 | 21,153 | 5,845 | 3,746 | 30,864 |
| 39,518 | 120 | 20,943 | 5,800 | 3,719 | 30,582 |
| 39,519 | 121 | 21,537 | 5,961 | 3,815 | 31,434 |
| 39,520 | 125 | 21,637 | 5,954 | 3,810 | 31,526 |
| 39,521 | 128 | 21,435 | 5,873 | 3,778 | 31,214 |
| 39,522 | 124 | 21,285 | 5,847 | 3,756 | 31,012 |
| 39,523 | 125 | 21,280 | 5,854 | 3,753 | 31,012 |
| 39,524 | 129 | 21,538 | 5,934 | 3,802 | 31,403 |
| 39,525 | 129 | 21,648 | 5,954 | 3,809 | 31,540 |
| 39,526 | 130 | 21,777 | 5,944 | 3,786 | 31,637 |
| 39,527 | 130 | 21,474 | 5,822 | 3,732 | 31,158 |
| 39,528 | 138 | 21,801 | 5,886 | 3,774 | 31,599 |
| 39,529 | 135 | 21,896 | 5,904 | 3,776 | 31,711 |
| 39,530 | 131 | 21,972 | 5,870 | 3,777 | 31,750 |
| 39,531 | 131 | 21,942 | 5,883 | 3,757 | 31,713 |
| 39,532 | 131 | 21,803 | 5,874 | 3,761 | 31,569 |
| 39,533 | 131 | 21,844 | 5,917 | 3,779 | 31,671 |
| 39,534 | 129 | 22,030 | 5,981 | 3,796 | 31,936 |
| 39,535 | 137 | 21,820 | 5,959 | 3,774 | 31,690 |
| 39,536 | 137 | 21,831 | 5,953 | 3,755 | 31,676 |
| 39,537 | 140 | 22,222 | 6,054 | 3,835 | 32,251 |
| 39,538 | 143 | 22,028 | 6,011 | 3,782 | 31,964 |
| 39,539 | 142 | 21,779 | 5,946 | 3,754 | 31,621 |
| 39,540 | 146 | 22,072 | 6,058 | 3,782 | 32,058 |
| 39,541 | 148 | 21,929 | 6,072 | 3,777 | 31,926 |
| 39,542 | 146 | 21,827 | 6,096 | 3,764 | 31,833 |
| 39,543 | 152 | 21,732 | 6,170 | 3,787 | 31,841 |

|        |     |        |       |       |        |
|--------|-----|--------|-------|-------|--------|
| 39,544 | 152 | 21,528 | 6,185 | 3,776 | 31,641 |
| 39,545 | 150 | 21,352 | 6,223 | 3,765 | 31,490 |
| 39,546 | 148 | 21,292 | 6,160 | 3,758 | 31,358 |
| 39,547 | 140 | 21,201 | 6,110 | 3,753 | 31,204 |
| 39,548 | 139 | 21,453 | 6,122 | 3,754 | 31,468 |
| 39,549 | 138 | 21,217 | 6,069 | 3,716 | 31,140 |
| 39,550 | 138 | 21,181 | 6,079 | 3,715 | 31,113 |
| 39,551 | 140 | 21,273 | 6,146 | 3,728 | 31,287 |
| 39,552 | 139 | 20,929 | 6,061 | 3,695 | 30,824 |
| 39,553 | 140 | 21,490 | 6,181 | 3,785 | 31,596 |
| 39,554 | 139 | 21,581 | 6,223 | 3,789 | 31,732 |
| 39,555 | 139 | 21,581 | 6,271 | 3,797 | 31,788 |
| 39,556 | 140 | 21,551 | 6,278 | 3,790 | 31,759 |
| 39,557 | 140 | 21,480 | 6,196 | 3,752 | 31,568 |
| 39,558 | 140 | 21,695 | 6,227 | 3,751 | 31,813 |
| 39,559 | 137 | 21,662 | 6,139 | 3,712 | 31,650 |
| 39,560 | 136 | 21,592 | 6,045 | 3,695 | 31,468 |
| 39,561 | 136 | 21,619 | 6,036 | 3,697 | 31,488 |
| 39,562 | 145 | 21,885 | 6,070 | 3,719 | 31,819 |
| 39,563 | 143 | 21,688 | 6,006 | 3,680 | 31,517 |
| 39,564 | 145 | 21,433 | 5,922 | 3,635 | 31,135 |
| 39,565 | 143 | 21,359 | 5,888 | 3,614 | 31,004 |
| 39,566 | 136 | 21,135 | 5,901 | 3,612 | 30,784 |
| 39,567 | 138 | 21,287 | 5,953 | 3,636 | 31,014 |
| 39,568 | 140 | 21,557 | 6,040 | 3,665 | 31,402 |
| 39,569 | 138 | 21,112 | 5,906 | 3,609 | 30,765 |
| 39,570 | 140 | 21,283 | 5,955 | 3,633 | 31,011 |
| 39,571 | 137 | 21,469 | 5,995 | 3,655 | 31,256 |
| 39,572 | 141 | 21,731 | 6,045 | 3,693 | 31,610 |
| 39,573 | 142 | 21,776 | 6,089 | 3,687 | 31,694 |
| 39,574 | 135 | 21,644 | 6,022 | 3,656 | 31,457 |
| 39,575 | 136 | 21,530 | 5,983 | 3,647 | 31,296 |

|        |     |        |       |       |        |
|--------|-----|--------|-------|-------|--------|
| 39,576 | 137 | 21,491 | 5,983 | 3,643 | 31,254 |
| 39,577 | 138 | 21,733 | 6,040 | 3,692 | 31,603 |
| 39,578 | 135 | 21,741 | 6,048 | 3,705 | 31,629 |
| 39,579 | 132 | 21,813 | 6,103 | 3,706 | 31,754 |
| 39,580 | 133 | 21,744 | 6,115 | 3,703 | 31,695 |
| 39,581 | 132 | 21,516 | 6,037 | 3,663 | 31,348 |
| 39,582 | 132 | 21,519 | 6,048 | 3,651 | 31,350 |
| 39,583 | 130 | 21,642 | 6,079 | 3,683 | 31,534 |
| 39,584 | 132 | 21,711 | 6,103 | 3,704 | 31,650 |
| 39,585 | 124 | 21,299 | 6,003 | 3,673 | 31,099 |
| 39,586 | 124 | 21,212 | 5,989 | 3,671 | 30,996 |
| 39,587 | 121 | 20,949 | 5,975 | 3,659 | 30,704 |
| 39,588 | 118 | 21,010 | 6,008 | 3,682 | 30,818 |
| 39,589 | 111 | 20,859 | 5,997 | 3,726 | 30,693 |
| 39,590 | 115 | 20,716 | 5,961 | 3,736 | 30,528 |
| 39,591 | 114 | 20,716 | 5,973 | 3,758 | 30,561 |
| 39,592 | 116 | 20,806 | 5,958 | 3,773 | 30,653 |
| 39,593 | 117 | 20,789 | 5,954 | 3,789 | 30,649 |
| 39,594 | 112 | 20,970 | 5,942 | 3,796 | 30,820 |
| 39,595 | 118 | 21,164 | 5,935 | 3,802 | 31,019 |
| 39,596 | 119 | 21,244 | 5,924 | 3,787 | 31,074 |
| 39,597 | 120 | 21,154 | 5,912 | 3,758 | 30,944 |
| 39,598 | 118 | 20,866 | 5,827 | 3,719 | 30,530 |
| 39,599 | 120 | 20,996 | 5,876 | 3,748 | 30,740 |
| 39,600 | 118 | 20,902 | 5,820 | 3,741 | 30,581 |
| 39,601 | 118 | 20,930 | 5,808 | 3,765 | 30,621 |
| 39,602 | 121 | 20,802 | 5,814 | 3,766 | 30,503 |
| 39,603 | 121 | 20,679 | 5,781 | 3,750 | 30,331 |
| 39,604 | 122 | 20,643 | 5,775 | 3,741 | 30,281 |
| 39,605 | 123 | 20,599 | 5,741 | 3,715 | 30,178 |
| 39,606 | 122 | 20,374 | 5,640 | 3,662 | 29,798 |
| 39,607 | 127 | 20,422 | 5,619 | 3,664 | 29,832 |

|        |     |        |       |       |        |
|--------|-----|--------|-------|-------|--------|
| 39,608 | 127 | 20,353 | 5,605 | 3,677 | 29,762 |
| 39,609 | 133 | 20,390 | 5,617 | 3,693 | 29,833 |
| 39,610 | 133 | 20,363 | 5,584 | 3,685 | 29,765 |
| 39,611 | 142 | 20,717 | 5,756 | 3,757 | 30,372 |
| 39,612 | 144 | 21,019 | 5,838 | 3,799 | 30,800 |
| 39,613 | 135 | 21,133 | 5,879 | 3,840 | 30,987 |
| 39,614 | 131 | 21,072 | 5,853 | 3,833 | 30,889 |
| 39,615 | 130 | 21,134 | 5,881 | 3,839 | 30,984 |
| 39,616 | 124 | 20,742 | 5,790 | 3,753 | 30,409 |
| 39,617 | 124 | 21,179 | 5,908 | 3,797 | 31,008 |
| 39,618 | 125 | 21,545 | 5,985 | 3,838 | 31,493 |
| 39,619 | 129 | 21,514 | 5,964 | 3,840 | 31,447 |
| 39,620 | 131 | 21,541 | 5,982 | 3,832 | 31,486 |
| 39,621 | 129 | 21,305 | 5,900 | 3,802 | 31,136 |
| 39,622 | 131 | 21,082 | 5,867 | 3,760 | 30,840 |
| 39,623 | 126 | 20,863 | 5,816 | 3,714 | 30,519 |
| 39,624 | 128 | 21,939 | 6,137 | 3,892 | 32,096 |
| 39,625 | 128 | 21,671 | 6,063 | 3,831 | 31,693 |
| 39,626 | 127 | 21,937 | 6,157 | 3,892 | 32,113 |
| 39,627 | 128 | 21,890 | 6,166 | 3,904 | 32,088 |
| 39,628 | 125 | 21,557 | 6,086 | 3,848 | 31,616 |
| 39,629 | 127 | 21,551 | 6,145 | 3,866 | 31,689 |
| 39,630 | 131 | 21,464 | 6,087 | 3,853 | 31,535 |
| 39,631 | 128 | 21,236 | 6,024 | 3,825 | 31,213 |
| 39,632 | 129 | 21,435 | 6,047 | 3,835 | 31,446 |
| 39,633 | 127 | 21,372 | 6,061 | 3,846 | 31,406 |
| 39,634 | 128 | 21,461 | 6,122 | 3,867 | 31,578 |
| 39,635 | 131 | 21,580 | 6,095 | 3,888 | 31,694 |
| 39,636 | 127 | 21,418 | 6,024 | 3,839 | 31,408 |
| 39,637 | 129 | 21,634 | 6,054 | 3,855 | 31,672 |
| 39,638 | 131 | 21,788 | 6,081 | 3,849 | 31,849 |
| 39,639 | 133 | 22,301 | 6,092 | 3,876 | 32,402 |

|        |     |        |       |       |        |
|--------|-----|--------|-------|-------|--------|
| 39,640 | 134 | 22,666 | 6,163 | 3,924 | 32,887 |
| 39,641 | 128 | 23,079 | 6,278 | 3,994 | 33,479 |
| 39,642 | 125 | 23,180 | 6,286 | 3,986 | 33,577 |
| 39,643 | 124 | 23,304 | 6,267 | 3,966 | 33,661 |
| 39,644 | 123 | 23,301 | 6,276 | 3,963 | 33,663 |
| 39,645 | 125 | 23,709 | 6,340 | 4,001 | 34,175 |
| 39,646 | 130 | 23,937 | 6,429 | 4,049 | 34,545 |
| 39,647 | 131 | 24,113 | 6,443 | 4,055 | 34,742 |
| 39,648 | 138 | 23,549 | 6,261 | 3,923 | 33,871 |
| 39,649 | 138 | 23,412 | 6,207 | 3,891 | 33,648 |
| 39,650 | 141 | 23,408 | 6,177 | 3,872 | 33,598 |
| 39,651 | 141 | 23,349 | 6,169 | 3,866 | 33,525 |
| 39,652 | 144 | 23,328 | 6,158 | 3,847 | 33,477 |
| 39,653 | 142 | 23,319 | 6,157 | 3,842 | 33,460 |
| 39,654 | 146 | 24,303 | 6,433 | 3,987 | 34,869 |
| 39,655 | 151 | 24,100 | 6,385 | 3,935 | 34,571 |
| 39,656 | 150 | 23,832 | 6,312 | 3,906 | 34,200 |
| 39,657 | 158 | 24,269 | 6,491 | 3,981 | 34,899 |
| 39,658 | 158 | 24,241 | 6,466 | 3,962 | 34,827 |
| 39,659 | 158 | 23,772 | 6,347 | 3,871 | 34,148 |
| 39,660 | 160 | 23,885 | 6,391 | 3,887 | 34,323 |
| 39,661 | 150 | 24,067 | 6,382 | 3,892 | 34,491 |
| 39,662 | 153 | 24,139 | 6,398 | 3,919 | 34,609 |
| 39,663 | 151 | 23,992 | 6,365 | 3,893 | 34,401 |
| 39,664 | 163 | 23,771 | 6,277 | 3,827 | 34,038 |
| 39,665 | 163 | 23,650 | 6,241 | 3,809 | 33,863 |
| 39,666 | 162 | 23,662 | 6,266 | 3,841 | 33,931 |
| 39,667 | 164 | 23,538 | 6,279 | 3,849 | 33,830 |
| 39,668 | 166 | 23,720 | 6,335 | 3,916 | 34,137 |
| 39,669 | 163 | 23,441 | 6,272 | 3,887 | 33,763 |
| 39,670 | 157 | 23,316 | 6,250 | 3,886 | 33,609 |
| 39,671 | 154 | 23,174 | 6,245 | 3,877 | 33,450 |



|        |     |        |       |       |        |
|--------|-----|--------|-------|-------|--------|
| 39,672 | 157 | 23,264 | 6,295 | 3,906 | 33,622 |
| 39,673 | 156 | 23,195 | 6,273 | 3,904 | 33,528 |
| 39,674 | 161 | 23,097 | 6,214 | 3,898 | 33,370 |
| 39,675 | 162 | 23,149 | 6,223 | 3,916 | 33,450 |
| 39,676 | 172 | 23,150 | 6,229 | 3,939 | 33,490 |
| 39,677 | 172 | 23,288 | 6,250 | 3,931 | 33,641 |
| 39,678 | 174 | 23,357 | 6,254 | 3,914 | 33,699 |
| 39,679 | 180 | 23,422 | 6,260 | 3,933 | 33,795 |
| 39,680 | 179 | 23,503 | 6,258 | 3,925 | 33,865 |
| 39,681 | 175 | 23,486 | 6,273 | 3,913 | 33,847 |
| 39,682 | 174 | 23,409 | 6,259 | 3,914 | 33,756 |
| 39,683 | 173 | 23,414 | 6,259 | 3,939 | 33,785 |
| 39,684 | 177 | 23,607 | 6,248 | 3,932 | 33,964 |
| 39,685 | 180 | 23,912 | 6,297 | 3,965 | 34,354 |
| 39,686 | 181 | 23,639 | 6,281 | 3,901 | 34,002 |
| 39,687 | 178 | 23,481 | 6,226 | 3,878 | 33,763 |
| 39,688 | 177 | 23,715 | 6,319 | 3,922 | 34,133 |
| 39,689 | 176 | 23,514 | 6,306 | 3,928 | 33,924 |
| 39,690 | 176 | 23,388 | 6,312 | 3,933 | 33,809 |
| 39,691 | 183 | 23,094 | 6,284 | 3,929 | 33,490 |
| 39,692 | 184 | 23,111 | 6,258 | 3,901 | 33,454 |
| 39,693 | 183 | 22,882 | 6,230 | 3,888 | 33,183 |
| 39,694 | 187 | 23,247 | 6,314 | 3,927 | 33,675 |
| 39,695 | 193 | 23,457 | 6,371 | 3,973 | 33,994 |
| 39,696 | 195 | 23,502 | 6,378 | 3,978 | 34,053 |
| 39,697 | 190 | 23,353 | 6,289 | 3,931 | 33,763 |
| 39,698 | 190 | 23,354 | 6,282 | 3,940 | 33,766 |
| 39,699 | 180 | 23,377 | 6,286 | 3,966 | 33,809 |
| 39,700 | 179 | 23,310 | 6,260 | 3,952 | 33,701 |
| 39,701 | 176 | 23,235 | 6,247 | 3,964 | 33,622 |
| 39,702 | 176 | 23,619 | 6,361 | 4,035 | 34,191 |
| 39,703 | 173 | 23,457 | 6,275 | 4,004 | 33,909 |

|        |     |        |       |       |        |
|--------|-----|--------|-------|-------|--------|
| 39,704 | 173 | 23,524 | 6,277 | 3,997 | 33,971 |
| 39,705 | 172 | 23,883 | 6,297 | 4,022 | 34,374 |
| 39,706 | 167 | 23,891 | 6,278 | 4,029 | 34,365 |
| 39,707 | 167 | 23,793 | 6,302 | 4,022 | 34,284 |
| 39,708 | 159 | 23,744 | 6,276 | 4,017 | 34,196 |
| 39,709 | 157 | 23,526 | 6,246 | 3,989 | 33,918 |
| 39,710 | 150 | 23,488 | 6,238 | 3,994 | 33,870 |
| 39,711 | 149 | 23,553 | 6,259 | 4,018 | 33,979 |
| 39,712 | 155 | 23,465 | 6,240 | 3,996 | 33,856 |
| 39,713 | 150 | 23,189 | 6,168 | 3,938 | 33,445 |
| 39,714 | 153 | 23,113 | 6,137 | 3,936 | 33,339 |
| 39,715 | 141 | 22,708 | 6,083 | 3,885 | 32,817 |
| 39,716 | 141 | 22,717 | 6,122 | 3,901 | 32,881 |
| 39,717 | 140 | 22,927 | 6,125 | 3,926 | 33,118 |
| 39,718 | 142 | 22,872 | 6,075 | 3,893 | 32,982 |
| 39,719 | 144 | 22,686 | 5,999 | 3,836 | 32,665 |
| 39,720 | 144 | 22,805 | 6,012 | 3,839 | 32,800 |
| 39,721 | 145 | 22,687 | 5,970 | 3,824 | 32,626 |
| 39,722 | 144 | 22,717 | 5,958 | 3,823 | 32,642 |
| 39,723 | 140 | 21,994 | 5,772 | 3,710 | 31,616 |
| 39,724 | 140 | 22,153 | 5,805 | 3,730 | 31,828 |
| 39,725 | 135 | 22,064 | 5,769 | 3,696 | 31,664 |
| 39,726 | 139 | 22,180 | 5,793 | 3,725 | 31,837 |
| 39,727 | 132 | 22,166 | 5,782 | 3,719 | 31,799 |
| 39,728 | 132 | 22,399 | 5,829 | 3,749 | 32,109 |
| 39,729 | 132 | 22,269 | 5,784 | 3,731 | 31,916 |
| 39,730 | 129 | 22,429 | 5,818 | 3,757 | 32,133 |
| 39,731 | 126 | 22,252 | 5,770 | 3,745 | 31,893 |
| 39,732 | 130 | 22,138 | 5,755 | 3,751 | 31,774 |
| 39,733 | 132 | 22,016 | 5,713 | 3,714 | 31,575 |
| 39,734 | 132 | 22,007 | 5,700 | 3,708 | 31,547 |
| 39,735 | 127 | 21,895 | 5,669 | 3,703 | 31,394 |

|        |     |        |       |       |        |
|--------|-----|--------|-------|-------|--------|
| 39,736 | 119 | 21,844 | 5,618 | 3,692 | 31,273 |
| 39,737 | 122 | 21,696 | 5,542 | 3,674 | 31,034 |
| 39,738 | 123 | 21,592 | 5,525 | 3,662 | 30,902 |
| 39,739 | 123 | 21,813 | 5,531 | 3,677 | 31,144 |
| 39,740 | 122 | 21,362 | 5,313 | 3,563 | 30,360 |
| 39,741 | 123 | 21,733 | 5,372 | 3,603 | 30,831 |
| 39,742 | 117 | 21,760 | 5,376 | 3,606 | 30,859 |
| 39,743 | 118 | 21,720 | 5,373 | 3,625 | 30,836 |
| 39,744 | 118 | 21,838 | 5,394 | 3,636 | 30,986 |
| 39,745 | 113 | 21,707 | 5,360 | 3,608 | 30,788 |
| 39,746 | 109 | 21,698 | 5,345 | 3,596 | 30,748 |
| 39,747 | 107 | 21,576 | 5,331 | 3,583 | 30,597 |
| 39,748 | 100 | 21,196 | 5,246 | 3,542 | 30,084 |
| 39,749 | 102 | 21,144 | 5,270 | 3,526 | 30,042 |
| 39,750 | 102 | 21,000 | 5,244 | 3,497 | 29,843 |
| 39,751 | 106 | 20,936 | 5,213 | 3,450 | 29,705 |
| 39,752 | 105 | 20,863 | 5,133 | 3,443 | 29,544 |
| 39,753 | 107 | 20,881 | 5,139 | 3,440 | 29,567 |
| 39,754 | 104 | 20,620 | 5,109 | 3,417 | 29,250 |
| 39,755 | 103 | 20,817 | 5,198 | 3,496 | 29,614 |
| 39,756 | 105 | 21,162 | 5,301 | 3,550 | 30,118 |
| 39,757 | 102 | 21,218 | 5,317 | 3,556 | 30,193 |
| 39,758 | 100 | 21,041 | 5,242 | 3,520 | 29,903 |
| 39,759 | 101 | 21,161 | 5,261 | 3,528 | 30,051 |
| 39,760 | 106 | 21,453 | 5,301 | 3,573 | 30,433 |
| 39,761 | 108 | 21,443 | 5,322 | 3,591 | 30,464 |
| 39,762 | 101 | 21,477 | 5,315 | 3,604 | 30,497 |
| 39,763 | 102 | 21,476 | 5,333 | 3,610 | 30,521 |
| 39,764 | 102 | 21,816 | 5,388 | 3,653 | 30,959 |
| 39,765 | 101 | 21,740 | 5,359 | 3,635 | 30,835 |
| 39,766 | 101 | 21,763 | 5,337 | 3,626 | 30,827 |
| 39,767 | 105 | 22,034 | 5,382 | 3,649 | 31,170 |

|        |     |        |       |       |        |
|--------|-----|--------|-------|-------|--------|
| 39,768 | 105 | 21,938 | 5,374 | 3,637 | 31,054 |
| 39,769 | 107 | 22,168 | 5,400 | 3,651 | 31,326 |
| 39,770 | 103 | 22,249 | 5,395 | 3,653 | 31,400 |
| 39,771 | 104 | 21,908 | 5,302 | 3,585 | 30,899 |
| 39,772 | 104 | 22,184 | 5,347 | 3,609 | 31,244 |
| 39,773 | 103 | 22,068 | 5,358 | 3,608 | 31,137 |
| 39,774 | 102 | 22,366 | 5,443 | 3,656 | 31,567 |
| 39,775 | 100 | 21,937 | 5,372 | 3,607 | 31,016 |
| 39,776 | 102 | 22,167 | 5,422 | 3,633 | 31,324 |
| 39,777 | 102 | 22,424 | 5,466 | 3,663 | 31,655 |
| 39,778 | 102 | 22,358 | 5,443 | 3,663 | 31,566 |
| 39,779 | 102 | 22,120 | 5,399 | 3,637 | 31,258 |
| 39,780 | 101 | 22,356 | 5,429 | 3,646 | 31,532 |
| 39,781 | 101 | 22,440 | 5,419 | 3,648 | 31,608 |
| 39,782 | 99  | 22,392 | 5,359 | 3,598 | 31,448 |
| 39,783 | 99  | 22,428 | 5,365 | 3,603 | 31,495 |
| 39,784 | 98  | 22,513 | 5,404 | 3,616 | 31,631 |
| 39,785 | 107 | 22,371 | 5,332 | 3,572 | 31,382 |
| 39,786 | 107 | 22,330 | 5,326 | 3,570 | 31,333 |
| 39,787 | 109 | 22,117 | 5,287 | 3,536 | 31,049 |
| 39,788 | 106 | 21,969 | 5,275 | 3,521 | 30,871 |
| 39,789 | 104 | 22,968 | 5,462 | 3,649 | 32,183 |
| 39,790 | 108 | 22,996 | 5,480 | 3,657 | 32,241 |
| 39,791 | 102 | 22,886 | 5,489 | 3,631 | 32,108 |
| 39,792 | 102 | 22,853 | 5,540 | 3,657 | 32,152 |
| 39,793 | 101 | 22,996 | 5,562 | 3,672 | 32,331 |
| 39,794 | 95  | 22,751 | 5,474 | 3,608 | 31,928 |
| 39,795 | 95  | 23,016 | 5,544 | 3,654 | 32,309 |
| 39,796 | 96  | 23,112 | 5,566 | 3,665 | 32,439 |
| 39,797 | 97  | 23,143 | 5,527 | 3,653 | 32,420 |
| 39,798 | 94  | 23,102 | 5,512 | 3,631 | 32,339 |
| 39,799 | 97  | 23,036 | 5,482 | 3,631 | 32,246 |

|        |     |        |       |       |        |
|--------|-----|--------|-------|-------|--------|
| 39,800 | 96  | 22,943 | 5,444 | 3,605 | 32,088 |
| 39,801 | 97  | 22,980 | 5,447 | 3,602 | 32,126 |
| 39,802 | 92  | 22,705 | 5,428 | 3,576 | 31,801 |
| 39,803 | 95  | 22,817 | 5,505 | 3,613 | 32,030 |
| 39,804 | 98  | 23,086 | 5,549 | 3,643 | 32,376 |
| 39,805 | 98  | 23,101 | 5,536 | 3,622 | 32,357 |
| 39,806 | 101 | 22,965 | 5,503 | 3,601 | 32,170 |
| 39,807 | 103 | 22,834 | 5,498 | 3,565 | 32,000 |
| 39,808 | 105 | 22,521 | 5,395 | 3,524 | 31,545 |
| 39,809 | 105 | 22,651 | 5,410 | 3,534 | 31,700 |
| 39,810 | 109 | 22,844 | 5,447 | 3,580 | 31,980 |
| 39,811 | 105 | 22,598 | 5,421 | 3,518 | 31,642 |
| 39,812 | 105 | 22,435 | 5,355 | 3,451 | 31,346 |
| 39,813 | 108 | 22,637 | 5,369 | 3,469 | 31,583 |
| 39,814 | 110 | 22,749 | 5,428 | 3,495 | 31,782 |
| 39,815 | 110 | 22,496 | 5,398 | 3,450 | 31,454 |
| 39,816 | 104 | 22,269 | 5,340 | 3,401 | 31,114 |
| 39,817 | 104 | 22,272 | 5,331 | 3,414 | 31,121 |
| 39,818 | 105 | 22,229 | 5,343 | 3,408 | 31,085 |
| 39,819 | 111 | 22,558 | 5,417 | 3,469 | 31,555 |
| 39,820 | 109 | 22,316 | 5,358 | 3,455 | 31,238 |
| 39,821 | 113 | 22,413 | 5,400 | 3,498 | 31,424 |
| 39,822 | 111 | 22,471 | 5,402 | 3,494 | 31,478 |
| 39,823 | 111 | 22,529 | 5,393 | 3,493 | 31,526 |
| 39,824 | 109 | 22,019 | 5,279 | 3,413 | 30,820 |
| 39,825 | 109 | 22,209 | 5,318 | 3,451 | 31,087 |
| 39,826 | 108 | 22,386 | 5,359 | 3,503 | 31,356 |
| 39,827 | 108 | 22,400 | 5,367 | 3,499 | 31,374 |
| 39,828 | 109 | 22,421 | 5,377 | 3,478 | 31,385 |
| 39,829 | 114 | 22,490 | 5,364 | 3,476 | 31,444 |
| 39,830 | 111 | 22,338 | 5,328 | 3,459 | 31,236 |
| 39,831 | 112 | 22,503 | 5,377 | 3,512 | 31,504 |

|        |     |        |       |       |        |
|--------|-----|--------|-------|-------|--------|
| 39,832 | 119 | 22,715 | 5,436 | 3,527 | 31,797 |
| 39,833 | 116 | 22,567 | 5,423 | 3,510 | 31,616 |
| 39,834 | 118 | 22,555 | 5,419 | 3,516 | 31,608 |
| 39,835 | 114 | 22,442 | 5,399 | 3,516 | 31,471 |
| 39,836 | 113 | 22,835 | 5,515 | 3,597 | 32,060 |
| 39,837 | 114 | 22,745 | 5,513 | 3,586 | 31,958 |
| 39,838 | 116 | 22,899 | 5,551 | 3,608 | 32,174 |
| 39,839 | 116 | 23,004 | 5,580 | 3,621 | 32,321 |
| 39,840 | 115 | 23,121 | 5,634 | 3,635 | 32,505 |
| 39,841 | 122 | 23,275 | 5,663 | 3,626 | 32,686 |
| 39,842 | 125 | 23,204 | 5,613 | 3,583 | 32,525 |
| 39,843 | 127 | 23,260 | 5,623 | 3,597 | 32,607 |
| 39,844 | 128 | 23,120 | 5,619 | 3,600 | 32,467 |
| 39,845 | 129 | 23,042 | 5,602 | 3,591 | 32,364 |
| 39,846 | 129 | 23,171 | 5,675 | 3,633 | 32,608 |
| 39,847 | 128 | 23,009 | 5,675 | 3,660 | 32,472 |
| 39,848 | 126 | 22,875 | 5,719 | 3,666 | 32,386 |
| 39,849 | 126 | 22,895 | 5,749 | 3,694 | 32,464 |
| 39,850 | 122 | 22,783 | 5,716 | 3,665 | 32,286 |
| 39,851 | 123 | 23,067 | 5,749 | 3,695 | 32,634 |
| 39,852 | 124 | 23,263 | 5,774 | 3,693 | 32,854 |
| 39,853 | 123 | 23,326 | 5,828 | 3,727 | 33,004 |
| 39,854 | 128 | 23,456 | 5,891 | 3,765 | 33,240 |
| 39,855 | 125 | 23,175 | 5,875 | 3,729 | 32,904 |
| 39,856 | 124 | 23,206 | 5,851 | 3,712 | 32,893 |
| 39,857 | 125 | 23,263 | 5,875 | 3,723 | 32,986 |
| 39,858 | 126 | 23,439 | 5,929 | 3,763 | 33,257 |
| 39,859 | 123 | 22,977 | 5,841 | 3,679 | 32,620 |
| 39,860 | 123 | 23,213 | 5,872 | 3,724 | 32,932 |
| 39,861 | 128 | 23,541 | 5,933 | 3,745 | 33,347 |
| 39,862 | 124 | 23,211 | 5,873 | 3,731 | 32,939 |
| 39,863 | 135 | 23,623 | 5,941 | 3,797 | 33,496 |

|        |     |        |       |       |        |
|--------|-----|--------|-------|-------|--------|
| 39,864 | 131 | 23,449 | 5,930 | 3,773 | 33,283 |
| 39,865 | 131 | 23,609 | 5,900 | 3,785 | 33,425 |
| 39,866 | 132 | 23,669 | 5,899 | 3,798 | 33,498 |
| 39,867 | 131 | 23,991 | 5,984 | 3,862 | 33,968 |
| 39,868 | 125 | 23,713 | 5,939 | 3,810 | 33,587 |
| 39,869 | 126 | 23,951 | 5,995 | 3,835 | 33,907 |
| 39,870 | 129 | 23,981 | 6,001 | 3,824 | 33,935 |
| 39,871 | 127 | 23,836 | 5,975 | 3,794 | 33,732 |
| 39,872 | 126 | 24,173 | 6,043 | 3,838 | 34,180 |
| 39,873 | 128 | 24,354 | 6,100 | 3,877 | 34,459 |
| 39,874 | 127 | 24,332 | 6,121 | 3,865 | 34,445 |
| 39,875 | 136 | 24,409 | 6,116 | 3,854 | 34,515 |
| 39,876 | 145 | 24,339 | 6,093 | 3,814 | 34,391 |
| 39,877 | 144 | 24,381 | 6,120 | 3,818 | 34,463 |
| 39,878 | 146 | 24,408 | 6,128 | 3,835 | 34,517 |
| 39,879 | 149 | 24,793 | 6,196 | 3,888 | 35,026 |
| 39,880 | 139 | 24,490 | 6,166 | 3,863 | 34,658 |
| 39,881 | 145 | 24,625 | 6,167 | 3,873 | 34,810 |
| 39,882 | 145 | 24,636 | 6,180 | 3,858 | 34,819 |
| 39,883 | 140 | 24,629 | 6,162 | 3,871 | 34,802 |
| 39,884 | 139 | 24,689 | 6,236 | 3,882 | 34,946 |
| 39,885 | 136 | 24,686 | 6,255 | 3,862 | 34,939 |
| 39,886 | 133 | 24,431 | 6,209 | 3,789 | 34,562 |
| 39,887 | 135 | 24,533 | 6,230 | 3,812 | 34,710 |
| 39,888 | 136 | 24,457 | 6,251 | 3,815 | 34,659 |
| 39,889 | 131 | 24,538 | 6,288 | 3,877 | 34,834 |
| 39,890 | 132 | 24,338 | 6,274 | 3,843 | 34,587 |
| 39,891 | 130 | 24,269 | 6,267 | 3,830 | 34,496 |
| 39,892 | 141 | 23,992 | 6,190 | 3,792 | 34,115 |
| 39,893 | 138 | 23,767 | 6,155 | 3,760 | 33,820 |
| 39,894 | 139 | 23,988 | 6,239 | 3,806 | 34,172 |
| 39,895 | 140 | 23,948 | 6,246 | 3,812 | 34,146 |

|        |     |        |       |       |        |
|--------|-----|--------|-------|-------|--------|
| 39,896 | 140 | 23,857 | 6,216 | 3,811 | 34,024 |
| 39,897 | 140 | 23,685 | 6,175 | 3,765 | 33,765 |
| 39,898 | 145 | 23,770 | 6,157 | 3,750 | 33,822 |
| 39,899 | 149 | 23,673 | 6,124 | 3,751 | 33,697 |
| 39,900 | 149 | 23,553 | 6,115 | 3,737 | 33,554 |
| 39,901 | 155 | 23,642 | 6,195 | 3,792 | 33,784 |
| 39,902 | 156 | 23,629 | 6,267 | 3,797 | 33,849 |
| 39,903 | 155 | 23,584 | 6,244 | 3,805 | 33,788 |
| 39,904 | 156 | 23,652 | 6,202 | 3,782 | 33,792 |
| 39,905 | 152 | 23,517 | 6,144 | 3,754 | 33,567 |
| 39,906 | 151 | 23,312 | 6,075 | 3,720 | 33,258 |
| 39,907 | 148 | 23,185 | 6,098 | 3,719 | 33,150 |
| 39,908 | 147 | 23,185 | 6,094 | 3,736 | 33,162 |
| 39,909 | 145 | 23,116 | 6,062 | 3,738 | 33,061 |
| 39,910 | 150 | 22,792 | 6,012 | 3,708 | 32,662 |
| 39,911 | 153 | 22,476 | 5,975 | 3,655 | 32,259 |
| 39,912 | 149 | 22,962 | 6,109 | 3,771 | 32,991 |
| 39,913 | 150 | 22,974 | 6,127 | 3,771 | 33,022 |
| 39,914 | 151 | 22,751 | 6,107 | 3,749 | 32,758 |
| 39,915 | 150 | 22,385 | 6,067 | 3,720 | 32,322 |
| 39,916 | 153 | 22,408 | 6,150 | 3,783 | 32,494 |
| 39,917 | 153 | 22,511 | 6,183 | 3,797 | 32,644 |
| 39,918 | 153 | 22,446 | 6,186 | 3,795 | 32,580 |
| 39,919 | 161 | 22,409 | 6,205 | 3,823 | 32,598 |
| 39,920 | 169 | 22,308 | 6,210 | 3,832 | 32,519 |
| 39,921 | 163 | 21,955 | 6,127 | 3,796 | 32,041 |
| 39,922 | 176 | 22,183 | 6,165 | 3,837 | 32,361 |
| 39,923 | 183 | 21,977 | 6,148 | 3,808 | 32,116 |
| 39,924 | 181 | 21,742 | 6,099 | 3,783 | 31,805 |
| 39,925 | 179 | 21,780 | 6,146 | 3,833 | 31,938 |
| 39,926 | 170 | 21,700 | 6,134 | 3,849 | 31,853 |
| 39,927 | 162 | 21,892 | 6,176 | 3,873 | 32,103 |



|        |     |        |       |       |        |
|--------|-----|--------|-------|-------|--------|
| 39,928 | 159 | 21,689 | 6,135 | 3,844 | 31,827 |
| 39,929 | 159 | 21,843 | 6,180 | 3,879 | 32,061 |
| 39,930 | 153 | 21,547 | 6,113 | 3,875 | 31,688 |
| 39,931 | 156 | 21,761 | 6,140 | 3,899 | 31,956 |
| 39,932 | 153 | 21,899 | 6,212 | 3,929 | 32,193 |
| 39,933 | 159 | 21,910 | 6,191 | 3,928 | 32,188 |
| 39,934 | 159 | 21,701 | 6,138 | 3,897 | 31,895 |
| 39,935 | 159 | 21,610 | 6,118 | 3,899 | 31,786 |
| 39,936 | 161 | 21,602 | 6,100 | 3,913 | 31,776 |
| 39,937 | 165 | 21,576 | 6,037 | 3,921 | 31,699 |
| 39,938 | 162 | 21,487 | 6,075 | 3,917 | 31,641 |
| 39,939 | 162 | 21,722 | 6,075 | 3,926 | 31,885 |
| 39,940 | 161 | 21,450 | 6,006 | 3,875 | 31,492 |
| 39,941 | 163 | 21,544 | 6,044 | 3,903 | 31,654 |
| 39,942 | 162 | 21,439 | 5,997 | 3,901 | 31,499 |
| 39,943 | 150 | 21,219 | 5,967 | 3,889 | 31,225 |
| 39,944 | 153 | 21,163 | 5,956 | 3,877 | 31,149 |
| 39,945 | 149 | 21,078 | 5,951 | 3,840 | 31,018 |
| 39,946 | 150 | 20,869 | 5,881 | 3,803 | 30,703 |
| 39,947 | 150 | 21,009 | 5,882 | 3,831 | 30,872 |
| 39,948 | 150 | 21,071 | 5,896 | 3,836 | 30,953 |
| 39,949 | 144 | 21,264 | 5,955 | 3,859 | 31,222 |
| 39,950 | 144 | 21,280 | 5,943 | 3,844 | 31,211 |
| 39,951 | 143 | 21,376 | 5,939 | 3,823 | 31,281 |
| 39,952 | 141 | 21,450 | 5,893 | 3,804 | 31,288 |
| 39,953 | 139 | 21,172 | 5,789 | 3,758 | 30,858 |
| 39,954 | 138 | 20,935 | 5,787 | 3,737 | 30,597 |
| 39,955 | 137 | 20,898 | 5,761 | 3,746 | 30,542 |
| 39,956 | 137 | 21,033 | 5,780 | 3,743 | 30,693 |
| 39,957 | 138 | 21,033 | 5,746 | 3,744 | 30,661 |
| 39,958 | 139 | 21,178 | 5,808 | 3,763 | 30,888 |
| 39,959 | 139 | 21,171 | 5,811 | 3,748 | 30,869 |

|        |     |        |       |       |        |
|--------|-----|--------|-------|-------|--------|
| 39,960 | 135 | 21,054 | 5,752 | 3,722 | 30,663 |
| 39,961 | 132 | 21,081 | 5,738 | 3,711 | 30,662 |
| 39,962 | 135 | 21,238 | 5,785 | 3,727 | 30,885 |
| 39,963 | 138 | 21,192 | 5,796 | 3,729 | 30,855 |
| 39,964 | 137 | 21,055 | 5,770 | 3,713 | 30,675 |
| 39,965 | 128 | 20,834 | 5,652 | 3,636 | 30,250 |
| 39,966 | 127 | 21,081 | 5,675 | 3,652 | 30,535 |
| 39,967 | 125 | 21,088 | 5,635 | 3,617 | 30,465 |
| 39,968 | 128 | 21,092 | 5,613 | 3,600 | 30,433 |
| 39,969 | 111 | 20,376 | 5,426 | 3,469 | 29,382 |
| 39,970 | 113 | 20,635 | 5,452 | 3,504 | 29,704 |
| 39,971 | 110 | 20,548 | 5,435 | 3,478 | 29,571 |
| 39,972 | 110 | 20,653 | 5,462 | 3,487 | 29,712 |
| 39,973 | 108 | 20,808 | 5,516 | 3,520 | 29,952 |
| 39,974 | 102 | 20,784 | 5,458 | 3,489 | 29,833 |
| 39,975 | 107 | 20,690 | 5,372 | 3,426 | 29,595 |
| 39,976 | 107 | 20,595 | 5,365 | 3,430 | 29,497 |
| 39,977 | 108 | 20,433 | 5,344 | 3,422 | 29,307 |
| 39,978 | 108 | 20,566 | 5,391 | 3,431 | 29,496 |
| 39,979 | 110 | 20,461 | 5,349 | 3,384 | 29,304 |
| 39,980 | 115 | 19,557 | 5,133 | 3,198 | 28,003 |
| 39,981 | 114 | 19,834 | 5,171 | 3,219 | 28,338 |
| 39,982 | 115 | 19,498 | 5,015 | 3,144 | 27,772 |
| 39,983 | 116 | 19,715 | 5,036 | 3,161 | 28,028 |
| 39,984 | 112 | 19,920 | 5,100 | 3,190 | 28,322 |
| 39,985 | 112 | 19,981 | 5,074 | 3,190 | 28,357 |
| 39,986 | 116 | 20,417 | 5,200 | 3,252 | 28,985 |
| 39,987 | 116 | 20,414 | 5,194 | 3,248 | 28,972 |
| 39,988 | 124 | 20,680 | 5,254 | 3,291 | 29,349 |
| 39,989 | 126 | 20,848 | 5,304 | 3,337 | 29,615 |
| 39,990 | 126 | 20,998 | 5,361 | 3,359 | 29,844 |
| 39,991 | 128 | 21,097 | 5,398 | 3,396 | 30,019 |

|        |     |        |       |       |        |
|--------|-----|--------|-------|-------|--------|
| 39,992 | 129 | 21,242 | 5,464 | 3,425 | 30,260 |
| 39,993 | 143 | 21,590 | 5,535 | 3,461 | 30,729 |
| 39,994 | 141 | 21,957 | 5,584 | 3,491 | 31,173 |
| 39,995 | 141 | 22,263 | 5,615 | 3,497 | 31,516 |
| 39,996 | 148 | 22,076 | 5,534 | 3,473 | 31,231 |
| 39,997 | 145 | 21,976 | 5,492 | 3,443 | 31,056 |
| 39,998 | 148 | 22,461 | 5,647 | 3,522 | 31,778 |
| 39,999 | 160 | 22,486 | 5,651 | 3,498 | 31,795 |
| 40,000 | 160 | 22,542 | 5,644 | 3,499 | 31,845 |
| 40,001 | 160 | 22,516 | 5,675 | 3,535 | 31,886 |
| 40,002 | 160 | 22,533 | 5,683 | 3,540 | 31,916 |
| 40,003 | 161 | 22,788 | 5,742 | 3,572 | 32,263 |
| 40,004 | 162 | 22,766 | 5,669 | 3,531 | 32,128 |
| 40,005 | 172 | 22,857 | 5,666 | 3,531 | 32,226 |
| 40,006 | 175 | 23,226 | 5,737 | 3,573 | 32,711 |
| 40,007 | 177 | 23,230 | 5,709 | 3,565 | 32,681 |
| 40,008 | 181 | 23,370 | 5,706 | 3,558 | 32,815 |
| 40,009 | 190 | 23,723 | 5,770 | 3,625 | 33,308 |
| 40,010 | 189 | 23,496 | 5,748 | 3,613 | 33,046 |
| 40,011 | 188 | 23,464 | 5,736 | 3,607 | 32,995 |
| 40,012 | 187 | 23,574 | 5,756 | 3,639 | 33,156 |
| 40,013 | 186 | 23,951 | 5,806 | 3,696 | 33,639 |
| 40,014 | 177 | 23,719 | 5,746 | 3,663 | 33,305 |
| 40,015 | 180 | 24,070 | 5,803 | 3,694 | 33,747 |
| 40,016 | 177 | 23,919 | 5,798 | 3,707 | 33,601 |
| 40,017 | 179 | 24,211 | 5,863 | 3,739 | 33,992 |
| 40,018 | 181 | 24,342 | 5,877 | 3,761 | 34,161 |
| 40,019 | 176 | 24,128 | 5,820 | 3,725 | 33,849 |
| 40,020 | 180 | 24,489 | 5,899 | 3,780 | 34,348 |
| 40,021 | 176 | 24,369 | 5,895 | 3,755 | 34,195 |
| 40,022 | 177 | 24,443 | 5,914 | 3,775 | 34,309 |
| 40,023 | 177 | 24,461 | 5,921 | 3,779 | 34,338 |

|        |     |        |       |       |        |
|--------|-----|--------|-------|-------|--------|
| 40,024 | 170 | 24,438 | 5,917 | 3,779 | 34,304 |
| 40,025 | 171 | 24,576 | 5,955 | 3,809 | 34,511 |
| 40,026 | 171 | 24,562 | 5,974 | 3,809 | 34,516 |
| 40,027 | 168 | 24,699 | 5,994 | 3,806 | 34,667 |
| 40,028 | 168 | 24,752 | 5,981 | 3,801 | 34,702 |
| 40,029 | 172 | 24,774 | 5,962 | 3,815 | 34,723 |
| 40,030 | 169 | 24,472 | 5,909 | 3,782 | 34,332 |
| 40,031 | 162 | 24,341 | 5,919 | 3,810 | 34,232 |
| 40,032 | 167 | 24,525 | 5,996 | 3,833 | 34,521 |
| 40,033 | 168 | 24,246 | 5,974 | 3,825 | 34,213 |
| 40,034 | 167 | 24,170 | 5,961 | 3,824 | 34,122 |
| 40,035 | 166 | 24,239 | 5,975 | 3,824 | 34,204 |
| 40,036 | 173 | 24,513 | 6,037 | 3,834 | 34,557 |
| 40,037 | 170 | 24,472 | 6,015 | 3,837 | 34,494 |
| 40,038 | 164 | 24,441 | 6,001 | 3,822 | 34,428 |
| 40,039 | 162 | 24,299 | 5,957 | 3,785 | 34,203 |
| 40,040 | 172 | 24,472 | 5,996 | 3,778 | 34,418 |
| 40,041 | 175 | 24,274 | 5,929 | 3,720 | 34,098 |
| 40,042 | 169 | 24,070 | 5,837 | 3,646 | 33,722 |
| 40,043 | 172 | 24,394 | 5,869 | 3,662 | 34,097 |
| 40,044 | 171 | 24,236 | 5,836 | 3,645 | 33,888 |
| 40,045 | 175 | 23,997 | 5,786 | 3,621 | 33,579 |
| 40,046 | 179 | 23,997 | 5,805 | 3,636 | 33,617 |
| 40,047 | 176 | 23,651 | 5,727 | 3,567 | 33,121 |
| 40,048 | 176 | 23,588 | 5,706 | 3,546 | 33,016 |
| 40,049 | 175 | 23,462 | 5,680 | 3,539 | 32,856 |
| 40,050 | 169 | 23,427 | 5,660 | 3,522 | 32,778 |
| 40,051 | 166 | 23,327 | 5,623 | 3,477 | 32,593 |
| 40,052 | 168 | 23,285 | 5,600 | 3,470 | 32,523 |
| 40,053 | 169 | 23,224 | 5,601 | 3,476 | 32,470 |
| 40,054 | 175 | 22,952 | 5,553 | 3,462 | 32,142 |
| 40,055 | 171 | 22,621 | 5,498 | 3,439 | 31,729 |

|        |     |        |       |       |        |
|--------|-----|--------|-------|-------|--------|
| 40,056 | 167 | 22,868 | 5,620 | 3,498 | 32,153 |
| 40,057 | 165 | 22,722 | 5,581 | 3,499 | 31,967 |
| 40,058 | 165 | 22,512 | 5,584 | 3,496 | 31,757 |
| 40,059 | 165 | 22,717 | 5,644 | 3,540 | 32,066 |
| 40,060 | 161 | 22,584 | 5,611 | 3,496 | 31,852 |
| 40,061 | 161 | 22,833 | 5,627 | 3,517 | 32,138 |
| 40,062 | 162 | 22,932 | 5,624 | 3,512 | 32,230 |
| 40,063 | 162 | 22,978 | 5,647 | 3,521 | 32,308 |
| 40,064 | 166 | 23,015 | 5,648 | 3,528 | 32,357 |
| 40,065 | 165 | 23,312 | 5,676 | 3,550 | 32,703 |
| 40,066 | 163 | 23,038 | 5,612 | 3,513 | 32,326 |
| 40,067 | 175 | 23,231 | 5,662 | 3,550 | 32,618 |
| 40,068 | 181 | 23,256 | 5,685 | 3,558 | 32,680 |
| 40,069 | 181 | 22,943 | 5,663 | 3,534 | 32,321 |
| 40,070 | 189 | 23,050 | 5,712 | 3,552 | 32,503 |
| 40,071 | 192 | 22,943 | 5,672 | 3,520 | 32,327 |
| 40,072 | 193 | 22,698 | 5,614 | 3,505 | 32,010 |
| 40,073 | 199 | 22,865 | 5,691 | 3,530 | 32,285 |
| 40,074 | 201 | 22,793 | 5,692 | 3,509 | 32,195 |
| 40,075 | 208 | 22,823 | 5,671 | 3,519 | 32,221 |
| 40,076 | 209 | 22,651 | 5,650 | 3,499 | 32,009 |
| 40,077 | 205 | 22,784 | 5,661 | 3,512 | 32,162 |
| 40,078 | 209 | 22,600 | 5,602 | 3,481 | 31,892 |
| 40,079 | 208 | 22,407 | 5,552 | 3,467 | 31,634 |
| 40,080 | 208 | 23,311 | 5,731 | 3,585 | 32,835 |
| 40,081 | 207 | 23,287 | 5,680 | 3,542 | 32,716 |
| 40,082 | 209 | 23,370 | 5,686 | 3,571 | 32,836 |
| 40,083 | 205 | 23,340 | 5,689 | 3,581 | 32,815 |
| 40,084 | 205 | 23,404 | 5,678 | 3,594 | 32,881 |
| 40,085 | 206 | 23,815 | 5,759 | 3,637 | 33,417 |
| 40,086 | 204 | 23,839 | 5,733 | 3,649 | 33,425 |
| 40,087 | 204 | 23,802 | 5,736 | 3,671 | 33,413 |

|        |     |        |       |       |        |
|--------|-----|--------|-------|-------|--------|
| 40,088 | 202 | 23,778 | 5,740 | 3,657 | 33,377 |
| 40,089 | 206 | 23,456 | 5,662 | 3,622 | 32,946 |
| 40,090 | 193 | 23,373 | 5,621 | 3,619 | 32,806 |
| 40,091 | 193 | 23,467 | 5,613 | 3,622 | 32,895 |
| 40,092 | 190 | 23,462 | 5,619 | 3,650 | 32,921 |
| 40,093 | 186 | 23,347 | 5,587 | 3,647 | 32,767 |
| 40,094 | 172 | 22,831 | 5,445 | 3,583 | 32,031 |
| 40,095 | 174 | 22,863 | 5,434 | 3,569 | 32,040 |
| 40,096 | 165 | 22,536 | 5,343 | 3,525 | 31,569 |
| 40,097 | 154 | 22,852 | 5,359 | 3,544 | 31,909 |
| 40,098 | 159 | 22,898 | 5,346 | 3,533 | 31,936 |
| 40,099 | 160 | 22,919 | 5,355 | 3,530 | 31,964 |
| 40,100 | 154 | 22,668 | 5,298 | 3,504 | 31,624 |
| 40,101 | 158 | 23,009 | 5,372 | 3,574 | 32,113 |
| 40,102 | 156 | 23,111 | 5,376 | 3,563 | 32,206 |
| 40,103 | 155 | 23,005 | 5,364 | 3,542 | 32,066 |
| 40,104 | 156 | 23,201 | 5,404 | 3,570 | 32,331 |
| 40,105 | 147 | 23,216 | 5,336 | 3,535 | 32,234 |
| 40,106 | 147 | 23,094 | 5,293 | 3,512 | 32,046 |
| 40,107 | 147 | 23,185 | 5,310 | 3,495 | 32,137 |
| 40,108 | 147 | 23,213 | 5,292 | 3,488 | 32,140 |
| 40,109 | 148 | 23,391 | 5,340 | 3,516 | 32,395 |
| 40,110 | 144 | 23,284 | 5,312 | 3,505 | 32,245 |
| 40,111 | 142 | 22,085 | 5,100 | 3,352 | 30,679 |
| 40,112 | 142 | 22,309 | 5,129 | 3,371 | 30,951 |
| 40,113 | 148 | 21,849 | 5,020 | 3,304 | 30,321 |
| 40,114 | 148 | 22,029 | 5,048 | 3,338 | 30,563 |
| 40,115 | 147 | 22,288 | 5,096 | 3,371 | 30,902 |
| 40,116 | 139 | 21,948 | 4,975 | 3,289 | 30,351 |
| 40,117 | 139 | 22,386 | 5,040 | 3,321 | 30,886 |
| 40,118 | 137 | 22,795 | 5,104 | 3,348 | 31,384 |
| 40,119 | 132 | 22,657 | 5,067 | 3,352 | 31,208 |

|        |     |        |       |       |        |
|--------|-----|--------|-------|-------|--------|
| 40,120 | 132 | 22,529 | 5,040 | 3,334 | 31,035 |
| 40,121 | 124 | 22,336 | 4,957 | 3,303 | 30,720 |
| 40,122 | 119 | 22,574 | 4,968 | 3,324 | 30,985 |
| 40,123 | 114 | 22,289 | 4,899 | 3,279 | 30,581 |
| 40,124 | 114 | 22,361 | 4,885 | 3,276 | 30,636 |
| 40,125 | 113 | 22,565 | 4,900 | 3,300 | 30,878 |
| 40,126 | 106 | 22,305 | 4,871 | 3,274 | 30,556 |
| 40,127 | 105 | 22,255 | 4,820 | 3,243 | 30,423 |
| 40,128 | 104 | 22,344 | 4,842 | 3,253 | 30,543 |
| 40,129 | 101 | 22,120 | 4,816 | 3,255 | 30,292 |
| 40,130 | 103 | 22,006 | 4,815 | 3,240 | 30,164 |
| 40,131 | 105 | 21,939 | 4,795 | 3,226 | 30,065 |
| 40,132 | 102 | 21,714 | 4,750 | 3,198 | 29,764 |
| 40,133 | 101 | 21,729 | 4,768 | 3,204 | 29,802 |
| 40,134 | 101 | 21,723 | 4,763 | 3,193 | 29,780 |
| 40,135 | 99  | 21,696 | 4,777 | 3,183 | 29,755 |
| 40,136 | 96  | 21,066 | 4,672 | 3,105 | 28,939 |
| 40,137 | 95  | 21,151 | 4,706 | 3,144 | 29,096 |
| 40,138 | 97  | 21,111 | 4,674 | 3,129 | 29,011 |
| 40,139 | 100 | 21,224 | 4,699 | 3,154 | 29,177 |
| 40,140 | 93  | 21,171 | 4,701 | 3,158 | 29,123 |
| 40,141 | 92  | 21,175 | 4,707 | 3,163 | 29,137 |
| 40,142 | 97  | 21,227 | 4,696 | 3,148 | 29,168 |
| 40,143 | 100 | 21,327 | 4,711 | 3,164 | 29,302 |
| 40,144 | 103 | 21,636 | 4,789 | 3,191 | 29,719 |
| 40,145 | 114 | 21,759 | 4,829 | 3,220 | 29,922 |
| 40,146 | 115 | 21,487 | 4,798 | 3,194 | 29,594 |
| 40,147 | 116 | 21,182 | 4,749 | 3,156 | 29,203 |
| 40,148 | 122 | 21,348 | 4,773 | 3,184 | 29,427 |
| 40,149 | 122 | 21,263 | 4,757 | 3,190 | 29,332 |
| 40,150 | 126 | 21,035 | 4,745 | 3,142 | 29,048 |
| 40,151 | 126 | 20,833 | 4,691 | 3,144 | 28,794 |

|        |     |        |       |       |        |
|--------|-----|--------|-------|-------|--------|
| 40,152 | 128 | 21,906 | 4,907 | 3,300 | 30,241 |
| 40,153 | 132 | 21,721 | 4,934 | 3,302 | 30,089 |
| 40,154 | 132 | 21,832 | 4,934 | 3,307 | 30,205 |
| 40,155 | 136 | 21,935 | 4,985 | 3,332 | 30,388 |
| 40,156 | 136 | 21,925 | 5,008 | 3,342 | 30,411 |
| 40,157 | 136 | 21,984 | 5,031 | 3,359 | 30,510 |
| 40,158 | 146 | 22,322 | 5,131 | 3,435 | 31,034 |
| 40,159 | 143 | 22,132 | 5,126 | 3,416 | 30,817 |
| 40,160 | 145 | 22,379 | 5,148 | 3,424 | 31,096 |
| 40,161 | 140 | 22,475 | 5,186 | 3,447 | 31,248 |
| 40,162 | 145 | 22,430 | 5,203 | 3,451 | 31,229 |
| 40,163 | 146 | 22,211 | 5,190 | 3,428 | 30,975 |
| 40,164 | 151 | 22,533 | 5,357 | 3,461 | 31,502 |
| 40,165 | 154 | 22,498 | 5,383 | 3,461 | 31,496 |
| 40,166 | 152 | 22,491 | 5,396 | 3,461 | 31,500 |
| 40,167 | 150 | 22,486 | 5,457 | 3,487 | 31,580 |
| 40,168 | 150 | 22,367 | 5,480 | 3,494 | 31,491 |
| 40,169 | 156 | 22,532 | 5,548 | 3,557 | 31,793 |
| 40,170 | 162 | 22,826 | 5,576 | 3,559 | 32,123 |
| 40,171 | 159 | 22,586 | 5,543 | 3,546 | 31,834 |
| 40,172 | 161 | 22,714 | 5,605 | 3,573 | 32,053 |
| 40,173 | 162 | 23,119 | 5,713 | 3,664 | 32,658 |
| 40,174 | 166 | 23,284 | 5,747 | 3,673 | 32,870 |
| 40,175 | 178 | 23,534 | 5,828 | 3,711 | 33,251 |
| 40,176 | 197 | 23,662 | 5,856 | 3,737 | 33,452 |
| 40,177 | 198 | 23,934 | 5,945 | 3,788 | 33,865 |
| 40,178 | 200 | 23,942 | 5,979 | 3,794 | 33,915 |
| 40,179 | 206 | 24,013 | 6,016 | 3,798 | 34,033 |
| 40,180 | 213 | 24,419 | 6,106 | 3,833 | 34,571 |
| 40,181 | 212 | 24,419 | 6,156 | 3,843 | 34,630 |
| 40,182 | 217 | 24,419 | 6,186 | 3,844 | 34,666 |
| 40,183 | 221 | 24,431 | 6,212 | 3,852 | 34,716 |



|        |     |        |       |       |        |
|--------|-----|--------|-------|-------|--------|
| 40,184 | 218 | 24,423 | 6,185 | 3,856 | 34,682 |
| 40,185 | 225 | 24,581 | 6,207 | 3,856 | 34,869 |
| 40,186 | 225 | 24,460 | 6,177 | 3,836 | 34,698 |
| 40,187 | 240 | 24,695 | 6,202 | 3,847 | 34,984 |
| 40,188 | 244 | 24,996 | 6,282 | 3,866 | 35,388 |
| 40,189 | 241 | 24,568 | 6,203 | 3,810 | 34,822 |
| 40,190 | 239 | 24,492 | 6,226 | 3,792 | 34,749 |
| 40,191 | 244 | 24,215 | 6,186 | 3,739 | 34,384 |
| 40,192 | 244 | 23,979 | 6,167 | 3,721 | 34,111 |
| 40,193 | 248 | 24,871 | 6,369 | 3,825 | 35,313 |
| 40,194 | 248 | 24,466 | 6,329 | 3,765 | 34,808 |
| 40,195 | 245 | 24,039 | 6,245 | 3,739 | 34,268 |
| 40,196 | 236 | 24,267 | 6,320 | 3,769 | 34,592 |
| 40,197 | 233 | 23,923 | 6,231 | 3,715 | 34,102 |
| 40,198 | 222 | 23,782 | 6,199 | 3,692 | 33,895 |
| 40,199 | 222 | 23,800 | 6,204 | 3,697 | 33,923 |
| 40,200 | 218 | 23,754 | 6,236 | 3,699 | 33,907 |
| 40,201 | 213 | 23,634 | 6,231 | 3,699 | 33,777 |
| 40,202 | 209 | 23,455 | 6,206 | 3,693 | 33,563 |
| 40,203 | 211 | 23,372 | 6,251 | 3,683 | 33,517 |
| 40,204 | 207 | 23,250 | 6,177 | 3,658 | 33,292 |
| 40,205 | 205 | 23,117 | 6,145 | 3,643 | 33,110 |
| 40,206 | 193 | 22,760 | 5,983 | 3,543 | 32,479 |
| 40,207 | 199 | 22,820 | 5,990 | 3,546 | 32,555 |
| 40,208 | 202 | 22,923 | 6,026 | 3,564 | 32,715 |
| 40,209 | 202 | 22,826 | 6,028 | 3,575 | 32,631 |
| 40,210 | 200 | 22,834 | 6,106 | 3,608 | 32,748 |
| 40,211 | 202 | 22,779 | 6,120 | 3,625 | 32,726 |
| 40,212 | 207 | 22,753 | 6,116 | 3,614 | 32,690 |
| 40,213 | 200 | 22,473 | 6,013 | 3,555 | 32,241 |
| 40,214 | 199 | 22,485 | 6,015 | 3,568 | 32,267 |
| 40,215 | 193 | 22,376 | 5,983 | 3,584 | 32,136 |

|        |     |        |       |       |        |
|--------|-----|--------|-------|-------|--------|
| 40,216 | 197 | 22,438 | 6,019 | 3,611 | 32,265 |
| 40,217 | 206 | 22,449 | 5,969 | 3,580 | 32,204 |
| 40,218 | 209 | 22,505 | 5,963 | 3,590 | 32,267 |
| 40,219 | 209 | 22,491 | 5,955 | 3,604 | 32,259 |
| 40,220 | 202 | 22,215 | 5,959 | 3,596 | 31,972 |
| 40,221 | 196 | 21,954 | 5,909 | 3,588 | 31,647 |
| 40,222 | 193 | 21,881 | 5,883 | 3,585 | 31,542 |
| 40,223 | 191 | 21,764 | 5,880 | 3,553 | 31,388 |
| 40,224 | 192 | 22,046 | 5,953 | 3,620 | 31,811 |
| 40,225 | 181 | 21,471 | 5,816 | 3,539 | 31,007 |
| 40,226 | 176 | 21,665 | 5,882 | 3,572 | 31,295 |
| 40,227 | 161 | 21,888 | 5,950 | 3,624 | 31,623 |
| 40,228 | 176 | 21,745 | 5,891 | 3,612 | 31,424 |
| 40,229 | 173 | 21,763 | 5,909 | 3,618 | 31,463 |
| 40,230 | 174 | 21,901 | 5,986 | 3,652 | 31,713 |
| 40,231 | 166 | 21,623 | 5,871 | 3,598 | 31,258 |
| 40,232 | 174 | 21,668 | 5,923 | 3,621 | 31,386 |
| 40,233 | 167 | 21,684 | 5,932 | 3,631 | 31,414 |
| 40,234 | 169 | 21,610 | 5,883 | 3,622 | 31,284 |
| 40,235 | 169 | 21,570 | 5,923 | 3,617 | 31,279 |
| 40,236 | 165 | 21,477 | 5,923 | 3,641 | 31,206 |
| 40,237 | 164 | 21,383 | 5,952 | 3,639 | 31,138 |
| 40,238 | 149 | 21,546 | 6,020 | 3,690 | 31,405 |
| 40,239 | 145 | 21,684 | 6,026 | 3,724 | 31,579 |
| 40,240 | 138 | 21,614 | 6,037 | 3,757 | 31,546 |
| 40,241 | 139 | 21,691 | 6,081 | 3,791 | 31,702 |
| 40,242 | 134 | 21,768 | 6,128 | 3,811 | 31,841 |
| 40,243 | 136 | 21,943 | 6,143 | 3,843 | 32,065 |
| 40,244 | 134 | 21,731 | 6,112 | 3,825 | 31,802 |
| 40,245 | 131 | 21,912 | 6,110 | 3,852 | 32,005 |
| 40,246 | 131 | 22,179 | 6,173 | 3,893 | 32,376 |
| 40,247 | 134 | 22,236 | 6,193 | 3,903 | 32,466 |

|        |     |        |       |       |        |
|--------|-----|--------|-------|-------|--------|
| 40,248 | 141 | 21,967 | 6,159 | 3,876 | 32,143 |
| 40,249 | 140 | 21,674 | 6,117 | 3,855 | 31,786 |
| 40,250 | 140 | 22,008 | 6,213 | 3,919 | 32,280 |
| 40,251 | 142 | 21,460 | 5,992 | 3,790 | 31,384 |
| 40,252 | 146 | 21,602 | 6,036 | 3,820 | 31,604 |
| 40,253 | 144 | 21,799 | 6,066 | 3,845 | 31,854 |
| 40,254 | 147 | 22,015 | 6,146 | 3,894 | 32,202 |
| 40,255 | 145 | 21,934 | 6,093 | 3,880 | 32,052 |
| 40,256 | 151 | 21,748 | 6,058 | 3,860 | 31,817 |
| 40,257 | 153 | 21,620 | 6,060 | 3,851 | 31,684 |
| 40,258 | 147 | 21,391 | 6,046 | 3,828 | 31,412 |
| 40,259 | 143 | 21,362 | 6,017 | 3,784 | 31,306 |
| 40,260 | 144 | 21,357 | 5,974 | 3,775 | 31,250 |
| 40,261 | 144 | 21,359 | 5,954 | 3,768 | 31,225 |
| 40,262 | 141 | 21,560 | 6,027 | 3,801 | 31,529 |
| 40,263 | 137 | 21,545 | 6,018 | 3,815 | 31,515 |
| 40,264 | 134 | 21,082 | 5,878 | 3,749 | 30,843 |
| 40,265 | 134 | 21,244 | 5,924 | 3,775 | 31,077 |
| 40,266 | 128 | 21,342 | 5,976 | 3,817 | 31,263 |
| 40,267 | 138 | 21,285 | 5,959 | 3,830 | 31,212 |
| 40,268 | 137 | 21,288 | 6,026 | 3,851 | 31,302 |
| 40,269 | 134 | 21,247 | 6,034 | 3,841 | 31,256 |
| 40,270 | 139 | 21,390 | 6,041 | 3,820 | 31,390 |
| 40,271 | 145 | 21,198 | 6,008 | 3,763 | 31,114 |
| 40,272 | 144 | 21,255 | 6,008 | 3,787 | 31,194 |
| 40,273 | 147 | 21,167 | 5,978 | 3,774 | 31,066 |
| 40,274 | 149 | 21,095 | 5,971 | 3,758 | 30,973 |
| 40,275 | 144 | 20,208 | 5,686 | 3,589 | 29,627 |
| 40,276 | 144 | 20,583 | 5,758 | 3,644 | 30,129 |
| 40,277 | 131 | 20,588 | 5,722 | 3,634 | 30,075 |
| 40,278 | 135 | 20,855 | 5,819 | 3,691 | 30,500 |
| 40,279 | 130 | 20,998 | 5,949 | 3,750 | 30,827 |

|        |     |        |       |       |        |
|--------|-----|--------|-------|-------|--------|
| 40,280 | 126 | 20,625 | 5,845 | 3,685 | 30,281 |
| 40,281 | 128 | 20,831 | 5,900 | 3,721 | 30,580 |
| 40,282 | 129 | 20,783 | 5,882 | 3,747 | 30,541 |
| 40,283 | 121 | 20,578 | 5,827 | 3,711 | 30,237 |
| 40,284 | 120 | 20,582 | 5,841 | 3,703 | 30,246 |
| 40,285 | 114 | 20,614 | 5,855 | 3,704 | 30,287 |
| 40,286 | 115 | 20,459 | 5,827 | 3,701 | 30,102 |
| 40,287 | 117 | 20,434 | 5,845 | 3,705 | 30,101 |
| 40,288 | 116 | 20,100 | 5,765 | 3,666 | 29,647 |
| 40,289 | 120 | 20,409 | 5,888 | 3,717 | 30,134 |
| 40,290 | 129 | 20,315 | 5,909 | 3,720 | 30,073 |
| 40,291 | 127 | 19,960 | 5,814 | 3,657 | 29,558 |
| 40,292 | 131 | 19,836 | 5,792 | 3,644 | 29,403 |
| 40,293 | 134 | 19,985 | 5,840 | 3,680 | 29,639 |
| 40,294 | 131 | 19,931 | 5,862 | 3,679 | 29,603 |
| 40,295 | 133 | 19,791 | 5,809 | 3,654 | 29,387 |
| 40,296 | 133 | 19,695 | 5,780 | 3,635 | 29,243 |
| 40,297 | 136 | 20,206 | 5,887 | 3,702 | 29,931 |
| 40,298 | 128 | 20,082 | 5,795 | 3,659 | 29,664 |
| 40,299 | 128 | 20,025 | 5,803 | 3,663 | 29,619 |
| 40,300 | 128 | 20,126 | 5,820 | 3,673 | 29,747 |
| 40,301 | 128 | 20,395 | 5,882 | 3,717 | 30,122 |
| 40,302 | 129 | 20,447 | 5,910 | 3,727 | 30,213 |
| 40,303 | 126 | 20,365 | 5,877 | 3,700 | 30,068 |
| 40,304 | 127 | 20,389 | 5,881 | 3,716 | 30,113 |
| 40,305 | 124 | 20,484 | 5,900 | 3,730 | 30,238 |
| 40,306 | 124 | 20,481 | 5,912 | 3,724 | 30,241 |
| 40,307 | 118 | 19,926 | 5,697 | 3,623 | 29,364 |
| 40,308 | 119 | 20,065 | 5,753 | 3,650 | 29,587 |
| 40,309 | 117 | 20,247 | 5,807 | 3,689 | 29,860 |
| 40,310 | 121 | 20,434 | 5,861 | 3,719 | 30,135 |
| 40,311 | 120 | 20,473 | 5,904 | 3,727 | 30,224 |

|        |     |        |       |       |        |
|--------|-----|--------|-------|-------|--------|
| 40,312 | 126 | 20,558 | 5,957 | 3,738 | 30,379 |
| 40,313 | 126 | 20,722 | 5,998 | 3,763 | 30,609 |
| 40,314 | 126 | 20,470 | 5,946 | 3,729 | 30,271 |
| 40,315 | 127 | 20,721 | 5,962 | 3,765 | 30,575 |
| 40,316 | 122 | 20,725 | 5,928 | 3,729 | 30,504 |
| 40,317 | 123 | 21,016 | 5,985 | 3,757 | 30,881 |
| 40,318 | 113 | 21,297 | 6,017 | 3,786 | 31,213 |
| 40,319 | 112 | 21,412 | 5,984 | 3,775 | 31,283 |
| 40,320 | 109 | 21,189 | 5,953 | 3,765 | 31,016 |
| 40,321 | 105 | 21,208 | 5,949 | 3,758 | 31,020 |
| 40,322 | 103 | 21,150 | 5,956 | 3,768 | 30,977 |
| 40,323 | 102 | 21,325 | 6,031 | 3,754 | 31,212 |
| 40,324 | 101 | 21,279 | 6,038 | 3,747 | 31,165 |
| 40,325 | 100 | 21,302 | 6,054 | 3,742 | 31,198 |
| 40,326 | 102 | 21,343 | 6,091 | 3,748 | 31,284 |
| 40,327 | 106 | 21,300 | 6,092 | 3,740 | 31,238 |
| 40,328 | 110 | 21,191 | 6,082 | 3,733 | 31,116 |
| 40,329 | 108 | 21,158 | 6,078 | 3,713 | 31,057 |
| 40,330 | 115 | 21,256 | 6,037 | 3,683 | 31,091 |
| 40,331 | 120 | 21,099 | 6,005 | 3,677 | 30,901 |
| 40,332 | 115 | 20,969 | 5,978 | 3,693 | 30,755 |
| 40,333 | 115 | 21,083 | 6,022 | 3,717 | 30,937 |
| 40,334 | 116 | 21,042 | 6,023 | 3,726 | 30,907 |
| 40,335 | 117 | 21,013 | 5,996 | 3,740 | 30,866 |
| 40,336 | 119 | 21,008 | 6,013 | 3,740 | 30,880 |
| 40,337 | 119 | 21,061 | 5,977 | 3,716 | 30,873 |
| 40,338 | 118 | 21,018 | 5,962 | 3,712 | 30,810 |
| 40,339 | 120 | 21,140 | 5,937 | 3,718 | 30,915 |
| 40,340 | 120 | 21,151 | 5,950 | 3,720 | 30,941 |
| 40,341 | 117 | 21,228 | 5,999 | 3,724 | 31,068 |
| 40,342 | 113 | 21,324 | 6,026 | 3,751 | 31,214 |
| 40,343 | 121 | 21,264 | 6,036 | 3,757 | 31,178 |

|        |     |        |       |       |        |
|--------|-----|--------|-------|-------|--------|
| 40,344 | 116 | 21,460 | 6,086 | 3,788 | 31,450 |
| 40,345 | 120 | 21,420 | 6,057 | 3,778 | 31,375 |
| 40,346 | 127 | 21,484 | 6,081 | 3,811 | 31,503 |
| 40,347 | 129 | 21,638 | 6,113 | 3,826 | 31,706 |
| 40,348 | 132 | 21,767 | 6,185 | 3,858 | 31,942 |
| 40,349 | 131 | 21,687 | 6,238 | 3,895 | 31,951 |
| 40,350 | 131 | 21,668 | 6,242 | 3,889 | 31,930 |
| 40,351 | 135 | 21,850 | 6,356 | 3,983 | 32,324 |
| 40,352 | 141 | 21,851 | 6,396 | 4,019 | 32,407 |
| 40,353 | 138 | 21,728 | 6,366 | 4,003 | 32,235 |
| 40,354 | 137 | 21,794 | 6,416 | 4,012 | 32,359 |
| 40,355 | 147 | 21,855 | 6,442 | 4,040 | 32,484 |
| 40,356 | 152 | 22,116 | 6,529 | 4,077 | 32,874 |
| 40,357 | 152 | 21,896 | 6,498 | 4,083 | 32,629 |
| 40,358 | 150 | 21,971 | 6,515 | 4,090 | 32,726 |
| 40,359 | 153 | 22,001 | 6,551 | 4,081 | 32,786 |
| 40,360 | 154 | 22,072 | 6,542 | 4,086 | 32,854 |
| 40,361 | 154 | 22,035 | 6,486 | 4,076 | 32,751 |
| 40,362 | 154 | 21,991 | 6,474 | 4,066 | 32,685 |
| 40,363 | 147 | 21,790 | 6,405 | 4,058 | 32,400 |
| 40,364 | 153 | 22,187 | 6,573 | 4,166 | 33,079 |
| 40,365 | 155 | 22,085 | 6,591 | 4,142 | 32,973 |
| 40,366 | 154 | 22,109 | 6,598 | 4,135 | 32,996 |
| 40,367 | 158 | 22,143 | 6,638 | 4,132 | 33,071 |
| 40,368 | 157 | 21,992 | 6,576 | 4,096 | 32,821 |
| 40,369 | 158 | 22,141 | 6,638 | 4,115 | 33,052 |
| 40,370 | 160 | 21,849 | 6,583 | 4,102 | 32,694 |
| 40,371 | 160 | 22,089 | 6,621 | 4,134 | 33,004 |
| 40,372 | 157 | 22,101 | 6,603 | 4,146 | 33,007 |
| 40,373 | 157 | 22,097 | 6,559 | 4,135 | 32,948 |
| 40,374 | 157 | 22,041 | 6,556 | 4,154 | 32,908 |
| 40,375 | 156 | 21,805 | 6,496 | 4,127 | 32,584 |

|        |     |        |       |       |        |
|--------|-----|--------|-------|-------|--------|
| 40,376 | 167 | 22,321 | 6,765 | 4,244 | 33,497 |
| 40,377 | 164 | 22,437 | 6,814 | 4,281 | 33,696 |
| 40,378 | 161 | 22,422 | 6,813 | 4,272 | 33,668 |
| 40,379 | 157 | 22,031 | 6,714 | 4,205 | 33,107 |
| 40,380 | 157 | 22,003 | 6,718 | 4,212 | 33,090 |
| 40,381 | 155 | 22,270 | 6,799 | 4,268 | 33,492 |
| 40,382 | 149 | 22,136 | 6,715 | 4,194 | 33,194 |
| 40,383 | 150 | 22,166 | 6,726 | 4,194 | 33,236 |
| 40,384 | 150 | 22,165 | 6,735 | 4,183 | 33,233 |
| 40,385 | 155 | 22,461 | 6,839 | 4,223 | 33,678 |
| 40,386 | 155 | 22,367 | 6,834 | 4,229 | 33,585 |
| 40,387 | 153 | 22,184 | 6,813 | 4,213 | 33,363 |
| 40,388 | 155 | 21,143 | 6,426 | 4,013 | 31,737 |
| 40,389 | 155 | 21,538 | 6,509 | 4,060 | 32,262 |
| 40,390 | 155 | 21,822 | 6,574 | 4,081 | 32,632 |
| 40,391 | 155 | 21,847 | 6,572 | 4,082 | 32,656 |
| 40,392 | 157 | 22,298 | 6,693 | 4,166 | 33,314 |
| 40,393 | 157 | 22,250 | 6,701 | 4,182 | 33,290 |
| 40,394 | 149 | 22,112 | 6,645 | 4,142 | 33,048 |
| 40,395 | 146 | 22,070 | 6,655 | 4,154 | 33,025 |
| 40,396 | 145 | 22,189 | 6,720 | 4,172 | 33,226 |
| 40,397 | 138 | 22,253 | 6,733 | 4,144 | 33,268 |
| 40,398 | 137 | 22,170 | 6,718 | 4,115 | 33,140 |
| 40,399 | 133 | 22,111 | 6,685 | 4,109 | 33,038 |
| 40,400 | 136 | 22,207 | 6,660 | 4,093 | 33,096 |
| 40,401 | 138 | 22,433 | 6,676 | 4,086 | 33,333 |
| 40,402 | 139 | 22,719 | 6,669 | 4,085 | 33,612 |
| 40,403 | 137 | 22,869 | 6,681 | 4,081 | 33,768 |
| 40,404 | 129 | 22,179 | 6,491 | 3,991 | 32,790 |
| 40,405 | 130 | 22,489 | 6,529 | 4,021 | 33,169 |
| 40,406 | 126 | 22,873 | 6,607 | 4,068 | 33,674 |
| 40,407 | 127 | 22,869 | 6,606 | 4,073 | 33,675 |

|        |     |        |       |       |        |
|--------|-----|--------|-------|-------|--------|
| 40,408 | 127 | 22,977 | 6,623 | 4,071 | 33,798 |
| 40,409 | 135 | 23,056 | 6,629 | 4,091 | 33,911 |
| 40,410 | 132 | 23,065 | 6,632 | 4,099 | 33,928 |
| 40,411 | 129 | 23,101 | 6,691 | 4,117 | 34,038 |
| 40,412 | 129 | 23,138 | 6,774 | 4,134 | 34,175 |
| 40,413 | 135 | 23,500 | 6,848 | 4,191 | 34,674 |
| 40,414 | 150 | 23,530 | 6,864 | 4,185 | 34,729 |
| 40,415 | 154 | 23,344 | 6,765 | 4,148 | 34,411 |
| 40,416 | 152 | 23,410 | 6,757 | 4,153 | 34,472 |
| 40,417 | 157 | 23,281 | 6,779 | 4,144 | 34,361 |
| 40,418 | 152 | 23,166 | 6,762 | 4,139 | 34,219 |
| 40,419 | 156 | 23,433 | 6,847 | 4,185 | 34,621 |
| 40,420 | 157 | 23,529 | 6,853 | 4,196 | 34,735 |
| 40,421 | 154 | 23,675 | 6,892 | 4,208 | 34,929 |
| 40,422 | 156 | 23,712 | 6,919 | 4,201 | 34,988 |
| 40,423 | 158 | 23,817 | 6,907 | 4,195 | 35,077 |
| 40,424 | 162 | 24,212 | 6,980 | 4,252 | 35,606 |
| 40,425 | 159 | 24,233 | 6,954 | 4,260 | 35,606 |
| 40,426 | 157 | 24,289 | 6,938 | 4,258 | 35,642 |
| 40,427 | 154 | 23,653 | 6,750 | 4,158 | 34,715 |
| 40,428 | 154 | 23,869 | 6,790 | 4,182 | 34,995 |
| 40,429 | 155 | 24,086 | 6,857 | 4,234 | 35,332 |
| 40,430 | 155 | 24,123 | 6,871 | 4,226 | 35,375 |
| 40,431 | 154 | 24,407 | 6,956 | 4,286 | 35,803 |
| 40,432 | 156 | 24,697 | 7,037 | 4,353 | 36,243 |
| 40,433 | 155 | 24,640 | 7,033 | 4,340 | 36,168 |
| 40,434 | 154 | 24,474 | 6,993 | 4,302 | 35,923 |
| 40,435 | 155 | 24,526 | 6,950 | 4,294 | 35,925 |
| 40,436 | 150 | 24,536 | 6,930 | 4,262 | 35,878 |
| 40,437 | 156 | 24,654 | 6,945 | 4,253 | 36,008 |
| 40,438 | 154 | 24,392 | 6,898 | 4,214 | 35,658 |
| 40,439 | 159 | 24,802 | 7,011 | 4,285 | 36,257 |



|        |     |        |       |       |        |
|--------|-----|--------|-------|-------|--------|
| 40,440 | 165 | 25,105 | 7,091 | 4,338 | 36,699 |
| 40,441 | 160 | 24,895 | 7,058 | 4,320 | 36,433 |
| 40,442 | 159 | 24,943 | 7,116 | 4,346 | 36,564 |
| 40,443 | 150 | 25,056 | 7,142 | 4,344 | 36,692 |
| 40,444 | 153 | 25,186 | 7,114 | 4,345 | 36,798 |
| 40,445 | 156 | 25,201 | 7,090 | 4,341 | 36,788 |
| 40,446 | 156 | 25,290 | 7,078 | 4,346 | 36,870 |
| 40,447 | 156 | 25,292 | 7,069 | 4,355 | 36,872 |
| 40,448 | 154 | 25,385 | 7,094 | 4,394 | 37,027 |
| 40,449 | 158 | 25,387 | 7,099 | 4,412 | 37,056 |
| 40,450 | 160 | 25,327 | 7,097 | 4,410 | 36,994 |
| 40,451 | 155 | 24,744 | 6,987 | 4,339 | 36,225 |
| 40,452 | 155 | 24,812 | 7,054 | 4,369 | 36,390 |
| 40,453 | 149 | 23,677 | 6,856 | 4,205 | 34,887 |
| 40,454 | 147 | 23,862 | 6,903 | 4,220 | 35,132 |
| 40,455 | 148 | 24,023 | 6,978 | 4,265 | 35,414 |
| 40,456 | 148 | 23,900 | 6,959 | 4,240 | 35,247 |
| 40,457 | 144 | 23,837 | 6,938 | 4,214 | 35,133 |
| 40,458 | 148 | 23,834 | 6,921 | 4,215 | 35,118 |
| 40,459 | 148 | 23,896 | 6,925 | 4,217 | 35,186 |
| 40,460 | 141 | 23,872 | 6,970 | 4,255 | 35,238 |
| 40,461 | 141 | 23,934 | 6,960 | 4,273 | 35,308 |
| 40,462 | 141 | 24,115 | 7,026 | 4,306 | 35,588 |
| 40,463 | 140 | 24,173 | 7,029 | 4,315 | 35,657 |
| 40,464 | 135 | 24,189 | 7,057 | 4,304 | 35,685 |
| 40,465 | 120 | 23,878 | 6,970 | 4,224 | 35,192 |
| 40,466 | 117 | 23,898 | 6,985 | 4,226 | 35,226 |
| 40,467 | 121 | 24,160 | 7,054 | 4,302 | 35,637 |
| 40,468 | 124 | 23,992 | 7,015 | 4,298 | 35,429 |
| 40,469 | 121 | 23,785 | 6,961 | 4,273 | 35,140 |
| 40,470 | 119 | 23,731 | 7,010 | 4,290 | 35,150 |
| 40,471 | 122 | 23,453 | 6,967 | 4,269 | 34,811 |

|        |     |        |       |       |        |
|--------|-----|--------|-------|-------|--------|
| 40,472 | 123 | 23,266 | 6,925 | 4,245 | 34,559 |
| 40,473 | 121 | 23,154 | 6,918 | 4,245 | 34,438 |
| 40,474 | 113 | 23,099 | 6,896 | 4,253 | 34,361 |
| 40,475 | 112 | 23,061 | 6,926 | 4,243 | 34,342 |
| 40,476 | 114 | 23,165 | 6,972 | 4,239 | 34,490 |
| 40,477 | 114 | 23,202 | 6,979 | 4,237 | 34,532 |
| 40,478 | 114 | 22,951 | 6,929 | 4,205 | 34,199 |
| 40,479 | 114 | 22,965 | 6,919 | 4,196 | 34,194 |
| 40,480 | 112 | 23,250 | 6,973 | 4,221 | 34,556 |
| 40,481 | 112 | 23,240 | 6,939 | 4,214 | 34,505 |
| 40,482 | 110 | 23,044 | 6,882 | 4,187 | 34,223 |
| 40,483 | 108 | 22,557 | 6,803 | 4,111 | 33,579 |
| 40,484 | 109 | 22,415 | 6,755 | 4,083 | 33,362 |
| 40,485 | 111 | 22,432 | 6,759 | 4,070 | 33,372 |
| 40,486 | 109 | 22,103 | 6,691 | 4,025 | 32,928 |
| 40,487 | 108 | 22,131 | 6,724 | 4,050 | 33,013 |
| 40,488 | 110 | 22,043 | 6,698 | 4,058 | 32,909 |
| 40,489 | 108 | 19,473 | 6,191 | 3,576 | 29,348 |
| 40,490 | 111 | 21,890 | 6,654 | 4,026 | 32,681 |
| 40,491 | 106 | 21,897 | 6,655 | 4,047 | 32,705 |
| 40,492 | 106 | 21,784 | 6,603 | 4,046 | 32,539 |
| 40,493 | 106 | 21,751 | 6,577 | 4,048 | 32,482 |
| 40,494 | 108 | 21,648 | 6,590 | 4,008 | 32,354 |
| 40,495 | 108 | 21,441 | 6,600 | 4,014 | 32,163 |
| 40,496 | 106 | 21,356 | 6,617 | 4,000 | 32,079 |
| 40,497 | 112 | 21,268 | 6,631 | 3,975 | 31,986 |
| 40,498 | 114 | 21,261 | 6,678 | 3,990 | 32,043 |
| 40,499 | 124 | 21,209 | 6,672 | 3,967 | 31,972 |
| 40,500 | 120 | 21,170 | 6,638 | 3,950 | 31,878 |
| 40,501 | 119 | 21,193 | 6,637 | 3,937 | 31,886 |
| 40,502 | 123 | 21,253 | 6,585 | 3,915 | 31,876 |
| 40,503 | 124 | 21,523 | 6,585 | 3,909 | 32,141 |

|        |     |        |       |       |        |
|--------|-----|--------|-------|-------|--------|
| 40,504 | 122 | 21,303 | 6,532 | 3,891 | 31,848 |
| 40,505 | 121 | 21,596 | 6,586 | 3,948 | 32,251 |
| 40,506 | 125 | 21,654 | 6,570 | 3,940 | 32,289 |
| 40,507 | 125 | 21,511 | 6,513 | 3,935 | 32,084 |
| 40,508 | 126 | 21,812 | 6,570 | 3,964 | 32,472 |
| 40,509 | 128 | 22,091 | 6,629 | 4,016 | 32,864 |
| 40,510 | 126 | 22,163 | 6,606 | 4,012 | 32,907 |
| 40,511 | 130 | 22,184 | 6,578 | 4,000 | 32,892 |
| 40,512 | 129 | 21,918 | 6,481 | 3,938 | 32,466 |
| 40,513 | 128 | 21,888 | 6,426 | 3,918 | 32,360 |
| 40,514 | 127 | 21,872 | 6,419 | 3,912 | 32,330 |
| 40,515 | 133 | 22,035 | 6,434 | 3,921 | 32,523 |
| 40,516 | 130 | 21,656 | 6,332 | 3,881 | 31,999 |
| 40,517 | 130 | 22,023 | 6,393 | 3,910 | 32,456 |
| 40,518 | 122 | 22,003 | 6,368 | 3,890 | 32,383 |
| 40,519 | 122 | 21,869 | 6,231 | 3,813 | 32,035 |
| 40,520 | 122 | 21,818 | 6,229 | 3,801 | 31,970 |
| 40,521 | 122 | 22,132 | 6,219 | 3,812 | 32,285 |
| 40,522 | 118 | 22,285 | 6,251 | 3,822 | 32,476 |
| 40,523 | 125 | 21,977 | 6,129 | 3,729 | 31,960 |
| 40,524 | 130 | 22,173 | 6,177 | 3,757 | 32,237 |
| 40,525 | 127 | 22,131 | 6,181 | 3,744 | 32,183 |
| 40,526 | 128 | 22,010 | 6,171 | 3,744 | 32,053 |
| 40,527 | 126 | 21,549 | 6,086 | 3,732 | 31,493 |
| 40,528 | 129 | 21,614 | 6,085 | 3,729 | 31,557 |
| 40,529 | 131 | 21,539 | 6,079 | 3,703 | 31,452 |
| 40,530 | 134 | 21,457 | 6,054 | 3,694 | 31,339 |
| 40,531 | 135 | 21,453 | 6,037 | 3,682 | 31,307 |
| 40,532 | 136 | 21,218 | 5,993 | 3,646 | 30,993 |
| 40,533 | 132 | 21,296 | 5,988 | 3,635 | 31,051 |
| 40,534 | 133 | 21,362 | 5,982 | 3,643 | 31,120 |
| 40,535 | 128 | 21,473 | 5,974 | 3,666 | 31,241 |

|        |     |        |       |       |        |
|--------|-----|--------|-------|-------|--------|
| 40,536 | 126 | 21,542 | 5,964 | 3,673 | 31,305 |
| 40,537 | 126 | 21,515 | 5,941 | 3,658 | 31,240 |
| 40,538 | 124 | 22,078 | 6,053 | 3,700 | 31,955 |
| 40,539 | 119 | 22,239 | 6,085 | 3,738 | 32,181 |
| 40,540 | 118 | 22,315 | 6,120 | 3,760 | 32,313 |
| 40,541 | 116 | 22,237 | 6,091 | 3,735 | 32,179 |
| 40,542 | 115 | 22,295 | 6,076 | 3,735 | 32,221 |
| 40,543 | 117 | 22,398 | 6,124 | 3,751 | 32,390 |
| 40,544 | 115 | 21,588 | 5,748 | 3,541 | 30,992 |
| 40,545 | 117 | 21,687 | 5,772 | 3,564 | 31,140 |
| 40,546 | 118 | 21,961 | 5,811 | 3,575 | 31,465 |
| 40,547 | 118 | 21,817 | 5,787 | 3,569 | 31,291 |
| 40,548 | 122 | 22,244 | 5,908 | 3,646 | 31,920 |
| 40,549 | 122 | 22,479 | 5,968 | 3,692 | 32,261 |
| 40,550 | 111 | 22,401 | 5,962 | 3,694 | 32,168 |
| 40,551 | 111 | 22,050 | 5,891 | 3,648 | 31,700 |
| 40,552 | 108 | 21,701 | 5,801 | 3,594 | 31,204 |
| 40,553 | 115 | 22,204 | 6,016 | 3,719 | 32,054 |
| 40,554 | 122 | 22,256 | 6,056 | 3,759 | 32,193 |
| 40,555 | 125 | 22,124 | 6,059 | 3,743 | 32,051 |
| 40,556 | 127 | 22,073 | 6,016 | 3,708 | 31,924 |
| 40,557 | 124 | 21,891 | 5,956 | 3,662 | 31,633 |
| 40,558 | 129 | 22,170 | 6,021 | 3,691 | 32,011 |
| 40,559 | 132 | 22,178 | 6,032 | 3,693 | 32,035 |
| 40,560 | 133 | 21,896 | 5,984 | 3,621 | 31,634 |
| 40,561 | 133 | 21,889 | 5,991 | 3,624 | 31,637 |
| 40,562 | 128 | 21,880 | 5,971 | 3,608 | 31,587 |
| 40,563 | 129 | 21,887 | 5,979 | 3,612 | 31,607 |
| 40,564 | 129 | 21,798 | 5,964 | 3,610 | 31,501 |
| 40,565 | 128 | 21,605 | 5,903 | 3,581 | 31,217 |
| 40,566 | 132 | 22,108 | 6,020 | 3,685 | 31,945 |
| 40,567 | 130 | 21,944 | 5,986 | 3,647 | 31,707 |

|        |     |        |       |       |        |
|--------|-----|--------|-------|-------|--------|
| 40,568 | 132 | 21,993 | 6,030 | 3,691 | 31,846 |
| 40,569 | 134 | 21,949 | 6,014 | 3,672 | 31,769 |
| 40,570 | 130 | 21,654 | 5,991 | 3,650 | 31,425 |
| 40,571 | 129 | 22,060 | 6,100 | 3,725 | 32,014 |
| 40,572 | 131 | 22,401 | 6,208 | 3,788 | 32,528 |
| 40,573 | 131 | 22,322 | 6,206 | 3,755 | 32,414 |
| 40,574 | 123 | 22,262 | 6,187 | 3,779 | 32,351 |
| 40,575 | 119 | 22,104 | 6,169 | 3,768 | 32,160 |
| 40,576 | 122 | 22,237 | 6,199 | 3,774 | 32,332 |
| 40,577 | 122 | 22,595 | 6,220 | 3,797 | 32,734 |
| 40,578 | 124 | 22,581 | 6,177 | 3,786 | 32,668 |
| 40,579 | 124 | 22,667 | 6,191 | 3,789 | 32,771 |
| 40,580 | 123 | 22,682 | 6,217 | 3,809 | 32,831 |
| 40,581 | 120 | 22,429 | 6,166 | 3,770 | 32,485 |
| 40,582 | 129 | 22,437 | 6,225 | 3,805 | 32,596 |
| 40,583 | 128 | 22,217 | 6,161 | 3,765 | 32,271 |
| 40,584 | 128 | 21,911 | 6,086 | 3,731 | 31,856 |
| 40,585 | 127 | 21,692 | 6,038 | 3,679 | 31,536 |
| 40,586 | 132 | 21,969 | 6,233 | 3,784 | 32,118 |
| 40,587 | 134 | 22,106 | 6,307 | 3,805 | 32,352 |
| 40,588 | 140 | 21,931 | 6,365 | 3,813 | 32,249 |
| 40,589 | 138 | 21,815 | 6,367 | 3,828 | 32,148 |
| 40,590 | 139 | 21,565 | 6,360 | 3,789 | 31,853 |
| 40,591 | 142 | 21,562 | 6,393 | 3,784 | 31,881 |
| 40,592 | 143 | 21,371 | 6,334 | 3,774 | 31,622 |
| 40,593 | 150 | 21,398 | 6,380 | 3,763 | 31,691 |
| 40,594 | 150 | 21,423 | 6,387 | 3,755 | 31,715 |
| 40,595 | 147 | 21,403 | 6,412 | 3,784 | 31,746 |
| 40,596 | 152 | 21,414 | 6,431 | 3,783 | 31,780 |
| 40,597 | 157 | 21,540 | 6,523 | 3,853 | 32,073 |
| 40,598 | 166 | 21,420 | 6,468 | 3,821 | 31,875 |
| 40,599 | 157 | 21,234 | 6,405 | 3,798 | 31,594 |

|        |     |        |       |       |        |
|--------|-----|--------|-------|-------|--------|
| 40,600 | 156 | 21,240 | 6,441 | 3,819 | 31,656 |
| 40,601 | 160 | 21,110 | 6,359 | 3,800 | 31,429 |
| 40,602 | 161 | 21,267 | 6,394 | 3,834 | 31,656 |
| 40,603 | 150 | 21,251 | 6,381 | 3,824 | 31,606 |
| 40,604 | 157 | 21,515 | 6,424 | 3,837 | 31,933 |
| 40,605 | 153 | 21,233 | 6,361 | 3,799 | 31,546 |
| 40,606 | 159 | 21,429 | 6,409 | 3,830 | 31,827 |
| 40,607 | 157 | 21,094 | 6,357 | 3,806 | 31,414 |
| 40,608 | 159 | 21,024 | 6,355 | 3,785 | 31,323 |
| 40,609 | 159 | 20,991 | 6,340 | 3,774 | 31,264 |
| 40,610 | 163 | 21,203 | 6,374 | 3,800 | 31,540 |
| 40,611 | 158 | 20,953 | 6,306 | 3,771 | 31,188 |
| 40,612 | 167 | 21,191 | 6,362 | 3,809 | 31,529 |
| 40,613 | 169 | 21,256 | 6,400 | 3,827 | 31,652 |
| 40,614 | 167 | 21,096 | 6,350 | 3,781 | 31,394 |
| 40,615 | 168 | 20,983 | 6,331 | 3,771 | 31,253 |
| 40,616 | 168 | 20,928 | 6,322 | 3,761 | 31,179 |
| 40,617 | 161 | 20,855 | 6,317 | 3,741 | 31,074 |
| 40,618 | 164 | 20,975 | 6,351 | 3,771 | 31,261 |
| 40,619 | 164 | 20,997 | 6,390 | 3,781 | 31,332 |
| 40,620 | 161 | 20,843 | 6,309 | 3,743 | 31,056 |
| 40,621 | 161 | 20,613 | 6,261 | 3,707 | 30,742 |
| 40,622 | 167 | 20,960 | 6,333 | 3,769 | 31,229 |
| 40,623 | 168 | 20,882 | 6,289 | 3,736 | 31,075 |
| 40,624 | 169 | 20,757 | 6,230 | 3,749 | 30,905 |
| 40,625 | 168 | 20,738 | 6,246 | 3,741 | 30,893 |
| 40,626 | 170 | 21,083 | 6,337 | 3,799 | 31,389 |
| 40,627 | 171 | 21,057 | 6,267 | 3,784 | 31,279 |
| 40,628 | 169 | 21,088 | 6,252 | 3,797 | 31,306 |
| 40,629 | 164 | 21,081 | 6,253 | 3,792 | 31,290 |
| 40,630 | 165 | 20,747 | 6,162 | 3,783 | 30,857 |
| 40,631 | 167 | 21,032 | 6,198 | 3,800 | 31,197 |

|        |     |        |       |       |        |
|--------|-----|--------|-------|-------|--------|
| 40,632 | 162 | 21,248 | 6,217 | 3,831 | 31,458 |
| 40,633 | 160 | 21,119 | 6,169 | 3,795 | 31,243 |
| 40,634 | 165 | 21,321 | 6,139 | 3,796 | 31,421 |
| 40,635 | 165 | 21,323 | 6,119 | 3,783 | 31,390 |
| 40,636 | 164 | 21,316 | 6,124 | 3,797 | 31,401 |
| 40,637 | 171 | 21,494 | 6,160 | 3,823 | 31,648 |
| 40,638 | 171 | 21,343 | 6,084 | 3,805 | 31,403 |
| 40,639 | 166 | 21,479 | 6,038 | 3,782 | 31,465 |
| 40,640 | 169 | 21,372 | 5,961 | 3,727 | 31,229 |
| 40,641 | 169 | 21,478 | 5,949 | 3,728 | 31,324 |
| 40,642 | 164 | 21,335 | 5,872 | 3,674 | 31,045 |
| 40,643 | 167 | 21,524 | 5,900 | 3,679 | 31,270 |
| 40,644 | 157 | 21,200 | 5,698 | 3,608 | 30,663 |
| 40,645 | 159 | 21,371 | 5,721 | 3,617 | 30,868 |
| 40,646 | 157 | 21,676 | 5,758 | 3,659 | 31,250 |
| 40,647 | 151 | 21,671 | 5,737 | 3,659 | 31,218 |
| 40,648 | 157 | 22,003 | 5,790 | 3,675 | 31,625 |
| 40,649 | 150 | 21,978 | 5,730 | 3,661 | 31,519 |
| 40,650 | 153 | 22,332 | 5,798 | 3,709 | 31,992 |
| 40,651 | 150 | 22,172 | 5,759 | 3,665 | 31,746 |
| 40,652 | 149 | 21,591 | 5,605 | 3,570 | 30,915 |
| 40,653 | 150 | 21,795 | 5,643 | 3,577 | 31,165 |
| 40,654 | 144 | 21,993 | 5,692 | 3,621 | 31,450 |
| 40,655 | 145 | 22,038 | 5,699 | 3,617 | 31,499 |
| 40,656 | 144 | 22,477 | 5,772 | 3,686 | 32,079 |
| 40,657 | 139 | 22,250 | 5,730 | 3,648 | 31,767 |
| 40,658 | 139 | 22,244 | 5,716 | 3,638 | 31,737 |
| 40,659 | 134 | 22,429 | 5,769 | 3,670 | 32,002 |
| 40,660 | 132 | 22,284 | 5,739 | 3,663 | 31,818 |
| 40,661 | 134 | 22,428 | 5,753 | 3,710 | 32,025 |
| 40,662 | 134 | 22,332 | 5,735 | 3,711 | 31,912 |
| 40,663 | 135 | 22,024 | 5,632 | 3,645 | 31,436 |

|        |     |        |       |       |        |
|--------|-----|--------|-------|-------|--------|
| 40,664 | 137 | 22,131 | 5,628 | 3,656 | 31,552 |
| 40,665 | 139 | 21,938 | 5,574 | 3,642 | 31,293 |
| 40,666 | 138 | 22,049 | 5,572 | 3,625 | 31,384 |
| 40,667 | 139 | 22,127 | 5,598 | 3,645 | 31,509 |
| 40,668 | 149 | 22,063 | 5,597 | 3,606 | 31,415 |
| 40,669 | 147 | 22,037 | 5,588 | 3,620 | 31,392 |
| 40,670 | 149 | 21,726 | 5,450 | 3,547 | 30,872 |
| 40,671 | 152 | 21,977 | 5,507 | 3,593 | 31,229 |
| 40,672 | 147 | 21,838 | 5,485 | 3,572 | 31,042 |
| 40,673 | 150 | 21,956 | 5,528 | 3,584 | 31,218 |
| 40,674 | 148 | 22,130 | 5,559 | 3,606 | 31,443 |
| 40,675 | 149 | 21,871 | 5,477 | 3,521 | 31,018 |
| 40,676 | 149 | 21,863 | 5,459 | 3,521 | 30,992 |
| 40,677 | 147 | 22,004 | 5,489 | 3,538 | 31,178 |
| 40,678 | 142 | 22,005 | 5,529 | 3,533 | 31,209 |
| 40,679 | 146 | 22,085 | 5,555 | 3,550 | 31,336 |
| 40,680 | 145 | 21,364 | 5,405 | 3,441 | 30,355 |
| 40,681 | 147 | 21,549 | 5,449 | 3,455 | 30,600 |
| 40,682 | 145 | 21,618 | 5,477 | 3,471 | 30,711 |
| 40,683 | 147 | 21,636 | 5,474 | 3,459 | 30,716 |
| 40,684 | 144 | 21,492 | 5,444 | 3,475 | 30,555 |
| 40,685 | 142 | 21,897 | 5,516 | 3,519 | 31,074 |
| 40,686 | 144 | 22,025 | 5,528 | 3,516 | 31,213 |
| 40,687 | 136 | 21,976 | 5,466 | 3,483 | 31,061 |
| 40,688 | 137 | 22,033 | 5,478 | 3,480 | 31,128 |
| 40,689 | 136 | 22,072 | 5,497 | 3,475 | 31,180 |
| 40,690 | 135 | 21,912 | 5,485 | 3,473 | 31,005 |
| 40,691 | 135 | 21,937 | 5,496 | 3,488 | 31,056 |
| 40,692 | 135 | 21,744 | 5,430 | 3,475 | 30,784 |
| 40,693 | 137 | 21,841 | 5,488 | 3,536 | 31,002 |
| 40,694 | 137 | 21,621 | 5,449 | 3,499 | 30,706 |
| 40,695 | 137 | 21,637 | 5,450 | 3,513 | 30,737 |



|        |     |        |       |       |        |
|--------|-----|--------|-------|-------|--------|
| 40,696 | 148 | 21,820 | 5,551 | 3,561 | 31,080 |
| 40,697 | 150 | 21,708 | 5,574 | 3,549 | 30,981 |
| 40,698 | 150 | 21,551 | 5,544 | 3,535 | 30,780 |
| 40,699 | 154 | 21,608 | 5,568 | 3,555 | 30,885 |
| 40,700 | 153 | 21,562 | 5,557 | 3,538 | 30,810 |
| 40,701 | 155 | 21,372 | 5,499 | 3,500 | 30,526 |
| 40,702 | 156 | 21,179 | 5,472 | 3,458 | 30,265 |
| 40,703 | 152 | 21,450 | 5,573 | 3,498 | 30,673 |
| 40,704 | 153 | 21,437 | 5,595 | 3,485 | 30,670 |
| 40,705 | 160 | 21,534 | 5,585 | 3,494 | 30,773 |
| 40,706 | 158 | 21,422 | 5,576 | 3,474 | 30,630 |
| 40,707 | 163 | 21,770 | 5,682 | 3,532 | 31,147 |
| 40,708 | 163 | 21,956 | 5,725 | 3,561 | 31,405 |
| 40,709 | 161 | 21,872 | 5,712 | 3,548 | 31,293 |
| 40,710 | 157 | 21,230 | 5,565 | 3,437 | 30,389 |
| 40,711 | 158 | 21,413 | 5,622 | 3,459 | 30,652 |
| 40,712 | 154 | 21,616 | 5,686 | 3,485 | 30,941 |
| 40,713 | 154 | 21,614 | 5,693 | 3,492 | 30,953 |
| 40,714 | 146 | 21,813 | 5,770 | 3,541 | 31,270 |
| 40,715 | 155 | 21,958 | 5,813 | 3,569 | 31,495 |
| 40,716 | 152 | 22,160 | 5,856 | 3,609 | 31,777 |
| 40,717 | 154 | 21,976 | 5,789 | 3,565 | 31,484 |
| 40,718 | 150 | 22,147 | 5,809 | 3,577 | 31,683 |
| 40,719 | 152 | 22,213 | 5,797 | 3,551 | 31,713 |
| 40,720 | 150 | 22,425 | 5,884 | 3,592 | 32,051 |
| 40,721 | 154 | 22,425 | 5,899 | 3,610 | 32,088 |
| 40,722 | 152 | 22,575 | 5,944 | 3,631 | 32,302 |
| 40,723 | 155 | 22,430 | 5,934 | 3,624 | 32,143 |
| 40,724 | 153 | 22,307 | 5,905 | 3,599 | 31,964 |
| 40,725 | 166 | 22,786 | 6,069 | 3,661 | 32,682 |
| 40,726 | 166 | 22,854 | 6,076 | 3,668 | 32,764 |
| 40,727 | 166 | 23,074 | 6,108 | 3,675 | 33,023 |

|        |     |        |       |       |        |
|--------|-----|--------|-------|-------|--------|
| 40,728 | 168 | 22,375 | 5,905 | 3,569 | 32,017 |
| 40,729 | 168 | 22,548 | 5,955 | 3,585 | 32,256 |
| 40,730 | 167 | 22,863 | 6,014 | 3,605 | 32,649 |
| 40,731 | 168 | 22,742 | 5,930 | 3,558 | 32,398 |
| 40,732 | 166 | 22,864 | 5,942 | 3,548 | 32,520 |
| 40,733 | 166 | 23,025 | 5,973 | 3,559 | 32,723 |
| 40,734 | 172 | 23,035 | 5,973 | 3,516 | 32,696 |
| 40,735 | 174 | 23,242 | 6,044 | 3,544 | 33,004 |
| 40,736 | 174 | 23,238 | 6,055 | 3,561 | 33,028 |
| 40,737 | 169 | 22,932 | 5,993 | 3,536 | 32,630 |
| 40,738 | 170 | 23,170 | 6,051 | 3,568 | 32,959 |
| 40,739 | 175 | 23,228 | 6,038 | 3,576 | 33,017 |
| 40,740 | 174 | 23,076 | 5,987 | 3,560 | 32,797 |
| 40,741 | 174 | 23,231 | 6,023 | 3,596 | 33,024 |
| 40,742 | 171 | 22,893 | 5,952 | 3,550 | 32,566 |
| 40,743 | 172 | 23,195 | 5,974 | 3,568 | 32,909 |
| 40,744 | 171 | 23,298 | 5,991 | 3,567 | 33,027 |
| 40,745 | 169 | 23,437 | 6,045 | 3,605 | 33,256 |
| 40,746 | 167 | 23,438 | 6,044 | 3,616 | 33,265 |
| 40,747 | 158 | 23,493 | 6,029 | 3,654 | 33,334 |
| 40,748 | 153 | 23,639 | 6,025 | 3,670 | 33,487 |
| 40,749 | 141 | 23,474 | 5,947 | 3,617 | 33,179 |
| 40,750 | 142 | 23,249 | 5,921 | 3,591 | 32,903 |
| 40,751 | 142 | 23,297 | 5,932 | 3,597 | 32,968 |
| 40,752 | 134 | 23,171 | 5,908 | 3,574 | 32,787 |
| 40,753 | 136 | 23,379 | 5,944 | 3,606 | 33,065 |
| 40,754 | 136 | 22,750 | 5,750 | 3,485 | 32,121 |
| 40,755 | 137 | 22,942 | 5,793 | 3,513 | 32,385 |
| 40,756 | 133 | 23,202 | 5,841 | 3,551 | 32,727 |
| 40,757 | 137 | 23,435 | 5,885 | 3,587 | 33,044 |
| 40,758 | 138 | 23,404 | 5,867 | 3,574 | 32,983 |
| 40,759 | 135 | 23,319 | 5,776 | 3,558 | 32,788 |

|        |     |        |       |       |        |
|--------|-----|--------|-------|-------|--------|
| 40,760 | 136 | 23,025 | 5,732 | 3,510 | 32,403 |
| 40,761 | 136 | 23,174 | 5,772 | 3,538 | 32,620 |
| 40,762 | 142 | 23,326 | 5,787 | 3,544 | 32,799 |
| 40,763 | 145 | 23,363 | 5,711 | 3,511 | 32,730 |
| 40,764 | 147 | 23,693 | 5,791 | 3,556 | 33,187 |
| 40,765 | 135 | 23,812 | 5,821 | 3,567 | 33,335 |
| 40,766 | 137 | 23,907 | 5,844 | 3,591 | 33,479 |
| 40,767 | 141 | 23,942 | 5,815 | 3,590 | 33,488 |
| 40,768 | 140 | 24,007 | 5,817 | 3,595 | 33,559 |
| 40,769 | 138 | 24,069 | 5,827 | 3,613 | 33,647 |
| 40,770 | 137 | 23,913 | 5,784 | 3,615 | 33,449 |
| 40,771 | 141 | 24,104 | 5,830 | 3,643 | 33,718 |
| 40,772 | 130 | 22,980 | 5,508 | 3,441 | 32,059 |
| 40,773 | 133 | 23,083 | 5,554 | 3,459 | 32,229 |
| 40,774 | 141 | 23,272 | 5,617 | 3,493 | 32,523 |
| 40,775 | 143 | 23,175 | 5,610 | 3,485 | 32,413 |
| 40,776 | 137 | 23,423 | 5,653 | 3,557 | 32,770 |
| 40,777 | 138 | 23,221 | 5,591 | 3,528 | 32,478 |
| 40,778 | 140 | 23,023 | 5,556 | 3,502 | 32,221 |
| 40,779 | 139 | 23,292 | 5,611 | 3,547 | 32,589 |
| 40,780 | 146 | 23,133 | 5,574 | 3,574 | 32,427 |
| 40,781 | 145 | 23,114 | 5,591 | 3,576 | 32,426 |
| 40,782 | 148 | 22,987 | 5,584 | 3,582 | 32,301 |
| 40,783 | 148 | 22,991 | 5,588 | 3,595 | 32,322 |
| 40,784 | 146 | 22,928 | 5,579 | 3,629 | 32,282 |
| 40,785 | 140 | 23,320 | 5,689 | 3,696 | 32,845 |
| 40,786 | 134 | 23,238 | 5,652 | 3,682 | 32,706 |
| 40,787 | 135 | 23,303 | 5,682 | 3,710 | 32,830 |
| 40,788 | 134 | 23,435 | 5,700 | 3,722 | 32,991 |
| 40,789 | 135 | 23,604 | 5,741 | 3,757 | 33,237 |
| 40,790 | 128 | 23,643 | 5,745 | 3,769 | 33,285 |
| 40,791 | 130 | 23,789 | 5,743 | 3,763 | 33,425 |

|        |     |        |       |       |        |
|--------|-----|--------|-------|-------|--------|
| 40,792 | 129 | 23,793 | 5,733 | 3,748 | 33,403 |
| 40,793 | 126 | 23,758 | 5,706 | 3,740 | 33,330 |
| 40,794 | 133 | 23,697 | 5,709 | 3,728 | 33,267 |
| 40,795 | 136 | 23,642 | 5,701 | 3,724 | 33,203 |
| 40,796 | 136 | 23,577 | 5,644 | 3,679 | 33,036 |
| 40,797 | 135 | 23,586 | 5,650 | 3,655 | 33,026 |
| 40,798 | 135 | 23,921 | 5,734 | 3,680 | 33,470 |
| 40,799 | 140 | 23,807 | 5,711 | 3,669 | 33,327 |
| 40,800 | 139 | 23,686 | 5,671 | 3,659 | 33,155 |
| 40,801 | 145 | 24,018 | 5,769 | 3,692 | 33,624 |
| 40,802 | 149 | 23,569 | 5,646 | 3,635 | 32,999 |
| 40,803 | 152 | 23,729 | 5,662 | 3,664 | 33,207 |
| 40,804 | 150 | 23,704 | 5,658 | 3,675 | 33,187 |
| 40,805 | 146 | 23,682 | 5,647 | 3,700 | 33,175 |
| 40,806 | 146 | 23,636 | 5,611 | 3,703 | 33,096 |
| 40,807 | 143 | 23,537 | 5,593 | 3,704 | 32,977 |
| 40,808 | 139 | 23,422 | 5,598 | 3,695 | 32,854 |
| 40,809 | 132 | 23,160 | 5,520 | 3,658 | 32,470 |
| 40,810 | 132 | 23,475 | 5,589 | 3,691 | 32,887 |
| 40,811 | 132 | 22,795 | 5,400 | 3,558 | 31,885 |
| 40,812 | 130 | 23,213 | 5,474 | 3,626 | 32,443 |
| 40,813 | 125 | 23,118 | 5,494 | 3,644 | 32,381 |
| 40,814 | 124 | 23,126 | 5,501 | 3,660 | 32,411 |
| 40,815 | 125 | 22,991 | 5,429 | 3,629 | 32,174 |
| 40,816 | 125 | 23,176 | 5,449 | 3,638 | 32,388 |
| 40,817 | 123 | 23,390 | 5,511 | 3,679 | 32,703 |
| 40,818 | 118 | 23,478 | 5,524 | 3,679 | 32,799 |
| 40,819 | 118 | 23,512 | 5,534 | 3,719 | 32,883 |
| 40,820 | 116 | 23,693 | 5,553 | 3,751 | 33,113 |
| 40,821 | 115 | 23,687 | 5,585 | 3,760 | 33,147 |
| 40,822 | 111 | 23,865 | 5,609 | 3,782 | 33,367 |
| 40,823 | 108 | 23,931 | 5,608 | 3,788 | 33,435 |

|        |     |        |       |       |        |
|--------|-----|--------|-------|-------|--------|
| 40,824 | 107 | 24,036 | 5,621 | 3,802 | 33,566 |
| 40,825 | 97  | 24,044 | 5,615 | 3,815 | 33,571 |
| 40,826 | 95  | 23,985 | 5,578 | 3,780 | 33,438 |
| 40,827 | 95  | 24,263 | 5,614 | 3,813 | 33,785 |
| 40,828 | 96  | 24,217 | 5,617 | 3,802 | 33,732 |
| 40,829 | 93  | 23,872 | 5,525 | 3,736 | 33,226 |
| 40,830 | 90  | 23,830 | 5,515 | 3,731 | 33,166 |
| 40,831 | 94  | 23,904 | 5,505 | 3,714 | 33,217 |
| 40,832 | 94  | 23,573 | 5,439 | 3,683 | 32,789 |
| 40,833 | 104 | 24,198 | 5,569 | 3,760 | 33,631 |
| 40,834 | 110 | 24,159 | 5,525 | 3,734 | 33,528 |
| 40,835 | 119 | 24,361 | 5,620 | 3,765 | 33,865 |
| 40,836 | 129 | 24,406 | 5,593 | 3,773 | 33,901 |
| 40,837 | 131 | 24,082 | 5,531 | 3,728 | 33,472 |
| 40,838 | 135 | 24,079 | 5,544 | 3,716 | 33,474 |
| 40,839 | 135 | 23,972 | 5,512 | 3,719 | 33,338 |
| 40,840 | 139 | 23,828 | 5,457 | 3,680 | 33,104 |
| 40,841 | 139 | 23,570 | 5,405 | 3,636 | 32,750 |
| 40,842 | 141 | 23,880 | 5,493 | 3,675 | 33,189 |
| 40,843 | 142 | 23,967 | 5,498 | 3,697 | 33,304 |
| 40,844 | 142 | 23,950 | 5,494 | 3,695 | 33,281 |
| 40,845 | 134 | 24,333 | 5,623 | 3,761 | 33,851 |
| 40,846 | 129 | 24,160 | 5,574 | 3,737 | 33,600 |
| 40,847 | 132 | 24,066 | 5,584 | 3,745 | 33,527 |
| 40,848 | 133 | 24,230 | 5,594 | 3,765 | 33,722 |
| 40,849 | 134 | 24,382 | 5,630 | 3,789 | 33,935 |
| 40,850 | 131 | 24,131 | 5,548 | 3,758 | 33,568 |
| 40,851 | 131 | 24,327 | 5,593 | 3,795 | 33,846 |
| 40,852 | 132 | 24,576 | 5,652 | 3,850 | 34,210 |
| 40,853 | 132 | 24,770 | 5,692 | 3,874 | 34,468 |
| 40,854 | 130 | 24,666 | 5,671 | 3,854 | 34,321 |
| 40,855 | 130 | 24,755 | 5,675 | 3,852 | 34,412 |

|        |     |        |       |       |        |
|--------|-----|--------|-------|-------|--------|
| 40,856 | 130 | 24,777 | 5,681 | 3,860 | 34,448 |
| 40,857 | 134 | 25,182 | 5,784 | 3,904 | 35,004 |
| 40,858 | 133 | 25,181 | 5,749 | 3,890 | 34,953 |
| 40,859 | 134 | 25,454 | 5,842 | 3,908 | 35,338 |
| 40,860 | 135 | 25,235 | 5,801 | 3,880 | 35,051 |
| 40,861 | 135 | 25,243 | 5,818 | 3,889 | 35,085 |
| 40,862 | 140 | 24,992 | 5,743 | 3,853 | 34,728 |
| 40,863 | 140 | 25,132 | 5,818 | 3,878 | 34,968 |
| 40,864 | 136 | 25,364 | 5,882 | 3,935 | 35,317 |
| 40,865 | 136 | 25,168 | 5,843 | 3,906 | 35,053 |
| 40,866 | 139 | 25,099 | 5,851 | 3,897 | 34,986 |
| 40,867 | 144 | 25,108 | 5,866 | 3,909 | 35,027 |
| 40,868 | 143 | 24,598 | 5,763 | 3,815 | 34,319 |
| 40,869 | 146 | 25,075 | 5,830 | 3,902 | 34,953 |
| 40,870 | 147 | 25,352 | 5,885 | 3,902 | 35,286 |
| 40,871 | 149 | 25,282 | 5,878 | 3,874 | 35,183 |
| 40,872 | 145 | 25,417 | 5,857 | 3,865 | 35,284 |
| 40,873 | 157 | 25,023 | 5,823 | 3,830 | 34,833 |
| 40,874 | 161 | 24,711 | 5,797 | 3,797 | 34,466 |
| 40,875 | 167 | 24,998 | 5,863 | 3,834 | 34,862 |
| 40,876 | 169 | 25,031 | 5,847 | 3,823 | 34,870 |
| 40,877 | 171 | 25,023 | 5,841 | 3,821 | 34,856 |
| 40,878 | 171 | 25,068 | 5,875 | 3,842 | 34,956 |
| 40,879 | 168 | 24,971 | 5,862 | 3,839 | 34,840 |
| 40,880 | 165 | 24,805 | 5,857 | 3,835 | 34,662 |
| 40,881 | 165 | 24,770 | 5,841 | 3,820 | 34,596 |
| 40,882 | 156 | 24,674 | 5,854 | 3,843 | 34,527 |
| 40,883 | 155 | 24,809 | 5,879 | 3,877 | 34,720 |
| 40,884 | 146 | 25,051 | 5,931 | 3,917 | 35,045 |
| 40,885 | 141 | 25,160 | 5,955 | 3,923 | 35,179 |
| 40,886 | 132 | 25,372 | 5,942 | 3,927 | 35,373 |
| 40,887 | 125 | 25,320 | 5,957 | 3,926 | 35,328 |

|        |     |        |       |       |        |
|--------|-----|--------|-------|-------|--------|
| 40,888 | 125 | 25,054 | 5,898 | 3,877 | 34,954 |
| 40,889 | 125 | 24,828 | 5,870 | 3,862 | 34,685 |
| 40,890 | 131 | 24,999 | 6,022 | 3,967 | 35,119 |
| 40,891 | 134 | 24,795 | 5,990 | 3,936 | 34,855 |
| 40,892 | 134 | 24,516 | 5,917 | 3,900 | 34,467 |
| 40,893 | 132 | 24,673 | 5,983 | 3,934 | 34,722 |
| 40,894 | 130 | 24,671 | 5,983 | 3,919 | 34,703 |
| 40,895 | 130 | 24,938 | 6,021 | 3,948 | 35,037 |
| 40,896 | 136 | 24,942 | 5,952 | 3,938 | 34,968 |
| 40,897 | 133 | 24,737 | 5,901 | 3,883 | 34,654 |
| 40,898 | 132 | 24,862 | 5,932 | 3,895 | 34,821 |
| 40,899 | 137 | 24,945 | 5,949 | 3,912 | 34,943 |
| 40,900 | 137 | 24,847 | 5,924 | 3,912 | 34,820 |
| 40,901 | 136 | 24,702 | 5,964 | 3,925 | 34,727 |
| 40,902 | 141 | 25,058 | 6,091 | 3,967 | 35,257 |
| 40,903 | 142 | 25,155 | 6,082 | 3,967 | 35,346 |
| 40,904 | 144 | 24,977 | 6,038 | 3,941 | 35,100 |
| 40,905 | 144 | 24,745 | 6,002 | 3,912 | 34,803 |
| 40,906 | 144 | 24,739 | 6,018 | 3,901 | 34,802 |
| 40,907 | 142 | 24,910 | 6,032 | 3,931 | 35,015 |
| 40,908 | 140 | 24,929 | 6,037 | 3,924 | 35,030 |
| 40,909 | 146 | 24,650 | 5,984 | 3,888 | 34,668 |
| 40,910 | 146 | 24,593 | 5,954 | 3,896 | 34,589 |
| 40,911 | 151 | 24,564 | 5,960 | 3,879 | 34,554 |
| 40,912 | 151 | 24,375 | 5,894 | 3,831 | 34,251 |
| 40,913 | 143 | 24,534 | 5,930 | 3,874 | 34,481 |
| 40,914 | 147 | 24,717 | 5,891 | 3,853 | 34,608 |
| 40,915 | 156 | 24,890 | 5,969 | 3,886 | 34,901 |
| 40,916 | 157 | 24,419 | 5,895 | 3,828 | 34,299 |
| 40,917 | 154 | 24,265 | 5,901 | 3,820 | 34,140 |
| 40,918 | 154 | 24,395 | 5,954 | 3,812 | 34,315 |
| 40,919 | 155 | 24,223 | 5,921 | 3,800 | 34,099 |

|        |     |        |       |       |        |
|--------|-----|--------|-------|-------|--------|
| 40,920 | 160 | 24,087 | 5,938 | 3,784 | 33,969 |
| 40,921 | 159 | 23,748 | 5,894 | 3,755 | 33,556 |
| 40,922 | 157 | 23,721 | 5,891 | 3,743 | 33,512 |
| 40,923 | 158 | 23,691 | 5,910 | 3,748 | 33,507 |
| 40,924 | 144 | 23,682 | 5,888 | 3,732 | 33,446 |
| 40,925 | 140 | 23,588 | 5,833 | 3,717 | 33,278 |
| 40,926 | 132 | 23,272 | 5,817 | 3,710 | 32,931 |
| 40,927 | 137 | 23,317 | 5,862 | 3,720 | 33,036 |
| 40,928 | 138 | 23,171 | 5,811 | 3,694 | 32,814 |
| 40,929 | 145 | 23,347 | 5,884 | 3,722 | 33,098 |
| 40,930 | 143 | 23,273 | 5,830 | 3,694 | 32,940 |
| 40,931 | 144 | 23,445 | 5,854 | 3,719 | 33,162 |
| 40,932 | 153 | 23,540 | 5,860 | 3,694 | 33,247 |
| 40,933 | 155 | 23,473 | 5,871 | 3,683 | 33,182 |
| 40,934 | 155 | 23,376 | 5,885 | 3,677 | 33,093 |
| 40,935 | 156 | 23,187 | 5,880 | 3,683 | 32,906 |
| 40,936 | 157 | 23,192 | 5,904 | 3,690 | 32,943 |
| 40,937 | 159 | 22,996 | 5,865 | 3,696 | 32,716 |
| 40,938 | 162 | 22,993 | 5,879 | 3,682 | 32,716 |
| 40,939 | 158 | 23,172 | 5,853 | 3,676 | 32,859 |
| 40,940 | 155 | 23,150 | 5,761 | 3,590 | 32,656 |
| 40,941 | 156 | 23,297 | 5,751 | 3,604 | 32,808 |
| 40,942 | 148 | 22,977 | 5,711 | 3,572 | 32,408 |
| 40,943 | 149 | 22,991 | 5,781 | 3,615 | 32,536 |
| 40,944 | 153 | 22,989 | 5,756 | 3,587 | 32,485 |
| 40,945 | 156 | 22,952 | 5,764 | 3,575 | 32,447 |
| 40,946 | 156 | 22,615 | 5,717 | 3,554 | 32,042 |
| 40,947 | 151 | 22,593 | 5,776 | 3,581 | 32,101 |
| 40,948 | 151 | 22,473 | 5,714 | 3,563 | 31,901 |
| 40,949 | 155 | 22,543 | 5,735 | 3,570 | 32,003 |
| 40,950 | 153 | 22,576 | 5,716 | 3,562 | 32,007 |
| 40,951 | 154 | 22,764 | 5,745 | 3,555 | 32,218 |



|        |     |        |       |       |        |
|--------|-----|--------|-------|-------|--------|
| 40,952 | 154 | 22,877 | 5,702 | 3,533 | 32,266 |
| 40,953 | 153 | 22,467 | 5,638 | 3,500 | 31,758 |
| 40,954 | 146 | 22,333 | 5,636 | 3,490 | 31,605 |
| 40,955 | 142 | 22,185 | 5,631 | 3,493 | 31,451 |
| 40,956 | 145 | 22,405 | 5,629 | 3,516 | 31,695 |
| 40,957 | 145 | 22,312 | 5,634 | 3,505 | 31,596 |
| 40,958 | 144 | 22,140 | 5,626 | 3,487 | 31,397 |
| 40,959 | 145 | 22,158 | 5,615 | 3,489 | 31,407 |
| 40,960 | 143 | 21,998 | 5,596 | 3,497 | 31,234 |
| 40,961 | 137 | 21,957 | 5,596 | 3,473 | 31,163 |
| 40,962 | 137 | 21,921 | 5,605 | 3,472 | 31,135 |
| 40,963 | 140 | 21,780 | 5,656 | 3,476 | 31,052 |
| 40,964 | 140 | 22,151 | 5,748 | 3,567 | 31,606 |
| 40,965 | 138 | 22,316 | 5,802 | 3,595 | 31,851 |
| 40,966 | 132 | 22,284 | 5,736 | 3,581 | 31,733 |
| 40,967 | 132 | 22,254 | 5,747 | 3,592 | 31,725 |
| 40,968 | 130 | 22,140 | 5,726 | 3,641 | 31,637 |
| 40,969 | 124 | 22,388 | 5,791 | 3,701 | 32,004 |
| 40,970 | 124 | 22,486 | 5,816 | 3,716 | 32,142 |
| 40,971 | 119 | 22,469 | 5,801 | 3,708 | 32,097 |
| 40,972 | 119 | 22,531 | 5,795 | 3,701 | 32,146 |
| 40,973 | 117 | 22,467 | 5,733 | 3,714 | 32,031 |
| 40,974 | 118 | 22,516 | 5,717 | 3,702 | 32,053 |
| 40,975 | 119 | 22,501 | 5,692 | 3,681 | 31,993 |
| 40,976 | 119 | 22,631 | 5,711 | 3,690 | 32,151 |
| 40,977 | 116 | 22,823 | 5,690 | 3,694 | 32,323 |
| 40,978 | 116 | 22,806 | 5,702 | 3,691 | 32,315 |
| 40,979 | 122 | 23,187 | 5,752 | 3,747 | 32,808 |
| 40,980 | 121 | 23,319 | 5,769 | 3,775 | 32,984 |
| 40,981 | 128 | 23,025 | 5,744 | 3,733 | 32,630 |
| 40,982 | 127 | 22,851 | 5,700 | 3,690 | 32,368 |
| 40,983 | 125 | 23,099 | 5,745 | 3,745 | 32,714 |

|        |     |        |       |       |        |
|--------|-----|--------|-------|-------|--------|
| 40,984 | 125 | 23,266 | 5,768 | 3,760 | 32,919 |
| 40,985 | 117 | 22,376 | 5,472 | 3,589 | 31,554 |
| 40,986 | 117 | 22,506 | 5,501 | 3,606 | 31,730 |
| 40,987 | 117 | 22,762 | 5,561 | 3,631 | 32,071 |
| 40,988 | 116 | 22,649 | 5,575 | 3,630 | 31,970 |
| 40,989 | 117 | 22,681 | 5,610 | 3,649 | 32,057 |
| 40,990 | 115 | 22,726 | 5,648 | 3,677 | 32,166 |
| 40,991 | 114 | 22,640 | 5,644 | 3,691 | 32,089 |
| 40,992 | 113 | 22,689 | 5,627 | 3,670 | 32,099 |
| 40,993 | 116 | 22,805 | 5,591 | 3,657 | 32,169 |
| 40,994 | 116 | 22,640 | 5,537 | 3,627 | 31,920 |
| 40,995 | 116 | 22,725 | 5,532 | 3,640 | 32,013 |
| 40,996 | 115 | 22,756 | 5,514 | 3,644 | 32,029 |
| 40,997 | 117 | 22,803 | 5,534 | 3,628 | 32,082 |
| 40,998 | 117 | 22,753 | 5,546 | 3,625 | 32,041 |
| 40,999 | 116 | 22,975 | 5,598 | 3,674 | 32,363 |
| 41,000 | 116 | 22,690 | 5,561 | 3,621 | 31,988 |
| 41,001 | 114 | 22,311 | 5,524 | 3,591 | 31,540 |
| 41,002 | 124 | 22,660 | 5,583 | 3,649 | 32,016 |
| 41,003 | 119 | 22,185 | 5,435 | 3,544 | 31,283 |
| 41,004 | 128 | 22,298 | 5,462 | 3,565 | 31,453 |
| 41,005 | 125 | 22,560 | 5,479 | 3,603 | 31,767 |
| 41,006 | 126 | 22,590 | 5,487 | 3,587 | 31,790 |
| 41,007 | 125 | 22,550 | 5,473 | 3,581 | 31,729 |
| 41,008 | 125 | 22,426 | 5,437 | 3,551 | 31,539 |
| 41,009 | 125 | 22,296 | 5,400 | 3,524 | 31,345 |
| 41,010 | 126 | 22,323 | 5,404 | 3,513 | 31,366 |
| 41,011 | 122 | 22,006 | 5,349 | 3,474 | 30,951 |
| 41,012 | 123 | 21,779 | 5,286 | 3,460 | 30,648 |
| 41,013 | 127 | 23,358 | 5,596 | 3,690 | 32,771 |
| 41,014 | 129 | 23,415 | 5,600 | 3,699 | 32,843 |
| 41,015 | 133 | 23,420 | 5,588 | 3,666 | 32,807 |

|        |     |        |       |       |        |
|--------|-----|--------|-------|-------|--------|
| 41,016 | 136 | 23,208 | 5,551 | 3,630 | 32,525 |
| 41,017 | 143 | 23,063 | 5,523 | 3,579 | 32,308 |
| 41,018 | 143 | 23,200 | 5,538 | 3,560 | 32,441 |
| 41,019 | 144 | 23,088 | 5,531 | 3,553 | 32,316 |
| 41,020 | 145 | 22,993 | 5,528 | 3,543 | 32,209 |
| 41,021 | 143 | 22,840 | 5,543 | 3,524 | 32,050 |
| 41,022 | 151 | 22,890 | 5,559 | 3,556 | 32,156 |
| 41,023 | 151 | 22,429 | 5,495 | 3,518 | 31,593 |
| 41,024 | 156 | 22,249 | 5,528 | 3,512 | 31,445 |
| 41,025 | 155 | 22,108 | 5,531 | 3,508 | 31,302 |
| 41,026 | 153 | 21,710 | 5,447 | 3,457 | 30,767 |
| 41,027 | 153 | 21,415 | 5,390 | 3,431 | 30,389 |
| 41,028 | 161 | 21,747 | 5,496 | 3,487 | 30,891 |
| 41,029 | 162 | 21,928 | 5,550 | 3,527 | 31,167 |
| 41,030 | 158 | 21,889 | 5,584 | 3,512 | 31,143 |
| 41,031 | 153 | 21,877 | 5,547 | 3,474 | 31,051 |
| 41,032 | 141 | 21,839 | 5,512 | 3,477 | 30,969 |
| 41,033 | 144 | 21,752 | 5,480 | 3,484 | 30,860 |
| 41,034 | 143 | 21,520 | 5,421 | 3,444 | 30,528 |
| 41,035 | 145 | 21,563 | 5,430 | 3,440 | 30,578 |
| 41,036 | 150 | 21,721 | 5,485 | 3,465 | 30,821 |
| 41,037 | 152 | 21,996 | 5,540 | 3,516 | 31,204 |
| 41,038 | 151 | 22,086 | 5,558 | 3,521 | 31,316 |
| 41,039 | 150 | 21,974 | 5,490 | 3,494 | 31,108 |
| 41,040 | 152 | 22,299 | 5,549 | 3,541 | 31,541 |
| 41,041 | 153 | 22,356 | 5,540 | 3,559 | 31,608 |
| 41,042 | 157 | 22,336 | 5,549 | 3,576 | 31,618 |
| 41,043 | 157 | 22,311 | 5,521 | 3,558 | 31,547 |
| 41,044 | 152 | 22,061 | 5,474 | 3,526 | 31,213 |
| 41,045 | 152 | 22,510 | 5,614 | 3,614 | 31,890 |
| 41,046 | 151 | 22,480 | 5,646 | 3,640 | 31,917 |
| 41,047 | 155 | 22,334 | 5,630 | 3,640 | 31,759 |

|        |     |        |       |       |        |
|--------|-----|--------|-------|-------|--------|
| 41,048 | 155 | 22,412 | 5,643 | 3,629 | 31,839 |
| 41,049 | 154 | 22,338 | 5,662 | 3,614 | 31,768 |
| 41,050 | 154 | 22,329 | 5,666 | 3,607 | 31,756 |
| 41,051 | 150 | 22,572 | 5,696 | 3,658 | 32,076 |
| 41,052 | 149 | 22,603 | 5,715 | 3,657 | 32,124 |
| 41,053 | 148 | 22,366 | 5,655 | 3,606 | 31,775 |
| 41,054 | 148 | 22,374 | 5,661 | 3,615 | 31,798 |
| 41,055 | 150 | 22,690 | 5,741 | 3,678 | 32,259 |
| 41,056 | 151 | 22,427 | 5,694 | 3,636 | 31,908 |
| 41,057 | 148 | 22,079 | 5,626 | 3,611 | 31,464 |
| 41,058 | 153 | 22,388 | 5,767 | 3,711 | 32,019 |
| 41,059 | 152 | 22,033 | 5,724 | 3,695 | 31,604 |
| 41,060 | 156 | 22,184 | 5,771 | 3,725 | 31,836 |
| 41,061 | 156 | 22,164 | 5,803 | 3,753 | 31,876 |
| 41,062 | 161 | 22,186 | 5,794 | 3,748 | 31,889 |
| 41,063 | 157 | 22,069 | 5,743 | 3,706 | 31,675 |
| 41,064 | 161 | 22,056 | 5,732 | 3,700 | 31,649 |
| 41,065 | 161 | 21,961 | 5,681 | 3,672 | 31,475 |
| 41,066 | 161 | 21,968 | 5,708 | 3,702 | 31,539 |
| 41,067 | 158 | 22,050 | 5,753 | 3,732 | 31,693 |
| 41,068 | 146 | 21,763 | 5,701 | 3,711 | 31,321 |
| 41,069 | 146 | 21,908 | 5,695 | 3,697 | 31,446 |
| 41,070 | 145 | 22,014 | 5,705 | 3,697 | 31,561 |
| 41,071 | 150 | 22,053 | 5,674 | 3,701 | 31,578 |
| 41,072 | 148 | 22,078 | 5,681 | 3,693 | 31,600 |
| 41,073 | 141 | 22,197 | 5,718 | 3,729 | 31,785 |
| 41,074 | 143 | 22,442 | 5,708 | 3,717 | 32,010 |
| 41,075 | 148 | 22,446 | 5,666 | 3,695 | 31,955 |
| 41,076 | 149 | 22,452 | 5,682 | 3,698 | 31,981 |
| 41,077 | 151 | 22,705 | 5,702 | 3,732 | 32,290 |
| 41,078 | 142 | 22,578 | 5,678 | 3,700 | 32,098 |
| 41,079 | 148 | 22,574 | 5,673 | 3,692 | 32,087 |

|        |     |        |       |       |        |
|--------|-----|--------|-------|-------|--------|
| 41,080 | 150 | 22,598 | 5,680 | 3,697 | 32,125 |
| 41,081 | 150 | 22,431 | 5,618 | 3,697 | 31,896 |
| 41,082 | 155 | 22,377 | 5,624 | 3,700 | 31,856 |
| 41,083 | 155 | 22,292 | 5,634 | 3,695 | 31,776 |
| 41,084 | 147 | 22,196 | 5,666 | 3,696 | 31,705 |
| 41,085 | 147 | 22,408 | 5,728 | 3,741 | 32,024 |
| 41,086 | 142 | 22,231 | 5,700 | 3,727 | 31,800 |
| 41,087 | 143 | 22,201 | 5,729 | 3,758 | 31,831 |
| 41,088 | 147 | 22,293 | 5,742 | 3,753 | 31,935 |
| 41,089 | 145 | 22,128 | 5,695 | 3,735 | 31,703 |
| 41,090 | 149 | 22,105 | 5,694 | 3,696 | 31,644 |
| 41,091 | 150 | 22,124 | 5,720 | 3,699 | 31,693 |
| 41,092 | 146 | 21,974 | 5,697 | 3,657 | 31,474 |
| 41,093 | 146 | 21,797 | 5,678 | 3,670 | 31,291 |
| 41,094 | 148 | 21,874 | 5,718 | 3,680 | 31,420 |
| 41,095 | 145 | 22,050 | 5,770 | 3,714 | 31,679 |
| 41,096 | 144 | 21,870 | 5,736 | 3,678 | 31,428 |
| 41,097 | 138 | 21,701 | 5,700 | 3,646 | 31,185 |
| 41,098 | 139 | 21,668 | 5,662 | 3,630 | 31,099 |
| 41,099 | 141 | 21,650 | 5,634 | 3,639 | 31,064 |
| 41,100 | 145 | 21,692 | 5,626 | 3,633 | 31,096 |
| 41,101 | 145 | 21,418 | 5,578 | 3,591 | 30,732 |
| 41,102 | 140 | 21,694 | 5,724 | 3,667 | 31,225 |
| 41,103 | 139 | 21,385 | 5,669 | 3,627 | 30,820 |
| 41,104 | 137 | 21,606 | 5,737 | 3,676 | 31,156 |
| 41,105 | 137 | 21,507 | 5,767 | 3,689 | 31,100 |
| 41,106 | 129 | 21,476 | 5,751 | 3,672 | 31,028 |
| 41,107 | 130 | 21,410 | 5,763 | 3,653 | 30,956 |
| 41,108 | 134 | 21,608 | 5,797 | 3,622 | 31,161 |
| 41,109 | 136 | 21,461 | 5,744 | 3,568 | 30,909 |
| 41,110 | 135 | 21,274 | 5,696 | 3,516 | 30,621 |
| 41,111 | 136 | 21,736 | 5,864 | 3,604 | 31,340 |

|        |     |        |       |       |        |
|--------|-----|--------|-------|-------|--------|
| 41,112 | 131 | 21,430 | 5,767 | 3,522 | 30,850 |
| 41,113 | 131 | 21,453 | 5,761 | 3,523 | 30,868 |
| 41,114 | 130 | 21,183 | 5,752 | 3,513 | 30,578 |
| 41,115 | 124 | 20,966 | 5,739 | 3,521 | 30,350 |
| 41,116 | 120 | 20,976 | 5,783 | 3,518 | 30,397 |
| 41,117 | 124 | 20,569 | 5,660 | 3,446 | 29,799 |
| 41,118 | 125 | 20,456 | 5,627 | 3,426 | 29,634 |
| 41,119 | 122 | 20,417 | 5,589 | 3,406 | 29,534 |
| 41,120 | 130 | 20,695 | 5,634 | 3,430 | 29,889 |
| 41,121 | 134 | 20,494 | 5,578 | 3,407 | 29,613 |
| 41,122 | 136 | 20,544 | 5,565 | 3,390 | 29,635 |
| 41,123 | 137 | 20,510 | 5,554 | 3,375 | 29,576 |
| 41,124 | 144 | 20,725 | 5,607 | 3,386 | 29,862 |
| 41,125 | 139 | 20,401 | 5,567 | 3,349 | 29,456 |
| 41,126 | 135 | 20,160 | 5,501 | 3,304 | 29,100 |
| 41,127 | 134 | 20,236 | 5,521 | 3,304 | 29,195 |
| 41,128 | 129 | 20,045 | 5,481 | 3,287 | 28,942 |
| 41,129 | 122 | 20,603 | 5,593 | 3,364 | 29,682 |
| 41,130 | 121 | 20,666 | 5,574 | 3,360 | 29,721 |
| 41,131 | 121 | 20,943 | 5,666 | 3,378 | 30,108 |
| 41,132 | 118 | 20,774 | 5,647 | 3,351 | 29,890 |
| 41,133 | 121 | 20,813 | 5,663 | 3,345 | 29,942 |
| 41,134 | 127 | 20,816 | 5,628 | 3,310 | 29,881 |
| 41,135 | 130 | 21,097 | 5,673 | 3,340 | 30,240 |
| 41,136 | 129 | 20,809 | 5,582 | 3,256 | 29,776 |
| 41,137 | 129 | 20,861 | 5,571 | 3,237 | 29,798 |
| 41,138 | 129 | 20,880 | 5,580 | 3,244 | 29,833 |
| 41,139 | 127 | 20,893 | 5,621 | 3,277 | 29,918 |
| 41,140 | 132 | 20,790 | 5,625 | 3,297 | 29,844 |
| 41,141 | 132 | 20,736 | 5,628 | 3,321 | 29,817 |
| 41,142 | 132 | 20,760 | 5,624 | 3,327 | 29,843 |
| 41,143 | 137 | 20,708 | 5,609 | 3,308 | 29,762 |

|        |     |        |       |       |        |
|--------|-----|--------|-------|-------|--------|
| 41,144 | 136 | 20,753 | 5,618 | 3,298 | 29,805 |
| 41,145 | 134 | 20,561 | 5,567 | 3,275 | 29,537 |
| 41,146 | 134 | 20,803 | 5,602 | 3,293 | 29,832 |
| 41,147 | 133 | 20,690 | 5,565 | 3,266 | 29,654 |
| 41,148 | 136 | 20,626 | 5,569 | 3,269 | 29,600 |
| 41,149 | 135 | 20,605 | 5,573 | 3,280 | 29,593 |
| 41,150 | 129 | 20,530 | 5,578 | 3,281 | 29,518 |
| 41,151 | 131 | 20,514 | 5,584 | 3,272 | 29,501 |
| 41,152 | 131 | 20,411 | 5,549 | 3,250 | 29,341 |
| 41,153 | 133 | 20,626 | 5,626 | 3,299 | 29,684 |
| 41,154 | 138 | 20,532 | 5,574 | 3,266 | 29,510 |
| 41,155 | 140 | 20,422 | 5,549 | 3,243 | 29,354 |
| 41,156 | 144 | 20,680 | 5,551 | 3,231 | 29,606 |
| 41,157 | 145 | 20,653 | 5,560 | 3,242 | 29,600 |
| 41,158 | 143 | 20,660 | 5,549 | 3,235 | 29,587 |
| 41,159 | 146 | 20,597 | 5,526 | 3,250 | 29,519 |
| 41,160 | 141 | 20,460 | 5,471 | 3,237 | 29,309 |
| 41,161 | 140 | 20,246 | 5,385 | 3,205 | 28,976 |
| 41,162 | 143 | 20,445 | 5,428 | 3,218 | 29,234 |
| 41,163 | 138 | 20,443 | 5,417 | 3,214 | 29,212 |
| 41,164 | 139 | 20,469 | 5,369 | 3,181 | 29,158 |
| 41,165 | 142 | 20,521 | 5,359 | 3,169 | 29,191 |
| 41,166 | 145 | 20,814 | 5,426 | 3,184 | 29,569 |
| 41,167 | 146 | 20,574 | 5,349 | 3,131 | 29,200 |
| 41,168 | 143 | 20,576 | 5,366 | 3,129 | 29,214 |
| 41,169 | 142 | 20,890 | 5,408 | 3,177 | 29,617 |
| 41,170 | 142 | 20,839 | 5,420 | 3,171 | 29,572 |
| 41,171 | 134 | 20,918 | 5,467 | 3,220 | 29,739 |
| 41,172 | 126 | 20,689 | 5,426 | 3,166 | 29,407 |
| 41,173 | 127 | 20,646 | 5,425 | 3,161 | 29,359 |
| 41,174 | 127 | 20,678 | 5,410 | 3,156 | 29,371 |
| 41,175 | 122 | 20,831 | 5,468 | 3,182 | 29,603 |

|        |     |        |       |       |        |
|--------|-----|--------|-------|-------|--------|
| 41,176 | 128 | 20,785 | 5,445 | 3,196 | 29,554 |
| 41,177 | 129 | 20,555 | 5,414 | 3,184 | 29,282 |
| 41,178 | 128 | 20,352 | 5,388 | 3,168 | 29,036 |
| 41,179 | 133 | 20,272 | 5,398 | 3,145 | 28,948 |
| 41,180 | 133 | 20,062 | 5,362 | 3,132 | 28,689 |
| 41,181 | 148 | 20,465 | 5,460 | 3,191 | 29,264 |
| 41,182 | 149 | 20,343 | 5,386 | 3,194 | 29,072 |
| 41,183 | 150 | 20,222 | 5,389 | 3,184 | 28,945 |
| 41,184 | 147 | 20,479 | 5,442 | 3,208 | 29,276 |
| 41,185 | 141 | 20,257 | 5,396 | 3,196 | 28,990 |
| 41,186 | 143 | 20,277 | 5,421 | 3,208 | 29,049 |
| 41,187 | 144 | 20,279 | 5,471 | 3,230 | 29,124 |
| 41,188 | 148 | 20,271 | 5,501 | 3,250 | 29,170 |
| 41,189 | 150 | 20,549 | 5,567 | 3,245 | 29,511 |
| 41,190 | 150 | 20,557 | 5,561 | 3,244 | 29,512 |
| 41,191 | 147 | 20,767 | 5,624 | 3,276 | 29,814 |
| 41,192 | 141 | 20,805 | 5,653 | 3,270 | 29,869 |
| 41,193 | 137 | 20,793 | 5,647 | 3,256 | 29,833 |
| 41,194 | 134 | 20,522 | 5,585 | 3,235 | 29,476 |
| 41,195 | 133 | 20,483 | 5,573 | 3,226 | 29,415 |
| 41,196 | 134 | 20,635 | 5,657 | 3,254 | 29,680 |
| 41,197 | 137 | 20,812 | 5,699 | 3,290 | 29,938 |
| 41,198 | 137 | 20,819 | 5,676 | 3,281 | 29,913 |
| 41,199 | 140 | 20,971 | 5,732 | 3,290 | 30,133 |
| 41,200 | 139 | 21,111 | 5,733 | 3,304 | 30,287 |
| 41,201 | 140 | 20,837 | 5,595 | 3,231 | 29,803 |
| 41,202 | 143 | 21,096 | 5,643 | 3,246 | 30,128 |
| 41,203 | 141 | 21,258 | 5,694 | 3,298 | 30,391 |
| 41,204 | 141 | 21,311 | 5,707 | 3,302 | 30,461 |
| 41,205 | 134 | 20,948 | 5,650 | 3,291 | 30,023 |
| 41,206 | 144 | 21,236 | 5,737 | 3,344 | 30,461 |
| 41,207 | 140 | 21,159 | 5,724 | 3,338 | 30,361 |



|        |     |        |       |       |        |
|--------|-----|--------|-------|-------|--------|
| 41,208 | 138 | 21,012 | 5,667 | 3,293 | 30,110 |
| 41,209 | 138 | 21,053 | 5,671 | 3,301 | 30,163 |
| 41,210 | 133 | 21,040 | 5,671 | 3,311 | 30,155 |
| 41,211 | 144 | 21,452 | 5,822 | 3,387 | 30,805 |
| 41,212 | 143 | 21,423 | 5,836 | 3,393 | 30,795 |
| 41,213 | 142 | 20,921 | 5,716 | 3,334 | 30,113 |
| 41,214 | 143 | 21,031 | 5,754 | 3,362 | 30,290 |
| 41,215 | 142 | 20,989 | 5,758 | 3,366 | 30,255 |
| 41,216 | 139 | 20,779 | 5,729 | 3,355 | 30,002 |
| 41,217 | 136 | 21,095 | 5,822 | 3,459 | 30,512 |
| 41,218 | 132 | 20,966 | 5,822 | 3,479 | 30,399 |
| 41,219 | 136 | 20,884 | 5,830 | 3,474 | 30,324 |
| 41,220 | 135 | 20,820 | 5,835 | 3,475 | 30,265 |
| 41,221 | 138 | 20,658 | 5,762 | 3,464 | 30,022 |
| 41,222 | 139 | 20,735 | 5,760 | 3,461 | 30,095 |
| 41,223 | 138 | 20,633 | 5,754 | 3,488 | 30,013 |
| 41,224 | 137 | 20,627 | 5,774 | 3,486 | 30,024 |
| 41,225 | 138 | 20,572 | 5,764 | 3,477 | 29,951 |
| 41,226 | 138 | 20,852 | 5,826 | 3,532 | 30,348 |
| 41,227 | 129 | 20,600 | 5,764 | 3,487 | 29,980 |
| 41,228 | 129 | 20,514 | 5,780 | 3,499 | 29,922 |
| 41,229 | 125 | 20,417 | 5,784 | 3,503 | 29,829 |
| 41,230 | 111 | 20,120 | 5,719 | 3,465 | 29,415 |
| 41,231 | 112 | 19,688 | 5,621 | 3,409 | 28,830 |
| 41,232 | 112 | 19,335 | 5,571 | 3,373 | 28,391 |
| 41,233 | 115 | 19,550 | 5,668 | 3,432 | 28,765 |
| 41,234 | 114 | 19,494 | 5,672 | 3,425 | 28,705 |
| 41,235 | 112 | 19,457 | 5,647 | 3,428 | 28,644 |
| 41,236 | 114 | 19,551 | 5,655 | 3,439 | 28,759 |
| 41,237 | 113 | 19,478 | 5,601 | 3,416 | 28,608 |
| 41,238 | 108 | 19,437 | 5,583 | 3,405 | 28,533 |
| 41,239 | 107 | 19,358 | 5,568 | 3,372 | 28,405 |

|        |     |        |       |       |        |
|--------|-----|--------|-------|-------|--------|
| 41,240 | 105 | 19,280 | 5,526 | 3,380 | 28,291 |
| 41,241 | 104 | 19,269 | 5,529 | 3,369 | 28,271 |
| 41,242 | 107 | 19,215 | 5,545 | 3,356 | 28,223 |
| 41,243 | 108 | 18,335 | 5,325 | 3,205 | 26,973 |
| 41,244 | 109 | 18,408 | 5,346 | 3,236 | 27,099 |
| 41,245 | 108 | 18,567 | 5,408 | 3,252 | 27,335 |
| 41,246 | 110 | 18,370 | 5,328 | 3,212 | 27,020 |
| 41,247 | 110 | 18,382 | 5,324 | 3,200 | 27,016 |
| 41,248 | 109 | 17,931 | 5,239 | 3,131 | 26,410 |
| 41,249 | 106 | 17,698 | 5,166 | 3,092 | 26,062 |
| 41,250 | 107 | 18,100 | 5,287 | 3,196 | 26,690 |
| 41,251 | 109 | 17,851 | 5,248 | 3,162 | 26,370 |
| 41,252 | 110 | 18,181 | 5,349 | 3,230 | 26,870 |
| 41,253 | 113 | 18,373 | 5,366 | 3,264 | 27,116 |
| 41,254 | 112 | 18,254 | 5,353 | 3,234 | 26,953 |
| 41,255 | 106 | 18,342 | 5,368 | 3,259 | 27,075 |
| 41,256 | 105 | 18,615 | 5,449 | 3,307 | 27,476 |
| 41,257 | 104 | 18,555 | 5,433 | 3,290 | 27,382 |
| 41,258 | 104 | 18,539 | 5,446 | 3,290 | 27,379 |
| 41,259 | 101 | 18,384 | 5,476 | 3,328 | 27,289 |
| 41,260 | 109 | 18,421 | 5,525 | 3,337 | 27,392 |
| 41,261 | 104 | 18,658 | 5,582 | 3,369 | 27,713 |
| 41,262 | 98  | 18,736 | 5,598 | 3,375 | 27,807 |
| 41,263 | 103 | 18,842 | 5,596 | 3,393 | 27,934 |
| 41,264 | 103 | 18,845 | 5,605 | 3,415 | 27,968 |
| 41,265 | 102 | 18,685 | 5,566 | 3,388 | 27,741 |
| 41,266 | 103 | 18,840 | 5,596 | 3,396 | 27,935 |
| 41,267 | 104 | 18,997 | 5,684 | 3,425 | 28,210 |
| 41,268 | 105 | 18,981 | 5,659 | 3,367 | 28,112 |
| 41,269 | 105 | 18,861 | 5,655 | 3,365 | 27,986 |
| 41,270 | 105 | 18,999 | 5,724 | 3,400 | 28,228 |
| 41,271 | 110 | 19,160 | 5,776 | 3,430 | 28,476 |

|        |     |        |       |       |        |
|--------|-----|--------|-------|-------|--------|
| 41,272 | 107 | 18,953 | 5,783 | 3,399 | 28,242 |
| 41,273 | 108 | 18,981 | 5,803 | 3,400 | 28,292 |
| 41,274 | 107 | 18,788 | 5,777 | 3,383 | 28,055 |
| 41,275 | 105 | 18,840 | 5,877 | 3,441 | 28,263 |
| 41,276 | 109 | 18,954 | 5,931 | 3,460 | 28,454 |
| 41,277 | 111 | 18,894 | 5,940 | 3,467 | 28,412 |
| 41,278 | 109 | 18,828 | 5,916 | 3,424 | 28,277 |
| 41,279 | 109 | 18,862 | 5,920 | 3,427 | 28,318 |
| 41,280 | 114 | 19,184 | 5,973 | 3,454 | 28,725 |
| 41,281 | 122 | 19,261 | 5,907 | 3,410 | 28,700 |
| 41,282 | 124 | 19,497 | 5,999 | 3,461 | 29,081 |
| 41,283 | 123 | 19,766 | 6,057 | 3,499 | 29,445 |
| 41,284 | 125 | 19,895 | 6,068 | 3,497 | 29,585 |
| 41,285 | 133 | 19,813 | 6,059 | 3,486 | 29,491 |
| 41,286 | 133 | 19,636 | 6,062 | 3,465 | 29,296 |
| 41,287 | 130 | 19,590 | 6,098 | 3,481 | 29,299 |
| 41,288 | 129 | 19,345 | 6,034 | 3,456 | 28,964 |
| 41,289 | 128 | 19,926 | 6,224 | 3,578 | 29,856 |
| 41,290 | 130 | 19,989 | 6,273 | 3,616 | 30,008 |
| 41,291 | 134 | 20,347 | 6,400 | 3,665 | 30,546 |
| 41,292 | 139 | 20,338 | 6,397 | 3,668 | 30,542 |
| 41,293 | 139 | 20,222 | 6,346 | 3,684 | 30,391 |
| 41,294 | 139 | 19,999 | 6,300 | 3,664 | 30,102 |
| 41,295 | 138 | 19,802 | 6,260 | 3,622 | 29,822 |
| 41,296 | 139 | 20,251 | 6,357 | 3,699 | 30,446 |
| 41,297 | 135 | 20,191 | 6,321 | 3,688 | 30,335 |
| 41,298 | 135 | 20,040 | 6,270 | 3,665 | 30,110 |
| 41,299 | 135 | 20,012 | 6,303 | 3,678 | 30,128 |
| 41,300 | 134 | 19,765 | 6,265 | 3,654 | 29,818 |
| 41,301 | 136 | 19,862 | 6,315 | 3,678 | 29,991 |
| 41,302 | 134 | 19,810 | 6,335 | 3,684 | 29,963 |
| 41,303 | 131 | 19,808 | 6,352 | 3,682 | 29,973 |

|        |     |        |       |       |        |
|--------|-----|--------|-------|-------|--------|
| 41,304 | 126 | 19,718 | 6,337 | 3,643 | 29,824 |
| 41,305 | 123 | 19,603 | 6,316 | 3,641 | 29,683 |
| 41,306 | 126 | 19,770 | 6,334 | 3,635 | 29,865 |
| 41,307 | 128 | 19,883 | 6,367 | 3,664 | 30,042 |
| 41,308 | 129 | 19,537 | 6,276 | 3,605 | 29,547 |
| 41,309 | 129 | 19,575 | 6,288 | 3,596 | 29,588 |
| 41,310 | 122 | 19,584 | 6,313 | 3,599 | 29,618 |
| 41,311 | 122 | 19,601 | 6,338 | 3,602 | 29,663 |
| 41,312 | 124 | 19,226 | 6,241 | 3,542 | 29,133 |
| 41,313 | 124 | 19,194 | 6,229 | 3,536 | 29,083 |
| 41,314 | 118 | 19,233 | 6,264 | 3,552 | 29,167 |
| 41,315 | 115 | 19,125 | 6,303 | 3,552 | 29,095 |
| 41,316 | 114 | 18,915 | 6,285 | 3,552 | 28,866 |
| 41,317 | 113 | 18,854 | 6,282 | 3,559 | 28,808 |
| 41,318 | 115 | 18,816 | 6,276 | 3,546 | 28,753 |
| 41,319 | 114 | 18,435 | 6,205 | 3,517 | 28,271 |
| 41,320 | 113 | 18,781 | 6,313 | 3,581 | 28,788 |
| 41,321 | 114 | 18,730 | 6,280 | 3,598 | 28,722 |
| 41,322 | 111 | 18,412 | 6,226 | 3,570 | 28,319 |
| 41,323 | 110 | 18,330 | 6,180 | 3,543 | 28,163 |
| 41,324 | 110 | 18,349 | 6,147 | 3,521 | 28,127 |
| 41,325 | 113 | 18,423 | 6,121 | 3,507 | 28,164 |
| 41,326 | 114 | 18,469 | 6,122 | 3,511 | 28,216 |
| 41,327 | 108 | 18,344 | 6,079 | 3,487 | 28,018 |
| 41,328 | 106 | 18,228 | 6,037 | 3,473 | 27,844 |
| 41,329 | 105 | 18,099 | 6,019 | 3,484 | 27,707 |
| 41,330 | 107 | 17,917 | 6,038 | 3,496 | 27,558 |
| 41,331 | 100 | 18,061 | 6,116 | 3,525 | 27,802 |
| 41,332 | 88  | 17,916 | 6,136 | 3,530 | 27,670 |
| 41,333 | 87  | 17,933 | 6,146 | 3,551 | 27,717 |
| 41,334 | 85  | 17,950 | 6,195 | 3,586 | 27,816 |
| 41,335 | 85  | 17,830 | 6,180 | 3,577 | 27,672 |

|        |    |        |       |       |        |
|--------|----|--------|-------|-------|--------|
| 41,336 | 76 | 17,757 | 6,154 | 3,545 | 27,532 |
| 41,337 | 74 | 17,767 | 6,187 | 3,550 | 27,578 |
| 41,338 | 77 | 17,735 | 6,217 | 3,549 | 27,578 |
| 41,339 | 77 | 17,588 | 6,202 | 3,508 | 27,375 |
| 41,340 | 76 | 17,449 | 6,251 | 3,492 | 27,268 |
| 41,341 | 75 | 17,318 | 6,241 | 3,488 | 27,122 |
| 41,342 | 74 | 17,317 | 6,239 | 3,493 | 27,123 |
| 41,343 | 69 | 17,403 | 6,252 | 3,487 | 27,211 |
| 41,344 | 67 | 17,483 | 6,294 | 3,462 | 27,306 |
| 41,345 | 65 | 17,450 | 6,307 | 3,457 | 27,279 |
| 41,346 | 65 | 17,408 | 6,318 | 3,461 | 27,252 |
| 41,347 | 67 | 17,270 | 6,302 | 3,434 | 27,073 |
| 41,348 | 67 | 17,088 | 6,212 | 3,406 | 26,773 |
| 41,349 | 67 | 17,322 | 6,274 | 3,425 | 27,088 |
| 41,350 | 65 | 17,437 | 6,331 | 3,447 | 27,280 |
| 41,351 | 68 | 17,419 | 6,341 | 3,452 | 27,280 |
| 41,352 | 67 | 17,462 | 6,357 | 3,445 | 27,331 |
| 41,353 | 68 | 17,458 | 6,315 | 3,445 | 27,286 |
| 41,354 | 70 | 17,279 | 6,293 | 3,424 | 27,066 |
| 41,355 | 76 | 17,206 | 6,277 | 3,437 | 26,996 |
| 41,356 | 77 | 17,177 | 6,272 | 3,390 | 26,916 |
| 41,357 | 74 | 16,916 | 6,205 | 3,355 | 26,550 |
| 41,358 | 71 | 16,912 | 6,182 | 3,358 | 26,523 |
| 41,359 | 70 | 16,975 | 6,165 | 3,336 | 26,546 |
| 41,360 | 70 | 17,207 | 6,220 | 3,378 | 26,875 |
| 41,361 | 67 | 17,047 | 6,150 | 3,336 | 26,600 |
| 41,362 | 66 | 16,803 | 6,062 | 3,301 | 26,232 |
| 41,363 | 67 | 17,106 | 6,169 | 3,358 | 26,700 |
| 41,364 | 67 | 16,895 | 6,100 | 3,312 | 26,374 |
| 41,365 | 70 | 16,715 | 6,003 | 3,241 | 26,029 |
| 41,366 | 71 | 17,007 | 6,052 | 3,262 | 26,392 |
| 41,367 | 74 | 16,896 | 5,966 | 3,221 | 26,157 |

|        |    |        |       |       |        |
|--------|----|--------|-------|-------|--------|
| 41,368 | 79 | 17,029 | 6,019 | 3,242 | 26,369 |
| 41,369 | 76 | 16,996 | 5,961 | 3,205 | 26,238 |
| 41,370 | 75 | 17,061 | 5,964 | 3,186 | 26,286 |
| 41,371 | 76 | 17,042 | 5,964 | 3,178 | 26,260 |
| 41,372 | 74 | 16,817 | 5,910 | 3,114 | 25,915 |
| 41,373 | 77 | 17,388 | 6,038 | 3,179 | 26,682 |
| 41,374 | 76 | 17,238 | 5,959 | 3,143 | 26,416 |
| 41,375 | 76 | 17,274 | 5,970 | 3,144 | 26,464 |
| 41,376 | 76 | 17,333 | 6,012 | 3,161 | 26,582 |
| 41,377 | 75 | 17,312 | 6,012 | 3,163 | 26,562 |
| 41,378 | 75 | 17,384 | 6,031 | 3,169 | 26,659 |
| 41,379 | 74 | 17,493 | 6,063 | 3,198 | 26,828 |
| 41,380 | 77 | 17,877 | 6,085 | 3,189 | 27,228 |
| 41,381 | 78 | 18,097 | 6,148 | 3,236 | 27,559 |
| 41,382 | 78 | 18,084 | 6,116 | 3,243 | 27,521 |
| 41,383 | 78 | 18,134 | 6,094 | 3,225 | 27,531 |
| 41,384 | 82 | 17,860 | 5,977 | 3,142 | 27,061 |
| 41,385 | 82 | 17,779 | 5,916 | 3,127 | 26,904 |
| 41,386 | 82 | 17,982 | 5,995 | 3,174 | 27,233 |
| 41,387 | 82 | 17,979 | 5,946 | 3,175 | 27,182 |
| 41,388 | 82 | 17,938 | 5,861 | 3,168 | 27,049 |
| 41,389 | 84 | 17,781 | 5,734 | 3,114 | 26,713 |
| 41,390 | 85 | 17,949 | 5,765 | 3,147 | 26,946 |
| 41,391 | 85 | 18,146 | 5,801 | 3,190 | 27,222 |
| 41,392 | 84 | 18,287 | 5,770 | 3,190 | 27,331 |
| 41,393 | 89 | 18,117 | 5,690 | 3,170 | 27,066 |
| 41,394 | 89 | 18,027 | 5,684 | 3,158 | 26,958 |
| 41,395 | 88 | 17,806 | 5,593 | 3,107 | 26,594 |
| 41,396 | 97 | 18,133 | 5,704 | 3,196 | 27,130 |
| 41,397 | 97 | 18,123 | 5,700 | 3,187 | 27,107 |
| 41,398 | 98 | 18,180 | 5,706 | 3,198 | 27,182 |
| 41,399 | 99 | 18,291 | 5,735 | 3,205 | 27,330 |

|        |    |        |       |       |        |
|--------|----|--------|-------|-------|--------|
| 41,400 | 99 | 18,464 | 5,780 | 3,225 | 27,568 |
| 41,401 | 98 | 18,391 | 5,708 | 3,187 | 27,384 |
| 41,402 | 97 | 18,651 | 5,772 | 3,241 | 27,761 |
| 41,403 | 93 | 18,564 | 5,755 | 3,218 | 27,630 |
| 41,404 | 92 | 18,339 | 5,704 | 3,166 | 27,301 |
| 41,405 | 90 | 18,179 | 5,654 | 3,144 | 27,067 |
| 41,406 | 87 | 18,652 | 5,849 | 3,221 | 27,809 |
| 41,407 | 86 | 18,562 | 5,823 | 3,229 | 27,700 |
| 41,408 | 86 | 18,340 | 5,797 | 3,200 | 27,423 |
| 41,409 | 85 | 18,130 | 5,797 | 3,201 | 27,213 |
| 41,410 | 85 | 17,891 | 5,750 | 3,171 | 26,897 |
| 41,411 | 85 | 17,737 | 5,749 | 3,154 | 26,725 |
| 41,412 | 86 | 17,654 | 5,783 | 3,161 | 26,684 |
| 41,413 | 85 | 17,429 | 5,714 | 3,120 | 26,348 |
| 41,414 | 84 | 17,087 | 5,656 | 3,089 | 25,916 |
| 41,415 | 84 | 17,263 | 5,709 | 3,096 | 26,152 |
| 41,416 | 81 | 17,174 | 5,703 | 3,074 | 26,032 |
| 41,417 | 84 | 17,072 | 5,727 | 3,063 | 25,946 |
| 41,418 | 81 | 16,938 | 5,779 | 3,074 | 25,872 |
| 41,419 | 76 | 16,753 | 5,714 | 3,022 | 25,565 |
| 41,420 | 76 | 16,606 | 5,723 | 2,997 | 25,402 |
| 41,421 | 75 | 16,207 | 5,633 | 2,978 | 24,893 |
| 41,422 | 74 | 16,221 | 5,628 | 2,989 | 24,912 |
| 41,423 | 69 | 16,322 | 5,663 | 2,998 | 25,052 |
| 41,424 | 69 | 16,196 | 5,589 | 2,977 | 24,831 |
| 41,425 | 71 | 16,212 | 5,615 | 2,966 | 24,864 |
| 41,426 | 68 | 16,095 | 5,591 | 2,943 | 24,697 |
| 41,427 | 68 | 15,991 | 5,619 | 2,939 | 24,617 |
| 41,428 | 67 | 15,877 | 5,678 | 2,985 | 24,607 |
| 41,429 | 67 | 15,702 | 5,682 | 2,961 | 24,412 |
| 41,430 | 66 | 15,430 | 5,642 | 2,913 | 24,051 |
| 41,431 | 64 | 15,208 | 5,613 | 2,888 | 23,773 |

|        |    |        |        |       |        |
|--------|----|--------|--------|-------|--------|
| 41,432 | 65 | 15,087 | 5,581  | 2,830 | 23,563 |
| 41,433 | 66 | 14,990 | 5,565  | 2,803 | 23,424 |
| 41,434 | 62 | 15,118 | 5,619  | 2,830 | 23,629 |
| 41,435 | 57 | 14,729 | 5,513  | 2,758 | 23,057 |
| 41,436 | 56 | 14,456 | 5,519  | 2,754 | 22,785 |
| 41,437 | 55 | 14,261 | 5,498  | 2,728 | 22,542 |
| 41,438 | 55 | 14,014 | 5,499  | 2,708 | 22,276 |
| 41,439 | 55 | 13,939 | 5,499  | 2,694 | 22,187 |
| 41,440 | 52 | 13,908 | 5,524  | 2,699 | 22,183 |
| 41,441 | 51 | 14,109 | 5,636  | 2,738 | 22,534 |
| 41,442 | 54 | 14,848 | 6,000  | 2,843 | 23,745 |
| 41,443 | 58 | 15,279 | 6,441  | 2,920 | 24,698 |
| 41,444 | 49 | 15,724 | 6,809  | 3,027 | 25,609 |
| 41,445 | 53 | 16,011 | 7,115  | 3,096 | 26,275 |
| 41,446 | 53 | 16,033 | 7,303  | 3,105 | 26,494 |
| 41,447 | 56 | 15,944 | 7,480  | 3,116 | 26,596 |
| 41,448 | 52 | 16,144 | 7,728  | 3,164 | 27,088 |
| 41,449 | 50 | 15,944 | 7,739  | 3,118 | 26,851 |
| 41,450 | 52 | 16,455 | 8,052  | 3,212 | 27,771 |
| 41,451 | 55 | 17,210 | 8,513  | 3,329 | 29,107 |
| 41,452 | 57 | 17,843 | 8,930  | 3,450 | 30,280 |
| 41,453 | 57 | 18,368 | 9,260  | 3,513 | 31,198 |
| 41,454 | 57 | 18,840 | 9,695  | 3,628 | 32,220 |
| 41,455 | 61 | 19,439 | 10,084 | 3,742 | 33,326 |
| 41,456 | 60 | 19,873 | 10,407 | 3,823 | 34,163 |
| 41,457 | 65 | 20,381 | 10,718 | 3,942 | 35,106 |
| 41,458 | 67 | 21,004 | 11,163 | 4,094 | 36,328 |
| 41,459 | 71 | 21,992 | 11,687 | 4,265 | 38,015 |
| 41,460 | 71 | 23,508 | 12,463 | 4,517 | 40,559 |
| 41,461 | 79 | 24,393 | 13,177 | 4,723 | 42,372 |
| 41,462 | 84 | 25,071 | 13,684 | 4,864 | 43,703 |
| 41,463 | 89 | 25,464 | 14,239 | 5,024 | 44,816 |



|        |     |        |        |       |        |
|--------|-----|--------|--------|-------|--------|
| 41,464 | 90  | 25,735 | 14,606 | 5,140 | 45,571 |
| 41,465 | 91  | 25,852 | 14,941 | 5,229 | 46,113 |
| 41,466 | 97  | 26,239 | 15,247 | 5,329 | 46,912 |
| 41,467 | 97  | 26,515 | 15,525 | 5,425 | 47,562 |
| 41,468 | 96  | 27,187 | 15,971 | 5,543 | 48,797 |
| 41,469 | 95  | 28,298 | 16,601 | 5,732 | 50,726 |
| 41,470 | 97  | 28,602 | 16,913 | 5,827 | 51,439 |
| 41,471 | 99  | 29,117 | 17,264 | 5,886 | 52,366 |
| 41,472 | 104 | 29,304 | 17,574 | 5,924 | 52,906 |
| 41,473 | 108 | 29,448 | 17,760 | 5,962 | 53,278 |
| 41,474 | 109 | 29,385 | 17,838 | 5,980 | 53,312 |
| 41,475 | 111 | 29,403 | 17,942 | 6,011 | 53,467 |
| 41,476 | 109 | 29,319 | 17,924 | 6,025 | 53,377 |
| 41,477 | 111 | 29,436 | 18,032 | 6,041 | 53,620 |
| 41,478 | 113 | 29,573 | 18,046 | 6,034 | 53,766 |
| 41,479 | 114 | 29,455 | 17,992 | 6,003 | 53,564 |
| 41,480 | 123 | 29,636 | 18,069 | 6,021 | 53,849 |
| 41,481 | 123 | 29,709 | 18,148 | 6,035 | 54,015 |
| 41,482 | 123 | 29,626 | 18,199 | 6,043 | 53,991 |
| 41,483 | 125 | 29,561 | 18,255 | 6,071 | 54,012 |
| 41,484 | 127 | 29,577 | 18,291 | 6,075 | 54,070 |
| 41,485 | 127 | 29,437 | 18,233 | 6,071 | 53,868 |
| 41,486 | 127 | 29,593 | 18,345 | 6,094 | 54,159 |
| 41,487 | 128 | 29,749 | 18,408 | 6,105 | 54,390 |
| 41,488 | 127 | 29,714 | 18,359 | 6,106 | 54,306 |
| 41,489 | 130 | 29,943 | 18,434 | 6,125 | 54,632 |
| 41,490 | 130 | 29,949 | 18,524 | 6,141 | 54,744 |
| 41,491 | 131 | 29,914 | 18,537 | 6,147 | 54,729 |
| 41,492 | 133 | 29,695 | 18,473 | 6,111 | 54,412 |
| 41,493 | 136 | 28,869 | 18,112 | 6,005 | 53,122 |
| 41,494 | 136 | 28,274 | 17,719 | 5,904 | 52,033 |
| 41,495 | 137 | 27,823 | 17,409 | 5,834 | 51,203 |

|        |     |        |        |       |        |
|--------|-----|--------|--------|-------|--------|
| 41,496 | 130 | 27,597 | 17,104 | 5,768 | 50,599 |
| 41,497 | 130 | 27,044 | 16,557 | 5,676 | 49,407 |
| 41,498 | 126 | 27,157 | 16,520 | 5,696 | 49,499 |
| 41,499 | 129 | 27,063 | 16,441 | 5,675 | 49,308 |
| 41,500 | 129 | 26,880 | 16,345 | 5,653 | 49,007 |
| 41,501 | 127 | 26,451 | 16,153 | 5,601 | 48,332 |
| 41,502 | 127 | 25,682 | 15,727 | 5,496 | 47,032 |
| 41,503 | 125 | 24,832 | 15,254 | 5,341 | 45,552 |
| 41,504 | 124 | 24,282 | 15,015 | 5,281 | 44,702 |
| 41,505 | 122 | 23,809 | 14,589 | 5,176 | 43,696 |
| 41,506 | 118 | 22,737 | 13,828 | 4,973 | 41,656 |
| 41,507 | 118 | 22,470 | 13,724 | 4,948 | 41,260 |
| 41,508 | 118 | 22,089 | 13,611 | 4,915 | 40,733 |
| 41,509 | 117 | 21,356 | 13,150 | 4,749 | 39,372 |
| 41,510 | 114 | 20,487 | 12,715 | 4,623 | 37,939 |
| 41,511 | 114 | 19,007 | 11,956 | 4,388 | 35,465 |
| 41,512 | 106 | 18,104 | 11,193 | 4,154 | 33,557 |
| 41,513 | 102 | 17,691 | 10,782 | 4,056 | 32,631 |
| 41,514 | 95  | 17,508 | 10,298 | 3,911 | 31,812 |
| 41,515 | 87  | 16,751 | 9,329  | 3,634 | 29,801 |
| 41,516 | 86  | 16,919 | 9,272  | 3,607 | 29,884 |
| 41,517 | 86  | 16,814 | 9,171  | 3,580 | 29,651 |
| 41,518 | 90  | 16,725 | 9,009  | 3,521 | 29,345 |
| 41,519 | 97  | 16,353 | 8,670  | 3,435 | 28,555 |
| 41,520 | 98  | 15,507 | 8,053  | 3,276 | 26,934 |
| 41,521 | 96  | 15,059 | 7,618  | 3,164 | 25,937 |
| 41,522 | 97  | 14,872 | 7,350  | 3,104 | 25,423 |
| 41,523 | 92  | 14,799 | 7,072  | 3,078 | 25,041 |
| 41,524 | 85  | 14,753 | 6,889  | 3,038 | 24,765 |
| 41,525 | 85  | 14,684 | 6,816  | 3,017 | 24,602 |
| 41,526 | 86  | 14,940 | 6,839  | 3,045 | 24,910 |
| 41,527 | 87  | 15,052 | 6,828  | 3,048 | 25,015 |

|        |    |        |       |       |        |
|--------|----|--------|-------|-------|--------|
| 41,528 | 89 | 15,182 | 6,766 | 3,060 | 25,097 |
| 41,529 | 89 | 15,276 | 6,719 | 3,058 | 25,142 |
| 41,530 | 87 | 15,340 | 6,671 | 3,073 | 25,171 |
| 41,531 | 82 | 15,521 | 6,659 | 3,069 | 25,331 |
| 41,532 | 83 | 15,581 | 6,586 | 3,060 | 25,310 |
| 41,533 | 87 | 15,977 | 6,633 | 3,104 | 25,801 |
| 41,534 | 84 | 16,016 | 6,569 | 3,061 | 25,730 |
| 41,535 | 87 | 16,463 | 6,677 | 3,123 | 26,350 |
| 41,536 | 89 | 16,635 | 6,697 | 3,123 | 26,544 |
| 41,537 | 96 | 16,854 | 6,730 | 3,135 | 26,815 |
| 41,538 | 95 | 17,129 | 6,733 | 3,148 | 27,105 |
| 41,539 | 95 | 17,250 | 6,713 | 3,158 | 27,216 |
| 41,540 | 93 | 17,336 | 6,661 | 3,115 | 27,205 |
| 41,541 | 93 | 17,544 | 6,691 | 3,160 | 27,488 |
| 41,542 | 91 | 17,712 | 6,665 | 3,167 | 27,635 |
| 41,543 | 88 | 17,937 | 6,680 | 3,198 | 27,903 |
| 41,544 | 83 | 18,080 | 6,649 | 3,183 | 27,995 |
| 41,545 | 80 | 17,975 | 6,516 | 3,156 | 27,727 |
| 41,546 | 83 | 17,878 | 6,494 | 3,143 | 27,598 |
| 41,547 | 84 | 17,954 | 6,503 | 3,168 | 27,709 |
| 41,548 | 83 | 17,796 | 6,436 | 3,132 | 27,447 |
| 41,549 | 84 | 17,922 | 6,426 | 3,132 | 27,564 |
| 41,550 | 85 | 18,151 | 6,406 | 3,132 | 27,774 |
| 41,551 | 88 | 18,314 | 6,398 | 3,125 | 27,925 |
| 41,552 | 88 | 18,439 | 6,379 | 3,137 | 28,043 |
| 41,553 | 86 | 18,568 | 6,408 | 3,147 | 28,209 |
| 41,554 | 86 | 18,726 | 6,402 | 3,173 | 28,387 |
| 41,555 | 89 | 18,957 | 6,383 | 3,196 | 28,625 |
| 41,556 | 91 | 19,229 | 6,431 | 3,231 | 28,982 |
| 41,557 | 90 | 19,183 | 6,352 | 3,151 | 28,776 |
| 41,558 | 91 | 19,544 | 6,404 | 3,193 | 29,232 |
| 41,559 | 92 | 19,944 | 6,450 | 3,237 | 29,723 |

|        |     |        |       |       |        |
|--------|-----|--------|-------|-------|--------|
| 41,560 | 92  | 20,135 | 6,450 | 3,244 | 29,921 |
| 41,561 | 94  | 20,283 | 6,441 | 3,230 | 30,048 |
| 41,562 | 96  | 20,620 | 6,469 | 3,267 | 30,452 |
| 41,563 | 105 | 20,760 | 6,478 | 3,281 | 30,624 |
| 41,564 | 108 | 20,873 | 6,459 | 3,293 | 30,733 |
| 41,565 | 110 | 20,999 | 6,464 | 3,336 | 30,909 |
| 41,566 | 111 | 20,799 | 6,427 | 3,352 | 30,689 |
| 41,567 | 110 | 20,836 | 6,461 | 3,390 | 30,797 |
| 41,568 | 99  | 20,666 | 6,404 | 3,374 | 30,543 |
| 41,569 | 99  | 20,849 | 6,414 | 3,401 | 30,763 |
| 41,570 | 102 | 21,022 | 6,439 | 3,433 | 30,996 |
| 41,571 | 102 | 20,948 | 6,389 | 3,430 | 30,869 |
| 41,572 | 100 | 20,879 | 6,315 | 3,407 | 30,701 |
| 41,573 | 103 | 20,841 | 6,300 | 3,402 | 30,646 |
| 41,574 | 103 | 20,835 | 6,295 | 3,395 | 30,628 |
| 41,575 | 107 | 20,811 | 6,266 | 3,384 | 30,568 |
| 41,576 | 108 | 20,789 | 6,253 | 3,375 | 30,525 |
| 41,577 | 107 | 20,699 | 6,216 | 3,351 | 30,373 |
| 41,578 | 108 | 20,865 | 6,258 | 3,387 | 30,618 |
| 41,579 | 103 | 20,622 | 6,277 | 3,403 | 30,405 |
| 41,580 | 105 | 20,578 | 6,267 | 3,397 | 30,347 |
| 41,581 | 108 | 20,893 | 6,356 | 3,436 | 30,793 |
| 41,582 | 105 | 20,921 | 6,331 | 3,470 | 30,827 |
| 41,583 | 104 | 20,782 | 6,267 | 3,432 | 30,585 |
| 41,584 | 100 | 20,555 | 6,198 | 3,421 | 30,274 |
| 41,585 | 99  | 20,662 | 6,259 | 3,462 | 30,482 |
| 41,586 | 92  | 20,277 | 6,207 | 3,461 | 30,037 |
| 41,587 | 93  | 20,489 | 6,179 | 3,483 | 30,244 |
| 41,588 | 93  | 20,709 | 6,197 | 3,504 | 30,503 |
| 41,589 | 104 | 20,700 | 6,196 | 3,503 | 30,503 |
| 41,590 | 105 | 20,561 | 6,153 | 3,507 | 30,326 |
| 41,591 | 106 | 20,612 | 6,148 | 3,520 | 30,386 |

|        |     |        |       |       |        |
|--------|-----|--------|-------|-------|--------|
| 41,592 | 110 | 20,704 | 6,154 | 3,526 | 30,494 |
| 41,593 | 111 | 20,856 | 6,191 | 3,544 | 30,702 |
| 41,594 | 107 | 20,370 | 6,012 | 3,420 | 29,909 |
| 41,595 | 109 | 20,702 | 6,084 | 3,458 | 30,353 |
| 41,596 | 112 | 21,029 | 6,185 | 3,507 | 30,833 |
| 41,597 | 112 | 21,116 | 6,197 | 3,498 | 30,923 |
| 41,598 | 116 | 21,279 | 6,283 | 3,553 | 31,231 |
| 41,599 | 118 | 21,306 | 6,304 | 3,557 | 31,285 |
| 41,600 | 119 | 21,232 | 6,312 | 3,569 | 31,232 |
| 41,601 | 123 | 21,210 | 6,376 | 3,614 | 31,323 |
| 41,602 | 121 | 21,211 | 6,344 | 3,635 | 31,311 |
| 41,603 | 127 | 21,099 | 6,274 | 3,594 | 31,094 |
| 41,604 | 127 | 20,965 | 6,209 | 3,593 | 30,894 |
| 41,605 | 127 | 21,200 | 6,263 | 3,609 | 31,199 |
| 41,606 | 128 | 21,331 | 6,302 | 3,624 | 31,385 |
| 41,607 | 127 | 21,192 | 6,245 | 3,594 | 31,158 |
| 41,608 | 126 | 21,215 | 6,255 | 3,588 | 31,184 |
| 41,609 | 126 | 21,304 | 6,261 | 3,584 | 31,275 |
| 41,610 | 126 | 21,497 | 6,324 | 3,610 | 31,557 |
| 41,611 | 125 | 21,377 | 6,260 | 3,586 | 31,348 |
| 41,612 | 124 | 21,754 | 6,351 | 3,636 | 31,865 |
| 41,613 | 123 | 21,811 | 6,356 | 3,637 | 31,927 |
| 41,614 | 112 | 21,482 | 6,250 | 3,585 | 31,429 |
| 41,615 | 111 | 21,444 | 6,229 | 3,563 | 31,347 |
| 41,616 | 113 | 21,339 | 6,173 | 3,532 | 31,157 |
| 41,617 | 115 | 21,577 | 6,216 | 3,571 | 31,479 |
| 41,618 | 115 | 21,560 | 6,176 | 3,547 | 31,398 |
| 41,619 | 113 | 21,640 | 6,184 | 3,580 | 31,517 |
| 41,620 | 113 | 21,451 | 6,105 | 3,517 | 31,186 |
| 41,621 | 114 | 21,387 | 6,080 | 3,477 | 31,058 |
| 41,622 | 114 | 21,434 | 6,072 | 3,469 | 31,089 |
| 41,623 | 116 | 21,474 | 6,108 | 3,507 | 31,205 |

|        |     |        |       |       |        |
|--------|-----|--------|-------|-------|--------|
| 41,624 | 115 | 20,889 | 5,994 | 3,437 | 30,435 |
| 41,625 | 116 | 21,188 | 6,058 | 3,475 | 30,837 |
| 41,626 | 117 | 21,531 | 6,132 | 3,517 | 31,297 |
| 41,627 | 117 | 21,674 | 6,166 | 3,535 | 31,492 |
| 41,628 | 119 | 21,822 | 6,164 | 3,537 | 31,642 |
| 41,629 | 119 | 22,166 | 6,210 | 3,562 | 32,057 |
| 41,630 | 122 | 22,299 | 6,193 | 3,527 | 32,141 |
| 41,631 | 119 | 22,442 | 6,169 | 3,526 | 32,256 |
| 41,632 | 119 | 22,314 | 6,095 | 3,495 | 32,023 |
| 41,633 | 118 | 22,084 | 6,038 | 3,430 | 31,670 |
| 41,634 | 118 | 22,418 | 6,062 | 3,466 | 32,064 |
| 41,635 | 118 | 22,236 | 5,981 | 3,419 | 31,754 |
| 41,636 | 122 | 22,311 | 5,984 | 3,424 | 31,841 |
| 41,637 | 124 | 22,049 | 5,889 | 3,362 | 31,424 |
| 41,638 | 123 | 21,918 | 5,827 | 3,320 | 31,188 |
| 41,639 | 120 | 22,010 | 5,798 | 3,339 | 31,267 |
| 41,640 | 111 | 21,638 | 5,697 | 3,257 | 30,703 |
| 41,641 | 111 | 21,702 | 5,668 | 3,262 | 30,743 |
| 41,642 | 108 | 21,654 | 5,624 | 3,269 | 30,655 |
| 41,643 | 109 | 21,966 | 5,646 | 3,295 | 31,016 |
| 41,644 | 125 | 21,733 | 5,574 | 3,252 | 30,684 |
| 41,645 | 121 | 21,631 | 5,557 | 3,247 | 30,556 |
| 41,646 | 115 | 22,199 | 5,624 | 3,301 | 31,239 |
| 41,647 | 111 | 22,151 | 5,554 | 3,260 | 31,076 |
| 41,648 | 111 | 22,422 | 5,555 | 3,277 | 31,365 |
| 41,649 | 112 | 22,705 | 5,592 | 3,304 | 31,713 |
| 41,650 | 106 | 22,651 | 5,493 | 3,264 | 31,514 |
| 41,651 | 103 | 22,614 | 5,426 | 3,229 | 31,372 |
| 41,652 | 104 | 22,693 | 5,424 | 3,245 | 31,466 |
| 41,653 | 106 | 22,635 | 5,391 | 3,217 | 31,349 |
| 41,654 | 101 | 22,391 | 5,358 | 3,200 | 31,050 |
| 41,655 | 100 | 22,296 | 5,314 | 3,163 | 30,873 |

|        |     |        |       |       |        |
|--------|-----|--------|-------|-------|--------|
| 41,656 | 103 | 22,488 | 5,345 | 3,202 | 31,138 |
| 41,657 | 103 | 22,470 | 5,319 | 3,194 | 31,086 |
| 41,658 | 101 | 21,961 | 5,209 | 3,144 | 30,415 |
| 41,659 | 106 | 22,149 | 5,209 | 3,168 | 30,632 |
| 41,660 | 117 | 21,972 | 5,118 | 3,141 | 30,348 |
| 41,661 | 118 | 21,795 | 5,045 | 3,119 | 30,077 |
| 41,662 | 123 | 22,270 | 5,136 | 3,168 | 30,697 |
| 41,663 | 127 | 22,338 | 5,094 | 3,161 | 30,720 |
| 41,664 | 125 | 22,085 | 5,045 | 3,134 | 30,389 |
| 41,665 | 125 | 22,140 | 5,029 | 3,143 | 30,437 |
| 41,666 | 126 | 22,219 | 5,051 | 3,167 | 30,563 |
| 41,667 | 127 | 22,446 | 5,076 | 3,172 | 30,821 |
| 41,668 | 126 | 22,597 | 5,054 | 3,171 | 30,948 |
| 41,669 | 130 | 22,605 | 5,041 | 3,163 | 30,939 |
| 41,670 | 133 | 22,655 | 5,079 | 3,168 | 31,035 |
| 41,671 | 136 | 22,871 | 5,119 | 3,210 | 31,336 |
| 41,672 | 135 | 22,966 | 5,104 | 3,225 | 31,430 |
| 41,673 | 134 | 23,033 | 5,075 | 3,217 | 31,459 |
| 41,674 | 133 | 23,194 | 5,127 | 3,216 | 31,670 |
| 41,675 | 134 | 23,049 | 5,104 | 3,233 | 31,520 |
| 41,676 | 133 | 23,135 | 5,107 | 3,232 | 31,607 |
| 41,677 | 130 | 23,003 | 5,080 | 3,209 | 31,422 |
| 41,678 | 130 | 23,046 | 5,081 | 3,218 | 31,475 |
| 41,679 | 130 | 23,063 | 5,083 | 3,232 | 31,508 |
| 41,680 | 142 | 23,397 | 5,132 | 3,266 | 31,937 |
| 41,681 | 139 | 23,131 | 5,080 | 3,261 | 31,611 |
| 41,682 | 141 | 23,209 | 5,065 | 3,258 | 31,673 |
| 41,683 | 147 | 23,300 | 5,051 | 3,282 | 31,780 |
| 41,684 | 147 | 23,443 | 5,082 | 3,299 | 31,971 |
| 41,685 | 155 | 23,410 | 5,095 | 3,292 | 31,952 |
| 41,686 | 155 | 23,702 | 5,134 | 3,334 | 32,325 |
| 41,687 | 151 | 23,841 | 5,142 | 3,336 | 32,470 |

|        |     |        |       |       |        |
|--------|-----|--------|-------|-------|--------|
| 41,688 | 147 | 23,619 | 5,145 | 3,355 | 32,266 |
| 41,689 | 146 | 23,633 | 5,149 | 3,351 | 32,279 |
| 41,690 | 143 | 23,620 | 5,176 | 3,374 | 32,313 |
| 41,691 | 144 | 23,753 | 5,219 | 3,403 | 32,519 |
| 41,692 | 148 | 24,041 | 5,282 | 3,418 | 32,889 |
| 41,693 | 150 | 24,100 | 5,281 | 3,414 | 32,945 |
| 41,694 | 151 | 23,949 | 5,298 | 3,439 | 32,837 |
| 41,695 | 136 | 23,826 | 5,320 | 3,439 | 32,721 |
| 41,696 | 139 | 23,512 | 5,240 | 3,420 | 32,311 |
| 41,697 | 145 | 23,625 | 5,283 | 3,439 | 32,492 |
| 41,698 | 149 | 23,612 | 5,259 | 3,440 | 32,460 |
| 41,699 | 149 | 23,400 | 5,230 | 3,411 | 32,190 |
| 41,700 | 152 | 23,225 | 5,210 | 3,397 | 31,984 |
| 41,701 | 154 | 23,391 | 5,222 | 3,415 | 32,182 |
| 41,702 | 154 | 23,476 | 5,225 | 3,422 | 32,277 |
| 41,703 | 151 | 23,614 | 5,267 | 3,441 | 32,473 |
| 41,704 | 152 | 23,654 | 5,245 | 3,439 | 32,490 |
| 41,705 | 154 | 23,879 | 5,321 | 3,488 | 32,842 |
| 41,706 | 157 | 23,956 | 5,349 | 3,507 | 32,969 |
| 41,707 | 159 | 23,936 | 5,348 | 3,474 | 32,917 |
| 41,708 | 161 | 23,999 | 5,385 | 3,497 | 33,042 |
| 41,709 | 161 | 24,028 | 5,387 | 3,498 | 33,074 |
| 41,710 | 158 | 23,923 | 5,409 | 3,519 | 33,009 |
| 41,711 | 146 | 24,049 | 5,468 | 3,551 | 33,214 |
| 41,712 | 143 | 23,665 | 5,429 | 3,533 | 32,770 |
| 41,713 | 141 | 23,883 | 5,493 | 3,571 | 33,088 |
| 41,714 | 141 | 23,840 | 5,514 | 3,575 | 33,070 |
| 41,715 | 140 | 23,854 | 5,513 | 3,570 | 33,077 |
| 41,716 | 142 | 23,613 | 5,468 | 3,505 | 32,728 |
| 41,717 | 142 | 23,695 | 5,487 | 3,514 | 32,838 |
| 41,718 | 140 | 23,633 | 5,482 | 3,548 | 32,803 |
| 41,719 | 140 | 23,861 | 5,535 | 3,578 | 33,114 |



|        |     |        |       |       |        |
|--------|-----|--------|-------|-------|--------|
| 41,720 | 137 | 23,844 | 5,524 | 3,571 | 33,076 |
| 41,721 | 135 | 23,781 | 5,469 | 3,534 | 32,919 |
| 41,722 | 134 | 23,672 | 5,469 | 3,528 | 32,803 |
| 41,723 | 137 | 23,596 | 5,459 | 3,520 | 32,712 |
| 41,724 | 137 | 23,689 | 5,439 | 3,514 | 32,779 |
| 41,725 | 135 | 23,807 | 5,407 | 3,496 | 32,845 |
| 41,726 | 136 | 23,906 | 5,423 | 3,508 | 32,973 |
| 41,727 | 139 | 23,728 | 5,354 | 3,486 | 32,707 |
| 41,728 | 144 | 23,715 | 5,328 | 3,471 | 32,658 |
| 41,729 | 142 | 23,765 | 5,322 | 3,482 | 32,711 |
| 41,730 | 145 | 23,831 | 5,384 | 3,499 | 32,859 |
| 41,731 | 141 | 23,734 | 5,372 | 3,501 | 32,748 |
| 41,732 | 141 | 23,359 | 5,299 | 3,451 | 32,250 |
| 41,733 | 141 | 23,629 | 5,347 | 3,474 | 32,591 |
| 41,734 | 134 | 23,118 | 5,267 | 3,402 | 31,921 |
| 41,735 | 136 | 23,357 | 5,286 | 3,430 | 32,209 |
| 41,736 | 130 | 23,448 | 5,304 | 3,443 | 32,325 |
| 41,737 | 132 | 23,341 | 5,259 | 3,417 | 32,149 |
| 41,738 | 135 | 23,485 | 5,254 | 3,412 | 32,286 |
| 41,739 | 135 | 23,674 | 5,260 | 3,408 | 32,477 |
| 41,740 | 136 | 23,703 | 5,228 | 3,384 | 32,451 |
| 41,741 | 141 | 23,908 | 5,265 | 3,397 | 32,711 |
| 41,742 | 141 | 23,883 | 5,238 | 3,402 | 32,664 |
| 41,743 | 134 | 23,504 | 5,179 | 3,354 | 32,171 |
| 41,744 | 131 | 23,685 | 5,169 | 3,348 | 32,333 |
| 41,745 | 133 | 23,662 | 5,117 | 3,331 | 32,243 |
| 41,746 | 134 | 23,873 | 5,114 | 3,357 | 32,478 |
| 41,747 | 132 | 23,761 | 5,109 | 3,325 | 32,327 |
| 41,748 | 125 | 23,563 | 5,068 | 3,296 | 32,052 |
| 41,749 | 120 | 23,458 | 5,070 | 3,296 | 31,944 |
| 41,750 | 116 | 23,219 | 5,041 | 3,274 | 31,650 |
| 41,751 | 115 | 23,330 | 5,039 | 3,278 | 31,762 |

|        |     |        |       |       |        |
|--------|-----|--------|-------|-------|--------|
| 41,752 | 115 | 23,357 | 5,031 | 3,263 | 31,766 |
| 41,753 | 119 | 23,588 | 5,103 | 3,284 | 32,094 |
| 41,754 | 122 | 23,627 | 5,114 | 3,290 | 32,153 |
| 41,755 | 120 | 23,589 | 5,057 | 3,251 | 32,017 |
| 41,756 | 110 | 23,286 | 4,989 | 3,218 | 31,603 |
| 41,757 | 111 | 23,451 | 5,022 | 3,246 | 31,830 |
| 41,758 | 110 | 23,454 | 5,043 | 3,257 | 31,864 |
| 41,759 | 110 | 23,465 | 5,019 | 3,249 | 31,843 |
| 41,760 | 109 | 23,435 | 4,983 | 3,227 | 31,754 |
| 41,761 | 106 | 23,377 | 4,981 | 3,211 | 31,675 |
| 41,762 | 109 | 23,419 | 4,988 | 3,206 | 31,722 |
| 41,763 | 109 | 22,905 | 4,849 | 3,076 | 30,939 |
| 41,764 | 110 | 23,124 | 4,869 | 3,103 | 31,206 |
| 41,765 | 106 | 23,232 | 4,882 | 3,120 | 31,340 |
| 41,766 | 105 | 23,158 | 4,862 | 3,130 | 31,255 |
| 41,767 | 107 | 23,277 | 4,858 | 3,125 | 31,367 |
| 41,768 | 107 | 23,339 | 4,853 | 3,102 | 31,401 |
| 41,769 | 111 | 23,601 | 4,920 | 3,154 | 31,786 |
| 41,770 | 116 | 23,445 | 4,954 | 3,166 | 31,681 |
| 41,771 | 112 | 23,134 | 4,895 | 3,130 | 31,271 |
| 41,772 | 120 | 23,142 | 4,883 | 3,139 | 31,284 |
| 41,773 | 120 | 23,154 | 4,884 | 3,159 | 31,317 |
| 41,774 | 117 | 23,541 | 5,010 | 3,250 | 31,918 |
| 41,775 | 118 | 23,486 | 5,031 | 3,255 | 31,890 |
| 41,776 | 115 | 23,257 | 5,008 | 3,238 | 31,618 |
| 41,777 | 119 | 23,749 | 5,107 | 3,319 | 32,294 |
| 41,778 | 127 | 24,211 | 5,202 | 3,364 | 32,904 |
| 41,779 | 125 | 23,261 | 5,027 | 3,246 | 31,659 |
| 41,780 | 124 | 23,523 | 5,067 | 3,281 | 31,995 |
| 41,781 | 118 | 23,765 | 5,114 | 3,321 | 32,318 |
| 41,782 | 117 | 23,719 | 5,126 | 3,319 | 32,281 |
| 41,783 | 113 | 24,031 | 5,200 | 3,366 | 32,710 |

|        |     |        |       |       |        |
|--------|-----|--------|-------|-------|--------|
| 41,784 | 112 | 23,812 | 5,219 | 3,370 | 32,513 |
| 41,785 | 118 | 24,009 | 5,250 | 3,402 | 32,779 |
| 41,786 | 119 | 23,754 | 5,249 | 3,373 | 32,495 |
| 41,787 | 119 | 23,540 | 5,183 | 3,360 | 32,202 |
| 41,788 | 119 | 23,549 | 5,262 | 3,392 | 32,322 |
| 41,789 | 118 | 23,385 | 5,268 | 3,393 | 32,164 |
| 41,790 | 129 | 23,218 | 5,270 | 3,379 | 31,996 |
| 41,791 | 128 | 23,117 | 5,250 | 3,372 | 31,867 |
| 41,792 | 124 | 23,042 | 5,270 | 3,386 | 31,822 |
| 41,793 | 126 | 23,042 | 5,330 | 3,384 | 31,882 |
| 41,794 | 126 | 23,024 | 5,323 | 3,382 | 31,855 |
| 41,795 | 131 | 22,963 | 5,318 | 3,393 | 31,805 |
| 41,796 | 129 | 22,661 | 5,321 | 3,368 | 31,479 |
| 41,797 | 131 | 23,057 | 5,408 | 3,396 | 31,992 |
| 41,798 | 132 | 22,018 | 5,187 | 3,260 | 30,597 |
| 41,799 | 132 | 22,228 | 5,217 | 3,300 | 30,877 |
| 41,800 | 132 | 22,504 | 5,246 | 3,332 | 31,214 |
| 41,801 | 134 | 22,495 | 5,256 | 3,331 | 31,216 |
| 41,802 | 134 | 22,882 | 5,371 | 3,411 | 31,798 |
| 41,803 | 133 | 22,659 | 5,337 | 3,397 | 31,526 |
| 41,804 | 138 | 22,580 | 5,330 | 3,405 | 31,453 |
| 41,805 | 134 | 22,242 | 5,268 | 3,362 | 31,006 |
| 41,806 | 138 | 22,360 | 5,381 | 3,427 | 31,306 |
| 41,807 | 142 | 22,126 | 5,378 | 3,407 | 31,053 |
| 41,808 | 148 | 21,992 | 5,309 | 3,363 | 30,812 |
| 41,809 | 149 | 22,093 | 5,321 | 3,378 | 30,941 |
| 41,810 | 151 | 21,717 | 5,249 | 3,311 | 30,428 |
| 41,811 | 151 | 21,681 | 5,244 | 3,324 | 30,400 |
| 41,812 | 152 | 21,489 | 5,192 | 3,298 | 30,131 |
| 41,813 | 151 | 21,217 | 5,150 | 3,270 | 29,788 |
| 41,814 | 152 | 21,683 | 5,254 | 3,371 | 30,460 |
| 41,815 | 159 | 21,443 | 5,224 | 3,337 | 30,163 |

|        |     |        |       |       |        |
|--------|-----|--------|-------|-------|--------|
| 41,816 | 160 | 21,574 | 5,290 | 3,369 | 30,393 |
| 41,817 | 163 | 21,465 | 5,284 | 3,373 | 30,285 |
| 41,818 | 162 | 21,439 | 5,288 | 3,372 | 30,261 |
| 41,819 | 160 | 21,365 | 5,292 | 3,351 | 30,168 |
| 41,820 | 157 | 21,134 | 5,198 | 3,286 | 29,775 |
| 41,821 | 158 | 21,236 | 5,192 | 3,286 | 29,872 |
| 41,822 | 155 | 20,910 | 5,142 | 3,263 | 29,470 |
| 41,823 | 148 | 21,241 | 5,250 | 3,318 | 29,957 |
| 41,824 | 147 | 21,176 | 5,257 | 3,293 | 29,873 |
| 41,825 | 153 | 21,152 | 5,215 | 3,256 | 29,776 |
| 41,826 | 154 | 20,878 | 5,112 | 3,200 | 29,344 |
| 41,827 | 154 | 20,665 | 5,107 | 3,184 | 29,110 |
| 41,828 | 153 | 20,572 | 5,076 | 3,178 | 28,979 |
| 41,829 | 149 | 20,695 | 5,173 | 3,199 | 29,216 |
| 41,830 | 146 | 20,479 | 5,150 | 3,175 | 28,950 |
| 41,831 | 144 | 20,626 | 5,175 | 3,203 | 29,148 |
| 41,832 | 147 | 20,710 | 5,159 | 3,186 | 29,202 |
| 41,833 | 151 | 20,715 | 5,146 | 3,155 | 29,167 |
| 41,834 | 154 | 20,796 | 5,134 | 3,140 | 29,224 |
| 41,835 | 154 | 20,731 | 5,135 | 3,139 | 29,159 |
| 41,836 | 155 | 21,060 | 5,227 | 3,169 | 29,611 |
| 41,837 | 152 | 20,722 | 5,161 | 3,133 | 29,168 |
| 41,838 | 152 | 20,708 | 5,124 | 3,124 | 29,108 |
| 41,839 | 152 | 20,728 | 5,115 | 3,104 | 29,099 |
| 41,840 | 151 | 20,745 | 5,117 | 3,110 | 29,123 |
| 41,841 | 141 | 20,807 | 5,151 | 3,127 | 29,226 |
| 41,842 | 149 | 20,747 | 5,107 | 3,101 | 29,104 |
| 41,843 | 146 | 20,809 | 5,100 | 3,116 | 29,171 |
| 41,844 | 147 | 20,900 | 5,090 | 3,105 | 29,242 |
| 41,845 | 154 | 21,083 | 5,146 | 3,117 | 29,500 |
| 41,846 | 153 | 20,780 | 5,084 | 3,058 | 29,075 |
| 41,847 | 152 | 21,029 | 5,124 | 3,095 | 29,400 |

|        |     |        |       |       |        |
|--------|-----|--------|-------|-------|--------|
| 41,848 | 149 | 20,859 | 5,085 | 3,074 | 29,167 |
| 41,849 | 153 | 21,085 | 5,131 | 3,094 | 29,463 |
| 41,850 | 155 | 21,183 | 5,156 | 3,111 | 29,605 |
| 41,851 | 154 | 21,337 | 5,183 | 3,110 | 29,784 |
| 41,852 | 152 | 21,384 | 5,176 | 3,107 | 29,819 |
| 41,853 | 153 | 21,744 | 5,226 | 3,143 | 30,266 |
| 41,854 | 156 | 21,904 | 5,266 | 3,149 | 30,475 |
| 41,855 | 151 | 22,101 | 5,281 | 3,158 | 30,691 |
| 41,856 | 152 | 22,226 | 5,304 | 3,166 | 30,848 |
| 41,857 | 150 | 22,143 | 5,267 | 3,157 | 30,717 |
| 41,858 | 147 | 22,166 | 5,278 | 3,167 | 30,758 |
| 41,859 | 142 | 22,252 | 5,325 | 3,221 | 30,940 |
| 41,860 | 135 | 22,196 | 5,319 | 3,219 | 30,869 |
| 41,861 | 135 | 22,286 | 5,330 | 3,227 | 30,978 |
| 41,862 | 132 | 22,384 | 5,346 | 3,222 | 31,084 |
| 41,863 | 133 | 22,502 | 5,356 | 3,227 | 31,218 |
| 41,864 | 133 | 22,504 | 5,351 | 3,233 | 31,221 |
| 41,865 | 126 | 22,711 | 5,411 | 3,265 | 31,513 |
| 41,866 | 126 | 22,608 | 5,384 | 3,241 | 31,359 |
| 41,867 | 132 | 22,912 | 5,441 | 3,273 | 31,758 |
| 41,868 | 132 | 23,093 | 5,476 | 3,272 | 31,973 |
| 41,869 | 140 | 22,792 | 5,420 | 3,236 | 31,588 |
| 41,870 | 140 | 22,408 | 5,377 | 3,220 | 31,145 |
| 41,871 | 137 | 22,987 | 5,468 | 3,289 | 31,881 |
| 41,872 | 136 | 23,080 | 5,440 | 3,286 | 31,942 |
| 41,873 | 136 | 22,937 | 5,384 | 3,218 | 31,675 |
| 41,874 | 143 | 23,059 | 5,385 | 3,233 | 31,820 |
| 41,875 | 144 | 23,129 | 5,385 | 3,222 | 31,880 |
| 41,876 | 146 | 23,459 | 5,472 | 3,268 | 32,345 |
| 41,877 | 139 | 23,218 | 5,402 | 3,241 | 32,000 |
| 41,878 | 143 | 23,359 | 5,397 | 3,237 | 32,136 |
| 41,879 | 144 | 23,360 | 5,391 | 3,238 | 32,133 |

|        |     |        |       |       |        |
|--------|-----|--------|-------|-------|--------|
| 41,880 | 145 | 23,255 | 5,323 | 3,194 | 31,917 |
| 41,881 | 147 | 23,066 | 5,286 | 3,172 | 31,671 |
| 41,882 | 148 | 23,039 | 5,302 | 3,156 | 31,645 |
| 41,883 | 145 | 22,830 | 5,266 | 3,148 | 31,389 |
| 41,884 | 140 | 23,207 | 5,381 | 3,231 | 31,959 |
| 41,885 | 140 | 23,170 | 5,388 | 3,256 | 31,954 |
| 41,886 | 136 | 23,148 | 5,308 | 3,261 | 31,853 |
| 41,887 | 139 | 23,063 | 5,302 | 3,263 | 31,767 |
| 41,888 | 137 | 23,153 | 5,314 | 3,259 | 31,863 |
| 41,889 | 138 | 23,158 | 5,318 | 3,264 | 31,878 |
| 41,890 | 142 | 23,339 | 5,363 | 3,302 | 32,146 |
| 41,891 | 143 | 22,888 | 5,222 | 3,227 | 31,480 |
| 41,892 | 143 | 23,167 | 5,266 | 3,276 | 31,852 |
| 41,893 | 137 | 23,261 | 5,291 | 3,295 | 31,984 |
| 41,894 | 137 | 22,930 | 5,249 | 3,292 | 31,608 |
| 41,895 | 137 | 22,915 | 5,276 | 3,304 | 31,632 |
| 41,896 | 130 | 22,881 | 5,249 | 3,312 | 31,572 |
| 41,897 | 129 | 22,910 | 5,305 | 3,343 | 31,687 |
| 41,898 | 128 | 22,788 | 5,283 | 3,318 | 31,517 |
| 41,899 | 127 | 22,403 | 5,189 | 3,280 | 30,999 |
| 41,900 | 128 | 22,571 | 5,258 | 3,314 | 31,271 |
| 41,901 | 129 | 22,614 | 5,288 | 3,332 | 31,363 |
| 41,902 | 138 | 22,396 | 5,270 | 3,310 | 31,114 |
| 41,903 | 138 | 22,220 | 5,222 | 3,267 | 30,847 |
| 41,904 | 137 | 22,558 | 5,377 | 3,356 | 31,428 |
| 41,905 | 131 | 22,216 | 5,302 | 3,336 | 30,985 |
| 41,906 | 128 | 22,186 | 5,272 | 3,343 | 30,929 |
| 41,907 | 128 | 22,012 | 5,265 | 3,328 | 30,733 |
| 41,908 | 130 | 22,073 | 5,273 | 3,335 | 30,811 |
| 41,909 | 130 | 22,086 | 5,287 | 3,336 | 30,839 |
| 41,910 | 127 | 22,108 | 5,324 | 3,374 | 30,933 |
| 41,911 | 129 | 22,165 | 5,338 | 3,384 | 31,016 |

|        |     |        |       |       |        |
|--------|-----|--------|-------|-------|--------|
| 41,912 | 133 | 22,393 | 5,433 | 3,417 | 31,376 |
| 41,913 | 141 | 22,485 | 5,466 | 3,441 | 31,533 |
| 41,914 | 141 | 22,391 | 5,466 | 3,409 | 31,407 |
| 41,915 | 144 | 22,364 | 5,460 | 3,415 | 31,383 |
| 41,916 | 144 | 22,408 | 5,486 | 3,419 | 31,457 |
| 41,917 | 144 | 22,375 | 5,502 | 3,440 | 31,461 |
| 41,918 | 137 | 22,333 | 5,495 | 3,454 | 31,419 |
| 41,919 | 141 | 22,449 | 5,547 | 3,490 | 31,627 |
| 41,920 | 138 | 22,115 | 5,523 | 3,453 | 31,229 |
| 41,921 | 138 | 21,967 | 5,520 | 3,445 | 31,070 |
| 41,922 | 138 | 21,980 | 5,564 | 3,495 | 31,177 |
| 41,923 | 139 | 21,597 | 5,528 | 3,463 | 30,727 |
| 41,924 | 138 | 21,213 | 5,465 | 3,451 | 30,267 |
| 41,925 | 135 | 21,491 | 5,539 | 3,498 | 30,663 |
| 41,926 | 134 | 21,606 | 5,591 | 3,513 | 30,844 |
| 41,927 | 129 | 21,602 | 5,595 | 3,525 | 30,851 |
| 41,928 | 128 | 21,535 | 5,605 | 3,513 | 30,781 |
| 41,929 | 124 | 21,225 | 5,543 | 3,498 | 30,390 |
| 41,930 | 121 | 21,193 | 5,569 | 3,527 | 30,410 |
| 41,931 | 118 | 21,274 | 5,651 | 3,548 | 30,591 |
| 41,932 | 115 | 21,035 | 5,613 | 3,517 | 30,280 |
| 41,933 | 120 | 21,286 | 5,661 | 3,558 | 30,625 |
| 41,934 | 123 | 21,041 | 5,627 | 3,511 | 30,302 |
| 41,935 | 124 | 21,151 | 5,677 | 3,536 | 30,488 |
| 41,936 | 125 | 21,267 | 5,693 | 3,539 | 30,624 |
| 41,937 | 124 | 21,045 | 5,710 | 3,521 | 30,400 |
| 41,938 | 120 | 21,000 | 5,703 | 3,512 | 30,335 |
| 41,939 | 121 | 20,659 | 5,670 | 3,457 | 29,907 |
| 41,940 | 119 | 20,892 | 5,726 | 3,477 | 30,214 |
| 41,941 | 116 | 21,118 | 5,776 | 3,504 | 30,514 |
| 41,942 | 115 | 21,184 | 5,805 | 3,516 | 30,620 |
| 41,943 | 114 | 21,095 | 5,797 | 3,488 | 30,494 |

|        |     |        |       |       |        |
|--------|-----|--------|-------|-------|--------|
| 41,944 | 113 | 20,846 | 5,747 | 3,429 | 30,135 |
| 41,945 | 113 | 20,836 | 5,740 | 3,427 | 30,116 |
| 41,946 | 112 | 20,933 | 5,788 | 3,448 | 30,281 |
| 41,947 | 111 | 20,782 | 5,788 | 3,446 | 30,127 |
| 41,948 | 111 | 20,748 | 5,762 | 3,451 | 30,072 |
| 41,949 | 110 | 20,714 | 5,771 | 3,466 | 30,061 |
| 41,950 | 112 | 20,579 | 5,756 | 3,436 | 29,883 |
| 41,951 | 110 | 20,472 | 5,718 | 3,429 | 29,729 |
| 41,952 | 110 | 20,376 | 5,685 | 3,414 | 29,585 |
| 41,953 | 103 | 19,985 | 5,579 | 3,388 | 29,055 |
| 41,954 | 104 | 20,026 | 5,569 | 3,387 | 29,086 |
| 41,955 | 108 | 20,046 | 5,561 | 3,344 | 29,059 |
| 41,956 | 109 | 20,355 | 5,626 | 3,383 | 29,473 |
| 41,957 | 110 | 20,165 | 5,598 | 3,350 | 29,223 |
| 41,958 | 111 | 20,279 | 5,623 | 3,361 | 29,374 |
| 41,959 | 111 | 20,166 | 5,584 | 3,332 | 29,193 |
| 41,960 | 111 | 20,392 | 5,623 | 3,354 | 29,480 |
| 41,961 | 120 | 20,167 | 5,553 | 3,311 | 29,151 |
| 41,962 | 119 | 20,007 | 5,527 | 3,273 | 28,926 |
| 41,963 | 111 | 19,974 | 5,512 | 3,287 | 28,884 |
| 41,964 | 111 | 19,912 | 5,516 | 3,287 | 28,826 |
| 41,965 | 111 | 19,886 | 5,503 | 3,308 | 28,808 |
| 41,966 | 114 | 20,066 | 5,535 | 3,316 | 29,031 |
| 41,967 | 111 | 19,885 | 5,429 | 3,278 | 28,703 |
| 41,968 | 116 | 20,082 | 5,471 | 3,303 | 28,972 |
| 41,969 | 113 | 19,854 | 5,395 | 3,251 | 28,613 |
| 41,970 | 104 | 19,818 | 5,350 | 3,222 | 28,494 |
| 41,971 | 110 | 19,911 | 5,322 | 3,187 | 28,530 |
| 41,972 | 118 | 19,929 | 5,332 | 3,174 | 28,553 |
| 41,973 | 115 | 19,702 | 5,253 | 3,127 | 28,197 |
| 41,974 | 119 | 20,000 | 5,342 | 3,156 | 28,617 |
| 41,975 | 119 | 20,052 | 5,352 | 3,160 | 28,683 |



|        |     |        |       |       |        |
|--------|-----|--------|-------|-------|--------|
| 41,976 | 118 | 20,012 | 5,393 | 3,179 | 28,702 |
| 41,977 | 120 | 19,806 | 5,348 | 3,187 | 28,461 |
| 41,978 | 123 | 19,695 | 5,322 | 3,174 | 28,314 |
| 41,979 | 124 | 19,715 | 5,322 | 3,154 | 28,315 |
| 41,980 | 125 | 20,008 | 5,391 | 3,178 | 28,702 |
| 41,981 | 125 | 19,769 | 5,326 | 3,163 | 28,383 |
| 41,982 | 129 | 19,533 | 5,179 | 3,107 | 27,948 |
| 41,983 | 128 | 19,922 | 5,210 | 3,142 | 28,402 |
| 41,984 | 123 | 20,183 | 5,269 | 3,163 | 28,738 |
| 41,985 | 123 | 20,427 | 5,336 | 3,196 | 29,082 |
| 41,986 | 122 | 20,110 | 5,238 | 3,128 | 28,598 |
| 41,987 | 119 | 20,371 | 5,303 | 3,154 | 28,947 |
| 41,988 | 118 | 20,619 | 5,364 | 3,182 | 29,283 |
| 41,989 | 118 | 20,747 | 5,384 | 3,219 | 29,468 |
| 41,990 | 118 | 20,817 | 5,362 | 3,258 | 29,555 |
| 41,991 | 118 | 20,520 | 5,300 | 3,227 | 29,165 |
| 41,992 | 118 | 20,715 | 5,362 | 3,275 | 29,470 |
| 41,993 | 116 | 20,689 | 5,329 | 3,295 | 29,429 |
| 41,994 | 118 | 20,747 | 5,347 | 3,305 | 29,517 |
| 41,995 | 117 | 20,808 | 5,370 | 3,336 | 29,631 |
| 41,996 | 118 | 20,797 | 5,363 | 3,324 | 29,602 |
| 41,997 | 118 | 20,880 | 5,360 | 3,333 | 29,691 |
| 41,998 | 120 | 20,997 | 5,358 | 3,323 | 29,798 |
| 41,999 | 123 | 21,023 | 5,346 | 3,322 | 29,814 |
| 42,000 | 124 | 20,787 | 5,299 | 3,279 | 29,489 |
| 42,001 | 121 | 21,077 | 5,374 | 3,321 | 29,893 |
| 42,002 | 120 | 20,980 | 5,390 | 3,323 | 29,813 |
| 42,003 | 120 | 21,189 | 5,445 | 3,336 | 30,090 |
| 42,004 | 116 | 20,912 | 5,423 | 3,323 | 29,774 |
| 42,005 | 115 | 20,680 | 5,429 | 3,317 | 29,541 |
| 42,006 | 111 | 20,748 | 5,417 | 3,335 | 29,611 |
| 42,007 | 111 | 20,818 | 5,461 | 3,331 | 29,721 |

|        |     |        |       |       |        |
|--------|-----|--------|-------|-------|--------|
| 42,008 | 116 | 20,893 | 5,479 | 3,335 | 29,823 |
| 42,009 | 114 | 20,855 | 5,455 | 3,320 | 29,744 |
| 42,010 | 121 | 20,641 | 5,378 | 3,292 | 29,432 |
| 42,011 | 123 | 20,944 | 5,422 | 3,316 | 29,805 |
| 42,012 | 119 | 20,990 | 5,442 | 3,292 | 29,843 |
| 42,013 | 114 | 20,749 | 5,376 | 3,264 | 29,503 |
| 42,014 | 116 | 21,006 | 5,409 | 3,295 | 29,826 |
| 42,015 | 117 | 21,213 | 5,468 | 3,326 | 30,124 |
| 42,016 | 117 | 21,005 | 5,416 | 3,299 | 29,837 |
| 42,017 | 124 | 21,219 | 5,465 | 3,328 | 30,136 |
| 42,018 | 117 | 21,055 | 5,420 | 3,271 | 29,863 |
| 42,019 | 117 | 21,254 | 5,475 | 3,307 | 30,153 |
| 42,020 | 114 | 20,958 | 5,420 | 3,270 | 29,762 |
| 42,021 | 114 | 21,007 | 5,423 | 3,274 | 29,818 |
| 42,022 | 108 | 21,081 | 5,467 | 3,324 | 29,980 |
| 42,023 | 103 | 21,086 | 5,447 | 3,347 | 29,983 |
| 42,024 | 103 | 21,099 | 5,452 | 3,344 | 29,998 |
| 42,025 | 103 | 21,036 | 5,427 | 3,343 | 29,909 |
| 42,026 | 103 | 20,950 | 5,396 | 3,342 | 29,791 |
| 42,027 | 108 | 20,913 | 5,377 | 3,320 | 29,718 |
| 42,028 | 106 | 20,814 | 5,335 | 3,283 | 29,538 |
| 42,029 | 110 | 20,627 | 5,314 | 3,238 | 29,289 |
| 42,030 | 110 | 20,630 | 5,310 | 3,239 | 29,289 |
| 42,031 | 109 | 20,340 | 5,237 | 3,215 | 28,901 |
| 42,032 | 109 | 20,128 | 5,171 | 3,181 | 28,589 |
| 42,033 | 121 | 20,839 | 5,423 | 3,309 | 29,692 |
| 42,034 | 121 | 20,503 | 5,370 | 3,258 | 29,252 |
| 42,035 | 123 | 20,187 | 5,315 | 3,228 | 28,853 |
| 42,036 | 128 | 20,439 | 5,355 | 3,287 | 29,209 |
| 42,037 | 129 | 20,380 | 5,339 | 3,306 | 29,154 |
| 42,038 | 133 | 20,580 | 5,358 | 3,334 | 29,405 |
| 42,039 | 135 | 20,501 | 5,349 | 3,341 | 29,326 |

|        |     |        |       |       |        |
|--------|-----|--------|-------|-------|--------|
| 42,040 | 136 | 20,455 | 5,353 | 3,312 | 29,256 |
| 42,041 | 134 | 20,291 | 5,322 | 3,267 | 29,014 |
| 42,042 | 134 | 20,290 | 5,289 | 3,238 | 28,951 |
| 42,043 | 136 | 20,410 | 5,291 | 3,241 | 29,078 |
| 42,044 | 138 | 20,413 | 5,307 | 3,207 | 29,065 |
| 42,045 | 141 | 20,413 | 5,301 | 3,187 | 29,042 |
| 42,046 | 140 | 20,465 | 5,307 | 3,180 | 29,092 |
| 42,047 | 141 | 20,465 | 5,283 | 3,170 | 29,059 |
| 42,048 | 139 | 20,237 | 5,255 | 3,135 | 28,766 |
| 42,049 | 148 | 20,697 | 5,396 | 3,215 | 29,456 |
| 42,050 | 145 | 20,708 | 5,376 | 3,219 | 29,448 |
| 42,051 | 147 | 20,857 | 5,422 | 3,264 | 29,690 |
| 42,052 | 149 | 21,130 | 5,480 | 3,298 | 30,057 |
| 42,053 | 151 | 21,398 | 5,492 | 3,298 | 30,339 |
| 42,054 | 152 | 21,463 | 5,491 | 3,281 | 30,387 |
| 42,055 | 153 | 21,608 | 5,478 | 3,297 | 30,536 |
| 42,056 | 158 | 21,953 | 5,561 | 3,336 | 31,008 |
| 42,057 | 156 | 21,231 | 5,380 | 3,246 | 30,013 |
| 42,058 | 156 | 21,512 | 5,424 | 3,274 | 30,366 |
| 42,059 | 154 | 21,340 | 5,412 | 3,266 | 30,172 |
| 42,060 | 157 | 21,607 | 5,434 | 3,289 | 30,487 |
| 42,061 | 147 | 21,931 | 5,522 | 3,328 | 30,928 |
| 42,062 | 151 | 22,189 | 5,596 | 3,372 | 31,308 |
| 42,063 | 152 | 21,939 | 5,523 | 3,335 | 30,949 |
| 42,064 | 152 | 21,689 | 5,450 | 3,315 | 30,606 |
| 42,065 | 156 | 21,825 | 5,518 | 3,356 | 30,855 |
| 42,066 | 157 | 21,808 | 5,493 | 3,342 | 30,800 |
| 42,067 | 148 | 21,790 | 5,512 | 3,352 | 30,802 |
| 42,068 | 148 | 21,693 | 5,512 | 3,345 | 30,698 |
| 42,069 | 153 | 21,771 | 5,561 | 3,377 | 30,862 |
| 42,070 | 158 | 21,648 | 5,552 | 3,348 | 30,706 |
| 42,071 | 157 | 21,662 | 5,562 | 3,356 | 30,737 |

|        |     |        |       |       |        |
|--------|-----|--------|-------|-------|--------|
| 42,072 | 157 | 21,470 | 5,507 | 3,309 | 30,443 |
| 42,073 | 158 | 21,676 | 5,560 | 3,334 | 30,728 |
| 42,074 | 158 | 21,661 | 5,566 | 3,318 | 30,703 |
| 42,075 | 164 | 21,927 | 5,662 | 3,365 | 31,118 |
| 42,076 | 164 | 21,760 | 5,626 | 3,349 | 30,899 |
| 42,077 | 164 | 21,848 | 5,629 | 3,338 | 30,979 |
| 42,078 | 159 | 21,815 | 5,651 | 3,334 | 30,959 |
| 42,079 | 154 | 21,816 | 5,668 | 3,358 | 30,996 |
| 42,080 | 146 | 21,866 | 5,716 | 3,355 | 31,083 |
| 42,081 | 146 | 21,830 | 5,695 | 3,325 | 30,996 |
| 42,082 | 146 | 22,085 | 5,723 | 3,367 | 31,321 |
| 42,083 | 136 | 22,118 | 5,715 | 3,382 | 31,351 |
| 42,084 | 145 | 22,400 | 5,799 | 3,423 | 31,767 |
| 42,085 | 141 | 22,210 | 5,774 | 3,423 | 31,548 |
| 42,086 | 140 | 22,290 | 5,775 | 3,411 | 31,616 |
| 42,087 | 140 | 22,594 | 5,850 | 3,449 | 32,033 |
| 42,088 | 145 | 22,409 | 5,829 | 3,404 | 31,787 |
| 42,089 | 141 | 22,212 | 5,828 | 3,394 | 31,575 |
| 42,090 | 140 | 22,321 | 5,868 | 3,410 | 31,739 |
| 42,091 | 143 | 22,002 | 5,788 | 3,365 | 31,298 |
| 42,092 | 143 | 21,648 | 5,755 | 3,344 | 30,890 |
| 42,093 | 145 | 22,008 | 5,883 | 3,443 | 31,479 |
| 42,094 | 142 | 21,734 | 5,859 | 3,416 | 31,151 |
| 42,095 | 140 | 21,912 | 5,900 | 3,425 | 31,377 |
| 42,096 | 140 | 21,946 | 5,909 | 3,453 | 31,448 |
| 42,097 | 144 | 21,984 | 5,927 | 3,472 | 31,527 |
| 42,098 | 152 | 21,837 | 5,895 | 3,447 | 31,331 |
| 42,099 | 151 | 21,805 | 5,850 | 3,431 | 31,237 |
| 42,100 | 146 | 22,020 | 5,880 | 3,448 | 31,494 |
| 42,101 | 146 | 21,971 | 5,889 | 3,427 | 31,433 |
| 42,102 | 142 | 21,525 | 5,792 | 3,354 | 30,813 |
| 42,103 | 142 | 21,585 | 5,800 | 3,368 | 30,895 |

|        |     |        |       |       |        |
|--------|-----|--------|-------|-------|--------|
| 42,104 | 143 | 21,775 | 5,878 | 3,416 | 31,212 |
| 42,105 | 140 | 21,331 | 5,744 | 3,334 | 30,549 |
| 42,106 | 140 | 21,599 | 5,782 | 3,344 | 30,865 |
| 42,107 | 140 | 21,546 | 5,776 | 3,328 | 30,790 |
| 42,108 | 142 | 21,603 | 5,802 | 3,379 | 30,926 |
| 42,109 | 145 | 20,799 | 5,642 | 3,279 | 29,865 |
| 42,110 | 146 | 21,014 | 5,671 | 3,266 | 30,097 |
| 42,111 | 142 | 20,972 | 5,670 | 3,265 | 30,049 |
| 42,112 | 146 | 21,132 | 5,708 | 3,310 | 30,296 |
| 42,113 | 145 | 21,038 | 5,692 | 3,297 | 30,172 |
| 42,114 | 138 | 21,090 | 5,711 | 3,302 | 30,241 |
| 42,115 | 134 | 20,935 | 5,695 | 3,264 | 30,028 |
| 42,116 | 136 | 21,036 | 5,707 | 3,286 | 30,165 |
| 42,117 | 133 | 21,046 | 5,724 | 3,280 | 30,183 |
| 42,118 | 135 | 21,085 | 5,709 | 3,269 | 30,198 |
| 42,119 | 135 | 21,084 | 5,716 | 3,267 | 30,202 |
| 42,120 | 129 | 21,010 | 5,701 | 3,263 | 30,103 |
| 42,121 | 123 | 20,775 | 5,633 | 3,231 | 29,762 |
| 42,122 | 122 | 20,552 | 5,582 | 3,209 | 29,465 |
| 42,123 | 128 | 20,945 | 5,744 | 3,296 | 30,113 |
| 42,124 | 128 | 20,898 | 5,719 | 3,283 | 30,028 |
| 42,125 | 127 | 21,283 | 5,787 | 3,357 | 30,554 |
| 42,126 | 135 | 21,474 | 5,796 | 3,392 | 30,797 |
| 42,127 | 128 | 21,308 | 5,751 | 3,352 | 30,539 |
| 42,128 | 126 | 21,298 | 5,732 | 3,377 | 30,533 |
| 42,129 | 131 | 21,296 | 5,740 | 3,364 | 30,531 |
| 42,130 | 130 | 21,209 | 5,685 | 3,341 | 30,365 |
| 42,131 | 131 | 21,316 | 5,698 | 3,375 | 30,520 |
| 42,132 | 137 | 20,956 | 5,612 | 3,294 | 29,999 |
| 42,133 | 140 | 21,182 | 5,632 | 3,310 | 30,264 |
| 42,134 | 135 | 21,101 | 5,613 | 3,316 | 30,165 |
| 42,135 | 135 | 20,805 | 5,554 | 3,277 | 29,771 |

|        |     |        |       |       |        |
|--------|-----|--------|-------|-------|--------|
| 42,136 | 132 | 20,501 | 5,488 | 3,258 | 29,379 |
| 42,137 | 140 | 21,138 | 5,662 | 3,370 | 30,310 |
| 42,138 | 140 | 21,186 | 5,699 | 3,374 | 30,399 |
| 42,139 | 132 | 20,980 | 5,561 | 3,320 | 29,993 |
| 42,140 | 132 | 21,225 | 5,626 | 3,348 | 30,331 |
| 42,141 | 136 | 21,254 | 5,622 | 3,330 | 30,342 |
| 42,142 | 131 | 21,228 | 5,561 | 3,297 | 30,217 |
| 42,143 | 131 | 21,328 | 5,554 | 3,285 | 30,298 |
| 42,144 | 134 | 21,590 | 5,595 | 3,336 | 30,655 |
| 42,145 | 136 | 21,425 | 5,525 | 3,287 | 30,373 |
| 42,146 | 135 | 21,365 | 5,518 | 3,291 | 30,309 |
| 42,147 | 135 | 21,458 | 5,543 | 3,302 | 30,438 |
| 42,148 | 133 | 21,425 | 5,547 | 3,289 | 30,394 |
| 42,149 | 122 | 21,320 | 5,527 | 3,272 | 30,241 |
| 42,150 | 121 | 21,035 | 5,463 | 3,248 | 29,867 |
| 42,151 | 125 | 21,345 | 5,537 | 3,285 | 30,292 |
| 42,152 | 126 | 21,076 | 5,488 | 3,252 | 29,942 |
| 42,153 | 127 | 21,168 | 5,487 | 3,259 | 30,041 |
| 42,154 | 129 | 21,506 | 5,558 | 3,308 | 30,501 |
| 42,155 | 125 | 21,086 | 5,460 | 3,257 | 29,928 |
| 42,156 | 122 | 20,838 | 5,523 | 3,251 | 29,734 |
| 42,157 | 122 | 20,797 | 5,550 | 3,260 | 29,729 |
| 42,158 | 122 | 20,682 | 5,534 | 3,239 | 29,577 |
| 42,159 | 126 | 20,742 | 5,550 | 3,228 | 29,646 |
| 42,160 | 121 | 20,560 | 5,522 | 3,210 | 29,413 |
| 42,161 | 120 | 20,585 | 5,531 | 3,231 | 29,467 |
| 42,162 | 127 | 20,641 | 5,560 | 3,251 | 29,579 |
| 42,163 | 127 | 20,398 | 5,509 | 3,197 | 29,231 |
| 42,164 | 125 | 20,301 | 5,458 | 3,166 | 29,050 |
| 42,165 | 128 | 20,313 | 5,433 | 3,147 | 29,021 |
| 42,166 | 129 | 20,501 | 5,455 | 3,159 | 29,244 |
| 42,167 | 128 | 20,690 | 5,492 | 3,174 | 29,484 |

|        |     |        |       |       |        |
|--------|-----|--------|-------|-------|--------|
| 42,168 | 128 | 20,638 | 5,490 | 3,178 | 29,434 |
| 42,169 | 132 | 20,512 | 5,426 | 3,171 | 29,241 |
| 42,170 | 133 | 20,750 | 5,494 | 3,192 | 29,569 |
| 42,171 | 139 | 20,695 | 5,475 | 3,186 | 29,495 |
| 42,172 | 137 | 20,471 | 5,435 | 3,153 | 29,196 |
| 42,173 | 134 | 20,380 | 5,371 | 3,143 | 29,028 |
| 42,174 | 137 | 20,681 | 5,421 | 3,163 | 29,402 |
| 42,175 | 135 | 20,656 | 5,428 | 3,152 | 29,371 |
| 42,176 | 136 | 20,552 | 5,392 | 3,157 | 29,237 |
| 42,177 | 130 | 20,350 | 5,369 | 3,107 | 28,956 |
| 42,178 | 130 | 20,074 | 5,310 | 3,058 | 28,572 |
| 42,179 | 131 | 20,058 | 5,311 | 3,035 | 28,535 |
| 42,180 | 133 | 20,279 | 5,331 | 3,085 | 28,828 |
| 42,181 | 132 | 19,969 | 5,276 | 3,042 | 28,419 |
| 42,182 | 131 | 19,906 | 5,274 | 3,037 | 28,348 |
| 42,183 | 123 | 19,892 | 5,304 | 3,042 | 28,361 |
| 42,184 | 127 | 19,872 | 5,313 | 3,033 | 28,345 |
| 42,185 | 131 | 19,742 | 5,315 | 3,021 | 28,209 |
| 42,186 | 125 | 19,812 | 5,344 | 3,058 | 28,339 |
| 42,187 | 125 | 19,810 | 5,367 | 3,040 | 28,342 |
| 42,188 | 130 | 19,858 | 5,381 | 3,009 | 28,378 |
| 42,189 | 132 | 19,852 | 5,379 | 2,992 | 28,355 |
| 42,190 | 135 | 19,580 | 5,350 | 2,959 | 28,024 |
| 42,191 | 135 | 19,586 | 5,357 | 2,950 | 28,028 |
| 42,192 | 129 | 19,804 | 5,426 | 3,015 | 28,374 |
| 42,193 | 127 | 19,598 | 5,366 | 2,974 | 28,065 |
| 42,194 | 130 | 19,530 | 5,372 | 2,980 | 28,012 |
| 42,195 | 134 | 19,737 | 5,433 | 3,003 | 28,307 |
| 42,196 | 133 | 19,635 | 5,442 | 3,009 | 28,219 |
| 42,197 | 138 | 20,000 | 5,541 | 3,044 | 28,723 |
| 42,198 | 137 | 19,775 | 5,524 | 3,016 | 28,452 |
| 42,199 | 135 | 20,006 | 5,554 | 3,062 | 28,757 |

|        |     |        |       |       |        |
|--------|-----|--------|-------|-------|--------|
| 42,200 | 138 | 20,027 | 5,566 | 3,077 | 28,808 |
| 42,201 | 139 | 20,093 | 5,602 | 3,087 | 28,921 |
| 42,202 | 136 | 20,053 | 5,602 | 3,071 | 28,862 |
| 42,203 | 133 | 19,788 | 5,549 | 3,041 | 28,511 |
| 42,204 | 144 | 19,915 | 5,646 | 3,062 | 28,767 |
| 42,205 | 148 | 19,850 | 5,644 | 3,085 | 28,727 |
| 42,206 | 150 | 19,976 | 5,569 | 3,082 | 28,777 |
| 42,207 | 154 | 20,164 | 5,641 | 3,104 | 29,063 |
| 42,208 | 156 | 20,123 | 5,618 | 3,088 | 28,985 |
| 42,209 | 153 | 20,004 | 5,554 | 3,060 | 28,771 |
| 42,210 | 149 | 19,868 | 5,556 | 3,042 | 28,615 |
| 42,211 | 150 | 19,895 | 5,546 | 3,038 | 28,629 |
| 42,212 | 150 | 19,881 | 5,558 | 3,026 | 28,615 |
| 42,213 | 144 | 20,105 | 5,634 | 3,075 | 28,958 |
| 42,214 | 133 | 19,772 | 5,579 | 3,049 | 28,533 |
| 42,215 | 137 | 19,880 | 5,732 | 3,095 | 28,844 |
| 42,216 | 139 | 19,825 | 5,757 | 3,099 | 28,820 |
| 42,217 | 138 | 19,821 | 5,823 | 3,102 | 28,884 |
| 42,218 | 135 | 19,326 | 5,734 | 3,047 | 28,242 |
| 42,219 | 135 | 19,562 | 5,784 | 3,065 | 28,546 |
| 42,220 | 130 | 19,799 | 5,844 | 3,088 | 28,861 |
| 42,221 | 131 | 19,823 | 5,820 | 3,095 | 28,869 |
| 42,222 | 126 | 19,679 | 5,745 | 3,056 | 28,606 |
| 42,223 | 128 | 19,801 | 5,798 | 3,068 | 28,795 |
| 42,224 | 130 | 19,595 | 5,840 | 3,087 | 28,652 |
| 42,225 | 127 | 19,501 | 5,845 | 3,086 | 28,559 |
| 42,226 | 131 | 19,451 | 5,846 | 3,082 | 28,510 |
| 42,227 | 125 | 19,231 | 5,790 | 3,024 | 28,170 |
| 42,228 | 122 | 18,905 | 5,720 | 2,987 | 27,734 |
| 42,229 | 126 | 19,238 | 5,812 | 3,038 | 28,214 |
| 42,230 | 123 | 19,342 | 5,875 | 3,055 | 28,395 |
| 42,231 | 118 | 19,356 | 5,904 | 3,047 | 28,425 |



|        |     |        |       |       |        |
|--------|-----|--------|-------|-------|--------|
| 42,232 | 118 | 19,305 | 5,926 | 3,055 | 28,404 |
| 42,233 | 124 | 18,978 | 5,815 | 3,027 | 27,944 |
| 42,234 | 124 | 19,125 | 5,864 | 3,047 | 28,160 |
| 42,235 | 121 | 19,397 | 5,923 | 3,074 | 28,515 |
| 42,236 | 117 | 19,323 | 5,876 | 3,043 | 28,359 |
| 42,237 | 118 | 19,360 | 5,889 | 3,031 | 28,398 |
| 42,238 | 115 | 19,099 | 5,789 | 3,000 | 28,003 |
| 42,239 | 114 | 19,565 | 5,859 | 3,047 | 28,585 |
| 42,240 | 114 | 19,464 | 5,812 | 3,055 | 28,445 |
| 42,241 | 113 | 19,533 | 5,810 | 3,070 | 28,526 |
| 42,242 | 114 | 19,574 | 5,834 | 3,050 | 28,572 |
| 42,243 | 118 | 19,274 | 5,766 | 2,999 | 28,157 |
| 42,244 | 116 | 19,059 | 5,700 | 2,972 | 27,847 |
| 42,245 | 112 | 19,223 | 5,767 | 3,018 | 28,120 |
| 42,246 | 107 | 18,893 | 5,719 | 2,967 | 27,686 |
| 42,247 | 107 | 18,898 | 5,692 | 2,971 | 27,668 |
| 42,248 | 104 | 18,822 | 5,617 | 2,969 | 27,512 |
| 42,249 | 105 | 18,626 | 5,557 | 2,913 | 27,201 |
| 42,250 | 105 | 18,736 | 5,604 | 2,911 | 27,356 |
| 42,251 | 102 | 18,864 | 5,642 | 2,940 | 27,548 |
| 42,252 | 102 | 18,736 | 5,620 | 2,918 | 27,376 |
| 42,253 | 92  | 18,537 | 5,500 | 2,897 | 27,026 |
| 42,254 | 96  | 18,687 | 5,503 | 2,901 | 27,187 |
| 42,255 | 97  | 18,878 | 5,547 | 2,914 | 27,436 |
| 42,256 | 98  | 18,756 | 5,503 | 2,864 | 27,221 |
| 42,257 | 91  | 18,612 | 5,449 | 2,833 | 26,985 |
| 42,258 | 90  | 18,602 | 5,422 | 2,825 | 26,939 |
| 42,259 | 91  | 18,703 | 5,450 | 2,847 | 27,091 |
| 42,260 | 92  | 18,396 | 5,365 | 2,803 | 26,656 |
| 42,261 | 92  | 18,560 | 5,379 | 2,831 | 26,862 |
| 42,262 | 90  | 18,533 | 5,360 | 2,814 | 26,797 |
| 42,263 | 89  | 18,640 | 5,336 | 2,809 | 26,874 |

|        |     |        |       |       |        |
|--------|-----|--------|-------|-------|--------|
| 42,264 | 89  | 18,584 | 5,311 | 2,805 | 26,789 |
| 42,265 | 93  | 18,580 | 5,200 | 2,765 | 26,638 |
| 42,266 | 89  | 18,499 | 5,102 | 2,730 | 26,420 |
| 42,267 | 91  | 18,204 | 5,011 | 2,714 | 26,020 |
| 42,268 | 92  | 18,169 | 4,971 | 2,708 | 25,940 |
| 42,269 | 93  | 18,146 | 4,950 | 2,683 | 25,872 |
| 42,270 | 95  | 17,890 | 4,848 | 2,648 | 25,481 |
| 42,271 | 95  | 17,758 | 4,823 | 2,634 | 25,310 |
| 42,272 | 100 | 17,787 | 4,822 | 2,626 | 25,335 |
| 42,273 | 99  | 17,667 | 4,765 | 2,611 | 25,142 |
| 42,274 | 100 | 17,655 | 4,682 | 2,564 | 25,001 |
| 42,275 | 101 | 17,818 | 4,683 | 2,561 | 25,163 |
| 42,276 | 99  | 17,706 | 4,618 | 2,535 | 24,958 |
| 42,277 | 98  | 17,693 | 4,579 | 2,516 | 24,886 |
| 42,278 | 103 | 17,806 | 4,569 | 2,519 | 24,997 |
| 42,279 | 100 | 17,667 | 4,536 | 2,511 | 24,814 |
| 42,280 | 100 | 17,484 | 4,456 | 2,471 | 24,511 |
| 42,281 | 108 | 17,519 | 4,430 | 2,483 | 24,540 |
| 42,282 | 114 | 17,038 | 4,266 | 2,427 | 23,845 |
| 42,283 | 117 | 17,250 | 4,251 | 2,406 | 24,024 |
| 42,284 | 112 | 17,397 | 4,307 | 2,427 | 24,243 |
| 42,285 | 112 | 17,320 | 4,254 | 2,392 | 24,078 |
| 42,286 | 117 | 17,590 | 4,362 | 2,426 | 24,495 |
| 42,287 | 117 | 17,458 | 4,316 | 2,407 | 24,298 |
| 42,288 | 116 | 17,690 | 4,387 | 2,458 | 24,651 |
| 42,289 | 118 | 17,821 | 4,448 | 2,507 | 24,894 |
| 42,290 | 115 | 17,613 | 4,448 | 2,496 | 24,672 |
| 42,291 | 114 | 17,709 | 4,485 | 2,499 | 24,807 |
| 42,292 | 116 | 17,736 | 4,482 | 2,490 | 24,824 |
| 42,293 | 115 | 17,437 | 4,391 | 2,457 | 24,400 |
| 42,294 | 114 | 17,524 | 4,385 | 2,460 | 24,483 |
| 42,295 | 115 | 17,533 | 4,369 | 2,463 | 24,480 |

|        |     |        |       |       |        |
|--------|-----|--------|-------|-------|--------|
| 42,296 | 115 | 17,580 | 4,351 | 2,453 | 24,499 |
| 42,297 | 117 | 17,510 | 4,338 | 2,432 | 24,397 |
| 42,298 | 115 | 17,326 | 4,283 | 2,390 | 24,114 |
| 42,299 | 116 | 17,467 | 4,355 | 2,421 | 24,359 |
| 42,300 | 116 | 17,401 | 4,326 | 2,431 | 24,274 |
| 42,301 | 119 | 17,427 | 4,319 | 2,437 | 24,302 |
| 42,302 | 118 | 17,438 | 4,312 | 2,432 | 24,300 |
| 42,303 | 119 | 17,405 | 4,283 | 2,423 | 24,230 |
| 42,304 | 118 | 17,440 | 4,260 | 2,395 | 24,213 |
| 42,305 | 118 | 17,715 | 4,320 | 2,434 | 24,587 |
| 42,306 | 115 | 17,749 | 4,329 | 2,456 | 24,649 |
| 42,307 | 116 | 17,581 | 4,325 | 2,454 | 24,476 |
| 42,308 | 117 | 17,704 | 4,382 | 2,475 | 24,678 |
| 42,309 | 122 | 17,878 | 4,431 | 2,500 | 24,931 |
| 42,310 | 123 | 17,922 | 4,447 | 2,509 | 25,001 |
| 42,311 | 129 | 18,060 | 4,508 | 2,531 | 25,228 |
| 42,312 | 129 | 18,013 | 4,495 | 2,535 | 25,172 |
| 42,313 | 134 | 18,144 | 4,537 | 2,548 | 25,363 |
| 42,314 | 134 | 18,085 | 4,534 | 2,553 | 25,306 |
| 42,315 | 135 | 17,971 | 4,531 | 2,540 | 25,177 |
| 42,316 | 132 | 17,795 | 4,552 | 2,543 | 25,022 |
| 42,317 | 128 | 17,483 | 4,503 | 2,508 | 24,622 |
| 42,318 | 133 | 17,602 | 4,522 | 2,515 | 24,772 |
| 42,319 | 137 | 17,783 | 4,533 | 2,535 | 24,988 |
| 42,320 | 136 | 17,754 | 4,519 | 2,529 | 24,938 |
| 42,321 | 139 | 18,046 | 4,599 | 2,562 | 25,346 |
| 42,322 | 139 | 17,987 | 4,592 | 2,551 | 25,269 |
| 42,323 | 135 | 18,011 | 4,652 | 2,565 | 25,363 |
| 42,324 | 135 | 17,941 | 4,635 | 2,552 | 25,263 |
| 42,325 | 131 | 17,939 | 4,658 | 2,584 | 25,312 |
| 42,326 | 130 | 17,981 | 4,720 | 2,603 | 25,434 |
| 42,327 | 136 | 18,125 | 4,801 | 2,641 | 25,703 |

|        |     |        |       |       |        |
|--------|-----|--------|-------|-------|--------|
| 42,328 | 132 | 17,937 | 4,800 | 2,668 | 25,537 |
| 42,329 | 139 | 17,889 | 4,820 | 2,664 | 25,512 |
| 42,330 | 140 | 18,178 | 4,872 | 2,710 | 25,900 |
| 42,331 | 137 | 18,379 | 4,944 | 2,756 | 26,216 |
| 42,332 | 135 | 18,355 | 5,004 | 2,759 | 26,253 |
| 42,333 | 130 | 18,147 | 4,996 | 2,750 | 26,023 |
| 42,334 | 127 | 17,897 | 4,969 | 2,741 | 25,734 |
| 42,335 | 126 | 18,526 | 5,144 | 2,843 | 26,639 |
| 42,336 | 129 | 18,609 | 5,175 | 2,857 | 26,770 |
| 42,337 | 126 | 18,525 | 5,124 | 2,872 | 26,647 |
| 42,338 | 125 | 18,553 | 5,128 | 2,867 | 26,673 |
| 42,339 | 125 | 18,188 | 5,056 | 2,820 | 26,189 |
| 42,340 | 130 | 18,235 | 5,130 | 2,858 | 26,353 |
| 42,341 | 132 | 18,121 | 5,077 | 2,828 | 26,158 |
| 42,342 | 135 | 18,462 | 5,176 | 2,898 | 26,671 |
| 42,343 | 130 | 18,060 | 5,126 | 2,862 | 26,178 |
| 42,344 | 137 | 17,982 | 5,158 | 2,872 | 26,149 |
| 42,345 | 136 | 17,966 | 5,235 | 2,914 | 26,251 |
| 42,346 | 134 | 17,972 | 5,259 | 2,916 | 26,281 |
| 42,347 | 136 | 17,916 | 5,263 | 2,913 | 26,228 |
| 42,348 | 136 | 17,825 | 5,254 | 2,893 | 26,108 |
| 42,349 | 136 | 17,737 | 5,265 | 2,895 | 26,033 |
| 42,350 | 136 | 17,804 | 5,282 | 2,909 | 26,131 |
| 42,351 | 133 | 17,587 | 5,239 | 2,863 | 25,822 |
| 42,352 | 133 | 17,391 | 5,211 | 2,836 | 25,571 |
| 42,353 | 135 | 17,129 | 5,193 | 2,801 | 25,258 |
| 42,354 | 134 | 16,987 | 5,187 | 2,794 | 25,102 |
| 42,355 | 133 | 16,712 | 5,205 | 2,780 | 24,830 |
| 42,356 | 140 | 16,092 | 5,097 | 2,718 | 24,047 |
| 42,357 | 138 | 15,978 | 5,096 | 2,702 | 23,914 |
| 42,358 | 132 | 15,951 | 5,078 | 2,699 | 23,860 |
| 42,359 | 132 | 15,826 | 5,044 | 2,693 | 23,695 |

|        |     |        |       |       |        |
|--------|-----|--------|-------|-------|--------|
| 42,360 | 130 | 15,866 | 5,108 | 2,686 | 23,790 |
| 42,361 | 129 | 15,788 | 5,090 | 2,662 | 23,669 |
| 42,362 | 127 | 15,634 | 5,051 | 2,630 | 23,442 |
| 42,363 | 125 | 15,620 | 5,081 | 2,621 | 23,447 |
| 42,364 | 126 | 15,760 | 5,126 | 2,660 | 23,672 |
| 42,365 | 123 | 15,635 | 5,076 | 2,639 | 23,473 |
| 42,366 | 122 | 15,650 | 5,089 | 2,633 | 23,494 |
| 42,367 | 124 | 15,770 | 5,121 | 2,667 | 23,682 |
| 42,368 | 124 | 15,653 | 5,108 | 2,644 | 23,529 |
| 42,369 | 122 | 15,941 | 5,198 | 2,695 | 23,956 |
| 42,370 | 121 | 15,879 | 5,226 | 2,693 | 23,919 |
| 42,371 | 118 | 16,250 | 5,304 | 2,753 | 24,425 |
| 42,372 | 118 | 16,212 | 5,316 | 2,752 | 24,398 |
| 42,373 | 115 | 16,612 | 5,407 | 2,828 | 24,962 |
| 42,374 | 118 | 16,795 | 5,463 | 2,856 | 25,232 |
| 42,375 | 115 | 16,886 | 5,461 | 2,845 | 25,307 |
| 42,376 | 115 | 17,187 | 5,508 | 2,880 | 25,690 |
| 42,377 | 110 | 17,172 | 5,536 | 2,877 | 25,695 |
| 42,378 | 109 | 17,373 | 5,561 | 2,927 | 25,970 |
| 42,379 | 109 | 17,625 | 5,636 | 2,947 | 26,317 |
| 42,380 | 106 | 17,843 | 5,724 | 2,993 | 26,666 |
| 42,381 | 109 | 18,039 | 5,778 | 2,991 | 26,917 |
| 42,382 | 111 | 18,233 | 5,813 | 2,991 | 27,148 |
| 42,383 | 121 | 18,061 | 5,760 | 2,979 | 26,921 |
| 42,384 | 119 | 17,995 | 5,719 | 2,966 | 26,799 |
| 42,385 | 124 | 18,689 | 5,760 | 3,044 | 27,617 |
| 42,386 | 123 | 18,633 | 5,775 | 3,059 | 27,590 |
| 42,387 | 121 | 18,736 | 5,818 | 3,095 | 27,770 |
| 42,388 | 127 | 18,952 | 5,851 | 3,117 | 28,047 |
| 42,389 | 125 | 18,922 | 5,818 | 3,085 | 27,950 |
| 42,390 | 117 | 18,746 | 5,685 | 3,020 | 27,568 |
| 42,391 | 117 | 18,582 | 5,631 | 2,993 | 27,323 |

|        |     |        |       |       |        |
|--------|-----|--------|-------|-------|--------|
| 42,392 | 50  | 9,242  | 2,831 | 1,590 | 13,713 |
| 42,393 | 64  | 12,730 | 3,805 | 2,072 | 18,671 |
| 42,394 | 111 | 19,229 | 5,698 | 3,089 | 28,127 |
| 42,395 | 113 | 19,565 | 5,762 | 3,136 | 28,576 |
| 42,396 | 112 | 19,790 | 5,792 | 3,157 | 28,851 |
| 42,397 | 110 | 19,944 | 5,801 | 3,184 | 29,039 |
| 42,398 | 112 | 20,147 | 5,835 | 3,194 | 29,288 |
| 42,399 | 112 | 20,315 | 5,849 | 3,217 | 29,493 |
| 42,400 | 112 | 20,453 | 5,883 | 3,227 | 29,675 |
| 42,401 | 112 | 20,623 | 5,919 | 3,259 | 29,913 |
| 42,402 | 114 | 20,935 | 5,961 | 3,305 | 30,315 |
| 42,403 | 119 | 21,196 | 5,980 | 3,348 | 30,643 |
| 42,404 | 122 | 21,456 | 6,013 | 3,391 | 30,982 |
| 42,405 | 122 | 21,775 | 6,056 | 3,427 | 31,380 |
| 42,406 | 121 | 22,047 | 6,114 | 3,461 | 31,743 |
| 42,407 | 123 | 22,344 | 6,214 | 3,515 | 32,196 |
| 42,408 | 121 | 22,527 | 6,233 | 3,530 | 32,411 |
| 42,409 | 118 | 22,696 | 6,220 | 3,550 | 32,584 |
| 42,410 | 119 | 22,797 | 6,277 | 3,572 | 32,765 |
| 42,411 | 120 | 22,934 | 6,321 | 3,582 | 32,957 |
| 42,412 | 123 | 23,173 | 6,300 | 3,595 | 33,191 |
| 42,413 | 123 | 23,168 | 6,326 | 3,626 | 33,243 |
| 42,414 | 119 | 23,160 | 6,316 | 3,644 | 33,239 |
| 42,415 | 120 | 23,175 | 6,332 | 3,670 | 33,297 |
| 42,416 | 118 | 23,225 | 6,341 | 3,657 | 33,341 |
| 42,417 | 124 | 23,080 | 6,310 | 3,628 | 33,142 |
| 42,418 | 129 | 22,919 | 6,294 | 3,617 | 32,959 |
| 42,419 | 136 | 23,388 | 6,315 | 3,670 | 33,509 |
| 42,420 | 134 | 23,197 | 6,322 | 3,639 | 33,292 |
| 42,421 | 136 | 23,382 | 6,333 | 3,646 | 33,497 |
| 42,422 | 132 | 23,195 | 6,343 | 3,646 | 33,316 |
| 42,423 | 138 | 23,069 | 6,286 | 3,628 | 33,121 |

|        |     |        |       |       |        |
|--------|-----|--------|-------|-------|--------|
| 42,424 | 138 | 22,935 | 6,329 | 3,608 | 33,010 |
| 42,425 | 138 | 22,908 | 6,351 | 3,637 | 33,034 |
| 42,426 | 141 | 22,785 | 6,348 | 3,644 | 32,918 |
| 42,427 | 140 | 22,694 | 6,383 | 3,651 | 32,868 |
| 42,428 | 140 | 22,692 | 6,366 | 3,640 | 32,838 |
| 42,429 | 140 | 22,443 | 6,255 | 3,595 | 32,433 |
| 42,430 | 142 | 22,452 | 6,299 | 3,613 | 32,506 |
| 42,431 | 140 | 22,456 | 6,298 | 3,632 | 32,526 |
| 42,432 | 139 | 22,442 | 6,356 | 3,624 | 32,561 |
| 42,433 | 134 | 22,346 | 6,245 | 3,599 | 32,324 |
| 42,434 | 138 | 22,332 | 6,347 | 3,639 | 32,456 |
| 42,435 | 128 | 22,072 | 6,261 | 3,599 | 32,060 |
| 42,436 | 130 | 22,286 | 6,383 | 3,622 | 32,421 |
| 42,437 | 139 | 22,295 | 6,458 | 3,640 | 32,532 |
| 42,438 | 141 | 22,034 | 6,480 | 3,588 | 32,243 |
| 42,439 | 139 | 21,772 | 6,429 | 3,561 | 31,901 |
| 42,440 | 139 | 21,910 | 6,408 | 3,554 | 32,011 |
| 42,441 | 141 | 21,951 | 6,462 | 3,556 | 32,110 |
| 42,442 | 144 | 21,944 | 6,472 | 3,562 | 32,122 |
| 42,443 | 143 | 21,736 | 6,412 | 3,541 | 31,832 |
| 42,444 | 144 | 21,779 | 6,456 | 3,550 | 31,929 |
| 42,445 | 140 | 21,558 | 6,426 | 3,514 | 31,638 |
| 42,446 | 143 | 21,622 | 6,459 | 3,527 | 31,751 |
| 42,447 | 144 | 21,357 | 6,398 | 3,486 | 31,385 |
| 42,448 | 142 | 21,034 | 6,322 | 3,438 | 30,936 |
| 42,449 | 140 | 21,488 | 6,394 | 3,486 | 31,508 |
| 42,450 | 138 | 21,649 | 6,448 | 3,508 | 31,743 |
| 42,451 | 138 | 21,516 | 6,395 | 3,482 | 31,531 |
| 42,452 | 135 | 21,392 | 6,371 | 3,466 | 31,364 |
| 42,453 | 137 | 21,475 | 6,456 | 3,516 | 31,584 |
| 42,454 | 137 | 21,627 | 6,553 | 3,556 | 31,873 |
| 42,455 | 135 | 21,720 | 6,605 | 3,556 | 32,016 |

|        |     |        |       |       |        |
|--------|-----|--------|-------|-------|--------|
| 42,456 | 134 | 21,408 | 6,572 | 3,528 | 31,642 |
| 42,457 | 135 | 21,359 | 6,633 | 3,563 | 31,690 |
| 42,458 | 138 | 21,328 | 6,629 | 3,584 | 31,679 |
| 42,459 | 138 | 21,430 | 6,720 | 3,613 | 31,901 |
| 42,460 | 138 | 21,403 | 6,713 | 3,608 | 31,862 |
| 42,461 | 129 | 20,587 | 6,381 | 3,434 | 30,531 |
| 42,462 | 130 | 20,751 | 6,494 | 3,491 | 30,866 |
| 42,463 | 132 | 21,055 | 6,599 | 3,536 | 31,322 |
| 42,464 | 131 | 20,990 | 6,626 | 3,549 | 31,296 |
| 42,465 | 132 | 21,123 | 6,758 | 3,614 | 31,627 |
| 42,466 | 146 | 21,314 | 6,851 | 3,674 | 31,985 |
| 42,467 | 144 | 21,034 | 6,786 | 3,647 | 31,611 |
| 42,468 | 139 | 21,259 | 6,876 | 3,673 | 31,947 |
| 42,469 | 136 | 21,180 | 6,962 | 3,689 | 31,967 |
| 42,470 | 134 | 21,143 | 7,021 | 3,707 | 32,005 |
| 42,471 | 137 | 21,187 | 7,001 | 3,699 | 32,024 |
| 42,472 | 133 | 20,899 | 6,940 | 3,676 | 31,648 |
| 42,473 | 137 | 21,091 | 7,011 | 3,694 | 31,933 |
| 42,474 | 130 | 20,897 | 6,968 | 3,657 | 31,652 |
| 42,475 | 131 | 20,958 | 7,026 | 3,694 | 31,809 |
| 42,476 | 127 | 20,732 | 6,929 | 3,625 | 31,413 |
| 42,477 | 127 | 20,747 | 6,991 | 3,627 | 31,492 |
| 42,478 | 131 | 20,355 | 6,820 | 3,559 | 30,865 |
| 42,479 | 136 | 20,506 | 6,915 | 3,602 | 31,159 |
| 42,480 | 134 | 20,203 | 6,859 | 3,545 | 30,741 |
| 42,481 | 133 | 19,592 | 6,692 | 3,430 | 29,847 |
| 42,482 | 133 | 19,883 | 6,779 | 3,467 | 30,262 |
| 42,483 | 134 | 20,065 | 6,878 | 3,511 | 30,588 |
| 42,484 | 129 | 19,672 | 6,792 | 3,458 | 30,051 |
| 42,485 | 127 | 19,278 | 6,644 | 3,395 | 29,444 |
| 42,486 | 126 | 18,834 | 6,543 | 3,351 | 28,854 |
| 42,487 | 128 | 19,263 | 6,685 | 3,425 | 29,501 |



|        |     |        |       |       |        |
|--------|-----|--------|-------|-------|--------|
| 42,488 | 116 | 18,712 | 6,525 | 3,336 | 28,689 |
| 42,489 | 114 | 18,734 | 6,531 | 3,351 | 28,730 |
| 42,490 | 114 | 18,620 | 6,521 | 3,317 | 28,572 |
| 42,491 | 115 | 18,215 | 6,425 | 3,254 | 28,009 |
| 42,492 | 113 | 17,958 | 6,359 | 3,231 | 27,661 |
| 42,493 | 112 | 18,029 | 6,417 | 3,266 | 27,824 |
| 42,494 | 110 | 17,874 | 6,405 | 3,246 | 27,635 |
| 42,495 | 110 | 18,029 | 6,475 | 3,284 | 27,898 |
| 42,496 | 108 | 18,015 | 6,472 | 3,304 | 27,899 |
| 42,497 | 112 | 17,992 | 6,516 | 3,323 | 27,943 |
| 42,498 | 115 | 17,837 | 6,566 | 3,345 | 27,863 |
| 42,499 | 120 | 17,811 | 6,598 | 3,346 | 27,875 |
| 42,500 | 120 | 17,548 | 6,535 | 3,325 | 27,528 |
| 42,501 | 120 | 17,319 | 6,483 | 3,295 | 27,217 |
| 42,502 | 120 | 17,432 | 6,609 | 3,370 | 27,531 |
| 42,503 | 121 | 17,292 | 6,628 | 3,350 | 27,391 |
| 42,504 | 121 | 17,278 | 6,651 | 3,332 | 27,382 |
| 42,505 | 118 | 17,265 | 6,671 | 3,332 | 27,386 |
| 42,506 | 118 | 17,050 | 6,651 | 3,303 | 27,122 |
| 42,507 | 121 | 17,298 | 6,695 | 3,328 | 27,442 |
| 42,508 | 115 | 17,121 | 6,635 | 3,281 | 27,152 |
| 42,509 | 116 | 16,906 | 6,645 | 3,279 | 26,946 |
| 42,510 | 114 | 16,875 | 6,638 | 3,278 | 26,905 |
| 42,511 | 112 | 16,852 | 6,665 | 3,288 | 26,917 |
| 42,512 | 113 | 16,717 | 6,664 | 3,296 | 26,790 |
| 42,513 | 112 | 16,595 | 6,658 | 3,291 | 26,656 |
| 42,514 | 111 | 16,727 | 6,707 | 3,341 | 26,886 |
| 42,515 | 109 | 17,119 | 6,772 | 3,362 | 27,362 |
| 42,516 | 109 | 17,316 | 6,824 | 3,391 | 27,640 |
| 42,517 | 99  | 17,088 | 6,762 | 3,369 | 27,318 |
| 42,518 | 101 | 17,163 | 6,797 | 3,400 | 27,461 |
| 42,519 | 101 | 17,443 | 6,884 | 3,479 | 27,907 |

|        |     |        |       |       |        |
|--------|-----|--------|-------|-------|--------|
| 42,520 | 98  | 17,458 | 6,874 | 3,504 | 27,934 |
| 42,521 | 98  | 17,518 | 6,864 | 3,515 | 27,995 |
| 42,522 | 94  | 17,434 | 6,893 | 3,531 | 27,952 |
| 42,523 | 96  | 17,391 | 6,885 | 3,533 | 27,905 |
| 42,524 | 97  | 17,447 | 6,919 | 3,574 | 28,037 |
| 42,525 | 100 | 17,536 | 6,925 | 3,573 | 28,134 |
| 42,526 | 99  | 17,735 | 6,986 | 3,613 | 28,433 |
| 42,527 | 105 | 17,920 | 7,011 | 3,633 | 28,669 |
| 42,528 | 105 | 17,945 | 7,018 | 3,656 | 28,724 |
| 42,529 | 101 | 17,802 | 6,976 | 3,621 | 28,500 |
| 42,530 | 98  | 17,596 | 6,880 | 3,604 | 28,178 |
| 42,531 | 98  | 17,641 | 6,930 | 3,601 | 28,270 |
| 42,532 | 100 | 17,822 | 6,968 | 3,651 | 28,541 |
| 42,533 | 100 | 17,783 | 6,970 | 3,651 | 28,504 |
| 42,534 | 99  | 17,602 | 6,909 | 3,631 | 28,241 |
| 42,535 | 110 | 18,002 | 7,039 | 3,739 | 28,890 |
| 42,536 | 104 | 17,945 | 7,005 | 3,735 | 28,789 |
| 42,537 | 103 | 18,228 | 7,080 | 3,770 | 29,181 |
| 42,538 | 101 | 18,328 | 7,113 | 3,788 | 29,330 |
| 42,539 | 100 | 18,344 | 7,117 | 3,830 | 29,391 |
| 42,540 | 93  | 18,225 | 7,064 | 3,810 | 29,192 |
| 42,541 | 98  | 18,331 | 7,168 | 3,843 | 29,440 |
| 42,542 | 98  | 18,415 | 7,219 | 3,854 | 29,586 |
| 42,543 | 98  | 18,602 | 7,274 | 3,877 | 29,851 |
| 42,544 | 101 | 18,530 | 7,229 | 3,877 | 29,737 |
| 42,545 | 103 | 18,324 | 7,171 | 3,838 | 29,436 |
| 42,546 | 105 | 18,598 | 7,291 | 3,886 | 29,880 |
| 42,547 | 108 | 18,847 | 7,344 | 3,915 | 30,214 |
| 42,548 | 103 | 18,993 | 7,394 | 3,949 | 30,439 |
| 42,549 | 99  | 19,073 | 7,391 | 3,942 | 30,505 |
| 42,550 | 94  | 19,163 | 7,443 | 3,974 | 30,674 |
| 42,551 | 94  | 19,169 | 7,478 | 3,972 | 30,713 |

|        |     |        |       |       |        |
|--------|-----|--------|-------|-------|--------|
| 42,552 | 93  | 19,117 | 7,488 | 3,992 | 30,690 |
| 42,553 | 95  | 19,330 | 7,531 | 4,022 | 30,978 |
| 42,554 | 99  | 19,516 | 7,610 | 4,080 | 31,305 |
| 42,555 | 97  | 19,684 | 7,655 | 4,125 | 31,561 |
| 42,556 | 97  | 19,630 | 7,639 | 4,127 | 31,493 |
| 42,557 | 95  | 19,751 | 7,655 | 4,132 | 31,633 |
| 42,558 | 94  | 19,722 | 7,572 | 4,114 | 31,502 |
| 42,559 | 95  | 20,043 | 7,600 | 4,137 | 31,875 |
| 42,560 | 94  | 20,016 | 7,553 | 4,116 | 31,779 |
| 42,561 | 94  | 20,187 | 7,655 | 4,155 | 32,091 |
| 42,562 | 97  | 20,341 | 7,595 | 4,138 | 32,171 |
| 42,563 | 96  | 20,335 | 7,607 | 4,146 | 32,184 |
| 42,564 | 102 | 20,645 | 7,684 | 4,208 | 32,639 |
| 42,565 | 107 | 20,634 | 7,681 | 4,221 | 32,643 |
| 42,566 | 107 | 20,478 | 7,642 | 4,213 | 32,440 |
| 42,567 | 102 | 20,447 | 7,613 | 4,179 | 32,341 |
| 42,568 | 102 | 20,281 | 7,557 | 4,136 | 32,076 |
| 42,569 | 100 | 20,245 | 7,557 | 4,108 | 32,010 |
| 42,570 | 100 | 20,310 | 7,576 | 4,112 | 32,098 |
| 42,571 | 98  | 20,067 | 7,472 | 4,053 | 31,690 |
| 42,572 | 110 | 20,042 | 7,509 | 4,041 | 31,702 |
| 42,573 | 111 | 20,218 | 7,604 | 4,057 | 31,990 |
| 42,574 | 106 | 20,267 | 7,607 | 4,062 | 32,042 |
| 42,575 | 106 | 20,110 | 7,501 | 4,008 | 31,725 |
| 42,576 | 104 | 19,939 | 7,439 | 3,979 | 31,461 |
| 42,577 | 111 | 20,422 | 7,569 | 4,068 | 32,170 |
| 42,578 | 107 | 20,285 | 7,556 | 4,061 | 32,009 |
| 42,579 | 106 | 20,119 | 7,485 | 4,031 | 31,741 |
| 42,580 | 107 | 20,302 | 7,543 | 4,054 | 32,006 |
| 42,581 | 107 | 19,936 | 7,407 | 3,965 | 31,415 |
| 42,582 | 107 | 20,212 | 7,455 | 4,017 | 31,791 |
| 42,583 | 106 | 20,203 | 7,482 | 4,012 | 31,803 |

|        |     |        |       |       |        |
|--------|-----|--------|-------|-------|--------|
| 42,584 | 104 | 20,403 | 7,568 | 4,047 | 32,122 |
| 42,585 | 102 | 20,251 | 7,522 | 3,994 | 31,869 |
| 42,586 | 102 | 20,025 | 7,457 | 3,957 | 31,541 |
| 42,587 | 107 | 20,031 | 7,516 | 3,955 | 31,609 |
| 42,588 | 107 | 20,064 | 7,534 | 3,968 | 31,673 |
| 42,589 | 104 | 19,903 | 7,453 | 3,915 | 31,375 |
| 42,590 | 109 | 19,940 | 7,433 | 3,906 | 31,388 |
| 42,591 | 109 | 19,715 | 7,361 | 3,866 | 31,051 |
| 42,592 | 113 | 20,255 | 7,491 | 3,950 | 31,809 |
| 42,593 | 112 | 19,870 | 7,407 | 3,907 | 31,296 |
| 42,594 | 114 | 19,936 | 7,393 | 3,928 | 31,371 |
| 42,595 | 117 | 19,671 | 7,290 | 3,873 | 30,951 |
| 42,596 | 116 | 19,573 | 7,229 | 3,854 | 30,772 |
| 42,597 | 114 | 19,877 | 7,395 | 3,914 | 31,300 |
| 42,598 | 116 | 19,905 | 7,382 | 3,905 | 31,308 |
| 42,599 | 118 | 19,581 | 7,258 | 3,851 | 30,808 |
| 42,600 | 120 | 19,447 | 7,171 | 3,809 | 30,547 |
| 42,601 | 127 | 19,787 | 7,273 | 3,853 | 31,040 |
| 42,602 | 127 | 19,590 | 7,150 | 3,806 | 30,673 |
| 42,603 | 127 | 19,541 | 7,147 | 3,794 | 30,609 |
| 42,604 | 127 | 19,589 | 7,154 | 3,836 | 30,706 |
| 42,605 | 122 | 19,446 | 7,105 | 3,795 | 30,468 |
| 42,606 | 128 | 19,564 | 7,091 | 3,790 | 30,573 |
| 42,607 | 130 | 19,643 | 7,072 | 3,781 | 30,626 |
| 42,608 | 131 | 19,450 | 7,002 | 3,770 | 30,353 |
| 42,609 | 128 | 19,357 | 7,042 | 3,757 | 30,284 |
| 42,610 | 132 | 19,592 | 7,094 | 3,781 | 30,599 |
| 42,611 | 132 | 19,352 | 6,964 | 3,728 | 30,176 |
| 42,612 | 133 | 19,141 | 6,920 | 3,715 | 29,909 |
| 42,613 | 130 | 19,305 | 7,023 | 3,759 | 30,217 |
| 42,614 | 126 | 19,185 | 6,949 | 3,706 | 29,966 |
| 42,615 | 124 | 19,447 | 7,022 | 3,752 | 30,345 |

|        |     |        |       |       |        |
|--------|-----|--------|-------|-------|--------|
| 42,616 | 123 | 19,380 | 7,015 | 3,728 | 30,246 |
| 42,617 | 130 | 18,798 | 6,765 | 3,602 | 29,295 |
| 42,618 | 133 | 19,049 | 6,796 | 3,639 | 29,617 |
| 42,619 | 137 | 19,315 | 6,856 | 3,688 | 29,996 |
| 42,620 | 137 | 19,159 | 6,809 | 3,641 | 29,746 |
| 42,621 | 137 | 19,447 | 6,854 | 3,666 | 30,104 |
| 42,622 | 128 | 19,709 | 6,879 | 3,711 | 30,427 |
| 42,623 | 133 | 19,992 | 6,935 | 3,746 | 30,806 |
| 42,624 | 132 | 20,052 | 6,906 | 3,764 | 30,854 |
| 42,625 | 137 | 20,098 | 6,906 | 3,760 | 30,901 |
| 42,626 | 137 | 20,058 | 6,924 | 3,744 | 30,863 |
| 42,627 | 138 | 19,983 | 6,892 | 3,730 | 30,743 |
| 42,628 | 133 | 19,841 | 6,838 | 3,743 | 30,555 |
| 42,629 | 137 | 20,165 | 6,903 | 3,780 | 30,985 |
| 42,630 | 138 | 19,992 | 6,811 | 3,736 | 30,677 |
| 42,631 | 138 | 20,177 | 6,866 | 3,765 | 30,946 |
| 42,632 | 140 | 20,115 | 6,865 | 3,782 | 30,902 |
| 42,633 | 141 | 20,001 | 6,775 | 3,757 | 30,674 |
| 42,634 | 143 | 20,334 | 6,843 | 3,811 | 31,131 |
| 42,635 | 144 | 20,340 | 6,822 | 3,812 | 31,118 |
| 42,636 | 138 | 20,194 | 6,724 | 3,792 | 30,848 |
| 42,637 | 141 | 20,422 | 6,797 | 3,801 | 31,161 |
| 42,638 | 141 | 20,304 | 6,764 | 3,771 | 30,980 |
| 42,639 | 145 | 20,257 | 6,787 | 3,786 | 30,975 |
| 42,640 | 150 | 20,342 | 6,842 | 3,824 | 31,158 |
| 42,641 | 146 | 20,156 | 6,788 | 3,802 | 30,892 |
| 42,642 | 149 | 19,999 | 6,725 | 3,759 | 30,632 |
| 42,643 | 150 | 20,093 | 6,792 | 3,800 | 30,835 |
| 42,644 | 149 | 19,957 | 6,695 | 3,757 | 30,558 |
| 42,645 | 146 | 19,841 | 6,696 | 3,728 | 30,411 |
| 42,646 | 141 | 19,978 | 6,699 | 3,740 | 30,558 |
| 42,647 | 142 | 19,798 | 6,606 | 3,717 | 30,263 |

|        |     |        |       |       |        |
|--------|-----|--------|-------|-------|--------|
| 42,648 | 143 | 20,073 | 6,710 | 3,738 | 30,664 |
| 42,649 | 143 | 19,921 | 6,711 | 3,726 | 30,501 |
| 42,650 | 135 | 19,654 | 6,642 | 3,684 | 30,115 |
| 42,651 | 132 | 19,451 | 6,596 | 3,650 | 29,829 |
| 42,652 | 132 | 19,472 | 6,618 | 3,663 | 29,885 |
| 42,653 | 134 | 19,497 | 6,657 | 3,673 | 29,961 |
| 42,654 | 133 | 19,646 | 6,640 | 3,661 | 30,080 |
| 42,655 | 134 | 19,305 | 6,537 | 3,587 | 29,563 |
| 42,656 | 134 | 19,298 | 6,527 | 3,584 | 29,543 |
| 42,657 | 128 | 19,253 | 6,506 | 3,584 | 29,471 |
| 42,658 | 125 | 19,144 | 6,502 | 3,580 | 29,351 |
| 42,659 | 125 | 18,944 | 6,464 | 3,568 | 29,101 |
| 42,660 | 122 | 18,939 | 6,459 | 3,604 | 29,124 |
| 42,661 | 120 | 18,769 | 6,389 | 3,559 | 28,837 |
| 42,662 | 121 | 18,920 | 6,449 | 3,589 | 29,079 |
| 42,663 | 123 | 18,853 | 6,407 | 3,603 | 28,986 |
| 42,664 | 122 | 18,559 | 6,324 | 3,544 | 28,549 |
| 42,665 | 122 | 18,607 | 6,413 | 3,582 | 28,724 |
| 42,666 | 124 | 18,507 | 6,388 | 3,577 | 28,596 |
| 42,667 | 120 | 18,226 | 6,295 | 3,537 | 28,178 |
| 42,668 | 113 | 17,941 | 6,292 | 3,545 | 27,891 |
| 42,669 | 111 | 17,713 | 6,284 | 3,549 | 27,657 |
| 42,670 | 106 | 17,805 | 6,370 | 3,577 | 27,858 |
| 42,671 | 104 | 17,318 | 6,249 | 3,508 | 27,179 |
| 42,672 | 104 | 17,490 | 6,279 | 3,541 | 27,414 |
| 42,673 | 101 | 17,758 | 6,345 | 3,571 | 27,775 |
| 42,674 | 95  | 17,532 | 6,282 | 3,541 | 27,450 |
| 42,675 | 96  | 17,599 | 6,326 | 3,542 | 27,563 |
| 42,676 | 91  | 17,623 | 6,329 | 3,560 | 27,603 |
| 42,677 | 88  | 17,659 | 6,311 | 3,555 | 27,613 |
| 42,678 | 88  | 17,611 | 6,284 | 3,559 | 27,542 |
| 42,679 | 91  | 17,615 | 6,322 | 3,525 | 27,553 |

|        |    |        |       |       |        |
|--------|----|--------|-------|-------|--------|
| 42,680 | 88 | 17,612 | 6,304 | 3,528 | 27,532 |
| 42,681 | 86 | 17,435 | 6,268 | 3,503 | 27,292 |
| 42,682 | 93 | 17,595 | 6,330 | 3,541 | 27,559 |
| 42,683 | 88 | 17,297 | 6,245 | 3,491 | 27,121 |
| 42,684 | 86 | 17,147 | 6,243 | 3,499 | 26,975 |
| 42,685 | 86 | 17,195 | 6,282 | 3,503 | 27,066 |
| 42,686 | 84 | 17,167 | 6,256 | 3,499 | 27,006 |
| 42,687 | 80 | 17,211 | 6,268 | 3,504 | 27,063 |
| 42,688 | 85 | 17,262 | 6,259 | 3,516 | 27,122 |
| 42,689 | 87 | 17,533 | 6,248 | 3,537 | 27,405 |
| 42,690 | 80 | 17,727 | 6,234 | 3,539 | 27,580 |
| 42,691 | 76 | 17,538 | 6,217 | 3,521 | 27,352 |
| 42,692 | 76 | 17,688 | 6,217 | 3,540 | 27,521 |
| 42,693 | 67 | 18,112 | 6,370 | 3,663 | 28,212 |
| 42,694 | 68 | 17,987 | 6,322 | 3,643 | 28,020 |
| 42,695 | 68 | 17,955 | 6,314 | 3,645 | 27,982 |
| 42,696 | 69 | 18,478 | 6,419 | 3,765 | 28,731 |
| 42,697 | 70 | 18,658 | 6,470 | 3,786 | 28,984 |
| 42,698 | 71 | 18,795 | 6,542 | 3,811 | 29,219 |
| 42,699 | 71 | 18,974 | 6,535 | 3,825 | 29,405 |
| 42,700 | 71 | 18,957 | 6,495 | 3,819 | 29,342 |
| 42,701 | 73 | 19,206 | 6,518 | 3,858 | 29,655 |
| 42,702 | 74 | 19,520 | 6,541 | 3,896 | 30,031 |
| 42,703 | 73 | 19,588 | 6,509 | 3,876 | 30,046 |
| 42,704 | 72 | 19,935 | 6,564 | 3,920 | 30,491 |
| 42,705 | 72 | 20,163 | 6,612 | 3,942 | 30,789 |
| 42,706 | 75 | 20,457 | 6,687 | 3,982 | 31,201 |
| 42,707 | 79 | 20,715 | 6,759 | 4,015 | 31,568 |
| 42,708 | 79 | 20,755 | 6,790 | 4,013 | 31,637 |
| 42,709 | 79 | 20,843 | 6,799 | 4,030 | 31,751 |
| 42,710 | 79 | 21,132 | 6,882 | 4,079 | 32,172 |
| 42,711 | 79 | 21,039 | 6,882 | 4,054 | 32,054 |

|        |     |        |       |       |        |
|--------|-----|--------|-------|-------|--------|
| 42,712 | 80  | 21,064 | 6,925 | 4,076 | 32,145 |
| 42,713 | 78  | 21,128 | 6,932 | 4,104 | 32,242 |
| 42,714 | 76  | 21,151 | 6,916 | 4,100 | 32,243 |
| 42,715 | 79  | 21,394 | 6,944 | 4,124 | 32,541 |
| 42,716 | 77  | 21,676 | 6,974 | 4,135 | 32,862 |
| 42,717 | 75  | 21,784 | 6,978 | 4,135 | 32,972 |
| 42,718 | 80  | 22,169 | 7,010 | 4,159 | 33,418 |
| 42,719 | 78  | 22,112 | 6,977 | 4,112 | 33,279 |
| 42,720 | 79  | 22,051 | 6,937 | 4,072 | 33,139 |
| 42,721 | 95  | 22,766 | 7,132 | 4,211 | 34,204 |
| 42,722 | 95  | 22,509 | 7,050 | 4,172 | 33,826 |
| 42,723 | 99  | 22,589 | 7,104 | 4,192 | 33,984 |
| 42,724 | 103 | 22,803 | 7,176 | 4,223 | 34,305 |
| 42,725 | 101 | 22,630 | 7,115 | 4,190 | 34,036 |
| 42,726 | 100 | 22,651 | 7,142 | 4,202 | 34,095 |
| 42,727 | 100 | 22,659 | 7,158 | 4,207 | 34,124 |
| 42,728 | 100 | 22,329 | 7,060 | 4,167 | 33,656 |
| 42,729 | 100 | 22,395 | 7,089 | 4,182 | 33,766 |
| 42,730 | 97  | 22,459 | 7,136 | 4,201 | 33,893 |
| 42,731 | 101 | 22,066 | 7,005 | 4,121 | 33,293 |
| 42,732 | 97  | 22,356 | 7,036 | 4,145 | 33,634 |
| 42,733 | 95  | 22,623 | 7,085 | 4,183 | 33,986 |
| 42,734 | 96  | 22,606 | 7,083 | 4,172 | 33,957 |
| 42,735 | 95  | 22,636 | 7,027 | 4,142 | 33,900 |
| 42,736 | 95  | 23,122 | 7,163 | 4,212 | 34,592 |
| 42,737 | 93  | 22,675 | 7,059 | 4,167 | 33,994 |
| 42,738 | 93  | 22,613 | 7,054 | 4,164 | 33,924 |
| 42,739 | 87  | 22,698 | 7,125 | 4,183 | 34,093 |
| 42,740 | 85  | 22,562 | 7,076 | 4,163 | 33,886 |
| 42,741 | 83  | 22,478 | 7,078 | 4,146 | 33,785 |
| 42,742 | 83  | 22,274 | 7,057 | 4,118 | 33,532 |
| 42,743 | 85  | 22,255 | 7,039 | 4,068 | 33,447 |



|        |     |        |       |       |        |
|--------|-----|--------|-------|-------|--------|
| 42,744 | 99  | 22,091 | 6,974 | 4,036 | 33,200 |
| 42,745 | 98  | 22,051 | 6,938 | 4,011 | 33,098 |
| 42,746 | 104 | 21,998 | 6,902 | 3,991 | 32,995 |
| 42,747 | 102 | 21,743 | 6,850 | 3,937 | 32,632 |
| 42,748 | 112 | 22,176 | 7,004 | 4,012 | 33,304 |
| 42,749 | 109 | 21,752 | 6,899 | 3,965 | 32,725 |
| 42,750 | 112 | 21,713 | 6,916 | 3,980 | 32,721 |
| 42,751 | 110 | 21,391 | 6,834 | 3,944 | 32,279 |
| 42,752 | 110 | 21,166 | 6,814 | 3,924 | 32,014 |
| 42,753 | 109 | 21,063 | 6,804 | 3,898 | 31,874 |
| 42,754 | 111 | 21,027 | 6,833 | 3,912 | 31,883 |
| 42,755 | 112 | 20,881 | 6,851 | 3,935 | 31,779 |
| 42,756 | 114 | 20,493 | 6,857 | 3,928 | 31,392 |
| 42,757 | 114 | 20,660 | 6,899 | 3,970 | 31,643 |
| 42,758 | 118 | 20,647 | 6,864 | 3,991 | 31,620 |
| 42,759 | 119 | 20,561 | 6,848 | 3,984 | 31,512 |
| 42,760 | 118 | 20,790 | 6,875 | 4,001 | 31,784 |
| 42,761 | 122 | 20,868 | 6,903 | 4,018 | 31,911 |
| 42,762 | 124 | 20,821 | 6,824 | 3,996 | 31,765 |
| 42,763 | 128 | 20,919 | 6,819 | 3,987 | 31,853 |
| 42,764 | 128 | 21,095 | 6,850 | 4,008 | 32,081 |
| 42,765 | 129 | 21,299 | 6,911 | 4,027 | 32,366 |
| 42,766 | 129 | 21,293 | 6,894 | 4,017 | 32,333 |
| 42,767 | 130 | 21,049 | 6,896 | 4,021 | 32,096 |
| 42,768 | 130 | 21,291 | 6,925 | 4,046 | 32,392 |
| 42,769 | 125 | 21,386 | 6,932 | 4,048 | 32,491 |
| 42,770 | 124 | 21,213 | 6,843 | 3,990 | 32,170 |
| 42,771 | 120 | 21,425 | 6,883 | 4,012 | 32,440 |
| 42,772 | 110 | 21,604 | 6,970 | 4,026 | 32,710 |
| 42,773 | 111 | 21,584 | 6,944 | 4,020 | 32,659 |
| 42,774 | 122 | 21,631 | 6,962 | 4,051 | 32,766 |
| 42,775 | 128 | 21,809 | 7,024 | 4,098 | 33,059 |

|        |     |        |       |       |        |
|--------|-----|--------|-------|-------|--------|
| 42,776 | 131 | 21,866 | 7,048 | 4,123 | 33,168 |
| 42,777 | 132 | 21,971 | 7,045 | 4,161 | 33,309 |
| 42,778 | 134 | 21,131 | 6,755 | 4,003 | 32,023 |
| 42,779 | 136 | 21,392 | 6,848 | 4,063 | 32,439 |
| 42,780 | 140 | 21,576 | 6,909 | 4,105 | 32,730 |
| 42,781 | 140 | 21,604 | 6,923 | 4,104 | 32,771 |
| 42,782 | 136 | 21,794 | 6,979 | 4,139 | 33,048 |
| 42,783 | 143 | 21,953 | 7,078 | 4,192 | 33,366 |
| 42,784 | 144 | 21,854 | 7,070 | 4,194 | 33,262 |
| 42,785 | 146 | 21,855 | 7,073 | 4,206 | 33,280 |
| 42,786 | 149 | 21,727 | 7,014 | 4,190 | 33,080 |
| 42,787 | 153 | 21,683 | 6,996 | 4,176 | 33,008 |
| 42,788 | 153 | 21,896 | 7,012 | 4,172 | 33,233 |
| 42,789 | 155 | 21,905 | 7,001 | 4,186 | 33,247 |
| 42,790 | 153 | 21,658 | 6,895 | 4,161 | 32,867 |
| 42,791 | 156 | 22,279 | 7,075 | 4,237 | 33,747 |
| 42,792 | 156 | 22,281 | 7,018 | 4,218 | 33,673 |
| 42,793 | 156 | 22,298 | 6,959 | 4,209 | 33,622 |
| 42,794 | 157 | 22,463 | 6,953 | 4,221 | 33,794 |
| 42,795 | 148 | 22,507 | 6,961 | 4,214 | 33,830 |
| 42,796 | 136 | 22,322 | 6,859 | 4,188 | 33,505 |
| 42,797 | 136 | 22,296 | 6,851 | 4,195 | 33,478 |
| 42,798 | 138 | 22,732 | 6,924 | 4,255 | 34,049 |
| 42,799 | 135 | 22,708 | 6,916 | 4,259 | 34,018 |
| 42,800 | 132 | 22,642 | 6,793 | 4,215 | 33,782 |
| 42,801 | 132 | 22,564 | 6,785 | 4,221 | 33,702 |
| 42,802 | 129 | 22,546 | 6,772 | 4,226 | 33,673 |
| 42,803 | 129 | 22,624 | 6,787 | 4,218 | 33,758 |
| 42,804 | 131 | 22,922 | 6,860 | 4,264 | 34,177 |
| 42,805 | 134 | 23,059 | 6,831 | 4,268 | 34,292 |
| 42,806 | 132 | 23,348 | 6,818 | 4,260 | 34,558 |
| 42,807 | 131 | 23,534 | 6,807 | 4,261 | 34,733 |

|        |     |        |       |       |        |
|--------|-----|--------|-------|-------|--------|
| 42,808 | 129 | 23,472 | 6,802 | 4,252 | 34,655 |
| 42,809 | 121 | 23,191 | 6,707 | 4,175 | 34,194 |
| 42,810 | 122 | 23,087 | 6,673 | 4,182 | 34,064 |
| 42,811 | 123 | 23,219 | 6,683 | 4,188 | 34,213 |
| 42,812 | 119 | 22,981 | 6,559 | 4,133 | 33,792 |
| 42,813 | 121 | 23,191 | 6,593 | 4,134 | 34,039 |
| 42,814 | 116 | 23,085 | 6,575 | 4,110 | 33,886 |
| 42,815 | 114 | 22,820 | 6,502 | 4,046 | 33,482 |
| 42,816 | 114 | 22,995 | 6,508 | 4,102 | 33,719 |
| 42,817 | 116 | 22,864 | 6,501 | 4,079 | 33,560 |
| 42,818 | 117 | 22,725 | 6,407 | 4,048 | 33,297 |
| 42,819 | 121 | 22,530 | 6,366 | 4,020 | 33,037 |
| 42,820 | 119 | 22,584 | 6,381 | 4,030 | 33,114 |
| 42,821 | 120 | 22,408 | 6,288 | 3,996 | 32,812 |
| 42,822 | 120 | 22,407 | 6,224 | 3,976 | 32,727 |
| 42,823 | 120 | 22,291 | 6,206 | 3,987 | 32,604 |
| 42,824 | 108 | 22,309 | 6,147 | 3,951 | 32,515 |
| 42,825 | 104 | 22,394 | 6,216 | 4,003 | 32,717 |
| 42,826 | 97  | 22,294 | 6,174 | 3,985 | 32,550 |
| 42,827 | 96  | 22,402 | 6,192 | 3,973 | 32,663 |
| 42,828 | 99  | 22,385 | 6,144 | 3,941 | 32,569 |
| 42,829 | 96  | 22,434 | 6,127 | 3,937 | 32,594 |
| 42,830 | 97  | 22,510 | 6,103 | 3,934 | 32,644 |
| 42,831 | 91  | 22,470 | 6,064 | 3,907 | 32,532 |
| 42,832 | 90  | 22,545 | 6,093 | 3,931 | 32,659 |
| 42,833 | 87  | 22,564 | 6,085 | 3,942 | 32,678 |
| 42,834 | 84  | 22,676 | 6,055 | 3,916 | 32,731 |
| 42,835 | 83  | 22,728 | 6,051 | 3,916 | 32,778 |
| 42,836 | 86  | 22,980 | 6,121 | 3,936 | 33,123 |
| 42,837 | 88  | 23,040 | 6,137 | 3,910 | 33,175 |
| 42,838 | 84  | 22,872 | 6,105 | 3,893 | 32,954 |
| 42,839 | 84  | 23,006 | 6,171 | 3,913 | 33,174 |

|        |     |        |       |       |        |
|--------|-----|--------|-------|-------|--------|
| 42,840 | 86  | 23,058 | 6,236 | 3,930 | 33,310 |
| 42,841 | 87  | 22,948 | 6,251 | 3,929 | 33,215 |
| 42,842 | 85  | 22,817 | 6,223 | 3,930 | 33,055 |
| 42,843 | 84  | 22,731 | 6,217 | 3,937 | 32,969 |
| 42,844 | 80  | 22,702 | 6,216 | 3,929 | 32,927 |
| 42,845 | 82  | 22,656 | 6,258 | 3,951 | 32,947 |
| 42,846 | 81  | 22,789 | 6,332 | 3,969 | 33,171 |
| 42,847 | 87  | 22,729 | 6,309 | 3,951 | 33,076 |
| 42,848 | 88  | 22,895 | 6,364 | 3,964 | 33,311 |
| 42,849 | 93  | 23,335 | 6,487 | 4,050 | 33,965 |
| 42,850 | 94  | 23,302 | 6,529 | 4,053 | 33,978 |
| 42,851 | 91  | 23,338 | 6,548 | 4,034 | 34,011 |
| 42,852 | 95  | 23,456 | 6,570 | 4,018 | 34,139 |
| 42,853 | 99  | 23,839 | 6,650 | 4,074 | 34,662 |
| 42,854 | 109 | 23,991 | 6,689 | 4,100 | 34,889 |
| 42,855 | 112 | 24,065 | 6,705 | 4,120 | 35,002 |
| 42,856 | 108 | 23,803 | 6,642 | 4,076 | 34,629 |
| 42,857 | 107 | 23,960 | 6,680 | 4,101 | 34,848 |
| 42,858 | 108 | 24,029 | 6,745 | 4,139 | 35,021 |
| 42,859 | 109 | 24,016 | 6,743 | 4,131 | 34,999 |
| 42,860 | 107 | 23,838 | 6,687 | 4,105 | 34,737 |
| 42,861 | 110 | 23,675 | 6,639 | 4,051 | 34,475 |
| 42,862 | 111 | 23,432 | 6,585 | 4,030 | 34,158 |
| 42,863 | 111 | 24,064 | 6,757 | 4,103 | 35,035 |
| 42,864 | 109 | 23,997 | 6,749 | 4,119 | 34,974 |
| 42,865 | 115 | 24,110 | 6,738 | 4,126 | 35,089 |
| 42,866 | 118 | 24,365 | 6,768 | 4,165 | 35,416 |
| 42,867 | 118 | 24,462 | 6,824 | 4,162 | 35,566 |
| 42,868 | 118 | 24,222 | 6,780 | 4,128 | 35,248 |
| 42,869 | 119 | 24,197 | 6,803 | 4,137 | 35,256 |
| 42,870 | 118 | 24,286 | 6,868 | 4,153 | 35,425 |
| 42,871 | 118 | 24,012 | 6,829 | 4,110 | 35,069 |

|        |     |        |       |       |        |
|--------|-----|--------|-------|-------|--------|
| 42,872 | 129 | 24,279 | 6,920 | 4,150 | 35,478 |
| 42,873 | 131 | 24,325 | 6,905 | 4,149 | 35,510 |
| 42,874 | 131 | 24,364 | 6,905 | 4,150 | 35,550 |
| 42,875 | 141 | 24,490 | 6,863 | 4,110 | 35,604 |
| 42,876 | 150 | 24,874 | 6,926 | 4,162 | 36,112 |
| 42,877 | 154 | 25,207 | 7,023 | 4,213 | 36,597 |
| 42,878 | 154 | 25,188 | 6,996 | 4,226 | 36,564 |
| 42,879 | 150 | 24,795 | 6,932 | 4,182 | 36,059 |
| 42,880 | 154 | 25,262 | 7,086 | 4,280 | 36,782 |
| 42,881 | 151 | 24,920 | 6,981 | 4,194 | 36,246 |
| 42,882 | 153 | 25,257 | 7,040 | 4,225 | 36,675 |
| 42,883 | 153 | 25,223 | 7,057 | 4,230 | 36,663 |
| 42,884 | 156 | 24,959 | 6,998 | 4,191 | 36,304 |
| 42,885 | 156 | 24,640 | 6,941 | 4,169 | 35,906 |
| 42,886 | 154 | 25,080 | 7,142 | 4,300 | 36,676 |
| 42,887 | 151 | 25,073 | 7,119 | 4,312 | 36,655 |
| 42,888 | 146 | 24,782 | 7,110 | 4,320 | 36,358 |
| 42,889 | 148 | 24,871 | 7,086 | 4,315 | 36,420 |
| 42,890 | 144 | 24,703 | 7,021 | 4,279 | 36,147 |
| 42,891 | 143 | 24,629 | 7,010 | 4,261 | 36,043 |
| 42,892 | 143 | 24,553 | 6,969 | 4,244 | 35,909 |
| 42,893 | 143 | 24,807 | 7,023 | 4,274 | 36,247 |
| 42,894 | 143 | 24,432 | 6,960 | 4,218 | 35,753 |
| 42,895 | 141 | 24,460 | 6,980 | 4,233 | 35,814 |
| 42,896 | 139 | 24,572 | 7,014 | 4,247 | 35,972 |
| 42,897 | 136 | 24,409 | 6,940 | 4,234 | 35,719 |
| 42,898 | 131 | 24,196 | 6,898 | 4,236 | 35,461 |
| 42,899 | 130 | 24,114 | 6,882 | 4,241 | 35,367 |
| 42,900 | 124 | 23,950 | 6,833 | 4,211 | 35,118 |
| 42,901 | 122 | 23,619 | 6,722 | 4,155 | 34,618 |
| 42,902 | 122 | 23,321 | 6,686 | 4,128 | 34,257 |
| 42,903 | 120 | 23,513 | 6,736 | 4,204 | 34,573 |

|        |     |        |       |       |        |
|--------|-----|--------|-------|-------|--------|
| 42,904 | 117 | 23,370 | 6,725 | 4,205 | 34,417 |
| 42,905 | 106 | 23,204 | 6,702 | 4,193 | 34,205 |
| 42,906 | 104 | 23,029 | 6,690 | 4,176 | 33,999 |
| 42,907 | 108 | 22,934 | 6,712 | 4,171 | 33,925 |
| 42,908 | 109 | 22,804 | 6,663 | 4,129 | 33,705 |
| 42,909 | 110 | 22,758 | 6,639 | 4,098 | 33,605 |
| 42,910 | 109 | 22,800 | 6,620 | 4,113 | 33,642 |
| 42,911 | 114 | 23,120 | 6,721 | 4,173 | 34,128 |
| 42,912 | 114 | 23,178 | 6,783 | 4,213 | 34,288 |
| 42,913 | 117 | 23,012 | 6,735 | 4,199 | 34,063 |
| 42,914 | 123 | 23,294 | 6,827 | 4,241 | 34,485 |
| 42,915 | 124 | 23,291 | 6,825 | 4,241 | 34,481 |
| 42,916 | 118 | 23,259 | 6,879 | 4,259 | 34,515 |
| 42,917 | 118 | 23,203 | 6,925 | 4,264 | 34,510 |
| 42,918 | 117 | 23,372 | 6,968 | 4,312 | 34,769 |
| 42,919 | 119 | 23,359 | 6,958 | 4,313 | 34,749 |
| 42,920 | 122 | 23,240 | 6,885 | 4,276 | 34,523 |
| 42,921 | 121 | 23,394 | 6,907 | 4,302 | 34,724 |
| 42,922 | 118 | 23,393 | 6,883 | 4,317 | 34,711 |
| 42,923 | 112 | 23,311 | 6,891 | 4,328 | 34,642 |
| 42,924 | 114 | 23,274 | 6,896 | 4,341 | 34,625 |
| 42,925 | 114 | 23,496 | 6,983 | 4,405 | 34,998 |
| 42,926 | 107 | 23,489 | 6,978 | 4,403 | 34,977 |
| 42,927 | 98  | 23,054 | 6,930 | 4,379 | 34,461 |
| 42,928 | 93  | 23,148 | 6,958 | 4,414 | 34,613 |
| 42,929 | 101 | 23,111 | 6,901 | 4,376 | 34,489 |
| 42,930 | 101 | 23,296 | 6,981 | 4,417 | 34,795 |
| 42,931 | 96  | 23,403 | 7,082 | 4,459 | 35,040 |
| 42,932 | 98  | 23,353 | 7,094 | 4,482 | 35,027 |
| 42,933 | 97  | 23,339 | 7,153 | 4,482 | 35,071 |
| 42,934 | 99  | 23,591 | 7,176 | 4,510 | 35,376 |
| 42,935 | 94  | 23,458 | 7,107 | 4,478 | 35,137 |

|        |     |        |       |       |        |
|--------|-----|--------|-------|-------|--------|
| 42,936 | 93  | 23,875 | 7,202 | 4,507 | 35,677 |
| 42,937 | 93  | 23,909 | 7,230 | 4,510 | 35,742 |
| 42,938 | 96  | 23,783 | 7,168 | 4,493 | 35,540 |
| 42,939 | 98  | 23,898 | 7,223 | 4,511 | 35,730 |
| 42,940 | 97  | 23,587 | 7,185 | 4,483 | 35,352 |
| 42,941 | 101 | 23,464 | 7,177 | 4,502 | 35,244 |
| 42,942 | 101 | 23,414 | 7,135 | 4,496 | 35,146 |
| 42,943 | 102 | 23,574 | 7,172 | 4,515 | 35,363 |
| 42,944 | 105 | 23,706 | 7,165 | 4,513 | 35,489 |
| 42,945 | 105 | 23,777 | 7,126 | 4,499 | 35,507 |
| 42,946 | 106 | 23,813 | 7,133 | 4,493 | 35,545 |
| 42,947 | 105 | 23,603 | 7,050 | 4,436 | 35,194 |
| 42,948 | 106 | 23,592 | 7,050 | 4,429 | 35,177 |
| 42,949 | 105 | 23,310 | 6,995 | 4,366 | 34,776 |
| 42,950 | 107 | 23,710 | 7,120 | 4,428 | 35,365 |
| 42,951 | 105 | 23,489 | 7,085 | 4,387 | 35,066 |
| 42,952 | 106 | 23,573 | 7,069 | 4,386 | 35,134 |
| 42,953 | 108 | 23,569 | 7,073 | 4,379 | 35,129 |
| 42,954 | 105 | 23,373 | 7,029 | 4,342 | 34,849 |
| 42,955 | 105 | 23,340 | 6,978 | 4,322 | 34,745 |
| 42,956 | 106 | 23,355 | 6,939 | 4,301 | 34,701 |
| 42,957 | 105 | 23,365 | 6,908 | 4,294 | 34,672 |
| 42,958 | 103 | 23,021 | 6,793 | 4,251 | 34,168 |
| 42,959 | 101 | 22,784 | 6,737 | 4,221 | 33,843 |
| 42,960 | 105 | 23,149 | 6,810 | 4,287 | 34,351 |
| 42,961 | 108 | 23,161 | 6,814 | 4,268 | 34,351 |
| 42,962 | 112 | 22,903 | 6,803 | 4,252 | 34,070 |
| 42,963 | 102 | 22,447 | 6,667 | 4,141 | 33,357 |
| 42,964 | 105 | 22,590 | 6,716 | 4,164 | 33,575 |
| 42,965 | 102 | 22,396 | 6,650 | 4,136 | 33,284 |
| 42,966 | 106 | 22,436 | 6,621 | 4,124 | 33,287 |
| 42,967 | 105 | 22,188 | 6,524 | 4,067 | 32,884 |

|        |     |        |       |       |        |
|--------|-----|--------|-------|-------|--------|
| 42,968 | 110 | 22,578 | 6,612 | 4,070 | 33,370 |
| 42,969 | 109 | 22,386 | 6,548 | 4,014 | 33,057 |
| 42,970 | 101 | 22,377 | 6,503 | 3,990 | 32,971 |
| 42,971 | 102 | 22,289 | 6,457 | 3,961 | 32,809 |
| 42,972 | 102 | 22,315 | 6,469 | 3,958 | 32,844 |
| 42,973 | 103 | 22,221 | 6,475 | 3,956 | 32,755 |
| 42,974 | 103 | 22,703 | 6,569 | 4,020 | 33,395 |
| 42,975 | 109 | 22,314 | 6,500 | 3,965 | 32,888 |
| 42,976 | 109 | 21,929 | 6,396 | 3,905 | 32,339 |
| 42,977 | 107 | 22,360 | 6,531 | 4,001 | 32,999 |
| 42,978 | 108 | 22,115 | 6,437 | 3,932 | 32,592 |
| 42,979 | 108 | 21,753 | 6,315 | 3,853 | 32,029 |
| 42,980 | 100 | 22,803 | 6,609 | 4,061 | 33,573 |
| 42,981 | 100 | 22,791 | 6,556 | 4,021 | 33,468 |
| 42,982 | 102 | 22,895 | 6,511 | 4,019 | 33,527 |
| 42,983 | 108 | 22,570 | 6,362 | 3,960 | 33,000 |
| 42,984 | 108 | 22,510 | 6,337 | 3,962 | 32,917 |
| 42,985 | 106 | 22,626 | 6,398 | 3,991 | 33,121 |
| 42,986 | 113 | 22,471 | 6,282 | 3,921 | 32,787 |
| 42,987 | 113 | 22,583 | 6,331 | 3,964 | 32,991 |
| 42,988 | 119 | 22,892 | 6,408 | 4,028 | 33,447 |
| 42,989 | 120 | 22,781 | 6,427 | 4,020 | 33,348 |
| 42,990 | 119 | 22,914 | 6,387 | 4,001 | 33,421 |
| 42,991 | 119 | 22,939 | 6,395 | 4,017 | 33,470 |
| 42,992 | 122 | 23,283 | 6,450 | 4,027 | 33,882 |
| 42,993 | 121 | 23,099 | 6,400 | 3,988 | 33,608 |
| 42,994 | 123 | 23,518 | 6,478 | 4,044 | 34,163 |
| 42,995 | 122 | 23,565 | 6,516 | 4,099 | 34,302 |
| 42,996 | 121 | 23,599 | 6,542 | 4,115 | 34,377 |
| 42,997 | 127 | 23,949 | 6,614 | 4,194 | 34,884 |
| 42,998 | 127 | 23,890 | 6,587 | 4,199 | 34,803 |
| 42,999 | 129 | 24,176 | 6,673 | 4,251 | 35,229 |



|        |     |        |       |       |        |
|--------|-----|--------|-------|-------|--------|
| 43,000 | 130 | 24,282 | 6,660 | 4,278 | 35,350 |
| 43,001 | 131 | 24,452 | 6,670 | 4,268 | 35,521 |
| 43,002 | 131 | 24,200 | 6,595 | 4,253 | 35,179 |
| 43,003 | 134 | 24,649 | 6,713 | 4,329 | 35,825 |
| 43,004 | 138 | 24,622 | 6,688 | 4,323 | 35,771 |
| 43,005 | 143 | 24,901 | 6,768 | 4,384 | 36,196 |
| 43,006 | 150 | 24,957 | 6,831 | 4,399 | 36,337 |
| 43,007 | 146 | 24,699 | 6,761 | 4,310 | 35,916 |
| 43,008 | 148 | 24,818 | 6,789 | 4,348 | 36,103 |
| 43,009 | 145 | 25,027 | 6,821 | 4,381 | 36,374 |
| 43,010 | 144 | 24,718 | 6,747 | 4,337 | 35,946 |
| 43,011 | 141 | 24,707 | 6,767 | 4,339 | 35,954 |
| 43,012 | 140 | 24,991 | 6,828 | 4,418 | 36,377 |
| 43,013 | 135 | 25,182 | 6,818 | 4,417 | 36,552 |
| 43,014 | 135 | 24,919 | 6,696 | 4,386 | 36,136 |
| 43,015 | 134 | 25,036 | 6,707 | 4,401 | 36,278 |
| 43,016 | 131 | 24,810 | 6,683 | 4,385 | 36,009 |
| 43,017 | 132 | 24,961 | 6,743 | 4,429 | 36,265 |
| 43,018 | 129 | 25,021 | 6,783 | 4,468 | 36,401 |
| 43,019 | 128 | 24,689 | 6,692 | 4,435 | 35,944 |
| 43,020 | 131 | 24,932 | 6,759 | 4,481 | 36,303 |
| 43,021 | 129 | 24,953 | 6,792 | 4,487 | 36,361 |
| 43,022 | 129 | 24,745 | 6,751 | 4,500 | 36,125 |
| 43,023 | 130 | 24,664 | 6,724 | 4,492 | 36,010 |
| 43,024 | 128 | 24,505 | 6,664 | 4,455 | 35,752 |
| 43,025 | 128 | 25,002 | 6,744 | 4,543 | 36,417 |
| 43,026 | 118 | 25,008 | 6,717 | 4,504 | 36,347 |
| 43,027 | 122 | 24,993 | 6,714 | 4,464 | 36,293 |
| 43,028 | 125 | 24,949 | 6,721 | 4,464 | 36,259 |
| 43,029 | 123 | 24,671 | 6,646 | 4,404 | 35,844 |
| 43,030 | 123 | 24,731 | 6,658 | 4,427 | 35,939 |
| 43,031 | 123 | 24,714 | 6,709 | 4,425 | 35,971 |

|        |     |        |       |       |        |
|--------|-----|--------|-------|-------|--------|
| 43,032 | 123 | 24,356 | 6,654 | 4,430 | 35,563 |
| 43,033 | 115 | 24,157 | 6,610 | 4,403 | 35,285 |
| 43,034 | 113 | 24,137 | 6,624 | 4,375 | 35,249 |
| 43,035 | 113 | 23,892 | 6,513 | 4,309 | 34,827 |
| 43,036 | 116 | 23,949 | 6,541 | 4,323 | 34,929 |
| 43,037 | 111 | 23,878 | 6,522 | 4,312 | 34,823 |
| 43,038 | 112 | 24,184 | 6,607 | 4,349 | 35,252 |
| 43,039 | 116 | 24,121 | 6,598 | 4,320 | 35,155 |
| 43,040 | 111 | 23,984 | 6,527 | 4,265 | 34,887 |
| 43,041 | 120 | 24,039 | 6,562 | 4,277 | 34,998 |
| 43,042 | 120 | 24,042 | 6,577 | 4,287 | 35,026 |
| 43,043 | 116 | 23,984 | 6,597 | 4,314 | 35,011 |
| 43,044 | 116 | 24,121 | 6,651 | 4,371 | 35,259 |
| 43,045 | 115 | 24,024 | 6,646 | 4,337 | 35,122 |
| 43,046 | 116 | 24,008 | 6,614 | 4,288 | 35,026 |
| 43,047 | 117 | 24,031 | 6,634 | 4,337 | 35,119 |
| 43,048 | 115 | 24,019 | 6,721 | 4,356 | 35,211 |
| 43,049 | 116 | 23,974 | 6,741 | 4,344 | 35,175 |
| 43,050 | 114 | 24,040 | 6,763 | 4,341 | 35,258 |
| 43,051 | 116 | 24,335 | 6,846 | 4,383 | 35,680 |
| 43,052 | 112 | 24,435 | 6,896 | 4,408 | 35,851 |
| 43,053 | 109 | 24,510 | 6,923 | 4,392 | 35,934 |
| 43,054 | 112 | 24,529 | 6,923 | 4,394 | 35,958 |
| 43,055 | 107 | 24,626 | 6,931 | 4,384 | 36,048 |
| 43,056 | 104 | 24,782 | 6,941 | 4,357 | 36,184 |
| 43,057 | 96  | 24,607 | 6,840 | 4,303 | 35,846 |
| 43,058 | 96  | 24,685 | 6,877 | 4,365 | 36,023 |
| 43,059 | 94  | 24,559 | 6,858 | 4,347 | 35,858 |
| 43,060 | 96  | 24,642 | 6,881 | 4,382 | 36,001 |
| 43,061 | 99  | 24,485 | 6,829 | 4,326 | 35,739 |
| 43,062 | 99  | 24,616 | 6,846 | 4,318 | 35,879 |
| 43,063 | 101 | 24,841 | 6,914 | 4,361 | 36,217 |

|        |     |        |       |       |        |
|--------|-----|--------|-------|-------|--------|
| 43,064 | 98  | 24,709 | 6,909 | 4,357 | 36,073 |
| 43,065 | 95  | 24,518 | 6,920 | 4,345 | 35,878 |
| 43,066 | 99  | 24,553 | 6,952 | 4,371 | 35,975 |
| 43,067 | 100 | 24,379 | 6,912 | 4,327 | 35,718 |
| 43,068 | 98  | 24,272 | 6,907 | 4,310 | 35,587 |
| 43,069 | 98  | 24,279 | 6,903 | 4,304 | 35,584 |
| 43,070 | 99  | 24,129 | 6,910 | 4,300 | 35,438 |
| 43,071 | 99  | 24,182 | 6,954 | 4,311 | 35,546 |
| 43,072 | 102 | 23,861 | 6,865 | 4,266 | 35,094 |
| 43,073 | 101 | 23,577 | 6,822 | 4,216 | 34,716 |
| 43,074 | 102 | 23,525 | 6,856 | 4,221 | 34,704 |
| 43,075 | 108 | 23,582 | 6,897 | 4,240 | 34,827 |
| 43,076 | 109 | 23,515 | 6,917 | 4,246 | 34,787 |
| 43,077 | 107 | 23,054 | 6,814 | 4,196 | 34,171 |
| 43,078 | 110 | 23,088 | 6,866 | 4,239 | 34,303 |
| 43,079 | 112 | 22,832 | 6,795 | 4,189 | 33,928 |
| 43,080 | 112 | 22,732 | 6,747 | 4,160 | 33,751 |
| 43,081 | 111 | 22,432 | 6,667 | 4,081 | 33,291 |
| 43,082 | 111 | 22,392 | 6,675 | 4,065 | 33,243 |
| 43,083 | 110 | 22,572 | 6,698 | 4,060 | 33,440 |
| 43,084 | 113 | 22,632 | 6,663 | 4,043 | 33,451 |
| 43,085 | 113 | 22,619 | 6,645 | 4,050 | 33,427 |
| 43,086 | 115 | 22,848 | 6,712 | 4,098 | 33,773 |
| 43,087 | 112 | 22,727 | 6,652 | 4,071 | 33,562 |
| 43,088 | 111 | 23,031 | 6,711 | 4,113 | 33,966 |
| 43,089 | 111 | 23,168 | 6,725 | 4,114 | 34,118 |
| 43,090 | 101 | 22,907 | 6,640 | 4,071 | 33,719 |
| 43,091 | 103 | 23,100 | 6,663 | 4,121 | 33,987 |
| 43,092 | 94  | 23,222 | 6,648 | 4,119 | 34,083 |
| 43,093 | 94  | 23,347 | 6,639 | 4,089 | 34,169 |
| 43,094 | 92  | 23,234 | 6,612 | 4,051 | 33,989 |
| 43,095 | 91  | 22,791 | 6,484 | 3,981 | 33,347 |

|        |     |        |       |       |        |
|--------|-----|--------|-------|-------|--------|
| 43,096 | 93  | 22,585 | 6,428 | 3,967 | 33,073 |
| 43,097 | 92  | 22,615 | 6,443 | 3,995 | 33,145 |
| 43,098 | 92  | 22,455 | 6,377 | 3,928 | 32,852 |
| 43,099 | 90  | 22,408 | 6,280 | 3,895 | 32,673 |
| 43,100 | 91  | 22,408 | 6,251 | 3,866 | 32,616 |
| 43,101 | 95  | 22,378 | 6,205 | 3,865 | 32,543 |
| 43,102 | 95  | 22,332 | 6,162 | 3,862 | 32,451 |
| 43,103 | 97  | 21,819 | 6,025 | 3,805 | 31,746 |
| 43,104 | 97  | 21,842 | 6,005 | 3,799 | 31,743 |
| 43,105 | 98  | 22,050 | 6,046 | 3,809 | 32,003 |
| 43,106 | 99  | 21,722 | 5,981 | 3,792 | 31,594 |
| 43,107 | 98  | 21,590 | 5,954 | 3,801 | 31,443 |
| 43,108 | 99  | 21,165 | 5,836 | 3,681 | 30,781 |
| 43,109 | 99  | 21,334 | 5,861 | 3,694 | 30,988 |
| 43,110 | 98  | 21,422 | 5,874 | 3,719 | 31,113 |
| 43,111 | 99  | 21,455 | 5,875 | 3,703 | 31,132 |
| 43,112 | 96  | 21,209 | 5,815 | 3,678 | 30,798 |
| 43,113 | 93  | 21,491 | 5,842 | 3,695 | 31,121 |
| 43,114 | 95  | 21,519 | 5,860 | 3,712 | 31,186 |
| 43,115 | 99  | 21,403 | 5,768 | 3,657 | 30,927 |
| 43,116 | 101 | 21,605 | 5,789 | 3,680 | 31,175 |
| 43,117 | 94  | 21,695 | 5,754 | 3,649 | 31,192 |
| 43,118 | 92  | 21,325 | 5,595 | 3,547 | 30,559 |
| 43,119 | 93  | 21,670 | 5,619 | 3,568 | 30,950 |
| 43,120 | 93  | 21,981 | 5,667 | 3,618 | 31,359 |
| 43,121 | 98  | 22,289 | 5,701 | 3,647 | 31,735 |
| 43,122 | 97  | 22,238 | 5,703 | 3,660 | 31,698 |
| 43,123 | 91  | 22,054 | 5,627 | 3,605 | 31,377 |
| 43,124 | 91  | 22,036 | 5,597 | 3,583 | 31,307 |
| 43,125 | 86  | 22,197 | 5,625 | 3,614 | 31,522 |
| 43,126 | 85  | 22,276 | 5,608 | 3,616 | 31,585 |
| 43,127 | 91  | 22,368 | 5,588 | 3,604 | 31,651 |

|        |     |        |       |       |        |
|--------|-----|--------|-------|-------|--------|
| 43,128 | 90  | 22,354 | 5,559 | 3,568 | 31,571 |
| 43,129 | 87  | 22,423 | 5,499 | 3,534 | 31,543 |
| 43,130 | 82  | 22,207 | 5,440 | 3,486 | 31,215 |
| 43,131 | 81  | 22,200 | 5,415 | 3,478 | 31,174 |
| 43,132 | 84  | 22,224 | 5,398 | 3,484 | 31,190 |
| 43,133 | 83  | 22,073 | 5,320 | 3,437 | 30,913 |
| 43,134 | 87  | 22,225 | 5,329 | 3,475 | 31,116 |
| 43,135 | 86  | 22,046 | 5,301 | 3,455 | 30,888 |
| 43,136 | 91  | 22,520 | 5,373 | 3,524 | 31,508 |
| 43,137 | 93  | 22,418 | 5,369 | 3,484 | 31,364 |
| 43,138 | 93  | 22,268 | 5,333 | 3,456 | 31,150 |
| 43,139 | 100 | 22,420 | 5,398 | 3,487 | 31,405 |
| 43,140 | 101 | 22,212 | 5,373 | 3,464 | 31,150 |
| 43,141 | 99  | 21,937 | 5,320 | 3,429 | 30,785 |
| 43,142 | 99  | 22,040 | 5,355 | 3,416 | 30,910 |
| 43,143 | 100 | 21,985 | 5,345 | 3,435 | 30,865 |
| 43,144 | 98  | 21,892 | 5,343 | 3,443 | 30,776 |
| 43,145 | 98  | 21,831 | 5,308 | 3,441 | 30,678 |
| 43,146 | 97  | 21,942 | 5,333 | 3,443 | 30,815 |
| 43,147 | 100 | 22,087 | 5,312 | 3,413 | 30,912 |
| 43,148 | 102 | 22,301 | 5,331 | 3,447 | 31,181 |
| 43,149 | 99  | 22,237 | 5,319 | 3,459 | 31,114 |
| 43,150 | 98  | 22,274 | 5,336 | 3,471 | 31,179 |
| 43,151 | 100 | 22,291 | 5,358 | 3,506 | 31,255 |
| 43,152 | 95  | 22,461 | 5,419 | 3,519 | 31,494 |
| 43,153 | 97  | 22,712 | 5,491 | 3,542 | 31,842 |
| 43,154 | 95  | 22,738 | 5,512 | 3,559 | 31,904 |
| 43,155 | 94  | 22,838 | 5,538 | 3,579 | 32,049 |
| 43,156 | 98  | 22,923 | 5,561 | 3,597 | 32,179 |
| 43,157 | 101 | 22,958 | 5,559 | 3,560 | 32,178 |
| 43,158 | 105 | 23,341 | 5,606 | 3,603 | 32,655 |
| 43,159 | 103 | 23,139 | 5,584 | 3,607 | 32,433 |

|        |     |        |       |       |        |
|--------|-----|--------|-------|-------|--------|
| 43,160 | 102 | 23,149 | 5,571 | 3,602 | 32,424 |
| 43,161 | 102 | 23,111 | 5,583 | 3,597 | 32,393 |
| 43,162 | 105 | 23,349 | 5,596 | 3,617 | 32,667 |
| 43,163 | 107 | 23,381 | 5,611 | 3,612 | 32,711 |
| 43,164 | 109 | 23,234 | 5,592 | 3,607 | 32,542 |
| 43,165 | 109 | 23,368 | 5,594 | 3,625 | 32,696 |
| 43,166 | 108 | 23,379 | 5,636 | 3,630 | 32,753 |
| 43,167 | 114 | 23,363 | 5,639 | 3,630 | 32,746 |
| 43,168 | 116 | 23,717 | 5,697 | 3,683 | 33,213 |
| 43,169 | 115 | 23,435 | 5,650 | 3,666 | 32,866 |
| 43,170 | 115 | 23,720 | 5,713 | 3,713 | 33,261 |
| 43,171 | 117 | 23,971 | 5,767 | 3,738 | 33,593 |
| 43,172 | 119 | 23,795 | 5,761 | 3,698 | 33,373 |
| 43,173 | 119 | 23,873 | 5,746 | 3,700 | 33,438 |
| 43,174 | 118 | 24,068 | 5,819 | 3,759 | 33,764 |
| 43,175 | 118 | 24,158 | 5,928 | 3,810 | 34,014 |
| 43,176 | 119 | 24,040 | 5,909 | 3,778 | 33,846 |
| 43,177 | 128 | 24,288 | 5,986 | 3,821 | 34,223 |
| 43,178 | 125 | 24,095 | 5,954 | 3,812 | 33,986 |
| 43,179 | 123 | 23,901 | 5,917 | 3,784 | 33,725 |
| 43,180 | 129 | 24,099 | 5,983 | 3,815 | 34,026 |
| 43,181 | 134 | 24,335 | 6,060 | 3,856 | 34,385 |
| 43,182 | 138 | 23,893 | 5,972 | 3,795 | 33,798 |
| 43,183 | 135 | 23,813 | 5,958 | 3,791 | 33,697 |
| 43,184 | 134 | 23,574 | 5,930 | 3,749 | 33,387 |
| 43,185 | 133 | 23,288 | 5,886 | 3,719 | 33,026 |
| 43,186 | 133 | 24,227 | 6,168 | 3,916 | 34,444 |
| 43,187 | 129 | 24,060 | 6,182 | 3,904 | 34,275 |
| 43,188 | 124 | 23,932 | 6,182 | 3,915 | 34,153 |
| 43,189 | 123 | 24,149 | 6,214 | 3,946 | 34,432 |
| 43,190 | 118 | 23,798 | 6,135 | 3,907 | 33,958 |
| 43,191 | 120 | 24,100 | 6,170 | 3,946 | 34,336 |

|        |     |        |       |       |        |
|--------|-----|--------|-------|-------|--------|
| 43,192 | 122 | 24,268 | 6,225 | 3,986 | 34,601 |
| 43,193 | 123 | 24,053 | 6,175 | 3,925 | 34,276 |
| 43,194 | 123 | 24,123 | 6,181 | 3,929 | 34,356 |
| 43,195 | 133 | 24,214 | 6,189 | 3,912 | 34,448 |
| 43,196 | 132 | 24,174 | 6,195 | 3,916 | 34,417 |
| 43,197 | 131 | 24,445 | 6,263 | 3,977 | 34,816 |
| 43,198 | 129 | 24,164 | 6,248 | 3,949 | 34,490 |
| 43,199 | 129 | 24,315 | 6,277 | 3,938 | 34,659 |
| 43,200 | 130 | 24,535 | 6,350 | 3,981 | 34,996 |
| 43,201 | 130 | 24,593 | 6,364 | 3,986 | 35,073 |
| 43,202 | 130 | 24,635 | 6,344 | 3,998 | 35,107 |
| 43,203 | 135 | 24,325 | 6,296 | 3,950 | 34,706 |
| 43,204 | 136 | 24,278 | 6,258 | 3,931 | 34,603 |
| 43,205 | 135 | 24,004 | 6,180 | 3,890 | 34,209 |
| 43,206 | 136 | 24,225 | 6,197 | 3,906 | 34,464 |
| 43,207 | 131 | 24,419 | 6,215 | 3,932 | 34,697 |
| 43,208 | 131 | 24,194 | 6,213 | 3,939 | 34,477 |
| 43,209 | 134 | 23,964 | 6,179 | 3,888 | 34,165 |
| 43,210 | 143 | 23,993 | 6,171 | 3,879 | 34,186 |
| 43,211 | 143 | 24,090 | 6,199 | 3,884 | 34,316 |
| 43,212 | 143 | 24,208 | 6,219 | 3,893 | 34,463 |
| 43,213 | 146 | 24,203 | 6,234 | 3,925 | 34,508 |
| 43,214 | 142 | 24,025 | 6,206 | 3,903 | 34,276 |
| 43,215 | 141 | 23,920 | 6,225 | 3,904 | 34,190 |
| 43,216 | 138 | 23,869 | 6,232 | 3,903 | 34,142 |
| 43,217 | 136 | 23,824 | 6,243 | 3,928 | 34,131 |
| 43,218 | 137 | 24,110 | 6,335 | 3,988 | 34,570 |
| 43,219 | 139 | 24,127 | 6,361 | 3,978 | 34,605 |
| 43,220 | 139 | 23,350 | 6,200 | 3,902 | 33,591 |
| 43,221 | 141 | 23,593 | 6,271 | 3,926 | 33,931 |
| 43,222 | 141 | 23,765 | 6,331 | 3,963 | 34,200 |
| 43,223 | 141 | 23,853 | 6,361 | 3,970 | 34,325 |

|        |     |        |       |       |        |
|--------|-----|--------|-------|-------|--------|
| 43,224 | 142 | 23,922 | 6,356 | 3,976 | 34,396 |
| 43,225 | 149 | 23,868 | 6,290 | 3,917 | 34,224 |
| 43,226 | 150 | 24,129 | 6,259 | 3,923 | 34,461 |
| 43,227 | 157 | 24,432 | 6,328 | 3,944 | 34,861 |
| 43,228 | 145 | 24,235 | 6,281 | 3,925 | 34,586 |
| 43,229 | 146 | 24,425 | 6,343 | 3,937 | 34,851 |
| 43,230 | 147 | 24,325 | 6,344 | 3,943 | 34,759 |
| 43,231 | 146 | 24,256 | 6,362 | 3,931 | 34,695 |
| 43,232 | 150 | 24,218 | 6,334 | 3,929 | 34,631 |
| 43,233 | 148 | 24,334 | 6,368 | 3,925 | 34,775 |
| 43,234 | 151 | 24,398 | 6,401 | 3,946 | 34,896 |
| 43,235 | 155 | 24,143 | 6,330 | 3,932 | 34,560 |
| 43,236 | 155 | 24,112 | 6,302 | 3,912 | 34,481 |
| 43,237 | 157 | 24,327 | 6,275 | 3,908 | 34,667 |
| 43,238 | 158 | 24,261 | 6,239 | 3,877 | 34,535 |
| 43,239 | 158 | 24,370 | 6,253 | 3,883 | 34,664 |
| 43,240 | 157 | 24,176 | 6,191 | 3,843 | 34,367 |
| 43,241 | 159 | 24,405 | 6,249 | 3,882 | 34,695 |
| 43,242 | 158 | 24,146 | 6,162 | 3,837 | 34,303 |
| 43,243 | 154 | 24,145 | 6,162 | 3,810 | 34,271 |
| 43,244 | 156 | 24,159 | 6,154 | 3,814 | 34,283 |
| 43,245 | 155 | 23,971 | 6,104 | 3,788 | 34,018 |
| 43,246 | 153 | 24,196 | 6,191 | 3,866 | 34,406 |
| 43,247 | 159 | 24,493 | 6,255 | 3,912 | 34,819 |
| 43,248 | 159 | 24,526 | 6,229 | 3,907 | 34,821 |
| 43,249 | 159 | 23,731 | 6,066 | 3,789 | 33,745 |
| 43,250 | 160 | 23,800 | 6,083 | 3,796 | 33,839 |
| 43,251 | 159 | 23,864 | 6,079 | 3,787 | 33,889 |
| 43,252 | 165 | 23,519 | 6,008 | 3,734 | 33,426 |
| 43,253 | 170 | 23,737 | 6,049 | 3,750 | 33,706 |
| 43,254 | 167 | 23,302 | 5,888 | 3,692 | 33,049 |
| 43,255 | 170 | 23,279 | 5,879 | 3,684 | 33,012 |



|        |     |        |       |       |        |
|--------|-----|--------|-------|-------|--------|
| 43,256 | 171 | 23,297 | 5,889 | 3,685 | 33,042 |
| 43,257 | 172 | 23,301 | 5,925 | 3,693 | 33,091 |
| 43,258 | 168 | 23,250 | 5,865 | 3,629 | 32,912 |
| 43,259 | 169 | 23,372 | 5,905 | 3,665 | 33,111 |
| 43,260 | 155 | 23,005 | 5,817 | 3,626 | 32,603 |
| 43,261 | 156 | 22,972 | 5,816 | 3,632 | 32,576 |
| 43,262 | 156 | 23,024 | 5,822 | 3,637 | 32,639 |
| 43,263 | 151 | 23,426 | 5,920 | 3,692 | 33,189 |
| 43,264 | 146 | 23,323 | 5,888 | 3,683 | 33,040 |
| 43,265 | 146 | 23,404 | 5,854 | 3,659 | 33,063 |
| 43,266 | 146 | 23,641 | 5,904 | 3,685 | 33,376 |
| 43,267 | 144 | 23,202 | 5,791 | 3,576 | 32,713 |
| 43,268 | 146 | 23,404 | 5,822 | 3,597 | 32,969 |
| 43,269 | 143 | 23,599 | 5,863 | 3,616 | 33,221 |
| 43,270 | 141 | 23,466 | 5,822 | 3,607 | 33,036 |
| 43,271 | 133 | 23,414 | 5,794 | 3,586 | 32,927 |
| 43,272 | 132 | 22,992 | 5,717 | 3,535 | 32,376 |
| 43,273 | 133 | 23,129 | 5,719 | 3,537 | 32,518 |
| 43,274 | 140 | 22,853 | 5,630 | 3,506 | 32,129 |
| 43,275 | 142 | 22,826 | 5,624 | 3,495 | 32,087 |
| 43,276 | 137 | 22,876 | 5,633 | 3,523 | 32,169 |
| 43,277 | 136 | 22,519 | 5,594 | 3,495 | 31,744 |
| 43,278 | 129 | 22,774 | 5,632 | 3,539 | 32,074 |
| 43,279 | 129 | 22,629 | 5,554 | 3,482 | 31,794 |
| 43,280 | 129 | 22,966 | 5,619 | 3,541 | 32,255 |
| 43,281 | 128 | 23,089 | 5,591 | 3,561 | 32,369 |
| 43,282 | 125 | 22,780 | 5,517 | 3,536 | 31,958 |
| 43,283 | 118 | 22,857 | 5,531 | 3,562 | 32,068 |
| 43,284 | 109 | 22,441 | 5,491 | 3,494 | 31,535 |
| 43,285 | 109 | 22,908 | 5,553 | 3,526 | 32,096 |
| 43,286 | 111 | 22,850 | 5,594 | 3,526 | 32,081 |
| 43,287 | 112 | 22,480 | 5,539 | 3,478 | 31,609 |

|        |     |        |       |       |        |
|--------|-----|--------|-------|-------|--------|
| 43,288 | 115 | 22,907 | 5,677 | 3,567 | 32,266 |
| 43,289 | 119 | 23,155 | 5,773 | 3,613 | 32,660 |
| 43,290 | 123 | 23,224 | 5,802 | 3,638 | 32,787 |
| 43,291 | 124 | 23,262 | 5,772 | 3,621 | 32,779 |
| 43,292 | 124 | 23,272 | 5,777 | 3,618 | 32,791 |
| 43,293 | 122 | 23,023 | 5,742 | 3,584 | 32,471 |
| 43,294 | 120 | 22,581 | 5,676 | 3,543 | 31,920 |
| 43,295 | 120 | 22,752 | 5,726 | 3,560 | 32,158 |
| 43,296 | 117 | 22,800 | 5,690 | 3,548 | 32,155 |
| 43,297 | 121 | 22,995 | 5,715 | 3,569 | 32,400 |
| 43,298 | 118 | 23,196 | 5,776 | 3,592 | 32,682 |
| 43,299 | 116 | 22,938 | 5,730 | 3,563 | 32,347 |
| 43,300 | 116 | 22,774 | 5,682 | 3,522 | 32,094 |
| 43,301 | 117 | 22,979 | 5,732 | 3,535 | 32,363 |
| 43,302 | 112 | 22,917 | 5,744 | 3,527 | 32,300 |
| 43,303 | 107 | 22,913 | 5,739 | 3,520 | 32,279 |
| 43,304 | 102 | 22,920 | 5,765 | 3,524 | 32,311 |
| 43,305 | 103 | 23,358 | 5,925 | 3,583 | 32,969 |
| 43,306 | 99  | 23,422 | 5,938 | 3,599 | 33,058 |
| 43,307 | 96  | 22,789 | 5,760 | 3,488 | 32,133 |
| 43,308 | 96  | 23,015 | 5,779 | 3,513 | 32,403 |
| 43,309 | 96  | 23,266 | 5,817 | 3,540 | 32,719 |
| 43,310 | 98  | 23,557 | 5,885 | 3,607 | 33,147 |
| 43,311 | 95  | 23,353 | 5,833 | 3,577 | 32,858 |
| 43,312 | 96  | 23,478 | 5,879 | 3,591 | 33,044 |
| 43,313 | 97  | 23,440 | 5,878 | 3,593 | 33,008 |
| 43,314 | 102 | 23,296 | 5,854 | 3,572 | 32,824 |
| 43,315 | 106 | 23,261 | 5,864 | 3,566 | 32,797 |
| 43,316 | 106 | 23,015 | 5,829 | 3,549 | 32,499 |
| 43,317 | 109 | 22,581 | 5,723 | 3,486 | 31,899 |
| 43,318 | 112 | 22,880 | 5,741 | 3,521 | 32,254 |
| 43,319 | 110 | 22,759 | 5,737 | 3,517 | 32,123 |

|        |     |        |       |       |        |
|--------|-----|--------|-------|-------|--------|
| 43,320 | 111 | 22,624 | 5,730 | 3,498 | 31,963 |
| 43,321 | 109 | 22,608 | 5,721 | 3,493 | 31,931 |
| 43,322 | 109 | 22,742 | 5,723 | 3,490 | 32,064 |
| 43,323 | 104 | 22,724 | 5,678 | 3,483 | 31,989 |
| 43,324 | 105 | 22,853 | 5,681 | 3,480 | 32,119 |
| 43,325 | 99  | 22,655 | 5,645 | 3,457 | 31,856 |
| 43,326 | 100 | 22,764 | 5,670 | 3,482 | 32,016 |
| 43,327 | 100 | 22,687 | 5,659 | 3,475 | 31,921 |
| 43,328 | 102 | 22,968 | 5,700 | 3,484 | 32,254 |
| 43,329 | 102 | 22,960 | 5,658 | 3,468 | 32,188 |
| 43,330 | 102 | 22,910 | 5,659 | 3,470 | 32,141 |
| 43,331 | 102 | 22,817 | 5,642 | 3,454 | 32,015 |
| 43,332 | 100 | 22,504 | 5,570 | 3,399 | 31,573 |
| 43,333 | 100 | 22,602 | 5,547 | 3,360 | 31,609 |
| 43,334 | 98  | 22,556 | 5,469 | 3,356 | 31,479 |
| 43,335 | 101 | 22,736 | 5,527 | 3,378 | 31,742 |
| 43,336 | 101 | 22,528 | 5,493 | 3,377 | 31,499 |
| 43,337 | 93  | 22,594 | 5,469 | 3,348 | 31,504 |
| 43,338 | 89  | 22,347 | 5,357 | 3,294 | 31,087 |
| 43,339 | 89  | 22,570 | 5,388 | 3,311 | 31,358 |
| 43,340 | 90  | 22,740 | 5,431 | 3,338 | 31,599 |
| 43,341 | 90  | 22,444 | 5,347 | 3,288 | 31,169 |
| 43,342 | 90  | 22,382 | 5,377 | 3,309 | 31,158 |
| 43,343 | 90  | 22,422 | 5,389 | 3,307 | 31,208 |
| 43,344 | 89  | 22,139 | 5,319 | 3,306 | 30,853 |
| 43,345 | 96  | 22,105 | 5,297 | 3,294 | 30,792 |
| 43,346 | 96  | 22,139 | 5,291 | 3,294 | 30,820 |
| 43,347 | 95  | 22,216 | 5,359 | 3,310 | 30,980 |
| 43,348 | 92  | 21,913 | 5,340 | 3,284 | 30,629 |
| 43,349 | 96  | 22,007 | 5,360 | 3,299 | 30,762 |
| 43,350 | 95  | 21,739 | 5,305 | 3,270 | 30,409 |
| 43,351 | 98  | 21,709 | 5,309 | 3,276 | 30,392 |

|        |     |        |       |       |        |
|--------|-----|--------|-------|-------|--------|
| 43,352 | 97  | 21,561 | 5,296 | 3,270 | 30,224 |
| 43,353 | 97  | 21,786 | 5,374 | 3,326 | 30,583 |
| 43,354 | 98  | 21,692 | 5,369 | 3,321 | 30,480 |
| 43,355 | 101 | 21,930 | 5,380 | 3,359 | 30,770 |
| 43,356 | 98  | 21,896 | 5,355 | 3,349 | 30,698 |
| 43,357 | 102 | 21,631 | 5,377 | 3,349 | 30,459 |
| 43,358 | 102 | 21,630 | 5,379 | 3,373 | 30,484 |
| 43,359 | 109 | 21,625 | 5,414 | 3,399 | 30,547 |
| 43,360 | 111 | 21,717 | 5,447 | 3,427 | 30,702 |
| 43,361 | 113 | 22,160 | 5,568 | 3,476 | 31,317 |
| 43,362 | 114 | 22,069 | 5,559 | 3,476 | 31,218 |
| 43,363 | 115 | 22,143 | 5,558 | 3,478 | 31,294 |
| 43,364 | 114 | 22,545 | 5,674 | 3,530 | 31,863 |
| 43,365 | 108 | 22,278 | 5,565 | 3,476 | 31,427 |
| 43,366 | 108 | 22,747 | 5,707 | 3,555 | 32,117 |
| 43,367 | 104 | 23,280 | 5,858 | 3,645 | 32,887 |
| 43,368 | 106 | 23,488 | 5,968 | 3,736 | 33,298 |
| 43,369 | 105 | 23,676 | 6,050 | 3,780 | 33,611 |
| 43,370 | 106 | 23,521 | 6,004 | 3,772 | 33,403 |
| 43,371 | 109 | 23,861 | 6,126 | 3,868 | 33,964 |
| 43,372 | 106 | 23,604 | 6,088 | 3,832 | 33,630 |
| 43,373 | 105 | 23,615 | 6,131 | 3,848 | 33,699 |
| 43,374 | 114 | 23,559 | 6,135 | 3,850 | 33,658 |
| 43,375 | 114 | 23,788 | 6,235 | 3,882 | 34,019 |
| 43,376 | 118 | 23,844 | 6,248 | 3,905 | 34,115 |
| 43,377 | 116 | 23,786 | 6,233 | 3,902 | 34,037 |
| 43,378 | 118 | 23,716 | 6,251 | 3,894 | 33,979 |
| 43,379 | 116 | 23,424 | 6,224 | 3,896 | 33,660 |
| 43,380 | 121 | 23,395 | 6,278 | 3,905 | 33,699 |
| 43,381 | 126 | 23,662 | 6,369 | 3,953 | 34,110 |
| 43,382 | 128 | 23,640 | 6,391 | 3,966 | 34,125 |
| 43,383 | 130 | 23,641 | 6,441 | 3,971 | 34,183 |

|        |     |        |       |       |        |
|--------|-----|--------|-------|-------|--------|
| 43,384 | 128 | 23,235 | 6,391 | 3,938 | 33,692 |
| 43,385 | 128 | 23,104 | 6,390 | 3,926 | 33,548 |
| 43,386 | 126 | 22,832 | 6,314 | 3,877 | 33,149 |
| 43,387 | 126 | 22,435 | 6,235 | 3,823 | 32,619 |
| 43,388 | 130 | 23,210 | 6,455 | 3,999 | 33,794 |
| 43,389 | 130 | 23,142 | 6,409 | 4,004 | 33,685 |
| 43,390 | 136 | 23,221 | 6,430 | 4,004 | 33,791 |
| 43,391 | 135 | 23,245 | 6,431 | 3,995 | 33,806 |
| 43,392 | 129 | 23,011 | 6,372 | 3,956 | 33,468 |
| 43,393 | 130 | 23,237 | 6,436 | 4,005 | 33,808 |
| 43,394 | 137 | 23,301 | 6,428 | 3,997 | 33,863 |
| 43,395 | 135 | 23,432 | 6,464 | 3,996 | 34,027 |
| 43,396 | 129 | 23,201 | 6,417 | 3,966 | 33,713 |
| 43,397 | 130 | 22,756 | 6,325 | 3,906 | 33,117 |
| 43,398 | 130 | 22,790 | 6,305 | 3,916 | 33,141 |
| 43,399 | 132 | 22,626 | 6,251 | 3,895 | 32,904 |
| 43,400 | 129 | 22,440 | 6,179 | 3,869 | 32,617 |
| 43,401 | 134 | 24,012 | 6,582 | 4,167 | 34,895 |
| 43,402 | 131 | 23,829 | 6,536 | 4,137 | 34,633 |
| 43,403 | 138 | 23,881 | 6,524 | 4,141 | 34,684 |
| 43,404 | 139 | 23,858 | 6,522 | 4,140 | 34,659 |
| 43,405 | 141 | 24,243 | 6,581 | 4,176 | 35,141 |
| 43,406 | 136 | 23,907 | 6,524 | 4,132 | 34,699 |
| 43,407 | 136 | 23,784 | 6,461 | 4,071 | 34,452 |
| 43,408 | 136 | 24,049 | 6,490 | 4,095 | 34,770 |
| 43,409 | 131 | 24,201 | 6,539 | 4,119 | 34,990 |
| 43,410 | 127 | 24,152 | 6,565 | 4,154 | 34,998 |
| 43,411 | 128 | 24,140 | 6,590 | 4,157 | 35,015 |
| 43,412 | 127 | 24,135 | 6,569 | 4,130 | 34,961 |
| 43,413 | 127 | 24,123 | 6,577 | 4,133 | 34,960 |
| 43,414 | 130 | 24,110 | 6,621 | 4,127 | 34,988 |
| 43,415 | 133 | 23,558 | 6,442 | 4,025 | 34,158 |

|        |     |        |       |       |        |
|--------|-----|--------|-------|-------|--------|
| 43,416 | 134 | 23,561 | 6,471 | 4,034 | 34,200 |
| 43,417 | 136 | 23,804 | 6,486 | 4,073 | 34,499 |
| 43,418 | 148 | 23,609 | 6,447 | 4,055 | 34,259 |
| 43,419 | 146 | 23,564 | 6,402 | 4,005 | 34,117 |
| 43,420 | 147 | 23,537 | 6,386 | 3,981 | 34,051 |
| 43,421 | 147 | 23,628 | 6,362 | 3,961 | 34,098 |
| 43,422 | 149 | 23,580 | 6,358 | 3,944 | 34,031 |
| 43,423 | 149 | 23,516 | 6,340 | 3,935 | 33,940 |
| 43,424 | 141 | 23,446 | 6,309 | 3,941 | 33,837 |
| 43,425 | 143 | 23,412 | 6,293 | 3,938 | 33,786 |
| 43,426 | 141 | 23,241 | 6,303 | 3,964 | 33,649 |
| 43,427 | 138 | 23,259 | 6,379 | 3,994 | 33,770 |
| 43,428 | 137 | 23,326 | 6,365 | 3,998 | 33,826 |
| 43,429 | 134 | 23,219 | 6,361 | 3,978 | 33,692 |
| 43,430 | 131 | 23,325 | 6,458 | 4,011 | 33,925 |
| 43,431 | 131 | 23,263 | 6,448 | 4,034 | 33,876 |
| 43,432 | 129 | 23,270 | 6,431 | 4,017 | 33,847 |
| 43,433 | 124 | 23,151 | 6,401 | 4,015 | 33,691 |
| 43,434 | 132 | 23,311 | 6,373 | 4,021 | 33,837 |
| 43,435 | 132 | 23,386 | 6,376 | 4,029 | 33,923 |
| 43,436 | 135 | 23,472 | 6,427 | 4,039 | 34,073 |
| 43,437 | 137 | 23,699 | 6,441 | 4,062 | 34,339 |
| 43,438 | 137 | 23,623 | 6,432 | 4,044 | 34,236 |
| 43,439 | 135 | 23,569 | 6,452 | 4,049 | 34,205 |
| 43,440 | 141 | 23,693 | 6,530 | 4,068 | 34,432 |
| 43,441 | 142 | 23,703 | 6,552 | 4,085 | 34,482 |
| 43,442 | 142 | 23,819 | 6,574 | 4,113 | 34,648 |
| 43,443 | 147 | 23,617 | 6,542 | 4,068 | 34,374 |
| 43,444 | 151 | 23,785 | 6,561 | 4,095 | 34,592 |
| 43,445 | 145 | 23,727 | 6,536 | 4,099 | 34,507 |
| 43,446 | 146 | 23,668 | 6,542 | 4,123 | 34,479 |
| 43,447 | 149 | 23,604 | 6,541 | 4,121 | 34,415 |

|        |     |        |       |       |        |
|--------|-----|--------|-------|-------|--------|
| 43,448 | 148 | 23,598 | 6,538 | 4,139 | 34,423 |
| 43,449 | 152 | 23,434 | 6,528 | 4,091 | 34,205 |
| 43,450 | 146 | 23,329 | 6,480 | 4,051 | 34,006 |
| 43,451 | 146 | 23,469 | 6,508 | 4,084 | 34,207 |
| 43,452 | 151 | 23,278 | 6,465 | 4,051 | 33,945 |
| 43,453 | 151 | 23,265 | 6,451 | 4,036 | 33,903 |
| 43,454 | 148 | 23,265 | 6,449 | 4,019 | 33,881 |
| 43,455 | 148 | 23,411 | 6,461 | 4,029 | 34,049 |
| 43,456 | 146 | 23,143 | 6,415 | 3,994 | 33,698 |
| 43,457 | 146 | 23,124 | 6,395 | 3,994 | 33,659 |
| 43,458 | 146 | 23,356 | 6,412 | 4,012 | 33,926 |
| 43,459 | 144 | 23,179 | 6,376 | 3,980 | 33,679 |
| 43,460 | 149 | 23,370 | 6,411 | 3,970 | 33,900 |
| 43,461 | 148 | 23,257 | 6,404 | 3,961 | 33,770 |
| 43,462 | 147 | 23,451 | 6,440 | 3,976 | 34,014 |
| 43,463 | 147 | 23,305 | 6,429 | 3,992 | 33,873 |
| 43,464 | 145 | 23,172 | 6,304 | 3,956 | 33,577 |
| 43,465 | 145 | 23,132 | 6,293 | 3,956 | 33,526 |
| 43,466 | 141 | 23,343 | 6,368 | 4,007 | 33,859 |
| 43,467 | 143 | 23,407 | 6,354 | 4,003 | 33,907 |
| 43,468 | 139 | 23,285 | 6,322 | 3,980 | 33,726 |
| 43,469 | 126 | 22,915 | 6,217 | 3,911 | 33,169 |
| 43,470 | 127 | 22,853 | 6,212 | 3,921 | 33,113 |
| 43,471 | 123 | 22,612 | 6,153 | 3,907 | 32,795 |
| 43,472 | 126 | 22,553 | 6,148 | 3,917 | 32,744 |
| 43,473 | 122 | 22,272 | 6,136 | 3,907 | 32,437 |
| 43,474 | 122 | 22,052 | 6,110 | 3,887 | 32,171 |
| 43,475 | 123 | 22,065 | 6,154 | 3,878 | 32,220 |
| 43,476 | 121 | 22,052 | 6,129 | 3,859 | 32,161 |
| 43,477 | 127 | 21,987 | 6,080 | 3,815 | 32,009 |
| 43,478 | 141 | 22,094 | 6,080 | 3,820 | 32,135 |
| 43,479 | 141 | 21,904 | 6,010 | 3,786 | 31,841 |

|        |     |        |       |       |        |
|--------|-----|--------|-------|-------|--------|
| 43,480 | 147 | 21,835 | 5,910 | 3,710 | 31,602 |
| 43,481 | 147 | 21,844 | 5,900 | 3,706 | 31,597 |
| 43,482 | 145 | 21,782 | 5,867 | 3,659 | 31,453 |
| 43,483 | 145 | 21,466 | 5,771 | 3,593 | 30,975 |
| 43,484 | 146 | 21,632 | 5,794 | 3,598 | 31,170 |
| 43,485 | 143 | 21,558 | 5,793 | 3,603 | 31,097 |
| 43,486 | 142 | 21,531 | 5,791 | 3,595 | 31,059 |
| 43,487 | 139 | 21,388 | 5,769 | 3,607 | 30,903 |
| 43,488 | 139 | 21,422 | 5,768 | 3,601 | 30,930 |
| 43,489 | 139 | 21,412 | 5,723 | 3,571 | 30,845 |
| 43,490 | 139 | 21,438 | 5,709 | 3,569 | 30,855 |
| 43,491 | 134 | 21,658 | 5,751 | 3,600 | 31,143 |
| 43,492 | 131 | 21,672 | 5,752 | 3,610 | 31,165 |
| 43,493 | 129 | 21,203 | 5,650 | 3,548 | 30,530 |
| 43,494 | 137 | 21,478 | 5,662 | 3,602 | 30,879 |
| 43,495 | 132 | 21,459 | 5,690 | 3,591 | 30,872 |
| 43,496 | 130 | 21,522 | 5,729 | 3,598 | 30,979 |
| 43,497 | 121 | 20,604 | 5,409 | 3,385 | 29,519 |
| 43,498 | 121 | 20,930 | 5,449 | 3,403 | 29,903 |
| 43,499 | 124 | 21,335 | 5,516 | 3,442 | 30,417 |
| 43,500 | 124 | 21,354 | 5,533 | 3,434 | 30,445 |
| 43,501 | 128 | 21,780 | 5,648 | 3,516 | 31,072 |
| 43,502 | 126 | 21,489 | 5,567 | 3,461 | 30,643 |
| 43,503 | 123 | 20,993 | 5,472 | 3,406 | 29,994 |
| 43,504 | 122 | 20,889 | 5,454 | 3,406 | 29,871 |
| 43,505 | 118 | 20,573 | 5,400 | 3,363 | 29,454 |
| 43,506 | 118 | 20,253 | 5,355 | 3,340 | 29,066 |
| 43,507 | 119 | 20,764 | 5,556 | 3,477 | 29,916 |
| 43,508 | 127 | 20,922 | 5,642 | 3,516 | 30,207 |
| 43,509 | 125 | 20,695 | 5,652 | 3,511 | 29,983 |
| 43,510 | 123 | 20,424 | 5,608 | 3,485 | 29,640 |
| 43,511 | 119 | 20,340 | 5,553 | 3,476 | 29,488 |



|        |     |        |       |       |        |
|--------|-----|--------|-------|-------|--------|
| 43,512 | 119 | 20,221 | 5,503 | 3,434 | 29,277 |
| 43,513 | 119 | 20,341 | 5,525 | 3,456 | 29,441 |
| 43,514 | 124 | 20,358 | 5,507 | 3,451 | 29,440 |
| 43,515 | 124 | 20,137 | 5,447 | 3,418 | 29,126 |
| 43,516 | 126 | 20,019 | 5,395 | 3,388 | 28,928 |
| 43,517 | 127 | 20,047 | 5,374 | 3,375 | 28,923 |
| 43,518 | 124 | 20,062 | 5,399 | 3,360 | 28,945 |
| 43,519 | 125 | 20,114 | 5,388 | 3,367 | 28,994 |
| 43,520 | 126 | 20,103 | 5,376 | 3,353 | 28,958 |
| 43,521 | 126 | 20,279 | 5,393 | 3,347 | 29,145 |
| 43,522 | 127 | 20,481 | 5,434 | 3,374 | 29,416 |
| 43,523 | 126 | 20,685 | 5,449 | 3,369 | 29,629 |
| 43,524 | 126 | 20,772 | 5,437 | 3,369 | 29,704 |
| 43,525 | 126 | 21,000 | 5,465 | 3,420 | 30,011 |
| 43,526 | 135 | 20,975 | 5,440 | 3,404 | 29,954 |
| 43,527 | 139 | 21,330 | 5,486 | 3,441 | 30,396 |
| 43,528 | 135 | 21,630 | 5,543 | 3,478 | 30,786 |
| 43,529 | 120 | 21,394 | 5,495 | 3,436 | 30,445 |
| 43,530 | 119 | 21,437 | 5,510 | 3,439 | 30,505 |
| 43,531 | 118 | 21,394 | 5,490 | 3,457 | 30,459 |
| 43,532 | 117 | 21,316 | 5,488 | 3,461 | 30,382 |
| 43,533 | 119 | 21,248 | 5,483 | 3,461 | 30,311 |
| 43,534 | 115 | 21,125 | 5,463 | 3,444 | 30,147 |
| 43,535 | 125 | 21,427 | 5,579 | 3,513 | 30,644 |
| 43,536 | 124 | 21,355 | 5,511 | 3,499 | 30,489 |
| 43,537 | 128 | 21,459 | 5,499 | 3,471 | 30,557 |
| 43,538 | 128 | 21,717 | 5,546 | 3,515 | 30,906 |
| 43,539 | 134 | 21,537 | 5,528 | 3,510 | 30,709 |
| 43,540 | 135 | 21,563 | 5,533 | 3,508 | 30,739 |
| 43,541 | 136 | 21,593 | 5,582 | 3,510 | 30,821 |
| 43,542 | 137 | 21,565 | 5,587 | 3,515 | 30,804 |
| 43,543 | 134 | 21,487 | 5,565 | 3,534 | 30,720 |

|        |     |        |       |       |        |
|--------|-----|--------|-------|-------|--------|
| 43,544 | 129 | 21,548 | 5,600 | 3,527 | 30,804 |
| 43,545 | 128 | 21,478 | 5,604 | 3,520 | 30,730 |
| 43,546 | 129 | 21,048 | 5,510 | 3,465 | 30,152 |
| 43,547 | 129 | 21,016 | 5,510 | 3,468 | 30,123 |
| 43,548 | 126 | 20,822 | 5,521 | 3,469 | 29,938 |
| 43,549 | 129 | 20,945 | 5,592 | 3,492 | 30,158 |
| 43,550 | 127 | 20,896 | 5,601 | 3,490 | 30,114 |
| 43,551 | 125 | 20,972 | 5,617 | 3,492 | 30,206 |
| 43,552 | 125 | 20,919 | 5,633 | 3,461 | 30,138 |
| 43,553 | 125 | 21,261 | 5,697 | 3,509 | 30,592 |
| 43,554 | 124 | 21,383 | 5,724 | 3,503 | 30,734 |
| 43,555 | 123 | 21,581 | 5,752 | 3,521 | 30,977 |
| 43,556 | 125 | 21,696 | 5,745 | 3,513 | 31,079 |
| 43,557 | 124 | 21,960 | 5,771 | 3,547 | 31,402 |
| 43,558 | 116 | 22,296 | 5,824 | 3,590 | 31,826 |
| 43,559 | 116 | 22,089 | 5,772 | 3,572 | 31,549 |
| 43,560 | 119 | 22,298 | 5,804 | 3,605 | 31,826 |
| 43,561 | 119 | 22,277 | 5,799 | 3,585 | 31,780 |
| 43,562 | 123 | 22,134 | 5,814 | 3,585 | 31,656 |
| 43,563 | 125 | 22,334 | 5,866 | 3,627 | 31,952 |
| 43,564 | 120 | 21,974 | 5,802 | 3,571 | 31,467 |
| 43,565 | 124 | 22,113 | 5,842 | 3,586 | 31,665 |
| 43,566 | 127 | 21,951 | 5,837 | 3,563 | 31,478 |
| 43,567 | 129 | 21,827 | 5,831 | 3,532 | 31,319 |
| 43,568 | 132 | 21,432 | 5,764 | 3,495 | 30,823 |
| 43,569 | 133 | 21,475 | 5,790 | 3,520 | 30,918 |
| 43,570 | 133 | 21,102 | 5,733 | 3,455 | 30,423 |
| 43,571 | 133 | 21,140 | 5,728 | 3,455 | 30,456 |
| 43,572 | 135 | 21,057 | 5,718 | 3,427 | 30,337 |
| 43,573 | 131 | 21,034 | 5,736 | 3,428 | 30,329 |
| 43,574 | 132 | 20,973 | 5,699 | 3,415 | 30,219 |
| 43,575 | 129 | 20,651 | 5,662 | 3,375 | 29,817 |

|        |     |        |       |       |        |
|--------|-----|--------|-------|-------|--------|
| 43,576 | 129 | 20,763 | 5,718 | 3,404 | 30,014 |
| 43,577 | 134 | 20,993 | 5,757 | 3,443 | 30,327 |
| 43,578 | 132 | 20,751 | 5,703 | 3,399 | 29,985 |
| 43,579 | 129 | 20,551 | 5,673 | 3,384 | 29,737 |
| 43,580 | 129 | 20,735 | 5,800 | 3,470 | 30,134 |
| 43,581 | 124 | 20,651 | 5,780 | 3,462 | 30,017 |
| 43,582 | 128 | 20,022 | 5,612 | 3,342 | 29,104 |
| 43,583 | 128 | 20,237 | 5,649 | 3,379 | 29,393 |
| 43,584 | 130 | 20,269 | 5,681 | 3,374 | 29,454 |
| 43,585 | 130 | 20,489 | 5,727 | 3,410 | 29,756 |
| 43,586 | 124 | 20,658 | 5,747 | 3,439 | 29,968 |
| 43,587 | 124 | 20,282 | 5,708 | 3,376 | 29,490 |
| 43,588 | 124 | 20,314 | 5,761 | 3,398 | 29,597 |
| 43,589 | 124 | 20,153 | 5,735 | 3,374 | 29,386 |
| 43,590 | 119 | 20,092 | 5,713 | 3,360 | 29,284 |
| 43,591 | 117 | 20,076 | 5,662 | 3,346 | 29,201 |
| 43,592 | 117 | 20,005 | 5,659 | 3,327 | 29,108 |
| 43,593 | 117 | 20,064 | 5,624 | 3,305 | 29,110 |
| 43,594 | 116 | 19,838 | 5,578 | 3,259 | 28,791 |
| 43,595 | 119 | 19,988 | 5,592 | 3,283 | 28,982 |
| 43,596 | 110 | 19,606 | 5,511 | 3,223 | 28,450 |
| 43,597 | 110 | 19,739 | 5,516 | 3,201 | 28,566 |
| 43,598 | 110 | 19,677 | 5,516 | 3,202 | 28,505 |
| 43,599 | 108 | 19,833 | 5,500 | 3,207 | 28,648 |
| 43,600 | 112 | 19,978 | 5,560 | 3,226 | 28,876 |
| 43,601 | 113 | 19,925 | 5,527 | 3,217 | 28,782 |
| 43,602 | 113 | 19,831 | 5,506 | 3,216 | 28,666 |
| 43,603 | 113 | 19,758 | 5,485 | 3,228 | 28,584 |
| 43,604 | 122 | 19,704 | 5,478 | 3,214 | 28,518 |
| 43,605 | 124 | 19,353 | 5,355 | 3,170 | 28,002 |
| 43,606 | 129 | 19,553 | 5,393 | 3,200 | 28,275 |
| 43,607 | 136 | 19,257 | 5,345 | 3,154 | 27,892 |

|        |     |        |       |       |        |
|--------|-----|--------|-------|-------|--------|
| 43,608 | 136 | 18,991 | 5,298 | 3,102 | 27,527 |
| 43,609 | 144 | 19,164 | 5,416 | 3,163 | 27,887 |
| 43,610 | 146 | 18,974 | 5,384 | 3,133 | 27,637 |
| 43,611 | 144 | 18,810 | 5,331 | 3,094 | 27,379 |
| 43,612 | 142 | 18,953 | 5,354 | 3,089 | 27,538 |
| 43,613 | 142 | 19,026 | 5,348 | 3,077 | 27,593 |
| 43,614 | 141 | 19,028 | 5,361 | 3,073 | 27,603 |
| 43,615 | 138 | 19,046 | 5,346 | 3,049 | 27,579 |
| 43,616 | 138 | 18,936 | 5,323 | 3,039 | 27,436 |
| 43,617 | 131 | 18,901 | 5,331 | 3,033 | 27,396 |
| 43,618 | 134 | 18,977 | 5,352 | 3,047 | 27,510 |
| 43,619 | 134 | 18,800 | 5,293 | 3,004 | 27,231 |
| 43,620 | 134 | 18,795 | 5,279 | 3,001 | 27,209 |
| 43,621 | 137 | 18,897 | 5,281 | 3,030 | 27,345 |
| 43,622 | 137 | 19,115 | 5,349 | 3,079 | 27,680 |
| 43,623 | 141 | 19,096 | 5,336 | 3,089 | 27,662 |
| 43,624 | 141 | 18,847 | 5,274 | 3,043 | 27,305 |
| 43,625 | 141 | 18,813 | 5,251 | 3,052 | 27,257 |
| 43,626 | 141 | 18,555 | 5,162 | 2,981 | 26,839 |
| 43,627 | 142 | 18,807 | 5,171 | 2,991 | 27,111 |
| 43,628 | 130 | 18,990 | 5,203 | 3,021 | 27,344 |
| 43,629 | 133 | 18,194 | 4,918 | 2,843 | 26,088 |
| 43,630 | 133 | 18,511 | 4,936 | 2,859 | 26,439 |
| 43,631 | 131 | 18,797 | 4,963 | 2,868 | 26,759 |
| 43,632 | 129 | 18,791 | 4,965 | 2,858 | 26,743 |
| 43,633 | 128 | 18,884 | 4,971 | 2,871 | 26,854 |
| 43,634 | 131 | 19,015 | 4,982 | 2,864 | 26,992 |
| 43,635 | 130 | 19,200 | 4,992 | 2,875 | 27,197 |
| 43,636 | 129 | 18,975 | 4,948 | 2,839 | 26,891 |
| 43,637 | 131 | 19,076 | 4,964 | 2,835 | 27,006 |
| 43,638 | 136 | 19,348 | 4,972 | 2,890 | 27,346 |
| 43,639 | 136 | 19,299 | 4,908 | 2,872 | 27,215 |

|        |     |        |       |       |        |
|--------|-----|--------|-------|-------|--------|
| 43,640 | 136 | 19,317 | 4,902 | 2,863 | 27,218 |
| 43,641 | 134 | 19,359 | 4,905 | 2,873 | 27,271 |
| 43,642 | 138 | 19,484 | 4,912 | 2,881 | 27,415 |
| 43,643 | 138 | 19,526 | 4,886 | 2,888 | 27,438 |
| 43,644 | 137 | 19,571 | 4,877 | 2,890 | 27,475 |
| 43,645 | 141 | 19,618 | 4,859 | 2,885 | 27,503 |
| 43,646 | 138 | 19,410 | 4,806 | 2,851 | 27,205 |
| 43,647 | 142 | 19,518 | 4,811 | 2,856 | 27,327 |
| 43,648 | 149 | 19,474 | 4,768 | 2,853 | 27,244 |
| 43,649 | 149 | 19,306 | 4,728 | 2,829 | 27,012 |
| 43,650 | 149 | 19,388 | 4,785 | 2,853 | 27,175 |
| 43,651 | 141 | 19,401 | 4,781 | 2,858 | 27,181 |
| 43,652 | 138 | 19,368 | 4,773 | 2,859 | 27,138 |
| 43,653 | 140 | 19,505 | 4,805 | 2,863 | 27,313 |
| 43,654 | 141 | 19,544 | 4,778 | 2,851 | 27,314 |
| 43,655 | 133 | 19,262 | 4,714 | 2,806 | 26,915 |
| 43,656 | 129 | 19,226 | 4,751 | 2,817 | 26,923 |
| 43,657 | 126 | 19,389 | 4,784 | 2,852 | 27,151 |
| 43,658 | 115 | 19,249 | 4,680 | 2,798 | 26,842 |
| 43,659 | 115 | 19,343 | 4,664 | 2,813 | 26,935 |
| 43,660 | 121 | 19,261 | 4,625 | 2,796 | 26,803 |
| 43,661 | 118 | 19,103 | 4,563 | 2,769 | 26,553 |
| 43,662 | 120 | 19,683 | 4,683 | 2,867 | 27,353 |
| 43,663 | 118 | 19,797 | 4,656 | 2,890 | 27,461 |
| 43,664 | 126 | 20,152 | 4,748 | 2,956 | 27,982 |
| 43,665 | 127 | 20,402 | 4,827 | 3,005 | 28,361 |
| 43,666 | 127 | 20,502 | 4,862 | 3,046 | 28,537 |
| 43,667 | 127 | 20,395 | 4,846 | 3,046 | 28,414 |
| 43,668 | 130 | 20,974 | 5,055 | 3,153 | 29,312 |
| 43,669 | 125 | 20,837 | 5,045 | 3,174 | 29,181 |
| 43,670 | 126 | 21,026 | 5,124 | 3,232 | 29,508 |
| 43,671 | 126 | 21,018 | 5,168 | 3,229 | 29,541 |

|        |     |        |       |       |        |
|--------|-----|--------|-------|-------|--------|
| 43,672 | 124 | 20,833 | 5,118 | 3,211 | 29,286 |
| 43,673 | 123 | 20,830 | 5,119 | 3,230 | 29,302 |
| 43,674 | 120 | 20,667 | 5,067 | 3,216 | 29,070 |
| 43,675 | 119 | 20,682 | 5,065 | 3,211 | 29,077 |
| 43,676 | 118 | 20,595 | 5,040 | 3,191 | 28,944 |
| 43,677 | 119 | 20,483 | 4,990 | 3,174 | 28,766 |
| 43,678 | 119 | 20,382 | 4,980 | 3,169 | 28,650 |
| 43,679 | 120 | 20,139 | 4,926 | 3,129 | 28,314 |
| 43,680 | 119 | 20,067 | 4,927 | 3,130 | 28,243 |
| 43,681 | 118 | 19,767 | 4,901 | 3,101 | 27,887 |
| 43,682 | 122 | 19,818 | 4,949 | 3,114 | 28,003 |
| 43,683 | 122 | 19,587 | 4,888 | 3,077 | 27,674 |
| 43,684 | 119 | 19,450 | 4,898 | 3,072 | 27,539 |
| 43,685 | 119 | 19,434 | 4,883 | 3,075 | 27,511 |
| 43,686 | 117 | 19,496 | 4,925 | 3,100 | 27,638 |
| 43,687 | 115 | 19,499 | 4,896 | 3,103 | 27,613 |
| 43,688 | 113 | 19,317 | 4,880 | 3,063 | 27,373 |
| 43,689 | 119 | 19,402 | 4,905 | 3,060 | 27,486 |
| 43,690 | 120 | 19,305 | 4,892 | 3,039 | 27,356 |
| 43,691 | 121 | 19,255 | 4,886 | 3,036 | 27,298 |
| 43,692 | 120 | 19,040 | 4,854 | 3,006 | 27,020 |
| 43,693 | 116 | 19,166 | 4,898 | 3,035 | 27,215 |
| 43,694 | 122 | 19,228 | 4,938 | 3,071 | 27,359 |
| 43,695 | 121 | 18,713 | 4,890 | 3,007 | 26,731 |
| 43,696 | 120 | 18,717 | 4,916 | 3,022 | 26,775 |
| 43,697 | 121 | 18,780 | 4,955 | 3,043 | 26,899 |
| 43,698 | 121 | 18,697 | 4,938 | 3,036 | 26,792 |
| 43,699 | 114 | 18,555 | 4,897 | 3,019 | 26,585 |
| 43,700 | 116 | 18,460 | 4,879 | 3,003 | 26,458 |
| 43,701 | 116 | 18,334 | 4,813 | 2,970 | 26,233 |
| 43,702 | 117 | 18,969 | 4,952 | 3,085 | 27,123 |
| 43,703 | 117 | 18,982 | 4,967 | 3,078 | 27,144 |

|        |     |        |       |       |        |
|--------|-----|--------|-------|-------|--------|
| 43,704 | 115 | 18,691 | 4,898 | 3,045 | 26,749 |
| 43,705 | 112 | 18,693 | 4,943 | 3,082 | 26,830 |
| 43,706 | 115 | 18,696 | 4,924 | 3,064 | 26,799 |
| 43,707 | 117 | 18,603 | 4,887 | 3,029 | 26,636 |
| 43,708 | 116 | 18,397 | 4,855 | 3,004 | 26,372 |
| 43,709 | 113 | 18,421 | 4,894 | 3,032 | 26,460 |
| 43,710 | 106 | 18,161 | 4,883 | 2,997 | 26,147 |
| 43,711 | 106 | 18,042 | 4,887 | 2,989 | 26,024 |
| 43,712 | 104 | 17,898 | 4,880 | 2,985 | 25,867 |
| 43,713 | 110 | 17,931 | 4,895 | 3,013 | 25,949 |
| 43,714 | 111 | 17,659 | 4,829 | 2,977 | 25,576 |
| 43,715 | 105 | 17,631 | 4,826 | 2,944 | 25,506 |
| 43,716 | 101 | 17,566 | 4,816 | 2,936 | 25,419 |
| 43,717 | 106 | 17,786 | 4,867 | 2,975 | 25,734 |
| 43,718 | 107 | 17,800 | 4,837 | 2,970 | 25,714 |
| 43,719 | 105 | 17,575 | 4,724 | 2,918 | 25,322 |
| 43,720 | 108 | 18,033 | 4,760 | 2,956 | 25,857 |
| 43,721 | 109 | 18,258 | 4,741 | 2,951 | 26,059 |
| 43,722 | 110 | 18,536 | 4,758 | 2,967 | 26,371 |
| 43,723 | 112 | 18,814 | 4,806 | 2,967 | 26,699 |
| 43,724 | 116 | 19,035 | 4,863 | 2,991 | 27,005 |
| 43,725 | 119 | 19,330 | 4,930 | 3,027 | 27,406 |
| 43,726 | 124 | 19,437 | 4,957 | 3,056 | 27,574 |
| 43,727 | 123 | 19,588 | 5,017 | 3,074 | 27,802 |
| 43,728 | 126 | 19,700 | 5,067 | 3,089 | 27,982 |
| 43,729 | 126 | 19,955 | 5,177 | 3,150 | 28,408 |
| 43,730 | 130 | 19,918 | 5,181 | 3,164 | 28,393 |
| 43,731 | 126 | 19,802 | 5,151 | 3,174 | 28,253 |
| 43,732 | 130 | 20,154 | 5,240 | 3,230 | 28,754 |
| 43,733 | 130 | 20,353 | 5,269 | 3,259 | 29,011 |
| 43,734 | 129 | 20,318 | 5,249 | 3,268 | 28,964 |
| 43,735 | 131 | 20,466 | 5,287 | 3,280 | 29,164 |

|        |     |        |       |       |        |
|--------|-----|--------|-------|-------|--------|
| 43,736 | 132 | 20,661 | 5,312 | 3,315 | 29,420 |
| 43,737 | 132 | 20,717 | 5,345 | 3,325 | 29,519 |
| 43,738 | 134 | 20,767 | 5,349 | 3,329 | 29,579 |
| 43,739 | 134 | 21,114 | 5,429 | 3,388 | 30,065 |
| 43,740 | 135 | 21,464 | 5,526 | 3,454 | 30,579 |
| 43,741 | 132 | 21,565 | 5,549 | 3,456 | 30,702 |
| 43,742 | 133 | 21,765 | 5,622 | 3,497 | 31,017 |
| 43,743 | 134 | 21,522 | 5,524 | 3,452 | 30,632 |
| 43,744 | 133 | 21,752 | 5,549 | 3,469 | 30,903 |
| 43,745 | 127 | 21,959 | 5,608 | 3,506 | 31,200 |
| 43,746 | 127 | 22,136 | 5,670 | 3,558 | 31,491 |
| 43,747 | 123 | 22,147 | 5,663 | 3,556 | 31,489 |
| 43,748 | 127 | 22,332 | 5,720 | 3,583 | 31,762 |
| 43,749 | 135 | 22,427 | 5,788 | 3,614 | 31,964 |
| 43,750 | 139 | 22,698 | 5,828 | 3,677 | 32,342 |
| 43,751 | 137 | 22,828 | 5,865 | 3,715 | 32,545 |
| 43,752 | 139 | 22,848 | 5,898 | 3,735 | 32,620 |
| 43,753 | 141 | 22,851 | 5,907 | 3,731 | 32,630 |
| 43,754 | 142 | 22,789 | 5,891 | 3,723 | 32,545 |
| 43,755 | 149 | 23,174 | 5,941 | 3,762 | 33,026 |
| 43,756 | 149 | 23,211 | 5,934 | 3,750 | 33,044 |
| 43,757 | 146 | 23,215 | 5,949 | 3,760 | 33,070 |
| 43,758 | 144 | 23,161 | 5,966 | 3,769 | 33,040 |
| 43,759 | 143 | 23,125 | 5,985 | 3,810 | 33,063 |
| 43,760 | 145 | 23,445 | 6,033 | 3,833 | 33,456 |
| 43,761 | 149 | 23,435 | 6,024 | 3,815 | 33,423 |
| 43,762 | 152 | 23,543 | 6,032 | 3,808 | 33,535 |
| 43,763 | 153 | 23,561 | 6,040 | 3,810 | 33,564 |
| 43,764 | 146 | 23,334 | 5,990 | 3,794 | 33,264 |
| 43,765 | 149 | 23,231 | 6,008 | 3,794 | 33,182 |
| 43,766 | 147 | 23,138 | 5,950 | 3,796 | 33,031 |
| 43,767 | 149 | 23,056 | 5,927 | 3,766 | 32,898 |



|        |     |        |       |       |        |
|--------|-----|--------|-------|-------|--------|
| 43,768 | 152 | 22,882 | 5,868 | 3,713 | 32,615 |
| 43,769 | 157 | 22,896 | 5,874 | 3,720 | 32,647 |
| 43,770 | 153 | 23,167 | 5,943 | 3,754 | 33,017 |
| 43,771 | 148 | 22,931 | 5,923 | 3,713 | 32,715 |
| 43,772 | 151 | 22,754 | 5,872 | 3,699 | 32,476 |
| 43,773 | 149 | 22,410 | 5,809 | 3,649 | 32,017 |
| 43,774 | 152 | 22,686 | 5,859 | 3,697 | 32,394 |
| 43,775 | 147 | 22,973 | 5,970 | 3,738 | 32,828 |
| 43,776 | 150 | 22,977 | 5,954 | 3,719 | 32,800 |
| 43,777 | 145 | 22,749 | 5,915 | 3,678 | 32,487 |
| 43,778 | 153 | 23,121 | 5,983 | 3,737 | 32,994 |
| 43,779 | 151 | 22,949 | 5,956 | 3,740 | 32,796 |
| 43,780 | 152 | 23,040 | 5,981 | 3,756 | 32,929 |
| 43,781 | 143 | 22,753 | 5,913 | 3,697 | 32,506 |
| 43,782 | 141 | 22,539 | 5,822 | 3,648 | 32,150 |
| 43,783 | 140 | 22,534 | 5,835 | 3,654 | 32,163 |
| 43,784 | 141 | 22,280 | 5,782 | 3,625 | 31,828 |
| 43,785 | 138 | 21,987 | 5,726 | 3,590 | 31,441 |
| 43,786 | 147 | 22,284 | 5,883 | 3,689 | 32,003 |
| 43,787 | 147 | 22,201 | 5,883 | 3,668 | 31,899 |
| 43,788 | 146 | 21,875 | 5,829 | 3,645 | 31,495 |
| 43,789 | 142 | 22,045 | 5,906 | 3,691 | 31,784 |
| 43,790 | 144 | 21,914 | 5,914 | 3,688 | 31,660 |
| 43,791 | 141 | 21,508 | 5,880 | 3,658 | 31,187 |
| 43,792 | 141 | 21,373 | 5,845 | 3,648 | 31,007 |
| 43,793 | 144 | 21,381 | 5,852 | 3,629 | 31,006 |
| 43,794 | 144 | 21,424 | 5,877 | 3,635 | 31,080 |
| 43,795 | 146 | 21,397 | 5,916 | 3,630 | 31,089 |
| 43,796 | 150 | 21,250 | 5,851 | 3,586 | 30,837 |
| 43,797 | 153 | 21,295 | 5,878 | 3,587 | 30,913 |
| 43,798 | 153 | 21,229 | 5,862 | 3,589 | 30,833 |
| 43,799 | 151 | 21,081 | 5,829 | 3,588 | 30,649 |

|        |     |        |       |       |        |
|--------|-----|--------|-------|-------|--------|
| 43,800 | 150 | 21,204 | 5,805 | 3,598 | 30,757 |
| 43,801 | 147 | 21,024 | 5,783 | 3,544 | 30,498 |
| 43,802 | 150 | 21,121 | 5,787 | 3,554 | 30,612 |
| 43,803 | 153 | 21,535 | 5,852 | 3,586 | 31,126 |
| 43,804 | 157 | 21,269 | 5,749 | 3,535 | 30,710 |
| 43,805 | 157 | 21,308 | 5,765 | 3,537 | 30,767 |
| 43,806 | 150 | 21,341 | 5,802 | 3,552 | 30,845 |
| 43,807 | 151 | 21,742 | 5,886 | 3,592 | 31,371 |
| 43,808 | 152 | 21,869 | 5,886 | 3,613 | 31,520 |
| 43,809 | 153 | 22,032 | 5,861 | 3,566 | 31,612 |
| 43,810 | 159 | 22,076 | 5,906 | 3,603 | 31,744 |
| 43,811 | 158 | 22,073 | 5,940 | 3,614 | 31,785 |
| 43,812 | 152 | 22,130 | 5,914 | 3,602 | 31,798 |
| 43,813 | 146 | 22,163 | 5,866 | 3,580 | 31,755 |
| 43,814 | 148 | 22,278 | 5,888 | 3,584 | 31,898 |
| 43,815 | 148 | 22,337 | 5,875 | 3,566 | 31,926 |
| 43,816 | 151 | 22,208 | 5,869 | 3,555 | 31,783 |
| 43,817 | 150 | 22,155 | 5,869 | 3,559 | 31,733 |
| 43,818 | 150 | 21,963 | 5,822 | 3,559 | 31,494 |
| 43,819 | 147 | 21,905 | 5,832 | 3,561 | 31,445 |
| 43,820 | 142 | 21,622 | 5,778 | 3,545 | 31,087 |
| 43,821 | 144 | 21,621 | 5,798 | 3,530 | 31,093 |
| 43,822 | 141 | 21,384 | 5,739 | 3,488 | 30,752 |
| 43,823 | 140 | 21,242 | 5,760 | 3,491 | 30,633 |
| 43,824 | 138 | 20,958 | 5,709 | 3,452 | 30,257 |
| 43,825 | 140 | 21,224 | 5,789 | 3,522 | 30,675 |
| 43,826 | 147 | 21,582 | 5,853 | 3,577 | 31,159 |
| 43,827 | 153 | 21,613 | 5,889 | 3,608 | 31,263 |
| 43,828 | 158 | 21,753 | 5,938 | 3,649 | 31,498 |
| 43,829 | 154 | 21,719 | 5,938 | 3,632 | 31,443 |
| 43,830 | 152 | 21,538 | 5,873 | 3,601 | 31,164 |
| 43,831 | 153 | 21,647 | 5,901 | 3,603 | 31,304 |

|        |     |        |       |       |        |
|--------|-----|--------|-------|-------|--------|
| 43,832 | 150 | 21,553 | 5,872 | 3,568 | 31,143 |
| 43,833 | 152 | 21,772 | 5,929 | 3,594 | 31,447 |
| 43,834 | 151 | 21,925 | 5,944 | 3,640 | 31,660 |
| 43,835 | 149 | 21,735 | 5,898 | 3,612 | 31,394 |
| 43,836 | 145 | 21,537 | 5,861 | 3,573 | 31,116 |
| 43,837 | 146 | 21,595 | 5,913 | 3,597 | 31,251 |
| 43,838 | 152 | 21,846 | 6,027 | 3,665 | 31,690 |
| 43,839 | 151 | 21,784 | 5,992 | 3,637 | 31,564 |
| 43,840 | 148 | 21,827 | 5,959 | 3,632 | 31,566 |
| 43,841 | 147 | 21,977 | 5,940 | 3,612 | 31,676 |
| 43,842 | 148 | 22,030 | 5,943 | 3,611 | 31,732 |
| 43,843 | 143 | 21,944 | 5,905 | 3,604 | 31,596 |
| 43,844 | 150 | 22,181 | 5,969 | 3,640 | 31,940 |
| 43,845 | 154 | 22,105 | 5,963 | 3,620 | 31,842 |
| 43,846 | 152 | 21,840 | 5,891 | 3,601 | 31,484 |
| 43,847 | 148 | 21,771 | 5,915 | 3,606 | 31,440 |
| 43,848 | 150 | 21,884 | 5,954 | 3,604 | 31,592 |
| 43,849 | 147 | 21,807 | 5,907 | 3,563 | 31,424 |
| 43,850 | 150 | 21,661 | 5,884 | 3,534 | 31,229 |
| 43,851 | 143 | 21,410 | 5,832 | 3,503 | 30,888 |
| 43,852 | 142 | 21,361 | 5,891 | 3,534 | 30,928 |
| 43,853 | 146 | 21,238 | 5,883 | 3,508 | 30,775 |
| 43,854 | 143 | 20,835 | 5,806 | 3,438 | 30,222 |
| 43,855 | 140 | 20,705 | 5,828 | 3,443 | 30,116 |
| 43,856 | 149 | 20,658 | 5,826 | 3,445 | 30,078 |
| 43,857 | 155 | 20,314 | 5,761 | 3,423 | 29,653 |
| 43,858 | 155 | 20,069 | 5,713 | 3,402 | 29,339 |
| 43,859 | 156 | 19,921 | 5,771 | 3,393 | 29,241 |
| 43,860 | 158 | 19,793 | 5,802 | 3,397 | 29,150 |
| 43,861 | 158 | 19,678 | 5,765 | 3,359 | 28,960 |
| 43,862 | 160 | 19,542 | 5,725 | 3,350 | 28,777 |
| 43,863 | 165 | 19,471 | 5,727 | 3,353 | 28,716 |

|        |     |        |       |       |        |
|--------|-----|--------|-------|-------|--------|
| 43,864 | 166 | 19,097 | 5,688 | 3,294 | 28,245 |
| 43,865 | 162 | 19,415 | 5,792 | 3,348 | 28,717 |
| 43,866 | 162 | 19,242 | 5,767 | 3,318 | 28,489 |
| 43,867 | 161 | 19,306 | 5,773 | 3,318 | 28,558 |
| 43,868 | 157 | 19,329 | 5,799 | 3,310 | 28,595 |
| 43,869 | 156 | 19,344 | 5,815 | 3,326 | 28,641 |
| 43,870 | 154 | 19,408 | 5,822 | 3,319 | 28,703 |
| 43,871 | 155 | 19,524 | 5,884 | 3,347 | 28,910 |
| 43,872 | 152 | 19,013 | 5,766 | 3,300 | 28,231 |
| 43,873 | 152 | 19,091 | 5,795 | 3,322 | 28,360 |
| 43,874 | 148 | 18,755 | 5,686 | 3,252 | 27,841 |
| 43,875 | 145 | 18,543 | 5,650 | 3,239 | 27,577 |
| 43,876 | 146 | 18,671 | 5,691 | 3,257 | 27,765 |
| 43,877 | 139 | 18,613 | 5,700 | 3,258 | 27,710 |
| 43,878 | 132 | 18,442 | 5,669 | 3,251 | 27,494 |
| 43,879 | 126 | 18,009 | 5,590 | 3,212 | 26,937 |
| 43,880 | 125 | 17,922 | 5,568 | 3,191 | 26,806 |
| 43,881 | 135 | 17,896 | 5,593 | 3,199 | 26,823 |
| 43,882 | 135 | 17,973 | 5,622 | 3,219 | 26,949 |
| 43,883 | 145 | 18,008 | 5,646 | 3,226 | 27,025 |
| 43,884 | 143 | 18,082 | 5,643 | 3,223 | 27,091 |
| 43,885 | 147 | 18,026 | 5,653 | 3,214 | 27,040 |
| 43,886 | 144 | 18,083 | 5,618 | 3,203 | 27,048 |
| 43,887 | 140 | 18,039 | 5,595 | 3,175 | 26,949 |
| 43,888 | 135 | 18,177 | 5,602 | 3,186 | 27,100 |
| 43,889 | 136 | 18,115 | 5,551 | 3,175 | 26,977 |
| 43,890 | 136 | 18,033 | 5,528 | 3,168 | 26,865 |
| 43,891 | 138 | 18,130 | 5,577 | 3,198 | 27,043 |
| 43,892 | 137 | 18,244 | 5,580 | 3,217 | 27,178 |
| 43,893 | 136 | 18,197 | 5,533 | 3,192 | 27,058 |
| 43,894 | 135 | 18,355 | 5,584 | 3,229 | 27,303 |
| 43,895 | 130 | 18,390 | 5,587 | 3,259 | 27,366 |

|        |     |        |       |       |        |
|--------|-----|--------|-------|-------|--------|
| 43,896 | 130 | 18,317 | 5,554 | 3,225 | 27,226 |
| 43,897 | 130 | 18,193 | 5,546 | 3,245 | 27,114 |
| 43,898 | 131 | 18,565 | 5,641 | 3,314 | 27,651 |
| 43,899 | 128 | 18,506 | 5,637 | 3,330 | 27,601 |
| 43,900 | 124 | 18,624 | 5,656 | 3,349 | 27,753 |
| 43,901 | 130 | 19,082 | 5,720 | 3,393 | 28,325 |
| 43,902 | 130 | 19,149 | 5,709 | 3,396 | 28,384 |
| 43,903 | 125 | 19,288 | 5,750 | 3,439 | 28,602 |
| 43,904 | 122 | 19,264 | 5,750 | 3,442 | 28,578 |
| 43,905 | 121 | 19,127 | 5,747 | 3,453 | 28,448 |
| 43,906 | 120 | 19,456 | 5,796 | 3,495 | 28,867 |
| 43,907 | 116 | 19,610 | 5,794 | 3,503 | 29,023 |
| 43,908 | 109 | 19,431 | 5,721 | 3,465 | 28,726 |
| 43,909 | 103 | 18,895 | 5,435 | 3,324 | 27,757 |
| 43,910 | 106 | 19,146 | 5,490 | 3,343 | 28,085 |
| 43,911 | 106 | 19,345 | 5,550 | 3,383 | 28,384 |
| 43,912 | 106 | 19,349 | 5,539 | 3,374 | 28,368 |
| 43,913 | 107 | 19,841 | 5,683 | 3,442 | 29,073 |
| 43,914 | 113 | 20,055 | 5,771 | 3,512 | 29,451 |
| 43,915 | 113 | 20,139 | 5,772 | 3,547 | 29,571 |
| 43,916 | 119 | 20,253 | 5,795 | 3,548 | 29,715 |
| 43,917 | 122 | 20,124 | 5,752 | 3,537 | 29,535 |
| 43,918 | 122 | 20,062 | 5,756 | 3,523 | 29,463 |
| 43,919 | 132 | 20,151 | 5,803 | 3,536 | 29,622 |
| 43,920 | 133 | 20,230 | 5,807 | 3,532 | 29,702 |
| 43,921 | 137 | 20,341 | 5,851 | 3,564 | 29,893 |
| 43,922 | 141 | 20,388 | 5,819 | 3,552 | 29,900 |
| 43,923 | 146 | 20,596 | 5,828 | 3,533 | 30,103 |
| 43,924 | 157 | 21,046 | 5,901 | 3,570 | 30,674 |
| 43,925 | 158 | 20,924 | 5,868 | 3,538 | 30,488 |
| 43,926 | 159 | 20,879 | 5,868 | 3,535 | 30,441 |
| 43,927 | 160 | 21,097 | 5,886 | 3,539 | 30,682 |

|        |     |        |       |       |        |
|--------|-----|--------|-------|-------|--------|
| 43,928 | 161 | 21,243 | 5,917 | 3,544 | 30,865 |
| 43,929 | 156 | 21,081 | 5,848 | 3,492 | 30,577 |
| 43,930 | 155 | 20,592 | 5,699 | 3,403 | 29,849 |
| 43,931 | 153 | 20,868 | 5,774 | 3,446 | 30,241 |
| 43,932 | 142 | 21,009 | 5,786 | 3,461 | 30,398 |
| 43,933 | 141 | 21,170 | 5,832 | 3,481 | 30,624 |
| 43,934 | 131 | 21,257 | 5,866 | 3,519 | 30,773 |
| 43,935 | 131 | 21,460 | 5,911 | 3,566 | 31,068 |
| 43,936 | 133 | 21,388 | 5,876 | 3,538 | 30,935 |
| 43,937 | 131 | 21,220 | 5,857 | 3,535 | 30,743 |
| 43,938 | 131 | 21,455 | 5,903 | 3,572 | 31,061 |
| 43,939 | 131 | 21,752 | 5,987 | 3,592 | 31,462 |
| 43,940 | 128 | 21,733 | 5,975 | 3,568 | 31,404 |
| 43,941 | 127 | 21,581 | 5,885 | 3,525 | 31,118 |
| 43,942 | 128 | 21,385 | 5,874 | 3,513 | 30,900 |
| 43,943 | 131 | 21,462 | 5,924 | 3,540 | 31,057 |
| 43,944 | 131 | 21,430 | 5,931 | 3,536 | 31,028 |
| 43,945 | 129 | 21,161 | 5,884 | 3,495 | 30,669 |
| 43,946 | 131 | 21,276 | 5,908 | 3,518 | 30,833 |
| 43,947 | 128 | 21,203 | 5,888 | 3,518 | 30,737 |
| 43,948 | 130 | 21,126 | 5,832 | 3,455 | 30,543 |
| 43,949 | 130 | 21,214 | 5,792 | 3,454 | 30,590 |
| 43,950 | 131 | 21,431 | 5,865 | 3,473 | 30,900 |
| 43,951 | 132 | 21,437 | 5,889 | 3,472 | 30,930 |
| 43,952 | 129 | 21,305 | 5,899 | 3,460 | 30,793 |
| 43,953 | 133 | 21,181 | 5,874 | 3,440 | 30,628 |
| 43,954 | 135 | 21,393 | 5,893 | 3,429 | 30,850 |
| 43,955 | 135 | 21,548 | 5,908 | 3,430 | 31,021 |
| 43,956 | 131 | 21,457 | 5,859 | 3,422 | 30,869 |
| 43,957 | 134 | 21,723 | 5,946 | 3,455 | 31,258 |
| 43,958 | 135 | 21,585 | 5,930 | 3,451 | 31,101 |
| 43,959 | 134 | 21,463 | 5,895 | 3,405 | 30,897 |

|        |     |        |       |       |        |
|--------|-----|--------|-------|-------|--------|
| 43,960 | 134 | 21,477 | 5,939 | 3,420 | 30,970 |
| 43,961 | 137 | 21,695 | 5,954 | 3,471 | 31,257 |
| 43,962 | 129 | 21,693 | 5,936 | 3,459 | 31,217 |
| 43,963 | 127 | 21,887 | 5,984 | 3,507 | 31,505 |
| 43,964 | 125 | 22,011 | 6,007 | 3,512 | 31,655 |
| 43,965 | 123 | 22,030 | 5,996 | 3,500 | 31,649 |
| 43,966 | 112 | 21,543 | 5,809 | 3,416 | 30,880 |
| 43,967 | 115 | 21,719 | 5,847 | 3,451 | 31,132 |
| 43,968 | 114 | 21,812 | 5,914 | 3,468 | 31,308 |
| 43,969 | 115 | 21,924 | 5,936 | 3,484 | 31,459 |
| 43,970 | 111 | 22,198 | 5,991 | 3,534 | 31,834 |
| 43,971 | 111 | 21,970 | 5,907 | 3,473 | 31,461 |
| 43,972 | 108 | 21,781 | 5,908 | 3,455 | 31,252 |
| 43,973 | 109 | 21,518 | 5,896 | 3,424 | 30,947 |
| 43,974 | 105 | 21,234 | 5,897 | 3,409 | 30,645 |
| 43,975 | 100 | 21,937 | 6,100 | 3,523 | 31,660 |
| 43,976 | 101 | 21,782 | 6,111 | 3,536 | 31,530 |
| 43,977 | 100 | 21,877 | 6,147 | 3,548 | 31,672 |
| 43,978 | 103 | 21,748 | 6,130 | 3,557 | 31,538 |
| 43,979 | 108 | 21,706 | 6,120 | 3,543 | 31,477 |
| 43,980 | 109 | 21,782 | 6,119 | 3,540 | 31,550 |
| 43,981 | 111 | 22,087 | 6,186 | 3,573 | 31,957 |
| 43,982 | 118 | 22,077 | 6,200 | 3,602 | 31,997 |
| 43,983 | 121 | 22,014 | 6,186 | 3,585 | 31,906 |
| 43,984 | 129 | 21,852 | 6,133 | 3,562 | 31,676 |
| 43,985 | 129 | 21,765 | 6,072 | 3,540 | 31,506 |
| 43,986 | 137 | 21,976 | 6,137 | 3,568 | 31,818 |
| 43,987 | 132 | 21,814 | 6,127 | 3,541 | 31,614 |
| 43,988 | 131 | 21,560 | 6,079 | 3,489 | 31,259 |
| 43,989 | 130 | 21,747 | 6,145 | 3,517 | 31,539 |
| 43,990 | 132 | 21,668 | 6,119 | 3,539 | 31,458 |
| 43,991 | 134 | 21,722 | 6,149 | 3,549 | 31,554 |

|        |     |        |       |       |        |
|--------|-----|--------|-------|-------|--------|
| 43,992 | 132 | 21,547 | 6,079 | 3,501 | 31,259 |
| 43,993 | 132 | 21,538 | 6,084 | 3,511 | 31,265 |
| 43,994 | 130 | 21,698 | 6,143 | 3,551 | 31,522 |
| 43,995 | 130 | 21,453 | 6,099 | 3,519 | 31,201 |
| 43,996 | 133 | 21,438 | 6,097 | 3,519 | 31,187 |
| 43,997 | 131 | 21,250 | 6,060 | 3,488 | 30,929 |
| 43,998 | 133 | 21,564 | 6,145 | 3,563 | 31,405 |
| 43,999 | 132 | 21,565 | 6,126 | 3,553 | 31,376 |
| 44,000 | 132 | 21,405 | 6,133 | 3,539 | 31,209 |
| 44,001 | 131 | 21,317 | 6,051 | 3,511 | 31,010 |
| 44,002 | 130 | 21,313 | 6,011 | 3,504 | 30,958 |
| 44,003 | 132 | 21,634 | 6,078 | 3,536 | 31,380 |
| 44,004 | 129 | 21,229 | 5,997 | 3,473 | 30,828 |
| 44,005 | 129 | 21,244 | 5,992 | 3,484 | 30,849 |
| 44,006 | 133 | 21,252 | 6,006 | 3,502 | 30,893 |
| 44,007 | 135 | 21,319 | 6,093 | 3,552 | 31,099 |
| 44,008 | 132 | 21,248 | 6,061 | 3,562 | 31,003 |
| 44,009 | 127 | 20,928 | 5,987 | 3,501 | 30,543 |
| 44,010 | 133 | 20,777 | 5,967 | 3,502 | 30,379 |
| 44,011 | 137 | 20,451 | 5,898 | 3,450 | 29,936 |
| 44,012 | 131 | 20,136 | 5,849 | 3,393 | 29,509 |
| 44,013 | 135 | 20,612 | 5,930 | 3,437 | 30,114 |
| 44,014 | 137 | 20,527 | 5,945 | 3,430 | 30,039 |
| 44,015 | 135 | 20,481 | 5,940 | 3,443 | 29,999 |
| 44,016 | 137 | 20,279 | 5,886 | 3,412 | 29,714 |
| 44,017 | 141 | 20,481 | 5,968 | 3,441 | 30,031 |
| 44,018 | 135 | 20,323 | 5,927 | 3,443 | 29,828 |
| 44,019 | 137 | 20,672 | 5,983 | 3,477 | 30,269 |
| 44,020 | 137 | 20,387 | 5,893 | 3,428 | 29,845 |
| 44,021 | 137 | 20,417 | 5,897 | 3,420 | 29,871 |
| 44,022 | 135 | 20,411 | 5,819 | 3,418 | 29,783 |
| 44,023 | 135 | 20,350 | 5,808 | 3,408 | 29,701 |



|        |     |        |       |       |        |
|--------|-----|--------|-------|-------|--------|
| 44,024 | 130 | 20,285 | 5,765 | 3,405 | 29,585 |
| 44,025 | 129 | 20,315 | 5,724 | 3,408 | 29,576 |
| 44,026 | 124 | 19,682 | 5,527 | 3,314 | 28,647 |
| 44,027 | 125 | 19,774 | 5,535 | 3,311 | 28,745 |
| 44,028 | 126 | 19,412 | 5,454 | 3,258 | 28,250 |
| 44,029 | 121 | 19,243 | 5,353 | 3,228 | 27,945 |
| 44,030 | 128 | 20,047 | 5,540 | 3,396 | 29,111 |
| 44,031 | 123 | 19,765 | 5,454 | 3,332 | 28,674 |
| 44,032 | 123 | 19,995 | 5,504 | 3,355 | 28,977 |
| 44,033 | 120 | 20,239 | 5,535 | 3,391 | 29,285 |
| 44,034 | 118 | 20,003 | 5,493 | 3,368 | 28,982 |
| 44,035 | 107 | 19,968 | 5,466 | 3,365 | 28,906 |
| 44,036 | 106 | 20,113 | 5,511 | 3,395 | 29,125 |
| 44,037 | 106 | 20,145 | 5,519 | 3,377 | 29,147 |
| 44,038 | 107 | 20,105 | 5,473 | 3,380 | 29,065 |
| 44,039 | 108 | 20,178 | 5,459 | 3,384 | 29,129 |
| 44,040 | 115 | 20,130 | 5,465 | 3,375 | 29,085 |
| 44,041 | 118 | 20,262 | 5,528 | 3,390 | 29,298 |
| 44,042 | 117 | 20,141 | 5,487 | 3,371 | 29,116 |
| 44,043 | 115 | 20,007 | 5,466 | 3,330 | 28,918 |
| 44,044 | 115 | 19,812 | 5,397 | 3,307 | 28,631 |
| 44,045 | 115 | 20,070 | 5,424 | 3,317 | 28,926 |
| 44,046 | 116 | 20,266 | 5,468 | 3,344 | 29,194 |
| 44,047 | 114 | 20,293 | 5,450 | 3,333 | 29,190 |
| 44,048 | 115 | 20,166 | 5,423 | 3,311 | 29,015 |
| 44,049 | 116 | 20,391 | 5,486 | 3,333 | 29,326 |
| 44,050 | 118 | 20,038 | 5,402 | 3,290 | 28,848 |
| 44,051 | 119 | 20,149 | 5,432 | 3,308 | 29,008 |
| 44,052 | 117 | 19,865 | 5,389 | 3,302 | 28,673 |
| 44,053 | 120 | 19,690 | 5,372 | 3,299 | 28,481 |
| 44,054 | 122 | 19,655 | 5,360 | 3,297 | 28,434 |
| 44,055 | 121 | 19,505 | 5,340 | 3,295 | 28,261 |

|        |     |        |       |       |        |
|--------|-----|--------|-------|-------|--------|
| 44,056 | 122 | 19,675 | 5,340 | 3,322 | 28,459 |
| 44,057 | 118 | 19,679 | 5,314 | 3,281 | 28,392 |
| 44,058 | 117 | 19,536 | 5,229 | 3,230 | 28,112 |
| 44,059 | 118 | 19,741 | 5,282 | 3,255 | 28,396 |
| 44,060 | 113 | 19,775 | 5,305 | 3,250 | 28,443 |
| 44,061 | 114 | 20,131 | 5,356 | 3,311 | 28,912 |
| 44,062 | 113 | 20,156 | 5,351 | 3,322 | 28,942 |
| 44,063 | 109 | 20,290 | 5,417 | 3,377 | 29,193 |
| 44,064 | 107 | 20,628 | 5,510 | 3,450 | 29,695 |
| 44,065 | 104 | 20,298 | 5,482 | 3,420 | 29,304 |
| 44,066 | 104 | 20,778 | 5,588 | 3,486 | 29,956 |
| 44,067 | 106 | 21,303 | 5,736 | 3,574 | 30,719 |
| 44,068 | 108 | 21,340 | 5,840 | 3,650 | 30,938 |
| 44,069 | 114 | 21,557 | 5,901 | 3,663 | 31,235 |
| 44,070 | 112 | 21,584 | 5,900 | 3,657 | 31,253 |
| 44,071 | 112 | 21,587 | 5,924 | 3,659 | 31,282 |
| 44,072 | 112 | 21,768 | 5,983 | 3,695 | 31,558 |
| 44,073 | 112 | 21,969 | 6,062 | 3,746 | 31,889 |
| 44,074 | 115 | 22,193 | 6,095 | 3,790 | 32,193 |
| 44,075 | 115 | 22,063 | 6,074 | 3,784 | 32,036 |
| 44,076 | 115 | 22,360 | 6,202 | 3,879 | 32,556 |
| 44,077 | 116 | 22,436 | 6,258 | 3,899 | 32,709 |
| 44,078 | 111 | 22,237 | 6,209 | 3,858 | 32,415 |
| 44,079 | 112 | 22,646 | 6,286 | 3,943 | 32,987 |
| 44,080 | 118 | 22,577 | 6,312 | 3,941 | 32,948 |
| 44,081 | 117 | 22,536 | 6,318 | 3,897 | 32,868 |
| 44,082 | 125 | 22,313 | 6,266 | 3,860 | 32,564 |
| 44,083 | 125 | 22,330 | 6,288 | 3,870 | 32,613 |
| 44,084 | 130 | 22,347 | 6,297 | 3,852 | 32,626 |
| 44,085 | 130 | 22,322 | 6,312 | 3,854 | 32,618 |
| 44,086 | 135 | 22,190 | 6,302 | 3,830 | 32,457 |
| 44,087 | 141 | 22,381 | 6,349 | 3,866 | 32,737 |

|        |     |        |       |       |        |
|--------|-----|--------|-------|-------|--------|
| 44,088 | 138 | 22,679 | 6,437 | 3,928 | 33,182 |
| 44,089 | 138 | 22,385 | 6,341 | 3,869 | 32,733 |
| 44,090 | 142 | 22,667 | 6,395 | 3,911 | 33,115 |
| 44,091 | 136 | 22,965 | 6,485 | 3,974 | 33,560 |
| 44,092 | 136 | 22,714 | 6,375 | 3,938 | 33,163 |
| 44,093 | 137 | 22,925 | 6,465 | 3,976 | 33,503 |
| 44,094 | 137 | 22,887 | 6,469 | 3,978 | 33,471 |
| 44,095 | 139 | 22,884 | 6,526 | 3,957 | 33,506 |
| 44,096 | 140 | 22,915 | 6,571 | 3,983 | 33,609 |
| 44,097 | 138 | 23,165 | 6,620 | 3,999 | 33,922 |
| 44,098 | 139 | 23,143 | 6,623 | 3,997 | 33,902 |
| 44,099 | 138 | 22,782 | 6,489 | 3,917 | 33,326 |
| 44,100 | 137 | 23,011 | 6,541 | 3,964 | 33,653 |
| 44,101 | 133 | 22,978 | 6,554 | 3,966 | 33,631 |
| 44,102 | 140 | 23,270 | 6,675 | 4,033 | 34,118 |
| 44,103 | 137 | 23,046 | 6,621 | 3,976 | 33,780 |
| 44,104 | 137 | 23,077 | 6,613 | 3,962 | 33,789 |
| 44,105 | 145 | 23,069 | 6,660 | 3,969 | 33,843 |
| 44,106 | 147 | 23,087 | 6,649 | 3,959 | 33,842 |
| 44,107 | 145 | 22,739 | 6,600 | 3,890 | 33,374 |
| 44,108 | 147 | 22,845 | 6,666 | 3,917 | 33,575 |
| 44,109 | 149 | 22,876 | 6,717 | 3,928 | 33,670 |
| 44,110 | 148 | 22,883 | 6,731 | 3,929 | 33,691 |
| 44,111 | 151 | 22,800 | 6,709 | 3,926 | 33,586 |
| 44,112 | 150 | 22,477 | 6,651 | 3,865 | 33,143 |
| 44,113 | 153 | 22,166 | 6,585 | 3,811 | 32,715 |
| 44,114 | 153 | 22,376 | 6,659 | 3,829 | 33,017 |
| 44,115 | 156 | 22,044 | 6,546 | 3,767 | 32,513 |
| 44,116 | 170 | 22,248 | 6,630 | 3,782 | 32,830 |
| 44,117 | 175 | 22,173 | 6,638 | 3,793 | 32,779 |
| 44,118 | 172 | 21,924 | 6,567 | 3,755 | 32,418 |
| 44,119 | 190 | 22,217 | 6,610 | 3,768 | 32,785 |

|        |     |        |       |       |        |
|--------|-----|--------|-------|-------|--------|
| 44,120 | 190 | 22,069 | 6,566 | 3,742 | 32,567 |
| 44,121 | 192 | 22,322 | 6,689 | 3,821 | 33,024 |
| 44,122 | 208 | 22,338 | 6,716 | 3,815 | 33,077 |
| 44,123 | 207 | 22,295 | 6,714 | 3,807 | 33,023 |
| 44,124 | 204 | 22,366 | 6,745 | 3,817 | 33,132 |
| 44,125 | 205 | 22,462 | 6,777 | 3,816 | 33,260 |
| 44,126 | 213 | 22,475 | 6,745 | 3,783 | 33,216 |
| 44,127 | 213 | 22,371 | 6,743 | 3,777 | 33,104 |
| 44,128 | 214 | 22,569 | 6,804 | 3,802 | 33,389 |
| 44,129 | 219 | 22,481 | 6,827 | 3,806 | 33,333 |
| 44,130 | 232 | 22,478 | 6,863 | 3,815 | 33,388 |
| 44,131 | 226 | 22,292 | 6,809 | 3,782 | 33,109 |
| 44,132 | 227 | 22,327 | 6,843 | 3,813 | 33,210 |
| 44,133 | 220 | 22,349 | 6,872 | 3,827 | 33,268 |
| 44,134 | 218 | 22,376 | 6,857 | 3,833 | 33,284 |
| 44,135 | 218 | 22,301 | 6,874 | 3,838 | 33,231 |
| 44,136 | 215 | 22,350 | 6,908 | 3,852 | 33,325 |
| 44,137 | 216 | 22,389 | 6,912 | 3,888 | 33,405 |
| 44,138 | 213 | 22,298 | 6,960 | 3,928 | 33,399 |
| 44,139 | 222 | 22,429 | 7,028 | 3,944 | 33,623 |
| 44,140 | 224 | 22,398 | 7,049 | 3,946 | 33,617 |
| 44,141 | 227 | 22,420 | 7,083 | 3,970 | 33,700 |
| 44,142 | 231 | 22,463 | 7,064 | 3,970 | 33,728 |
| 44,143 | 237 | 22,395 | 7,062 | 3,950 | 33,644 |
| 44,144 | 238 | 22,395 | 7,065 | 3,962 | 33,660 |
| 44,145 | 239 | 22,635 | 7,085 | 4,009 | 33,968 |
| 44,146 | 238 | 22,599 | 7,033 | 4,005 | 33,875 |
| 44,147 | 240 | 22,603 | 7,020 | 3,992 | 33,855 |
| 44,148 | 241 | 22,611 | 7,025 | 4,024 | 33,901 |
| 44,149 | 237 | 22,735 | 7,074 | 4,052 | 34,098 |
| 44,150 | 233 | 22,958 | 7,134 | 4,103 | 34,428 |
| 44,151 | 234 | 22,809 | 7,102 | 4,065 | 34,210 |

|        |     |        |       |       |        |
|--------|-----|--------|-------|-------|--------|
| 44,152 | 234 | 22,832 | 7,104 | 4,065 | 34,235 |
| 44,153 | 228 | 22,922 | 7,149 | 4,083 | 34,382 |
| 44,154 | 238 | 22,830 | 7,125 | 4,072 | 34,265 |
| 44,155 | 237 | 22,954 | 7,145 | 4,086 | 34,422 |
| 44,156 | 235 | 23,252 | 7,224 | 4,139 | 34,850 |
| 44,157 | 240 | 23,127 | 7,186 | 4,132 | 34,685 |
| 44,158 | 239 | 22,882 | 7,144 | 4,117 | 34,382 |
| 44,159 | 239 | 22,968 | 7,177 | 4,138 | 34,522 |
| 44,160 | 246 | 23,132 | 7,188 | 4,169 | 34,735 |
| 44,161 | 246 | 22,863 | 7,113 | 4,119 | 34,341 |
| 44,162 | 251 | 22,851 | 7,073 | 4,112 | 34,287 |
| 44,163 | 256 | 22,882 | 7,077 | 4,108 | 34,323 |
| 44,164 | 258 | 22,706 | 6,984 | 4,041 | 33,989 |
| 44,165 | 258 | 22,655 | 6,970 | 4,043 | 33,926 |
| 44,166 | 251 | 22,480 | 6,914 | 4,015 | 33,660 |
| 44,167 | 237 | 22,373 | 6,850 | 3,994 | 33,454 |
| 44,168 | 235 | 22,127 | 6,809 | 3,979 | 33,150 |
| 44,169 | 215 | 21,490 | 6,572 | 3,844 | 32,121 |
| 44,170 | 215 | 21,513 | 6,550 | 3,838 | 32,116 |
| 44,171 | 207 | 21,126 | 6,471 | 3,812 | 31,616 |
| 44,172 | 200 | 20,864 | 6,417 | 3,776 | 31,257 |
| 44,173 | 191 | 20,530 | 6,280 | 3,724 | 30,725 |
| 44,174 | 190 | 20,342 | 6,224 | 3,673 | 30,429 |
| 44,175 | 191 | 20,074 | 6,160 | 3,648 | 30,073 |
| 44,176 | 191 | 20,125 | 6,168 | 3,650 | 30,134 |
| 44,177 | 182 | 19,828 | 6,113 | 3,613 | 29,736 |
| 44,178 | 179 | 19,666 | 6,044 | 3,571 | 29,460 |
| 44,179 | 166 | 19,696 | 6,006 | 3,558 | 29,426 |
| 44,180 | 167 | 19,778 | 6,088 | 3,585 | 29,618 |
| 44,181 | 161 | 20,039 | 6,192 | 3,631 | 30,023 |
| 44,182 | 162 | 19,979 | 6,174 | 3,602 | 29,917 |
| 44,183 | 162 | 20,039 | 6,173 | 3,604 | 29,978 |

|        |     |        |       |       |        |
|--------|-----|--------|-------|-------|--------|
| 44,184 | 162 | 20,019 | 6,178 | 3,604 | 29,963 |
| 44,185 | 160 | 20,011 | 6,210 | 3,648 | 30,029 |
| 44,186 | 160 | 20,006 | 6,207 | 3,643 | 30,016 |
| 44,187 | 161 | 20,264 | 6,277 | 3,658 | 30,360 |
| 44,188 | 159 | 20,463 | 6,255 | 3,624 | 30,501 |
| 44,189 | 163 | 20,712 | 6,254 | 3,616 | 30,745 |
| 44,190 | 155 | 20,764 | 6,246 | 3,632 | 30,797 |
| 44,191 | 145 | 20,496 | 6,120 | 3,577 | 30,338 |
| 44,192 | 148 | 20,517 | 6,149 | 3,571 | 30,385 |
| 44,193 | 144 | 20,571 | 6,222 | 3,590 | 30,527 |
| 44,194 | 133 | 20,288 | 6,131 | 3,541 | 30,093 |
| 44,195 | 133 | 20,198 | 6,131 | 3,543 | 30,005 |
| 44,196 | 129 | 19,987 | 6,109 | 3,523 | 29,748 |
| 44,197 | 137 | 20,339 | 6,252 | 3,599 | 30,327 |
| 44,198 | 135 | 20,442 | 6,298 | 3,614 | 30,489 |
| 44,199 | 139 | 20,400 | 6,296 | 3,605 | 30,440 |
| 44,200 | 142 | 20,289 | 6,300 | 3,610 | 30,341 |
| 44,201 | 145 | 20,197 | 6,302 | 3,577 | 30,221 |
| 44,202 | 144 | 20,058 | 6,281 | 3,556 | 30,039 |
| 44,203 | 143 | 20,161 | 6,274 | 3,557 | 30,135 |
| 44,204 | 137 | 19,969 | 6,197 | 3,520 | 29,823 |
| 44,205 | 140 | 20,310 | 6,263 | 3,551 | 30,264 |
| 44,206 | 145 | 20,480 | 6,352 | 3,585 | 30,562 |
| 44,207 | 150 | 20,596 | 6,399 | 3,607 | 30,752 |
| 44,208 | 140 | 20,345 | 6,342 | 3,564 | 30,391 |
| 44,209 | 140 | 20,347 | 6,295 | 3,543 | 30,325 |
| 44,210 | 142 | 20,391 | 6,374 | 3,593 | 30,500 |
| 44,211 | 132 | 20,095 | 6,300 | 3,540 | 30,067 |
| 44,212 | 133 | 20,228 | 6,332 | 3,569 | 30,262 |
| 44,213 | 122 | 20,196 | 6,323 | 3,559 | 30,200 |
| 44,214 | 116 | 20,148 | 6,318 | 3,573 | 30,155 |
| 44,215 | 112 | 20,066 | 6,333 | 3,571 | 30,082 |

|        |     |        |       |       |        |
|--------|-----|--------|-------|-------|--------|
| 44,216 | 113 | 20,191 | 6,388 | 3,597 | 30,289 |
| 44,217 | 113 | 20,106 | 6,302 | 3,550 | 30,071 |
| 44,218 | 117 | 20,479 | 6,361 | 3,587 | 30,544 |
| 44,219 | 115 | 20,465 | 6,380 | 3,581 | 30,541 |
| 44,220 | 111 | 20,378 | 6,396 | 3,579 | 30,464 |
| 44,221 | 108 | 20,446 | 6,385 | 3,580 | 30,519 |
| 44,222 | 108 | 20,193 | 6,309 | 3,527 | 30,137 |
| 44,223 | 116 | 20,429 | 6,357 | 3,536 | 30,438 |
| 44,224 | 118 | 20,104 | 6,290 | 3,470 | 29,982 |
| 44,225 | 119 | 20,324 | 6,308 | 3,513 | 30,264 |
| 44,226 | 117 | 20,339 | 6,332 | 3,526 | 30,314 |
| 44,227 | 120 | 20,161 | 6,272 | 3,490 | 30,043 |
| 44,228 | 117 | 20,079 | 6,228 | 3,467 | 29,891 |
| 44,229 | 121 | 20,504 | 6,290 | 3,515 | 30,430 |
| 44,230 | 118 | 20,472 | 6,260 | 3,482 | 30,332 |
| 44,231 | 119 | 20,617 | 6,251 | 3,496 | 30,483 |
| 44,232 | 117 | 20,330 | 6,127 | 3,431 | 30,005 |
| 44,233 | 126 | 20,395 | 6,109 | 3,427 | 30,057 |
| 44,234 | 124 | 20,172 | 6,034 | 3,380 | 29,710 |
| 44,235 | 135 | 20,535 | 6,075 | 3,362 | 30,107 |
| 44,236 | 137 | 20,531 | 6,070 | 3,357 | 30,095 |
| 44,237 | 146 | 20,681 | 6,108 | 3,371 | 30,306 |
| 44,238 | 143 | 20,369 | 5,993 | 3,339 | 29,844 |
| 44,239 | 149 | 20,157 | 5,941 | 3,311 | 29,558 |
| 44,240 | 151 | 20,216 | 5,914 | 3,331 | 29,612 |
| 44,241 | 148 | 19,821 | 5,824 | 3,264 | 29,057 |
| 44,242 | 149 | 20,033 | 5,865 | 3,293 | 29,340 |
| 44,243 | 148 | 19,855 | 5,791 | 3,248 | 29,042 |
| 44,244 | 149 | 19,932 | 5,759 | 3,255 | 29,095 |
| 44,245 | 149 | 20,089 | 5,810 | 3,324 | 29,372 |
| 44,246 | 149 | 20,234 | 5,818 | 3,332 | 29,533 |
| 44,247 | 148 | 20,143 | 5,748 | 3,285 | 29,324 |

|        |     |        |       |       |        |
|--------|-----|--------|-------|-------|--------|
| 44,248 | 150 | 20,024 | 5,711 | 3,273 | 29,158 |
| 44,249 | 153 | 20,233 | 5,718 | 3,298 | 29,402 |
| 44,250 | 150 | 19,962 | 5,624 | 3,244 | 28,980 |
| 44,251 | 146 | 20,096 | 5,581 | 3,242 | 29,065 |
| 44,252 | 156 | 20,248 | 5,601 | 3,260 | 29,265 |
| 44,253 | 157 | 19,964 | 5,518 | 3,211 | 28,850 |
| 44,254 | 157 | 19,925 | 5,488 | 3,216 | 28,786 |
| 44,255 | 154 | 19,973 | 5,490 | 3,222 | 28,839 |
| 44,256 | 149 | 19,753 | 5,421 | 3,176 | 28,499 |
| 44,257 | 150 | 19,900 | 5,433 | 3,199 | 28,682 |
| 44,258 | 142 | 20,122 | 5,496 | 3,257 | 29,017 |
| 44,259 | 146 | 19,713 | 5,386 | 3,139 | 28,384 |
| 44,260 | 147 | 19,804 | 5,408 | 3,159 | 28,518 |
| 44,261 | 143 | 20,117 | 5,437 | 3,191 | 28,888 |
| 44,262 | 143 | 20,053 | 5,412 | 3,194 | 28,802 |
| 44,263 | 145 | 20,406 | 5,555 | 3,230 | 29,336 |
| 44,264 | 147 | 20,674 | 5,652 | 3,278 | 29,751 |
| 44,265 | 154 | 20,947 | 5,745 | 3,315 | 30,161 |
| 44,266 | 156 | 21,156 | 5,759 | 3,342 | 30,413 |
| 44,267 | 157 | 20,791 | 5,668 | 3,286 | 29,902 |
| 44,268 | 158 | 20,687 | 5,622 | 3,270 | 29,737 |
| 44,269 | 158 | 21,856 | 5,977 | 3,471 | 31,462 |
| 44,270 | 165 | 21,835 | 5,913 | 3,442 | 31,355 |
| 44,271 | 171 | 21,950 | 5,948 | 3,445 | 31,514 |
| 44,272 | 171 | 21,852 | 5,935 | 3,439 | 31,397 |
| 44,273 | 181 | 22,108 | 6,001 | 3,472 | 31,762 |
| 44,274 | 188 | 22,013 | 5,994 | 3,455 | 31,650 |
| 44,275 | 188 | 21,823 | 5,958 | 3,439 | 31,408 |
| 44,276 | 189 | 21,866 | 5,970 | 3,426 | 31,451 |
| 44,277 | 193 | 21,762 | 5,904 | 3,389 | 31,248 |
| 44,278 | 201 | 21,707 | 5,864 | 3,374 | 31,146 |
| 44,279 | 198 | 21,431 | 5,814 | 3,361 | 30,804 |



|        |     |        |       |       |        |
|--------|-----|--------|-------|-------|--------|
| 44,280 | 198 | 21,560 | 5,879 | 3,396 | 31,033 |
| 44,281 | 208 | 21,521 | 5,866 | 3,389 | 30,984 |
| 44,282 | 211 | 21,255 | 5,785 | 3,328 | 30,579 |
| 44,283 | 211 | 20,998 | 5,730 | 3,302 | 30,241 |
| 44,284 | 203 | 21,488 | 5,921 | 3,428 | 31,040 |
| 44,285 | 212 | 21,448 | 5,932 | 3,453 | 31,045 |
| 44,286 | 223 | 21,643 | 5,967 | 3,461 | 31,294 |
| 44,287 | 222 | 21,557 | 5,950 | 3,457 | 31,186 |
| 44,288 | 229 | 21,897 | 6,091 | 3,543 | 31,760 |
| 44,289 | 220 | 21,749 | 6,057 | 3,524 | 31,550 |
| 44,290 | 218 | 21,888 | 6,133 | 3,559 | 31,798 |
| 44,291 | 218 | 21,844 | 6,173 | 3,563 | 31,798 |
| 44,292 | 217 | 21,847 | 6,236 | 3,586 | 31,886 |
| 44,293 | 214 | 21,842 | 6,269 | 3,618 | 31,943 |
| 44,294 | 215 | 21,784 | 6,279 | 3,614 | 31,892 |
| 44,295 | 215 | 21,781 | 6,286 | 3,587 | 31,869 |
| 44,296 | 217 | 21,751 | 6,292 | 3,583 | 31,843 |
| 44,297 | 216 | 21,901 | 6,350 | 3,629 | 32,096 |
| 44,298 | 213 | 21,981 | 6,381 | 3,634 | 32,209 |
| 44,299 | 211 | 22,095 | 6,402 | 3,640 | 32,348 |
| 44,300 | 210 | 21,796 | 6,390 | 3,628 | 32,024 |
| 44,301 | 215 | 21,994 | 6,429 | 3,653 | 32,291 |
| 44,302 | 214 | 21,982 | 6,443 | 3,675 | 32,314 |
| 44,303 | 204 | 22,051 | 6,472 | 3,697 | 32,424 |
| 44,304 | 207 | 22,083 | 6,483 | 3,711 | 32,484 |
| 44,305 | 201 | 21,747 | 6,401 | 3,671 | 32,020 |
| 44,306 | 201 | 21,894 | 6,405 | 3,687 | 32,187 |
| 44,307 | 203 | 21,962 | 6,438 | 3,695 | 32,298 |
| 44,308 | 208 | 21,917 | 6,447 | 3,702 | 32,274 |
| 44,309 | 207 | 21,949 | 6,413 | 3,696 | 32,265 |
| 44,310 | 203 | 21,817 | 6,332 | 3,690 | 32,042 |
| 44,311 | 206 | 22,036 | 6,332 | 3,684 | 32,258 |

|        |     |        |       |       |        |
|--------|-----|--------|-------|-------|--------|
| 44,312 | 205 | 21,947 | 6,298 | 3,669 | 32,119 |
| 44,313 | 209 | 22,456 | 6,329 | 3,704 | 32,698 |
| 44,314 | 217 | 22,346 | 6,267 | 3,694 | 32,524 |
| 44,315 | 211 | 22,090 | 6,185 | 3,649 | 32,135 |
| 44,316 | 217 | 22,198 | 6,177 | 3,666 | 32,258 |
| 44,317 | 216 | 22,059 | 6,090 | 3,620 | 31,985 |
| 44,318 | 220 | 22,045 | 6,047 | 3,592 | 31,904 |
| 44,319 | 224 | 22,061 | 6,028 | 3,578 | 31,891 |
| 44,320 | 225 | 22,365 | 6,132 | 3,638 | 32,360 |
| 44,321 | 220 | 22,177 | 6,114 | 3,633 | 32,144 |
| 44,322 | 218 | 22,161 | 6,072 | 3,638 | 32,089 |
| 44,323 | 218 | 22,289 | 6,101 | 3,709 | 32,317 |
| 44,324 | 219 | 22,283 | 6,089 | 3,703 | 32,294 |
| 44,325 | 212 | 22,237 | 6,116 | 3,740 | 32,305 |
| 44,326 | 215 | 22,228 | 6,121 | 3,744 | 32,308 |
| 44,327 | 206 | 22,049 | 6,123 | 3,781 | 32,159 |
| 44,328 | 201 | 21,991 | 6,135 | 3,793 | 32,120 |
| 44,329 | 201 | 21,940 | 6,125 | 3,803 | 32,069 |
| 44,330 | 199 | 21,933 | 6,102 | 3,776 | 32,010 |
| 44,331 | 191 | 22,020 | 6,115 | 3,778 | 32,104 |
| 44,332 | 184 | 21,853 | 6,141 | 3,785 | 31,963 |
| 44,333 | 189 | 21,939 | 6,110 | 3,776 | 32,014 |
| 44,334 | 189 | 22,014 | 6,096 | 3,779 | 32,078 |
| 44,335 | 184 | 22,015 | 6,076 | 3,787 | 32,062 |
| 44,336 | 183 | 22,365 | 6,167 | 3,858 | 32,573 |
| 44,337 | 163 | 22,166 | 6,104 | 3,829 | 32,262 |
| 44,338 | 166 | 22,298 | 6,155 | 3,878 | 32,497 |
| 44,339 | 160 | 22,451 | 6,189 | 3,914 | 32,714 |
| 44,340 | 163 | 22,540 | 6,224 | 3,909 | 32,836 |
| 44,341 | 158 | 22,317 | 6,143 | 3,870 | 32,488 |
| 44,342 | 168 | 22,724 | 6,226 | 3,924 | 33,042 |
| 44,343 | 172 | 22,356 | 6,106 | 3,856 | 32,490 |

|        |     |        |       |       |        |
|--------|-----|--------|-------|-------|--------|
| 44,344 | 173 | 22,473 | 6,136 | 3,883 | 32,665 |
| 44,345 | 169 | 22,491 | 6,138 | 3,895 | 32,693 |
| 44,346 | 168 | 22,525 | 6,173 | 3,933 | 32,799 |
| 44,347 | 172 | 22,630 | 6,224 | 3,960 | 32,986 |
| 44,348 | 174 | 22,439 | 6,154 | 3,909 | 32,676 |
| 44,349 | 173 | 21,872 | 6,028 | 3,848 | 31,921 |
| 44,350 | 176 | 21,927 | 6,053 | 3,879 | 32,035 |
| 44,351 | 176 | 22,006 | 6,056 | 3,902 | 32,140 |
| 44,352 | 171 | 21,878 | 6,025 | 3,868 | 31,942 |
| 44,353 | 178 | 21,262 | 5,910 | 3,759 | 31,109 |
| 44,354 | 187 | 21,356 | 5,934 | 3,778 | 31,255 |
| 44,355 | 188 | 21,532 | 5,951 | 3,792 | 31,463 |
| 44,356 | 190 | 21,516 | 5,946 | 3,792 | 31,444 |
| 44,357 | 190 | 21,426 | 5,948 | 3,792 | 31,356 |
| 44,358 | 188 | 21,419 | 5,954 | 3,799 | 31,360 |
| 44,359 | 185 | 21,610 | 5,996 | 3,819 | 31,610 |
| 44,360 | 197 | 21,297 | 5,938 | 3,749 | 31,181 |
| 44,361 | 196 | 21,057 | 5,904 | 3,728 | 30,885 |
| 44,362 | 194 | 21,168 | 5,934 | 3,755 | 31,051 |
| 44,363 | 198 | 20,720 | 5,878 | 3,707 | 30,503 |
| 44,364 | 198 | 20,379 | 5,829 | 3,687 | 30,093 |
| 44,365 | 196 | 20,524 | 5,871 | 3,699 | 30,290 |
| 44,366 | 196 | 20,405 | 5,855 | 3,686 | 30,142 |
| 44,367 | 186 | 20,158 | 5,830 | 3,679 | 29,853 |
| 44,368 | 185 | 20,004 | 5,837 | 3,682 | 29,708 |
| 44,369 | 189 | 20,316 | 5,938 | 3,760 | 30,203 |
| 44,370 | 185 | 20,317 | 5,912 | 3,770 | 30,184 |
| 44,371 | 186 | 20,224 | 5,908 | 3,774 | 30,092 |
| 44,372 | 184 | 20,181 | 5,908 | 3,773 | 30,046 |
| 44,373 | 187 | 20,247 | 5,906 | 3,757 | 30,097 |
| 44,374 | 174 | 20,247 | 5,901 | 3,745 | 30,067 |
| 44,375 | 172 | 20,233 | 5,894 | 3,738 | 30,037 |

|        |     |        |       |       |        |
|--------|-----|--------|-------|-------|--------|
| 44,376 | 169 | 20,051 | 5,822 | 3,698 | 29,740 |
| 44,377 | 171 | 20,110 | 5,796 | 3,691 | 29,768 |
| 44,378 | 171 | 20,115 | 5,812 | 3,695 | 29,793 |
| 44,379 | 168 | 20,090 | 5,808 | 3,686 | 29,752 |
| 44,380 | 171 | 20,177 | 5,835 | 3,712 | 29,895 |
| 44,381 | 172 | 20,083 | 5,795 | 3,678 | 29,728 |
| 44,382 | 173 | 20,090 | 5,749 | 3,657 | 29,669 |
| 44,383 | 173 | 20,047 | 5,734 | 3,661 | 29,615 |
| 44,384 | 170 | 20,018 | 5,731 | 3,667 | 29,586 |
| 44,385 | 176 | 19,904 | 5,761 | 3,660 | 29,501 |
| 44,386 | 176 | 19,631 | 5,743 | 3,639 | 29,189 |
| 44,387 | 185 | 19,775 | 5,746 | 3,645 | 29,351 |
| 44,388 | 180 | 19,504 | 5,622 | 3,560 | 28,866 |
| 44,389 | 172 | 19,603 | 5,620 | 3,541 | 28,936 |
| 44,390 | 170 | 19,692 | 5,635 | 3,560 | 29,057 |
| 44,391 | 172 | 20,023 | 5,661 | 3,604 | 29,460 |
| 44,392 | 167 | 20,279 | 5,717 | 3,625 | 29,788 |
| 44,393 | 164 | 20,211 | 5,686 | 3,599 | 29,660 |
| 44,394 | 165 | 20,313 | 5,724 | 3,608 | 29,810 |
| 44,395 | 167 | 20,349 | 5,744 | 3,601 | 29,861 |
| 44,396 | 169 | 20,716 | 5,803 | 3,635 | 30,323 |
| 44,397 | 171 | 21,013 | 5,833 | 3,646 | 30,663 |
| 44,398 | 170 | 21,239 | 5,854 | 3,677 | 30,940 |
| 44,399 | 167 | 20,985 | 5,833 | 3,653 | 30,638 |
| 44,400 | 167 | 21,154 | 5,853 | 3,659 | 30,833 |
| 44,401 | 159 | 20,908 | 5,749 | 3,585 | 30,401 |
| 44,402 | 164 | 21,159 | 5,786 | 3,593 | 30,702 |
| 44,403 | 163 | 21,256 | 5,793 | 3,577 | 30,789 |
| 44,404 | 163 | 21,492 | 5,824 | 3,607 | 31,086 |
| 44,405 | 157 | 21,516 | 5,828 | 3,615 | 31,116 |
| 44,406 | 149 | 21,640 | 5,867 | 3,654 | 31,310 |
| 44,407 | 156 | 21,775 | 5,874 | 3,654 | 31,459 |

|        |     |        |       |       |        |
|--------|-----|--------|-------|-------|--------|
| 44,408 | 156 | 21,725 | 5,824 | 3,606 | 31,311 |
| 44,409 | 170 | 21,926 | 5,858 | 3,623 | 31,577 |
| 44,410 | 168 | 22,160 | 5,913 | 3,656 | 31,897 |
| 44,411 | 152 | 21,902 | 5,872 | 3,634 | 31,560 |
| 44,412 | 157 | 22,105 | 5,908 | 3,641 | 31,811 |
| 44,413 | 161 | 21,952 | 5,904 | 3,608 | 31,625 |
| 44,414 | 156 | 21,856 | 5,839 | 3,572 | 31,423 |
| 44,415 | 157 | 22,143 | 5,879 | 3,593 | 31,772 |
| 44,416 | 157 | 21,979 | 5,861 | 3,596 | 31,593 |
| 44,417 | 169 | 22,439 | 5,985 | 3,648 | 32,241 |
| 44,418 | 172 | 22,443 | 5,897 | 3,590 | 32,102 |
| 44,419 | 173 | 22,586 | 5,941 | 3,597 | 32,297 |
| 44,420 | 168 | 22,816 | 6,035 | 3,644 | 32,663 |
| 44,421 | 171 | 22,392 | 5,923 | 3,566 | 32,052 |
| 44,422 | 175 | 22,566 | 5,942 | 3,563 | 32,246 |
| 44,423 | 170 | 22,924 | 5,989 | 3,607 | 32,690 |
| 44,424 | 168 | 22,709 | 5,958 | 3,551 | 32,386 |
| 44,425 | 172 | 22,794 | 5,976 | 3,532 | 32,474 |
| 44,426 | 173 | 22,913 | 5,991 | 3,535 | 32,612 |
| 44,427 | 172 | 23,053 | 5,994 | 3,529 | 32,748 |
| 44,428 | 172 | 23,092 | 6,017 | 3,528 | 32,809 |
| 44,429 | 170 | 23,251 | 6,031 | 3,519 | 32,971 |
| 44,430 | 170 | 23,265 | 6,038 | 3,504 | 32,977 |
| 44,431 | 170 | 23,106 | 6,002 | 3,469 | 32,747 |
| 44,432 | 173 | 23,301 | 6,048 | 3,528 | 33,050 |
| 44,433 | 170 | 23,345 | 6,093 | 3,548 | 33,156 |
| 44,434 | 165 | 23,553 | 6,168 | 3,554 | 33,440 |
| 44,435 | 161 | 23,571 | 6,103 | 3,506 | 33,341 |
| 44,436 | 160 | 23,649 | 6,107 | 3,507 | 33,423 |
| 44,437 | 157 | 23,516 | 6,058 | 3,492 | 33,223 |
| 44,438 | 162 | 24,027 | 6,203 | 3,578 | 33,970 |
| 44,439 | 165 | 23,883 | 6,217 | 3,582 | 33,847 |

|        |     |        |       |       |        |
|--------|-----|--------|-------|-------|--------|
| 44,440 | 168 | 23,127 | 6,053 | 3,444 | 32,792 |
| 44,441 | 173 | 23,135 | 6,071 | 3,442 | 32,821 |
| 44,442 | 170 | 23,116 | 6,078 | 3,452 | 32,816 |
| 44,443 | 171 | 23,013 | 6,030 | 3,433 | 32,647 |
| 44,444 | 171 | 22,785 | 5,948 | 3,400 | 32,304 |
| 44,445 | 176 | 22,535 | 5,857 | 3,334 | 31,902 |
| 44,446 | 174 | 22,555 | 5,852 | 3,317 | 31,898 |
| 44,447 | 175 | 22,503 | 5,857 | 3,306 | 31,841 |
| 44,448 | 171 | 22,168 | 5,797 | 3,261 | 31,397 |
| 44,449 | 183 | 21,857 | 5,680 | 3,200 | 30,920 |
| 44,450 | 185 | 21,991 | 5,694 | 3,190 | 31,060 |
| 44,451 | 186 | 21,949 | 5,681 | 3,187 | 31,003 |
| 44,452 | 186 | 21,832 | 5,677 | 3,189 | 30,884 |
| 44,453 | 182 | 21,944 | 5,698 | 3,209 | 31,033 |
| 44,454 | 180 | 21,925 | 5,696 | 3,215 | 31,016 |
| 44,455 | 178 | 21,791 | 5,675 | 3,234 | 30,878 |
| 44,456 | 182 | 21,644 | 5,649 | 3,212 | 30,687 |
| 44,457 | 182 | 21,683 | 5,657 | 3,215 | 30,737 |
| 44,458 | 176 | 21,128 | 5,475 | 3,114 | 29,893 |
| 44,459 | 183 | 21,256 | 5,520 | 3,151 | 30,110 |
| 44,460 | 177 | 21,424 | 5,544 | 3,174 | 30,319 |
| 44,461 | 177 | 21,386 | 5,539 | 3,184 | 30,286 |
| 44,462 | 176 | 21,577 | 5,581 | 3,227 | 30,561 |
| 44,463 | 169 | 21,662 | 5,607 | 3,240 | 30,678 |
| 44,464 | 171 | 21,545 | 5,631 | 3,242 | 30,589 |
| 44,465 | 172 | 21,736 | 5,714 | 3,289 | 30,911 |
| 44,466 | 170 | 21,721 | 5,724 | 3,281 | 30,896 |
| 44,467 | 166 | 21,627 | 5,712 | 3,286 | 30,791 |
| 44,468 | 163 | 21,681 | 5,756 | 3,300 | 30,900 |
| 44,469 | 161 | 21,650 | 5,754 | 3,310 | 30,875 |
| 44,470 | 161 | 21,585 | 5,749 | 3,318 | 30,813 |
| 44,471 | 159 | 21,253 | 5,669 | 3,265 | 30,346 |

|        |     |        |       |       |        |
|--------|-----|--------|-------|-------|--------|
| 44,472 | 156 | 21,241 | 5,685 | 3,269 | 30,351 |
| 44,473 | 150 | 21,069 | 5,654 | 3,263 | 30,136 |
| 44,474 | 162 | 20,783 | 5,620 | 3,219 | 29,784 |
| 44,475 | 160 | 20,543 | 5,561 | 3,195 | 29,459 |
| 44,476 | 161 | 20,960 | 5,682 | 3,294 | 30,097 |
| 44,477 | 157 | 20,823 | 5,681 | 3,275 | 29,936 |
| 44,478 | 162 | 20,698 | 5,676 | 3,287 | 29,823 |
| 44,479 | 164 | 20,665 | 5,675 | 3,311 | 29,815 |
| 44,480 | 164 | 20,618 | 5,667 | 3,316 | 29,765 |
| 44,481 | 160 | 20,642 | 5,691 | 3,346 | 29,839 |
| 44,482 | 159 | 20,748 | 5,696 | 3,334 | 29,937 |
| 44,483 | 159 | 20,787 | 5,700 | 3,335 | 29,981 |
| 44,484 | 160 | 20,858 | 5,712 | 3,344 | 30,074 |
| 44,485 | 160 | 20,708 | 5,701 | 3,348 | 29,917 |
| 44,486 | 163 | 20,707 | 5,805 | 3,383 | 30,058 |
| 44,487 | 159 | 20,620 | 5,837 | 3,411 | 30,027 |
| 44,488 | 161 | 20,738 | 5,878 | 3,399 | 30,176 |
| 44,489 | 165 | 20,917 | 5,936 | 3,411 | 30,429 |
| 44,490 | 165 | 20,976 | 5,934 | 3,410 | 30,485 |
| 44,491 | 162 | 20,940 | 5,904 | 3,405 | 30,411 |
| 44,492 | 164 | 21,037 | 5,954 | 3,415 | 30,570 |
| 44,493 | 165 | 20,991 | 5,964 | 3,419 | 30,539 |
| 44,494 | 172 | 20,883 | 5,939 | 3,405 | 30,399 |
| 44,495 | 169 | 20,629 | 5,890 | 3,366 | 30,054 |
| 44,496 | 166 | 20,793 | 5,965 | 3,424 | 30,348 |
| 44,497 | 164 | 20,562 | 5,886 | 3,380 | 29,992 |
| 44,498 | 164 | 20,531 | 5,887 | 3,377 | 29,959 |
| 44,499 | 170 | 20,809 | 5,969 | 3,424 | 30,372 |
| 44,500 | 161 | 20,816 | 6,022 | 3,437 | 30,436 |
| 44,501 | 160 | 20,814 | 6,021 | 3,452 | 30,447 |
| 44,502 | 154 | 20,375 | 5,920 | 3,362 | 29,811 |
| 44,503 | 153 | 20,740 | 6,010 | 3,429 | 30,332 |

|        |     |        |       |       |        |
|--------|-----|--------|-------|-------|--------|
| 44,504 | 155 | 20,469 | 5,945 | 3,370 | 29,939 |
| 44,505 | 155 | 20,772 | 6,023 | 3,407 | 30,357 |
| 44,506 | 157 | 20,963 | 6,086 | 3,432 | 30,638 |
| 44,507 | 156 | 21,033 | 6,104 | 3,431 | 30,724 |
| 44,508 | 159 | 21,598 | 6,270 | 3,494 | 31,521 |
| 44,509 | 157 | 21,736 | 6,290 | 3,503 | 31,686 |
| 44,510 | 144 | 21,716 | 6,292 | 3,487 | 31,639 |
| 44,511 | 144 | 21,590 | 6,286 | 3,490 | 31,510 |
| 44,512 | 144 | 22,212 | 6,451 | 3,574 | 32,381 |
| 44,513 | 145 | 22,260 | 6,460 | 3,599 | 32,464 |
| 44,514 | 142 | 22,230 | 6,451 | 3,601 | 32,424 |
| 44,515 | 140 | 22,167 | 6,449 | 3,620 | 32,376 |
| 44,516 | 136 | 22,001 | 6,363 | 3,577 | 32,077 |
| 44,517 | 131 | 21,164 | 6,156 | 3,490 | 30,941 |
| 44,518 | 131 | 21,386 | 6,197 | 3,507 | 31,221 |
| 44,519 | 126 | 21,635 | 6,260 | 3,527 | 31,548 |
| 44,520 | 128 | 21,596 | 6,199 | 3,520 | 31,443 |
| 44,521 | 128 | 21,571 | 6,198 | 3,525 | 31,422 |
| 44,522 | 132 | 21,777 | 6,223 | 3,546 | 31,678 |
| 44,523 | 125 | 20,958 | 5,999 | 3,417 | 30,499 |
| 44,524 | 131 | 21,195 | 6,000 | 3,426 | 30,752 |
| 44,525 | 130 | 21,565 | 6,066 | 3,483 | 31,244 |
| 44,526 | 128 | 21,192 | 5,922 | 3,421 | 30,663 |
| 44,527 | 132 | 21,494 | 6,002 | 3,462 | 31,090 |
| 44,528 | 127 | 21,917 | 6,125 | 3,506 | 31,675 |
| 44,529 | 125 | 22,043 | 6,129 | 3,518 | 31,815 |
| 44,530 | 131 | 22,332 | 6,179 | 3,552 | 32,194 |
| 44,531 | 135 | 22,529 | 6,235 | 3,575 | 32,474 |
| 44,532 | 136 | 22,646 | 6,251 | 3,590 | 32,623 |
| 44,533 | 137 | 22,504 | 6,192 | 3,566 | 32,399 |
| 44,534 | 137 | 22,526 | 6,181 | 3,563 | 32,407 |
| 44,535 | 143 | 22,686 | 6,232 | 3,619 | 32,680 |



|        |     |        |       |       |        |
|--------|-----|--------|-------|-------|--------|
| 44,536 | 141 | 22,724 | 6,196 | 3,608 | 32,669 |
| 44,537 | 136 | 22,481 | 6,051 | 3,520 | 32,188 |
| 44,538 | 136 | 22,487 | 6,060 | 3,530 | 32,213 |
| 44,539 | 131 | 22,429 | 6,060 | 3,555 | 32,175 |
| 44,540 | 129 | 22,211 | 6,003 | 3,517 | 31,860 |
| 44,541 | 132 | 21,869 | 5,887 | 3,456 | 31,344 |
| 44,542 | 133 | 21,847 | 5,875 | 3,453 | 31,308 |
| 44,543 | 126 | 21,662 | 5,831 | 3,445 | 31,064 |
| 44,544 | 124 | 21,853 | 5,849 | 3,469 | 31,295 |
| 44,545 | 117 | 21,914 | 5,869 | 3,473 | 31,373 |
| 44,546 | 113 | 21,862 | 5,815 | 3,457 | 31,247 |
| 44,547 | 112 | 21,922 | 5,815 | 3,468 | 31,317 |
| 44,548 | 112 | 21,824 | 5,806 | 3,464 | 31,206 |
| 44,549 | 111 | 22,068 | 5,857 | 3,509 | 31,545 |
| 44,550 | 109 | 21,921 | 5,842 | 3,537 | 31,409 |
| 44,551 | 104 | 21,833 | 5,801 | 3,534 | 31,272 |
| 44,552 | 104 | 21,957 | 5,812 | 3,530 | 31,403 |
| 44,553 | 106 | 21,844 | 5,770 | 3,530 | 31,250 |
| 44,554 | 108 | 21,681 | 5,744 | 3,509 | 31,042 |
| 44,555 | 102 | 21,588 | 5,705 | 3,480 | 30,875 |
| 44,556 | 106 | 21,680 | 5,710 | 3,505 | 31,001 |
| 44,557 | 106 | 21,736 | 5,728 | 3,511 | 31,081 |
| 44,558 | 107 | 21,727 | 5,759 | 3,537 | 31,130 |
| 44,559 | 113 | 21,438 | 5,681 | 3,519 | 30,751 |
| 44,560 | 110 | 21,094 | 5,610 | 3,511 | 30,325 |
| 44,561 | 116 | 21,345 | 5,738 | 3,595 | 30,794 |
| 44,562 | 123 | 21,513 | 5,793 | 3,617 | 31,046 |
| 44,563 | 121 | 21,457 | 5,773 | 3,602 | 30,953 |
| 44,564 | 119 | 21,187 | 5,690 | 3,563 | 30,559 |
| 44,565 | 119 | 21,261 | 5,662 | 3,540 | 30,582 |
| 44,566 | 122 | 21,307 | 5,630 | 3,490 | 30,549 |
| 44,567 | 127 | 21,331 | 5,608 | 3,476 | 30,542 |

|        |     |        |       |       |        |
|--------|-----|--------|-------|-------|--------|
| 44,568 | 128 | 21,492 | 5,606 | 3,456 | 30,682 |
| 44,569 | 130 | 21,593 | 5,643 | 3,487 | 30,853 |
| 44,570 | 134 | 21,892 | 5,717 | 3,525 | 31,268 |
| 44,571 | 131 | 21,552 | 5,642 | 3,453 | 30,778 |
| 44,572 | 132 | 21,537 | 5,631 | 3,459 | 30,759 |
| 44,573 | 137 | 21,258 | 5,568 | 3,414 | 30,377 |
| 44,574 | 131 | 21,067 | 5,519 | 3,394 | 30,111 |
| 44,575 | 125 | 21,662 | 5,708 | 3,526 | 31,021 |
| 44,576 | 126 | 21,395 | 5,671 | 3,470 | 30,662 |
| 44,577 | 125 | 21,141 | 5,619 | 3,448 | 30,333 |
| 44,578 | 128 | 21,365 | 5,698 | 3,502 | 30,693 |
| 44,579 | 135 | 21,359 | 5,681 | 3,509 | 30,684 |
| 44,580 | 135 | 21,214 | 5,680 | 3,495 | 30,524 |
| 44,581 | 129 | 21,121 | 5,676 | 3,488 | 30,414 |
| 44,582 | 130 | 21,290 | 5,749 | 3,539 | 30,708 |
| 44,583 | 130 | 21,329 | 5,793 | 3,546 | 30,798 |
| 44,584 | 130 | 21,475 | 5,806 | 3,597 | 31,008 |
| 44,585 | 128 | 21,573 | 5,834 | 3,608 | 31,143 |
| 44,586 | 133 | 21,447 | 5,807 | 3,602 | 30,989 |
| 44,587 | 133 | 21,598 | 5,829 | 3,607 | 31,167 |
| 44,588 | 136 | 22,030 | 5,890 | 3,702 | 31,758 |
| 44,589 | 140 | 22,396 | 5,910 | 3,715 | 32,161 |
| 44,590 | 136 | 22,173 | 5,843 | 3,684 | 31,836 |
| 44,591 | 136 | 22,818 | 5,970 | 3,789 | 32,713 |
| 44,592 | 130 | 22,587 | 5,918 | 3,767 | 32,402 |
| 44,593 | 130 | 22,794 | 5,991 | 3,821 | 32,736 |
| 44,594 | 132 | 23,268 | 6,133 | 3,952 | 33,485 |
| 44,595 | 132 | 23,257 | 6,185 | 3,998 | 33,572 |
| 44,596 | 134 | 23,218 | 6,226 | 3,982 | 33,560 |
| 44,597 | 134 | 23,034 | 6,254 | 3,998 | 33,420 |
| 44,598 | 135 | 23,248 | 6,294 | 4,047 | 33,724 |
| 44,599 | 137 | 23,446 | 6,359 | 4,068 | 34,010 |

|        |     |        |       |       |        |
|--------|-----|--------|-------|-------|--------|
| 44,600 | 138 | 23,494 | 6,404 | 4,074 | 34,110 |
| 44,601 | 141 | 23,184 | 6,347 | 4,023 | 33,695 |
| 44,602 | 142 | 23,188 | 6,342 | 4,006 | 33,678 |
| 44,603 | 143 | 22,997 | 6,348 | 4,000 | 33,488 |
| 44,604 | 145 | 22,902 | 6,335 | 3,996 | 33,378 |
| 44,605 | 154 | 22,849 | 6,326 | 3,994 | 33,323 |
| 44,606 | 162 | 22,950 | 6,361 | 4,023 | 33,496 |
| 44,607 | 162 | 22,956 | 6,366 | 4,013 | 33,497 |
| 44,608 | 162 | 22,998 | 6,347 | 3,995 | 33,502 |
| 44,609 | 163 | 22,979 | 6,268 | 3,950 | 33,360 |
| 44,610 | 163 | 23,008 | 6,281 | 3,956 | 33,408 |
| 44,611 | 163 | 23,039 | 6,283 | 3,932 | 33,417 |
| 44,612 | 159 | 23,456 | 6,372 | 3,973 | 33,960 |
| 44,613 | 153 | 23,393 | 6,276 | 3,944 | 33,766 |
| 44,614 | 153 | 23,067 | 6,208 | 3,909 | 33,337 |
| 44,615 | 159 | 22,928 | 6,245 | 3,896 | 33,228 |
| 44,616 | 165 | 23,174 | 6,305 | 3,942 | 33,586 |
| 44,617 | 161 | 22,976 | 6,285 | 3,960 | 33,382 |
| 44,618 | 158 | 22,879 | 6,281 | 3,963 | 33,281 |
| 44,619 | 165 | 22,990 | 6,367 | 4,006 | 33,528 |
| 44,620 | 165 | 22,936 | 6,383 | 4,024 | 33,508 |
| 44,621 | 167 | 22,746 | 6,334 | 4,013 | 33,260 |
| 44,622 | 165 | 22,728 | 6,314 | 4,019 | 33,226 |
| 44,623 | 168 | 23,119 | 6,388 | 4,065 | 33,740 |
| 44,624 | 169 | 23,153 | 6,392 | 4,048 | 33,762 |
| 44,625 | 169 | 23,196 | 6,390 | 4,060 | 33,815 |
| 44,626 | 175 | 23,316 | 6,403 | 4,086 | 33,980 |
| 44,627 | 180 | 23,460 | 6,429 | 4,119 | 34,188 |
| 44,628 | 180 | 23,439 | 6,423 | 4,115 | 34,157 |
| 44,629 | 183 | 23,722 | 6,480 | 4,169 | 34,554 |
| 44,630 | 180 | 23,801 | 6,519 | 4,177 | 34,677 |
| 44,631 | 185 | 23,638 | 6,408 | 4,107 | 34,338 |

|        |     |        |       |       |        |
|--------|-----|--------|-------|-------|--------|
| 44,632 | 186 | 23,889 | 6,461 | 4,151 | 34,687 |
| 44,633 | 184 | 24,210 | 6,500 | 4,184 | 35,078 |
| 44,634 | 187 | 24,231 | 6,500 | 4,179 | 35,097 |
| 44,635 | 192 | 23,781 | 6,426 | 4,084 | 34,483 |
| 44,636 | 191 | 23,471 | 6,375 | 4,042 | 34,079 |
| 44,637 | 183 | 23,651 | 6,448 | 4,095 | 34,377 |
| 44,638 | 186 | 23,337 | 6,357 | 4,044 | 33,924 |
| 44,639 | 184 | 23,078 | 6,317 | 4,006 | 33,585 |
| 44,640 | 181 | 23,473 | 6,494 | 4,105 | 34,253 |
| 44,641 | 182 | 23,165 | 6,406 | 4,050 | 33,803 |
| 44,642 | 182 | 23,084 | 6,409 | 4,027 | 33,702 |
| 44,643 | 185 | 23,397 | 6,468 | 4,056 | 34,106 |
| 44,644 | 197 | 23,552 | 6,492 | 4,030 | 34,271 |
| 44,645 | 204 | 23,774 | 6,469 | 4,003 | 34,450 |
| 44,646 | 205 | 23,805 | 6,449 | 3,974 | 34,433 |
| 44,647 | 209 | 23,962 | 6,382 | 3,986 | 34,539 |
| 44,648 | 212 | 24,226 | 6,366 | 3,962 | 34,766 |
| 44,649 | 225 | 24,508 | 6,443 | 3,984 | 35,160 |
| 44,650 | 225 | 24,576 | 6,426 | 3,990 | 35,217 |
| 44,651 | 225 | 24,652 | 6,356 | 3,954 | 35,187 |
| 44,652 | 226 | 24,772 | 6,372 | 3,975 | 35,345 |
| 44,653 | 227 | 24,872 | 6,386 | 3,988 | 35,473 |
| 44,654 | 224 | 25,068 | 6,425 | 4,026 | 35,743 |
| 44,655 | 219 | 25,363 | 6,507 | 4,057 | 36,146 |
| 44,656 | 213 | 25,257 | 6,483 | 4,042 | 35,995 |
| 44,657 | 212 | 25,279 | 6,498 | 4,057 | 36,046 |
| 44,658 | 210 | 25,081 | 6,465 | 4,055 | 35,811 |
| 44,659 | 210 | 24,975 | 6,456 | 4,063 | 35,704 |
| 44,660 | 202 | 24,954 | 6,452 | 4,071 | 35,679 |
| 44,661 | 207 | 25,082 | 6,454 | 4,090 | 35,833 |
| 44,662 | 208 | 25,012 | 6,456 | 4,089 | 35,765 |
| 44,663 | 210 | 25,029 | 6,482 | 4,115 | 35,836 |

|        |     |        |       |       |        |
|--------|-----|--------|-------|-------|--------|
| 44,664 | 206 | 24,261 | 6,371 | 4,015 | 34,853 |
| 44,665 | 205 | 24,487 | 6,401 | 4,036 | 35,129 |
| 44,666 | 206 | 24,734 | 6,435 | 4,056 | 35,431 |
| 44,667 | 210 | 24,675 | 6,411 | 4,049 | 35,345 |
| 44,668 | 211 | 24,696 | 6,414 | 4,063 | 35,384 |
| 44,669 | 213 | 24,896 | 6,454 | 4,090 | 35,653 |
| 44,670 | 221 | 25,118 | 6,479 | 4,123 | 35,941 |
| 44,671 | 220 | 24,952 | 6,400 | 4,078 | 35,650 |
| 44,672 | 215 | 24,910 | 6,365 | 4,044 | 35,534 |
| 44,673 | 211 | 24,669 | 6,354 | 4,002 | 35,236 |
| 44,674 | 210 | 24,625 | 6,349 | 4,006 | 35,190 |
| 44,675 | 200 | 24,519 | 6,348 | 4,016 | 35,083 |
| 44,676 | 200 | 24,533 | 6,399 | 4,028 | 35,160 |
| 44,677 | 196 | 24,735 | 6,426 | 4,050 | 35,407 |
| 44,678 | 194 | 24,786 | 6,423 | 4,044 | 35,447 |
| 44,679 | 200 | 24,600 | 6,404 | 4,018 | 35,222 |
| 44,680 | 191 | 24,519 | 6,377 | 4,004 | 35,091 |
| 44,681 | 205 | 24,847 | 6,457 | 4,048 | 35,557 |
| 44,682 | 201 | 24,713 | 6,456 | 4,027 | 35,397 |
| 44,683 | 207 | 24,623 | 6,428 | 3,993 | 35,251 |
| 44,684 | 204 | 24,249 | 6,318 | 3,938 | 34,709 |
| 44,685 | 211 | 24,182 | 6,304 | 3,921 | 34,618 |
| 44,686 | 205 | 23,979 | 6,240 | 3,896 | 34,320 |
| 44,687 | 205 | 24,009 | 6,236 | 3,877 | 34,327 |
| 44,688 | 203 | 23,927 | 6,156 | 3,829 | 34,115 |
| 44,689 | 207 | 23,858 | 6,141 | 3,788 | 33,994 |
| 44,690 | 208 | 23,921 | 6,110 | 3,784 | 34,023 |
| 44,691 | 203 | 23,590 | 6,044 | 3,734 | 33,571 |
| 44,692 | 201 | 23,258 | 5,980 | 3,698 | 33,137 |
| 44,693 | 201 | 22,968 | 5,914 | 3,653 | 32,736 |
| 44,694 | 201 | 22,981 | 5,913 | 3,666 | 32,761 |
| 44,695 | 189 | 22,951 | 5,911 | 3,698 | 32,749 |

|        |     |        |       |       |        |
|--------|-----|--------|-------|-------|--------|
| 44,696 | 181 | 22,527 | 5,874 | 3,651 | 32,233 |
| 44,697 | 177 | 22,297 | 5,881 | 3,657 | 32,012 |
| 44,698 | 182 | 22,355 | 5,961 | 3,707 | 32,205 |
| 44,699 | 184 | 22,150 | 5,969 | 3,727 | 32,030 |
| 44,700 | 173 | 22,272 | 5,983 | 3,731 | 32,159 |
| 44,701 | 175 | 22,195 | 5,992 | 3,718 | 32,080 |
| 44,702 | 172 | 22,131 | 6,044 | 3,722 | 32,069 |
| 44,703 | 170 | 21,836 | 5,963 | 3,684 | 31,653 |
| 44,704 | 171 | 22,009 | 5,977 | 3,694 | 31,851 |
| 44,705 | 172 | 22,038 | 5,964 | 3,680 | 31,854 |
| 44,706 | 168 | 21,670 | 5,863 | 3,604 | 31,305 |
| 44,707 | 172 | 21,701 | 5,834 | 3,576 | 31,283 |
| 44,708 | 172 | 21,777 | 5,857 | 3,581 | 31,387 |
| 44,709 | 171 | 21,273 | 5,675 | 3,450 | 30,569 |
| 44,710 | 172 | 21,405 | 5,724 | 3,500 | 30,801 |
| 44,711 | 166 | 21,591 | 5,771 | 3,537 | 31,065 |
| 44,712 | 170 | 21,598 | 5,718 | 3,535 | 31,021 |
| 44,713 | 175 | 21,553 | 5,695 | 3,499 | 30,922 |
| 44,714 | 174 | 21,410 | 5,679 | 3,495 | 30,758 |
| 44,715 | 175 | 21,605 | 5,732 | 3,523 | 31,035 |
| 44,716 | 171 | 21,258 | 5,622 | 3,483 | 30,534 |
| 44,717 | 165 | 21,323 | 5,598 | 3,485 | 30,571 |
| 44,718 | 165 | 21,658 | 5,658 | 3,520 | 31,001 |
| 44,719 | 164 | 21,702 | 5,649 | 3,492 | 31,007 |
| 44,720 | 152 | 21,395 | 5,599 | 3,463 | 30,609 |
| 44,721 | 153 | 21,494 | 5,641 | 3,498 | 30,786 |
| 44,722 | 155 | 21,212 | 5,571 | 3,470 | 30,408 |
| 44,723 | 157 | 21,319 | 5,565 | 3,462 | 30,503 |
| 44,724 | 157 | 21,124 | 5,525 | 3,451 | 30,257 |
| 44,725 | 161 | 21,430 | 5,619 | 3,502 | 30,712 |
| 44,726 | 161 | 21,674 | 5,594 | 3,490 | 30,919 |
| 44,727 | 160 | 21,666 | 5,605 | 3,496 | 30,927 |

|        |     |        |       |       |        |
|--------|-----|--------|-------|-------|--------|
| 44,728 | 162 | 22,066 | 5,693 | 3,531 | 31,452 |
| 44,729 | 155 | 21,395 | 5,502 | 3,396 | 30,448 |
| 44,730 | 156 | 21,635 | 5,592 | 3,434 | 30,817 |
| 44,731 | 146 | 21,841 | 5,662 | 3,469 | 31,118 |
| 44,732 | 144 | 21,737 | 5,622 | 3,453 | 30,956 |
| 44,733 | 148 | 21,549 | 5,550 | 3,427 | 30,674 |
| 44,734 | 140 | 21,330 | 5,491 | 3,418 | 30,379 |
| 44,735 | 137 | 21,197 | 5,478 | 3,398 | 30,210 |
| 44,736 | 129 | 20,856 | 5,422 | 3,391 | 29,798 |
| 44,737 | 137 | 21,098 | 5,502 | 3,461 | 30,198 |
| 44,738 | 145 | 21,267 | 5,557 | 3,474 | 30,443 |
| 44,739 | 143 | 21,252 | 5,562 | 3,478 | 30,435 |
| 44,740 | 142 | 21,215 | 5,551 | 3,483 | 30,391 |
| 44,741 | 148 | 21,274 | 5,589 | 3,488 | 30,499 |
| 44,742 | 151 | 21,288 | 5,589 | 3,511 | 30,539 |
| 44,743 | 152 | 21,389 | 5,596 | 3,513 | 30,650 |
| 44,744 | 150 | 21,337 | 5,572 | 3,485 | 30,544 |
| 44,745 | 152 | 21,125 | 5,498 | 3,434 | 30,209 |
| 44,746 | 153 | 21,402 | 5,530 | 3,445 | 30,530 |
| 44,747 | 159 | 21,674 | 5,592 | 3,476 | 30,901 |
| 44,748 | 154 | 21,551 | 5,520 | 3,437 | 30,662 |
| 44,749 | 155 | 21,731 | 5,602 | 3,461 | 30,949 |
| 44,750 | 148 | 21,618 | 5,512 | 3,413 | 30,691 |
| 44,751 | 158 | 21,680 | 5,511 | 3,413 | 30,762 |
| 44,752 | 155 | 21,652 | 5,465 | 3,407 | 30,679 |
| 44,753 | 157 | 21,342 | 5,331 | 3,337 | 30,167 |
| 44,754 | 156 | 21,390 | 5,339 | 3,335 | 30,220 |
| 44,755 | 151 | 21,326 | 5,292 | 3,324 | 30,093 |
| 44,756 | 153 | 21,332 | 5,289 | 3,333 | 30,107 |
| 44,757 | 153 | 21,368 | 5,294 | 3,344 | 30,159 |
| 44,758 | 158 | 21,800 | 5,422 | 3,405 | 30,785 |
| 44,759 | 159 | 21,617 | 5,418 | 3,388 | 30,582 |

|        |     |        |       |       |        |
|--------|-----|--------|-------|-------|--------|
| 44,760 | 159 | 21,738 | 5,427 | 3,389 | 30,713 |
| 44,761 | 158 | 21,748 | 5,431 | 3,375 | 30,712 |
| 44,762 | 159 | 21,723 | 5,438 | 3,380 | 30,700 |
| 44,763 | 155 | 22,033 | 5,530 | 3,413 | 31,131 |
| 44,764 | 150 | 21,912 | 5,502 | 3,419 | 30,983 |
| 44,765 | 158 | 22,161 | 5,565 | 3,450 | 31,334 |
| 44,766 | 165 | 22,167 | 5,523 | 3,432 | 31,287 |
| 44,767 | 165 | 21,811 | 5,502 | 3,406 | 30,884 |
| 44,768 | 166 | 22,309 | 5,633 | 3,468 | 31,576 |
| 44,769 | 164 | 21,978 | 5,598 | 3,437 | 31,177 |
| 44,770 | 163 | 22,009 | 5,553 | 3,405 | 31,130 |
| 44,771 | 167 | 22,207 | 5,627 | 3,445 | 31,446 |
| 44,772 | 165 | 22,289 | 5,637 | 3,457 | 31,548 |
| 44,773 | 163 | 22,287 | 5,684 | 3,445 | 31,579 |
| 44,774 | 168 | 22,579 | 5,765 | 3,483 | 31,995 |
| 44,775 | 176 | 22,595 | 5,763 | 3,463 | 31,997 |
| 44,776 | 177 | 22,345 | 5,669 | 3,415 | 31,606 |
| 44,777 | 180 | 22,197 | 5,662 | 3,432 | 31,471 |
| 44,778 | 179 | 21,886 | 5,627 | 3,393 | 31,085 |
| 44,779 | 179 | 22,365 | 5,761 | 3,477 | 31,782 |
| 44,780 | 179 | 21,978 | 5,690 | 3,448 | 31,295 |
| 44,781 | 184 | 21,976 | 5,686 | 3,444 | 31,290 |
| 44,782 | 184 | 22,017 | 5,694 | 3,445 | 31,340 |
| 44,783 | 178 | 22,172 | 5,719 | 3,469 | 31,538 |
| 44,784 | 174 | 22,320 | 5,770 | 3,476 | 31,740 |
| 44,785 | 170 | 22,555 | 5,833 | 3,526 | 32,084 |
| 44,786 | 170 | 22,615 | 5,835 | 3,535 | 32,155 |
| 44,787 | 171 | 22,702 | 5,817 | 3,469 | 32,159 |
| 44,788 | 171 | 22,926 | 5,889 | 3,522 | 32,508 |
| 44,789 | 165 | 23,258 | 5,972 | 3,583 | 32,978 |
| 44,790 | 173 | 23,086 | 5,941 | 3,569 | 32,769 |
| 44,791 | 173 | 23,247 | 6,004 | 3,603 | 33,027 |



|        |     |        |       |       |        |
|--------|-----|--------|-------|-------|--------|
| 44,792 | 166 | 23,553 | 6,092 | 3,670 | 33,481 |
| 44,793 | 166 | 23,785 | 6,095 | 3,685 | 33,731 |
| 44,794 | 167 | 24,021 | 6,131 | 3,684 | 34,003 |
| 44,795 | 166 | 24,093 | 6,132 | 3,692 | 34,083 |
| 44,796 | 170 | 24,277 | 6,190 | 3,742 | 34,379 |
| 44,797 | 173 | 24,671 | 6,305 | 3,825 | 34,974 |
| 44,798 | 170 | 24,822 | 6,320 | 3,861 | 35,173 |
| 44,799 | 174 | 24,228 | 6,150 | 3,772 | 34,324 |
| 44,800 | 176 | 24,622 | 6,209 | 3,799 | 34,806 |
| 44,801 | 172 | 24,891 | 6,255 | 3,862 | 35,180 |
| 44,802 | 171 | 25,127 | 6,322 | 3,889 | 35,509 |
| 44,803 | 176 | 25,220 | 6,377 | 3,930 | 35,703 |
| 44,804 | 169 | 24,971 | 6,316 | 3,912 | 35,368 |
| 44,805 | 170 | 25,014 | 6,344 | 3,933 | 35,461 |
| 44,806 | 171 | 24,974 | 6,365 | 3,963 | 35,473 |
| 44,807 | 170 | 24,994 | 6,372 | 4,001 | 35,537 |
| 44,808 | 170 | 25,301 | 6,441 | 4,096 | 36,008 |
| 44,809 | 163 | 25,270 | 6,447 | 4,100 | 35,980 |
| 44,810 | 160 | 25,365 | 6,452 | 4,116 | 36,093 |
| 44,811 | 162 | 25,328 | 6,489 | 4,155 | 36,134 |
| 44,812 | 162 | 25,122 | 6,434 | 4,131 | 35,849 |
| 44,813 | 162 | 25,329 | 6,465 | 4,151 | 36,107 |
| 44,814 | 161 | 24,968 | 6,339 | 4,067 | 35,535 |
| 44,815 | 159 | 25,336 | 6,399 | 4,091 | 35,985 |
| 44,816 | 155 | 25,635 | 6,478 | 4,151 | 36,419 |
| 44,817 | 160 | 25,869 | 6,553 | 4,201 | 36,783 |
| 44,818 | 159 | 25,244 | 6,364 | 4,128 | 35,895 |
| 44,819 | 162 | 25,484 | 6,414 | 4,153 | 36,213 |
| 44,820 | 168 | 25,601 | 6,425 | 4,162 | 36,356 |
| 44,821 | 171 | 25,790 | 6,464 | 4,192 | 36,617 |
| 44,822 | 168 | 25,950 | 6,500 | 4,223 | 36,841 |
| 44,823 | 168 | 25,590 | 6,450 | 4,188 | 36,396 |

|        |     |        |       |       |        |
|--------|-----|--------|-------|-------|--------|
| 44,824 | 165 | 25,278 | 6,361 | 4,168 | 35,972 |
| 44,825 | 160 | 25,788 | 6,428 | 4,225 | 36,601 |
| 44,826 | 150 | 25,357 | 6,343 | 4,175 | 36,025 |
| 44,827 | 147 | 25,269 | 6,356 | 4,169 | 35,941 |
| 44,828 | 144 | 25,273 | 6,361 | 4,151 | 35,929 |
| 44,829 | 142 | 25,274 | 6,365 | 4,158 | 35,939 |
| 44,830 | 141 | 25,060 | 6,316 | 4,132 | 35,649 |
| 44,831 | 137 | 24,778 | 6,242 | 4,102 | 35,259 |
| 44,832 | 133 | 24,547 | 6,183 | 4,070 | 34,933 |
| 44,833 | 133 | 24,315 | 6,117 | 4,051 | 34,616 |
| 44,834 | 139 | 24,619 | 6,197 | 4,126 | 35,081 |
| 44,835 | 142 | 24,546 | 6,197 | 4,119 | 35,004 |
| 44,836 | 150 | 23,954 | 6,026 | 4,017 | 34,147 |
| 44,837 | 154 | 24,134 | 6,069 | 4,052 | 34,409 |
| 44,838 | 152 | 24,408 | 6,148 | 4,098 | 34,806 |
| 44,839 | 155 | 24,277 | 6,114 | 4,070 | 34,616 |
| 44,840 | 157 | 24,406 | 6,168 | 4,095 | 34,826 |
| 44,841 | 149 | 24,191 | 6,125 | 4,056 | 34,521 |
| 44,842 | 148 | 24,094 | 6,063 | 4,026 | 34,331 |
| 44,843 | 148 | 23,737 | 5,988 | 3,989 | 33,862 |
| 44,844 | 153 | 23,819 | 6,039 | 4,014 | 34,025 |
| 44,845 | 154 | 24,093 | 6,097 | 4,095 | 34,439 |
| 44,846 | 154 | 23,803 | 6,061 | 4,029 | 34,047 |
| 44,847 | 154 | 23,805 | 6,054 | 4,025 | 34,038 |
| 44,848 | 150 | 23,688 | 6,034 | 4,032 | 33,904 |
| 44,849 | 149 | 23,748 | 6,063 | 4,038 | 33,998 |
| 44,850 | 143 | 23,885 | 6,115 | 4,104 | 34,247 |
| 44,851 | 140 | 23,580 | 6,043 | 4,074 | 33,837 |
| 44,852 | 141 | 23,733 | 6,064 | 4,079 | 34,017 |
| 44,853 | 141 | 23,683 | 6,060 | 4,088 | 33,972 |
| 44,854 | 139 | 23,652 | 6,059 | 4,043 | 33,893 |
| 44,855 | 140 | 23,705 | 6,061 | 4,030 | 33,936 |

|        |     |        |       |       |        |
|--------|-----|--------|-------|-------|--------|
| 44,856 | 143 | 23,761 | 6,063 | 4,011 | 33,978 |
| 44,857 | 145 | 23,997 | 6,147 | 4,047 | 34,336 |
| 44,858 | 148 | 24,098 | 6,164 | 4,031 | 34,441 |
| 44,859 | 144 | 23,732 | 6,113 | 3,978 | 33,967 |
| 44,860 | 149 | 23,577 | 6,071 | 3,947 | 33,744 |
| 44,861 | 146 | 23,456 | 6,063 | 3,930 | 33,595 |
| 44,862 | 152 | 23,603 | 6,062 | 3,940 | 33,757 |
| 44,863 | 151 | 23,588 | 6,047 | 3,941 | 33,727 |
| 44,864 | 149 | 23,449 | 6,045 | 3,941 | 33,584 |
| 44,865 | 140 | 23,369 | 6,102 | 3,979 | 33,590 |
| 44,866 | 155 | 23,607 | 6,189 | 4,048 | 33,999 |
| 44,867 | 152 | 23,775 | 6,192 | 4,062 | 34,181 |
| 44,868 | 152 | 23,707 | 6,161 | 4,037 | 34,057 |
| 44,869 | 152 | 23,807 | 6,151 | 4,041 | 34,151 |
| 44,870 | 149 | 23,745 | 6,154 | 4,041 | 34,089 |
| 44,871 | 149 | 24,457 | 6,331 | 4,140 | 35,077 |
| 44,872 | 143 | 24,216 | 6,259 | 4,105 | 34,723 |
| 44,873 | 148 | 24,561 | 6,299 | 4,151 | 35,159 |
| 44,874 | 145 | 24,612 | 6,288 | 4,137 | 35,182 |
| 44,875 | 146 | 24,768 | 6,332 | 4,176 | 35,422 |
| 44,876 | 150 | 24,792 | 6,357 | 4,190 | 35,489 |
| 44,877 | 152 | 25,119 | 6,392 | 4,256 | 35,919 |
| 44,878 | 152 | 25,245 | 6,408 | 4,288 | 36,093 |
| 44,879 | 152 | 24,965 | 6,333 | 4,250 | 35,700 |
| 44,880 | 151 | 25,001 | 6,334 | 4,251 | 35,737 |
| 44,881 | 151 | 25,110 | 6,331 | 4,249 | 35,841 |
| 44,882 | 153 | 25,597 | 6,446 | 4,332 | 36,528 |
| 44,883 | 150 | 25,681 | 6,465 | 4,347 | 36,643 |
| 44,884 | 149 | 25,754 | 6,473 | 4,331 | 36,707 |
| 44,885 | 144 | 25,467 | 6,432 | 4,285 | 36,328 |
| 44,886 | 142 | 25,371 | 6,409 | 4,281 | 36,203 |
| 44,887 | 129 | 25,341 | 6,468 | 4,316 | 36,254 |

|        |     |        |       |       |        |
|--------|-----|--------|-------|-------|--------|
| 44,888 | 127 | 25,424 | 6,470 | 4,331 | 36,352 |
| 44,889 | 127 | 25,390 | 6,431 | 4,327 | 36,275 |
| 44,890 | 124 | 25,478 | 6,462 | 4,341 | 36,405 |
| 44,891 | 121 | 25,191 | 6,346 | 4,297 | 35,955 |
| 44,892 | 121 | 25,276 | 6,356 | 4,300 | 36,053 |
| 44,893 | 116 | 24,936 | 6,309 | 4,253 | 35,614 |
| 44,894 | 111 | 25,303 | 6,345 | 4,265 | 36,024 |
| 44,895 | 116 | 25,481 | 6,427 | 4,283 | 36,307 |
| 44,896 | 115 | 25,279 | 6,380 | 4,268 | 36,042 |
| 44,897 | 116 | 25,287 | 6,370 | 4,278 | 36,051 |
| 44,898 | 118 | 25,473 | 6,444 | 4,276 | 36,311 |
| 44,899 | 120 | 25,235 | 6,358 | 4,218 | 35,931 |
| 44,900 | 119 | 25,307 | 6,345 | 4,208 | 35,979 |
| 44,901 | 135 | 25,571 | 6,424 | 4,259 | 36,389 |
| 44,902 | 133 | 25,250 | 6,379 | 4,214 | 35,976 |
| 44,903 | 130 | 25,418 | 6,411 | 4,260 | 36,219 |
| 44,904 | 131 | 25,313 | 6,385 | 4,262 | 36,091 |
| 44,905 | 132 | 25,315 | 6,353 | 4,269 | 36,069 |
| 44,906 | 137 | 25,670 | 6,417 | 4,343 | 36,567 |
| 44,907 | 133 | 25,499 | 6,355 | 4,315 | 36,302 |
| 44,908 | 130 | 25,514 | 6,299 | 4,320 | 36,263 |
| 44,909 | 133 | 25,471 | 6,299 | 4,317 | 36,220 |
| 44,910 | 132 | 25,960 | 6,398 | 4,366 | 36,856 |
| 44,911 | 128 | 25,850 | 6,351 | 4,360 | 36,689 |
| 44,912 | 129 | 25,939 | 6,360 | 4,368 | 36,796 |
| 44,913 | 124 | 25,918 | 6,399 | 4,354 | 36,795 |
| 44,914 | 125 | 25,673 | 6,318 | 4,302 | 36,418 |
| 44,915 | 126 | 25,963 | 6,360 | 4,317 | 36,766 |
| 44,916 | 111 | 25,961 | 6,354 | 4,317 | 36,743 |
| 44,917 | 112 | 25,645 | 6,286 | 4,272 | 36,315 |
| 44,918 | 112 | 25,414 | 6,257 | 4,236 | 36,019 |
| 44,919 | 109 | 26,069 | 6,439 | 4,324 | 36,941 |

|        |     |        |       |       |        |
|--------|-----|--------|-------|-------|--------|
| 44,920 | 108 | 25,951 | 6,396 | 4,302 | 36,757 |
| 44,921 | 109 | 25,858 | 6,331 | 4,287 | 36,585 |
| 44,922 | 115 | 25,586 | 6,290 | 4,246 | 36,237 |
| 44,923 | 115 | 25,525 | 6,285 | 4,245 | 36,170 |
| 44,924 | 117 | 25,788 | 6,318 | 4,251 | 36,474 |
| 44,925 | 121 | 25,615 | 6,269 | 4,223 | 36,228 |
| 44,926 | 120 | 25,606 | 6,260 | 4,228 | 36,214 |
| 44,927 | 119 | 25,493 | 6,261 | 4,242 | 36,115 |
| 44,928 | 119 | 25,279 | 6,245 | 4,201 | 35,844 |
| 44,929 | 128 | 25,290 | 6,245 | 4,183 | 35,846 |
| 44,930 | 132 | 25,523 | 6,257 | 4,197 | 36,109 |
| 44,931 | 133 | 25,387 | 6,209 | 4,163 | 35,892 |
| 44,932 | 133 | 25,177 | 6,175 | 4,133 | 35,618 |
| 44,933 | 137 | 25,528 | 6,230 | 4,181 | 36,076 |
| 44,934 | 140 | 25,201 | 6,163 | 4,144 | 35,648 |
| 44,935 | 141 | 25,344 | 6,198 | 4,166 | 35,849 |
| 44,936 | 139 | 25,572 | 6,200 | 4,177 | 36,088 |
| 44,937 | 139 | 25,435 | 6,106 | 4,101 | 35,781 |
| 44,938 | 141 | 25,760 | 6,129 | 4,131 | 36,161 |
| 44,939 | 140 | 25,700 | 6,125 | 4,124 | 36,089 |
| 44,940 | 140 | 25,655 | 6,098 | 4,108 | 36,001 |
| 44,941 | 142 | 25,851 | 6,107 | 4,141 | 36,241 |
| 44,942 | 141 | 25,536 | 6,075 | 4,115 | 35,867 |
| 44,943 | 141 | 25,756 | 6,110 | 4,151 | 36,158 |
| 44,944 | 140 | 25,603 | 6,049 | 4,109 | 35,901 |
| 44,945 | 145 | 25,534 | 6,053 | 4,109 | 35,841 |
| 44,946 | 140 | 25,329 | 5,963 | 4,079 | 35,511 |
| 44,947 | 139 | 25,536 | 6,027 | 4,127 | 35,829 |
| 44,948 | 133 | 25,357 | 5,975 | 4,108 | 35,573 |
| 44,949 | 131 | 25,266 | 5,912 | 4,114 | 35,423 |
| 44,950 | 126 | 24,722 | 5,803 | 4,052 | 34,703 |
| 44,951 | 124 | 24,847 | 5,827 | 4,062 | 34,860 |

|        |     |        |       |       |        |
|--------|-----|--------|-------|-------|--------|
| 44,952 | 108 | 24,924 | 5,898 | 4,083 | 35,013 |
| 44,953 | 109 | 24,838 | 5,863 | 4,049 | 34,859 |
| 44,954 | 114 | 24,547 | 5,810 | 3,992 | 34,463 |
| 44,955 | 113 | 24,270 | 5,772 | 3,957 | 34,112 |
| 44,956 | 114 | 24,653 | 5,857 | 4,014 | 34,638 |
| 44,957 | 118 | 24,532 | 5,866 | 4,010 | 34,526 |
| 44,958 | 125 | 24,227 | 5,803 | 3,948 | 34,103 |
| 44,959 | 122 | 23,862 | 5,748 | 3,914 | 33,646 |
| 44,960 | 119 | 23,848 | 5,747 | 3,913 | 33,627 |
| 44,961 | 118 | 23,569 | 5,722 | 3,909 | 33,318 |
| 44,962 | 124 | 23,566 | 5,687 | 3,898 | 33,275 |
| 44,963 | 125 | 23,245 | 5,587 | 3,838 | 32,795 |
| 44,964 | 128 | 23,338 | 5,591 | 3,845 | 32,902 |
| 44,965 | 128 | 23,305 | 5,571 | 3,839 | 32,843 |
| 44,966 | 131 | 23,210 | 5,578 | 3,841 | 32,760 |
| 44,967 | 133 | 23,170 | 5,581 | 3,856 | 32,740 |
| 44,968 | 135 | 23,304 | 5,564 | 3,866 | 32,869 |
| 44,969 | 136 | 22,945 | 5,455 | 3,803 | 32,339 |
| 44,970 | 144 | 22,975 | 5,465 | 3,800 | 32,384 |
| 44,971 | 142 | 22,639 | 5,399 | 3,780 | 31,960 |
| 44,972 | 134 | 22,217 | 5,293 | 3,718 | 31,362 |
| 44,973 | 134 | 22,143 | 5,281 | 3,704 | 31,262 |
| 44,974 | 133 | 21,987 | 5,269 | 3,684 | 31,073 |
| 44,975 | 132 | 21,787 | 5,239 | 3,678 | 30,836 |
| 44,976 | 131 | 22,476 | 5,411 | 3,770 | 31,788 |
| 44,977 | 127 | 22,690 | 5,401 | 3,763 | 31,981 |
| 44,978 | 127 | 22,660 | 5,396 | 3,747 | 31,930 |
| 44,979 | 129 | 22,831 | 5,394 | 3,758 | 32,112 |
| 44,980 | 120 | 22,791 | 5,363 | 3,752 | 32,026 |
| 44,981 | 116 | 22,449 | 5,302 | 3,711 | 31,578 |
| 44,982 | 116 | 22,354 | 5,290 | 3,702 | 31,462 |
| 44,983 | 113 | 22,630 | 5,345 | 3,742 | 31,830 |

|        |     |        |       |       |        |
|--------|-----|--------|-------|-------|--------|
| 44,984 | 116 | 22,713 | 5,379 | 3,783 | 31,991 |
| 44,985 | 113 | 22,590 | 5,325 | 3,744 | 31,772 |
| 44,986 | 112 | 22,459 | 5,349 | 3,761 | 31,681 |
| 44,987 | 111 | 22,056 | 5,325 | 3,751 | 31,243 |
| 44,988 | 118 | 21,951 | 5,290 | 3,748 | 31,107 |
| 44,989 | 116 | 21,696 | 5,276 | 3,716 | 30,804 |
| 44,990 | 118 | 21,983 | 5,408 | 3,793 | 31,302 |
| 44,991 | 118 | 22,243 | 5,486 | 3,825 | 31,672 |
| 44,992 | 115 | 21,973 | 5,422 | 3,790 | 31,300 |
| 44,993 | 117 | 21,936 | 5,398 | 3,761 | 31,212 |
| 44,994 | 121 | 22,544 | 5,586 | 3,882 | 32,133 |
| 44,995 | 121 | 22,159 | 5,526 | 3,846 | 31,652 |
| 44,996 | 117 | 22,641 | 5,623 | 3,907 | 32,288 |
| 44,997 | 119 | 22,981 | 5,719 | 3,967 | 32,786 |
| 44,998 | 123 | 23,295 | 5,773 | 3,969 | 33,160 |
| 44,999 | 125 | 23,409 | 5,836 | 4,003 | 33,373 |
| 45,000 | 124 | 23,239 | 5,777 | 3,940 | 33,080 |
| 45,001 | 124 | 23,557 | 5,853 | 3,967 | 33,501 |
| 45,002 | 136 | 23,894 | 5,917 | 4,044 | 33,991 |
| 45,003 | 137 | 23,862 | 5,920 | 4,045 | 33,964 |
| 45,004 | 132 | 23,979 | 5,946 | 4,068 | 34,125 |
| 45,005 | 132 | 24,168 | 5,969 | 4,098 | 34,367 |
| 45,006 | 137 | 24,498 | 6,005 | 4,125 | 34,765 |
| 45,007 | 134 | 24,637 | 6,060 | 4,143 | 34,974 |
| 45,008 | 127 | 24,337 | 6,006 | 4,111 | 34,581 |
| 45,009 | 124 | 24,365 | 6,019 | 4,127 | 34,635 |
| 45,010 | 126 | 24,707 | 6,088 | 4,172 | 35,093 |
| 45,011 | 128 | 24,779 | 6,082 | 4,147 | 35,136 |
| 45,012 | 128 | 24,593 | 6,034 | 4,120 | 34,875 |
| 45,013 | 127 | 24,760 | 6,140 | 4,178 | 35,205 |
| 45,014 | 128 | 24,753 | 6,168 | 4,205 | 35,254 |
| 45,015 | 130 | 24,920 | 6,261 | 4,244 | 35,555 |

|        |     |        |       |       |        |
|--------|-----|--------|-------|-------|--------|
| 45,016 | 126 | 25,033 | 6,271 | 4,248 | 35,678 |
| 45,017 | 125 | 24,843 | 6,247 | 4,219 | 35,434 |
| 45,018 | 126 | 24,876 | 6,280 | 4,230 | 35,512 |
| 45,019 | 124 | 25,051 | 6,361 | 4,280 | 35,816 |
| 45,020 | 124 | 25,169 | 6,375 | 4,296 | 35,964 |
| 45,021 | 121 | 25,213 | 6,376 | 4,314 | 36,024 |
| 45,022 | 117 | 24,963 | 6,345 | 4,265 | 35,690 |
| 45,023 | 122 | 25,316 | 6,443 | 4,336 | 36,217 |
| 45,024 | 121 | 25,102 | 6,398 | 4,321 | 35,942 |
| 45,025 | 117 | 24,815 | 6,360 | 4,281 | 35,573 |
| 45,026 | 123 | 25,024 | 6,454 | 4,352 | 35,953 |
| 45,027 | 122 | 24,986 | 6,469 | 4,357 | 35,934 |
| 45,028 | 123 | 25,126 | 6,522 | 4,397 | 36,168 |
| 45,029 | 124 | 25,178 | 6,511 | 4,401 | 36,214 |
| 45,030 | 123 | 25,197 | 6,559 | 4,426 | 36,305 |
| 45,031 | 122 | 24,936 | 6,515 | 4,389 | 35,962 |
| 45,032 | 123 | 25,155 | 6,559 | 4,408 | 36,245 |
| 45,033 | 122 | 25,390 | 6,613 | 4,446 | 36,571 |
| 45,034 | 123 | 25,260 | 6,619 | 4,445 | 36,447 |
| 45,035 | 120 | 25,237 | 6,616 | 4,396 | 36,369 |
| 45,036 | 124 | 25,495 | 6,623 | 4,399 | 36,641 |
| 45,037 | 126 | 25,553 | 6,604 | 4,387 | 36,670 |
| 45,038 | 129 | 25,923 | 6,719 | 4,437 | 37,208 |
| 45,039 | 127 | 25,848 | 6,711 | 4,406 | 37,092 |
| 45,040 | 131 | 25,598 | 6,637 | 4,349 | 36,715 |
| 45,041 | 131 | 25,385 | 6,586 | 4,321 | 36,423 |
| 45,042 | 133 | 25,623 | 6,662 | 4,410 | 36,828 |
| 45,043 | 135 | 25,638 | 6,665 | 4,397 | 36,835 |
| 45,044 | 140 | 25,832 | 6,667 | 4,425 | 37,064 |
| 45,045 | 141 | 25,663 | 6,641 | 4,404 | 36,849 |
| 45,046 | 149 | 25,481 | 6,569 | 4,366 | 36,565 |
| 45,047 | 150 | 25,252 | 6,526 | 4,348 | 36,276 |



|        |     |        |       |       |        |
|--------|-----|--------|-------|-------|--------|
| 45,048 | 156 | 25,359 | 6,533 | 4,352 | 36,400 |
| 45,049 | 153 | 24,937 | 6,437 | 4,315 | 35,842 |
| 45,050 | 151 | 24,884 | 6,449 | 4,296 | 35,780 |
| 45,051 | 154 | 24,032 | 6,256 | 4,166 | 34,608 |
| 45,052 | 160 | 24,114 | 6,253 | 4,158 | 34,685 |
| 45,053 | 161 | 24,175 | 6,239 | 4,136 | 34,711 |
| 45,054 | 160 | 24,178 | 6,212 | 4,125 | 34,675 |
| 45,055 | 161 | 24,281 | 6,232 | 4,127 | 34,801 |
| 45,056 | 160 | 24,223 | 6,232 | 4,110 | 34,725 |
| 45,057 | 158 | 24,102 | 6,251 | 4,099 | 34,610 |
| 45,058 | 168 | 24,276 | 6,293 | 4,104 | 34,841 |
| 45,059 | 165 | 24,177 | 6,233 | 4,047 | 34,622 |
| 45,060 | 164 | 24,052 | 6,219 | 4,000 | 34,435 |
| 45,061 | 166 | 23,712 | 6,090 | 3,883 | 33,851 |
| 45,062 | 167 | 23,739 | 6,114 | 3,898 | 33,918 |
| 45,063 | 163 | 23,970 | 6,130 | 3,902 | 34,165 |
| 45,064 | 162 | 24,005 | 6,133 | 3,905 | 34,205 |
| 45,065 | 162 | 23,652 | 6,028 | 3,843 | 33,685 |
| 45,066 | 159 | 22,875 | 5,898 | 3,703 | 32,635 |
| 45,067 | 163 | 23,411 | 5,927 | 3,780 | 33,281 |
| 45,068 | 160 | 23,382 | 5,907 | 3,776 | 33,225 |
| 45,069 | 159 | 23,251 | 5,859 | 3,764 | 33,033 |
| 45,070 | 159 | 23,173 | 5,830 | 3,767 | 32,929 |
| 45,071 | 157 | 22,961 | 5,803 | 3,744 | 32,665 |
| 45,072 | 152 | 22,750 | 5,766 | 3,737 | 32,405 |
| 45,073 | 147 | 22,721 | 5,767 | 3,736 | 32,371 |
| 45,074 | 146 | 22,656 | 5,739 | 3,725 | 32,266 |
| 45,075 | 148 | 22,920 | 5,781 | 3,750 | 32,599 |
| 45,076 | 149 | 23,411 | 5,830 | 3,777 | 33,167 |
| 45,077 | 161 | 23,591 | 5,808 | 3,765 | 33,325 |
| 45,078 | 164 | 23,724 | 5,833 | 3,777 | 33,498 |
| 45,079 | 168 | 23,941 | 5,916 | 3,841 | 33,866 |

|        |     |        |       |       |        |
|--------|-----|--------|-------|-------|--------|
| 45,080 | 165 | 23,723 | 5,904 | 3,802 | 33,594 |
| 45,081 | 168 | 23,603 | 5,954 | 3,807 | 33,532 |
| 45,082 | 166 | 23,465 | 5,943 | 3,796 | 33,370 |
| 45,083 | 176 | 23,731 | 6,063 | 3,858 | 33,828 |
| 45,084 | 176 | 23,439 | 6,037 | 3,842 | 33,494 |
| 45,085 | 175 | 23,383 | 6,066 | 3,849 | 33,473 |
| 45,086 | 176 | 23,180 | 6,066 | 3,866 | 33,288 |
| 45,087 | 172 | 22,852 | 6,012 | 3,855 | 32,891 |
| 45,088 | 180 | 23,083 | 6,078 | 3,898 | 33,239 |
| 45,089 | 188 | 23,301 | 6,111 | 3,929 | 33,529 |
| 45,090 | 181 | 23,121 | 6,080 | 3,915 | 33,297 |
| 45,091 | 180 | 23,292 | 6,116 | 3,926 | 33,514 |
| 45,092 | 179 | 23,535 | 6,211 | 3,976 | 33,901 |
| 45,093 | 182 | 23,615 | 6,244 | 3,991 | 34,032 |
| 45,094 | 182 | 23,770 | 6,313 | 4,008 | 34,273 |
| 45,095 | 174 | 23,444 | 6,267 | 3,955 | 33,840 |
| 45,096 | 175 | 23,573 | 6,279 | 3,955 | 33,982 |
| 45,097 | 164 | 23,801 | 6,372 | 3,994 | 34,331 |
| 45,098 | 169 | 23,713 | 6,362 | 3,987 | 34,231 |
| 45,099 | 165 | 22,988 | 6,152 | 3,886 | 33,191 |
| 45,100 | 169 | 23,159 | 6,177 | 3,932 | 33,437 |
| 45,101 | 169 | 23,395 | 6,268 | 3,970 | 33,802 |
| 45,102 | 165 | 23,214 | 6,231 | 3,976 | 33,586 |
| 45,103 | 159 | 22,840 | 6,166 | 3,937 | 33,102 |
| 45,104 | 154 | 22,725 | 6,165 | 3,944 | 32,988 |
| 45,105 | 158 | 22,461 | 6,123 | 3,924 | 32,666 |
| 45,106 | 164 | 22,594 | 6,191 | 3,969 | 32,918 |
| 45,107 | 165 | 22,509 | 6,163 | 3,964 | 32,801 |
| 45,108 | 152 | 21,893 | 6,011 | 3,896 | 31,952 |
| 45,109 | 155 | 22,100 | 6,045 | 3,911 | 32,211 |
| 45,110 | 155 | 22,321 | 6,082 | 3,962 | 32,520 |
| 45,111 | 154 | 22,059 | 6,026 | 3,951 | 32,190 |

|        |     |        |       |       |        |
|--------|-----|--------|-------|-------|--------|
| 45,112 | 150 | 22,012 | 6,030 | 3,975 | 32,167 |
| 45,113 | 151 | 22,021 | 6,026 | 3,973 | 32,171 |
| 45,114 | 148 | 22,154 | 6,035 | 4,004 | 32,341 |
| 45,115 | 149 | 22,256 | 6,081 | 4,035 | 32,521 |
| 45,116 | 144 | 22,500 | 6,124 | 4,057 | 32,825 |
| 45,117 | 142 | 22,476 | 6,136 | 4,083 | 32,837 |
| 45,118 | 150 | 22,745 | 6,183 | 4,119 | 33,197 |
| 45,119 | 156 | 22,774 | 6,186 | 4,134 | 33,250 |
| 45,120 | 158 | 22,823 | 6,235 | 4,138 | 33,354 |
| 45,121 | 158 | 22,867 | 6,270 | 4,121 | 33,416 |
| 45,122 | 163 | 23,009 | 6,311 | 4,160 | 33,643 |
| 45,123 | 167 | 23,068 | 6,365 | 4,154 | 33,754 |
| 45,124 | 169 | 23,116 | 6,354 | 4,137 | 33,776 |
| 45,125 | 173 | 23,111 | 6,364 | 4,134 | 33,782 |
| 45,126 | 170 | 23,062 | 6,342 | 4,133 | 33,707 |
| 45,127 | 164 | 22,702 | 6,264 | 4,096 | 33,226 |
| 45,128 | 158 | 22,535 | 6,242 | 4,069 | 33,004 |
| 45,129 | 155 | 22,354 | 6,165 | 4,025 | 32,699 |
| 45,130 | 154 | 22,415 | 6,147 | 4,042 | 32,758 |
| 45,131 | 156 | 22,325 | 6,033 | 4,009 | 32,523 |
| 45,132 | 157 | 22,677 | 6,091 | 4,032 | 32,957 |
| 45,133 | 156 | 22,841 | 6,139 | 4,080 | 33,216 |
| 45,134 | 150 | 22,624 | 6,024 | 4,009 | 32,807 |
| 45,135 | 148 | 22,699 | 5,979 | 3,967 | 32,793 |
| 45,136 | 148 | 22,800 | 5,961 | 3,940 | 32,849 |
| 45,137 | 148 | 22,870 | 5,968 | 3,943 | 32,929 |
| 45,138 | 151 | 23,065 | 6,004 | 3,937 | 33,157 |
| 45,139 | 148 | 23,004 | 5,961 | 3,945 | 33,058 |
| 45,140 | 143 | 22,849 | 5,916 | 3,904 | 32,812 |
| 45,141 | 154 | 22,861 | 5,891 | 3,884 | 32,790 |
| 45,142 | 151 | 22,634 | 5,794 | 3,849 | 32,428 |
| 45,143 | 150 | 22,612 | 5,769 | 3,810 | 32,341 |

|        |     |        |       |       |        |
|--------|-----|--------|-------|-------|--------|
| 45,144 | 156 | 22,875 | 5,788 | 3,864 | 32,683 |
| 45,145 | 158 | 22,688 | 5,702 | 3,822 | 32,370 |
| 45,146 | 156 | 22,847 | 5,723 | 3,833 | 32,559 |
| 45,147 | 167 | 22,578 | 5,641 | 3,770 | 32,156 |
| 45,148 | 171 | 22,723 | 5,700 | 3,811 | 32,405 |
| 45,149 | 163 | 22,712 | 5,699 | 3,817 | 32,391 |
| 45,150 | 162 | 22,782 | 5,753 | 3,813 | 32,510 |
| 45,151 | 162 | 22,476 | 5,617 | 3,714 | 31,969 |
| 45,152 | 160 | 22,692 | 5,632 | 3,725 | 32,209 |
| 45,153 | 160 | 22,919 | 5,663 | 3,738 | 32,480 |
| 45,154 | 158 | 22,904 | 5,683 | 3,731 | 32,476 |
| 45,155 | 163 | 23,170 | 5,743 | 3,759 | 32,835 |
| 45,156 | 161 | 23,210 | 5,759 | 3,755 | 32,885 |
| 45,157 | 154 | 23,297 | 5,793 | 3,759 | 33,003 |
| 45,158 | 161 | 23,376 | 5,853 | 3,777 | 33,167 |
| 45,159 | 164 | 23,345 | 5,854 | 3,773 | 33,136 |
| 45,160 | 164 | 23,167 | 5,835 | 3,732 | 32,898 |
| 45,161 | 168 | 23,207 | 5,838 | 3,723 | 32,936 |
| 45,162 | 168 | 23,205 | 5,842 | 3,723 | 32,938 |
| 45,163 | 175 | 23,263 | 5,860 | 3,753 | 33,051 |
| 45,164 | 184 | 23,333 | 5,869 | 3,768 | 33,154 |
| 45,165 | 192 | 23,186 | 5,857 | 3,749 | 32,984 |
| 45,166 | 192 | 23,037 | 5,827 | 3,724 | 32,780 |
| 45,167 | 200 | 23,128 | 5,900 | 3,788 | 33,016 |
| 45,168 | 211 | 22,822 | 5,879 | 3,750 | 32,662 |
| 45,169 | 204 | 22,571 | 5,853 | 3,732 | 32,360 |
| 45,170 | 201 | 22,764 | 5,908 | 3,755 | 32,628 |
| 45,171 | 198 | 22,714 | 5,916 | 3,741 | 32,569 |
| 45,172 | 197 | 22,712 | 5,891 | 3,716 | 32,516 |
| 45,173 | 193 | 22,726 | 5,891 | 3,696 | 32,506 |
| 45,174 | 189 | 22,790 | 5,901 | 3,710 | 32,590 |
| 45,175 | 186 | 23,044 | 6,010 | 3,750 | 32,990 |

|        |     |        |       |       |        |
|--------|-----|--------|-------|-------|--------|
| 45,176 | 181 | 22,884 | 5,973 | 3,729 | 32,767 |
| 45,177 | 189 | 22,794 | 5,991 | 3,727 | 32,701 |
| 45,178 | 197 | 23,123 | 6,055 | 3,776 | 33,151 |
| 45,179 | 190 | 22,572 | 5,958 | 3,695 | 32,415 |
| 45,180 | 188 | 22,644 | 6,008 | 3,710 | 32,550 |
| 45,181 | 187 | 22,770 | 6,080 | 3,750 | 32,787 |
| 45,182 | 182 | 22,619 | 6,066 | 3,748 | 32,615 |
| 45,183 | 183 | 22,730 | 6,107 | 3,763 | 32,783 |
| 45,184 | 182 | 22,827 | 6,124 | 3,760 | 32,893 |
| 45,185 | 181 | 22,615 | 6,065 | 3,731 | 32,592 |
| 45,186 | 186 | 22,245 | 6,001 | 3,695 | 32,127 |
| 45,187 | 190 | 22,323 | 6,036 | 3,717 | 32,266 |
| 45,188 | 186 | 22,350 | 6,029 | 3,723 | 32,288 |
| 45,189 | 186 | 22,254 | 6,063 | 3,720 | 32,223 |
| 45,190 | 179 | 21,899 | 6,027 | 3,639 | 31,744 |
| 45,191 | 182 | 22,191 | 6,113 | 3,725 | 32,211 |
| 45,192 | 183 | 22,386 | 6,141 | 3,765 | 32,475 |
| 45,193 | 182 | 22,320 | 6,105 | 3,746 | 32,353 |
| 45,194 | 185 | 21,986 | 6,014 | 3,713 | 31,898 |
| 45,195 | 179 | 21,660 | 5,974 | 3,649 | 31,462 |
| 45,196 | 181 | 21,900 | 6,093 | 3,747 | 31,921 |
| 45,197 | 187 | 21,814 | 6,072 | 3,741 | 31,814 |
| 45,198 | 184 | 21,547 | 6,021 | 3,679 | 31,431 |
| 45,199 | 184 | 21,593 | 6,028 | 3,672 | 31,477 |
| 45,200 | 181 | 21,489 | 6,012 | 3,661 | 31,343 |
| 45,201 | 186 | 21,243 | 5,968 | 3,632 | 31,029 |
| 45,202 | 190 | 21,194 | 5,938 | 3,629 | 30,951 |
| 45,203 | 189 | 21,027 | 5,902 | 3,617 | 30,735 |
| 45,204 | 191 | 21,252 | 6,000 | 3,652 | 31,095 |
| 45,205 | 191 | 21,155 | 5,983 | 3,661 | 30,990 |
| 45,206 | 185 | 21,425 | 6,062 | 3,715 | 31,387 |
| 45,207 | 185 | 21,543 | 6,061 | 3,734 | 31,523 |

|        |     |        |       |       |        |
|--------|-----|--------|-------|-------|--------|
| 45,208 | 178 | 21,457 | 6,006 | 3,703 | 31,344 |
| 45,209 | 178 | 21,446 | 5,993 | 3,698 | 31,315 |
| 45,210 | 180 | 21,769 | 6,036 | 3,757 | 31,742 |
| 45,211 | 177 | 21,441 | 5,949 | 3,708 | 31,275 |
| 45,212 | 181 | 21,698 | 5,989 | 3,736 | 31,604 |
| 45,213 | 187 | 22,059 | 6,071 | 3,769 | 32,086 |
| 45,214 | 181 | 22,018 | 6,055 | 3,753 | 32,007 |
| 45,215 | 193 | 22,289 | 6,133 | 3,785 | 32,400 |
| 45,216 | 188 | 22,380 | 6,137 | 3,799 | 32,504 |
| 45,217 | 185 | 22,214 | 6,074 | 3,760 | 32,233 |
| 45,218 | 186 | 22,022 | 6,009 | 3,706 | 31,923 |
| 45,219 | 175 | 21,752 | 5,940 | 3,649 | 31,516 |
| 45,220 | 179 | 22,199 | 6,116 | 3,728 | 32,222 |
| 45,221 | 182 | 22,126 | 6,065 | 3,713 | 32,086 |
| 45,222 | 182 | 21,940 | 5,984 | 3,676 | 31,782 |
| 45,223 | 183 | 21,928 | 5,971 | 3,673 | 31,755 |
| 45,224 | 184 | 21,860 | 5,951 | 3,658 | 31,653 |
| 45,225 | 185 | 20,942 | 5,672 | 3,509 | 30,308 |
| 45,226 | 185 | 21,089 | 5,710 | 3,522 | 30,506 |
| 45,227 | 179 | 21,281 | 5,756 | 3,540 | 30,756 |
| 45,228 | 179 | 21,343 | 5,812 | 3,550 | 30,884 |
| 45,229 | 173 | 21,200 | 5,819 | 3,514 | 30,706 |
| 45,230 | 178 | 20,745 | 5,733 | 3,439 | 30,095 |
| 45,231 | 179 | 20,731 | 5,684 | 3,407 | 30,001 |
| 45,232 | 181 | 20,624 | 5,661 | 3,372 | 29,838 |
| 45,233 | 181 | 20,858 | 5,737 | 3,403 | 30,179 |
| 45,234 | 182 | 20,725 | 5,674 | 3,382 | 29,963 |
| 45,235 | 181 | 20,707 | 5,684 | 3,382 | 29,954 |
| 45,236 | 179 | 20,611 | 5,660 | 3,367 | 29,817 |
| 45,237 | 176 | 20,724 | 5,682 | 3,384 | 29,966 |
| 45,238 | 176 | 20,780 | 5,666 | 3,387 | 30,009 |
| 45,239 | 174 | 20,982 | 5,723 | 3,429 | 30,308 |

|        |     |        |       |       |        |
|--------|-----|--------|-------|-------|--------|
| 45,240 | 168 | 20,868 | 5,676 | 3,419 | 30,131 |
| 45,241 | 173 | 20,923 | 5,665 | 3,411 | 30,172 |
| 45,242 | 173 | 20,984 | 5,647 | 3,374 | 30,178 |
| 45,243 | 169 | 20,886 | 5,647 | 3,341 | 30,043 |
| 45,244 | 167 | 20,993 | 5,666 | 3,330 | 30,156 |
| 45,245 | 176 | 20,956 | 5,611 | 3,276 | 30,019 |
| 45,246 | 179 | 21,185 | 5,649 | 3,290 | 30,303 |
| 45,247 | 174 | 21,092 | 5,639 | 3,290 | 30,195 |
| 45,248 | 173 | 21,105 | 5,699 | 3,331 | 30,308 |
| 45,249 | 170 | 20,955 | 5,641 | 3,318 | 30,084 |
| 45,250 | 170 | 20,955 | 5,645 | 3,312 | 30,082 |
| 45,251 | 171 | 21,211 | 5,706 | 3,327 | 30,415 |
| 45,252 | 168 | 21,147 | 5,725 | 3,331 | 30,371 |
| 45,253 | 161 | 21,079 | 5,761 | 3,348 | 30,349 |
| 45,254 | 158 | 21,000 | 5,748 | 3,349 | 30,255 |
| 45,255 | 160 | 21,032 | 5,737 | 3,342 | 30,271 |
| 45,256 | 160 | 20,889 | 5,731 | 3,319 | 30,099 |
| 45,257 | 158 | 21,369 | 5,900 | 3,390 | 30,817 |
| 45,258 | 158 | 21,339 | 5,962 | 3,407 | 30,866 |
| 45,259 | 156 | 21,625 | 6,011 | 3,474 | 31,266 |
| 45,260 | 153 | 21,627 | 6,039 | 3,471 | 31,290 |
| 45,261 | 151 | 21,471 | 6,059 | 3,479 | 31,160 |
| 45,262 | 150 | 21,789 | 6,196 | 3,572 | 31,707 |
| 45,263 | 138 | 21,517 | 6,143 | 3,538 | 31,336 |
| 45,264 | 143 | 21,801 | 6,238 | 3,583 | 31,765 |
| 45,265 | 144 | 22,024 | 6,307 | 3,631 | 32,106 |
| 45,266 | 128 | 21,750 | 6,262 | 3,614 | 31,754 |
| 45,267 | 128 | 21,904 | 6,326 | 3,638 | 31,996 |
| 45,268 | 124 | 22,101 | 6,408 | 3,696 | 32,329 |
| 45,269 | 123 | 22,227 | 6,452 | 3,719 | 32,521 |
| 45,270 | 125 | 22,239 | 6,403 | 3,710 | 32,477 |
| 45,271 | 127 | 22,201 | 6,416 | 3,705 | 32,449 |

|        |     |        |       |       |        |
|--------|-----|--------|-------|-------|--------|
| 45,272 | 125 | 22,073 | 6,407 | 3,673 | 32,278 |
| 45,273 | 138 | 22,756 | 6,581 | 3,796 | 33,271 |
| 45,274 | 139 | 22,727 | 6,577 | 3,809 | 33,252 |
| 45,275 | 139 | 22,746 | 6,577 | 3,808 | 33,270 |
| 45,276 | 138 | 22,686 | 6,560 | 3,810 | 33,194 |
| 45,277 | 143 | 23,013 | 6,720 | 3,919 | 33,795 |
| 45,278 | 142 | 22,957 | 6,710 | 3,922 | 33,731 |
| 45,279 | 141 | 22,460 | 6,573 | 3,847 | 33,021 |
| 45,280 | 141 | 22,594 | 6,605 | 3,861 | 33,201 |
| 45,281 | 136 | 22,554 | 6,613 | 3,893 | 33,196 |
| 45,282 | 143 | 22,580 | 6,637 | 3,915 | 33,275 |
| 45,283 | 146 | 22,619 | 6,664 | 3,934 | 33,363 |
| 45,284 | 152 | 22,464 | 6,586 | 3,909 | 33,111 |
| 45,285 | 149 | 22,143 | 6,528 | 3,865 | 32,685 |
| 45,286 | 150 | 22,397 | 6,608 | 3,912 | 33,067 |
| 45,287 | 148 | 22,097 | 6,537 | 3,875 | 32,657 |
| 45,288 | 155 | 22,076 | 6,539 | 3,879 | 32,649 |
| 45,289 | 156 | 22,316 | 6,596 | 3,894 | 32,962 |
| 45,290 | 158 | 22,189 | 6,526 | 3,863 | 32,736 |
| 45,291 | 157 | 21,890 | 6,462 | 3,821 | 32,330 |
| 45,292 | 152 | 21,959 | 6,496 | 3,842 | 32,449 |
| 45,293 | 149 | 21,733 | 6,470 | 3,840 | 32,192 |
| 45,294 | 142 | 21,244 | 6,375 | 3,778 | 31,539 |
| 45,295 | 142 | 21,281 | 6,403 | 3,819 | 31,645 |
| 45,296 | 137 | 21,352 | 6,421 | 3,835 | 31,745 |
| 45,297 | 137 | 21,404 | 6,415 | 3,832 | 31,788 |
| 45,298 | 138 | 21,463 | 6,377 | 3,819 | 31,797 |
| 45,299 | 136 | 21,387 | 6,377 | 3,787 | 31,687 |
| 45,300 | 130 | 21,343 | 6,374 | 3,787 | 31,634 |
| 45,301 | 133 | 21,183 | 6,350 | 3,773 | 31,439 |
| 45,302 | 132 | 21,227 | 6,336 | 3,778 | 31,473 |
| 45,303 | 136 | 21,114 | 6,280 | 3,738 | 31,268 |



|        |     |        |       |       |        |
|--------|-----|--------|-------|-------|--------|
| 45,304 | 135 | 20,890 | 6,226 | 3,710 | 30,961 |
| 45,305 | 135 | 20,910 | 6,245 | 3,741 | 31,031 |
| 45,306 | 141 | 20,792 | 6,189 | 3,735 | 30,857 |
| 45,307 | 139 | 20,705 | 6,086 | 3,704 | 30,634 |
| 45,308 | 144 | 20,454 | 6,023 | 3,666 | 30,287 |
| 45,309 | 144 | 20,166 | 5,923 | 3,623 | 29,856 |
| 45,310 | 147 | 20,324 | 5,923 | 3,647 | 30,041 |
| 45,311 | 148 | 20,265 | 5,884 | 3,601 | 29,898 |
| 45,312 | 148 | 20,256 | 5,873 | 3,599 | 29,876 |
| 45,313 | 144 | 20,040 | 5,812 | 3,537 | 29,533 |
| 45,314 | 147 | 19,963 | 5,780 | 3,515 | 29,405 |
| 45,315 | 140 | 19,815 | 5,734 | 3,479 | 29,168 |
| 45,316 | 138 | 19,480 | 5,638 | 3,407 | 28,663 |
| 45,317 | 138 | 19,525 | 5,600 | 3,399 | 28,662 |
| 45,318 | 143 | 18,778 | 5,351 | 3,256 | 27,528 |
| 45,319 | 143 | 18,985 | 5,374 | 3,265 | 27,767 |
| 45,320 | 136 | 19,140 | 5,384 | 3,270 | 27,930 |
| 45,321 | 133 | 19,089 | 5,353 | 3,272 | 27,847 |
| 45,322 | 131 | 19,112 | 5,362 | 3,268 | 27,873 |
| 45,323 | 125 | 19,005 | 5,344 | 3,268 | 27,742 |
| 45,324 | 125 | 18,690 | 5,297 | 3,253 | 27,365 |
| 45,325 | 124 | 18,556 | 5,260 | 3,238 | 27,178 |
| 45,326 | 124 | 18,594 | 5,262 | 3,241 | 27,221 |
| 45,327 | 126 | 18,491 | 5,253 | 3,230 | 27,100 |
| 45,328 | 129 | 18,563 | 5,225 | 3,224 | 27,141 |
| 45,329 | 132 | 18,843 | 5,247 | 3,270 | 27,492 |
| 45,330 | 136 | 19,051 | 5,247 | 3,281 | 27,715 |
| 45,331 | 134 | 19,134 | 5,248 | 3,290 | 27,806 |
| 45,332 | 134 | 19,276 | 5,256 | 3,280 | 27,946 |
| 45,333 | 129 | 19,477 | 5,311 | 3,316 | 28,233 |
| 45,334 | 125 | 19,421 | 5,302 | 3,301 | 28,149 |
| 45,335 | 120 | 19,189 | 5,251 | 3,273 | 27,833 |

|        |     |        |       |       |        |
|--------|-----|--------|-------|-------|--------|
| 45,336 | 123 | 19,229 | 5,257 | 3,291 | 27,900 |
| 45,337 | 123 | 19,282 | 5,275 | 3,332 | 28,012 |
| 45,338 | 116 | 19,158 | 5,272 | 3,309 | 27,855 |
| 45,339 | 118 | 19,155 | 5,255 | 3,285 | 27,813 |
| 45,340 | 116 | 18,967 | 5,217 | 3,250 | 27,550 |
| 45,341 | 121 | 19,504 | 5,432 | 3,328 | 28,385 |
| 45,342 | 120 | 19,318 | 5,350 | 3,291 | 28,079 |
| 45,343 | 121 | 19,476 | 5,369 | 3,318 | 28,284 |
| 45,344 | 120 | 19,751 | 5,431 | 3,379 | 28,681 |
| 45,345 | 120 | 19,527 | 5,369 | 3,335 | 28,351 |
| 45,346 | 120 | 19,462 | 5,352 | 3,325 | 28,259 |
| 45,347 | 123 | 19,848 | 5,463 | 3,388 | 28,822 |
| 45,348 | 121 | 19,588 | 5,434 | 3,366 | 28,509 |
| 45,349 | 119 | 19,445 | 5,419 | 3,354 | 28,337 |
| 45,350 | 126 | 19,798 | 5,501 | 3,412 | 28,837 |
| 45,351 | 127 | 19,867 | 5,516 | 3,429 | 28,939 |
| 45,352 | 130 | 19,926 | 5,508 | 3,426 | 28,990 |
| 45,353 | 135 | 19,744 | 5,442 | 3,399 | 28,720 |
| 45,354 | 136 | 19,815 | 5,464 | 3,388 | 28,803 |
| 45,355 | 144 | 20,075 | 5,535 | 3,409 | 29,163 |
| 45,356 | 140 | 19,908 | 5,499 | 3,364 | 28,911 |
| 45,357 | 139 | 19,897 | 5,481 | 3,367 | 28,884 |
| 45,358 | 144 | 19,823 | 5,457 | 3,350 | 28,774 |
| 45,359 | 147 | 20,001 | 5,498 | 3,370 | 29,016 |
| 45,360 | 145 | 20,032 | 5,505 | 3,355 | 29,037 |
| 45,361 | 149 | 19,851 | 5,487 | 3,317 | 28,804 |
| 45,362 | 150 | 20,172 | 5,550 | 3,356 | 29,228 |
| 45,363 | 151 | 20,122 | 5,511 | 3,362 | 29,146 |
| 45,364 | 151 | 19,981 | 5,494 | 3,367 | 28,993 |
| 45,365 | 153 | 20,232 | 5,571 | 3,407 | 29,363 |
| 45,366 | 148 | 20,222 | 5,570 | 3,410 | 29,350 |
| 45,367 | 146 | 20,389 | 5,639 | 3,447 | 29,621 |

|        |     |        |       |       |        |
|--------|-----|--------|-------|-------|--------|
| 45,368 | 152 | 20,480 | 5,653 | 3,446 | 29,731 |
| 45,369 | 144 | 20,534 | 5,640 | 3,460 | 29,778 |
| 45,370 | 153 | 20,435 | 5,605 | 3,448 | 29,641 |
| 45,371 | 154 | 20,408 | 5,614 | 3,440 | 29,616 |
| 45,372 | 154 | 20,672 | 5,711 | 3,470 | 30,007 |
| 45,373 | 154 | 20,751 | 5,669 | 3,449 | 30,023 |
| 45,374 | 154 | 20,743 | 5,678 | 3,443 | 30,018 |
| 45,375 | 156 | 20,841 | 5,700 | 3,434 | 30,131 |
| 45,376 | 157 | 20,944 | 5,699 | 3,404 | 30,204 |
| 45,377 | 156 | 21,083 | 5,757 | 3,434 | 30,430 |
| 45,378 | 153 | 20,878 | 5,680 | 3,377 | 30,088 |
| 45,379 | 148 | 20,577 | 5,651 | 3,359 | 29,735 |
| 45,380 | 156 | 20,796 | 5,767 | 3,405 | 30,124 |
| 45,381 | 152 | 20,721 | 5,799 | 3,421 | 30,093 |
| 45,382 | 154 | 20,696 | 5,774 | 3,426 | 30,050 |
| 45,383 | 155 | 20,862 | 5,801 | 3,445 | 30,263 |
| 45,384 | 154 | 20,945 | 5,830 | 3,442 | 30,371 |
| 45,385 | 153 | 21,081 | 5,831 | 3,471 | 30,536 |
| 45,386 | 151 | 21,033 | 5,801 | 3,431 | 30,416 |
| 45,387 | 151 | 21,211 | 5,805 | 3,425 | 30,592 |
| 45,388 | 152 | 21,479 | 5,897 | 3,444 | 30,972 |
| 45,389 | 153 | 21,478 | 5,900 | 3,452 | 30,983 |
| 45,390 | 151 | 21,362 | 5,850 | 3,444 | 30,807 |
| 45,391 | 151 | 21,586 | 5,911 | 3,514 | 31,162 |
| 45,392 | 150 | 21,627 | 5,901 | 3,533 | 31,211 |
| 45,393 | 151 | 21,458 | 5,876 | 3,506 | 30,991 |
| 45,394 | 151 | 21,578 | 5,855 | 3,504 | 31,088 |
| 45,395 | 152 | 21,570 | 5,889 | 3,509 | 31,120 |
| 45,396 | 156 | 22,030 | 5,990 | 3,571 | 31,747 |
| 45,397 | 158 | 21,988 | 6,018 | 3,588 | 31,752 |
| 45,398 | 156 | 22,114 | 6,051 | 3,599 | 31,920 |
| 45,399 | 158 | 21,826 | 5,968 | 3,536 | 31,488 |

|        |     |        |       |       |        |
|--------|-----|--------|-------|-------|--------|
| 45,400 | 165 | 22,087 | 5,986 | 3,558 | 31,796 |
| 45,401 | 159 | 22,297 | 6,022 | 3,611 | 32,089 |
| 45,402 | 163 | 22,656 | 6,075 | 3,668 | 32,562 |
| 45,403 | 160 | 22,943 | 6,113 | 3,705 | 32,921 |
| 45,404 | 157 | 22,916 | 6,093 | 3,690 | 32,856 |
| 45,405 | 158 | 22,947 | 6,070 | 3,685 | 32,860 |
| 45,406 | 150 | 22,988 | 6,115 | 3,731 | 32,984 |
| 45,407 | 149 | 22,984 | 6,124 | 3,749 | 33,006 |
| 45,408 | 146 | 22,634 | 6,089 | 3,708 | 32,577 |
| 45,409 | 145 | 22,828 | 6,157 | 3,750 | 32,880 |
| 45,410 | 143 | 22,822 | 6,148 | 3,757 | 32,870 |
| 45,411 | 145 | 22,884 | 6,171 | 3,779 | 32,979 |
| 45,412 | 138 | 22,849 | 6,146 | 3,791 | 32,924 |
| 45,413 | 140 | 22,724 | 6,154 | 3,813 | 32,831 |
| 45,414 | 145 | 22,600 | 6,143 | 3,792 | 32,680 |
| 45,415 | 145 | 22,606 | 6,145 | 3,795 | 32,691 |
| 45,416 | 144 | 22,443 | 6,106 | 3,769 | 32,462 |
| 45,417 | 150 | 21,804 | 5,977 | 3,653 | 31,584 |
| 45,418 | 151 | 22,019 | 6,034 | 3,691 | 31,895 |
| 45,419 | 154 | 22,197 | 6,083 | 3,722 | 32,156 |
| 45,420 | 156 | 22,254 | 6,080 | 3,706 | 32,196 |
| 45,421 | 156 | 22,388 | 6,108 | 3,751 | 32,403 |
| 45,422 | 158 | 22,473 | 6,099 | 3,756 | 32,486 |
| 45,423 | 161 | 22,391 | 6,133 | 3,776 | 32,461 |
| 45,424 | 161 | 22,384 | 6,130 | 3,796 | 32,471 |
| 45,425 | 157 | 22,669 | 6,159 | 3,842 | 32,827 |
| 45,426 | 161 | 22,791 | 6,165 | 3,864 | 32,981 |
| 45,427 | 161 | 22,836 | 6,188 | 3,896 | 33,081 |
| 45,428 | 161 | 22,883 | 6,177 | 3,906 | 33,127 |
| 45,429 | 162 | 22,703 | 6,075 | 3,847 | 32,787 |
| 45,430 | 165 | 22,828 | 6,112 | 3,885 | 32,990 |
| 45,431 | 157 | 23,181 | 6,157 | 3,918 | 33,413 |

|        |     |        |       |       |        |
|--------|-----|--------|-------|-------|--------|
| 45,432 | 158 | 23,499 | 6,197 | 3,978 | 33,832 |
| 45,433 | 157 | 23,359 | 6,224 | 3,953 | 33,693 |
| 45,434 | 157 | 23,301 | 6,208 | 3,982 | 33,648 |
| 45,435 | 159 | 23,408 | 6,242 | 4,008 | 33,817 |
| 45,436 | 169 | 23,401 | 6,259 | 3,994 | 33,823 |
| 45,437 | 166 | 23,118 | 6,206 | 3,971 | 33,461 |
| 45,438 | 169 | 23,310 | 6,301 | 4,032 | 33,812 |
| 45,439 | 168 | 23,141 | 6,270 | 4,039 | 33,618 |
| 45,440 | 166 | 23,189 | 6,258 | 4,000 | 33,613 |
| 45,441 | 171 | 23,071 | 6,228 | 3,982 | 33,452 |
| 45,442 | 172 | 23,017 | 6,206 | 3,969 | 33,364 |
| 45,443 | 174 | 22,986 | 6,176 | 3,936 | 33,272 |
| 45,444 | 176 | 22,959 | 6,146 | 3,937 | 33,218 |
| 45,445 | 175 | 22,945 | 6,138 | 3,938 | 33,196 |
| 45,446 | 175 | 23,027 | 6,212 | 3,967 | 33,381 |
| 45,447 | 177 | 23,007 | 6,230 | 3,995 | 33,409 |
| 45,448 | 171 | 22,907 | 6,174 | 3,953 | 33,205 |
| 45,449 | 177 | 22,710 | 6,131 | 3,952 | 32,970 |
| 45,450 | 169 | 22,416 | 6,090 | 3,920 | 32,595 |
| 45,451 | 166 | 22,793 | 6,217 | 4,024 | 33,200 |
| 45,452 | 171 | 22,559 | 6,180 | 3,992 | 32,902 |
| 45,453 | 175 | 22,670 | 6,229 | 4,011 | 33,085 |
| 45,454 | 176 | 22,686 | 6,254 | 4,017 | 33,133 |
| 45,455 | 165 | 22,450 | 6,208 | 3,988 | 32,811 |
| 45,456 | 166 | 21,986 | 6,053 | 3,907 | 32,112 |
| 45,457 | 166 | 22,232 | 6,091 | 3,932 | 32,421 |
| 45,458 | 163 | 22,442 | 6,148 | 3,970 | 32,723 |
| 45,459 | 165 | 22,199 | 6,062 | 3,894 | 32,320 |
| 45,460 | 167 | 22,306 | 6,091 | 3,903 | 32,467 |
| 45,461 | 162 | 22,487 | 6,150 | 3,938 | 32,737 |
| 45,462 | 162 | 22,081 | 6,031 | 3,828 | 32,102 |
| 45,463 | 160 | 22,235 | 6,063 | 3,839 | 32,297 |

|        |     |        |       |       |        |
|--------|-----|--------|-------|-------|--------|
| 45,464 | 162 | 22,243 | 6,073 | 3,844 | 32,322 |
| 45,465 | 156 | 21,975 | 6,017 | 3,800 | 31,948 |
| 45,466 | 158 | 22,191 | 6,031 | 3,837 | 32,217 |
| 45,467 | 159 | 22,117 | 6,003 | 3,851 | 32,130 |
| 45,468 | 149 | 22,035 | 5,981 | 3,847 | 32,012 |
| 45,469 | 149 | 21,965 | 5,931 | 3,816 | 31,861 |
| 45,470 | 141 | 21,796 | 5,886 | 3,783 | 31,606 |
| 45,471 | 137 | 21,486 | 5,847 | 3,769 | 31,239 |
| 45,472 | 129 | 21,435 | 5,828 | 3,760 | 31,152 |
| 45,473 | 125 | 21,344 | 5,807 | 3,751 | 31,027 |
| 45,474 | 127 | 21,547 | 5,832 | 3,773 | 31,279 |
| 45,475 | 129 | 21,505 | 5,832 | 3,753 | 31,219 |
| 45,476 | 122 | 21,414 | 5,825 | 3,734 | 31,095 |
| 45,477 | 118 | 20,646 | 5,639 | 3,607 | 30,010 |
| 45,478 | 124 | 20,883 | 5,676 | 3,630 | 30,313 |
| 45,479 | 124 | 21,270 | 5,741 | 3,655 | 30,790 |
| 45,480 | 126 | 21,345 | 5,759 | 3,647 | 30,877 |
| 45,481 | 124 | 21,070 | 5,704 | 3,615 | 30,513 |
| 45,482 | 124 | 21,033 | 5,716 | 3,624 | 30,497 |
| 45,483 | 124 | 21,066 | 5,760 | 3,619 | 30,569 |
| 45,484 | 123 | 20,832 | 5,658 | 3,581 | 30,194 |
| 45,485 | 125 | 20,599 | 5,617 | 3,518 | 29,859 |
| 45,486 | 125 | 20,272 | 5,542 | 3,474 | 29,413 |
| 45,487 | 114 | 20,375 | 5,553 | 3,487 | 29,529 |
| 45,488 | 120 | 20,394 | 5,528 | 3,471 | 29,513 |
| 45,489 | 123 | 20,372 | 5,474 | 3,441 | 29,410 |
| 45,490 | 122 | 20,371 | 5,465 | 3,437 | 29,395 |
| 45,491 | 121 | 20,433 | 5,447 | 3,461 | 29,462 |
| 45,492 | 118 | 20,417 | 5,435 | 3,469 | 29,439 |
| 45,493 | 118 | 20,347 | 5,444 | 3,470 | 29,379 |
| 45,494 | 114 | 20,352 | 5,432 | 3,476 | 29,374 |
| 45,495 | 113 | 20,366 | 5,419 | 3,438 | 29,336 |

|        |     |        |       |       |        |
|--------|-----|--------|-------|-------|--------|
| 45,496 | 117 | 20,296 | 5,420 | 3,456 | 29,289 |
| 45,497 | 114 | 20,114 | 5,341 | 3,415 | 28,984 |
| 45,498 | 115 | 20,536 | 5,399 | 3,437 | 29,487 |
| 45,499 | 112 | 20,005 | 5,178 | 3,284 | 28,579 |
| 45,500 | 113 | 20,282 | 5,244 | 3,339 | 28,978 |
| 45,501 | 108 | 20,349 | 5,276 | 3,347 | 29,080 |
| 45,502 | 110 | 20,505 | 5,292 | 3,334 | 29,241 |
| 45,503 | 104 | 20,645 | 5,308 | 3,326 | 29,383 |
| 45,504 | 99  | 20,655 | 5,300 | 3,326 | 29,380 |
| 45,505 | 99  | 20,558 | 5,281 | 3,322 | 29,260 |
| 45,506 | 96  | 20,223 | 5,212 | 3,262 | 28,793 |
| 45,507 | 95  | 20,090 | 5,225 | 3,233 | 28,643 |
| 45,508 | 98  | 20,427 | 5,289 | 3,286 | 29,100 |
| 45,509 | 108 | 20,206 | 5,247 | 3,248 | 28,809 |
| 45,510 | 105 | 20,051 | 5,231 | 3,241 | 28,628 |
| 45,511 | 108 | 20,476 | 5,307 | 3,274 | 29,165 |
| 45,512 | 113 | 20,455 | 5,302 | 3,278 | 29,148 |
| 45,513 | 111 | 20,231 | 5,229 | 3,252 | 28,823 |
| 45,514 | 115 | 20,580 | 5,281 | 3,288 | 29,264 |
| 45,515 | 115 | 20,851 | 5,300 | 3,306 | 29,572 |
| 45,516 | 112 | 20,968 | 5,313 | 3,315 | 29,708 |
| 45,517 | 112 | 20,947 | 5,304 | 3,272 | 29,635 |
| 45,518 | 111 | 21,088 | 5,315 | 3,264 | 29,778 |
| 45,519 | 111 | 21,115 | 5,305 | 3,269 | 29,800 |
| 45,520 | 110 | 21,358 | 5,375 | 3,322 | 30,165 |
| 45,521 | 109 | 21,302 | 5,363 | 3,320 | 30,094 |
| 45,522 | 115 | 21,313 | 5,292 | 3,265 | 29,985 |
| 45,523 | 115 | 21,512 | 5,320 | 3,289 | 30,236 |
| 45,524 | 111 | 21,805 | 5,382 | 3,327 | 30,625 |
| 45,525 | 111 | 22,122 | 5,443 | 3,366 | 31,042 |
| 45,526 | 111 | 22,169 | 5,428 | 3,374 | 31,082 |
| 45,527 | 112 | 21,829 | 5,270 | 3,299 | 30,510 |

|        |     |        |       |       |        |
|--------|-----|--------|-------|-------|--------|
| 45,528 | 114 | 22,251 | 5,352 | 3,331 | 31,048 |
| 45,529 | 114 | 22,494 | 5,409 | 3,385 | 31,402 |
| 45,530 | 121 | 22,489 | 5,401 | 3,388 | 31,399 |
| 45,531 | 118 | 22,348 | 5,358 | 3,385 | 31,209 |
| 45,532 | 121 | 22,457 | 5,390 | 3,389 | 31,357 |
| 45,533 | 122 | 22,666 | 5,452 | 3,431 | 31,671 |
| 45,534 | 121 | 22,567 | 5,421 | 3,403 | 31,512 |
| 45,535 | 116 | 22,443 | 5,378 | 3,397 | 31,334 |
| 45,536 | 115 | 22,319 | 5,331 | 3,377 | 31,142 |
| 45,537 | 115 | 22,347 | 5,339 | 3,377 | 31,178 |
| 45,538 | 109 | 22,174 | 5,316 | 3,367 | 30,966 |
| 45,539 | 110 | 22,535 | 5,391 | 3,429 | 31,465 |
| 45,540 | 105 | 22,392 | 5,351 | 3,415 | 31,263 |
| 45,541 | 106 | 22,616 | 5,439 | 3,466 | 31,627 |
| 45,542 | 113 | 22,481 | 5,393 | 3,435 | 31,422 |
| 45,543 | 112 | 22,399 | 5,375 | 3,410 | 31,296 |
| 45,544 | 114 | 22,617 | 5,444 | 3,440 | 31,615 |
| 45,545 | 113 | 22,610 | 5,430 | 3,442 | 31,595 |
| 45,546 | 111 | 21,943 | 5,271 | 3,325 | 30,650 |
| 45,547 | 112 | 22,094 | 5,314 | 3,351 | 30,871 |
| 45,548 | 109 | 22,269 | 5,377 | 3,398 | 31,153 |
| 45,549 | 106 | 22,011 | 5,349 | 3,380 | 30,846 |
| 45,550 | 106 | 21,862 | 5,307 | 3,352 | 30,627 |
| 45,551 | 110 | 21,840 | 5,291 | 3,343 | 30,584 |
| 45,552 | 108 | 21,504 | 5,228 | 3,316 | 30,156 |
| 45,553 | 110 | 21,716 | 5,325 | 3,352 | 30,503 |
| 45,554 | 111 | 21,618 | 5,332 | 3,356 | 30,417 |
| 45,555 | 115 | 21,651 | 5,343 | 3,364 | 30,473 |
| 45,556 | 116 | 21,779 | 5,345 | 3,405 | 30,645 |
| 45,557 | 116 | 21,722 | 5,302 | 3,384 | 30,524 |
| 45,558 | 117 | 21,862 | 5,323 | 3,391 | 30,693 |
| 45,559 | 122 | 22,090 | 5,402 | 3,433 | 31,047 |



|        |     |        |       |       |        |
|--------|-----|--------|-------|-------|--------|
| 45,560 | 113 | 22,115 | 5,371 | 3,425 | 31,024 |
| 45,561 | 114 | 21,925 | 5,302 | 3,389 | 30,730 |
| 45,562 | 113 | 21,922 | 5,293 | 3,399 | 30,727 |
| 45,563 | 108 | 22,498 | 5,400 | 3,477 | 31,483 |
| 45,564 | 107 | 22,326 | 5,377 | 3,447 | 31,257 |
| 45,565 | 107 | 22,783 | 5,465 | 3,524 | 31,879 |
| 45,566 | 104 | 22,525 | 5,426 | 3,506 | 31,561 |
| 45,567 | 105 | 22,462 | 5,431 | 3,525 | 31,523 |
| 45,568 | 106 | 22,473 | 5,468 | 3,553 | 31,600 |
| 45,569 | 108 | 22,496 | 5,483 | 3,563 | 31,650 |
| 45,570 | 111 | 22,366 | 5,484 | 3,560 | 31,521 |
| 45,571 | 111 | 22,349 | 5,484 | 3,563 | 31,507 |
| 45,572 | 113 | 22,351 | 5,498 | 3,571 | 31,533 |
| 45,573 | 116 | 22,116 | 5,484 | 3,528 | 31,244 |
| 45,574 | 116 | 22,079 | 5,475 | 3,539 | 31,209 |
| 45,575 | 118 | 22,164 | 5,519 | 3,558 | 31,359 |
| 45,576 | 119 | 22,051 | 5,534 | 3,569 | 31,273 |
| 45,577 | 117 | 21,853 | 5,522 | 3,547 | 31,039 |
| 45,578 | 118 | 22,409 | 5,717 | 3,666 | 31,910 |
| 45,579 | 116 | 22,313 | 5,754 | 3,704 | 31,887 |
| 45,580 | 111 | 22,315 | 5,791 | 3,698 | 31,915 |
| 45,581 | 112 | 21,942 | 5,720 | 3,647 | 31,421 |
| 45,582 | 113 | 22,192 | 5,782 | 3,676 | 31,763 |
| 45,583 | 113 | 22,489 | 5,868 | 3,724 | 32,194 |
| 45,584 | 113 | 22,483 | 5,910 | 3,746 | 32,252 |
| 45,585 | 120 | 22,588 | 5,936 | 3,774 | 32,418 |
| 45,586 | 124 | 22,551 | 5,933 | 3,781 | 32,389 |
| 45,587 | 124 | 22,707 | 5,994 | 3,840 | 32,665 |
| 45,588 | 136 | 23,002 | 6,069 | 3,895 | 33,102 |
| 45,589 | 136 | 23,158 | 6,083 | 3,916 | 33,293 |
| 45,590 | 137 | 22,921 | 6,072 | 3,902 | 33,032 |
| 45,591 | 138 | 22,865 | 6,063 | 3,891 | 32,957 |

|        |     |        |       |       |        |
|--------|-----|--------|-------|-------|--------|
| 45,592 | 136 | 22,517 | 5,968 | 3,801 | 32,422 |
| 45,593 | 136 | 22,480 | 5,980 | 3,802 | 32,398 |
| 45,594 | 142 | 22,284 | 5,959 | 3,791 | 32,176 |
| 45,595 | 139 | 22,338 | 5,981 | 3,814 | 32,272 |
| 45,596 | 136 | 22,046 | 5,947 | 3,780 | 31,909 |
| 45,597 | 135 | 22,127 | 5,920 | 3,777 | 31,959 |
| 45,598 | 137 | 22,090 | 5,899 | 3,764 | 31,890 |
| 45,599 | 140 | 22,101 | 5,903 | 3,752 | 31,896 |
| 45,600 | 141 | 22,161 | 5,902 | 3,747 | 31,951 |
| 45,601 | 139 | 22,008 | 5,864 | 3,735 | 31,746 |
| 45,602 | 137 | 22,346 | 5,989 | 3,804 | 32,276 |
| 45,603 | 138 | 22,594 | 6,010 | 3,808 | 32,550 |
| 45,604 | 135 | 22,458 | 5,911 | 3,761 | 32,265 |
| 45,605 | 138 | 22,647 | 5,955 | 3,798 | 32,538 |
| 45,606 | 137 | 22,755 | 5,979 | 3,812 | 32,683 |
| 45,607 | 132 | 22,525 | 5,984 | 3,773 | 32,414 |
| 45,608 | 130 | 22,263 | 5,918 | 3,757 | 32,068 |
| 45,609 | 134 | 22,500 | 5,985 | 3,786 | 32,405 |
| 45,610 | 132 | 22,463 | 5,996 | 3,830 | 32,421 |
| 45,611 | 127 | 22,296 | 5,968 | 3,811 | 32,202 |
| 45,612 | 139 | 22,351 | 5,992 | 3,861 | 32,343 |
| 45,613 | 146 | 22,491 | 6,049 | 3,894 | 32,580 |
| 45,614 | 157 | 22,463 | 6,067 | 3,902 | 32,589 |
| 45,615 | 162 | 22,305 | 6,040 | 3,890 | 32,397 |
| 45,616 | 169 | 22,486 | 6,067 | 3,902 | 32,624 |
| 45,617 | 173 | 22,674 | 6,110 | 3,902 | 32,859 |
| 45,618 | 180 | 22,737 | 6,127 | 3,958 | 33,002 |
| 45,619 | 187 | 23,051 | 6,247 | 4,013 | 33,498 |
| 45,620 | 185 | 23,065 | 6,243 | 4,022 | 33,515 |
| 45,621 | 189 | 23,257 | 6,278 | 4,016 | 33,740 |
| 45,622 | 188 | 23,309 | 6,305 | 4,026 | 33,828 |
| 45,623 | 185 | 23,362 | 6,342 | 4,069 | 33,958 |

|        |     |        |       |       |        |
|--------|-----|--------|-------|-------|--------|
| 45,624 | 178 | 23,374 | 6,359 | 4,101 | 34,012 |
| 45,625 | 178 | 23,349 | 6,365 | 4,098 | 33,990 |
| 45,626 | 182 | 23,385 | 6,389 | 4,123 | 34,079 |
| 45,627 | 179 | 23,425 | 6,387 | 4,122 | 34,113 |
| 45,628 | 180 | 22,977 | 6,288 | 4,072 | 33,517 |
| 45,629 | 184 | 23,028 | 6,272 | 4,043 | 33,527 |
| 45,630 | 186 | 23,001 | 6,229 | 4,007 | 33,423 |
| 45,631 | 188 | 23,068 | 6,212 | 3,988 | 33,456 |
| 45,632 | 186 | 22,868 | 6,234 | 4,005 | 33,293 |
| 45,633 | 185 | 22,866 | 6,277 | 4,043 | 33,371 |
| 45,634 | 188 | 22,919 | 6,244 | 4,053 | 33,404 |
| 45,635 | 190 | 23,334 | 6,314 | 4,120 | 33,958 |
| 45,636 | 183 | 23,548 | 6,348 | 4,181 | 34,260 |
| 45,637 | 180 | 23,399 | 6,280 | 4,108 | 33,967 |
| 45,638 | 181 | 23,686 | 6,340 | 4,101 | 34,308 |
| 45,639 | 172 | 23,941 | 6,397 | 4,141 | 34,651 |
| 45,640 | 171 | 24,200 | 6,469 | 4,155 | 34,995 |
| 45,641 | 162 | 23,812 | 6,397 | 4,087 | 34,458 |
| 45,642 | 166 | 24,067 | 6,437 | 4,101 | 34,771 |
| 45,643 | 164 | 24,339 | 6,484 | 4,144 | 35,131 |
| 45,644 | 158 | 24,185 | 6,427 | 4,117 | 34,887 |
| 45,645 | 158 | 24,204 | 6,418 | 4,117 | 34,897 |
| 45,646 | 158 | 24,462 | 6,495 | 4,156 | 35,271 |
| 45,647 | 164 | 24,419 | 6,531 | 4,154 | 35,268 |
| 45,648 | 165 | 24,138 | 6,460 | 4,115 | 34,878 |
| 45,649 | 163 | 23,943 | 6,430 | 4,089 | 34,625 |
| 45,650 | 163 | 24,036 | 6,549 | 4,170 | 34,918 |
| 45,651 | 161 | 23,788 | 6,485 | 4,153 | 34,587 |
| 45,652 | 170 | 23,978 | 6,561 | 4,202 | 34,911 |
| 45,653 | 171 | 24,177 | 6,576 | 4,223 | 35,147 |
| 45,654 | 174 | 24,075 | 6,564 | 4,229 | 35,042 |
| 45,655 | 172 | 23,911 | 6,542 | 4,234 | 34,859 |

|        |     |        |       |       |        |
|--------|-----|--------|-------|-------|--------|
| 45,656 | 168 | 23,641 | 6,478 | 4,189 | 34,476 |
| 45,657 | 168 | 23,390 | 6,360 | 4,125 | 34,043 |
| 45,658 | 170 | 23,721 | 6,395 | 4,144 | 34,430 |
| 45,659 | 168 | 23,776 | 6,401 | 4,132 | 34,477 |
| 45,660 | 162 | 23,297 | 6,291 | 4,059 | 33,809 |
| 45,661 | 163 | 23,399 | 6,283 | 4,063 | 33,908 |
| 45,662 | 159 | 23,686 | 6,326 | 4,088 | 34,259 |
| 45,663 | 152 | 23,218 | 6,251 | 4,029 | 33,650 |
| 45,664 | 152 | 23,169 | 6,242 | 4,034 | 33,597 |
| 45,665 | 138 | 22,849 | 6,184 | 4,005 | 33,176 |
| 45,666 | 133 | 22,568 | 6,138 | 3,983 | 32,822 |
| 45,667 | 128 | 22,562 | 6,130 | 4,015 | 32,835 |
| 45,668 | 128 | 22,341 | 6,067 | 3,993 | 32,529 |
| 45,669 | 119 | 22,211 | 6,026 | 3,930 | 32,286 |
| 45,670 | 118 | 22,163 | 5,954 | 3,925 | 32,160 |
| 45,671 | 122 | 21,827 | 5,898 | 3,888 | 31,735 |
| 45,672 | 120 | 21,675 | 5,829 | 3,867 | 31,491 |
| 45,673 | 133 | 22,252 | 5,876 | 3,941 | 32,202 |
| 45,674 | 134 | 22,185 | 5,866 | 3,926 | 32,111 |
| 45,675 | 135 | 22,266 | 5,869 | 3,941 | 32,211 |
| 45,676 | 133 | 22,304 | 5,873 | 3,951 | 32,261 |
| 45,677 | 130 | 22,258 | 5,867 | 3,956 | 32,211 |
| 45,678 | 143 | 22,575 | 5,932 | 3,986 | 32,636 |
| 45,679 | 139 | 22,330 | 5,875 | 3,937 | 32,281 |
| 45,680 | 135 | 22,369 | 5,885 | 3,959 | 32,348 |
| 45,681 | 133 | 22,342 | 5,850 | 3,978 | 32,303 |
| 45,682 | 135 | 22,393 | 5,773 | 3,925 | 32,226 |
| 45,683 | 142 | 22,379 | 5,744 | 3,908 | 32,173 |
| 45,684 | 136 | 22,305 | 5,682 | 3,858 | 31,981 |
| 45,685 | 133 | 22,413 | 5,674 | 3,845 | 32,065 |
| 45,686 | 139 | 22,609 | 5,733 | 3,858 | 32,339 |
| 45,687 | 152 | 22,033 | 5,601 | 3,729 | 31,515 |

|        |     |        |       |       |        |
|--------|-----|--------|-------|-------|--------|
| 45,688 | 150 | 21,654 | 5,542 | 3,698 | 31,044 |
| 45,689 | 153 | 21,783 | 5,548 | 3,738 | 31,222 |
| 45,690 | 156 | 21,381 | 5,449 | 3,666 | 30,652 |
| 45,691 | 158 | 21,419 | 5,404 | 3,679 | 30,660 |
| 45,692 | 157 | 21,506 | 5,417 | 3,684 | 30,764 |
| 45,693 | 156 | 21,573 | 5,440 | 3,691 | 30,860 |
| 45,694 | 156 | 21,711 | 5,426 | 3,707 | 31,000 |
| 45,695 | 162 | 21,901 | 5,420 | 3,705 | 31,188 |
| 45,696 | 167 | 22,093 | 5,463 | 3,732 | 31,455 |
| 45,697 | 168 | 22,317 | 5,565 | 3,763 | 31,813 |
| 45,698 | 167 | 22,616 | 5,572 | 3,800 | 32,155 |
| 45,699 | 168 | 22,794 | 5,575 | 3,812 | 32,349 |
| 45,700 | 165 | 23,133 | 5,573 | 3,837 | 32,708 |
| 45,701 | 166 | 23,318 | 5,540 | 3,795 | 32,819 |
| 45,702 | 170 | 23,656 | 5,597 | 3,829 | 33,252 |
| 45,703 | 162 | 23,508 | 5,587 | 3,820 | 33,077 |
| 45,704 | 162 | 23,816 | 5,653 | 3,849 | 33,480 |
| 45,705 | 163 | 23,959 | 5,681 | 3,824 | 33,627 |
| 45,706 | 170 | 23,891 | 5,697 | 3,791 | 33,549 |
| 45,707 | 170 | 23,965 | 5,702 | 3,807 | 33,644 |
| 45,708 | 170 | 23,761 | 5,685 | 3,796 | 33,412 |
| 45,709 | 170 | 23,822 | 5,718 | 3,815 | 33,525 |
| 45,710 | 171 | 23,730 | 5,679 | 3,792 | 33,372 |
| 45,711 | 169 | 23,519 | 5,598 | 3,731 | 33,017 |
| 45,712 | 168 | 23,538 | 5,622 | 3,737 | 33,065 |
| 45,713 | 167 | 23,425 | 5,585 | 3,690 | 32,867 |
| 45,714 | 172 | 23,510 | 5,573 | 3,661 | 32,916 |
| 45,715 | 180 | 23,558 | 5,545 | 3,629 | 32,912 |
| 45,716 | 183 | 23,782 | 5,571 | 3,649 | 33,185 |
| 45,717 | 184 | 23,785 | 5,588 | 3,601 | 33,158 |
| 45,718 | 178 | 23,650 | 5,538 | 3,543 | 32,909 |
| 45,719 | 184 | 23,680 | 5,560 | 3,549 | 32,973 |

|        |     |        |       |       |        |
|--------|-----|--------|-------|-------|--------|
| 45,720 | 184 | 23,744 | 5,559 | 3,552 | 33,039 |
| 45,721 | 174 | 23,573 | 5,488 | 3,504 | 32,739 |
| 45,722 | 174 | 23,751 | 5,554 | 3,508 | 32,987 |
| 45,723 | 172 | 23,852 | 5,571 | 3,518 | 33,113 |
| 45,724 | 166 | 23,866 | 5,618 | 3,500 | 33,150 |
| 45,725 | 163 | 23,883 | 5,596 | 3,476 | 33,118 |
| 45,726 | 168 | 24,031 | 5,646 | 3,494 | 33,339 |
| 45,727 | 168 | 24,084 | 5,629 | 3,470 | 33,351 |
| 45,728 | 163 | 24,493 | 5,745 | 3,534 | 33,935 |
| 45,729 | 160 | 24,631 | 5,737 | 3,552 | 34,080 |
| 45,730 | 163 | 24,319 | 5,679 | 3,511 | 33,672 |
| 45,731 | 165 | 24,438 | 5,673 | 3,505 | 33,781 |
| 45,732 | 171 | 24,763 | 5,769 | 3,549 | 34,252 |
| 45,733 | 163 | 24,472 | 5,733 | 3,522 | 33,890 |
| 45,734 | 160 | 24,499 | 5,736 | 3,528 | 33,923 |
| 45,735 | 161 | 24,386 | 5,730 | 3,544 | 33,821 |
| 45,736 | 162 | 24,337 | 5,746 | 3,528 | 33,773 |
| 45,737 | 158 | 24,538 | 5,761 | 3,585 | 34,042 |
| 45,738 | 143 | 24,188 | 5,696 | 3,549 | 33,576 |
| 45,739 | 149 | 24,187 | 5,713 | 3,533 | 33,582 |
| 45,740 | 153 | 24,442 | 5,815 | 3,592 | 34,002 |
| 45,741 | 148 | 24,219 | 5,725 | 3,557 | 33,649 |
| 45,742 | 147 | 24,174 | 5,752 | 3,553 | 33,626 |
| 45,743 | 153 | 24,195 | 5,733 | 3,553 | 33,634 |
| 45,744 | 156 | 24,083 | 5,719 | 3,526 | 33,484 |
| 45,745 | 156 | 24,029 | 5,722 | 3,528 | 33,435 |
| 45,746 | 150 | 23,991 | 5,736 | 3,526 | 33,403 |
| 45,747 | 149 | 24,025 | 5,697 | 3,520 | 33,391 |
| 45,748 | 149 | 24,025 | 5,656 | 3,539 | 33,369 |
| 45,749 | 162 | 24,435 | 5,770 | 3,583 | 33,950 |
| 45,750 | 164 | 24,381 | 5,776 | 3,584 | 33,905 |
| 45,751 | 164 | 24,121 | 5,740 | 3,565 | 33,590 |

|        |     |        |       |       |        |
|--------|-----|--------|-------|-------|--------|
| 45,752 | 163 | 24,101 | 5,759 | 3,567 | 33,590 |
| 45,753 | 165 | 24,098 | 5,703 | 3,570 | 33,536 |
| 45,754 | 165 | 24,310 | 5,750 | 3,603 | 33,828 |
| 45,755 | 169 | 24,648 | 5,805 | 3,639 | 34,261 |
| 45,756 | 164 | 24,601 | 5,794 | 3,671 | 34,230 |
| 45,757 | 163 | 24,767 | 5,807 | 3,710 | 34,447 |
| 45,758 | 179 | 24,551 | 5,795 | 3,675 | 34,200 |
| 45,759 | 182 | 24,642 | 5,824 | 3,661 | 34,309 |
| 45,760 | 182 | 24,443 | 5,793 | 3,646 | 34,064 |
| 45,761 | 181 | 24,788 | 5,911 | 3,766 | 34,646 |
| 45,762 | 181 | 24,747 | 5,908 | 3,756 | 34,592 |
| 45,763 | 180 | 24,798 | 5,941 | 3,781 | 34,700 |
| 45,764 | 185 | 25,037 | 5,991 | 3,818 | 35,031 |
| 45,765 | 179 | 24,999 | 5,998 | 3,850 | 35,026 |
| 45,766 | 176 | 24,731 | 5,952 | 3,815 | 34,674 |
| 45,767 | 174 | 24,674 | 5,942 | 3,810 | 34,600 |
| 45,768 | 178 | 24,866 | 6,008 | 3,886 | 34,938 |
| 45,769 | 180 | 24,798 | 6,015 | 3,882 | 34,875 |
| 45,770 | 177 | 24,615 | 5,964 | 3,850 | 34,606 |
| 45,771 | 177 | 24,474 | 5,924 | 3,833 | 34,408 |
| 45,772 | 182 | 24,541 | 6,000 | 3,879 | 34,602 |
| 45,773 | 186 | 24,462 | 5,971 | 3,889 | 34,508 |
| 45,774 | 187 | 24,499 | 6,009 | 3,906 | 34,601 |
| 45,775 | 182 | 24,447 | 5,979 | 3,910 | 34,518 |
| 45,776 | 190 | 24,382 | 5,975 | 3,883 | 34,430 |
| 45,777 | 189 | 24,376 | 5,924 | 3,868 | 34,357 |
| 45,778 | 192 | 24,493 | 5,914 | 3,884 | 34,483 |
| 45,779 | 194 | 23,989 | 5,804 | 3,784 | 33,771 |
| 45,780 | 195 | 24,247 | 5,849 | 3,815 | 34,106 |
| 45,781 | 195 | 24,377 | 5,825 | 3,820 | 34,217 |
| 45,782 | 194 | 24,316 | 5,828 | 3,833 | 34,171 |
| 45,783 | 191 | 24,310 | 5,827 | 3,835 | 34,163 |

|        |     |        |       |       |        |
|--------|-----|--------|-------|-------|--------|
| 45,784 | 194 | 24,407 | 5,840 | 3,858 | 34,299 |
| 45,785 | 194 | 24,517 | 5,827 | 3,854 | 34,392 |
| 45,786 | 198 | 24,687 | 5,816 | 3,864 | 34,565 |
| 45,787 | 198 | 24,751 | 5,777 | 3,836 | 34,562 |
| 45,788 | 203 | 25,030 | 5,818 | 3,834 | 34,885 |
| 45,789 | 203 | 25,134 | 5,828 | 3,847 | 35,012 |
| 45,790 | 202 | 25,073 | 5,805 | 3,846 | 34,926 |
| 45,791 | 206 | 24,920 | 5,762 | 3,798 | 34,686 |
| 45,792 | 207 | 24,965 | 5,729 | 3,800 | 34,701 |
| 45,793 | 204 | 24,906 | 5,742 | 3,808 | 34,660 |
| 45,794 | 201 | 24,919 | 5,730 | 3,804 | 34,654 |
| 45,795 | 201 | 24,931 | 5,707 | 3,804 | 34,643 |
| 45,796 | 201 | 24,879 | 5,693 | 3,815 | 34,588 |
| 45,797 | 197 | 24,882 | 5,685 | 3,811 | 34,575 |
| 45,798 | 195 | 24,303 | 5,563 | 3,737 | 33,798 |
| 45,799 | 191 | 24,363 | 5,578 | 3,741 | 33,873 |
| 45,800 | 181 | 24,594 | 5,625 | 3,778 | 34,178 |
| 45,801 | 178 | 24,091 | 5,491 | 3,706 | 33,466 |
| 45,802 | 178 | 24,133 | 5,488 | 3,708 | 33,507 |
| 45,803 | 179 | 23,983 | 5,462 | 3,676 | 33,300 |
| 45,804 | 185 | 23,944 | 5,455 | 3,655 | 33,239 |
| 45,805 | 184 | 23,627 | 5,411 | 3,630 | 32,852 |
| 45,806 | 185 | 23,923 | 5,509 | 3,705 | 33,322 |
| 45,807 | 181 | 23,433 | 5,408 | 3,635 | 32,657 |
| 45,808 | 182 | 23,540 | 5,425 | 3,649 | 32,796 |
| 45,809 | 171 | 23,875 | 5,463 | 3,676 | 33,185 |
| 45,810 | 171 | 23,836 | 5,432 | 3,657 | 33,096 |
| 45,811 | 172 | 23,952 | 5,420 | 3,644 | 33,188 |
| 45,812 | 174 | 24,146 | 5,399 | 3,639 | 33,358 |
| 45,813 | 174 | 24,249 | 5,407 | 3,631 | 33,461 |
| 45,814 | 172 | 24,437 | 5,438 | 3,660 | 33,707 |
| 45,815 | 173 | 24,516 | 5,454 | 3,668 | 33,811 |



|        |     |        |       |       |        |
|--------|-----|--------|-------|-------|--------|
| 45,816 | 172 | 24,673 | 5,483 | 3,669 | 33,997 |
| 45,817 | 174 | 24,739 | 5,489 | 3,678 | 34,080 |
| 45,818 | 175 | 24,934 | 5,535 | 3,704 | 34,348 |
| 45,819 | 174 | 24,813 | 5,495 | 3,689 | 34,171 |
| 45,820 | 173 | 24,753 | 5,464 | 3,689 | 34,079 |
| 45,821 | 176 | 25,115 | 5,539 | 3,717 | 34,547 |
| 45,822 | 170 | 25,053 | 5,537 | 3,708 | 34,468 |
| 45,823 | 168 | 25,410 | 5,593 | 3,758 | 34,929 |
| 45,824 | 168 | 25,600 | 5,633 | 3,772 | 35,173 |
| 45,825 | 170 | 25,785 | 5,648 | 3,772 | 35,375 |
| 45,826 | 171 | 25,748 | 5,641 | 3,759 | 35,319 |
| 45,827 | 164 | 25,554 | 5,624 | 3,779 | 35,121 |
| 45,828 | 161 | 25,645 | 5,647 | 3,815 | 35,268 |
| 45,829 | 158 | 25,711 | 5,693 | 3,877 | 35,439 |
| 45,830 | 147 | 25,342 | 5,646 | 3,849 | 34,984 |
| 45,831 | 152 | 25,391 | 5,636 | 3,845 | 35,024 |
| 45,832 | 151 | 25,207 | 5,594 | 3,804 | 34,756 |
| 45,833 | 151 | 25,452 | 5,654 | 3,863 | 35,120 |
| 45,834 | 153 | 25,168 | 5,583 | 3,817 | 34,721 |
| 45,835 | 152 | 24,882 | 5,574 | 3,787 | 34,395 |
| 45,836 | 151 | 24,724 | 5,585 | 3,774 | 34,234 |
| 45,837 | 151 | 24,709 | 5,618 | 3,786 | 34,264 |
| 45,838 | 152 | 24,691 | 5,671 | 3,809 | 34,323 |
| 45,839 | 140 | 24,321 | 5,619 | 3,808 | 33,888 |
| 45,840 | 138 | 24,375 | 5,626 | 3,800 | 33,939 |
| 45,841 | 140 | 24,665 | 5,689 | 3,833 | 34,327 |
| 45,842 | 137 | 24,428 | 5,621 | 3,804 | 33,990 |
| 45,843 | 136 | 24,208 | 5,580 | 3,771 | 33,695 |
| 45,844 | 139 | 24,843 | 5,676 | 3,851 | 34,509 |
| 45,845 | 141 | 24,632 | 5,634 | 3,815 | 34,222 |
| 45,846 | 137 | 24,849 | 5,681 | 3,831 | 34,498 |
| 45,847 | 139 | 24,792 | 5,679 | 3,822 | 34,432 |

|        |     |        |       |       |        |
|--------|-----|--------|-------|-------|--------|
| 45,848 | 140 | 24,762 | 5,673 | 3,818 | 34,393 |
| 45,849 | 146 | 25,046 | 5,740 | 3,859 | 34,791 |
| 45,850 | 148 | 24,658 | 5,634 | 3,817 | 34,257 |
| 45,851 | 148 | 24,502 | 5,654 | 3,796 | 34,100 |
| 45,852 | 148 | 24,513 | 5,658 | 3,789 | 34,108 |
| 45,853 | 154 | 24,733 | 5,708 | 3,813 | 34,408 |
| 45,854 | 155 | 24,644 | 5,686 | 3,800 | 34,285 |
| 45,855 | 150 | 24,510 | 5,616 | 3,726 | 34,002 |
| 45,856 | 148 | 24,564 | 5,603 | 3,728 | 34,043 |
| 45,857 | 145 | 24,604 | 5,598 | 3,727 | 34,074 |
| 45,858 | 144 | 24,347 | 5,538 | 3,717 | 33,746 |
| 45,859 | 137 | 23,423 | 5,350 | 3,602 | 32,512 |
| 45,860 | 137 | 23,493 | 5,375 | 3,626 | 32,631 |
| 45,861 | 137 | 23,633 | 5,382 | 3,640 | 32,792 |
| 45,862 | 140 | 23,440 | 5,357 | 3,622 | 32,559 |
| 45,863 | 138 | 23,255 | 5,328 | 3,609 | 32,330 |
| 45,864 | 133 | 22,370 | 5,138 | 3,493 | 31,134 |
| 45,865 | 134 | 22,411 | 5,138 | 3,477 | 31,160 |
| 45,866 | 134 | 22,500 | 5,161 | 3,485 | 31,280 |
| 45,867 | 135 | 22,448 | 5,135 | 3,485 | 31,203 |
| 45,868 | 131 | 22,499 | 5,165 | 3,490 | 31,285 |
| 45,869 | 127 | 22,277 | 5,104 | 3,451 | 30,959 |
| 45,870 | 127 | 22,462 | 5,115 | 3,450 | 31,154 |
| 45,871 | 129 | 22,404 | 5,117 | 3,433 | 31,083 |
| 45,872 | 135 | 22,317 | 5,072 | 3,420 | 30,944 |
| 45,873 | 140 | 22,260 | 5,047 | 3,397 | 30,844 |
| 45,874 | 142 | 21,859 | 4,948 | 3,321 | 30,270 |
| 45,875 | 142 | 21,820 | 4,942 | 3,339 | 30,243 |
| 45,876 | 140 | 21,661 | 4,897 | 3,352 | 30,050 |
| 45,877 | 141 | 21,787 | 4,876 | 3,350 | 30,154 |
| 45,878 | 149 | 21,607 | 4,826 | 3,293 | 29,875 |
| 45,879 | 153 | 21,514 | 4,789 | 3,249 | 29,705 |

|        |     |        |       |       |        |
|--------|-----|--------|-------|-------|--------|
| 45,880 | 166 | 21,504 | 4,779 | 3,241 | 29,690 |
| 45,881 | 167 | 21,108 | 4,722 | 3,208 | 29,205 |
| 45,882 | 164 | 21,045 | 4,750 | 3,237 | 29,196 |
| 45,883 | 163 | 20,797 | 4,722 | 3,181 | 28,863 |
| 45,884 | 166 | 20,682 | 4,692 | 3,153 | 28,693 |
| 45,885 | 165 | 20,613 | 4,643 | 3,127 | 28,548 |
| 45,886 | 164 | 20,612 | 4,655 | 3,130 | 28,561 |
| 45,887 | 160 | 20,654 | 4,638 | 3,135 | 28,587 |
| 45,888 | 160 | 20,691 | 4,637 | 3,143 | 28,631 |
| 45,889 | 164 | 20,777 | 4,618 | 3,131 | 28,690 |
| 45,890 | 169 | 20,765 | 4,642 | 3,119 | 28,695 |
| 45,891 | 171 | 20,577 | 4,594 | 3,110 | 28,452 |
| 45,892 | 176 | 20,628 | 4,607 | 3,125 | 28,536 |
| 45,893 | 175 | 20,615 | 4,657 | 3,166 | 28,613 |
| 45,894 | 178 | 20,801 | 4,728 | 3,226 | 28,933 |
| 45,895 | 174 | 21,237 | 4,864 | 3,315 | 29,590 |
| 45,896 | 174 | 21,321 | 4,920 | 3,350 | 29,765 |
| 45,897 | 177 | 21,407 | 4,927 | 3,370 | 29,881 |
| 45,898 | 177 | 22,071 | 5,116 | 3,473 | 30,837 |
| 45,899 | 172 | 22,190 | 5,149 | 3,505 | 31,016 |
| 45,900 | 171 | 22,235 | 5,164 | 3,490 | 31,060 |
| 45,901 | 171 | 22,705 | 5,272 | 3,543 | 31,691 |
| 45,902 | 170 | 22,589 | 5,191 | 3,516 | 31,466 |
| 45,903 | 171 | 22,766 | 5,239 | 3,539 | 31,715 |
| 45,904 | 164 | 23,050 | 5,352 | 3,581 | 32,147 |
| 45,905 | 163 | 23,062 | 5,350 | 3,609 | 32,184 |
| 45,906 | 160 | 22,684 | 5,299 | 3,585 | 31,728 |
| 45,907 | 164 | 22,788 | 5,356 | 3,614 | 31,922 |
| 45,908 | 166 | 22,886 | 5,423 | 3,622 | 32,097 |
| 45,909 | 168 | 22,848 | 5,408 | 3,600 | 32,024 |
| 45,910 | 169 | 22,960 | 5,428 | 3,618 | 32,175 |
| 45,911 | 172 | 23,117 | 5,438 | 3,629 | 32,356 |

|        |     |        |       |       |        |
|--------|-----|--------|-------|-------|--------|
| 45,912 | 181 | 23,533 | 5,520 | 3,658 | 32,892 |
| 45,913 | 182 | 23,415 | 5,497 | 3,625 | 32,719 |
| 45,914 | 182 | 23,420 | 5,514 | 3,634 | 32,750 |
| 45,915 | 188 | 23,928 | 5,675 | 3,715 | 33,506 |
| 45,916 | 190 | 24,104 | 5,706 | 3,766 | 33,766 |
| 45,917 | 197 | 24,347 | 5,822 | 3,825 | 34,191 |
| 45,918 | 201 | 24,491 | 5,869 | 3,840 | 34,401 |
| 45,919 | 203 | 24,444 | 5,819 | 3,817 | 34,283 |
| 45,920 | 203 | 24,491 | 5,843 | 3,833 | 34,370 |
| 45,921 | 203 | 24,507 | 5,860 | 3,862 | 34,432 |
| 45,922 | 200 | 24,834 | 5,901 | 3,905 | 34,840 |
| 45,923 | 191 | 24,521 | 5,857 | 3,878 | 34,447 |
| 45,924 | 181 | 24,346 | 5,822 | 3,845 | 34,194 |
| 45,925 | 180 | 24,343 | 5,813 | 3,828 | 34,164 |
| 45,926 | 182 | 24,240 | 5,827 | 3,816 | 34,065 |
| 45,927 | 176 | 23,812 | 5,777 | 3,767 | 33,532 |
| 45,928 | 176 | 23,944 | 5,844 | 3,792 | 33,756 |
| 45,929 | 171 | 24,156 | 5,915 | 3,843 | 34,085 |
| 45,930 | 153 | 23,629 | 5,784 | 3,724 | 33,290 |
| 45,931 | 154 | 23,826 | 5,826 | 3,748 | 33,554 |
| 45,932 | 151 | 24,048 | 5,876 | 3,792 | 33,867 |
| 45,933 | 148 | 23,714 | 5,833 | 3,733 | 33,428 |
| 45,934 | 149 | 23,911 | 5,856 | 3,754 | 33,670 |
| 45,935 | 150 | 24,135 | 5,910 | 3,772 | 33,967 |
| 45,936 | 145 | 23,896 | 5,870 | 3,754 | 33,665 |
| 45,937 | 145 | 24,026 | 5,921 | 3,774 | 33,866 |
| 45,938 | 148 | 24,199 | 5,967 | 3,792 | 34,106 |
| 45,939 | 149 | 24,058 | 5,966 | 3,786 | 33,959 |
| 45,940 | 143 | 23,906 | 5,949 | 3,792 | 33,790 |
| 45,941 | 133 | 23,399 | 5,778 | 3,684 | 32,994 |
| 45,942 | 135 | 23,611 | 5,824 | 3,714 | 33,284 |
| 45,943 | 128 | 23,779 | 5,863 | 3,746 | 33,516 |

|        |     |        |       |       |        |
|--------|-----|--------|-------|-------|--------|
| 45,944 | 128 | 23,759 | 5,835 | 3,688 | 33,410 |
| 45,945 | 133 | 23,701 | 5,823 | 3,686 | 33,343 |
| 45,946 | 140 | 23,517 | 5,810 | 3,640 | 33,107 |
| 45,947 | 144 | 23,355 | 5,744 | 3,605 | 32,848 |
| 45,948 | 155 | 23,089 | 5,710 | 3,541 | 32,495 |
| 45,949 | 157 | 23,010 | 5,687 | 3,550 | 32,404 |
| 45,950 | 156 | 22,686 | 5,615 | 3,506 | 31,963 |
| 45,951 | 155 | 22,681 | 5,595 | 3,506 | 31,937 |
| 45,952 | 155 | 22,757 | 5,614 | 3,503 | 32,029 |
| 45,953 | 164 | 22,849 | 5,658 | 3,506 | 32,177 |
| 45,954 | 169 | 22,868 | 5,635 | 3,513 | 32,185 |
| 45,955 | 173 | 23,054 | 5,684 | 3,560 | 32,471 |
| 45,956 | 171 | 22,991 | 5,672 | 3,533 | 32,367 |
| 45,957 | 169 | 22,971 | 5,684 | 3,532 | 32,356 |
| 45,958 | 166 | 22,905 | 5,695 | 3,544 | 32,310 |
| 45,959 | 164 | 22,776 | 5,677 | 3,542 | 32,159 |
| 45,960 | 159 | 22,762 | 5,710 | 3,517 | 32,148 |
| 45,961 | 158 | 22,700 | 5,724 | 3,519 | 32,101 |
| 45,962 | 154 | 22,549 | 5,739 | 3,547 | 31,989 |
| 45,963 | 148 | 22,492 | 5,750 | 3,596 | 31,986 |
| 45,964 | 144 | 22,261 | 5,780 | 3,602 | 31,787 |
| 45,965 | 146 | 22,270 | 5,843 | 3,651 | 31,910 |
| 45,966 | 146 | 22,217 | 5,819 | 3,627 | 31,809 |
| 45,967 | 145 | 22,168 | 5,815 | 3,603 | 31,731 |
| 45,968 | 140 | 21,929 | 5,700 | 3,553 | 31,322 |
| 45,969 | 140 | 21,897 | 5,715 | 3,554 | 31,306 |
| 45,970 | 145 | 21,710 | 5,706 | 3,546 | 31,107 |
| 45,971 | 149 | 21,646 | 5,697 | 3,533 | 31,025 |
| 45,972 | 171 | 23,544 | 6,167 | 3,752 | 33,634 |
| 45,973 | 171 | 23,373 | 6,182 | 3,733 | 33,459 |
| 45,974 | 169 | 23,278 | 6,172 | 3,732 | 33,351 |
| 45,975 | 172 | 23,598 | 6,278 | 3,765 | 33,813 |

|        |     |        |       |       |        |
|--------|-----|--------|-------|-------|--------|
| 45,976 | 173 | 23,453 | 6,268 | 3,758 | 33,652 |
| 45,977 | 171 | 23,717 | 6,334 | 3,807 | 34,029 |
| 45,978 | 173 | 23,647 | 6,326 | 3,808 | 33,954 |
| 45,979 | 176 | 23,751 | 6,360 | 3,819 | 34,106 |
| 45,980 | 180 | 23,558 | 6,301 | 3,775 | 33,814 |
| 45,981 | 179 | 23,417 | 6,264 | 3,770 | 33,630 |
| 45,982 | 183 | 23,354 | 6,259 | 3,760 | 33,556 |
| 45,983 | 182 | 23,129 | 6,211 | 3,725 | 33,247 |
| 45,984 | 184 | 23,284 | 6,250 | 3,752 | 33,470 |
| 45,985 | 183 | 23,037 | 6,226 | 3,736 | 33,182 |
| 45,986 | 188 | 23,365 | 6,405 | 3,827 | 33,785 |
| 45,987 | 188 | 23,242 | 6,364 | 3,803 | 33,597 |
| 45,988 | 189 | 23,294 | 6,405 | 3,815 | 33,703 |
| 45,989 | 185 | 23,162 | 6,376 | 3,804 | 33,527 |
| 45,990 | 188 | 23,217 | 6,374 | 3,804 | 33,583 |
| 45,991 | 190 | 23,239 | 6,402 | 3,816 | 33,647 |
| 45,992 | 190 | 23,136 | 6,411 | 3,811 | 33,548 |
| 45,993 | 191 | 23,028 | 6,385 | 3,788 | 33,392 |
| 45,994 | 193 | 23,184 | 6,449 | 3,820 | 33,646 |
| 45,995 | 188 | 21,765 | 6,127 | 3,577 | 31,657 |
| 45,996 | 189 | 21,924 | 6,168 | 3,594 | 31,875 |
| 45,997 | 186 | 22,127 | 6,234 | 3,637 | 32,184 |
| 45,998 | 184 | 22,348 | 6,318 | 3,683 | 32,533 |
| 45,999 | 176 | 22,005 | 6,218 | 3,621 | 32,020 |
| 46,000 | 175 | 22,044 | 6,211 | 3,627 | 32,057 |
| 46,001 | 180 | 21,969 | 6,184 | 3,625 | 31,958 |
| 46,002 | 185 | 22,152 | 6,268 | 3,664 | 32,269 |
| 46,003 | 190 | 22,024 | 6,292 | 3,659 | 32,165 |
| 46,004 | 184 | 21,651 | 6,232 | 3,655 | 31,722 |
| 46,005 | 178 | 21,240 | 6,166 | 3,635 | 31,219 |
| 46,006 | 176 | 21,409 | 6,180 | 3,667 | 31,432 |
| 46,007 | 180 | 21,494 | 6,174 | 3,674 | 31,522 |

|        |     |        |       |       |        |
|--------|-----|--------|-------|-------|--------|
| 46,008 | 183 | 21,580 | 6,145 | 3,656 | 31,564 |
| 46,009 | 191 | 21,586 | 6,140 | 3,655 | 31,572 |
| 46,010 | 192 | 21,609 | 6,142 | 3,652 | 31,595 |
| 46,011 | 192 | 21,616 | 6,116 | 3,680 | 31,604 |
| 46,012 | 189 | 21,730 | 6,128 | 3,682 | 31,729 |
| 46,013 | 189 | 21,847 | 6,165 | 3,674 | 31,875 |
| 46,014 | 194 | 21,987 | 6,132 | 3,656 | 31,969 |
| 46,015 | 194 | 22,046 | 6,124 | 3,656 | 32,020 |
| 46,016 | 192 | 21,893 | 6,105 | 3,668 | 31,858 |
| 46,017 | 182 | 21,555 | 6,080 | 3,656 | 31,473 |
| 46,018 | 174 | 21,499 | 6,143 | 3,644 | 31,460 |
| 46,019 | 163 | 21,413 | 6,113 | 3,661 | 31,350 |
| 46,020 | 166 | 21,546 | 6,135 | 3,681 | 31,528 |
| 46,021 | 158 | 21,468 | 6,140 | 3,697 | 31,463 |
| 46,022 | 153 | 21,027 | 6,013 | 3,637 | 30,830 |
| 46,023 | 153 | 21,027 | 6,005 | 3,644 | 30,829 |
| 46,024 | 154 | 21,344 | 6,027 | 3,677 | 31,202 |
| 46,025 | 160 | 21,151 | 5,959 | 3,642 | 30,912 |
| 46,026 | 159 | 20,896 | 5,921 | 3,608 | 30,584 |
| 46,027 | 158 | 21,205 | 5,964 | 3,657 | 30,984 |
| 46,028 | 158 | 21,353 | 6,036 | 3,690 | 31,237 |
| 46,029 | 154 | 21,199 | 5,983 | 3,655 | 30,991 |
| 46,030 | 149 | 21,136 | 5,981 | 3,654 | 30,920 |
| 46,031 | 149 | 21,204 | 6,031 | 3,673 | 31,057 |
| 46,032 | 148 | 21,077 | 6,046 | 3,697 | 30,968 |
| 46,033 | 143 | 21,052 | 6,037 | 3,705 | 30,937 |
| 46,034 | 144 | 21,045 | 6,044 | 3,706 | 30,939 |
| 46,035 | 145 | 21,094 | 6,029 | 3,721 | 30,989 |
| 46,036 | 139 | 21,236 | 6,018 | 3,734 | 31,127 |
| 46,037 | 146 | 21,089 | 5,947 | 3,717 | 30,899 |
| 46,038 | 146 | 21,190 | 5,963 | 3,722 | 31,021 |
| 46,039 | 147 | 21,183 | 5,894 | 3,705 | 30,929 |

|        |     |        |       |       |        |
|--------|-----|--------|-------|-------|--------|
| 46,040 | 147 | 21,154 | 5,871 | 3,649 | 30,821 |
| 46,041 | 150 | 21,247 | 5,893 | 3,673 | 30,963 |
| 46,042 | 147 | 21,468 | 5,938 | 3,714 | 31,267 |
| 46,043 | 152 | 21,376 | 5,888 | 3,710 | 31,126 |
| 46,044 | 155 | 21,134 | 5,867 | 3,663 | 30,819 |
| 46,045 | 157 | 21,376 | 5,886 | 3,706 | 31,125 |
| 46,046 | 151 | 21,421 | 5,907 | 3,722 | 31,201 |
| 46,047 | 153 | 21,530 | 5,961 | 3,739 | 31,383 |
| 46,048 | 149 | 21,214 | 5,877 | 3,695 | 30,935 |
| 46,049 | 149 | 21,197 | 5,840 | 3,698 | 30,884 |
| 46,050 | 147 | 21,262 | 5,814 | 3,717 | 30,940 |
| 46,051 | 146 | 21,155 | 5,828 | 3,715 | 30,844 |
| 46,052 | 141 | 20,584 | 5,665 | 3,612 | 30,002 |
| 46,053 | 144 | 20,720 | 5,687 | 3,622 | 30,173 |
| 46,054 | 143 | 20,715 | 5,692 | 3,633 | 30,183 |
| 46,055 | 141 | 20,773 | 5,687 | 3,610 | 30,211 |
| 46,056 | 139 | 20,786 | 5,655 | 3,558 | 30,138 |
| 46,057 | 139 | 20,808 | 5,664 | 3,545 | 30,156 |
| 46,058 | 138 | 20,844 | 5,686 | 3,562 | 30,230 |
| 46,059 | 139 | 20,840 | 5,704 | 3,584 | 30,267 |
| 46,060 | 132 | 20,947 | 5,730 | 3,614 | 30,423 |
| 46,061 | 132 | 20,990 | 5,761 | 3,612 | 30,495 |
| 46,062 | 132 | 20,801 | 5,689 | 3,578 | 30,200 |
| 46,063 | 133 | 20,997 | 5,743 | 3,618 | 30,491 |
| 46,064 | 138 | 21,315 | 5,812 | 3,674 | 30,939 |
| 46,065 | 138 | 21,326 | 5,814 | 3,675 | 30,953 |
| 46,066 | 142 | 21,423 | 5,876 | 3,660 | 31,101 |
| 46,067 | 139 | 21,325 | 5,746 | 3,593 | 30,803 |
| 46,068 | 139 | 21,161 | 5,671 | 3,577 | 30,548 |
| 46,069 | 143 | 21,148 | 5,669 | 3,594 | 30,554 |
| 46,070 | 138 | 20,738 | 5,586 | 3,529 | 29,991 |
| 46,071 | 136 | 20,960 | 5,691 | 3,563 | 30,350 |



|        |     |        |       |       |        |
|--------|-----|--------|-------|-------|--------|
| 46,072 | 135 | 20,960 | 5,671 | 3,534 | 30,300 |
| 46,073 | 133 | 20,677 | 5,587 | 3,481 | 29,878 |
| 46,074 | 133 | 20,462 | 5,547 | 3,468 | 29,610 |
| 46,075 | 130 | 20,945 | 5,728 | 3,574 | 30,377 |
| 46,076 | 131 | 20,951 | 5,717 | 3,544 | 30,343 |
| 46,077 | 131 | 20,753 | 5,680 | 3,517 | 30,081 |
| 46,078 | 136 | 21,135 | 5,755 | 3,579 | 30,605 |
| 46,079 | 136 | 21,149 | 5,721 | 3,545 | 30,551 |
| 46,080 | 137 | 21,329 | 5,741 | 3,570 | 30,777 |
| 46,081 | 141 | 21,488 | 5,761 | 3,596 | 30,986 |
| 46,082 | 144 | 21,619 | 5,768 | 3,560 | 31,091 |
| 46,083 | 147 | 21,922 | 5,810 | 3,599 | 31,478 |
| 46,084 | 145 | 21,193 | 5,638 | 3,482 | 30,458 |
| 46,085 | 144 | 21,509 | 5,733 | 3,536 | 30,922 |
| 46,086 | 145 | 21,848 | 5,804 | 3,584 | 31,381 |
| 46,087 | 145 | 21,859 | 5,799 | 3,578 | 31,381 |
| 46,088 | 139 | 22,134 | 5,909 | 3,648 | 31,830 |
| 46,089 | 147 | 22,288 | 5,999 | 3,684 | 32,118 |
| 46,090 | 153 | 22,624 | 6,071 | 3,763 | 32,611 |
| 46,091 | 145 | 22,610 | 6,071 | 3,771 | 32,597 |
| 46,092 | 145 | 22,596 | 6,063 | 3,747 | 32,551 |
| 46,093 | 146 | 22,913 | 6,171 | 3,797 | 33,027 |
| 46,094 | 146 | 23,191 | 6,249 | 3,831 | 33,417 |
| 46,095 | 138 | 22,903 | 6,179 | 3,814 | 33,034 |
| 46,096 | 137 | 23,249 | 6,303 | 3,861 | 33,550 |
| 46,097 | 140 | 23,285 | 6,338 | 3,892 | 33,655 |
| 46,098 | 135 | 23,182 | 6,279 | 3,868 | 33,464 |
| 46,099 | 137 | 23,438 | 6,371 | 3,909 | 33,855 |
| 46,100 | 133 | 23,221 | 6,320 | 3,867 | 33,541 |
| 46,101 | 135 | 23,260 | 6,322 | 3,873 | 33,590 |
| 46,102 | 135 | 23,239 | 6,328 | 3,868 | 33,570 |
| 46,103 | 132 | 23,527 | 6,404 | 3,935 | 33,998 |

|        |     |        |       |       |        |
|--------|-----|--------|-------|-------|--------|
| 46,104 | 128 | 23,275 | 6,365 | 3,917 | 33,685 |
| 46,105 | 126 | 23,514 | 6,477 | 3,967 | 34,084 |
| 46,106 | 125 | 23,268 | 6,437 | 3,930 | 33,760 |
| 46,107 | 126 | 23,089 | 6,431 | 3,925 | 33,571 |
| 46,108 | 129 | 23,721 | 6,638 | 4,043 | 34,531 |
| 46,109 | 124 | 23,594 | 6,620 | 4,020 | 34,358 |
| 46,110 | 124 | 23,535 | 6,636 | 3,998 | 34,293 |
| 46,111 | 123 | 23,246 | 6,546 | 3,968 | 33,883 |
| 46,112 | 123 | 22,953 | 6,498 | 3,935 | 33,509 |
| 46,113 | 125 | 23,152 | 6,617 | 3,987 | 33,881 |
| 46,114 | 125 | 22,915 | 6,534 | 3,941 | 33,515 |
| 46,115 | 117 | 22,940 | 6,555 | 3,932 | 33,544 |
| 46,116 | 116 | 22,844 | 6,536 | 3,927 | 33,423 |
| 46,117 | 115 | 22,585 | 6,461 | 3,902 | 33,063 |
| 46,118 | 119 | 22,795 | 6,560 | 3,941 | 33,415 |
| 46,119 | 118 | 22,591 | 6,536 | 3,910 | 33,155 |
| 46,120 | 118 | 22,561 | 6,519 | 3,903 | 33,101 |
| 46,121 | 117 | 22,507 | 6,488 | 3,905 | 33,017 |
| 46,122 | 117 | 22,555 | 6,503 | 3,942 | 33,117 |
| 46,123 | 115 | 22,496 | 6,515 | 3,975 | 33,101 |
| 46,124 | 118 | 22,348 | 6,512 | 3,979 | 32,957 |
| 46,125 | 124 | 22,234 | 6,487 | 3,942 | 32,787 |
| 46,126 | 123 | 22,123 | 6,432 | 3,934 | 32,612 |
| 46,127 | 124 | 22,124 | 6,444 | 3,938 | 32,630 |
| 46,128 | 125 | 22,075 | 6,436 | 3,935 | 32,571 |
| 46,129 | 121 | 22,026 | 6,469 | 3,940 | 32,556 |
| 46,130 | 124 | 21,869 | 6,479 | 3,925 | 32,397 |
| 46,131 | 124 | 21,633 | 6,435 | 3,888 | 32,080 |
| 46,132 | 123 | 21,650 | 6,431 | 3,889 | 32,093 |
| 46,133 | 121 | 21,681 | 6,456 | 3,928 | 32,186 |
| 46,134 | 118 | 21,695 | 6,490 | 3,932 | 32,235 |
| 46,135 | 119 | 21,798 | 6,537 | 3,950 | 32,404 |

|        |     |        |       |       |        |
|--------|-----|--------|-------|-------|--------|
| 46,136 | 118 | 21,931 | 6,520 | 3,962 | 32,531 |
| 46,137 | 121 | 21,929 | 6,523 | 3,931 | 32,504 |
| 46,138 | 121 | 21,968 | 6,541 | 3,943 | 32,573 |
| 46,139 | 119 | 22,211 | 6,629 | 3,998 | 32,957 |
| 46,140 | 121 | 21,960 | 6,619 | 3,970 | 32,670 |
| 46,141 | 118 | 21,762 | 6,599 | 3,940 | 32,419 |
| 46,142 | 132 | 21,749 | 6,632 | 3,984 | 32,497 |
| 46,143 | 136 | 21,751 | 6,679 | 4,008 | 32,574 |
| 46,144 | 134 | 21,601 | 6,660 | 4,000 | 32,395 |
| 46,145 | 133 | 20,732 | 6,434 | 3,843 | 31,142 |
| 46,146 | 135 | 20,891 | 6,490 | 3,890 | 31,406 |
| 46,147 | 135 | 21,015 | 6,514 | 3,929 | 31,593 |
| 46,148 | 135 | 21,008 | 6,522 | 3,915 | 31,580 |
| 46,149 | 142 | 21,154 | 6,565 | 3,945 | 31,806 |
| 46,150 | 140 | 21,095 | 6,547 | 3,949 | 31,731 |
| 46,151 | 140 | 21,043 | 6,579 | 3,950 | 31,712 |
| 46,152 | 136 | 20,978 | 6,602 | 3,968 | 31,684 |
| 46,153 | 150 | 21,329 | 6,674 | 4,040 | 32,193 |
| 46,154 | 146 | 21,327 | 6,682 | 4,025 | 32,180 |
| 46,155 | 142 | 21,195 | 6,616 | 4,001 | 31,954 |
| 46,156 | 142 | 21,450 | 6,678 | 4,019 | 32,289 |
| 46,157 | 141 | 21,629 | 6,720 | 4,076 | 32,566 |
| 46,158 | 145 | 21,673 | 6,741 | 4,047 | 32,606 |
| 46,159 | 145 | 21,550 | 6,697 | 4,047 | 32,439 |
| 46,160 | 143 | 21,757 | 6,724 | 4,079 | 32,703 |
| 46,161 | 147 | 21,855 | 6,759 | 4,049 | 32,810 |
| 46,162 | 148 | 22,016 | 6,802 | 4,083 | 33,049 |
| 46,163 | 148 | 22,011 | 6,819 | 4,089 | 33,067 |
| 46,164 | 146 | 21,788 | 6,803 | 4,070 | 32,807 |
| 46,165 | 146 | 21,795 | 6,817 | 4,071 | 32,829 |
| 46,166 | 148 | 22,052 | 6,881 | 4,105 | 33,186 |
| 46,167 | 147 | 22,044 | 6,905 | 4,109 | 33,205 |

|        |     |        |       |       |        |
|--------|-----|--------|-------|-------|--------|
| 46,168 | 144 | 21,997 | 6,907 | 4,085 | 33,133 |
| 46,169 | 142 | 21,982 | 6,879 | 4,080 | 33,083 |
| 46,170 | 140 | 22,044 | 6,869 | 4,089 | 33,142 |
| 46,171 | 147 | 21,971 | 6,874 | 4,053 | 33,045 |
| 46,172 | 152 | 21,936 | 6,872 | 4,061 | 33,021 |
| 46,173 | 153 | 21,945 | 6,868 | 4,041 | 33,007 |
| 46,174 | 154 | 22,168 | 6,894 | 4,052 | 33,268 |
| 46,175 | 153 | 22,097 | 6,862 | 4,028 | 33,140 |
| 46,176 | 152 | 21,970 | 6,859 | 4,009 | 32,990 |
| 46,177 | 150 | 21,845 | 6,846 | 3,988 | 32,829 |
| 46,178 | 155 | 21,720 | 6,833 | 3,988 | 32,696 |
| 46,179 | 157 | 21,649 | 6,757 | 3,937 | 32,500 |
| 46,180 | 157 | 21,720 | 6,776 | 3,941 | 32,594 |
| 46,181 | 152 | 21,584 | 6,715 | 3,928 | 32,379 |
| 46,182 | 150 | 21,687 | 6,766 | 3,970 | 32,573 |
| 46,183 | 153 | 21,381 | 6,680 | 3,893 | 32,107 |
| 46,184 | 153 | 21,329 | 6,670 | 3,891 | 32,043 |
| 46,185 | 152 | 21,203 | 6,619 | 3,876 | 31,850 |
| 46,186 | 153 | 21,390 | 6,698 | 3,920 | 32,161 |
| 46,187 | 150 | 21,243 | 6,711 | 3,912 | 32,016 |
| 46,188 | 136 | 19,931 | 6,291 | 3,689 | 30,047 |
| 46,189 | 136 | 20,023 | 6,343 | 3,711 | 30,213 |
| 46,190 | 132 | 20,220 | 6,365 | 3,718 | 30,435 |
| 46,191 | 131 | 20,334 | 6,393 | 3,712 | 30,570 |
| 46,192 | 124 | 20,586 | 6,492 | 3,742 | 30,944 |
| 46,193 | 118 | 20,514 | 6,514 | 3,743 | 30,889 |
| 46,194 | 114 | 20,192 | 6,349 | 3,648 | 30,303 |
| 46,195 | 114 | 20,352 | 6,410 | 3,692 | 30,568 |
| 46,196 | 108 | 20,576 | 6,420 | 3,725 | 30,829 |
| 46,197 | 111 | 20,322 | 6,370 | 3,654 | 30,457 |
| 46,198 | 115 | 20,366 | 6,364 | 3,645 | 30,490 |
| 46,199 | 111 | 20,279 | 6,317 | 3,632 | 30,339 |

|        |     |        |       |       |        |
|--------|-----|--------|-------|-------|--------|
| 46,200 | 109 | 20,553 | 6,450 | 3,658 | 30,770 |
| 46,201 | 112 | 20,762 | 6,463 | 3,665 | 31,002 |
| 46,202 | 112 | 20,737 | 6,459 | 3,662 | 30,970 |
| 46,203 | 103 | 20,688 | 6,499 | 3,667 | 30,957 |
| 46,204 | 102 | 20,453 | 6,442 | 3,615 | 30,612 |
| 46,205 | 102 | 20,218 | 6,409 | 3,594 | 30,323 |
| 46,206 | 110 | 20,178 | 6,467 | 3,600 | 30,355 |
| 46,207 | 112 | 20,284 | 6,496 | 3,646 | 30,538 |
| 46,208 | 112 | 20,140 | 6,458 | 3,579 | 30,289 |
| 46,209 | 107 | 19,731 | 6,299 | 3,514 | 29,651 |
| 46,210 | 114 | 20,073 | 6,383 | 3,551 | 30,121 |
| 46,211 | 116 | 20,057 | 6,364 | 3,532 | 30,069 |
| 46,212 | 112 | 19,998 | 6,313 | 3,533 | 29,956 |
| 46,213 | 121 | 20,397 | 6,433 | 3,588 | 30,539 |
| 46,214 | 125 | 20,288 | 6,371 | 3,561 | 30,345 |
| 46,215 | 126 | 20,286 | 6,374 | 3,549 | 30,335 |
| 46,216 | 130 | 20,506 | 6,484 | 3,645 | 30,765 |
| 46,217 | 129 | 20,422 | 6,483 | 3,651 | 30,685 |
| 46,218 | 128 | 20,253 | 6,387 | 3,619 | 30,387 |
| 46,219 | 129 | 20,304 | 6,350 | 3,613 | 30,396 |
| 46,220 | 128 | 20,384 | 6,350 | 3,611 | 30,473 |
| 46,221 | 124 | 20,265 | 6,328 | 3,598 | 30,315 |
| 46,222 | 122 | 20,166 | 6,353 | 3,584 | 30,225 |
| 46,223 | 117 | 20,317 | 6,415 | 3,639 | 30,488 |
| 46,224 | 122 | 20,563 | 6,472 | 3,655 | 30,812 |
| 46,225 | 123 | 20,386 | 6,460 | 3,620 | 30,589 |
| 46,226 | 122 | 20,354 | 6,433 | 3,592 | 30,501 |
| 46,227 | 123 | 21,071 | 6,643 | 3,712 | 31,549 |
| 46,228 | 122 | 21,115 | 6,634 | 3,723 | 31,594 |
| 46,229 | 113 | 20,943 | 6,573 | 3,693 | 31,322 |
| 46,230 | 114 | 20,588 | 6,522 | 3,660 | 30,884 |
| 46,231 | 114 | 20,544 | 6,506 | 3,634 | 30,798 |

|        |     |        |       |       |        |
|--------|-----|--------|-------|-------|--------|
| 46,232 | 119 | 21,369 | 6,676 | 3,779 | 31,943 |
| 46,233 | 121 | 21,504 | 6,734 | 3,803 | 32,162 |
| 46,234 | 119 | 21,380 | 6,683 | 3,798 | 31,980 |
| 46,235 | 119 | 21,165 | 6,648 | 3,769 | 31,701 |
| 46,236 | 120 | 21,570 | 6,769 | 3,854 | 32,313 |
| 46,237 | 127 | 21,583 | 6,727 | 3,847 | 32,284 |
| 46,238 | 127 | 21,398 | 6,622 | 3,766 | 31,913 |
| 46,239 | 129 | 21,475 | 6,618 | 3,753 | 31,975 |
| 46,240 | 130 | 21,717 | 6,684 | 3,795 | 32,326 |
| 46,241 | 134 | 21,422 | 6,624 | 3,778 | 31,958 |
| 46,242 | 135 | 21,657 | 6,712 | 3,812 | 32,316 |
| 46,243 | 138 | 21,370 | 6,606 | 3,786 | 31,900 |
| 46,244 | 140 | 21,610 | 6,648 | 3,822 | 32,220 |
| 46,245 | 143 | 21,657 | 6,640 | 3,829 | 32,269 |
| 46,246 | 147 | 21,514 | 6,597 | 3,794 | 32,052 |
| 46,247 | 147 | 21,396 | 6,577 | 3,774 | 31,894 |
| 46,248 | 137 | 21,565 | 6,655 | 3,814 | 32,171 |
| 46,249 | 137 | 21,475 | 6,639 | 3,827 | 32,078 |
| 46,250 | 144 | 21,555 | 6,666 | 3,863 | 32,228 |
| 46,251 | 143 | 21,613 | 6,679 | 3,887 | 32,322 |
| 46,252 | 141 | 21,401 | 6,605 | 3,852 | 31,999 |
| 46,253 | 139 | 21,266 | 6,501 | 3,780 | 31,686 |
| 46,254 | 140 | 21,540 | 6,559 | 3,817 | 32,056 |
| 46,255 | 137 | 21,626 | 6,551 | 3,822 | 32,136 |
| 46,256 | 136 | 21,730 | 6,532 | 3,804 | 32,202 |
| 46,257 | 136 | 21,723 | 6,534 | 3,790 | 32,183 |
| 46,258 | 140 | 21,978 | 6,574 | 3,832 | 32,524 |
| 46,259 | 138 | 21,621 | 6,474 | 3,799 | 32,032 |
| 46,260 | 138 | 21,420 | 6,404 | 3,775 | 31,737 |
| 46,261 | 131 | 21,279 | 6,348 | 3,747 | 31,505 |
| 46,262 | 126 | 21,316 | 6,356 | 3,783 | 31,581 |
| 46,263 | 127 | 21,465 | 6,380 | 3,788 | 31,760 |

|        |     |        |       |       |        |
|--------|-----|--------|-------|-------|--------|
| 46,264 | 124 | 21,616 | 6,395 | 3,826 | 31,961 |
| 46,265 | 125 | 21,485 | 6,361 | 3,785 | 31,756 |
| 46,266 | 124 | 21,526 | 6,340 | 3,765 | 31,755 |
| 46,267 | 131 | 21,339 | 6,249 | 3,685 | 31,404 |
| 46,268 | 133 | 21,573 | 6,262 | 3,682 | 31,650 |
| 46,269 | 134 | 21,274 | 6,247 | 3,664 | 31,319 |
| 46,270 | 134 | 21,221 | 6,252 | 3,663 | 31,270 |
| 46,271 | 132 | 21,167 | 6,241 | 3,686 | 31,226 |
| 46,272 | 133 | 21,299 | 6,231 | 3,674 | 31,337 |
| 46,273 | 139 | 21,349 | 6,237 | 3,642 | 31,367 |
| 46,274 | 139 | 21,318 | 6,216 | 3,640 | 31,313 |
| 46,275 | 135 | 21,442 | 6,263 | 3,672 | 31,512 |
| 46,276 | 131 | 21,446 | 6,238 | 3,665 | 31,480 |
| 46,277 | 125 | 21,248 | 6,202 | 3,679 | 31,254 |
| 46,278 | 126 | 21,129 | 6,109 | 3,647 | 31,011 |
| 46,279 | 133 | 21,020 | 6,077 | 3,636 | 30,866 |
| 46,280 | 133 | 20,970 | 6,090 | 3,618 | 30,811 |
| 46,281 | 133 | 20,891 | 6,047 | 3,602 | 30,673 |
| 46,282 | 133 | 20,540 | 5,959 | 3,570 | 30,202 |
| 46,283 | 127 | 21,063 | 6,232 | 3,723 | 31,145 |
| 46,284 | 124 | 21,226 | 6,255 | 3,730 | 31,335 |
| 46,285 | 122 | 21,276 | 6,270 | 3,714 | 31,382 |
| 46,286 | 123 | 20,923 | 6,187 | 3,655 | 30,888 |
| 46,287 | 123 | 21,138 | 6,254 | 3,680 | 31,195 |
| 46,288 | 121 | 21,430 | 6,326 | 3,701 | 31,578 |
| 46,289 | 125 | 21,506 | 6,356 | 3,746 | 31,733 |
| 46,290 | 124 | 21,706 | 6,410 | 3,780 | 32,020 |
| 46,291 | 128 | 21,749 | 6,431 | 3,769 | 32,077 |
| 46,292 | 128 | 21,717 | 6,437 | 3,787 | 32,069 |
| 46,293 | 128 | 21,585 | 6,394 | 3,758 | 31,865 |
| 46,294 | 124 | 21,398 | 6,313 | 3,716 | 31,551 |
| 46,295 | 136 | 21,507 | 6,395 | 3,748 | 31,786 |

|        |     |        |       |       |        |
|--------|-----|--------|-------|-------|--------|
| 46,296 | 135 | 21,541 | 6,451 | 3,763 | 31,890 |
| 46,297 | 131 | 21,319 | 6,409 | 3,746 | 31,605 |
| 46,298 | 133 | 20,908 | 6,316 | 3,685 | 31,042 |
| 46,299 | 133 | 20,931 | 6,312 | 3,687 | 31,063 |
| 46,300 | 135 | 21,053 | 6,344 | 3,701 | 31,233 |
| 46,301 | 129 | 21,104 | 6,352 | 3,681 | 31,266 |
| 46,302 | 129 | 20,913 | 6,299 | 3,646 | 30,987 |
| 46,303 | 127 | 20,705 | 6,248 | 3,609 | 30,689 |
| 46,304 | 134 | 20,947 | 6,317 | 3,645 | 31,043 |
| 46,305 | 133 | 20,746 | 6,274 | 3,617 | 30,770 |
| 46,306 | 133 | 20,652 | 6,252 | 3,604 | 30,641 |
| 46,307 | 135 | 20,780 | 6,296 | 3,647 | 30,858 |
| 46,308 | 133 | 20,867 | 6,300 | 3,652 | 30,952 |
| 46,309 | 133 | 20,671 | 6,267 | 3,616 | 30,687 |
| 46,310 | 133 | 20,605 | 6,237 | 3,576 | 30,551 |
| 46,311 | 135 | 20,869 | 6,373 | 3,654 | 31,031 |
| 46,312 | 137 | 20,775 | 6,387 | 3,664 | 30,963 |
| 46,313 | 136 | 19,784 | 6,169 | 3,533 | 29,622 |
| 46,314 | 137 | 20,030 | 6,259 | 3,577 | 30,003 |
| 46,315 | 138 | 20,204 | 6,303 | 3,608 | 30,253 |
| 46,316 | 137 | 20,092 | 6,245 | 3,586 | 30,060 |
| 46,317 | 139 | 20,269 | 6,313 | 3,608 | 30,329 |
| 46,318 | 131 | 20,219 | 6,307 | 3,637 | 30,294 |
| 46,319 | 132 | 20,349 | 6,315 | 3,682 | 30,478 |
| 46,320 | 130 | 20,477 | 6,333 | 3,689 | 30,629 |
| 46,321 | 133 | 20,424 | 6,281 | 3,666 | 30,504 |
| 46,322 | 133 | 20,354 | 6,265 | 3,646 | 30,398 |
| 46,323 | 136 | 20,587 | 6,314 | 3,704 | 30,741 |
| 46,324 | 130 | 20,558 | 6,319 | 3,735 | 30,742 |
| 46,325 | 129 | 20,587 | 6,368 | 3,749 | 30,833 |
| 46,326 | 130 | 20,713 | 6,341 | 3,777 | 30,961 |
| 46,327 | 130 | 20,813 | 6,377 | 3,791 | 31,111 |



|        |     |        |       |       |        |
|--------|-----|--------|-------|-------|--------|
| 46,328 | 132 | 20,788 | 6,381 | 3,785 | 31,086 |
| 46,329 | 130 | 20,682 | 6,342 | 3,748 | 30,902 |
| 46,330 | 123 | 20,359 | 6,276 | 3,683 | 30,441 |
| 46,331 | 128 | 20,819 | 6,369 | 3,757 | 31,073 |
| 46,332 | 123 | 20,606 | 6,280 | 3,673 | 30,682 |
| 46,333 | 123 | 20,646 | 6,243 | 3,668 | 30,680 |
| 46,334 | 128 | 20,407 | 6,179 | 3,631 | 30,345 |
| 46,335 | 132 | 20,656 | 6,189 | 3,640 | 30,617 |
| 46,336 | 132 | 20,552 | 6,168 | 3,641 | 30,493 |
| 46,337 | 133 | 20,446 | 6,084 | 3,610 | 30,273 |
| 46,338 | 133 | 20,320 | 6,069 | 3,605 | 30,127 |
| 46,339 | 131 | 20,139 | 6,080 | 3,613 | 29,963 |
| 46,340 | 140 | 20,299 | 6,101 | 3,630 | 30,170 |
| 46,341 | 145 | 20,322 | 6,109 | 3,621 | 30,197 |
| 46,342 | 139 | 20,239 | 6,038 | 3,575 | 29,991 |
| 46,343 | 146 | 20,643 | 6,098 | 3,617 | 30,504 |
| 46,344 | 137 | 20,995 | 6,171 | 3,653 | 30,956 |
| 46,345 | 142 | 21,188 | 6,177 | 3,651 | 31,158 |
| 46,346 | 141 | 21,423 | 6,204 | 3,677 | 31,445 |
| 46,347 | 155 | 21,582 | 6,226 | 3,688 | 31,651 |
| 46,348 | 153 | 21,676 | 6,229 | 3,677 | 31,735 |
| 46,349 | 155 | 21,708 | 6,212 | 3,674 | 31,749 |
| 46,350 | 154 | 21,668 | 6,193 | 3,632 | 31,647 |
| 46,351 | 153 | 21,864 | 6,261 | 3,722 | 32,000 |
| 46,352 | 160 | 21,854 | 6,283 | 3,733 | 32,030 |
| 46,353 | 160 | 21,897 | 6,267 | 3,733 | 32,057 |
| 46,354 | 161 | 22,174 | 6,359 | 3,779 | 32,473 |
| 46,355 | 155 | 21,918 | 6,315 | 3,766 | 32,154 |
| 46,356 | 151 | 22,289 | 6,392 | 3,796 | 32,628 |
| 46,357 | 152 | 22,351 | 6,398 | 3,797 | 32,698 |
| 46,358 | 150 | 22,366 | 6,406 | 3,797 | 32,719 |
| 46,359 | 148 | 22,194 | 6,363 | 3,757 | 32,462 |

|        |     |        |       |       |        |
|--------|-----|--------|-------|-------|--------|
| 46,360 | 150 | 22,510 | 6,448 | 3,781 | 32,889 |
| 46,361 | 149 | 22,779 | 6,501 | 3,805 | 33,234 |
| 46,362 | 144 | 22,354 | 6,365 | 3,735 | 32,598 |
| 46,363 | 143 | 22,314 | 6,368 | 3,747 | 32,572 |
| 46,364 | 138 | 22,451 | 6,391 | 3,786 | 32,766 |
| 46,365 | 141 | 22,391 | 6,393 | 3,800 | 32,725 |
| 46,366 | 141 | 22,317 | 6,385 | 3,781 | 32,624 |
| 46,367 | 140 | 22,182 | 6,350 | 3,760 | 32,432 |
| 46,368 | 140 | 22,060 | 6,294 | 3,735 | 32,229 |
| 46,369 | 137 | 21,832 | 6,222 | 3,677 | 31,868 |
| 46,370 | 139 | 22,201 | 6,351 | 3,706 | 32,397 |
| 46,371 | 137 | 21,976 | 6,301 | 3,683 | 32,097 |
| 46,372 | 135 | 22,115 | 6,353 | 3,686 | 32,289 |
| 46,373 | 133 | 21,991 | 6,314 | 3,666 | 32,104 |
| 46,374 | 131 | 22,134 | 6,324 | 3,624 | 32,213 |
| 46,375 | 132 | 22,181 | 6,371 | 3,632 | 32,316 |
| 46,376 | 141 | 22,255 | 6,360 | 3,636 | 32,392 |
| 46,377 | 140 | 22,020 | 6,353 | 3,577 | 32,090 |
| 46,378 | 148 | 21,924 | 6,320 | 3,567 | 31,959 |
| 46,379 | 156 | 22,029 | 6,311 | 3,555 | 32,051 |
| 46,380 | 161 | 21,840 | 6,236 | 3,503 | 31,740 |
| 46,381 | 161 | 21,792 | 6,239 | 3,501 | 31,693 |
| 46,382 | 160 | 21,778 | 6,223 | 3,493 | 31,654 |
| 46,383 | 166 | 21,831 | 6,293 | 3,535 | 31,825 |
| 46,384 | 167 | 21,781 | 6,284 | 3,508 | 31,740 |
| 46,385 | 168 | 21,849 | 6,305 | 3,528 | 31,850 |
| 46,386 | 165 | 21,834 | 6,313 | 3,561 | 31,873 |
| 46,387 | 168 | 21,804 | 6,320 | 3,565 | 31,857 |
| 46,388 | 165 | 21,862 | 6,317 | 3,591 | 31,935 |
| 46,389 | 165 | 21,960 | 6,282 | 3,577 | 31,984 |
| 46,390 | 164 | 21,937 | 6,290 | 3,567 | 31,958 |
| 46,391 | 158 | 21,995 | 6,323 | 3,553 | 32,029 |

|        |     |        |       |       |        |
|--------|-----|--------|-------|-------|--------|
| 46,392 | 156 | 21,925 | 6,293 | 3,552 | 31,926 |
| 46,393 | 159 | 22,248 | 6,331 | 3,583 | 32,321 |
| 46,394 | 156 | 22,071 | 6,306 | 3,565 | 32,098 |
| 46,395 | 154 | 21,874 | 6,286 | 3,563 | 31,877 |
| 46,396 | 151 | 21,989 | 6,373 | 3,621 | 32,134 |
| 46,397 | 150 | 22,133 | 6,454 | 3,655 | 32,392 |
| 46,398 | 138 | 21,966 | 6,467 | 3,670 | 32,241 |
| 46,399 | 140 | 22,109 | 6,502 | 3,706 | 32,457 |
| 46,400 | 139 | 22,056 | 6,479 | 3,671 | 32,345 |
| 46,401 | 139 | 22,339 | 6,547 | 3,704 | 32,729 |
| 46,402 | 138 | 22,612 | 6,560 | 3,751 | 33,061 |
| 46,403 | 135 | 22,355 | 6,517 | 3,721 | 32,728 |
| 46,404 | 139 | 22,608 | 6,573 | 3,742 | 33,062 |
| 46,405 | 140 | 22,671 | 6,615 | 3,769 | 33,195 |
| 46,406 | 147 | 22,707 | 6,643 | 3,782 | 33,279 |
| 46,407 | 152 | 22,748 | 6,636 | 3,798 | 33,334 |
| 46,408 | 156 | 22,790 | 6,634 | 3,815 | 33,395 |
| 46,409 | 161 | 22,748 | 6,610 | 3,824 | 33,343 |
| 46,410 | 158 | 22,657 | 6,594 | 3,840 | 33,249 |
| 46,411 | 160 | 22,040 | 6,425 | 3,719 | 32,344 |
| 46,412 | 158 | 22,214 | 6,478 | 3,772 | 32,622 |
| 46,413 | 158 | 22,502 | 6,552 | 3,808 | 33,020 |
| 46,414 | 157 | 22,277 | 6,453 | 3,718 | 32,605 |
| 46,415 | 157 | 22,594 | 6,532 | 3,747 | 33,030 |
| 46,416 | 154 | 22,840 | 6,581 | 3,777 | 33,352 |
| 46,417 | 154 | 22,910 | 6,592 | 3,810 | 33,466 |
| 46,418 | 156 | 22,974 | 6,594 | 3,811 | 33,535 |
| 46,419 | 151 | 22,884 | 6,551 | 3,810 | 33,396 |
| 46,420 | 150 | 22,851 | 6,559 | 3,805 | 33,365 |
| 46,421 | 150 | 23,005 | 6,600 | 3,838 | 33,593 |
| 46,422 | 154 | 22,977 | 6,599 | 3,844 | 33,574 |
| 46,423 | 152 | 22,829 | 6,573 | 3,835 | 33,389 |

|        |     |        |       |       |        |
|--------|-----|--------|-------|-------|--------|
| 46,424 | 158 | 23,047 | 6,637 | 3,897 | 33,739 |
| 46,425 | 160 | 23,208 | 6,671 | 3,938 | 33,977 |
| 46,426 | 164 | 23,473 | 6,720 | 3,956 | 34,313 |
| 46,427 | 159 | 23,491 | 6,693 | 3,961 | 34,304 |
| 46,428 | 158 | 23,176 | 6,604 | 3,932 | 33,870 |
| 46,429 | 149 | 22,981 | 6,540 | 3,908 | 33,578 |
| 46,430 | 137 | 22,165 | 6,327 | 3,793 | 32,422 |
| 46,431 | 138 | 22,326 | 6,359 | 3,815 | 32,638 |
| 46,432 | 131 | 22,244 | 6,345 | 3,786 | 32,506 |
| 46,433 | 132 | 22,301 | 6,348 | 3,794 | 32,575 |
| 46,434 | 132 | 22,425 | 6,323 | 3,799 | 32,679 |
| 46,435 | 130 | 22,150 | 6,237 | 3,753 | 32,270 |
| 46,436 | 129 | 22,011 | 6,183 | 3,732 | 32,055 |
| 46,437 | 129 | 22,363 | 6,268 | 3,776 | 32,536 |
| 46,438 | 133 | 22,291 | 6,255 | 3,750 | 32,429 |
| 46,439 | 132 | 22,247 | 6,269 | 3,729 | 32,377 |
| 46,440 | 132 | 22,130 | 6,235 | 3,723 | 32,220 |
| 46,441 | 128 | 22,181 | 6,288 | 3,762 | 32,359 |
| 46,442 | 131 | 21,963 | 6,214 | 3,736 | 32,044 |
| 46,443 | 126 | 21,680 | 6,165 | 3,694 | 31,665 |
| 46,444 | 121 | 21,604 | 6,165 | 3,711 | 31,601 |
| 46,445 | 120 | 21,368 | 6,123 | 3,698 | 31,309 |
| 46,446 | 124 | 21,386 | 6,105 | 3,676 | 31,291 |
| 46,447 | 122 | 20,915 | 5,908 | 3,565 | 30,510 |
| 46,448 | 129 | 20,848 | 5,841 | 3,520 | 30,338 |
| 46,449 | 130 | 20,940 | 5,874 | 3,535 | 30,479 |
| 46,450 | 127 | 20,714 | 5,820 | 3,497 | 30,158 |
| 46,451 | 128 | 20,613 | 5,753 | 3,479 | 29,973 |
| 46,452 | 128 | 20,595 | 5,745 | 3,483 | 29,951 |
| 46,453 | 126 | 20,475 | 5,747 | 3,461 | 29,809 |
| 46,454 | 122 | 20,491 | 5,748 | 3,456 | 29,817 |
| 46,455 | 114 | 19,975 | 5,629 | 3,372 | 29,090 |

|        |     |        |       |       |        |
|--------|-----|--------|-------|-------|--------|
| 46,456 | 114 | 20,234 | 5,678 | 3,404 | 29,430 |
| 46,457 | 112 | 20,383 | 5,729 | 3,441 | 29,665 |
| 46,458 | 112 | 20,430 | 5,763 | 3,466 | 29,771 |
| 46,459 | 109 | 20,615 | 5,832 | 3,495 | 30,051 |
| 46,460 | 107 | 20,392 | 5,759 | 3,418 | 29,676 |
| 46,461 | 115 | 20,658 | 5,799 | 3,451 | 30,023 |
| 46,462 | 115 | 20,738 | 5,813 | 3,483 | 30,149 |
| 46,463 | 119 | 20,839 | 5,820 | 3,492 | 30,270 |
| 46,464 | 120 | 20,626 | 5,772 | 3,452 | 29,970 |
| 46,465 | 119 | 20,451 | 5,704 | 3,436 | 29,710 |
| 46,466 | 126 | 20,921 | 5,800 | 3,512 | 30,359 |
| 46,467 | 125 | 20,669 | 5,745 | 3,476 | 30,015 |
| 46,468 | 126 | 21,034 | 5,802 | 3,504 | 30,466 |
| 46,469 | 127 | 20,759 | 5,761 | 3,470 | 30,117 |
| 46,470 | 129 | 21,026 | 5,819 | 3,517 | 30,491 |
| 46,471 | 131 | 21,087 | 5,837 | 3,532 | 30,587 |
| 46,472 | 138 | 20,825 | 5,763 | 3,487 | 30,213 |
| 46,473 | 135 | 20,572 | 5,707 | 3,443 | 29,857 |
| 46,474 | 137 | 20,892 | 5,793 | 3,472 | 30,294 |
| 46,475 | 134 | 20,871 | 5,852 | 3,505 | 30,362 |
| 46,476 | 135 | 20,771 | 5,836 | 3,517 | 30,259 |
| 46,477 | 134 | 20,676 | 5,804 | 3,519 | 30,133 |
| 46,478 | 130 | 20,434 | 5,756 | 3,480 | 29,800 |
| 46,479 | 130 | 20,556 | 5,790 | 3,489 | 29,965 |
| 46,480 | 132 | 20,540 | 5,828 | 3,518 | 30,018 |
| 46,481 | 134 | 20,594 | 5,847 | 3,517 | 30,092 |
| 46,482 | 137 | 20,622 | 5,838 | 3,523 | 30,120 |
| 46,483 | 139 | 20,679 | 5,833 | 3,531 | 30,182 |
| 46,484 | 139 | 20,435 | 5,793 | 3,507 | 29,874 |
| 46,485 | 139 | 20,650 | 5,882 | 3,537 | 30,208 |
| 46,486 | 132 | 20,834 | 5,912 | 3,558 | 30,436 |
| 46,487 | 136 | 20,752 | 5,913 | 3,544 | 30,345 |

|        |     |        |       |       |        |
|--------|-----|--------|-------|-------|--------|
| 46,488 | 135 | 20,759 | 5,897 | 3,508 | 30,299 |
| 46,489 | 130 | 20,511 | 5,829 | 3,484 | 29,954 |
| 46,490 | 131 | 20,893 | 5,928 | 3,546 | 30,498 |
| 46,491 | 135 | 20,637 | 5,831 | 3,491 | 30,094 |
| 46,492 | 140 | 20,963 | 5,863 | 3,500 | 30,466 |
| 46,493 | 143 | 21,228 | 5,931 | 3,528 | 30,830 |
| 46,494 | 143 | 21,472 | 5,995 | 3,560 | 31,170 |
| 46,495 | 142 | 21,155 | 5,856 | 3,493 | 30,646 |
| 46,496 | 142 | 21,484 | 5,939 | 3,523 | 31,088 |
| 46,497 | 139 | 21,512 | 5,958 | 3,528 | 31,137 |
| 46,498 | 142 | 21,691 | 6,022 | 3,567 | 31,422 |
| 46,499 | 132 | 21,591 | 5,999 | 3,571 | 31,293 |
| 46,500 | 134 | 21,648 | 5,981 | 3,563 | 31,326 |
| 46,501 | 137 | 21,576 | 5,997 | 3,545 | 31,255 |
| 46,502 | 135 | 21,647 | 6,010 | 3,550 | 31,342 |
| 46,503 | 135 | 21,547 | 5,957 | 3,521 | 31,160 |
| 46,504 | 134 | 21,630 | 5,961 | 3,523 | 31,248 |
| 46,505 | 135 | 21,435 | 5,894 | 3,514 | 30,978 |
| 46,506 | 135 | 21,365 | 5,823 | 3,490 | 30,813 |
| 46,507 | 141 | 21,292 | 5,813 | 3,482 | 30,728 |
| 46,508 | 139 | 21,061 | 5,752 | 3,439 | 30,391 |
| 46,509 | 142 | 21,646 | 5,839 | 3,482 | 31,109 |
| 46,510 | 144 | 21,461 | 5,785 | 3,424 | 30,814 |
| 46,511 | 143 | 21,176 | 5,730 | 3,400 | 30,449 |
| 46,512 | 135 | 20,896 | 5,683 | 3,378 | 30,092 |
| 46,513 | 131 | 21,199 | 5,731 | 3,421 | 30,482 |
| 46,514 | 127 | 20,835 | 5,665 | 3,362 | 29,989 |
| 46,515 | 132 | 21,095 | 5,680 | 3,400 | 30,307 |
| 46,516 | 134 | 21,021 | 5,696 | 3,391 | 30,242 |
| 46,517 | 130 | 20,826 | 5,646 | 3,364 | 29,966 |
| 46,518 | 130 | 20,873 | 5,689 | 3,381 | 30,073 |
| 46,519 | 127 | 20,889 | 5,714 | 3,375 | 30,105 |

|        |     |        |       |       |        |
|--------|-----|--------|-------|-------|--------|
| 46,520 | 126 | 20,818 | 5,694 | 3,377 | 30,015 |
| 46,521 | 129 | 21,186 | 5,770 | 3,406 | 30,491 |
| 46,522 | 126 | 21,158 | 5,763 | 3,403 | 30,450 |
| 46,523 | 120 | 21,130 | 5,752 | 3,398 | 30,400 |
| 46,524 | 120 | 21,200 | 5,739 | 3,412 | 30,471 |
| 46,525 | 117 | 21,125 | 5,645 | 3,366 | 30,253 |
| 46,526 | 118 | 21,290 | 5,643 | 3,368 | 30,419 |
| 46,527 | 118 | 21,367 | 5,657 | 3,357 | 30,499 |
| 46,528 | 117 | 21,511 | 5,674 | 3,391 | 30,693 |
| 46,529 | 123 | 21,484 | 5,672 | 3,396 | 30,675 |
| 46,530 | 130 | 21,383 | 5,636 | 3,375 | 30,524 |
| 46,531 | 128 | 21,295 | 5,577 | 3,340 | 30,340 |
| 46,532 | 123 | 21,194 | 5,594 | 3,349 | 30,260 |
| 46,533 | 122 | 21,084 | 5,613 | 3,359 | 30,178 |
| 46,534 | 121 | 21,054 | 5,585 | 3,365 | 30,125 |
| 46,535 | 126 | 21,436 | 5,687 | 3,415 | 30,664 |
| 46,536 | 128 | 21,217 | 5,698 | 3,393 | 30,436 |
| 46,537 | 128 | 21,177 | 5,711 | 3,388 | 30,404 |
| 46,538 | 125 | 20,979 | 5,703 | 3,373 | 30,180 |
| 46,539 | 124 | 20,980 | 5,715 | 3,384 | 30,203 |
| 46,540 | 122 | 20,781 | 5,590 | 3,350 | 29,843 |
| 46,541 | 122 | 20,978 | 5,637 | 3,380 | 30,117 |
| 46,542 | 118 | 21,178 | 5,680 | 3,414 | 30,390 |
| 46,543 | 113 | 20,875 | 5,642 | 3,394 | 30,024 |
| 46,544 | 113 | 20,681 | 5,618 | 3,389 | 29,801 |
| 46,545 | 113 | 20,444 | 5,590 | 3,374 | 29,521 |
| 46,546 | 120 | 20,979 | 5,797 | 3,464 | 30,360 |
| 46,547 | 121 | 20,911 | 5,794 | 3,485 | 30,311 |
| 46,548 | 121 | 20,865 | 5,783 | 3,497 | 30,266 |
| 46,549 | 120 | 20,507 | 5,690 | 3,436 | 29,753 |
| 46,550 | 121 | 20,746 | 5,739 | 3,449 | 30,055 |
| 46,551 | 122 | 20,861 | 5,786 | 3,477 | 30,246 |

|        |     |        |       |       |        |
|--------|-----|--------|-------|-------|--------|
| 46,552 | 119 | 20,640 | 5,701 | 3,456 | 29,916 |
| 46,553 | 119 | 20,493 | 5,702 | 3,438 | 29,752 |
| 46,554 | 120 | 20,478 | 5,715 | 3,434 | 29,747 |
| 46,555 | 120 | 20,445 | 5,698 | 3,428 | 29,691 |
| 46,556 | 123 | 20,307 | 5,709 | 3,410 | 29,549 |
| 46,557 | 126 | 20,414 | 5,818 | 3,457 | 29,815 |
| 46,558 | 118 | 20,192 | 5,791 | 3,441 | 29,542 |
| 46,559 | 120 | 20,394 | 5,892 | 3,501 | 29,907 |
| 46,560 | 122 | 20,302 | 5,938 | 3,524 | 29,886 |
| 46,561 | 118 | 20,174 | 5,911 | 3,550 | 29,753 |
| 46,562 | 120 | 20,101 | 5,871 | 3,510 | 29,602 |
| 46,563 | 123 | 20,480 | 5,971 | 3,545 | 30,119 |
| 46,564 | 128 | 20,507 | 5,977 | 3,543 | 30,155 |
| 46,565 | 128 | 20,445 | 6,001 | 3,540 | 30,114 |
| 46,566 | 123 | 20,658 | 6,112 | 3,607 | 30,500 |
| 46,567 | 129 | 20,637 | 6,135 | 3,605 | 30,506 |
| 46,568 | 131 | 20,682 | 6,105 | 3,590 | 30,508 |
| 46,569 | 134 | 20,646 | 6,095 | 3,587 | 30,462 |
| 46,570 | 133 | 20,354 | 6,059 | 3,555 | 30,101 |
| 46,571 | 138 | 20,942 | 6,280 | 3,654 | 31,014 |
| 46,572 | 136 | 20,961 | 6,297 | 3,682 | 31,076 |
| 46,573 | 136 | 20,489 | 6,204 | 3,609 | 30,438 |
| 46,574 | 136 | 20,485 | 6,191 | 3,615 | 30,427 |
| 46,575 | 137 | 20,171 | 6,122 | 3,560 | 29,990 |
| 46,576 | 137 | 19,979 | 6,088 | 3,538 | 29,742 |
| 46,577 | 138 | 20,908 | 6,343 | 3,698 | 31,087 |
| 46,578 | 139 | 20,861 | 6,335 | 3,684 | 31,019 |
| 46,579 | 136 | 20,218 | 6,189 | 3,573 | 30,116 |
| 46,580 | 137 | 20,421 | 6,247 | 3,593 | 30,398 |
| 46,581 | 132 | 20,667 | 6,331 | 3,631 | 30,761 |
| 46,582 | 132 | 20,816 | 6,337 | 3,655 | 30,940 |
| 46,583 | 141 | 21,004 | 6,395 | 3,710 | 31,250 |



|        |     |        |       |       |        |
|--------|-----|--------|-------|-------|--------|
| 46,584 | 142 | 21,021 | 6,423 | 3,717 | 31,303 |
| 46,585 | 143 | 21,031 | 6,499 | 3,737 | 31,410 |
| 46,586 | 146 | 21,076 | 6,538 | 3,764 | 31,524 |
| 46,587 | 145 | 21,206 | 6,528 | 3,788 | 31,667 |
| 46,588 | 146 | 21,142 | 6,460 | 3,766 | 31,514 |
| 46,589 | 153 | 21,021 | 6,407 | 3,740 | 31,321 |
| 46,590 | 153 | 20,847 | 6,375 | 3,705 | 31,080 |
| 46,591 | 155 | 21,239 | 6,542 | 3,789 | 31,725 |
| 46,592 | 155 | 21,188 | 6,552 | 3,773 | 31,668 |
| 46,593 | 152 | 21,423 | 6,589 | 3,798 | 31,962 |
| 46,594 | 149 | 21,109 | 6,521 | 3,772 | 31,551 |
| 46,595 | 147 | 21,171 | 6,580 | 3,784 | 31,682 |
| 46,596 | 148 | 21,210 | 6,591 | 3,775 | 31,724 |
| 46,597 | 143 | 20,888 | 6,468 | 3,707 | 31,206 |
| 46,598 | 144 | 20,882 | 6,481 | 3,692 | 31,199 |
| 46,599 | 151 | 21,119 | 6,548 | 3,722 | 31,540 |
| 46,600 | 146 | 21,121 | 6,548 | 3,739 | 31,554 |
| 46,601 | 148 | 21,358 | 6,598 | 3,779 | 31,883 |
| 46,602 | 143 | 21,203 | 6,566 | 3,755 | 31,667 |
| 46,603 | 143 | 21,212 | 6,554 | 3,756 | 31,665 |
| 46,604 | 142 | 21,250 | 6,610 | 3,784 | 31,786 |
| 46,605 | 145 | 21,300 | 6,631 | 3,793 | 31,869 |
| 46,606 | 141 | 21,432 | 6,659 | 3,791 | 32,023 |
| 46,607 | 138 | 21,549 | 6,660 | 3,778 | 32,125 |
| 46,608 | 137 | 21,644 | 6,638 | 3,789 | 32,208 |
| 46,609 | 145 | 21,648 | 6,612 | 3,764 | 32,169 |
| 46,610 | 144 | 21,837 | 6,585 | 3,786 | 32,352 |
| 46,611 | 150 | 21,718 | 6,519 | 3,744 | 32,131 |
| 46,612 | 151 | 21,571 | 6,489 | 3,700 | 31,911 |
| 46,613 | 156 | 21,431 | 6,472 | 3,669 | 31,728 |
| 46,614 | 153 | 21,251 | 6,423 | 3,650 | 31,477 |
| 46,615 | 156 | 21,687 | 6,538 | 3,710 | 32,091 |

|        |     |        |       |       |        |
|--------|-----|--------|-------|-------|--------|
| 46,616 | 160 | 21,579 | 6,444 | 3,660 | 31,843 |
| 46,617 | 160 | 21,647 | 6,481 | 3,667 | 31,955 |
| 46,618 | 155 | 21,657 | 6,477 | 3,677 | 31,966 |
| 46,619 | 162 | 21,625 | 6,457 | 3,660 | 31,904 |
| 46,620 | 157 | 21,520 | 6,405 | 3,630 | 31,712 |
| 46,621 | 159 | 21,956 | 6,422 | 3,661 | 32,198 |
| 46,622 | 165 | 22,081 | 6,452 | 3,682 | 32,380 |
| 46,623 | 167 | 22,327 | 6,505 | 3,717 | 32,716 |
| 46,624 | 173 | 22,162 | 6,444 | 3,677 | 32,456 |
| 46,625 | 173 | 22,217 | 6,455 | 3,692 | 32,537 |
| 46,626 | 168 | 22,298 | 6,449 | 3,684 | 32,599 |
| 46,627 | 169 | 22,238 | 6,448 | 3,663 | 32,518 |
| 46,628 | 168 | 22,533 | 6,552 | 3,699 | 32,952 |
| 46,629 | 169 | 22,277 | 6,505 | 3,669 | 32,620 |
| 46,630 | 165 | 22,256 | 6,513 | 3,677 | 32,611 |
| 46,631 | 169 | 22,566 | 6,629 | 3,741 | 33,105 |
| 46,632 | 168 | 22,404 | 6,571 | 3,696 | 32,839 |
| 46,633 | 167 | 22,616 | 6,603 | 3,723 | 33,109 |
| 46,634 | 160 | 22,806 | 6,702 | 3,759 | 33,427 |
| 46,635 | 153 | 22,446 | 6,524 | 3,670 | 32,793 |
| 46,636 | 153 | 22,702 | 6,547 | 3,694 | 33,096 |
| 46,637 | 156 | 22,688 | 6,520 | 3,695 | 33,059 |
| 46,638 | 156 | 22,404 | 6,478 | 3,640 | 32,678 |
| 46,639 | 156 | 22,507 | 6,515 | 3,661 | 32,839 |
| 46,640 | 151 | 22,403 | 6,496 | 3,632 | 32,682 |
| 46,641 | 151 | 22,407 | 6,503 | 3,616 | 32,677 |
| 46,642 | 154 | 22,505 | 6,525 | 3,620 | 32,804 |
| 46,643 | 157 | 22,342 | 6,498 | 3,609 | 32,606 |
| 46,644 | 158 | 22,416 | 6,492 | 3,600 | 32,666 |
| 46,645 | 164 | 22,592 | 6,504 | 3,623 | 32,883 |
| 46,646 | 167 | 22,234 | 6,393 | 3,582 | 32,376 |
| 46,647 | 168 | 22,248 | 6,375 | 3,594 | 32,385 |

|        |     |        |       |       |        |
|--------|-----|--------|-------|-------|--------|
| 46,648 | 174 | 22,228 | 6,375 | 3,609 | 32,386 |
| 46,649 | 174 | 22,190 | 6,351 | 3,606 | 32,321 |
| 46,650 | 167 | 22,196 | 6,344 | 3,599 | 32,306 |
| 46,651 | 170 | 22,218 | 6,375 | 3,606 | 32,369 |
| 46,652 | 168 | 22,056 | 6,329 | 3,590 | 32,143 |
| 46,653 | 168 | 21,977 | 6,260 | 3,546 | 31,951 |
| 46,654 | 174 | 22,094 | 6,259 | 3,542 | 32,069 |
| 46,655 | 178 | 22,077 | 6,265 | 3,548 | 32,068 |
| 46,656 | 175 | 22,000 | 6,250 | 3,539 | 31,964 |
| 46,657 | 174 | 21,908 | 6,228 | 3,541 | 31,851 |
| 46,658 | 181 | 21,998 | 6,275 | 3,563 | 32,017 |
| 46,659 | 187 | 21,936 | 6,300 | 3,558 | 31,981 |
| 46,660 | 179 | 21,661 | 6,239 | 3,536 | 31,615 |
| 46,661 | 182 | 21,634 | 6,283 | 3,537 | 31,636 |
| 46,662 | 171 | 21,392 | 6,227 | 3,514 | 31,304 |
| 46,663 | 176 | 21,441 | 6,263 | 3,530 | 31,410 |
| 46,664 | 170 | 21,173 | 6,178 | 3,497 | 31,018 |
| 46,665 | 170 | 20,910 | 6,164 | 3,483 | 30,727 |
| 46,666 | 171 | 20,767 | 6,152 | 3,476 | 30,566 |
| 46,667 | 174 | 20,409 | 6,095 | 3,440 | 30,118 |
| 46,668 | 174 | 20,049 | 5,992 | 3,399 | 29,614 |
| 46,669 | 167 | 20,317 | 6,120 | 3,427 | 30,031 |
| 46,670 | 160 | 20,191 | 6,146 | 3,433 | 29,930 |
| 46,671 | 164 | 19,882 | 6,104 | 3,410 | 29,560 |
| 46,672 | 167 | 19,442 | 6,012 | 3,359 | 28,980 |
| 46,673 | 161 | 19,387 | 6,008 | 3,359 | 28,915 |
| 46,674 | 165 | 19,327 | 6,076 | 3,374 | 28,942 |
| 46,675 | 159 | 19,118 | 6,075 | 3,372 | 28,724 |
| 46,676 | 162 | 18,788 | 5,982 | 3,340 | 28,272 |
| 46,677 | 162 | 18,659 | 5,975 | 3,330 | 28,126 |
| 46,678 | 160 | 18,600 | 5,969 | 3,344 | 28,073 |
| 46,679 | 159 | 18,404 | 5,949 | 3,323 | 27,835 |

|        |     |        |       |       |        |
|--------|-----|--------|-------|-------|--------|
| 46,680 | 153 | 18,353 | 5,928 | 3,313 | 27,747 |
| 46,681 | 156 | 18,477 | 5,959 | 3,334 | 27,926 |
| 46,682 | 155 | 18,451 | 5,938 | 3,310 | 27,854 |
| 46,683 | 159 | 18,305 | 5,925 | 3,306 | 27,695 |
| 46,684 | 159 | 18,358 | 5,924 | 3,311 | 27,752 |
| 46,685 | 162 | 18,171 | 5,839 | 3,244 | 27,416 |
| 46,686 | 161 | 18,022 | 5,810 | 3,210 | 27,203 |
| 46,687 | 159 | 17,879 | 5,867 | 3,200 | 27,105 |
| 46,688 | 159 | 17,807 | 5,864 | 3,205 | 27,035 |
| 46,689 | 161 | 17,847 | 5,924 | 3,253 | 27,185 |
| 46,690 | 151 | 17,225 | 5,751 | 3,185 | 26,312 |
| 46,691 | 151 | 17,316 | 5,766 | 3,201 | 26,434 |
| 46,692 | 152 | 17,495 | 5,792 | 3,229 | 26,668 |
| 46,693 | 152 | 17,760 | 5,868 | 3,262 | 27,042 |
| 46,694 | 156 | 17,789 | 5,873 | 3,273 | 27,091 |
| 46,695 | 154 | 17,804 | 5,934 | 3,309 | 27,201 |
| 46,696 | 143 | 17,491 | 5,887 | 3,234 | 26,755 |
| 46,697 | 144 | 17,775 | 5,953 | 3,265 | 27,137 |
| 46,698 | 145 | 18,145 | 6,055 | 3,316 | 27,661 |
| 46,699 | 139 | 18,256 | 6,146 | 3,337 | 27,878 |
| 46,700 | 139 | 18,125 | 6,101 | 3,338 | 27,703 |
| 46,701 | 138 | 18,294 | 6,115 | 3,346 | 27,893 |
| 46,702 | 139 | 18,854 | 6,226 | 3,422 | 28,641 |
| 46,703 | 139 | 18,658 | 6,200 | 3,421 | 28,418 |
| 46,704 | 139 | 18,605 | 6,193 | 3,412 | 28,349 |
| 46,705 | 136 | 18,785 | 6,311 | 3,490 | 28,722 |
| 46,706 | 132 | 18,813 | 6,337 | 3,505 | 28,787 |
| 46,707 | 135 | 18,787 | 6,320 | 3,491 | 28,733 |
| 46,708 | 127 | 18,661 | 6,216 | 3,456 | 28,460 |
| 46,709 | 128 | 18,804 | 6,281 | 3,493 | 28,706 |
| 46,710 | 127 | 18,991 | 6,337 | 3,503 | 28,958 |
| 46,711 | 127 | 18,705 | 6,222 | 3,422 | 28,476 |

|        |     |        |       |       |        |
|--------|-----|--------|-------|-------|--------|
| 46,712 | 126 | 18,914 | 6,242 | 3,461 | 28,743 |
| 46,713 | 124 | 19,033 | 6,275 | 3,484 | 28,916 |
| 46,714 | 121 | 19,068 | 6,273 | 3,471 | 28,933 |
| 46,715 | 117 | 18,877 | 6,200 | 3,429 | 28,623 |
| 46,716 | 119 | 19,073 | 6,252 | 3,463 | 28,907 |
| 46,717 | 127 | 19,087 | 6,242 | 3,470 | 28,926 |
| 46,718 | 120 | 19,087 | 6,230 | 3,448 | 28,885 |
| 46,719 | 121 | 18,852 | 6,127 | 3,404 | 28,504 |
| 46,720 | 121 | 18,750 | 6,077 | 3,377 | 28,325 |
| 46,721 | 131 | 19,368 | 6,188 | 3,455 | 29,142 |
| 46,722 | 119 | 19,204 | 6,125 | 3,421 | 28,869 |
| 46,723 | 124 | 19,425 | 6,140 | 3,405 | 29,094 |
| 46,724 | 125 | 19,708 | 6,200 | 3,427 | 29,460 |
| 46,725 | 121 | 19,856 | 6,174 | 3,440 | 29,591 |
| 46,726 | 128 | 19,989 | 6,172 | 3,429 | 29,718 |
| 46,727 | 133 | 19,716 | 6,100 | 3,380 | 29,329 |
| 46,728 | 134 | 19,574 | 6,031 | 3,339 | 29,078 |
| 46,729 | 150 | 20,224 | 6,163 | 3,420 | 29,957 |
| 46,730 | 150 | 20,159 | 6,157 | 3,411 | 29,877 |
| 46,731 | 150 | 20,176 | 6,157 | 3,415 | 29,898 |
| 46,732 | 156 | 20,463 | 6,245 | 3,468 | 30,332 |
| 46,733 | 153 | 20,156 | 6,139 | 3,426 | 29,874 |
| 46,734 | 156 | 20,371 | 6,203 | 3,451 | 30,181 |
| 46,735 | 157 | 20,167 | 6,210 | 3,427 | 29,961 |
| 46,736 | 150 | 19,637 | 6,038 | 3,367 | 29,192 |
| 46,737 | 154 | 19,826 | 6,069 | 3,390 | 29,439 |
| 46,738 | 151 | 19,957 | 6,072 | 3,391 | 29,571 |
| 46,739 | 153 | 19,996 | 6,068 | 3,368 | 29,585 |
| 46,740 | 150 | 19,915 | 6,021 | 3,323 | 29,409 |
| 46,741 | 154 | 19,774 | 6,056 | 3,307 | 29,291 |
| 46,742 | 154 | 19,750 | 6,060 | 3,287 | 29,251 |
| 46,743 | 153 | 19,675 | 6,051 | 3,291 | 29,170 |

|        |     |        |       |       |        |
|--------|-----|--------|-------|-------|--------|
| 46,744 | 155 | 19,715 | 6,067 | 3,307 | 29,244 |
| 46,745 | 151 | 19,664 | 6,042 | 3,286 | 29,143 |
| 46,746 | 152 | 19,639 | 6,011 | 3,251 | 29,053 |
| 46,747 | 149 | 19,466 | 5,938 | 3,244 | 28,797 |
| 46,748 | 150 | 19,473 | 5,995 | 3,282 | 28,900 |
| 46,749 | 148 | 19,161 | 5,915 | 3,228 | 28,452 |
| 46,750 | 148 | 18,995 | 5,850 | 3,175 | 28,168 |
| 46,751 | 151 | 19,172 | 5,906 | 3,184 | 28,413 |
| 46,752 | 158 | 19,075 | 5,918 | 3,180 | 28,331 |
| 46,753 | 162 | 18,914 | 5,896 | 3,144 | 28,116 |
| 46,754 | 162 | 18,882 | 5,889 | 3,101 | 28,034 |
| 46,755 | 163 | 18,826 | 5,821 | 3,062 | 27,872 |
| 46,756 | 166 | 18,908 | 5,816 | 3,039 | 27,929 |
| 46,757 | 168 | 18,886 | 5,795 | 3,040 | 27,889 |
| 46,758 | 164 | 18,854 | 5,791 | 3,052 | 27,861 |
| 46,759 | 170 | 18,838 | 5,823 | 3,079 | 27,910 |
| 46,760 | 170 | 18,755 | 5,797 | 3,046 | 27,768 |
| 46,761 | 168 | 18,632 | 5,804 | 3,048 | 27,652 |
| 46,762 | 168 | 18,528 | 5,791 | 3,059 | 27,546 |
| 46,763 | 168 | 18,497 | 5,798 | 3,043 | 27,506 |
| 46,764 | 165 | 18,572 | 5,796 | 3,031 | 27,564 |
| 46,765 | 164 | 18,538 | 5,778 | 3,049 | 27,529 |
| 46,766 | 170 | 18,776 | 5,839 | 3,056 | 27,841 |
| 46,767 | 169 | 18,798 | 5,809 | 3,053 | 27,829 |
| 46,768 | 165 | 18,963 | 5,923 | 3,098 | 28,149 |
| 46,769 | 163 | 18,806 | 5,876 | 3,083 | 27,928 |
| 46,770 | 171 | 18,874 | 5,892 | 3,082 | 28,019 |
| 46,771 | 171 | 18,727 | 5,882 | 3,076 | 27,856 |
| 46,772 | 174 | 19,030 | 5,981 | 3,136 | 28,321 |
| 46,773 | 176 | 18,953 | 5,988 | 3,124 | 28,241 |
| 46,774 | 173 | 18,892 | 5,973 | 3,126 | 28,164 |
| 46,775 | 175 | 18,798 | 5,962 | 3,128 | 28,063 |

|        |     |        |       |       |        |
|--------|-----|--------|-------|-------|--------|
| 46,776 | 176 | 18,700 | 5,947 | 3,120 | 27,943 |
| 46,777 | 171 | 18,730 | 5,959 | 3,132 | 27,992 |
| 46,778 | 163 | 18,801 | 6,003 | 3,161 | 28,128 |
| 46,779 | 157 | 18,645 | 5,993 | 3,153 | 27,948 |
| 46,780 | 154 | 18,750 | 6,058 | 3,159 | 28,121 |
| 46,781 | 156 | 18,667 | 6,013 | 3,150 | 27,986 |
| 46,782 | 158 | 18,778 | 6,038 | 3,177 | 28,151 |
| 46,783 | 150 | 19,024 | 6,099 | 3,206 | 28,479 |
| 46,784 | 152 | 19,173 | 6,125 | 3,213 | 28,663 |
| 46,785 | 145 | 18,993 | 6,071 | 3,177 | 28,386 |
| 46,786 | 145 | 19,140 | 6,100 | 3,227 | 28,612 |
| 46,787 | 145 | 19,335 | 6,143 | 3,292 | 28,915 |
| 46,788 | 145 | 19,419 | 6,192 | 3,320 | 29,076 |
| 46,789 | 147 | 19,493 | 6,261 | 3,358 | 29,259 |
| 46,790 | 148 | 19,454 | 6,228 | 3,364 | 29,194 |
| 46,791 | 146 | 19,500 | 6,204 | 3,389 | 29,239 |
| 46,792 | 150 | 19,625 | 6,202 | 3,406 | 29,383 |
| 46,793 | 153 | 19,683 | 6,229 | 3,430 | 29,495 |
| 46,794 | 153 | 19,669 | 6,211 | 3,435 | 29,468 |
| 46,795 | 156 | 19,901 | 6,296 | 3,481 | 29,834 |
| 46,796 | 160 | 19,886 | 6,309 | 3,484 | 29,839 |
| 46,797 | 163 | 19,920 | 6,309 | 3,499 | 29,891 |
| 46,798 | 167 | 19,175 | 6,033 | 3,329 | 28,704 |
| 46,799 | 172 | 19,478 | 6,090 | 3,361 | 29,101 |
| 46,800 | 174 | 19,741 | 6,133 | 3,407 | 29,455 |
| 46,801 | 173 | 19,819 | 6,131 | 3,414 | 29,537 |
| 46,802 | 172 | 19,920 | 6,170 | 3,428 | 29,690 |
| 46,803 | 171 | 19,888 | 6,152 | 3,433 | 29,644 |
| 46,804 | 169 | 19,683 | 6,104 | 3,451 | 29,407 |
| 46,805 | 173 | 19,799 | 6,133 | 3,489 | 29,594 |
| 46,806 | 169 | 19,688 | 6,127 | 3,491 | 29,475 |
| 46,807 | 174 | 19,571 | 6,098 | 3,489 | 29,332 |

|        |     |        |       |       |        |
|--------|-----|--------|-------|-------|--------|
| 46,808 | 176 | 19,611 | 6,087 | 3,464 | 29,338 |
| 46,809 | 174 | 19,460 | 6,024 | 3,432 | 29,090 |
| 46,810 | 172 | 19,530 | 6,004 | 3,421 | 29,127 |
| 46,811 | 179 | 19,523 | 6,004 | 3,428 | 29,134 |
| 46,812 | 176 | 19,334 | 5,961 | 3,389 | 28,860 |
| 46,813 | 177 | 19,803 | 6,071 | 3,459 | 29,510 |
| 46,814 | 179 | 19,904 | 6,104 | 3,483 | 29,670 |
| 46,815 | 182 | 19,938 | 6,114 | 3,510 | 29,744 |
| 46,816 | 183 | 19,909 | 6,112 | 3,532 | 29,736 |
| 46,817 | 178 | 19,841 | 6,107 | 3,547 | 29,673 |
| 46,818 | 184 | 19,653 | 6,039 | 3,522 | 29,398 |
| 46,819 | 184 | 19,593 | 6,006 | 3,517 | 29,300 |
| 46,820 | 178 | 19,519 | 6,034 | 3,513 | 29,244 |
| 46,821 | 175 | 19,592 | 6,034 | 3,513 | 29,314 |
| 46,822 | 168 | 19,485 | 5,969 | 3,471 | 29,093 |
| 46,823 | 170 | 19,650 | 5,989 | 3,491 | 29,300 |
| 46,824 | 167 | 19,379 | 5,897 | 3,461 | 28,904 |
| 46,825 | 167 | 19,472 | 5,893 | 3,463 | 28,995 |
| 46,826 | 164 | 19,674 | 5,920 | 3,471 | 29,229 |
| 46,827 | 160 | 19,674 | 5,900 | 3,463 | 29,197 |
| 46,828 | 150 | 18,525 | 5,560 | 3,251 | 27,486 |
| 46,829 | 150 | 18,669 | 5,575 | 3,281 | 27,675 |
| 46,830 | 150 | 18,889 | 5,580 | 3,307 | 27,926 |
| 46,831 | 149 | 18,823 | 5,568 | 3,303 | 27,843 |
| 46,832 | 148 | 19,137 | 5,651 | 3,361 | 28,297 |
| 46,833 | 147 | 19,078 | 5,660 | 3,340 | 28,225 |
| 46,834 | 151 | 18,966 | 5,640 | 3,331 | 28,088 |
| 46,835 | 151 | 18,936 | 5,607 | 3,315 | 28,009 |
| 46,836 | 149 | 18,823 | 5,547 | 3,303 | 27,822 |
| 46,837 | 152 | 18,605 | 5,476 | 3,205 | 27,438 |
| 46,838 | 153 | 18,864 | 5,506 | 3,218 | 27,741 |
| 46,839 | 149 | 19,028 | 5,541 | 3,247 | 27,965 |



|        |     |        |       |       |        |
|--------|-----|--------|-------|-------|--------|
| 46,840 | 150 | 19,046 | 5,481 | 3,229 | 27,906 |
| 46,841 | 146 | 18,951 | 5,449 | 3,196 | 27,742 |
| 46,842 | 148 | 19,027 | 5,472 | 3,193 | 27,840 |
| 46,843 | 145 | 18,968 | 5,441 | 3,194 | 27,748 |
| 46,844 | 146 | 19,090 | 5,391 | 3,152 | 27,779 |
| 46,845 | 150 | 19,083 | 5,367 | 3,144 | 27,744 |
| 46,846 | 147 | 19,180 | 5,396 | 3,157 | 27,880 |
| 46,847 | 138 | 19,024 | 5,320 | 3,125 | 27,607 |
| 46,848 | 137 | 19,010 | 5,310 | 3,116 | 27,573 |
| 46,849 | 134 | 18,983 | 5,312 | 3,126 | 27,555 |
| 46,850 | 129 | 18,825 | 5,272 | 3,100 | 27,326 |
| 46,851 | 139 | 18,781 | 5,252 | 3,085 | 27,257 |
| 46,852 | 142 | 18,742 | 5,239 | 3,074 | 27,197 |
| 46,853 | 148 | 18,863 | 5,263 | 3,106 | 27,380 |
| 46,854 | 145 | 18,769 | 5,238 | 3,076 | 27,228 |
| 46,855 | 145 | 18,776 | 5,224 | 3,083 | 27,228 |
| 46,856 | 149 | 18,847 | 5,237 | 3,069 | 27,302 |
| 46,857 | 149 | 18,856 | 5,224 | 3,063 | 27,292 |
| 46,858 | 141 | 18,846 | 5,194 | 3,058 | 27,239 |
| 46,859 | 139 | 18,714 | 5,180 | 3,057 | 27,090 |
| 46,860 | 145 | 18,749 | 5,204 | 3,070 | 27,168 |
| 46,861 | 147 | 18,692 | 5,215 | 3,093 | 27,147 |
| 46,862 | 140 | 18,974 | 5,252 | 3,101 | 27,467 |
| 46,863 | 143 | 18,982 | 5,256 | 3,102 | 27,483 |
| 46,864 | 142 | 19,055 | 5,252 | 3,132 | 27,581 |
| 46,865 | 139 | 19,070 | 5,243 | 3,135 | 27,587 |
| 46,866 | 142 | 19,202 | 5,247 | 3,117 | 27,708 |
| 46,867 | 141 | 19,190 | 5,235 | 3,111 | 27,677 |
| 46,868 | 131 | 19,126 | 5,215 | 3,092 | 27,564 |
| 46,869 | 134 | 19,445 | 5,209 | 3,092 | 27,880 |
| 46,870 | 139 | 19,270 | 5,120 | 3,064 | 27,593 |
| 46,871 | 139 | 19,326 | 5,102 | 3,067 | 27,634 |

|        |     |        |       |       |        |
|--------|-----|--------|-------|-------|--------|
| 46,872 | 142 | 19,040 | 5,032 | 3,038 | 27,252 |
| 46,873 | 143 | 18,798 | 4,969 | 3,020 | 26,930 |
| 46,874 | 155 | 19,729 | 5,348 | 3,196 | 28,428 |
| 46,875 | 153 | 19,533 | 5,278 | 3,158 | 28,122 |
| 46,876 | 156 | 19,531 | 5,328 | 3,184 | 28,199 |
| 46,877 | 156 | 19,601 | 5,408 | 3,217 | 28,382 |
| 46,878 | 158 | 19,380 | 5,365 | 3,178 | 28,081 |
| 46,879 | 159 | 19,551 | 5,398 | 3,190 | 28,298 |
| 46,880 | 161 | 19,466 | 5,374 | 3,181 | 28,182 |
| 46,881 | 159 | 19,318 | 5,364 | 3,180 | 28,021 |
| 46,882 | 162 | 19,790 | 5,485 | 3,240 | 28,677 |
| 46,883 | 166 | 19,871 | 5,506 | 3,244 | 28,787 |
| 46,884 | 173 | 19,719 | 5,425 | 3,211 | 28,528 |
| 46,885 | 173 | 19,759 | 5,438 | 3,220 | 28,590 |
| 46,886 | 170 | 19,751 | 5,472 | 3,221 | 28,614 |
| 46,887 | 170 | 19,887 | 5,499 | 3,238 | 28,794 |
| 46,888 | 171 | 20,090 | 5,536 | 3,287 | 29,084 |
| 46,889 | 172 | 19,419 | 5,390 | 3,172 | 28,153 |
| 46,890 | 173 | 19,714 | 5,429 | 3,209 | 28,525 |
| 46,891 | 174 | 19,947 | 5,449 | 3,233 | 28,803 |
| 46,892 | 179 | 19,989 | 5,441 | 3,235 | 28,844 |
| 46,893 | 177 | 19,883 | 5,393 | 3,206 | 28,659 |
| 46,894 | 175 | 20,010 | 5,496 | 3,250 | 28,931 |
| 46,895 | 173 | 20,056 | 5,490 | 3,246 | 28,965 |
| 46,896 | 173 | 20,012 | 5,460 | 3,258 | 28,903 |
| 46,897 | 181 | 20,466 | 5,548 | 3,309 | 29,504 |
| 46,898 | 190 | 20,535 | 5,557 | 3,314 | 29,596 |
| 46,899 | 184 | 20,437 | 5,539 | 3,311 | 29,471 |
| 46,900 | 185 | 20,551 | 5,556 | 3,320 | 29,612 |
| 46,901 | 187 | 20,692 | 5,645 | 3,354 | 29,878 |
| 46,902 | 180 | 20,541 | 5,608 | 3,346 | 29,675 |
| 46,903 | 175 | 20,597 | 5,602 | 3,355 | 29,729 |

|        |     |        |       |       |        |
|--------|-----|--------|-------|-------|--------|
| 46,904 | 167 | 20,742 | 5,632 | 3,353 | 29,894 |
| 46,905 | 167 | 20,783 | 5,643 | 3,351 | 29,944 |
| 46,906 | 160 | 20,739 | 5,648 | 3,339 | 29,886 |
| 46,907 | 162 | 20,941 | 5,704 | 3,366 | 30,173 |
| 46,908 | 159 | 20,934 | 5,642 | 3,315 | 30,050 |
| 46,909 | 165 | 21,169 | 5,681 | 3,365 | 30,380 |
| 46,910 | 157 | 21,343 | 5,735 | 3,383 | 30,618 |
| 46,911 | 155 | 21,394 | 5,733 | 3,393 | 30,675 |
| 46,912 | 156 | 21,609 | 5,754 | 3,385 | 30,904 |
| 46,913 | 156 | 21,418 | 5,747 | 3,401 | 30,722 |
| 46,914 | 154 | 21,465 | 5,721 | 3,395 | 30,735 |
| 46,915 | 157 | 21,356 | 5,706 | 3,351 | 30,570 |
| 46,916 | 155 | 21,100 | 5,652 | 3,317 | 30,224 |
| 46,917 | 158 | 21,413 | 5,739 | 3,389 | 30,699 |
| 46,918 | 158 | 21,137 | 5,678 | 3,349 | 30,322 |
| 46,919 | 159 | 21,492 | 5,738 | 3,395 | 30,784 |
| 46,920 | 158 | 21,543 | 5,766 | 3,408 | 30,875 |
| 46,921 | 149 | 21,687 | 5,782 | 3,422 | 31,040 |
| 46,922 | 150 | 21,780 | 5,764 | 3,412 | 31,106 |
| 46,923 | 144 | 21,783 | 5,726 | 3,405 | 31,058 |
| 46,924 | 145 | 21,840 | 5,710 | 3,386 | 31,081 |
| 46,925 | 143 | 21,811 | 5,646 | 3,356 | 30,956 |
| 46,926 | 147 | 22,036 | 5,635 | 3,338 | 31,156 |
| 46,927 | 147 | 22,092 | 5,634 | 3,344 | 31,217 |
| 46,928 | 143 | 22,200 | 5,614 | 3,382 | 31,339 |
| 46,929 | 142 | 22,160 | 5,623 | 3,380 | 31,305 |
| 46,930 | 143 | 22,037 | 5,588 | 3,369 | 31,137 |
| 46,931 | 146 | 22,047 | 5,573 | 3,364 | 31,130 |
| 46,932 | 144 | 22,122 | 5,569 | 3,373 | 31,208 |
| 46,933 | 135 | 22,011 | 5,530 | 3,390 | 31,066 |
| 46,934 | 133 | 22,379 | 5,598 | 3,430 | 31,540 |
| 46,935 | 126 | 22,358 | 5,587 | 3,425 | 31,496 |

|        |     |        |       |       |        |
|--------|-----|--------|-------|-------|--------|
| 46,936 | 131 | 22,442 | 5,612 | 3,463 | 31,648 |
| 46,937 | 131 | 22,404 | 5,572 | 3,477 | 31,584 |
| 46,938 | 133 | 22,541 | 5,563 | 3,472 | 31,709 |
| 46,939 | 131 | 22,273 | 5,533 | 3,447 | 31,384 |
| 46,940 | 133 | 22,437 | 5,570 | 3,471 | 31,611 |
| 46,941 | 131 | 22,178 | 5,524 | 3,437 | 31,270 |
| 46,942 | 134 | 22,314 | 5,573 | 3,468 | 31,489 |
| 46,943 | 126 | 22,265 | 5,577 | 3,486 | 31,454 |
| 46,944 | 125 | 21,899 | 5,493 | 3,446 | 30,963 |
| 46,945 | 124 | 21,871 | 5,488 | 3,427 | 30,910 |
| 46,946 | 123 | 21,891 | 5,511 | 3,448 | 30,973 |
| 46,947 | 126 | 22,068 | 5,540 | 3,460 | 31,194 |
| 46,948 | 119 | 21,925 | 5,531 | 3,472 | 31,047 |
| 46,949 | 116 | 21,900 | 5,498 | 3,451 | 30,965 |
| 46,950 | 116 | 21,342 | 5,363 | 3,353 | 30,174 |
| 46,951 | 117 | 21,468 | 5,362 | 3,359 | 30,306 |
| 46,952 | 117 | 21,778 | 5,380 | 3,383 | 30,658 |
| 46,953 | 123 | 21,939 | 5,424 | 3,403 | 30,889 |
| 46,954 | 122 | 21,699 | 5,361 | 3,359 | 30,541 |
| 46,955 | 127 | 21,757 | 5,328 | 3,354 | 30,566 |
| 46,956 | 129 | 21,910 | 5,382 | 3,374 | 30,795 |
| 46,957 | 137 | 21,659 | 5,311 | 3,321 | 30,428 |
| 46,958 | 137 | 21,616 | 5,285 | 3,325 | 30,363 |
| 46,959 | 139 | 21,462 | 5,245 | 3,305 | 30,151 |
| 46,960 | 133 | 21,298 | 5,245 | 3,299 | 29,975 |
| 46,961 | 132 | 21,271 | 5,213 | 3,291 | 29,907 |
| 46,962 | 131 | 21,247 | 5,206 | 3,288 | 29,872 |
| 46,963 | 128 | 21,253 | 5,210 | 3,287 | 29,878 |
| 46,964 | 133 | 21,297 | 5,210 | 3,284 | 29,924 |
| 46,965 | 134 | 21,103 | 5,171 | 3,266 | 29,674 |
| 46,966 | 134 | 21,555 | 5,258 | 3,298 | 30,245 |
| 46,967 | 129 | 21,284 | 5,184 | 3,253 | 29,850 |

|        |     |        |       |       |        |
|--------|-----|--------|-------|-------|--------|
| 46,968 | 132 | 21,628 | 5,265 | 3,281 | 30,306 |
| 46,969 | 138 | 21,853 | 5,309 | 3,298 | 30,598 |
| 46,970 | 137 | 21,808 | 5,292 | 3,304 | 30,541 |
| 46,971 | 135 | 21,579 | 5,243 | 3,281 | 30,238 |
| 46,972 | 135 | 21,289 | 5,180 | 3,255 | 29,859 |
| 46,973 | 135 | 21,332 | 5,197 | 3,253 | 29,917 |
| 46,974 | 136 | 21,373 | 5,243 | 3,284 | 30,036 |
| 46,975 | 128 | 20,955 | 5,165 | 3,239 | 29,487 |
| 46,976 | 129 | 21,265 | 5,202 | 3,266 | 29,862 |
| 46,977 | 121 | 21,171 | 5,215 | 3,277 | 29,784 |
| 46,978 | 122 | 21,035 | 5,201 | 3,269 | 29,627 |
| 46,979 | 124 | 21,022 | 5,234 | 3,256 | 29,636 |
| 46,980 | 131 | 21,024 | 5,237 | 3,256 | 29,648 |
| 46,981 | 130 | 21,370 | 5,299 | 3,288 | 30,087 |
| 46,982 | 127 | 21,492 | 5,341 | 3,292 | 30,252 |
| 46,983 | 127 | 21,589 | 5,350 | 3,295 | 30,361 |
| 46,984 | 126 | 20,967 | 5,205 | 3,186 | 29,484 |
| 46,985 | 129 | 21,192 | 5,248 | 3,210 | 29,779 |
| 46,986 | 127 | 21,580 | 5,303 | 3,237 | 30,247 |
| 46,987 | 127 | 21,617 | 5,328 | 3,225 | 30,297 |
| 46,988 | 129 | 21,926 | 5,392 | 3,265 | 30,712 |
| 46,989 | 123 | 21,576 | 5,320 | 3,232 | 30,251 |
| 46,990 | 122 | 21,655 | 5,307 | 3,236 | 30,320 |
| 46,991 | 123 | 22,003 | 5,356 | 3,275 | 30,757 |
| 46,992 | 120 | 21,877 | 5,318 | 3,249 | 30,564 |
| 46,993 | 122 | 21,773 | 5,301 | 3,215 | 30,411 |
| 46,994 | 125 | 21,902 | 5,278 | 3,207 | 30,512 |
| 46,995 | 126 | 22,209 | 5,339 | 3,255 | 30,929 |
| 46,996 | 128 | 21,609 | 5,211 | 3,156 | 30,104 |
| 46,997 | 129 | 21,975 | 5,253 | 3,185 | 30,542 |
| 46,998 | 126 | 21,690 | 5,190 | 3,162 | 30,168 |
| 46,999 | 126 | 21,915 | 5,277 | 3,193 | 30,511 |

|        |     |        |       |       |        |
|--------|-----|--------|-------|-------|--------|
| 47,000 | 124 | 22,248 | 5,337 | 3,232 | 30,941 |
| 47,001 | 123 | 22,307 | 5,318 | 3,242 | 30,990 |
| 47,002 | 122 | 22,198 | 5,300 | 3,236 | 30,856 |
| 47,003 | 117 | 22,690 | 5,417 | 3,296 | 31,520 |
| 47,004 | 111 | 22,550 | 5,357 | 3,272 | 31,290 |
| 47,005 | 112 | 22,759 | 5,420 | 3,338 | 31,629 |
| 47,006 | 108 | 22,738 | 5,420 | 3,337 | 31,603 |
| 47,007 | 106 | 22,545 | 5,365 | 3,308 | 31,324 |
| 47,008 | 100 | 22,755 | 5,406 | 3,333 | 31,594 |
| 47,009 | 98  | 22,954 | 5,432 | 3,341 | 31,825 |
| 47,010 | 101 | 23,027 | 5,464 | 3,337 | 31,929 |
| 47,011 | 102 | 22,803 | 5,416 | 3,303 | 31,624 |
| 47,012 | 102 | 22,761 | 5,413 | 3,300 | 31,576 |
| 47,013 | 107 | 23,091 | 5,470 | 3,327 | 31,995 |
| 47,014 | 114 | 23,128 | 5,432 | 3,326 | 32,000 |
| 47,015 | 106 | 22,876 | 5,330 | 3,271 | 31,583 |
| 47,016 | 106 | 22,824 | 5,318 | 3,287 | 31,535 |
| 47,017 | 111 | 22,763 | 5,292 | 3,276 | 31,442 |
| 47,018 | 111 | 22,964 | 5,301 | 3,302 | 31,678 |
| 47,019 | 113 | 22,765 | 5,215 | 3,263 | 31,356 |
| 47,020 | 107 | 22,384 | 5,125 | 3,223 | 30,839 |
| 47,021 | 108 | 22,388 | 5,116 | 3,209 | 30,821 |
| 47,022 | 110 | 22,648 | 5,165 | 3,235 | 31,158 |
| 47,023 | 112 | 22,418 | 5,097 | 3,234 | 30,861 |
| 47,024 | 108 | 22,453 | 5,099 | 3,242 | 30,902 |
| 47,025 | 112 | 22,758 | 5,182 | 3,282 | 31,334 |
| 47,026 | 120 | 22,949 | 5,211 | 3,320 | 31,600 |
| 47,027 | 121 | 23,036 | 5,229 | 3,352 | 31,738 |
| 47,028 | 120 | 23,003 | 5,153 | 3,329 | 31,605 |
| 47,029 | 122 | 23,267 | 5,224 | 3,358 | 31,971 |
| 47,030 | 124 | 23,099 | 5,187 | 3,344 | 31,754 |
| 47,031 | 115 | 23,015 | 5,154 | 3,323 | 31,607 |

|        |     |        |       |       |        |
|--------|-----|--------|-------|-------|--------|
| 47,032 | 118 | 23,051 | 5,175 | 3,347 | 31,691 |
| 47,033 | 119 | 23,011 | 5,170 | 3,354 | 31,654 |
| 47,034 | 123 | 22,882 | 5,127 | 3,338 | 31,470 |
| 47,035 | 125 | 22,843 | 5,117 | 3,330 | 31,415 |
| 47,036 | 122 | 22,520 | 5,067 | 3,298 | 31,007 |
| 47,037 | 126 | 22,901 | 5,179 | 3,377 | 31,583 |
| 47,038 | 127 | 22,587 | 5,147 | 3,331 | 31,192 |
| 47,039 | 129 | 22,524 | 5,167 | 3,354 | 31,174 |
| 47,040 | 129 | 22,527 | 5,147 | 3,361 | 31,164 |
| 47,041 | 132 | 22,610 | 5,142 | 3,358 | 31,242 |
| 47,042 | 136 | 22,627 | 5,154 | 3,361 | 31,278 |
| 47,043 | 136 | 22,600 | 5,143 | 3,359 | 31,238 |
| 47,044 | 139 | 23,023 | 5,234 | 3,432 | 31,828 |
| 47,045 | 136 | 22,891 | 5,232 | 3,411 | 31,670 |
| 47,046 | 144 | 23,414 | 5,309 | 3,483 | 32,350 |
| 47,047 | 141 | 23,108 | 5,251 | 3,444 | 31,944 |
| 47,048 | 142 | 23,210 | 5,348 | 3,483 | 32,183 |
| 47,049 | 136 | 23,019 | 5,287 | 3,470 | 31,912 |
| 47,050 | 139 | 23,295 | 5,318 | 3,490 | 32,242 |
| 47,051 | 143 | 23,076 | 5,291 | 3,480 | 31,990 |
| 47,052 | 143 | 22,885 | 5,269 | 3,476 | 31,773 |
| 47,053 | 144 | 23,006 | 5,330 | 3,510 | 31,990 |
| 47,054 | 147 | 23,064 | 5,311 | 3,491 | 32,013 |
| 47,055 | 151 | 23,033 | 5,310 | 3,466 | 31,960 |
| 47,056 | 153 | 23,054 | 5,308 | 3,475 | 31,990 |
| 47,057 | 151 | 22,861 | 5,287 | 3,475 | 31,774 |
| 47,058 | 159 | 23,061 | 5,368 | 3,515 | 32,103 |
| 47,059 | 162 | 23,107 | 5,368 | 3,534 | 32,171 |
| 47,060 | 161 | 23,312 | 5,405 | 3,575 | 32,453 |
| 47,061 | 159 | 23,148 | 5,319 | 3,561 | 32,187 |
| 47,062 | 159 | 23,290 | 5,316 | 3,571 | 32,336 |
| 47,063 | 164 | 23,834 | 5,394 | 3,605 | 32,997 |

|        |     |        |       |       |        |
|--------|-----|--------|-------|-------|--------|
| 47,064 | 161 | 23,866 | 5,410 | 3,630 | 33,067 |
| 47,065 | 155 | 23,373 | 5,298 | 3,554 | 32,380 |
| 47,066 | 159 | 23,672 | 5,372 | 3,591 | 32,794 |
| 47,067 | 162 | 24,015 | 5,437 | 3,629 | 33,243 |
| 47,068 | 167 | 24,009 | 5,439 | 3,625 | 33,240 |
| 47,069 | 166 | 23,980 | 5,450 | 3,624 | 33,220 |
| 47,070 | 168 | 23,925 | 5,506 | 3,630 | 33,229 |
| 47,071 | 168 | 24,145 | 5,550 | 3,658 | 33,521 |
| 47,072 | 174 | 23,951 | 5,536 | 3,641 | 33,302 |
| 47,073 | 172 | 23,796 | 5,535 | 3,630 | 33,133 |
| 47,074 | 171 | 24,159 | 5,610 | 3,672 | 33,612 |
| 47,075 | 170 | 24,185 | 5,599 | 3,666 | 33,620 |
| 47,076 | 169 | 24,236 | 5,606 | 3,675 | 33,686 |
| 47,077 | 162 | 24,273 | 5,638 | 3,677 | 33,750 |
| 47,078 | 158 | 24,146 | 5,615 | 3,656 | 33,575 |
| 47,079 | 156 | 23,915 | 5,545 | 3,605 | 33,221 |
| 47,080 | 157 | 23,875 | 5,476 | 3,580 | 33,088 |
| 47,081 | 157 | 23,888 | 5,473 | 3,579 | 33,097 |
| 47,082 | 155 | 23,931 | 5,435 | 3,550 | 33,071 |
| 47,083 | 165 | 24,164 | 5,513 | 3,589 | 33,431 |
| 47,084 | 164 | 24,069 | 5,488 | 3,568 | 33,289 |
| 47,085 | 160 | 24,166 | 5,531 | 3,569 | 33,426 |
| 47,086 | 160 | 24,267 | 5,512 | 3,569 | 33,508 |
| 47,087 | 155 | 23,907 | 5,369 | 3,500 | 32,931 |
| 47,088 | 156 | 24,341 | 5,448 | 3,555 | 33,500 |
| 47,089 | 152 | 24,753 | 5,542 | 3,609 | 34,056 |
| 47,090 | 153 | 24,880 | 5,555 | 3,611 | 34,199 |
| 47,091 | 152 | 24,786 | 5,546 | 3,592 | 34,076 |
| 47,092 | 164 | 24,858 | 5,606 | 3,617 | 34,245 |
| 47,093 | 160 | 24,699 | 5,610 | 3,606 | 34,075 |
| 47,094 | 158 | 25,415 | 5,703 | 3,685 | 34,961 |
| 47,095 | 159 | 25,471 | 5,739 | 3,715 | 35,084 |



|        |     |        |       |       |        |
|--------|-----|--------|-------|-------|--------|
| 47,096 | 156 | 25,481 | 5,739 | 3,724 | 35,100 |
| 47,097 | 158 | 25,416 | 5,727 | 3,691 | 34,992 |
| 47,098 | 162 | 25,322 | 5,663 | 3,645 | 34,792 |
| 47,099 | 163 | 25,450 | 5,666 | 3,674 | 34,953 |
| 47,100 | 166 | 25,408 | 5,694 | 3,670 | 34,938 |
| 47,101 | 162 | 25,306 | 5,655 | 3,640 | 34,763 |
| 47,102 | 162 | 25,229 | 5,637 | 3,655 | 34,683 |
| 47,103 | 163 | 25,224 | 5,618 | 3,655 | 34,660 |
| 47,104 | 167 | 25,377 | 5,595 | 3,644 | 34,783 |
| 47,105 | 169 | 25,653 | 5,661 | 3,683 | 35,166 |
| 47,106 | 163 | 25,572 | 5,579 | 3,653 | 34,967 |
| 47,107 | 162 | 25,598 | 5,589 | 3,655 | 35,004 |
| 47,108 | 158 | 25,979 | 5,625 | 3,678 | 35,440 |
| 47,109 | 156 | 25,893 | 5,591 | 3,657 | 35,297 |
| 47,110 | 165 | 25,935 | 5,595 | 3,649 | 35,344 |
| 47,111 | 164 | 25,701 | 5,571 | 3,617 | 35,053 |
| 47,112 | 168 | 25,905 | 5,646 | 3,657 | 35,376 |
| 47,113 | 170 | 25,738 | 5,653 | 3,659 | 35,220 |
| 47,114 | 167 | 25,678 | 5,678 | 3,692 | 35,215 |
| 47,115 | 167 | 25,426 | 5,605 | 3,658 | 34,856 |
| 47,116 | 163 | 25,344 | 5,616 | 3,656 | 34,779 |
| 47,117 | 166 | 25,302 | 5,644 | 3,682 | 34,794 |
| 47,118 | 164 | 25,078 | 5,618 | 3,678 | 34,538 |
| 47,119 | 159 | 24,845 | 5,609 | 3,662 | 34,275 |
| 47,120 | 152 | 25,272 | 5,711 | 3,783 | 34,918 |
| 47,121 | 156 | 25,153 | 5,671 | 3,750 | 34,730 |
| 47,122 | 154 | 24,793 | 5,636 | 3,727 | 34,310 |
| 47,123 | 147 | 25,154 | 5,719 | 3,772 | 34,792 |
| 47,124 | 151 | 25,065 | 5,673 | 3,742 | 34,631 |
| 47,125 | 151 | 25,050 | 5,675 | 3,739 | 34,615 |
| 47,126 | 150 | 24,812 | 5,631 | 3,700 | 34,293 |
| 47,127 | 150 | 24,845 | 5,599 | 3,717 | 34,311 |

|        |     |        |       |       |        |
|--------|-----|--------|-------|-------|--------|
| 47,128 | 151 | 24,402 | 5,502 | 3,642 | 33,697 |
| 47,129 | 151 | 24,500 | 5,506 | 3,649 | 33,806 |
| 47,130 | 151 | 24,384 | 5,495 | 3,650 | 33,680 |
| 47,131 | 147 | 24,166 | 5,486 | 3,640 | 33,439 |
| 47,132 | 147 | 24,138 | 5,513 | 3,699 | 33,497 |
| 47,133 | 137 | 23,450 | 5,375 | 3,606 | 32,568 |
| 47,134 | 148 | 23,687 | 5,409 | 3,624 | 32,868 |
| 47,135 | 154 | 23,737 | 5,436 | 3,638 | 32,965 |
| 47,136 | 159 | 23,472 | 5,387 | 3,620 | 32,638 |
| 47,137 | 159 | 23,596 | 5,429 | 3,667 | 32,851 |
| 47,138 | 168 | 23,804 | 5,525 | 3,688 | 33,185 |
| 47,139 | 164 | 23,248 | 5,403 | 3,592 | 32,407 |
| 47,140 | 170 | 23,440 | 5,405 | 3,620 | 32,635 |
| 47,141 | 171 | 23,411 | 5,384 | 3,623 | 32,589 |
| 47,142 | 169 | 23,423 | 5,397 | 3,615 | 32,604 |
| 47,143 | 158 | 23,068 | 5,320 | 3,596 | 32,142 |
| 47,144 | 157 | 22,904 | 5,284 | 3,585 | 31,930 |
| 47,145 | 157 | 23,116 | 5,340 | 3,647 | 32,260 |
| 47,146 | 160 | 22,821 | 5,260 | 3,581 | 31,822 |
| 47,147 | 160 | 22,779 | 5,266 | 3,586 | 31,791 |
| 47,148 | 154 | 22,543 | 5,286 | 3,599 | 31,582 |
| 47,149 | 148 | 22,435 | 5,269 | 3,610 | 31,462 |
| 47,150 | 153 | 22,429 | 5,275 | 3,616 | 31,473 |
| 47,151 | 147 | 22,421 | 5,284 | 3,649 | 31,501 |
| 47,152 | 147 | 22,438 | 5,301 | 3,665 | 31,551 |
| 47,153 | 147 | 22,409 | 5,379 | 3,649 | 31,584 |
| 47,154 | 143 | 22,488 | 5,399 | 3,639 | 31,669 |
| 47,155 | 143 | 22,400 | 5,422 | 3,655 | 31,620 |
| 47,156 | 152 | 22,848 | 5,584 | 3,745 | 32,329 |
| 47,157 | 155 | 22,908 | 5,661 | 3,795 | 32,519 |
| 47,158 | 152 | 23,189 | 5,696 | 3,823 | 32,860 |
| 47,159 | 139 | 22,814 | 5,623 | 3,785 | 32,361 |

|        |     |        |       |       |        |
|--------|-----|--------|-------|-------|--------|
| 47,160 | 141 | 22,913 | 5,686 | 3,815 | 32,555 |
| 47,161 | 140 | 23,094 | 5,730 | 3,876 | 32,840 |
| 47,162 | 138 | 22,987 | 5,692 | 3,865 | 32,682 |
| 47,163 | 138 | 23,314 | 5,761 | 3,910 | 33,123 |
| 47,164 | 137 | 23,457 | 5,790 | 3,912 | 33,296 |
| 47,165 | 135 | 23,512 | 5,788 | 3,930 | 33,365 |
| 47,166 | 136 | 23,572 | 5,806 | 3,946 | 33,460 |
| 47,167 | 137 | 23,535 | 5,805 | 3,922 | 33,399 |
| 47,168 | 132 | 23,603 | 5,818 | 3,927 | 33,480 |
| 47,169 | 127 | 23,611 | 5,772 | 3,912 | 33,422 |
| 47,170 | 126 | 23,605 | 5,715 | 3,869 | 33,315 |
| 47,171 | 128 | 23,839 | 5,756 | 3,880 | 33,603 |
| 47,172 | 125 | 23,671 | 5,713 | 3,860 | 33,369 |
| 47,173 | 127 | 23,787 | 5,651 | 3,839 | 33,404 |
| 47,174 | 127 | 23,804 | 5,646 | 3,834 | 33,411 |
| 47,175 | 128 | 23,653 | 5,653 | 3,819 | 33,253 |
| 47,176 | 135 | 23,961 | 5,698 | 3,858 | 33,652 |
| 47,177 | 137 | 23,908 | 5,708 | 3,848 | 33,601 |
| 47,178 | 140 | 23,906 | 5,712 | 3,871 | 33,629 |
| 47,179 | 141 | 24,069 | 5,731 | 3,878 | 33,819 |
| 47,180 | 148 | 24,354 | 5,805 | 3,917 | 34,224 |
| 47,181 | 150 | 24,453 | 5,803 | 3,907 | 34,313 |
| 47,182 | 150 | 24,720 | 5,802 | 3,893 | 34,565 |
| 47,183 | 147 | 24,804 | 5,789 | 3,885 | 34,625 |
| 47,184 | 147 | 25,169 | 5,833 | 3,939 | 35,088 |
| 47,185 | 144 | 25,719 | 5,908 | 3,999 | 35,770 |
| 47,186 | 137 | 25,341 | 5,862 | 3,947 | 35,287 |
| 47,187 | 132 | 25,096 | 5,800 | 3,912 | 34,940 |
| 47,188 | 130 | 25,894 | 5,956 | 4,054 | 36,034 |
| 47,189 | 128 | 25,692 | 5,920 | 4,064 | 35,804 |
| 47,190 | 132 | 25,531 | 5,936 | 4,069 | 35,668 |
| 47,191 | 127 | 25,412 | 5,941 | 4,052 | 35,532 |

|        |     |        |       |       |        |
|--------|-----|--------|-------|-------|--------|
| 47,192 | 125 | 25,333 | 5,898 | 4,025 | 35,381 |
| 47,193 | 126 | 25,161 | 5,850 | 3,991 | 35,128 |
| 47,194 | 124 | 24,901 | 5,774 | 3,941 | 34,740 |
| 47,195 | 125 | 25,297 | 5,843 | 3,975 | 35,240 |
| 47,196 | 130 | 25,179 | 5,864 | 3,946 | 35,119 |
| 47,197 | 127 | 25,083 | 5,821 | 3,909 | 34,940 |
| 47,198 | 127 | 25,042 | 5,741 | 3,876 | 34,786 |
| 47,199 | 130 | 25,228 | 5,764 | 3,876 | 34,998 |
| 47,200 | 125 | 25,464 | 5,821 | 3,884 | 35,294 |
| 47,201 | 137 | 25,533 | 5,813 | 3,864 | 35,347 |
| 47,202 | 140 | 25,815 | 5,835 | 3,871 | 35,661 |
| 47,203 | 139 | 25,683 | 5,761 | 3,836 | 35,419 |
| 47,204 | 138 | 25,763 | 5,760 | 3,860 | 35,521 |
| 47,205 | 136 | 25,894 | 5,783 | 3,865 | 35,678 |
| 47,206 | 137 | 25,661 | 5,646 | 3,795 | 35,239 |
| 47,207 | 144 | 25,961 | 5,656 | 3,813 | 35,574 |
| 47,208 | 142 | 26,178 | 5,693 | 3,818 | 35,831 |
| 47,209 | 148 | 25,568 | 5,563 | 3,728 | 35,007 |
| 47,210 | 148 | 25,529 | 5,555 | 3,727 | 34,959 |
| 47,211 | 147 | 25,664 | 5,532 | 3,734 | 35,077 |
| 47,212 | 147 | 25,605 | 5,530 | 3,706 | 34,988 |
| 47,213 | 150 | 25,471 | 5,506 | 3,696 | 34,823 |
| 47,214 | 147 | 25,338 | 5,485 | 3,687 | 34,657 |
| 47,215 | 149 | 25,299 | 5,462 | 3,690 | 34,600 |
| 47,216 | 149 | 25,519 | 5,512 | 3,715 | 34,895 |
| 47,217 | 155 | 25,528 | 5,512 | 3,697 | 34,892 |
| 47,218 | 153 | 25,402 | 5,453 | 3,670 | 34,678 |
| 47,219 | 152 | 25,409 | 5,436 | 3,660 | 34,657 |
| 47,220 | 151 | 25,273 | 5,444 | 3,642 | 34,510 |
| 47,221 | 150 | 25,302 | 5,448 | 3,640 | 34,540 |
| 47,222 | 157 | 25,536 | 5,526 | 3,670 | 34,889 |
| 47,223 | 158 | 25,440 | 5,516 | 3,650 | 34,764 |

|        |     |        |       |       |        |
|--------|-----|--------|-------|-------|--------|
| 47,224 | 162 | 25,386 | 5,519 | 3,659 | 34,726 |
| 47,225 | 167 | 25,380 | 5,508 | 3,645 | 34,700 |
| 47,226 | 161 | 25,156 | 5,458 | 3,634 | 34,409 |
| 47,227 | 162 | 25,694 | 5,593 | 3,706 | 35,155 |
| 47,228 | 163 | 25,606 | 5,531 | 3,702 | 35,002 |
| 47,229 | 157 | 25,453 | 5,492 | 3,662 | 34,764 |
| 47,230 | 157 | 25,743 | 5,596 | 3,708 | 35,204 |
| 47,231 | 150 | 25,478 | 5,538 | 3,677 | 34,843 |
| 47,232 | 154 | 25,150 | 5,483 | 3,645 | 34,432 |
| 47,233 | 154 | 24,774 | 5,450 | 3,612 | 33,990 |
| 47,234 | 155 | 25,030 | 5,536 | 3,651 | 34,372 |
| 47,235 | 156 | 24,840 | 5,521 | 3,605 | 34,122 |
| 47,236 | 154 | 25,264 | 5,647 | 3,677 | 34,742 |
| 47,237 | 154 | 25,291 | 5,576 | 3,673 | 34,694 |
| 47,238 | 156 | 25,026 | 5,486 | 3,587 | 34,255 |
| 47,239 | 160 | 25,314 | 5,499 | 3,585 | 34,558 |
| 47,240 | 165 | 25,413 | 5,507 | 3,592 | 34,677 |
| 47,241 | 173 | 25,755 | 5,536 | 3,636 | 35,100 |
| 47,242 | 178 | 25,878 | 5,550 | 3,639 | 35,245 |
| 47,243 | 181 | 25,896 | 5,549 | 3,638 | 35,264 |
| 47,244 | 183 | 26,016 | 5,563 | 3,625 | 35,387 |
| 47,245 | 184 | 26,141 | 5,619 | 3,668 | 35,612 |
| 47,246 | 188 | 26,046 | 5,605 | 3,659 | 35,498 |
| 47,247 | 182 | 25,958 | 5,551 | 3,640 | 35,331 |
| 47,248 | 180 | 25,852 | 5,539 | 3,644 | 35,215 |
| 47,249 | 179 | 25,866 | 5,538 | 3,643 | 35,226 |
| 47,250 | 180 | 25,895 | 5,577 | 3,656 | 35,308 |
| 47,251 | 174 | 25,827 | 5,526 | 3,671 | 35,198 |
| 47,252 | 168 | 25,616 | 5,535 | 3,663 | 34,982 |
| 47,253 | 169 | 25,633 | 5,533 | 3,679 | 35,014 |
| 47,254 | 175 | 25,381 | 5,488 | 3,652 | 34,696 |
| 47,255 | 175 | 25,558 | 5,495 | 3,684 | 34,912 |

|        |     |        |       |       |        |
|--------|-----|--------|-------|-------|--------|
| 47,256 | 168 | 25,776 | 5,553 | 3,741 | 35,238 |
| 47,257 | 176 | 25,789 | 5,552 | 3,746 | 35,263 |
| 47,258 | 173 | 25,817 | 5,575 | 3,763 | 35,328 |
| 47,259 | 170 | 25,544 | 5,525 | 3,741 | 34,980 |
| 47,260 | 163 | 25,451 | 5,535 | 3,749 | 34,898 |
| 47,261 | 173 | 25,209 | 5,503 | 3,708 | 34,593 |
| 47,262 | 174 | 24,992 | 5,470 | 3,663 | 34,299 |
| 47,263 | 170 | 25,704 | 5,585 | 3,755 | 35,214 |
| 47,264 | 170 | 25,497 | 5,554 | 3,710 | 34,931 |
| 47,265 | 169 | 25,847 | 5,626 | 3,752 | 35,394 |
| 47,266 | 171 | 25,439 | 5,526 | 3,656 | 34,792 |
| 47,267 | 174 | 25,545 | 5,522 | 3,673 | 34,914 |
| 47,268 | 169 | 25,506 | 5,509 | 3,675 | 34,859 |
| 47,269 | 170 | 25,594 | 5,501 | 3,710 | 34,975 |
| 47,270 | 172 | 25,662 | 5,522 | 3,738 | 35,094 |
| 47,271 | 179 | 25,455 | 5,552 | 3,766 | 34,952 |
| 47,272 | 178 | 25,688 | 5,575 | 3,811 | 35,252 |
| 47,273 | 176 | 25,624 | 5,552 | 3,799 | 35,151 |
| 47,274 | 183 | 25,919 | 5,621 | 3,843 | 35,566 |
| 47,275 | 177 | 25,600 | 5,565 | 3,809 | 35,151 |
| 47,276 | 191 | 25,929 | 5,665 | 3,901 | 35,686 |
| 47,277 | 189 | 26,055 | 5,697 | 3,919 | 35,860 |
| 47,278 | 182 | 25,700 | 5,635 | 3,900 | 35,417 |
| 47,279 | 181 | 25,605 | 5,692 | 3,905 | 35,383 |
| 47,280 | 184 | 25,499 | 5,688 | 3,902 | 35,273 |
| 47,281 | 185 | 25,442 | 5,736 | 3,926 | 35,289 |
| 47,282 | 192 | 25,364 | 5,752 | 3,910 | 35,218 |
| 47,283 | 188 | 25,115 | 5,675 | 3,871 | 34,849 |
| 47,284 | 186 | 24,879 | 5,640 | 3,864 | 34,569 |
| 47,285 | 189 | 24,639 | 5,563 | 3,821 | 34,212 |
| 47,286 | 190 | 24,681 | 5,580 | 3,807 | 34,258 |
| 47,287 | 193 | 24,323 | 5,574 | 3,794 | 33,884 |

|        |     |        |       |       |        |
|--------|-----|--------|-------|-------|--------|
| 47,288 | 194 | 24,144 | 5,592 | 3,801 | 33,731 |
| 47,289 | 199 | 24,305 | 5,627 | 3,820 | 33,951 |
| 47,290 | 198 | 24,147 | 5,600 | 3,820 | 33,765 |
| 47,291 | 187 | 24,017 | 5,597 | 3,805 | 33,606 |
| 47,292 | 191 | 23,600 | 5,557 | 3,757 | 33,105 |
| 47,293 | 187 | 23,282 | 5,506 | 3,738 | 32,713 |
| 47,294 | 183 | 23,549 | 5,595 | 3,780 | 33,107 |
| 47,295 | 182 | 23,714 | 5,620 | 3,825 | 33,341 |
| 47,296 | 178 | 23,798 | 5,634 | 3,825 | 33,435 |
| 47,297 | 179 | 23,914 | 5,625 | 3,830 | 33,548 |
| 47,298 | 183 | 23,665 | 5,596 | 3,792 | 33,236 |
| 47,299 | 186 | 23,923 | 5,642 | 3,833 | 33,584 |
| 47,300 | 182 | 23,987 | 5,632 | 3,838 | 33,639 |
| 47,301 | 182 | 24,013 | 5,668 | 3,852 | 33,715 |
| 47,302 | 182 | 23,908 | 5,698 | 3,858 | 33,646 |
| 47,303 | 183 | 24,229 | 5,742 | 3,896 | 34,050 |
| 47,304 | 190 | 23,808 | 5,663 | 3,828 | 33,489 |
| 47,305 | 193 | 23,796 | 5,672 | 3,838 | 33,499 |
| 47,306 | 192 | 23,318 | 5,604 | 3,799 | 32,913 |
| 47,307 | 194 | 23,609 | 5,697 | 3,830 | 33,330 |
| 47,308 | 184 | 23,489 | 5,686 | 3,830 | 33,189 |
| 47,309 | 180 | 23,134 | 5,634 | 3,798 | 32,746 |
| 47,310 | 182 | 22,948 | 5,617 | 3,773 | 32,520 |
| 47,311 | 185 | 22,767 | 5,594 | 3,744 | 32,290 |
| 47,312 | 175 | 22,479 | 5,517 | 3,712 | 31,883 |
| 47,313 | 180 | 22,433 | 5,530 | 3,725 | 31,868 |
| 47,314 | 180 | 22,296 | 5,519 | 3,712 | 31,707 |
| 47,315 | 184 | 22,225 | 5,469 | 3,693 | 31,571 |
| 47,316 | 180 | 21,914 | 5,428 | 3,653 | 31,175 |
| 47,317 | 178 | 21,803 | 5,411 | 3,647 | 31,039 |
| 47,318 | 180 | 21,915 | 5,434 | 3,650 | 31,179 |
| 47,319 | 185 | 22,036 | 5,495 | 3,668 | 31,384 |

|        |     |        |       |       |        |
|--------|-----|--------|-------|-------|--------|
| 47,320 | 182 | 21,157 | 5,318 | 3,522 | 30,179 |
| 47,321 | 183 | 21,404 | 5,314 | 3,525 | 30,426 |
| 47,322 | 176 | 21,523 | 5,335 | 3,536 | 30,570 |
| 47,323 | 176 | 21,493 | 5,348 | 3,501 | 30,518 |
| 47,324 | 171 | 21,607 | 5,417 | 3,532 | 30,727 |
| 47,325 | 168 | 21,092 | 5,249 | 3,433 | 29,942 |
| 47,326 | 168 | 21,288 | 5,258 | 3,443 | 30,157 |
| 47,327 | 161 | 21,543 | 5,299 | 3,465 | 30,468 |
| 47,328 | 166 | 21,600 | 5,307 | 3,446 | 30,519 |
| 47,329 | 165 | 21,679 | 5,287 | 3,419 | 30,550 |
| 47,330 | 176 | 21,670 | 5,238 | 3,404 | 30,488 |
| 47,331 | 179 | 21,729 | 5,169 | 3,395 | 30,472 |
| 47,332 | 181 | 21,800 | 5,172 | 3,404 | 30,557 |
| 47,333 | 172 | 21,648 | 5,113 | 3,364 | 30,297 |
| 47,334 | 172 | 21,749 | 5,118 | 3,374 | 30,413 |
| 47,335 | 173 | 21,762 | 5,121 | 3,371 | 30,427 |
| 47,336 | 176 | 21,982 | 5,136 | 3,416 | 30,710 |
| 47,337 | 177 | 22,234 | 5,176 | 3,453 | 31,040 |
| 47,338 | 173 | 22,287 | 5,224 | 3,465 | 31,149 |
| 47,339 | 177 | 22,868 | 5,339 | 3,523 | 31,907 |
| 47,340 | 172 | 22,685 | 5,300 | 3,495 | 31,652 |
| 47,341 | 178 | 22,776 | 5,351 | 3,507 | 31,812 |
| 47,342 | 182 | 22,801 | 5,348 | 3,505 | 31,836 |
| 47,343 | 177 | 23,244 | 5,377 | 3,559 | 32,357 |
| 47,344 | 174 | 23,053 | 5,310 | 3,527 | 32,064 |
| 47,345 | 175 | 23,053 | 5,366 | 3,559 | 32,153 |
| 47,346 | 174 | 23,177 | 5,418 | 3,552 | 32,321 |
| 47,347 | 187 | 23,143 | 5,455 | 3,547 | 32,332 |
| 47,348 | 184 | 23,287 | 5,492 | 3,580 | 32,543 |
| 47,349 | 189 | 22,935 | 5,398 | 3,514 | 32,036 |
| 47,350 | 187 | 23,229 | 5,440 | 3,527 | 32,383 |
| 47,351 | 184 | 23,466 | 5,471 | 3,575 | 32,696 |



|        |     |        |       |       |        |
|--------|-----|--------|-------|-------|--------|
| 47,352 | 186 | 23,735 | 5,548 | 3,629 | 33,098 |
| 47,353 | 187 | 23,398 | 5,468 | 3,602 | 32,655 |
| 47,354 | 191 | 23,737 | 5,518 | 3,637 | 33,083 |
| 47,355 | 186 | 24,089 | 5,594 | 3,690 | 33,559 |
| 47,356 | 185 | 24,223 | 5,625 | 3,699 | 33,732 |
| 47,357 | 186 | 24,388 | 5,649 | 3,705 | 33,928 |
| 47,358 | 189 | 24,699 | 5,644 | 3,725 | 34,257 |
| 47,359 | 188 | 24,404 | 5,574 | 3,665 | 33,831 |
| 47,360 | 190 | 25,106 | 5,688 | 3,752 | 34,736 |
| 47,361 | 190 | 25,054 | 5,632 | 3,718 | 34,594 |
| 47,362 | 193 | 25,397 | 5,699 | 3,760 | 35,049 |
| 47,363 | 189 | 25,458 | 5,696 | 3,741 | 35,084 |
| 47,364 | 189 | 25,509 | 5,705 | 3,738 | 35,141 |
| 47,365 | 190 | 26,098 | 5,786 | 3,809 | 35,883 |
| 47,366 | 187 | 25,766 | 5,738 | 3,785 | 35,476 |
| 47,367 | 193 | 25,816 | 5,760 | 3,811 | 35,580 |
| 47,368 | 189 | 25,824 | 5,758 | 3,795 | 35,566 |
| 47,369 | 189 | 26,125 | 5,797 | 3,830 | 35,941 |
| 47,370 | 184 | 26,125 | 5,780 | 3,836 | 35,925 |
| 47,371 | 182 | 25,891 | 5,719 | 3,804 | 35,596 |
| 47,372 | 181 | 26,153 | 5,757 | 3,837 | 35,928 |
| 47,373 | 182 | 25,868 | 5,667 | 3,795 | 35,512 |
| 47,374 | 182 | 25,886 | 5,624 | 3,785 | 35,477 |
| 47,375 | 183 | 25,921 | 5,643 | 3,780 | 35,527 |
| 47,376 | 177 | 25,907 | 5,686 | 3,802 | 35,572 |
| 47,377 | 179 | 25,817 | 5,692 | 3,801 | 35,489 |
| 47,378 | 172 | 25,420 | 5,606 | 3,741 | 34,939 |
| 47,379 | 169 | 24,782 | 5,458 | 3,646 | 34,055 |
| 47,380 | 170 | 24,738 | 5,457 | 3,645 | 34,010 |
| 47,381 | 159 | 24,438 | 5,437 | 3,615 | 33,649 |
| 47,382 | 154 | 24,207 | 5,418 | 3,587 | 33,366 |
| 47,383 | 154 | 24,886 | 5,575 | 3,691 | 34,306 |

|        |     |        |       |       |        |
|--------|-----|--------|-------|-------|--------|
| 47,384 | 159 | 25,062 | 5,642 | 3,756 | 34,619 |
| 47,385 | 161 | 24,990 | 5,648 | 3,760 | 34,559 |
| 47,386 | 159 | 24,990 | 5,626 | 3,748 | 34,523 |
| 47,387 | 157 | 24,740 | 5,594 | 3,713 | 34,204 |
| 47,388 | 155 | 24,658 | 5,598 | 3,716 | 34,127 |
| 47,389 | 146 | 24,823 | 5,638 | 3,792 | 34,399 |
| 47,390 | 140 | 24,412 | 5,569 | 3,744 | 33,865 |
| 47,391 | 152 | 24,715 | 5,597 | 3,753 | 34,217 |
| 47,392 | 143 | 24,540 | 5,594 | 3,746 | 34,023 |
| 47,393 | 145 | 24,707 | 5,631 | 3,774 | 34,257 |
| 47,394 | 145 | 23,343 | 5,305 | 3,553 | 32,346 |
| 47,395 | 148 | 23,635 | 5,323 | 3,561 | 32,667 |
| 47,396 | 155 | 23,966 | 5,362 | 3,591 | 33,074 |
| 47,397 | 159 | 24,068 | 5,359 | 3,589 | 33,175 |
| 47,398 | 155 | 24,122 | 5,363 | 3,598 | 33,238 |
| 47,399 | 155 | 24,145 | 5,354 | 3,605 | 33,259 |
| 47,400 | 150 | 24,076 | 5,327 | 3,591 | 33,144 |
| 47,401 | 155 | 23,772 | 5,337 | 3,561 | 32,825 |
| 47,402 | 155 | 23,785 | 5,353 | 3,567 | 32,860 |
| 47,403 | 155 | 23,690 | 5,308 | 3,539 | 32,692 |
| 47,404 | 148 | 23,380 | 5,231 | 3,502 | 32,261 |
| 47,405 | 144 | 23,197 | 5,169 | 3,466 | 31,976 |
| 47,406 | 151 | 23,226 | 5,197 | 3,456 | 32,030 |
| 47,407 | 146 | 22,934 | 5,169 | 3,427 | 31,676 |
| 47,408 | 142 | 23,072 | 5,220 | 3,422 | 31,856 |
| 47,409 | 138 | 23,007 | 5,201 | 3,400 | 31,746 |
| 47,410 | 142 | 23,060 | 5,219 | 3,428 | 31,849 |
| 47,411 | 141 | 23,290 | 5,300 | 3,458 | 32,189 |
| 47,412 | 139 | 23,128 | 5,289 | 3,454 | 32,010 |
| 47,413 | 139 | 23,123 | 5,295 | 3,459 | 32,016 |
| 47,414 | 137 | 23,193 | 5,352 | 3,499 | 32,181 |
| 47,415 | 139 | 23,131 | 5,391 | 3,525 | 32,186 |

|        |     |        |       |       |        |
|--------|-----|--------|-------|-------|--------|
| 47,416 | 143 | 23,328 | 5,475 | 3,574 | 32,520 |
| 47,417 | 141 | 23,184 | 5,475 | 3,560 | 32,360 |
| 47,418 | 142 | 23,020 | 5,464 | 3,560 | 32,186 |
| 47,419 | 141 | 23,120 | 5,585 | 3,631 | 32,477 |
| 47,420 | 145 | 23,372 | 5,695 | 3,684 | 32,896 |
| 47,421 | 146 | 23,412 | 5,723 | 3,693 | 32,974 |
| 47,422 | 149 | 23,482 | 5,768 | 3,708 | 33,107 |
| 47,423 | 149 | 23,435 | 5,780 | 3,703 | 33,067 |
| 47,424 | 151 | 23,345 | 5,771 | 3,701 | 32,968 |
| 47,425 | 155 | 23,492 | 5,797 | 3,730 | 33,174 |
| 47,426 | 154 | 23,420 | 5,729 | 3,705 | 33,008 |
| 47,427 | 157 | 23,608 | 5,760 | 3,723 | 33,248 |
| 47,428 | 155 | 23,559 | 5,748 | 3,730 | 33,192 |
| 47,429 | 156 | 23,578 | 5,770 | 3,739 | 33,243 |
| 47,430 | 154 | 23,443 | 5,762 | 3,718 | 33,077 |
| 47,431 | 154 | 23,629 | 5,810 | 3,748 | 33,341 |
| 47,432 | 153 | 23,877 | 5,867 | 3,778 | 33,675 |
| 47,433 | 153 | 24,109 | 5,932 | 3,816 | 34,010 |
| 47,434 | 157 | 24,159 | 5,964 | 3,848 | 34,128 |
| 47,435 | 154 | 24,003 | 5,919 | 3,831 | 33,907 |
| 47,436 | 150 | 23,689 | 5,883 | 3,803 | 33,525 |
| 47,437 | 152 | 24,132 | 5,994 | 3,897 | 34,175 |
| 47,438 | 152 | 24,062 | 5,993 | 3,894 | 34,101 |
| 47,439 | 154 | 23,905 | 5,946 | 3,836 | 33,841 |
| 47,440 | 155 | 23,879 | 5,908 | 3,788 | 33,730 |
| 47,441 | 156 | 23,609 | 5,873 | 3,749 | 33,387 |
| 47,442 | 148 | 23,649 | 5,856 | 3,742 | 33,395 |
| 47,443 | 148 | 23,650 | 5,877 | 3,728 | 33,403 |
| 47,444 | 142 | 23,424 | 5,842 | 3,701 | 33,109 |
| 47,445 | 136 | 23,122 | 5,799 | 3,656 | 32,713 |
| 47,446 | 134 | 22,846 | 5,756 | 3,632 | 32,368 |
| 47,447 | 127 | 23,191 | 5,846 | 3,695 | 32,859 |

|        |     |        |       |       |        |
|--------|-----|--------|-------|-------|--------|
| 47,448 | 124 | 22,892 | 5,791 | 3,672 | 32,479 |
| 47,449 | 121 | 22,824 | 5,842 | 3,685 | 32,472 |
| 47,450 | 118 | 22,789 | 5,843 | 3,679 | 32,429 |
| 47,451 | 114 | 22,613 | 5,770 | 3,647 | 32,144 |
| 47,452 | 118 | 22,901 | 5,824 | 3,678 | 32,521 |
| 47,453 | 114 | 22,935 | 5,857 | 3,676 | 32,582 |
| 47,454 | 115 | 22,496 | 5,749 | 3,613 | 31,973 |
| 47,455 | 115 | 22,470 | 5,772 | 3,601 | 31,958 |
| 47,456 | 116 | 22,231 | 5,738 | 3,577 | 31,662 |
| 47,457 | 108 | 21,989 | 5,682 | 3,568 | 31,347 |
| 47,458 | 119 | 23,038 | 5,904 | 3,765 | 32,826 |
| 47,459 | 126 | 22,908 | 5,869 | 3,757 | 32,660 |
| 47,460 | 122 | 22,564 | 5,818 | 3,740 | 32,244 |
| 47,461 | 123 | 22,808 | 5,913 | 3,789 | 32,633 |
| 47,462 | 122 | 22,498 | 5,849 | 3,743 | 32,212 |
| 47,463 | 118 | 22,164 | 5,765 | 3,692 | 31,739 |
| 47,464 | 117 | 21,841 | 5,639 | 3,617 | 31,214 |
| 47,465 | 116 | 21,980 | 5,672 | 3,638 | 31,406 |
| 47,466 | 115 | 22,258 | 5,734 | 3,677 | 31,784 |
| 47,467 | 111 | 21,979 | 5,634 | 3,622 | 31,346 |
| 47,468 | 110 | 21,958 | 5,619 | 3,582 | 31,269 |
| 47,469 | 109 | 21,818 | 5,521 | 3,536 | 30,984 |
| 47,470 | 110 | 22,029 | 5,576 | 3,575 | 31,290 |
| 47,471 | 113 | 22,009 | 5,578 | 3,555 | 31,255 |
| 47,472 | 113 | 21,726 | 5,533 | 3,504 | 30,876 |
| 47,473 | 113 | 21,946 | 5,631 | 3,520 | 31,210 |
| 47,474 | 118 | 22,093 | 5,699 | 3,559 | 31,469 |
| 47,475 | 119 | 21,936 | 5,681 | 3,519 | 31,255 |
| 47,476 | 123 | 21,812 | 5,711 | 3,514 | 31,160 |
| 47,477 | 122 | 21,481 | 5,685 | 3,474 | 30,762 |
| 47,478 | 122 | 21,533 | 5,745 | 3,521 | 30,921 |
| 47,479 | 126 | 21,584 | 5,768 | 3,503 | 30,981 |

|        |     |        |       |       |        |
|--------|-----|--------|-------|-------|--------|
| 47,480 | 128 | 21,466 | 5,761 | 3,504 | 30,859 |
| 47,481 | 125 | 21,384 | 5,746 | 3,518 | 30,773 |
| 47,482 | 126 | 21,400 | 5,740 | 3,517 | 30,783 |
| 47,483 | 128 | 21,585 | 5,758 | 3,531 | 31,002 |
| 47,484 | 124 | 21,412 | 5,700 | 3,474 | 30,710 |
| 47,485 | 122 | 21,466 | 5,715 | 3,479 | 30,782 |
| 47,486 | 127 | 21,688 | 5,792 | 3,510 | 31,117 |
| 47,487 | 127 | 21,388 | 5,686 | 3,414 | 30,615 |
| 47,488 | 123 | 21,372 | 5,715 | 3,428 | 30,638 |
| 47,489 | 123 | 21,458 | 5,758 | 3,456 | 30,795 |
| 47,490 | 125 | 21,208 | 5,725 | 3,426 | 30,484 |
| 47,491 | 123 | 21,026 | 5,675 | 3,415 | 30,239 |
| 47,492 | 125 | 21,144 | 5,770 | 3,490 | 30,529 |
| 47,493 | 124 | 21,165 | 5,728 | 3,494 | 30,511 |
| 47,494 | 126 | 21,142 | 5,691 | 3,489 | 30,448 |
| 47,495 | 130 | 21,047 | 5,689 | 3,482 | 30,348 |
| 47,496 | 126 | 20,801 | 5,635 | 3,462 | 30,024 |
| 47,497 | 131 | 20,974 | 5,699 | 3,496 | 30,300 |
| 47,498 | 132 | 21,001 | 5,751 | 3,541 | 30,425 |
| 47,499 | 134 | 20,911 | 5,705 | 3,516 | 30,266 |
| 47,500 | 132 | 20,692 | 5,612 | 3,471 | 29,907 |
| 47,501 | 134 | 20,418 | 5,557 | 3,434 | 29,543 |
| 47,502 | 132 | 20,111 | 5,490 | 3,396 | 29,129 |
| 47,503 | 129 | 20,610 | 5,671 | 3,524 | 29,934 |
| 47,504 | 129 | 20,364 | 5,619 | 3,487 | 29,599 |
| 47,505 | 131 | 20,588 | 5,727 | 3,519 | 29,965 |
| 47,506 | 130 | 20,723 | 5,718 | 3,525 | 30,096 |
| 47,507 | 125 | 20,891 | 5,760 | 3,544 | 30,320 |
| 47,508 | 124 | 20,973 | 5,769 | 3,530 | 30,396 |
| 47,509 | 122 | 21,139 | 5,794 | 3,515 | 30,570 |
| 47,510 | 115 | 21,303 | 5,812 | 3,522 | 30,752 |
| 47,511 | 117 | 21,490 | 5,847 | 3,544 | 30,998 |

|        |     |        |       |       |        |
|--------|-----|--------|-------|-------|--------|
| 47,512 | 121 | 21,334 | 5,822 | 3,520 | 30,797 |
| 47,513 | 126 | 21,713 | 5,891 | 3,568 | 31,298 |
| 47,514 | 126 | 21,630 | 5,840 | 3,544 | 31,140 |
| 47,515 | 128 | 21,778 | 5,883 | 3,550 | 31,339 |
| 47,516 | 128 | 21,781 | 5,877 | 3,544 | 31,330 |
| 47,517 | 123 | 22,146 | 5,955 | 3,566 | 31,790 |
| 47,518 | 126 | 22,104 | 5,948 | 3,541 | 31,719 |
| 47,519 | 128 | 22,366 | 5,986 | 3,600 | 32,080 |
| 47,520 | 128 | 22,092 | 5,960 | 3,543 | 31,723 |
| 47,521 | 128 | 22,072 | 5,937 | 3,543 | 31,680 |
| 47,522 | 124 | 21,995 | 5,880 | 3,532 | 31,531 |
| 47,523 | 124 | 21,838 | 5,808 | 3,499 | 31,269 |
| 47,524 | 122 | 21,982 | 5,811 | 3,529 | 31,444 |
| 47,525 | 124 | 22,196 | 5,859 | 3,544 | 31,723 |
| 47,526 | 117 | 22,196 | 5,821 | 3,543 | 31,677 |
| 47,527 | 111 | 22,160 | 5,770 | 3,509 | 31,550 |
| 47,528 | 110 | 22,140 | 5,770 | 3,504 | 31,524 |
| 47,529 | 115 | 22,405 | 5,804 | 3,547 | 31,871 |
| 47,530 | 120 | 22,427 | 5,844 | 3,550 | 31,941 |
| 47,531 | 122 | 22,641 | 5,905 | 3,553 | 32,221 |
| 47,532 | 121 | 22,466 | 5,833 | 3,516 | 31,936 |
| 47,533 | 134 | 22,490 | 5,841 | 3,521 | 31,986 |
| 47,534 | 131 | 22,048 | 5,729 | 3,451 | 31,359 |
| 47,535 | 131 | 21,709 | 5,652 | 3,420 | 30,912 |
| 47,536 | 140 | 22,855 | 5,874 | 3,553 | 32,422 |
| 47,537 | 137 | 22,895 | 5,887 | 3,562 | 32,481 |
| 47,538 | 135 | 22,741 | 5,836 | 3,527 | 32,239 |
| 47,539 | 143 | 22,816 | 5,815 | 3,558 | 32,332 |
| 47,540 | 145 | 23,096 | 5,882 | 3,569 | 32,692 |
| 47,541 | 147 | 23,024 | 5,861 | 3,538 | 32,570 |
| 47,542 | 146 | 22,744 | 5,797 | 3,493 | 32,180 |
| 47,543 | 146 | 22,808 | 5,831 | 3,492 | 32,277 |

|        |     |        |       |       |        |
|--------|-----|--------|-------|-------|--------|
| 47,544 | 150 | 22,734 | 5,834 | 3,478 | 32,196 |
| 47,545 | 152 | 22,804 | 5,870 | 3,486 | 32,312 |
| 47,546 | 146 | 22,819 | 5,852 | 3,479 | 32,296 |
| 47,547 | 142 | 22,736 | 5,847 | 3,480 | 32,205 |
| 47,548 | 145 | 22,732 | 5,804 | 3,448 | 32,129 |
| 47,549 | 145 | 22,657 | 5,788 | 3,427 | 32,017 |
| 47,550 | 142 | 22,603 | 5,829 | 3,446 | 32,020 |
| 47,551 | 147 | 22,462 | 5,850 | 3,434 | 31,893 |
| 47,552 | 147 | 22,479 | 5,895 | 3,475 | 31,996 |
| 47,553 | 148 | 22,384 | 5,884 | 3,435 | 31,851 |
| 47,554 | 152 | 22,530 | 5,927 | 3,463 | 32,072 |
| 47,555 | 155 | 22,471 | 5,899 | 3,447 | 31,972 |
| 47,556 | 156 | 22,185 | 5,836 | 3,414 | 31,591 |
| 47,557 | 159 | 21,909 | 5,800 | 3,397 | 31,265 |
| 47,558 | 162 | 22,108 | 5,815 | 3,425 | 31,510 |
| 47,559 | 159 | 21,827 | 5,768 | 3,393 | 31,147 |
| 47,560 | 164 | 21,542 | 5,682 | 3,352 | 30,740 |
| 47,561 | 164 | 21,249 | 5,640 | 3,323 | 30,376 |
| 47,562 | 170 | 21,706 | 5,774 | 3,360 | 31,010 |
| 47,563 | 168 | 21,326 | 5,675 | 3,303 | 30,472 |
| 47,564 | 168 | 21,160 | 5,677 | 3,276 | 30,281 |
| 47,565 | 170 | 21,033 | 5,699 | 3,283 | 30,185 |
| 47,566 | 173 | 20,864 | 5,706 | 3,293 | 30,036 |
| 47,567 | 176 | 20,554 | 5,609 | 3,277 | 29,616 |
| 47,568 | 176 | 20,257 | 5,580 | 3,255 | 29,268 |
| 47,569 | 173 | 20,295 | 5,648 | 3,295 | 29,411 |
| 47,570 | 183 | 20,215 | 5,644 | 3,270 | 29,312 |
| 47,571 | 185 | 20,127 | 5,628 | 3,259 | 29,199 |
| 47,572 | 182 | 20,113 | 5,662 | 3,278 | 29,235 |
| 47,573 | 182 | 20,025 | 5,649 | 3,270 | 29,126 |
| 47,574 | 185 | 19,839 | 5,617 | 3,272 | 28,913 |
| 47,575 | 185 | 19,865 | 5,618 | 3,264 | 28,932 |

|        |     |        |       |       |        |
|--------|-----|--------|-------|-------|--------|
| 47,576 | 181 | 19,723 | 5,583 | 3,296 | 28,783 |
| 47,577 | 181 | 19,577 | 5,574 | 3,295 | 28,627 |
| 47,578 | 179 | 19,553 | 5,571 | 3,292 | 28,595 |
| 47,579 | 175 | 19,509 | 5,554 | 3,281 | 28,519 |
| 47,580 | 175 | 19,483 | 5,576 | 3,285 | 28,519 |
| 47,581 | 172 | 19,294 | 5,532 | 3,273 | 28,271 |
| 47,582 | 182 | 19,243 | 5,523 | 3,292 | 28,240 |
| 47,583 | 171 | 19,121 | 5,506 | 3,277 | 28,075 |
| 47,584 | 173 | 19,518 | 5,589 | 3,365 | 28,645 |
| 47,585 | 166 | 19,364 | 5,545 | 3,350 | 28,425 |
| 47,586 | 165 | 19,442 | 5,610 | 3,372 | 28,589 |
| 47,587 | 165 | 19,847 | 5,767 | 3,478 | 29,257 |
| 47,588 | 168 | 19,748 | 5,750 | 3,465 | 29,131 |
| 47,589 | 168 | 19,993 | 5,818 | 3,504 | 29,483 |
| 47,590 | 160 | 19,955 | 5,845 | 3,508 | 29,468 |
| 47,591 | 164 | 20,639 | 6,059 | 3,689 | 30,551 |
| 47,592 | 159 | 20,545 | 6,026 | 3,701 | 30,431 |
| 47,593 | 158 | 20,877 | 6,085 | 3,767 | 30,887 |
| 47,594 | 154 | 21,155 | 6,244 | 3,841 | 31,394 |
| 47,595 | 153 | 21,484 | 6,316 | 3,913 | 31,866 |
| 47,596 | 151 | 21,850 | 6,378 | 3,990 | 32,369 |
| 47,597 | 150 | 21,948 | 6,438 | 4,023 | 32,559 |
| 47,598 | 152 | 22,240 | 6,494 | 4,073 | 32,959 |
| 47,599 | 153 | 22,455 | 6,601 | 4,138 | 33,347 |
| 47,600 | 154 | 22,522 | 6,645 | 4,171 | 33,492 |
| 47,601 | 150 | 22,645 | 6,662 | 4,187 | 33,644 |
| 47,602 | 153 | 22,955 | 6,724 | 4,214 | 34,046 |
| 47,603 | 155 | 22,951 | 6,751 | 4,214 | 34,071 |
| 47,604 | 153 | 22,927 | 6,726 | 4,234 | 34,040 |
| 47,605 | 149 | 22,765 | 6,674 | 4,192 | 33,780 |
| 47,606 | 146 | 22,639 | 6,677 | 4,207 | 33,669 |
| 47,607 | 148 | 22,604 | 6,665 | 4,209 | 33,626 |



|        |     |        |       |       |        |
|--------|-----|--------|-------|-------|--------|
| 47,608 | 147 | 22,513 | 6,651 | 4,189 | 33,500 |
| 47,609 | 147 | 22,410 | 6,645 | 4,171 | 33,373 |
| 47,610 | 147 | 22,378 | 6,633 | 4,194 | 33,352 |
| 47,611 | 137 | 22,123 | 6,605 | 4,177 | 33,042 |
| 47,612 | 140 | 21,809 | 6,529 | 4,153 | 32,631 |
| 47,613 | 141 | 21,949 | 6,568 | 4,174 | 32,832 |
| 47,614 | 139 | 22,101 | 6,615 | 4,206 | 33,061 |
| 47,615 | 133 | 22,162 | 6,601 | 4,218 | 33,114 |
| 47,616 | 133 | 22,116 | 6,581 | 4,217 | 33,047 |
| 47,617 | 133 | 22,107 | 6,555 | 4,216 | 33,011 |
| 47,618 | 132 | 21,881 | 6,452 | 4,128 | 32,593 |
| 47,619 | 132 | 21,920 | 6,448 | 4,122 | 32,622 |
| 47,620 | 134 | 22,154 | 6,491 | 4,193 | 32,972 |
| 47,621 | 124 | 22,126 | 6,499 | 4,223 | 32,972 |
| 47,622 | 122 | 22,014 | 6,447 | 4,198 | 32,781 |
| 47,623 | 127 | 22,236 | 6,480 | 4,227 | 33,070 |
| 47,624 | 128 | 22,155 | 6,474 | 4,227 | 32,984 |
| 47,625 | 124 | 21,832 | 6,425 | 4,192 | 32,573 |
| 47,626 | 126 | 22,007 | 6,470 | 4,194 | 32,797 |
| 47,627 | 126 | 22,033 | 6,482 | 4,171 | 32,812 |
| 47,628 | 126 | 21,861 | 6,395 | 4,127 | 32,509 |
| 47,629 | 130 | 21,915 | 6,412 | 4,128 | 32,585 |
| 47,630 | 124 | 21,695 | 6,372 | 4,102 | 32,293 |
| 47,631 | 124 | 21,853 | 6,373 | 4,109 | 32,459 |
| 47,632 | 110 | 21,386 | 6,261 | 4,004 | 31,761 |
| 47,633 | 114 | 21,506 | 6,306 | 4,013 | 31,939 |
| 47,634 | 112 | 21,426 | 6,307 | 4,008 | 31,853 |
| 47,635 | 110 | 21,117 | 6,255 | 3,963 | 31,445 |
| 47,636 | 119 | 21,474 | 6,366 | 4,021 | 31,980 |
| 47,637 | 123 | 21,010 | 6,239 | 3,935 | 31,307 |
| 47,638 | 122 | 20,668 | 6,096 | 3,876 | 30,762 |
| 47,639 | 119 | 20,579 | 6,088 | 3,863 | 30,649 |

|        |     |        |       |       |        |
|--------|-----|--------|-------|-------|--------|
| 47,640 | 124 | 20,484 | 6,111 | 3,848 | 30,567 |
| 47,641 | 128 | 20,126 | 5,996 | 3,774 | 30,024 |
| 47,642 | 125 | 19,998 | 5,939 | 3,707 | 29,769 |
| 47,643 | 129 | 20,174 | 5,935 | 3,696 | 29,934 |
| 47,644 | 131 | 19,811 | 5,826 | 3,608 | 29,376 |
| 47,645 | 131 | 19,885 | 5,802 | 3,610 | 29,428 |
| 47,646 | 136 | 19,757 | 5,754 | 3,571 | 29,218 |
| 47,647 | 141 | 19,655 | 5,753 | 3,541 | 29,090 |
| 47,648 | 146 | 19,875 | 5,799 | 3,568 | 29,388 |
| 47,649 | 145 | 20,005 | 5,778 | 3,524 | 29,452 |
| 47,650 | 145 | 19,877 | 5,747 | 3,502 | 29,271 |
| 47,651 | 145 | 19,905 | 5,727 | 3,496 | 29,273 |
| 47,652 | 153 | 19,942 | 5,730 | 3,476 | 29,301 |
| 47,653 | 151 | 19,824 | 5,703 | 3,454 | 29,132 |
| 47,654 | 155 | 20,137 | 5,756 | 3,487 | 29,535 |
| 47,655 | 169 | 20,437 | 5,791 | 3,520 | 29,917 |
| 47,656 | 168 | 20,465 | 5,809 | 3,510 | 29,952 |
| 47,657 | 164 | 20,640 | 5,830 | 3,512 | 30,146 |
| 47,658 | 170 | 20,829 | 5,873 | 3,530 | 30,402 |
| 47,659 | 172 | 20,939 | 5,882 | 3,539 | 30,532 |
| 47,660 | 176 | 20,924 | 5,887 | 3,540 | 30,527 |
| 47,661 | 179 | 21,107 | 5,904 | 3,535 | 30,725 |
| 47,662 | 179 | 21,007 | 5,901 | 3,530 | 30,617 |
| 47,663 | 171 | 21,112 | 5,960 | 3,553 | 30,796 |
| 47,664 | 171 | 21,105 | 5,969 | 3,582 | 30,827 |
| 47,665 | 170 | 21,066 | 5,929 | 3,545 | 30,710 |
| 47,666 | 174 | 20,971 | 5,922 | 3,535 | 30,602 |
| 47,667 | 174 | 20,917 | 5,910 | 3,534 | 30,535 |
| 47,668 | 171 | 21,037 | 5,961 | 3,555 | 30,724 |
| 47,669 | 168 | 21,108 | 6,026 | 3,587 | 30,889 |
| 47,670 | 172 | 21,190 | 6,069 | 3,624 | 31,055 |
| 47,671 | 170 | 21,326 | 6,089 | 3,604 | 31,189 |

|        |     |        |       |       |        |
|--------|-----|--------|-------|-------|--------|
| 47,672 | 168 | 21,381 | 6,077 | 3,587 | 31,213 |
| 47,673 | 168 | 21,272 | 6,049 | 3,566 | 31,055 |
| 47,674 | 170 | 21,468 | 6,094 | 3,577 | 31,309 |
| 47,675 | 173 | 21,570 | 6,091 | 3,565 | 31,399 |
| 47,676 | 175 | 21,620 | 6,095 | 3,573 | 31,463 |
| 47,677 | 173 | 21,997 | 6,169 | 3,653 | 31,992 |
| 47,678 | 171 | 21,803 | 6,122 | 3,652 | 31,748 |
| 47,679 | 168 | 21,825 | 6,173 | 3,650 | 31,816 |
| 47,680 | 168 | 21,723 | 6,131 | 3,630 | 31,652 |
| 47,681 | 168 | 21,677 | 6,157 | 3,634 | 31,636 |
| 47,682 | 166 | 21,496 | 6,090 | 3,617 | 31,369 |
| 47,683 | 164 | 21,419 | 6,076 | 3,607 | 31,266 |
| 47,684 | 163 | 22,023 | 6,318 | 3,728 | 32,232 |
| 47,685 | 161 | 22,124 | 6,340 | 3,745 | 32,370 |
| 47,686 | 158 | 22,221 | 6,390 | 3,750 | 32,519 |
| 47,687 | 159 | 22,339 | 6,415 | 3,761 | 32,674 |
| 47,688 | 159 | 22,153 | 6,340 | 3,724 | 32,376 |
| 47,689 | 159 | 22,267 | 6,360 | 3,734 | 32,520 |
| 47,690 | 164 | 22,661 | 6,451 | 3,784 | 33,060 |
| 47,691 | 158 | 22,280 | 6,347 | 3,720 | 32,505 |
| 47,692 | 151 | 22,363 | 6,384 | 3,735 | 32,633 |
| 47,693 | 155 | 22,211 | 6,355 | 3,740 | 32,461 |
| 47,694 | 148 | 21,675 | 6,224 | 3,656 | 31,703 |
| 47,695 | 148 | 21,638 | 6,235 | 3,670 | 31,691 |
| 47,696 | 149 | 21,272 | 6,152 | 3,611 | 31,184 |
| 47,697 | 147 | 20,781 | 6,081 | 3,550 | 30,559 |
| 47,698 | 151 | 21,449 | 6,267 | 3,672 | 31,539 |
| 47,699 | 150 | 21,294 | 6,230 | 3,624 | 31,298 |
| 47,700 | 147 | 20,794 | 6,149 | 3,578 | 30,668 |
| 47,701 | 149 | 20,660 | 6,090 | 3,550 | 30,449 |
| 47,702 | 149 | 20,751 | 6,115 | 3,551 | 30,566 |
| 47,703 | 140 | 20,638 | 6,107 | 3,553 | 30,438 |

|        |     |        |       |       |        |
|--------|-----|--------|-------|-------|--------|
| 47,704 | 133 | 20,562 | 6,060 | 3,556 | 30,311 |
| 47,705 | 134 | 20,395 | 6,052 | 3,544 | 30,125 |
| 47,706 | 126 | 20,415 | 6,133 | 3,561 | 30,235 |
| 47,707 | 128 | 20,263 | 6,141 | 3,584 | 30,116 |
| 47,708 | 127 | 20,231 | 6,160 | 3,591 | 30,109 |
| 47,709 | 122 | 20,132 | 6,144 | 3,573 | 29,971 |
| 47,710 | 123 | 20,322 | 6,232 | 3,642 | 30,319 |
| 47,711 | 125 | 20,275 | 6,288 | 3,654 | 30,342 |
| 47,712 | 119 | 20,200 | 6,237 | 3,607 | 30,163 |
| 47,713 | 118 | 20,252 | 6,235 | 3,579 | 30,184 |
| 47,714 | 117 | 20,154 | 6,229 | 3,564 | 30,064 |
| 47,715 | 119 | 20,307 | 6,326 | 3,591 | 30,343 |
| 47,716 | 121 | 20,081 | 6,339 | 3,614 | 30,155 |
| 47,717 | 121 | 20,001 | 6,310 | 3,603 | 30,035 |
| 47,718 | 123 | 20,147 | 6,330 | 3,597 | 30,197 |
| 47,719 | 125 | 20,226 | 6,285 | 3,583 | 30,219 |
| 47,720 | 128 | 20,252 | 6,291 | 3,584 | 30,255 |
| 47,721 | 127 | 20,137 | 6,294 | 3,580 | 30,138 |
| 47,722 | 129 | 19,858 | 6,262 | 3,557 | 29,806 |
| 47,723 | 129 | 19,940 | 6,263 | 3,553 | 29,885 |
| 47,724 | 125 | 19,945 | 6,319 | 3,595 | 29,984 |
| 47,725 | 124 | 19,956 | 6,328 | 3,612 | 30,020 |
| 47,726 | 120 | 19,857 | 6,321 | 3,607 | 29,905 |
| 47,727 | 122 | 19,258 | 6,155 | 3,487 | 29,022 |
| 47,728 | 122 | 19,443 | 6,195 | 3,530 | 29,290 |
| 47,729 | 121 | 19,638 | 6,245 | 3,562 | 29,566 |
| 47,730 | 121 | 19,814 | 6,301 | 3,586 | 29,822 |
| 47,731 | 120 | 19,820 | 6,298 | 3,581 | 29,819 |
| 47,732 | 119 | 19,892 | 6,305 | 3,589 | 29,905 |
| 47,733 | 119 | 19,900 | 6,271 | 3,559 | 29,849 |
| 47,734 | 118 | 19,574 | 6,155 | 3,516 | 29,363 |
| 47,735 | 118 | 19,684 | 6,158 | 3,530 | 29,490 |

|        |     |        |       |       |        |
|--------|-----|--------|-------|-------|--------|
| 47,736 | 119 | 19,687 | 6,164 | 3,550 | 29,520 |
| 47,737 | 117 | 19,557 | 6,113 | 3,533 | 29,320 |
| 47,738 | 114 | 19,465 | 6,103 | 3,520 | 29,202 |
| 47,739 | 111 | 19,386 | 6,130 | 3,539 | 29,166 |
| 47,740 | 112 | 19,372 | 6,118 | 3,549 | 29,151 |
| 47,741 | 110 | 19,128 | 6,102 | 3,532 | 28,872 |
| 47,742 | 110 | 19,001 | 6,019 | 3,508 | 28,638 |
| 47,743 | 117 | 18,884 | 5,977 | 3,479 | 28,457 |
| 47,744 | 114 | 18,696 | 5,905 | 3,420 | 28,135 |
| 47,745 | 109 | 18,838 | 6,012 | 3,463 | 28,422 |
| 47,746 | 110 | 18,882 | 5,990 | 3,460 | 28,442 |
| 47,747 | 109 | 18,909 | 6,009 | 3,467 | 28,494 |
| 47,748 | 107 | 19,227 | 6,091 | 3,526 | 28,951 |
| 47,749 | 109 | 19,121 | 6,087 | 3,524 | 28,841 |
| 47,750 | 105 | 18,885 | 5,978 | 3,493 | 28,461 |
| 47,751 | 105 | 18,943 | 5,992 | 3,488 | 28,528 |
| 47,752 | 101 | 19,092 | 6,067 | 3,512 | 28,772 |
| 47,753 | 102 | 19,371 | 6,127 | 3,562 | 29,162 |
| 47,754 | 102 | 19,166 | 6,010 | 3,478 | 28,756 |
| 47,755 | 106 | 19,264 | 6,055 | 3,511 | 28,936 |
| 47,756 | 102 | 19,551 | 6,104 | 3,554 | 29,311 |
| 47,757 | 100 | 19,531 | 6,034 | 3,515 | 29,180 |
| 47,758 | 99  | 19,452 | 5,984 | 3,477 | 29,012 |
| 47,759 | 99  | 19,498 | 5,995 | 3,485 | 29,077 |
| 47,760 | 97  | 19,746 | 6,044 | 3,524 | 29,411 |
| 47,761 | 94  | 19,773 | 6,018 | 3,502 | 29,387 |
| 47,762 | 92  | 19,524 | 5,903 | 3,485 | 29,004 |
| 47,763 | 91  | 19,468 | 5,885 | 3,484 | 28,928 |
| 47,764 | 93  | 19,495 | 5,846 | 3,497 | 28,931 |
| 47,765 | 103 | 19,673 | 5,909 | 3,517 | 29,202 |
| 47,766 | 107 | 19,583 | 5,817 | 3,497 | 29,004 |
| 47,767 | 110 | 19,847 | 5,869 | 3,518 | 29,344 |

|        |     |        |       |       |        |
|--------|-----|--------|-------|-------|--------|
| 47,768 | 109 | 19,635 | 5,797 | 3,484 | 29,025 |
| 47,769 | 109 | 19,761 | 5,838 | 3,512 | 29,220 |
| 47,770 | 111 | 19,971 | 5,897 | 3,543 | 29,522 |
| 47,771 | 105 | 19,790 | 5,831 | 3,479 | 29,205 |
| 47,772 | 105 | 19,951 | 5,887 | 3,505 | 29,448 |
| 47,773 | 102 | 20,125 | 5,893 | 3,510 | 29,630 |
| 47,774 | 105 | 20,189 | 5,921 | 3,520 | 29,735 |
| 47,775 | 108 | 20,064 | 5,880 | 3,499 | 29,551 |
| 47,776 | 107 | 19,821 | 5,827 | 3,470 | 29,225 |
| 47,777 | 112 | 20,095 | 5,899 | 3,497 | 29,603 |
| 47,778 | 110 | 20,105 | 5,944 | 3,512 | 29,671 |
| 47,779 | 113 | 20,125 | 5,978 | 3,502 | 29,718 |
| 47,780 | 113 | 20,209 | 6,014 | 3,522 | 29,858 |
| 47,781 | 117 | 20,232 | 6,061 | 3,545 | 29,955 |
| 47,782 | 118 | 20,177 | 6,101 | 3,541 | 29,937 |
| 47,783 | 122 | 20,280 | 6,133 | 3,571 | 30,106 |
| 47,784 | 120 | 20,079 | 6,085 | 3,534 | 29,818 |
| 47,785 | 120 | 20,220 | 6,118 | 3,542 | 30,000 |
| 47,786 | 122 | 20,452 | 6,208 | 3,559 | 30,341 |
| 47,787 | 121 | 20,388 | 6,189 | 3,547 | 30,245 |
| 47,788 | 122 | 20,599 | 6,248 | 3,590 | 30,559 |
| 47,789 | 124 | 20,608 | 6,228 | 3,582 | 30,542 |
| 47,790 | 129 | 20,833 | 6,230 | 3,589 | 30,781 |
| 47,791 | 130 | 20,937 | 6,245 | 3,596 | 30,908 |
| 47,792 | 121 | 20,385 | 6,041 | 3,487 | 30,034 |
| 47,793 | 121 | 20,774 | 6,122 | 3,525 | 30,542 |
| 47,794 | 120 | 21,029 | 6,175 | 3,544 | 30,868 |
| 47,795 | 124 | 21,338 | 6,256 | 3,579 | 31,297 |
| 47,796 | 126 | 21,353 | 6,218 | 3,568 | 31,265 |
| 47,797 | 124 | 21,368 | 6,210 | 3,550 | 31,252 |
| 47,798 | 124 | 21,214 | 6,146 | 3,520 | 31,004 |
| 47,799 | 127 | 21,427 | 6,204 | 3,529 | 31,287 |

|        |     |        |       |       |        |
|--------|-----|--------|-------|-------|--------|
| 47,800 | 123 | 21,228 | 6,122 | 3,472 | 30,945 |
| 47,801 | 132 | 21,387 | 6,174 | 3,512 | 31,205 |
| 47,802 | 142 | 21,256 | 6,106 | 3,522 | 31,026 |
| 47,803 | 143 | 21,138 | 6,039 | 3,464 | 30,784 |
| 47,804 | 149 | 21,329 | 6,101 | 3,516 | 31,095 |
| 47,805 | 154 | 21,107 | 6,056 | 3,467 | 30,784 |
| 47,806 | 153 | 21,215 | 6,052 | 3,464 | 30,884 |
| 47,807 | 163 | 21,141 | 5,995 | 3,418 | 30,717 |
| 47,808 | 162 | 21,144 | 5,968 | 3,412 | 30,686 |
| 47,809 | 167 | 21,356 | 6,004 | 3,425 | 30,952 |
| 47,810 | 167 | 21,369 | 5,989 | 3,421 | 30,946 |
| 47,811 | 169 | 21,590 | 6,034 | 3,458 | 31,251 |
| 47,812 | 165 | 21,442 | 5,973 | 3,426 | 31,006 |
| 47,813 | 173 | 21,551 | 5,991 | 3,432 | 31,147 |
| 47,814 | 176 | 21,955 | 6,044 | 3,465 | 31,640 |
| 47,815 | 173 | 21,788 | 5,966 | 3,411 | 31,338 |
| 47,816 | 171 | 22,133 | 5,986 | 3,445 | 31,735 |
| 47,817 | 164 | 22,200 | 5,984 | 3,444 | 31,792 |
| 47,818 | 161 | 22,316 | 5,988 | 3,447 | 31,912 |
| 47,819 | 166 | 21,989 | 5,916 | 3,401 | 31,472 |
| 47,820 | 165 | 21,861 | 5,875 | 3,370 | 31,271 |
| 47,821 | 164 | 22,336 | 6,017 | 3,427 | 31,944 |
| 47,822 | 165 | 22,521 | 6,040 | 3,470 | 32,196 |
| 47,823 | 164 | 22,163 | 5,923 | 3,430 | 31,680 |
| 47,824 | 160 | 22,002 | 5,820 | 3,363 | 31,345 |
| 47,825 | 162 | 22,254 | 5,854 | 3,388 | 31,658 |
| 47,826 | 159 | 22,139 | 5,838 | 3,390 | 31,526 |
| 47,827 | 157 | 22,149 | 5,831 | 3,396 | 31,533 |
| 47,828 | 158 | 22,054 | 5,853 | 3,398 | 31,463 |
| 47,829 | 156 | 21,993 | 5,851 | 3,398 | 31,398 |
| 47,830 | 155 | 22,099 | 5,817 | 3,404 | 31,475 |
| 47,831 | 154 | 22,213 | 5,763 | 3,381 | 31,511 |

|        |     |        |       |       |        |
|--------|-----|--------|-------|-------|--------|
| 47,832 | 154 | 22,427 | 5,716 | 3,387 | 31,684 |
| 47,833 | 153 | 22,525 | 5,685 | 3,366 | 31,729 |
| 47,834 | 154 | 22,568 | 5,637 | 3,349 | 31,708 |
| 47,835 | 160 | 22,501 | 5,635 | 3,344 | 31,640 |
| 47,836 | 160 | 22,712 | 5,624 | 3,340 | 31,836 |
| 47,837 | 159 | 22,806 | 5,579 | 3,343 | 31,887 |
| 47,838 | 162 | 22,897 | 5,544 | 3,336 | 31,939 |
| 47,839 | 162 | 22,795 | 5,509 | 3,315 | 31,781 |
| 47,840 | 163 | 23,035 | 5,517 | 3,344 | 32,059 |
| 47,841 | 159 | 22,920 | 5,469 | 3,310 | 31,858 |
| 47,842 | 156 | 22,674 | 5,389 | 3,255 | 31,474 |
| 47,843 | 159 | 22,592 | 5,355 | 3,258 | 31,364 |
| 47,844 | 165 | 22,506 | 5,333 | 3,258 | 31,262 |
| 47,845 | 169 | 22,505 | 5,287 | 3,233 | 31,194 |
| 47,846 | 165 | 22,480 | 5,254 | 3,235 | 31,134 |
| 47,847 | 161 | 22,268 | 5,220 | 3,236 | 30,885 |
| 47,848 | 163 | 22,285 | 5,203 | 3,224 | 30,875 |
| 47,849 | 165 | 22,200 | 5,156 | 3,212 | 30,733 |
| 47,850 | 162 | 22,254 | 5,120 | 3,216 | 30,752 |
| 47,851 | 160 | 22,420 | 5,142 | 3,206 | 30,928 |
| 47,852 | 158 | 22,616 | 5,188 | 3,229 | 31,191 |
| 47,853 | 147 | 22,521 | 5,119 | 3,174 | 30,961 |
| 47,854 | 150 | 22,830 | 5,139 | 3,172 | 31,291 |
| 47,855 | 138 | 22,179 | 5,049 | 3,119 | 30,485 |
| 47,856 | 138 | 22,299 | 5,046 | 3,153 | 30,636 |
| 47,857 | 131 | 22,219 | 5,015 | 3,148 | 30,513 |
| 47,858 | 126 | 21,950 | 5,016 | 3,150 | 30,242 |
| 47,859 | 130 | 21,936 | 5,009 | 3,162 | 30,237 |
| 47,860 | 129 | 21,544 | 4,912 | 3,139 | 29,724 |
| 47,861 | 129 | 21,414 | 4,914 | 3,131 | 29,588 |
| 47,862 | 127 | 21,323 | 4,919 | 3,133 | 29,502 |
| 47,863 | 127 | 21,270 | 4,922 | 3,135 | 29,454 |



|        |     |        |       |       |        |
|--------|-----|--------|-------|-------|--------|
| 47,864 | 119 | 21,322 | 4,915 | 3,141 | 29,497 |
| 47,865 | 116 | 21,290 | 4,920 | 3,167 | 29,493 |
| 47,866 | 116 | 21,002 | 4,846 | 3,118 | 29,082 |
| 47,867 | 112 | 20,736 | 4,824 | 3,099 | 28,771 |
| 47,868 | 115 | 21,164 | 4,995 | 3,249 | 29,523 |
| 47,869 | 109 | 21,217 | 4,988 | 3,245 | 29,559 |
| 47,870 | 111 | 21,362 | 5,034 | 3,287 | 29,794 |
| 47,871 | 108 | 21,436 | 5,020 | 3,302 | 29,866 |
| 47,872 | 107 | 21,325 | 4,974 | 3,276 | 29,682 |
| 47,873 | 104 | 20,970 | 4,907 | 3,225 | 29,206 |
| 47,874 | 106 | 21,208 | 4,954 | 3,242 | 29,510 |
| 47,875 | 106 | 21,070 | 4,935 | 3,229 | 29,340 |
| 47,876 | 106 | 21,284 | 5,011 | 3,269 | 29,670 |
| 47,877 | 106 | 21,588 | 5,065 | 3,293 | 30,052 |
| 47,878 | 107 | 21,727 | 5,009 | 3,277 | 30,120 |
| 47,879 | 113 | 21,798 | 4,987 | 3,267 | 30,165 |
| 47,880 | 114 | 21,684 | 4,946 | 3,245 | 29,989 |
| 47,881 | 120 | 22,087 | 5,072 | 3,316 | 30,595 |
| 47,882 | 127 | 22,032 | 5,086 | 3,319 | 30,564 |
| 47,883 | 126 | 21,703 | 5,017 | 3,276 | 30,122 |
| 47,884 | 128 | 21,397 | 4,962 | 3,252 | 29,739 |
| 47,885 | 126 | 21,602 | 5,014 | 3,273 | 30,015 |
| 47,886 | 129 | 21,712 | 5,052 | 3,293 | 30,186 |
| 47,887 | 130 | 21,494 | 5,075 | 3,281 | 29,980 |
| 47,888 | 130 | 21,464 | 5,061 | 3,262 | 29,917 |
| 47,889 | 127 | 21,535 | 5,133 | 3,292 | 30,087 |
| 47,890 | 128 | 21,644 | 5,209 | 3,326 | 30,307 |
| 47,891 | 126 | 21,499 | 5,231 | 3,317 | 30,173 |
| 47,892 | 125 | 21,353 | 5,220 | 3,314 | 30,012 |
| 47,893 | 122 | 21,265 | 5,239 | 3,309 | 29,935 |
| 47,894 | 123 | 21,510 | 5,282 | 3,336 | 30,251 |
| 47,895 | 121 | 21,307 | 5,232 | 3,310 | 29,970 |

|        |     |        |       |       |        |
|--------|-----|--------|-------|-------|--------|
| 47,896 | 116 | 21,008 | 5,184 | 3,294 | 29,602 |
| 47,897 | 121 | 21,200 | 5,233 | 3,309 | 29,863 |
| 47,898 | 121 | 21,167 | 5,237 | 3,321 | 29,846 |
| 47,899 | 122 | 21,297 | 5,274 | 3,370 | 30,063 |
| 47,900 | 121 | 21,120 | 5,294 | 3,363 | 29,898 |
| 47,901 | 124 | 20,983 | 5,297 | 3,355 | 29,759 |
| 47,902 | 127 | 20,963 | 5,292 | 3,363 | 29,745 |
| 47,903 | 128 | 21,032 | 5,315 | 3,374 | 29,849 |
| 47,904 | 130 | 20,906 | 5,309 | 3,388 | 29,733 |
| 47,905 | 126 | 20,631 | 5,263 | 3,378 | 29,398 |
| 47,906 | 126 | 20,781 | 5,282 | 3,381 | 29,570 |
| 47,907 | 127 | 20,988 | 5,303 | 3,378 | 29,796 |
| 47,908 | 128 | 21,201 | 5,296 | 3,381 | 30,006 |
| 47,909 | 128 | 21,146 | 5,282 | 3,381 | 29,937 |
| 47,910 | 124 | 21,248 | 5,329 | 3,398 | 30,099 |
| 47,911 | 130 | 21,663 | 5,377 | 3,399 | 30,569 |
| 47,912 | 138 | 22,058 | 5,428 | 3,441 | 31,065 |
| 47,913 | 143 | 22,204 | 5,444 | 3,416 | 31,207 |
| 47,914 | 144 | 22,281 | 5,479 | 3,432 | 31,336 |
| 47,915 | 154 | 22,282 | 5,454 | 3,420 | 31,310 |
| 47,916 | 149 | 22,063 | 5,372 | 3,344 | 30,928 |
| 47,917 | 153 | 22,094 | 5,334 | 3,305 | 30,886 |
| 47,918 | 153 | 22,167 | 5,333 | 3,283 | 30,936 |
| 47,919 | 155 | 22,271 | 5,346 | 3,264 | 31,036 |
| 47,920 | 150 | 21,913 | 5,264 | 3,218 | 30,545 |
| 47,921 | 148 | 21,833 | 5,238 | 3,208 | 30,427 |
| 47,922 | 155 | 21,738 | 5,209 | 3,185 | 30,287 |
| 47,923 | 156 | 21,410 | 5,158 | 3,155 | 29,879 |
| 47,924 | 158 | 21,542 | 5,192 | 3,189 | 30,081 |
| 47,925 | 158 | 21,474 | 5,170 | 3,187 | 29,989 |
| 47,926 | 161 | 21,546 | 5,156 | 3,175 | 30,038 |
| 47,927 | 161 | 21,508 | 5,148 | 3,189 | 30,006 |

|        |     |        |       |       |        |
|--------|-----|--------|-------|-------|--------|
| 47,928 | 169 | 21,077 | 5,054 | 3,136 | 29,436 |
| 47,929 | 168 | 20,851 | 5,046 | 3,119 | 29,184 |
| 47,930 | 162 | 21,102 | 5,136 | 3,186 | 29,586 |
| 47,931 | 167 | 21,110 | 5,109 | 3,171 | 29,557 |
| 47,932 | 167 | 21,266 | 5,129 | 3,169 | 29,731 |
| 47,933 | 162 | 21,060 | 5,104 | 3,161 | 29,487 |
| 47,934 | 159 | 21,050 | 5,090 | 3,161 | 29,460 |
| 47,935 | 157 | 20,830 | 5,047 | 3,157 | 29,191 |
| 47,936 | 157 | 20,860 | 5,040 | 3,160 | 29,217 |
| 47,937 | 148 | 20,810 | 5,019 | 3,170 | 29,147 |
| 47,938 | 147 | 20,563 | 4,913 | 3,116 | 28,739 |
| 47,939 | 146 | 20,583 | 4,892 | 3,126 | 28,747 |
| 47,940 | 148 | 20,628 | 4,910 | 3,136 | 28,822 |
| 47,941 | 151 | 20,602 | 4,890 | 3,122 | 28,765 |
| 47,942 | 158 | 20,698 | 4,905 | 3,137 | 28,898 |
| 47,943 | 160 | 20,837 | 4,922 | 3,140 | 29,059 |
| 47,944 | 157 | 20,680 | 4,862 | 3,103 | 28,802 |
| 47,945 | 167 | 20,849 | 4,914 | 3,119 | 29,049 |
| 47,946 | 162 | 20,906 | 4,918 | 3,124 | 29,110 |
| 47,947 | 162 | 21,075 | 4,952 | 3,143 | 29,332 |
| 47,948 | 165 | 21,280 | 4,972 | 3,179 | 29,596 |
| 47,949 | 166 | 21,442 | 5,028 | 3,171 | 29,807 |
| 47,950 | 168 | 21,820 | 5,039 | 3,168 | 30,195 |
| 47,951 | 167 | 21,836 | 5,060 | 3,169 | 30,232 |
| 47,952 | 171 | 21,914 | 5,085 | 3,195 | 30,365 |
| 47,953 | 170 | 21,986 | 5,095 | 3,221 | 30,472 |
| 47,954 | 169 | 21,938 | 5,103 | 3,195 | 30,405 |
| 47,955 | 174 | 21,691 | 5,054 | 3,152 | 30,071 |
| 47,956 | 187 | 21,824 | 5,087 | 3,179 | 30,277 |
| 47,957 | 182 | 21,781 | 5,104 | 3,183 | 30,250 |
| 47,958 | 183 | 21,707 | 5,103 | 3,195 | 30,188 |
| 47,959 | 188 | 21,673 | 5,167 | 3,200 | 30,228 |

|        |     |        |       |       |        |
|--------|-----|--------|-------|-------|--------|
| 47,960 | 187 | 21,755 | 5,198 | 3,209 | 30,349 |
| 47,961 | 193 | 21,777 | 5,215 | 3,219 | 30,404 |
| 47,962 | 191 | 21,835 | 5,253 | 3,234 | 30,513 |
| 47,963 | 194 | 22,149 | 5,311 | 3,269 | 30,923 |
| 47,964 | 186 | 21,966 | 5,249 | 3,259 | 30,660 |
| 47,965 | 190 | 22,213 | 5,301 | 3,270 | 30,974 |
| 47,966 | 180 | 22,002 | 5,320 | 3,255 | 30,757 |
| 47,967 | 185 | 22,007 | 5,352 | 3,283 | 30,827 |
| 47,968 | 183 | 21,837 | 5,347 | 3,282 | 30,649 |
| 47,969 | 192 | 22,240 | 5,444 | 3,351 | 31,227 |
| 47,970 | 192 | 22,189 | 5,464 | 3,373 | 31,218 |
| 47,971 | 193 | 22,064 | 5,427 | 3,336 | 31,020 |
| 47,972 | 192 | 22,177 | 5,457 | 3,360 | 31,186 |
| 47,973 | 194 | 22,144 | 5,455 | 3,375 | 31,168 |
| 47,974 | 193 | 21,920 | 5,439 | 3,335 | 30,887 |
| 47,975 | 192 | 22,410 | 5,516 | 3,397 | 31,515 |
| 47,976 | 193 | 22,485 | 5,527 | 3,417 | 31,622 |
| 47,977 | 188 | 22,602 | 5,528 | 3,413 | 31,731 |
| 47,978 | 188 | 22,656 | 5,536 | 3,416 | 31,796 |
| 47,979 | 177 | 22,459 | 5,445 | 3,353 | 31,434 |
| 47,980 | 178 | 22,748 | 5,510 | 3,380 | 31,816 |
| 47,981 | 171 | 23,029 | 5,587 | 3,418 | 32,205 |
| 47,982 | 172 | 22,584 | 5,453 | 3,370 | 31,579 |
| 47,983 | 175 | 22,712 | 5,516 | 3,421 | 31,824 |
| 47,984 | 179 | 23,026 | 5,592 | 3,461 | 32,258 |
| 47,985 | 178 | 22,806 | 5,555 | 3,434 | 31,973 |
| 47,986 | 182 | 23,023 | 5,620 | 3,465 | 32,290 |
| 47,987 | 183 | 22,709 | 5,545 | 3,420 | 31,857 |
| 47,988 | 183 | 22,783 | 5,548 | 3,420 | 31,934 |
| 47,989 | 183 | 22,800 | 5,531 | 3,408 | 31,922 |
| 47,990 | 178 | 22,788 | 5,480 | 3,391 | 31,837 |
| 47,991 | 176 | 23,083 | 5,537 | 3,455 | 32,251 |

|        |     |        |       |       |        |
|--------|-----|--------|-------|-------|--------|
| 47,992 | 171 | 22,224 | 5,333 | 3,328 | 31,056 |
| 47,993 | 166 | 22,497 | 5,401 | 3,362 | 31,426 |
| 47,994 | 161 | 22,600 | 5,401 | 3,381 | 31,543 |
| 47,995 | 163 | 22,737 | 5,443 | 3,389 | 31,732 |
| 47,996 | 158 | 22,823 | 5,479 | 3,431 | 31,891 |
| 47,997 | 161 | 22,724 | 5,481 | 3,410 | 31,776 |
| 47,998 | 161 | 22,607 | 5,483 | 3,401 | 31,652 |
| 47,999 | 159 | 22,247 | 5,440 | 3,353 | 31,199 |
| 48,000 | 162 | 22,091 | 5,455 | 3,373 | 31,081 |
| 48,001 | 161 | 22,087 | 5,478 | 3,397 | 31,123 |
| 48,002 | 151 | 21,869 | 5,392 | 3,371 | 30,783 |
| 48,003 | 152 | 21,792 | 5,380 | 3,327 | 30,651 |
| 48,004 | 155 | 21,657 | 5,373 | 3,310 | 30,495 |
| 48,005 | 155 | 21,674 | 5,387 | 3,311 | 30,527 |
| 48,006 | 148 | 21,692 | 5,373 | 3,320 | 30,533 |
| 48,007 | 142 | 21,618 | 5,342 | 3,288 | 30,390 |
| 48,008 | 141 | 21,679 | 5,337 | 3,284 | 30,441 |
| 48,009 | 137 | 21,710 | 5,293 | 3,261 | 30,401 |
| 48,010 | 135 | 21,684 | 5,311 | 3,271 | 30,401 |
| 48,011 | 134 | 21,655 | 5,324 | 3,290 | 30,403 |
| 48,012 | 132 | 21,247 | 5,269 | 3,247 | 29,895 |
| 48,013 | 132 | 21,167 | 5,243 | 3,223 | 29,765 |
| 48,014 | 127 | 20,946 | 5,238 | 3,222 | 29,533 |
| 48,015 | 132 | 20,739 | 5,234 | 3,210 | 29,315 |
| 48,016 | 131 | 20,094 | 5,098 | 3,154 | 28,477 |
| 48,017 | 130 | 19,991 | 5,111 | 3,154 | 28,386 |
| 48,018 | 125 | 19,795 | 5,091 | 3,121 | 28,132 |
| 48,019 | 124 | 19,628 | 5,045 | 3,108 | 27,905 |
| 48,020 | 117 | 19,418 | 5,008 | 3,077 | 27,620 |
| 48,021 | 118 | 19,175 | 4,924 | 3,022 | 27,239 |
| 48,022 | 117 | 18,741 | 4,863 | 2,994 | 26,715 |
| 48,023 | 118 | 18,917 | 4,967 | 3,048 | 27,050 |

|        |     |        |       |       |        |
|--------|-----|--------|-------|-------|--------|
| 48,024 | 122 | 18,864 | 4,969 | 3,042 | 26,997 |
| 48,025 | 122 | 18,720 | 4,944 | 3,059 | 26,845 |
| 48,026 | 128 | 18,698 | 4,962 | 3,023 | 26,811 |
| 48,027 | 130 | 18,719 | 5,014 | 3,028 | 26,891 |
| 48,028 | 141 | 18,489 | 4,974 | 2,987 | 26,591 |
| 48,029 | 141 | 18,565 | 4,996 | 2,985 | 26,687 |
| 48,030 | 146 | 18,482 | 5,000 | 2,982 | 26,610 |
| 48,031 | 146 | 18,379 | 5,010 | 2,991 | 26,526 |
| 48,032 | 148 | 18,456 | 5,058 | 2,998 | 26,660 |
| 48,033 | 140 | 18,321 | 5,036 | 2,951 | 26,448 |
| 48,034 | 141 | 18,530 | 5,073 | 2,967 | 26,711 |
| 48,035 | 142 | 18,521 | 5,059 | 2,970 | 26,692 |
| 48,036 | 142 | 18,458 | 5,046 | 2,959 | 26,605 |
| 48,037 | 147 | 18,817 | 5,092 | 2,969 | 27,025 |
| 48,038 | 147 | 18,715 | 5,092 | 2,975 | 26,929 |
| 48,039 | 152 | 19,029 | 5,190 | 3,019 | 27,390 |
| 48,040 | 155 | 19,103 | 5,245 | 3,032 | 27,535 |
| 48,041 | 159 | 19,232 | 5,311 | 3,033 | 27,735 |
| 48,042 | 165 | 19,054 | 5,300 | 2,994 | 27,513 |
| 48,043 | 162 | 18,889 | 5,261 | 2,990 | 27,302 |
| 48,044 | 172 | 19,337 | 5,351 | 3,036 | 27,896 |
| 48,045 | 173 | 19,179 | 5,326 | 3,001 | 27,679 |
| 48,046 | 173 | 19,198 | 5,317 | 2,996 | 27,684 |
| 48,047 | 177 | 19,532 | 5,366 | 3,046 | 28,121 |
| 48,048 | 181 | 19,303 | 5,293 | 3,016 | 27,793 |
| 48,049 | 182 | 19,287 | 5,280 | 3,012 | 27,761 |
| 48,050 | 185 | 19,210 | 5,216 | 2,967 | 27,578 |
| 48,051 | 181 | 19,536 | 5,218 | 3,005 | 27,940 |
| 48,052 | 179 | 19,533 | 5,189 | 2,979 | 27,880 |
| 48,053 | 186 | 19,730 | 5,253 | 3,008 | 28,177 |
| 48,054 | 183 | 19,576 | 5,218 | 2,984 | 27,961 |
| 48,055 | 188 | 19,737 | 5,245 | 3,004 | 28,174 |

|        |     |        |       |       |        |
|--------|-----|--------|-------|-------|--------|
| 48,056 | 193 | 19,837 | 5,243 | 2,994 | 28,267 |
| 48,057 | 196 | 19,661 | 5,193 | 2,973 | 28,023 |
| 48,058 | 190 | 19,410 | 5,140 | 2,949 | 27,689 |
| 48,059 | 189 | 19,722 | 5,201 | 2,993 | 28,105 |
| 48,060 | 188 | 19,791 | 5,253 | 3,016 | 28,248 |
| 48,061 | 190 | 19,736 | 5,198 | 3,003 | 28,127 |
| 48,062 | 189 | 19,891 | 5,200 | 3,002 | 28,282 |
| 48,063 | 189 | 19,860 | 5,204 | 2,993 | 28,246 |
| 48,064 | 186 | 20,051 | 5,263 | 3,028 | 28,528 |
| 48,065 | 187 | 20,046 | 5,220 | 2,985 | 28,438 |
| 48,066 | 183 | 20,025 | 5,180 | 2,977 | 28,365 |
| 48,067 | 184 | 20,071 | 5,125 | 2,921 | 28,301 |
| 48,068 | 184 | 20,129 | 5,130 | 2,925 | 28,368 |
| 48,069 | 190 | 20,291 | 5,148 | 2,925 | 28,554 |
| 48,070 | 193 | 20,357 | 5,136 | 2,921 | 28,607 |
| 48,071 | 188 | 20,366 | 5,144 | 2,912 | 28,610 |
| 48,072 | 189 | 20,586 | 5,197 | 2,937 | 28,909 |
| 48,073 | 184 | 20,626 | 5,147 | 2,887 | 28,844 |
| 48,074 | 183 | 20,793 | 5,213 | 2,921 | 29,110 |
| 48,075 | 183 | 20,102 | 4,964 | 2,792 | 28,041 |
| 48,076 | 181 | 20,342 | 5,033 | 2,809 | 28,365 |
| 48,077 | 179 | 20,591 | 5,067 | 2,843 | 28,680 |
| 48,078 | 176 | 20,623 | 5,093 | 2,860 | 28,752 |
| 48,079 | 175 | 20,644 | 5,075 | 2,861 | 28,755 |
| 48,080 | 173 | 20,808 | 5,139 | 2,899 | 29,019 |
| 48,081 | 176 | 20,879 | 5,142 | 2,915 | 29,112 |
| 48,082 | 175 | 20,920 | 5,117 | 2,916 | 29,128 |
| 48,083 | 175 | 20,751 | 5,055 | 2,883 | 28,864 |
| 48,084 | 174 | 20,446 | 4,966 | 2,850 | 28,436 |
| 48,085 | 174 | 20,442 | 4,960 | 2,851 | 28,427 |
| 48,086 | 173 | 20,104 | 4,920 | 2,815 | 28,012 |
| 48,087 | 174 | 19,868 | 4,861 | 2,773 | 27,676 |

|        |     |        |       |       |        |
|--------|-----|--------|-------|-------|--------|
| 48,088 | 171 | 20,602 | 5,053 | 2,940 | 28,766 |
| 48,089 | 172 | 20,641 | 5,028 | 2,924 | 28,765 |
| 48,090 | 179 | 20,406 | 4,951 | 2,910 | 28,446 |
| 48,091 | 179 | 20,406 | 4,926 | 2,907 | 28,418 |
| 48,092 | 175 | 20,257 | 4,895 | 2,901 | 28,228 |
| 48,093 | 174 | 20,246 | 4,900 | 2,897 | 28,217 |
| 48,094 | 168 | 20,198 | 4,899 | 2,917 | 28,182 |
| 48,095 | 168 | 20,140 | 4,909 | 2,922 | 28,139 |
| 48,096 | 168 | 20,119 | 4,974 | 2,941 | 28,202 |
| 48,097 | 167 | 20,070 | 5,007 | 2,952 | 28,196 |
| 48,098 | 168 | 20,254 | 5,063 | 2,992 | 28,477 |
| 48,099 | 158 | 20,101 | 5,010 | 2,966 | 28,235 |
| 48,100 | 155 | 19,943 | 5,013 | 2,954 | 28,065 |
| 48,101 | 150 | 20,039 | 5,097 | 3,007 | 28,293 |
| 48,102 | 153 | 20,071 | 5,118 | 3,019 | 28,361 |
| 48,103 | 151 | 20,187 | 5,175 | 3,044 | 28,557 |
| 48,104 | 155 | 20,439 | 5,215 | 3,102 | 28,911 |
| 48,105 | 150 | 20,254 | 5,164 | 3,084 | 28,652 |
| 48,106 | 145 | 20,075 | 5,134 | 3,064 | 28,418 |
| 48,107 | 143 | 20,387 | 5,287 | 3,143 | 28,960 |
| 48,108 | 145 | 20,379 | 5,312 | 3,145 | 28,981 |
| 48,109 | 145 | 20,242 | 5,288 | 3,131 | 28,806 |
| 48,110 | 145 | 20,228 | 5,318 | 3,146 | 28,837 |
| 48,111 | 145 | 20,363 | 5,358 | 3,176 | 29,042 |
| 48,112 | 138 | 20,336 | 5,375 | 3,179 | 29,028 |
| 48,113 | 143 | 20,079 | 5,321 | 3,144 | 28,687 |
| 48,114 | 143 | 19,960 | 5,296 | 3,139 | 28,538 |
| 48,115 | 148 | 20,017 | 5,369 | 3,179 | 28,713 |
| 48,116 | 144 | 19,881 | 5,365 | 3,191 | 28,581 |
| 48,117 | 143 | 19,860 | 5,380 | 3,184 | 28,567 |
| 48,118 | 139 | 19,780 | 5,356 | 3,213 | 28,488 |
| 48,119 | 143 | 19,922 | 5,409 | 3,259 | 28,733 |



|        |     |        |       |       |        |
|--------|-----|--------|-------|-------|--------|
| 48,120 | 139 | 19,982 | 5,401 | 3,264 | 28,786 |
| 48,121 | 140 | 20,237 | 5,417 | 3,291 | 29,085 |
| 48,122 | 146 | 19,769 | 5,294 | 3,217 | 28,426 |
| 48,123 | 147 | 20,064 | 5,359 | 3,274 | 28,844 |
| 48,124 | 150 | 19,890 | 5,351 | 3,266 | 28,657 |
| 48,125 | 152 | 20,237 | 5,406 | 3,303 | 29,098 |
| 48,126 | 143 | 20,568 | 5,492 | 3,354 | 29,557 |
| 48,127 | 142 | 20,603 | 5,512 | 3,367 | 29,624 |
| 48,128 | 143 | 20,836 | 5,580 | 3,410 | 29,969 |
| 48,129 | 134 | 21,035 | 5,590 | 3,430 | 30,189 |
| 48,130 | 137 | 21,009 | 5,555 | 3,422 | 30,123 |
| 48,131 | 137 | 20,896 | 5,533 | 3,403 | 29,969 |
| 48,132 | 135 | 21,143 | 5,633 | 3,491 | 30,402 |
| 48,133 | 136 | 21,051 | 5,624 | 3,483 | 30,294 |
| 48,134 | 134 | 20,857 | 5,586 | 3,458 | 30,035 |
| 48,135 | 136 | 21,130 | 5,723 | 3,531 | 30,520 |
| 48,136 | 137 | 21,206 | 5,736 | 3,551 | 30,630 |
| 48,137 | 136 | 21,512 | 5,794 | 3,576 | 31,018 |
| 48,138 | 145 | 21,286 | 5,754 | 3,524 | 30,709 |
| 48,139 | 144 | 21,222 | 5,734 | 3,498 | 30,598 |
| 48,140 | 144 | 21,266 | 5,731 | 3,519 | 30,660 |
| 48,141 | 140 | 21,332 | 5,793 | 3,550 | 30,815 |
| 48,142 | 137 | 21,104 | 5,757 | 3,523 | 30,521 |
| 48,143 | 137 | 20,923 | 5,702 | 3,496 | 30,258 |
| 48,144 | 137 | 20,784 | 5,681 | 3,476 | 30,078 |
| 48,145 | 145 | 21,534 | 5,808 | 3,528 | 31,015 |
| 48,146 | 146 | 21,665 | 5,790 | 3,533 | 31,134 |
| 48,147 | 145 | 21,584 | 5,742 | 3,501 | 30,972 |
| 48,148 | 145 | 21,708 | 5,739 | 3,480 | 31,072 |
| 48,149 | 143 | 21,724 | 5,740 | 3,477 | 31,084 |
| 48,150 | 153 | 22,040 | 5,848 | 3,520 | 31,561 |
| 48,151 | 157 | 22,223 | 5,856 | 3,547 | 31,783 |

|        |     |        |       |       |        |
|--------|-----|--------|-------|-------|--------|
| 48,152 | 159 | 22,212 | 5,831 | 3,523 | 31,725 |
| 48,153 | 159 | 22,060 | 5,786 | 3,516 | 31,521 |
| 48,154 | 169 | 22,663 | 5,945 | 3,638 | 32,415 |
| 48,155 | 165 | 22,531 | 5,916 | 3,601 | 32,213 |
| 48,156 | 165 | 22,584 | 5,919 | 3,606 | 32,274 |
| 48,157 | 164 | 22,577 | 5,897 | 3,609 | 32,247 |
| 48,158 | 165 | 22,665 | 5,896 | 3,617 | 32,343 |
| 48,159 | 162 | 22,684 | 5,870 | 3,604 | 32,320 |
| 48,160 | 169 | 22,728 | 5,872 | 3,582 | 32,351 |
| 48,161 | 171 | 22,881 | 5,872 | 3,591 | 32,515 |
| 48,162 | 175 | 22,890 | 5,876 | 3,579 | 32,520 |
| 48,163 | 179 | 23,096 | 5,905 | 3,617 | 32,797 |
| 48,164 | 180 | 23,275 | 5,900 | 3,616 | 32,971 |
| 48,165 | 179 | 23,237 | 5,841 | 3,603 | 32,860 |
| 48,166 | 184 | 23,294 | 5,896 | 3,615 | 32,989 |
| 48,167 | 190 | 23,619 | 5,986 | 3,661 | 33,456 |
| 48,168 | 198 | 23,643 | 5,990 | 3,633 | 33,464 |
| 48,169 | 192 | 23,607 | 6,017 | 3,636 | 33,452 |
| 48,170 | 194 | 23,646 | 6,023 | 3,638 | 33,501 |
| 48,171 | 194 | 23,624 | 6,032 | 3,649 | 33,499 |
| 48,172 | 192 | 23,644 | 6,132 | 3,683 | 33,651 |
| 48,173 | 183 | 23,649 | 6,141 | 3,715 | 33,688 |
| 48,174 | 183 | 23,709 | 6,162 | 3,710 | 33,764 |
| 48,175 | 184 | 23,801 | 6,152 | 3,708 | 33,845 |
| 48,176 | 186 | 23,657 | 6,143 | 3,715 | 33,701 |
| 48,177 | 191 | 23,567 | 6,144 | 3,716 | 33,618 |
| 48,178 | 190 | 23,662 | 6,154 | 3,726 | 33,732 |
| 48,179 | 187 | 23,071 | 6,029 | 3,614 | 32,901 |
| 48,180 | 190 | 23,128 | 6,033 | 3,627 | 32,978 |
| 48,181 | 190 | 23,152 | 6,010 | 3,611 | 32,963 |
| 48,182 | 190 | 23,096 | 5,993 | 3,582 | 32,861 |
| 48,183 | 194 | 23,053 | 5,969 | 3,552 | 32,768 |

|        |     |        |       |       |        |
|--------|-----|--------|-------|-------|--------|
| 48,184 | 195 | 23,128 | 5,957 | 3,548 | 32,828 |
| 48,185 | 197 | 23,022 | 5,917 | 3,507 | 32,643 |
| 48,186 | 199 | 22,917 | 5,868 | 3,461 | 32,445 |
| 48,187 | 201 | 22,916 | 5,866 | 3,451 | 32,434 |
| 48,188 | 196 | 23,019 | 5,878 | 3,475 | 32,568 |
| 48,189 | 188 | 22,719 | 5,788 | 3,439 | 32,134 |
| 48,190 | 198 | 22,769 | 5,838 | 3,447 | 32,252 |
| 48,191 | 197 | 22,808 | 5,838 | 3,445 | 32,288 |
| 48,192 | 195 | 22,837 | 5,798 | 3,426 | 32,256 |
| 48,193 | 194 | 22,835 | 5,821 | 3,433 | 32,283 |
| 48,194 | 188 | 22,914 | 5,837 | 3,440 | 32,379 |
| 48,195 | 183 | 22,599 | 5,755 | 3,399 | 31,936 |
| 48,196 | 182 | 22,559 | 5,767 | 3,405 | 31,913 |
| 48,197 | 184 | 22,278 | 5,722 | 3,359 | 31,543 |
| 48,198 | 179 | 21,995 | 5,663 | 3,333 | 31,170 |
| 48,199 | 182 | 22,450 | 5,778 | 3,459 | 31,869 |
| 48,200 | 182 | 22,344 | 5,748 | 3,437 | 31,711 |
| 48,201 | 179 | 23,239 | 5,885 | 3,562 | 32,865 |
| 48,202 | 183 | 23,093 | 5,844 | 3,529 | 32,649 |
| 48,203 | 169 | 22,820 | 5,765 | 3,485 | 32,239 |
| 48,204 | 174 | 22,700 | 5,759 | 3,473 | 32,106 |
| 48,205 | 186 | 22,725 | 5,770 | 3,471 | 32,152 |
| 48,206 | 184 | 22,438 | 5,729 | 3,425 | 31,776 |
| 48,207 | 187 | 22,731 | 5,784 | 3,478 | 32,180 |
| 48,208 | 191 | 22,664 | 5,758 | 3,448 | 32,061 |
| 48,209 | 198 | 22,661 | 5,764 | 3,458 | 32,081 |
| 48,210 | 198 | 22,718 | 5,773 | 3,467 | 32,156 |
| 48,211 | 196 | 22,801 | 5,787 | 3,509 | 32,293 |
| 48,212 | 197 | 22,724 | 5,789 | 3,504 | 32,214 |
| 48,213 | 196 | 22,899 | 5,844 | 3,537 | 32,476 |
| 48,214 | 187 | 22,594 | 5,783 | 3,506 | 32,070 |
| 48,215 | 183 | 22,591 | 5,801 | 3,519 | 32,094 |

|        |     |        |       |       |        |
|--------|-----|--------|-------|-------|--------|
| 48,216 | 176 | 22,523 | 5,803 | 3,516 | 32,018 |
| 48,217 | 174 | 22,498 | 5,788 | 3,544 | 32,004 |
| 48,218 | 175 | 22,696 | 5,844 | 3,580 | 32,295 |
| 48,219 | 166 | 22,469 | 5,762 | 3,556 | 31,953 |
| 48,220 | 168 | 22,710 | 5,793 | 3,584 | 32,255 |
| 48,221 | 168 | 22,889 | 5,859 | 3,621 | 32,537 |
| 48,222 | 168 | 23,071 | 5,854 | 3,638 | 32,731 |
| 48,223 | 173 | 23,200 | 5,879 | 3,648 | 32,900 |
| 48,224 | 177 | 23,165 | 5,879 | 3,652 | 32,873 |
| 48,225 | 174 | 22,736 | 5,776 | 3,601 | 32,287 |
| 48,226 | 173 | 22,574 | 5,769 | 3,597 | 32,113 |
| 48,227 | 173 | 22,600 | 5,776 | 3,591 | 32,140 |
| 48,228 | 169 | 22,471 | 5,733 | 3,582 | 31,955 |
| 48,229 | 170 | 22,441 | 5,756 | 3,586 | 31,953 |
| 48,230 | 165 | 22,170 | 5,714 | 3,578 | 31,627 |
| 48,231 | 162 | 21,854 | 5,652 | 3,551 | 31,219 |
| 48,232 | 162 | 22,129 | 5,714 | 3,581 | 31,586 |
| 48,233 | 157 | 22,146 | 5,724 | 3,584 | 31,611 |
| 48,234 | 157 | 22,361 | 5,773 | 3,611 | 31,902 |
| 48,235 | 153 | 22,046 | 5,715 | 3,585 | 31,499 |
| 48,236 | 153 | 22,262 | 5,775 | 3,607 | 31,797 |
| 48,237 | 146 | 21,821 | 5,713 | 3,570 | 31,250 |
| 48,238 | 144 | 21,955 | 5,772 | 3,601 | 31,472 |
| 48,239 | 142 | 21,915 | 5,796 | 3,617 | 31,470 |
| 48,240 | 145 | 22,226 | 5,899 | 3,673 | 31,943 |
| 48,241 | 135 | 22,135 | 5,874 | 3,662 | 31,806 |
| 48,242 | 133 | 22,074 | 5,900 | 3,667 | 31,774 |
| 48,243 | 128 | 22,037 | 5,900 | 3,682 | 31,747 |
| 48,244 | 130 | 21,977 | 5,871 | 3,686 | 31,664 |
| 48,245 | 136 | 21,732 | 5,849 | 3,672 | 31,389 |
| 48,246 | 135 | 21,660 | 5,822 | 3,668 | 31,285 |
| 48,247 | 132 | 21,992 | 5,902 | 3,704 | 31,730 |

|        |     |        |       |       |        |
|--------|-----|--------|-------|-------|--------|
| 48,248 | 134 | 22,211 | 5,954 | 3,742 | 32,041 |
| 48,249 | 135 | 22,080 | 5,961 | 3,724 | 31,900 |
| 48,250 | 126 | 21,793 | 5,896 | 3,670 | 31,485 |
| 48,251 | 132 | 21,542 | 5,884 | 3,646 | 31,204 |
| 48,252 | 132 | 21,604 | 5,895 | 3,653 | 31,284 |
| 48,253 | 128 | 21,462 | 5,876 | 3,634 | 31,100 |
| 48,254 | 124 | 21,451 | 5,871 | 3,605 | 31,051 |
| 48,255 | 112 | 21,380 | 5,820 | 3,584 | 30,896 |
| 48,256 | 111 | 21,666 | 5,904 | 3,635 | 31,316 |
| 48,257 | 111 | 21,302 | 5,806 | 3,596 | 30,815 |
| 48,258 | 111 | 21,377 | 5,802 | 3,618 | 30,908 |
| 48,259 | 112 | 21,588 | 5,873 | 3,652 | 31,225 |
| 48,260 | 103 | 21,631 | 5,910 | 3,687 | 31,331 |
| 48,261 | 99  | 21,693 | 5,926 | 3,684 | 31,402 |
| 48,262 | 100 | 20,912 | 5,770 | 3,582 | 30,364 |
| 48,263 | 102 | 21,212 | 5,829 | 3,625 | 30,768 |
| 48,264 | 104 | 21,544 | 5,879 | 3,662 | 31,189 |
| 48,265 | 105 | 21,689 | 5,875 | 3,660 | 31,329 |
| 48,266 | 106 | 21,768 | 5,853 | 3,658 | 31,385 |
| 48,267 | 108 | 21,768 | 5,861 | 3,662 | 31,399 |
| 48,268 | 108 | 22,199 | 5,924 | 3,725 | 31,956 |
| 48,269 | 122 | 22,348 | 5,911 | 3,732 | 32,113 |
| 48,270 | 124 | 22,081 | 5,880 | 3,706 | 31,791 |
| 48,271 | 122 | 21,827 | 5,853 | 3,674 | 31,476 |
| 48,272 | 122 | 21,957 | 5,932 | 3,744 | 31,755 |
| 48,273 | 119 | 21,853 | 5,933 | 3,752 | 31,657 |
| 48,274 | 116 | 21,916 | 5,929 | 3,734 | 31,695 |
| 48,275 | 114 | 22,026 | 5,943 | 3,732 | 31,815 |
| 48,276 | 112 | 22,023 | 5,878 | 3,725 | 31,738 |
| 48,277 | 112 | 22,216 | 5,876 | 3,732 | 31,936 |
| 48,278 | 113 | 22,359 | 5,891 | 3,728 | 32,091 |
| 48,279 | 112 | 22,234 | 5,883 | 3,703 | 31,932 |

|        |     |        |       |       |        |
|--------|-----|--------|-------|-------|--------|
| 48,280 | 122 | 22,825 | 5,949 | 3,800 | 32,696 |
| 48,281 | 123 | 22,985 | 5,966 | 3,781 | 32,855 |
| 48,282 | 127 | 22,704 | 5,871 | 3,731 | 32,433 |
| 48,283 | 134 | 22,952 | 5,891 | 3,765 | 32,742 |
| 48,284 | 133 | 22,972 | 5,897 | 3,774 | 32,776 |
| 48,285 | 132 | 23,171 | 5,935 | 3,803 | 33,041 |
| 48,286 | 136 | 23,265 | 5,951 | 3,831 | 33,183 |
| 48,287 | 137 | 23,345 | 5,950 | 3,840 | 33,272 |
| 48,288 | 139 | 23,427 | 5,958 | 3,836 | 33,360 |
| 48,289 | 140 | 23,686 | 5,992 | 3,881 | 33,699 |
| 48,290 | 142 | 23,878 | 6,014 | 3,887 | 33,921 |
| 48,291 | 140 | 23,971 | 6,003 | 3,885 | 33,999 |
| 48,292 | 139 | 23,882 | 5,952 | 3,852 | 33,825 |
| 48,293 | 147 | 24,059 | 5,965 | 3,857 | 34,028 |
| 48,294 | 150 | 24,329 | 6,045 | 3,874 | 34,398 |
| 48,295 | 147 | 24,215 | 5,966 | 3,847 | 34,175 |
| 48,296 | 154 | 24,531 | 6,045 | 3,906 | 34,636 |
| 48,297 | 155 | 24,456 | 6,041 | 3,891 | 34,543 |
| 48,298 | 164 | 24,514 | 6,016 | 3,906 | 34,600 |
| 48,299 | 165 | 24,316 | 5,954 | 3,866 | 34,301 |
| 48,300 | 167 | 24,304 | 5,898 | 3,868 | 34,237 |
| 48,301 | 167 | 24,428 | 5,905 | 3,875 | 34,375 |
| 48,302 | 162 | 24,418 | 5,884 | 3,886 | 34,350 |
| 48,303 | 162 | 24,444 | 5,859 | 3,880 | 34,345 |
| 48,304 | 173 | 24,679 | 5,890 | 3,905 | 34,647 |
| 48,305 | 173 | 24,473 | 5,875 | 3,872 | 34,393 |
| 48,306 | 174 | 24,419 | 5,841 | 3,857 | 34,291 |
| 48,307 | 176 | 24,283 | 5,806 | 3,824 | 34,089 |
| 48,308 | 185 | 24,226 | 5,798 | 3,820 | 34,029 |
| 48,309 | 181 | 23,960 | 5,767 | 3,797 | 33,705 |
| 48,310 | 187 | 23,930 | 5,758 | 3,802 | 33,677 |
| 48,311 | 191 | 23,883 | 5,726 | 3,792 | 33,592 |

|        |     |        |       |       |        |
|--------|-----|--------|-------|-------|--------|
| 48,312 | 189 | 23,547 | 5,629 | 3,748 | 33,113 |
| 48,313 | 185 | 23,672 | 5,651 | 3,756 | 33,264 |
| 48,314 | 188 | 23,729 | 5,664 | 3,757 | 33,338 |
| 48,315 | 187 | 23,780 | 5,684 | 3,768 | 33,419 |
| 48,316 | 191 | 23,886 | 5,751 | 3,776 | 33,604 |
| 48,317 | 191 | 23,741 | 5,746 | 3,764 | 33,442 |
| 48,318 | 189 | 23,848 | 5,836 | 3,789 | 33,662 |
| 48,319 | 191 | 23,796 | 5,843 | 3,782 | 33,612 |
| 48,320 | 179 | 23,545 | 5,834 | 3,755 | 33,313 |
| 48,321 | 181 | 23,688 | 5,817 | 3,753 | 33,439 |
| 48,322 | 182 | 23,920 | 5,790 | 3,749 | 33,641 |
| 48,323 | 188 | 23,794 | 5,742 | 3,684 | 33,408 |
| 48,324 | 187 | 23,564 | 5,707 | 3,632 | 33,090 |
| 48,325 | 187 | 23,732 | 5,752 | 3,681 | 33,352 |
| 48,326 | 185 | 23,759 | 5,785 | 3,711 | 33,440 |
| 48,327 | 181 | 23,351 | 5,724 | 3,654 | 32,910 |
| 48,328 | 184 | 23,229 | 5,735 | 3,653 | 32,801 |
| 48,329 | 181 | 23,385 | 5,821 | 3,687 | 33,074 |
| 48,330 | 178 | 23,103 | 5,762 | 3,656 | 32,699 |
| 48,331 | 175 | 23,168 | 5,785 | 3,668 | 32,796 |
| 48,332 | 175 | 23,103 | 5,796 | 3,663 | 32,737 |
| 48,333 | 177 | 23,140 | 5,855 | 3,691 | 32,863 |
| 48,334 | 171 | 22,883 | 5,827 | 3,674 | 32,555 |
| 48,335 | 182 | 22,595 | 5,764 | 3,630 | 32,171 |
| 48,336 | 180 | 22,397 | 5,713 | 3,614 | 31,904 |
| 48,337 | 184 | 23,010 | 5,834 | 3,684 | 32,712 |
| 48,338 | 185 | 22,945 | 5,832 | 3,678 | 32,640 |
| 48,339 | 185 | 22,945 | 5,821 | 3,681 | 32,632 |
| 48,340 | 181 | 23,012 | 5,834 | 3,700 | 32,727 |
| 48,341 | 178 | 22,927 | 5,807 | 3,700 | 32,612 |
| 48,342 | 182 | 23,043 | 5,875 | 3,735 | 32,835 |
| 48,343 | 176 | 22,754 | 5,824 | 3,693 | 32,447 |

|        |     |        |       |       |        |
|--------|-----|--------|-------|-------|--------|
| 48,344 | 179 | 22,637 | 5,823 | 3,699 | 32,338 |
| 48,345 | 178 | 22,369 | 5,767 | 3,682 | 31,996 |
| 48,346 | 177 | 22,654 | 5,880 | 3,732 | 32,443 |
| 48,347 | 173 | 22,330 | 5,806 | 3,687 | 31,996 |
| 48,348 | 172 | 21,993 | 5,738 | 3,645 | 31,548 |
| 48,349 | 170 | 22,207 | 5,808 | 3,685 | 31,870 |
| 48,350 | 167 | 22,356 | 5,882 | 3,716 | 32,121 |
| 48,351 | 163 | 21,902 | 5,791 | 3,641 | 31,497 |
| 48,352 | 161 | 21,844 | 5,782 | 3,624 | 31,411 |
| 48,353 | 162 | 21,530 | 5,726 | 3,570 | 30,988 |
| 48,354 | 162 | 21,358 | 5,692 | 3,552 | 30,764 |
| 48,355 | 155 | 22,226 | 5,957 | 3,704 | 32,042 |
| 48,356 | 151 | 22,001 | 5,885 | 3,688 | 31,725 |
| 48,357 | 137 | 21,779 | 5,760 | 3,594 | 31,270 |
| 48,358 | 141 | 22,088 | 5,825 | 3,646 | 31,700 |
| 48,359 | 140 | 22,366 | 5,895 | 3,679 | 32,080 |
| 48,360 | 132 | 22,420 | 5,908 | 3,665 | 32,125 |
| 48,361 | 140 | 22,342 | 5,916 | 3,651 | 32,049 |
| 48,362 | 135 | 22,090 | 5,870 | 3,613 | 31,708 |
| 48,363 | 138 | 22,224 | 5,967 | 3,657 | 31,986 |
| 48,364 | 135 | 22,241 | 6,020 | 3,696 | 32,092 |
| 48,365 | 137 | 22,277 | 6,001 | 3,698 | 32,113 |
| 48,366 | 140 | 22,233 | 6,016 | 3,703 | 32,092 |
| 48,367 | 139 | 22,123 | 5,977 | 3,697 | 31,936 |
| 48,368 | 141 | 22,202 | 5,975 | 3,691 | 32,009 |
| 48,369 | 140 | 22,061 | 5,894 | 3,649 | 31,744 |
| 48,370 | 137 | 21,917 | 5,851 | 3,618 | 31,523 |
| 48,371 | 137 | 21,880 | 5,860 | 3,630 | 31,507 |
| 48,372 | 135 | 21,829 | 5,866 | 3,635 | 31,465 |
| 48,373 | 132 | 21,626 | 5,873 | 3,633 | 31,264 |
| 48,374 | 125 | 21,635 | 5,850 | 3,657 | 31,267 |
| 48,375 | 140 | 21,547 | 5,840 | 3,657 | 31,184 |



|        |     |        |       |       |        |
|--------|-----|--------|-------|-------|--------|
| 48,376 | 139 | 21,576 | 5,826 | 3,643 | 31,184 |
| 48,377 | 148 | 21,530 | 5,774 | 3,634 | 31,086 |
| 48,378 | 151 | 21,547 | 5,736 | 3,607 | 31,041 |
| 48,379 | 151 | 21,530 | 5,761 | 3,607 | 31,049 |
| 48,380 | 152 | 21,409 | 5,708 | 3,588 | 30,857 |
| 48,381 | 155 | 21,510 | 5,768 | 3,590 | 31,023 |
| 48,382 | 158 | 21,471 | 5,724 | 3,586 | 30,939 |
| 48,383 | 158 | 21,519 | 5,734 | 3,591 | 31,002 |
| 48,384 | 145 | 21,266 | 5,663 | 3,541 | 30,615 |
| 48,385 | 148 | 21,436 | 5,729 | 3,553 | 30,866 |
| 48,386 | 147 | 21,774 | 5,832 | 3,614 | 31,367 |
| 48,387 | 148 | 21,413 | 5,756 | 3,548 | 30,865 |
| 48,388 | 144 | 21,146 | 5,722 | 3,535 | 30,547 |
| 48,389 | 144 | 21,160 | 5,761 | 3,560 | 30,625 |
| 48,390 | 145 | 21,259 | 5,839 | 3,606 | 30,849 |
| 48,391 | 148 | 21,128 | 5,834 | 3,566 | 30,676 |
| 48,392 | 148 | 21,107 | 5,808 | 3,549 | 30,612 |
| 48,393 | 145 | 21,232 | 5,821 | 3,548 | 30,746 |
| 48,394 | 144 | 21,205 | 5,774 | 3,552 | 30,675 |
| 48,395 | 143 | 21,323 | 5,798 | 3,559 | 30,823 |
| 48,396 | 136 | 21,411 | 5,762 | 3,526 | 30,835 |
| 48,397 | 148 | 21,672 | 5,841 | 3,555 | 31,216 |
| 48,398 | 143 | 22,025 | 5,959 | 3,642 | 31,769 |
| 48,399 | 152 | 21,930 | 6,015 | 3,638 | 31,735 |
| 48,400 | 151 | 21,856 | 6,002 | 3,617 | 31,626 |
| 48,401 | 158 | 21,722 | 5,981 | 3,608 | 31,469 |
| 48,402 | 166 | 22,209 | 6,041 | 3,655 | 32,071 |
| 48,403 | 172 | 22,260 | 6,066 | 3,661 | 32,159 |
| 48,404 | 171 | 21,764 | 5,951 | 3,604 | 31,490 |
| 48,405 | 172 | 21,869 | 5,967 | 3,633 | 31,641 |
| 48,406 | 173 | 21,873 | 5,951 | 3,623 | 31,620 |
| 48,407 | 176 | 21,583 | 5,865 | 3,586 | 31,210 |

|        |     |        |       |       |        |
|--------|-----|--------|-------|-------|--------|
| 48,408 | 176 | 21,390 | 5,833 | 3,564 | 30,963 |
| 48,409 | 173 | 21,627 | 5,960 | 3,642 | 31,402 |
| 48,410 | 174 | 21,582 | 5,922 | 3,665 | 31,343 |
| 48,411 | 175 | 21,567 | 5,894 | 3,656 | 31,292 |
| 48,412 | 171 | 21,553 | 5,879 | 3,663 | 31,266 |
| 48,413 | 178 | 21,702 | 5,880 | 3,652 | 31,412 |
| 48,414 | 181 | 21,737 | 5,852 | 3,657 | 31,427 |
| 48,415 | 182 | 21,181 | 5,706 | 3,541 | 30,610 |
| 48,416 | 180 | 21,387 | 5,724 | 3,546 | 30,837 |
| 48,417 | 178 | 21,681 | 5,778 | 3,581 | 31,218 |
| 48,418 | 176 | 21,764 | 5,741 | 3,597 | 31,278 |
| 48,419 | 180 | 22,036 | 5,777 | 3,634 | 31,627 |
| 48,420 | 177 | 22,003 | 5,735 | 3,624 | 31,539 |
| 48,421 | 182 | 22,351 | 5,803 | 3,660 | 31,996 |
| 48,422 | 183 | 22,548 | 5,812 | 3,681 | 32,224 |
| 48,423 | 185 | 22,692 | 5,851 | 3,693 | 32,421 |
| 48,424 | 181 | 22,541 | 5,711 | 3,631 | 32,064 |
| 48,425 | 181 | 22,609 | 5,752 | 3,640 | 32,182 |
| 48,426 | 176 | 22,871 | 5,810 | 3,682 | 32,539 |
| 48,427 | 164 | 22,080 | 5,624 | 3,551 | 31,419 |
| 48,428 | 167 | 22,329 | 5,677 | 3,564 | 31,737 |
| 48,429 | 168 | 22,569 | 5,707 | 3,610 | 32,054 |
| 48,430 | 170 | 22,585 | 5,704 | 3,605 | 32,064 |
| 48,431 | 169 | 22,308 | 5,640 | 3,582 | 31,699 |
| 48,432 | 164 | 22,448 | 5,709 | 3,612 | 31,933 |
| 48,433 | 161 | 22,381 | 5,713 | 3,620 | 31,875 |
| 48,434 | 167 | 22,098 | 5,639 | 3,581 | 31,485 |
| 48,435 | 161 | 21,837 | 5,586 | 3,543 | 31,127 |
| 48,436 | 173 | 22,364 | 5,695 | 3,634 | 31,866 |
| 48,437 | 174 | 22,168 | 5,632 | 3,613 | 31,587 |
| 48,438 | 172 | 22,168 | 5,583 | 3,583 | 31,506 |
| 48,439 | 171 | 22,304 | 5,563 | 3,569 | 31,607 |

|        |     |        |       |       |        |
|--------|-----|--------|-------|-------|--------|
| 48,440 | 172 | 22,527 | 5,602 | 3,599 | 31,900 |
| 48,441 | 172 | 22,536 | 5,582 | 3,586 | 31,876 |
| 48,442 | 169 | 22,359 | 5,505 | 3,567 | 31,600 |
| 48,443 | 169 | 22,345 | 5,507 | 3,575 | 31,596 |
| 48,444 | 168 | 21,801 | 5,388 | 3,512 | 30,869 |
| 48,445 | 168 | 21,985 | 5,404 | 3,526 | 31,083 |
| 48,446 | 168 | 21,888 | 5,383 | 3,518 | 30,957 |
| 48,447 | 167 | 21,751 | 5,382 | 3,532 | 30,832 |
| 48,448 | 162 | 21,937 | 5,415 | 3,575 | 31,089 |
| 48,449 | 166 | 21,789 | 5,357 | 3,529 | 30,841 |
| 48,450 | 166 | 21,936 | 5,284 | 3,515 | 30,901 |
| 48,451 | 162 | 21,679 | 5,210 | 3,497 | 30,548 |
| 48,452 | 168 | 21,917 | 5,241 | 3,503 | 30,829 |
| 48,453 | 156 | 21,473 | 5,197 | 3,454 | 30,280 |
| 48,454 | 152 | 21,725 | 5,206 | 3,487 | 30,570 |
| 48,455 | 155 | 21,788 | 5,190 | 3,460 | 30,593 |
| 48,456 | 152 | 21,800 | 5,213 | 3,453 | 30,618 |
| 48,457 | 152 | 21,888 | 5,194 | 3,445 | 30,679 |
| 48,458 | 152 | 22,087 | 5,204 | 3,453 | 30,896 |
| 48,459 | 154 | 22,093 | 5,212 | 3,459 | 30,918 |
| 48,460 | 153 | 21,614 | 5,109 | 3,378 | 30,254 |
| 48,461 | 153 | 21,879 | 5,191 | 3,414 | 30,637 |
| 48,462 | 148 | 22,232 | 5,248 | 3,443 | 31,071 |
| 48,463 | 151 | 22,441 | 5,303 | 3,462 | 31,357 |
| 48,464 | 149 | 22,500 | 5,317 | 3,494 | 31,460 |
| 48,465 | 144 | 22,324 | 5,278 | 3,466 | 31,212 |
| 48,466 | 146 | 22,256 | 5,283 | 3,479 | 31,164 |
| 48,467 | 146 | 22,326 | 5,334 | 3,515 | 31,321 |
| 48,468 | 141 | 22,266 | 5,343 | 3,544 | 31,294 |
| 48,469 | 144 | 22,525 | 5,417 | 3,592 | 31,678 |
| 48,470 | 145 | 22,374 | 5,395 | 3,558 | 31,472 |
| 48,471 | 144 | 22,116 | 5,354 | 3,510 | 31,124 |

|        |     |        |       |       |        |
|--------|-----|--------|-------|-------|--------|
| 48,472 | 143 | 22,576 | 5,442 | 3,610 | 31,771 |
| 48,473 | 140 | 22,465 | 5,408 | 3,611 | 31,624 |
| 48,474 | 136 | 22,186 | 5,342 | 3,590 | 31,254 |
| 48,475 | 134 | 22,125 | 5,326 | 3,571 | 31,156 |
| 48,476 | 136 | 22,268 | 5,321 | 3,569 | 31,294 |
| 48,477 | 134 | 22,046 | 5,240 | 3,533 | 30,953 |
| 48,478 | 131 | 22,281 | 5,262 | 3,558 | 31,232 |
| 48,479 | 128 | 22,134 | 5,210 | 3,560 | 31,032 |
| 48,480 | 126 | 22,071 | 5,260 | 3,564 | 31,021 |
| 48,481 | 130 | 22,202 | 5,297 | 3,571 | 31,200 |
| 48,482 | 136 | 22,146 | 5,243 | 3,551 | 31,076 |
| 48,483 | 136 | 22,383 | 5,279 | 3,573 | 31,371 |
| 48,484 | 130 | 22,657 | 5,333 | 3,601 | 31,721 |
| 48,485 | 122 | 22,601 | 5,316 | 3,576 | 31,615 |
| 48,486 | 128 | 22,977 | 5,388 | 3,621 | 32,114 |
| 48,487 | 129 | 23,107 | 5,426 | 3,652 | 32,314 |
| 48,488 | 127 | 23,136 | 5,420 | 3,634 | 32,317 |
| 48,489 | 128 | 22,957 | 5,367 | 3,643 | 32,095 |
| 48,490 | 128 | 23,029 | 5,360 | 3,651 | 32,168 |
| 48,491 | 131 | 23,032 | 5,368 | 3,647 | 32,178 |
| 48,492 | 135 | 23,114 | 5,372 | 3,648 | 32,269 |
| 48,493 | 135 | 23,023 | 5,365 | 3,643 | 32,166 |
| 48,494 | 136 | 23,160 | 5,418 | 3,669 | 32,383 |
| 48,495 | 139 | 23,088 | 5,375 | 3,667 | 32,269 |
| 48,496 | 138 | 23,114 | 5,382 | 3,676 | 32,310 |
| 48,497 | 136 | 22,984 | 5,343 | 3,624 | 32,087 |
| 48,498 | 136 | 23,060 | 5,346 | 3,630 | 32,172 |
| 48,499 | 137 | 23,007 | 5,328 | 3,615 | 32,087 |
| 48,500 | 131 | 22,969 | 5,300 | 3,590 | 31,990 |
| 48,501 | 123 | 22,576 | 5,211 | 3,519 | 31,429 |
| 48,502 | 123 | 22,592 | 5,208 | 3,518 | 31,441 |
| 48,503 | 127 | 22,614 | 5,189 | 3,523 | 31,453 |

|        |     |        |       |       |        |
|--------|-----|--------|-------|-------|--------|
| 48,504 | 135 | 22,643 | 5,173 | 3,532 | 31,483 |
| 48,505 | 133 | 22,205 | 5,103 | 3,478 | 30,919 |
| 48,506 | 132 | 22,240 | 5,087 | 3,492 | 30,951 |
| 48,507 | 133 | 22,390 | 5,073 | 3,488 | 31,084 |
| 48,508 | 137 | 22,715 | 5,140 | 3,503 | 31,495 |
| 48,509 | 146 | 22,673 | 5,143 | 3,518 | 31,480 |
| 48,510 | 143 | 22,472 | 5,074 | 3,471 | 31,160 |
| 48,511 | 141 | 22,600 | 5,098 | 3,510 | 31,349 |
| 48,512 | 142 | 22,603 | 5,095 | 3,529 | 31,369 |
| 48,513 | 141 | 22,866 | 5,132 | 3,577 | 31,716 |
| 48,514 | 138 | 22,650 | 5,114 | 3,577 | 31,479 |
| 48,515 | 136 | 22,816 | 5,131 | 3,599 | 31,682 |
| 48,516 | 139 | 22,888 | 5,138 | 3,595 | 31,760 |
| 48,517 | 138 | 22,939 | 5,127 | 3,598 | 31,802 |
| 48,518 | 138 | 22,735 | 5,066 | 3,567 | 31,506 |
| 48,519 | 147 | 22,439 | 5,008 | 3,520 | 31,114 |
| 48,520 | 143 | 22,058 | 4,945 | 3,482 | 30,628 |
| 48,521 | 140 | 22,686 | 5,064 | 3,590 | 31,480 |
| 48,522 | 142 | 22,393 | 4,993 | 3,521 | 31,049 |
| 48,523 | 143 | 22,390 | 4,984 | 3,517 | 31,034 |
| 48,524 | 149 | 22,445 | 4,986 | 3,498 | 31,078 |
| 48,525 | 158 | 22,379 | 5,007 | 3,497 | 31,041 |
| 48,526 | 159 | 22,398 | 5,014 | 3,489 | 31,060 |
| 48,527 | 158 | 22,325 | 5,021 | 3,487 | 30,991 |
| 48,528 | 160 | 22,235 | 5,057 | 3,487 | 30,939 |
| 48,529 | 163 | 22,240 | 5,043 | 3,474 | 30,920 |
| 48,530 | 162 | 22,369 | 4,995 | 3,465 | 30,991 |
| 48,531 | 163 | 22,692 | 5,077 | 3,515 | 31,447 |
| 48,532 | 162 | 22,757 | 5,082 | 3,522 | 31,523 |
| 48,533 | 155 | 22,511 | 5,033 | 3,504 | 31,203 |
| 48,534 | 158 | 22,573 | 5,031 | 3,529 | 31,291 |
| 48,535 | 159 | 22,518 | 5,044 | 3,535 | 31,256 |

|        |     |        |       |       |        |
|--------|-----|--------|-------|-------|--------|
| 48,536 | 160 | 22,732 | 5,094 | 3,582 | 31,568 |
| 48,537 | 155 | 22,999 | 5,175 | 3,625 | 31,954 |
| 48,538 | 153 | 23,014 | 5,174 | 3,639 | 31,980 |
| 48,539 | 154 | 22,855 | 5,124 | 3,631 | 31,764 |
| 48,540 | 155 | 22,993 | 5,211 | 3,632 | 31,991 |
| 48,541 | 156 | 22,985 | 5,243 | 3,621 | 32,005 |
| 48,542 | 154 | 22,813 | 5,199 | 3,618 | 31,784 |
| 48,543 | 156 | 23,226 | 5,272 | 3,666 | 32,320 |
| 48,544 | 156 | 23,316 | 5,279 | 3,663 | 32,414 |
| 48,545 | 156 | 23,343 | 5,309 | 3,661 | 32,469 |
| 48,546 | 158 | 23,281 | 5,338 | 3,664 | 32,441 |
| 48,547 | 166 | 23,585 | 5,413 | 3,686 | 32,850 |
| 48,548 | 181 | 23,530 | 5,390 | 3,672 | 32,773 |
| 48,549 | 178 | 23,572 | 5,412 | 3,684 | 32,846 |
| 48,550 | 178 | 23,657 | 5,461 | 3,719 | 33,015 |
| 48,551 | 178 | 23,321 | 5,431 | 3,677 | 32,607 |
| 48,552 | 179 | 23,479 | 5,475 | 3,704 | 32,837 |
| 48,553 | 166 | 23,460 | 5,487 | 3,727 | 32,840 |
| 48,554 | 164 | 23,580 | 5,527 | 3,737 | 33,008 |
| 48,555 | 159 | 23,603 | 5,553 | 3,782 | 33,097 |
| 48,556 | 159 | 23,688 | 5,565 | 3,803 | 33,215 |
| 48,557 | 158 | 23,947 | 5,670 | 3,842 | 33,617 |
| 48,558 | 153 | 23,920 | 5,701 | 3,867 | 33,641 |
| 48,559 | 151 | 23,743 | 5,722 | 3,873 | 33,489 |
| 48,560 | 145 | 23,718 | 5,753 | 3,868 | 33,484 |
| 48,561 | 150 | 23,438 | 5,741 | 3,852 | 33,181 |
| 48,562 | 150 | 23,206 | 5,719 | 3,830 | 32,905 |
| 48,563 | 154 | 23,555 | 5,837 | 3,892 | 33,438 |
| 48,564 | 155 | 23,324 | 5,768 | 3,813 | 33,060 |
| 48,565 | 164 | 23,434 | 5,802 | 3,787 | 33,187 |
| 48,566 | 166 | 23,432 | 5,840 | 3,801 | 33,239 |
| 48,567 | 161 | 23,344 | 5,828 | 3,789 | 33,122 |

|        |     |        |       |       |        |
|--------|-----|--------|-------|-------|--------|
| 48,568 | 162 | 23,122 | 5,785 | 3,762 | 32,831 |
| 48,569 | 165 | 23,071 | 5,798 | 3,776 | 32,810 |
| 48,570 | 157 | 23,163 | 5,796 | 3,769 | 32,885 |
| 48,571 | 163 | 23,104 | 5,801 | 3,773 | 32,841 |
| 48,572 | 162 | 22,960 | 5,767 | 3,734 | 32,623 |
| 48,573 | 161 | 23,160 | 5,823 | 3,761 | 32,905 |
| 48,574 | 166 | 23,420 | 5,894 | 3,798 | 33,278 |
| 48,575 | 162 | 23,400 | 5,919 | 3,813 | 33,294 |
| 48,576 | 160 | 23,371 | 5,872 | 3,793 | 33,196 |
| 48,577 | 159 | 23,362 | 5,902 | 3,795 | 33,218 |
| 48,578 | 161 | 23,384 | 5,917 | 3,807 | 33,269 |
| 48,579 | 161 | 23,400 | 5,925 | 3,804 | 33,290 |
| 48,580 | 161 | 23,527 | 5,989 | 3,802 | 33,479 |
| 48,581 | 163 | 23,526 | 6,023 | 3,810 | 33,522 |
| 48,582 | 168 | 23,476 | 5,986 | 3,814 | 33,444 |
| 48,583 | 173 | 23,448 | 6,005 | 3,827 | 33,453 |
| 48,584 | 172 | 23,260 | 6,000 | 3,793 | 33,225 |
| 48,585 | 180 | 23,373 | 6,044 | 3,822 | 33,419 |
| 48,586 | 176 | 23,289 | 6,076 | 3,843 | 33,384 |
| 48,587 | 183 | 23,176 | 6,091 | 3,836 | 33,286 |
| 48,588 | 181 | 22,817 | 6,014 | 3,794 | 32,806 |
| 48,589 | 176 | 22,762 | 6,034 | 3,751 | 32,723 |
| 48,590 | 175 | 22,735 | 6,011 | 3,765 | 32,686 |
| 48,591 | 180 | 22,844 | 6,004 | 3,770 | 32,798 |
| 48,592 | 179 | 22,856 | 6,015 | 3,779 | 32,829 |
| 48,593 | 177 | 23,051 | 6,078 | 3,799 | 33,105 |
| 48,594 | 183 | 23,177 | 6,142 | 3,818 | 33,320 |
| 48,595 | 188 | 23,052 | 6,117 | 3,807 | 33,164 |
| 48,596 | 196 | 23,103 | 6,124 | 3,845 | 33,268 |
| 48,597 | 196 | 23,145 | 6,136 | 3,844 | 33,321 |
| 48,598 | 182 | 23,186 | 6,105 | 3,845 | 33,318 |
| 48,599 | 174 | 23,336 | 6,195 | 3,886 | 33,591 |

|        |     |        |       |       |        |
|--------|-----|--------|-------|-------|--------|
| 48,600 | 171 | 23,602 | 6,230 | 3,933 | 33,936 |
| 48,601 | 172 | 23,629 | 6,200 | 3,908 | 33,909 |
| 48,602 | 173 | 23,897 | 6,294 | 3,977 | 34,341 |
| 48,603 | 172 | 23,987 | 6,337 | 3,996 | 34,492 |
| 48,604 | 173 | 23,801 | 6,275 | 3,944 | 34,193 |
| 48,605 | 177 | 23,937 | 6,340 | 3,965 | 34,419 |
| 48,606 | 174 | 23,912 | 6,359 | 3,929 | 34,374 |
| 48,607 | 182 | 23,826 | 6,378 | 3,893 | 34,279 |
| 48,608 | 190 | 23,837 | 6,326 | 3,871 | 34,224 |
| 48,609 | 192 | 23,489 | 6,220 | 3,799 | 33,700 |
| 48,610 | 192 | 23,504 | 6,224 | 3,815 | 33,735 |
| 48,611 | 194 | 23,664 | 6,211 | 3,826 | 33,895 |
| 48,612 | 188 | 23,537 | 6,153 | 3,792 | 33,670 |
| 48,613 | 192 | 23,128 | 6,047 | 3,715 | 33,082 |
| 48,614 | 194 | 23,223 | 6,063 | 3,729 | 33,209 |
| 48,615 | 185 | 23,193 | 6,039 | 3,746 | 33,163 |
| 48,616 | 185 | 23,119 | 6,047 | 3,762 | 33,113 |
| 48,617 | 186 | 23,246 | 6,027 | 3,763 | 33,222 |
| 48,618 | 185 | 23,172 | 6,047 | 3,766 | 33,170 |
| 48,619 | 182 | 23,124 | 6,045 | 3,751 | 33,102 |
| 48,620 | 184 | 23,044 | 6,027 | 3,743 | 32,998 |
| 48,621 | 184 | 22,971 | 6,039 | 3,724 | 32,918 |
| 48,622 | 179 | 23,144 | 6,113 | 3,738 | 33,174 |
| 48,623 | 179 | 23,174 | 6,101 | 3,743 | 33,197 |
| 48,624 | 183 | 23,034 | 6,108 | 3,721 | 33,046 |
| 48,625 | 180 | 22,960 | 6,099 | 3,723 | 32,962 |
| 48,626 | 178 | 22,720 | 6,064 | 3,695 | 32,657 |
| 48,627 | 173 | 22,535 | 6,015 | 3,678 | 32,401 |
| 48,628 | 173 | 22,523 | 6,005 | 3,669 | 32,370 |
| 48,629 | 172 | 22,700 | 6,040 | 3,694 | 32,606 |
| 48,630 | 173 | 22,174 | 5,955 | 3,656 | 31,958 |
| 48,631 | 172 | 22,187 | 5,970 | 3,675 | 32,004 |



|        |     |        |       |       |        |
|--------|-----|--------|-------|-------|--------|
| 48,632 | 172 | 22,395 | 6,012 | 3,720 | 32,299 |
| 48,633 | 167 | 22,287 | 5,969 | 3,677 | 32,100 |
| 48,634 | 156 | 21,941 | 5,907 | 3,630 | 31,634 |
| 48,635 | 157 | 22,042 | 5,943 | 3,670 | 31,812 |
| 48,636 | 157 | 21,828 | 5,887 | 3,605 | 31,477 |
| 48,637 | 150 | 21,962 | 5,834 | 3,573 | 31,519 |
| 48,638 | 150 | 21,827 | 5,784 | 3,549 | 31,310 |
| 48,639 | 152 | 21,677 | 5,740 | 3,543 | 31,112 |
| 48,640 | 151 | 21,602 | 5,721 | 3,530 | 31,004 |
| 48,641 | 157 | 21,720 | 5,778 | 3,557 | 31,212 |
| 48,642 | 148 | 21,540 | 5,739 | 3,542 | 30,969 |
| 48,643 | 152 | 21,229 | 5,690 | 3,508 | 30,579 |
| 48,644 | 151 | 20,930 | 5,633 | 3,476 | 30,190 |
| 48,645 | 144 | 20,943 | 5,642 | 3,499 | 30,228 |
| 48,646 | 139 | 20,737 | 5,636 | 3,475 | 29,987 |
| 48,647 | 137 | 20,485 | 5,573 | 3,411 | 29,606 |
| 48,648 | 137 | 20,200 | 5,537 | 3,378 | 29,252 |
| 48,649 | 139 | 20,394 | 5,616 | 3,411 | 29,560 |
| 48,650 | 152 | 20,183 | 5,570 | 3,380 | 29,285 |
| 48,651 | 150 | 19,781 | 5,484 | 3,311 | 28,726 |
| 48,652 | 148 | 20,018 | 5,557 | 3,357 | 29,080 |
| 48,653 | 147 | 20,032 | 5,538 | 3,335 | 29,052 |
| 48,654 | 149 | 19,886 | 5,463 | 3,298 | 28,796 |
| 48,655 | 150 | 19,869 | 5,491 | 3,294 | 28,804 |
| 48,656 | 153 | 19,861 | 5,442 | 3,299 | 28,755 |
| 48,657 | 153 | 19,861 | 5,463 | 3,302 | 28,779 |
| 48,658 | 153 | 19,899 | 5,506 | 3,340 | 28,898 |
| 48,659 | 155 | 19,731 | 5,492 | 3,323 | 28,701 |
| 48,660 | 150 | 19,567 | 5,444 | 3,311 | 28,472 |
| 48,661 | 148 | 19,771 | 5,508 | 3,333 | 28,760 |
| 48,662 | 154 | 19,972 | 5,554 | 3,368 | 29,048 |
| 48,663 | 146 | 19,752 | 5,476 | 3,328 | 28,702 |

|        |     |        |       |       |        |
|--------|-----|--------|-------|-------|--------|
| 48,664 | 146 | 19,730 | 5,465 | 3,326 | 28,667 |
| 48,665 | 143 | 19,643 | 5,458 | 3,320 | 28,564 |
| 48,666 | 144 | 19,462 | 5,448 | 3,317 | 28,371 |
| 48,667 | 142 | 19,485 | 5,481 | 3,335 | 28,443 |
| 48,668 | 140 | 19,543 | 5,547 | 3,348 | 28,578 |
| 48,669 | 142 | 19,733 | 5,574 | 3,376 | 28,825 |
| 48,670 | 145 | 19,808 | 5,604 | 3,400 | 28,957 |
| 48,671 | 144 | 19,840 | 5,639 | 3,402 | 29,025 |
| 48,672 | 142 | 19,855 | 5,580 | 3,412 | 28,989 |
| 48,673 | 147 | 19,859 | 5,579 | 3,408 | 28,993 |
| 48,674 | 145 | 19,570 | 5,537 | 3,370 | 28,622 |
| 48,675 | 142 | 19,550 | 5,524 | 3,389 | 28,605 |
| 48,676 | 142 | 19,517 | 5,527 | 3,385 | 28,571 |
| 48,677 | 140 | 19,205 | 5,433 | 3,328 | 28,106 |
| 48,678 | 142 | 19,457 | 5,471 | 3,369 | 28,439 |
| 48,679 | 138 | 19,655 | 5,500 | 3,392 | 28,685 |
| 48,680 | 138 | 19,479 | 5,429 | 3,350 | 28,396 |
| 48,681 | 137 | 19,732 | 5,459 | 3,374 | 28,702 |
| 48,682 | 139 | 19,981 | 5,557 | 3,420 | 29,097 |
| 48,683 | 137 | 19,876 | 5,549 | 3,403 | 28,965 |
| 48,684 | 132 | 19,641 | 5,455 | 3,379 | 28,607 |
| 48,685 | 132 | 19,755 | 5,485 | 3,416 | 28,788 |
| 48,686 | 132 | 19,800 | 5,503 | 3,417 | 28,852 |
| 48,687 | 134 | 20,307 | 5,613 | 3,485 | 29,539 |
| 48,688 | 135 | 20,419 | 5,651 | 3,523 | 29,728 |
| 48,689 | 136 | 20,606 | 5,711 | 3,553 | 30,006 |
| 48,690 | 138 | 20,159 | 5,606 | 3,482 | 29,385 |
| 48,691 | 140 | 20,341 | 5,699 | 3,536 | 29,716 |
| 48,692 | 135 | 20,520 | 5,774 | 3,597 | 30,026 |
| 48,693 | 138 | 20,640 | 5,774 | 3,584 | 30,136 |
| 48,694 | 139 | 20,691 | 5,766 | 3,559 | 30,155 |
| 48,695 | 142 | 20,855 | 5,850 | 3,589 | 30,436 |

|        |     |        |       |       |        |
|--------|-----|--------|-------|-------|--------|
| 48,696 | 143 | 20,908 | 5,874 | 3,618 | 30,543 |
| 48,697 | 146 | 20,727 | 5,827 | 3,590 | 30,290 |
| 48,698 | 138 | 20,571 | 5,777 | 3,570 | 30,056 |
| 48,699 | 139 | 20,709 | 5,763 | 3,571 | 30,182 |
| 48,700 | 139 | 20,364 | 5,700 | 3,541 | 29,744 |
| 48,701 | 143 | 21,125 | 5,889 | 3,671 | 30,828 |
| 48,702 | 147 | 21,071 | 5,889 | 3,674 | 30,781 |
| 48,703 | 147 | 20,852 | 5,827 | 3,630 | 30,456 |
| 48,704 | 152 | 20,687 | 5,780 | 3,606 | 30,225 |
| 48,705 | 148 | 20,472 | 5,738 | 3,581 | 29,939 |
| 48,706 | 150 | 20,964 | 5,888 | 3,659 | 30,661 |
| 48,707 | 150 | 21,217 | 5,935 | 3,691 | 30,993 |
| 48,708 | 153 | 21,114 | 5,847 | 3,651 | 30,765 |
| 48,709 | 152 | 21,174 | 5,853 | 3,668 | 30,847 |
| 48,710 | 149 | 21,260 | 5,896 | 3,716 | 31,021 |
| 48,711 | 154 | 21,309 | 5,910 | 3,738 | 31,111 |
| 48,712 | 153 | 20,824 | 5,788 | 3,662 | 30,427 |
| 48,713 | 156 | 20,827 | 5,785 | 3,672 | 30,440 |
| 48,714 | 165 | 20,596 | 5,748 | 3,641 | 30,150 |
| 48,715 | 166 | 20,517 | 5,735 | 3,646 | 30,064 |
| 48,716 | 189 | 21,104 | 5,920 | 3,735 | 30,948 |
| 48,717 | 188 | 21,103 | 5,897 | 3,698 | 30,886 |
| 48,718 | 197 | 21,670 | 6,059 | 3,821 | 31,747 |
| 48,719 | 210 | 21,813 | 6,081 | 3,845 | 31,949 |
| 48,720 | 209 | 21,533 | 6,003 | 3,777 | 31,522 |
| 48,721 | 204 | 21,350 | 5,926 | 3,727 | 31,207 |
| 48,722 | 210 | 21,627 | 6,054 | 3,810 | 31,701 |
| 48,723 | 205 | 21,306 | 6,004 | 3,750 | 31,265 |
| 48,724 | 205 | 21,365 | 5,988 | 3,762 | 31,320 |
| 48,725 | 206 | 21,600 | 6,046 | 3,775 | 31,627 |
| 48,726 | 205 | 21,614 | 6,047 | 3,772 | 31,638 |
| 48,727 | 205 | 21,549 | 6,054 | 3,783 | 31,591 |

|        |     |        |       |       |        |
|--------|-----|--------|-------|-------|--------|
| 48,728 | 215 | 21,829 | 6,151 | 3,814 | 32,009 |
| 48,729 | 216 | 21,902 | 6,205 | 3,822 | 32,145 |
| 48,730 | 215 | 21,812 | 6,222 | 3,816 | 32,065 |
| 48,731 | 217 | 21,798 | 6,257 | 3,819 | 32,091 |
| 48,732 | 215 | 21,966 | 6,286 | 3,831 | 32,298 |
| 48,733 | 218 | 21,916 | 6,255 | 3,818 | 32,207 |
| 48,734 | 222 | 22,309 | 6,361 | 3,880 | 32,772 |
| 48,735 | 227 | 22,170 | 6,359 | 3,844 | 32,600 |
| 48,736 | 226 | 22,147 | 6,371 | 3,836 | 32,580 |
| 48,737 | 227 | 22,397 | 6,454 | 3,895 | 32,973 |
| 48,738 | 226 | 22,245 | 6,451 | 3,864 | 32,786 |
| 48,739 | 226 | 22,205 | 6,434 | 3,829 | 32,694 |
| 48,740 | 227 | 22,268 | 6,383 | 3,811 | 32,689 |
| 48,741 | 230 | 22,037 | 6,305 | 3,753 | 32,325 |
| 48,742 | 237 | 22,085 | 6,261 | 3,717 | 32,300 |
| 48,743 | 239 | 22,261 | 6,271 | 3,725 | 32,496 |
| 48,744 | 235 | 22,280 | 6,303 | 3,737 | 32,555 |
| 48,745 | 238 | 22,394 | 6,308 | 3,755 | 32,695 |
| 48,746 | 241 | 22,621 | 6,339 | 3,780 | 32,981 |
| 48,747 | 248 | 22,377 | 6,256 | 3,731 | 32,612 |
| 48,748 | 246 | 22,349 | 6,259 | 3,732 | 32,586 |
| 48,749 | 243 | 22,783 | 6,359 | 3,789 | 33,174 |
| 48,750 | 249 | 22,558 | 6,310 | 3,761 | 32,878 |
| 48,751 | 245 | 22,541 | 6,281 | 3,762 | 32,829 |
| 48,752 | 249 | 22,814 | 6,341 | 3,809 | 33,213 |
| 48,753 | 259 | 22,564 | 6,332 | 3,766 | 32,921 |
| 48,754 | 259 | 22,567 | 6,342 | 3,760 | 32,928 |
| 48,755 | 259 | 22,463 | 6,293 | 3,745 | 32,760 |
| 48,756 | 258 | 22,391 | 6,286 | 3,752 | 32,687 |
| 48,757 | 252 | 22,192 | 6,254 | 3,767 | 32,465 |
| 48,758 | 259 | 22,401 | 6,360 | 3,819 | 32,839 |
| 48,759 | 257 | 22,245 | 6,331 | 3,796 | 32,629 |

|        |     |        |       |       |        |
|--------|-----|--------|-------|-------|--------|
| 48,760 | 257 | 22,423 | 6,368 | 3,810 | 32,858 |
| 48,761 | 252 | 22,725 | 6,455 | 3,830 | 33,262 |
| 48,762 | 244 | 22,632 | 6,435 | 3,789 | 33,100 |
| 48,763 | 246 | 22,979 | 6,492 | 3,817 | 33,534 |
| 48,764 | 227 | 23,126 | 6,499 | 3,829 | 33,681 |
| 48,765 | 213 | 23,331 | 6,541 | 3,843 | 33,928 |
| 48,766 | 216 | 23,645 | 6,648 | 3,886 | 34,395 |
| 48,767 | 214 | 23,687 | 6,648 | 3,890 | 34,439 |
| 48,768 | 214 | 23,639 | 6,638 | 3,891 | 34,382 |
| 48,769 | 216 | 24,207 | 6,779 | 3,968 | 35,170 |
| 48,770 | 210 | 24,222 | 6,742 | 3,973 | 35,147 |
| 48,771 | 205 | 24,264 | 6,727 | 3,984 | 35,180 |
| 48,772 | 202 | 24,044 | 6,665 | 3,943 | 34,854 |
| 48,773 | 201 | 23,905 | 6,612 | 3,925 | 34,643 |
| 48,774 | 201 | 23,877 | 6,616 | 3,912 | 34,606 |
| 48,775 | 218 | 24,035 | 6,706 | 3,944 | 34,903 |
| 48,776 | 224 | 24,116 | 6,719 | 3,998 | 35,057 |
| 48,777 | 227 | 24,084 | 6,685 | 3,993 | 34,989 |
| 48,778 | 230 | 24,154 | 6,674 | 3,987 | 35,045 |
| 48,779 | 224 | 24,194 | 6,656 | 3,981 | 35,055 |
| 48,780 | 222 | 23,970 | 6,599 | 3,930 | 34,721 |
| 48,781 | 222 | 23,879 | 6,585 | 3,925 | 34,611 |
| 48,782 | 220 | 24,095 | 6,633 | 3,949 | 34,897 |
| 48,783 | 228 | 23,863 | 6,574 | 3,922 | 34,587 |
| 48,784 | 223 | 23,833 | 6,541 | 3,900 | 34,497 |
| 48,785 | 224 | 23,859 | 6,505 | 3,888 | 34,476 |
| 48,786 | 218 | 23,581 | 6,455 | 3,843 | 34,097 |
| 48,787 | 221 | 23,605 | 6,416 | 3,827 | 34,069 |
| 48,788 | 221 | 23,503 | 6,348 | 3,815 | 33,887 |
| 48,789 | 225 | 23,366 | 6,315 | 3,814 | 33,720 |
| 48,790 | 226 | 23,244 | 6,291 | 3,786 | 33,547 |
| 48,791 | 226 | 23,227 | 6,293 | 3,805 | 33,551 |

|        |     |        |       |       |        |
|--------|-----|--------|-------|-------|--------|
| 48,792 | 211 | 23,222 | 6,304 | 3,818 | 33,555 |
| 48,793 | 210 | 23,135 | 6,280 | 3,801 | 33,426 |
| 48,794 | 208 | 23,101 | 6,264 | 3,791 | 33,364 |
| 48,795 | 208 | 23,091 | 6,287 | 3,790 | 33,376 |
| 48,796 | 206 | 23,317 | 6,383 | 3,817 | 33,723 |
| 48,797 | 206 | 23,148 | 6,340 | 3,795 | 33,489 |
| 48,798 | 189 | 22,778 | 6,298 | 3,762 | 33,027 |
| 48,799 | 189 | 23,332 | 6,409 | 3,848 | 33,778 |
| 48,800 | 187 | 23,445 | 6,408 | 3,866 | 33,906 |
| 48,801 | 166 | 22,616 | 6,175 | 3,732 | 32,689 |
| 48,802 | 166 | 22,844 | 6,194 | 3,769 | 32,973 |
| 48,803 | 161 | 23,049 | 6,221 | 3,801 | 33,232 |
| 48,804 | 161 | 23,281 | 6,258 | 3,838 | 33,538 |
| 48,805 | 159 | 23,298 | 6,304 | 3,887 | 33,648 |
| 48,806 | 154 | 23,108 | 6,247 | 3,849 | 33,358 |
| 48,807 | 154 | 23,040 | 6,168 | 3,765 | 33,127 |
| 48,808 | 155 | 23,255 | 6,230 | 3,818 | 33,458 |
| 48,809 | 163 | 23,549 | 6,302 | 3,878 | 33,892 |
| 48,810 | 156 | 23,520 | 6,283 | 3,879 | 33,838 |
| 48,811 | 157 | 22,566 | 6,024 | 3,737 | 32,484 |
| 48,812 | 159 | 22,789 | 6,045 | 3,755 | 32,748 |
| 48,813 | 157 | 22,834 | 6,045 | 3,755 | 32,791 |
| 48,814 | 163 | 23,082 | 6,128 | 3,830 | 33,203 |
| 48,815 | 167 | 22,700 | 6,037 | 3,758 | 32,662 |
| 48,816 | 165 | 22,317 | 5,908 | 3,682 | 32,072 |
| 48,817 | 165 | 22,455 | 5,888 | 3,684 | 32,192 |
| 48,818 | 167 | 22,180 | 5,830 | 3,625 | 31,802 |
| 48,819 | 167 | 22,221 | 5,838 | 3,626 | 31,852 |
| 48,820 | 161 | 22,050 | 5,844 | 3,621 | 31,676 |
| 48,821 | 160 | 22,070 | 5,837 | 3,619 | 31,686 |
| 48,822 | 163 | 22,088 | 5,821 | 3,614 | 31,686 |
| 48,823 | 164 | 22,305 | 5,908 | 3,642 | 32,019 |

|        |     |        |       |       |        |
|--------|-----|--------|-------|-------|--------|
| 48,824 | 164 | 22,096 | 5,832 | 3,632 | 31,724 |
| 48,825 | 168 | 22,323 | 5,876 | 3,638 | 32,005 |
| 48,826 | 160 | 22,637 | 5,907 | 3,662 | 32,366 |
| 48,827 | 154 | 22,469 | 5,856 | 3,609 | 32,088 |
| 48,828 | 156 | 22,780 | 5,936 | 3,643 | 32,515 |
| 48,829 | 149 | 22,598 | 5,881 | 3,619 | 32,247 |
| 48,830 | 157 | 22,769 | 5,928 | 3,651 | 32,505 |
| 48,831 | 160 | 22,893 | 5,921 | 3,649 | 32,623 |
| 48,832 | 164 | 22,834 | 5,860 | 3,643 | 32,501 |
| 48,833 | 164 | 22,825 | 5,850 | 3,651 | 32,490 |
| 48,834 | 159 | 23,054 | 5,946 | 3,696 | 32,855 |
| 48,835 | 160 | 22,812 | 5,921 | 3,665 | 32,558 |
| 48,836 | 158 | 22,483 | 5,902 | 3,639 | 32,182 |
| 48,837 | 156 | 22,567 | 5,865 | 3,645 | 32,233 |
| 48,838 | 158 | 22,583 | 5,882 | 3,656 | 32,279 |
| 48,839 | 163 | 22,773 | 5,935 | 3,695 | 32,566 |
| 48,840 | 159 | 22,638 | 5,881 | 3,667 | 32,345 |
| 48,841 | 157 | 22,395 | 5,861 | 3,658 | 32,071 |
| 48,842 | 154 | 22,608 | 5,943 | 3,684 | 32,389 |
| 48,843 | 158 | 22,365 | 5,888 | 3,665 | 32,076 |
| 48,844 | 157 | 22,234 | 5,859 | 3,668 | 31,918 |
| 48,845 | 157 | 22,616 | 5,962 | 3,729 | 32,464 |
| 48,846 | 156 | 22,464 | 5,873 | 3,700 | 32,193 |
| 48,847 | 153 | 22,423 | 5,900 | 3,719 | 32,195 |
| 48,848 | 149 | 22,213 | 5,903 | 3,731 | 31,996 |
| 48,849 | 151 | 22,089 | 5,844 | 3,709 | 31,793 |
| 48,850 | 147 | 21,684 | 5,757 | 3,651 | 31,239 |
| 48,851 | 155 | 21,569 | 5,807 | 3,670 | 31,201 |
| 48,852 | 153 | 21,482 | 5,769 | 3,643 | 31,047 |
| 48,853 | 152 | 21,346 | 5,744 | 3,597 | 30,839 |
| 48,854 | 158 | 21,397 | 5,779 | 3,614 | 30,948 |
| 48,855 | 161 | 21,267 | 5,765 | 3,572 | 30,765 |

|        |     |        |       |       |        |
|--------|-----|--------|-------|-------|--------|
| 48,856 | 164 | 21,392 | 5,769 | 3,568 | 30,893 |
| 48,857 | 164 | 21,376 | 5,772 | 3,575 | 30,887 |
| 48,858 | 166 | 21,409 | 5,846 | 3,610 | 31,031 |
| 48,859 | 174 | 21,678 | 5,893 | 3,654 | 31,399 |
| 48,860 | 175 | 22,100 | 5,993 | 3,718 | 31,986 |
| 48,861 | 176 | 21,863 | 5,949 | 3,671 | 31,659 |
| 48,862 | 171 | 21,664 | 5,944 | 3,663 | 31,442 |
| 48,863 | 175 | 22,264 | 6,097 | 3,781 | 32,317 |
| 48,864 | 201 | 22,982 | 6,273 | 3,903 | 33,359 |
| 48,865 | 195 | 23,115 | 6,289 | 3,893 | 33,492 |
| 48,866 | 188 | 22,872 | 6,210 | 3,861 | 33,131 |
| 48,867 | 184 | 23,106 | 6,296 | 3,885 | 33,471 |
| 48,868 | 179 | 23,171 | 6,382 | 3,945 | 33,677 |
| 48,869 | 181 | 23,282 | 6,374 | 3,953 | 33,790 |
| 48,870 | 186 | 23,202 | 6,312 | 3,911 | 33,611 |
| 48,871 | 189 | 23,496 | 6,391 | 3,949 | 34,025 |
| 48,872 | 189 | 23,514 | 6,399 | 3,951 | 34,053 |
| 48,873 | 190 | 23,590 | 6,401 | 3,948 | 34,129 |
| 48,874 | 189 | 23,521 | 6,391 | 3,935 | 34,036 |
| 48,875 | 190 | 23,598 | 6,399 | 3,938 | 34,125 |
| 48,876 | 187 | 23,574 | 6,410 | 3,946 | 34,117 |
| 48,877 | 187 | 23,313 | 6,389 | 3,935 | 33,824 |
| 48,878 | 185 | 23,157 | 6,373 | 3,909 | 33,624 |
| 48,879 | 183 | 23,339 | 6,473 | 3,979 | 33,974 |
| 48,880 | 187 | 23,635 | 6,555 | 4,035 | 34,412 |
| 48,881 | 184 | 23,687 | 6,561 | 4,049 | 34,481 |
| 48,882 | 180 | 23,627 | 6,541 | 4,052 | 34,400 |
| 48,883 | 193 | 23,885 | 6,721 | 4,136 | 34,935 |
| 48,884 | 207 | 24,139 | 6,778 | 4,164 | 35,288 |
| 48,885 | 212 | 24,641 | 6,829 | 4,202 | 35,884 |
| 48,886 | 213 | 24,363 | 6,748 | 4,168 | 35,492 |
| 48,887 | 210 | 24,210 | 6,675 | 4,121 | 35,216 |



|        |     |        |       |       |        |
|--------|-----|--------|-------|-------|--------|
| 48,888 | 210 | 24,656 | 6,778 | 4,150 | 35,794 |
| 48,889 | 208 | 24,908 | 6,805 | 4,192 | 36,113 |
| 48,890 | 204 | 24,950 | 6,833 | 4,201 | 36,188 |
| 48,891 | 202 | 24,876 | 6,800 | 4,184 | 36,062 |
| 48,892 | 202 | 24,864 | 6,801 | 4,157 | 36,024 |
| 48,893 | 202 | 24,965 | 6,839 | 4,185 | 36,191 |
| 48,894 | 202 | 24,928 | 6,845 | 4,186 | 36,161 |
| 48,895 | 201 | 24,816 | 6,826 | 4,161 | 36,004 |
| 48,896 | 213 | 24,879 | 6,815 | 4,174 | 36,081 |
| 48,897 | 218 | 24,991 | 6,795 | 4,181 | 36,185 |
| 48,898 | 219 | 25,217 | 6,784 | 4,188 | 36,408 |
| 48,899 | 216 | 25,052 | 6,703 | 4,131 | 36,102 |
| 48,900 | 216 | 25,174 | 6,741 | 4,134 | 36,265 |
| 48,901 | 212 | 25,155 | 6,714 | 4,145 | 36,226 |
| 48,902 | 213 | 25,217 | 6,710 | 4,130 | 36,270 |
| 48,903 | 221 | 25,191 | 6,702 | 4,144 | 36,258 |
| 48,904 | 218 | 24,890 | 6,641 | 4,107 | 35,856 |
| 48,905 | 217 | 25,533 | 6,764 | 4,185 | 36,699 |
| 48,906 | 212 | 25,504 | 6,732 | 4,183 | 36,631 |
| 48,907 | 209 | 25,322 | 6,688 | 4,162 | 36,381 |
| 48,908 | 210 | 25,661 | 6,714 | 4,192 | 36,777 |
| 48,909 | 206 | 25,869 | 6,727 | 4,203 | 37,005 |
| 48,910 | 201 | 25,655 | 6,680 | 4,156 | 36,692 |
| 48,911 | 193 | 25,812 | 6,705 | 4,166 | 36,876 |
| 48,912 | 186 | 25,568 | 6,656 | 4,126 | 36,536 |
| 48,913 | 191 | 25,693 | 6,672 | 4,151 | 36,707 |
| 48,914 | 181 | 25,504 | 6,671 | 4,118 | 36,474 |
| 48,915 | 174 | 25,177 | 6,589 | 4,062 | 36,002 |
| 48,916 | 183 | 25,119 | 6,516 | 4,036 | 35,854 |
| 48,917 | 185 | 24,859 | 6,419 | 3,990 | 35,453 |
| 48,918 | 190 | 24,905 | 6,364 | 3,957 | 35,416 |
| 48,919 | 193 | 24,935 | 6,345 | 3,936 | 35,409 |

|        |     |        |       |       |        |
|--------|-----|--------|-------|-------|--------|
| 48,920 | 196 | 24,987 | 6,347 | 3,964 | 35,494 |
| 48,921 | 194 | 24,929 | 6,367 | 3,949 | 35,439 |
| 48,922 | 194 | 24,898 | 6,368 | 3,943 | 35,403 |
| 48,923 | 193 | 24,883 | 6,378 | 3,959 | 35,413 |
| 48,924 | 185 | 24,883 | 6,354 | 3,964 | 35,386 |
| 48,925 | 186 | 24,979 | 6,363 | 3,956 | 35,484 |
| 48,926 | 186 | 25,095 | 6,350 | 3,970 | 35,601 |
| 48,927 | 191 | 25,182 | 6,330 | 3,949 | 35,652 |
| 48,928 | 192 | 25,195 | 6,297 | 3,946 | 35,630 |
| 48,929 | 190 | 25,254 | 6,274 | 3,954 | 35,672 |
| 48,930 | 192 | 25,578 | 6,312 | 3,984 | 36,066 |
| 48,931 | 188 | 24,852 | 6,120 | 3,845 | 35,005 |
| 48,932 | 189 | 25,224 | 6,181 | 3,885 | 35,479 |
| 48,933 | 179 | 25,229 | 6,182 | 3,879 | 35,469 |
| 48,934 | 181 | 25,082 | 6,156 | 3,889 | 35,308 |
| 48,935 | 169 | 25,016 | 6,217 | 3,912 | 35,314 |
| 48,936 | 167 | 25,110 | 6,313 | 3,945 | 35,535 |
| 48,937 | 168 | 25,098 | 6,343 | 3,964 | 35,573 |
| 48,938 | 171 | 25,206 | 6,358 | 3,987 | 35,722 |
| 48,939 | 188 | 25,394 | 6,435 | 4,007 | 36,024 |
| 48,940 | 190 | 25,551 | 6,429 | 3,998 | 36,168 |
| 48,941 | 191 | 25,838 | 6,495 | 4,044 | 36,568 |
| 48,942 | 189 | 25,742 | 6,433 | 4,030 | 36,394 |
| 48,943 | 188 | 25,714 | 6,335 | 3,986 | 36,223 |
| 48,944 | 188 | 26,036 | 6,397 | 4,026 | 36,647 |
| 48,945 | 185 | 26,090 | 6,401 | 4,028 | 36,704 |
| 48,946 | 186 | 26,271 | 6,464 | 4,068 | 36,989 |
| 48,947 | 178 | 26,390 | 6,518 | 4,109 | 37,195 |
| 48,948 | 175 | 26,410 | 6,541 | 4,111 | 37,237 |
| 48,949 | 173 | 26,434 | 6,548 | 4,105 | 37,260 |
| 48,950 | 176 | 26,193 | 6,487 | 4,057 | 36,913 |
| 48,951 | 176 | 26,549 | 6,540 | 4,079 | 37,344 |

|        |     |        |       |       |        |
|--------|-----|--------|-------|-------|--------|
| 48,952 | 173 | 26,559 | 6,542 | 4,082 | 37,356 |
| 48,953 | 174 | 26,360 | 6,484 | 4,040 | 37,058 |
| 48,954 | 166 | 26,204 | 6,444 | 4,004 | 36,818 |
| 48,955 | 166 | 26,567 | 6,555 | 4,086 | 37,374 |
| 48,956 | 171 | 26,474 | 6,583 | 4,094 | 37,322 |
| 48,957 | 172 | 26,180 | 6,506 | 4,037 | 36,895 |
| 48,958 | 185 | 26,096 | 6,487 | 4,002 | 36,770 |
| 48,959 | 184 | 26,029 | 6,482 | 3,988 | 36,683 |
| 48,960 | 180 | 25,824 | 6,421 | 3,967 | 36,392 |
| 48,961 | 188 | 26,129 | 6,470 | 4,020 | 36,807 |
| 48,962 | 185 | 25,579 | 6,348 | 3,932 | 36,044 |
| 48,963 | 181 | 25,372 | 6,329 | 3,906 | 35,788 |
| 48,964 | 183 | 25,456 | 6,303 | 3,891 | 35,833 |
| 48,965 | 176 | 24,736 | 6,180 | 3,831 | 34,923 |
| 48,966 | 176 | 24,751 | 6,179 | 3,830 | 34,936 |
| 48,967 | 167 | 24,473 | 6,168 | 3,807 | 34,615 |
| 48,968 | 169 | 24,591 | 6,180 | 3,825 | 34,765 |
| 48,969 | 158 | 24,161 | 6,073 | 3,786 | 34,178 |
| 48,970 | 164 | 24,275 | 6,122 | 3,795 | 34,356 |
| 48,971 | 161 | 24,347 | 6,131 | 3,813 | 34,452 |
| 48,972 | 160 | 24,210 | 6,056 | 3,779 | 34,205 |
| 48,973 | 166 | 24,221 | 6,056 | 3,757 | 34,200 |
| 48,974 | 166 | 24,250 | 6,050 | 3,754 | 34,220 |
| 48,975 | 164 | 24,322 | 6,042 | 3,765 | 34,293 |
| 48,976 | 169 | 24,291 | 6,047 | 3,762 | 34,269 |
| 48,977 | 170 | 24,280 | 6,043 | 3,753 | 34,246 |
| 48,978 | 163 | 24,277 | 6,066 | 3,773 | 34,279 |
| 48,979 | 166 | 24,444 | 6,143 | 3,812 | 34,565 |
| 48,980 | 167 | 24,119 | 6,096 | 3,763 | 34,145 |
| 48,981 | 164 | 23,719 | 6,028 | 3,711 | 33,622 |
| 48,982 | 161 | 23,666 | 6,080 | 3,747 | 33,654 |
| 48,983 | 160 | 23,609 | 6,043 | 3,714 | 33,526 |

|        |     |        |       |       |        |
|--------|-----|--------|-------|-------|--------|
| 48,984 | 153 | 23,326 | 5,947 | 3,661 | 33,087 |
| 48,985 | 161 | 23,422 | 5,923 | 3,662 | 33,168 |
| 48,986 | 161 | 23,207 | 5,822 | 3,603 | 32,793 |
| 48,987 | 155 | 22,808 | 5,712 | 3,527 | 32,202 |
| 48,988 | 155 | 22,720 | 5,720 | 3,538 | 32,133 |
| 48,989 | 152 | 22,396 | 5,662 | 3,516 | 31,726 |
| 48,990 | 138 | 22,454 | 5,661 | 3,521 | 31,774 |
| 48,991 | 138 | 22,356 | 5,632 | 3,526 | 31,652 |
| 48,992 | 142 | 22,233 | 5,614 | 3,500 | 31,489 |
| 48,993 | 142 | 21,864 | 5,559 | 3,450 | 31,015 |
| 48,994 | 145 | 21,967 | 5,578 | 3,482 | 31,172 |
| 48,995 | 147 | 21,933 | 5,561 | 3,488 | 31,129 |
| 48,996 | 145 | 21,648 | 5,502 | 3,450 | 30,745 |
| 48,997 | 146 | 21,621 | 5,469 | 3,430 | 30,666 |
| 48,998 | 144 | 21,544 | 5,429 | 3,386 | 30,503 |
| 48,999 | 144 | 21,374 | 5,399 | 3,360 | 30,277 |
| 49,000 | 145 | 21,528 | 5,427 | 3,384 | 30,484 |
| 49,001 | 146 | 21,597 | 5,434 | 3,411 | 30,588 |
| 49,002 | 153 | 21,522 | 5,437 | 3,384 | 30,496 |
| 49,003 | 151 | 21,385 | 5,376 | 3,349 | 30,261 |
| 49,004 | 153 | 21,302 | 5,382 | 3,352 | 30,189 |
| 49,005 | 154 | 21,254 | 5,366 | 3,318 | 30,092 |
| 49,006 | 154 | 21,273 | 5,338 | 3,300 | 30,065 |
| 49,007 | 156 | 21,097 | 5,323 | 3,285 | 29,861 |
| 49,008 | 153 | 20,997 | 5,309 | 3,293 | 29,752 |
| 49,009 | 146 | 21,082 | 5,340 | 3,318 | 29,886 |
| 49,010 | 150 | 21,204 | 5,355 | 3,338 | 30,047 |
| 49,011 | 152 | 21,153 | 5,383 | 3,325 | 30,013 |
| 49,012 | 145 | 21,140 | 5,394 | 3,312 | 29,991 |
| 49,013 | 149 | 21,119 | 5,380 | 3,322 | 29,970 |
| 49,014 | 144 | 20,888 | 5,312 | 3,277 | 29,621 |
| 49,015 | 142 | 20,983 | 5,343 | 3,282 | 29,750 |

|        |     |        |       |       |        |
|--------|-----|--------|-------|-------|--------|
| 49,016 | 142 | 20,972 | 5,319 | 3,267 | 29,700 |
| 49,017 | 143 | 21,314 | 5,392 | 3,321 | 30,170 |
| 49,018 | 141 | 21,198 | 5,367 | 3,299 | 30,005 |
| 49,019 | 142 | 20,900 | 5,319 | 3,271 | 29,632 |
| 49,020 | 142 | 20,647 | 5,283 | 3,241 | 29,313 |
| 49,021 | 137 | 21,403 | 5,489 | 3,406 | 30,435 |
| 49,022 | 131 | 21,189 | 5,481 | 3,398 | 30,199 |
| 49,023 | 135 | 21,574 | 5,554 | 3,466 | 30,729 |
| 49,024 | 128 | 21,330 | 5,503 | 3,436 | 30,397 |
| 49,025 | 127 | 21,394 | 5,557 | 3,436 | 30,514 |
| 49,026 | 127 | 21,549 | 5,610 | 3,478 | 30,764 |
| 49,027 | 126 | 21,713 | 5,632 | 3,505 | 30,976 |
| 49,028 | 129 | 21,692 | 5,618 | 3,505 | 30,944 |
| 49,029 | 131 | 21,778 | 5,638 | 3,491 | 31,038 |
| 49,030 | 128 | 21,626 | 5,551 | 3,481 | 30,786 |
| 49,031 | 130 | 21,842 | 5,552 | 3,469 | 30,993 |
| 49,032 | 133 | 21,643 | 5,478 | 3,417 | 30,671 |
| 49,033 | 133 | 21,694 | 5,462 | 3,423 | 30,712 |
| 49,034 | 135 | 21,281 | 5,382 | 3,375 | 30,173 |
| 49,035 | 134 | 21,045 | 5,333 | 3,337 | 29,849 |
| 49,036 | 140 | 21,691 | 5,481 | 3,420 | 30,732 |
| 49,037 | 139 | 21,493 | 5,428 | 3,371 | 30,431 |
| 49,038 | 141 | 22,008 | 5,520 | 3,448 | 31,117 |
| 49,039 | 141 | 21,874 | 5,464 | 3,400 | 30,879 |
| 49,040 | 150 | 22,513 | 5,641 | 3,497 | 31,801 |
| 49,041 | 162 | 22,686 | 5,695 | 3,532 | 32,075 |
| 49,042 | 161 | 22,577 | 5,650 | 3,506 | 31,894 |
| 49,043 | 162 | 22,406 | 5,597 | 3,451 | 31,616 |
| 49,044 | 167 | 22,356 | 5,601 | 3,444 | 31,568 |
| 49,045 | 164 | 22,091 | 5,573 | 3,420 | 31,248 |
| 49,046 | 171 | 22,555 | 5,744 | 3,487 | 31,957 |
| 49,047 | 173 | 22,364 | 5,711 | 3,459 | 31,707 |

|        |     |        |       |       |        |
|--------|-----|--------|-------|-------|--------|
| 49,048 | 175 | 22,368 | 5,704 | 3,457 | 31,704 |
| 49,049 | 181 | 22,351 | 5,688 | 3,457 | 31,677 |
| 49,050 | 183 | 22,354 | 5,674 | 3,466 | 31,677 |
| 49,051 | 181 | 22,129 | 5,592 | 3,394 | 31,296 |
| 49,052 | 183 | 22,541 | 5,656 | 3,433 | 31,813 |
| 49,053 | 182 | 22,663 | 5,686 | 3,437 | 31,968 |
| 49,054 | 186 | 22,863 | 5,735 | 3,468 | 32,252 |
| 49,055 | 181 | 22,826 | 5,717 | 3,455 | 32,179 |
| 49,056 | 180 | 22,692 | 5,682 | 3,435 | 31,989 |
| 49,057 | 185 | 22,999 | 5,775 | 3,510 | 32,469 |
| 49,058 | 184 | 23,518 | 5,897 | 3,573 | 33,172 |
| 49,059 | 183 | 23,579 | 5,872 | 3,564 | 33,198 |
| 49,060 | 181 | 23,720 | 5,897 | 3,591 | 33,389 |
| 49,061 | 178 | 23,634 | 5,884 | 3,583 | 33,279 |
| 49,062 | 175 | 23,303 | 5,791 | 3,543 | 32,812 |
| 49,063 | 183 | 23,500 | 5,880 | 3,580 | 33,143 |
| 49,064 | 190 | 23,564 | 5,899 | 3,592 | 33,245 |
| 49,065 | 188 | 23,547 | 5,873 | 3,590 | 33,198 |
| 49,066 | 188 | 23,631 | 5,841 | 3,589 | 33,249 |
| 49,067 | 193 | 23,776 | 5,895 | 3,621 | 33,485 |
| 49,068 | 196 | 23,787 | 5,945 | 3,627 | 33,555 |
| 49,069 | 204 | 23,719 | 5,895 | 3,568 | 33,386 |
| 49,070 | 206 | 23,500 | 5,816 | 3,517 | 33,039 |
| 49,071 | 213 | 23,371 | 5,743 | 3,469 | 32,796 |
| 49,072 | 213 | 23,425 | 5,746 | 3,454 | 32,838 |
| 49,073 | 210 | 23,058 | 5,703 | 3,382 | 32,353 |
| 49,074 | 209 | 22,746 | 5,641 | 3,349 | 31,945 |
| 49,075 | 233 | 23,516 | 5,781 | 3,472 | 33,002 |
| 49,076 | 239 | 23,528 | 5,782 | 3,447 | 32,996 |
| 49,077 | 240 | 23,457 | 5,776 | 3,416 | 32,889 |
| 49,078 | 241 | 23,466 | 5,800 | 3,439 | 32,946 |
| 49,079 | 234 | 23,472 | 5,799 | 3,445 | 32,950 |

|        |     |        |       |       |        |
|--------|-----|--------|-------|-------|--------|
| 49,080 | 233 | 23,300 | 5,762 | 3,430 | 32,725 |
| 49,081 | 234 | 23,366 | 5,759 | 3,426 | 32,785 |
| 49,082 | 230 | 23,432 | 5,743 | 3,460 | 32,865 |
| 49,083 | 235 | 23,405 | 5,757 | 3,462 | 32,859 |
| 49,084 | 236 | 23,304 | 5,759 | 3,457 | 32,756 |
| 49,085 | 227 | 23,060 | 5,716 | 3,435 | 32,438 |
| 49,086 | 242 | 23,467 | 5,842 | 3,501 | 33,052 |
| 49,087 | 237 | 23,489 | 5,825 | 3,504 | 33,055 |
| 49,088 | 236 | 22,985 | 5,655 | 3,425 | 32,301 |
| 49,089 | 236 | 23,384 | 5,718 | 3,468 | 32,806 |
| 49,090 | 232 | 23,315 | 5,700 | 3,448 | 32,695 |
| 49,091 | 238 | 23,528 | 5,723 | 3,484 | 32,973 |
| 49,092 | 228 | 23,451 | 5,715 | 3,487 | 32,881 |
| 49,093 | 228 | 23,406 | 5,736 | 3,485 | 32,855 |
| 49,094 | 224 | 23,228 | 5,744 | 3,495 | 32,691 |
| 49,095 | 219 | 23,124 | 5,724 | 3,497 | 32,564 |
| 49,096 | 220 | 23,153 | 5,660 | 3,462 | 32,495 |
| 49,097 | 223 | 23,085 | 5,651 | 3,457 | 32,416 |
| 49,098 | 222 | 23,080 | 5,632 | 3,460 | 32,394 |
| 49,099 | 214 | 23,045 | 5,672 | 3,482 | 32,413 |
| 49,100 | 211 | 23,030 | 5,672 | 3,521 | 32,434 |
| 49,101 | 210 | 22,968 | 5,701 | 3,534 | 32,413 |
| 49,102 | 212 | 22,818 | 5,725 | 3,544 | 32,299 |
| 49,103 | 215 | 22,920 | 5,765 | 3,563 | 32,463 |
| 49,104 | 217 | 22,691 | 5,735 | 3,561 | 32,204 |
| 49,105 | 215 | 22,976 | 5,745 | 3,566 | 32,502 |
| 49,106 | 208 | 23,042 | 5,733 | 3,569 | 32,552 |
| 49,107 | 209 | 22,864 | 5,752 | 3,578 | 32,403 |
| 49,108 | 210 | 23,203 | 5,763 | 3,634 | 32,810 |
| 49,109 | 206 | 23,327 | 5,789 | 3,659 | 32,981 |
| 49,110 | 210 | 23,244 | 5,768 | 3,629 | 32,851 |
| 49,111 | 212 | 23,302 | 5,757 | 3,642 | 32,913 |

|        |     |        |       |       |        |
|--------|-----|--------|-------|-------|--------|
| 49,112 | 213 | 23,266 | 5,742 | 3,624 | 32,845 |
| 49,113 | 207 | 23,432 | 5,768 | 3,652 | 33,059 |
| 49,114 | 202 | 23,467 | 5,798 | 3,687 | 33,154 |
| 49,115 | 195 | 23,534 | 5,806 | 3,679 | 33,214 |
| 49,116 | 203 | 23,190 | 5,739 | 3,643 | 32,775 |
| 49,117 | 203 | 23,299 | 5,730 | 3,622 | 32,854 |
| 49,118 | 194 | 23,105 | 5,647 | 3,590 | 32,536 |
| 49,119 | 193 | 23,151 | 5,657 | 3,602 | 32,603 |
| 49,120 | 186 | 22,767 | 5,617 | 3,569 | 32,139 |
| 49,121 | 186 | 22,741 | 5,602 | 3,564 | 32,093 |
| 49,122 | 178 | 22,764 | 5,577 | 3,564 | 32,083 |
| 49,123 | 178 | 22,703 | 5,581 | 3,560 | 32,022 |
| 49,124 | 171 | 22,627 | 5,585 | 3,610 | 31,993 |
| 49,125 | 169 | 22,477 | 5,559 | 3,586 | 31,791 |
| 49,126 | 166 | 21,715 | 5,366 | 3,506 | 30,753 |
| 49,127 | 168 | 21,766 | 5,385 | 3,526 | 30,845 |
| 49,128 | 162 | 21,236 | 5,274 | 3,451 | 30,123 |
| 49,129 | 164 | 21,414 | 5,323 | 3,471 | 30,372 |
| 49,130 | 162 | 21,602 | 5,352 | 3,492 | 30,608 |
| 49,131 | 162 | 21,627 | 5,337 | 3,476 | 30,602 |
| 49,132 | 165 | 21,751 | 5,387 | 3,503 | 30,806 |
| 49,133 | 166 | 21,685 | 5,387 | 3,484 | 30,722 |
| 49,134 | 164 | 21,712 | 5,422 | 3,526 | 30,824 |
| 49,135 | 159 | 20,829 | 5,166 | 3,384 | 29,538 |
| 49,136 | 161 | 20,993 | 5,180 | 3,404 | 29,738 |
| 49,137 | 147 | 21,192 | 5,237 | 3,454 | 30,030 |
| 49,138 | 150 | 21,375 | 5,294 | 3,486 | 30,305 |
| 49,139 | 154 | 21,339 | 5,280 | 3,477 | 30,250 |
| 49,140 | 155 | 21,260 | 5,280 | 3,460 | 30,155 |
| 49,141 | 151 | 20,982 | 5,244 | 3,433 | 29,810 |
| 49,142 | 151 | 20,936 | 5,255 | 3,443 | 29,785 |
| 49,143 | 151 | 20,778 | 5,220 | 3,411 | 29,560 |



|        |     |        |       |       |        |
|--------|-----|--------|-------|-------|--------|
| 49,144 | 152 | 20,529 | 5,061 | 3,335 | 29,077 |
| 49,145 | 153 | 20,541 | 5,056 | 3,334 | 29,084 |
| 49,146 | 150 | 20,346 | 5,001 | 3,290 | 28,787 |
| 49,147 | 149 | 20,199 | 4,975 | 3,273 | 28,596 |
| 49,148 | 149 | 20,829 | 5,170 | 3,389 | 29,537 |
| 49,149 | 150 | 20,788 | 5,205 | 3,385 | 29,528 |
| 49,150 | 149 | 20,721 | 5,179 | 3,343 | 29,392 |
| 49,151 | 155 | 20,889 | 5,212 | 3,389 | 29,645 |
| 49,152 | 159 | 20,660 | 5,155 | 3,335 | 29,309 |
| 49,153 | 157 | 20,380 | 5,088 | 3,303 | 28,928 |
| 49,154 | 161 | 20,427 | 5,139 | 3,324 | 29,051 |
| 49,155 | 154 | 20,427 | 5,126 | 3,327 | 29,034 |
| 49,156 | 155 | 20,043 | 5,057 | 3,307 | 28,562 |
| 49,157 | 155 | 19,856 | 5,005 | 3,257 | 28,273 |
| 49,158 | 155 | 19,950 | 5,034 | 3,264 | 28,403 |
| 49,159 | 157 | 19,958 | 5,080 | 3,272 | 28,467 |
| 49,160 | 156 | 19,845 | 5,028 | 3,253 | 28,282 |
| 49,161 | 152 | 19,371 | 4,941 | 3,201 | 27,665 |
| 49,162 | 156 | 19,256 | 5,007 | 3,212 | 27,631 |
| 49,163 | 155 | 19,197 | 4,985 | 3,194 | 27,531 |
| 49,164 | 157 | 19,042 | 4,921 | 3,149 | 27,269 |
| 49,165 | 158 | 18,908 | 4,858 | 3,141 | 27,065 |
| 49,166 | 153 | 18,955 | 4,899 | 3,168 | 27,175 |
| 49,167 | 145 | 18,697 | 4,864 | 3,152 | 26,858 |
| 49,168 | 146 | 18,768 | 4,841 | 3,168 | 26,923 |
| 49,169 | 150 | 18,708 | 4,824 | 3,148 | 26,830 |
| 49,170 | 150 | 18,652 | 4,827 | 3,151 | 26,780 |
| 49,171 | 146 | 18,798 | 4,851 | 3,195 | 26,990 |
| 49,172 | 145 | 18,759 | 4,860 | 3,206 | 26,970 |
| 49,173 | 141 | 18,676 | 4,843 | 3,189 | 26,849 |
| 49,174 | 139 | 18,751 | 4,839 | 3,156 | 26,885 |
| 49,175 | 133 | 18,517 | 4,739 | 3,106 | 26,495 |

|        |     |        |       |       |        |
|--------|-----|--------|-------|-------|--------|
| 49,176 | 133 | 18,543 | 4,737 | 3,112 | 26,525 |
| 49,177 | 125 | 18,311 | 4,712 | 3,098 | 26,246 |
| 49,178 | 123 | 18,214 | 4,685 | 3,099 | 26,121 |
| 49,179 | 125 | 18,233 | 4,706 | 3,087 | 26,151 |
| 49,180 | 124 | 18,314 | 4,711 | 3,085 | 26,234 |
| 49,181 | 129 | 18,352 | 4,717 | 3,102 | 26,300 |
| 49,182 | 124 | 18,227 | 4,691 | 3,090 | 26,132 |
| 49,183 | 128 | 18,234 | 4,689 | 3,085 | 26,136 |
| 49,184 | 131 | 18,444 | 4,721 | 3,125 | 26,421 |
| 49,185 | 135 | 18,249 | 4,656 | 3,076 | 26,116 |
| 49,186 | 137 | 18,275 | 4,662 | 3,074 | 26,148 |
| 49,187 | 138 | 18,448 | 4,684 | 3,095 | 26,365 |
| 49,188 | 141 | 18,600 | 4,723 | 3,095 | 26,559 |
| 49,189 | 143 | 18,616 | 4,729 | 3,098 | 26,586 |
| 49,190 | 138 | 18,267 | 4,664 | 3,077 | 26,146 |
| 49,191 | 140 | 18,263 | 4,656 | 3,065 | 26,124 |
| 49,192 | 147 | 18,199 | 4,626 | 3,037 | 26,009 |
| 49,193 | 148 | 18,237 | 4,630 | 3,027 | 26,042 |
| 49,194 | 148 | 18,107 | 4,591 | 2,993 | 25,839 |
| 49,195 | 142 | 17,918 | 4,548 | 2,985 | 25,593 |
| 49,196 | 142 | 18,974 | 4,784 | 3,161 | 27,061 |
| 49,197 | 140 | 19,158 | 4,855 | 3,215 | 27,368 |
| 49,198 | 143 | 19,317 | 4,877 | 3,222 | 27,559 |
| 49,199 | 142 | 19,472 | 4,851 | 3,240 | 27,705 |
| 49,200 | 155 | 19,776 | 4,920 | 3,262 | 28,113 |
| 49,201 | 145 | 19,483 | 4,799 | 3,185 | 27,612 |
| 49,202 | 155 | 19,824 | 4,879 | 3,225 | 28,083 |
| 49,203 | 152 | 20,125 | 4,956 | 3,255 | 28,488 |
| 49,204 | 157 | 20,266 | 4,988 | 3,291 | 28,702 |
| 49,205 | 163 | 20,353 | 5,025 | 3,299 | 28,840 |
| 49,206 | 169 | 20,284 | 5,019 | 3,287 | 28,759 |
| 49,207 | 168 | 20,285 | 5,047 | 3,292 | 28,792 |

|        |     |        |       |       |        |
|--------|-----|--------|-------|-------|--------|
| 49,208 | 169 | 20,138 | 5,030 | 3,289 | 28,626 |
| 49,209 | 172 | 20,135 | 4,980 | 3,264 | 28,551 |
| 49,210 | 175 | 20,219 | 5,022 | 3,288 | 28,704 |
| 49,211 | 178 | 20,167 | 5,013 | 3,255 | 28,613 |
| 49,212 | 182 | 20,421 | 5,024 | 3,271 | 28,898 |
| 49,213 | 178 | 20,376 | 4,993 | 3,241 | 28,788 |
| 49,214 | 179 | 20,364 | 4,971 | 3,222 | 28,736 |
| 49,215 | 183 | 20,496 | 4,958 | 3,224 | 28,861 |
| 49,216 | 186 | 20,628 | 4,949 | 3,191 | 28,954 |
| 49,217 | 186 | 20,643 | 4,956 | 3,190 | 28,975 |
| 49,218 | 186 | 20,633 | 5,012 | 3,181 | 29,012 |
| 49,219 | 187 | 20,595 | 5,019 | 3,181 | 28,982 |
| 49,220 | 185 | 20,428 | 5,007 | 3,166 | 28,786 |
| 49,221 | 187 | 20,896 | 5,101 | 3,232 | 29,416 |
| 49,222 | 190 | 20,992 | 5,120 | 3,241 | 29,543 |
| 49,223 | 191 | 21,114 | 5,146 | 3,232 | 29,683 |
| 49,224 | 190 | 20,839 | 5,121 | 3,212 | 29,362 |
| 49,225 | 190 | 20,838 | 5,128 | 3,231 | 29,387 |
| 49,226 | 204 | 21,023 | 5,197 | 3,261 | 29,685 |
| 49,227 | 204 | 21,160 | 5,231 | 3,269 | 29,864 |
| 49,228 | 209 | 21,424 | 5,302 | 3,309 | 30,244 |
| 49,229 | 211 | 21,556 | 5,318 | 3,325 | 30,410 |
| 49,230 | 211 | 21,274 | 5,285 | 3,274 | 30,044 |
| 49,231 | 212 | 21,232 | 5,279 | 3,289 | 30,012 |
| 49,232 | 210 | 21,368 | 5,348 | 3,308 | 30,234 |
| 49,233 | 207 | 21,249 | 5,319 | 3,295 | 30,070 |
| 49,234 | 196 | 21,074 | 5,314 | 3,277 | 29,861 |
| 49,235 | 196 | 21,148 | 5,347 | 3,286 | 29,977 |
| 49,236 | 195 | 21,176 | 5,341 | 3,285 | 29,997 |
| 49,237 | 193 | 21,026 | 5,316 | 3,263 | 29,798 |
| 49,238 | 191 | 21,205 | 5,385 | 3,301 | 30,082 |
| 49,239 | 193 | 21,156 | 5,386 | 3,309 | 30,044 |

|        |     |        |       |       |        |
|--------|-----|--------|-------|-------|--------|
| 49,240 | 180 | 20,533 | 5,273 | 3,231 | 29,217 |
| 49,241 | 180 | 20,671 | 5,290 | 3,239 | 29,380 |
| 49,242 | 173 | 20,829 | 5,321 | 3,257 | 29,580 |
| 49,243 | 178 | 20,796 | 5,316 | 3,248 | 29,538 |
| 49,244 | 177 | 20,685 | 5,286 | 3,226 | 29,374 |
| 49,245 | 179 | 20,829 | 5,373 | 3,269 | 29,650 |
| 49,246 | 181 | 20,619 | 5,353 | 3,230 | 29,383 |
| 49,247 | 192 | 20,485 | 5,310 | 3,186 | 29,173 |
| 49,248 | 191 | 20,497 | 5,272 | 3,189 | 29,149 |
| 49,249 | 196 | 20,487 | 5,287 | 3,169 | 29,139 |
| 49,250 | 196 | 20,454 | 5,302 | 3,152 | 29,104 |
| 49,251 | 187 | 20,023 | 5,181 | 3,098 | 28,489 |
| 49,252 | 184 | 20,226 | 5,234 | 3,125 | 28,769 |
| 49,253 | 179 | 20,406 | 5,242 | 3,139 | 28,966 |
| 49,254 | 185 | 20,411 | 5,226 | 3,114 | 28,936 |
| 49,255 | 183 | 20,405 | 5,224 | 3,118 | 28,930 |
| 49,256 | 175 | 20,492 | 5,243 | 3,123 | 29,033 |
| 49,257 | 169 | 20,646 | 5,281 | 3,130 | 29,226 |
| 49,258 | 173 | 20,479 | 5,208 | 3,080 | 28,940 |
| 49,259 | 176 | 20,678 | 5,260 | 3,099 | 29,213 |
| 49,260 | 170 | 20,661 | 5,258 | 3,097 | 29,186 |
| 49,261 | 168 | 20,691 | 5,275 | 3,101 | 29,235 |
| 49,262 | 164 | 20,565 | 5,263 | 3,096 | 29,088 |
| 49,263 | 167 | 20,342 | 5,224 | 3,055 | 28,788 |
| 49,264 | 168 | 20,148 | 5,206 | 3,044 | 28,566 |
| 49,265 | 174 | 20,433 | 5,346 | 3,087 | 29,040 |
| 49,266 | 175 | 20,356 | 5,369 | 3,093 | 28,993 |
| 49,267 | 182 | 20,141 | 5,354 | 3,099 | 28,776 |
| 49,268 | 182 | 20,179 | 5,367 | 3,111 | 28,839 |
| 49,269 | 189 | 20,124 | 5,330 | 3,121 | 28,764 |
| 49,270 | 194 | 20,093 | 5,344 | 3,120 | 28,751 |
| 49,271 | 196 | 20,091 | 5,366 | 3,119 | 28,772 |

|        |     |        |       |       |        |
|--------|-----|--------|-------|-------|--------|
| 49,272 | 202 | 20,038 | 5,400 | 3,101 | 28,741 |
| 49,273 | 200 | 19,857 | 5,377 | 3,106 | 28,540 |
| 49,274 | 199 | 19,840 | 5,374 | 3,100 | 28,513 |
| 49,275 | 204 | 20,022 | 5,417 | 3,113 | 28,756 |
| 49,276 | 199 | 20,137 | 5,417 | 3,126 | 28,879 |
| 49,277 | 196 | 20,195 | 5,432 | 3,122 | 28,945 |
| 49,278 | 200 | 20,313 | 5,452 | 3,149 | 29,114 |
| 49,279 | 201 | 20,397 | 5,446 | 3,155 | 29,199 |
| 49,280 | 203 | 20,193 | 5,387 | 3,123 | 28,906 |
| 49,281 | 205 | 20,241 | 5,394 | 3,128 | 28,968 |
| 49,282 | 205 | 20,168 | 5,392 | 3,127 | 28,892 |
| 49,283 | 210 | 20,306 | 5,485 | 3,176 | 29,177 |
| 49,284 | 214 | 20,185 | 5,491 | 3,166 | 29,056 |
| 49,285 | 218 | 20,249 | 5,487 | 3,182 | 29,136 |
| 49,286 | 213 | 20,300 | 5,486 | 3,178 | 29,177 |
| 49,287 | 225 | 20,324 | 5,499 | 3,178 | 29,226 |
| 49,288 | 225 | 20,414 | 5,501 | 3,185 | 29,325 |
| 49,289 | 222 | 20,465 | 5,548 | 3,203 | 29,438 |
| 49,290 | 225 | 20,584 | 5,555 | 3,200 | 29,564 |
| 49,291 | 226 | 20,728 | 5,576 | 3,211 | 29,741 |
| 49,292 | 231 | 21,049 | 5,664 | 3,257 | 30,201 |
| 49,293 | 223 | 20,826 | 5,570 | 3,223 | 29,842 |
| 49,294 | 221 | 20,815 | 5,584 | 3,232 | 29,852 |
| 49,295 | 224 | 20,903 | 5,605 | 3,229 | 29,961 |
| 49,296 | 228 | 21,096 | 5,668 | 3,265 | 30,257 |
| 49,297 | 223 | 20,869 | 5,604 | 3,244 | 29,940 |
| 49,298 | 219 | 20,948 | 5,637 | 3,252 | 30,056 |
| 49,299 | 216 | 20,943 | 5,639 | 3,271 | 30,069 |
| 49,300 | 213 | 20,883 | 5,650 | 3,291 | 30,037 |
| 49,301 | 208 | 20,688 | 5,648 | 3,307 | 29,851 |
| 49,302 | 213 | 20,655 | 5,640 | 3,331 | 29,839 |
| 49,303 | 217 | 20,892 | 5,705 | 3,353 | 30,167 |

|        |     |        |       |       |        |
|--------|-----|--------|-------|-------|--------|
| 49,304 | 214 | 20,793 | 5,735 | 3,354 | 30,096 |
| 49,305 | 206 | 20,728 | 5,748 | 3,359 | 30,041 |
| 49,306 | 211 | 21,111 | 5,841 | 3,420 | 30,583 |
| 49,307 | 208 | 20,944 | 5,787 | 3,390 | 30,329 |
| 49,308 | 225 | 21,356 | 5,835 | 3,451 | 30,867 |
| 49,309 | 220 | 21,388 | 5,876 | 3,475 | 30,959 |
| 49,310 | 224 | 21,510 | 5,873 | 3,501 | 31,108 |
| 49,311 | 227 | 21,638 | 5,892 | 3,530 | 31,287 |
| 49,312 | 230 | 21,682 | 5,924 | 3,548 | 31,384 |
| 49,313 | 221 | 21,686 | 5,918 | 3,549 | 31,374 |
| 49,314 | 221 | 21,715 | 5,952 | 3,566 | 31,454 |
| 49,315 | 219 | 21,416 | 5,883 | 3,544 | 31,062 |
| 49,316 | 216 | 21,775 | 5,947 | 3,601 | 31,539 |
| 49,317 | 216 | 21,879 | 5,967 | 3,624 | 31,686 |
| 49,318 | 206 | 21,901 | 5,958 | 3,627 | 31,692 |
| 49,319 | 206 | 21,937 | 5,961 | 3,621 | 31,725 |
| 49,320 | 192 | 21,671 | 5,857 | 3,575 | 31,295 |
| 49,321 | 192 | 21,834 | 5,874 | 3,613 | 31,513 |
| 49,322 | 184 | 22,136 | 5,924 | 3,644 | 31,888 |
| 49,323 | 186 | 22,098 | 5,900 | 3,641 | 31,825 |
| 49,324 | 185 | 22,009 | 5,879 | 3,614 | 31,687 |
| 49,325 | 185 | 22,108 | 5,875 | 3,623 | 31,791 |
| 49,326 | 188 | 22,026 | 5,867 | 3,626 | 31,707 |
| 49,327 | 186 | 21,632 | 5,817 | 3,572 | 31,207 |
| 49,328 | 186 | 21,877 | 5,872 | 3,606 | 31,541 |
| 49,329 | 183 | 21,593 | 5,832 | 3,564 | 31,172 |
| 49,330 | 177 | 21,472 | 5,834 | 3,545 | 31,028 |
| 49,331 | 170 | 21,403 | 5,856 | 3,534 | 30,963 |
| 49,332 | 167 | 21,427 | 5,874 | 3,548 | 31,016 |
| 49,333 | 161 | 21,536 | 5,855 | 3,521 | 31,073 |
| 49,334 | 164 | 21,682 | 5,923 | 3,561 | 31,330 |
| 49,335 | 159 | 21,598 | 5,881 | 3,564 | 31,202 |

|        |     |        |       |       |        |
|--------|-----|--------|-------|-------|--------|
| 49,336 | 156 | 21,258 | 5,835 | 3,527 | 30,776 |
| 49,337 | 157 | 21,569 | 5,902 | 3,565 | 31,193 |
| 49,338 | 150 | 21,807 | 5,932 | 3,592 | 31,481 |
| 49,339 | 153 | 21,843 | 5,938 | 3,584 | 31,518 |
| 49,340 | 153 | 21,681 | 5,878 | 3,565 | 31,277 |
| 49,341 | 159 | 21,691 | 5,952 | 3,628 | 31,430 |
| 49,342 | 162 | 21,355 | 5,855 | 3,588 | 30,960 |
| 49,343 | 160 | 21,389 | 5,857 | 3,594 | 31,000 |
| 49,344 | 159 | 21,302 | 5,859 | 3,570 | 30,890 |
| 49,345 | 158 | 21,293 | 5,855 | 3,559 | 30,865 |
| 49,346 | 157 | 21,265 | 5,826 | 3,550 | 30,798 |
| 49,347 | 156 | 21,208 | 5,841 | 3,564 | 30,769 |
| 49,348 | 154 | 21,265 | 5,855 | 3,546 | 30,820 |
| 49,349 | 158 | 21,164 | 5,829 | 3,538 | 30,689 |
| 49,350 | 159 | 20,919 | 5,765 | 3,475 | 30,318 |
| 49,351 | 161 | 20,801 | 5,710 | 3,432 | 30,104 |
| 49,352 | 161 | 20,827 | 5,725 | 3,444 | 30,157 |
| 49,353 | 157 | 20,753 | 5,748 | 3,436 | 30,094 |
| 49,354 | 153 | 20,691 | 5,668 | 3,405 | 29,917 |
| 49,355 | 151 | 20,599 | 5,629 | 3,401 | 29,780 |
| 49,356 | 150 | 20,668 | 5,655 | 3,391 | 29,864 |
| 49,357 | 146 | 20,147 | 5,585 | 3,353 | 29,231 |
| 49,358 | 144 | 20,304 | 5,621 | 3,389 | 29,458 |
| 49,359 | 134 | 20,362 | 5,649 | 3,398 | 29,543 |
| 49,360 | 132 | 20,060 | 5,588 | 3,358 | 29,138 |
| 49,361 | 133 | 20,577 | 5,747 | 3,436 | 29,893 |
| 49,362 | 131 | 20,547 | 5,734 | 3,435 | 29,847 |
| 49,363 | 129 | 20,510 | 5,697 | 3,395 | 29,731 |
| 49,364 | 135 | 20,669 | 5,705 | 3,418 | 29,927 |
| 49,365 | 139 | 20,728 | 5,738 | 3,425 | 30,030 |
| 49,366 | 142 | 20,757 | 5,757 | 3,447 | 30,103 |
| 49,367 | 143 | 20,997 | 5,822 | 3,474 | 30,436 |

|        |     |        |       |       |        |
|--------|-----|--------|-------|-------|--------|
| 49,368 | 141 | 20,770 | 5,757 | 3,434 | 30,102 |
| 49,369 | 148 | 20,833 | 5,757 | 3,418 | 30,156 |
| 49,370 | 148 | 20,691 | 5,715 | 3,397 | 29,951 |
| 49,371 | 147 | 21,026 | 5,830 | 3,428 | 30,431 |
| 49,372 | 147 | 20,997 | 5,819 | 3,426 | 30,389 |
| 49,373 | 151 | 21,178 | 5,870 | 3,490 | 30,689 |
| 49,374 | 149 | 21,000 | 5,815 | 3,442 | 30,406 |
| 49,375 | 146 | 21,000 | 5,803 | 3,444 | 30,393 |
| 49,376 | 146 | 21,115 | 5,802 | 3,446 | 30,509 |
| 49,377 | 152 | 21,147 | 5,819 | 3,451 | 30,569 |
| 49,378 | 149 | 21,116 | 5,767 | 3,444 | 30,476 |
| 49,379 | 153 | 21,529 | 5,874 | 3,513 | 31,069 |
| 49,380 | 154 | 21,572 | 5,866 | 3,519 | 31,111 |
| 49,381 | 156 | 21,372 | 5,760 | 3,455 | 30,743 |
| 49,382 | 156 | 21,567 | 5,799 | 3,492 | 31,014 |
| 49,383 | 157 | 21,766 | 5,825 | 3,521 | 31,269 |
| 49,384 | 155 | 21,687 | 5,760 | 3,498 | 31,100 |
| 49,385 | 162 | 21,980 | 5,822 | 3,531 | 31,495 |
| 49,386 | 161 | 21,390 | 5,670 | 3,416 | 30,637 |
| 49,387 | 159 | 21,644 | 5,731 | 3,441 | 30,975 |
| 49,388 | 158 | 21,508 | 5,712 | 3,429 | 30,807 |
| 49,389 | 157 | 21,487 | 5,747 | 3,450 | 30,841 |
| 49,390 | 157 | 21,455 | 5,730 | 3,443 | 30,785 |
| 49,391 | 156 | 21,359 | 5,697 | 3,387 | 30,599 |
| 49,392 | 149 | 21,109 | 5,638 | 3,344 | 30,240 |
| 49,393 | 142 | 20,795 | 5,604 | 3,317 | 29,858 |
| 49,394 | 145 | 21,063 | 5,638 | 3,364 | 30,210 |
| 49,395 | 144 | 21,019 | 5,618 | 3,348 | 30,129 |
| 49,396 | 143 | 21,028 | 5,609 | 3,349 | 30,129 |
| 49,397 | 138 | 21,001 | 5,583 | 3,328 | 30,050 |
| 49,398 | 137 | 20,822 | 5,515 | 3,299 | 29,773 |
| 49,399 | 135 | 20,833 | 5,523 | 3,329 | 29,820 |



|        |     |        |       |       |        |
|--------|-----|--------|-------|-------|--------|
| 49,400 | 135 | 20,841 | 5,530 | 3,331 | 29,837 |
| 49,401 | 141 | 21,223 | 5,576 | 3,370 | 30,310 |
| 49,402 | 140 | 21,324 | 5,619 | 3,380 | 30,463 |
| 49,403 | 144 | 21,325 | 5,632 | 3,384 | 30,485 |
| 49,404 | 158 | 21,374 | 5,671 | 3,411 | 30,614 |
| 49,405 | 163 | 21,401 | 5,703 | 3,418 | 30,685 |
| 49,406 | 168 | 21,425 | 5,725 | 3,410 | 30,728 |
| 49,407 | 177 | 21,480 | 5,696 | 3,414 | 30,767 |
| 49,408 | 178 | 21,440 | 5,673 | 3,386 | 30,677 |
| 49,409 | 185 | 21,630 | 5,808 | 3,427 | 31,050 |
| 49,410 | 188 | 21,347 | 5,752 | 3,385 | 30,672 |
| 49,411 | 189 | 21,105 | 5,640 | 3,335 | 30,269 |
| 49,412 | 188 | 21,265 | 5,717 | 3,379 | 30,549 |
| 49,413 | 202 | 21,235 | 5,734 | 3,371 | 30,542 |
| 49,414 | 196 | 20,914 | 5,648 | 3,354 | 30,112 |
| 49,415 | 196 | 20,916 | 5,635 | 3,348 | 30,095 |
| 49,416 | 185 | 20,954 | 5,624 | 3,356 | 30,119 |
| 49,417 | 184 | 20,901 | 5,610 | 3,360 | 30,055 |
| 49,418 | 183 | 20,607 | 5,530 | 3,307 | 29,627 |
| 49,419 | 184 | 20,320 | 5,459 | 3,255 | 29,218 |
| 49,420 | 188 | 20,734 | 5,558 | 3,340 | 29,820 |
| 49,421 | 190 | 20,829 | 5,565 | 3,360 | 29,944 |
| 49,422 | 188 | 20,647 | 5,523 | 3,326 | 29,684 |
| 49,423 | 188 | 20,780 | 5,558 | 3,291 | 29,817 |
| 49,424 | 194 | 21,097 | 5,626 | 3,322 | 30,239 |
| 49,425 | 198 | 20,806 | 5,551 | 3,274 | 29,829 |
| 49,426 | 196 | 20,766 | 5,550 | 3,276 | 29,788 |
| 49,427 | 190 | 20,861 | 5,559 | 3,291 | 29,901 |
| 49,428 | 188 | 21,049 | 5,612 | 3,305 | 30,154 |
| 49,429 | 190 | 20,744 | 5,563 | 3,276 | 29,773 |
| 49,430 | 189 | 20,536 | 5,510 | 3,254 | 29,489 |
| 49,431 | 199 | 20,715 | 5,564 | 3,279 | 29,757 |

|        |     |        |       |       |        |
|--------|-----|--------|-------|-------|--------|
| 49,432 | 199 | 20,585 | 5,563 | 3,281 | 29,628 |
| 49,433 | 205 | 20,804 | 5,617 | 3,292 | 29,918 |
| 49,434 | 201 | 20,649 | 5,573 | 3,255 | 29,678 |
| 49,435 | 202 | 20,841 | 5,582 | 3,272 | 29,897 |
| 49,436 | 199 | 21,003 | 5,602 | 3,282 | 30,086 |
| 49,437 | 196 | 20,726 | 5,532 | 3,258 | 29,712 |
| 49,438 | 198 | 20,858 | 5,591 | 3,272 | 29,919 |
| 49,439 | 208 | 20,666 | 5,549 | 3,246 | 29,669 |
| 49,440 | 212 | 21,057 | 5,637 | 3,277 | 30,183 |
| 49,441 | 208 | 21,046 | 5,640 | 3,275 | 30,169 |
| 49,442 | 209 | 21,445 | 5,765 | 3,336 | 30,755 |
| 49,443 | 212 | 21,475 | 5,772 | 3,327 | 30,786 |
| 49,444 | 213 | 21,830 | 5,837 | 3,371 | 31,251 |
| 49,445 | 212 | 21,822 | 5,855 | 3,385 | 31,274 |
| 49,446 | 211 | 21,574 | 5,822 | 3,355 | 30,962 |
| 49,447 | 213 | 21,671 | 5,849 | 3,375 | 31,108 |
| 49,448 | 218 | 21,730 | 5,865 | 3,383 | 31,196 |
| 49,449 | 218 | 21,890 | 5,895 | 3,380 | 31,383 |
| 49,450 | 222 | 22,056 | 5,950 | 3,395 | 31,623 |
| 49,451 | 225 | 22,152 | 5,975 | 3,422 | 31,774 |
| 49,452 | 221 | 22,147 | 5,997 | 3,420 | 31,785 |
| 49,453 | 220 | 22,082 | 5,944 | 3,406 | 31,652 |
| 49,454 | 224 | 22,366 | 5,987 | 3,445 | 32,022 |
| 49,455 | 223 | 22,563 | 6,043 | 3,471 | 32,300 |
| 49,456 | 221 | 22,494 | 6,039 | 3,466 | 32,220 |
| 49,457 | 211 | 22,291 | 5,957 | 3,417 | 31,876 |
| 49,458 | 214 | 22,283 | 5,942 | 3,416 | 31,855 |
| 49,459 | 208 | 22,290 | 5,903 | 3,402 | 31,803 |
| 49,460 | 211 | 22,288 | 5,859 | 3,395 | 31,753 |
| 49,461 | 213 | 22,532 | 5,893 | 3,420 | 32,058 |
| 49,462 | 206 | 22,129 | 5,809 | 3,355 | 31,499 |
| 49,463 | 208 | 22,344 | 5,866 | 3,367 | 31,785 |

|        |     |        |       |       |        |
|--------|-----|--------|-------|-------|--------|
| 49,464 | 199 | 22,332 | 5,859 | 3,377 | 31,767 |
| 49,465 | 207 | 22,425 | 5,908 | 3,383 | 31,923 |
| 49,466 | 208 | 22,572 | 5,919 | 3,385 | 32,084 |
| 49,467 | 214 | 22,604 | 5,963 | 3,387 | 32,168 |
| 49,468 | 214 | 22,540 | 5,997 | 3,393 | 32,144 |
| 49,469 | 213 | 22,471 | 5,993 | 3,386 | 32,063 |
| 49,470 | 216 | 22,600 | 6,085 | 3,418 | 32,319 |
| 49,471 | 213 | 22,353 | 6,028 | 3,387 | 31,981 |
| 49,472 | 215 | 22,640 | 6,088 | 3,414 | 32,357 |
| 49,473 | 212 | 22,460 | 6,015 | 3,390 | 32,077 |
| 49,474 | 210 | 22,482 | 6,033 | 3,394 | 32,119 |
| 49,475 | 210 | 22,206 | 5,981 | 3,374 | 31,771 |
| 49,476 | 206 | 22,096 | 5,970 | 3,355 | 31,627 |
| 49,477 | 210 | 22,589 | 6,094 | 3,460 | 32,353 |
| 49,478 | 214 | 22,682 | 6,108 | 3,449 | 32,453 |
| 49,479 | 212 | 22,477 | 6,021 | 3,389 | 32,099 |
| 49,480 | 213 | 22,638 | 6,020 | 3,415 | 32,286 |
| 49,481 | 207 | 22,901 | 6,069 | 3,444 | 32,621 |
| 49,482 | 206 | 22,864 | 6,053 | 3,437 | 32,560 |
| 49,483 | 202 | 22,738 | 6,025 | 3,424 | 32,389 |
| 49,484 | 198 | 23,234 | 6,146 | 3,493 | 33,071 |
| 49,485 | 196 | 22,847 | 6,099 | 3,476 | 32,618 |
| 49,486 | 202 | 22,884 | 6,141 | 3,507 | 32,734 |
| 49,487 | 199 | 22,825 | 6,113 | 3,520 | 32,657 |
| 49,488 | 198 | 22,410 | 6,016 | 3,471 | 32,095 |
| 49,489 | 199 | 22,640 | 6,046 | 3,488 | 32,373 |
| 49,490 | 193 | 22,817 | 6,054 | 3,500 | 32,564 |
| 49,491 | 192 | 22,695 | 6,012 | 3,488 | 32,387 |
| 49,492 | 193 | 22,560 | 5,923 | 3,455 | 32,131 |
| 49,493 | 194 | 22,372 | 5,901 | 3,445 | 31,912 |
| 49,494 | 196 | 22,402 | 5,879 | 3,435 | 31,912 |
| 49,495 | 197 | 22,440 | 5,925 | 3,457 | 32,019 |

|        |     |        |       |       |        |
|--------|-----|--------|-------|-------|--------|
| 49,496 | 198 | 22,121 | 5,853 | 3,400 | 31,572 |
| 49,497 | 207 | 22,213 | 5,835 | 3,392 | 31,647 |
| 49,498 | 205 | 22,204 | 5,823 | 3,387 | 31,619 |
| 49,499 | 201 | 22,165 | 5,846 | 3,391 | 31,603 |
| 49,500 | 201 | 22,086 | 5,847 | 3,390 | 31,524 |
| 49,501 | 187 | 21,813 | 5,777 | 3,384 | 31,161 |
| 49,502 | 185 | 21,499 | 5,744 | 3,356 | 30,784 |
| 49,503 | 184 | 21,404 | 5,716 | 3,338 | 30,642 |
| 49,504 | 177 | 20,788 | 5,581 | 3,264 | 29,810 |
| 49,505 | 176 | 20,884 | 5,570 | 3,274 | 29,904 |
| 49,506 | 166 | 21,012 | 5,591 | 3,284 | 30,053 |
| 49,507 | 168 | 21,132 | 5,619 | 3,332 | 30,251 |
| 49,508 | 161 | 20,810 | 5,582 | 3,316 | 29,869 |
| 49,509 | 157 | 20,278 | 5,479 | 3,272 | 29,186 |
| 49,510 | 157 | 20,477 | 5,506 | 3,315 | 29,455 |
| 49,511 | 151 | 20,690 | 5,571 | 3,359 | 29,771 |
| 49,512 | 148 | 20,720 | 5,586 | 3,351 | 29,805 |
| 49,513 | 147 | 20,605 | 5,567 | 3,343 | 29,662 |
| 49,514 | 146 | 20,598 | 5,579 | 3,339 | 29,662 |
| 49,515 | 139 | 20,565 | 5,563 | 3,337 | 29,604 |
| 49,516 | 135 | 20,534 | 5,525 | 3,345 | 29,539 |
| 49,517 | 140 | 20,700 | 5,579 | 3,381 | 29,800 |
| 49,518 | 137 | 20,790 | 5,545 | 3,370 | 29,842 |
| 49,519 | 142 | 20,787 | 5,468 | 3,363 | 29,760 |
| 49,520 | 140 | 20,854 | 5,465 | 3,361 | 29,820 |
| 49,521 | 132 | 20,929 | 5,456 | 3,380 | 29,897 |
| 49,522 | 135 | 21,105 | 5,494 | 3,406 | 30,140 |
| 49,523 | 136 | 21,370 | 5,571 | 3,466 | 30,543 |
| 49,524 | 135 | 21,150 | 5,518 | 3,467 | 30,270 |
| 49,525 | 132 | 20,214 | 5,274 | 3,339 | 28,959 |
| 49,526 | 135 | 20,483 | 5,337 | 3,378 | 29,333 |
| 49,527 | 132 | 20,584 | 5,382 | 3,401 | 29,499 |

|        |     |        |       |       |        |
|--------|-----|--------|-------|-------|--------|
| 49,528 | 132 | 20,512 | 5,383 | 3,396 | 29,423 |
| 49,529 | 137 | 20,778 | 5,483 | 3,457 | 29,855 |
| 49,530 | 143 | 20,751 | 5,500 | 3,455 | 29,849 |
| 49,531 | 141 | 20,497 | 5,468 | 3,430 | 29,536 |
| 49,532 | 137 | 20,796 | 5,584 | 3,511 | 30,028 |
| 49,533 | 137 | 20,772 | 5,574 | 3,527 | 30,010 |
| 49,534 | 141 | 19,908 | 5,360 | 3,370 | 28,779 |
| 49,535 | 143 | 20,018 | 5,356 | 3,380 | 28,897 |
| 49,536 | 143 | 20,256 | 5,399 | 3,419 | 29,217 |
| 49,537 | 143 | 20,302 | 5,403 | 3,406 | 29,254 |
| 49,538 | 144 | 20,595 | 5,510 | 3,451 | 29,700 |
| 49,539 | 141 | 20,343 | 5,441 | 3,412 | 29,337 |
| 49,540 | 150 | 20,574 | 5,450 | 3,448 | 29,622 |
| 49,541 | 148 | 20,247 | 5,403 | 3,417 | 29,215 |
| 49,542 | 148 | 20,210 | 5,414 | 3,423 | 29,195 |
| 49,543 | 148 | 20,380 | 5,473 | 3,431 | 29,432 |
| 49,544 | 143 | 20,311 | 5,433 | 3,428 | 29,315 |
| 49,545 | 141 | 20,010 | 5,376 | 3,392 | 28,919 |
| 49,546 | 140 | 19,935 | 5,351 | 3,381 | 28,807 |
| 49,547 | 144 | 19,989 | 5,379 | 3,420 | 28,932 |
| 49,548 | 135 | 20,010 | 5,382 | 3,430 | 28,957 |
| 49,549 | 140 | 20,027 | 5,361 | 3,427 | 28,955 |
| 49,550 | 138 | 20,083 | 5,352 | 3,436 | 29,009 |
| 49,551 | 137 | 19,997 | 5,307 | 3,421 | 28,862 |
| 49,552 | 140 | 20,099 | 5,320 | 3,416 | 28,975 |
| 49,553 | 144 | 20,144 | 5,281 | 3,409 | 28,978 |
| 49,554 | 143 | 20,218 | 5,305 | 3,431 | 29,097 |
| 49,555 | 146 | 20,183 | 5,279 | 3,420 | 29,028 |
| 49,556 | 145 | 20,138 | 5,316 | 3,417 | 29,016 |
| 49,557 | 146 | 20,222 | 5,338 | 3,439 | 29,145 |
| 49,558 | 147 | 19,769 | 5,216 | 3,342 | 28,474 |
| 49,559 | 147 | 19,951 | 5,230 | 3,364 | 28,692 |

|        |     |        |       |       |        |
|--------|-----|--------|-------|-------|--------|
| 49,560 | 146 | 19,954 | 5,211 | 3,350 | 28,661 |
| 49,561 | 146 | 19,801 | 5,168 | 3,314 | 28,429 |
| 49,562 | 159 | 20,191 | 5,269 | 3,334 | 28,953 |
| 49,563 | 159 | 19,972 | 5,208 | 3,289 | 28,628 |
| 49,564 | 159 | 19,998 | 5,185 | 3,289 | 28,631 |
| 49,565 | 158 | 20,053 | 5,175 | 3,301 | 28,687 |
| 49,566 | 154 | 19,144 | 4,977 | 3,132 | 27,407 |
| 49,567 | 152 | 19,253 | 4,971 | 3,134 | 27,510 |
| 49,568 | 153 | 19,419 | 5,005 | 3,138 | 27,715 |
| 49,569 | 152 | 19,360 | 5,001 | 3,146 | 27,659 |
| 49,570 | 156 | 19,643 | 5,107 | 3,171 | 28,077 |
| 49,571 | 164 | 19,579 | 5,084 | 3,164 | 27,991 |
| 49,572 | 164 | 19,334 | 5,039 | 3,130 | 27,667 |
| 49,573 | 169 | 19,532 | 5,049 | 3,155 | 27,905 |
| 49,574 | 170 | 19,175 | 4,956 | 3,096 | 27,397 |
| 49,575 | 168 | 18,890 | 4,896 | 3,037 | 26,991 |
| 49,576 | 162 | 19,024 | 4,936 | 3,058 | 27,180 |
| 49,577 | 161 | 18,668 | 4,862 | 2,993 | 26,684 |
| 49,578 | 161 | 18,791 | 4,879 | 2,997 | 26,828 |
| 49,579 | 159 | 18,998 | 4,886 | 3,011 | 27,054 |
| 49,580 | 160 | 19,094 | 4,872 | 2,996 | 27,122 |
| 49,581 | 153 | 19,174 | 4,824 | 2,968 | 27,119 |
| 49,582 | 156 | 19,392 | 4,874 | 2,982 | 27,404 |
| 49,583 | 161 | 19,246 | 4,829 | 2,950 | 27,186 |
| 49,584 | 161 | 19,241 | 4,840 | 2,953 | 27,195 |
| 49,585 | 156 | 19,313 | 4,865 | 2,959 | 27,293 |
| 49,586 | 160 | 19,576 | 4,931 | 3,019 | 27,686 |
| 49,587 | 160 | 19,490 | 4,892 | 2,991 | 27,533 |
| 49,588 | 162 | 19,598 | 4,921 | 2,998 | 27,679 |
| 49,589 | 162 | 19,712 | 4,911 | 2,993 | 27,778 |
| 49,590 | 165 | 19,946 | 4,988 | 3,012 | 28,111 |
| 49,591 | 161 | 19,796 | 4,987 | 3,014 | 27,958 |

|        |     |        |       |       |        |
|--------|-----|--------|-------|-------|--------|
| 49,592 | 165 | 20,224 | 5,044 | 3,067 | 28,500 |
| 49,593 | 166 | 20,471 | 5,082 | 3,123 | 28,842 |
| 49,594 | 161 | 20,455 | 5,051 | 3,134 | 28,801 |
| 49,595 | 161 | 20,520 | 5,053 | 3,125 | 28,859 |
| 49,596 | 165 | 20,731 | 5,090 | 3,133 | 29,119 |
| 49,597 | 170 | 20,959 | 5,138 | 3,160 | 29,427 |
| 49,598 | 170 | 20,864 | 5,081 | 3,128 | 29,243 |
| 49,599 | 170 | 20,886 | 5,077 | 3,134 | 29,267 |
| 49,600 | 168 | 20,974 | 5,109 | 3,135 | 29,386 |
| 49,601 | 172 | 21,016 | 5,115 | 3,134 | 29,437 |
| 49,602 | 173 | 21,118 | 5,179 | 3,185 | 29,655 |
| 49,603 | 172 | 21,259 | 5,187 | 3,207 | 29,825 |
| 49,604 | 173 | 21,385 | 5,230 | 3,256 | 30,044 |
| 49,605 | 179 | 21,475 | 5,245 | 3,260 | 30,159 |
| 49,606 | 175 | 21,259 | 5,212 | 3,254 | 29,900 |
| 49,607 | 174 | 21,530 | 5,279 | 3,302 | 30,285 |
| 49,608 | 179 | 21,777 | 5,338 | 3,341 | 30,635 |
| 49,609 | 173 | 21,593 | 5,293 | 3,314 | 30,373 |
| 49,610 | 173 | 21,606 | 5,296 | 3,312 | 30,387 |
| 49,611 | 174 | 21,879 | 5,362 | 3,370 | 30,785 |
| 49,612 | 161 | 21,745 | 5,332 | 3,368 | 30,606 |
| 49,613 | 166 | 21,986 | 5,428 | 3,426 | 31,006 |
| 49,614 | 165 | 21,713 | 5,397 | 3,386 | 30,661 |
| 49,615 | 167 | 21,861 | 5,437 | 3,426 | 30,891 |
| 49,616 | 168 | 21,949 | 5,464 | 3,434 | 31,015 |
| 49,617 | 176 | 21,918 | 5,470 | 3,423 | 30,987 |
| 49,618 | 180 | 21,986 | 5,505 | 3,431 | 31,102 |
| 49,619 | 180 | 21,984 | 5,464 | 3,428 | 31,056 |
| 49,620 | 180 | 22,011 | 5,467 | 3,430 | 31,088 |
| 49,621 | 175 | 22,177 | 5,486 | 3,460 | 31,298 |
| 49,622 | 163 | 21,664 | 5,367 | 3,368 | 30,562 |
| 49,623 | 168 | 21,932 | 5,443 | 3,416 | 30,959 |

|        |     |        |       |       |        |
|--------|-----|--------|-------|-------|--------|
| 49,624 | 166 | 21,950 | 5,472 | 3,425 | 31,013 |
| 49,625 | 167 | 22,208 | 5,493 | 3,458 | 31,326 |
| 49,626 | 167 | 22,138 | 5,461 | 3,418 | 31,184 |
| 49,627 | 166 | 22,098 | 5,453 | 3,424 | 31,141 |
| 49,628 | 166 | 22,143 | 5,555 | 3,453 | 31,317 |
| 49,629 | 170 | 22,164 | 5,567 | 3,461 | 31,362 |
| 49,630 | 165 | 21,865 | 5,517 | 3,444 | 30,991 |
| 49,631 | 164 | 21,807 | 5,559 | 3,462 | 30,992 |
| 49,632 | 165 | 21,786 | 5,590 | 3,481 | 31,022 |
| 49,633 | 164 | 22,049 | 5,656 | 3,539 | 31,408 |
| 49,634 | 163 | 22,092 | 5,635 | 3,520 | 31,410 |
| 49,635 | 161 | 21,979 | 5,612 | 3,507 | 31,259 |
| 49,636 | 157 | 22,065 | 5,625 | 3,498 | 31,345 |
| 49,637 | 157 | 22,020 | 5,625 | 3,498 | 31,300 |
| 49,638 | 152 | 21,776 | 5,596 | 3,501 | 31,025 |
| 49,639 | 155 | 21,883 | 5,625 | 3,541 | 31,204 |
| 49,640 | 152 | 22,190 | 5,705 | 3,564 | 31,611 |
| 49,641 | 149 | 22,017 | 5,666 | 3,550 | 31,382 |
| 49,642 | 148 | 21,861 | 5,638 | 3,514 | 31,161 |
| 49,643 | 164 | 22,484 | 5,777 | 3,608 | 32,033 |
| 49,644 | 163 | 22,309 | 5,768 | 3,568 | 31,808 |
| 49,645 | 158 | 21,263 | 5,566 | 3,429 | 30,416 |
| 49,646 | 158 | 21,487 | 5,605 | 3,469 | 30,719 |
| 49,647 | 158 | 21,723 | 5,641 | 3,518 | 31,040 |
| 49,648 | 156 | 21,803 | 5,654 | 3,520 | 31,133 |
| 49,649 | 153 | 22,080 | 5,723 | 3,582 | 31,538 |
| 49,650 | 152 | 22,157 | 5,728 | 3,576 | 31,613 |
| 49,651 | 152 | 22,046 | 5,726 | 3,575 | 31,499 |
| 49,652 | 149 | 22,347 | 5,775 | 3,612 | 31,883 |
| 49,653 | 148 | 22,374 | 5,768 | 3,601 | 31,891 |
| 49,654 | 149 | 22,324 | 5,757 | 3,595 | 31,825 |
| 49,655 | 139 | 22,305 | 5,707 | 3,551 | 31,702 |



|        |     |        |       |       |        |
|--------|-----|--------|-------|-------|--------|
| 49,656 | 142 | 22,504 | 5,752 | 3,579 | 31,977 |
| 49,657 | 141 | 22,189 | 5,691 | 3,529 | 31,550 |
| 49,658 | 138 | 22,151 | 5,697 | 3,530 | 31,516 |
| 49,659 | 134 | 22,078 | 5,692 | 3,530 | 31,434 |
| 49,660 | 138 | 22,038 | 5,674 | 3,529 | 31,379 |
| 49,661 | 144 | 21,720 | 5,596 | 3,459 | 30,919 |
| 49,662 | 148 | 21,821 | 5,630 | 3,465 | 31,064 |
| 49,663 | 144 | 21,767 | 5,632 | 3,465 | 31,008 |
| 49,664 | 143 | 21,701 | 5,626 | 3,486 | 30,956 |
| 49,665 | 144 | 21,353 | 5,484 | 3,426 | 30,407 |
| 49,666 | 146 | 21,261 | 5,489 | 3,414 | 30,310 |
| 49,667 | 146 | 21,300 | 5,493 | 3,437 | 30,376 |
| 49,668 | 134 | 21,342 | 5,503 | 3,458 | 30,437 |
| 49,669 | 130 | 21,161 | 5,486 | 3,458 | 30,235 |
| 49,670 | 128 | 21,168 | 5,486 | 3,473 | 30,255 |
| 49,671 | 127 | 21,054 | 5,467 | 3,469 | 30,117 |
| 49,672 | 126 | 21,134 | 5,462 | 3,484 | 30,206 |
| 49,673 | 129 | 21,480 | 5,507 | 3,524 | 30,640 |
| 49,674 | 125 | 21,626 | 5,516 | 3,524 | 30,791 |
| 49,675 | 122 | 21,381 | 5,458 | 3,500 | 30,461 |
| 49,676 | 122 | 21,521 | 5,520 | 3,527 | 30,690 |
| 49,677 | 124 | 21,465 | 5,508 | 3,528 | 30,625 |
| 49,678 | 131 | 21,520 | 5,440 | 3,501 | 30,592 |
| 49,679 | 131 | 21,581 | 5,417 | 3,508 | 30,637 |
| 49,680 | 127 | 21,588 | 5,462 | 3,541 | 30,718 |
| 49,681 | 132 | 21,804 | 5,444 | 3,525 | 30,905 |
| 49,682 | 131 | 21,789 | 5,444 | 3,523 | 30,887 |
| 49,683 | 135 | 22,087 | 5,480 | 3,539 | 31,241 |
| 49,684 | 136 | 22,091 | 5,504 | 3,532 | 31,263 |
| 49,685 | 131 | 21,774 | 5,453 | 3,507 | 30,865 |
| 49,686 | 134 | 21,740 | 5,443 | 3,511 | 30,828 |
| 49,687 | 134 | 21,699 | 5,421 | 3,492 | 30,746 |

|        |     |        |       |       |        |
|--------|-----|--------|-------|-------|--------|
| 49,688 | 135 | 21,700 | 5,415 | 3,471 | 30,721 |
| 49,689 | 134 | 21,597 | 5,410 | 3,475 | 30,616 |
| 49,690 | 133 | 21,617 | 5,416 | 3,481 | 30,647 |
| 49,691 | 132 | 21,757 | 5,475 | 3,516 | 30,880 |
| 49,692 | 128 | 21,575 | 5,458 | 3,509 | 30,670 |
| 49,693 | 118 | 21,495 | 5,454 | 3,515 | 30,582 |
| 49,694 | 118 | 21,638 | 5,504 | 3,516 | 30,776 |
| 49,695 | 114 | 21,268 | 5,395 | 3,478 | 30,255 |
| 49,696 | 115 | 21,409 | 5,388 | 3,466 | 30,378 |
| 49,697 | 115 | 21,127 | 5,353 | 3,447 | 30,042 |
| 49,698 | 113 | 21,172 | 5,391 | 3,471 | 30,147 |
| 49,699 | 113 | 21,368 | 5,437 | 3,497 | 30,415 |
| 49,700 | 113 | 21,391 | 5,429 | 3,480 | 30,413 |
| 49,701 | 112 | 21,520 | 5,465 | 3,484 | 30,581 |
| 49,702 | 114 | 21,726 | 5,498 | 3,488 | 30,826 |
| 49,703 | 114 | 21,730 | 5,497 | 3,484 | 30,825 |
| 49,704 | 113 | 21,511 | 5,443 | 3,438 | 30,505 |
| 49,705 | 109 | 21,600 | 5,501 | 3,446 | 30,656 |
| 49,706 | 109 | 21,429 | 5,467 | 3,433 | 30,438 |
| 49,707 | 105 | 21,185 | 5,379 | 3,398 | 30,067 |
| 49,708 | 106 | 21,320 | 5,365 | 3,396 | 30,187 |
| 49,709 | 107 | 21,412 | 5,364 | 3,393 | 30,276 |
| 49,710 | 107 | 21,087 | 5,314 | 3,357 | 29,865 |
| 49,711 | 106 | 21,356 | 5,391 | 3,406 | 30,259 |
| 49,712 | 98  | 21,178 | 5,345 | 3,374 | 29,995 |
| 49,713 | 97  | 21,089 | 5,292 | 3,351 | 29,829 |
| 49,714 | 99  | 21,219 | 5,267 | 3,333 | 29,918 |
| 49,715 | 100 | 21,396 | 5,319 | 3,379 | 30,194 |
| 49,716 | 90  | 21,288 | 5,294 | 3,368 | 30,040 |
| 49,717 | 98  | 21,554 | 5,335 | 3,394 | 30,381 |
| 49,718 | 98  | 21,659 | 5,333 | 3,389 | 30,479 |
| 49,719 | 100 | 21,459 | 5,301 | 3,360 | 30,220 |

|        |     |        |       |       |        |
|--------|-----|--------|-------|-------|--------|
| 49,720 | 101 | 21,585 | 5,344 | 3,378 | 30,408 |
| 49,721 | 105 | 21,800 | 5,420 | 3,419 | 30,744 |
| 49,722 | 109 | 21,710 | 5,395 | 3,421 | 30,635 |
| 49,723 | 109 | 21,644 | 5,409 | 3,396 | 30,558 |
| 49,724 | 110 | 21,597 | 5,401 | 3,383 | 30,491 |
| 49,725 | 111 | 21,300 | 5,309 | 3,318 | 30,038 |
| 49,726 | 111 | 21,232 | 5,309 | 3,303 | 29,955 |
| 49,727 | 114 | 21,414 | 5,348 | 3,335 | 30,211 |
| 49,728 | 101 | 21,049 | 5,249 | 3,290 | 29,689 |
| 49,729 | 103 | 20,940 | 5,192 | 3,250 | 29,485 |
| 49,730 | 110 | 21,036 | 5,207 | 3,252 | 29,605 |
| 49,731 | 112 | 20,856 | 5,138 | 3,190 | 29,296 |
| 49,732 | 115 | 21,115 | 5,246 | 3,231 | 29,707 |
| 49,733 | 120 | 21,258 | 5,264 | 3,238 | 29,880 |
| 49,734 | 120 | 20,802 | 5,167 | 3,180 | 29,269 |
| 49,735 | 121 | 20,946 | 5,168 | 3,218 | 29,453 |
| 49,736 | 124 | 21,156 | 5,208 | 3,235 | 29,723 |
| 49,737 | 121 | 20,962 | 5,127 | 3,204 | 29,414 |
| 49,738 | 121 | 20,944 | 5,146 | 3,198 | 29,409 |
| 49,739 | 122 | 20,853 | 5,161 | 3,200 | 29,336 |
| 49,740 | 120 | 20,999 | 5,172 | 3,202 | 29,493 |
| 49,741 | 125 | 20,414 | 5,055 | 3,118 | 28,712 |
| 49,742 | 138 | 20,582 | 5,071 | 3,146 | 28,937 |
| 49,743 | 130 | 20,558 | 5,041 | 3,140 | 28,869 |
| 49,744 | 135 | 20,624 | 5,035 | 3,156 | 28,950 |
| 49,745 | 141 | 20,542 | 4,997 | 3,163 | 28,843 |
| 49,746 | 138 | 20,293 | 4,918 | 3,136 | 28,485 |
| 49,747 | 138 | 20,388 | 4,918 | 3,144 | 28,588 |
| 49,748 | 141 | 20,670 | 4,930 | 3,132 | 28,873 |
| 49,749 | 145 | 20,903 | 4,962 | 3,169 | 29,179 |
| 49,750 | 146 | 20,855 | 4,982 | 3,167 | 29,150 |
| 49,751 | 146 | 20,605 | 4,906 | 3,157 | 28,814 |

|        |     |        |       |       |        |
|--------|-----|--------|-------|-------|--------|
| 49,752 | 144 | 20,401 | 4,835 | 3,159 | 28,539 |
| 49,753 | 149 | 20,543 | 4,863 | 3,190 | 28,745 |
| 49,754 | 150 | 20,538 | 4,861 | 3,203 | 28,752 |
| 49,755 | 151 | 20,525 | 4,810 | 3,185 | 28,671 |
| 49,756 | 151 | 20,527 | 4,785 | 3,180 | 28,643 |
| 49,757 | 153 | 20,847 | 4,848 | 3,212 | 29,060 |
| 49,758 | 152 | 20,962 | 4,867 | 3,194 | 29,175 |
| 49,759 | 156 | 20,999 | 4,868 | 3,188 | 29,211 |
| 49,760 | 154 | 20,874 | 4,827 | 3,175 | 29,030 |
| 49,761 | 153 | 21,172 | 4,883 | 3,240 | 29,448 |
| 49,762 | 154 | 21,234 | 4,878 | 3,236 | 29,502 |
| 49,763 | 157 | 21,536 | 4,929 | 3,281 | 29,903 |
| 49,764 | 152 | 21,533 | 4,901 | 3,284 | 29,870 |
| 49,765 | 152 | 21,704 | 4,953 | 3,308 | 30,117 |
| 49,766 | 153 | 21,779 | 4,933 | 3,281 | 30,146 |
| 49,767 | 154 | 21,927 | 4,961 | 3,304 | 30,346 |
| 49,768 | 151 | 22,071 | 4,991 | 3,330 | 30,543 |
| 49,769 | 154 | 22,037 | 5,012 | 3,329 | 30,532 |
| 49,770 | 153 | 22,129 | 5,018 | 3,334 | 30,634 |
| 49,771 | 153 | 22,218 | 5,012 | 3,323 | 30,706 |
| 49,772 | 150 | 22,266 | 4,992 | 3,310 | 30,718 |
| 49,773 | 145 | 22,116 | 4,951 | 3,283 | 30,495 |
| 49,774 | 145 | 22,188 | 4,956 | 3,287 | 30,576 |
| 49,775 | 145 | 22,173 | 4,945 | 3,304 | 30,567 |
| 49,776 | 145 | 22,044 | 4,965 | 3,306 | 30,460 |
| 49,777 | 145 | 22,009 | 4,964 | 3,284 | 30,402 |
| 49,778 | 141 | 22,229 | 5,002 | 3,325 | 30,697 |
| 49,779 | 143 | 22,250 | 5,041 | 3,336 | 30,770 |
| 49,780 | 136 | 22,160 | 5,014 | 3,339 | 30,649 |
| 49,781 | 139 | 22,156 | 4,994 | 3,351 | 30,640 |
| 49,782 | 136 | 22,150 | 5,013 | 3,382 | 30,681 |
| 49,783 | 130 | 21,807 | 4,937 | 3,360 | 30,234 |

|        |     |        |       |       |        |
|--------|-----|--------|-------|-------|--------|
| 49,784 | 130 | 22,029 | 5,006 | 3,397 | 30,562 |
| 49,785 | 129 | 22,160 | 5,074 | 3,433 | 30,796 |
| 49,786 | 126 | 21,989 | 5,093 | 3,419 | 30,627 |
| 49,787 | 125 | 21,932 | 5,088 | 3,429 | 30,574 |
| 49,788 | 125 | 21,961 | 5,113 | 3,434 | 30,633 |
| 49,789 | 129 | 22,174 | 5,156 | 3,466 | 30,925 |
| 49,790 | 130 | 22,332 | 5,154 | 3,480 | 31,096 |
| 49,791 | 128 | 22,150 | 5,148 | 3,439 | 30,865 |
| 49,792 | 129 | 22,413 | 5,181 | 3,486 | 31,209 |
| 49,793 | 116 | 22,488 | 5,187 | 3,492 | 31,283 |
| 49,794 | 116 | 22,953 | 5,253 | 3,529 | 31,851 |
| 49,795 | 117 | 23,131 | 5,258 | 3,528 | 32,034 |
| 49,796 | 112 | 22,878 | 5,230 | 3,506 | 31,726 |
| 49,797 | 114 | 22,811 | 5,252 | 3,499 | 31,676 |
| 49,798 | 114 | 22,933 | 5,307 | 3,531 | 31,885 |
| 49,799 | 112 | 23,159 | 5,366 | 3,568 | 32,205 |
| 49,800 | 111 | 23,151 | 5,389 | 3,562 | 32,213 |
| 49,801 | 110 | 22,947 | 5,304 | 3,523 | 31,884 |
| 49,802 | 111 | 22,586 | 5,260 | 3,477 | 31,434 |
| 49,803 | 111 | 22,311 | 5,220 | 3,448 | 31,090 |
| 49,804 | 112 | 22,669 | 5,345 | 3,499 | 31,625 |
| 49,805 | 115 | 22,784 | 5,372 | 3,517 | 31,788 |
| 49,806 | 118 | 22,650 | 5,376 | 3,486 | 31,630 |
| 49,807 | 119 | 22,612 | 5,402 | 3,511 | 31,644 |
| 49,808 | 119 | 22,416 | 5,391 | 3,478 | 31,404 |
| 49,809 | 119 | 22,260 | 5,348 | 3,461 | 31,188 |
| 49,810 | 124 | 22,726 | 5,407 | 3,498 | 31,755 |
| 49,811 | 132 | 22,530 | 5,350 | 3,444 | 31,456 |
| 49,812 | 130 | 22,239 | 5,291 | 3,428 | 31,088 |
| 49,813 | 130 | 22,511 | 5,350 | 3,497 | 31,488 |
| 49,814 | 137 | 22,864 | 5,423 | 3,529 | 31,953 |
| 49,815 | 138 | 22,549 | 5,365 | 3,480 | 31,532 |

|        |     |        |       |       |        |
|--------|-----|--------|-------|-------|--------|
| 49,816 | 139 | 22,516 | 5,360 | 3,470 | 31,485 |
| 49,817 | 143 | 22,550 | 5,419 | 3,522 | 31,634 |
| 49,818 | 148 | 22,441 | 5,415 | 3,518 | 31,522 |
| 49,819 | 143 | 22,162 | 5,353 | 3,479 | 31,137 |
| 49,820 | 146 | 22,364 | 5,423 | 3,530 | 31,463 |
| 49,821 | 149 | 22,241 | 5,392 | 3,508 | 31,290 |
| 49,822 | 149 | 22,288 | 5,394 | 3,524 | 31,355 |
| 49,823 | 155 | 22,332 | 5,404 | 3,529 | 31,420 |
| 49,824 | 156 | 22,506 | 5,457 | 3,558 | 31,677 |
| 49,825 | 153 | 22,377 | 5,470 | 3,547 | 31,547 |
| 49,826 | 163 | 22,383 | 5,450 | 3,552 | 31,548 |
| 49,827 | 167 | 22,432 | 5,456 | 3,553 | 31,608 |
| 49,828 | 167 | 22,161 | 5,406 | 3,532 | 31,266 |
| 49,829 | 167 | 22,425 | 5,484 | 3,591 | 31,667 |
| 49,830 | 164 | 22,465 | 5,472 | 3,586 | 31,687 |
| 49,831 | 162 | 22,400 | 5,472 | 3,562 | 31,596 |
| 49,832 | 159 | 22,394 | 5,477 | 3,541 | 31,571 |
| 49,833 | 162 | 22,351 | 5,442 | 3,504 | 31,459 |
| 49,834 | 158 | 22,122 | 5,382 | 3,465 | 31,127 |
| 49,835 | 157 | 22,361 | 5,409 | 3,477 | 31,404 |
| 49,836 | 152 | 22,343 | 5,359 | 3,437 | 31,291 |
| 49,837 | 154 | 22,516 | 5,346 | 3,431 | 31,447 |
| 49,838 | 152 | 22,362 | 5,283 | 3,374 | 31,171 |
| 49,839 | 153 | 22,502 | 5,282 | 3,392 | 31,329 |
| 49,840 | 150 | 22,545 | 5,275 | 3,398 | 31,368 |
| 49,841 | 147 | 22,360 | 5,229 | 3,373 | 31,109 |
| 49,842 | 145 | 22,168 | 5,169 | 3,352 | 30,834 |
| 49,843 | 144 | 22,178 | 5,177 | 3,329 | 30,828 |
| 49,844 | 149 | 22,285 | 5,208 | 3,355 | 30,997 |
| 49,845 | 150 | 21,907 | 5,182 | 3,311 | 30,550 |
| 49,846 | 152 | 21,910 | 5,220 | 3,328 | 30,610 |
| 49,847 | 152 | 21,730 | 5,184 | 3,286 | 30,352 |

|        |     |        |       |       |        |
|--------|-----|--------|-------|-------|--------|
| 49,848 | 156 | 21,735 | 5,179 | 3,272 | 30,342 |
| 49,849 | 157 | 21,214 | 5,053 | 3,185 | 29,609 |
| 49,850 | 164 | 21,493 | 5,095 | 3,200 | 29,952 |
| 49,851 | 168 | 21,774 | 5,142 | 3,240 | 30,324 |
| 49,852 | 169 | 21,753 | 5,136 | 3,246 | 30,304 |
| 49,853 | 165 | 22,130 | 5,179 | 3,268 | 30,742 |
| 49,854 | 169 | 22,123 | 5,158 | 3,241 | 30,691 |
| 49,855 | 167 | 22,067 | 5,151 | 3,234 | 30,619 |
| 49,856 | 166 | 22,145 | 5,182 | 3,262 | 30,755 |
| 49,857 | 164 | 22,062 | 5,188 | 3,279 | 30,693 |
| 49,858 | 163 | 22,331 | 5,206 | 3,300 | 31,000 |
| 49,859 | 161 | 22,026 | 5,129 | 3,279 | 30,595 |
| 49,860 | 156 | 22,111 | 5,140 | 3,291 | 30,698 |
| 49,861 | 155 | 22,075 | 5,158 | 3,280 | 30,668 |
| 49,862 | 158 | 22,063 | 5,175 | 3,271 | 30,667 |
| 49,863 | 158 | 22,024 | 5,184 | 3,275 | 30,641 |
| 49,864 | 154 | 22,102 | 5,185 | 3,285 | 30,726 |
| 49,865 | 154 | 22,080 | 5,191 | 3,292 | 30,717 |
| 49,866 | 146 | 21,684 | 5,069 | 3,229 | 30,128 |
| 49,867 | 144 | 21,882 | 5,076 | 3,262 | 30,364 |
| 49,868 | 142 | 22,164 | 5,111 | 3,288 | 30,705 |
| 49,869 | 143 | 22,191 | 5,105 | 3,304 | 30,743 |
| 49,870 | 139 | 22,682 | 5,216 | 3,360 | 31,397 |
| 49,871 | 136 | 22,526 | 5,183 | 3,334 | 31,179 |
| 49,872 | 137 | 22,733 | 5,205 | 3,358 | 31,433 |
| 49,873 | 131 | 22,921 | 5,234 | 3,384 | 31,670 |
| 49,874 | 134 | 23,063 | 5,244 | 3,390 | 31,831 |
| 49,875 | 131 | 22,646 | 5,086 | 3,312 | 31,175 |
| 49,876 | 133 | 22,888 | 5,102 | 3,332 | 31,455 |
| 49,877 | 123 | 23,258 | 5,175 | 3,371 | 31,927 |
| 49,878 | 126 | 23,563 | 5,181 | 3,384 | 32,254 |
| 49,879 | 125 | 23,577 | 5,195 | 3,383 | 32,280 |

|        |     |        |       |       |        |
|--------|-----|--------|-------|-------|--------|
| 49,880 | 127 | 23,707 | 5,215 | 3,394 | 32,443 |
| 49,881 | 129 | 23,823 | 5,256 | 3,431 | 32,639 |
| 49,882 | 129 | 23,465 | 5,165 | 3,403 | 32,162 |
| 49,883 | 131 | 23,719 | 5,206 | 3,451 | 32,507 |
| 49,884 | 130 | 23,753 | 5,205 | 3,479 | 32,567 |
| 49,885 | 129 | 23,521 | 5,126 | 3,460 | 32,236 |
| 49,886 | 131 | 23,223 | 5,083 | 3,413 | 31,850 |
| 49,887 | 131 | 23,347 | 5,116 | 3,467 | 32,061 |
| 49,888 | 129 | 23,131 | 5,088 | 3,444 | 31,792 |
| 49,889 | 130 | 23,180 | 5,072 | 3,455 | 31,837 |
| 49,890 | 130 | 23,156 | 5,064 | 3,446 | 31,796 |
| 49,891 | 133 | 23,113 | 5,041 | 3,428 | 31,715 |
| 49,892 | 131 | 23,136 | 5,029 | 3,426 | 31,722 |
| 49,893 | 135 | 23,261 | 5,065 | 3,456 | 31,917 |
| 49,894 | 136 | 23,214 | 5,065 | 3,470 | 31,885 |
| 49,895 | 136 | 23,243 | 5,074 | 3,465 | 31,918 |
| 49,896 | 128 | 23,098 | 4,981 | 3,445 | 31,652 |
| 49,897 | 132 | 23,478 | 5,066 | 3,479 | 32,155 |
| 49,898 | 126 | 23,069 | 4,998 | 3,428 | 31,621 |
| 49,899 | 126 | 23,136 | 4,983 | 3,424 | 31,669 |
| 49,900 | 121 | 23,015 | 5,000 | 3,427 | 31,563 |
| 49,901 | 114 | 22,814 | 4,947 | 3,420 | 31,295 |
| 49,902 | 111 | 22,527 | 4,907 | 3,371 | 30,916 |
| 49,903 | 110 | 22,403 | 4,857 | 3,342 | 30,712 |
| 49,904 | 115 | 22,628 | 4,938 | 3,407 | 31,088 |
| 49,905 | 110 | 22,458 | 4,903 | 3,395 | 30,866 |
| 49,906 | 109 | 22,602 | 4,911 | 3,390 | 31,012 |
| 49,907 | 106 | 22,403 | 4,850 | 3,370 | 30,729 |
| 49,908 | 107 | 22,394 | 4,816 | 3,331 | 30,648 |
| 49,909 | 107 | 22,255 | 4,792 | 3,320 | 30,474 |
| 49,910 | 113 | 22,489 | 4,823 | 3,322 | 30,747 |
| 49,911 | 116 | 22,349 | 4,822 | 3,319 | 30,606 |



|        |     |        |       |       |        |
|--------|-----|--------|-------|-------|--------|
| 49,912 | 108 | 22,027 | 4,777 | 3,289 | 30,201 |
| 49,913 | 107 | 21,655 | 4,666 | 3,194 | 29,622 |
| 49,914 | 109 | 21,687 | 4,681 | 3,183 | 29,660 |
| 49,915 | 104 | 21,671 | 4,677 | 3,188 | 29,640 |
| 49,916 | 106 | 21,491 | 4,663 | 3,157 | 29,417 |
| 49,917 | 114 | 21,389 | 4,649 | 3,137 | 29,289 |
| 49,918 | 117 | 21,440 | 4,644 | 3,123 | 29,324 |
| 49,919 | 118 | 21,194 | 4,619 | 3,068 | 28,999 |
| 49,920 | 119 | 20,996 | 4,580 | 3,043 | 28,738 |
| 49,921 | 117 | 20,798 | 4,534 | 3,043 | 28,492 |
| 49,922 | 118 | 21,046 | 4,580 | 3,067 | 28,811 |
| 49,923 | 119 | 20,486 | 4,478 | 2,990 | 28,073 |
| 49,924 | 117 | 20,473 | 4,493 | 3,008 | 28,091 |
| 49,925 | 115 | 20,198 | 4,457 | 2,993 | 27,763 |
| 49,926 | 112 | 19,858 | 4,418 | 2,948 | 27,336 |
| 49,927 | 115 | 20,765 | 4,638 | 3,091 | 28,609 |
| 49,928 | 112 | 20,353 | 4,567 | 3,050 | 28,082 |
| 49,929 | 116 | 20,331 | 4,626 | 3,081 | 28,154 |
| 49,930 | 120 | 20,262 | 4,640 | 3,097 | 28,119 |
| 49,931 | 121 | 20,251 | 4,671 | 3,093 | 28,136 |
| 49,932 | 127 | 20,183 | 4,657 | 3,071 | 28,038 |
| 49,933 | 127 | 20,060 | 4,637 | 3,041 | 27,865 |
| 49,934 | 131 | 20,519 | 4,735 | 3,108 | 28,493 |
| 49,935 | 127 | 20,282 | 4,678 | 3,031 | 28,118 |
| 49,936 | 127 | 20,354 | 4,650 | 3,027 | 28,158 |
| 49,937 | 128 | 20,323 | 4,665 | 3,033 | 28,149 |
| 49,938 | 130 | 20,330 | 4,674 | 3,045 | 28,179 |
| 49,939 | 128 | 20,249 | 4,661 | 3,030 | 28,068 |
| 49,940 | 128 | 20,385 | 4,695 | 3,069 | 28,277 |
| 49,941 | 131 | 20,172 | 4,662 | 3,046 | 28,011 |
| 49,942 | 128 | 19,956 | 4,653 | 3,036 | 27,773 |
| 49,943 | 140 | 20,347 | 4,782 | 3,118 | 28,387 |

|        |     |        |       |       |        |
|--------|-----|--------|-------|-------|--------|
| 49,944 | 139 | 20,284 | 4,730 | 3,093 | 28,246 |
| 49,945 | 135 | 20,186 | 4,708 | 3,074 | 28,103 |
| 49,946 | 135 | 20,344 | 4,750 | 3,104 | 28,333 |
| 49,947 | 134 | 20,299 | 4,758 | 3,081 | 28,272 |
| 49,948 | 138 | 20,339 | 4,761 | 3,085 | 28,323 |
| 49,949 | 142 | 20,393 | 4,770 | 3,109 | 28,414 |
| 49,950 | 142 | 20,394 | 4,748 | 3,110 | 28,394 |
| 49,951 | 144 | 20,539 | 4,761 | 3,115 | 28,559 |
| 49,952 | 141 | 20,342 | 4,710 | 3,075 | 28,268 |
| 49,953 | 142 | 20,552 | 4,748 | 3,086 | 28,528 |
| 49,954 | 139 | 20,509 | 4,746 | 3,088 | 28,482 |
| 49,955 | 137 | 20,271 | 4,705 | 3,053 | 28,166 |
| 49,956 | 141 | 20,556 | 4,786 | 3,106 | 28,589 |
| 49,957 | 141 | 20,622 | 4,804 | 3,122 | 28,689 |
| 49,958 | 140 | 20,413 | 4,762 | 3,081 | 28,396 |
| 49,959 | 139 | 20,255 | 4,738 | 3,065 | 28,197 |
| 49,960 | 139 | 21,071 | 4,909 | 3,168 | 29,287 |
| 49,961 | 134 | 21,073 | 4,906 | 3,159 | 29,272 |
| 49,962 | 130 | 20,175 | 4,724 | 3,035 | 28,064 |
| 49,963 | 134 | 20,385 | 4,752 | 3,073 | 28,344 |
| 49,964 | 134 | 20,637 | 4,811 | 3,098 | 28,680 |
| 49,965 | 134 | 20,642 | 4,811 | 3,104 | 28,691 |
| 49,966 | 133 | 21,152 | 4,910 | 3,180 | 29,375 |
| 49,967 | 133 | 21,026 | 4,946 | 3,212 | 29,317 |
| 49,968 | 128 | 21,036 | 4,957 | 3,226 | 29,347 |
| 49,969 | 128 | 20,854 | 4,904 | 3,192 | 29,078 |
| 49,970 | 130 | 20,734 | 4,866 | 3,174 | 28,904 |
| 49,971 | 131 | 20,999 | 4,910 | 3,205 | 29,245 |
| 49,972 | 131 | 21,043 | 4,915 | 3,181 | 29,270 |
| 49,973 | 130 | 21,004 | 4,910 | 3,170 | 29,214 |
| 49,974 | 130 | 20,909 | 4,871 | 3,132 | 29,042 |
| 49,975 | 127 | 20,860 | 4,842 | 3,097 | 28,926 |

|        |     |        |       |       |        |
|--------|-----|--------|-------|-------|--------|
| 49,976 | 132 | 20,854 | 4,852 | 3,098 | 28,936 |
| 49,977 | 137 | 21,007 | 4,897 | 3,140 | 29,181 |
| 49,978 | 134 | 21,004 | 4,881 | 3,158 | 29,177 |
| 49,979 | 131 | 20,811 | 4,763 | 3,079 | 28,784 |
| 49,980 | 134 | 21,063 | 4,783 | 3,079 | 29,059 |
| 49,981 | 133 | 21,284 | 4,803 | 3,102 | 29,322 |
| 49,982 | 132 | 20,988 | 4,718 | 3,052 | 28,890 |
| 49,983 | 123 | 20,952 | 4,699 | 3,034 | 28,808 |
| 49,984 | 130 | 21,196 | 4,722 | 3,056 | 29,104 |
| 49,985 | 135 | 21,230 | 4,713 | 3,052 | 29,130 |
| 49,986 | 136 | 21,051 | 4,692 | 3,038 | 28,917 |
| 49,987 | 138 | 21,064 | 4,688 | 3,029 | 28,919 |
| 49,988 | 139 | 21,458 | 4,736 | 3,087 | 29,420 |
| 49,989 | 139 | 21,292 | 4,709 | 3,049 | 29,189 |
| 49,990 | 141 | 21,397 | 4,750 | 3,051 | 29,339 |
| 49,991 | 139 | 21,454 | 4,756 | 3,043 | 29,392 |
| 49,992 | 143 | 21,390 | 4,698 | 3,008 | 29,239 |
| 49,993 | 143 | 21,662 | 4,771 | 3,039 | 29,615 |
| 49,994 | 136 | 21,847 | 4,832 | 3,079 | 29,894 |
| 49,995 | 145 | 21,756 | 4,848 | 3,078 | 29,827 |
| 49,996 | 141 | 21,652 | 4,838 | 3,056 | 29,687 |
| 49,997 | 142 | 21,727 | 4,822 | 3,075 | 29,766 |
| 49,998 | 143 | 21,380 | 4,754 | 3,032 | 29,309 |
| 49,999 | 135 | 21,052 | 4,676 | 2,999 | 28,862 |
| 50,000 | 130 | 21,245 | 4,719 | 3,024 | 29,118 |
| 50,001 | 137 | 21,329 | 4,756 | 3,021 | 29,243 |
| 50,002 | 135 | 21,100 | 4,721 | 2,992 | 28,948 |
| 50,003 | 139 | 20,870 | 4,673 | 2,961 | 28,643 |
| 50,004 | 138 | 20,669 | 4,641 | 2,934 | 28,382 |
| 50,005 | 145 | 21,504 | 4,804 | 3,039 | 29,492 |
| 50,006 | 149 | 21,451 | 4,805 | 3,024 | 29,429 |
| 50,007 | 150 | 21,351 | 4,781 | 3,005 | 29,287 |

|        |     |        |       |       |        |
|--------|-----|--------|-------|-------|--------|
| 50,008 | 149 | 21,354 | 4,782 | 2,998 | 29,283 |
| 50,009 | 146 | 21,257 | 4,796 | 3,015 | 29,214 |
| 50,010 | 147 | 21,027 | 4,796 | 3,033 | 29,003 |
| 50,011 | 148 | 21,033 | 4,775 | 3,045 | 29,001 |
| 50,012 | 147 | 20,952 | 4,735 | 3,042 | 28,876 |
| 50,013 | 150 | 21,205 | 4,775 | 3,076 | 29,206 |
| 50,014 | 147 | 21,214 | 4,755 | 3,067 | 29,183 |
| 50,015 | 144 | 20,908 | 4,703 | 3,045 | 28,800 |
| 50,016 | 143 | 21,001 | 4,707 | 3,060 | 28,911 |
| 50,017 | 148 | 21,167 | 4,740 | 3,067 | 29,122 |
| 50,018 | 155 | 21,325 | 4,718 | 3,073 | 29,271 |
| 50,019 | 148 | 21,075 | 4,630 | 3,026 | 28,879 |
| 50,020 | 148 | 21,017 | 4,639 | 3,030 | 28,834 |
| 50,021 | 156 | 21,085 | 4,678 | 3,054 | 28,973 |
| 50,022 | 160 | 20,983 | 4,668 | 3,072 | 28,883 |
| 50,023 | 160 | 20,921 | 4,668 | 3,065 | 28,814 |
| 50,024 | 158 | 20,996 | 4,692 | 3,082 | 28,928 |
| 50,025 | 163 | 21,109 | 4,721 | 3,090 | 29,083 |
| 50,026 | 162 | 21,269 | 4,773 | 3,117 | 29,321 |
| 50,027 | 159 | 21,449 | 4,823 | 3,154 | 29,585 |
| 50,028 | 154 | 21,305 | 4,784 | 3,128 | 29,371 |
| 50,029 | 156 | 21,557 | 4,866 | 3,156 | 29,735 |
| 50,030 | 151 | 21,414 | 4,842 | 3,124 | 29,531 |
| 50,031 | 149 | 21,492 | 4,887 | 3,146 | 29,674 |
| 50,032 | 146 | 21,515 | 4,907 | 3,163 | 29,731 |
| 50,033 | 147 | 21,543 | 4,884 | 3,172 | 29,746 |
| 50,034 | 147 | 21,586 | 4,916 | 3,201 | 29,850 |
| 50,035 | 134 | 21,241 | 4,880 | 3,177 | 29,432 |
| 50,036 | 133 | 21,284 | 4,881 | 3,170 | 29,468 |
| 50,037 | 134 | 20,686 | 4,812 | 3,134 | 28,766 |
| 50,038 | 134 | 20,783 | 4,856 | 3,167 | 28,940 |
| 50,039 | 131 | 21,001 | 4,905 | 3,171 | 29,208 |

|        |     |        |       |       |        |
|--------|-----|--------|-------|-------|--------|
| 50,040 | 135 | 21,050 | 4,888 | 3,184 | 29,257 |
| 50,041 | 135 | 20,993 | 4,883 | 3,186 | 29,197 |
| 50,042 | 134 | 20,791 | 4,844 | 3,170 | 28,939 |
| 50,043 | 131 | 21,161 | 4,949 | 3,244 | 29,485 |
| 50,044 | 133 | 21,166 | 4,942 | 3,242 | 29,483 |
| 50,045 | 133 | 21,318 | 4,954 | 3,248 | 29,653 |
| 50,046 | 123 | 21,141 | 4,916 | 3,222 | 29,402 |
| 50,047 | 122 | 21,119 | 4,939 | 3,209 | 29,389 |
| 50,048 | 123 | 21,175 | 4,935 | 3,214 | 29,447 |
| 50,049 | 124 | 21,284 | 4,909 | 3,224 | 29,541 |
| 50,050 | 129 | 21,438 | 4,975 | 3,267 | 29,809 |
| 50,051 | 124 | 21,244 | 4,960 | 3,272 | 29,600 |
| 50,052 | 125 | 21,239 | 4,960 | 3,273 | 29,597 |
| 50,053 | 125 | 20,980 | 4,923 | 3,266 | 29,294 |
| 50,054 | 122 | 21,413 | 4,995 | 3,339 | 29,869 |
| 50,055 | 125 | 21,382 | 4,995 | 3,330 | 29,832 |
| 50,056 | 116 | 21,398 | 5,009 | 3,337 | 29,860 |
| 50,057 | 116 | 21,612 | 5,048 | 3,354 | 30,130 |
| 50,058 | 115 | 21,598 | 5,037 | 3,361 | 30,111 |
| 50,059 | 115 | 21,620 | 4,976 | 3,331 | 30,042 |
| 50,060 | 119 | 22,078 | 5,050 | 3,390 | 30,637 |
| 50,061 | 120 | 22,123 | 5,061 | 3,406 | 30,710 |
| 50,062 | 122 | 22,555 | 5,260 | 3,491 | 31,428 |
| 50,063 | 120 | 22,705 | 5,348 | 3,537 | 31,710 |
| 50,064 | 120 | 22,738 | 5,366 | 3,549 | 31,773 |
| 50,065 | 120 | 23,249 | 5,521 | 3,604 | 32,494 |
| 50,066 | 120 | 23,689 | 5,656 | 3,698 | 33,163 |
| 50,067 | 112 | 23,058 | 5,478 | 3,589 | 32,237 |
| 50,068 | 115 | 23,382 | 5,578 | 3,652 | 32,727 |
| 50,069 | 112 | 23,790 | 5,660 | 3,707 | 33,269 |
| 50,070 | 110 | 23,809 | 5,679 | 3,721 | 33,319 |
| 50,071 | 104 | 24,350 | 5,784 | 3,761 | 33,999 |

|        |     |        |       |       |        |
|--------|-----|--------|-------|-------|--------|
| 50,072 | 99  | 24,368 | 5,793 | 3,779 | 34,039 |
| 50,073 | 105 | 24,312 | 5,779 | 3,773 | 33,969 |
| 50,074 | 105 | 24,090 | 5,751 | 3,748 | 33,694 |
| 50,075 | 109 | 24,479 | 5,858 | 3,819 | 34,265 |
| 50,076 | 107 | 24,548 | 5,889 | 3,854 | 34,398 |
| 50,077 | 111 | 24,369 | 5,869 | 3,817 | 34,166 |
| 50,078 | 110 | 24,291 | 5,858 | 3,827 | 34,086 |
| 50,079 | 114 | 24,419 | 5,932 | 3,868 | 34,333 |
| 50,080 | 116 | 24,550 | 5,990 | 3,899 | 34,555 |
| 50,081 | 124 | 24,605 | 6,023 | 3,901 | 34,653 |
| 50,082 | 126 | 24,574 | 6,009 | 3,918 | 34,627 |
| 50,083 | 131 | 24,584 | 6,046 | 3,924 | 34,685 |
| 50,084 | 134 | 24,363 | 6,014 | 3,875 | 34,386 |
| 50,085 | 142 | 24,430 | 6,058 | 3,871 | 34,501 |
| 50,086 | 142 | 24,630 | 6,113 | 3,907 | 34,792 |
| 50,087 | 153 | 24,646 | 6,128 | 3,918 | 34,845 |
| 50,088 | 144 | 24,460 | 6,082 | 3,884 | 34,570 |
| 50,089 | 160 | 24,556 | 6,122 | 3,890 | 34,728 |
| 50,090 | 160 | 24,563 | 6,117 | 3,896 | 34,736 |
| 50,091 | 160 | 24,847 | 6,200 | 3,952 | 35,159 |
| 50,092 | 161 | 24,991 | 6,239 | 3,960 | 35,351 |
| 50,093 | 164 | 25,060 | 6,253 | 3,971 | 35,448 |
| 50,094 | 163 | 24,893 | 6,204 | 3,932 | 35,192 |
| 50,095 | 163 | 25,076 | 6,278 | 3,989 | 35,506 |
| 50,096 | 160 | 24,740 | 6,160 | 3,937 | 34,997 |
| 50,097 | 159 | 24,497 | 6,088 | 3,897 | 34,641 |
| 50,098 | 160 | 24,635 | 6,131 | 3,945 | 34,871 |
| 50,099 | 157 | 24,871 | 6,193 | 3,990 | 35,211 |
| 50,100 | 163 | 24,888 | 6,239 | 3,981 | 35,271 |
| 50,101 | 159 | 24,941 | 6,218 | 3,961 | 35,279 |
| 50,102 | 158 | 24,718 | 6,161 | 3,908 | 34,945 |
| 50,103 | 159 | 24,828 | 6,168 | 3,882 | 35,037 |

|        |     |        |       |       |        |
|--------|-----|--------|-------|-------|--------|
| 50,104 | 159 | 24,797 | 6,167 | 3,871 | 34,994 |
| 50,105 | 156 | 24,710 | 6,227 | 3,912 | 35,005 |
| 50,106 | 157 | 24,579 | 6,214 | 3,903 | 34,853 |
| 50,107 | 153 | 24,234 | 6,122 | 3,824 | 34,333 |
| 50,108 | 154 | 24,420 | 6,161 | 3,847 | 34,582 |
| 50,109 | 159 | 23,979 | 6,065 | 3,779 | 33,982 |
| 50,110 | 159 | 23,639 | 6,048 | 3,755 | 33,601 |
| 50,111 | 155 | 23,949 | 6,153 | 3,811 | 34,068 |
| 50,112 | 159 | 23,690 | 6,094 | 3,767 | 33,710 |
| 50,113 | 159 | 23,716 | 6,076 | 3,762 | 33,713 |
| 50,114 | 176 | 23,488 | 6,003 | 3,701 | 33,368 |
| 50,115 | 177 | 23,316 | 5,930 | 3,674 | 33,097 |
| 50,116 | 175 | 23,307 | 5,929 | 3,721 | 33,132 |
| 50,117 | 177 | 23,121 | 5,870 | 3,691 | 32,859 |
| 50,118 | 179 | 23,202 | 5,906 | 3,679 | 32,966 |
| 50,119 | 177 | 23,010 | 5,833 | 3,635 | 32,655 |
| 50,120 | 177 | 22,967 | 5,872 | 3,639 | 32,655 |
| 50,121 | 177 | 22,876 | 5,867 | 3,636 | 32,556 |
| 50,122 | 185 | 22,849 | 5,867 | 3,635 | 32,536 |
| 50,123 | 185 | 22,766 | 5,866 | 3,620 | 32,437 |
| 50,124 | 184 | 22,808 | 5,869 | 3,601 | 32,462 |
| 50,125 | 182 | 22,679 | 5,860 | 3,600 | 32,321 |
| 50,126 | 180 | 22,617 | 5,807 | 3,567 | 32,171 |
| 50,127 | 179 | 22,667 | 5,790 | 3,552 | 32,188 |
| 50,128 | 179 | 22,564 | 5,767 | 3,524 | 32,034 |
| 50,129 | 179 | 22,483 | 5,726 | 3,501 | 31,889 |
| 50,130 | 180 | 22,443 | 5,733 | 3,510 | 31,866 |
| 50,131 | 180 | 22,534 | 5,737 | 3,523 | 31,974 |
| 50,132 | 175 | 22,283 | 5,695 | 3,532 | 31,685 |
| 50,133 | 173 | 22,239 | 5,696 | 3,545 | 31,653 |
| 50,134 | 169 | 22,455 | 5,717 | 3,577 | 31,918 |
| 50,135 | 165 | 22,858 | 5,853 | 3,634 | 32,510 |

|        |     |        |       |       |        |
|--------|-----|--------|-------|-------|--------|
| 50,136 | 157 | 23,027 | 5,834 | 3,659 | 32,677 |
| 50,137 | 157 | 23,516 | 5,922 | 3,705 | 33,300 |
| 50,138 | 142 | 22,863 | 5,756 | 3,614 | 32,375 |
| 50,139 | 139 | 23,030 | 5,807 | 3,636 | 32,612 |
| 50,140 | 131 | 23,300 | 5,864 | 3,686 | 32,981 |
| 50,141 | 130 | 23,143 | 5,867 | 3,676 | 32,816 |
| 50,142 | 128 | 23,490 | 5,988 | 3,750 | 33,356 |
| 50,143 | 129 | 23,464 | 5,974 | 3,785 | 33,352 |
| 50,144 | 131 | 23,459 | 5,976 | 3,780 | 33,346 |
| 50,145 | 136 | 23,482 | 5,970 | 3,809 | 33,397 |
| 50,146 | 136 | 23,334 | 5,920 | 3,773 | 33,163 |
| 50,147 | 142 | 23,199 | 5,952 | 3,791 | 33,084 |
| 50,148 | 142 | 23,246 | 5,952 | 3,785 | 33,125 |
| 50,149 | 149 | 23,353 | 5,997 | 3,772 | 33,271 |
| 50,150 | 152 | 23,604 | 6,067 | 3,819 | 33,642 |
| 50,151 | 148 | 23,501 | 6,039 | 3,821 | 33,509 |
| 50,152 | 150 | 23,489 | 6,041 | 3,818 | 33,498 |
| 50,153 | 149 | 23,868 | 6,119 | 3,889 | 34,025 |
| 50,154 | 149 | 23,881 | 6,077 | 3,892 | 33,999 |
| 50,155 | 150 | 24,087 | 6,089 | 3,895 | 34,221 |
| 50,156 | 151 | 24,082 | 6,071 | 3,891 | 34,195 |
| 50,157 | 147 | 23,920 | 6,061 | 3,883 | 34,011 |
| 50,158 | 148 | 24,354 | 6,133 | 3,985 | 34,620 |
| 50,159 | 148 | 24,257 | 6,170 | 4,015 | 34,590 |
| 50,160 | 152 | 24,226 | 6,155 | 4,011 | 34,544 |
| 50,161 | 154 | 24,165 | 6,057 | 3,970 | 34,346 |
| 50,162 | 158 | 24,143 | 6,093 | 3,975 | 34,369 |
| 50,163 | 154 | 23,866 | 6,058 | 3,952 | 34,030 |
| 50,164 | 159 | 23,436 | 5,963 | 3,899 | 33,457 |
| 50,165 | 140 | 22,952 | 5,886 | 3,830 | 32,808 |
| 50,166 | 140 | 22,963 | 5,904 | 3,835 | 32,842 |
| 50,167 | 140 | 22,715 | 5,859 | 3,784 | 32,498 |



|        |     |        |       |       |        |
|--------|-----|--------|-------|-------|--------|
| 50,168 | 137 | 22,512 | 5,848 | 3,759 | 32,256 |
| 50,169 | 136 | 22,318 | 5,792 | 3,758 | 32,004 |
| 50,170 | 135 | 22,359 | 5,795 | 3,740 | 32,029 |
| 50,171 | 135 | 22,304 | 5,740 | 3,730 | 31,909 |
| 50,172 | 123 | 21,984 | 5,651 | 3,705 | 31,463 |
| 50,173 | 123 | 22,138 | 5,694 | 3,731 | 31,686 |
| 50,174 | 122 | 21,912 | 5,644 | 3,710 | 31,388 |
| 50,175 | 122 | 21,800 | 5,620 | 3,710 | 31,252 |
| 50,176 | 121 | 22,157 | 5,689 | 3,749 | 31,716 |
| 50,177 | 121 | 22,143 | 5,705 | 3,762 | 31,731 |
| 50,178 | 119 | 22,134 | 5,694 | 3,781 | 31,728 |
| 50,179 | 117 | 22,084 | 5,668 | 3,768 | 31,637 |
| 50,180 | 109 | 21,849 | 5,593 | 3,739 | 31,290 |
| 50,181 | 113 | 22,092 | 5,639 | 3,751 | 31,595 |
| 50,182 | 109 | 21,958 | 5,571 | 3,704 | 31,342 |
| 50,183 | 109 | 21,949 | 5,575 | 3,686 | 31,319 |
| 50,184 | 111 | 22,152 | 5,659 | 3,725 | 31,647 |
| 50,185 | 121 | 21,913 | 5,622 | 3,703 | 31,359 |
| 50,186 | 123 | 21,723 | 5,566 | 3,704 | 31,116 |
| 50,187 | 123 | 20,997 | 5,445 | 3,629 | 30,194 |
| 50,188 | 127 | 20,425 | 5,320 | 3,539 | 29,411 |
| 50,189 | 128 | 20,634 | 5,356 | 3,578 | 29,696 |
| 50,190 | 128 | 20,646 | 5,352 | 3,590 | 29,716 |
| 50,191 | 129 | 20,671 | 5,326 | 3,542 | 29,668 |
| 50,192 | 133 | 20,588 | 5,264 | 3,514 | 29,499 |
| 50,193 | 132 | 20,205 | 5,145 | 3,435 | 28,917 |
| 50,194 | 137 | 20,413 | 5,200 | 3,445 | 29,195 |
| 50,195 | 133 | 20,450 | 5,230 | 3,461 | 29,274 |
| 50,196 | 126 | 20,348 | 5,191 | 3,399 | 29,064 |
| 50,197 | 123 | 20,391 | 5,161 | 3,384 | 29,059 |
| 50,198 | 121 | 20,389 | 5,162 | 3,380 | 29,052 |
| 50,199 | 118 | 20,516 | 5,182 | 3,399 | 29,215 |

|        |     |        |       |       |        |
|--------|-----|--------|-------|-------|--------|
| 50,200 | 113 | 20,502 | 5,150 | 3,410 | 29,175 |
| 50,201 | 115 | 20,739 | 5,212 | 3,427 | 29,493 |
| 50,202 | 112 | 20,801 | 5,225 | 3,429 | 29,567 |
| 50,203 | 116 | 20,927 | 5,298 | 3,466 | 29,807 |
| 50,204 | 116 | 20,742 | 5,262 | 3,448 | 29,568 |
| 50,205 | 118 | 20,733 | 5,282 | 3,484 | 29,617 |
| 50,206 | 121 | 20,888 | 5,351 | 3,516 | 29,876 |
| 50,207 | 119 | 20,897 | 5,426 | 3,545 | 29,987 |
| 50,208 | 120 | 20,767 | 5,396 | 3,518 | 29,801 |
| 50,209 | 116 | 20,726 | 5,365 | 3,470 | 29,677 |
| 50,210 | 116 | 20,925 | 5,431 | 3,514 | 29,986 |
| 50,211 | 118 | 21,215 | 5,491 | 3,550 | 30,374 |
| 50,212 | 121 | 21,422 | 5,587 | 3,581 | 30,711 |
| 50,213 | 121 | 21,605 | 5,588 | 3,608 | 30,922 |
| 50,214 | 119 | 21,417 | 5,522 | 3,561 | 30,619 |
| 50,215 | 115 | 21,746 | 5,595 | 3,624 | 31,080 |
| 50,216 | 114 | 21,758 | 5,579 | 3,616 | 31,067 |
| 50,217 | 114 | 21,780 | 5,542 | 3,602 | 31,038 |
| 50,218 | 116 | 22,159 | 5,622 | 3,635 | 31,532 |
| 50,219 | 114 | 22,008 | 5,565 | 3,612 | 31,299 |
| 50,220 | 115 | 22,034 | 5,597 | 3,616 | 31,362 |
| 50,221 | 117 | 22,483 | 5,722 | 3,688 | 32,010 |
| 50,222 | 115 | 22,314 | 5,719 | 3,688 | 31,836 |
| 50,223 | 117 | 21,933 | 5,614 | 3,615 | 31,279 |
| 50,224 | 117 | 22,139 | 5,690 | 3,657 | 31,603 |
| 50,225 | 113 | 22,085 | 5,700 | 3,655 | 31,553 |
| 50,226 | 113 | 22,070 | 5,717 | 3,668 | 31,568 |
| 50,227 | 116 | 22,119 | 5,751 | 3,681 | 31,667 |
| 50,228 | 121 | 22,110 | 5,748 | 3,681 | 31,660 |
| 50,229 | 122 | 21,940 | 5,747 | 3,649 | 31,458 |
| 50,230 | 126 | 22,002 | 5,779 | 3,642 | 31,549 |
| 50,231 | 125 | 22,059 | 5,790 | 3,660 | 31,634 |

|        |     |        |       |       |        |
|--------|-----|--------|-------|-------|--------|
| 50,232 | 126 | 22,275 | 5,847 | 3,671 | 31,919 |
| 50,233 | 130 | 22,260 | 5,873 | 3,651 | 31,914 |
| 50,234 | 131 | 22,432 | 5,887 | 3,662 | 32,112 |
| 50,235 | 135 | 22,499 | 5,878 | 3,657 | 32,169 |
| 50,236 | 126 | 22,568 | 5,869 | 3,635 | 32,198 |
| 50,237 | 132 | 22,304 | 5,813 | 3,568 | 31,817 |
| 50,238 | 132 | 22,409 | 5,813 | 3,560 | 31,914 |
| 50,239 | 135 | 22,487 | 5,861 | 3,586 | 32,069 |
| 50,240 | 138 | 22,692 | 5,885 | 3,609 | 32,324 |
| 50,241 | 139 | 22,237 | 5,783 | 3,541 | 31,700 |
| 50,242 | 139 | 22,166 | 5,783 | 3,546 | 31,634 |
| 50,243 | 140 | 21,957 | 5,743 | 3,513 | 31,353 |
| 50,244 | 136 | 21,800 | 5,737 | 3,493 | 31,166 |
| 50,245 | 140 | 22,657 | 5,943 | 3,619 | 32,359 |
| 50,246 | 141 | 22,626 | 5,917 | 3,619 | 32,303 |
| 50,247 | 145 | 22,484 | 5,871 | 3,589 | 32,089 |
| 50,248 | 144 | 22,461 | 5,867 | 3,586 | 32,058 |
| 50,249 | 142 | 22,622 | 5,902 | 3,584 | 32,250 |
| 50,250 | 145 | 22,155 | 5,798 | 3,538 | 31,636 |
| 50,251 | 154 | 22,444 | 5,863 | 3,577 | 32,038 |
| 50,252 | 153 | 22,733 | 5,906 | 3,624 | 32,416 |
| 50,253 | 157 | 22,839 | 5,986 | 3,662 | 32,644 |
| 50,254 | 152 | 22,733 | 5,967 | 3,636 | 32,488 |
| 50,255 | 155 | 22,609 | 5,969 | 3,616 | 32,349 |
| 50,256 | 161 | 22,659 | 5,985 | 3,611 | 32,416 |
| 50,257 | 161 | 22,602 | 5,944 | 3,604 | 32,311 |
| 50,258 | 170 | 22,385 | 5,847 | 3,535 | 31,937 |
| 50,259 | 170 | 22,118 | 5,781 | 3,499 | 31,568 |
| 50,260 | 168 | 22,318 | 5,807 | 3,522 | 31,815 |
| 50,261 | 175 | 22,089 | 5,736 | 3,480 | 31,480 |
| 50,262 | 170 | 21,819 | 5,683 | 3,438 | 31,110 |
| 50,263 | 166 | 21,998 | 5,693 | 3,473 | 31,330 |

|        |     |        |       |       |        |
|--------|-----|--------|-------|-------|--------|
| 50,264 | 162 | 21,681 | 5,631 | 3,424 | 30,898 |
| 50,265 | 163 | 21,838 | 5,619 | 3,418 | 31,038 |
| 50,266 | 162 | 21,936 | 5,677 | 3,424 | 31,199 |
| 50,267 | 163 | 21,590 | 5,597 | 3,380 | 30,730 |
| 50,268 | 169 | 21,548 | 5,565 | 3,373 | 30,655 |
| 50,269 | 167 | 21,486 | 5,564 | 3,369 | 30,586 |
| 50,270 | 174 | 21,850 | 5,636 | 3,407 | 31,067 |
| 50,271 | 174 | 21,831 | 5,634 | 3,390 | 31,029 |
| 50,272 | 172 | 21,769 | 5,618 | 3,345 | 30,904 |
| 50,273 | 176 | 22,212 | 5,694 | 3,380 | 31,462 |
| 50,274 | 173 | 21,950 | 5,662 | 3,346 | 31,131 |
| 50,275 | 177 | 21,871 | 5,610 | 3,323 | 30,981 |
| 50,276 | 177 | 21,962 | 5,613 | 3,328 | 31,080 |
| 50,277 | 176 | 21,826 | 5,585 | 3,333 | 30,920 |
| 50,278 | 174 | 21,809 | 5,589 | 3,317 | 30,889 |
| 50,279 | 177 | 21,901 | 5,578 | 3,313 | 30,969 |
| 50,280 | 174 | 21,672 | 5,496 | 3,253 | 30,595 |
| 50,281 | 171 | 21,698 | 5,506 | 3,258 | 30,633 |
| 50,282 | 176 | 21,508 | 5,474 | 3,266 | 30,424 |
| 50,283 | 175 | 21,487 | 5,491 | 3,286 | 30,439 |
| 50,284 | 174 | 21,238 | 5,401 | 3,259 | 30,072 |
| 50,285 | 179 | 21,427 | 5,405 | 3,270 | 30,281 |
| 50,286 | 173 | 21,244 | 5,333 | 3,257 | 30,007 |
| 50,287 | 173 | 21,229 | 5,340 | 3,252 | 29,994 |
| 50,288 | 165 | 21,509 | 5,421 | 3,300 | 30,395 |
| 50,289 | 162 | 21,639 | 5,459 | 3,315 | 30,575 |
| 50,290 | 155 | 21,605 | 5,437 | 3,294 | 30,491 |
| 50,291 | 154 | 21,665 | 5,448 | 3,289 | 30,556 |
| 50,292 | 154 | 21,697 | 5,434 | 3,285 | 30,570 |
| 50,293 | 153 | 21,837 | 5,476 | 3,338 | 30,804 |
| 50,294 | 151 | 21,682 | 5,439 | 3,324 | 30,596 |
| 50,295 | 151 | 21,749 | 5,459 | 3,345 | 30,704 |

|        |     |        |       |       |        |
|--------|-----|--------|-------|-------|--------|
| 50,296 | 146 | 21,503 | 5,419 | 3,317 | 30,385 |
| 50,297 | 149 | 21,429 | 5,421 | 3,320 | 30,319 |
| 50,298 | 151 | 21,435 | 5,439 | 3,345 | 30,370 |
| 50,299 | 152 | 21,383 | 5,434 | 3,352 | 30,321 |
| 50,300 | 152 | 21,218 | 5,412 | 3,317 | 30,099 |
| 50,301 | 157 | 21,357 | 5,457 | 3,341 | 30,312 |
| 50,302 | 154 | 21,550 | 5,560 | 3,400 | 30,664 |
| 50,303 | 154 | 21,759 | 5,624 | 3,425 | 30,962 |
| 50,304 | 152 | 21,805 | 5,607 | 3,423 | 30,987 |
| 50,305 | 150 | 21,739 | 5,557 | 3,405 | 30,851 |
| 50,306 | 148 | 21,775 | 5,519 | 3,388 | 30,830 |
| 50,307 | 144 | 21,588 | 5,488 | 3,373 | 30,593 |
| 50,308 | 141 | 21,342 | 5,455 | 3,347 | 30,285 |
| 50,309 | 137 | 21,536 | 5,552 | 3,371 | 30,596 |
| 50,310 | 138 | 21,269 | 5,484 | 3,342 | 30,233 |
| 50,311 | 132 | 21,289 | 5,469 | 3,332 | 30,222 |
| 50,312 | 136 | 21,212 | 5,458 | 3,331 | 30,137 |
| 50,313 | 140 | 21,241 | 5,470 | 3,329 | 30,180 |
| 50,314 | 140 | 21,031 | 5,451 | 3,306 | 29,928 |
| 50,315 | 139 | 21,135 | 5,526 | 3,338 | 30,138 |
| 50,316 | 145 | 21,078 | 5,542 | 3,356 | 30,121 |
| 50,317 | 145 | 21,032 | 5,535 | 3,339 | 30,051 |
| 50,318 | 147 | 21,200 | 5,619 | 3,393 | 30,359 |
| 50,319 | 152 | 21,326 | 5,661 | 3,420 | 30,559 |
| 50,320 | 149 | 21,351 | 5,680 | 3,446 | 30,626 |
| 50,321 | 151 | 21,281 | 5,684 | 3,448 | 30,564 |
| 50,322 | 153 | 20,951 | 5,593 | 3,426 | 30,123 |
| 50,323 | 156 | 21,080 | 5,633 | 3,478 | 30,347 |
| 50,324 | 154 | 21,040 | 5,609 | 3,506 | 30,309 |
| 50,325 | 149 | 20,817 | 5,583 | 3,484 | 30,033 |
| 50,326 | 149 | 20,871 | 5,608 | 3,476 | 30,104 |
| 50,327 | 149 | 20,854 | 5,589 | 3,442 | 30,034 |

|        |     |        |       |       |        |
|--------|-----|--------|-------|-------|--------|
| 50,328 | 152 | 21,103 | 5,639 | 3,467 | 30,361 |
| 50,329 | 147 | 21,060 | 5,647 | 3,472 | 30,326 |
| 50,330 | 146 | 20,999 | 5,699 | 3,512 | 30,356 |
| 50,331 | 146 | 20,885 | 5,703 | 3,532 | 30,266 |
| 50,332 | 139 | 20,641 | 5,636 | 3,481 | 29,897 |
| 50,333 | 140 | 20,716 | 5,642 | 3,477 | 29,975 |
| 50,334 | 142 | 20,722 | 5,643 | 3,470 | 29,977 |
| 50,335 | 141 | 20,704 | 5,669 | 3,484 | 29,998 |
| 50,336 | 138 | 20,826 | 5,780 | 3,527 | 30,271 |
| 50,337 | 141 | 20,654 | 5,798 | 3,526 | 30,119 |
| 50,338 | 143 | 20,609 | 5,820 | 3,543 | 30,115 |
| 50,339 | 143 | 20,456 | 5,841 | 3,554 | 29,994 |
| 50,340 | 154 | 20,259 | 5,840 | 3,547 | 29,800 |
| 50,341 | 157 | 20,295 | 5,844 | 3,569 | 29,865 |
| 50,342 | 157 | 20,132 | 5,832 | 3,547 | 29,668 |
| 50,343 | 159 | 20,052 | 5,834 | 3,539 | 29,584 |
| 50,344 | 162 | 20,102 | 5,828 | 3,538 | 29,630 |
| 50,345 | 163 | 20,187 | 5,830 | 3,537 | 29,717 |
| 50,346 | 163 | 20,070 | 5,778 | 3,525 | 29,536 |
| 50,347 | 160 | 20,035 | 5,784 | 3,511 | 29,490 |
| 50,348 | 156 | 19,904 | 5,763 | 3,494 | 29,317 |
| 50,349 | 156 | 20,082 | 5,846 | 3,502 | 29,586 |
| 50,350 | 154 | 19,731 | 5,764 | 3,445 | 29,094 |
| 50,351 | 157 | 19,810 | 5,829 | 3,487 | 29,283 |
| 50,352 | 151 | 19,801 | 5,830 | 3,484 | 29,266 |
| 50,353 | 153 | 19,762 | 5,800 | 3,463 | 29,178 |
| 50,354 | 154 | 19,765 | 5,800 | 3,483 | 29,202 |
| 50,355 | 152 | 19,554 | 5,744 | 3,463 | 28,913 |
| 50,356 | 151 | 19,345 | 5,718 | 3,440 | 28,654 |
| 50,357 | 148 | 19,197 | 5,687 | 3,429 | 28,461 |
| 50,358 | 148 | 19,967 | 5,841 | 3,532 | 29,488 |
| 50,359 | 147 | 20,216 | 5,880 | 3,541 | 29,784 |

|        |     |        |       |       |        |
|--------|-----|--------|-------|-------|--------|
| 50,360 | 141 | 20,384 | 5,897 | 3,566 | 29,988 |
| 50,361 | 139 | 20,397 | 5,904 | 3,568 | 30,008 |
| 50,362 | 143 | 20,536 | 5,932 | 3,572 | 30,183 |
| 50,363 | 134 | 20,253 | 5,844 | 3,521 | 29,752 |
| 50,364 | 134 | 20,522 | 5,908 | 3,538 | 30,102 |
| 50,365 | 135 | 20,772 | 5,964 | 3,585 | 30,456 |
| 50,366 | 135 | 20,748 | 5,986 | 3,557 | 30,426 |
| 50,367 | 129 | 20,718 | 5,976 | 3,558 | 30,381 |
| 50,368 | 126 | 20,684 | 5,923 | 3,545 | 30,278 |
| 50,369 | 122 | 20,577 | 5,887 | 3,511 | 30,097 |
| 50,370 | 120 | 21,094 | 6,052 | 3,575 | 30,841 |
| 50,371 | 122 | 21,178 | 6,060 | 3,567 | 30,927 |
| 50,372 | 125 | 21,027 | 6,025 | 3,535 | 30,712 |
| 50,373 | 127 | 21,068 | 6,032 | 3,535 | 30,762 |
| 50,374 | 133 | 21,318 | 6,066 | 3,550 | 31,067 |
| 50,375 | 133 | 20,929 | 6,002 | 3,476 | 30,540 |
| 50,376 | 135 | 20,940 | 5,930 | 3,473 | 30,478 |
| 50,377 | 137 | 21,278 | 5,989 | 3,505 | 30,909 |
| 50,378 | 136 | 21,411 | 6,000 | 3,515 | 31,062 |
| 50,379 | 134 | 21,279 | 5,977 | 3,509 | 30,899 |
| 50,380 | 133 | 21,358 | 5,978 | 3,499 | 30,968 |
| 50,381 | 134 | 21,311 | 5,922 | 3,465 | 30,832 |
| 50,382 | 137 | 21,440 | 5,938 | 3,490 | 31,005 |
| 50,383 | 137 | 21,483 | 5,935 | 3,489 | 31,044 |
| 50,384 | 134 | 21,696 | 5,985 | 3,541 | 31,356 |
| 50,385 | 134 | 21,701 | 5,970 | 3,543 | 31,348 |
| 50,386 | 129 | 21,361 | 5,804 | 3,453 | 30,747 |
| 50,387 | 133 | 21,554 | 5,829 | 3,481 | 30,997 |
| 50,388 | 135 | 21,839 | 5,879 | 3,506 | 31,359 |
| 50,389 | 135 | 21,900 | 5,852 | 3,497 | 31,384 |
| 50,390 | 135 | 21,881 | 5,840 | 3,477 | 31,333 |
| 50,391 | 126 | 22,220 | 5,880 | 3,520 | 31,746 |

|        |     |        |       |       |        |
|--------|-----|--------|-------|-------|--------|
| 50,392 | 124 | 22,158 | 5,861 | 3,520 | 31,663 |
| 50,393 | 123 | 21,985 | 5,819 | 3,506 | 31,433 |
| 50,394 | 117 | 21,919 | 5,772 | 3,472 | 31,280 |
| 50,395 | 119 | 21,864 | 5,768 | 3,466 | 31,217 |
| 50,396 | 130 | 21,899 | 5,768 | 3,464 | 31,261 |
| 50,397 | 127 | 21,774 | 5,743 | 3,444 | 31,088 |
| 50,398 | 128 | 21,952 | 5,799 | 3,490 | 31,369 |
| 50,399 | 137 | 21,740 | 5,711 | 3,461 | 31,049 |
| 50,400 | 135 | 21,471 | 5,655 | 3,442 | 30,703 |
| 50,401 | 135 | 21,597 | 5,708 | 3,472 | 30,912 |
| 50,402 | 131 | 21,686 | 5,667 | 3,452 | 30,936 |
| 50,403 | 134 | 21,578 | 5,624 | 3,420 | 30,756 |
| 50,404 | 131 | 21,762 | 5,634 | 3,450 | 30,977 |
| 50,405 | 140 | 21,496 | 5,537 | 3,402 | 30,575 |
| 50,406 | 141 | 21,385 | 5,455 | 3,348 | 30,329 |
| 50,407 | 141 | 21,328 | 5,439 | 3,345 | 30,253 |
| 50,408 | 140 | 21,354 | 5,428 | 3,334 | 30,256 |
| 50,409 | 143 | 21,343 | 5,439 | 3,335 | 30,260 |
| 50,410 | 148 | 21,458 | 5,445 | 3,345 | 30,396 |
| 50,411 | 154 | 21,058 | 5,296 | 3,272 | 29,780 |
| 50,412 | 157 | 21,181 | 5,329 | 3,285 | 29,952 |
| 50,413 | 153 | 21,140 | 5,339 | 3,302 | 29,934 |
| 50,414 | 157 | 21,214 | 5,353 | 3,342 | 30,066 |
| 50,415 | 159 | 21,251 | 5,338 | 3,338 | 30,086 |
| 50,416 | 158 | 21,267 | 5,336 | 3,340 | 30,101 |
| 50,417 | 159 | 21,320 | 5,314 | 3,345 | 30,138 |
| 50,418 | 158 | 21,140 | 5,259 | 3,336 | 29,893 |
| 50,419 | 157 | 21,361 | 5,331 | 3,383 | 30,232 |
| 50,420 | 158 | 21,364 | 5,312 | 3,365 | 30,199 |
| 50,421 | 168 | 21,249 | 5,274 | 3,388 | 30,079 |
| 50,422 | 167 | 21,498 | 5,305 | 3,407 | 30,377 |
| 50,423 | 155 | 21,447 | 5,321 | 3,437 | 30,360 |



|        |     |        |       |       |        |
|--------|-----|--------|-------|-------|--------|
| 50,424 | 151 | 21,434 | 5,336 | 3,448 | 30,369 |
| 50,425 | 147 | 21,603 | 5,383 | 3,478 | 30,611 |
| 50,426 | 145 | 21,672 | 5,391 | 3,466 | 30,674 |
| 50,427 | 143 | 21,397 | 5,348 | 3,436 | 30,324 |
| 50,428 | 144 | 21,538 | 5,380 | 3,466 | 30,528 |
| 50,429 | 144 | 21,586 | 5,363 | 3,494 | 30,587 |
| 50,430 | 145 | 21,484 | 5,311 | 3,472 | 30,412 |
| 50,431 | 152 | 21,542 | 5,329 | 3,469 | 30,492 |
| 50,432 | 150 | 21,424 | 5,302 | 3,454 | 30,330 |
| 50,433 | 155 | 21,876 | 5,360 | 3,504 | 30,895 |
| 50,434 | 158 | 21,627 | 5,290 | 3,447 | 30,522 |
| 50,435 | 160 | 21,889 | 5,333 | 3,486 | 30,868 |
| 50,436 | 158 | 21,952 | 5,355 | 3,496 | 30,961 |
| 50,437 | 154 | 22,064 | 5,387 | 3,524 | 31,129 |
| 50,438 | 150 | 21,833 | 5,313 | 3,492 | 30,788 |
| 50,439 | 146 | 21,690 | 5,279 | 3,483 | 30,598 |
| 50,440 | 152 | 21,793 | 5,310 | 3,505 | 30,760 |
| 50,441 | 153 | 21,771 | 5,292 | 3,499 | 30,715 |
| 50,442 | 152 | 21,829 | 5,280 | 3,496 | 30,757 |
| 50,443 | 150 | 21,527 | 5,205 | 3,436 | 30,318 |
| 50,444 | 159 | 21,868 | 5,285 | 3,473 | 30,785 |
| 50,445 | 160 | 21,884 | 5,303 | 3,479 | 30,826 |
| 50,446 | 157 | 21,761 | 5,261 | 3,452 | 30,631 |
| 50,447 | 158 | 22,109 | 5,389 | 3,500 | 31,156 |
| 50,448 | 156 | 21,998 | 5,380 | 3,466 | 31,000 |
| 50,449 | 147 | 22,177 | 5,406 | 3,476 | 31,206 |
| 50,450 | 149 | 22,320 | 5,445 | 3,506 | 31,420 |
| 50,451 | 152 | 22,276 | 5,431 | 3,505 | 31,364 |
| 50,452 | 155 | 22,210 | 5,438 | 3,504 | 31,307 |
| 50,453 | 155 | 22,116 | 5,448 | 3,479 | 31,198 |
| 50,454 | 164 | 21,909 | 5,395 | 3,439 | 30,907 |
| 50,455 | 160 | 21,572 | 5,335 | 3,394 | 30,461 |

|        |     |        |       |       |        |
|--------|-----|--------|-------|-------|--------|
| 50,456 | 151 | 21,568 | 5,378 | 3,408 | 30,505 |
| 50,457 | 149 | 21,413 | 5,360 | 3,397 | 30,319 |
| 50,458 | 155 | 21,261 | 5,435 | 3,421 | 30,272 |
| 50,459 | 157 | 21,008 | 5,417 | 3,389 | 29,971 |
| 50,460 | 153 | 20,803 | 5,357 | 3,355 | 29,668 |
| 50,461 | 150 | 20,640 | 5,391 | 3,352 | 29,533 |
| 50,462 | 145 | 20,350 | 5,351 | 3,321 | 29,167 |
| 50,463 | 141 | 20,137 | 5,292 | 3,297 | 28,867 |
| 50,464 | 147 | 20,496 | 5,347 | 3,331 | 29,321 |
| 50,465 | 154 | 20,602 | 5,393 | 3,339 | 29,488 |
| 50,466 | 153 | 20,590 | 5,403 | 3,329 | 29,475 |
| 50,467 | 152 | 20,436 | 5,344 | 3,300 | 29,232 |
| 50,468 | 152 | 20,410 | 5,353 | 3,291 | 29,206 |
| 50,469 | 149 | 20,602 | 5,373 | 3,330 | 29,454 |
| 50,470 | 152 | 20,596 | 5,356 | 3,333 | 29,437 |
| 50,471 | 151 | 20,470 | 5,302 | 3,292 | 29,215 |
| 50,472 | 146 | 20,325 | 5,263 | 3,243 | 28,977 |
| 50,473 | 147 | 20,161 | 5,177 | 3,197 | 28,682 |
| 50,474 | 151 | 20,420 | 5,210 | 3,216 | 28,997 |
| 50,475 | 158 | 19,672 | 5,003 | 3,100 | 27,933 |
| 50,476 | 156 | 19,720 | 5,000 | 3,094 | 27,970 |
| 50,477 | 157 | 19,461 | 4,947 | 3,065 | 27,630 |
| 50,478 | 159 | 19,423 | 4,908 | 3,033 | 27,523 |
| 50,479 | 159 | 20,227 | 5,054 | 3,131 | 28,571 |
| 50,480 | 163 | 20,193 | 5,105 | 3,121 | 28,582 |
| 50,481 | 158 | 19,819 | 4,983 | 3,060 | 28,020 |
| 50,482 | 156 | 19,822 | 4,965 | 3,055 | 27,998 |
| 50,483 | 164 | 19,584 | 4,907 | 3,011 | 27,666 |
| 50,484 | 162 | 19,385 | 4,857 | 2,983 | 27,387 |
| 50,485 | 164 | 20,028 | 5,030 | 3,083 | 28,305 |
| 50,486 | 166 | 20,076 | 5,004 | 3,060 | 28,306 |
| 50,487 | 169 | 20,080 | 4,977 | 3,043 | 28,269 |

|        |     |        |       |       |        |
|--------|-----|--------|-------|-------|--------|
| 50,488 | 170 | 20,208 | 5,000 | 3,059 | 28,437 |
| 50,489 | 175 | 20,067 | 4,970 | 3,026 | 28,238 |
| 50,490 | 175 | 20,123 | 4,976 | 3,031 | 28,305 |
| 50,491 | 172 | 20,118 | 4,985 | 3,022 | 28,297 |
| 50,492 | 172 | 20,164 | 4,972 | 3,038 | 28,346 |
| 50,493 | 171 | 19,758 | 4,950 | 3,009 | 27,888 |
| 50,494 | 174 | 19,842 | 4,966 | 2,993 | 27,975 |
| 50,495 | 165 | 20,092 | 4,986 | 3,019 | 28,262 |
| 50,496 | 163 | 20,071 | 4,966 | 3,029 | 28,229 |
| 50,497 | 156 | 20,169 | 4,950 | 3,043 | 28,318 |
| 50,498 | 153 | 20,129 | 4,935 | 3,074 | 28,291 |
| 50,499 | 159 | 20,193 | 4,923 | 3,095 | 28,370 |
| 50,500 | 162 | 20,172 | 4,906 | 3,119 | 28,359 |
| 50,501 | 159 | 20,310 | 4,935 | 3,113 | 28,517 |
| 50,502 | 160 | 20,499 | 4,951 | 3,130 | 28,740 |
| 50,503 | 162 | 20,635 | 4,923 | 3,133 | 28,853 |
| 50,504 | 156 | 20,720 | 4,889 | 3,141 | 28,906 |
| 50,505 | 156 | 20,695 | 4,867 | 3,127 | 28,845 |
| 50,506 | 158 | 20,798 | 4,859 | 3,116 | 28,931 |
| 50,507 | 161 | 21,178 | 4,883 | 3,160 | 29,382 |
| 50,508 | 157 | 21,339 | 4,841 | 3,149 | 29,486 |
| 50,509 | 153 | 21,550 | 4,818 | 3,159 | 29,680 |
| 50,510 | 153 | 21,666 | 4,813 | 3,165 | 29,797 |
| 50,511 | 153 | 21,860 | 4,806 | 3,174 | 29,993 |
| 50,512 | 146 | 21,872 | 4,777 | 3,181 | 29,976 |
| 50,513 | 145 | 21,809 | 4,719 | 3,144 | 29,817 |
| 50,514 | 145 | 21,957 | 4,736 | 3,144 | 29,982 |
| 50,515 | 144 | 22,351 | 4,818 | 3,201 | 30,514 |
| 50,516 | 137 | 22,216 | 4,768 | 3,198 | 30,319 |
| 50,517 | 143 | 22,439 | 4,810 | 3,227 | 30,619 |
| 50,518 | 144 | 22,374 | 4,759 | 3,218 | 30,495 |
| 50,519 | 143 | 22,426 | 4,746 | 3,216 | 30,531 |

|        |     |        |       |       |        |
|--------|-----|--------|-------|-------|--------|
| 50,520 | 146 | 22,673 | 4,816 | 3,248 | 30,883 |
| 50,521 | 145 | 22,917 | 4,870 | 3,285 | 31,217 |
| 50,522 | 140 | 22,619 | 4,831 | 3,261 | 30,851 |
| 50,523 | 150 | 22,619 | 4,837 | 3,280 | 30,886 |
| 50,524 | 154 | 22,850 | 4,914 | 3,319 | 31,237 |
| 50,525 | 152 | 22,828 | 4,913 | 3,311 | 31,204 |
| 50,526 | 146 | 22,853 | 4,940 | 3,330 | 31,269 |
| 50,527 | 145 | 22,879 | 4,958 | 3,355 | 31,337 |
| 50,528 | 143 | 22,773 | 4,940 | 3,348 | 31,204 |
| 50,529 | 141 | 22,814 | 4,961 | 3,355 | 31,271 |
| 50,530 | 140 | 22,624 | 4,944 | 3,331 | 31,039 |
| 50,531 | 139 | 22,554 | 4,933 | 3,341 | 30,967 |
| 50,532 | 139 | 22,547 | 4,896 | 3,338 | 30,920 |
| 50,533 | 148 | 22,612 | 4,904 | 3,334 | 30,998 |
| 50,534 | 133 | 22,429 | 4,839 | 3,307 | 30,708 |
| 50,535 | 133 | 22,446 | 4,889 | 3,342 | 30,810 |
| 50,536 | 135 | 22,489 | 4,881 | 3,344 | 30,849 |
| 50,537 | 139 | 22,795 | 4,974 | 3,396 | 31,304 |
| 50,538 | 138 | 22,710 | 4,971 | 3,396 | 31,215 |
| 50,539 | 133 | 22,471 | 4,886 | 3,362 | 30,852 |
| 50,540 | 135 | 22,709 | 4,918 | 3,388 | 31,150 |
| 50,541 | 132 | 22,952 | 4,973 | 3,452 | 31,509 |
| 50,542 | 136 | 23,033 | 4,951 | 3,442 | 31,562 |
| 50,543 | 141 | 23,114 | 4,920 | 3,445 | 31,620 |
| 50,544 | 143 | 23,150 | 4,924 | 3,450 | 31,667 |
| 50,545 | 140 | 23,110 | 4,941 | 3,486 | 31,677 |
| 50,546 | 147 | 22,849 | 4,874 | 3,443 | 31,313 |
| 50,547 | 144 | 22,655 | 4,822 | 3,410 | 31,031 |
| 50,548 | 153 | 22,845 | 4,915 | 3,429 | 31,342 |
| 50,549 | 153 | 22,780 | 4,889 | 3,389 | 31,211 |
| 50,550 | 160 | 23,541 | 5,091 | 3,498 | 32,290 |
| 50,551 | 155 | 23,273 | 5,033 | 3,437 | 31,898 |

|        |     |        |       |       |        |
|--------|-----|--------|-------|-------|--------|
| 50,552 | 154 | 23,356 | 5,036 | 3,475 | 32,021 |
| 50,553 | 148 | 23,226 | 5,035 | 3,508 | 31,917 |
| 50,554 | 149 | 23,177 | 5,054 | 3,505 | 31,885 |
| 50,555 | 144 | 23,135 | 5,060 | 3,497 | 31,836 |
| 50,556 | 141 | 23,490 | 5,135 | 3,594 | 32,360 |
| 50,557 | 158 | 23,642 | 5,197 | 3,626 | 32,623 |
| 50,558 | 157 | 23,496 | 5,237 | 3,642 | 32,532 |
| 50,559 | 162 | 23,319 | 5,262 | 3,634 | 32,377 |
| 50,560 | 163 | 23,024 | 5,249 | 3,618 | 32,054 |
| 50,561 | 168 | 23,066 | 5,241 | 3,614 | 32,089 |
| 50,562 | 168 | 23,025 | 5,254 | 3,616 | 32,063 |
| 50,563 | 167 | 22,977 | 5,295 | 3,625 | 32,064 |
| 50,564 | 167 | 22,978 | 5,307 | 3,656 | 32,108 |
| 50,565 | 168 | 22,875 | 5,309 | 3,641 | 31,993 |
| 50,566 | 169 | 22,868 | 5,294 | 3,631 | 31,962 |
| 50,567 | 171 | 22,594 | 5,250 | 3,587 | 31,602 |
| 50,568 | 166 | 22,598 | 5,236 | 3,593 | 31,593 |
| 50,569 | 167 | 22,239 | 5,165 | 3,548 | 31,119 |
| 50,570 | 167 | 22,017 | 5,121 | 3,508 | 30,813 |
| 50,571 | 168 | 22,336 | 5,220 | 3,572 | 31,296 |
| 50,572 | 166 | 22,551 | 5,246 | 3,585 | 31,548 |
| 50,573 | 168 | 22,496 | 5,198 | 3,553 | 31,415 |
| 50,574 | 162 | 22,428 | 5,169 | 3,532 | 31,291 |
| 50,575 | 161 | 22,268 | 5,110 | 3,497 | 31,036 |
| 50,576 | 159 | 22,332 | 5,115 | 3,518 | 31,124 |
| 50,577 | 167 | 22,464 | 5,103 | 3,490 | 31,224 |
| 50,578 | 167 | 22,561 | 5,099 | 3,483 | 31,310 |
| 50,579 | 168 | 22,505 | 5,047 | 3,492 | 31,212 |
| 50,580 | 168 | 22,497 | 5,043 | 3,495 | 31,203 |
| 50,581 | 166 | 22,523 | 5,013 | 3,492 | 31,194 |
| 50,582 | 163 | 22,706 | 5,048 | 3,520 | 31,437 |
| 50,583 | 155 | 22,741 | 5,080 | 3,529 | 31,505 |

|        |     |        |       |       |        |
|--------|-----|--------|-------|-------|--------|
| 50,584 | 157 | 22,781 | 5,080 | 3,505 | 31,523 |
| 50,585 | 157 | 22,871 | 5,094 | 3,505 | 31,627 |
| 50,586 | 153 | 23,096 | 5,158 | 3,534 | 31,941 |
| 50,587 | 155 | 23,152 | 5,181 | 3,560 | 32,048 |
| 50,588 | 156 | 22,894 | 5,123 | 3,530 | 31,703 |
| 50,589 | 156 | 22,778 | 5,082 | 3,506 | 31,522 |
| 50,590 | 157 | 23,141 | 5,209 | 3,550 | 32,057 |
| 50,591 | 161 | 22,959 | 5,174 | 3,518 | 31,812 |
| 50,592 | 161 | 22,950 | 5,165 | 3,496 | 31,772 |
| 50,593 | 167 | 23,197 | 5,254 | 3,525 | 32,143 |
| 50,594 | 164 | 22,995 | 5,232 | 3,500 | 31,891 |
| 50,595 | 163 | 22,864 | 5,205 | 3,487 | 31,719 |
| 50,596 | 157 | 23,185 | 5,260 | 3,521 | 32,123 |
| 50,597 | 154 | 23,460 | 5,315 | 3,556 | 32,485 |
| 50,598 | 154 | 23,450 | 5,296 | 3,523 | 32,423 |
| 50,599 | 149 | 23,379 | 5,257 | 3,500 | 32,285 |
| 50,600 | 141 | 23,051 | 5,163 | 3,454 | 31,809 |
| 50,601 | 140 | 23,078 | 5,144 | 3,451 | 31,813 |
| 50,602 | 142 | 22,951 | 5,083 | 3,390 | 31,566 |
| 50,603 | 143 | 22,949 | 5,073 | 3,368 | 31,533 |
| 50,604 | 148 | 22,999 | 5,050 | 3,343 | 31,540 |
| 50,605 | 149 | 22,914 | 5,026 | 3,329 | 31,418 |
| 50,606 | 155 | 22,742 | 4,966 | 3,282 | 31,145 |
| 50,607 | 158 | 23,009 | 4,983 | 3,295 | 31,445 |
| 50,608 | 141 | 23,360 | 5,020 | 3,305 | 31,826 |
| 50,609 | 143 | 23,565 | 5,025 | 3,302 | 32,035 |
| 50,610 | 141 | 23,715 | 4,968 | 3,289 | 32,113 |
| 50,611 | 141 | 23,786 | 4,972 | 3,290 | 32,189 |
| 50,612 | 138 | 23,823 | 4,986 | 3,288 | 32,235 |
| 50,613 | 137 | 24,050 | 4,992 | 3,296 | 32,475 |
| 50,614 | 137 | 24,283 | 5,032 | 3,315 | 32,767 |
| 50,615 | 136 | 24,083 | 4,979 | 3,255 | 32,453 |

|        |     |        |       |       |        |
|--------|-----|--------|-------|-------|--------|
| 50,616 | 136 | 24,106 | 4,998 | 3,273 | 32,513 |
| 50,617 | 134 | 24,131 | 5,002 | 3,281 | 32,548 |
| 50,618 | 138 | 24,057 | 5,006 | 3,294 | 32,495 |
| 50,619 | 140 | 24,337 | 5,057 | 3,335 | 32,869 |
| 50,620 | 135 | 24,347 | 5,080 | 3,341 | 32,903 |
| 50,621 | 134 | 24,312 | 5,089 | 3,347 | 32,882 |
| 50,622 | 145 | 24,112 | 5,067 | 3,344 | 32,668 |
| 50,623 | 149 | 24,063 | 5,035 | 3,332 | 32,579 |
| 50,624 | 142 | 23,859 | 4,999 | 3,306 | 32,306 |
| 50,625 | 140 | 23,766 | 4,989 | 3,311 | 32,206 |
| 50,626 | 138 | 23,460 | 4,924 | 3,260 | 31,782 |
| 50,627 | 138 | 23,203 | 4,872 | 3,220 | 31,433 |
| 50,628 | 130 | 23,880 | 4,959 | 3,320 | 32,289 |
| 50,629 | 133 | 23,693 | 4,945 | 3,292 | 32,063 |
| 50,630 | 133 | 23,672 | 4,948 | 3,292 | 32,045 |
| 50,631 | 138 | 23,773 | 4,999 | 3,313 | 32,223 |
| 50,632 | 145 | 23,729 | 4,998 | 3,277 | 32,149 |
| 50,633 | 146 | 23,600 | 4,985 | 3,273 | 32,004 |
| 50,634 | 145 | 23,547 | 4,974 | 3,294 | 31,960 |
| 50,635 | 143 | 23,322 | 4,939 | 3,292 | 31,696 |
| 50,636 | 144 | 23,345 | 4,950 | 3,298 | 31,737 |
| 50,637 | 143 | 23,225 | 4,919 | 3,287 | 31,574 |
| 50,638 | 137 | 23,162 | 4,880 | 3,257 | 31,436 |
| 50,639 | 133 | 23,130 | 4,841 | 3,232 | 31,336 |
| 50,640 | 132 | 22,871 | 4,804 | 3,187 | 30,994 |
| 50,641 | 133 | 22,929 | 4,794 | 3,192 | 31,048 |
| 50,642 | 136 | 23,095 | 4,811 | 3,203 | 31,245 |
| 50,643 | 135 | 23,095 | 4,765 | 3,192 | 31,187 |
| 50,644 | 126 | 23,041 | 4,765 | 3,203 | 31,135 |
| 50,645 | 121 | 23,127 | 4,739 | 3,188 | 31,175 |
| 50,646 | 125 | 23,243 | 4,723 | 3,191 | 31,282 |
| 50,647 | 129 | 23,419 | 4,728 | 3,211 | 31,487 |

|        |     |        |       |       |        |
|--------|-----|--------|-------|-------|--------|
| 50,648 | 128 | 23,462 | 4,739 | 3,214 | 31,543 |
| 50,649 | 133 | 23,225 | 4,691 | 3,186 | 31,235 |
| 50,650 | 133 | 23,283 | 4,704 | 3,192 | 31,312 |
| 50,651 | 132 | 23,436 | 4,718 | 3,226 | 31,512 |
| 50,652 | 134 | 23,835 | 4,817 | 3,293 | 32,079 |
| 50,653 | 137 | 23,689 | 4,813 | 3,277 | 31,916 |
| 50,654 | 134 | 23,800 | 4,821 | 3,293 | 32,048 |
| 50,655 | 135 | 23,916 | 4,865 | 3,298 | 32,214 |
| 50,656 | 133 | 23,666 | 4,828 | 3,266 | 31,893 |
| 50,657 | 131 | 23,624 | 4,840 | 3,280 | 31,875 |
| 50,658 | 130 | 23,436 | 4,825 | 3,268 | 31,659 |
| 50,659 | 130 | 23,193 | 4,790 | 3,257 | 31,370 |
| 50,660 | 131 | 23,733 | 4,924 | 3,343 | 32,131 |
| 50,661 | 129 | 23,793 | 4,945 | 3,358 | 32,225 |
| 50,662 | 127 | 23,661 | 4,916 | 3,350 | 32,054 |
| 50,663 | 128 | 23,584 | 4,944 | 3,348 | 32,004 |
| 50,664 | 128 | 23,604 | 4,957 | 3,375 | 32,064 |
| 50,665 | 137 | 23,556 | 4,938 | 3,390 | 32,021 |
| 50,666 | 135 | 23,616 | 4,960 | 3,421 | 32,132 |
| 50,667 | 136 | 23,392 | 4,920 | 3,384 | 31,832 |
| 50,668 | 142 | 23,683 | 4,946 | 3,413 | 32,184 |
| 50,669 | 144 | 24,113 | 5,025 | 3,458 | 32,740 |
| 50,670 | 143 | 24,242 | 5,057 | 3,474 | 32,916 |
| 50,671 | 146 | 23,976 | 4,951 | 3,387 | 32,460 |
| 50,672 | 148 | 24,202 | 4,973 | 3,409 | 32,732 |
| 50,673 | 143 | 24,350 | 4,963 | 3,424 | 32,880 |
| 50,674 | 140 | 24,517 | 4,981 | 3,454 | 33,092 |
| 50,675 | 139 | 24,278 | 4,941 | 3,431 | 32,789 |
| 50,676 | 142 | 24,294 | 4,958 | 3,436 | 32,830 |
| 50,677 | 148 | 24,208 | 4,973 | 3,449 | 32,778 |
| 50,678 | 150 | 24,139 | 4,978 | 3,451 | 32,718 |
| 50,679 | 151 | 23,930 | 4,963 | 3,427 | 32,471 |



|        |     |        |       |       |        |
|--------|-----|--------|-------|-------|--------|
| 50,680 | 148 | 24,110 | 5,046 | 3,468 | 32,772 |
| 50,681 | 141 | 23,840 | 4,926 | 3,406 | 32,313 |
| 50,682 | 146 | 24,156 | 4,969 | 3,426 | 32,697 |
| 50,683 | 141 | 24,219 | 4,973 | 3,466 | 32,799 |
| 50,684 | 146 | 24,303 | 4,948 | 3,408 | 32,805 |
| 50,685 | 147 | 24,184 | 4,892 | 3,363 | 32,586 |
| 50,686 | 149 | 24,505 | 4,940 | 3,390 | 32,984 |
| 50,687 | 156 | 24,371 | 4,899 | 3,361 | 32,787 |
| 50,688 | 156 | 24,437 | 4,957 | 3,402 | 32,952 |
| 50,689 | 154 | 24,195 | 4,907 | 3,388 | 32,644 |
| 50,690 | 152 | 24,131 | 4,912 | 3,398 | 32,593 |
| 50,691 | 153 | 24,454 | 4,955 | 3,445 | 33,007 |
| 50,692 | 154 | 24,501 | 4,978 | 3,470 | 33,103 |
| 50,693 | 153 | 24,570 | 5,042 | 3,495 | 33,260 |
| 50,694 | 157 | 24,684 | 5,062 | 3,511 | 33,414 |
| 50,695 | 157 | 24,333 | 5,013 | 3,475 | 32,978 |
| 50,696 | 161 | 24,357 | 5,047 | 3,499 | 33,064 |
| 50,697 | 159 | 24,248 | 5,027 | 3,503 | 32,937 |
| 50,698 | 161 | 24,263 | 5,041 | 3,534 | 32,999 |
| 50,699 | 168 | 24,214 | 5,049 | 3,551 | 32,982 |
| 50,700 | 165 | 23,888 | 5,008 | 3,527 | 32,588 |
| 50,701 | 165 | 23,704 | 4,980 | 3,496 | 32,345 |
| 50,702 | 166 | 23,884 | 5,011 | 3,520 | 32,581 |
| 50,703 | 164 | 23,582 | 4,954 | 3,486 | 32,186 |
| 50,704 | 160 | 23,393 | 4,899 | 3,453 | 31,905 |
| 50,705 | 162 | 23,969 | 4,948 | 3,535 | 32,614 |
| 50,706 | 166 | 24,024 | 4,938 | 3,556 | 32,684 |
| 50,707 | 166 | 24,119 | 4,948 | 3,557 | 32,790 |
| 50,708 | 162 | 24,387 | 4,938 | 3,563 | 33,050 |
| 50,709 | 166 | 24,668 | 4,977 | 3,589 | 33,400 |
| 50,710 | 168 | 24,424 | 4,909 | 3,564 | 33,065 |
| 50,711 | 168 | 24,463 | 4,916 | 3,559 | 33,106 |

|        |     |        |       |       |        |
|--------|-----|--------|-------|-------|--------|
| 50,712 | 168 | 24,527 | 4,886 | 3,556 | 33,137 |
| 50,713 | 167 | 24,622 | 4,856 | 3,562 | 33,207 |
| 50,714 | 163 | 24,344 | 4,806 | 3,518 | 32,831 |
| 50,715 | 163 | 24,591 | 4,870 | 3,548 | 33,172 |
| 50,716 | 159 | 24,626 | 4,870 | 3,545 | 33,200 |
| 50,717 | 170 | 24,993 | 4,929 | 3,590 | 33,682 |
| 50,718 | 169 | 24,833 | 4,866 | 3,552 | 33,420 |
| 50,719 | 158 | 24,763 | 4,842 | 3,523 | 33,286 |
| 50,720 | 158 | 24,646 | 4,798 | 3,480 | 33,082 |
| 50,721 | 158 | 24,544 | 4,818 | 3,471 | 32,991 |
| 50,722 | 161 | 24,791 | 4,864 | 3,504 | 33,320 |
| 50,723 | 158 | 24,651 | 4,849 | 3,478 | 33,136 |
| 50,724 | 163 | 24,828 | 4,917 | 3,521 | 33,429 |
| 50,725 | 168 | 24,976 | 4,982 | 3,549 | 33,675 |
| 50,726 | 169 | 24,770 | 4,945 | 3,532 | 33,416 |
| 50,727 | 171 | 24,981 | 4,985 | 3,529 | 33,666 |
| 50,728 | 166 | 24,804 | 4,943 | 3,502 | 33,415 |
| 50,729 | 167 | 24,872 | 4,935 | 3,516 | 33,490 |
| 50,730 | 164 | 24,847 | 4,954 | 3,520 | 33,485 |
| 50,731 | 163 | 24,781 | 4,944 | 3,526 | 33,414 |
| 50,732 | 166 | 24,946 | 5,019 | 3,572 | 33,703 |
| 50,733 | 162 | 24,679 | 4,989 | 3,555 | 33,385 |
| 50,734 | 162 | 24,651 | 4,993 | 3,541 | 33,347 |
| 50,735 | 165 | 24,864 | 5,046 | 3,584 | 33,659 |
| 50,736 | 163 | 24,679 | 5,040 | 3,578 | 33,460 |
| 50,737 | 163 | 25,054 | 5,091 | 3,634 | 33,942 |
| 50,738 | 156 | 24,992 | 5,087 | 3,641 | 33,876 |
| 50,739 | 156 | 24,813 | 5,047 | 3,598 | 33,614 |
| 50,740 | 158 | 24,738 | 5,080 | 3,600 | 33,576 |
| 50,741 | 157 | 24,725 | 5,086 | 3,618 | 33,586 |
| 50,742 | 160 | 24,860 | 5,127 | 3,651 | 33,798 |
| 50,743 | 159 | 24,807 | 5,115 | 3,650 | 33,731 |

|        |     |        |       |       |        |
|--------|-----|--------|-------|-------|--------|
| 50,744 | 156 | 24,841 | 5,106 | 3,658 | 33,761 |
| 50,745 | 154 | 24,874 | 5,099 | 3,666 | 33,793 |
| 50,746 | 162 | 24,852 | 5,091 | 3,638 | 33,743 |
| 50,747 | 162 | 25,016 | 5,109 | 3,645 | 33,932 |
| 50,748 | 162 | 24,853 | 5,108 | 3,628 | 33,751 |
| 50,749 | 163 | 24,813 | 5,116 | 3,620 | 33,712 |
| 50,750 | 153 | 25,043 | 5,160 | 3,607 | 33,963 |
| 50,751 | 146 | 24,802 | 5,101 | 3,581 | 33,630 |
| 50,752 | 148 | 24,783 | 5,084 | 3,572 | 33,587 |
| 50,753 | 152 | 24,700 | 5,062 | 3,551 | 33,465 |
| 50,754 | 152 | 24,622 | 5,096 | 3,545 | 33,415 |
| 50,755 | 148 | 24,510 | 5,082 | 3,573 | 33,313 |
| 50,756 | 149 | 24,594 | 5,125 | 3,609 | 33,477 |
| 50,757 | 141 | 24,436 | 5,145 | 3,603 | 33,325 |
| 50,758 | 146 | 24,353 | 5,157 | 3,588 | 33,244 |
| 50,759 | 145 | 24,350 | 5,199 | 3,603 | 33,297 |
| 50,760 | 141 | 24,092 | 5,188 | 3,577 | 32,998 |
| 50,761 | 138 | 24,021 | 5,204 | 3,589 | 32,952 |
| 50,762 | 138 | 24,015 | 5,239 | 3,604 | 32,996 |
| 50,763 | 139 | 23,988 | 5,253 | 3,594 | 32,974 |
| 50,764 | 141 | 24,008 | 5,273 | 3,619 | 33,041 |
| 50,765 | 142 | 23,982 | 5,260 | 3,610 | 32,994 |
| 50,766 | 146 | 23,808 | 5,246 | 3,578 | 32,778 |
| 50,767 | 146 | 23,999 | 5,291 | 3,607 | 33,043 |
| 50,768 | 144 | 24,262 | 5,352 | 3,654 | 33,412 |
| 50,769 | 156 | 23,961 | 5,341 | 3,631 | 33,089 |
| 50,770 | 156 | 23,736 | 5,326 | 3,623 | 32,841 |
| 50,771 | 163 | 23,854 | 5,386 | 3,655 | 33,058 |
| 50,772 | 163 | 23,720 | 5,392 | 3,657 | 32,932 |
| 50,773 | 158 | 23,952 | 5,450 | 3,702 | 33,262 |
| 50,774 | 158 | 23,582 | 5,419 | 3,666 | 32,825 |
| 50,775 | 154 | 24,113 | 5,539 | 3,732 | 33,538 |

|        |     |        |       |       |        |
|--------|-----|--------|-------|-------|--------|
| 50,776 | 157 | 23,659 | 5,463 | 3,675 | 32,954 |
| 50,777 | 154 | 23,470 | 5,443 | 3,663 | 32,730 |
| 50,778 | 151 | 23,839 | 5,485 | 3,759 | 33,234 |
| 50,779 | 147 | 24,086 | 5,539 | 3,776 | 33,548 |
| 50,780 | 149 | 24,227 | 5,544 | 3,783 | 33,703 |
| 50,781 | 149 | 24,255 | 5,581 | 3,792 | 33,777 |
| 50,782 | 148 | 24,750 | 5,692 | 3,850 | 34,440 |
| 50,783 | 146 | 24,590 | 5,642 | 3,824 | 34,202 |
| 50,784 | 145 | 24,760 | 5,658 | 3,851 | 34,414 |
| 50,785 | 145 | 24,624 | 5,664 | 3,845 | 34,278 |
| 50,786 | 140 | 24,858 | 5,745 | 3,891 | 34,634 |
| 50,787 | 141 | 24,959 | 5,795 | 3,901 | 34,796 |
| 50,788 | 141 | 24,581 | 5,736 | 3,849 | 34,307 |
| 50,789 | 143 | 24,898 | 5,804 | 3,881 | 34,726 |
| 50,790 | 144 | 24,620 | 5,697 | 3,803 | 34,264 |
| 50,791 | 147 | 24,933 | 5,772 | 3,843 | 34,695 |
| 50,792 | 148 | 25,160 | 5,841 | 3,894 | 35,043 |
| 50,793 | 157 | 25,091 | 5,867 | 3,894 | 35,009 |
| 50,794 | 154 | 24,925 | 5,861 | 3,880 | 34,820 |
| 50,795 | 157 | 25,173 | 5,908 | 3,904 | 35,142 |
| 50,796 | 155 | 24,921 | 5,914 | 3,879 | 34,869 |
| 50,797 | 147 | 24,789 | 5,894 | 3,870 | 34,700 |
| 50,798 | 142 | 24,467 | 5,835 | 3,828 | 34,272 |
| 50,799 | 140 | 24,361 | 5,832 | 3,818 | 34,151 |
| 50,800 | 138 | 24,294 | 5,833 | 3,812 | 34,077 |
| 50,801 | 140 | 24,266 | 5,824 | 3,815 | 34,045 |
| 50,802 | 147 | 24,570 | 5,916 | 3,865 | 34,498 |
| 50,803 | 147 | 24,654 | 5,933 | 3,860 | 34,594 |
| 50,804 | 144 | 24,701 | 5,983 | 3,882 | 34,710 |
| 50,805 | 142 | 24,570 | 5,927 | 3,849 | 34,488 |
| 50,806 | 141 | 24,648 | 5,978 | 3,878 | 34,645 |
| 50,807 | 140 | 24,612 | 5,968 | 3,869 | 34,589 |

|        |     |        |       |       |        |
|--------|-----|--------|-------|-------|--------|
| 50,808 | 141 | 24,347 | 5,891 | 3,826 | 34,205 |
| 50,809 | 141 | 24,499 | 5,944 | 3,877 | 34,461 |
| 50,810 | 142 | 24,027 | 5,856 | 3,836 | 33,861 |
| 50,811 | 142 | 24,034 | 5,853 | 3,839 | 33,868 |
| 50,812 | 141 | 23,796 | 5,820 | 3,832 | 33,589 |
| 50,813 | 140 | 23,601 | 5,806 | 3,810 | 33,357 |
| 50,814 | 138 | 23,581 | 5,818 | 3,817 | 33,354 |
| 50,815 | 136 | 23,241 | 5,714 | 3,758 | 32,849 |
| 50,816 | 141 | 23,487 | 5,770 | 3,796 | 33,194 |
| 50,817 | 140 | 23,462 | 5,753 | 3,804 | 33,159 |
| 50,818 | 141 | 23,079 | 5,716 | 3,765 | 32,701 |
| 50,819 | 134 | 22,782 | 5,654 | 3,716 | 32,286 |
| 50,820 | 123 | 23,187 | 5,710 | 3,776 | 32,796 |
| 50,821 | 137 | 23,110 | 5,669 | 3,759 | 32,675 |
| 50,822 | 130 | 23,228 | 5,671 | 3,789 | 32,818 |
| 50,823 | 125 | 23,042 | 5,597 | 3,759 | 32,523 |
| 50,824 | 128 | 23,046 | 5,568 | 3,760 | 32,502 |
| 50,825 | 132 | 23,356 | 5,653 | 3,796 | 32,937 |
| 50,826 | 127 | 23,142 | 5,593 | 3,744 | 32,606 |
| 50,827 | 133 | 23,124 | 5,589 | 3,723 | 32,569 |
| 50,828 | 134 | 23,383 | 5,661 | 3,754 | 32,932 |
| 50,829 | 137 | 23,263 | 5,649 | 3,734 | 32,783 |
| 50,830 | 143 | 23,203 | 5,646 | 3,735 | 32,727 |
| 50,831 | 153 | 23,083 | 5,653 | 3,744 | 32,633 |
| 50,832 | 156 | 23,007 | 5,607 | 3,734 | 32,504 |
| 50,833 | 159 | 23,002 | 5,621 | 3,755 | 32,537 |
| 50,834 | 159 | 22,674 | 5,552 | 3,683 | 32,068 |
| 50,835 | 158 | 22,667 | 5,580 | 3,695 | 32,100 |
| 50,836 | 158 | 22,861 | 5,580 | 3,700 | 32,299 |
| 50,837 | 165 | 22,697 | 5,503 | 3,663 | 32,028 |
| 50,838 | 164 | 22,587 | 5,513 | 3,653 | 31,917 |
| 50,839 | 161 | 22,505 | 5,504 | 3,647 | 31,817 |

|        |     |        |       |       |        |
|--------|-----|--------|-------|-------|--------|
| 50,840 | 157 | 22,419 | 5,489 | 3,638 | 31,703 |
| 50,841 | 160 | 22,634 | 5,541 | 3,668 | 32,003 |
| 50,842 | 159 | 22,542 | 5,525 | 3,683 | 31,909 |
| 50,843 | 146 | 22,170 | 5,373 | 3,574 | 31,263 |
| 50,844 | 153 | 22,385 | 5,447 | 3,616 | 31,601 |
| 50,845 | 149 | 22,472 | 5,471 | 3,630 | 31,722 |
| 50,846 | 149 | 22,339 | 5,455 | 3,641 | 31,584 |
| 50,847 | 153 | 22,359 | 5,461 | 3,652 | 31,625 |
| 50,848 | 150 | 22,171 | 5,451 | 3,624 | 31,396 |
| 50,849 | 149 | 22,437 | 5,552 | 3,699 | 31,837 |
| 50,850 | 154 | 23,037 | 5,634 | 3,766 | 32,591 |
| 50,851 | 153 | 23,018 | 5,615 | 3,775 | 32,561 |
| 50,852 | 150 | 23,232 | 5,693 | 3,822 | 32,897 |
| 50,853 | 151 | 23,075 | 5,687 | 3,835 | 32,748 |
| 50,854 | 147 | 22,856 | 5,656 | 3,811 | 32,470 |
| 50,855 | 148 | 22,823 | 5,665 | 3,834 | 32,470 |
| 50,856 | 149 | 22,797 | 5,676 | 3,838 | 32,460 |
| 50,857 | 151 | 22,914 | 5,679 | 3,835 | 32,579 |
| 50,858 | 152 | 22,969 | 5,694 | 3,846 | 32,661 |
| 50,859 | 155 | 23,157 | 5,728 | 3,878 | 32,918 |
| 50,860 | 152 | 23,284 | 5,751 | 3,876 | 33,063 |
| 50,861 | 150 | 23,206 | 5,735 | 3,838 | 32,929 |
| 50,862 | 149 | 23,359 | 5,748 | 3,826 | 33,082 |
| 50,863 | 156 | 23,520 | 5,747 | 3,823 | 33,246 |
| 50,864 | 165 | 23,573 | 5,776 | 3,844 | 33,358 |
| 50,865 | 164 | 23,630 | 5,793 | 3,855 | 33,442 |
| 50,866 | 169 | 23,607 | 5,838 | 3,881 | 33,495 |
| 50,867 | 171 | 23,636 | 5,869 | 3,879 | 33,555 |
| 50,868 | 165 | 23,353 | 5,815 | 3,837 | 33,170 |
| 50,869 | 167 | 23,883 | 5,966 | 3,931 | 33,947 |
| 50,870 | 169 | 23,164 | 5,780 | 3,807 | 32,920 |
| 50,871 | 168 | 23,396 | 5,837 | 3,824 | 33,225 |

|        |     |        |       |       |        |
|--------|-----|--------|-------|-------|--------|
| 50,872 | 156 | 23,789 | 5,951 | 3,911 | 33,807 |
| 50,873 | 153 | 23,391 | 5,864 | 3,840 | 33,248 |
| 50,874 | 152 | 23,632 | 5,908 | 3,870 | 33,562 |
| 50,875 | 149 | 23,889 | 5,989 | 3,910 | 33,937 |
| 50,876 | 150 | 23,895 | 6,007 | 3,914 | 33,966 |
| 50,877 | 147 | 23,720 | 5,984 | 3,892 | 33,743 |
| 50,878 | 145 | 24,047 | 6,109 | 3,970 | 34,271 |
| 50,879 | 144 | 23,830 | 6,055 | 3,947 | 33,976 |
| 50,880 | 143 | 23,969 | 6,076 | 3,963 | 34,151 |
| 50,881 | 131 | 23,713 | 5,994 | 3,913 | 33,751 |
| 50,882 | 132 | 23,959 | 6,044 | 3,942 | 34,077 |
| 50,883 | 125 | 23,632 | 5,974 | 3,872 | 33,603 |
| 50,884 | 125 | 23,875 | 6,041 | 3,919 | 33,960 |
| 50,885 | 124 | 23,693 | 6,041 | 3,919 | 33,777 |
| 50,886 | 129 | 23,748 | 6,101 | 3,953 | 33,931 |
| 50,887 | 131 | 23,677 | 6,143 | 3,971 | 33,922 |
| 50,888 | 132 | 23,620 | 6,203 | 3,992 | 33,947 |
| 50,889 | 139 | 23,795 | 6,223 | 4,028 | 34,185 |
| 50,890 | 138 | 23,739 | 6,171 | 4,001 | 34,049 |
| 50,891 | 139 | 24,002 | 6,243 | 4,054 | 34,438 |
| 50,892 | 135 | 24,077 | 6,254 | 4,079 | 34,545 |
| 50,893 | 143 | 24,164 | 6,265 | 4,062 | 34,634 |
| 50,894 | 147 | 24,052 | 6,264 | 4,085 | 34,548 |
| 50,895 | 141 | 23,898 | 6,242 | 4,086 | 34,367 |
| 50,896 | 141 | 23,751 | 6,218 | 4,069 | 34,179 |
| 50,897 | 143 | 23,680 | 6,227 | 4,043 | 34,093 |
| 50,898 | 143 | 23,634 | 6,183 | 4,041 | 34,001 |
| 50,899 | 146 | 23,333 | 6,098 | 3,986 | 33,563 |
| 50,900 | 146 | 23,214 | 6,031 | 3,942 | 33,333 |
| 50,901 | 151 | 23,478 | 6,114 | 3,971 | 33,714 |
| 50,902 | 154 | 23,268 | 6,085 | 3,956 | 33,463 |
| 50,903 | 161 | 23,352 | 6,086 | 3,937 | 33,536 |

|        |     |        |       |       |        |
|--------|-----|--------|-------|-------|--------|
| 50,904 | 157 | 22,997 | 5,989 | 3,868 | 33,011 |
| 50,905 | 157 | 22,868 | 5,956 | 3,828 | 32,809 |
| 50,906 | 160 | 23,056 | 5,961 | 3,825 | 33,002 |
| 50,907 | 161 | 23,473 | 6,042 | 3,881 | 33,557 |
| 50,908 | 163 | 23,481 | 6,085 | 3,909 | 33,638 |
| 50,909 | 159 | 23,258 | 6,033 | 3,873 | 33,323 |
| 50,910 | 163 | 23,269 | 6,090 | 3,889 | 33,411 |
| 50,911 | 165 | 23,226 | 6,103 | 3,923 | 33,417 |
| 50,912 | 168 | 23,297 | 6,132 | 3,960 | 33,557 |
| 50,913 | 168 | 23,194 | 6,128 | 3,960 | 33,450 |
| 50,914 | 162 | 23,230 | 6,185 | 4,012 | 33,589 |
| 50,915 | 153 | 23,199 | 6,203 | 4,021 | 33,576 |
| 50,916 | 150 | 23,114 | 6,194 | 4,011 | 33,469 |
| 50,917 | 145 | 22,813 | 6,110 | 3,970 | 33,038 |
| 50,918 | 141 | 22,856 | 6,115 | 4,000 | 33,112 |
| 50,919 | 141 | 22,769 | 6,103 | 3,988 | 33,001 |
| 50,920 | 136 | 22,705 | 6,073 | 3,983 | 32,897 |
| 50,921 | 134 | 22,563 | 6,058 | 3,959 | 32,714 |
| 50,922 | 134 | 22,534 | 6,089 | 3,971 | 32,728 |
| 50,923 | 133 | 22,347 | 6,041 | 3,916 | 32,437 |
| 50,924 | 133 | 21,941 | 5,948 | 3,859 | 31,881 |
| 50,925 | 133 | 21,880 | 5,967 | 3,857 | 31,837 |
| 50,926 | 132 | 21,872 | 5,982 | 3,882 | 31,868 |
| 50,927 | 131 | 21,743 | 5,850 | 3,827 | 31,551 |
| 50,928 | 133 | 21,060 | 5,668 | 3,706 | 30,567 |
| 50,929 | 136 | 21,306 | 5,722 | 3,741 | 30,905 |
| 50,930 | 135 | 21,568 | 5,786 | 3,786 | 31,275 |
| 50,931 | 135 | 21,557 | 5,791 | 3,784 | 31,267 |
| 50,932 | 129 | 21,654 | 5,874 | 3,828 | 31,485 |
| 50,933 | 135 | 21,574 | 5,869 | 3,811 | 31,389 |
| 50,934 | 143 | 21,779 | 5,928 | 3,864 | 31,714 |
| 50,935 | 142 | 21,468 | 5,863 | 3,817 | 31,290 |



|        |     |        |       |       |        |
|--------|-----|--------|-------|-------|--------|
| 50,936 | 137 | 21,229 | 5,736 | 3,735 | 30,837 |
| 50,937 | 136 | 21,175 | 5,740 | 3,739 | 30,790 |
| 50,938 | 129 | 20,982 | 5,660 | 3,695 | 30,466 |
| 50,939 | 126 | 20,934 | 5,589 | 3,652 | 30,301 |
| 50,940 | 128 | 22,327 | 5,973 | 3,889 | 32,317 |
| 50,941 | 128 | 22,233 | 5,961 | 3,900 | 32,222 |
| 50,942 | 132 | 21,831 | 5,878 | 3,825 | 31,666 |
| 50,943 | 135 | 21,963 | 5,895 | 3,837 | 31,830 |
| 50,944 | 126 | 22,213 | 5,965 | 3,890 | 32,194 |
| 50,945 | 127 | 22,247 | 5,955 | 3,879 | 32,208 |
| 50,946 | 124 | 22,387 | 5,942 | 3,853 | 32,306 |
| 50,947 | 126 | 22,429 | 5,926 | 3,869 | 32,350 |
| 50,948 | 127 | 22,473 | 5,929 | 3,861 | 32,390 |
| 50,949 | 122 | 22,438 | 5,965 | 3,850 | 32,375 |
| 50,950 | 116 | 22,397 | 5,985 | 3,861 | 32,359 |
| 50,951 | 116 | 22,389 | 6,062 | 3,903 | 32,470 |
| 50,952 | 116 | 22,183 | 6,011 | 3,897 | 32,207 |
| 50,953 | 115 | 22,209 | 6,006 | 3,891 | 32,221 |
| 50,954 | 112 | 22,160 | 6,038 | 3,913 | 32,223 |
| 50,955 | 111 | 22,289 | 6,072 | 3,964 | 32,436 |
| 50,956 | 107 | 22,164 | 6,100 | 3,982 | 32,353 |
| 50,957 | 107 | 22,077 | 6,087 | 3,985 | 32,256 |
| 50,958 | 110 | 22,325 | 6,162 | 4,022 | 32,619 |
| 50,959 | 107 | 22,352 | 6,158 | 4,018 | 32,635 |
| 50,960 | 105 | 22,424 | 6,161 | 3,997 | 32,687 |
| 50,961 | 106 | 22,437 | 6,215 | 4,025 | 32,783 |
| 50,962 | 105 | 22,584 | 6,270 | 4,044 | 33,003 |
| 50,963 | 109 | 22,459 | 6,236 | 4,010 | 32,814 |
| 50,964 | 109 | 22,386 | 6,206 | 3,989 | 32,690 |
| 50,965 | 116 | 23,065 | 6,349 | 4,127 | 33,657 |
| 50,966 | 121 | 23,234 | 6,332 | 4,124 | 33,811 |
| 50,967 | 120 | 23,050 | 6,282 | 4,085 | 33,537 |

|        |     |        |       |       |        |
|--------|-----|--------|-------|-------|--------|
| 50,968 | 120 | 23,205 | 6,301 | 4,085 | 33,711 |
| 50,969 | 122 | 23,454 | 6,355 | 4,146 | 34,077 |
| 50,970 | 121 | 23,714 | 6,388 | 4,186 | 34,409 |
| 50,971 | 121 | 23,522 | 6,348 | 4,168 | 34,159 |
| 50,972 | 119 | 23,557 | 6,408 | 4,194 | 34,278 |
| 50,973 | 120 | 23,480 | 6,390 | 4,183 | 34,173 |
| 50,974 | 120 | 23,445 | 6,379 | 4,182 | 34,126 |
| 50,975 | 120 | 23,235 | 6,321 | 4,166 | 33,842 |
| 50,976 | 130 | 23,304 | 6,342 | 4,165 | 33,941 |
| 50,977 | 128 | 23,074 | 6,300 | 4,131 | 33,633 |
| 50,978 | 126 | 22,914 | 6,305 | 4,128 | 33,473 |
| 50,979 | 121 | 22,775 | 6,286 | 4,108 | 33,290 |
| 50,980 | 132 | 23,641 | 6,474 | 4,245 | 34,492 |
| 50,981 | 132 | 23,593 | 6,479 | 4,241 | 34,445 |
| 50,982 | 132 | 23,595 | 6,474 | 4,229 | 34,430 |
| 50,983 | 136 | 23,796 | 6,497 | 4,267 | 34,696 |
| 50,984 | 134 | 23,865 | 6,539 | 4,285 | 34,823 |
| 50,985 | 139 | 24,153 | 6,570 | 4,335 | 35,197 |
| 50,986 | 139 | 24,153 | 6,582 | 4,341 | 35,215 |
| 50,987 | 143 | 23,981 | 6,493 | 4,279 | 34,896 |
| 50,988 | 143 | 23,781 | 6,450 | 4,268 | 34,642 |
| 50,989 | 144 | 24,248 | 6,590 | 4,340 | 35,322 |
| 50,990 | 147 | 24,257 | 6,598 | 4,360 | 35,362 |
| 50,991 | 145 | 24,140 | 6,574 | 4,332 | 35,191 |
| 50,992 | 146 | 24,115 | 6,576 | 4,318 | 35,155 |
| 50,993 | 144 | 24,055 | 6,596 | 4,332 | 35,127 |
| 50,994 | 144 | 23,918 | 6,621 | 4,306 | 34,989 |
| 50,995 | 144 | 23,941 | 6,649 | 4,320 | 35,054 |
| 50,996 | 148 | 23,704 | 6,603 | 4,284 | 34,739 |
| 50,997 | 147 | 23,557 | 6,584 | 4,295 | 34,583 |
| 50,998 | 143 | 23,560 | 6,655 | 4,322 | 34,680 |
| 50,999 | 145 | 23,595 | 6,674 | 4,354 | 34,768 |

|        |     |        |       |       |        |
|--------|-----|--------|-------|-------|--------|
| 51,000 | 144 | 23,690 | 6,705 | 4,358 | 34,897 |
| 51,001 | 145 | 23,672 | 6,664 | 4,349 | 34,830 |
| 51,002 | 144 | 23,615 | 6,643 | 4,343 | 34,745 |
| 51,003 | 139 | 23,715 | 6,673 | 4,351 | 34,878 |
| 51,004 | 134 | 23,687 | 6,696 | 4,358 | 34,875 |
| 51,005 | 138 | 23,719 | 6,712 | 4,328 | 34,897 |
| 51,006 | 138 | 23,616 | 6,647 | 4,291 | 34,692 |
| 51,007 | 144 | 23,489 | 6,594 | 4,261 | 34,488 |
| 51,008 | 145 | 23,213 | 6,531 | 4,236 | 34,125 |
| 51,009 | 145 | 23,241 | 6,530 | 4,232 | 34,148 |
| 51,010 | 142 | 23,004 | 6,493 | 4,216 | 33,855 |
| 51,011 | 138 | 22,696 | 6,460 | 4,201 | 33,495 |
| 51,012 | 137 | 22,836 | 6,464 | 4,204 | 33,641 |
| 51,013 | 131 | 22,322 | 6,288 | 4,112 | 32,853 |
| 51,014 | 130 | 22,534 | 6,358 | 4,140 | 33,162 |
| 51,015 | 128 | 22,541 | 6,382 | 4,160 | 33,211 |
| 51,016 | 126 | 22,441 | 6,386 | 4,121 | 33,074 |
| 51,017 | 121 | 22,186 | 6,361 | 4,101 | 32,769 |
| 51,018 | 122 | 22,370 | 6,393 | 4,164 | 33,049 |
| 51,019 | 123 | 22,374 | 6,404 | 4,176 | 33,077 |
| 51,020 | 123 | 22,290 | 6,436 | 4,125 | 32,974 |
| 51,021 | 126 | 22,193 | 6,422 | 4,110 | 32,851 |
| 51,022 | 126 | 22,202 | 6,423 | 4,127 | 32,878 |
| 51,023 | 125 | 22,232 | 6,442 | 4,129 | 32,928 |
| 51,024 | 126 | 22,299 | 6,411 | 4,147 | 32,983 |
| 51,025 | 126 | 22,415 | 6,445 | 4,167 | 33,153 |
| 51,026 | 128 | 22,442 | 6,462 | 4,163 | 33,195 |
| 51,027 | 117 | 22,265 | 6,403 | 4,154 | 32,939 |
| 51,028 | 114 | 22,471 | 6,481 | 4,211 | 33,277 |
| 51,029 | 114 | 22,583 | 6,519 | 4,220 | 33,436 |
| 51,030 | 112 | 22,652 | 6,534 | 4,248 | 33,546 |
| 51,031 | 103 | 22,453 | 6,606 | 4,275 | 33,437 |

|        |     |        |       |       |        |
|--------|-----|--------|-------|-------|--------|
| 51,032 | 103 | 22,698 | 6,721 | 4,331 | 33,853 |
| 51,033 | 94  | 22,598 | 6,705 | 4,328 | 33,725 |
| 51,034 | 93  | 22,552 | 6,717 | 4,353 | 33,715 |
| 51,035 | 92  | 23,004 | 6,874 | 4,447 | 34,417 |
| 51,036 | 89  | 23,013 | 6,970 | 4,479 | 34,551 |
| 51,037 | 82  | 22,664 | 6,853 | 4,417 | 34,016 |
| 51,038 | 83  | 22,762 | 6,911 | 4,474 | 34,230 |
| 51,039 | 82  | 23,071 | 7,003 | 4,520 | 34,676 |
| 51,040 | 83  | 22,807 | 6,955 | 4,498 | 34,343 |
| 51,041 | 79  | 22,545 | 6,942 | 4,485 | 34,051 |
| 51,042 | 81  | 23,203 | 7,142 | 4,606 | 35,032 |
| 51,043 | 79  | 23,244 | 7,127 | 4,606 | 35,056 |
| 51,044 | 78  | 23,413 | 7,173 | 4,618 | 35,282 |
| 51,045 | 78  | 23,541 | 7,229 | 4,637 | 35,485 |
| 51,046 | 78  | 23,529 | 7,244 | 4,659 | 35,510 |
| 51,047 | 70  | 23,301 | 7,173 | 4,615 | 35,159 |
| 51,048 | 72  | 23,461 | 7,227 | 4,644 | 35,404 |
| 51,049 | 73  | 23,523 | 7,210 | 4,626 | 35,432 |
| 51,050 | 71  | 23,286 | 7,123 | 4,577 | 35,057 |
| 51,051 | 74  | 23,234 | 7,148 | 4,586 | 35,042 |
| 51,052 | 77  | 23,107 | 7,151 | 4,560 | 34,895 |
| 51,053 | 77  | 22,964 | 7,111 | 4,531 | 34,683 |
| 51,054 | 77  | 22,768 | 7,069 | 4,506 | 34,420 |
| 51,055 | 79  | 23,432 | 7,208 | 4,591 | 35,310 |
| 51,056 | 76  | 23,349 | 7,175 | 4,614 | 35,214 |
| 51,057 | 68  | 22,939 | 7,058 | 4,533 | 34,598 |
| 51,058 | 71  | 23,125 | 7,098 | 4,552 | 34,846 |
| 51,059 | 69  | 23,418 | 7,188 | 4,603 | 35,278 |
| 51,060 | 73  | 23,340 | 7,167 | 4,557 | 35,137 |
| 51,061 | 73  | 23,595 | 7,218 | 4,596 | 35,482 |
| 51,062 | 71  | 23,631 | 7,209 | 4,598 | 35,509 |
| 51,063 | 75  | 23,604 | 7,202 | 4,580 | 35,461 |

|        |     |        |       |       |        |
|--------|-----|--------|-------|-------|--------|
| 51,064 | 75  | 23,372 | 7,141 | 4,524 | 35,112 |
| 51,065 | 76  | 23,411 | 7,150 | 4,527 | 35,164 |
| 51,066 | 76  | 23,105 | 7,057 | 4,460 | 34,698 |
| 51,067 | 73  | 23,031 | 7,048 | 4,472 | 34,624 |
| 51,068 | 77  | 23,259 | 7,112 | 4,507 | 34,955 |
| 51,069 | 76  | 23,215 | 7,085 | 4,468 | 34,844 |
| 51,070 | 73  | 23,157 | 7,044 | 4,457 | 34,731 |
| 51,071 | 72  | 23,036 | 6,948 | 4,439 | 34,495 |
| 51,072 | 69  | 22,774 | 6,890 | 4,401 | 34,134 |
| 51,073 | 69  | 22,508 | 6,806 | 4,361 | 33,744 |
| 51,074 | 68  | 22,171 | 6,718 | 4,328 | 33,285 |
| 51,075 | 71  | 22,480 | 6,847 | 4,378 | 33,776 |
| 51,076 | 74  | 22,623 | 6,854 | 4,396 | 33,947 |
| 51,077 | 75  | 22,663 | 6,853 | 4,381 | 33,972 |
| 51,078 | 76  | 22,751 | 6,866 | 4,399 | 34,092 |
| 51,079 | 76  | 22,709 | 6,861 | 4,395 | 34,041 |
| 51,080 | 77  | 22,616 | 6,832 | 4,357 | 33,882 |
| 51,081 | 80  | 22,057 | 6,573 | 4,201 | 32,911 |
| 51,082 | 84  | 22,468 | 6,610 | 4,245 | 33,407 |
| 51,083 | 87  | 22,562 | 6,599 | 4,248 | 33,496 |
| 51,084 | 87  | 22,334 | 6,498 | 4,175 | 33,094 |
| 51,085 | 86  | 22,758 | 6,555 | 4,214 | 33,613 |
| 51,086 | 89  | 22,632 | 6,482 | 4,169 | 33,372 |
| 51,087 | 88  | 22,386 | 6,341 | 4,099 | 32,914 |
| 51,088 | 91  | 22,083 | 6,210 | 4,025 | 32,409 |
| 51,089 | 90  | 22,002 | 6,217 | 4,024 | 32,333 |
| 51,090 | 88  | 21,925 | 6,176 | 4,014 | 32,203 |
| 51,091 | 94  | 22,064 | 6,122 | 3,991 | 32,271 |
| 51,092 | 99  | 22,270 | 6,159 | 4,026 | 32,554 |
| 51,093 | 104 | 21,945 | 6,074 | 3,963 | 32,086 |
| 51,094 | 105 | 21,765 | 6,054 | 3,948 | 31,872 |
| 51,095 | 105 | 21,992 | 6,130 | 3,997 | 32,224 |

|        |     |        |       |       |        |
|--------|-----|--------|-------|-------|--------|
| 51,096 | 112 | 22,026 | 6,136 | 4,016 | 32,290 |
| 51,097 | 114 | 22,229 | 6,162 | 4,042 | 32,547 |
| 51,098 | 114 | 22,261 | 6,196 | 4,040 | 32,611 |
| 51,099 | 116 | 22,246 | 6,183 | 4,045 | 32,590 |
| 51,100 | 121 | 22,264 | 6,194 | 4,045 | 32,624 |
| 51,101 | 118 | 22,137 | 6,188 | 4,035 | 32,478 |
| 51,102 | 114 | 22,634 | 6,269 | 4,129 | 33,146 |
| 51,103 | 115 | 22,743 | 6,221 | 4,130 | 33,209 |
| 51,104 | 119 | 22,793 | 6,248 | 4,128 | 33,288 |
| 51,105 | 117 | 22,716 | 6,231 | 4,098 | 33,162 |
| 51,106 | 119 | 22,899 | 6,286 | 4,118 | 33,422 |
| 51,107 | 123 | 23,109 | 6,377 | 4,138 | 33,747 |
| 51,108 | 129 | 23,254 | 6,448 | 4,146 | 33,977 |
| 51,109 | 128 | 23,011 | 6,378 | 4,094 | 33,611 |
| 51,110 | 133 | 23,242 | 6,439 | 4,127 | 33,941 |
| 51,111 | 130 | 23,192 | 6,445 | 4,124 | 33,891 |
| 51,112 | 138 | 23,614 | 6,526 | 4,155 | 34,433 |
| 51,113 | 139 | 23,533 | 6,483 | 4,119 | 34,274 |
| 51,114 | 138 | 23,548 | 6,491 | 4,120 | 34,297 |
| 51,115 | 140 | 23,504 | 6,499 | 4,123 | 34,266 |
| 51,116 | 140 | 23,544 | 6,511 | 4,140 | 34,335 |
| 51,117 | 145 | 23,394 | 6,463 | 4,078 | 34,080 |
| 51,118 | 145 | 23,238 | 6,450 | 4,041 | 33,874 |
| 51,119 | 148 | 23,697 | 6,571 | 4,109 | 34,525 |
| 51,120 | 148 | 23,733 | 6,585 | 4,113 | 34,579 |
| 51,121 | 155 | 23,859 | 6,681 | 4,154 | 34,849 |
| 51,122 | 156 | 23,856 | 6,727 | 4,166 | 34,905 |
| 51,123 | 164 | 23,590 | 6,658 | 4,082 | 34,494 |
| 51,124 | 166 | 23,653 | 6,690 | 4,079 | 34,588 |
| 51,125 | 169 | 23,578 | 6,668 | 4,049 | 34,464 |
| 51,126 | 173 | 23,483 | 6,657 | 4,024 | 34,337 |
| 51,127 | 176 | 24,460 | 6,960 | 4,193 | 35,789 |

|        |     |        |       |       |        |
|--------|-----|--------|-------|-------|--------|
| 51,128 | 173 | 24,250 | 6,898 | 4,158 | 35,479 |
| 51,129 | 180 | 23,976 | 6,842 | 4,103 | 35,101 |
| 51,130 | 181 | 23,730 | 6,791 | 4,062 | 34,764 |
| 51,131 | 182 | 23,820 | 6,871 | 4,127 | 35,000 |
| 51,132 | 182 | 23,595 | 6,875 | 4,114 | 34,766 |
| 51,133 | 181 | 23,613 | 6,921 | 4,113 | 34,828 |
| 51,134 | 176 | 23,319 | 6,864 | 4,053 | 34,412 |
| 51,135 | 176 | 22,835 | 6,809 | 3,998 | 33,818 |
| 51,136 | 176 | 22,585 | 6,792 | 3,969 | 33,522 |
| 51,137 | 174 | 22,804 | 6,885 | 4,031 | 33,894 |
| 51,138 | 175 | 22,648 | 6,885 | 4,003 | 33,711 |
| 51,139 | 171 | 22,783 | 6,995 | 4,054 | 34,003 |
| 51,140 | 173 | 22,533 | 6,939 | 4,000 | 33,645 |
| 51,141 | 175 | 22,656 | 6,995 | 4,039 | 33,865 |
| 51,142 | 169 | 22,537 | 6,987 | 4,039 | 33,732 |
| 51,143 | 164 | 22,498 | 6,976 | 4,033 | 33,671 |
| 51,144 | 156 | 21,803 | 6,787 | 3,912 | 32,658 |
| 51,145 | 156 | 22,004 | 6,805 | 3,924 | 32,889 |
| 51,146 | 150 | 22,187 | 6,842 | 3,969 | 33,148 |
| 51,147 | 147 | 22,148 | 6,803 | 3,948 | 33,046 |
| 51,148 | 147 | 21,955 | 6,722 | 3,902 | 32,726 |
| 51,149 | 145 | 22,080 | 6,723 | 3,904 | 32,852 |
| 51,150 | 141 | 22,142 | 6,722 | 3,905 | 32,910 |
| 51,151 | 146 | 22,228 | 6,805 | 3,957 | 33,136 |
| 51,152 | 144 | 21,873 | 6,708 | 3,884 | 32,609 |
| 51,153 | 148 | 22,068 | 6,778 | 3,908 | 32,902 |
| 51,154 | 154 | 21,994 | 6,812 | 3,900 | 32,860 |
| 51,155 | 150 | 21,799 | 6,740 | 3,857 | 32,546 |
| 51,156 | 150 | 21,722 | 6,727 | 3,854 | 32,453 |
| 51,157 | 147 | 21,460 | 6,692 | 3,856 | 32,155 |
| 51,158 | 142 | 21,210 | 6,677 | 3,850 | 31,879 |
| 51,159 | 135 | 20,870 | 6,612 | 3,854 | 31,471 |

|        |     |        |       |       |        |
|--------|-----|--------|-------|-------|--------|
| 51,160 | 136 | 21,019 | 6,684 | 3,896 | 31,735 |
| 51,161 | 132 | 21,129 | 6,755 | 3,951 | 31,967 |
| 51,162 | 134 | 21,218 | 6,810 | 4,016 | 32,178 |
| 51,163 | 128 | 20,904 | 6,692 | 3,959 | 31,683 |
| 51,164 | 127 | 20,975 | 6,724 | 3,996 | 31,822 |
| 51,165 | 129 | 21,074 | 6,739 | 4,011 | 31,953 |
| 51,166 | 129 | 20,860 | 6,684 | 3,989 | 31,662 |
| 51,167 | 129 | 21,341 | 6,854 | 4,082 | 32,406 |
| 51,168 | 130 | 21,378 | 6,880 | 4,112 | 32,500 |
| 51,169 | 134 | 21,255 | 6,889 | 4,107 | 32,385 |
| 51,170 | 129 | 21,187 | 6,892 | 4,108 | 32,316 |
| 51,171 | 130 | 21,346 | 6,927 | 4,140 | 32,543 |
| 51,172 | 123 | 21,385 | 6,924 | 4,149 | 32,581 |
| 51,173 | 124 | 21,462 | 6,946 | 4,156 | 32,688 |
| 51,174 | 118 | 21,593 | 6,952 | 4,152 | 32,815 |
| 51,175 | 123 | 21,449 | 6,939 | 4,182 | 32,693 |
| 51,176 | 123 | 21,557 | 6,964 | 4,201 | 32,845 |
| 51,177 | 115 | 21,480 | 6,872 | 4,178 | 32,645 |
| 51,178 | 115 | 21,435 | 6,835 | 4,170 | 32,555 |
| 51,179 | 111 | 21,368 | 6,770 | 4,126 | 32,375 |
| 51,180 | 111 | 21,437 | 6,763 | 4,131 | 32,442 |
| 51,181 | 111 | 21,240 | 6,689 | 4,078 | 32,118 |
| 51,182 | 110 | 21,104 | 6,642 | 4,041 | 31,897 |
| 51,183 | 111 | 22,141 | 6,900 | 4,261 | 33,413 |
| 51,184 | 108 | 21,868 | 6,796 | 4,225 | 32,997 |
| 51,185 | 110 | 22,069 | 6,838 | 4,275 | 33,292 |
| 51,186 | 108 | 21,894 | 6,744 | 4,228 | 32,974 |
| 51,187 | 110 | 21,986 | 6,814 | 4,267 | 33,177 |
| 51,188 | 110 | 22,023 | 6,833 | 4,288 | 33,254 |
| 51,189 | 115 | 22,057 | 6,848 | 4,278 | 33,298 |
| 51,190 | 115 | 22,156 | 6,852 | 4,292 | 33,415 |
| 51,191 | 115 | 22,184 | 6,856 | 4,284 | 33,439 |



|        |     |        |       |       |        |
|--------|-----|--------|-------|-------|--------|
| 51,192 | 113 | 22,268 | 6,863 | 4,283 | 33,527 |
| 51,193 | 111 | 22,009 | 6,770 | 4,220 | 33,110 |
| 51,194 | 111 | 22,251 | 6,827 | 4,247 | 33,436 |
| 51,195 | 108 | 22,038 | 6,744 | 4,204 | 33,094 |
| 51,196 | 108 | 22,060 | 6,745 | 4,206 | 33,119 |
| 51,197 | 108 | 21,918 | 6,716 | 4,179 | 32,921 |
| 51,198 | 108 | 21,963 | 6,780 | 4,208 | 33,059 |
| 51,199 | 105 | 21,748 | 6,770 | 4,181 | 32,804 |
| 51,200 | 105 | 21,667 | 6,753 | 4,188 | 32,713 |
| 51,201 | 105 | 21,642 | 6,740 | 4,183 | 32,670 |
| 51,202 | 102 | 21,790 | 6,731 | 4,195 | 32,818 |
| 51,203 | 103 | 21,612 | 6,675 | 4,147 | 32,537 |
| 51,204 | 98  | 21,450 | 6,608 | 4,135 | 32,291 |
| 51,205 | 94  | 21,668 | 6,695 | 4,176 | 32,633 |
| 51,206 | 95  | 21,616 | 6,669 | 4,166 | 32,546 |
| 51,207 | 98  | 21,136 | 6,412 | 4,035 | 31,681 |
| 51,208 | 100 | 21,507 | 6,471 | 4,068 | 32,146 |
| 51,209 | 101 | 21,786 | 6,544 | 4,101 | 32,532 |
| 51,210 | 99  | 21,675 | 6,512 | 4,057 | 32,343 |
| 51,211 | 103 | 21,900 | 6,548 | 4,091 | 32,642 |
| 51,212 | 106 | 21,711 | 6,471 | 4,026 | 32,314 |
| 51,213 | 105 | 21,657 | 6,433 | 3,955 | 32,150 |
| 51,214 | 101 | 21,223 | 6,332 | 3,889 | 31,545 |
| 51,215 | 101 | 21,110 | 6,325 | 3,862 | 31,398 |
| 51,216 | 98  | 20,860 | 6,292 | 3,848 | 31,098 |
| 51,217 | 101 | 21,178 | 6,318 | 3,869 | 31,466 |
| 51,218 | 99  | 21,263 | 6,293 | 3,849 | 31,504 |
| 51,219 | 95  | 21,306 | 6,272 | 3,840 | 31,513 |
| 51,220 | 92  | 21,023 | 6,200 | 3,797 | 31,112 |
| 51,221 | 91  | 21,212 | 6,235 | 3,824 | 31,362 |
| 51,222 | 90  | 20,924 | 6,230 | 3,791 | 31,035 |
| 51,223 | 91  | 20,721 | 6,193 | 3,783 | 30,788 |

|        |     |        |       |       |        |
|--------|-----|--------|-------|-------|--------|
| 51,224 | 90  | 20,982 | 6,253 | 3,827 | 31,152 |
| 51,225 | 82  | 20,663 | 6,180 | 3,782 | 30,707 |
| 51,226 | 83  | 20,797 | 6,228 | 3,810 | 30,918 |
| 51,227 | 78  | 20,673 | 6,197 | 3,793 | 30,741 |
| 51,228 | 75  | 20,242 | 6,106 | 3,753 | 30,176 |
| 51,229 | 75  | 20,020 | 6,076 | 3,730 | 29,901 |
| 51,230 | 80  | 20,405 | 6,187 | 3,814 | 30,486 |
| 51,231 | 84  | 20,402 | 6,232 | 3,799 | 30,517 |
| 51,232 | 86  | 20,542 | 6,263 | 3,808 | 30,699 |
| 51,233 | 84  | 20,393 | 6,252 | 3,792 | 30,521 |
| 51,234 | 86  | 20,240 | 6,194 | 3,738 | 30,258 |
| 51,235 | 86  | 20,538 | 6,250 | 3,755 | 30,629 |
| 51,236 | 91  | 20,911 | 6,374 | 3,824 | 31,200 |
| 51,237 | 90  | 20,937 | 6,387 | 3,811 | 31,225 |
| 51,238 | 93  | 20,967 | 6,387 | 3,807 | 31,254 |
| 51,239 | 97  | 20,666 | 6,286 | 3,740 | 30,789 |
| 51,240 | 91  | 20,505 | 6,199 | 3,709 | 30,504 |
| 51,241 | 98  | 21,001 | 6,337 | 3,809 | 31,245 |
| 51,242 | 97  | 20,707 | 6,235 | 3,764 | 30,803 |
| 51,243 | 98  | 20,402 | 6,155 | 3,712 | 30,367 |
| 51,244 | 98  | 20,880 | 6,354 | 3,823 | 31,155 |
| 51,245 | 98  | 20,573 | 6,299 | 3,798 | 30,768 |
| 51,246 | 102 | 20,555 | 6,310 | 3,819 | 30,786 |
| 51,247 | 104 | 20,926 | 6,447 | 3,898 | 31,375 |
| 51,248 | 108 | 20,984 | 6,449 | 3,892 | 31,433 |
| 51,249 | 109 | 21,444 | 6,566 | 3,961 | 32,080 |
| 51,250 | 124 | 21,759 | 6,643 | 4,001 | 32,527 |
| 51,251 | 126 | 21,935 | 6,706 | 4,012 | 32,779 |
| 51,252 | 125 | 21,631 | 6,638 | 3,970 | 32,364 |
| 51,253 | 126 | 22,031 | 6,743 | 4,022 | 32,922 |
| 51,254 | 124 | 21,889 | 6,685 | 3,984 | 32,682 |
| 51,255 | 125 | 21,761 | 6,622 | 3,927 | 32,435 |

|        |     |        |       |       |        |
|--------|-----|--------|-------|-------|--------|
| 51,256 | 131 | 22,281 | 6,860 | 4,077 | 33,349 |
| 51,257 | 130 | 21,928 | 6,772 | 4,044 | 32,874 |
| 51,258 | 125 | 21,944 | 6,840 | 4,057 | 32,966 |
| 51,259 | 127 | 22,099 | 6,895 | 4,116 | 33,237 |
| 51,260 | 120 | 21,587 | 6,748 | 4,055 | 32,510 |
| 51,261 | 123 | 21,785 | 6,767 | 4,086 | 32,761 |
| 51,262 | 123 | 21,913 | 6,816 | 4,121 | 32,973 |
| 51,263 | 126 | 21,959 | 6,873 | 4,154 | 33,112 |
| 51,264 | 127 | 22,017 | 6,885 | 4,174 | 33,203 |
| 51,265 | 128 | 21,990 | 6,839 | 4,166 | 33,123 |
| 51,266 | 136 | 22,239 | 6,920 | 4,212 | 33,507 |
| 51,267 | 140 | 22,289 | 6,943 | 4,205 | 33,577 |
| 51,268 | 138 | 22,370 | 6,961 | 4,205 | 33,674 |
| 51,269 | 147 | 22,314 | 6,950 | 4,217 | 33,628 |
| 51,270 | 156 | 22,337 | 6,997 | 4,236 | 33,726 |
| 51,271 | 158 | 22,497 | 6,989 | 4,236 | 33,880 |
| 51,272 | 162 | 22,350 | 6,902 | 4,181 | 33,595 |
| 51,273 | 164 | 22,370 | 6,832 | 4,162 | 33,528 |
| 51,274 | 172 | 23,245 | 7,044 | 4,259 | 34,720 |
| 51,275 | 178 | 22,453 | 6,803 | 4,067 | 33,501 |
| 51,276 | 182 | 22,743 | 6,892 | 4,102 | 33,919 |
| 51,277 | 185 | 23,026 | 6,955 | 4,131 | 34,297 |
| 51,278 | 185 | 23,102 | 6,949 | 4,127 | 34,363 |
| 51,279 | 182 | 23,312 | 7,036 | 4,145 | 34,675 |
| 51,280 | 180 | 23,193 | 7,001 | 4,135 | 34,509 |
| 51,281 | 174 | 23,281 | 7,100 | 4,182 | 34,737 |
| 51,282 | 171 | 23,241 | 7,072 | 4,177 | 34,661 |
| 51,283 | 168 | 23,011 | 6,991 | 4,147 | 34,317 |
| 51,284 | 173 | 23,270 | 7,050 | 4,179 | 34,672 |
| 51,285 | 174 | 23,174 | 7,068 | 4,200 | 34,616 |
| 51,286 | 175 | 22,909 | 7,090 | 4,224 | 34,398 |
| 51,287 | 170 | 22,802 | 7,013 | 4,198 | 34,183 |

|        |     |        |       |       |        |
|--------|-----|--------|-------|-------|--------|
| 51,288 | 174 | 22,783 | 7,005 | 4,183 | 34,145 |
| 51,289 | 175 | 22,774 | 6,950 | 4,164 | 34,063 |
| 51,290 | 171 | 22,577 | 6,914 | 4,146 | 33,808 |
| 51,291 | 169 | 22,658 | 6,932 | 4,164 | 33,923 |
| 51,292 | 170 | 22,759 | 6,915 | 4,132 | 33,976 |
| 51,293 | 170 | 22,830 | 6,903 | 4,123 | 34,026 |
| 51,294 | 172 | 22,625 | 6,821 | 4,105 | 33,723 |
| 51,295 | 172 | 22,624 | 6,795 | 4,092 | 33,683 |
| 51,296 | 174 | 22,718 | 6,800 | 4,088 | 33,780 |
| 51,297 | 173 | 22,402 | 6,712 | 4,026 | 33,313 |
| 51,298 | 174 | 22,603 | 6,753 | 4,054 | 33,584 |
| 51,299 | 175 | 22,574 | 6,736 | 4,065 | 33,550 |
| 51,300 | 178 | 22,774 | 6,737 | 4,049 | 33,738 |
| 51,301 | 170 | 22,970 | 6,784 | 4,094 | 34,018 |
| 51,302 | 171 | 22,991 | 6,767 | 4,092 | 34,021 |
| 51,303 | 166 | 22,581 | 6,595 | 4,004 | 33,346 |
| 51,304 | 167 | 22,732 | 6,612 | 4,022 | 33,533 |
| 51,305 | 166 | 23,048 | 6,601 | 4,031 | 33,846 |
| 51,306 | 168 | 23,109 | 6,567 | 4,003 | 33,847 |
| 51,307 | 169 | 23,231 | 6,546 | 3,981 | 33,927 |
| 51,308 | 173 | 23,235 | 6,486 | 3,966 | 33,860 |
| 51,309 | 174 | 23,332 | 6,468 | 3,958 | 33,932 |
| 51,310 | 173 | 23,355 | 6,513 | 3,963 | 34,004 |
| 51,311 | 180 | 23,642 | 6,563 | 3,986 | 34,371 |
| 51,312 | 178 | 23,557 | 6,571 | 3,942 | 34,248 |
| 51,313 | 178 | 23,767 | 6,528 | 3,954 | 34,427 |
| 51,314 | 176 | 23,837 | 6,514 | 3,923 | 34,450 |
| 51,315 | 174 | 23,747 | 6,479 | 3,914 | 34,314 |
| 51,316 | 172 | 23,754 | 6,456 | 3,909 | 34,291 |
| 51,317 | 164 | 23,967 | 6,475 | 3,928 | 34,534 |
| 51,318 | 166 | 23,953 | 6,457 | 3,929 | 34,505 |
| 51,319 | 167 | 23,947 | 6,449 | 3,926 | 34,489 |

|        |     |        |       |       |        |
|--------|-----|--------|-------|-------|--------|
| 51,320 | 157 | 24,091 | 6,469 | 3,917 | 34,634 |
| 51,321 | 155 | 24,134 | 6,453 | 3,926 | 34,668 |
| 51,322 | 152 | 23,822 | 6,388 | 3,889 | 34,251 |
| 51,323 | 153 | 24,209 | 6,445 | 3,954 | 34,761 |
| 51,324 | 158 | 24,450 | 6,506 | 3,959 | 35,073 |
| 51,325 | 150 | 24,471 | 6,514 | 3,962 | 35,097 |
| 51,326 | 143 | 24,470 | 6,430 | 3,968 | 35,011 |
| 51,327 | 140 | 24,693 | 6,461 | 4,012 | 35,306 |
| 51,328 | 136 | 24,661 | 6,432 | 4,001 | 35,230 |
| 51,329 | 135 | 24,348 | 6,366 | 3,965 | 34,814 |
| 51,330 | 140 | 24,619 | 6,441 | 3,999 | 35,199 |
| 51,331 | 144 | 24,612 | 6,396 | 3,985 | 35,137 |
| 51,332 | 149 | 24,913 | 6,428 | 4,010 | 35,500 |
| 51,333 | 150 | 25,022 | 6,420 | 4,008 | 35,600 |
| 51,334 | 150 | 24,983 | 6,384 | 4,007 | 35,524 |
| 51,335 | 155 | 25,054 | 6,371 | 4,019 | 35,599 |
| 51,336 | 158 | 25,044 | 6,303 | 3,981 | 35,486 |
| 51,337 | 158 | 25,097 | 6,270 | 3,957 | 35,482 |
| 51,338 | 157 | 24,885 | 6,291 | 3,953 | 35,286 |
| 51,339 | 158 | 24,987 | 6,304 | 3,983 | 35,432 |
| 51,340 | 149 | 24,703 | 6,217 | 3,922 | 34,991 |
| 51,341 | 148 | 24,855 | 6,261 | 3,925 | 35,189 |
| 51,342 | 149 | 24,848 | 6,269 | 3,927 | 35,193 |
| 51,343 | 148 | 24,598 | 6,266 | 3,934 | 34,946 |
| 51,344 | 147 | 24,323 | 6,206 | 3,871 | 34,547 |
| 51,345 | 151 | 24,521 | 6,227 | 3,873 | 34,772 |
| 51,346 | 146 | 24,777 | 6,253 | 3,898 | 35,074 |
| 51,347 | 144 | 24,490 | 6,183 | 3,870 | 34,687 |
| 51,348 | 147 | 24,036 | 6,103 | 3,797 | 34,083 |
| 51,349 | 151 | 24,221 | 6,091 | 3,792 | 34,255 |
| 51,350 | 152 | 24,495 | 6,114 | 3,803 | 34,564 |
| 51,351 | 153 | 24,322 | 6,087 | 3,822 | 34,384 |

|        |     |        |       |       |        |
|--------|-----|--------|-------|-------|--------|
| 51,352 | 151 | 24,230 | 6,019 | 3,782 | 34,182 |
| 51,353 | 147 | 23,920 | 5,923 | 3,728 | 33,718 |
| 51,354 | 154 | 23,561 | 5,893 | 3,676 | 33,284 |
| 51,355 | 153 | 23,604 | 5,872 | 3,674 | 33,303 |
| 51,356 | 151 | 23,406 | 5,846 | 3,645 | 33,048 |
| 51,357 | 147 | 23,390 | 5,851 | 3,670 | 33,058 |
| 51,358 | 143 | 23,305 | 5,861 | 3,685 | 32,994 |
| 51,359 | 146 | 23,330 | 5,844 | 3,677 | 32,997 |
| 51,360 | 142 | 23,592 | 5,890 | 3,707 | 33,331 |
| 51,361 | 143 | 23,375 | 5,799 | 3,664 | 32,981 |
| 51,362 | 144 | 23,635 | 5,869 | 3,710 | 33,358 |
| 51,363 | 154 | 23,651 | 5,870 | 3,742 | 33,417 |
| 51,364 | 156 | 23,512 | 5,903 | 3,735 | 33,306 |
| 51,365 | 160 | 23,575 | 5,895 | 3,730 | 33,360 |
| 51,366 | 162 | 23,726 | 5,927 | 3,738 | 33,553 |
| 51,367 | 169 | 23,805 | 5,898 | 3,729 | 33,601 |
| 51,368 | 168 | 23,470 | 5,816 | 3,684 | 33,138 |
| 51,369 | 168 | 23,606 | 5,809 | 3,697 | 33,280 |
| 51,370 | 166 | 23,259 | 5,713 | 3,650 | 32,788 |
| 51,371 | 164 | 23,131 | 5,683 | 3,637 | 32,615 |
| 51,372 | 157 | 22,942 | 5,630 | 3,597 | 32,326 |
| 51,373 | 157 | 22,614 | 5,540 | 3,539 | 31,850 |
| 51,374 | 158 | 22,120 | 5,452 | 3,479 | 31,209 |
| 51,375 | 160 | 22,726 | 5,611 | 3,627 | 32,124 |
| 51,376 | 165 | 22,597 | 5,559 | 3,596 | 31,917 |
| 51,377 | 168 | 22,153 | 5,436 | 3,513 | 31,270 |
| 51,378 | 169 | 22,187 | 5,438 | 3,513 | 31,307 |
| 51,379 | 171 | 22,195 | 5,469 | 3,530 | 31,365 |
| 51,380 | 171 | 22,433 | 5,464 | 3,533 | 31,601 |
| 51,381 | 172 | 22,458 | 5,444 | 3,528 | 31,602 |
| 51,382 | 167 | 22,718 | 5,483 | 3,539 | 31,907 |
| 51,383 | 162 | 22,802 | 5,488 | 3,529 | 31,981 |

|        |     |        |       |       |        |
|--------|-----|--------|-------|-------|--------|
| 51,384 | 158 | 22,353 | 5,376 | 3,468 | 31,355 |
| 51,385 | 157 | 22,502 | 5,399 | 3,477 | 31,535 |
| 51,386 | 157 | 22,720 | 5,420 | 3,478 | 31,775 |
| 51,387 | 161 | 22,615 | 5,386 | 3,424 | 31,586 |
| 51,388 | 167 | 22,665 | 5,350 | 3,402 | 31,584 |
| 51,389 | 164 | 22,466 | 5,309 | 3,370 | 31,309 |
| 51,390 | 165 | 23,357 | 5,462 | 3,498 | 32,482 |
| 51,391 | 168 | 23,543 | 5,445 | 3,499 | 32,655 |
| 51,392 | 170 | 23,490 | 5,389 | 3,479 | 32,528 |
| 51,393 | 176 | 23,634 | 5,391 | 3,465 | 32,666 |
| 51,394 | 174 | 23,732 | 5,349 | 3,482 | 32,737 |
| 51,395 | 175 | 23,657 | 5,339 | 3,479 | 32,650 |
| 51,396 | 173 | 23,731 | 5,329 | 3,494 | 32,727 |
| 51,397 | 176 | 23,912 | 5,345 | 3,518 | 32,951 |
| 51,398 | 175 | 23,702 | 5,277 | 3,480 | 32,634 |
| 51,399 | 171 | 23,751 | 5,272 | 3,475 | 32,669 |
| 51,400 | 167 | 24,005 | 5,330 | 3,507 | 33,009 |
| 51,401 | 160 | 23,783 | 5,241 | 3,449 | 32,633 |
| 51,402 | 161 | 23,856 | 5,236 | 3,443 | 32,696 |
| 51,403 | 160 | 23,827 | 5,251 | 3,437 | 32,675 |
| 51,404 | 158 | 23,851 | 5,243 | 3,444 | 32,696 |
| 51,405 | 153 | 23,860 | 5,268 | 3,466 | 32,747 |
| 51,406 | 156 | 24,306 | 5,331 | 3,522 | 33,315 |
| 51,407 | 158 | 24,443 | 5,320 | 3,511 | 33,432 |
| 51,408 | 161 | 24,876 | 5,369 | 3,570 | 33,976 |
| 51,409 | 161 | 25,161 | 5,382 | 3,599 | 34,303 |
| 51,410 | 159 | 24,987 | 5,356 | 3,602 | 34,104 |
| 51,411 | 161 | 25,016 | 5,358 | 3,614 | 34,149 |
| 51,412 | 155 | 25,194 | 5,411 | 3,663 | 34,423 |
| 51,413 | 155 | 25,257 | 5,405 | 3,663 | 34,480 |
| 51,414 | 147 | 25,318 | 5,380 | 3,642 | 34,487 |
| 51,415 | 143 | 25,290 | 5,328 | 3,622 | 34,383 |

|        |     |        |       |       |        |
|--------|-----|--------|-------|-------|--------|
| 51,416 | 140 | 25,136 | 5,288 | 3,630 | 34,194 |
| 51,417 | 140 | 25,235 | 5,303 | 3,633 | 34,311 |
| 51,418 | 134 | 25,353 | 5,367 | 3,644 | 34,498 |
| 51,419 | 132 | 25,213 | 5,335 | 3,613 | 34,293 |
| 51,420 | 133 | 25,357 | 5,374 | 3,633 | 34,497 |
| 51,421 | 136 | 25,482 | 5,352 | 3,623 | 34,593 |
| 51,422 | 136 | 25,468 | 5,349 | 3,637 | 34,590 |
| 51,423 | 130 | 25,561 | 5,336 | 3,631 | 34,658 |
| 51,424 | 133 | 25,822 | 5,394 | 3,656 | 35,005 |
| 51,425 | 133 | 25,954 | 5,381 | 3,655 | 35,123 |
| 51,426 | 135 | 25,816 | 5,320 | 3,624 | 34,895 |
| 51,427 | 126 | 25,662 | 5,263 | 3,582 | 34,633 |
| 51,428 | 128 | 25,689 | 5,305 | 3,580 | 34,702 |
| 51,429 | 125 | 25,668 | 5,275 | 3,561 | 34,629 |
| 51,430 | 124 | 25,966 | 5,354 | 3,599 | 35,043 |
| 51,431 | 122 | 25,891 | 5,359 | 3,616 | 34,988 |
| 51,432 | 124 | 25,771 | 5,352 | 3,633 | 34,880 |
| 51,433 | 125 | 25,481 | 5,322 | 3,622 | 34,550 |
| 51,434 | 125 | 25,411 | 5,328 | 3,651 | 34,515 |
| 51,435 | 126 | 25,453 | 5,377 | 3,659 | 34,615 |
| 51,436 | 126 | 25,384 | 5,362 | 3,667 | 34,539 |
| 51,437 | 120 | 25,274 | 5,387 | 3,672 | 34,453 |
| 51,438 | 109 | 25,067 | 5,373 | 3,684 | 34,233 |
| 51,439 | 103 | 25,257 | 5,408 | 3,711 | 34,479 |
| 51,440 | 105 | 25,305 | 5,399 | 3,675 | 34,484 |
| 51,441 | 102 | 25,097 | 5,376 | 3,649 | 34,224 |
| 51,442 | 106 | 24,928 | 5,381 | 3,647 | 34,062 |
| 51,443 | 101 | 24,683 | 5,362 | 3,621 | 33,767 |
| 51,444 | 96  | 24,663 | 5,371 | 3,610 | 33,740 |
| 51,445 | 104 | 24,733 | 5,444 | 3,645 | 33,926 |
| 51,446 | 102 | 24,660 | 5,435 | 3,600 | 33,797 |
| 51,447 | 101 | 24,598 | 5,437 | 3,596 | 33,732 |



|        |     |        |       |       |        |
|--------|-----|--------|-------|-------|--------|
| 51,448 | 102 | 24,591 | 5,449 | 3,591 | 33,733 |
| 51,449 | 104 | 24,279 | 5,406 | 3,562 | 33,351 |
| 51,450 | 107 | 24,371 | 5,425 | 3,579 | 33,482 |
| 51,451 | 109 | 24,340 | 5,439 | 3,590 | 33,478 |
| 51,452 | 107 | 24,255 | 5,451 | 3,608 | 33,421 |
| 51,453 | 109 | 24,369 | 5,512 | 3,644 | 33,634 |
| 51,454 | 108 | 24,260 | 5,452 | 3,622 | 33,442 |
| 51,455 | 108 | 24,112 | 5,429 | 3,611 | 33,260 |
| 51,456 | 105 | 24,202 | 5,471 | 3,611 | 33,389 |
| 51,457 | 107 | 24,115 | 5,480 | 3,632 | 33,334 |
| 51,458 | 105 | 24,033 | 5,524 | 3,658 | 33,320 |
| 51,459 | 108 | 23,990 | 5,563 | 3,635 | 33,296 |
| 51,460 | 109 | 23,929 | 5,580 | 3,605 | 33,223 |
| 51,461 | 112 | 23,683 | 5,504 | 3,522 | 32,821 |
| 51,462 | 113 | 23,813 | 5,512 | 3,524 | 32,962 |
| 51,463 | 112 | 23,721 | 5,546 | 3,534 | 32,913 |
| 51,464 | 110 | 23,325 | 5,477 | 3,482 | 32,394 |
| 51,465 | 111 | 23,187 | 5,508 | 3,486 | 32,292 |
| 51,466 | 112 | 22,919 | 5,564 | 3,477 | 32,072 |
| 51,467 | 112 | 22,969 | 5,569 | 3,481 | 32,131 |
| 51,468 | 115 | 23,080 | 5,639 | 3,529 | 32,363 |
| 51,469 | 115 | 22,969 | 5,632 | 3,535 | 32,251 |
| 51,470 | 113 | 22,916 | 5,650 | 3,532 | 32,211 |
| 51,471 | 110 | 22,589 | 5,577 | 3,492 | 31,768 |
| 51,472 | 110 | 22,308 | 5,547 | 3,467 | 31,432 |
| 51,473 | 110 | 22,186 | 5,542 | 3,427 | 31,265 |
| 51,474 | 112 | 22,881 | 5,695 | 3,529 | 32,217 |
| 51,475 | 110 | 22,810 | 5,674 | 3,520 | 32,114 |
| 51,476 | 106 | 22,398 | 5,625 | 3,480 | 31,609 |
| 51,477 | 105 | 22,327 | 5,671 | 3,484 | 31,587 |
| 51,478 | 110 | 22,589 | 5,746 | 3,519 | 31,964 |
| 51,479 | 109 | 22,623 | 5,744 | 3,540 | 32,016 |

|        |     |        |       |       |        |
|--------|-----|--------|-------|-------|--------|
| 51,480 | 112 | 22,537 | 5,726 | 3,547 | 31,922 |
| 51,481 | 114 | 22,568 | 5,700 | 3,558 | 31,940 |
| 51,482 | 111 | 22,150 | 5,616 | 3,489 | 31,366 |
| 51,483 | 114 | 22,534 | 5,715 | 3,537 | 31,900 |
| 51,484 | 118 | 22,594 | 5,684 | 3,542 | 31,938 |
| 51,485 | 120 | 22,619 | 5,679 | 3,514 | 31,932 |
| 51,486 | 121 | 22,602 | 5,637 | 3,491 | 31,851 |
| 51,487 | 121 | 22,568 | 5,645 | 3,489 | 31,823 |
| 51,488 | 122 | 22,704 | 5,636 | 3,488 | 31,950 |
| 51,489 | 125 | 23,059 | 5,669 | 3,529 | 32,382 |
| 51,490 | 125 | 22,711 | 5,598 | 3,477 | 31,911 |
| 51,491 | 126 | 22,623 | 5,618 | 3,491 | 31,858 |
| 51,492 | 129 | 22,958 | 5,678 | 3,524 | 32,289 |
| 51,493 | 127 | 22,586 | 5,565 | 3,449 | 31,727 |
| 51,494 | 131 | 22,541 | 5,573 | 3,456 | 31,701 |
| 51,495 | 128 | 22,254 | 5,519 | 3,437 | 31,338 |
| 51,496 | 122 | 22,811 | 5,610 | 3,471 | 32,014 |
| 51,497 | 123 | 22,516 | 5,552 | 3,449 | 31,640 |
| 51,498 | 122 | 22,429 | 5,552 | 3,442 | 31,545 |
| 51,499 | 120 | 22,877 | 5,648 | 3,505 | 32,150 |
| 51,500 | 123 | 22,857 | 5,632 | 3,499 | 32,111 |
| 51,501 | 123 | 23,092 | 5,700 | 3,516 | 32,431 |
| 51,502 | 124 | 22,612 | 5,629 | 3,446 | 31,811 |
| 51,503 | 125 | 22,779 | 5,671 | 3,501 | 32,076 |
| 51,504 | 123 | 23,023 | 5,733 | 3,534 | 32,413 |
| 51,505 | 121 | 22,677 | 5,686 | 3,498 | 31,982 |
| 51,506 | 119 | 22,613 | 5,662 | 3,464 | 31,858 |
| 51,507 | 119 | 22,356 | 5,584 | 3,426 | 31,485 |
| 51,508 | 130 | 22,715 | 5,629 | 3,471 | 31,945 |
| 51,509 | 130 | 22,588 | 5,609 | 3,457 | 31,784 |
| 51,510 | 124 | 22,689 | 5,608 | 3,482 | 31,903 |
| 51,511 | 121 | 22,606 | 5,599 | 3,476 | 31,802 |

|        |     |        |       |       |        |
|--------|-----|--------|-------|-------|--------|
| 51,512 | 115 | 22,583 | 5,613 | 3,481 | 31,792 |
| 51,513 | 118 | 22,122 | 5,464 | 3,380 | 31,084 |
| 51,514 | 118 | 22,454 | 5,521 | 3,408 | 31,501 |
| 51,515 | 112 | 22,412 | 5,515 | 3,408 | 31,447 |
| 51,516 | 114 | 22,688 | 5,534 | 3,440 | 31,776 |
| 51,517 | 114 | 23,001 | 5,552 | 3,487 | 32,154 |
| 51,518 | 117 | 22,987 | 5,562 | 3,485 | 32,151 |
| 51,519 | 115 | 22,794 | 5,508 | 3,446 | 31,863 |
| 51,520 | 116 | 22,887 | 5,499 | 3,434 | 31,936 |
| 51,521 | 123 | 22,897 | 5,476 | 3,446 | 31,942 |
| 51,522 | 124 | 22,956 | 5,483 | 3,444 | 32,007 |
| 51,523 | 126 | 23,130 | 5,550 | 3,481 | 32,287 |
| 51,524 | 123 | 22,881 | 5,497 | 3,443 | 31,944 |
| 51,525 | 126 | 22,913 | 5,510 | 3,456 | 32,005 |
| 51,526 | 126 | 22,882 | 5,535 | 3,458 | 32,001 |
| 51,527 | 130 | 22,966 | 5,536 | 3,439 | 32,071 |
| 51,528 | 136 | 23,188 | 5,548 | 3,473 | 32,345 |
| 51,529 | 136 | 23,331 | 5,581 | 3,489 | 32,537 |
| 51,530 | 140 | 23,461 | 5,619 | 3,506 | 32,726 |
| 51,531 | 135 | 23,349 | 5,625 | 3,473 | 32,582 |
| 51,532 | 138 | 23,418 | 5,616 | 3,455 | 32,627 |
| 51,533 | 150 | 23,752 | 5,685 | 3,506 | 33,093 |
| 51,534 | 145 | 23,559 | 5,619 | 3,438 | 32,761 |
| 51,535 | 151 | 23,811 | 5,677 | 3,452 | 33,091 |
| 51,536 | 150 | 23,710 | 5,706 | 3,469 | 33,035 |
| 51,537 | 154 | 23,367 | 5,645 | 3,426 | 32,592 |
| 51,538 | 152 | 23,136 | 5,617 | 3,404 | 32,309 |
| 51,539 | 152 | 23,437 | 5,662 | 3,437 | 32,688 |
| 51,540 | 151 | 23,430 | 5,681 | 3,437 | 32,699 |
| 51,541 | 148 | 23,489 | 5,693 | 3,447 | 32,777 |
| 51,542 | 151 | 23,551 | 5,705 | 3,468 | 32,875 |
| 51,543 | 150 | 23,570 | 5,695 | 3,466 | 32,881 |

|        |     |        |       |       |        |
|--------|-----|--------|-------|-------|--------|
| 51,544 | 144 | 23,713 | 5,707 | 3,480 | 33,044 |
| 51,545 | 144 | 23,605 | 5,704 | 3,478 | 32,931 |
| 51,546 | 142 | 23,756 | 5,749 | 3,522 | 33,169 |
| 51,547 | 143 | 23,781 | 5,759 | 3,525 | 33,208 |
| 51,548 | 144 | 23,839 | 5,825 | 3,560 | 33,368 |
| 51,549 | 147 | 24,004 | 5,865 | 3,569 | 33,585 |
| 51,550 | 147 | 24,011 | 5,875 | 3,569 | 33,602 |
| 51,551 | 143 | 23,964 | 5,909 | 3,541 | 33,557 |
| 51,552 | 142 | 24,089 | 5,954 | 3,588 | 33,773 |
| 51,553 | 138 | 23,859 | 5,864 | 3,535 | 33,396 |
| 51,554 | 139 | 23,950 | 5,901 | 3,544 | 33,534 |
| 51,555 | 141 | 24,298 | 5,978 | 3,617 | 34,034 |
| 51,556 | 138 | 24,143 | 5,944 | 3,579 | 33,804 |
| 51,557 | 141 | 24,313 | 6,053 | 3,644 | 34,151 |
| 51,558 | 134 | 24,187 | 6,068 | 3,669 | 34,058 |
| 51,559 | 136 | 24,199 | 6,070 | 3,662 | 34,067 |
| 51,560 | 139 | 24,230 | 6,075 | 3,656 | 34,100 |
| 51,561 | 139 | 24,166 | 6,097 | 3,653 | 34,055 |
| 51,562 | 142 | 24,001 | 6,085 | 3,656 | 33,884 |
| 51,563 | 143 | 23,879 | 6,087 | 3,659 | 33,768 |
| 51,564 | 138 | 23,609 | 6,057 | 3,649 | 33,453 |
| 51,565 | 141 | 23,554 | 6,023 | 3,641 | 33,359 |
| 51,566 | 141 | 23,597 | 6,041 | 3,647 | 33,426 |
| 51,567 | 140 | 23,561 | 6,022 | 3,638 | 33,361 |
| 51,568 | 139 | 23,720 | 6,112 | 3,680 | 33,651 |
| 51,569 | 142 | 23,569 | 6,076 | 3,648 | 33,435 |
| 51,570 | 140 | 23,553 | 6,102 | 3,661 | 33,456 |
| 51,571 | 144 | 23,937 | 6,174 | 3,695 | 33,950 |
| 51,572 | 145 | 23,941 | 6,212 | 3,684 | 33,982 |
| 51,573 | 153 | 23,912 | 6,197 | 3,686 | 33,948 |
| 51,574 | 148 | 23,712 | 6,169 | 3,665 | 33,694 |
| 51,575 | 151 | 24,364 | 6,280 | 3,792 | 34,587 |

|        |     |        |       |       |        |
|--------|-----|--------|-------|-------|--------|
| 51,576 | 149 | 24,076 | 6,228 | 3,744 | 34,197 |
| 51,577 | 151 | 24,400 | 6,320 | 3,813 | 34,684 |
| 51,578 | 145 | 24,126 | 6,293 | 3,797 | 34,361 |
| 51,579 | 139 | 23,986 | 6,339 | 3,810 | 34,274 |
| 51,580 | 132 | 23,532 | 6,241 | 3,758 | 33,663 |
| 51,581 | 131 | 23,411 | 6,232 | 3,750 | 33,524 |
| 51,582 | 130 | 23,112 | 6,215 | 3,732 | 33,189 |
| 51,583 | 125 | 23,026 | 6,233 | 3,757 | 33,141 |
| 51,584 | 118 | 22,734 | 6,228 | 3,734 | 32,814 |
| 51,585 | 115 | 22,461 | 6,235 | 3,736 | 32,547 |
| 51,586 | 115 | 22,530 | 6,329 | 3,806 | 32,780 |
| 51,587 | 121 | 22,487 | 6,321 | 3,803 | 32,732 |
| 51,588 | 116 | 22,463 | 6,354 | 3,821 | 32,754 |
| 51,589 | 116 | 22,139 | 6,309 | 3,775 | 32,339 |
| 51,590 | 115 | 22,087 | 6,323 | 3,785 | 32,310 |
| 51,591 | 116 | 22,111 | 6,352 | 3,809 | 32,388 |
| 51,592 | 114 | 22,025 | 6,369 | 3,844 | 32,352 |
| 51,593 | 111 | 22,039 | 6,375 | 3,866 | 32,391 |
| 51,594 | 113 | 22,081 | 6,411 | 3,899 | 32,504 |
| 51,595 | 110 | 22,023 | 6,435 | 3,915 | 32,483 |
| 51,596 | 110 | 21,756 | 6,387 | 3,880 | 32,133 |
| 51,597 | 110 | 21,755 | 6,428 | 3,886 | 32,179 |
| 51,598 | 109 | 22,050 | 6,525 | 3,969 | 32,653 |
| 51,599 | 110 | 22,203 | 6,558 | 3,992 | 32,863 |
| 51,600 | 110 | 21,825 | 6,486 | 3,959 | 32,380 |
| 51,601 | 108 | 21,477 | 6,399 | 3,915 | 31,899 |
| 51,602 | 113 | 21,670 | 6,433 | 3,960 | 32,176 |
| 51,603 | 112 | 21,668 | 6,455 | 3,973 | 32,208 |
| 51,604 | 117 | 21,614 | 6,504 | 3,977 | 32,212 |
| 51,605 | 117 | 21,422 | 6,503 | 3,970 | 32,012 |
| 51,606 | 115 | 21,416 | 6,534 | 3,950 | 32,015 |
| 51,607 | 120 | 21,381 | 6,501 | 3,913 | 31,915 |

|        |     |        |       |       |        |
|--------|-----|--------|-------|-------|--------|
| 51,608 | 118 | 21,184 | 6,475 | 3,887 | 31,664 |
| 51,609 | 123 | 21,324 | 6,524 | 3,894 | 31,865 |
| 51,610 | 116 | 20,572 | 6,313 | 3,787 | 30,788 |
| 51,611 | 116 | 20,630 | 6,355 | 3,835 | 30,936 |
| 51,612 | 114 | 20,822 | 6,411 | 3,868 | 31,215 |
| 51,613 | 117 | 20,805 | 6,387 | 3,866 | 31,175 |
| 51,614 | 121 | 20,927 | 6,396 | 3,876 | 31,320 |
| 51,615 | 122 | 20,929 | 6,386 | 3,884 | 31,321 |
| 51,616 | 125 | 21,282 | 6,530 | 3,987 | 31,924 |
| 51,617 | 125 | 21,097 | 6,506 | 3,931 | 31,659 |
| 51,618 | 125 | 21,007 | 6,542 | 3,955 | 31,629 |
| 51,619 | 130 | 20,897 | 6,504 | 3,963 | 31,494 |
| 51,620 | 126 | 20,789 | 6,535 | 3,955 | 31,405 |
| 51,621 | 121 | 20,423 | 6,520 | 3,922 | 30,986 |
| 51,622 | 126 | 20,694 | 6,692 | 4,029 | 31,541 |
| 51,623 | 128 | 20,454 | 6,665 | 4,018 | 31,265 |
| 51,624 | 122 | 20,425 | 6,741 | 4,004 | 31,292 |
| 51,625 | 122 | 20,319 | 6,777 | 4,034 | 31,252 |
| 51,626 | 118 | 19,873 | 6,709 | 3,989 | 30,689 |
| 51,627 | 116 | 19,759 | 6,713 | 3,969 | 30,557 |
| 51,628 | 115 | 19,802 | 6,740 | 3,964 | 30,621 |
| 51,629 | 118 | 19,792 | 6,710 | 3,942 | 30,562 |
| 51,630 | 120 | 19,789 | 6,700 | 3,950 | 30,559 |
| 51,631 | 118 | 19,800 | 6,715 | 3,958 | 30,591 |
| 51,632 | 117 | 19,933 | 6,751 | 3,974 | 30,775 |
| 51,633 | 116 | 19,584 | 6,557 | 3,867 | 30,124 |
| 51,634 | 116 | 19,891 | 6,638 | 3,903 | 30,548 |
| 51,635 | 116 | 20,218 | 6,724 | 3,936 | 30,994 |
| 51,636 | 106 | 19,711 | 6,473 | 3,825 | 30,115 |
| 51,637 | 105 | 20,071 | 6,539 | 3,864 | 30,579 |
| 51,638 | 100 | 20,310 | 6,630 | 3,894 | 30,934 |
| 51,639 | 100 | 20,114 | 6,572 | 3,871 | 30,657 |

|        |     |        |       |       |        |
|--------|-----|--------|-------|-------|--------|
| 51,640 | 100 | 20,119 | 6,549 | 3,847 | 30,615 |
| 51,641 | 101 | 20,182 | 6,584 | 3,838 | 30,705 |
| 51,642 | 106 | 20,170 | 6,593 | 3,830 | 30,699 |
| 51,643 | 112 | 20,089 | 6,592 | 3,815 | 30,608 |
| 51,644 | 111 | 19,863 | 6,558 | 3,748 | 30,280 |
| 51,645 | 112 | 20,082 | 6,634 | 3,774 | 30,602 |
| 51,646 | 118 | 19,810 | 6,570 | 3,740 | 30,238 |
| 51,647 | 118 | 19,580 | 6,509 | 3,702 | 29,909 |
| 51,648 | 126 | 19,755 | 6,563 | 3,716 | 30,160 |
| 51,649 | 129 | 19,702 | 6,560 | 3,683 | 30,074 |
| 51,650 | 129 | 19,441 | 6,490 | 3,632 | 29,692 |
| 51,651 | 126 | 19,232 | 6,416 | 3,590 | 29,364 |
| 51,652 | 124 | 19,490 | 6,543 | 3,666 | 29,823 |
| 51,653 | 122 | 19,478 | 6,541 | 3,666 | 29,807 |
| 51,654 | 125 | 19,515 | 6,514 | 3,647 | 29,801 |
| 51,655 | 124 | 19,641 | 6,488 | 3,671 | 29,924 |
| 51,656 | 124 | 19,362 | 6,355 | 3,612 | 29,453 |
| 51,657 | 125 | 19,383 | 6,368 | 3,609 | 29,485 |
| 51,658 | 125 | 19,505 | 6,414 | 3,638 | 29,682 |
| 51,659 | 122 | 19,358 | 6,318 | 3,596 | 29,394 |
| 51,660 | 122 | 19,391 | 6,323 | 3,601 | 29,437 |
| 51,661 | 126 | 19,303 | 6,353 | 3,587 | 29,369 |
| 51,662 | 134 | 19,381 | 6,354 | 3,560 | 29,429 |
| 51,663 | 134 | 19,297 | 6,358 | 3,544 | 29,333 |
| 51,664 | 134 | 19,582 | 6,436 | 3,597 | 29,749 |
| 51,665 | 132 | 19,520 | 6,461 | 3,573 | 29,686 |
| 51,666 | 128 | 19,673 | 6,518 | 3,597 | 29,916 |
| 51,667 | 128 | 19,825 | 6,570 | 3,617 | 30,140 |
| 51,668 | 127 | 19,597 | 6,466 | 3,579 | 29,769 |
| 51,669 | 127 | 19,870 | 6,543 | 3,602 | 30,142 |
| 51,670 | 120 | 20,192 | 6,625 | 3,613 | 30,550 |
| 51,671 | 113 | 20,187 | 6,560 | 3,610 | 30,470 |

|        |     |        |       |       |        |
|--------|-----|--------|-------|-------|--------|
| 51,672 | 114 | 20,335 | 6,507 | 3,600 | 30,556 |
| 51,673 | 111 | 20,213 | 6,424 | 3,562 | 30,310 |
| 51,674 | 109 | 20,158 | 6,368 | 3,561 | 30,196 |
| 51,675 | 107 | 19,587 | 6,107 | 3,434 | 29,235 |
| 51,676 | 108 | 19,811 | 6,168 | 3,451 | 29,538 |
| 51,677 | 108 | 19,843 | 6,158 | 3,451 | 29,560 |
| 51,678 | 113 | 19,832 | 6,168 | 3,463 | 29,576 |
| 51,679 | 116 | 19,786 | 6,175 | 3,459 | 29,536 |
| 51,680 | 112 | 19,629 | 6,093 | 3,423 | 29,257 |
| 51,681 | 118 | 19,917 | 6,203 | 3,458 | 29,696 |
| 51,682 | 119 | 19,929 | 6,211 | 3,475 | 29,734 |
| 51,683 | 121 | 19,845 | 6,199 | 3,459 | 29,624 |
| 51,684 | 120 | 19,935 | 6,211 | 3,475 | 29,741 |
| 51,685 | 129 | 20,058 | 6,236 | 3,489 | 29,912 |
| 51,686 | 133 | 19,893 | 6,190 | 3,463 | 29,679 |
| 51,687 | 133 | 19,695 | 6,183 | 3,445 | 29,456 |
| 51,688 | 133 | 20,026 | 6,307 | 3,498 | 29,964 |
| 51,689 | 135 | 19,996 | 6,258 | 3,500 | 29,889 |
| 51,690 | 136 | 20,243 | 6,365 | 3,505 | 30,249 |
| 51,691 | 137 | 20,093 | 6,289 | 3,488 | 30,007 |
| 51,692 | 137 | 20,066 | 6,304 | 3,499 | 30,006 |
| 51,693 | 134 | 20,044 | 6,328 | 3,495 | 30,001 |
| 51,694 | 125 | 19,942 | 6,327 | 3,503 | 29,897 |
| 51,695 | 131 | 20,123 | 6,368 | 3,527 | 30,149 |
| 51,696 | 131 | 20,200 | 6,376 | 3,542 | 30,249 |
| 51,697 | 118 | 20,009 | 6,312 | 3,516 | 29,955 |
| 51,698 | 123 | 20,107 | 6,363 | 3,547 | 30,140 |
| 51,699 | 128 | 20,181 | 6,456 | 3,579 | 30,344 |
| 51,700 | 122 | 19,971 | 6,378 | 3,563 | 30,034 |
| 51,701 | 123 | 20,241 | 6,509 | 3,621 | 30,494 |
| 51,702 | 126 | 20,106 | 6,517 | 3,620 | 30,369 |
| 51,703 | 128 | 19,866 | 6,440 | 3,568 | 30,002 |



|        |     |        |       |       |        |
|--------|-----|--------|-------|-------|--------|
| 51,704 | 130 | 19,766 | 6,472 | 3,562 | 29,930 |
| 51,705 | 129 | 19,714 | 6,501 | 3,563 | 29,907 |
| 51,706 | 125 | 19,598 | 6,522 | 3,564 | 29,809 |
| 51,707 | 126 | 19,585 | 6,559 | 3,574 | 29,844 |
| 51,708 | 122 | 19,499 | 6,550 | 3,583 | 29,754 |
| 51,709 | 120 | 19,568 | 6,579 | 3,607 | 29,874 |
| 51,710 | 124 | 19,176 | 6,462 | 3,529 | 29,291 |
| 51,711 | 128 | 19,361 | 6,514 | 3,554 | 29,557 |
| 51,712 | 124 | 19,427 | 6,516 | 3,560 | 29,627 |
| 51,713 | 127 | 19,571 | 6,571 | 3,612 | 29,881 |
| 51,714 | 137 | 19,433 | 6,543 | 3,573 | 29,686 |
| 51,715 | 134 | 19,228 | 6,490 | 3,542 | 29,394 |
| 51,716 | 138 | 19,073 | 6,452 | 3,536 | 29,199 |
| 51,717 | 138 | 18,838 | 6,395 | 3,498 | 28,869 |
| 51,718 | 140 | 18,789 | 6,412 | 3,482 | 28,823 |
| 51,719 | 141 | 18,794 | 6,460 | 3,498 | 28,893 |
| 51,720 | 141 | 18,562 | 6,393 | 3,493 | 28,589 |
| 51,721 | 150 | 18,302 | 6,345 | 3,461 | 28,258 |
| 51,722 | 150 | 18,533 | 6,426 | 3,497 | 28,606 |
| 51,723 | 147 | 18,549 | 6,463 | 3,493 | 28,652 |
| 51,724 | 148 | 18,764 | 6,562 | 3,509 | 28,983 |
| 51,725 | 147 | 18,814 | 6,562 | 3,502 | 29,025 |
| 51,726 | 143 | 18,755 | 6,535 | 3,469 | 28,902 |
| 51,727 | 147 | 18,789 | 6,544 | 3,459 | 28,939 |
| 51,728 | 146 | 18,887 | 6,623 | 3,496 | 29,152 |
| 51,729 | 147 | 18,879 | 6,615 | 3,475 | 29,116 |
| 51,730 | 141 | 18,814 | 6,601 | 3,470 | 29,026 |
| 51,731 | 144 | 18,726 | 6,592 | 3,463 | 28,925 |
| 51,732 | 140 | 18,679 | 6,559 | 3,445 | 28,823 |
| 51,733 | 142 | 18,902 | 6,598 | 3,474 | 29,116 |
| 51,734 | 142 | 18,989 | 6,663 | 3,506 | 29,300 |
| 51,735 | 139 | 18,750 | 6,627 | 3,485 | 29,001 |

|        |     |        |       |       |        |
|--------|-----|--------|-------|-------|--------|
| 51,736 | 130 | 18,587 | 6,625 | 3,480 | 28,822 |
| 51,737 | 129 | 18,447 | 6,594 | 3,468 | 28,638 |
| 51,738 | 130 | 18,485 | 6,560 | 3,466 | 28,641 |
| 51,739 | 135 | 18,376 | 6,579 | 3,470 | 28,560 |
| 51,740 | 133 | 18,156 | 6,585 | 3,436 | 28,310 |
| 51,741 | 133 | 18,014 | 6,479 | 3,415 | 28,041 |
| 51,742 | 135 | 18,082 | 6,571 | 3,481 | 28,269 |
| 51,743 | 139 | 18,105 | 6,554 | 3,486 | 28,284 |
| 51,744 | 137 | 17,719 | 6,408 | 3,418 | 27,682 |
| 51,745 | 139 | 17,714 | 6,463 | 3,447 | 27,763 |
| 51,746 | 138 | 17,831 | 6,518 | 3,473 | 27,960 |
| 51,747 | 137 | 17,615 | 6,493 | 3,444 | 27,689 |
| 51,748 | 138 | 17,690 | 6,506 | 3,440 | 27,774 |
| 51,749 | 135 | 17,691 | 6,481 | 3,443 | 27,750 |
| 51,750 | 130 | 17,538 | 6,416 | 3,420 | 27,504 |
| 51,751 | 133 | 17,624 | 6,486 | 3,438 | 27,681 |
| 51,752 | 133 | 17,589 | 6,419 | 3,417 | 27,558 |
| 51,753 | 132 | 17,491 | 6,367 | 3,370 | 27,360 |
| 51,754 | 128 | 17,619 | 6,357 | 3,377 | 27,481 |
| 51,755 | 134 | 17,760 | 6,345 | 3,374 | 27,613 |
| 51,756 | 143 | 17,980 | 6,409 | 3,398 | 27,930 |
| 51,757 | 142 | 17,961 | 6,389 | 3,389 | 27,881 |
| 51,758 | 146 | 17,938 | 6,308 | 3,359 | 27,751 |
| 51,759 | 146 | 18,053 | 6,338 | 3,361 | 27,898 |
| 51,760 | 151 | 18,191 | 6,393 | 3,405 | 28,140 |
| 51,761 | 143 | 17,985 | 6,337 | 3,388 | 27,853 |
| 51,762 | 145 | 18,213 | 6,435 | 3,452 | 28,245 |
| 51,763 | 136 | 17,955 | 6,369 | 3,413 | 27,873 |
| 51,764 | 126 | 17,894 | 6,348 | 3,391 | 27,759 |
| 51,765 | 133 | 17,930 | 6,335 | 3,386 | 27,784 |
| 51,766 | 133 | 17,793 | 6,287 | 3,366 | 27,579 |
| 51,767 | 127 | 18,080 | 6,384 | 3,440 | 28,031 |

|        |     |        |       |       |        |
|--------|-----|--------|-------|-------|--------|
| 51,768 | 129 | 18,089 | 6,391 | 3,447 | 28,056 |
| 51,769 | 127 | 17,985 | 6,291 | 3,396 | 27,799 |
| 51,770 | 129 | 18,190 | 6,343 | 3,418 | 28,080 |
| 51,771 | 135 | 18,187 | 6,388 | 3,405 | 28,115 |
| 51,772 | 124 | 18,006 | 6,340 | 3,383 | 27,853 |
| 51,773 | 134 | 17,787 | 6,285 | 3,360 | 27,566 |
| 51,774 | 134 | 17,556 | 6,187 | 3,343 | 27,220 |
| 51,775 | 136 | 18,148 | 6,323 | 3,468 | 28,075 |
| 51,776 | 137 | 17,937 | 6,289 | 3,466 | 27,829 |
| 51,777 | 138 | 17,991 | 6,329 | 3,496 | 27,954 |
| 51,778 | 134 | 18,228 | 6,422 | 3,540 | 28,324 |
| 51,779 | 136 | 18,079 | 6,365 | 3,511 | 28,091 |
| 51,780 | 132 | 17,938 | 6,298 | 3,501 | 27,869 |
| 51,781 | 133 | 17,800 | 6,286 | 3,511 | 27,730 |
| 51,782 | 133 | 17,878 | 6,314 | 3,519 | 27,844 |
| 51,783 | 129 | 18,094 | 6,368 | 3,553 | 28,144 |
| 51,784 | 129 | 18,146 | 6,413 | 3,552 | 28,240 |
| 51,785 | 133 | 18,270 | 6,429 | 3,556 | 28,388 |
| 51,786 | 134 | 18,269 | 6,390 | 3,537 | 28,330 |
| 51,787 | 134 | 18,153 | 6,368 | 3,528 | 28,183 |
| 51,788 | 133 | 18,408 | 6,444 | 3,580 | 28,565 |
| 51,789 | 132 | 18,472 | 6,452 | 3,572 | 28,628 |
| 51,790 | 128 | 18,651 | 6,508 | 3,612 | 28,899 |
| 51,791 | 129 | 18,772 | 6,495 | 3,638 | 29,034 |
| 51,792 | 127 | 18,786 | 6,525 | 3,646 | 29,084 |
| 51,793 | 125 | 19,046 | 6,599 | 3,682 | 29,452 |
| 51,794 | 124 | 19,251 | 6,674 | 3,697 | 29,746 |
| 51,795 | 126 | 19,352 | 6,699 | 3,693 | 29,870 |
| 51,796 | 124 | 19,335 | 6,667 | 3,665 | 29,791 |
| 51,797 | 123 | 19,315 | 6,706 | 3,679 | 29,823 |
| 51,798 | 127 | 19,373 | 6,717 | 3,713 | 29,930 |
| 51,799 | 124 | 19,630 | 6,771 | 3,736 | 30,261 |

|        |     |        |       |       |        |
|--------|-----|--------|-------|-------|--------|
| 51,800 | 132 | 19,439 | 6,703 | 3,697 | 29,971 |
| 51,801 | 130 | 19,473 | 6,656 | 3,710 | 29,969 |
| 51,802 | 127 | 18,971 | 6,497 | 3,639 | 29,234 |
| 51,803 | 128 | 19,115 | 6,546 | 3,668 | 29,457 |
| 51,804 | 129 | 19,356 | 6,594 | 3,699 | 29,778 |
| 51,805 | 130 | 19,533 | 6,640 | 3,724 | 30,027 |
| 51,806 | 125 | 19,620 | 6,639 | 3,734 | 30,118 |
| 51,807 | 118 | 19,680 | 6,622 | 3,737 | 30,157 |
| 51,808 | 117 | 19,415 | 6,545 | 3,702 | 29,779 |
| 51,809 | 114 | 19,439 | 6,586 | 3,710 | 29,849 |
| 51,810 | 114 | 19,666 | 6,657 | 3,769 | 30,206 |
| 51,811 | 111 | 19,810 | 6,686 | 3,772 | 30,379 |
| 51,812 | 112 | 19,843 | 6,720 | 3,756 | 30,431 |
| 51,813 | 113 | 19,890 | 6,706 | 3,765 | 30,474 |
| 51,814 | 112 | 19,679 | 6,648 | 3,742 | 30,181 |
| 51,815 | 116 | 19,587 | 6,596 | 3,736 | 30,035 |
| 51,816 | 108 | 19,419 | 6,565 | 3,694 | 29,786 |
| 51,817 | 117 | 19,902 | 6,706 | 3,762 | 30,487 |
| 51,818 | 118 | 19,902 | 6,706 | 3,763 | 30,489 |
| 51,819 | 116 | 19,857 | 6,673 | 3,746 | 30,392 |
| 51,820 | 116 | 19,838 | 6,676 | 3,755 | 30,385 |
| 51,821 | 115 | 19,739 | 6,657 | 3,749 | 30,260 |
| 51,822 | 112 | 19,942 | 6,687 | 3,779 | 30,520 |
| 51,823 | 112 | 19,990 | 6,712 | 3,791 | 30,605 |
| 51,824 | 101 | 19,892 | 6,693 | 3,784 | 30,470 |
| 51,825 | 102 | 19,782 | 6,709 | 3,755 | 30,348 |
| 51,826 | 104 | 19,663 | 6,726 | 3,747 | 30,240 |
| 51,827 | 103 | 19,551 | 6,683 | 3,704 | 30,041 |
| 51,828 | 102 | 19,518 | 6,651 | 3,673 | 29,944 |
| 51,829 | 109 | 19,597 | 6,706 | 3,697 | 30,109 |
| 51,830 | 109 | 19,366 | 6,605 | 3,637 | 29,717 |
| 51,831 | 113 | 19,632 | 6,647 | 3,665 | 30,057 |

|        |     |        |       |       |        |
|--------|-----|--------|-------|-------|--------|
| 51,832 | 116 | 19,515 | 6,568 | 3,629 | 29,828 |
| 51,833 | 116 | 19,712 | 6,674 | 3,671 | 30,173 |
| 51,834 | 119 | 19,474 | 6,571 | 3,644 | 29,808 |
| 51,835 | 119 | 19,582 | 6,613 | 3,678 | 29,992 |
| 51,836 | 119 | 19,778 | 6,670 | 3,709 | 30,276 |
| 51,837 | 118 | 19,607 | 6,585 | 3,683 | 29,993 |
| 51,838 | 117 | 19,592 | 6,549 | 3,671 | 29,929 |
| 51,839 | 120 | 19,781 | 6,647 | 3,704 | 30,252 |
| 51,840 | 123 | 19,674 | 6,680 | 3,716 | 30,193 |
| 51,841 | 126 | 19,650 | 6,671 | 3,712 | 30,159 |
| 51,842 | 126 | 19,495 | 6,605 | 3,661 | 29,887 |
| 51,843 | 142 | 19,654 | 6,666 | 3,684 | 30,146 |
| 51,844 | 140 | 19,579 | 6,605 | 3,662 | 29,986 |
| 51,845 | 138 | 19,675 | 6,567 | 3,654 | 30,034 |
| 51,846 | 140 | 19,239 | 6,371 | 3,563 | 29,313 |
| 51,847 | 140 | 19,502 | 6,399 | 3,587 | 29,628 |
| 51,848 | 151 | 19,757 | 6,464 | 3,596 | 29,968 |
| 51,849 | 152 | 19,565 | 6,363 | 3,552 | 29,632 |
| 51,850 | 152 | 19,694 | 6,418 | 3,577 | 29,841 |
| 51,851 | 143 | 19,790 | 6,401 | 3,573 | 29,907 |
| 51,852 | 143 | 19,837 | 6,444 | 3,572 | 29,996 |
| 51,853 | 152 | 19,895 | 6,469 | 3,586 | 30,102 |
| 51,854 | 152 | 19,971 | 6,469 | 3,598 | 30,190 |
| 51,855 | 153 | 20,080 | 6,506 | 3,604 | 30,343 |
| 51,856 | 153 | 20,098 | 6,524 | 3,608 | 30,383 |
| 51,857 | 153 | 19,989 | 6,541 | 3,615 | 30,298 |
| 51,858 | 152 | 20,149 | 6,625 | 3,644 | 30,570 |
| 51,859 | 152 | 20,105 | 6,560 | 3,609 | 30,426 |
| 51,860 | 153 | 20,088 | 6,539 | 3,601 | 30,381 |
| 51,861 | 159 | 20,430 | 6,619 | 3,620 | 30,828 |
| 51,862 | 158 | 20,306 | 6,547 | 3,589 | 30,600 |
| 51,863 | 159 | 20,303 | 6,532 | 3,607 | 30,601 |

|        |     |        |       |       |        |
|--------|-----|--------|-------|-------|--------|
| 51,864 | 155 | 20,084 | 6,488 | 3,580 | 30,307 |
| 51,865 | 168 | 20,773 | 6,645 | 3,656 | 31,242 |
| 51,866 | 171 | 20,870 | 6,694 | 3,665 | 31,400 |
| 51,867 | 173 | 20,726 | 6,637 | 3,647 | 31,183 |
| 51,868 | 174 | 20,831 | 6,646 | 3,645 | 31,296 |
| 51,869 | 174 | 20,828 | 6,633 | 3,641 | 31,276 |
| 51,870 | 173 | 20,803 | 6,649 | 3,649 | 31,274 |
| 51,871 | 174 | 20,882 | 6,655 | 3,663 | 31,374 |
| 51,872 | 174 | 20,823 | 6,604 | 3,660 | 31,261 |
| 51,873 | 177 | 20,994 | 6,666 | 3,689 | 31,526 |
| 51,874 | 180 | 21,045 | 6,641 | 3,670 | 31,536 |
| 51,875 | 179 | 20,976 | 6,582 | 3,626 | 31,363 |
| 51,876 | 179 | 20,452 | 6,401 | 3,559 | 30,591 |
| 51,877 | 177 | 20,669 | 6,451 | 3,585 | 30,882 |
| 51,878 | 173 | 20,859 | 6,513 | 3,626 | 31,171 |
| 51,879 | 173 | 20,930 | 6,516 | 3,625 | 31,244 |
| 51,880 | 174 | 20,905 | 6,514 | 3,619 | 31,212 |
| 51,881 | 177 | 20,948 | 6,519 | 3,605 | 31,249 |
| 51,882 | 172 | 20,798 | 6,477 | 3,581 | 31,028 |
| 51,883 | 171 | 21,269 | 6,672 | 3,669 | 31,781 |
| 51,884 | 176 | 21,312 | 6,664 | 3,672 | 31,824 |
| 51,885 | 172 | 21,062 | 6,592 | 3,632 | 31,458 |
| 51,886 | 171 | 21,026 | 6,584 | 3,623 | 31,404 |
| 51,887 | 171 | 21,233 | 6,642 | 3,651 | 31,697 |
| 51,888 | 171 | 20,469 | 6,376 | 3,468 | 30,484 |
| 51,889 | 173 | 20,719 | 6,439 | 3,501 | 30,832 |
| 51,890 | 172 | 20,950 | 6,487 | 3,547 | 31,156 |
| 51,891 | 172 | 20,987 | 6,492 | 3,537 | 31,188 |
| 51,892 | 176 | 21,005 | 6,481 | 3,556 | 31,218 |
| 51,893 | 175 | 20,914 | 6,477 | 3,566 | 31,132 |
| 51,894 | 164 | 21,104 | 6,530 | 3,593 | 31,391 |
| 51,895 | 162 | 20,745 | 6,468 | 3,526 | 30,901 |

|        |     |        |       |       |        |
|--------|-----|--------|-------|-------|--------|
| 51,896 | 159 | 20,532 | 6,430 | 3,519 | 30,640 |
| 51,897 | 159 | 19,930 | 6,268 | 3,427 | 29,784 |
| 51,898 | 162 | 20,219 | 6,313 | 3,470 | 30,164 |
| 51,899 | 148 | 20,419 | 6,374 | 3,499 | 30,440 |
| 51,900 | 151 | 20,490 | 6,362 | 3,492 | 30,495 |
| 51,901 | 151 | 20,499 | 6,355 | 3,485 | 30,490 |
| 51,902 | 155 | 20,745 | 6,437 | 3,511 | 30,848 |
| 51,903 | 160 | 20,760 | 6,466 | 3,509 | 30,895 |
| 51,904 | 159 | 20,727 | 6,449 | 3,508 | 30,843 |
| 51,905 | 174 | 20,711 | 6,484 | 3,505 | 30,874 |
| 51,906 | 169 | 20,506 | 6,413 | 3,471 | 30,559 |
| 51,907 | 169 | 20,389 | 6,390 | 3,454 | 30,402 |
| 51,908 | 168 | 20,390 | 6,381 | 3,456 | 30,395 |
| 51,909 | 170 | 20,482 | 6,418 | 3,443 | 30,513 |
| 51,910 | 168 | 20,207 | 6,360 | 3,419 | 30,154 |
| 51,911 | 168 | 20,120 | 6,375 | 3,407 | 30,070 |
| 51,912 | 161 | 20,050 | 6,364 | 3,417 | 29,992 |
| 51,913 | 164 | 20,006 | 6,331 | 3,361 | 29,862 |
| 51,914 | 164 | 19,997 | 6,350 | 3,361 | 29,872 |
| 51,915 | 154 | 19,580 | 6,245 | 3,304 | 29,283 |
| 51,916 | 150 | 19,763 | 6,266 | 3,317 | 29,496 |
| 51,917 | 141 | 19,871 | 6,325 | 3,369 | 29,706 |
| 51,918 | 138 | 19,737 | 6,337 | 3,372 | 29,584 |
| 51,919 | 136 | 19,636 | 6,299 | 3,382 | 29,453 |
| 51,920 | 136 | 19,831 | 6,369 | 3,423 | 29,759 |
| 51,921 | 136 | 20,042 | 6,427 | 3,443 | 30,048 |
| 51,922 | 139 | 20,064 | 6,438 | 3,431 | 30,072 |
| 51,923 | 135 | 19,537 | 6,309 | 3,330 | 29,311 |
| 51,924 | 135 | 19,765 | 6,342 | 3,356 | 29,598 |
| 51,925 | 134 | 20,055 | 6,410 | 3,403 | 30,002 |
| 51,926 | 134 | 19,946 | 6,408 | 3,403 | 29,891 |
| 51,927 | 132 | 19,943 | 6,420 | 3,410 | 29,905 |

|        |     |        |       |       |        |
|--------|-----|--------|-------|-------|--------|
| 51,928 | 130 | 19,776 | 6,372 | 3,368 | 29,646 |
| 51,929 | 129 | 19,878 | 6,383 | 3,363 | 29,753 |
| 51,930 | 129 | 19,666 | 6,337 | 3,351 | 29,483 |
| 51,931 | 129 | 19,787 | 6,416 | 3,403 | 29,735 |
| 51,932 | 122 | 19,833 | 6,401 | 3,419 | 29,775 |
| 51,933 | 121 | 19,835 | 6,390 | 3,444 | 29,790 |
| 51,934 | 121 | 19,953 | 6,431 | 3,460 | 29,965 |
| 51,935 | 124 | 20,059 | 6,426 | 3,482 | 30,091 |
| 51,936 | 125 | 19,897 | 6,386 | 3,450 | 29,858 |
| 51,937 | 124 | 19,787 | 6,347 | 3,440 | 29,698 |
| 51,938 | 125 | 20,123 | 6,439 | 3,482 | 30,169 |
| 51,939 | 122 | 20,392 | 6,530 | 3,554 | 30,598 |
| 51,940 | 120 | 20,194 | 6,477 | 3,525 | 30,316 |
| 51,941 | 118 | 20,030 | 6,464 | 3,506 | 30,118 |
| 51,942 | 116 | 20,238 | 6,597 | 3,581 | 30,532 |
| 51,943 | 118 | 20,424 | 6,614 | 3,570 | 30,726 |
| 51,944 | 114 | 20,475 | 6,598 | 3,566 | 30,753 |
| 51,945 | 115 | 20,562 | 6,612 | 3,587 | 30,876 |
| 51,946 | 113 | 20,503 | 6,562 | 3,566 | 30,744 |
| 51,947 | 111 | 20,336 | 6,508 | 3,538 | 30,493 |
| 51,948 | 110 | 20,132 | 6,466 | 3,505 | 30,213 |
| 51,949 | 108 | 20,074 | 6,473 | 3,479 | 30,134 |
| 51,950 | 108 | 19,897 | 6,416 | 3,461 | 29,882 |
| 51,951 | 111 | 20,579 | 6,601 | 3,598 | 30,889 |
| 51,952 | 110 | 20,685 | 6,590 | 3,614 | 30,999 |
| 51,953 | 109 | 20,750 | 6,570 | 3,627 | 31,056 |
| 51,954 | 100 | 20,742 | 6,563 | 3,636 | 31,041 |
| 51,955 | 93  | 20,513 | 6,490 | 3,589 | 30,685 |
| 51,956 | 77  | 20,555 | 6,505 | 3,597 | 30,734 |
| 51,957 | 77  | 20,286 | 6,401 | 3,566 | 30,330 |
| 51,958 | 77  | 20,391 | 6,417 | 3,564 | 30,449 |
| 51,959 | 78  | 20,518 | 6,415 | 3,561 | 30,572 |



|        |     |        |       |       |        |
|--------|-----|--------|-------|-------|--------|
| 51,960 | 77  | 20,532 | 6,390 | 3,566 | 30,565 |
| 51,961 | 78  | 20,634 | 6,398 | 3,584 | 30,694 |
| 51,962 | 78  | 20,810 | 6,478 | 3,641 | 31,007 |
| 51,963 | 73  | 20,745 | 6,505 | 3,667 | 30,990 |
| 51,964 | 70  | 20,645 | 6,506 | 3,668 | 30,889 |
| 51,965 | 73  | 20,372 | 6,428 | 3,632 | 30,505 |
| 51,966 | 73  | 20,108 | 6,356 | 3,583 | 30,120 |
| 51,967 | 77  | 20,516 | 6,472 | 3,659 | 30,724 |
| 51,968 | 77  | 20,522 | 6,442 | 3,620 | 30,661 |
| 51,969 | 71  | 20,286 | 6,328 | 3,563 | 30,248 |
| 51,970 | 71  | 20,386 | 6,344 | 3,578 | 30,379 |
| 51,971 | 70  | 20,078 | 6,252 | 3,535 | 29,935 |
| 51,972 | 71  | 20,154 | 6,244 | 3,543 | 30,012 |
| 51,973 | 66  | 20,178 | 6,265 | 3,556 | 30,065 |
| 51,974 | 68  | 20,125 | 6,258 | 3,583 | 30,034 |
| 51,975 | 71  | 20,171 | 6,268 | 3,589 | 30,099 |
| 51,976 | 73  | 20,235 | 6,285 | 3,598 | 30,191 |
| 51,977 | 74  | 20,404 | 6,305 | 3,581 | 30,364 |
| 51,978 | 75  | 20,412 | 6,282 | 3,577 | 30,346 |
| 51,979 | 84  | 20,464 | 6,276 | 3,599 | 30,423 |
| 51,980 | 83  | 20,307 | 6,197 | 3,583 | 30,170 |
| 51,981 | 86  | 20,616 | 6,263 | 3,634 | 30,599 |
| 51,982 | 92  | 20,537 | 6,197 | 3,595 | 30,421 |
| 51,983 | 92  | 20,549 | 6,191 | 3,584 | 30,416 |
| 51,984 | 94  | 20,445 | 6,206 | 3,587 | 30,332 |
| 51,985 | 92  | 20,544 | 6,204 | 3,586 | 30,426 |
| 51,986 | 89  | 20,417 | 6,191 | 3,559 | 30,256 |
| 51,987 | 86  | 20,074 | 6,134 | 3,533 | 29,827 |
| 51,988 | 88  | 20,031 | 6,141 | 3,527 | 29,787 |
| 51,989 | 93  | 19,998 | 6,121 | 3,533 | 29,745 |
| 51,990 | 102 | 19,977 | 6,097 | 3,506 | 29,682 |
| 51,991 | 100 | 19,841 | 5,963 | 3,454 | 29,358 |

|        |     |        |       |       |        |
|--------|-----|--------|-------|-------|--------|
| 51,992 | 100 | 19,915 | 5,975 | 3,463 | 29,453 |
| 51,993 | 104 | 19,956 | 6,053 | 3,476 | 29,589 |
| 51,994 | 105 | 19,817 | 6,057 | 3,466 | 29,445 |
| 51,995 | 104 | 19,579 | 6,007 | 3,443 | 29,133 |
| 51,996 | 103 | 19,620 | 6,041 | 3,458 | 29,222 |
| 51,997 | 107 | 19,557 | 6,028 | 3,461 | 29,153 |
| 51,998 | 109 | 19,378 | 6,013 | 3,458 | 28,958 |
| 51,999 | 111 | 19,456 | 6,064 | 3,487 | 29,118 |
| 52,000 | 108 | 19,065 | 5,955 | 3,411 | 28,539 |
| 52,001 | 109 | 19,251 | 6,001 | 3,438 | 28,799 |
| 52,002 | 110 | 19,375 | 6,080 | 3,472 | 29,037 |
| 52,003 | 109 | 19,118 | 6,124 | 3,482 | 28,833 |
| 52,004 | 115 | 18,968 | 6,164 | 3,487 | 28,734 |
| 52,005 | 116 | 18,868 | 6,097 | 3,467 | 28,548 |
| 52,006 | 116 | 18,869 | 6,093 | 3,468 | 28,546 |
| 52,007 | 117 | 18,906 | 6,099 | 3,459 | 28,581 |
| 52,008 | 119 | 18,953 | 6,108 | 3,464 | 28,644 |
| 52,009 | 117 | 18,864 | 6,120 | 3,494 | 28,595 |
| 52,010 | 119 | 18,587 | 6,090 | 3,473 | 28,269 |
| 52,011 | 120 | 18,310 | 6,046 | 3,452 | 27,928 |
| 52,012 | 127 | 18,744 | 6,189 | 3,533 | 28,593 |
| 52,013 | 134 | 18,719 | 6,188 | 3,532 | 28,573 |
| 52,014 | 137 | 18,872 | 6,188 | 3,528 | 28,725 |
| 52,015 | 137 | 18,721 | 6,123 | 3,505 | 28,486 |
| 52,016 | 133 | 18,826 | 6,130 | 3,531 | 28,620 |
| 52,017 | 145 | 18,992 | 6,184 | 3,538 | 28,859 |
| 52,018 | 145 | 18,833 | 6,142 | 3,516 | 28,636 |
| 52,019 | 146 | 18,639 | 6,110 | 3,504 | 28,399 |
| 52,020 | 146 | 18,615 | 6,094 | 3,495 | 28,350 |
| 52,021 | 149 | 18,507 | 6,084 | 3,467 | 28,207 |
| 52,022 | 148 | 18,443 | 6,064 | 3,464 | 28,119 |
| 52,023 | 154 | 19,439 | 6,405 | 3,596 | 29,594 |

|        |     |        |       |       |        |
|--------|-----|--------|-------|-------|--------|
| 52,024 | 156 | 19,588 | 6,403 | 3,596 | 29,743 |
| 52,025 | 153 | 19,528 | 6,405 | 3,602 | 29,688 |
| 52,026 | 151 | 19,335 | 6,350 | 3,598 | 29,434 |
| 52,027 | 150 | 20,146 | 6,647 | 3,793 | 30,736 |
| 52,028 | 146 | 19,893 | 6,580 | 3,771 | 30,390 |
| 52,029 | 146 | 20,327 | 6,646 | 3,806 | 30,925 |
| 52,030 | 138 | 20,756 | 6,757 | 3,844 | 31,495 |
| 52,031 | 138 | 20,563 | 6,695 | 3,818 | 31,214 |
| 52,032 | 137 | 20,979 | 6,829 | 3,853 | 31,798 |
| 52,033 | 131 | 21,061 | 6,883 | 3,876 | 31,951 |
| 52,034 | 130 | 20,943 | 6,860 | 3,834 | 31,767 |
| 52,035 | 130 | 21,110 | 6,922 | 3,875 | 32,037 |
| 52,036 | 130 | 21,341 | 6,985 | 3,921 | 32,377 |
| 52,037 | 125 | 21,253 | 6,893 | 3,867 | 32,138 |
| 52,038 | 125 | 21,288 | 6,895 | 3,876 | 32,184 |
| 52,039 | 115 | 20,912 | 6,814 | 3,868 | 31,709 |
| 52,040 | 117 | 21,033 | 6,840 | 3,890 | 31,880 |
| 52,041 | 118 | 21,271 | 6,905 | 3,913 | 32,207 |
| 52,042 | 116 | 21,302 | 6,917 | 3,921 | 32,256 |
| 52,043 | 114 | 21,495 | 6,911 | 3,928 | 32,448 |
| 52,044 | 113 | 21,488 | 6,915 | 3,961 | 32,477 |
| 52,045 | 114 | 21,520 | 6,887 | 3,956 | 32,477 |
| 52,046 | 114 | 21,488 | 6,892 | 3,957 | 32,451 |
| 52,047 | 113 | 21,858 | 6,970 | 4,006 | 32,947 |
| 52,048 | 110 | 21,867 | 6,952 | 3,977 | 32,906 |
| 52,049 | 112 | 22,105 | 7,016 | 4,019 | 33,252 |
| 52,050 | 113 | 22,202 | 7,039 | 4,039 | 33,393 |
| 52,051 | 112 | 22,360 | 7,112 | 4,072 | 33,656 |
| 52,052 | 105 | 22,216 | 7,069 | 4,028 | 33,418 |
| 52,053 | 99  | 22,209 | 6,944 | 3,985 | 33,237 |
| 52,054 | 100 | 22,588 | 7,002 | 4,021 | 33,711 |
| 52,055 | 102 | 22,845 | 7,083 | 4,062 | 34,092 |

|        |     |        |       |       |        |
|--------|-----|--------|-------|-------|--------|
| 52,056 | 102 | 22,738 | 7,092 | 4,056 | 33,988 |
| 52,057 | 100 | 22,485 | 7,053 | 4,047 | 33,685 |
| 52,058 | 99  | 22,486 | 7,014 | 4,016 | 33,615 |
| 52,059 | 101 | 22,687 | 7,067 | 4,023 | 33,878 |
| 52,060 | 97  | 22,915 | 7,142 | 4,075 | 34,229 |
| 52,061 | 93  | 22,899 | 7,087 | 4,040 | 34,119 |
| 52,062 | 92  | 22,968 | 7,091 | 4,044 | 34,195 |
| 52,063 | 90  | 23,150 | 7,157 | 4,081 | 34,478 |
| 52,064 | 83  | 23,187 | 7,136 | 4,058 | 34,464 |
| 52,065 | 80  | 23,123 | 7,115 | 4,048 | 34,366 |
| 52,066 | 76  | 23,103 | 7,121 | 4,065 | 34,365 |
| 52,067 | 76  | 23,069 | 7,151 | 4,054 | 34,350 |
| 52,068 | 70  | 22,872 | 7,045 | 4,019 | 34,006 |
| 52,069 | 70  | 23,138 | 7,132 | 4,060 | 34,400 |
| 52,070 | 70  | 23,247 | 7,172 | 4,085 | 34,574 |
| 52,071 | 69  | 23,214 | 7,164 | 4,116 | 34,563 |
| 52,072 | 68  | 23,127 | 7,115 | 4,105 | 34,415 |
| 52,073 | 67  | 22,975 | 7,044 | 4,067 | 34,153 |
| 52,074 | 63  | 22,803 | 6,990 | 4,030 | 33,886 |
| 52,075 | 63  | 22,861 | 7,039 | 4,053 | 34,016 |
| 52,076 | 65  | 22,868 | 6,984 | 3,999 | 33,916 |
| 52,077 | 73  | 22,591 | 6,872 | 3,918 | 33,454 |
| 52,078 | 72  | 22,599 | 6,849 | 3,914 | 33,434 |
| 52,079 | 77  | 22,772 | 6,872 | 3,942 | 33,663 |
| 52,080 | 81  | 22,491 | 6,782 | 3,899 | 33,253 |
| 52,081 | 81  | 22,391 | 6,759 | 3,900 | 33,131 |
| 52,082 | 79  | 22,300 | 6,782 | 3,912 | 33,073 |
| 52,083 | 82  | 22,217 | 6,752 | 3,906 | 32,957 |
| 52,084 | 87  | 22,040 | 6,695 | 3,867 | 32,689 |
| 52,085 | 89  | 21,971 | 6,688 | 3,865 | 32,613 |
| 52,086 | 89  | 21,844 | 6,654 | 3,861 | 32,448 |
| 52,087 | 90  | 21,900 | 6,707 | 3,892 | 32,589 |

|        |     |        |       |       |        |
|--------|-----|--------|-------|-------|--------|
| 52,088 | 93  | 22,005 | 6,708 | 3,909 | 32,715 |
| 52,089 | 92  | 21,841 | 6,664 | 3,861 | 32,458 |
| 52,090 | 92  | 21,926 | 6,677 | 3,865 | 32,560 |
| 52,091 | 90  | 21,888 | 6,688 | 3,881 | 32,547 |
| 52,092 | 90  | 21,707 | 6,679 | 3,895 | 32,371 |
| 52,093 | 90  | 21,570 | 6,676 | 3,858 | 32,194 |
| 52,094 | 96  | 21,554 | 6,713 | 3,849 | 32,212 |
| 52,095 | 95  | 21,719 | 6,788 | 3,878 | 32,480 |
| 52,096 | 93  | 21,715 | 6,779 | 3,882 | 32,469 |
| 52,097 | 96  | 21,505 | 6,683 | 3,839 | 32,123 |
| 52,098 | 96  | 21,688 | 6,729 | 3,868 | 32,381 |
| 52,099 | 95  | 21,606 | 6,718 | 3,868 | 32,287 |
| 52,100 | 94  | 21,583 | 6,755 | 3,886 | 32,318 |
| 52,101 | 92  | 21,418 | 6,771 | 3,872 | 32,153 |
| 52,102 | 93  | 21,368 | 6,745 | 3,876 | 32,082 |
| 52,103 | 95  | 21,322 | 6,711 | 3,886 | 32,014 |
| 52,104 | 95  | 21,345 | 6,735 | 3,902 | 32,077 |
| 52,105 | 95  | 21,402 | 6,767 | 3,919 | 32,183 |
| 52,106 | 92  | 21,374 | 6,725 | 3,897 | 32,088 |
| 52,107 | 95  | 21,105 | 6,615 | 3,820 | 31,635 |
| 52,108 | 104 | 21,471 | 6,673 | 3,840 | 32,088 |
| 52,109 | 111 | 21,324 | 6,615 | 3,803 | 31,853 |
| 52,110 | 110 | 21,156 | 6,582 | 3,810 | 31,658 |
| 52,111 | 114 | 21,473 | 6,646 | 3,883 | 32,116 |
| 52,112 | 115 | 21,272 | 6,590 | 3,832 | 31,809 |
| 52,113 | 114 | 21,305 | 6,574 | 3,816 | 31,809 |
| 52,114 | 113 | 21,215 | 6,617 | 3,811 | 31,756 |
| 52,115 | 113 | 21,134 | 6,599 | 3,825 | 31,671 |
| 52,116 | 114 | 20,902 | 6,547 | 3,801 | 31,364 |
| 52,117 | 115 | 21,135 | 6,586 | 3,828 | 31,664 |
| 52,118 | 116 | 21,125 | 6,584 | 3,823 | 31,648 |
| 52,119 | 116 | 20,885 | 6,568 | 3,793 | 31,362 |

|        |     |        |       |       |        |
|--------|-----|--------|-------|-------|--------|
| 52,120 | 118 | 21,465 | 6,664 | 3,862 | 32,109 |
| 52,121 | 123 | 21,498 | 6,658 | 3,871 | 32,150 |
| 52,122 | 125 | 21,429 | 6,657 | 3,859 | 32,070 |
| 52,123 | 122 | 21,137 | 6,592 | 3,811 | 31,662 |
| 52,124 | 125 | 21,176 | 6,546 | 3,803 | 31,650 |
| 52,125 | 125 | 21,176 | 6,550 | 3,794 | 31,645 |
| 52,126 | 127 | 21,256 | 6,602 | 3,832 | 31,817 |
| 52,127 | 126 | 21,102 | 6,585 | 3,820 | 31,633 |
| 52,128 | 122 | 20,940 | 6,558 | 3,794 | 31,414 |
| 52,129 | 125 | 20,923 | 6,560 | 3,746 | 31,354 |
| 52,130 | 119 | 20,390 | 6,484 | 3,699 | 30,692 |
| 52,131 | 119 | 20,306 | 6,474 | 3,692 | 30,591 |
| 52,132 | 120 | 20,281 | 6,405 | 3,660 | 30,466 |
| 52,133 | 124 | 20,549 | 6,466 | 3,689 | 30,828 |
| 52,134 | 112 | 19,308 | 6,100 | 3,465 | 28,985 |
| 52,135 | 112 | 19,638 | 6,149 | 3,503 | 29,402 |
| 52,136 | 116 | 19,976 | 6,205 | 3,536 | 29,833 |
| 52,137 | 116 | 19,923 | 6,189 | 3,523 | 29,751 |
| 52,138 | 118 | 20,349 | 6,321 | 3,586 | 30,374 |
| 52,139 | 119 | 20,592 | 6,404 | 3,638 | 30,753 |
| 52,140 | 122 | 20,088 | 6,163 | 3,490 | 29,863 |
| 52,141 | 123 | 20,463 | 6,240 | 3,507 | 30,333 |
| 52,142 | 119 | 20,819 | 6,321 | 3,549 | 30,808 |
| 52,143 | 119 | 20,827 | 6,308 | 3,549 | 30,803 |
| 52,144 | 127 | 21,559 | 6,485 | 3,682 | 31,853 |
| 52,145 | 120 | 21,510 | 6,451 | 3,677 | 31,758 |
| 52,146 | 124 | 21,551 | 6,406 | 3,641 | 31,722 |
| 52,147 | 124 | 21,438 | 6,394 | 3,632 | 31,588 |
| 52,148 | 122 | 21,072 | 6,319 | 3,590 | 31,103 |
| 52,149 | 126 | 21,127 | 6,367 | 3,614 | 31,234 |
| 52,150 | 134 | 21,131 | 6,347 | 3,589 | 31,201 |
| 52,151 | 133 | 21,083 | 6,282 | 3,537 | 31,035 |

|        |     |        |       |       |        |
|--------|-----|--------|-------|-------|--------|
| 52,152 | 136 | 21,195 | 6,250 | 3,537 | 31,118 |
| 52,153 | 140 | 20,927 | 6,176 | 3,489 | 30,732 |
| 52,154 | 138 | 20,700 | 6,098 | 3,444 | 30,380 |
| 52,155 | 142 | 21,040 | 6,135 | 3,465 | 30,782 |
| 52,156 | 142 | 20,970 | 6,113 | 3,443 | 30,668 |
| 52,157 | 148 | 21,193 | 6,230 | 3,514 | 31,085 |
| 52,158 | 146 | 21,329 | 6,236 | 3,538 | 31,249 |
| 52,159 | 132 | 20,825 | 6,108 | 3,468 | 30,533 |
| 52,160 | 133 | 20,975 | 6,148 | 3,474 | 30,730 |
| 52,161 | 131 | 20,940 | 6,137 | 3,460 | 30,668 |
| 52,162 | 129 | 21,248 | 6,222 | 3,501 | 31,100 |
| 52,163 | 129 | 20,909 | 6,087 | 3,466 | 30,591 |
| 52,164 | 133 | 21,165 | 6,089 | 3,474 | 30,861 |
| 52,165 | 133 | 21,193 | 6,086 | 3,474 | 30,886 |
| 52,166 | 141 | 20,959 | 6,028 | 3,429 | 30,557 |
| 52,167 | 140 | 20,678 | 5,943 | 3,377 | 30,138 |
| 52,168 | 135 | 21,330 | 6,056 | 3,445 | 30,966 |
| 52,169 | 136 | 21,545 | 6,098 | 3,475 | 31,254 |
| 52,170 | 140 | 21,640 | 6,129 | 3,485 | 31,394 |
| 52,171 | 141 | 21,677 | 6,124 | 3,471 | 31,413 |
| 52,172 | 142 | 21,622 | 6,092 | 3,444 | 31,300 |
| 52,173 | 139 | 21,381 | 6,003 | 3,395 | 30,918 |
| 52,174 | 139 | 21,454 | 6,028 | 3,403 | 31,024 |
| 52,175 | 147 | 21,814 | 6,144 | 3,469 | 31,574 |
| 52,176 | 150 | 21,625 | 6,073 | 3,439 | 31,287 |
| 52,177 | 150 | 21,596 | 6,077 | 3,430 | 31,253 |
| 52,178 | 160 | 21,934 | 6,147 | 3,485 | 31,726 |
| 52,179 | 151 | 21,673 | 6,093 | 3,446 | 31,363 |
| 52,180 | 151 | 21,452 | 6,068 | 3,451 | 31,122 |
| 52,181 | 150 | 21,531 | 6,053 | 3,438 | 31,172 |
| 52,182 | 152 | 21,715 | 6,107 | 3,441 | 31,415 |
| 52,183 | 153 | 21,617 | 6,063 | 3,419 | 31,252 |

|        |     |        |       |       |        |
|--------|-----|--------|-------|-------|--------|
| 52,184 | 149 | 21,852 | 6,123 | 3,430 | 31,554 |
| 52,185 | 145 | 21,442 | 6,022 | 3,365 | 30,974 |
| 52,186 | 145 | 21,632 | 6,095 | 3,380 | 31,252 |
| 52,187 | 141 | 21,633 | 6,057 | 3,365 | 31,196 |
| 52,188 | 142 | 21,902 | 6,098 | 3,391 | 31,533 |
| 52,189 | 139 | 21,899 | 6,089 | 3,396 | 31,523 |
| 52,190 | 140 | 21,770 | 6,099 | 3,379 | 31,388 |
| 52,191 | 138 | 21,769 | 6,134 | 3,398 | 31,439 |
| 52,192 | 144 | 21,858 | 6,182 | 3,400 | 31,584 |
| 52,193 | 144 | 21,930 | 6,236 | 3,454 | 31,764 |
| 52,194 | 137 | 21,919 | 6,282 | 3,465 | 31,803 |
| 52,195 | 140 | 21,695 | 6,272 | 3,453 | 31,560 |
| 52,196 | 142 | 21,433 | 6,203 | 3,403 | 31,181 |
| 52,197 | 138 | 21,838 | 6,303 | 3,454 | 31,733 |
| 52,198 | 139 | 21,968 | 6,319 | 3,455 | 31,881 |
| 52,199 | 135 | 21,949 | 6,289 | 3,424 | 31,797 |
| 52,200 | 134 | 21,944 | 6,280 | 3,404 | 31,762 |
| 52,201 | 125 | 21,946 | 6,268 | 3,401 | 31,740 |
| 52,202 | 124 | 22,060 | 6,306 | 3,416 | 31,906 |
| 52,203 | 124 | 21,917 | 6,288 | 3,398 | 31,727 |
| 52,204 | 117 | 21,920 | 6,302 | 3,406 | 31,745 |
| 52,205 | 118 | 21,941 | 6,352 | 3,402 | 31,813 |
| 52,206 | 116 | 22,043 | 6,379 | 3,439 | 31,977 |
| 52,207 | 116 | 22,153 | 6,380 | 3,457 | 32,106 |
| 52,208 | 118 | 22,273 | 6,392 | 3,437 | 32,220 |
| 52,209 | 116 | 21,977 | 6,326 | 3,414 | 31,833 |
| 52,210 | 116 | 21,947 | 6,320 | 3,405 | 31,788 |
| 52,211 | 115 | 21,679 | 6,272 | 3,373 | 31,439 |
| 52,212 | 120 | 22,356 | 6,471 | 3,501 | 32,448 |
| 52,213 | 123 | 22,274 | 6,448 | 3,496 | 32,341 |
| 52,214 | 122 | 22,189 | 6,440 | 3,487 | 32,238 |
| 52,215 | 121 | 22,213 | 6,491 | 3,509 | 32,334 |



|        |     |        |       |       |        |
|--------|-----|--------|-------|-------|--------|
| 52,216 | 122 | 22,124 | 6,536 | 3,501 | 32,283 |
| 52,217 | 118 | 22,243 | 6,584 | 3,506 | 32,451 |
| 52,218 | 117 | 21,928 | 6,521 | 3,458 | 32,024 |
| 52,219 | 115 | 22,007 | 6,562 | 3,477 | 32,161 |
| 52,220 | 115 | 22,019 | 6,586 | 3,480 | 32,200 |
| 52,221 | 111 | 21,585 | 6,470 | 3,439 | 31,605 |
| 52,222 | 110 | 21,453 | 6,445 | 3,431 | 31,439 |
| 52,223 | 105 | 21,340 | 6,442 | 3,433 | 31,320 |
| 52,224 | 107 | 21,275 | 6,455 | 3,427 | 31,264 |
| 52,225 | 102 | 21,306 | 6,463 | 3,436 | 31,307 |
| 52,226 | 99  | 21,296 | 6,436 | 3,433 | 31,264 |
| 52,227 | 93  | 20,883 | 6,336 | 3,359 | 30,671 |
| 52,228 | 93  | 20,951 | 6,353 | 3,377 | 30,774 |
| 52,229 | 84  | 21,068 | 6,403 | 3,394 | 30,949 |
| 52,230 | 84  | 20,841 | 6,308 | 3,371 | 30,604 |
| 52,231 | 85  | 20,950 | 6,342 | 3,401 | 30,778 |
| 52,232 | 86  | 20,778 | 6,354 | 3,369 | 30,587 |
| 52,233 | 86  | 20,692 | 6,339 | 3,375 | 30,492 |
| 52,234 | 88  | 20,300 | 6,279 | 3,322 | 29,989 |
| 52,235 | 89  | 20,001 | 6,194 | 3,287 | 29,571 |
| 52,236 | 95  | 20,125 | 6,215 | 3,325 | 29,760 |
| 52,237 | 95  | 19,731 | 6,096 | 3,278 | 29,200 |
| 52,238 | 97  | 19,635 | 6,113 | 3,294 | 29,139 |
| 52,239 | 100 | 19,653 | 6,141 | 3,305 | 29,199 |
| 52,240 | 100 | 19,479 | 6,090 | 3,261 | 28,930 |
| 52,241 | 100 | 19,375 | 6,095 | 3,261 | 28,831 |
| 52,242 | 102 | 19,088 | 6,056 | 3,253 | 28,499 |
| 52,243 | 98  | 18,938 | 6,017 | 3,240 | 28,293 |
| 52,244 | 99  | 18,977 | 5,981 | 3,195 | 28,252 |
| 52,245 | 95  | 18,649 | 5,835 | 3,137 | 27,716 |
| 52,246 | 99  | 18,673 | 5,838 | 3,122 | 27,732 |
| 52,247 | 97  | 18,407 | 5,778 | 3,081 | 27,363 |

|        |     |        |       |       |        |
|--------|-----|--------|-------|-------|--------|
| 52,248 | 100 | 18,817 | 5,868 | 3,132 | 27,917 |
| 52,249 | 102 | 18,428 | 5,779 | 3,089 | 27,398 |
| 52,250 | 101 | 18,047 | 5,708 | 3,049 | 26,905 |
| 52,251 | 107 | 18,190 | 5,811 | 3,118 | 27,226 |
| 52,252 | 107 | 17,970 | 5,774 | 3,118 | 26,969 |
| 52,253 | 112 | 18,086 | 5,811 | 3,144 | 27,153 |
| 52,254 | 117 | 18,174 | 5,851 | 3,166 | 27,308 |
| 52,255 | 118 | 18,414 | 5,876 | 3,199 | 27,607 |
| 52,256 | 128 | 18,240 | 5,842 | 3,189 | 27,399 |
| 52,257 | 127 | 18,184 | 5,822 | 3,161 | 27,294 |
| 52,258 | 125 | 17,865 | 5,742 | 3,105 | 26,837 |
| 52,259 | 122 | 17,581 | 5,658 | 3,074 | 26,435 |
| 52,260 | 121 | 18,031 | 5,746 | 3,144 | 27,042 |
| 52,261 | 121 | 18,054 | 5,765 | 3,159 | 27,099 |
| 52,262 | 122 | 18,165 | 5,788 | 3,182 | 27,257 |
| 52,263 | 122 | 18,085 | 5,761 | 3,168 | 27,136 |
| 52,264 | 129 | 18,135 | 5,790 | 3,174 | 27,228 |
| 52,265 | 129 | 18,159 | 5,810 | 3,173 | 27,271 |
| 52,266 | 130 | 18,090 | 5,718 | 3,137 | 27,075 |
| 52,267 | 129 | 18,030 | 5,667 | 3,135 | 26,961 |
| 52,268 | 128 | 18,545 | 5,807 | 3,224 | 27,704 |
| 52,269 | 127 | 18,341 | 5,736 | 3,184 | 27,388 |
| 52,270 | 133 | 18,641 | 5,837 | 3,221 | 27,832 |
| 52,271 | 131 | 18,394 | 5,774 | 3,202 | 27,501 |
| 52,272 | 133 | 18,575 | 5,829 | 3,227 | 27,764 |
| 52,273 | 134 | 18,611 | 5,852 | 3,234 | 27,831 |
| 52,274 | 134 | 18,399 | 5,783 | 3,205 | 27,521 |
| 52,275 | 134 | 18,270 | 5,759 | 3,174 | 27,337 |
| 52,276 | 139 | 18,358 | 5,814 | 3,217 | 27,528 |
| 52,277 | 138 | 18,248 | 5,782 | 3,195 | 27,363 |
| 52,278 | 136 | 18,005 | 5,716 | 3,163 | 27,020 |
| 52,279 | 135 | 18,149 | 5,769 | 3,213 | 27,266 |

|        |     |        |       |       |        |
|--------|-----|--------|-------|-------|--------|
| 52,280 | 137 | 18,099 | 5,777 | 3,220 | 27,233 |
| 52,281 | 136 | 18,013 | 5,767 | 3,199 | 27,115 |
| 52,282 | 135 | 17,896 | 5,727 | 3,162 | 26,920 |
| 52,283 | 134 | 17,905 | 5,699 | 3,170 | 26,908 |
| 52,284 | 132 | 17,941 | 5,710 | 3,168 | 26,951 |
| 52,285 | 127 | 18,106 | 5,726 | 3,200 | 27,159 |
| 52,286 | 129 | 18,246 | 5,763 | 3,238 | 27,376 |
| 52,287 | 124 | 18,106 | 5,729 | 3,220 | 27,179 |
| 52,288 | 121 | 18,233 | 5,775 | 3,225 | 27,354 |
| 52,289 | 118 | 18,333 | 5,801 | 3,248 | 27,500 |
| 52,290 | 118 | 18,280 | 5,821 | 3,239 | 27,458 |
| 52,291 | 122 | 18,356 | 5,822 | 3,250 | 27,550 |
| 52,292 | 121 | 18,420 | 5,778 | 3,244 | 27,563 |
| 52,293 | 116 | 18,179 | 5,699 | 3,197 | 27,191 |
| 52,294 | 116 | 18,364 | 5,755 | 3,249 | 27,484 |
| 52,295 | 117 | 18,148 | 5,741 | 3,255 | 27,261 |
| 52,296 | 119 | 18,385 | 5,818 | 3,282 | 27,604 |
| 52,297 | 117 | 18,421 | 5,799 | 3,286 | 27,623 |
| 52,298 | 115 | 18,483 | 5,793 | 3,329 | 27,720 |
| 52,299 | 119 | 18,476 | 5,807 | 3,338 | 27,740 |
| 52,300 | 109 | 18,526 | 5,756 | 3,312 | 27,703 |
| 52,301 | 108 | 18,486 | 5,644 | 3,262 | 27,500 |
| 52,302 | 110 | 18,535 | 5,643 | 3,251 | 27,539 |
| 52,303 | 104 | 18,670 | 5,674 | 3,267 | 27,715 |
| 52,304 | 106 | 18,674 | 5,692 | 3,270 | 27,742 |
| 52,305 | 110 | 18,595 | 5,702 | 3,243 | 27,650 |
| 52,306 | 107 | 18,370 | 5,648 | 3,209 | 27,334 |
| 52,307 | 100 | 18,323 | 5,668 | 3,216 | 27,307 |
| 52,308 | 100 | 18,332 | 5,677 | 3,217 | 27,326 |
| 52,309 | 100 | 18,356 | 5,686 | 3,206 | 27,348 |
| 52,310 | 103 | 18,359 | 5,643 | 3,171 | 27,276 |
| 52,311 | 104 | 18,324 | 5,680 | 3,162 | 27,270 |

|        |     |        |       |       |        |
|--------|-----|--------|-------|-------|--------|
| 52,312 | 107 | 18,325 | 5,680 | 3,163 | 27,275 |
| 52,313 | 105 | 18,388 | 5,708 | 3,183 | 27,384 |
| 52,314 | 104 | 18,360 | 5,713 | 3,163 | 27,340 |
| 52,315 | 101 | 18,710 | 5,766 | 3,196 | 27,773 |
| 52,316 | 98  | 18,338 | 5,679 | 3,140 | 27,255 |
| 52,317 | 94  | 18,295 | 5,715 | 3,157 | 27,261 |
| 52,318 | 105 | 18,543 | 5,827 | 3,204 | 27,679 |
| 52,319 | 109 | 18,754 | 5,902 | 3,248 | 28,013 |
| 52,320 | 114 | 18,842 | 5,937 | 3,286 | 28,179 |
| 52,321 | 115 | 18,887 | 5,961 | 3,324 | 28,287 |
| 52,322 | 115 | 18,847 | 5,954 | 3,311 | 28,227 |
| 52,323 | 115 | 18,967 | 5,974 | 3,316 | 28,372 |
| 52,324 | 115 | 18,751 | 5,944 | 3,284 | 28,094 |
| 52,325 | 116 | 18,934 | 6,002 | 3,308 | 28,360 |
| 52,326 | 117 | 18,781 | 5,947 | 3,263 | 28,108 |
| 52,327 | 116 | 18,694 | 5,931 | 3,253 | 27,994 |
| 52,328 | 114 | 18,803 | 6,005 | 3,286 | 28,208 |
| 52,329 | 113 | 18,889 | 6,037 | 3,280 | 28,319 |
| 52,330 | 114 | 19,196 | 6,120 | 3,316 | 28,746 |
| 52,331 | 115 | 19,084 | 6,040 | 3,277 | 28,516 |
| 52,332 | 119 | 19,087 | 6,048 | 3,281 | 28,535 |
| 52,333 | 120 | 18,951 | 6,023 | 3,244 | 28,338 |
| 52,334 | 124 | 18,930 | 6,026 | 3,257 | 28,337 |
| 52,335 | 124 | 18,803 | 6,001 | 3,241 | 28,169 |
| 52,336 | 123 | 19,261 | 6,165 | 3,320 | 28,869 |
| 52,337 | 121 | 19,074 | 6,118 | 3,279 | 28,592 |
| 52,338 | 124 | 19,128 | 6,131 | 3,274 | 28,657 |
| 52,339 | 126 | 19,085 | 6,090 | 3,259 | 28,560 |
| 52,340 | 127 | 19,117 | 6,089 | 3,246 | 28,579 |
| 52,341 | 126 | 19,085 | 6,096 | 3,245 | 28,552 |
| 52,342 | 121 | 19,150 | 6,162 | 3,274 | 28,707 |
| 52,343 | 125 | 19,098 | 6,181 | 3,262 | 28,666 |

|        |     |        |       |       |        |
|--------|-----|--------|-------|-------|--------|
| 52,344 | 135 | 19,111 | 6,144 | 3,227 | 28,617 |
| 52,345 | 137 | 19,094 | 6,131 | 3,221 | 28,583 |
| 52,346 | 139 | 19,180 | 6,154 | 3,244 | 28,717 |
| 52,347 | 137 | 18,982 | 6,099 | 3,223 | 28,441 |
| 52,348 | 138 | 18,689 | 6,043 | 3,175 | 28,045 |
| 52,349 | 140 | 18,837 | 6,093 | 3,166 | 28,236 |
| 52,350 | 138 | 18,766 | 6,095 | 3,161 | 28,160 |
| 52,351 | 139 | 18,725 | 6,107 | 3,168 | 28,139 |
| 52,352 | 138 | 18,568 | 6,141 | 3,175 | 28,022 |
| 52,353 | 141 | 18,404 | 6,108 | 3,145 | 27,798 |
| 52,354 | 141 | 18,359 | 6,100 | 3,139 | 27,739 |
| 52,355 | 138 | 18,430 | 6,081 | 3,152 | 27,801 |
| 52,356 | 133 | 18,126 | 5,990 | 3,115 | 27,364 |
| 52,357 | 136 | 18,099 | 6,023 | 3,112 | 27,370 |
| 52,358 | 138 | 17,930 | 5,928 | 3,067 | 27,063 |
| 52,359 | 141 | 17,821 | 5,918 | 3,070 | 26,950 |
| 52,360 | 137 | 17,703 | 5,941 | 3,081 | 26,862 |
| 52,361 | 135 | 17,714 | 5,953 | 3,084 | 26,886 |
| 52,362 | 132 | 17,674 | 5,928 | 3,075 | 26,809 |
| 52,363 | 134 | 17,799 | 5,979 | 3,079 | 26,991 |
| 52,364 | 130 | 17,541 | 5,963 | 3,066 | 26,700 |
| 52,365 | 132 | 17,710 | 6,044 | 3,110 | 26,996 |
| 52,366 | 128 | 17,511 | 5,993 | 3,069 | 26,701 |
| 52,367 | 128 | 17,481 | 6,041 | 3,079 | 26,729 |
| 52,368 | 121 | 17,369 | 6,002 | 3,087 | 26,579 |
| 52,369 | 122 | 17,167 | 5,954 | 3,077 | 26,320 |
| 52,370 | 121 | 17,190 | 5,991 | 3,073 | 26,375 |
| 52,371 | 115 | 16,922 | 5,946 | 3,034 | 26,017 |
| 52,372 | 114 | 16,741 | 5,902 | 3,002 | 25,759 |
| 52,373 | 114 | 16,752 | 5,902 | 2,993 | 25,761 |
| 52,374 | 114 | 16,561 | 5,844 | 2,957 | 25,476 |
| 52,375 | 112 | 16,651 | 5,838 | 2,939 | 25,540 |

|        |     |        |       |       |        |
|--------|-----|--------|-------|-------|--------|
| 52,376 | 110 | 16,544 | 5,781 | 2,929 | 25,364 |
| 52,377 | 109 | 16,401 | 5,779 | 2,932 | 25,221 |
| 52,378 | 109 | 16,357 | 5,762 | 2,921 | 25,149 |
| 52,379 | 110 | 16,453 | 5,818 | 2,954 | 25,335 |
| 52,380 | 113 | 16,402 | 5,836 | 2,952 | 25,303 |
| 52,381 | 112 | 16,392 | 5,838 | 2,954 | 25,296 |
| 52,382 | 114 | 16,335 | 5,809 | 2,951 | 25,209 |
| 52,383 | 109 | 16,285 | 5,773 | 2,944 | 25,111 |
| 52,384 | 110 | 16,544 | 5,853 | 2,971 | 25,478 |
| 52,385 | 107 | 16,366 | 5,768 | 2,950 | 25,191 |
| 52,386 | 111 | 16,553 | 5,786 | 2,958 | 25,408 |
| 52,387 | 111 | 16,392 | 5,725 | 2,951 | 25,179 |
| 52,388 | 114 | 16,779 | 5,804 | 3,003 | 25,700 |
| 52,389 | 110 | 16,660 | 5,776 | 2,973 | 25,519 |
| 52,390 | 110 | 16,686 | 5,784 | 2,994 | 25,574 |
| 52,391 | 111 | 16,922 | 5,839 | 3,029 | 25,901 |
| 52,392 | 111 | 16,569 | 5,711 | 2,976 | 25,367 |
| 52,393 | 112 | 16,726 | 5,735 | 3,002 | 25,575 |
| 52,394 | 108 | 16,831 | 5,763 | 3,017 | 25,719 |
| 52,395 | 98  | 16,847 | 5,769 | 3,016 | 25,730 |
| 52,396 | 101 | 17,025 | 5,821 | 3,034 | 25,981 |
| 52,397 | 97  | 16,915 | 5,773 | 2,987 | 25,772 |
| 52,398 | 97  | 17,037 | 5,825 | 3,006 | 25,965 |
| 52,399 | 94  | 16,987 | 5,847 | 3,017 | 25,945 |
| 52,400 | 93  | 17,054 | 5,860 | 3,022 | 26,029 |
| 52,401 | 93  | 16,887 | 5,792 | 2,994 | 25,766 |
| 52,402 | 96  | 16,995 | 5,812 | 3,000 | 25,903 |
| 52,403 | 95  | 16,888 | 5,754 | 2,989 | 25,726 |
| 52,404 | 95  | 17,119 | 5,817 | 3,039 | 26,070 |
| 52,405 | 94  | 16,744 | 5,695 | 2,962 | 25,495 |
| 52,406 | 94  | 16,898 | 5,739 | 2,974 | 25,705 |
| 52,407 | 90  | 17,178 | 5,793 | 3,010 | 26,071 |

|        |     |        |       |       |        |
|--------|-----|--------|-------|-------|--------|
| 52,408 | 92  | 17,408 | 5,839 | 3,049 | 26,388 |
| 52,409 | 86  | 17,269 | 5,821 | 3,039 | 26,215 |
| 52,410 | 88  | 17,297 | 5,808 | 3,023 | 26,216 |
| 52,411 | 88  | 17,501 | 5,862 | 3,049 | 26,500 |
| 52,412 | 90  | 17,493 | 5,854 | 3,073 | 26,510 |
| 52,413 | 92  | 17,536 | 5,846 | 3,083 | 26,557 |
| 52,414 | 90  | 17,306 | 5,757 | 3,047 | 26,200 |
| 52,415 | 90  | 17,333 | 5,755 | 3,042 | 26,220 |
| 52,416 | 93  | 17,324 | 5,737 | 3,038 | 26,192 |
| 52,417 | 96  | 17,223 | 5,722 | 3,038 | 26,079 |
| 52,418 | 96  | 17,275 | 5,712 | 3,061 | 26,144 |
| 52,419 | 97  | 17,129 | 5,683 | 3,023 | 25,932 |
| 52,420 | 93  | 17,183 | 5,662 | 3,024 | 25,962 |
| 52,421 | 92  | 17,122 | 5,611 | 3,032 | 25,857 |
| 52,422 | 95  | 17,039 | 5,558 | 3,004 | 25,696 |
| 52,423 | 96  | 17,164 | 5,581 | 3,012 | 25,853 |
| 52,424 | 95  | 17,140 | 5,580 | 3,022 | 25,837 |
| 52,425 | 94  | 17,245 | 5,610 | 3,050 | 25,999 |
| 52,426 | 95  | 17,396 | 5,608 | 3,096 | 26,195 |
| 52,427 | 96  | 17,460 | 5,605 | 3,081 | 26,242 |
| 52,428 | 94  | 17,502 | 5,565 | 3,059 | 26,220 |
| 52,429 | 96  | 17,743 | 5,634 | 3,082 | 26,555 |
| 52,430 | 92  | 17,805 | 5,568 | 3,067 | 26,532 |
| 52,431 | 94  | 17,586 | 5,502 | 3,032 | 26,214 |
| 52,432 | 95  | 17,909 | 5,544 | 3,070 | 26,618 |
| 52,433 | 102 | 18,056 | 5,603 | 3,104 | 26,865 |
| 52,434 | 105 | 17,927 | 5,586 | 3,078 | 26,696 |
| 52,435 | 106 | 17,720 | 5,531 | 3,047 | 26,404 |
| 52,436 | 108 | 18,009 | 5,593 | 3,078 | 26,788 |
| 52,437 | 104 | 18,084 | 5,639 | 3,113 | 26,940 |
| 52,438 | 107 | 18,161 | 5,650 | 3,113 | 27,031 |
| 52,439 | 106 | 17,979 | 5,647 | 3,085 | 26,817 |

|        |     |        |       |       |        |
|--------|-----|--------|-------|-------|--------|
| 52,440 | 105 | 17,744 | 5,582 | 3,071 | 26,502 |
| 52,441 | 111 | 17,838 | 5,617 | 3,075 | 26,641 |
| 52,442 | 110 | 17,748 | 5,595 | 3,038 | 26,491 |
| 52,443 | 107 | 17,864 | 5,573 | 3,038 | 26,582 |
| 52,444 | 111 | 18,283 | 5,653 | 3,083 | 27,130 |
| 52,445 | 113 | 18,150 | 5,603 | 3,064 | 26,930 |
| 52,446 | 112 | 18,013 | 5,559 | 3,047 | 26,731 |
| 52,447 | 111 | 18,438 | 5,670 | 3,091 | 27,310 |
| 52,448 | 111 | 18,396 | 5,664 | 3,096 | 27,267 |
| 52,449 | 114 | 18,564 | 5,722 | 3,130 | 27,530 |
| 52,450 | 116 | 18,998 | 5,800 | 3,179 | 28,093 |
| 52,451 | 118 | 18,971 | 5,782 | 3,189 | 28,060 |
| 52,452 | 118 | 18,959 | 5,782 | 3,179 | 28,038 |
| 52,453 | 115 | 19,024 | 5,766 | 3,167 | 28,072 |
| 52,454 | 115 | 18,831 | 5,700 | 3,142 | 27,788 |
| 52,455 | 117 | 19,001 | 5,777 | 3,175 | 28,070 |
| 52,456 | 113 | 18,812 | 5,704 | 3,143 | 27,772 |
| 52,457 | 115 | 18,893 | 5,755 | 3,174 | 27,937 |
| 52,458 | 120 | 19,003 | 5,781 | 3,177 | 28,081 |
| 52,459 | 120 | 19,311 | 5,889 | 3,206 | 28,526 |
| 52,460 | 117 | 19,388 | 5,874 | 3,199 | 28,578 |
| 52,461 | 116 | 19,407 | 5,826 | 3,181 | 28,530 |
| 52,462 | 114 | 19,416 | 5,815 | 3,175 | 28,520 |
| 52,463 | 122 | 19,727 | 5,902 | 3,205 | 28,956 |
| 52,464 | 120 | 19,542 | 5,861 | 3,154 | 28,677 |
| 52,465 | 127 | 19,714 | 5,850 | 3,171 | 28,862 |
| 52,466 | 127 | 19,873 | 5,859 | 3,174 | 29,033 |
| 52,467 | 122 | 20,198 | 5,966 | 3,220 | 29,506 |
| 52,468 | 122 | 20,197 | 5,894 | 3,174 | 29,387 |
| 52,469 | 123 | 20,151 | 5,907 | 3,172 | 29,353 |
| 52,470 | 126 | 20,432 | 5,984 | 3,211 | 29,753 |
| 52,471 | 126 | 20,117 | 5,856 | 3,139 | 29,238 |



|        |     |        |       |       |        |
|--------|-----|--------|-------|-------|--------|
| 52,472 | 131 | 20,389 | 5,911 | 3,167 | 29,598 |
| 52,473 | 128 | 20,758 | 5,972 | 3,214 | 30,072 |
| 52,474 | 130 | 21,048 | 6,025 | 3,245 | 30,448 |
| 52,475 | 130 | 21,048 | 6,008 | 3,224 | 30,410 |
| 52,476 | 133 | 21,114 | 6,035 | 3,227 | 30,509 |
| 52,477 | 133 | 21,210 | 6,066 | 3,225 | 30,634 |
| 52,478 | 132 | 20,993 | 6,064 | 3,240 | 30,429 |
| 52,479 | 132 | 21,026 | 6,062 | 3,242 | 30,462 |
| 52,480 | 131 | 20,726 | 6,059 | 3,193 | 30,109 |
| 52,481 | 132 | 20,859 | 6,127 | 3,222 | 30,340 |
| 52,482 | 125 | 21,021 | 6,186 | 3,277 | 30,609 |
| 52,483 | 125 | 21,242 | 6,273 | 3,317 | 30,957 |
| 52,484 | 113 | 21,199 | 6,234 | 3,302 | 30,848 |
| 52,485 | 114 | 21,286 | 6,256 | 3,306 | 30,962 |
| 52,486 | 113 | 21,009 | 6,214 | 3,285 | 30,621 |
| 52,487 | 117 | 21,066 | 6,384 | 3,343 | 30,910 |
| 52,488 | 122 | 20,941 | 6,348 | 3,334 | 30,745 |
| 52,489 | 120 | 20,939 | 6,351 | 3,321 | 30,731 |
| 52,490 | 121 | 20,837 | 6,293 | 3,297 | 30,548 |
| 52,491 | 121 | 20,859 | 6,309 | 3,319 | 30,608 |
| 52,492 | 116 | 20,998 | 6,371 | 3,341 | 30,826 |
| 52,493 | 117 | 20,814 | 6,306 | 3,331 | 30,568 |
| 52,494 | 117 | 20,669 | 6,300 | 3,331 | 30,417 |
| 52,495 | 116 | 20,576 | 6,304 | 3,343 | 30,339 |
| 52,496 | 112 | 20,410 | 6,262 | 3,325 | 30,109 |
| 52,497 | 119 | 20,414 | 6,266 | 3,367 | 30,166 |
| 52,498 | 124 | 20,469 | 6,319 | 3,401 | 30,313 |
| 52,499 | 121 | 20,675 | 6,378 | 3,444 | 30,618 |
| 52,500 | 121 | 20,493 | 6,330 | 3,394 | 30,338 |
| 52,501 | 121 | 20,395 | 6,361 | 3,392 | 30,269 |
| 52,502 | 122 | 20,327 | 6,355 | 3,387 | 30,191 |
| 52,503 | 127 | 20,463 | 6,369 | 3,398 | 30,357 |

|        |     |        |       |       |        |
|--------|-----|--------|-------|-------|--------|
| 52,504 | 124 | 20,332 | 6,312 | 3,378 | 30,146 |
| 52,505 | 123 | 20,477 | 6,392 | 3,388 | 30,380 |
| 52,506 | 123 | 20,407 | 6,380 | 3,394 | 30,304 |
| 52,507 | 122 | 20,580 | 6,448 | 3,439 | 30,589 |
| 52,508 | 124 | 20,404 | 6,394 | 3,421 | 30,343 |
| 52,509 | 125 | 20,289 | 6,322 | 3,417 | 30,153 |
| 52,510 | 134 | 20,550 | 6,501 | 3,498 | 30,683 |
| 52,511 | 135 | 20,461 | 6,494 | 3,495 | 30,585 |
| 52,512 | 141 | 20,271 | 6,464 | 3,475 | 30,351 |
| 52,513 | 143 | 20,295 | 6,444 | 3,470 | 30,352 |
| 52,514 | 137 | 20,258 | 6,440 | 3,463 | 30,298 |
| 52,515 | 137 | 20,196 | 6,408 | 3,468 | 30,209 |
| 52,516 | 131 | 20,250 | 6,428 | 3,484 | 30,293 |
| 52,517 | 136 | 20,327 | 6,414 | 3,504 | 30,381 |
| 52,518 | 134 | 20,237 | 6,428 | 3,462 | 30,261 |
| 52,519 | 134 | 20,331 | 6,446 | 3,453 | 30,364 |
| 52,520 | 135 | 20,421 | 6,437 | 3,456 | 30,449 |
| 52,521 | 136 | 20,627 | 6,533 | 3,512 | 30,808 |
| 52,522 | 143 | 20,362 | 6,473 | 3,493 | 30,471 |
| 52,523 | 136 | 20,093 | 6,423 | 3,480 | 30,132 |
| 52,524 | 134 | 20,007 | 6,471 | 3,499 | 30,111 |
| 52,525 | 135 | 19,971 | 6,465 | 3,521 | 30,092 |
| 52,526 | 134 | 20,087 | 6,478 | 3,547 | 30,246 |
| 52,527 | 128 | 19,866 | 6,421 | 3,528 | 29,943 |
| 52,528 | 130 | 20,078 | 6,450 | 3,522 | 30,180 |
| 52,529 | 133 | 20,188 | 6,469 | 3,521 | 30,311 |
| 52,530 | 142 | 20,247 | 6,430 | 3,533 | 30,352 |
| 52,531 | 146 | 20,564 | 6,526 | 3,594 | 30,830 |
| 52,532 | 146 | 20,712 | 6,548 | 3,621 | 31,027 |
| 52,533 | 146 | 20,851 | 6,544 | 3,629 | 31,170 |
| 52,534 | 147 | 20,717 | 6,501 | 3,606 | 30,971 |
| 52,535 | 147 | 20,774 | 6,495 | 3,619 | 31,035 |

|        |     |        |       |       |        |
|--------|-----|--------|-------|-------|--------|
| 52,536 | 147 | 20,950 | 6,465 | 3,643 | 31,205 |
| 52,537 | 147 | 21,254 | 6,429 | 3,658 | 31,488 |
| 52,538 | 137 | 21,158 | 6,330 | 3,619 | 31,244 |
| 52,539 | 137 | 21,206 | 6,349 | 3,627 | 31,319 |
| 52,540 | 138 | 21,367 | 6,392 | 3,683 | 31,580 |
| 52,541 | 137 | 21,396 | 6,341 | 3,654 | 31,528 |
| 52,542 | 135 | 21,399 | 6,334 | 3,682 | 31,550 |
| 52,543 | 134 | 21,355 | 6,325 | 3,684 | 31,498 |
| 52,544 | 138 | 21,723 | 6,428 | 3,732 | 32,021 |
| 52,545 | 139 | 21,693 | 6,459 | 3,749 | 32,040 |
| 52,546 | 133 | 21,681 | 6,433 | 3,726 | 31,973 |
| 52,547 | 128 | 21,369 | 6,342 | 3,684 | 31,523 |
| 52,548 | 123 | 21,199 | 6,264 | 3,629 | 31,215 |
| 52,549 | 125 | 21,431 | 6,293 | 3,641 | 31,490 |
| 52,550 | 125 | 21,712 | 6,333 | 3,674 | 31,844 |
| 52,551 | 122 | 21,151 | 6,135 | 3,574 | 30,982 |
| 52,552 | 123 | 21,396 | 6,164 | 3,605 | 31,288 |
| 52,553 | 124 | 21,693 | 6,204 | 3,633 | 31,654 |
| 52,554 | 121 | 21,439 | 6,141 | 3,608 | 31,309 |
| 52,555 | 122 | 21,522 | 6,151 | 3,624 | 31,419 |
| 52,556 | 125 | 21,547 | 6,075 | 3,570 | 31,317 |
| 52,557 | 125 | 21,729 | 6,120 | 3,597 | 31,571 |
| 52,558 | 126 | 21,986 | 6,189 | 3,632 | 31,933 |
| 52,559 | 120 | 21,939 | 6,138 | 3,619 | 31,816 |
| 52,560 | 111 | 21,629 | 6,032 | 3,558 | 31,330 |
| 52,561 | 108 | 21,722 | 6,008 | 3,550 | 31,388 |
| 52,562 | 113 | 21,997 | 6,062 | 3,589 | 31,761 |
| 52,563 | 106 | 21,995 | 6,052 | 3,603 | 31,756 |
| 52,564 | 103 | 21,800 | 6,003 | 3,578 | 31,484 |
| 52,565 | 103 | 21,753 | 6,002 | 3,579 | 31,437 |
| 52,566 | 103 | 21,840 | 6,070 | 3,632 | 31,645 |
| 52,567 | 99  | 21,822 | 6,063 | 3,625 | 31,609 |

|        |     |        |       |       |        |
|--------|-----|--------|-------|-------|--------|
| 52,568 | 101 | 21,430 | 5,963 | 3,593 | 31,087 |
| 52,569 | 104 | 21,731 | 6,035 | 3,633 | 31,503 |
| 52,570 | 110 | 21,971 | 6,093 | 3,663 | 31,837 |
| 52,571 | 106 | 21,816 | 6,012 | 3,616 | 31,550 |
| 52,572 | 112 | 21,916 | 6,064 | 3,644 | 31,736 |
| 52,573 | 103 | 21,660 | 5,982 | 3,553 | 31,298 |
| 52,574 | 106 | 21,744 | 5,968 | 3,558 | 31,376 |
| 52,575 | 106 | 21,653 | 5,900 | 3,528 | 31,187 |
| 52,576 | 104 | 21,828 | 5,948 | 3,536 | 31,416 |
| 52,577 | 103 | 21,639 | 5,919 | 3,504 | 31,165 |
| 52,578 | 105 | 21,623 | 5,907 | 3,521 | 31,156 |
| 52,579 | 101 | 21,409 | 5,800 | 3,472 | 30,782 |
| 52,580 | 103 | 21,640 | 5,855 | 3,525 | 31,123 |
| 52,581 | 94  | 21,820 | 5,938 | 3,560 | 31,412 |
| 52,582 | 93  | 21,901 | 5,904 | 3,547 | 31,445 |
| 52,583 | 96  | 21,651 | 5,810 | 3,494 | 31,051 |
| 52,584 | 96  | 21,377 | 5,744 | 3,464 | 30,681 |
| 52,585 | 95  | 21,510 | 5,807 | 3,483 | 30,895 |
| 52,586 | 97  | 21,617 | 5,863 | 3,517 | 31,094 |
| 52,587 | 99  | 21,360 | 5,852 | 3,471 | 30,782 |
| 52,588 | 102 | 21,327 | 5,855 | 3,473 | 30,757 |
| 52,589 | 101 | 21,200 | 5,832 | 3,463 | 30,596 |
| 52,590 | 105 | 21,111 | 5,805 | 3,436 | 30,457 |
| 52,591 | 105 | 21,414 | 5,840 | 3,460 | 30,819 |
| 52,592 | 106 | 21,715 | 5,921 | 3,513 | 31,255 |
| 52,593 | 105 | 21,889 | 5,936 | 3,512 | 31,442 |
| 52,594 | 108 | 22,045 | 5,987 | 3,532 | 31,672 |
| 52,595 | 107 | 22,036 | 5,987 | 3,537 | 31,667 |
| 52,596 | 114 | 21,855 | 5,923 | 3,481 | 31,373 |
| 52,597 | 114 | 21,634 | 5,891 | 3,461 | 31,100 |
| 52,598 | 115 | 21,841 | 5,935 | 3,480 | 31,371 |
| 52,599 | 115 | 22,026 | 5,956 | 3,493 | 31,590 |

|        |     |        |       |       |        |
|--------|-----|--------|-------|-------|--------|
| 52,600 | 114 | 21,920 | 5,918 | 3,490 | 31,442 |
| 52,601 | 113 | 21,945 | 5,911 | 3,513 | 31,482 |
| 52,602 | 115 | 21,973 | 5,934 | 3,530 | 31,552 |
| 52,603 | 111 | 22,133 | 5,972 | 3,570 | 31,786 |
| 52,604 | 111 | 22,009 | 5,957 | 3,577 | 31,654 |
| 52,605 | 112 | 21,992 | 5,969 | 3,581 | 31,654 |
| 52,606 | 110 | 21,774 | 5,911 | 3,555 | 31,350 |
| 52,607 | 109 | 21,385 | 5,795 | 3,508 | 30,797 |
| 52,608 | 110 | 21,474 | 5,818 | 3,510 | 30,912 |
| 52,609 | 109 | 21,280 | 5,741 | 3,473 | 30,603 |
| 52,610 | 106 | 21,147 | 5,682 | 3,453 | 30,388 |
| 52,611 | 111 | 21,620 | 5,944 | 3,541 | 31,216 |
| 52,612 | 112 | 21,719 | 5,986 | 3,582 | 31,399 |
| 52,613 | 112 | 21,970 | 6,049 | 3,614 | 31,745 |
| 52,614 | 111 | 21,972 | 6,027 | 3,619 | 31,729 |
| 52,615 | 117 | 22,234 | 6,080 | 3,662 | 32,093 |
| 52,616 | 119 | 22,288 | 6,051 | 3,648 | 32,106 |
| 52,617 | 121 | 21,839 | 5,927 | 3,588 | 31,475 |
| 52,618 | 122 | 22,237 | 6,033 | 3,639 | 32,031 |
| 52,619 | 121 | 22,374 | 6,060 | 3,664 | 32,219 |
| 52,620 | 118 | 22,528 | 6,101 | 3,701 | 32,448 |
| 52,621 | 117 | 22,716 | 6,150 | 3,735 | 32,718 |
| 52,622 | 114 | 22,822 | 6,139 | 3,759 | 32,834 |
| 52,623 | 111 | 22,769 | 6,071 | 3,725 | 32,676 |
| 52,624 | 111 | 22,807 | 6,055 | 3,727 | 32,700 |
| 52,625 | 104 | 22,692 | 6,042 | 3,723 | 32,561 |
| 52,626 | 108 | 23,046 | 6,136 | 3,761 | 33,051 |
| 52,627 | 111 | 23,010 | 6,115 | 3,753 | 32,989 |
| 52,628 | 112 | 22,800 | 6,073 | 3,718 | 32,703 |
| 52,629 | 117 | 23,256 | 6,154 | 3,757 | 33,284 |
| 52,630 | 119 | 23,180 | 6,135 | 3,741 | 33,175 |
| 52,631 | 115 | 22,826 | 6,007 | 3,684 | 32,632 |

|        |     |        |       |       |        |
|--------|-----|--------|-------|-------|--------|
| 52,632 | 115 | 22,728 | 5,989 | 3,673 | 32,505 |
| 52,633 | 114 | 22,688 | 6,009 | 3,693 | 32,504 |
| 52,634 | 110 | 22,474 | 5,955 | 3,690 | 32,229 |
| 52,635 | 112 | 22,521 | 5,941 | 3,664 | 32,238 |
| 52,636 | 112 | 22,675 | 5,942 | 3,668 | 32,397 |
| 52,637 | 110 | 22,751 | 5,919 | 3,660 | 32,440 |
| 52,638 | 106 | 22,427 | 5,842 | 3,620 | 31,995 |
| 52,639 | 106 | 22,548 | 5,913 | 3,647 | 32,214 |
| 52,640 | 105 | 22,505 | 5,909 | 3,619 | 32,138 |
| 52,641 | 107 | 22,662 | 5,925 | 3,644 | 32,338 |
| 52,642 | 111 | 22,648 | 5,974 | 3,668 | 32,401 |
| 52,643 | 113 | 22,788 | 5,977 | 3,680 | 32,558 |
| 52,644 | 121 | 22,689 | 5,904 | 3,647 | 32,361 |
| 52,645 | 123 | 22,674 | 5,892 | 3,638 | 32,327 |
| 52,646 | 123 | 23,105 | 5,972 | 3,679 | 32,879 |
| 52,647 | 115 | 22,758 | 5,872 | 3,631 | 32,376 |
| 52,648 | 118 | 22,836 | 5,891 | 3,663 | 32,508 |
| 52,649 | 118 | 22,503 | 5,825 | 3,614 | 32,060 |
| 52,650 | 118 | 22,224 | 5,791 | 3,606 | 31,739 |
| 52,651 | 118 | 22,509 | 5,886 | 3,661 | 32,174 |
| 52,652 | 119 | 22,626 | 5,921 | 3,681 | 32,347 |
| 52,653 | 118 | 22,603 | 5,928 | 3,685 | 32,334 |
| 52,654 | 121 | 22,727 | 5,956 | 3,700 | 32,504 |
| 52,655 | 124 | 22,465 | 5,838 | 3,606 | 32,033 |
| 52,656 | 127 | 22,721 | 5,846 | 3,646 | 32,340 |
| 52,657 | 126 | 23,075 | 5,857 | 3,693 | 32,751 |
| 52,658 | 126 | 22,923 | 5,834 | 3,672 | 32,555 |
| 52,659 | 127 | 22,742 | 5,757 | 3,609 | 32,235 |
| 52,660 | 133 | 22,748 | 5,737 | 3,609 | 32,227 |
| 52,661 | 134 | 22,528 | 5,677 | 3,577 | 31,916 |
| 52,662 | 132 | 22,780 | 5,785 | 3,597 | 32,294 |
| 52,663 | 132 | 22,735 | 5,772 | 3,596 | 32,235 |

|        |     |        |       |       |        |
|--------|-----|--------|-------|-------|--------|
| 52,664 | 133 | 22,970 | 5,821 | 3,641 | 32,565 |
| 52,665 | 136 | 22,864 | 5,839 | 3,635 | 32,474 |
| 52,666 | 131 | 22,650 | 5,772 | 3,597 | 32,150 |
| 52,667 | 130 | 22,279 | 5,683 | 3,535 | 31,627 |
| 52,668 | 128 | 22,028 | 5,614 | 3,499 | 31,269 |
| 52,669 | 134 | 22,574 | 5,779 | 3,618 | 32,105 |
| 52,670 | 129 | 22,224 | 5,704 | 3,580 | 31,637 |
| 52,671 | 131 | 22,443 | 5,776 | 3,620 | 31,970 |
| 52,672 | 135 | 22,115 | 5,687 | 3,576 | 31,513 |
| 52,673 | 136 | 22,076 | 5,679 | 3,583 | 31,474 |
| 52,674 | 132 | 21,992 | 5,669 | 3,564 | 31,357 |
| 52,675 | 133 | 22,362 | 5,719 | 3,612 | 31,826 |
| 52,676 | 130 | 22,105 | 5,631 | 3,561 | 31,427 |
| 52,677 | 135 | 22,451 | 5,721 | 3,584 | 31,891 |
| 52,678 | 129 | 22,562 | 5,732 | 3,604 | 32,027 |
| 52,679 | 129 | 22,326 | 5,696 | 3,582 | 31,733 |
| 52,680 | 129 | 22,349 | 5,697 | 3,589 | 31,764 |
| 52,681 | 134 | 22,481 | 5,759 | 3,644 | 32,018 |
| 52,682 | 139 | 22,510 | 5,775 | 3,630 | 32,054 |
| 52,683 | 139 | 22,509 | 5,762 | 3,638 | 32,048 |
| 52,684 | 146 | 22,961 | 5,857 | 3,691 | 32,655 |
| 52,685 | 151 | 22,913 | 5,891 | 3,672 | 32,627 |
| 52,686 | 149 | 22,684 | 5,838 | 3,650 | 32,321 |
| 52,687 | 149 | 22,629 | 5,810 | 3,637 | 32,225 |
| 52,688 | 152 | 22,869 | 5,841 | 3,671 | 32,533 |
| 52,689 | 153 | 22,987 | 5,831 | 3,652 | 32,623 |
| 52,690 | 151 | 22,758 | 5,743 | 3,622 | 32,274 |
| 52,691 | 152 | 22,772 | 5,714 | 3,624 | 32,262 |
| 52,692 | 150 | 22,585 | 5,666 | 3,618 | 32,019 |
| 52,693 | 146 | 22,655 | 5,673 | 3,639 | 32,113 |
| 52,694 | 145 | 22,488 | 5,650 | 3,603 | 31,886 |
| 52,695 | 134 | 22,143 | 5,609 | 3,583 | 31,469 |

|        |     |        |       |       |        |
|--------|-----|--------|-------|-------|--------|
| 52,696 | 139 | 22,269 | 5,666 | 3,624 | 31,698 |
| 52,697 | 137 | 22,170 | 5,639 | 3,616 | 31,562 |
| 52,698 | 138 | 22,383 | 5,630 | 3,609 | 31,760 |
| 52,699 | 152 | 22,434 | 5,628 | 3,591 | 31,805 |
| 52,700 | 152 | 22,594 | 5,624 | 3,593 | 31,963 |
| 52,701 | 157 | 22,785 | 5,676 | 3,598 | 32,216 |
| 52,702 | 157 | 22,808 | 5,685 | 3,608 | 32,258 |
| 52,703 | 155 | 22,920 | 5,702 | 3,615 | 32,392 |
| 52,704 | 164 | 22,395 | 5,584 | 3,515 | 31,658 |
| 52,705 | 165 | 22,599 | 5,601 | 3,535 | 31,900 |
| 52,706 | 158 | 22,904 | 5,649 | 3,576 | 32,287 |
| 52,707 | 159 | 23,278 | 5,702 | 3,599 | 32,738 |
| 52,708 | 163 | 23,142 | 5,678 | 3,575 | 32,558 |
| 52,709 | 170 | 23,511 | 5,714 | 3,598 | 32,993 |
| 52,710 | 162 | 23,369 | 5,674 | 3,592 | 32,797 |
| 52,711 | 163 | 23,293 | 5,646 | 3,575 | 32,677 |
| 52,712 | 158 | 22,981 | 5,586 | 3,555 | 32,280 |
| 52,713 | 158 | 23,389 | 5,696 | 3,637 | 32,880 |
| 52,714 | 161 | 23,403 | 5,715 | 3,651 | 32,930 |
| 52,715 | 160 | 23,587 | 5,744 | 3,656 | 33,147 |
| 52,716 | 157 | 23,303 | 5,650 | 3,604 | 32,714 |
| 52,717 | 156 | 23,454 | 5,688 | 3,623 | 32,921 |
| 52,718 | 155 | 23,551 | 5,708 | 3,641 | 33,055 |
| 52,719 | 152 | 23,616 | 5,733 | 3,631 | 33,132 |
| 52,720 | 148 | 23,830 | 5,743 | 3,672 | 33,393 |
| 52,721 | 148 | 23,744 | 5,732 | 3,653 | 33,277 |
| 52,722 | 148 | 23,694 | 5,697 | 3,628 | 33,167 |
| 52,723 | 144 | 23,544 | 5,693 | 3,596 | 32,977 |
| 52,724 | 144 | 23,646 | 5,723 | 3,589 | 33,102 |
| 52,725 | 143 | 22,966 | 5,606 | 3,548 | 32,263 |
| 52,726 | 146 | 23,121 | 5,616 | 3,568 | 32,451 |
| 52,727 | 143 | 23,341 | 5,659 | 3,597 | 32,740 |



|        |     |        |       |       |        |
|--------|-----|--------|-------|-------|--------|
| 52,728 | 143 | 23,262 | 5,641 | 3,603 | 32,649 |
| 52,729 | 151 | 23,431 | 5,689 | 3,616 | 32,887 |
| 52,730 | 146 | 22,758 | 5,526 | 3,526 | 31,956 |
| 52,731 | 149 | 23,043 | 5,559 | 3,549 | 32,300 |
| 52,732 | 148 | 23,337 | 5,604 | 3,571 | 32,660 |
| 52,733 | 151 | 23,717 | 5,648 | 3,598 | 33,114 |
| 52,734 | 145 | 23,545 | 5,605 | 3,558 | 32,853 |
| 52,735 | 142 | 23,689 | 5,577 | 3,564 | 32,972 |
| 52,736 | 144 | 23,991 | 5,612 | 3,597 | 33,344 |
| 52,737 | 145 | 23,534 | 5,558 | 3,544 | 32,781 |
| 52,738 | 149 | 23,464 | 5,565 | 3,566 | 32,744 |
| 52,739 | 152 | 23,640 | 5,611 | 3,569 | 32,972 |
| 52,740 | 152 | 23,418 | 5,567 | 3,546 | 32,683 |
| 52,741 | 151 | 23,529 | 5,602 | 3,568 | 32,850 |
| 52,742 | 153 | 23,426 | 5,566 | 3,519 | 32,664 |
| 52,743 | 159 | 23,400 | 5,545 | 3,482 | 32,586 |
| 52,744 | 160 | 23,413 | 5,527 | 3,486 | 32,586 |
| 52,745 | 156 | 23,356 | 5,508 | 3,493 | 32,513 |
| 52,746 | 159 | 23,442 | 5,492 | 3,499 | 32,592 |
| 52,747 | 156 | 23,386 | 5,444 | 3,463 | 32,449 |
| 52,748 | 157 | 23,421 | 5,458 | 3,464 | 32,500 |
| 52,749 | 155 | 23,531 | 5,496 | 3,501 | 32,683 |
| 52,750 | 139 | 23,078 | 5,435 | 3,459 | 32,111 |
| 52,751 | 138 | 23,060 | 5,435 | 3,461 | 32,094 |
| 52,752 | 136 | 22,802 | 5,355 | 3,413 | 31,706 |
| 52,753 | 139 | 23,022 | 5,392 | 3,444 | 31,997 |
| 52,754 | 132 | 23,048 | 5,380 | 3,452 | 32,012 |
| 52,755 | 131 | 23,191 | 5,434 | 3,481 | 32,237 |
| 52,756 | 127 | 22,894 | 5,393 | 3,454 | 31,868 |
| 52,757 | 127 | 22,846 | 5,393 | 3,486 | 31,852 |
| 52,758 | 127 | 23,109 | 5,477 | 3,539 | 32,252 |
| 52,759 | 123 | 23,015 | 5,490 | 3,535 | 32,163 |

|        |     |        |       |       |        |
|--------|-----|--------|-------|-------|--------|
| 52,760 | 113 | 22,693 | 5,447 | 3,509 | 31,762 |
| 52,761 | 110 | 22,701 | 5,447 | 3,524 | 31,782 |
| 52,762 | 111 | 22,909 | 5,467 | 3,556 | 32,043 |
| 52,763 | 112 | 22,165 | 5,266 | 3,432 | 30,975 |
| 52,764 | 115 | 22,361 | 5,317 | 3,465 | 31,258 |
| 52,765 | 113 | 22,634 | 5,374 | 3,511 | 31,632 |
| 52,766 | 122 | 22,816 | 5,435 | 3,556 | 31,929 |
| 52,767 | 124 | 23,007 | 5,526 | 3,589 | 32,246 |
| 52,768 | 128 | 22,863 | 5,515 | 3,584 | 32,090 |
| 52,769 | 128 | 22,781 | 5,479 | 3,586 | 31,974 |
| 52,770 | 130 | 22,744 | 5,463 | 3,592 | 31,929 |
| 52,771 | 129 | 22,696 | 5,439 | 3,560 | 31,824 |
| 52,772 | 133 | 22,407 | 5,340 | 3,505 | 31,385 |
| 52,773 | 133 | 22,595 | 5,359 | 3,514 | 31,601 |
| 52,774 | 134 | 22,635 | 5,373 | 3,524 | 31,666 |
| 52,775 | 137 | 22,527 | 5,322 | 3,509 | 31,495 |
| 52,776 | 137 | 22,541 | 5,325 | 3,492 | 31,495 |
| 52,777 | 136 | 22,524 | 5,345 | 3,510 | 31,515 |
| 52,778 | 134 | 21,536 | 5,140 | 3,368 | 30,178 |
| 52,779 | 134 | 21,622 | 5,140 | 3,371 | 30,267 |
| 52,780 | 131 | 21,853 | 5,182 | 3,406 | 30,572 |
| 52,781 | 130 | 21,800 | 5,190 | 3,397 | 30,517 |
| 52,782 | 130 | 22,326 | 5,278 | 3,463 | 31,197 |
| 52,783 | 127 | 22,541 | 5,324 | 3,498 | 31,490 |
| 52,784 | 128 | 22,553 | 5,361 | 3,535 | 31,577 |
| 52,785 | 131 | 22,315 | 5,310 | 3,517 | 31,273 |
| 52,786 | 131 | 22,522 | 5,341 | 3,550 | 31,544 |
| 52,787 | 129 | 22,348 | 5,311 | 3,553 | 31,341 |
| 52,788 | 125 | 22,380 | 5,277 | 3,527 | 31,309 |
| 52,789 | 128 | 22,729 | 5,306 | 3,550 | 31,713 |
| 52,790 | 131 | 22,895 | 5,338 | 3,579 | 31,943 |
| 52,791 | 129 | 22,784 | 5,274 | 3,553 | 31,740 |

|        |     |        |       |       |        |
|--------|-----|--------|-------|-------|--------|
| 52,792 | 129 | 22,766 | 5,275 | 3,558 | 31,728 |
| 52,793 | 126 | 22,715 | 5,311 | 3,573 | 31,725 |
| 52,794 | 124 | 22,858 | 5,373 | 3,618 | 31,973 |
| 52,795 | 124 | 22,756 | 5,369 | 3,621 | 31,870 |
| 52,796 | 123 | 22,817 | 5,397 | 3,648 | 31,985 |
| 52,797 | 124 | 22,804 | 5,399 | 3,644 | 31,971 |
| 52,798 | 121 | 22,847 | 5,400 | 3,649 | 32,017 |
| 52,799 | 117 | 22,711 | 5,354 | 3,614 | 31,796 |
| 52,800 | 122 | 22,458 | 5,294 | 3,567 | 31,441 |
| 52,801 | 122 | 22,778 | 5,350 | 3,592 | 31,842 |
| 52,802 | 121 | 23,004 | 5,412 | 3,625 | 32,162 |
| 52,803 | 129 | 23,171 | 5,428 | 3,638 | 32,366 |
| 52,804 | 125 | 22,948 | 5,365 | 3,602 | 32,040 |
| 52,805 | 126 | 23,274 | 5,396 | 3,638 | 32,434 |
| 52,806 | 130 | 23,248 | 5,412 | 3,661 | 32,451 |
| 52,807 | 134 | 23,254 | 5,421 | 3,652 | 32,461 |
| 52,808 | 134 | 23,047 | 5,390 | 3,586 | 32,157 |
| 52,809 | 133 | 23,012 | 5,360 | 3,601 | 32,106 |
| 52,810 | 133 | 23,053 | 5,371 | 3,610 | 32,167 |
| 52,811 | 134 | 23,392 | 5,414 | 3,634 | 32,574 |
| 52,812 | 132 | 22,984 | 5,353 | 3,597 | 32,066 |
| 52,813 | 134 | 22,947 | 5,319 | 3,587 | 31,987 |
| 52,814 | 134 | 23,034 | 5,329 | 3,573 | 32,070 |
| 52,815 | 136 | 23,348 | 5,403 | 3,606 | 32,493 |
| 52,816 | 137 | 23,329 | 5,371 | 3,576 | 32,413 |
| 52,817 | 131 | 23,432 | 5,354 | 3,570 | 32,487 |
| 52,818 | 135 | 23,513 | 5,303 | 3,563 | 32,514 |
| 52,819 | 132 | 23,441 | 5,275 | 3,545 | 32,393 |
| 52,820 | 134 | 23,338 | 5,297 | 3,535 | 32,304 |
| 52,821 | 142 | 23,109 | 5,285 | 3,533 | 32,069 |
| 52,822 | 140 | 23,177 | 5,271 | 3,527 | 32,115 |
| 52,823 | 148 | 23,431 | 5,317 | 3,541 | 32,437 |

|        |     |        |       |       |        |
|--------|-----|--------|-------|-------|--------|
| 52,824 | 144 | 23,550 | 5,326 | 3,552 | 32,572 |
| 52,825 | 143 | 23,279 | 5,259 | 3,531 | 32,212 |
| 52,826 | 139 | 23,343 | 5,276 | 3,541 | 32,299 |
| 52,827 | 139 | 23,414 | 5,296 | 3,556 | 32,405 |
| 52,828 | 144 | 23,465 | 5,354 | 3,590 | 32,553 |
| 52,829 | 141 | 23,202 | 5,321 | 3,574 | 32,238 |
| 52,830 | 144 | 23,217 | 5,312 | 3,582 | 32,255 |
| 52,831 | 151 | 23,471 | 5,380 | 3,613 | 32,615 |
| 52,832 | 156 | 23,558 | 5,386 | 3,613 | 32,713 |
| 52,833 | 161 | 23,227 | 5,337 | 3,551 | 32,276 |
| 52,834 | 161 | 23,230 | 5,343 | 3,548 | 32,282 |
| 52,835 | 156 | 22,934 | 5,292 | 3,490 | 31,872 |
| 52,836 | 159 | 22,890 | 5,294 | 3,486 | 31,829 |
| 52,837 | 157 | 22,544 | 5,253 | 3,443 | 31,397 |
| 52,838 | 156 | 22,960 | 5,347 | 3,497 | 31,960 |
| 52,839 | 153 | 22,531 | 5,286 | 3,451 | 31,421 |
| 52,840 | 153 | 22,775 | 5,350 | 3,460 | 31,738 |
| 52,841 | 152 | 23,040 | 5,395 | 3,478 | 32,065 |
| 52,842 | 151 | 22,739 | 5,312 | 3,399 | 31,601 |
| 52,843 | 151 | 22,913 | 5,341 | 3,441 | 31,846 |
| 52,844 | 150 | 22,986 | 5,396 | 3,449 | 31,981 |
| 52,845 | 156 | 22,951 | 5,351 | 3,433 | 31,891 |
| 52,846 | 156 | 22,996 | 5,358 | 3,417 | 31,927 |
| 52,847 | 154 | 23,019 | 5,348 | 3,421 | 31,942 |
| 52,848 | 152 | 22,903 | 5,346 | 3,415 | 31,816 |
| 52,849 | 152 | 22,677 | 5,320 | 3,408 | 31,557 |
| 52,850 | 161 | 22,717 | 5,315 | 3,406 | 31,599 |
| 52,851 | 156 | 22,577 | 5,261 | 3,388 | 31,382 |
| 52,852 | 160 | 22,731 | 5,276 | 3,409 | 31,576 |
| 52,853 | 159 | 22,808 | 5,276 | 3,409 | 31,652 |
| 52,854 | 155 | 22,729 | 5,255 | 3,411 | 31,550 |
| 52,855 | 156 | 22,558 | 5,241 | 3,389 | 31,344 |

|        |     |        |       |       |        |
|--------|-----|--------|-------|-------|--------|
| 52,856 | 157 | 22,453 | 5,254 | 3,385 | 31,249 |
| 52,857 | 164 | 22,509 | 5,248 | 3,379 | 31,300 |
| 52,858 | 157 | 22,515 | 5,224 | 3,392 | 31,288 |
| 52,859 | 159 | 22,483 | 5,258 | 3,400 | 31,300 |
| 52,860 | 161 | 22,327 | 5,230 | 3,388 | 31,106 |
| 52,861 | 164 | 22,316 | 5,227 | 3,389 | 31,096 |
| 52,862 | 167 | 22,391 | 5,260 | 3,405 | 31,223 |
| 52,863 | 168 | 22,375 | 5,261 | 3,402 | 31,206 |
| 52,864 | 171 | 22,447 | 5,299 | 3,436 | 31,353 |
| 52,865 | 171 | 22,540 | 5,302 | 3,461 | 31,474 |
| 52,866 | 167 | 22,491 | 5,275 | 3,471 | 31,404 |
| 52,867 | 165 | 22,467 | 5,302 | 3,482 | 31,416 |
| 52,868 | 162 | 22,363 | 5,290 | 3,475 | 31,290 |
| 52,869 | 158 | 22,136 | 5,168 | 3,406 | 30,868 |
| 52,870 | 159 | 22,492 | 5,211 | 3,429 | 31,291 |
| 52,871 | 154 | 22,663 | 5,234 | 3,421 | 31,472 |
| 52,872 | 148 | 22,757 | 5,258 | 3,413 | 31,576 |
| 52,873 | 141 | 22,894 | 5,270 | 3,413 | 31,718 |
| 52,874 | 140 | 22,891 | 5,269 | 3,392 | 31,692 |
| 52,875 | 142 | 22,977 | 5,293 | 3,399 | 31,811 |
| 52,876 | 140 | 23,218 | 5,364 | 3,458 | 32,180 |
| 52,877 | 140 | 23,470 | 5,404 | 3,476 | 32,490 |
| 52,878 | 140 | 23,418 | 5,351 | 3,449 | 32,358 |
| 52,879 | 139 | 23,559 | 5,372 | 3,467 | 32,537 |
| 52,880 | 148 | 23,826 | 5,417 | 3,497 | 32,888 |
| 52,881 | 139 | 23,723 | 5,388 | 3,474 | 32,724 |
| 52,882 | 139 | 23,992 | 5,447 | 3,506 | 33,084 |
| 52,883 | 125 | 23,915 | 5,430 | 3,544 | 33,014 |
| 52,884 | 127 | 24,246 | 5,497 | 3,589 | 33,459 |
| 52,885 | 132 | 24,050 | 5,460 | 3,565 | 33,207 |
| 52,886 | 128 | 23,857 | 5,414 | 3,567 | 32,966 |
| 52,887 | 135 | 24,057 | 5,443 | 3,575 | 33,210 |

|        |     |        |       |       |        |
|--------|-----|--------|-------|-------|--------|
| 52,888 | 136 | 24,087 | 5,469 | 3,592 | 33,284 |
| 52,889 | 134 | 24,344 | 5,528 | 3,622 | 33,628 |
| 52,890 | 130 | 24,193 | 5,530 | 3,641 | 33,494 |
| 52,891 | 131 | 24,114 | 5,524 | 3,651 | 33,420 |
| 52,892 | 129 | 23,874 | 5,471 | 3,640 | 33,114 |
| 52,893 | 127 | 23,962 | 5,505 | 3,675 | 33,269 |
| 52,894 | 127 | 23,937 | 5,516 | 3,652 | 33,232 |
| 52,895 | 122 | 23,852 | 5,446 | 3,627 | 33,047 |
| 52,896 | 125 | 23,743 | 5,433 | 3,589 | 32,890 |
| 52,897 | 130 | 23,910 | 5,496 | 3,621 | 33,157 |
| 52,898 | 132 | 23,858 | 5,485 | 3,616 | 33,091 |
| 52,899 | 130 | 23,429 | 5,399 | 3,550 | 32,508 |
| 52,900 | 138 | 23,623 | 5,446 | 3,561 | 32,768 |
| 52,901 | 135 | 23,860 | 5,520 | 3,613 | 33,128 |
| 52,902 | 136 | 23,814 | 5,533 | 3,597 | 33,080 |
| 52,903 | 135 | 23,537 | 5,483 | 3,587 | 32,742 |
| 52,904 | 147 | 23,709 | 5,547 | 3,620 | 33,023 |
| 52,905 | 140 | 23,381 | 5,523 | 3,579 | 32,623 |
| 52,906 | 142 | 23,373 | 5,539 | 3,596 | 32,650 |
| 52,907 | 133 | 23,417 | 5,557 | 3,606 | 32,713 |
| 52,908 | 131 | 23,038 | 5,479 | 3,545 | 32,193 |
| 52,909 | 131 | 22,971 | 5,494 | 3,544 | 32,140 |
| 52,910 | 129 | 23,028 | 5,464 | 3,550 | 32,171 |
| 52,911 | 129 | 22,916 | 5,432 | 3,514 | 31,991 |
| 52,912 | 126 | 22,640 | 5,378 | 3,491 | 31,635 |
| 52,913 | 134 | 22,941 | 5,469 | 3,517 | 32,061 |
| 52,914 | 129 | 23,155 | 5,550 | 3,536 | 32,370 |
| 52,915 | 136 | 23,218 | 5,563 | 3,525 | 32,442 |
| 52,916 | 139 | 22,967 | 5,495 | 3,470 | 32,071 |
| 52,917 | 140 | 22,914 | 5,478 | 3,483 | 32,015 |
| 52,918 | 140 | 22,922 | 5,489 | 3,479 | 32,030 |
| 52,919 | 147 | 23,139 | 5,544 | 3,500 | 32,330 |

|        |     |        |       |       |        |
|--------|-----|--------|-------|-------|--------|
| 52,920 | 142 | 22,879 | 5,511 | 3,505 | 32,037 |
| 52,921 | 143 | 22,885 | 5,530 | 3,512 | 32,070 |
| 52,922 | 147 | 22,368 | 5,411 | 3,471 | 31,397 |
| 52,923 | 147 | 22,272 | 5,448 | 3,476 | 31,343 |
| 52,924 | 147 | 22,210 | 5,431 | 3,477 | 31,265 |
| 52,925 | 155 | 22,334 | 5,474 | 3,518 | 31,481 |
| 52,926 | 154 | 21,955 | 5,388 | 3,471 | 30,968 |
| 52,927 | 155 | 22,000 | 5,392 | 3,469 | 31,016 |
| 52,928 | 154 | 21,461 | 5,306 | 3,402 | 30,323 |
| 52,929 | 159 | 21,358 | 5,290 | 3,379 | 30,186 |
| 52,930 | 159 | 21,260 | 5,297 | 3,387 | 30,103 |
| 52,931 | 152 | 21,226 | 5,293 | 3,408 | 30,079 |
| 52,932 | 150 | 21,058 | 5,267 | 3,394 | 29,869 |
| 52,933 | 148 | 20,948 | 5,266 | 3,395 | 29,757 |
| 52,934 | 152 | 20,718 | 5,245 | 3,345 | 29,460 |
| 52,935 | 151 | 21,038 | 5,335 | 3,419 | 29,943 |
| 52,936 | 147 | 20,994 | 5,355 | 3,442 | 29,938 |
| 52,937 | 146 | 21,119 | 5,358 | 3,412 | 30,035 |
| 52,938 | 143 | 20,894 | 5,351 | 3,398 | 29,786 |
| 52,939 | 143 | 21,214 | 5,440 | 3,438 | 30,235 |
| 52,940 | 145 | 20,867 | 5,348 | 3,394 | 29,754 |
| 52,941 | 148 | 21,078 | 5,418 | 3,411 | 30,055 |
| 52,942 | 149 | 21,176 | 5,497 | 3,452 | 30,274 |
| 52,943 | 149 | 21,130 | 5,517 | 3,450 | 30,246 |
| 52,944 | 150 | 20,843 | 5,475 | 3,414 | 29,882 |
| 52,945 | 150 | 21,021 | 5,512 | 3,443 | 30,126 |
| 52,946 | 144 | 20,962 | 5,511 | 3,443 | 30,060 |
| 52,947 | 143 | 20,964 | 5,546 | 3,464 | 30,117 |
| 52,948 | 142 | 21,279 | 5,599 | 3,522 | 30,542 |
| 52,949 | 138 | 20,973 | 5,530 | 3,470 | 30,111 |
| 52,950 | 138 | 21,211 | 5,566 | 3,502 | 30,417 |
| 52,951 | 135 | 21,474 | 5,664 | 3,541 | 30,814 |

|        |     |        |       |       |        |
|--------|-----|--------|-------|-------|--------|
| 52,952 | 134 | 21,492 | 5,662 | 3,551 | 30,839 |
| 52,953 | 125 | 21,555 | 5,684 | 3,560 | 30,924 |
| 52,954 | 123 | 21,589 | 5,697 | 3,547 | 30,956 |
| 52,955 | 125 | 21,640 | 5,702 | 3,567 | 31,034 |
| 52,956 | 130 | 21,762 | 5,713 | 3,569 | 31,174 |
| 52,957 | 126 | 21,838 | 5,703 | 3,546 | 31,213 |
| 52,958 | 127 | 21,853 | 5,719 | 3,556 | 31,255 |
| 52,959 | 130 | 21,830 | 5,735 | 3,555 | 31,250 |
| 52,960 | 130 | 21,624 | 5,686 | 3,533 | 30,973 |
| 52,961 | 127 | 21,902 | 5,732 | 3,567 | 31,328 |
| 52,962 | 125 | 21,803 | 5,732 | 3,589 | 31,249 |
| 52,963 | 127 | 21,976 | 5,803 | 3,623 | 31,529 |
| 52,964 | 126 | 21,921 | 5,801 | 3,619 | 31,467 |
| 52,965 | 127 | 21,665 | 5,748 | 3,593 | 31,133 |
| 52,966 | 137 | 21,813 | 5,784 | 3,607 | 31,341 |
| 52,967 | 140 | 21,934 | 5,809 | 3,614 | 31,497 |
| 52,968 | 146 | 22,178 | 5,898 | 3,640 | 31,862 |
| 52,969 | 150 | 22,141 | 5,905 | 3,657 | 31,853 |
| 52,970 | 146 | 21,975 | 5,883 | 3,604 | 31,608 |
| 52,971 | 148 | 22,019 | 5,931 | 3,612 | 31,710 |
| 52,972 | 148 | 22,071 | 5,938 | 3,625 | 31,782 |
| 52,973 | 146 | 22,124 | 5,948 | 3,633 | 31,851 |
| 52,974 | 147 | 22,412 | 6,012 | 3,675 | 32,246 |
| 52,975 | 147 | 22,266 | 6,026 | 3,661 | 32,100 |
| 52,976 | 146 | 22,145 | 5,998 | 3,634 | 31,923 |
| 52,977 | 150 | 22,160 | 6,014 | 3,649 | 31,973 |
| 52,978 | 153 | 22,387 | 6,091 | 3,694 | 32,325 |
| 52,979 | 150 | 22,081 | 6,017 | 3,657 | 31,905 |
| 52,980 | 146 | 21,834 | 5,996 | 3,629 | 31,605 |
| 52,981 | 149 | 22,383 | 6,135 | 3,717 | 32,384 |
| 52,982 | 150 | 22,152 | 6,082 | 3,665 | 32,049 |
| 52,983 | 154 | 22,280 | 6,129 | 3,694 | 32,257 |



|        |     |        |       |       |        |
|--------|-----|--------|-------|-------|--------|
| 52,984 | 158 | 22,253 | 6,101 | 3,700 | 32,212 |
| 52,985 | 153 | 22,134 | 6,084 | 3,689 | 32,060 |
| 52,986 | 156 | 22,211 | 6,112 | 3,698 | 32,177 |
| 52,987 | 154 | 22,144 | 6,095 | 3,682 | 32,075 |
| 52,988 | 154 | 22,128 | 6,111 | 3,695 | 32,088 |
| 52,989 | 151 | 22,097 | 6,088 | 3,677 | 32,013 |
| 52,990 | 151 | 22,010 | 6,092 | 3,664 | 31,917 |
| 52,991 | 152 | 21,977 | 6,086 | 3,652 | 31,867 |
| 52,992 | 152 | 22,015 | 6,047 | 3,666 | 31,880 |
| 52,993 | 154 | 22,173 | 6,061 | 3,668 | 32,056 |
| 52,994 | 159 | 22,108 | 6,046 | 3,635 | 31,948 |
| 52,995 | 159 | 21,963 | 5,992 | 3,628 | 31,742 |
| 52,996 | 159 | 22,013 | 6,033 | 3,649 | 31,854 |
| 52,997 | 158 | 21,962 | 6,023 | 3,670 | 31,813 |
| 52,998 | 156 | 21,859 | 6,012 | 3,650 | 31,677 |
| 52,999 | 158 | 21,856 | 6,011 | 3,637 | 31,662 |
| 53,000 | 154 | 21,550 | 5,937 | 3,599 | 31,240 |
| 53,001 | 157 | 21,418 | 5,950 | 3,596 | 31,121 |
| 53,002 | 160 | 21,569 | 5,945 | 3,623 | 31,297 |
| 53,003 | 162 | 21,339 | 5,877 | 3,547 | 30,925 |
| 53,004 | 173 | 21,444 | 5,895 | 3,558 | 31,070 |
| 53,005 | 173 | 21,142 | 5,816 | 3,518 | 30,649 |
| 53,006 | 171 | 20,737 | 5,723 | 3,449 | 30,080 |
| 53,007 | 167 | 21,119 | 5,816 | 3,506 | 30,608 |
| 53,008 | 167 | 20,724 | 5,746 | 3,474 | 30,111 |
| 53,009 | 166 | 20,714 | 5,765 | 3,471 | 30,116 |
| 53,010 | 167 | 20,800 | 5,788 | 3,469 | 30,224 |
| 53,011 | 168 | 20,842 | 5,805 | 3,443 | 30,258 |
| 53,012 | 169 | 20,907 | 5,785 | 3,405 | 30,266 |
| 53,013 | 169 | 20,845 | 5,775 | 3,397 | 30,186 |
| 53,014 | 164 | 21,019 | 5,795 | 3,404 | 30,382 |
| 53,015 | 159 | 20,922 | 5,790 | 3,402 | 30,273 |

|        |     |        |       |       |        |
|--------|-----|--------|-------|-------|--------|
| 53,016 | 147 | 20,831 | 5,729 | 3,383 | 30,090 |
| 53,017 | 138 | 20,681 | 5,677 | 3,376 | 29,872 |
| 53,018 | 145 | 20,594 | 5,642 | 3,360 | 29,741 |
| 53,019 | 139 | 20,535 | 5,600 | 3,341 | 29,615 |
| 53,020 | 134 | 20,320 | 5,563 | 3,303 | 29,320 |
| 53,021 | 134 | 20,378 | 5,561 | 3,332 | 29,405 |
| 53,022 | 133 | 20,298 | 5,529 | 3,327 | 29,287 |
| 53,023 | 134 | 20,144 | 5,504 | 3,298 | 29,080 |
| 53,024 | 134 | 20,130 | 5,494 | 3,293 | 29,051 |
| 53,025 | 132 | 20,150 | 5,454 | 3,280 | 29,016 |
| 53,026 | 131 | 20,043 | 5,433 | 3,274 | 28,881 |
| 53,027 | 128 | 20,030 | 5,435 | 3,273 | 28,866 |
| 53,028 | 123 | 19,761 | 5,341 | 3,207 | 28,432 |
| 53,029 | 118 | 19,738 | 5,296 | 3,204 | 28,356 |
| 53,030 | 120 | 19,845 | 5,334 | 3,224 | 28,523 |
| 53,031 | 118 | 19,673 | 5,296 | 3,204 | 28,291 |
| 53,032 | 118 | 19,495 | 5,305 | 3,202 | 28,120 |
| 53,033 | 113 | 19,280 | 5,268 | 3,206 | 27,867 |
| 53,034 | 115 | 19,110 | 5,223 | 3,163 | 27,611 |
| 53,035 | 115 | 19,078 | 5,225 | 3,129 | 27,547 |
| 53,036 | 123 | 19,013 | 5,205 | 3,113 | 27,454 |
| 53,037 | 123 | 18,867 | 5,142 | 3,066 | 27,198 |
| 53,038 | 125 | 19,075 | 5,160 | 3,070 | 27,430 |
| 53,039 | 124 | 18,979 | 5,153 | 3,070 | 27,326 |
| 53,040 | 128 | 19,010 | 5,156 | 3,063 | 27,357 |
| 53,041 | 128 | 18,830 | 5,120 | 3,039 | 27,117 |
| 53,042 | 131 | 18,894 | 5,174 | 3,062 | 27,261 |
| 53,043 | 133 | 18,883 | 5,187 | 3,044 | 27,247 |
| 53,044 | 133 | 18,827 | 5,174 | 3,023 | 27,157 |
| 53,045 | 129 | 18,540 | 5,096 | 3,000 | 26,765 |
| 53,046 | 129 | 18,622 | 5,062 | 2,974 | 26,787 |
| 53,047 | 131 | 18,754 | 5,098 | 2,947 | 26,930 |

|        |     |        |       |       |        |
|--------|-----|--------|-------|-------|--------|
| 53,048 | 137 | 19,004 | 5,150 | 2,967 | 27,258 |
| 53,049 | 135 | 18,852 | 5,138 | 2,963 | 27,088 |
| 53,050 | 134 | 18,852 | 5,157 | 2,985 | 27,128 |
| 53,051 | 133 | 18,813 | 5,191 | 2,990 | 27,127 |
| 53,052 | 130 | 18,612 | 5,150 | 2,969 | 26,861 |
| 53,053 | 131 | 18,580 | 5,157 | 2,968 | 26,836 |
| 53,054 | 128 | 18,348 | 5,128 | 2,979 | 26,583 |
| 53,055 | 120 | 18,263 | 5,118 | 2,986 | 26,487 |
| 53,056 | 115 | 18,740 | 5,245 | 3,119 | 27,219 |
| 53,057 | 114 | 18,695 | 5,259 | 3,121 | 27,189 |
| 53,058 | 115 | 18,641 | 5,222 | 3,109 | 27,087 |
| 53,059 | 116 | 18,854 | 5,269 | 3,168 | 27,407 |
| 53,060 | 115 | 19,113 | 5,372 | 3,244 | 27,844 |
| 53,061 | 115 | 18,903 | 5,341 | 3,235 | 27,594 |
| 53,062 | 117 | 19,038 | 5,429 | 3,311 | 27,895 |
| 53,063 | 120 | 18,827 | 5,424 | 3,311 | 27,682 |
| 53,064 | 120 | 18,710 | 5,407 | 3,298 | 27,535 |
| 53,065 | 120 | 19,195 | 5,541 | 3,394 | 28,250 |
| 53,066 | 118 | 18,942 | 5,472 | 3,358 | 27,890 |
| 53,067 | 120 | 19,033 | 5,518 | 3,375 | 28,046 |
| 53,068 | 119 | 18,924 | 5,529 | 3,374 | 27,946 |
| 53,069 | 111 | 19,080 | 5,685 | 3,413 | 28,289 |
| 53,070 | 114 | 18,883 | 5,712 | 3,419 | 28,128 |
| 53,071 | 114 | 18,820 | 5,683 | 3,421 | 28,038 |
| 53,072 | 118 | 18,824 | 5,689 | 3,429 | 28,060 |
| 53,073 | 122 | 18,990 | 5,762 | 3,453 | 28,327 |
| 53,074 | 125 | 18,989 | 5,798 | 3,487 | 28,399 |
| 53,075 | 127 | 18,867 | 5,829 | 3,495 | 28,318 |
| 53,076 | 124 | 18,724 | 5,848 | 3,494 | 28,190 |
| 53,077 | 124 | 18,710 | 5,833 | 3,509 | 28,176 |
| 53,078 | 127 | 18,752 | 5,867 | 3,521 | 28,267 |
| 53,079 | 127 | 18,756 | 5,884 | 3,529 | 28,296 |

|        |     |        |       |       |        |
|--------|-----|--------|-------|-------|--------|
| 53,080 | 127 | 19,047 | 6,025 | 3,592 | 28,791 |
| 53,081 | 133 | 19,079 | 6,047 | 3,593 | 28,852 |
| 53,082 | 135 | 19,185 | 6,028 | 3,574 | 28,922 |
| 53,083 | 134 | 19,151 | 5,991 | 3,531 | 28,807 |
| 53,084 | 138 | 19,490 | 6,063 | 3,585 | 29,276 |
| 53,085 | 133 | 19,181 | 5,976 | 3,574 | 28,864 |
| 53,086 | 132 | 19,195 | 5,983 | 3,587 | 28,897 |
| 53,087 | 120 | 19,186 | 6,010 | 3,625 | 28,941 |
| 53,088 | 121 | 19,226 | 6,069 | 3,658 | 29,074 |
| 53,089 | 120 | 19,192 | 6,110 | 3,692 | 29,114 |
| 53,090 | 120 | 19,289 | 6,155 | 3,727 | 29,291 |
| 53,091 | 118 | 19,259 | 6,077 | 3,734 | 29,188 |
| 53,092 | 118 | 19,631 | 6,162 | 3,810 | 29,721 |
| 53,093 | 107 | 19,496 | 6,151 | 3,792 | 29,546 |
| 53,094 | 104 | 19,111 | 6,019 | 3,750 | 28,984 |
| 53,095 | 105 | 19,451 | 6,108 | 3,815 | 29,479 |
| 53,096 | 105 | 19,563 | 6,176 | 3,873 | 29,717 |
| 53,097 | 107 | 19,648 | 6,263 | 3,914 | 29,932 |
| 53,098 | 105 | 19,722 | 6,326 | 3,975 | 30,128 |
| 53,099 | 103 | 19,607 | 6,318 | 3,977 | 30,005 |
| 53,100 | 103 | 19,771 | 6,348 | 4,009 | 30,231 |
| 53,101 | 103 | 19,816 | 6,378 | 4,003 | 30,300 |
| 53,102 | 104 | 19,729 | 6,382 | 4,009 | 30,224 |
| 53,103 | 104 | 19,715 | 6,387 | 4,027 | 30,233 |
| 53,104 | 107 | 19,709 | 6,382 | 4,018 | 30,216 |
| 53,105 | 108 | 19,937 | 6,409 | 4,011 | 30,465 |
| 53,106 | 108 | 20,036 | 6,452 | 4,028 | 30,624 |
| 53,107 | 108 | 20,159 | 6,473 | 4,036 | 30,776 |
| 53,108 | 109 | 20,144 | 6,442 | 4,045 | 30,740 |
| 53,109 | 107 | 20,027 | 6,410 | 4,014 | 30,558 |
| 53,110 | 109 | 20,027 | 6,447 | 4,003 | 30,586 |
| 53,111 | 110 | 20,012 | 6,417 | 3,970 | 30,509 |

|        |     |        |       |       |        |
|--------|-----|--------|-------|-------|--------|
| 53,112 | 110 | 19,948 | 6,371 | 3,922 | 30,351 |
| 53,113 | 111 | 20,128 | 6,390 | 3,917 | 30,546 |
| 53,114 | 120 | 20,429 | 6,458 | 3,946 | 30,953 |
| 53,115 | 120 | 20,148 | 6,381 | 3,904 | 30,553 |
| 53,116 | 120 | 19,950 | 6,325 | 3,874 | 30,269 |
| 53,117 | 120 | 20,175 | 6,407 | 3,945 | 30,647 |
| 53,118 | 128 | 20,195 | 6,429 | 3,935 | 30,687 |
| 53,119 | 131 | 20,671 | 6,517 | 3,988 | 31,307 |
| 53,120 | 131 | 20,770 | 6,451 | 3,992 | 31,344 |
| 53,121 | 131 | 20,866 | 6,442 | 3,991 | 31,430 |
| 53,122 | 130 | 21,134 | 6,518 | 4,044 | 31,826 |
| 53,123 | 125 | 21,224 | 6,537 | 4,043 | 31,929 |
| 53,124 | 122 | 21,146 | 6,524 | 4,041 | 31,833 |
| 53,125 | 120 | 21,275 | 6,547 | 4,034 | 31,976 |
| 53,126 | 120 | 21,212 | 6,490 | 3,992 | 31,814 |
| 53,127 | 121 | 21,247 | 6,484 | 4,013 | 31,865 |
| 53,128 | 131 | 21,269 | 6,527 | 4,054 | 31,981 |
| 53,129 | 134 | 21,484 | 6,580 | 4,093 | 32,291 |
| 53,130 | 144 | 21,721 | 6,570 | 4,105 | 32,540 |
| 53,131 | 144 | 21,894 | 6,571 | 4,152 | 32,761 |
| 53,132 | 142 | 21,954 | 6,652 | 4,201 | 32,949 |
| 53,133 | 139 | 21,936 | 6,680 | 4,222 | 32,977 |
| 53,134 | 137 | 22,056 | 6,693 | 4,238 | 33,124 |
| 53,135 | 135 | 22,198 | 6,731 | 4,254 | 33,318 |
| 53,136 | 134 | 22,420 | 6,738 | 4,258 | 33,550 |
| 53,137 | 135 | 22,753 | 6,802 | 4,258 | 33,948 |
| 53,138 | 134 | 22,703 | 6,755 | 4,237 | 33,829 |
| 53,139 | 135 | 22,916 | 6,800 | 4,277 | 34,128 |
| 53,140 | 135 | 22,922 | 6,768 | 4,258 | 34,083 |
| 53,141 | 136 | 23,095 | 6,799 | 4,271 | 34,301 |
| 53,142 | 139 | 23,321 | 6,884 | 4,309 | 34,653 |
| 53,143 | 138 | 23,396 | 6,902 | 4,310 | 34,746 |

|        |     |        |       |       |        |
|--------|-----|--------|-------|-------|--------|
| 53,144 | 138 | 23,257 | 6,809 | 4,278 | 34,482 |
| 53,145 | 145 | 23,489 | 6,904 | 4,310 | 34,848 |
| 53,146 | 146 | 23,612 | 6,898 | 4,288 | 34,944 |
| 53,147 | 146 | 23,795 | 6,860 | 4,247 | 35,048 |
| 53,148 | 145 | 23,840 | 6,771 | 4,177 | 34,933 |
| 53,149 | 146 | 24,062 | 6,809 | 4,182 | 35,199 |
| 53,150 | 142 | 24,121 | 6,798 | 4,181 | 35,242 |
| 53,151 | 143 | 24,099 | 6,791 | 4,181 | 35,214 |
| 53,152 | 146 | 24,376 | 6,787 | 4,191 | 35,500 |
| 53,153 | 146 | 24,303 | 6,764 | 4,176 | 35,389 |
| 53,154 | 144 | 24,343 | 6,780 | 4,170 | 35,437 |
| 53,155 | 148 | 24,671 | 6,880 | 4,216 | 35,915 |
| 53,156 | 145 | 24,686 | 6,876 | 4,221 | 35,928 |
| 53,157 | 149 | 24,804 | 6,830 | 4,186 | 35,969 |
| 53,158 | 149 | 24,847 | 6,831 | 4,194 | 36,021 |
| 53,159 | 152 | 24,821 | 6,785 | 4,157 | 35,915 |
| 53,160 | 153 | 24,879 | 6,774 | 4,151 | 35,957 |
| 53,161 | 159 | 24,910 | 6,765 | 4,155 | 35,989 |
| 53,162 | 158 | 24,836 | 6,761 | 4,131 | 35,886 |
| 53,163 | 156 | 24,806 | 6,756 | 4,168 | 35,886 |
| 53,164 | 162 | 24,982 | 6,792 | 4,198 | 36,134 |
| 53,165 | 155 | 25,080 | 6,781 | 4,197 | 36,213 |
| 53,166 | 154 | 24,662 | 6,655 | 4,107 | 35,578 |
| 53,167 | 154 | 24,843 | 6,700 | 4,127 | 35,824 |
| 53,168 | 145 | 24,759 | 6,695 | 4,129 | 35,728 |
| 53,169 | 144 | 24,567 | 6,672 | 4,133 | 35,516 |
| 53,170 | 137 | 24,448 | 6,583 | 4,086 | 35,254 |
| 53,171 | 139 | 24,459 | 6,570 | 4,071 | 35,239 |
| 53,172 | 139 | 24,373 | 6,574 | 4,056 | 35,142 |
| 53,173 | 139 | 24,280 | 6,543 | 4,037 | 34,999 |
| 53,174 | 137 | 24,185 | 6,527 | 4,012 | 34,861 |
| 53,175 | 137 | 24,254 | 6,507 | 4,003 | 34,901 |

|        |     |        |       |       |        |
|--------|-----|--------|-------|-------|--------|
| 53,176 | 132 | 23,939 | 6,402 | 3,949 | 34,422 |
| 53,177 | 131 | 24,028 | 6,418 | 3,959 | 34,536 |
| 53,178 | 122 | 24,276 | 6,487 | 3,984 | 34,869 |
| 53,179 | 117 | 24,336 | 6,511 | 3,968 | 34,932 |
| 53,180 | 109 | 23,921 | 6,446 | 3,892 | 34,368 |
| 53,181 | 106 | 23,981 | 6,471 | 3,937 | 34,495 |
| 53,182 | 108 | 24,055 | 6,535 | 3,928 | 34,626 |
| 53,183 | 105 | 23,926 | 6,453 | 3,896 | 34,380 |
| 53,184 | 107 | 23,836 | 6,459 | 3,906 | 34,308 |
| 53,185 | 107 | 23,763 | 6,482 | 3,904 | 34,256 |
| 53,186 | 105 | 23,693 | 6,468 | 3,895 | 34,161 |
| 53,187 | 115 | 23,690 | 6,495 | 3,902 | 34,202 |
| 53,188 | 118 | 23,488 | 6,487 | 3,921 | 34,014 |
| 53,189 | 121 | 23,610 | 6,526 | 3,969 | 34,226 |
| 53,190 | 122 | 23,153 | 6,407 | 3,887 | 33,569 |
| 53,191 | 124 | 23,484 | 6,498 | 3,927 | 34,033 |
| 53,192 | 125 | 23,834 | 6,561 | 3,991 | 34,511 |
| 53,193 | 119 | 23,635 | 6,512 | 3,955 | 34,221 |
| 53,194 | 120 | 23,322 | 6,443 | 3,924 | 33,809 |
| 53,195 | 111 | 23,143 | 6,427 | 3,913 | 33,594 |
| 53,196 | 116 | 23,201 | 6,424 | 3,911 | 33,652 |
| 53,197 | 116 | 22,902 | 6,369 | 3,887 | 33,274 |
| 53,198 | 123 | 23,102 | 6,484 | 3,977 | 33,686 |
| 53,199 | 122 | 22,777 | 6,438 | 3,944 | 33,281 |
| 53,200 | 122 | 22,640 | 6,476 | 3,973 | 33,211 |
| 53,201 | 122 | 22,744 | 6,519 | 3,981 | 33,366 |
| 53,202 | 118 | 22,473 | 6,462 | 3,934 | 32,987 |
| 53,203 | 119 | 22,613 | 6,470 | 3,942 | 33,144 |
| 53,204 | 122 | 22,429 | 6,411 | 3,902 | 32,864 |
| 53,205 | 122 | 22,424 | 6,429 | 3,901 | 32,876 |
| 53,206 | 115 | 22,099 | 6,319 | 3,852 | 32,385 |
| 53,207 | 115 | 21,745 | 6,254 | 3,813 | 31,927 |

|        |     |        |       |       |        |
|--------|-----|--------|-------|-------|--------|
| 53,208 | 116 | 21,995 | 6,392 | 3,905 | 32,408 |
| 53,209 | 114 | 21,731 | 6,359 | 3,840 | 32,044 |
| 53,210 | 113 | 22,072 | 6,495 | 3,956 | 32,636 |
| 53,211 | 110 | 21,833 | 6,450 | 3,937 | 32,330 |
| 53,212 | 101 | 22,671 | 6,768 | 4,145 | 33,685 |
| 53,213 | 98  | 22,309 | 6,654 | 4,077 | 33,138 |
| 53,214 | 98  | 22,538 | 6,676 | 4,102 | 33,414 |
| 53,215 | 91  | 22,603 | 6,746 | 4,140 | 33,580 |
| 53,216 | 89  | 22,378 | 6,750 | 4,149 | 33,366 |
| 53,217 | 91  | 21,830 | 6,638 | 4,083 | 32,642 |
| 53,218 | 91  | 21,974 | 6,666 | 4,119 | 32,850 |
| 53,219 | 92  | 22,127 | 6,752 | 4,179 | 33,150 |
| 53,220 | 101 | 22,051 | 6,751 | 4,184 | 33,087 |
| 53,221 | 103 | 21,956 | 6,777 | 4,209 | 33,045 |
| 53,222 | 107 | 21,831 | 6,763 | 4,201 | 32,902 |
| 53,223 | 109 | 21,789 | 6,737 | 4,203 | 32,838 |
| 53,224 | 120 | 21,698 | 6,746 | 4,184 | 32,748 |
| 53,225 | 124 | 21,717 | 6,716 | 4,198 | 32,755 |
| 53,226 | 126 | 21,443 | 6,682 | 4,163 | 32,414 |
| 53,227 | 132 | 21,201 | 6,587 | 4,118 | 32,038 |
| 53,228 | 133 | 21,497 | 6,657 | 4,142 | 32,429 |
| 53,229 | 133 | 21,709 | 6,699 | 4,177 | 32,718 |
| 53,230 | 133 | 21,455 | 6,600 | 4,123 | 32,311 |
| 53,231 | 134 | 21,335 | 6,537 | 4,080 | 32,086 |
| 53,232 | 136 | 21,595 | 6,583 | 4,092 | 32,406 |
| 53,233 | 135 | 21,775 | 6,596 | 4,130 | 32,636 |
| 53,234 | 133 | 21,591 | 6,525 | 4,066 | 32,315 |
| 53,235 | 135 | 21,610 | 6,419 | 4,014 | 32,178 |
| 53,236 | 139 | 21,788 | 6,478 | 4,049 | 32,454 |
| 53,237 | 130 | 21,900 | 6,526 | 4,068 | 32,624 |
| 53,238 | 129 | 21,873 | 6,505 | 4,054 | 32,561 |
| 53,239 | 133 | 21,727 | 6,430 | 3,986 | 32,276 |



|        |     |        |       |       |        |
|--------|-----|--------|-------|-------|--------|
| 53,240 | 129 | 21,426 | 6,361 | 3,912 | 31,828 |
| 53,241 | 130 | 21,482 | 6,394 | 3,958 | 31,964 |
| 53,242 | 130 | 21,517 | 6,407 | 4,001 | 32,055 |
| 53,243 | 128 | 21,336 | 6,385 | 3,954 | 31,803 |
| 53,244 | 127 | 21,048 | 6,286 | 3,909 | 31,370 |
| 53,245 | 122 | 20,899 | 6,235 | 3,872 | 31,128 |
| 53,246 | 125 | 21,178 | 6,298 | 3,918 | 31,519 |
| 53,247 | 121 | 21,111 | 6,303 | 3,912 | 31,447 |
| 53,248 | 126 | 21,379 | 6,396 | 3,960 | 31,861 |
| 53,249 | 125 | 21,403 | 6,385 | 3,946 | 31,859 |
| 53,250 | 126 | 21,341 | 6,334 | 3,922 | 31,723 |
| 53,251 | 124 | 21,169 | 6,262 | 3,876 | 31,431 |
| 53,252 | 122 | 21,244 | 6,248 | 3,885 | 31,499 |
| 53,253 | 127 | 21,603 | 6,321 | 3,939 | 31,990 |
| 53,254 | 131 | 21,561 | 6,371 | 3,988 | 32,051 |
| 53,255 | 129 | 21,479 | 6,366 | 4,000 | 31,974 |
| 53,256 | 127 | 21,434 | 6,367 | 3,988 | 31,916 |
| 53,257 | 128 | 21,755 | 6,460 | 4,040 | 32,383 |
| 53,258 | 130 | 21,748 | 6,419 | 4,004 | 32,301 |
| 53,259 | 127 | 21,785 | 6,411 | 3,971 | 32,294 |
| 53,260 | 132 | 21,779 | 6,403 | 3,976 | 32,290 |
| 53,261 | 135 | 21,569 | 6,296 | 3,949 | 31,949 |
| 53,262 | 143 | 21,097 | 6,146 | 3,868 | 31,254 |
| 53,263 | 149 | 21,304 | 6,196 | 3,871 | 31,520 |
| 53,264 | 152 | 21,503 | 6,243 | 3,891 | 31,789 |
| 53,265 | 156 | 21,696 | 6,245 | 3,887 | 31,984 |
| 53,266 | 162 | 21,828 | 6,261 | 3,877 | 32,128 |
| 53,267 | 161 | 21,933 | 6,272 | 3,880 | 32,246 |
| 53,268 | 162 | 22,205 | 6,332 | 3,899 | 32,598 |
| 53,269 | 161 | 22,178 | 6,243 | 3,850 | 32,432 |
| 53,270 | 162 | 22,556 | 6,314 | 3,872 | 32,904 |
| 53,271 | 157 | 22,817 | 6,362 | 3,911 | 33,247 |

|        |     |        |       |       |        |
|--------|-----|--------|-------|-------|--------|
| 53,272 | 156 | 23,144 | 6,438 | 3,963 | 33,701 |
| 53,273 | 150 | 23,200 | 6,459 | 3,967 | 33,776 |
| 53,274 | 149 | 23,656 | 6,577 | 4,039 | 34,421 |
| 53,275 | 140 | 23,814 | 6,618 | 4,056 | 34,628 |
| 53,276 | 142 | 23,608 | 6,570 | 4,044 | 34,364 |
| 53,277 | 140 | 23,630 | 6,554 | 4,035 | 34,359 |
| 53,278 | 135 | 23,779 | 6,593 | 4,078 | 34,585 |
| 53,279 | 135 | 23,761 | 6,573 | 4,070 | 34,539 |
| 53,280 | 135 | 24,010 | 6,623 | 4,108 | 34,876 |
| 53,281 | 132 | 23,788 | 6,556 | 4,074 | 34,550 |
| 53,282 | 130 | 23,882 | 6,610 | 4,090 | 34,712 |
| 53,283 | 132 | 24,006 | 6,650 | 4,091 | 34,879 |
| 53,284 | 133 | 24,195 | 6,719 | 4,124 | 35,171 |
| 53,285 | 130 | 24,006 | 6,722 | 4,098 | 34,956 |
| 53,286 | 130 | 24,249 | 6,784 | 4,155 | 35,318 |
| 53,287 | 128 | 24,318 | 6,812 | 4,189 | 35,447 |
| 53,288 | 129 | 24,345 | 6,817 | 4,183 | 35,474 |
| 53,289 | 128 | 24,287 | 6,808 | 4,190 | 35,413 |
| 53,290 | 123 | 24,215 | 6,788 | 4,186 | 35,312 |
| 53,291 | 123 | 24,280 | 6,811 | 4,203 | 35,417 |
| 53,292 | 128 | 24,489 | 6,856 | 4,227 | 35,700 |
| 53,293 | 133 | 24,279 | 6,814 | 4,179 | 35,405 |
| 53,294 | 133 | 24,079 | 6,762 | 4,142 | 35,116 |
| 53,295 | 137 | 24,243 | 6,827 | 4,151 | 35,358 |
| 53,296 | 137 | 24,401 | 6,866 | 4,175 | 35,579 |
| 53,297 | 139 | 24,717 | 6,944 | 4,219 | 36,019 |
| 53,298 | 141 | 24,783 | 6,930 | 4,211 | 36,065 |
| 53,299 | 138 | 24,542 | 6,871 | 4,160 | 35,711 |
| 53,300 | 136 | 24,635 | 6,873 | 4,179 | 35,823 |
| 53,301 | 135 | 24,550 | 6,877 | 4,217 | 35,779 |
| 53,302 | 136 | 24,442 | 6,877 | 4,247 | 35,702 |
| 53,303 | 136 | 24,425 | 6,892 | 4,239 | 35,692 |

|        |     |        |       |       |        |
|--------|-----|--------|-------|-------|--------|
| 53,304 | 133 | 24,402 | 6,967 | 4,254 | 35,756 |
| 53,305 | 140 | 24,354 | 6,896 | 4,192 | 35,582 |
| 53,306 | 139 | 24,150 | 6,855 | 4,170 | 35,314 |
| 53,307 | 138 | 24,414 | 6,930 | 4,205 | 35,687 |
| 53,308 | 140 | 24,338 | 6,897 | 4,221 | 35,596 |
| 53,309 | 136 | 24,220 | 6,866 | 4,195 | 35,417 |
| 53,310 | 132 | 24,134 | 6,786 | 4,193 | 35,245 |
| 53,311 | 134 | 24,361 | 6,847 | 4,231 | 35,573 |
| 53,312 | 129 | 23,848 | 6,724 | 4,129 | 34,830 |
| 53,313 | 127 | 24,032 | 6,745 | 4,157 | 35,061 |
| 53,314 | 121 | 24,041 | 6,742 | 4,148 | 35,052 |
| 53,315 | 117 | 23,883 | 6,712 | 4,141 | 34,853 |
| 53,316 | 113 | 23,689 | 6,704 | 4,123 | 34,629 |
| 53,317 | 108 | 23,632 | 6,743 | 4,152 | 34,635 |
| 53,318 | 105 | 23,337 | 6,653 | 4,087 | 34,182 |
| 53,319 | 104 | 23,427 | 6,705 | 4,142 | 34,378 |
| 53,320 | 105 | 23,356 | 6,740 | 4,145 | 34,346 |
| 53,321 | 105 | 23,211 | 6,719 | 4,144 | 34,179 |
| 53,322 | 106 | 22,939 | 6,691 | 4,106 | 33,842 |
| 53,323 | 115 | 22,688 | 6,651 | 4,063 | 33,517 |
| 53,324 | 117 | 22,433 | 6,576 | 4,023 | 33,149 |
| 53,325 | 118 | 22,637 | 6,701 | 4,073 | 33,529 |
| 53,326 | 117 | 22,345 | 6,630 | 4,030 | 33,122 |
| 53,327 | 112 | 22,281 | 6,644 | 4,011 | 33,048 |
| 53,328 | 115 | 22,126 | 6,627 | 3,990 | 32,858 |
| 53,329 | 116 | 21,962 | 6,635 | 3,975 | 32,688 |
| 53,330 | 114 | 21,891 | 6,665 | 3,981 | 32,651 |
| 53,331 | 113 | 21,818 | 6,703 | 3,983 | 32,617 |
| 53,332 | 121 | 21,845 | 6,726 | 4,028 | 32,720 |
| 53,333 | 122 | 21,506 | 6,684 | 3,982 | 32,294 |
| 53,334 | 120 | 21,121 | 6,606 | 3,957 | 31,804 |
| 53,335 | 119 | 21,541 | 6,716 | 4,037 | 32,413 |

|        |     |        |       |       |        |
|--------|-----|--------|-------|-------|--------|
| 53,336 | 119 | 21,575 | 6,718 | 4,035 | 32,447 |
| 53,337 | 120 | 21,637 | 6,731 | 4,041 | 32,529 |
| 53,338 | 122 | 21,530 | 6,682 | 3,989 | 32,323 |
| 53,339 | 120 | 21,509 | 6,673 | 3,990 | 32,292 |
| 53,340 | 119 | 21,352 | 6,612 | 3,943 | 32,026 |
| 53,341 | 117 | 21,404 | 6,584 | 3,916 | 32,021 |
| 53,342 | 118 | 21,360 | 6,583 | 3,907 | 31,968 |
| 53,343 | 113 | 21,423 | 6,590 | 3,915 | 32,041 |
| 53,344 | 105 | 21,322 | 6,599 | 3,932 | 31,958 |
| 53,345 | 108 | 21,409 | 6,585 | 3,948 | 32,050 |
| 53,346 | 108 | 21,169 | 6,503 | 3,925 | 31,705 |
| 53,347 | 111 | 21,183 | 6,560 | 3,937 | 31,791 |
| 53,348 | 111 | 20,970 | 6,552 | 3,927 | 31,560 |
| 53,349 | 106 | 20,653 | 6,484 | 3,899 | 31,142 |
| 53,350 | 111 | 20,698 | 6,456 | 3,854 | 31,119 |
| 53,351 | 112 | 20,775 | 6,431 | 3,823 | 31,141 |
| 53,352 | 117 | 21,030 | 6,487 | 3,866 | 31,500 |
| 53,353 | 122 | 20,612 | 6,336 | 3,791 | 30,861 |
| 53,354 | 123 | 20,837 | 6,388 | 3,802 | 31,150 |
| 53,355 | 123 | 20,913 | 6,378 | 3,794 | 31,208 |
| 53,356 | 116 | 20,757 | 6,315 | 3,753 | 30,941 |
| 53,357 | 116 | 20,697 | 6,282 | 3,743 | 30,838 |
| 53,358 | 121 | 20,676 | 6,296 | 3,722 | 30,815 |
| 53,359 | 118 | 20,630 | 6,295 | 3,709 | 30,752 |
| 53,360 | 118 | 20,947 | 6,397 | 3,783 | 31,245 |
| 53,361 | 118 | 21,038 | 6,431 | 3,795 | 31,382 |
| 53,362 | 120 | 20,970 | 6,425 | 3,770 | 31,285 |
| 53,363 | 116 | 20,819 | 6,442 | 3,787 | 31,164 |
| 53,364 | 118 | 20,744 | 6,452 | 3,782 | 31,096 |
| 53,365 | 117 | 20,630 | 6,410 | 3,765 | 30,922 |
| 53,366 | 117 | 20,713 | 6,406 | 3,758 | 30,994 |
| 53,367 | 118 | 20,992 | 6,470 | 3,776 | 31,356 |

|        |     |        |       |       |        |
|--------|-----|--------|-------|-------|--------|
| 53,368 | 119 | 20,999 | 6,447 | 3,766 | 31,331 |
| 53,369 | 123 | 20,844 | 6,423 | 3,746 | 31,136 |
| 53,370 | 126 | 20,882 | 6,379 | 3,686 | 31,073 |
| 53,371 | 124 | 20,837 | 6,308 | 3,661 | 30,930 |
| 53,372 | 109 | 20,416 | 6,108 | 3,569 | 30,202 |
| 53,373 | 111 | 20,757 | 6,172 | 3,600 | 30,640 |
| 53,374 | 111 | 20,766 | 6,150 | 3,600 | 30,627 |
| 53,375 | 112 | 20,976 | 6,151 | 3,614 | 30,853 |
| 53,376 | 112 | 21,004 | 6,126 | 3,622 | 30,864 |
| 53,377 | 111 | 20,778 | 6,029 | 3,592 | 30,510 |
| 53,378 | 107 | 20,827 | 6,028 | 3,595 | 30,557 |
| 53,379 | 101 | 20,876 | 6,018 | 3,584 | 30,579 |
| 53,380 | 99  | 20,915 | 5,987 | 3,597 | 30,598 |
| 53,381 | 100 | 20,989 | 5,977 | 3,635 | 30,701 |
| 53,382 | 99  | 21,100 | 5,978 | 3,634 | 30,811 |
| 53,383 | 101 | 20,955 | 5,865 | 3,577 | 30,498 |
| 53,384 | 102 | 21,060 | 5,907 | 3,589 | 30,658 |
| 53,385 | 102 | 21,098 | 5,909 | 3,562 | 30,671 |
| 53,386 | 103 | 20,796 | 5,835 | 3,503 | 30,237 |
| 53,387 | 103 | 20,493 | 5,745 | 3,439 | 29,780 |
| 53,388 | 108 | 20,767 | 5,781 | 3,451 | 30,107 |
| 53,389 | 104 | 20,514 | 5,725 | 3,407 | 29,750 |
| 53,390 | 104 | 20,459 | 5,702 | 3,400 | 29,665 |
| 53,391 | 103 | 20,391 | 5,691 | 3,413 | 29,598 |
| 53,392 | 106 | 20,533 | 5,722 | 3,418 | 29,779 |
| 53,393 | 105 | 20,320 | 5,647 | 3,390 | 29,462 |
| 53,394 | 106 | 20,325 | 5,597 | 3,349 | 29,377 |
| 53,395 | 107 | 20,527 | 5,661 | 3,355 | 29,650 |
| 53,396 | 104 | 20,491 | 5,673 | 3,345 | 29,613 |
| 53,397 | 105 | 20,384 | 5,656 | 3,344 | 29,489 |
| 53,398 | 106 | 20,152 | 5,560 | 3,282 | 29,100 |
| 53,399 | 104 | 20,174 | 5,513 | 3,254 | 29,045 |

|        |     |        |       |       |        |
|--------|-----|--------|-------|-------|--------|
| 53,400 | 106 | 20,473 | 5,580 | 3,263 | 29,422 |
| 53,401 | 104 | 20,438 | 5,594 | 3,292 | 29,428 |
| 53,402 | 90  | 19,564 | 5,355 | 3,186 | 28,195 |
| 53,403 | 91  | 19,756 | 5,375 | 3,194 | 28,416 |
| 53,404 | 91  | 19,969 | 5,408 | 3,210 | 28,678 |
| 53,405 | 91  | 19,879 | 5,384 | 3,202 | 28,556 |
| 53,406 | 90  | 20,230 | 5,487 | 3,248 | 29,055 |
| 53,407 | 89  | 20,177 | 5,479 | 3,257 | 29,002 |
| 53,408 | 89  | 20,275 | 5,502 | 3,260 | 29,126 |
| 53,409 | 91  | 20,239 | 5,497 | 3,254 | 29,081 |
| 53,410 | 92  | 20,232 | 5,472 | 3,219 | 29,015 |
| 53,411 | 93  | 20,283 | 5,459 | 3,210 | 29,045 |
| 53,412 | 90  | 19,281 | 5,148 | 3,008 | 27,527 |
| 53,413 | 96  | 19,619 | 5,180 | 3,013 | 27,908 |
| 53,414 | 99  | 20,021 | 5,241 | 3,069 | 28,430 |
| 53,415 | 99  | 20,055 | 5,246 | 3,060 | 28,460 |
| 53,416 | 102 | 20,454 | 5,316 | 3,090 | 28,962 |
| 53,417 | 102 | 20,623 | 5,330 | 3,100 | 29,155 |
| 53,418 | 102 | 20,561 | 5,315 | 3,125 | 29,103 |
| 53,419 | 104 | 20,582 | 5,308 | 3,109 | 29,103 |
| 53,420 | 100 | 20,493 | 5,253 | 3,083 | 28,929 |
| 53,421 | 104 | 20,859 | 5,388 | 3,140 | 29,491 |
| 53,422 | 102 | 20,727 | 5,447 | 3,150 | 29,426 |
| 53,423 | 107 | 21,015 | 5,504 | 3,155 | 29,781 |
| 53,424 | 105 | 21,040 | 5,509 | 3,150 | 29,804 |
| 53,425 | 112 | 21,421 | 5,592 | 3,201 | 30,326 |
| 53,426 | 116 | 21,387 | 5,622 | 3,196 | 30,321 |
| 53,427 | 117 | 21,710 | 5,664 | 3,228 | 30,719 |
| 53,428 | 121 | 22,036 | 5,769 | 3,247 | 31,173 |
| 53,429 | 127 | 22,190 | 5,803 | 3,246 | 31,366 |
| 53,430 | 128 | 22,012 | 5,744 | 3,211 | 31,095 |
| 53,431 | 128 | 22,283 | 5,833 | 3,259 | 31,503 |

|        |     |        |       |       |        |
|--------|-----|--------|-------|-------|--------|
| 53,432 | 127 | 21,942 | 5,727 | 3,213 | 31,009 |
| 53,433 | 131 | 22,167 | 5,761 | 3,215 | 31,274 |
| 53,434 | 127 | 22,489 | 5,839 | 3,244 | 31,699 |
| 53,435 | 127 | 22,487 | 5,832 | 3,232 | 31,678 |
| 53,436 | 126 | 22,790 | 5,883 | 3,295 | 32,094 |
| 53,437 | 125 | 22,807 | 5,894 | 3,325 | 32,151 |
| 53,438 | 129 | 22,996 | 5,936 | 3,351 | 32,412 |
| 53,439 | 129 | 23,114 | 5,967 | 3,386 | 32,596 |
| 53,440 | 131 | 23,141 | 5,966 | 3,398 | 32,636 |
| 53,441 | 134 | 23,125 | 5,950 | 3,383 | 32,592 |
| 53,442 | 134 | 22,961 | 5,921 | 3,346 | 32,362 |
| 53,443 | 138 | 23,602 | 6,077 | 3,429 | 33,246 |
| 53,444 | 138 | 23,573 | 6,070 | 3,426 | 33,207 |
| 53,445 | 135 | 23,868 | 6,133 | 3,486 | 33,622 |
| 53,446 | 137 | 24,453 | 6,266 | 3,572 | 34,428 |
| 53,447 | 138 | 24,534 | 6,241 | 3,573 | 34,486 |
| 53,448 | 140 | 24,389 | 6,183 | 3,524 | 34,236 |
| 53,449 | 137 | 24,892 | 6,314 | 3,600 | 34,943 |
| 53,450 | 138 | 24,851 | 6,289 | 3,603 | 34,881 |
| 53,451 | 136 | 24,706 | 6,248 | 3,600 | 34,690 |
| 53,452 | 140 | 25,339 | 6,429 | 3,707 | 35,615 |
| 53,453 | 140 | 25,116 | 6,384 | 3,678 | 35,318 |
| 53,454 | 139 | 25,184 | 6,432 | 3,696 | 35,451 |
| 53,455 | 139 | 25,369 | 6,531 | 3,721 | 35,760 |
| 53,456 | 139 | 25,268 | 6,494 | 3,708 | 35,609 |
| 53,457 | 137 | 25,251 | 6,497 | 3,705 | 35,590 |
| 53,458 | 142 | 25,355 | 6,533 | 3,719 | 35,749 |
| 53,459 | 142 | 25,316 | 6,505 | 3,718 | 35,681 |
| 53,460 | 136 | 25,291 | 6,501 | 3,724 | 35,652 |
| 53,461 | 135 | 25,064 | 6,430 | 3,708 | 35,337 |
| 53,462 | 133 | 24,794 | 6,406 | 3,684 | 35,017 |
| 53,463 | 128 | 24,559 | 6,380 | 3,688 | 34,755 |

|        |     |        |       |       |        |
|--------|-----|--------|-------|-------|--------|
| 53,464 | 121 | 24,415 | 6,418 | 3,703 | 34,657 |
| 53,465 | 127 | 24,492 | 6,467 | 3,719 | 34,805 |
| 53,466 | 134 | 24,363 | 6,494 | 3,725 | 34,716 |
| 53,467 | 134 | 24,321 | 6,509 | 3,744 | 34,708 |
| 53,468 | 135 | 23,889 | 6,418 | 3,693 | 34,135 |
| 53,469 | 137 | 23,992 | 6,442 | 3,693 | 34,264 |
| 53,470 | 135 | 24,143 | 6,443 | 3,725 | 34,446 |
| 53,471 | 133 | 23,805 | 6,374 | 3,702 | 34,014 |
| 53,472 | 138 | 23,853 | 6,356 | 3,700 | 34,047 |
| 53,473 | 139 | 23,873 | 6,317 | 3,691 | 34,020 |
| 53,474 | 139 | 23,794 | 6,337 | 3,749 | 34,019 |
| 53,475 | 140 | 23,658 | 6,288 | 3,730 | 33,816 |
| 53,476 | 140 | 23,830 | 6,354 | 3,749 | 34,073 |
| 53,477 | 133 | 23,796 | 6,359 | 3,784 | 34,072 |
| 53,478 | 133 | 23,136 | 6,231 | 3,717 | 33,217 |
| 53,479 | 131 | 23,269 | 6,246 | 3,773 | 33,419 |
| 53,480 | 131 | 23,399 | 6,269 | 3,809 | 33,608 |
| 53,481 | 131 | 23,055 | 6,202 | 3,779 | 33,167 |
| 53,482 | 133 | 23,076 | 6,202 | 3,752 | 33,163 |
| 53,483 | 132 | 23,100 | 6,186 | 3,763 | 33,181 |
| 53,484 | 123 | 23,073 | 6,241 | 3,810 | 33,247 |
| 53,485 | 127 | 23,089 | 6,212 | 3,808 | 33,236 |
| 53,486 | 127 | 23,044 | 6,248 | 3,798 | 33,217 |
| 53,487 | 129 | 23,038 | 6,248 | 3,784 | 33,199 |
| 53,488 | 125 | 22,809 | 6,214 | 3,743 | 32,891 |
| 53,489 | 127 | 23,135 | 6,321 | 3,811 | 33,394 |
| 53,490 | 129 | 23,112 | 6,338 | 3,846 | 33,425 |
| 53,491 | 127 | 22,886 | 6,307 | 3,832 | 33,152 |
| 53,492 | 127 | 22,873 | 6,282 | 3,820 | 33,102 |
| 53,493 | 124 | 22,680 | 6,269 | 3,828 | 32,901 |
| 53,494 | 124 | 22,597 | 6,321 | 3,851 | 32,893 |
| 53,495 | 123 | 22,320 | 6,271 | 3,804 | 32,518 |



|        |     |        |       |       |        |
|--------|-----|--------|-------|-------|--------|
| 53,496 | 122 | 22,253 | 6,273 | 3,813 | 32,461 |
| 53,497 | 123 | 22,060 | 6,279 | 3,796 | 32,258 |
| 53,498 | 124 | 21,735 | 6,262 | 3,763 | 31,884 |
| 53,499 | 120 | 22,270 | 6,458 | 3,919 | 32,767 |
| 53,500 | 130 | 22,289 | 6,488 | 3,943 | 32,850 |
| 53,501 | 137 | 22,283 | 6,544 | 3,943 | 32,907 |
| 53,502 | 143 | 22,294 | 6,530 | 3,960 | 32,927 |
| 53,503 | 142 | 22,339 | 6,584 | 3,956 | 33,021 |
| 53,504 | 142 | 22,231 | 6,611 | 3,941 | 32,925 |
| 53,505 | 142 | 22,171 | 6,588 | 3,934 | 32,835 |
| 53,506 | 145 | 22,183 | 6,578 | 3,958 | 32,864 |
| 53,507 | 147 | 22,507 | 6,637 | 3,986 | 33,277 |
| 53,508 | 149 | 22,312 | 6,593 | 3,954 | 33,008 |
| 53,509 | 144 | 22,112 | 6,534 | 3,919 | 32,709 |
| 53,510 | 151 | 22,560 | 6,696 | 3,991 | 33,398 |
| 53,511 | 152 | 22,619 | 6,702 | 4,013 | 33,486 |
| 53,512 | 156 | 22,637 | 6,664 | 4,006 | 33,463 |
| 53,513 | 156 | 22,686 | 6,666 | 3,998 | 33,506 |
| 53,514 | 168 | 22,253 | 6,592 | 3,984 | 32,997 |
| 53,515 | 170 | 22,402 | 6,629 | 4,000 | 33,201 |
| 53,516 | 167 | 22,637 | 6,638 | 4,011 | 33,453 |
| 53,517 | 153 | 21,712 | 6,372 | 3,877 | 32,114 |
| 53,518 | 154 | 21,847 | 6,393 | 3,905 | 32,299 |
| 53,519 | 152 | 22,028 | 6,410 | 3,925 | 32,515 |
| 53,520 | 153 | 22,038 | 6,391 | 3,907 | 32,489 |
| 53,521 | 152 | 21,967 | 6,369 | 3,889 | 32,377 |
| 53,522 | 151 | 21,907 | 6,337 | 3,896 | 32,291 |
| 53,523 | 147 | 22,044 | 6,355 | 3,926 | 32,472 |
| 53,524 | 146 | 21,989 | 6,350 | 3,914 | 32,399 |
| 53,525 | 147 | 21,900 | 6,343 | 3,894 | 32,284 |
| 53,526 | 145 | 21,824 | 6,347 | 3,900 | 32,216 |
| 53,527 | 142 | 21,801 | 6,346 | 3,887 | 32,176 |

|        |     |        |       |       |        |
|--------|-----|--------|-------|-------|--------|
| 53,528 | 139 | 21,130 | 6,183 | 3,755 | 31,207 |
| 53,529 | 139 | 21,262 | 6,201 | 3,771 | 31,373 |
| 53,530 | 140 | 21,198 | 6,191 | 3,750 | 31,279 |
| 53,531 | 135 | 21,109 | 6,200 | 3,732 | 31,176 |
| 53,532 | 133 | 21,088 | 6,202 | 3,733 | 31,156 |
| 53,533 | 134 | 21,051 | 6,183 | 3,729 | 31,097 |
| 53,534 | 134 | 21,018 | 6,160 | 3,705 | 31,017 |
| 53,535 | 134 | 21,056 | 6,145 | 3,699 | 31,034 |
| 53,536 | 132 | 21,020 | 6,131 | 3,700 | 30,983 |
| 53,537 | 132 | 20,958 | 6,113 | 3,681 | 30,884 |
| 53,538 | 135 | 21,242 | 6,166 | 3,704 | 31,247 |
| 53,539 | 139 | 21,259 | 6,138 | 3,695 | 31,231 |
| 53,540 | 140 | 21,188 | 6,122 | 3,670 | 31,120 |
| 53,541 | 142 | 21,134 | 6,062 | 3,642 | 30,980 |
| 53,542 | 143 | 21,151 | 6,038 | 3,622 | 30,954 |
| 53,543 | 148 | 20,905 | 5,938 | 3,560 | 30,551 |
| 53,544 | 148 | 20,966 | 5,940 | 3,540 | 30,594 |
| 53,545 | 149 | 20,656 | 5,848 | 3,483 | 30,136 |
| 53,546 | 150 | 20,258 | 5,738 | 3,440 | 29,586 |
| 53,547 | 157 | 20,894 | 5,780 | 3,512 | 30,343 |
| 53,548 | 160 | 20,722 | 5,619 | 3,429 | 29,930 |
| 53,549 | 161 | 20,728 | 5,600 | 3,429 | 29,918 |
| 53,550 | 158 | 20,631 | 5,567 | 3,386 | 29,742 |
| 53,551 | 156 | 20,377 | 5,462 | 3,314 | 29,309 |
| 53,552 | 147 | 20,006 | 5,331 | 3,271 | 28,755 |
| 53,553 | 145 | 20,590 | 5,413 | 3,322 | 29,470 |
| 53,554 | 148 | 20,736 | 5,358 | 3,314 | 29,556 |
| 53,555 | 147 | 20,791 | 5,329 | 3,293 | 29,560 |
| 53,556 | 147 | 20,963 | 5,293 | 3,297 | 29,700 |
| 53,557 | 147 | 20,969 | 5,300 | 3,267 | 29,683 |
| 53,558 | 146 | 21,141 | 5,300 | 3,291 | 29,878 |
| 53,559 | 145 | 21,085 | 5,284 | 3,299 | 29,813 |

|        |     |        |       |       |        |
|--------|-----|--------|-------|-------|--------|
| 53,560 | 140 | 20,823 | 5,239 | 3,280 | 29,482 |
| 53,561 | 146 | 21,266 | 5,298 | 3,335 | 30,045 |
| 53,562 | 149 | 21,267 | 5,277 | 3,308 | 30,001 |
| 53,563 | 145 | 21,286 | 5,249 | 3,264 | 29,944 |
| 53,564 | 133 | 21,282 | 5,182 | 3,231 | 29,828 |
| 53,565 | 133 | 21,309 | 5,175 | 3,234 | 29,851 |
| 53,566 | 135 | 21,499 | 5,185 | 3,240 | 30,059 |
| 53,567 | 137 | 21,294 | 5,161 | 3,205 | 29,797 |
| 53,568 | 137 | 21,245 | 5,171 | 3,198 | 29,751 |
| 53,569 | 138 | 21,122 | 5,155 | 3,203 | 29,618 |
| 53,570 | 140 | 21,163 | 5,179 | 3,207 | 29,689 |
| 53,571 | 139 | 21,186 | 5,191 | 3,205 | 29,721 |
| 53,572 | 139 | 21,255 | 5,222 | 3,208 | 29,824 |
| 53,573 | 138 | 20,937 | 5,138 | 3,134 | 29,347 |
| 53,574 | 139 | 20,915 | 5,155 | 3,134 | 29,343 |
| 53,575 | 137 | 20,851 | 5,163 | 3,139 | 29,290 |
| 53,576 | 130 | 20,871 | 5,124 | 3,118 | 29,243 |
| 53,577 | 131 | 20,855 | 5,156 | 3,135 | 29,277 |
| 53,578 | 133 | 20,567 | 5,077 | 3,109 | 28,886 |
| 53,579 | 133 | 20,374 | 5,037 | 3,076 | 28,620 |
| 53,580 | 134 | 20,537 | 5,089 | 3,086 | 28,846 |
| 53,581 | 135 | 20,564 | 5,047 | 3,068 | 28,814 |
| 53,582 | 138 | 20,544 | 5,052 | 3,060 | 28,794 |
| 53,583 | 138 | 20,419 | 5,011 | 3,032 | 28,600 |
| 53,584 | 138 | 20,325 | 4,995 | 3,013 | 28,471 |
| 53,585 | 142 | 20,297 | 4,963 | 2,990 | 28,392 |
| 53,586 | 143 | 20,296 | 4,964 | 2,994 | 28,397 |
| 53,587 | 141 | 20,409 | 4,989 | 2,977 | 28,516 |
| 53,588 | 141 | 20,534 | 5,041 | 2,999 | 28,715 |
| 53,589 | 138 | 20,285 | 4,977 | 2,972 | 28,372 |
| 53,590 | 131 | 20,026 | 4,940 | 2,933 | 28,030 |
| 53,591 | 125 | 20,038 | 4,969 | 2,934 | 28,066 |

|        |     |        |       |       |        |
|--------|-----|--------|-------|-------|--------|
| 53,592 | 125 | 19,875 | 4,985 | 2,938 | 27,923 |
| 53,593 | 123 | 19,833 | 4,996 | 2,925 | 27,877 |
| 53,594 | 131 | 19,810 | 5,016 | 2,913 | 27,870 |
| 53,595 | 128 | 19,598 | 4,992 | 2,913 | 27,631 |
| 53,596 | 124 | 19,719 | 5,063 | 2,949 | 27,855 |
| 53,597 | 127 | 19,440 | 5,056 | 2,898 | 27,521 |
| 53,598 | 126 | 19,261 | 5,047 | 2,871 | 27,305 |
| 53,599 | 128 | 19,613 | 5,160 | 2,911 | 27,812 |
| 53,600 | 128 | 19,631 | 5,172 | 2,911 | 27,842 |
| 53,601 | 120 | 19,490 | 5,159 | 2,916 | 27,685 |
| 53,602 | 127 | 19,388 | 5,175 | 2,891 | 27,581 |
| 53,603 | 127 | 19,277 | 5,198 | 2,892 | 27,494 |
| 53,604 | 123 | 19,143 | 5,234 | 2,929 | 27,429 |
| 53,605 | 120 | 19,019 | 5,253 | 2,915 | 27,307 |
| 53,606 | 120 | 19,132 | 5,342 | 2,951 | 27,545 |
| 53,607 | 117 | 19,164 | 5,428 | 2,999 | 27,708 |
| 53,608 | 119 | 19,215 | 5,430 | 3,029 | 27,793 |
| 53,609 | 123 | 19,121 | 5,455 | 3,034 | 27,733 |
| 53,610 | 118 | 18,885 | 5,419 | 3,014 | 27,436 |
| 53,611 | 121 | 18,997 | 5,480 | 3,029 | 27,627 |
| 53,612 | 126 | 18,994 | 5,477 | 3,030 | 27,627 |
| 53,613 | 122 | 19,038 | 5,499 | 3,027 | 27,686 |
| 53,614 | 119 | 18,801 | 5,471 | 3,008 | 27,399 |
| 53,615 | 122 | 18,877 | 5,522 | 3,029 | 27,550 |
| 53,616 | 122 | 19,042 | 5,574 | 3,074 | 27,812 |
| 53,617 | 123 | 18,904 | 5,557 | 3,079 | 27,663 |
| 53,618 | 120 | 18,956 | 5,558 | 3,109 | 27,743 |
| 53,619 | 119 | 19,025 | 5,559 | 3,110 | 27,813 |
| 53,620 | 119 | 19,227 | 5,613 | 3,134 | 28,093 |
| 53,621 | 119 | 19,191 | 5,662 | 3,165 | 28,137 |
| 53,622 | 119 | 18,987 | 5,621 | 3,151 | 27,878 |
| 53,623 | 118 | 19,165 | 5,674 | 3,178 | 28,135 |

|        |     |        |       |       |        |
|--------|-----|--------|-------|-------|--------|
| 53,624 | 118 | 19,200 | 5,689 | 3,180 | 28,187 |
| 53,625 | 117 | 19,133 | 5,658 | 3,172 | 28,080 |
| 53,626 | 118 | 19,216 | 5,711 | 3,213 | 28,258 |
| 53,627 | 117 | 19,027 | 5,658 | 3,192 | 27,994 |
| 53,628 | 121 | 19,178 | 5,717 | 3,217 | 28,233 |
| 53,629 | 123 | 19,244 | 5,759 | 3,232 | 28,358 |
| 53,630 | 124 | 19,055 | 5,723 | 3,204 | 28,106 |
| 53,631 | 123 | 18,747 | 5,661 | 3,174 | 27,705 |
| 53,632 | 123 | 18,709 | 5,659 | 3,184 | 27,675 |
| 53,633 | 126 | 18,874 | 5,722 | 3,227 | 27,949 |
| 53,634 | 134 | 18,724 | 5,704 | 3,209 | 27,771 |
| 53,635 | 134 | 18,676 | 5,708 | 3,208 | 27,726 |
| 53,636 | 133 | 18,737 | 5,816 | 3,277 | 27,963 |
| 53,637 | 139 | 18,674 | 5,846 | 3,292 | 27,951 |
| 53,638 | 144 | 18,564 | 5,814 | 3,292 | 27,814 |
| 53,639 | 143 | 18,359 | 5,755 | 3,265 | 27,522 |
| 53,640 | 139 | 18,343 | 5,760 | 3,264 | 27,506 |
| 53,641 | 139 | 18,278 | 5,740 | 3,266 | 27,423 |
| 53,642 | 140 | 18,200 | 5,717 | 3,280 | 27,337 |
| 53,643 | 146 | 18,371 | 5,784 | 3,304 | 27,605 |
| 53,644 | 145 | 18,331 | 5,798 | 3,297 | 27,571 |
| 53,645 | 135 | 18,070 | 5,727 | 3,266 | 27,198 |
| 53,646 | 134 | 18,149 | 5,731 | 3,286 | 27,300 |
| 53,647 | 133 | 18,098 | 5,729 | 3,293 | 27,253 |
| 53,648 | 135 | 18,366 | 5,834 | 3,341 | 27,676 |
| 53,649 | 134 | 18,399 | 5,865 | 3,364 | 27,762 |
| 53,650 | 141 | 17,983 | 5,830 | 3,341 | 27,295 |
| 53,651 | 142 | 17,964 | 5,821 | 3,333 | 27,260 |
| 53,652 | 140 | 17,887 | 5,821 | 3,334 | 27,182 |
| 53,653 | 138 | 18,181 | 5,920 | 3,396 | 27,635 |
| 53,654 | 139 | 18,373 | 5,911 | 3,388 | 27,811 |
| 53,655 | 140 | 18,293 | 5,823 | 3,330 | 27,586 |

|        |     |        |       |       |        |
|--------|-----|--------|-------|-------|--------|
| 53,656 | 146 | 18,312 | 5,809 | 3,343 | 27,610 |
| 53,657 | 153 | 18,185 | 5,764 | 3,311 | 27,413 |
| 53,658 | 154 | 17,374 | 5,560 | 3,135 | 26,223 |
| 53,659 | 152 | 17,597 | 5,612 | 3,193 | 26,554 |
| 53,660 | 146 | 17,860 | 5,686 | 3,237 | 26,929 |
| 53,661 | 146 | 17,888 | 5,689 | 3,247 | 26,970 |
| 53,662 | 142 | 18,241 | 5,818 | 3,331 | 27,532 |
| 53,663 | 136 | 17,937 | 5,753 | 3,299 | 27,125 |
| 53,664 | 137 | 17,975 | 5,841 | 3,362 | 27,315 |
| 53,665 | 138 | 17,674 | 5,782 | 3,334 | 26,928 |
| 53,666 | 135 | 17,682 | 5,837 | 3,355 | 27,009 |
| 53,667 | 135 | 17,745 | 5,896 | 3,390 | 27,166 |
| 53,668 | 131 | 17,644 | 5,888 | 3,381 | 27,044 |
| 53,669 | 135 | 17,492 | 5,962 | 3,406 | 26,995 |
| 53,670 | 134 | 17,526 | 6,031 | 3,434 | 27,125 |
| 53,671 | 136 | 17,517 | 6,046 | 3,437 | 27,136 |
| 53,672 | 133 | 17,520 | 6,021 | 3,434 | 27,108 |
| 53,673 | 135 | 17,592 | 6,055 | 3,470 | 27,252 |
| 53,674 | 135 | 17,518 | 6,039 | 3,479 | 27,171 |
| 53,675 | 140 | 17,676 | 6,085 | 3,516 | 27,417 |
| 53,676 | 147 | 17,964 | 6,092 | 3,536 | 27,739 |
| 53,677 | 151 | 18,160 | 6,125 | 3,540 | 27,976 |
| 53,678 | 148 | 18,166 | 6,125 | 3,523 | 27,962 |
| 53,679 | 152 | 18,457 | 6,173 | 3,554 | 28,336 |
| 53,680 | 149 | 18,143 | 6,104 | 3,540 | 27,936 |
| 53,681 | 149 | 18,293 | 6,101 | 3,559 | 28,102 |
| 53,682 | 140 | 18,164 | 6,032 | 3,528 | 27,864 |
| 53,683 | 140 | 18,283 | 6,069 | 3,546 | 28,038 |
| 53,684 | 137 | 18,556 | 6,122 | 3,596 | 28,411 |
| 53,685 | 143 | 18,722 | 6,120 | 3,595 | 28,580 |
| 53,686 | 147 | 18,799 | 6,094 | 3,574 | 28,614 |
| 53,687 | 151 | 19,037 | 6,144 | 3,605 | 28,937 |

|        |     |        |       |       |        |
|--------|-----|--------|-------|-------|--------|
| 53,688 | 151 | 19,128 | 6,153 | 3,622 | 29,054 |
| 53,689 | 152 | 19,204 | 6,202 | 3,623 | 29,181 |
| 53,690 | 151 | 19,134 | 6,188 | 3,619 | 29,092 |
| 53,691 | 152 | 19,184 | 6,156 | 3,602 | 29,094 |
| 53,692 | 153 | 19,476 | 6,195 | 3,631 | 29,455 |
| 53,693 | 147 | 19,782 | 6,266 | 3,665 | 29,860 |
| 53,694 | 146 | 19,682 | 6,268 | 3,661 | 29,757 |
| 53,695 | 150 | 19,855 | 6,262 | 3,677 | 29,944 |
| 53,696 | 150 | 19,861 | 6,235 | 3,632 | 29,878 |
| 53,697 | 150 | 20,048 | 6,263 | 3,665 | 30,126 |
| 53,698 | 147 | 20,194 | 6,326 | 3,696 | 30,363 |
| 53,699 | 143 | 20,209 | 6,298 | 3,694 | 30,344 |
| 53,700 | 145 | 20,223 | 6,261 | 3,692 | 30,321 |
| 53,701 | 144 | 20,184 | 6,178 | 3,658 | 30,164 |
| 53,702 | 142 | 20,135 | 6,155 | 3,663 | 30,095 |
| 53,703 | 141 | 20,437 | 6,209 | 3,725 | 30,512 |
| 53,704 | 145 | 20,260 | 6,141 | 3,688 | 30,234 |
| 53,705 | 144 | 19,833 | 6,052 | 3,650 | 29,679 |
| 53,706 | 142 | 20,118 | 6,207 | 3,736 | 30,203 |
| 53,707 | 142 | 20,266 | 6,225 | 3,752 | 30,385 |
| 53,708 | 136 | 20,054 | 6,169 | 3,714 | 30,073 |
| 53,709 | 137 | 20,091 | 6,178 | 3,716 | 30,122 |
| 53,710 | 137 | 20,108 | 6,163 | 3,707 | 30,115 |
| 53,711 | 137 | 20,153 | 6,150 | 3,717 | 30,157 |
| 53,712 | 141 | 20,294 | 6,175 | 3,717 | 30,327 |
| 53,713 | 142 | 20,526 | 6,183 | 3,743 | 30,594 |
| 53,714 | 152 | 20,811 | 6,255 | 3,790 | 31,008 |
| 53,715 | 152 | 20,982 | 6,246 | 3,799 | 31,179 |
| 53,716 | 154 | 21,135 | 6,261 | 3,806 | 31,356 |
| 53,717 | 158 | 21,180 | 6,194 | 3,752 | 31,284 |
| 53,718 | 159 | 21,375 | 6,210 | 3,753 | 31,497 |
| 53,719 | 159 | 21,581 | 6,208 | 3,753 | 31,701 |

|        |     |        |       |       |        |
|--------|-----|--------|-------|-------|--------|
| 53,720 | 156 | 21,613 | 6,173 | 3,733 | 31,675 |
| 53,721 | 157 | 21,654 | 6,153 | 3,733 | 31,697 |
| 53,722 | 155 | 21,390 | 6,090 | 3,704 | 31,339 |
| 53,723 | 155 | 21,557 | 6,140 | 3,755 | 31,607 |
| 53,724 | 156 | 21,564 | 6,154 | 3,731 | 31,605 |
| 53,725 | 159 | 21,761 | 6,196 | 3,771 | 31,887 |
| 53,726 | 160 | 21,542 | 6,170 | 3,746 | 31,618 |
| 53,727 | 153 | 21,479 | 6,175 | 3,734 | 31,541 |
| 53,728 | 150 | 21,388 | 6,162 | 3,719 | 31,419 |
| 53,729 | 148 | 21,097 | 6,065 | 3,676 | 30,986 |
| 53,730 | 146 | 21,022 | 6,052 | 3,654 | 30,874 |
| 53,731 | 147 | 21,113 | 6,063 | 3,657 | 30,980 |
| 53,732 | 147 | 21,057 | 6,058 | 3,644 | 30,906 |
| 53,733 | 146 | 20,880 | 6,074 | 3,610 | 30,710 |
| 53,734 | 146 | 20,941 | 6,082 | 3,609 | 30,778 |
| 53,735 | 145 | 21,009 | 6,122 | 3,614 | 30,890 |
| 53,736 | 140 | 20,974 | 6,115 | 3,645 | 30,874 |
| 53,737 | 131 | 20,798 | 6,046 | 3,616 | 30,591 |
| 53,738 | 136 | 20,741 | 6,041 | 3,617 | 30,535 |
| 53,739 | 130 | 20,567 | 5,964 | 3,573 | 30,234 |
| 53,740 | 125 | 20,619 | 5,954 | 3,584 | 30,282 |
| 53,741 | 128 | 20,788 | 5,968 | 3,606 | 30,490 |
| 53,742 | 129 | 20,836 | 5,998 | 3,606 | 30,569 |
| 53,743 | 131 | 20,865 | 6,030 | 3,599 | 30,625 |
| 53,744 | 135 | 20,546 | 5,927 | 3,549 | 30,157 |
| 53,745 | 134 | 20,309 | 5,862 | 3,508 | 29,813 |
| 53,746 | 132 | 20,492 | 5,918 | 3,529 | 30,071 |
| 53,747 | 135 | 20,535 | 5,942 | 3,561 | 30,173 |
| 53,748 | 136 | 20,474 | 5,965 | 3,563 | 30,138 |
| 53,749 | 135 | 20,486 | 5,919 | 3,549 | 30,089 |
| 53,750 | 138 | 20,475 | 5,880 | 3,548 | 30,041 |
| 53,751 | 134 | 20,166 | 5,811 | 3,510 | 29,621 |



|        |     |        |       |       |        |
|--------|-----|--------|-------|-------|--------|
| 53,752 | 123 | 20,357 | 5,874 | 3,568 | 29,922 |
| 53,753 | 134 | 20,673 | 5,949 | 3,613 | 30,369 |
| 53,754 | 132 | 20,443 | 5,865 | 3,538 | 29,978 |
| 53,755 | 131 | 20,544 | 5,862 | 3,521 | 30,058 |
| 53,756 | 137 | 20,599 | 5,856 | 3,526 | 30,118 |
| 53,757 | 136 | 20,294 | 5,788 | 3,483 | 29,701 |
| 53,758 | 146 | 20,507 | 5,888 | 3,521 | 30,062 |
| 53,759 | 142 | 20,249 | 5,824 | 3,474 | 29,689 |
| 53,760 | 142 | 20,241 | 5,824 | 3,492 | 29,699 |
| 53,761 | 147 | 20,221 | 5,838 | 3,493 | 29,699 |
| 53,762 | 151 | 20,280 | 5,866 | 3,486 | 29,783 |
| 53,763 | 146 | 20,069 | 5,753 | 3,418 | 29,386 |
| 53,764 | 154 | 20,251 | 5,798 | 3,426 | 29,629 |
| 53,765 | 147 | 20,089 | 5,773 | 3,411 | 29,420 |
| 53,766 | 151 | 20,237 | 5,823 | 3,461 | 29,672 |
| 53,767 | 147 | 20,090 | 5,812 | 3,452 | 29,501 |
| 53,768 | 143 | 19,956 | 5,784 | 3,458 | 29,341 |
| 53,769 | 143 | 19,920 | 5,803 | 3,467 | 29,333 |
| 53,770 | 142 | 19,998 | 5,821 | 3,480 | 29,441 |
| 53,771 | 146 | 20,116 | 5,827 | 3,517 | 29,606 |
| 53,772 | 148 | 20,334 | 5,865 | 3,513 | 29,860 |
| 53,773 | 158 | 20,619 | 5,862 | 3,496 | 30,135 |
| 53,774 | 162 | 20,737 | 5,865 | 3,500 | 30,264 |
| 53,775 | 163 | 20,950 | 5,866 | 3,515 | 30,494 |
| 53,776 | 157 | 20,839 | 5,816 | 3,467 | 30,279 |
| 53,777 | 157 | 20,911 | 5,823 | 3,460 | 30,351 |
| 53,778 | 164 | 21,057 | 5,867 | 3,473 | 30,561 |
| 53,779 | 158 | 20,706 | 5,782 | 3,445 | 30,091 |
| 53,780 | 167 | 20,744 | 5,803 | 3,442 | 30,156 |
| 53,781 | 167 | 20,765 | 5,805 | 3,447 | 30,184 |
| 53,782 | 169 | 21,003 | 5,896 | 3,488 | 30,556 |
| 53,783 | 168 | 20,867 | 5,839 | 3,470 | 30,344 |

|        |     |        |       |       |        |
|--------|-----|--------|-------|-------|--------|
| 53,784 | 167 | 20,829 | 5,818 | 3,462 | 30,276 |
| 53,785 | 168 | 21,057 | 5,872 | 3,492 | 30,589 |
| 53,786 | 168 | 20,905 | 5,866 | 3,486 | 30,425 |
| 53,787 | 167 | 20,681 | 5,825 | 3,431 | 30,104 |
| 53,788 | 166 | 20,766 | 5,856 | 3,438 | 30,226 |
| 53,789 | 165 | 20,817 | 5,834 | 3,440 | 30,256 |
| 53,790 | 165 | 20,765 | 5,823 | 3,449 | 30,202 |
| 53,791 | 165 | 20,607 | 5,788 | 3,416 | 29,976 |
| 53,792 | 165 | 20,583 | 5,807 | 3,426 | 29,981 |
| 53,793 | 165 | 20,484 | 5,796 | 3,436 | 29,881 |
| 53,794 | 161 | 20,425 | 5,756 | 3,439 | 29,781 |
| 53,795 | 151 | 20,132 | 5,663 | 3,423 | 29,369 |
| 53,796 | 151 | 20,294 | 5,727 | 3,460 | 29,632 |
| 53,797 | 150 | 20,337 | 5,750 | 3,461 | 29,698 |
| 53,798 | 151 | 20,309 | 5,687 | 3,431 | 29,578 |
| 53,799 | 153 | 20,215 | 5,683 | 3,453 | 29,504 |
| 53,800 | 152 | 20,201 | 5,685 | 3,459 | 29,497 |
| 53,801 | 149 | 20,151 | 5,687 | 3,453 | 29,440 |
| 53,802 | 147 | 20,019 | 5,616 | 3,387 | 29,169 |
| 53,803 | 148 | 20,199 | 5,663 | 3,408 | 29,418 |
| 53,804 | 141 | 20,450 | 5,704 | 3,436 | 29,731 |
| 53,805 | 139 | 20,268 | 5,624 | 3,426 | 29,457 |
| 53,806 | 139 | 20,321 | 5,627 | 3,421 | 29,508 |
| 53,807 | 139 | 20,454 | 5,631 | 3,436 | 29,660 |
| 53,808 | 132 | 20,699 | 5,622 | 3,463 | 29,916 |
| 53,809 | 130 | 20,429 | 5,560 | 3,418 | 29,537 |
| 53,810 | 133 | 20,543 | 5,607 | 3,437 | 29,720 |
| 53,811 | 132 | 20,843 | 5,691 | 3,479 | 30,145 |
| 53,812 | 133 | 20,647 | 5,626 | 3,436 | 29,842 |
| 53,813 | 133 | 20,727 | 5,627 | 3,457 | 29,944 |
| 53,814 | 130 | 20,570 | 5,606 | 3,465 | 29,771 |
| 53,815 | 128 | 20,303 | 5,541 | 3,410 | 29,382 |

|        |     |        |       |       |        |
|--------|-----|--------|-------|-------|--------|
| 53,816 | 129 | 20,430 | 5,560 | 3,431 | 29,550 |
| 53,817 | 125 | 20,511 | 5,598 | 3,424 | 29,658 |
| 53,818 | 132 | 20,626 | 5,600 | 3,425 | 29,783 |
| 53,819 | 133 | 20,770 | 5,604 | 3,424 | 29,931 |
| 53,820 | 135 | 20,812 | 5,613 | 3,433 | 29,993 |
| 53,821 | 136 | 20,831 | 5,606 | 3,453 | 30,026 |
| 53,822 | 136 | 20,874 | 5,648 | 3,472 | 30,130 |
| 53,823 | 135 | 20,684 | 5,626 | 3,481 | 29,926 |
| 53,824 | 128 | 20,915 | 5,727 | 3,557 | 30,327 |
| 53,825 | 121 | 20,761 | 5,701 | 3,547 | 30,130 |
| 53,826 | 120 | 21,047 | 5,780 | 3,575 | 30,522 |
| 53,827 | 117 | 21,220 | 5,807 | 3,595 | 30,739 |
| 53,828 | 113 | 21,291 | 5,854 | 3,645 | 30,903 |
| 53,829 | 109 | 21,191 | 5,807 | 3,628 | 30,735 |
| 53,830 | 113 | 21,432 | 5,858 | 3,672 | 31,075 |
| 53,831 | 109 | 21,695 | 5,938 | 3,723 | 31,465 |
| 53,832 | 111 | 21,980 | 6,001 | 3,771 | 31,863 |
| 53,833 | 108 | 22,201 | 6,011 | 3,798 | 32,118 |
| 53,834 | 116 | 22,334 | 6,051 | 3,838 | 32,339 |
| 53,835 | 117 | 22,141 | 5,985 | 3,841 | 32,084 |
| 53,836 | 120 | 22,399 | 6,055 | 3,869 | 32,443 |
| 53,837 | 120 | 22,699 | 6,116 | 3,921 | 32,856 |
| 53,838 | 122 | 22,538 | 6,097 | 3,913 | 32,670 |
| 53,839 | 117 | 22,595 | 6,083 | 3,916 | 32,711 |
| 53,840 | 116 | 22,582 | 6,128 | 3,915 | 32,741 |
| 53,841 | 117 | 22,715 | 6,164 | 3,947 | 32,943 |
| 53,842 | 117 | 22,586 | 6,124 | 3,924 | 32,751 |
| 53,843 | 120 | 22,603 | 6,115 | 3,919 | 32,757 |
| 53,844 | 123 | 22,843 | 6,185 | 3,966 | 33,117 |
| 53,845 | 125 | 22,756 | 6,213 | 3,953 | 33,047 |
| 53,846 | 131 | 22,897 | 6,235 | 3,966 | 33,229 |
| 53,847 | 133 | 22,963 | 6,230 | 3,969 | 33,295 |

|        |     |        |       |       |        |
|--------|-----|--------|-------|-------|--------|
| 53,848 | 135 | 22,921 | 6,228 | 3,967 | 33,251 |
| 53,849 | 131 | 22,771 | 6,176 | 3,935 | 33,013 |
| 53,850 | 132 | 22,476 | 6,142 | 3,884 | 32,634 |
| 53,851 | 131 | 22,260 | 6,075 | 3,858 | 32,324 |
| 53,852 | 131 | 22,881 | 6,262 | 3,970 | 33,244 |
| 53,853 | 129 | 22,655 | 6,232 | 3,978 | 32,994 |
| 53,854 | 128 | 22,852 | 6,306 | 4,026 | 33,312 |
| 53,855 | 125 | 22,245 | 6,206 | 3,946 | 32,522 |
| 53,856 | 124 | 22,349 | 6,249 | 3,974 | 32,696 |
| 53,857 | 119 | 22,562 | 6,345 | 4,019 | 33,045 |
| 53,858 | 118 | 22,555 | 6,374 | 4,015 | 33,062 |
| 53,859 | 118 | 22,115 | 6,277 | 3,967 | 32,477 |
| 53,860 | 121 | 22,378 | 6,322 | 3,992 | 32,813 |
| 53,861 | 120 | 22,711 | 6,411 | 4,041 | 33,283 |
| 53,862 | 116 | 22,601 | 6,391 | 4,029 | 33,137 |
| 53,863 | 114 | 22,400 | 6,325 | 4,000 | 32,839 |
| 53,864 | 116 | 22,453 | 6,354 | 3,990 | 32,913 |
| 53,865 | 116 | 22,412 | 6,344 | 3,987 | 32,859 |
| 53,866 | 110 | 22,417 | 6,350 | 4,000 | 32,877 |
| 53,867 | 113 | 22,714 | 6,416 | 4,038 | 33,281 |
| 53,868 | 113 | 22,674 | 6,380 | 4,044 | 33,211 |
| 53,869 | 109 | 22,266 | 6,284 | 3,966 | 32,625 |
| 53,870 | 109 | 22,204 | 6,328 | 3,978 | 32,619 |
| 53,871 | 108 | 22,384 | 6,340 | 4,003 | 32,835 |
| 53,872 | 109 | 22,333 | 6,329 | 3,959 | 32,730 |
| 53,873 | 104 | 22,555 | 6,378 | 3,990 | 33,027 |
| 53,874 | 104 | 22,470 | 6,316 | 3,945 | 32,835 |
| 53,875 | 101 | 22,374 | 6,290 | 3,940 | 32,705 |
| 53,876 | 102 | 22,238 | 6,281 | 3,940 | 32,561 |
| 53,877 | 103 | 21,989 | 6,230 | 3,951 | 32,273 |
| 53,878 | 103 | 21,891 | 6,171 | 3,913 | 32,078 |
| 53,879 | 102 | 21,819 | 6,124 | 3,892 | 31,937 |

|        |     |        |       |       |        |
|--------|-----|--------|-------|-------|--------|
| 53,880 | 104 | 21,964 | 6,182 | 3,957 | 32,207 |
| 53,881 | 102 | 22,029 | 6,183 | 3,943 | 32,257 |
| 53,882 | 99  | 22,014 | 6,176 | 3,929 | 32,218 |
| 53,883 | 98  | 21,852 | 6,143 | 3,900 | 31,993 |
| 53,884 | 97  | 21,828 | 6,165 | 3,882 | 31,972 |
| 53,885 | 91  | 21,846 | 6,102 | 3,855 | 31,894 |
| 53,886 | 87  | 21,558 | 6,038 | 3,813 | 31,496 |
| 53,887 | 90  | 21,675 | 6,107 | 3,857 | 31,729 |
| 53,888 | 95  | 21,811 | 6,118 | 3,870 | 31,894 |
| 53,889 | 96  | 21,924 | 6,112 | 3,864 | 31,996 |
| 53,890 | 98  | 22,014 | 6,113 | 3,870 | 32,095 |
| 53,891 | 103 | 22,218 | 6,132 | 3,890 | 32,343 |
| 53,892 | 102 | 22,318 | 6,145 | 3,888 | 32,453 |
| 53,893 | 101 | 22,565 | 6,167 | 3,907 | 32,740 |
| 53,894 | 97  | 22,452 | 6,161 | 3,891 | 32,601 |
| 53,895 | 94  | 22,753 | 6,143 | 3,901 | 32,891 |
| 53,896 | 94  | 22,619 | 6,121 | 3,897 | 32,731 |
| 53,897 | 91  | 22,994 | 6,215 | 3,970 | 33,270 |
| 53,898 | 92  | 23,007 | 6,250 | 4,000 | 33,349 |
| 53,899 | 89  | 23,035 | 6,243 | 3,995 | 33,362 |
| 53,900 | 98  | 23,252 | 6,313 | 4,009 | 33,672 |
| 53,901 | 96  | 23,314 | 6,323 | 4,021 | 33,754 |
| 53,902 | 105 | 23,124 | 6,266 | 3,969 | 33,464 |
| 53,903 | 112 | 23,137 | 6,247 | 3,954 | 33,450 |
| 53,904 | 126 | 23,305 | 6,317 | 3,968 | 33,716 |
| 53,905 | 128 | 23,368 | 6,334 | 3,973 | 33,803 |
| 53,906 | 129 | 23,323 | 6,328 | 3,968 | 33,748 |
| 53,907 | 129 | 23,349 | 6,336 | 3,969 | 33,783 |
| 53,908 | 132 | 23,351 | 6,317 | 3,944 | 33,744 |
| 53,909 | 142 | 23,551 | 6,345 | 3,966 | 34,004 |
| 53,910 | 142 | 23,413 | 6,309 | 3,919 | 33,783 |
| 53,911 | 140 | 23,366 | 6,298 | 3,920 | 33,724 |

|        |     |        |       |       |        |
|--------|-----|--------|-------|-------|--------|
| 53,912 | 139 | 23,384 | 6,282 | 3,924 | 33,729 |
| 53,913 | 146 | 23,443 | 6,279 | 3,927 | 33,795 |
| 53,914 | 147 | 23,840 | 6,383 | 3,972 | 34,342 |
| 53,915 | 147 | 23,914 | 6,332 | 3,954 | 34,347 |
| 53,916 | 146 | 23,922 | 6,333 | 3,952 | 34,353 |
| 53,917 | 144 | 24,184 | 6,398 | 3,975 | 34,701 |
| 53,918 | 141 | 24,241 | 6,424 | 3,983 | 34,789 |
| 53,919 | 140 | 24,170 | 6,418 | 3,971 | 34,699 |
| 53,920 | 139 | 24,024 | 6,383 | 3,960 | 34,506 |
| 53,921 | 142 | 24,114 | 6,374 | 3,973 | 34,603 |
| 53,922 | 139 | 23,744 | 6,320 | 3,924 | 34,127 |
| 53,923 | 141 | 23,842 | 6,424 | 3,971 | 34,378 |
| 53,924 | 145 | 23,690 | 6,366 | 3,954 | 34,155 |
| 53,925 | 150 | 23,634 | 6,374 | 3,933 | 34,091 |
| 53,926 | 157 | 23,520 | 6,359 | 3,923 | 33,959 |
| 53,927 | 161 | 23,417 | 6,342 | 3,898 | 33,818 |
| 53,928 | 161 | 23,223 | 6,285 | 3,861 | 33,530 |
| 53,929 | 161 | 23,225 | 6,310 | 3,879 | 33,575 |
| 53,930 | 161 | 23,179 | 6,334 | 3,893 | 33,567 |
| 53,931 | 159 | 23,193 | 6,336 | 3,866 | 33,554 |
| 53,932 | 158 | 23,205 | 6,342 | 3,867 | 33,572 |
| 53,933 | 158 | 23,202 | 6,337 | 3,870 | 33,567 |
| 53,934 | 160 | 23,211 | 6,305 | 3,882 | 33,558 |
| 53,935 | 167 | 23,082 | 6,307 | 3,886 | 33,442 |
| 53,936 | 165 | 23,068 | 6,302 | 3,878 | 33,413 |
| 53,937 | 161 | 22,854 | 6,226 | 3,818 | 33,059 |
| 53,938 | 159 | 22,859 | 6,258 | 3,848 | 33,124 |
| 53,939 | 157 | 22,951 | 6,316 | 3,883 | 33,307 |
| 53,940 | 155 | 22,684 | 6,299 | 3,871 | 33,009 |
| 53,941 | 154 | 22,538 | 6,313 | 3,868 | 32,873 |
| 53,942 | 150 | 22,829 | 6,374 | 3,879 | 33,232 |
| 53,943 | 149 | 22,584 | 6,335 | 3,857 | 32,925 |

|        |     |        |       |       |        |
|--------|-----|--------|-------|-------|--------|
| 53,944 | 157 | 22,654 | 6,394 | 3,875 | 33,080 |
| 53,945 | 157 | 22,459 | 6,347 | 3,844 | 32,807 |
| 53,946 | 154 | 22,270 | 6,339 | 3,811 | 32,574 |
| 53,947 | 162 | 21,803 | 6,190 | 3,702 | 31,857 |
| 53,948 | 160 | 21,906 | 6,217 | 3,722 | 32,005 |
| 53,949 | 162 | 21,863 | 6,159 | 3,693 | 31,877 |
| 53,950 | 162 | 21,993 | 6,219 | 3,700 | 32,074 |
| 53,951 | 157 | 22,129 | 6,266 | 3,725 | 32,277 |
| 53,952 | 143 | 21,391 | 6,040 | 3,569 | 31,143 |
| 53,953 | 148 | 21,703 | 6,091 | 3,599 | 31,541 |
| 53,954 | 144 | 21,915 | 6,124 | 3,639 | 31,822 |
| 53,955 | 137 | 21,703 | 6,055 | 3,617 | 31,512 |
| 53,956 | 135 | 21,682 | 6,049 | 3,655 | 31,521 |
| 53,957 | 134 | 21,673 | 6,030 | 3,660 | 31,497 |
| 53,958 | 133 | 21,702 | 6,011 | 3,662 | 31,508 |
| 53,959 | 119 | 21,507 | 5,941 | 3,627 | 31,194 |
| 53,960 | 119 | 21,441 | 5,933 | 3,636 | 31,129 |
| 53,961 | 118 | 21,057 | 5,878 | 3,600 | 30,653 |
| 53,962 | 119 | 20,760 | 5,857 | 3,573 | 30,309 |
| 53,963 | 117 | 21,551 | 6,070 | 3,741 | 31,479 |
| 53,964 | 114 | 21,508 | 6,040 | 3,735 | 31,397 |
| 53,965 | 116 | 21,396 | 6,060 | 3,754 | 31,326 |
| 53,966 | 117 | 21,352 | 6,066 | 3,758 | 31,293 |
| 53,967 | 122 | 21,377 | 6,064 | 3,779 | 31,342 |
| 53,968 | 122 | 21,506 | 6,084 | 3,806 | 31,518 |
| 53,969 | 122 | 21,220 | 6,022 | 3,771 | 31,135 |
| 53,970 | 122 | 21,343 | 6,046 | 3,786 | 31,297 |
| 53,971 | 120 | 21,513 | 6,032 | 3,793 | 31,458 |
| 53,972 | 124 | 21,736 | 6,093 | 3,862 | 31,815 |
| 53,973 | 117 | 21,584 | 6,003 | 3,780 | 31,484 |
| 53,974 | 119 | 21,760 | 6,051 | 3,805 | 31,735 |
| 53,975 | 123 | 21,934 | 6,085 | 3,813 | 31,955 |

|        |     |        |       |       |        |
|--------|-----|--------|-------|-------|--------|
| 53,976 | 119 | 21,784 | 5,991 | 3,774 | 31,668 |
| 53,977 | 118 | 22,035 | 6,037 | 3,794 | 31,984 |
| 53,978 | 114 | 21,910 | 6,042 | 3,761 | 31,827 |
| 53,979 | 117 | 21,669 | 5,989 | 3,724 | 31,499 |
| 53,980 | 117 | 21,338 | 5,898 | 3,671 | 31,024 |
| 53,981 | 119 | 21,607 | 5,948 | 3,712 | 31,386 |
| 53,982 | 119 | 21,507 | 5,931 | 3,721 | 31,278 |
| 53,983 | 116 | 21,233 | 5,881 | 3,680 | 30,910 |
| 53,984 | 116 | 21,506 | 5,934 | 3,723 | 31,279 |
| 53,985 | 116 | 21,435 | 5,912 | 3,707 | 31,170 |
| 53,986 | 109 | 21,583 | 5,904 | 3,721 | 31,317 |
| 53,987 | 112 | 21,748 | 5,928 | 3,738 | 31,526 |
| 53,988 | 116 | 21,486 | 5,861 | 3,701 | 31,164 |
| 53,989 | 113 | 21,600 | 5,851 | 3,691 | 31,255 |
| 53,990 | 113 | 21,640 | 5,820 | 3,640 | 31,213 |
| 53,991 | 113 | 21,595 | 5,810 | 3,640 | 31,158 |
| 53,992 | 122 | 21,879 | 5,845 | 3,698 | 31,544 |
| 53,993 | 123 | 21,734 | 5,861 | 3,689 | 31,407 |
| 53,994 | 120 | 20,865 | 5,645 | 3,585 | 30,215 |
| 53,995 | 121 | 21,216 | 5,716 | 3,642 | 30,695 |
| 53,996 | 120 | 21,486 | 5,778 | 3,684 | 31,068 |
| 53,997 | 118 | 21,601 | 5,789 | 3,679 | 31,187 |
| 53,998 | 112 | 21,736 | 5,765 | 3,682 | 31,295 |
| 53,999 | 117 | 21,923 | 5,828 | 3,714 | 31,582 |
| 54,000 | 113 | 21,727 | 5,818 | 3,715 | 31,373 |
| 54,001 | 116 | 21,569 | 5,736 | 3,706 | 31,127 |
| 54,002 | 120 | 21,812 | 5,800 | 3,757 | 31,489 |
| 54,003 | 117 | 21,800 | 5,820 | 3,774 | 31,511 |
| 54,004 | 116 | 21,555 | 5,735 | 3,733 | 31,139 |
| 54,005 | 114 | 21,277 | 5,704 | 3,695 | 30,790 |
| 54,006 | 114 | 21,419 | 5,741 | 3,688 | 30,962 |
| 54,007 | 114 | 21,274 | 5,724 | 3,677 | 30,789 |



|        |     |        |       |       |        |
|--------|-----|--------|-------|-------|--------|
| 54,008 | 123 | 21,600 | 5,829 | 3,751 | 31,303 |
| 54,009 | 123 | 21,510 | 5,851 | 3,756 | 31,240 |
| 54,010 | 123 | 21,419 | 5,830 | 3,742 | 31,114 |
| 54,011 | 124 | 21,188 | 5,747 | 3,683 | 30,742 |
| 54,012 | 128 | 21,477 | 5,798 | 3,722 | 31,125 |
| 54,013 | 127 | 21,475 | 5,752 | 3,695 | 31,049 |
| 54,014 | 128 | 21,114 | 5,670 | 3,620 | 30,532 |
| 54,015 | 125 | 20,731 | 5,564 | 3,556 | 29,976 |
| 54,016 | 127 | 21,041 | 5,647 | 3,589 | 30,404 |
| 54,017 | 126 | 20,918 | 5,661 | 3,583 | 30,288 |
| 54,018 | 121 | 20,774 | 5,641 | 3,573 | 30,109 |
| 54,019 | 123 | 20,795 | 5,696 | 3,588 | 30,202 |
| 54,020 | 123 | 20,565 | 5,658 | 3,560 | 29,906 |
| 54,021 | 126 | 20,663 | 5,687 | 3,580 | 30,056 |
| 54,022 | 126 | 20,683 | 5,716 | 3,586 | 30,111 |
| 54,023 | 127 | 20,772 | 5,717 | 3,574 | 30,190 |
| 54,024 | 127 | 20,562 | 5,670 | 3,546 | 29,905 |
| 54,025 | 125 | 20,683 | 5,704 | 3,569 | 30,081 |
| 54,026 | 125 | 20,673 | 5,727 | 3,573 | 30,098 |
| 54,027 | 118 | 20,728 | 5,748 | 3,569 | 30,163 |
| 54,028 | 118 | 20,732 | 5,738 | 3,591 | 30,179 |
| 54,029 | 118 | 20,639 | 5,726 | 3,596 | 30,079 |
| 54,030 | 114 | 20,675 | 5,766 | 3,612 | 30,167 |
| 54,031 | 120 | 21,008 | 5,867 | 3,653 | 30,648 |
| 54,032 | 118 | 20,784 | 5,809 | 3,619 | 30,330 |
| 54,033 | 119 | 20,985 | 5,851 | 3,638 | 30,593 |
| 54,034 | 119 | 20,571 | 5,739 | 3,568 | 29,997 |
| 54,035 | 122 | 20,762 | 5,794 | 3,599 | 30,277 |
| 54,036 | 120 | 20,765 | 5,804 | 3,606 | 30,295 |
| 54,037 | 125 | 20,961 | 5,874 | 3,638 | 30,598 |
| 54,038 | 125 | 20,701 | 5,854 | 3,643 | 30,323 |
| 54,039 | 127 | 20,659 | 5,828 | 3,639 | 30,253 |

|        |     |        |       |       |        |
|--------|-----|--------|-------|-------|--------|
| 54,040 | 127 | 20,840 | 5,884 | 3,679 | 30,530 |
| 54,041 | 125 | 20,680 | 5,881 | 3,693 | 30,379 |
| 54,042 | 125 | 20,742 | 5,890 | 3,715 | 30,472 |
| 54,043 | 117 | 20,765 | 5,881 | 3,697 | 30,460 |
| 54,044 | 118 | 20,877 | 5,920 | 3,754 | 30,669 |
| 54,045 | 115 | 20,945 | 5,943 | 3,744 | 30,747 |
| 54,046 | 115 | 20,688 | 5,940 | 3,723 | 30,466 |
| 54,047 | 115 | 20,706 | 5,940 | 3,714 | 30,475 |
| 54,048 | 117 | 20,997 | 6,034 | 3,794 | 30,942 |
| 54,049 | 117 | 20,810 | 6,069 | 3,814 | 30,810 |
| 54,050 | 113 | 20,621 | 6,019 | 3,791 | 30,544 |
| 54,051 | 112 | 20,708 | 6,042 | 3,820 | 30,682 |
| 54,052 | 112 | 20,794 | 6,130 | 3,861 | 30,897 |
| 54,053 | 111 | 20,488 | 6,067 | 3,806 | 30,472 |
| 54,054 | 110 | 20,439 | 6,073 | 3,801 | 30,423 |
| 54,055 | 109 | 20,414 | 6,082 | 3,804 | 30,409 |
| 54,056 | 112 | 20,426 | 6,095 | 3,821 | 30,454 |
| 54,057 | 121 | 20,510 | 6,118 | 3,803 | 30,552 |
| 54,058 | 122 | 20,646 | 6,206 | 3,819 | 30,793 |
| 54,059 | 124 | 20,911 | 6,256 | 3,836 | 31,127 |
| 54,060 | 125 | 21,045 | 6,272 | 3,844 | 31,286 |
| 54,061 | 125 | 20,784 | 6,247 | 3,834 | 30,990 |
| 54,062 | 124 | 20,779 | 6,238 | 3,832 | 30,973 |
| 54,063 | 124 | 20,931 | 6,289 | 3,847 | 31,191 |
| 54,064 | 124 | 20,901 | 6,283 | 3,851 | 31,159 |
| 54,065 | 127 | 20,976 | 6,318 | 3,892 | 31,313 |
| 54,066 | 127 | 21,040 | 6,382 | 3,922 | 31,471 |
| 54,067 | 126 | 21,163 | 6,403 | 3,947 | 31,639 |
| 54,068 | 129 | 21,180 | 6,431 | 3,955 | 31,695 |
| 54,069 | 132 | 21,162 | 6,468 | 3,956 | 31,718 |
| 54,070 | 129 | 21,014 | 6,385 | 3,934 | 31,462 |
| 54,071 | 129 | 21,228 | 6,442 | 3,964 | 31,763 |

|        |     |        |       |       |        |
|--------|-----|--------|-------|-------|--------|
| 54,072 | 126 | 21,225 | 6,443 | 3,961 | 31,755 |
| 54,073 | 126 | 21,138 | 6,428 | 3,949 | 31,641 |
| 54,074 | 121 | 20,851 | 6,356 | 3,900 | 31,228 |
| 54,075 | 120 | 20,749 | 6,317 | 3,879 | 31,065 |
| 54,076 | 115 | 20,977 | 6,369 | 3,937 | 31,398 |
| 54,077 | 115 | 20,681 | 6,293 | 3,893 | 30,982 |
| 54,078 | 115 | 20,760 | 6,364 | 3,945 | 31,184 |
| 54,079 | 113 | 20,830 | 6,384 | 3,953 | 31,280 |
| 54,080 | 114 | 20,989 | 6,401 | 3,956 | 31,460 |
| 54,081 | 112 | 20,731 | 6,342 | 3,916 | 31,101 |
| 54,082 | 109 | 21,026 | 6,444 | 3,973 | 31,552 |
| 54,083 | 110 | 21,144 | 6,503 | 3,986 | 31,743 |
| 54,084 | 111 | 20,709 | 6,417 | 3,918 | 31,155 |
| 54,085 | 111 | 20,992 | 6,504 | 3,953 | 31,560 |
| 54,086 | 108 | 20,968 | 6,505 | 3,942 | 31,523 |
| 54,087 | 114 | 21,197 | 6,566 | 3,979 | 31,856 |
| 54,088 | 110 | 21,261 | 6,560 | 3,955 | 31,886 |
| 54,089 | 107 | 21,244 | 6,538 | 3,926 | 31,815 |
| 54,090 | 101 | 21,021 | 6,513 | 3,899 | 31,534 |
| 54,091 | 102 | 20,818 | 6,472 | 3,858 | 31,250 |
| 54,092 | 103 | 20,726 | 6,416 | 3,830 | 31,075 |
| 54,093 | 102 | 20,531 | 6,387 | 3,790 | 30,810 |
| 54,094 | 107 | 20,773 | 6,475 | 3,863 | 31,218 |
| 54,095 | 105 | 20,634 | 6,426 | 3,805 | 30,970 |
| 54,096 | 99  | 20,168 | 6,272 | 3,716 | 30,255 |
| 54,097 | 101 | 20,395 | 6,270 | 3,720 | 30,486 |
| 54,098 | 105 | 20,624 | 6,322 | 3,722 | 30,773 |
| 54,099 | 103 | 20,443 | 6,266 | 3,691 | 30,503 |
| 54,100 | 111 | 20,832 | 6,344 | 3,743 | 31,030 |
| 54,101 | 121 | 20,788 | 6,279 | 3,698 | 30,886 |
| 54,102 | 120 | 20,896 | 6,254 | 3,708 | 30,978 |
| 54,103 | 120 | 21,093 | 6,295 | 3,721 | 31,229 |

|        |     |        |       |       |        |
|--------|-----|--------|-------|-------|--------|
| 54,104 | 119 | 21,084 | 6,286 | 3,727 | 31,216 |
| 54,105 | 119 | 21,089 | 6,262 | 3,714 | 31,184 |
| 54,106 | 118 | 21,078 | 6,253 | 3,714 | 31,163 |
| 54,107 | 114 | 21,053 | 6,234 | 3,711 | 31,112 |
| 54,108 | 109 | 21,231 | 6,248 | 3,719 | 31,307 |
| 54,109 | 106 | 21,171 | 6,216 | 3,715 | 31,208 |
| 54,110 | 102 | 21,070 | 6,161 | 3,691 | 31,024 |
| 54,111 | 101 | 20,877 | 6,119 | 3,677 | 30,774 |
| 54,112 | 100 | 20,942 | 6,110 | 3,673 | 30,825 |
| 54,113 | 99  | 20,893 | 6,103 | 3,671 | 30,766 |
| 54,114 | 102 | 20,779 | 6,118 | 3,683 | 30,682 |
| 54,115 | 105 | 20,943 | 6,186 | 3,697 | 30,931 |
| 54,116 | 102 | 20,781 | 6,084 | 3,663 | 30,630 |
| 54,117 | 104 | 20,914 | 6,157 | 3,700 | 30,875 |
| 54,118 | 105 | 20,873 | 6,151 | 3,689 | 30,818 |
| 54,119 | 101 | 20,747 | 6,043 | 3,644 | 30,535 |
| 54,120 | 102 | 20,814 | 6,045 | 3,637 | 30,598 |
| 54,121 | 102 | 20,609 | 6,013 | 3,590 | 30,314 |
| 54,122 | 105 | 21,095 | 6,106 | 3,669 | 30,975 |
| 54,123 | 107 | 21,021 | 6,044 | 3,640 | 30,812 |
| 54,124 | 106 | 20,764 | 5,979 | 3,598 | 30,447 |
| 54,125 | 107 | 20,952 | 6,021 | 3,618 | 30,698 |
| 54,126 | 106 | 20,839 | 6,023 | 3,632 | 30,600 |
| 54,127 | 110 | 20,911 | 5,962 | 3,585 | 30,568 |
| 54,128 | 111 | 21,114 | 5,994 | 3,610 | 30,829 |
| 54,129 | 112 | 21,112 | 5,988 | 3,621 | 30,833 |
| 54,130 | 116 | 20,910 | 5,913 | 3,580 | 30,519 |
| 54,131 | 115 | 20,608 | 5,850 | 3,565 | 30,138 |
| 54,132 | 115 | 21,076 | 5,968 | 3,627 | 30,786 |
| 54,133 | 116 | 20,998 | 5,900 | 3,606 | 30,620 |
| 54,134 | 114 | 21,149 | 5,905 | 3,621 | 30,789 |
| 54,135 | 115 | 20,628 | 5,753 | 3,530 | 30,026 |

|        |     |        |       |       |        |
|--------|-----|--------|-------|-------|--------|
| 54,136 | 115 | 20,775 | 5,756 | 3,550 | 30,196 |
| 54,137 | 109 | 20,962 | 5,805 | 3,581 | 30,457 |
| 54,138 | 115 | 21,176 | 5,854 | 3,614 | 30,759 |
| 54,139 | 115 | 21,155 | 5,871 | 3,641 | 30,782 |
| 54,140 | 121 | 21,091 | 5,817 | 3,634 | 30,663 |
| 54,141 | 121 | 21,102 | 5,837 | 3,636 | 30,696 |
| 54,142 | 125 | 21,294 | 5,905 | 3,650 | 30,974 |
| 54,143 | 120 | 21,050 | 5,794 | 3,558 | 30,522 |
| 54,144 | 122 | 21,260 | 5,851 | 3,587 | 30,820 |
| 54,145 | 120 | 21,208 | 5,864 | 3,587 | 30,779 |
| 54,146 | 123 | 21,172 | 5,847 | 3,586 | 30,728 |
| 54,147 | 123 | 21,014 | 5,840 | 3,598 | 30,575 |
| 54,148 | 123 | 20,841 | 5,847 | 3,601 | 30,412 |
| 54,149 | 118 | 20,701 | 5,841 | 3,610 | 30,270 |
| 54,150 | 110 | 20,242 | 5,808 | 3,559 | 29,719 |
| 54,151 | 112 | 20,428 | 5,851 | 3,599 | 29,990 |
| 54,152 | 100 | 20,616 | 5,918 | 3,645 | 30,279 |
| 54,153 | 103 | 20,626 | 5,961 | 3,647 | 30,337 |
| 54,154 | 98  | 20,159 | 5,829 | 3,568 | 29,654 |
| 54,155 | 97  | 20,224 | 5,837 | 3,574 | 29,732 |
| 54,156 | 97  | 20,085 | 5,801 | 3,562 | 29,545 |
| 54,157 | 97  | 20,232 | 5,843 | 3,563 | 29,735 |
| 54,158 | 96  | 20,413 | 5,918 | 3,587 | 30,014 |
| 54,159 | 99  | 20,403 | 5,910 | 3,592 | 30,004 |
| 54,160 | 99  | 20,120 | 5,847 | 3,543 | 29,609 |
| 54,161 | 98  | 20,285 | 5,937 | 3,590 | 29,910 |
| 54,162 | 95  | 20,295 | 5,913 | 3,584 | 29,887 |
| 54,163 | 96  | 20,215 | 5,898 | 3,585 | 29,794 |
| 54,164 | 92  | 19,997 | 5,791 | 3,529 | 29,409 |
| 54,165 | 92  | 20,120 | 5,846 | 3,543 | 29,601 |
| 54,166 | 87  | 20,339 | 5,896 | 3,586 | 29,908 |
| 54,167 | 84  | 19,835 | 5,759 | 3,507 | 29,185 |

|        |     |        |       |       |        |
|--------|-----|--------|-------|-------|--------|
| 54,168 | 86  | 20,032 | 5,795 | 3,513 | 29,426 |
| 54,169 | 84  | 20,074 | 5,797 | 3,518 | 29,473 |
| 54,170 | 81  | 20,207 | 5,854 | 3,542 | 29,684 |
| 54,171 | 81  | 20,028 | 5,808 | 3,543 | 29,460 |
| 54,172 | 84  | 20,272 | 5,847 | 3,582 | 29,785 |
| 54,173 | 79  | 20,025 | 5,813 | 3,558 | 29,475 |
| 54,174 | 82  | 20,229 | 5,888 | 3,607 | 29,806 |
| 54,175 | 82  | 20,361 | 5,915 | 3,629 | 29,987 |
| 54,176 | 90  | 20,195 | 5,858 | 3,601 | 29,744 |
| 54,177 | 93  | 20,582 | 5,972 | 3,663 | 30,310 |
| 54,178 | 89  | 20,745 | 6,070 | 3,696 | 30,600 |
| 54,179 | 93  | 20,065 | 5,891 | 3,543 | 29,592 |
| 54,180 | 94  | 20,327 | 5,951 | 3,591 | 29,963 |
| 54,181 | 95  | 20,495 | 6,018 | 3,656 | 30,264 |
| 54,182 | 96  | 20,495 | 6,025 | 3,660 | 30,276 |
| 54,183 | 101 | 20,697 | 6,112 | 3,701 | 30,611 |
| 54,184 | 103 | 20,677 | 6,120 | 3,703 | 30,603 |
| 54,185 | 103 | 20,620 | 6,089 | 3,705 | 30,517 |
| 54,186 | 104 | 20,629 | 6,147 | 3,745 | 30,625 |
| 54,187 | 109 | 20,605 | 6,159 | 3,762 | 30,635 |
| 54,188 | 102 | 20,359 | 6,125 | 3,735 | 30,321 |
| 54,189 | 103 | 20,219 | 6,109 | 3,708 | 30,139 |
| 54,190 | 101 | 20,184 | 6,098 | 3,691 | 30,074 |
| 54,191 | 104 | 20,463 | 6,170 | 3,714 | 30,451 |
| 54,192 | 106 | 20,663 | 6,158 | 3,741 | 30,668 |
| 54,193 | 108 | 20,513 | 6,103 | 3,722 | 30,446 |
| 54,194 | 109 | 20,435 | 6,054 | 3,723 | 30,321 |
| 54,195 | 113 | 20,894 | 6,183 | 3,796 | 30,986 |
| 54,196 | 111 | 20,941 | 6,188 | 3,809 | 31,049 |
| 54,197 | 113 | 20,872 | 6,143 | 3,788 | 30,916 |
| 54,198 | 111 | 20,997 | 6,117 | 3,785 | 31,010 |
| 54,199 | 110 | 20,971 | 6,083 | 3,759 | 30,923 |

|        |     |        |       |       |        |
|--------|-----|--------|-------|-------|--------|
| 54,200 | 112 | 21,103 | 6,121 | 3,779 | 31,115 |
| 54,201 | 111 | 21,079 | 6,129 | 3,755 | 31,074 |
| 54,202 | 112 | 21,037 | 6,129 | 3,741 | 31,019 |
| 54,203 | 112 | 20,991 | 6,114 | 3,737 | 30,954 |
| 54,204 | 107 | 20,707 | 6,025 | 3,695 | 30,534 |
| 54,205 | 105 | 20,433 | 5,976 | 3,660 | 30,174 |
| 54,206 | 108 | 20,701 | 6,115 | 3,745 | 30,669 |
| 54,207 | 108 | 20,626 | 6,114 | 3,727 | 30,575 |
| 54,208 | 111 | 20,437 | 6,089 | 3,720 | 30,357 |
| 54,209 | 116 | 20,622 | 6,157 | 3,774 | 30,669 |
| 54,210 | 111 | 20,733 | 6,175 | 3,794 | 30,813 |
| 54,211 | 111 | 20,715 | 6,142 | 3,804 | 30,772 |
| 54,212 | 111 | 20,590 | 6,067 | 3,768 | 30,536 |
| 54,213 | 116 | 20,027 | 5,962 | 3,686 | 29,791 |
| 54,214 | 116 | 20,226 | 6,013 | 3,699 | 30,054 |
| 54,215 | 122 | 20,345 | 6,070 | 3,715 | 30,252 |
| 54,216 | 124 | 20,076 | 5,969 | 3,670 | 29,839 |
| 54,217 | 125 | 20,158 | 5,982 | 3,665 | 29,930 |
| 54,218 | 125 | 20,333 | 6,022 | 3,683 | 30,163 |
| 54,219 | 125 | 20,258 | 6,018 | 3,695 | 30,096 |
| 54,220 | 132 | 20,243 | 6,000 | 3,677 | 30,052 |
| 54,221 | 134 | 20,161 | 5,942 | 3,641 | 29,878 |
| 54,222 | 133 | 20,043 | 5,923 | 3,631 | 29,730 |
| 54,223 | 147 | 19,964 | 5,948 | 3,621 | 29,680 |
| 54,224 | 147 | 19,799 | 5,900 | 3,578 | 29,424 |
| 54,225 | 143 | 19,353 | 5,803 | 3,488 | 28,787 |
| 54,226 | 143 | 19,481 | 5,813 | 3,482 | 28,919 |
| 54,227 | 137 | 19,770 | 5,884 | 3,514 | 29,305 |
| 54,228 | 131 | 19,480 | 5,801 | 3,461 | 28,873 |
| 54,229 | 132 | 19,688 | 5,799 | 3,483 | 29,102 |
| 54,230 | 133 | 20,067 | 5,881 | 3,509 | 29,590 |
| 54,231 | 133 | 19,822 | 5,793 | 3,430 | 29,178 |

|        |     |        |       |       |        |
|--------|-----|--------|-------|-------|--------|
| 54,232 | 136 | 20,091 | 5,862 | 3,461 | 29,550 |
| 54,233 | 134 | 20,204 | 5,861 | 3,469 | 29,668 |
| 54,234 | 132 | 20,278 | 5,922 | 3,529 | 29,861 |
| 54,235 | 133 | 20,531 | 6,003 | 3,533 | 30,200 |
| 54,236 | 131 | 20,007 | 5,779 | 3,387 | 29,304 |
| 54,237 | 131 | 20,355 | 5,862 | 3,437 | 29,785 |
| 54,238 | 132 | 20,681 | 5,968 | 3,491 | 30,272 |
| 54,239 | 133 | 20,695 | 5,981 | 3,500 | 30,309 |
| 54,240 | 140 | 21,020 | 6,096 | 3,568 | 30,824 |
| 54,241 | 138 | 20,873 | 6,050 | 3,545 | 30,606 |
| 54,242 | 135 | 20,674 | 5,971 | 3,525 | 30,305 |
| 54,243 | 127 | 20,319 | 5,957 | 3,466 | 29,869 |
| 54,244 | 130 | 20,504 | 6,004 | 3,503 | 30,141 |
| 54,245 | 130 | 20,695 | 6,070 | 3,527 | 30,422 |
| 54,246 | 131 | 20,650 | 6,053 | 3,530 | 30,364 |
| 54,247 | 134 | 20,991 | 6,140 | 3,604 | 30,869 |
| 54,248 | 138 | 20,793 | 6,088 | 3,554 | 30,573 |
| 54,249 | 143 | 20,997 | 6,116 | 3,574 | 30,830 |
| 54,250 | 142 | 21,289 | 6,182 | 3,619 | 31,232 |
| 54,251 | 143 | 21,184 | 6,175 | 3,622 | 31,124 |
| 54,252 | 142 | 21,187 | 6,174 | 3,629 | 31,132 |
| 54,253 | 140 | 21,163 | 6,135 | 3,622 | 31,060 |
| 54,254 | 144 | 21,485 | 6,204 | 3,674 | 31,507 |
| 54,255 | 148 | 21,737 | 6,221 | 3,700 | 31,806 |
| 54,256 | 148 | 21,694 | 6,153 | 3,665 | 31,660 |
| 54,257 | 148 | 22,156 | 6,242 | 3,727 | 32,273 |
| 54,258 | 147 | 22,122 | 6,211 | 3,706 | 32,186 |
| 54,259 | 151 | 22,435 | 6,278 | 3,758 | 32,622 |
| 54,260 | 147 | 22,747 | 6,337 | 3,788 | 33,019 |
| 54,261 | 148 | 22,908 | 6,384 | 3,800 | 33,240 |
| 54,262 | 148 | 22,974 | 6,392 | 3,806 | 33,320 |
| 54,263 | 148 | 23,003 | 6,390 | 3,793 | 33,334 |



|        |     |        |       |       |        |
|--------|-----|--------|-------|-------|--------|
| 54,264 | 140 | 22,358 | 6,198 | 3,701 | 32,397 |
| 54,265 | 141 | 22,616 | 6,245 | 3,743 | 32,745 |
| 54,266 | 134 | 22,867 | 6,289 | 3,792 | 33,082 |
| 54,267 | 132 | 22,882 | 6,284 | 3,799 | 33,097 |
| 54,268 | 137 | 23,296 | 6,390 | 3,888 | 33,711 |
| 54,269 | 137 | 23,307 | 6,386 | 3,878 | 33,708 |
| 54,270 | 136 | 23,331 | 6,363 | 3,872 | 33,702 |
| 54,271 | 129 | 23,173 | 6,331 | 3,867 | 33,500 |
| 54,272 | 120 | 22,912 | 6,242 | 3,797 | 33,071 |
| 54,273 | 111 | 22,923 | 6,242 | 3,805 | 33,081 |
| 54,274 | 111 | 22,870 | 6,208 | 3,793 | 32,982 |
| 54,275 | 112 | 23,071 | 6,282 | 3,818 | 33,283 |
| 54,276 | 112 | 23,084 | 6,268 | 3,846 | 33,310 |
| 54,277 | 116 | 23,040 | 6,287 | 3,858 | 33,301 |
| 54,278 | 118 | 22,892 | 6,251 | 3,834 | 33,095 |
| 54,279 | 119 | 22,801 | 6,217 | 3,829 | 32,966 |
| 54,280 | 113 | 22,351 | 6,111 | 3,791 | 32,366 |
| 54,281 | 117 | 22,547 | 6,143 | 3,837 | 32,644 |
| 54,282 | 113 | 22,227 | 6,050 | 3,828 | 32,218 |
| 54,283 | 116 | 22,340 | 6,053 | 3,803 | 32,312 |
| 54,284 | 114 | 22,384 | 6,071 | 3,790 | 32,359 |
| 54,285 | 118 | 22,713 | 6,143 | 3,824 | 32,798 |
| 54,286 | 131 | 22,457 | 6,050 | 3,788 | 32,426 |
| 54,287 | 127 | 22,353 | 5,991 | 3,776 | 32,247 |
| 54,288 | 134 | 22,617 | 6,031 | 3,787 | 32,569 |
| 54,289 | 135 | 22,678 | 6,041 | 3,798 | 32,652 |
| 54,290 | 140 | 22,845 | 6,047 | 3,794 | 32,826 |
| 54,291 | 151 | 22,562 | 5,943 | 3,730 | 32,386 |
| 54,292 | 154 | 22,584 | 5,913 | 3,736 | 32,387 |
| 54,293 | 155 | 22,495 | 5,914 | 3,726 | 32,290 |
| 54,294 | 150 | 22,404 | 5,904 | 3,738 | 32,196 |
| 54,295 | 148 | 22,300 | 5,913 | 3,695 | 32,056 |

|        |     |        |       |       |        |
|--------|-----|--------|-------|-------|--------|
| 54,296 | 155 | 22,257 | 5,868 | 3,696 | 31,976 |
| 54,297 | 155 | 22,251 | 5,842 | 3,673 | 31,921 |
| 54,298 | 157 | 22,236 | 5,844 | 3,664 | 31,901 |
| 54,299 | 151 | 22,146 | 5,828 | 3,668 | 31,793 |
| 54,300 | 150 | 22,138 | 5,829 | 3,673 | 31,790 |
| 54,301 | 155 | 22,351 | 5,869 | 3,671 | 32,046 |
| 54,302 | 168 | 22,265 | 5,786 | 3,627 | 31,846 |
| 54,303 | 169 | 22,295 | 5,809 | 3,620 | 31,893 |
| 54,304 | 171 | 22,420 | 5,834 | 3,645 | 32,070 |
| 54,305 | 176 | 22,300 | 5,777 | 3,608 | 31,861 |
| 54,306 | 171 | 21,862 | 5,700 | 3,539 | 31,272 |
| 54,307 | 175 | 22,406 | 5,828 | 3,598 | 32,007 |
| 54,308 | 175 | 22,423 | 5,872 | 3,621 | 32,091 |
| 54,309 | 174 | 22,033 | 5,763 | 3,550 | 31,520 |
| 54,310 | 167 | 22,313 | 5,829 | 3,570 | 31,879 |
| 54,311 | 167 | 21,821 | 5,686 | 3,515 | 31,189 |
| 54,312 | 169 | 21,895 | 5,693 | 3,499 | 31,256 |
| 54,313 | 172 | 22,122 | 5,755 | 3,534 | 31,583 |
| 54,314 | 175 | 22,235 | 5,795 | 3,549 | 31,754 |
| 54,315 | 174 | 22,373 | 5,795 | 3,550 | 31,892 |
| 54,316 | 177 | 22,251 | 5,783 | 3,538 | 31,749 |
| 54,317 | 180 | 22,471 | 5,834 | 3,552 | 32,037 |
| 54,318 | 178 | 22,771 | 5,890 | 3,595 | 32,434 |
| 54,319 | 181 | 22,840 | 5,922 | 3,595 | 32,538 |
| 54,320 | 183 | 22,766 | 5,888 | 3,580 | 32,417 |
| 54,321 | 183 | 22,806 | 5,877 | 3,563 | 32,429 |
| 54,322 | 182 | 22,938 | 5,918 | 3,589 | 32,627 |
| 54,323 | 182 | 22,666 | 5,846 | 3,581 | 32,275 |
| 54,324 | 185 | 22,856 | 5,856 | 3,578 | 32,475 |
| 54,325 | 186 | 22,888 | 5,801 | 3,552 | 32,427 |
| 54,326 | 189 | 23,059 | 5,824 | 3,582 | 32,654 |
| 54,327 | 189 | 23,011 | 5,845 | 3,566 | 32,611 |

|        |     |        |       |       |        |
|--------|-----|--------|-------|-------|--------|
| 54,328 | 184 | 22,827 | 5,755 | 3,506 | 32,272 |
| 54,329 | 189 | 23,004 | 5,784 | 3,540 | 32,517 |
| 54,330 | 192 | 22,465 | 5,654 | 3,456 | 31,767 |
| 54,331 | 193 | 22,461 | 5,663 | 3,441 | 31,758 |
| 54,332 | 198 | 22,215 | 5,596 | 3,379 | 31,388 |
| 54,333 | 195 | 21,872 | 5,550 | 3,330 | 30,947 |
| 54,334 | 197 | 22,334 | 5,635 | 3,409 | 31,575 |
| 54,335 | 194 | 22,253 | 5,586 | 3,368 | 31,401 |
| 54,336 | 196 | 22,475 | 5,602 | 3,394 | 31,667 |
| 54,337 | 183 | 22,215 | 5,569 | 3,359 | 31,326 |
| 54,338 | 180 | 21,870 | 5,471 | 3,309 | 30,830 |
| 54,339 | 181 | 21,649 | 5,455 | 3,271 | 30,556 |
| 54,340 | 181 | 21,666 | 5,448 | 3,273 | 30,568 |
| 54,341 | 168 | 21,638 | 5,435 | 3,282 | 30,523 |
| 54,342 | 154 | 21,567 | 5,473 | 3,270 | 30,464 |
| 54,343 | 153 | 21,508 | 5,471 | 3,240 | 30,372 |
| 54,344 | 153 | 21,575 | 5,451 | 3,218 | 30,397 |
| 54,345 | 158 | 21,743 | 5,472 | 3,247 | 30,620 |
| 54,346 | 156 | 21,595 | 5,422 | 3,208 | 30,381 |
| 54,347 | 155 | 21,642 | 5,420 | 3,214 | 30,431 |
| 54,348 | 151 | 21,694 | 5,472 | 3,227 | 30,544 |
| 54,349 | 152 | 21,628 | 5,465 | 3,240 | 30,485 |
| 54,350 | 151 | 22,062 | 5,520 | 3,290 | 31,023 |
| 54,351 | 144 | 21,352 | 5,412 | 3,240 | 30,148 |
| 54,352 | 142 | 21,418 | 5,412 | 3,274 | 30,246 |
| 54,353 | 132 | 21,633 | 5,466 | 3,302 | 30,533 |
| 54,354 | 135 | 21,464 | 5,420 | 3,272 | 30,291 |
| 54,355 | 132 | 21,101 | 5,366 | 3,229 | 29,828 |
| 54,356 | 136 | 21,167 | 5,398 | 3,257 | 29,958 |
| 54,357 | 139 | 20,844 | 5,307 | 3,222 | 29,512 |
| 54,358 | 143 | 20,919 | 5,299 | 3,219 | 29,580 |
| 54,359 | 144 | 20,884 | 5,254 | 3,214 | 29,496 |

|        |     |        |       |       |        |
|--------|-----|--------|-------|-------|--------|
| 54,360 | 148 | 20,947 | 5,274 | 3,240 | 29,609 |
| 54,361 | 149 | 20,511 | 5,145 | 3,179 | 28,984 |
| 54,362 | 149 | 20,501 | 5,163 | 3,182 | 28,995 |
| 54,363 | 149 | 20,434 | 5,149 | 3,205 | 28,937 |
| 54,364 | 147 | 20,353 | 5,119 | 3,188 | 28,807 |
| 54,365 | 149 | 20,535 | 5,167 | 3,209 | 29,060 |
| 54,366 | 146 | 20,030 | 5,083 | 3,122 | 28,381 |
| 54,367 | 146 | 20,359 | 5,119 | 3,145 | 28,769 |
| 54,368 | 149 | 20,679 | 5,175 | 3,186 | 29,189 |
| 54,369 | 152 | 20,563 | 5,169 | 3,171 | 29,055 |
| 54,370 | 147 | 20,280 | 5,087 | 3,130 | 28,644 |
| 54,371 | 148 | 20,468 | 5,125 | 3,161 | 28,902 |
| 54,372 | 153 | 20,449 | 5,084 | 3,155 | 28,841 |
| 54,373 | 154 | 20,632 | 5,102 | 3,145 | 29,033 |
| 54,374 | 154 | 20,699 | 5,109 | 3,138 | 29,100 |
| 54,375 | 149 | 20,525 | 5,102 | 3,131 | 28,907 |
| 54,376 | 156 | 21,036 | 5,271 | 3,210 | 29,673 |
| 54,377 | 153 | 20,846 | 5,245 | 3,191 | 29,435 |
| 54,378 | 157 | 21,106 | 5,302 | 3,216 | 29,781 |
| 54,379 | 157 | 21,157 | 5,329 | 3,226 | 29,869 |
| 54,380 | 155 | 20,993 | 5,304 | 3,191 | 29,643 |
| 54,381 | 147 | 20,787 | 5,270 | 3,164 | 29,368 |
| 54,382 | 148 | 21,145 | 5,348 | 3,228 | 29,869 |
| 54,383 | 143 | 21,125 | 5,322 | 3,215 | 29,805 |
| 54,384 | 144 | 21,037 | 5,266 | 3,168 | 29,615 |
| 54,385 | 145 | 20,740 | 5,205 | 3,124 | 29,214 |
| 54,386 | 144 | 20,502 | 5,158 | 3,103 | 28,907 |
| 54,387 | 147 | 21,061 | 5,313 | 3,185 | 29,706 |
| 54,388 | 141 | 21,004 | 5,291 | 3,177 | 29,613 |
| 54,389 | 140 | 21,012 | 5,285 | 3,185 | 29,622 |
| 54,390 | 141 | 20,961 | 5,256 | 3,174 | 29,532 |
| 54,391 | 141 | 21,089 | 5,288 | 3,203 | 29,721 |

|        |     |        |       |       |        |
|--------|-----|--------|-------|-------|--------|
| 54,392 | 143 | 21,086 | 5,269 | 3,209 | 29,707 |
| 54,393 | 141 | 20,856 | 5,198 | 3,177 | 29,372 |
| 54,394 | 146 | 21,134 | 5,256 | 3,213 | 29,749 |
| 54,395 | 153 | 21,158 | 5,286 | 3,221 | 29,818 |
| 54,396 | 161 | 21,242 | 5,332 | 3,240 | 29,975 |
| 54,397 | 161 | 21,269 | 5,343 | 3,254 | 30,027 |
| 54,398 | 163 | 21,319 | 5,352 | 3,268 | 30,102 |
| 54,399 | 161 | 21,295 | 5,348 | 3,265 | 30,069 |
| 54,400 | 169 | 21,429 | 5,324 | 3,254 | 30,176 |
| 54,401 | 168 | 21,136 | 5,220 | 3,192 | 29,716 |
| 54,402 | 162 | 20,587 | 5,015 | 3,060 | 28,824 |
| 54,403 | 168 | 20,985 | 5,040 | 3,067 | 29,260 |
| 54,404 | 171 | 21,389 | 5,087 | 3,111 | 29,758 |
| 54,405 | 172 | 21,459 | 5,090 | 3,115 | 29,836 |
| 54,406 | 171 | 21,916 | 5,228 | 3,193 | 30,508 |
| 54,407 | 159 | 21,682 | 5,172 | 3,140 | 30,153 |
| 54,408 | 165 | 21,893 | 5,219 | 3,176 | 30,453 |
| 54,409 | 167 | 21,922 | 5,191 | 3,158 | 30,438 |
| 54,410 | 166 | 21,860 | 5,176 | 3,132 | 30,334 |
| 54,411 | 165 | 21,899 | 5,177 | 3,142 | 30,383 |
| 54,412 | 173 | 21,954 | 5,183 | 3,128 | 30,438 |
| 54,413 | 171 | 21,809 | 5,115 | 3,098 | 30,193 |
| 54,414 | 177 | 21,852 | 5,124 | 3,104 | 30,257 |
| 54,415 | 177 | 21,673 | 5,068 | 3,064 | 29,982 |
| 54,416 | 176 | 21,787 | 5,082 | 3,103 | 30,148 |
| 54,417 | 177 | 21,595 | 5,070 | 3,095 | 29,937 |
| 54,418 | 178 | 21,476 | 5,055 | 3,075 | 29,784 |
| 54,419 | 170 | 20,888 | 4,916 | 3,004 | 28,978 |
| 54,420 | 169 | 20,937 | 4,893 | 3,003 | 29,002 |
| 54,421 | 173 | 20,781 | 4,845 | 2,970 | 28,769 |
| 54,422 | 169 | 20,550 | 4,805 | 2,925 | 28,449 |
| 54,423 | 178 | 21,212 | 5,027 | 3,027 | 29,444 |

|        |     |        |       |       |        |
|--------|-----|--------|-------|-------|--------|
| 54,424 | 185 | 21,095 | 4,961 | 3,002 | 29,243 |
| 54,425 | 185 | 21,337 | 4,975 | 3,021 | 29,518 |
| 54,426 | 182 | 21,367 | 4,942 | 3,017 | 29,508 |
| 54,427 | 179 | 21,647 | 4,970 | 3,052 | 29,848 |
| 54,428 | 179 | 21,700 | 4,982 | 3,051 | 29,912 |
| 54,429 | 176 | 21,561 | 4,923 | 3,024 | 29,684 |
| 54,430 | 176 | 21,489 | 4,896 | 3,055 | 29,616 |
| 54,431 | 177 | 21,411 | 4,886 | 3,051 | 29,525 |
| 54,432 | 180 | 21,408 | 4,906 | 3,041 | 29,535 |
| 54,433 | 182 | 21,672 | 4,936 | 3,060 | 29,850 |
| 54,434 | 182 | 21,691 | 4,925 | 3,052 | 29,850 |
| 54,435 | 180 | 21,636 | 4,873 | 3,034 | 29,723 |
| 54,436 | 182 | 21,462 | 4,802 | 3,010 | 29,456 |
| 54,437 | 182 | 21,411 | 4,797 | 3,009 | 29,399 |
| 54,438 | 180 | 21,439 | 4,792 | 2,991 | 29,402 |
| 54,439 | 180 | 21,438 | 4,778 | 2,983 | 29,379 |
| 54,440 | 179 | 21,466 | 4,773 | 2,978 | 29,396 |
| 54,441 | 178 | 21,595 | 4,753 | 2,991 | 29,517 |
| 54,442 | 179 | 21,801 | 4,766 | 3,026 | 29,772 |
| 54,443 | 179 | 21,598 | 4,737 | 3,010 | 29,524 |
| 54,444 | 178 | 21,692 | 4,715 | 3,018 | 29,603 |
| 54,445 | 189 | 21,923 | 4,765 | 3,030 | 29,907 |
| 54,446 | 190 | 21,985 | 4,759 | 3,047 | 29,981 |
| 54,447 | 177 | 22,035 | 4,729 | 3,022 | 29,963 |
| 54,448 | 171 | 21,883 | 4,672 | 2,991 | 29,717 |
| 54,449 | 169 | 21,769 | 4,623 | 2,978 | 29,539 |
| 54,450 | 172 | 21,923 | 4,654 | 2,988 | 29,737 |
| 54,451 | 167 | 21,506 | 4,589 | 2,946 | 29,208 |
| 54,452 | 166 | 21,506 | 4,600 | 2,943 | 29,215 |
| 54,453 | 162 | 21,454 | 4,616 | 2,948 | 29,180 |
| 54,454 | 156 | 21,272 | 4,648 | 2,949 | 29,025 |
| 54,455 | 160 | 21,301 | 4,695 | 2,974 | 29,130 |

|        |     |        |       |       |        |
|--------|-----|--------|-------|-------|--------|
| 54,456 | 159 | 21,022 | 4,631 | 2,922 | 28,734 |
| 54,457 | 158 | 21,044 | 4,654 | 2,932 | 28,788 |
| 54,458 | 158 | 21,009 | 4,642 | 2,934 | 28,743 |
| 54,459 | 159 | 21,107 | 4,728 | 2,974 | 28,968 |
| 54,460 | 159 | 21,088 | 4,727 | 2,982 | 28,956 |
| 54,461 | 158 | 21,017 | 4,705 | 2,952 | 28,832 |
| 54,462 | 151 | 21,065 | 4,709 | 2,949 | 28,874 |
| 54,463 | 152 | 21,110 | 4,733 | 2,952 | 28,947 |
| 54,464 | 153 | 21,191 | 4,750 | 2,944 | 29,038 |
| 54,465 | 152 | 21,684 | 4,909 | 3,010 | 29,755 |
| 54,466 | 159 | 21,771 | 4,938 | 3,013 | 29,881 |
| 54,467 | 158 | 21,816 | 4,911 | 3,006 | 29,891 |
| 54,468 | 155 | 21,879 | 4,910 | 3,023 | 29,967 |
| 54,469 | 155 | 21,909 | 4,952 | 3,079 | 30,095 |
| 54,470 | 150 | 21,939 | 5,004 | 3,111 | 30,204 |
| 54,471 | 145 | 22,020 | 5,020 | 3,134 | 30,319 |
| 54,472 | 148 | 22,348 | 5,088 | 3,174 | 30,758 |
| 54,473 | 161 | 22,092 | 5,046 | 3,160 | 30,459 |
| 54,474 | 161 | 21,983 | 5,030 | 3,143 | 30,317 |
| 54,475 | 164 | 22,399 | 5,201 | 3,225 | 30,989 |
| 54,476 | 167 | 22,273 | 5,219 | 3,242 | 30,901 |
| 54,477 | 175 | 21,931 | 5,180 | 3,221 | 30,507 |
| 54,478 | 172 | 21,784 | 5,149 | 3,206 | 30,311 |
| 54,479 | 180 | 21,765 | 5,134 | 3,216 | 30,295 |
| 54,480 | 180 | 21,523 | 5,063 | 3,184 | 29,950 |
| 54,481 | 183 | 22,026 | 5,229 | 3,271 | 30,709 |
| 54,482 | 182 | 22,035 | 5,201 | 3,294 | 30,712 |
| 54,483 | 182 | 21,992 | 5,194 | 3,294 | 30,662 |
| 54,484 | 182 | 21,934 | 5,188 | 3,305 | 30,609 |
| 54,485 | 181 | 22,049 | 5,266 | 3,353 | 30,849 |
| 54,486 | 180 | 22,136 | 5,284 | 3,372 | 30,972 |
| 54,487 | 176 | 21,890 | 5,245 | 3,336 | 30,647 |

|        |     |        |       |       |        |
|--------|-----|--------|-------|-------|--------|
| 54,488 | 181 | 21,701 | 5,239 | 3,332 | 30,453 |
| 54,489 | 181 | 21,766 | 5,238 | 3,341 | 30,526 |
| 54,490 | 184 | 21,817 | 5,265 | 3,350 | 30,616 |
| 54,491 | 195 | 21,849 | 5,323 | 3,361 | 30,728 |
| 54,492 | 196 | 21,929 | 5,359 | 3,365 | 30,849 |
| 54,493 | 199 | 21,729 | 5,340 | 3,313 | 30,581 |
| 54,494 | 197 | 22,064 | 5,389 | 3,344 | 30,994 |
| 54,495 | 196 | 22,409 | 5,435 | 3,389 | 31,429 |
| 54,496 | 192 | 22,535 | 5,443 | 3,407 | 31,577 |
| 54,497 | 186 | 22,553 | 5,455 | 3,401 | 31,595 |
| 54,498 | 188 | 22,321 | 5,428 | 3,391 | 31,328 |
| 54,499 | 189 | 22,538 | 5,486 | 3,428 | 31,641 |
| 54,500 | 188 | 22,450 | 5,449 | 3,405 | 31,492 |
| 54,501 | 188 | 22,611 | 5,477 | 3,436 | 31,712 |
| 54,502 | 185 | 22,579 | 5,480 | 3,443 | 31,687 |
| 54,503 | 185 | 22,729 | 5,480 | 3,448 | 31,842 |
| 54,504 | 189 | 22,907 | 5,494 | 3,468 | 32,058 |
| 54,505 | 193 | 22,962 | 5,486 | 3,460 | 32,101 |
| 54,506 | 192 | 23,064 | 5,462 | 3,449 | 32,167 |
| 54,507 | 191 | 22,962 | 5,397 | 3,431 | 31,981 |
| 54,508 | 193 | 23,348 | 5,425 | 3,468 | 32,434 |
| 54,509 | 184 | 22,962 | 5,309 | 3,402 | 31,857 |
| 54,510 | 186 | 23,377 | 5,355 | 3,442 | 32,360 |
| 54,511 | 185 | 23,439 | 5,378 | 3,448 | 32,450 |
| 54,512 | 192 | 23,872 | 5,470 | 3,517 | 33,051 |
| 54,513 | 191 | 23,703 | 5,417 | 3,498 | 32,809 |
| 54,514 | 193 | 23,963 | 5,426 | 3,538 | 33,120 |
| 54,515 | 199 | 24,119 | 5,446 | 3,579 | 33,343 |
| 54,516 | 193 | 24,112 | 5,441 | 3,597 | 33,343 |
| 54,517 | 185 | 23,965 | 5,389 | 3,556 | 33,095 |
| 54,518 | 191 | 24,015 | 5,432 | 3,566 | 33,204 |
| 54,519 | 189 | 24,123 | 5,420 | 3,530 | 33,262 |



|        |     |        |       |       |        |
|--------|-----|--------|-------|-------|--------|
| 54,520 | 188 | 24,269 | 5,381 | 3,530 | 33,368 |
| 54,521 | 192 | 24,339 | 5,432 | 3,516 | 33,479 |
| 54,522 | 190 | 24,337 | 5,393 | 3,509 | 33,429 |
| 54,523 | 174 | 24,357 | 5,359 | 3,476 | 33,366 |
| 54,524 | 174 | 24,648 | 5,394 | 3,520 | 33,736 |
| 54,525 | 168 | 24,489 | 5,317 | 3,484 | 33,458 |
| 54,526 | 161 | 24,292 | 5,248 | 3,437 | 33,138 |
| 54,527 | 164 | 24,579 | 5,280 | 3,464 | 33,487 |
| 54,528 | 158 | 24,568 | 5,281 | 3,477 | 33,484 |
| 54,529 | 164 | 24,697 | 5,314 | 3,482 | 33,657 |
| 54,530 | 159 | 24,446 | 5,252 | 3,425 | 33,282 |
| 54,531 | 157 | 24,491 | 5,194 | 3,403 | 33,245 |
| 54,532 | 159 | 24,564 | 5,192 | 3,388 | 33,303 |
| 54,533 | 160 | 24,592 | 5,197 | 3,367 | 33,316 |
| 54,534 | 159 | 24,563 | 5,195 | 3,357 | 33,274 |
| 54,535 | 159 | 24,653 | 5,194 | 3,348 | 33,354 |
| 54,536 | 156 | 24,607 | 5,155 | 3,343 | 33,261 |
| 54,537 | 159 | 24,774 | 5,177 | 3,352 | 33,462 |
| 54,538 | 163 | 24,653 | 5,136 | 3,338 | 33,290 |
| 54,539 | 160 | 24,744 | 5,149 | 3,355 | 33,408 |
| 54,540 | 163 | 24,760 | 5,126 | 3,356 | 33,405 |
| 54,541 | 162 | 24,751 | 5,123 | 3,370 | 33,406 |
| 54,542 | 152 | 24,733 | 5,104 | 3,380 | 33,369 |
| 54,543 | 156 | 24,501 | 5,073 | 3,366 | 33,096 |
| 54,544 | 156 | 24,246 | 5,047 | 3,343 | 32,792 |
| 54,545 | 165 | 24,655 | 5,112 | 3,379 | 33,311 |
| 54,546 | 160 | 24,387 | 5,068 | 3,355 | 32,970 |
| 54,547 | 158 | 24,331 | 5,062 | 3,347 | 32,898 |
| 54,548 | 162 | 24,455 | 5,081 | 3,385 | 33,083 |
| 54,549 | 165 | 24,062 | 5,000 | 3,344 | 32,571 |
| 54,550 | 171 | 24,370 | 5,022 | 3,379 | 32,942 |
| 54,551 | 174 | 24,053 | 5,012 | 3,352 | 32,591 |

|        |     |        |       |       |        |
|--------|-----|--------|-------|-------|--------|
| 54,552 | 179 | 24,058 | 5,038 | 3,368 | 32,643 |
| 54,553 | 182 | 24,012 | 5,078 | 3,374 | 32,646 |
| 54,554 | 181 | 23,833 | 5,071 | 3,359 | 32,444 |
| 54,555 | 180 | 23,423 | 5,019 | 3,338 | 31,960 |
| 54,556 | 175 | 23,141 | 4,997 | 3,320 | 31,633 |
| 54,557 | 171 | 23,577 | 5,062 | 3,379 | 32,189 |
| 54,558 | 170 | 23,398 | 5,069 | 3,371 | 32,008 |
| 54,559 | 168 | 23,230 | 5,054 | 3,359 | 31,811 |
| 54,560 | 167 | 23,120 | 5,044 | 3,353 | 31,684 |
| 54,561 | 166 | 22,895 | 5,022 | 3,351 | 31,434 |
| 54,562 | 159 | 22,551 | 5,017 | 3,336 | 31,063 |
| 54,563 | 158 | 22,469 | 5,018 | 3,336 | 30,981 |
| 54,564 | 155 | 22,395 | 4,996 | 3,318 | 30,864 |
| 54,565 | 152 | 22,575 | 5,021 | 3,329 | 31,077 |
| 54,566 | 148 | 22,458 | 4,975 | 3,304 | 30,885 |
| 54,567 | 150 | 22,451 | 4,963 | 3,329 | 30,893 |
| 54,568 | 148 | 22,087 | 4,885 | 3,276 | 30,396 |
| 54,569 | 149 | 21,613 | 4,816 | 3,205 | 29,783 |
| 54,570 | 152 | 21,739 | 4,861 | 3,223 | 29,975 |
| 54,571 | 151 | 21,698 | 4,860 | 3,222 | 29,931 |
| 54,572 | 151 | 21,724 | 4,839 | 3,240 | 29,954 |
| 54,573 | 149 | 21,396 | 4,785 | 3,197 | 29,527 |
| 54,574 | 149 | 21,060 | 4,752 | 3,180 | 29,141 |
| 54,575 | 154 | 21,054 | 4,749 | 3,184 | 29,141 |
| 54,576 | 148 | 20,826 | 4,695 | 3,171 | 28,840 |
| 54,577 | 149 | 20,953 | 4,735 | 3,189 | 29,026 |
| 54,578 | 145 | 20,882 | 4,726 | 3,169 | 28,922 |
| 54,579 | 145 | 20,813 | 4,721 | 3,146 | 28,825 |
| 54,580 | 145 | 20,520 | 4,646 | 3,119 | 28,430 |
| 54,581 | 145 | 20,522 | 4,655 | 3,111 | 28,433 |
| 54,582 | 141 | 20,322 | 4,653 | 3,099 | 28,215 |
| 54,583 | 143 | 20,250 | 4,666 | 3,109 | 28,168 |

|        |     |        |       |       |        |
|--------|-----|--------|-------|-------|--------|
| 54,584 | 137 | 20,315 | 4,685 | 3,153 | 28,290 |
| 54,585 | 137 | 19,980 | 4,619 | 3,112 | 27,848 |
| 54,586 | 140 | 20,185 | 4,660 | 3,123 | 28,108 |
| 54,587 | 143 | 19,901 | 4,634 | 3,081 | 27,759 |
| 54,588 | 140 | 19,560 | 4,587 | 3,052 | 27,339 |
| 54,589 | 132 | 19,750 | 4,629 | 3,080 | 27,591 |
| 54,590 | 132 | 19,419 | 4,572 | 3,040 | 27,163 |
| 54,591 | 133 | 19,453 | 4,575 | 3,025 | 27,186 |
| 54,592 | 136 | 19,392 | 4,557 | 2,991 | 27,076 |
| 54,593 | 137 | 19,367 | 4,542 | 2,990 | 27,036 |
| 54,594 | 132 | 19,578 | 4,553 | 2,986 | 27,249 |
| 54,595 | 132 | 19,509 | 4,559 | 2,980 | 27,180 |
| 54,596 | 126 | 18,987 | 4,493 | 2,948 | 26,554 |
| 54,597 | 126 | 19,201 | 4,532 | 2,982 | 26,841 |
| 54,598 | 121 | 19,179 | 4,524 | 2,981 | 26,805 |
| 54,599 | 119 | 19,401 | 4,587 | 3,002 | 27,109 |
| 54,600 | 110 | 19,250 | 4,552 | 2,982 | 26,894 |
| 54,601 | 108 | 19,387 | 4,607 | 3,016 | 27,118 |
| 54,602 | 99  | 19,273 | 4,548 | 2,988 | 26,908 |
| 54,603 | 99  | 19,141 | 4,474 | 2,948 | 26,662 |
| 54,604 | 96  | 19,086 | 4,445 | 2,935 | 26,562 |
| 54,605 | 111 | 19,946 | 4,670 | 3,122 | 27,849 |
| 54,606 | 111 | 20,032 | 4,709 | 3,141 | 27,993 |
| 54,607 | 117 | 19,985 | 4,666 | 3,109 | 27,877 |
| 54,608 | 123 | 20,076 | 4,655 | 3,093 | 27,947 |
| 54,609 | 128 | 20,391 | 4,712 | 3,139 | 28,370 |
| 54,610 | 131 | 20,333 | 4,752 | 3,122 | 28,338 |
| 54,611 | 131 | 20,197 | 4,678 | 3,061 | 28,067 |
| 54,612 | 131 | 20,221 | 4,683 | 3,057 | 28,092 |
| 54,613 | 133 | 20,220 | 4,653 | 3,049 | 28,055 |
| 54,614 | 136 | 20,333 | 4,692 | 3,057 | 28,218 |
| 54,615 | 137 | 19,400 | 4,520 | 2,926 | 26,983 |

|        |     |        |       |       |        |
|--------|-----|--------|-------|-------|--------|
| 54,616 | 138 | 19,614 | 4,560 | 2,954 | 27,266 |
| 54,617 | 141 | 19,732 | 4,554 | 2,945 | 27,372 |
| 54,618 | 141 | 19,459 | 4,535 | 2,917 | 27,052 |
| 54,619 | 148 | 19,668 | 4,604 | 2,954 | 27,374 |
| 54,620 | 152 | 19,804 | 4,588 | 3,001 | 27,545 |
| 54,621 | 153 | 19,961 | 4,660 | 3,044 | 27,818 |
| 54,622 | 147 | 19,643 | 4,579 | 3,015 | 27,384 |
| 54,623 | 147 | 19,931 | 4,624 | 3,036 | 27,738 |
| 54,624 | 142 | 19,887 | 4,629 | 3,048 | 27,706 |
| 54,625 | 147 | 20,119 | 4,696 | 3,055 | 28,017 |
| 54,626 | 147 | 20,271 | 4,698 | 3,044 | 28,160 |
| 54,627 | 149 | 20,031 | 4,607 | 3,009 | 27,796 |
| 54,628 | 150 | 20,265 | 4,646 | 3,016 | 28,077 |
| 54,629 | 150 | 20,370 | 4,652 | 3,020 | 28,192 |
| 54,630 | 158 | 20,864 | 4,707 | 3,074 | 28,803 |
| 54,631 | 155 | 20,930 | 4,731 | 3,088 | 28,904 |
| 54,632 | 157 | 20,830 | 4,690 | 3,090 | 28,767 |
| 54,633 | 160 | 21,219 | 4,765 | 3,130 | 29,274 |
| 54,634 | 158 | 21,038 | 4,706 | 3,066 | 28,968 |
| 54,635 | 161 | 21,407 | 4,752 | 3,114 | 29,434 |
| 54,636 | 159 | 21,494 | 4,752 | 3,111 | 29,516 |
| 54,637 | 153 | 21,703 | 4,740 | 3,150 | 29,746 |
| 54,638 | 158 | 21,851 | 4,755 | 3,148 | 29,912 |
| 54,639 | 158 | 22,194 | 4,818 | 3,184 | 30,354 |
| 54,640 | 156 | 22,055 | 4,783 | 3,174 | 30,168 |
| 54,641 | 159 | 22,145 | 4,837 | 3,196 | 30,337 |
| 54,642 | 154 | 22,440 | 4,894 | 3,245 | 30,733 |
| 54,643 | 152 | 22,648 | 4,939 | 3,280 | 31,019 |
| 54,644 | 153 | 22,662 | 4,966 | 3,295 | 31,076 |
| 54,645 | 150 | 22,506 | 4,949 | 3,282 | 30,887 |
| 54,646 | 149 | 22,560 | 4,897 | 3,272 | 30,878 |
| 54,647 | 149 | 22,700 | 4,909 | 3,274 | 31,032 |

|        |     |        |       |       |        |
|--------|-----|--------|-------|-------|--------|
| 54,648 | 153 | 22,792 | 4,938 | 3,274 | 31,157 |
| 54,649 | 153 | 22,846 | 4,935 | 3,297 | 31,231 |
| 54,650 | 158 | 23,043 | 4,988 | 3,316 | 31,505 |
| 54,651 | 157 | 23,034 | 4,963 | 3,291 | 31,445 |
| 54,652 | 157 | 23,068 | 5,003 | 3,288 | 31,516 |
| 54,653 | 169 | 23,571 | 5,098 | 3,296 | 32,134 |
| 54,654 | 166 | 23,634 | 5,115 | 3,306 | 32,221 |
| 54,655 | 160 | 23,446 | 5,018 | 3,219 | 31,843 |
| 54,656 | 163 | 23,470 | 4,964 | 3,195 | 31,792 |
| 54,657 | 161 | 23,454 | 4,964 | 3,179 | 31,758 |
| 54,658 | 155 | 23,449 | 4,973 | 3,175 | 31,752 |
| 54,659 | 150 | 23,742 | 4,996 | 3,205 | 32,093 |
| 54,660 | 148 | 23,786 | 4,987 | 3,193 | 32,114 |
| 54,661 | 157 | 23,629 | 4,917 | 3,145 | 31,848 |
| 54,662 | 157 | 23,640 | 4,944 | 3,150 | 31,891 |
| 54,663 | 162 | 23,943 | 4,944 | 3,158 | 32,207 |
| 54,664 | 159 | 23,986 | 4,931 | 3,168 | 32,244 |
| 54,665 | 158 | 24,162 | 4,934 | 3,188 | 32,442 |
| 54,666 | 159 | 24,222 | 4,952 | 3,188 | 32,521 |
| 54,667 | 156 | 24,198 | 4,961 | 3,169 | 32,484 |
| 54,668 | 156 | 24,083 | 4,955 | 3,173 | 32,367 |
| 54,669 | 153 | 24,395 | 5,015 | 3,199 | 32,762 |
| 54,670 | 155 | 24,333 | 5,025 | 3,182 | 32,695 |
| 54,671 | 150 | 24,125 | 4,978 | 3,129 | 32,382 |
| 54,672 | 152 | 24,193 | 4,951 | 3,127 | 32,423 |
| 54,673 | 157 | 24,475 | 4,996 | 3,140 | 32,768 |
| 54,674 | 165 | 24,420 | 4,967 | 3,140 | 32,692 |
| 54,675 | 163 | 24,426 | 4,954 | 3,158 | 32,701 |
| 54,676 | 161 | 24,546 | 4,973 | 3,178 | 32,858 |
| 54,677 | 167 | 24,668 | 5,007 | 3,207 | 33,049 |
| 54,678 | 162 | 24,299 | 4,972 | 3,167 | 32,600 |
| 54,679 | 161 | 24,352 | 4,995 | 3,196 | 32,704 |

|        |     |        |       |       |        |
|--------|-----|--------|-------|-------|--------|
| 54,680 | 166 | 24,630 | 5,056 | 3,267 | 33,119 |
| 54,681 | 160 | 24,553 | 5,066 | 3,255 | 33,034 |
| 54,682 | 156 | 24,326 | 5,013 | 3,216 | 32,711 |
| 54,683 | 154 | 24,389 | 5,055 | 3,239 | 32,837 |
| 54,684 | 155 | 24,097 | 5,011 | 3,220 | 32,483 |
| 54,685 | 153 | 23,938 | 4,954 | 3,206 | 32,251 |
| 54,686 | 154 | 24,007 | 5,048 | 3,251 | 32,460 |
| 54,687 | 161 | 23,909 | 5,051 | 3,234 | 32,355 |
| 54,688 | 160 | 23,724 | 5,047 | 3,196 | 32,127 |
| 54,689 | 160 | 24,002 | 5,123 | 3,241 | 32,526 |
| 54,690 | 165 | 23,925 | 5,114 | 3,223 | 32,427 |
| 54,691 | 170 | 23,861 | 5,082 | 3,215 | 32,328 |
| 54,692 | 165 | 23,556 | 5,010 | 3,187 | 31,918 |
| 54,693 | 168 | 23,644 | 5,054 | 3,211 | 32,077 |
| 54,694 | 162 | 23,175 | 4,989 | 3,156 | 31,482 |
| 54,695 | 165 | 22,874 | 4,901 | 3,117 | 31,057 |
| 54,696 | 173 | 23,197 | 4,975 | 3,147 | 31,492 |
| 54,697 | 174 | 23,173 | 4,983 | 3,158 | 31,488 |
| 54,698 | 180 | 23,139 | 4,981 | 3,165 | 31,465 |
| 54,699 | 179 | 23,098 | 4,963 | 3,163 | 31,403 |
| 54,700 | 183 | 22,895 | 4,990 | 3,123 | 31,191 |
| 54,701 | 183 | 22,886 | 4,985 | 3,129 | 31,183 |
| 54,702 | 183 | 22,738 | 4,958 | 3,143 | 31,022 |
| 54,703 | 183 | 22,966 | 5,030 | 3,199 | 31,378 |
| 54,704 | 178 | 22,833 | 5,023 | 3,209 | 31,243 |
| 54,705 | 174 | 22,556 | 4,956 | 3,184 | 30,870 |
| 54,706 | 172 | 22,709 | 4,960 | 3,230 | 31,071 |
| 54,707 | 176 | 23,037 | 5,055 | 3,277 | 31,545 |
| 54,708 | 178 | 22,562 | 4,954 | 3,204 | 30,898 |
| 54,709 | 178 | 22,482 | 4,970 | 3,213 | 30,843 |
| 54,710 | 183 | 22,082 | 4,924 | 3,185 | 30,374 |
| 54,711 | 180 | 21,812 | 4,897 | 3,168 | 30,057 |

|        |     |        |       |       |        |
|--------|-----|--------|-------|-------|--------|
| 54,712 | 166 | 22,483 | 5,043 | 3,335 | 31,027 |
| 54,713 | 166 | 22,287 | 5,032 | 3,340 | 30,825 |
| 54,714 | 162 | 22,466 | 5,102 | 3,386 | 31,116 |
| 54,715 | 166 | 21,976 | 5,042 | 3,355 | 30,539 |
| 54,716 | 167 | 22,205 | 5,051 | 3,410 | 30,833 |
| 54,717 | 164 | 22,504 | 5,120 | 3,439 | 31,227 |
| 54,718 | 163 | 22,191 | 5,075 | 3,420 | 30,849 |
| 54,719 | 165 | 22,371 | 5,078 | 3,436 | 31,050 |
| 54,720 | 164 | 22,603 | 5,131 | 3,493 | 31,391 |
| 54,721 | 157 | 22,319 | 5,040 | 3,468 | 30,984 |
| 54,722 | 155 | 22,415 | 5,045 | 3,467 | 31,082 |
| 54,723 | 157 | 22,385 | 5,056 | 3,467 | 31,065 |
| 54,724 | 154 | 22,208 | 5,019 | 3,448 | 30,829 |
| 54,725 | 148 | 22,643 | 5,179 | 3,555 | 31,525 |
| 54,726 | 153 | 22,386 | 5,143 | 3,531 | 31,213 |
| 54,727 | 152 | 22,280 | 5,127 | 3,517 | 31,076 |
| 54,728 | 148 | 22,621 | 5,228 | 3,592 | 31,589 |
| 54,729 | 150 | 22,866 | 5,280 | 3,647 | 31,943 |
| 54,730 | 149 | 22,688 | 5,313 | 3,655 | 31,805 |
| 54,731 | 143 | 22,277 | 5,222 | 3,608 | 31,250 |
| 54,732 | 146 | 22,383 | 5,273 | 3,660 | 31,462 |
| 54,733 | 146 | 22,410 | 5,295 | 3,657 | 31,508 |
| 54,734 | 144 | 22,379 | 5,242 | 3,606 | 31,371 |
| 54,735 | 145 | 22,447 | 5,246 | 3,601 | 31,439 |
| 54,736 | 146 | 22,621 | 5,295 | 3,631 | 31,693 |
| 54,737 | 142 | 22,369 | 5,245 | 3,598 | 31,354 |
| 54,738 | 141 | 22,822 | 5,325 | 3,688 | 31,976 |
| 54,739 | 138 | 22,480 | 5,278 | 3,670 | 31,566 |
| 54,740 | 138 | 22,486 | 5,288 | 3,670 | 31,582 |
| 54,741 | 136 | 22,917 | 5,397 | 3,750 | 32,200 |
| 54,742 | 134 | 22,985 | 5,412 | 3,768 | 32,299 |
| 54,743 | 133 | 23,115 | 5,369 | 3,735 | 32,352 |

|        |     |        |       |       |        |
|--------|-----|--------|-------|-------|--------|
| 54,744 | 131 | 23,069 | 5,348 | 3,726 | 32,274 |
| 54,745 | 131 | 23,570 | 5,429 | 3,813 | 32,943 |
| 54,746 | 132 | 23,860 | 5,513 | 3,849 | 33,354 |
| 54,747 | 125 | 23,941 | 5,493 | 3,886 | 33,445 |
| 54,748 | 117 | 23,775 | 5,458 | 3,867 | 33,217 |
| 54,749 | 118 | 24,151 | 5,538 | 3,905 | 33,712 |
| 54,750 | 114 | 24,205 | 5,508 | 3,918 | 33,745 |
| 54,751 | 113 | 24,311 | 5,476 | 3,926 | 33,826 |
| 54,752 | 112 | 24,323 | 5,460 | 3,915 | 33,810 |
| 54,753 | 111 | 24,159 | 5,409 | 3,870 | 33,549 |
| 54,754 | 116 | 24,328 | 5,428 | 3,890 | 33,762 |
| 54,755 | 108 | 23,907 | 5,345 | 3,848 | 33,208 |
| 54,756 | 116 | 24,008 | 5,382 | 3,893 | 33,399 |
| 54,757 | 116 | 23,952 | 5,386 | 3,884 | 33,338 |
| 54,758 | 119 | 23,552 | 5,302 | 3,833 | 32,806 |
| 54,759 | 118 | 23,403 | 5,266 | 3,812 | 32,599 |
| 54,760 | 119 | 23,824 | 5,351 | 3,861 | 33,155 |
| 54,761 | 116 | 23,890 | 5,347 | 3,836 | 33,189 |
| 54,762 | 125 | 23,939 | 5,343 | 3,821 | 33,228 |
| 54,763 | 128 | 24,038 | 5,323 | 3,821 | 33,310 |
| 54,764 | 128 | 24,159 | 5,283 | 3,790 | 33,360 |
| 54,765 | 128 | 24,158 | 5,280 | 3,785 | 33,351 |
| 54,766 | 122 | 24,122 | 5,256 | 3,751 | 33,251 |
| 54,767 | 121 | 23,990 | 5,267 | 3,724 | 33,102 |
| 54,768 | 120 | 24,283 | 5,296 | 3,766 | 33,465 |
| 54,769 | 115 | 24,558 | 5,313 | 3,808 | 33,794 |
| 54,770 | 112 | 24,648 | 5,296 | 3,828 | 33,884 |
| 54,771 | 112 | 24,323 | 5,240 | 3,779 | 33,454 |
| 54,772 | 113 | 24,362 | 5,291 | 3,807 | 33,573 |
| 54,773 | 112 | 24,168 | 5,291 | 3,819 | 33,390 |
| 54,774 | 113 | 24,195 | 5,293 | 3,829 | 33,430 |
| 54,775 | 115 | 24,357 | 5,335 | 3,852 | 33,659 |



|        |     |        |       |       |        |
|--------|-----|--------|-------|-------|--------|
| 54,776 | 118 | 24,488 | 5,360 | 3,850 | 33,816 |
| 54,777 | 111 | 24,503 | 5,356 | 3,830 | 33,800 |
| 54,778 | 112 | 24,182 | 5,271 | 3,771 | 33,336 |
| 54,779 | 113 | 24,051 | 5,225 | 3,750 | 33,139 |
| 54,780 | 115 | 24,155 | 5,214 | 3,751 | 33,235 |
| 54,781 | 115 | 24,398 | 5,218 | 3,731 | 33,462 |
| 54,782 | 117 | 24,405 | 5,186 | 3,721 | 33,429 |
| 54,783 | 114 | 24,185 | 5,134 | 3,686 | 33,119 |
| 54,784 | 119 | 24,633 | 5,208 | 3,750 | 33,710 |
| 54,785 | 116 | 24,353 | 5,142 | 3,733 | 33,344 |
| 54,786 | 115 | 24,575 | 5,173 | 3,754 | 33,617 |
| 54,787 | 123 | 24,647 | 5,213 | 3,799 | 33,782 |
| 54,788 | 125 | 24,944 | 5,269 | 3,842 | 34,180 |
| 54,789 | 122 | 24,838 | 5,239 | 3,825 | 34,024 |
| 54,790 | 126 | 25,103 | 5,285 | 3,849 | 34,363 |
| 54,791 | 129 | 24,784 | 5,182 | 3,784 | 33,879 |
| 54,792 | 134 | 24,815 | 5,202 | 3,810 | 33,961 |
| 54,793 | 132 | 24,726 | 5,228 | 3,835 | 33,921 |
| 54,794 | 132 | 24,566 | 5,241 | 3,845 | 33,784 |
| 54,795 | 135 | 24,822 | 5,310 | 3,906 | 34,173 |
| 54,796 | 136 | 24,677 | 5,281 | 3,869 | 33,963 |
| 54,797 | 134 | 24,482 | 5,232 | 3,839 | 33,687 |
| 54,798 | 135 | 24,344 | 5,259 | 3,822 | 33,560 |
| 54,799 | 136 | 24,133 | 5,275 | 3,827 | 33,371 |
| 54,800 | 136 | 24,128 | 5,249 | 3,812 | 33,325 |
| 54,801 | 134 | 24,088 | 5,296 | 3,824 | 33,342 |
| 54,802 | 135 | 24,140 | 5,324 | 3,841 | 33,440 |
| 54,803 | 140 | 24,029 | 5,309 | 3,854 | 33,332 |
| 54,804 | 141 | 23,995 | 5,318 | 3,854 | 33,308 |
| 54,805 | 135 | 24,094 | 5,331 | 3,861 | 33,421 |
| 54,806 | 131 | 24,513 | 5,374 | 3,849 | 33,867 |
| 54,807 | 129 | 24,460 | 5,367 | 3,872 | 33,828 |

|        |     |        |       |       |        |
|--------|-----|--------|-------|-------|--------|
| 54,808 | 119 | 24,259 | 5,321 | 3,815 | 33,514 |
| 54,809 | 123 | 24,493 | 5,390 | 3,836 | 33,842 |
| 54,810 | 123 | 24,429 | 5,386 | 3,856 | 33,794 |
| 54,811 | 120 | 24,274 | 5,370 | 3,841 | 33,605 |
| 54,812 | 117 | 24,405 | 5,439 | 3,917 | 33,878 |
| 54,813 | 113 | 24,102 | 5,399 | 3,881 | 33,495 |
| 54,814 | 113 | 24,028 | 5,431 | 3,880 | 33,452 |
| 54,815 | 114 | 23,937 | 5,454 | 3,904 | 33,409 |
| 54,816 | 115 | 23,616 | 5,406 | 3,877 | 33,014 |
| 54,817 | 115 | 23,271 | 5,382 | 3,858 | 32,626 |
| 54,818 | 118 | 23,875 | 5,555 | 3,985 | 33,533 |
| 54,819 | 118 | 23,840 | 5,549 | 3,988 | 33,495 |
| 54,820 | 122 | 23,640 | 5,543 | 3,952 | 33,257 |
| 54,821 | 122 | 23,493 | 5,539 | 3,933 | 33,087 |
| 54,822 | 122 | 23,599 | 5,566 | 3,928 | 33,215 |
| 54,823 | 121 | 23,547 | 5,541 | 3,918 | 33,127 |
| 54,824 | 122 | 23,281 | 5,443 | 3,845 | 32,691 |
| 54,825 | 122 | 23,352 | 5,435 | 3,844 | 32,753 |
| 54,826 | 119 | 23,335 | 5,432 | 3,824 | 32,710 |
| 54,827 | 118 | 23,270 | 5,392 | 3,819 | 32,599 |
| 54,828 | 124 | 23,423 | 5,424 | 3,846 | 32,817 |
| 54,829 | 125 | 23,406 | 5,412 | 3,823 | 32,766 |
| 54,830 | 124 | 23,393 | 5,418 | 3,826 | 32,761 |
| 54,831 | 123 | 23,306 | 5,456 | 3,862 | 32,747 |
| 54,832 | 125 | 23,507 | 5,498 | 3,891 | 33,021 |
| 54,833 | 120 | 23,548 | 5,535 | 3,903 | 33,106 |
| 54,834 | 118 | 23,553 | 5,544 | 3,912 | 33,127 |
| 54,835 | 121 | 23,090 | 5,422 | 3,831 | 32,464 |
| 54,836 | 124 | 23,104 | 5,440 | 3,838 | 32,506 |
| 54,837 | 127 | 23,071 | 5,450 | 3,817 | 32,465 |
| 54,838 | 124 | 22,697 | 5,387 | 3,773 | 31,981 |
| 54,839 | 124 | 22,769 | 5,411 | 3,824 | 32,128 |

|        |     |        |       |       |        |
|--------|-----|--------|-------|-------|--------|
| 54,840 | 123 | 22,721 | 5,395 | 3,825 | 32,064 |
| 54,841 | 121 | 22,729 | 5,389 | 3,797 | 32,036 |
| 54,842 | 115 | 22,761 | 5,376 | 3,794 | 32,046 |
| 54,843 | 115 | 22,734 | 5,361 | 3,787 | 31,997 |
| 54,844 | 114 | 22,745 | 5,330 | 3,758 | 31,947 |
| 54,845 | 114 | 22,763 | 5,312 | 3,750 | 31,939 |
| 54,846 | 121 | 22,999 | 5,374 | 3,761 | 32,255 |
| 54,847 | 124 | 23,072 | 5,384 | 3,759 | 32,339 |
| 54,848 | 120 | 22,842 | 5,272 | 3,714 | 31,948 |
| 54,849 | 121 | 22,925 | 5,251 | 3,703 | 32,000 |
| 54,850 | 134 | 22,821 | 5,211 | 3,682 | 31,848 |
| 54,851 | 137 | 23,062 | 5,242 | 3,711 | 32,152 |
| 54,852 | 134 | 22,746 | 5,170 | 3,672 | 31,722 |
| 54,853 | 131 | 22,695 | 5,159 | 3,661 | 31,646 |
| 54,854 | 129 | 22,551 | 5,121 | 3,635 | 31,436 |
| 54,855 | 145 | 22,841 | 5,202 | 3,696 | 31,884 |
| 54,856 | 150 | 22,634 | 5,152 | 3,677 | 31,613 |
| 54,857 | 150 | 22,384 | 5,159 | 3,680 | 31,373 |
| 54,858 | 152 | 22,025 | 5,087 | 3,621 | 30,885 |
| 54,859 | 153 | 22,223 | 5,120 | 3,666 | 31,162 |
| 54,860 | 149 | 22,057 | 5,074 | 3,655 | 30,935 |
| 54,861 | 148 | 22,028 | 5,040 | 3,626 | 30,842 |
| 54,862 | 146 | 21,694 | 4,942 | 3,564 | 30,346 |
| 54,863 | 143 | 21,681 | 4,933 | 3,550 | 30,307 |
| 54,864 | 141 | 21,703 | 4,914 | 3,551 | 30,309 |
| 54,865 | 144 | 21,902 | 4,878 | 3,557 | 30,481 |
| 54,866 | 143 | 21,755 | 4,815 | 3,538 | 30,251 |
| 54,867 | 141 | 21,981 | 4,836 | 3,543 | 30,501 |
| 54,868 | 143 | 22,148 | 4,803 | 3,544 | 30,638 |
| 54,869 | 139 | 21,856 | 4,739 | 3,464 | 30,198 |
| 54,870 | 142 | 21,857 | 4,734 | 3,445 | 30,178 |
| 54,871 | 139 | 21,468 | 4,665 | 3,403 | 29,675 |

|        |     |        |       |       |        |
|--------|-----|--------|-------|-------|--------|
| 54,872 | 146 | 22,138 | 4,771 | 3,466 | 30,521 |
| 54,873 | 152 | 22,210 | 4,739 | 3,478 | 30,579 |
| 54,874 | 152 | 22,085 | 4,701 | 3,454 | 30,392 |
| 54,875 | 152 | 22,076 | 4,691 | 3,444 | 30,363 |
| 54,876 | 152 | 22,225 | 4,717 | 3,457 | 30,551 |
| 54,877 | 155 | 22,614 | 4,803 | 3,500 | 31,072 |
| 54,878 | 151 | 22,641 | 4,798 | 3,486 | 31,076 |
| 54,879 | 149 | 22,590 | 4,770 | 3,488 | 30,997 |
| 54,880 | 152 | 22,522 | 4,749 | 3,479 | 30,902 |
| 54,881 | 156 | 22,284 | 4,654 | 3,433 | 30,527 |
| 54,882 | 156 | 22,388 | 4,649 | 3,420 | 30,613 |
| 54,883 | 158 | 22,357 | 4,643 | 3,412 | 30,570 |
| 54,884 | 158 | 22,272 | 4,601 | 3,378 | 30,409 |
| 54,885 | 159 | 22,219 | 4,586 | 3,351 | 30,315 |
| 54,886 | 158 | 22,326 | 4,652 | 3,366 | 30,502 |
| 54,887 | 155 | 22,095 | 4,610 | 3,339 | 30,199 |
| 54,888 | 145 | 22,059 | 4,577 | 3,325 | 30,106 |
| 54,889 | 150 | 21,986 | 4,566 | 3,302 | 30,004 |
| 54,890 | 151 | 21,935 | 4,543 | 3,289 | 29,918 |
| 54,891 | 162 | 22,249 | 4,623 | 3,333 | 30,367 |
| 54,892 | 159 | 22,068 | 4,574 | 3,328 | 30,129 |
| 54,893 | 158 | 22,160 | 4,587 | 3,350 | 30,255 |
| 54,894 | 156 | 22,201 | 4,573 | 3,332 | 30,262 |
| 54,895 | 157 | 21,945 | 4,534 | 3,308 | 29,944 |
| 54,896 | 158 | 22,192 | 4,553 | 3,325 | 30,228 |
| 54,897 | 150 | 22,572 | 4,628 | 3,372 | 30,722 |
| 54,898 | 147 | 22,508 | 4,605 | 3,363 | 30,623 |
| 54,899 | 147 | 21,820 | 4,493 | 3,264 | 29,724 |
| 54,900 | 144 | 22,098 | 4,513 | 3,293 | 30,048 |
| 54,901 | 133 | 22,499 | 4,599 | 3,320 | 30,551 |
| 54,902 | 134 | 22,348 | 4,563 | 3,288 | 30,333 |
| 54,903 | 140 | 22,670 | 4,606 | 3,307 | 30,723 |

|        |     |        |       |       |        |
|--------|-----|--------|-------|-------|--------|
| 54,904 | 138 | 22,968 | 4,646 | 3,337 | 31,089 |
| 54,905 | 136 | 22,756 | 4,592 | 3,293 | 30,777 |
| 54,906 | 129 | 23,054 | 4,663 | 3,330 | 31,176 |
| 54,907 | 125 | 22,767 | 4,568 | 3,239 | 30,699 |
| 54,908 | 126 | 22,965 | 4,595 | 3,273 | 30,959 |
| 54,909 | 131 | 23,067 | 4,630 | 3,298 | 31,126 |
| 54,910 | 131 | 23,126 | 4,640 | 3,289 | 31,186 |
| 54,911 | 130 | 22,908 | 4,583 | 3,245 | 30,866 |
| 54,912 | 130 | 22,888 | 4,583 | 3,239 | 30,840 |
| 54,913 | 132 | 22,870 | 4,598 | 3,227 | 30,827 |
| 54,914 | 132 | 22,991 | 4,647 | 3,265 | 31,035 |
| 54,915 | 132 | 22,801 | 4,632 | 3,229 | 30,794 |
| 54,916 | 130 | 22,730 | 4,670 | 3,233 | 30,763 |
| 54,917 | 133 | 22,821 | 4,681 | 3,227 | 30,862 |
| 54,918 | 137 | 22,976 | 4,739 | 3,277 | 31,129 |
| 54,919 | 136 | 22,607 | 4,674 | 3,221 | 30,638 |
| 54,920 | 136 | 22,818 | 4,677 | 3,240 | 30,871 |
| 54,921 | 131 | 22,720 | 4,685 | 3,242 | 30,778 |
| 54,922 | 129 | 22,866 | 4,691 | 3,257 | 30,943 |
| 54,923 | 130 | 22,903 | 4,718 | 3,310 | 31,061 |
| 54,924 | 136 | 22,654 | 4,667 | 3,250 | 30,707 |
| 54,925 | 134 | 22,466 | 4,645 | 3,203 | 30,448 |
| 54,926 | 140 | 22,838 | 4,691 | 3,233 | 30,902 |
| 54,927 | 143 | 22,973 | 4,704 | 3,241 | 31,061 |
| 54,928 | 139 | 22,775 | 4,670 | 3,215 | 30,799 |
| 54,929 | 140 | 22,743 | 4,640 | 3,216 | 30,739 |
| 54,930 | 146 | 23,008 | 4,672 | 3,209 | 31,035 |
| 54,931 | 146 | 22,842 | 4,652 | 3,182 | 30,822 |
| 54,932 | 144 | 22,833 | 4,663 | 3,174 | 30,814 |
| 54,933 | 141 | 22,786 | 4,624 | 3,164 | 30,715 |
| 54,934 | 139 | 22,765 | 4,633 | 3,173 | 30,710 |
| 54,935 | 143 | 22,803 | 4,627 | 3,179 | 30,752 |

|        |     |        |       |       |        |
|--------|-----|--------|-------|-------|--------|
| 54,936 | 143 | 22,760 | 4,600 | 3,204 | 30,707 |
| 54,937 | 148 | 22,884 | 4,601 | 3,176 | 30,809 |
| 54,938 | 154 | 22,975 | 4,602 | 3,176 | 30,907 |
| 54,939 | 149 | 23,045 | 4,627 | 3,175 | 30,996 |
| 54,940 | 153 | 23,140 | 4,631 | 3,181 | 31,105 |
| 54,941 | 141 | 23,079 | 4,655 | 3,176 | 31,051 |
| 54,942 | 146 | 23,093 | 4,675 | 3,177 | 31,091 |
| 54,943 | 165 | 23,141 | 4,679 | 3,168 | 31,153 |
| 54,944 | 166 | 22,889 | 4,653 | 3,125 | 30,833 |
| 54,945 | 167 | 22,813 | 4,656 | 3,125 | 30,761 |
| 54,946 | 165 | 22,607 | 4,630 | 3,088 | 30,490 |
| 54,947 | 164 | 22,485 | 4,652 | 3,095 | 30,396 |
| 54,948 | 165 | 22,761 | 4,666 | 3,146 | 30,738 |
| 54,949 | 164 | 22,484 | 4,612 | 3,107 | 30,367 |
| 54,950 | 168 | 22,596 | 4,609 | 3,138 | 30,511 |
| 54,951 | 168 | 22,818 | 4,668 | 3,160 | 30,814 |
| 54,952 | 169 | 22,902 | 4,678 | 3,201 | 30,950 |
| 54,953 | 167 | 22,941 | 4,675 | 3,186 | 30,969 |
| 54,954 | 164 | 23,360 | 4,737 | 3,243 | 31,504 |
| 54,955 | 163 | 23,495 | 4,735 | 3,252 | 31,645 |
| 54,956 | 162 | 23,354 | 4,719 | 3,238 | 31,473 |
| 54,957 | 160 | 23,815 | 4,779 | 3,291 | 32,045 |
| 54,958 | 156 | 23,302 | 4,658 | 3,214 | 31,330 |
| 54,959 | 156 | 23,595 | 4,669 | 3,247 | 31,667 |
| 54,960 | 152 | 23,879 | 4,717 | 3,273 | 32,021 |
| 54,961 | 163 | 23,884 | 4,696 | 3,260 | 32,003 |
| 54,962 | 164 | 23,877 | 4,696 | 3,261 | 31,998 |
| 54,963 | 162 | 24,272 | 4,768 | 3,305 | 32,507 |
| 54,964 | 162 | 24,288 | 4,798 | 3,326 | 32,574 |
| 54,965 | 163 | 24,116 | 4,725 | 3,286 | 32,290 |
| 54,966 | 163 | 24,257 | 4,724 | 3,309 | 32,453 |
| 54,967 | 165 | 24,535 | 4,752 | 3,331 | 32,783 |

|        |     |        |       |       |        |
|--------|-----|--------|-------|-------|--------|
| 54,968 | 167 | 24,531 | 4,743 | 3,307 | 32,748 |
| 54,969 | 164 | 24,331 | 4,705 | 3,281 | 32,481 |
| 54,970 | 165 | 24,773 | 4,820 | 3,395 | 33,153 |
| 54,971 | 167 | 24,741 | 4,817 | 3,404 | 33,129 |
| 54,972 | 167 | 24,521 | 4,785 | 3,388 | 32,861 |
| 54,973 | 167 | 24,485 | 4,749 | 3,336 | 32,737 |
| 54,974 | 169 | 24,501 | 4,747 | 3,320 | 32,737 |
| 54,975 | 155 | 24,236 | 4,696 | 3,293 | 32,380 |
| 54,976 | 158 | 24,411 | 4,719 | 3,319 | 32,607 |
| 54,977 | 156 | 24,139 | 4,663 | 3,268 | 32,226 |
| 54,978 | 160 | 23,965 | 4,616 | 3,262 | 32,003 |
| 54,979 | 160 | 23,904 | 4,607 | 3,264 | 31,935 |
| 54,980 | 165 | 23,968 | 4,645 | 3,277 | 32,055 |
| 54,981 | 160 | 23,739 | 4,611 | 3,267 | 31,777 |
| 54,982 | 159 | 23,715 | 4,585 | 3,262 | 31,721 |
| 54,983 | 163 | 23,007 | 4,495 | 3,157 | 30,822 |
| 54,984 | 166 | 23,199 | 4,493 | 3,178 | 31,036 |
| 54,985 | 171 | 23,340 | 4,508 | 3,187 | 31,206 |
| 54,986 | 171 | 23,318 | 4,520 | 3,177 | 31,186 |
| 54,987 | 171 | 23,587 | 4,592 | 3,227 | 31,577 |
| 54,988 | 161 | 23,473 | 4,579 | 3,243 | 31,456 |
| 54,989 | 164 | 23,395 | 4,556 | 3,223 | 31,338 |
| 54,990 | 163 | 23,210 | 4,497 | 3,202 | 31,072 |
| 54,991 | 158 | 23,482 | 4,544 | 3,231 | 31,415 |
| 54,992 | 158 | 23,362 | 4,502 | 3,203 | 31,225 |
| 54,993 | 153 | 23,429 | 4,472 | 3,210 | 31,264 |
| 54,994 | 134 | 23,076 | 4,410 | 3,152 | 30,772 |
| 54,995 | 136 | 22,880 | 4,341 | 3,125 | 30,482 |
| 54,996 | 134 | 22,599 | 4,303 | 3,101 | 30,137 |
| 54,997 | 137 | 23,025 | 4,360 | 3,152 | 30,674 |
| 54,998 | 135 | 22,569 | 4,262 | 3,070 | 30,036 |
| 54,999 | 135 | 22,516 | 4,285 | 3,079 | 30,015 |

|        |     |        |       |       |        |
|--------|-----|--------|-------|-------|--------|
| 55,000 | 131 | 22,571 | 4,317 | 3,087 | 30,106 |
| 55,001 | 141 | 22,451 | 4,295 | 3,049 | 29,936 |
| 55,002 | 138 | 22,122 | 4,239 | 3,028 | 29,527 |
| 55,003 | 144 | 22,122 | 4,240 | 3,025 | 29,531 |
| 55,004 | 144 | 21,869 | 4,246 | 3,007 | 29,266 |
| 55,005 | 140 | 21,416 | 4,210 | 2,969 | 28,735 |
| 55,006 | 145 | 21,115 | 4,173 | 2,945 | 28,378 |
| 55,007 | 149 | 20,975 | 4,155 | 2,926 | 28,205 |
| 55,008 | 149 | 20,599 | 4,117 | 2,891 | 27,756 |
| 55,009 | 144 | 20,533 | 4,139 | 2,912 | 27,728 |
| 55,010 | 145 | 20,362 | 4,139 | 2,909 | 27,555 |
| 55,011 | 134 | 20,336 | 4,149 | 2,901 | 27,520 |
| 55,012 | 138 | 20,227 | 4,104 | 2,873 | 27,342 |
| 55,013 | 137 | 20,168 | 4,107 | 2,882 | 27,294 |
| 55,014 | 137 | 20,090 | 4,084 | 2,862 | 27,173 |
| 55,015 | 140 | 20,368 | 4,128 | 2,875 | 27,511 |
| 55,016 | 142 | 20,070 | 4,097 | 2,847 | 27,156 |
| 55,017 | 141 | 19,882 | 4,103 | 2,843 | 26,969 |
| 55,018 | 138 | 20,233 | 4,239 | 2,907 | 27,517 |
| 55,019 | 142 | 20,269 | 4,226 | 2,920 | 27,557 |
| 55,020 | 148 | 20,497 | 4,235 | 2,927 | 27,807 |
| 55,021 | 143 | 20,223 | 4,212 | 2,868 | 27,446 |
| 55,022 | 150 | 20,135 | 4,217 | 2,835 | 27,337 |
| 55,023 | 152 | 20,219 | 4,227 | 2,829 | 27,427 |
| 55,024 | 148 | 20,077 | 4,214 | 2,831 | 27,270 |
| 55,025 | 147 | 19,986 | 4,221 | 2,827 | 27,181 |
| 55,026 | 142 | 20,065 | 4,254 | 2,834 | 27,295 |
| 55,027 | 143 | 19,896 | 4,221 | 2,829 | 27,089 |
| 55,028 | 143 | 20,093 | 4,252 | 2,858 | 27,346 |
| 55,029 | 141 | 20,086 | 4,263 | 2,886 | 27,376 |
| 55,030 | 136 | 19,887 | 4,206 | 2,876 | 27,105 |
| 55,031 | 136 | 19,851 | 4,213 | 2,872 | 27,072 |



|        |     |        |       |       |        |
|--------|-----|--------|-------|-------|--------|
| 55,032 | 135 | 19,954 | 4,206 | 2,894 | 27,189 |
| 55,033 | 127 | 19,647 | 4,146 | 2,880 | 26,800 |
| 55,034 | 126 | 19,892 | 4,185 | 2,911 | 27,114 |
| 55,035 | 125 | 19,899 | 4,206 | 2,912 | 27,142 |
| 55,036 | 119 | 19,733 | 4,189 | 2,896 | 26,937 |
| 55,037 | 122 | 20,247 | 4,285 | 2,953 | 27,607 |
| 55,038 | 121 | 19,999 | 4,237 | 2,906 | 27,263 |
| 55,039 | 126 | 20,432 | 4,318 | 2,969 | 27,845 |
| 55,040 | 122 | 20,344 | 4,322 | 2,984 | 27,772 |
| 55,041 | 122 | 20,156 | 4,295 | 2,951 | 27,524 |
| 55,042 | 122 | 20,349 | 4,355 | 2,978 | 27,804 |
| 55,043 | 122 | 20,386 | 4,331 | 2,983 | 27,822 |
| 55,044 | 127 | 20,604 | 4,358 | 2,985 | 28,074 |
| 55,045 | 135 | 21,024 | 4,423 | 3,018 | 28,600 |
| 55,046 | 129 | 20,974 | 4,404 | 3,004 | 28,511 |
| 55,047 | 137 | 21,127 | 4,408 | 3,013 | 28,685 |
| 55,048 | 138 | 21,452 | 4,486 | 3,074 | 29,150 |
| 55,049 | 139 | 21,238 | 4,453 | 3,038 | 28,868 |
| 55,050 | 139 | 21,196 | 4,469 | 3,039 | 28,843 |
| 55,051 | 135 | 21,275 | 4,476 | 3,024 | 28,910 |
| 55,052 | 134 | 21,503 | 4,538 | 3,059 | 29,234 |
| 55,053 | 130 | 21,642 | 4,556 | 3,033 | 29,361 |
| 55,054 | 129 | 21,593 | 4,554 | 3,036 | 29,312 |
| 55,055 | 127 | 21,210 | 4,453 | 2,957 | 28,747 |
| 55,056 | 127 | 21,307 | 4,493 | 2,991 | 28,918 |
| 55,057 | 124 | 21,505 | 4,544 | 3,038 | 29,211 |
| 55,058 | 120 | 21,276 | 4,500 | 3,012 | 28,908 |
| 55,059 | 120 | 21,288 | 4,513 | 3,008 | 28,929 |
| 55,060 | 123 | 21,330 | 4,512 | 2,998 | 28,963 |
| 55,061 | 126 | 21,619 | 4,581 | 3,029 | 29,355 |
| 55,062 | 129 | 21,665 | 4,595 | 3,044 | 29,433 |
| 55,063 | 125 | 21,486 | 4,593 | 3,035 | 29,239 |

|        |     |        |       |       |        |
|--------|-----|--------|-------|-------|--------|
| 55,064 | 128 | 21,534 | 4,609 | 3,028 | 29,299 |
| 55,065 | 128 | 21,425 | 4,603 | 3,031 | 29,187 |
| 55,066 | 126 | 21,635 | 4,670 | 3,086 | 29,517 |
| 55,067 | 121 | 21,681 | 4,642 | 3,078 | 29,522 |
| 55,068 | 121 | 21,186 | 4,522 | 2,965 | 28,794 |
| 55,069 | 126 | 21,529 | 4,559 | 2,972 | 29,186 |
| 55,070 | 122 | 21,549 | 4,565 | 2,971 | 29,207 |
| 55,071 | 119 | 21,800 | 4,591 | 3,001 | 29,511 |
| 55,072 | 119 | 21,770 | 4,566 | 3,015 | 29,470 |
| 55,073 | 122 | 22,022 | 4,592 | 3,047 | 29,783 |
| 55,074 | 131 | 22,204 | 4,645 | 3,071 | 30,051 |
| 55,075 | 133 | 22,148 | 4,651 | 3,066 | 29,998 |
| 55,076 | 138 | 22,258 | 4,696 | 3,092 | 30,184 |
| 55,077 | 143 | 22,658 | 4,788 | 3,133 | 30,722 |
| 55,078 | 137 | 22,198 | 4,740 | 3,088 | 30,163 |
| 55,079 | 141 | 22,484 | 4,831 | 3,122 | 30,578 |
| 55,080 | 139 | 22,507 | 4,842 | 3,120 | 30,608 |
| 55,081 | 139 | 22,598 | 4,871 | 3,135 | 30,743 |
| 55,082 | 137 | 22,738 | 4,926 | 3,158 | 30,959 |
| 55,083 | 143 | 22,921 | 4,944 | 3,175 | 31,183 |
| 55,084 | 145 | 22,976 | 4,977 | 3,167 | 31,265 |
| 55,085 | 153 | 23,410 | 5,068 | 3,235 | 31,866 |
| 55,086 | 159 | 23,686 | 5,139 | 3,283 | 32,267 |
| 55,087 | 154 | 23,648 | 5,143 | 3,271 | 32,216 |
| 55,088 | 155 | 23,934 | 5,199 | 3,315 | 32,603 |
| 55,089 | 157 | 24,095 | 5,226 | 3,312 | 32,790 |
| 55,090 | 152 | 23,968 | 5,187 | 3,282 | 32,589 |
| 55,091 | 156 | 24,283 | 5,248 | 3,304 | 32,991 |
| 55,092 | 164 | 24,161 | 5,194 | 3,267 | 32,786 |
| 55,093 | 163 | 24,174 | 5,215 | 3,284 | 32,836 |
| 55,094 | 163 | 24,143 | 5,283 | 3,295 | 32,884 |
| 55,095 | 158 | 24,277 | 5,320 | 3,361 | 33,116 |

|        |     |        |       |       |        |
|--------|-----|--------|-------|-------|--------|
| 55,096 | 151 | 23,740 | 5,237 | 3,310 | 32,438 |
| 55,097 | 151 | 23,756 | 5,284 | 3,322 | 32,513 |
| 55,098 | 149 | 23,942 | 5,351 | 3,357 | 32,799 |
| 55,099 | 157 | 23,939 | 5,359 | 3,346 | 32,801 |
| 55,100 | 157 | 23,920 | 5,371 | 3,364 | 32,812 |
| 55,101 | 155 | 24,029 | 5,392 | 3,398 | 32,974 |
| 55,102 | 154 | 23,973 | 5,423 | 3,434 | 32,984 |
| 55,103 | 153 | 23,914 | 5,435 | 3,452 | 32,954 |
| 55,104 | 154 | 23,769 | 5,426 | 3,484 | 32,833 |
| 55,105 | 157 | 23,774 | 5,431 | 3,484 | 32,846 |
| 55,106 | 157 | 23,751 | 5,468 | 3,500 | 32,876 |
| 55,107 | 156 | 23,916 | 5,499 | 3,517 | 33,088 |
| 55,108 | 156 | 24,070 | 5,495 | 3,522 | 33,243 |
| 55,109 | 158 | 24,144 | 5,476 | 3,515 | 33,293 |
| 55,110 | 161 | 24,340 | 5,528 | 3,544 | 33,573 |
| 55,111 | 159 | 24,080 | 5,471 | 3,497 | 33,207 |
| 55,112 | 157 | 24,260 | 5,500 | 3,527 | 33,444 |
| 55,113 | 165 | 24,251 | 5,522 | 3,530 | 33,468 |
| 55,114 | 163 | 24,044 | 5,468 | 3,506 | 33,181 |
| 55,115 | 172 | 24,341 | 5,527 | 3,545 | 33,585 |
| 55,116 | 175 | 24,355 | 5,534 | 3,530 | 33,594 |
| 55,117 | 176 | 24,215 | 5,498 | 3,517 | 33,406 |
| 55,118 | 176 | 24,200 | 5,522 | 3,524 | 33,422 |
| 55,119 | 172 | 24,187 | 5,502 | 3,547 | 33,408 |
| 55,120 | 172 | 24,070 | 5,480 | 3,551 | 33,273 |
| 55,121 | 178 | 23,975 | 5,499 | 3,563 | 33,215 |
| 55,122 | 176 | 23,686 | 5,483 | 3,536 | 32,881 |
| 55,123 | 168 | 23,702 | 5,549 | 3,554 | 32,973 |
| 55,124 | 175 | 23,466 | 5,538 | 3,517 | 32,696 |
| 55,125 | 167 | 23,354 | 5,519 | 3,512 | 32,552 |
| 55,126 | 172 | 23,694 | 5,571 | 3,531 | 32,968 |
| 55,127 | 173 | 23,685 | 5,570 | 3,546 | 32,974 |

|        |     |        |       |       |        |
|--------|-----|--------|-------|-------|--------|
| 55,128 | 176 | 23,568 | 5,532 | 3,539 | 32,815 |
| 55,129 | 176 | 23,517 | 5,547 | 3,548 | 32,788 |
| 55,130 | 173 | 23,537 | 5,534 | 3,557 | 32,801 |
| 55,131 | 178 | 23,546 | 5,500 | 3,538 | 32,762 |
| 55,132 | 179 | 23,327 | 5,503 | 3,544 | 32,553 |
| 55,133 | 176 | 23,568 | 5,630 | 3,585 | 32,959 |
| 55,134 | 176 | 23,406 | 5,590 | 3,569 | 32,741 |
| 55,135 | 179 | 23,428 | 5,640 | 3,583 | 32,830 |
| 55,136 | 182 | 23,378 | 5,647 | 3,598 | 32,805 |
| 55,137 | 177 | 23,121 | 5,595 | 3,570 | 32,463 |
| 55,138 | 185 | 22,848 | 5,532 | 3,525 | 32,090 |
| 55,139 | 183 | 22,510 | 5,493 | 3,496 | 31,682 |
| 55,140 | 181 | 22,542 | 5,574 | 3,546 | 31,843 |
| 55,141 | 183 | 22,115 | 5,526 | 3,511 | 31,335 |
| 55,142 | 179 | 21,780 | 5,481 | 3,490 | 30,930 |
| 55,143 | 178 | 22,217 | 5,566 | 3,566 | 31,527 |
| 55,144 | 178 | 22,264 | 5,553 | 3,544 | 31,539 |
| 55,145 | 175 | 22,019 | 5,478 | 3,507 | 31,179 |
| 55,146 | 179 | 22,224 | 5,564 | 3,508 | 31,475 |
| 55,147 | 183 | 21,586 | 5,403 | 3,426 | 30,598 |
| 55,148 | 185 | 21,836 | 5,443 | 3,470 | 30,934 |
| 55,149 | 180 | 21,928 | 5,494 | 3,517 | 31,119 |
| 55,150 | 173 | 21,842 | 5,473 | 3,512 | 31,000 |
| 55,151 | 184 | 21,772 | 5,431 | 3,463 | 30,850 |
| 55,152 | 187 | 21,548 | 5,342 | 3,428 | 30,505 |
| 55,153 | 188 | 21,421 | 5,278 | 3,374 | 30,261 |
| 55,154 | 188 | 21,341 | 5,269 | 3,386 | 30,184 |
| 55,155 | 188 | 21,302 | 5,240 | 3,356 | 30,086 |
| 55,156 | 189 | 21,264 | 5,195 | 3,338 | 29,986 |
| 55,157 | 199 | 21,436 | 5,232 | 3,364 | 30,231 |
| 55,158 | 198 | 21,128 | 5,143 | 3,286 | 29,755 |
| 55,159 | 201 | 21,242 | 5,201 | 3,309 | 29,953 |

|        |     |        |       |       |        |
|--------|-----|--------|-------|-------|--------|
| 55,160 | 198 | 20,831 | 5,098 | 3,265 | 29,392 |
| 55,161 | 198 | 20,800 | 5,100 | 3,262 | 29,360 |
| 55,162 | 194 | 20,712 | 5,089 | 3,253 | 29,248 |
| 55,163 | 198 | 20,783 | 5,105 | 3,273 | 29,359 |
| 55,164 | 184 | 20,727 | 5,079 | 3,272 | 29,262 |
| 55,165 | 178 | 20,339 | 4,994 | 3,210 | 28,721 |
| 55,166 | 174 | 20,327 | 4,973 | 3,201 | 28,675 |
| 55,167 | 174 | 20,342 | 4,982 | 3,223 | 28,721 |
| 55,168 | 174 | 20,534 | 5,040 | 3,256 | 29,004 |
| 55,169 | 176 | 20,564 | 5,015 | 3,256 | 29,011 |
| 55,170 | 176 | 20,424 | 4,988 | 3,251 | 28,839 |
| 55,171 | 171 | 20,250 | 4,953 | 3,217 | 28,591 |
| 55,172 | 166 | 20,170 | 4,970 | 3,214 | 28,520 |
| 55,173 | 167 | 19,873 | 4,856 | 3,152 | 28,048 |
| 55,174 | 167 | 20,028 | 4,901 | 3,165 | 28,261 |
| 55,175 | 150 | 19,799 | 4,841 | 3,155 | 27,945 |
| 55,176 | 149 | 19,469 | 4,795 | 3,126 | 27,539 |
| 55,177 | 145 | 19,511 | 4,765 | 3,128 | 27,549 |
| 55,178 | 144 | 19,352 | 4,745 | 3,096 | 27,337 |
| 55,179 | 136 | 19,202 | 4,693 | 3,069 | 27,100 |
| 55,180 | 140 | 19,192 | 4,669 | 3,052 | 27,053 |
| 55,181 | 142 | 19,015 | 4,638 | 3,015 | 26,810 |
| 55,182 | 138 | 18,886 | 4,593 | 2,984 | 26,601 |
| 55,183 | 138 | 18,911 | 4,571 | 2,988 | 26,608 |
| 55,184 | 131 | 18,930 | 4,522 | 2,989 | 26,572 |
| 55,185 | 119 | 18,658 | 4,457 | 2,915 | 26,149 |
| 55,186 | 121 | 18,866 | 4,517 | 2,959 | 26,463 |
| 55,187 | 108 | 17,902 | 4,184 | 2,790 | 24,984 |
| 55,188 | 109 | 18,028 | 4,226 | 2,824 | 25,187 |
| 55,189 | 109 | 18,182 | 4,268 | 2,861 | 25,420 |
| 55,190 | 109 | 18,188 | 4,273 | 2,865 | 25,435 |
| 55,191 | 104 | 18,349 | 4,312 | 2,897 | 25,662 |

|        |     |        |       |       |        |
|--------|-----|--------|-------|-------|--------|
| 55,192 | 109 | 18,325 | 4,316 | 2,899 | 25,649 |
| 55,193 | 107 | 18,303 | 4,289 | 2,878 | 25,577 |
| 55,194 | 112 | 18,678 | 4,392 | 2,911 | 26,093 |
| 55,195 | 112 | 18,707 | 4,406 | 2,921 | 26,146 |
| 55,196 | 111 | 18,922 | 4,416 | 2,930 | 26,379 |
| 55,197 | 112 | 19,387 | 4,528 | 2,988 | 27,015 |
| 55,198 | 107 | 19,875 | 4,607 | 3,046 | 27,635 |
| 55,199 | 105 | 19,964 | 4,612 | 3,046 | 27,727 |
| 55,200 | 105 | 19,899 | 4,581 | 3,054 | 27,639 |
| 55,201 | 107 | 20,163 | 4,627 | 3,083 | 27,980 |
| 55,202 | 97  | 20,492 | 4,715 | 3,144 | 28,448 |
| 55,203 | 93  | 20,633 | 4,748 | 3,155 | 28,629 |
| 55,204 | 99  | 20,746 | 4,718 | 3,152 | 28,715 |
| 55,205 | 97  | 20,624 | 4,681 | 3,103 | 28,505 |
| 55,206 | 97  | 20,419 | 4,656 | 3,093 | 28,265 |
| 55,207 | 96  | 20,306 | 4,632 | 3,077 | 28,111 |
| 55,208 | 91  | 21,151 | 4,771 | 3,171 | 29,184 |
| 55,209 | 93  | 21,313 | 4,779 | 3,214 | 29,399 |
| 55,210 | 92  | 21,379 | 4,778 | 3,208 | 29,457 |
| 55,211 | 98  | 21,483 | 4,831 | 3,260 | 29,672 |
| 55,212 | 103 | 21,614 | 4,907 | 3,301 | 29,925 |
| 55,213 | 109 | 21,665 | 4,930 | 3,311 | 30,015 |
| 55,214 | 108 | 21,481 | 4,934 | 3,299 | 29,822 |
| 55,215 | 109 | 21,689 | 4,961 | 3,331 | 30,090 |
| 55,216 | 115 | 21,747 | 4,967 | 3,342 | 30,171 |
| 55,217 | 120 | 21,871 | 4,969 | 3,350 | 30,310 |
| 55,218 | 120 | 22,031 | 4,976 | 3,369 | 30,496 |
| 55,219 | 123 | 21,924 | 4,935 | 3,342 | 30,324 |
| 55,220 | 127 | 22,322 | 5,057 | 3,363 | 30,869 |
| 55,221 | 129 | 22,428 | 5,069 | 3,384 | 31,010 |
| 55,222 | 129 | 22,344 | 4,988 | 3,361 | 30,822 |
| 55,223 | 132 | 22,622 | 5,035 | 3,379 | 31,168 |

|        |     |        |       |       |        |
|--------|-----|--------|-------|-------|--------|
| 55,224 | 129 | 22,567 | 5,042 | 3,388 | 31,126 |
| 55,225 | 129 | 22,785 | 5,071 | 3,431 | 31,416 |
| 55,226 | 133 | 23,168 | 5,156 | 3,510 | 31,967 |
| 55,227 | 130 | 23,036 | 5,088 | 3,479 | 31,733 |
| 55,228 | 132 | 23,054 | 5,107 | 3,475 | 31,768 |
| 55,229 | 134 | 23,178 | 5,132 | 3,509 | 31,953 |
| 55,230 | 132 | 23,459 | 5,228 | 3,570 | 32,389 |
| 55,231 | 127 | 23,360 | 5,212 | 3,552 | 32,251 |
| 55,232 | 127 | 23,317 | 5,198 | 3,553 | 32,195 |
| 55,233 | 127 | 23,521 | 5,277 | 3,596 | 32,521 |
| 55,234 | 130 | 23,596 | 5,324 | 3,600 | 32,650 |
| 55,235 | 131 | 23,667 | 5,321 | 3,606 | 32,725 |
| 55,236 | 130 | 23,499 | 5,301 | 3,604 | 32,534 |
| 55,237 | 130 | 23,450 | 5,287 | 3,594 | 32,461 |
| 55,238 | 130 | 23,373 | 5,268 | 3,571 | 32,342 |
| 55,239 | 133 | 23,536 | 5,265 | 3,566 | 32,500 |
| 55,240 | 137 | 23,475 | 5,224 | 3,521 | 32,357 |
| 55,241 | 137 | 23,590 | 5,205 | 3,513 | 32,445 |
| 55,242 | 142 | 23,624 | 5,292 | 3,521 | 32,579 |
| 55,243 | 137 | 23,559 | 5,289 | 3,516 | 32,501 |
| 55,244 | 136 | 23,301 | 5,197 | 3,458 | 32,092 |
| 55,245 | 136 | 23,239 | 5,186 | 3,447 | 32,008 |
| 55,246 | 138 | 23,334 | 5,190 | 3,455 | 32,117 |
| 55,247 | 137 | 22,913 | 5,103 | 3,401 | 31,554 |
| 55,248 | 137 | 22,989 | 5,109 | 3,435 | 31,670 |
| 55,249 | 145 | 22,608 | 5,020 | 3,373 | 31,146 |
| 55,250 | 148 | 22,432 | 4,969 | 3,317 | 30,866 |
| 55,251 | 163 | 22,757 | 5,051 | 3,354 | 31,325 |
| 55,252 | 161 | 22,685 | 5,032 | 3,349 | 31,227 |
| 55,253 | 162 | 22,850 | 5,019 | 3,361 | 31,392 |
| 55,254 | 161 | 22,726 | 4,989 | 3,339 | 31,215 |
| 55,255 | 155 | 22,895 | 5,045 | 3,372 | 31,467 |

|        |     |        |       |       |        |
|--------|-----|--------|-------|-------|--------|
| 55,256 | 154 | 22,638 | 5,006 | 3,351 | 31,149 |
| 55,257 | 158 | 22,599 | 5,028 | 3,349 | 31,134 |
| 55,258 | 157 | 22,487 | 5,018 | 3,332 | 30,994 |
| 55,259 | 159 | 22,488 | 5,056 | 3,328 | 31,031 |
| 55,260 | 156 | 22,651 | 5,131 | 3,329 | 31,267 |
| 55,261 | 151 | 22,628 | 5,090 | 3,309 | 31,178 |
| 55,262 | 150 | 22,528 | 5,032 | 3,226 | 30,936 |
| 55,263 | 147 | 22,826 | 5,084 | 3,249 | 31,306 |
| 55,264 | 153 | 23,072 | 5,105 | 3,273 | 31,603 |
| 55,265 | 155 | 23,103 | 5,104 | 3,284 | 31,646 |
| 55,266 | 156 | 23,054 | 5,092 | 3,273 | 31,575 |
| 55,267 | 149 | 23,044 | 5,070 | 3,269 | 31,532 |
| 55,268 | 157 | 22,874 | 5,107 | 3,257 | 31,395 |
| 55,269 | 157 | 22,823 | 5,085 | 3,236 | 31,301 |
| 55,270 | 153 | 22,986 | 5,113 | 3,276 | 31,528 |
| 55,271 | 151 | 22,809 | 5,057 | 3,258 | 31,275 |
| 55,272 | 155 | 22,856 | 5,065 | 3,272 | 31,348 |
| 55,273 | 155 | 22,835 | 5,056 | 3,272 | 31,318 |
| 55,274 | 153 | 23,250 | 5,141 | 3,329 | 31,873 |
| 55,275 | 153 | 23,433 | 5,160 | 3,337 | 32,083 |
| 55,276 | 156 | 23,575 | 5,200 | 3,350 | 32,281 |
| 55,277 | 153 | 23,423 | 5,181 | 3,326 | 32,083 |
| 55,278 | 153 | 23,549 | 5,191 | 3,343 | 32,236 |
| 55,279 | 151 | 23,573 | 5,172 | 3,333 | 32,229 |
| 55,280 | 150 | 23,422 | 5,164 | 3,321 | 32,057 |
| 55,281 | 149 | 23,835 | 5,231 | 3,384 | 32,599 |
| 55,282 | 151 | 23,875 | 5,236 | 3,376 | 32,638 |
| 55,283 | 156 | 24,053 | 5,275 | 3,389 | 32,873 |
| 55,284 | 154 | 24,197 | 5,294 | 3,407 | 33,052 |
| 55,285 | 152 | 23,898 | 5,292 | 3,407 | 32,749 |
| 55,286 | 151 | 23,771 | 5,257 | 3,361 | 32,540 |
| 55,287 | 153 | 23,982 | 5,292 | 3,381 | 32,808 |



|        |     |        |       |       |        |
|--------|-----|--------|-------|-------|--------|
| 55,288 | 152 | 24,178 | 5,320 | 3,428 | 33,078 |
| 55,289 | 152 | 23,917 | 5,284 | 3,384 | 32,737 |
| 55,290 | 155 | 24,109 | 5,329 | 3,436 | 33,029 |
| 55,291 | 148 | 23,434 | 5,199 | 3,391 | 32,172 |
| 55,292 | 149 | 23,596 | 5,180 | 3,408 | 32,333 |
| 55,293 | 148 | 23,694 | 5,213 | 3,433 | 32,488 |
| 55,294 | 157 | 23,801 | 5,237 | 3,453 | 32,648 |
| 55,295 | 157 | 23,467 | 5,174 | 3,447 | 32,245 |
| 55,296 | 157 | 23,268 | 5,095 | 3,414 | 31,934 |
| 55,297 | 157 | 23,385 | 5,122 | 3,443 | 32,107 |
| 55,298 | 155 | 23,187 | 5,106 | 3,417 | 31,865 |
| 55,299 | 156 | 23,327 | 5,153 | 3,461 | 32,097 |
| 55,300 | 143 | 22,711 | 5,052 | 3,395 | 31,301 |
| 55,301 | 142 | 22,641 | 5,023 | 3,391 | 31,197 |
| 55,302 | 132 | 22,709 | 5,036 | 3,385 | 31,262 |
| 55,303 | 132 | 22,513 | 5,019 | 3,376 | 31,040 |
| 55,304 | 128 | 22,179 | 5,001 | 3,335 | 30,643 |
| 55,305 | 133 | 21,609 | 4,858 | 3,229 | 29,829 |
| 55,306 | 135 | 21,858 | 4,855 | 3,239 | 30,087 |
| 55,307 | 130 | 22,167 | 4,897 | 3,283 | 30,477 |
| 55,308 | 130 | 22,150 | 4,890 | 3,288 | 30,458 |
| 55,309 | 129 | 22,455 | 4,947 | 3,330 | 30,861 |
| 55,310 | 131 | 22,151 | 4,905 | 3,326 | 30,513 |
| 55,311 | 130 | 22,090 | 4,904 | 3,338 | 30,462 |
| 55,312 | 135 | 22,098 | 4,920 | 3,346 | 30,499 |
| 55,313 | 133 | 21,811 | 4,892 | 3,352 | 30,188 |
| 55,314 | 135 | 22,099 | 4,932 | 3,393 | 30,559 |
| 55,315 | 129 | 22,417 | 4,986 | 3,430 | 30,962 |
| 55,316 | 126 | 22,352 | 4,971 | 3,416 | 30,865 |
| 55,317 | 126 | 22,377 | 4,975 | 3,415 | 30,893 |
| 55,318 | 128 | 22,785 | 5,056 | 3,461 | 31,430 |
| 55,319 | 120 | 22,654 | 5,003 | 3,432 | 31,209 |

|        |     |        |       |       |        |
|--------|-----|--------|-------|-------|--------|
| 55,320 | 119 | 22,282 | 4,957 | 3,406 | 30,764 |
| 55,321 | 119 | 22,206 | 4,928 | 3,397 | 30,650 |
| 55,322 | 115 | 21,869 | 4,884 | 3,372 | 30,240 |
| 55,323 | 114 | 21,501 | 4,853 | 3,327 | 29,795 |
| 55,324 | 123 | 22,258 | 4,972 | 3,444 | 30,797 |
| 55,325 | 126 | 22,174 | 4,947 | 3,425 | 30,672 |
| 55,326 | 128 | 22,137 | 4,935 | 3,414 | 30,614 |
| 55,327 | 129 | 21,818 | 4,854 | 3,337 | 30,138 |
| 55,328 | 129 | 21,818 | 4,848 | 3,328 | 30,123 |
| 55,329 | 134 | 21,890 | 4,921 | 3,366 | 30,311 |
| 55,330 | 131 | 21,537 | 4,828 | 3,312 | 29,808 |
| 55,331 | 131 | 21,682 | 4,863 | 3,349 | 30,025 |
| 55,332 | 134 | 21,615 | 4,855 | 3,307 | 29,911 |
| 55,333 | 132 | 21,392 | 4,817 | 3,283 | 29,624 |
| 55,334 | 127 | 21,562 | 4,820 | 3,295 | 29,804 |
| 55,335 | 126 | 21,551 | 4,778 | 3,281 | 29,736 |
| 55,336 | 135 | 21,613 | 4,743 | 3,274 | 29,765 |
| 55,337 | 134 | 21,452 | 4,730 | 3,263 | 29,579 |
| 55,338 | 137 | 21,945 | 4,785 | 3,328 | 30,195 |
| 55,339 | 138 | 21,815 | 4,756 | 3,294 | 30,003 |
| 55,340 | 138 | 22,027 | 4,777 | 3,314 | 30,256 |
| 55,341 | 135 | 22,250 | 4,843 | 3,351 | 30,579 |
| 55,342 | 133 | 22,222 | 4,836 | 3,353 | 30,544 |
| 55,343 | 135 | 22,262 | 4,800 | 3,340 | 30,537 |
| 55,344 | 139 | 22,618 | 4,839 | 3,361 | 30,957 |
| 55,345 | 130 | 22,528 | 4,845 | 3,362 | 30,865 |
| 55,346 | 130 | 22,563 | 4,857 | 3,354 | 30,904 |
| 55,347 | 134 | 22,939 | 4,945 | 3,397 | 31,415 |
| 55,348 | 137 | 23,001 | 4,948 | 3,397 | 31,483 |
| 55,349 | 137 | 23,040 | 4,950 | 3,403 | 31,530 |
| 55,350 | 144 | 23,169 | 4,951 | 3,396 | 31,660 |
| 55,351 | 140 | 22,951 | 4,922 | 3,380 | 31,393 |

|        |     |        |       |       |        |
|--------|-----|--------|-------|-------|--------|
| 55,352 | 141 | 22,974 | 4,947 | 3,394 | 31,456 |
| 55,353 | 140 | 23,015 | 4,925 | 3,412 | 31,492 |
| 55,354 | 140 | 23,097 | 4,873 | 3,396 | 31,506 |
| 55,355 | 141 | 23,479 | 4,930 | 3,443 | 31,993 |
| 55,356 | 136 | 23,497 | 4,949 | 3,456 | 32,038 |
| 55,357 | 135 | 23,314 | 4,943 | 3,457 | 31,849 |
| 55,358 | 133 | 23,351 | 4,936 | 3,467 | 31,887 |
| 55,359 | 134 | 23,380 | 4,942 | 3,468 | 31,924 |
| 55,360 | 131 | 23,300 | 4,920 | 3,433 | 31,784 |
| 55,361 | 131 | 23,337 | 4,924 | 3,447 | 31,839 |
| 55,362 | 125 | 23,542 | 4,950 | 3,455 | 32,072 |
| 55,363 | 125 | 23,301 | 4,884 | 3,438 | 31,748 |
| 55,364 | 123 | 23,242 | 4,875 | 3,428 | 31,668 |
| 55,365 | 123 | 23,304 | 4,913 | 3,434 | 31,774 |
| 55,366 | 120 | 23,029 | 4,839 | 3,396 | 31,384 |
| 55,367 | 126 | 23,075 | 4,859 | 3,412 | 31,472 |
| 55,368 | 123 | 23,036 | 4,868 | 3,413 | 31,440 |
| 55,369 | 129 | 22,815 | 4,788 | 3,369 | 31,101 |
| 55,370 | 130 | 22,953 | 4,800 | 3,372 | 31,255 |
| 55,371 | 131 | 22,859 | 4,809 | 3,361 | 31,160 |
| 55,372 | 130 | 22,858 | 4,818 | 3,380 | 31,186 |
| 55,373 | 125 | 22,875 | 4,821 | 3,366 | 31,187 |
| 55,374 | 125 | 23,126 | 4,852 | 3,382 | 31,485 |
| 55,375 | 125 | 22,987 | 4,869 | 3,368 | 31,349 |
| 55,376 | 122 | 22,808 | 4,850 | 3,360 | 31,140 |
| 55,377 | 121 | 22,953 | 4,898 | 3,395 | 31,367 |
| 55,378 | 116 | 22,862 | 4,886 | 3,419 | 31,283 |
| 55,379 | 112 | 23,038 | 4,881 | 3,428 | 31,459 |
| 55,380 | 111 | 22,918 | 4,855 | 3,404 | 31,288 |
| 55,381 | 112 | 23,120 | 4,889 | 3,429 | 31,550 |
| 55,382 | 112 | 22,967 | 4,850 | 3,407 | 31,336 |
| 55,383 | 111 | 22,831 | 4,859 | 3,414 | 31,215 |

|        |     |        |       |       |        |
|--------|-----|--------|-------|-------|--------|
| 55,384 | 111 | 22,914 | 4,881 | 3,451 | 31,357 |
| 55,385 | 113 | 23,050 | 4,898 | 3,442 | 31,503 |
| 55,386 | 121 | 23,132 | 4,945 | 3,469 | 31,667 |
| 55,387 | 116 | 23,121 | 4,958 | 3,453 | 31,648 |
| 55,388 | 115 | 22,923 | 4,904 | 3,438 | 31,380 |
| 55,389 | 115 | 22,954 | 4,912 | 3,436 | 31,417 |
| 55,390 | 117 | 23,104 | 4,937 | 3,464 | 31,622 |
| 55,391 | 117 | 23,127 | 4,941 | 3,471 | 31,656 |
| 55,392 | 119 | 23,002 | 4,907 | 3,433 | 31,461 |
| 55,393 | 120 | 22,954 | 4,916 | 3,438 | 31,428 |
| 55,394 | 117 | 23,159 | 4,986 | 3,461 | 31,723 |
| 55,395 | 113 | 23,173 | 5,026 | 3,491 | 31,803 |
| 55,396 | 112 | 23,059 | 4,999 | 3,480 | 31,650 |
| 55,397 | 110 | 23,008 | 4,995 | 3,478 | 31,591 |
| 55,398 | 110 | 23,447 | 5,032 | 3,504 | 32,093 |
| 55,399 | 110 | 23,101 | 4,965 | 3,467 | 31,643 |
| 55,400 | 110 | 23,207 | 4,986 | 3,476 | 31,779 |
| 55,401 | 104 | 23,383 | 5,023 | 3,476 | 31,986 |
| 55,402 | 104 | 23,194 | 4,990 | 3,456 | 31,744 |
| 55,403 | 103 | 23,395 | 5,031 | 3,462 | 31,991 |
| 55,404 | 106 | 23,594 | 5,102 | 3,508 | 32,310 |
| 55,405 | 106 | 23,696 | 5,144 | 3,518 | 32,464 |
| 55,406 | 106 | 23,629 | 5,144 | 3,519 | 32,398 |
| 55,407 | 108 | 23,492 | 5,111 | 3,496 | 32,207 |
| 55,408 | 108 | 23,179 | 5,080 | 3,442 | 31,809 |
| 55,409 | 109 | 23,314 | 5,086 | 3,443 | 31,952 |
| 55,410 | 116 | 23,195 | 5,062 | 3,433 | 31,806 |
| 55,411 | 116 | 23,224 | 5,076 | 3,437 | 31,853 |
| 55,412 | 116 | 23,327 | 5,083 | 3,477 | 32,003 |
| 55,413 | 116 | 23,144 | 5,046 | 3,437 | 31,743 |
| 55,414 | 120 | 23,092 | 5,026 | 3,409 | 31,647 |
| 55,415 | 119 | 22,967 | 4,960 | 3,387 | 31,433 |

|        |     |        |       |       |        |
|--------|-----|--------|-------|-------|--------|
| 55,416 | 119 | 23,239 | 5,011 | 3,419 | 31,788 |
| 55,417 | 117 | 23,139 | 5,007 | 3,394 | 31,657 |
| 55,418 | 111 | 22,925 | 4,977 | 3,361 | 31,374 |
| 55,419 | 110 | 22,952 | 4,980 | 3,388 | 31,430 |
| 55,420 | 103 | 22,673 | 4,942 | 3,340 | 31,058 |
| 55,421 | 101 | 22,804 | 4,962 | 3,342 | 31,209 |
| 55,422 | 101 | 22,759 | 4,957 | 3,343 | 31,160 |
| 55,423 | 101 | 22,821 | 4,993 | 3,370 | 31,285 |
| 55,424 | 105 | 22,757 | 5,010 | 3,378 | 31,250 |
| 55,425 | 106 | 22,763 | 4,991 | 3,383 | 31,243 |
| 55,426 | 110 | 22,873 | 5,008 | 3,401 | 31,392 |
| 55,427 | 115 | 22,969 | 5,025 | 3,420 | 31,529 |
| 55,428 | 113 | 22,887 | 5,022 | 3,421 | 31,443 |
| 55,429 | 113 | 22,568 | 4,962 | 3,372 | 31,015 |
| 55,430 | 115 | 22,577 | 4,971 | 3,385 | 31,048 |
| 55,431 | 115 | 22,554 | 4,968 | 3,414 | 31,051 |
| 55,432 | 115 | 22,341 | 4,908 | 3,355 | 30,719 |
| 55,433 | 115 | 22,104 | 4,805 | 3,301 | 30,325 |
| 55,434 | 116 | 22,138 | 4,847 | 3,312 | 30,413 |
| 55,435 | 116 | 22,305 | 4,910 | 3,358 | 30,689 |
| 55,436 | 114 | 22,099 | 4,882 | 3,351 | 30,446 |
| 55,437 | 106 | 21,859 | 4,849 | 3,324 | 30,138 |
| 55,438 | 103 | 21,822 | 4,864 | 3,327 | 30,116 |
| 55,439 | 106 | 21,415 | 4,838 | 3,286 | 29,645 |
| 55,440 | 109 | 21,572 | 4,892 | 3,281 | 29,854 |
| 55,441 | 107 | 21,458 | 4,885 | 3,273 | 29,723 |
| 55,442 | 106 | 21,324 | 4,826 | 3,245 | 29,501 |
| 55,443 | 107 | 21,487 | 4,832 | 3,231 | 29,657 |
| 55,444 | 109 | 21,666 | 4,869 | 3,267 | 29,911 |
| 55,445 | 107 | 21,268 | 4,771 | 3,208 | 29,354 |
| 55,446 | 110 | 21,286 | 4,771 | 3,225 | 29,392 |
| 55,447 | 107 | 21,020 | 4,721 | 3,196 | 29,044 |

|        |     |        |       |       |        |
|--------|-----|--------|-------|-------|--------|
| 55,448 | 112 | 21,138 | 4,797 | 3,233 | 29,280 |
| 55,449 | 113 | 21,178 | 4,856 | 3,266 | 29,413 |
| 55,450 | 109 | 20,927 | 4,796 | 3,228 | 29,060 |
| 55,451 | 107 | 20,863 | 4,792 | 3,230 | 28,992 |
| 55,452 | 107 | 20,823 | 4,748 | 3,212 | 28,890 |
| 55,453 | 109 | 20,933 | 4,785 | 3,237 | 29,064 |
| 55,454 | 107 | 20,829 | 4,763 | 3,228 | 28,927 |
| 55,455 | 106 | 20,516 | 4,715 | 3,192 | 28,529 |
| 55,456 | 107 | 19,930 | 4,633 | 3,124 | 27,794 |
| 55,457 | 108 | 20,270 | 4,666 | 3,158 | 28,202 |
| 55,458 | 108 | 20,512 | 4,714 | 3,198 | 28,532 |
| 55,459 | 108 | 20,633 | 4,751 | 3,221 | 28,713 |
| 55,460 | 103 | 20,609 | 4,738 | 3,220 | 28,670 |
| 55,461 | 97  | 20,575 | 4,746 | 3,217 | 28,635 |
| 55,462 | 96  | 20,492 | 4,700 | 3,187 | 28,475 |
| 55,463 | 96  | 20,110 | 4,646 | 3,136 | 27,988 |
| 55,464 | 102 | 20,287 | 4,663 | 3,156 | 28,208 |
| 55,465 | 101 | 20,235 | 4,667 | 3,169 | 28,172 |
| 55,466 | 102 | 20,528 | 4,747 | 3,212 | 28,589 |
| 55,467 | 102 | 20,132 | 4,704 | 3,178 | 28,116 |
| 55,468 | 104 | 20,130 | 4,700 | 3,196 | 28,130 |
| 55,469 | 105 | 20,131 | 4,698 | 3,196 | 28,130 |
| 55,470 | 108 | 20,195 | 4,738 | 3,210 | 28,251 |
| 55,471 | 108 | 20,066 | 4,753 | 3,241 | 28,168 |
| 55,472 | 104 | 20,111 | 4,754 | 3,251 | 28,220 |
| 55,473 | 102 | 20,157 | 4,723 | 3,222 | 28,204 |
| 55,474 | 102 | 20,192 | 4,713 | 3,233 | 28,240 |
| 55,475 | 102 | 20,677 | 4,795 | 3,285 | 28,859 |
| 55,476 | 100 | 20,724 | 4,794 | 3,269 | 28,887 |
| 55,477 | 95  | 20,795 | 4,746 | 3,261 | 28,897 |
| 55,478 | 90  | 20,570 | 4,698 | 3,207 | 28,565 |
| 55,479 | 90  | 20,997 | 4,754 | 3,262 | 29,103 |

|        |     |        |       |       |        |
|--------|-----|--------|-------|-------|--------|
| 55,480 | 90  | 21,424 | 4,857 | 3,335 | 29,706 |
| 55,481 | 88  | 21,336 | 4,866 | 3,309 | 29,599 |
| 55,482 | 97  | 21,531 | 4,896 | 3,317 | 29,841 |
| 55,483 | 98  | 21,448 | 4,831 | 3,258 | 29,635 |
| 55,484 | 99  | 21,824 | 4,912 | 3,311 | 30,146 |
| 55,485 | 102 | 22,239 | 4,943 | 3,354 | 30,638 |
| 55,486 | 103 | 22,258 | 4,966 | 3,338 | 30,665 |
| 55,487 | 104 | 22,639 | 5,007 | 3,374 | 31,124 |
| 55,488 | 109 | 22,734 | 4,962 | 3,368 | 31,173 |
| 55,489 | 104 | 22,695 | 4,923 | 3,346 | 31,068 |
| 55,490 | 104 | 22,776 | 4,890 | 3,352 | 31,122 |
| 55,491 | 103 | 22,762 | 4,899 | 3,379 | 31,143 |
| 55,492 | 107 | 22,925 | 4,929 | 3,419 | 31,380 |
| 55,493 | 102 | 22,876 | 4,956 | 3,426 | 31,360 |
| 55,494 | 100 | 22,569 | 4,941 | 3,401 | 31,011 |
| 55,495 | 101 | 22,605 | 4,950 | 3,406 | 31,062 |
| 55,496 | 104 | 22,596 | 4,939 | 3,426 | 31,065 |
| 55,497 | 111 | 23,007 | 5,021 | 3,459 | 31,598 |
| 55,498 | 112 | 22,924 | 5,002 | 3,445 | 31,483 |
| 55,499 | 118 | 23,303 | 5,112 | 3,509 | 32,042 |
| 55,500 | 120 | 23,538 | 5,154 | 3,539 | 32,351 |
| 55,501 | 124 | 23,522 | 5,153 | 3,544 | 32,343 |
| 55,502 | 125 | 23,739 | 5,202 | 3,572 | 32,638 |
| 55,503 | 124 | 24,004 | 5,282 | 3,571 | 32,981 |
| 55,504 | 127 | 24,444 | 5,376 | 3,644 | 33,591 |
| 55,505 | 131 | 24,210 | 5,307 | 3,598 | 33,246 |
| 55,506 | 130 | 24,192 | 5,311 | 3,597 | 33,230 |
| 55,507 | 129 | 24,271 | 5,319 | 3,605 | 33,324 |
| 55,508 | 128 | 24,369 | 5,363 | 3,642 | 33,502 |
| 55,509 | 124 | 24,506 | 5,394 | 3,663 | 33,687 |
| 55,510 | 124 | 24,308 | 5,352 | 3,633 | 33,417 |
| 55,511 | 126 | 24,279 | 5,363 | 3,652 | 33,420 |

|        |     |        |       |       |        |
|--------|-----|--------|-------|-------|--------|
| 55,512 | 128 | 24,269 | 5,342 | 3,640 | 33,379 |
| 55,513 | 128 | 24,278 | 5,349 | 3,639 | 33,394 |
| 55,514 | 127 | 24,183 | 5,352 | 3,649 | 33,311 |
| 55,515 | 123 | 24,228 | 5,406 | 3,684 | 33,441 |
| 55,516 | 122 | 24,304 | 5,401 | 3,681 | 33,508 |
| 55,517 | 120 | 24,340 | 5,410 | 3,688 | 33,558 |
| 55,518 | 116 | 24,105 | 5,333 | 3,638 | 33,192 |
| 55,519 | 116 | 24,266 | 5,371 | 3,646 | 33,399 |
| 55,520 | 115 | 24,569 | 5,446 | 3,674 | 33,804 |
| 55,521 | 115 | 24,413 | 5,395 | 3,649 | 33,572 |
| 55,522 | 117 | 24,695 | 5,438 | 3,670 | 33,920 |
| 55,523 | 119 | 24,606 | 5,409 | 3,665 | 33,799 |
| 55,524 | 124 | 24,357 | 5,375 | 3,623 | 33,479 |
| 55,525 | 124 | 24,262 | 5,368 | 3,612 | 33,366 |
| 55,526 | 125 | 24,198 | 5,367 | 3,617 | 33,307 |
| 55,527 | 127 | 23,901 | 5,337 | 3,591 | 32,956 |
| 55,528 | 128 | 23,609 | 5,319 | 3,565 | 32,621 |
| 55,529 | 133 | 23,853 | 5,367 | 3,597 | 32,950 |
| 55,530 | 135 | 23,960 | 5,388 | 3,625 | 33,108 |
| 55,531 | 142 | 23,408 | 5,271 | 3,541 | 32,362 |
| 55,532 | 143 | 23,476 | 5,262 | 3,549 | 32,430 |
| 55,533 | 138 | 23,391 | 5,286 | 3,558 | 32,373 |
| 55,534 | 147 | 23,060 | 5,242 | 3,541 | 31,990 |
| 55,535 | 147 | 22,863 | 5,193 | 3,505 | 31,708 |
| 55,536 | 155 | 23,191 | 5,335 | 3,594 | 32,275 |
| 55,537 | 161 | 23,132 | 5,349 | 3,620 | 32,262 |
| 55,538 | 164 | 23,093 | 5,355 | 3,631 | 32,243 |
| 55,539 | 159 | 22,871 | 5,348 | 3,617 | 31,995 |
| 55,540 | 160 | 22,810 | 5,350 | 3,614 | 31,934 |
| 55,541 | 161 | 22,721 | 5,333 | 3,594 | 31,809 |
| 55,542 | 163 | 22,833 | 5,346 | 3,612 | 31,954 |
| 55,543 | 158 | 22,633 | 5,314 | 3,592 | 31,697 |



|        |     |        |       |       |        |
|--------|-----|--------|-------|-------|--------|
| 55,544 | 160 | 22,552 | 5,306 | 3,594 | 31,612 |
| 55,545 | 158 | 22,574 | 5,307 | 3,616 | 31,655 |
| 55,546 | 154 | 22,597 | 5,369 | 3,623 | 31,743 |
| 55,547 | 156 | 22,570 | 5,341 | 3,614 | 31,681 |
| 55,548 | 143 | 22,415 | 5,341 | 3,614 | 31,513 |
| 55,549 | 135 | 22,466 | 5,304 | 3,621 | 31,526 |
| 55,550 | 134 | 22,408 | 5,279 | 3,595 | 31,416 |
| 55,551 | 138 | 22,719 | 5,341 | 3,634 | 31,832 |
| 55,552 | 135 | 22,399 | 5,301 | 3,611 | 31,446 |
| 55,553 | 133 | 22,123 | 5,276 | 3,593 | 31,125 |
| 55,554 | 133 | 22,414 | 5,336 | 3,674 | 31,557 |
| 55,555 | 136 | 22,468 | 5,335 | 3,683 | 31,622 |
| 55,556 | 134 | 22,394 | 5,347 | 3,679 | 31,554 |
| 55,557 | 136 | 22,451 | 5,368 | 3,699 | 31,654 |
| 55,558 | 140 | 22,192 | 5,358 | 3,684 | 31,374 |
| 55,559 | 140 | 21,989 | 5,332 | 3,661 | 31,122 |
| 55,560 | 144 | 22,297 | 5,378 | 3,683 | 31,502 |
| 55,561 | 144 | 22,308 | 5,402 | 3,699 | 31,553 |
| 55,562 | 146 | 22,374 | 5,375 | 3,698 | 31,593 |
| 55,563 | 144 | 22,283 | 5,358 | 3,683 | 31,468 |
| 55,564 | 145 | 22,570 | 5,413 | 3,725 | 31,853 |
| 55,565 | 143 | 22,553 | 5,369 | 3,701 | 31,766 |
| 55,566 | 143 | 22,382 | 5,345 | 3,711 | 31,581 |
| 55,567 | 143 | 22,362 | 5,361 | 3,728 | 31,594 |
| 55,568 | 147 | 22,389 | 5,388 | 3,762 | 31,686 |
| 55,569 | 146 | 22,187 | 5,337 | 3,741 | 31,411 |
| 55,570 | 147 | 22,131 | 5,297 | 3,733 | 31,308 |
| 55,571 | 147 | 22,210 | 5,334 | 3,773 | 31,464 |
| 55,572 | 145 | 22,200 | 5,319 | 3,770 | 31,434 |
| 55,573 | 144 | 22,277 | 5,319 | 3,784 | 31,524 |
| 55,574 | 144 | 22,297 | 5,334 | 3,784 | 31,559 |
| 55,575 | 142 | 22,041 | 5,269 | 3,729 | 31,181 |

|        |     |        |       |       |        |
|--------|-----|--------|-------|-------|--------|
| 55,576 | 142 | 21,977 | 5,277 | 3,721 | 31,117 |
| 55,577 | 140 | 22,242 | 5,345 | 3,791 | 31,518 |
| 55,578 | 132 | 21,619 | 5,157 | 3,691 | 30,599 |
| 55,579 | 134 | 21,641 | 5,168 | 3,707 | 30,650 |
| 55,580 | 135 | 21,907 | 5,203 | 3,738 | 30,983 |
| 55,581 | 137 | 21,833 | 5,198 | 3,694 | 30,862 |
| 55,582 | 124 | 21,198 | 5,054 | 3,573 | 29,949 |
| 55,583 | 122 | 21,493 | 5,104 | 3,616 | 30,335 |
| 55,584 | 119 | 21,531 | 5,099 | 3,595 | 30,344 |
| 55,585 | 108 | 21,140 | 5,031 | 3,558 | 29,837 |
| 55,586 | 111 | 21,279 | 5,101 | 3,603 | 30,094 |
| 55,587 | 104 | 21,319 | 5,105 | 3,608 | 30,136 |
| 55,588 | 102 | 21,360 | 5,098 | 3,598 | 30,158 |
| 55,589 | 106 | 21,491 | 5,113 | 3,601 | 30,311 |
| 55,590 | 106 | 21,457 | 5,102 | 3,598 | 30,263 |
| 55,591 | 107 | 21,453 | 5,118 | 3,600 | 30,278 |
| 55,592 | 108 | 21,310 | 5,083 | 3,589 | 30,090 |
| 55,593 | 104 | 21,165 | 5,061 | 3,566 | 29,896 |
| 55,594 | 109 | 22,185 | 5,264 | 3,672 | 31,230 |
| 55,595 | 114 | 22,289 | 5,298 | 3,669 | 31,370 |
| 55,596 | 113 | 22,099 | 5,244 | 3,627 | 31,083 |
| 55,597 | 111 | 22,073 | 5,241 | 3,639 | 31,064 |
| 55,598 | 119 | 22,066 | 5,198 | 3,637 | 31,020 |
| 55,599 | 118 | 21,901 | 5,161 | 3,589 | 30,769 |
| 55,600 | 119 | 22,148 | 5,230 | 3,609 | 31,106 |
| 55,601 | 123 | 22,103 | 5,223 | 3,618 | 31,067 |
| 55,602 | 119 | 21,648 | 5,118 | 3,561 | 30,446 |
| 55,603 | 124 | 21,292 | 5,003 | 3,496 | 29,915 |
| 55,604 | 124 | 21,039 | 4,933 | 3,437 | 29,533 |
| 55,605 | 126 | 21,292 | 4,994 | 3,461 | 29,873 |
| 55,606 | 131 | 21,069 | 4,953 | 3,459 | 29,612 |
| 55,607 | 130 | 21,073 | 4,969 | 3,462 | 29,634 |

|        |     |        |       |       |        |
|--------|-----|--------|-------|-------|--------|
| 55,608 | 126 | 20,901 | 4,947 | 3,446 | 29,420 |
| 55,609 | 133 | 21,156 | 4,973 | 3,485 | 29,747 |
| 55,610 | 135 | 21,300 | 4,979 | 3,483 | 29,897 |
| 55,611 | 133 | 20,970 | 4,900 | 3,425 | 29,428 |
| 55,612 | 138 | 20,976 | 4,907 | 3,422 | 29,443 |
| 55,613 | 136 | 20,858 | 4,892 | 3,396 | 29,282 |
| 55,614 | 137 | 21,312 | 4,980 | 3,457 | 29,886 |
| 55,615 | 140 | 21,264 | 4,963 | 3,426 | 29,793 |
| 55,616 | 143 | 21,324 | 4,953 | 3,381 | 29,801 |
| 55,617 | 143 | 21,688 | 4,999 | 3,425 | 30,255 |
| 55,618 | 147 | 21,882 | 5,066 | 3,444 | 30,539 |
| 55,619 | 144 | 21,742 | 5,034 | 3,415 | 30,335 |
| 55,620 | 146 | 22,000 | 5,108 | 3,449 | 30,703 |
| 55,621 | 149 | 22,115 | 5,128 | 3,472 | 30,864 |
| 55,622 | 154 | 22,208 | 5,111 | 3,477 | 30,950 |
| 55,623 | 161 | 22,156 | 5,141 | 3,481 | 30,939 |
| 55,624 | 161 | 21,913 | 5,112 | 3,449 | 30,635 |
| 55,625 | 159 | 21,931 | 5,125 | 3,452 | 30,667 |
| 55,626 | 164 | 22,268 | 5,187 | 3,486 | 31,105 |
| 55,627 | 168 | 22,398 | 5,189 | 3,469 | 31,224 |
| 55,628 | 167 | 22,221 | 5,132 | 3,434 | 30,954 |
| 55,629 | 167 | 22,217 | 5,174 | 3,434 | 30,992 |
| 55,630 | 171 | 22,274 | 5,170 | 3,429 | 31,044 |
| 55,631 | 169 | 22,058 | 5,135 | 3,396 | 30,758 |
| 55,632 | 168 | 22,196 | 5,207 | 3,464 | 31,035 |
| 55,633 | 171 | 22,321 | 5,231 | 3,536 | 31,259 |
| 55,634 | 174 | 22,065 | 5,137 | 3,479 | 30,855 |
| 55,635 | 176 | 22,214 | 5,180 | 3,490 | 31,060 |
| 55,636 | 175 | 22,418 | 5,209 | 3,540 | 31,342 |
| 55,637 | 179 | 22,575 | 5,269 | 3,565 | 31,588 |
| 55,638 | 177 | 22,613 | 5,265 | 3,553 | 31,608 |
| 55,639 | 177 | 22,409 | 5,241 | 3,524 | 31,351 |

|        |     |        |       |       |        |
|--------|-----|--------|-------|-------|--------|
| 55,640 | 172 | 22,616 | 5,286 | 3,555 | 31,629 |
| 55,641 | 169 | 22,498 | 5,243 | 3,534 | 31,444 |
| 55,642 | 167 | 22,547 | 5,267 | 3,550 | 31,531 |
| 55,643 | 165 | 22,561 | 5,272 | 3,562 | 31,560 |
| 55,644 | 170 | 22,775 | 5,306 | 3,607 | 31,858 |
| 55,645 | 166 | 22,410 | 5,239 | 3,580 | 31,395 |
| 55,646 | 173 | 22,468 | 5,254 | 3,589 | 31,484 |
| 55,647 | 175 | 22,845 | 5,330 | 3,658 | 32,008 |
| 55,648 | 171 | 22,760 | 5,298 | 3,609 | 31,838 |
| 55,649 | 172 | 22,763 | 5,316 | 3,617 | 31,868 |
| 55,650 | 173 | 22,891 | 5,344 | 3,647 | 32,055 |
| 55,651 | 169 | 22,665 | 5,298 | 3,611 | 31,743 |
| 55,652 | 169 | 22,588 | 5,275 | 3,596 | 31,628 |
| 55,653 | 168 | 22,624 | 5,279 | 3,596 | 31,667 |
| 55,654 | 166 | 22,710 | 5,300 | 3,610 | 31,786 |
| 55,655 | 168 | 22,733 | 5,283 | 3,582 | 31,766 |
| 55,656 | 167 | 22,880 | 5,277 | 3,590 | 31,914 |
| 55,657 | 164 | 22,790 | 5,235 | 3,545 | 31,734 |
| 55,658 | 164 | 22,836 | 5,239 | 3,549 | 31,788 |
| 55,659 | 161 | 23,040 | 5,275 | 3,567 | 32,043 |
| 55,660 | 157 | 22,926 | 5,231 | 3,528 | 31,842 |
| 55,661 | 158 | 23,004 | 5,219 | 3,513 | 31,894 |
| 55,662 | 157 | 23,013 | 5,209 | 3,519 | 31,898 |
| 55,663 | 154 | 23,218 | 5,277 | 3,565 | 32,214 |
| 55,664 | 157 | 23,503 | 5,360 | 3,633 | 32,653 |
| 55,665 | 156 | 23,443 | 5,378 | 3,632 | 32,609 |
| 55,666 | 153 | 23,450 | 5,355 | 3,626 | 32,584 |
| 55,667 | 152 | 23,729 | 5,435 | 3,676 | 32,992 |
| 55,668 | 153 | 23,813 | 5,449 | 3,691 | 33,106 |
| 55,669 | 150 | 23,895 | 5,408 | 3,715 | 33,168 |
| 55,670 | 154 | 24,069 | 5,417 | 3,711 | 33,351 |
| 55,671 | 163 | 24,495 | 5,487 | 3,755 | 33,900 |

|        |     |        |       |       |        |
|--------|-----|--------|-------|-------|--------|
| 55,672 | 156 | 24,473 | 5,468 | 3,745 | 33,842 |
| 55,673 | 154 | 24,497 | 5,485 | 3,752 | 33,888 |
| 55,674 | 149 | 24,763 | 5,520 | 3,782 | 34,214 |
| 55,675 | 149 | 24,583 | 5,480 | 3,757 | 33,969 |
| 55,676 | 143 | 24,571 | 5,477 | 3,762 | 33,953 |
| 55,677 | 140 | 24,458 | 5,449 | 3,771 | 33,818 |
| 55,678 | 140 | 24,463 | 5,418 | 3,774 | 33,795 |
| 55,679 | 142 | 24,496 | 5,410 | 3,782 | 33,830 |
| 55,680 | 142 | 24,783 | 5,456 | 3,813 | 34,194 |
| 55,681 | 138 | 24,621 | 5,450 | 3,798 | 34,007 |
| 55,682 | 144 | 24,909 | 5,519 | 3,843 | 34,415 |
| 55,683 | 145 | 24,929 | 5,527 | 3,825 | 34,426 |
| 55,684 | 143 | 25,029 | 5,532 | 3,816 | 34,520 |
| 55,685 | 140 | 24,332 | 5,390 | 3,704 | 33,566 |
| 55,686 | 139 | 24,686 | 5,416 | 3,732 | 33,973 |
| 55,687 | 136 | 25,049 | 5,482 | 3,759 | 34,426 |
| 55,688 | 136 | 24,965 | 5,439 | 3,759 | 34,299 |
| 55,689 | 142 | 24,970 | 5,443 | 3,745 | 34,300 |
| 55,690 | 140 | 24,750 | 5,389 | 3,720 | 33,999 |
| 55,691 | 141 | 24,859 | 5,415 | 3,752 | 34,167 |
| 55,692 | 142 | 24,916 | 5,413 | 3,707 | 34,178 |
| 55,693 | 147 | 25,052 | 5,472 | 3,739 | 34,410 |
| 55,694 | 143 | 24,552 | 5,361 | 3,616 | 33,672 |
| 55,695 | 145 | 24,657 | 5,397 | 3,627 | 33,826 |
| 55,696 | 143 | 24,887 | 5,462 | 3,668 | 34,160 |
| 55,697 | 145 | 24,859 | 5,428 | 3,625 | 34,057 |
| 55,698 | 144 | 24,850 | 5,439 | 3,597 | 34,030 |
| 55,699 | 139 | 24,469 | 5,379 | 3,558 | 33,545 |
| 55,700 | 141 | 24,581 | 5,370 | 3,557 | 33,649 |
| 55,701 | 140 | 24,394 | 5,334 | 3,533 | 33,401 |
| 55,702 | 140 | 24,533 | 5,369 | 3,548 | 33,590 |
| 55,703 | 140 | 24,546 | 5,411 | 3,536 | 33,633 |

|        |     |        |       |       |        |
|--------|-----|--------|-------|-------|--------|
| 55,704 | 136 | 24,472 | 5,410 | 3,516 | 33,534 |
| 55,705 | 135 | 24,141 | 5,327 | 3,485 | 33,088 |
| 55,706 | 133 | 24,090 | 5,322 | 3,496 | 33,041 |
| 55,707 | 132 | 24,080 | 5,351 | 3,509 | 33,072 |
| 55,708 | 129 | 23,690 | 5,243 | 3,441 | 32,503 |
| 55,709 | 130 | 23,771 | 5,237 | 3,456 | 32,594 |
| 55,710 | 127 | 23,696 | 5,250 | 3,456 | 32,529 |
| 55,711 | 125 | 23,506 | 5,259 | 3,471 | 32,361 |
| 55,712 | 125 | 23,502 | 5,314 | 3,496 | 32,437 |
| 55,713 | 122 | 23,324 | 5,302 | 3,494 | 32,242 |
| 55,714 | 122 | 23,183 | 5,265 | 3,457 | 32,027 |
| 55,715 | 119 | 23,046 | 5,206 | 3,409 | 31,780 |
| 55,716 | 118 | 22,838 | 5,159 | 3,381 | 31,496 |
| 55,717 | 118 | 22,924 | 5,194 | 3,410 | 31,646 |
| 55,718 | 125 | 22,584 | 5,166 | 3,375 | 31,250 |
| 55,719 | 124 | 22,508 | 5,152 | 3,375 | 31,159 |
| 55,720 | 122 | 22,153 | 5,113 | 3,324 | 30,712 |
| 55,721 | 123 | 21,996 | 5,106 | 3,318 | 30,543 |
| 55,722 | 118 | 21,954 | 5,110 | 3,311 | 30,493 |
| 55,723 | 115 | 21,860 | 5,108 | 3,268 | 30,351 |
| 55,724 | 121 | 21,702 | 5,067 | 3,238 | 30,128 |
| 55,725 | 120 | 21,737 | 5,069 | 3,239 | 30,165 |
| 55,726 | 123 | 21,711 | 5,072 | 3,229 | 30,135 |
| 55,727 | 123 | 21,633 | 5,075 | 3,236 | 30,067 |
| 55,728 | 124 | 21,712 | 5,098 | 3,250 | 30,184 |
| 55,729 | 124 | 21,731 | 5,109 | 3,249 | 30,213 |
| 55,730 | 123 | 21,521 | 5,071 | 3,210 | 29,925 |
| 55,731 | 127 | 22,018 | 5,199 | 3,302 | 30,646 |
| 55,732 | 130 | 21,938 | 5,163 | 3,298 | 30,529 |
| 55,733 | 131 | 21,935 | 5,140 | 3,274 | 30,480 |
| 55,734 | 134 | 21,482 | 5,014 | 3,196 | 29,826 |
| 55,735 | 134 | 21,464 | 5,041 | 3,195 | 29,834 |

|        |     |        |       |       |        |
|--------|-----|--------|-------|-------|--------|
| 55,736 | 127 | 21,172 | 4,999 | 3,204 | 29,502 |
| 55,737 | 131 | 21,278 | 5,051 | 3,236 | 29,696 |
| 55,738 | 130 | 21,056 | 5,020 | 3,210 | 29,416 |
| 55,739 | 133 | 21,023 | 5,007 | 3,195 | 29,358 |
| 55,740 | 127 | 20,783 | 4,985 | 3,192 | 29,087 |
| 55,741 | 131 | 20,892 | 5,020 | 3,226 | 29,269 |
| 55,742 | 130 | 20,878 | 5,023 | 3,229 | 29,260 |
| 55,743 | 138 | 20,966 | 5,013 | 3,233 | 29,350 |
| 55,744 | 133 | 20,814 | 4,933 | 3,213 | 29,093 |
| 55,745 | 133 | 20,884 | 4,948 | 3,226 | 29,191 |
| 55,746 | 134 | 20,700 | 4,923 | 3,246 | 29,003 |
| 55,747 | 137 | 20,858 | 4,970 | 3,265 | 29,230 |
| 55,748 | 135 | 21,109 | 5,017 | 3,332 | 29,593 |
| 55,749 | 135 | 21,150 | 5,011 | 3,348 | 29,644 |
| 55,750 | 134 | 21,083 | 5,037 | 3,358 | 29,612 |
| 55,751 | 140 | 21,099 | 5,070 | 3,381 | 29,690 |
| 55,752 | 139 | 20,993 | 5,052 | 3,360 | 29,544 |
| 55,753 | 140 | 21,059 | 5,056 | 3,385 | 29,640 |
| 55,754 | 143 | 20,929 | 5,018 | 3,392 | 29,482 |
| 55,755 | 143 | 20,854 | 4,988 | 3,396 | 29,381 |
| 55,756 | 145 | 20,684 | 4,969 | 3,373 | 29,171 |
| 55,757 | 144 | 20,535 | 4,952 | 3,345 | 28,976 |
| 55,758 | 146 | 21,247 | 5,100 | 3,451 | 29,944 |
| 55,759 | 145 | 21,108 | 5,087 | 3,414 | 29,754 |
| 55,760 | 144 | 20,868 | 5,004 | 3,336 | 29,352 |
| 55,761 | 143 | 21,027 | 5,032 | 3,354 | 29,556 |
| 55,762 | 141 | 21,243 | 5,090 | 3,391 | 29,865 |
| 55,763 | 143 | 21,193 | 5,067 | 3,368 | 29,771 |
| 55,764 | 152 | 21,188 | 5,047 | 3,353 | 29,740 |
| 55,765 | 149 | 20,878 | 4,993 | 3,321 | 29,341 |
| 55,766 | 153 | 21,131 | 5,065 | 3,363 | 29,712 |
| 55,767 | 154 | 21,016 | 5,063 | 3,335 | 29,568 |

|        |     |        |       |       |        |
|--------|-----|--------|-------|-------|--------|
| 55,768 | 151 | 20,787 | 4,966 | 3,278 | 29,182 |
| 55,769 | 147 | 20,480 | 4,875 | 3,204 | 28,706 |
| 55,770 | 147 | 20,502 | 4,890 | 3,206 | 28,745 |
| 55,771 | 148 | 20,296 | 4,869 | 3,173 | 28,486 |
| 55,772 | 146 | 20,076 | 4,804 | 3,146 | 28,172 |
| 55,773 | 146 | 20,831 | 4,978 | 3,256 | 29,211 |
| 55,774 | 146 | 20,544 | 4,922 | 3,237 | 28,849 |
| 55,775 | 140 | 21,034 | 5,092 | 3,366 | 29,632 |
| 55,776 | 138 | 20,988 | 5,091 | 3,373 | 29,590 |
| 55,777 | 137 | 20,880 | 5,035 | 3,362 | 29,414 |
| 55,778 | 136 | 20,811 | 5,037 | 3,339 | 29,323 |
| 55,779 | 140 | 21,069 | 5,092 | 3,403 | 29,704 |
| 55,780 | 142 | 21,059 | 5,082 | 3,417 | 29,700 |
| 55,781 | 142 | 20,877 | 5,023 | 3,378 | 29,420 |
| 55,782 | 140 | 20,895 | 5,014 | 3,365 | 29,414 |
| 55,783 | 140 | 20,846 | 5,012 | 3,357 | 29,355 |
| 55,784 | 135 | 20,889 | 5,017 | 3,373 | 29,414 |
| 55,785 | 132 | 21,141 | 5,099 | 3,462 | 29,834 |
| 55,786 | 150 | 21,103 | 5,057 | 3,424 | 29,734 |
| 55,787 | 150 | 21,143 | 5,046 | 3,421 | 29,760 |
| 55,788 | 147 | 20,983 | 5,039 | 3,376 | 29,545 |
| 55,789 | 150 | 21,106 | 5,051 | 3,408 | 29,715 |
| 55,790 | 147 | 21,036 | 5,065 | 3,425 | 29,673 |
| 55,791 | 149 | 21,059 | 5,056 | 3,391 | 29,655 |
| 55,792 | 149 | 21,005 | 5,047 | 3,388 | 29,589 |
| 55,793 | 143 | 20,848 | 5,050 | 3,389 | 29,430 |
| 55,794 | 144 | 20,829 | 5,065 | 3,394 | 29,432 |
| 55,795 | 143 | 20,792 | 5,067 | 3,392 | 29,394 |
| 55,796 | 145 | 21,110 | 5,112 | 3,431 | 29,798 |
| 55,797 | 136 | 21,233 | 5,174 | 3,474 | 30,017 |
| 55,798 | 130 | 21,004 | 5,127 | 3,446 | 29,707 |
| 55,799 | 138 | 21,108 | 5,179 | 3,441 | 29,866 |



|        |     |        |       |       |        |
|--------|-----|--------|-------|-------|--------|
| 55,800 | 141 | 21,297 | 5,212 | 3,472 | 30,122 |
| 55,801 | 139 | 21,584 | 5,202 | 3,483 | 30,408 |
| 55,802 | 143 | 21,593 | 5,194 | 3,467 | 30,397 |
| 55,803 | 143 | 21,656 | 5,205 | 3,445 | 30,449 |
| 55,804 | 140 | 21,805 | 5,222 | 3,443 | 30,610 |
| 55,805 | 140 | 21,761 | 5,227 | 3,429 | 30,557 |
| 55,806 | 146 | 22,203 | 5,314 | 3,489 | 31,152 |
| 55,807 | 150 | 22,333 | 5,326 | 3,489 | 31,298 |
| 55,808 | 153 | 22,113 | 5,273 | 3,442 | 30,981 |
| 55,809 | 150 | 21,998 | 5,257 | 3,428 | 30,833 |
| 55,810 | 151 | 22,556 | 5,366 | 3,514 | 31,587 |
| 55,811 | 154 | 22,432 | 5,315 | 3,496 | 31,397 |
| 55,812 | 155 | 22,400 | 5,306 | 3,495 | 31,356 |
| 55,813 | 165 | 22,574 | 5,336 | 3,510 | 31,585 |
| 55,814 | 163 | 22,379 | 5,292 | 3,489 | 31,323 |
| 55,815 | 154 | 22,142 | 5,261 | 3,472 | 31,029 |
| 55,816 | 154 | 22,526 | 5,365 | 3,510 | 31,555 |
| 55,817 | 156 | 22,258 | 5,316 | 3,468 | 31,198 |
| 55,818 | 163 | 22,406 | 5,354 | 3,498 | 31,421 |
| 55,819 | 165 | 22,391 | 5,364 | 3,490 | 31,410 |
| 55,820 | 162 | 22,012 | 5,223 | 3,426 | 30,823 |
| 55,821 | 167 | 22,108 | 5,219 | 3,448 | 30,942 |
| 55,822 | 166 | 22,358 | 5,277 | 3,480 | 31,281 |
| 55,823 | 169 | 22,736 | 5,355 | 3,508 | 31,768 |
| 55,824 | 167 | 22,332 | 5,267 | 3,458 | 31,224 |
| 55,825 | 166 | 22,471 | 5,311 | 3,481 | 31,429 |
| 55,826 | 166 | 22,357 | 5,328 | 3,463 | 31,314 |
| 55,827 | 166 | 22,625 | 5,406 | 3,491 | 31,688 |
| 55,828 | 158 | 21,723 | 5,205 | 3,327 | 30,413 |
| 55,829 | 160 | 21,798 | 5,227 | 3,315 | 30,500 |
| 55,830 | 164 | 22,031 | 5,253 | 3,338 | 30,786 |
| 55,831 | 164 | 22,047 | 5,257 | 3,328 | 30,796 |

|        |     |        |       |       |        |
|--------|-----|--------|-------|-------|--------|
| 55,832 | 171 | 21,935 | 5,261 | 3,296 | 30,663 |
| 55,833 | 171 | 22,088 | 5,306 | 3,296 | 30,861 |
| 55,834 | 168 | 22,380 | 5,370 | 3,358 | 31,276 |
| 55,835 | 159 | 22,014 | 5,307 | 3,307 | 30,787 |
| 55,836 | 158 | 22,132 | 5,316 | 3,293 | 30,899 |
| 55,837 | 152 | 22,210 | 5,333 | 3,302 | 30,997 |
| 55,838 | 158 | 21,922 | 5,299 | 3,269 | 30,648 |
| 55,839 | 158 | 21,966 | 5,296 | 3,278 | 30,698 |
| 55,840 | 157 | 21,954 | 5,289 | 3,263 | 30,663 |
| 55,841 | 154 | 21,925 | 5,267 | 3,234 | 30,580 |
| 55,842 | 158 | 21,868 | 5,243 | 3,223 | 30,492 |
| 55,843 | 157 | 21,853 | 5,256 | 3,214 | 30,480 |
| 55,844 | 155 | 21,894 | 5,263 | 3,228 | 30,540 |
| 55,845 | 159 | 21,790 | 5,249 | 3,228 | 30,426 |
| 55,846 | 159 | 21,691 | 5,246 | 3,228 | 30,324 |
| 55,847 | 160 | 21,277 | 5,137 | 3,163 | 29,737 |
| 55,848 | 164 | 21,435 | 5,173 | 3,164 | 29,936 |
| 55,849 | 160 | 21,607 | 5,225 | 3,192 | 30,184 |
| 55,850 | 159 | 21,274 | 5,170 | 3,159 | 29,762 |
| 55,851 | 160 | 21,107 | 5,140 | 3,152 | 29,559 |
| 55,852 | 160 | 21,212 | 5,215 | 3,189 | 29,776 |
| 55,853 | 150 | 20,877 | 5,146 | 3,156 | 29,329 |
| 55,854 | 151 | 20,723 | 5,116 | 3,153 | 29,143 |
| 55,855 | 152 | 20,753 | 5,147 | 3,153 | 29,205 |
| 55,856 | 152 | 20,596 | 5,154 | 3,147 | 29,049 |
| 55,857 | 148 | 20,655 | 5,194 | 3,157 | 29,154 |
| 55,858 | 147 | 20,498 | 5,165 | 3,154 | 28,964 |
| 55,859 | 149 | 20,422 | 5,172 | 3,151 | 28,894 |
| 55,860 | 151 | 20,287 | 5,168 | 3,123 | 28,729 |
| 55,861 | 150 | 20,084 | 5,129 | 3,095 | 28,458 |
| 55,862 | 151 | 19,993 | 5,122 | 3,091 | 28,357 |
| 55,863 | 156 | 20,242 | 5,191 | 3,119 | 28,708 |

|        |     |        |       |       |        |
|--------|-----|--------|-------|-------|--------|
| 55,864 | 151 | 19,968 | 5,114 | 3,078 | 28,311 |
| 55,865 | 151 | 19,943 | 5,087 | 3,073 | 28,254 |
| 55,866 | 152 | 19,903 | 5,030 | 3,056 | 28,141 |
| 55,867 | 152 | 19,763 | 4,993 | 3,027 | 27,935 |
| 55,868 | 150 | 20,022 | 5,089 | 3,093 | 28,354 |
| 55,869 | 149 | 19,864 | 5,090 | 3,090 | 28,193 |
| 55,870 | 151 | 19,970 | 5,163 | 3,141 | 28,425 |
| 55,871 | 148 | 19,925 | 5,183 | 3,167 | 28,423 |
| 55,872 | 143 | 19,586 | 5,170 | 3,148 | 28,047 |
| 55,873 | 145 | 19,727 | 5,197 | 3,156 | 28,225 |
| 55,874 | 142 | 19,693 | 5,213 | 3,172 | 28,220 |
| 55,875 | 142 | 19,717 | 5,207 | 3,182 | 28,248 |
| 55,876 | 148 | 19,573 | 5,177 | 3,140 | 28,038 |
| 55,877 | 148 | 19,470 | 5,131 | 3,133 | 27,882 |
| 55,878 | 155 | 19,521 | 5,126 | 3,155 | 27,957 |
| 55,879 | 156 | 19,292 | 5,097 | 3,129 | 27,674 |
| 55,880 | 159 | 20,118 | 5,365 | 3,286 | 28,928 |
| 55,881 | 152 | 19,772 | 5,333 | 3,248 | 28,505 |
| 55,882 | 152 | 19,710 | 5,321 | 3,262 | 28,445 |
| 55,883 | 141 | 19,744 | 5,362 | 3,261 | 28,508 |
| 55,884 | 144 | 19,707 | 5,359 | 3,275 | 28,485 |
| 55,885 | 151 | 19,571 | 5,321 | 3,235 | 28,278 |
| 55,886 | 147 | 19,416 | 5,287 | 3,216 | 28,066 |
| 55,887 | 151 | 19,552 | 5,383 | 3,267 | 28,353 |
| 55,888 | 146 | 19,211 | 5,322 | 3,233 | 27,912 |
| 55,889 | 148 | 19,369 | 5,347 | 3,269 | 28,133 |
| 55,890 | 148 | 19,071 | 5,316 | 3,227 | 27,762 |
| 55,891 | 148 | 18,998 | 5,320 | 3,227 | 27,693 |
| 55,892 | 147 | 19,055 | 5,342 | 3,240 | 27,784 |
| 55,893 | 145 | 19,024 | 5,339 | 3,257 | 27,765 |
| 55,894 | 147 | 18,786 | 5,290 | 3,246 | 27,469 |
| 55,895 | 146 | 18,621 | 5,259 | 3,209 | 27,235 |

|        |     |        |       |       |        |
|--------|-----|--------|-------|-------|--------|
| 55,896 | 148 | 18,856 | 5,353 | 3,213 | 27,570 |
| 55,897 | 152 | 18,785 | 5,365 | 3,192 | 27,494 |
| 55,898 | 157 | 18,996 | 5,402 | 3,224 | 27,779 |
| 55,899 | 157 | 18,879 | 5,385 | 3,209 | 27,630 |
| 55,900 | 153 | 18,798 | 5,380 | 3,197 | 27,528 |
| 55,901 | 151 | 18,645 | 5,354 | 3,188 | 27,338 |
| 55,902 | 151 | 18,149 | 5,215 | 3,104 | 26,619 |
| 55,903 | 154 | 18,412 | 5,233 | 3,126 | 26,925 |
| 55,904 | 152 | 18,458 | 5,238 | 3,140 | 26,988 |
| 55,905 | 154 | 18,610 | 5,283 | 3,159 | 27,206 |
| 55,906 | 159 | 18,492 | 5,244 | 3,142 | 27,037 |
| 55,907 | 159 | 18,539 | 5,235 | 3,141 | 27,074 |
| 55,908 | 159 | 18,605 | 5,261 | 3,173 | 27,198 |
| 55,909 | 151 | 18,147 | 5,139 | 3,123 | 26,560 |
| 55,910 | 151 | 18,137 | 5,158 | 3,121 | 26,567 |
| 55,911 | 145 | 18,062 | 5,137 | 3,147 | 26,491 |
| 55,912 | 147 | 18,071 | 5,115 | 3,128 | 26,461 |
| 55,913 | 149 | 18,257 | 5,174 | 3,169 | 26,749 |
| 55,914 | 143 | 18,423 | 5,207 | 3,202 | 26,975 |
| 55,915 | 134 | 18,228 | 5,210 | 3,220 | 26,792 |
| 55,916 | 134 | 18,200 | 5,191 | 3,220 | 26,745 |
| 55,917 | 137 | 18,480 | 5,248 | 3,243 | 27,108 |
| 55,918 | 135 | 18,736 | 5,331 | 3,285 | 27,487 |
| 55,919 | 139 | 18,669 | 5,344 | 3,290 | 27,442 |
| 55,920 | 139 | 18,793 | 5,362 | 3,307 | 27,601 |
| 55,921 | 145 | 18,886 | 5,380 | 3,304 | 27,715 |
| 55,922 | 144 | 18,614 | 5,331 | 3,240 | 27,329 |
| 55,923 | 144 | 18,482 | 5,283 | 3,209 | 27,118 |
| 55,924 | 154 | 18,671 | 5,369 | 3,263 | 27,457 |
| 55,925 | 160 | 18,573 | 5,338 | 3,244 | 27,315 |
| 55,926 | 164 | 18,565 | 5,398 | 3,243 | 27,370 |
| 55,927 | 157 | 18,266 | 5,348 | 3,217 | 26,988 |

|        |     |        |       |       |        |
|--------|-----|--------|-------|-------|--------|
| 55,928 | 161 | 18,062 | 5,303 | 3,191 | 26,717 |
| 55,929 | 159 | 17,957 | 5,311 | 3,203 | 26,630 |
| 55,930 | 158 | 17,746 | 5,239 | 3,174 | 26,317 |
| 55,931 | 156 | 17,646 | 5,219 | 3,156 | 26,177 |
| 55,932 | 160 | 17,699 | 5,226 | 3,149 | 26,234 |
| 55,933 | 159 | 17,557 | 5,174 | 3,127 | 26,017 |
| 55,934 | 159 | 17,709 | 5,191 | 3,146 | 26,205 |
| 55,935 | 156 | 17,655 | 5,176 | 3,131 | 26,118 |
| 55,936 | 149 | 17,641 | 5,186 | 3,149 | 26,125 |
| 55,937 | 154 | 17,256 | 5,086 | 3,061 | 25,557 |
| 55,938 | 157 | 17,534 | 5,118 | 3,085 | 25,894 |
| 55,939 | 150 | 17,782 | 5,186 | 3,135 | 26,253 |
| 55,940 | 150 | 17,890 | 5,178 | 3,141 | 26,359 |
| 55,941 | 150 | 17,763 | 5,150 | 3,105 | 26,168 |
| 55,942 | 151 | 18,004 | 5,212 | 3,143 | 26,510 |
| 55,943 | 146 | 18,130 | 5,236 | 3,139 | 26,651 |
| 55,944 | 145 | 18,178 | 5,274 | 3,177 | 26,774 |
| 55,945 | 143 | 18,133 | 5,250 | 3,187 | 26,713 |
| 55,946 | 145 | 18,269 | 5,265 | 3,194 | 26,873 |
| 55,947 | 145 | 18,654 | 5,313 | 3,260 | 27,372 |
| 55,948 | 143 | 18,651 | 5,294 | 3,262 | 27,350 |
| 55,949 | 138 | 18,615 | 5,313 | 3,286 | 27,352 |
| 55,950 | 134 | 18,443 | 5,270 | 3,261 | 27,108 |
| 55,951 | 134 | 18,503 | 5,283 | 3,288 | 27,208 |
| 55,952 | 133 | 18,298 | 5,226 | 3,235 | 26,892 |
| 55,953 | 132 | 18,546 | 5,313 | 3,259 | 27,250 |
| 55,954 | 132 | 18,274 | 5,268 | 3,205 | 26,879 |
| 55,955 | 135 | 18,420 | 5,303 | 3,225 | 27,083 |
| 55,956 | 139 | 18,595 | 5,338 | 3,241 | 27,313 |
| 55,957 | 138 | 18,366 | 5,293 | 3,212 | 27,009 |
| 55,958 | 138 | 18,358 | 5,300 | 3,199 | 26,995 |
| 55,959 | 142 | 18,587 | 5,397 | 3,238 | 27,364 |

|        |     |        |       |       |        |
|--------|-----|--------|-------|-------|--------|
| 55,960 | 140 | 18,495 | 5,369 | 3,231 | 27,235 |
| 55,961 | 141 | 18,474 | 5,359 | 3,234 | 27,208 |
| 55,962 | 140 | 18,470 | 5,358 | 3,228 | 27,196 |
| 55,963 | 138 | 18,546 | 5,414 | 3,275 | 27,373 |
| 55,964 | 138 | 18,238 | 5,330 | 3,228 | 26,934 |
| 55,965 | 143 | 18,269 | 5,349 | 3,222 | 26,983 |
| 55,966 | 153 | 18,504 | 5,400 | 3,250 | 27,307 |
| 55,967 | 152 | 18,539 | 5,431 | 3,258 | 27,380 |
| 55,968 | 157 | 18,559 | 5,366 | 3,244 | 27,326 |
| 55,969 | 153 | 18,713 | 5,378 | 3,273 | 27,517 |
| 55,970 | 156 | 18,478 | 5,271 | 3,222 | 27,127 |
| 55,971 | 158 | 18,766 | 5,332 | 3,280 | 27,536 |
| 55,972 | 158 | 19,016 | 5,358 | 3,318 | 27,850 |
| 55,973 | 167 | 19,395 | 5,446 | 3,369 | 28,377 |
| 55,974 | 158 | 19,620 | 5,469 | 3,425 | 28,672 |
| 55,975 | 157 | 19,686 | 5,482 | 3,443 | 28,768 |
| 55,976 | 151 | 19,815 | 5,480 | 3,453 | 28,899 |
| 55,977 | 146 | 19,536 | 5,346 | 3,395 | 28,423 |
| 55,978 | 148 | 19,829 | 5,370 | 3,421 | 28,768 |
| 55,979 | 142 | 19,831 | 5,400 | 3,429 | 28,802 |
| 55,980 | 141 | 20,042 | 5,387 | 3,423 | 28,993 |
| 55,981 | 139 | 19,785 | 5,299 | 3,365 | 28,588 |
| 55,982 | 142 | 20,097 | 5,363 | 3,397 | 28,999 |
| 55,983 | 139 | 20,006 | 5,341 | 3,387 | 28,873 |
| 55,984 | 145 | 20,048 | 5,403 | 3,443 | 29,039 |
| 55,985 | 150 | 20,194 | 5,462 | 3,490 | 29,296 |
| 55,986 | 149 | 20,294 | 5,490 | 3,482 | 29,415 |
| 55,987 | 145 | 20,223 | 5,437 | 3,474 | 29,279 |
| 55,988 | 142 | 20,122 | 5,408 | 3,475 | 29,147 |
| 55,989 | 141 | 20,442 | 5,504 | 3,507 | 29,594 |
| 55,990 | 143 | 20,643 | 5,548 | 3,522 | 29,856 |
| 55,991 | 142 | 20,324 | 5,428 | 3,464 | 29,358 |

|        |     |        |       |       |        |
|--------|-----|--------|-------|-------|--------|
| 55,992 | 140 | 20,466 | 5,475 | 3,472 | 29,553 |
| 55,993 | 144 | 20,658 | 5,526 | 3,489 | 29,817 |
| 55,994 | 156 | 20,583 | 5,494 | 3,468 | 29,701 |
| 55,995 | 156 | 20,661 | 5,500 | 3,469 | 29,786 |
| 55,996 | 158 | 20,898 | 5,569 | 3,493 | 30,118 |
| 55,997 | 162 | 20,877 | 5,589 | 3,494 | 30,122 |
| 55,998 | 165 | 20,817 | 5,586 | 3,483 | 30,051 |
| 55,999 | 163 | 20,639 | 5,540 | 3,415 | 29,757 |
| 56,000 | 166 | 20,695 | 5,514 | 3,394 | 29,769 |
| 56,001 | 166 | 20,723 | 5,506 | 3,387 | 29,782 |
| 56,002 | 164 | 20,778 | 5,532 | 3,420 | 29,894 |
| 56,003 | 161 | 20,681 | 5,487 | 3,399 | 29,728 |
| 56,004 | 161 | 20,499 | 5,454 | 3,388 | 29,502 |
| 56,005 | 155 | 20,188 | 5,362 | 3,333 | 29,038 |
| 56,006 | 155 | 20,152 | 5,355 | 3,330 | 28,992 |
| 56,007 | 155 | 19,941 | 5,318 | 3,329 | 28,743 |
| 56,008 | 151 | 19,791 | 5,280 | 3,305 | 28,527 |
| 56,009 | 157 | 20,870 | 5,497 | 3,467 | 29,991 |
| 56,010 | 156 | 20,813 | 5,463 | 3,452 | 29,884 |
| 56,011 | 157 | 21,012 | 5,485 | 3,446 | 30,100 |
| 56,012 | 160 | 21,294 | 5,560 | 3,502 | 30,516 |
| 56,013 | 161 | 21,439 | 5,560 | 3,512 | 30,672 |
| 56,014 | 160 | 21,490 | 5,537 | 3,519 | 30,706 |
| 56,015 | 161 | 21,657 | 5,564 | 3,540 | 30,922 |
| 56,016 | 156 | 21,855 | 5,627 | 3,584 | 31,222 |
| 56,017 | 148 | 21,683 | 5,546 | 3,556 | 30,933 |
| 56,018 | 145 | 21,693 | 5,567 | 3,556 | 30,961 |
| 56,019 | 138 | 21,200 | 5,467 | 3,466 | 30,271 |
| 56,020 | 137 | 21,291 | 5,495 | 3,492 | 30,415 |
| 56,021 | 129 | 21,368 | 5,498 | 3,512 | 30,507 |
| 56,022 | 125 | 20,922 | 5,390 | 3,432 | 29,869 |
| 56,023 | 126 | 20,924 | 5,415 | 3,448 | 29,913 |

|        |     |        |       |       |        |
|--------|-----|--------|-------|-------|--------|
| 56,024 | 118 | 21,051 | 5,423 | 3,466 | 30,058 |
| 56,025 | 121 | 20,925 | 5,430 | 3,414 | 29,890 |
| 56,026 | 122 | 20,837 | 5,427 | 3,422 | 29,808 |
| 56,027 | 125 | 20,557 | 5,455 | 3,410 | 29,547 |
| 56,028 | 129 | 20,656 | 5,464 | 3,418 | 29,667 |
| 56,029 | 130 | 20,589 | 5,480 | 3,418 | 29,617 |
| 56,030 | 130 | 20,460 | 5,416 | 3,396 | 29,402 |
| 56,031 | 133 | 20,627 | 5,491 | 3,434 | 29,685 |
| 56,032 | 141 | 20,741 | 5,548 | 3,466 | 29,896 |
| 56,033 | 140 | 20,658 | 5,574 | 3,490 | 29,862 |
| 56,034 | 142 | 20,873 | 5,639 | 3,522 | 30,176 |
| 56,035 | 147 | 20,841 | 5,597 | 3,494 | 30,079 |
| 56,036 | 142 | 20,714 | 5,559 | 3,467 | 29,882 |
| 56,037 | 147 | 20,925 | 5,683 | 3,546 | 30,301 |
| 56,038 | 143 | 20,665 | 5,618 | 3,488 | 29,914 |
| 56,039 | 144 | 20,532 | 5,639 | 3,509 | 29,824 |
| 56,040 | 145 | 20,660 | 5,683 | 3,553 | 30,041 |
| 56,041 | 143 | 20,516 | 5,658 | 3,566 | 29,883 |
| 56,042 | 143 | 20,499 | 5,675 | 3,571 | 29,888 |
| 56,043 | 142 | 20,695 | 5,762 | 3,629 | 30,228 |
| 56,044 | 141 | 20,792 | 5,780 | 3,656 | 30,369 |
| 56,045 | 135 | 20,559 | 5,711 | 3,611 | 30,016 |
| 56,046 | 135 | 20,648 | 5,724 | 3,640 | 30,147 |
| 56,047 | 137 | 20,771 | 5,786 | 3,702 | 30,396 |
| 56,048 | 133 | 20,809 | 5,803 | 3,700 | 30,445 |
| 56,049 | 131 | 20,796 | 5,803 | 3,718 | 30,448 |
| 56,050 | 133 | 20,623 | 5,807 | 3,707 | 30,270 |
| 56,051 | 132 | 20,824 | 5,852 | 3,740 | 30,548 |
| 56,052 | 139 | 20,948 | 5,892 | 3,735 | 30,714 |
| 56,053 | 140 | 20,986 | 5,858 | 3,735 | 30,719 |
| 56,054 | 149 | 21,268 | 5,890 | 3,752 | 31,059 |
| 56,055 | 154 | 21,163 | 5,878 | 3,734 | 30,929 |



|        |     |        |       |       |        |
|--------|-----|--------|-------|-------|--------|
| 56,056 | 151 | 21,009 | 5,836 | 3,713 | 30,709 |
| 56,057 | 153 | 21,516 | 5,978 | 3,814 | 31,461 |
| 56,058 | 145 | 21,325 | 5,930 | 3,788 | 31,188 |
| 56,059 | 142 | 21,343 | 5,948 | 3,808 | 31,241 |
| 56,060 | 141 | 21,234 | 5,949 | 3,798 | 31,122 |
| 56,061 | 141 | 21,276 | 5,947 | 3,797 | 31,161 |
| 56,062 | 145 | 21,567 | 5,994 | 3,851 | 31,557 |
| 56,063 | 149 | 21,625 | 6,005 | 3,835 | 31,614 |
| 56,064 | 149 | 21,415 | 5,974 | 3,789 | 31,327 |
| 56,065 | 150 | 21,494 | 5,962 | 3,765 | 31,371 |
| 56,066 | 153 | 21,338 | 5,922 | 3,739 | 31,152 |
| 56,067 | 155 | 21,539 | 5,950 | 3,759 | 31,403 |
| 56,068 | 154 | 21,699 | 6,019 | 3,800 | 31,672 |
| 56,069 | 152 | 21,587 | 5,998 | 3,822 | 31,559 |
| 56,070 | 156 | 21,771 | 6,022 | 3,839 | 31,788 |
| 56,071 | 160 | 21,818 | 6,023 | 3,828 | 31,829 |
| 56,072 | 161 | 21,801 | 6,036 | 3,819 | 31,817 |
| 56,073 | 159 | 21,684 | 6,014 | 3,793 | 31,650 |
| 56,074 | 159 | 21,710 | 6,014 | 3,792 | 31,675 |
| 56,075 | 158 | 21,625 | 6,014 | 3,773 | 31,570 |
| 56,076 | 154 | 21,679 | 6,012 | 3,759 | 31,604 |
| 56,077 | 150 | 21,637 | 5,925 | 3,704 | 31,416 |
| 56,078 | 150 | 21,920 | 5,967 | 3,740 | 31,777 |
| 56,079 | 144 | 22,003 | 5,982 | 3,764 | 31,893 |
| 56,080 | 138 | 21,990 | 5,955 | 3,752 | 31,835 |
| 56,081 | 138 | 21,777 | 5,935 | 3,750 | 31,600 |
| 56,082 | 132 | 22,084 | 5,972 | 3,802 | 31,990 |
| 56,083 | 135 | 22,253 | 5,977 | 3,824 | 32,189 |
| 56,084 | 138 | 22,369 | 6,027 | 3,819 | 32,353 |
| 56,085 | 137 | 22,288 | 6,021 | 3,810 | 32,256 |
| 56,086 | 127 | 22,118 | 5,911 | 3,737 | 31,893 |
| 56,087 | 125 | 22,252 | 5,920 | 3,732 | 32,029 |

|        |     |        |       |       |        |
|--------|-----|--------|-------|-------|--------|
| 56,088 | 124 | 21,895 | 5,742 | 3,639 | 31,400 |
| 56,089 | 124 | 22,206 | 5,800 | 3,683 | 31,813 |
| 56,090 | 122 | 22,470 | 5,865 | 3,736 | 32,193 |
| 56,091 | 121 | 22,426 | 5,836 | 3,705 | 32,088 |
| 56,092 | 121 | 22,430 | 5,813 | 3,702 | 32,066 |
| 56,093 | 123 | 22,253 | 5,768 | 3,682 | 31,826 |
| 56,094 | 125 | 22,501 | 5,796 | 3,710 | 32,132 |
| 56,095 | 122 | 22,441 | 5,774 | 3,706 | 32,043 |
| 56,096 | 119 | 21,940 | 5,673 | 3,603 | 31,335 |
| 56,097 | 122 | 22,189 | 5,702 | 3,615 | 31,628 |
| 56,098 | 115 | 22,363 | 5,726 | 3,618 | 31,822 |
| 56,099 | 116 | 22,226 | 5,660 | 3,553 | 31,555 |
| 56,100 | 114 | 22,290 | 5,662 | 3,565 | 31,631 |
| 56,101 | 113 | 22,038 | 5,570 | 3,515 | 31,236 |
| 56,102 | 113 | 22,019 | 5,563 | 3,531 | 31,226 |
| 56,103 | 112 | 21,800 | 5,502 | 3,523 | 30,937 |
| 56,104 | 110 | 21,614 | 5,500 | 3,504 | 30,728 |
| 56,105 | 104 | 22,283 | 5,684 | 3,641 | 31,712 |
| 56,106 | 97  | 22,143 | 5,653 | 3,616 | 31,509 |
| 56,107 | 97  | 21,965 | 5,595 | 3,586 | 31,243 |
| 56,108 | 97  | 21,938 | 5,584 | 3,570 | 31,189 |
| 56,109 | 107 | 22,225 | 5,651 | 3,609 | 31,592 |
| 56,110 | 109 | 21,827 | 5,537 | 3,517 | 30,990 |
| 56,111 | 107 | 21,913 | 5,538 | 3,534 | 31,092 |
| 56,112 | 115 | 21,677 | 5,519 | 3,510 | 30,821 |
| 56,113 | 111 | 21,462 | 5,508 | 3,485 | 30,566 |
| 56,114 | 107 | 22,379 | 5,711 | 3,673 | 31,870 |
| 56,115 | 105 | 22,063 | 5,652 | 3,621 | 31,441 |
| 56,116 | 119 | 21,822 | 5,627 | 3,596 | 31,164 |
| 56,117 | 114 | 21,654 | 5,620 | 3,587 | 30,975 |
| 56,118 | 128 | 22,339 | 5,815 | 3,717 | 31,999 |
| 56,119 | 131 | 22,133 | 5,779 | 3,667 | 31,710 |

|        |     |        |       |       |        |
|--------|-----|--------|-------|-------|--------|
| 56,120 | 133 | 22,393 | 5,837 | 3,676 | 32,039 |
| 56,121 | 132 | 22,641 | 5,914 | 3,739 | 32,426 |
| 56,122 | 135 | 22,745 | 5,943 | 3,768 | 32,591 |
| 56,123 | 140 | 22,613 | 5,902 | 3,741 | 32,396 |
| 56,124 | 141 | 22,557 | 5,886 | 3,735 | 32,319 |
| 56,125 | 149 | 22,747 | 5,920 | 3,775 | 32,591 |
| 56,126 | 148 | 22,566 | 5,857 | 3,749 | 32,320 |
| 56,127 | 149 | 22,692 | 5,908 | 3,808 | 32,557 |
| 56,128 | 149 | 22,415 | 5,854 | 3,777 | 32,195 |
| 56,129 | 151 | 22,450 | 5,923 | 3,818 | 32,342 |
| 56,130 | 152 | 22,301 | 5,914 | 3,791 | 32,158 |
| 56,131 | 151 | 22,538 | 5,966 | 3,822 | 32,477 |
| 56,132 | 151 | 22,540 | 5,963 | 3,790 | 32,444 |
| 56,133 | 143 | 21,901 | 5,807 | 3,677 | 31,528 |
| 56,134 | 144 | 22,097 | 5,849 | 3,710 | 31,800 |
| 56,135 | 156 | 22,370 | 5,907 | 3,760 | 32,193 |
| 56,136 | 156 | 22,100 | 5,844 | 3,728 | 31,828 |
| 56,137 | 154 | 21,705 | 5,781 | 3,698 | 31,338 |
| 56,138 | 156 | 22,097 | 5,937 | 3,777 | 31,967 |
| 56,139 | 158 | 21,991 | 5,909 | 3,766 | 31,824 |
| 56,140 | 158 | 21,961 | 5,900 | 3,755 | 31,774 |
| 56,141 | 157 | 21,755 | 5,828 | 3,719 | 31,459 |
| 56,142 | 160 | 21,028 | 5,667 | 3,595 | 30,450 |
| 56,143 | 162 | 21,218 | 5,693 | 3,630 | 30,703 |
| 56,144 | 162 | 21,453 | 5,735 | 3,658 | 31,008 |
| 56,145 | 162 | 21,436 | 5,746 | 3,661 | 31,005 |
| 56,146 | 165 | 21,926 | 5,859 | 3,727 | 31,677 |
| 56,147 | 162 | 21,645 | 5,792 | 3,695 | 31,294 |
| 56,148 | 166 | 21,671 | 5,795 | 3,697 | 31,329 |
| 56,149 | 166 | 21,575 | 5,780 | 3,713 | 31,234 |
| 56,150 | 173 | 21,822 | 5,841 | 3,781 | 31,617 |
| 56,151 | 173 | 21,718 | 5,851 | 3,799 | 31,541 |

|        |     |        |       |       |        |
|--------|-----|--------|-------|-------|--------|
| 56,152 | 174 | 21,655 | 5,854 | 3,806 | 31,489 |
| 56,153 | 178 | 21,711 | 5,869 | 3,812 | 31,570 |
| 56,154 | 179 | 21,760 | 5,901 | 3,801 | 31,641 |
| 56,155 | 182 | 21,644 | 5,870 | 3,750 | 31,446 |
| 56,156 | 183 | 21,750 | 5,892 | 3,770 | 31,595 |
| 56,157 | 187 | 22,126 | 5,940 | 3,837 | 32,090 |
| 56,158 | 182 | 21,555 | 5,804 | 3,764 | 31,305 |
| 56,159 | 185 | 21,777 | 5,885 | 3,810 | 31,657 |
| 56,160 | 181 | 21,920 | 5,951 | 3,852 | 31,904 |
| 56,161 | 180 | 21,860 | 5,958 | 3,844 | 31,842 |
| 56,162 | 186 | 21,960 | 5,988 | 3,846 | 31,980 |
| 56,163 | 185 | 22,077 | 5,984 | 3,839 | 32,085 |
| 56,164 | 183 | 21,843 | 5,906 | 3,783 | 31,715 |
| 56,165 | 168 | 21,059 | 5,720 | 3,665 | 30,612 |
| 56,166 | 169 | 21,407 | 5,796 | 3,702 | 31,074 |
| 56,167 | 165 | 21,307 | 5,768 | 3,663 | 30,903 |
| 56,168 | 170 | 21,518 | 5,781 | 3,673 | 31,142 |
| 56,169 | 164 | 21,507 | 5,761 | 3,665 | 31,097 |
| 56,170 | 161 | 21,273 | 5,689 | 3,615 | 30,738 |
| 56,171 | 151 | 20,936 | 5,546 | 3,515 | 30,148 |
| 56,172 | 154 | 21,098 | 5,587 | 3,550 | 30,389 |
| 56,173 | 149 | 21,344 | 5,640 | 3,580 | 30,713 |
| 56,174 | 154 | 21,296 | 5,597 | 3,579 | 30,626 |
| 56,175 | 144 | 21,338 | 5,614 | 3,565 | 30,661 |
| 56,176 | 151 | 21,554 | 5,633 | 3,583 | 30,921 |
| 56,177 | 152 | 21,837 | 5,661 | 3,608 | 31,258 |
| 56,178 | 155 | 21,996 | 5,666 | 3,613 | 31,430 |
| 56,179 | 156 | 22,246 | 5,735 | 3,647 | 31,784 |
| 56,180 | 159 | 22,249 | 5,698 | 3,637 | 31,743 |
| 56,181 | 165 | 22,273 | 5,670 | 3,632 | 31,740 |
| 56,182 | 165 | 21,968 | 5,620 | 3,589 | 31,342 |
| 56,183 | 168 | 22,705 | 5,781 | 3,704 | 32,358 |

|        |     |        |       |       |        |
|--------|-----|--------|-------|-------|--------|
| 56,184 | 168 | 22,312 | 5,677 | 3,651 | 31,808 |
| 56,185 | 168 | 22,469 | 5,727 | 3,667 | 32,031 |
| 56,186 | 159 | 22,758 | 5,750 | 3,708 | 32,375 |
| 56,187 | 164 | 22,834 | 5,757 | 3,691 | 32,446 |
| 56,188 | 162 | 22,734 | 5,711 | 3,659 | 32,266 |
| 56,189 | 164 | 22,670 | 5,693 | 3,677 | 32,204 |
| 56,190 | 165 | 22,670 | 5,710 | 3,653 | 32,198 |
| 56,191 | 166 | 22,689 | 5,698 | 3,621 | 32,174 |
| 56,192 | 167 | 22,900 | 5,748 | 3,645 | 32,460 |
| 56,193 | 168 | 23,060 | 5,797 | 3,659 | 32,684 |
| 56,194 | 166 | 22,889 | 5,783 | 3,628 | 32,466 |
| 56,195 | 166 | 23,027 | 5,842 | 3,652 | 32,687 |
| 56,196 | 168 | 23,118 | 5,862 | 3,663 | 32,811 |
| 56,197 | 178 | 23,475 | 5,968 | 3,691 | 33,312 |
| 56,198 | 177 | 23,480 | 5,954 | 3,700 | 33,311 |
| 56,199 | 173 | 23,678 | 6,033 | 3,775 | 33,659 |
| 56,200 | 168 | 23,955 | 6,107 | 3,803 | 34,033 |
| 56,201 | 161 | 23,501 | 5,968 | 3,685 | 33,315 |
| 56,202 | 161 | 23,615 | 5,988 | 3,704 | 33,468 |
| 56,203 | 158 | 23,557 | 5,992 | 3,692 | 33,399 |
| 56,204 | 158 | 23,658 | 6,034 | 3,732 | 33,582 |
| 56,205 | 156 | 24,025 | 6,072 | 3,766 | 34,019 |
| 56,206 | 154 | 24,009 | 6,023 | 3,762 | 33,948 |
| 56,207 | 160 | 23,867 | 6,007 | 3,741 | 33,775 |
| 56,208 | 156 | 23,717 | 6,005 | 3,697 | 33,575 |
| 56,209 | 157 | 23,986 | 6,081 | 3,740 | 33,964 |
| 56,210 | 158 | 24,065 | 6,021 | 3,732 | 33,976 |
| 56,211 | 158 | 24,022 | 6,022 | 3,741 | 33,943 |
| 56,212 | 157 | 23,894 | 6,007 | 3,732 | 33,790 |
| 56,213 | 152 | 24,154 | 6,087 | 3,783 | 34,176 |
| 56,214 | 146 | 24,235 | 6,085 | 3,798 | 34,264 |
| 56,215 | 152 | 23,569 | 5,930 | 3,693 | 33,344 |

|        |     |        |       |       |        |
|--------|-----|--------|-------|-------|--------|
| 56,216 | 151 | 23,873 | 5,964 | 3,728 | 33,716 |
| 56,217 | 151 | 24,104 | 6,016 | 3,780 | 34,051 |
| 56,218 | 152 | 24,344 | 6,066 | 3,811 | 34,373 |
| 56,219 | 146 | 24,002 | 6,028 | 3,781 | 33,957 |
| 56,220 | 146 | 24,059 | 6,036 | 3,792 | 34,033 |
| 56,221 | 151 | 23,824 | 6,006 | 3,783 | 33,764 |
| 56,222 | 152 | 23,740 | 6,013 | 3,753 | 33,658 |
| 56,223 | 149 | 23,807 | 6,020 | 3,758 | 33,734 |
| 56,224 | 147 | 23,492 | 5,960 | 3,730 | 33,329 |
| 56,225 | 143 | 23,457 | 5,986 | 3,722 | 33,308 |
| 56,226 | 142 | 23,306 | 5,986 | 3,710 | 33,144 |
| 56,227 | 142 | 23,464 | 6,033 | 3,734 | 33,373 |
| 56,228 | 142 | 23,535 | 6,045 | 3,764 | 33,486 |
| 56,229 | 141 | 23,481 | 6,021 | 3,774 | 33,417 |
| 56,230 | 142 | 23,432 | 6,011 | 3,761 | 33,346 |
| 56,231 | 136 | 23,594 | 6,094 | 3,846 | 33,670 |
| 56,232 | 127 | 23,386 | 6,113 | 3,865 | 33,491 |
| 56,233 | 130 | 23,261 | 6,047 | 3,864 | 33,302 |
| 56,234 | 129 | 23,299 | 6,066 | 3,890 | 33,384 |
| 56,235 | 130 | 23,376 | 6,105 | 3,897 | 33,508 |
| 56,236 | 131 | 23,337 | 6,130 | 3,896 | 33,494 |
| 56,237 | 131 | 23,298 | 6,133 | 3,895 | 33,457 |
| 56,238 | 125 | 23,339 | 6,152 | 3,935 | 33,551 |
| 56,239 | 123 | 23,383 | 6,147 | 3,921 | 33,574 |
| 56,240 | 124 | 23,458 | 6,114 | 3,921 | 33,617 |
| 56,241 | 121 | 23,219 | 6,041 | 3,919 | 33,300 |
| 56,242 | 120 | 23,092 | 6,022 | 3,929 | 33,163 |
| 56,243 | 120 | 23,163 | 6,030 | 3,936 | 33,249 |
| 56,244 | 114 | 23,196 | 6,012 | 3,955 | 33,277 |
| 56,245 | 117 | 23,219 | 5,990 | 3,965 | 33,291 |
| 56,246 | 114 | 23,081 | 5,918 | 3,930 | 33,043 |
| 56,247 | 106 | 22,966 | 5,877 | 3,917 | 32,866 |

|        |     |        |       |       |        |
|--------|-----|--------|-------|-------|--------|
| 56,248 | 102 | 22,865 | 5,819 | 3,914 | 32,700 |
| 56,249 | 100 | 22,463 | 5,754 | 3,873 | 32,190 |
| 56,250 | 106 | 22,796 | 5,794 | 3,882 | 32,578 |
| 56,251 | 106 | 22,812 | 5,762 | 3,875 | 32,555 |
| 56,252 | 110 | 22,648 | 5,708 | 3,835 | 32,301 |
| 56,253 | 107 | 22,639 | 5,699 | 3,836 | 32,281 |
| 56,254 | 107 | 22,585 | 5,675 | 3,828 | 32,195 |
| 56,255 | 110 | 22,787 | 5,726 | 3,856 | 32,479 |
| 56,256 | 109 | 22,689 | 5,715 | 3,847 | 32,360 |
| 56,257 | 106 | 22,382 | 5,665 | 3,827 | 31,980 |
| 56,258 | 102 | 22,404 | 5,667 | 3,838 | 32,011 |
| 56,259 | 97  | 22,082 | 5,582 | 3,810 | 31,571 |
| 56,260 | 100 | 22,052 | 5,568 | 3,798 | 31,518 |
| 56,261 | 97  | 22,001 | 5,577 | 3,797 | 31,472 |
| 56,262 | 97  | 21,965 | 5,578 | 3,800 | 31,440 |
| 56,263 | 97  | 21,947 | 5,558 | 3,802 | 31,404 |
| 56,264 | 96  | 21,459 | 5,446 | 3,771 | 30,772 |
| 56,265 | 99  | 21,632 | 5,483 | 3,812 | 31,026 |
| 56,266 | 103 | 21,647 | 5,493 | 3,809 | 31,052 |
| 56,267 | 104 | 21,435 | 5,468 | 3,798 | 30,805 |
| 56,268 | 103 | 21,698 | 5,569 | 3,856 | 31,226 |
| 56,269 | 99  | 21,577 | 5,528 | 3,824 | 31,028 |
| 56,270 | 100 | 21,861 | 5,559 | 3,863 | 31,383 |
| 56,271 | 95  | 22,183 | 5,626 | 3,920 | 31,824 |
| 56,272 | 93  | 21,955 | 5,569 | 3,901 | 31,518 |
| 56,273 | 93  | 21,961 | 5,592 | 3,922 | 31,568 |
| 56,274 | 96  | 21,934 | 5,619 | 3,940 | 31,589 |
| 56,275 | 102 | 22,359 | 5,705 | 3,989 | 32,155 |
| 56,276 | 102 | 22,397 | 5,713 | 4,012 | 32,224 |
| 56,277 | 98  | 22,609 | 5,749 | 4,022 | 32,478 |
| 56,278 | 94  | 22,114 | 5,661 | 3,927 | 31,796 |
| 56,279 | 95  | 22,316 | 5,692 | 3,935 | 32,038 |

|        |     |        |       |       |        |
|--------|-----|--------|-------|-------|--------|
| 56,280 | 95  | 22,471 | 5,729 | 3,965 | 32,260 |
| 56,281 | 96  | 22,599 | 5,724 | 3,969 | 32,388 |
| 56,282 | 106 | 22,163 | 5,622 | 3,832 | 31,723 |
| 56,283 | 106 | 22,505 | 5,648 | 3,858 | 32,117 |
| 56,284 | 111 | 22,809 | 5,705 | 3,875 | 32,500 |
| 56,285 | 111 | 22,745 | 5,686 | 3,838 | 32,380 |
| 56,286 | 109 | 22,495 | 5,607 | 3,799 | 32,010 |
| 56,287 | 108 | 22,641 | 5,660 | 3,842 | 32,251 |
| 56,288 | 106 | 22,568 | 5,609 | 3,797 | 32,080 |
| 56,289 | 110 | 22,519 | 5,584 | 3,790 | 32,003 |
| 56,290 | 110 | 22,472 | 5,575 | 3,796 | 31,953 |
| 56,291 | 109 | 22,493 | 5,605 | 3,807 | 32,014 |
| 56,292 | 120 | 22,719 | 5,676 | 3,808 | 32,323 |
| 56,293 | 119 | 22,626 | 5,662 | 3,800 | 32,207 |
| 56,294 | 120 | 22,767 | 5,738 | 3,828 | 32,453 |
| 56,295 | 121 | 22,844 | 5,734 | 3,830 | 32,529 |
| 56,296 | 118 | 22,669 | 5,698 | 3,799 | 32,284 |
| 56,297 | 121 | 23,023 | 5,783 | 3,854 | 32,781 |
| 56,298 | 124 | 22,784 | 5,714 | 3,802 | 32,424 |
| 56,299 | 128 | 22,802 | 5,719 | 3,806 | 32,455 |
| 56,300 | 128 | 22,834 | 5,700 | 3,794 | 32,456 |
| 56,301 | 129 | 23,021 | 5,775 | 3,861 | 32,786 |
| 56,302 | 134 | 23,014 | 5,801 | 3,878 | 32,827 |
| 56,303 | 131 | 22,916 | 5,769 | 3,880 | 32,696 |
| 56,304 | 132 | 22,938 | 5,761 | 3,874 | 32,705 |
| 56,305 | 132 | 23,022 | 5,744 | 3,865 | 32,763 |
| 56,306 | 129 | 23,113 | 5,776 | 3,864 | 32,882 |
| 56,307 | 127 | 23,205 | 5,829 | 3,920 | 33,081 |
| 56,308 | 127 | 22,973 | 5,739 | 3,827 | 32,666 |
| 56,309 | 130 | 23,124 | 5,807 | 3,847 | 32,908 |
| 56,310 | 128 | 23,354 | 5,849 | 3,854 | 33,185 |
| 56,311 | 127 | 23,227 | 5,821 | 3,833 | 33,008 |



|        |     |        |       |       |        |
|--------|-----|--------|-------|-------|--------|
| 56,312 | 128 | 23,072 | 5,749 | 3,772 | 32,721 |
| 56,313 | 129 | 23,261 | 5,790 | 3,789 | 32,969 |
| 56,314 | 129 | 23,486 | 5,825 | 3,819 | 33,259 |
| 56,315 | 131 | 23,436 | 5,822 | 3,815 | 33,204 |
| 56,316 | 128 | 23,344 | 5,804 | 3,763 | 33,039 |
| 56,317 | 130 | 23,266 | 5,774 | 3,748 | 32,918 |
| 56,318 | 136 | 23,036 | 5,686 | 3,710 | 32,568 |
| 56,319 | 135 | 22,683 | 5,606 | 3,637 | 32,061 |
| 56,320 | 140 | 22,773 | 5,660 | 3,686 | 32,259 |
| 56,321 | 142 | 22,852 | 5,682 | 3,668 | 32,344 |
| 56,322 | 146 | 23,014 | 5,725 | 3,707 | 32,592 |
| 56,323 | 147 | 23,066 | 5,701 | 3,693 | 32,607 |
| 56,324 | 146 | 23,079 | 5,674 | 3,695 | 32,594 |
| 56,325 | 140 | 23,307 | 5,715 | 3,720 | 32,882 |
| 56,326 | 142 | 23,194 | 5,699 | 3,719 | 32,754 |
| 56,327 | 147 | 23,035 | 5,648 | 3,675 | 32,505 |
| 56,328 | 153 | 23,249 | 5,671 | 3,689 | 32,762 |
| 56,329 | 158 | 22,938 | 5,594 | 3,625 | 32,315 |
| 56,330 | 160 | 22,933 | 5,602 | 3,624 | 32,319 |
| 56,331 | 164 | 22,237 | 5,454 | 3,498 | 31,353 |
| 56,332 | 164 | 22,482 | 5,495 | 3,545 | 31,686 |
| 56,333 | 159 | 22,663 | 5,538 | 3,572 | 31,932 |
| 56,334 | 159 | 22,647 | 5,533 | 3,579 | 31,918 |
| 56,335 | 156 | 23,132 | 5,631 | 3,642 | 32,561 |
| 56,336 | 158 | 23,302 | 5,636 | 3,670 | 32,766 |
| 56,337 | 163 | 23,359 | 5,683 | 3,692 | 32,897 |
| 56,338 | 164 | 23,383 | 5,658 | 3,696 | 32,901 |
| 56,339 | 162 | 23,620 | 5,700 | 3,721 | 33,203 |
| 56,340 | 167 | 23,699 | 5,666 | 3,721 | 33,253 |
| 56,341 | 170 | 23,994 | 5,705 | 3,755 | 33,624 |
| 56,342 | 167 | 24,408 | 5,794 | 3,808 | 34,177 |
| 56,343 | 161 | 24,443 | 5,730 | 3,771 | 34,105 |

|        |     |        |       |       |        |
|--------|-----|--------|-------|-------|--------|
| 56,344 | 161 | 24,450 | 5,703 | 3,766 | 34,080 |
| 56,345 | 160 | 24,524 | 5,706 | 3,764 | 34,154 |
| 56,346 | 172 | 24,381 | 5,727 | 3,759 | 34,039 |
| 56,347 | 173 | 24,606 | 5,776 | 3,811 | 34,366 |
| 56,348 | 174 | 24,432 | 5,692 | 3,764 | 34,062 |
| 56,349 | 171 | 24,197 | 5,661 | 3,761 | 33,790 |
| 56,350 | 168 | 24,340 | 5,699 | 3,799 | 34,006 |
| 56,351 | 166 | 24,144 | 5,641 | 3,725 | 33,676 |
| 56,352 | 166 | 24,420 | 5,690 | 3,745 | 34,021 |
| 56,353 | 161 | 24,286 | 5,669 | 3,746 | 33,862 |
| 56,354 | 160 | 24,215 | 5,669 | 3,752 | 33,796 |
| 56,355 | 162 | 24,322 | 5,716 | 3,806 | 34,006 |
| 56,356 | 166 | 24,360 | 5,755 | 3,830 | 34,111 |
| 56,357 | 165 | 24,166 | 5,706 | 3,789 | 33,826 |
| 56,358 | 176 | 24,489 | 5,766 | 3,826 | 34,257 |
| 56,359 | 176 | 24,304 | 5,743 | 3,812 | 34,035 |
| 56,360 | 173 | 24,331 | 5,729 | 3,819 | 34,052 |
| 56,361 | 176 | 24,470 | 5,760 | 3,867 | 34,273 |
| 56,362 | 176 | 24,696 | 5,792 | 3,886 | 34,550 |
| 56,363 | 176 | 24,478 | 5,726 | 3,827 | 34,207 |
| 56,364 | 175 | 24,661 | 5,776 | 3,867 | 34,479 |
| 56,365 | 171 | 24,696 | 5,775 | 3,873 | 34,515 |
| 56,366 | 161 | 23,864 | 5,640 | 3,748 | 33,413 |
| 56,367 | 166 | 24,132 | 5,679 | 3,794 | 33,771 |
| 56,368 | 163 | 24,408 | 5,706 | 3,827 | 34,104 |
| 56,369 | 163 | 24,344 | 5,697 | 3,815 | 34,019 |
| 56,370 | 161 | 24,682 | 5,786 | 3,891 | 34,520 |
| 56,371 | 161 | 24,809 | 5,811 | 3,908 | 34,689 |
| 56,372 | 159 | 24,817 | 5,821 | 3,910 | 34,707 |
| 56,373 | 158 | 24,810 | 5,787 | 3,905 | 34,660 |
| 56,374 | 160 | 24,534 | 5,714 | 3,864 | 34,272 |
| 56,375 | 161 | 24,419 | 5,694 | 3,833 | 34,107 |

|        |     |        |       |       |        |
|--------|-----|--------|-------|-------|--------|
| 56,376 | 161 | 24,509 | 5,687 | 3,842 | 34,199 |
| 56,377 | 162 | 24,580 | 5,666 | 3,839 | 34,247 |
| 56,378 | 160 | 24,557 | 5,628 | 3,834 | 34,179 |
| 56,379 | 154 | 24,207 | 5,574 | 3,804 | 33,739 |
| 56,380 | 149 | 24,075 | 5,581 | 3,807 | 33,612 |
| 56,381 | 138 | 23,902 | 5,536 | 3,807 | 33,383 |
| 56,382 | 141 | 24,072 | 5,544 | 3,821 | 33,578 |
| 56,383 | 146 | 23,798 | 5,515 | 3,765 | 33,224 |
| 56,384 | 141 | 23,572 | 5,454 | 3,743 | 32,910 |
| 56,385 | 146 | 23,938 | 5,515 | 3,788 | 33,387 |
| 56,386 | 145 | 23,767 | 5,504 | 3,772 | 33,188 |
| 56,387 | 139 | 23,480 | 5,447 | 3,712 | 32,778 |
| 56,388 | 145 | 23,543 | 5,434 | 3,696 | 32,818 |
| 56,389 | 144 | 23,308 | 5,419 | 3,677 | 32,548 |
| 56,390 | 147 | 23,344 | 5,454 | 3,693 | 32,638 |
| 56,391 | 139 | 23,066 | 5,414 | 3,651 | 32,270 |
| 56,392 | 142 | 23,226 | 5,438 | 3,654 | 32,460 |
| 56,393 | 147 | 22,821 | 5,388 | 3,606 | 31,962 |
| 56,394 | 157 | 22,955 | 5,441 | 3,647 | 32,200 |
| 56,395 | 162 | 22,812 | 5,428 | 3,632 | 32,034 |
| 56,396 | 161 | 22,690 | 5,410 | 3,634 | 31,895 |
| 56,397 | 147 | 22,612 | 5,402 | 3,629 | 31,790 |
| 56,398 | 145 | 22,530 | 5,393 | 3,606 | 31,674 |
| 56,399 | 146 | 22,565 | 5,359 | 3,576 | 31,646 |
| 56,400 | 145 | 22,504 | 5,364 | 3,572 | 31,585 |
| 56,401 | 146 | 22,507 | 5,367 | 3,566 | 31,586 |
| 56,402 | 146 | 22,409 | 5,353 | 3,558 | 31,466 |
| 56,403 | 144 | 22,232 | 5,296 | 3,557 | 31,229 |
| 56,404 | 144 | 22,138 | 5,288 | 3,542 | 31,112 |
| 56,405 | 144 | 22,152 | 5,278 | 3,519 | 31,093 |
| 56,406 | 139 | 22,201 | 5,310 | 3,511 | 31,161 |
| 56,407 | 129 | 21,708 | 5,173 | 3,433 | 30,443 |

|        |     |        |       |       |        |
|--------|-----|--------|-------|-------|--------|
| 56,408 | 131 | 22,099 | 5,204 | 3,457 | 30,891 |
| 56,409 | 125 | 22,114 | 5,183 | 3,463 | 30,885 |
| 56,410 | 122 | 22,131 | 5,173 | 3,457 | 30,883 |
| 56,411 | 120 | 22,530 | 5,248 | 3,501 | 31,399 |
| 56,412 | 127 | 22,613 | 5,213 | 3,488 | 31,441 |
| 56,413 | 127 | 22,352 | 5,171 | 3,466 | 31,116 |
| 56,414 | 125 | 22,458 | 5,208 | 3,505 | 31,296 |
| 56,415 | 125 | 22,366 | 5,172 | 3,484 | 31,147 |
| 56,416 | 122 | 22,372 | 5,144 | 3,466 | 31,104 |
| 56,417 | 124 | 22,670 | 5,189 | 3,514 | 31,497 |
| 56,418 | 120 | 22,990 | 5,250 | 3,544 | 31,904 |
| 56,419 | 117 | 23,086 | 5,281 | 3,553 | 32,037 |
| 56,420 | 117 | 23,208 | 5,305 | 3,576 | 32,206 |
| 56,421 | 123 | 23,394 | 5,326 | 3,601 | 32,444 |
| 56,422 | 124 | 23,354 | 5,323 | 3,577 | 32,378 |
| 56,423 | 125 | 22,998 | 5,265 | 3,521 | 31,909 |
| 56,424 | 126 | 22,947 | 5,252 | 3,512 | 31,837 |
| 56,425 | 124 | 22,906 | 5,232 | 3,505 | 31,767 |
| 56,426 | 126 | 22,907 | 5,213 | 3,495 | 31,741 |
| 56,427 | 121 | 22,630 | 5,189 | 3,456 | 31,396 |
| 56,428 | 122 | 22,637 | 5,214 | 3,449 | 31,422 |
| 56,429 | 119 | 22,655 | 5,237 | 3,471 | 31,482 |
| 56,430 | 121 | 22,832 | 5,224 | 3,493 | 31,670 |
| 56,431 | 124 | 22,734 | 5,219 | 3,490 | 31,567 |
| 56,432 | 124 | 22,637 | 5,217 | 3,485 | 31,463 |
| 56,433 | 126 | 23,009 | 5,286 | 3,530 | 31,951 |
| 56,434 | 119 | 22,854 | 5,226 | 3,493 | 31,692 |
| 56,435 | 114 | 23,075 | 5,296 | 3,535 | 32,020 |
| 56,436 | 119 | 23,098 | 5,306 | 3,544 | 32,067 |
| 56,437 | 123 | 22,656 | 5,191 | 3,508 | 31,478 |
| 56,438 | 123 | 22,738 | 5,214 | 3,519 | 31,594 |
| 56,439 | 112 | 22,930 | 5,234 | 3,545 | 31,821 |

|        |     |        |       |       |        |
|--------|-----|--------|-------|-------|--------|
| 56,440 | 113 | 22,583 | 5,125 | 3,485 | 31,306 |
| 56,441 | 113 | 22,437 | 5,135 | 3,474 | 31,159 |
| 56,442 | 116 | 22,612 | 5,183 | 3,507 | 31,418 |
| 56,443 | 108 | 22,297 | 5,154 | 3,493 | 31,052 |
| 56,444 | 108 | 22,392 | 5,187 | 3,510 | 31,197 |
| 56,445 | 101 | 22,388 | 5,207 | 3,521 | 31,217 |
| 56,446 | 100 | 22,309 | 5,217 | 3,543 | 31,169 |
| 56,447 | 100 | 22,136 | 5,181 | 3,519 | 30,936 |
| 56,448 | 108 | 22,125 | 5,196 | 3,531 | 30,960 |
| 56,449 | 107 | 22,155 | 5,212 | 3,550 | 31,024 |
| 56,450 | 105 | 22,099 | 5,208 | 3,561 | 30,973 |
| 56,451 | 107 | 22,409 | 5,294 | 3,595 | 31,405 |
| 56,452 | 104 | 22,532 | 5,292 | 3,612 | 31,540 |
| 56,453 | 105 | 22,505 | 5,279 | 3,586 | 31,475 |
| 56,454 | 106 | 22,760 | 5,345 | 3,624 | 31,835 |
| 56,455 | 107 | 22,800 | 5,321 | 3,608 | 31,836 |
| 56,456 | 109 | 22,981 | 5,362 | 3,637 | 32,089 |
| 56,457 | 116 | 23,296 | 5,467 | 3,692 | 32,571 |
| 56,458 | 122 | 23,250 | 5,493 | 3,706 | 32,571 |
| 56,459 | 124 | 23,133 | 5,501 | 3,731 | 32,489 |
| 56,460 | 124 | 23,220 | 5,515 | 3,744 | 32,603 |
| 56,461 | 127 | 22,902 | 5,466 | 3,710 | 32,205 |
| 56,462 | 125 | 22,641 | 5,423 | 3,688 | 31,877 |
| 56,463 | 119 | 22,924 | 5,485 | 3,728 | 32,256 |
| 56,464 | 118 | 22,987 | 5,482 | 3,730 | 32,317 |
| 56,465 | 123 | 23,361 | 5,575 | 3,780 | 32,839 |
| 56,466 | 123 | 23,150 | 5,537 | 3,761 | 32,571 |
| 56,467 | 132 | 23,231 | 5,586 | 3,792 | 32,741 |
| 56,468 | 143 | 23,115 | 5,598 | 3,794 | 32,650 |
| 56,469 | 153 | 22,882 | 5,570 | 3,784 | 32,389 |
| 56,470 | 160 | 22,848 | 5,590 | 3,806 | 32,404 |
| 56,471 | 162 | 22,632 | 5,541 | 3,769 | 32,104 |

|        |     |        |       |       |        |
|--------|-----|--------|-------|-------|--------|
| 56,472 | 158 | 22,260 | 5,480 | 3,714 | 31,612 |
| 56,473 | 160 | 22,332 | 5,513 | 3,756 | 31,761 |
| 56,474 | 170 | 22,403 | 5,510 | 3,770 | 31,853 |
| 56,475 | 171 | 22,322 | 5,508 | 3,761 | 31,762 |
| 56,476 | 167 | 22,438 | 5,568 | 3,801 | 31,974 |
| 56,477 | 166 | 22,490 | 5,647 | 3,841 | 32,144 |
| 56,478 | 164 | 22,628 | 5,669 | 3,853 | 32,314 |
| 56,479 | 167 | 22,647 | 5,676 | 3,876 | 32,366 |
| 56,480 | 166 | 22,555 | 5,710 | 3,873 | 32,304 |
| 56,481 | 161 | 22,697 | 5,754 | 3,882 | 32,494 |
| 56,482 | 162 | 23,116 | 5,826 | 3,917 | 33,021 |
| 56,483 | 161 | 23,356 | 5,865 | 3,954 | 33,336 |
| 56,484 | 161 | 23,535 | 5,925 | 3,989 | 33,610 |
| 56,485 | 160 | 23,381 | 5,891 | 3,972 | 33,404 |
| 56,486 | 175 | 23,726 | 5,964 | 4,026 | 33,891 |
| 56,487 | 181 | 23,706 | 5,967 | 4,023 | 33,877 |
| 56,488 | 187 | 23,651 | 5,928 | 4,005 | 33,771 |
| 56,489 | 192 | 23,694 | 5,976 | 4,019 | 33,881 |
| 56,490 | 190 | 23,740 | 6,026 | 4,012 | 33,968 |
| 56,491 | 193 | 23,768 | 6,022 | 4,020 | 34,003 |
| 56,492 | 194 | 23,931 | 6,125 | 4,062 | 34,312 |
| 56,493 | 190 | 24,130 | 6,139 | 4,106 | 34,565 |
| 56,494 | 190 | 23,930 | 6,081 | 4,072 | 34,273 |
| 56,495 | 193 | 23,940 | 6,070 | 4,084 | 34,287 |
| 56,496 | 191 | 24,191 | 6,073 | 4,102 | 34,557 |
| 56,497 | 185 | 24,165 | 6,004 | 4,087 | 34,441 |
| 56,498 | 185 | 24,203 | 6,027 | 4,075 | 34,490 |
| 56,499 | 190 | 24,035 | 5,996 | 4,030 | 34,251 |
| 56,500 | 190 | 23,941 | 5,971 | 4,023 | 34,125 |
| 56,501 | 195 | 24,056 | 6,008 | 4,036 | 34,295 |
| 56,502 | 195 | 23,954 | 6,000 | 4,029 | 34,178 |
| 56,503 | 195 | 23,782 | 5,974 | 4,006 | 33,957 |

|        |     |        |       |       |        |
|--------|-----|--------|-------|-------|--------|
| 56,504 | 194 | 23,646 | 5,966 | 3,993 | 33,799 |
| 56,505 | 193 | 23,845 | 5,975 | 4,023 | 34,036 |
| 56,506 | 194 | 23,649 | 5,956 | 4,017 | 33,816 |
| 56,507 | 192 | 23,511 | 5,889 | 3,978 | 33,570 |
| 56,508 | 191 | 23,494 | 5,864 | 3,974 | 33,523 |
| 56,509 | 188 | 23,338 | 5,805 | 3,925 | 33,256 |
| 56,510 | 193 | 23,473 | 5,810 | 3,927 | 33,403 |
| 56,511 | 196 | 23,207 | 5,784 | 3,887 | 33,074 |
| 56,512 | 193 | 23,262 | 5,859 | 3,915 | 33,229 |
| 56,513 | 198 | 23,087 | 5,808 | 3,876 | 32,969 |
| 56,514 | 197 | 23,079 | 5,832 | 3,877 | 32,985 |
| 56,515 | 194 | 23,033 | 5,809 | 3,865 | 32,901 |
| 56,516 | 183 | 22,676 | 5,707 | 3,781 | 32,347 |
| 56,517 | 183 | 22,941 | 5,755 | 3,818 | 32,697 |
| 56,518 | 176 | 23,158 | 5,795 | 3,832 | 32,961 |
| 56,519 | 180 | 23,433 | 5,859 | 3,877 | 33,349 |
| 56,520 | 172 | 23,757 | 5,914 | 3,913 | 33,756 |
| 56,521 | 163 | 23,546 | 5,790 | 3,833 | 33,332 |
| 56,522 | 162 | 23,572 | 5,782 | 3,827 | 33,343 |
| 56,523 | 159 | 23,519 | 5,775 | 3,810 | 33,263 |
| 56,524 | 147 | 23,589 | 5,788 | 3,816 | 33,340 |
| 56,525 | 148 | 23,704 | 5,822 | 3,824 | 33,498 |
| 56,526 | 150 | 23,789 | 5,835 | 3,837 | 33,611 |
| 56,527 | 155 | 23,851 | 5,846 | 3,838 | 33,690 |
| 56,528 | 162 | 23,771 | 5,849 | 3,848 | 33,630 |
| 56,529 | 167 | 23,915 | 5,873 | 3,868 | 33,823 |
| 56,530 | 173 | 23,776 | 5,817 | 3,843 | 33,609 |
| 56,531 | 180 | 24,028 | 5,914 | 3,886 | 34,008 |
| 56,532 | 180 | 23,966 | 5,902 | 3,885 | 33,933 |
| 56,533 | 178 | 23,900 | 5,899 | 3,908 | 33,885 |
| 56,534 | 176 | 23,767 | 5,880 | 3,884 | 33,707 |
| 56,535 | 175 | 23,408 | 5,823 | 3,860 | 33,266 |

|        |     |        |       |       |        |
|--------|-----|--------|-------|-------|--------|
| 56,536 | 175 | 23,411 | 5,840 | 3,858 | 33,284 |
| 56,537 | 162 | 23,643 | 5,893 | 3,887 | 33,585 |
| 56,538 | 155 | 23,670 | 5,921 | 3,910 | 33,656 |
| 56,539 | 142 | 23,577 | 5,921 | 3,896 | 33,536 |
| 56,540 | 140 | 23,664 | 5,912 | 3,922 | 33,638 |
| 56,541 | 141 | 23,792 | 5,900 | 3,951 | 33,784 |
| 56,542 | 142 | 23,912 | 5,903 | 3,942 | 33,899 |
| 56,543 | 141 | 23,716 | 5,788 | 3,896 | 33,541 |
| 56,544 | 140 | 23,880 | 5,863 | 3,904 | 33,787 |
| 56,545 | 135 | 23,613 | 5,807 | 3,857 | 33,412 |
| 56,546 | 141 | 24,012 | 5,915 | 3,914 | 33,982 |
| 56,547 | 146 | 23,999 | 5,901 | 3,908 | 33,954 |
| 56,548 | 146 | 23,649 | 5,865 | 3,849 | 33,509 |
| 56,549 | 139 | 23,692 | 5,859 | 3,855 | 33,545 |
| 56,550 | 141 | 23,862 | 5,906 | 3,921 | 33,830 |
| 56,551 | 143 | 23,796 | 5,934 | 3,894 | 33,767 |
| 56,552 | 138 | 23,544 | 5,869 | 3,854 | 33,405 |
| 56,553 | 138 | 23,617 | 5,894 | 3,867 | 33,516 |
| 56,554 | 143 | 23,737 | 5,972 | 3,911 | 33,763 |
| 56,555 | 143 | 23,726 | 5,989 | 3,929 | 33,787 |
| 56,556 | 142 | 23,565 | 5,931 | 3,906 | 33,544 |
| 56,557 | 149 | 23,486 | 5,952 | 3,892 | 33,479 |
| 56,558 | 153 | 23,460 | 5,980 | 3,891 | 33,484 |
| 56,559 | 147 | 23,156 | 5,907 | 3,840 | 33,050 |
| 56,560 | 150 | 23,361 | 6,035 | 3,917 | 33,463 |
| 56,561 | 144 | 23,219 | 6,004 | 3,892 | 33,259 |
| 56,562 | 143 | 22,974 | 5,903 | 3,842 | 32,862 |
| 56,563 | 140 | 22,682 | 5,845 | 3,814 | 32,481 |
| 56,564 | 141 | 22,834 | 5,897 | 3,861 | 32,733 |
| 56,565 | 143 | 22,473 | 5,794 | 3,811 | 32,221 |
| 56,566 | 141 | 22,164 | 5,733 | 3,764 | 31,802 |
| 56,567 | 146 | 22,700 | 5,814 | 3,854 | 32,514 |



|        |     |        |       |       |        |
|--------|-----|--------|-------|-------|--------|
| 56,568 | 147 | 22,151 | 5,686 | 3,744 | 31,728 |
| 56,569 | 148 | 22,217 | 5,745 | 3,778 | 31,888 |
| 56,570 | 143 | 22,150 | 5,761 | 3,763 | 31,817 |
| 56,571 | 149 | 22,072 | 5,819 | 3,815 | 31,855 |
| 56,572 | 149 | 21,962 | 5,839 | 3,812 | 31,762 |
| 56,573 | 154 | 21,858 | 5,789 | 3,818 | 31,619 |
| 56,574 | 155 | 21,760 | 5,775 | 3,816 | 31,506 |
| 56,575 | 156 | 21,698 | 5,792 | 3,804 | 31,450 |
| 56,576 | 153 | 21,713 | 5,834 | 3,819 | 31,519 |
| 56,577 | 153 | 21,351 | 5,710 | 3,741 | 30,955 |
| 56,578 | 159 | 21,473 | 5,725 | 3,775 | 31,132 |
| 56,579 | 155 | 21,693 | 5,796 | 3,786 | 31,430 |
| 56,580 | 149 | 21,719 | 5,829 | 3,771 | 31,468 |
| 56,581 | 145 | 21,821 | 5,865 | 3,773 | 31,604 |
| 56,582 | 141 | 21,571 | 5,776 | 3,728 | 31,216 |
| 56,583 | 142 | 21,369 | 5,744 | 3,698 | 30,953 |
| 56,584 | 147 | 21,778 | 5,797 | 3,750 | 31,472 |
| 56,585 | 148 | 21,940 | 5,815 | 3,787 | 31,690 |
| 56,586 | 154 | 22,014 | 5,837 | 3,780 | 31,785 |
| 56,587 | 157 | 21,785 | 5,822 | 3,776 | 31,540 |
| 56,588 | 155 | 21,636 | 5,801 | 3,764 | 31,356 |
| 56,589 | 153 | 21,355 | 5,768 | 3,752 | 31,028 |
| 56,590 | 152 | 21,454 | 5,804 | 3,791 | 31,201 |
| 56,591 | 154 | 21,081 | 5,780 | 3,752 | 30,767 |
| 56,592 | 153 | 20,575 | 5,723 | 3,702 | 30,153 |
| 56,593 | 151 | 20,696 | 5,825 | 3,744 | 30,416 |
| 56,594 | 155 | 20,720 | 5,832 | 3,757 | 30,464 |
| 56,595 | 166 | 20,714 | 5,857 | 3,775 | 30,512 |
| 56,596 | 163 | 20,527 | 5,833 | 3,763 | 30,286 |
| 56,597 | 162 | 20,375 | 5,785 | 3,750 | 30,072 |
| 56,598 | 183 | 21,441 | 6,078 | 3,926 | 31,628 |
| 56,599 | 191 | 21,581 | 6,128 | 3,979 | 31,879 |

|        |     |        |       |       |        |
|--------|-----|--------|-------|-------|--------|
| 56,600 | 190 | 21,733 | 6,167 | 3,988 | 32,078 |
| 56,601 | 200 | 21,843 | 6,205 | 3,985 | 32,233 |
| 56,602 | 197 | 21,763 | 6,152 | 3,967 | 32,079 |
| 56,603 | 199 | 21,819 | 6,096 | 3,937 | 32,051 |
| 56,604 | 200 | 22,195 | 6,164 | 3,981 | 32,540 |
| 56,605 | 195 | 22,501 | 6,230 | 4,019 | 32,945 |
| 56,606 | 195 | 22,459 | 6,206 | 4,007 | 32,867 |
| 56,607 | 198 | 22,641 | 6,266 | 4,017 | 33,122 |
| 56,608 | 193 | 22,840 | 6,299 | 4,052 | 33,384 |
| 56,609 | 192 | 22,998 | 6,297 | 4,052 | 33,539 |
| 56,610 | 189 | 23,151 | 6,324 | 4,048 | 33,712 |
| 56,611 | 187 | 23,036 | 6,302 | 4,039 | 33,564 |
| 56,612 | 189 | 23,144 | 6,341 | 4,069 | 33,743 |
| 56,613 | 187 | 23,191 | 6,337 | 4,073 | 33,788 |
| 56,614 | 186 | 23,128 | 6,353 | 4,059 | 33,726 |
| 56,615 | 185 | 22,848 | 6,324 | 4,021 | 33,378 |
| 56,616 | 180 | 23,148 | 6,434 | 4,065 | 33,827 |
| 56,617 | 180 | 23,192 | 6,444 | 4,071 | 33,887 |
| 56,618 | 180 | 23,164 | 6,458 | 4,097 | 33,899 |
| 56,619 | 175 | 23,297 | 6,479 | 4,140 | 34,091 |
| 56,620 | 176 | 23,406 | 6,480 | 4,155 | 34,217 |
| 56,621 | 174 | 23,334 | 6,431 | 4,131 | 34,070 |
| 56,622 | 176 | 23,599 | 6,475 | 4,139 | 34,389 |
| 56,623 | 167 | 23,120 | 6,335 | 4,037 | 33,659 |
| 56,624 | 169 | 23,222 | 6,330 | 4,027 | 33,748 |
| 56,625 | 170 | 22,971 | 6,243 | 3,977 | 33,361 |
| 56,626 | 171 | 23,197 | 6,283 | 4,005 | 33,656 |
| 56,627 | 167 | 23,420 | 6,331 | 4,042 | 33,960 |
| 56,628 | 168 | 23,368 | 6,324 | 4,039 | 33,899 |
| 56,629 | 162 | 23,042 | 6,296 | 3,998 | 33,498 |
| 56,630 | 161 | 23,159 | 6,332 | 4,010 | 33,662 |
| 56,631 | 162 | 23,289 | 6,359 | 4,032 | 33,842 |

|        |     |        |       |       |        |
|--------|-----|--------|-------|-------|--------|
| 56,632 | 164 | 23,183 | 6,323 | 4,023 | 33,693 |
| 56,633 | 169 | 22,878 | 6,280 | 3,975 | 33,302 |
| 56,634 | 164 | 22,568 | 6,221 | 3,944 | 32,897 |
| 56,635 | 169 | 22,885 | 6,326 | 3,961 | 33,341 |
| 56,636 | 167 | 22,910 | 6,305 | 3,940 | 33,322 |
| 56,637 | 166 | 22,822 | 6,300 | 3,904 | 33,192 |
| 56,638 | 166 | 23,014 | 6,302 | 3,906 | 33,388 |
| 56,639 | 174 | 23,135 | 6,297 | 3,894 | 33,500 |
| 56,640 | 174 | 23,203 | 6,292 | 3,888 | 33,557 |
| 56,641 | 172 | 23,360 | 6,284 | 3,855 | 33,671 |
| 56,642 | 172 | 23,373 | 6,291 | 3,866 | 33,702 |
| 56,643 | 174 | 23,641 | 6,302 | 3,870 | 33,987 |
| 56,644 | 172 | 23,535 | 6,313 | 3,867 | 33,887 |
| 56,645 | 168 | 23,579 | 6,353 | 3,857 | 33,957 |
| 56,646 | 169 | 23,466 | 6,288 | 3,782 | 33,705 |
| 56,647 | 171 | 23,634 | 6,322 | 3,803 | 33,930 |
| 56,648 | 152 | 23,845 | 6,392 | 3,851 | 34,240 |
| 56,649 | 149 | 23,724 | 6,354 | 3,839 | 34,066 |
| 56,650 | 143 | 23,038 | 6,192 | 3,718 | 33,091 |
| 56,651 | 144 | 23,189 | 6,215 | 3,764 | 33,312 |
| 56,652 | 138 | 23,213 | 6,208 | 3,746 | 33,305 |
| 56,653 | 139 | 22,953 | 6,174 | 3,700 | 32,966 |
| 56,654 | 137 | 23,081 | 6,234 | 3,722 | 33,174 |
| 56,655 | 136 | 23,047 | 6,247 | 3,729 | 33,159 |
| 56,656 | 138 | 22,693 | 6,176 | 3,694 | 32,701 |
| 56,657 | 136 | 22,811 | 6,221 | 3,702 | 32,870 |
| 56,658 | 133 | 22,496 | 6,134 | 3,673 | 32,436 |
| 56,659 | 132 | 22,320 | 6,130 | 3,656 | 32,238 |
| 56,660 | 131 | 22,214 | 6,116 | 3,650 | 32,111 |
| 56,661 | 133 | 22,195 | 6,153 | 3,651 | 32,132 |
| 56,662 | 136 | 22,265 | 6,149 | 3,636 | 32,186 |
| 56,663 | 138 | 22,175 | 6,137 | 3,590 | 32,040 |

|        |     |        |       |       |        |
|--------|-----|--------|-------|-------|--------|
| 56,664 | 138 | 22,317 | 6,146 | 3,607 | 32,208 |
| 56,665 | 143 | 22,420 | 6,195 | 3,642 | 32,400 |
| 56,666 | 144 | 22,370 | 6,193 | 3,647 | 32,354 |
| 56,667 | 144 | 22,283 | 6,157 | 3,635 | 32,219 |
| 56,668 | 149 | 22,457 | 6,199 | 3,634 | 32,439 |
| 56,669 | 148 | 22,155 | 6,141 | 3,588 | 32,032 |
| 56,670 | 154 | 22,130 | 6,130 | 3,587 | 32,001 |
| 56,671 | 152 | 21,833 | 6,048 | 3,535 | 31,568 |
| 56,672 | 155 | 22,077 | 6,082 | 3,562 | 31,876 |
| 56,673 | 155 | 22,090 | 6,087 | 3,559 | 31,891 |
| 56,674 | 154 | 21,906 | 6,085 | 3,554 | 31,699 |
| 56,675 | 159 | 22,148 | 6,198 | 3,594 | 32,099 |
| 56,676 | 159 | 21,973 | 6,144 | 3,553 | 31,829 |
| 56,677 | 168 | 22,159 | 6,194 | 3,591 | 32,112 |
| 56,678 | 179 | 21,902 | 6,159 | 3,549 | 31,789 |
| 56,679 | 178 | 21,664 | 6,119 | 3,522 | 31,483 |
| 56,680 | 179 | 21,743 | 6,082 | 3,524 | 31,528 |
| 56,681 | 178 | 21,507 | 6,012 | 3,483 | 31,180 |
| 56,682 | 181 | 22,038 | 6,165 | 3,585 | 31,969 |
| 56,683 | 177 | 21,650 | 6,084 | 3,541 | 31,452 |
| 56,684 | 175 | 21,504 | 6,033 | 3,530 | 31,242 |
| 56,685 | 174 | 21,271 | 6,002 | 3,535 | 30,982 |
| 56,686 | 176 | 21,153 | 5,959 | 3,516 | 30,804 |
| 56,687 | 180 | 21,155 | 5,938 | 3,537 | 30,810 |
| 56,688 | 175 | 21,080 | 5,868 | 3,540 | 30,663 |
| 56,689 | 164 | 20,928 | 5,832 | 3,509 | 30,433 |
| 56,690 | 164 | 20,801 | 5,808 | 3,499 | 30,272 |
| 56,691 | 166 | 20,665 | 5,790 | 3,502 | 30,123 |
| 56,692 | 164 | 20,727 | 5,829 | 3,560 | 30,280 |
| 56,693 | 162 | 20,465 | 5,734 | 3,517 | 29,878 |
| 56,694 | 161 | 20,488 | 5,777 | 3,536 | 29,962 |
| 56,695 | 158 | 20,617 | 5,790 | 3,561 | 30,126 |

|        |     |        |       |       |        |
|--------|-----|--------|-------|-------|--------|
| 56,696 | 153 | 20,406 | 5,732 | 3,549 | 29,840 |
| 56,697 | 149 | 20,229 | 5,698 | 3,533 | 29,609 |
| 56,698 | 145 | 19,237 | 5,504 | 3,383 | 28,269 |
| 56,699 | 146 | 19,608 | 5,559 | 3,430 | 28,743 |
| 56,700 | 146 | 19,836 | 5,599 | 3,457 | 29,038 |
| 56,701 | 140 | 19,430 | 5,523 | 3,405 | 28,498 |
| 56,702 | 138 | 19,508 | 5,555 | 3,403 | 28,604 |
| 56,703 | 131 | 19,464 | 5,529 | 3,413 | 28,537 |
| 56,704 | 132 | 19,432 | 5,477 | 3,392 | 28,433 |
| 56,705 | 133 | 19,546 | 5,505 | 3,402 | 28,586 |
| 56,706 | 133 | 19,344 | 5,453 | 3,368 | 28,298 |
| 56,707 | 131 | 19,377 | 5,459 | 3,356 | 28,323 |
| 56,708 | 137 | 19,534 | 5,474 | 3,364 | 28,509 |
| 56,709 | 138 | 19,582 | 5,465 | 3,347 | 28,532 |
| 56,710 | 137 | 19,912 | 5,519 | 3,382 | 28,950 |
| 56,711 | 134 | 19,617 | 5,462 | 3,351 | 28,564 |
| 56,712 | 134 | 19,706 | 5,504 | 3,422 | 28,766 |
| 56,713 | 140 | 19,631 | 5,476 | 3,419 | 28,666 |
| 56,714 | 141 | 19,586 | 5,467 | 3,409 | 28,603 |
| 56,715 | 140 | 19,592 | 5,432 | 3,419 | 28,583 |
| 56,716 | 135 | 19,409 | 5,354 | 3,389 | 28,287 |
| 56,717 | 136 | 19,442 | 5,349 | 3,386 | 28,313 |
| 56,718 | 147 | 19,708 | 5,395 | 3,396 | 28,646 |
| 56,719 | 144 | 19,598 | 5,353 | 3,387 | 28,482 |
| 56,720 | 146 | 19,859 | 5,412 | 3,427 | 28,844 |
| 56,721 | 139 | 19,835 | 5,423 | 3,410 | 28,807 |
| 56,722 | 139 | 19,674 | 5,425 | 3,406 | 28,644 |
| 56,723 | 133 | 19,468 | 5,356 | 3,389 | 28,346 |
| 56,724 | 135 | 19,258 | 5,336 | 3,369 | 28,098 |
| 56,725 | 134 | 19,226 | 5,275 | 3,369 | 28,004 |
| 56,726 | 123 | 19,378 | 5,277 | 3,424 | 28,202 |
| 56,727 | 124 | 19,507 | 5,330 | 3,466 | 28,427 |

|        |     |        |       |       |        |
|--------|-----|--------|-------|-------|--------|
| 56,728 | 124 | 19,704 | 5,420 | 3,496 | 28,744 |
| 56,729 | 108 | 19,490 | 5,375 | 3,477 | 28,450 |
| 56,730 | 105 | 19,660 | 5,385 | 3,476 | 28,626 |
| 56,731 | 102 | 19,548 | 5,344 | 3,481 | 28,475 |
| 56,732 | 103 | 19,811 | 5,412 | 3,521 | 28,847 |
| 56,733 | 102 | 19,884 | 5,459 | 3,548 | 28,993 |
| 56,734 | 100 | 19,848 | 5,443 | 3,501 | 28,892 |
| 56,735 | 98  | 19,839 | 5,431 | 3,482 | 28,850 |
| 56,736 | 95  | 20,059 | 5,510 | 3,510 | 29,174 |
| 56,737 | 99  | 20,069 | 5,539 | 3,521 | 29,228 |
| 56,738 | 96  | 19,930 | 5,551 | 3,504 | 29,081 |
| 56,739 | 97  | 20,136 | 5,622 | 3,548 | 29,403 |
| 56,740 | 104 | 20,174 | 5,635 | 3,576 | 29,489 |
| 56,741 | 103 | 20,327 | 5,683 | 3,608 | 29,721 |
| 56,742 | 102 | 20,618 | 5,777 | 3,634 | 30,131 |
| 56,743 | 104 | 20,783 | 5,802 | 3,636 | 30,325 |
| 56,744 | 105 | 20,968 | 5,838 | 3,654 | 30,565 |
| 56,745 | 104 | 20,705 | 5,783 | 3,618 | 30,210 |
| 56,746 | 104 | 20,793 | 5,826 | 3,670 | 30,393 |
| 56,747 | 105 | 20,940 | 5,820 | 3,665 | 30,530 |
| 56,748 | 104 | 20,789 | 5,764 | 3,623 | 30,280 |
| 56,749 | 105 | 21,036 | 5,833 | 3,655 | 30,629 |
| 56,750 | 104 | 20,969 | 5,838 | 3,651 | 30,562 |
| 56,751 | 104 | 20,826 | 5,803 | 3,628 | 30,361 |
| 56,752 | 107 | 20,751 | 5,742 | 3,622 | 30,222 |
| 56,753 | 107 | 20,597 | 5,726 | 3,596 | 30,026 |
| 56,754 | 110 | 21,175 | 5,974 | 3,727 | 30,986 |
| 56,755 | 108 | 21,034 | 5,964 | 3,732 | 30,838 |
| 56,756 | 110 | 21,089 | 5,953 | 3,725 | 30,877 |
| 56,757 | 121 | 21,432 | 6,035 | 3,780 | 31,368 |
| 56,758 | 118 | 21,244 | 5,960 | 3,767 | 31,089 |
| 56,759 | 117 | 21,044 | 5,918 | 3,743 | 30,822 |

|        |     |        |       |       |        |
|--------|-----|--------|-------|-------|--------|
| 56,760 | 122 | 21,640 | 6,108 | 3,855 | 31,725 |
| 56,761 | 124 | 21,792 | 6,101 | 3,863 | 31,880 |
| 56,762 | 123 | 21,689 | 6,021 | 3,834 | 31,667 |
| 56,763 | 121 | 21,864 | 6,056 | 3,861 | 31,902 |
| 56,764 | 119 | 22,053 | 6,108 | 3,900 | 32,180 |
| 56,765 | 114 | 21,789 | 6,028 | 3,863 | 31,794 |
| 56,766 | 115 | 21,810 | 6,056 | 3,851 | 31,832 |
| 56,767 | 113 | 21,786 | 6,063 | 3,848 | 31,810 |
| 56,768 | 108 | 21,618 | 6,050 | 3,830 | 31,606 |
| 56,769 | 110 | 21,709 | 6,074 | 3,847 | 31,740 |
| 56,770 | 113 | 21,871 | 6,111 | 3,868 | 31,963 |
| 56,771 | 112 | 21,921 | 6,125 | 3,853 | 32,011 |
| 56,772 | 110 | 21,621 | 6,029 | 3,782 | 31,542 |
| 56,773 | 112 | 21,830 | 6,070 | 3,815 | 31,827 |
| 56,774 | 110 | 21,800 | 6,072 | 3,816 | 31,798 |
| 56,775 | 107 | 21,834 | 6,064 | 3,814 | 31,819 |
| 56,776 | 113 | 21,994 | 6,106 | 3,816 | 32,029 |
| 56,777 | 113 | 21,957 | 6,133 | 3,803 | 32,006 |
| 56,778 | 113 | 22,040 | 6,193 | 3,805 | 32,151 |
| 56,779 | 108 | 21,748 | 6,090 | 3,773 | 31,719 |
| 56,780 | 109 | 22,027 | 6,160 | 3,808 | 32,104 |
| 56,781 | 110 | 22,067 | 6,164 | 3,825 | 32,166 |
| 56,782 | 116 | 22,082 | 6,162 | 3,788 | 32,148 |
| 56,783 | 116 | 21,884 | 6,106 | 3,752 | 31,858 |
| 56,784 | 117 | 22,243 | 6,175 | 3,798 | 32,333 |
| 56,785 | 113 | 22,278 | 6,164 | 3,798 | 32,353 |
| 56,786 | 114 | 22,168 | 6,106 | 3,776 | 32,164 |
| 56,787 | 113 | 22,051 | 6,078 | 3,756 | 31,998 |
| 56,788 | 111 | 22,349 | 6,137 | 3,780 | 32,377 |
| 56,789 | 109 | 22,134 | 6,041 | 3,687 | 31,971 |
| 56,790 | 110 | 22,219 | 6,068 | 3,667 | 32,064 |
| 56,791 | 105 | 22,398 | 6,137 | 3,675 | 32,315 |

|        |     |        |       |       |        |
|--------|-----|--------|-------|-------|--------|
| 56,792 | 108 | 22,638 | 6,200 | 3,696 | 32,642 |
| 56,793 | 111 | 22,447 | 6,140 | 3,656 | 32,354 |
| 56,794 | 109 | 22,463 | 6,134 | 3,666 | 32,372 |
| 56,795 | 115 | 22,441 | 6,106 | 3,641 | 32,303 |
| 56,796 | 122 | 22,291 | 6,094 | 3,625 | 32,132 |
| 56,797 | 121 | 22,444 | 6,097 | 3,611 | 32,273 |
| 56,798 | 122 | 22,418 | 6,137 | 3,614 | 32,291 |
| 56,799 | 126 | 22,353 | 6,156 | 3,619 | 32,254 |
| 56,800 | 130 | 22,358 | 6,154 | 3,612 | 32,254 |
| 56,801 | 130 | 22,336 | 6,163 | 3,613 | 32,242 |
| 56,802 | 129 | 22,195 | 6,149 | 3,585 | 32,058 |
| 56,803 | 125 | 22,110 | 6,164 | 3,591 | 31,990 |
| 56,804 | 124 | 22,172 | 6,130 | 3,594 | 32,020 |
| 56,805 | 124 | 22,113 | 6,101 | 3,589 | 31,927 |
| 56,806 | 132 | 22,311 | 6,136 | 3,618 | 32,197 |
| 56,807 | 135 | 22,325 | 6,180 | 3,654 | 32,294 |
| 56,808 | 124 | 22,092 | 6,131 | 3,615 | 31,962 |
| 56,809 | 124 | 21,842 | 6,072 | 3,592 | 31,630 |
| 56,810 | 132 | 21,990 | 6,102 | 3,602 | 31,826 |
| 56,811 | 129 | 22,139 | 6,142 | 3,615 | 32,025 |
| 56,812 | 130 | 21,939 | 6,128 | 3,585 | 31,782 |
| 56,813 | 132 | 21,410 | 6,045 | 3,485 | 31,072 |
| 56,814 | 133 | 21,744 | 6,126 | 3,511 | 31,514 |
| 56,815 | 130 | 22,028 | 6,190 | 3,535 | 31,883 |
| 56,816 | 129 | 22,063 | 6,196 | 3,531 | 31,919 |
| 56,817 | 131 | 21,997 | 6,151 | 3,525 | 31,804 |
| 56,818 | 131 | 22,197 | 6,178 | 3,538 | 32,044 |
| 56,819 | 127 | 21,926 | 6,129 | 3,512 | 31,694 |
| 56,820 | 123 | 21,872 | 6,118 | 3,512 | 31,625 |
| 56,821 | 119 | 21,955 | 6,172 | 3,508 | 31,754 |
| 56,822 | 120 | 21,644 | 6,118 | 3,479 | 31,361 |
| 56,823 | 124 | 21,763 | 6,184 | 3,514 | 31,585 |



|        |     |        |       |       |        |
|--------|-----|--------|-------|-------|--------|
| 56,824 | 127 | 21,805 | 6,228 | 3,521 | 31,681 |
| 56,825 | 131 | 21,964 | 6,261 | 3,524 | 31,880 |
| 56,826 | 134 | 21,818 | 6,217 | 3,500 | 31,669 |
| 56,827 | 129 | 21,637 | 6,176 | 3,473 | 31,415 |
| 56,828 | 130 | 21,933 | 6,261 | 3,533 | 31,857 |
| 56,829 | 130 | 22,088 | 6,237 | 3,567 | 32,022 |
| 56,830 | 130 | 21,961 | 6,190 | 3,525 | 31,806 |
| 56,831 | 131 | 21,931 | 6,210 | 3,537 | 31,809 |
| 56,832 | 131 | 21,871 | 6,205 | 3,536 | 31,743 |
| 56,833 | 132 | 21,738 | 6,178 | 3,536 | 31,584 |
| 56,834 | 134 | 21,664 | 6,146 | 3,509 | 31,453 |
| 56,835 | 137 | 21,986 | 6,237 | 3,569 | 31,929 |
| 56,836 | 139 | 22,036 | 6,249 | 3,573 | 31,997 |
| 56,837 | 138 | 22,095 | 6,264 | 3,581 | 32,078 |
| 56,838 | 139 | 21,932 | 6,204 | 3,565 | 31,840 |
| 56,839 | 139 | 21,840 | 6,187 | 3,564 | 31,730 |
| 56,840 | 138 | 21,717 | 6,157 | 3,564 | 31,576 |
| 56,841 | 138 | 21,977 | 6,219 | 3,650 | 31,984 |
| 56,842 | 136 | 21,589 | 6,135 | 3,630 | 31,490 |
| 56,843 | 131 | 21,514 | 6,104 | 3,631 | 31,380 |
| 56,844 | 129 | 21,304 | 5,997 | 3,593 | 31,023 |
| 56,845 | 129 | 21,502 | 6,060 | 3,620 | 31,311 |
| 56,846 | 125 | 21,565 | 6,083 | 3,623 | 31,396 |
| 56,847 | 119 | 21,772 | 6,077 | 3,638 | 31,606 |
| 56,848 | 118 | 21,809 | 6,063 | 3,636 | 31,626 |
| 56,849 | 116 | 21,341 | 5,874 | 3,539 | 30,870 |
| 56,850 | 117 | 21,559 | 5,918 | 3,552 | 31,146 |
| 56,851 | 115 | 21,861 | 5,985 | 3,600 | 31,561 |
| 56,852 | 116 | 22,016 | 5,961 | 3,602 | 31,695 |
| 56,853 | 117 | 22,184 | 5,962 | 3,583 | 31,846 |
| 56,854 | 117 | 22,524 | 6,012 | 3,614 | 32,267 |
| 56,855 | 118 | 22,208 | 5,895 | 3,549 | 31,770 |

|        |     |        |       |       |        |
|--------|-----|--------|-------|-------|--------|
| 56,856 | 117 | 22,538 | 5,970 | 3,572 | 32,197 |
| 56,857 | 114 | 22,881 | 6,022 | 3,593 | 32,610 |
| 56,858 | 110 | 22,751 | 5,970 | 3,541 | 32,372 |
| 56,859 | 107 | 22,491 | 5,883 | 3,492 | 31,973 |
| 56,860 | 107 | 22,409 | 5,890 | 3,483 | 31,889 |
| 56,861 | 96  | 22,518 | 5,952 | 3,533 | 32,099 |
| 56,862 | 95  | 22,315 | 5,886 | 3,511 | 31,807 |
| 56,863 | 89  | 22,087 | 5,777 | 3,466 | 31,419 |
| 56,864 | 94  | 22,421 | 5,831 | 3,507 | 31,853 |
| 56,865 | 95  | 22,491 | 5,831 | 3,519 | 31,936 |
| 56,866 | 93  | 21,877 | 5,671 | 3,443 | 31,084 |
| 56,867 | 96  | 22,142 | 5,732 | 3,475 | 31,445 |
| 56,868 | 99  | 22,422 | 5,767 | 3,509 | 31,797 |
| 56,869 | 98  | 22,402 | 5,756 | 3,501 | 31,757 |
| 56,870 | 98  | 22,400 | 5,748 | 3,491 | 31,737 |
| 56,871 | 98  | 22,524 | 5,761 | 3,532 | 31,915 |
| 56,872 | 98  | 22,698 | 5,785 | 3,548 | 32,129 |
| 56,873 | 96  | 22,675 | 5,779 | 3,540 | 32,090 |
| 56,874 | 93  | 22,706 | 5,767 | 3,534 | 32,100 |
| 56,875 | 88  | 22,451 | 5,671 | 3,505 | 31,715 |
| 56,876 | 87  | 22,527 | 5,669 | 3,523 | 31,806 |
| 56,877 | 81  | 22,317 | 5,628 | 3,504 | 31,530 |
| 56,878 | 81  | 22,260 | 5,580 | 3,488 | 31,409 |
| 56,879 | 80  | 22,016 | 5,553 | 3,445 | 31,094 |
| 56,880 | 91  | 21,742 | 5,486 | 3,398 | 30,717 |
| 56,881 | 92  | 21,813 | 5,516 | 3,404 | 30,825 |
| 56,882 | 97  | 21,587 | 5,453 | 3,376 | 30,513 |
| 56,883 | 95  | 21,299 | 5,384 | 3,334 | 30,112 |
| 56,884 | 85  | 21,316 | 5,381 | 3,363 | 30,145 |
| 56,885 | 89  | 21,448 | 5,414 | 3,376 | 30,327 |
| 56,886 | 86  | 21,312 | 5,380 | 3,357 | 30,135 |
| 56,887 | 83  | 20,902 | 5,317 | 3,315 | 29,617 |

|        |     |        |       |       |        |
|--------|-----|--------|-------|-------|--------|
| 56,888 | 83  | 20,954 | 5,315 | 3,304 | 29,656 |
| 56,889 | 80  | 20,829 | 5,286 | 3,315 | 29,510 |
| 56,890 | 87  | 20,896 | 5,309 | 3,316 | 29,608 |
| 56,891 | 91  | 20,196 | 5,109 | 3,166 | 28,562 |
| 56,892 | 94  | 20,198 | 5,125 | 3,182 | 28,599 |
| 56,893 | 94  | 20,343 | 5,148 | 3,186 | 28,771 |
| 56,894 | 95  | 20,406 | 5,210 | 3,206 | 28,917 |
| 56,895 | 99  | 20,255 | 5,204 | 3,223 | 28,781 |
| 56,896 | 100 | 19,968 | 5,146 | 3,181 | 28,395 |
| 56,897 | 100 | 19,833 | 5,116 | 3,164 | 28,213 |
| 56,898 | 98  | 19,503 | 5,075 | 3,141 | 27,817 |
| 56,899 | 97  | 19,313 | 5,027 | 3,121 | 27,558 |
| 56,900 | 95  | 19,176 | 5,002 | 3,121 | 27,394 |
| 56,901 | 96  | 19,109 | 5,017 | 3,126 | 27,348 |
| 56,902 | 105 | 18,789 | 4,948 | 3,076 | 26,918 |
| 56,903 | 104 | 18,529 | 4,922 | 3,057 | 26,612 |
| 56,904 | 106 | 18,649 | 5,026 | 3,129 | 26,910 |
| 56,905 | 107 | 18,396 | 4,986 | 3,106 | 26,595 |
| 56,906 | 103 | 18,484 | 5,100 | 3,153 | 26,840 |
| 56,907 | 109 | 18,196 | 5,050 | 3,132 | 26,487 |
| 56,908 | 109 | 17,961 | 5,031 | 3,110 | 26,211 |
| 56,909 | 114 | 18,100 | 5,056 | 3,166 | 26,436 |
| 56,910 | 114 | 18,116 | 5,072 | 3,161 | 26,463 |
| 56,911 | 115 | 18,174 | 5,073 | 3,155 | 26,517 |
| 56,912 | 121 | 18,234 | 5,119 | 3,182 | 26,656 |
| 56,913 | 121 | 17,962 | 5,113 | 3,158 | 26,354 |
| 56,914 | 123 | 18,068 | 5,160 | 3,192 | 26,543 |
| 56,915 | 121 | 18,064 | 5,182 | 3,191 | 26,558 |
| 56,916 | 121 | 17,780 | 5,137 | 3,162 | 26,200 |
| 56,917 | 124 | 17,623 | 5,144 | 3,168 | 26,059 |
| 56,918 | 116 | 17,827 | 5,215 | 3,227 | 26,385 |
| 56,919 | 118 | 17,849 | 5,223 | 3,225 | 26,415 |

|        |     |        |       |       |        |
|--------|-----|--------|-------|-------|--------|
| 56,920 | 118 | 17,898 | 5,235 | 3,238 | 26,489 |
| 56,921 | 117 | 18,042 | 5,290 | 3,269 | 26,718 |
| 56,922 | 117 | 18,055 | 5,339 | 3,289 | 26,800 |
| 56,923 | 117 | 17,919 | 5,292 | 3,273 | 26,601 |
| 56,924 | 120 | 18,173 | 5,340 | 3,298 | 26,931 |
| 56,925 | 120 | 18,349 | 5,392 | 3,340 | 27,201 |
| 56,926 | 120 | 18,484 | 5,445 | 3,362 | 27,411 |
| 56,927 | 117 | 18,467 | 5,462 | 3,367 | 27,413 |
| 56,928 | 117 | 18,237 | 5,413 | 3,310 | 27,077 |
| 56,929 | 117 | 18,094 | 5,371 | 3,279 | 26,861 |
| 56,930 | 122 | 18,424 | 5,512 | 3,351 | 27,409 |
| 56,931 | 109 | 18,489 | 5,541 | 3,356 | 27,495 |
| 56,932 | 112 | 18,300 | 5,500 | 3,338 | 27,250 |
| 56,933 | 105 | 18,121 | 5,463 | 3,320 | 27,009 |
| 56,934 | 111 | 18,792 | 5,659 | 3,420 | 27,982 |
| 56,935 | 111 | 18,895 | 5,706 | 3,434 | 28,146 |
| 56,936 | 107 | 18,949 | 5,755 | 3,450 | 28,261 |
| 56,937 | 110 | 19,094 | 5,792 | 3,461 | 28,457 |
| 56,938 | 110 | 19,157 | 5,781 | 3,471 | 28,519 |
| 56,939 | 110 | 19,212 | 5,806 | 3,479 | 28,607 |
| 56,940 | 111 | 19,257 | 5,843 | 3,473 | 28,684 |
| 56,941 | 106 | 19,600 | 5,948 | 3,531 | 29,185 |
| 56,942 | 98  | 19,530 | 5,952 | 3,516 | 29,096 |
| 56,943 | 98  | 19,566 | 5,964 | 3,509 | 29,137 |
| 56,944 | 100 | 19,853 | 6,024 | 3,557 | 29,534 |
| 56,945 | 101 | 20,002 | 6,035 | 3,586 | 29,724 |
| 56,946 | 100 | 20,032 | 6,034 | 3,577 | 29,743 |
| 56,947 | 100 | 20,036 | 5,995 | 3,543 | 29,674 |
| 56,948 | 106 | 20,289 | 6,089 | 3,583 | 30,067 |
| 56,949 | 109 | 20,282 | 6,132 | 3,592 | 30,115 |
| 56,950 | 112 | 20,267 | 6,133 | 3,574 | 30,086 |
| 56,951 | 112 | 20,290 | 6,155 | 3,567 | 30,124 |

|        |     |        |       |       |        |
|--------|-----|--------|-------|-------|--------|
| 56,952 | 119 | 20,320 | 6,139 | 3,572 | 30,150 |
| 56,953 | 110 | 20,297 | 6,114 | 3,557 | 30,078 |
| 56,954 | 114 | 20,390 | 6,092 | 3,541 | 30,137 |
| 56,955 | 112 | 20,215 | 6,000 | 3,504 | 29,831 |
| 56,956 | 110 | 20,367 | 6,043 | 3,535 | 30,055 |
| 56,957 | 111 | 20,296 | 6,049 | 3,548 | 30,004 |
| 56,958 | 111 | 20,343 | 6,055 | 3,543 | 30,052 |
| 56,959 | 114 | 20,679 | 6,150 | 3,587 | 30,530 |
| 56,960 | 114 | 20,534 | 6,126 | 3,555 | 30,329 |
| 56,961 | 114 | 20,538 | 6,119 | 3,546 | 30,317 |
| 56,962 | 108 | 20,907 | 6,162 | 3,579 | 30,756 |
| 56,963 | 109 | 20,994 | 6,189 | 3,589 | 30,881 |
| 56,964 | 112 | 21,335 | 6,270 | 3,637 | 31,354 |
| 56,965 | 117 | 21,120 | 6,217 | 3,598 | 31,052 |
| 56,966 | 114 | 20,869 | 6,146 | 3,563 | 30,692 |
| 56,967 | 116 | 21,562 | 6,340 | 3,685 | 31,703 |
| 56,968 | 117 | 21,616 | 6,342 | 3,657 | 31,732 |
| 56,969 | 120 | 21,744 | 6,357 | 3,681 | 31,902 |
| 56,970 | 118 | 21,406 | 6,304 | 3,653 | 31,481 |
| 56,971 | 119 | 21,470 | 6,361 | 3,664 | 31,614 |
| 56,972 | 118 | 21,334 | 6,312 | 3,658 | 31,422 |
| 56,973 | 120 | 21,433 | 6,345 | 3,680 | 31,578 |
| 56,974 | 119 | 21,259 | 6,312 | 3,657 | 31,347 |
| 56,975 | 117 | 21,296 | 6,312 | 3,670 | 31,395 |
| 56,976 | 120 | 21,187 | 6,320 | 3,652 | 31,279 |
| 56,977 | 123 | 21,070 | 6,270 | 3,624 | 31,087 |
| 56,978 | 121 | 21,116 | 6,252 | 3,615 | 31,104 |
| 56,979 | 122 | 21,071 | 6,204 | 3,607 | 31,004 |
| 56,980 | 124 | 21,238 | 6,225 | 3,613 | 31,200 |
| 56,981 | 121 | 21,198 | 6,175 | 3,606 | 31,100 |
| 56,982 | 123 | 21,419 | 6,233 | 3,624 | 31,399 |
| 56,983 | 117 | 21,434 | 6,205 | 3,611 | 31,367 |

|        |     |        |       |       |        |
|--------|-----|--------|-------|-------|--------|
| 56,984 | 117 | 21,327 | 6,159 | 3,597 | 31,200 |
| 56,985 | 115 | 21,348 | 6,181 | 3,607 | 31,251 |
| 56,986 | 121 | 21,363 | 6,145 | 3,606 | 31,235 |
| 56,987 | 121 | 21,234 | 6,124 | 3,600 | 31,079 |
| 56,988 | 118 | 21,433 | 6,146 | 3,630 | 31,327 |
| 56,989 | 130 | 21,084 | 6,109 | 3,593 | 30,916 |
| 56,990 | 129 | 20,956 | 6,070 | 3,607 | 30,762 |
| 56,991 | 133 | 21,394 | 6,162 | 3,687 | 31,376 |
| 56,992 | 132 | 21,457 | 6,204 | 3,695 | 31,488 |
| 56,993 | 135 | 21,510 | 6,235 | 3,704 | 31,584 |
| 56,994 | 134 | 21,606 | 6,260 | 3,724 | 31,724 |
| 56,995 | 139 | 21,819 | 6,345 | 3,767 | 32,070 |
| 56,996 | 138 | 21,727 | 6,347 | 3,763 | 31,975 |
| 56,997 | 135 | 21,862 | 6,397 | 3,809 | 32,203 |
| 56,998 | 136 | 21,886 | 6,430 | 3,828 | 32,280 |
| 56,999 | 134 | 21,894 | 6,367 | 3,827 | 32,222 |
| 57,000 | 133 | 21,941 | 6,367 | 3,839 | 32,280 |
| 57,001 | 129 | 21,938 | 6,361 | 3,852 | 32,280 |
| 57,002 | 130 | 21,876 | 6,345 | 3,854 | 32,205 |
| 57,003 | 122 | 21,890 | 6,347 | 3,876 | 32,235 |
| 57,004 | 127 | 21,992 | 6,351 | 3,902 | 32,372 |
| 57,005 | 123 | 21,958 | 6,375 | 3,923 | 32,379 |
| 57,006 | 131 | 21,744 | 6,331 | 3,877 | 32,083 |
| 57,007 | 134 | 21,693 | 6,263 | 3,841 | 31,931 |
| 57,008 | 142 | 22,067 | 6,366 | 3,898 | 32,473 |
| 57,009 | 143 | 22,043 | 6,345 | 3,916 | 32,447 |
| 57,010 | 141 | 22,162 | 6,394 | 3,927 | 32,624 |
| 57,011 | 137 | 21,987 | 6,355 | 3,930 | 32,409 |
| 57,012 | 137 | 22,019 | 6,421 | 3,960 | 32,537 |
| 57,013 | 138 | 22,055 | 6,433 | 3,979 | 32,605 |
| 57,014 | 137 | 22,207 | 6,449 | 4,030 | 32,823 |
| 57,015 | 134 | 21,831 | 6,390 | 3,990 | 32,345 |

|        |     |        |       |       |        |
|--------|-----|--------|-------|-------|--------|
| 57,016 | 136 | 21,882 | 6,461 | 4,029 | 32,508 |
| 57,017 | 136 | 21,943 | 6,451 | 4,061 | 32,591 |
| 57,018 | 142 | 21,987 | 6,503 | 4,091 | 32,723 |
| 57,019 | 138 | 22,255 | 6,562 | 4,173 | 33,128 |
| 57,020 | 142 | 22,086 | 6,555 | 4,133 | 32,916 |
| 57,021 | 142 | 22,158 | 6,558 | 4,141 | 32,999 |
| 57,022 | 144 | 22,424 | 6,628 | 4,161 | 33,357 |
| 57,023 | 144 | 22,627 | 6,646 | 4,157 | 33,574 |
| 57,024 | 142 | 22,492 | 6,609 | 4,129 | 33,372 |
| 57,025 | 142 | 22,456 | 6,606 | 4,123 | 33,327 |
| 57,026 | 143 | 22,550 | 6,654 | 4,144 | 33,491 |
| 57,027 | 139 | 22,400 | 6,581 | 4,114 | 33,234 |
| 57,028 | 136 | 22,569 | 6,622 | 4,152 | 33,479 |
| 57,029 | 136 | 22,316 | 6,560 | 4,129 | 33,141 |
| 57,030 | 138 | 22,404 | 6,617 | 4,142 | 33,301 |
| 57,031 | 138 | 22,361 | 6,643 | 4,158 | 33,300 |
| 57,032 | 139 | 22,168 | 6,605 | 4,153 | 33,065 |
| 57,033 | 137 | 21,885 | 6,531 | 4,118 | 32,671 |
| 57,034 | 138 | 21,592 | 6,445 | 4,067 | 32,242 |
| 57,035 | 138 | 21,296 | 6,344 | 3,992 | 31,770 |
| 57,036 | 141 | 21,275 | 6,366 | 3,998 | 31,780 |
| 57,037 | 135 | 21,026 | 6,295 | 3,965 | 31,421 |
| 57,038 | 146 | 21,417 | 6,402 | 4,018 | 31,983 |
| 57,039 | 146 | 21,228 | 6,401 | 3,973 | 31,748 |
| 57,040 | 136 | 20,953 | 6,259 | 3,881 | 31,229 |
| 57,041 | 132 | 20,542 | 6,123 | 3,798 | 30,595 |
| 57,042 | 137 | 20,713 | 6,159 | 3,809 | 30,818 |
| 57,043 | 141 | 20,628 | 6,148 | 3,815 | 30,732 |
| 57,044 | 139 | 20,263 | 6,054 | 3,782 | 30,238 |
| 57,045 | 142 | 20,645 | 6,178 | 3,815 | 30,780 |
| 57,046 | 142 | 20,564 | 6,131 | 3,776 | 30,613 |
| 57,047 | 141 | 20,466 | 6,061 | 3,726 | 30,394 |

|        |     |        |       |       |        |
|--------|-----|--------|-------|-------|--------|
| 57,048 | 141 | 20,386 | 6,059 | 3,715 | 30,301 |
| 57,049 | 141 | 20,255 | 6,018 | 3,706 | 30,120 |
| 57,050 | 137 | 20,162 | 5,998 | 3,681 | 29,978 |
| 57,051 | 137 | 20,273 | 6,000 | 3,674 | 30,084 |
| 57,052 | 137 | 20,246 | 5,992 | 3,668 | 30,043 |
| 57,053 | 138 | 20,427 | 6,030 | 3,675 | 30,270 |
| 57,054 | 121 | 19,724 | 5,795 | 3,544 | 29,184 |
| 57,055 | 121 | 19,867 | 5,823 | 3,560 | 29,371 |
| 57,056 | 118 | 19,735 | 5,776 | 3,537 | 29,166 |
| 57,057 | 118 | 19,878 | 5,811 | 3,544 | 29,351 |
| 57,058 | 114 | 19,870 | 5,829 | 3,554 | 29,367 |
| 57,059 | 111 | 19,843 | 5,834 | 3,562 | 29,350 |
| 57,060 | 108 | 19,937 | 5,847 | 3,554 | 29,446 |
| 57,061 | 109 | 19,796 | 5,822 | 3,516 | 29,243 |
| 57,062 | 109 | 20,114 | 5,901 | 3,596 | 29,720 |
| 57,063 | 108 | 19,607 | 5,747 | 3,501 | 28,963 |
| 57,064 | 110 | 19,229 | 5,625 | 3,415 | 28,379 |
| 57,065 | 111 | 19,471 | 5,678 | 3,438 | 28,698 |
| 57,066 | 101 | 19,528 | 5,651 | 3,448 | 28,728 |
| 57,067 | 101 | 18,635 | 5,387 | 3,214 | 27,337 |
| 57,068 | 101 | 18,849 | 5,471 | 3,264 | 27,685 |
| 57,069 | 96  | 18,811 | 5,440 | 3,238 | 27,585 |
| 57,070 | 96  | 18,842 | 5,448 | 3,254 | 27,640 |
| 57,071 | 93  | 19,053 | 5,493 | 3,295 | 27,934 |
| 57,072 | 96  | 19,041 | 5,474 | 3,284 | 27,895 |
| 57,073 | 97  | 18,840 | 5,389 | 3,254 | 27,580 |
| 57,074 | 99  | 18,668 | 5,336 | 3,236 | 27,339 |
| 57,075 | 103 | 18,731 | 5,364 | 3,245 | 27,443 |
| 57,076 | 102 | 18,642 | 5,311 | 3,209 | 27,264 |
| 57,077 | 105 | 18,958 | 5,356 | 3,230 | 27,649 |
| 57,078 | 108 | 18,877 | 5,330 | 3,206 | 27,521 |
| 57,079 | 116 | 18,936 | 5,366 | 3,205 | 27,623 |



|        |     |        |       |       |        |
|--------|-----|--------|-------|-------|--------|
| 57,080 | 116 | 18,970 | 5,367 | 3,210 | 27,663 |
| 57,081 | 117 | 19,276 | 5,414 | 3,256 | 28,063 |
| 57,082 | 116 | 18,926 | 5,296 | 3,206 | 27,544 |
| 57,083 | 116 | 19,146 | 5,374 | 3,247 | 27,883 |
| 57,084 | 117 | 19,500 | 5,477 | 3,303 | 28,397 |
| 57,085 | 119 | 19,070 | 5,365 | 3,222 | 27,776 |
| 57,086 | 127 | 19,272 | 5,391 | 3,253 | 28,043 |
| 57,087 | 131 | 19,565 | 5,428 | 3,265 | 28,389 |
| 57,088 | 130 | 19,643 | 5,419 | 3,271 | 28,463 |
| 57,089 | 132 | 19,958 | 5,484 | 3,351 | 28,925 |
| 57,090 | 132 | 19,910 | 5,490 | 3,357 | 28,889 |
| 57,091 | 132 | 19,910 | 5,493 | 3,366 | 28,901 |
| 57,092 | 131 | 19,947 | 5,503 | 3,399 | 28,980 |
| 57,093 | 130 | 20,115 | 5,550 | 3,436 | 29,231 |
| 57,094 | 124 | 20,158 | 5,554 | 3,457 | 29,293 |
| 57,095 | 124 | 20,321 | 5,550 | 3,451 | 29,446 |
| 57,096 | 123 | 20,526 | 5,570 | 3,487 | 29,706 |
| 57,097 | 123 | 20,524 | 5,573 | 3,494 | 29,714 |
| 57,098 | 122 | 20,341 | 5,532 | 3,474 | 29,469 |
| 57,099 | 124 | 20,165 | 5,487 | 3,449 | 29,225 |
| 57,100 | 121 | 20,020 | 5,479 | 3,422 | 29,042 |
| 57,101 | 129 | 20,740 | 5,667 | 3,511 | 30,047 |
| 57,102 | 134 | 20,526 | 5,622 | 3,497 | 29,779 |
| 57,103 | 135 | 20,417 | 5,609 | 3,493 | 29,654 |
| 57,104 | 134 | 20,947 | 5,766 | 3,596 | 30,443 |
| 57,105 | 137 | 20,681 | 5,683 | 3,544 | 30,045 |
| 57,106 | 137 | 20,597 | 5,665 | 3,528 | 29,927 |
| 57,107 | 135 | 20,467 | 5,622 | 3,496 | 29,720 |
| 57,108 | 135 | 20,376 | 5,588 | 3,498 | 29,597 |
| 57,109 | 130 | 21,189 | 5,889 | 3,694 | 30,902 |
| 57,110 | 131 | 21,159 | 5,856 | 3,686 | 30,832 |
| 57,111 | 130 | 21,027 | 5,838 | 3,682 | 30,677 |

|        |     |        |       |       |        |
|--------|-----|--------|-------|-------|--------|
| 57,112 | 129 | 21,092 | 5,831 | 3,706 | 30,758 |
| 57,113 | 135 | 21,082 | 5,814 | 3,682 | 30,713 |
| 57,114 | 135 | 20,917 | 5,761 | 3,638 | 30,451 |
| 57,115 | 135 | 21,142 | 5,785 | 3,653 | 30,715 |
| 57,116 | 136 | 21,300 | 5,815 | 3,695 | 30,946 |
| 57,117 | 139 | 21,293 | 5,817 | 3,704 | 30,953 |
| 57,118 | 143 | 21,049 | 5,756 | 3,656 | 30,604 |
| 57,119 | 147 | 21,347 | 5,822 | 3,679 | 30,995 |
| 57,120 | 146 | 21,248 | 5,775 | 3,653 | 30,822 |
| 57,121 | 146 | 21,254 | 5,771 | 3,646 | 30,817 |
| 57,122 | 148 | 21,451 | 5,804 | 3,673 | 31,076 |
| 57,123 | 142 | 21,170 | 5,721 | 3,597 | 30,630 |
| 57,124 | 141 | 21,243 | 5,734 | 3,603 | 30,721 |
| 57,125 | 138 | 21,346 | 5,752 | 3,612 | 30,848 |
| 57,126 | 138 | 21,374 | 5,768 | 3,613 | 30,893 |
| 57,127 | 139 | 21,815 | 5,881 | 3,682 | 31,517 |
| 57,128 | 137 | 21,323 | 5,751 | 3,617 | 30,828 |
| 57,129 | 136 | 21,640 | 5,804 | 3,668 | 31,248 |
| 57,130 | 133 | 21,558 | 5,719 | 3,651 | 31,061 |
| 57,131 | 133 | 21,852 | 5,787 | 3,682 | 31,454 |
| 57,132 | 132 | 22,281 | 5,888 | 3,723 | 32,024 |
| 57,133 | 138 | 22,078 | 5,832 | 3,673 | 31,721 |
| 57,134 | 140 | 22,380 | 5,851 | 3,695 | 32,066 |
| 57,135 | 156 | 22,450 | 5,828 | 3,707 | 32,141 |
| 57,136 | 151 | 22,356 | 5,820 | 3,702 | 32,029 |
| 57,137 | 138 | 22,564 | 5,891 | 3,746 | 32,339 |
| 57,138 | 138 | 22,570 | 5,913 | 3,752 | 32,373 |
| 57,139 | 137 | 22,656 | 5,937 | 3,731 | 32,461 |
| 57,140 | 136 | 22,865 | 5,992 | 3,769 | 32,762 |
| 57,141 | 133 | 22,759 | 5,943 | 3,748 | 32,583 |
| 57,142 | 133 | 22,961 | 6,024 | 3,795 | 32,913 |
| 57,143 | 132 | 22,837 | 5,973 | 3,755 | 32,697 |

|        |     |        |       |       |        |
|--------|-----|--------|-------|-------|--------|
| 57,144 | 132 | 22,379 | 5,848 | 3,699 | 32,058 |
| 57,145 | 132 | 22,631 | 5,884 | 3,723 | 32,370 |
| 57,146 | 130 | 22,614 | 5,899 | 3,730 | 32,373 |
| 57,147 | 134 | 22,605 | 5,952 | 3,780 | 32,471 |
| 57,148 | 134 | 22,573 | 5,948 | 3,784 | 32,439 |
| 57,149 | 135 | 22,645 | 5,937 | 3,779 | 32,496 |
| 57,150 | 131 | 22,278 | 5,782 | 3,721 | 31,912 |
| 57,151 | 132 | 22,540 | 5,827 | 3,749 | 32,248 |
| 57,152 | 127 | 22,786 | 5,880 | 3,795 | 32,588 |
| 57,153 | 121 | 22,556 | 5,787 | 3,732 | 32,196 |
| 57,154 | 126 | 22,749 | 5,837 | 3,785 | 32,497 |
| 57,155 | 124 | 22,679 | 5,807 | 3,768 | 32,378 |
| 57,156 | 122 | 22,686 | 5,807 | 3,751 | 32,366 |
| 57,157 | 129 | 22,908 | 5,853 | 3,750 | 32,640 |
| 57,158 | 129 | 22,868 | 5,848 | 3,748 | 32,593 |
| 57,159 | 130 | 22,740 | 5,794 | 3,707 | 32,371 |
| 57,160 | 131 | 22,807 | 5,795 | 3,719 | 32,452 |
| 57,161 | 131 | 22,829 | 5,770 | 3,704 | 32,434 |
| 57,162 | 132 | 23,201 | 5,842 | 3,742 | 32,917 |
| 57,163 | 129 | 22,817 | 5,750 | 3,654 | 32,350 |
| 57,164 | 121 | 22,724 | 5,706 | 3,647 | 32,198 |
| 57,165 | 121 | 22,796 | 5,711 | 3,648 | 32,276 |
| 57,166 | 122 | 22,704 | 5,707 | 3,643 | 32,176 |
| 57,167 | 127 | 22,957 | 5,762 | 3,672 | 32,518 |
| 57,168 | 131 | 22,767 | 5,748 | 3,636 | 32,282 |
| 57,169 | 124 | 22,618 | 5,708 | 3,628 | 32,078 |
| 57,170 | 121 | 22,373 | 5,644 | 3,578 | 31,716 |
| 57,171 | 125 | 22,451 | 5,701 | 3,606 | 31,883 |
| 57,172 | 127 | 22,568 | 5,715 | 3,629 | 32,039 |
| 57,173 | 123 | 22,422 | 5,693 | 3,617 | 31,855 |
| 57,174 | 122 | 22,401 | 5,707 | 3,657 | 31,887 |
| 57,175 | 123 | 22,220 | 5,708 | 3,647 | 31,698 |

|        |     |        |       |       |        |
|--------|-----|--------|-------|-------|--------|
| 57,176 | 121 | 22,175 | 5,674 | 3,653 | 31,623 |
| 57,177 | 123 | 22,155 | 5,663 | 3,655 | 31,596 |
| 57,178 | 128 | 22,220 | 5,721 | 3,684 | 31,753 |
| 57,179 | 123 | 22,159 | 5,717 | 3,694 | 31,693 |
| 57,180 | 121 | 21,838 | 5,650 | 3,645 | 31,254 |
| 57,181 | 120 | 21,442 | 5,608 | 3,595 | 30,765 |
| 57,182 | 118 | 21,128 | 5,559 | 3,585 | 30,390 |
| 57,183 | 119 | 21,363 | 5,667 | 3,637 | 30,786 |
| 57,184 | 113 | 21,385 | 5,664 | 3,635 | 30,797 |
| 57,185 | 114 | 21,299 | 5,690 | 3,644 | 30,747 |
| 57,186 | 94  | 21,301 | 5,696 | 3,645 | 30,736 |
| 57,187 | 93  | 21,127 | 5,628 | 3,619 | 30,467 |
| 57,188 | 93  | 21,312 | 5,677 | 3,662 | 30,744 |
| 57,189 | 93  | 21,292 | 5,702 | 3,677 | 30,764 |
| 57,190 | 94  | 21,173 | 5,658 | 3,671 | 30,596 |
| 57,191 | 95  | 21,155 | 5,660 | 3,666 | 30,576 |
| 57,192 | 101 | 21,195 | 5,666 | 3,673 | 30,635 |
| 57,193 | 99  | 20,906 | 5,569 | 3,591 | 30,165 |
| 57,194 | 98  | 20,880 | 5,558 | 3,595 | 30,131 |
| 57,195 | 98  | 21,188 | 5,603 | 3,604 | 30,493 |
| 57,196 | 98  | 20,876 | 5,512 | 3,540 | 30,026 |
| 57,197 | 98  | 21,219 | 5,576 | 3,572 | 30,465 |
| 57,198 | 96  | 21,506 | 5,610 | 3,596 | 30,808 |
| 57,199 | 100 | 21,296 | 5,544 | 3,558 | 30,498 |
| 57,200 | 99  | 21,082 | 5,497 | 3,526 | 30,204 |
| 57,201 | 103 | 21,861 | 5,715 | 3,617 | 31,296 |
| 57,202 | 104 | 21,886 | 5,747 | 3,639 | 31,376 |
| 57,203 | 106 | 21,722 | 5,699 | 3,587 | 31,114 |
| 57,204 | 105 | 22,037 | 5,759 | 3,637 | 31,538 |
| 57,205 | 101 | 21,736 | 5,703 | 3,580 | 31,120 |
| 57,206 | 100 | 21,689 | 5,664 | 3,564 | 31,017 |
| 57,207 | 102 | 21,710 | 5,647 | 3,562 | 31,021 |

|        |     |        |       |       |        |
|--------|-----|--------|-------|-------|--------|
| 57,208 | 97  | 21,795 | 5,664 | 3,600 | 31,156 |
| 57,209 | 99  | 21,686 | 5,644 | 3,575 | 31,004 |
| 57,210 | 98  | 21,368 | 5,583 | 3,528 | 30,577 |
| 57,211 | 98  | 21,309 | 5,613 | 3,524 | 30,544 |
| 57,212 | 102 | 21,628 | 5,676 | 3,564 | 30,970 |
| 57,213 | 102 | 21,635 | 5,699 | 3,569 | 31,005 |
| 57,214 | 112 | 21,409 | 5,648 | 3,547 | 30,716 |
| 57,215 | 112 | 21,470 | 5,672 | 3,543 | 30,797 |
| 57,216 | 114 | 21,518 | 5,689 | 3,561 | 30,882 |
| 57,217 | 106 | 21,407 | 5,611 | 3,520 | 30,644 |
| 57,218 | 111 | 21,718 | 5,659 | 3,563 | 31,051 |
| 57,219 | 110 | 22,118 | 5,739 | 3,640 | 31,607 |
| 57,220 | 111 | 22,031 | 5,743 | 3,644 | 31,529 |
| 57,221 | 112 | 22,183 | 5,798 | 3,694 | 31,787 |
| 57,222 | 109 | 22,241 | 5,804 | 3,715 | 31,869 |
| 57,223 | 109 | 22,059 | 5,717 | 3,663 | 31,548 |
| 57,224 | 112 | 22,147 | 5,717 | 3,659 | 31,635 |
| 57,225 | 116 | 22,194 | 5,710 | 3,660 | 31,680 |
| 57,226 | 115 | 22,061 | 5,655 | 3,628 | 31,459 |
| 57,227 | 121 | 22,756 | 5,856 | 3,748 | 32,481 |
| 57,228 | 123 | 22,997 | 5,864 | 3,742 | 32,726 |
| 57,229 | 118 | 23,165 | 5,850 | 3,734 | 32,867 |
| 57,230 | 115 | 23,060 | 5,804 | 3,674 | 32,653 |
| 57,231 | 117 | 23,467 | 5,875 | 3,721 | 33,180 |
| 57,232 | 119 | 23,477 | 5,824 | 3,674 | 33,094 |
| 57,233 | 119 | 23,496 | 5,816 | 3,678 | 33,109 |
| 57,234 | 126 | 23,814 | 5,835 | 3,741 | 33,516 |
| 57,235 | 124 | 23,425 | 5,744 | 3,690 | 32,983 |
| 57,236 | 134 | 23,775 | 5,785 | 3,738 | 33,432 |
| 57,237 | 136 | 23,817 | 5,801 | 3,742 | 33,496 |
| 57,238 | 138 | 23,916 | 5,791 | 3,727 | 33,572 |
| 57,239 | 142 | 24,058 | 5,803 | 3,753 | 33,756 |

|        |     |        |       |       |        |
|--------|-----|--------|-------|-------|--------|
| 57,240 | 148 | 23,895 | 5,735 | 3,721 | 33,499 |
| 57,241 | 147 | 24,048 | 5,740 | 3,732 | 33,667 |
| 57,242 | 143 | 24,118 | 5,723 | 3,740 | 33,724 |
| 57,243 | 139 | 23,966 | 5,705 | 3,764 | 33,574 |
| 57,244 | 139 | 23,886 | 5,723 | 3,763 | 33,511 |
| 57,245 | 145 | 24,134 | 5,790 | 3,808 | 33,877 |
| 57,246 | 148 | 23,916 | 5,747 | 3,800 | 33,611 |
| 57,247 | 150 | 24,198 | 5,803 | 3,842 | 33,993 |
| 57,248 | 153 | 23,999 | 5,750 | 3,827 | 33,729 |
| 57,249 | 151 | 23,803 | 5,729 | 3,790 | 33,473 |
| 57,250 | 150 | 24,299 | 5,806 | 3,834 | 34,089 |
| 57,251 | 150 | 24,394 | 5,840 | 3,887 | 34,271 |
| 57,252 | 160 | 24,533 | 5,853 | 3,896 | 34,442 |
| 57,253 | 160 | 24,225 | 5,794 | 3,862 | 34,041 |
| 57,254 | 161 | 24,404 | 5,825 | 3,890 | 34,280 |
| 57,255 | 160 | 24,408 | 5,847 | 3,889 | 34,304 |
| 57,256 | 160 | 24,612 | 5,866 | 3,902 | 34,540 |
| 57,257 | 162 | 24,787 | 5,874 | 3,911 | 34,734 |
| 57,258 | 161 | 24,848 | 5,873 | 3,910 | 34,792 |
| 57,259 | 164 | 24,941 | 5,868 | 3,899 | 34,872 |
| 57,260 | 160 | 24,719 | 5,809 | 3,873 | 34,561 |
| 57,261 | 166 | 25,014 | 5,843 | 3,915 | 34,938 |
| 57,262 | 166 | 25,040 | 5,835 | 3,909 | 34,950 |
| 57,263 | 167 | 24,994 | 5,781 | 3,894 | 34,836 |
| 57,264 | 167 | 25,312 | 5,830 | 3,948 | 35,257 |
| 57,265 | 154 | 24,745 | 5,704 | 3,872 | 34,475 |
| 57,266 | 159 | 25,112 | 5,772 | 3,919 | 34,962 |
| 57,267 | 164 | 25,233 | 5,796 | 3,936 | 35,129 |
| 57,268 | 168 | 25,543 | 5,847 | 3,974 | 35,532 |
| 57,269 | 168 | 25,656 | 5,926 | 4,014 | 35,764 |
| 57,270 | 168 | 25,467 | 5,910 | 3,971 | 35,516 |
| 57,271 | 168 | 25,462 | 5,875 | 3,952 | 35,457 |

|        |     |        |       |       |        |
|--------|-----|--------|-------|-------|--------|
| 57,272 | 173 | 25,701 | 5,884 | 3,957 | 35,715 |
| 57,273 | 173 | 25,721 | 5,863 | 3,963 | 35,720 |
| 57,274 | 171 | 25,541 | 5,883 | 3,948 | 35,543 |
| 57,275 | 173 | 25,733 | 5,921 | 3,972 | 35,799 |
| 57,276 | 175 | 25,510 | 5,860 | 3,956 | 35,501 |
| 57,277 | 176 | 25,355 | 5,804 | 3,919 | 35,254 |
| 57,278 | 172 | 25,707 | 5,866 | 3,962 | 35,707 |
| 57,279 | 170 | 25,140 | 5,792 | 3,932 | 35,034 |
| 57,280 | 175 | 25,004 | 5,818 | 3,932 | 34,929 |
| 57,281 | 175 | 25,133 | 5,870 | 3,959 | 35,137 |
| 57,282 | 173 | 24,928 | 5,832 | 3,949 | 34,882 |
| 57,283 | 169 | 24,876 | 5,827 | 3,954 | 34,826 |
| 57,284 | 173 | 24,963 | 5,872 | 3,977 | 34,985 |
| 57,285 | 180 | 24,927 | 5,904 | 3,979 | 34,990 |
| 57,286 | 180 | 24,980 | 5,905 | 3,965 | 35,030 |
| 57,287 | 176 | 24,900 | 5,899 | 3,944 | 34,919 |
| 57,288 | 176 | 24,729 | 5,883 | 3,942 | 34,730 |
| 57,289 | 177 | 24,143 | 5,760 | 3,865 | 33,945 |
| 57,290 | 178 | 24,402 | 5,799 | 3,881 | 34,260 |
| 57,291 | 176 | 24,650 | 5,847 | 3,914 | 34,587 |
| 57,292 | 179 | 24,743 | 5,899 | 3,903 | 34,724 |
| 57,293 | 180 | 24,966 | 5,909 | 3,914 | 34,969 |
| 57,294 | 186 | 25,234 | 5,897 | 3,899 | 35,216 |
| 57,295 | 189 | 25,623 | 5,945 | 3,929 | 35,686 |
| 57,296 | 183 | 25,521 | 5,923 | 3,910 | 35,537 |
| 57,297 | 180 | 25,568 | 5,916 | 3,903 | 35,567 |
| 57,298 | 179 | 25,576 | 5,928 | 3,910 | 35,593 |
| 57,299 | 182 | 25,727 | 5,987 | 3,927 | 35,823 |
| 57,300 | 176 | 25,713 | 5,960 | 3,942 | 35,791 |
| 57,301 | 174 | 25,133 | 5,847 | 3,863 | 35,017 |
| 57,302 | 173 | 25,369 | 5,854 | 3,899 | 35,295 |
| 57,303 | 167 | 25,512 | 5,893 | 3,944 | 35,516 |

|        |     |        |       |       |        |
|--------|-----|--------|-------|-------|--------|
| 57,304 | 170 | 25,591 | 5,878 | 3,958 | 35,597 |
| 57,305 | 167 | 25,302 | 5,830 | 3,894 | 35,193 |
| 57,306 | 172 | 25,082 | 5,780 | 3,869 | 34,903 |
| 57,307 | 173 | 25,234 | 5,832 | 3,895 | 35,134 |
| 57,308 | 171 | 24,967 | 5,785 | 3,890 | 34,813 |
| 57,309 | 170 | 24,650 | 5,723 | 3,847 | 34,390 |
| 57,310 | 170 | 24,906 | 5,761 | 3,880 | 34,717 |
| 57,311 | 163 | 24,891 | 5,795 | 3,884 | 34,733 |
| 57,312 | 163 | 25,048 | 5,840 | 3,925 | 34,976 |
| 57,313 | 161 | 25,126 | 5,871 | 3,955 | 35,113 |
| 57,314 | 157 | 24,896 | 5,926 | 3,981 | 34,960 |
| 57,315 | 156 | 24,531 | 5,878 | 3,974 | 34,539 |
| 57,316 | 159 | 24,753 | 5,936 | 4,022 | 34,870 |
| 57,317 | 155 | 24,932 | 5,974 | 4,073 | 35,134 |
| 57,318 | 156 | 24,841 | 5,982 | 4,084 | 35,063 |
| 57,319 | 152 | 24,903 | 6,001 | 4,096 | 35,152 |
| 57,320 | 146 | 24,795 | 5,925 | 4,063 | 34,929 |
| 57,321 | 151 | 25,297 | 6,008 | 4,134 | 35,590 |
| 57,322 | 150 | 25,192 | 5,981 | 4,116 | 35,439 |
| 57,323 | 151 | 25,268 | 6,016 | 4,120 | 35,555 |
| 57,324 | 152 | 25,173 | 5,990 | 4,080 | 35,395 |
| 57,325 | 157 | 25,598 | 6,019 | 4,109 | 35,883 |
| 57,326 | 160 | 25,712 | 6,030 | 4,125 | 36,027 |
| 57,327 | 154 | 25,876 | 6,034 | 4,121 | 36,185 |
| 57,328 | 154 | 25,844 | 6,019 | 4,129 | 36,146 |
| 57,329 | 153 | 25,730 | 6,021 | 4,127 | 36,031 |
| 57,330 | 149 | 25,648 | 5,972 | 4,121 | 35,890 |
| 57,331 | 159 | 25,913 | 6,029 | 4,157 | 36,258 |
| 57,332 | 169 | 25,719 | 5,969 | 4,134 | 35,991 |
| 57,333 | 170 | 25,869 | 5,969 | 4,150 | 36,158 |
| 57,334 | 152 | 25,071 | 5,762 | 4,020 | 35,005 |
| 57,335 | 156 | 25,322 | 5,809 | 4,059 | 35,346 |



|        |     |        |       |       |        |
|--------|-----|--------|-------|-------|--------|
| 57,336 | 155 | 25,681 | 5,900 | 4,103 | 35,839 |
| 57,337 | 155 | 25,687 | 5,911 | 4,100 | 35,853 |
| 57,338 | 158 | 26,234 | 6,039 | 4,193 | 36,624 |
| 57,339 | 156 | 26,032 | 6,006 | 4,161 | 36,355 |
| 57,340 | 150 | 26,155 | 6,047 | 4,171 | 36,523 |
| 57,341 | 158 | 26,189 | 6,053 | 4,154 | 36,554 |
| 57,342 | 156 | 26,135 | 6,043 | 4,154 | 36,488 |
| 57,343 | 165 | 26,488 | 6,131 | 4,193 | 36,977 |
| 57,344 | 169 | 26,701 | 6,187 | 4,222 | 37,279 |
| 57,345 | 163 | 26,296 | 6,155 | 4,182 | 36,796 |
| 57,346 | 162 | 26,402 | 6,192 | 4,210 | 36,966 |
| 57,347 | 166 | 26,224 | 6,166 | 4,172 | 36,728 |
| 57,348 | 168 | 26,457 | 6,235 | 4,223 | 37,083 |
| 57,349 | 163 | 26,609 | 6,293 | 4,268 | 37,333 |
| 57,350 | 166 | 26,283 | 6,214 | 4,203 | 36,866 |
| 57,351 | 165 | 26,439 | 6,289 | 4,253 | 37,146 |
| 57,352 | 168 | 26,387 | 6,275 | 4,245 | 37,075 |
| 57,353 | 169 | 26,408 | 6,279 | 4,252 | 37,108 |
| 57,354 | 168 | 26,310 | 6,264 | 4,222 | 36,964 |
| 57,355 | 164 | 26,147 | 6,235 | 4,196 | 36,742 |
| 57,356 | 163 | 25,952 | 6,172 | 4,170 | 36,457 |
| 57,357 | 162 | 26,107 | 6,222 | 4,206 | 36,697 |
| 57,358 | 161 | 26,147 | 6,213 | 4,184 | 36,705 |
| 57,359 | 158 | 26,081 | 6,191 | 4,179 | 36,609 |
| 57,360 | 158 | 26,025 | 6,172 | 4,170 | 36,525 |
| 57,361 | 164 | 26,024 | 6,188 | 4,169 | 36,545 |
| 57,362 | 167 | 25,949 | 6,145 | 4,141 | 36,402 |
| 57,363 | 167 | 26,090 | 6,084 | 4,117 | 36,458 |
| 57,364 | 171 | 25,956 | 6,025 | 4,058 | 36,210 |
| 57,365 | 176 | 25,876 | 5,948 | 4,005 | 36,005 |
| 57,366 | 180 | 26,166 | 5,950 | 3,990 | 36,286 |
| 57,367 | 178 | 26,217 | 5,949 | 3,969 | 36,313 |

|        |     |        |       |       |        |
|--------|-----|--------|-------|-------|--------|
| 57,368 | 176 | 26,240 | 5,937 | 3,944 | 36,297 |
| 57,369 | 173 | 25,953 | 5,847 | 3,865 | 35,838 |
| 57,370 | 174 | 25,602 | 5,780 | 3,802 | 35,358 |
| 57,371 | 171 | 25,987 | 5,868 | 3,867 | 35,893 |
| 57,372 | 176 | 25,761 | 5,849 | 3,844 | 35,630 |
| 57,373 | 177 | 25,666 | 5,842 | 3,829 | 35,514 |
| 57,374 | 174 | 25,565 | 5,754 | 3,822 | 35,315 |
| 57,375 | 177 | 25,466 | 5,773 | 3,826 | 35,242 |
| 57,376 | 168 | 25,210 | 5,746 | 3,801 | 34,925 |
| 57,377 | 166 | 24,956 | 5,698 | 3,766 | 34,586 |
| 57,378 | 165 | 24,929 | 5,702 | 3,757 | 34,553 |
| 57,379 | 168 | 25,133 | 5,708 | 3,766 | 34,775 |
| 57,380 | 172 | 25,207 | 5,709 | 3,754 | 34,842 |
| 57,381 | 171 | 25,232 | 5,702 | 3,756 | 34,861 |
| 57,382 | 165 | 25,165 | 5,695 | 3,758 | 34,783 |
| 57,383 | 161 | 24,936 | 5,648 | 3,739 | 34,484 |
| 57,384 | 165 | 24,827 | 5,654 | 3,724 | 34,370 |
| 57,385 | 163 | 24,581 | 5,611 | 3,687 | 34,042 |
| 57,386 | 154 | 24,884 | 5,662 | 3,732 | 34,432 |
| 57,387 | 160 | 24,931 | 5,658 | 3,727 | 34,476 |
| 57,388 | 160 | 24,879 | 5,646 | 3,718 | 34,403 |
| 57,389 | 155 | 24,302 | 5,458 | 3,608 | 33,523 |
| 57,390 | 157 | 24,526 | 5,488 | 3,625 | 33,796 |
| 57,391 | 154 | 24,653 | 5,524 | 3,663 | 33,994 |
| 57,392 | 153 | 24,574 | 5,526 | 3,657 | 33,910 |
| 57,393 | 145 | 24,651 | 5,529 | 3,677 | 34,002 |
| 57,394 | 143 | 24,453 | 5,493 | 3,680 | 33,769 |
| 57,395 | 136 | 24,253 | 5,473 | 3,665 | 33,527 |
| 57,396 | 134 | 24,275 | 5,450 | 3,703 | 33,562 |
| 57,397 | 135 | 24,295 | 5,436 | 3,681 | 33,547 |
| 57,398 | 136 | 24,326 | 5,424 | 3,689 | 33,575 |
| 57,399 | 141 | 24,055 | 5,335 | 3,627 | 33,158 |

|        |     |        |       |       |        |
|--------|-----|--------|-------|-------|--------|
| 57,400 | 143 | 24,123 | 5,352 | 3,622 | 33,240 |
| 57,401 | 144 | 23,817 | 5,297 | 3,601 | 32,859 |
| 57,402 | 144 | 24,006 | 5,366 | 3,616 | 33,132 |
| 57,403 | 141 | 24,071 | 5,417 | 3,648 | 33,277 |
| 57,404 | 149 | 24,140 | 5,431 | 3,613 | 33,333 |
| 57,405 | 147 | 23,987 | 5,383 | 3,579 | 33,096 |
| 57,406 | 150 | 24,043 | 5,378 | 3,571 | 33,142 |
| 57,407 | 156 | 24,262 | 5,405 | 3,584 | 33,407 |
| 57,408 | 159 | 24,279 | 5,427 | 3,592 | 33,457 |
| 57,409 | 161 | 24,111 | 5,386 | 3,555 | 33,213 |
| 57,410 | 165 | 24,069 | 5,377 | 3,529 | 33,140 |
| 57,411 | 166 | 24,011 | 5,377 | 3,534 | 33,088 |
| 57,412 | 162 | 23,979 | 5,402 | 3,544 | 33,087 |
| 57,413 | 165 | 24,149 | 5,434 | 3,581 | 33,329 |
| 57,414 | 166 | 23,991 | 5,464 | 3,580 | 33,201 |
| 57,415 | 167 | 23,760 | 5,447 | 3,588 | 32,962 |
| 57,416 | 163 | 23,667 | 5,478 | 3,592 | 32,900 |
| 57,417 | 159 | 23,318 | 5,428 | 3,563 | 32,468 |
| 57,418 | 167 | 23,354 | 5,437 | 3,577 | 32,535 |
| 57,419 | 168 | 23,212 | 5,441 | 3,558 | 32,379 |
| 57,420 | 163 | 23,155 | 5,462 | 3,580 | 32,360 |
| 57,421 | 158 | 22,515 | 5,291 | 3,492 | 31,456 |
| 57,422 | 161 | 22,668 | 5,311 | 3,504 | 31,644 |
| 57,423 | 150 | 22,017 | 5,115 | 3,394 | 30,676 |
| 57,424 | 150 | 22,163 | 5,153 | 3,406 | 30,872 |
| 57,425 | 149 | 22,451 | 5,204 | 3,452 | 31,256 |
| 57,426 | 149 | 22,366 | 5,186 | 3,435 | 31,136 |
| 57,427 | 148 | 22,865 | 5,316 | 3,504 | 31,833 |
| 57,428 | 147 | 22,697 | 5,295 | 3,499 | 31,638 |
| 57,429 | 152 | 22,983 | 5,354 | 3,552 | 32,041 |
| 57,430 | 148 | 22,892 | 5,367 | 3,544 | 31,951 |
| 57,431 | 145 | 22,834 | 5,344 | 3,543 | 31,866 |

|        |     |        |       |       |        |
|--------|-----|--------|-------|-------|--------|
| 57,432 | 141 | 22,500 | 5,278 | 3,494 | 31,413 |
| 57,433 | 142 | 22,633 | 5,306 | 3,510 | 31,591 |
| 57,434 | 133 | 22,303 | 5,232 | 3,441 | 31,109 |
| 57,435 | 138 | 22,593 | 5,275 | 3,474 | 31,480 |
| 57,436 | 139 | 22,426 | 5,265 | 3,470 | 31,300 |
| 57,437 | 140 | 22,103 | 5,187 | 3,432 | 30,862 |
| 57,438 | 139 | 21,960 | 5,169 | 3,422 | 30,690 |
| 57,439 | 145 | 21,917 | 5,184 | 3,422 | 30,668 |
| 57,440 | 150 | 22,109 | 5,257 | 3,473 | 30,989 |
| 57,441 | 144 | 21,679 | 5,210 | 3,429 | 30,462 |
| 57,442 | 144 | 21,639 | 5,204 | 3,420 | 30,407 |
| 57,443 | 144 | 21,611 | 5,244 | 3,448 | 30,447 |
| 57,444 | 147 | 21,547 | 5,189 | 3,390 | 30,273 |
| 57,445 | 152 | 21,693 | 5,213 | 3,417 | 30,475 |
| 57,446 | 151 | 21,600 | 5,213 | 3,414 | 30,378 |
| 57,447 | 151 | 21,489 | 5,190 | 3,370 | 30,200 |
| 57,448 | 152 | 21,153 | 5,173 | 3,370 | 29,848 |
| 57,449 | 153 | 21,176 | 5,219 | 3,420 | 29,968 |
| 57,450 | 152 | 21,211 | 5,233 | 3,408 | 30,004 |
| 57,451 | 148 | 21,381 | 5,209 | 3,433 | 30,171 |
| 57,452 | 148 | 21,145 | 5,136 | 3,409 | 29,838 |
| 57,453 | 141 | 20,958 | 5,046 | 3,360 | 29,505 |
| 57,454 | 143 | 21,231 | 5,092 | 3,386 | 29,852 |
| 57,455 | 142 | 21,109 | 5,074 | 3,383 | 29,708 |
| 57,456 | 142 | 21,201 | 5,126 | 3,422 | 29,891 |
| 57,457 | 140 | 20,987 | 5,082 | 3,389 | 29,598 |
| 57,458 | 134 | 21,015 | 5,104 | 3,419 | 29,672 |
| 57,459 | 135 | 20,715 | 5,045 | 3,375 | 29,270 |
| 57,460 | 134 | 20,477 | 5,032 | 3,369 | 29,012 |
| 57,461 | 137 | 21,075 | 5,199 | 3,486 | 29,897 |
| 57,462 | 135 | 20,861 | 5,161 | 3,452 | 29,609 |
| 57,463 | 135 | 20,730 | 5,140 | 3,426 | 29,431 |

|        |     |        |       |       |        |
|--------|-----|--------|-------|-------|--------|
| 57,464 | 152 | 21,357 | 5,265 | 3,503 | 30,277 |
| 57,465 | 149 | 21,386 | 5,253 | 3,506 | 30,294 |
| 57,466 | 148 | 21,221 | 5,207 | 3,469 | 30,045 |
| 57,467 | 148 | 21,347 | 5,244 | 3,479 | 30,218 |
| 57,468 | 143 | 21,384 | 5,328 | 3,489 | 30,344 |
| 57,469 | 141 | 21,354 | 5,301 | 3,482 | 30,278 |
| 57,470 | 145 | 21,512 | 5,339 | 3,480 | 30,476 |
| 57,471 | 147 | 21,752 | 5,393 | 3,510 | 30,802 |
| 57,472 | 145 | 21,817 | 5,415 | 3,511 | 30,888 |
| 57,473 | 141 | 21,558 | 5,373 | 3,500 | 30,572 |
| 57,474 | 140 | 21,571 | 5,466 | 3,544 | 30,721 |
| 57,475 | 144 | 21,657 | 5,520 | 3,576 | 30,897 |
| 57,476 | 150 | 21,695 | 5,596 | 3,579 | 31,020 |
| 57,477 | 150 | 21,561 | 5,575 | 3,568 | 30,854 |
| 57,478 | 151 | 21,552 | 5,565 | 3,607 | 30,875 |
| 57,479 | 157 | 21,666 | 5,628 | 3,623 | 31,074 |
| 57,480 | 153 | 21,638 | 5,667 | 3,628 | 31,086 |
| 57,481 | 161 | 21,452 | 5,651 | 3,630 | 30,894 |
| 57,482 | 168 | 21,538 | 5,700 | 3,646 | 31,052 |
| 57,483 | 169 | 21,612 | 5,732 | 3,645 | 31,158 |
| 57,484 | 169 | 21,636 | 5,758 | 3,653 | 31,216 |
| 57,485 | 161 | 21,837 | 5,823 | 3,648 | 31,469 |
| 57,486 | 161 | 21,794 | 5,829 | 3,639 | 31,423 |
| 57,487 | 169 | 21,971 | 5,900 | 3,696 | 31,736 |
| 57,488 | 164 | 21,998 | 5,959 | 3,723 | 31,844 |
| 57,489 | 157 | 21,874 | 5,920 | 3,716 | 31,667 |
| 57,490 | 168 | 22,020 | 5,980 | 3,739 | 31,907 |
| 57,491 | 163 | 22,172 | 6,009 | 3,764 | 32,108 |
| 57,492 | 166 | 22,384 | 6,075 | 3,798 | 32,423 |
| 57,493 | 167 | 22,199 | 6,024 | 3,787 | 32,177 |
| 57,494 | 168 | 22,319 | 6,073 | 3,804 | 32,364 |
| 57,495 | 164 | 22,273 | 6,086 | 3,808 | 32,331 |

|        |     |        |       |       |        |
|--------|-----|--------|-------|-------|--------|
| 57,496 | 162 | 22,544 | 6,165 | 3,864 | 32,735 |
| 57,497 | 163 | 22,956 | 6,259 | 3,928 | 33,306 |
| 57,498 | 161 | 22,906 | 6,242 | 3,890 | 33,199 |
| 57,499 | 157 | 22,755 | 6,202 | 3,852 | 32,966 |
| 57,500 | 156 | 22,836 | 6,242 | 3,866 | 33,100 |
| 57,501 | 155 | 22,905 | 6,306 | 3,905 | 33,271 |
| 57,502 | 159 | 22,616 | 6,285 | 3,845 | 32,905 |
| 57,503 | 160 | 22,348 | 6,235 | 3,801 | 32,544 |
| 57,504 | 166 | 22,509 | 6,342 | 3,865 | 32,882 |
| 57,505 | 165 | 22,637 | 6,421 | 3,900 | 33,123 |
| 57,506 | 164 | 22,807 | 6,454 | 3,929 | 33,354 |
| 57,507 | 169 | 22,870 | 6,435 | 3,954 | 33,428 |
| 57,508 | 169 | 22,815 | 6,424 | 3,951 | 33,359 |
| 57,509 | 172 | 23,304 | 6,537 | 3,979 | 33,992 |
| 57,510 | 163 | 23,035 | 6,445 | 3,920 | 33,563 |
| 57,511 | 164 | 23,297 | 6,478 | 3,926 | 33,865 |
| 57,512 | 164 | 23,631 | 6,564 | 3,989 | 34,348 |
| 57,513 | 161 | 23,490 | 6,473 | 3,957 | 34,081 |
| 57,514 | 160 | 23,463 | 6,458 | 3,945 | 34,026 |
| 57,515 | 155 | 23,431 | 6,469 | 3,956 | 34,011 |
| 57,516 | 157 | 23,467 | 6,474 | 3,956 | 34,054 |
| 57,517 | 160 | 23,505 | 6,492 | 3,955 | 34,112 |
| 57,518 | 158 | 23,598 | 6,448 | 3,977 | 34,181 |
| 57,519 | 160 | 23,558 | 6,421 | 3,961 | 34,100 |
| 57,520 | 161 | 23,563 | 6,425 | 3,965 | 34,114 |
| 57,521 | 159 | 23,787 | 6,455 | 4,037 | 34,438 |
| 57,522 | 166 | 23,872 | 6,477 | 4,050 | 34,565 |
| 57,523 | 168 | 23,697 | 6,436 | 4,009 | 34,310 |
| 57,524 | 173 | 23,909 | 6,489 | 4,051 | 34,622 |
| 57,525 | 167 | 23,661 | 6,390 | 3,981 | 34,199 |
| 57,526 | 170 | 23,902 | 6,436 | 3,993 | 34,501 |
| 57,527 | 174 | 24,117 | 6,501 | 4,042 | 34,834 |

|        |     |        |       |       |        |
|--------|-----|--------|-------|-------|--------|
| 57,528 | 178 | 23,910 | 6,432 | 3,987 | 34,507 |
| 57,529 | 178 | 23,991 | 6,458 | 3,994 | 34,621 |
| 57,530 | 170 | 23,836 | 6,383 | 3,967 | 34,356 |
| 57,531 | 170 | 23,782 | 6,374 | 3,956 | 34,282 |
| 57,532 | 165 | 23,847 | 6,385 | 3,962 | 34,359 |
| 57,533 | 163 | 23,848 | 6,384 | 3,953 | 34,348 |
| 57,534 | 167 | 23,772 | 6,330 | 3,948 | 34,217 |
| 57,535 | 169 | 23,656 | 6,286 | 3,951 | 34,062 |
| 57,536 | 173 | 23,554 | 6,237 | 3,954 | 33,918 |
| 57,537 | 173 | 23,396 | 6,215 | 3,930 | 33,714 |
| 57,538 | 167 | 23,642 | 6,241 | 3,940 | 33,990 |
| 57,539 | 171 | 23,518 | 6,191 | 3,899 | 33,779 |
| 57,540 | 171 | 23,431 | 6,177 | 3,874 | 33,653 |
| 57,541 | 166 | 23,565 | 6,219 | 3,881 | 33,831 |
| 57,542 | 171 | 23,262 | 6,162 | 3,838 | 33,433 |
| 57,543 | 171 | 23,185 | 6,115 | 3,824 | 33,295 |
| 57,544 | 172 | 23,092 | 6,074 | 3,790 | 33,128 |
| 57,545 | 173 | 23,130 | 6,091 | 3,798 | 33,192 |
| 57,546 | 177 | 23,078 | 6,086 | 3,789 | 33,130 |
| 57,547 | 176 | 22,722 | 6,012 | 3,741 | 32,651 |
| 57,548 | 174 | 22,578 | 5,970 | 3,723 | 32,445 |
| 57,549 | 176 | 22,524 | 5,942 | 3,708 | 32,350 |
| 57,550 | 182 | 22,533 | 5,949 | 3,699 | 32,363 |
| 57,551 | 185 | 22,587 | 5,954 | 3,699 | 32,425 |
| 57,552 | 182 | 22,344 | 5,842 | 3,646 | 32,014 |
| 57,553 | 181 | 22,383 | 5,840 | 3,639 | 32,043 |
| 57,554 | 177 | 22,303 | 5,762 | 3,604 | 31,846 |
| 57,555 | 177 | 22,132 | 5,698 | 3,565 | 31,572 |
| 57,556 | 177 | 22,053 | 5,713 | 3,544 | 31,487 |
| 57,557 | 173 | 22,018 | 5,717 | 3,542 | 31,450 |
| 57,558 | 169 | 21,961 | 5,748 | 3,515 | 31,393 |
| 57,559 | 167 | 21,774 | 5,717 | 3,493 | 31,151 |

|        |     |        |       |       |        |
|--------|-----|--------|-------|-------|--------|
| 57,560 | 166 | 22,073 | 5,761 | 3,573 | 31,573 |
| 57,561 | 164 | 21,827 | 5,718 | 3,540 | 31,249 |
| 57,562 | 163 | 21,832 | 5,729 | 3,578 | 31,302 |
| 57,563 | 155 | 21,783 | 5,721 | 3,551 | 31,210 |
| 57,564 | 151 | 21,745 | 5,722 | 3,529 | 31,147 |
| 57,565 | 150 | 21,660 | 5,674 | 3,485 | 30,969 |
| 57,566 | 150 | 21,645 | 5,660 | 3,489 | 30,944 |
| 57,567 | 150 | 21,984 | 5,747 | 3,563 | 31,444 |
| 57,568 | 155 | 21,983 | 5,756 | 3,567 | 31,461 |
| 57,569 | 155 | 21,725 | 5,745 | 3,525 | 31,150 |
| 57,570 | 153 | 21,612 | 5,719 | 3,509 | 30,993 |
| 57,571 | 150 | 21,257 | 5,608 | 3,422 | 30,437 |
| 57,572 | 151 | 21,316 | 5,631 | 3,430 | 30,528 |
| 57,573 | 146 | 21,542 | 5,705 | 3,469 | 30,862 |
| 57,574 | 142 | 21,177 | 5,592 | 3,417 | 30,328 |
| 57,575 | 140 | 21,310 | 5,587 | 3,411 | 30,448 |
| 57,576 | 146 | 21,365 | 5,558 | 3,406 | 30,475 |
| 57,577 | 149 | 21,369 | 5,548 | 3,412 | 30,478 |
| 57,578 | 148 | 21,313 | 5,516 | 3,400 | 30,377 |
| 57,579 | 144 | 21,120 | 5,467 | 3,357 | 30,088 |
| 57,580 | 145 | 21,187 | 5,484 | 3,361 | 30,177 |
| 57,581 | 149 | 21,157 | 5,472 | 3,376 | 30,154 |
| 57,582 | 153 | 21,150 | 5,465 | 3,364 | 30,132 |
| 57,583 | 150 | 20,912 | 5,402 | 3,323 | 29,787 |
| 57,584 | 142 | 20,850 | 5,398 | 3,312 | 29,702 |
| 57,585 | 146 | 20,935 | 5,454 | 3,330 | 29,865 |
| 57,586 | 151 | 21,032 | 5,466 | 3,322 | 29,971 |
| 57,587 | 145 | 20,752 | 5,379 | 3,273 | 29,549 |
| 57,588 | 145 | 20,768 | 5,382 | 3,285 | 29,580 |
| 57,589 | 145 | 20,889 | 5,391 | 3,289 | 29,714 |
| 57,590 | 142 | 21,153 | 5,464 | 3,369 | 30,128 |
| 57,591 | 137 | 20,975 | 5,412 | 3,348 | 29,872 |



|        |     |        |       |       |        |
|--------|-----|--------|-------|-------|--------|
| 57,592 | 140 | 21,303 | 5,460 | 3,391 | 30,294 |
| 57,593 | 130 | 20,885 | 5,358 | 3,345 | 29,718 |
| 57,594 | 130 | 21,014 | 5,422 | 3,362 | 29,928 |
| 57,595 | 128 | 20,941 | 5,412 | 3,384 | 29,865 |
| 57,596 | 126 | 20,819 | 5,334 | 3,337 | 29,616 |
| 57,597 | 122 | 20,817 | 5,309 | 3,322 | 29,570 |
| 57,598 | 126 | 21,124 | 5,413 | 3,353 | 30,016 |
| 57,599 | 121 | 20,955 | 5,355 | 3,332 | 29,763 |
| 57,600 | 121 | 20,964 | 5,365 | 3,333 | 29,783 |
| 57,601 | 119 | 21,101 | 5,392 | 3,381 | 29,993 |
| 57,602 | 114 | 21,199 | 5,412 | 3,376 | 30,101 |
| 57,603 | 108 | 20,945 | 5,344 | 3,348 | 29,745 |
| 57,604 | 107 | 20,896 | 5,346 | 3,364 | 29,713 |
| 57,605 | 107 | 21,111 | 5,397 | 3,393 | 30,008 |
| 57,606 | 111 | 21,214 | 5,403 | 3,404 | 30,132 |
| 57,607 | 112 | 21,316 | 5,439 | 3,425 | 30,292 |
| 57,608 | 119 | 21,352 | 5,457 | 3,426 | 30,354 |
| 57,609 | 124 | 21,256 | 5,412 | 3,393 | 30,185 |
| 57,610 | 121 | 20,832 | 5,311 | 3,321 | 29,585 |
| 57,611 | 123 | 20,749 | 5,273 | 3,331 | 29,476 |
| 57,612 | 128 | 20,888 | 5,320 | 3,359 | 29,695 |
| 57,613 | 135 | 20,818 | 5,320 | 3,339 | 29,612 |
| 57,614 | 135 | 20,678 | 5,311 | 3,341 | 29,465 |
| 57,615 | 135 | 20,460 | 5,291 | 3,350 | 29,236 |
| 57,616 | 135 | 20,305 | 5,306 | 3,363 | 29,109 |
| 57,617 | 137 | 20,410 | 5,323 | 3,350 | 29,220 |
| 57,618 | 137 | 20,471 | 5,305 | 3,338 | 29,251 |
| 57,619 | 131 | 20,165 | 5,205 | 3,307 | 28,808 |
| 57,620 | 135 | 20,364 | 5,203 | 3,314 | 29,016 |
| 57,621 | 136 | 20,718 | 5,303 | 3,369 | 29,526 |
| 57,622 | 141 | 20,577 | 5,269 | 3,343 | 29,330 |
| 57,623 | 139 | 20,673 | 5,273 | 3,341 | 29,426 |

|        |     |        |       |       |        |
|--------|-----|--------|-------|-------|--------|
| 57,624 | 140 | 20,710 | 5,256 | 3,335 | 29,441 |
| 57,625 | 140 | 20,712 | 5,254 | 3,352 | 29,458 |
| 57,626 | 135 | 20,675 | 5,269 | 3,392 | 29,471 |
| 57,627 | 135 | 20,804 | 5,338 | 3,416 | 29,693 |
| 57,628 | 128 | 20,936 | 5,386 | 3,466 | 29,916 |
| 57,629 | 125 | 20,644 | 5,306 | 3,433 | 29,508 |
| 57,630 | 127 | 20,811 | 5,319 | 3,436 | 29,693 |
| 57,631 | 125 | 20,914 | 5,342 | 3,429 | 29,810 |
| 57,632 | 122 | 21,139 | 5,338 | 3,436 | 30,035 |
| 57,633 | 121 | 21,264 | 5,358 | 3,471 | 30,214 |
| 57,634 | 120 | 21,391 | 5,354 | 3,476 | 30,341 |
| 57,635 | 119 | 21,313 | 5,326 | 3,454 | 30,212 |
| 57,636 | 121 | 21,644 | 5,364 | 3,484 | 30,613 |
| 57,637 | 113 | 21,460 | 5,329 | 3,463 | 30,365 |
| 57,638 | 111 | 21,116 | 5,254 | 3,418 | 29,899 |
| 57,639 | 119 | 21,328 | 5,339 | 3,454 | 30,240 |
| 57,640 | 120 | 21,144 | 5,299 | 3,422 | 29,985 |
| 57,641 | 124 | 21,241 | 5,285 | 3,410 | 30,060 |
| 57,642 | 125 | 21,072 | 5,233 | 3,383 | 29,813 |
| 57,643 | 127 | 21,394 | 5,297 | 3,411 | 30,229 |
| 57,644 | 128 | 21,187 | 5,240 | 3,362 | 29,917 |
| 57,645 | 136 | 21,189 | 5,210 | 3,337 | 29,872 |
| 57,646 | 136 | 21,134 | 5,177 | 3,315 | 29,762 |
| 57,647 | 136 | 21,104 | 5,181 | 3,301 | 29,722 |
| 57,648 | 149 | 21,407 | 5,261 | 3,367 | 30,184 |
| 57,649 | 153 | 21,369 | 5,254 | 3,368 | 30,144 |
| 57,650 | 154 | 21,091 | 5,210 | 3,339 | 29,794 |
| 57,651 | 153 | 21,137 | 5,212 | 3,333 | 29,835 |
| 57,652 | 152 | 21,276 | 5,231 | 3,339 | 29,998 |
| 57,653 | 154 | 21,265 | 5,191 | 3,333 | 29,943 |
| 57,654 | 154 | 21,158 | 5,180 | 3,332 | 29,824 |
| 57,655 | 153 | 21,349 | 5,232 | 3,340 | 30,074 |

|        |     |        |       |       |        |
|--------|-----|--------|-------|-------|--------|
| 57,656 | 155 | 21,742 | 5,311 | 3,382 | 30,590 |
| 57,657 | 147 | 21,372 | 5,211 | 3,310 | 30,040 |
| 57,658 | 148 | 21,823 | 5,286 | 3,369 | 30,626 |
| 57,659 | 147 | 22,160 | 5,349 | 3,431 | 31,087 |
| 57,660 | 140 | 22,141 | 5,351 | 3,458 | 31,090 |
| 57,661 | 145 | 22,171 | 5,322 | 3,466 | 31,104 |
| 57,662 | 146 | 22,315 | 5,389 | 3,488 | 31,338 |
| 57,663 | 143 | 22,324 | 5,395 | 3,494 | 31,356 |
| 57,664 | 142 | 22,310 | 5,410 | 3,519 | 31,381 |
| 57,665 | 142 | 22,562 | 5,496 | 3,576 | 31,776 |
| 57,666 | 140 | 22,650 | 5,468 | 3,531 | 31,789 |
| 57,667 | 145 | 22,376 | 5,420 | 3,479 | 31,420 |
| 57,668 | 144 | 22,531 | 5,444 | 3,508 | 31,627 |
| 57,669 | 147 | 22,699 | 5,489 | 3,556 | 31,891 |
| 57,670 | 151 | 22,713 | 5,548 | 3,545 | 31,957 |
| 57,671 | 146 | 21,754 | 5,367 | 3,399 | 30,666 |
| 57,672 | 149 | 21,907 | 5,372 | 3,416 | 30,844 |
| 57,673 | 154 | 22,146 | 5,433 | 3,450 | 31,183 |
| 57,674 | 153 | 22,095 | 5,420 | 3,435 | 31,103 |
| 57,675 | 161 | 22,597 | 5,520 | 3,522 | 31,800 |
| 57,676 | 169 | 22,613 | 5,519 | 3,513 | 31,814 |
| 57,677 | 179 | 22,605 | 5,510 | 3,483 | 31,777 |
| 57,678 | 180 | 22,717 | 5,513 | 3,481 | 31,891 |
| 57,679 | 186 | 23,033 | 5,605 | 3,476 | 32,300 |
| 57,680 | 184 | 22,895 | 5,597 | 3,473 | 32,149 |
| 57,681 | 187 | 22,985 | 5,631 | 3,521 | 32,324 |
| 57,682 | 189 | 23,458 | 5,728 | 3,582 | 32,957 |
| 57,683 | 190 | 23,542 | 5,772 | 3,608 | 33,112 |
| 57,684 | 193 | 23,344 | 5,723 | 3,563 | 32,823 |
| 57,685 | 194 | 23,176 | 5,711 | 3,546 | 32,627 |
| 57,686 | 192 | 23,503 | 5,812 | 3,622 | 33,129 |
| 57,687 | 195 | 23,710 | 5,858 | 3,656 | 33,419 |

|        |     |        |       |       |        |
|--------|-----|--------|-------|-------|--------|
| 57,688 | 198 | 23,693 | 5,848 | 3,641 | 33,380 |
| 57,689 | 197 | 24,194 | 5,941 | 3,711 | 34,043 |
| 57,690 | 197 | 24,173 | 5,948 | 3,728 | 34,046 |
| 57,691 | 197 | 24,061 | 5,950 | 3,727 | 33,935 |
| 57,692 | 198 | 23,847 | 5,939 | 3,740 | 33,724 |
| 57,693 | 200 | 23,970 | 5,991 | 3,760 | 33,921 |
| 57,694 | 195 | 23,845 | 5,989 | 3,757 | 33,786 |
| 57,695 | 191 | 23,875 | 6,007 | 3,781 | 33,854 |
| 57,696 | 181 | 23,874 | 6,053 | 3,806 | 33,914 |
| 57,697 | 181 | 23,934 | 6,079 | 3,822 | 34,016 |
| 57,698 | 178 | 24,204 | 6,126 | 3,874 | 34,382 |
| 57,699 | 171 | 24,180 | 6,125 | 3,870 | 34,346 |
| 57,700 | 163 | 23,907 | 6,039 | 3,832 | 33,941 |
| 57,701 | 167 | 23,878 | 6,032 | 3,814 | 33,891 |
| 57,702 | 166 | 23,641 | 6,019 | 3,793 | 33,619 |
| 57,703 | 171 | 23,854 | 6,098 | 3,846 | 33,969 |
| 57,704 | 170 | 23,709 | 6,093 | 3,849 | 33,821 |
| 57,705 | 184 | 23,986 | 6,212 | 3,876 | 34,258 |
| 57,706 | 185 | 23,960 | 6,205 | 3,896 | 34,246 |
| 57,707 | 183 | 23,544 | 6,112 | 3,859 | 33,698 |
| 57,708 | 185 | 23,749 | 6,148 | 3,885 | 33,967 |
| 57,709 | 187 | 23,701 | 6,157 | 3,899 | 33,944 |
| 57,710 | 185 | 23,676 | 6,181 | 3,895 | 33,937 |
| 57,711 | 186 | 23,661 | 6,189 | 3,902 | 33,938 |
| 57,712 | 188 | 23,023 | 6,025 | 3,761 | 32,997 |
| 57,713 | 188 | 23,308 | 6,034 | 3,780 | 33,310 |
| 57,714 | 188 | 23,615 | 6,089 | 3,787 | 33,679 |
| 57,715 | 191 | 23,640 | 6,044 | 3,769 | 33,644 |
| 57,716 | 191 | 23,660 | 6,101 | 3,805 | 33,757 |
| 57,717 | 192 | 23,591 | 6,089 | 3,807 | 33,679 |
| 57,718 | 187 | 23,425 | 6,082 | 3,800 | 33,494 |
| 57,719 | 186 | 23,317 | 6,046 | 3,762 | 33,311 |

|        |     |        |       |       |        |
|--------|-----|--------|-------|-------|--------|
| 57,720 | 185 | 23,295 | 6,032 | 3,755 | 33,267 |
| 57,721 | 177 | 23,288 | 5,988 | 3,770 | 33,223 |
| 57,722 | 176 | 23,258 | 5,977 | 3,765 | 33,176 |
| 57,723 | 170 | 23,368 | 5,998 | 3,790 | 33,326 |
| 57,724 | 170 | 23,539 | 6,050 | 3,817 | 33,576 |
| 57,725 | 165 | 23,284 | 5,983 | 3,777 | 33,209 |
| 57,726 | 164 | 23,178 | 5,962 | 3,766 | 33,070 |
| 57,727 | 160 | 23,425 | 6,036 | 3,802 | 33,423 |
| 57,728 | 148 | 23,047 | 5,983 | 3,788 | 32,966 |
| 57,729 | 156 | 23,221 | 6,079 | 3,862 | 33,318 |
| 57,730 | 157 | 23,202 | 6,105 | 3,910 | 33,374 |
| 57,731 | 156 | 23,100 | 6,117 | 3,911 | 33,284 |
| 57,732 | 157 | 22,977 | 6,112 | 3,898 | 33,144 |
| 57,733 | 158 | 22,804 | 6,090 | 3,896 | 32,948 |
| 57,734 | 157 | 22,355 | 6,010 | 3,825 | 32,347 |
| 57,735 | 153 | 22,325 | 6,002 | 3,835 | 32,315 |
| 57,736 | 151 | 22,124 | 5,962 | 3,818 | 32,055 |
| 57,737 | 151 | 21,916 | 5,925 | 3,810 | 31,802 |
| 57,738 | 150 | 21,778 | 5,906 | 3,800 | 31,634 |
| 57,739 | 147 | 21,798 | 5,882 | 3,799 | 31,626 |
| 57,740 | 150 | 21,891 | 5,953 | 3,810 | 31,804 |
| 57,741 | 146 | 21,903 | 5,927 | 3,794 | 31,770 |
| 57,742 | 149 | 22,114 | 5,910 | 3,782 | 31,955 |
| 57,743 | 148 | 21,887 | 5,890 | 3,770 | 31,695 |
| 57,744 | 146 | 21,637 | 5,836 | 3,735 | 31,354 |
| 57,745 | 154 | 22,058 | 5,882 | 3,808 | 31,902 |
| 57,746 | 156 | 22,322 | 5,913 | 3,825 | 32,216 |
| 57,747 | 156 | 22,444 | 5,910 | 3,828 | 32,338 |
| 57,748 | 156 | 22,471 | 5,888 | 3,829 | 32,344 |
| 57,749 | 156 | 22,333 | 5,864 | 3,817 | 32,170 |
| 57,750 | 152 | 22,048 | 5,780 | 3,755 | 31,735 |
| 57,751 | 152 | 22,136 | 5,779 | 3,759 | 31,826 |

|        |     |        |       |       |        |
|--------|-----|--------|-------|-------|--------|
| 57,752 | 143 | 22,500 | 5,828 | 3,804 | 32,275 |
| 57,753 | 142 | 22,571 | 5,826 | 3,801 | 32,340 |
| 57,754 | 140 | 22,334 | 5,768 | 3,755 | 31,997 |
| 57,755 | 148 | 22,415 | 5,794 | 3,783 | 32,140 |
| 57,756 | 138 | 22,519 | 5,775 | 3,810 | 32,242 |
| 57,757 | 141 | 22,269 | 5,725 | 3,747 | 31,882 |
| 57,758 | 140 | 22,330 | 5,726 | 3,747 | 31,943 |
| 57,759 | 135 | 22,066 | 5,641 | 3,702 | 31,544 |
| 57,760 | 135 | 22,162 | 5,666 | 3,722 | 31,685 |
| 57,761 | 139 | 21,357 | 5,445 | 3,582 | 30,523 |
| 57,762 | 138 | 21,550 | 5,459 | 3,601 | 30,748 |
| 57,763 | 136 | 21,287 | 5,380 | 3,572 | 30,375 |
| 57,764 | 136 | 21,485 | 5,390 | 3,587 | 30,598 |
| 57,765 | 132 | 21,702 | 5,410 | 3,603 | 30,847 |
| 57,766 | 131 | 21,675 | 5,381 | 3,594 | 30,781 |
| 57,767 | 131 | 21,813 | 5,392 | 3,603 | 30,939 |
| 57,768 | 130 | 21,601 | 5,339 | 3,585 | 30,655 |
| 57,769 | 133 | 21,622 | 5,335 | 3,587 | 30,677 |
| 57,770 | 134 | 21,621 | 5,362 | 3,621 | 30,738 |
| 57,771 | 138 | 21,743 | 5,426 | 3,667 | 30,974 |
| 57,772 | 137 | 21,609 | 5,396 | 3,671 | 30,813 |
| 57,773 | 146 | 21,326 | 5,335 | 3,622 | 30,429 |
| 57,774 | 148 | 21,213 | 5,299 | 3,581 | 30,241 |
| 57,775 | 148 | 21,212 | 5,289 | 3,593 | 30,242 |
| 57,776 | 150 | 21,147 | 5,289 | 3,587 | 30,173 |
| 57,777 | 152 | 21,215 | 5,293 | 3,570 | 30,230 |
| 57,778 | 153 | 21,020 | 5,261 | 3,556 | 29,990 |
| 57,779 | 156 | 21,235 | 5,227 | 3,573 | 30,191 |
| 57,780 | 153 | 21,343 | 5,219 | 3,558 | 30,273 |
| 57,781 | 150 | 21,214 | 5,099 | 3,488 | 29,951 |
| 57,782 | 149 | 21,348 | 5,083 | 3,459 | 30,039 |
| 57,783 | 148 | 21,385 | 5,068 | 3,458 | 30,059 |

|        |     |        |       |       |        |
|--------|-----|--------|-------|-------|--------|
| 57,784 | 150 | 21,549 | 5,097 | 3,449 | 30,245 |
| 57,785 | 149 | 21,642 | 5,102 | 3,447 | 30,340 |
| 57,786 | 157 | 21,572 | 5,036 | 3,407 | 30,172 |
| 57,787 | 157 | 21,470 | 5,023 | 3,401 | 30,051 |
| 57,788 | 154 | 21,495 | 5,074 | 3,407 | 30,130 |
| 57,789 | 162 | 21,524 | 5,114 | 3,391 | 30,191 |
| 57,790 | 160 | 21,267 | 5,062 | 3,360 | 29,849 |
| 57,791 | 161 | 21,225 | 5,007 | 3,332 | 29,725 |
| 57,792 | 160 | 21,124 | 5,013 | 3,330 | 29,627 |
| 57,793 | 157 | 20,867 | 4,978 | 3,324 | 29,326 |
| 57,794 | 157 | 21,043 | 5,007 | 3,309 | 29,516 |
| 57,795 | 154 | 20,869 | 4,934 | 3,271 | 29,228 |
| 57,796 | 156 | 20,932 | 4,981 | 3,306 | 29,375 |
| 57,797 | 154 | 20,865 | 4,966 | 3,331 | 29,316 |
| 57,798 | 155 | 20,449 | 4,876 | 3,243 | 28,723 |
| 57,799 | 156 | 20,597 | 4,921 | 3,272 | 28,946 |
| 57,800 | 156 | 20,550 | 4,928 | 3,261 | 28,895 |
| 57,801 | 157 | 20,636 | 4,944 | 3,289 | 29,026 |
| 57,802 | 159 | 20,668 | 4,972 | 3,308 | 29,107 |
| 57,803 | 160 | 20,839 | 5,024 | 3,336 | 29,359 |
| 57,804 | 164 | 20,672 | 4,943 | 3,285 | 29,064 |
| 57,805 | 165 | 21,110 | 5,033 | 3,342 | 29,650 |
| 57,806 | 158 | 21,337 | 5,124 | 3,394 | 30,013 |
| 57,807 | 156 | 21,260 | 5,134 | 3,406 | 29,956 |
| 57,808 | 151 | 21,019 | 5,086 | 3,371 | 29,627 |
| 57,809 | 151 | 20,963 | 5,101 | 3,392 | 29,607 |
| 57,810 | 154 | 20,769 | 5,145 | 3,387 | 29,455 |
| 57,811 | 154 | 20,787 | 5,150 | 3,398 | 29,489 |
| 57,812 | 141 | 20,236 | 5,073 | 3,356 | 28,806 |
| 57,813 | 142 | 20,383 | 5,116 | 3,375 | 29,016 |
| 57,814 | 136 | 20,610 | 5,192 | 3,417 | 29,355 |
| 57,815 | 137 | 20,736 | 5,257 | 3,435 | 29,565 |

|        |     |        |       |       |        |
|--------|-----|--------|-------|-------|--------|
| 57,816 | 139 | 20,588 | 5,225 | 3,427 | 29,379 |
| 57,817 | 142 | 20,720 | 5,242 | 3,453 | 29,557 |
| 57,818 | 139 | 20,711 | 5,269 | 3,432 | 29,551 |
| 57,819 | 144 | 20,917 | 5,325 | 3,457 | 29,843 |
| 57,820 | 143 | 21,174 | 5,353 | 3,504 | 30,174 |
| 57,821 | 143 | 21,032 | 5,287 | 3,445 | 29,907 |
| 57,822 | 144 | 20,656 | 5,192 | 3,375 | 29,367 |
| 57,823 | 144 | 20,677 | 5,208 | 3,376 | 29,405 |
| 57,824 | 134 | 20,443 | 5,149 | 3,351 | 29,077 |
| 57,825 | 129 | 20,200 | 5,102 | 3,329 | 28,760 |
| 57,826 | 126 | 21,366 | 5,380 | 3,495 | 30,367 |
| 57,827 | 125 | 21,529 | 5,415 | 3,526 | 30,595 |
| 57,828 | 117 | 21,451 | 5,374 | 3,511 | 30,453 |
| 57,829 | 119 | 21,698 | 5,433 | 3,527 | 30,777 |
| 57,830 | 112 | 21,382 | 5,375 | 3,466 | 30,335 |
| 57,831 | 110 | 21,390 | 5,384 | 3,464 | 30,348 |
| 57,832 | 105 | 21,193 | 5,333 | 3,433 | 30,064 |
| 57,833 | 102 | 21,016 | 5,310 | 3,452 | 29,880 |
| 57,834 | 105 | 21,222 | 5,359 | 3,482 | 30,168 |
| 57,835 | 104 | 21,313 | 5,373 | 3,486 | 30,276 |
| 57,836 | 107 | 21,482 | 5,423 | 3,494 | 30,506 |
| 57,837 | 108 | 21,623 | 5,456 | 3,505 | 30,692 |
| 57,838 | 112 | 21,627 | 5,433 | 3,484 | 30,656 |
| 57,839 | 112 | 21,723 | 5,459 | 3,501 | 30,795 |
| 57,840 | 106 | 21,720 | 5,419 | 3,535 | 30,780 |
| 57,841 | 107 | 21,721 | 5,448 | 3,559 | 30,835 |
| 57,842 | 107 | 21,672 | 5,413 | 3,549 | 30,741 |
| 57,843 | 107 | 21,657 | 5,406 | 3,518 | 30,688 |
| 57,844 | 104 | 22,164 | 5,509 | 3,576 | 31,353 |
| 57,845 | 99  | 22,065 | 5,499 | 3,560 | 31,223 |
| 57,846 | 97  | 21,930 | 5,472 | 3,537 | 31,036 |
| 57,847 | 98  | 21,906 | 5,443 | 3,522 | 30,969 |



|        |     |        |       |       |        |
|--------|-----|--------|-------|-------|--------|
| 57,848 | 100 | 22,092 | 5,503 | 3,539 | 31,234 |
| 57,849 | 98  | 21,859 | 5,458 | 3,521 | 30,936 |
| 57,850 | 97  | 21,725 | 5,410 | 3,480 | 30,712 |
| 57,851 | 102 | 21,939 | 5,497 | 3,523 | 31,061 |
| 57,852 | 100 | 21,963 | 5,490 | 3,499 | 31,052 |
| 57,853 | 98  | 21,653 | 5,413 | 3,454 | 30,618 |
| 57,854 | 104 | 21,682 | 5,453 | 3,476 | 30,715 |
| 57,855 | 99  | 21,794 | 5,513 | 3,515 | 30,921 |
| 57,856 | 104 | 21,766 | 5,501 | 3,511 | 30,882 |
| 57,857 | 113 | 21,743 | 5,490 | 3,492 | 30,838 |
| 57,858 | 116 | 21,812 | 5,475 | 3,500 | 30,903 |
| 57,859 | 117 | 21,921 | 5,465 | 3,479 | 30,982 |
| 57,860 | 116 | 21,684 | 5,394 | 3,445 | 30,639 |
| 57,861 | 119 | 21,918 | 5,404 | 3,444 | 30,885 |
| 57,862 | 122 | 21,833 | 5,402 | 3,433 | 30,790 |
| 57,863 | 121 | 21,590 | 5,332 | 3,380 | 30,423 |
| 57,864 | 120 | 21,487 | 5,369 | 3,394 | 30,370 |
| 57,865 | 120 | 21,252 | 5,340 | 3,380 | 30,092 |
| 57,866 | 128 | 21,217 | 5,328 | 3,404 | 30,077 |
| 57,867 | 128 | 20,981 | 5,323 | 3,405 | 29,837 |
| 57,868 | 127 | 20,521 | 5,257 | 3,358 | 29,263 |
| 57,869 | 126 | 20,746 | 5,257 | 3,362 | 29,491 |
| 57,870 | 121 | 20,719 | 5,253 | 3,365 | 29,458 |
| 57,871 | 126 | 20,843 | 5,276 | 3,358 | 29,603 |
| 57,872 | 123 | 20,517 | 5,217 | 3,318 | 29,175 |
| 57,873 | 135 | 20,640 | 5,270 | 3,352 | 29,397 |
| 57,874 | 136 | 20,724 | 5,280 | 3,355 | 29,495 |
| 57,875 | 141 | 20,762 | 5,287 | 3,346 | 29,536 |
| 57,876 | 146 | 20,698 | 5,262 | 3,324 | 29,430 |
| 57,877 | 145 | 20,516 | 5,217 | 3,316 | 29,194 |
| 57,878 | 153 | 21,111 | 5,321 | 3,375 | 29,960 |
| 57,879 | 154 | 20,873 | 5,274 | 3,335 | 29,636 |

|        |     |        |       |       |        |
|--------|-----|--------|-------|-------|--------|
| 57,880 | 155 | 20,865 | 5,254 | 3,332 | 29,606 |
| 57,881 | 154 | 20,838 | 5,251 | 3,344 | 29,587 |
| 57,882 | 154 | 20,894 | 5,256 | 3,373 | 29,677 |
| 57,883 | 151 | 20,846 | 5,242 | 3,365 | 29,604 |
| 57,884 | 150 | 20,799 | 5,216 | 3,344 | 29,509 |
| 57,885 | 151 | 20,989 | 5,253 | 3,375 | 29,768 |
| 57,886 | 149 | 21,000 | 5,285 | 3,401 | 29,835 |
| 57,887 | 146 | 21,009 | 5,277 | 3,412 | 29,844 |
| 57,888 | 138 | 20,714 | 5,209 | 3,377 | 29,438 |
| 57,889 | 132 | 20,738 | 5,195 | 3,395 | 29,460 |
| 57,890 | 135 | 20,931 | 5,258 | 3,453 | 29,777 |
| 57,891 | 135 | 21,101 | 5,257 | 3,460 | 29,953 |
| 57,892 | 133 | 20,905 | 5,191 | 3,434 | 29,663 |
| 57,893 | 133 | 20,989 | 5,220 | 3,445 | 29,787 |
| 57,894 | 131 | 21,093 | 5,222 | 3,479 | 29,925 |
| 57,895 | 131 | 20,961 | 5,191 | 3,479 | 29,762 |
| 57,896 | 133 | 20,764 | 5,105 | 3,426 | 29,428 |
| 57,897 | 135 | 20,742 | 5,092 | 3,434 | 29,403 |
| 57,898 | 137 | 20,757 | 5,093 | 3,441 | 29,428 |
| 57,899 | 136 | 20,661 | 5,047 | 3,421 | 29,265 |
| 57,900 | 136 | 20,971 | 5,112 | 3,482 | 29,701 |
| 57,901 | 136 | 20,876 | 5,108 | 3,473 | 29,593 |
| 57,902 | 131 | 20,752 | 5,070 | 3,447 | 29,400 |
| 57,903 | 136 | 20,564 | 4,997 | 3,407 | 29,104 |
| 57,904 | 138 | 20,709 | 5,026 | 3,421 | 29,294 |
| 57,905 | 132 | 21,009 | 5,049 | 3,457 | 29,647 |
| 57,906 | 137 | 21,035 | 5,029 | 3,436 | 29,637 |
| 57,907 | 122 | 20,727 | 4,944 | 3,375 | 29,168 |
| 57,908 | 121 | 20,688 | 4,913 | 3,354 | 29,076 |
| 57,909 | 126 | 20,601 | 4,885 | 3,342 | 28,954 |
| 57,910 | 126 | 20,514 | 4,841 | 3,330 | 28,811 |
| 57,911 | 128 | 20,794 | 4,889 | 3,376 | 29,187 |

|        |     |        |       |       |        |
|--------|-----|--------|-------|-------|--------|
| 57,912 | 126 | 20,940 | 4,924 | 3,391 | 29,381 |
| 57,913 | 126 | 21,085 | 4,938 | 3,403 | 29,552 |
| 57,914 | 127 | 21,425 | 4,976 | 3,436 | 29,964 |
| 57,915 | 128 | 21,678 | 5,046 | 3,474 | 30,326 |
| 57,916 | 120 | 21,686 | 5,045 | 3,472 | 30,323 |
| 57,917 | 117 | 21,984 | 5,062 | 3,482 | 30,645 |
| 57,918 | 116 | 21,963 | 5,014 | 3,475 | 30,568 |
| 57,919 | 117 | 21,778 | 4,982 | 3,465 | 30,342 |
| 57,920 | 123 | 22,033 | 4,985 | 3,489 | 30,630 |
| 57,921 | 120 | 22,031 | 4,977 | 3,489 | 30,617 |
| 57,922 | 121 | 21,990 | 4,996 | 3,483 | 30,590 |
| 57,923 | 119 | 21,962 | 5,032 | 3,496 | 30,609 |
| 57,924 | 119 | 22,491 | 5,088 | 3,554 | 31,252 |
| 57,925 | 117 | 22,081 | 4,998 | 3,500 | 30,696 |
| 57,926 | 112 | 21,960 | 5,002 | 3,511 | 30,585 |
| 57,927 | 111 | 22,178 | 5,051 | 3,565 | 30,905 |
| 57,928 | 110 | 22,152 | 5,056 | 3,545 | 30,863 |
| 57,929 | 111 | 21,905 | 5,011 | 3,516 | 30,543 |
| 57,930 | 107 | 21,610 | 4,962 | 3,486 | 30,165 |
| 57,931 | 107 | 21,831 | 5,033 | 3,545 | 30,516 |
| 57,932 | 108 | 21,933 | 5,038 | 3,554 | 30,633 |
| 57,933 | 107 | 21,674 | 4,991 | 3,498 | 30,270 |
| 57,934 | 111 | 21,941 | 5,026 | 3,550 | 30,628 |
| 57,935 | 108 | 21,927 | 5,023 | 3,571 | 30,629 |
| 57,936 | 105 | 21,704 | 4,960 | 3,537 | 30,306 |
| 57,937 | 108 | 21,902 | 5,029 | 3,573 | 30,612 |
| 57,938 | 108 | 21,887 | 5,024 | 3,571 | 30,590 |
| 57,939 | 110 | 22,194 | 5,101 | 3,609 | 31,014 |
| 57,940 | 110 | 22,234 | 5,101 | 3,597 | 31,042 |
| 57,941 | 108 | 22,299 | 5,129 | 3,577 | 31,113 |
| 57,942 | 108 | 22,404 | 5,177 | 3,572 | 31,261 |
| 57,943 | 108 | 22,178 | 5,132 | 3,540 | 30,958 |

|        |     |        |       |       |        |
|--------|-----|--------|-------|-------|--------|
| 57,944 | 109 | 22,514 | 5,219 | 3,577 | 31,419 |
| 57,945 | 108 | 22,130 | 5,145 | 3,500 | 30,883 |
| 57,946 | 109 | 22,470 | 5,187 | 3,528 | 31,294 |
| 57,947 | 105 | 22,677 | 5,270 | 3,562 | 31,614 |
| 57,948 | 103 | 22,428 | 5,239 | 3,517 | 31,287 |
| 57,949 | 101 | 22,455 | 5,246 | 3,520 | 31,322 |
| 57,950 | 100 | 22,547 | 5,291 | 3,549 | 31,487 |
| 57,951 | 100 | 22,379 | 5,230 | 3,517 | 31,226 |
| 57,952 | 105 | 21,986 | 5,137 | 3,470 | 30,698 |
| 57,953 | 105 | 22,050 | 5,159 | 3,483 | 30,797 |
| 57,954 | 101 | 22,205 | 5,193 | 3,510 | 31,009 |
| 57,955 | 110 | 22,353 | 5,219 | 3,514 | 31,196 |
| 57,956 | 110 | 22,431 | 5,235 | 3,511 | 31,287 |
| 57,957 | 105 | 22,229 | 5,164 | 3,466 | 30,964 |
| 57,958 | 111 | 22,023 | 5,133 | 3,442 | 30,709 |
| 57,959 | 119 | 22,246 | 5,189 | 3,480 | 31,034 |
| 57,960 | 113 | 22,157 | 5,177 | 3,463 | 30,910 |
| 57,961 | 112 | 22,145 | 5,213 | 3,480 | 30,950 |
| 57,962 | 111 | 22,378 | 5,272 | 3,517 | 31,278 |
| 57,963 | 111 | 22,224 | 5,228 | 3,516 | 31,079 |
| 57,964 | 115 | 22,398 | 5,242 | 3,532 | 31,287 |
| 57,965 | 116 | 22,358 | 5,233 | 3,542 | 31,249 |
| 57,966 | 116 | 22,235 | 5,170 | 3,474 | 30,995 |
| 57,967 | 116 | 22,405 | 5,170 | 3,469 | 31,160 |
| 57,968 | 118 | 22,612 | 5,239 | 3,517 | 31,486 |
| 57,969 | 115 | 22,286 | 5,174 | 3,456 | 31,031 |
| 57,970 | 117 | 22,516 | 5,186 | 3,479 | 31,298 |
| 57,971 | 112 | 22,491 | 5,202 | 3,480 | 31,285 |
| 57,972 | 111 | 22,814 | 5,240 | 3,521 | 31,686 |
| 57,973 | 110 | 22,718 | 5,210 | 3,511 | 31,549 |
| 57,974 | 105 | 23,071 | 5,282 | 3,538 | 31,996 |
| 57,975 | 112 | 23,006 | 5,272 | 3,498 | 31,888 |

|        |     |        |       |       |        |
|--------|-----|--------|-------|-------|--------|
| 57,976 | 117 | 22,912 | 5,249 | 3,464 | 31,742 |
| 57,977 | 118 | 23,039 | 5,275 | 3,488 | 31,920 |
| 57,978 | 114 | 22,888 | 5,223 | 3,448 | 31,673 |
| 57,979 | 119 | 23,064 | 5,266 | 3,487 | 31,936 |
| 57,980 | 114 | 22,828 | 5,203 | 3,434 | 31,579 |
| 57,981 | 119 | 22,765 | 5,191 | 3,443 | 31,518 |
| 57,982 | 119 | 22,700 | 5,187 | 3,434 | 31,440 |
| 57,983 | 119 | 22,668 | 5,233 | 3,428 | 31,448 |
| 57,984 | 120 | 22,817 | 5,234 | 3,439 | 31,610 |
| 57,985 | 120 | 22,589 | 5,233 | 3,418 | 31,360 |
| 57,986 | 125 | 22,408 | 5,255 | 3,431 | 31,219 |
| 57,987 | 126 | 22,387 | 5,220 | 3,431 | 31,164 |
| 57,988 | 130 | 22,358 | 5,179 | 3,406 | 31,073 |
| 57,989 | 130 | 22,338 | 5,148 | 3,399 | 31,015 |
| 57,990 | 129 | 22,564 | 5,199 | 3,440 | 31,332 |
| 57,991 | 129 | 22,593 | 5,200 | 3,452 | 31,374 |
| 57,992 | 127 | 22,560 | 5,151 | 3,443 | 31,281 |
| 57,993 | 135 | 22,715 | 5,168 | 3,462 | 31,480 |
| 57,994 | 140 | 22,588 | 5,117 | 3,424 | 31,269 |
| 57,995 | 145 | 22,615 | 5,133 | 3,431 | 31,324 |
| 57,996 | 147 | 22,632 | 5,124 | 3,416 | 31,319 |
| 57,997 | 150 | 23,051 | 5,241 | 3,473 | 31,915 |
| 57,998 | 156 | 22,985 | 5,186 | 3,451 | 31,778 |
| 57,999 | 157 | 23,036 | 5,206 | 3,464 | 31,863 |
| 58,000 | 157 | 23,144 | 5,213 | 3,478 | 31,992 |
| 58,001 | 157 | 23,203 | 5,217 | 3,494 | 32,071 |
| 58,002 | 161 | 23,302 | 5,264 | 3,529 | 32,256 |
| 58,003 | 159 | 23,294 | 5,273 | 3,535 | 32,261 |
| 58,004 | 165 | 23,336 | 5,283 | 3,529 | 32,313 |
| 58,005 | 165 | 23,154 | 5,260 | 3,506 | 32,085 |
| 58,006 | 160 | 23,494 | 5,307 | 3,557 | 32,518 |
| 58,007 | 160 | 23,309 | 5,291 | 3,561 | 32,321 |

|        |     |        |       |       |        |
|--------|-----|--------|-------|-------|--------|
| 58,008 | 160 | 23,045 | 5,256 | 3,535 | 31,996 |
| 58,009 | 153 | 22,967 | 5,230 | 3,524 | 31,874 |
| 58,010 | 157 | 23,535 | 5,301 | 3,563 | 32,556 |
| 58,011 | 163 | 23,570 | 5,368 | 3,599 | 32,700 |
| 58,012 | 167 | 23,656 | 5,394 | 3,626 | 32,843 |
| 58,013 | 167 | 23,603 | 5,378 | 3,580 | 32,728 |
| 58,014 | 167 | 23,718 | 5,424 | 3,580 | 32,889 |
| 58,015 | 162 | 23,520 | 5,390 | 3,557 | 32,629 |
| 58,016 | 160 | 23,257 | 5,352 | 3,516 | 32,285 |
| 58,017 | 159 | 23,120 | 5,354 | 3,526 | 32,159 |
| 58,018 | 158 | 22,962 | 5,350 | 3,504 | 31,974 |
| 58,019 | 160 | 22,808 | 5,345 | 3,473 | 31,786 |
| 58,020 | 160 | 22,830 | 5,343 | 3,478 | 31,811 |
| 58,021 | 159 | 22,723 | 5,358 | 3,451 | 31,691 |
| 58,022 | 157 | 22,418 | 5,298 | 3,384 | 31,257 |
| 58,023 | 158 | 22,584 | 5,327 | 3,416 | 31,485 |
| 58,024 | 159 | 22,594 | 5,355 | 3,436 | 31,544 |
| 58,025 | 167 | 22,726 | 5,393 | 3,468 | 31,754 |
| 58,026 | 154 | 22,376 | 5,333 | 3,441 | 31,304 |
| 58,027 | 151 | 22,511 | 5,309 | 3,427 | 31,398 |
| 58,028 | 157 | 22,313 | 5,274 | 3,402 | 31,146 |
| 58,029 | 161 | 22,417 | 5,351 | 3,425 | 31,354 |
| 58,030 | 157 | 22,106 | 5,322 | 3,391 | 30,976 |
| 58,031 | 153 | 22,119 | 5,319 | 3,406 | 30,997 |
| 58,032 | 157 | 22,144 | 5,319 | 3,381 | 31,001 |
| 58,033 | 157 | 22,204 | 5,343 | 3,409 | 31,113 |
| 58,034 | 155 | 22,255 | 5,376 | 3,394 | 31,180 |
| 58,035 | 160 | 22,191 | 5,273 | 3,340 | 30,964 |
| 58,036 | 163 | 22,480 | 5,306 | 3,355 | 31,304 |
| 58,037 | 159 | 22,439 | 5,339 | 3,350 | 31,287 |
| 58,038 | 157 | 22,430 | 5,390 | 3,341 | 31,318 |
| 58,039 | 152 | 22,259 | 5,403 | 3,335 | 31,149 |

|        |     |        |       |       |        |
|--------|-----|--------|-------|-------|--------|
| 58,040 | 154 | 22,175 | 5,428 | 3,324 | 31,081 |
| 58,041 | 157 | 21,839 | 5,353 | 3,268 | 30,617 |
| 58,042 | 157 | 21,820 | 5,343 | 3,263 | 30,583 |
| 58,043 | 160 | 21,529 | 5,298 | 3,227 | 30,214 |
| 58,044 | 152 | 21,223 | 5,259 | 3,195 | 29,829 |
| 58,045 | 148 | 21,800 | 5,381 | 3,283 | 30,612 |
| 58,046 | 144 | 21,575 | 5,360 | 3,264 | 30,343 |
| 58,047 | 143 | 21,533 | 5,332 | 3,269 | 30,277 |
| 58,048 | 147 | 21,594 | 5,402 | 3,306 | 30,449 |
| 58,049 | 145 | 21,557 | 5,443 | 3,307 | 30,452 |
| 58,050 | 145 | 21,417 | 5,447 | 3,285 | 30,294 |
| 58,051 | 147 | 21,380 | 5,458 | 3,274 | 30,259 |
| 58,052 | 148 | 21,449 | 5,480 | 3,270 | 30,347 |
| 58,053 | 148 | 21,492 | 5,480 | 3,258 | 30,378 |
| 58,054 | 144 | 21,498 | 5,507 | 3,299 | 30,448 |
| 58,055 | 140 | 21,493 | 5,519 | 3,294 | 30,446 |
| 58,056 | 139 | 21,074 | 5,426 | 3,237 | 29,876 |
| 58,057 | 139 | 21,110 | 5,426 | 3,214 | 29,889 |
| 58,058 | 141 | 20,851 | 5,386 | 3,185 | 29,563 |
| 58,059 | 137 | 20,669 | 5,333 | 3,153 | 29,292 |
| 58,060 | 139 | 21,330 | 5,476 | 3,277 | 30,222 |
| 58,061 | 128 | 20,939 | 5,325 | 3,197 | 29,589 |
| 58,062 | 131 | 21,068 | 5,326 | 3,219 | 29,744 |
| 58,063 | 130 | 21,030 | 5,354 | 3,217 | 29,731 |
| 58,064 | 133 | 21,168 | 5,383 | 3,235 | 29,919 |
| 58,065 | 132 | 20,858 | 5,307 | 3,206 | 29,503 |
| 58,066 | 136 | 20,763 | 5,286 | 3,171 | 29,356 |
| 58,067 | 136 | 20,795 | 5,313 | 3,165 | 29,409 |
| 58,068 | 137 | 20,837 | 5,318 | 3,190 | 29,482 |
| 58,069 | 137 | 20,585 | 5,271 | 3,149 | 29,142 |
| 58,070 | 137 | 20,761 | 5,294 | 3,170 | 29,362 |
| 58,071 | 136 | 20,509 | 5,234 | 3,143 | 29,022 |

|        |     |        |       |       |        |
|--------|-----|--------|-------|-------|--------|
| 58,072 | 135 | 20,373 | 5,225 | 3,130 | 28,863 |
| 58,073 | 133 | 20,265 | 5,216 | 3,141 | 28,755 |
| 58,074 | 130 | 19,901 | 5,123 | 3,080 | 28,234 |
| 58,075 | 130 | 20,126 | 5,193 | 3,106 | 28,555 |
| 58,076 | 122 | 20,270 | 5,222 | 3,129 | 28,743 |
| 58,077 | 123 | 19,698 | 5,082 | 3,057 | 27,960 |
| 58,078 | 121 | 19,886 | 5,101 | 3,070 | 28,178 |
| 58,079 | 120 | 20,066 | 5,145 | 3,081 | 28,412 |
| 58,080 | 113 | 19,849 | 5,068 | 3,036 | 28,066 |
| 58,081 | 114 | 19,581 | 4,984 | 2,978 | 27,657 |
| 58,082 | 116 | 19,773 | 5,030 | 2,991 | 27,910 |
| 58,083 | 112 | 20,014 | 5,074 | 3,027 | 28,227 |
| 58,084 | 111 | 20,095 | 5,075 | 3,026 | 28,307 |
| 58,085 | 114 | 19,987 | 5,023 | 3,013 | 28,137 |
| 58,086 | 109 | 20,016 | 5,033 | 3,025 | 28,183 |
| 58,087 | 112 | 20,047 | 5,042 | 3,013 | 28,214 |
| 58,088 | 113 | 20,053 | 5,002 | 3,015 | 28,183 |
| 58,089 | 118 | 19,934 | 4,953 | 2,975 | 27,980 |
| 58,090 | 119 | 19,730 | 4,901 | 2,935 | 27,685 |
| 58,091 | 116 | 20,084 | 4,904 | 2,970 | 28,074 |
| 58,092 | 115 | 20,069 | 4,925 | 2,975 | 28,084 |
| 58,093 | 115 | 20,087 | 4,954 | 2,977 | 28,133 |
| 58,094 | 117 | 19,991 | 4,934 | 2,970 | 28,012 |
| 58,095 | 117 | 19,896 | 4,959 | 2,962 | 27,934 |
| 58,096 | 118 | 19,784 | 4,950 | 2,951 | 27,803 |
| 58,097 | 119 | 19,618 | 4,904 | 2,936 | 27,577 |
| 58,098 | 114 | 19,562 | 4,873 | 2,908 | 27,457 |
| 58,099 | 115 | 19,676 | 4,897 | 2,925 | 27,613 |
| 58,100 | 112 | 19,680 | 4,863 | 2,911 | 27,566 |
| 58,101 | 118 | 19,631 | 4,824 | 2,900 | 27,473 |
| 58,102 | 117 | 19,425 | 4,777 | 2,858 | 27,177 |
| 58,103 | 116 | 19,010 | 4,675 | 2,790 | 26,591 |



|        |     |        |       |       |        |
|--------|-----|--------|-------|-------|--------|
| 58,104 | 116 | 19,058 | 4,697 | 2,781 | 26,652 |
| 58,105 | 120 | 18,828 | 4,632 | 2,741 | 26,321 |
| 58,106 | 118 | 18,645 | 4,597 | 2,711 | 26,071 |
| 58,107 | 115 | 19,581 | 4,806 | 2,843 | 27,345 |
| 58,108 | 116 | 19,563 | 4,798 | 2,838 | 27,315 |
| 58,109 | 111 | 19,710 | 4,809 | 2,828 | 27,458 |
| 58,110 | 116 | 19,857 | 4,849 | 2,851 | 27,673 |
| 58,111 | 114 | 19,695 | 4,789 | 2,801 | 27,399 |
| 58,112 | 113 | 19,846 | 4,812 | 2,821 | 27,592 |
| 58,113 | 113 | 20,029 | 4,888 | 2,853 | 27,883 |
| 58,114 | 113 | 20,193 | 4,878 | 2,853 | 28,037 |
| 58,115 | 108 | 19,515 | 4,701 | 2,760 | 27,084 |
| 58,116 | 108 | 19,718 | 4,742 | 2,775 | 27,343 |
| 58,117 | 111 | 19,918 | 4,776 | 2,795 | 27,600 |
| 58,118 | 111 | 19,969 | 4,787 | 2,803 | 27,670 |
| 58,119 | 109 | 20,141 | 4,837 | 2,870 | 27,957 |
| 58,120 | 114 | 20,325 | 4,891 | 2,909 | 28,239 |
| 58,121 | 112 | 20,189 | 4,892 | 2,870 | 28,063 |
| 58,122 | 117 | 20,177 | 4,910 | 2,875 | 28,079 |
| 58,123 | 120 | 20,127 | 4,900 | 2,873 | 28,020 |
| 58,124 | 121 | 19,904 | 4,850 | 2,837 | 27,712 |
| 58,125 | 124 | 20,180 | 4,954 | 2,909 | 28,167 |
| 58,126 | 127 | 19,690 | 4,836 | 2,848 | 27,501 |
| 58,127 | 127 | 19,700 | 4,856 | 2,849 | 27,532 |
| 58,128 | 129 | 19,508 | 4,854 | 2,824 | 27,315 |
| 58,129 | 130 | 19,324 | 4,844 | 2,811 | 27,109 |
| 58,130 | 127 | 20,229 | 5,098 | 2,929 | 28,383 |
| 58,131 | 129 | 20,130 | 5,063 | 2,913 | 28,235 |
| 58,132 | 129 | 20,118 | 5,089 | 2,917 | 28,253 |
| 58,133 | 130 | 20,430 | 5,141 | 2,967 | 28,668 |
| 58,134 | 129 | 20,265 | 5,101 | 2,942 | 28,437 |
| 58,135 | 130 | 20,286 | 5,125 | 2,949 | 28,490 |

|        |     |        |       |       |        |
|--------|-----|--------|-------|-------|--------|
| 58,136 | 126 | 19,849 | 5,052 | 2,887 | 27,914 |
| 58,137 | 127 | 19,926 | 5,100 | 2,893 | 28,046 |
| 58,138 | 125 | 20,098 | 5,169 | 2,944 | 28,336 |
| 58,139 | 120 | 20,038 | 5,121 | 2,941 | 28,220 |
| 58,140 | 120 | 20,130 | 5,182 | 2,970 | 28,402 |
| 58,141 | 119 | 20,021 | 5,206 | 2,949 | 28,295 |
| 58,142 | 118 | 20,025 | 5,277 | 2,962 | 28,382 |
| 58,143 | 118 | 20,000 | 5,283 | 2,969 | 28,370 |
| 58,144 | 121 | 20,031 | 5,280 | 2,964 | 28,396 |
| 58,145 | 115 | 20,094 | 5,318 | 2,992 | 28,519 |
| 58,146 | 113 | 20,080 | 5,240 | 2,985 | 28,418 |
| 58,147 | 113 | 20,150 | 5,249 | 2,992 | 28,504 |
| 58,148 | 111 | 20,329 | 5,305 | 3,013 | 28,758 |
| 58,149 | 111 | 20,299 | 5,321 | 3,008 | 28,739 |
| 58,150 | 113 | 20,519 | 5,379 | 3,049 | 29,060 |
| 58,151 | 111 | 20,463 | 5,412 | 3,064 | 29,050 |
| 58,152 | 100 | 19,735 | 5,240 | 2,975 | 28,050 |
| 58,153 | 108 | 19,814 | 5,294 | 3,003 | 28,219 |
| 58,154 | 105 | 19,940 | 5,345 | 3,024 | 28,414 |
| 58,155 | 106 | 20,023 | 5,397 | 3,061 | 28,587 |
| 58,156 | 104 | 19,775 | 5,349 | 3,039 | 28,267 |
| 58,157 | 104 | 19,527 | 5,309 | 3,018 | 27,958 |
| 58,158 | 103 | 19,630 | 5,358 | 3,035 | 28,126 |
| 58,159 | 105 | 19,763 | 5,413 | 3,058 | 28,339 |
| 58,160 | 109 | 19,453 | 5,353 | 3,042 | 27,957 |
| 58,161 | 104 | 19,158 | 5,313 | 3,007 | 27,582 |
| 58,162 | 102 | 19,153 | 5,364 | 3,033 | 27,652 |
| 58,163 | 103 | 19,309 | 5,441 | 3,066 | 27,919 |
| 58,164 | 109 | 19,290 | 5,444 | 3,075 | 27,918 |
| 58,165 | 109 | 19,176 | 5,445 | 3,090 | 27,820 |
| 58,166 | 106 | 18,709 | 5,347 | 3,046 | 27,208 |
| 58,167 | 107 | 18,931 | 5,404 | 3,091 | 27,533 |

|        |     |        |       |       |        |
|--------|-----|--------|-------|-------|--------|
| 58,168 | 106 | 18,988 | 5,421 | 3,091 | 27,606 |
| 58,169 | 106 | 19,117 | 5,481 | 3,098 | 27,802 |
| 58,170 | 105 | 19,263 | 5,533 | 3,121 | 28,022 |
| 58,171 | 100 | 19,383 | 5,554 | 3,129 | 28,166 |
| 58,172 | 97  | 19,367 | 5,542 | 3,138 | 28,144 |
| 58,173 | 94  | 19,480 | 5,564 | 3,146 | 28,284 |
| 58,174 | 92  | 19,640 | 5,565 | 3,147 | 28,444 |
| 58,175 | 89  | 19,488 | 5,518 | 3,121 | 28,216 |
| 58,176 | 91  | 19,532 | 5,530 | 3,149 | 28,302 |
| 58,177 | 88  | 19,536 | 5,538 | 3,172 | 28,334 |
| 58,178 | 89  | 19,843 | 5,607 | 3,221 | 28,760 |
| 58,179 | 83  | 19,621 | 5,515 | 3,198 | 28,417 |
| 58,180 | 84  | 19,683 | 5,483 | 3,206 | 28,456 |
| 58,181 | 84  | 19,831 | 5,557 | 3,247 | 28,719 |
| 58,182 | 82  | 19,615 | 5,487 | 3,219 | 28,403 |
| 58,183 | 86  | 19,722 | 5,547 | 3,252 | 28,607 |
| 58,184 | 85  | 19,618 | 5,520 | 3,227 | 28,450 |
| 58,185 | 85  | 19,410 | 5,472 | 3,188 | 28,155 |
| 58,186 | 94  | 19,572 | 5,505 | 3,226 | 28,397 |
| 58,187 | 89  | 19,285 | 5,448 | 3,186 | 28,008 |
| 58,188 | 91  | 19,316 | 5,468 | 3,207 | 28,082 |
| 58,189 | 91  | 19,178 | 5,452 | 3,198 | 27,919 |
| 58,190 | 94  | 19,337 | 5,551 | 3,244 | 28,226 |
| 58,191 | 92  | 19,333 | 5,498 | 3,235 | 28,158 |
| 58,192 | 94  | 19,148 | 5,458 | 3,232 | 27,932 |
| 58,193 | 97  | 19,343 | 5,518 | 3,282 | 28,240 |
| 58,194 | 100 | 19,369 | 5,552 | 3,291 | 28,312 |
| 58,195 | 98  | 19,294 | 5,587 | 3,298 | 28,277 |
| 58,196 | 99  | 19,109 | 5,533 | 3,266 | 28,007 |
| 58,197 | 99  | 18,902 | 5,500 | 3,229 | 27,730 |
| 58,198 | 98  | 19,067 | 5,578 | 3,287 | 28,030 |
| 58,199 | 100 | 18,781 | 5,523 | 3,272 | 27,676 |

|        |     |        |       |       |        |
|--------|-----|--------|-------|-------|--------|
| 58,200 | 100 | 18,736 | 5,484 | 3,254 | 27,574 |
| 58,201 | 101 | 19,054 | 5,602 | 3,325 | 28,082 |
| 58,202 | 106 | 18,657 | 5,468 | 3,243 | 27,474 |
| 58,203 | 107 | 18,953 | 5,521 | 3,271 | 27,852 |
| 58,204 | 102 | 19,081 | 5,540 | 3,300 | 28,023 |
| 58,205 | 109 | 19,015 | 5,497 | 3,265 | 27,886 |
| 58,206 | 108 | 19,092 | 5,470 | 3,259 | 27,929 |
| 58,207 | 108 | 19,038 | 5,470 | 3,253 | 27,869 |
| 58,208 | 107 | 19,056 | 5,460 | 3,257 | 27,880 |
| 58,209 | 115 | 19,187 | 5,506 | 3,289 | 28,097 |
| 58,210 | 120 | 19,249 | 5,524 | 3,302 | 28,195 |
| 58,211 | 116 | 19,044 | 5,474 | 3,278 | 27,912 |
| 58,212 | 117 | 18,857 | 5,442 | 3,248 | 27,664 |
| 58,213 | 122 | 19,330 | 5,609 | 3,323 | 28,384 |
| 58,214 | 122 | 19,472 | 5,608 | 3,319 | 28,521 |
| 58,215 | 121 | 19,571 | 5,621 | 3,322 | 28,635 |
| 58,216 | 122 | 19,515 | 5,619 | 3,309 | 28,565 |
| 58,217 | 122 | 19,369 | 5,606 | 3,301 | 28,398 |
| 58,218 | 123 | 19,152 | 5,567 | 3,291 | 28,133 |
| 58,219 | 123 | 18,965 | 5,506 | 3,260 | 27,854 |
| 58,220 | 127 | 18,837 | 5,447 | 3,242 | 27,653 |
| 58,221 | 127 | 18,759 | 5,395 | 3,221 | 27,502 |
| 58,222 | 136 | 18,709 | 5,430 | 3,236 | 27,511 |
| 58,223 | 136 | 18,572 | 5,369 | 3,220 | 27,297 |
| 58,224 | 140 | 18,610 | 5,395 | 3,288 | 27,433 |
| 58,225 | 140 | 18,495 | 5,381 | 3,272 | 27,288 |
| 58,226 | 145 | 18,217 | 5,341 | 3,227 | 26,930 |
| 58,227 | 145 | 18,036 | 5,315 | 3,203 | 26,699 |
| 58,228 | 157 | 18,826 | 5,594 | 3,353 | 27,930 |
| 58,229 | 161 | 18,797 | 5,609 | 3,343 | 27,910 |
| 58,230 | 160 | 18,787 | 5,626 | 3,339 | 27,912 |
| 58,231 | 162 | 18,358 | 5,548 | 3,277 | 27,345 |

|        |     |        |       |       |        |
|--------|-----|--------|-------|-------|--------|
| 58,232 | 164 | 18,433 | 5,575 | 3,290 | 27,462 |
| 58,233 | 162 | 18,510 | 5,609 | 3,316 | 27,597 |
| 58,234 | 163 | 18,417 | 5,595 | 3,304 | 27,479 |
| 58,235 | 163 | 18,395 | 5,607 | 3,303 | 27,468 |
| 58,236 | 156 | 18,385 | 5,592 | 3,315 | 27,448 |
| 58,237 | 154 | 18,622 | 5,681 | 3,341 | 27,798 |
| 58,238 | 152 | 18,655 | 5,670 | 3,323 | 27,800 |
| 58,239 | 150 | 18,477 | 5,622 | 3,303 | 27,552 |
| 58,240 | 146 | 18,664 | 5,650 | 3,335 | 27,795 |
| 58,241 | 148 | 18,547 | 5,618 | 3,310 | 27,623 |
| 58,242 | 152 | 18,494 | 5,591 | 3,294 | 27,531 |
| 58,243 | 149 | 18,336 | 5,515 | 3,246 | 27,246 |
| 58,244 | 151 | 18,665 | 5,543 | 3,290 | 27,649 |
| 58,245 | 146 | 18,471 | 5,441 | 3,253 | 27,311 |
| 58,246 | 146 | 18,589 | 5,413 | 3,246 | 27,394 |
| 58,247 | 150 | 18,552 | 5,398 | 3,238 | 27,338 |
| 58,248 | 152 | 18,634 | 5,413 | 3,231 | 27,430 |
| 58,249 | 155 | 18,861 | 5,445 | 3,242 | 27,703 |
| 58,250 | 148 | 18,516 | 5,362 | 3,173 | 27,199 |
| 58,251 | 150 | 18,603 | 5,354 | 3,186 | 27,293 |
| 58,252 | 150 | 18,469 | 5,318 | 3,150 | 27,087 |
| 58,253 | 148 | 18,552 | 5,384 | 3,206 | 27,290 |
| 58,254 | 148 | 18,460 | 5,355 | 3,177 | 27,140 |
| 58,255 | 148 | 18,502 | 5,368 | 3,177 | 27,195 |
| 58,256 | 145 | 18,662 | 5,432 | 3,187 | 27,426 |
| 58,257 | 148 | 18,687 | 5,432 | 3,174 | 27,441 |
| 58,258 | 148 | 18,658 | 5,422 | 3,185 | 27,413 |
| 58,259 | 145 | 18,645 | 5,384 | 3,184 | 27,358 |
| 58,260 | 144 | 18,834 | 5,466 | 3,225 | 27,669 |
| 58,261 | 135 | 18,630 | 5,400 | 3,190 | 27,355 |
| 58,262 | 132 | 18,862 | 5,460 | 3,237 | 27,691 |
| 58,263 | 131 | 18,911 | 5,447 | 3,240 | 27,729 |

|        |     |        |       |       |        |
|--------|-----|--------|-------|-------|--------|
| 58,264 | 129 | 18,678 | 5,382 | 3,198 | 27,387 |
| 58,265 | 134 | 18,729 | 5,444 | 3,221 | 27,528 |
| 58,266 | 129 | 18,522 | 5,376 | 3,165 | 27,192 |
| 58,267 | 128 | 18,639 | 5,399 | 3,182 | 27,348 |
| 58,268 | 131 | 18,769 | 5,427 | 3,168 | 27,495 |
| 58,269 | 131 | 18,893 | 5,468 | 3,185 | 27,677 |
| 58,270 | 129 | 18,919 | 5,454 | 3,192 | 27,694 |
| 58,271 | 133 | 19,191 | 5,528 | 3,224 | 28,076 |
| 58,272 | 122 | 19,121 | 5,525 | 3,205 | 27,973 |
| 58,273 | 122 | 19,533 | 5,599 | 3,243 | 28,497 |
| 58,274 | 122 | 19,461 | 5,576 | 3,219 | 28,378 |
| 58,275 | 119 | 19,510 | 5,583 | 3,238 | 28,450 |
| 58,276 | 120 | 19,536 | 5,602 | 3,248 | 28,506 |
| 58,277 | 115 | 19,407 | 5,554 | 3,200 | 28,276 |
| 58,278 | 117 | 19,475 | 5,563 | 3,193 | 28,348 |
| 58,279 | 110 | 19,248 | 5,493 | 3,159 | 28,010 |
| 58,280 | 117 | 19,643 | 5,643 | 3,245 | 28,648 |
| 58,281 | 116 | 19,599 | 5,627 | 3,257 | 28,599 |
| 58,282 | 115 | 19,418 | 5,585 | 3,244 | 28,362 |
| 58,283 | 114 | 19,463 | 5,571 | 3,246 | 28,394 |
| 58,284 | 112 | 19,493 | 5,567 | 3,251 | 28,423 |
| 58,285 | 112 | 19,566 | 5,574 | 3,255 | 28,507 |
| 58,286 | 119 | 19,643 | 5,582 | 3,256 | 28,600 |
| 58,287 | 121 | 19,806 | 5,642 | 3,287 | 28,856 |
| 58,288 | 123 | 19,800 | 5,618 | 3,292 | 28,833 |
| 58,289 | 121 | 18,956 | 5,392 | 3,171 | 27,640 |
| 58,290 | 124 | 19,105 | 5,452 | 3,211 | 27,892 |
| 58,291 | 132 | 19,277 | 5,506 | 3,231 | 28,146 |
| 58,292 | 131 | 19,267 | 5,506 | 3,233 | 28,137 |
| 58,293 | 135 | 19,665 | 5,618 | 3,297 | 28,715 |
| 58,294 | 134 | 19,835 | 5,677 | 3,331 | 28,977 |
| 58,295 | 132 | 19,679 | 5,677 | 3,306 | 28,794 |

|        |     |        |       |       |        |
|--------|-----|--------|-------|-------|--------|
| 58,296 | 132 | 19,703 | 5,668 | 3,319 | 28,822 |
| 58,297 | 127 | 19,452 | 5,629 | 3,285 | 28,493 |
| 58,298 | 128 | 19,661 | 5,681 | 3,320 | 28,790 |
| 58,299 | 127 | 19,721 | 5,704 | 3,345 | 28,897 |
| 58,300 | 126 | 19,606 | 5,678 | 3,346 | 28,756 |
| 58,301 | 126 | 19,529 | 5,623 | 3,326 | 28,604 |
| 58,302 | 128 | 19,641 | 5,655 | 3,352 | 28,776 |
| 58,303 | 127 | 19,854 | 5,691 | 3,365 | 29,037 |
| 58,304 | 123 | 19,893 | 5,711 | 3,371 | 29,098 |
| 58,305 | 119 | 19,675 | 5,675 | 3,362 | 28,831 |
| 58,306 | 124 | 19,719 | 5,693 | 3,381 | 28,917 |
| 58,307 | 120 | 19,658 | 5,671 | 3,382 | 28,831 |
| 58,308 | 122 | 19,635 | 5,658 | 3,378 | 28,793 |
| 58,309 | 120 | 19,337 | 5,574 | 3,292 | 28,323 |
| 58,310 | 121 | 19,512 | 5,620 | 3,321 | 28,574 |
| 58,311 | 121 | 19,463 | 5,620 | 3,323 | 28,527 |
| 58,312 | 125 | 19,388 | 5,644 | 3,341 | 28,498 |
| 58,313 | 126 | 19,414 | 5,670 | 3,348 | 28,558 |
| 58,314 | 123 | 18,950 | 5,485 | 3,253 | 27,811 |
| 58,315 | 126 | 19,249 | 5,529 | 3,296 | 28,200 |
| 58,316 | 124 | 19,194 | 5,518 | 3,299 | 28,135 |
| 58,317 | 126 | 19,085 | 5,521 | 3,306 | 28,038 |
| 58,318 | 128 | 19,113 | 5,556 | 3,307 | 28,104 |
| 58,319 | 123 | 19,196 | 5,579 | 3,310 | 28,208 |
| 58,320 | 122 | 19,262 | 5,598 | 3,314 | 28,296 |
| 58,321 | 118 | 19,104 | 5,565 | 3,283 | 28,070 |
| 58,322 | 114 | 19,382 | 5,629 | 3,313 | 28,438 |
| 58,323 | 121 | 19,308 | 5,595 | 3,303 | 28,327 |
| 58,324 | 126 | 19,325 | 5,588 | 3,287 | 28,326 |
| 58,325 | 126 | 19,122 | 5,538 | 3,243 | 28,029 |
| 58,326 | 131 | 19,034 | 5,501 | 3,223 | 27,889 |
| 58,327 | 131 | 19,102 | 5,516 | 3,230 | 27,979 |

|        |     |        |       |       |        |
|--------|-----|--------|-------|-------|--------|
| 58,328 | 123 | 18,889 | 5,354 | 3,141 | 27,507 |
| 58,329 | 125 | 19,071 | 5,382 | 3,178 | 27,756 |
| 58,330 | 125 | 19,265 | 5,415 | 3,201 | 28,006 |
| 58,331 | 132 | 19,162 | 5,353 | 3,160 | 27,807 |
| 58,332 | 141 | 19,454 | 5,400 | 3,197 | 28,192 |
| 58,333 | 135 | 19,270 | 5,357 | 3,158 | 27,920 |
| 58,334 | 140 | 19,414 | 5,390 | 3,159 | 28,103 |
| 58,335 | 140 | 19,460 | 5,413 | 3,168 | 28,181 |
| 58,336 | 138 | 19,561 | 5,441 | 3,169 | 28,309 |
| 58,337 | 133 | 19,582 | 5,425 | 3,156 | 28,296 |
| 58,338 | 135 | 19,680 | 5,451 | 3,195 | 28,461 |
| 58,339 | 133 | 19,514 | 5,426 | 3,161 | 28,234 |
| 58,340 | 129 | 19,549 | 5,426 | 3,156 | 28,260 |
| 58,341 | 137 | 19,713 | 5,471 | 3,178 | 28,499 |
| 58,342 | 133 | 19,818 | 5,499 | 3,191 | 28,641 |
| 58,343 | 134 | 19,797 | 5,458 | 3,179 | 28,568 |
| 58,344 | 139 | 20,016 | 5,526 | 3,210 | 28,891 |
| 58,345 | 143 | 19,862 | 5,469 | 3,183 | 28,657 |
| 58,346 | 141 | 19,772 | 5,431 | 3,155 | 28,499 |
| 58,347 | 156 | 20,141 | 5,565 | 3,229 | 29,091 |
| 58,348 | 155 | 19,917 | 5,498 | 3,196 | 28,766 |
| 58,349 | 155 | 19,865 | 5,487 | 3,196 | 28,703 |
| 58,350 | 160 | 20,018 | 5,503 | 3,201 | 28,882 |
| 58,351 | 160 | 20,064 | 5,522 | 3,200 | 28,946 |
| 58,352 | 161 | 20,088 | 5,545 | 3,208 | 29,002 |
| 58,353 | 159 | 20,049 | 5,527 | 3,200 | 28,935 |
| 58,354 | 160 | 20,345 | 5,574 | 3,238 | 29,317 |
| 58,355 | 166 | 20,302 | 5,537 | 3,227 | 29,232 |
| 58,356 | 166 | 20,307 | 5,484 | 3,212 | 29,169 |
| 58,357 | 172 | 20,334 | 5,494 | 3,223 | 29,223 |
| 58,358 | 172 | 20,334 | 5,493 | 3,230 | 29,229 |
| 58,359 | 165 | 20,233 | 5,474 | 3,208 | 29,080 |



|        |     |        |       |       |        |
|--------|-----|--------|-------|-------|--------|
| 58,360 | 164 | 20,215 | 5,456 | 3,236 | 29,071 |
| 58,361 | 170 | 20,450 | 5,501 | 3,257 | 29,378 |
| 58,362 | 173 | 20,473 | 5,468 | 3,228 | 29,342 |
| 58,363 | 173 | 20,425 | 5,427 | 3,185 | 29,210 |
| 58,364 | 180 | 21,083 | 5,525 | 3,254 | 30,042 |
| 58,365 | 180 | 20,999 | 5,523 | 3,248 | 29,950 |
| 58,366 | 181 | 21,426 | 5,612 | 3,301 | 30,520 |
| 58,367 | 183 | 21,375 | 5,566 | 3,284 | 30,408 |
| 58,368 | 182 | 21,355 | 5,537 | 3,285 | 30,359 |
| 58,369 | 183 | 21,789 | 5,607 | 3,369 | 30,948 |
| 58,370 | 187 | 21,763 | 5,548 | 3,374 | 30,872 |
| 58,371 | 190 | 21,227 | 5,381 | 3,301 | 30,099 |
| 58,372 | 192 | 21,437 | 5,395 | 3,330 | 30,354 |
| 58,373 | 192 | 21,497 | 5,400 | 3,340 | 30,429 |
| 58,374 | 185 | 21,439 | 5,377 | 3,342 | 30,343 |
| 58,375 | 185 | 21,323 | 5,342 | 3,335 | 30,185 |
| 58,376 | 179 | 21,179 | 5,302 | 3,330 | 29,990 |
| 58,377 | 182 | 21,430 | 5,338 | 3,352 | 30,302 |
| 58,378 | 181 | 21,254 | 5,271 | 3,326 | 30,032 |
| 58,379 | 180 | 21,311 | 5,275 | 3,339 | 30,105 |
| 58,380 | 177 | 21,174 | 5,263 | 3,297 | 29,911 |
| 58,381 | 177 | 21,117 | 5,277 | 3,299 | 29,870 |
| 58,382 | 171 | 21,264 | 5,322 | 3,325 | 30,082 |
| 58,383 | 162 | 20,971 | 5,266 | 3,284 | 29,683 |
| 58,384 | 166 | 21,198 | 5,288 | 3,318 | 29,970 |
| 58,385 | 162 | 21,109 | 5,287 | 3,312 | 29,870 |
| 58,386 | 163 | 20,991 | 5,216 | 3,289 | 29,659 |
| 58,387 | 167 | 21,196 | 5,267 | 3,306 | 29,936 |
| 58,388 | 170 | 20,989 | 5,227 | 3,289 | 29,675 |
| 58,389 | 169 | 21,026 | 5,226 | 3,280 | 29,701 |
| 58,390 | 168 | 20,887 | 5,169 | 3,254 | 29,478 |
| 58,391 | 170 | 21,078 | 5,246 | 3,303 | 29,797 |

|        |     |        |       |       |        |
|--------|-----|--------|-------|-------|--------|
| 58,392 | 155 | 20,987 | 5,204 | 3,266 | 29,612 |
| 58,393 | 148 | 20,518 | 5,071 | 3,198 | 28,935 |
| 58,394 | 147 | 20,734 | 5,117 | 3,217 | 29,215 |
| 58,395 | 142 | 20,722 | 5,078 | 3,210 | 29,152 |
| 58,396 | 144 | 20,893 | 5,095 | 3,234 | 29,366 |
| 58,397 | 137 | 21,086 | 5,130 | 3,268 | 29,621 |
| 58,398 | 134 | 20,814 | 5,094 | 3,231 | 29,273 |
| 58,399 | 135 | 20,972 | 5,110 | 3,227 | 29,444 |
| 58,400 | 135 | 21,187 | 5,128 | 3,256 | 29,706 |
| 58,401 | 133 | 20,984 | 5,086 | 3,233 | 29,436 |
| 58,402 | 133 | 21,036 | 5,089 | 3,237 | 29,495 |
| 58,403 | 137 | 20,886 | 5,066 | 3,209 | 29,298 |
| 58,404 | 136 | 20,706 | 5,060 | 3,198 | 29,100 |
| 58,405 | 138 | 20,705 | 5,077 | 3,197 | 29,117 |
| 58,406 | 133 | 20,621 | 5,140 | 3,225 | 29,119 |
| 58,407 | 126 | 20,577 | 5,104 | 3,217 | 29,024 |
| 58,408 | 125 | 20,579 | 5,119 | 3,230 | 29,053 |
| 58,409 | 126 | 20,678 | 5,133 | 3,256 | 29,193 |
| 58,410 | 126 | 20,685 | 5,152 | 3,246 | 29,209 |
| 58,411 | 125 | 20,833 | 5,224 | 3,274 | 29,456 |
| 58,412 | 124 | 20,517 | 5,172 | 3,254 | 29,067 |
| 58,413 | 115 | 20,497 | 5,167 | 3,265 | 29,044 |
| 58,414 | 115 | 20,570 | 5,192 | 3,282 | 29,159 |
| 58,415 | 110 | 20,526 | 5,233 | 3,302 | 29,171 |
| 58,416 | 108 | 20,712 | 5,281 | 3,339 | 29,440 |
| 58,417 | 105 | 20,529 | 5,255 | 3,294 | 29,183 |
| 58,418 | 113 | 20,825 | 5,334 | 3,315 | 29,587 |
| 58,419 | 116 | 21,061 | 5,352 | 3,319 | 29,848 |
| 58,420 | 115 | 20,973 | 5,325 | 3,296 | 29,709 |
| 58,421 | 119 | 20,739 | 5,321 | 3,262 | 29,441 |
| 58,422 | 119 | 20,691 | 5,337 | 3,259 | 29,406 |
| 58,423 | 121 | 20,462 | 5,293 | 3,228 | 29,104 |

|        |     |        |       |       |        |
|--------|-----|--------|-------|-------|--------|
| 58,424 | 120 | 20,288 | 5,250 | 3,222 | 28,880 |
| 58,425 | 117 | 21,085 | 5,560 | 3,407 | 30,169 |
| 58,426 | 124 | 20,888 | 5,518 | 3,373 | 29,903 |
| 58,427 | 121 | 20,570 | 5,503 | 3,332 | 29,526 |
| 58,428 | 122 | 20,899 | 5,636 | 3,436 | 30,093 |
| 58,429 | 119 | 20,838 | 5,645 | 3,435 | 30,037 |
| 58,430 | 119 | 20,545 | 5,593 | 3,406 | 29,663 |
| 58,431 | 120 | 20,952 | 5,702 | 3,492 | 30,266 |
| 58,432 | 119 | 21,112 | 5,701 | 3,505 | 30,437 |
| 58,433 | 118 | 20,953 | 5,682 | 3,483 | 30,236 |
| 58,434 | 118 | 21,158 | 5,731 | 3,532 | 30,539 |
| 58,435 | 119 | 21,166 | 5,745 | 3,520 | 30,550 |
| 58,436 | 116 | 20,989 | 5,678 | 3,495 | 30,278 |
| 58,437 | 117 | 21,195 | 5,739 | 3,551 | 30,602 |
| 58,438 | 114 | 21,158 | 5,776 | 3,596 | 30,644 |
| 58,439 | 110 | 21,324 | 5,798 | 3,587 | 30,819 |
| 58,440 | 109 | 21,148 | 5,755 | 3,576 | 30,588 |
| 58,441 | 110 | 21,352 | 5,792 | 3,596 | 30,850 |
| 58,442 | 118 | 21,455 | 5,784 | 3,607 | 30,964 |
| 58,443 | 119 | 21,159 | 5,709 | 3,571 | 30,558 |
| 58,444 | 122 | 21,308 | 5,822 | 3,629 | 30,881 |
| 58,445 | 129 | 21,490 | 5,883 | 3,670 | 31,172 |
| 58,446 | 129 | 21,229 | 5,889 | 3,640 | 30,887 |
| 58,447 | 126 | 21,177 | 5,870 | 3,637 | 30,810 |
| 58,448 | 128 | 21,176 | 5,867 | 3,621 | 30,792 |
| 58,449 | 127 | 21,234 | 5,845 | 3,624 | 30,830 |
| 58,450 | 127 | 21,205 | 5,847 | 3,625 | 30,804 |
| 58,451 | 126 | 21,424 | 5,983 | 3,661 | 31,194 |
| 58,452 | 130 | 21,453 | 6,007 | 3,699 | 31,289 |
| 58,453 | 127 | 21,555 | 5,999 | 3,700 | 31,381 |
| 58,454 | 131 | 21,842 | 6,044 | 3,741 | 31,758 |
| 58,455 | 129 | 21,746 | 6,007 | 3,733 | 31,615 |

|        |     |        |       |       |        |
|--------|-----|--------|-------|-------|--------|
| 58,456 | 135 | 21,769 | 5,989 | 3,716 | 31,609 |
| 58,457 | 135 | 21,998 | 6,027 | 3,748 | 31,908 |
| 58,458 | 134 | 21,856 | 6,089 | 3,757 | 31,836 |
| 58,459 | 135 | 21,947 | 6,115 | 3,757 | 31,954 |
| 58,460 | 135 | 22,047 | 6,134 | 3,747 | 32,063 |
| 58,461 | 135 | 22,016 | 6,133 | 3,749 | 32,033 |
| 58,462 | 136 | 21,979 | 6,108 | 3,768 | 31,991 |
| 58,463 | 136 | 21,924 | 6,088 | 3,732 | 31,880 |
| 58,464 | 135 | 21,576 | 5,984 | 3,688 | 31,383 |
| 58,465 | 138 | 21,563 | 6,040 | 3,724 | 31,465 |
| 58,466 | 137 | 21,579 | 6,033 | 3,721 | 31,470 |
| 58,467 | 142 | 21,529 | 6,019 | 3,725 | 31,415 |
| 58,468 | 138 | 21,285 | 5,977 | 3,716 | 31,116 |
| 58,469 | 130 | 20,611 | 5,849 | 3,646 | 30,236 |
| 58,470 | 130 | 20,753 | 5,849 | 3,681 | 30,413 |
| 58,471 | 129 | 20,973 | 5,943 | 3,707 | 30,752 |
| 58,472 | 130 | 20,928 | 5,914 | 3,689 | 30,661 |
| 58,473 | 131 | 21,227 | 5,896 | 3,688 | 30,942 |
| 58,474 | 133 | 21,075 | 5,816 | 3,634 | 30,658 |
| 58,475 | 140 | 21,209 | 5,827 | 3,622 | 30,798 |
| 58,476 | 135 | 21,073 | 5,790 | 3,595 | 30,593 |
| 58,477 | 140 | 21,403 | 5,829 | 3,607 | 30,979 |
| 58,478 | 140 | 21,369 | 5,813 | 3,592 | 30,914 |
| 58,479 | 141 | 21,507 | 5,788 | 3,598 | 31,034 |
| 58,480 | 142 | 21,520 | 5,805 | 3,617 | 31,084 |
| 58,481 | 146 | 21,867 | 5,905 | 3,660 | 31,578 |
| 58,482 | 158 | 21,889 | 5,879 | 3,636 | 31,562 |
| 58,483 | 161 | 21,641 | 5,797 | 3,596 | 31,195 |
| 58,484 | 162 | 21,637 | 5,782 | 3,582 | 31,163 |
| 58,485 | 162 | 21,659 | 5,773 | 3,580 | 31,174 |
| 58,486 | 158 | 21,683 | 5,793 | 3,607 | 31,241 |
| 58,487 | 160 | 21,746 | 5,819 | 3,636 | 31,361 |

|        |     |        |       |       |        |
|--------|-----|--------|-------|-------|--------|
| 58,488 | 160 | 21,720 | 5,750 | 3,591 | 31,221 |
| 58,489 | 167 | 22,023 | 5,793 | 3,613 | 31,596 |
| 58,490 | 173 | 21,956 | 5,802 | 3,612 | 31,543 |
| 58,491 | 175 | 21,955 | 5,801 | 3,612 | 31,543 |
| 58,492 | 166 | 21,824 | 5,769 | 3,584 | 31,343 |
| 58,493 | 165 | 21,690 | 5,677 | 3,529 | 31,061 |
| 58,494 | 173 | 22,038 | 5,724 | 3,560 | 31,495 |
| 58,495 | 172 | 21,976 | 5,741 | 3,563 | 31,452 |
| 58,496 | 165 | 22,423 | 5,821 | 3,632 | 32,041 |
| 58,497 | 167 | 22,282 | 5,731 | 3,602 | 31,782 |
| 58,498 | 169 | 22,153 | 5,704 | 3,577 | 31,603 |
| 58,499 | 165 | 22,038 | 5,702 | 3,613 | 31,518 |
| 58,500 | 167 | 22,181 | 5,751 | 3,640 | 31,739 |
| 58,501 | 167 | 22,096 | 5,674 | 3,595 | 31,532 |
| 58,502 | 167 | 22,259 | 5,673 | 3,630 | 31,729 |
| 58,503 | 161 | 22,326 | 5,699 | 3,665 | 31,851 |
| 58,504 | 160 | 22,352 | 5,694 | 3,666 | 31,872 |
| 58,505 | 154 | 21,745 | 5,516 | 3,542 | 30,957 |
| 58,506 | 156 | 22,004 | 5,545 | 3,570 | 31,275 |
| 58,507 | 155 | 22,343 | 5,589 | 3,610 | 31,697 |
| 58,508 | 157 | 22,371 | 5,548 | 3,577 | 31,653 |
| 58,509 | 159 | 22,666 | 5,581 | 3,604 | 32,010 |
| 58,510 | 164 | 22,592 | 5,551 | 3,592 | 31,899 |
| 58,511 | 161 | 22,358 | 5,486 | 3,558 | 31,563 |
| 58,512 | 161 | 22,299 | 5,467 | 3,557 | 31,484 |
| 58,513 | 158 | 22,359 | 5,456 | 3,555 | 31,528 |
| 58,514 | 158 | 22,276 | 5,436 | 3,569 | 31,439 |
| 58,515 | 157 | 22,347 | 5,429 | 3,563 | 31,496 |
| 58,516 | 157 | 22,558 | 5,440 | 3,546 | 31,701 |
| 58,517 | 153 | 22,563 | 5,386 | 3,533 | 31,635 |
| 58,518 | 155 | 22,340 | 5,323 | 3,453 | 31,271 |
| 58,519 | 155 | 22,357 | 5,315 | 3,452 | 31,279 |

|        |     |        |       |       |        |
|--------|-----|--------|-------|-------|--------|
| 58,520 | 161 | 22,433 | 5,372 | 3,452 | 31,418 |
| 58,521 | 154 | 22,208 | 5,305 | 3,409 | 31,076 |
| 58,522 | 153 | 22,033 | 5,253 | 3,400 | 30,839 |
| 58,523 | 159 | 22,335 | 5,310 | 3,444 | 31,248 |
| 58,524 | 161 | 22,281 | 5,300 | 3,444 | 31,186 |
| 58,525 | 156 | 22,018 | 5,246 | 3,405 | 30,825 |
| 58,526 | 156 | 22,049 | 5,240 | 3,437 | 30,882 |
| 58,527 | 155 | 21,783 | 5,155 | 3,396 | 30,489 |
| 58,528 | 145 | 21,738 | 5,163 | 3,378 | 30,424 |
| 58,529 | 143 | 21,798 | 5,189 | 3,387 | 30,517 |
| 58,530 | 144 | 21,775 | 5,169 | 3,386 | 30,474 |
| 58,531 | 145 | 21,435 | 5,087 | 3,348 | 30,015 |
| 58,532 | 148 | 21,562 | 5,105 | 3,374 | 30,189 |
| 58,533 | 141 | 21,557 | 5,090 | 3,386 | 30,174 |
| 58,534 | 137 | 21,354 | 5,056 | 3,356 | 29,903 |
| 58,535 | 144 | 21,711 | 5,148 | 3,450 | 30,453 |
| 58,536 | 147 | 21,783 | 5,145 | 3,445 | 30,520 |
| 58,537 | 143 | 21,644 | 5,087 | 3,416 | 30,290 |
| 58,538 | 142 | 21,562 | 5,077 | 3,392 | 30,173 |
| 58,539 | 142 | 21,535 | 5,086 | 3,394 | 30,157 |
| 58,540 | 134 | 21,353 | 5,070 | 3,381 | 29,938 |
| 58,541 | 128 | 21,105 | 4,969 | 3,354 | 29,556 |
| 58,542 | 125 | 20,654 | 4,894 | 3,303 | 28,976 |
| 58,543 | 130 | 21,346 | 5,062 | 3,406 | 29,944 |
| 58,544 | 129 | 21,426 | 5,094 | 3,447 | 30,096 |
| 58,545 | 121 | 21,181 | 5,073 | 3,438 | 29,813 |
| 58,546 | 130 | 21,202 | 5,021 | 3,425 | 29,778 |
| 58,547 | 134 | 21,187 | 5,035 | 3,429 | 29,785 |
| 58,548 | 126 | 20,990 | 4,983 | 3,379 | 29,478 |
| 58,549 | 130 | 21,376 | 5,050 | 3,418 | 29,974 |
| 58,550 | 133 | 21,374 | 5,049 | 3,405 | 29,961 |
| 58,551 | 133 | 21,213 | 5,014 | 3,369 | 29,729 |

|        |     |        |       |       |        |
|--------|-----|--------|-------|-------|--------|
| 58,552 | 137 | 21,176 | 5,009 | 3,353 | 29,675 |
| 58,553 | 143 | 20,874 | 4,941 | 3,272 | 29,230 |
| 58,554 | 144 | 20,882 | 4,927 | 3,268 | 29,221 |
| 58,555 | 146 | 20,520 | 4,868 | 3,225 | 28,759 |
| 58,556 | 145 | 20,303 | 4,841 | 3,224 | 28,513 |
| 58,557 | 147 | 21,094 | 5,089 | 3,395 | 29,725 |
| 58,558 | 141 | 20,986 | 5,106 | 3,413 | 29,646 |
| 58,559 | 145 | 20,840 | 5,084 | 3,420 | 29,489 |
| 58,560 | 144 | 20,637 | 5,048 | 3,392 | 29,221 |
| 58,561 | 140 | 20,769 | 5,073 | 3,417 | 29,399 |
| 58,562 | 140 | 20,715 | 5,070 | 3,394 | 29,319 |
| 58,563 | 144 | 20,536 | 5,030 | 3,356 | 29,066 |
| 58,564 | 143 | 20,436 | 4,988 | 3,319 | 28,886 |
| 58,565 | 150 | 20,990 | 5,139 | 3,370 | 29,649 |
| 58,566 | 152 | 20,985 | 5,148 | 3,387 | 29,672 |
| 58,567 | 152 | 20,885 | 5,133 | 3,388 | 29,558 |
| 58,568 | 159 | 20,716 | 5,151 | 3,410 | 29,436 |
| 58,569 | 160 | 20,955 | 5,220 | 3,451 | 29,786 |
| 58,570 | 157 | 20,824 | 5,163 | 3,449 | 29,593 |
| 58,571 | 155 | 20,872 | 5,178 | 3,468 | 29,673 |
| 58,572 | 155 | 20,833 | 5,192 | 3,474 | 29,654 |
| 58,573 | 150 | 20,194 | 5,078 | 3,369 | 28,791 |
| 58,574 | 151 | 20,414 | 5,118 | 3,393 | 29,076 |
| 58,575 | 152 | 20,626 | 5,191 | 3,433 | 29,402 |
| 58,576 | 147 | 20,598 | 5,190 | 3,433 | 29,368 |
| 58,577 | 148 | 20,680 | 5,188 | 3,437 | 29,453 |
| 58,578 | 148 | 20,588 | 5,189 | 3,436 | 29,361 |
| 58,579 | 146 | 20,922 | 5,280 | 3,488 | 29,836 |
| 58,580 | 148 | 20,920 | 5,250 | 3,466 | 29,784 |
| 58,581 | 148 | 20,916 | 5,234 | 3,433 | 29,731 |
| 58,582 | 140 | 20,673 | 5,165 | 3,395 | 29,373 |
| 58,583 | 139 | 20,646 | 5,155 | 3,392 | 29,332 |

|        |     |        |       |       |        |
|--------|-----|--------|-------|-------|--------|
| 58,584 | 138 | 20,782 | 5,250 | 3,391 | 29,561 |
| 58,585 | 136 | 19,940 | 5,084 | 3,265 | 28,425 |
| 58,586 | 139 | 20,068 | 5,134 | 3,287 | 28,628 |
| 58,587 | 146 | 20,377 | 5,193 | 3,323 | 29,039 |
| 58,588 | 146 | 20,403 | 5,180 | 3,316 | 29,045 |
| 58,589 | 147 | 20,602 | 5,220 | 3,347 | 29,316 |
| 58,590 | 149 | 20,852 | 5,294 | 3,397 | 29,692 |
| 58,591 | 152 | 20,771 | 5,272 | 3,363 | 29,558 |
| 58,592 | 154 | 20,843 | 5,313 | 3,392 | 29,702 |
| 58,593 | 154 | 20,905 | 5,307 | 3,404 | 29,770 |
| 58,594 | 158 | 20,835 | 5,286 | 3,392 | 29,671 |
| 58,595 | 169 | 20,489 | 5,221 | 3,327 | 29,206 |
| 58,596 | 169 | 20,631 | 5,239 | 3,322 | 29,361 |
| 58,597 | 163 | 20,831 | 5,268 | 3,329 | 29,591 |
| 58,598 | 175 | 20,719 | 5,255 | 3,312 | 29,461 |
| 58,599 | 175 | 20,711 | 5,247 | 3,318 | 29,451 |
| 58,600 | 171 | 20,917 | 5,298 | 3,321 | 29,707 |
| 58,601 | 174 | 20,905 | 5,296 | 3,318 | 29,693 |
| 58,602 | 171 | 20,638 | 5,258 | 3,283 | 29,350 |
| 58,603 | 168 | 21,003 | 5,344 | 3,380 | 29,895 |
| 58,604 | 170 | 21,348 | 5,433 | 3,474 | 30,425 |
| 58,605 | 169 | 21,469 | 5,392 | 3,460 | 30,490 |
| 58,606 | 169 | 21,635 | 5,430 | 3,473 | 30,707 |
| 58,607 | 167 | 21,810 | 5,478 | 3,491 | 30,946 |
| 58,608 | 168 | 21,911 | 5,469 | 3,470 | 31,018 |
| 58,609 | 180 | 21,998 | 5,482 | 3,462 | 31,122 |
| 58,610 | 174 | 21,830 | 5,440 | 3,420 | 30,864 |
| 58,611 | 177 | 21,906 | 5,412 | 3,412 | 30,907 |
| 58,612 | 177 | 21,827 | 5,367 | 3,395 | 30,766 |
| 58,613 | 172 | 22,326 | 5,429 | 3,489 | 31,416 |
| 58,614 | 173 | 22,324 | 5,446 | 3,498 | 31,441 |
| 58,615 | 170 | 22,512 | 5,493 | 3,532 | 31,707 |



|        |     |        |       |       |        |
|--------|-----|--------|-------|-------|--------|
| 58,616 | 169 | 22,411 | 5,434 | 3,505 | 31,519 |
| 58,617 | 173 | 22,690 | 5,472 | 3,533 | 31,868 |
| 58,618 | 170 | 23,034 | 5,527 | 3,580 | 32,311 |
| 58,619 | 169 | 23,230 | 5,548 | 3,580 | 32,527 |
| 58,620 | 166 | 22,990 | 5,486 | 3,554 | 32,196 |
| 58,621 | 165 | 22,993 | 5,489 | 3,537 | 32,184 |
| 58,622 | 164 | 23,042 | 5,478 | 3,528 | 32,212 |
| 58,623 | 165 | 22,777 | 5,399 | 3,495 | 31,836 |
| 58,624 | 161 | 22,547 | 5,337 | 3,477 | 31,522 |
| 58,625 | 177 | 23,795 | 5,556 | 3,632 | 33,160 |
| 58,626 | 175 | 23,933 | 5,556 | 3,638 | 33,302 |
| 58,627 | 173 | 23,815 | 5,534 | 3,612 | 33,134 |
| 58,628 | 181 | 23,752 | 5,496 | 3,547 | 32,976 |
| 58,629 | 184 | 24,069 | 5,578 | 3,587 | 33,418 |
| 58,630 | 184 | 24,146 | 5,584 | 3,589 | 33,503 |
| 58,631 | 187 | 24,287 | 5,615 | 3,620 | 33,709 |
| 58,632 | 190 | 24,304 | 5,610 | 3,623 | 33,727 |
| 58,633 | 185 | 24,108 | 5,587 | 3,602 | 33,482 |
| 58,634 | 187 | 24,689 | 5,657 | 3,669 | 34,202 |
| 58,635 | 191 | 24,824 | 5,678 | 3,690 | 34,383 |
| 58,636 | 189 | 24,716 | 5,643 | 3,668 | 34,216 |
| 58,637 | 194 | 24,693 | 5,628 | 3,674 | 34,189 |
| 58,638 | 191 | 24,627 | 5,634 | 3,667 | 34,119 |
| 58,639 | 189 | 24,466 | 5,614 | 3,640 | 33,909 |
| 58,640 | 191 | 24,390 | 5,621 | 3,646 | 33,848 |
| 58,641 | 193 | 24,268 | 5,620 | 3,635 | 33,716 |
| 58,642 | 188 | 24,008 | 5,580 | 3,601 | 33,377 |
| 58,643 | 186 | 24,088 | 5,543 | 3,606 | 33,423 |
| 58,644 | 183 | 23,732 | 5,494 | 3,554 | 32,963 |
| 58,645 | 183 | 23,724 | 5,483 | 3,550 | 32,940 |
| 58,646 | 173 | 23,387 | 5,367 | 3,486 | 32,413 |
| 58,647 | 172 | 23,460 | 5,411 | 3,499 | 32,542 |

|        |     |        |       |       |        |
|--------|-----|--------|-------|-------|--------|
| 58,648 | 164 | 23,556 | 5,482 | 3,527 | 32,729 |
| 58,649 | 167 | 23,423 | 5,521 | 3,522 | 32,633 |
| 58,650 | 169 | 23,255 | 5,508 | 3,523 | 32,455 |
| 58,651 | 170 | 23,022 | 5,458 | 3,519 | 32,169 |
| 58,652 | 175 | 23,216 | 5,553 | 3,575 | 32,519 |
| 58,653 | 189 | 22,967 | 5,479 | 3,516 | 32,151 |
| 58,654 | 190 | 22,776 | 5,417 | 3,482 | 31,865 |
| 58,655 | 183 | 22,988 | 5,515 | 3,488 | 32,174 |
| 58,656 | 180 | 22,951 | 5,593 | 3,518 | 32,242 |
| 58,657 | 179 | 22,814 | 5,578 | 3,519 | 32,090 |
| 58,658 | 185 | 22,748 | 5,555 | 3,535 | 32,023 |
| 58,659 | 185 | 22,713 | 5,536 | 3,536 | 31,970 |
| 58,660 | 172 | 22,641 | 5,552 | 3,544 | 31,909 |
| 58,661 | 173 | 22,564 | 5,567 | 3,554 | 31,858 |
| 58,662 | 172 | 22,541 | 5,662 | 3,577 | 31,952 |
| 58,663 | 181 | 22,045 | 5,597 | 3,512 | 31,335 |
| 58,664 | 182 | 22,088 | 5,562 | 3,494 | 31,326 |
| 58,665 | 181 | 22,216 | 5,567 | 3,506 | 31,470 |
| 58,666 | 184 | 21,778 | 5,519 | 3,462 | 30,943 |
| 58,667 | 182 | 21,972 | 5,590 | 3,489 | 31,233 |
| 58,668 | 178 | 21,987 | 5,598 | 3,494 | 31,257 |
| 58,669 | 179 | 21,923 | 5,632 | 3,494 | 31,228 |
| 58,670 | 180 | 21,512 | 5,550 | 3,461 | 30,703 |
| 58,671 | 185 | 21,661 | 5,573 | 3,496 | 30,915 |
| 58,672 | 180 | 21,631 | 5,601 | 3,491 | 30,903 |
| 58,673 | 177 | 21,568 | 5,656 | 3,525 | 30,926 |
| 58,674 | 173 | 21,599 | 5,707 | 3,554 | 31,033 |
| 58,675 | 172 | 21,439 | 5,711 | 3,519 | 30,841 |
| 58,676 | 172 | 21,395 | 5,685 | 3,497 | 30,749 |
| 58,677 | 177 | 21,424 | 5,693 | 3,510 | 30,804 |
| 58,678 | 177 | 21,487 | 5,705 | 3,524 | 30,893 |
| 58,679 | 173 | 21,760 | 5,796 | 3,603 | 31,332 |

|        |     |        |       |       |        |
|--------|-----|--------|-------|-------|--------|
| 58,680 | 171 | 21,901 | 5,819 | 3,627 | 31,518 |
| 58,681 | 172 | 21,992 | 5,814 | 3,643 | 31,621 |
| 58,682 | 167 | 21,673 | 5,808 | 3,640 | 31,288 |
| 58,683 | 164 | 21,927 | 5,889 | 3,696 | 31,676 |
| 58,684 | 165 | 21,995 | 5,917 | 3,710 | 31,787 |
| 58,685 | 162 | 22,105 | 5,971 | 3,744 | 31,982 |
| 58,686 | 161 | 22,257 | 6,007 | 3,782 | 32,207 |
| 58,687 | 157 | 22,160 | 5,999 | 3,772 | 32,088 |
| 58,688 | 147 | 21,918 | 5,932 | 3,735 | 31,732 |
| 58,689 | 150 | 22,160 | 5,985 | 3,762 | 32,057 |
| 58,690 | 149 | 22,371 | 5,994 | 3,767 | 32,281 |
| 58,691 | 151 | 22,472 | 6,001 | 3,763 | 32,387 |
| 58,692 | 147 | 22,391 | 5,946 | 3,747 | 32,231 |
| 58,693 | 149 | 22,714 | 5,986 | 3,763 | 32,612 |
| 58,694 | 145 | 22,742 | 6,012 | 3,760 | 32,659 |
| 58,695 | 147 | 22,401 | 5,925 | 3,712 | 32,185 |
| 58,696 | 147 | 22,501 | 5,945 | 3,726 | 32,319 |
| 58,697 | 147 | 22,684 | 5,979 | 3,743 | 32,553 |
| 58,698 | 149 | 22,674 | 5,951 | 3,745 | 32,519 |
| 58,699 | 146 | 22,622 | 5,901 | 3,733 | 32,402 |
| 58,700 | 139 | 22,694 | 5,858 | 3,740 | 32,431 |
| 58,701 | 128 | 22,293 | 5,721 | 3,604 | 31,746 |
| 58,702 | 135 | 22,385 | 5,729 | 3,626 | 31,875 |
| 58,703 | 145 | 22,490 | 5,718 | 3,628 | 31,981 |
| 58,704 | 131 | 22,206 | 5,658 | 3,597 | 31,592 |
| 58,705 | 132 | 22,360 | 5,664 | 3,603 | 31,759 |
| 58,706 | 134 | 22,526 | 5,647 | 3,615 | 31,922 |
| 58,707 | 136 | 22,546 | 5,618 | 3,587 | 31,887 |
| 58,708 | 132 | 22,521 | 5,569 | 3,546 | 31,768 |
| 58,709 | 131 | 22,627 | 5,577 | 3,519 | 31,854 |
| 58,710 | 132 | 22,891 | 5,630 | 3,571 | 32,224 |
| 58,711 | 120 | 22,032 | 5,377 | 3,402 | 30,931 |

|        |     |        |       |       |        |
|--------|-----|--------|-------|-------|--------|
| 58,712 | 118 | 22,357 | 5,411 | 3,431 | 31,317 |
| 58,713 | 121 | 22,686 | 5,479 | 3,460 | 31,746 |
| 58,714 | 124 | 22,728 | 5,473 | 3,461 | 31,786 |
| 58,715 | 128 | 23,122 | 5,558 | 3,523 | 32,331 |
| 58,716 | 126 | 23,165 | 5,563 | 3,529 | 32,383 |
| 58,717 | 127 | 23,487 | 5,654 | 3,589 | 32,857 |
| 58,718 | 141 | 23,733 | 5,672 | 3,607 | 33,153 |
| 58,719 | 137 | 23,467 | 5,541 | 3,539 | 32,684 |
| 58,720 | 141 | 23,624 | 5,613 | 3,578 | 32,956 |
| 58,721 | 139 | 23,569 | 5,624 | 3,578 | 32,910 |
| 58,722 | 134 | 23,445 | 5,629 | 3,568 | 32,776 |
| 58,723 | 135 | 23,497 | 5,570 | 3,516 | 32,718 |
| 58,724 | 138 | 23,398 | 5,498 | 3,467 | 32,501 |
| 58,725 | 139 | 23,404 | 5,492 | 3,474 | 32,509 |
| 58,726 | 136 | 23,362 | 5,460 | 3,470 | 32,428 |
| 58,727 | 136 | 23,223 | 5,430 | 3,456 | 32,245 |
| 58,728 | 134 | 23,143 | 5,442 | 3,453 | 32,172 |
| 58,729 | 135 | 23,301 | 5,461 | 3,466 | 32,363 |
| 58,730 | 133 | 22,928 | 5,372 | 3,401 | 31,834 |
| 58,731 | 134 | 22,912 | 5,357 | 3,427 | 31,830 |
| 58,732 | 131 | 22,842 | 5,353 | 3,398 | 31,724 |
| 58,733 | 134 | 22,079 | 5,075 | 3,234 | 30,522 |
| 58,734 | 145 | 22,442 | 5,133 | 3,272 | 30,992 |
| 58,735 | 153 | 21,936 | 4,977 | 3,169 | 30,235 |
| 58,736 | 154 | 21,972 | 4,962 | 3,159 | 30,247 |
| 58,737 | 155 | 22,005 | 4,964 | 3,150 | 30,274 |
| 58,738 | 155 | 22,004 | 4,961 | 3,165 | 30,285 |
| 58,739 | 156 | 22,001 | 4,946 | 3,186 | 30,289 |
| 58,740 | 156 | 22,101 | 4,973 | 3,207 | 30,437 |
| 58,741 | 165 | 23,270 | 5,300 | 3,419 | 32,154 |
| 58,742 | 162 | 23,060 | 5,231 | 3,398 | 31,851 |
| 58,743 | 163 | 23,199 | 5,276 | 3,415 | 32,053 |

|        |     |        |       |       |        |
|--------|-----|--------|-------|-------|--------|
| 58,744 | 169 | 23,082 | 5,247 | 3,440 | 31,938 |
| 58,745 | 171 | 23,483 | 5,330 | 3,478 | 32,462 |
| 58,746 | 175 | 23,744 | 5,379 | 3,523 | 32,821 |
| 58,747 | 176 | 23,840 | 5,411 | 3,548 | 32,975 |
| 58,748 | 179 | 24,041 | 5,477 | 3,579 | 33,276 |
| 58,749 | 183 | 24,174 | 5,496 | 3,580 | 33,433 |
| 58,750 | 184 | 24,114 | 5,465 | 3,557 | 33,320 |
| 58,751 | 184 | 24,061 | 5,457 | 3,547 | 33,249 |
| 58,752 | 189 | 24,103 | 5,474 | 3,571 | 33,337 |
| 58,753 | 183 | 24,187 | 5,485 | 3,561 | 33,416 |
| 58,754 | 176 | 24,199 | 5,489 | 3,568 | 33,432 |
| 58,755 | 175 | 24,099 | 5,439 | 3,535 | 33,248 |
| 58,756 | 182 | 24,358 | 5,510 | 3,561 | 33,611 |
| 58,757 | 182 | 24,414 | 5,501 | 3,544 | 33,641 |
| 58,758 | 183 | 24,254 | 5,446 | 3,513 | 33,396 |
| 58,759 | 180 | 23,998 | 5,416 | 3,486 | 33,080 |
| 58,760 | 184 | 24,089 | 5,428 | 3,495 | 33,196 |
| 58,761 | 185 | 24,040 | 5,406 | 3,477 | 33,108 |
| 58,762 | 186 | 24,105 | 5,402 | 3,482 | 33,175 |
| 58,763 | 187 | 24,399 | 5,473 | 3,515 | 33,574 |
| 58,764 | 181 | 24,258 | 5,434 | 3,493 | 33,366 |
| 58,765 | 184 | 24,494 | 5,473 | 3,503 | 33,654 |
| 58,766 | 178 | 24,251 | 5,450 | 3,497 | 33,376 |
| 58,767 | 177 | 24,048 | 5,356 | 3,470 | 33,051 |
| 58,768 | 178 | 24,120 | 5,407 | 3,496 | 33,201 |
| 58,769 | 173 | 24,371 | 5,471 | 3,537 | 33,552 |
| 58,770 | 174 | 24,368 | 5,458 | 3,548 | 33,548 |
| 58,771 | 178 | 24,427 | 5,393 | 3,520 | 33,518 |
| 58,772 | 182 | 24,473 | 5,382 | 3,525 | 33,562 |
| 58,773 | 185 | 24,632 | 5,415 | 3,568 | 33,800 |
| 58,774 | 187 | 24,492 | 5,411 | 3,563 | 33,653 |
| 58,775 | 184 | 24,463 | 5,458 | 3,575 | 33,680 |

|        |     |        |       |       |        |
|--------|-----|--------|-------|-------|--------|
| 58,776 | 183 | 24,503 | 5,481 | 3,588 | 33,755 |
| 58,777 | 183 | 24,348 | 5,495 | 3,570 | 33,596 |
| 58,778 | 185 | 24,010 | 5,440 | 3,538 | 33,173 |
| 58,779 | 185 | 23,919 | 5,376 | 3,516 | 32,996 |
| 58,780 | 188 | 23,951 | 5,406 | 3,556 | 33,101 |
| 58,781 | 188 | 23,865 | 5,413 | 3,534 | 33,000 |
| 58,782 | 189 | 23,869 | 5,417 | 3,554 | 33,029 |
| 58,783 | 192 | 23,710 | 5,397 | 3,561 | 32,860 |
| 58,784 | 188 | 23,645 | 5,408 | 3,571 | 32,812 |
| 58,785 | 181 | 23,466 | 5,400 | 3,560 | 32,607 |
| 58,786 | 168 | 23,473 | 5,386 | 3,562 | 32,589 |
| 58,787 | 160 | 23,435 | 5,364 | 3,559 | 32,518 |
| 58,788 | 161 | 23,267 | 5,314 | 3,509 | 32,251 |
| 58,789 | 161 | 23,306 | 5,288 | 3,497 | 32,252 |
| 58,790 | 162 | 23,550 | 5,318 | 3,505 | 32,535 |
| 58,791 | 165 | 23,277 | 5,271 | 3,469 | 32,182 |
| 58,792 | 168 | 23,101 | 5,247 | 3,448 | 31,964 |
| 58,793 | 168 | 22,844 | 5,210 | 3,432 | 31,654 |
| 58,794 | 167 | 22,935 | 5,240 | 3,415 | 31,757 |
| 58,795 | 172 | 23,231 | 5,287 | 3,467 | 32,157 |
| 58,796 | 175 | 23,132 | 5,272 | 3,446 | 32,025 |
| 58,797 | 167 | 22,904 | 5,226 | 3,414 | 31,711 |
| 58,798 | 178 | 22,969 | 5,249 | 3,451 | 31,847 |
| 58,799 | 179 | 22,968 | 5,224 | 3,450 | 31,821 |
| 58,800 | 171 | 22,658 | 5,198 | 3,437 | 31,464 |
| 58,801 | 170 | 22,648 | 5,198 | 3,429 | 31,445 |
| 58,802 | 165 | 22,804 | 5,210 | 3,444 | 31,623 |
| 58,803 | 162 | 22,746 | 5,210 | 3,458 | 31,576 |
| 58,804 | 162 | 22,649 | 5,184 | 3,467 | 31,462 |
| 58,805 | 162 | 22,643 | 5,178 | 3,479 | 31,462 |
| 58,806 | 160 | 22,308 | 5,140 | 3,455 | 31,063 |
| 58,807 | 167 | 22,583 | 5,175 | 3,498 | 31,423 |

|        |     |        |       |       |        |
|--------|-----|--------|-------|-------|--------|
| 58,808 | 166 | 22,832 | 5,204 | 3,522 | 31,724 |
| 58,809 | 167 | 22,445 | 5,112 | 3,459 | 31,183 |
| 58,810 | 168 | 22,472 | 5,089 | 3,457 | 31,186 |
| 58,811 | 169 | 22,508 | 5,112 | 3,490 | 31,279 |
| 58,812 | 170 | 22,644 | 5,151 | 3,513 | 31,478 |
| 58,813 | 170 | 22,467 | 5,118 | 3,510 | 31,265 |
| 58,814 | 171 | 22,828 | 5,215 | 3,555 | 31,769 |
| 58,815 | 170 | 22,736 | 5,188 | 3,556 | 31,650 |
| 58,816 | 167 | 22,365 | 5,148 | 3,530 | 31,210 |
| 58,817 | 169 | 22,323 | 5,135 | 3,517 | 31,144 |
| 58,818 | 166 | 22,202 | 5,139 | 3,498 | 31,005 |
| 58,819 | 166 | 22,357 | 5,165 | 3,539 | 31,227 |
| 58,820 | 169 | 22,322 | 5,173 | 3,535 | 31,199 |
| 58,821 | 163 | 21,852 | 5,113 | 3,478 | 30,606 |
| 58,822 | 155 | 22,139 | 5,161 | 3,524 | 30,979 |
| 58,823 | 154 | 22,141 | 5,170 | 3,526 | 30,991 |
| 58,824 | 151 | 22,111 | 5,164 | 3,541 | 30,967 |
| 58,825 | 150 | 21,988 | 5,097 | 3,528 | 30,763 |
| 58,826 | 153 | 22,282 | 5,137 | 3,556 | 31,128 |
| 58,827 | 154 | 22,204 | 5,071 | 3,528 | 30,957 |
| 58,828 | 152 | 22,351 | 5,073 | 3,515 | 31,091 |
| 58,829 | 153 | 22,364 | 5,090 | 3,512 | 31,119 |
| 58,830 | 153 | 22,296 | 5,096 | 3,511 | 31,056 |
| 58,831 | 153 | 22,453 | 5,140 | 3,538 | 31,284 |
| 58,832 | 152 | 22,531 | 5,136 | 3,536 | 31,355 |
| 58,833 | 147 | 22,623 | 5,145 | 3,522 | 31,437 |
| 58,834 | 147 | 22,020 | 5,031 | 3,426 | 30,624 |
| 58,835 | 148 | 22,335 | 5,071 | 3,463 | 31,017 |
| 58,836 | 147 | 22,373 | 5,064 | 3,451 | 31,035 |
| 58,837 | 157 | 22,488 | 5,107 | 3,458 | 31,210 |
| 58,838 | 159 | 22,447 | 5,085 | 3,425 | 31,116 |
| 58,839 | 154 | 22,313 | 5,077 | 3,386 | 30,930 |

|        |     |        |       |       |        |
|--------|-----|--------|-------|-------|--------|
| 58,840 | 154 | 22,250 | 5,096 | 3,384 | 30,884 |
| 58,841 | 151 | 22,455 | 5,149 | 3,434 | 31,189 |
| 58,842 | 144 | 22,305 | 5,091 | 3,405 | 30,945 |
| 58,843 | 144 | 22,276 | 5,092 | 3,407 | 30,919 |
| 58,844 | 145 | 22,339 | 5,126 | 3,412 | 31,022 |
| 58,845 | 141 | 22,120 | 5,078 | 3,390 | 30,729 |
| 58,846 | 150 | 22,356 | 5,111 | 3,374 | 30,991 |
| 58,847 | 151 | 22,313 | 5,084 | 3,382 | 30,930 |
| 58,848 | 150 | 22,289 | 5,049 | 3,356 | 30,844 |
| 58,849 | 141 | 22,056 | 4,993 | 3,277 | 30,467 |
| 58,850 | 147 | 21,995 | 4,984 | 3,266 | 30,392 |
| 58,851 | 147 | 22,062 | 4,984 | 3,255 | 30,448 |
| 58,852 | 151 | 22,178 | 5,009 | 3,278 | 30,616 |
| 58,853 | 154 | 22,015 | 4,985 | 3,238 | 30,392 |
| 58,854 | 154 | 21,978 | 4,991 | 3,248 | 30,371 |
| 58,855 | 153 | 22,077 | 5,005 | 3,246 | 30,481 |
| 58,856 | 160 | 21,857 | 4,956 | 3,191 | 30,164 |
| 58,857 | 163 | 21,947 | 4,983 | 3,223 | 30,316 |
| 58,858 | 155 | 22,237 | 5,032 | 3,264 | 30,688 |
| 58,859 | 148 | 22,124 | 4,990 | 3,264 | 30,526 |
| 58,860 | 153 | 22,097 | 4,977 | 3,265 | 30,492 |
| 58,861 | 150 | 21,741 | 4,944 | 3,235 | 30,070 |
| 58,862 | 144 | 22,000 | 5,061 | 3,303 | 30,508 |
| 58,863 | 143 | 22,078 | 5,124 | 3,304 | 30,649 |
| 58,864 | 150 | 22,307 | 5,152 | 3,351 | 30,960 |
| 58,865 | 147 | 22,160 | 5,115 | 3,377 | 30,799 |
| 58,866 | 147 | 22,023 | 5,071 | 3,360 | 30,601 |
| 58,867 | 144 | 21,435 | 4,854 | 3,221 | 29,654 |
| 58,868 | 145 | 21,515 | 4,886 | 3,228 | 29,774 |
| 58,869 | 153 | 21,769 | 4,928 | 3,249 | 30,099 |
| 58,870 | 154 | 21,697 | 4,939 | 3,231 | 30,021 |
| 58,871 | 150 | 21,903 | 4,989 | 3,262 | 30,304 |



|        |     |        |       |       |        |
|--------|-----|--------|-------|-------|--------|
| 58,872 | 154 | 21,950 | 5,019 | 3,257 | 30,380 |
| 58,873 | 159 | 22,040 | 5,038 | 3,253 | 30,490 |
| 58,874 | 159 | 22,018 | 4,994 | 3,229 | 30,400 |
| 58,875 | 160 | 22,112 | 5,023 | 3,202 | 30,497 |
| 58,876 | 161 | 22,089 | 5,020 | 3,200 | 30,470 |
| 58,877 | 161 | 21,888 | 4,982 | 3,172 | 30,203 |
| 58,878 | 161 | 22,129 | 5,072 | 3,226 | 30,588 |
| 58,879 | 170 | 22,163 | 5,083 | 3,239 | 30,655 |
| 58,880 | 175 | 22,321 | 5,085 | 3,227 | 30,808 |
| 58,881 | 178 | 22,447 | 5,143 | 3,244 | 31,012 |
| 58,882 | 173 | 22,298 | 5,140 | 3,234 | 30,845 |
| 58,883 | 180 | 22,221 | 5,162 | 3,248 | 30,811 |
| 58,884 | 182 | 22,058 | 5,153 | 3,232 | 30,625 |
| 58,885 | 184 | 22,226 | 5,198 | 3,251 | 30,859 |
| 58,886 | 190 | 22,053 | 5,183 | 3,243 | 30,669 |
| 58,887 | 189 | 21,899 | 5,191 | 3,243 | 30,522 |
| 58,888 | 181 | 22,525 | 5,321 | 3,316 | 31,343 |
| 58,889 | 180 | 22,523 | 5,332 | 3,337 | 31,372 |
| 58,890 | 185 | 22,518 | 5,333 | 3,357 | 31,393 |
| 58,891 | 185 | 21,968 | 5,205 | 3,264 | 30,622 |
| 58,892 | 185 | 22,151 | 5,219 | 3,273 | 30,828 |
| 58,893 | 190 | 22,342 | 5,266 | 3,306 | 31,104 |
| 58,894 | 189 | 22,426 | 5,301 | 3,322 | 31,238 |
| 58,895 | 183 | 22,337 | 5,264 | 3,306 | 31,090 |
| 58,896 | 189 | 22,499 | 5,318 | 3,346 | 31,352 |
| 58,897 | 180 | 22,345 | 5,346 | 3,363 | 31,234 |
| 58,898 | 180 | 22,399 | 5,385 | 3,376 | 31,340 |
| 58,899 | 180 | 22,411 | 5,395 | 3,376 | 31,362 |
| 58,900 | 183 | 22,571 | 5,446 | 3,404 | 31,604 |
| 58,901 | 177 | 22,637 | 5,457 | 3,404 | 31,675 |
| 58,902 | 175 | 22,685 | 5,473 | 3,427 | 31,760 |
| 58,903 | 175 | 22,718 | 5,501 | 3,438 | 31,832 |

|        |     |        |       |       |        |
|--------|-----|--------|-------|-------|--------|
| 58,904 | 173 | 22,821 | 5,482 | 3,443 | 31,919 |
| 58,905 | 172 | 22,740 | 5,495 | 3,463 | 31,870 |
| 58,906 | 173 | 22,930 | 5,548 | 3,500 | 32,151 |
| 58,907 | 168 | 22,899 | 5,612 | 3,545 | 32,224 |
| 58,908 | 168 | 22,931 | 5,624 | 3,542 | 32,265 |
| 58,909 | 167 | 22,805 | 5,658 | 3,547 | 32,177 |
| 58,910 | 167 | 22,495 | 5,634 | 3,521 | 31,817 |
| 58,911 | 164 | 22,294 | 5,618 | 3,505 | 31,581 |
| 58,912 | 168 | 22,705 | 5,701 | 3,550 | 32,124 |
| 58,913 | 171 | 22,793 | 5,709 | 3,553 | 32,226 |
| 58,914 | 169 | 22,599 | 5,673 | 3,523 | 31,964 |
| 58,915 | 170 | 22,031 | 5,618 | 3,422 | 31,241 |
| 58,916 | 172 | 22,238 | 5,657 | 3,453 | 31,520 |
| 58,917 | 168 | 22,262 | 5,682 | 3,456 | 31,568 |
| 58,918 | 168 | 22,087 | 5,628 | 3,437 | 31,320 |
| 58,919 | 168 | 22,135 | 5,646 | 3,445 | 31,394 |
| 58,920 | 159 | 22,182 | 5,623 | 3,457 | 31,421 |
| 58,921 | 159 | 22,122 | 5,636 | 3,458 | 31,375 |
| 58,922 | 157 | 22,056 | 5,640 | 3,470 | 31,323 |
| 58,923 | 166 | 22,377 | 5,734 | 3,549 | 31,826 |
| 58,924 | 169 | 22,222 | 5,723 | 3,524 | 31,638 |
| 58,925 | 164 | 21,913 | 5,666 | 3,497 | 31,240 |
| 58,926 | 164 | 22,280 | 5,736 | 3,545 | 31,725 |
| 58,927 | 156 | 22,105 | 5,740 | 3,540 | 31,541 |
| 58,928 | 155 | 22,271 | 5,791 | 3,601 | 31,818 |
| 58,929 | 148 | 22,438 | 5,847 | 3,637 | 32,070 |
| 58,930 | 149 | 22,546 | 5,887 | 3,668 | 32,250 |
| 58,931 | 146 | 22,658 | 5,951 | 3,697 | 32,452 |
| 58,932 | 132 | 22,242 | 5,794 | 3,628 | 31,796 |
| 58,933 | 132 | 22,392 | 5,821 | 3,640 | 31,985 |
| 58,934 | 129 | 22,339 | 5,836 | 3,653 | 31,957 |
| 58,935 | 128 | 22,043 | 5,793 | 3,612 | 31,576 |

|        |     |        |       |       |        |
|--------|-----|--------|-------|-------|--------|
| 58,936 | 138 | 22,218 | 5,873 | 3,689 | 31,918 |
| 58,937 | 137 | 22,130 | 5,853 | 3,668 | 31,788 |
| 58,938 | 137 | 22,208 | 5,870 | 3,682 | 31,897 |
| 58,939 | 138 | 22,075 | 5,840 | 3,664 | 31,717 |
| 58,940 | 140 | 21,971 | 5,847 | 3,655 | 31,613 |
| 58,941 | 140 | 21,754 | 5,794 | 3,595 | 31,283 |
| 58,942 | 139 | 21,814 | 5,817 | 3,593 | 31,363 |
| 58,943 | 136 | 21,910 | 5,854 | 3,639 | 31,539 |
| 58,944 | 136 | 22,128 | 5,907 | 3,676 | 31,847 |
| 58,945 | 133 | 21,733 | 5,798 | 3,633 | 31,297 |
| 58,946 | 138 | 22,115 | 5,880 | 3,669 | 31,802 |
| 58,947 | 133 | 22,495 | 5,982 | 3,731 | 32,341 |
| 58,948 | 130 | 22,156 | 5,894 | 3,698 | 31,878 |
| 58,949 | 129 | 22,226 | 5,922 | 3,699 | 31,976 |
| 58,950 | 122 | 22,195 | 5,922 | 3,702 | 31,941 |
| 58,951 | 127 | 22,246 | 5,915 | 3,721 | 32,009 |
| 58,952 | 129 | 22,279 | 5,927 | 3,726 | 32,061 |
| 58,953 | 127 | 22,133 | 5,904 | 3,697 | 31,861 |
| 58,954 | 128 | 22,053 | 5,848 | 3,666 | 31,695 |
| 58,955 | 132 | 22,270 | 5,910 | 3,702 | 32,014 |
| 58,956 | 130 | 22,475 | 5,976 | 3,716 | 32,297 |
| 58,957 | 136 | 22,486 | 5,972 | 3,721 | 32,315 |
| 58,958 | 134 | 22,312 | 5,912 | 3,682 | 32,040 |
| 58,959 | 136 | 22,497 | 5,905 | 3,692 | 32,230 |
| 58,960 | 135 | 22,781 | 5,997 | 3,729 | 32,642 |
| 58,961 | 131 | 22,377 | 5,828 | 3,619 | 31,955 |
| 58,962 | 142 | 22,599 | 5,895 | 3,674 | 32,310 |
| 58,963 | 140 | 22,533 | 5,910 | 3,695 | 32,278 |
| 58,964 | 139 | 22,676 | 5,909 | 3,715 | 32,439 |
| 58,965 | 134 | 22,363 | 5,827 | 3,679 | 32,003 |
| 58,966 | 132 | 22,353 | 5,800 | 3,667 | 31,952 |
| 58,967 | 137 | 22,337 | 5,795 | 3,654 | 31,923 |

|        |     |        |       |       |        |
|--------|-----|--------|-------|-------|--------|
| 58,968 | 137 | 22,336 | 5,812 | 3,662 | 31,947 |
| 58,969 | 137 | 22,320 | 5,858 | 3,655 | 31,970 |
| 58,970 | 138 | 22,480 | 5,916 | 3,711 | 32,245 |
| 58,971 | 138 | 22,240 | 5,904 | 3,673 | 31,955 |
| 58,972 | 137 | 22,213 | 5,873 | 3,654 | 31,877 |
| 58,973 | 139 | 22,467 | 5,929 | 3,694 | 32,229 |
| 58,974 | 128 | 22,389 | 5,961 | 3,670 | 32,148 |
| 58,975 | 118 | 22,245 | 5,951 | 3,660 | 31,974 |
| 58,976 | 119 | 22,016 | 5,939 | 3,648 | 31,722 |
| 58,977 | 121 | 21,967 | 5,930 | 3,648 | 31,666 |
| 58,978 | 123 | 21,663 | 5,851 | 3,584 | 31,221 |
| 58,979 | 132 | 21,768 | 5,819 | 3,551 | 31,270 |
| 58,980 | 136 | 21,826 | 5,812 | 3,541 | 31,315 |
| 58,981 | 136 | 21,812 | 5,816 | 3,554 | 31,318 |
| 58,982 | 137 | 21,857 | 5,821 | 3,557 | 31,372 |
| 58,983 | 141 | 21,878 | 5,791 | 3,536 | 31,346 |
| 58,984 | 154 | 22,065 | 5,797 | 3,533 | 31,549 |
| 58,985 | 159 | 22,349 | 5,801 | 3,528 | 31,837 |
| 58,986 | 159 | 22,275 | 5,787 | 3,525 | 31,746 |
| 58,987 | 148 | 22,509 | 5,828 | 3,545 | 32,030 |
| 58,988 | 143 | 22,469 | 5,863 | 3,548 | 32,023 |
| 58,989 | 146 | 22,154 | 5,806 | 3,502 | 31,608 |
| 58,990 | 145 | 22,176 | 5,817 | 3,514 | 31,652 |
| 58,991 | 142 | 22,132 | 5,826 | 3,529 | 31,629 |
| 58,992 | 137 | 22,265 | 5,884 | 3,588 | 31,874 |
| 58,993 | 140 | 22,310 | 5,906 | 3,592 | 31,948 |
| 58,994 | 145 | 22,013 | 5,895 | 3,553 | 31,606 |
| 58,995 | 149 | 21,696 | 5,859 | 3,524 | 31,228 |
| 58,996 | 150 | 21,958 | 5,943 | 3,566 | 31,617 |
| 58,997 | 145 | 21,706 | 5,978 | 3,584 | 31,413 |
| 58,998 | 146 | 21,702 | 5,995 | 3,574 | 31,417 |
| 58,999 | 146 | 21,429 | 5,953 | 3,544 | 31,072 |

|        |     |        |       |       |        |
|--------|-----|--------|-------|-------|--------|
| 59,000 | 155 | 21,606 | 5,987 | 3,569 | 31,317 |
| 59,001 | 159 | 21,573 | 6,010 | 3,573 | 31,315 |
| 59,002 | 152 | 21,582 | 6,017 | 3,571 | 31,322 |
| 59,003 | 156 | 21,502 | 6,025 | 3,567 | 31,250 |
| 59,004 | 161 | 21,554 | 6,027 | 3,553 | 31,295 |
| 59,005 | 161 | 21,553 | 6,044 | 3,561 | 31,319 |
| 59,006 | 166 | 21,814 | 6,122 | 3,605 | 31,707 |
| 59,007 | 158 | 21,507 | 6,075 | 3,588 | 31,328 |
| 59,008 | 160 | 21,804 | 6,144 | 3,631 | 31,739 |
| 59,009 | 157 | 21,665 | 6,091 | 3,605 | 31,518 |
| 59,010 | 157 | 21,666 | 6,098 | 3,615 | 31,536 |
| 59,011 | 162 | 21,399 | 5,973 | 3,537 | 31,071 |
| 59,012 | 162 | 21,653 | 6,039 | 3,567 | 31,421 |
| 59,013 | 154 | 21,889 | 6,116 | 3,617 | 31,776 |
| 59,014 | 157 | 21,971 | 6,185 | 3,677 | 31,990 |
| 59,015 | 155 | 21,943 | 6,208 | 3,649 | 31,955 |
| 59,016 | 154 | 21,802 | 6,200 | 3,617 | 31,773 |
| 59,017 | 155 | 22,119 | 6,250 | 3,663 | 32,187 |
| 59,018 | 151 | 22,391 | 6,327 | 3,720 | 32,589 |
| 59,019 | 148 | 22,223 | 6,284 | 3,703 | 32,358 |
| 59,020 | 150 | 22,317 | 6,276 | 3,708 | 32,451 |
| 59,021 | 155 | 22,761 | 6,374 | 3,758 | 33,048 |
| 59,022 | 154 | 22,511 | 6,310 | 3,723 | 32,698 |
| 59,023 | 154 | 22,879 | 6,385 | 3,785 | 33,203 |
| 59,024 | 158 | 23,104 | 6,441 | 3,805 | 33,508 |
| 59,025 | 162 | 22,812 | 6,309 | 3,749 | 33,032 |
| 59,026 | 166 | 22,933 | 6,292 | 3,745 | 33,136 |
| 59,027 | 169 | 22,969 | 6,326 | 3,754 | 33,218 |
| 59,028 | 167 | 22,702 | 6,286 | 3,723 | 32,878 |
| 59,029 | 166 | 22,758 | 6,303 | 3,717 | 32,944 |
| 59,030 | 158 | 23,124 | 6,422 | 3,803 | 33,507 |
| 59,031 | 155 | 23,144 | 6,436 | 3,811 | 33,546 |

|        |     |        |       |       |        |
|--------|-----|--------|-------|-------|--------|
| 59,032 | 155 | 23,159 | 6,468 | 3,822 | 33,604 |
| 59,033 | 160 | 22,955 | 6,452 | 3,814 | 33,381 |
| 59,034 | 157 | 23,004 | 6,491 | 3,852 | 33,504 |
| 59,035 | 146 | 23,278 | 6,595 | 3,898 | 33,917 |
| 59,036 | 141 | 23,442 | 6,655 | 3,924 | 34,162 |
| 59,037 | 142 | 23,554 | 6,690 | 3,939 | 34,325 |
| 59,038 | 140 | 23,237 | 6,634 | 3,921 | 33,932 |
| 59,039 | 137 | 23,125 | 6,572 | 3,918 | 33,752 |
| 59,040 | 138 | 23,242 | 6,640 | 3,970 | 33,990 |
| 59,041 | 141 | 23,278 | 6,693 | 3,963 | 34,075 |
| 59,042 | 142 | 23,378 | 6,691 | 3,973 | 34,184 |
| 59,043 | 144 | 23,388 | 6,743 | 3,966 | 34,241 |
| 59,044 | 143 | 23,302 | 6,744 | 3,974 | 34,163 |
| 59,045 | 130 | 23,226 | 6,691 | 3,934 | 33,981 |
| 59,046 | 130 | 23,254 | 6,733 | 3,940 | 34,057 |
| 59,047 | 129 | 23,295 | 6,732 | 3,964 | 34,120 |
| 59,048 | 131 | 23,570 | 6,733 | 3,972 | 34,406 |
| 59,049 | 132 | 23,441 | 6,752 | 3,973 | 34,298 |
| 59,050 | 126 | 23,469 | 6,801 | 4,000 | 34,396 |
| 59,051 | 121 | 23,673 | 6,857 | 4,033 | 34,684 |
| 59,052 | 123 | 23,299 | 6,782 | 3,992 | 34,196 |
| 59,053 | 120 | 23,564 | 6,835 | 4,023 | 34,542 |
| 59,054 | 115 | 23,773 | 6,893 | 4,046 | 34,827 |
| 59,055 | 114 | 23,696 | 6,893 | 4,075 | 34,778 |
| 59,056 | 109 | 23,681 | 6,879 | 4,063 | 34,732 |
| 59,057 | 109 | 23,366 | 6,815 | 4,000 | 34,290 |
| 59,058 | 109 | 23,531 | 6,820 | 4,018 | 34,478 |
| 59,059 | 110 | 23,583 | 6,867 | 4,033 | 34,593 |
| 59,060 | 110 | 23,439 | 6,864 | 4,026 | 34,439 |
| 59,061 | 113 | 23,065 | 6,826 | 3,981 | 33,985 |
| 59,062 | 107 | 22,646 | 6,794 | 3,942 | 33,489 |
| 59,063 | 113 | 22,964 | 6,916 | 3,997 | 33,990 |

|        |     |        |       |       |        |
|--------|-----|--------|-------|-------|--------|
| 59,064 | 110 | 22,353 | 6,726 | 3,897 | 33,086 |
| 59,065 | 116 | 22,605 | 6,795 | 3,915 | 33,431 |
| 59,066 | 114 | 22,529 | 6,785 | 3,937 | 33,365 |
| 59,067 | 114 | 22,552 | 6,793 | 3,995 | 33,454 |
| 59,068 | 117 | 22,495 | 6,866 | 4,005 | 33,483 |
| 59,069 | 124 | 22,396 | 6,878 | 4,020 | 33,418 |
| 59,070 | 124 | 22,350 | 6,899 | 4,040 | 33,413 |
| 59,071 | 129 | 22,470 | 6,950 | 4,072 | 33,621 |
| 59,072 | 125 | 22,470 | 6,968 | 4,073 | 33,636 |
| 59,073 | 121 | 22,007 | 6,840 | 3,989 | 32,957 |
| 59,074 | 121 | 22,271 | 6,891 | 4,025 | 33,308 |
| 59,075 | 117 | 22,479 | 6,944 | 4,081 | 33,621 |
| 59,076 | 112 | 22,394 | 6,920 | 4,065 | 33,491 |
| 59,077 | 103 | 22,089 | 6,882 | 4,038 | 33,112 |
| 59,078 | 104 | 22,140 | 6,860 | 4,037 | 33,141 |
| 59,079 | 102 | 21,973 | 6,821 | 4,010 | 32,906 |
| 59,080 | 108 | 21,972 | 6,909 | 4,069 | 33,058 |
| 59,081 | 108 | 22,056 | 6,994 | 4,099 | 33,257 |
| 59,082 | 106 | 21,917 | 6,948 | 4,089 | 33,060 |
| 59,083 | 104 | 22,099 | 6,945 | 4,108 | 33,256 |
| 59,084 | 97  | 21,817 | 6,866 | 4,047 | 32,827 |
| 59,085 | 97  | 21,897 | 6,918 | 4,078 | 32,990 |
| 59,086 | 98  | 21,625 | 6,849 | 4,065 | 32,637 |
| 59,087 | 97  | 21,304 | 6,792 | 4,069 | 32,262 |
| 59,088 | 98  | 21,328 | 6,782 | 4,064 | 32,272 |
| 59,089 | 100 | 21,413 | 6,792 | 4,084 | 32,389 |
| 59,090 | 102 | 21,535 | 6,797 | 4,082 | 32,516 |
| 59,091 | 101 | 21,634 | 6,796 | 4,071 | 32,602 |
| 59,092 | 101 | 21,610 | 6,740 | 4,087 | 32,538 |
| 59,093 | 100 | 21,796 | 6,730 | 4,115 | 32,741 |
| 59,094 | 96  | 21,386 | 6,554 | 4,036 | 32,072 |
| 59,095 | 95  | 21,573 | 6,603 | 4,067 | 32,338 |

|        |    |        |       |       |        |
|--------|----|--------|-------|-------|--------|
| 59,096 | 94 | 21,689 | 6,637 | 4,102 | 32,522 |
| 59,097 | 94 | 21,745 | 6,656 | 4,110 | 32,605 |
| 59,098 | 95 | 21,794 | 6,679 | 4,120 | 32,688 |
| 59,099 | 92 | 21,761 | 6,683 | 4,121 | 32,657 |
| 59,100 | 91 | 21,718 | 6,586 | 4,085 | 32,480 |
| 59,101 | 95 | 21,925 | 6,647 | 4,121 | 32,788 |
| 59,102 | 95 | 21,947 | 6,682 | 4,138 | 32,862 |
| 59,103 | 94 | 21,960 | 6,630 | 4,130 | 32,814 |
| 59,104 | 91 | 21,741 | 6,573 | 4,119 | 32,524 |
| 59,105 | 91 | 21,941 | 6,615 | 4,155 | 32,802 |
| 59,106 | 91 | 21,667 | 6,536 | 4,096 | 32,390 |
| 59,107 | 94 | 21,652 | 6,531 | 4,093 | 32,370 |
| 59,108 | 93 | 21,939 | 6,597 | 4,156 | 32,785 |
| 59,109 | 93 | 21,690 | 6,532 | 4,106 | 32,421 |
| 59,110 | 97 | 22,130 | 6,660 | 4,197 | 33,084 |
| 59,111 | 99 | 22,097 | 6,643 | 4,174 | 33,013 |
| 59,112 | 93 | 21,814 | 6,543 | 4,137 | 32,587 |
| 59,113 | 92 | 21,810 | 6,492 | 4,137 | 32,531 |
| 59,114 | 94 | 21,566 | 6,416 | 4,085 | 32,161 |
| 59,115 | 92 | 21,276 | 6,345 | 4,041 | 31,754 |
| 59,116 | 89 | 21,744 | 6,470 | 4,141 | 32,444 |
| 59,117 | 90 | 21,991 | 6,558 | 4,144 | 32,783 |
| 59,118 | 87 | 22,061 | 6,551 | 4,150 | 32,849 |
| 59,119 | 82 | 22,202 | 6,491 | 4,145 | 32,920 |
| 59,120 | 84 | 22,265 | 6,467 | 4,105 | 32,921 |
| 59,121 | 84 | 22,278 | 6,474 | 4,116 | 32,952 |
| 59,122 | 80 | 22,322 | 6,467 | 4,130 | 32,999 |
| 59,123 | 81 | 22,002 | 6,356 | 4,079 | 32,518 |
| 59,124 | 82 | 22,297 | 6,430 | 4,099 | 32,908 |
| 59,125 | 83 | 22,320 | 6,448 | 4,090 | 32,941 |
| 59,126 | 83 | 22,289 | 6,426 | 4,056 | 32,854 |
| 59,127 | 82 | 22,232 | 6,395 | 4,050 | 32,759 |



|        |     |        |       |       |        |
|--------|-----|--------|-------|-------|--------|
| 59,128 | 81  | 21,860 | 6,240 | 3,970 | 32,151 |
| 59,129 | 83  | 22,158 | 6,318 | 3,986 | 32,545 |
| 59,130 | 82  | 22,446 | 6,367 | 4,035 | 32,930 |
| 59,131 | 83  | 22,336 | 6,305 | 4,013 | 32,737 |
| 59,132 | 85  | 22,097 | 6,240 | 3,957 | 32,379 |
| 59,133 | 85  | 21,842 | 6,185 | 3,917 | 32,029 |
| 59,134 | 93  | 22,125 | 6,275 | 3,984 | 32,477 |
| 59,135 | 97  | 21,867 | 6,218 | 3,955 | 32,137 |
| 59,136 | 97  | 21,746 | 6,154 | 3,912 | 31,909 |
| 59,137 | 95  | 21,931 | 6,228 | 3,937 | 32,191 |
| 59,138 | 97  | 21,956 | 6,246 | 3,931 | 32,230 |
| 59,139 | 99  | 22,123 | 6,337 | 3,985 | 32,544 |
| 59,140 | 100 | 22,011 | 6,351 | 3,955 | 32,417 |
| 59,141 | 99  | 22,052 | 6,374 | 3,964 | 32,489 |
| 59,142 | 105 | 22,254 | 6,437 | 4,000 | 32,796 |
| 59,143 | 106 | 22,384 | 6,460 | 4,009 | 32,959 |
| 59,144 | 107 | 22,366 | 6,474 | 4,007 | 32,954 |
| 59,145 | 107 | 22,149 | 6,402 | 3,984 | 32,642 |
| 59,146 | 110 | 22,317 | 6,481 | 4,033 | 32,941 |
| 59,147 | 111 | 22,597 | 6,542 | 4,067 | 33,317 |
| 59,148 | 110 | 22,366 | 6,419 | 4,000 | 32,895 |
| 59,149 | 110 | 22,472 | 6,440 | 4,011 | 33,033 |
| 59,150 | 111 | 22,372 | 6,377 | 3,993 | 32,853 |
| 59,151 | 110 | 22,424 | 6,369 | 3,985 | 32,888 |
| 59,152 | 108 | 22,108 | 6,272 | 3,917 | 32,405 |
| 59,153 | 108 | 22,200 | 6,261 | 3,921 | 32,490 |
| 59,154 | 115 | 22,244 | 6,264 | 3,921 | 32,544 |
| 59,155 | 116 | 22,274 | 6,271 | 3,936 | 32,597 |
| 59,156 | 117 | 22,356 | 6,292 | 3,940 | 32,705 |
| 59,157 | 123 | 22,517 | 6,351 | 3,975 | 32,966 |
| 59,158 | 127 | 22,553 | 6,402 | 4,002 | 33,084 |
| 59,159 | 128 | 22,515 | 6,409 | 4,029 | 33,081 |

|        |     |        |       |       |        |
|--------|-----|--------|-------|-------|--------|
| 59,160 | 135 | 22,584 | 6,476 | 4,079 | 33,274 |
| 59,161 | 136 | 22,606 | 6,458 | 4,075 | 33,275 |
| 59,162 | 132 | 22,381 | 6,400 | 4,048 | 32,961 |
| 59,163 | 133 | 22,500 | 6,436 | 4,064 | 33,133 |
| 59,164 | 134 | 22,422 | 6,448 | 4,071 | 33,075 |
| 59,165 | 128 | 22,329 | 6,449 | 4,069 | 32,975 |
| 59,166 | 128 | 22,301 | 6,428 | 4,057 | 32,914 |
| 59,167 | 130 | 21,933 | 6,316 | 3,985 | 32,364 |
| 59,168 | 129 | 21,936 | 6,296 | 3,989 | 32,350 |
| 59,169 | 129 | 21,705 | 6,240 | 3,934 | 32,008 |
| 59,170 | 127 | 21,409 | 6,223 | 3,914 | 31,673 |
| 59,171 | 127 | 22,391 | 6,513 | 4,083 | 33,114 |
| 59,172 | 131 | 22,471 | 6,561 | 4,105 | 33,268 |
| 59,173 | 133 | 22,759 | 6,668 | 4,174 | 33,734 |
| 59,174 | 139 | 22,650 | 6,679 | 4,204 | 33,672 |
| 59,175 | 143 | 22,619 | 6,697 | 4,261 | 33,720 |
| 59,176 | 146 | 22,529 | 6,734 | 4,289 | 33,698 |
| 59,177 | 146 | 22,381 | 6,722 | 4,281 | 33,530 |
| 59,178 | 146 | 22,417 | 6,760 | 4,315 | 33,638 |
| 59,179 | 145 | 22,526 | 6,801 | 4,338 | 33,810 |
| 59,180 | 145 | 22,837 | 6,848 | 4,418 | 34,248 |
| 59,181 | 144 | 22,934 | 6,868 | 4,425 | 34,371 |
| 59,182 | 141 | 23,054 | 6,891 | 4,449 | 34,535 |
| 59,183 | 131 | 23,221 | 6,935 | 4,467 | 34,754 |
| 59,184 | 133 | 23,280 | 6,968 | 4,485 | 34,866 |
| 59,185 | 129 | 23,218 | 6,964 | 4,492 | 34,803 |
| 59,186 | 129 | 23,273 | 6,947 | 4,494 | 34,843 |
| 59,187 | 130 | 23,206 | 6,966 | 4,495 | 34,797 |
| 59,188 | 131 | 23,414 | 7,006 | 4,575 | 35,126 |
| 59,189 | 129 | 23,375 | 6,996 | 4,585 | 35,085 |
| 59,190 | 128 | 23,542 | 6,966 | 4,591 | 35,227 |
| 59,191 | 128 | 23,627 | 6,962 | 4,616 | 35,333 |

|        |     |        |       |       |        |
|--------|-----|--------|-------|-------|--------|
| 59,192 | 129 | 23,508 | 6,932 | 4,593 | 35,162 |
| 59,193 | 124 | 23,292 | 6,847 | 4,552 | 34,815 |
| 59,194 | 121 | 23,429 | 6,901 | 4,595 | 35,046 |
| 59,195 | 124 | 23,442 | 6,908 | 4,587 | 35,061 |
| 59,196 | 124 | 23,404 | 6,886 | 4,549 | 34,963 |
| 59,197 | 121 | 23,136 | 6,788 | 4,503 | 34,548 |
| 59,198 | 121 | 23,104 | 6,755 | 4,490 | 34,470 |
| 59,199 | 122 | 23,082 | 6,803 | 4,500 | 34,507 |
| 59,200 | 125 | 23,095 | 6,796 | 4,520 | 34,536 |
| 59,201 | 125 | 22,952 | 6,778 | 4,501 | 34,356 |
| 59,202 | 127 | 22,849 | 6,777 | 4,499 | 34,252 |
| 59,203 | 124 | 23,036 | 6,833 | 4,564 | 34,557 |
| 59,204 | 116 | 22,891 | 6,829 | 4,590 | 34,426 |
| 59,205 | 113 | 22,599 | 6,766 | 4,532 | 34,010 |
| 59,206 | 113 | 22,446 | 6,777 | 4,534 | 33,870 |
| 59,207 | 110 | 22,245 | 6,773 | 4,519 | 33,647 |
| 59,208 | 105 | 22,283 | 6,752 | 4,534 | 33,674 |
| 59,209 | 98  | 22,426 | 6,773 | 4,542 | 33,839 |
| 59,210 | 95  | 22,227 | 6,726 | 4,515 | 33,563 |
| 59,211 | 88  | 22,309 | 6,727 | 4,513 | 33,637 |
| 59,212 | 87  | 22,357 | 6,753 | 4,521 | 33,718 |
| 59,213 | 88  | 22,319 | 6,768 | 4,525 | 33,700 |
| 59,214 | 88  | 22,448 | 6,774 | 4,532 | 33,842 |
| 59,215 | 89  | 22,417 | 6,704 | 4,498 | 33,708 |
| 59,216 | 90  | 22,456 | 6,697 | 4,496 | 33,739 |
| 59,217 | 91  | 22,331 | 6,646 | 4,459 | 33,527 |
| 59,218 | 90  | 22,924 | 6,803 | 4,527 | 34,344 |
| 59,219 | 91  | 22,832 | 6,786 | 4,499 | 34,208 |
| 59,220 | 89  | 22,513 | 6,689 | 4,450 | 33,741 |
| 59,221 | 89  | 22,084 | 6,548 | 4,335 | 33,056 |
| 59,222 | 89  | 22,102 | 6,566 | 4,345 | 33,102 |
| 59,223 | 87  | 22,151 | 6,588 | 4,361 | 33,187 |

|        |     |        |       |       |        |
|--------|-----|--------|-------|-------|--------|
| 59,224 | 89  | 22,004 | 6,527 | 4,334 | 32,954 |
| 59,225 | 88  | 21,998 | 6,479 | 4,286 | 32,851 |
| 59,226 | 90  | 22,024 | 6,465 | 4,254 | 32,833 |
| 59,227 | 90  | 21,499 | 6,320 | 4,187 | 32,096 |
| 59,228 | 90  | 21,221 | 6,250 | 4,123 | 31,684 |
| 59,229 | 93  | 21,274 | 6,293 | 4,146 | 31,806 |
| 59,230 | 93  | 21,126 | 6,242 | 4,096 | 31,557 |
| 59,231 | 92  | 20,900 | 6,221 | 4,074 | 31,287 |
| 59,232 | 90  | 20,664 | 6,158 | 4,041 | 30,953 |
| 59,233 | 91  | 20,443 | 6,106 | 4,007 | 30,647 |
| 59,234 | 91  | 20,392 | 6,087 | 4,005 | 30,575 |
| 59,235 | 89  | 20,462 | 6,048 | 3,991 | 30,590 |
| 59,236 | 89  | 20,502 | 6,017 | 3,980 | 30,588 |
| 59,237 | 88  | 20,460 | 5,971 | 3,947 | 30,466 |
| 59,238 | 87  | 20,581 | 5,987 | 3,922 | 30,577 |
| 59,239 | 87  | 20,753 | 6,023 | 3,956 | 30,819 |
| 59,240 | 87  | 20,817 | 6,026 | 3,940 | 30,870 |
| 59,241 | 87  | 20,784 | 6,025 | 3,919 | 30,815 |
| 59,242 | 85  | 20,788 | 5,983 | 3,888 | 30,744 |
| 59,243 | 82  | 20,516 | 5,904 | 3,864 | 30,366 |
| 59,244 | 80  | 20,403 | 5,907 | 3,846 | 30,236 |
| 59,245 | 84  | 20,623 | 5,925 | 3,855 | 30,487 |
| 59,246 | 84  | 20,576 | 5,896 | 3,843 | 30,399 |
| 59,247 | 88  | 20,285 | 5,833 | 3,825 | 30,031 |
| 59,248 | 88  | 20,403 | 5,883 | 3,868 | 30,242 |
| 59,249 | 101 | 20,145 | 5,821 | 3,821 | 29,888 |
| 59,250 | 100 | 19,968 | 5,759 | 3,802 | 29,629 |
| 59,251 | 98  | 20,288 | 5,887 | 3,861 | 30,134 |
| 59,252 | 104 | 20,481 | 5,917 | 3,894 | 30,396 |
| 59,253 | 106 | 20,454 | 5,924 | 3,876 | 30,360 |
| 59,254 | 108 | 20,456 | 5,869 | 3,840 | 30,273 |
| 59,255 | 114 | 20,446 | 5,873 | 3,826 | 30,259 |

|        |     |        |       |       |        |
|--------|-----|--------|-------|-------|--------|
| 59,256 | 113 | 20,331 | 5,795 | 3,788 | 30,027 |
| 59,257 | 112 | 20,510 | 5,864 | 3,843 | 30,329 |
| 59,258 | 112 | 20,641 | 5,854 | 3,823 | 30,430 |
| 59,259 | 115 | 20,620 | 5,833 | 3,808 | 30,376 |
| 59,260 | 116 | 20,612 | 5,841 | 3,780 | 30,349 |
| 59,261 | 119 | 20,538 | 5,823 | 3,758 | 30,238 |
| 59,262 | 119 | 20,777 | 5,866 | 3,782 | 30,544 |
| 59,263 | 114 | 20,604 | 5,801 | 3,757 | 30,276 |
| 59,264 | 113 | 20,556 | 5,774 | 3,740 | 30,183 |
| 59,265 | 117 | 20,856 | 5,822 | 3,755 | 30,550 |
| 59,266 | 120 | 21,169 | 5,904 | 3,815 | 31,008 |
| 59,267 | 119 | 21,304 | 5,921 | 3,847 | 31,191 |
| 59,268 | 124 | 21,377 | 5,936 | 3,853 | 31,290 |
| 59,269 | 123 | 21,367 | 5,959 | 3,881 | 31,330 |
| 59,270 | 121 | 21,268 | 5,918 | 3,879 | 31,186 |
| 59,271 | 121 | 21,376 | 5,917 | 3,890 | 31,304 |
| 59,272 | 124 | 21,466 | 6,006 | 3,933 | 31,529 |
| 59,273 | 122 | 21,437 | 5,971 | 3,929 | 31,459 |
| 59,274 | 120 | 21,203 | 5,904 | 3,880 | 31,107 |
| 59,275 | 122 | 21,365 | 5,934 | 3,907 | 31,328 |
| 59,276 | 120 | 21,583 | 6,006 | 3,939 | 31,648 |
| 59,277 | 117 | 21,564 | 5,998 | 3,944 | 31,623 |
| 59,278 | 119 | 21,429 | 5,906 | 3,879 | 31,333 |
| 59,279 | 119 | 21,577 | 5,896 | 3,886 | 31,478 |
| 59,280 | 119 | 21,652 | 5,903 | 3,890 | 31,564 |
| 59,281 | 121 | 21,848 | 5,931 | 3,893 | 31,793 |
| 59,282 | 122 | 21,867 | 5,927 | 3,892 | 31,808 |
| 59,283 | 126 | 22,106 | 5,953 | 3,895 | 32,080 |
| 59,284 | 126 | 22,099 | 5,946 | 3,900 | 32,071 |
| 59,285 | 135 | 22,497 | 6,049 | 3,967 | 32,648 |
| 59,286 | 136 | 22,514 | 6,089 | 3,967 | 32,706 |
| 59,287 | 139 | 22,235 | 6,046 | 3,923 | 32,343 |

|        |     |        |       |       |        |
|--------|-----|--------|-------|-------|--------|
| 59,288 | 146 | 22,201 | 6,040 | 3,920 | 32,307 |
| 59,289 | 146 | 21,968 | 5,974 | 3,894 | 31,982 |
| 59,290 | 152 | 22,397 | 6,069 | 3,957 | 32,575 |
| 59,291 | 153 | 22,060 | 6,038 | 3,920 | 32,171 |
| 59,292 | 152 | 22,089 | 6,094 | 3,952 | 32,287 |
| 59,293 | 152 | 21,886 | 6,080 | 3,930 | 32,048 |
| 59,294 | 153 | 21,850 | 6,089 | 3,918 | 32,010 |
| 59,295 | 162 | 22,047 | 6,141 | 3,948 | 32,298 |
| 59,296 | 163 | 22,072 | 6,184 | 3,964 | 32,383 |
| 59,297 | 155 | 21,919 | 6,161 | 3,906 | 32,141 |
| 59,298 | 141 | 21,666 | 6,076 | 3,872 | 31,755 |
| 59,299 | 141 | 21,880 | 6,139 | 3,905 | 32,065 |
| 59,300 | 141 | 22,234 | 6,181 | 3,942 | 32,498 |
| 59,301 | 142 | 22,135 | 6,161 | 3,908 | 32,346 |
| 59,302 | 139 | 22,045 | 6,118 | 3,885 | 32,187 |
| 59,303 | 135 | 21,829 | 6,060 | 3,848 | 31,872 |
| 59,304 | 133 | 21,918 | 6,066 | 3,855 | 31,972 |
| 59,305 | 125 | 21,861 | 6,037 | 3,857 | 31,880 |
| 59,306 | 127 | 21,892 | 6,041 | 3,851 | 31,911 |
| 59,307 | 128 | 21,910 | 6,022 | 3,830 | 31,890 |
| 59,308 | 127 | 21,800 | 6,012 | 3,818 | 31,757 |
| 59,309 | 128 | 21,996 | 6,077 | 3,851 | 32,052 |
| 59,310 | 125 | 21,583 | 5,971 | 3,781 | 31,460 |
| 59,311 | 124 | 21,873 | 6,035 | 3,818 | 31,850 |
| 59,312 | 122 | 21,793 | 6,025 | 3,817 | 31,757 |
| 59,313 | 122 | 21,835 | 6,043 | 3,822 | 31,822 |
| 59,314 | 120 | 21,796 | 6,057 | 3,792 | 31,765 |
| 59,315 | 120 | 21,968 | 6,141 | 3,842 | 32,071 |
| 59,316 | 118 | 21,864 | 6,121 | 3,863 | 31,966 |
| 59,317 | 116 | 21,868 | 6,123 | 3,851 | 31,958 |
| 59,318 | 117 | 21,765 | 6,124 | 3,834 | 31,840 |
| 59,319 | 111 | 21,325 | 6,032 | 3,792 | 31,260 |

|        |     |        |       |       |        |
|--------|-----|--------|-------|-------|--------|
| 59,320 | 112 | 21,142 | 5,987 | 3,746 | 30,987 |
| 59,321 | 112 | 21,396 | 6,049 | 3,764 | 31,321 |
| 59,322 | 117 | 21,642 | 6,084 | 3,808 | 31,651 |
| 59,323 | 114 | 21,272 | 6,000 | 3,738 | 31,124 |
| 59,324 | 113 | 21,236 | 5,966 | 3,718 | 31,033 |
| 59,325 | 113 | 21,309 | 5,963 | 3,713 | 31,098 |
| 59,326 | 118 | 21,375 | 6,000 | 3,724 | 31,217 |
| 59,327 | 116 | 21,314 | 5,979 | 3,694 | 31,103 |
| 59,328 | 115 | 21,000 | 5,896 | 3,643 | 30,654 |
| 59,329 | 115 | 20,986 | 5,908 | 3,642 | 30,651 |
| 59,330 | 119 | 21,145 | 6,016 | 3,703 | 30,983 |
| 59,331 | 123 | 21,115 | 6,055 | 3,709 | 31,002 |
| 59,332 | 124 | 20,906 | 5,993 | 3,686 | 30,709 |
| 59,333 | 122 | 20,684 | 5,959 | 3,658 | 30,423 |
| 59,334 | 118 | 20,566 | 6,005 | 3,704 | 30,393 |
| 59,335 | 120 | 20,468 | 6,016 | 3,717 | 30,321 |
| 59,336 | 111 | 20,610 | 6,027 | 3,720 | 30,468 |
| 59,337 | 109 | 20,525 | 5,949 | 3,720 | 30,303 |
| 59,338 | 108 | 20,465 | 5,957 | 3,720 | 30,250 |
| 59,339 | 101 | 20,432 | 5,962 | 3,732 | 30,227 |
| 59,340 | 96  | 19,736 | 5,765 | 3,605 | 29,202 |
| 59,341 | 95  | 19,898 | 5,819 | 3,647 | 29,459 |
| 59,342 | 94  | 20,186 | 5,851 | 3,688 | 29,819 |
| 59,343 | 94  | 20,074 | 5,855 | 3,671 | 29,694 |
| 59,344 | 97  | 20,101 | 5,815 | 3,679 | 29,692 |
| 59,345 | 107 | 20,278 | 5,866 | 3,706 | 29,957 |
| 59,346 | 100 | 20,290 | 5,891 | 3,729 | 30,010 |
| 59,347 | 96  | 20,219 | 5,870 | 3,728 | 29,913 |
| 59,348 | 98  | 19,882 | 5,769 | 3,681 | 29,430 |
| 59,349 | 99  | 19,836 | 5,765 | 3,671 | 29,371 |
| 59,350 | 102 | 20,188 | 5,814 | 3,712 | 29,816 |
| 59,351 | 101 | 20,078 | 5,812 | 3,698 | 29,689 |

|        |     |        |       |       |        |
|--------|-----|--------|-------|-------|--------|
| 59,352 | 106 | 19,873 | 5,749 | 3,669 | 29,397 |
| 59,353 | 104 | 19,782 | 5,714 | 3,650 | 29,250 |
| 59,354 | 110 | 19,884 | 5,746 | 3,685 | 29,425 |
| 59,355 | 112 | 19,915 | 5,754 | 3,672 | 29,453 |
| 59,356 | 112 | 19,806 | 5,740 | 3,654 | 29,312 |
| 59,357 | 111 | 20,085 | 5,840 | 3,709 | 29,745 |
| 59,358 | 109 | 19,891 | 5,778 | 3,675 | 29,453 |
| 59,359 | 109 | 19,937 | 5,769 | 3,691 | 29,506 |
| 59,360 | 110 | 19,836 | 5,733 | 3,685 | 29,364 |
| 59,361 | 111 | 20,090 | 5,776 | 3,741 | 29,718 |
| 59,362 | 122 | 20,096 | 5,768 | 3,761 | 29,747 |
| 59,363 | 123 | 20,292 | 5,795 | 3,781 | 29,991 |
| 59,364 | 127 | 20,207 | 5,795 | 3,781 | 29,910 |
| 59,365 | 128 | 19,915 | 5,679 | 3,737 | 29,459 |
| 59,366 | 128 | 19,741 | 5,614 | 3,681 | 29,164 |
| 59,367 | 128 | 19,871 | 5,640 | 3,683 | 29,322 |
| 59,368 | 131 | 19,037 | 5,393 | 3,552 | 28,113 |
| 59,369 | 131 | 19,279 | 5,451 | 3,579 | 28,440 |
| 59,370 | 132 | 19,554 | 5,503 | 3,613 | 28,802 |
| 59,371 | 130 | 19,118 | 5,347 | 3,527 | 28,122 |
| 59,372 | 130 | 19,350 | 5,384 | 3,566 | 28,430 |
| 59,373 | 126 | 19,676 | 5,469 | 3,607 | 28,878 |
| 59,374 | 126 | 19,829 | 5,502 | 3,630 | 29,087 |
| 59,375 | 125 | 20,009 | 5,543 | 3,671 | 29,348 |
| 59,376 | 124 | 20,009 | 5,546 | 3,664 | 29,343 |
| 59,377 | 118 | 20,165 | 5,568 | 3,680 | 29,531 |
| 59,378 | 121 | 20,338 | 5,574 | 3,751 | 29,784 |
| 59,379 | 110 | 20,339 | 5,594 | 3,750 | 29,793 |
| 59,380 | 108 | 20,505 | 5,620 | 3,762 | 29,995 |
| 59,381 | 107 | 20,515 | 5,598 | 3,766 | 29,986 |
| 59,382 | 103 | 20,364 | 5,506 | 3,732 | 29,705 |
| 59,383 | 105 | 20,495 | 5,521 | 3,735 | 29,856 |



|        |     |        |       |       |        |
|--------|-----|--------|-------|-------|--------|
| 59,384 | 105 | 20,337 | 5,487 | 3,702 | 29,631 |
| 59,385 | 108 | 20,971 | 5,595 | 3,769 | 30,443 |
| 59,386 | 111 | 20,782 | 5,552 | 3,715 | 30,160 |
| 59,387 | 116 | 20,792 | 5,597 | 3,753 | 30,258 |
| 59,388 | 122 | 20,513 | 5,555 | 3,701 | 29,891 |
| 59,389 | 122 | 20,407 | 5,539 | 3,722 | 29,790 |
| 59,390 | 122 | 20,428 | 5,595 | 3,714 | 29,859 |
| 59,391 | 124 | 20,588 | 5,662 | 3,713 | 30,087 |
| 59,392 | 129 | 20,974 | 5,742 | 3,767 | 30,612 |
| 59,393 | 129 | 20,927 | 5,742 | 3,759 | 30,557 |
| 59,394 | 132 | 20,977 | 5,738 | 3,753 | 30,600 |
| 59,395 | 128 | 20,884 | 5,727 | 3,731 | 30,470 |
| 59,396 | 122 | 21,869 | 5,961 | 3,884 | 31,836 |
| 59,397 | 124 | 21,861 | 5,911 | 3,850 | 31,746 |
| 59,398 | 124 | 21,844 | 5,932 | 3,871 | 31,771 |
| 59,399 | 123 | 22,023 | 6,055 | 3,933 | 32,134 |
| 59,400 | 122 | 21,936 | 6,079 | 3,934 | 32,071 |
| 59,401 | 121 | 21,964 | 6,094 | 3,940 | 32,119 |
| 59,402 | 120 | 21,607 | 6,011 | 3,914 | 31,652 |
| 59,403 | 118 | 21,778 | 6,123 | 3,932 | 31,951 |
| 59,404 | 117 | 21,679 | 6,126 | 3,887 | 31,809 |
| 59,405 | 114 | 21,685 | 6,100 | 3,872 | 31,771 |
| 59,406 | 113 | 21,534 | 6,053 | 3,862 | 31,562 |
| 59,407 | 115 | 21,506 | 6,080 | 3,880 | 31,581 |
| 59,408 | 115 | 21,487 | 6,065 | 3,870 | 31,537 |
| 59,409 | 120 | 21,553 | 6,065 | 3,855 | 31,593 |
| 59,410 | 120 | 21,566 | 6,086 | 3,870 | 31,642 |
| 59,411 | 121 | 21,439 | 6,105 | 3,824 | 31,489 |
| 59,412 | 121 | 21,611 | 6,173 | 3,870 | 31,775 |
| 59,413 | 122 | 21,865 | 6,266 | 3,918 | 32,171 |
| 59,414 | 124 | 21,963 | 6,280 | 3,911 | 32,278 |
| 59,415 | 126 | 22,023 | 6,311 | 3,923 | 32,383 |

|        |     |        |       |       |        |
|--------|-----|--------|-------|-------|--------|
| 59,416 | 132 | 22,185 | 6,323 | 3,930 | 32,570 |
| 59,417 | 132 | 21,978 | 6,303 | 3,905 | 32,318 |
| 59,418 | 138 | 21,941 | 6,349 | 3,915 | 32,343 |
| 59,419 | 131 | 22,106 | 6,391 | 3,937 | 32,565 |
| 59,420 | 133 | 22,393 | 6,467 | 4,011 | 33,004 |
| 59,421 | 138 | 22,165 | 6,460 | 3,958 | 32,721 |
| 59,422 | 138 | 22,151 | 6,494 | 3,967 | 32,750 |
| 59,423 | 144 | 22,465 | 6,593 | 4,027 | 33,229 |
| 59,424 | 153 | 22,425 | 6,638 | 4,034 | 33,250 |
| 59,425 | 154 | 22,411 | 6,645 | 4,029 | 33,239 |
| 59,426 | 158 | 22,503 | 6,667 | 4,022 | 33,350 |
| 59,427 | 160 | 22,457 | 6,657 | 4,009 | 33,283 |
| 59,428 | 160 | 22,506 | 6,680 | 4,021 | 33,367 |
| 59,429 | 161 | 22,506 | 6,724 | 3,985 | 33,376 |
| 59,430 | 163 | 22,429 | 6,682 | 3,972 | 33,246 |
| 59,431 | 164 | 22,223 | 6,622 | 3,943 | 32,952 |
| 59,432 | 164 | 22,178 | 6,644 | 3,928 | 32,914 |
| 59,433 | 162 | 22,080 | 6,662 | 3,928 | 32,832 |
| 59,434 | 157 | 21,903 | 6,679 | 3,927 | 32,666 |
| 59,435 | 159 | 21,986 | 6,740 | 3,978 | 32,863 |
| 59,436 | 160 | 22,120 | 6,768 | 4,014 | 33,062 |
| 59,437 | 154 | 21,591 | 6,632 | 3,909 | 32,286 |
| 59,438 | 155 | 21,860 | 6,713 | 3,947 | 32,675 |
| 59,439 | 146 | 22,176 | 6,747 | 3,974 | 33,043 |
| 59,440 | 148 | 22,142 | 6,688 | 3,947 | 32,925 |
| 59,441 | 149 | 22,239 | 6,729 | 3,984 | 33,101 |
| 59,442 | 153 | 22,464 | 6,811 | 4,025 | 33,453 |
| 59,443 | 156 | 22,394 | 6,835 | 4,027 | 33,412 |
| 59,444 | 156 | 22,373 | 6,866 | 4,028 | 33,423 |
| 59,445 | 161 | 21,991 | 6,774 | 3,946 | 32,872 |
| 59,446 | 169 | 22,170 | 6,799 | 3,986 | 33,124 |
| 59,447 | 168 | 22,285 | 6,857 | 3,986 | 33,296 |

|        |     |        |       |       |        |
|--------|-----|--------|-------|-------|--------|
| 59,448 | 163 | 22,090 | 6,854 | 3,960 | 33,067 |
| 59,449 | 165 | 22,239 | 6,851 | 3,947 | 33,202 |
| 59,450 | 177 | 22,482 | 6,866 | 3,943 | 33,468 |
| 59,451 | 182 | 22,608 | 6,884 | 3,934 | 33,608 |
| 59,452 | 196 | 22,977 | 7,018 | 3,993 | 34,184 |
| 59,453 | 194 | 22,886 | 6,983 | 3,961 | 34,024 |
| 59,454 | 193 | 22,879 | 6,982 | 3,967 | 34,021 |
| 59,455 | 192 | 23,091 | 7,015 | 4,010 | 34,308 |
| 59,456 | 196 | 23,361 | 7,099 | 4,056 | 34,712 |
| 59,457 | 194 | 23,296 | 7,112 | 4,052 | 34,654 |
| 59,458 | 196 | 23,265 | 7,154 | 4,076 | 34,691 |
| 59,459 | 200 | 23,318 | 7,186 | 4,066 | 34,770 |
| 59,460 | 199 | 23,286 | 7,218 | 4,097 | 34,800 |
| 59,461 | 198 | 23,428 | 7,219 | 4,117 | 34,962 |
| 59,462 | 194 | 23,351 | 7,216 | 4,135 | 34,896 |
| 59,463 | 196 | 23,260 | 7,247 | 4,141 | 34,844 |
| 59,464 | 188 | 23,432 | 7,250 | 4,139 | 35,009 |
| 59,465 | 180 | 23,227 | 7,201 | 4,143 | 34,751 |
| 59,466 | 186 | 23,488 | 7,285 | 4,171 | 35,130 |
| 59,467 | 187 | 23,497 | 7,397 | 4,174 | 35,255 |
| 59,468 | 178 | 23,489 | 7,373 | 4,160 | 35,200 |
| 59,469 | 192 | 23,571 | 7,456 | 4,190 | 35,409 |
| 59,470 | 191 | 23,429 | 7,424 | 4,173 | 35,217 |
| 59,471 | 201 | 23,757 | 7,483 | 4,182 | 35,623 |
| 59,472 | 198 | 23,822 | 7,541 | 4,201 | 35,762 |
| 59,473 | 200 | 23,864 | 7,527 | 4,189 | 35,780 |
| 59,474 | 200 | 23,792 | 7,548 | 4,182 | 35,722 |
| 59,475 | 189 | 23,550 | 7,487 | 4,161 | 35,387 |
| 59,476 | 187 | 23,236 | 7,469 | 4,131 | 35,023 |
| 59,477 | 191 | 24,226 | 7,704 | 4,313 | 36,434 |
| 59,478 | 189 | 24,081 | 7,714 | 4,311 | 36,295 |
| 59,479 | 188 | 24,303 | 7,782 | 4,357 | 36,630 |

|        |     |        |       |       |        |
|--------|-----|--------|-------|-------|--------|
| 59,480 | 186 | 24,290 | 7,755 | 4,367 | 36,598 |
| 59,481 | 188 | 24,135 | 7,729 | 4,332 | 36,384 |
| 59,482 | 185 | 24,058 | 7,727 | 4,314 | 36,284 |
| 59,483 | 185 | 24,599 | 7,836 | 4,418 | 37,038 |
| 59,484 | 184 | 24,487 | 7,705 | 4,334 | 36,710 |
| 59,485 | 185 | 24,626 | 7,743 | 4,343 | 36,897 |
| 59,486 | 187 | 24,790 | 7,784 | 4,340 | 37,101 |
| 59,487 | 188 | 24,674 | 7,755 | 4,301 | 36,918 |
| 59,488 | 193 | 24,739 | 7,747 | 4,307 | 36,986 |
| 59,489 | 196 | 24,869 | 7,773 | 4,321 | 37,159 |
| 59,490 | 200 | 24,700 | 7,768 | 4,295 | 36,963 |
| 59,491 | 194 | 24,044 | 7,550 | 4,174 | 35,962 |
| 59,492 | 195 | 24,337 | 7,586 | 4,190 | 36,308 |
| 59,493 | 197 | 24,483 | 7,605 | 4,221 | 36,506 |
| 59,494 | 196 | 24,163 | 7,469 | 4,153 | 35,981 |
| 59,495 | 196 | 24,195 | 7,491 | 4,145 | 36,027 |
| 59,496 | 192 | 23,861 | 7,370 | 4,094 | 35,517 |
| 59,497 | 184 | 23,561 | 7,307 | 4,023 | 35,075 |
| 59,498 | 185 | 23,754 | 7,317 | 4,080 | 35,336 |
| 59,499 | 186 | 23,680 | 7,280 | 4,062 | 35,208 |
| 59,500 | 170 | 23,255 | 7,178 | 3,991 | 34,594 |
| 59,501 | 169 | 23,337 | 7,186 | 4,011 | 34,703 |
| 59,502 | 166 | 23,401 | 7,209 | 4,029 | 34,805 |
| 59,503 | 161 | 23,293 | 7,184 | 4,023 | 34,661 |
| 59,504 | 161 | 23,207 | 7,194 | 4,004 | 34,566 |
| 59,505 | 164 | 23,018 | 7,150 | 3,975 | 34,307 |
| 59,506 | 169 | 22,759 | 7,137 | 3,945 | 34,010 |
| 59,507 | 169 | 22,367 | 7,019 | 3,849 | 33,404 |
| 59,508 | 170 | 22,664 | 7,007 | 3,863 | 33,704 |
| 59,509 | 166 | 22,743 | 6,973 | 3,866 | 33,748 |
| 59,510 | 164 | 22,843 | 6,978 | 3,872 | 33,857 |
| 59,511 | 163 | 22,798 | 6,966 | 3,837 | 33,764 |

|        |     |        |       |       |        |
|--------|-----|--------|-------|-------|--------|
| 59,512 | 164 | 22,789 | 6,956 | 3,776 | 33,685 |
| 59,513 | 163 | 22,724 | 6,860 | 3,744 | 33,491 |
| 59,514 | 168 | 22,543 | 6,821 | 3,715 | 33,247 |
| 59,515 | 167 | 22,552 | 6,863 | 3,728 | 33,310 |
| 59,516 | 162 | 22,063 | 6,734 | 3,640 | 32,599 |
| 59,517 | 157 | 21,222 | 6,362 | 3,491 | 31,232 |
| 59,518 | 158 | 21,489 | 6,387 | 3,529 | 31,563 |
| 59,519 | 145 | 21,788 | 6,415 | 3,567 | 31,915 |
| 59,520 | 144 | 21,807 | 6,421 | 3,568 | 31,940 |
| 59,521 | 142 | 21,533 | 6,340 | 3,522 | 31,537 |
| 59,522 | 128 | 21,004 | 6,189 | 3,483 | 30,804 |
| 59,523 | 132 | 21,027 | 6,211 | 3,512 | 30,882 |
| 59,524 | 137 | 20,921 | 6,224 | 3,538 | 30,820 |
| 59,525 | 132 | 20,819 | 6,194 | 3,539 | 30,684 |
| 59,526 | 138 | 20,641 | 6,138 | 3,478 | 30,395 |
| 59,527 | 142 | 20,680 | 6,083 | 3,484 | 30,389 |
| 59,528 | 157 | 20,411 | 6,038 | 3,424 | 30,030 |
| 59,529 | 158 | 20,191 | 5,938 | 3,382 | 29,669 |
| 59,530 | 159 | 20,028 | 5,870 | 3,341 | 29,398 |
| 59,531 | 158 | 19,947 | 5,846 | 3,311 | 29,262 |
| 59,532 | 154 | 19,815 | 5,809 | 3,296 | 29,074 |
| 59,533 | 156 | 19,774 | 5,780 | 3,275 | 28,985 |
| 59,534 | 156 | 19,717 | 5,734 | 3,269 | 28,876 |
| 59,535 | 162 | 19,729 | 5,738 | 3,260 | 28,889 |
| 59,536 | 161 | 19,677 | 5,705 | 3,244 | 28,787 |
| 59,537 | 158 | 19,652 | 5,739 | 3,276 | 28,825 |
| 59,538 | 157 | 19,842 | 5,766 | 3,279 | 29,044 |
| 59,539 | 150 | 19,496 | 5,665 | 3,228 | 28,539 |
| 59,540 | 151 | 19,612 | 5,697 | 3,243 | 28,703 |
| 59,541 | 148 | 19,488 | 5,667 | 3,228 | 28,531 |
| 59,542 | 139 | 19,318 | 5,614 | 3,185 | 28,256 |
| 59,543 | 140 | 19,100 | 5,572 | 3,156 | 27,968 |

|        |     |        |       |       |        |
|--------|-----|--------|-------|-------|--------|
| 59,544 | 138 | 18,834 | 5,538 | 3,128 | 27,638 |
| 59,545 | 136 | 19,212 | 5,643 | 3,213 | 28,204 |
| 59,546 | 135 | 18,967 | 5,605 | 3,214 | 27,921 |
| 59,547 | 134 | 19,051 | 5,643 | 3,230 | 28,058 |
| 59,548 | 134 | 18,813 | 5,631 | 3,230 | 27,808 |
| 59,549 | 139 | 18,774 | 5,646 | 3,235 | 27,794 |
| 59,550 | 139 | 18,593 | 5,607 | 3,215 | 27,554 |
| 59,551 | 138 | 18,544 | 5,555 | 3,231 | 27,468 |
| 59,552 | 140 | 18,336 | 5,497 | 3,190 | 27,163 |
| 59,553 | 132 | 18,123 | 5,408 | 3,175 | 26,838 |
| 59,554 | 134 | 18,113 | 5,441 | 3,176 | 26,864 |
| 59,555 | 135 | 18,230 | 5,432 | 3,209 | 27,006 |
| 59,556 | 137 | 18,048 | 5,373 | 3,176 | 26,734 |
| 59,557 | 130 | 17,838 | 5,283 | 3,144 | 26,395 |
| 59,558 | 133 | 17,792 | 5,321 | 3,199 | 26,445 |
| 59,559 | 133 | 17,668 | 5,351 | 3,191 | 26,343 |
| 59,560 | 134 | 17,535 | 5,342 | 3,190 | 26,201 |
| 59,561 | 136 | 17,593 | 5,411 | 3,189 | 26,329 |
| 59,562 | 135 | 17,450 | 5,379 | 3,189 | 26,153 |
| 59,563 | 131 | 17,244 | 5,321 | 3,193 | 25,889 |
| 59,564 | 126 | 17,288 | 5,360 | 3,202 | 25,976 |
| 59,565 | 126 | 17,337 | 5,332 | 3,220 | 26,015 |
| 59,566 | 126 | 17,257 | 5,319 | 3,201 | 25,903 |
| 59,567 | 127 | 17,408 | 5,425 | 3,269 | 26,229 |
| 59,568 | 135 | 17,439 | 5,472 | 3,297 | 26,343 |
| 59,569 | 134 | 17,492 | 5,508 | 3,305 | 26,439 |
| 59,570 | 136 | 17,526 | 5,529 | 3,324 | 26,515 |
| 59,571 | 131 | 17,682 | 5,603 | 3,346 | 26,762 |
| 59,572 | 137 | 17,258 | 5,498 | 3,294 | 26,187 |
| 59,573 | 143 | 17,735 | 5,657 | 3,361 | 26,896 |
| 59,574 | 143 | 18,162 | 5,795 | 3,427 | 27,527 |
| 59,575 | 144 | 18,192 | 5,798 | 3,390 | 27,524 |

|        |     |        |       |       |        |
|--------|-----|--------|-------|-------|--------|
| 59,576 | 144 | 18,180 | 5,789 | 3,385 | 27,498 |
| 59,577 | 148 | 18,558 | 6,013 | 3,495 | 28,214 |
| 59,578 | 148 | 18,517 | 6,010 | 3,492 | 28,167 |
| 59,579 | 132 | 18,301 | 5,961 | 3,463 | 27,857 |
| 59,580 | 142 | 19,618 | 6,491 | 3,698 | 29,949 |
| 59,581 | 143 | 19,943 | 6,573 | 3,745 | 30,404 |
| 59,582 | 148 | 20,104 | 6,651 | 3,780 | 30,683 |
| 59,583 | 154 | 20,322 | 6,722 | 3,806 | 31,004 |
| 59,584 | 152 | 20,089 | 6,650 | 3,784 | 30,675 |
| 59,585 | 160 | 20,444 | 6,832 | 3,853 | 31,289 |
| 59,586 | 153 | 20,176 | 6,754 | 3,827 | 30,910 |
| 59,587 | 153 | 20,178 | 6,807 | 3,836 | 30,974 |
| 59,588 | 160 | 20,494 | 6,883 | 3,862 | 31,399 |
| 59,589 | 162 | 20,359 | 6,914 | 3,881 | 31,316 |
| 59,590 | 160 | 20,304 | 6,908 | 3,873 | 31,245 |
| 59,591 | 161 | 20,064 | 6,855 | 3,827 | 30,907 |
| 59,592 | 161 | 20,249 | 6,880 | 3,845 | 31,135 |
| 59,593 | 161 | 20,223 | 6,880 | 3,854 | 31,118 |
| 59,594 | 162 | 20,285 | 6,879 | 3,862 | 31,188 |
| 59,595 | 164 | 19,876 | 6,726 | 3,757 | 30,523 |
| 59,596 | 166 | 20,237 | 6,831 | 3,805 | 31,039 |
| 59,597 | 167 | 20,558 | 6,904 | 3,855 | 31,484 |
| 59,598 | 169 | 20,832 | 6,971 | 3,896 | 31,868 |
| 59,599 | 169 | 20,852 | 6,946 | 3,883 | 31,850 |
| 59,600 | 167 | 21,365 | 7,183 | 3,982 | 32,697 |
| 59,601 | 165 | 21,159 | 7,145 | 3,954 | 32,423 |
| 59,602 | 177 | 21,488 | 7,347 | 4,022 | 33,034 |
| 59,603 | 178 | 21,773 | 7,412 | 4,036 | 33,399 |
| 59,604 | 186 | 22,020 | 7,524 | 4,095 | 33,825 |
| 59,605 | 189 | 22,324 | 7,611 | 4,171 | 34,295 |
| 59,606 | 187 | 22,571 | 7,668 | 4,192 | 34,618 |
| 59,607 | 197 | 22,725 | 7,699 | 4,192 | 34,813 |

|        |     |        |       |       |        |
|--------|-----|--------|-------|-------|--------|
| 59,608 | 195 | 22,919 | 7,715 | 4,188 | 35,017 |
| 59,609 | 196 | 23,299 | 7,825 | 4,237 | 35,557 |
| 59,610 | 195 | 23,201 | 7,748 | 4,185 | 35,329 |
| 59,611 | 199 | 23,727 | 7,924 | 4,273 | 36,123 |
| 59,612 | 197 | 23,672 | 7,850 | 4,243 | 35,962 |
| 59,613 | 198 | 23,981 | 8,019 | 4,318 | 36,516 |
| 59,614 | 197 | 24,044 | 8,051 | 4,330 | 36,622 |
| 59,615 | 199 | 24,099 | 8,062 | 4,330 | 36,690 |
| 59,616 | 199 | 24,004 | 8,066 | 4,310 | 36,579 |
| 59,617 | 198 | 24,225 | 8,050 | 4,279 | 36,752 |
| 59,618 | 198 | 24,289 | 8,047 | 4,294 | 36,828 |
| 59,619 | 195 | 24,347 | 8,065 | 4,305 | 36,912 |
| 59,620 | 197 | 24,337 | 8,068 | 4,288 | 36,890 |
| 59,621 | 198 | 23,932 | 7,953 | 4,219 | 36,302 |
| 59,622 | 201 | 23,961 | 7,938 | 4,218 | 36,318 |
| 59,623 | 193 | 24,164 | 7,956 | 4,244 | 36,557 |
| 59,624 | 188 | 24,093 | 7,896 | 4,206 | 36,383 |
| 59,625 | 191 | 24,034 | 7,861 | 4,168 | 36,254 |
| 59,626 | 187 | 23,945 | 7,792 | 4,157 | 36,081 |
| 59,627 | 180 | 23,899 | 7,695 | 4,105 | 35,879 |
| 59,628 | 177 | 23,734 | 7,605 | 4,072 | 35,588 |
| 59,629 | 181 | 23,501 | 7,547 | 4,054 | 35,283 |
| 59,630 | 197 | 23,567 | 7,530 | 4,040 | 35,334 |
| 59,631 | 190 | 23,313 | 7,372 | 3,978 | 34,853 |
| 59,632 | 189 | 23,095 | 7,370 | 3,972 | 34,626 |
| 59,633 | 188 | 23,057 | 7,365 | 3,984 | 34,594 |
| 59,634 | 184 | 22,833 | 7,332 | 3,970 | 34,319 |
| 59,635 | 180 | 22,722 | 7,317 | 3,950 | 34,169 |
| 59,636 | 182 | 22,694 | 7,285 | 3,921 | 34,082 |
| 59,637 | 182 | 22,638 | 7,262 | 3,902 | 33,984 |
| 59,638 | 180 | 22,692 | 7,246 | 3,923 | 34,041 |
| 59,639 | 180 | 22,774 | 7,245 | 3,923 | 34,122 |



|        |     |        |       |       |        |
|--------|-----|--------|-------|-------|--------|
| 59,640 | 176 | 22,805 | 7,232 | 3,928 | 34,141 |
| 59,641 | 176 | 22,790 | 7,200 | 3,914 | 34,080 |
| 59,642 | 173 | 22,839 | 7,217 | 3,932 | 34,161 |
| 59,643 | 184 | 23,013 | 7,343 | 4,003 | 34,543 |
| 59,644 | 191 | 22,954 | 7,330 | 4,016 | 34,491 |
| 59,645 | 188 | 22,913 | 7,334 | 3,988 | 34,423 |
| 59,646 | 191 | 22,918 | 7,377 | 4,035 | 34,521 |
| 59,647 | 192 | 22,930 | 7,356 | 4,045 | 34,523 |
| 59,648 | 195 | 22,919 | 7,362 | 4,025 | 34,501 |
| 59,649 | 196 | 22,952 | 7,355 | 4,015 | 34,518 |
| 59,650 | 198 | 22,923 | 7,302 | 4,021 | 34,444 |
| 59,651 | 197 | 22,948 | 7,252 | 3,997 | 34,394 |
| 59,652 | 190 | 23,114 | 7,266 | 3,982 | 34,552 |
| 59,653 | 188 | 23,117 | 7,196 | 3,969 | 34,470 |
| 59,654 | 194 | 23,318 | 7,234 | 4,020 | 34,766 |
| 59,655 | 189 | 23,435 | 7,193 | 4,001 | 34,818 |
| 59,656 | 188 | 23,387 | 7,162 | 3,969 | 34,706 |
| 59,657 | 187 | 23,186 | 7,135 | 3,978 | 34,486 |
| 59,658 | 172 | 23,261 | 7,160 | 4,006 | 34,599 |
| 59,659 | 166 | 23,116 | 7,148 | 4,015 | 34,445 |
| 59,660 | 167 | 23,180 | 7,120 | 4,001 | 34,468 |
| 59,661 | 169 | 23,136 | 7,073 | 4,004 | 34,382 |
| 59,662 | 168 | 22,923 | 7,018 | 3,986 | 34,095 |
| 59,663 | 171 | 22,958 | 7,002 | 3,988 | 34,119 |
| 59,664 | 173 | 22,914 | 7,008 | 3,989 | 34,084 |
| 59,665 | 181 | 23,005 | 6,972 | 3,973 | 34,131 |
| 59,666 | 179 | 22,861 | 6,943 | 3,959 | 33,942 |
| 59,667 | 180 | 23,264 | 7,030 | 4,024 | 34,498 |
| 59,668 | 184 | 23,039 | 6,998 | 3,998 | 34,219 |
| 59,669 | 185 | 23,012 | 6,998 | 3,980 | 34,175 |
| 59,670 | 181 | 23,111 | 7,029 | 4,030 | 34,351 |
| 59,671 | 177 | 22,781 | 6,934 | 3,980 | 33,872 |

|        |     |        |       |       |        |
|--------|-----|--------|-------|-------|--------|
| 59,672 | 184 | 22,833 | 7,034 | 3,994 | 34,045 |
| 59,673 | 181 | 22,556 | 6,938 | 3,957 | 33,632 |
| 59,674 | 183 | 22,221 | 6,846 | 3,890 | 33,140 |
| 59,675 | 183 | 21,911 | 6,761 | 3,844 | 32,699 |
| 59,676 | 181 | 22,130 | 6,848 | 3,933 | 33,092 |
| 59,677 | 177 | 21,997 | 6,801 | 3,898 | 32,873 |
| 59,678 | 173 | 21,508 | 6,653 | 3,796 | 32,130 |
| 59,679 | 173 | 21,461 | 6,643 | 3,787 | 32,064 |
| 59,680 | 170 | 21,364 | 6,568 | 3,748 | 31,850 |
| 59,681 | 151 | 20,971 | 6,442 | 3,699 | 31,263 |
| 59,682 | 151 | 21,087 | 6,488 | 3,705 | 31,431 |
| 59,683 | 154 | 20,857 | 6,375 | 3,633 | 31,019 |
| 59,684 | 158 | 20,793 | 6,323 | 3,606 | 30,880 |
| 59,685 | 155 | 20,482 | 6,203 | 3,544 | 30,384 |
| 59,686 | 154 | 20,512 | 6,191 | 3,539 | 30,396 |
| 59,687 | 155 | 20,615 | 6,198 | 3,567 | 30,535 |
| 59,688 | 154 | 20,338 | 6,114 | 3,531 | 30,137 |
| 59,689 | 154 | 20,505 | 6,128 | 3,562 | 30,349 |
| 59,690 | 150 | 20,109 | 6,034 | 3,515 | 29,808 |
| 59,691 | 152 | 20,140 | 6,025 | 3,526 | 29,843 |
| 59,692 | 152 | 20,153 | 6,032 | 3,540 | 29,877 |
| 59,693 | 150 | 20,073 | 5,981 | 3,519 | 29,723 |
| 59,694 | 141 | 20,078 | 5,923 | 3,484 | 29,626 |
| 59,695 | 137 | 20,174 | 5,923 | 3,471 | 29,705 |
| 59,696 | 129 | 20,064 | 5,822 | 3,431 | 29,446 |
| 59,697 | 125 | 19,771 | 5,792 | 3,388 | 29,076 |
| 59,698 | 125 | 19,782 | 5,769 | 3,383 | 29,059 |
| 59,699 | 121 | 19,653 | 5,718 | 3,377 | 28,869 |
| 59,700 | 118 | 19,444 | 5,663 | 3,330 | 28,555 |
| 59,701 | 115 | 18,999 | 5,514 | 3,234 | 27,862 |
| 59,702 | 117 | 18,933 | 5,483 | 3,243 | 27,776 |
| 59,703 | 114 | 18,573 | 5,357 | 3,183 | 27,227 |

|        |     |        |       |       |        |
|--------|-----|--------|-------|-------|--------|
| 59,704 | 119 | 18,696 | 5,400 | 3,192 | 27,407 |
| 59,705 | 115 | 18,440 | 5,348 | 3,146 | 27,049 |
| 59,706 | 115 | 18,149 | 5,298 | 3,109 | 26,671 |
| 59,707 | 118 | 18,086 | 5,287 | 3,080 | 26,571 |
| 59,708 | 119 | 17,710 | 5,130 | 2,978 | 25,937 |
| 59,709 | 119 | 17,833 | 5,133 | 2,992 | 26,077 |
| 59,710 | 119 | 17,457 | 5,060 | 2,951 | 25,587 |
| 59,711 | 116 | 17,220 | 4,989 | 2,900 | 25,225 |
| 59,712 | 118 | 17,235 | 4,974 | 2,891 | 25,218 |
| 59,713 | 119 | 16,818 | 4,844 | 2,798 | 24,579 |
| 59,714 | 119 | 16,818 | 4,812 | 2,777 | 24,526 |
| 59,715 | 107 | 16,575 | 4,728 | 2,724 | 24,134 |
| 59,716 | 109 | 16,826 | 4,772 | 2,761 | 24,468 |
| 59,717 | 113 | 16,611 | 4,692 | 2,722 | 24,138 |
| 59,718 | 114 | 16,730 | 4,669 | 2,708 | 24,221 |
| 59,719 | 118 | 16,786 | 4,657 | 2,704 | 24,265 |
| 59,720 | 117 | 16,830 | 4,664 | 2,700 | 24,311 |
| 59,721 | 119 | 16,958 | 4,668 | 2,694 | 24,439 |
| 59,722 | 117 | 16,982 | 4,660 | 2,704 | 24,463 |
| 59,723 | 114 | 17,162 | 4,649 | 2,716 | 24,641 |
| 59,724 | 117 | 17,335 | 4,663 | 2,738 | 24,853 |
| 59,725 | 111 | 17,226 | 4,620 | 2,710 | 24,667 |
| 59,726 | 110 | 17,332 | 4,633 | 2,746 | 24,821 |
| 59,727 | 109 | 17,440 | 4,676 | 2,759 | 24,984 |
| 59,728 | 107 | 17,517 | 4,691 | 2,764 | 25,079 |
| 59,729 | 107 | 17,844 | 4,767 | 2,806 | 25,524 |
| 59,730 | 108 | 17,844 | 4,736 | 2,798 | 25,486 |
| 59,731 | 112 | 18,005 | 4,747 | 2,802 | 25,666 |
| 59,732 | 116 | 18,282 | 4,815 | 2,817 | 26,030 |
| 59,733 | 122 | 18,266 | 4,767 | 2,810 | 25,965 |
| 59,734 | 118 | 18,221 | 4,741 | 2,806 | 25,886 |
| 59,735 | 112 | 18,238 | 4,715 | 2,815 | 25,880 |

|        |     |        |       |       |        |
|--------|-----|--------|-------|-------|--------|
| 59,736 | 112 | 18,223 | 4,688 | 2,802 | 25,825 |
| 59,737 | 114 | 19,031 | 4,888 | 2,953 | 26,986 |
| 59,738 | 114 | 19,331 | 4,929 | 3,000 | 27,374 |
| 59,739 | 117 | 19,289 | 4,955 | 3,009 | 27,370 |
| 59,740 | 115 | 19,285 | 4,988 | 2,993 | 27,381 |
| 59,741 | 120 | 19,241 | 4,989 | 2,979 | 27,329 |
| 59,742 | 118 | 19,226 | 4,989 | 2,965 | 27,298 |
| 59,743 | 119 | 19,462 | 5,036 | 2,981 | 27,598 |
| 59,744 | 121 | 19,458 | 5,023 | 2,971 | 27,573 |
| 59,745 | 126 | 19,392 | 5,007 | 2,975 | 27,500 |
| 59,746 | 123 | 19,346 | 4,990 | 2,938 | 27,397 |
| 59,747 | 126 | 19,120 | 4,948 | 2,900 | 27,094 |
| 59,748 | 126 | 19,186 | 4,950 | 2,904 | 27,166 |
| 59,749 | 128 | 18,968 | 4,920 | 2,864 | 26,880 |
| 59,750 | 128 | 18,981 | 4,895 | 2,850 | 26,854 |
| 59,751 | 130 | 18,848 | 4,859 | 2,833 | 26,670 |
| 59,752 | 129 | 18,680 | 4,839 | 2,816 | 26,464 |
| 59,753 | 130 | 19,424 | 5,010 | 2,909 | 27,473 |
| 59,754 | 124 | 19,422 | 5,034 | 2,921 | 27,501 |
| 59,755 | 123 | 19,449 | 4,993 | 2,914 | 27,479 |
| 59,756 | 124 | 19,630 | 5,053 | 2,934 | 27,741 |
| 59,757 | 121 | 19,649 | 5,011 | 2,943 | 27,724 |
| 59,758 | 118 | 19,591 | 4,993 | 2,919 | 27,621 |
| 59,759 | 119 | 19,589 | 4,986 | 2,905 | 27,599 |
| 59,760 | 120 | 19,713 | 4,983 | 2,888 | 27,704 |
| 59,761 | 118 | 19,553 | 4,929 | 2,870 | 27,470 |
| 59,762 | 119 | 19,656 | 4,951 | 2,886 | 27,612 |
| 59,763 | 114 | 19,513 | 4,951 | 2,882 | 27,460 |
| 59,764 | 114 | 19,557 | 4,956 | 2,874 | 27,501 |
| 59,765 | 115 | 19,539 | 4,957 | 2,895 | 27,506 |
| 59,766 | 116 | 19,322 | 4,920 | 2,902 | 27,260 |
| 59,767 | 115 | 19,252 | 4,922 | 2,891 | 27,180 |

|        |     |        |       |       |        |
|--------|-----|--------|-------|-------|--------|
| 59,768 | 112 | 19,332 | 4,914 | 2,873 | 27,231 |
| 59,769 | 106 | 19,281 | 4,909 | 2,868 | 27,164 |
| 59,770 | 101 | 19,050 | 4,830 | 2,824 | 26,805 |
| 59,771 | 103 | 19,197 | 4,840 | 2,840 | 26,980 |
| 59,772 | 103 | 19,123 | 4,849 | 2,838 | 26,913 |
| 59,773 | 103 | 19,255 | 4,876 | 2,849 | 27,083 |
| 59,774 | 99  | 19,290 | 4,858 | 2,828 | 27,075 |
| 59,775 | 97  | 19,027 | 4,809 | 2,778 | 26,711 |
| 59,776 | 100 | 18,870 | 4,764 | 2,733 | 26,467 |
| 59,777 | 100 | 18,747 | 4,712 | 2,703 | 26,262 |
| 59,778 | 100 | 19,040 | 4,819 | 2,742 | 26,701 |
| 59,779 | 100 | 18,943 | 4,801 | 2,734 | 26,578 |
| 59,780 | 100 | 19,033 | 4,840 | 2,754 | 26,727 |
| 59,781 | 97  | 18,610 | 4,775 | 2,724 | 26,206 |
| 59,782 | 98  | 18,594 | 4,777 | 2,734 | 26,203 |
| 59,783 | 97  | 18,525 | 4,780 | 2,744 | 26,146 |
| 59,784 | 96  | 18,493 | 4,828 | 2,760 | 26,177 |
| 59,785 | 99  | 18,326 | 4,829 | 2,728 | 25,982 |
| 59,786 | 101 | 18,362 | 4,851 | 2,756 | 26,070 |
| 59,787 | 98  | 18,208 | 4,875 | 2,749 | 25,930 |
| 59,788 | 94  | 18,245 | 4,911 | 2,761 | 26,011 |
| 59,789 | 94  | 18,288 | 4,950 | 2,756 | 26,088 |
| 59,790 | 93  | 18,296 | 4,914 | 2,751 | 26,054 |
| 59,791 | 95  | 18,269 | 4,883 | 2,747 | 25,994 |
| 59,792 | 94  | 18,606 | 4,984 | 2,786 | 26,470 |
| 59,793 | 97  | 18,833 | 5,035 | 2,808 | 26,773 |
| 59,794 | 94  | 18,867 | 5,012 | 2,821 | 26,794 |
| 59,795 | 91  | 18,979 | 5,048 | 2,837 | 26,955 |
| 59,796 | 92  | 19,273 | 5,118 | 2,874 | 27,357 |
| 59,797 | 87  | 19,151 | 5,116 | 2,903 | 27,257 |
| 59,798 | 87  | 19,181 | 5,125 | 2,925 | 27,318 |
| 59,799 | 94  | 19,517 | 5,185 | 2,954 | 27,750 |

|        |     |        |       |       |        |
|--------|-----|--------|-------|-------|--------|
| 59,800 | 99  | 19,569 | 5,231 | 2,986 | 27,885 |
| 59,801 | 105 | 19,588 | 5,278 | 3,019 | 27,990 |
| 59,802 | 101 | 19,334 | 5,270 | 3,002 | 27,707 |
| 59,803 | 106 | 19,748 | 5,382 | 3,080 | 28,316 |
| 59,804 | 106 | 19,853 | 5,387 | 3,072 | 28,418 |
| 59,805 | 107 | 19,777 | 5,348 | 3,043 | 28,275 |
| 59,806 | 113 | 19,628 | 5,346 | 3,017 | 28,104 |
| 59,807 | 111 | 19,555 | 5,289 | 3,001 | 27,956 |
| 59,808 | 118 | 19,704 | 5,463 | 3,081 | 28,366 |
| 59,809 | 118 | 19,619 | 5,464 | 3,074 | 28,275 |
| 59,810 | 117 | 19,717 | 5,503 | 3,097 | 28,434 |
| 59,811 | 115 | 19,635 | 5,517 | 3,110 | 28,377 |
| 59,812 | 126 | 19,613 | 5,523 | 3,103 | 28,365 |
| 59,813 | 125 | 19,535 | 5,525 | 3,085 | 28,270 |
| 59,814 | 135 | 19,810 | 5,553 | 3,112 | 28,610 |
| 59,815 | 140 | 19,685 | 5,506 | 3,075 | 28,406 |
| 59,816 | 139 | 19,736 | 5,523 | 3,073 | 28,471 |
| 59,817 | 145 | 19,987 | 5,561 | 3,087 | 28,780 |
| 59,818 | 151 | 19,833 | 5,539 | 3,062 | 28,585 |
| 59,819 | 148 | 19,774 | 5,552 | 3,062 | 28,536 |
| 59,820 | 149 | 19,864 | 5,623 | 3,105 | 28,741 |
| 59,821 | 152 | 19,809 | 5,638 | 3,110 | 28,709 |
| 59,822 | 149 | 19,815 | 5,679 | 3,119 | 28,762 |
| 59,823 | 148 | 19,704 | 5,653 | 3,118 | 28,623 |
| 59,824 | 150 | 20,017 | 5,790 | 3,182 | 29,139 |
| 59,825 | 152 | 19,914 | 5,804 | 3,203 | 29,073 |
| 59,826 | 149 | 19,557 | 5,717 | 3,186 | 28,609 |
| 59,827 | 149 | 19,314 | 5,664 | 3,166 | 28,293 |
| 59,828 | 150 | 19,306 | 5,648 | 3,162 | 28,266 |
| 59,829 | 150 | 19,547 | 5,711 | 3,198 | 28,606 |
| 59,830 | 149 | 19,245 | 5,634 | 3,168 | 28,196 |
| 59,831 | 150 | 19,468 | 5,685 | 3,206 | 28,509 |

|        |     |        |       |       |        |
|--------|-----|--------|-------|-------|--------|
| 59,832 | 147 | 19,488 | 5,674 | 3,204 | 28,513 |
| 59,833 | 147 | 19,652 | 5,743 | 3,206 | 28,748 |
| 59,834 | 144 | 19,594 | 5,755 | 3,185 | 28,678 |
| 59,835 | 146 | 19,534 | 5,738 | 3,186 | 28,604 |
| 59,836 | 143 | 19,503 | 5,673 | 3,168 | 28,487 |
| 59,837 | 141 | 19,470 | 5,634 | 3,139 | 28,384 |
| 59,838 | 145 | 19,549 | 5,647 | 3,153 | 28,494 |
| 59,839 | 151 | 19,630 | 5,685 | 3,150 | 28,616 |
| 59,840 | 161 | 19,304 | 5,619 | 3,090 | 28,174 |
| 59,841 | 166 | 18,894 | 5,518 | 3,034 | 27,612 |
| 59,842 | 170 | 19,070 | 5,546 | 3,034 | 27,820 |
| 59,843 | 166 | 19,036 | 5,550 | 3,048 | 27,800 |
| 59,844 | 167 | 18,786 | 5,511 | 3,025 | 27,489 |
| 59,845 | 167 | 18,509 | 5,462 | 2,976 | 27,114 |
| 59,846 | 171 | 18,972 | 5,632 | 3,081 | 27,856 |
| 59,847 | 174 | 18,750 | 5,599 | 3,030 | 27,553 |
| 59,848 | 177 | 18,722 | 5,586 | 3,022 | 27,507 |
| 59,849 | 179 | 18,746 | 5,599 | 3,008 | 27,532 |
| 59,850 | 174 | 18,883 | 5,645 | 3,047 | 27,749 |
| 59,851 | 159 | 18,654 | 5,574 | 3,011 | 27,398 |
| 59,852 | 159 | 18,870 | 5,590 | 3,013 | 27,632 |
| 59,853 | 157 | 18,825 | 5,586 | 3,023 | 27,591 |
| 59,854 | 159 | 19,039 | 5,675 | 3,047 | 27,920 |
| 59,855 | 152 | 18,696 | 5,554 | 3,008 | 27,410 |
| 59,856 | 154 | 18,919 | 5,654 | 3,022 | 27,749 |
| 59,857 | 152 | 18,995 | 5,668 | 3,026 | 27,841 |
| 59,858 | 154 | 18,909 | 5,659 | 3,045 | 27,767 |
| 59,859 | 155 | 18,975 | 5,667 | 3,039 | 27,836 |
| 59,860 | 152 | 18,998 | 5,683 | 3,042 | 27,875 |
| 59,861 | 153 | 18,293 | 5,516 | 2,941 | 26,903 |
| 59,862 | 154 | 18,353 | 5,533 | 2,968 | 27,008 |
| 59,863 | 148 | 18,555 | 5,559 | 2,991 | 27,253 |

|        |     |        |       |       |        |
|--------|-----|--------|-------|-------|--------|
| 59,864 | 147 | 18,539 | 5,548 | 2,997 | 27,231 |
| 59,865 | 140 | 18,742 | 5,615 | 3,024 | 27,521 |
| 59,866 | 139 | 18,581 | 5,588 | 3,012 | 27,320 |
| 59,867 | 137 | 18,429 | 5,585 | 3,017 | 27,168 |
| 59,868 | 137 | 19,188 | 5,740 | 3,145 | 28,210 |
| 59,869 | 134 | 19,230 | 5,803 | 3,178 | 28,345 |
| 59,870 | 138 | 19,406 | 5,838 | 3,207 | 28,589 |
| 59,871 | 140 | 19,347 | 5,836 | 3,211 | 28,534 |
| 59,872 | 137 | 19,228 | 5,858 | 3,217 | 28,440 |
| 59,873 | 135 | 18,920 | 5,789 | 3,188 | 28,032 |
| 59,874 | 134 | 18,878 | 5,727 | 3,193 | 27,932 |
| 59,875 | 136 | 18,804 | 5,704 | 3,172 | 27,816 |
| 59,876 | 134 | 18,887 | 5,694 | 3,167 | 27,882 |
| 59,877 | 142 | 18,753 | 5,647 | 3,130 | 27,672 |
| 59,878 | 142 | 18,940 | 5,668 | 3,130 | 27,880 |
| 59,879 | 140 | 18,933 | 5,668 | 3,145 | 27,886 |
| 59,880 | 140 | 18,933 | 5,664 | 3,140 | 27,877 |
| 59,881 | 143 | 18,807 | 5,626 | 3,121 | 27,697 |
| 59,882 | 143 | 18,883 | 5,637 | 3,113 | 27,776 |
| 59,883 | 142 | 19,198 | 5,686 | 3,168 | 28,194 |
| 59,884 | 140 | 19,341 | 5,648 | 3,196 | 28,325 |
| 59,885 | 142 | 18,713 | 5,485 | 3,071 | 27,411 |
| 59,886 | 141 | 18,822 | 5,521 | 3,090 | 27,574 |
| 59,887 | 141 | 19,014 | 5,586 | 3,131 | 27,872 |
| 59,888 | 141 | 19,068 | 5,600 | 3,142 | 27,951 |
| 59,889 | 138 | 19,089 | 5,580 | 3,165 | 27,972 |
| 59,890 | 138 | 19,362 | 5,635 | 3,206 | 28,341 |
| 59,891 | 127 | 19,565 | 5,659 | 3,232 | 28,583 |
| 59,892 | 119 | 19,406 | 5,618 | 3,217 | 28,360 |
| 59,893 | 114 | 19,496 | 5,645 | 3,240 | 28,495 |
| 59,894 | 111 | 19,031 | 5,453 | 3,152 | 27,747 |
| 59,895 | 112 | 19,283 | 5,470 | 3,164 | 28,029 |



|        |     |        |       |       |        |
|--------|-----|--------|-------|-------|--------|
| 59,896 | 112 | 19,573 | 5,513 | 3,194 | 28,392 |
| 59,897 | 109 | 19,523 | 5,466 | 3,188 | 28,286 |
| 59,898 | 110 | 19,716 | 5,502 | 3,202 | 28,530 |
| 59,899 | 105 | 19,593 | 5,440 | 3,191 | 28,329 |
| 59,900 | 108 | 19,805 | 5,503 | 3,213 | 28,629 |
| 59,901 | 107 | 19,494 | 5,432 | 3,167 | 28,200 |
| 59,902 | 107 | 19,635 | 5,493 | 3,200 | 28,435 |
| 59,903 | 108 | 19,569 | 5,474 | 3,213 | 28,364 |
| 59,904 | 105 | 19,486 | 5,457 | 3,203 | 28,251 |
| 59,905 | 105 | 19,474 | 5,425 | 3,183 | 28,187 |
| 59,906 | 107 | 19,346 | 5,409 | 3,178 | 28,040 |
| 59,907 | 107 | 19,322 | 5,354 | 3,195 | 27,978 |
| 59,908 | 104 | 19,154 | 5,288 | 3,166 | 27,712 |
| 59,909 | 103 | 19,076 | 5,238 | 3,159 | 27,576 |
| 59,910 | 106 | 19,330 | 5,296 | 3,188 | 27,920 |
| 59,911 | 104 | 19,115 | 5,221 | 3,161 | 27,601 |
| 59,912 | 105 | 19,087 | 5,216 | 3,146 | 27,554 |
| 59,913 | 104 | 19,088 | 5,225 | 3,152 | 27,569 |
| 59,914 | 104 | 19,071 | 5,252 | 3,168 | 27,595 |
| 59,915 | 105 | 19,137 | 5,270 | 3,170 | 27,682 |
| 59,916 | 111 | 19,376 | 5,345 | 3,204 | 28,036 |
| 59,917 | 106 | 19,429 | 5,400 | 3,236 | 28,171 |
| 59,918 | 108 | 19,262 | 5,400 | 3,250 | 28,020 |
| 59,919 | 106 | 19,065 | 5,443 | 3,245 | 27,859 |
| 59,920 | 109 | 19,016 | 5,402 | 3,238 | 27,765 |
| 59,921 | 105 | 18,866 | 5,414 | 3,233 | 27,618 |
| 59,922 | 105 | 19,029 | 5,444 | 3,255 | 27,833 |
| 59,923 | 106 | 19,120 | 5,406 | 3,223 | 27,855 |
| 59,924 | 109 | 19,491 | 5,503 | 3,286 | 28,389 |
| 59,925 | 113 | 19,581 | 5,545 | 3,272 | 28,511 |
| 59,926 | 113 | 19,751 | 5,533 | 3,287 | 28,684 |
| 59,927 | 113 | 19,491 | 5,460 | 3,245 | 28,309 |

|        |     |        |       |       |        |
|--------|-----|--------|-------|-------|--------|
| 59,928 | 104 | 19,516 | 5,475 | 3,261 | 28,356 |
| 59,929 | 105 | 19,772 | 5,554 | 3,302 | 28,733 |
| 59,930 | 108 | 19,635 | 5,516 | 3,296 | 28,555 |
| 59,931 | 110 | 19,839 | 5,585 | 3,330 | 28,864 |
| 59,932 | 106 | 19,776 | 5,594 | 3,330 | 28,806 |
| 59,933 | 106 | 19,703 | 5,589 | 3,314 | 28,712 |
| 59,934 | 108 | 19,636 | 5,626 | 3,304 | 28,674 |
| 59,935 | 107 | 19,508 | 5,609 | 3,288 | 28,512 |
| 59,936 | 106 | 18,918 | 5,435 | 3,193 | 27,652 |
| 59,937 | 109 | 19,232 | 5,490 | 3,228 | 28,059 |
| 59,938 | 108 | 19,585 | 5,555 | 3,271 | 28,519 |
| 59,939 | 111 | 19,948 | 5,631 | 3,315 | 29,005 |
| 59,940 | 123 | 19,967 | 5,636 | 3,281 | 29,007 |
| 59,941 | 122 | 19,762 | 5,610 | 3,239 | 28,733 |
| 59,942 | 132 | 19,915 | 5,660 | 3,268 | 28,975 |
| 59,943 | 133 | 19,873 | 5,658 | 3,282 | 28,946 |
| 59,944 | 131 | 20,091 | 5,711 | 3,308 | 29,241 |
| 59,945 | 128 | 19,808 | 5,679 | 3,278 | 28,893 |
| 59,946 | 129 | 19,787 | 5,702 | 3,279 | 28,897 |
| 59,947 | 130 | 19,496 | 5,661 | 3,235 | 28,522 |
| 59,948 | 129 | 19,281 | 5,643 | 3,225 | 28,278 |
| 59,949 | 129 | 19,957 | 5,824 | 3,337 | 29,247 |
| 59,950 | 128 | 19,742 | 5,786 | 3,294 | 28,950 |
| 59,951 | 126 | 20,123 | 5,867 | 3,360 | 29,476 |
| 59,952 | 125 | 20,091 | 5,843 | 3,354 | 29,413 |
| 59,953 | 126 | 20,119 | 5,818 | 3,366 | 29,429 |
| 59,954 | 124 | 19,703 | 5,709 | 3,292 | 28,828 |
| 59,955 | 126 | 19,882 | 5,761 | 3,316 | 29,085 |
| 59,956 | 119 | 19,401 | 5,615 | 3,253 | 28,388 |
| 59,957 | 119 | 19,575 | 5,686 | 3,290 | 28,670 |
| 59,958 | 120 | 19,609 | 5,707 | 3,298 | 28,734 |
| 59,959 | 120 | 19,411 | 5,674 | 3,267 | 28,472 |

|        |     |        |       |       |        |
|--------|-----|--------|-------|-------|--------|
| 59,960 | 114 | 19,768 | 5,757 | 3,281 | 28,920 |
| 59,961 | 114 | 19,644 | 5,764 | 3,299 | 28,821 |
| 59,962 | 117 | 19,882 | 5,812 | 3,321 | 29,132 |
| 59,963 | 119 | 19,726 | 5,789 | 3,322 | 28,956 |
| 59,964 | 116 | 19,620 | 5,785 | 3,290 | 28,811 |
| 59,965 | 124 | 20,154 | 5,911 | 3,362 | 29,551 |
| 59,966 | 121 | 19,897 | 5,869 | 3,321 | 29,208 |
| 59,967 | 122 | 19,996 | 5,887 | 3,341 | 29,346 |
| 59,968 | 125 | 20,018 | 5,857 | 3,322 | 29,322 |
| 59,969 | 125 | 19,835 | 5,694 | 3,204 | 28,858 |
| 59,970 | 125 | 20,164 | 5,733 | 3,238 | 29,260 |
| 59,971 | 122 | 20,387 | 5,784 | 3,268 | 29,561 |
| 59,972 | 123 | 20,144 | 5,690 | 3,225 | 29,182 |
| 59,973 | 123 | 20,232 | 5,698 | 3,220 | 29,273 |
| 59,974 | 122 | 20,353 | 5,727 | 3,271 | 29,473 |
| 59,975 | 120 | 20,184 | 5,655 | 3,230 | 29,189 |
| 59,976 | 116 | 20,212 | 5,661 | 3,242 | 29,231 |
| 59,977 | 114 | 20,136 | 5,661 | 3,234 | 29,145 |
| 59,978 | 119 | 20,044 | 5,660 | 3,204 | 29,027 |
| 59,979 | 120 | 20,085 | 5,660 | 3,191 | 29,056 |
| 59,980 | 127 | 20,248 | 5,728 | 3,192 | 29,295 |
| 59,981 | 126 | 20,299 | 5,764 | 3,192 | 29,381 |
| 59,982 | 129 | 20,284 | 5,731 | 3,163 | 29,307 |
| 59,983 | 132 | 20,430 | 5,703 | 3,157 | 29,422 |
| 59,984 | 132 | 20,458 | 5,690 | 3,161 | 29,441 |
| 59,985 | 136 | 20,737 | 5,769 | 3,211 | 29,853 |
| 59,986 | 139 | 20,495 | 5,723 | 3,185 | 29,542 |
| 59,987 | 136 | 20,189 | 5,683 | 3,158 | 29,166 |
| 59,988 | 137 | 20,377 | 5,765 | 3,190 | 29,469 |
| 59,989 | 137 | 20,253 | 5,769 | 3,181 | 29,340 |
| 59,990 | 134 | 20,067 | 5,805 | 3,176 | 29,182 |
| 59,991 | 132 | 19,987 | 5,867 | 3,202 | 29,188 |

|        |     |        |       |       |        |
|--------|-----|--------|-------|-------|--------|
| 59,992 | 131 | 20,064 | 5,865 | 3,216 | 29,276 |
| 59,993 | 125 | 20,099 | 5,913 | 3,219 | 29,356 |
| 59,994 | 131 | 20,050 | 5,905 | 3,207 | 29,293 |
| 59,995 | 130 | 19,914 | 5,910 | 3,201 | 29,155 |
| 59,996 | 129 | 20,115 | 6,022 | 3,241 | 29,507 |
| 59,997 | 128 | 20,119 | 6,011 | 3,252 | 29,510 |
| 59,998 | 130 | 20,113 | 5,981 | 3,215 | 29,439 |
| 59,999 | 133 | 20,243 | 6,037 | 3,250 | 29,663 |
| 60,000 | 132 | 20,118 | 6,040 | 3,233 | 29,523 |
| 60,001 | 133 | 20,017 | 6,023 | 3,243 | 29,416 |
| 60,002 | 133 | 19,961 | 6,033 | 3,236 | 29,363 |
| 60,003 | 133 | 20,015 | 6,044 | 3,236 | 29,428 |
| 60,004 | 132 | 19,859 | 6,021 | 3,181 | 29,193 |
| 60,005 | 134 | 20,229 | 6,098 | 3,227 | 29,688 |
| 60,006 | 129 | 20,056 | 6,039 | 3,181 | 29,405 |
| 60,007 | 130 | 20,202 | 6,095 | 3,218 | 29,645 |
| 60,008 | 132 | 20,547 | 6,184 | 3,259 | 30,122 |
| 60,009 | 132 | 20,568 | 6,187 | 3,273 | 30,160 |
| 60,010 | 133 | 20,250 | 6,104 | 3,231 | 29,718 |
| 60,011 | 136 | 20,385 | 6,126 | 3,236 | 29,883 |
| 60,012 | 136 | 20,412 | 6,136 | 3,216 | 29,900 |
| 60,013 | 131 | 20,501 | 6,184 | 3,225 | 30,041 |
| 60,014 | 133 | 20,617 | 6,274 | 3,254 | 30,278 |
| 60,015 | 127 | 20,567 | 6,215 | 3,247 | 30,156 |
| 60,016 | 127 | 20,435 | 6,157 | 3,222 | 29,941 |
| 60,017 | 136 | 20,504 | 6,190 | 3,231 | 30,061 |
| 60,018 | 128 | 20,313 | 6,150 | 3,202 | 29,793 |
| 60,019 | 126 | 20,322 | 6,144 | 3,213 | 29,805 |
| 60,020 | 130 | 20,296 | 6,140 | 3,204 | 29,770 |
| 60,021 | 130 | 20,106 | 6,118 | 3,167 | 29,521 |
| 60,022 | 132 | 20,338 | 6,186 | 3,211 | 29,867 |
| 60,023 | 137 | 20,437 | 6,185 | 3,214 | 29,973 |

|        |     |        |       |       |        |
|--------|-----|--------|-------|-------|--------|
| 60,024 | 141 | 20,450 | 6,206 | 3,225 | 30,022 |
| 60,025 | 146 | 20,469 | 6,218 | 3,208 | 30,041 |
| 60,026 | 155 | 20,635 | 6,290 | 3,241 | 30,321 |
| 60,027 | 154 | 20,375 | 6,230 | 3,216 | 29,975 |
| 60,028 | 158 | 20,675 | 6,308 | 3,239 | 30,380 |
| 60,029 | 155 | 20,262 | 6,243 | 3,225 | 29,885 |
| 60,030 | 154 | 20,168 | 6,250 | 3,218 | 29,790 |
| 60,031 | 150 | 20,241 | 6,265 | 3,254 | 29,910 |
| 60,032 | 147 | 19,872 | 6,168 | 3,207 | 29,394 |
| 60,033 | 146 | 19,970 | 6,224 | 3,249 | 29,589 |
| 60,034 | 144 | 20,006 | 6,273 | 3,253 | 29,676 |
| 60,035 | 133 | 19,652 | 6,127 | 3,170 | 29,082 |
| 60,036 | 136 | 19,770 | 6,165 | 3,173 | 29,244 |
| 60,037 | 135 | 19,962 | 6,218 | 3,203 | 29,518 |
| 60,038 | 134 | 19,972 | 6,211 | 3,187 | 29,504 |
| 60,039 | 132 | 19,950 | 6,163 | 3,183 | 29,428 |
| 60,040 | 133 | 19,929 | 6,104 | 3,160 | 29,326 |
| 60,041 | 130 | 20,108 | 6,089 | 3,168 | 29,495 |
| 60,042 | 125 | 20,113 | 6,032 | 3,159 | 29,429 |
| 60,043 | 125 | 19,884 | 5,966 | 3,128 | 29,103 |
| 60,044 | 123 | 19,596 | 5,842 | 3,073 | 28,634 |
| 60,045 | 117 | 19,843 | 5,854 | 3,122 | 28,936 |
| 60,046 | 122 | 19,605 | 5,706 | 3,052 | 28,485 |
| 60,047 | 125 | 19,663 | 5,684 | 3,052 | 28,524 |
| 60,048 | 126 | 19,435 | 5,655 | 3,039 | 28,255 |
| 60,049 | 125 | 19,375 | 5,663 | 3,035 | 28,198 |
| 60,050 | 123 | 19,275 | 5,640 | 2,999 | 28,037 |
| 60,051 | 123 | 19,280 | 5,620 | 3,015 | 28,038 |
| 60,052 | 124 | 19,370 | 5,624 | 3,010 | 28,128 |
| 60,053 | 123 | 19,070 | 5,526 | 2,932 | 27,651 |
| 60,054 | 123 | 19,077 | 5,531 | 2,937 | 27,668 |
| 60,055 | 122 | 18,922 | 5,474 | 2,911 | 27,429 |

|        |     |        |       |       |        |
|--------|-----|--------|-------|-------|--------|
| 60,056 | 122 | 19,432 | 5,581 | 2,964 | 28,099 |
| 60,057 | 121 | 19,215 | 5,556 | 2,963 | 27,855 |
| 60,058 | 123 | 19,160 | 5,543 | 2,944 | 27,770 |
| 60,059 | 121 | 18,976 | 5,514 | 2,925 | 27,536 |
| 60,060 | 124 | 18,705 | 5,448 | 2,871 | 27,148 |
| 60,061 | 123 | 18,615 | 5,402 | 2,833 | 26,973 |
| 60,062 | 120 | 18,823 | 5,474 | 2,892 | 27,309 |
| 60,063 | 119 | 18,819 | 5,453 | 2,897 | 27,288 |
| 60,064 | 108 | 18,078 | 5,172 | 2,770 | 26,128 |
| 60,065 | 109 | 18,286 | 5,186 | 2,783 | 26,364 |
| 60,066 | 109 | 18,499 | 5,264 | 2,811 | 26,683 |
| 60,067 | 108 | 18,536 | 5,262 | 2,802 | 26,708 |
| 60,068 | 107 | 18,746 | 5,362 | 2,845 | 27,060 |
| 60,069 | 107 | 18,679 | 5,396 | 2,840 | 27,022 |
| 60,070 | 104 | 18,621 | 5,390 | 2,829 | 26,944 |
| 60,071 | 104 | 18,508 | 5,395 | 2,833 | 26,840 |
| 60,072 | 101 | 18,382 | 5,368 | 2,823 | 26,674 |
| 60,073 | 102 | 18,435 | 5,387 | 2,837 | 26,761 |
| 60,074 | 93  | 18,442 | 5,365 | 2,807 | 26,707 |
| 60,075 | 89  | 18,428 | 5,332 | 2,777 | 26,626 |
| 60,076 | 87  | 18,425 | 5,310 | 2,757 | 26,579 |
| 60,077 | 78  | 18,168 | 5,218 | 2,710 | 26,174 |
| 60,078 | 84  | 18,246 | 5,264 | 2,731 | 26,325 |
| 60,079 | 82  | 18,193 | 5,254 | 2,732 | 26,261 |
| 60,080 | 90  | 18,165 | 5,156 | 2,693 | 26,104 |
| 60,081 | 90  | 18,228 | 5,149 | 2,680 | 26,147 |
| 60,082 | 101 | 18,418 | 5,192 | 2,714 | 26,425 |
| 60,083 | 101 | 18,535 | 5,207 | 2,719 | 26,562 |
| 60,084 | 102 | 18,473 | 5,192 | 2,706 | 26,473 |
| 60,085 | 101 | 18,129 | 5,086 | 2,669 | 25,985 |
| 60,086 | 100 | 17,971 | 5,077 | 2,666 | 25,814 |
| 60,087 | 97  | 17,950 | 5,079 | 2,689 | 25,815 |

|        |     |        |       |       |        |
|--------|-----|--------|-------|-------|--------|
| 60,088 | 97  | 18,074 | 5,142 | 2,718 | 26,031 |
| 60,089 | 96  | 18,061 | 5,109 | 2,712 | 25,978 |
| 60,090 | 96  | 17,887 | 5,062 | 2,686 | 25,731 |
| 60,091 | 95  | 17,870 | 5,061 | 2,677 | 25,703 |
| 60,092 | 102 | 17,982 | 5,080 | 2,680 | 25,844 |
| 60,093 | 102 | 17,887 | 5,082 | 2,672 | 25,743 |
| 60,094 | 104 | 17,768 | 5,067 | 2,663 | 25,602 |
| 60,095 | 107 | 17,625 | 5,068 | 2,633 | 25,433 |
| 60,096 | 112 | 17,570 | 5,036 | 2,611 | 25,329 |
| 60,097 | 110 | 17,714 | 5,049 | 2,614 | 25,487 |
| 60,098 | 107 | 17,595 | 5,005 | 2,573 | 25,280 |
| 60,099 | 108 | 17,914 | 5,091 | 2,607 | 25,720 |
| 60,100 | 107 | 17,786 | 5,033 | 2,581 | 25,507 |
| 60,101 | 110 | 18,040 | 5,105 | 2,620 | 25,875 |
| 60,102 | 108 | 17,830 | 5,040 | 2,582 | 25,560 |
| 60,103 | 108 | 17,774 | 5,044 | 2,584 | 25,510 |
| 60,104 | 109 | 17,690 | 5,035 | 2,599 | 25,433 |
| 60,105 | 109 | 17,708 | 5,057 | 2,632 | 25,506 |
| 60,106 | 111 | 17,501 | 5,038 | 2,623 | 25,273 |
| 60,107 | 112 | 17,283 | 4,997 | 2,601 | 24,993 |
| 60,108 | 111 | 17,177 | 4,936 | 2,560 | 24,784 |
| 60,109 | 110 | 16,878 | 4,805 | 2,503 | 24,296 |
| 60,110 | 110 | 16,885 | 4,785 | 2,484 | 24,264 |
| 60,111 | 106 | 16,568 | 4,703 | 2,469 | 23,846 |
| 60,112 | 107 | 16,682 | 4,707 | 2,472 | 23,968 |
| 60,113 | 107 | 16,603 | 4,701 | 2,445 | 23,856 |
| 60,114 | 109 | 16,450 | 4,641 | 2,430 | 23,630 |
| 60,115 | 112 | 16,342 | 4,624 | 2,422 | 23,500 |
| 60,116 | 111 | 15,753 | 4,488 | 2,341 | 22,693 |
| 60,117 | 110 | 15,760 | 4,477 | 2,327 | 22,674 |
| 60,118 | 111 | 15,709 | 4,425 | 2,297 | 22,542 |
| 60,119 | 111 | 15,884 | 4,411 | 2,294 | 22,700 |

|        |     |        |       |       |        |
|--------|-----|--------|-------|-------|--------|
| 60,120 | 113 | 15,923 | 4,400 | 2,302 | 22,738 |
| 60,121 | 113 | 15,692 | 4,334 | 2,272 | 22,411 |
| 60,122 | 113 | 15,767 | 4,293 | 2,273 | 22,446 |
| 60,123 | 116 | 15,690 | 4,272 | 2,229 | 22,307 |
| 60,124 | 117 | 15,553 | 4,247 | 2,214 | 22,131 |
| 60,125 | 118 | 15,288 | 4,204 | 2,197 | 21,807 |
| 60,126 | 118 | 15,241 | 4,176 | 2,179 | 21,714 |
| 60,127 | 120 | 15,335 | 4,227 | 2,213 | 21,895 |
| 60,128 | 119 | 15,337 | 4,246 | 2,191 | 21,893 |
| 60,129 | 115 | 15,078 | 4,159 | 2,181 | 21,533 |
| 60,130 | 112 | 15,017 | 4,133 | 2,154 | 21,416 |
| 60,131 | 106 | 15,115 | 4,177 | 2,159 | 21,557 |
| 60,132 | 106 | 15,022 | 4,176 | 2,153 | 21,457 |
| 60,133 | 104 | 14,939 | 4,150 | 2,129 | 21,322 |
| 60,134 | 104 | 14,831 | 4,133 | 2,099 | 21,167 |
| 60,135 | 107 | 14,880 | 4,168 | 2,094 | 21,249 |
| 60,136 | 111 | 15,008 | 4,217 | 2,102 | 21,438 |
| 60,137 | 114 | 14,810 | 4,177 | 2,064 | 21,165 |
| 60,138 | 116 | 14,694 | 4,134 | 2,029 | 20,973 |
| 60,139 | 118 | 14,881 | 4,203 | 2,095 | 21,297 |
| 60,140 | 119 | 14,775 | 4,178 | 2,077 | 21,149 |
| 60,141 | 119 | 15,159 | 4,328 | 2,153 | 21,759 |
| 60,142 | 117 | 15,041 | 4,302 | 2,124 | 21,584 |
| 60,143 | 111 | 15,247 | 4,403 | 2,171 | 21,932 |
| 60,144 | 112 | 15,612 | 4,513 | 2,242 | 22,479 |
| 60,145 | 109 | 15,461 | 4,480 | 2,221 | 22,271 |
| 60,146 | 107 | 15,467 | 4,503 | 2,232 | 22,309 |
| 60,147 | 102 | 15,808 | 4,684 | 2,321 | 22,915 |
| 60,148 | 100 | 15,590 | 4,669 | 2,331 | 22,690 |
| 60,149 | 102 | 15,258 | 4,599 | 2,327 | 22,286 |
| 60,150 | 105 | 15,296 | 4,624 | 2,320 | 22,345 |
| 60,151 | 104 | 15,343 | 4,636 | 2,329 | 22,412 |



|        |     |        |       |       |        |
|--------|-----|--------|-------|-------|--------|
| 60,152 | 104 | 15,354 | 4,672 | 2,350 | 22,480 |
| 60,153 | 106 | 15,286 | 4,707 | 2,361 | 22,460 |
| 60,154 | 107 | 15,310 | 4,707 | 2,384 | 22,508 |
| 60,155 | 110 | 14,954 | 4,575 | 2,334 | 21,973 |
| 60,156 | 108 | 15,129 | 4,603 | 2,324 | 22,164 |
| 60,157 | 108 | 15,308 | 4,634 | 2,340 | 22,390 |
| 60,158 | 107 | 15,300 | 4,653 | 2,356 | 22,416 |
| 60,159 | 107 | 15,430 | 4,690 | 2,376 | 22,603 |
| 60,160 | 109 | 15,332 | 4,717 | 2,359 | 22,517 |
| 60,161 | 111 | 15,447 | 4,736 | 2,364 | 22,658 |
| 60,162 | 115 | 15,630 | 4,798 | 2,395 | 22,938 |
| 60,163 | 114 | 15,678 | 4,847 | 2,409 | 23,048 |
| 60,164 | 117 | 15,540 | 4,875 | 2,423 | 22,955 |
| 60,165 | 116 | 15,463 | 4,865 | 2,406 | 22,850 |
| 60,166 | 121 | 15,706 | 4,948 | 2,453 | 23,228 |
| 60,167 | 124 | 15,564 | 4,937 | 2,471 | 23,096 |
| 60,168 | 124 | 15,432 | 4,902 | 2,457 | 22,915 |
| 60,169 | 125 | 15,668 | 5,039 | 2,532 | 23,364 |
| 60,170 | 127 | 15,416 | 5,016 | 2,516 | 23,075 |
| 60,171 | 129 | 15,451 | 5,015 | 2,510 | 23,105 |
| 60,172 | 125 | 15,575 | 5,057 | 2,528 | 23,285 |
| 60,173 | 124 | 15,486 | 5,074 | 2,506 | 23,190 |
| 60,174 | 120 | 15,441 | 5,062 | 2,509 | 23,132 |
| 60,175 | 121 | 15,307 | 5,048 | 2,519 | 22,995 |
| 60,176 | 120 | 15,307 | 5,034 | 2,506 | 22,967 |
| 60,177 | 116 | 15,318 | 5,049 | 2,514 | 22,997 |
| 60,178 | 115 | 15,158 | 5,009 | 2,510 | 22,792 |
| 60,179 | 116 | 14,857 | 4,935 | 2,488 | 22,396 |
| 60,180 | 115 | 14,790 | 4,925 | 2,474 | 22,304 |
| 60,181 | 112 | 14,754 | 4,929 | 2,472 | 22,267 |
| 60,182 | 112 | 14,636 | 4,900 | 2,463 | 22,111 |
| 60,183 | 105 | 14,633 | 4,934 | 2,492 | 22,164 |

|        |     |        |       |       |        |
|--------|-----|--------|-------|-------|--------|
| 60,184 | 103 | 14,409 | 4,886 | 2,463 | 21,861 |
| 60,185 | 102 | 14,175 | 4,822 | 2,443 | 21,542 |
| 60,186 | 96  | 14,303 | 4,888 | 2,499 | 21,786 |
| 60,187 | 91  | 14,016 | 4,791 | 2,475 | 21,373 |
| 60,188 | 93  | 14,057 | 4,817 | 2,475 | 21,442 |
| 60,189 | 90  | 13,864 | 4,778 | 2,449 | 21,181 |
| 60,190 | 92  | 13,791 | 4,761 | 2,433 | 21,077 |
| 60,191 | 94  | 13,550 | 4,698 | 2,409 | 20,751 |
| 60,192 | 94  | 13,325 | 4,628 | 2,368 | 20,415 |
| 60,193 | 98  | 13,037 | 4,525 | 2,319 | 19,979 |
| 60,194 | 95  | 12,905 | 4,473 | 2,287 | 19,760 |
| 60,195 | 95  | 12,643 | 4,425 | 2,275 | 19,438 |
| 60,196 | 94  | 12,549 | 4,404 | 2,256 | 19,303 |
| 60,197 | 96  | 12,344 | 4,321 | 2,226 | 18,987 |
| 60,198 | 103 | 12,180 | 4,252 | 2,192 | 18,727 |
| 60,199 | 102 | 12,129 | 4,223 | 2,160 | 18,614 |
| 60,200 | 96  | 12,075 | 4,204 | 2,159 | 18,534 |
| 60,201 | 93  | 11,983 | 4,181 | 2,161 | 18,418 |
| 60,202 | 95  | 12,040 | 4,189 | 2,171 | 18,495 |
| 60,203 | 97  | 12,125 | 4,185 | 2,153 | 18,560 |
| 60,204 | 100 | 12,088 | 4,142 | 2,123 | 18,453 |
| 60,205 | 98  | 11,868 | 4,105 | 2,087 | 18,158 |
| 60,206 | 94  | 11,950 | 4,177 | 2,141 | 18,362 |
| 60,207 | 97  | 12,020 | 4,214 | 2,159 | 18,490 |
| 60,208 | 98  | 12,123 | 4,204 | 2,174 | 18,599 |
| 60,209 | 104 | 12,343 | 4,252 | 2,190 | 18,889 |
| 60,210 | 104 | 12,275 | 4,236 | 2,190 | 18,805 |
| 60,211 | 104 | 12,653 | 4,339 | 2,290 | 19,386 |
| 60,212 | 102 | 12,841 | 4,418 | 2,333 | 19,694 |
| 60,213 | 100 | 13,063 | 4,486 | 2,350 | 19,999 |
| 60,214 | 98  | 13,236 | 4,563 | 2,411 | 20,308 |
| 60,215 | 99  | 13,585 | 4,653 | 2,466 | 20,803 |

|        |     |        |       |       |        |
|--------|-----|--------|-------|-------|--------|
| 60,216 | 102 | 13,456 | 4,644 | 2,447 | 20,649 |
| 60,217 | 96  | 13,321 | 4,646 | 2,440 | 20,503 |
| 60,218 | 97  | 13,866 | 4,816 | 2,517 | 21,296 |
| 60,219 | 99  | 14,169 | 4,967 | 2,623 | 21,858 |
| 60,220 | 100 | 14,282 | 5,028 | 2,651 | 22,061 |
| 60,221 | 97  | 14,308 | 5,069 | 2,691 | 22,165 |
| 60,222 | 94  | 14,297 | 5,121 | 2,729 | 22,241 |
| 60,223 | 99  | 14,334 | 5,149 | 2,749 | 22,331 |
| 60,224 | 100 | 14,383 | 5,160 | 2,772 | 22,415 |
| 60,225 | 102 | 14,326 | 5,160 | 2,757 | 22,345 |
| 60,226 | 105 | 14,196 | 5,114 | 2,729 | 22,144 |
| 60,227 | 105 | 14,162 | 5,105 | 2,727 | 22,099 |
| 60,228 | 105 | 14,011 | 5,059 | 2,695 | 21,870 |
| 60,229 | 105 | 13,935 | 5,017 | 2,675 | 21,732 |
| 60,230 | 103 | 13,835 | 4,965 | 2,646 | 21,549 |
| 60,231 | 101 | 13,730 | 4,920 | 2,628 | 21,379 |
| 60,232 | 101 | 13,647 | 4,885 | 2,614 | 21,247 |
| 60,233 | 101 | 13,576 | 4,856 | 2,594 | 21,127 |
| 60,234 | 101 | 13,413 | 4,807 | 2,548 | 20,869 |
| 60,235 | 98  | 13,333 | 4,747 | 2,525 | 20,703 |
| 60,236 | 102 | 13,177 | 4,699 | 2,495 | 20,473 |
| 60,237 | 103 | 13,008 | 4,672 | 2,468 | 20,251 |
| 60,238 | 101 | 12,816 | 4,631 | 2,435 | 19,983 |
| 60,239 | 100 | 12,624 | 4,560 | 2,400 | 19,684 |
| 60,240 | 98  | 12,432 | 4,496 | 2,366 | 19,392 |
| 60,241 | 96  | 12,285 | 4,452 | 2,343 | 19,176 |
| 60,242 | 91  | 12,123 | 4,393 | 2,310 | 18,917 |
| 60,243 | 91  | 11,952 | 4,362 | 2,287 | 18,692 |
| 60,244 | 88  | 11,743 | 4,303 | 2,258 | 18,392 |
| 60,245 | 88  | 11,615 | 4,249 | 2,220 | 18,172 |
| 60,246 | 86  | 11,507 | 4,197 | 2,183 | 17,973 |
| 60,247 | 87  | 11,311 | 4,127 | 2,154 | 17,679 |

|        |     |        |       |       |        |
|--------|-----|--------|-------|-------|--------|
| 60,248 | 85  | 11,212 | 4,088 | 2,141 | 17,526 |
| 60,249 | 79  | 10,979 | 4,030 | 2,093 | 17,181 |
| 60,250 | 78  | 10,805 | 3,966 | 2,046 | 16,895 |
| 60,251 | 79  | 10,780 | 3,959 | 2,043 | 16,861 |
| 60,252 | 77  | 10,536 | 3,881 | 2,001 | 16,495 |
| 60,253 | 76  | 10,475 | 3,859 | 2,003 | 16,413 |
| 60,254 | 72  | 10,299 | 3,801 | 1,969 | 16,141 |
| 60,255 | 71  | 10,078 | 3,690 | 1,908 | 15,747 |
| 60,256 | 71  | 10,100 | 3,696 | 1,898 | 15,765 |
| 60,257 | 69  | 9,832  | 3,631 | 1,855 | 15,387 |
| 60,258 | 68  | 9,825  | 3,650 | 1,843 | 15,386 |
| 60,259 | 67  | 9,615  | 3,622 | 1,798 | 15,102 |
| 60,260 | 61  | 9,305  | 3,548 | 1,755 | 14,669 |
| 60,261 | 60  | 9,051  | 3,481 | 1,693 | 14,285 |
| 60,262 | 61  | 9,146  | 3,488 | 1,692 | 14,387 |
| 60,263 | 73  | 9,445  | 3,555 | 1,751 | 14,824 |
| 60,264 | 82  | 10,626 | 3,769 | 1,935 | 16,412 |
| 60,265 | 82  | 10,969 | 3,780 | 1,956 | 16,787 |
| 60,266 | 88  | 11,319 | 3,847 | 1,993 | 17,247 |
| 60,267 | 83  | 11,344 | 3,742 | 1,995 | 17,164 |
| 60,268 | 87  | 11,627 | 3,718 | 1,993 | 17,425 |
| 60,269 | 100 | 11,977 | 3,706 | 2,008 | 17,791 |
| 60,270 | 102 | 12,323 | 3,676 | 2,018 | 18,119 |
| 60,271 | 107 | 12,558 | 3,650 | 2,008 | 18,323 |
| 60,272 | 109 | 12,907 | 3,652 | 2,037 | 18,705 |
| 60,273 | 104 | 13,202 | 3,656 | 2,074 | 19,036 |
| 60,274 | 102 | 13,435 | 3,693 | 2,111 | 19,341 |
| 60,275 | 105 | 13,670 | 3,698 | 2,151 | 19,624 |
| 60,276 | 104 | 14,058 | 3,768 | 2,204 | 20,134 |
| 60,277 | 109 | 14,507 | 3,856 | 2,265 | 20,737 |
| 60,278 | 110 | 15,010 | 3,948 | 2,363 | 21,431 |
| 60,279 | 110 | 15,482 | 4,045 | 2,446 | 22,083 |

|        |     |        |       |       |        |
|--------|-----|--------|-------|-------|--------|
| 60,280 | 108 | 15,891 | 4,116 | 2,509 | 22,624 |
| 60,281 | 113 | 16,510 | 4,257 | 2,595 | 23,475 |
| 60,282 | 114 | 17,063 | 4,362 | 2,680 | 24,219 |
| 60,283 | 115 | 17,565 | 4,488 | 2,752 | 24,920 |
| 60,284 | 116 | 18,022 | 4,585 | 2,831 | 25,554 |
| 60,285 | 117 | 18,467 | 4,680 | 2,900 | 26,164 |
| 60,286 | 114 | 18,881 | 4,745 | 2,960 | 26,700 |
| 60,287 | 118 | 19,124 | 4,817 | 3,034 | 27,093 |
| 60,288 | 119 | 19,592 | 4,912 | 3,118 | 27,741 |
| 60,289 | 123 | 19,974 | 5,004 | 3,185 | 28,286 |
| 60,290 | 125 | 20,121 | 5,085 | 3,224 | 28,555 |
| 60,291 | 126 | 20,264 | 5,118 | 3,252 | 28,760 |
| 60,292 | 127 | 20,902 | 5,260 | 3,334 | 29,623 |
| 60,293 | 128 | 21,280 | 5,324 | 3,384 | 30,116 |
| 60,294 | 128 | 21,676 | 5,424 | 3,424 | 30,652 |
| 60,295 | 130 | 22,024 | 5,493 | 3,490 | 31,137 |
| 60,296 | 131 | 22,157 | 5,565 | 3,519 | 31,372 |
| 60,297 | 137 | 22,703 | 5,674 | 3,596 | 32,110 |
| 60,298 | 139 | 23,053 | 5,738 | 3,647 | 32,577 |
| 60,299 | 149 | 23,436 | 5,822 | 3,696 | 33,103 |
| 60,300 | 151 | 23,559 | 5,864 | 3,722 | 33,296 |
| 60,301 | 154 | 24,008 | 5,977 | 3,800 | 33,939 |
| 60,302 | 154 | 24,169 | 6,014 | 3,822 | 34,159 |
| 60,303 | 156 | 24,479 | 6,057 | 3,880 | 34,572 |
| 60,304 | 165 | 24,736 | 6,108 | 3,921 | 34,930 |
| 60,305 | 166 | 24,811 | 6,126 | 3,940 | 35,043 |
| 60,306 | 171 | 25,160 | 6,216 | 4,023 | 35,570 |
| 60,307 | 178 | 25,257 | 6,246 | 4,046 | 35,727 |
| 60,308 | 178 | 25,242 | 6,254 | 4,050 | 35,724 |
| 60,309 | 182 | 25,719 | 6,380 | 4,131 | 36,412 |
| 60,310 | 184 | 25,793 | 6,400 | 4,179 | 36,556 |
| 60,311 | 190 | 25,875 | 6,415 | 4,165 | 36,645 |

|        |     |        |       |       |        |
|--------|-----|--------|-------|-------|--------|
| 60,312 | 187 | 25,833 | 6,377 | 4,176 | 36,573 |
| 60,313 | 187 | 25,743 | 6,394 | 4,182 | 36,506 |
| 60,314 | 183 | 25,508 | 6,373 | 4,161 | 36,225 |
| 60,315 | 177 | 25,489 | 6,395 | 4,164 | 36,225 |
| 60,316 | 175 | 25,441 | 6,414 | 4,164 | 36,194 |
| 60,317 | 170 | 25,024 | 6,343 | 4,124 | 35,661 |
| 60,318 | 168 | 24,937 | 6,350 | 4,103 | 35,558 |
| 60,319 | 166 | 24,961 | 6,406 | 4,127 | 35,660 |
| 60,320 | 154 | 24,865 | 6,436 | 4,089 | 35,544 |
| 60,321 | 147 | 24,566 | 6,405 | 4,054 | 35,172 |
| 60,322 | 144 | 24,519 | 6,434 | 4,081 | 35,178 |
| 60,323 | 145 | 24,329 | 6,422 | 4,021 | 34,917 |
| 60,324 | 146 | 24,250 | 6,400 | 3,998 | 34,794 |
| 60,325 | 152 | 24,426 | 6,475 | 4,020 | 35,073 |
| 60,326 | 147 | 24,121 | 6,469 | 3,978 | 34,715 |
| 60,327 | 144 | 24,040 | 6,541 | 4,014 | 34,739 |
| 60,328 | 141 | 23,823 | 6,537 | 4,008 | 34,509 |
| 60,329 | 139 | 23,700 | 6,536 | 3,984 | 34,359 |
| 60,330 | 143 | 23,658 | 6,542 | 3,970 | 34,313 |
| 60,331 | 149 | 23,613 | 6,557 | 3,962 | 34,281 |
| 60,332 | 150 | 23,498 | 6,539 | 3,942 | 34,129 |
| 60,333 | 152 | 23,308 | 6,529 | 3,916 | 33,905 |
| 60,334 | 152 | 22,912 | 6,391 | 3,862 | 33,317 |
| 60,335 | 153 | 23,007 | 6,448 | 3,891 | 33,499 |
| 60,336 | 156 | 22,894 | 6,434 | 3,866 | 33,350 |
| 60,337 | 157 | 22,627 | 6,327 | 3,790 | 32,901 |
| 60,338 | 157 | 22,578 | 6,336 | 3,772 | 32,843 |
| 60,339 | 155 | 22,615 | 6,357 | 3,793 | 32,920 |
| 60,340 | 150 | 22,115 | 6,160 | 3,693 | 32,118 |
| 60,341 | 150 | 22,026 | 6,141 | 3,703 | 32,020 |
| 60,342 | 151 | 21,646 | 6,077 | 3,653 | 31,527 |
| 60,343 | 151 | 21,323 | 6,038 | 3,596 | 31,108 |

|        |     |        |       |       |        |
|--------|-----|--------|-------|-------|--------|
| 60,344 | 179 | 22,090 | 6,266 | 3,753 | 32,288 |
| 60,345 | 181 | 21,852 | 6,206 | 3,726 | 31,965 |
| 60,346 | 181 | 21,863 | 6,206 | 3,721 | 31,971 |
| 60,347 | 180 | 21,808 | 6,177 | 3,708 | 31,873 |
| 60,348 | 176 | 21,651 | 6,157 | 3,687 | 31,671 |
| 60,349 | 179 | 21,790 | 6,196 | 3,699 | 31,864 |
| 60,350 | 179 | 21,695 | 6,198 | 3,701 | 31,773 |
| 60,351 | 174 | 21,520 | 6,137 | 3,653 | 31,484 |
| 60,352 | 172 | 21,454 | 6,148 | 3,646 | 31,420 |
| 60,353 | 172 | 21,430 | 6,145 | 3,633 | 31,380 |
| 60,354 | 176 | 21,646 | 6,221 | 3,662 | 31,705 |
| 60,355 | 170 | 21,581 | 6,226 | 3,645 | 31,622 |
| 60,356 | 170 | 21,644 | 6,241 | 3,640 | 31,695 |
| 60,357 | 156 | 21,682 | 6,228 | 3,645 | 31,711 |
| 60,358 | 156 | 21,462 | 6,209 | 3,648 | 31,475 |
| 60,359 | 151 | 21,603 | 6,278 | 3,658 | 31,690 |
| 60,360 | 147 | 21,863 | 6,378 | 3,672 | 32,060 |
| 60,361 | 140 | 21,820 | 6,355 | 3,681 | 31,996 |
| 60,362 | 140 | 21,757 | 6,411 | 3,648 | 31,956 |
| 60,363 | 137 | 21,988 | 6,455 | 3,663 | 32,243 |
| 60,364 | 133 | 21,730 | 6,377 | 3,600 | 31,840 |
| 60,365 | 136 | 22,134 | 6,496 | 3,632 | 32,398 |
| 60,366 | 136 | 22,028 | 6,473 | 3,636 | 32,273 |
| 60,367 | 134 | 21,760 | 6,396 | 3,598 | 31,888 |
| 60,368 | 134 | 21,350 | 6,292 | 3,537 | 31,313 |
| 60,369 | 134 | 20,812 | 6,191 | 3,489 | 30,626 |
| 60,370 | 137 | 21,112 | 6,280 | 3,576 | 31,105 |
| 60,371 | 134 | 20,819 | 6,195 | 3,579 | 30,727 |
| 60,372 | 135 | 20,697 | 6,123 | 3,542 | 30,497 |
| 60,373 | 137 | 20,427 | 6,036 | 3,501 | 30,101 |
| 60,374 | 135 | 20,144 | 5,968 | 3,484 | 29,731 |
| 60,375 | 141 | 20,224 | 5,986 | 3,469 | 29,820 |

|        |     |        |       |       |        |
|--------|-----|--------|-------|-------|--------|
| 60,376 | 137 | 20,143 | 5,941 | 3,425 | 29,646 |
| 60,377 | 136 | 20,001 | 5,807 | 3,382 | 29,326 |
| 60,378 | 146 | 20,204 | 5,882 | 3,396 | 29,628 |
| 60,379 | 149 | 20,301 | 5,873 | 3,388 | 29,711 |
| 60,380 | 159 | 20,239 | 5,850 | 3,353 | 29,601 |
| 60,381 | 162 | 19,970 | 5,791 | 3,305 | 29,228 |
| 60,382 | 156 | 19,704 | 5,712 | 3,255 | 28,827 |
| 60,383 | 154 | 19,956 | 5,796 | 3,310 | 29,216 |
| 60,384 | 153 | 19,786 | 5,729 | 3,276 | 28,944 |
| 60,385 | 158 | 19,824 | 5,753 | 3,245 | 28,980 |
| 60,386 | 158 | 19,830 | 5,737 | 3,236 | 28,961 |
| 60,387 | 155 | 19,850 | 5,765 | 3,256 | 29,026 |
| 60,388 | 151 | 19,936 | 5,784 | 3,260 | 29,131 |
| 60,389 | 153 | 19,979 | 5,775 | 3,260 | 29,167 |
| 60,390 | 154 | 19,935 | 5,738 | 3,207 | 29,034 |
| 60,391 | 155 | 20,185 | 5,787 | 3,218 | 29,345 |
| 60,392 | 147 | 20,393 | 5,857 | 3,251 | 29,648 |
| 60,393 | 138 | 20,498 | 5,825 | 3,264 | 29,725 |
| 60,394 | 130 | 20,515 | 5,810 | 3,277 | 29,732 |
| 60,395 | 133 | 20,563 | 5,800 | 3,306 | 29,802 |
| 60,396 | 134 | 20,443 | 5,762 | 3,288 | 29,627 |
| 60,397 | 134 | 20,343 | 5,740 | 3,281 | 29,498 |
| 60,398 | 132 | 20,651 | 5,794 | 3,323 | 29,900 |
| 60,399 | 133 | 20,959 | 5,859 | 3,376 | 30,327 |
| 60,400 | 129 | 21,001 | 5,853 | 3,372 | 30,355 |
| 60,401 | 119 | 20,746 | 5,749 | 3,346 | 29,960 |
| 60,402 | 119 | 20,817 | 5,757 | 3,363 | 30,056 |
| 60,403 | 119 | 20,838 | 5,728 | 3,356 | 30,041 |
| 60,404 | 117 | 20,601 | 5,671 | 3,343 | 29,732 |
| 60,405 | 115 | 20,829 | 5,760 | 3,393 | 30,097 |
| 60,406 | 112 | 20,909 | 5,750 | 3,409 | 30,180 |
| 60,407 | 116 | 21,011 | 5,753 | 3,423 | 30,303 |



|        |     |        |       |       |        |
|--------|-----|--------|-------|-------|--------|
| 60,408 | 121 | 20,819 | 5,718 | 3,395 | 30,053 |
| 60,409 | 121 | 20,714 | 5,653 | 3,368 | 29,856 |
| 60,410 | 126 | 21,109 | 5,723 | 3,442 | 30,400 |
| 60,411 | 130 | 20,793 | 5,598 | 3,383 | 29,904 |
| 60,412 | 129 | 20,599 | 5,464 | 3,331 | 29,523 |
| 60,413 | 133 | 20,595 | 5,422 | 3,328 | 29,478 |
| 60,414 | 131 | 20,065 | 5,309 | 3,269 | 28,774 |
| 60,415 | 134 | 20,434 | 5,347 | 3,337 | 29,252 |
| 60,416 | 138 | 20,522 | 5,317 | 3,341 | 29,318 |
| 60,417 | 142 | 20,281 | 5,267 | 3,286 | 28,976 |
| 60,418 | 142 | 20,416 | 5,267 | 3,282 | 29,107 |
| 60,419 | 146 | 20,493 | 5,288 | 3,295 | 29,222 |
| 60,420 | 149 | 20,556 | 5,265 | 3,271 | 29,241 |
| 60,421 | 157 | 20,513 | 5,253 | 3,247 | 29,170 |
| 60,422 | 161 | 20,687 | 5,312 | 3,272 | 29,432 |
| 60,423 | 161 | 20,281 | 5,229 | 3,214 | 28,885 |
| 60,424 | 160 | 20,237 | 5,233 | 3,201 | 28,831 |
| 60,425 | 156 | 20,052 | 5,176 | 3,152 | 28,536 |
| 60,426 | 153 | 19,796 | 5,131 | 3,133 | 28,213 |
| 60,427 | 159 | 20,244 | 5,312 | 3,274 | 28,989 |
| 60,428 | 162 | 20,443 | 5,350 | 3,305 | 29,260 |
| 60,429 | 152 | 20,281 | 5,291 | 3,291 | 29,015 |
| 60,430 | 155 | 20,349 | 5,330 | 3,326 | 29,160 |
| 60,431 | 150 | 20,359 | 5,363 | 3,340 | 29,212 |
| 60,432 | 145 | 20,119 | 5,307 | 3,295 | 28,866 |
| 60,433 | 151 | 20,120 | 5,316 | 3,312 | 28,899 |
| 60,434 | 153 | 20,151 | 5,325 | 3,293 | 28,922 |
| 60,435 | 152 | 19,952 | 5,275 | 3,266 | 28,645 |
| 60,436 | 147 | 20,042 | 5,391 | 3,332 | 28,912 |
| 60,437 | 147 | 19,885 | 5,348 | 3,302 | 28,682 |
| 60,438 | 147 | 19,561 | 5,264 | 3,289 | 28,261 |
| 60,439 | 146 | 19,555 | 5,244 | 3,289 | 28,234 |

|        |     |        |       |       |        |
|--------|-----|--------|-------|-------|--------|
| 60,440 | 144 | 19,298 | 5,188 | 3,255 | 27,885 |
| 60,441 | 140 | 19,056 | 5,152 | 3,227 | 27,575 |
| 60,442 | 151 | 20,075 | 5,557 | 3,423 | 29,206 |
| 60,443 | 151 | 19,763 | 5,468 | 3,388 | 28,770 |
| 60,444 | 159 | 20,020 | 5,620 | 3,447 | 29,246 |
| 60,445 | 159 | 19,978 | 5,625 | 3,428 | 29,190 |
| 60,446 | 155 | 20,351 | 5,801 | 3,534 | 29,841 |
| 60,447 | 150 | 20,090 | 5,748 | 3,484 | 29,472 |
| 60,448 | 161 | 20,654 | 5,903 | 3,583 | 30,301 |
| 60,449 | 162 | 20,700 | 5,946 | 3,588 | 30,396 |
| 60,450 | 163 | 20,823 | 6,032 | 3,632 | 30,650 |
| 60,451 | 164 | 20,902 | 6,044 | 3,660 | 30,770 |
| 60,452 | 163 | 20,647 | 6,015 | 3,620 | 30,445 |
| 60,453 | 172 | 20,925 | 6,096 | 3,673 | 30,866 |
| 60,454 | 176 | 20,810 | 6,078 | 3,649 | 30,713 |
| 60,455 | 176 | 20,752 | 6,093 | 3,645 | 30,666 |
| 60,456 | 178 | 20,971 | 6,201 | 3,709 | 31,059 |
| 60,457 | 182 | 20,978 | 6,250 | 3,713 | 31,123 |
| 60,458 | 178 | 20,692 | 6,194 | 3,662 | 30,726 |
| 60,459 | 174 | 20,574 | 6,202 | 3,640 | 30,590 |
| 60,460 | 179 | 20,734 | 6,269 | 3,669 | 30,851 |
| 60,461 | 174 | 20,497 | 6,204 | 3,640 | 30,515 |
| 60,462 | 181 | 20,505 | 6,235 | 3,681 | 30,602 |
| 60,463 | 180 | 20,432 | 6,224 | 3,669 | 30,505 |
| 60,464 | 177 | 20,413 | 6,267 | 3,699 | 30,556 |
| 60,465 | 184 | 20,390 | 6,296 | 3,731 | 30,601 |
| 60,466 | 183 | 20,204 | 6,347 | 3,726 | 30,460 |
| 60,467 | 182 | 20,505 | 6,445 | 3,775 | 30,907 |
| 60,468 | 191 | 20,688 | 6,436 | 3,795 | 31,110 |
| 60,469 | 192 | 20,929 | 6,455 | 3,795 | 31,371 |
| 60,470 | 190 | 20,988 | 6,487 | 3,796 | 31,461 |
| 60,471 | 190 | 21,011 | 6,478 | 3,804 | 31,483 |

|        |     |        |       |       |        |
|--------|-----|--------|-------|-------|--------|
| 60,472 | 181 | 21,408 | 6,587 | 3,884 | 32,060 |
| 60,473 | 177 | 21,198 | 6,536 | 3,856 | 31,767 |
| 60,474 | 180 | 21,405 | 6,595 | 3,880 | 32,060 |
| 60,475 | 174 | 21,577 | 6,662 | 3,912 | 32,325 |
| 60,476 | 177 | 21,540 | 6,639 | 3,894 | 32,250 |
| 60,477 | 176 | 21,610 | 6,639 | 3,883 | 32,308 |
| 60,478 | 173 | 21,311 | 6,554 | 3,830 | 31,868 |
| 60,479 | 175 | 21,482 | 6,608 | 3,851 | 32,116 |
| 60,480 | 171 | 21,635 | 6,655 | 3,872 | 32,333 |
| 60,481 | 169 | 21,808 | 6,715 | 3,910 | 32,602 |
| 60,482 | 164 | 21,641 | 6,679 | 3,920 | 32,404 |
| 60,483 | 164 | 21,620 | 6,642 | 3,920 | 32,346 |
| 60,484 | 158 | 21,631 | 6,639 | 3,905 | 32,333 |
| 60,485 | 155 | 21,543 | 6,575 | 3,905 | 32,178 |
| 60,486 | 155 | 21,673 | 6,578 | 3,914 | 32,320 |
| 60,487 | 156 | 21,764 | 6,558 | 3,912 | 32,390 |
| 60,488 | 157 | 22,022 | 6,641 | 3,930 | 32,750 |
| 60,489 | 154 | 22,042 | 6,610 | 3,935 | 32,741 |
| 60,490 | 157 | 22,031 | 6,583 | 3,914 | 32,685 |
| 60,491 | 157 | 22,047 | 6,570 | 3,899 | 32,673 |
| 60,492 | 154 | 22,426 | 6,707 | 4,007 | 33,294 |
| 60,493 | 158 | 22,549 | 6,733 | 4,061 | 33,501 |
| 60,494 | 158 | 22,683 | 6,773 | 4,048 | 33,662 |
| 60,495 | 152 | 22,593 | 6,696 | 4,007 | 33,448 |
| 60,496 | 154 | 22,473 | 6,593 | 3,949 | 33,169 |
| 60,497 | 155 | 22,589 | 6,580 | 3,951 | 33,275 |
| 60,498 | 152 | 22,485 | 6,564 | 3,924 | 33,125 |
| 60,499 | 156 | 22,281 | 6,561 | 3,885 | 32,883 |
| 60,500 | 165 | 22,579 | 6,641 | 3,944 | 33,329 |
| 60,501 | 163 | 22,429 | 6,572 | 3,892 | 33,056 |
| 60,502 | 162 | 22,406 | 6,589 | 3,894 | 33,051 |
| 60,503 | 158 | 22,496 | 6,608 | 3,885 | 33,147 |

|        |     |        |       |       |        |
|--------|-----|--------|-------|-------|--------|
| 60,504 | 161 | 22,578 | 6,653 | 3,919 | 33,311 |
| 60,505 | 160 | 22,727 | 6,610 | 3,903 | 33,400 |
| 60,506 | 161 | 22,862 | 6,607 | 3,899 | 33,529 |
| 60,507 | 160 | 22,813 | 6,581 | 3,886 | 33,440 |
| 60,508 | 162 | 22,969 | 6,623 | 3,926 | 33,680 |
| 60,509 | 162 | 22,953 | 6,620 | 3,925 | 33,660 |
| 60,510 | 158 | 22,866 | 6,606 | 3,915 | 33,545 |
| 60,511 | 162 | 22,950 | 6,594 | 3,899 | 33,605 |
| 60,512 | 162 | 22,888 | 6,578 | 3,900 | 33,528 |
| 60,513 | 160 | 22,981 | 6,621 | 3,957 | 33,719 |
| 60,514 | 157 | 23,108 | 6,630 | 3,978 | 33,873 |
| 60,515 | 162 | 23,236 | 6,654 | 3,927 | 33,979 |
| 60,516 | 163 | 23,431 | 6,670 | 3,940 | 34,204 |
| 60,517 | 166 | 23,368 | 6,662 | 3,945 | 34,141 |
| 60,518 | 163 | 23,239 | 6,668 | 3,942 | 34,012 |
| 60,519 | 150 | 22,878 | 6,685 | 3,944 | 33,657 |
| 60,520 | 156 | 22,933 | 6,745 | 3,975 | 33,809 |
| 60,521 | 154 | 23,146 | 6,772 | 4,005 | 34,077 |
| 60,522 | 155 | 22,702 | 6,704 | 3,918 | 33,479 |
| 60,523 | 157 | 23,102 | 6,768 | 3,933 | 33,960 |
| 60,524 | 161 | 23,331 | 6,823 | 3,975 | 34,290 |
| 60,525 | 161 | 23,220 | 6,780 | 3,945 | 34,106 |
| 60,526 | 162 | 23,185 | 6,771 | 3,937 | 34,055 |
| 60,527 | 162 | 23,473 | 6,849 | 3,979 | 34,463 |
| 60,528 | 165 | 23,594 | 6,882 | 4,003 | 34,644 |
| 60,529 | 169 | 23,645 | 6,875 | 3,995 | 34,684 |
| 60,530 | 168 | 23,712 | 6,874 | 4,001 | 34,755 |
| 60,531 | 168 | 23,510 | 6,847 | 3,970 | 34,495 |
| 60,532 | 171 | 23,761 | 6,906 | 4,018 | 34,856 |
| 60,533 | 171 | 23,551 | 6,852 | 3,965 | 34,539 |
| 60,534 | 170 | 23,659 | 6,939 | 4,016 | 34,784 |
| 60,535 | 169 | 23,564 | 6,950 | 4,028 | 34,711 |

|        |     |        |       |       |        |
|--------|-----|--------|-------|-------|--------|
| 60,536 | 175 | 23,422 | 6,925 | 4,019 | 34,541 |
| 60,537 | 179 | 23,212 | 6,871 | 3,991 | 34,253 |
| 60,538 | 178 | 22,960 | 6,823 | 3,971 | 33,932 |
| 60,539 | 178 | 22,900 | 6,781 | 3,956 | 33,815 |
| 60,540 | 177 | 22,555 | 6,706 | 3,888 | 33,326 |
| 60,541 | 179 | 23,005 | 6,782 | 3,935 | 33,901 |
| 60,542 | 178 | 22,848 | 6,735 | 3,919 | 33,680 |
| 60,543 | 177 | 22,671 | 6,662 | 3,842 | 33,352 |
| 60,544 | 182 | 22,590 | 6,629 | 3,813 | 33,214 |
| 60,545 | 183 | 22,580 | 6,629 | 3,808 | 33,200 |
| 60,546 | 183 | 22,268 | 6,578 | 3,775 | 32,804 |
| 60,547 | 183 | 22,231 | 6,572 | 3,769 | 32,755 |
| 60,548 | 183 | 22,144 | 6,563 | 3,752 | 32,642 |
| 60,549 | 175 | 21,996 | 6,514 | 3,746 | 32,431 |
| 60,550 | 173 | 22,076 | 6,493 | 3,753 | 32,495 |
| 60,551 | 161 | 21,906 | 6,417 | 3,702 | 32,186 |
| 60,552 | 163 | 21,668 | 6,304 | 3,675 | 31,810 |
| 60,553 | 162 | 21,663 | 6,321 | 3,674 | 31,820 |
| 60,554 | 157 | 21,850 | 6,308 | 3,686 | 32,001 |
| 60,555 | 157 | 21,811 | 6,291 | 3,679 | 31,938 |
| 60,556 | 152 | 21,452 | 6,230 | 3,640 | 31,474 |
| 60,557 | 151 | 21,624 | 6,254 | 3,656 | 31,685 |
| 60,558 | 148 | 21,693 | 6,252 | 3,645 | 31,738 |
| 60,559 | 146 | 21,777 | 6,249 | 3,651 | 31,823 |
| 60,560 | 145 | 21,735 | 6,227 | 3,636 | 31,743 |
| 60,561 | 150 | 22,079 | 6,306 | 3,665 | 32,200 |
| 60,562 | 149 | 21,961 | 6,286 | 3,625 | 32,021 |
| 60,563 | 142 | 21,863 | 6,276 | 3,606 | 31,887 |
| 60,564 | 137 | 21,526 | 6,156 | 3,521 | 31,340 |
| 60,565 | 138 | 21,692 | 6,174 | 3,530 | 31,534 |
| 60,566 | 136 | 21,925 | 6,187 | 3,564 | 31,812 |
| 60,567 | 137 | 21,822 | 6,137 | 3,530 | 31,626 |

|        |     |        |       |       |        |
|--------|-----|--------|-------|-------|--------|
| 60,568 | 138 | 21,709 | 6,042 | 3,494 | 31,383 |
| 60,569 | 138 | 21,829 | 6,044 | 3,497 | 31,508 |
| 60,570 | 135 | 21,872 | 6,016 | 3,460 | 31,483 |
| 60,571 | 128 | 21,728 | 5,942 | 3,450 | 31,248 |
| 60,572 | 126 | 21,589 | 5,886 | 3,429 | 31,030 |
| 60,573 | 122 | 21,185 | 5,782 | 3,388 | 30,477 |
| 60,574 | 122 | 21,237 | 5,801 | 3,410 | 30,570 |
| 60,575 | 114 | 20,973 | 5,739 | 3,367 | 30,193 |
| 60,576 | 119 | 20,995 | 5,765 | 3,391 | 30,270 |
| 60,577 | 124 | 21,056 | 5,766 | 3,408 | 30,354 |
| 60,578 | 125 | 21,009 | 5,754 | 3,405 | 30,293 |
| 60,579 | 124 | 20,800 | 5,655 | 3,362 | 29,941 |
| 60,580 | 122 | 20,709 | 5,662 | 3,366 | 29,859 |
| 60,581 | 122 | 20,681 | 5,699 | 3,362 | 29,864 |
| 60,582 | 120 | 20,655 | 5,664 | 3,371 | 29,810 |
| 60,583 | 119 | 20,589 | 5,639 | 3,357 | 29,704 |
| 60,584 | 121 | 20,679 | 5,681 | 3,378 | 29,859 |
| 60,585 | 119 | 20,639 | 5,642 | 3,365 | 29,765 |
| 60,586 | 119 | 20,807 | 5,646 | 3,365 | 29,937 |
| 60,587 | 112 | 20,706 | 5,604 | 3,325 | 29,747 |
| 60,588 | 111 | 20,752 | 5,617 | 3,331 | 29,811 |
| 60,589 | 112 | 20,830 | 5,638 | 3,331 | 29,911 |
| 60,590 | 108 | 20,820 | 5,671 | 3,339 | 29,938 |
| 60,591 | 108 | 20,804 | 5,665 | 3,334 | 29,911 |
| 60,592 | 104 | 20,688 | 5,605 | 3,315 | 29,712 |
| 60,593 | 108 | 20,986 | 5,678 | 3,350 | 30,122 |
| 60,594 | 116 | 20,972 | 5,674 | 3,363 | 30,125 |
| 60,595 | 112 | 20,777 | 5,624 | 3,343 | 29,856 |
| 60,596 | 118 | 20,890 | 5,666 | 3,374 | 30,048 |
| 60,597 | 116 | 20,784 | 5,633 | 3,348 | 29,881 |
| 60,598 | 118 | 21,477 | 5,793 | 3,480 | 30,868 |
| 60,599 | 118 | 21,281 | 5,756 | 3,449 | 30,604 |

|        |     |        |       |       |        |
|--------|-----|--------|-------|-------|--------|
| 60,600 | 119 | 21,583 | 5,793 | 3,470 | 30,965 |
| 60,601 | 121 | 21,474 | 5,768 | 3,478 | 30,841 |
| 60,602 | 127 | 21,675 | 5,854 | 3,521 | 31,177 |
| 60,603 | 129 | 21,420 | 5,822 | 3,485 | 30,856 |
| 60,604 | 129 | 21,222 | 5,779 | 3,450 | 30,580 |
| 60,605 | 134 | 21,654 | 5,930 | 3,552 | 31,270 |
| 60,606 | 134 | 21,329 | 5,877 | 3,497 | 30,837 |
| 60,607 | 134 | 21,230 | 5,847 | 3,491 | 30,702 |
| 60,608 | 135 | 21,560 | 5,962 | 3,553 | 31,210 |
| 60,609 | 134 | 21,283 | 5,912 | 3,544 | 30,873 |
| 60,610 | 138 | 21,029 | 5,893 | 3,523 | 30,583 |
| 60,611 | 140 | 21,125 | 5,890 | 3,538 | 30,693 |
| 60,612 | 137 | 21,092 | 5,869 | 3,554 | 30,652 |
| 60,613 | 139 | 20,622 | 5,739 | 3,466 | 29,966 |
| 60,614 | 136 | 20,908 | 5,816 | 3,483 | 30,343 |
| 60,615 | 135 | 20,791 | 5,829 | 3,486 | 30,241 |
| 60,616 | 135 | 20,725 | 5,834 | 3,502 | 30,196 |
| 60,617 | 135 | 20,516 | 5,820 | 3,498 | 29,969 |
| 60,618 | 131 | 20,412 | 5,789 | 3,487 | 29,819 |
| 60,619 | 129 | 20,512 | 5,811 | 3,488 | 29,940 |
| 60,620 | 126 | 20,507 | 5,803 | 3,489 | 29,925 |
| 60,621 | 128 | 20,581 | 5,841 | 3,498 | 30,048 |
| 60,622 | 128 | 20,482 | 5,852 | 3,488 | 29,950 |
| 60,623 | 132 | 20,645 | 5,934 | 3,524 | 30,235 |
| 60,624 | 132 | 20,592 | 5,926 | 3,527 | 30,177 |
| 60,625 | 133 | 20,551 | 5,907 | 3,536 | 30,127 |
| 60,626 | 136 | 20,854 | 5,982 | 3,567 | 30,539 |
| 60,627 | 131 | 20,947 | 5,976 | 3,578 | 30,632 |
| 60,628 | 126 | 20,770 | 5,947 | 3,559 | 30,402 |
| 60,629 | 125 | 20,736 | 5,955 | 3,545 | 30,361 |
| 60,630 | 122 | 20,296 | 5,818 | 3,463 | 29,699 |
| 60,631 | 124 | 20,423 | 5,858 | 3,481 | 29,886 |

|        |     |        |       |       |        |
|--------|-----|--------|-------|-------|--------|
| 60,632 | 125 | 20,595 | 5,906 | 3,500 | 30,126 |
| 60,633 | 131 | 20,544 | 5,905 | 3,465 | 30,045 |
| 60,634 | 135 | 20,357 | 5,825 | 3,411 | 29,728 |
| 60,635 | 139 | 20,651 | 5,876 | 3,430 | 30,096 |
| 60,636 | 143 | 20,617 | 5,868 | 3,420 | 30,048 |
| 60,637 | 143 | 20,404 | 5,832 | 3,410 | 29,789 |
| 60,638 | 146 | 20,308 | 5,839 | 3,398 | 29,691 |
| 60,639 | 146 | 20,060 | 5,784 | 3,371 | 29,361 |
| 60,640 | 150 | 20,162 | 5,853 | 3,417 | 29,582 |
| 60,641 | 152 | 20,239 | 5,895 | 3,437 | 29,723 |
| 60,642 | 153 | 20,047 | 5,841 | 3,422 | 29,463 |
| 60,643 | 151 | 19,728 | 5,769 | 3,403 | 29,051 |
| 60,644 | 153 | 19,813 | 5,790 | 3,422 | 29,178 |
| 60,645 | 141 | 19,478 | 5,705 | 3,355 | 28,679 |
| 60,646 | 139 | 19,204 | 5,626 | 3,328 | 28,297 |
| 60,647 | 130 | 19,356 | 5,758 | 3,381 | 28,625 |
| 60,648 | 133 | 18,932 | 5,672 | 3,329 | 28,066 |
| 60,649 | 134 | 19,214 | 5,730 | 3,376 | 28,454 |
| 60,650 | 137 | 19,145 | 5,716 | 3,358 | 28,356 |
| 60,651 | 136 | 18,870 | 5,659 | 3,328 | 27,993 |
| 60,652 | 137 | 18,834 | 5,670 | 3,328 | 27,969 |
| 60,653 | 130 | 18,845 | 5,638 | 3,318 | 27,931 |
| 60,654 | 133 | 18,514 | 5,524 | 3,267 | 27,438 |
| 60,655 | 134 | 18,580 | 5,556 | 3,290 | 27,560 |
| 60,656 | 129 | 18,879 | 5,644 | 3,317 | 27,969 |
| 60,657 | 133 | 18,912 | 5,647 | 3,304 | 27,996 |
| 60,658 | 133 | 18,972 | 5,678 | 3,304 | 28,087 |
| 60,659 | 134 | 18,984 | 5,681 | 3,305 | 28,104 |
| 60,660 | 130 | 18,838 | 5,622 | 3,263 | 27,853 |
| 60,661 | 132 | 18,890 | 5,618 | 3,290 | 27,930 |
| 60,662 | 134 | 18,744 | 5,603 | 3,263 | 27,744 |
| 60,663 | 135 | 19,168 | 5,730 | 3,308 | 28,341 |



|        |     |        |       |       |        |
|--------|-----|--------|-------|-------|--------|
| 60,664 | 127 | 18,932 | 5,667 | 3,284 | 28,010 |
| 60,665 | 134 | 19,022 | 5,681 | 3,303 | 28,140 |
| 60,666 | 133 | 18,839 | 5,633 | 3,274 | 27,879 |
| 60,667 | 137 | 18,671 | 5,611 | 3,228 | 27,647 |
| 60,668 | 137 | 18,637 | 5,606 | 3,213 | 27,593 |
| 60,669 | 137 | 19,235 | 5,800 | 3,328 | 28,500 |
| 60,670 | 139 | 18,993 | 5,746 | 3,281 | 28,159 |
| 60,671 | 139 | 18,716 | 5,666 | 3,237 | 27,758 |
| 60,672 | 141 | 18,651 | 5,655 | 3,230 | 27,677 |
| 60,673 | 141 | 18,329 | 5,568 | 3,200 | 27,238 |
| 60,674 | 152 | 18,941 | 5,775 | 3,307 | 28,175 |
| 60,675 | 151 | 18,901 | 5,781 | 3,300 | 28,133 |
| 60,676 | 152 | 19,071 | 5,825 | 3,306 | 28,354 |
| 60,677 | 147 | 18,878 | 5,789 | 3,291 | 28,105 |
| 60,678 | 150 | 18,962 | 5,812 | 3,305 | 28,229 |
| 60,679 | 150 | 19,056 | 5,819 | 3,311 | 28,336 |
| 60,680 | 149 | 19,270 | 5,883 | 3,361 | 28,663 |
| 60,681 | 149 | 19,270 | 5,872 | 3,365 | 28,656 |
| 60,682 | 151 | 19,448 | 6,010 | 3,447 | 29,056 |
| 60,683 | 146 | 19,156 | 5,943 | 3,426 | 28,671 |
| 60,684 | 146 | 19,165 | 5,932 | 3,415 | 28,658 |
| 60,685 | 140 | 19,313 | 6,019 | 3,484 | 28,956 |
| 60,686 | 137 | 19,359 | 6,040 | 3,484 | 29,020 |
| 60,687 | 125 | 19,016 | 5,906 | 3,419 | 28,466 |
| 60,688 | 128 | 19,217 | 5,957 | 3,438 | 28,740 |
| 60,689 | 128 | 19,449 | 6,008 | 3,472 | 29,057 |
| 60,690 | 134 | 19,643 | 6,030 | 3,481 | 29,288 |
| 60,691 | 132 | 19,772 | 6,008 | 3,469 | 29,381 |
| 60,692 | 132 | 19,788 | 5,990 | 3,466 | 29,376 |
| 60,693 | 130 | 19,453 | 5,941 | 3,425 | 28,949 |
| 60,694 | 143 | 20,003 | 6,082 | 3,483 | 29,711 |
| 60,695 | 149 | 20,198 | 6,156 | 3,501 | 30,004 |

|        |     |        |       |       |        |
|--------|-----|--------|-------|-------|--------|
| 60,696 | 147 | 19,988 | 6,108 | 3,477 | 29,720 |
| 60,697 | 165 | 20,331 | 6,187 | 3,520 | 30,203 |
| 60,698 | 176 | 20,432 | 6,226 | 3,541 | 30,375 |
| 60,699 | 174 | 20,225 | 6,170 | 3,514 | 30,083 |
| 60,700 | 175 | 19,999 | 6,099 | 3,464 | 29,737 |
| 60,701 | 171 | 19,732 | 6,031 | 3,428 | 29,362 |
| 60,702 | 172 | 20,207 | 6,234 | 3,529 | 30,142 |
| 60,703 | 173 | 20,221 | 6,223 | 3,526 | 30,143 |
| 60,704 | 176 | 20,146 | 6,214 | 3,495 | 30,031 |
| 60,705 | 175 | 19,965 | 6,174 | 3,461 | 29,775 |
| 60,706 | 175 | 19,946 | 6,171 | 3,458 | 29,750 |
| 60,707 | 173 | 20,097 | 6,176 | 3,489 | 29,935 |
| 60,708 | 175 | 20,144 | 6,170 | 3,507 | 29,996 |
| 60,709 | 176 | 20,167 | 6,163 | 3,508 | 30,014 |
| 60,710 | 174 | 20,074 | 6,122 | 3,475 | 29,845 |
| 60,711 | 175 | 20,176 | 6,155 | 3,506 | 30,012 |
| 60,712 | 172 | 20,129 | 6,122 | 3,506 | 29,929 |
| 60,713 | 172 | 20,165 | 6,114 | 3,516 | 29,967 |
| 60,714 | 170 | 20,099 | 6,128 | 3,524 | 29,921 |
| 60,715 | 171 | 20,064 | 6,142 | 3,526 | 29,903 |
| 60,716 | 164 | 20,177 | 6,136 | 3,543 | 30,020 |
| 60,717 | 166 | 20,268 | 6,160 | 3,572 | 30,166 |
| 60,718 | 160 | 20,181 | 6,135 | 3,588 | 30,064 |
| 60,719 | 159 | 19,947 | 6,072 | 3,564 | 29,742 |
| 60,720 | 162 | 19,966 | 6,083 | 3,566 | 29,777 |
| 60,721 | 160 | 20,016 | 6,105 | 3,603 | 29,884 |
| 60,722 | 155 | 20,161 | 6,091 | 3,585 | 29,992 |
| 60,723 | 150 | 20,033 | 6,017 | 3,558 | 29,758 |
| 60,724 | 147 | 19,945 | 6,024 | 3,551 | 29,667 |
| 60,725 | 146 | 20,197 | 6,129 | 3,579 | 30,051 |
| 60,726 | 144 | 20,011 | 6,051 | 3,541 | 29,747 |
| 60,727 | 144 | 20,281 | 6,135 | 3,585 | 30,145 |

|        |     |        |       |       |        |
|--------|-----|--------|-------|-------|--------|
| 60,728 | 149 | 20,403 | 6,180 | 3,613 | 30,345 |
| 60,729 | 145 | 20,502 | 6,207 | 3,629 | 30,483 |
| 60,730 | 148 | 20,450 | 6,204 | 3,643 | 30,445 |
| 60,731 | 146 | 20,403 | 6,230 | 3,636 | 30,415 |
| 60,732 | 144 | 20,436 | 6,226 | 3,628 | 30,434 |
| 60,733 | 148 | 20,608 | 6,252 | 3,639 | 30,647 |
| 60,734 | 149 | 20,707 | 6,247 | 3,637 | 30,740 |
| 60,735 | 149 | 20,621 | 6,198 | 3,615 | 30,583 |
| 60,736 | 149 | 20,751 | 6,205 | 3,613 | 30,718 |
| 60,737 | 158 | 20,457 | 6,217 | 3,611 | 30,443 |
| 60,738 | 157 | 20,493 | 6,223 | 3,603 | 30,476 |
| 60,739 | 157 | 20,272 | 6,229 | 3,599 | 30,257 |
| 60,740 | 155 | 20,296 | 6,229 | 3,599 | 30,279 |
| 60,741 | 161 | 20,252 | 6,239 | 3,608 | 30,260 |
| 60,742 | 161 | 20,154 | 6,256 | 3,619 | 30,190 |
| 60,743 | 159 | 20,101 | 6,295 | 3,644 | 30,199 |
| 60,744 | 158 | 20,211 | 6,354 | 3,668 | 30,391 |
| 60,745 | 156 | 20,412 | 6,376 | 3,695 | 30,639 |
| 60,746 | 153 | 20,140 | 6,237 | 3,648 | 30,178 |
| 60,747 | 155 | 20,547 | 6,273 | 3,659 | 30,634 |
| 60,748 | 138 | 20,914 | 6,371 | 3,735 | 31,158 |
| 60,749 | 124 | 20,885 | 6,330 | 3,728 | 31,067 |
| 60,750 | 120 | 20,876 | 6,346 | 3,742 | 31,084 |
| 60,751 | 124 | 20,919 | 6,348 | 3,734 | 31,125 |
| 60,752 | 130 | 21,045 | 6,362 | 3,739 | 31,276 |
| 60,753 | 137 | 21,087 | 6,367 | 3,744 | 31,335 |
| 60,754 | 135 | 20,908 | 6,351 | 3,717 | 31,111 |
| 60,755 | 137 | 20,777 | 6,317 | 3,721 | 30,952 |
| 60,756 | 131 | 20,528 | 6,262 | 3,690 | 30,611 |
| 60,757 | 137 | 21,004 | 6,388 | 3,752 | 31,281 |
| 60,758 | 136 | 20,921 | 6,412 | 3,749 | 31,218 |
| 60,759 | 133 | 20,930 | 6,405 | 3,748 | 31,216 |

|        |     |        |       |       |        |
|--------|-----|--------|-------|-------|--------|
| 60,760 | 131 | 20,618 | 6,328 | 3,708 | 30,785 |
| 60,761 | 137 | 20,732 | 6,404 | 3,724 | 30,997 |
| 60,762 | 142 | 20,749 | 6,390 | 3,721 | 31,002 |
| 60,763 | 140 | 20,600 | 6,347 | 3,693 | 30,780 |
| 60,764 | 141 | 20,597 | 6,347 | 3,695 | 30,780 |
| 60,765 | 141 | 20,614 | 6,339 | 3,681 | 30,775 |
| 60,766 | 140 | 20,698 | 6,361 | 3,673 | 30,872 |
| 60,767 | 141 | 20,754 | 6,377 | 3,696 | 30,968 |
| 60,768 | 138 | 20,255 | 6,198 | 3,578 | 30,169 |
| 60,769 | 139 | 20,433 | 6,202 | 3,595 | 30,369 |
| 60,770 | 142 | 20,618 | 6,218 | 3,615 | 30,593 |
| 60,771 | 145 | 20,605 | 6,237 | 3,612 | 30,599 |
| 60,772 | 144 | 20,378 | 6,211 | 3,598 | 30,331 |
| 60,773 | 146 | 20,797 | 6,349 | 3,655 | 30,947 |
| 60,774 | 149 | 20,747 | 6,367 | 3,663 | 30,926 |
| 60,775 | 154 | 20,817 | 6,342 | 3,653 | 30,966 |
| 60,776 | 159 | 20,785 | 6,307 | 3,658 | 30,909 |
| 60,777 | 160 | 20,510 | 6,192 | 3,602 | 30,464 |
| 60,778 | 163 | 20,468 | 6,192 | 3,604 | 30,427 |
| 60,779 | 157 | 20,191 | 6,085 | 3,541 | 29,974 |
| 60,780 | 152 | 20,206 | 6,065 | 3,524 | 29,947 |
| 60,781 | 155 | 20,324 | 6,080 | 3,531 | 30,090 |
| 60,782 | 159 | 20,165 | 6,003 | 3,505 | 29,832 |
| 60,783 | 157 | 20,085 | 5,974 | 3,489 | 29,705 |
| 60,784 | 156 | 20,078 | 5,952 | 3,473 | 29,659 |
| 60,785 | 156 | 20,232 | 5,992 | 3,491 | 29,871 |
| 60,786 | 152 | 19,857 | 5,854 | 3,428 | 29,291 |
| 60,787 | 152 | 20,007 | 5,883 | 3,448 | 29,490 |
| 60,788 | 148 | 20,362 | 5,905 | 3,484 | 29,899 |
| 60,789 | 145 | 20,415 | 5,885 | 3,497 | 29,942 |
| 60,790 | 143 | 20,507 | 5,882 | 3,501 | 30,033 |
| 60,791 | 136 | 20,635 | 5,953 | 3,532 | 30,256 |

|        |     |        |       |       |        |
|--------|-----|--------|-------|-------|--------|
| 60,792 | 134 | 20,741 | 5,982 | 3,545 | 30,402 |
| 60,793 | 131 | 20,569 | 5,878 | 3,480 | 30,058 |
| 60,794 | 132 | 20,462 | 5,794 | 3,457 | 29,845 |
| 60,795 | 133 | 20,458 | 5,808 | 3,461 | 29,860 |
| 60,796 | 132 | 20,467 | 5,831 | 3,484 | 29,914 |
| 60,797 | 135 | 20,439 | 5,862 | 3,480 | 29,916 |
| 60,798 | 135 | 20,300 | 5,849 | 3,469 | 29,753 |
| 60,799 | 135 | 19,921 | 5,749 | 3,379 | 29,184 |
| 60,800 | 137 | 19,590 | 5,669 | 3,349 | 28,745 |
| 60,801 | 138 | 19,613 | 5,666 | 3,341 | 28,758 |
| 60,802 | 136 | 19,681 | 5,680 | 3,332 | 28,829 |
| 60,803 | 132 | 19,832 | 5,726 | 3,372 | 29,062 |
| 60,804 | 130 | 19,640 | 5,651 | 3,314 | 28,735 |
| 60,805 | 130 | 19,685 | 5,654 | 3,308 | 28,777 |
| 60,806 | 127 | 20,118 | 5,734 | 3,351 | 29,330 |
| 60,807 | 129 | 20,175 | 5,716 | 3,353 | 29,373 |
| 60,808 | 126 | 20,027 | 5,635 | 3,325 | 29,113 |
| 60,809 | 126 | 19,972 | 5,637 | 3,327 | 29,062 |
| 60,810 | 123 | 19,920 | 5,657 | 3,331 | 29,031 |
| 60,811 | 125 | 19,712 | 5,587 | 3,324 | 28,748 |
| 60,812 | 125 | 19,599 | 5,529 | 3,301 | 28,554 |
| 60,813 | 121 | 19,467 | 5,522 | 3,283 | 28,393 |
| 60,814 | 120 | 19,271 | 5,501 | 3,259 | 28,151 |
| 60,815 | 122 | 19,682 | 5,605 | 3,326 | 28,735 |
| 60,816 | 124 | 19,804 | 5,666 | 3,382 | 28,976 |
| 60,817 | 126 | 19,645 | 5,631 | 3,360 | 28,762 |
| 60,818 | 132 | 19,729 | 5,637 | 3,352 | 28,850 |
| 60,819 | 133 | 19,850 | 5,645 | 3,371 | 28,999 |
| 60,820 | 132 | 19,804 | 5,656 | 3,366 | 28,958 |
| 60,821 | 134 | 20,099 | 5,740 | 3,433 | 29,406 |
| 60,822 | 129 | 20,168 | 5,769 | 3,459 | 29,525 |
| 60,823 | 133 | 20,193 | 5,753 | 3,436 | 29,515 |

|        |     |        |       |       |        |
|--------|-----|--------|-------|-------|--------|
| 60,824 | 136 | 20,148 | 5,740 | 3,439 | 29,463 |
| 60,825 | 135 | 19,888 | 5,664 | 3,393 | 29,080 |
| 60,826 | 130 | 19,799 | 5,674 | 3,395 | 28,998 |
| 60,827 | 124 | 19,646 | 5,655 | 3,398 | 28,823 |
| 60,828 | 124 | 19,554 | 5,654 | 3,391 | 28,723 |
| 60,829 | 122 | 19,679 | 5,706 | 3,393 | 28,900 |
| 60,830 | 123 | 19,373 | 5,629 | 3,351 | 28,476 |
| 60,831 | 123 | 19,154 | 5,580 | 3,335 | 28,192 |
| 60,832 | 119 | 19,354 | 5,620 | 3,361 | 28,454 |
| 60,833 | 118 | 19,266 | 5,598 | 3,340 | 28,322 |
| 60,834 | 113 | 18,920 | 5,523 | 3,302 | 27,858 |
| 60,835 | 112 | 19,000 | 5,579 | 3,326 | 28,017 |
| 60,836 | 112 | 18,885 | 5,567 | 3,324 | 27,888 |
| 60,837 | 114 | 18,682 | 5,520 | 3,270 | 27,586 |
| 60,838 | 114 | 19,041 | 5,597 | 3,309 | 28,061 |
| 60,839 | 117 | 19,037 | 5,621 | 3,321 | 28,096 |
| 60,840 | 121 | 19,147 | 5,644 | 3,300 | 28,212 |
| 60,841 | 123 | 19,080 | 5,559 | 3,247 | 28,009 |
| 60,842 | 126 | 19,343 | 5,617 | 3,303 | 28,389 |
| 60,843 | 122 | 18,980 | 5,567 | 3,276 | 27,945 |
| 60,844 | 122 | 18,944 | 5,579 | 3,280 | 27,925 |
| 60,845 | 120 | 19,090 | 5,640 | 3,306 | 28,156 |
| 60,846 | 117 | 19,056 | 5,641 | 3,303 | 28,117 |
| 60,847 | 115 | 19,115 | 5,669 | 3,310 | 28,209 |
| 60,848 | 113 | 18,902 | 5,615 | 3,281 | 27,911 |
| 60,849 | 112 | 18,832 | 5,617 | 3,291 | 27,852 |
| 60,850 | 110 | 18,666 | 5,621 | 3,307 | 27,704 |
| 60,851 | 108 | 18,629 | 5,646 | 3,305 | 27,688 |
| 60,852 | 112 | 18,838 | 5,738 | 3,361 | 28,049 |
| 60,853 | 111 | 18,644 | 5,663 | 3,334 | 27,752 |
| 60,854 | 114 | 18,387 | 5,612 | 3,291 | 27,404 |
| 60,855 | 107 | 18,053 | 5,561 | 3,278 | 26,999 |

|        |     |        |       |       |        |
|--------|-----|--------|-------|-------|--------|
| 60,856 | 109 | 18,839 | 5,789 | 3,466 | 28,203 |
| 60,857 | 113 | 18,839 | 5,804 | 3,489 | 28,245 |
| 60,858 | 109 | 18,810 | 5,867 | 3,503 | 28,289 |
| 60,859 | 113 | 18,922 | 5,918 | 3,513 | 28,466 |
| 60,860 | 114 | 19,053 | 5,938 | 3,530 | 28,635 |
| 60,861 | 112 | 19,266 | 5,985 | 3,521 | 28,884 |
| 60,862 | 112 | 19,326 | 6,000 | 3,532 | 28,970 |
| 60,863 | 110 | 19,439 | 6,023 | 3,532 | 29,104 |
| 60,864 | 108 | 19,438 | 6,028 | 3,537 | 29,111 |
| 60,865 | 111 | 19,504 | 6,023 | 3,532 | 29,170 |
| 60,866 | 114 | 19,890 | 6,131 | 3,581 | 29,716 |
| 60,867 | 111 | 19,821 | 6,095 | 3,567 | 29,594 |
| 60,868 | 117 | 20,130 | 6,207 | 3,629 | 30,083 |
| 60,869 | 113 | 20,140 | 6,214 | 3,631 | 30,098 |
| 60,870 | 113 | 20,364 | 6,325 | 3,673 | 30,475 |
| 60,871 | 114 | 20,540 | 6,370 | 3,708 | 30,732 |
| 60,872 | 107 | 20,585 | 6,394 | 3,732 | 30,818 |
| 60,873 | 107 | 20,562 | 6,381 | 3,732 | 30,782 |
| 60,874 | 105 | 20,649 | 6,386 | 3,772 | 30,912 |
| 60,875 | 99  | 20,413 | 6,315 | 3,742 | 30,569 |
| 60,876 | 99  | 20,326 | 6,262 | 3,718 | 30,405 |
| 60,877 | 100 | 20,251 | 6,232 | 3,685 | 30,268 |
| 60,878 | 105 | 20,944 | 6,435 | 3,782 | 31,266 |
| 60,879 | 112 | 21,186 | 6,455 | 3,808 | 31,561 |
| 60,880 | 109 | 21,085 | 6,412 | 3,782 | 31,388 |
| 60,881 | 111 | 20,776 | 6,346 | 3,731 | 30,964 |
| 60,882 | 114 | 21,067 | 6,377 | 3,774 | 31,332 |
| 60,883 | 113 | 21,067 | 6,385 | 3,796 | 31,361 |
| 60,884 | 118 | 21,371 | 6,485 | 3,838 | 31,812 |
| 60,885 | 119 | 21,420 | 6,471 | 3,837 | 31,847 |
| 60,886 | 121 | 21,472 | 6,468 | 3,835 | 31,896 |
| 60,887 | 121 | 21,512 | 6,487 | 3,838 | 31,958 |

|        |     |        |       |       |        |
|--------|-----|--------|-------|-------|--------|
| 60,888 | 121 | 21,703 | 6,543 | 3,901 | 32,268 |
| 60,889 | 124 | 21,920 | 6,599 | 3,967 | 32,610 |
| 60,890 | 119 | 21,924 | 6,681 | 3,984 | 32,708 |
| 60,891 | 115 | 21,845 | 6,704 | 4,040 | 32,704 |
| 60,892 | 115 | 21,650 | 6,706 | 4,067 | 32,538 |
| 60,893 | 114 | 21,784 | 6,761 | 4,078 | 32,737 |
| 60,894 | 112 | 21,533 | 6,674 | 4,045 | 32,364 |
| 60,895 | 114 | 21,642 | 6,680 | 4,052 | 32,488 |
| 60,896 | 123 | 21,947 | 6,821 | 4,110 | 33,001 |
| 60,897 | 127 | 21,938 | 6,811 | 4,101 | 32,977 |
| 60,898 | 124 | 21,909 | 6,770 | 4,099 | 32,902 |
| 60,899 | 124 | 21,866 | 6,768 | 4,101 | 32,859 |
| 60,900 | 127 | 21,979 | 6,765 | 4,103 | 32,974 |
| 60,901 | 127 | 22,145 | 6,757 | 4,078 | 33,107 |
| 60,902 | 124 | 22,322 | 6,749 | 4,087 | 33,282 |
| 60,903 | 126 | 22,333 | 6,741 | 4,091 | 33,291 |
| 60,904 | 121 | 22,188 | 6,673 | 4,029 | 33,011 |
| 60,905 | 126 | 22,315 | 6,660 | 4,038 | 33,139 |
| 60,906 | 125 | 22,286 | 6,668 | 4,034 | 33,113 |
| 60,907 | 133 | 22,378 | 6,693 | 4,062 | 33,266 |
| 60,908 | 130 | 22,432 | 6,712 | 4,059 | 33,333 |
| 60,909 | 133 | 22,369 | 6,634 | 4,038 | 33,174 |
| 60,910 | 130 | 22,302 | 6,603 | 4,023 | 33,058 |
| 60,911 | 131 | 22,465 | 6,619 | 4,051 | 33,266 |
| 60,912 | 129 | 22,637 | 6,693 | 4,090 | 33,549 |
| 60,913 | 131 | 22,344 | 6,619 | 4,062 | 33,156 |
| 60,914 | 131 | 22,390 | 6,627 | 4,081 | 33,229 |
| 60,915 | 127 | 22,231 | 6,658 | 4,066 | 33,082 |
| 60,916 | 127 | 22,272 | 6,650 | 4,064 | 33,113 |
| 60,917 | 128 | 22,227 | 6,639 | 4,060 | 33,054 |
| 60,918 | 128 | 22,100 | 6,619 | 4,056 | 32,903 |
| 60,919 | 120 | 22,376 | 6,685 | 4,086 | 33,267 |



|        |     |        |       |       |        |
|--------|-----|--------|-------|-------|--------|
| 60,920 | 120 | 22,380 | 6,705 | 4,099 | 33,304 |
| 60,921 | 119 | 22,408 | 6,686 | 4,101 | 33,314 |
| 60,922 | 121 | 22,464 | 6,664 | 4,088 | 33,337 |
| 60,923 | 122 | 22,213 | 6,596 | 4,028 | 32,959 |
| 60,924 | 123 | 22,417 | 6,623 | 4,057 | 33,220 |
| 60,925 | 126 | 22,244 | 6,567 | 4,006 | 32,943 |
| 60,926 | 126 | 22,343 | 6,553 | 4,001 | 33,023 |
| 60,927 | 121 | 22,296 | 6,535 | 4,000 | 32,952 |
| 60,928 | 121 | 22,191 | 6,538 | 4,009 | 32,859 |
| 60,929 | 120 | 22,375 | 6,605 | 4,055 | 33,155 |
| 60,930 | 113 | 22,274 | 6,596 | 4,042 | 33,025 |
| 60,931 | 117 | 22,024 | 6,527 | 4,036 | 32,704 |
| 60,932 | 116 | 22,059 | 6,538 | 4,045 | 32,758 |
| 60,933 | 113 | 21,956 | 6,572 | 4,031 | 32,672 |
| 60,934 | 111 | 21,800 | 6,570 | 4,032 | 32,513 |
| 60,935 | 110 | 21,852 | 6,571 | 4,064 | 32,597 |
| 60,936 | 112 | 21,742 | 6,542 | 4,054 | 32,450 |
| 60,937 | 111 | 21,666 | 6,474 | 4,028 | 32,279 |
| 60,938 | 109 | 21,673 | 6,472 | 4,001 | 32,255 |
| 60,939 | 106 | 21,721 | 6,479 | 3,978 | 32,284 |
| 60,940 | 108 | 21,973 | 6,574 | 3,998 | 32,653 |
| 60,941 | 108 | 22,090 | 6,553 | 4,034 | 32,785 |
| 60,942 | 107 | 21,990 | 6,494 | 3,955 | 32,546 |
| 60,943 | 107 | 22,028 | 6,499 | 3,964 | 32,598 |
| 60,944 | 106 | 21,833 | 6,473 | 3,966 | 32,378 |
| 60,945 | 114 | 22,141 | 6,631 | 4,058 | 32,944 |
| 60,946 | 109 | 22,314 | 6,654 | 4,079 | 33,156 |
| 60,947 | 108 | 22,472 | 6,642 | 4,093 | 33,315 |
| 60,948 | 103 | 22,283 | 6,573 | 4,061 | 33,020 |
| 60,949 | 103 | 22,408 | 6,648 | 4,109 | 33,268 |
| 60,950 | 102 | 22,579 | 6,642 | 4,128 | 33,451 |
| 60,951 | 99  | 22,349 | 6,597 | 4,077 | 33,122 |

|        |     |        |       |       |        |
|--------|-----|--------|-------|-------|--------|
| 60,952 | 98  | 22,585 | 6,668 | 4,105 | 33,456 |
| 60,953 | 97  | 22,568 | 6,650 | 4,104 | 33,419 |
| 60,954 | 96  | 22,217 | 6,568 | 4,046 | 32,927 |
| 60,955 | 96  | 22,234 | 6,573 | 4,054 | 32,957 |
| 60,956 | 94  | 22,301 | 6,547 | 4,036 | 32,978 |
| 60,957 | 94  | 22,221 | 6,525 | 4,045 | 32,885 |
| 60,958 | 88  | 22,413 | 6,594 | 4,076 | 33,171 |
| 60,959 | 86  | 22,399 | 6,565 | 4,077 | 33,127 |
| 60,960 | 84  | 22,322 | 6,539 | 4,093 | 33,038 |
| 60,961 | 84  | 22,327 | 6,547 | 4,087 | 33,045 |
| 60,962 | 85  | 22,258 | 6,524 | 4,077 | 32,944 |
| 60,963 | 78  | 21,914 | 6,415 | 4,033 | 32,440 |
| 60,964 | 79  | 21,982 | 6,420 | 4,038 | 32,519 |
| 60,965 | 80  | 21,996 | 6,404 | 4,038 | 32,518 |
| 60,966 | 83  | 22,355 | 6,468 | 4,086 | 32,992 |
| 60,967 | 83  | 22,499 | 6,491 | 4,116 | 33,189 |
| 60,968 | 89  | 22,470 | 6,503 | 4,099 | 33,161 |
| 60,969 | 99  | 22,604 | 6,519 | 4,115 | 33,337 |
| 60,970 | 99  | 22,312 | 6,426 | 4,049 | 32,886 |
| 60,971 | 101 | 22,075 | 6,385 | 4,033 | 32,594 |
| 60,972 | 103 | 22,272 | 6,414 | 4,072 | 32,861 |
| 60,973 | 103 | 22,191 | 6,432 | 4,044 | 32,770 |
| 60,974 | 101 | 22,131 | 6,412 | 4,034 | 32,678 |
| 60,975 | 100 | 21,907 | 6,365 | 4,009 | 32,381 |
| 60,976 | 99  | 21,916 | 6,412 | 4,032 | 32,459 |
| 60,977 | 108 | 21,937 | 6,441 | 4,029 | 32,515 |
| 60,978 | 109 | 21,889 | 6,432 | 4,017 | 32,447 |
| 60,979 | 108 | 21,815 | 6,438 | 4,006 | 32,367 |
| 60,980 | 112 | 21,697 | 6,435 | 4,003 | 32,247 |
| 60,981 | 115 | 21,693 | 6,422 | 3,998 | 32,228 |
| 60,982 | 110 | 21,515 | 6,376 | 3,950 | 31,951 |
| 60,983 | 112 | 21,295 | 6,325 | 3,887 | 31,619 |

|        |     |        |       |       |        |
|--------|-----|--------|-------|-------|--------|
| 60,984 | 112 | 21,520 | 6,366 | 3,903 | 31,901 |
| 60,985 | 112 | 21,485 | 6,378 | 3,900 | 31,875 |
| 60,986 | 110 | 21,596 | 6,406 | 3,927 | 32,039 |
| 60,987 | 107 | 21,281 | 6,336 | 3,880 | 31,604 |
| 60,988 | 108 | 21,255 | 6,391 | 3,942 | 31,696 |
| 60,989 | 108 | 21,165 | 6,376 | 3,936 | 31,585 |
| 60,990 | 109 | 21,157 | 6,365 | 3,963 | 31,594 |
| 60,991 | 108 | 21,207 | 6,328 | 3,982 | 31,625 |
| 60,992 | 119 | 21,066 | 6,273 | 3,933 | 31,391 |
| 60,993 | 116 | 20,584 | 6,131 | 3,835 | 30,666 |
| 60,994 | 119 | 20,870 | 6,162 | 3,856 | 31,007 |
| 60,995 | 112 | 21,154 | 6,191 | 3,866 | 31,323 |
| 60,996 | 110 | 21,150 | 6,136 | 3,842 | 31,238 |
| 60,997 | 109 | 21,052 | 6,118 | 3,824 | 31,103 |
| 60,998 | 109 | 20,741 | 6,006 | 3,776 | 30,632 |
| 60,999 | 107 | 20,814 | 6,032 | 3,779 | 30,732 |
| 61,000 | 114 | 21,196 | 6,100 | 3,807 | 31,217 |
| 61,001 | 120 | 21,234 | 6,122 | 3,779 | 31,255 |
| 61,002 | 126 | 21,014 | 6,036 | 3,804 | 30,980 |
| 61,003 | 126 | 20,984 | 6,057 | 3,818 | 30,985 |
| 61,004 | 124 | 21,101 | 6,124 | 3,843 | 31,192 |
| 61,005 | 123 | 21,260 | 6,181 | 3,839 | 31,403 |
| 61,006 | 125 | 21,354 | 6,258 | 3,856 | 31,593 |
| 61,007 | 125 | 21,244 | 6,281 | 3,861 | 31,511 |
| 61,008 | 127 | 21,300 | 6,365 | 3,854 | 31,646 |
| 61,009 | 126 | 21,323 | 6,386 | 3,848 | 31,683 |
| 61,010 | 129 | 21,065 | 6,356 | 3,786 | 31,336 |
| 61,011 | 129 | 20,760 | 6,308 | 3,732 | 30,929 |
| 61,012 | 132 | 20,751 | 6,370 | 3,791 | 31,044 |
| 61,013 | 130 | 20,549 | 6,319 | 3,740 | 30,738 |
| 61,014 | 131 | 20,528 | 6,288 | 3,716 | 30,663 |
| 61,015 | 131 | 20,460 | 6,275 | 3,710 | 30,576 |

|        |     |        |       |       |        |
|--------|-----|--------|-------|-------|--------|
| 61,016 | 130 | 20,463 | 6,281 | 3,701 | 30,575 |
| 61,017 | 131 | 20,219 | 6,192 | 3,663 | 30,205 |
| 61,018 | 130 | 20,450 | 6,245 | 3,680 | 30,505 |
| 61,019 | 123 | 20,699 | 6,308 | 3,728 | 30,858 |
| 61,020 | 113 | 20,498 | 6,230 | 3,688 | 30,529 |
| 61,021 | 114 | 20,892 | 6,328 | 3,746 | 31,080 |
| 61,022 | 111 | 20,940 | 6,320 | 3,734 | 31,105 |
| 61,023 | 109 | 21,058 | 6,354 | 3,730 | 31,251 |
| 61,024 | 106 | 20,791 | 6,290 | 3,718 | 30,905 |
| 61,025 | 105 | 20,798 | 6,244 | 3,693 | 30,840 |
| 61,026 | 106 | 21,112 | 6,296 | 3,713 | 31,227 |
| 61,027 | 106 | 21,376 | 6,351 | 3,739 | 31,572 |
| 61,028 | 96  | 21,487 | 6,359 | 3,759 | 31,701 |
| 61,029 | 95  | 21,222 | 6,260 | 3,712 | 31,289 |
| 61,030 | 95  | 21,577 | 6,331 | 3,763 | 31,766 |
| 61,031 | 92  | 21,741 | 6,374 | 3,794 | 32,001 |
| 61,032 | 90  | 21,612 | 6,375 | 3,788 | 31,865 |
| 61,033 | 90  | 21,637 | 6,357 | 3,788 | 31,872 |
| 61,034 | 90  | 21,840 | 6,371 | 3,825 | 32,126 |
| 61,035 | 91  | 22,009 | 6,377 | 3,832 | 32,309 |
| 61,036 | 89  | 21,958 | 6,345 | 3,818 | 32,210 |
| 61,037 | 87  | 22,193 | 6,391 | 3,863 | 32,534 |
| 61,038 | 86  | 22,236 | 6,350 | 3,822 | 32,494 |
| 61,039 | 89  | 22,518 | 6,387 | 3,839 | 32,833 |
| 61,040 | 90  | 22,507 | 6,403 | 3,856 | 32,856 |
| 61,041 | 90  | 21,222 | 6,139 | 3,654 | 31,105 |
| 61,042 | 89  | 21,398 | 6,175 | 3,671 | 31,333 |
| 61,043 | 90  | 21,651 | 6,248 | 3,704 | 31,693 |
| 61,044 | 90  | 21,746 | 6,240 | 3,701 | 31,777 |
| 61,045 | 100 | 22,315 | 6,358 | 3,756 | 32,529 |
| 61,046 | 103 | 22,704 | 6,464 | 3,794 | 33,065 |
| 61,047 | 109 | 22,624 | 6,409 | 3,787 | 32,929 |

|        |     |        |       |       |        |
|--------|-----|--------|-------|-------|--------|
| 61,048 | 108 | 22,637 | 6,411 | 3,783 | 32,939 |
| 61,049 | 110 | 22,696 | 6,459 | 3,771 | 33,036 |
| 61,050 | 110 | 22,691 | 6,444 | 3,760 | 33,005 |
| 61,051 | 103 | 22,661 | 6,484 | 3,782 | 33,030 |
| 61,052 | 97  | 22,590 | 6,459 | 3,778 | 32,924 |
| 61,053 | 100 | 22,557 | 6,468 | 3,741 | 32,866 |
| 61,054 | 104 | 22,525 | 6,451 | 3,729 | 32,809 |
| 61,055 | 108 | 22,478 | 6,447 | 3,729 | 32,762 |
| 61,056 | 109 | 22,474 | 6,455 | 3,739 | 32,777 |
| 61,057 | 104 | 22,478 | 6,414 | 3,754 | 32,750 |
| 61,058 | 107 | 22,885 | 6,496 | 3,785 | 33,273 |
| 61,059 | 108 | 23,025 | 6,451 | 3,798 | 33,382 |
| 61,060 | 107 | 22,837 | 6,341 | 3,771 | 33,056 |
| 61,061 | 107 | 23,030 | 6,365 | 3,772 | 33,274 |
| 61,062 | 106 | 23,215 | 6,424 | 3,775 | 33,520 |
| 61,063 | 106 | 23,256 | 6,442 | 3,752 | 33,556 |
| 61,064 | 108 | 23,289 | 6,458 | 3,761 | 33,616 |
| 61,065 | 111 | 23,264 | 6,461 | 3,765 | 33,601 |
| 61,066 | 111 | 23,091 | 6,439 | 3,740 | 33,381 |
| 61,067 | 113 | 23,548 | 6,620 | 3,880 | 34,161 |
| 61,068 | 110 | 23,179 | 6,537 | 3,831 | 33,657 |
| 61,069 | 111 | 23,367 | 6,633 | 3,874 | 33,985 |
| 61,070 | 114 | 23,250 | 6,603 | 3,887 | 33,854 |
| 61,071 | 114 | 23,078 | 6,588 | 3,866 | 33,646 |
| 61,072 | 112 | 22,761 | 6,532 | 3,815 | 33,220 |
| 61,073 | 111 | 22,781 | 6,554 | 3,814 | 33,260 |
| 61,074 | 121 | 22,936 | 6,598 | 3,839 | 33,494 |
| 61,075 | 121 | 22,890 | 6,588 | 3,837 | 33,436 |
| 61,076 | 121 | 22,903 | 6,617 | 3,845 | 33,486 |
| 61,077 | 121 | 22,986 | 6,660 | 3,871 | 33,638 |
| 61,078 | 121 | 23,375 | 6,764 | 3,935 | 34,195 |
| 61,079 | 120 | 23,439 | 6,766 | 3,945 | 34,270 |

|        |     |        |       |       |        |
|--------|-----|--------|-------|-------|--------|
| 61,080 | 119 | 23,072 | 6,661 | 3,868 | 33,720 |
| 61,081 | 120 | 23,203 | 6,663 | 3,876 | 33,862 |
| 61,082 | 127 | 23,273 | 6,681 | 3,876 | 33,957 |
| 61,083 | 127 | 23,121 | 6,618 | 3,860 | 33,726 |
| 61,084 | 137 | 23,436 | 6,704 | 3,921 | 34,198 |
| 61,085 | 139 | 23,433 | 6,696 | 3,910 | 34,178 |
| 61,086 | 141 | 23,398 | 6,698 | 3,899 | 34,136 |
| 61,087 | 146 | 23,475 | 6,720 | 3,902 | 34,243 |
| 61,088 | 146 | 23,486 | 6,727 | 3,900 | 34,259 |
| 61,089 | 146 | 23,528 | 6,751 | 3,920 | 34,345 |
| 61,090 | 149 | 23,754 | 6,848 | 3,964 | 34,715 |
| 61,091 | 149 | 23,478 | 6,781 | 3,914 | 34,322 |
| 61,092 | 149 | 23,570 | 6,773 | 3,924 | 34,416 |
| 61,093 | 142 | 23,697 | 6,803 | 3,957 | 34,599 |
| 61,094 | 148 | 23,846 | 6,851 | 3,990 | 34,835 |
| 61,095 | 145 | 23,578 | 6,831 | 3,959 | 34,513 |
| 61,096 | 138 | 23,209 | 6,775 | 3,940 | 34,062 |
| 61,097 | 138 | 23,417 | 6,854 | 4,021 | 34,430 |
| 61,098 | 134 | 23,305 | 6,849 | 4,012 | 34,300 |
| 61,099 | 133 | 23,386 | 6,844 | 4,029 | 34,392 |
| 61,100 | 133 | 23,560 | 6,819 | 4,040 | 34,552 |
| 61,101 | 139 | 23,344 | 6,749 | 4,003 | 34,235 |
| 61,102 | 140 | 23,405 | 6,740 | 4,011 | 34,296 |
| 61,103 | 140 | 23,399 | 6,704 | 4,009 | 34,252 |
| 61,104 | 131 | 23,343 | 6,668 | 4,013 | 34,155 |
| 61,105 | 128 | 23,349 | 6,633 | 4,009 | 34,119 |
| 61,106 | 124 | 23,317 | 6,582 | 4,000 | 34,023 |
| 61,107 | 122 | 22,836 | 6,421 | 3,913 | 33,292 |
| 61,108 | 125 | 23,101 | 6,438 | 3,931 | 33,595 |
| 61,109 | 123 | 23,069 | 6,418 | 3,939 | 33,549 |
| 61,110 | 119 | 22,738 | 6,339 | 3,885 | 33,081 |
| 61,111 | 115 | 22,332 | 6,275 | 3,836 | 32,558 |

|        |     |        |       |       |        |
|--------|-----|--------|-------|-------|--------|
| 61,112 | 115 | 23,196 | 6,420 | 3,995 | 33,726 |
| 61,113 | 116 | 23,134 | 6,414 | 4,016 | 33,680 |
| 61,114 | 118 | 23,308 | 6,417 | 4,045 | 33,888 |
| 61,115 | 117 | 23,474 | 6,413 | 4,071 | 34,075 |
| 61,116 | 113 | 23,573 | 6,409 | 4,043 | 34,138 |
| 61,117 | 112 | 23,713 | 6,368 | 4,026 | 34,219 |
| 61,118 | 109 | 23,590 | 6,308 | 3,988 | 33,995 |
| 61,119 | 109 | 23,718 | 6,285 | 3,983 | 34,095 |
| 61,120 | 106 | 23,592 | 6,227 | 3,962 | 33,887 |
| 61,121 | 106 | 23,517 | 6,171 | 3,933 | 33,727 |
| 61,122 | 107 | 23,733 | 6,202 | 3,955 | 33,997 |
| 61,123 | 108 | 23,302 | 6,071 | 3,896 | 33,377 |
| 61,124 | 109 | 23,418 | 6,089 | 3,913 | 33,529 |
| 61,125 | 103 | 23,403 | 6,068 | 3,913 | 33,487 |
| 61,126 | 104 | 23,269 | 5,983 | 3,880 | 33,236 |
| 61,127 | 105 | 23,527 | 6,048 | 3,930 | 33,610 |
| 61,128 | 109 | 23,232 | 5,960 | 3,902 | 33,203 |
| 61,129 | 107 | 23,323 | 5,997 | 3,904 | 33,331 |
| 61,130 | 112 | 22,861 | 5,897 | 3,853 | 32,723 |
| 61,131 | 113 | 22,790 | 5,870 | 3,851 | 32,624 |
| 61,132 | 112 | 22,809 | 5,915 | 3,845 | 32,681 |
| 61,133 | 102 | 22,646 | 5,894 | 3,813 | 32,455 |
| 61,134 | 98  | 22,582 | 5,902 | 3,812 | 32,394 |
| 61,135 | 96  | 22,466 | 5,882 | 3,817 | 32,261 |
| 61,136 | 95  | 22,283 | 5,881 | 3,832 | 32,091 |
| 61,137 | 94  | 22,284 | 5,914 | 3,868 | 32,160 |
| 61,138 | 89  | 22,246 | 5,936 | 3,895 | 32,166 |
| 61,139 | 90  | 22,538 | 6,013 | 3,921 | 32,562 |
| 61,140 | 92  | 22,578 | 6,032 | 3,947 | 32,649 |
| 61,141 | 89  | 22,833 | 6,094 | 3,988 | 33,004 |
| 61,142 | 87  | 22,756 | 6,042 | 3,962 | 32,847 |
| 61,143 | 90  | 22,803 | 6,054 | 3,986 | 32,933 |

|        |     |        |       |       |        |
|--------|-----|--------|-------|-------|--------|
| 61,144 | 89  | 23,085 | 6,106 | 4,011 | 33,291 |
| 61,145 | 87  | 23,450 | 6,179 | 4,063 | 33,779 |
| 61,146 | 81  | 23,319 | 6,106 | 4,032 | 33,538 |
| 61,147 | 91  | 23,327 | 6,113 | 4,042 | 33,573 |
| 61,148 | 91  | 23,254 | 6,092 | 4,034 | 33,471 |
| 61,149 | 88  | 23,478 | 6,153 | 4,064 | 33,783 |
| 61,150 | 87  | 22,804 | 6,010 | 3,980 | 32,881 |
| 61,151 | 87  | 22,957 | 6,060 | 4,000 | 33,104 |
| 61,152 | 85  | 22,982 | 6,049 | 4,003 | 33,119 |
| 61,153 | 88  | 23,108 | 6,100 | 4,033 | 33,329 |
| 61,154 | 91  | 23,232 | 6,156 | 4,067 | 33,546 |
| 61,155 | 93  | 23,164 | 6,122 | 4,026 | 33,405 |
| 61,156 | 93  | 23,233 | 6,156 | 4,030 | 33,512 |
| 61,157 | 100 | 23,259 | 6,197 | 4,028 | 33,584 |
| 61,158 | 101 | 23,254 | 6,201 | 4,020 | 33,576 |
| 61,159 | 98  | 23,135 | 6,254 | 4,062 | 33,549 |
| 61,160 | 98  | 23,304 | 6,302 | 4,117 | 33,821 |
| 61,161 | 99  | 23,302 | 6,358 | 4,114 | 33,873 |
| 61,162 | 102 | 23,332 | 6,404 | 4,128 | 33,966 |
| 61,163 | 104 | 23,047 | 6,375 | 4,086 | 33,612 |
| 61,164 | 102 | 22,735 | 6,281 | 4,023 | 33,141 |
| 61,165 | 102 | 23,081 | 6,393 | 4,095 | 33,671 |
| 61,166 | 99  | 22,992 | 6,453 | 4,109 | 33,653 |
| 61,167 | 101 | 22,895 | 6,436 | 4,117 | 33,549 |
| 61,168 | 102 | 22,914 | 6,430 | 4,107 | 33,553 |
| 61,169 | 102 | 22,634 | 6,384 | 4,048 | 33,168 |
| 61,170 | 102 | 22,641 | 6,405 | 4,066 | 33,214 |
| 61,171 | 103 | 22,804 | 6,453 | 4,096 | 33,456 |
| 61,172 | 104 | 22,889 | 6,463 | 4,111 | 33,567 |
| 61,173 | 102 | 22,568 | 6,395 | 4,079 | 33,144 |
| 61,174 | 101 | 22,391 | 6,383 | 4,091 | 32,966 |
| 61,175 | 107 | 22,446 | 6,444 | 4,107 | 33,104 |



|        |     |        |       |       |        |
|--------|-----|--------|-------|-------|--------|
| 61,176 | 105 | 22,406 | 6,436 | 4,083 | 33,030 |
| 61,177 | 105 | 22,412 | 6,455 | 4,082 | 33,054 |
| 61,178 | 103 | 22,291 | 6,494 | 4,101 | 32,989 |
| 61,179 | 103 | 22,172 | 6,478 | 4,091 | 32,844 |
| 61,180 | 105 | 22,020 | 6,457 | 4,103 | 32,685 |
| 61,181 | 100 | 21,795 | 6,397 | 4,043 | 32,335 |
| 61,182 | 102 | 22,136 | 6,440 | 4,088 | 32,766 |
| 61,183 | 105 | 22,159 | 6,390 | 4,091 | 32,745 |
| 61,184 | 104 | 22,147 | 6,377 | 4,093 | 32,721 |
| 61,185 | 106 | 22,266 | 6,396 | 4,099 | 32,867 |
| 61,186 | 104 | 22,405 | 6,394 | 4,108 | 33,011 |
| 61,187 | 104 | 22,486 | 6,360 | 4,097 | 33,047 |
| 61,188 | 107 | 22,459 | 6,316 | 4,056 | 32,938 |
| 61,189 | 108 | 22,246 | 6,224 | 4,002 | 32,580 |
| 61,190 | 107 | 22,482 | 6,267 | 4,057 | 32,913 |
| 61,191 | 103 | 22,190 | 6,166 | 3,992 | 32,451 |
| 61,192 | 103 | 22,313 | 6,202 | 4,004 | 32,622 |
| 61,193 | 99  | 22,189 | 6,161 | 3,957 | 32,406 |
| 61,194 | 94  | 21,892 | 6,076 | 3,900 | 31,962 |
| 61,195 | 93  | 22,143 | 6,182 | 3,954 | 32,372 |
| 61,196 | 92  | 21,291 | 5,936 | 3,803 | 31,122 |
| 61,197 | 92  | 21,606 | 5,989 | 3,831 | 31,518 |
| 61,198 | 91  | 21,867 | 6,034 | 3,851 | 31,843 |
| 61,199 | 91  | 21,902 | 6,019 | 3,838 | 31,850 |
| 61,200 | 93  | 22,067 | 6,094 | 3,876 | 32,130 |
| 61,201 | 91  | 21,991 | 6,095 | 3,870 | 32,047 |
| 61,202 | 90  | 21,966 | 6,104 | 3,866 | 32,026 |
| 61,203 | 93  | 22,182 | 6,165 | 3,880 | 32,320 |
| 61,204 | 94  | 22,160 | 6,170 | 3,863 | 32,287 |
| 61,205 | 92  | 22,043 | 6,133 | 3,832 | 32,100 |
| 61,206 | 96  | 22,085 | 6,237 | 3,902 | 32,320 |
| 61,207 | 96  | 22,199 | 6,288 | 3,921 | 32,504 |

|        |     |        |       |       |        |
|--------|-----|--------|-------|-------|--------|
| 61,208 | 94  | 22,425 | 6,346 | 3,955 | 32,820 |
| 61,209 | 94  | 22,583 | 6,357 | 3,949 | 32,983 |
| 61,210 | 94  | 22,377 | 6,271 | 3,910 | 32,652 |
| 61,211 | 94  | 22,415 | 6,294 | 3,933 | 32,736 |
| 61,212 | 91  | 22,563 | 6,238 | 3,893 | 32,785 |
| 61,213 | 92  | 22,779 | 6,295 | 3,935 | 33,101 |
| 61,214 | 88  | 22,531 | 6,210 | 3,884 | 32,713 |
| 61,215 | 86  | 22,387 | 6,158 | 3,862 | 32,493 |
| 61,216 | 89  | 22,839 | 6,303 | 3,924 | 33,155 |
| 61,217 | 93  | 22,581 | 6,194 | 3,857 | 32,725 |
| 61,218 | 91  | 22,384 | 6,145 | 3,815 | 32,435 |
| 61,219 | 104 | 22,869 | 6,274 | 3,916 | 33,163 |
| 61,220 | 105 | 23,065 | 6,305 | 3,964 | 33,439 |
| 61,221 | 107 | 22,532 | 6,210 | 3,867 | 32,716 |
| 61,222 | 106 | 22,730 | 6,288 | 3,900 | 33,024 |
| 61,223 | 105 | 22,922 | 6,373 | 3,921 | 33,321 |
| 61,224 | 111 | 23,024 | 6,340 | 3,926 | 33,401 |
| 61,225 | 112 | 23,300 | 6,427 | 3,940 | 33,779 |
| 61,226 | 109 | 23,570 | 6,465 | 3,973 | 34,117 |
| 61,227 | 115 | 23,588 | 6,471 | 3,968 | 34,142 |
| 61,228 | 114 | 23,514 | 6,383 | 3,934 | 33,945 |
| 61,229 | 116 | 23,560 | 6,368 | 3,915 | 33,959 |
| 61,230 | 116 | 23,807 | 6,353 | 3,926 | 34,202 |
| 61,231 | 115 | 23,731 | 6,348 | 3,904 | 34,098 |
| 61,232 | 119 | 24,024 | 6,455 | 3,951 | 34,549 |
| 61,233 | 117 | 24,140 | 6,476 | 3,964 | 34,697 |
| 61,234 | 119 | 23,979 | 6,426 | 3,921 | 34,445 |
| 61,235 | 119 | 23,864 | 6,397 | 3,908 | 34,288 |
| 61,236 | 120 | 24,398 | 6,500 | 3,979 | 34,997 |
| 61,237 | 118 | 24,029 | 6,436 | 3,927 | 34,510 |
| 61,238 | 123 | 24,149 | 6,492 | 3,946 | 34,710 |
| 61,239 | 120 | 24,070 | 6,488 | 3,936 | 34,614 |

|        |     |        |       |       |        |
|--------|-----|--------|-------|-------|--------|
| 61,240 | 119 | 23,761 | 6,418 | 3,886 | 34,184 |
| 61,241 | 120 | 23,751 | 6,406 | 3,879 | 34,156 |
| 61,242 | 122 | 23,994 | 6,460 | 3,909 | 34,485 |
| 61,243 | 126 | 23,717 | 6,387 | 3,862 | 34,092 |
| 61,244 | 127 | 23,447 | 6,344 | 3,827 | 33,745 |
| 61,245 | 135 | 23,551 | 6,319 | 3,825 | 33,830 |
| 61,246 | 136 | 23,759 | 6,368 | 3,861 | 34,124 |
| 61,247 | 135 | 23,548 | 6,326 | 3,832 | 33,841 |
| 61,248 | 136 | 23,686 | 6,359 | 3,833 | 34,014 |
| 61,249 | 134 | 23,449 | 6,283 | 3,800 | 33,666 |
| 61,250 | 133 | 23,445 | 6,263 | 3,780 | 33,621 |
| 61,251 | 137 | 23,480 | 6,255 | 3,775 | 33,647 |
| 61,252 | 137 | 23,270 | 6,211 | 3,739 | 33,357 |
| 61,253 | 137 | 23,696 | 6,286 | 3,814 | 33,933 |
| 61,254 | 135 | 23,626 | 6,273 | 3,787 | 33,821 |
| 61,255 | 133 | 23,566 | 6,211 | 3,770 | 33,680 |
| 61,256 | 127 | 23,360 | 6,118 | 3,728 | 33,333 |
| 61,257 | 125 | 23,214 | 6,103 | 3,682 | 33,124 |
| 61,258 | 125 | 23,099 | 6,035 | 3,668 | 32,927 |
| 61,259 | 127 | 23,245 | 6,071 | 3,689 | 33,132 |
| 61,260 | 130 | 22,891 | 6,011 | 3,635 | 32,667 |
| 61,261 | 130 | 22,730 | 5,966 | 3,583 | 32,409 |
| 61,262 | 130 | 22,848 | 5,995 | 3,603 | 32,576 |
| 61,263 | 129 | 22,737 | 5,968 | 3,600 | 32,434 |
| 61,264 | 128 | 22,674 | 5,956 | 3,622 | 32,380 |
| 61,265 | 128 | 22,701 | 5,960 | 3,604 | 32,393 |
| 61,266 | 127 | 22,731 | 5,956 | 3,616 | 32,430 |
| 61,267 | 125 | 22,624 | 5,949 | 3,625 | 32,323 |
| 61,268 | 115 | 22,439 | 5,957 | 3,650 | 32,161 |
| 61,269 | 118 | 22,303 | 5,938 | 3,676 | 32,035 |
| 61,270 | 117 | 22,216 | 5,921 | 3,658 | 31,912 |
| 61,271 | 116 | 22,232 | 5,903 | 3,656 | 31,907 |

|        |     |        |       |       |        |
|--------|-----|--------|-------|-------|--------|
| 61,272 | 116 | 21,967 | 5,817 | 3,594 | 31,494 |
| 61,273 | 118 | 21,957 | 5,787 | 3,571 | 31,433 |
| 61,274 | 118 | 22,212 | 5,820 | 3,602 | 31,752 |
| 61,275 | 116 | 21,711 | 5,696 | 3,530 | 31,053 |
| 61,276 | 121 | 21,898 | 5,692 | 3,535 | 31,246 |
| 61,277 | 118 | 21,896 | 5,695 | 3,546 | 31,255 |
| 61,278 | 111 | 21,634 | 5,621 | 3,522 | 30,888 |
| 61,279 | 111 | 21,380 | 5,597 | 3,497 | 30,585 |
| 61,280 | 114 | 21,896 | 5,719 | 3,596 | 31,325 |
| 61,281 | 116 | 21,948 | 5,753 | 3,592 | 31,409 |
| 61,282 | 118 | 21,978 | 5,775 | 3,605 | 31,476 |
| 61,283 | 114 | 22,184 | 5,779 | 3,635 | 31,712 |
| 61,284 | 113 | 21,903 | 5,732 | 3,609 | 31,357 |
| 61,285 | 116 | 22,023 | 5,788 | 3,624 | 31,551 |
| 61,286 | 115 | 21,656 | 5,704 | 3,570 | 31,045 |
| 61,287 | 120 | 21,574 | 5,672 | 3,538 | 30,904 |
| 61,288 | 122 | 21,616 | 5,666 | 3,543 | 30,947 |
| 61,289 | 120 | 21,494 | 5,621 | 3,519 | 30,754 |
| 61,290 | 119 | 21,228 | 5,550 | 3,495 | 30,392 |
| 61,291 | 122 | 21,687 | 5,760 | 3,637 | 31,206 |
| 61,292 | 130 | 21,779 | 5,838 | 3,670 | 31,417 |
| 61,293 | 129 | 21,514 | 5,792 | 3,652 | 31,087 |
| 61,294 | 127 | 21,493 | 5,805 | 3,652 | 31,077 |
| 61,295 | 125 | 21,285 | 5,805 | 3,664 | 30,879 |
| 61,296 | 122 | 21,254 | 5,835 | 3,671 | 30,882 |
| 61,297 | 128 | 21,480 | 5,885 | 3,696 | 31,189 |
| 61,298 | 129 | 21,158 | 5,840 | 3,663 | 30,790 |
| 61,299 | 128 | 21,134 | 5,863 | 3,678 | 30,803 |
| 61,300 | 126 | 21,044 | 5,916 | 3,701 | 30,787 |
| 61,301 | 134 | 21,443 | 6,053 | 3,794 | 31,424 |
| 61,302 | 135 | 21,686 | 6,122 | 3,851 | 31,794 |
| 61,303 | 135 | 21,795 | 6,134 | 3,888 | 31,952 |

|        |     |        |       |       |        |
|--------|-----|--------|-------|-------|--------|
| 61,304 | 135 | 21,818 | 6,165 | 3,894 | 32,012 |
| 61,305 | 134 | 21,521 | 6,106 | 3,874 | 31,635 |
| 61,306 | 134 | 21,531 | 6,095 | 3,875 | 31,635 |
| 61,307 | 138 | 21,746 | 6,149 | 3,908 | 31,941 |
| 61,308 | 133 | 21,641 | 6,067 | 3,894 | 31,735 |
| 61,309 | 137 | 21,936 | 6,115 | 3,936 | 32,124 |
| 61,310 | 137 | 22,039 | 6,148 | 3,969 | 32,293 |
| 61,311 | 135 | 22,039 | 6,125 | 3,973 | 32,272 |
| 61,312 | 136 | 21,926 | 6,077 | 3,954 | 32,093 |
| 61,313 | 135 | 21,944 | 6,048 | 3,947 | 32,074 |
| 61,314 | 137 | 22,229 | 6,107 | 3,998 | 32,471 |
| 61,315 | 137 | 22,386 | 6,110 | 3,968 | 32,601 |
| 61,316 | 140 | 22,487 | 6,127 | 3,973 | 32,727 |
| 61,317 | 140 | 22,619 | 6,155 | 4,002 | 32,916 |
| 61,318 | 130 | 21,052 | 5,732 | 3,697 | 30,611 |
| 61,319 | 130 | 21,362 | 5,784 | 3,733 | 31,009 |
| 61,320 | 126 | 21,712 | 5,869 | 3,764 | 31,471 |
| 61,321 | 126 | 21,710 | 5,882 | 3,775 | 31,493 |
| 61,322 | 133 | 22,191 | 6,025 | 3,848 | 32,197 |
| 61,323 | 142 | 22,486 | 6,056 | 3,897 | 32,581 |
| 61,324 | 143 | 22,535 | 6,066 | 3,922 | 32,666 |
| 61,325 | 141 | 22,420 | 6,079 | 3,934 | 32,574 |
| 61,326 | 141 | 22,505 | 6,085 | 3,941 | 32,672 |
| 61,327 | 134 | 22,482 | 6,065 | 3,932 | 32,613 |
| 61,328 | 133 | 22,470 | 6,076 | 3,938 | 32,617 |
| 61,329 | 133 | 22,752 | 6,138 | 4,000 | 33,023 |
| 61,330 | 132 | 22,856 | 6,155 | 4,013 | 33,156 |
| 61,331 | 135 | 22,770 | 6,170 | 4,017 | 33,092 |
| 61,332 | 132 | 22,718 | 6,152 | 4,030 | 33,032 |
| 61,333 | 132 | 22,600 | 6,159 | 4,027 | 32,918 |
| 61,334 | 131 | 22,538 | 6,160 | 4,022 | 32,851 |
| 61,335 | 127 | 22,439 | 6,151 | 3,985 | 32,702 |

|        |     |        |       |       |        |
|--------|-----|--------|-------|-------|--------|
| 61,336 | 124 | 22,428 | 6,130 | 4,003 | 32,685 |
| 61,337 | 124 | 22,528 | 6,162 | 4,041 | 32,855 |
| 61,338 | 118 | 22,553 | 6,186 | 4,030 | 32,887 |
| 61,339 | 116 | 22,653 | 6,202 | 4,022 | 32,993 |
| 61,340 | 115 | 22,799 | 6,211 | 4,033 | 33,158 |
| 61,341 | 114 | 22,959 | 6,157 | 4,014 | 33,244 |
| 61,342 | 111 | 22,908 | 6,099 | 3,981 | 33,099 |
| 61,343 | 106 | 23,064 | 6,168 | 3,990 | 33,328 |
| 61,344 | 102 | 23,049 | 6,135 | 3,972 | 33,258 |
| 61,345 | 100 | 23,039 | 6,069 | 3,938 | 33,146 |
| 61,346 | 98  | 23,031 | 6,046 | 3,952 | 33,127 |
| 61,347 | 98  | 23,074 | 6,057 | 3,950 | 33,179 |
| 61,348 | 96  | 23,227 | 6,068 | 3,966 | 33,357 |
| 61,349 | 92  | 23,035 | 5,992 | 3,939 | 33,058 |
| 61,350 | 91  | 23,349 | 6,017 | 3,980 | 33,437 |
| 61,351 | 98  | 23,318 | 5,994 | 3,950 | 33,360 |
| 61,352 | 95  | 23,152 | 5,949 | 3,938 | 33,134 |
| 61,353 | 96  | 22,965 | 5,877 | 3,893 | 32,831 |
| 61,354 | 94  | 22,702 | 5,808 | 3,843 | 32,447 |
| 61,355 | 94  | 22,739 | 5,778 | 3,833 | 32,444 |
| 61,356 | 94  | 22,617 | 5,737 | 3,809 | 32,257 |
| 61,357 | 92  | 22,689 | 5,722 | 3,789 | 32,292 |
| 61,358 | 92  | 22,760 | 5,736 | 3,782 | 32,370 |
| 61,359 | 88  | 22,810 | 5,762 | 3,780 | 32,440 |
| 61,360 | 89  | 22,718 | 5,751 | 3,776 | 32,334 |
| 61,361 | 94  | 22,744 | 5,786 | 3,797 | 32,421 |
| 61,362 | 93  | 22,515 | 5,741 | 3,770 | 32,119 |
| 61,363 | 94  | 22,491 | 5,776 | 3,793 | 32,154 |
| 61,364 | 94  | 22,382 | 5,801 | 3,791 | 32,068 |
| 61,365 | 94  | 22,306 | 5,820 | 3,783 | 32,003 |
| 61,366 | 95  | 22,152 | 5,797 | 3,796 | 31,840 |
| 61,367 | 94  | 22,136 | 5,784 | 3,816 | 31,830 |

|        |     |        |       |       |        |
|--------|-----|--------|-------|-------|--------|
| 61,368 | 94  | 22,112 | 5,777 | 3,790 | 31,773 |
| 61,369 | 93  | 21,935 | 5,754 | 3,758 | 31,540 |
| 61,370 | 96  | 22,033 | 5,777 | 3,771 | 31,677 |
| 61,371 | 96  | 22,228 | 5,796 | 3,780 | 31,900 |
| 61,372 | 97  | 22,371 | 5,799 | 3,799 | 32,066 |
| 61,373 | 94  | 22,440 | 5,794 | 3,802 | 32,130 |
| 61,374 | 85  | 22,179 | 5,771 | 3,780 | 31,815 |
| 61,375 | 87  | 22,301 | 5,808 | 3,771 | 31,967 |
| 61,376 | 101 | 22,274 | 5,797 | 3,761 | 31,933 |
| 61,377 | 102 | 22,355 | 5,794 | 3,774 | 32,025 |
| 61,378 | 104 | 22,449 | 5,828 | 3,788 | 32,169 |
| 61,379 | 108 | 22,485 | 5,854 | 3,779 | 32,226 |
| 61,380 | 105 | 21,886 | 5,652 | 3,674 | 31,317 |
| 61,381 | 104 | 22,248 | 5,738 | 3,735 | 31,825 |
| 61,382 | 103 | 22,669 | 5,787 | 3,785 | 32,344 |
| 61,383 | 107 | 22,713 | 5,780 | 3,770 | 32,370 |
| 61,384 | 107 | 22,683 | 5,739 | 3,758 | 32,287 |
| 61,385 | 111 | 23,457 | 5,944 | 3,895 | 33,407 |
| 61,386 | 117 | 23,589 | 5,975 | 3,921 | 33,602 |
| 61,387 | 118 | 23,344 | 5,944 | 3,893 | 33,299 |
| 61,388 | 123 | 23,562 | 6,010 | 3,921 | 33,616 |
| 61,389 | 130 | 23,576 | 5,996 | 3,926 | 33,628 |
| 61,390 | 132 | 23,554 | 5,980 | 3,914 | 33,580 |
| 61,391 | 133 | 23,525 | 5,984 | 3,889 | 33,531 |
| 61,392 | 135 | 23,201 | 5,902 | 3,830 | 33,068 |
| 61,393 | 134 | 23,267 | 5,896 | 3,837 | 33,134 |
| 61,394 | 134 | 23,183 | 5,929 | 3,855 | 33,101 |
| 61,395 | 143 | 23,196 | 5,965 | 3,851 | 33,155 |
| 61,396 | 144 | 23,141 | 5,940 | 3,833 | 33,058 |
| 61,397 | 150 | 23,467 | 6,024 | 3,853 | 33,494 |
| 61,398 | 154 | 23,523 | 6,042 | 3,858 | 33,577 |
| 61,399 | 152 | 23,260 | 6,028 | 3,843 | 33,283 |

|        |     |        |       |       |        |
|--------|-----|--------|-------|-------|--------|
| 61,400 | 152 | 23,196 | 6,060 | 3,857 | 33,265 |
| 61,401 | 163 | 23,430 | 6,110 | 3,859 | 33,562 |
| 61,402 | 155 | 23,570 | 6,099 | 3,860 | 33,684 |
| 61,403 | 150 | 23,419 | 6,048 | 3,818 | 33,435 |
| 61,404 | 144 | 23,306 | 6,054 | 3,820 | 33,324 |
| 61,405 | 146 | 23,160 | 6,013 | 3,793 | 33,112 |
| 61,406 | 146 | 23,123 | 6,022 | 3,798 | 33,089 |
| 61,407 | 147 | 23,289 | 6,070 | 3,813 | 33,319 |
| 61,408 | 151 | 23,296 | 6,109 | 3,831 | 33,387 |
| 61,409 | 153 | 23,453 | 6,172 | 3,892 | 33,670 |
| 61,410 | 147 | 23,243 | 6,094 | 3,813 | 33,297 |
| 61,411 | 149 | 23,551 | 6,179 | 3,846 | 33,725 |
| 61,412 | 149 | 23,841 | 6,250 | 3,889 | 34,129 |
| 61,413 | 146 | 23,654 | 6,180 | 3,830 | 33,810 |
| 61,414 | 147 | 23,649 | 6,107 | 3,755 | 33,658 |
| 61,415 | 150 | 23,956 | 6,186 | 3,798 | 34,090 |
| 61,416 | 149 | 24,085 | 6,193 | 3,798 | 34,225 |
| 61,417 | 148 | 24,291 | 6,266 | 3,807 | 34,512 |
| 61,418 | 147 | 24,262 | 6,249 | 3,804 | 34,462 |
| 61,419 | 149 | 23,960 | 6,146 | 3,760 | 34,015 |
| 61,420 | 148 | 23,967 | 6,136 | 3,763 | 34,014 |
| 61,421 | 148 | 23,892 | 6,124 | 3,770 | 33,934 |
| 61,422 | 148 | 23,757 | 6,107 | 3,779 | 33,791 |
| 61,423 | 144 | 23,886 | 6,178 | 3,822 | 34,030 |
| 61,424 | 146 | 23,945 | 6,181 | 3,835 | 34,107 |
| 61,425 | 145 | 23,939 | 6,160 | 3,806 | 34,050 |
| 61,426 | 143 | 23,889 | 6,158 | 3,787 | 33,977 |
| 61,427 | 129 | 23,754 | 6,111 | 3,755 | 33,749 |
| 61,428 | 126 | 23,910 | 6,142 | 3,778 | 33,956 |
| 61,429 | 120 | 23,775 | 6,078 | 3,736 | 33,709 |
| 61,430 | 120 | 23,659 | 6,044 | 3,708 | 33,531 |
| 61,431 | 121 | 23,573 | 6,106 | 3,717 | 33,517 |



|        |     |        |       |       |        |
|--------|-----|--------|-------|-------|--------|
| 61,432 | 121 | 23,563 | 6,114 | 3,712 | 33,510 |
| 61,433 | 121 | 23,724 | 6,124 | 3,740 | 33,709 |
| 61,434 | 120 | 23,448 | 6,076 | 3,709 | 33,353 |
| 61,435 | 121 | 23,278 | 5,999 | 3,654 | 33,052 |
| 61,436 | 119 | 23,696 | 6,048 | 3,711 | 33,574 |
| 61,437 | 112 | 23,579 | 6,024 | 3,678 | 33,393 |
| 61,438 | 110 | 22,775 | 5,781 | 3,566 | 32,232 |
| 61,439 | 111 | 23,014 | 5,811 | 3,608 | 32,544 |
| 61,440 | 110 | 23,234 | 5,828 | 3,643 | 32,815 |
| 61,441 | 110 | 23,252 | 5,845 | 3,646 | 32,853 |
| 61,442 | 103 | 23,523 | 5,917 | 3,701 | 33,244 |
| 61,443 | 104 | 23,545 | 5,913 | 3,680 | 33,242 |
| 61,444 | 103 | 23,619 | 5,847 | 3,658 | 33,227 |
| 61,445 | 102 | 23,883 | 5,911 | 3,694 | 33,590 |
| 61,446 | 96  | 23,908 | 5,898 | 3,721 | 33,623 |
| 61,447 | 95  | 23,644 | 5,866 | 3,695 | 33,300 |
| 61,448 | 92  | 23,956 | 5,923 | 3,773 | 33,744 |
| 61,449 | 87  | 23,710 | 5,821 | 3,732 | 33,350 |
| 61,450 | 92  | 24,146 | 5,912 | 3,766 | 33,916 |
| 61,451 | 92  | 24,246 | 5,948 | 3,793 | 34,079 |
| 61,452 | 91  | 24,233 | 5,957 | 3,805 | 34,086 |
| 61,453 | 91  | 23,951 | 5,909 | 3,771 | 33,722 |
| 61,454 | 91  | 23,920 | 5,911 | 3,786 | 33,708 |
| 61,455 | 90  | 23,962 | 5,920 | 3,771 | 33,743 |
| 61,456 | 90  | 24,037 | 5,918 | 3,767 | 33,812 |
| 61,457 | 90  | 23,945 | 5,928 | 3,770 | 33,733 |
| 61,458 | 88  | 23,915 | 5,920 | 3,786 | 33,709 |
| 61,459 | 90  | 24,085 | 5,962 | 3,822 | 33,959 |
| 61,460 | 89  | 23,698 | 5,878 | 3,783 | 33,448 |
| 61,461 | 92  | 23,613 | 5,867 | 3,782 | 33,354 |
| 61,462 | 92  | 23,615 | 5,821 | 3,779 | 33,307 |
| 61,463 | 96  | 23,393 | 5,743 | 3,741 | 32,973 |

|        |     |        |       |       |        |
|--------|-----|--------|-------|-------|--------|
| 61,464 | 95  | 23,035 | 5,660 | 3,709 | 32,499 |
| 61,465 | 100 | 23,046 | 5,675 | 3,747 | 32,568 |
| 61,466 | 101 | 23,184 | 5,669 | 3,754 | 32,708 |
| 61,467 | 100 | 23,052 | 5,653 | 3,746 | 32,551 |
| 61,468 | 102 | 23,078 | 5,641 | 3,742 | 32,563 |
| 61,469 | 117 | 23,132 | 5,657 | 3,721 | 32,627 |
| 61,470 | 116 | 22,873 | 5,591 | 3,670 | 32,250 |
| 61,471 | 121 | 22,642 | 5,540 | 3,638 | 31,941 |
| 61,472 | 121 | 22,339 | 5,488 | 3,597 | 31,545 |
| 61,473 | 126 | 23,062 | 5,683 | 3,695 | 32,566 |
| 61,474 | 130 | 23,318 | 5,733 | 3,733 | 32,914 |
| 61,475 | 129 | 23,174 | 5,715 | 3,724 | 32,742 |
| 61,476 | 127 | 22,825 | 5,635 | 3,683 | 32,270 |
| 61,477 | 127 | 22,773 | 5,628 | 3,688 | 32,216 |
| 61,478 | 127 | 22,725 | 5,647 | 3,693 | 32,192 |
| 61,479 | 131 | 22,597 | 5,636 | 3,667 | 32,031 |
| 61,480 | 136 | 22,676 | 5,655 | 3,693 | 32,160 |
| 61,481 | 137 | 22,517 | 5,640 | 3,648 | 31,942 |
| 61,482 | 140 | 22,213 | 5,583 | 3,626 | 31,562 |
| 61,483 | 138 | 22,141 | 5,545 | 3,607 | 31,431 |
| 61,484 | 141 | 22,263 | 5,599 | 3,638 | 31,641 |
| 61,485 | 142 | 22,205 | 5,577 | 3,622 | 31,546 |
| 61,486 | 141 | 21,670 | 5,490 | 3,557 | 30,858 |
| 61,487 | 147 | 21,859 | 5,553 | 3,598 | 31,157 |
| 61,488 | 149 | 21,693 | 5,511 | 3,586 | 30,939 |
| 61,489 | 141 | 21,442 | 5,483 | 3,539 | 30,605 |
| 61,490 | 148 | 21,767 | 5,519 | 3,561 | 30,995 |
| 61,491 | 146 | 21,906 | 5,579 | 3,572 | 31,203 |
| 61,492 | 152 | 22,060 | 5,595 | 3,605 | 31,412 |
| 61,493 | 158 | 21,567 | 5,485 | 3,537 | 30,747 |
| 61,494 | 157 | 21,546 | 5,473 | 3,539 | 30,715 |
| 61,495 | 162 | 21,326 | 5,398 | 3,499 | 30,385 |

|        |     |        |       |       |        |
|--------|-----|--------|-------|-------|--------|
| 61,496 | 164 | 21,072 | 5,323 | 3,461 | 30,020 |
| 61,497 | 170 | 21,495 | 5,470 | 3,538 | 30,673 |
| 61,498 | 170 | 21,458 | 5,466 | 3,521 | 30,615 |
| 61,499 | 176 | 21,152 | 5,383 | 3,463 | 30,174 |
| 61,500 | 174 | 21,021 | 5,334 | 3,434 | 29,963 |
| 61,501 | 181 | 21,309 | 5,388 | 3,474 | 30,352 |
| 61,502 | 179 | 20,992 | 5,293 | 3,429 | 29,893 |
| 61,503 | 174 | 21,389 | 5,388 | 3,512 | 30,463 |
| 61,504 | 178 | 21,374 | 5,338 | 3,467 | 30,357 |
| 61,505 | 175 | 21,483 | 5,358 | 3,480 | 30,496 |
| 61,506 | 175 | 21,676 | 5,402 | 3,520 | 30,773 |
| 61,507 | 181 | 21,844 | 5,374 | 3,487 | 30,886 |
| 61,508 | 181 | 22,064 | 5,425 | 3,524 | 31,194 |
| 61,509 | 181 | 22,400 | 5,479 | 3,554 | 31,614 |
| 61,510 | 184 | 22,263 | 5,447 | 3,522 | 31,416 |
| 61,511 | 185 | 22,374 | 5,475 | 3,515 | 31,549 |
| 61,512 | 186 | 22,253 | 5,446 | 3,485 | 31,370 |
| 61,513 | 184 | 22,222 | 5,443 | 3,481 | 31,330 |
| 61,514 | 174 | 22,237 | 5,465 | 3,492 | 31,368 |
| 61,515 | 176 | 22,848 | 5,553 | 3,542 | 32,119 |
| 61,516 | 174 | 22,782 | 5,518 | 3,522 | 31,996 |
| 61,517 | 172 | 22,821 | 5,574 | 3,565 | 32,132 |
| 61,518 | 173 | 23,268 | 5,692 | 3,650 | 32,783 |
| 61,519 | 164 | 23,034 | 5,634 | 3,651 | 32,483 |
| 61,520 | 160 | 23,256 | 5,674 | 3,701 | 32,791 |
| 61,521 | 159 | 23,385 | 5,700 | 3,727 | 32,971 |
| 61,522 | 154 | 23,452 | 5,697 | 3,712 | 33,015 |
| 61,523 | 155 | 23,314 | 5,631 | 3,680 | 32,780 |
| 61,524 | 154 | 23,225 | 5,611 | 3,654 | 32,644 |
| 61,525 | 152 | 23,596 | 5,736 | 3,725 | 33,209 |
| 61,526 | 153 | 23,439 | 5,684 | 3,690 | 32,966 |
| 61,527 | 159 | 23,646 | 5,721 | 3,721 | 33,247 |

|        |     |        |       |       |        |
|--------|-----|--------|-------|-------|--------|
| 61,528 | 162 | 23,740 | 5,694 | 3,711 | 33,307 |
| 61,529 | 163 | 23,718 | 5,638 | 3,698 | 33,217 |
| 61,530 | 163 | 23,726 | 5,626 | 3,696 | 33,211 |
| 61,531 | 154 | 23,787 | 5,662 | 3,702 | 33,305 |
| 61,532 | 159 | 23,809 | 5,638 | 3,692 | 33,298 |
| 61,533 | 156 | 23,842 | 5,634 | 3,688 | 33,320 |
| 61,534 | 159 | 24,302 | 5,742 | 3,737 | 33,940 |
| 61,535 | 155 | 24,417 | 5,766 | 3,769 | 34,107 |
| 61,536 | 159 | 24,627 | 5,829 | 3,810 | 34,425 |
| 61,537 | 156 | 24,497 | 5,812 | 3,788 | 34,253 |
| 61,538 | 153 | 24,770 | 5,858 | 3,811 | 34,592 |
| 61,539 | 156 | 24,575 | 5,790 | 3,768 | 34,289 |
| 61,540 | 155 | 24,259 | 5,746 | 3,735 | 33,895 |
| 61,541 | 151 | 24,356 | 5,806 | 3,780 | 34,093 |
| 61,542 | 150 | 24,424 | 5,824 | 3,781 | 34,179 |
| 61,543 | 144 | 24,288 | 5,781 | 3,758 | 33,971 |
| 61,544 | 137 | 24,194 | 5,757 | 3,757 | 33,845 |
| 61,545 | 139 | 24,178 | 5,759 | 3,746 | 33,822 |
| 61,546 | 125 | 23,794 | 5,669 | 3,700 | 33,288 |
| 61,547 | 125 | 24,131 | 5,733 | 3,730 | 33,719 |
| 61,548 | 118 | 24,180 | 5,730 | 3,724 | 33,752 |
| 61,549 | 120 | 24,260 | 5,755 | 3,736 | 33,871 |
| 61,550 | 114 | 24,256 | 5,772 | 3,720 | 33,862 |
| 61,551 | 114 | 23,970 | 5,711 | 3,694 | 33,489 |
| 61,552 | 114 | 23,948 | 5,703 | 3,684 | 33,449 |
| 61,553 | 113 | 23,647 | 5,615 | 3,637 | 33,012 |
| 61,554 | 112 | 23,243 | 5,546 | 3,579 | 32,480 |
| 61,555 | 115 | 23,716 | 5,741 | 3,717 | 33,289 |
| 61,556 | 118 | 23,735 | 5,781 | 3,729 | 33,363 |
| 61,557 | 119 | 23,528 | 5,761 | 3,689 | 33,097 |
| 61,558 | 116 | 23,254 | 5,705 | 3,664 | 32,739 |
| 61,559 | 114 | 23,117 | 5,652 | 3,658 | 32,541 |

|        |     |        |       |       |        |
|--------|-----|--------|-------|-------|--------|
| 61,560 | 108 | 23,211 | 5,667 | 3,669 | 32,655 |
| 61,561 | 110 | 23,189 | 5,650 | 3,655 | 32,604 |
| 61,562 | 117 | 23,517 | 5,699 | 3,681 | 33,014 |
| 61,563 | 123 | 23,240 | 5,670 | 3,674 | 32,707 |
| 61,564 | 124 | 23,047 | 5,617 | 3,644 | 32,432 |
| 61,565 | 124 | 23,480 | 5,724 | 3,687 | 33,015 |
| 61,566 | 129 | 23,376 | 5,766 | 3,711 | 32,982 |
| 61,567 | 134 | 23,319 | 5,756 | 3,693 | 32,902 |
| 61,568 | 142 | 23,156 | 5,693 | 3,622 | 32,613 |
| 61,569 | 142 | 23,019 | 5,666 | 3,601 | 32,428 |
| 61,570 | 142 | 22,955 | 5,678 | 3,564 | 32,339 |
| 61,571 | 146 | 22,901 | 5,666 | 3,550 | 32,263 |
| 61,572 | 145 | 22,529 | 5,568 | 3,497 | 31,739 |
| 61,573 | 145 | 22,694 | 5,596 | 3,525 | 31,960 |
| 61,574 | 145 | 22,681 | 5,545 | 3,506 | 31,877 |
| 61,575 | 147 | 22,675 | 5,564 | 3,486 | 31,872 |
| 61,576 | 147 | 22,722 | 5,546 | 3,493 | 31,908 |
| 61,577 | 142 | 22,724 | 5,545 | 3,476 | 31,887 |
| 61,578 | 141 | 22,797 | 5,537 | 3,494 | 31,969 |
| 61,579 | 135 | 22,847 | 5,584 | 3,516 | 32,082 |
| 61,580 | 137 | 22,904 | 5,606 | 3,517 | 32,164 |
| 61,581 | 139 | 22,879 | 5,591 | 3,505 | 32,114 |
| 61,582 | 144 | 23,024 | 5,634 | 3,544 | 32,346 |
| 61,583 | 141 | 22,979 | 5,642 | 3,553 | 32,315 |
| 61,584 | 140 | 22,895 | 5,661 | 3,571 | 32,267 |
| 61,585 | 136 | 22,865 | 5,660 | 3,560 | 32,221 |
| 61,586 | 139 | 22,728 | 5,647 | 3,518 | 32,032 |
| 61,587 | 141 | 22,901 | 5,667 | 3,510 | 32,219 |
| 61,588 | 142 | 22,818 | 5,623 | 3,502 | 32,085 |
| 61,589 | 142 | 22,621 | 5,558 | 3,488 | 31,809 |
| 61,590 | 148 | 22,869 | 5,605 | 3,522 | 32,144 |
| 61,591 | 145 | 22,898 | 5,632 | 3,519 | 32,194 |

|        |     |        |       |       |        |
|--------|-----|--------|-------|-------|--------|
| 61,592 | 148 | 22,692 | 5,579 | 3,483 | 31,902 |
| 61,593 | 147 | 22,426 | 5,508 | 3,451 | 31,532 |
| 61,594 | 148 | 22,377 | 5,589 | 3,494 | 31,608 |
| 61,595 | 148 | 22,354 | 5,560 | 3,479 | 31,541 |
| 61,596 | 154 | 22,224 | 5,546 | 3,481 | 31,405 |
| 61,597 | 154 | 22,205 | 5,502 | 3,450 | 31,311 |
| 61,598 | 156 | 22,437 | 5,557 | 3,473 | 31,623 |
| 61,599 | 155 | 22,521 | 5,567 | 3,506 | 31,749 |
| 61,600 | 153 | 22,149 | 5,448 | 3,459 | 31,209 |
| 61,601 | 153 | 22,141 | 5,467 | 3,464 | 31,225 |
| 61,602 | 149 | 22,261 | 5,493 | 3,479 | 31,382 |
| 61,603 | 153 | 22,333 | 5,467 | 3,472 | 31,425 |
| 61,604 | 156 | 22,380 | 5,439 | 3,455 | 31,430 |
| 61,605 | 162 | 22,676 | 5,485 | 3,478 | 31,801 |
| 61,606 | 161 | 22,598 | 5,419 | 3,450 | 31,628 |
| 61,607 | 166 | 22,473 | 5,385 | 3,411 | 31,435 |
| 61,608 | 166 | 22,491 | 5,384 | 3,424 | 31,465 |
| 61,609 | 168 | 22,227 | 5,329 | 3,368 | 31,092 |
| 61,610 | 167 | 22,161 | 5,294 | 3,355 | 30,977 |
| 61,611 | 168 | 22,344 | 5,346 | 3,383 | 31,241 |
| 61,612 | 171 | 22,366 | 5,329 | 3,424 | 31,290 |
| 61,613 | 164 | 22,356 | 5,313 | 3,440 | 31,273 |
| 61,614 | 164 | 22,244 | 5,306 | 3,455 | 31,169 |
| 61,615 | 173 | 22,150 | 5,299 | 3,461 | 31,083 |
| 61,616 | 175 | 22,049 | 5,239 | 3,423 | 30,886 |
| 61,617 | 175 | 21,905 | 5,211 | 3,396 | 30,687 |
| 61,618 | 174 | 22,082 | 5,246 | 3,443 | 30,945 |
| 61,619 | 168 | 21,913 | 5,211 | 3,440 | 30,732 |
| 61,620 | 164 | 22,016 | 5,193 | 3,438 | 30,811 |
| 61,621 | 169 | 21,973 | 5,196 | 3,437 | 30,775 |
| 61,622 | 164 | 21,713 | 5,165 | 3,424 | 30,466 |
| 61,623 | 166 | 21,930 | 5,210 | 3,455 | 30,761 |

|        |     |        |       |       |        |
|--------|-----|--------|-------|-------|--------|
| 61,624 | 166 | 21,907 | 5,218 | 3,427 | 30,718 |
| 61,625 | 170 | 21,924 | 5,238 | 3,463 | 30,795 |
| 61,626 | 173 | 21,912 | 5,211 | 3,465 | 30,761 |
| 61,627 | 178 | 21,764 | 5,186 | 3,434 | 30,562 |
| 61,628 | 178 | 21,675 | 5,180 | 3,413 | 30,446 |
| 61,629 | 186 | 21,817 | 5,233 | 3,423 | 30,659 |
| 61,630 | 186 | 21,871 | 5,219 | 3,432 | 30,708 |
| 61,631 | 182 | 21,394 | 5,115 | 3,391 | 30,082 |
| 61,632 | 183 | 21,538 | 5,118 | 3,392 | 30,231 |
| 61,633 | 184 | 21,585 | 5,085 | 3,354 | 30,208 |
| 61,634 | 184 | 21,614 | 5,068 | 3,354 | 30,220 |
| 61,635 | 185 | 21,499 | 5,036 | 3,334 | 30,054 |
| 61,636 | 182 | 21,455 | 5,000 | 3,316 | 29,953 |
| 61,637 | 187 | 21,678 | 5,074 | 3,351 | 30,290 |
| 61,638 | 183 | 21,514 | 5,042 | 3,332 | 30,071 |
| 61,639 | 182 | 21,497 | 5,039 | 3,297 | 30,015 |
| 61,640 | 177 | 21,488 | 5,031 | 3,277 | 29,973 |
| 61,641 | 171 | 21,590 | 5,016 | 3,272 | 30,049 |
| 61,642 | 169 | 21,458 | 4,945 | 3,258 | 29,830 |
| 61,643 | 170 | 21,529 | 4,935 | 3,258 | 29,892 |
| 61,644 | 171 | 21,621 | 4,940 | 3,261 | 29,993 |
| 61,645 | 177 | 21,933 | 4,974 | 3,285 | 30,369 |
| 61,646 | 174 | 21,988 | 4,970 | 3,298 | 30,430 |
| 61,647 | 172 | 21,710 | 4,923 | 3,252 | 30,057 |
| 61,648 | 173 | 21,569 | 4,949 | 3,245 | 29,936 |
| 61,649 | 176 | 21,683 | 4,970 | 3,265 | 30,094 |
| 61,650 | 175 | 21,246 | 4,895 | 3,207 | 29,523 |
| 61,651 | 177 | 21,249 | 4,908 | 3,200 | 29,534 |
| 61,652 | 177 | 21,250 | 4,929 | 3,195 | 29,551 |
| 61,653 | 179 | 21,325 | 4,941 | 3,192 | 29,637 |
| 61,654 | 176 | 21,603 | 5,024 | 3,265 | 30,068 |
| 61,655 | 164 | 21,337 | 4,966 | 3,195 | 29,662 |

|        |     |        |       |       |        |
|--------|-----|--------|-------|-------|--------|
| 61,656 | 159 | 20,788 | 4,823 | 3,139 | 28,909 |
| 61,657 | 159 | 21,038 | 4,876 | 3,165 | 29,238 |
| 61,658 | 161 | 21,155 | 4,924 | 3,203 | 29,443 |
| 61,659 | 161 | 21,085 | 4,933 | 3,208 | 29,387 |
| 61,660 | 156 | 21,157 | 4,966 | 3,233 | 29,512 |
| 61,661 | 158 | 21,374 | 5,027 | 3,279 | 29,838 |
| 61,662 | 157 | 21,350 | 5,018 | 3,271 | 29,796 |
| 61,663 | 154 | 21,477 | 5,042 | 3,261 | 29,934 |
| 61,664 | 154 | 21,483 | 5,035 | 3,253 | 29,925 |
| 61,665 | 142 | 21,561 | 4,983 | 3,253 | 29,939 |
| 61,666 | 133 | 21,575 | 4,961 | 3,233 | 29,902 |
| 61,667 | 125 | 21,342 | 4,908 | 3,206 | 29,581 |
| 61,668 | 128 | 21,297 | 4,895 | 3,175 | 29,495 |
| 61,669 | 130 | 21,499 | 4,928 | 3,185 | 29,742 |
| 61,670 | 127 | 21,133 | 4,816 | 3,119 | 29,195 |
| 61,671 | 131 | 21,214 | 4,826 | 3,131 | 29,302 |
| 61,672 | 129 | 21,239 | 4,817 | 3,133 | 29,318 |
| 61,673 | 132 | 21,593 | 4,925 | 3,180 | 29,830 |
| 61,674 | 142 | 21,430 | 4,906 | 3,144 | 29,622 |
| 61,675 | 140 | 21,486 | 4,909 | 3,141 | 29,676 |
| 61,676 | 137 | 21,660 | 4,940 | 3,141 | 29,878 |
| 61,677 | 133 | 21,569 | 4,923 | 3,146 | 29,771 |
| 61,678 | 133 | 21,462 | 4,912 | 3,140 | 29,647 |
| 61,679 | 129 | 21,479 | 4,945 | 3,169 | 29,722 |
| 61,680 | 124 | 21,525 | 4,950 | 3,200 | 29,799 |
| 61,681 | 125 | 21,158 | 4,888 | 3,138 | 29,309 |
| 61,682 | 127 | 21,440 | 4,936 | 3,172 | 29,675 |
| 61,683 | 123 | 21,382 | 4,930 | 3,153 | 29,588 |
| 61,684 | 121 | 21,115 | 4,853 | 3,106 | 29,195 |
| 61,685 | 121 | 21,039 | 4,839 | 3,105 | 29,104 |
| 61,686 | 120 | 20,830 | 4,790 | 3,080 | 28,820 |
| 61,687 | 128 | 21,205 | 4,897 | 3,164 | 29,394 |



|        |     |        |       |       |        |
|--------|-----|--------|-------|-------|--------|
| 61,688 | 124 | 20,982 | 4,815 | 3,134 | 29,055 |
| 61,689 | 127 | 21,039 | 4,836 | 3,139 | 29,141 |
| 61,690 | 136 | 21,438 | 4,904 | 3,193 | 29,671 |
| 61,691 | 146 | 21,456 | 4,942 | 3,223 | 29,767 |
| 61,692 | 146 | 21,270 | 4,888 | 3,191 | 29,495 |
| 61,693 | 145 | 21,334 | 4,909 | 3,179 | 29,567 |
| 61,694 | 149 | 21,625 | 4,968 | 3,217 | 29,959 |
| 61,695 | 151 | 21,656 | 4,976 | 3,227 | 30,010 |
| 61,696 | 146 | 21,597 | 4,997 | 3,225 | 29,965 |
| 61,697 | 150 | 21,634 | 5,002 | 3,213 | 29,999 |
| 61,698 | 149 | 21,511 | 4,954 | 3,191 | 29,805 |
| 61,699 | 153 | 21,309 | 4,904 | 3,163 | 29,529 |
| 61,700 | 148 | 21,116 | 4,853 | 3,148 | 29,265 |
| 61,701 | 145 | 21,590 | 4,949 | 3,203 | 29,887 |
| 61,702 | 151 | 21,795 | 5,007 | 3,224 | 30,177 |
| 61,703 | 156 | 21,852 | 4,972 | 3,246 | 30,226 |
| 61,704 | 157 | 21,653 | 4,903 | 3,187 | 29,900 |
| 61,705 | 156 | 21,658 | 4,903 | 3,182 | 29,899 |
| 61,706 | 159 | 21,886 | 4,958 | 3,215 | 30,218 |
| 61,707 | 161 | 21,722 | 4,956 | 3,196 | 30,035 |
| 61,708 | 157 | 21,760 | 4,976 | 3,191 | 30,084 |
| 61,709 | 161 | 22,048 | 5,006 | 3,218 | 30,433 |
| 61,710 | 161 | 22,031 | 4,997 | 3,216 | 30,405 |
| 61,711 | 167 | 22,248 | 5,023 | 3,237 | 30,675 |
| 61,712 | 164 | 21,930 | 4,983 | 3,185 | 30,262 |
| 61,713 | 164 | 21,980 | 4,981 | 3,193 | 30,318 |
| 61,714 | 164 | 21,642 | 4,934 | 3,149 | 29,889 |
| 61,715 | 166 | 21,640 | 4,956 | 3,137 | 29,899 |
| 61,716 | 167 | 21,702 | 5,010 | 3,164 | 30,043 |
| 61,717 | 166 | 21,566 | 5,024 | 3,159 | 29,915 |
| 61,718 | 161 | 21,541 | 5,038 | 3,162 | 29,902 |
| 61,719 | 164 | 21,358 | 4,980 | 3,152 | 29,654 |

|        |     |        |       |       |        |
|--------|-----|--------|-------|-------|--------|
| 61,720 | 162 | 21,456 | 4,997 | 3,175 | 29,790 |
| 61,721 | 166 | 21,767 | 5,047 | 3,198 | 30,178 |
| 61,722 | 163 | 21,467 | 5,027 | 3,182 | 29,839 |
| 61,723 | 161 | 21,405 | 5,025 | 3,177 | 29,768 |
| 61,724 | 162 | 21,579 | 5,052 | 3,193 | 29,986 |
| 61,725 | 151 | 21,548 | 5,023 | 3,194 | 29,916 |
| 61,726 | 152 | 21,436 | 5,004 | 3,190 | 29,782 |
| 61,727 | 148 | 21,099 | 4,964 | 3,172 | 29,383 |
| 61,728 | 151 | 21,158 | 4,990 | 3,171 | 29,470 |
| 61,729 | 154 | 21,289 | 5,003 | 3,176 | 29,622 |
| 61,730 | 154 | 21,264 | 4,999 | 3,166 | 29,583 |
| 61,731 | 152 | 21,295 | 5,007 | 3,183 | 29,637 |
| 61,732 | 154 | 21,328 | 5,010 | 3,177 | 29,669 |
| 61,733 | 155 | 21,317 | 4,994 | 3,199 | 29,665 |
| 61,734 | 152 | 21,378 | 4,986 | 3,222 | 29,738 |
| 61,735 | 152 | 21,392 | 4,996 | 3,218 | 29,758 |
| 61,736 | 151 | 21,421 | 5,018 | 3,236 | 29,826 |
| 61,737 | 149 | 21,577 | 5,048 | 3,247 | 30,021 |
| 61,738 | 158 | 21,818 | 5,130 | 3,280 | 30,386 |
| 61,739 | 167 | 21,766 | 5,181 | 3,317 | 30,431 |
| 61,740 | 163 | 21,875 | 5,163 | 3,335 | 30,536 |
| 61,741 | 156 | 21,540 | 5,130 | 3,324 | 30,150 |
| 61,742 | 151 | 21,280 | 5,090 | 3,282 | 29,803 |
| 61,743 | 149 | 21,105 | 5,075 | 3,262 | 29,591 |
| 61,744 | 156 | 21,896 | 5,269 | 3,385 | 30,706 |
| 61,745 | 157 | 21,910 | 5,283 | 3,382 | 30,732 |
| 61,746 | 157 | 21,662 | 5,243 | 3,358 | 30,420 |
| 61,747 | 150 | 21,484 | 5,196 | 3,335 | 30,165 |
| 61,748 | 149 | 21,436 | 5,196 | 3,319 | 30,100 |
| 61,749 | 155 | 21,178 | 5,145 | 3,290 | 29,768 |
| 61,750 | 152 | 21,017 | 5,094 | 3,271 | 29,534 |
| 61,751 | 159 | 21,677 | 5,272 | 3,394 | 30,502 |

|        |     |        |       |       |        |
|--------|-----|--------|-------|-------|--------|
| 61,752 | 161 | 21,533 | 5,215 | 3,408 | 30,317 |
| 61,753 | 158 | 21,422 | 5,204 | 3,400 | 30,184 |
| 61,754 | 158 | 21,253 | 5,220 | 3,391 | 30,022 |
| 61,755 | 157 | 21,404 | 5,285 | 3,438 | 30,284 |
| 61,756 | 158 | 21,415 | 5,300 | 3,448 | 30,321 |
| 61,757 | 155 | 21,442 | 5,285 | 3,443 | 30,325 |
| 61,758 | 153 | 21,410 | 5,243 | 3,420 | 30,226 |
| 61,759 | 150 | 21,336 | 5,203 | 3,420 | 30,109 |
| 61,760 | 152 | 21,157 | 5,175 | 3,370 | 29,854 |
| 61,761 | 157 | 21,425 | 5,220 | 3,385 | 30,187 |
| 61,762 | 158 | 21,181 | 5,144 | 3,356 | 29,839 |
| 61,763 | 161 | 21,279 | 5,157 | 3,361 | 29,958 |
| 61,764 | 161 | 21,219 | 5,157 | 3,356 | 29,893 |
| 61,765 | 163 | 21,413 | 5,218 | 3,403 | 30,197 |
| 61,766 | 167 | 21,373 | 5,230 | 3,418 | 30,188 |
| 61,767 | 167 | 21,164 | 5,157 | 3,386 | 29,874 |
| 61,768 | 166 | 21,082 | 5,115 | 3,386 | 29,749 |
| 61,769 | 165 | 20,842 | 5,078 | 3,360 | 29,445 |
| 61,770 | 160 | 20,772 | 5,108 | 3,348 | 29,388 |
| 61,771 | 161 | 20,823 | 5,114 | 3,365 | 29,463 |
| 61,772 | 155 | 20,703 | 5,058 | 3,342 | 29,258 |
| 61,773 | 156 | 20,340 | 4,908 | 3,291 | 28,695 |
| 61,774 | 158 | 20,556 | 4,954 | 3,344 | 29,012 |
| 61,775 | 156 | 20,901 | 5,031 | 3,420 | 29,508 |
| 61,776 | 163 | 21,220 | 5,129 | 3,462 | 29,974 |
| 61,777 | 157 | 21,152 | 5,079 | 3,437 | 29,825 |
| 61,778 | 158 | 21,506 | 5,138 | 3,488 | 30,290 |
| 61,779 | 153 | 21,682 | 5,195 | 3,531 | 30,561 |
| 61,780 | 152 | 21,503 | 5,202 | 3,545 | 30,402 |
| 61,781 | 157 | 21,424 | 5,196 | 3,519 | 30,296 |
| 61,782 | 157 | 21,346 | 5,181 | 3,522 | 30,206 |
| 61,783 | 153 | 21,269 | 5,190 | 3,540 | 30,152 |

|        |     |        |       |       |        |
|--------|-----|--------|-------|-------|--------|
| 61,784 | 154 | 21,504 | 5,284 | 3,581 | 30,523 |
| 61,785 | 155 | 21,580 | 5,321 | 3,603 | 30,659 |
| 61,786 | 153 | 21,604 | 5,326 | 3,595 | 30,678 |
| 61,787 | 155 | 21,250 | 5,225 | 3,508 | 30,138 |
| 61,788 | 156 | 21,481 | 5,249 | 3,521 | 30,407 |
| 61,789 | 147 | 21,715 | 5,275 | 3,560 | 30,697 |
| 61,790 | 149 | 21,757 | 5,208 | 3,533 | 30,647 |
| 61,791 | 148 | 21,353 | 5,159 | 3,484 | 30,144 |
| 61,792 | 142 | 21,231 | 5,131 | 3,464 | 29,968 |
| 61,793 | 149 | 20,853 | 5,048 | 3,414 | 29,464 |
| 61,794 | 151 | 21,015 | 5,055 | 3,424 | 29,645 |
| 61,795 | 148 | 20,940 | 5,078 | 3,454 | 29,620 |
| 61,796 | 145 | 21,029 | 5,038 | 3,448 | 29,660 |
| 61,797 | 152 | 21,064 | 5,020 | 3,455 | 29,691 |
| 61,798 | 152 | 21,063 | 5,016 | 3,447 | 29,678 |
| 61,799 | 151 | 21,096 | 5,021 | 3,473 | 29,741 |
| 61,800 | 147 | 21,134 | 5,037 | 3,483 | 29,801 |
| 61,801 | 144 | 21,410 | 5,083 | 3,506 | 30,143 |
| 61,802 | 142 | 21,259 | 5,071 | 3,460 | 29,932 |
| 61,803 | 135 | 21,643 | 5,145 | 3,487 | 30,410 |
| 61,804 | 131 | 21,813 | 5,119 | 3,469 | 30,532 |
| 61,805 | 134 | 21,974 | 5,163 | 3,502 | 30,773 |
| 61,806 | 135 | 21,953 | 5,184 | 3,512 | 30,784 |
| 61,807 | 134 | 21,559 | 5,126 | 3,492 | 30,311 |
| 61,808 | 140 | 21,285 | 5,087 | 3,477 | 29,989 |
| 61,809 | 141 | 21,463 | 5,145 | 3,502 | 30,251 |
| 61,810 | 141 | 21,488 | 5,140 | 3,522 | 30,291 |
| 61,811 | 132 | 21,545 | 5,137 | 3,538 | 30,352 |
| 61,812 | 132 | 21,537 | 5,131 | 3,544 | 30,344 |
| 61,813 | 127 | 21,706 | 5,182 | 3,603 | 30,618 |
| 61,814 | 131 | 21,689 | 5,203 | 3,629 | 30,652 |
| 61,815 | 134 | 21,635 | 5,240 | 3,664 | 30,673 |

|        |     |        |       |       |        |
|--------|-----|--------|-------|-------|--------|
| 61,816 | 131 | 21,674 | 5,297 | 3,698 | 30,800 |
| 61,817 | 129 | 21,696 | 5,288 | 3,692 | 30,805 |
| 61,818 | 131 | 21,788 | 5,294 | 3,651 | 30,864 |
| 61,819 | 138 | 22,067 | 5,370 | 3,701 | 31,276 |
| 61,820 | 138 | 22,184 | 5,398 | 3,732 | 31,452 |
| 61,821 | 136 | 22,034 | 5,343 | 3,708 | 31,221 |
| 61,822 | 136 | 22,083 | 5,364 | 3,727 | 31,310 |
| 61,823 | 138 | 21,753 | 5,346 | 3,701 | 30,938 |
| 61,824 | 135 | 21,521 | 5,330 | 3,667 | 30,653 |
| 61,825 | 137 | 21,710 | 5,360 | 3,684 | 30,891 |
| 61,826 | 137 | 21,680 | 5,396 | 3,687 | 30,900 |
| 61,827 | 131 | 21,853 | 5,436 | 3,723 | 31,143 |
| 61,828 | 130 | 21,691 | 5,394 | 3,685 | 30,900 |
| 61,829 | 130 | 21,605 | 5,406 | 3,675 | 30,816 |
| 61,830 | 129 | 21,078 | 5,243 | 3,544 | 29,994 |
| 61,831 | 131 | 21,319 | 5,231 | 3,545 | 30,226 |
| 61,832 | 133 | 21,503 | 5,255 | 3,557 | 30,448 |
| 61,833 | 134 | 21,624 | 5,283 | 3,561 | 30,602 |
| 61,834 | 136 | 21,738 | 5,317 | 3,570 | 30,761 |
| 61,835 | 143 | 21,552 | 5,311 | 3,527 | 30,533 |
| 61,836 | 142 | 21,495 | 5,299 | 3,530 | 30,466 |
| 61,837 | 140 | 21,582 | 5,324 | 3,548 | 30,594 |
| 61,838 | 139 | 21,752 | 5,395 | 3,583 | 30,869 |
| 61,839 | 133 | 21,067 | 5,259 | 3,495 | 29,954 |
| 61,840 | 133 | 21,182 | 5,286 | 3,519 | 30,120 |
| 61,841 | 131 | 21,384 | 5,342 | 3,533 | 30,390 |
| 61,842 | 135 | 21,124 | 5,259 | 3,485 | 30,003 |
| 61,843 | 138 | 21,151 | 5,256 | 3,479 | 30,024 |
| 61,844 | 140 | 20,987 | 5,196 | 3,453 | 29,776 |
| 61,845 | 139 | 20,825 | 5,183 | 3,425 | 29,572 |
| 61,846 | 140 | 21,079 | 5,251 | 3,458 | 29,928 |
| 61,847 | 137 | 20,828 | 5,227 | 3,425 | 29,617 |

|        |     |        |       |       |        |
|--------|-----|--------|-------|-------|--------|
| 61,848 | 138 | 21,123 | 5,322 | 3,464 | 30,047 |
| 61,849 | 138 | 21,034 | 5,360 | 3,460 | 29,992 |
| 61,850 | 135 | 20,982 | 5,390 | 3,464 | 29,971 |
| 61,851 | 141 | 21,011 | 5,437 | 3,467 | 30,056 |
| 61,852 | 149 | 21,115 | 5,542 | 3,511 | 30,317 |
| 61,853 | 152 | 21,005 | 5,542 | 3,527 | 30,226 |
| 61,854 | 150 | 20,537 | 5,478 | 3,470 | 29,635 |
| 61,855 | 149 | 20,704 | 5,486 | 3,491 | 29,830 |
| 61,856 | 147 | 20,725 | 5,494 | 3,475 | 29,841 |
| 61,857 | 146 | 20,824 | 5,494 | 3,480 | 29,944 |
| 61,858 | 142 | 21,025 | 5,556 | 3,513 | 30,236 |
| 61,859 | 144 | 21,115 | 5,583 | 3,528 | 30,370 |
| 61,860 | 149 | 21,353 | 5,645 | 3,555 | 30,702 |
| 61,861 | 149 | 21,371 | 5,677 | 3,563 | 30,760 |
| 61,862 | 150 | 21,325 | 5,706 | 3,600 | 30,781 |
| 61,863 | 158 | 21,629 | 5,828 | 3,657 | 31,272 |
| 61,864 | 155 | 21,993 | 5,878 | 3,689 | 31,715 |
| 61,865 | 149 | 22,371 | 5,896 | 3,659 | 32,075 |
| 61,866 | 151 | 22,849 | 5,927 | 3,676 | 32,603 |
| 61,867 | 150 | 23,036 | 5,961 | 3,674 | 32,821 |
| 61,868 | 148 | 23,594 | 6,076 | 3,739 | 33,557 |
| 61,869 | 147 | 23,601 | 6,134 | 3,794 | 33,676 |
| 61,870 | 140 | 23,621 | 6,128 | 3,807 | 33,696 |
| 61,871 | 138 | 23,390 | 6,142 | 3,795 | 33,465 |
| 61,872 | 139 | 23,339 | 6,187 | 3,808 | 33,473 |
| 61,873 | 139 | 23,251 | 6,187 | 3,801 | 33,378 |
| 61,874 | 136 | 23,092 | 6,123 | 3,751 | 33,102 |
| 61,875 | 136 | 22,989 | 6,087 | 3,742 | 32,954 |
| 61,876 | 134 | 23,010 | 6,096 | 3,747 | 32,987 |
| 61,877 | 138 | 23,050 | 6,113 | 3,755 | 33,056 |
| 61,878 | 138 | 22,475 | 6,003 | 3,674 | 32,290 |
| 61,879 | 138 | 22,312 | 5,965 | 3,638 | 32,053 |

|        |     |        |       |       |        |
|--------|-----|--------|-------|-------|--------|
| 61,880 | 137 | 22,297 | 5,939 | 3,621 | 31,994 |
| 61,881 | 140 | 22,587 | 6,015 | 3,654 | 32,396 |
| 61,882 | 139 | 22,079 | 5,931 | 3,606 | 31,755 |
| 61,883 | 139 | 22,282 | 5,982 | 3,646 | 32,049 |
| 61,884 | 137 | 22,426 | 6,026 | 3,681 | 32,270 |
| 61,885 | 129 | 22,225 | 5,947 | 3,670 | 31,971 |
| 61,886 | 128 | 22,403 | 5,986 | 3,697 | 32,214 |
| 61,887 | 130 | 22,350 | 5,976 | 3,696 | 32,152 |
| 61,888 | 132 | 22,242 | 5,966 | 3,681 | 32,021 |
| 61,889 | 132 | 22,166 | 5,947 | 3,667 | 31,912 |
| 61,890 | 127 | 21,979 | 5,890 | 3,628 | 31,624 |
| 61,891 | 128 | 22,037 | 5,890 | 3,622 | 31,677 |
| 61,892 | 124 | 22,238 | 5,929 | 3,646 | 31,937 |
| 61,893 | 119 | 22,005 | 5,873 | 3,614 | 31,611 |
| 61,894 | 106 | 21,730 | 5,811 | 3,594 | 31,241 |
| 61,895 | 106 | 21,865 | 5,862 | 3,619 | 31,452 |
| 61,896 | 102 | 21,814 | 5,848 | 3,625 | 31,389 |
| 61,897 | 99  | 21,870 | 5,860 | 3,613 | 31,442 |
| 61,898 | 99  | 21,997 | 5,856 | 3,612 | 31,564 |
| 61,899 | 97  | 21,599 | 5,675 | 3,537 | 30,908 |
| 61,900 | 96  | 21,921 | 5,708 | 3,570 | 31,295 |
| 61,901 | 95  | 22,185 | 5,756 | 3,604 | 31,640 |
| 61,902 | 89  | 22,257 | 5,741 | 3,605 | 31,692 |
| 61,903 | 94  | 22,220 | 5,717 | 3,586 | 31,617 |
| 61,904 | 93  | 21,842 | 5,572 | 3,492 | 30,999 |
| 61,905 | 95  | 21,993 | 5,587 | 3,496 | 31,171 |
| 61,906 | 95  | 21,660 | 5,520 | 3,448 | 30,723 |
| 61,907 | 93  | 21,383 | 5,481 | 3,431 | 30,388 |
| 61,908 | 95  | 21,609 | 5,517 | 3,428 | 30,649 |
| 61,909 | 91  | 21,401 | 5,457 | 3,394 | 30,343 |
| 61,910 | 91  | 21,540 | 5,497 | 3,402 | 30,530 |
| 61,911 | 87  | 21,276 | 5,412 | 3,353 | 30,128 |

|        |     |        |       |       |        |
|--------|-----|--------|-------|-------|--------|
| 61,912 | 86  | 21,044 | 5,313 | 3,278 | 29,721 |
| 61,913 | 86  | 21,139 | 5,330 | 3,280 | 29,835 |
| 61,914 | 78  | 20,643 | 5,220 | 3,172 | 29,113 |
| 61,915 | 81  | 20,708 | 5,254 | 3,188 | 29,231 |
| 61,916 | 86  | 20,305 | 5,201 | 3,179 | 28,771 |
| 61,917 | 85  | 19,973 | 5,151 | 3,180 | 28,389 |
| 61,918 | 85  | 19,125 | 5,013 | 3,072 | 27,295 |
| 61,919 | 84  | 19,167 | 4,985 | 3,088 | 27,324 |
| 61,920 | 85  | 19,278 | 4,954 | 3,049 | 27,366 |
| 61,921 | 87  | 19,400 | 4,920 | 3,026 | 27,433 |
| 61,922 | 86  | 19,529 | 4,878 | 3,008 | 27,501 |
| 61,923 | 86  | 19,622 | 4,869 | 2,982 | 27,559 |
| 61,924 | 87  | 19,698 | 4,888 | 2,983 | 27,656 |
| 61,925 | 86  | 19,836 | 4,883 | 2,981 | 27,786 |
| 61,926 | 86  | 19,815 | 4,868 | 2,949 | 27,718 |
| 61,927 | 86  | 20,154 | 4,944 | 3,003 | 28,187 |
| 61,928 | 84  | 20,580 | 5,045 | 3,063 | 28,772 |
| 61,929 | 84  | 20,362 | 4,992 | 3,043 | 28,481 |
| 61,930 | 87  | 20,526 | 5,056 | 3,099 | 28,768 |
| 61,931 | 94  | 20,712 | 5,146 | 3,130 | 29,082 |
| 61,932 | 93  | 20,782 | 5,184 | 3,164 | 29,223 |
| 61,933 | 89  | 20,760 | 5,177 | 3,145 | 29,171 |
| 61,934 | 94  | 21,010 | 5,204 | 3,172 | 29,480 |
| 61,935 | 94  | 20,981 | 5,192 | 3,147 | 29,414 |
| 61,936 | 98  | 21,032 | 5,230 | 3,138 | 29,498 |
| 61,937 | 98  | 20,977 | 5,236 | 3,142 | 29,453 |
| 61,938 | 111 | 21,455 | 5,292 | 3,173 | 30,031 |
| 61,939 | 109 | 21,224 | 5,229 | 3,153 | 29,715 |
| 61,940 | 113 | 21,429 | 5,257 | 3,199 | 29,998 |
| 61,941 | 120 | 21,176 | 5,203 | 3,169 | 29,668 |
| 61,942 | 120 | 21,019 | 5,196 | 3,159 | 29,494 |
| 61,943 | 131 | 21,502 | 5,327 | 3,241 | 30,201 |



|        |     |        |       |       |        |
|--------|-----|--------|-------|-------|--------|
| 61,944 | 130 | 21,461 | 5,318 | 3,198 | 30,107 |
| 61,945 | 132 | 21,483 | 5,325 | 3,202 | 30,142 |
| 61,946 | 133 | 21,503 | 5,312 | 3,197 | 30,145 |
| 61,947 | 138 | 21,806 | 5,374 | 3,244 | 30,562 |
| 61,948 | 138 | 21,627 | 5,316 | 3,236 | 30,317 |
| 61,949 | 138 | 21,580 | 5,319 | 3,238 | 30,275 |
| 61,950 | 137 | 21,552 | 5,337 | 3,253 | 30,279 |
| 61,951 | 147 | 21,708 | 5,411 | 3,271 | 30,537 |
| 61,952 | 144 | 21,645 | 5,437 | 3,264 | 30,490 |
| 61,953 | 149 | 21,691 | 5,428 | 3,261 | 30,529 |
| 61,954 | 140 | 21,521 | 5,361 | 3,215 | 30,237 |
| 61,955 | 141 | 21,531 | 5,364 | 3,219 | 30,255 |
| 61,956 | 140 | 21,621 | 5,393 | 3,256 | 30,410 |
| 61,957 | 144 | 21,765 | 5,465 | 3,283 | 30,657 |
| 61,958 | 149 | 21,741 | 5,476 | 3,281 | 30,647 |
| 61,959 | 147 | 21,532 | 5,448 | 3,268 | 30,395 |
| 61,960 | 151 | 21,925 | 5,569 | 3,334 | 30,979 |
| 61,961 | 157 | 22,334 | 5,684 | 3,403 | 31,578 |
| 61,962 | 159 | 22,164 | 5,693 | 3,401 | 31,417 |
| 61,963 | 163 | 22,541 | 5,765 | 3,458 | 31,927 |
| 61,964 | 173 | 22,571 | 5,788 | 3,494 | 32,026 |
| 61,965 | 177 | 22,637 | 5,836 | 3,521 | 32,171 |
| 61,966 | 168 | 22,448 | 5,752 | 3,468 | 31,836 |
| 61,967 | 170 | 22,620 | 5,831 | 3,515 | 32,136 |
| 61,968 | 170 | 22,470 | 5,807 | 3,470 | 31,917 |
| 61,969 | 168 | 21,984 | 5,688 | 3,388 | 31,228 |
| 61,970 | 168 | 22,153 | 5,730 | 3,425 | 31,476 |
| 61,971 | 167 | 21,619 | 5,691 | 3,389 | 30,866 |
| 61,972 | 170 | 21,856 | 5,752 | 3,405 | 31,183 |
| 61,973 | 171 | 21,251 | 5,608 | 3,353 | 30,383 |
| 61,974 | 172 | 21,372 | 5,635 | 3,367 | 30,546 |
| 61,975 | 170 | 21,344 | 5,628 | 3,360 | 30,502 |

|        |     |        |       |       |        |
|--------|-----|--------|-------|-------|--------|
| 61,976 | 171 | 21,040 | 5,581 | 3,310 | 30,102 |
| 61,977 | 171 | 20,677 | 5,528 | 3,287 | 29,663 |
| 61,978 | 175 | 20,623 | 5,596 | 3,336 | 29,730 |
| 61,979 | 174 | 20,386 | 5,539 | 3,319 | 29,418 |
| 61,980 | 176 | 20,551 | 5,588 | 3,324 | 29,639 |
| 61,981 | 173 | 20,811 | 5,637 | 3,350 | 29,971 |
| 61,982 | 163 | 20,624 | 5,583 | 3,335 | 29,705 |
| 61,983 | 160 | 20,336 | 5,509 | 3,306 | 29,311 |
| 61,984 | 162 | 20,490 | 5,531 | 3,295 | 29,478 |
| 61,985 | 158 | 20,390 | 5,588 | 3,305 | 29,441 |
| 61,986 | 156 | 20,135 | 5,545 | 3,265 | 29,101 |
| 61,987 | 156 | 20,065 | 5,531 | 3,285 | 29,037 |
| 61,988 | 161 | 20,451 | 5,619 | 3,329 | 29,560 |
| 61,989 | 156 | 20,432 | 5,660 | 3,341 | 29,589 |
| 61,990 | 158 | 20,413 | 5,668 | 3,315 | 29,554 |
| 61,991 | 161 | 20,463 | 5,696 | 3,318 | 29,638 |
| 61,992 | 163 | 20,904 | 5,840 | 3,411 | 30,318 |
| 61,993 | 159 | 20,670 | 5,788 | 3,367 | 29,984 |
| 61,994 | 161 | 20,795 | 5,868 | 3,404 | 30,228 |
| 61,995 | 165 | 20,837 | 5,938 | 3,449 | 30,389 |
| 61,996 | 165 | 20,905 | 6,012 | 3,479 | 30,561 |
| 61,997 | 165 | 20,822 | 6,016 | 3,477 | 30,480 |
| 61,998 | 159 | 20,742 | 6,020 | 3,469 | 30,390 |
| 61,999 | 160 | 20,929 | 6,076 | 3,497 | 30,662 |
| 62,000 | 166 | 20,950 | 6,085 | 3,480 | 30,681 |
| 62,001 | 160 | 20,791 | 6,037 | 3,454 | 30,442 |
| 62,002 | 165 | 20,685 | 5,988 | 3,460 | 30,298 |
| 62,003 | 166 | 20,669 | 5,978 | 3,458 | 30,271 |
| 62,004 | 161 | 20,464 | 5,968 | 3,457 | 30,050 |
| 62,005 | 158 | 20,295 | 5,999 | 3,491 | 29,943 |
| 62,006 | 160 | 20,320 | 6,015 | 3,508 | 30,003 |
| 62,007 | 161 | 20,362 | 5,997 | 3,503 | 30,023 |

|        |     |        |       |       |        |
|--------|-----|--------|-------|-------|--------|
| 62,008 | 162 | 20,411 | 6,020 | 3,508 | 30,101 |
| 62,009 | 155 | 20,249 | 5,993 | 3,506 | 29,903 |
| 62,010 | 153 | 20,572 | 6,045 | 3,543 | 30,313 |
| 62,011 | 155 | 20,725 | 6,114 | 3,572 | 30,566 |
| 62,012 | 149 | 20,779 | 6,145 | 3,594 | 30,667 |
| 62,013 | 143 | 20,893 | 6,210 | 3,591 | 30,837 |
| 62,014 | 143 | 21,071 | 6,301 | 3,616 | 31,131 |
| 62,015 | 134 | 21,230 | 6,352 | 3,649 | 31,365 |
| 62,016 | 129 | 21,304 | 6,361 | 3,668 | 31,462 |
| 62,017 | 129 | 21,419 | 6,398 | 3,701 | 31,647 |
| 62,018 | 130 | 21,530 | 6,395 | 3,711 | 31,766 |
| 62,019 | 129 | 21,650 | 6,424 | 3,733 | 31,936 |
| 62,020 | 128 | 21,689 | 6,424 | 3,743 | 31,984 |
| 62,021 | 131 | 21,752 | 6,464 | 3,754 | 32,101 |
| 62,022 | 126 | 21,666 | 6,407 | 3,761 | 31,960 |
| 62,023 | 126 | 21,739 | 6,413 | 3,794 | 32,072 |
| 62,024 | 130 | 21,894 | 6,480 | 3,801 | 32,305 |
| 62,025 | 130 | 21,924 | 6,504 | 3,820 | 32,378 |
| 62,026 | 128 | 21,983 | 6,495 | 3,811 | 32,417 |
| 62,027 | 129 | 21,973 | 6,459 | 3,779 | 32,340 |
| 62,028 | 129 | 22,262 | 6,530 | 3,833 | 32,754 |
| 62,029 | 136 | 22,392 | 6,560 | 3,841 | 32,929 |
| 62,030 | 138 | 22,401 | 6,542 | 3,859 | 32,940 |
| 62,031 | 145 | 22,450 | 6,555 | 3,864 | 33,014 |
| 62,032 | 145 | 22,341 | 6,537 | 3,865 | 32,888 |
| 62,033 | 150 | 22,607 | 6,586 | 3,905 | 33,248 |
| 62,034 | 147 | 22,257 | 6,507 | 3,873 | 32,784 |
| 62,035 | 151 | 22,096 | 6,420 | 3,819 | 32,486 |
| 62,036 | 151 | 22,069 | 6,443 | 3,820 | 32,483 |
| 62,037 | 149 | 21,828 | 6,372 | 3,792 | 32,141 |
| 62,038 | 148 | 21,617 | 6,307 | 3,732 | 31,804 |
| 62,039 | 141 | 21,967 | 6,425 | 3,812 | 32,345 |

|        |     |        |       |       |        |
|--------|-----|--------|-------|-------|--------|
| 62,040 | 137 | 21,644 | 6,351 | 3,770 | 31,902 |
| 62,041 | 137 | 22,375 | 6,542 | 3,888 | 32,942 |
| 62,042 | 137 | 22,271 | 6,514 | 3,885 | 32,807 |
| 62,043 | 132 | 22,272 | 6,482 | 3,866 | 32,752 |
| 62,044 | 125 | 22,205 | 6,422 | 3,847 | 32,599 |
| 62,045 | 120 | 21,942 | 6,351 | 3,792 | 32,205 |
| 62,046 | 117 | 22,007 | 6,345 | 3,831 | 32,300 |
| 62,047 | 123 | 22,069 | 6,294 | 3,806 | 32,292 |
| 62,048 | 126 | 22,108 | 6,289 | 3,803 | 32,326 |
| 62,049 | 129 | 21,973 | 6,312 | 3,817 | 32,231 |
| 62,050 | 128 | 21,931 | 6,306 | 3,817 | 32,182 |
| 62,051 | 123 | 21,892 | 6,310 | 3,829 | 32,154 |
| 62,052 | 120 | 21,969 | 6,338 | 3,841 | 32,268 |
| 62,053 | 116 | 22,111 | 6,351 | 3,858 | 32,436 |
| 62,054 | 120 | 22,179 | 6,343 | 3,844 | 32,486 |
| 62,055 | 120 | 22,258 | 6,358 | 3,839 | 32,575 |
| 62,056 | 116 | 22,220 | 6,388 | 3,828 | 32,552 |
| 62,057 | 116 | 22,357 | 6,427 | 3,871 | 32,771 |
| 62,058 | 121 | 22,294 | 6,440 | 3,851 | 32,706 |
| 62,059 | 122 | 22,193 | 6,399 | 3,830 | 32,544 |
| 62,060 | 127 | 21,820 | 6,331 | 3,748 | 32,026 |
| 62,061 | 127 | 21,502 | 6,275 | 3,720 | 31,624 |
| 62,062 | 125 | 21,519 | 6,252 | 3,745 | 31,641 |
| 62,063 | 125 | 21,356 | 6,213 | 3,723 | 31,417 |
| 62,064 | 126 | 21,147 | 6,124 | 3,694 | 31,091 |
| 62,065 | 125 | 20,878 | 6,019 | 3,670 | 30,692 |
| 62,066 | 132 | 21,004 | 6,083 | 3,680 | 30,899 |
| 62,067 | 142 | 20,716 | 6,011 | 3,643 | 30,512 |
| 62,068 | 142 | 20,388 | 5,934 | 3,606 | 30,070 |
| 62,069 | 143 | 20,372 | 5,960 | 3,610 | 30,085 |
| 62,070 | 147 | 20,353 | 5,948 | 3,603 | 30,051 |
| 62,071 | 152 | 20,522 | 5,975 | 3,628 | 30,277 |

|        |     |        |       |       |        |
|--------|-----|--------|-------|-------|--------|
| 62,072 | 147 | 20,316 | 5,901 | 3,567 | 29,931 |
| 62,073 | 151 | 20,462 | 5,918 | 3,566 | 30,097 |
| 62,074 | 153 | 20,471 | 5,920 | 3,556 | 30,100 |
| 62,075 | 157 | 20,498 | 5,931 | 3,576 | 30,162 |
| 62,076 | 156 | 20,461 | 5,928 | 3,570 | 30,115 |
| 62,077 | 153 | 20,544 | 5,949 | 3,610 | 30,256 |
| 62,078 | 152 | 20,483 | 5,934 | 3,594 | 30,163 |
| 62,079 | 152 | 20,683 | 5,970 | 3,598 | 30,403 |
| 62,080 | 147 | 20,885 | 6,065 | 3,635 | 30,732 |
| 62,081 | 146 | 20,657 | 6,029 | 3,586 | 30,418 |
| 62,082 | 139 | 20,496 | 6,004 | 3,572 | 30,211 |
| 62,083 | 141 | 20,748 | 6,060 | 3,617 | 30,566 |
| 62,084 | 140 | 20,694 | 6,066 | 3,633 | 30,533 |
| 62,085 | 138 | 20,814 | 6,090 | 3,656 | 30,698 |
| 62,086 | 138 | 20,795 | 6,101 | 3,636 | 30,670 |
| 62,087 | 137 | 20,934 | 6,097 | 3,650 | 30,818 |
| 62,088 | 141 | 21,143 | 6,155 | 3,666 | 31,105 |
| 62,089 | 140 | 21,227 | 6,167 | 3,686 | 31,220 |
| 62,090 | 139 | 21,214 | 6,156 | 3,693 | 31,202 |
| 62,091 | 138 | 20,657 | 5,991 | 3,608 | 30,394 |
| 62,092 | 136 | 20,707 | 6,041 | 3,622 | 30,506 |
| 62,093 | 133 | 20,857 | 6,085 | 3,646 | 30,721 |
| 62,094 | 133 | 20,835 | 6,087 | 3,627 | 30,682 |
| 62,095 | 131 | 20,453 | 5,971 | 3,565 | 30,120 |
| 62,096 | 137 | 20,612 | 5,992 | 3,588 | 30,329 |
| 62,097 | 139 | 20,631 | 5,980 | 3,581 | 30,331 |
| 62,098 | 134 | 20,463 | 5,952 | 3,547 | 30,096 |
| 62,099 | 130 | 20,582 | 5,949 | 3,544 | 30,205 |
| 62,100 | 131 | 20,644 | 5,953 | 3,546 | 30,274 |
| 62,101 | 133 | 20,785 | 5,936 | 3,539 | 30,393 |
| 62,102 | 131 | 20,765 | 5,950 | 3,530 | 30,376 |
| 62,103 | 136 | 20,808 | 6,002 | 3,552 | 30,498 |

|        |     |        |       |       |        |
|--------|-----|--------|-------|-------|--------|
| 62,104 | 134 | 20,817 | 6,023 | 3,553 | 30,527 |
| 62,105 | 133 | 20,654 | 5,983 | 3,530 | 30,300 |
| 62,106 | 133 | 20,584 | 5,955 | 3,514 | 30,186 |
| 62,107 | 137 | 20,628 | 5,941 | 3,543 | 30,249 |
| 62,108 | 135 | 20,846 | 5,990 | 3,567 | 30,538 |
| 62,109 | 126 | 20,446 | 5,874 | 3,507 | 29,953 |
| 62,110 | 127 | 20,478 | 5,894 | 3,525 | 30,024 |
| 62,111 | 125 | 20,082 | 5,774 | 3,436 | 29,417 |
| 62,112 | 128 | 20,204 | 5,820 | 3,468 | 29,620 |
| 62,113 | 128 | 20,181 | 5,825 | 3,461 | 29,595 |
| 62,114 | 132 | 20,214 | 5,821 | 3,453 | 29,620 |
| 62,115 | 134 | 19,926 | 5,731 | 3,407 | 29,198 |
| 62,116 | 133 | 19,698 | 5,671 | 3,359 | 28,861 |
| 62,117 | 130 | 19,731 | 5,647 | 3,377 | 28,885 |
| 62,118 | 119 | 19,460 | 5,567 | 3,311 | 28,457 |
| 62,119 | 118 | 19,518 | 5,625 | 3,326 | 28,587 |
| 62,120 | 116 | 19,696 | 5,651 | 3,327 | 28,790 |
| 62,121 | 122 | 19,495 | 5,614 | 3,315 | 28,546 |
| 62,122 | 117 | 19,242 | 5,556 | 3,267 | 28,182 |
| 62,123 | 118 | 19,468 | 5,614 | 3,323 | 28,523 |
| 62,124 | 109 | 19,142 | 5,546 | 3,263 | 28,060 |
| 62,125 | 110 | 19,299 | 5,573 | 3,279 | 28,261 |
| 62,126 | 113 | 19,281 | 5,579 | 3,267 | 28,240 |
| 62,127 | 113 | 19,177 | 5,571 | 3,235 | 28,096 |
| 62,128 | 114 | 19,305 | 5,577 | 3,231 | 28,227 |
| 62,129 | 117 | 19,375 | 5,595 | 3,240 | 28,327 |
| 62,130 | 118 | 18,821 | 5,438 | 3,152 | 27,529 |
| 62,131 | 119 | 18,903 | 5,450 | 3,161 | 27,633 |
| 62,132 | 114 | 19,129 | 5,501 | 3,189 | 27,933 |
| 62,133 | 122 | 18,637 | 5,383 | 3,112 | 27,254 |
| 62,134 | 126 | 18,815 | 5,449 | 3,146 | 27,536 |
| 62,135 | 127 | 19,094 | 5,515 | 3,171 | 27,907 |

|        |     |        |       |       |        |
|--------|-----|--------|-------|-------|--------|
| 62,136 | 126 | 18,981 | 5,491 | 3,156 | 27,754 |
| 62,137 | 127 | 18,644 | 5,433 | 3,111 | 27,315 |
| 62,138 | 127 | 18,673 | 5,439 | 3,125 | 27,364 |
| 62,139 | 123 | 18,590 | 5,442 | 3,129 | 27,284 |
| 62,140 | 133 | 18,477 | 5,397 | 3,082 | 27,089 |
| 62,141 | 132 | 18,472 | 5,414 | 3,085 | 27,103 |
| 62,142 | 130 | 18,231 | 5,407 | 3,099 | 26,867 |
| 62,143 | 130 | 18,255 | 5,424 | 3,077 | 26,886 |
| 62,144 | 132 | 18,103 | 5,394 | 3,046 | 26,675 |
| 62,145 | 135 | 18,178 | 5,433 | 3,084 | 26,830 |
| 62,146 | 131 | 17,950 | 5,410 | 3,058 | 26,549 |
| 62,147 | 135 | 18,265 | 5,459 | 3,100 | 26,959 |
| 62,148 | 135 | 18,228 | 5,461 | 3,088 | 26,912 |
| 62,149 | 134 | 18,113 | 5,471 | 3,095 | 26,813 |
| 62,150 | 135 | 18,148 | 5,440 | 3,102 | 26,825 |
| 62,151 | 137 | 17,955 | 5,417 | 3,056 | 26,565 |
| 62,152 | 137 | 18,186 | 5,495 | 3,092 | 26,910 |
| 62,153 | 139 | 18,390 | 5,505 | 3,113 | 27,147 |
| 62,154 | 134 | 18,587 | 5,532 | 3,131 | 27,384 |
| 62,155 | 130 | 18,399 | 5,462 | 3,099 | 27,090 |
| 62,156 | 131 | 18,703 | 5,538 | 3,141 | 27,513 |
| 62,157 | 127 | 18,701 | 5,552 | 3,133 | 27,513 |
| 62,158 | 129 | 18,879 | 5,575 | 3,152 | 27,735 |
| 62,159 | 127 | 18,877 | 5,590 | 3,141 | 27,735 |
| 62,160 | 134 | 18,786 | 5,577 | 3,136 | 27,633 |
| 62,161 | 136 | 18,897 | 5,599 | 3,140 | 27,772 |
| 62,162 | 136 | 18,902 | 5,564 | 3,126 | 27,728 |
| 62,163 | 135 | 19,066 | 5,603 | 3,162 | 27,966 |
| 62,164 | 129 | 19,084 | 5,615 | 3,168 | 27,996 |
| 62,165 | 129 | 19,259 | 5,679 | 3,201 | 28,268 |
| 62,166 | 125 | 19,050 | 5,645 | 3,165 | 27,985 |
| 62,167 | 132 | 19,142 | 5,648 | 3,155 | 28,077 |

|        |     |        |       |       |        |
|--------|-----|--------|-------|-------|--------|
| 62,168 | 132 | 19,198 | 5,637 | 3,164 | 28,131 |
| 62,169 | 139 | 19,392 | 5,681 | 3,178 | 28,390 |
| 62,170 | 146 | 19,376 | 5,696 | 3,175 | 28,393 |
| 62,171 | 145 | 19,139 | 5,638 | 3,158 | 28,080 |
| 62,172 | 149 | 19,545 | 5,751 | 3,221 | 28,666 |
| 62,173 | 148 | 19,452 | 5,730 | 3,195 | 28,525 |
| 62,174 | 151 | 19,616 | 5,795 | 3,216 | 28,778 |
| 62,175 | 150 | 19,548 | 5,804 | 3,222 | 28,724 |
| 62,176 | 158 | 19,608 | 5,821 | 3,221 | 28,808 |
| 62,177 | 151 | 19,450 | 5,783 | 3,199 | 28,583 |
| 62,178 | 154 | 19,611 | 5,804 | 3,226 | 28,795 |
| 62,179 | 152 | 19,528 | 5,770 | 3,205 | 28,655 |
| 62,180 | 156 | 19,833 | 5,857 | 3,254 | 29,100 |
| 62,181 | 160 | 19,840 | 5,852 | 3,255 | 29,107 |
| 62,182 | 162 | 19,447 | 5,746 | 3,167 | 28,522 |
| 62,183 | 163 | 19,626 | 5,789 | 3,195 | 28,773 |
| 62,184 | 157 | 19,760 | 5,835 | 3,204 | 28,956 |
| 62,185 | 153 | 19,800 | 5,787 | 3,175 | 28,915 |
| 62,186 | 152 | 19,594 | 5,707 | 3,130 | 28,583 |
| 62,187 | 151 | 19,633 | 5,708 | 3,120 | 28,612 |
| 62,188 | 154 | 19,641 | 5,663 | 3,098 | 28,556 |
| 62,189 | 158 | 19,690 | 5,655 | 3,086 | 28,589 |
| 62,190 | 158 | 19,499 | 5,594 | 3,064 | 28,315 |
| 62,191 | 148 | 19,863 | 5,700 | 3,166 | 28,877 |
| 62,192 | 148 | 19,560 | 5,591 | 3,104 | 28,403 |
| 62,193 | 149 | 19,847 | 5,643 | 3,129 | 28,768 |
| 62,194 | 145 | 20,056 | 5,658 | 3,166 | 29,025 |
| 62,195 | 142 | 19,990 | 5,616 | 3,150 | 28,898 |
| 62,196 | 143 | 19,917 | 5,584 | 3,123 | 28,767 |
| 62,197 | 143 | 19,987 | 5,576 | 3,135 | 28,841 |
| 62,198 | 137 | 20,027 | 5,646 | 3,136 | 28,946 |
| 62,199 | 135 | 19,766 | 5,543 | 3,081 | 28,525 |



|        |     |        |       |       |        |
|--------|-----|--------|-------|-------|--------|
| 62,200 | 141 | 20,003 | 5,625 | 3,117 | 28,886 |
| 62,201 | 140 | 19,924 | 5,622 | 3,107 | 28,793 |
| 62,202 | 138 | 20,180 | 5,681 | 3,130 | 29,129 |
| 62,203 | 140 | 20,122 | 5,699 | 3,140 | 29,101 |
| 62,204 | 139 | 19,999 | 5,686 | 3,129 | 28,953 |
| 62,205 | 139 | 19,726 | 5,633 | 3,105 | 28,603 |
| 62,206 | 138 | 19,705 | 5,613 | 3,097 | 28,553 |
| 62,207 | 143 | 19,693 | 5,598 | 3,089 | 28,523 |
| 62,208 | 148 | 20,064 | 5,656 | 3,127 | 28,995 |
| 62,209 | 141 | 19,460 | 5,526 | 3,075 | 28,202 |
| 62,210 | 143 | 19,696 | 5,553 | 3,099 | 28,491 |
| 62,211 | 142 | 19,938 | 5,571 | 3,126 | 28,777 |
| 62,212 | 145 | 20,113 | 5,667 | 3,169 | 29,094 |
| 62,213 | 141 | 20,006 | 5,664 | 3,158 | 28,969 |
| 62,214 | 141 | 19,988 | 5,651 | 3,162 | 28,942 |
| 62,215 | 140 | 20,057 | 5,605 | 3,146 | 28,948 |
| 62,216 | 143 | 20,129 | 5,607 | 3,145 | 29,024 |
| 62,217 | 143 | 20,219 | 5,616 | 3,163 | 29,141 |
| 62,218 | 140 | 20,361 | 5,652 | 3,174 | 29,327 |
| 62,219 | 140 | 20,397 | 5,657 | 3,191 | 29,385 |
| 62,220 | 124 | 20,291 | 5,583 | 3,147 | 29,145 |
| 62,221 | 123 | 20,607 | 5,638 | 3,182 | 29,550 |
| 62,222 | 120 | 21,011 | 5,726 | 3,247 | 30,104 |
| 62,223 | 125 | 20,213 | 5,487 | 3,120 | 28,945 |
| 62,224 | 125 | 20,426 | 5,532 | 3,138 | 29,221 |
| 62,225 | 128 | 20,679 | 5,596 | 3,166 | 29,569 |
| 62,226 | 126 | 20,805 | 5,606 | 3,178 | 29,715 |
| 62,227 | 129 | 21,422 | 5,744 | 3,251 | 30,546 |
| 62,228 | 131 | 21,548 | 5,783 | 3,281 | 30,743 |
| 62,229 | 130 | 21,544 | 5,792 | 3,289 | 30,755 |
| 62,230 | 127 | 21,480 | 5,761 | 3,264 | 30,632 |
| 62,231 | 128 | 21,593 | 5,784 | 3,290 | 30,795 |

|        |     |        |       |       |        |
|--------|-----|--------|-------|-------|--------|
| 62,232 | 119 | 21,585 | 5,801 | 3,303 | 30,808 |
| 62,233 | 119 | 21,797 | 5,873 | 3,356 | 31,145 |
| 62,234 | 119 | 21,723 | 5,868 | 3,356 | 31,066 |
| 62,235 | 124 | 21,793 | 5,858 | 3,362 | 31,137 |
| 62,236 | 125 | 21,689 | 5,861 | 3,358 | 31,033 |
| 62,237 | 126 | 21,836 | 5,964 | 3,403 | 31,329 |
| 62,238 | 125 | 21,668 | 5,902 | 3,392 | 31,087 |
| 62,239 | 123 | 21,626 | 5,946 | 3,425 | 31,120 |
| 62,240 | 122 | 21,673 | 5,984 | 3,433 | 31,212 |
| 62,241 | 122 | 21,681 | 5,979 | 3,432 | 31,214 |
| 62,242 | 125 | 21,834 | 6,040 | 3,464 | 31,463 |
| 62,243 | 123 | 21,821 | 6,034 | 3,474 | 31,452 |
| 62,244 | 122 | 21,600 | 5,987 | 3,464 | 31,173 |
| 62,245 | 122 | 21,585 | 6,014 | 3,451 | 31,172 |
| 62,246 | 124 | 21,804 | 6,123 | 3,520 | 31,571 |
| 62,247 | 129 | 21,686 | 6,140 | 3,508 | 31,463 |
| 62,248 | 129 | 21,829 | 6,177 | 3,520 | 31,655 |
| 62,249 | 128 | 21,849 | 6,166 | 3,522 | 31,665 |
| 62,250 | 129 | 21,574 | 6,133 | 3,511 | 31,347 |
| 62,251 | 128 | 22,119 | 6,305 | 3,621 | 32,173 |
| 62,252 | 127 | 21,957 | 6,272 | 3,618 | 31,974 |
| 62,253 | 125 | 22,011 | 6,295 | 3,640 | 32,071 |
| 62,254 | 123 | 22,096 | 6,311 | 3,643 | 32,173 |
| 62,255 | 123 | 21,829 | 6,263 | 3,618 | 31,833 |
| 62,256 | 124 | 21,592 | 6,192 | 3,585 | 31,493 |
| 62,257 | 127 | 21,863 | 6,214 | 3,622 | 31,826 |
| 62,258 | 125 | 22,009 | 6,252 | 3,649 | 32,035 |
| 62,259 | 121 | 21,900 | 6,217 | 3,627 | 31,865 |
| 62,260 | 119 | 21,913 | 6,208 | 3,603 | 31,843 |
| 62,261 | 117 | 21,955 | 6,231 | 3,612 | 31,915 |
| 62,262 | 118 | 21,883 | 6,214 | 3,619 | 31,834 |
| 62,263 | 118 | 21,979 | 6,179 | 3,629 | 31,905 |

|        |     |        |       |       |        |
|--------|-----|--------|-------|-------|--------|
| 62,264 | 128 | 21,596 | 6,096 | 3,559 | 31,379 |
| 62,265 | 136 | 21,737 | 6,095 | 3,559 | 31,527 |
| 62,266 | 136 | 21,501 | 6,076 | 3,546 | 31,259 |
| 62,267 | 138 | 21,666 | 6,132 | 3,593 | 31,529 |
| 62,268 | 138 | 21,625 | 6,152 | 3,593 | 31,508 |
| 62,269 | 133 | 21,370 | 6,099 | 3,545 | 31,147 |
| 62,270 | 133 | 21,160 | 6,056 | 3,516 | 30,865 |
| 62,271 | 133 | 21,746 | 6,216 | 3,592 | 31,687 |
| 62,272 | 135 | 21,846 | 6,269 | 3,637 | 31,887 |
| 62,273 | 132 | 21,733 | 6,248 | 3,615 | 31,728 |
| 62,274 | 125 | 21,542 | 6,214 | 3,589 | 31,470 |
| 62,275 | 119 | 21,523 | 6,187 | 3,591 | 31,420 |
| 62,276 | 119 | 21,482 | 6,177 | 3,585 | 31,363 |
| 62,277 | 117 | 21,623 | 6,223 | 3,640 | 31,603 |
| 62,278 | 113 | 21,478 | 6,241 | 3,656 | 31,488 |
| 62,279 | 112 | 21,369 | 6,255 | 3,657 | 31,393 |
| 62,280 | 112 | 21,387 | 6,245 | 3,662 | 31,406 |
| 62,281 | 113 | 21,181 | 6,230 | 3,639 | 31,163 |
| 62,282 | 114 | 21,180 | 6,256 | 3,635 | 31,185 |
| 62,283 | 117 | 21,004 | 6,154 | 3,578 | 30,853 |
| 62,284 | 111 | 20,787 | 6,063 | 3,543 | 30,504 |
| 62,285 | 110 | 20,808 | 6,061 | 3,557 | 30,536 |
| 62,286 | 103 | 20,590 | 5,987 | 3,528 | 30,208 |
| 62,287 | 104 | 20,701 | 6,002 | 3,554 | 30,361 |
| 62,288 | 103 | 20,473 | 5,923 | 3,505 | 30,004 |
| 62,289 | 104 | 20,554 | 5,939 | 3,525 | 30,122 |
| 62,290 | 107 | 20,493 | 5,889 | 3,493 | 29,982 |
| 62,291 | 107 | 20,481 | 5,842 | 3,480 | 29,910 |
| 62,292 | 108 | 20,515 | 5,841 | 3,465 | 29,929 |
| 62,293 | 107 | 20,552 | 5,819 | 3,429 | 29,907 |
| 62,294 | 107 | 20,252 | 5,733 | 3,381 | 29,473 |
| 62,295 | 110 | 20,372 | 5,699 | 3,371 | 29,552 |

|        |     |        |       |       |        |
|--------|-----|--------|-------|-------|--------|
| 62,296 | 110 | 20,538 | 5,682 | 3,372 | 29,702 |
| 62,297 | 108 | 20,658 | 5,649 | 3,356 | 29,771 |
| 62,298 | 101 | 20,451 | 5,554 | 3,311 | 29,417 |
| 62,299 | 101 | 20,604 | 5,563 | 3,338 | 29,606 |
| 62,300 | 100 | 20,549 | 5,509 | 3,319 | 29,477 |
| 62,301 | 107 | 20,456 | 5,410 | 3,260 | 29,233 |
| 62,302 | 107 | 20,551 | 5,417 | 3,255 | 29,330 |
| 62,303 | 111 | 20,604 | 5,409 | 3,232 | 29,356 |
| 62,304 | 118 | 20,400 | 5,340 | 3,184 | 29,042 |
| 62,305 | 118 | 20,301 | 5,284 | 3,156 | 28,859 |
| 62,306 | 120 | 20,473 | 5,311 | 3,175 | 29,079 |
| 62,307 | 123 | 20,292 | 5,263 | 3,132 | 28,810 |
| 62,308 | 120 | 20,282 | 5,274 | 3,129 | 28,805 |
| 62,309 | 119 | 20,451 | 5,273 | 3,125 | 28,968 |
| 62,310 | 119 | 20,662 | 5,336 | 3,195 | 29,312 |
| 62,311 | 119 | 20,562 | 5,328 | 3,172 | 29,181 |
| 62,312 | 117 | 20,505 | 5,278 | 3,130 | 29,030 |
| 62,313 | 112 | 20,087 | 5,197 | 3,052 | 28,448 |
| 62,314 | 115 | 20,170 | 5,215 | 3,061 | 28,561 |
| 62,315 | 108 | 20,140 | 5,192 | 3,077 | 28,517 |
| 62,316 | 106 | 20,383 | 5,247 | 3,126 | 28,862 |
| 62,317 | 105 | 20,348 | 5,269 | 3,119 | 28,841 |
| 62,318 | 108 | 20,394 | 5,267 | 3,128 | 28,897 |
| 62,319 | 113 | 20,424 | 5,267 | 3,136 | 28,940 |
| 62,320 | 116 | 20,500 | 5,279 | 3,149 | 29,044 |
| 62,321 | 114 | 20,298 | 5,206 | 3,132 | 28,750 |
| 62,322 | 119 | 20,388 | 5,211 | 3,130 | 28,848 |
| 62,323 | 119 | 20,763 | 5,256 | 3,184 | 29,322 |
| 62,324 | 126 | 20,457 | 5,214 | 3,145 | 28,942 |
| 62,325 | 126 | 20,518 | 5,183 | 3,151 | 28,978 |
| 62,326 | 134 | 20,819 | 5,223 | 3,194 | 29,370 |
| 62,327 | 134 | 20,799 | 5,229 | 3,188 | 29,350 |

|        |     |        |       |       |        |
|--------|-----|--------|-------|-------|--------|
| 62,328 | 131 | 20,717 | 5,196 | 3,187 | 29,231 |
| 62,329 | 133 | 21,076 | 5,240 | 3,205 | 29,654 |
| 62,330 | 133 | 21,225 | 5,209 | 3,218 | 29,785 |
| 62,331 | 130 | 21,112 | 5,158 | 3,194 | 29,594 |
| 62,332 | 128 | 21,277 | 5,166 | 3,194 | 29,765 |
| 62,333 | 132 | 21,537 | 5,175 | 3,223 | 30,067 |
| 62,334 | 139 | 21,368 | 5,140 | 3,198 | 29,845 |
| 62,335 | 138 | 21,442 | 5,135 | 3,194 | 29,909 |
| 62,336 | 137 | 21,591 | 5,167 | 3,199 | 30,094 |
| 62,337 | 136 | 21,769 | 5,174 | 3,213 | 30,292 |
| 62,338 | 138 | 22,050 | 5,256 | 3,262 | 30,706 |
| 62,339 | 142 | 22,041 | 5,244 | 3,261 | 30,688 |
| 62,340 | 140 | 22,062 | 5,222 | 3,266 | 30,690 |
| 62,341 | 138 | 21,948 | 5,212 | 3,239 | 30,537 |
| 62,342 | 138 | 22,665 | 5,451 | 3,350 | 31,604 |
| 62,343 | 137 | 22,413 | 5,396 | 3,329 | 31,275 |
| 62,344 | 141 | 22,795 | 5,511 | 3,433 | 31,880 |
| 62,345 | 141 | 22,645 | 5,508 | 3,420 | 31,714 |
| 62,346 | 141 | 22,652 | 5,519 | 3,420 | 31,732 |
| 62,347 | 143 | 22,831 | 5,637 | 3,467 | 32,078 |
| 62,348 | 145 | 22,629 | 5,601 | 3,445 | 31,820 |
| 62,349 | 147 | 22,652 | 5,593 | 3,462 | 31,854 |
| 62,350 | 147 | 22,583 | 5,594 | 3,465 | 31,789 |
| 62,351 | 144 | 22,688 | 5,629 | 3,470 | 31,931 |
| 62,352 | 138 | 22,885 | 5,681 | 3,503 | 32,207 |
| 62,353 | 132 | 22,640 | 5,649 | 3,482 | 31,903 |
| 62,354 | 132 | 22,696 | 5,662 | 3,500 | 31,990 |
| 62,355 | 125 | 22,644 | 5,659 | 3,511 | 31,939 |
| 62,356 | 126 | 22,745 | 5,716 | 3,548 | 32,135 |
| 62,357 | 128 | 22,996 | 5,777 | 3,576 | 32,477 |
| 62,358 | 124 | 23,006 | 5,768 | 3,579 | 32,477 |
| 62,359 | 125 | 23,108 | 5,835 | 3,631 | 32,699 |

|        |     |        |       |       |        |
|--------|-----|--------|-------|-------|--------|
| 62,360 | 127 | 23,205 | 5,853 | 3,670 | 32,855 |
| 62,361 | 133 | 23,245 | 5,879 | 3,667 | 32,924 |
| 62,362 | 141 | 23,276 | 5,878 | 3,678 | 32,973 |
| 62,363 | 142 | 23,369 | 5,882 | 3,689 | 33,082 |
| 62,364 | 141 | 23,371 | 5,884 | 3,703 | 33,099 |
| 62,365 | 147 | 23,285 | 5,852 | 3,679 | 32,963 |
| 62,366 | 147 | 23,161 | 5,819 | 3,661 | 32,788 |
| 62,367 | 139 | 23,275 | 5,792 | 3,662 | 32,868 |
| 62,368 | 139 | 23,300 | 5,786 | 3,660 | 32,885 |
| 62,369 | 138 | 23,547 | 5,854 | 3,727 | 33,266 |
| 62,370 | 138 | 23,635 | 5,853 | 3,732 | 33,358 |
| 62,371 | 133 | 23,540 | 5,819 | 3,732 | 33,224 |
| 62,372 | 127 | 23,312 | 5,752 | 3,678 | 32,869 |
| 62,373 | 126 | 23,151 | 5,751 | 3,677 | 32,705 |
| 62,374 | 127 | 23,248 | 5,768 | 3,686 | 32,829 |
| 62,375 | 131 | 23,573 | 5,806 | 3,714 | 33,224 |
| 62,376 | 126 | 23,427 | 5,798 | 3,677 | 33,028 |
| 62,377 | 128 | 23,377 | 5,788 | 3,663 | 32,956 |
| 62,378 | 132 | 23,360 | 5,791 | 3,647 | 32,930 |
| 62,379 | 140 | 23,671 | 5,831 | 3,680 | 33,322 |
| 62,380 | 137 | 23,396 | 5,785 | 3,639 | 32,957 |
| 62,381 | 134 | 23,246 | 5,764 | 3,608 | 32,752 |
| 62,382 | 133 | 22,961 | 5,724 | 3,585 | 32,403 |
| 62,383 | 136 | 23,101 | 5,751 | 3,615 | 32,603 |
| 62,384 | 124 | 22,787 | 5,731 | 3,573 | 32,215 |
| 62,385 | 124 | 22,727 | 5,721 | 3,565 | 32,137 |
| 62,386 | 125 | 22,620 | 5,697 | 3,562 | 32,004 |
| 62,387 | 126 | 22,580 | 5,694 | 3,586 | 31,986 |
| 62,388 | 127 | 22,486 | 5,730 | 3,588 | 31,931 |
| 62,389 | 131 | 22,722 | 5,782 | 3,607 | 32,242 |
| 62,390 | 125 | 22,419 | 5,734 | 3,569 | 31,847 |
| 62,391 | 125 | 22,613 | 5,817 | 3,610 | 32,165 |

|        |     |        |       |       |        |
|--------|-----|--------|-------|-------|--------|
| 62,392 | 129 | 22,722 | 5,809 | 3,639 | 32,299 |
| 62,393 | 125 | 22,752 | 5,767 | 3,641 | 32,285 |
| 62,394 | 122 | 22,943 | 5,758 | 3,656 | 32,479 |
| 62,395 | 121 | 23,086 | 5,791 | 3,646 | 32,644 |
| 62,396 | 121 | 23,277 | 5,813 | 3,643 | 32,854 |
| 62,397 | 121 | 23,136 | 5,750 | 3,621 | 32,628 |
| 62,398 | 124 | 23,509 | 5,795 | 3,676 | 33,104 |
| 62,399 | 120 | 23,230 | 5,727 | 3,636 | 32,713 |
| 62,400 | 120 | 23,222 | 5,759 | 3,633 | 32,734 |
| 62,401 | 126 | 23,015 | 5,708 | 3,615 | 32,464 |
| 62,402 | 126 | 22,725 | 5,651 | 3,577 | 32,079 |
| 62,403 | 126 | 23,044 | 5,765 | 3,663 | 32,598 |
| 62,404 | 127 | 22,882 | 5,735 | 3,664 | 32,408 |
| 62,405 | 127 | 22,932 | 5,735 | 3,663 | 32,457 |
| 62,406 | 130 | 22,885 | 5,740 | 3,677 | 32,432 |
| 62,407 | 133 | 23,200 | 5,768 | 3,703 | 32,804 |
| 62,408 | 133 | 23,105 | 5,725 | 3,678 | 32,641 |
| 62,409 | 138 | 22,776 | 5,629 | 3,603 | 32,146 |
| 62,410 | 140 | 22,602 | 5,593 | 3,561 | 31,896 |
| 62,411 | 142 | 22,616 | 5,566 | 3,550 | 31,874 |
| 62,412 | 148 | 22,902 | 5,596 | 3,561 | 32,207 |
| 62,413 | 143 | 23,052 | 5,630 | 3,605 | 32,430 |
| 62,414 | 144 | 22,881 | 5,591 | 3,586 | 32,202 |
| 62,415 | 137 | 23,035 | 5,600 | 3,599 | 32,371 |
| 62,416 | 137 | 23,062 | 5,610 | 3,596 | 32,405 |
| 62,417 | 137 | 23,158 | 5,631 | 3,603 | 32,529 |
| 62,418 | 138 | 23,363 | 5,652 | 3,629 | 32,782 |
| 62,419 | 139 | 23,165 | 5,588 | 3,570 | 32,462 |
| 62,420 | 139 | 23,396 | 5,637 | 3,583 | 32,755 |
| 62,421 | 139 | 23,465 | 5,648 | 3,595 | 32,847 |
| 62,422 | 140 | 23,326 | 5,614 | 3,570 | 32,650 |
| 62,423 | 141 | 23,761 | 5,708 | 3,632 | 33,242 |

|        |     |        |       |       |        |
|--------|-----|--------|-------|-------|--------|
| 62,424 | 140 | 23,613 | 5,667 | 3,605 | 33,025 |
| 62,425 | 140 | 23,608 | 5,694 | 3,621 | 33,063 |
| 62,426 | 130 | 23,665 | 5,750 | 3,644 | 33,189 |
| 62,427 | 122 | 23,078 | 5,634 | 3,563 | 32,397 |
| 62,428 | 123 | 23,147 | 5,622 | 3,598 | 32,490 |
| 62,429 | 124 | 23,121 | 5,620 | 3,605 | 32,470 |
| 62,430 | 121 | 22,904 | 5,587 | 3,577 | 32,189 |
| 62,431 | 123 | 22,730 | 5,535 | 3,577 | 31,965 |
| 62,432 | 124 | 22,360 | 5,459 | 3,521 | 31,464 |
| 62,433 | 123 | 22,423 | 5,450 | 3,534 | 31,530 |
| 62,434 | 122 | 22,251 | 5,414 | 3,503 | 31,290 |
| 62,435 | 120 | 22,018 | 5,365 | 3,489 | 30,992 |
| 62,436 | 125 | 23,408 | 5,675 | 3,679 | 32,887 |
| 62,437 | 124 | 23,454 | 5,679 | 3,687 | 32,944 |
| 62,438 | 126 | 23,515 | 5,647 | 3,678 | 32,966 |
| 62,439 | 122 | 23,385 | 5,608 | 3,679 | 32,794 |
| 62,440 | 120 | 23,437 | 5,578 | 3,673 | 32,808 |
| 62,441 | 120 | 23,371 | 5,562 | 3,667 | 32,720 |
| 62,442 | 120 | 23,098 | 5,495 | 3,636 | 32,349 |
| 62,443 | 122 | 23,245 | 5,526 | 3,651 | 32,544 |
| 62,444 | 122 | 23,005 | 5,462 | 3,610 | 32,199 |
| 62,445 | 132 | 23,021 | 5,479 | 3,624 | 32,256 |
| 62,446 | 136 | 22,832 | 5,444 | 3,615 | 32,027 |
| 62,447 | 134 | 22,078 | 5,250 | 3,488 | 30,950 |
| 62,448 | 135 | 22,135 | 5,284 | 3,493 | 31,047 |
| 62,449 | 135 | 22,369 | 5,340 | 3,520 | 31,364 |
| 62,450 | 133 | 22,033 | 5,222 | 3,448 | 30,836 |
| 62,451 | 133 | 22,362 | 5,285 | 3,484 | 31,264 |
| 62,452 | 134 | 22,599 | 5,339 | 3,519 | 31,591 |
| 62,453 | 138 | 22,688 | 5,361 | 3,519 | 31,706 |
| 62,454 | 141 | 22,638 | 5,335 | 3,509 | 31,623 |
| 62,455 | 142 | 22,715 | 5,338 | 3,504 | 31,699 |



|        |     |        |       |       |        |
|--------|-----|--------|-------|-------|--------|
| 62,456 | 141 | 22,520 | 5,252 | 3,465 | 31,378 |
| 62,457 | 142 | 22,496 | 5,268 | 3,462 | 31,368 |
| 62,458 | 141 | 22,258 | 5,224 | 3,425 | 31,048 |
| 62,459 | 138 | 22,025 | 5,169 | 3,404 | 30,736 |
| 62,460 | 133 | 22,756 | 5,355 | 3,542 | 31,786 |
| 62,461 | 133 | 22,703 | 5,354 | 3,546 | 31,736 |
| 62,462 | 132 | 22,785 | 5,382 | 3,566 | 31,865 |
| 62,463 | 119 | 22,575 | 5,361 | 3,569 | 31,624 |
| 62,464 | 119 | 22,744 | 5,391 | 3,589 | 31,843 |
| 62,465 | 123 | 22,777 | 5,388 | 3,597 | 31,885 |
| 62,466 | 124 | 22,775 | 5,414 | 3,615 | 31,928 |
| 62,467 | 123 | 22,535 | 5,387 | 3,604 | 31,649 |
| 62,468 | 127 | 22,512 | 5,402 | 3,601 | 31,642 |
| 62,469 | 132 | 22,150 | 5,334 | 3,559 | 31,175 |
| 62,470 | 131 | 21,944 | 5,300 | 3,546 | 30,921 |
| 62,471 | 133 | 22,182 | 5,405 | 3,631 | 31,351 |
| 62,472 | 133 | 22,169 | 5,398 | 3,620 | 31,320 |
| 62,473 | 138 | 21,824 | 5,354 | 3,592 | 30,908 |
| 62,474 | 136 | 21,552 | 5,316 | 3,578 | 30,582 |
| 62,475 | 138 | 21,746 | 5,326 | 3,592 | 30,802 |
| 62,476 | 138 | 21,757 | 5,308 | 3,586 | 30,789 |
| 62,477 | 138 | 21,777 | 5,299 | 3,574 | 30,788 |
| 62,478 | 139 | 21,757 | 5,303 | 3,576 | 30,775 |
| 62,479 | 138 | 21,579 | 5,277 | 3,553 | 30,547 |
| 62,480 | 136 | 21,826 | 5,331 | 3,588 | 30,881 |
| 62,481 | 141 | 21,763 | 5,361 | 3,613 | 30,878 |
| 62,482 | 139 | 21,576 | 5,341 | 3,583 | 30,639 |
| 62,483 | 137 | 21,349 | 5,290 | 3,562 | 30,338 |
| 62,484 | 138 | 21,421 | 5,319 | 3,605 | 30,483 |
| 62,485 | 135 | 21,452 | 5,338 | 3,620 | 30,545 |
| 62,486 | 137 | 21,331 | 5,307 | 3,576 | 30,351 |
| 62,487 | 139 | 21,437 | 5,321 | 3,585 | 30,482 |

|        |     |        |       |       |        |
|--------|-----|--------|-------|-------|--------|
| 62,488 | 139 | 21,189 | 5,330 | 3,567 | 30,225 |
| 62,489 | 140 | 21,399 | 5,386 | 3,579 | 30,504 |
| 62,490 | 144 | 21,252 | 5,356 | 3,552 | 30,304 |
| 62,491 | 148 | 21,418 | 5,405 | 3,590 | 30,561 |
| 62,492 | 143 | 21,323 | 5,428 | 3,601 | 30,495 |
| 62,493 | 143 | 21,214 | 5,396 | 3,569 | 30,322 |
| 62,494 | 144 | 21,576 | 5,482 | 3,637 | 30,839 |
| 62,495 | 143 | 21,462 | 5,482 | 3,622 | 30,709 |
| 62,496 | 139 | 21,343 | 5,458 | 3,584 | 30,524 |
| 62,497 | 132 | 21,018 | 5,396 | 3,544 | 30,090 |
| 62,498 | 130 | 20,869 | 5,377 | 3,532 | 29,908 |
| 62,499 | 130 | 20,821 | 5,362 | 3,537 | 29,850 |
| 62,500 | 130 | 20,864 | 5,381 | 3,570 | 29,945 |
| 62,501 | 125 | 20,740 | 5,361 | 3,581 | 29,807 |
| 62,502 | 128 | 20,621 | 5,336 | 3,538 | 29,623 |
| 62,503 | 132 | 20,537 | 5,323 | 3,535 | 29,527 |
| 62,504 | 128 | 20,576 | 5,313 | 3,554 | 29,571 |
| 62,505 | 125 | 20,575 | 5,299 | 3,549 | 29,548 |
| 62,506 | 131 | 20,452 | 5,273 | 3,535 | 29,391 |
| 62,507 | 127 | 20,330 | 5,242 | 3,519 | 29,218 |
| 62,508 | 120 | 20,628 | 5,337 | 3,586 | 29,671 |
| 62,509 | 121 | 20,547 | 5,326 | 3,572 | 29,566 |
| 62,510 | 119 | 20,595 | 5,316 | 3,542 | 29,572 |
| 62,511 | 123 | 20,885 | 5,384 | 3,567 | 29,959 |
| 62,512 | 120 | 20,716 | 5,350 | 3,523 | 29,709 |
| 62,513 | 126 | 20,639 | 5,373 | 3,519 | 29,657 |
| 62,514 | 125 | 20,076 | 5,190 | 3,430 | 28,821 |
| 62,515 | 128 | 20,383 | 5,229 | 3,445 | 29,185 |
| 62,516 | 127 | 20,389 | 5,220 | 3,413 | 29,149 |
| 62,517 | 126 | 20,542 | 5,262 | 3,420 | 29,350 |
| 62,518 | 128 | 20,794 | 5,322 | 3,459 | 29,703 |
| 62,519 | 121 | 20,749 | 5,313 | 3,434 | 29,617 |

|        |     |        |       |       |        |
|--------|-----|--------|-------|-------|--------|
| 62,520 | 121 | 20,793 | 5,290 | 3,406 | 29,610 |
| 62,521 | 122 | 20,862 | 5,285 | 3,398 | 29,667 |
| 62,522 | 119 | 20,695 | 5,248 | 3,380 | 29,442 |
| 62,523 | 115 | 20,935 | 5,290 | 3,385 | 29,725 |
| 62,524 | 122 | 20,921 | 5,282 | 3,365 | 29,690 |
| 62,525 | 122 | 20,943 | 5,305 | 3,364 | 29,734 |
| 62,526 | 124 | 21,219 | 5,380 | 3,413 | 30,136 |
| 62,527 | 132 | 21,377 | 5,392 | 3,428 | 30,329 |
| 62,528 | 135 | 21,118 | 5,322 | 3,382 | 29,957 |
| 62,529 | 142 | 21,468 | 5,369 | 3,422 | 30,401 |
| 62,530 | 139 | 21,758 | 5,423 | 3,493 | 30,813 |
| 62,531 | 133 | 21,838 | 5,382 | 3,474 | 30,827 |
| 62,532 | 131 | 21,987 | 5,391 | 3,466 | 30,975 |
| 62,533 | 136 | 22,085 | 5,396 | 3,466 | 31,083 |
| 62,534 | 135 | 22,482 | 5,460 | 3,502 | 31,579 |
| 62,535 | 140 | 22,439 | 5,427 | 3,459 | 31,465 |
| 62,536 | 140 | 22,459 | 5,438 | 3,482 | 31,519 |
| 62,537 | 140 | 22,612 | 5,468 | 3,533 | 31,753 |
| 62,538 | 142 | 22,714 | 5,521 | 3,558 | 31,935 |
| 62,539 | 142 | 23,381 | 5,575 | 3,646 | 32,744 |
| 62,540 | 142 | 23,225 | 5,519 | 3,595 | 32,481 |
| 62,541 | 143 | 23,709 | 5,599 | 3,670 | 33,121 |
| 62,542 | 139 | 23,690 | 5,620 | 3,684 | 33,133 |
| 62,543 | 141 | 24,299 | 5,748 | 3,752 | 33,940 |
| 62,544 | 139 | 24,127 | 5,698 | 3,734 | 33,698 |
| 62,545 | 139 | 24,538 | 5,792 | 3,793 | 34,262 |
| 62,546 | 139 | 24,576 | 5,790 | 3,794 | 34,299 |
| 62,547 | 138 | 24,541 | 5,783 | 3,786 | 34,248 |
| 62,548 | 136 | 24,778 | 5,814 | 3,821 | 34,549 |
| 62,549 | 134 | 24,628 | 5,790 | 3,806 | 34,358 |
| 62,550 | 142 | 25,518 | 6,026 | 3,944 | 35,630 |
| 62,551 | 142 | 25,377 | 5,964 | 3,921 | 35,404 |

|        |     |        |       |       |        |
|--------|-----|--------|-------|-------|--------|
| 62,552 | 146 | 25,639 | 6,042 | 3,960 | 35,787 |
| 62,553 | 145 | 25,462 | 6,043 | 4,001 | 35,651 |
| 62,554 | 138 | 25,160 | 5,993 | 3,956 | 35,247 |
| 62,555 | 140 | 25,095 | 6,041 | 3,960 | 35,236 |
| 62,556 | 152 | 24,946 | 6,026 | 3,944 | 35,068 |
| 62,557 | 149 | 24,849 | 5,996 | 3,901 | 34,895 |
| 62,558 | 152 | 24,587 | 5,928 | 3,831 | 34,498 |
| 62,559 | 153 | 24,684 | 5,930 | 3,850 | 34,617 |
| 62,560 | 151 | 24,633 | 5,948 | 3,860 | 34,592 |
| 62,561 | 151 | 24,569 | 5,955 | 3,881 | 34,556 |
| 62,562 | 152 | 24,469 | 5,940 | 3,886 | 34,447 |
| 62,563 | 153 | 24,490 | 5,914 | 3,875 | 34,432 |
| 62,564 | 157 | 24,850 | 5,959 | 3,913 | 34,879 |
| 62,565 | 155 | 25,010 | 6,015 | 3,917 | 35,097 |
| 62,566 | 154 | 24,754 | 5,980 | 3,894 | 34,782 |
| 62,567 | 161 | 25,018 | 6,013 | 3,925 | 35,117 |
| 62,568 | 162 | 25,057 | 6,014 | 3,935 | 35,168 |
| 62,569 | 161 | 25,200 | 6,023 | 3,952 | 35,336 |
| 62,570 | 163 | 25,544 | 6,062 | 3,992 | 35,761 |
| 62,571 | 162 | 25,231 | 6,005 | 3,920 | 35,318 |
| 62,572 | 161 | 25,546 | 6,043 | 3,974 | 35,724 |
| 62,573 | 157 | 25,572 | 6,064 | 3,996 | 35,789 |
| 62,574 | 158 | 26,059 | 6,165 | 4,044 | 36,426 |
| 62,575 | 154 | 26,287 | 6,184 | 4,060 | 36,685 |
| 62,576 | 154 | 26,044 | 6,161 | 4,035 | 36,394 |
| 62,577 | 151 | 26,376 | 6,245 | 4,087 | 36,859 |
| 62,578 | 158 | 26,035 | 6,186 | 4,039 | 36,418 |
| 62,579 | 153 | 25,905 | 6,135 | 4,015 | 36,208 |
| 62,580 | 159 | 26,345 | 6,288 | 4,043 | 36,835 |
| 62,581 | 160 | 26,415 | 6,287 | 4,045 | 36,907 |
| 62,582 | 170 | 26,596 | 6,312 | 4,040 | 37,118 |
| 62,583 | 169 | 26,596 | 6,283 | 4,052 | 37,100 |

|        |     |        |       |       |        |
|--------|-----|--------|-------|-------|--------|
| 62,584 | 171 | 26,797 | 6,348 | 4,069 | 37,385 |
| 62,585 | 171 | 26,673 | 6,351 | 4,065 | 37,260 |
| 62,586 | 167 | 26,819 | 6,384 | 4,127 | 37,497 |
| 62,587 | 169 | 26,767 | 6,350 | 4,107 | 37,393 |
| 62,588 | 163 | 26,729 | 6,326 | 4,114 | 37,332 |
| 62,589 | 162 | 26,690 | 6,365 | 4,108 | 37,325 |
| 62,590 | 169 | 26,692 | 6,408 | 4,118 | 37,387 |
| 62,591 | 170 | 26,259 | 6,295 | 4,034 | 36,758 |
| 62,592 | 172 | 26,372 | 6,343 | 4,065 | 36,952 |
| 62,593 | 182 | 26,088 | 6,207 | 3,998 | 36,475 |
| 62,594 | 182 | 26,079 | 6,218 | 4,018 | 36,497 |
| 62,595 | 182 | 25,857 | 6,190 | 3,996 | 36,225 |
| 62,596 | 181 | 25,698 | 6,182 | 3,976 | 36,037 |
| 62,597 | 184 | 25,470 | 6,138 | 3,932 | 35,724 |
| 62,598 | 186 | 25,458 | 6,121 | 3,907 | 35,672 |
| 62,599 | 190 | 25,343 | 6,100 | 3,889 | 35,522 |
| 62,600 | 190 | 25,340 | 6,120 | 3,886 | 35,536 |
| 62,601 | 182 | 25,483 | 6,139 | 3,898 | 35,702 |
| 62,602 | 183 | 25,755 | 6,218 | 3,955 | 36,111 |
| 62,603 | 178 | 25,677 | 6,196 | 3,934 | 35,985 |
| 62,604 | 178 | 25,965 | 6,203 | 3,940 | 36,286 |
| 62,605 | 179 | 25,801 | 6,137 | 3,913 | 36,030 |
| 62,606 | 182 | 25,960 | 6,185 | 3,958 | 36,285 |
| 62,607 | 169 | 26,095 | 6,215 | 3,994 | 36,473 |
| 62,608 | 168 | 26,054 | 6,237 | 4,025 | 36,484 |
| 62,609 | 169 | 25,886 | 6,224 | 4,007 | 36,286 |
| 62,610 | 169 | 25,965 | 6,248 | 4,015 | 36,397 |
| 62,611 | 169 | 25,981 | 6,247 | 4,015 | 36,412 |
| 62,612 | 170 | 26,021 | 6,244 | 4,000 | 36,435 |
| 62,613 | 169 | 25,932 | 6,267 | 4,014 | 36,382 |
| 62,614 | 167 | 26,018 | 6,286 | 4,018 | 36,489 |
| 62,615 | 174 | 25,943 | 6,276 | 4,015 | 36,408 |

|        |     |        |       |       |        |
|--------|-----|--------|-------|-------|--------|
| 62,616 | 176 | 26,026 | 6,335 | 4,056 | 36,593 |
| 62,617 | 170 | 25,911 | 6,377 | 4,066 | 36,524 |
| 62,618 | 168 | 25,974 | 6,400 | 4,103 | 36,645 |
| 62,619 | 189 | 25,686 | 6,372 | 4,092 | 36,339 |
| 62,620 | 188 | 25,597 | 6,368 | 4,079 | 36,232 |
| 62,621 | 192 | 25,754 | 6,461 | 4,172 | 36,579 |
| 62,622 | 190 | 25,628 | 6,452 | 4,181 | 36,451 |
| 62,623 | 190 | 25,627 | 6,476 | 4,189 | 36,482 |
| 62,624 | 193 | 25,372 | 6,412 | 4,188 | 36,165 |
| 62,625 | 193 | 25,325 | 6,378 | 4,170 | 36,066 |
| 62,626 | 191 | 25,202 | 6,324 | 4,154 | 35,871 |
| 62,627 | 196 | 25,212 | 6,337 | 4,156 | 35,901 |
| 62,628 | 196 | 24,965 | 6,296 | 4,142 | 35,599 |
| 62,629 | 181 | 25,004 | 6,328 | 4,192 | 35,705 |
| 62,630 | 184 | 24,935 | 6,338 | 4,200 | 35,657 |
| 62,631 | 189 | 24,955 | 6,322 | 4,218 | 35,684 |
| 62,632 | 193 | 24,855 | 6,325 | 4,193 | 35,566 |
| 62,633 | 190 | 24,499 | 6,290 | 4,160 | 35,139 |
| 62,634 | 190 | 24,452 | 6,276 | 4,159 | 35,077 |
| 62,635 | 189 | 24,650 | 6,372 | 4,214 | 35,425 |
| 62,636 | 189 | 24,454 | 6,332 | 4,158 | 35,133 |
| 62,637 | 187 | 24,287 | 6,297 | 4,112 | 34,883 |
| 62,638 | 187 | 24,152 | 6,296 | 4,084 | 34,719 |
| 62,639 | 190 | 24,305 | 6,347 | 4,107 | 34,949 |
| 62,640 | 198 | 24,288 | 6,298 | 4,093 | 34,877 |
| 62,641 | 194 | 24,190 | 6,273 | 4,097 | 34,754 |
| 62,642 | 194 | 24,083 | 6,227 | 4,086 | 34,590 |
| 62,643 | 189 | 23,930 | 6,204 | 4,036 | 34,359 |
| 62,644 | 176 | 23,474 | 6,129 | 3,975 | 33,754 |
| 62,645 | 179 | 23,557 | 6,158 | 3,990 | 33,884 |
| 62,646 | 179 | 23,377 | 6,123 | 3,967 | 33,646 |
| 62,647 | 177 | 23,046 | 6,029 | 3,915 | 33,167 |

|        |     |        |       |       |        |
|--------|-----|--------|-------|-------|--------|
| 62,648 | 173 | 22,675 | 5,945 | 3,885 | 32,678 |
| 62,649 | 175 | 22,850 | 6,020 | 3,960 | 33,005 |
| 62,650 | 173 | 22,750 | 6,009 | 3,954 | 32,886 |
| 62,651 | 173 | 22,506 | 5,971 | 3,925 | 32,575 |
| 62,652 | 176 | 22,264 | 5,979 | 3,932 | 32,351 |
| 62,653 | 178 | 22,377 | 5,973 | 3,919 | 32,447 |
| 62,654 | 178 | 22,499 | 5,967 | 3,909 | 32,553 |
| 62,655 | 179 | 22,584 | 5,986 | 3,906 | 32,655 |
| 62,656 | 168 | 22,052 | 5,849 | 3,776 | 31,845 |
| 62,657 | 179 | 22,492 | 5,948 | 3,835 | 32,454 |
| 62,658 | 184 | 22,896 | 6,030 | 3,875 | 32,985 |
| 62,659 | 184 | 22,866 | 6,021 | 3,875 | 32,946 |
| 62,660 | 184 | 23,276 | 6,093 | 3,932 | 33,485 |
| 62,661 | 187 | 23,214 | 6,186 | 3,984 | 33,571 |
| 62,662 | 189 | 23,495 | 6,247 | 4,024 | 33,955 |
| 62,663 | 187 | 23,252 | 6,191 | 3,992 | 33,622 |
| 62,664 | 184 | 23,212 | 6,191 | 3,986 | 33,573 |
| 62,665 | 177 | 22,934 | 6,187 | 3,998 | 33,296 |
| 62,666 | 173 | 23,056 | 6,211 | 4,028 | 33,468 |
| 62,667 | 169 | 22,678 | 6,087 | 3,954 | 32,888 |
| 62,668 | 166 | 22,569 | 6,039 | 3,921 | 32,695 |
| 62,669 | 172 | 22,502 | 6,024 | 3,887 | 32,585 |
| 62,670 | 148 | 22,354 | 5,945 | 3,833 | 32,280 |
| 62,671 | 147 | 22,021 | 5,843 | 3,752 | 31,763 |
| 62,672 | 151 | 21,755 | 5,709 | 3,618 | 31,233 |
| 62,673 | 156 | 22,010 | 5,777 | 3,649 | 31,592 |
| 62,674 | 157 | 22,310 | 5,855 | 3,704 | 32,026 |
| 62,675 | 163 | 22,291 | 5,865 | 3,692 | 32,011 |
| 62,676 | 165 | 22,186 | 5,842 | 3,686 | 31,879 |
| 62,677 | 165 | 21,861 | 5,775 | 3,626 | 31,427 |
| 62,678 | 161 | 21,871 | 5,749 | 3,617 | 31,398 |
| 62,679 | 167 | 22,269 | 5,834 | 3,678 | 31,948 |

|        |     |        |       |       |        |
|--------|-----|--------|-------|-------|--------|
| 62,680 | 171 | 21,971 | 5,747 | 3,623 | 31,512 |
| 62,681 | 166 | 21,574 | 5,646 | 3,564 | 30,950 |
| 62,682 | 164 | 22,062 | 5,691 | 3,601 | 31,518 |
| 62,683 | 157 | 21,588 | 5,606 | 3,558 | 30,909 |
| 62,684 | 155 | 21,506 | 5,595 | 3,564 | 30,820 |
| 62,685 | 158 | 21,917 | 5,673 | 3,623 | 31,371 |
| 62,686 | 154 | 21,562 | 5,553 | 3,549 | 30,818 |
| 62,687 | 152 | 21,251 | 5,462 | 3,505 | 30,370 |
| 62,688 | 151 | 21,391 | 5,517 | 3,536 | 30,595 |
| 62,689 | 150 | 21,090 | 5,431 | 3,483 | 30,154 |
| 62,690 | 148 | 20,956 | 5,365 | 3,449 | 29,918 |
| 62,691 | 146 | 21,661 | 5,560 | 3,552 | 30,919 |
| 62,692 | 142 | 21,379 | 5,479 | 3,492 | 30,492 |
| 62,693 | 145 | 21,557 | 5,539 | 3,523 | 30,764 |
| 62,694 | 147 | 21,467 | 5,494 | 3,515 | 30,623 |
| 62,695 | 149 | 21,667 | 5,534 | 3,555 | 30,905 |
| 62,696 | 148 | 21,818 | 5,523 | 3,516 | 31,005 |
| 62,697 | 152 | 21,934 | 5,518 | 3,503 | 31,107 |
| 62,698 | 151 | 21,910 | 5,518 | 3,495 | 31,074 |
| 62,699 | 148 | 22,340 | 5,569 | 3,531 | 31,588 |
| 62,700 | 150 | 22,480 | 5,568 | 3,530 | 31,728 |
| 62,701 | 148 | 22,604 | 5,583 | 3,525 | 31,860 |
| 62,702 | 145 | 22,835 | 5,588 | 3,513 | 32,081 |
| 62,703 | 147 | 23,127 | 5,622 | 3,526 | 32,422 |
| 62,704 | 145 | 23,030 | 5,605 | 3,526 | 32,306 |
| 62,705 | 149 | 22,953 | 5,597 | 3,538 | 32,237 |
| 62,706 | 141 | 22,393 | 5,442 | 3,464 | 31,440 |
| 62,707 | 147 | 22,634 | 5,463 | 3,473 | 31,717 |
| 62,708 | 142 | 22,462 | 5,430 | 3,439 | 31,473 |
| 62,709 | 141 | 22,424 | 5,456 | 3,447 | 31,468 |
| 62,710 | 154 | 22,849 | 5,584 | 3,512 | 32,099 |
| 62,711 | 159 | 22,800 | 5,591 | 3,501 | 32,051 |



|        |     |        |       |       |        |
|--------|-----|--------|-------|-------|--------|
| 62,712 | 162 | 23,069 | 5,646 | 3,525 | 32,402 |
| 62,713 | 167 | 23,177 | 5,633 | 3,526 | 32,503 |
| 62,714 | 170 | 23,409 | 5,632 | 3,532 | 32,743 |
| 62,715 | 171 | 23,409 | 5,621 | 3,518 | 32,719 |
| 62,716 | 170 | 23,486 | 5,642 | 3,512 | 32,810 |
| 62,717 | 171 | 23,633 | 5,740 | 3,547 | 33,091 |
| 62,718 | 171 | 23,585 | 5,712 | 3,544 | 33,012 |
| 62,719 | 174 | 23,476 | 5,708 | 3,543 | 32,901 |
| 62,720 | 179 | 23,445 | 5,739 | 3,553 | 32,916 |
| 62,721 | 174 | 23,325 | 5,750 | 3,551 | 32,800 |
| 62,722 | 174 | 23,198 | 5,773 | 3,546 | 32,691 |
| 62,723 | 168 | 23,103 | 5,782 | 3,569 | 32,622 |
| 62,724 | 169 | 22,970 | 5,752 | 3,544 | 32,435 |
| 62,725 | 170 | 23,304 | 5,788 | 3,556 | 32,818 |
| 62,726 | 162 | 23,377 | 5,789 | 3,559 | 32,887 |
| 62,727 | 161 | 23,664 | 5,886 | 3,575 | 33,286 |
| 62,728 | 170 | 23,907 | 5,950 | 3,620 | 33,647 |
| 62,729 | 179 | 23,857 | 5,933 | 3,584 | 33,553 |
| 62,730 | 177 | 23,702 | 5,922 | 3,576 | 33,377 |
| 62,731 | 176 | 23,371 | 5,900 | 3,563 | 33,010 |
| 62,732 | 177 | 23,195 | 5,918 | 3,544 | 32,834 |
| 62,733 | 181 | 24,268 | 6,218 | 3,742 | 34,409 |
| 62,734 | 183 | 24,272 | 6,275 | 3,743 | 34,473 |
| 62,735 | 191 | 24,390 | 6,310 | 3,757 | 34,648 |
| 62,736 | 191 | 24,163 | 6,248 | 3,710 | 34,312 |
| 62,737 | 195 | 24,296 | 6,310 | 3,734 | 34,535 |
| 62,738 | 196 | 24,277 | 6,281 | 3,723 | 34,477 |
| 62,739 | 199 | 24,426 | 6,315 | 3,731 | 34,671 |
| 62,740 | 200 | 24,524 | 6,364 | 3,747 | 34,835 |
| 62,741 | 199 | 24,548 | 6,363 | 3,717 | 34,827 |
| 62,742 | 197 | 24,272 | 6,333 | 3,682 | 34,484 |
| 62,743 | 198 | 24,280 | 6,379 | 3,701 | 34,558 |

|        |     |        |       |       |        |
|--------|-----|--------|-------|-------|--------|
| 62,744 | 200 | 24,355 | 6,411 | 3,713 | 34,679 |
| 62,745 | 204 | 24,398 | 6,435 | 3,735 | 34,772 |
| 62,746 | 208 | 24,284 | 6,470 | 3,708 | 34,670 |
| 62,747 | 210 | 24,200 | 6,474 | 3,711 | 34,595 |
| 62,748 | 209 | 23,990 | 6,444 | 3,697 | 34,340 |
| 62,749 | 210 | 24,126 | 6,490 | 3,711 | 34,537 |
| 62,750 | 214 | 24,329 | 6,571 | 3,755 | 34,869 |
| 62,751 | 218 | 24,299 | 6,555 | 3,754 | 34,826 |
| 62,752 | 222 | 24,034 | 6,488 | 3,732 | 34,476 |
| 62,753 | 221 | 24,007 | 6,484 | 3,745 | 34,457 |
| 62,754 | 219 | 23,924 | 6,479 | 3,734 | 34,356 |
| 62,755 | 218 | 23,831 | 6,449 | 3,705 | 34,203 |
| 62,756 | 215 | 23,815 | 6,455 | 3,687 | 34,172 |
| 62,757 | 212 | 23,593 | 6,432 | 3,688 | 33,925 |
| 62,758 | 211 | 23,315 | 6,312 | 3,623 | 33,461 |
| 62,759 | 212 | 23,431 | 6,321 | 3,631 | 33,595 |
| 62,760 | 210 | 23,585 | 6,323 | 3,662 | 33,780 |
| 62,761 | 213 | 23,403 | 6,262 | 3,633 | 33,511 |
| 62,762 | 209 | 23,288 | 6,186 | 3,601 | 33,284 |
| 62,763 | 210 | 22,985 | 6,067 | 3,535 | 32,797 |
| 62,764 | 204 | 22,671 | 6,018 | 3,504 | 32,397 |
| 62,765 | 202 | 22,843 | 6,075 | 3,537 | 32,657 |
| 62,766 | 205 | 22,816 | 6,050 | 3,512 | 32,583 |
| 62,767 | 209 | 22,741 | 5,987 | 3,491 | 32,428 |
| 62,768 | 209 | 22,786 | 5,980 | 3,472 | 32,447 |
| 62,769 | 206 | 22,960 | 5,962 | 3,449 | 32,577 |
| 62,770 | 200 | 23,039 | 5,932 | 3,456 | 32,627 |
| 62,771 | 201 | 23,033 | 5,907 | 3,445 | 32,586 |
| 62,772 | 203 | 23,184 | 5,879 | 3,452 | 32,718 |
| 62,773 | 206 | 23,246 | 5,820 | 3,427 | 32,699 |
| 62,774 | 206 | 23,207 | 5,800 | 3,420 | 32,633 |
| 62,775 | 203 | 23,161 | 5,809 | 3,413 | 32,586 |

|        |     |        |       |       |        |
|--------|-----|--------|-------|-------|--------|
| 62,776 | 202 | 22,920 | 5,758 | 3,410 | 32,290 |
| 62,777 | 202 | 22,881 | 5,768 | 3,431 | 32,282 |
| 62,778 | 192 | 22,676 | 5,723 | 3,412 | 32,003 |
| 62,779 | 186 | 22,478 | 5,682 | 3,377 | 31,723 |
| 62,780 | 179 | 22,269 | 5,660 | 3,357 | 31,465 |
| 62,781 | 177 | 22,275 | 5,625 | 3,312 | 31,389 |
| 62,782 | 164 | 22,156 | 5,544 | 3,266 | 31,130 |
| 62,783 | 170 | 21,978 | 5,449 | 3,231 | 30,828 |
| 62,784 | 171 | 21,827 | 5,388 | 3,192 | 30,578 |
| 62,785 | 170 | 21,792 | 5,370 | 3,187 | 30,519 |
| 62,786 | 163 | 21,777 | 5,326 | 3,190 | 30,456 |
| 62,787 | 168 | 21,697 | 5,264 | 3,165 | 30,294 |
| 62,788 | 164 | 21,493 | 5,209 | 3,132 | 29,998 |
| 62,789 | 172 | 21,788 | 5,277 | 3,182 | 30,419 |
| 62,790 | 166 | 21,507 | 5,228 | 3,173 | 30,074 |
| 62,791 | 179 | 21,812 | 5,272 | 3,230 | 30,493 |
| 62,792 | 177 | 21,678 | 5,203 | 3,225 | 30,283 |
| 62,793 | 181 | 21,701 | 5,193 | 3,216 | 30,291 |
| 62,794 | 181 | 21,755 | 5,186 | 3,216 | 30,338 |
| 62,795 | 179 | 21,833 | 5,202 | 3,229 | 30,443 |
| 62,796 | 173 | 21,950 | 5,218 | 3,221 | 30,562 |
| 62,797 | 165 | 21,797 | 5,134 | 3,195 | 30,291 |
| 62,798 | 165 | 21,654 | 5,114 | 3,201 | 30,134 |
| 62,799 | 163 | 21,625 | 5,069 | 3,189 | 30,046 |
| 62,800 | 160 | 21,539 | 5,023 | 3,176 | 29,898 |
| 62,801 | 165 | 21,620 | 5,058 | 3,200 | 30,043 |
| 62,802 | 159 | 21,333 | 5,013 | 3,166 | 29,671 |
| 62,803 | 155 | 21,073 | 4,977 | 3,136 | 29,341 |
| 62,804 | 156 | 21,227 | 5,012 | 3,186 | 29,581 |
| 62,805 | 162 | 21,196 | 5,002 | 3,179 | 29,539 |
| 62,806 | 164 | 21,177 | 4,990 | 3,164 | 29,495 |
| 62,807 | 163 | 21,155 | 4,976 | 3,150 | 29,444 |

|        |     |        |       |       |        |
|--------|-----|--------|-------|-------|--------|
| 62,808 | 158 | 20,852 | 4,899 | 3,092 | 29,001 |
| 62,809 | 157 | 20,872 | 4,935 | 3,124 | 29,088 |
| 62,810 | 152 | 20,733 | 4,923 | 3,109 | 28,917 |
| 62,811 | 151 | 20,769 | 4,963 | 3,121 | 29,004 |
| 62,812 | 140 | 20,698 | 4,983 | 3,134 | 28,955 |
| 62,813 | 134 | 20,461 | 4,944 | 3,116 | 28,655 |
| 62,814 | 127 | 20,351 | 4,930 | 3,111 | 28,519 |
| 62,815 | 126 | 20,458 | 4,987 | 3,136 | 28,707 |
| 62,816 | 123 | 20,315 | 4,968 | 3,123 | 28,529 |
| 62,817 | 119 | 20,118 | 4,917 | 3,106 | 28,260 |
| 62,818 | 115 | 19,931 | 4,893 | 3,079 | 28,018 |
| 62,819 | 113 | 19,743 | 4,856 | 3,084 | 27,796 |
| 62,820 | 117 | 20,292 | 5,056 | 3,198 | 28,663 |
| 62,821 | 115 | 20,479 | 5,157 | 3,243 | 28,994 |
| 62,822 | 117 | 20,420 | 5,172 | 3,260 | 28,969 |
| 62,823 | 119 | 20,114 | 5,158 | 3,245 | 28,636 |
| 62,824 | 119 | 20,060 | 5,170 | 3,234 | 28,583 |
| 62,825 | 116 | 19,872 | 5,144 | 3,217 | 28,349 |
| 62,826 | 116 | 19,283 | 4,989 | 3,111 | 27,499 |
| 62,827 | 118 | 19,390 | 5,044 | 3,133 | 27,685 |
| 62,828 | 116 | 19,686 | 5,120 | 3,170 | 28,092 |
| 62,829 | 118 | 19,493 | 5,085 | 3,150 | 27,846 |
| 62,830 | 117 | 19,485 | 5,055 | 3,162 | 27,819 |
| 62,831 | 118 | 19,666 | 5,119 | 3,188 | 28,091 |
| 62,832 | 120 | 19,199 | 5,060 | 3,142 | 27,521 |
| 62,833 | 119 | 19,352 | 5,135 | 3,170 | 27,776 |
| 62,834 | 112 | 19,275 | 5,162 | 3,194 | 27,743 |
| 62,835 | 107 | 19,005 | 5,102 | 3,169 | 27,383 |
| 62,836 | 108 | 18,987 | 5,116 | 3,184 | 27,395 |
| 62,837 | 105 | 18,882 | 5,132 | 3,196 | 27,315 |
| 62,838 | 99  | 18,780 | 5,157 | 3,178 | 27,214 |
| 62,839 | 109 | 19,025 | 5,269 | 3,219 | 27,622 |

|        |     |        |       |       |        |
|--------|-----|--------|-------|-------|--------|
| 62,840 | 102 | 19,106 | 5,290 | 3,248 | 27,746 |
| 62,841 | 105 | 19,201 | 5,315 | 3,222 | 27,843 |
| 62,842 | 102 | 19,051 | 5,335 | 3,272 | 27,760 |
| 62,843 | 104 | 19,026 | 5,376 | 3,284 | 27,790 |
| 62,844 | 99  | 18,941 | 5,371 | 3,294 | 27,705 |
| 62,845 | 102 | 19,022 | 5,418 | 3,295 | 27,837 |
| 62,846 | 99  | 18,875 | 5,395 | 3,274 | 27,643 |
| 62,847 | 102 | 18,943 | 5,411 | 3,302 | 27,758 |
| 62,848 | 107 | 18,745 | 5,354 | 3,275 | 27,481 |
| 62,849 | 106 | 18,591 | 5,320 | 3,259 | 27,276 |
| 62,850 | 114 | 19,211 | 5,473 | 3,359 | 28,157 |
| 62,851 | 108 | 19,345 | 5,538 | 3,368 | 28,359 |
| 62,852 | 112 | 19,283 | 5,509 | 3,371 | 28,275 |
| 62,853 | 112 | 19,254 | 5,529 | 3,369 | 28,264 |
| 62,854 | 114 | 19,161 | 5,495 | 3,354 | 28,124 |
| 62,855 | 116 | 19,296 | 5,550 | 3,399 | 28,361 |
| 62,856 | 110 | 19,416 | 5,614 | 3,440 | 28,580 |
| 62,857 | 107 | 19,318 | 5,602 | 3,444 | 28,471 |
| 62,858 | 109 | 19,223 | 5,646 | 3,447 | 28,425 |
| 62,859 | 110 | 19,151 | 5,635 | 3,444 | 28,340 |
| 62,860 | 112 | 19,199 | 5,650 | 3,454 | 28,415 |
| 62,861 | 116 | 19,304 | 5,687 | 3,459 | 28,566 |
| 62,862 | 118 | 19,362 | 5,707 | 3,453 | 28,640 |
| 62,863 | 123 | 19,429 | 5,698 | 3,445 | 28,695 |
| 62,864 | 126 | 19,450 | 5,696 | 3,464 | 28,736 |
| 62,865 | 126 | 19,281 | 5,671 | 3,441 | 28,519 |
| 62,866 | 131 | 19,401 | 5,690 | 3,439 | 28,661 |
| 62,867 | 142 | 19,290 | 5,654 | 3,406 | 28,492 |
| 62,868 | 142 | 19,115 | 5,582 | 3,385 | 28,224 |
| 62,869 | 151 | 19,514 | 5,667 | 3,443 | 28,775 |
| 62,870 | 150 | 19,188 | 5,621 | 3,393 | 28,352 |
| 62,871 | 153 | 19,246 | 5,619 | 3,408 | 28,426 |

|        |     |        |       |       |        |
|--------|-----|--------|-------|-------|--------|
| 62,872 | 154 | 19,517 | 5,656 | 3,436 | 28,763 |
| 62,873 | 144 | 19,287 | 5,590 | 3,394 | 28,415 |
| 62,874 | 146 | 19,104 | 5,528 | 3,364 | 28,142 |
| 62,875 | 147 | 19,129 | 5,510 | 3,360 | 28,146 |
| 62,876 | 147 | 18,899 | 5,450 | 3,323 | 27,819 |
| 62,877 | 145 | 18,675 | 5,407 | 3,306 | 27,533 |
| 62,878 | 152 | 19,183 | 5,562 | 3,420 | 28,317 |
| 62,879 | 160 | 19,207 | 5,603 | 3,414 | 28,384 |
| 62,880 | 157 | 19,065 | 5,545 | 3,395 | 28,162 |
| 62,881 | 158 | 19,296 | 5,599 | 3,421 | 28,474 |
| 62,882 | 158 | 19,424 | 5,620 | 3,446 | 28,648 |
| 62,883 | 158 | 19,422 | 5,558 | 3,420 | 28,558 |
| 62,884 | 172 | 19,604 | 5,580 | 3,449 | 28,805 |
| 62,885 | 177 | 19,585 | 5,526 | 3,410 | 28,698 |
| 62,886 | 177 | 19,610 | 5,532 | 3,408 | 28,727 |
| 62,887 | 179 | 19,968 | 5,552 | 3,409 | 29,108 |
| 62,888 | 179 | 19,813 | 5,529 | 3,416 | 28,937 |
| 62,889 | 174 | 20,026 | 5,587 | 3,476 | 29,263 |
| 62,890 | 178 | 20,041 | 5,556 | 3,497 | 29,272 |
| 62,891 | 177 | 20,022 | 5,520 | 3,478 | 29,197 |
| 62,892 | 175 | 20,108 | 5,504 | 3,472 | 29,259 |
| 62,893 | 165 | 20,021 | 5,443 | 3,412 | 29,041 |
| 62,894 | 164 | 20,016 | 5,391 | 3,393 | 28,964 |
| 62,895 | 165 | 20,012 | 5,408 | 3,402 | 28,987 |
| 62,896 | 167 | 20,075 | 5,440 | 3,437 | 29,119 |
| 62,897 | 168 | 19,860 | 5,363 | 3,388 | 28,779 |
| 62,898 | 168 | 19,830 | 5,357 | 3,386 | 28,741 |
| 62,899 | 160 | 19,740 | 5,376 | 3,396 | 28,672 |
| 62,900 | 161 | 19,622 | 5,389 | 3,412 | 28,584 |
| 62,901 | 159 | 19,650 | 5,391 | 3,411 | 28,611 |
| 62,902 | 161 | 19,685 | 5,395 | 3,409 | 28,650 |
| 62,903 | 163 | 19,704 | 5,378 | 3,376 | 28,621 |

|        |     |        |       |       |        |
|--------|-----|--------|-------|-------|--------|
| 62,904 | 164 | 19,707 | 5,400 | 3,375 | 28,646 |
| 62,905 | 166 | 19,884 | 5,460 | 3,408 | 28,918 |
| 62,906 | 168 | 19,643 | 5,369 | 3,329 | 28,509 |
| 62,907 | 172 | 19,714 | 5,375 | 3,319 | 28,580 |
| 62,908 | 173 | 19,773 | 5,381 | 3,324 | 28,651 |
| 62,909 | 176 | 20,083 | 5,369 | 3,328 | 28,956 |
| 62,910 | 177 | 20,136 | 5,369 | 3,323 | 29,005 |
| 62,911 | 174 | 20,079 | 5,379 | 3,307 | 28,939 |
| 62,912 | 172 | 20,081 | 5,409 | 3,340 | 29,002 |
| 62,913 | 170 | 19,947 | 5,371 | 3,333 | 28,821 |
| 62,914 | 169 | 20,381 | 5,490 | 3,376 | 29,416 |
| 62,915 | 170 | 20,214 | 5,431 | 3,320 | 29,135 |
| 62,916 | 170 | 20,189 | 5,425 | 3,324 | 29,108 |
| 62,917 | 165 | 20,118 | 5,413 | 3,330 | 29,026 |
| 62,918 | 150 | 20,033 | 5,395 | 3,295 | 28,873 |
| 62,919 | 146 | 19,962 | 5,380 | 3,306 | 28,794 |
| 62,920 | 149 | 20,233 | 5,451 | 3,357 | 29,190 |
| 62,921 | 163 | 20,381 | 5,479 | 3,358 | 29,381 |
| 62,922 | 164 | 20,447 | 5,511 | 3,374 | 29,496 |
| 62,923 | 165 | 20,394 | 5,519 | 3,379 | 29,457 |
| 62,924 | 162 | 20,128 | 5,484 | 3,339 | 29,113 |
| 62,925 | 164 | 20,189 | 5,509 | 3,345 | 29,207 |
| 62,926 | 163 | 20,369 | 5,542 | 3,357 | 29,431 |
| 62,927 | 162 | 20,355 | 5,520 | 3,334 | 29,371 |
| 62,928 | 162 | 20,399 | 5,550 | 3,333 | 29,444 |
| 62,929 | 158 | 20,580 | 5,601 | 3,339 | 29,678 |
| 62,930 | 154 | 20,615 | 5,613 | 3,373 | 29,755 |
| 62,931 | 153 | 20,594 | 5,636 | 3,362 | 29,745 |
| 62,932 | 152 | 20,505 | 5,622 | 3,351 | 29,630 |
| 62,933 | 152 | 20,474 | 5,621 | 3,359 | 29,606 |
| 62,934 | 148 | 20,194 | 5,595 | 3,329 | 29,266 |
| 62,935 | 135 | 20,536 | 5,718 | 3,387 | 29,776 |

|        |     |        |       |       |        |
|--------|-----|--------|-------|-------|--------|
| 62,936 | 129 | 20,265 | 5,671 | 3,368 | 29,433 |
| 62,937 | 133 | 20,293 | 5,739 | 3,388 | 29,553 |
| 62,938 | 135 | 20,300 | 5,779 | 3,384 | 29,598 |
| 62,939 | 130 | 20,110 | 5,709 | 3,283 | 29,232 |
| 62,940 | 131 | 20,226 | 5,754 | 3,308 | 29,419 |
| 62,941 | 130 | 20,394 | 5,819 | 3,326 | 29,669 |
| 62,942 | 128 | 19,991 | 5,770 | 3,284 | 29,173 |
| 62,943 | 128 | 20,041 | 5,832 | 3,315 | 29,316 |
| 62,944 | 134 | 20,023 | 5,835 | 3,301 | 29,293 |
| 62,945 | 133 | 19,845 | 5,754 | 3,258 | 28,990 |
| 62,946 | 133 | 20,094 | 5,805 | 3,288 | 29,320 |
| 62,947 | 131 | 20,125 | 5,854 | 3,305 | 29,415 |
| 62,948 | 126 | 20,127 | 5,866 | 3,330 | 29,449 |
| 62,949 | 132 | 20,257 | 5,908 | 3,335 | 29,632 |
| 62,950 | 131 | 20,457 | 5,891 | 3,329 | 29,808 |
| 62,951 | 132 | 20,351 | 5,823 | 3,285 | 29,591 |
| 62,952 | 127 | 19,758 | 5,706 | 3,210 | 28,801 |
| 62,953 | 128 | 19,833 | 5,701 | 3,225 | 28,887 |
| 62,954 | 126 | 20,031 | 5,709 | 3,233 | 29,099 |
| 62,955 | 123 | 19,811 | 5,595 | 3,200 | 28,729 |
| 62,956 | 127 | 20,044 | 5,638 | 3,227 | 29,036 |
| 62,957 | 123 | 19,880 | 5,581 | 3,201 | 28,785 |
| 62,958 | 118 | 19,558 | 5,508 | 3,165 | 28,349 |
| 62,959 | 117 | 19,589 | 5,556 | 3,177 | 28,439 |
| 62,960 | 117 | 19,449 | 5,558 | 3,181 | 28,305 |
| 62,961 | 119 | 19,294 | 5,496 | 3,173 | 28,082 |
| 62,962 | 120 | 19,324 | 5,470 | 3,154 | 28,068 |
| 62,963 | 120 | 19,571 | 5,519 | 3,196 | 28,406 |
| 62,964 | 122 | 19,510 | 5,464 | 3,178 | 28,274 |
| 62,965 | 119 | 19,412 | 5,401 | 3,167 | 28,099 |
| 62,966 | 117 | 19,230 | 5,361 | 3,141 | 27,849 |
| 62,967 | 120 | 19,227 | 5,335 | 3,140 | 27,822 |



|        |     |        |       |       |        |
|--------|-----|--------|-------|-------|--------|
| 62,968 | 120 | 19,244 | 5,345 | 3,135 | 27,844 |
| 62,969 | 116 | 19,111 | 5,321 | 3,139 | 27,687 |
| 62,970 | 101 | 18,742 | 5,208 | 3,058 | 27,109 |
| 62,971 | 101 | 18,792 | 5,233 | 3,063 | 27,189 |
| 62,972 | 98  | 18,904 | 5,280 | 3,093 | 27,375 |
| 62,973 | 93  | 18,775 | 5,253 | 3,058 | 27,179 |
| 62,974 | 96  | 18,771 | 5,251 | 3,060 | 27,178 |
| 62,975 | 96  | 18,468 | 5,166 | 3,046 | 26,776 |
| 62,976 | 96  | 18,538 | 5,160 | 3,050 | 26,844 |
| 62,977 | 100 | 18,497 | 5,187 | 3,081 | 26,865 |
| 62,978 | 103 | 18,472 | 5,198 | 3,090 | 26,863 |
| 62,979 | 102 | 18,143 | 5,074 | 3,040 | 26,359 |
| 62,980 | 102 | 18,120 | 5,084 | 3,036 | 26,342 |
| 62,981 | 107 | 17,995 | 5,018 | 3,004 | 26,124 |
| 62,982 | 105 | 17,871 | 4,978 | 3,002 | 25,956 |
| 62,983 | 105 | 17,978 | 5,013 | 2,995 | 26,091 |
| 62,984 | 104 | 17,385 | 4,835 | 2,866 | 25,190 |
| 62,985 | 105 | 17,567 | 4,880 | 2,882 | 25,434 |
| 62,986 | 110 | 17,685 | 4,891 | 2,886 | 25,572 |
| 62,987 | 117 | 17,640 | 4,833 | 2,872 | 25,462 |
| 62,988 | 114 | 17,657 | 4,847 | 2,875 | 25,493 |
| 62,989 | 113 | 17,606 | 4,834 | 2,898 | 25,451 |
| 62,990 | 112 | 17,221 | 4,750 | 2,860 | 24,943 |
| 62,991 | 114 | 17,316 | 4,805 | 2,880 | 25,115 |
| 62,992 | 111 | 17,103 | 4,721 | 2,851 | 24,786 |
| 62,993 | 113 | 17,241 | 4,726 | 2,870 | 24,950 |
| 62,994 | 114 | 17,269 | 4,737 | 2,876 | 24,996 |
| 62,995 | 107 | 17,006 | 4,664 | 2,870 | 24,647 |
| 62,996 | 108 | 16,865 | 4,661 | 2,839 | 24,473 |
| 62,997 | 109 | 16,970 | 4,695 | 2,848 | 24,622 |
| 62,998 | 110 | 16,884 | 4,646 | 2,839 | 24,479 |
| 62,999 | 113 | 17,059 | 4,710 | 2,864 | 24,746 |

|        |     |        |       |       |        |
|--------|-----|--------|-------|-------|--------|
| 63,000 | 107 | 17,208 | 4,764 | 2,905 | 24,984 |
| 63,001 | 112 | 17,282 | 4,862 | 2,941 | 25,197 |
| 63,002 | 113 | 17,338 | 4,929 | 2,963 | 25,343 |
| 63,003 | 113 | 17,344 | 4,954 | 2,980 | 25,391 |
| 63,004 | 122 | 17,252 | 4,964 | 2,961 | 25,299 |
| 63,005 | 121 | 17,014 | 4,952 | 2,954 | 25,041 |
| 63,006 | 118 | 17,286 | 5,028 | 2,982 | 25,414 |
| 63,007 | 121 | 17,630 | 5,125 | 3,005 | 25,881 |
| 63,008 | 126 | 17,620 | 5,100 | 2,991 | 25,837 |
| 63,009 | 126 | 17,684 | 5,112 | 2,994 | 25,916 |
| 63,010 | 139 | 18,228 | 5,291 | 3,075 | 26,733 |
| 63,011 | 136 | 18,180 | 5,255 | 3,057 | 26,628 |
| 63,012 | 134 | 18,175 | 5,259 | 3,054 | 26,622 |
| 63,013 | 131 | 18,231 | 5,350 | 3,104 | 26,816 |
| 63,014 | 131 | 18,380 | 5,431 | 3,138 | 27,080 |
| 63,015 | 137 | 18,356 | 5,500 | 3,167 | 27,160 |
| 63,016 | 137 | 18,480 | 5,562 | 3,186 | 27,365 |
| 63,017 | 135 | 18,351 | 5,574 | 3,192 | 27,252 |
| 63,018 | 137 | 18,340 | 5,620 | 3,220 | 27,317 |
| 63,019 | 146 | 18,445 | 5,613 | 3,216 | 27,420 |
| 63,020 | 154 | 18,499 | 5,622 | 3,205 | 27,480 |
| 63,021 | 159 | 18,517 | 5,660 | 3,226 | 27,562 |
| 63,022 | 171 | 18,605 | 5,669 | 3,246 | 27,691 |
| 63,023 | 169 | 18,451 | 5,568 | 3,189 | 27,377 |
| 63,024 | 169 | 18,709 | 5,625 | 3,223 | 27,726 |
| 63,025 | 169 | 18,753 | 5,589 | 3,208 | 27,719 |
| 63,026 | 163 | 18,458 | 5,513 | 3,133 | 27,267 |
| 63,027 | 163 | 18,775 | 5,578 | 3,168 | 27,684 |
| 63,028 | 164 | 19,079 | 5,607 | 3,208 | 28,058 |
| 63,029 | 163 | 18,935 | 5,543 | 3,184 | 27,825 |
| 63,030 | 163 | 19,019 | 5,568 | 3,186 | 27,936 |
| 63,031 | 167 | 19,313 | 5,609 | 3,220 | 28,309 |

|        |     |        |       |       |        |
|--------|-----|--------|-------|-------|--------|
| 63,032 | 164 | 19,274 | 5,616 | 3,187 | 28,241 |
| 63,033 | 167 | 19,440 | 5,618 | 3,205 | 28,430 |
| 63,034 | 176 | 19,541 | 5,623 | 3,220 | 28,560 |
| 63,035 | 178 | 19,589 | 5,629 | 3,226 | 28,622 |
| 63,036 | 177 | 19,467 | 5,592 | 3,230 | 28,466 |
| 63,037 | 178 | 20,213 | 5,764 | 3,341 | 29,496 |
| 63,038 | 172 | 20,300 | 5,774 | 3,349 | 29,595 |
| 63,039 | 168 | 20,070 | 5,712 | 3,314 | 29,264 |
| 63,040 | 169 | 20,281 | 5,790 | 3,348 | 29,588 |
| 63,041 | 168 | 20,373 | 5,791 | 3,358 | 29,690 |
| 63,042 | 167 | 20,539 | 5,820 | 3,373 | 29,899 |
| 63,043 | 172 | 20,727 | 5,846 | 3,369 | 30,114 |
| 63,044 | 169 | 20,661 | 5,824 | 3,336 | 29,990 |
| 63,045 | 167 | 20,946 | 5,863 | 3,343 | 30,319 |
| 63,046 | 166 | 21,041 | 5,855 | 3,347 | 30,409 |
| 63,047 | 164 | 20,918 | 5,797 | 3,322 | 30,201 |
| 63,048 | 169 | 20,564 | 5,680 | 3,234 | 29,647 |
| 63,049 | 173 | 20,606 | 5,711 | 3,249 | 29,739 |
| 63,050 | 170 | 20,903 | 5,758 | 3,283 | 30,114 |
| 63,051 | 170 | 21,101 | 5,783 | 3,307 | 30,361 |
| 63,052 | 168 | 21,109 | 5,688 | 3,261 | 30,226 |
| 63,053 | 174 | 20,852 | 5,552 | 3,170 | 29,748 |
| 63,054 | 173 | 20,976 | 5,546 | 3,185 | 29,880 |
| 63,055 | 168 | 21,145 | 5,580 | 3,238 | 30,131 |
| 63,056 | 174 | 21,088 | 5,524 | 3,210 | 29,996 |
| 63,057 | 175 | 21,104 | 5,504 | 3,208 | 29,991 |
| 63,058 | 165 | 21,052 | 5,516 | 3,209 | 29,942 |
| 63,059 | 165 | 21,076 | 5,515 | 3,229 | 29,985 |
| 63,060 | 159 | 21,111 | 5,549 | 3,256 | 30,075 |
| 63,061 | 162 | 21,105 | 5,531 | 3,267 | 30,065 |
| 63,062 | 167 | 21,220 | 5,547 | 3,261 | 30,195 |
| 63,063 | 170 | 21,376 | 5,538 | 3,247 | 30,331 |

|        |     |        |       |       |        |
|--------|-----|--------|-------|-------|--------|
| 63,064 | 175 | 21,574 | 5,493 | 3,228 | 30,470 |
| 63,065 | 175 | 21,634 | 5,493 | 3,214 | 30,516 |
| 63,066 | 172 | 21,880 | 5,478 | 3,211 | 30,741 |
| 63,067 | 175 | 22,054 | 5,517 | 3,236 | 30,982 |
| 63,068 | 173 | 22,128 | 5,448 | 3,199 | 30,948 |
| 63,069 | 173 | 22,287 | 5,461 | 3,189 | 31,110 |
| 63,070 | 163 | 22,340 | 5,494 | 3,194 | 31,191 |
| 63,071 | 162 | 22,399 | 5,501 | 3,192 | 31,254 |
| 63,072 | 166 | 22,297 | 5,498 | 3,185 | 31,146 |
| 63,073 | 157 | 22,045 | 5,477 | 3,164 | 30,843 |
| 63,074 | 166 | 22,496 | 5,629 | 3,218 | 31,509 |
| 63,075 | 167 | 22,256 | 5,599 | 3,195 | 31,217 |
| 63,076 | 166 | 22,181 | 5,634 | 3,194 | 31,175 |
| 63,077 | 165 | 22,080 | 5,651 | 3,226 | 31,122 |
| 63,078 | 167 | 22,096 | 5,685 | 3,211 | 31,159 |
| 63,079 | 165 | 22,098 | 5,694 | 3,202 | 31,159 |
| 63,080 | 169 | 22,013 | 5,708 | 3,193 | 31,083 |
| 63,081 | 168 | 21,968 | 5,714 | 3,200 | 31,050 |
| 63,082 | 164 | 21,914 | 5,728 | 3,207 | 31,013 |
| 63,083 | 164 | 21,869 | 5,733 | 3,242 | 31,008 |
| 63,084 | 163 | 21,776 | 5,783 | 3,247 | 30,969 |
| 63,085 | 154 | 21,922 | 5,816 | 3,282 | 31,174 |
| 63,086 | 152 | 21,907 | 5,833 | 3,267 | 31,159 |
| 63,087 | 150 | 21,843 | 5,808 | 3,238 | 31,039 |
| 63,088 | 150 | 21,975 | 5,851 | 3,267 | 31,243 |
| 63,089 | 151 | 21,824 | 5,834 | 3,248 | 31,057 |
| 63,090 | 150 | 22,094 | 5,892 | 3,282 | 31,418 |
| 63,091 | 148 | 22,009 | 5,850 | 3,274 | 31,281 |
| 63,092 | 150 | 21,987 | 5,842 | 3,270 | 31,249 |
| 63,093 | 152 | 22,035 | 5,856 | 3,278 | 31,321 |
| 63,094 | 147 | 21,791 | 5,809 | 3,252 | 30,999 |
| 63,095 | 153 | 21,857 | 5,822 | 3,283 | 31,115 |

|        |     |        |       |       |        |
|--------|-----|--------|-------|-------|--------|
| 63,096 | 161 | 21,540 | 5,780 | 3,254 | 30,735 |
| 63,097 | 161 | 21,554 | 5,801 | 3,260 | 30,776 |
| 63,098 | 159 | 21,451 | 5,770 | 3,240 | 30,620 |
| 63,099 | 161 | 21,434 | 5,784 | 3,246 | 30,625 |
| 63,100 | 161 | 21,259 | 5,752 | 3,222 | 30,394 |
| 63,101 | 164 | 21,068 | 5,718 | 3,211 | 30,161 |
| 63,102 | 164 | 21,061 | 5,723 | 3,203 | 30,151 |
| 63,103 | 160 | 20,852 | 5,760 | 3,211 | 29,983 |
| 63,104 | 156 | 20,866 | 5,797 | 3,241 | 30,060 |
| 63,105 | 153 | 20,613 | 5,775 | 3,207 | 29,748 |
| 63,106 | 154 | 20,810 | 5,787 | 3,205 | 29,956 |
| 63,107 | 147 | 20,384 | 5,737 | 3,180 | 29,448 |
| 63,108 | 147 | 20,230 | 5,700 | 3,164 | 29,241 |
| 63,109 | 147 | 20,041 | 5,669 | 3,150 | 29,007 |
| 63,110 | 148 | 20,035 | 5,673 | 3,138 | 28,994 |
| 63,111 | 143 | 19,957 | 5,624 | 3,120 | 28,844 |
| 63,112 | 138 | 19,523 | 5,530 | 3,058 | 28,249 |
| 63,113 | 140 | 19,066 | 5,451 | 3,012 | 27,669 |
| 63,114 | 137 | 18,702 | 5,403 | 2,989 | 27,231 |
| 63,115 | 137 | 18,936 | 5,515 | 3,058 | 27,646 |
| 63,116 | 135 | 18,056 | 5,343 | 2,965 | 26,499 |
| 63,117 | 136 | 18,144 | 5,353 | 2,969 | 26,602 |
| 63,118 | 135 | 18,206 | 5,378 | 2,966 | 26,685 |
| 63,119 | 137 | 18,041 | 5,371 | 2,959 | 26,508 |
| 63,120 | 136 | 18,079 | 5,390 | 2,956 | 26,561 |
| 63,121 | 135 | 17,978 | 5,354 | 2,977 | 26,444 |
| 63,122 | 134 | 17,884 | 5,345 | 2,964 | 26,327 |
| 63,123 | 124 | 17,793 | 5,304 | 2,977 | 26,198 |
| 63,124 | 128 | 17,926 | 5,325 | 3,003 | 26,382 |
| 63,125 | 125 | 18,024 | 5,322 | 3,014 | 26,485 |
| 63,126 | 124 | 18,044 | 5,272 | 3,023 | 26,463 |
| 63,127 | 122 | 18,198 | 5,299 | 3,014 | 26,633 |

|        |     |        |       |       |        |
|--------|-----|--------|-------|-------|--------|
| 63,128 | 121 | 18,109 | 5,241 | 2,992 | 26,463 |
| 63,129 | 111 | 18,002 | 5,171 | 3,002 | 26,286 |
| 63,130 | 115 | 18,214 | 5,197 | 3,037 | 26,563 |
| 63,131 | 119 | 18,500 | 5,243 | 3,073 | 26,935 |
| 63,132 | 119 | 18,230 | 5,209 | 3,037 | 26,595 |
| 63,133 | 123 | 18,680 | 5,270 | 3,100 | 27,173 |
| 63,134 | 124 | 18,564 | 5,225 | 3,067 | 26,980 |
| 63,135 | 125 | 18,426 | 5,171 | 3,038 | 26,760 |
| 63,136 | 132 | 18,426 | 5,185 | 3,035 | 26,778 |
| 63,137 | 131 | 18,133 | 5,113 | 3,005 | 26,382 |
| 63,138 | 151 | 18,940 | 5,286 | 3,120 | 27,497 |
| 63,139 | 150 | 18,935 | 5,287 | 3,112 | 27,484 |
| 63,140 | 151 | 19,176 | 5,337 | 3,137 | 27,801 |
| 63,141 | 149 | 19,069 | 5,299 | 3,114 | 27,631 |
| 63,142 | 155 | 19,408 | 5,373 | 3,150 | 28,086 |
| 63,143 | 154 | 19,915 | 5,507 | 3,203 | 28,779 |
| 63,144 | 153 | 19,645 | 5,451 | 3,172 | 28,421 |
| 63,145 | 158 | 19,671 | 5,475 | 3,182 | 28,486 |
| 63,146 | 159 | 20,037 | 5,565 | 3,257 | 29,018 |
| 63,147 | 151 | 20,088 | 5,572 | 3,253 | 29,064 |
| 63,148 | 150 | 20,156 | 5,591 | 3,253 | 29,150 |
| 63,149 | 147 | 20,139 | 5,605 | 3,271 | 29,162 |
| 63,150 | 148 | 19,970 | 5,532 | 3,270 | 28,920 |
| 63,151 | 154 | 19,892 | 5,514 | 3,238 | 28,798 |
| 63,152 | 154 | 20,157 | 5,558 | 3,251 | 29,120 |
| 63,153 | 162 | 20,384 | 5,583 | 3,285 | 29,414 |
| 63,154 | 157 | 20,331 | 5,493 | 3,255 | 29,236 |
| 63,155 | 157 | 20,563 | 5,566 | 3,297 | 29,583 |
| 63,156 | 158 | 20,625 | 5,584 | 3,297 | 29,664 |
| 63,157 | 161 | 20,471 | 5,528 | 3,267 | 29,427 |
| 63,158 | 162 | 20,529 | 5,534 | 3,279 | 29,504 |
| 63,159 | 169 | 20,685 | 5,553 | 3,279 | 29,686 |

|        |     |        |       |       |        |
|--------|-----|--------|-------|-------|--------|
| 63,160 | 172 | 20,723 | 5,548 | 3,270 | 29,713 |
| 63,161 | 171 | 20,552 | 5,517 | 3,248 | 29,488 |
| 63,162 | 174 | 21,071 | 5,670 | 3,275 | 30,190 |
| 63,163 | 186 | 21,611 | 5,778 | 3,327 | 30,902 |
| 63,164 | 183 | 21,481 | 5,673 | 3,275 | 30,612 |
| 63,165 | 187 | 21,968 | 5,748 | 3,321 | 31,224 |
| 63,166 | 187 | 22,378 | 5,846 | 3,377 | 31,788 |
| 63,167 | 183 | 22,142 | 5,776 | 3,345 | 31,446 |
| 63,168 | 181 | 22,146 | 5,791 | 3,358 | 31,476 |
| 63,169 | 181 | 22,358 | 5,865 | 3,417 | 31,821 |
| 63,170 | 177 | 22,295 | 5,871 | 3,420 | 31,763 |
| 63,171 | 175 | 22,088 | 5,822 | 3,395 | 31,480 |
| 63,172 | 175 | 22,352 | 5,887 | 3,428 | 31,842 |
| 63,173 | 176 | 22,470 | 5,924 | 3,425 | 31,995 |
| 63,174 | 172 | 22,469 | 5,882 | 3,381 | 31,904 |
| 63,175 | 175 | 22,544 | 5,927 | 3,415 | 32,061 |
| 63,176 | 170 | 22,036 | 5,841 | 3,369 | 31,416 |
| 63,177 | 177 | 22,094 | 5,850 | 3,361 | 31,482 |
| 63,178 | 179 | 21,884 | 5,777 | 3,331 | 31,171 |
| 63,179 | 191 | 21,854 | 5,806 | 3,329 | 31,180 |
| 63,180 | 191 | 21,839 | 5,812 | 3,315 | 31,157 |
| 63,181 | 187 | 21,763 | 5,832 | 3,301 | 31,083 |
| 63,182 | 181 | 21,151 | 5,611 | 3,169 | 30,112 |
| 63,183 | 187 | 21,124 | 5,636 | 3,170 | 30,117 |
| 63,184 | 183 | 21,235 | 5,691 | 3,192 | 30,301 |
| 63,185 | 182 | 21,124 | 5,679 | 3,179 | 30,164 |
| 63,186 | 177 | 21,481 | 5,743 | 3,234 | 30,635 |
| 63,187 | 166 | 21,208 | 5,722 | 3,222 | 30,318 |
| 63,188 | 170 | 21,172 | 5,772 | 3,233 | 30,347 |
| 63,189 | 173 | 20,929 | 5,719 | 3,191 | 30,012 |
| 63,190 | 172 | 20,770 | 5,675 | 3,168 | 29,785 |
| 63,191 | 180 | 21,055 | 5,701 | 3,183 | 30,119 |

|        |     |        |       |       |        |
|--------|-----|--------|-------|-------|--------|
| 63,192 | 180 | 21,021 | 5,698 | 3,157 | 30,056 |
| 63,193 | 178 | 20,992 | 5,678 | 3,171 | 30,019 |
| 63,194 | 184 | 20,946 | 5,654 | 3,156 | 29,940 |
| 63,195 | 185 | 20,927 | 5,624 | 3,129 | 29,865 |
| 63,196 | 182 | 20,783 | 5,628 | 3,110 | 29,703 |
| 63,197 | 179 | 20,911 | 5,684 | 3,123 | 29,897 |
| 63,198 | 180 | 21,033 | 5,752 | 3,164 | 30,129 |
| 63,199 | 181 | 20,887 | 5,704 | 3,138 | 29,910 |
| 63,200 | 183 | 20,892 | 5,692 | 3,116 | 29,883 |
| 63,201 | 178 | 20,884 | 5,696 | 3,113 | 29,871 |
| 63,202 | 175 | 20,833 | 5,695 | 3,119 | 29,822 |
| 63,203 | 175 | 20,845 | 5,719 | 3,120 | 29,859 |
| 63,204 | 165 | 20,876 | 5,746 | 3,106 | 29,893 |
| 63,205 | 168 | 20,936 | 5,757 | 3,107 | 29,968 |
| 63,206 | 171 | 20,820 | 5,716 | 3,112 | 29,819 |
| 63,207 | 172 | 20,971 | 5,776 | 3,126 | 30,045 |
| 63,208 | 170 | 20,851 | 5,769 | 3,115 | 29,905 |
| 63,209 | 171 | 20,999 | 5,790 | 3,115 | 30,075 |
| 63,210 | 162 | 21,151 | 5,852 | 3,151 | 30,316 |
| 63,211 | 163 | 21,318 | 5,840 | 3,163 | 30,484 |
| 63,212 | 161 | 21,355 | 5,867 | 3,182 | 30,565 |
| 63,213 | 153 | 21,488 | 5,901 | 3,243 | 30,785 |
| 63,214 | 152 | 21,744 | 6,003 | 3,288 | 31,187 |
| 63,215 | 148 | 21,808 | 6,064 | 3,299 | 31,319 |
| 63,216 | 144 | 21,749 | 6,126 | 3,311 | 31,330 |
| 63,217 | 141 | 21,623 | 6,136 | 3,314 | 31,214 |
| 63,218 | 144 | 21,727 | 6,194 | 3,317 | 31,382 |
| 63,219 | 146 | 21,982 | 6,257 | 3,340 | 31,725 |
| 63,220 | 148 | 21,869 | 6,214 | 3,314 | 31,545 |
| 63,221 | 151 | 21,937 | 6,212 | 3,313 | 31,613 |
| 63,222 | 150 | 21,756 | 6,157 | 3,284 | 31,347 |
| 63,223 | 151 | 22,007 | 6,268 | 3,362 | 31,788 |



|        |     |        |       |       |        |
|--------|-----|--------|-------|-------|--------|
| 63,224 | 154 | 22,178 | 6,282 | 3,394 | 32,008 |
| 63,225 | 148 | 21,983 | 6,238 | 3,375 | 31,744 |
| 63,226 | 150 | 22,000 | 6,227 | 3,358 | 31,735 |
| 63,227 | 152 | 22,069 | 6,276 | 3,353 | 31,850 |
| 63,228 | 149 | 22,018 | 6,307 | 3,372 | 31,846 |
| 63,229 | 144 | 21,969 | 6,317 | 3,372 | 31,802 |
| 63,230 | 139 | 22,043 | 6,337 | 3,389 | 31,908 |
| 63,231 | 140 | 22,117 | 6,340 | 3,395 | 31,992 |
| 63,232 | 135 | 21,697 | 6,233 | 3,343 | 31,408 |
| 63,233 | 135 | 21,961 | 6,318 | 3,369 | 31,783 |
| 63,234 | 129 | 21,921 | 6,329 | 3,371 | 31,750 |
| 63,235 | 129 | 22,037 | 6,350 | 3,368 | 31,884 |
| 63,236 | 130 | 22,129 | 6,397 | 3,391 | 32,047 |
| 63,237 | 128 | 22,111 | 6,431 | 3,390 | 32,060 |
| 63,238 | 135 | 21,857 | 6,360 | 3,345 | 31,697 |
| 63,239 | 129 | 21,720 | 6,307 | 3,304 | 31,460 |
| 63,240 | 124 | 21,510 | 6,301 | 3,306 | 31,241 |
| 63,241 | 122 | 21,213 | 6,232 | 3,264 | 30,831 |
| 63,242 | 121 | 21,115 | 6,213 | 3,246 | 30,695 |
| 63,243 | 121 | 21,037 | 6,230 | 3,232 | 30,620 |
| 63,244 | 121 | 20,756 | 6,163 | 3,195 | 30,235 |
| 63,245 | 115 | 20,517 | 6,122 | 3,183 | 29,937 |
| 63,246 | 114 | 21,317 | 6,275 | 3,282 | 30,988 |
| 63,247 | 114 | 21,287 | 6,246 | 3,279 | 30,926 |
| 63,248 | 114 | 20,934 | 6,117 | 3,213 | 30,378 |
| 63,249 | 119 | 20,967 | 6,111 | 3,216 | 30,413 |
| 63,250 | 131 | 21,173 | 6,169 | 3,249 | 30,722 |
| 63,251 | 132 | 21,018 | 6,139 | 3,231 | 30,520 |
| 63,252 | 132 | 21,075 | 6,137 | 3,230 | 30,574 |
| 63,253 | 130 | 21,179 | 6,139 | 3,287 | 30,735 |
| 63,254 | 138 | 21,349 | 6,187 | 3,302 | 30,976 |
| 63,255 | 141 | 21,146 | 6,160 | 3,280 | 30,727 |

|        |     |        |       |       |        |
|--------|-----|--------|-------|-------|--------|
| 63,256 | 140 | 21,069 | 6,157 | 3,285 | 30,651 |
| 63,257 | 138 | 20,984 | 6,150 | 3,272 | 30,544 |
| 63,258 | 137 | 20,633 | 6,078 | 3,234 | 30,082 |
| 63,259 | 132 | 20,292 | 6,023 | 3,198 | 29,645 |
| 63,260 | 137 | 20,407 | 6,139 | 3,278 | 29,961 |
| 63,261 | 144 | 20,241 | 6,100 | 3,286 | 29,771 |
| 63,262 | 142 | 20,091 | 6,098 | 3,285 | 29,616 |
| 63,263 | 145 | 19,867 | 6,055 | 3,275 | 29,342 |
| 63,264 | 146 | 19,637 | 5,984 | 3,230 | 28,997 |
| 63,265 | 145 | 19,337 | 5,919 | 3,199 | 28,600 |
| 63,266 | 145 | 19,469 | 5,900 | 3,211 | 28,725 |
| 63,267 | 147 | 19,315 | 5,812 | 3,208 | 28,482 |
| 63,268 | 146 | 18,849 | 5,608 | 3,144 | 27,747 |
| 63,269 | 148 | 18,965 | 5,604 | 3,158 | 27,875 |
| 63,270 | 147 | 18,754 | 5,508 | 3,129 | 27,538 |
| 63,271 | 147 | 19,053 | 5,586 | 3,180 | 27,966 |
| 63,272 | 144 | 18,891 | 5,512 | 3,160 | 27,707 |
| 63,273 | 143 | 18,400 | 5,343 | 3,051 | 26,937 |
| 63,274 | 149 | 18,638 | 5,376 | 3,059 | 27,222 |
| 63,275 | 146 | 18,839 | 5,417 | 3,084 | 27,486 |
| 63,276 | 146 | 18,981 | 5,459 | 3,104 | 27,690 |
| 63,277 | 144 | 19,039 | 5,419 | 3,097 | 27,699 |
| 63,278 | 144 | 19,119 | 5,411 | 3,114 | 27,788 |
| 63,279 | 140 | 19,272 | 5,419 | 3,111 | 27,942 |
| 63,280 | 139 | 19,062 | 5,355 | 3,080 | 27,636 |
| 63,281 | 138 | 18,907 | 5,332 | 3,079 | 27,456 |
| 63,282 | 142 | 19,010 | 5,340 | 3,101 | 27,593 |
| 63,283 | 143 | 19,152 | 5,373 | 3,132 | 27,800 |
| 63,284 | 147 | 19,238 | 5,360 | 3,142 | 27,887 |
| 63,285 | 154 | 19,251 | 5,360 | 3,144 | 27,909 |
| 63,286 | 154 | 19,142 | 5,325 | 3,123 | 27,744 |
| 63,287 | 154 | 19,227 | 5,334 | 3,147 | 27,862 |

|        |     |        |       |       |        |
|--------|-----|--------|-------|-------|--------|
| 63,288 | 154 | 19,193 | 5,342 | 3,164 | 27,853 |
| 63,289 | 145 | 19,060 | 5,275 | 3,147 | 27,627 |
| 63,290 | 151 | 18,996 | 5,258 | 3,157 | 27,562 |
| 63,291 | 145 | 18,829 | 5,225 | 3,132 | 27,331 |
| 63,292 | 145 | 18,748 | 5,253 | 3,155 | 27,301 |
| 63,293 | 141 | 18,781 | 5,305 | 3,180 | 27,407 |
| 63,294 | 143 | 18,656 | 5,257 | 3,166 | 27,222 |
| 63,295 | 143 | 18,650 | 5,244 | 3,167 | 27,204 |
| 63,296 | 140 | 18,653 | 5,247 | 3,201 | 27,241 |
| 63,297 | 141 | 18,610 | 5,251 | 3,197 | 27,199 |
| 63,298 | 141 | 18,615 | 5,237 | 3,194 | 27,187 |
| 63,299 | 142 | 18,775 | 5,325 | 3,221 | 27,463 |
| 63,300 | 138 | 18,928 | 5,398 | 3,249 | 27,713 |
| 63,301 | 126 | 18,739 | 5,369 | 3,252 | 27,486 |
| 63,302 | 122 | 18,865 | 5,426 | 3,314 | 27,727 |
| 63,303 | 124 | 19,043 | 5,471 | 3,321 | 27,959 |
| 63,304 | 124 | 19,177 | 5,517 | 3,311 | 28,129 |
| 63,305 | 120 | 19,285 | 5,547 | 3,336 | 28,288 |
| 63,306 | 115 | 19,306 | 5,545 | 3,349 | 28,315 |
| 63,307 | 113 | 19,404 | 5,526 | 3,329 | 28,372 |
| 63,308 | 111 | 19,547 | 5,507 | 3,337 | 28,502 |
| 63,309 | 110 | 19,717 | 5,488 | 3,336 | 28,651 |
| 63,310 | 109 | 19,656 | 5,482 | 3,327 | 28,574 |
| 63,311 | 105 | 19,814 | 5,520 | 3,329 | 28,768 |
| 63,312 | 99  | 19,758 | 5,542 | 3,310 | 28,709 |
| 63,313 | 101 | 19,788 | 5,549 | 3,328 | 28,766 |
| 63,314 | 108 | 19,854 | 5,552 | 3,324 | 28,838 |
| 63,315 | 110 | 19,960 | 5,583 | 3,347 | 29,000 |
| 63,316 | 114 | 19,987 | 5,606 | 3,360 | 29,067 |
| 63,317 | 115 | 19,647 | 5,549 | 3,329 | 28,640 |
| 63,318 | 114 | 19,465 | 5,530 | 3,306 | 28,415 |
| 63,319 | 115 | 19,361 | 5,516 | 3,276 | 28,268 |

|        |     |        |       |       |        |
|--------|-----|--------|-------|-------|--------|
| 63,320 | 114 | 19,218 | 5,478 | 3,248 | 28,058 |
| 63,321 | 111 | 19,568 | 5,604 | 3,311 | 28,594 |
| 63,322 | 109 | 19,573 | 5,600 | 3,315 | 28,597 |
| 63,323 | 108 | 19,592 | 5,673 | 3,314 | 28,687 |
| 63,324 | 112 | 19,723 | 5,727 | 3,360 | 28,922 |
| 63,325 | 106 | 19,476 | 5,722 | 3,355 | 28,659 |
| 63,326 | 111 | 19,444 | 5,703 | 3,343 | 28,601 |
| 63,327 | 112 | 19,442 | 5,711 | 3,354 | 28,619 |
| 63,328 | 117 | 19,440 | 5,775 | 3,398 | 28,730 |
| 63,329 | 118 | 19,351 | 5,741 | 3,400 | 28,610 |
| 63,330 | 117 | 19,398 | 5,768 | 3,403 | 28,686 |
| 63,331 | 122 | 19,518 | 5,799 | 3,404 | 28,843 |
| 63,332 | 124 | 19,259 | 5,761 | 3,381 | 28,525 |
| 63,333 | 122 | 19,481 | 5,872 | 3,440 | 28,915 |
| 63,334 | 125 | 19,434 | 5,917 | 3,440 | 28,916 |
| 63,335 | 121 | 19,422 | 5,940 | 3,467 | 28,950 |
| 63,336 | 116 | 19,389 | 5,931 | 3,457 | 28,893 |
| 63,337 | 119 | 19,579 | 5,954 | 3,482 | 29,134 |
| 63,338 | 117 | 19,477 | 5,891 | 3,440 | 28,925 |
| 63,339 | 115 | 19,728 | 5,971 | 3,481 | 29,295 |
| 63,340 | 114 | 19,982 | 5,987 | 3,507 | 29,590 |
| 63,341 | 117 | 19,779 | 5,866 | 3,459 | 29,221 |
| 63,342 | 118 | 20,091 | 5,922 | 3,493 | 29,624 |
| 63,343 | 119 | 20,119 | 5,940 | 3,501 | 29,679 |
| 63,344 | 117 | 19,916 | 5,892 | 3,496 | 29,421 |
| 63,345 | 113 | 20,308 | 6,039 | 3,555 | 30,015 |
| 63,346 | 113 | 20,376 | 6,093 | 3,578 | 30,160 |
| 63,347 | 113 | 20,256 | 6,073 | 3,555 | 29,997 |
| 63,348 | 113 | 20,216 | 6,038 | 3,544 | 29,911 |
| 63,349 | 112 | 20,062 | 6,034 | 3,536 | 29,744 |
| 63,350 | 112 | 20,130 | 6,011 | 3,538 | 29,791 |
| 63,351 | 117 | 19,820 | 5,903 | 3,483 | 29,323 |

|        |     |        |       |       |        |
|--------|-----|--------|-------|-------|--------|
| 63,352 | 117 | 19,760 | 5,839 | 3,431 | 29,147 |
| 63,353 | 118 | 19,499 | 5,809 | 3,392 | 28,818 |
| 63,354 | 118 | 19,540 | 5,788 | 3,406 | 28,852 |
| 63,355 | 115 | 19,231 | 5,703 | 3,360 | 28,409 |
| 63,356 | 111 | 19,017 | 5,632 | 3,324 | 28,084 |
| 63,357 | 128 | 19,706 | 5,881 | 3,395 | 29,110 |
| 63,358 | 132 | 19,816 | 5,915 | 3,403 | 29,266 |
| 63,359 | 139 | 20,034 | 5,991 | 3,444 | 29,608 |
| 63,360 | 137 | 20,037 | 5,983 | 3,438 | 29,595 |
| 63,361 | 141 | 20,202 | 6,038 | 3,478 | 29,859 |
| 63,362 | 139 | 20,131 | 6,003 | 3,461 | 29,734 |
| 63,363 | 136 | 19,845 | 5,909 | 3,421 | 29,311 |
| 63,364 | 137 | 20,011 | 5,985 | 3,442 | 29,575 |
| 63,365 | 134 | 20,135 | 6,038 | 3,474 | 29,781 |
| 63,366 | 132 | 20,080 | 6,030 | 3,452 | 29,694 |
| 63,367 | 131 | 20,155 | 6,013 | 3,467 | 29,766 |
| 63,368 | 128 | 19,877 | 5,952 | 3,416 | 29,373 |
| 63,369 | 132 | 19,912 | 5,987 | 3,395 | 29,426 |
| 63,370 | 142 | 20,113 | 6,049 | 3,450 | 29,754 |
| 63,371 | 143 | 19,867 | 5,974 | 3,406 | 29,390 |
| 63,372 | 143 | 19,565 | 5,946 | 3,361 | 29,015 |
| 63,373 | 143 | 19,824 | 6,014 | 3,412 | 29,393 |
| 63,374 | 144 | 19,824 | 5,980 | 3,417 | 29,365 |
| 63,375 | 138 | 19,464 | 5,871 | 3,356 | 28,829 |
| 63,376 | 138 | 19,705 | 5,930 | 3,404 | 29,177 |
| 63,377 | 132 | 19,830 | 5,936 | 3,406 | 29,304 |
| 63,378 | 133 | 20,073 | 5,984 | 3,433 | 29,623 |
| 63,379 | 128 | 20,070 | 5,992 | 3,436 | 29,626 |
| 63,380 | 129 | 20,070 | 5,959 | 3,411 | 29,569 |
| 63,381 | 132 | 20,327 | 6,006 | 3,431 | 29,896 |
| 63,382 | 128 | 20,291 | 5,996 | 3,429 | 29,844 |
| 63,383 | 124 | 20,394 | 5,950 | 3,398 | 29,866 |

|        |     |        |       |       |        |
|--------|-----|--------|-------|-------|--------|
| 63,384 | 125 | 20,480 | 5,963 | 3,409 | 29,977 |
| 63,385 | 121 | 20,540 | 5,922 | 3,368 | 29,951 |
| 63,386 | 127 | 20,716 | 5,958 | 3,395 | 30,196 |
| 63,387 | 131 | 20,712 | 5,972 | 3,391 | 30,206 |
| 63,388 | 128 | 20,430 | 5,894 | 3,350 | 29,802 |
| 63,389 | 128 | 20,407 | 5,892 | 3,351 | 29,778 |
| 63,390 | 129 | 20,414 | 5,932 | 3,363 | 29,838 |
| 63,391 | 130 | 20,341 | 5,930 | 3,356 | 29,757 |
| 63,392 | 128 | 20,320 | 5,955 | 3,365 | 29,768 |
| 63,393 | 129 | 20,382 | 5,992 | 3,383 | 29,886 |
| 63,394 | 132 | 20,442 | 6,013 | 3,427 | 30,014 |
| 63,395 | 133 | 20,585 | 6,026 | 3,422 | 30,166 |
| 63,396 | 137 | 20,613 | 6,020 | 3,445 | 30,215 |
| 63,397 | 141 | 20,783 | 6,052 | 3,472 | 30,448 |
| 63,398 | 143 | 20,959 | 6,076 | 3,487 | 30,665 |
| 63,399 | 145 | 21,016 | 6,132 | 3,520 | 30,813 |
| 63,400 | 146 | 21,230 | 6,189 | 3,561 | 31,126 |
| 63,401 | 145 | 20,931 | 6,092 | 3,515 | 30,683 |
| 63,402 | 149 | 20,911 | 6,075 | 3,486 | 30,621 |
| 63,403 | 149 | 20,939 | 6,082 | 3,484 | 30,654 |
| 63,404 | 140 | 21,052 | 6,107 | 3,541 | 30,840 |
| 63,405 | 137 | 21,052 | 6,132 | 3,547 | 30,868 |
| 63,406 | 136 | 20,915 | 6,070 | 3,527 | 30,648 |
| 63,407 | 137 | 20,807 | 6,019 | 3,535 | 30,498 |
| 63,408 | 137 | 21,180 | 6,103 | 3,595 | 31,015 |
| 63,409 | 134 | 21,178 | 6,129 | 3,601 | 31,042 |
| 63,410 | 130 | 20,606 | 5,978 | 3,501 | 30,215 |
| 63,411 | 134 | 20,847 | 6,014 | 3,519 | 30,514 |
| 63,412 | 131 | 20,904 | 6,018 | 3,521 | 30,574 |
| 63,413 | 135 | 21,203 | 6,058 | 3,563 | 30,959 |
| 63,414 | 131 | 21,261 | 6,079 | 3,550 | 31,021 |
| 63,415 | 130 | 21,247 | 6,053 | 3,556 | 30,986 |

|        |     |        |       |       |        |
|--------|-----|--------|-------|-------|--------|
| 63,416 | 130 | 21,268 | 6,037 | 3,545 | 30,980 |
| 63,417 | 129 | 21,185 | 6,029 | 3,529 | 30,872 |
| 63,418 | 126 | 20,970 | 6,063 | 3,516 | 30,675 |
| 63,419 | 123 | 21,267 | 6,114 | 3,559 | 31,063 |
| 63,420 | 121 | 21,367 | 6,150 | 3,579 | 31,217 |
| 63,421 | 119 | 21,402 | 6,164 | 3,569 | 31,254 |
| 63,422 | 118 | 21,523 | 6,216 | 3,600 | 31,457 |
| 63,423 | 119 | 21,429 | 6,147 | 3,580 | 31,275 |
| 63,424 | 119 | 21,274 | 6,115 | 3,570 | 31,078 |
| 63,425 | 122 | 21,311 | 6,158 | 3,594 | 31,185 |
| 63,426 | 124 | 21,482 | 6,190 | 3,612 | 31,408 |
| 63,427 | 126 | 21,525 | 6,192 | 3,612 | 31,455 |
| 63,428 | 126 | 21,612 | 6,230 | 3,630 | 31,598 |
| 63,429 | 128 | 21,433 | 6,205 | 3,603 | 31,369 |
| 63,430 | 125 | 21,189 | 6,138 | 3,591 | 31,043 |
| 63,431 | 127 | 21,318 | 6,230 | 3,641 | 31,316 |
| 63,432 | 125 | 21,579 | 6,324 | 3,704 | 31,732 |
| 63,433 | 125 | 21,422 | 6,319 | 3,707 | 31,573 |
| 63,434 | 126 | 21,391 | 6,299 | 3,703 | 31,519 |
| 63,435 | 126 | 21,321 | 6,253 | 3,705 | 31,405 |
| 63,436 | 120 | 21,059 | 6,135 | 3,686 | 31,000 |
| 63,437 | 120 | 21,263 | 6,209 | 3,716 | 31,308 |
| 63,438 | 117 | 21,280 | 6,217 | 3,717 | 31,331 |
| 63,439 | 120 | 21,422 | 6,235 | 3,725 | 31,502 |
| 63,440 | 122 | 21,756 | 6,293 | 3,787 | 31,958 |
| 63,441 | 123 | 21,554 | 6,217 | 3,747 | 31,641 |
| 63,442 | 123 | 21,715 | 6,280 | 3,777 | 31,895 |
| 63,443 | 120 | 21,646 | 6,253 | 3,755 | 31,774 |
| 63,444 | 113 | 21,041 | 6,073 | 3,617 | 30,844 |
| 63,445 | 113 | 21,197 | 6,089 | 3,623 | 31,022 |
| 63,446 | 114 | 21,427 | 6,113 | 3,631 | 31,285 |
| 63,447 | 113 | 21,263 | 6,044 | 3,574 | 30,994 |

|        |     |        |       |       |        |
|--------|-----|--------|-------|-------|--------|
| 63,448 | 113 | 21,036 | 5,969 | 3,529 | 30,647 |
| 63,449 | 111 | 21,240 | 6,040 | 3,567 | 30,958 |
| 63,450 | 111 | 21,023 | 5,954 | 3,523 | 30,611 |
| 63,451 | 111 | 21,099 | 5,959 | 3,527 | 30,696 |
| 63,452 | 101 | 21,079 | 5,989 | 3,538 | 30,707 |
| 63,453 | 101 | 21,072 | 6,003 | 3,545 | 30,721 |
| 63,454 | 100 | 20,929 | 5,991 | 3,514 | 30,534 |
| 63,455 | 98  | 20,837 | 5,969 | 3,489 | 30,393 |
| 63,456 | 99  | 20,899 | 5,960 | 3,490 | 30,448 |
| 63,457 | 99  | 20,953 | 5,986 | 3,517 | 30,555 |
| 63,458 | 98  | 20,828 | 5,950 | 3,475 | 30,351 |
| 63,459 | 99  | 20,502 | 5,897 | 3,419 | 29,917 |
| 63,460 | 102 | 20,543 | 5,869 | 3,419 | 29,933 |
| 63,461 | 98  | 20,156 | 5,770 | 3,371 | 29,395 |
| 63,462 | 102 | 20,387 | 5,824 | 3,406 | 29,719 |
| 63,463 | 104 | 20,521 | 5,862 | 3,441 | 29,928 |
| 63,464 | 101 | 20,448 | 5,818 | 3,431 | 29,798 |
| 63,465 | 104 | 20,460 | 5,854 | 3,426 | 29,844 |
| 63,466 | 103 | 20,334 | 5,811 | 3,408 | 29,656 |
| 63,467 | 109 | 20,504 | 5,862 | 3,434 | 29,909 |
| 63,468 | 107 | 20,566 | 5,874 | 3,424 | 29,971 |
| 63,469 | 110 | 20,590 | 5,831 | 3,422 | 29,953 |
| 63,470 | 109 | 20,543 | 5,813 | 3,413 | 29,878 |
| 63,471 | 103 | 20,664 | 5,823 | 3,407 | 29,997 |
| 63,472 | 100 | 20,457 | 5,747 | 3,378 | 29,682 |
| 63,473 | 107 | 20,372 | 5,688 | 3,329 | 29,496 |
| 63,474 | 107 | 20,332 | 5,678 | 3,321 | 29,438 |
| 63,475 | 112 | 20,678 | 5,790 | 3,364 | 29,944 |
| 63,476 | 112 | 20,926 | 5,854 | 3,394 | 30,286 |
| 63,477 | 110 | 20,728 | 5,793 | 3,346 | 29,977 |
| 63,478 | 114 | 20,734 | 5,783 | 3,307 | 29,938 |
| 63,479 | 115 | 20,679 | 5,764 | 3,297 | 29,855 |



|        |     |        |       |       |        |
|--------|-----|--------|-------|-------|--------|
| 63,480 | 112 | 20,495 | 5,700 | 3,264 | 29,571 |
| 63,481 | 115 | 21,144 | 5,843 | 3,335 | 30,437 |
| 63,482 | 115 | 21,215 | 5,852 | 3,333 | 30,515 |
| 63,483 | 118 | 21,362 | 5,904 | 3,348 | 30,732 |
| 63,484 | 118 | 21,545 | 5,925 | 3,363 | 30,951 |
| 63,485 | 124 | 21,814 | 6,002 | 3,408 | 31,348 |
| 63,486 | 123 | 21,788 | 5,973 | 3,399 | 31,283 |
| 63,487 | 123 | 21,749 | 5,973 | 3,379 | 31,224 |
| 63,488 | 125 | 21,595 | 5,928 | 3,358 | 31,006 |
| 63,489 | 128 | 21,725 | 5,956 | 3,388 | 31,197 |
| 63,490 | 131 | 21,733 | 5,975 | 3,379 | 31,218 |
| 63,491 | 130 | 21,487 | 5,915 | 3,321 | 30,853 |
| 63,492 | 129 | 21,439 | 5,924 | 3,334 | 30,826 |
| 63,493 | 130 | 21,706 | 5,963 | 3,373 | 31,172 |
| 63,494 | 132 | 21,482 | 5,879 | 3,355 | 30,848 |
| 63,495 | 132 | 21,346 | 5,878 | 3,349 | 30,705 |
| 63,496 | 136 | 21,345 | 5,901 | 3,359 | 30,741 |
| 63,497 | 137 | 21,317 | 5,940 | 3,381 | 30,775 |
| 63,498 | 136 | 21,308 | 5,944 | 3,393 | 30,781 |
| 63,499 | 133 | 21,310 | 5,965 | 3,392 | 30,800 |
| 63,500 | 133 | 21,674 | 6,025 | 3,405 | 31,237 |
| 63,501 | 130 | 21,766 | 6,043 | 3,403 | 31,342 |
| 63,502 | 135 | 21,964 | 6,047 | 3,401 | 31,547 |
| 63,503 | 136 | 21,777 | 6,000 | 3,390 | 31,303 |
| 63,504 | 138 | 21,704 | 5,943 | 3,366 | 31,151 |
| 63,505 | 138 | 21,737 | 5,930 | 3,364 | 31,169 |
| 63,506 | 137 | 21,535 | 5,886 | 3,346 | 30,904 |
| 63,507 | 137 | 21,399 | 5,857 | 3,341 | 30,734 |
| 63,508 | 138 | 22,300 | 6,049 | 3,478 | 31,965 |
| 63,509 | 136 | 22,059 | 5,994 | 3,465 | 31,654 |
| 63,510 | 134 | 22,099 | 5,958 | 3,466 | 31,657 |
| 63,511 | 140 | 22,273 | 5,991 | 3,493 | 31,897 |

|        |     |        |       |       |        |
|--------|-----|--------|-------|-------|--------|
| 63,512 | 135 | 22,096 | 5,969 | 3,488 | 31,688 |
| 63,513 | 131 | 21,776 | 5,917 | 3,463 | 31,287 |
| 63,514 | 137 | 22,260 | 6,055 | 3,518 | 31,970 |
| 63,515 | 137 | 22,157 | 6,058 | 3,505 | 31,857 |
| 63,516 | 137 | 22,206 | 6,047 | 3,520 | 31,910 |
| 63,517 | 139 | 22,320 | 6,057 | 3,536 | 32,052 |
| 63,518 | 136 | 22,466 | 6,061 | 3,566 | 32,229 |
| 63,519 | 133 | 22,391 | 5,999 | 3,564 | 32,087 |
| 63,520 | 137 | 22,705 | 6,039 | 3,584 | 32,465 |
| 63,521 | 139 | 22,530 | 6,003 | 3,571 | 32,243 |
| 63,522 | 139 | 22,466 | 5,950 | 3,562 | 32,117 |
| 63,523 | 139 | 22,501 | 5,938 | 3,572 | 32,150 |
| 63,524 | 132 | 22,125 | 5,796 | 3,488 | 31,541 |
| 63,525 | 137 | 22,338 | 5,796 | 3,515 | 31,786 |
| 63,526 | 135 | 22,635 | 5,871 | 3,572 | 32,213 |
| 63,527 | 141 | 22,579 | 5,844 | 3,568 | 32,132 |
| 63,528 | 139 | 22,336 | 5,770 | 3,569 | 31,814 |
| 63,529 | 136 | 22,820 | 5,886 | 3,635 | 32,477 |
| 63,530 | 137 | 22,705 | 5,822 | 3,594 | 32,258 |
| 63,531 | 137 | 22,594 | 5,817 | 3,598 | 32,146 |
| 63,532 | 133 | 22,563 | 5,811 | 3,571 | 32,078 |
| 63,533 | 133 | 22,853 | 5,827 | 3,625 | 32,438 |
| 63,534 | 133 | 22,719 | 5,775 | 3,594 | 32,221 |
| 63,535 | 136 | 22,763 | 5,815 | 3,602 | 32,316 |
| 63,536 | 131 | 22,693 | 5,778 | 3,574 | 32,176 |
| 63,537 | 130 | 22,485 | 5,762 | 3,563 | 31,940 |
| 63,538 | 131 | 22,498 | 5,798 | 3,571 | 31,998 |
| 63,539 | 128 | 22,530 | 5,803 | 3,564 | 32,025 |
| 63,540 | 122 | 22,513 | 5,780 | 3,566 | 31,981 |
| 63,541 | 123 | 22,425 | 5,774 | 3,561 | 31,883 |
| 63,542 | 121 | 22,304 | 5,769 | 3,551 | 31,745 |
| 63,543 | 120 | 22,365 | 5,795 | 3,552 | 31,832 |

|        |     |        |       |       |        |
|--------|-----|--------|-------|-------|--------|
| 63,544 | 126 | 22,211 | 5,761 | 3,523 | 31,621 |
| 63,545 | 123 | 22,011 | 5,746 | 3,491 | 31,371 |
| 63,546 | 120 | 22,354 | 5,932 | 3,607 | 32,013 |
| 63,547 | 118 | 22,266 | 5,917 | 3,592 | 31,893 |
| 63,548 | 120 | 22,364 | 5,929 | 3,608 | 32,021 |
| 63,549 | 119 | 22,714 | 6,052 | 3,685 | 32,570 |
| 63,550 | 120 | 22,668 | 6,050 | 3,699 | 32,537 |
| 63,551 | 118 | 22,465 | 6,042 | 3,701 | 32,326 |
| 63,552 | 120 | 22,643 | 6,055 | 3,745 | 32,563 |
| 63,553 | 115 | 22,417 | 5,997 | 3,714 | 32,243 |
| 63,554 | 118 | 22,536 | 6,016 | 3,721 | 32,391 |
| 63,555 | 120 | 22,826 | 6,081 | 3,746 | 32,773 |
| 63,556 | 123 | 22,859 | 6,133 | 3,765 | 32,880 |
| 63,557 | 123 | 22,827 | 6,147 | 3,775 | 32,872 |
| 63,558 | 122 | 22,884 | 6,176 | 3,790 | 32,972 |
| 63,559 | 131 | 23,250 | 6,321 | 3,892 | 33,594 |
| 63,560 | 137 | 23,060 | 6,298 | 3,884 | 33,379 |
| 63,561 | 135 | 22,762 | 6,266 | 3,844 | 33,007 |
| 63,562 | 131 | 23,041 | 6,443 | 3,943 | 33,558 |
| 63,563 | 128 | 22,488 | 6,195 | 3,814 | 32,625 |
| 63,564 | 129 | 22,702 | 6,262 | 3,836 | 32,929 |
| 63,565 | 122 | 22,954 | 6,312 | 3,893 | 33,281 |
| 63,566 | 122 | 23,017 | 6,319 | 3,914 | 33,372 |
| 63,567 | 122 | 23,230 | 6,362 | 3,949 | 33,663 |
| 63,568 | 121 | 23,322 | 6,404 | 3,968 | 33,815 |
| 63,569 | 118 | 22,994 | 6,360 | 3,916 | 33,388 |
| 63,570 | 119 | 23,168 | 6,425 | 3,951 | 33,663 |
| 63,571 | 124 | 23,184 | 6,451 | 3,956 | 33,715 |
| 63,572 | 125 | 22,753 | 6,380 | 3,877 | 33,135 |
| 63,573 | 125 | 22,810 | 6,402 | 3,881 | 33,218 |
| 63,574 | 128 | 22,465 | 6,378 | 3,839 | 32,810 |
| 63,575 | 131 | 22,195 | 6,348 | 3,829 | 32,503 |

|        |     |        |       |       |        |
|--------|-----|--------|-------|-------|--------|
| 63,576 | 141 | 23,024 | 6,747 | 4,061 | 33,973 |
| 63,577 | 140 | 22,728 | 6,679 | 4,011 | 33,558 |
| 63,578 | 133 | 22,587 | 6,671 | 4,018 | 33,409 |
| 63,579 | 139 | 22,764 | 6,752 | 4,053 | 33,708 |
| 63,580 | 140 | 22,382 | 6,706 | 4,029 | 33,257 |
| 63,581 | 138 | 22,076 | 6,670 | 4,005 | 32,889 |
| 63,582 | 140 | 22,586 | 6,848 | 4,124 | 33,698 |
| 63,583 | 141 | 22,496 | 6,909 | 4,152 | 33,698 |
| 63,584 | 142 | 22,342 | 6,908 | 4,126 | 33,518 |
| 63,585 | 139 | 22,312 | 6,897 | 4,135 | 33,483 |
| 63,586 | 136 | 22,107 | 6,851 | 4,133 | 33,227 |
| 63,587 | 137 | 21,839 | 6,822 | 4,096 | 32,894 |
| 63,588 | 137 | 21,627 | 6,802 | 4,088 | 32,654 |
| 63,589 | 135 | 22,077 | 6,883 | 4,135 | 33,230 |
| 63,590 | 137 | 22,078 | 6,865 | 4,135 | 33,215 |
| 63,591 | 134 | 22,056 | 6,852 | 4,138 | 33,180 |
| 63,592 | 133 | 22,225 | 6,858 | 4,143 | 33,359 |
| 63,593 | 125 | 21,843 | 6,724 | 4,077 | 32,769 |
| 63,594 | 129 | 22,090 | 6,754 | 4,091 | 33,064 |
| 63,595 | 132 | 22,427 | 6,840 | 4,151 | 33,550 |
| 63,596 | 133 | 22,025 | 6,688 | 4,058 | 32,904 |
| 63,597 | 136 | 22,301 | 6,722 | 4,082 | 33,241 |
| 63,598 | 132 | 22,478 | 6,775 | 4,125 | 33,510 |
| 63,599 | 134 | 22,390 | 6,754 | 4,126 | 33,404 |
| 63,600 | 136 | 22,253 | 6,698 | 4,088 | 33,175 |
| 63,601 | 135 | 21,895 | 6,581 | 4,022 | 32,633 |
| 63,602 | 137 | 21,590 | 6,498 | 3,950 | 32,175 |
| 63,603 | 135 | 21,283 | 6,429 | 3,916 | 31,763 |
| 63,604 | 131 | 21,997 | 6,672 | 4,043 | 32,843 |
| 63,605 | 132 | 21,977 | 6,691 | 4,066 | 32,866 |
| 63,606 | 131 | 21,587 | 6,543 | 4,012 | 32,273 |
| 63,607 | 132 | 21,704 | 6,589 | 4,027 | 32,452 |

|        |     |        |       |       |        |
|--------|-----|--------|-------|-------|--------|
| 63,608 | 131 | 21,924 | 6,609 | 4,060 | 32,724 |
| 63,609 | 125 | 21,978 | 6,572 | 4,038 | 32,713 |
| 63,610 | 119 | 21,780 | 6,450 | 3,970 | 32,319 |
| 63,611 | 124 | 21,896 | 6,447 | 3,977 | 32,444 |
| 63,612 | 125 | 21,994 | 6,437 | 3,972 | 32,528 |
| 63,613 | 124 | 22,128 | 6,469 | 4,011 | 32,732 |
| 63,614 | 129 | 21,832 | 6,445 | 3,979 | 32,385 |
| 63,615 | 128 | 21,437 | 6,351 | 3,936 | 31,852 |
| 63,616 | 128 | 21,469 | 6,328 | 3,923 | 31,848 |
| 63,617 | 127 | 21,439 | 6,325 | 3,910 | 31,801 |
| 63,618 | 133 | 21,434 | 6,300 | 3,904 | 31,771 |
| 63,619 | 134 | 21,714 | 6,335 | 3,924 | 32,107 |
| 63,620 | 134 | 21,547 | 6,282 | 3,891 | 31,854 |
| 63,621 | 133 | 21,212 | 6,215 | 3,856 | 31,416 |
| 63,622 | 130 | 21,321 | 6,212 | 3,861 | 31,524 |
| 63,623 | 130 | 21,570 | 6,248 | 3,889 | 31,837 |
| 63,624 | 125 | 21,740 | 6,263 | 3,883 | 32,011 |
| 63,625 | 114 | 21,925 | 6,221 | 3,874 | 32,134 |
| 63,626 | 110 | 21,999 | 6,166 | 3,873 | 32,148 |
| 63,627 | 110 | 21,870 | 6,082 | 3,826 | 31,888 |
| 63,628 | 110 | 21,806 | 6,067 | 3,815 | 31,798 |
| 63,629 | 112 | 21,833 | 6,098 | 3,809 | 31,852 |
| 63,630 | 109 | 21,716 | 6,075 | 3,786 | 31,686 |
| 63,631 | 106 | 21,817 | 6,046 | 3,788 | 31,757 |
| 63,632 | 104 | 21,940 | 6,007 | 3,788 | 31,839 |
| 63,633 | 111 | 22,123 | 5,968 | 3,814 | 32,016 |
| 63,634 | 108 | 22,120 | 5,906 | 3,768 | 31,902 |
| 63,635 | 107 | 22,142 | 5,903 | 3,795 | 31,947 |
| 63,636 | 107 | 21,748 | 5,739 | 3,721 | 31,315 |
| 63,637 | 110 | 21,838 | 5,783 | 3,743 | 31,474 |
| 63,638 | 110 | 21,779 | 5,776 | 3,743 | 31,408 |
| 63,639 | 113 | 21,860 | 5,752 | 3,735 | 31,460 |

|        |     |        |       |       |        |
|--------|-----|--------|-------|-------|--------|
| 63,640 | 114 | 22,037 | 5,790 | 3,766 | 31,707 |
| 63,641 | 112 | 21,788 | 5,747 | 3,740 | 31,387 |
| 63,642 | 113 | 21,782 | 5,752 | 3,740 | 31,387 |
| 63,643 | 121 | 21,532 | 5,698 | 3,694 | 31,045 |
| 63,644 | 120 | 21,233 | 5,626 | 3,650 | 30,629 |
| 63,645 | 119 | 21,750 | 5,789 | 3,756 | 31,414 |
| 63,646 | 123 | 21,994 | 5,852 | 3,797 | 31,766 |
| 63,647 | 121 | 22,046 | 5,867 | 3,822 | 31,856 |
| 63,648 | 119 | 21,794 | 5,795 | 3,760 | 31,468 |
| 63,649 | 120 | 22,013 | 5,840 | 3,794 | 31,767 |
| 63,650 | 119 | 22,087 | 5,887 | 3,818 | 31,911 |
| 63,651 | 119 | 21,887 | 5,846 | 3,810 | 31,662 |
| 63,652 | 119 | 21,788 | 5,805 | 3,796 | 31,508 |
| 63,653 | 122 | 21,528 | 5,772 | 3,771 | 31,193 |
| 63,654 | 122 | 21,381 | 5,714 | 3,746 | 30,963 |
| 63,655 | 124 | 21,548 | 5,753 | 3,797 | 31,222 |
| 63,656 | 123 | 21,419 | 5,707 | 3,779 | 31,028 |
| 63,657 | 124 | 21,231 | 5,702 | 3,723 | 30,780 |
| 63,658 | 121 | 21,124 | 5,705 | 3,734 | 30,684 |
| 63,659 | 122 | 21,022 | 5,687 | 3,691 | 30,522 |
| 63,660 | 125 | 21,099 | 5,764 | 3,707 | 30,695 |
| 63,661 | 119 | 21,072 | 5,778 | 3,687 | 30,656 |
| 63,662 | 115 | 20,891 | 5,720 | 3,653 | 30,379 |
| 63,663 | 124 | 20,958 | 5,733 | 3,636 | 30,451 |
| 63,664 | 123 | 20,777 | 5,684 | 3,592 | 30,176 |
| 63,665 | 124 | 20,486 | 5,552 | 3,510 | 29,672 |
| 63,666 | 125 | 20,588 | 5,566 | 3,504 | 29,783 |
| 63,667 | 126 | 20,326 | 5,540 | 3,488 | 29,480 |
| 63,668 | 129 | 20,135 | 5,499 | 3,471 | 29,234 |
| 63,669 | 132 | 20,909 | 5,793 | 3,653 | 30,487 |
| 63,670 | 132 | 20,810 | 5,797 | 3,654 | 30,393 |
| 63,671 | 127 | 20,561 | 5,763 | 3,655 | 30,106 |

|        |     |        |       |       |        |
|--------|-----|--------|-------|-------|--------|
| 63,672 | 125 | 20,567 | 5,779 | 3,669 | 30,140 |
| 63,673 | 123 | 20,674 | 5,853 | 3,690 | 30,340 |
| 63,674 | 122 | 20,579 | 5,840 | 3,681 | 30,222 |
| 63,675 | 126 | 20,704 | 5,886 | 3,728 | 30,444 |
| 63,676 | 124 | 20,336 | 5,820 | 3,690 | 29,970 |
| 63,677 | 124 | 20,356 | 5,887 | 3,704 | 30,071 |
| 63,678 | 121 | 20,820 | 6,014 | 3,793 | 30,748 |
| 63,679 | 117 | 21,128 | 6,105 | 3,835 | 31,185 |
| 63,680 | 119 | 20,970 | 6,062 | 3,823 | 30,974 |
| 63,681 | 119 | 20,975 | 6,119 | 3,872 | 31,085 |
| 63,682 | 121 | 21,044 | 6,132 | 3,854 | 31,151 |
| 63,683 | 122 | 21,304 | 6,219 | 3,895 | 31,540 |
| 63,684 | 117 | 21,339 | 6,278 | 3,912 | 31,646 |
| 63,685 | 119 | 21,184 | 6,245 | 3,891 | 31,439 |
| 63,686 | 122 | 21,419 | 6,293 | 3,901 | 31,735 |
| 63,687 | 119 | 21,513 | 6,297 | 3,919 | 31,848 |
| 63,688 | 119 | 21,475 | 6,287 | 3,920 | 31,801 |
| 63,689 | 122 | 21,698 | 6,425 | 3,997 | 32,242 |
| 63,690 | 126 | 21,936 | 6,524 | 4,083 | 32,669 |
| 63,691 | 125 | 21,667 | 6,491 | 4,053 | 32,336 |
| 63,692 | 130 | 21,651 | 6,534 | 4,066 | 32,381 |
| 63,693 | 133 | 21,583 | 6,558 | 4,074 | 32,348 |
| 63,694 | 127 | 21,800 | 6,670 | 4,161 | 32,758 |
| 63,695 | 127 | 21,856 | 6,681 | 4,172 | 32,836 |
| 63,696 | 124 | 21,959 | 6,695 | 4,180 | 32,958 |
| 63,697 | 132 | 21,925 | 6,728 | 4,197 | 32,982 |
| 63,698 | 133 | 21,818 | 6,722 | 4,181 | 32,854 |
| 63,699 | 136 | 21,798 | 6,736 | 4,180 | 32,850 |
| 63,700 | 143 | 21,969 | 6,783 | 4,191 | 33,086 |
| 63,701 | 142 | 21,897 | 6,714 | 4,145 | 32,898 |
| 63,702 | 137 | 21,855 | 6,648 | 4,101 | 32,741 |
| 63,703 | 139 | 22,247 | 6,702 | 4,140 | 33,228 |

|        |     |        |       |       |        |
|--------|-----|--------|-------|-------|--------|
| 63,704 | 138 | 22,527 | 6,799 | 4,193 | 33,657 |
| 63,705 | 137 | 22,304 | 6,742 | 4,142 | 33,325 |
| 63,706 | 138 | 22,320 | 6,751 | 4,133 | 33,342 |
| 63,707 | 137 | 22,658 | 6,826 | 4,180 | 33,801 |
| 63,708 | 135 | 22,521 | 6,754 | 4,166 | 33,576 |
| 63,709 | 138 | 22,289 | 6,690 | 4,112 | 33,229 |
| 63,710 | 137 | 22,127 | 6,661 | 4,091 | 33,016 |
| 63,711 | 136 | 22,705 | 6,826 | 4,206 | 33,873 |
| 63,712 | 137 | 22,809 | 6,827 | 4,230 | 34,003 |
| 63,713 | 136 | 22,768 | 6,821 | 4,224 | 33,949 |
| 63,714 | 127 | 23,028 | 6,930 | 4,292 | 34,377 |
| 63,715 | 129 | 22,889 | 6,932 | 4,294 | 34,244 |
| 63,716 | 129 | 22,860 | 6,953 | 4,327 | 34,269 |
| 63,717 | 123 | 22,826 | 6,930 | 4,331 | 34,210 |
| 63,718 | 126 | 22,785 | 6,928 | 4,310 | 34,149 |
| 63,719 | 123 | 22,632 | 6,885 | 4,280 | 33,920 |
| 63,720 | 121 | 22,752 | 6,852 | 4,273 | 33,998 |
| 63,721 | 121 | 22,960 | 6,904 | 4,309 | 34,294 |
| 63,722 | 126 | 23,096 | 6,895 | 4,297 | 34,414 |
| 63,723 | 126 | 23,138 | 6,881 | 4,288 | 34,433 |
| 63,724 | 130 | 23,164 | 6,864 | 4,321 | 34,479 |
| 63,725 | 135 | 23,025 | 6,851 | 4,319 | 34,330 |
| 63,726 | 131 | 22,720 | 6,767 | 4,247 | 33,865 |
| 63,727 | 129 | 22,709 | 6,750 | 4,228 | 33,816 |
| 63,728 | 133 | 22,460 | 6,701 | 4,198 | 33,492 |
| 63,729 | 130 | 22,219 | 6,656 | 4,141 | 33,146 |
| 63,730 | 131 | 22,057 | 6,601 | 4,120 | 32,909 |
| 63,731 | 140 | 21,981 | 6,536 | 4,064 | 32,721 |
| 63,732 | 141 | 22,011 | 6,543 | 4,045 | 32,740 |
| 63,733 | 141 | 21,891 | 6,555 | 4,065 | 32,652 |
| 63,734 | 140 | 21,848 | 6,563 | 4,061 | 32,612 |
| 63,735 | 138 | 21,674 | 6,512 | 4,011 | 32,335 |



|        |     |        |       |       |        |
|--------|-----|--------|-------|-------|--------|
| 63,736 | 135 | 21,515 | 6,465 | 3,962 | 32,077 |
| 63,737 | 131 | 21,382 | 6,443 | 3,955 | 31,911 |
| 63,738 | 130 | 21,426 | 6,451 | 3,935 | 31,942 |
| 63,739 | 127 | 21,440 | 6,453 | 3,919 | 31,939 |
| 63,740 | 130 | 21,670 | 6,464 | 3,941 | 32,205 |
| 63,741 | 130 | 21,542 | 6,397 | 3,869 | 31,938 |
| 63,742 | 125 | 21,447 | 6,336 | 3,854 | 31,762 |
| 63,743 | 129 | 21,342 | 6,309 | 3,862 | 31,642 |
| 63,744 | 125 | 21,279 | 6,258 | 3,837 | 31,499 |
| 63,745 | 123 | 21,178 | 6,208 | 3,814 | 31,323 |
| 63,746 | 128 | 21,092 | 6,251 | 3,809 | 31,280 |
| 63,747 | 126 | 21,047 | 6,220 | 3,778 | 31,171 |
| 63,748 | 117 | 20,839 | 6,120 | 3,733 | 30,809 |
| 63,749 | 119 | 20,530 | 6,032 | 3,680 | 30,361 |
| 63,750 | 118 | 20,432 | 6,025 | 3,658 | 30,233 |
| 63,751 | 113 | 20,291 | 5,976 | 3,647 | 30,027 |
| 63,752 | 112 | 20,075 | 5,962 | 3,632 | 29,781 |
| 63,753 | 111 | 19,876 | 5,965 | 3,622 | 29,574 |
| 63,754 | 110 | 19,743 | 5,974 | 3,629 | 29,456 |
| 63,755 | 108 | 19,677 | 5,997 | 3,628 | 29,410 |
| 63,756 | 108 | 19,758 | 5,997 | 3,648 | 29,511 |
| 63,757 | 107 | 19,902 | 6,079 | 3,678 | 29,766 |
| 63,758 | 110 | 19,998 | 6,110 | 3,696 | 29,914 |
| 63,759 | 111 | 19,898 | 6,089 | 3,667 | 29,765 |
| 63,760 | 112 | 19,938 | 6,041 | 3,682 | 29,773 |
| 63,761 | 117 | 20,005 | 6,039 | 3,696 | 29,857 |
| 63,762 | 117 | 19,926 | 6,019 | 3,693 | 29,755 |
| 63,763 | 118 | 20,067 | 6,070 | 3,724 | 29,979 |
| 63,764 | 120 | 20,287 | 6,120 | 3,732 | 30,259 |
| 63,765 | 124 | 20,387 | 6,095 | 3,739 | 30,345 |
| 63,766 | 129 | 20,504 | 6,104 | 3,727 | 30,464 |
| 63,767 | 124 | 20,358 | 6,035 | 3,660 | 30,177 |

|        |     |        |       |       |        |
|--------|-----|--------|-------|-------|--------|
| 63,768 | 124 | 20,420 | 6,039 | 3,660 | 30,243 |
| 63,769 | 126 | 20,498 | 6,040 | 3,675 | 30,339 |
| 63,770 | 126 | 20,516 | 6,057 | 3,703 | 30,402 |
| 63,771 | 129 | 20,416 | 6,055 | 3,688 | 30,288 |
| 63,772 | 129 | 20,376 | 6,066 | 3,680 | 30,251 |
| 63,773 | 126 | 20,346 | 6,071 | 3,683 | 30,226 |
| 63,774 | 133 | 20,341 | 6,127 | 3,714 | 30,315 |
| 63,775 | 136 | 20,495 | 6,158 | 3,733 | 30,522 |
| 63,776 | 138 | 20,634 | 6,177 | 3,736 | 30,685 |
| 63,777 | 147 | 20,726 | 6,242 | 3,779 | 30,894 |
| 63,778 | 155 | 20,571 | 6,169 | 3,736 | 30,631 |
| 63,779 | 152 | 20,491 | 6,122 | 3,715 | 30,480 |
| 63,780 | 160 | 20,362 | 6,128 | 3,719 | 30,369 |
| 63,781 | 159 | 20,078 | 6,042 | 3,663 | 29,942 |
| 63,782 | 150 | 20,417 | 6,191 | 3,766 | 30,524 |
| 63,783 | 150 | 20,376 | 6,105 | 3,743 | 30,374 |
| 63,784 | 150 | 20,284 | 6,066 | 3,746 | 30,246 |
| 63,785 | 150 | 20,277 | 6,050 | 3,761 | 30,238 |
| 63,786 | 149 | 20,056 | 6,013 | 3,721 | 29,939 |
| 63,787 | 154 | 20,438 | 6,159 | 3,816 | 30,567 |
| 63,788 | 154 | 20,282 | 6,099 | 3,808 | 30,343 |
| 63,789 | 153 | 20,246 | 6,082 | 3,812 | 30,293 |
| 63,790 | 154 | 20,189 | 6,027 | 3,808 | 30,178 |
| 63,791 | 155 | 20,364 | 6,126 | 3,854 | 30,499 |
| 63,792 | 148 | 20,385 | 6,170 | 3,897 | 30,600 |
| 63,793 | 155 | 20,545 | 6,227 | 3,896 | 30,823 |
| 63,794 | 156 | 20,895 | 6,263 | 3,915 | 31,229 |
| 63,795 | 158 | 21,137 | 6,304 | 3,952 | 31,551 |
| 63,796 | 161 | 21,336 | 6,346 | 3,979 | 31,822 |
| 63,797 | 155 | 21,125 | 6,239 | 3,928 | 31,447 |
| 63,798 | 155 | 21,451 | 6,304 | 3,980 | 31,890 |
| 63,799 | 154 | 21,830 | 6,396 | 4,065 | 32,445 |

|        |     |        |       |       |        |
|--------|-----|--------|-------|-------|--------|
| 63,800 | 151 | 21,983 | 6,410 | 4,090 | 32,634 |
| 63,801 | 152 | 22,079 | 6,478 | 4,128 | 32,837 |
| 63,802 | 149 | 21,926 | 6,444 | 4,105 | 32,624 |
| 63,803 | 150 | 22,208 | 6,498 | 4,150 | 33,006 |
| 63,804 | 149 | 22,311 | 6,485 | 4,147 | 33,092 |
| 63,805 | 151 | 21,788 | 6,275 | 4,032 | 32,246 |
| 63,806 | 152 | 21,875 | 6,303 | 4,055 | 32,385 |
| 63,807 | 153 | 21,890 | 6,314 | 4,067 | 32,424 |
| 63,808 | 158 | 21,324 | 6,090 | 3,977 | 31,549 |
| 63,809 | 162 | 21,458 | 6,128 | 4,013 | 31,761 |
| 63,810 | 156 | 21,471 | 6,123 | 4,001 | 31,751 |
| 63,811 | 163 | 21,633 | 6,192 | 4,037 | 32,025 |
| 63,812 | 158 | 21,268 | 6,106 | 3,993 | 31,525 |
| 63,813 | 157 | 21,273 | 6,056 | 3,980 | 31,466 |
| 63,814 | 157 | 21,253 | 6,058 | 3,974 | 31,442 |
| 63,815 | 159 | 21,251 | 6,046 | 4,024 | 31,480 |
| 63,816 | 159 | 21,302 | 6,043 | 4,013 | 31,517 |
| 63,817 | 152 | 21,246 | 6,025 | 4,012 | 31,435 |
| 63,818 | 150 | 21,238 | 6,068 | 4,027 | 31,483 |
| 63,819 | 144 | 21,111 | 6,019 | 4,006 | 31,280 |
| 63,820 | 142 | 21,042 | 5,959 | 3,952 | 31,095 |
| 63,821 | 144 | 21,424 | 6,026 | 3,992 | 31,586 |
| 63,822 | 144 | 21,406 | 6,028 | 4,001 | 31,579 |
| 63,823 | 144 | 21,687 | 6,102 | 4,029 | 31,962 |
| 63,824 | 148 | 22,024 | 6,206 | 4,081 | 32,459 |
| 63,825 | 141 | 22,224 | 6,219 | 4,080 | 32,664 |
| 63,826 | 135 | 22,175 | 6,242 | 4,050 | 32,602 |
| 63,827 | 128 | 22,097 | 6,239 | 4,069 | 32,533 |
| 63,828 | 120 | 22,190 | 6,196 | 4,061 | 32,567 |
| 63,829 | 120 | 22,094 | 6,127 | 4,007 | 32,348 |
| 63,830 | 123 | 21,900 | 6,078 | 3,943 | 32,044 |
| 63,831 | 136 | 22,104 | 6,094 | 3,994 | 32,328 |

|        |     |        |       |       |        |
|--------|-----|--------|-------|-------|--------|
| 63,832 | 136 | 22,107 | 6,106 | 4,001 | 32,350 |
| 63,833 | 138 | 22,144 | 6,109 | 3,991 | 32,382 |
| 63,834 | 139 | 22,237 | 6,185 | 3,985 | 32,546 |
| 63,835 | 146 | 22,134 | 6,127 | 3,943 | 32,350 |
| 63,836 | 148 | 22,313 | 6,141 | 3,954 | 32,556 |
| 63,837 | 144 | 22,325 | 6,139 | 3,962 | 32,570 |
| 63,838 | 146 | 22,367 | 6,145 | 3,961 | 32,619 |
| 63,839 | 150 | 22,104 | 6,088 | 3,908 | 32,250 |
| 63,840 | 150 | 21,919 | 6,060 | 3,872 | 32,001 |
| 63,841 | 151 | 22,496 | 6,285 | 3,956 | 32,888 |
| 63,842 | 154 | 22,142 | 6,154 | 3,879 | 32,329 |
| 63,843 | 154 | 22,410 | 6,226 | 3,904 | 32,694 |
| 63,844 | 143 | 22,460 | 6,224 | 3,920 | 32,747 |
| 63,845 | 142 | 22,432 | 6,215 | 3,919 | 32,708 |
| 63,846 | 139 | 22,433 | 6,213 | 3,901 | 32,686 |
| 63,847 | 135 | 22,297 | 6,165 | 3,849 | 32,446 |
| 63,848 | 142 | 22,126 | 6,097 | 3,788 | 32,153 |
| 63,849 | 143 | 22,168 | 6,155 | 3,793 | 32,259 |
| 63,850 | 139 | 22,300 | 6,195 | 3,789 | 32,423 |
| 63,851 | 149 | 22,274 | 6,249 | 3,794 | 32,466 |
| 63,852 | 148 | 22,346 | 6,199 | 3,802 | 32,495 |
| 63,853 | 151 | 22,450 | 6,221 | 3,819 | 32,641 |
| 63,854 | 152 | 22,532 | 6,237 | 3,827 | 32,748 |
| 63,855 | 152 | 22,646 | 6,260 | 3,848 | 32,906 |
| 63,856 | 153 | 22,720 | 6,274 | 3,831 | 32,978 |
| 63,857 | 155 | 22,782 | 6,289 | 3,832 | 33,058 |
| 63,858 | 147 | 22,703 | 6,272 | 3,818 | 32,940 |
| 63,859 | 146 | 22,787 | 6,268 | 3,817 | 33,018 |
| 63,860 | 150 | 22,924 | 6,341 | 3,825 | 33,240 |
| 63,861 | 156 | 22,882 | 6,374 | 3,847 | 33,259 |
| 63,862 | 154 | 22,806 | 6,353 | 3,824 | 33,137 |
| 63,863 | 157 | 22,669 | 6,364 | 3,794 | 32,984 |

|        |     |        |       |       |        |
|--------|-----|--------|-------|-------|--------|
| 63,864 | 160 | 22,909 | 6,421 | 3,818 | 33,308 |
| 63,865 | 160 | 22,718 | 6,378 | 3,778 | 33,034 |
| 63,866 | 160 | 22,723 | 6,367 | 3,764 | 33,014 |
| 63,867 | 157 | 22,620 | 6,363 | 3,770 | 32,910 |
| 63,868 | 161 | 22,738 | 6,407 | 3,781 | 33,087 |
| 63,869 | 162 | 22,841 | 6,399 | 3,788 | 33,190 |
| 63,870 | 164 | 22,739 | 6,397 | 3,797 | 33,097 |
| 63,871 | 162 | 22,635 | 6,446 | 3,833 | 33,076 |
| 63,872 | 166 | 22,958 | 6,603 | 3,909 | 33,636 |
| 63,873 | 168 | 23,123 | 6,622 | 3,947 | 33,860 |
| 63,874 | 169 | 23,088 | 6,600 | 3,946 | 33,803 |
| 63,875 | 166 | 22,981 | 6,581 | 3,927 | 33,655 |
| 63,876 | 165 | 23,101 | 6,558 | 3,945 | 33,769 |
| 63,877 | 164 | 23,052 | 6,520 | 3,942 | 33,678 |
| 63,878 | 166 | 23,267 | 6,595 | 3,979 | 34,007 |
| 63,879 | 164 | 23,356 | 6,637 | 4,007 | 34,164 |
| 63,880 | 143 | 22,148 | 6,271 | 3,802 | 32,364 |
| 63,881 | 150 | 22,411 | 6,323 | 3,828 | 32,712 |
| 63,882 | 147 | 22,626 | 6,382 | 3,855 | 33,010 |
| 63,883 | 147 | 22,690 | 6,407 | 3,860 | 33,104 |
| 63,884 | 134 | 21,932 | 6,254 | 3,744 | 32,064 |
| 63,885 | 134 | 22,111 | 6,290 | 3,786 | 32,321 |
| 63,886 | 137 | 22,387 | 6,355 | 3,819 | 32,698 |
| 63,887 | 137 | 22,336 | 6,353 | 3,810 | 32,636 |
| 63,888 | 142 | 22,924 | 6,552 | 3,911 | 33,529 |
| 63,889 | 143 | 23,278 | 6,641 | 3,962 | 34,024 |
| 63,890 | 138 | 23,273 | 6,634 | 3,985 | 34,030 |
| 63,891 | 138 | 23,108 | 6,517 | 3,940 | 33,703 |
| 63,892 | 135 | 23,048 | 6,526 | 3,914 | 33,623 |
| 63,893 | 137 | 23,188 | 6,554 | 3,937 | 33,816 |
| 63,894 | 137 | 23,035 | 6,516 | 3,923 | 33,611 |
| 63,895 | 137 | 22,878 | 6,482 | 3,873 | 33,370 |

|        |     |        |       |       |        |
|--------|-----|--------|-------|-------|--------|
| 63,896 | 138 | 22,432 | 6,383 | 3,819 | 32,772 |
| 63,897 | 138 | 22,481 | 6,381 | 3,817 | 32,817 |
| 63,898 | 136 | 21,971 | 6,236 | 3,744 | 32,087 |
| 63,899 | 136 | 21,913 | 6,240 | 3,749 | 32,038 |
| 63,900 | 137 | 21,683 | 6,147 | 3,708 | 31,675 |
| 63,901 | 137 | 21,271 | 6,056 | 3,675 | 31,139 |
| 63,902 | 131 | 22,206 | 6,342 | 3,828 | 32,507 |
| 63,903 | 131 | 21,966 | 6,320 | 3,817 | 32,234 |
| 63,904 | 129 | 21,837 | 6,311 | 3,832 | 32,109 |
| 63,905 | 132 | 21,861 | 6,352 | 3,839 | 32,184 |
| 63,906 | 132 | 21,865 | 6,371 | 3,843 | 32,211 |
| 63,907 | 130 | 21,662 | 6,337 | 3,810 | 31,939 |
| 63,908 | 132 | 22,110 | 6,457 | 3,875 | 32,574 |
| 63,909 | 132 | 22,105 | 6,454 | 3,870 | 32,561 |
| 63,910 | 132 | 22,196 | 6,438 | 3,871 | 32,637 |
| 63,911 | 127 | 22,491 | 6,491 | 3,918 | 33,027 |
| 63,912 | 121 | 22,601 | 6,469 | 3,911 | 33,102 |
| 63,913 | 116 | 22,374 | 6,430 | 3,879 | 32,799 |
| 63,914 | 113 | 22,564 | 6,473 | 3,933 | 33,083 |
| 63,915 | 109 | 22,237 | 6,408 | 3,888 | 32,642 |
| 63,916 | 106 | 22,011 | 6,342 | 3,845 | 32,304 |
| 63,917 | 103 | 21,880 | 6,303 | 3,819 | 32,105 |
| 63,918 | 112 | 22,481 | 6,460 | 3,929 | 32,982 |
| 63,919 | 111 | 22,462 | 6,428 | 3,907 | 32,908 |
| 63,920 | 112 | 22,189 | 6,323 | 3,804 | 32,428 |
| 63,921 | 114 | 22,388 | 6,369 | 3,834 | 32,705 |
| 63,922 | 114 | 22,581 | 6,403 | 3,865 | 32,963 |
| 63,923 | 111 | 22,034 | 6,246 | 3,767 | 32,158 |
| 63,924 | 111 | 21,966 | 6,244 | 3,753 | 32,074 |
| 63,925 | 111 | 21,945 | 6,213 | 3,744 | 32,013 |
| 63,926 | 114 | 22,231 | 6,262 | 3,785 | 32,392 |
| 63,927 | 118 | 21,944 | 6,203 | 3,719 | 31,984 |

|        |     |        |       |       |        |
|--------|-----|--------|-------|-------|--------|
| 63,928 | 119 | 22,096 | 6,196 | 3,716 | 32,127 |
| 63,929 | 113 | 21,770 | 6,075 | 3,656 | 31,614 |
| 63,930 | 115 | 22,087 | 6,135 | 3,685 | 32,022 |
| 63,931 | 112 | 22,054 | 6,123 | 3,682 | 31,971 |
| 63,932 | 108 | 22,425 | 6,189 | 3,734 | 32,456 |
| 63,933 | 105 | 22,326 | 6,144 | 3,711 | 32,286 |
| 63,934 | 104 | 22,488 | 6,130 | 3,735 | 32,457 |
| 63,935 | 104 | 22,526 | 6,122 | 3,738 | 32,490 |
| 63,936 | 103 | 22,407 | 6,094 | 3,717 | 32,321 |
| 63,937 | 103 | 23,004 | 6,271 | 3,827 | 33,205 |
| 63,938 | 103 | 22,947 | 6,267 | 3,839 | 33,156 |
| 63,939 | 101 | 22,868 | 6,253 | 3,831 | 33,053 |
| 63,940 | 103 | 22,685 | 6,235 | 3,831 | 32,854 |
| 63,941 | 100 | 22,511 | 6,148 | 3,769 | 32,528 |
| 63,942 | 105 | 22,599 | 6,194 | 3,791 | 32,689 |
| 63,943 | 107 | 22,354 | 6,119 | 3,757 | 32,337 |
| 63,944 | 113 | 22,517 | 6,120 | 3,758 | 32,508 |
| 63,945 | 113 | 22,581 | 6,128 | 3,760 | 32,582 |
| 63,946 | 113 | 22,772 | 6,144 | 3,776 | 32,805 |
| 63,947 | 113 | 22,785 | 6,159 | 3,763 | 32,820 |
| 63,948 | 111 | 23,225 | 6,259 | 3,819 | 33,414 |
| 63,949 | 113 | 23,333 | 6,279 | 3,831 | 33,556 |
| 63,950 | 111 | 23,391 | 6,242 | 3,861 | 33,605 |
| 63,951 | 111 | 23,638 | 6,300 | 3,904 | 33,953 |
| 63,952 | 110 | 23,790 | 6,333 | 3,921 | 34,154 |
| 63,953 | 109 | 24,035 | 6,318 | 3,912 | 34,374 |
| 63,954 | 108 | 24,145 | 6,317 | 3,880 | 34,450 |
| 63,955 | 109 | 24,085 | 6,261 | 3,829 | 34,284 |
| 63,956 | 108 | 23,982 | 6,203 | 3,806 | 34,099 |
| 63,957 | 117 | 23,924 | 6,162 | 3,799 | 34,002 |
| 63,958 | 119 | 23,689 | 6,102 | 3,792 | 33,702 |
| 63,959 | 118 | 24,132 | 6,200 | 3,844 | 34,294 |

|        |     |        |       |       |        |
|--------|-----|--------|-------|-------|--------|
| 63,960 | 125 | 23,853 | 6,135 | 3,812 | 33,925 |
| 63,961 | 125 | 23,759 | 6,131 | 3,800 | 33,815 |
| 63,962 | 123 | 24,045 | 6,250 | 3,845 | 34,263 |
| 63,963 | 123 | 24,031 | 6,272 | 3,851 | 34,277 |
| 63,964 | 121 | 24,145 | 6,284 | 3,866 | 34,416 |
| 63,965 | 122 | 24,295 | 6,276 | 3,866 | 34,559 |
| 63,966 | 125 | 24,369 | 6,297 | 3,870 | 34,661 |
| 63,967 | 122 | 24,195 | 6,263 | 3,836 | 34,416 |
| 63,968 | 123 | 24,526 | 6,289 | 3,872 | 34,810 |
| 63,969 | 123 | 24,526 | 6,303 | 3,870 | 34,822 |
| 63,970 | 126 | 24,226 | 6,266 | 3,844 | 34,462 |
| 63,971 | 128 | 24,672 | 6,414 | 3,935 | 35,149 |
| 63,972 | 125 | 24,400 | 6,358 | 3,894 | 34,777 |
| 63,973 | 122 | 24,387 | 6,364 | 3,883 | 34,756 |
| 63,974 | 120 | 24,320 | 6,343 | 3,877 | 34,660 |
| 63,975 | 118 | 24,250 | 6,354 | 3,891 | 34,613 |
| 63,976 | 121 | 23,958 | 6,312 | 3,862 | 34,253 |
| 63,977 | 118 | 23,711 | 6,277 | 3,825 | 33,931 |
| 63,978 | 122 | 24,039 | 6,377 | 3,928 | 34,466 |
| 63,979 | 124 | 23,911 | 6,412 | 3,900 | 34,347 |
| 63,980 | 126 | 24,031 | 6,451 | 3,919 | 34,527 |
| 63,981 | 126 | 24,052 | 6,501 | 3,937 | 34,616 |
| 63,982 | 128 | 24,125 | 6,543 | 3,941 | 34,737 |
| 63,983 | 126 | 23,807 | 6,504 | 3,906 | 34,343 |
| 63,984 | 126 | 23,794 | 6,508 | 3,896 | 34,324 |
| 63,985 | 134 | 23,877 | 6,552 | 3,909 | 34,472 |
| 63,986 | 134 | 23,858 | 6,545 | 3,921 | 34,458 |
| 63,987 | 133 | 23,680 | 6,518 | 3,889 | 34,220 |
| 63,988 | 134 | 23,368 | 6,474 | 3,827 | 33,803 |
| 63,989 | 142 | 23,311 | 6,448 | 3,801 | 33,702 |
| 63,990 | 144 | 23,286 | 6,390 | 3,771 | 33,591 |
| 63,991 | 144 | 23,246 | 6,387 | 3,748 | 33,525 |



|        |     |        |       |       |        |
|--------|-----|--------|-------|-------|--------|
| 63,992 | 146 | 23,540 | 6,423 | 3,771 | 33,880 |
| 63,993 | 140 | 23,361 | 6,389 | 3,746 | 33,636 |
| 63,994 | 140 | 23,351 | 6,401 | 3,744 | 33,636 |
| 63,995 | 140 | 23,484 | 6,428 | 3,771 | 33,823 |
| 63,996 | 140 | 23,427 | 6,444 | 3,778 | 33,789 |
| 63,997 | 137 | 23,341 | 6,452 | 3,779 | 33,709 |
| 63,998 | 142 | 23,226 | 6,429 | 3,768 | 33,565 |
| 63,999 | 146 | 23,170 | 6,399 | 3,756 | 33,471 |
| 64,000 | 144 | 22,998 | 6,353 | 3,721 | 33,216 |
| 64,001 | 155 | 23,039 | 6,391 | 3,714 | 33,299 |
| 64,002 | 162 | 22,778 | 6,338 | 3,687 | 32,965 |
| 64,003 | 164 | 22,809 | 6,334 | 3,679 | 32,986 |
| 64,004 | 164 | 22,403 | 6,289 | 3,645 | 32,501 |
| 64,005 | 168 | 22,310 | 6,294 | 3,638 | 32,410 |
| 64,006 | 164 | 22,004 | 6,235 | 3,595 | 31,998 |
| 64,007 | 163 | 22,063 | 6,262 | 3,620 | 32,108 |
| 64,008 | 155 | 21,960 | 6,263 | 3,603 | 31,981 |
| 64,009 | 155 | 22,099 | 6,268 | 3,615 | 32,137 |
| 64,010 | 154 | 21,855 | 6,210 | 3,564 | 31,783 |
| 64,011 | 144 | 21,588 | 6,136 | 3,523 | 31,391 |
| 64,012 | 143 | 21,553 | 6,096 | 3,499 | 31,291 |
| 64,013 | 143 | 21,508 | 6,073 | 3,479 | 31,203 |
| 64,014 | 147 | 21,482 | 6,086 | 3,446 | 31,161 |
| 64,015 | 147 | 21,432 | 6,075 | 3,453 | 31,107 |
| 64,016 | 146 | 21,341 | 6,089 | 3,451 | 31,027 |
| 64,017 | 143 | 21,430 | 6,154 | 3,511 | 31,238 |
| 64,018 | 153 | 21,473 | 6,181 | 3,506 | 31,313 |
| 64,019 | 146 | 21,249 | 6,135 | 3,455 | 30,985 |
| 64,020 | 148 | 21,628 | 6,215 | 3,506 | 31,497 |
| 64,021 | 140 | 21,745 | 6,240 | 3,519 | 31,644 |
| 64,022 | 137 | 21,660 | 6,175 | 3,494 | 31,466 |
| 64,023 | 138 | 21,721 | 6,224 | 3,531 | 31,614 |

|        |     |        |       |       |        |
|--------|-----|--------|-------|-------|--------|
| 64,024 | 138 | 21,669 | 6,226 | 3,518 | 31,551 |
| 64,025 | 134 | 21,507 | 6,110 | 3,453 | 31,204 |
| 64,026 | 135 | 21,758 | 6,174 | 3,472 | 31,539 |
| 64,027 | 131 | 21,951 | 6,234 | 3,500 | 31,816 |
| 64,028 | 131 | 21,798 | 6,168 | 3,440 | 31,537 |
| 64,029 | 133 | 22,102 | 6,205 | 3,460 | 31,900 |
| 64,030 | 137 | 21,826 | 6,137 | 3,434 | 31,534 |
| 64,031 | 135 | 21,602 | 6,071 | 3,381 | 31,189 |
| 64,032 | 136 | 21,710 | 6,034 | 3,414 | 31,294 |
| 64,033 | 135 | 21,541 | 5,978 | 3,389 | 31,043 |
| 64,034 | 135 | 20,982 | 5,824 | 3,314 | 30,255 |
| 64,035 | 135 | 21,174 | 5,855 | 3,354 | 30,518 |
| 64,036 | 131 | 21,402 | 5,936 | 3,365 | 30,834 |
| 64,037 | 130 | 21,138 | 5,875 | 3,309 | 30,452 |
| 64,038 | 129 | 21,430 | 5,902 | 3,363 | 30,824 |
| 64,039 | 129 | 21,616 | 5,919 | 3,405 | 31,069 |
| 64,040 | 115 | 21,641 | 5,921 | 3,401 | 31,078 |
| 64,041 | 113 | 21,437 | 5,880 | 3,373 | 30,803 |
| 64,042 | 112 | 21,293 | 5,841 | 3,353 | 30,599 |
| 64,043 | 109 | 21,507 | 5,947 | 3,407 | 30,970 |
| 64,044 | 111 | 21,211 | 5,875 | 3,380 | 30,577 |
| 64,045 | 110 | 21,054 | 5,819 | 3,350 | 30,333 |
| 64,046 | 115 | 22,052 | 6,044 | 3,506 | 31,717 |
| 64,047 | 116 | 21,696 | 5,955 | 3,487 | 31,254 |
| 64,048 | 117 | 21,830 | 5,997 | 3,500 | 31,444 |
| 64,049 | 117 | 21,982 | 6,033 | 3,531 | 31,663 |
| 64,050 | 113 | 21,833 | 6,035 | 3,533 | 31,514 |
| 64,051 | 110 | 21,754 | 6,005 | 3,525 | 31,394 |
| 64,052 | 104 | 21,521 | 5,944 | 3,484 | 31,053 |
| 64,053 | 97  | 21,305 | 5,915 | 3,463 | 30,780 |
| 64,054 | 96  | 21,333 | 5,914 | 3,443 | 30,786 |
| 64,055 | 97  | 21,426 | 5,879 | 3,442 | 30,844 |

|        |     |        |       |       |        |
|--------|-----|--------|-------|-------|--------|
| 64,056 | 97  | 21,420 | 5,885 | 3,454 | 30,856 |
| 64,057 | 98  | 21,584 | 5,955 | 3,497 | 31,134 |
| 64,058 | 98  | 21,433 | 5,934 | 3,475 | 30,940 |
| 64,059 | 94  | 21,258 | 5,872 | 3,447 | 30,671 |
| 64,060 | 98  | 21,477 | 5,915 | 3,474 | 30,964 |
| 64,061 | 100 | 21,482 | 5,909 | 3,459 | 30,950 |
| 64,062 | 103 | 21,445 | 5,883 | 3,459 | 30,890 |
| 64,063 | 109 | 21,342 | 5,861 | 3,445 | 30,757 |
| 64,064 | 104 | 21,148 | 5,774 | 3,428 | 30,454 |
| 64,065 | 106 | 21,436 | 5,860 | 3,468 | 30,870 |
| 64,066 | 109 | 21,257 | 5,806 | 3,413 | 30,585 |
| 64,067 | 106 | 21,021 | 5,691 | 3,349 | 30,167 |
| 64,068 | 106 | 21,111 | 5,725 | 3,356 | 30,298 |
| 64,069 | 103 | 21,049 | 5,711 | 3,346 | 30,209 |
| 64,070 | 104 | 20,600 | 5,648 | 3,318 | 29,670 |
| 64,071 | 103 | 20,873 | 5,772 | 3,372 | 30,120 |
| 64,072 | 105 | 20,679 | 5,707 | 3,350 | 29,841 |
| 64,073 | 106 | 20,361 | 5,602 | 3,298 | 29,367 |
| 64,074 | 106 | 20,402 | 5,595 | 3,275 | 29,378 |
| 64,075 | 107 | 20,255 | 5,565 | 3,253 | 29,180 |
| 64,076 | 106 | 20,214 | 5,576 | 3,249 | 29,145 |
| 64,077 | 105 | 20,225 | 5,566 | 3,254 | 29,150 |
| 64,078 | 103 | 19,959 | 5,512 | 3,210 | 28,784 |
| 64,079 | 102 | 19,613 | 5,431 | 3,171 | 28,317 |
| 64,080 | 103 | 20,072 | 5,612 | 3,282 | 29,069 |
| 64,081 | 98  | 19,996 | 5,659 | 3,304 | 29,057 |
| 64,082 | 103 | 19,778 | 5,651 | 3,270 | 28,802 |
| 64,083 | 104 | 19,854 | 5,662 | 3,258 | 28,878 |
| 64,084 | 111 | 19,922 | 5,692 | 3,259 | 28,984 |
| 64,085 | 112 | 19,876 | 5,666 | 3,237 | 28,891 |
| 64,086 | 112 | 19,687 | 5,623 | 3,198 | 28,620 |
| 64,087 | 109 | 19,837 | 5,682 | 3,278 | 28,906 |

|        |     |        |       |       |        |
|--------|-----|--------|-------|-------|--------|
| 64,088 | 110 | 19,829 | 5,655 | 3,273 | 28,867 |
| 64,089 | 115 | 19,981 | 5,715 | 3,269 | 29,080 |
| 64,090 | 113 | 19,786 | 5,670 | 3,239 | 28,808 |
| 64,091 | 113 | 19,939 | 5,672 | 3,266 | 28,990 |
| 64,092 | 114 | 20,205 | 5,718 | 3,287 | 29,324 |
| 64,093 | 115 | 20,334 | 5,715 | 3,301 | 29,465 |
| 64,094 | 114 | 20,238 | 5,662 | 3,262 | 29,276 |
| 64,095 | 114 | 20,074 | 5,688 | 3,269 | 29,145 |
| 64,096 | 116 | 20,241 | 5,745 | 3,313 | 29,415 |
| 64,097 | 115 | 20,280 | 5,745 | 3,323 | 29,463 |
| 64,098 | 114 | 20,358 | 5,747 | 3,317 | 29,536 |
| 64,099 | 112 | 20,224 | 5,703 | 3,315 | 29,354 |
| 64,100 | 109 | 20,367 | 5,701 | 3,296 | 29,473 |
| 64,101 | 110 | 20,573 | 5,743 | 3,320 | 29,746 |
| 64,102 | 112 | 20,707 | 5,776 | 3,319 | 29,914 |
| 64,103 | 111 | 20,757 | 5,761 | 3,318 | 29,947 |
| 64,104 | 111 | 20,863 | 5,747 | 3,315 | 30,036 |
| 64,105 | 116 | 21,297 | 5,837 | 3,370 | 30,620 |
| 64,106 | 115 | 21,467 | 5,918 | 3,399 | 30,899 |
| 64,107 | 127 | 21,660 | 5,958 | 3,416 | 31,161 |
| 64,108 | 129 | 21,831 | 5,917 | 3,416 | 31,293 |
| 64,109 | 129 | 21,861 | 5,925 | 3,420 | 31,335 |
| 64,110 | 130 | 22,236 | 6,014 | 3,475 | 31,855 |
| 64,111 | 128 | 22,071 | 5,966 | 3,456 | 31,621 |
| 64,112 | 128 | 22,038 | 5,962 | 3,452 | 31,580 |
| 64,113 | 138 | 22,026 | 5,991 | 3,464 | 31,619 |
| 64,114 | 132 | 22,015 | 6,030 | 3,487 | 31,664 |
| 64,115 | 138 | 22,141 | 6,070 | 3,526 | 31,875 |
| 64,116 | 137 | 22,084 | 6,055 | 3,537 | 31,813 |
| 64,117 | 137 | 21,966 | 6,033 | 3,541 | 31,677 |
| 64,118 | 142 | 21,802 | 5,988 | 3,527 | 31,459 |
| 64,119 | 145 | 22,015 | 6,045 | 3,554 | 31,759 |

|        |     |        |       |       |        |
|--------|-----|--------|-------|-------|--------|
| 64,120 | 143 | 21,964 | 6,064 | 3,553 | 31,724 |
| 64,121 | 146 | 21,777 | 5,962 | 3,530 | 31,415 |
| 64,122 | 147 | 21,576 | 5,891 | 3,496 | 31,110 |
| 64,123 | 147 | 21,663 | 5,933 | 3,524 | 31,267 |
| 64,124 | 146 | 21,549 | 5,937 | 3,510 | 31,142 |
| 64,125 | 146 | 21,368 | 5,884 | 3,507 | 30,905 |
| 64,126 | 146 | 21,296 | 5,864 | 3,508 | 30,814 |
| 64,127 | 149 | 21,359 | 5,873 | 3,521 | 30,902 |
| 64,128 | 150 | 21,335 | 5,835 | 3,504 | 30,824 |
| 64,129 | 147 | 21,378 | 5,845 | 3,518 | 30,888 |
| 64,130 | 150 | 21,493 | 5,838 | 3,543 | 31,024 |
| 64,131 | 145 | 21,183 | 5,731 | 3,484 | 30,543 |
| 64,132 | 145 | 21,393 | 5,779 | 3,514 | 30,831 |
| 64,133 | 143 | 21,124 | 5,746 | 3,492 | 30,505 |
| 64,134 | 143 | 21,269 | 5,747 | 3,507 | 30,666 |
| 64,135 | 139 | 21,485 | 5,778 | 3,546 | 30,948 |
| 64,136 | 139 | 21,445 | 5,746 | 3,513 | 30,843 |
| 64,137 | 141 | 21,675 | 5,795 | 3,531 | 31,142 |
| 64,138 | 151 | 21,491 | 5,752 | 3,496 | 30,890 |
| 64,139 | 148 | 21,509 | 5,761 | 3,501 | 30,919 |
| 64,140 | 151 | 21,573 | 5,759 | 3,483 | 30,966 |
| 64,141 | 157 | 21,663 | 5,810 | 3,502 | 31,132 |
| 64,142 | 156 | 21,510 | 5,825 | 3,495 | 30,986 |
| 64,143 | 156 | 21,143 | 5,770 | 3,457 | 30,526 |
| 64,144 | 165 | 21,247 | 5,822 | 3,516 | 30,750 |
| 64,145 | 163 | 20,875 | 5,746 | 3,452 | 30,236 |
| 64,146 | 165 | 20,793 | 5,735 | 3,449 | 30,142 |
| 64,147 | 166 | 20,702 | 5,752 | 3,439 | 30,059 |
| 64,148 | 171 | 20,382 | 5,721 | 3,393 | 29,667 |
| 64,149 | 170 | 20,239 | 5,721 | 3,399 | 29,529 |
| 64,150 | 168 | 20,044 | 5,699 | 3,398 | 29,309 |
| 64,151 | 174 | 19,716 | 5,659 | 3,366 | 28,915 |

|        |     |        |       |       |        |
|--------|-----|--------|-------|-------|--------|
| 64,152 | 173 | 19,488 | 5,611 | 3,326 | 28,598 |
| 64,153 | 169 | 19,528 | 5,708 | 3,371 | 28,776 |
| 64,154 | 169 | 19,363 | 5,687 | 3,364 | 28,583 |
| 64,155 | 168 | 19,273 | 5,703 | 3,369 | 28,513 |
| 64,156 | 165 | 19,272 | 5,752 | 3,394 | 28,583 |
| 64,157 | 163 | 19,403 | 5,807 | 3,446 | 28,819 |
| 64,158 | 156 | 19,532 | 5,889 | 3,453 | 29,030 |
| 64,159 | 158 | 19,376 | 5,902 | 3,411 | 28,847 |
| 64,160 | 157 | 19,410 | 5,927 | 3,405 | 28,899 |
| 64,161 | 162 | 19,159 | 5,866 | 3,363 | 28,550 |
| 64,162 | 162 | 19,296 | 5,905 | 3,400 | 28,763 |
| 64,163 | 150 | 19,395 | 5,933 | 3,430 | 28,908 |
| 64,164 | 154 | 19,421 | 5,971 | 3,448 | 28,994 |
| 64,165 | 162 | 19,614 | 6,035 | 3,475 | 29,286 |
| 64,166 | 160 | 19,401 | 6,008 | 3,437 | 29,006 |
| 64,167 | 167 | 19,128 | 5,938 | 3,390 | 28,623 |
| 64,168 | 163 | 18,918 | 5,895 | 3,353 | 28,329 |
| 64,169 | 158 | 19,210 | 6,029 | 3,418 | 28,815 |
| 64,170 | 160 | 19,245 | 6,082 | 3,450 | 28,937 |
| 64,171 | 162 | 19,262 | 6,098 | 3,445 | 28,967 |
| 64,172 | 160 | 19,062 | 6,059 | 3,392 | 28,673 |
| 64,173 | 159 | 18,939 | 6,021 | 3,384 | 28,503 |
| 64,174 | 165 | 19,022 | 6,031 | 3,375 | 28,593 |
| 64,175 | 166 | 18,916 | 6,006 | 3,346 | 28,434 |
| 64,176 | 167 | 19,122 | 6,096 | 3,405 | 28,790 |
| 64,177 | 166 | 19,001 | 6,080 | 3,388 | 28,635 |
| 64,178 | 173 | 19,238 | 6,261 | 3,474 | 29,146 |
| 64,179 | 171 | 19,072 | 6,246 | 3,456 | 28,945 |
| 64,180 | 171 | 19,260 | 6,319 | 3,497 | 29,247 |
| 64,181 | 171 | 19,206 | 6,318 | 3,446 | 29,141 |
| 64,182 | 169 | 19,228 | 6,367 | 3,469 | 29,233 |
| 64,183 | 168 | 18,951 | 6,259 | 3,432 | 28,810 |

|        |     |        |       |       |        |
|--------|-----|--------|-------|-------|--------|
| 64,184 | 166 | 19,243 | 6,317 | 3,474 | 29,200 |
| 64,185 | 172 | 19,035 | 6,293 | 3,456 | 28,956 |
| 64,186 | 171 | 18,747 | 6,240 | 3,423 | 28,581 |
| 64,187 | 172 | 18,876 | 6,331 | 3,482 | 28,861 |
| 64,188 | 159 | 18,768 | 6,287 | 3,476 | 28,690 |
| 64,189 | 159 | 18,652 | 6,269 | 3,462 | 28,542 |
| 64,190 | 162 | 18,717 | 6,337 | 3,527 | 28,743 |
| 64,191 | 161 | 18,633 | 6,336 | 3,543 | 28,673 |
| 64,192 | 158 | 18,638 | 6,342 | 3,560 | 28,698 |
| 64,193 | 162 | 18,606 | 6,300 | 3,547 | 28,615 |
| 64,194 | 155 | 18,617 | 6,296 | 3,530 | 28,598 |
| 64,195 | 154 | 18,616 | 6,307 | 3,491 | 28,568 |
| 64,196 | 154 | 18,729 | 6,321 | 3,489 | 28,693 |
| 64,197 | 147 | 18,814 | 6,325 | 3,484 | 28,770 |
| 64,198 | 142 | 18,812 | 6,257 | 3,476 | 28,687 |
| 64,199 | 141 | 19,005 | 6,282 | 3,477 | 28,905 |
| 64,200 | 141 | 19,064 | 6,302 | 3,478 | 28,985 |
| 64,201 | 142 | 19,139 | 6,295 | 3,468 | 29,044 |
| 64,202 | 142 | 19,126 | 6,285 | 3,483 | 29,036 |
| 64,203 | 144 | 19,112 | 6,286 | 3,480 | 29,022 |
| 64,204 | 144 | 19,339 | 6,347 | 3,531 | 29,361 |
| 64,205 | 149 | 19,297 | 6,340 | 3,518 | 29,304 |
| 64,206 | 153 | 19,271 | 6,303 | 3,510 | 29,237 |
| 64,207 | 160 | 19,163 | 6,222 | 3,480 | 29,025 |
| 64,208 | 159 | 18,997 | 6,202 | 3,428 | 28,786 |
| 64,209 | 155 | 18,835 | 6,143 | 3,418 | 28,551 |
| 64,210 | 158 | 19,019 | 6,188 | 3,443 | 28,808 |
| 64,211 | 154 | 18,664 | 6,098 | 3,419 | 28,335 |
| 64,212 | 154 | 18,601 | 6,097 | 3,421 | 28,273 |
| 64,213 | 156 | 18,440 | 6,089 | 3,401 | 28,086 |
| 64,214 | 159 | 18,239 | 6,031 | 3,371 | 27,800 |
| 64,215 | 157 | 18,126 | 5,967 | 3,346 | 27,596 |

|        |     |        |       |       |        |
|--------|-----|--------|-------|-------|--------|
| 64,216 | 155 | 18,375 | 6,088 | 3,434 | 28,052 |
| 64,217 | 154 | 18,311 | 6,082 | 3,459 | 28,006 |
| 64,218 | 145 | 18,214 | 6,043 | 3,416 | 27,818 |
| 64,219 | 146 | 18,424 | 6,056 | 3,429 | 28,055 |
| 64,220 | 143 | 18,572 | 6,050 | 3,442 | 28,207 |
| 64,221 | 142 | 18,576 | 6,060 | 3,438 | 28,216 |
| 64,222 | 145 | 18,403 | 6,053 | 3,477 | 28,078 |
| 64,223 | 139 | 18,413 | 6,047 | 3,460 | 28,059 |
| 64,224 | 139 | 18,458 | 6,056 | 3,446 | 28,099 |
| 64,225 | 130 | 18,424 | 6,028 | 3,440 | 28,022 |
| 64,226 | 131 | 18,698 | 6,064 | 3,471 | 28,364 |
| 64,227 | 131 | 18,753 | 6,080 | 3,476 | 28,440 |
| 64,228 | 131 | 18,684 | 6,014 | 3,444 | 28,273 |
| 64,229 | 130 | 18,690 | 5,979 | 3,426 | 28,225 |
| 64,230 | 133 | 18,823 | 5,968 | 3,427 | 28,351 |
| 64,231 | 134 | 18,922 | 5,998 | 3,448 | 28,502 |
| 64,232 | 135 | 18,987 | 6,025 | 3,482 | 28,629 |
| 64,233 | 142 | 18,850 | 5,962 | 3,439 | 28,393 |
| 64,234 | 142 | 18,929 | 5,977 | 3,433 | 28,481 |
| 64,235 | 140 | 19,015 | 6,002 | 3,422 | 28,579 |
| 64,236 | 144 | 19,010 | 5,976 | 3,417 | 28,547 |
| 64,237 | 147 | 19,180 | 6,019 | 3,424 | 28,770 |
| 64,238 | 151 | 19,117 | 6,000 | 3,379 | 28,647 |
| 64,239 | 149 | 19,075 | 5,970 | 3,352 | 28,546 |
| 64,240 | 150 | 19,325 | 6,033 | 3,361 | 28,869 |
| 64,241 | 150 | 19,487 | 6,066 | 3,390 | 29,093 |
| 64,242 | 147 | 19,158 | 5,974 | 3,339 | 28,618 |
| 64,243 | 147 | 19,131 | 5,954 | 3,331 | 28,563 |
| 64,244 | 144 | 19,055 | 5,956 | 3,327 | 28,482 |
| 64,245 | 153 | 19,301 | 5,981 | 3,351 | 28,786 |
| 64,246 | 154 | 19,425 | 6,003 | 3,378 | 28,960 |
| 64,247 | 151 | 19,190 | 5,921 | 3,343 | 28,605 |



|        |     |        |       |       |        |
|--------|-----|--------|-------|-------|--------|
| 64,248 | 151 | 19,192 | 5,928 | 3,342 | 28,613 |
| 64,249 | 156 | 19,345 | 5,975 | 3,380 | 28,856 |
| 64,250 | 156 | 19,055 | 5,922 | 3,351 | 28,484 |
| 64,251 | 152 | 18,977 | 5,947 | 3,336 | 28,412 |
| 64,252 | 152 | 18,917 | 5,954 | 3,346 | 28,369 |
| 64,253 | 157 | 19,028 | 6,042 | 3,363 | 28,590 |
| 64,254 | 162 | 19,100 | 5,992 | 3,324 | 28,578 |
| 64,255 | 170 | 19,319 | 6,039 | 3,349 | 28,877 |
| 64,256 | 166 | 19,210 | 6,027 | 3,334 | 28,737 |
| 64,257 | 162 | 18,908 | 5,984 | 3,302 | 28,356 |
| 64,258 | 153 | 18,858 | 5,968 | 3,329 | 28,308 |
| 64,259 | 152 | 18,658 | 5,914 | 3,334 | 28,058 |
| 64,260 | 151 | 18,780 | 5,951 | 3,378 | 28,260 |
| 64,261 | 151 | 18,809 | 5,957 | 3,391 | 28,308 |
| 64,262 | 147 | 18,819 | 5,967 | 3,385 | 28,318 |
| 64,263 | 146 | 18,922 | 5,982 | 3,388 | 28,438 |
| 64,264 | 141 | 19,010 | 5,985 | 3,366 | 28,502 |
| 64,265 | 137 | 18,795 | 5,940 | 3,320 | 28,192 |
| 64,266 | 141 | 18,875 | 5,912 | 3,295 | 28,223 |
| 64,267 | 144 | 18,870 | 5,877 | 3,275 | 28,166 |
| 64,268 | 156 | 19,020 | 5,961 | 3,294 | 28,431 |
| 64,269 | 161 | 18,926 | 5,955 | 3,279 | 28,321 |
| 64,270 | 163 | 18,867 | 5,977 | 3,283 | 28,290 |
| 64,271 | 170 | 18,623 | 5,891 | 3,207 | 27,891 |
| 64,272 | 172 | 18,865 | 5,947 | 3,235 | 28,219 |
| 64,273 | 165 | 18,848 | 5,952 | 3,232 | 28,197 |
| 64,274 | 170 | 18,844 | 5,958 | 3,226 | 28,198 |
| 64,275 | 171 | 18,670 | 5,916 | 3,213 | 27,970 |
| 64,276 | 173 | 18,824 | 5,962 | 3,233 | 28,192 |
| 64,277 | 172 | 18,698 | 5,934 | 3,189 | 27,993 |
| 64,278 | 173 | 18,407 | 5,869 | 3,138 | 27,587 |
| 64,279 | 167 | 18,757 | 5,971 | 3,185 | 28,080 |

|        |     |        |       |       |        |
|--------|-----|--------|-------|-------|--------|
| 64,280 | 166 | 18,481 | 5,904 | 3,150 | 27,701 |
| 64,281 | 164 | 18,463 | 5,884 | 3,150 | 27,661 |
| 64,282 | 159 | 18,422 | 5,900 | 3,124 | 27,605 |
| 64,283 | 161 | 18,648 | 5,974 | 3,149 | 27,932 |
| 64,284 | 150 | 18,163 | 5,821 | 3,085 | 27,219 |
| 64,285 | 151 | 18,315 | 5,829 | 3,110 | 27,405 |
| 64,286 | 149 | 18,469 | 5,872 | 3,132 | 27,622 |
| 64,287 | 145 | 18,248 | 5,834 | 3,088 | 27,315 |
| 64,288 | 142 | 18,175 | 5,830 | 3,090 | 27,237 |
| 64,289 | 139 | 18,239 | 5,847 | 3,113 | 27,338 |
| 64,290 | 136 | 17,862 | 5,735 | 3,029 | 26,762 |
| 64,291 | 141 | 18,029 | 5,763 | 3,055 | 26,988 |
| 64,292 | 140 | 18,214 | 5,846 | 3,078 | 27,278 |
| 64,293 | 148 | 18,405 | 5,928 | 3,101 | 27,582 |
| 64,294 | 150 | 18,428 | 5,951 | 3,104 | 27,633 |
| 64,295 | 149 | 18,446 | 5,959 | 3,098 | 27,652 |
| 64,296 | 144 | 18,434 | 5,964 | 3,106 | 27,648 |
| 64,297 | 142 | 18,256 | 5,942 | 3,090 | 27,430 |
| 64,298 | 138 | 18,032 | 5,887 | 3,056 | 27,113 |
| 64,299 | 137 | 18,092 | 5,901 | 3,066 | 27,196 |
| 64,300 | 138 | 18,065 | 5,916 | 3,086 | 27,205 |
| 64,301 | 135 | 17,412 | 5,611 | 2,949 | 26,107 |
| 64,302 | 137 | 17,683 | 5,643 | 2,977 | 26,440 |
| 64,303 | 137 | 17,837 | 5,662 | 3,003 | 26,639 |
| 64,304 | 139 | 17,837 | 5,666 | 2,998 | 26,640 |
| 64,305 | 132 | 18,077 | 5,737 | 3,032 | 26,978 |
| 64,306 | 132 | 18,235 | 5,800 | 3,051 | 27,218 |
| 64,307 | 131 | 18,062 | 5,684 | 2,989 | 26,866 |
| 64,308 | 131 | 18,194 | 5,711 | 2,981 | 27,017 |
| 64,309 | 131 | 18,266 | 5,695 | 2,970 | 27,062 |
| 64,310 | 131 | 18,591 | 5,808 | 3,005 | 27,535 |
| 64,311 | 130 | 18,387 | 5,750 | 2,976 | 27,243 |

|        |     |        |       |       |        |
|--------|-----|--------|-------|-------|--------|
| 64,312 | 127 | 18,685 | 5,820 | 3,003 | 27,635 |
| 64,313 | 128 | 18,627 | 5,772 | 2,973 | 27,500 |
| 64,314 | 128 | 18,553 | 5,724 | 2,951 | 27,356 |
| 64,315 | 128 | 18,808 | 5,790 | 2,988 | 27,714 |
| 64,316 | 125 | 19,004 | 5,841 | 3,026 | 27,996 |
| 64,317 | 122 | 18,700 | 5,719 | 2,967 | 27,508 |
| 64,318 | 120 | 18,983 | 5,796 | 3,001 | 27,900 |
| 64,319 | 109 | 19,289 | 5,862 | 3,055 | 28,315 |
| 64,320 | 104 | 19,386 | 5,858 | 3,081 | 28,429 |
| 64,321 | 109 | 19,404 | 5,807 | 3,075 | 28,395 |
| 64,322 | 105 | 19,405 | 5,783 | 3,066 | 28,359 |
| 64,323 | 107 | 19,480 | 5,762 | 3,070 | 28,419 |
| 64,324 | 102 | 19,328 | 5,718 | 3,052 | 28,200 |
| 64,325 | 110 | 19,599 | 5,728 | 3,087 | 28,524 |
| 64,326 | 112 | 19,448 | 5,652 | 3,039 | 28,251 |
| 64,327 | 124 | 19,692 | 5,711 | 3,059 | 28,586 |
| 64,328 | 127 | 19,625 | 5,685 | 3,061 | 28,498 |
| 64,329 | 129 | 19,420 | 5,614 | 3,026 | 28,189 |
| 64,330 | 132 | 19,440 | 5,633 | 3,025 | 28,230 |
| 64,331 | 138 | 19,462 | 5,623 | 3,009 | 28,232 |
| 64,332 | 144 | 19,512 | 5,600 | 2,988 | 28,244 |
| 64,333 | 144 | 19,480 | 5,570 | 2,998 | 28,192 |
| 64,334 | 142 | 19,425 | 5,552 | 2,994 | 28,113 |
| 64,335 | 141 | 19,459 | 5,562 | 2,997 | 28,159 |
| 64,336 | 141 | 19,614 | 5,687 | 3,022 | 28,464 |
| 64,337 | 147 | 19,465 | 5,630 | 3,003 | 28,245 |
| 64,338 | 146 | 19,457 | 5,639 | 3,010 | 28,252 |
| 64,339 | 146 | 19,739 | 5,687 | 3,032 | 28,604 |
| 64,340 | 136 | 18,998 | 5,435 | 2,920 | 27,489 |
| 64,341 | 136 | 19,129 | 5,477 | 2,938 | 27,680 |
| 64,342 | 131 | 19,405 | 5,559 | 2,984 | 28,079 |
| 64,343 | 131 | 19,322 | 5,546 | 2,988 | 27,987 |

|        |     |        |       |       |        |
|--------|-----|--------|-------|-------|--------|
| 64,344 | 130 | 19,486 | 5,649 | 3,050 | 28,315 |
| 64,345 | 129 | 19,574 | 5,719 | 3,102 | 28,524 |
| 64,346 | 128 | 19,557 | 5,714 | 3,119 | 28,518 |
| 64,347 | 124 | 19,564 | 5,715 | 3,114 | 28,517 |
| 64,348 | 122 | 19,366 | 5,634 | 3,077 | 28,199 |
| 64,349 | 122 | 19,569 | 5,686 | 3,094 | 28,471 |
| 64,350 | 119 | 19,568 | 5,664 | 3,093 | 28,444 |
| 64,351 | 118 | 19,681 | 5,682 | 3,091 | 28,572 |
| 64,352 | 115 | 19,513 | 5,624 | 3,080 | 28,332 |
| 64,353 | 118 | 19,883 | 5,754 | 3,154 | 28,909 |
| 64,354 | 112 | 19,729 | 5,719 | 3,136 | 28,696 |
| 64,355 | 112 | 19,801 | 5,779 | 3,187 | 28,879 |
| 64,356 | 109 | 19,638 | 5,755 | 3,199 | 28,701 |
| 64,357 | 109 | 19,360 | 5,692 | 3,184 | 28,345 |
| 64,358 | 107 | 19,216 | 5,689 | 3,192 | 28,204 |
| 64,359 | 108 | 19,035 | 5,669 | 3,172 | 27,984 |
| 64,360 | 118 | 19,205 | 5,720 | 3,204 | 28,247 |
| 64,361 | 122 | 18,967 | 5,647 | 3,165 | 27,901 |
| 64,362 | 122 | 18,736 | 5,588 | 3,124 | 27,570 |
| 64,363 | 123 | 18,833 | 5,647 | 3,186 | 27,789 |
| 64,364 | 129 | 18,737 | 5,659 | 3,168 | 27,693 |
| 64,365 | 131 | 18,499 | 5,629 | 3,159 | 27,418 |
| 64,366 | 132 | 18,441 | 5,608 | 3,152 | 27,333 |
| 64,367 | 128 | 18,384 | 5,593 | 3,138 | 27,243 |
| 64,368 | 127 | 18,389 | 5,591 | 3,143 | 27,250 |
| 64,369 | 132 | 18,399 | 5,584 | 3,135 | 27,250 |
| 64,370 | 133 | 18,282 | 5,560 | 3,122 | 27,097 |
| 64,371 | 134 | 18,563 | 5,604 | 3,169 | 27,470 |
| 64,372 | 139 | 18,857 | 5,690 | 3,211 | 27,897 |
| 64,373 | 144 | 18,973 | 5,728 | 3,257 | 28,102 |
| 64,374 | 141 | 19,011 | 5,732 | 3,255 | 28,139 |
| 64,375 | 140 | 19,028 | 5,752 | 3,244 | 28,164 |

|        |     |        |       |       |        |
|--------|-----|--------|-------|-------|--------|
| 64,376 | 139 | 19,310 | 5,895 | 3,312 | 28,656 |
| 64,377 | 139 | 19,481 | 5,943 | 3,348 | 28,911 |
| 64,378 | 130 | 19,301 | 5,883 | 3,328 | 28,642 |
| 64,379 | 129 | 19,301 | 5,893 | 3,346 | 28,669 |
| 64,380 | 130 | 19,243 | 5,887 | 3,359 | 28,619 |
| 64,381 | 127 | 19,380 | 5,937 | 3,408 | 28,852 |
| 64,382 | 126 | 19,481 | 5,954 | 3,430 | 28,991 |
| 64,383 | 125 | 19,312 | 5,922 | 3,428 | 28,787 |
| 64,384 | 125 | 19,104 | 5,911 | 3,411 | 28,551 |
| 64,385 | 129 | 19,485 | 6,022 | 3,488 | 29,124 |
| 64,386 | 125 | 19,246 | 5,916 | 3,481 | 28,768 |
| 64,387 | 129 | 19,444 | 5,948 | 3,502 | 29,023 |
| 64,388 | 127 | 19,441 | 5,932 | 3,509 | 29,009 |
| 64,389 | 127 | 19,424 | 5,907 | 3,514 | 28,972 |
| 64,390 | 140 | 20,051 | 6,080 | 3,637 | 29,908 |
| 64,391 | 143 | 20,121 | 6,092 | 3,669 | 30,025 |
| 64,392 | 150 | 20,179 | 6,125 | 3,701 | 30,155 |
| 64,393 | 151 | 20,187 | 6,122 | 3,702 | 30,162 |
| 64,394 | 152 | 20,434 | 6,155 | 3,717 | 30,458 |
| 64,395 | 151 | 20,412 | 6,086 | 3,684 | 30,333 |
| 64,396 | 151 | 20,486 | 6,091 | 3,692 | 30,420 |
| 64,397 | 151 | 20,477 | 6,129 | 3,703 | 30,460 |
| 64,398 | 153 | 20,706 | 6,214 | 3,726 | 30,799 |
| 64,399 | 158 | 20,893 | 6,277 | 3,770 | 31,098 |
| 64,400 | 159 | 20,657 | 6,222 | 3,739 | 30,777 |
| 64,401 | 159 | 20,445 | 6,158 | 3,715 | 30,477 |
| 64,402 | 168 | 20,801 | 6,352 | 3,827 | 31,148 |
| 64,403 | 166 | 20,619 | 6,349 | 3,801 | 30,935 |
| 64,404 | 170 | 20,523 | 6,417 | 3,836 | 30,946 |
| 64,405 | 176 | 20,594 | 6,433 | 3,830 | 31,033 |
| 64,406 | 173 | 20,733 | 6,434 | 3,830 | 31,170 |
| 64,407 | 174 | 20,978 | 6,456 | 3,829 | 31,437 |

|        |     |        |       |       |        |
|--------|-----|--------|-------|-------|--------|
| 64,408 | 176 | 21,098 | 6,487 | 3,821 | 31,582 |
| 64,409 | 177 | 21,141 | 6,474 | 3,821 | 31,613 |
| 64,410 | 173 | 21,080 | 6,447 | 3,803 | 31,503 |
| 64,411 | 167 | 21,329 | 6,583 | 3,886 | 31,965 |
| 64,412 | 166 | 21,297 | 6,564 | 3,889 | 31,916 |
| 64,413 | 165 | 21,123 | 6,490 | 3,835 | 31,613 |
| 64,414 | 166 | 21,172 | 6,486 | 3,864 | 31,688 |
| 64,415 | 163 | 20,992 | 6,423 | 3,821 | 31,399 |
| 64,416 | 163 | 21,056 | 6,420 | 3,827 | 31,466 |
| 64,417 | 166 | 21,327 | 6,493 | 3,852 | 31,838 |
| 64,418 | 169 | 21,272 | 6,504 | 3,843 | 31,788 |
| 64,419 | 167 | 21,042 | 6,458 | 3,818 | 31,485 |
| 64,420 | 164 | 21,229 | 6,524 | 3,869 | 31,786 |
| 64,421 | 164 | 20,818 | 6,454 | 3,797 | 31,233 |
| 64,422 | 165 | 21,050 | 6,519 | 3,826 | 31,560 |
| 64,423 | 158 | 21,060 | 6,513 | 3,841 | 31,572 |
| 64,424 | 152 | 20,799 | 6,490 | 3,801 | 31,242 |
| 64,425 | 152 | 20,995 | 6,570 | 3,835 | 31,552 |
| 64,426 | 156 | 21,296 | 6,632 | 3,889 | 31,973 |
| 64,427 | 155 | 21,221 | 6,626 | 3,886 | 31,888 |
| 64,428 | 151 | 21,091 | 6,652 | 3,898 | 31,792 |
| 64,429 | 145 | 20,957 | 6,592 | 3,875 | 31,569 |
| 64,430 | 143 | 21,222 | 6,657 | 3,901 | 31,923 |
| 64,431 | 143 | 21,241 | 6,661 | 3,914 | 31,959 |
| 64,432 | 155 | 21,531 | 6,805 | 3,974 | 32,465 |
| 64,433 | 153 | 21,314 | 6,762 | 3,950 | 32,179 |
| 64,434 | 155 | 21,544 | 6,812 | 3,955 | 32,466 |
| 64,435 | 156 | 21,526 | 6,815 | 3,944 | 32,441 |
| 64,436 | 155 | 21,559 | 6,796 | 3,926 | 32,436 |
| 64,437 | 155 | 21,482 | 6,793 | 3,917 | 32,347 |
| 64,438 | 153 | 21,567 | 6,817 | 3,961 | 32,498 |
| 64,439 | 156 | 21,442 | 6,841 | 3,919 | 32,358 |

|        |     |        |       |       |        |
|--------|-----|--------|-------|-------|--------|
| 64,440 | 156 | 21,551 | 6,859 | 3,941 | 32,507 |
| 64,441 | 144 | 21,716 | 6,906 | 3,970 | 32,736 |
| 64,442 | 140 | 21,701 | 6,894 | 3,953 | 32,688 |
| 64,443 | 134 | 21,592 | 6,823 | 3,930 | 32,479 |
| 64,444 | 133 | 21,529 | 6,821 | 3,929 | 32,412 |
| 64,445 | 130 | 21,537 | 6,850 | 3,945 | 32,462 |
| 64,446 | 130 | 21,585 | 6,844 | 3,945 | 32,504 |
| 64,447 | 130 | 21,641 | 6,838 | 3,940 | 32,549 |
| 64,448 | 128 | 21,735 | 6,793 | 3,952 | 32,608 |
| 64,449 | 130 | 22,059 | 6,862 | 3,996 | 33,047 |
| 64,450 | 132 | 22,018 | 6,796 | 3,964 | 32,910 |
| 64,451 | 127 | 22,164 | 6,816 | 3,985 | 33,092 |
| 64,452 | 128 | 22,286 | 6,834 | 3,979 | 33,227 |
| 64,453 | 129 | 22,259 | 6,782 | 3,944 | 33,114 |
| 64,454 | 122 | 21,732 | 6,516 | 3,814 | 32,184 |
| 64,455 | 124 | 22,249 | 6,591 | 3,867 | 32,831 |
| 64,456 | 122 | 22,423 | 6,628 | 3,895 | 33,068 |
| 64,457 | 122 | 22,474 | 6,633 | 3,909 | 33,138 |
| 64,458 | 120 | 22,722 | 6,658 | 3,955 | 33,455 |
| 64,459 | 119 | 22,787 | 6,649 | 3,975 | 33,530 |
| 64,460 | 121 | 22,902 | 6,678 | 3,990 | 33,691 |
| 64,461 | 121 | 22,835 | 6,625 | 3,971 | 33,552 |
| 64,462 | 123 | 22,872 | 6,601 | 3,949 | 33,545 |
| 64,463 | 123 | 22,990 | 6,607 | 3,945 | 33,665 |
| 64,464 | 121 | 22,962 | 6,618 | 3,942 | 33,643 |
| 64,465 | 127 | 23,139 | 6,733 | 3,983 | 33,982 |
| 64,466 | 124 | 23,203 | 6,729 | 3,995 | 34,051 |
| 64,467 | 129 | 23,143 | 6,674 | 3,977 | 33,923 |
| 64,468 | 141 | 23,163 | 6,681 | 3,977 | 33,962 |
| 64,469 | 137 | 23,117 | 6,634 | 3,971 | 33,859 |
| 64,470 | 144 | 23,365 | 6,696 | 3,973 | 34,178 |
| 64,471 | 145 | 23,486 | 6,703 | 3,981 | 34,315 |

|        |     |        |       |       |        |
|--------|-----|--------|-------|-------|--------|
| 64,472 | 149 | 23,454 | 6,704 | 3,989 | 34,296 |
| 64,473 | 148 | 23,481 | 6,668 | 3,985 | 34,282 |
| 64,474 | 150 | 23,527 | 6,595 | 3,970 | 34,242 |
| 64,475 | 153 | 23,532 | 6,560 | 3,977 | 34,222 |
| 64,476 | 153 | 23,884 | 6,620 | 4,024 | 34,681 |
| 64,477 | 149 | 23,744 | 6,550 | 3,988 | 34,431 |
| 64,478 | 149 | 24,071 | 6,563 | 3,967 | 34,750 |
| 64,479 | 150 | 24,150 | 6,542 | 3,963 | 34,805 |
| 64,480 | 156 | 24,409 | 6,592 | 4,010 | 35,167 |
| 64,481 | 161 | 24,582 | 6,626 | 4,013 | 35,382 |
| 64,482 | 158 | 24,635 | 6,589 | 4,013 | 35,395 |
| 64,483 | 149 | 24,490 | 6,529 | 3,992 | 35,160 |
| 64,484 | 155 | 24,204 | 6,460 | 3,954 | 34,773 |
| 64,485 | 152 | 23,946 | 6,404 | 3,941 | 34,443 |
| 64,486 | 150 | 24,012 | 6,459 | 4,008 | 34,629 |
| 64,487 | 151 | 23,921 | 6,465 | 3,998 | 34,535 |
| 64,488 | 151 | 24,117 | 6,501 | 4,033 | 34,802 |
| 64,489 | 151 | 24,312 | 6,527 | 4,022 | 35,012 |
| 64,490 | 147 | 24,224 | 6,491 | 4,023 | 34,885 |
| 64,491 | 148 | 24,194 | 6,488 | 3,998 | 34,828 |
| 64,492 | 149 | 24,186 | 6,483 | 3,977 | 34,795 |
| 64,493 | 148 | 23,912 | 6,410 | 3,913 | 34,383 |
| 64,494 | 149 | 24,288 | 6,453 | 3,955 | 34,845 |
| 64,495 | 153 | 24,187 | 6,416 | 3,927 | 34,683 |
| 64,496 | 153 | 23,810 | 6,309 | 3,846 | 34,118 |
| 64,497 | 156 | 23,851 | 6,316 | 3,843 | 34,166 |
| 64,498 | 155 | 23,644 | 6,263 | 3,818 | 33,880 |
| 64,499 | 158 | 23,737 | 6,327 | 3,850 | 34,072 |
| 64,500 | 160 | 23,513 | 6,268 | 3,825 | 33,766 |
| 64,501 | 157 | 22,968 | 6,155 | 3,736 | 33,016 |
| 64,502 | 157 | 22,959 | 6,144 | 3,738 | 32,998 |
| 64,503 | 151 | 22,841 | 6,093 | 3,713 | 32,798 |



|        |     |        |       |       |        |
|--------|-----|--------|-------|-------|--------|
| 64,504 | 151 | 22,789 | 6,120 | 3,721 | 32,781 |
| 64,505 | 151 | 22,676 | 6,135 | 3,697 | 32,659 |
| 64,506 | 152 | 22,462 | 6,090 | 3,671 | 32,375 |
| 64,507 | 148 | 22,220 | 6,032 | 3,648 | 32,048 |
| 64,508 | 148 | 22,263 | 6,048 | 3,652 | 32,111 |
| 64,509 | 149 | 22,190 | 6,059 | 3,643 | 32,041 |
| 64,510 | 147 | 22,271 | 6,063 | 3,674 | 32,155 |
| 64,511 | 147 | 22,141 | 6,008 | 3,634 | 31,930 |
| 64,512 | 143 | 22,082 | 5,987 | 3,655 | 31,867 |
| 64,513 | 143 | 22,131 | 5,995 | 3,660 | 31,929 |
| 64,514 | 140 | 22,004 | 5,952 | 3,619 | 31,715 |
| 64,515 | 139 | 21,971 | 5,908 | 3,589 | 31,607 |
| 64,516 | 138 | 22,016 | 5,896 | 3,584 | 31,634 |
| 64,517 | 133 | 21,702 | 5,844 | 3,566 | 31,245 |
| 64,518 | 144 | 21,917 | 5,885 | 3,579 | 31,525 |
| 64,519 | 133 | 21,512 | 5,757 | 3,518 | 30,920 |
| 64,520 | 130 | 21,492 | 5,728 | 3,503 | 30,853 |
| 64,521 | 133 | 21,428 | 5,718 | 3,479 | 30,758 |
| 64,522 | 131 | 21,694 | 5,765 | 3,520 | 31,110 |
| 64,523 | 126 | 21,380 | 5,665 | 3,475 | 30,646 |
| 64,524 | 128 | 21,677 | 5,718 | 3,498 | 31,021 |
| 64,525 | 125 | 21,340 | 5,673 | 3,434 | 30,572 |
| 64,526 | 126 | 21,261 | 5,638 | 3,422 | 30,447 |
| 64,527 | 126 | 21,138 | 5,625 | 3,429 | 30,318 |
| 64,528 | 124 | 21,268 | 5,658 | 3,430 | 30,480 |
| 64,529 | 121 | 21,301 | 5,653 | 3,479 | 30,554 |
| 64,530 | 118 | 21,274 | 5,596 | 3,461 | 30,449 |
| 64,531 | 112 | 21,234 | 5,553 | 3,448 | 30,347 |
| 64,532 | 104 | 20,920 | 5,494 | 3,430 | 29,948 |
| 64,533 | 100 | 20,766 | 5,470 | 3,407 | 29,743 |
| 64,534 | 102 | 20,856 | 5,439 | 3,386 | 29,783 |
| 64,535 | 93  | 20,631 | 5,337 | 3,347 | 29,408 |

|        |     |        |       |       |        |
|--------|-----|--------|-------|-------|--------|
| 64,536 | 97  | 20,841 | 5,364 | 3,369 | 29,671 |
| 64,537 | 98  | 20,887 | 5,353 | 3,340 | 29,678 |
| 64,538 | 95  | 20,822 | 5,323 | 3,337 | 29,577 |
| 64,539 | 94  | 20,758 | 5,315 | 3,308 | 29,475 |
| 64,540 | 99  | 20,622 | 5,261 | 3,299 | 29,281 |
| 64,541 | 100 | 20,418 | 5,207 | 3,269 | 28,994 |
| 64,542 | 105 | 20,692 | 5,251 | 3,295 | 29,343 |
| 64,543 | 109 | 20,604 | 5,240 | 3,300 | 29,253 |
| 64,544 | 110 | 20,565 | 5,239 | 3,310 | 29,224 |
| 64,545 | 110 | 20,525 | 5,222 | 3,294 | 29,151 |
| 64,546 | 110 | 20,566 | 5,220 | 3,315 | 29,211 |
| 64,547 | 114 | 20,647 | 5,237 | 3,317 | 29,315 |
| 64,548 | 115 | 20,744 | 5,227 | 3,317 | 29,403 |
| 64,549 | 112 | 20,631 | 5,255 | 3,307 | 29,305 |
| 64,550 | 115 | 20,692 | 5,273 | 3,319 | 29,399 |
| 64,551 | 108 | 20,732 | 5,272 | 3,317 | 29,429 |
| 64,552 | 115 | 20,838 | 5,262 | 3,321 | 29,536 |
| 64,553 | 116 | 20,751 | 5,218 | 3,282 | 29,367 |
| 64,554 | 116 | 21,083 | 5,313 | 3,342 | 29,854 |
| 64,555 | 122 | 21,546 | 5,380 | 3,384 | 30,432 |
| 64,556 | 122 | 21,392 | 5,324 | 3,364 | 30,202 |
| 64,557 | 120 | 21,515 | 5,352 | 3,375 | 30,362 |
| 64,558 | 123 | 21,380 | 5,343 | 3,361 | 30,207 |
| 64,559 | 126 | 21,437 | 5,398 | 3,404 | 30,365 |
| 64,560 | 123 | 21,563 | 5,441 | 3,403 | 30,530 |
| 64,561 | 124 | 21,479 | 5,409 | 3,371 | 30,383 |
| 64,562 | 127 | 21,765 | 5,454 | 3,398 | 30,744 |
| 64,563 | 130 | 21,643 | 5,438 | 3,375 | 30,586 |
| 64,564 | 128 | 21,649 | 5,431 | 3,384 | 30,592 |
| 64,565 | 129 | 21,694 | 5,476 | 3,409 | 30,708 |
| 64,566 | 133 | 21,880 | 5,512 | 3,471 | 30,996 |
| 64,567 | 138 | 21,757 | 5,470 | 3,432 | 30,797 |

|        |     |        |       |       |        |
|--------|-----|--------|-------|-------|--------|
| 64,568 | 138 | 21,802 | 5,476 | 3,429 | 30,845 |
| 64,569 | 130 | 21,953 | 5,526 | 3,481 | 31,090 |
| 64,570 | 128 | 21,840 | 5,529 | 3,483 | 30,980 |
| 64,571 | 127 | 22,133 | 5,663 | 3,563 | 31,486 |
| 64,572 | 123 | 22,209 | 5,684 | 3,574 | 31,590 |
| 64,573 | 124 | 22,400 | 5,745 | 3,608 | 31,877 |
| 64,574 | 123 | 22,163 | 5,700 | 3,571 | 31,557 |
| 64,575 | 120 | 22,056 | 5,729 | 3,600 | 31,505 |
| 64,576 | 119 | 22,324 | 5,794 | 3,634 | 31,871 |
| 64,577 | 117 | 21,975 | 5,699 | 3,544 | 31,335 |
| 64,578 | 117 | 22,255 | 5,776 | 3,594 | 31,742 |
| 64,579 | 124 | 22,438 | 5,853 | 3,646 | 32,061 |
| 64,580 | 130 | 22,116 | 5,861 | 3,610 | 31,717 |
| 64,581 | 134 | 21,809 | 5,828 | 3,588 | 31,359 |
| 64,582 | 134 | 21,558 | 5,790 | 3,549 | 31,031 |
| 64,583 | 137 | 21,665 | 5,841 | 3,566 | 31,209 |
| 64,584 | 136 | 21,741 | 5,838 | 3,580 | 31,295 |
| 64,585 | 135 | 21,623 | 5,892 | 3,607 | 31,257 |
| 64,586 | 133 | 21,645 | 5,904 | 3,573 | 31,255 |
| 64,587 | 137 | 21,740 | 5,906 | 3,589 | 31,372 |
| 64,588 | 139 | 21,918 | 5,963 | 3,610 | 31,630 |
| 64,589 | 145 | 21,949 | 5,942 | 3,596 | 31,632 |
| 64,590 | 145 | 21,965 | 5,946 | 3,602 | 31,658 |
| 64,591 | 140 | 21,879 | 6,013 | 3,633 | 31,665 |
| 64,592 | 139 | 21,803 | 6,008 | 3,637 | 31,587 |
| 64,593 | 131 | 21,809 | 5,953 | 3,630 | 31,523 |
| 64,594 | 134 | 21,901 | 6,049 | 3,686 | 31,770 |
| 64,595 | 133 | 21,995 | 6,063 | 3,724 | 31,915 |
| 64,596 | 129 | 21,663 | 5,997 | 3,706 | 31,495 |
| 64,597 | 129 | 21,554 | 6,047 | 3,725 | 31,455 |
| 64,598 | 123 | 21,467 | 6,051 | 3,729 | 31,370 |
| 64,599 | 122 | 21,515 | 6,063 | 3,717 | 31,417 |

|        |     |        |       |       |        |
|--------|-----|--------|-------|-------|--------|
| 64,600 | 121 | 21,403 | 5,995 | 3,701 | 31,220 |
| 64,601 | 121 | 21,324 | 5,988 | 3,709 | 31,142 |
| 64,602 | 119 | 21,445 | 6,030 | 3,742 | 31,336 |
| 64,603 | 118 | 21,726 | 6,101 | 3,801 | 31,746 |
| 64,604 | 124 | 21,979 | 6,167 | 3,849 | 32,119 |
| 64,605 | 122 | 21,852 | 6,166 | 3,847 | 31,987 |
| 64,606 | 122 | 21,985 | 6,222 | 3,920 | 32,249 |
| 64,607 | 121 | 22,009 | 6,261 | 3,949 | 32,340 |
| 64,608 | 121 | 22,139 | 6,261 | 3,960 | 32,481 |
| 64,609 | 116 | 22,232 | 6,232 | 3,951 | 32,531 |
| 64,610 | 119 | 22,977 | 6,377 | 4,025 | 33,498 |
| 64,611 | 117 | 22,580 | 6,309 | 3,963 | 32,969 |
| 64,612 | 117 | 22,876 | 6,350 | 4,015 | 33,358 |
| 64,613 | 116 | 23,228 | 6,429 | 4,081 | 33,854 |
| 64,614 | 111 | 22,845 | 6,336 | 4,037 | 33,329 |
| 64,615 | 117 | 23,220 | 6,391 | 4,089 | 33,817 |
| 64,616 | 114 | 23,167 | 6,386 | 4,090 | 33,757 |
| 64,617 | 111 | 23,153 | 6,406 | 4,080 | 33,750 |
| 64,618 | 103 | 23,117 | 6,415 | 4,108 | 33,743 |
| 64,619 | 103 | 22,985 | 6,441 | 4,117 | 33,646 |
| 64,620 | 103 | 23,192 | 6,467 | 4,163 | 33,925 |
| 64,621 | 114 | 23,471 | 6,482 | 4,165 | 34,232 |
| 64,622 | 118 | 23,538 | 6,504 | 4,159 | 34,319 |
| 64,623 | 114 | 22,954 | 6,357 | 4,065 | 33,490 |
| 64,624 | 115 | 23,112 | 6,381 | 4,110 | 33,718 |
| 64,625 | 117 | 23,406 | 6,442 | 4,157 | 34,122 |
| 64,626 | 119 | 23,160 | 6,387 | 4,125 | 33,791 |
| 64,627 | 119 | 22,787 | 6,316 | 4,095 | 33,317 |
| 64,628 | 123 | 23,334 | 6,459 | 4,194 | 34,110 |
| 64,629 | 130 | 23,381 | 6,438 | 4,207 | 34,156 |
| 64,630 | 122 | 23,387 | 6,402 | 4,208 | 34,119 |
| 64,631 | 122 | 23,445 | 6,349 | 4,195 | 34,111 |

|        |     |        |       |       |        |
|--------|-----|--------|-------|-------|--------|
| 64,632 | 116 | 23,262 | 6,261 | 4,145 | 33,784 |
| 64,633 | 117 | 23,272 | 6,267 | 4,155 | 33,811 |
| 64,634 | 117 | 23,594 | 6,326 | 4,180 | 34,217 |
| 64,635 | 116 | 23,493 | 6,288 | 4,139 | 34,036 |
| 64,636 | 116 | 23,600 | 6,272 | 4,150 | 34,138 |
| 64,637 | 117 | 23,799 | 6,315 | 4,214 | 34,445 |
| 64,638 | 114 | 23,844 | 6,359 | 4,248 | 34,565 |
| 64,639 | 112 | 23,820 | 6,364 | 4,269 | 34,565 |
| 64,640 | 108 | 23,861 | 6,364 | 4,272 | 34,605 |
| 64,641 | 108 | 23,695 | 6,293 | 4,246 | 34,342 |
| 64,642 | 108 | 23,823 | 6,336 | 4,275 | 34,542 |
| 64,643 | 105 | 23,873 | 6,366 | 4,296 | 34,640 |
| 64,644 | 104 | 23,680 | 6,329 | 4,281 | 34,394 |
| 64,645 | 106 | 23,823 | 6,289 | 4,258 | 34,476 |
| 64,646 | 107 | 23,643 | 6,254 | 4,220 | 34,224 |
| 64,647 | 107 | 23,459 | 6,179 | 4,196 | 33,941 |
| 64,648 | 115 | 23,525 | 6,182 | 4,186 | 34,008 |
| 64,649 | 117 | 23,597 | 6,176 | 4,197 | 34,087 |
| 64,650 | 126 | 23,876 | 6,202 | 4,235 | 34,439 |
| 64,651 | 128 | 23,681 | 6,159 | 4,193 | 34,161 |
| 64,652 | 126 | 23,473 | 6,107 | 4,158 | 33,864 |
| 64,653 | 132 | 23,879 | 6,210 | 4,250 | 34,471 |
| 64,654 | 132 | 23,748 | 6,137 | 4,206 | 34,223 |
| 64,655 | 126 | 23,580 | 6,065 | 4,183 | 33,954 |
| 64,656 | 126 | 23,847 | 6,097 | 4,220 | 34,290 |
| 64,657 | 129 | 23,899 | 6,059 | 4,178 | 34,265 |
| 64,658 | 128 | 23,682 | 5,971 | 4,133 | 33,914 |
| 64,659 | 128 | 23,479 | 5,904 | 4,083 | 33,594 |
| 64,660 | 133 | 23,764 | 5,984 | 4,118 | 33,999 |
| 64,661 | 137 | 23,419 | 5,933 | 4,094 | 33,583 |
| 64,662 | 136 | 23,152 | 5,850 | 4,054 | 33,192 |
| 64,663 | 141 | 23,269 | 5,873 | 4,037 | 33,320 |

|        |     |        |       |       |        |
|--------|-----|--------|-------|-------|--------|
| 64,664 | 152 | 23,346 | 5,841 | 4,023 | 33,362 |
| 64,665 | 152 | 23,415 | 5,833 | 4,006 | 33,406 |
| 64,666 | 155 | 23,790 | 5,889 | 4,052 | 33,886 |
| 64,667 | 157 | 23,700 | 5,852 | 4,026 | 33,735 |
| 64,668 | 164 | 23,705 | 5,842 | 4,002 | 33,713 |
| 64,669 | 171 | 23,734 | 5,833 | 3,990 | 33,728 |
| 64,670 | 172 | 23,701 | 5,835 | 3,961 | 33,669 |
| 64,671 | 173 | 23,585 | 5,824 | 3,953 | 33,535 |
| 64,672 | 166 | 23,293 | 5,793 | 3,958 | 33,210 |
| 64,673 | 169 | 22,958 | 5,713 | 3,920 | 32,760 |
| 64,674 | 169 | 22,618 | 5,650 | 3,884 | 32,321 |
| 64,675 | 168 | 22,584 | 5,688 | 3,909 | 32,349 |
| 64,676 | 163 | 22,474 | 5,659 | 3,907 | 32,203 |
| 64,677 | 164 | 22,242 | 5,614 | 3,891 | 31,911 |
| 64,678 | 165 | 22,332 | 5,587 | 3,891 | 31,975 |
| 64,679 | 166 | 22,550 | 5,602 | 3,908 | 32,226 |
| 64,680 | 168 | 22,102 | 5,529 | 3,839 | 31,638 |
| 64,681 | 175 | 22,345 | 5,588 | 3,858 | 31,966 |
| 64,682 | 170 | 22,409 | 5,589 | 3,858 | 32,026 |
| 64,683 | 172 | 22,553 | 5,602 | 3,874 | 32,201 |
| 64,684 | 175 | 22,833 | 5,660 | 3,910 | 32,578 |
| 64,685 | 177 | 22,710 | 5,621 | 3,924 | 32,432 |
| 64,686 | 177 | 22,626 | 5,599 | 3,917 | 32,319 |
| 64,687 | 177 | 22,528 | 5,588 | 3,928 | 32,221 |
| 64,688 | 180 | 22,657 | 5,594 | 3,911 | 32,342 |
| 64,689 | 179 | 22,373 | 5,524 | 3,851 | 31,927 |
| 64,690 | 181 | 22,506 | 5,521 | 3,860 | 32,068 |
| 64,691 | 185 | 22,595 | 5,575 | 3,866 | 32,221 |
| 64,692 | 186 | 22,626 | 5,558 | 3,859 | 32,229 |
| 64,693 | 187 | 22,770 | 5,561 | 3,857 | 32,375 |
| 64,694 | 189 | 22,737 | 5,544 | 3,836 | 32,306 |
| 64,695 | 189 | 23,149 | 5,635 | 3,883 | 32,856 |

|        |     |        |       |       |        |
|--------|-----|--------|-------|-------|--------|
| 64,696 | 188 | 23,374 | 5,676 | 3,915 | 33,153 |
| 64,697 | 185 | 23,073 | 5,576 | 3,837 | 32,671 |
| 64,698 | 186 | 23,570 | 5,641 | 3,871 | 33,268 |
| 64,699 | 177 | 23,678 | 5,652 | 3,887 | 33,394 |
| 64,700 | 175 | 23,832 | 5,728 | 3,945 | 33,680 |
| 64,701 | 166 | 23,695 | 5,703 | 3,916 | 33,480 |
| 64,702 | 163 | 23,837 | 5,740 | 3,935 | 33,675 |
| 64,703 | 165 | 23,934 | 5,772 | 3,933 | 33,804 |
| 64,704 | 159 | 23,873 | 5,768 | 3,937 | 33,737 |
| 64,705 | 165 | 23,454 | 5,734 | 3,875 | 33,228 |
| 64,706 | 165 | 23,332 | 5,699 | 3,830 | 33,026 |
| 64,707 | 169 | 23,682 | 5,745 | 3,865 | 33,461 |
| 64,708 | 163 | 23,466 | 5,733 | 3,855 | 33,217 |
| 64,709 | 163 | 23,055 | 5,647 | 3,803 | 32,668 |
| 64,710 | 163 | 22,813 | 5,627 | 3,796 | 32,399 |
| 64,711 | 165 | 22,811 | 5,623 | 3,823 | 32,422 |
| 64,712 | 158 | 22,562 | 5,537 | 3,766 | 32,023 |
| 64,713 | 157 | 22,665 | 5,565 | 3,804 | 32,191 |
| 64,714 | 154 | 22,565 | 5,556 | 3,809 | 32,084 |
| 64,715 | 148 | 22,604 | 5,596 | 3,840 | 32,188 |
| 64,716 | 143 | 22,326 | 5,586 | 3,812 | 31,867 |
| 64,717 | 139 | 22,335 | 5,600 | 3,830 | 31,904 |
| 64,718 | 130 | 22,453 | 5,609 | 3,845 | 32,037 |
| 64,719 | 134 | 22,783 | 5,689 | 3,890 | 32,496 |
| 64,720 | 132 | 22,848 | 5,683 | 3,903 | 32,566 |
| 64,721 | 129 | 22,959 | 5,683 | 3,885 | 32,656 |
| 64,722 | 125 | 23,111 | 5,673 | 3,891 | 32,800 |
| 64,723 | 118 | 23,150 | 5,631 | 3,879 | 32,778 |
| 64,724 | 118 | 23,203 | 5,632 | 3,871 | 32,824 |
| 64,725 | 126 | 23,406 | 5,691 | 3,899 | 33,122 |
| 64,726 | 127 | 23,113 | 5,629 | 3,849 | 32,718 |
| 64,727 | 127 | 23,210 | 5,633 | 3,849 | 32,819 |

|        |     |        |       |       |        |
|--------|-----|--------|-------|-------|--------|
| 64,728 | 124 | 22,994 | 5,607 | 3,795 | 32,520 |
| 64,729 | 122 | 23,105 | 5,644 | 3,824 | 32,695 |
| 64,730 | 126 | 23,238 | 5,715 | 3,859 | 32,938 |
| 64,731 | 118 | 23,072 | 5,698 | 3,836 | 32,724 |
| 64,732 | 112 | 23,113 | 5,702 | 3,849 | 32,776 |
| 64,733 | 111 | 23,005 | 5,731 | 3,859 | 32,706 |
| 64,734 | 109 | 22,836 | 5,727 | 3,882 | 32,554 |
| 64,735 | 114 | 22,858 | 5,734 | 3,886 | 32,592 |
| 64,736 | 112 | 22,658 | 5,677 | 3,810 | 32,257 |
| 64,737 | 118 | 22,803 | 5,697 | 3,819 | 32,437 |
| 64,738 | 120 | 22,836 | 5,705 | 3,835 | 32,496 |
| 64,739 | 116 | 22,560 | 5,682 | 3,832 | 32,190 |
| 64,740 | 118 | 22,736 | 5,719 | 3,877 | 32,450 |
| 64,741 | 113 | 22,641 | 5,686 | 3,858 | 32,298 |
| 64,742 | 108 | 22,518 | 5,617 | 3,829 | 32,072 |
| 64,743 | 108 | 22,627 | 5,644 | 3,843 | 32,222 |
| 64,744 | 107 | 22,407 | 5,582 | 3,808 | 31,904 |
| 64,745 | 109 | 22,385 | 5,612 | 3,782 | 31,888 |
| 64,746 | 109 | 22,490 | 5,628 | 3,807 | 32,034 |
| 64,747 | 111 | 22,716 | 5,672 | 3,830 | 32,329 |
| 64,748 | 112 | 22,705 | 5,662 | 3,829 | 32,308 |
| 64,749 | 111 | 22,664 | 5,678 | 3,818 | 32,271 |
| 64,750 | 112 | 22,467 | 5,601 | 3,764 | 31,944 |
| 64,751 | 113 | 22,788 | 5,649 | 3,796 | 32,346 |
| 64,752 | 122 | 22,411 | 5,569 | 3,756 | 31,858 |
| 64,753 | 122 | 22,524 | 5,549 | 3,756 | 31,951 |
| 64,754 | 115 | 22,487 | 5,500 | 3,728 | 31,830 |
| 64,755 | 117 | 22,445 | 5,503 | 3,721 | 31,786 |
| 64,756 | 111 | 22,244 | 5,475 | 3,718 | 31,548 |
| 64,757 | 112 | 22,217 | 5,485 | 3,731 | 31,545 |
| 64,758 | 112 | 22,456 | 5,555 | 3,763 | 31,886 |
| 64,759 | 116 | 22,376 | 5,503 | 3,712 | 31,707 |



|        |     |        |       |       |        |
|--------|-----|--------|-------|-------|--------|
| 64,760 | 117 | 22,332 | 5,459 | 3,674 | 31,582 |
| 64,761 | 119 | 22,640 | 5,496 | 3,711 | 31,966 |
| 64,762 | 113 | 22,569 | 5,497 | 3,717 | 31,896 |
| 64,763 | 114 | 22,589 | 5,524 | 3,715 | 31,942 |
| 64,764 | 113 | 22,878 | 5,595 | 3,761 | 32,347 |
| 64,765 | 113 | 22,748 | 5,604 | 3,754 | 32,219 |
| 64,766 | 110 | 22,675 | 5,633 | 3,749 | 32,167 |
| 64,767 | 106 | 22,321 | 5,548 | 3,706 | 31,681 |
| 64,768 | 108 | 22,455 | 5,570 | 3,729 | 31,862 |
| 64,769 | 111 | 22,419 | 5,591 | 3,735 | 31,856 |
| 64,770 | 109 | 22,551 | 5,579 | 3,738 | 31,977 |
| 64,771 | 108 | 21,881 | 5,436 | 3,661 | 31,086 |
| 64,772 | 107 | 22,037 | 5,475 | 3,681 | 31,300 |
| 64,773 | 106 | 22,389 | 5,555 | 3,726 | 31,776 |
| 64,774 | 113 | 21,990 | 5,429 | 3,607 | 31,139 |
| 64,775 | 114 | 22,202 | 5,497 | 3,637 | 31,450 |
| 64,776 | 109 | 22,358 | 5,520 | 3,668 | 31,655 |
| 64,777 | 109 | 22,418 | 5,523 | 3,674 | 31,724 |
| 64,778 | 119 | 22,895 | 5,590 | 3,731 | 32,335 |
| 64,779 | 119 | 22,968 | 5,593 | 3,715 | 32,395 |
| 64,780 | 116 | 23,256 | 5,670 | 3,753 | 32,795 |
| 64,781 | 121 | 23,094 | 5,595 | 3,712 | 32,522 |
| 64,782 | 120 | 22,997 | 5,551 | 3,701 | 32,369 |
| 64,783 | 121 | 23,204 | 5,557 | 3,701 | 32,583 |
| 64,784 | 120 | 22,725 | 5,442 | 3,607 | 31,894 |
| 64,785 | 122 | 23,028 | 5,492 | 3,639 | 32,281 |
| 64,786 | 122 | 23,201 | 5,567 | 3,691 | 32,581 |
| 64,787 | 129 | 23,325 | 5,634 | 3,750 | 32,838 |
| 64,788 | 127 | 23,425 | 5,678 | 3,782 | 33,012 |
| 64,789 | 126 | 23,743 | 5,732 | 3,823 | 33,424 |
| 64,790 | 134 | 23,764 | 5,784 | 3,822 | 33,504 |
| 64,791 | 132 | 23,692 | 5,757 | 3,803 | 33,384 |

|        |     |        |       |       |        |
|--------|-----|--------|-------|-------|--------|
| 64,792 | 132 | 23,545 | 5,778 | 3,819 | 33,274 |
| 64,793 | 135 | 23,562 | 5,763 | 3,827 | 33,287 |
| 64,794 | 135 | 23,882 | 5,831 | 3,871 | 33,719 |
| 64,795 | 135 | 23,672 | 5,790 | 3,839 | 33,436 |
| 64,796 | 138 | 23,411 | 5,712 | 3,813 | 33,074 |
| 64,797 | 138 | 23,264 | 5,693 | 3,794 | 32,889 |
| 64,798 | 140 | 23,927 | 5,825 | 3,911 | 33,803 |
| 64,799 | 143 | 24,078 | 5,857 | 3,947 | 34,025 |
| 64,800 | 147 | 23,743 | 5,762 | 3,904 | 33,556 |
| 64,801 | 153 | 23,764 | 5,785 | 3,884 | 33,586 |
| 64,802 | 153 | 23,825 | 5,796 | 3,887 | 33,661 |
| 64,803 | 149 | 24,109 | 5,860 | 3,928 | 34,046 |
| 64,804 | 156 | 24,276 | 5,894 | 3,934 | 34,260 |
| 64,805 | 156 | 24,451 | 5,927 | 3,927 | 34,461 |
| 64,806 | 157 | 24,952 | 5,990 | 3,965 | 35,064 |
| 64,807 | 155 | 25,047 | 5,997 | 3,958 | 35,157 |
| 64,808 | 153 | 25,092 | 5,993 | 3,970 | 35,208 |
| 64,809 | 158 | 25,346 | 6,118 | 4,040 | 35,662 |
| 64,810 | 152 | 25,085 | 6,076 | 4,038 | 35,351 |
| 64,811 | 157 | 25,353 | 6,175 | 4,101 | 35,786 |
| 64,812 | 154 | 25,261 | 6,188 | 4,096 | 35,699 |
| 64,813 | 154 | 25,316 | 6,185 | 4,123 | 35,778 |
| 64,814 | 162 | 25,543 | 6,275 | 4,153 | 36,133 |
| 64,815 | 167 | 25,696 | 6,328 | 4,177 | 36,368 |
| 64,816 | 166 | 25,656 | 6,318 | 4,161 | 36,301 |
| 64,817 | 165 | 25,322 | 6,222 | 4,095 | 35,804 |
| 64,818 | 166 | 25,303 | 6,231 | 4,097 | 35,797 |
| 64,819 | 162 | 25,203 | 6,239 | 4,072 | 35,676 |
| 64,820 | 162 | 25,084 | 6,203 | 4,056 | 35,505 |
| 64,821 | 161 | 24,981 | 6,192 | 4,049 | 35,383 |
| 64,822 | 163 | 24,928 | 6,211 | 4,057 | 35,359 |
| 64,823 | 169 | 25,088 | 6,291 | 4,088 | 35,636 |

|        |     |        |       |       |        |
|--------|-----|--------|-------|-------|--------|
| 64,824 | 172 | 25,047 | 6,303 | 4,071 | 35,593 |
| 64,825 | 168 | 25,039 | 6,297 | 4,089 | 35,593 |
| 64,826 | 170 | 24,935 | 6,249 | 4,055 | 35,409 |
| 64,827 | 173 | 24,972 | 6,269 | 4,046 | 35,460 |
| 64,828 | 174 | 25,015 | 6,341 | 4,077 | 35,607 |
| 64,829 | 169 | 24,711 | 6,306 | 4,037 | 35,223 |
| 64,830 | 170 | 24,522 | 6,315 | 4,052 | 35,059 |
| 64,831 | 168 | 24,281 | 6,299 | 4,050 | 34,798 |
| 64,832 | 168 | 24,141 | 6,280 | 4,042 | 34,631 |
| 64,833 | 168 | 23,975 | 6,277 | 4,007 | 34,427 |
| 64,834 | 168 | 23,867 | 6,275 | 4,009 | 34,319 |
| 64,835 | 168 | 23,872 | 6,280 | 3,997 | 34,317 |
| 64,836 | 171 | 23,979 | 6,396 | 4,030 | 34,576 |
| 64,837 | 170 | 24,147 | 6,429 | 4,033 | 34,779 |
| 64,838 | 164 | 24,206 | 6,474 | 4,018 | 34,862 |
| 64,839 | 162 | 24,057 | 6,472 | 4,003 | 34,694 |
| 64,840 | 162 | 24,154 | 6,499 | 3,993 | 34,808 |
| 64,841 | 154 | 23,953 | 6,416 | 3,956 | 34,479 |
| 64,842 | 155 | 23,966 | 6,438 | 3,940 | 34,499 |
| 64,843 | 155 | 23,839 | 6,441 | 3,962 | 34,397 |
| 64,844 | 154 | 23,919 | 6,475 | 3,957 | 34,505 |
| 64,845 | 151 | 23,777 | 6,547 | 3,987 | 34,462 |
| 64,846 | 150 | 23,483 | 6,546 | 3,988 | 34,167 |
| 64,847 | 152 | 23,284 | 6,555 | 4,006 | 33,997 |
| 64,848 | 151 | 23,114 | 6,510 | 3,945 | 33,720 |
| 64,849 | 150 | 22,915 | 6,529 | 3,946 | 33,540 |
| 64,850 | 151 | 22,885 | 6,555 | 3,936 | 33,527 |
| 64,851 | 148 | 22,778 | 6,575 | 3,959 | 33,460 |
| 64,852 | 144 | 22,748 | 6,575 | 3,973 | 33,440 |
| 64,853 | 140 | 22,596 | 6,592 | 3,968 | 33,296 |
| 64,854 | 140 | 22,435 | 6,572 | 3,970 | 33,117 |
| 64,855 | 134 | 22,305 | 6,570 | 3,993 | 33,002 |

|        |     |        |       |       |        |
|--------|-----|--------|-------|-------|--------|
| 64,856 | 133 | 22,252 | 6,562 | 4,011 | 32,958 |
| 64,857 | 137 | 22,379 | 6,646 | 4,073 | 33,235 |
| 64,858 | 137 | 22,397 | 6,611 | 4,081 | 33,226 |
| 64,859 | 130 | 22,269 | 6,527 | 4,029 | 32,955 |
| 64,860 | 131 | 22,558 | 6,609 | 4,084 | 33,382 |
| 64,861 | 128 | 22,649 | 6,653 | 4,089 | 33,519 |
| 64,862 | 125 | 22,776 | 6,610 | 4,086 | 33,597 |
| 64,863 | 125 | 22,757 | 6,578 | 4,063 | 33,523 |
| 64,864 | 125 | 22,761 | 6,598 | 4,082 | 33,566 |
| 64,865 | 124 | 22,732 | 6,575 | 4,095 | 33,526 |
| 64,866 | 119 | 22,615 | 6,530 | 4,106 | 33,370 |
| 64,867 | 119 | 22,472 | 6,464 | 4,092 | 33,147 |
| 64,868 | 118 | 22,384 | 6,451 | 4,115 | 33,068 |
| 64,869 | 118 | 22,372 | 6,468 | 4,121 | 33,079 |
| 64,870 | 123 | 22,586 | 6,499 | 4,134 | 33,342 |
| 64,871 | 121 | 22,576 | 6,503 | 4,148 | 33,348 |
| 64,872 | 122 | 22,392 | 6,460 | 4,099 | 33,073 |
| 64,873 | 117 | 22,507 | 6,430 | 4,078 | 33,132 |
| 64,874 | 114 | 22,444 | 6,414 | 4,082 | 33,054 |
| 64,875 | 111 | 22,417 | 6,399 | 4,095 | 33,022 |
| 64,876 | 107 | 22,601 | 6,428 | 4,136 | 33,272 |
| 64,877 | 104 | 22,562 | 6,440 | 4,145 | 33,251 |
| 64,878 | 96  | 22,473 | 6,353 | 4,115 | 33,037 |
| 64,879 | 97  | 22,623 | 6,363 | 4,124 | 33,207 |
| 64,880 | 94  | 22,736 | 6,353 | 4,131 | 33,314 |
| 64,881 | 90  | 22,872 | 6,362 | 4,140 | 33,464 |
| 64,882 | 90  | 22,853 | 6,329 | 4,120 | 33,392 |
| 64,883 | 91  | 22,945 | 6,369 | 4,154 | 33,559 |
| 64,884 | 87  | 22,846 | 6,322 | 4,170 | 33,425 |
| 64,885 | 87  | 22,870 | 6,301 | 4,171 | 33,429 |
| 64,886 | 89  | 23,050 | 6,323 | 4,214 | 33,676 |
| 64,887 | 84  | 22,969 | 6,308 | 4,207 | 33,568 |

|        |     |        |       |       |        |
|--------|-----|--------|-------|-------|--------|
| 64,888 | 81  | 22,914 | 6,286 | 4,202 | 33,483 |
| 64,889 | 86  | 22,895 | 6,265 | 4,203 | 33,449 |
| 64,890 | 88  | 22,823 | 6,219 | 4,163 | 33,293 |
| 64,891 | 92  | 22,647 | 6,182 | 4,150 | 33,071 |
| 64,892 | 100 | 22,680 | 6,211 | 4,134 | 33,125 |
| 64,893 | 114 | 22,782 | 6,240 | 4,129 | 33,265 |
| 64,894 | 113 | 22,829 | 6,228 | 4,131 | 33,301 |
| 64,895 | 118 | 22,919 | 6,169 | 4,117 | 33,323 |
| 64,896 | 116 | 22,491 | 5,950 | 3,994 | 32,551 |
| 64,897 | 120 | 22,711 | 5,997 | 4,022 | 32,850 |
| 64,898 | 118 | 22,971 | 6,032 | 4,059 | 33,180 |
| 64,899 | 120 | 22,949 | 6,041 | 4,073 | 33,183 |
| 64,900 | 120 | 22,920 | 6,031 | 4,056 | 33,127 |
| 64,901 | 122 | 22,883 | 6,014 | 4,038 | 33,057 |
| 64,902 | 120 | 22,838 | 6,006 | 4,023 | 32,987 |
| 64,903 | 117 | 22,720 | 5,944 | 4,005 | 32,786 |
| 64,904 | 116 | 22,732 | 5,888 | 3,990 | 32,726 |
| 64,905 | 118 | 22,904 | 5,908 | 3,955 | 32,885 |
| 64,906 | 121 | 23,207 | 5,986 | 3,988 | 33,302 |
| 64,907 | 122 | 22,744 | 5,861 | 3,929 | 32,656 |
| 64,908 | 122 | 23,043 | 5,944 | 3,983 | 33,092 |
| 64,909 | 128 | 22,804 | 5,969 | 3,962 | 32,863 |
| 64,910 | 129 | 22,431 | 5,853 | 3,908 | 32,321 |
| 64,911 | 134 | 22,357 | 5,859 | 3,876 | 32,226 |
| 64,912 | 134 | 21,865 | 5,760 | 3,802 | 31,561 |
| 64,913 | 136 | 21,961 | 5,820 | 3,837 | 31,754 |
| 64,914 | 136 | 21,803 | 5,811 | 3,818 | 31,568 |
| 64,915 | 143 | 22,112 | 5,890 | 3,843 | 31,988 |
| 64,916 | 143 | 22,248 | 5,907 | 3,847 | 32,145 |
| 64,917 | 147 | 21,854 | 5,852 | 3,743 | 31,596 |
| 64,918 | 147 | 21,907 | 5,808 | 3,721 | 31,583 |
| 64,919 | 148 | 21,969 | 5,855 | 3,717 | 31,689 |

|        |     |        |       |       |        |
|--------|-----|--------|-------|-------|--------|
| 64,920 | 143 | 21,860 | 5,843 | 3,742 | 31,588 |
| 64,921 | 143 | 21,839 | 5,823 | 3,719 | 31,524 |
| 64,922 | 144 | 22,050 | 5,864 | 3,732 | 31,790 |
| 64,923 | 139 | 21,851 | 5,817 | 3,716 | 31,523 |
| 64,924 | 144 | 22,095 | 5,923 | 3,786 | 31,948 |
| 64,925 | 144 | 22,172 | 5,950 | 3,817 | 32,083 |
| 64,926 | 144 | 22,051 | 5,937 | 3,818 | 31,950 |
| 64,927 | 143 | 21,907 | 5,937 | 3,807 | 31,794 |
| 64,928 | 144 | 21,929 | 5,934 | 3,811 | 31,818 |
| 64,929 | 147 | 22,142 | 6,018 | 3,848 | 32,155 |
| 64,930 | 148 | 22,228 | 6,034 | 3,848 | 32,258 |
| 64,931 | 156 | 22,171 | 6,053 | 3,852 | 32,232 |
| 64,932 | 158 | 21,930 | 5,988 | 3,812 | 31,888 |
| 64,933 | 160 | 21,650 | 5,923 | 3,736 | 31,469 |
| 64,934 | 161 | 21,753 | 5,937 | 3,734 | 31,585 |
| 64,935 | 164 | 21,459 | 5,872 | 3,697 | 31,192 |
| 64,936 | 163 | 21,270 | 5,852 | 3,668 | 30,953 |
| 64,937 | 173 | 22,264 | 6,127 | 3,819 | 32,383 |
| 64,938 | 175 | 22,174 | 6,130 | 3,840 | 32,319 |
| 64,939 | 178 | 22,085 | 6,133 | 3,835 | 32,231 |
| 64,940 | 172 | 21,845 | 6,058 | 3,799 | 31,874 |
| 64,941 | 173 | 22,578 | 6,222 | 3,901 | 32,874 |
| 64,942 | 160 | 22,319 | 6,100 | 3,829 | 32,408 |
| 64,943 | 160 | 22,161 | 6,117 | 3,833 | 32,271 |
| 64,944 | 144 | 22,324 | 6,111 | 3,852 | 32,431 |
| 64,945 | 149 | 22,636 | 6,202 | 3,905 | 32,892 |
| 64,946 | 144 | 22,514 | 6,203 | 3,932 | 32,793 |
| 64,947 | 141 | 22,514 | 6,226 | 3,940 | 32,821 |
| 64,948 | 137 | 22,433 | 6,260 | 3,928 | 32,758 |
| 64,949 | 130 | 21,919 | 6,127 | 3,834 | 32,010 |
| 64,950 | 131 | 22,104 | 6,174 | 3,856 | 32,265 |
| 64,951 | 130 | 22,388 | 6,232 | 3,892 | 32,642 |

|        |     |        |       |       |        |
|--------|-----|--------|-------|-------|--------|
| 64,952 | 134 | 22,477 | 6,259 | 3,908 | 32,778 |
| 64,953 | 138 | 22,523 | 6,311 | 3,906 | 32,878 |
| 64,954 | 142 | 22,258 | 6,268 | 3,873 | 32,541 |
| 64,955 | 143 | 21,935 | 6,228 | 3,855 | 32,161 |
| 64,956 | 147 | 22,360 | 6,352 | 3,949 | 32,808 |
| 64,957 | 143 | 22,027 | 6,263 | 3,914 | 32,347 |
| 64,958 | 150 | 22,103 | 6,335 | 3,951 | 32,539 |
| 64,959 | 150 | 22,052 | 6,324 | 3,936 | 32,462 |
| 64,960 | 145 | 21,903 | 6,236 | 3,892 | 32,176 |
| 64,961 | 142 | 21,770 | 6,248 | 3,901 | 32,061 |
| 64,962 | 142 | 21,735 | 6,233 | 3,883 | 31,993 |
| 64,963 | 141 | 21,713 | 6,244 | 3,869 | 31,967 |
| 64,964 | 140 | 21,879 | 6,311 | 3,892 | 32,222 |
| 64,965 | 134 | 21,831 | 6,317 | 3,895 | 32,177 |
| 64,966 | 139 | 21,762 | 6,313 | 3,869 | 32,083 |
| 64,967 | 135 | 21,792 | 6,348 | 3,869 | 32,144 |
| 64,968 | 133 | 21,493 | 6,299 | 3,860 | 31,785 |
| 64,969 | 135 | 21,477 | 6,314 | 3,866 | 31,792 |
| 64,970 | 135 | 21,650 | 6,320 | 3,888 | 31,993 |
| 64,971 | 135 | 21,883 | 6,414 | 3,930 | 32,362 |
| 64,972 | 138 | 21,608 | 6,385 | 3,916 | 32,047 |
| 64,973 | 137 | 21,282 | 6,336 | 3,885 | 31,640 |
| 64,974 | 137 | 21,344 | 6,410 | 3,907 | 31,798 |
| 64,975 | 135 | 21,493 | 6,429 | 3,913 | 31,970 |
| 64,976 | 135 | 21,542 | 6,440 | 3,911 | 32,028 |
| 64,977 | 133 | 21,079 | 6,352 | 3,810 | 31,374 |
| 64,978 | 139 | 21,357 | 6,431 | 3,840 | 31,767 |
| 64,979 | 142 | 21,650 | 6,520 | 3,864 | 32,176 |
| 64,980 | 144 | 21,657 | 6,499 | 3,858 | 32,158 |
| 64,981 | 142 | 21,526 | 6,493 | 3,853 | 32,014 |
| 64,982 | 135 | 21,114 | 6,352 | 3,778 | 31,379 |
| 64,983 | 137 | 21,312 | 6,418 | 3,788 | 31,655 |

|        |     |        |       |       |        |
|--------|-----|--------|-------|-------|--------|
| 64,984 | 139 | 21,596 | 6,479 | 3,826 | 32,040 |
| 64,985 | 132 | 21,449 | 6,430 | 3,781 | 31,792 |
| 64,986 | 134 | 21,560 | 6,469 | 3,821 | 31,984 |
| 64,987 | 133 | 21,498 | 6,430 | 3,806 | 31,867 |
| 64,988 | 136 | 21,630 | 6,467 | 3,815 | 32,048 |
| 64,989 | 138 | 21,797 | 6,486 | 3,824 | 32,245 |
| 64,990 | 137 | 21,700 | 6,428 | 3,801 | 32,066 |
| 64,991 | 137 | 21,565 | 6,443 | 3,805 | 31,950 |
| 64,992 | 134 | 21,387 | 6,432 | 3,801 | 31,754 |
| 64,993 | 133 | 21,187 | 6,412 | 3,798 | 31,530 |
| 64,994 | 134 | 21,366 | 6,480 | 3,823 | 31,803 |
| 64,995 | 132 | 21,081 | 6,474 | 3,802 | 31,489 |
| 64,996 | 131 | 20,954 | 6,472 | 3,785 | 31,342 |
| 64,997 | 135 | 20,960 | 6,440 | 3,751 | 31,286 |
| 64,998 | 132 | 20,727 | 6,365 | 3,723 | 30,947 |
| 64,999 | 137 | 20,897 | 6,390 | 3,724 | 31,148 |
| 65,000 | 137 | 20,913 | 6,390 | 3,723 | 31,163 |
| 65,001 | 138 | 20,862 | 6,415 | 3,735 | 31,150 |
| 65,002 | 136 | 20,744 | 6,434 | 3,737 | 31,051 |
| 65,003 | 129 | 20,627 | 6,410 | 3,727 | 30,893 |
| 65,004 | 134 | 20,791 | 6,466 | 3,757 | 31,148 |
| 65,005 | 130 | 20,751 | 6,460 | 3,748 | 31,089 |
| 65,006 | 126 | 20,892 | 6,455 | 3,745 | 31,218 |
| 65,007 | 126 | 20,772 | 6,423 | 3,700 | 31,021 |
| 65,008 | 118 | 20,709 | 6,417 | 3,674 | 30,918 |
| 65,009 | 116 | 20,924 | 6,435 | 3,684 | 31,159 |
| 65,010 | 114 | 20,623 | 6,375 | 3,646 | 30,758 |
| 65,011 | 114 | 20,840 | 6,419 | 3,660 | 31,033 |
| 65,012 | 111 | 20,777 | 6,405 | 3,637 | 30,930 |
| 65,013 | 113 | 20,908 | 6,411 | 3,638 | 31,070 |
| 65,014 | 117 | 20,916 | 6,404 | 3,660 | 31,097 |
| 65,015 | 118 | 20,889 | 6,390 | 3,658 | 31,055 |



|        |     |        |       |       |        |
|--------|-----|--------|-------|-------|--------|
| 65,016 | 117 | 20,546 | 6,312 | 3,611 | 30,586 |
| 65,017 | 118 | 20,964 | 6,441 | 3,704 | 31,227 |
| 65,018 | 118 | 20,849 | 6,414 | 3,673 | 31,054 |
| 65,019 | 115 | 20,919 | 6,404 | 3,663 | 31,101 |
| 65,020 | 120 | 20,797 | 6,405 | 3,652 | 30,974 |
| 65,021 | 125 | 20,674 | 6,438 | 3,616 | 30,853 |
| 65,022 | 125 | 20,516 | 6,376 | 3,568 | 30,585 |
| 65,023 | 124 | 20,300 | 6,325 | 3,525 | 30,274 |
| 65,024 | 123 | 20,150 | 6,280 | 3,508 | 30,061 |
| 65,025 | 125 | 20,646 | 6,421 | 3,622 | 30,814 |
| 65,026 | 127 | 20,484 | 6,393 | 3,604 | 30,608 |
| 65,027 | 131 | 20,378 | 6,335 | 3,598 | 30,442 |
| 65,028 | 129 | 20,394 | 6,328 | 3,596 | 30,447 |
| 65,029 | 131 | 20,626 | 6,411 | 3,678 | 30,846 |
| 65,030 | 128 | 20,524 | 6,402 | 3,681 | 30,735 |
| 65,031 | 124 | 19,977 | 6,225 | 3,601 | 29,927 |
| 65,032 | 124 | 20,134 | 6,275 | 3,615 | 30,148 |
| 65,033 | 119 | 20,283 | 6,335 | 3,644 | 30,381 |
| 65,034 | 119 | 20,527 | 6,384 | 3,679 | 30,709 |
| 65,035 | 113 | 20,483 | 6,385 | 3,673 | 30,654 |
| 65,036 | 112 | 20,201 | 6,314 | 3,643 | 30,270 |
| 65,037 | 110 | 20,199 | 6,339 | 3,640 | 30,288 |
| 65,038 | 109 | 19,946 | 6,309 | 3,616 | 29,980 |
| 65,039 | 104 | 19,936 | 6,328 | 3,638 | 30,006 |
| 65,040 | 101 | 19,834 | 6,306 | 3,616 | 29,857 |
| 65,041 | 100 | 19,808 | 6,273 | 3,603 | 29,784 |
| 65,042 | 103 | 19,837 | 6,239 | 3,576 | 29,755 |
| 65,043 | 103 | 19,766 | 6,210 | 3,547 | 29,626 |
| 65,044 | 111 | 20,672 | 6,367 | 3,654 | 30,804 |
| 65,045 | 108 | 20,532 | 6,293 | 3,635 | 30,568 |
| 65,046 | 108 | 19,874 | 6,180 | 3,526 | 29,688 |
| 65,047 | 108 | 20,247 | 6,258 | 3,591 | 30,204 |

|        |     |        |       |       |        |
|--------|-----|--------|-------|-------|--------|
| 65,048 | 106 | 20,595 | 6,356 | 3,647 | 30,704 |
| 65,049 | 110 | 20,804 | 6,412 | 3,691 | 31,017 |
| 65,050 | 105 | 20,697 | 6,396 | 3,708 | 30,906 |
| 65,051 | 108 | 20,837 | 6,418 | 3,700 | 31,063 |
| 65,052 | 110 | 20,798 | 6,364 | 3,695 | 30,967 |
| 65,053 | 119 | 20,983 | 6,429 | 3,727 | 31,258 |
| 65,054 | 114 | 20,804 | 6,360 | 3,704 | 30,982 |
| 65,055 | 119 | 20,848 | 6,334 | 3,675 | 30,976 |
| 65,056 | 122 | 21,107 | 6,422 | 3,722 | 31,373 |
| 65,057 | 123 | 21,071 | 6,443 | 3,729 | 31,366 |
| 65,058 | 124 | 21,008 | 6,477 | 3,718 | 31,327 |
| 65,059 | 128 | 20,896 | 6,436 | 3,691 | 31,151 |
| 65,060 | 128 | 20,689 | 6,412 | 3,669 | 30,898 |
| 65,061 | 133 | 21,321 | 6,581 | 3,779 | 31,814 |
| 65,062 | 135 | 21,057 | 6,516 | 3,756 | 31,464 |
| 65,063 | 135 | 21,186 | 6,552 | 3,792 | 31,665 |
| 65,064 | 134 | 21,044 | 6,509 | 3,795 | 31,482 |
| 65,065 | 131 | 20,965 | 6,513 | 3,775 | 31,384 |
| 65,066 | 134 | 20,720 | 6,455 | 3,737 | 31,046 |
| 65,067 | 134 | 20,571 | 6,408 | 3,706 | 30,819 |
| 65,068 | 129 | 20,799 | 6,475 | 3,733 | 31,136 |
| 65,069 | 131 | 20,532 | 6,344 | 3,687 | 30,694 |
| 65,070 | 132 | 20,484 | 6,337 | 3,679 | 30,632 |
| 65,071 | 126 | 20,571 | 6,358 | 3,693 | 30,748 |
| 65,072 | 125 | 20,490 | 6,354 | 3,712 | 30,681 |
| 65,073 | 127 | 20,394 | 6,359 | 3,710 | 30,590 |
| 65,074 | 121 | 20,493 | 6,402 | 3,751 | 30,767 |
| 65,075 | 115 | 19,841 | 6,207 | 3,635 | 29,798 |
| 65,076 | 114 | 20,121 | 6,265 | 3,670 | 30,170 |
| 65,077 | 117 | 20,206 | 6,281 | 3,651 | 30,255 |
| 65,078 | 118 | 20,256 | 6,299 | 3,660 | 30,333 |
| 65,079 | 121 | 20,466 | 6,345 | 3,670 | 30,602 |

|        |     |        |       |       |        |
|--------|-----|--------|-------|-------|--------|
| 65,080 | 122 | 20,213 | 6,262 | 3,612 | 30,209 |
| 65,081 | 123 | 19,936 | 6,201 | 3,582 | 29,842 |
| 65,082 | 128 | 20,205 | 6,311 | 3,645 | 30,289 |
| 65,083 | 129 | 19,992 | 6,253 | 3,616 | 29,990 |
| 65,084 | 128 | 19,954 | 6,245 | 3,628 | 29,955 |
| 65,085 | 128 | 19,786 | 6,185 | 3,603 | 29,702 |
| 65,086 | 127 | 19,499 | 6,107 | 3,575 | 29,308 |
| 65,087 | 127 | 19,853 | 6,230 | 3,643 | 29,853 |
| 65,088 | 129 | 19,746 | 6,189 | 3,619 | 29,683 |
| 65,089 | 133 | 19,729 | 6,196 | 3,626 | 29,684 |
| 65,090 | 137 | 19,614 | 6,129 | 3,586 | 29,466 |
| 65,091 | 137 | 19,284 | 6,039 | 3,548 | 29,008 |
| 65,092 | 136 | 19,541 | 6,187 | 3,609 | 29,473 |
| 65,093 | 134 | 19,325 | 6,146 | 3,579 | 29,184 |
| 65,094 | 134 | 19,193 | 6,131 | 3,571 | 29,029 |
| 65,095 | 136 | 19,076 | 6,127 | 3,546 | 28,885 |
| 65,096 | 138 | 18,947 | 6,025 | 3,508 | 28,618 |
| 65,097 | 140 | 18,990 | 6,014 | 3,507 | 28,651 |
| 65,098 | 141 | 18,969 | 6,030 | 3,518 | 28,658 |
| 65,099 | 139 | 18,874 | 6,001 | 3,493 | 28,507 |
| 65,100 | 138 | 18,825 | 5,950 | 3,422 | 28,335 |
| 65,101 | 135 | 18,952 | 5,960 | 3,443 | 28,490 |
| 65,102 | 135 | 18,969 | 5,940 | 3,444 | 28,488 |
| 65,103 | 133 | 18,978 | 5,942 | 3,418 | 28,471 |
| 65,104 | 125 | 19,061 | 5,973 | 3,414 | 28,573 |
| 65,105 | 125 | 18,955 | 5,955 | 3,404 | 28,439 |
| 65,106 | 120 | 19,125 | 6,036 | 3,493 | 28,774 |
| 65,107 | 118 | 19,219 | 6,057 | 3,487 | 28,881 |
| 65,108 | 123 | 19,065 | 5,981 | 3,466 | 28,635 |
| 65,109 | 121 | 19,013 | 5,951 | 3,464 | 28,549 |
| 65,110 | 114 | 19,035 | 6,004 | 3,487 | 28,640 |
| 65,111 | 110 | 18,850 | 5,995 | 3,487 | 28,442 |

|        |     |        |       |       |        |
|--------|-----|--------|-------|-------|--------|
| 65,112 | 110 | 18,864 | 5,991 | 3,501 | 28,466 |
| 65,113 | 108 | 18,731 | 5,942 | 3,463 | 28,244 |
| 65,114 | 107 | 18,766 | 5,990 | 3,487 | 28,350 |
| 65,115 | 107 | 18,858 | 5,989 | 3,479 | 28,433 |
| 65,116 | 107 | 18,710 | 5,911 | 3,436 | 28,164 |
| 65,117 | 107 | 18,715 | 5,894 | 3,437 | 28,153 |
| 65,118 | 108 | 18,561 | 5,837 | 3,403 | 27,909 |
| 65,119 | 108 | 18,423 | 5,808 | 3,390 | 27,729 |
| 65,120 | 133 | 19,314 | 6,125 | 3,554 | 29,126 |
| 65,121 | 133 | 19,506 | 6,128 | 3,565 | 29,332 |
| 65,122 | 129 | 19,726 | 6,139 | 3,573 | 29,567 |
| 65,123 | 128 | 19,856 | 6,131 | 3,586 | 29,701 |
| 65,124 | 129 | 19,792 | 6,088 | 3,534 | 29,543 |
| 65,125 | 129 | 19,846 | 6,068 | 3,532 | 29,575 |
| 65,126 | 131 | 19,836 | 6,064 | 3,530 | 29,561 |
| 65,127 | 132 | 19,987 | 6,108 | 3,542 | 29,769 |
| 65,128 | 127 | 19,702 | 6,029 | 3,526 | 29,384 |
| 65,129 | 127 | 19,762 | 6,020 | 3,522 | 29,431 |
| 65,130 | 119 | 19,832 | 6,054 | 3,546 | 29,551 |
| 65,131 | 113 | 19,821 | 6,009 | 3,549 | 29,492 |
| 65,132 | 110 | 19,591 | 5,970 | 3,496 | 29,167 |
| 65,133 | 113 | 19,868 | 6,034 | 3,539 | 29,554 |
| 65,134 | 115 | 19,783 | 5,996 | 3,503 | 29,397 |
| 65,135 | 120 | 20,045 | 6,063 | 3,536 | 29,764 |
| 65,136 | 122 | 20,049 | 6,037 | 3,492 | 29,700 |
| 65,137 | 120 | 19,959 | 6,011 | 3,470 | 29,560 |
| 65,138 | 125 | 20,261 | 6,076 | 3,507 | 29,969 |
| 65,139 | 121 | 20,309 | 6,067 | 3,515 | 30,012 |
| 65,140 | 117 | 20,649 | 6,101 | 3,508 | 30,375 |
| 65,141 | 123 | 20,966 | 6,186 | 3,548 | 30,823 |
| 65,142 | 123 | 20,762 | 6,159 | 3,520 | 30,564 |
| 65,143 | 123 | 20,728 | 6,130 | 3,515 | 30,496 |

|        |     |        |       |       |        |
|--------|-----|--------|-------|-------|--------|
| 65,144 | 124 | 21,064 | 6,237 | 3,586 | 31,011 |
| 65,145 | 127 | 20,925 | 6,204 | 3,577 | 30,833 |
| 65,146 | 119 | 20,627 | 6,115 | 3,544 | 30,405 |
| 65,147 | 115 | 20,200 | 5,972 | 3,454 | 29,741 |
| 65,148 | 115 | 20,198 | 5,970 | 3,444 | 29,727 |
| 65,149 | 118 | 19,944 | 5,908 | 3,395 | 29,365 |
| 65,150 | 117 | 19,652 | 5,820 | 3,356 | 28,945 |
| 65,151 | 116 | 20,179 | 6,036 | 3,508 | 29,839 |
| 65,152 | 117 | 20,122 | 6,022 | 3,484 | 29,745 |
| 65,153 | 117 | 19,945 | 5,954 | 3,445 | 29,461 |
| 65,154 | 118 | 19,832 | 5,965 | 3,435 | 29,350 |
| 65,155 | 117 | 20,180 | 6,049 | 3,483 | 29,829 |
| 65,156 | 122 | 20,060 | 5,987 | 3,423 | 29,592 |
| 65,157 | 118 | 19,687 | 5,902 | 3,377 | 29,084 |
| 65,158 | 118 | 19,836 | 5,944 | 3,416 | 29,314 |
| 65,159 | 115 | 19,887 | 5,947 | 3,416 | 29,365 |
| 65,160 | 114 | 20,185 | 5,977 | 3,441 | 29,717 |
| 65,161 | 115 | 20,357 | 5,968 | 3,432 | 29,872 |
| 65,162 | 116 | 20,231 | 5,913 | 3,404 | 29,664 |
| 65,163 | 116 | 20,288 | 5,922 | 3,399 | 29,725 |
| 65,164 | 119 | 20,379 | 5,895 | 3,406 | 29,799 |
| 65,165 | 115 | 20,179 | 5,883 | 3,386 | 29,563 |
| 65,166 | 114 | 20,381 | 5,926 | 3,411 | 29,832 |
| 65,167 | 109 | 20,594 | 5,973 | 3,457 | 30,133 |
| 65,168 | 107 | 20,399 | 5,865 | 3,383 | 29,754 |
| 65,169 | 109 | 20,524 | 5,883 | 3,394 | 29,910 |
| 65,170 | 88  | 20,771 | 5,920 | 3,445 | 30,224 |
| 65,171 | 94  | 20,752 | 5,885 | 3,421 | 30,152 |
| 65,172 | 99  | 20,635 | 5,868 | 3,407 | 30,009 |
| 65,173 | 98  | 20,417 | 5,770 | 3,363 | 29,648 |
| 65,174 | 98  | 20,251 | 5,778 | 3,347 | 29,474 |
| 65,175 | 98  | 20,205 | 5,765 | 3,367 | 29,435 |

|        |     |        |       |       |        |
|--------|-----|--------|-------|-------|--------|
| 65,176 | 101 | 20,297 | 5,772 | 3,381 | 29,551 |
| 65,177 | 100 | 20,315 | 5,784 | 3,388 | 29,587 |
| 65,178 | 102 | 20,367 | 5,820 | 3,393 | 29,682 |
| 65,179 | 107 | 20,459 | 5,840 | 3,393 | 29,799 |
| 65,180 | 107 | 20,506 | 5,849 | 3,410 | 29,872 |
| 65,181 | 108 | 20,573 | 5,894 | 3,417 | 29,992 |
| 65,182 | 108 | 20,577 | 5,909 | 3,416 | 30,010 |
| 65,183 | 109 | 20,658 | 5,888 | 3,419 | 30,074 |
| 65,184 | 108 | 20,875 | 5,941 | 3,453 | 30,377 |
| 65,185 | 104 | 20,757 | 5,902 | 3,457 | 30,220 |
| 65,186 | 99  | 20,736 | 5,916 | 3,480 | 30,231 |
| 65,187 | 97  | 20,838 | 5,944 | 3,547 | 30,426 |
| 65,188 | 97  | 20,722 | 5,931 | 3,545 | 30,295 |
| 65,189 | 94  | 20,897 | 6,017 | 3,583 | 30,591 |
| 65,190 | 95  | 20,883 | 6,082 | 3,629 | 30,689 |
| 65,191 | 93  | 21,169 | 6,181 | 3,712 | 31,155 |
| 65,192 | 96  | 21,006 | 6,116 | 3,691 | 30,909 |
| 65,193 | 100 | 21,268 | 6,186 | 3,738 | 31,292 |
| 65,194 | 102 | 21,436 | 6,231 | 3,730 | 31,499 |
| 65,195 | 103 | 21,519 | 6,248 | 3,759 | 31,629 |
| 65,196 | 102 | 21,317 | 6,189 | 3,729 | 31,337 |
| 65,197 | 106 | 21,579 | 6,243 | 3,769 | 31,697 |
| 65,198 | 111 | 21,505 | 6,224 | 3,768 | 31,608 |
| 65,199 | 113 | 21,578 | 6,261 | 3,787 | 31,739 |
| 65,200 | 113 | 21,681 | 6,282 | 3,788 | 31,864 |
| 65,201 | 115 | 21,764 | 6,292 | 3,798 | 31,969 |
| 65,202 | 115 | 21,539 | 6,224 | 3,746 | 31,624 |
| 65,203 | 115 | 21,504 | 6,215 | 3,730 | 31,564 |
| 65,204 | 115 | 21,439 | 6,207 | 3,738 | 31,499 |
| 65,205 | 119 | 21,608 | 6,233 | 3,765 | 31,725 |
| 65,206 | 118 | 21,502 | 6,199 | 3,757 | 31,576 |
| 65,207 | 115 | 21,564 | 6,222 | 3,775 | 31,676 |

|        |     |        |       |       |        |
|--------|-----|--------|-------|-------|--------|
| 65,208 | 128 | 21,527 | 6,184 | 3,749 | 31,588 |
| 65,209 | 128 | 21,368 | 6,149 | 3,729 | 31,374 |
| 65,210 | 132 | 21,687 | 6,239 | 3,784 | 31,842 |
| 65,211 | 133 | 21,562 | 6,215 | 3,738 | 31,648 |
| 65,212 | 133 | 21,433 | 6,251 | 3,736 | 31,553 |
| 65,213 | 143 | 21,632 | 6,276 | 3,754 | 31,805 |
| 65,214 | 147 | 21,521 | 6,246 | 3,739 | 31,653 |
| 65,215 | 161 | 21,491 | 6,322 | 3,758 | 31,732 |
| 65,216 | 162 | 21,572 | 6,312 | 3,780 | 31,826 |
| 65,217 | 169 | 21,352 | 6,264 | 3,777 | 31,562 |
| 65,218 | 169 | 21,315 | 6,268 | 3,775 | 31,527 |
| 65,219 | 169 | 21,513 | 6,320 | 3,808 | 31,810 |
| 65,220 | 168 | 21,284 | 6,298 | 3,774 | 31,524 |
| 65,221 | 169 | 21,256 | 6,316 | 3,751 | 31,492 |
| 65,222 | 164 | 21,215 | 6,358 | 3,769 | 31,506 |
| 65,223 | 159 | 21,200 | 6,378 | 3,778 | 31,515 |
| 65,224 | 170 | 21,420 | 6,491 | 3,824 | 31,905 |
| 65,225 | 174 | 21,456 | 6,501 | 3,854 | 31,985 |
| 65,226 | 177 | 21,377 | 6,480 | 3,827 | 31,861 |
| 65,227 | 174 | 21,125 | 6,428 | 3,792 | 31,519 |
| 65,228 | 177 | 21,143 | 6,488 | 3,850 | 31,658 |
| 65,229 | 180 | 21,332 | 6,519 | 3,873 | 31,904 |
| 65,230 | 175 | 21,193 | 6,472 | 3,868 | 31,708 |
| 65,231 | 188 | 21,423 | 6,517 | 3,907 | 32,035 |
| 65,232 | 192 | 21,598 | 6,516 | 3,921 | 32,227 |
| 65,233 | 193 | 20,769 | 6,290 | 3,729 | 30,981 |
| 65,234 | 195 | 21,072 | 6,363 | 3,779 | 31,409 |
| 65,235 | 199 | 21,444 | 6,431 | 3,811 | 31,885 |
| 65,236 | 199 | 21,517 | 6,449 | 3,823 | 31,988 |
| 65,237 | 200 | 21,634 | 6,485 | 3,841 | 32,160 |
| 65,238 | 206 | 21,621 | 6,491 | 3,835 | 32,153 |
| 65,239 | 206 | 21,521 | 6,436 | 3,801 | 31,964 |

|        |     |        |       |       |        |
|--------|-----|--------|-------|-------|--------|
| 65,240 | 204 | 21,745 | 6,498 | 3,833 | 32,280 |
| 65,241 | 203 | 21,214 | 6,290 | 3,673 | 31,380 |
| 65,242 | 204 | 21,496 | 6,345 | 3,698 | 31,743 |
| 65,243 | 196 | 21,640 | 6,371 | 3,722 | 31,929 |
| 65,244 | 197 | 21,788 | 6,409 | 3,737 | 32,131 |
| 65,245 | 195 | 21,821 | 6,388 | 3,732 | 32,136 |
| 65,246 | 193 | 21,735 | 6,341 | 3,682 | 31,951 |
| 65,247 | 191 | 20,983 | 6,068 | 3,519 | 30,761 |
| 65,248 | 189 | 21,094 | 6,102 | 3,550 | 30,935 |
| 65,249 | 188 | 21,324 | 6,147 | 3,558 | 31,217 |
| 65,250 | 189 | 21,405 | 6,168 | 3,564 | 31,326 |
| 65,251 | 189 | 21,556 | 6,197 | 3,578 | 31,520 |
| 65,252 | 188 | 21,489 | 6,199 | 3,579 | 31,455 |
| 65,253 | 188 | 21,661 | 6,247 | 3,608 | 31,704 |
| 65,254 | 187 | 21,441 | 6,235 | 3,606 | 31,469 |
| 65,255 | 189 | 21,958 | 6,357 | 3,676 | 32,180 |
| 65,256 | 189 | 22,072 | 6,383 | 3,717 | 32,361 |
| 65,257 | 190 | 21,982 | 6,391 | 3,734 | 32,297 |
| 65,258 | 187 | 21,795 | 6,346 | 3,720 | 32,048 |
| 65,259 | 173 | 21,283 | 6,167 | 3,626 | 31,249 |
| 65,260 | 173 | 21,456 | 6,229 | 3,650 | 31,508 |
| 65,261 | 171 | 21,752 | 6,300 | 3,711 | 31,934 |
| 65,262 | 173 | 21,700 | 6,246 | 3,713 | 31,832 |
| 65,263 | 171 | 21,710 | 6,197 | 3,682 | 31,760 |
| 65,264 | 163 | 21,668 | 6,192 | 3,687 | 31,710 |
| 65,265 | 158 | 21,639 | 6,164 | 3,686 | 31,647 |
| 65,266 | 146 | 21,428 | 6,108 | 3,670 | 31,352 |
| 65,267 | 147 | 21,302 | 6,094 | 3,632 | 31,175 |
| 65,268 | 142 | 21,420 | 6,156 | 3,677 | 31,395 |
| 65,269 | 145 | 21,682 | 6,213 | 3,705 | 31,745 |
| 65,270 | 150 | 21,508 | 6,177 | 3,706 | 31,541 |
| 65,271 | 147 | 21,409 | 6,128 | 3,686 | 31,370 |



|        |     |        |       |       |        |
|--------|-----|--------|-------|-------|--------|
| 65,272 | 150 | 21,760 | 6,221 | 3,732 | 31,863 |
| 65,273 | 150 | 21,914 | 6,217 | 3,706 | 31,987 |
| 65,274 | 158 | 22,022 | 6,172 | 3,699 | 32,051 |
| 65,275 | 151 | 21,853 | 6,111 | 3,662 | 31,777 |
| 65,276 | 148 | 21,884 | 6,098 | 3,632 | 31,762 |
| 65,277 | 142 | 21,887 | 6,024 | 3,599 | 31,652 |
| 65,278 | 143 | 21,940 | 6,033 | 3,605 | 31,721 |
| 65,279 | 141 | 21,975 | 6,018 | 3,574 | 31,708 |
| 65,280 | 143 | 22,076 | 6,018 | 3,595 | 31,832 |
| 65,281 | 141 | 21,869 | 5,965 | 3,555 | 31,530 |
| 65,282 | 132 | 21,851 | 5,941 | 3,555 | 31,479 |
| 65,283 | 128 | 21,762 | 5,944 | 3,558 | 31,392 |
| 65,284 | 124 | 21,717 | 5,905 | 3,566 | 31,312 |
| 65,285 | 123 | 21,831 | 5,923 | 3,595 | 31,472 |
| 65,286 | 118 | 21,951 | 5,963 | 3,628 | 31,660 |
| 65,287 | 127 | 21,878 | 5,926 | 3,591 | 31,522 |
| 65,288 | 126 | 21,656 | 5,933 | 3,582 | 31,297 |
| 65,289 | 121 | 21,904 | 5,998 | 3,603 | 31,626 |
| 65,290 | 122 | 22,100 | 6,037 | 3,630 | 31,889 |
| 65,291 | 122 | 22,272 | 6,019 | 3,639 | 32,052 |
| 65,292 | 122 | 22,232 | 6,015 | 3,649 | 32,018 |
| 65,293 | 121 | 22,227 | 6,012 | 3,652 | 32,012 |
| 65,294 | 125 | 21,946 | 5,938 | 3,603 | 31,612 |
| 65,295 | 120 | 21,862 | 5,882 | 3,572 | 31,436 |
| 65,296 | 118 | 21,994 | 5,983 | 3,613 | 31,708 |
| 65,297 | 110 | 21,715 | 5,897 | 3,576 | 31,298 |
| 65,298 | 110 | 21,810 | 5,915 | 3,556 | 31,391 |
| 65,299 | 113 | 21,906 | 5,932 | 3,592 | 31,543 |
| 65,300 | 121 | 21,922 | 5,953 | 3,612 | 31,608 |
| 65,301 | 120 | 21,946 | 5,957 | 3,608 | 31,631 |
| 65,302 | 122 | 21,942 | 5,963 | 3,616 | 31,643 |
| 65,303 | 125 | 22,065 | 5,998 | 3,636 | 31,824 |

|        |     |        |       |       |        |
|--------|-----|--------|-------|-------|--------|
| 65,304 | 129 | 22,033 | 5,971 | 3,628 | 31,761 |
| 65,305 | 128 | 21,953 | 5,917 | 3,607 | 31,605 |
| 65,306 | 129 | 21,971 | 5,893 | 3,583 | 31,576 |
| 65,307 | 125 | 21,927 | 5,873 | 3,559 | 31,484 |
| 65,308 | 126 | 21,710 | 5,809 | 3,520 | 31,165 |
| 65,309 | 128 | 22,045 | 5,868 | 3,555 | 31,596 |
| 65,310 | 135 | 21,961 | 5,850 | 3,542 | 31,488 |
| 65,311 | 138 | 21,757 | 5,775 | 3,498 | 31,168 |
| 65,312 | 136 | 21,619 | 5,776 | 3,480 | 31,011 |
| 65,313 | 140 | 21,688 | 5,788 | 3,490 | 31,106 |
| 65,314 | 141 | 21,482 | 5,752 | 3,473 | 30,848 |
| 65,315 | 139 | 21,625 | 5,795 | 3,492 | 31,051 |
| 65,316 | 140 | 21,670 | 5,798 | 3,492 | 31,100 |
| 65,317 | 136 | 21,762 | 5,798 | 3,473 | 31,169 |
| 65,318 | 134 | 21,669 | 5,739 | 3,430 | 30,972 |
| 65,319 | 127 | 21,290 | 5,636 | 3,350 | 30,403 |
| 65,320 | 129 | 21,430 | 5,646 | 3,381 | 30,586 |
| 65,321 | 126 | 21,449 | 5,652 | 3,385 | 30,612 |
| 65,322 | 124 | 21,282 | 5,628 | 3,383 | 30,417 |
| 65,323 | 124 | 21,064 | 5,575 | 3,359 | 30,122 |
| 65,324 | 125 | 21,060 | 5,559 | 3,388 | 30,132 |
| 65,325 | 117 | 20,751 | 5,486 | 3,360 | 29,714 |
| 65,326 | 114 | 20,539 | 5,440 | 3,346 | 29,439 |
| 65,327 | 115 | 20,661 | 5,495 | 3,374 | 29,645 |
| 65,328 | 121 | 20,563 | 5,529 | 3,369 | 29,582 |
| 65,329 | 120 | 20,612 | 5,525 | 3,404 | 29,661 |
| 65,330 | 116 | 20,458 | 5,477 | 3,382 | 29,433 |
| 65,331 | 123 | 20,350 | 5,478 | 3,373 | 29,324 |
| 65,332 | 121 | 20,203 | 5,473 | 3,344 | 29,141 |
| 65,333 | 121 | 20,276 | 5,527 | 3,385 | 29,309 |
| 65,334 | 125 | 19,994 | 5,423 | 3,326 | 28,868 |
| 65,335 | 125 | 19,933 | 5,422 | 3,334 | 28,814 |

|        |     |        |       |       |        |
|--------|-----|--------|-------|-------|--------|
| 65,336 | 124 | 19,687 | 5,366 | 3,297 | 28,474 |
| 65,337 | 126 | 19,690 | 5,398 | 3,329 | 28,543 |
| 65,338 | 121 | 19,481 | 5,348 | 3,326 | 28,276 |
| 65,339 | 126 | 19,413 | 5,298 | 3,329 | 28,166 |
| 65,340 | 127 | 19,438 | 5,281 | 3,330 | 28,176 |
| 65,341 | 129 | 18,933 | 5,102 | 3,224 | 27,388 |
| 65,342 | 133 | 18,976 | 5,144 | 3,233 | 27,486 |
| 65,343 | 133 | 18,954 | 5,157 | 3,231 | 27,475 |
| 65,344 | 140 | 19,132 | 5,200 | 3,243 | 27,715 |
| 65,345 | 140 | 18,770 | 5,147 | 3,212 | 27,269 |
| 65,346 | 141 | 18,790 | 5,122 | 3,216 | 27,269 |
| 65,347 | 143 | 18,868 | 5,121 | 3,245 | 27,377 |
| 65,348 | 144 | 18,916 | 5,145 | 3,271 | 27,476 |
| 65,349 | 142 | 19,012 | 5,202 | 3,305 | 27,661 |
| 65,350 | 141 | 18,999 | 5,209 | 3,305 | 27,654 |
| 65,351 | 131 | 19,379 | 5,301 | 3,381 | 28,192 |
| 65,352 | 130 | 19,491 | 5,340 | 3,392 | 28,353 |
| 65,353 | 130 | 18,963 | 5,191 | 3,329 | 27,613 |
| 65,354 | 128 | 19,241 | 5,254 | 3,337 | 27,960 |
| 65,355 | 129 | 19,292 | 5,287 | 3,369 | 28,077 |
| 65,356 | 135 | 19,682 | 5,383 | 3,423 | 28,623 |
| 65,357 | 132 | 19,703 | 5,385 | 3,436 | 28,656 |
| 65,358 | 137 | 19,984 | 5,413 | 3,455 | 28,989 |
| 65,359 | 133 | 20,140 | 5,402 | 3,412 | 29,087 |
| 65,360 | 132 | 20,538 | 5,510 | 3,487 | 29,667 |
| 65,361 | 141 | 20,960 | 5,662 | 3,559 | 30,322 |
| 65,362 | 140 | 20,962 | 5,684 | 3,570 | 30,356 |
| 65,363 | 135 | 21,150 | 5,712 | 3,595 | 30,592 |
| 65,364 | 151 | 21,498 | 5,778 | 3,632 | 31,059 |
| 65,365 | 151 | 21,946 | 5,894 | 3,709 | 31,700 |
| 65,366 | 151 | 22,143 | 6,007 | 3,777 | 32,078 |
| 65,367 | 150 | 22,295 | 6,079 | 3,833 | 32,357 |

|        |     |        |       |       |        |
|--------|-----|--------|-------|-------|--------|
| 65,368 | 151 | 22,452 | 6,086 | 3,853 | 32,542 |
| 65,369 | 155 | 22,702 | 6,137 | 3,883 | 32,877 |
| 65,370 | 154 | 22,859 | 6,182 | 3,900 | 33,095 |
| 65,371 | 151 | 22,576 | 6,109 | 3,850 | 32,686 |
| 65,372 | 156 | 22,816 | 6,155 | 3,876 | 33,003 |
| 65,373 | 157 | 23,156 | 6,221 | 3,934 | 33,468 |
| 65,374 | 171 | 23,384 | 6,264 | 3,970 | 33,789 |
| 65,375 | 171 | 23,499 | 6,301 | 3,981 | 33,952 |
| 65,376 | 174 | 23,527 | 6,306 | 3,965 | 33,972 |
| 65,377 | 172 | 23,703 | 6,319 | 3,962 | 34,156 |
| 65,378 | 174 | 23,857 | 6,349 | 3,977 | 34,357 |
| 65,379 | 179 | 23,453 | 6,212 | 3,893 | 33,737 |
| 65,380 | 196 | 23,835 | 6,312 | 3,932 | 34,275 |
| 65,381 | 188 | 24,228 | 6,367 | 3,963 | 34,746 |
| 65,382 | 193 | 24,382 | 6,328 | 3,971 | 34,874 |
| 65,383 | 192 | 24,558 | 6,357 | 3,975 | 35,082 |
| 65,384 | 194 | 24,789 | 6,400 | 3,999 | 35,382 |
| 65,385 | 193 | 24,737 | 6,395 | 3,989 | 35,314 |
| 65,386 | 195 | 24,764 | 6,367 | 3,977 | 35,303 |
| 65,387 | 195 | 24,625 | 6,314 | 3,926 | 35,060 |
| 65,388 | 192 | 24,735 | 6,328 | 3,926 | 35,181 |
| 65,389 | 185 | 24,704 | 6,294 | 3,902 | 35,085 |
| 65,390 | 184 | 24,460 | 6,224 | 3,847 | 34,715 |
| 65,391 | 183 | 24,424 | 6,212 | 3,831 | 34,650 |
| 65,392 | 183 | 24,133 | 6,164 | 3,805 | 34,285 |
| 65,393 | 180 | 23,861 | 6,097 | 3,774 | 33,912 |
| 65,394 | 185 | 24,995 | 6,365 | 3,964 | 35,509 |
| 65,395 | 191 | 24,920 | 6,396 | 3,967 | 35,474 |
| 65,396 | 198 | 25,039 | 6,415 | 3,978 | 35,630 |
| 65,397 | 200 | 25,163 | 6,472 | 4,002 | 35,837 |
| 65,398 | 200 | 24,973 | 6,432 | 3,980 | 35,585 |
| 65,399 | 202 | 25,046 | 6,495 | 3,990 | 35,733 |

|        |     |        |       |       |        |
|--------|-----|--------|-------|-------|--------|
| 65,400 | 206 | 25,146 | 6,532 | 4,006 | 35,890 |
| 65,401 | 217 | 25,603 | 6,636 | 4,073 | 36,529 |
| 65,402 | 218 | 25,437 | 6,582 | 4,046 | 36,283 |
| 65,403 | 221 | 25,567 | 6,608 | 4,088 | 36,484 |
| 65,404 | 227 | 26,026 | 6,731 | 4,160 | 37,144 |
| 65,405 | 225 | 25,951 | 6,707 | 4,169 | 37,052 |
| 65,406 | 221 | 26,562 | 6,907 | 4,319 | 38,009 |
| 65,407 | 216 | 26,776 | 6,977 | 4,373 | 38,342 |
| 65,408 | 214 | 26,462 | 6,905 | 4,355 | 37,936 |
| 65,409 | 212 | 26,599 | 6,985 | 4,380 | 38,176 |
| 65,410 | 218 | 26,233 | 6,881 | 4,356 | 37,688 |
| 65,411 | 218 | 25,998 | 6,817 | 4,321 | 37,354 |
| 65,412 | 215 | 27,050 | 7,086 | 4,547 | 38,898 |
| 65,413 | 220 | 26,528 | 6,940 | 4,433 | 38,121 |
| 65,414 | 223 | 26,877 | 7,031 | 4,485 | 38,616 |
| 65,415 | 210 | 27,050 | 7,136 | 4,557 | 38,953 |
| 65,416 | 214 | 26,921 | 7,075 | 4,523 | 38,733 |
| 65,417 | 226 | 26,989 | 7,037 | 4,498 | 38,750 |
| 65,418 | 229 | 27,101 | 7,013 | 4,477 | 38,820 |
| 65,419 | 231 | 27,389 | 7,127 | 4,542 | 39,289 |
| 65,420 | 225 | 27,209 | 7,059 | 4,524 | 39,017 |
| 65,421 | 234 | 27,203 | 7,083 | 4,550 | 39,070 |
| 65,422 | 234 | 27,161 | 7,071 | 4,523 | 38,989 |
| 65,423 | 236 | 27,217 | 7,119 | 4,541 | 39,113 |
| 65,424 | 238 | 27,199 | 7,107 | 4,535 | 39,079 |
| 65,425 | 229 | 26,981 | 7,126 | 4,531 | 38,867 |
| 65,426 | 229 | 26,998 | 7,123 | 4,534 | 38,884 |
| 65,427 | 226 | 26,739 | 7,111 | 4,525 | 38,601 |
| 65,428 | 224 | 26,555 | 7,095 | 4,517 | 38,391 |
| 65,429 | 223 | 26,467 | 7,055 | 4,499 | 38,244 |
| 65,430 | 212 | 26,507 | 7,124 | 4,535 | 38,378 |
| 65,431 | 206 | 26,275 | 7,097 | 4,511 | 38,089 |

|        |     |        |       |       |        |
|--------|-----|--------|-------|-------|--------|
| 65,432 | 207 | 26,059 | 7,090 | 4,498 | 37,854 |
| 65,433 | 204 | 26,115 | 7,164 | 4,548 | 38,031 |
| 65,434 | 207 | 25,939 | 7,138 | 4,518 | 37,802 |
| 65,435 | 207 | 25,869 | 7,131 | 4,506 | 37,713 |
| 65,436 | 204 | 25,718 | 7,168 | 4,496 | 37,586 |
| 65,437 | 204 | 25,661 | 7,176 | 4,506 | 37,547 |
| 65,438 | 214 | 25,574 | 7,155 | 4,500 | 37,443 |
| 65,439 | 215 | 25,566 | 7,149 | 4,478 | 37,408 |
| 65,440 | 226 | 25,693 | 7,234 | 4,513 | 37,666 |
| 65,441 | 225 | 25,884 | 7,288 | 4,550 | 37,947 |
| 65,442 | 226 | 25,802 | 7,254 | 4,532 | 37,814 |
| 65,443 | 227 | 25,917 | 7,250 | 4,527 | 37,921 |
| 65,444 | 230 | 25,922 | 7,261 | 4,528 | 37,941 |
| 65,445 | 226 | 26,012 | 7,284 | 4,538 | 38,060 |
| 65,446 | 222 | 26,161 | 7,264 | 4,551 | 38,198 |
| 65,447 | 220 | 26,144 | 7,258 | 4,550 | 38,172 |
| 65,448 | 224 | 26,186 | 7,266 | 4,574 | 38,250 |
| 65,449 | 224 | 26,163 | 7,255 | 4,565 | 38,207 |
| 65,450 | 219 | 26,253 | 7,269 | 4,600 | 38,341 |
| 65,451 | 220 | 26,433 | 7,316 | 4,621 | 38,590 |
| 65,452 | 223 | 26,210 | 7,301 | 4,579 | 38,313 |
| 65,453 | 220 | 25,971 | 7,228 | 4,532 | 37,951 |
| 65,454 | 216 | 26,355 | 7,338 | 4,601 | 38,510 |
| 65,455 | 218 | 26,236 | 7,335 | 4,593 | 38,382 |
| 65,456 | 224 | 26,346 | 7,328 | 4,565 | 38,463 |
| 65,457 | 224 | 26,364 | 7,295 | 4,522 | 38,405 |
| 65,458 | 228 | 26,402 | 7,260 | 4,492 | 38,382 |
| 65,459 | 240 | 26,502 | 7,318 | 4,516 | 38,576 |
| 65,460 | 237 | 26,339 | 7,281 | 4,480 | 38,337 |
| 65,461 | 227 | 26,383 | 7,285 | 4,439 | 38,334 |
| 65,462 | 228 | 26,310 | 7,280 | 4,400 | 38,218 |
| 65,463 | 232 | 26,527 | 7,366 | 4,460 | 38,585 |

|        |     |        |       |       |        |
|--------|-----|--------|-------|-------|--------|
| 65,464 | 230 | 26,215 | 7,299 | 4,436 | 38,180 |
| 65,465 | 232 | 26,026 | 7,218 | 4,378 | 37,854 |
| 65,466 | 233 | 26,102 | 7,208 | 4,376 | 37,919 |
| 65,467 | 229 | 25,944 | 7,186 | 4,329 | 37,688 |
| 65,468 | 220 | 26,062 | 7,215 | 4,365 | 37,862 |
| 65,469 | 217 | 25,826 | 7,135 | 4,324 | 37,502 |
| 65,470 | 214 | 25,531 | 7,076 | 4,296 | 37,117 |
| 65,471 | 213 | 24,988 | 6,911 | 4,210 | 36,322 |
| 65,472 | 211 | 25,127 | 6,943 | 4,225 | 36,506 |
| 65,473 | 210 | 24,956 | 6,920 | 4,220 | 36,306 |
| 65,474 | 205 | 24,862 | 6,879 | 4,208 | 36,154 |
| 65,475 | 206 | 24,905 | 6,884 | 4,193 | 36,188 |
| 65,476 | 200 | 24,973 | 6,844 | 4,199 | 36,216 |
| 65,477 | 199 | 24,891 | 6,797 | 4,175 | 36,062 |
| 65,478 | 201 | 24,714 | 6,753 | 4,144 | 35,812 |
| 65,479 | 202 | 24,549 | 6,693 | 4,106 | 35,550 |
| 65,480 | 205 | 25,016 | 6,768 | 4,160 | 36,149 |
| 65,481 | 207 | 25,038 | 6,715 | 4,156 | 36,116 |
| 65,482 | 198 | 24,813 | 6,558 | 4,086 | 35,655 |
| 65,483 | 196 | 24,702 | 6,528 | 4,041 | 35,467 |
| 65,484 | 198 | 24,787 | 6,535 | 4,074 | 35,594 |
| 65,485 | 194 | 24,592 | 6,504 | 4,047 | 35,337 |
| 65,486 | 199 | 24,907 | 6,562 | 4,086 | 35,754 |
| 65,487 | 202 | 24,671 | 6,485 | 4,057 | 35,415 |
| 65,488 | 203 | 24,679 | 6,476 | 4,038 | 35,396 |
| 65,489 | 193 | 24,455 | 6,444 | 4,002 | 35,094 |
| 65,490 | 187 | 24,777 | 6,471 | 4,036 | 35,471 |
| 65,491 | 180 | 24,504 | 6,420 | 3,988 | 35,092 |
| 65,492 | 182 | 24,565 | 6,409 | 4,007 | 35,163 |
| 65,493 | 174 | 24,355 | 6,359 | 3,984 | 34,872 |
| 65,494 | 174 | 24,297 | 6,350 | 3,996 | 34,817 |
| 65,495 | 171 | 24,178 | 6,301 | 3,965 | 34,615 |

|        |     |        |       |       |        |
|--------|-----|--------|-------|-------|--------|
| 65,496 | 170 | 24,018 | 6,266 | 3,943 | 34,397 |
| 65,497 | 164 | 24,011 | 6,238 | 3,919 | 34,332 |
| 65,498 | 167 | 24,190 | 6,230 | 3,941 | 34,528 |
| 65,499 | 158 | 24,053 | 6,137 | 3,866 | 34,214 |
| 65,500 | 157 | 23,918 | 6,020 | 3,806 | 33,901 |
| 65,501 | 160 | 23,619 | 5,935 | 3,766 | 33,480 |
| 65,502 | 161 | 23,600 | 5,930 | 3,768 | 33,459 |
| 65,503 | 150 | 23,356 | 5,869 | 3,757 | 33,132 |
| 65,504 | 152 | 22,813 | 5,680 | 3,633 | 32,278 |
| 65,505 | 153 | 22,846 | 5,673 | 3,632 | 32,304 |
| 65,506 | 151 | 22,841 | 5,611 | 3,640 | 32,243 |
| 65,507 | 144 | 22,320 | 5,472 | 3,561 | 31,497 |
| 65,508 | 141 | 21,606 | 5,312 | 3,452 | 30,511 |
| 65,509 | 140 | 21,595 | 5,326 | 3,449 | 30,510 |
| 65,510 | 125 | 21,291 | 5,227 | 3,412 | 30,055 |
| 65,511 | 129 | 21,138 | 5,155 | 3,384 | 29,806 |
| 65,512 | 131 | 20,674 | 5,055 | 3,338 | 29,198 |
| 65,513 | 129 | 20,485 | 4,957 | 3,275 | 28,846 |
| 65,514 | 128 | 20,265 | 4,856 | 3,215 | 28,464 |
| 65,515 | 127 | 20,485 | 4,913 | 3,240 | 28,765 |
| 65,516 | 121 | 19,400 | 4,614 | 3,082 | 27,217 |
| 65,517 | 122 | 19,569 | 4,656 | 3,085 | 27,432 |
| 65,518 | 120 | 19,825 | 4,708 | 3,126 | 27,779 |
| 65,519 | 127 | 19,818 | 4,696 | 3,102 | 27,743 |
| 65,520 | 127 | 19,831 | 4,652 | 3,078 | 27,688 |
| 65,521 | 126 | 19,827 | 4,666 | 3,084 | 27,703 |
| 65,522 | 120 | 19,726 | 4,680 | 3,064 | 27,590 |
| 65,523 | 121 | 19,937 | 4,709 | 3,054 | 27,821 |
| 65,524 | 123 | 20,140 | 4,771 | 3,063 | 28,097 |
| 65,525 | 123 | 20,084 | 4,743 | 3,035 | 27,985 |
| 65,526 | 121 | 20,205 | 4,780 | 3,056 | 28,162 |
| 65,527 | 121 | 20,238 | 4,815 | 3,064 | 28,238 |



|        |     |        |       |       |        |
|--------|-----|--------|-------|-------|--------|
| 65,528 | 119 | 20,391 | 4,828 | 3,075 | 28,413 |
| 65,529 | 123 | 20,511 | 4,851 | 3,078 | 28,563 |
| 65,530 | 124 | 20,499 | 4,855 | 3,085 | 28,563 |
| 65,531 | 127 | 20,915 | 4,974 | 3,154 | 29,170 |
| 65,532 | 127 | 21,079 | 5,029 | 3,186 | 29,421 |
| 65,533 | 122 | 21,320 | 5,094 | 3,222 | 29,758 |
| 65,534 | 123 | 21,247 | 5,056 | 3,210 | 29,636 |
| 65,535 | 123 | 21,702 | 5,128 | 3,252 | 30,205 |
| 65,536 | 121 | 21,820 | 5,143 | 3,271 | 30,355 |
| 65,537 | 123 | 22,085 | 5,215 | 3,320 | 30,743 |
| 65,538 | 119 | 21,998 | 5,182 | 3,300 | 30,599 |
| 65,539 | 126 | 22,146 | 5,189 | 3,303 | 30,764 |
| 65,540 | 127 | 22,143 | 5,210 | 3,324 | 30,804 |
| 65,541 | 125 | 22,295 | 5,257 | 3,353 | 31,030 |
| 65,542 | 123 | 22,385 | 5,307 | 3,367 | 31,182 |
| 65,543 | 119 | 22,377 | 5,289 | 3,358 | 31,143 |
| 65,544 | 120 | 22,461 | 5,286 | 3,340 | 31,207 |
| 65,545 | 125 | 22,564 | 5,321 | 3,348 | 31,358 |
| 65,546 | 123 | 22,345 | 5,275 | 3,336 | 31,079 |
| 65,547 | 122 | 22,859 | 5,388 | 3,388 | 31,757 |
| 65,548 | 125 | 23,016 | 5,451 | 3,413 | 32,005 |
| 65,549 | 122 | 22,922 | 5,456 | 3,436 | 31,936 |
| 65,550 | 120 | 22,757 | 5,494 | 3,453 | 31,824 |
| 65,551 | 130 | 22,868 | 5,540 | 3,488 | 32,026 |
| 65,552 | 125 | 22,773 | 5,514 | 3,456 | 31,868 |
| 65,553 | 122 | 22,615 | 5,472 | 3,446 | 31,655 |
| 65,554 | 123 | 22,971 | 5,541 | 3,493 | 32,128 |
| 65,555 | 121 | 22,913 | 5,553 | 3,503 | 32,090 |
| 65,556 | 123 | 23,234 | 5,699 | 3,527 | 32,583 |
| 65,557 | 125 | 23,585 | 5,812 | 3,579 | 33,101 |
| 65,558 | 126 | 23,372 | 5,759 | 3,550 | 32,807 |
| 65,559 | 124 | 23,230 | 5,747 | 3,529 | 32,630 |

|        |     |        |       |       |        |
|--------|-----|--------|-------|-------|--------|
| 65,560 | 134 | 23,696 | 5,937 | 3,634 | 33,401 |
| 65,561 | 135 | 23,793 | 5,966 | 3,635 | 33,529 |
| 65,562 | 135 | 23,709 | 6,000 | 3,624 | 33,468 |
| 65,563 | 133 | 23,509 | 5,989 | 3,605 | 33,236 |
| 65,564 | 133 | 23,511 | 6,007 | 3,607 | 33,258 |
| 65,565 | 134 | 23,580 | 6,045 | 3,630 | 33,389 |
| 65,566 | 138 | 23,972 | 6,155 | 3,686 | 33,951 |
| 65,567 | 141 | 23,872 | 6,162 | 3,686 | 33,861 |
| 65,568 | 142 | 23,517 | 6,103 | 3,653 | 33,415 |
| 65,569 | 143 | 23,675 | 6,147 | 3,690 | 33,655 |
| 65,570 | 138 | 23,856 | 6,206 | 3,735 | 33,935 |
| 65,571 | 140 | 23,959 | 6,279 | 3,753 | 34,131 |
| 65,572 | 139 | 23,903 | 6,217 | 3,730 | 33,989 |
| 65,573 | 140 | 24,168 | 6,249 | 3,767 | 34,324 |
| 65,574 | 149 | 24,157 | 6,248 | 3,775 | 34,329 |
| 65,575 | 146 | 23,916 | 6,174 | 3,755 | 33,991 |
| 65,576 | 147 | 23,880 | 6,162 | 3,765 | 33,954 |
| 65,577 | 156 | 23,975 | 6,195 | 3,777 | 34,103 |
| 65,578 | 156 | 23,949 | 6,194 | 3,774 | 34,073 |
| 65,579 | 159 | 23,819 | 6,231 | 3,802 | 34,011 |
| 65,580 | 160 | 24,192 | 6,349 | 3,885 | 34,586 |
| 65,581 | 156 | 24,208 | 6,384 | 3,888 | 34,636 |
| 65,582 | 152 | 24,287 | 6,387 | 3,891 | 34,717 |
| 65,583 | 152 | 24,317 | 6,446 | 3,877 | 34,792 |
| 65,584 | 152 | 24,097 | 6,448 | 3,855 | 34,552 |
| 65,585 | 149 | 23,708 | 6,384 | 3,822 | 34,063 |
| 65,586 | 168 | 24,053 | 6,497 | 3,860 | 34,578 |
| 65,587 | 173 | 23,667 | 6,422 | 3,804 | 34,066 |
| 65,588 | 170 | 23,497 | 6,401 | 3,795 | 33,863 |
| 65,589 | 174 | 23,886 | 6,541 | 3,877 | 34,478 |
| 65,590 | 174 | 23,766 | 6,544 | 3,892 | 34,376 |
| 65,591 | 177 | 23,817 | 6,556 | 3,898 | 34,448 |

|        |     |        |       |       |        |
|--------|-----|--------|-------|-------|--------|
| 65,592 | 179 | 23,735 | 6,547 | 3,894 | 34,355 |
| 65,593 | 181 | 23,649 | 6,537 | 3,889 | 34,256 |
| 65,594 | 180 | 23,301 | 6,519 | 3,855 | 33,855 |
| 65,595 | 191 | 23,409 | 6,623 | 3,903 | 34,126 |
| 65,596 | 189 | 23,293 | 6,696 | 3,915 | 34,093 |
| 65,597 | 190 | 23,164 | 6,679 | 3,901 | 33,934 |
| 65,598 | 190 | 23,071 | 6,688 | 3,905 | 33,854 |
| 65,599 | 192 | 23,115 | 6,679 | 3,906 | 33,892 |
| 65,600 | 195 | 22,389 | 6,481 | 3,754 | 32,819 |
| 65,601 | 198 | 22,687 | 6,520 | 3,775 | 33,180 |
| 65,602 | 189 | 22,707 | 6,517 | 3,770 | 33,183 |
| 65,603 | 186 | 22,387 | 6,453 | 3,749 | 32,775 |
| 65,604 | 192 | 22,431 | 6,518 | 3,786 | 32,927 |
| 65,605 | 200 | 22,315 | 6,544 | 3,781 | 32,840 |
| 65,606 | 198 | 22,533 | 6,619 | 3,809 | 33,159 |
| 65,607 | 201 | 22,435 | 6,610 | 3,813 | 33,059 |
| 65,608 | 200 | 22,422 | 6,624 | 3,818 | 33,064 |
| 65,609 | 192 | 22,443 | 6,628 | 3,815 | 33,078 |
| 65,610 | 192 | 21,788 | 6,430 | 3,717 | 32,127 |
| 65,611 | 193 | 22,023 | 6,456 | 3,741 | 32,413 |
| 65,612 | 188 | 21,887 | 6,395 | 3,742 | 32,212 |
| 65,613 | 188 | 22,155 | 6,428 | 3,769 | 32,540 |
| 65,614 | 183 | 22,059 | 6,383 | 3,770 | 32,395 |
| 65,615 | 183 | 21,993 | 6,378 | 3,784 | 32,338 |
| 65,616 | 184 | 21,974 | 6,392 | 3,781 | 32,331 |
| 65,617 | 185 | 22,106 | 6,461 | 3,823 | 32,575 |
| 65,618 | 184 | 22,090 | 6,432 | 3,817 | 32,523 |
| 65,619 | 180 | 22,087 | 6,446 | 3,805 | 32,518 |
| 65,620 | 183 | 22,132 | 6,433 | 3,804 | 32,552 |
| 65,621 | 187 | 22,317 | 6,462 | 3,807 | 32,773 |
| 65,622 | 187 | 22,344 | 6,432 | 3,813 | 32,776 |
| 65,623 | 188 | 22,215 | 6,439 | 3,821 | 32,663 |

|        |     |        |       |       |        |
|--------|-----|--------|-------|-------|--------|
| 65,624 | 188 | 22,113 | 6,430 | 3,830 | 32,561 |
| 65,625 | 179 | 22,001 | 6,434 | 3,839 | 32,453 |
| 65,626 | 182 | 21,677 | 6,375 | 3,795 | 32,029 |
| 65,627 | 179 | 21,333 | 6,330 | 3,770 | 31,612 |
| 65,628 | 181 | 21,774 | 6,530 | 3,866 | 32,351 |
| 65,629 | 178 | 21,798 | 6,506 | 3,849 | 32,331 |
| 65,630 | 179 | 21,813 | 6,521 | 3,839 | 32,352 |
| 65,631 | 179 | 21,863 | 6,506 | 3,846 | 32,394 |
| 65,632 | 180 | 21,546 | 6,422 | 3,808 | 31,956 |
| 65,633 | 181 | 21,531 | 6,431 | 3,825 | 31,968 |
| 65,634 | 180 | 21,625 | 6,415 | 3,867 | 32,087 |
| 65,635 | 180 | 21,612 | 6,392 | 3,855 | 32,039 |
| 65,636 | 180 | 21,784 | 6,425 | 3,864 | 32,253 |
| 65,637 | 167 | 21,852 | 6,439 | 3,875 | 32,333 |
| 65,638 | 158 | 21,889 | 6,443 | 3,901 | 32,391 |
| 65,639 | 150 | 21,801 | 6,427 | 3,869 | 32,247 |
| 65,640 | 151 | 21,633 | 6,392 | 3,809 | 31,985 |
| 65,641 | 150 | 21,723 | 6,383 | 3,801 | 32,057 |
| 65,642 | 150 | 21,789 | 6,367 | 3,827 | 32,133 |
| 65,643 | 148 | 21,802 | 6,360 | 3,814 | 32,124 |
| 65,644 | 142 | 21,887 | 6,327 | 3,827 | 32,183 |
| 65,645 | 137 | 21,969 | 6,298 | 3,830 | 32,234 |
| 65,646 | 135 | 22,056 | 6,241 | 3,797 | 32,229 |
| 65,647 | 140 | 22,098 | 6,198 | 3,797 | 32,233 |
| 65,648 | 141 | 22,151 | 6,194 | 3,801 | 32,287 |
| 65,649 | 141 | 22,322 | 6,236 | 3,848 | 32,547 |
| 65,650 | 136 | 22,275 | 6,227 | 3,844 | 32,482 |
| 65,651 | 136 | 21,828 | 6,118 | 3,757 | 31,839 |
| 65,652 | 136 | 21,952 | 6,145 | 3,778 | 32,011 |
| 65,653 | 135 | 22,159 | 6,177 | 3,802 | 32,273 |
| 65,654 | 138 | 22,323 | 6,230 | 3,823 | 32,514 |
| 65,655 | 133 | 22,407 | 6,218 | 3,837 | 32,595 |

|        |     |        |       |       |        |
|--------|-----|--------|-------|-------|--------|
| 65,656 | 139 | 22,231 | 6,144 | 3,788 | 32,302 |
| 65,657 | 139 | 22,029 | 6,059 | 3,759 | 31,986 |
| 65,658 | 138 | 22,035 | 6,057 | 3,784 | 32,014 |
| 65,659 | 142 | 21,774 | 6,005 | 3,768 | 31,689 |
| 65,660 | 142 | 21,804 | 6,014 | 3,806 | 31,766 |
| 65,661 | 141 | 21,458 | 5,926 | 3,758 | 31,283 |
| 65,662 | 141 | 21,403 | 5,900 | 3,745 | 31,189 |
| 65,663 | 141 | 21,430 | 5,883 | 3,730 | 31,184 |
| 65,664 | 145 | 21,412 | 5,868 | 3,731 | 31,156 |
| 65,665 | 142 | 21,118 | 5,823 | 3,685 | 30,768 |
| 65,666 | 143 | 21,504 | 5,917 | 3,732 | 31,296 |
| 65,667 | 144 | 21,319 | 5,825 | 3,691 | 30,979 |
| 65,668 | 142 | 21,125 | 5,774 | 3,679 | 30,720 |
| 65,669 | 139 | 21,234 | 5,835 | 3,702 | 30,910 |
| 65,670 | 138 | 21,190 | 5,855 | 3,722 | 30,905 |
| 65,671 | 137 | 21,302 | 5,897 | 3,735 | 31,071 |
| 65,672 | 131 | 21,429 | 5,927 | 3,760 | 31,247 |
| 65,673 | 125 | 21,392 | 5,920 | 3,755 | 31,192 |
| 65,674 | 129 | 21,258 | 5,913 | 3,704 | 31,004 |
| 65,675 | 130 | 21,493 | 5,975 | 3,750 | 31,348 |
| 65,676 | 127 | 21,737 | 6,036 | 3,783 | 31,683 |
| 65,677 | 122 | 21,740 | 5,949 | 3,751 | 31,562 |
| 65,678 | 122 | 21,767 | 5,944 | 3,734 | 31,567 |
| 65,679 | 122 | 22,019 | 6,005 | 3,823 | 31,969 |
| 65,680 | 120 | 21,688 | 5,916 | 3,777 | 31,501 |
| 65,681 | 120 | 21,403 | 5,828 | 3,723 | 31,074 |
| 65,682 | 117 | 20,987 | 5,758 | 3,674 | 30,536 |
| 65,683 | 125 | 21,430 | 5,905 | 3,783 | 31,243 |
| 65,684 | 129 | 21,223 | 5,887 | 3,739 | 30,978 |
| 65,685 | 133 | 20,927 | 5,823 | 3,722 | 30,605 |
| 65,686 | 132 | 20,637 | 5,761 | 3,692 | 30,222 |
| 65,687 | 129 | 20,562 | 5,748 | 3,710 | 30,149 |

|        |     |        |       |       |        |
|--------|-----|--------|-------|-------|--------|
| 65,688 | 135 | 20,499 | 5,767 | 3,735 | 30,136 |
| 65,689 | 141 | 20,429 | 5,743 | 3,693 | 30,006 |
| 65,690 | 143 | 20,256 | 5,675 | 3,673 | 29,747 |
| 65,691 | 142 | 20,313 | 5,688 | 3,684 | 29,827 |
| 65,692 | 143 | 20,389 | 5,709 | 3,673 | 29,914 |
| 65,693 | 146 | 20,473 | 5,752 | 3,689 | 30,060 |
| 65,694 | 149 | 20,462 | 5,746 | 3,700 | 30,057 |
| 65,695 | 149 | 20,337 | 5,739 | 3,691 | 29,916 |
| 65,696 | 150 | 20,579 | 5,778 | 3,724 | 30,231 |
| 65,697 | 151 | 20,553 | 5,787 | 3,718 | 30,209 |
| 65,698 | 144 | 20,364 | 5,757 | 3,692 | 29,957 |
| 65,699 | 143 | 20,443 | 5,791 | 3,708 | 30,085 |
| 65,700 | 139 | 19,998 | 5,685 | 3,634 | 29,456 |
| 65,701 | 140 | 20,199 | 5,739 | 3,660 | 29,738 |
| 65,702 | 137 | 20,323 | 5,791 | 3,683 | 29,934 |
| 65,703 | 135 | 20,317 | 5,780 | 3,672 | 29,904 |
| 65,704 | 136 | 20,472 | 5,843 | 3,699 | 30,150 |
| 65,705 | 125 | 19,890 | 5,675 | 3,606 | 29,296 |
| 65,706 | 124 | 20,110 | 5,717 | 3,624 | 29,575 |
| 65,707 | 120 | 20,302 | 5,762 | 3,662 | 29,846 |
| 65,708 | 124 | 20,483 | 5,810 | 3,684 | 30,101 |
| 65,709 | 117 | 20,651 | 5,834 | 3,670 | 30,272 |
| 65,710 | 116 | 20,815 | 5,906 | 3,717 | 30,554 |
| 65,711 | 116 | 20,889 | 5,961 | 3,723 | 30,689 |
| 65,712 | 116 | 20,843 | 5,993 | 3,748 | 30,700 |
| 65,713 | 113 | 20,786 | 6,022 | 3,767 | 30,688 |
| 65,714 | 109 | 20,393 | 5,908 | 3,700 | 30,110 |
| 65,715 | 109 | 20,408 | 5,944 | 3,702 | 30,163 |
| 65,716 | 111 | 20,625 | 6,001 | 3,734 | 30,471 |
| 65,717 | 106 | 20,302 | 5,933 | 3,685 | 30,026 |
| 65,718 | 106 | 20,312 | 5,937 | 3,689 | 30,044 |
| 65,719 | 107 | 20,211 | 5,957 | 3,699 | 29,974 |

|        |     |        |       |       |        |
|--------|-----|--------|-------|-------|--------|
| 65,720 | 105 | 20,178 | 5,934 | 3,706 | 29,923 |
| 65,721 | 107 | 20,150 | 5,892 | 3,669 | 29,818 |
| 65,722 | 106 | 20,157 | 5,868 | 3,668 | 29,799 |
| 65,723 | 114 | 20,056 | 5,836 | 3,653 | 29,659 |
| 65,724 | 110 | 19,931 | 5,794 | 3,639 | 29,474 |
| 65,725 | 111 | 20,401 | 5,875 | 3,696 | 30,083 |
| 65,726 | 110 | 20,437 | 5,866 | 3,694 | 30,107 |
| 65,727 | 111 | 20,155 | 5,785 | 3,636 | 29,687 |
| 65,728 | 111 | 20,627 | 5,885 | 3,700 | 30,323 |
| 65,729 | 115 | 20,893 | 5,975 | 3,741 | 30,724 |
| 65,730 | 120 | 20,930 | 5,978 | 3,741 | 30,769 |
| 65,731 | 122 | 21,008 | 5,972 | 3,743 | 30,845 |
| 65,732 | 114 | 20,886 | 5,927 | 3,704 | 30,631 |
| 65,733 | 114 | 21,390 | 6,039 | 3,787 | 31,330 |
| 65,734 | 113 | 21,563 | 6,069 | 3,790 | 31,535 |
| 65,735 | 108 | 21,552 | 6,130 | 3,783 | 31,573 |
| 65,736 | 112 | 21,615 | 6,130 | 3,771 | 31,628 |
| 65,737 | 113 | 21,597 | 6,106 | 3,747 | 31,563 |
| 65,738 | 115 | 21,706 | 6,113 | 3,739 | 31,673 |
| 65,739 | 108 | 21,547 | 6,086 | 3,702 | 31,443 |
| 65,740 | 102 | 21,416 | 6,077 | 3,709 | 31,304 |
| 65,741 | 98  | 21,327 | 6,024 | 3,690 | 31,139 |
| 65,742 | 110 | 21,821 | 6,186 | 3,797 | 31,914 |
| 65,743 | 107 | 21,648 | 6,160 | 3,777 | 31,692 |
| 65,744 | 107 | 21,513 | 6,180 | 3,776 | 31,576 |
| 65,745 | 108 | 21,851 | 6,307 | 3,829 | 32,095 |
| 65,746 | 111 | 22,110 | 6,409 | 3,876 | 32,506 |
| 65,747 | 127 | 22,216 | 6,461 | 3,895 | 32,699 |
| 65,748 | 127 | 22,264 | 6,501 | 3,914 | 32,806 |
| 65,749 | 134 | 22,332 | 6,533 | 3,923 | 32,922 |
| 65,750 | 132 | 21,342 | 6,235 | 3,762 | 31,471 |
| 65,751 | 136 | 21,586 | 6,271 | 3,772 | 31,765 |

|        |     |        |       |       |        |
|--------|-----|--------|-------|-------|--------|
| 65,752 | 136 | 21,898 | 6,343 | 3,813 | 32,190 |
| 65,753 | 136 | 21,926 | 6,366 | 3,822 | 32,250 |
| 65,754 | 134 | 22,283 | 6,470 | 3,886 | 32,773 |
| 65,755 | 133 | 21,984 | 6,373 | 3,827 | 32,317 |
| 65,756 | 134 | 22,181 | 6,431 | 3,860 | 32,606 |
| 65,757 | 134 | 22,170 | 6,451 | 3,865 | 32,620 |
| 65,758 | 139 | 22,194 | 6,468 | 3,862 | 32,663 |
| 65,759 | 135 | 22,365 | 6,486 | 3,877 | 32,863 |
| 65,760 | 135 | 22,221 | 6,409 | 3,835 | 32,600 |
| 65,761 | 134 | 22,367 | 6,388 | 3,807 | 32,696 |
| 65,762 | 134 | 22,469 | 6,354 | 3,781 | 32,738 |
| 65,763 | 134 | 22,298 | 6,259 | 3,712 | 32,403 |
| 65,764 | 135 | 22,442 | 6,236 | 3,686 | 32,499 |
| 65,765 | 136 | 22,619 | 6,232 | 3,687 | 32,674 |
| 65,766 | 137 | 22,939 | 6,290 | 3,733 | 33,099 |
| 65,767 | 137 | 22,702 | 6,209 | 3,689 | 32,737 |
| 65,768 | 138 | 22,715 | 6,211 | 3,685 | 32,749 |
| 65,769 | 137 | 23,093 | 6,250 | 3,692 | 33,172 |
| 65,770 | 140 | 22,980 | 6,196 | 3,647 | 32,963 |
| 65,771 | 150 | 23,004 | 6,237 | 3,663 | 33,054 |
| 65,772 | 150 | 22,718 | 6,187 | 3,638 | 32,693 |
| 65,773 | 150 | 22,446 | 6,131 | 3,597 | 32,324 |
| 65,774 | 146 | 22,566 | 6,197 | 3,617 | 32,526 |
| 65,775 | 148 | 22,509 | 6,168 | 3,585 | 32,410 |
| 65,776 | 149 | 22,366 | 6,098 | 3,539 | 32,152 |
| 65,777 | 148 | 22,338 | 6,048 | 3,520 | 32,054 |
| 65,778 | 145 | 22,037 | 5,977 | 3,470 | 31,629 |
| 65,779 | 150 | 22,306 | 6,034 | 3,479 | 31,969 |
| 65,780 | 150 | 22,296 | 5,992 | 3,463 | 31,901 |
| 65,781 | 147 | 22,184 | 5,939 | 3,406 | 31,676 |
| 65,782 | 146 | 22,277 | 5,912 | 3,385 | 31,720 |
| 65,783 | 150 | 22,349 | 5,905 | 3,390 | 31,794 |



|        |     |        |       |       |        |
|--------|-----|--------|-------|-------|--------|
| 65,784 | 151 | 22,249 | 5,873 | 3,356 | 31,629 |
| 65,785 | 149 | 21,976 | 5,726 | 3,296 | 31,147 |
| 65,786 | 155 | 21,953 | 5,649 | 3,280 | 31,037 |
| 65,787 | 153 | 22,018 | 5,636 | 3,274 | 31,081 |
| 65,788 | 153 | 22,080 | 5,667 | 3,284 | 31,184 |
| 65,789 | 155 | 22,144 | 5,650 | 3,277 | 31,226 |
| 65,790 | 151 | 22,132 | 5,561 | 3,238 | 31,082 |
| 65,791 | 150 | 22,109 | 5,550 | 3,219 | 31,028 |
| 65,792 | 146 | 22,067 | 5,536 | 3,193 | 30,942 |
| 65,793 | 149 | 22,196 | 5,509 | 3,207 | 31,061 |
| 65,794 | 140 | 21,904 | 5,302 | 3,120 | 30,466 |
| 65,795 | 140 | 21,899 | 5,277 | 3,096 | 30,412 |
| 65,796 | 128 | 21,305 | 5,067 | 2,961 | 29,461 |
| 65,797 | 131 | 21,599 | 5,108 | 2,990 | 29,828 |
| 65,798 | 125 | 21,623 | 5,088 | 2,985 | 29,821 |
| 65,799 | 133 | 21,830 | 5,089 | 3,024 | 30,076 |
| 65,800 | 135 | 21,911 | 5,072 | 3,026 | 30,144 |
| 65,801 | 133 | 21,712 | 5,041 | 3,002 | 29,888 |
| 65,802 | 132 | 21,945 | 5,101 | 3,043 | 30,221 |
| 65,803 | 136 | 22,113 | 5,121 | 3,049 | 30,419 |
| 65,804 | 135 | 22,061 | 5,050 | 3,013 | 30,259 |
| 65,805 | 138 | 22,096 | 5,071 | 3,018 | 30,323 |
| 65,806 | 136 | 22,180 | 5,104 | 3,042 | 30,462 |
| 65,807 | 139 | 22,220 | 5,099 | 3,016 | 30,474 |
| 65,808 | 139 | 22,158 | 5,073 | 3,017 | 30,387 |
| 65,809 | 138 | 22,414 | 5,115 | 3,052 | 30,719 |
| 65,810 | 142 | 22,291 | 5,125 | 3,077 | 30,635 |
| 65,811 | 142 | 22,165 | 5,105 | 3,075 | 30,487 |
| 65,812 | 143 | 22,120 | 5,098 | 3,080 | 30,441 |
| 65,813 | 141 | 21,764 | 5,021 | 3,051 | 29,977 |
| 65,814 | 140 | 21,514 | 4,999 | 3,047 | 29,700 |
| 65,815 | 139 | 21,526 | 5,010 | 3,099 | 29,774 |

|        |     |        |       |       |        |
|--------|-----|--------|-------|-------|--------|
| 65,816 | 136 | 21,036 | 4,954 | 3,045 | 29,171 |
| 65,817 | 140 | 21,104 | 4,980 | 3,066 | 29,290 |
| 65,818 | 139 | 21,300 | 4,972 | 3,071 | 29,482 |
| 65,819 | 143 | 21,132 | 4,915 | 3,061 | 29,251 |
| 65,820 | 149 | 21,287 | 4,917 | 3,092 | 29,445 |
| 65,821 | 137 | 21,213 | 4,858 | 3,078 | 29,286 |
| 65,822 | 139 | 21,276 | 4,863 | 3,051 | 29,329 |
| 65,823 | 145 | 21,523 | 4,893 | 3,081 | 29,642 |
| 65,824 | 145 | 21,471 | 4,844 | 3,042 | 29,502 |
| 65,825 | 144 | 21,441 | 4,825 | 3,038 | 29,448 |
| 65,826 | 145 | 21,186 | 4,779 | 3,028 | 29,138 |
| 65,827 | 147 | 21,279 | 4,813 | 3,046 | 29,285 |
| 65,828 | 156 | 21,223 | 4,843 | 3,045 | 29,267 |
| 65,829 | 172 | 20,926 | 4,755 | 2,991 | 28,844 |
| 65,830 | 168 | 20,681 | 4,698 | 2,969 | 28,516 |
| 65,831 | 169 | 20,608 | 4,708 | 2,982 | 28,467 |
| 65,832 | 171 | 20,500 | 4,658 | 2,970 | 28,299 |
| 65,833 | 171 | 20,429 | 4,653 | 2,959 | 28,212 |
| 65,834 | 171 | 20,510 | 4,638 | 2,960 | 28,279 |
| 65,835 | 168 | 20,330 | 4,644 | 2,967 | 28,109 |
| 65,836 | 168 | 20,350 | 4,649 | 2,968 | 28,135 |
| 65,837 | 166 | 20,307 | 4,660 | 2,952 | 28,085 |
| 65,838 | 174 | 20,640 | 4,725 | 2,991 | 28,530 |
| 65,839 | 175 | 20,490 | 4,678 | 2,960 | 28,303 |
| 65,840 | 173 | 20,345 | 4,650 | 2,939 | 28,107 |
| 65,841 | 171 | 20,462 | 4,786 | 2,980 | 28,399 |
| 65,842 | 176 | 20,733 | 4,831 | 3,034 | 28,774 |
| 65,843 | 172 | 20,824 | 4,847 | 3,036 | 28,879 |
| 65,844 | 177 | 20,811 | 4,922 | 3,048 | 28,958 |
| 65,845 | 176 | 20,842 | 4,907 | 3,057 | 28,982 |
| 65,846 | 175 | 20,784 | 4,932 | 3,082 | 28,973 |
| 65,847 | 180 | 21,011 | 5,005 | 3,145 | 29,341 |

|        |     |        |       |       |        |
|--------|-----|--------|-------|-------|--------|
| 65,848 | 180 | 21,250 | 5,085 | 3,171 | 29,686 |
| 65,849 | 185 | 21,793 | 5,186 | 3,247 | 30,411 |
| 65,850 | 180 | 22,040 | 5,264 | 3,274 | 30,758 |
| 65,851 | 170 | 21,869 | 5,238 | 3,255 | 30,532 |
| 65,852 | 172 | 22,201 | 5,315 | 3,302 | 30,990 |
| 65,853 | 172 | 22,221 | 5,320 | 3,296 | 31,009 |
| 65,854 | 176 | 22,842 | 5,429 | 3,365 | 31,812 |
| 65,855 | 174 | 22,738 | 5,411 | 3,358 | 31,681 |
| 65,856 | 176 | 22,972 | 5,459 | 3,368 | 31,975 |
| 65,857 | 177 | 23,314 | 5,521 | 3,401 | 32,413 |
| 65,858 | 174 | 23,414 | 5,557 | 3,443 | 32,588 |
| 65,859 | 172 | 23,222 | 5,461 | 3,373 | 32,228 |
| 65,860 | 176 | 23,461 | 5,506 | 3,398 | 32,541 |
| 65,861 | 172 | 23,543 | 5,499 | 3,397 | 32,611 |
| 65,862 | 176 | 23,580 | 5,525 | 3,387 | 32,668 |
| 65,863 | 183 | 23,676 | 5,532 | 3,408 | 32,799 |
| 65,864 | 184 | 23,891 | 5,539 | 3,404 | 33,018 |
| 65,865 | 185 | 23,953 | 5,563 | 3,409 | 33,110 |
| 65,866 | 187 | 23,392 | 5,478 | 3,325 | 32,382 |
| 65,867 | 191 | 23,717 | 5,537 | 3,357 | 32,802 |
| 65,868 | 190 | 24,186 | 5,596 | 3,394 | 33,366 |
| 65,869 | 188 | 24,234 | 5,605 | 3,393 | 33,420 |
| 65,870 | 189 | 24,859 | 5,732 | 3,480 | 34,260 |
| 65,871 | 186 | 24,800 | 5,757 | 3,454 | 34,197 |
| 65,872 | 187 | 24,840 | 5,749 | 3,454 | 34,230 |
| 65,873 | 178 | 24,999 | 5,797 | 3,494 | 34,468 |
| 65,874 | 183 | 25,309 | 5,852 | 3,539 | 34,883 |
| 65,875 | 182 | 25,300 | 5,857 | 3,544 | 34,883 |
| 65,876 | 182 | 25,655 | 5,926 | 3,589 | 35,352 |
| 65,877 | 179 | 25,542 | 5,900 | 3,577 | 35,198 |
| 65,878 | 179 | 25,518 | 5,900 | 3,576 | 35,173 |
| 65,879 | 172 | 25,533 | 5,894 | 3,577 | 35,176 |

|        |     |        |       |       |        |
|--------|-----|--------|-------|-------|--------|
| 65,880 | 158 | 25,901 | 5,954 | 3,637 | 35,650 |
| 65,881 | 155 | 25,596 | 5,902 | 3,597 | 35,250 |
| 65,882 | 159 | 25,903 | 5,944 | 3,622 | 35,628 |
| 65,883 | 155 | 25,823 | 5,942 | 3,604 | 35,524 |
| 65,884 | 155 | 25,808 | 5,968 | 3,610 | 35,541 |
| 65,885 | 158 | 25,853 | 6,021 | 3,639 | 35,671 |
| 65,886 | 160 | 25,810 | 6,022 | 3,628 | 35,620 |
| 65,887 | 158 | 25,524 | 5,972 | 3,616 | 35,270 |
| 65,888 | 155 | 26,038 | 6,118 | 3,700 | 36,011 |
| 65,889 | 145 | 25,935 | 6,111 | 3,695 | 35,886 |
| 65,890 | 143 | 25,891 | 6,094 | 3,707 | 35,835 |
| 65,891 | 144 | 25,873 | 6,103 | 3,697 | 35,817 |
| 65,892 | 143 | 25,771 | 6,046 | 3,687 | 35,647 |
| 65,893 | 148 | 25,977 | 6,090 | 3,705 | 35,920 |
| 65,894 | 150 | 25,846 | 6,054 | 3,682 | 35,732 |
| 65,895 | 148 | 25,856 | 6,061 | 3,687 | 35,752 |
| 65,896 | 156 | 26,040 | 6,082 | 3,713 | 35,991 |
| 65,897 | 153 | 26,205 | 6,073 | 3,711 | 36,142 |
| 65,898 | 154 | 25,863 | 6,041 | 3,699 | 35,757 |
| 65,899 | 162 | 26,107 | 6,118 | 3,732 | 36,119 |
| 65,900 | 160 | 25,707 | 6,078 | 3,702 | 35,647 |
| 65,901 | 161 | 25,447 | 6,089 | 3,691 | 35,388 |
| 65,902 | 164 | 25,204 | 6,056 | 3,677 | 35,101 |
| 65,903 | 164 | 24,993 | 6,075 | 3,683 | 34,915 |
| 65,904 | 163 | 24,911 | 6,072 | 3,718 | 34,864 |
| 65,905 | 166 | 24,407 | 6,032 | 3,710 | 34,315 |
| 65,906 | 166 | 24,009 | 5,956 | 3,670 | 33,801 |
| 65,907 | 169 | 24,219 | 6,000 | 3,705 | 34,093 |
| 65,908 | 169 | 24,028 | 5,971 | 3,687 | 33,855 |
| 65,909 | 169 | 23,957 | 5,946 | 3,677 | 33,749 |
| 65,910 | 168 | 23,939 | 5,946 | 3,687 | 33,740 |
| 65,911 | 166 | 23,989 | 5,950 | 3,696 | 33,801 |

|        |     |        |       |       |        |
|--------|-----|--------|-------|-------|--------|
| 65,912 | 166 | 23,953 | 5,962 | 3,682 | 33,763 |
| 65,913 | 165 | 23,979 | 5,974 | 3,692 | 33,810 |
| 65,914 | 165 | 23,854 | 5,966 | 3,685 | 33,670 |
| 65,915 | 167 | 23,929 | 5,997 | 3,711 | 33,804 |
| 65,916 | 166 | 24,044 | 6,039 | 3,740 | 33,989 |
| 65,917 | 165 | 24,015 | 6,037 | 3,739 | 33,956 |
| 65,918 | 162 | 24,080 | 6,105 | 3,803 | 34,150 |
| 65,919 | 163 | 23,990 | 6,151 | 3,839 | 34,143 |
| 65,920 | 176 | 23,985 | 6,208 | 3,862 | 34,231 |
| 65,921 | 177 | 23,765 | 6,190 | 3,853 | 33,985 |
| 65,922 | 186 | 24,093 | 6,238 | 3,907 | 34,424 |
| 65,923 | 191 | 23,918 | 6,229 | 3,890 | 34,228 |
| 65,924 | 188 | 23,987 | 6,239 | 3,912 | 34,326 |
| 65,925 | 183 | 24,043 | 6,287 | 3,930 | 34,443 |
| 65,926 | 183 | 24,090 | 6,288 | 3,942 | 34,503 |
| 65,927 | 179 | 23,932 | 6,240 | 3,928 | 34,279 |
| 65,928 | 179 | 23,825 | 6,276 | 3,953 | 34,233 |
| 65,929 | 177 | 24,042 | 6,324 | 3,982 | 34,525 |
| 65,930 | 177 | 24,097 | 6,303 | 3,990 | 34,567 |
| 65,931 | 182 | 24,401 | 6,367 | 4,036 | 34,986 |
| 65,932 | 182 | 24,533 | 6,404 | 4,039 | 35,158 |
| 65,933 | 182 | 24,462 | 6,400 | 4,047 | 35,091 |
| 65,934 | 191 | 24,658 | 6,433 | 4,080 | 35,362 |
| 65,935 | 208 | 24,590 | 6,411 | 4,054 | 35,263 |
| 65,936 | 210 | 24,581 | 6,415 | 4,055 | 35,261 |
| 65,937 | 211 | 24,976 | 6,479 | 4,095 | 35,761 |
| 65,938 | 220 | 24,969 | 6,461 | 4,062 | 35,712 |
| 65,939 | 218 | 24,844 | 6,415 | 4,038 | 35,515 |
| 65,940 | 220 | 25,019 | 6,421 | 4,066 | 35,726 |
| 65,941 | 220 | 24,928 | 6,423 | 4,068 | 35,639 |
| 65,942 | 218 | 24,652 | 6,349 | 4,032 | 35,251 |
| 65,943 | 212 | 24,561 | 6,343 | 4,016 | 35,132 |

|        |     |        |       |       |        |
|--------|-----|--------|-------|-------|--------|
| 65,944 | 211 | 24,552 | 6,346 | 4,030 | 35,139 |
| 65,945 | 206 | 24,634 | 6,355 | 4,035 | 35,230 |
| 65,946 | 213 | 24,396 | 6,304 | 4,019 | 34,932 |
| 65,947 | 212 | 24,205 | 6,277 | 4,004 | 34,698 |
| 65,948 | 210 | 23,881 | 6,264 | 3,966 | 34,321 |
| 65,949 | 206 | 23,810 | 6,194 | 3,948 | 34,158 |
| 65,950 | 205 | 23,528 | 6,100 | 3,893 | 33,726 |
| 65,951 | 202 | 23,184 | 5,982 | 3,823 | 33,191 |
| 65,952 | 203 | 23,324 | 5,959 | 3,819 | 33,305 |
| 65,953 | 201 | 23,339 | 5,927 | 3,778 | 33,245 |
| 65,954 | 203 | 23,041 | 5,766 | 3,654 | 32,664 |
| 65,955 | 202 | 22,993 | 5,774 | 3,652 | 32,621 |
| 65,956 | 192 | 22,695 | 5,683 | 3,593 | 32,163 |
| 65,957 | 192 | 22,514 | 5,641 | 3,585 | 31,932 |
| 65,958 | 200 | 22,950 | 5,782 | 3,684 | 32,616 |
| 65,959 | 204 | 22,982 | 5,778 | 3,689 | 32,653 |
| 65,960 | 207 | 22,694 | 5,731 | 3,624 | 32,256 |
| 65,961 | 206 | 22,438 | 5,692 | 3,593 | 31,929 |
| 65,962 | 208 | 22,403 | 5,717 | 3,621 | 31,949 |
| 65,963 | 207 | 22,297 | 5,694 | 3,608 | 31,806 |
| 65,964 | 203 | 22,373 | 5,706 | 3,610 | 31,892 |
| 65,965 | 202 | 22,223 | 5,703 | 3,604 | 31,732 |
| 65,966 | 202 | 22,440 | 5,764 | 3,635 | 32,041 |
| 65,967 | 198 | 22,442 | 5,779 | 3,642 | 32,061 |
| 65,968 | 196 | 22,436 | 5,774 | 3,638 | 32,044 |
| 65,969 | 186 | 21,746 | 5,540 | 3,491 | 30,963 |
| 65,970 | 194 | 22,025 | 5,613 | 3,530 | 31,362 |
| 65,971 | 186 | 22,146 | 5,626 | 3,550 | 31,508 |
| 65,972 | 191 | 22,316 | 5,636 | 3,570 | 31,713 |
| 65,973 | 182 | 22,112 | 5,605 | 3,575 | 31,474 |
| 65,974 | 176 | 21,907 | 5,546 | 3,541 | 31,170 |
| 65,975 | 180 | 21,917 | 5,549 | 3,516 | 31,162 |

|        |     |        |       |       |        |
|--------|-----|--------|-------|-------|--------|
| 65,976 | 184 | 21,648 | 5,507 | 3,507 | 30,846 |
| 65,977 | 184 | 21,680 | 5,526 | 3,526 | 30,916 |
| 65,978 | 186 | 21,753 | 5,483 | 3,491 | 30,913 |
| 65,979 | 186 | 21,747 | 5,494 | 3,506 | 30,933 |
| 65,980 | 182 | 21,652 | 5,461 | 3,487 | 30,782 |
| 65,981 | 181 | 21,504 | 5,476 | 3,457 | 30,618 |
| 65,982 | 179 | 21,374 | 5,461 | 3,480 | 30,494 |
| 65,983 | 175 | 21,248 | 5,481 | 3,490 | 30,394 |
| 65,984 | 158 | 20,884 | 5,398 | 3,450 | 29,890 |
| 65,985 | 155 | 21,084 | 5,478 | 3,483 | 30,200 |
| 65,986 | 144 | 21,316 | 5,567 | 3,547 | 30,574 |
| 65,987 | 144 | 21,329 | 5,602 | 3,566 | 30,641 |
| 65,988 | 142 | 21,386 | 5,596 | 3,586 | 30,710 |
| 65,989 | 137 | 21,286 | 5,610 | 3,597 | 30,630 |
| 65,990 | 139 | 21,296 | 5,623 | 3,607 | 30,665 |
| 65,991 | 139 | 21,312 | 5,579 | 3,593 | 30,623 |
| 65,992 | 143 | 21,044 | 5,566 | 3,580 | 30,333 |
| 65,993 | 145 | 21,414 | 5,635 | 3,626 | 30,820 |
| 65,994 | 155 | 21,641 | 5,696 | 3,672 | 31,164 |
| 65,995 | 160 | 21,490 | 5,685 | 3,641 | 30,976 |
| 65,996 | 159 | 21,288 | 5,654 | 3,602 | 30,703 |
| 65,997 | 160 | 21,791 | 5,753 | 3,680 | 31,384 |
| 65,998 | 153 | 21,553 | 5,693 | 3,650 | 31,049 |
| 65,999 | 152 | 21,416 | 5,673 | 3,651 | 30,892 |
| 66,000 | 153 | 21,510 | 5,686 | 3,646 | 30,995 |
| 66,001 | 149 | 21,444 | 5,680 | 3,652 | 30,925 |
| 66,002 | 146 | 21,203 | 5,646 | 3,619 | 30,614 |
| 66,003 | 152 | 21,298 | 5,672 | 3,659 | 30,781 |
| 66,004 | 149 | 21,277 | 5,664 | 3,657 | 30,747 |
| 66,005 | 145 | 21,397 | 5,668 | 3,679 | 30,889 |
| 66,006 | 140 | 21,254 | 5,640 | 3,671 | 30,705 |
| 66,007 | 150 | 21,730 | 5,737 | 3,755 | 31,372 |

|        |     |        |       |       |        |
|--------|-----|--------|-------|-------|--------|
| 66,008 | 154 | 21,385 | 5,628 | 3,676 | 30,843 |
| 66,009 | 153 | 21,610 | 5,662 | 3,709 | 31,134 |
| 66,010 | 152 | 21,697 | 5,736 | 3,752 | 31,337 |
| 66,011 | 147 | 21,209 | 5,595 | 3,693 | 30,644 |
| 66,012 | 148 | 21,432 | 5,657 | 3,705 | 30,942 |
| 66,013 | 146 | 21,712 | 5,720 | 3,751 | 31,329 |
| 66,014 | 146 | 21,748 | 5,717 | 3,758 | 31,369 |
| 66,015 | 144 | 21,782 | 5,735 | 3,755 | 31,416 |
| 66,016 | 143 | 21,675 | 5,692 | 3,733 | 31,243 |
| 66,017 | 147 | 21,836 | 5,702 | 3,743 | 31,428 |
| 66,018 | 155 | 21,940 | 5,712 | 3,746 | 31,553 |
| 66,019 | 152 | 22,007 | 5,722 | 3,737 | 31,618 |
| 66,020 | 155 | 22,119 | 5,761 | 3,763 | 31,798 |
| 66,021 | 151 | 22,298 | 5,795 | 3,815 | 32,059 |
| 66,022 | 150 | 22,227 | 5,796 | 3,792 | 31,965 |
| 66,023 | 145 | 22,109 | 5,791 | 3,753 | 31,798 |
| 66,024 | 145 | 22,333 | 5,853 | 3,785 | 32,116 |
| 66,025 | 147 | 22,260 | 5,826 | 3,770 | 32,003 |
| 66,026 | 147 | 22,041 | 5,770 | 3,739 | 31,697 |
| 66,027 | 146 | 21,905 | 5,763 | 3,696 | 31,510 |
| 66,028 | 151 | 22,492 | 5,868 | 3,747 | 32,258 |
| 66,029 | 149 | 22,305 | 5,835 | 3,730 | 32,019 |
| 66,030 | 167 | 22,852 | 6,008 | 3,801 | 32,828 |
| 66,031 | 166 | 22,600 | 5,951 | 3,769 | 32,486 |
| 66,032 | 169 | 22,914 | 6,040 | 3,809 | 32,932 |
| 66,033 | 172 | 22,833 | 6,014 | 3,790 | 32,809 |
| 66,034 | 182 | 22,698 | 5,938 | 3,748 | 32,566 |
| 66,035 | 181 | 22,645 | 5,952 | 3,750 | 32,528 |
| 66,036 | 183 | 22,806 | 5,965 | 3,763 | 32,717 |
| 66,037 | 180 | 22,724 | 5,920 | 3,734 | 32,558 |
| 66,038 | 183 | 22,990 | 5,970 | 3,760 | 32,903 |
| 66,039 | 186 | 23,000 | 5,973 | 3,761 | 32,920 |



|        |     |        |       |       |        |
|--------|-----|--------|-------|-------|--------|
| 66,040 | 180 | 22,667 | 5,877 | 3,717 | 32,441 |
| 66,041 | 178 | 22,672 | 5,876 | 3,733 | 32,459 |
| 66,042 | 191 | 22,821 | 5,977 | 3,797 | 32,786 |
| 66,043 | 190 | 23,105 | 5,995 | 3,802 | 33,092 |
| 66,044 | 194 | 23,225 | 6,034 | 3,824 | 33,277 |
| 66,045 | 189 | 23,208 | 6,035 | 3,839 | 33,271 |
| 66,046 | 187 | 23,045 | 5,989 | 3,806 | 33,027 |
| 66,047 | 184 | 23,438 | 6,086 | 3,867 | 33,575 |
| 66,048 | 185 | 23,352 | 6,063 | 3,839 | 33,439 |
| 66,049 | 185 | 23,463 | 6,061 | 3,833 | 33,542 |
| 66,050 | 182 | 23,573 | 6,073 | 3,856 | 33,684 |
| 66,051 | 181 | 23,546 | 6,082 | 3,864 | 33,673 |
| 66,052 | 179 | 23,556 | 6,091 | 3,865 | 33,691 |
| 66,053 | 176 | 23,919 | 6,147 | 3,913 | 34,155 |
| 66,054 | 174 | 23,843 | 6,105 | 3,885 | 34,007 |
| 66,055 | 176 | 23,960 | 6,146 | 3,891 | 34,173 |
| 66,056 | 176 | 24,198 | 6,225 | 3,922 | 34,521 |
| 66,057 | 164 | 24,453 | 6,317 | 3,983 | 34,917 |
| 66,058 | 167 | 24,608 | 6,333 | 3,980 | 35,088 |
| 66,059 | 166 | 24,762 | 6,354 | 4,024 | 35,306 |
| 66,060 | 166 | 24,915 | 6,367 | 4,030 | 35,478 |
| 66,061 | 168 | 24,919 | 6,334 | 3,966 | 35,387 |
| 66,062 | 172 | 25,272 | 6,391 | 4,007 | 35,842 |
| 66,063 | 172 | 25,354 | 6,374 | 4,031 | 35,931 |
| 66,064 | 172 | 25,653 | 6,449 | 4,055 | 36,329 |
| 66,065 | 176 | 25,759 | 6,455 | 4,045 | 36,435 |
| 66,066 | 177 | 25,987 | 6,486 | 4,092 | 36,742 |
| 66,067 | 181 | 25,560 | 6,402 | 4,036 | 36,179 |
| 66,068 | 182 | 25,633 | 6,462 | 4,056 | 36,333 |
| 66,069 | 180 | 25,767 | 6,522 | 4,107 | 36,576 |
| 66,070 | 186 | 25,883 | 6,555 | 4,127 | 36,751 |
| 66,071 | 185 | 25,797 | 6,561 | 4,103 | 36,646 |

|        |     |        |       |       |        |
|--------|-----|--------|-------|-------|--------|
| 66,072 | 192 | 25,923 | 6,587 | 4,093 | 36,795 |
| 66,073 | 191 | 25,810 | 6,517 | 4,076 | 36,594 |
| 66,074 | 195 | 26,336 | 6,643 | 4,133 | 37,307 |
| 66,075 | 195 | 26,278 | 6,640 | 4,128 | 37,241 |
| 66,076 | 191 | 26,293 | 6,670 | 4,152 | 37,306 |
| 66,077 | 187 | 25,942 | 6,605 | 4,108 | 36,842 |
| 66,078 | 185 | 25,827 | 6,594 | 4,123 | 36,729 |
| 66,079 | 185 | 25,616 | 6,584 | 4,127 | 36,512 |
| 66,080 | 183 | 25,639 | 6,604 | 4,130 | 36,556 |
| 66,081 | 176 | 25,471 | 6,541 | 4,126 | 36,314 |
| 66,082 | 172 | 25,435 | 6,536 | 4,132 | 36,275 |
| 66,083 | 176 | 25,258 | 6,475 | 4,105 | 36,014 |
| 66,084 | 168 | 25,066 | 6,459 | 4,083 | 35,776 |
| 66,085 | 166 | 25,012 | 6,428 | 4,077 | 35,683 |
| 66,086 | 171 | 25,260 | 6,494 | 4,100 | 36,025 |
| 66,087 | 170 | 25,172 | 6,447 | 4,097 | 35,886 |
| 66,088 | 177 | 25,149 | 6,488 | 4,108 | 35,922 |
| 66,089 | 175 | 25,057 | 6,477 | 4,119 | 35,828 |
| 66,090 | 171 | 24,861 | 6,465 | 4,094 | 35,591 |
| 66,091 | 173 | 24,851 | 6,437 | 4,054 | 35,515 |
| 66,092 | 171 | 25,047 | 6,471 | 4,076 | 35,765 |
| 66,093 | 159 | 25,380 | 6,537 | 4,119 | 36,195 |
| 66,094 | 157 | 25,335 | 6,497 | 4,105 | 36,094 |
| 66,095 | 153 | 25,233 | 6,489 | 4,098 | 35,973 |
| 66,096 | 148 | 25,054 | 6,445 | 4,047 | 35,694 |
| 66,097 | 146 | 25,148 | 6,451 | 4,091 | 35,836 |
| 66,098 | 149 | 25,103 | 6,434 | 4,087 | 35,773 |
| 66,099 | 145 | 24,934 | 6,392 | 4,044 | 35,515 |
| 66,100 | 144 | 24,825 | 6,400 | 4,040 | 35,409 |
| 66,101 | 150 | 24,862 | 6,413 | 4,031 | 35,456 |
| 66,102 | 150 | 24,864 | 6,408 | 4,020 | 35,442 |
| 66,103 | 150 | 24,789 | 6,399 | 4,032 | 35,370 |

|        |     |        |       |       |        |
|--------|-----|--------|-------|-------|--------|
| 66,104 | 153 | 24,392 | 6,343 | 3,968 | 34,856 |
| 66,105 | 154 | 24,096 | 6,298 | 3,931 | 34,479 |
| 66,106 | 154 | 24,027 | 6,352 | 3,999 | 34,532 |
| 66,107 | 157 | 24,021 | 6,380 | 3,984 | 34,542 |
| 66,108 | 163 | 23,655 | 6,313 | 3,913 | 34,044 |
| 66,109 | 159 | 23,277 | 6,221 | 3,868 | 33,525 |
| 66,110 | 165 | 23,209 | 6,206 | 3,856 | 33,436 |
| 66,111 | 165 | 22,771 | 6,129 | 3,802 | 32,867 |
| 66,112 | 164 | 23,010 | 6,260 | 3,901 | 33,335 |
| 66,113 | 160 | 23,011 | 6,237 | 3,897 | 33,305 |
| 66,114 | 167 | 23,159 | 6,312 | 3,915 | 33,553 |
| 66,115 | 164 | 23,072 | 6,282 | 3,907 | 33,425 |
| 66,116 | 158 | 22,857 | 6,209 | 3,876 | 33,100 |
| 66,117 | 161 | 23,042 | 6,280 | 3,897 | 33,380 |
| 66,118 | 154 | 22,957 | 6,252 | 3,865 | 33,228 |
| 66,119 | 146 | 22,655 | 6,141 | 3,813 | 32,755 |
| 66,120 | 147 | 22,895 | 6,188 | 3,844 | 33,074 |
| 66,121 | 145 | 22,525 | 6,114 | 3,796 | 32,580 |
| 66,122 | 142 | 22,454 | 6,075 | 3,785 | 32,456 |
| 66,123 | 152 | 22,132 | 5,987 | 3,758 | 32,029 |
| 66,124 | 149 | 21,902 | 5,911 | 3,714 | 31,676 |
| 66,125 | 152 | 21,950 | 5,907 | 3,704 | 31,713 |
| 66,126 | 162 | 21,961 | 5,876 | 3,698 | 31,697 |
| 66,127 | 162 | 22,002 | 5,885 | 3,703 | 31,752 |
| 66,128 | 161 | 22,255 | 5,865 | 3,714 | 31,995 |
| 66,129 | 162 | 22,419 | 5,885 | 3,687 | 32,153 |
| 66,130 | 161 | 22,124 | 5,794 | 3,630 | 31,709 |
| 66,131 | 162 | 22,139 | 5,804 | 3,642 | 31,747 |
| 66,132 | 160 | 21,899 | 5,735 | 3,579 | 31,373 |
| 66,133 | 160 | 21,497 | 5,634 | 3,529 | 30,820 |
| 66,134 | 152 | 22,116 | 5,818 | 3,640 | 31,726 |
| 66,135 | 147 | 22,123 | 5,785 | 3,656 | 31,711 |

|        |     |        |       |       |        |
|--------|-----|--------|-------|-------|--------|
| 66,136 | 149 | 22,506 | 5,873 | 3,668 | 32,196 |
| 66,137 | 145 | 22,699 | 5,865 | 3,695 | 32,404 |
| 66,138 | 139 | 22,652 | 5,800 | 3,655 | 32,246 |
| 66,139 | 142 | 22,917 | 5,857 | 3,675 | 32,591 |
| 66,140 | 143 | 22,868 | 5,838 | 3,668 | 32,517 |
| 66,141 | 145 | 23,096 | 5,902 | 3,712 | 32,855 |
| 66,142 | 145 | 22,831 | 5,797 | 3,697 | 32,470 |
| 66,143 | 147 | 22,874 | 5,850 | 3,722 | 32,593 |
| 66,144 | 152 | 22,607 | 5,822 | 3,694 | 32,275 |
| 66,145 | 148 | 22,280 | 5,751 | 3,655 | 31,834 |
| 66,146 | 154 | 22,187 | 5,712 | 3,624 | 31,677 |
| 66,147 | 155 | 22,348 | 5,772 | 3,646 | 31,921 |
| 66,148 | 162 | 22,512 | 5,801 | 3,638 | 32,113 |
| 66,149 | 161 | 22,634 | 5,824 | 3,658 | 32,277 |
| 66,150 | 161 | 22,411 | 5,761 | 3,627 | 31,960 |
| 66,151 | 161 | 22,280 | 5,717 | 3,603 | 31,761 |
| 66,152 | 159 | 22,649 | 5,838 | 3,710 | 32,356 |
| 66,153 | 161 | 22,891 | 5,913 | 3,752 | 32,717 |
| 66,154 | 161 | 23,038 | 5,898 | 3,765 | 32,862 |
| 66,155 | 157 | 22,998 | 5,849 | 3,751 | 32,755 |
| 66,156 | 159 | 23,046 | 5,843 | 3,749 | 32,797 |
| 66,157 | 158 | 22,864 | 5,770 | 3,719 | 32,511 |
| 66,158 | 156 | 23,091 | 5,823 | 3,795 | 32,865 |
| 66,159 | 149 | 23,170 | 5,797 | 3,766 | 32,882 |
| 66,160 | 148 | 22,950 | 5,733 | 3,718 | 32,549 |
| 66,161 | 135 | 22,852 | 5,690 | 3,696 | 32,373 |
| 66,162 | 140 | 22,911 | 5,671 | 3,677 | 32,399 |
| 66,163 | 140 | 22,786 | 5,629 | 3,652 | 32,207 |
| 66,164 | 138 | 23,346 | 5,724 | 3,725 | 32,933 |
| 66,165 | 138 | 23,212 | 5,706 | 3,711 | 32,767 |
| 66,166 | 140 | 23,638 | 5,791 | 3,769 | 33,338 |
| 66,167 | 142 | 23,702 | 5,823 | 3,755 | 33,422 |

|        |     |        |       |       |        |
|--------|-----|--------|-------|-------|--------|
| 66,168 | 139 | 23,789 | 5,808 | 3,761 | 33,497 |
| 66,169 | 140 | 23,582 | 5,737 | 3,715 | 33,174 |
| 66,170 | 141 | 23,902 | 5,767 | 3,735 | 33,545 |
| 66,171 | 141 | 23,666 | 5,676 | 3,698 | 33,181 |
| 66,172 | 141 | 23,797 | 5,672 | 3,689 | 33,299 |
| 66,173 | 125 | 23,746 | 5,659 | 3,678 | 33,208 |
| 66,174 | 124 | 23,717 | 5,657 | 3,673 | 33,171 |
| 66,175 | 124 | 23,792 | 5,708 | 3,704 | 33,328 |
| 66,176 | 120 | 23,566 | 5,638 | 3,666 | 32,990 |
| 66,177 | 111 | 23,330 | 5,582 | 3,614 | 32,637 |
| 66,178 | 111 | 23,034 | 5,540 | 3,594 | 32,279 |
| 66,179 | 125 | 23,900 | 5,762 | 3,783 | 33,570 |
| 66,180 | 128 | 23,707 | 5,699 | 3,747 | 33,281 |
| 66,181 | 125 | 23,622 | 5,650 | 3,727 | 33,124 |
| 66,182 | 131 | 23,730 | 5,654 | 3,718 | 33,233 |
| 66,183 | 126 | 23,537 | 5,581 | 3,669 | 32,913 |
| 66,184 | 131 | 24,135 | 5,698 | 3,722 | 33,686 |
| 66,185 | 132 | 23,907 | 5,622 | 3,668 | 33,329 |
| 66,186 | 131 | 23,660 | 5,572 | 3,616 | 32,979 |
| 66,187 | 138 | 23,909 | 5,664 | 3,680 | 33,391 |
| 66,188 | 145 | 24,117 | 5,728 | 3,695 | 33,685 |
| 66,189 | 144 | 24,060 | 5,742 | 3,717 | 33,663 |
| 66,190 | 141 | 23,169 | 5,525 | 3,551 | 32,386 |
| 66,191 | 142 | 23,500 | 5,585 | 3,570 | 32,797 |
| 66,192 | 142 | 23,831 | 5,642 | 3,583 | 33,198 |
| 66,193 | 141 | 23,869 | 5,630 | 3,562 | 33,202 |
| 66,194 | 141 | 23,921 | 5,598 | 3,541 | 33,201 |
| 66,195 | 140 | 23,845 | 5,533 | 3,501 | 33,019 |
| 66,196 | 139 | 23,792 | 5,519 | 3,496 | 32,946 |
| 66,197 | 132 | 23,752 | 5,508 | 3,505 | 32,897 |
| 66,198 | 134 | 24,031 | 5,577 | 3,565 | 33,307 |
| 66,199 | 126 | 23,644 | 5,523 | 3,553 | 32,846 |

|        |     |        |       |       |        |
|--------|-----|--------|-------|-------|--------|
| 66,200 | 126 | 23,626 | 5,506 | 3,529 | 32,787 |
| 66,201 | 124 | 23,434 | 5,421 | 3,482 | 32,461 |
| 66,202 | 127 | 23,686 | 5,467 | 3,516 | 32,796 |
| 66,203 | 129 | 23,741 | 5,485 | 3,500 | 32,855 |
| 66,204 | 129 | 23,609 | 5,426 | 3,464 | 32,628 |
| 66,205 | 129 | 23,403 | 5,398 | 3,401 | 32,331 |
| 66,206 | 128 | 23,565 | 5,433 | 3,413 | 32,539 |
| 66,207 | 129 | 23,653 | 5,398 | 3,396 | 32,576 |
| 66,208 | 129 | 23,671 | 5,397 | 3,368 | 32,565 |
| 66,209 | 128 | 23,757 | 5,381 | 3,351 | 32,617 |
| 66,210 | 130 | 23,657 | 5,357 | 3,333 | 32,477 |
| 66,211 | 131 | 23,746 | 5,370 | 3,357 | 32,604 |
| 66,212 | 129 | 23,332 | 5,309 | 3,301 | 32,071 |
| 66,213 | 129 | 23,042 | 5,258 | 3,245 | 31,674 |
| 66,214 | 129 | 22,700 | 5,194 | 3,190 | 31,213 |
| 66,215 | 132 | 22,684 | 5,244 | 3,189 | 31,249 |
| 66,216 | 132 | 22,485 | 5,168 | 3,164 | 30,949 |
| 66,217 | 135 | 22,800 | 5,275 | 3,199 | 31,409 |
| 66,218 | 135 | 22,429 | 5,194 | 3,178 | 30,936 |
| 66,219 | 135 | 22,440 | 5,189 | 3,170 | 30,934 |
| 66,220 | 136 | 22,395 | 5,166 | 3,161 | 30,858 |
| 66,221 | 136 | 22,459 | 5,164 | 3,149 | 30,908 |
| 66,222 | 132 | 22,508 | 5,207 | 3,165 | 31,012 |
| 66,223 | 140 | 22,154 | 5,180 | 3,164 | 30,638 |
| 66,224 | 137 | 22,403 | 5,184 | 3,162 | 30,886 |
| 66,225 | 137 | 22,725 | 5,232 | 3,186 | 31,280 |
| 66,226 | 143 | 22,583 | 5,204 | 3,159 | 31,089 |
| 66,227 | 146 | 22,723 | 5,248 | 3,157 | 31,274 |
| 66,228 | 140 | 22,978 | 5,292 | 3,158 | 31,568 |
| 66,229 | 145 | 22,797 | 5,219 | 3,071 | 31,232 |
| 66,230 | 144 | 22,516 | 5,179 | 3,032 | 30,871 |
| 66,231 | 138 | 22,516 | 5,231 | 3,067 | 30,952 |

|        |     |        |       |       |        |
|--------|-----|--------|-------|-------|--------|
| 66,232 | 139 | 22,321 | 5,238 | 3,060 | 30,758 |
| 66,233 | 133 | 22,109 | 5,209 | 3,051 | 30,502 |
| 66,234 | 136 | 22,050 | 5,232 | 3,055 | 30,473 |
| 66,235 | 136 | 21,985 | 5,197 | 3,031 | 30,349 |
| 66,236 | 135 | 22,029 | 5,205 | 3,050 | 30,419 |
| 66,237 | 139 | 21,795 | 5,131 | 2,989 | 30,054 |
| 66,238 | 136 | 21,580 | 5,054 | 2,958 | 29,728 |
| 66,239 | 145 | 21,652 | 5,072 | 2,991 | 29,860 |
| 66,240 | 146 | 21,536 | 5,011 | 2,946 | 29,639 |
| 66,241 | 144 | 21,237 | 4,948 | 2,926 | 29,255 |
| 66,242 | 148 | 21,488 | 5,042 | 2,990 | 29,668 |
| 66,243 | 151 | 21,361 | 5,004 | 2,972 | 29,488 |
| 66,244 | 149 | 21,096 | 4,942 | 2,931 | 29,118 |
| 66,245 | 152 | 20,968 | 4,954 | 2,939 | 29,013 |
| 66,246 | 152 | 20,845 | 4,951 | 2,937 | 28,885 |
| 66,247 | 157 | 20,978 | 4,965 | 2,929 | 29,029 |
| 66,248 | 157 | 20,976 | 4,954 | 2,902 | 28,989 |
| 66,249 | 164 | 20,965 | 4,881 | 2,863 | 28,873 |
| 66,250 | 166 | 21,047 | 4,863 | 2,844 | 28,920 |
| 66,251 | 165 | 21,173 | 4,885 | 2,886 | 29,109 |
| 66,252 | 161 | 20,896 | 4,835 | 2,879 | 28,771 |
| 66,253 | 157 | 20,474 | 4,708 | 2,815 | 28,154 |
| 66,254 | 159 | 20,779 | 4,755 | 2,835 | 28,528 |
| 66,255 | 158 | 21,061 | 4,797 | 2,858 | 28,874 |
| 66,256 | 161 | 21,027 | 4,768 | 2,851 | 28,807 |
| 66,257 | 161 | 20,930 | 4,739 | 2,818 | 28,648 |
| 66,258 | 160 | 20,716 | 4,709 | 2,785 | 28,370 |
| 66,259 | 164 | 21,197 | 4,814 | 2,881 | 29,056 |
| 66,260 | 165 | 21,071 | 4,765 | 2,868 | 28,869 |
| 66,261 | 164 | 20,988 | 4,737 | 2,847 | 28,736 |
| 66,262 | 163 | 21,023 | 4,727 | 2,851 | 28,764 |
| 66,263 | 166 | 21,091 | 4,690 | 2,887 | 28,834 |

|        |     |        |       |       |        |
|--------|-----|--------|-------|-------|--------|
| 66,264 | 166 | 21,093 | 4,663 | 2,883 | 28,805 |
| 66,265 | 160 | 21,083 | 4,631 | 2,873 | 28,747 |
| 66,266 | 159 | 20,979 | 4,620 | 2,866 | 28,624 |
| 66,267 | 176 | 21,152 | 4,622 | 2,890 | 28,840 |
| 66,268 | 177 | 20,728 | 4,514 | 2,824 | 28,243 |
| 66,269 | 174 | 20,625 | 4,491 | 2,798 | 28,088 |
| 66,270 | 174 | 20,279 | 4,443 | 2,756 | 27,652 |
| 66,271 | 175 | 20,360 | 4,503 | 2,784 | 27,822 |
| 66,272 | 175 | 20,398 | 4,507 | 2,809 | 27,889 |
| 66,273 | 173 | 20,011 | 4,380 | 2,741 | 27,305 |
| 66,274 | 171 | 19,878 | 4,348 | 2,717 | 27,114 |
| 66,275 | 171 | 19,607 | 4,304 | 2,680 | 26,762 |
| 66,276 | 172 | 19,839 | 4,306 | 2,700 | 27,017 |
| 66,277 | 163 | 19,670 | 4,269 | 2,684 | 26,786 |
| 66,278 | 163 | 19,515 | 4,196 | 2,659 | 26,533 |
| 66,279 | 158 | 19,302 | 4,124 | 2,645 | 26,229 |
| 66,280 | 147 | 18,905 | 4,022 | 2,591 | 25,665 |
| 66,281 | 149 | 18,859 | 3,972 | 2,560 | 25,540 |
| 66,282 | 154 | 18,818 | 3,917 | 2,539 | 25,428 |
| 66,283 | 154 | 18,806 | 3,893 | 2,524 | 25,377 |
| 66,284 | 156 | 18,805 | 3,895 | 2,544 | 25,400 |
| 66,285 | 155 | 18,482 | 3,817 | 2,524 | 24,978 |
| 66,286 | 154 | 18,455 | 3,793 | 2,499 | 24,901 |
| 66,287 | 143 | 17,626 | 3,670 | 2,424 | 23,863 |
| 66,288 | 145 | 17,590 | 3,676 | 2,425 | 23,836 |
| 66,289 | 140 | 17,584 | 3,679 | 2,423 | 23,826 |
| 66,290 | 139 | 17,440 | 3,640 | 2,398 | 23,617 |
| 66,291 | 142 | 17,256 | 3,608 | 2,368 | 23,374 |
| 66,292 | 143 | 17,084 | 3,558 | 2,349 | 23,134 |
| 66,293 | 149 | 17,232 | 3,572 | 2,367 | 23,320 |
| 66,294 | 149 | 17,041 | 3,521 | 2,340 | 23,051 |
| 66,295 | 146 | 17,126 | 3,522 | 2,336 | 23,130 |



|        |     |        |       |       |        |
|--------|-----|--------|-------|-------|--------|
| 66,296 | 145 | 17,266 | 3,528 | 2,346 | 23,285 |
| 66,297 | 143 | 17,118 | 3,496 | 2,333 | 23,090 |
| 66,298 | 144 | 17,003 | 3,489 | 2,362 | 22,998 |
| 66,299 | 146 | 16,984 | 3,509 | 2,378 | 23,017 |
| 66,300 | 142 | 17,002 | 3,523 | 2,380 | 23,047 |
| 66,301 | 144 | 16,658 | 3,471 | 2,333 | 22,606 |
| 66,302 | 143 | 16,317 | 3,432 | 2,290 | 22,182 |
| 66,303 | 144 | 17,272 | 3,654 | 2,445 | 23,515 |
| 66,304 | 143 | 17,536 | 3,752 | 2,542 | 23,973 |
| 66,305 | 149 | 17,485 | 3,773 | 2,534 | 23,941 |
| 66,306 | 147 | 17,159 | 3,719 | 2,499 | 23,524 |
| 66,307 | 146 | 17,217 | 3,763 | 2,503 | 23,629 |
| 66,308 | 146 | 17,310 | 3,762 | 2,518 | 23,736 |
| 66,309 | 146 | 17,200 | 3,742 | 2,499 | 23,587 |
| 66,310 | 147 | 17,242 | 3,762 | 2,509 | 23,660 |
| 66,311 | 144 | 17,550 | 3,868 | 2,556 | 24,118 |
| 66,312 | 141 | 17,316 | 3,805 | 2,522 | 23,784 |
| 66,313 | 141 | 17,422 | 3,850 | 2,524 | 23,937 |
| 66,314 | 140 | 17,658 | 3,919 | 2,560 | 24,277 |
| 66,315 | 139 | 17,510 | 3,908 | 2,559 | 24,116 |
| 66,316 | 139 | 17,623 | 3,948 | 2,568 | 24,278 |
| 66,317 | 120 | 17,653 | 3,988 | 2,605 | 24,366 |
| 66,318 | 117 | 17,449 | 3,964 | 2,577 | 24,107 |
| 66,319 | 122 | 17,445 | 4,000 | 2,601 | 24,168 |
| 66,320 | 119 | 17,653 | 4,026 | 2,628 | 24,426 |
| 66,321 | 119 | 17,753 | 4,032 | 2,629 | 24,533 |
| 66,322 | 122 | 18,042 | 4,105 | 2,668 | 24,937 |
| 66,323 | 131 | 18,119 | 4,148 | 2,679 | 25,077 |
| 66,324 | 131 | 17,866 | 4,134 | 2,659 | 24,790 |
| 66,325 | 128 | 17,667 | 4,117 | 2,644 | 24,556 |
| 66,326 | 134 | 18,101 | 4,197 | 2,695 | 25,127 |
| 66,327 | 141 | 18,277 | 4,258 | 2,730 | 25,406 |

|        |     |        |       |       |        |
|--------|-----|--------|-------|-------|--------|
| 66,328 | 144 | 18,294 | 4,214 | 2,721 | 25,373 |
| 66,329 | 151 | 18,388 | 4,250 | 2,750 | 25,539 |
| 66,330 | 152 | 18,591 | 4,300 | 2,780 | 25,823 |
| 66,331 | 153 | 18,540 | 4,322 | 2,800 | 25,815 |
| 66,332 | 151 | 18,740 | 4,361 | 2,829 | 26,081 |
| 66,333 | 146 | 18,705 | 4,356 | 2,840 | 26,047 |
| 66,334 | 147 | 18,943 | 4,400 | 2,866 | 26,356 |
| 66,335 | 146 | 19,080 | 4,446 | 2,876 | 26,548 |
| 66,336 | 142 | 19,058 | 4,447 | 2,880 | 26,527 |
| 66,337 | 139 | 18,993 | 4,438 | 2,883 | 26,453 |
| 66,338 | 139 | 19,240 | 4,475 | 2,900 | 26,754 |
| 66,339 | 136 | 19,362 | 4,508 | 2,917 | 26,923 |
| 66,340 | 126 | 19,141 | 4,455 | 2,892 | 26,614 |
| 66,341 | 125 | 19,283 | 4,494 | 2,915 | 26,817 |
| 66,342 | 121 | 19,391 | 4,531 | 2,956 | 26,999 |
| 66,343 | 123 | 19,498 | 4,571 | 2,973 | 27,165 |
| 66,344 | 115 | 19,566 | 4,593 | 2,985 | 27,259 |
| 66,345 | 111 | 19,313 | 4,564 | 2,964 | 26,952 |
| 66,346 | 128 | 19,686 | 4,661 | 3,040 | 27,515 |
| 66,347 | 128 | 19,484 | 4,656 | 3,016 | 27,284 |
| 66,348 | 126 | 19,499 | 4,680 | 2,996 | 27,301 |
| 66,349 | 124 | 19,404 | 4,690 | 2,975 | 27,193 |
| 66,350 | 120 | 19,086 | 4,667 | 2,935 | 26,808 |
| 66,351 | 120 | 18,839 | 4,662 | 2,893 | 26,514 |
| 66,352 | 114 | 18,960 | 4,712 | 2,929 | 26,715 |
| 66,353 | 117 | 18,788 | 4,662 | 2,893 | 26,460 |
| 66,354 | 117 | 18,620 | 4,597 | 2,814 | 26,148 |
| 66,355 | 117 | 18,528 | 4,587 | 2,809 | 26,041 |
| 66,356 | 117 | 18,444 | 4,557 | 2,809 | 25,927 |
| 66,357 | 117 | 18,307 | 4,514 | 2,787 | 25,725 |
| 66,358 | 123 | 18,359 | 4,527 | 2,817 | 25,826 |
| 66,359 | 122 | 18,135 | 4,518 | 2,791 | 25,566 |

|        |     |        |       |       |        |
|--------|-----|--------|-------|-------|--------|
| 66,360 | 120 | 17,975 | 4,540 | 2,775 | 25,410 |
| 66,361 | 121 | 17,940 | 4,552 | 2,787 | 25,400 |
| 66,362 | 120 | 17,991 | 4,553 | 2,802 | 25,466 |
| 66,363 | 119 | 17,725 | 4,569 | 2,801 | 25,214 |
| 66,364 | 120 | 17,562 | 4,516 | 2,782 | 24,980 |
| 66,365 | 120 | 17,570 | 4,526 | 2,767 | 24,983 |
| 66,366 | 120 | 17,649 | 4,532 | 2,774 | 25,075 |
| 66,367 | 124 | 17,688 | 4,498 | 2,757 | 25,067 |
| 66,368 | 124 | 17,606 | 4,486 | 2,735 | 24,951 |
| 66,369 | 123 | 17,924 | 4,563 | 2,778 | 25,388 |
| 66,370 | 123 | 17,781 | 4,518 | 2,759 | 25,181 |
| 66,371 | 123 | 17,478 | 4,471 | 2,738 | 24,810 |
| 66,372 | 127 | 17,717 | 4,536 | 2,776 | 25,156 |
| 66,373 | 125 | 17,843 | 4,581 | 2,795 | 25,344 |
| 66,374 | 115 | 17,600 | 4,528 | 2,765 | 25,008 |
| 66,375 | 109 | 17,581 | 4,547 | 2,784 | 25,021 |
| 66,376 | 111 | 17,722 | 4,593 | 2,824 | 25,250 |
| 66,377 | 110 | 17,472 | 4,563 | 2,798 | 24,943 |
| 66,378 | 108 | 17,671 | 4,622 | 2,831 | 25,232 |
| 66,379 | 103 | 17,782 | 4,699 | 2,867 | 25,451 |
| 66,380 | 100 | 17,927 | 4,738 | 2,887 | 25,652 |
| 66,381 | 114 | 18,157 | 4,799 | 2,895 | 25,965 |
| 66,382 | 120 | 18,198 | 4,820 | 2,884 | 26,022 |
| 66,383 | 120 | 18,174 | 4,830 | 2,886 | 26,010 |
| 66,384 | 127 | 18,362 | 4,879 | 2,896 | 26,264 |
| 66,385 | 132 | 18,461 | 4,929 | 2,892 | 26,414 |
| 66,386 | 133 | 18,540 | 4,948 | 2,898 | 26,519 |
| 66,387 | 141 | 18,537 | 4,935 | 2,884 | 26,497 |
| 66,388 | 141 | 18,514 | 4,940 | 2,865 | 26,460 |
| 66,389 | 144 | 18,631 | 4,979 | 2,889 | 26,643 |
| 66,390 | 146 | 18,856 | 5,024 | 2,915 | 26,941 |
| 66,391 | 155 | 19,228 | 5,139 | 2,987 | 27,509 |

|        |     |        |       |       |        |
|--------|-----|--------|-------|-------|--------|
| 66,392 | 162 | 19,340 | 5,175 | 3,007 | 27,684 |
| 66,393 | 160 | 19,640 | 5,219 | 3,030 | 28,049 |
| 66,394 | 160 | 19,775 | 5,229 | 3,045 | 28,209 |
| 66,395 | 161 | 19,926 | 5,273 | 3,079 | 28,439 |
| 66,396 | 146 | 20,171 | 5,340 | 3,112 | 28,769 |
| 66,397 | 143 | 19,925 | 5,228 | 3,079 | 28,375 |
| 66,398 | 143 | 20,263 | 5,245 | 3,113 | 28,764 |
| 66,399 | 142 | 20,540 | 5,301 | 3,143 | 29,126 |
| 66,400 | 140 | 20,589 | 5,257 | 3,137 | 29,123 |
| 66,401 | 146 | 20,771 | 5,311 | 3,165 | 29,393 |
| 66,402 | 145 | 20,583 | 5,246 | 3,147 | 29,121 |
| 66,403 | 145 | 20,547 | 5,228 | 3,139 | 29,059 |
| 66,404 | 142 | 20,675 | 5,269 | 3,160 | 29,246 |
| 66,405 | 140 | 20,670 | 5,248 | 3,159 | 29,217 |
| 66,406 | 133 | 20,318 | 5,183 | 3,127 | 28,761 |
| 66,407 | 133 | 20,582 | 5,227 | 3,156 | 29,098 |
| 66,408 | 128 | 20,739 | 5,307 | 3,182 | 29,356 |
| 66,409 | 131 | 20,596 | 5,259 | 3,166 | 29,152 |
| 66,410 | 134 | 20,902 | 5,309 | 3,225 | 29,570 |
| 66,411 | 133 | 20,787 | 5,305 | 3,228 | 29,453 |
| 66,412 | 133 | 20,879 | 5,348 | 3,256 | 29,616 |
| 66,413 | 132 | 20,696 | 5,311 | 3,229 | 29,368 |
| 66,414 | 132 | 20,723 | 5,320 | 3,224 | 29,399 |
| 66,415 | 129 | 20,543 | 5,332 | 3,240 | 29,244 |
| 66,416 | 134 | 20,768 | 5,390 | 3,288 | 29,580 |
| 66,417 | 134 | 20,536 | 5,355 | 3,258 | 29,283 |
| 66,418 | 130 | 20,326 | 5,356 | 3,247 | 29,059 |
| 66,419 | 128 | 20,831 | 5,483 | 3,335 | 29,777 |
| 66,420 | 132 | 20,699 | 5,443 | 3,319 | 29,593 |
| 66,421 | 132 | 20,689 | 5,448 | 3,305 | 29,574 |
| 66,422 | 137 | 21,250 | 5,553 | 3,389 | 30,329 |
| 66,423 | 141 | 21,346 | 5,564 | 3,424 | 30,475 |

|        |     |        |       |       |        |
|--------|-----|--------|-------|-------|--------|
| 66,424 | 141 | 21,285 | 5,523 | 3,428 | 30,377 |
| 66,425 | 145 | 21,393 | 5,560 | 3,467 | 30,565 |
| 66,426 | 145 | 21,394 | 5,561 | 3,468 | 30,568 |
| 66,427 | 142 | 21,249 | 5,531 | 3,440 | 30,362 |
| 66,428 | 146 | 21,415 | 5,556 | 3,448 | 30,565 |
| 66,429 | 143 | 21,342 | 5,537 | 3,455 | 30,477 |
| 66,430 | 142 | 21,201 | 5,512 | 3,414 | 30,269 |
| 66,431 | 142 | 21,346 | 5,566 | 3,440 | 30,494 |
| 66,432 | 127 | 21,192 | 5,550 | 3,441 | 30,310 |
| 66,433 | 121 | 20,922 | 5,458 | 3,395 | 29,896 |
| 66,434 | 118 | 20,880 | 5,457 | 3,410 | 29,865 |
| 66,435 | 116 | 20,931 | 5,482 | 3,447 | 29,976 |
| 66,436 | 115 | 21,061 | 5,507 | 3,493 | 30,176 |
| 66,437 | 118 | 20,736 | 5,447 | 3,459 | 29,760 |
| 66,438 | 109 | 20,534 | 5,410 | 3,446 | 29,499 |
| 66,439 | 110 | 21,086 | 5,592 | 3,573 | 30,361 |
| 66,440 | 111 | 21,108 | 5,542 | 3,547 | 30,308 |
| 66,441 | 110 | 21,257 | 5,581 | 3,546 | 30,494 |
| 66,442 | 102 | 21,149 | 5,608 | 3,552 | 30,411 |
| 66,443 | 98  | 21,301 | 5,651 | 3,571 | 30,621 |
| 66,444 | 103 | 21,024 | 5,608 | 3,556 | 30,291 |
| 66,445 | 109 | 21,336 | 5,661 | 3,597 | 30,703 |
| 66,446 | 110 | 21,408 | 5,703 | 3,598 | 30,819 |
| 66,447 | 114 | 21,144 | 5,659 | 3,556 | 30,473 |
| 66,448 | 113 | 20,903 | 5,611 | 3,522 | 30,149 |
| 66,449 | 118 | 21,340 | 5,745 | 3,602 | 30,805 |
| 66,450 | 119 | 21,107 | 5,679 | 3,558 | 30,463 |
| 66,451 | 123 | 21,586 | 5,788 | 3,633 | 31,130 |
| 66,452 | 121 | 21,442 | 5,745 | 3,612 | 30,920 |
| 66,453 | 123 | 21,648 | 5,797 | 3,645 | 31,213 |
| 66,454 | 124 | 21,603 | 5,789 | 3,639 | 31,155 |
| 66,455 | 125 | 21,724 | 5,837 | 3,663 | 31,349 |

|        |     |        |       |       |        |
|--------|-----|--------|-------|-------|--------|
| 66,456 | 126 | 21,677 | 5,830 | 3,642 | 31,275 |
| 66,457 | 128 | 21,659 | 5,827 | 3,648 | 31,262 |
| 66,458 | 128 | 21,757 | 5,857 | 3,655 | 31,397 |
| 66,459 | 121 | 21,616 | 5,750 | 3,629 | 31,116 |
| 66,460 | 126 | 21,900 | 5,819 | 3,661 | 31,506 |
| 66,461 | 125 | 22,094 | 5,822 | 3,660 | 31,701 |
| 66,462 | 123 | 22,020 | 5,815 | 3,636 | 31,594 |
| 66,463 | 129 | 22,326 | 5,877 | 3,670 | 32,002 |
| 66,464 | 134 | 22,378 | 5,781 | 3,614 | 31,907 |
| 66,465 | 142 | 22,830 | 5,851 | 3,640 | 32,463 |
| 66,466 | 142 | 22,748 | 5,866 | 3,649 | 32,405 |
| 66,467 | 141 | 22,588 | 5,822 | 3,646 | 32,197 |
| 66,468 | 142 | 22,882 | 5,874 | 3,676 | 32,574 |
| 66,469 | 145 | 22,637 | 5,793 | 3,650 | 32,225 |
| 66,470 | 145 | 22,369 | 5,728 | 3,604 | 31,846 |
| 66,471 | 137 | 22,817 | 5,810 | 3,648 | 32,412 |
| 66,472 | 137 | 22,786 | 5,830 | 3,641 | 32,394 |
| 66,473 | 135 | 22,933 | 5,850 | 3,639 | 32,557 |
| 66,474 | 132 | 22,703 | 5,809 | 3,585 | 32,229 |
| 66,475 | 132 | 23,026 | 5,873 | 3,616 | 32,647 |
| 66,476 | 133 | 22,697 | 5,736 | 3,534 | 32,100 |
| 66,477 | 135 | 22,844 | 5,763 | 3,555 | 32,297 |
| 66,478 | 131 | 22,761 | 5,771 | 3,558 | 32,221 |
| 66,479 | 129 | 22,712 | 5,746 | 3,545 | 32,132 |
| 66,480 | 134 | 22,854 | 5,804 | 3,573 | 32,365 |
| 66,481 | 134 | 22,877 | 5,771 | 3,573 | 32,355 |
| 66,482 | 131 | 22,599 | 5,706 | 3,532 | 31,968 |
| 66,483 | 131 | 22,540 | 5,687 | 3,520 | 31,878 |
| 66,484 | 129 | 22,449 | 5,685 | 3,531 | 31,794 |
| 66,485 | 127 | 22,562 | 5,719 | 3,531 | 31,939 |
| 66,486 | 126 | 22,232 | 5,677 | 3,494 | 31,529 |
| 66,487 | 124 | 22,086 | 5,677 | 3,473 | 31,360 |

|        |     |        |       |       |        |
|--------|-----|--------|-------|-------|--------|
| 66,488 | 125 | 22,182 | 5,651 | 3,480 | 31,438 |
| 66,489 | 128 | 22,259 | 5,664 | 3,475 | 31,526 |
| 66,490 | 130 | 22,215 | 5,663 | 3,467 | 31,475 |
| 66,491 | 133 | 21,941 | 5,629 | 3,445 | 31,148 |
| 66,492 | 136 | 22,112 | 5,635 | 3,448 | 31,331 |
| 66,493 | 138 | 22,131 | 5,653 | 3,447 | 31,369 |
| 66,494 | 140 | 22,150 | 5,675 | 3,450 | 31,415 |
| 66,495 | 134 | 22,164 | 5,693 | 3,439 | 31,430 |
| 66,496 | 130 | 21,964 | 5,701 | 3,442 | 31,237 |
| 66,497 | 126 | 21,983 | 5,678 | 3,429 | 31,216 |
| 66,498 | 130 | 22,076 | 5,680 | 3,424 | 31,310 |
| 66,499 | 129 | 21,763 | 5,614 | 3,391 | 30,897 |
| 66,500 | 136 | 22,124 | 5,717 | 3,445 | 31,422 |
| 66,501 | 145 | 22,264 | 5,778 | 3,460 | 31,647 |
| 66,502 | 141 | 22,136 | 5,818 | 3,481 | 31,576 |
| 66,503 | 143 | 22,168 | 5,821 | 3,485 | 31,617 |
| 66,504 | 142 | 22,139 | 5,794 | 3,458 | 31,533 |
| 66,505 | 141 | 22,336 | 5,820 | 3,457 | 31,754 |
| 66,506 | 146 | 22,572 | 5,861 | 3,489 | 32,068 |
| 66,507 | 148 | 22,282 | 5,783 | 3,446 | 31,659 |
| 66,508 | 147 | 22,226 | 5,782 | 3,441 | 31,596 |
| 66,509 | 150 | 21,943 | 5,718 | 3,399 | 31,210 |
| 66,510 | 150 | 21,651 | 5,691 | 3,376 | 30,868 |
| 66,511 | 150 | 22,222 | 5,860 | 3,480 | 31,712 |
| 66,512 | 162 | 22,231 | 5,930 | 3,506 | 31,829 |
| 66,513 | 157 | 21,934 | 5,871 | 3,460 | 31,422 |
| 66,514 | 164 | 21,720 | 5,869 | 3,469 | 31,222 |
| 66,515 | 161 | 21,771 | 5,894 | 3,522 | 31,348 |
| 66,516 | 155 | 21,676 | 5,922 | 3,522 | 31,275 |
| 66,517 | 154 | 21,690 | 5,936 | 3,522 | 31,302 |
| 66,518 | 152 | 21,488 | 5,884 | 3,468 | 30,992 |
| 66,519 | 155 | 21,448 | 5,894 | 3,477 | 30,974 |

|        |     |        |       |       |        |
|--------|-----|--------|-------|-------|--------|
| 66,520 | 150 | 21,437 | 5,934 | 3,466 | 30,987 |
| 66,521 | 154 | 21,504 | 5,910 | 3,467 | 31,035 |
| 66,522 | 162 | 21,463 | 5,905 | 3,458 | 30,988 |
| 66,523 | 160 | 21,265 | 5,874 | 3,456 | 30,755 |
| 66,524 | 160 | 21,281 | 5,943 | 3,487 | 30,871 |
| 66,525 | 161 | 21,328 | 6,007 | 3,516 | 31,012 |
| 66,526 | 162 | 21,336 | 6,044 | 3,542 | 31,084 |
| 66,527 | 155 | 21,011 | 6,014 | 3,524 | 30,704 |
| 66,528 | 153 | 21,001 | 6,055 | 3,542 | 30,751 |
| 66,529 | 155 | 21,112 | 6,105 | 3,590 | 30,962 |
| 66,530 | 158 | 21,212 | 6,141 | 3,614 | 31,125 |
| 66,531 | 158 | 21,367 | 6,162 | 3,623 | 31,310 |
| 66,532 | 160 | 21,136 | 6,121 | 3,595 | 31,012 |
| 66,533 | 163 | 21,189 | 6,183 | 3,622 | 31,157 |
| 66,534 | 166 | 21,230 | 6,230 | 3,635 | 31,261 |
| 66,535 | 167 | 21,181 | 6,163 | 3,612 | 31,123 |
| 66,536 | 163 | 21,286 | 6,184 | 3,606 | 31,239 |
| 66,537 | 165 | 21,208 | 6,181 | 3,601 | 31,155 |
| 66,538 | 173 | 21,403 | 6,281 | 3,647 | 31,504 |
| 66,539 | 174 | 21,334 | 6,304 | 3,643 | 31,455 |
| 66,540 | 175 | 21,273 | 6,286 | 3,670 | 31,404 |
| 66,541 | 175 | 21,291 | 6,287 | 3,670 | 31,423 |
| 66,542 | 172 | 21,000 | 6,227 | 3,630 | 31,029 |
| 66,543 | 172 | 20,733 | 6,183 | 3,609 | 30,697 |
| 66,544 | 166 | 20,821 | 6,210 | 3,658 | 30,855 |
| 66,545 | 168 | 21,090 | 6,292 | 3,708 | 31,258 |
| 66,546 | 167 | 20,963 | 6,212 | 3,681 | 31,023 |
| 66,547 | 175 | 20,998 | 6,242 | 3,675 | 31,090 |
| 66,548 | 174 | 21,010 | 6,248 | 3,685 | 31,117 |
| 66,549 | 171 | 21,226 | 6,299 | 3,734 | 31,430 |
| 66,550 | 166 | 21,256 | 6,318 | 3,744 | 31,484 |
| 66,551 | 166 | 21,101 | 6,310 | 3,732 | 31,309 |



|        |     |        |       |       |        |
|--------|-----|--------|-------|-------|--------|
| 66,552 | 162 | 20,710 | 6,222 | 3,688 | 30,782 |
| 66,553 | 163 | 20,711 | 6,201 | 3,674 | 30,749 |
| 66,554 | 161 | 20,532 | 6,144 | 3,646 | 30,483 |
| 66,555 | 159 | 20,439 | 6,118 | 3,641 | 30,357 |
| 66,556 | 161 | 20,562 | 6,153 | 3,664 | 30,540 |
| 66,557 | 157 | 20,731 | 6,167 | 3,675 | 30,730 |
| 66,558 | 150 | 20,615 | 6,114 | 3,666 | 30,545 |
| 66,559 | 150 | 20,625 | 6,127 | 3,670 | 30,572 |
| 66,560 | 148 | 20,247 | 6,036 | 3,589 | 30,020 |
| 66,561 | 150 | 20,540 | 6,091 | 3,632 | 30,413 |
| 66,562 | 141 | 20,723 | 6,055 | 3,647 | 30,566 |
| 66,563 | 142 | 21,061 | 6,100 | 3,684 | 30,987 |
| 66,564 | 139 | 21,089 | 6,103 | 3,684 | 31,015 |
| 66,565 | 136 | 21,131 | 6,066 | 3,641 | 30,974 |
| 66,566 | 137 | 21,405 | 6,162 | 3,726 | 31,430 |
| 66,567 | 132 | 20,684 | 5,932 | 3,618 | 30,366 |
| 66,568 | 132 | 20,897 | 6,004 | 3,644 | 30,677 |
| 66,569 | 129 | 21,041 | 6,040 | 3,671 | 30,881 |
| 66,570 | 131 | 21,187 | 6,085 | 3,709 | 31,112 |
| 66,571 | 132 | 21,120 | 6,082 | 3,726 | 31,060 |
| 66,572 | 129 | 21,000 | 6,063 | 3,726 | 30,918 |
| 66,573 | 120 | 20,909 | 6,039 | 3,738 | 30,806 |
| 66,574 | 120 | 20,575 | 5,902 | 3,662 | 30,259 |
| 66,575 | 119 | 20,852 | 5,925 | 3,694 | 30,590 |
| 66,576 | 118 | 21,017 | 5,979 | 3,737 | 30,851 |
| 66,577 | 120 | 20,910 | 5,905 | 3,695 | 30,630 |
| 66,578 | 122 | 20,977 | 5,885 | 3,687 | 30,671 |
| 66,579 | 124 | 21,096 | 5,898 | 3,687 | 30,805 |
| 66,580 | 122 | 20,883 | 5,852 | 3,641 | 30,498 |
| 66,581 | 119 | 21,550 | 5,998 | 3,733 | 31,400 |
| 66,582 | 117 | 21,575 | 6,006 | 3,754 | 31,452 |
| 66,583 | 109 | 20,886 | 5,814 | 3,677 | 30,486 |

|        |     |        |       |       |        |
|--------|-----|--------|-------|-------|--------|
| 66,584 | 109 | 21,188 | 5,875 | 3,735 | 30,907 |
| 66,585 | 109 | 21,381 | 5,909 | 3,777 | 31,176 |
| 66,586 | 109 | 21,412 | 5,937 | 3,773 | 31,231 |
| 66,587 | 114 | 21,330 | 5,867 | 3,738 | 31,049 |
| 66,588 | 114 | 21,565 | 5,950 | 3,772 | 31,401 |
| 66,589 | 107 | 21,744 | 5,987 | 3,797 | 31,635 |
| 66,590 | 103 | 21,642 | 5,942 | 3,777 | 31,464 |
| 66,591 | 103 | 21,501 | 5,907 | 3,749 | 31,260 |
| 66,592 | 102 | 21,412 | 5,888 | 3,751 | 31,153 |
| 66,593 | 97  | 21,133 | 5,787 | 3,715 | 30,732 |
| 66,594 | 101 | 21,037 | 5,753 | 3,682 | 30,573 |
| 66,595 | 102 | 20,993 | 5,732 | 3,670 | 30,497 |
| 66,596 | 106 | 21,146 | 5,745 | 3,679 | 30,676 |
| 66,597 | 101 | 21,090 | 5,771 | 3,670 | 30,632 |
| 66,598 | 98  | 21,055 | 5,744 | 3,680 | 30,577 |
| 66,599 | 95  | 21,009 | 5,748 | 3,659 | 30,511 |
| 66,600 | 91  | 20,698 | 5,702 | 3,603 | 30,094 |
| 66,601 | 92  | 20,532 | 5,664 | 3,584 | 29,872 |
| 66,602 | 87  | 20,335 | 5,573 | 3,535 | 29,530 |
| 66,603 | 92  | 20,561 | 5,599 | 3,563 | 29,815 |
| 66,604 | 92  | 20,508 | 5,605 | 3,561 | 29,766 |
| 66,605 | 91  | 20,293 | 5,582 | 3,545 | 29,511 |
| 66,606 | 90  | 20,027 | 5,537 | 3,511 | 29,165 |
| 66,607 | 93  | 20,396 | 5,683 | 3,613 | 29,785 |
| 66,608 | 93  | 20,271 | 5,725 | 3,626 | 29,715 |
| 66,609 | 94  | 19,999 | 5,737 | 3,608 | 29,438 |
| 66,610 | 90  | 19,788 | 5,699 | 3,593 | 29,170 |
| 66,611 | 92  | 19,874 | 5,727 | 3,602 | 29,295 |
| 66,612 | 90  | 19,834 | 5,716 | 3,600 | 29,240 |
| 66,613 | 87  | 19,733 | 5,730 | 3,596 | 29,146 |
| 66,614 | 88  | 19,821 | 5,779 | 3,629 | 29,317 |
| 66,615 | 87  | 19,645 | 5,780 | 3,617 | 29,129 |

|        |     |        |       |       |        |
|--------|-----|--------|-------|-------|--------|
| 66,616 | 87  | 19,451 | 5,768 | 3,604 | 28,910 |
| 66,617 | 89  | 19,565 | 5,827 | 3,617 | 29,098 |
| 66,618 | 90  | 19,617 | 5,826 | 3,616 | 29,149 |
| 66,619 | 94  | 19,657 | 5,837 | 3,636 | 29,224 |
| 66,620 | 97  | 19,797 | 5,911 | 3,641 | 29,446 |
| 66,621 | 101 | 19,979 | 5,941 | 3,658 | 29,679 |
| 66,622 | 101 | 19,809 | 5,904 | 3,621 | 29,435 |
| 66,623 | 100 | 19,806 | 5,899 | 3,612 | 29,417 |
| 66,624 | 106 | 20,110 | 5,957 | 3,654 | 29,827 |
| 66,625 | 111 | 19,649 | 5,838 | 3,568 | 29,166 |
| 66,626 | 112 | 19,851 | 5,898 | 3,589 | 29,450 |
| 66,627 | 112 | 19,813 | 5,879 | 3,589 | 29,393 |
| 66,628 | 112 | 19,933 | 5,940 | 3,605 | 29,590 |
| 66,629 | 115 | 19,965 | 5,924 | 3,603 | 29,607 |
| 66,630 | 119 | 19,942 | 5,932 | 3,602 | 29,595 |
| 66,631 | 127 | 20,046 | 5,941 | 3,628 | 29,742 |
| 66,632 | 128 | 20,101 | 5,984 | 3,624 | 29,837 |
| 66,633 | 131 | 19,701 | 5,902 | 3,523 | 29,257 |
| 66,634 | 134 | 20,060 | 5,952 | 3,556 | 29,702 |
| 66,635 | 138 | 20,395 | 5,999 | 3,593 | 30,125 |
| 66,636 | 139 | 20,727 | 6,059 | 3,636 | 30,561 |
| 66,637 | 140 | 20,850 | 6,055 | 3,653 | 30,698 |
| 66,638 | 136 | 21,001 | 6,111 | 3,690 | 30,938 |
| 66,639 | 141 | 21,110 | 6,108 | 3,697 | 31,056 |
| 66,640 | 140 | 20,961 | 6,055 | 3,675 | 30,831 |
| 66,641 | 139 | 21,509 | 6,252 | 3,785 | 31,685 |
| 66,642 | 137 | 21,520 | 6,250 | 3,801 | 31,708 |
| 66,643 | 135 | 21,621 | 6,275 | 3,820 | 31,851 |
| 66,644 | 131 | 21,571 | 6,260 | 3,801 | 31,763 |
| 66,645 | 130 | 21,538 | 6,227 | 3,787 | 31,682 |
| 66,646 | 131 | 22,280 | 6,421 | 3,901 | 32,733 |
| 66,647 | 130 | 22,374 | 6,421 | 3,915 | 32,840 |

|        |     |        |       |       |        |
|--------|-----|--------|-------|-------|--------|
| 66,648 | 130 | 22,233 | 6,346 | 3,872 | 32,581 |
| 66,649 | 131 | 22,274 | 6,324 | 3,881 | 32,610 |
| 66,650 | 131 | 22,562 | 6,390 | 3,941 | 33,024 |
| 66,651 | 138 | 22,513 | 6,397 | 3,936 | 32,984 |
| 66,652 | 136 | 22,675 | 6,425 | 3,959 | 33,195 |
| 66,653 | 137 | 23,038 | 6,518 | 4,018 | 33,711 |
| 66,654 | 133 | 23,269 | 6,580 | 4,073 | 34,055 |
| 66,655 | 135 | 23,281 | 6,518 | 4,059 | 33,993 |
| 66,656 | 136 | 23,579 | 6,581 | 4,081 | 34,377 |
| 66,657 | 134 | 23,700 | 6,671 | 4,148 | 34,653 |
| 66,658 | 134 | 23,684 | 6,707 | 4,183 | 34,708 |
| 66,659 | 134 | 23,825 | 6,726 | 4,201 | 34,886 |
| 66,660 | 141 | 23,848 | 6,737 | 4,230 | 34,956 |
| 66,661 | 140 | 23,928 | 6,738 | 4,233 | 35,039 |
| 66,662 | 139 | 23,958 | 6,730 | 4,262 | 35,089 |
| 66,663 | 140 | 23,837 | 6,757 | 4,255 | 34,989 |
| 66,664 | 143 | 23,794 | 6,767 | 4,247 | 34,951 |
| 66,665 | 145 | 23,756 | 6,738 | 4,242 | 34,881 |
| 66,666 | 146 | 23,736 | 6,712 | 4,218 | 34,812 |
| 66,667 | 146 | 23,744 | 6,675 | 4,204 | 34,769 |
| 66,668 | 147 | 24,070 | 6,739 | 4,238 | 35,194 |
| 66,669 | 152 | 24,356 | 6,793 | 4,297 | 35,598 |
| 66,670 | 145 | 24,308 | 6,729 | 4,258 | 35,440 |
| 66,671 | 145 | 24,326 | 6,694 | 4,267 | 35,432 |
| 66,672 | 141 | 24,543 | 6,755 | 4,301 | 35,740 |
| 66,673 | 138 | 24,525 | 6,761 | 4,293 | 35,717 |
| 66,674 | 139 | 24,544 | 6,776 | 4,291 | 35,750 |
| 66,675 | 129 | 24,380 | 6,777 | 4,258 | 35,544 |
| 66,676 | 128 | 24,316 | 6,767 | 4,267 | 35,478 |
| 66,677 | 128 | 24,552 | 6,853 | 4,295 | 35,828 |
| 66,678 | 128 | 24,595 | 6,834 | 4,310 | 35,867 |
| 66,679 | 128 | 24,709 | 6,853 | 4,315 | 36,005 |

|        |     |        |       |       |        |
|--------|-----|--------|-------|-------|--------|
| 66,680 | 123 | 24,447 | 6,819 | 4,287 | 35,676 |
| 66,681 | 116 | 24,097 | 6,763 | 4,241 | 35,217 |
| 66,682 | 110 | 23,994 | 6,782 | 4,229 | 35,115 |
| 66,683 | 110 | 23,781 | 6,707 | 4,212 | 34,810 |
| 66,684 | 108 | 23,719 | 6,695 | 4,230 | 34,752 |
| 66,685 | 112 | 23,799 | 6,726 | 4,229 | 34,866 |
| 66,686 | 114 | 23,727 | 6,734 | 4,220 | 34,795 |
| 66,687 | 114 | 23,490 | 6,664 | 4,171 | 34,439 |
| 66,688 | 127 | 23,192 | 6,568 | 4,092 | 33,979 |
| 66,689 | 136 | 23,542 | 6,632 | 4,120 | 34,430 |
| 66,690 | 140 | 23,282 | 6,518 | 4,025 | 33,965 |
| 66,691 | 145 | 23,226 | 6,490 | 4,010 | 33,871 |
| 66,692 | 149 | 23,154 | 6,472 | 3,963 | 33,738 |
| 66,693 | 156 | 22,954 | 6,443 | 3,959 | 33,512 |
| 66,694 | 155 | 22,631 | 6,366 | 3,882 | 33,034 |
| 66,695 | 152 | 22,844 | 6,416 | 3,918 | 33,330 |
| 66,696 | 151 | 22,711 | 6,379 | 3,914 | 33,155 |
| 66,697 | 152 | 22,586 | 6,356 | 3,910 | 33,004 |
| 66,698 | 155 | 22,441 | 6,370 | 3,912 | 32,878 |
| 66,699 | 153 | 22,318 | 6,383 | 3,913 | 32,767 |
| 66,700 | 152 | 22,221 | 6,374 | 3,890 | 32,637 |
| 66,701 | 152 | 22,220 | 6,366 | 3,912 | 32,650 |
| 66,702 | 147 | 21,921 | 6,292 | 3,889 | 32,249 |
| 66,703 | 146 | 21,643 | 6,257 | 3,853 | 31,899 |
| 66,704 | 144 | 22,397 | 6,428 | 3,966 | 32,935 |
| 66,705 | 149 | 22,427 | 6,412 | 3,970 | 32,958 |
| 66,706 | 155 | 22,517 | 6,448 | 3,982 | 33,102 |
| 66,707 | 156 | 22,669 | 6,488 | 4,000 | 33,313 |
| 66,708 | 155 | 22,633 | 6,395 | 3,922 | 33,105 |
| 66,709 | 150 | 22,590 | 6,301 | 3,858 | 32,899 |
| 66,710 | 150 | 22,826 | 6,340 | 3,899 | 33,215 |
| 66,711 | 156 | 23,136 | 6,372 | 3,933 | 33,597 |

|        |     |        |       |       |        |
|--------|-----|--------|-------|-------|--------|
| 66,712 | 156 | 23,132 | 6,351 | 3,872 | 33,511 |
| 66,713 | 157 | 23,236 | 6,327 | 3,875 | 33,595 |
| 66,714 | 157 | 23,397 | 6,324 | 3,882 | 33,760 |
| 66,715 | 153 | 23,476 | 6,333 | 3,892 | 33,854 |
| 66,716 | 154 | 23,414 | 6,288 | 3,851 | 33,707 |
| 66,717 | 153 | 23,317 | 6,293 | 3,858 | 33,621 |
| 66,718 | 156 | 23,515 | 6,299 | 3,903 | 33,873 |
| 66,719 | 154 | 23,169 | 6,261 | 3,857 | 33,441 |
| 66,720 | 153 | 23,243 | 6,295 | 3,872 | 33,563 |
| 66,721 | 155 | 23,161 | 6,288 | 3,849 | 33,453 |
| 66,722 | 156 | 22,970 | 6,242 | 3,811 | 33,179 |
| 66,723 | 157 | 22,945 | 6,163 | 3,813 | 33,078 |
| 66,724 | 168 | 23,075 | 6,159 | 3,808 | 33,210 |
| 66,725 | 167 | 22,892 | 6,117 | 3,783 | 32,959 |
| 66,726 | 173 | 22,980 | 6,181 | 3,846 | 33,180 |
| 66,727 | 173 | 22,985 | 6,175 | 3,831 | 33,164 |
| 66,728 | 175 | 22,966 | 6,127 | 3,807 | 33,075 |
| 66,729 | 179 | 23,314 | 6,206 | 3,825 | 33,524 |
| 66,730 | 176 | 23,332 | 6,192 | 3,845 | 33,545 |
| 66,731 | 174 | 23,056 | 6,122 | 3,825 | 33,177 |
| 66,732 | 176 | 23,293 | 6,154 | 3,865 | 33,488 |
| 66,733 | 178 | 23,523 | 6,197 | 3,893 | 33,791 |
| 66,734 | 165 | 22,539 | 5,895 | 3,719 | 32,318 |
| 66,735 | 167 | 22,747 | 5,947 | 3,753 | 32,614 |
| 66,736 | 162 | 22,949 | 5,989 | 3,791 | 32,891 |
| 66,737 | 162 | 22,857 | 5,974 | 3,803 | 32,796 |
| 66,738 | 162 | 22,921 | 5,979 | 3,815 | 32,877 |
| 66,739 | 137 | 22,537 | 5,893 | 3,777 | 32,344 |
| 66,740 | 137 | 22,681 | 5,947 | 3,802 | 32,567 |
| 66,741 | 123 | 22,428 | 5,881 | 3,771 | 32,203 |
| 66,742 | 120 | 22,669 | 5,946 | 3,805 | 32,540 |
| 66,743 | 121 | 22,631 | 5,935 | 3,818 | 32,505 |

|        |     |        |       |       |        |
|--------|-----|--------|-------|-------|--------|
| 66,744 | 115 | 22,452 | 5,893 | 3,782 | 32,242 |
| 66,745 | 115 | 22,258 | 5,905 | 3,795 | 32,073 |
| 66,746 | 120 | 22,369 | 5,959 | 3,839 | 32,287 |
| 66,747 | 121 | 22,371 | 5,985 | 3,829 | 32,306 |
| 66,748 | 119 | 22,355 | 5,986 | 3,827 | 32,287 |
| 66,749 | 123 | 22,072 | 5,909 | 3,784 | 31,888 |
| 66,750 | 122 | 21,833 | 5,847 | 3,770 | 31,572 |
| 66,751 | 122 | 21,954 | 5,888 | 3,807 | 31,771 |
| 66,752 | 123 | 21,818 | 5,867 | 3,765 | 31,573 |
| 66,753 | 120 | 21,659 | 5,806 | 3,719 | 31,304 |
| 66,754 | 120 | 21,647 | 5,775 | 3,700 | 31,242 |
| 66,755 | 120 | 21,626 | 5,759 | 3,675 | 31,180 |
| 66,756 | 117 | 21,517 | 5,731 | 3,659 | 31,024 |
| 66,757 | 110 | 21,387 | 5,677 | 3,623 | 30,797 |
| 66,758 | 108 | 20,800 | 5,547 | 3,574 | 30,029 |
| 66,759 | 111 | 20,847 | 5,577 | 3,566 | 30,101 |
| 66,760 | 108 | 20,640 | 5,558 | 3,545 | 29,851 |
| 66,761 | 112 | 20,677 | 5,535 | 3,535 | 29,859 |
| 66,762 | 105 | 20,364 | 5,467 | 3,484 | 29,420 |
| 66,763 | 105 | 20,335 | 5,481 | 3,496 | 29,417 |
| 66,764 | 106 | 20,329 | 5,480 | 3,504 | 29,419 |
| 66,765 | 107 | 20,552 | 5,556 | 3,564 | 29,779 |
| 66,766 | 106 | 20,506 | 5,556 | 3,565 | 29,733 |
| 66,767 | 100 | 20,451 | 5,597 | 3,584 | 29,732 |
| 66,768 | 102 | 20,771 | 5,685 | 3,619 | 30,177 |
| 66,769 | 97  | 20,361 | 5,593 | 3,554 | 29,605 |
| 66,770 | 97  | 20,486 | 5,592 | 3,559 | 29,734 |
| 66,771 | 97  | 20,508 | 5,590 | 3,565 | 29,760 |
| 66,772 | 96  | 20,484 | 5,569 | 3,568 | 29,717 |
| 66,773 | 101 | 20,826 | 5,694 | 3,631 | 30,252 |
| 66,774 | 104 | 20,950 | 5,739 | 3,668 | 30,461 |
| 66,775 | 94  | 20,841 | 5,697 | 3,640 | 30,272 |

|        |     |        |       |       |        |
|--------|-----|--------|-------|-------|--------|
| 66,776 | 94  | 21,003 | 5,696 | 3,651 | 30,444 |
| 66,777 | 93  | 21,170 | 5,758 | 3,699 | 30,720 |
| 66,778 | 92  | 21,193 | 5,752 | 3,706 | 30,743 |
| 66,779 | 89  | 21,162 | 5,731 | 3,703 | 30,685 |
| 66,780 | 88  | 21,611 | 5,901 | 3,824 | 31,424 |
| 66,781 | 88  | 21,503 | 5,914 | 3,806 | 31,311 |
| 66,782 | 88  | 21,526 | 5,925 | 3,784 | 31,323 |
| 66,783 | 91  | 21,464 | 5,924 | 3,791 | 31,270 |
| 66,784 | 103 | 21,543 | 5,945 | 3,805 | 31,396 |
| 66,785 | 99  | 21,503 | 5,929 | 3,801 | 31,332 |
| 66,786 | 104 | 21,773 | 6,008 | 3,852 | 31,737 |
| 66,787 | 111 | 21,892 | 6,056 | 3,873 | 31,932 |
| 66,788 | 113 | 22,083 | 6,113 | 3,890 | 32,199 |
| 66,789 | 123 | 22,114 | 6,135 | 3,910 | 32,282 |
| 66,790 | 122 | 21,892 | 6,107 | 3,889 | 32,010 |
| 66,791 | 122 | 21,942 | 6,101 | 3,914 | 32,079 |
| 66,792 | 126 | 22,427 | 6,185 | 3,977 | 32,715 |
| 66,793 | 131 | 22,566 | 6,171 | 3,974 | 32,842 |
| 66,794 | 128 | 22,556 | 6,185 | 3,967 | 32,836 |
| 66,795 | 127 | 22,481 | 6,139 | 3,952 | 32,699 |
| 66,796 | 134 | 22,802 | 6,156 | 3,961 | 33,053 |
| 66,797 | 132 | 22,674 | 6,107 | 3,939 | 32,852 |
| 66,798 | 130 | 22,504 | 6,035 | 3,936 | 32,605 |
| 66,799 | 133 | 22,755 | 6,106 | 3,979 | 32,973 |
| 66,800 | 131 | 22,625 | 6,023 | 3,933 | 32,712 |
| 66,801 | 131 | 22,441 | 5,957 | 3,886 | 32,415 |
| 66,802 | 146 | 23,349 | 6,185 | 4,030 | 33,710 |
| 66,803 | 148 | 23,339 | 6,103 | 4,026 | 33,616 |
| 66,804 | 149 | 23,588 | 6,172 | 4,073 | 33,982 |
| 66,805 | 149 | 23,620 | 6,211 | 4,076 | 34,056 |
| 66,806 | 148 | 23,310 | 6,159 | 4,044 | 33,661 |
| 66,807 | 148 | 23,434 | 6,211 | 4,057 | 33,850 |



|        |     |        |       |       |        |
|--------|-----|--------|-------|-------|--------|
| 66,808 | 148 | 23,618 | 6,273 | 4,094 | 34,133 |
| 66,809 | 147 | 23,843 | 6,313 | 4,135 | 34,438 |
| 66,810 | 142 | 23,576 | 6,251 | 4,088 | 34,057 |
| 66,811 | 142 | 23,602 | 6,235 | 4,097 | 34,076 |
| 66,812 | 138 | 23,264 | 6,199 | 4,066 | 33,667 |
| 66,813 | 139 | 23,789 | 6,296 | 4,140 | 34,364 |
| 66,814 | 137 | 23,719 | 6,268 | 4,121 | 34,245 |
| 66,815 | 138 | 23,728 | 6,257 | 4,090 | 34,213 |
| 66,816 | 137 | 23,788 | 6,263 | 4,083 | 34,271 |
| 66,817 | 135 | 23,412 | 6,190 | 4,031 | 33,768 |
| 66,818 | 138 | 23,720 | 6,278 | 4,072 | 34,208 |
| 66,819 | 143 | 23,656 | 6,230 | 4,043 | 34,072 |
| 66,820 | 142 | 23,547 | 6,187 | 4,024 | 33,900 |
| 66,821 | 143 | 23,717 | 6,232 | 4,046 | 34,138 |
| 66,822 | 142 | 23,585 | 6,194 | 4,022 | 33,943 |
| 66,823 | 141 | 23,934 | 6,237 | 4,038 | 34,350 |
| 66,824 | 140 | 24,118 | 6,271 | 4,062 | 34,591 |
| 66,825 | 137 | 23,889 | 6,264 | 4,043 | 34,333 |
| 66,826 | 140 | 23,637 | 6,202 | 3,978 | 33,957 |
| 66,827 | 142 | 23,749 | 6,246 | 3,968 | 34,105 |
| 66,828 | 140 | 23,742 | 6,221 | 3,972 | 34,075 |
| 66,829 | 148 | 23,756 | 6,237 | 3,973 | 34,114 |
| 66,830 | 150 | 23,653 | 6,225 | 3,961 | 33,989 |
| 66,831 | 151 | 23,717 | 6,219 | 3,959 | 34,046 |
| 66,832 | 151 | 23,739 | 6,215 | 3,948 | 34,053 |
| 66,833 | 150 | 24,053 | 6,269 | 3,961 | 34,433 |
| 66,834 | 145 | 23,952 | 6,247 | 3,952 | 34,296 |
| 66,835 | 133 | 23,853 | 6,240 | 3,953 | 34,179 |
| 66,836 | 134 | 24,163 | 6,335 | 3,987 | 34,619 |
| 66,837 | 135 | 24,337 | 6,362 | 4,022 | 34,856 |
| 66,838 | 132 | 24,106 | 6,309 | 3,986 | 34,533 |
| 66,839 | 132 | 24,245 | 6,347 | 4,035 | 34,759 |

|        |     |        |       |       |        |
|--------|-----|--------|-------|-------|--------|
| 66,840 | 122 | 24,075 | 6,301 | 3,993 | 34,491 |
| 66,841 | 131 | 24,067 | 6,309 | 3,967 | 34,474 |
| 66,842 | 132 | 24,165 | 6,324 | 3,983 | 34,604 |
| 66,843 | 128 | 24,234 | 6,349 | 4,016 | 34,727 |
| 66,844 | 127 | 23,912 | 6,295 | 3,971 | 34,305 |
| 66,845 | 127 | 23,828 | 6,295 | 3,968 | 34,218 |
| 66,846 | 123 | 23,915 | 6,316 | 3,971 | 34,325 |
| 66,847 | 134 | 23,957 | 6,346 | 3,970 | 34,407 |
| 66,848 | 131 | 24,127 | 6,333 | 3,946 | 34,537 |
| 66,849 | 132 | 24,110 | 6,331 | 3,941 | 34,514 |
| 66,850 | 130 | 24,530 | 6,421 | 3,986 | 35,067 |
| 66,851 | 125 | 24,405 | 6,354 | 3,926 | 34,810 |
| 66,852 | 125 | 24,602 | 6,377 | 3,964 | 35,068 |
| 66,853 | 124 | 24,526 | 6,375 | 3,959 | 34,984 |
| 66,854 | 122 | 24,326 | 6,353 | 3,918 | 34,719 |
| 66,855 | 125 | 24,806 | 6,474 | 4,020 | 35,425 |
| 66,856 | 124 | 24,648 | 6,421 | 4,029 | 35,222 |
| 66,857 | 135 | 24,463 | 6,365 | 3,978 | 34,941 |
| 66,858 | 136 | 24,369 | 6,339 | 3,973 | 34,817 |
| 66,859 | 141 | 24,933 | 6,457 | 4,062 | 35,593 |
| 66,860 | 146 | 24,645 | 6,381 | 3,991 | 35,163 |
| 66,861 | 150 | 24,568 | 6,373 | 4,011 | 35,102 |
| 66,862 | 158 | 24,629 | 6,411 | 4,020 | 35,218 |
| 66,863 | 162 | 24,733 | 6,417 | 4,007 | 35,319 |
| 66,864 | 167 | 24,450 | 6,355 | 3,982 | 34,954 |
| 66,865 | 167 | 24,200 | 6,308 | 3,939 | 34,614 |
| 66,866 | 165 | 24,479 | 6,421 | 4,054 | 35,119 |
| 66,867 | 166 | 24,395 | 6,410 | 4,052 | 35,023 |
| 66,868 | 170 | 24,457 | 6,365 | 4,034 | 35,026 |
| 66,869 | 169 | 24,352 | 6,325 | 4,020 | 34,866 |
| 66,870 | 165 | 24,410 | 6,387 | 4,051 | 35,013 |
| 66,871 | 170 | 24,176 | 6,341 | 4,019 | 34,706 |

|        |     |        |       |       |        |
|--------|-----|--------|-------|-------|--------|
| 66,872 | 169 | 23,897 | 6,272 | 3,992 | 34,330 |
| 66,873 | 175 | 23,742 | 6,291 | 4,012 | 34,220 |
| 66,874 | 174 | 23,516 | 6,228 | 4,001 | 33,919 |
| 66,875 | 185 | 23,996 | 6,411 | 4,105 | 34,697 |
| 66,876 | 185 | 23,714 | 6,348 | 4,043 | 34,290 |
| 66,877 | 178 | 23,377 | 6,260 | 4,013 | 33,828 |
| 66,878 | 183 | 23,310 | 6,239 | 4,018 | 33,750 |
| 66,879 | 178 | 23,069 | 6,171 | 3,979 | 33,397 |
| 66,880 | 174 | 23,145 | 6,184 | 4,015 | 33,518 |
| 66,881 | 176 | 23,350 | 6,207 | 4,054 | 33,787 |
| 66,882 | 185 | 23,369 | 6,196 | 4,039 | 33,789 |
| 66,883 | 194 | 23,353 | 6,148 | 4,027 | 33,722 |
| 66,884 | 197 | 23,321 | 6,134 | 4,007 | 33,659 |
| 66,885 | 197 | 23,414 | 6,133 | 3,996 | 33,740 |
| 66,886 | 198 | 22,424 | 5,923 | 3,858 | 32,403 |
| 66,887 | 204 | 22,568 | 5,938 | 3,857 | 32,567 |
| 66,888 | 200 | 22,748 | 5,966 | 3,855 | 32,769 |
| 66,889 | 198 | 22,592 | 5,891 | 3,821 | 32,502 |
| 66,890 | 198 | 22,589 | 5,900 | 3,797 | 32,484 |
| 66,891 | 194 | 22,559 | 5,894 | 3,797 | 32,444 |
| 66,892 | 189 | 22,454 | 5,846 | 3,769 | 32,258 |
| 66,893 | 191 | 22,325 | 5,790 | 3,744 | 32,050 |
| 66,894 | 193 | 22,294 | 5,802 | 3,737 | 32,026 |
| 66,895 | 188 | 22,319 | 5,804 | 3,761 | 32,072 |
| 66,896 | 188 | 22,555 | 5,841 | 3,794 | 32,378 |
| 66,897 | 176 | 22,234 | 5,753 | 3,754 | 31,917 |
| 66,898 | 176 | 22,170 | 5,730 | 3,756 | 31,832 |
| 66,899 | 174 | 22,331 | 5,752 | 3,775 | 32,032 |
| 66,900 | 171 | 22,179 | 5,719 | 3,747 | 31,816 |
| 66,901 | 173 | 22,058 | 5,692 | 3,748 | 31,671 |
| 66,902 | 180 | 22,247 | 5,757 | 3,776 | 31,960 |
| 66,903 | 187 | 22,291 | 5,788 | 3,759 | 32,025 |

|        |     |        |       |       |        |
|--------|-----|--------|-------|-------|--------|
| 66,904 | 181 | 22,125 | 5,740 | 3,732 | 31,778 |
| 66,905 | 186 | 22,338 | 5,745 | 3,750 | 32,019 |
| 66,906 | 183 | 21,985 | 5,643 | 3,667 | 31,478 |
| 66,907 | 184 | 22,035 | 5,645 | 3,648 | 31,512 |
| 66,908 | 172 | 21,874 | 5,575 | 3,630 | 31,251 |
| 66,909 | 173 | 22,079 | 5,618 | 3,654 | 31,524 |
| 66,910 | 162 | 21,716 | 5,535 | 3,569 | 30,982 |
| 66,911 | 164 | 21,878 | 5,584 | 3,587 | 31,213 |
| 66,912 | 161 | 21,813 | 5,589 | 3,583 | 31,146 |
| 66,913 | 156 | 22,054 | 5,620 | 3,623 | 31,453 |
| 66,914 | 154 | 22,196 | 5,639 | 3,630 | 31,619 |
| 66,915 | 156 | 22,229 | 5,625 | 3,645 | 31,655 |
| 66,916 | 155 | 22,158 | 5,588 | 3,624 | 31,525 |
| 66,917 | 156 | 22,199 | 5,571 | 3,614 | 31,540 |
| 66,918 | 154 | 22,038 | 5,550 | 3,600 | 31,342 |
| 66,919 | 148 | 22,539 | 5,658 | 3,688 | 32,033 |
| 66,920 | 145 | 22,377 | 5,611 | 3,639 | 31,772 |
| 66,921 | 141 | 22,340 | 5,548 | 3,615 | 31,644 |
| 66,922 | 141 | 22,316 | 5,566 | 3,625 | 31,648 |
| 66,923 | 136 | 22,219 | 5,539 | 3,636 | 31,530 |
| 66,924 | 127 | 22,190 | 5,520 | 3,626 | 31,463 |
| 66,925 | 128 | 22,301 | 5,577 | 3,644 | 31,650 |
| 66,926 | 128 | 22,398 | 5,576 | 3,650 | 31,752 |
| 66,927 | 127 | 22,263 | 5,531 | 3,615 | 31,536 |
| 66,928 | 127 | 22,385 | 5,553 | 3,653 | 31,718 |
| 66,929 | 132 | 22,483 | 5,631 | 3,687 | 31,933 |
| 66,930 | 132 | 22,764 | 5,730 | 3,752 | 32,378 |
| 66,931 | 133 | 22,728 | 5,771 | 3,759 | 32,391 |
| 66,932 | 119 | 22,328 | 5,747 | 3,741 | 31,935 |
| 66,933 | 120 | 22,503 | 5,807 | 3,755 | 32,185 |
| 66,934 | 116 | 22,860 | 5,887 | 3,788 | 32,651 |
| 66,935 | 119 | 22,846 | 5,866 | 3,778 | 32,609 |

|        |     |        |       |       |        |
|--------|-----|--------|-------|-------|--------|
| 66,936 | 113 | 22,801 | 5,826 | 3,785 | 32,525 |
| 66,937 | 115 | 23,178 | 5,926 | 3,834 | 33,053 |
| 66,938 | 110 | 23,017 | 5,899 | 3,856 | 32,882 |
| 66,939 | 114 | 23,328 | 5,982 | 3,914 | 33,338 |
| 66,940 | 120 | 23,417 | 6,039 | 3,936 | 33,512 |
| 66,941 | 123 | 23,119 | 5,966 | 3,927 | 33,135 |
| 66,942 | 126 | 23,283 | 6,017 | 3,960 | 33,386 |
| 66,943 | 126 | 23,120 | 6,006 | 3,941 | 33,193 |
| 66,944 | 126 | 23,116 | 6,015 | 3,934 | 33,191 |
| 66,945 | 129 | 23,358 | 6,052 | 3,959 | 33,498 |
| 66,946 | 130 | 23,295 | 6,059 | 3,960 | 33,444 |
| 66,947 | 127 | 23,015 | 6,002 | 3,914 | 33,058 |
| 66,948 | 128 | 23,029 | 6,012 | 3,911 | 33,080 |
| 66,949 | 140 | 23,131 | 6,076 | 3,925 | 33,272 |
| 66,950 | 142 | 23,163 | 6,077 | 3,931 | 33,313 |
| 66,951 | 134 | 22,552 | 5,907 | 3,853 | 32,446 |
| 66,952 | 134 | 22,653 | 5,942 | 3,877 | 32,606 |
| 66,953 | 142 | 22,562 | 5,942 | 3,864 | 32,510 |
| 66,954 | 135 | 22,223 | 5,901 | 3,830 | 32,089 |
| 66,955 | 137 | 22,476 | 5,990 | 3,854 | 32,457 |
| 66,956 | 138 | 22,292 | 5,972 | 3,840 | 32,242 |
| 66,957 | 139 | 22,425 | 6,012 | 3,858 | 32,434 |
| 66,958 | 137 | 22,368 | 6,015 | 3,844 | 32,364 |
| 66,959 | 137 | 22,385 | 6,066 | 3,883 | 32,471 |
| 66,960 | 141 | 22,362 | 6,050 | 3,893 | 32,446 |
| 66,961 | 140 | 22,058 | 5,971 | 3,878 | 32,047 |
| 66,962 | 143 | 22,240 | 6,026 | 3,900 | 32,309 |
| 66,963 | 143 | 22,295 | 6,025 | 3,900 | 32,363 |
| 66,964 | 143 | 22,335 | 6,050 | 3,914 | 32,442 |
| 66,965 | 139 | 22,229 | 6,044 | 3,917 | 32,329 |
| 66,966 | 139 | 22,286 | 6,037 | 3,916 | 32,378 |
| 66,967 | 140 | 22,046 | 5,982 | 3,874 | 32,042 |

|        |     |        |       |       |        |
|--------|-----|--------|-------|-------|--------|
| 66,968 | 141 | 22,193 | 6,029 | 3,902 | 32,265 |
| 66,969 | 145 | 22,119 | 6,012 | 3,901 | 32,177 |
| 66,970 | 147 | 22,075 | 6,013 | 3,877 | 32,112 |
| 66,971 | 149 | 22,006 | 5,990 | 3,862 | 32,007 |
| 66,972 | 147 | 21,878 | 5,950 | 3,819 | 31,794 |
| 66,973 | 147 | 21,848 | 5,942 | 3,818 | 31,755 |
| 66,974 | 146 | 21,878 | 5,964 | 3,821 | 31,809 |
| 66,975 | 146 | 21,818 | 5,927 | 3,797 | 31,688 |
| 66,976 | 145 | 21,567 | 5,820 | 3,739 | 31,271 |
| 66,977 | 144 | 21,531 | 5,810 | 3,707 | 31,192 |
| 66,978 | 142 | 21,505 | 5,799 | 3,694 | 31,140 |
| 66,979 | 137 | 21,349 | 5,765 | 3,656 | 30,907 |
| 66,980 | 141 | 21,283 | 5,739 | 3,643 | 30,806 |
| 66,981 | 146 | 21,235 | 5,683 | 3,629 | 30,693 |
| 66,982 | 148 | 20,648 | 5,518 | 3,509 | 29,823 |
| 66,983 | 148 | 20,670 | 5,483 | 3,488 | 29,789 |
| 66,984 | 157 | 20,495 | 5,420 | 3,468 | 29,540 |
| 66,985 | 156 | 20,129 | 5,374 | 3,439 | 29,098 |
| 66,986 | 164 | 20,792 | 5,619 | 3,583 | 30,158 |
| 66,987 | 169 | 20,982 | 5,650 | 3,577 | 30,378 |
| 66,988 | 169 | 20,788 | 5,594 | 3,556 | 30,107 |
| 66,989 | 170 | 20,913 | 5,660 | 3,590 | 30,333 |
| 66,990 | 167 | 20,996 | 5,650 | 3,590 | 30,403 |
| 66,991 | 160 | 20,689 | 5,566 | 3,527 | 29,942 |
| 66,992 | 167 | 21,035 | 5,637 | 3,556 | 30,395 |
| 66,993 | 164 | 20,971 | 5,639 | 3,555 | 30,329 |
| 66,994 | 165 | 20,954 | 5,653 | 3,582 | 30,354 |
| 66,995 | 166 | 21,056 | 5,651 | 3,601 | 30,474 |
| 66,996 | 168 | 21,048 | 5,686 | 3,621 | 30,523 |
| 66,997 | 168 | 21,023 | 5,690 | 3,612 | 30,493 |
| 66,998 | 167 | 20,848 | 5,685 | 3,622 | 30,322 |
| 66,999 | 167 | 20,855 | 5,708 | 3,636 | 30,366 |

|        |     |        |       |       |        |
|--------|-----|--------|-------|-------|--------|
| 67,000 | 161 | 20,894 | 5,714 | 3,629 | 30,398 |
| 67,001 | 160 | 20,800 | 5,727 | 3,619 | 30,306 |
| 67,002 | 156 | 20,542 | 5,683 | 3,578 | 29,959 |
| 67,003 | 156 | 20,903 | 5,780 | 3,640 | 30,479 |
| 67,004 | 157 | 21,259 | 5,847 | 3,666 | 30,929 |
| 67,005 | 159 | 21,172 | 5,824 | 3,678 | 30,833 |
| 67,006 | 153 | 20,965 | 5,769 | 3,682 | 30,569 |
| 67,007 | 153 | 21,061 | 5,801 | 3,698 | 30,713 |
| 67,008 | 152 | 21,085 | 5,791 | 3,706 | 30,734 |
| 67,009 | 151 | 21,047 | 5,761 | 3,681 | 30,640 |
| 67,010 | 152 | 21,403 | 5,813 | 3,702 | 31,070 |
| 67,011 | 148 | 21,410 | 5,795 | 3,686 | 31,039 |
| 67,012 | 147 | 21,521 | 5,785 | 3,677 | 31,130 |
| 67,013 | 144 | 21,269 | 5,736 | 3,648 | 30,797 |
| 67,014 | 143 | 21,366 | 5,756 | 3,667 | 30,932 |
| 67,015 | 144 | 21,319 | 5,754 | 3,649 | 30,866 |
| 67,016 | 145 | 21,250 | 5,743 | 3,634 | 30,772 |
| 67,017 | 155 | 21,121 | 5,750 | 3,589 | 30,615 |
| 67,018 | 156 | 21,077 | 5,744 | 3,574 | 30,551 |
| 67,019 | 160 | 21,103 | 5,761 | 3,600 | 30,624 |
| 67,020 | 158 | 20,960 | 5,763 | 3,597 | 30,478 |
| 67,021 | 164 | 21,040 | 5,796 | 3,645 | 30,645 |
| 67,022 | 163 | 20,896 | 5,769 | 3,629 | 30,457 |
| 67,023 | 166 | 21,014 | 5,768 | 3,630 | 30,578 |
| 67,024 | 166 | 20,916 | 5,763 | 3,621 | 30,466 |
| 67,025 | 167 | 21,054 | 5,790 | 3,631 | 30,642 |
| 67,026 | 170 | 21,104 | 5,827 | 3,645 | 30,746 |
| 67,027 | 175 | 21,024 | 5,847 | 3,668 | 30,714 |
| 67,028 | 173 | 20,864 | 5,836 | 3,673 | 30,546 |
| 67,029 | 185 | 21,001 | 5,878 | 3,707 | 30,771 |
| 67,030 | 180 | 20,893 | 5,814 | 3,698 | 30,585 |
| 67,031 | 173 | 21,002 | 5,842 | 3,697 | 30,714 |

|        |     |        |       |       |        |
|--------|-----|--------|-------|-------|--------|
| 67,032 | 168 | 20,966 | 5,748 | 3,629 | 30,511 |
| 67,033 | 170 | 21,304 | 5,821 | 3,652 | 30,947 |
| 67,034 | 161 | 21,507 | 5,902 | 3,699 | 31,269 |
| 67,035 | 154 | 21,387 | 5,873 | 3,696 | 31,110 |
| 67,036 | 152 | 21,406 | 5,860 | 3,692 | 31,110 |
| 67,037 | 149 | 21,409 | 5,856 | 3,731 | 31,145 |
| 67,038 | 152 | 21,135 | 5,831 | 3,683 | 30,801 |
| 67,039 | 155 | 20,993 | 5,799 | 3,672 | 30,619 |
| 67,040 | 152 | 21,142 | 5,835 | 3,675 | 30,804 |
| 67,041 | 152 | 21,187 | 5,850 | 3,669 | 30,858 |
| 67,042 | 150 | 21,191 | 5,843 | 3,684 | 30,868 |
| 67,043 | 143 | 21,141 | 5,845 | 3,680 | 30,809 |
| 67,044 | 140 | 20,853 | 5,763 | 3,646 | 30,402 |
| 67,045 | 154 | 21,102 | 5,855 | 3,667 | 30,778 |
| 67,046 | 157 | 21,104 | 5,877 | 3,649 | 30,787 |
| 67,047 | 162 | 21,196 | 5,807 | 3,624 | 30,789 |
| 67,048 | 162 | 21,292 | 5,811 | 3,611 | 30,876 |
| 67,049 | 166 | 21,636 | 5,865 | 3,664 | 31,331 |
| 67,050 | 165 | 21,565 | 5,859 | 3,666 | 31,255 |
| 67,051 | 169 | 21,739 | 5,854 | 3,678 | 31,440 |
| 67,052 | 170 | 21,598 | 5,826 | 3,675 | 31,269 |
| 67,053 | 168 | 21,866 | 5,906 | 3,692 | 31,632 |
| 67,054 | 164 | 21,801 | 5,897 | 3,690 | 31,552 |
| 67,055 | 164 | 21,738 | 5,885 | 3,691 | 31,478 |
| 67,056 | 163 | 21,678 | 5,851 | 3,671 | 31,363 |
| 67,057 | 163 | 21,607 | 5,827 | 3,640 | 31,237 |
| 67,058 | 163 | 21,668 | 5,844 | 3,650 | 31,325 |
| 67,059 | 167 | 21,462 | 5,778 | 3,617 | 31,024 |
| 67,060 | 168 | 21,385 | 5,785 | 3,610 | 30,948 |
| 67,061 | 173 | 21,354 | 5,822 | 3,657 | 31,006 |
| 67,062 | 176 | 21,263 | 5,865 | 3,663 | 30,967 |
| 67,063 | 178 | 21,120 | 5,862 | 3,664 | 30,824 |



|        |     |        |       |       |        |
|--------|-----|--------|-------|-------|--------|
| 67,064 | 177 | 21,089 | 5,849 | 3,651 | 30,766 |
| 67,065 | 178 | 20,909 | 5,777 | 3,622 | 30,486 |
| 67,066 | 174 | 20,735 | 5,731 | 3,561 | 30,201 |
| 67,067 | 174 | 21,076 | 5,780 | 3,588 | 30,618 |
| 67,068 | 164 | 21,070 | 5,702 | 3,557 | 30,493 |
| 67,069 | 163 | 21,174 | 5,740 | 3,567 | 30,644 |
| 67,070 | 163 | 21,125 | 5,710 | 3,539 | 30,537 |
| 67,071 | 163 | 21,108 | 5,731 | 3,542 | 30,544 |
| 67,072 | 156 | 21,015 | 5,711 | 3,520 | 30,402 |
| 67,073 | 155 | 20,981 | 5,686 | 3,528 | 30,350 |
| 67,074 | 153 | 20,877 | 5,675 | 3,516 | 30,221 |
| 67,075 | 153 | 20,888 | 5,700 | 3,510 | 30,251 |
| 67,076 | 151 | 20,878 | 5,654 | 3,490 | 30,173 |
| 67,077 | 146 | 20,679 | 5,597 | 3,444 | 29,866 |
| 67,078 | 146 | 20,651 | 5,610 | 3,449 | 29,856 |
| 67,079 | 143 | 20,756 | 5,618 | 3,484 | 30,001 |
| 67,080 | 143 | 20,452 | 5,578 | 3,443 | 29,616 |
| 67,081 | 143 | 20,580 | 5,630 | 3,472 | 29,825 |
| 67,082 | 145 | 20,435 | 5,626 | 3,458 | 29,664 |
| 67,083 | 146 | 20,406 | 5,692 | 3,493 | 29,737 |
| 67,084 | 161 | 20,114 | 5,582 | 3,450 | 29,307 |
| 67,085 | 161 | 19,888 | 5,503 | 3,396 | 28,948 |
| 67,086 | 171 | 19,827 | 5,543 | 3,406 | 28,947 |
| 67,087 | 172 | 19,842 | 5,555 | 3,405 | 28,974 |
| 67,088 | 175 | 19,907 | 5,582 | 3,436 | 29,100 |
| 67,089 | 165 | 19,674 | 5,503 | 3,373 | 28,715 |
| 67,090 | 167 | 19,636 | 5,491 | 3,371 | 28,665 |
| 67,091 | 168 | 19,614 | 5,478 | 3,393 | 28,653 |
| 67,092 | 168 | 19,556 | 5,507 | 3,413 | 28,644 |
| 67,093 | 170 | 19,394 | 5,497 | 3,385 | 28,446 |
| 67,094 | 170 | 19,405 | 5,497 | 3,393 | 28,465 |
| 67,095 | 168 | 19,743 | 5,579 | 3,437 | 28,927 |

|        |     |        |       |       |        |
|--------|-----|--------|-------|-------|--------|
| 67,096 | 165 | 19,827 | 5,600 | 3,446 | 29,038 |
| 67,097 | 153 | 19,666 | 5,538 | 3,416 | 28,773 |
| 67,098 | 153 | 19,557 | 5,561 | 3,440 | 28,711 |
| 67,099 | 155 | 19,776 | 5,618 | 3,472 | 29,021 |
| 67,100 | 151 | 19,822 | 5,622 | 3,469 | 29,064 |
| 67,101 | 148 | 19,933 | 5,658 | 3,479 | 29,218 |
| 67,102 | 149 | 20,004 | 5,651 | 3,508 | 29,312 |
| 67,103 | 151 | 20,168 | 5,666 | 3,509 | 29,494 |
| 67,104 | 146 | 19,878 | 5,580 | 3,469 | 29,073 |
| 67,105 | 148 | 19,869 | 5,610 | 3,501 | 29,128 |
| 67,106 | 148 | 19,544 | 5,550 | 3,455 | 28,697 |
| 67,107 | 155 | 19,736 | 5,634 | 3,470 | 28,995 |
| 67,108 | 155 | 19,728 | 5,629 | 3,462 | 28,974 |
| 67,109 | 155 | 19,791 | 5,643 | 3,452 | 29,041 |
| 67,110 | 148 | 19,463 | 5,606 | 3,391 | 28,608 |
| 67,111 | 150 | 19,715 | 5,689 | 3,397 | 28,951 |
| 67,112 | 146 | 19,951 | 5,711 | 3,415 | 29,223 |
| 67,113 | 150 | 19,768 | 5,625 | 3,362 | 28,905 |
| 67,114 | 146 | 19,538 | 5,574 | 3,316 | 28,574 |
| 67,115 | 148 | 19,411 | 5,548 | 3,302 | 28,409 |
| 67,116 | 144 | 19,007 | 5,481 | 3,253 | 27,885 |
| 67,117 | 140 | 19,526 | 5,563 | 3,351 | 28,580 |
| 67,118 | 143 | 19,566 | 5,588 | 3,365 | 28,662 |
| 67,119 | 143 | 19,641 | 5,595 | 3,360 | 28,739 |
| 67,120 | 142 | 19,801 | 5,591 | 3,352 | 28,886 |
| 67,121 | 145 | 19,800 | 5,571 | 3,356 | 28,872 |
| 67,122 | 145 | 19,889 | 5,575 | 3,349 | 28,958 |
| 67,123 | 148 | 20,196 | 5,646 | 3,388 | 29,378 |
| 67,124 | 148 | 20,357 | 5,627 | 3,381 | 29,513 |
| 67,125 | 150 | 20,657 | 5,692 | 3,405 | 29,904 |
| 67,126 | 148 | 20,586 | 5,710 | 3,422 | 29,866 |
| 67,127 | 148 | 20,701 | 5,719 | 3,430 | 29,998 |

|        |     |        |       |       |        |
|--------|-----|--------|-------|-------|--------|
| 67,128 | 151 | 20,973 | 5,793 | 3,461 | 30,378 |
| 67,129 | 149 | 21,052 | 5,779 | 3,446 | 30,426 |
| 67,130 | 146 | 20,881 | 5,741 | 3,421 | 30,189 |
| 67,131 | 143 | 20,679 | 5,643 | 3,379 | 29,844 |
| 67,132 | 144 | 20,891 | 5,685 | 3,391 | 30,111 |
| 67,133 | 142 | 21,052 | 5,716 | 3,410 | 30,320 |
| 67,134 | 141 | 20,869 | 5,663 | 3,390 | 30,063 |
| 67,135 | 124 | 20,792 | 5,610 | 3,351 | 29,877 |
| 67,136 | 121 | 20,905 | 5,605 | 3,349 | 29,980 |
| 67,137 | 128 | 20,850 | 5,538 | 3,291 | 29,807 |
| 67,138 | 129 | 20,874 | 5,532 | 3,285 | 29,820 |
| 67,139 | 129 | 21,188 | 5,625 | 3,319 | 30,261 |
| 67,140 | 126 | 21,099 | 5,565 | 3,303 | 30,093 |
| 67,141 | 125 | 21,110 | 5,545 | 3,295 | 30,075 |
| 67,142 | 127 | 21,419 | 5,619 | 3,303 | 30,468 |
| 67,143 | 126 | 21,359 | 5,521 | 3,280 | 30,286 |
| 67,144 | 128 | 21,349 | 5,512 | 3,267 | 30,256 |
| 67,145 | 127 | 21,502 | 5,518 | 3,275 | 30,422 |
| 67,146 | 118 | 21,045 | 5,375 | 3,195 | 29,733 |
| 67,147 | 120 | 21,217 | 5,408 | 3,218 | 29,963 |
| 67,148 | 129 | 20,976 | 5,312 | 3,148 | 29,565 |
| 67,149 | 128 | 20,948 | 5,297 | 3,152 | 29,525 |
| 67,150 | 127 | 20,882 | 5,273 | 3,151 | 29,433 |
| 67,151 | 123 | 20,818 | 5,259 | 3,147 | 29,347 |
| 67,152 | 122 | 20,695 | 5,255 | 3,132 | 29,204 |
| 67,153 | 125 | 20,895 | 5,359 | 3,156 | 29,535 |
| 67,154 | 125 | 20,849 | 5,373 | 3,172 | 29,519 |
| 67,155 | 125 | 20,583 | 5,251 | 3,111 | 29,070 |
| 67,156 | 127 | 21,032 | 5,331 | 3,147 | 29,637 |
| 67,157 | 125 | 21,287 | 5,387 | 3,189 | 29,988 |
| 67,158 | 117 | 21,114 | 5,299 | 3,153 | 29,683 |
| 67,159 | 118 | 21,201 | 5,312 | 3,176 | 29,807 |

|        |     |        |       |       |        |
|--------|-----|--------|-------|-------|--------|
| 67,160 | 117 | 21,061 | 5,254 | 3,141 | 29,573 |
| 67,161 | 117 | 21,269 | 5,276 | 3,160 | 29,822 |
| 67,162 | 123 | 21,303 | 5,270 | 3,153 | 29,849 |
| 67,163 | 123 | 21,231 | 5,261 | 3,162 | 29,777 |
| 67,164 | 113 | 21,174 | 5,258 | 3,191 | 29,736 |
| 67,165 | 113 | 21,137 | 5,253 | 3,194 | 29,697 |
| 67,166 | 115 | 21,204 | 5,284 | 3,204 | 29,807 |
| 67,167 | 116 | 21,310 | 5,335 | 3,244 | 30,005 |
| 67,168 | 117 | 21,426 | 5,370 | 3,235 | 30,148 |
| 67,169 | 120 | 21,412 | 5,368 | 3,238 | 30,138 |
| 67,170 | 123 | 21,219 | 5,342 | 3,236 | 29,920 |
| 67,171 | 122 | 21,238 | 5,353 | 3,248 | 29,961 |
| 67,172 | 120 | 21,211 | 5,360 | 3,246 | 29,937 |
| 67,173 | 120 | 21,045 | 5,350 | 3,242 | 29,757 |
| 67,174 | 119 | 21,264 | 5,491 | 3,292 | 30,166 |
| 67,175 | 119 | 21,272 | 5,520 | 3,307 | 30,218 |
| 67,176 | 117 | 21,427 | 5,551 | 3,359 | 30,454 |
| 67,177 | 125 | 21,479 | 5,588 | 3,387 | 30,579 |
| 67,178 | 122 | 21,519 | 5,627 | 3,385 | 30,653 |
| 67,179 | 122 | 21,654 | 5,650 | 3,425 | 30,851 |
| 67,180 | 121 | 21,480 | 5,618 | 3,400 | 30,619 |
| 67,181 | 124 | 21,131 | 5,516 | 3,354 | 30,125 |
| 67,182 | 125 | 21,428 | 5,574 | 3,382 | 30,509 |
| 67,183 | 124 | 21,588 | 5,632 | 3,401 | 30,745 |
| 67,184 | 121 | 21,490 | 5,611 | 3,381 | 30,603 |
| 67,185 | 121 | 21,542 | 5,602 | 3,387 | 30,652 |
| 67,186 | 111 | 21,058 | 5,524 | 3,352 | 30,045 |
| 67,187 | 114 | 21,213 | 5,543 | 3,380 | 30,250 |
| 67,188 | 114 | 21,325 | 5,576 | 3,424 | 30,439 |
| 67,189 | 125 | 21,406 | 5,590 | 3,421 | 30,542 |
| 67,190 | 129 | 21,033 | 5,529 | 3,367 | 30,058 |
| 67,191 | 133 | 21,191 | 5,553 | 3,391 | 30,268 |

|        |     |        |       |       |        |
|--------|-----|--------|-------|-------|--------|
| 67,192 | 141 | 20,927 | 5,548 | 3,353 | 29,969 |
| 67,193 | 141 | 20,787 | 5,535 | 3,352 | 29,815 |
| 67,194 | 146 | 20,807 | 5,605 | 3,359 | 29,917 |
| 67,195 | 145 | 20,565 | 5,577 | 3,334 | 29,621 |
| 67,196 | 148 | 20,515 | 5,575 | 3,333 | 29,571 |
| 67,197 | 149 | 20,486 | 5,571 | 3,336 | 29,542 |
| 67,198 | 148 | 20,439 | 5,553 | 3,322 | 29,462 |
| 67,199 | 136 | 20,251 | 5,538 | 3,333 | 29,258 |
| 67,200 | 140 | 20,151 | 5,541 | 3,328 | 29,160 |
| 67,201 | 140 | 19,910 | 5,515 | 3,281 | 28,846 |
| 67,202 | 146 | 20,007 | 5,577 | 3,309 | 29,039 |
| 67,203 | 146 | 19,948 | 5,601 | 3,300 | 28,995 |
| 67,204 | 143 | 20,009 | 5,567 | 3,301 | 29,020 |
| 67,205 | 140 | 19,644 | 5,491 | 3,244 | 28,519 |
| 67,206 | 138 | 19,478 | 5,493 | 3,239 | 28,348 |
| 67,207 | 137 | 19,515 | 5,537 | 3,263 | 28,452 |
| 67,208 | 135 | 19,160 | 5,465 | 3,205 | 27,965 |
| 67,209 | 148 | 19,359 | 5,553 | 3,271 | 28,331 |
| 67,210 | 151 | 19,403 | 5,578 | 3,265 | 28,397 |
| 67,211 | 154 | 19,481 | 5,589 | 3,285 | 28,509 |
| 67,212 | 146 | 19,322 | 5,519 | 3,269 | 28,256 |
| 67,213 | 148 | 19,404 | 5,550 | 3,265 | 28,367 |
| 67,214 | 156 | 19,612 | 5,603 | 3,266 | 28,637 |
| 67,215 | 157 | 19,679 | 5,617 | 3,270 | 28,723 |
| 67,216 | 157 | 20,178 | 5,753 | 3,355 | 29,443 |
| 67,217 | 168 | 20,402 | 5,844 | 3,379 | 29,793 |
| 67,218 | 166 | 20,491 | 5,866 | 3,374 | 29,897 |
| 67,219 | 165 | 20,633 | 5,937 | 3,407 | 30,142 |
| 67,220 | 160 | 20,597 | 5,915 | 3,405 | 30,077 |
| 67,221 | 163 | 20,577 | 5,934 | 3,377 | 30,051 |
| 67,222 | 163 | 20,425 | 5,883 | 3,346 | 29,817 |
| 67,223 | 166 | 20,728 | 5,947 | 3,392 | 30,233 |

|        |     |        |       |       |        |
|--------|-----|--------|-------|-------|--------|
| 67,224 | 171 | 20,971 | 6,028 | 3,428 | 30,598 |
| 67,225 | 171 | 20,959 | 5,974 | 3,410 | 30,514 |
| 67,226 | 175 | 20,624 | 5,899 | 3,353 | 30,051 |
| 67,227 | 186 | 20,730 | 5,927 | 3,363 | 30,206 |
| 67,228 | 179 | 19,966 | 5,720 | 3,191 | 29,056 |
| 67,229 | 181 | 20,254 | 5,815 | 3,233 | 29,483 |
| 67,230 | 183 | 20,425 | 5,847 | 3,243 | 29,698 |
| 67,231 | 193 | 20,454 | 5,856 | 3,239 | 29,742 |
| 67,232 | 194 | 20,474 | 5,859 | 3,223 | 29,750 |
| 67,233 | 198 | 20,491 | 5,915 | 3,236 | 29,840 |
| 67,234 | 199 | 20,434 | 5,907 | 3,234 | 29,774 |
| 67,235 | 199 | 20,379 | 5,942 | 3,240 | 29,760 |
| 67,236 | 201 | 20,397 | 5,951 | 3,248 | 29,797 |
| 67,237 | 199 | 20,402 | 5,963 | 3,245 | 29,809 |
| 67,238 | 202 | 20,124 | 5,925 | 3,206 | 29,457 |
| 67,239 | 201 | 19,959 | 5,876 | 3,152 | 29,188 |
| 67,240 | 196 | 20,999 | 6,158 | 3,327 | 30,680 |
| 67,241 | 187 | 20,820 | 6,120 | 3,319 | 30,446 |
| 67,242 | 185 | 20,939 | 6,173 | 3,343 | 30,640 |
| 67,243 | 174 | 21,179 | 6,135 | 3,349 | 30,837 |
| 67,244 | 175 | 21,490 | 6,257 | 3,426 | 31,348 |
| 67,245 | 178 | 21,872 | 6,358 | 3,509 | 31,917 |
| 67,246 | 179 | 21,853 | 6,342 | 3,517 | 31,891 |
| 67,247 | 189 | 22,844 | 6,552 | 3,637 | 33,222 |
| 67,248 | 185 | 22,358 | 6,350 | 3,506 | 32,399 |
| 67,249 | 191 | 22,647 | 6,454 | 3,540 | 32,832 |
| 67,250 | 193 | 23,026 | 6,550 | 3,595 | 33,364 |
| 67,251 | 193 | 23,017 | 6,544 | 3,593 | 33,347 |
| 67,252 | 202 | 23,623 | 6,677 | 3,693 | 34,195 |
| 67,253 | 203 | 23,913 | 6,744 | 3,747 | 34,607 |
| 67,254 | 200 | 23,946 | 6,741 | 3,766 | 34,653 |
| 67,255 | 208 | 23,724 | 6,589 | 3,689 | 34,210 |

|        |     |        |       |       |        |
|--------|-----|--------|-------|-------|--------|
| 67,256 | 211 | 23,933 | 6,660 | 3,727 | 34,531 |
| 67,257 | 217 | 24,153 | 6,736 | 3,761 | 34,867 |
| 67,258 | 222 | 24,115 | 6,754 | 3,754 | 34,845 |
| 67,259 | 221 | 24,365 | 6,822 | 3,817 | 35,225 |
| 67,260 | 215 | 24,161 | 6,772 | 3,787 | 34,935 |
| 67,261 | 213 | 24,021 | 6,730 | 3,793 | 34,757 |
| 67,262 | 215 | 24,156 | 6,761 | 3,835 | 34,967 |
| 67,263 | 220 | 23,822 | 6,701 | 3,781 | 34,524 |
| 67,264 | 223 | 23,811 | 6,719 | 3,752 | 34,505 |
| 67,265 | 214 | 23,896 | 6,728 | 3,750 | 34,588 |
| 67,266 | 219 | 23,893 | 6,698 | 3,723 | 34,533 |
| 67,267 | 220 | 23,797 | 6,691 | 3,728 | 34,436 |
| 67,268 | 221 | 23,775 | 6,647 | 3,750 | 34,393 |
| 67,269 | 226 | 23,662 | 6,563 | 3,719 | 34,170 |
| 67,270 | 227 | 23,591 | 6,521 | 3,704 | 34,043 |
| 67,271 | 227 | 23,638 | 6,529 | 3,721 | 34,115 |
| 67,272 | 223 | 23,516 | 6,508 | 3,754 | 34,001 |
| 67,273 | 222 | 23,458 | 6,537 | 3,751 | 33,968 |
| 67,274 | 218 | 23,374 | 6,506 | 3,729 | 33,827 |
| 67,275 | 216 | 23,249 | 6,442 | 3,710 | 33,617 |
| 67,276 | 217 | 23,185 | 6,420 | 3,692 | 33,514 |
| 67,277 | 215 | 23,150 | 6,445 | 3,705 | 33,515 |
| 67,278 | 204 | 23,130 | 6,440 | 3,689 | 33,463 |
| 67,279 | 199 | 23,144 | 6,439 | 3,689 | 33,471 |
| 67,280 | 204 | 22,863 | 6,369 | 3,660 | 33,096 |
| 67,281 | 202 | 22,665 | 6,325 | 3,649 | 32,841 |
| 67,282 | 192 | 22,796 | 6,371 | 3,670 | 33,029 |
| 67,283 | 190 | 22,826 | 6,337 | 3,669 | 33,022 |
| 67,284 | 193 | 22,838 | 6,327 | 3,681 | 33,039 |
| 67,285 | 193 | 22,807 | 6,329 | 3,691 | 33,020 |
| 67,286 | 188 | 22,855 | 6,346 | 3,714 | 33,103 |
| 67,287 | 187 | 22,720 | 6,327 | 3,722 | 32,956 |

|        |     |        |       |       |        |
|--------|-----|--------|-------|-------|--------|
| 67,288 | 193 | 22,722 | 6,344 | 3,722 | 32,981 |
| 67,289 | 195 | 22,401 | 6,262 | 3,681 | 32,539 |
| 67,290 | 193 | 22,356 | 6,253 | 3,682 | 32,484 |
| 67,291 | 191 | 22,328 | 6,268 | 3,679 | 32,466 |
| 67,292 | 188 | 22,332 | 6,329 | 3,679 | 32,528 |
| 67,293 | 187 | 22,268 | 6,347 | 3,710 | 32,512 |
| 67,294 | 185 | 21,926 | 6,290 | 3,679 | 32,080 |
| 67,295 | 181 | 22,033 | 6,268 | 3,686 | 32,168 |
| 67,296 | 181 | 21,836 | 6,286 | 3,674 | 31,977 |
| 67,297 | 177 | 21,838 | 6,322 | 3,690 | 32,027 |
| 67,298 | 171 | 21,744 | 6,358 | 3,707 | 31,980 |
| 67,299 | 172 | 21,731 | 6,346 | 3,703 | 31,952 |
| 67,300 | 168 | 21,821 | 6,310 | 3,692 | 31,991 |
| 67,301 | 166 | 21,637 | 6,256 | 3,662 | 31,721 |
| 67,302 | 166 | 21,744 | 6,291 | 3,668 | 31,869 |
| 67,303 | 156 | 21,409 | 6,247 | 3,638 | 31,450 |
| 67,304 | 157 | 21,687 | 6,317 | 3,679 | 31,840 |
| 67,305 | 158 | 21,866 | 6,399 | 3,740 | 32,163 |
| 67,306 | 154 | 21,522 | 6,300 | 3,682 | 31,658 |
| 67,307 | 154 | 21,619 | 6,322 | 3,704 | 31,799 |
| 67,308 | 148 | 21,808 | 6,361 | 3,723 | 32,040 |
| 67,309 | 141 | 21,399 | 6,240 | 3,645 | 31,425 |
| 67,310 | 140 | 21,579 | 6,291 | 3,660 | 31,670 |
| 67,311 | 141 | 21,746 | 6,361 | 3,696 | 31,944 |
| 67,312 | 130 | 21,170 | 6,206 | 3,582 | 31,088 |
| 67,313 | 132 | 21,231 | 6,237 | 3,592 | 31,192 |
| 67,314 | 133 | 21,254 | 6,233 | 3,590 | 31,210 |
| 67,315 | 130 | 21,047 | 6,175 | 3,584 | 30,936 |
| 67,316 | 131 | 21,110 | 6,234 | 3,654 | 31,129 |
| 67,317 | 124 | 20,641 | 6,098 | 3,569 | 30,432 |
| 67,318 | 124 | 20,655 | 6,108 | 3,563 | 30,450 |
| 67,319 | 115 | 20,568 | 6,160 | 3,582 | 30,425 |



|        |     |        |       |       |        |
|--------|-----|--------|-------|-------|--------|
| 67,320 | 109 | 20,426 | 6,134 | 3,566 | 30,235 |
| 67,321 | 109 | 20,269 | 6,116 | 3,557 | 30,051 |
| 67,322 | 108 | 20,020 | 6,013 | 3,464 | 29,605 |
| 67,323 | 108 | 19,849 | 5,983 | 3,453 | 29,393 |
| 67,324 | 112 | 20,082 | 6,033 | 3,478 | 29,705 |
| 67,325 | 109 | 19,893 | 5,987 | 3,453 | 29,442 |
| 67,326 | 109 | 19,871 | 5,987 | 3,456 | 29,423 |
| 67,327 | 107 | 19,661 | 5,942 | 3,435 | 29,145 |
| 67,328 | 115 | 19,966 | 6,015 | 3,507 | 29,603 |
| 67,329 | 115 | 19,941 | 6,031 | 3,511 | 29,598 |
| 67,330 | 110 | 19,715 | 5,962 | 3,517 | 29,304 |
| 67,331 | 110 | 19,624 | 5,960 | 3,524 | 29,218 |
| 67,332 | 111 | 19,642 | 5,994 | 3,529 | 29,276 |
| 67,333 | 112 | 19,552 | 5,957 | 3,517 | 29,138 |
| 67,334 | 108 | 19,623 | 5,969 | 3,543 | 29,243 |
| 67,335 | 103 | 19,692 | 5,954 | 3,527 | 29,276 |
| 67,336 | 102 | 19,599 | 5,884 | 3,465 | 29,050 |
| 67,337 | 104 | 19,667 | 5,888 | 3,468 | 29,127 |
| 67,338 | 106 | 19,877 | 5,928 | 3,496 | 29,407 |
| 67,339 | 101 | 19,686 | 5,894 | 3,471 | 29,152 |
| 67,340 | 90  | 19,417 | 5,832 | 3,426 | 28,765 |
| 67,341 | 93  | 19,676 | 5,890 | 3,464 | 29,123 |
| 67,342 | 93  | 19,505 | 5,821 | 3,445 | 28,864 |
| 67,343 | 93  | 19,274 | 5,705 | 3,373 | 28,445 |
| 67,344 | 92  | 18,517 | 5,468 | 3,228 | 27,305 |
| 67,345 | 92  | 18,556 | 5,464 | 3,235 | 27,347 |
| 67,346 | 95  | 18,079 | 5,326 | 3,141 | 26,641 |
| 67,347 | 97  | 17,883 | 5,234 | 3,075 | 26,289 |
| 67,348 | 101 | 18,683 | 5,424 | 3,185 | 27,393 |
| 67,349 | 103 | 17,610 | 5,106 | 3,023 | 25,842 |
| 67,350 | 103 | 17,648 | 5,119 | 3,027 | 25,897 |
| 67,351 | 103 | 17,249 | 5,053 | 2,991 | 25,396 |

|        |     |        |       |       |        |
|--------|-----|--------|-------|-------|--------|
| 67,352 | 98  | 16,851 | 4,954 | 2,947 | 24,850 |
| 67,353 | 97  | 17,381 | 5,223 | 3,090 | 25,791 |
| 67,354 | 96  | 17,215 | 5,181 | 3,041 | 25,533 |
| 67,355 | 98  | 17,247 | 5,192 | 3,045 | 25,582 |
| 67,356 | 95  | 16,997 | 5,155 | 3,016 | 25,263 |
| 67,357 | 90  | 16,850 | 5,128 | 3,021 | 25,089 |
| 67,358 | 89  | 16,936 | 5,153 | 3,025 | 25,203 |
| 67,359 | 92  | 16,685 | 5,072 | 2,985 | 24,834 |
| 67,360 | 92  | 16,762 | 5,088 | 2,972 | 24,914 |
| 67,361 | 95  | 17,223 | 5,220 | 3,041 | 25,579 |
| 67,362 | 96  | 17,300 | 5,258 | 3,047 | 25,701 |
| 67,363 | 97  | 17,277 | 5,270 | 3,047 | 25,691 |
| 67,364 | 95  | 17,207 | 5,262 | 3,038 | 25,602 |
| 67,365 | 93  | 17,251 | 5,346 | 3,085 | 25,775 |
| 67,366 | 93  | 17,217 | 5,351 | 3,102 | 25,763 |
| 67,367 | 100 | 17,398 | 5,405 | 3,133 | 26,036 |
| 67,368 | 101 | 17,347 | 5,369 | 3,107 | 25,924 |
| 67,369 | 104 | 17,687 | 5,456 | 3,125 | 26,372 |
| 67,370 | 105 | 17,719 | 5,453 | 3,124 | 26,401 |
| 67,371 | 105 | 17,596 | 5,425 | 3,119 | 26,245 |
| 67,372 | 106 | 17,982 | 5,524 | 3,173 | 26,785 |
| 67,373 | 118 | 18,172 | 5,603 | 3,213 | 27,106 |
| 67,374 | 114 | 18,113 | 5,545 | 3,163 | 26,935 |
| 67,375 | 115 | 18,076 | 5,547 | 3,162 | 26,900 |
| 67,376 | 116 | 18,278 | 5,598 | 3,214 | 27,206 |
| 67,377 | 119 | 18,184 | 5,557 | 3,190 | 27,050 |
| 67,378 | 126 | 18,459 | 5,625 | 3,220 | 27,430 |
| 67,379 | 121 | 18,565 | 5,636 | 3,217 | 27,539 |
| 67,380 | 120 | 18,569 | 5,605 | 3,222 | 27,516 |
| 67,381 | 128 | 18,903 | 5,645 | 3,243 | 27,919 |
| 67,382 | 134 | 19,013 | 5,660 | 3,247 | 28,054 |
| 67,383 | 132 | 18,991 | 5,619 | 3,238 | 27,980 |

|        |     |        |       |       |        |
|--------|-----|--------|-------|-------|--------|
| 67,384 | 139 | 19,451 | 5,725 | 3,295 | 28,610 |
| 67,385 | 142 | 19,456 | 5,769 | 3,300 | 28,667 |
| 67,386 | 154 | 19,915 | 5,930 | 3,349 | 29,348 |
| 67,387 | 155 | 19,940 | 5,925 | 3,331 | 29,351 |
| 67,388 | 161 | 19,866 | 5,920 | 3,320 | 29,267 |
| 67,389 | 162 | 19,745 | 5,918 | 3,299 | 29,124 |
| 67,390 | 180 | 20,239 | 6,009 | 3,349 | 29,777 |
| 67,391 | 185 | 20,012 | 5,954 | 3,328 | 29,479 |
| 67,392 | 184 | 19,851 | 5,928 | 3,301 | 29,264 |
| 67,393 | 194 | 20,416 | 6,080 | 3,399 | 30,089 |
| 67,394 | 193 | 20,460 | 6,098 | 3,412 | 30,163 |
| 67,395 | 192 | 20,570 | 6,145 | 3,457 | 30,364 |
| 67,396 | 197 | 20,712 | 6,207 | 3,508 | 30,624 |
| 67,397 | 192 | 21,090 | 6,311 | 3,545 | 31,138 |
| 67,398 | 188 | 21,224 | 6,366 | 3,582 | 31,360 |
| 67,399 | 188 | 21,064 | 6,339 | 3,553 | 31,144 |
| 67,400 | 185 | 21,362 | 6,423 | 3,602 | 31,572 |
| 67,401 | 188 | 21,183 | 6,361 | 3,563 | 31,295 |
| 67,402 | 190 | 21,269 | 6,361 | 3,573 | 31,393 |
| 67,403 | 190 | 21,510 | 6,383 | 3,598 | 31,681 |
| 67,404 | 190 | 21,432 | 6,357 | 3,587 | 31,566 |
| 67,405 | 188 | 21,571 | 6,361 | 3,596 | 31,716 |
| 67,406 | 187 | 21,562 | 6,351 | 3,583 | 31,683 |
| 67,407 | 186 | 21,633 | 6,342 | 3,585 | 31,746 |
| 67,408 | 186 | 21,600 | 6,320 | 3,574 | 31,680 |
| 67,409 | 188 | 21,693 | 6,392 | 3,602 | 31,875 |
| 67,410 | 185 | 21,660 | 6,435 | 3,620 | 31,900 |
| 67,411 | 185 | 21,598 | 6,463 | 3,641 | 31,887 |
| 67,412 | 185 | 21,583 | 6,443 | 3,642 | 31,853 |
| 67,413 | 189 | 21,671 | 6,454 | 3,659 | 31,973 |
| 67,414 | 194 | 21,744 | 6,472 | 3,678 | 32,088 |
| 67,415 | 196 | 22,037 | 6,497 | 3,693 | 32,423 |

|        |     |        |       |       |        |
|--------|-----|--------|-------|-------|--------|
| 67,416 | 202 | 22,174 | 6,506 | 3,666 | 32,548 |
| 67,417 | 203 | 22,236 | 6,517 | 3,656 | 32,612 |
| 67,418 | 202 | 22,266 | 6,580 | 3,657 | 32,705 |
| 67,419 | 198 | 21,927 | 6,538 | 3,644 | 32,307 |
| 67,420 | 205 | 22,130 | 6,571 | 3,686 | 32,592 |
| 67,421 | 209 | 22,083 | 6,565 | 3,692 | 32,549 |
| 67,422 | 218 | 21,810 | 6,492 | 3,633 | 32,153 |
| 67,423 | 219 | 21,853 | 6,504 | 3,642 | 32,218 |
| 67,424 | 208 | 21,785 | 6,528 | 3,658 | 32,179 |
| 67,425 | 211 | 21,610 | 6,525 | 3,668 | 32,014 |
| 67,426 | 212 | 21,577 | 6,545 | 3,645 | 31,979 |
| 67,427 | 211 | 21,470 | 6,539 | 3,630 | 31,850 |
| 67,428 | 204 | 21,438 | 6,528 | 3,641 | 31,811 |
| 67,429 | 199 | 21,298 | 6,527 | 3,635 | 31,659 |
| 67,430 | 201 | 21,052 | 6,477 | 3,610 | 31,340 |
| 67,431 | 200 | 21,038 | 6,476 | 3,593 | 31,307 |
| 67,432 | 192 | 21,117 | 6,541 | 3,609 | 31,459 |
| 67,433 | 184 | 21,139 | 6,553 | 3,633 | 31,509 |
| 67,434 | 187 | 21,193 | 6,635 | 3,669 | 31,684 |
| 67,435 | 193 | 21,011 | 6,581 | 3,639 | 31,424 |
| 67,436 | 190 | 21,132 | 6,578 | 3,654 | 31,554 |
| 67,437 | 185 | 21,133 | 6,596 | 3,668 | 31,582 |
| 67,438 | 189 | 21,196 | 6,640 | 3,699 | 31,724 |
| 67,439 | 166 | 21,280 | 6,705 | 3,769 | 31,920 |
| 67,440 | 164 | 21,286 | 6,641 | 3,756 | 31,847 |
| 67,441 | 165 | 21,314 | 6,663 | 3,764 | 31,906 |
| 67,442 | 156 | 21,633 | 6,740 | 3,787 | 32,316 |
| 67,443 | 149 | 21,714 | 6,721 | 3,785 | 32,369 |
| 67,444 | 150 | 21,556 | 6,660 | 3,766 | 32,132 |
| 67,445 | 152 | 21,753 | 6,687 | 3,792 | 32,384 |
| 67,446 | 153 | 21,936 | 6,714 | 3,811 | 32,614 |
| 67,447 | 154 | 22,006 | 6,720 | 3,809 | 32,689 |

|        |     |        |       |       |        |
|--------|-----|--------|-------|-------|--------|
| 67,448 | 153 | 21,918 | 6,741 | 3,797 | 32,609 |
| 67,449 | 150 | 21,746 | 6,718 | 3,774 | 32,388 |
| 67,450 | 151 | 21,610 | 6,707 | 3,741 | 32,209 |
| 67,451 | 154 | 21,662 | 6,715 | 3,760 | 32,291 |
| 67,452 | 150 | 21,401 | 6,651 | 3,720 | 31,922 |
| 67,453 | 150 | 21,465 | 6,648 | 3,725 | 31,988 |
| 67,454 | 153 | 21,450 | 6,678 | 3,733 | 32,014 |
| 67,455 | 154 | 21,145 | 6,581 | 3,699 | 31,579 |
| 67,456 | 157 | 21,026 | 6,545 | 3,687 | 31,415 |
| 67,457 | 161 | 21,077 | 6,561 | 3,681 | 31,480 |
| 67,458 | 161 | 20,951 | 6,528 | 3,663 | 31,303 |
| 67,459 | 159 | 21,175 | 6,580 | 3,669 | 31,583 |
| 67,460 | 160 | 21,185 | 6,571 | 3,655 | 31,571 |
| 67,461 | 155 | 20,604 | 6,367 | 3,550 | 30,676 |
| 67,462 | 156 | 20,827 | 6,412 | 3,575 | 30,970 |
| 67,463 | 156 | 21,072 | 6,469 | 3,612 | 31,309 |
| 67,464 | 152 | 21,330 | 6,532 | 3,637 | 31,651 |
| 67,465 | 148 | 21,164 | 6,486 | 3,617 | 31,415 |
| 67,466 | 145 | 21,130 | 6,480 | 3,601 | 31,356 |
| 67,467 | 139 | 21,109 | 6,490 | 3,644 | 31,382 |
| 67,468 | 137 | 20,929 | 6,404 | 3,621 | 31,091 |
| 67,469 | 135 | 20,969 | 6,403 | 3,627 | 31,134 |
| 67,470 | 127 | 21,104 | 6,413 | 3,632 | 31,276 |
| 67,471 | 131 | 21,102 | 6,448 | 3,656 | 31,337 |
| 67,472 | 123 | 21,087 | 6,481 | 3,677 | 31,368 |
| 67,473 | 114 | 20,975 | 6,493 | 3,685 | 31,267 |
| 67,474 | 115 | 20,967 | 6,462 | 3,678 | 31,222 |
| 67,475 | 118 | 20,795 | 6,401 | 3,643 | 30,957 |
| 67,476 | 114 | 20,637 | 6,360 | 3,621 | 30,732 |
| 67,477 | 118 | 20,732 | 6,397 | 3,648 | 30,895 |
| 67,478 | 121 | 20,608 | 6,416 | 3,634 | 30,779 |
| 67,479 | 122 | 20,787 | 6,444 | 3,640 | 30,993 |

|        |     |        |       |       |        |
|--------|-----|--------|-------|-------|--------|
| 67,480 | 123 | 20,783 | 6,419 | 3,641 | 30,966 |
| 67,481 | 128 | 20,726 | 6,437 | 3,625 | 30,916 |
| 67,482 | 128 | 20,658 | 6,429 | 3,614 | 30,829 |
| 67,483 | 128 | 20,381 | 6,328 | 3,570 | 30,407 |
| 67,484 | 133 | 20,403 | 6,371 | 3,574 | 30,481 |
| 67,485 | 130 | 20,154 | 6,272 | 3,529 | 30,085 |
| 67,486 | 119 | 19,860 | 6,176 | 3,475 | 29,630 |
| 67,487 | 123 | 19,780 | 6,165 | 3,467 | 29,535 |
| 67,488 | 119 | 19,216 | 5,992 | 3,388 | 28,715 |
| 67,489 | 117 | 18,366 | 5,771 | 3,214 | 27,468 |
| 67,490 | 119 | 18,530 | 5,787 | 3,227 | 27,663 |
| 67,491 | 120 | 18,756 | 5,813 | 3,236 | 27,925 |
| 67,492 | 123 | 18,954 | 5,870 | 3,271 | 28,218 |
| 67,493 | 134 | 18,835 | 5,855 | 3,254 | 28,078 |
| 67,494 | 137 | 18,354 | 5,710 | 3,169 | 27,370 |
| 67,495 | 137 | 18,393 | 5,709 | 3,158 | 27,397 |
| 67,496 | 139 | 18,381 | 5,727 | 3,157 | 27,404 |
| 67,497 | 132 | 18,123 | 5,649 | 3,116 | 27,020 |
| 67,498 | 133 | 18,187 | 5,686 | 3,133 | 27,139 |
| 67,499 | 132 | 17,837 | 5,558 | 3,077 | 26,604 |
| 67,500 | 133 | 17,820 | 5,511 | 3,076 | 26,540 |
| 67,501 | 134 | 17,784 | 5,494 | 3,067 | 26,479 |
| 67,502 | 130 | 18,130 | 5,548 | 3,118 | 26,926 |
| 67,503 | 134 | 18,213 | 5,544 | 3,102 | 26,993 |
| 67,504 | 132 | 18,238 | 5,527 | 3,111 | 27,008 |
| 67,505 | 133 | 18,260 | 5,534 | 3,100 | 27,027 |
| 67,506 | 134 | 18,094 | 5,485 | 3,066 | 26,779 |
| 67,507 | 134 | 18,414 | 5,623 | 3,124 | 27,295 |
| 67,508 | 133 | 18,536 | 5,639 | 3,158 | 27,466 |
| 67,509 | 136 | 18,228 | 5,547 | 3,110 | 27,021 |
| 67,510 | 136 | 18,009 | 5,473 | 3,083 | 26,701 |
| 67,511 | 143 | 18,303 | 5,582 | 3,145 | 27,173 |

|        |     |        |       |       |        |
|--------|-----|--------|-------|-------|--------|
| 67,512 | 142 | 18,004 | 5,523 | 3,124 | 26,793 |
| 67,513 | 142 | 18,359 | 5,707 | 3,251 | 27,459 |
| 67,514 | 144 | 18,329 | 5,682 | 3,245 | 27,400 |
| 67,515 | 143 | 18,252 | 5,690 | 3,244 | 27,329 |
| 67,516 | 141 | 18,277 | 5,685 | 3,222 | 27,325 |
| 67,517 | 139 | 17,660 | 5,530 | 3,123 | 26,452 |
| 67,518 | 140 | 17,686 | 5,563 | 3,137 | 26,526 |
| 67,519 | 140 | 17,836 | 5,571 | 3,171 | 26,718 |
| 67,520 | 143 | 17,835 | 5,578 | 3,181 | 26,737 |
| 67,521 | 148 | 17,918 | 5,538 | 3,165 | 26,769 |
| 67,522 | 144 | 17,956 | 5,538 | 3,146 | 26,784 |
| 67,523 | 154 | 18,153 | 5,526 | 3,132 | 26,965 |
| 67,524 | 152 | 18,141 | 5,474 | 3,107 | 26,874 |
| 67,525 | 152 | 18,201 | 5,496 | 3,107 | 26,956 |
| 67,526 | 147 | 18,446 | 5,495 | 3,090 | 27,178 |
| 67,527 | 145 | 18,452 | 5,496 | 3,098 | 27,191 |
| 67,528 | 149 | 18,732 | 5,504 | 3,123 | 27,508 |
| 67,529 | 154 | 18,764 | 5,506 | 3,140 | 27,564 |
| 67,530 | 154 | 18,753 | 5,496 | 3,138 | 27,541 |
| 67,531 | 156 | 19,076 | 5,577 | 3,184 | 27,993 |
| 67,532 | 154 | 18,850 | 5,502 | 3,142 | 27,648 |
| 67,533 | 153 | 19,074 | 5,525 | 3,159 | 27,911 |
| 67,534 | 152 | 19,394 | 5,593 | 3,190 | 28,329 |
| 67,535 | 155 | 19,238 | 5,562 | 3,174 | 28,129 |
| 67,536 | 154 | 19,313 | 5,569 | 3,185 | 28,221 |
| 67,537 | 157 | 19,652 | 5,635 | 3,231 | 28,675 |
| 67,538 | 156 | 19,643 | 5,651 | 3,226 | 28,676 |
| 67,539 | 156 | 19,852 | 5,713 | 3,258 | 28,979 |
| 67,540 | 154 | 20,106 | 5,812 | 3,308 | 29,380 |
| 67,541 | 154 | 20,116 | 5,825 | 3,317 | 29,412 |
| 67,542 | 159 | 19,932 | 5,783 | 3,304 | 29,178 |
| 67,543 | 161 | 20,143 | 5,822 | 3,331 | 29,457 |

|        |     |        |       |       |        |
|--------|-----|--------|-------|-------|--------|
| 67,544 | 156 | 20,403 | 5,882 | 3,383 | 29,824 |
| 67,545 | 156 | 20,537 | 5,908 | 3,373 | 29,974 |
| 67,546 | 155 | 20,705 | 5,947 | 3,393 | 30,200 |
| 67,547 | 156 | 20,496 | 5,917 | 3,368 | 29,937 |
| 67,548 | 155 | 20,268 | 5,889 | 3,348 | 29,660 |
| 67,549 | 162 | 20,846 | 6,122 | 3,481 | 30,611 |
| 67,550 | 165 | 20,702 | 6,083 | 3,464 | 30,414 |
| 67,551 | 162 | 20,636 | 6,056 | 3,443 | 30,297 |
| 67,552 | 164 | 21,087 | 6,177 | 3,501 | 30,929 |
| 67,553 | 166 | 21,331 | 6,280 | 3,528 | 31,305 |
| 67,554 | 158 | 21,181 | 6,248 | 3,511 | 31,098 |
| 67,555 | 156 | 21,377 | 6,291 | 3,554 | 31,378 |
| 67,556 | 152 | 21,379 | 6,280 | 3,540 | 31,351 |
| 67,557 | 153 | 21,319 | 6,226 | 3,524 | 31,222 |
| 67,558 | 155 | 21,477 | 6,267 | 3,521 | 31,420 |
| 67,559 | 152 | 21,482 | 6,307 | 3,545 | 31,486 |
| 67,560 | 151 | 21,583 | 6,308 | 3,538 | 31,580 |
| 67,561 | 153 | 21,827 | 6,295 | 3,547 | 31,822 |
| 67,562 | 157 | 22,029 | 6,302 | 3,554 | 32,042 |
| 67,563 | 163 | 22,074 | 6,329 | 3,552 | 32,118 |
| 67,564 | 163 | 22,099 | 6,339 | 3,546 | 32,147 |
| 67,565 | 161 | 22,025 | 6,349 | 3,548 | 32,083 |
| 67,566 | 165 | 22,135 | 6,360 | 3,560 | 32,220 |
| 67,567 | 167 | 22,280 | 6,424 | 3,608 | 32,479 |
| 67,568 | 173 | 22,470 | 6,431 | 3,622 | 32,696 |
| 67,569 | 181 | 22,635 | 6,475 | 3,605 | 32,896 |
| 67,570 | 181 | 22,671 | 6,482 | 3,595 | 32,929 |
| 67,571 | 184 | 23,200 | 6,606 | 3,673 | 33,663 |
| 67,572 | 183 | 22,967 | 6,574 | 3,662 | 33,386 |
| 67,573 | 183 | 22,852 | 6,517 | 3,624 | 33,176 |
| 67,574 | 180 | 23,403 | 6,737 | 3,740 | 34,060 |
| 67,575 | 182 | 23,498 | 6,820 | 3,775 | 34,275 |



|        |     |        |       |       |        |
|--------|-----|--------|-------|-------|--------|
| 67,576 | 174 | 22,826 | 6,694 | 3,721 | 33,415 |
| 67,577 | 173 | 22,864 | 6,734 | 3,750 | 33,521 |
| 67,578 | 173 | 22,796 | 6,744 | 3,736 | 33,449 |
| 67,579 | 174 | 22,987 | 6,800 | 3,776 | 33,737 |
| 67,580 | 169 | 23,050 | 6,852 | 3,786 | 33,857 |
| 67,581 | 171 | 23,158 | 6,885 | 3,787 | 34,001 |
| 67,582 | 165 | 23,306 | 6,895 | 3,798 | 34,164 |
| 67,583 | 165 | 23,281 | 6,872 | 3,804 | 34,122 |
| 67,584 | 161 | 22,792 | 6,765 | 3,751 | 33,469 |
| 67,585 | 168 | 22,901 | 6,785 | 3,774 | 33,628 |
| 67,586 | 163 | 23,143 | 6,849 | 3,800 | 33,955 |
| 67,587 | 170 | 22,776 | 6,765 | 3,759 | 33,470 |
| 67,588 | 169 | 22,472 | 6,726 | 3,728 | 33,095 |
| 67,589 | 170 | 22,403 | 6,741 | 3,775 | 33,089 |
| 67,590 | 173 | 22,205 | 6,713 | 3,767 | 32,858 |
| 67,591 | 169 | 22,116 | 6,657 | 3,760 | 32,702 |
| 67,592 | 169 | 21,953 | 6,649 | 3,752 | 32,523 |
| 67,593 | 158 | 21,793 | 6,629 | 3,742 | 32,322 |
| 67,594 | 157 | 21,802 | 6,636 | 3,752 | 32,347 |
| 67,595 | 156 | 21,764 | 6,633 | 3,737 | 32,290 |
| 67,596 | 160 | 21,606 | 6,567 | 3,730 | 32,063 |
| 67,597 | 158 | 21,577 | 6,562 | 3,729 | 32,026 |
| 67,598 | 160 | 21,803 | 6,590 | 3,753 | 32,306 |
| 67,599 | 160 | 22,080 | 6,578 | 3,723 | 32,541 |
| 67,600 | 170 | 21,986 | 6,535 | 3,689 | 32,380 |
| 67,601 | 165 | 21,735 | 6,535 | 3,676 | 32,111 |
| 67,602 | 178 | 21,930 | 6,617 | 3,714 | 32,439 |
| 67,603 | 181 | 21,711 | 6,560 | 3,683 | 32,135 |
| 67,604 | 185 | 21,647 | 6,527 | 3,701 | 32,060 |
| 67,605 | 185 | 21,670 | 6,533 | 3,701 | 32,089 |
| 67,606 | 191 | 21,816 | 6,623 | 3,727 | 32,357 |
| 67,607 | 197 | 21,455 | 6,498 | 3,688 | 31,838 |

|        |     |        |       |       |        |
|--------|-----|--------|-------|-------|--------|
| 67,608 | 196 | 21,437 | 6,514 | 3,672 | 31,819 |
| 67,609 | 196 | 21,387 | 6,527 | 3,682 | 31,792 |
| 67,610 | 193 | 21,432 | 6,497 | 3,646 | 31,768 |
| 67,611 | 193 | 21,280 | 6,438 | 3,629 | 31,540 |
| 67,612 | 190 | 21,297 | 6,502 | 3,686 | 31,675 |
| 67,613 | 191 | 21,261 | 6,485 | 3,680 | 31,617 |
| 67,614 | 185 | 21,148 | 6,473 | 3,682 | 31,488 |
| 67,615 | 188 | 21,230 | 6,525 | 3,694 | 31,637 |
| 67,616 | 186 | 21,229 | 6,509 | 3,688 | 31,612 |
| 67,617 | 190 | 21,167 | 6,483 | 3,704 | 31,544 |
| 67,618 | 188 | 20,959 | 6,456 | 3,685 | 31,288 |
| 67,619 | 182 | 20,992 | 6,482 | 3,713 | 31,369 |
| 67,620 | 174 | 20,816 | 6,476 | 3,732 | 31,198 |
| 67,621 | 167 | 21,022 | 6,569 | 3,764 | 31,522 |
| 67,622 | 176 | 20,787 | 6,563 | 3,764 | 31,290 |
| 67,623 | 172 | 20,605 | 6,571 | 3,729 | 31,077 |
| 67,624 | 177 | 20,571 | 6,524 | 3,723 | 30,995 |
| 67,625 | 176 | 20,650 | 6,535 | 3,710 | 31,071 |
| 67,626 | 178 | 20,514 | 6,441 | 3,675 | 30,808 |
| 67,627 | 176 | 20,425 | 6,390 | 3,656 | 30,647 |
| 67,628 | 177 | 20,772 | 6,430 | 3,687 | 31,066 |
| 67,629 | 175 | 20,910 | 6,468 | 3,699 | 31,252 |
| 67,630 | 175 | 20,650 | 6,380 | 3,652 | 30,857 |
| 67,631 | 178 | 20,615 | 6,341 | 3,632 | 30,766 |
| 67,632 | 176 | 20,420 | 6,306 | 3,610 | 30,512 |
| 67,633 | 169 | 20,153 | 6,270 | 3,576 | 30,168 |
| 67,634 | 171 | 20,250 | 6,268 | 3,565 | 30,254 |
| 67,635 | 176 | 20,463 | 6,288 | 3,585 | 30,512 |
| 67,636 | 176 | 20,428 | 6,276 | 3,577 | 30,457 |
| 67,637 | 164 | 20,409 | 6,219 | 3,548 | 30,340 |
| 67,638 | 162 | 20,462 | 6,171 | 3,517 | 30,312 |
| 67,639 | 161 | 20,519 | 6,165 | 3,508 | 30,353 |

|        |     |        |       |       |        |
|--------|-----|--------|-------|-------|--------|
| 67,640 | 157 | 20,561 | 6,137 | 3,484 | 30,339 |
| 67,641 | 157 | 20,745 | 6,144 | 3,512 | 30,558 |
| 67,642 | 159 | 20,368 | 6,033 | 3,419 | 29,979 |
| 67,643 | 157 | 20,343 | 6,018 | 3,407 | 29,925 |
| 67,644 | 161 | 20,107 | 5,949 | 3,361 | 29,578 |
| 67,645 | 159 | 19,789 | 5,872 | 3,350 | 29,170 |
| 67,646 | 154 | 20,760 | 6,118 | 3,484 | 30,516 |
| 67,647 | 155 | 20,886 | 6,131 | 3,483 | 30,655 |
| 67,648 | 152 | 20,837 | 6,073 | 3,461 | 30,523 |
| 67,649 | 153 | 20,671 | 6,033 | 3,451 | 30,308 |
| 67,650 | 148 | 20,282 | 5,907 | 3,402 | 29,739 |
| 67,651 | 138 | 19,854 | 5,729 | 3,344 | 29,065 |
| 67,652 | 138 | 19,901 | 5,715 | 3,328 | 29,082 |
| 67,653 | 125 | 19,765 | 5,686 | 3,313 | 28,889 |
| 67,654 | 117 | 19,220 | 5,457 | 3,207 | 28,001 |
| 67,655 | 116 | 19,359 | 5,484 | 3,214 | 28,173 |
| 67,656 | 113 | 19,440 | 5,513 | 3,227 | 28,293 |
| 67,657 | 112 | 19,519 | 5,546 | 3,230 | 28,407 |
| 67,658 | 106 | 19,454 | 5,546 | 3,233 | 28,339 |
| 67,659 | 103 | 19,411 | 5,505 | 3,221 | 28,240 |
| 67,660 | 100 | 19,091 | 5,418 | 3,185 | 27,794 |
| 67,661 | 100 | 19,256 | 5,480 | 3,220 | 28,056 |
| 67,662 | 98  | 18,945 | 5,434 | 3,178 | 27,655 |
| 67,663 | 104 | 18,945 | 5,396 | 3,170 | 27,615 |
| 67,664 | 103 | 18,914 | 5,335 | 3,131 | 27,483 |
| 67,665 | 105 | 19,089 | 5,404 | 3,174 | 27,772 |
| 67,666 | 103 | 18,834 | 5,304 | 3,145 | 27,386 |
| 67,667 | 98  | 18,712 | 5,314 | 3,135 | 27,259 |
| 67,668 | 105 | 18,699 | 5,306 | 3,112 | 27,222 |
| 67,669 | 104 | 18,564 | 5,243 | 3,059 | 26,970 |
| 67,670 | 110 | 18,652 | 5,311 | 3,101 | 27,174 |
| 67,671 | 112 | 18,629 | 5,264 | 3,072 | 27,077 |

|        |     |        |       |       |        |
|--------|-----|--------|-------|-------|--------|
| 67,672 | 113 | 18,716 | 5,231 | 3,070 | 27,130 |
| 67,673 | 115 | 18,550 | 5,143 | 3,015 | 26,823 |
| 67,674 | 116 | 18,245 | 5,018 | 2,973 | 26,352 |
| 67,675 | 107 | 18,263 | 5,042 | 2,988 | 26,400 |
| 67,676 | 108 | 17,968 | 4,971 | 2,981 | 26,028 |
| 67,677 | 107 | 17,827 | 4,938 | 2,957 | 25,829 |
| 67,678 | 111 | 17,695 | 4,897 | 2,940 | 25,643 |
| 67,679 | 112 | 17,734 | 4,866 | 2,922 | 25,634 |
| 67,680 | 111 | 17,703 | 4,858 | 2,922 | 25,594 |
| 67,681 | 112 | 17,920 | 4,918 | 2,955 | 25,905 |
| 67,682 | 108 | 17,741 | 4,898 | 2,959 | 25,706 |
| 67,683 | 117 | 17,953 | 4,939 | 2,995 | 26,004 |
| 67,684 | 116 | 17,852 | 4,948 | 2,979 | 25,895 |
| 67,685 | 114 | 17,825 | 4,959 | 2,982 | 25,880 |
| 67,686 | 127 | 18,017 | 5,112 | 3,030 | 26,286 |
| 67,687 | 129 | 18,082 | 5,140 | 3,029 | 26,380 |
| 67,688 | 132 | 18,078 | 5,144 | 3,043 | 26,397 |
| 67,689 | 132 | 18,013 | 5,151 | 3,034 | 26,330 |
| 67,690 | 138 | 18,320 | 5,252 | 3,088 | 26,798 |
| 67,691 | 139 | 18,128 | 5,233 | 3,069 | 26,569 |
| 67,692 | 142 | 18,493 | 5,359 | 3,135 | 27,129 |
| 67,693 | 139 | 18,215 | 5,299 | 3,105 | 26,758 |
| 67,694 | 135 | 18,367 | 5,362 | 3,133 | 26,997 |
| 67,695 | 138 | 18,530 | 5,430 | 3,155 | 27,253 |
| 67,696 | 138 | 18,796 | 5,477 | 3,153 | 27,564 |
| 67,697 | 136 | 18,695 | 5,453 | 3,156 | 27,440 |
| 67,698 | 135 | 18,560 | 5,437 | 3,129 | 27,261 |
| 67,699 | 128 | 18,205 | 5,418 | 3,093 | 26,844 |
| 67,700 | 128 | 18,404 | 5,490 | 3,110 | 27,132 |
| 67,701 | 128 | 18,431 | 5,509 | 3,099 | 27,167 |
| 67,702 | 127 | 18,249 | 5,507 | 3,081 | 26,964 |
| 67,703 | 135 | 18,616 | 5,646 | 3,193 | 27,590 |

|        |     |        |       |       |        |
|--------|-----|--------|-------|-------|--------|
| 67,704 | 140 | 18,465 | 5,632 | 3,182 | 27,419 |
| 67,705 | 143 | 18,684 | 5,710 | 3,215 | 27,752 |
| 67,706 | 143 | 18,757 | 5,734 | 3,234 | 27,868 |
| 67,707 | 143 | 18,842 | 5,787 | 3,263 | 28,035 |
| 67,708 | 145 | 18,956 | 5,827 | 3,276 | 28,204 |
| 67,709 | 149 | 18,888 | 5,785 | 3,234 | 28,056 |
| 67,710 | 152 | 19,008 | 5,849 | 3,256 | 28,265 |
| 67,711 | 153 | 19,023 | 5,891 | 3,259 | 28,326 |
| 67,712 | 153 | 19,121 | 5,896 | 3,274 | 28,444 |
| 67,713 | 145 | 19,105 | 5,884 | 3,248 | 28,382 |
| 67,714 | 148 | 19,101 | 5,816 | 3,244 | 28,309 |
| 67,715 | 150 | 19,347 | 5,863 | 3,271 | 28,631 |
| 67,716 | 149 | 19,532 | 5,923 | 3,274 | 28,878 |
| 67,717 | 145 | 19,192 | 5,833 | 3,220 | 28,390 |
| 67,718 | 146 | 19,422 | 5,831 | 3,223 | 28,622 |
| 67,719 | 143 | 19,632 | 5,863 | 3,259 | 28,897 |
| 67,720 | 143 | 19,664 | 5,814 | 3,230 | 28,851 |
| 67,721 | 146 | 19,660 | 5,821 | 3,232 | 28,859 |
| 67,722 | 145 | 19,558 | 5,783 | 3,215 | 28,701 |
| 67,723 | 145 | 19,901 | 5,864 | 3,265 | 29,175 |
| 67,724 | 134 | 19,943 | 5,865 | 3,249 | 29,191 |
| 67,725 | 134 | 19,962 | 5,840 | 3,238 | 29,174 |
| 67,726 | 136 | 20,159 | 5,894 | 3,249 | 29,438 |
| 67,727 | 134 | 20,075 | 5,870 | 3,222 | 29,301 |
| 67,728 | 132 | 20,096 | 5,887 | 3,222 | 29,337 |
| 67,729 | 140 | 20,252 | 5,960 | 3,261 | 29,613 |
| 67,730 | 143 | 20,410 | 6,038 | 3,288 | 29,879 |
| 67,731 | 141 | 20,299 | 6,019 | 3,309 | 29,768 |
| 67,732 | 135 | 19,899 | 5,878 | 3,238 | 29,150 |
| 67,733 | 138 | 20,141 | 5,933 | 3,261 | 29,473 |
| 67,734 | 133 | 20,274 | 6,010 | 3,297 | 29,714 |
| 67,735 | 126 | 20,132 | 5,968 | 3,275 | 29,501 |

|        |     |        |       |       |        |
|--------|-----|--------|-------|-------|--------|
| 67,736 | 125 | 20,244 | 6,003 | 3,298 | 29,670 |
| 67,737 | 124 | 20,471 | 6,030 | 3,322 | 29,947 |
| 67,738 | 121 | 20,437 | 6,010 | 3,323 | 29,891 |
| 67,739 | 119 | 20,212 | 5,965 | 3,292 | 29,588 |
| 67,740 | 117 | 20,128 | 5,935 | 3,277 | 29,457 |
| 67,741 | 128 | 20,439 | 6,017 | 3,308 | 29,892 |
| 67,742 | 124 | 20,433 | 5,997 | 3,307 | 29,861 |
| 67,743 | 125 | 20,410 | 5,979 | 3,290 | 29,804 |
| 67,744 | 129 | 20,337 | 5,916 | 3,238 | 29,620 |
| 67,745 | 129 | 20,361 | 5,898 | 3,236 | 29,624 |
| 67,746 | 132 | 20,307 | 5,889 | 3,243 | 29,571 |
| 67,747 | 137 | 20,302 | 5,886 | 3,242 | 29,567 |
| 67,748 | 139 | 20,056 | 5,856 | 3,217 | 29,268 |
| 67,749 | 144 | 20,318 | 5,915 | 3,273 | 29,650 |
| 67,750 | 148 | 20,424 | 5,917 | 3,285 | 29,774 |
| 67,751 | 150 | 20,513 | 5,891 | 3,262 | 29,816 |
| 67,752 | 152 | 20,687 | 5,875 | 3,246 | 29,960 |
| 67,753 | 151 | 20,678 | 5,892 | 3,236 | 29,957 |
| 67,754 | 157 | 20,897 | 5,911 | 3,276 | 30,241 |
| 67,755 | 157 | 20,789 | 5,883 | 3,236 | 30,065 |
| 67,756 | 154 | 20,692 | 5,849 | 3,249 | 29,944 |
| 67,757 | 155 | 20,770 | 5,890 | 3,267 | 30,082 |
| 67,758 | 156 | 20,951 | 5,928 | 3,264 | 30,299 |
| 67,759 | 157 | 20,848 | 5,908 | 3,245 | 30,158 |
| 67,760 | 150 | 20,903 | 5,926 | 3,264 | 30,243 |
| 67,761 | 153 | 21,063 | 5,927 | 3,275 | 30,418 |
| 67,762 | 155 | 21,012 | 5,891 | 3,265 | 30,323 |
| 67,763 | 157 | 21,200 | 5,949 | 3,290 | 30,596 |
| 67,764 | 155 | 20,943 | 5,880 | 3,255 | 30,233 |
| 67,765 | 155 | 21,097 | 5,906 | 3,240 | 30,398 |
| 67,766 | 155 | 20,880 | 5,855 | 3,202 | 30,092 |
| 67,767 | 154 | 20,905 | 5,861 | 3,217 | 30,137 |

|        |     |        |       |       |        |
|--------|-----|--------|-------|-------|--------|
| 67,768 | 153 | 20,935 | 5,896 | 3,227 | 30,211 |
| 67,769 | 152 | 20,748 | 5,851 | 3,208 | 29,959 |
| 67,770 | 151 | 20,714 | 5,870 | 3,189 | 29,924 |
| 67,771 | 150 | 20,623 | 5,854 | 3,180 | 29,807 |
| 67,772 | 146 | 20,500 | 5,836 | 3,166 | 29,648 |
| 67,773 | 150 | 20,667 | 5,905 | 3,204 | 29,926 |
| 67,774 | 150 | 20,560 | 5,888 | 3,175 | 29,773 |
| 67,775 | 151 | 20,579 | 5,893 | 3,190 | 29,813 |
| 67,776 | 151 | 20,644 | 5,908 | 3,188 | 29,891 |
| 67,777 | 148 | 20,588 | 5,943 | 3,206 | 29,885 |
| 67,778 | 150 | 20,712 | 6,011 | 3,227 | 30,100 |
| 67,779 | 152 | 20,650 | 6,023 | 3,238 | 30,063 |
| 67,780 | 145 | 20,476 | 5,988 | 3,220 | 29,829 |
| 67,781 | 148 | 20,397 | 5,966 | 3,191 | 29,702 |
| 67,782 | 150 | 20,347 | 5,968 | 3,199 | 29,664 |
| 67,783 | 160 | 20,539 | 6,007 | 3,232 | 29,938 |
| 67,784 | 165 | 20,532 | 5,997 | 3,225 | 29,919 |
| 67,785 | 164 | 20,432 | 5,936 | 3,197 | 29,729 |
| 67,786 | 166 | 20,469 | 5,924 | 3,193 | 29,752 |
| 67,787 | 168 | 20,493 | 5,920 | 3,204 | 29,785 |
| 67,788 | 166 | 20,480 | 5,893 | 3,204 | 29,743 |
| 67,789 | 169 | 20,700 | 5,957 | 3,236 | 30,062 |
| 67,790 | 168 | 20,259 | 5,850 | 3,154 | 29,431 |
| 67,791 | 170 | 20,436 | 5,883 | 3,172 | 29,661 |
| 67,792 | 162 | 20,367 | 5,890 | 3,181 | 29,600 |
| 67,793 | 168 | 20,525 | 5,941 | 3,212 | 29,846 |
| 67,794 | 166 | 20,374 | 5,904 | 3,181 | 29,625 |
| 67,795 | 161 | 20,112 | 5,858 | 3,159 | 29,290 |
| 67,796 | 160 | 20,241 | 5,894 | 3,190 | 29,485 |
| 67,797 | 163 | 20,315 | 5,889 | 3,199 | 29,566 |
| 67,798 | 154 | 20,072 | 5,841 | 3,163 | 29,230 |
| 67,799 | 158 | 20,192 | 5,783 | 3,144 | 29,277 |

|        |     |        |       |       |        |
|--------|-----|--------|-------|-------|--------|
| 67,800 | 155 | 20,170 | 5,787 | 3,154 | 29,266 |
| 67,801 | 156 | 20,358 | 5,802 | 3,174 | 29,490 |
| 67,802 | 154 | 20,345 | 5,832 | 3,185 | 29,516 |
| 67,803 | 151 | 20,337 | 5,837 | 3,191 | 29,516 |
| 67,804 | 148 | 20,096 | 5,767 | 3,143 | 29,154 |
| 67,805 | 143 | 20,023 | 5,790 | 3,142 | 29,098 |
| 67,806 | 140 | 20,102 | 5,846 | 3,182 | 29,270 |
| 67,807 | 143 | 19,991 | 5,842 | 3,150 | 29,126 |
| 67,808 | 146 | 19,767 | 5,785 | 3,113 | 28,811 |
| 67,809 | 143 | 19,452 | 5,706 | 3,094 | 28,395 |
| 67,810 | 140 | 19,167 | 5,672 | 3,118 | 28,097 |
| 67,811 | 140 | 19,204 | 5,677 | 3,127 | 28,148 |
| 67,812 | 136 | 19,069 | 5,655 | 3,115 | 27,975 |
| 67,813 | 132 | 18,876 | 5,606 | 3,082 | 27,696 |
| 67,814 | 130 | 18,702 | 5,545 | 3,054 | 27,431 |
| 67,815 | 130 | 18,839 | 5,576 | 3,070 | 27,615 |
| 67,816 | 127 | 18,157 | 5,392 | 2,972 | 26,648 |
| 67,817 | 129 | 18,332 | 5,423 | 2,998 | 26,882 |
| 67,818 | 130 | 18,549 | 5,483 | 3,019 | 27,181 |
| 67,819 | 138 | 18,717 | 5,529 | 3,049 | 27,433 |
| 67,820 | 142 | 18,493 | 5,489 | 3,012 | 27,136 |
| 67,821 | 141 | 18,189 | 5,403 | 2,980 | 26,713 |
| 67,822 | 142 | 18,503 | 5,512 | 3,025 | 27,182 |
| 67,823 | 138 | 18,175 | 5,419 | 3,001 | 26,733 |
| 67,824 | 144 | 18,408 | 5,469 | 3,019 | 27,040 |
| 67,825 | 145 | 18,277 | 5,446 | 3,017 | 26,885 |
| 67,826 | 140 | 18,199 | 5,436 | 2,995 | 26,770 |
| 67,827 | 140 | 17,923 | 5,340 | 2,954 | 26,357 |
| 67,828 | 136 | 17,472 | 5,193 | 2,832 | 25,633 |
| 67,829 | 137 | 17,683 | 5,187 | 2,858 | 25,865 |
| 67,830 | 134 | 17,332 | 5,059 | 2,770 | 25,295 |
| 67,831 | 134 | 17,473 | 5,069 | 2,784 | 25,460 |



|        |     |        |       |       |        |
|--------|-----|--------|-------|-------|--------|
| 67,832 | 134 | 17,690 | 5,134 | 2,832 | 25,790 |
| 67,833 | 133 | 17,745 | 5,136 | 2,829 | 25,843 |
| 67,834 | 134 | 17,943 | 5,177 | 2,863 | 26,117 |
| 67,835 | 134 | 17,923 | 5,178 | 2,870 | 26,105 |
| 67,836 | 137 | 17,625 | 5,072 | 2,832 | 25,666 |
| 67,837 | 137 | 17,642 | 5,063 | 2,833 | 25,675 |
| 67,838 | 131 | 17,740 | 5,076 | 2,847 | 25,794 |
| 67,839 | 129 | 17,533 | 5,041 | 2,811 | 25,514 |
| 67,840 | 127 | 17,467 | 5,025 | 2,800 | 25,419 |
| 67,841 | 120 | 17,471 | 5,017 | 2,800 | 25,408 |
| 67,842 | 120 | 17,476 | 5,017 | 2,802 | 25,415 |
| 67,843 | 119 | 17,590 | 5,075 | 2,797 | 25,581 |
| 67,844 | 118 | 17,367 | 4,972 | 2,746 | 25,203 |
| 67,845 | 119 | 17,166 | 4,915 | 2,701 | 24,901 |
| 67,846 | 117 | 17,106 | 4,911 | 2,699 | 24,833 |
| 67,847 | 118 | 16,940 | 4,869 | 2,681 | 24,608 |
| 67,848 | 113 | 16,763 | 4,844 | 2,664 | 24,384 |
| 67,849 | 113 | 17,570 | 5,084 | 2,806 | 25,573 |
| 67,850 | 117 | 17,312 | 5,078 | 2,781 | 25,288 |
| 67,851 | 117 | 17,102 | 5,051 | 2,752 | 25,022 |
| 67,852 | 123 | 17,360 | 5,174 | 2,816 | 25,473 |
| 67,853 | 122 | 17,048 | 5,085 | 2,798 | 25,053 |
| 67,854 | 124 | 17,294 | 5,151 | 2,827 | 25,396 |
| 67,855 | 123 | 17,460 | 5,169 | 2,843 | 25,595 |
| 67,856 | 125 | 17,638 | 5,179 | 2,859 | 25,801 |
| 67,857 | 126 | 17,732 | 5,178 | 2,871 | 25,907 |
| 67,858 | 121 | 17,553 | 5,102 | 2,841 | 25,617 |
| 67,859 | 124 | 17,672 | 5,081 | 2,814 | 25,691 |
| 67,860 | 124 | 17,775 | 5,096 | 2,813 | 25,808 |
| 67,861 | 133 | 18,002 | 5,112 | 2,821 | 26,068 |
| 67,862 | 139 | 18,196 | 5,167 | 2,837 | 26,339 |
| 67,863 | 141 | 18,198 | 5,163 | 2,854 | 26,356 |

|        |     |        |       |       |        |
|--------|-----|--------|-------|-------|--------|
| 67,864 | 141 | 17,995 | 5,109 | 2,832 | 26,077 |
| 67,865 | 144 | 18,031 | 5,145 | 2,819 | 26,139 |
| 67,866 | 143 | 18,146 | 5,184 | 2,839 | 26,312 |
| 67,867 | 137 | 18,020 | 5,145 | 2,810 | 26,112 |
| 67,868 | 137 | 18,047 | 5,172 | 2,825 | 26,181 |
| 67,869 | 140 | 18,106 | 5,215 | 2,840 | 26,301 |
| 67,870 | 137 | 18,165 | 5,239 | 2,846 | 26,387 |
| 67,871 | 133 | 18,367 | 5,297 | 2,875 | 26,672 |
| 67,872 | 137 | 18,509 | 5,347 | 2,892 | 26,885 |
| 67,873 | 136 | 18,147 | 5,251 | 2,845 | 26,379 |
| 67,874 | 139 | 18,406 | 5,317 | 2,870 | 26,732 |
| 67,875 | 137 | 18,562 | 5,366 | 2,914 | 26,979 |
| 67,876 | 135 | 18,382 | 5,315 | 2,888 | 26,720 |
| 67,877 | 138 | 18,427 | 5,292 | 2,891 | 26,748 |
| 67,878 | 136 | 18,219 | 5,237 | 2,878 | 26,470 |
| 67,879 | 136 | 18,431 | 5,343 | 2,959 | 26,869 |
| 67,880 | 132 | 18,524 | 5,414 | 2,983 | 27,053 |
| 67,881 | 130 | 18,524 | 5,408 | 2,998 | 27,060 |
| 67,882 | 137 | 18,767 | 5,469 | 3,044 | 27,417 |
| 67,883 | 134 | 18,880 | 5,460 | 3,049 | 27,523 |
| 67,884 | 126 | 18,673 | 5,410 | 3,026 | 27,235 |
| 67,885 | 127 | 18,960 | 5,477 | 3,069 | 27,633 |
| 67,886 | 126 | 19,180 | 5,548 | 3,105 | 27,959 |
| 67,887 | 121 | 19,040 | 5,507 | 3,075 | 27,743 |
| 67,888 | 124 | 19,226 | 5,561 | 3,108 | 28,019 |
| 67,889 | 124 | 19,223 | 5,578 | 3,116 | 28,041 |
| 67,890 | 128 | 19,282 | 5,576 | 3,124 | 28,110 |
| 67,891 | 133 | 19,504 | 5,666 | 3,155 | 28,458 |
| 67,892 | 140 | 19,539 | 5,696 | 3,161 | 28,536 |
| 67,893 | 143 | 19,355 | 5,639 | 3,159 | 28,296 |
| 67,894 | 143 | 19,425 | 5,673 | 3,173 | 28,414 |
| 67,895 | 141 | 19,426 | 5,675 | 3,185 | 28,427 |

|        |     |        |       |       |        |
|--------|-----|--------|-------|-------|--------|
| 67,896 | 143 | 19,631 | 5,715 | 3,224 | 28,713 |
| 67,897 | 147 | 19,621 | 5,731 | 3,209 | 28,708 |
| 67,898 | 146 | 19,607 | 5,752 | 3,200 | 28,705 |
| 67,899 | 145 | 19,453 | 5,700 | 3,162 | 28,460 |
| 67,900 | 142 | 19,476 | 5,655 | 3,131 | 28,404 |
| 67,901 | 144 | 19,633 | 5,667 | 3,138 | 28,582 |
| 67,902 | 142 | 19,519 | 5,594 | 3,139 | 28,394 |
| 67,903 | 141 | 19,306 | 5,538 | 3,106 | 28,091 |
| 67,904 | 143 | 19,486 | 5,573 | 3,130 | 28,332 |
| 67,905 | 142 | 19,721 | 5,615 | 3,160 | 28,638 |
| 67,906 | 144 | 19,918 | 5,683 | 3,189 | 28,934 |
| 67,907 | 141 | 19,867 | 5,662 | 3,169 | 28,839 |
| 67,908 | 137 | 19,642 | 5,623 | 3,127 | 28,529 |
| 67,909 | 139 | 19,618 | 5,587 | 3,108 | 28,452 |
| 67,910 | 139 | 19,634 | 5,595 | 3,106 | 28,474 |
| 67,911 | 143 | 19,409 | 5,557 | 3,079 | 28,188 |
| 67,912 | 140 | 19,151 | 5,533 | 3,075 | 27,899 |
| 67,913 | 141 | 19,926 | 5,791 | 3,204 | 29,062 |
| 67,914 | 142 | 19,764 | 5,800 | 3,167 | 28,873 |
| 67,915 | 139 | 19,861 | 5,818 | 3,187 | 29,005 |
| 67,916 | 147 | 19,937 | 5,812 | 3,197 | 29,093 |
| 67,917 | 149 | 20,008 | 5,816 | 3,198 | 29,171 |
| 67,918 | 149 | 20,170 | 5,819 | 3,220 | 29,358 |
| 67,919 | 149 | 20,172 | 5,823 | 3,234 | 29,378 |
| 67,920 | 143 | 19,949 | 5,768 | 3,237 | 29,097 |
| 67,921 | 139 | 20,138 | 5,812 | 3,283 | 29,372 |
| 67,922 | 139 | 20,074 | 5,790 | 3,284 | 29,287 |
| 67,923 | 134 | 19,803 | 5,663 | 3,245 | 28,845 |
| 67,924 | 139 | 20,121 | 5,754 | 3,277 | 29,291 |
| 67,925 | 142 | 20,120 | 5,781 | 3,302 | 29,345 |
| 67,926 | 142 | 20,240 | 5,813 | 3,317 | 29,512 |
| 67,927 | 147 | 20,173 | 5,811 | 3,317 | 29,448 |

|        |     |        |       |       |        |
|--------|-----|--------|-------|-------|--------|
| 67,928 | 147 | 20,205 | 5,841 | 3,312 | 29,505 |
| 67,929 | 152 | 20,252 | 5,808 | 3,298 | 29,510 |
| 67,930 | 162 | 20,098 | 5,755 | 3,257 | 29,272 |
| 67,931 | 163 | 20,111 | 5,753 | 3,258 | 29,285 |
| 67,932 | 163 | 20,122 | 5,778 | 3,257 | 29,320 |
| 67,933 | 157 | 20,060 | 5,780 | 3,237 | 29,234 |
| 67,934 | 158 | 19,964 | 5,773 | 3,220 | 29,115 |
| 67,935 | 158 | 20,022 | 5,785 | 3,216 | 29,181 |
| 67,936 | 155 | 20,055 | 5,792 | 3,219 | 29,221 |
| 67,937 | 153 | 20,000 | 5,791 | 3,221 | 29,165 |
| 67,938 | 156 | 20,162 | 5,867 | 3,233 | 29,418 |
| 67,939 | 154 | 20,179 | 5,877 | 3,209 | 29,419 |
| 67,940 | 150 | 20,110 | 5,860 | 3,187 | 29,307 |
| 67,941 | 154 | 20,163 | 5,856 | 3,181 | 29,354 |
| 67,942 | 153 | 20,328 | 5,881 | 3,195 | 29,557 |
| 67,943 | 144 | 20,172 | 5,797 | 3,188 | 29,301 |
| 67,944 | 148 | 20,116 | 5,797 | 3,185 | 29,246 |
| 67,945 | 149 | 20,373 | 5,831 | 3,194 | 29,547 |
| 67,946 | 149 | 20,183 | 5,792 | 3,189 | 29,313 |
| 67,947 | 149 | 20,153 | 5,799 | 3,192 | 29,293 |
| 67,948 | 146 | 20,270 | 5,799 | 3,219 | 29,434 |
| 67,949 | 142 | 20,250 | 5,801 | 3,220 | 29,413 |
| 67,950 | 143 | 20,175 | 5,794 | 3,224 | 29,336 |
| 67,951 | 145 | 20,183 | 5,824 | 3,235 | 29,387 |
| 67,952 | 142 | 19,989 | 5,807 | 3,208 | 29,146 |
| 67,953 | 148 | 20,170 | 5,876 | 3,223 | 29,417 |
| 67,954 | 145 | 20,229 | 5,909 | 3,222 | 29,505 |
| 67,955 | 146 | 20,003 | 5,895 | 3,206 | 29,250 |
| 67,956 | 155 | 20,239 | 5,930 | 3,230 | 29,554 |
| 67,957 | 154 | 19,910 | 5,833 | 3,187 | 29,084 |
| 67,958 | 154 | 19,979 | 5,849 | 3,201 | 29,183 |
| 67,959 | 156 | 20,279 | 5,928 | 3,237 | 29,600 |

|        |     |        |       |       |        |
|--------|-----|--------|-------|-------|--------|
| 67,960 | 159 | 20,375 | 5,951 | 3,262 | 29,747 |
| 67,961 | 149 | 20,390 | 5,917 | 3,237 | 29,693 |
| 67,962 | 149 | 20,415 | 5,920 | 3,244 | 29,728 |
| 67,963 | 147 | 20,334 | 5,865 | 3,218 | 29,564 |
| 67,964 | 149 | 20,793 | 5,958 | 3,257 | 30,157 |
| 67,965 | 152 | 20,763 | 5,913 | 3,250 | 30,078 |
| 67,966 | 165 | 20,933 | 5,935 | 3,260 | 30,293 |
| 67,967 | 155 | 20,843 | 5,927 | 3,254 | 30,179 |
| 67,968 | 158 | 20,897 | 5,955 | 3,259 | 30,269 |
| 67,969 | 160 | 20,477 | 5,802 | 3,122 | 29,561 |
| 67,970 | 169 | 20,757 | 5,840 | 3,157 | 29,923 |
| 67,971 | 173 | 21,014 | 5,917 | 3,175 | 30,279 |
| 67,972 | 173 | 20,999 | 5,906 | 3,172 | 30,250 |
| 67,973 | 173 | 21,132 | 5,958 | 3,212 | 30,475 |
| 67,974 | 176 | 21,084 | 5,967 | 3,230 | 30,457 |
| 67,975 | 175 | 21,263 | 5,982 | 3,251 | 30,671 |
| 67,976 | 172 | 21,393 | 5,971 | 3,241 | 30,777 |
| 67,977 | 172 | 21,054 | 5,884 | 3,180 | 30,290 |
| 67,978 | 171 | 21,174 | 5,927 | 3,184 | 30,456 |
| 67,979 | 161 | 20,981 | 5,880 | 3,212 | 30,234 |
| 67,980 | 161 | 21,018 | 5,885 | 3,204 | 30,268 |
| 67,981 | 148 | 20,780 | 5,898 | 3,211 | 30,037 |
| 67,982 | 155 | 20,820 | 5,893 | 3,214 | 30,082 |
| 67,983 | 154 | 20,738 | 5,847 | 3,195 | 29,934 |
| 67,984 | 154 | 21,083 | 5,978 | 3,288 | 30,503 |
| 67,985 | 155 | 21,183 | 5,993 | 3,286 | 30,617 |
| 67,986 | 160 | 21,026 | 5,953 | 3,256 | 30,395 |
| 67,987 | 165 | 21,204 | 6,029 | 3,282 | 30,680 |
| 67,988 | 163 | 20,970 | 5,969 | 3,264 | 30,366 |
| 67,989 | 177 | 21,133 | 6,037 | 3,298 | 30,645 |
| 67,990 | 178 | 21,065 | 6,033 | 3,311 | 30,587 |
| 67,991 | 178 | 20,969 | 5,997 | 3,309 | 30,453 |

|        |     |        |       |       |        |
|--------|-----|--------|-------|-------|--------|
| 67,992 | 174 | 20,726 | 5,932 | 3,290 | 30,122 |
| 67,993 | 174 | 20,715 | 5,946 | 3,301 | 30,136 |
| 67,994 | 175 | 20,772 | 5,974 | 3,293 | 30,214 |
| 67,995 | 167 | 20,665 | 5,925 | 3,271 | 30,028 |
| 67,996 | 166 | 20,660 | 5,900 | 3,271 | 29,997 |
| 67,997 | 178 | 20,827 | 5,943 | 3,296 | 30,244 |
| 67,998 | 180 | 20,955 | 5,976 | 3,299 | 30,410 |
| 67,999 | 187 | 20,418 | 5,766 | 3,176 | 29,547 |
| 68,000 | 189 | 20,591 | 5,812 | 3,215 | 29,807 |
| 68,001 | 187 | 20,823 | 5,851 | 3,241 | 30,102 |
| 68,002 | 191 | 20,603 | 5,750 | 3,184 | 29,728 |
| 68,003 | 196 | 20,853 | 5,795 | 3,225 | 30,069 |
| 68,004 | 190 | 20,927 | 5,787 | 3,229 | 30,133 |
| 68,005 | 190 | 20,651 | 5,680 | 3,219 | 29,740 |
| 68,006 | 189 | 20,686 | 5,682 | 3,221 | 29,778 |
| 68,007 | 183 | 20,608 | 5,690 | 3,239 | 29,720 |
| 68,008 | 181 | 20,610 | 5,684 | 3,246 | 29,721 |
| 68,009 | 179 | 20,550 | 5,667 | 3,237 | 29,633 |
| 68,010 | 184 | 20,788 | 5,730 | 3,261 | 29,963 |
| 68,011 | 176 | 20,715 | 5,719 | 3,251 | 29,861 |
| 68,012 | 174 | 20,490 | 5,653 | 3,224 | 29,541 |
| 68,013 | 175 | 20,722 | 5,711 | 3,250 | 29,858 |
| 68,014 | 172 | 20,496 | 5,655 | 3,207 | 29,530 |
| 68,015 | 177 | 20,618 | 5,664 | 3,231 | 29,690 |
| 68,016 | 160 | 20,396 | 5,588 | 3,203 | 29,347 |
| 68,017 | 158 | 19,654 | 5,432 | 3,125 | 28,369 |
| 68,018 | 159 | 19,908 | 5,500 | 3,146 | 28,713 |
| 68,019 | 161 | 20,168 | 5,550 | 3,175 | 29,054 |
| 68,020 | 161 | 20,110 | 5,544 | 3,176 | 28,991 |
| 68,021 | 153 | 20,389 | 5,649 | 3,228 | 29,419 |
| 68,022 | 153 | 20,280 | 5,689 | 3,226 | 29,348 |
| 68,023 | 151 | 20,151 | 5,629 | 3,182 | 29,113 |

|        |     |        |       |       |        |
|--------|-----|--------|-------|-------|--------|
| 68,024 | 149 | 20,328 | 5,669 | 3,204 | 29,350 |
| 68,025 | 145 | 20,542 | 5,741 | 3,259 | 29,687 |
| 68,026 | 149 | 20,377 | 5,758 | 3,248 | 29,532 |
| 68,027 | 148 | 20,085 | 5,722 | 3,218 | 29,173 |
| 68,028 | 144 | 19,965 | 5,686 | 3,212 | 29,007 |
| 68,029 | 143 | 19,883 | 5,658 | 3,206 | 28,890 |
| 68,030 | 144 | 20,072 | 5,683 | 3,195 | 29,094 |
| 68,031 | 146 | 20,191 | 5,683 | 3,187 | 29,207 |
| 68,032 | 146 | 20,138 | 5,635 | 3,186 | 29,105 |
| 68,033 | 143 | 20,102 | 5,631 | 3,150 | 29,026 |
| 68,034 | 142 | 20,117 | 5,573 | 3,119 | 28,951 |
| 68,035 | 145 | 20,342 | 5,623 | 3,144 | 29,254 |
| 68,036 | 143 | 20,352 | 5,627 | 3,131 | 29,253 |
| 68,037 | 137 | 20,332 | 5,619 | 3,130 | 29,218 |
| 68,038 | 129 | 19,826 | 5,439 | 3,030 | 28,424 |
| 68,039 | 132 | 20,131 | 5,492 | 3,065 | 28,820 |
| 68,040 | 126 | 20,497 | 5,550 | 3,089 | 29,262 |
| 68,041 | 132 | 20,583 | 5,532 | 3,093 | 29,340 |
| 68,042 | 132 | 20,618 | 5,541 | 3,098 | 29,389 |
| 68,043 | 131 | 20,432 | 5,528 | 3,100 | 29,191 |
| 68,044 | 132 | 20,426 | 5,537 | 3,105 | 29,200 |
| 68,045 | 134 | 20,523 | 5,558 | 3,132 | 29,347 |
| 68,046 | 133 | 20,296 | 5,534 | 3,102 | 29,065 |
| 68,047 | 132 | 20,390 | 5,599 | 3,129 | 29,250 |
| 68,048 | 121 | 20,180 | 5,554 | 3,103 | 28,958 |
| 68,049 | 117 | 19,957 | 5,487 | 3,079 | 28,640 |
| 68,050 | 112 | 20,287 | 5,583 | 3,124 | 29,106 |
| 68,051 | 111 | 20,071 | 5,526 | 3,073 | 28,781 |
| 68,052 | 111 | 20,076 | 5,516 | 3,091 | 28,794 |
| 68,053 | 107 | 20,104 | 5,539 | 3,123 | 28,873 |
| 68,054 | 107 | 19,902 | 5,488 | 3,095 | 28,592 |
| 68,055 | 107 | 19,728 | 5,483 | 3,081 | 28,399 |

|        |     |        |       |       |        |
|--------|-----|--------|-------|-------|--------|
| 68,056 | 103 | 20,074 | 5,668 | 3,155 | 29,000 |
| 68,057 | 121 | 20,353 | 5,772 | 3,197 | 29,443 |
| 68,058 | 124 | 20,546 | 5,831 | 3,217 | 29,718 |
| 68,059 | 130 | 20,133 | 5,760 | 3,162 | 29,185 |
| 68,060 | 132 | 20,263 | 5,770 | 3,188 | 29,353 |
| 68,061 | 129 | 20,227 | 5,760 | 3,193 | 29,309 |
| 68,062 | 129 | 19,945 | 5,712 | 3,166 | 28,952 |
| 68,063 | 137 | 20,360 | 5,820 | 3,223 | 29,540 |
| 68,064 | 136 | 20,089 | 5,744 | 3,204 | 29,173 |
| 68,065 | 139 | 20,193 | 5,813 | 3,252 | 29,397 |
| 68,066 | 133 | 20,177 | 5,826 | 3,252 | 29,388 |
| 68,067 | 131 | 19,672 | 5,695 | 3,184 | 28,682 |
| 68,068 | 132 | 19,796 | 5,715 | 3,198 | 28,841 |
| 68,069 | 132 | 20,002 | 5,743 | 3,236 | 29,113 |
| 68,070 | 126 | 19,918 | 5,722 | 3,231 | 28,997 |
| 68,071 | 130 | 19,881 | 5,663 | 3,191 | 28,865 |
| 68,072 | 134 | 20,147 | 5,714 | 3,230 | 29,225 |
| 68,073 | 127 | 19,942 | 5,563 | 3,177 | 28,809 |
| 68,074 | 131 | 20,330 | 5,633 | 3,213 | 29,307 |
| 68,075 | 136 | 20,293 | 5,548 | 3,155 | 29,132 |
| 68,076 | 139 | 20,478 | 5,605 | 3,186 | 29,408 |
| 68,077 | 136 | 20,539 | 5,624 | 3,192 | 29,491 |
| 68,078 | 136 | 20,706 | 5,642 | 3,222 | 29,706 |
| 68,079 | 139 | 20,691 | 5,669 | 3,209 | 29,708 |
| 68,080 | 141 | 20,693 | 5,658 | 3,206 | 29,698 |
| 68,081 | 141 | 20,788 | 5,700 | 3,218 | 29,847 |
| 68,082 | 139 | 20,529 | 5,612 | 3,192 | 29,472 |
| 68,083 | 145 | 20,872 | 5,659 | 3,204 | 29,880 |
| 68,084 | 147 | 20,628 | 5,606 | 3,184 | 29,565 |
| 68,085 | 147 | 20,674 | 5,607 | 3,204 | 29,632 |
| 68,086 | 149 | 20,718 | 5,647 | 3,209 | 29,723 |
| 68,087 | 157 | 20,629 | 5,659 | 3,233 | 29,678 |



|        |     |        |       |       |        |
|--------|-----|--------|-------|-------|--------|
| 68,088 | 160 | 20,840 | 5,728 | 3,267 | 29,995 |
| 68,089 | 155 | 20,481 | 5,643 | 3,224 | 29,503 |
| 68,090 | 157 | 20,725 | 5,704 | 3,265 | 29,851 |
| 68,091 | 154 | 20,762 | 5,713 | 3,277 | 29,906 |
| 68,092 | 151 | 20,613 | 5,676 | 3,249 | 29,689 |
| 68,093 | 156 | 20,721 | 5,664 | 3,255 | 29,796 |
| 68,094 | 155 | 20,908 | 5,675 | 3,257 | 29,995 |
| 68,095 | 157 | 21,267 | 5,772 | 3,300 | 30,496 |
| 68,096 | 155 | 21,222 | 5,730 | 3,288 | 30,395 |
| 68,097 | 155 | 21,303 | 5,742 | 3,292 | 30,492 |
| 68,098 | 157 | 21,482 | 5,760 | 3,316 | 30,715 |
| 68,099 | 158 | 21,783 | 5,822 | 3,373 | 31,136 |
| 68,100 | 161 | 21,522 | 5,754 | 3,329 | 30,766 |
| 68,101 | 158 | 21,311 | 5,730 | 3,312 | 30,511 |
| 68,102 | 164 | 21,849 | 5,906 | 3,428 | 31,347 |
| 68,103 | 168 | 21,869 | 5,922 | 3,388 | 31,347 |
| 68,104 | 162 | 22,106 | 5,939 | 3,428 | 31,635 |
| 68,105 | 168 | 22,140 | 5,885 | 3,398 | 31,591 |
| 68,106 | 169 | 22,453 | 5,962 | 3,434 | 32,018 |
| 68,107 | 161 | 22,729 | 6,029 | 3,480 | 32,399 |
| 68,108 | 152 | 22,823 | 6,065 | 3,477 | 32,517 |
| 68,109 | 154 | 22,679 | 6,059 | 3,478 | 32,370 |
| 68,110 | 148 | 22,378 | 5,979 | 3,432 | 31,937 |
| 68,111 | 146 | 22,441 | 6,003 | 3,436 | 32,026 |
| 68,112 | 140 | 22,607 | 6,020 | 3,443 | 32,210 |
| 68,113 | 138 | 22,930 | 6,063 | 3,470 | 32,601 |
| 68,114 | 146 | 22,945 | 6,044 | 3,468 | 32,603 |
| 68,115 | 145 | 22,870 | 6,007 | 3,428 | 32,450 |
| 68,116 | 153 | 22,977 | 6,047 | 3,429 | 32,606 |
| 68,117 | 154 | 22,969 | 6,055 | 3,423 | 32,601 |
| 68,118 | 153 | 23,236 | 6,136 | 3,480 | 33,005 |
| 68,119 | 153 | 23,131 | 6,138 | 3,481 | 32,903 |

|        |     |        |       |       |        |
|--------|-----|--------|-------|-------|--------|
| 68,120 | 157 | 23,164 | 6,189 | 3,509 | 33,019 |
| 68,121 | 164 | 23,411 | 6,280 | 3,557 | 33,412 |
| 68,122 | 167 | 23,415 | 6,319 | 3,585 | 33,486 |
| 68,123 | 166 | 23,222 | 6,277 | 3,557 | 33,222 |
| 68,124 | 166 | 23,048 | 6,270 | 3,548 | 33,032 |
| 68,125 | 171 | 23,392 | 6,384 | 3,595 | 33,542 |
| 68,126 | 168 | 23,260 | 6,378 | 3,596 | 33,402 |
| 68,127 | 165 | 23,369 | 6,379 | 3,594 | 33,507 |
| 68,128 | 162 | 22,626 | 6,176 | 3,451 | 32,415 |
| 68,129 | 162 | 22,872 | 6,209 | 3,477 | 32,720 |
| 68,130 | 164 | 23,310 | 6,286 | 3,537 | 33,297 |
| 68,131 | 164 | 23,378 | 6,293 | 3,551 | 33,386 |
| 68,132 | 168 | 23,827 | 6,403 | 3,645 | 34,043 |
| 68,133 | 163 | 23,620 | 6,383 | 3,631 | 33,797 |
| 68,134 | 166 | 23,726 | 6,394 | 3,636 | 33,922 |
| 68,135 | 166 | 23,626 | 6,396 | 3,636 | 33,824 |
| 68,136 | 164 | 23,451 | 6,315 | 3,597 | 33,527 |
| 68,137 | 163 | 23,383 | 6,305 | 3,574 | 33,425 |
| 68,138 | 162 | 23,511 | 6,310 | 3,593 | 33,576 |
| 68,139 | 161 | 23,313 | 6,234 | 3,546 | 33,254 |
| 68,140 | 159 | 23,201 | 6,205 | 3,537 | 33,102 |
| 68,141 | 159 | 23,182 | 6,196 | 3,526 | 33,063 |
| 68,142 | 156 | 23,004 | 6,140 | 3,518 | 32,818 |
| 68,143 | 157 | 22,868 | 6,137 | 3,504 | 32,666 |
| 68,144 | 152 | 22,859 | 6,162 | 3,509 | 32,682 |
| 68,145 | 151 | 22,819 | 6,144 | 3,500 | 32,614 |
| 68,146 | 157 | 22,928 | 6,174 | 3,525 | 32,784 |
| 68,147 | 157 | 22,871 | 6,192 | 3,517 | 32,737 |
| 68,148 | 161 | 22,848 | 6,174 | 3,516 | 32,699 |
| 68,149 | 160 | 22,852 | 6,164 | 3,499 | 32,675 |
| 68,150 | 154 | 22,538 | 6,088 | 3,459 | 32,239 |
| 68,151 | 154 | 22,508 | 6,092 | 3,458 | 32,212 |

|        |     |        |       |       |        |
|--------|-----|--------|-------|-------|--------|
| 68,152 | 154 | 22,437 | 6,035 | 3,421 | 32,047 |
| 68,153 | 153 | 22,372 | 6,023 | 3,423 | 31,971 |
| 68,154 | 155 | 22,421 | 6,022 | 3,456 | 32,054 |
| 68,155 | 162 | 22,265 | 6,004 | 3,435 | 31,866 |
| 68,156 | 166 | 22,243 | 6,005 | 3,436 | 31,850 |
| 68,157 | 165 | 21,883 | 5,972 | 3,424 | 31,444 |
| 68,158 | 166 | 21,744 | 5,951 | 3,403 | 31,264 |
| 68,159 | 174 | 21,863 | 5,936 | 3,413 | 31,386 |
| 68,160 | 169 | 21,696 | 5,845 | 3,364 | 31,074 |
| 68,161 | 171 | 21,634 | 5,870 | 3,371 | 31,046 |
| 68,162 | 170 | 21,634 | 5,880 | 3,375 | 31,059 |
| 68,163 | 179 | 21,518 | 5,829 | 3,354 | 30,880 |
| 68,164 | 179 | 21,466 | 5,837 | 3,375 | 30,857 |
| 68,165 | 169 | 21,326 | 5,849 | 3,388 | 30,732 |
| 68,166 | 167 | 21,233 | 5,822 | 3,398 | 30,620 |
| 68,167 | 159 | 21,313 | 5,788 | 3,410 | 30,670 |
| 68,168 | 160 | 21,279 | 5,741 | 3,382 | 30,562 |
| 68,169 | 159 | 21,357 | 5,783 | 3,401 | 30,700 |
| 68,170 | 155 | 21,717 | 5,845 | 3,431 | 31,148 |
| 68,171 | 148 | 21,531 | 5,713 | 3,374 | 30,766 |
| 68,172 | 149 | 21,959 | 5,773 | 3,428 | 31,309 |
| 68,173 | 146 | 22,331 | 5,852 | 3,469 | 31,798 |
| 68,174 | 142 | 22,429 | 5,850 | 3,471 | 31,892 |
| 68,175 | 140 | 22,211 | 5,785 | 3,439 | 31,575 |
| 68,176 | 140 | 22,190 | 5,768 | 3,439 | 31,537 |
| 68,177 | 142 | 22,567 | 5,862 | 3,510 | 32,081 |
| 68,178 | 146 | 22,518 | 5,862 | 3,512 | 32,038 |
| 68,179 | 141 | 22,185 | 5,798 | 3,480 | 31,604 |
| 68,180 | 140 | 22,411 | 5,926 | 3,575 | 32,052 |
| 68,181 | 139 | 22,496 | 6,019 | 3,649 | 32,303 |
| 68,182 | 138 | 22,411 | 6,030 | 3,637 | 32,216 |
| 68,183 | 135 | 22,517 | 6,040 | 3,650 | 32,342 |

|        |     |        |       |       |        |
|--------|-----|--------|-------|-------|--------|
| 68,184 | 134 | 22,304 | 5,991 | 3,605 | 32,034 |
| 68,185 | 133 | 22,610 | 6,062 | 3,667 | 32,472 |
| 68,186 | 129 | 22,411 | 5,971 | 3,640 | 32,151 |
| 68,187 | 131 | 22,125 | 5,931 | 3,602 | 31,789 |
| 68,188 | 130 | 21,966 | 5,906 | 3,592 | 31,594 |
| 68,189 | 128 | 22,445 | 6,055 | 3,675 | 32,303 |
| 68,190 | 132 | 22,159 | 5,995 | 3,658 | 31,944 |
| 68,191 | 133 | 22,168 | 5,993 | 3,652 | 31,946 |
| 68,192 | 133 | 22,299 | 6,055 | 3,679 | 32,166 |
| 68,193 | 136 | 22,205 | 6,001 | 3,654 | 31,996 |
| 68,194 | 136 | 22,233 | 5,998 | 3,667 | 32,034 |
| 68,195 | 136 | 22,367 | 6,004 | 3,687 | 32,194 |
| 68,196 | 134 | 22,351 | 5,996 | 3,674 | 32,155 |
| 68,197 | 127 | 22,129 | 5,926 | 3,634 | 31,816 |
| 68,198 | 136 | 22,312 | 5,954 | 3,663 | 32,065 |
| 68,199 | 131 | 22,019 | 5,892 | 3,618 | 31,660 |
| 68,200 | 133 | 22,120 | 5,931 | 3,631 | 31,815 |
| 68,201 | 138 | 21,913 | 5,899 | 3,575 | 31,525 |
| 68,202 | 138 | 21,892 | 5,901 | 3,588 | 31,519 |
| 68,203 | 129 | 21,632 | 5,785 | 3,492 | 31,038 |
| 68,204 | 130 | 21,858 | 5,845 | 3,524 | 31,357 |
| 68,205 | 124 | 21,491 | 5,695 | 3,429 | 30,739 |
| 68,206 | 124 | 21,669 | 5,738 | 3,450 | 30,981 |
| 68,207 | 120 | 21,712 | 5,767 | 3,474 | 31,073 |
| 68,208 | 119 | 21,801 | 5,812 | 3,500 | 31,232 |
| 68,209 | 123 | 21,828 | 5,811 | 3,542 | 31,304 |
| 68,210 | 113 | 21,756 | 5,806 | 3,535 | 31,210 |
| 68,211 | 112 | 21,525 | 5,748 | 3,494 | 30,879 |
| 68,212 | 111 | 21,527 | 5,729 | 3,498 | 30,865 |
| 68,213 | 109 | 21,403 | 5,699 | 3,475 | 30,686 |
| 68,214 | 103 | 21,470 | 5,697 | 3,476 | 30,746 |
| 68,215 | 103 | 21,335 | 5,618 | 3,419 | 30,475 |

|        |     |        |       |       |        |
|--------|-----|--------|-------|-------|--------|
| 68,216 | 102 | 21,334 | 5,621 | 3,418 | 30,475 |
| 68,217 | 103 | 21,015 | 5,565 | 3,377 | 30,060 |
| 68,218 | 104 | 21,264 | 5,646 | 3,432 | 30,446 |
| 68,219 | 102 | 21,183 | 5,642 | 3,420 | 30,347 |
| 68,220 | 103 | 21,244 | 5,629 | 3,410 | 30,386 |
| 68,221 | 113 | 21,061 | 5,593 | 3,388 | 30,155 |
| 68,222 | 116 | 20,716 | 5,570 | 3,350 | 29,752 |
| 68,223 | 117 | 20,314 | 5,503 | 3,303 | 29,237 |
| 68,224 | 117 | 20,166 | 5,484 | 3,291 | 29,058 |
| 68,225 | 119 | 20,268 | 5,516 | 3,303 | 29,206 |
| 68,226 | 116 | 20,290 | 5,509 | 3,295 | 29,210 |
| 68,227 | 120 | 20,195 | 5,453 | 3,275 | 29,043 |
| 68,228 | 118 | 20,238 | 5,381 | 3,270 | 29,007 |
| 68,229 | 114 | 20,187 | 5,317 | 3,227 | 28,845 |
| 68,230 | 120 | 20,564 | 5,355 | 3,245 | 29,284 |
| 68,231 | 125 | 20,441 | 5,287 | 3,195 | 29,048 |
| 68,232 | 132 | 20,595 | 5,233 | 3,207 | 29,167 |
| 68,233 | 131 | 20,794 | 5,215 | 3,225 | 29,365 |
| 68,234 | 133 | 20,825 | 5,233 | 3,240 | 29,431 |
| 68,235 | 135 | 20,941 | 5,251 | 3,249 | 29,576 |
| 68,236 | 140 | 21,070 | 5,317 | 3,272 | 29,799 |
| 68,237 | 139 | 21,214 | 5,333 | 3,304 | 29,990 |
| 68,238 | 139 | 21,284 | 5,363 | 3,318 | 30,104 |
| 68,239 | 141 | 21,127 | 5,354 | 3,304 | 29,926 |
| 68,240 | 145 | 21,285 | 5,434 | 3,335 | 30,199 |
| 68,241 | 138 | 21,509 | 5,497 | 3,383 | 30,527 |
| 68,242 | 140 | 21,718 | 5,510 | 3,388 | 30,756 |
| 68,243 | 140 | 21,724 | 5,496 | 3,395 | 30,755 |
| 68,244 | 137 | 22,237 | 5,632 | 3,453 | 31,459 |
| 68,245 | 135 | 22,146 | 5,608 | 3,445 | 31,334 |
| 68,246 | 137 | 22,346 | 5,695 | 3,459 | 31,637 |
| 68,247 | 143 | 22,500 | 5,757 | 3,498 | 31,898 |

|        |     |        |       |       |        |
|--------|-----|--------|-------|-------|--------|
| 68,248 | 143 | 22,955 | 5,906 | 3,574 | 32,578 |
| 68,249 | 136 | 22,883 | 5,876 | 3,552 | 32,447 |
| 68,250 | 141 | 23,154 | 5,922 | 3,590 | 32,807 |
| 68,251 | 139 | 23,077 | 5,923 | 3,602 | 32,741 |
| 68,252 | 133 | 23,030 | 5,930 | 3,625 | 32,718 |
| 68,253 | 132 | 23,276 | 6,036 | 3,701 | 33,145 |
| 68,254 | 134 | 23,316 | 6,011 | 3,718 | 33,179 |
| 68,255 | 145 | 23,376 | 6,020 | 3,707 | 33,248 |
| 68,256 | 147 | 23,528 | 6,022 | 3,706 | 33,403 |
| 68,257 | 157 | 23,497 | 6,004 | 3,689 | 33,347 |
| 68,258 | 160 | 23,450 | 5,972 | 3,649 | 33,231 |
| 68,259 | 161 | 23,760 | 6,028 | 3,679 | 33,628 |
| 68,260 | 160 | 23,730 | 6,034 | 3,684 | 33,608 |
| 68,261 | 179 | 24,021 | 6,127 | 3,723 | 34,050 |
| 68,262 | 178 | 23,915 | 6,103 | 3,722 | 33,918 |
| 68,263 | 180 | 24,204 | 6,189 | 3,764 | 34,337 |
| 68,264 | 179 | 24,234 | 6,225 | 3,793 | 34,431 |
| 68,265 | 184 | 24,260 | 6,239 | 3,831 | 34,514 |
| 68,266 | 185 | 24,428 | 6,309 | 3,846 | 34,768 |
| 68,267 | 191 | 24,352 | 6,265 | 3,831 | 34,639 |
| 68,268 | 188 | 24,301 | 6,249 | 3,796 | 34,534 |
| 68,269 | 197 | 24,933 | 6,472 | 3,917 | 35,519 |
| 68,270 | 195 | 24,689 | 6,452 | 3,906 | 35,242 |
| 68,271 | 205 | 24,961 | 6,507 | 3,935 | 35,608 |
| 68,272 | 198 | 25,145 | 6,564 | 3,971 | 35,878 |
| 68,273 | 194 | 25,035 | 6,520 | 3,937 | 35,686 |
| 68,274 | 197 | 24,888 | 6,484 | 3,916 | 35,485 |
| 68,275 | 197 | 24,878 | 6,482 | 3,914 | 35,471 |
| 68,276 | 194 | 24,579 | 6,403 | 3,883 | 35,059 |
| 68,277 | 193 | 24,169 | 6,350 | 3,855 | 34,567 |
| 68,278 | 201 | 24,662 | 6,533 | 3,914 | 35,310 |
| 68,279 | 201 | 24,340 | 6,515 | 3,901 | 34,957 |

|        |     |        |       |       |        |
|--------|-----|--------|-------|-------|--------|
| 68,280 | 204 | 24,549 | 6,604 | 3,906 | 35,263 |
| 68,281 | 205 | 24,289 | 6,608 | 3,898 | 35,000 |
| 68,282 | 191 | 23,706 | 6,518 | 3,837 | 34,252 |
| 68,283 | 191 | 23,818 | 6,556 | 3,846 | 34,411 |
| 68,284 | 192 | 23,656 | 6,558 | 3,820 | 34,226 |
| 68,285 | 190 | 23,395 | 6,516 | 3,769 | 33,870 |
| 68,286 | 188 | 23,059 | 6,467 | 3,730 | 33,444 |
| 68,287 | 182 | 22,992 | 6,416 | 3,711 | 33,301 |
| 68,288 | 178 | 22,888 | 6,385 | 3,694 | 33,145 |
| 68,289 | 179 | 22,971 | 6,375 | 3,693 | 33,218 |
| 68,290 | 176 | 22,838 | 6,354 | 3,689 | 33,057 |
| 68,291 | 174 | 22,860 | 6,333 | 3,682 | 33,049 |
| 68,292 | 174 | 23,003 | 6,366 | 3,676 | 33,219 |
| 68,293 | 174 | 22,972 | 6,380 | 3,684 | 33,210 |
| 68,294 | 173 | 22,943 | 6,351 | 3,671 | 33,138 |
| 68,295 | 176 | 22,885 | 6,337 | 3,678 | 33,076 |
| 68,296 | 177 | 23,017 | 6,356 | 3,681 | 33,231 |
| 68,297 | 177 | 22,969 | 6,329 | 3,676 | 33,151 |
| 68,298 | 182 | 22,687 | 6,221 | 3,609 | 32,699 |
| 68,299 | 185 | 22,666 | 6,217 | 3,611 | 32,679 |
| 68,300 | 182 | 22,467 | 6,181 | 3,582 | 32,412 |
| 68,301 | 185 | 22,421 | 6,179 | 3,602 | 32,387 |
| 68,302 | 186 | 22,358 | 6,138 | 3,570 | 32,252 |
| 68,303 | 187 | 22,248 | 6,058 | 3,518 | 32,011 |
| 68,304 | 187 | 22,263 | 6,069 | 3,513 | 32,032 |
| 68,305 | 181 | 22,173 | 6,046 | 3,504 | 31,904 |
| 68,306 | 172 | 21,981 | 6,043 | 3,512 | 31,708 |
| 68,307 | 170 | 21,940 | 6,058 | 3,509 | 31,677 |
| 68,308 | 160 | 21,955 | 6,075 | 3,513 | 31,703 |
| 68,309 | 157 | 21,933 | 6,058 | 3,510 | 31,658 |
| 68,310 | 157 | 21,871 | 6,066 | 3,510 | 31,604 |
| 68,311 | 147 | 21,951 | 6,056 | 3,507 | 31,661 |

|        |     |        |       |       |        |
|--------|-----|--------|-------|-------|--------|
| 68,312 | 140 | 22,275 | 6,097 | 3,547 | 32,059 |
| 68,313 | 138 | 22,255 | 6,047 | 3,515 | 31,955 |
| 68,314 | 143 | 22,611 | 6,112 | 3,574 | 32,440 |
| 68,315 | 146 | 22,537 | 6,044 | 3,516 | 32,243 |
| 68,316 | 146 | 22,746 | 6,097 | 3,554 | 32,543 |
| 68,317 | 145 | 23,102 | 6,196 | 3,589 | 33,032 |
| 68,318 | 143 | 23,093 | 6,166 | 3,622 | 33,024 |
| 68,319 | 143 | 23,264 | 6,167 | 3,619 | 33,193 |
| 68,320 | 141 | 22,546 | 5,968 | 3,517 | 32,172 |
| 68,321 | 139 | 22,762 | 6,030 | 3,536 | 32,467 |
| 68,322 | 137 | 23,023 | 6,070 | 3,575 | 32,805 |
| 68,323 | 137 | 23,126 | 6,089 | 3,598 | 32,950 |
| 68,324 | 132 | 23,301 | 6,131 | 3,636 | 33,200 |
| 68,325 | 136 | 23,539 | 6,158 | 3,661 | 33,494 |
| 68,326 | 133 | 23,169 | 6,045 | 3,595 | 32,942 |
| 68,327 | 131 | 23,384 | 6,124 | 3,637 | 33,276 |
| 68,328 | 126 | 23,643 | 6,197 | 3,683 | 33,649 |
| 68,329 | 125 | 23,567 | 6,198 | 3,676 | 33,566 |
| 68,330 | 128 | 23,793 | 6,235 | 3,713 | 33,869 |
| 68,331 | 127 | 23,909 | 6,256 | 3,755 | 34,047 |
| 68,332 | 125 | 23,949 | 6,210 | 3,736 | 34,020 |
| 68,333 | 126 | 24,240 | 6,279 | 3,763 | 34,408 |
| 68,334 | 131 | 24,204 | 6,254 | 3,744 | 34,333 |
| 68,335 | 130 | 24,233 | 6,249 | 3,740 | 34,352 |
| 68,336 | 133 | 24,272 | 6,273 | 3,748 | 34,426 |
| 68,337 | 132 | 24,143 | 6,258 | 3,746 | 34,279 |
| 68,338 | 132 | 24,053 | 6,273 | 3,750 | 34,208 |
| 68,339 | 135 | 24,187 | 6,332 | 3,760 | 34,414 |
| 68,340 | 138 | 24,320 | 6,406 | 3,793 | 34,657 |
| 68,341 | 141 | 24,041 | 6,385 | 3,774 | 34,341 |
| 68,342 | 139 | 23,959 | 6,369 | 3,760 | 34,227 |
| 68,343 | 140 | 23,786 | 6,286 | 3,751 | 33,963 |



|        |     |        |       |       |        |
|--------|-----|--------|-------|-------|--------|
| 68,344 | 139 | 23,610 | 6,255 | 3,736 | 33,740 |
| 68,345 | 139 | 23,479 | 6,241 | 3,697 | 33,556 |
| 68,346 | 139 | 23,489 | 6,262 | 3,689 | 33,579 |
| 68,347 | 136 | 23,546 | 6,244 | 3,709 | 33,635 |
| 68,348 | 133 | 23,551 | 6,267 | 3,703 | 33,654 |
| 68,349 | 124 | 23,501 | 6,253 | 3,702 | 33,580 |
| 68,350 | 119 | 23,221 | 6,200 | 3,677 | 33,217 |
| 68,351 | 121 | 23,277 | 6,201 | 3,685 | 33,284 |
| 68,352 | 122 | 23,463 | 6,221 | 3,706 | 33,512 |
| 68,353 | 128 | 23,549 | 6,224 | 3,725 | 33,626 |
| 68,354 | 129 | 23,389 | 6,206 | 3,707 | 33,431 |
| 68,355 | 136 | 23,882 | 6,362 | 3,802 | 34,182 |
| 68,356 | 136 | 23,876 | 6,369 | 3,796 | 34,177 |
| 68,357 | 135 | 23,739 | 6,278 | 3,786 | 33,938 |
| 68,358 | 135 | 23,962 | 6,333 | 3,823 | 34,253 |
| 68,359 | 132 | 23,610 | 6,264 | 3,802 | 33,808 |
| 68,360 | 132 | 23,628 | 6,237 | 3,798 | 33,795 |
| 68,361 | 132 | 23,706 | 6,256 | 3,799 | 33,893 |
| 68,362 | 130 | 23,561 | 6,207 | 3,798 | 33,696 |
| 68,363 | 133 | 23,632 | 6,251 | 3,830 | 33,846 |
| 68,364 | 137 | 23,365 | 6,206 | 3,795 | 33,503 |
| 68,365 | 128 | 22,713 | 6,079 | 3,703 | 32,623 |
| 68,366 | 131 | 22,964 | 6,143 | 3,734 | 32,972 |
| 68,367 | 134 | 22,895 | 6,110 | 3,728 | 32,867 |
| 68,368 | 131 | 22,449 | 5,994 | 3,666 | 32,240 |
| 68,369 | 129 | 21,920 | 5,887 | 3,569 | 31,505 |
| 68,370 | 129 | 21,995 | 5,921 | 3,602 | 31,647 |
| 68,371 | 130 | 22,080 | 5,987 | 3,654 | 31,851 |
| 68,372 | 127 | 21,876 | 5,917 | 3,635 | 31,555 |
| 68,373 | 131 | 21,769 | 5,933 | 3,606 | 31,439 |
| 68,374 | 131 | 21,762 | 5,929 | 3,612 | 31,434 |
| 68,375 | 130 | 21,744 | 5,969 | 3,646 | 31,489 |

|        |     |        |       |       |        |
|--------|-----|--------|-------|-------|--------|
| 68,376 | 125 | 21,631 | 5,969 | 3,645 | 31,370 |
| 68,377 | 128 | 20,764 | 5,686 | 3,514 | 30,092 |
| 68,378 | 132 | 21,000 | 5,755 | 3,527 | 30,414 |
| 68,379 | 132 | 21,304 | 5,822 | 3,549 | 30,807 |
| 68,380 | 137 | 21,689 | 5,893 | 3,605 | 31,324 |
| 68,381 | 140 | 21,478 | 5,772 | 3,542 | 30,932 |
| 68,382 | 139 | 21,449 | 5,791 | 3,535 | 30,914 |
| 68,383 | 139 | 21,564 | 5,801 | 3,554 | 31,058 |
| 68,384 | 140 | 21,615 | 5,834 | 3,569 | 31,158 |
| 68,385 | 135 | 21,312 | 5,800 | 3,551 | 30,798 |
| 68,386 | 139 | 21,695 | 5,872 | 3,600 | 31,306 |
| 68,387 | 137 | 21,940 | 5,913 | 3,620 | 31,610 |
| 68,388 | 137 | 22,016 | 5,871 | 3,607 | 31,631 |
| 68,389 | 143 | 22,089 | 5,831 | 3,590 | 31,653 |
| 68,390 | 142 | 22,240 | 5,797 | 3,607 | 31,786 |
| 68,391 | 133 | 22,102 | 5,684 | 3,551 | 31,470 |
| 68,392 | 134 | 22,213 | 5,698 | 3,553 | 31,598 |
| 68,393 | 137 | 22,402 | 5,748 | 3,563 | 31,850 |
| 68,394 | 138 | 22,176 | 5,673 | 3,512 | 31,499 |
| 68,395 | 142 | 22,198 | 5,685 | 3,525 | 31,550 |
| 68,396 | 136 | 22,040 | 5,655 | 3,527 | 31,358 |
| 68,397 | 148 | 22,042 | 5,686 | 3,549 | 31,425 |
| 68,398 | 148 | 21,941 | 5,665 | 3,528 | 31,282 |
| 68,399 | 153 | 22,521 | 5,787 | 3,613 | 32,074 |
| 68,400 | 153 | 22,295 | 5,753 | 3,606 | 31,807 |
| 68,401 | 153 | 22,386 | 5,787 | 3,635 | 31,961 |
| 68,402 | 149 | 22,538 | 5,852 | 3,660 | 32,199 |
| 68,403 | 151 | 22,322 | 5,812 | 3,623 | 31,908 |
| 68,404 | 143 | 22,243 | 5,801 | 3,594 | 31,781 |
| 68,405 | 150 | 22,572 | 5,926 | 3,687 | 32,335 |
| 68,406 | 146 | 22,413 | 5,879 | 3,669 | 32,107 |
| 68,407 | 146 | 22,762 | 5,942 | 3,697 | 32,547 |

|        |     |        |       |       |        |
|--------|-----|--------|-------|-------|--------|
| 68,408 | 142 | 22,511 | 5,898 | 3,667 | 32,218 |
| 68,409 | 146 | 22,396 | 5,872 | 3,673 | 32,087 |
| 68,410 | 150 | 22,523 | 5,898 | 3,688 | 32,259 |
| 68,411 | 150 | 22,237 | 5,861 | 3,658 | 31,906 |
| 68,412 | 151 | 22,202 | 5,910 | 3,665 | 31,928 |
| 68,413 | 156 | 22,525 | 5,960 | 3,689 | 32,330 |
| 68,414 | 153 | 22,293 | 5,907 | 3,651 | 32,004 |
| 68,415 | 149 | 22,419 | 5,929 | 3,659 | 32,156 |
| 68,416 | 147 | 22,381 | 5,934 | 3,656 | 32,118 |
| 68,417 | 153 | 22,574 | 6,020 | 3,694 | 32,441 |
| 68,418 | 155 | 22,663 | 6,028 | 3,695 | 32,541 |
| 68,419 | 149 | 22,503 | 5,951 | 3,668 | 32,271 |
| 68,420 | 149 | 22,494 | 5,935 | 3,654 | 32,232 |
| 68,421 | 147 | 22,407 | 5,896 | 3,629 | 32,079 |
| 68,422 | 152 | 22,730 | 5,958 | 3,663 | 32,503 |
| 68,423 | 157 | 22,753 | 6,024 | 3,662 | 32,596 |
| 68,424 | 152 | 22,920 | 6,017 | 3,689 | 32,778 |
| 68,425 | 152 | 23,021 | 5,976 | 3,645 | 32,794 |
| 68,426 | 156 | 23,078 | 5,964 | 3,653 | 32,851 |
| 68,427 | 156 | 23,133 | 5,986 | 3,650 | 32,925 |
| 68,428 | 149 | 22,911 | 5,949 | 3,631 | 32,640 |
| 68,429 | 150 | 23,342 | 6,083 | 3,731 | 33,306 |
| 68,430 | 150 | 23,127 | 6,040 | 3,736 | 33,053 |
| 68,431 | 150 | 23,255 | 6,113 | 3,757 | 33,275 |
| 68,432 | 146 | 23,078 | 6,115 | 3,764 | 33,103 |
| 68,433 | 143 | 23,005 | 6,050 | 3,736 | 32,934 |
| 68,434 | 144 | 23,161 | 6,024 | 3,735 | 33,064 |
| 68,435 | 146 | 23,076 | 6,009 | 3,706 | 32,937 |
| 68,436 | 151 | 23,287 | 6,041 | 3,725 | 33,204 |
| 68,437 | 151 | 23,308 | 6,071 | 3,745 | 33,275 |
| 68,438 | 162 | 22,897 | 5,973 | 3,696 | 32,728 |
| 68,439 | 162 | 22,725 | 5,958 | 3,667 | 32,512 |

|        |     |        |       |       |        |
|--------|-----|--------|-------|-------|--------|
| 68,440 | 163 | 23,092 | 6,132 | 3,729 | 33,116 |
| 68,441 | 174 | 22,850 | 6,099 | 3,690 | 32,813 |
| 68,442 | 173 | 22,714 | 6,074 | 3,665 | 32,626 |
| 68,443 | 183 | 23,261 | 6,216 | 3,777 | 33,437 |
| 68,444 | 183 | 23,459 | 6,269 | 3,807 | 33,718 |
| 68,445 | 183 | 23,767 | 6,340 | 3,832 | 34,122 |
| 68,446 | 182 | 23,575 | 6,226 | 3,795 | 33,778 |
| 68,447 | 182 | 23,471 | 6,236 | 3,793 | 33,682 |
| 68,448 | 168 | 23,471 | 6,240 | 3,810 | 33,689 |
| 68,449 | 171 | 23,752 | 6,335 | 3,880 | 34,138 |
| 68,450 | 170 | 23,766 | 6,322 | 3,883 | 34,141 |
| 68,451 | 178 | 23,637 | 6,242 | 3,841 | 33,898 |
| 68,452 | 187 | 23,667 | 6,228 | 3,811 | 33,893 |
| 68,453 | 187 | 23,843 | 6,307 | 3,854 | 34,191 |
| 68,454 | 181 | 23,809 | 6,309 | 3,860 | 34,159 |
| 68,455 | 181 | 23,430 | 6,212 | 3,786 | 33,609 |
| 68,456 | 186 | 23,753 | 6,305 | 3,824 | 34,068 |
| 68,457 | 189 | 23,751 | 6,291 | 3,816 | 34,047 |
| 68,458 | 187 | 23,633 | 6,290 | 3,813 | 33,923 |
| 68,459 | 189 | 23,770 | 6,354 | 3,837 | 34,150 |
| 68,460 | 183 | 23,645 | 6,338 | 3,830 | 33,996 |
| 68,461 | 184 | 23,714 | 6,291 | 3,795 | 33,984 |
| 68,462 | 184 | 23,929 | 6,315 | 3,815 | 34,243 |
| 68,463 | 182 | 24,107 | 6,375 | 3,866 | 34,530 |
| 68,464 | 200 | 24,065 | 6,408 | 3,879 | 34,552 |
| 68,465 | 204 | 24,004 | 6,392 | 3,854 | 34,454 |
| 68,466 | 204 | 23,948 | 6,369 | 3,853 | 34,374 |
| 68,467 | 194 | 24,013 | 6,402 | 3,848 | 34,457 |
| 68,468 | 194 | 24,119 | 6,454 | 3,887 | 34,654 |
| 68,469 | 188 | 23,918 | 6,438 | 3,871 | 34,415 |
| 68,470 | 188 | 23,573 | 6,354 | 3,821 | 33,936 |
| 68,471 | 189 | 23,662 | 6,376 | 3,830 | 34,057 |

|        |     |        |       |       |        |
|--------|-----|--------|-------|-------|--------|
| 68,472 | 189 | 23,667 | 6,367 | 3,829 | 34,052 |
| 68,473 | 185 | 23,851 | 6,433 | 3,857 | 34,326 |
| 68,474 | 179 | 23,366 | 6,294 | 3,801 | 33,640 |
| 68,475 | 183 | 23,542 | 6,361 | 3,843 | 33,929 |
| 68,476 | 189 | 23,496 | 6,395 | 3,855 | 33,935 |
| 68,477 | 190 | 23,477 | 6,404 | 3,851 | 33,922 |
| 68,478 | 192 | 23,373 | 6,384 | 3,855 | 33,804 |
| 68,479 | 194 | 23,152 | 6,315 | 3,795 | 33,456 |
| 68,480 | 196 | 23,451 | 6,380 | 3,829 | 33,856 |
| 68,481 | 197 | 23,169 | 6,305 | 3,764 | 33,435 |
| 68,482 | 198 | 23,078 | 6,267 | 3,742 | 33,285 |
| 68,483 | 197 | 23,104 | 6,291 | 3,748 | 33,340 |
| 68,484 | 193 | 23,042 | 6,288 | 3,736 | 33,259 |
| 68,485 | 194 | 23,146 | 6,335 | 3,780 | 33,455 |
| 68,486 | 195 | 22,872 | 6,289 | 3,745 | 33,101 |
| 68,487 | 190 | 22,654 | 6,232 | 3,718 | 32,794 |
| 68,488 | 186 | 22,685 | 6,250 | 3,733 | 32,854 |
| 68,489 | 176 | 22,800 | 6,297 | 3,768 | 33,041 |
| 68,490 | 167 | 22,767 | 6,260 | 3,744 | 32,938 |
| 68,491 | 165 | 22,644 | 6,212 | 3,746 | 32,767 |
| 68,492 | 146 | 22,423 | 6,184 | 3,729 | 32,482 |
| 68,493 | 154 | 22,370 | 6,178 | 3,715 | 32,417 |
| 68,494 | 158 | 22,027 | 6,090 | 3,677 | 31,952 |
| 68,495 | 159 | 21,728 | 6,011 | 3,650 | 31,548 |
| 68,496 | 163 | 21,495 | 5,993 | 3,652 | 31,303 |
| 68,497 | 158 | 21,223 | 5,953 | 3,605 | 30,939 |
| 68,498 | 161 | 21,527 | 6,062 | 3,661 | 31,411 |
| 68,499 | 162 | 21,596 | 6,033 | 3,647 | 31,438 |
| 68,500 | 160 | 21,204 | 5,937 | 3,586 | 30,887 |
| 68,501 | 161 | 21,339 | 5,992 | 3,592 | 31,084 |
| 68,502 | 152 | 21,504 | 6,034 | 3,629 | 31,319 |
| 68,503 | 148 | 21,026 | 5,859 | 3,517 | 30,550 |

|        |     |        |       |       |        |
|--------|-----|--------|-------|-------|--------|
| 68,504 | 150 | 21,195 | 5,885 | 3,537 | 30,767 |
| 68,505 | 145 | 21,428 | 5,910 | 3,564 | 31,047 |
| 68,506 | 145 | 21,488 | 5,874 | 3,554 | 31,061 |
| 68,507 | 140 | 21,347 | 5,816 | 3,536 | 30,839 |
| 68,508 | 136 | 21,125 | 5,765 | 3,505 | 30,531 |
| 68,509 | 136 | 20,934 | 5,685 | 3,462 | 30,217 |
| 68,510 | 134 | 20,825 | 5,604 | 3,434 | 29,997 |
| 68,511 | 133 | 20,593 | 5,564 | 3,387 | 29,677 |
| 68,512 | 131 | 20,525 | 5,527 | 3,373 | 29,556 |
| 68,513 | 135 | 20,259 | 5,442 | 3,338 | 29,174 |
| 68,514 | 131 | 20,059 | 5,361 | 3,280 | 28,831 |
| 68,515 | 116 | 21,051 | 5,534 | 3,429 | 30,130 |
| 68,516 | 112 | 20,956 | 5,502 | 3,420 | 29,990 |
| 68,517 | 112 | 21,121 | 5,476 | 3,466 | 30,175 |
| 68,518 | 118 | 20,877 | 5,371 | 3,423 | 29,789 |
| 68,519 | 117 | 21,356 | 5,474 | 3,474 | 30,421 |
| 68,520 | 117 | 21,421 | 5,434 | 3,466 | 30,438 |
| 68,521 | 115 | 21,930 | 5,496 | 3,551 | 31,092 |
| 68,522 | 116 | 22,171 | 5,571 | 3,612 | 31,470 |
| 68,523 | 115 | 22,112 | 5,542 | 3,601 | 31,370 |
| 68,524 | 120 | 22,696 | 5,709 | 3,705 | 32,230 |
| 68,525 | 124 | 22,874 | 5,750 | 3,721 | 32,469 |
| 68,526 | 124 | 23,014 | 5,748 | 3,729 | 32,615 |
| 68,527 | 123 | 23,032 | 5,730 | 3,733 | 32,618 |
| 68,528 | 118 | 22,752 | 5,644 | 3,697 | 32,211 |
| 68,529 | 118 | 22,814 | 5,637 | 3,688 | 32,257 |
| 68,530 | 117 | 22,803 | 5,641 | 3,702 | 32,263 |
| 68,531 | 118 | 22,980 | 5,670 | 3,729 | 32,497 |
| 68,532 | 114 | 22,958 | 5,674 | 3,735 | 32,481 |
| 68,533 | 109 | 22,827 | 5,606 | 3,693 | 32,235 |
| 68,534 | 111 | 22,831 | 5,618 | 3,678 | 32,238 |
| 68,535 | 111 | 22,809 | 5,595 | 3,678 | 32,193 |

|        |     |        |       |       |        |
|--------|-----|--------|-------|-------|--------|
| 68,536 | 110 | 22,805 | 5,585 | 3,663 | 32,163 |
| 68,537 | 117 | 22,889 | 5,578 | 3,676 | 32,260 |
| 68,538 | 117 | 22,753 | 5,527 | 3,660 | 32,057 |
| 68,539 | 117 | 23,085 | 5,593 | 3,698 | 32,493 |
| 68,540 | 127 | 23,228 | 5,574 | 3,694 | 32,623 |
| 68,541 | 128 | 23,233 | 5,545 | 3,707 | 32,613 |
| 68,542 | 136 | 23,180 | 5,511 | 3,672 | 32,499 |
| 68,543 | 136 | 23,287 | 5,477 | 3,666 | 32,566 |
| 68,544 | 133 | 23,577 | 5,537 | 3,733 | 32,980 |
| 68,545 | 131 | 23,786 | 5,506 | 3,736 | 33,159 |
| 68,546 | 130 | 23,735 | 5,463 | 3,696 | 33,024 |
| 68,547 | 132 | 23,774 | 5,432 | 3,680 | 33,018 |
| 68,548 | 132 | 24,154 | 5,469 | 3,727 | 33,482 |
| 68,549 | 130 | 23,952 | 5,415 | 3,676 | 33,173 |
| 68,550 | 130 | 23,958 | 5,402 | 3,680 | 33,170 |
| 68,551 | 128 | 23,842 | 5,386 | 3,678 | 33,034 |
| 68,552 | 127 | 23,803 | 5,356 | 3,668 | 32,954 |
| 68,553 | 127 | 23,905 | 5,419 | 3,716 | 33,167 |
| 68,554 | 122 | 23,665 | 5,367 | 3,678 | 32,832 |
| 68,555 | 122 | 23,806 | 5,423 | 3,718 | 33,069 |
| 68,556 | 123 | 23,851 | 5,448 | 3,722 | 33,144 |
| 68,557 | 121 | 23,755 | 5,413 | 3,698 | 32,987 |
| 68,558 | 125 | 23,866 | 5,434 | 3,706 | 33,131 |
| 68,559 | 130 | 23,854 | 5,433 | 3,695 | 33,112 |
| 68,560 | 130 | 23,820 | 5,437 | 3,696 | 33,083 |
| 68,561 | 133 | 23,864 | 5,453 | 3,696 | 33,146 |
| 68,562 | 136 | 24,195 | 5,521 | 3,747 | 33,599 |
| 68,563 | 137 | 24,211 | 5,558 | 3,757 | 33,663 |
| 68,564 | 135 | 24,170 | 5,597 | 3,751 | 33,653 |
| 68,565 | 136 | 24,079 | 5,590 | 3,720 | 33,525 |
| 68,566 | 136 | 23,979 | 5,610 | 3,734 | 33,459 |
| 68,567 | 143 | 23,812 | 5,562 | 3,700 | 33,217 |

|        |     |        |       |       |        |
|--------|-----|--------|-------|-------|--------|
| 68,568 | 143 | 23,452 | 5,525 | 3,629 | 32,749 |
| 68,569 | 142 | 23,375 | 5,589 | 3,662 | 32,768 |
| 68,570 | 159 | 23,461 | 5,629 | 3,700 | 32,949 |
| 68,571 | 159 | 23,319 | 5,574 | 3,669 | 32,721 |
| 68,572 | 161 | 22,560 | 5,484 | 3,578 | 31,783 |
| 68,573 | 167 | 22,840 | 5,489 | 3,573 | 32,069 |
| 68,574 | 170 | 22,916 | 5,470 | 3,551 | 32,107 |
| 68,575 | 176 | 22,996 | 5,440 | 3,534 | 32,146 |
| 68,576 | 177 | 23,066 | 5,391 | 3,491 | 32,125 |
| 68,577 | 179 | 23,104 | 5,438 | 3,485 | 32,206 |
| 68,578 | 179 | 23,131 | 5,423 | 3,468 | 32,201 |
| 68,579 | 181 | 23,319 | 5,490 | 3,514 | 32,504 |
| 68,580 | 191 | 23,436 | 5,533 | 3,522 | 32,682 |
| 68,581 | 190 | 23,375 | 5,527 | 3,532 | 32,624 |
| 68,582 | 188 | 23,466 | 5,601 | 3,563 | 32,818 |
| 68,583 | 188 | 23,469 | 5,607 | 3,573 | 32,837 |
| 68,584 | 189 | 23,553 | 5,603 | 3,576 | 32,921 |
| 68,585 | 191 | 23,647 | 5,606 | 3,582 | 33,026 |
| 68,586 | 191 | 23,688 | 5,607 | 3,571 | 33,057 |
| 68,587 | 189 | 23,930 | 5,663 | 3,611 | 33,393 |
| 68,588 | 191 | 24,171 | 5,717 | 3,646 | 33,725 |
| 68,589 | 193 | 24,167 | 5,694 | 3,631 | 33,685 |
| 68,590 | 194 | 23,974 | 5,678 | 3,614 | 33,460 |
| 68,591 | 190 | 23,932 | 5,712 | 3,620 | 33,454 |
| 68,592 | 192 | 23,773 | 5,673 | 3,579 | 33,217 |
| 68,593 | 181 | 24,409 | 5,847 | 3,660 | 34,097 |
| 68,594 | 182 | 24,127 | 5,831 | 3,620 | 33,760 |
| 68,595 | 189 | 24,410 | 5,891 | 3,642 | 34,132 |
| 68,596 | 184 | 24,143 | 5,873 | 3,610 | 33,810 |
| 68,597 | 187 | 24,073 | 5,870 | 3,618 | 33,748 |
| 68,598 | 181 | 24,067 | 5,907 | 3,636 | 33,791 |
| 68,599 | 187 | 24,162 | 5,913 | 3,645 | 33,907 |



|        |     |        |       |       |        |
|--------|-----|--------|-------|-------|--------|
| 68,600 | 187 | 24,142 | 5,932 | 3,637 | 33,898 |
| 68,601 | 192 | 24,249 | 5,938 | 3,641 | 34,020 |
| 68,602 | 192 | 24,346 | 5,918 | 3,623 | 34,079 |
| 68,603 | 199 | 24,475 | 5,929 | 3,627 | 34,230 |
| 68,604 | 209 | 24,943 | 6,007 | 3,638 | 34,797 |
| 68,605 | 215 | 24,906 | 5,976 | 3,641 | 34,738 |
| 68,606 | 214 | 25,032 | 5,960 | 3,637 | 34,843 |
| 68,607 | 214 | 25,076 | 5,984 | 3,660 | 34,934 |
| 68,608 | 215 | 24,903 | 5,948 | 3,645 | 34,711 |
| 68,609 | 216 | 24,891 | 5,969 | 3,663 | 34,739 |
| 68,610 | 213 | 24,918 | 5,972 | 3,658 | 34,761 |
| 68,611 | 212 | 25,123 | 5,974 | 3,659 | 34,968 |
| 68,612 | 216 | 25,178 | 5,976 | 3,668 | 35,038 |
| 68,613 | 215 | 25,151 | 5,989 | 3,669 | 35,024 |
| 68,614 | 219 | 25,430 | 5,991 | 3,666 | 35,306 |
| 68,615 | 220 | 25,403 | 5,999 | 3,686 | 35,308 |
| 68,616 | 221 | 25,468 | 5,979 | 3,683 | 35,351 |
| 68,617 | 216 | 25,564 | 5,947 | 3,671 | 35,398 |
| 68,618 | 219 | 25,505 | 5,875 | 3,626 | 35,225 |
| 68,619 | 222 | 25,818 | 5,893 | 3,637 | 35,570 |
| 68,620 | 215 | 25,921 | 5,897 | 3,651 | 35,684 |
| 68,621 | 215 | 26,301 | 5,948 | 3,690 | 36,154 |
| 68,622 | 216 | 25,701 | 5,888 | 3,627 | 35,432 |
| 68,623 | 223 | 25,842 | 5,919 | 3,614 | 35,598 |
| 68,624 | 223 | 25,602 | 5,881 | 3,597 | 35,303 |
| 68,625 | 217 | 25,686 | 5,884 | 3,613 | 35,400 |
| 68,626 | 218 | 25,656 | 5,909 | 3,635 | 35,418 |
| 68,627 | 208 | 25,350 | 5,845 | 3,620 | 35,023 |
| 68,628 | 209 | 25,194 | 5,778 | 3,597 | 34,778 |
| 68,629 | 207 | 25,101 | 5,732 | 3,569 | 34,609 |
| 68,630 | 205 | 25,265 | 5,746 | 3,584 | 34,800 |
| 68,631 | 192 | 25,203 | 5,711 | 3,567 | 34,673 |

|        |     |        |       |       |        |
|--------|-----|--------|-------|-------|--------|
| 68,632 | 195 | 25,135 | 5,643 | 3,507 | 34,480 |
| 68,633 | 200 | 25,024 | 5,568 | 3,491 | 34,283 |
| 68,634 | 201 | 25,016 | 5,573 | 3,499 | 34,289 |
| 68,635 | 199 | 24,994 | 5,600 | 3,482 | 34,275 |
| 68,636 | 201 | 24,777 | 5,577 | 3,468 | 34,023 |
| 68,637 | 203 | 24,598 | 5,530 | 3,446 | 33,777 |
| 68,638 | 204 | 24,772 | 5,553 | 3,451 | 33,980 |
| 68,639 | 204 | 24,567 | 5,530 | 3,416 | 33,717 |
| 68,640 | 206 | 24,855 | 5,524 | 3,437 | 34,022 |
| 68,641 | 219 | 24,971 | 5,541 | 3,464 | 34,195 |
| 68,642 | 214 | 24,518 | 5,390 | 3,399 | 33,521 |
| 68,643 | 217 | 24,414 | 5,352 | 3,386 | 33,369 |
| 68,644 | 218 | 24,394 | 5,363 | 3,405 | 33,380 |
| 68,645 | 205 | 24,233 | 5,288 | 3,388 | 33,114 |
| 68,646 | 207 | 24,210 | 5,274 | 3,372 | 33,063 |
| 68,647 | 202 | 23,922 | 5,210 | 3,339 | 32,673 |
| 68,648 | 199 | 23,882 | 5,215 | 3,319 | 32,615 |
| 68,649 | 199 | 23,779 | 5,208 | 3,304 | 32,490 |
| 68,650 | 197 | 23,372 | 5,134 | 3,267 | 31,970 |
| 68,651 | 197 | 23,293 | 5,136 | 3,267 | 31,893 |
| 68,652 | 194 | 23,115 | 5,114 | 3,254 | 31,677 |
| 68,653 | 195 | 23,042 | 5,130 | 3,269 | 31,636 |
| 68,654 | 190 | 22,892 | 5,090 | 3,249 | 31,421 |
| 68,655 | 186 | 22,774 | 5,072 | 3,255 | 31,287 |
| 68,656 | 185 | 22,728 | 5,078 | 3,270 | 31,261 |
| 68,657 | 187 | 22,430 | 5,034 | 3,219 | 30,870 |
| 68,658 | 191 | 22,507 | 5,025 | 3,202 | 30,925 |
| 68,659 | 191 | 22,607 | 5,042 | 3,218 | 31,058 |
| 68,660 | 185 | 22,509 | 4,965 | 3,202 | 30,861 |
| 68,661 | 187 | 22,487 | 4,974 | 3,191 | 30,839 |
| 68,662 | 185 | 22,447 | 4,983 | 3,206 | 30,821 |
| 68,663 | 180 | 22,367 | 4,912 | 3,197 | 30,656 |

|        |     |        |       |       |        |
|--------|-----|--------|-------|-------|--------|
| 68,664 | 183 | 22,524 | 4,968 | 3,249 | 30,924 |
| 68,665 | 183 | 22,370 | 4,920 | 3,203 | 30,676 |
| 68,666 | 181 | 22,794 | 4,984 | 3,258 | 31,217 |
| 68,667 | 182 | 22,552 | 4,961 | 3,245 | 30,940 |
| 68,668 | 186 | 22,514 | 4,984 | 3,248 | 30,932 |
| 68,669 | 179 | 22,210 | 4,955 | 3,225 | 30,569 |
| 68,670 | 175 | 22,444 | 4,979 | 3,260 | 30,858 |
| 68,671 | 180 | 22,525 | 5,001 | 3,274 | 30,980 |
| 68,672 | 174 | 22,133 | 4,953 | 3,219 | 30,479 |
| 68,673 | 171 | 21,853 | 4,905 | 3,191 | 30,120 |
| 68,674 | 163 | 21,771 | 4,923 | 3,252 | 30,109 |
| 68,675 | 158 | 21,438 | 4,902 | 3,220 | 29,718 |
| 68,676 | 151 | 21,498 | 4,927 | 3,245 | 29,821 |
| 68,677 | 155 | 21,414 | 4,922 | 3,237 | 29,728 |
| 68,678 | 154 | 21,313 | 4,956 | 3,237 | 29,660 |
| 68,679 | 151 | 21,002 | 4,935 | 3,206 | 29,294 |
| 68,680 | 164 | 20,993 | 4,975 | 3,226 | 29,358 |
| 68,681 | 168 | 21,037 | 5,001 | 3,229 | 29,435 |
| 68,682 | 181 | 20,732 | 4,973 | 3,210 | 29,096 |
| 68,683 | 179 | 20,633 | 5,017 | 3,212 | 29,041 |
| 68,684 | 173 | 20,499 | 5,017 | 3,209 | 28,898 |
| 68,685 | 173 | 20,508 | 5,060 | 3,218 | 28,959 |
| 68,686 | 173 | 20,713 | 5,088 | 3,282 | 29,256 |
| 68,687 | 169 | 20,649 | 5,077 | 3,299 | 29,194 |
| 68,688 | 168 | 20,539 | 5,079 | 3,299 | 29,085 |
| 68,689 | 164 | 20,546 | 5,131 | 3,330 | 29,171 |
| 68,690 | 155 | 20,162 | 5,061 | 3,298 | 28,676 |
| 68,691 | 165 | 20,596 | 5,162 | 3,360 | 29,283 |
| 68,692 | 158 | 20,697 | 5,175 | 3,384 | 29,414 |
| 68,693 | 163 | 20,699 | 5,215 | 3,404 | 29,481 |
| 68,694 | 162 | 20,733 | 5,279 | 3,431 | 29,605 |
| 68,695 | 165 | 20,724 | 5,256 | 3,383 | 29,528 |

|        |     |        |       |       |        |
|--------|-----|--------|-------|-------|--------|
| 68,696 | 166 | 20,753 | 5,281 | 3,392 | 29,592 |
| 68,697 | 171 | 20,860 | 5,323 | 3,398 | 29,752 |
| 68,698 | 172 | 20,946 | 5,333 | 3,406 | 29,857 |
| 68,699 | 174 | 21,424 | 5,429 | 3,492 | 30,519 |
| 68,700 | 180 | 21,649 | 5,478 | 3,529 | 30,836 |
| 68,701 | 175 | 21,493 | 5,449 | 3,499 | 30,616 |
| 68,702 | 176 | 21,868 | 5,532 | 3,561 | 31,137 |
| 68,703 | 176 | 21,714 | 5,497 | 3,540 | 30,927 |
| 68,704 | 175 | 21,683 | 5,495 | 3,544 | 30,897 |
| 68,705 | 175 | 21,793 | 5,513 | 3,554 | 31,035 |
| 68,706 | 168 | 22,055 | 5,562 | 3,552 | 31,337 |
| 68,707 | 162 | 22,008 | 5,560 | 3,515 | 31,245 |
| 68,708 | 159 | 21,745 | 5,514 | 3,499 | 30,917 |
| 68,709 | 158 | 22,119 | 5,669 | 3,567 | 31,513 |
| 68,710 | 161 | 22,040 | 5,687 | 3,573 | 31,461 |
| 68,711 | 158 | 21,832 | 5,700 | 3,557 | 31,247 |
| 68,712 | 161 | 21,875 | 5,708 | 3,562 | 31,306 |
| 68,713 | 161 | 21,672 | 5,690 | 3,546 | 31,069 |
| 68,714 | 160 | 21,499 | 5,705 | 3,520 | 30,884 |
| 68,715 | 158 | 21,297 | 5,655 | 3,482 | 30,592 |
| 68,716 | 165 | 21,243 | 5,745 | 3,512 | 30,665 |
| 68,717 | 173 | 21,326 | 5,820 | 3,551 | 30,870 |
| 68,718 | 183 | 21,025 | 5,804 | 3,555 | 30,567 |
| 68,719 | 182 | 20,792 | 5,753 | 3,524 | 30,251 |
| 68,720 | 184 | 20,838 | 5,784 | 3,524 | 30,330 |
| 68,721 | 183 | 20,943 | 5,764 | 3,539 | 30,429 |
| 68,722 | 181 | 21,017 | 5,777 | 3,543 | 30,518 |
| 68,723 | 182 | 21,135 | 5,792 | 3,538 | 30,647 |
| 68,724 | 180 | 21,292 | 5,786 | 3,520 | 30,778 |
| 68,725 | 180 | 21,422 | 5,801 | 3,533 | 30,936 |
| 68,726 | 185 | 21,356 | 5,713 | 3,492 | 30,746 |
| 68,727 | 186 | 21,667 | 5,787 | 3,529 | 31,169 |

|        |     |        |       |       |        |
|--------|-----|--------|-------|-------|--------|
| 68,728 | 182 | 21,859 | 5,784 | 3,531 | 31,356 |
| 68,729 | 183 | 21,903 | 5,846 | 3,545 | 31,477 |
| 68,730 | 176 | 21,990 | 5,889 | 3,587 | 31,642 |
| 68,731 | 174 | 22,012 | 5,905 | 3,581 | 31,672 |
| 68,732 | 166 | 22,288 | 5,952 | 3,597 | 32,003 |
| 68,733 | 173 | 22,149 | 5,909 | 3,589 | 31,820 |
| 68,734 | 172 | 22,114 | 5,889 | 3,585 | 31,760 |
| 68,735 | 176 | 22,768 | 5,983 | 3,626 | 32,553 |
| 68,736 | 175 | 22,738 | 5,974 | 3,626 | 32,513 |
| 68,737 | 182 | 22,625 | 5,951 | 3,584 | 32,342 |
| 68,738 | 182 | 22,643 | 5,978 | 3,593 | 32,396 |
| 68,739 | 182 | 22,524 | 5,972 | 3,569 | 32,247 |
| 68,740 | 182 | 22,419 | 5,973 | 3,563 | 32,137 |
| 68,741 | 186 | 22,717 | 6,023 | 3,577 | 32,503 |
| 68,742 | 195 | 22,513 | 5,968 | 3,553 | 32,229 |
| 68,743 | 191 | 22,379 | 5,945 | 3,527 | 32,042 |
| 68,744 | 186 | 22,657 | 5,986 | 3,550 | 32,379 |
| 68,745 | 187 | 22,687 | 5,996 | 3,552 | 32,422 |
| 68,746 | 191 | 22,668 | 5,980 | 3,563 | 32,402 |
| 68,747 | 190 | 22,653 | 5,973 | 3,572 | 32,388 |
| 68,748 | 191 | 22,903 | 6,027 | 3,610 | 32,731 |
| 68,749 | 191 | 22,914 | 6,057 | 3,622 | 32,784 |
| 68,750 | 205 | 22,988 | 6,124 | 3,637 | 32,954 |
| 68,751 | 199 | 23,112 | 6,138 | 3,659 | 33,108 |
| 68,752 | 200 | 23,322 | 6,173 | 3,675 | 33,370 |
| 68,753 | 202 | 23,167 | 6,161 | 3,674 | 33,204 |
| 68,754 | 203 | 23,139 | 6,154 | 3,666 | 33,162 |
| 68,755 | 211 | 23,666 | 6,313 | 3,759 | 33,949 |
| 68,756 | 223 | 23,741 | 6,382 | 3,779 | 34,125 |
| 68,757 | 226 | 23,809 | 6,411 | 3,811 | 34,257 |
| 68,758 | 228 | 23,501 | 6,284 | 3,748 | 33,761 |
| 68,759 | 228 | 23,416 | 6,273 | 3,751 | 33,668 |

|        |     |        |       |       |        |
|--------|-----|--------|-------|-------|--------|
| 68,760 | 225 | 23,456 | 6,294 | 3,777 | 33,752 |
| 68,761 | 227 | 23,454 | 6,269 | 3,740 | 33,690 |
| 68,762 | 239 | 23,606 | 6,293 | 3,734 | 33,872 |
| 68,763 | 248 | 23,758 | 6,276 | 3,735 | 34,017 |
| 68,764 | 253 | 23,888 | 6,291 | 3,739 | 34,171 |
| 68,765 | 253 | 23,887 | 6,294 | 3,741 | 34,175 |
| 68,766 | 240 | 23,784 | 6,276 | 3,725 | 34,025 |
| 68,767 | 245 | 23,966 | 6,296 | 3,733 | 34,240 |
| 68,768 | 239 | 24,088 | 6,284 | 3,708 | 34,319 |
| 68,769 | 227 | 24,166 | 6,252 | 3,670 | 34,315 |
| 68,770 | 223 | 23,854 | 6,173 | 3,618 | 33,868 |
| 68,771 | 221 | 23,594 | 6,151 | 3,608 | 33,574 |
| 68,772 | 240 | 23,669 | 6,195 | 3,626 | 33,730 |
| 68,773 | 239 | 23,403 | 6,146 | 3,613 | 33,401 |
| 68,774 | 247 | 23,365 | 6,126 | 3,587 | 33,325 |
| 68,775 | 249 | 23,199 | 6,040 | 3,538 | 33,026 |
| 68,776 | 249 | 23,410 | 6,079 | 3,558 | 33,296 |
| 68,777 | 242 | 23,648 | 6,134 | 3,594 | 33,618 |
| 68,778 | 243 | 23,641 | 6,148 | 3,598 | 33,630 |
| 68,779 | 240 | 23,308 | 6,077 | 3,561 | 33,186 |
| 68,780 | 239 | 23,379 | 6,075 | 3,575 | 33,268 |
| 68,781 | 234 | 23,355 | 6,099 | 3,560 | 33,248 |
| 68,782 | 229 | 23,155 | 6,041 | 3,571 | 32,996 |
| 68,783 | 230 | 23,214 | 6,091 | 3,609 | 33,144 |
| 68,784 | 223 | 23,233 | 6,071 | 3,597 | 33,124 |
| 68,785 | 231 | 23,124 | 6,085 | 3,588 | 33,028 |
| 68,786 | 233 | 22,908 | 6,082 | 3,583 | 32,806 |
| 68,787 | 228 | 22,654 | 6,048 | 3,558 | 32,488 |
| 68,788 | 233 | 22,770 | 6,065 | 3,564 | 32,632 |
| 68,789 | 232 | 22,649 | 6,009 | 3,549 | 32,439 |
| 68,790 | 232 | 22,633 | 5,997 | 3,543 | 32,405 |
| 68,791 | 228 | 22,708 | 6,010 | 3,532 | 32,478 |

|        |     |        |       |       |        |
|--------|-----|--------|-------|-------|--------|
| 68,792 | 236 | 22,857 | 6,035 | 3,569 | 32,697 |
| 68,793 | 216 | 22,452 | 5,945 | 3,508 | 32,121 |
| 68,794 | 221 | 22,248 | 5,944 | 3,472 | 31,885 |
| 68,795 | 221 | 22,263 | 5,939 | 3,480 | 31,903 |
| 68,796 | 209 | 22,090 | 5,923 | 3,454 | 31,676 |
| 68,797 | 208 | 22,177 | 6,011 | 3,481 | 31,877 |
| 68,798 | 203 | 21,821 | 5,948 | 3,449 | 31,421 |
| 68,799 | 201 | 21,452 | 5,849 | 3,379 | 30,881 |
| 68,800 | 200 | 21,752 | 5,908 | 3,417 | 31,277 |
| 68,801 | 188 | 21,779 | 5,906 | 3,424 | 31,297 |
| 68,802 | 189 | 21,326 | 5,832 | 3,368 | 30,715 |
| 68,803 | 190 | 21,587 | 5,896 | 3,424 | 31,097 |
| 68,804 | 183 | 21,139 | 5,739 | 3,347 | 30,408 |
| 68,805 | 182 | 21,338 | 5,754 | 3,357 | 30,631 |
| 68,806 | 180 | 21,597 | 5,801 | 3,397 | 30,975 |
| 68,807 | 170 | 21,437 | 5,756 | 3,405 | 30,768 |
| 68,808 | 173 | 21,412 | 5,754 | 3,391 | 30,730 |
| 68,809 | 170 | 21,283 | 5,780 | 3,386 | 30,619 |
| 68,810 | 180 | 21,427 | 5,803 | 3,378 | 30,788 |
| 68,811 | 180 | 21,530 | 5,784 | 3,383 | 30,877 |
| 68,812 | 177 | 21,567 | 5,791 | 3,412 | 30,947 |
| 68,813 | 171 | 21,561 | 5,807 | 3,415 | 30,954 |
| 68,814 | 164 | 21,536 | 5,840 | 3,435 | 30,975 |
| 68,815 | 165 | 21,426 | 5,815 | 3,436 | 30,842 |
| 68,816 | 172 | 21,370 | 5,793 | 3,431 | 30,766 |
| 68,817 | 174 | 21,359 | 5,775 | 3,435 | 30,743 |
| 68,818 | 166 | 21,387 | 5,765 | 3,438 | 30,756 |
| 68,819 | 165 | 21,415 | 5,755 | 3,450 | 30,785 |
| 68,820 | 164 | 21,205 | 5,709 | 3,412 | 30,490 |
| 68,821 | 164 | 21,270 | 5,714 | 3,409 | 30,557 |
| 68,822 | 155 | 21,638 | 5,811 | 3,463 | 31,067 |
| 68,823 | 147 | 21,404 | 5,774 | 3,417 | 30,742 |

|        |     |        |       |       |        |
|--------|-----|--------|-------|-------|--------|
| 68,824 | 147 | 21,407 | 5,766 | 3,416 | 30,736 |
| 68,825 | 145 | 21,543 | 5,837 | 3,467 | 30,992 |
| 68,826 | 149 | 21,526 | 5,878 | 3,490 | 31,043 |
| 68,827 | 154 | 21,456 | 5,919 | 3,509 | 31,038 |
| 68,828 | 149 | 21,178 | 5,835 | 3,474 | 30,636 |
| 68,829 | 153 | 21,160 | 5,849 | 3,493 | 30,655 |
| 68,830 | 153 | 21,233 | 5,845 | 3,505 | 30,736 |
| 68,831 | 159 | 21,511 | 5,865 | 3,544 | 31,079 |
| 68,832 | 166 | 21,511 | 5,892 | 3,544 | 31,113 |
| 68,833 | 166 | 21,617 | 5,884 | 3,537 | 31,204 |
| 68,834 | 168 | 21,817 | 5,928 | 3,563 | 31,476 |
| 68,835 | 166 | 21,903 | 5,956 | 3,559 | 31,584 |
| 68,836 | 158 | 22,022 | 5,939 | 3,565 | 31,684 |
| 68,837 | 163 | 22,093 | 5,943 | 3,573 | 31,772 |
| 68,838 | 161 | 22,064 | 5,944 | 3,563 | 31,732 |
| 68,839 | 162 | 22,213 | 5,954 | 3,571 | 31,900 |
| 68,840 | 168 | 22,004 | 5,926 | 3,540 | 31,638 |
| 68,841 | 169 | 22,206 | 5,982 | 3,576 | 31,933 |
| 68,842 | 161 | 22,412 | 6,043 | 3,603 | 32,219 |
| 68,843 | 164 | 22,617 | 6,112 | 3,637 | 32,530 |
| 68,844 | 160 | 22,689 | 6,118 | 3,667 | 32,634 |
| 68,845 | 156 | 22,835 | 6,112 | 3,664 | 32,767 |
| 68,846 | 157 | 22,844 | 6,119 | 3,662 | 32,782 |
| 68,847 | 162 | 23,064 | 6,196 | 3,706 | 33,128 |
| 68,848 | 162 | 22,630 | 6,061 | 3,623 | 32,476 |
| 68,849 | 163 | 22,698 | 6,106 | 3,647 | 32,614 |
| 68,850 | 165 | 22,717 | 6,147 | 3,671 | 32,700 |
| 68,851 | 166 | 22,652 | 6,128 | 3,673 | 32,619 |
| 68,852 | 162 | 22,597 | 6,138 | 3,676 | 32,573 |
| 68,853 | 167 | 22,704 | 6,130 | 3,666 | 32,667 |
| 68,854 | 169 | 22,625 | 6,143 | 3,650 | 32,587 |
| 68,855 | 167 | 22,341 | 6,050 | 3,589 | 32,147 |



|        |     |        |       |       |        |
|--------|-----|--------|-------|-------|--------|
| 68,856 | 168 | 22,363 | 6,074 | 3,607 | 32,212 |
| 68,857 | 174 | 22,331 | 6,100 | 3,605 | 32,210 |
| 68,858 | 174 | 22,357 | 6,085 | 3,581 | 32,197 |
| 68,859 | 172 | 22,079 | 5,975 | 3,566 | 31,792 |
| 68,860 | 172 | 22,175 | 6,001 | 3,598 | 31,946 |
| 68,861 | 160 | 22,423 | 6,052 | 3,639 | 32,274 |
| 68,862 | 164 | 22,169 | 6,007 | 3,640 | 31,980 |
| 68,863 | 164 | 22,444 | 6,073 | 3,658 | 32,339 |
| 68,864 | 157 | 22,699 | 6,117 | 3,692 | 32,665 |
| 68,865 | 157 | 22,697 | 6,095 | 3,668 | 32,617 |
| 68,866 | 150 | 22,657 | 6,071 | 3,635 | 32,513 |
| 68,867 | 143 | 22,419 | 6,031 | 3,598 | 32,191 |
| 68,868 | 144 | 22,286 | 5,995 | 3,583 | 32,008 |
| 68,869 | 144 | 22,049 | 5,946 | 3,562 | 31,701 |
| 68,870 | 147 | 22,828 | 6,203 | 3,703 | 32,881 |
| 68,871 | 149 | 22,885 | 6,221 | 3,722 | 32,977 |
| 68,872 | 149 | 22,428 | 6,080 | 3,669 | 32,326 |
| 68,873 | 150 | 22,561 | 6,117 | 3,680 | 32,508 |
| 68,874 | 144 | 22,426 | 6,069 | 3,665 | 32,304 |
| 68,875 | 144 | 22,751 | 6,125 | 3,684 | 32,704 |
| 68,876 | 142 | 22,758 | 6,108 | 3,700 | 32,708 |
| 68,877 | 131 | 22,563 | 6,062 | 3,670 | 32,426 |
| 68,878 | 131 | 22,811 | 6,083 | 3,696 | 32,721 |
| 68,879 | 129 | 22,309 | 5,992 | 3,612 | 32,042 |
| 68,880 | 127 | 22,460 | 6,018 | 3,621 | 32,226 |
| 68,881 | 124 | 22,700 | 6,074 | 3,647 | 32,545 |
| 68,882 | 123 | 22,564 | 6,026 | 3,609 | 32,322 |
| 68,883 | 117 | 22,388 | 5,942 | 3,571 | 32,018 |
| 68,884 | 123 | 22,101 | 5,855 | 3,527 | 31,606 |
| 68,885 | 124 | 22,121 | 5,846 | 3,519 | 31,610 |
| 68,886 | 129 | 21,777 | 5,757 | 3,486 | 31,149 |
| 68,887 | 128 | 21,498 | 5,688 | 3,447 | 30,761 |

|        |     |        |       |       |        |
|--------|-----|--------|-------|-------|--------|
| 68,888 | 123 | 22,165 | 5,862 | 3,579 | 31,729 |
| 68,889 | 118 | 21,868 | 5,785 | 3,553 | 31,324 |
| 68,890 | 117 | 22,063 | 5,812 | 3,563 | 31,555 |
| 68,891 | 113 | 22,023 | 5,821 | 3,564 | 31,521 |
| 68,892 | 113 | 21,843 | 5,817 | 3,561 | 31,334 |
| 68,893 | 113 | 21,983 | 5,836 | 3,591 | 31,523 |
| 68,894 | 112 | 21,994 | 5,815 | 3,594 | 31,515 |
| 68,895 | 116 | 21,909 | 5,826 | 3,569 | 31,420 |
| 68,896 | 115 | 21,831 | 5,807 | 3,569 | 31,322 |
| 68,897 | 117 | 21,723 | 5,758 | 3,544 | 31,142 |
| 68,898 | 120 | 21,529 | 5,665 | 3,512 | 30,826 |
| 68,899 | 120 | 21,639 | 5,675 | 3,521 | 30,955 |
| 68,900 | 120 | 21,683 | 5,616 | 3,503 | 30,922 |
| 68,901 | 118 | 21,672 | 5,604 | 3,496 | 30,890 |
| 68,902 | 124 | 21,371 | 5,548 | 3,444 | 30,487 |
| 68,903 | 125 | 21,245 | 5,470 | 3,411 | 30,251 |
| 68,904 | 129 | 22,092 | 5,747 | 3,581 | 31,549 |
| 68,905 | 133 | 21,889 | 5,679 | 3,546 | 31,247 |
| 68,906 | 132 | 21,929 | 5,685 | 3,546 | 31,292 |
| 68,907 | 124 | 21,919 | 5,666 | 3,556 | 31,265 |
| 68,908 | 131 | 21,937 | 5,672 | 3,552 | 31,292 |
| 68,909 | 129 | 21,769 | 5,630 | 3,532 | 31,060 |
| 68,910 | 138 | 22,095 | 5,728 | 3,578 | 31,539 |
| 68,911 | 148 | 21,887 | 5,650 | 3,561 | 31,246 |
| 68,912 | 148 | 21,804 | 5,639 | 3,552 | 31,143 |
| 68,913 | 142 | 21,969 | 5,666 | 3,566 | 31,343 |
| 68,914 | 143 | 22,006 | 5,698 | 3,579 | 31,426 |
| 68,915 | 148 | 21,764 | 5,627 | 3,549 | 31,088 |
| 68,916 | 146 | 21,493 | 5,582 | 3,529 | 30,750 |
| 68,917 | 151 | 21,763 | 5,661 | 3,623 | 31,198 |
| 68,918 | 153 | 21,765 | 5,648 | 3,619 | 31,185 |
| 68,919 | 153 | 22,019 | 5,729 | 3,652 | 31,553 |

|        |     |        |       |       |        |
|--------|-----|--------|-------|-------|--------|
| 68,920 | 153 | 22,149 | 5,771 | 3,657 | 31,730 |
| 68,921 | 150 | 22,255 | 5,781 | 3,690 | 31,876 |
| 68,922 | 147 | 21,994 | 5,693 | 3,649 | 31,483 |
| 68,923 | 148 | 22,173 | 5,756 | 3,679 | 31,756 |
| 68,924 | 145 | 21,916 | 5,716 | 3,658 | 31,435 |
| 68,925 | 147 | 22,263 | 5,793 | 3,732 | 31,935 |
| 68,926 | 155 | 21,728 | 5,686 | 3,660 | 31,229 |
| 68,927 | 158 | 22,131 | 5,776 | 3,695 | 31,760 |
| 68,928 | 160 | 22,483 | 5,844 | 3,752 | 32,239 |
| 68,929 | 164 | 22,337 | 5,829 | 3,734 | 32,064 |
| 68,930 | 164 | 22,379 | 5,814 | 3,738 | 32,095 |
| 68,931 | 170 | 22,639 | 5,852 | 3,776 | 32,437 |
| 68,932 | 169 | 22,267 | 5,770 | 3,739 | 31,945 |
| 68,933 | 168 | 22,248 | 5,759 | 3,745 | 31,920 |
| 68,934 | 166 | 22,263 | 5,841 | 3,788 | 32,058 |
| 68,935 | 154 | 22,200 | 5,873 | 3,775 | 32,002 |
| 68,936 | 146 | 22,160 | 5,824 | 3,738 | 31,868 |
| 68,937 | 146 | 22,563 | 5,892 | 3,770 | 32,371 |
| 68,938 | 149 | 22,436 | 5,892 | 3,790 | 32,267 |
| 68,939 | 151 | 22,353 | 5,896 | 3,814 | 32,214 |
| 68,940 | 149 | 22,239 | 5,851 | 3,787 | 32,026 |
| 68,941 | 152 | 22,115 | 5,800 | 3,756 | 31,823 |
| 68,942 | 151 | 22,172 | 5,809 | 3,759 | 31,891 |
| 68,943 | 153 | 22,588 | 5,885 | 3,815 | 32,441 |
| 68,944 | 153 | 22,031 | 5,754 | 3,729 | 31,667 |
| 68,945 | 156 | 22,346 | 5,811 | 3,769 | 32,082 |
| 68,946 | 151 | 22,399 | 5,825 | 3,767 | 32,142 |
| 68,947 | 153 | 22,570 | 5,893 | 3,795 | 32,411 |
| 68,948 | 152 | 22,495 | 5,869 | 3,793 | 32,309 |
| 68,949 | 149 | 22,828 | 5,934 | 3,824 | 32,735 |
| 68,950 | 152 | 22,962 | 5,975 | 3,841 | 32,930 |
| 68,951 | 148 | 22,989 | 5,953 | 3,836 | 32,926 |

|        |     |        |       |       |        |
|--------|-----|--------|-------|-------|--------|
| 68,952 | 138 | 22,921 | 5,869 | 3,814 | 32,742 |
| 68,953 | 138 | 23,069 | 5,869 | 3,814 | 32,890 |
| 68,954 | 138 | 23,266 | 5,933 | 3,858 | 33,195 |
| 68,955 | 137 | 23,320 | 5,985 | 3,861 | 33,303 |
| 68,956 | 139 | 23,309 | 5,987 | 3,867 | 33,302 |
| 68,957 | 145 | 23,500 | 6,059 | 3,900 | 33,604 |
| 68,958 | 148 | 23,496 | 6,067 | 3,901 | 33,612 |
| 68,959 | 138 | 23,333 | 6,032 | 3,856 | 33,359 |
| 68,960 | 139 | 23,344 | 6,012 | 3,844 | 33,339 |
| 68,961 | 154 | 23,383 | 6,016 | 3,845 | 33,398 |
| 68,962 | 145 | 23,079 | 5,990 | 3,803 | 33,017 |
| 68,963 | 154 | 23,585 | 6,115 | 3,854 | 33,708 |
| 68,964 | 156 | 23,187 | 6,038 | 3,805 | 33,186 |
| 68,965 | 155 | 22,815 | 5,943 | 3,776 | 32,689 |
| 68,966 | 151 | 23,174 | 6,036 | 3,848 | 33,209 |
| 68,967 | 150 | 22,918 | 5,982 | 3,820 | 32,870 |
| 68,968 | 147 | 23,010 | 5,989 | 3,798 | 32,944 |
| 68,969 | 146 | 23,010 | 5,970 | 3,809 | 32,935 |
| 68,970 | 144 | 23,011 | 5,915 | 3,786 | 32,856 |
| 68,971 | 145 | 22,957 | 5,883 | 3,785 | 32,770 |
| 68,972 | 145 | 23,045 | 5,897 | 3,788 | 32,875 |
| 68,973 | 142 | 23,193 | 5,894 | 3,772 | 33,001 |
| 68,974 | 142 | 23,158 | 5,910 | 3,778 | 32,988 |
| 68,975 | 138 | 23,049 | 5,834 | 3,737 | 32,758 |
| 68,976 | 139 | 23,309 | 5,931 | 3,738 | 33,117 |
| 68,977 | 134 | 23,592 | 5,985 | 3,776 | 33,487 |
| 68,978 | 137 | 23,376 | 5,970 | 3,782 | 33,265 |
| 68,979 | 140 | 23,434 | 5,999 | 3,798 | 33,371 |
| 68,980 | 136 | 23,376 | 5,966 | 3,792 | 33,270 |
| 68,981 | 133 | 23,499 | 6,000 | 3,820 | 33,452 |
| 68,982 | 134 | 23,531 | 6,004 | 3,835 | 33,504 |
| 68,983 | 139 | 23,622 | 6,009 | 3,818 | 33,588 |

|        |     |        |       |       |        |
|--------|-----|--------|-------|-------|--------|
| 68,984 | 140 | 23,657 | 5,999 | 3,782 | 33,578 |
| 68,985 | 139 | 23,586 | 5,986 | 3,793 | 33,504 |
| 68,986 | 138 | 23,325 | 5,935 | 3,775 | 33,173 |
| 68,987 | 139 | 23,384 | 5,974 | 3,795 | 33,292 |
| 68,988 | 141 | 23,313 | 5,947 | 3,777 | 33,178 |
| 68,989 | 141 | 23,386 | 5,951 | 3,754 | 33,232 |
| 68,990 | 140 | 23,098 | 5,886 | 3,688 | 32,812 |
| 68,991 | 146 | 23,419 | 5,934 | 3,734 | 33,233 |
| 68,992 | 144 | 23,096 | 5,859 | 3,696 | 32,795 |
| 68,993 | 148 | 23,255 | 5,890 | 3,721 | 33,014 |
| 68,994 | 151 | 22,854 | 5,814 | 3,665 | 32,484 |
| 68,995 | 154 | 22,530 | 5,758 | 3,640 | 32,082 |
| 68,996 | 156 | 22,516 | 5,831 | 3,681 | 32,184 |
| 68,997 | 165 | 22,787 | 5,898 | 3,745 | 32,595 |
| 68,998 | 161 | 22,392 | 5,819 | 3,702 | 32,074 |
| 68,999 | 160 | 22,165 | 5,787 | 3,674 | 31,786 |
| 69,000 | 158 | 22,343 | 5,866 | 3,723 | 32,090 |
| 69,001 | 155 | 22,281 | 5,825 | 3,731 | 31,992 |
| 69,002 | 154 | 22,036 | 5,833 | 3,713 | 31,736 |
| 69,003 | 156 | 21,988 | 5,854 | 3,717 | 31,715 |
| 69,004 | 156 | 21,877 | 5,870 | 3,713 | 31,616 |
| 69,005 | 156 | 21,948 | 5,910 | 3,730 | 31,744 |
| 69,006 | 152 | 21,980 | 5,937 | 3,733 | 31,802 |
| 69,007 | 144 | 21,804 | 5,877 | 3,714 | 31,539 |
| 69,008 | 122 | 21,182 | 5,688 | 3,614 | 30,606 |
| 69,009 | 128 | 21,397 | 5,727 | 3,643 | 30,895 |
| 69,010 | 127 | 21,640 | 5,766 | 3,678 | 31,211 |
| 69,011 | 127 | 21,680 | 5,757 | 3,679 | 31,243 |
| 69,012 | 124 | 21,999 | 5,810 | 3,728 | 31,661 |
| 69,013 | 121 | 21,784 | 5,758 | 3,695 | 31,358 |
| 69,014 | 123 | 21,863 | 5,727 | 3,713 | 31,426 |
| 69,015 | 120 | 21,824 | 5,682 | 3,663 | 31,289 |

|        |     |        |       |       |        |
|--------|-----|--------|-------|-------|--------|
| 69,016 | 122 | 22,077 | 5,731 | 3,689 | 31,619 |
| 69,017 | 126 | 22,139 | 5,783 | 3,697 | 31,745 |
| 69,018 | 127 | 21,868 | 5,715 | 3,642 | 31,352 |
| 69,019 | 133 | 21,849 | 5,737 | 3,678 | 31,397 |
| 69,020 | 133 | 21,872 | 5,754 | 3,682 | 31,441 |
| 69,021 | 137 | 22,100 | 5,834 | 3,729 | 31,800 |
| 69,022 | 139 | 21,851 | 5,791 | 3,699 | 31,480 |
| 69,023 | 138 | 21,577 | 5,737 | 3,657 | 31,109 |
| 69,024 | 138 | 21,572 | 5,741 | 3,673 | 31,124 |
| 69,025 | 140 | 21,595 | 5,708 | 3,676 | 31,119 |
| 69,026 | 138 | 21,296 | 5,667 | 3,638 | 30,739 |
| 69,027 | 140 | 21,223 | 5,633 | 3,627 | 30,623 |
| 69,028 | 135 | 21,239 | 5,590 | 3,595 | 30,559 |
| 69,029 | 136 | 21,497 | 5,627 | 3,630 | 30,890 |
| 69,030 | 133 | 21,130 | 5,530 | 3,572 | 30,365 |
| 69,031 | 139 | 21,191 | 5,543 | 3,567 | 30,440 |
| 69,032 | 138 | 21,332 | 5,568 | 3,578 | 30,616 |
| 69,033 | 135 | 21,345 | 5,596 | 3,583 | 30,659 |
| 69,034 | 130 | 21,297 | 5,586 | 3,585 | 30,598 |
| 69,035 | 136 | 21,401 | 5,533 | 3,552 | 30,622 |
| 69,036 | 136 | 21,625 | 5,579 | 3,584 | 30,924 |
| 69,037 | 133 | 21,626 | 5,577 | 3,580 | 30,916 |
| 69,038 | 132 | 21,475 | 5,547 | 3,544 | 30,698 |
| 69,039 | 137 | 21,799 | 5,619 | 3,618 | 31,173 |
| 69,040 | 134 | 21,659 | 5,562 | 3,611 | 30,966 |
| 69,041 | 137 | 21,526 | 5,497 | 3,590 | 30,750 |
| 69,042 | 131 | 21,553 | 5,491 | 3,573 | 30,748 |
| 69,043 | 130 | 21,465 | 5,499 | 3,587 | 30,681 |
| 69,044 | 118 | 21,306 | 5,412 | 3,506 | 30,342 |
| 69,045 | 118 | 21,565 | 5,464 | 3,520 | 30,667 |
| 69,046 | 113 | 21,663 | 5,473 | 3,527 | 30,776 |
| 69,047 | 114 | 22,020 | 5,486 | 3,543 | 31,163 |

|        |     |        |       |       |        |
|--------|-----|--------|-------|-------|--------|
| 69,048 | 106 | 22,010 | 5,448 | 3,533 | 31,097 |
| 69,049 | 102 | 21,933 | 5,370 | 3,492 | 30,897 |
| 69,050 | 106 | 22,002 | 5,362 | 3,476 | 30,946 |
| 69,051 | 106 | 21,631 | 5,242 | 3,405 | 30,384 |
| 69,052 | 112 | 21,884 | 5,274 | 3,426 | 30,696 |
| 69,053 | 110 | 22,132 | 5,351 | 3,454 | 31,047 |
| 69,054 | 108 | 22,173 | 5,333 | 3,435 | 31,049 |
| 69,055 | 117 | 22,456 | 5,385 | 3,474 | 31,432 |
| 69,056 | 121 | 21,966 | 5,248 | 3,410 | 30,745 |
| 69,057 | 120 | 21,764 | 5,197 | 3,370 | 30,451 |
| 69,058 | 121 | 21,973 | 5,260 | 3,386 | 30,740 |
| 69,059 | 119 | 21,820 | 5,254 | 3,369 | 30,562 |
| 69,060 | 114 | 21,788 | 5,259 | 3,363 | 30,524 |
| 69,061 | 116 | 21,519 | 5,230 | 3,324 | 30,189 |
| 69,062 | 123 | 21,819 | 5,278 | 3,350 | 30,570 |
| 69,063 | 122 | 21,820 | 5,300 | 3,351 | 30,593 |
| 69,064 | 119 | 21,907 | 5,317 | 3,357 | 30,700 |
| 69,065 | 117 | 21,838 | 5,352 | 3,367 | 30,674 |
| 69,066 | 117 | 21,997 | 5,401 | 3,400 | 30,915 |
| 69,067 | 114 | 21,743 | 5,285 | 3,343 | 30,485 |
| 69,068 | 109 | 21,953 | 5,307 | 3,353 | 30,722 |
| 69,069 | 104 | 22,258 | 5,408 | 3,379 | 31,149 |
| 69,070 | 116 | 22,320 | 5,427 | 3,370 | 31,233 |
| 69,071 | 113 | 22,273 | 5,385 | 3,352 | 31,123 |
| 69,072 | 108 | 22,088 | 5,343 | 3,333 | 30,872 |
| 69,073 | 110 | 22,394 | 5,427 | 3,376 | 31,307 |
| 69,074 | 115 | 22,491 | 5,473 | 3,399 | 31,478 |
| 69,075 | 112 | 22,266 | 5,417 | 3,343 | 31,138 |
| 69,076 | 120 | 22,496 | 5,481 | 3,372 | 31,469 |
| 69,077 | 123 | 22,517 | 5,473 | 3,383 | 31,496 |
| 69,078 | 128 | 22,741 | 5,503 | 3,391 | 31,763 |
| 69,079 | 128 | 22,503 | 5,500 | 3,380 | 31,511 |

|        |     |        |       |       |        |
|--------|-----|--------|-------|-------|--------|
| 69,080 | 129 | 22,347 | 5,487 | 3,348 | 31,311 |
| 69,081 | 129 | 22,452 | 5,511 | 3,342 | 31,434 |
| 69,082 | 127 | 22,322 | 5,484 | 3,332 | 31,265 |
| 69,083 | 129 | 22,327 | 5,496 | 3,338 | 31,290 |
| 69,084 | 128 | 22,073 | 5,412 | 3,323 | 30,936 |
| 69,085 | 127 | 22,259 | 5,459 | 3,359 | 31,204 |
| 69,086 | 128 | 22,439 | 5,509 | 3,391 | 31,467 |
| 69,087 | 132 | 22,443 | 5,542 | 3,398 | 31,515 |
| 69,088 | 132 | 22,529 | 5,564 | 3,402 | 31,627 |
| 69,089 | 135 | 22,333 | 5,532 | 3,369 | 31,369 |
| 69,090 | 140 | 22,334 | 5,502 | 3,360 | 31,336 |
| 69,091 | 138 | 22,111 | 5,474 | 3,329 | 31,052 |
| 69,092 | 138 | 22,423 | 5,593 | 3,372 | 31,526 |
| 69,093 | 149 | 22,620 | 5,714 | 3,428 | 31,911 |
| 69,094 | 150 | 22,784 | 5,716 | 3,415 | 32,065 |
| 69,095 | 152 | 22,547 | 5,649 | 3,400 | 31,748 |
| 69,096 | 152 | 22,317 | 5,584 | 3,368 | 31,421 |
| 69,097 | 155 | 22,415 | 5,634 | 3,432 | 31,636 |
| 69,098 | 155 | 22,117 | 5,575 | 3,392 | 31,239 |
| 69,099 | 154 | 21,596 | 5,456 | 3,308 | 30,514 |
| 69,100 | 155 | 21,798 | 5,507 | 3,337 | 30,797 |
| 69,101 | 150 | 21,710 | 5,496 | 3,353 | 30,709 |
| 69,102 | 154 | 21,880 | 5,535 | 3,370 | 30,939 |
| 69,103 | 148 | 22,077 | 5,577 | 3,384 | 31,186 |
| 69,104 | 150 | 21,744 | 5,486 | 3,341 | 30,721 |
| 69,105 | 150 | 21,494 | 5,421 | 3,312 | 30,377 |
| 69,106 | 144 | 21,894 | 5,531 | 3,360 | 30,929 |
| 69,107 | 137 | 21,661 | 5,462 | 3,318 | 30,578 |
| 69,108 | 138 | 21,583 | 5,464 | 3,312 | 30,497 |
| 69,109 | 138 | 21,503 | 5,445 | 3,319 | 30,405 |
| 69,110 | 136 | 21,513 | 5,424 | 3,320 | 30,393 |
| 69,111 | 136 | 21,276 | 5,351 | 3,290 | 30,053 |



|        |     |        |       |       |        |
|--------|-----|--------|-------|-------|--------|
| 69,112 | 134 | 21,143 | 5,306 | 3,275 | 29,858 |
| 69,113 | 132 | 21,429 | 5,367 | 3,307 | 30,235 |
| 69,114 | 132 | 21,220 | 5,281 | 3,281 | 29,914 |
| 69,115 | 137 | 21,308 | 5,282 | 3,283 | 30,010 |
| 69,116 | 137 | 21,265 | 5,252 | 3,262 | 29,916 |
| 69,117 | 138 | 21,381 | 5,310 | 3,283 | 30,112 |
| 69,118 | 143 | 21,280 | 5,299 | 3,270 | 29,992 |
| 69,119 | 144 | 21,030 | 5,202 | 3,245 | 29,621 |
| 69,120 | 148 | 21,248 | 5,240 | 3,293 | 29,929 |
| 69,121 | 140 | 20,839 | 5,144 | 3,224 | 29,347 |
| 69,122 | 141 | 20,884 | 5,126 | 3,224 | 29,375 |
| 69,123 | 141 | 20,932 | 5,135 | 3,217 | 29,425 |
| 69,124 | 141 | 21,051 | 5,184 | 3,254 | 29,630 |
| 69,125 | 137 | 21,035 | 5,140 | 3,265 | 29,577 |
| 69,126 | 132 | 20,805 | 5,069 | 3,242 | 29,248 |
| 69,127 | 132 | 21,212 | 5,184 | 3,309 | 29,837 |
| 69,128 | 130 | 21,101 | 5,179 | 3,295 | 29,705 |
| 69,129 | 136 | 20,879 | 5,137 | 3,301 | 29,453 |
| 69,130 | 137 | 20,649 | 5,056 | 3,263 | 29,105 |
| 69,131 | 136 | 20,810 | 5,052 | 3,284 | 29,282 |
| 69,132 | 136 | 20,786 | 5,051 | 3,288 | 29,261 |
| 69,133 | 132 | 20,790 | 5,059 | 3,305 | 29,286 |
| 69,134 | 133 | 20,737 | 5,072 | 3,301 | 29,243 |
| 69,135 | 138 | 20,711 | 5,038 | 3,265 | 29,152 |
| 69,136 | 133 | 20,455 | 4,972 | 3,212 | 28,772 |
| 69,137 | 132 | 20,455 | 4,959 | 3,201 | 28,747 |
| 69,138 | 130 | 20,276 | 4,882 | 3,157 | 28,445 |
| 69,139 | 129 | 20,028 | 4,815 | 3,138 | 28,110 |
| 69,140 | 136 | 20,845 | 5,008 | 3,250 | 29,239 |
| 69,141 | 131 | 21,352 | 5,097 | 3,331 | 29,911 |
| 69,142 | 139 | 21,276 | 5,047 | 3,278 | 29,740 |
| 69,143 | 139 | 21,557 | 5,090 | 3,312 | 30,098 |

|        |     |        |       |       |        |
|--------|-----|--------|-------|-------|--------|
| 69,144 | 134 | 21,651 | 5,118 | 3,365 | 30,268 |
| 69,145 | 129 | 21,391 | 5,089 | 3,337 | 29,946 |
| 69,146 | 133 | 21,530 | 5,075 | 3,322 | 30,060 |
| 69,147 | 135 | 21,542 | 5,078 | 3,321 | 30,076 |
| 69,148 | 131 | 21,259 | 5,040 | 3,288 | 29,718 |
| 69,149 | 130 | 21,343 | 5,091 | 3,313 | 29,877 |
| 69,150 | 134 | 21,446 | 5,129 | 3,345 | 30,054 |
| 69,151 | 137 | 21,200 | 5,085 | 3,277 | 29,699 |
| 69,152 | 137 | 21,219 | 5,084 | 3,269 | 29,709 |
| 69,153 | 137 | 21,514 | 5,133 | 3,300 | 30,084 |
| 69,154 | 140 | 21,519 | 5,132 | 3,307 | 30,098 |
| 69,155 | 139 | 21,575 | 5,122 | 3,319 | 30,155 |
| 69,156 | 141 | 21,329 | 5,057 | 3,275 | 29,802 |
| 69,157 | 145 | 21,436 | 5,086 | 3,291 | 29,958 |
| 69,158 | 144 | 21,285 | 5,040 | 3,270 | 29,739 |
| 69,159 | 146 | 21,704 | 5,135 | 3,326 | 30,311 |
| 69,160 | 151 | 21,632 | 5,125 | 3,305 | 30,213 |
| 69,161 | 151 | 21,585 | 5,102 | 3,297 | 30,135 |
| 69,162 | 150 | 21,928 | 5,218 | 3,339 | 30,635 |
| 69,163 | 150 | 21,766 | 5,189 | 3,324 | 30,429 |
| 69,164 | 149 | 21,634 | 5,171 | 3,318 | 30,272 |
| 69,165 | 154 | 21,762 | 5,247 | 3,335 | 30,498 |
| 69,166 | 149 | 21,672 | 5,221 | 3,316 | 30,358 |
| 69,167 | 148 | 21,598 | 5,201 | 3,319 | 30,266 |
| 69,168 | 147 | 21,484 | 5,174 | 3,282 | 30,087 |
| 69,169 | 140 | 21,970 | 5,294 | 3,333 | 30,737 |
| 69,170 | 140 | 21,806 | 5,278 | 3,316 | 30,540 |
| 69,171 | 136 | 21,785 | 5,244 | 3,285 | 30,450 |
| 69,172 | 132 | 21,573 | 5,199 | 3,252 | 30,156 |
| 69,173 | 132 | 21,670 | 5,262 | 3,255 | 30,319 |
| 69,174 | 130 | 21,657 | 5,251 | 3,252 | 30,290 |
| 69,175 | 133 | 21,827 | 5,324 | 3,273 | 30,557 |

|        |     |        |       |       |        |
|--------|-----|--------|-------|-------|--------|
| 69,176 | 139 | 21,865 | 5,333 | 3,259 | 30,596 |
| 69,177 | 145 | 21,832 | 5,333 | 3,250 | 30,560 |
| 69,178 | 146 | 21,818 | 5,299 | 3,228 | 30,491 |
| 69,179 | 142 | 21,745 | 5,244 | 3,204 | 30,335 |
| 69,180 | 132 | 21,793 | 5,245 | 3,191 | 30,361 |
| 69,181 | 130 | 21,847 | 5,244 | 3,181 | 30,402 |
| 69,182 | 132 | 21,885 | 5,213 | 3,158 | 30,388 |
| 69,183 | 133 | 22,092 | 5,250 | 3,166 | 30,641 |
| 69,184 | 132 | 22,006 | 5,239 | 3,132 | 30,509 |
| 69,185 | 131 | 21,985 | 5,248 | 3,143 | 30,507 |
| 69,186 | 127 | 22,229 | 5,302 | 3,179 | 30,837 |
| 69,187 | 123 | 22,189 | 5,290 | 3,174 | 30,776 |
| 69,188 | 127 | 22,144 | 5,274 | 3,167 | 30,712 |
| 69,189 | 122 | 21,944 | 5,243 | 3,154 | 30,463 |
| 69,190 | 120 | 21,935 | 5,304 | 3,198 | 30,557 |
| 69,191 | 124 | 22,039 | 5,343 | 3,225 | 30,731 |
| 69,192 | 122 | 21,955 | 5,346 | 3,243 | 30,666 |
| 69,193 | 116 | 21,823 | 5,302 | 3,229 | 30,470 |
| 69,194 | 120 | 21,878 | 5,301 | 3,225 | 30,524 |
| 69,195 | 114 | 21,747 | 5,275 | 3,171 | 30,307 |
| 69,196 | 113 | 21,700 | 5,267 | 3,159 | 30,239 |
| 69,197 | 110 | 21,633 | 5,269 | 3,133 | 30,145 |
| 69,198 | 116 | 21,638 | 5,248 | 3,120 | 30,122 |
| 69,199 | 122 | 21,485 | 5,205 | 3,086 | 29,898 |
| 69,200 | 123 | 21,404 | 5,200 | 3,083 | 29,810 |
| 69,201 | 127 | 21,173 | 5,182 | 3,040 | 29,522 |
| 69,202 | 125 | 20,987 | 5,144 | 3,042 | 29,298 |
| 69,203 | 135 | 21,496 | 5,275 | 3,113 | 30,019 |
| 69,204 | 140 | 21,573 | 5,332 | 3,119 | 30,164 |
| 69,205 | 138 | 21,253 | 5,286 | 3,074 | 29,751 |
| 69,206 | 136 | 21,216 | 5,266 | 3,083 | 29,701 |
| 69,207 | 136 | 21,222 | 5,279 | 3,063 | 29,700 |

|        |     |        |       |       |        |
|--------|-----|--------|-------|-------|--------|
| 69,208 | 131 | 21,297 | 5,319 | 3,067 | 29,814 |
| 69,209 | 133 | 21,207 | 5,284 | 3,056 | 29,680 |
| 69,210 | 135 | 21,447 | 5,325 | 3,053 | 29,960 |
| 69,211 | 131 | 21,527 | 5,327 | 3,037 | 30,022 |
| 69,212 | 132 | 21,556 | 5,344 | 3,046 | 30,078 |
| 69,213 | 135 | 21,513 | 5,344 | 3,045 | 30,037 |
| 69,214 | 138 | 21,383 | 5,349 | 3,033 | 29,903 |
| 69,215 | 140 | 21,502 | 5,371 | 3,033 | 30,046 |
| 69,216 | 141 | 21,572 | 5,377 | 3,038 | 30,128 |
| 69,217 | 140 | 21,549 | 5,353 | 3,024 | 30,066 |
| 69,218 | 145 | 21,627 | 5,365 | 3,036 | 30,173 |
| 69,219 | 147 | 21,353 | 5,317 | 2,994 | 29,811 |
| 69,220 | 148 | 21,249 | 5,301 | 2,976 | 29,674 |
| 69,221 | 148 | 21,285 | 5,297 | 2,964 | 29,694 |
| 69,222 | 147 | 21,146 | 5,342 | 2,958 | 29,593 |
| 69,223 | 147 | 21,038 | 5,314 | 2,955 | 29,454 |
| 69,224 | 148 | 20,972 | 5,291 | 2,944 | 29,355 |
| 69,225 | 150 | 20,962 | 5,259 | 2,943 | 29,314 |
| 69,226 | 153 | 21,012 | 5,269 | 2,944 | 29,378 |
| 69,227 | 146 | 20,939 | 5,281 | 2,942 | 29,308 |
| 69,228 | 146 | 20,691 | 5,224 | 2,905 | 28,966 |
| 69,229 | 144 | 20,310 | 5,198 | 2,877 | 28,529 |
| 69,230 | 144 | 20,200 | 5,218 | 2,872 | 28,434 |
| 69,231 | 147 | 20,058 | 5,226 | 2,879 | 28,310 |
| 69,232 | 145 | 19,796 | 5,228 | 2,861 | 28,030 |
| 69,233 | 142 | 19,654 | 5,220 | 2,858 | 27,874 |
| 69,234 | 142 | 19,327 | 5,135 | 2,811 | 27,415 |
| 69,235 | 144 | 19,410 | 5,160 | 2,842 | 27,556 |
| 69,236 | 143 | 19,348 | 5,176 | 2,839 | 27,506 |
| 69,237 | 143 | 19,236 | 5,154 | 2,826 | 27,359 |
| 69,238 | 140 | 18,526 | 4,977 | 2,707 | 26,350 |
| 69,239 | 141 | 18,762 | 5,021 | 2,727 | 26,651 |

|        |     |        |       |       |        |
|--------|-----|--------|-------|-------|--------|
| 69,240 | 142 | 19,054 | 5,036 | 2,751 | 26,983 |
| 69,241 | 147 | 19,362 | 5,080 | 2,778 | 27,367 |
| 69,242 | 141 | 18,681 | 4,924 | 2,650 | 26,396 |
| 69,243 | 147 | 18,789 | 4,943 | 2,641 | 26,520 |
| 69,244 | 145 | 18,870 | 4,955 | 2,645 | 26,615 |
| 69,245 | 148 | 18,582 | 4,893 | 2,606 | 26,229 |
| 69,246 | 148 | 18,599 | 4,902 | 2,587 | 26,236 |
| 69,247 | 155 | 18,454 | 4,872 | 2,585 | 26,066 |
| 69,248 | 155 | 18,482 | 4,869 | 2,598 | 26,104 |
| 69,249 | 152 | 18,387 | 4,860 | 2,600 | 25,999 |
| 69,250 | 154 | 18,332 | 4,872 | 2,600 | 25,958 |
| 69,251 | 150 | 18,460 | 4,896 | 2,618 | 26,124 |
| 69,252 | 140 | 18,795 | 4,916 | 2,673 | 26,524 |
| 69,253 | 135 | 18,774 | 4,873 | 2,667 | 26,449 |
| 69,254 | 130 | 18,789 | 4,867 | 2,671 | 26,457 |
| 69,255 | 131 | 18,951 | 4,893 | 2,708 | 26,683 |
| 69,256 | 130 | 18,622 | 4,838 | 2,695 | 26,285 |
| 69,257 | 129 | 18,649 | 4,823 | 2,685 | 26,286 |
| 69,258 | 129 | 18,579 | 4,823 | 2,694 | 26,225 |
| 69,259 | 130 | 18,562 | 4,841 | 2,712 | 26,245 |
| 69,260 | 127 | 18,347 | 4,824 | 2,686 | 25,984 |
| 69,261 | 130 | 18,411 | 4,878 | 2,730 | 26,149 |
| 69,262 | 128 | 18,373 | 4,895 | 2,760 | 26,156 |
| 69,263 | 121 | 17,963 | 4,809 | 2,737 | 25,630 |
| 69,264 | 119 | 17,906 | 4,803 | 2,732 | 25,560 |
| 69,265 | 129 | 18,073 | 4,864 | 2,759 | 25,825 |
| 69,266 | 129 | 18,043 | 4,851 | 2,761 | 25,784 |
| 69,267 | 131 | 18,101 | 4,867 | 2,779 | 25,878 |
| 69,268 | 131 | 17,797 | 4,826 | 2,761 | 25,515 |
| 69,269 | 126 | 17,855 | 4,833 | 2,771 | 25,585 |
| 69,270 | 125 | 18,019 | 4,872 | 2,808 | 25,824 |
| 69,271 | 122 | 17,882 | 4,838 | 2,793 | 25,635 |

|        |     |        |       |       |        |
|--------|-----|--------|-------|-------|--------|
| 69,272 | 123 | 18,106 | 4,883 | 2,822 | 25,934 |
| 69,273 | 126 | 17,886 | 4,757 | 2,803 | 25,572 |
| 69,274 | 125 | 18,086 | 4,794 | 2,823 | 25,828 |
| 69,275 | 125 | 18,258 | 4,852 | 2,846 | 26,081 |
| 69,276 | 117 | 18,093 | 4,815 | 2,812 | 25,837 |
| 69,277 | 120 | 18,431 | 4,887 | 2,851 | 26,289 |
| 69,278 | 124 | 18,297 | 4,870 | 2,843 | 26,134 |
| 69,279 | 116 | 18,044 | 4,816 | 2,821 | 25,797 |
| 69,280 | 116 | 18,264 | 4,878 | 2,845 | 26,103 |
| 69,281 | 113 | 17,325 | 4,579 | 2,684 | 24,701 |
| 69,282 | 116 | 17,580 | 4,628 | 2,716 | 25,040 |
| 69,283 | 117 | 17,775 | 4,674 | 2,746 | 25,312 |
| 69,284 | 117 | 17,723 | 4,690 | 2,743 | 25,273 |
| 69,285 | 117 | 18,085 | 4,809 | 2,816 | 25,827 |
| 69,286 | 120 | 18,081 | 4,815 | 2,810 | 25,826 |
| 69,287 | 120 | 18,299 | 4,892 | 2,838 | 26,149 |
| 69,288 | 122 | 18,317 | 4,908 | 2,836 | 26,183 |
| 69,289 | 119 | 18,012 | 4,866 | 2,823 | 25,820 |
| 69,290 | 121 | 18,129 | 4,911 | 2,862 | 26,023 |
| 69,291 | 118 | 17,920 | 4,911 | 2,858 | 25,807 |
| 69,292 | 117 | 17,860 | 4,909 | 2,848 | 25,734 |
| 69,293 | 113 | 17,697 | 4,875 | 2,829 | 25,514 |
| 69,294 | 110 | 17,625 | 4,874 | 2,863 | 25,472 |
| 69,295 | 104 | 17,475 | 4,818 | 2,849 | 25,246 |
| 69,296 | 103 | 17,723 | 4,863 | 2,870 | 25,559 |
| 69,297 | 104 | 18,007 | 4,925 | 2,914 | 25,950 |
| 69,298 | 101 | 17,959 | 4,910 | 2,915 | 25,885 |
| 69,299 | 100 | 17,937 | 4,919 | 2,915 | 25,871 |
| 69,300 | 99  | 18,058 | 5,003 | 2,961 | 26,121 |
| 69,301 | 97  | 18,020 | 5,011 | 2,965 | 26,093 |
| 69,302 | 98  | 17,889 | 5,047 | 2,964 | 25,998 |
| 69,303 | 104 | 17,742 | 5,100 | 2,966 | 25,912 |

|        |     |        |       |       |        |
|--------|-----|--------|-------|-------|--------|
| 69,304 | 105 | 17,617 | 5,092 | 2,943 | 25,757 |
| 69,305 | 107 | 17,387 | 5,043 | 2,947 | 25,484 |
| 69,306 | 107 | 17,504 | 5,062 | 2,958 | 25,631 |
| 69,307 | 117 | 17,674 | 5,110 | 2,970 | 25,871 |
| 69,308 | 119 | 17,901 | 5,134 | 2,991 | 26,145 |
| 69,309 | 119 | 17,976 | 5,137 | 2,994 | 26,226 |
| 69,310 | 119 | 17,994 | 5,131 | 2,998 | 26,242 |
| 69,311 | 117 | 18,229 | 5,151 | 3,032 | 26,529 |
| 69,312 | 118 | 18,337 | 5,154 | 3,043 | 26,652 |
| 69,313 | 118 | 18,071 | 5,053 | 2,981 | 26,223 |
| 69,314 | 116 | 17,980 | 4,991 | 2,940 | 26,027 |
| 69,315 | 115 | 18,291 | 5,023 | 2,948 | 26,377 |
| 69,316 | 106 | 18,277 | 5,013 | 2,960 | 26,356 |
| 69,317 | 99  | 18,250 | 5,040 | 2,953 | 26,342 |
| 69,318 | 102 | 18,326 | 5,081 | 2,987 | 26,496 |
| 69,319 | 105 | 18,405 | 5,159 | 3,019 | 26,688 |
| 69,320 | 112 | 18,394 | 5,151 | 3,024 | 26,681 |
| 69,321 | 114 | 18,416 | 5,199 | 3,030 | 26,759 |
| 69,322 | 117 | 18,511 | 5,236 | 3,050 | 26,914 |
| 69,323 | 119 | 18,483 | 5,239 | 3,060 | 26,901 |
| 69,324 | 118 | 18,398 | 5,229 | 3,037 | 26,782 |
| 69,325 | 118 | 18,119 | 5,183 | 3,018 | 26,438 |
| 69,326 | 119 | 18,015 | 5,180 | 3,034 | 26,348 |
| 69,327 | 121 | 18,119 | 5,209 | 3,058 | 26,507 |
| 69,328 | 124 | 18,095 | 5,177 | 3,062 | 26,458 |
| 69,329 | 123 | 18,058 | 5,170 | 3,034 | 26,385 |
| 69,330 | 126 | 18,241 | 5,197 | 3,016 | 26,580 |
| 69,331 | 127 | 18,146 | 5,117 | 2,991 | 26,381 |
| 69,332 | 128 | 18,182 | 5,120 | 2,994 | 26,424 |
| 69,333 | 124 | 18,245 | 5,127 | 3,006 | 26,502 |
| 69,334 | 124 | 18,232 | 5,133 | 3,012 | 26,501 |
| 69,335 | 127 | 18,412 | 5,108 | 3,037 | 26,684 |

|        |     |        |       |       |        |
|--------|-----|--------|-------|-------|--------|
| 69,336 | 128 | 18,590 | 5,178 | 3,060 | 26,956 |
| 69,337 | 126 | 18,590 | 5,154 | 3,072 | 26,942 |
| 69,338 | 127 | 18,673 | 5,154 | 3,096 | 27,050 |
| 69,339 | 131 | 18,625 | 5,158 | 3,101 | 27,015 |
| 69,340 | 135 | 18,649 | 5,143 | 3,080 | 27,007 |
| 69,341 | 133 | 18,891 | 5,155 | 3,079 | 27,258 |
| 69,342 | 134 | 19,163 | 5,225 | 3,107 | 27,629 |
| 69,343 | 132 | 19,052 | 5,220 | 3,093 | 27,497 |
| 69,344 | 130 | 18,991 | 5,222 | 3,097 | 27,440 |
| 69,345 | 132 | 19,117 | 5,250 | 3,091 | 27,590 |
| 69,346 | 133 | 18,861 | 5,222 | 3,079 | 27,295 |
| 69,347 | 136 | 19,435 | 5,388 | 3,180 | 28,139 |
| 69,348 | 140 | 19,492 | 5,379 | 3,172 | 28,183 |
| 69,349 | 142 | 19,153 | 5,279 | 3,087 | 27,661 |
| 69,350 | 143 | 19,388 | 5,300 | 3,084 | 27,915 |
| 69,351 | 139 | 19,403 | 5,304 | 3,078 | 27,924 |
| 69,352 | 142 | 19,528 | 5,241 | 3,051 | 27,962 |
| 69,353 | 142 | 19,534 | 5,250 | 3,044 | 27,970 |
| 69,354 | 139 | 19,582 | 5,201 | 3,047 | 27,969 |
| 69,355 | 138 | 19,569 | 5,222 | 3,044 | 27,973 |
| 69,356 | 138 | 19,738 | 5,278 | 3,037 | 28,191 |
| 69,357 | 136 | 19,608 | 5,267 | 3,036 | 28,047 |
| 69,358 | 136 | 19,853 | 5,362 | 3,104 | 28,455 |
| 69,359 | 135 | 19,978 | 5,414 | 3,128 | 28,655 |
| 69,360 | 132 | 19,824 | 5,375 | 3,105 | 28,436 |
| 69,361 | 134 | 19,603 | 5,347 | 3,093 | 28,177 |
| 69,362 | 133 | 19,275 | 5,305 | 3,062 | 27,775 |
| 69,363 | 131 | 19,884 | 5,501 | 3,139 | 28,655 |
| 69,364 | 130 | 19,734 | 5,488 | 3,150 | 28,502 |
| 69,365 | 137 | 19,894 | 5,532 | 3,182 | 28,745 |
| 69,366 | 139 | 19,973 | 5,599 | 3,219 | 28,930 |
| 69,367 | 147 | 20,037 | 5,579 | 3,229 | 28,992 |



|        |     |        |       |       |        |
|--------|-----|--------|-------|-------|--------|
| 69,368 | 147 | 20,092 | 5,573 | 3,237 | 29,049 |
| 69,369 | 146 | 19,973 | 5,515 | 3,197 | 28,831 |
| 69,370 | 144 | 19,838 | 5,451 | 3,167 | 28,600 |
| 69,371 | 142 | 20,136 | 5,557 | 3,215 | 29,050 |
| 69,372 | 148 | 20,362 | 5,584 | 3,231 | 29,325 |
| 69,373 | 146 | 20,325 | 5,523 | 3,203 | 29,197 |
| 69,374 | 144 | 20,282 | 5,540 | 3,203 | 29,169 |
| 69,375 | 143 | 20,182 | 5,554 | 3,200 | 29,079 |
| 69,376 | 144 | 20,596 | 5,619 | 3,213 | 29,572 |
| 69,377 | 151 | 20,605 | 5,601 | 3,180 | 29,537 |
| 69,378 | 151 | 20,888 | 5,674 | 3,222 | 29,935 |
| 69,379 | 146 | 20,933 | 5,689 | 3,216 | 29,984 |
| 69,380 | 146 | 20,887 | 5,701 | 3,242 | 29,976 |
| 69,381 | 147 | 20,772 | 5,701 | 3,259 | 29,879 |
| 69,382 | 148 | 20,336 | 5,643 | 3,188 | 29,315 |
| 69,383 | 148 | 20,299 | 5,624 | 3,190 | 29,261 |
| 69,384 | 151 | 20,069 | 5,581 | 3,166 | 28,967 |
| 69,385 | 152 | 19,915 | 5,552 | 3,131 | 28,750 |
| 69,386 | 148 | 20,076 | 5,694 | 3,186 | 29,104 |
| 69,387 | 147 | 20,128 | 5,694 | 3,201 | 29,170 |
| 69,388 | 150 | 19,854 | 5,623 | 3,147 | 28,774 |
| 69,389 | 147 | 19,502 | 5,538 | 3,092 | 28,279 |
| 69,390 | 149 | 19,621 | 5,593 | 3,118 | 28,481 |
| 69,391 | 145 | 19,585 | 5,580 | 3,122 | 28,432 |
| 69,392 | 149 | 19,502 | 5,628 | 3,152 | 28,431 |
| 69,393 | 151 | 19,571 | 5,637 | 3,159 | 28,518 |
| 69,394 | 148 | 19,095 | 5,501 | 3,110 | 27,854 |
| 69,395 | 151 | 19,252 | 5,536 | 3,120 | 28,059 |
| 69,396 | 152 | 19,386 | 5,578 | 3,151 | 28,267 |
| 69,397 | 154 | 19,393 | 5,553 | 3,154 | 28,254 |
| 69,398 | 158 | 19,287 | 5,533 | 3,120 | 28,098 |
| 69,399 | 147 | 19,019 | 5,516 | 3,088 | 27,770 |

|        |     |        |       |       |        |
|--------|-----|--------|-------|-------|--------|
| 69,400 | 147 | 18,970 | 5,517 | 3,100 | 27,734 |
| 69,401 | 144 | 18,997 | 5,520 | 3,120 | 27,781 |
| 69,402 | 146 | 18,956 | 5,533 | 3,148 | 27,783 |
| 69,403 | 144 | 18,931 | 5,545 | 3,138 | 27,758 |
| 69,404 | 145 | 18,681 | 5,472 | 3,108 | 27,406 |
| 69,405 | 142 | 18,593 | 5,438 | 3,091 | 27,264 |
| 69,406 | 141 | 18,955 | 5,562 | 3,162 | 27,820 |
| 69,407 | 139 | 18,914 | 5,530 | 3,134 | 27,717 |
| 69,408 | 145 | 18,863 | 5,459 | 3,103 | 27,570 |
| 69,409 | 141 | 18,708 | 5,394 | 3,085 | 27,328 |
| 69,410 | 141 | 18,501 | 5,355 | 3,070 | 27,067 |
| 69,411 | 141 | 18,349 | 5,340 | 3,053 | 26,883 |
| 69,412 | 143 | 18,439 | 5,300 | 3,045 | 26,927 |
| 69,413 | 144 | 18,390 | 5,268 | 3,020 | 26,822 |
| 69,414 | 149 | 18,287 | 5,215 | 2,978 | 26,629 |
| 69,415 | 149 | 18,311 | 5,219 | 2,986 | 26,665 |
| 69,416 | 147 | 18,113 | 5,182 | 2,931 | 26,373 |
| 69,417 | 146 | 18,024 | 5,174 | 2,942 | 26,286 |
| 69,418 | 145 | 17,902 | 5,154 | 2,920 | 26,121 |
| 69,419 | 141 | 17,907 | 5,132 | 2,895 | 26,075 |
| 69,420 | 145 | 18,073 | 5,159 | 2,921 | 26,298 |
| 69,421 | 147 | 17,861 | 5,080 | 2,890 | 25,978 |
| 69,422 | 145 | 17,657 | 5,016 | 2,873 | 25,691 |
| 69,423 | 143 | 17,947 | 5,125 | 2,943 | 26,158 |
| 69,424 | 141 | 17,903 | 5,127 | 2,955 | 26,126 |
| 69,425 | 140 | 17,741 | 5,103 | 2,928 | 25,912 |
| 69,426 | 139 | 18,048 | 5,143 | 2,955 | 26,285 |
| 69,427 | 141 | 17,963 | 5,134 | 2,985 | 26,223 |
| 69,428 | 132 | 17,880 | 5,139 | 3,007 | 26,158 |
| 69,429 | 143 | 17,839 | 5,157 | 3,014 | 26,153 |
| 69,430 | 143 | 17,824 | 5,085 | 2,996 | 26,048 |
| 69,431 | 145 | 18,108 | 5,124 | 3,039 | 26,416 |

|        |     |        |       |       |        |
|--------|-----|--------|-------|-------|--------|
| 69,432 | 142 | 18,266 | 5,132 | 3,059 | 26,599 |
| 69,433 | 144 | 18,407 | 5,157 | 3,061 | 26,769 |
| 69,434 | 139 | 18,439 | 5,141 | 3,059 | 26,778 |
| 69,435 | 140 | 18,514 | 5,124 | 3,080 | 26,858 |
| 69,436 | 141 | 18,665 | 5,114 | 3,110 | 27,030 |
| 69,437 | 141 | 18,726 | 5,096 | 3,110 | 27,073 |
| 69,438 | 150 | 18,929 | 5,162 | 3,146 | 27,387 |
| 69,439 | 147 | 19,014 | 5,166 | 3,158 | 27,485 |
| 69,440 | 145 | 19,150 | 5,185 | 3,177 | 27,657 |
| 69,441 | 144 | 19,413 | 5,224 | 3,189 | 27,970 |
| 69,442 | 140 | 19,436 | 5,222 | 3,190 | 27,988 |
| 69,443 | 143 | 19,764 | 5,290 | 3,225 | 28,422 |
| 69,444 | 140 | 19,473 | 5,199 | 3,198 | 28,010 |
| 69,445 | 140 | 19,584 | 5,212 | 3,199 | 28,135 |
| 69,446 | 139 | 19,744 | 5,246 | 3,227 | 28,356 |
| 69,447 | 134 | 19,571 | 5,171 | 3,180 | 28,056 |
| 69,448 | 136 | 19,580 | 5,190 | 3,193 | 28,099 |
| 69,449 | 129 | 19,627 | 5,162 | 3,196 | 28,114 |
| 69,450 | 129 | 19,666 | 5,125 | 3,215 | 28,135 |
| 69,451 | 131 | 19,741 | 5,164 | 3,243 | 28,279 |
| 69,452 | 130 | 19,844 | 5,188 | 3,252 | 28,414 |
| 69,453 | 126 | 19,919 | 5,211 | 3,276 | 28,532 |
| 69,454 | 125 | 19,982 | 5,245 | 3,290 | 28,642 |
| 69,455 | 125 | 20,111 | 5,241 | 3,304 | 28,781 |
| 69,456 | 130 | 20,228 | 5,268 | 3,297 | 28,923 |
| 69,457 | 130 | 20,353 | 5,279 | 3,340 | 29,102 |
| 69,458 | 117 | 20,012 | 5,222 | 3,306 | 28,657 |
| 69,459 | 118 | 20,129 | 5,236 | 3,320 | 28,803 |
| 69,460 | 116 | 19,992 | 5,215 | 3,288 | 28,611 |
| 69,461 | 120 | 20,190 | 5,256 | 3,319 | 28,885 |
| 69,462 | 116 | 19,844 | 5,203 | 3,276 | 28,439 |
| 69,463 | 115 | 19,919 | 5,190 | 3,290 | 28,514 |

|        |     |        |       |       |        |
|--------|-----|--------|-------|-------|--------|
| 69,464 | 115 | 19,947 | 5,191 | 3,306 | 28,559 |
| 69,465 | 111 | 20,182 | 5,300 | 3,333 | 28,926 |
| 69,466 | 105 | 19,854 | 5,221 | 3,277 | 28,457 |
| 69,467 | 106 | 20,165 | 5,249 | 3,324 | 28,844 |
| 69,468 | 99  | 20,236 | 5,248 | 3,334 | 28,917 |
| 69,469 | 99  | 20,077 | 5,242 | 3,325 | 28,743 |
| 69,470 | 103 | 20,350 | 5,334 | 3,360 | 29,147 |
| 69,471 | 99  | 20,365 | 5,346 | 3,365 | 29,175 |
| 69,472 | 96  | 20,504 | 5,389 | 3,399 | 29,388 |
| 69,473 | 96  | 20,593 | 5,409 | 3,392 | 29,490 |
| 69,474 | 96  | 20,505 | 5,350 | 3,369 | 29,320 |
| 69,475 | 96  | 20,249 | 5,287 | 3,323 | 28,955 |
| 69,476 | 103 | 20,529 | 5,382 | 3,381 | 29,395 |
| 69,477 | 103 | 20,476 | 5,367 | 3,365 | 29,311 |
| 69,478 | 103 | 20,516 | 5,338 | 3,325 | 29,282 |
| 69,479 | 103 | 20,497 | 5,343 | 3,330 | 29,273 |
| 69,480 | 92  | 20,689 | 5,377 | 3,353 | 29,511 |
| 69,481 | 86  | 20,486 | 5,367 | 3,345 | 29,284 |
| 69,482 | 84  | 20,422 | 5,358 | 3,344 | 29,208 |
| 69,483 | 81  | 20,425 | 5,361 | 3,346 | 29,213 |
| 69,484 | 80  | 20,032 | 5,292 | 3,311 | 28,715 |
| 69,485 | 80  | 20,248 | 5,381 | 3,344 | 29,053 |
| 69,486 | 81  | 20,485 | 5,431 | 3,360 | 29,357 |
| 69,487 | 84  | 20,259 | 5,401 | 3,289 | 29,033 |
| 69,488 | 84  | 20,283 | 5,393 | 3,301 | 29,061 |
| 69,489 | 76  | 20,534 | 5,496 | 3,332 | 29,438 |
| 69,490 | 89  | 20,471 | 5,508 | 3,341 | 29,409 |
| 69,491 | 88  | 20,401 | 5,468 | 3,332 | 29,289 |
| 69,492 | 92  | 19,955 | 5,348 | 3,266 | 28,661 |
| 69,493 | 89  | 19,899 | 5,340 | 3,251 | 28,579 |
| 69,494 | 90  | 19,887 | 5,322 | 3,224 | 28,523 |
| 69,495 | 91  | 19,900 | 5,331 | 3,215 | 28,537 |

|        |     |        |       |       |        |
|--------|-----|--------|-------|-------|--------|
| 69,496 | 96  | 19,985 | 5,355 | 3,223 | 28,659 |
| 69,497 | 95  | 19,791 | 5,327 | 3,197 | 28,410 |
| 69,498 | 103 | 19,980 | 5,406 | 3,234 | 28,723 |
| 69,499 | 103 | 20,021 | 5,396 | 3,248 | 28,768 |
| 69,500 | 105 | 19,865 | 5,353 | 3,207 | 28,530 |
| 69,501 | 105 | 19,811 | 5,344 | 3,194 | 28,454 |
| 69,502 | 109 | 19,846 | 5,384 | 3,191 | 28,530 |
| 69,503 | 112 | 20,010 | 5,352 | 3,166 | 28,640 |
| 69,504 | 113 | 20,055 | 5,410 | 3,219 | 28,797 |
| 69,505 | 114 | 19,893 | 5,389 | 3,221 | 28,617 |
| 69,506 | 114 | 19,904 | 5,393 | 3,199 | 28,610 |
| 69,507 | 114 | 19,886 | 5,392 | 3,188 | 28,580 |
| 69,508 | 114 | 19,926 | 5,386 | 3,171 | 28,597 |
| 69,509 | 114 | 19,979 | 5,390 | 3,157 | 28,640 |
| 69,510 | 113 | 20,101 | 5,386 | 3,157 | 28,757 |
| 69,511 | 114 | 20,259 | 5,404 | 3,157 | 28,934 |
| 69,512 | 112 | 20,160 | 5,366 | 3,151 | 28,789 |
| 69,513 | 112 | 20,211 | 5,359 | 3,153 | 28,835 |
| 69,514 | 115 | 20,484 | 5,442 | 3,203 | 29,244 |
| 69,515 | 117 | 20,466 | 5,456 | 3,204 | 29,243 |
| 69,516 | 116 | 20,333 | 5,401 | 3,188 | 29,038 |
| 69,517 | 119 | 20,643 | 5,481 | 3,248 | 29,491 |
| 69,518 | 120 | 20,457 | 5,439 | 3,221 | 29,237 |
| 69,519 | 120 | 20,287 | 5,413 | 3,197 | 29,017 |
| 69,520 | 115 | 20,416 | 5,412 | 3,229 | 29,172 |
| 69,521 | 117 | 20,164 | 5,350 | 3,198 | 28,829 |
| 69,522 | 117 | 20,202 | 5,346 | 3,189 | 28,854 |
| 69,523 | 113 | 20,022 | 5,299 | 3,153 | 28,587 |
| 69,524 | 112 | 19,800 | 5,245 | 3,119 | 28,276 |
| 69,525 | 112 | 20,921 | 5,554 | 3,313 | 29,900 |
| 69,526 | 112 | 20,676 | 5,466 | 3,279 | 29,533 |
| 69,527 | 113 | 20,654 | 5,490 | 3,279 | 29,536 |

|        |     |        |       |       |        |
|--------|-----|--------|-------|-------|--------|
| 69,528 | 119 | 20,809 | 5,528 | 3,307 | 29,763 |
| 69,529 | 122 | 20,704 | 5,511 | 3,290 | 29,627 |
| 69,530 | 124 | 20,701 | 5,526 | 3,298 | 29,649 |
| 69,531 | 131 | 20,601 | 5,461 | 3,234 | 29,427 |
| 69,532 | 133 | 20,869 | 5,505 | 3,273 | 29,780 |
| 69,533 | 132 | 20,827 | 5,518 | 3,280 | 29,757 |
| 69,534 | 135 | 20,822 | 5,520 | 3,279 | 29,756 |
| 69,535 | 144 | 20,842 | 5,542 | 3,251 | 29,779 |
| 69,536 | 148 | 20,881 | 5,508 | 3,234 | 29,771 |
| 69,537 | 144 | 20,701 | 5,479 | 3,224 | 29,548 |
| 69,538 | 141 | 20,918 | 5,526 | 3,275 | 29,860 |
| 69,539 | 140 | 20,882 | 5,527 | 3,291 | 29,840 |
| 69,540 | 143 | 21,098 | 5,557 | 3,330 | 30,128 |
| 69,541 | 135 | 21,122 | 5,555 | 3,328 | 30,140 |
| 69,542 | 135 | 21,222 | 5,603 | 3,349 | 30,309 |
| 69,543 | 129 | 21,036 | 5,549 | 3,336 | 30,050 |
| 69,544 | 130 | 21,074 | 5,567 | 3,340 | 30,111 |
| 69,545 | 133 | 21,149 | 5,585 | 3,346 | 30,213 |
| 69,546 | 132 | 21,208 | 5,575 | 3,337 | 30,252 |
| 69,547 | 128 | 21,304 | 5,588 | 3,353 | 30,373 |
| 69,548 | 126 | 21,323 | 5,587 | 3,362 | 30,398 |
| 69,549 | 118 | 21,634 | 5,625 | 3,399 | 30,776 |
| 69,550 | 117 | 21,318 | 5,599 | 3,380 | 30,414 |
| 69,551 | 117 | 21,250 | 5,600 | 3,386 | 30,353 |
| 69,552 | 114 | 21,273 | 5,650 | 3,418 | 30,455 |
| 69,553 | 117 | 21,527 | 5,686 | 3,447 | 30,777 |
| 69,554 | 114 | 21,587 | 5,705 | 3,460 | 30,866 |
| 69,555 | 114 | 21,452 | 5,620 | 3,397 | 30,583 |
| 69,556 | 118 | 21,523 | 5,621 | 3,403 | 30,665 |
| 69,557 | 116 | 21,325 | 5,560 | 3,407 | 30,408 |
| 69,558 | 111 | 21,362 | 5,631 | 3,466 | 30,570 |
| 69,559 | 111 | 21,132 | 5,590 | 3,449 | 30,282 |

|        |     |        |       |       |        |
|--------|-----|--------|-------|-------|--------|
| 69,560 | 111 | 20,871 | 5,535 | 3,422 | 29,939 |
| 69,561 | 113 | 21,112 | 5,627 | 3,493 | 30,345 |
| 69,562 | 112 | 21,039 | 5,623 | 3,513 | 30,287 |
| 69,563 | 112 | 21,099 | 5,662 | 3,519 | 30,392 |
| 69,564 | 109 | 21,156 | 5,683 | 3,545 | 30,493 |
| 69,565 | 109 | 21,123 | 5,681 | 3,531 | 30,444 |
| 69,566 | 112 | 21,189 | 5,679 | 3,533 | 30,513 |
| 69,567 | 118 | 21,166 | 5,680 | 3,524 | 30,488 |
| 69,568 | 115 | 21,010 | 5,623 | 3,493 | 30,241 |
| 69,569 | 116 | 20,827 | 5,574 | 3,457 | 29,974 |
| 69,570 | 116 | 20,561 | 5,516 | 3,414 | 29,607 |
| 69,571 | 114 | 20,684 | 5,598 | 3,437 | 29,833 |
| 69,572 | 115 | 20,848 | 5,626 | 3,458 | 30,047 |
| 69,573 | 110 | 21,070 | 5,675 | 3,507 | 30,362 |
| 69,574 | 117 | 20,784 | 5,578 | 3,463 | 29,942 |
| 69,575 | 117 | 20,621 | 5,533 | 3,442 | 29,713 |
| 69,576 | 124 | 20,949 | 5,597 | 3,489 | 30,159 |
| 69,577 | 124 | 20,742 | 5,545 | 3,460 | 29,871 |
| 69,578 | 123 | 20,645 | 5,525 | 3,459 | 29,752 |
| 69,579 | 117 | 20,606 | 5,511 | 3,447 | 29,681 |
| 69,580 | 117 | 20,279 | 5,426 | 3,405 | 29,227 |
| 69,581 | 115 | 19,978 | 5,362 | 3,365 | 28,820 |
| 69,582 | 116 | 20,615 | 5,524 | 3,440 | 29,695 |
| 69,583 | 111 | 20,079 | 5,382 | 3,364 | 28,936 |
| 69,584 | 114 | 20,162 | 5,429 | 3,385 | 29,090 |
| 69,585 | 107 | 20,288 | 5,468 | 3,423 | 29,286 |
| 69,586 | 106 | 20,305 | 5,456 | 3,415 | 29,282 |
| 69,587 | 106 | 20,308 | 5,470 | 3,419 | 29,303 |
| 69,588 | 105 | 20,223 | 5,448 | 3,384 | 29,160 |
| 69,589 | 107 | 20,392 | 5,490 | 3,400 | 29,389 |
| 69,590 | 105 | 20,446 | 5,491 | 3,400 | 29,442 |
| 69,591 | 105 | 20,392 | 5,463 | 3,392 | 29,352 |

|        |     |        |       |       |        |
|--------|-----|--------|-------|-------|--------|
| 69,592 | 104 | 20,077 | 5,400 | 3,353 | 28,934 |
| 69,593 | 104 | 20,005 | 5,381 | 3,332 | 28,822 |
| 69,594 | 104 | 19,987 | 5,419 | 3,338 | 28,848 |
| 69,595 | 104 | 19,811 | 5,375 | 3,321 | 28,611 |
| 69,596 | 106 | 19,937 | 5,448 | 3,361 | 28,852 |
| 69,597 | 109 | 19,888 | 5,469 | 3,384 | 28,850 |
| 69,598 | 110 | 19,862 | 5,504 | 3,435 | 28,911 |
| 69,599 | 112 | 19,782 | 5,508 | 3,434 | 28,836 |
| 69,600 | 111 | 19,584 | 5,459 | 3,398 | 28,552 |
| 69,601 | 114 | 19,675 | 5,494 | 3,409 | 28,692 |
| 69,602 | 112 | 19,731 | 5,504 | 3,405 | 28,752 |
| 69,603 | 112 | 19,725 | 5,497 | 3,424 | 28,758 |
| 69,604 | 108 | 20,030 | 5,564 | 3,456 | 29,158 |
| 69,605 | 108 | 19,853 | 5,543 | 3,467 | 28,971 |
| 69,606 | 107 | 20,084 | 5,580 | 3,500 | 29,271 |
| 69,607 | 109 | 20,429 | 5,634 | 3,497 | 29,669 |
| 69,608 | 109 | 20,454 | 5,613 | 3,489 | 29,665 |
| 69,609 | 107 | 20,900 | 5,713 | 3,544 | 30,264 |
| 69,610 | 111 | 20,863 | 5,674 | 3,521 | 30,169 |
| 69,611 | 111 | 20,822 | 5,691 | 3,526 | 30,150 |
| 69,612 | 114 | 21,096 | 5,811 | 3,548 | 30,569 |
| 69,613 | 119 | 20,868 | 5,713 | 3,500 | 30,200 |
| 69,614 | 118 | 20,790 | 5,721 | 3,508 | 30,137 |
| 69,615 | 121 | 20,420 | 5,655 | 3,445 | 29,641 |
| 69,616 | 125 | 20,193 | 5,583 | 3,417 | 29,318 |
| 69,617 | 136 | 21,014 | 5,802 | 3,533 | 30,485 |
| 69,618 | 132 | 20,705 | 5,741 | 3,513 | 30,091 |
| 69,619 | 132 | 20,613 | 5,703 | 3,491 | 29,939 |
| 69,620 | 137 | 20,738 | 5,725 | 3,531 | 30,131 |
| 69,621 | 137 | 20,663 | 5,707 | 3,526 | 30,033 |
| 69,622 | 136 | 20,704 | 5,678 | 3,514 | 30,032 |
| 69,623 | 139 | 20,605 | 5,674 | 3,486 | 29,904 |



|        |     |        |       |       |        |
|--------|-----|--------|-------|-------|--------|
| 69,624 | 146 | 20,797 | 5,709 | 3,496 | 30,148 |
| 69,625 | 137 | 20,903 | 5,684 | 3,519 | 30,243 |
| 69,626 | 133 | 20,589 | 5,617 | 3,462 | 29,801 |
| 69,627 | 133 | 20,320 | 5,549 | 3,437 | 29,439 |
| 69,628 | 133 | 20,116 | 5,486 | 3,401 | 29,136 |
| 69,629 | 134 | 20,731 | 5,626 | 3,490 | 29,981 |
| 69,630 | 138 | 21,093 | 5,718 | 3,551 | 30,500 |
| 69,631 | 134 | 21,238 | 5,770 | 3,579 | 30,721 |
| 69,632 | 135 | 21,409 | 5,805 | 3,623 | 30,972 |
| 69,633 | 134 | 21,169 | 5,775 | 3,602 | 30,680 |
| 69,634 | 132 | 21,397 | 5,814 | 3,650 | 30,993 |
| 69,635 | 134 | 21,376 | 5,800 | 3,656 | 30,966 |
| 69,636 | 136 | 21,670 | 5,859 | 3,680 | 31,345 |
| 69,637 | 136 | 21,789 | 5,882 | 3,707 | 31,514 |
| 69,638 | 138 | 21,589 | 5,852 | 3,700 | 31,279 |
| 69,639 | 138 | 21,806 | 5,879 | 3,707 | 31,530 |
| 69,640 | 140 | 21,432 | 5,779 | 3,647 | 30,998 |
| 69,641 | 140 | 21,414 | 5,775 | 3,642 | 30,971 |
| 69,642 | 140 | 21,766 | 5,868 | 3,681 | 31,455 |
| 69,643 | 142 | 21,745 | 5,806 | 3,644 | 31,337 |
| 69,644 | 142 | 21,860 | 5,835 | 3,662 | 31,499 |
| 69,645 | 140 | 22,127 | 5,868 | 3,704 | 31,839 |
| 69,646 | 134 | 21,821 | 5,728 | 3,634 | 31,317 |
| 69,647 | 134 | 21,911 | 5,777 | 3,650 | 31,472 |
| 69,648 | 132 | 22,159 | 5,841 | 3,698 | 31,830 |
| 69,649 | 138 | 22,121 | 5,831 | 3,653 | 31,743 |
| 69,650 | 137 | 22,055 | 5,833 | 3,658 | 31,683 |
| 69,651 | 137 | 21,946 | 5,828 | 3,632 | 31,543 |
| 69,652 | 135 | 22,060 | 5,843 | 3,643 | 31,681 |
| 69,653 | 138 | 22,064 | 5,846 | 3,644 | 31,692 |
| 69,654 | 138 | 22,151 | 5,848 | 3,640 | 31,777 |
| 69,655 | 140 | 21,775 | 5,784 | 3,581 | 31,280 |

|        |     |        |       |       |        |
|--------|-----|--------|-------|-------|--------|
| 69,656 | 150 | 22,016 | 5,802 | 3,588 | 31,556 |
| 69,657 | 150 | 21,882 | 5,758 | 3,562 | 31,352 |
| 69,658 | 154 | 21,866 | 5,733 | 3,556 | 31,309 |
| 69,659 | 158 | 21,832 | 5,714 | 3,541 | 31,245 |
| 69,660 | 163 | 22,011 | 5,705 | 3,564 | 31,443 |
| 69,661 | 163 | 21,875 | 5,645 | 3,518 | 31,201 |
| 69,662 | 168 | 21,807 | 5,580 | 3,485 | 31,040 |
| 69,663 | 170 | 21,913 | 5,588 | 3,493 | 31,164 |
| 69,664 | 164 | 21,881 | 5,569 | 3,485 | 31,099 |
| 69,665 | 171 | 22,122 | 5,581 | 3,468 | 31,342 |
| 69,666 | 172 | 22,113 | 5,573 | 3,476 | 31,334 |
| 69,667 | 163 | 22,111 | 5,599 | 3,487 | 31,360 |
| 69,668 | 172 | 22,080 | 5,584 | 3,474 | 31,310 |
| 69,669 | 168 | 21,802 | 5,521 | 3,430 | 30,921 |
| 69,670 | 163 | 21,814 | 5,569 | 3,439 | 30,985 |
| 69,671 | 166 | 21,899 | 5,568 | 3,465 | 31,098 |
| 69,672 | 163 | 21,677 | 5,538 | 3,433 | 30,811 |
| 69,673 | 164 | 21,681 | 5,551 | 3,455 | 30,851 |
| 69,674 | 163 | 21,847 | 5,562 | 3,463 | 31,035 |
| 69,675 | 156 | 21,861 | 5,573 | 3,472 | 31,062 |
| 69,676 | 154 | 21,743 | 5,588 | 3,468 | 30,953 |
| 69,677 | 152 | 21,935 | 5,604 | 3,539 | 31,230 |
| 69,678 | 154 | 21,970 | 5,684 | 3,578 | 31,386 |
| 69,679 | 156 | 21,806 | 5,634 | 3,539 | 31,135 |
| 69,680 | 155 | 21,743 | 5,622 | 3,525 | 31,045 |
| 69,681 | 157 | 21,792 | 5,668 | 3,536 | 31,153 |
| 69,682 | 162 | 21,833 | 5,670 | 3,565 | 31,230 |
| 69,683 | 158 | 21,437 | 5,595 | 3,510 | 30,700 |
| 69,684 | 158 | 21,711 | 5,620 | 3,517 | 31,006 |
| 69,685 | 158 | 21,710 | 5,592 | 3,530 | 30,990 |
| 69,686 | 155 | 21,609 | 5,587 | 3,508 | 30,859 |
| 69,687 | 155 | 21,688 | 5,622 | 3,547 | 31,012 |

|        |     |        |       |       |        |
|--------|-----|--------|-------|-------|--------|
| 69,688 | 157 | 21,599 | 5,647 | 3,529 | 30,932 |
| 69,689 | 163 | 21,611 | 5,660 | 3,518 | 30,952 |
| 69,690 | 163 | 21,446 | 5,642 | 3,529 | 30,780 |
| 69,691 | 156 | 21,584 | 5,681 | 3,574 | 30,995 |
| 69,692 | 155 | 21,791 | 5,755 | 3,611 | 31,312 |
| 69,693 | 158 | 21,829 | 5,759 | 3,618 | 31,364 |
| 69,694 | 160 | 21,871 | 5,768 | 3,629 | 31,428 |
| 69,695 | 160 | 21,793 | 5,754 | 3,632 | 31,339 |
| 69,696 | 161 | 21,750 | 5,801 | 3,635 | 31,347 |
| 69,697 | 160 | 21,890 | 5,885 | 3,672 | 31,607 |
| 69,698 | 163 | 21,892 | 5,801 | 3,634 | 31,490 |
| 69,699 | 163 | 22,168 | 5,898 | 3,673 | 31,902 |
| 69,700 | 156 | 22,472 | 6,003 | 3,729 | 32,360 |
| 69,701 | 155 | 22,612 | 5,989 | 3,737 | 32,493 |
| 69,702 | 153 | 22,548 | 5,985 | 3,735 | 32,421 |
| 69,703 | 156 | 22,543 | 5,951 | 3,724 | 32,374 |
| 69,704 | 154 | 22,287 | 5,871 | 3,677 | 31,989 |
| 69,705 | 157 | 21,935 | 5,807 | 3,633 | 31,532 |
| 69,706 | 155 | 21,593 | 5,733 | 3,599 | 31,080 |
| 69,707 | 145 | 21,853 | 5,828 | 3,629 | 31,455 |
| 69,708 | 144 | 21,642 | 5,791 | 3,590 | 31,167 |
| 69,709 | 136 | 21,248 | 5,724 | 3,548 | 30,656 |
| 69,710 | 132 | 20,712 | 5,644 | 3,477 | 29,965 |
| 69,711 | 131 | 20,669 | 5,647 | 3,471 | 29,918 |
| 69,712 | 126 | 20,267 | 5,594 | 3,432 | 29,419 |
| 69,713 | 117 | 19,948 | 5,543 | 3,416 | 29,024 |
| 69,714 | 122 | 20,655 | 5,761 | 3,556 | 30,094 |
| 69,715 | 119 | 20,596 | 5,779 | 3,560 | 30,054 |
| 69,716 | 111 | 20,578 | 5,766 | 3,573 | 30,028 |
| 69,717 | 112 | 20,526 | 5,727 | 3,560 | 29,925 |
| 69,718 | 108 | 20,584 | 5,750 | 3,568 | 30,010 |
| 69,719 | 100 | 20,661 | 5,721 | 3,571 | 30,053 |

|        |     |        |       |       |        |
|--------|-----|--------|-------|-------|--------|
| 69,720 | 99  | 20,634 | 5,714 | 3,562 | 30,009 |
| 69,721 | 101 | 20,996 | 5,758 | 3,606 | 30,461 |
| 69,722 | 100 | 21,028 | 5,796 | 3,593 | 30,517 |
| 69,723 | 104 | 21,013 | 5,785 | 3,583 | 30,485 |
| 69,724 | 107 | 20,966 | 5,806 | 3,582 | 30,461 |
| 69,725 | 107 | 20,656 | 5,757 | 3,556 | 30,076 |
| 69,726 | 115 | 21,056 | 5,856 | 3,605 | 30,632 |
| 69,727 | 117 | 20,988 | 5,875 | 3,553 | 30,533 |
| 69,728 | 114 | 20,758 | 5,738 | 3,459 | 30,069 |
| 69,729 | 111 | 20,786 | 5,719 | 3,422 | 30,038 |
| 69,730 | 111 | 20,890 | 5,736 | 3,438 | 30,175 |
| 69,731 | 106 | 20,857 | 5,728 | 3,417 | 30,108 |
| 69,732 | 107 | 20,596 | 5,670 | 3,371 | 29,744 |
| 69,733 | 106 | 20,593 | 5,678 | 3,362 | 29,739 |
| 69,734 | 110 | 20,744 | 5,722 | 3,380 | 29,956 |
| 69,735 | 111 | 20,575 | 5,692 | 3,373 | 29,751 |
| 69,736 | 112 | 20,264 | 5,598 | 3,307 | 29,281 |
| 69,737 | 115 | 20,288 | 5,596 | 3,308 | 29,307 |
| 69,738 | 113 | 19,975 | 5,542 | 3,263 | 28,893 |
| 69,739 | 108 | 20,355 | 5,613 | 3,327 | 29,403 |
| 69,740 | 101 | 20,178 | 5,514 | 3,285 | 29,078 |
| 69,741 | 102 | 20,190 | 5,533 | 3,289 | 29,114 |
| 69,742 | 102 | 20,181 | 5,482 | 3,254 | 29,019 |
| 69,743 | 102 | 19,864 | 5,442 | 3,220 | 28,628 |
| 69,744 | 101 | 19,960 | 5,483 | 3,237 | 28,781 |
| 69,745 | 105 | 19,910 | 5,464 | 3,247 | 28,726 |
| 69,746 | 104 | 19,774 | 5,408 | 3,215 | 28,501 |
| 69,747 | 109 | 20,017 | 5,458 | 3,246 | 28,830 |
| 69,748 | 116 | 19,748 | 5,379 | 3,190 | 28,433 |
| 69,749 | 113 | 19,390 | 5,302 | 3,167 | 27,972 |
| 69,750 | 124 | 19,707 | 5,416 | 3,228 | 28,475 |
| 69,751 | 127 | 19,569 | 5,354 | 3,208 | 28,258 |

|        |     |        |       |       |        |
|--------|-----|--------|-------|-------|--------|
| 69,752 | 130 | 19,370 | 5,282 | 3,154 | 27,936 |
| 69,753 | 126 | 19,371 | 5,272 | 3,157 | 27,926 |
| 69,754 | 127 | 19,613 | 5,285 | 3,163 | 28,188 |
| 69,755 | 130 | 19,638 | 5,302 | 3,152 | 28,222 |
| 69,756 | 127 | 19,460 | 5,246 | 3,129 | 27,962 |
| 69,757 | 127 | 19,600 | 5,290 | 3,157 | 28,174 |
| 69,758 | 127 | 19,565 | 5,255 | 3,180 | 28,127 |
| 69,759 | 128 | 19,360 | 5,190 | 3,154 | 27,832 |
| 69,760 | 126 | 19,254 | 5,144 | 3,131 | 27,655 |
| 69,761 | 126 | 19,930 | 5,345 | 3,239 | 28,640 |
| 69,762 | 122 | 20,172 | 5,377 | 3,260 | 28,931 |
| 69,763 | 122 | 20,170 | 5,337 | 3,235 | 28,864 |
| 69,764 | 124 | 20,495 | 5,412 | 3,275 | 29,306 |
| 69,765 | 124 | 20,318 | 5,397 | 3,270 | 29,109 |
| 69,766 | 128 | 20,412 | 5,390 | 3,258 | 29,188 |
| 69,767 | 126 | 20,197 | 5,360 | 3,234 | 28,917 |
| 69,768 | 128 | 20,688 | 5,477 | 3,287 | 29,580 |
| 69,769 | 129 | 20,777 | 5,476 | 3,286 | 29,668 |
| 69,770 | 126 | 20,590 | 5,433 | 3,254 | 29,403 |
| 69,771 | 126 | 20,558 | 5,459 | 3,244 | 29,387 |
| 69,772 | 126 | 20,867 | 5,534 | 3,291 | 29,818 |
| 69,773 | 127 | 20,830 | 5,479 | 3,260 | 29,696 |
| 69,774 | 127 | 20,829 | 5,461 | 3,255 | 29,672 |
| 69,775 | 123 | 20,910 | 5,515 | 3,277 | 29,825 |
| 69,776 | 127 | 21,018 | 5,532 | 3,288 | 29,965 |
| 69,777 | 124 | 20,910 | 5,507 | 3,281 | 29,822 |
| 69,778 | 125 | 20,866 | 5,453 | 3,275 | 29,719 |
| 69,779 | 128 | 20,642 | 5,447 | 3,249 | 29,466 |
| 69,780 | 128 | 20,719 | 5,461 | 3,257 | 29,565 |
| 69,781 | 135 | 20,803 | 5,485 | 3,263 | 29,686 |
| 69,782 | 135 | 20,822 | 5,479 | 3,271 | 29,707 |
| 69,783 | 134 | 20,979 | 5,494 | 3,283 | 29,890 |

|        |     |        |       |       |        |
|--------|-----|--------|-------|-------|--------|
| 69,784 | 137 | 21,227 | 5,536 | 3,313 | 30,213 |
| 69,785 | 134 | 21,110 | 5,476 | 3,298 | 30,018 |
| 69,786 | 135 | 21,327 | 5,515 | 3,326 | 30,303 |
| 69,787 | 139 | 21,326 | 5,534 | 3,316 | 30,315 |
| 69,788 | 137 | 21,202 | 5,468 | 3,282 | 30,089 |
| 69,789 | 140 | 21,174 | 5,506 | 3,270 | 30,090 |
| 69,790 | 142 | 21,217 | 5,504 | 3,276 | 30,139 |
| 69,791 | 146 | 21,502 | 5,586 | 3,321 | 30,555 |
| 69,792 | 151 | 21,237 | 5,546 | 3,307 | 30,241 |
| 69,793 | 151 | 21,362 | 5,533 | 3,320 | 30,366 |
| 69,794 | 151 | 21,401 | 5,554 | 3,328 | 30,434 |
| 69,795 | 144 | 21,419 | 5,577 | 3,325 | 30,465 |
| 69,796 | 144 | 21,435 | 5,574 | 3,319 | 30,472 |
| 69,797 | 150 | 21,493 | 5,590 | 3,332 | 30,565 |
| 69,798 | 148 | 21,332 | 5,588 | 3,333 | 30,401 |
| 69,799 | 141 | 21,689 | 5,692 | 3,420 | 30,942 |
| 69,800 | 140 | 21,909 | 5,709 | 3,444 | 31,202 |
| 69,801 | 139 | 21,690 | 5,623 | 3,408 | 30,860 |
| 69,802 | 135 | 21,449 | 5,585 | 3,383 | 30,552 |
| 69,803 | 133 | 21,506 | 5,652 | 3,434 | 30,725 |
| 69,804 | 135 | 21,944 | 5,787 | 3,493 | 31,359 |
| 69,805 | 139 | 22,170 | 5,820 | 3,518 | 31,647 |
| 69,806 | 135 | 22,023 | 5,765 | 3,502 | 31,425 |
| 69,807 | 134 | 22,091 | 5,790 | 3,533 | 31,548 |
| 69,808 | 135 | 22,197 | 5,843 | 3,555 | 31,730 |
| 69,809 | 138 | 22,390 | 5,901 | 3,563 | 31,992 |
| 69,810 | 134 | 22,343 | 5,930 | 3,561 | 31,968 |
| 69,811 | 133 | 22,068 | 5,859 | 3,534 | 31,594 |
| 69,812 | 136 | 21,818 | 5,831 | 3,506 | 31,291 |
| 69,813 | 138 | 21,996 | 5,876 | 3,528 | 31,538 |
| 69,814 | 140 | 21,979 | 5,863 | 3,512 | 31,494 |
| 69,815 | 139 | 21,796 | 5,782 | 3,477 | 31,194 |

|        |     |        |       |       |        |
|--------|-----|--------|-------|-------|--------|
| 69,816 | 139 | 21,907 | 5,858 | 3,532 | 31,436 |
| 69,817 | 148 | 22,217 | 5,940 | 3,596 | 31,901 |
| 69,818 | 148 | 22,070 | 5,918 | 3,564 | 31,700 |
| 69,819 | 147 | 22,053 | 5,920 | 3,567 | 31,687 |
| 69,820 | 150 | 22,108 | 5,949 | 3,571 | 31,778 |
| 69,821 | 148 | 22,165 | 5,991 | 3,578 | 31,882 |
| 69,822 | 150 | 21,967 | 5,946 | 3,550 | 31,613 |
| 69,823 | 155 | 22,169 | 5,967 | 3,549 | 31,840 |
| 69,824 | 162 | 22,379 | 6,030 | 3,595 | 32,166 |
| 69,825 | 168 | 22,500 | 6,049 | 3,614 | 32,331 |
| 69,826 | 166 | 22,499 | 6,015 | 3,608 | 32,288 |
| 69,827 | 165 | 22,463 | 6,021 | 3,611 | 32,260 |
| 69,828 | 164 | 22,490 | 6,028 | 3,624 | 32,306 |
| 69,829 | 163 | 22,510 | 6,061 | 3,631 | 32,365 |
| 69,830 | 159 | 22,532 | 6,110 | 3,686 | 32,487 |
| 69,831 | 156 | 22,326 | 6,051 | 3,642 | 32,175 |
| 69,832 | 153 | 22,318 | 6,075 | 3,670 | 32,216 |
| 69,833 | 154 | 22,221 | 6,081 | 3,666 | 32,122 |
| 69,834 | 151 | 22,043 | 6,044 | 3,645 | 31,883 |
| 69,835 | 147 | 21,862 | 6,060 | 3,627 | 31,696 |
| 69,836 | 145 | 21,852 | 6,051 | 3,630 | 31,678 |
| 69,837 | 145 | 21,776 | 6,050 | 3,613 | 31,584 |
| 69,838 | 138 | 21,668 | 6,003 | 3,605 | 31,414 |
| 69,839 | 139 | 21,622 | 5,951 | 3,598 | 31,310 |
| 69,840 | 139 | 21,593 | 5,938 | 3,597 | 31,267 |
| 69,841 | 138 | 21,823 | 5,987 | 3,622 | 31,570 |
| 69,842 | 135 | 21,689 | 5,957 | 3,614 | 31,395 |
| 69,843 | 130 | 21,732 | 5,919 | 3,595 | 31,376 |
| 69,844 | 131 | 21,739 | 5,953 | 3,612 | 31,435 |
| 69,845 | 131 | 21,918 | 5,985 | 3,625 | 31,659 |
| 69,846 | 129 | 21,797 | 5,932 | 3,591 | 31,449 |
| 69,847 | 131 | 21,896 | 5,945 | 3,630 | 31,602 |

|        |     |        |       |       |        |
|--------|-----|--------|-------|-------|--------|
| 69,848 | 123 | 21,865 | 5,930 | 3,627 | 31,545 |
| 69,849 | 119 | 21,917 | 5,891 | 3,624 | 31,551 |
| 69,850 | 116 | 21,677 | 5,860 | 3,593 | 31,246 |
| 69,851 | 115 | 21,866 | 5,895 | 3,620 | 31,496 |
| 69,852 | 113 | 21,703 | 5,845 | 3,595 | 31,256 |
| 69,853 | 113 | 21,731 | 5,850 | 3,577 | 31,271 |
| 69,854 | 117 | 21,804 | 5,851 | 3,567 | 31,339 |
| 69,855 | 118 | 21,706 | 5,814 | 3,547 | 31,185 |
| 69,856 | 113 | 21,324 | 5,737 | 3,487 | 30,661 |
| 69,857 | 119 | 21,333 | 5,737 | 3,457 | 30,646 |
| 69,858 | 118 | 21,262 | 5,714 | 3,439 | 30,533 |
| 69,859 | 120 | 21,492 | 5,785 | 3,473 | 30,870 |
| 69,860 | 119 | 21,302 | 5,727 | 3,461 | 30,609 |
| 69,861 | 135 | 21,351 | 5,716 | 3,470 | 30,672 |
| 69,862 | 135 | 21,398 | 5,708 | 3,483 | 30,724 |
| 69,863 | 138 | 21,432 | 5,752 | 3,486 | 30,808 |
| 69,864 | 137 | 21,452 | 5,800 | 3,500 | 30,889 |
| 69,865 | 134 | 21,291 | 5,807 | 3,476 | 30,708 |
| 69,866 | 135 | 20,940 | 5,755 | 3,416 | 30,246 |
| 69,867 | 135 | 21,174 | 5,774 | 3,452 | 30,535 |
| 69,868 | 130 | 21,195 | 5,772 | 3,438 | 30,535 |
| 69,869 | 128 | 20,960 | 5,720 | 3,424 | 30,232 |
| 69,870 | 125 | 21,048 | 5,754 | 3,464 | 30,391 |
| 69,871 | 126 | 20,708 | 5,664 | 3,437 | 29,935 |
| 69,872 | 126 | 20,610 | 5,648 | 3,420 | 29,804 |
| 69,873 | 121 | 20,467 | 5,627 | 3,430 | 29,645 |
| 69,874 | 118 | 20,129 | 5,597 | 3,418 | 29,262 |
| 69,875 | 109 | 19,759 | 5,513 | 3,380 | 28,761 |
| 69,876 | 108 | 19,872 | 5,668 | 3,469 | 29,117 |
| 69,877 | 105 | 19,663 | 5,654 | 3,455 | 28,877 |
| 69,878 | 105 | 19,550 | 5,649 | 3,449 | 28,753 |
| 69,879 | 105 | 19,568 | 5,664 | 3,465 | 28,802 |



|        |     |        |       |       |        |
|--------|-----|--------|-------|-------|--------|
| 69,880 | 111 | 19,742 | 5,674 | 3,495 | 29,022 |
| 69,881 | 110 | 19,877 | 5,705 | 3,498 | 29,190 |
| 69,882 | 110 | 19,794 | 5,692 | 3,461 | 29,057 |
| 69,883 | 111 | 19,624 | 5,642 | 3,467 | 28,844 |
| 69,884 | 116 | 19,582 | 5,598 | 3,446 | 28,742 |
| 69,885 | 120 | 19,721 | 5,636 | 3,473 | 28,950 |
| 69,886 | 121 | 19,420 | 5,560 | 3,427 | 28,528 |
| 69,887 | 120 | 19,392 | 5,576 | 3,420 | 28,508 |
| 69,888 | 119 | 19,179 | 5,533 | 3,392 | 28,223 |
| 69,889 | 119 | 18,927 | 5,507 | 3,374 | 27,927 |
| 69,890 | 126 | 19,402 | 5,702 | 3,485 | 28,715 |
| 69,891 | 128 | 19,459 | 5,791 | 3,540 | 28,918 |
| 69,892 | 126 | 19,486 | 5,796 | 3,552 | 28,960 |
| 69,893 | 133 | 19,406 | 5,791 | 3,550 | 28,880 |
| 69,894 | 131 | 19,172 | 5,806 | 3,557 | 28,666 |
| 69,895 | 132 | 18,967 | 5,788 | 3,516 | 28,403 |
| 69,896 | 131 | 18,884 | 5,754 | 3,509 | 28,278 |
| 69,897 | 134 | 18,731 | 5,749 | 3,525 | 28,139 |
| 69,898 | 137 | 18,826 | 5,781 | 3,516 | 28,260 |
| 69,899 | 138 | 18,589 | 5,714 | 3,426 | 27,867 |
| 69,900 | 144 | 18,797 | 5,769 | 3,455 | 28,165 |
| 69,901 | 154 | 18,744 | 5,739 | 3,424 | 28,061 |
| 69,902 | 155 | 18,460 | 5,668 | 3,375 | 27,658 |
| 69,903 | 160 | 18,454 | 5,643 | 3,361 | 27,618 |
| 69,904 | 161 | 18,531 | 5,653 | 3,354 | 27,699 |
| 69,905 | 158 | 18,625 | 5,655 | 3,383 | 27,821 |
| 69,906 | 155 | 18,358 | 5,607 | 3,357 | 27,477 |
| 69,907 | 153 | 18,252 | 5,593 | 3,343 | 27,341 |
| 69,908 | 151 | 18,273 | 5,580 | 3,359 | 27,363 |
| 69,909 | 150 | 18,357 | 5,552 | 3,354 | 27,413 |
| 69,910 | 149 | 18,352 | 5,549 | 3,361 | 27,411 |
| 69,911 | 148 | 18,313 | 5,539 | 3,345 | 27,345 |

|        |     |        |       |       |        |
|--------|-----|--------|-------|-------|--------|
| 69,912 | 133 | 18,442 | 5,575 | 3,387 | 27,537 |
| 69,913 | 131 | 18,548 | 5,579 | 3,381 | 27,639 |
| 69,914 | 130 | 18,538 | 5,559 | 3,415 | 27,642 |
| 69,915 | 129 | 18,289 | 5,457 | 3,363 | 27,238 |
| 69,916 | 129 | 18,321 | 5,488 | 3,409 | 27,347 |
| 69,917 | 127 | 18,034 | 5,419 | 3,383 | 26,963 |
| 69,918 | 128 | 18,191 | 5,465 | 3,394 | 27,178 |
| 69,919 | 124 | 18,193 | 5,485 | 3,388 | 27,190 |
| 69,920 | 123 | 18,150 | 5,478 | 3,359 | 27,110 |
| 69,921 | 122 | 18,102 | 5,487 | 3,351 | 27,062 |
| 69,922 | 118 | 18,103 | 5,476 | 3,354 | 27,051 |
| 69,923 | 118 | 17,883 | 5,341 | 3,269 | 26,611 |
| 69,924 | 121 | 18,126 | 5,365 | 3,297 | 26,909 |
| 69,925 | 123 | 18,339 | 5,412 | 3,325 | 27,199 |
| 69,926 | 120 | 18,395 | 5,369 | 3,288 | 27,172 |
| 69,927 | 118 | 18,352 | 5,239 | 3,205 | 26,914 |
| 69,928 | 122 | 18,590 | 5,295 | 3,226 | 27,233 |
| 69,929 | 125 | 18,384 | 5,210 | 3,169 | 26,888 |
| 69,930 | 123 | 18,501 | 5,256 | 3,192 | 27,072 |
| 69,931 | 117 | 18,322 | 5,247 | 3,165 | 26,851 |
| 69,932 | 114 | 17,418 | 4,975 | 3,043 | 25,550 |
| 69,933 | 115 | 17,591 | 5,050 | 3,060 | 25,816 |
| 69,934 | 117 | 17,895 | 5,124 | 3,079 | 26,215 |
| 69,935 | 114 | 17,933 | 5,130 | 3,086 | 26,263 |
| 69,936 | 108 | 18,178 | 5,211 | 3,118 | 26,615 |
| 69,937 | 105 | 18,016 | 5,144 | 3,087 | 26,352 |
| 69,938 | 105 | 17,948 | 5,134 | 3,081 | 26,268 |
| 69,939 | 104 | 17,777 | 5,103 | 3,051 | 26,035 |
| 69,940 | 103 | 17,580 | 5,064 | 3,020 | 25,767 |
| 69,941 | 104 | 18,070 | 5,245 | 3,165 | 26,584 |
| 69,942 | 102 | 18,151 | 5,209 | 3,143 | 26,605 |
| 69,943 | 102 | 18,202 | 5,234 | 3,153 | 26,691 |

|        |     |        |       |       |        |
|--------|-----|--------|-------|-------|--------|
| 69,944 | 95  | 18,055 | 5,118 | 3,088 | 26,356 |
| 69,945 | 95  | 18,277 | 5,180 | 3,138 | 26,690 |
| 69,946 | 94  | 18,547 | 5,230 | 3,184 | 27,055 |
| 69,947 | 94  | 18,584 | 5,277 | 3,175 | 27,130 |
| 69,948 | 90  | 18,493 | 5,218 | 3,135 | 26,936 |
| 69,949 | 85  | 18,088 | 5,172 | 3,084 | 26,429 |
| 69,950 | 85  | 18,294 | 5,217 | 3,105 | 26,701 |
| 69,951 | 80  | 18,460 | 5,280 | 3,135 | 26,955 |
| 69,952 | 72  | 18,301 | 5,272 | 3,125 | 26,770 |
| 69,953 | 70  | 18,014 | 5,215 | 3,103 | 26,402 |
| 69,954 | 66  | 18,138 | 5,292 | 3,150 | 26,646 |
| 69,955 | 72  | 17,974 | 5,272 | 3,119 | 26,437 |
| 69,956 | 72  | 17,813 | 5,263 | 3,103 | 26,251 |
| 69,957 | 74  | 18,017 | 5,357 | 3,161 | 26,609 |
| 69,958 | 75  | 18,074 | 5,388 | 3,155 | 26,692 |
| 69,959 | 73  | 18,084 | 5,382 | 3,149 | 26,688 |
| 69,960 | 79  | 18,069 | 5,401 | 3,147 | 26,696 |
| 69,961 | 79  | 17,871 | 5,347 | 3,136 | 26,433 |
| 69,962 | 78  | 18,007 | 5,451 | 3,171 | 26,707 |
| 69,963 | 82  | 18,389 | 5,556 | 3,228 | 27,255 |
| 69,964 | 79  | 17,906 | 5,467 | 3,183 | 26,635 |
| 69,965 | 81  | 18,049 | 5,476 | 3,181 | 26,787 |
| 69,966 | 84  | 18,246 | 5,527 | 3,210 | 27,067 |
| 69,967 | 88  | 18,072 | 5,467 | 3,155 | 26,782 |
| 69,968 | 86  | 18,010 | 5,449 | 3,157 | 26,702 |
| 69,969 | 89  | 18,160 | 5,532 | 3,223 | 27,004 |
| 69,970 | 90  | 17,823 | 5,457 | 3,192 | 26,562 |
| 69,971 | 96  | 17,879 | 5,434 | 3,199 | 26,608 |
| 69,972 | 98  | 17,939 | 5,467 | 3,194 | 26,698 |
| 69,973 | 100 | 17,904 | 5,461 | 3,195 | 26,660 |
| 69,974 | 106 | 18,120 | 5,543 | 3,252 | 27,021 |
| 69,975 | 103 | 17,934 | 5,534 | 3,236 | 26,807 |

|        |     |        |       |       |        |
|--------|-----|--------|-------|-------|--------|
| 69,976 | 99  | 17,835 | 5,568 | 3,245 | 26,747 |
| 69,977 | 100 | 18,062 | 5,674 | 3,302 | 27,138 |
| 69,978 | 101 | 18,125 | 5,782 | 3,337 | 27,345 |
| 69,979 | 101 | 18,237 | 5,850 | 3,369 | 27,557 |
| 69,980 | 97  | 18,175 | 5,883 | 3,388 | 27,543 |
| 69,981 | 96  | 18,261 | 5,909 | 3,374 | 27,640 |
| 69,982 | 98  | 18,587 | 5,967 | 3,405 | 28,057 |
| 69,983 | 99  | 18,607 | 5,967 | 3,394 | 28,067 |
| 69,984 | 101 | 18,968 | 6,039 | 3,440 | 28,548 |
| 69,985 | 97  | 19,082 | 6,079 | 3,496 | 28,754 |
| 69,986 | 96  | 18,827 | 6,034 | 3,457 | 28,414 |
| 69,987 | 97  | 18,861 | 6,103 | 3,498 | 28,559 |
| 69,988 | 95  | 18,745 | 6,130 | 3,507 | 28,477 |
| 69,989 | 90  | 18,912 | 6,163 | 3,513 | 28,678 |
| 69,990 | 93  | 18,943 | 6,199 | 3,530 | 28,765 |
| 69,991 | 97  | 19,057 | 6,183 | 3,504 | 28,841 |
| 69,992 | 97  | 19,170 | 6,197 | 3,514 | 28,978 |
| 69,993 | 98  | 19,264 | 6,291 | 3,582 | 29,235 |
| 69,994 | 100 | 19,132 | 6,264 | 3,575 | 29,071 |
| 69,995 | 101 | 18,954 | 6,261 | 3,552 | 28,868 |
| 69,996 | 101 | 19,030 | 6,294 | 3,586 | 29,011 |
| 69,997 | 102 | 18,917 | 6,294 | 3,596 | 28,909 |
| 69,998 | 101 | 18,851 | 6,258 | 3,600 | 28,810 |
| 69,999 | 100 | 18,857 | 6,269 | 3,613 | 28,839 |
| 70,000 | 100 | 18,967 | 6,272 | 3,621 | 28,960 |
| 70,001 | 102 | 19,036 | 6,305 | 3,643 | 29,086 |
| 70,002 | 106 | 19,099 | 6,325 | 3,663 | 29,193 |
| 70,003 | 106 | 19,192 | 6,337 | 3,652 | 29,287 |
| 70,004 | 110 | 19,339 | 6,345 | 3,631 | 29,425 |
| 70,005 | 105 | 19,303 | 6,357 | 3,630 | 29,395 |
| 70,006 | 105 | 19,393 | 6,363 | 3,634 | 29,495 |
| 70,007 | 117 | 19,630 | 6,451 | 3,675 | 29,873 |

|        |     |        |       |       |        |
|--------|-----|--------|-------|-------|--------|
| 70,008 | 117 | 19,638 | 6,449 | 3,671 | 29,875 |
| 70,009 | 116 | 19,549 | 6,432 | 3,686 | 29,783 |
| 70,010 | 118 | 19,422 | 6,412 | 3,681 | 29,633 |
| 70,011 | 113 | 19,250 | 6,359 | 3,644 | 29,366 |
| 70,012 | 113 | 19,046 | 6,299 | 3,600 | 29,058 |
| 70,013 | 116 | 19,619 | 6,428 | 3,691 | 29,854 |
| 70,014 | 119 | 19,702 | 6,428 | 3,672 | 29,921 |
| 70,015 | 117 | 19,552 | 6,433 | 3,645 | 29,747 |
| 70,016 | 111 | 19,405 | 6,378 | 3,615 | 29,509 |
| 70,017 | 111 | 19,709 | 6,444 | 3,649 | 29,913 |
| 70,018 | 111 | 19,722 | 6,442 | 3,656 | 29,931 |
| 70,019 | 108 | 19,831 | 6,458 | 3,668 | 30,065 |
| 70,020 | 106 | 19,660 | 6,427 | 3,614 | 29,807 |
| 70,021 | 105 | 19,891 | 6,493 | 3,632 | 30,121 |
| 70,022 | 101 | 20,025 | 6,525 | 3,638 | 30,289 |
| 70,023 | 105 | 20,023 | 6,520 | 3,655 | 30,303 |
| 70,024 | 105 | 20,160 | 6,568 | 3,647 | 30,480 |
| 70,025 | 102 | 20,133 | 6,531 | 3,595 | 30,361 |
| 70,026 | 105 | 20,132 | 6,531 | 3,600 | 30,368 |
| 70,027 | 105 | 19,938 | 6,447 | 3,585 | 30,075 |
| 70,028 | 107 | 20,371 | 6,551 | 3,651 | 30,680 |
| 70,029 | 105 | 20,287 | 6,433 | 3,615 | 30,440 |
| 70,030 | 102 | 19,896 | 6,293 | 3,559 | 29,850 |
| 70,031 | 102 | 20,006 | 6,288 | 3,565 | 29,961 |
| 70,032 | 106 | 19,851 | 6,310 | 3,601 | 29,868 |
| 70,033 | 114 | 19,628 | 6,285 | 3,599 | 29,626 |
| 70,034 | 109 | 19,250 | 6,192 | 3,551 | 29,102 |
| 70,035 | 111 | 19,202 | 6,186 | 3,563 | 29,062 |
| 70,036 | 112 | 19,449 | 6,199 | 3,555 | 29,315 |
| 70,037 | 113 | 19,558 | 6,178 | 3,562 | 29,411 |
| 70,038 | 114 | 19,580 | 6,156 | 3,541 | 29,391 |
| 70,039 | 119 | 19,802 | 6,207 | 3,573 | 29,701 |

|        |     |        |       |       |        |
|--------|-----|--------|-------|-------|--------|
| 70,040 | 117 | 19,478 | 6,098 | 3,523 | 29,216 |
| 70,041 | 127 | 19,715 | 6,152 | 3,541 | 29,535 |
| 70,042 | 124 | 19,719 | 6,147 | 3,541 | 29,531 |
| 70,043 | 127 | 19,799 | 6,140 | 3,544 | 29,610 |
| 70,044 | 130 | 19,456 | 6,013 | 3,437 | 29,036 |
| 70,045 | 131 | 19,717 | 6,038 | 3,444 | 29,330 |
| 70,046 | 130 | 19,794 | 6,047 | 3,441 | 29,412 |
| 70,047 | 131 | 19,950 | 6,065 | 3,428 | 29,574 |
| 70,048 | 133 | 20,026 | 6,052 | 3,423 | 29,634 |
| 70,049 | 134 | 20,025 | 6,064 | 3,424 | 29,647 |
| 70,050 | 133 | 19,947 | 6,034 | 3,417 | 29,531 |
| 70,051 | 133 | 19,967 | 6,030 | 3,425 | 29,555 |
| 70,052 | 132 | 19,885 | 6,031 | 3,438 | 29,486 |
| 70,053 | 128 | 19,822 | 6,020 | 3,433 | 29,403 |
| 70,054 | 127 | 19,990 | 6,081 | 3,480 | 29,678 |
| 70,055 | 129 | 19,974 | 6,059 | 3,491 | 29,653 |
| 70,056 | 127 | 19,920 | 5,977 | 3,451 | 29,475 |
| 70,057 | 124 | 20,010 | 5,988 | 3,471 | 29,593 |
| 70,058 | 117 | 20,329 | 6,010 | 3,483 | 29,939 |
| 70,059 | 118 | 20,260 | 5,968 | 3,472 | 29,818 |
| 70,060 | 118 | 20,307 | 5,973 | 3,473 | 29,871 |
| 70,061 | 112 | 20,203 | 5,963 | 3,486 | 29,764 |
| 70,062 | 112 | 20,140 | 6,038 | 3,510 | 29,800 |
| 70,063 | 114 | 19,994 | 6,023 | 3,505 | 29,636 |
| 70,064 | 111 | 20,039 | 6,037 | 3,510 | 29,697 |
| 70,065 | 110 | 19,923 | 6,016 | 3,516 | 29,565 |
| 70,066 | 114 | 19,955 | 6,018 | 3,501 | 29,588 |
| 70,067 | 117 | 19,976 | 6,016 | 3,507 | 29,616 |
| 70,068 | 125 | 19,769 | 5,977 | 3,471 | 29,342 |
| 70,069 | 126 | 19,789 | 5,976 | 3,461 | 29,352 |
| 70,070 | 128 | 19,941 | 5,996 | 3,469 | 29,534 |
| 70,071 | 128 | 19,691 | 5,908 | 3,455 | 29,182 |

|        |     |        |       |       |        |
|--------|-----|--------|-------|-------|--------|
| 70,072 | 133 | 19,442 | 5,815 | 3,424 | 28,814 |
| 70,073 | 132 | 19,175 | 5,759 | 3,412 | 28,478 |
| 70,074 | 131 | 19,589 | 5,868 | 3,496 | 29,084 |
| 70,075 | 128 | 19,725 | 5,908 | 3,560 | 29,321 |
| 70,076 | 126 | 19,551 | 5,875 | 3,558 | 29,110 |
| 70,077 | 123 | 19,533 | 5,882 | 3,560 | 29,098 |
| 70,078 | 127 | 19,528 | 5,873 | 3,529 | 29,057 |
| 70,079 | 126 | 19,478 | 5,849 | 3,529 | 28,982 |
| 70,080 | 126 | 19,166 | 5,799 | 3,503 | 28,594 |
| 70,081 | 124 | 19,167 | 5,788 | 3,494 | 28,573 |
| 70,082 | 125 | 19,093 | 5,755 | 3,469 | 28,442 |
| 70,083 | 121 | 19,139 | 5,713 | 3,452 | 28,425 |
| 70,084 | 111 | 18,756 | 5,607 | 3,376 | 27,850 |
| 70,085 | 111 | 18,829 | 5,607 | 3,384 | 27,931 |
| 70,086 | 110 | 18,742 | 5,592 | 3,343 | 27,787 |
| 70,087 | 109 | 19,048 | 5,740 | 3,395 | 28,292 |
| 70,088 | 105 | 18,626 | 5,627 | 3,311 | 27,669 |
| 70,089 | 105 | 18,832 | 5,713 | 3,373 | 28,023 |
| 70,090 | 108 | 18,866 | 5,706 | 3,376 | 28,056 |
| 70,091 | 108 | 18,589 | 5,646 | 3,345 | 27,688 |
| 70,092 | 96  | 18,672 | 5,766 | 3,428 | 27,962 |
| 70,093 | 93  | 18,349 | 5,705 | 3,346 | 27,493 |
| 70,094 | 98  | 18,397 | 5,714 | 3,357 | 27,566 |
| 70,095 | 93  | 18,143 | 5,640 | 3,350 | 27,226 |
| 70,096 | 91  | 18,148 | 5,711 | 3,408 | 27,358 |
| 70,097 | 94  | 18,260 | 5,747 | 3,428 | 27,529 |
| 70,098 | 96  | 18,135 | 5,734 | 3,389 | 27,354 |
| 70,099 | 96  | 18,059 | 5,669 | 3,372 | 27,196 |
| 70,100 | 98  | 18,188 | 5,674 | 3,376 | 27,336 |
| 70,101 | 98  | 18,470 | 5,756 | 3,417 | 27,741 |
| 70,102 | 102 | 18,485 | 5,727 | 3,405 | 27,719 |
| 70,103 | 102 | 18,379 | 5,662 | 3,365 | 27,508 |

|        |     |        |       |       |        |
|--------|-----|--------|-------|-------|--------|
| 70,104 | 101 | 18,156 | 5,598 | 3,338 | 27,193 |
| 70,105 | 96  | 17,909 | 5,554 | 3,316 | 26,875 |
| 70,106 | 97  | 17,921 | 5,545 | 3,301 | 26,864 |
| 70,107 | 94  | 17,646 | 5,474 | 3,279 | 26,493 |
| 70,108 | 97  | 17,946 | 5,540 | 3,327 | 26,910 |
| 70,109 | 96  | 17,853 | 5,577 | 3,361 | 26,887 |
| 70,110 | 99  | 17,799 | 5,586 | 3,371 | 26,855 |
| 70,111 | 100 | 17,587 | 5,525 | 3,301 | 26,513 |
| 70,112 | 105 | 17,572 | 5,454 | 3,283 | 26,414 |
| 70,113 | 105 | 17,756 | 5,501 | 3,311 | 26,673 |
| 70,114 | 93  | 16,418 | 5,030 | 3,054 | 24,595 |
| 70,115 | 93  | 16,437 | 5,023 | 3,042 | 24,595 |
| 70,116 | 93  | 16,444 | 5,021 | 3,037 | 24,595 |
| 70,117 | 91  | 16,430 | 5,015 | 3,045 | 24,581 |
| 70,118 | 91  | 16,433 | 5,018 | 3,054 | 24,596 |
| 70,119 | 90  | 16,481 | 5,037 | 3,066 | 24,674 |
| 70,120 | 95  | 17,485 | 5,302 | 3,221 | 26,103 |
| 70,121 | 95  | 17,169 | 5,252 | 3,181 | 25,697 |
| 70,122 | 95  | 17,439 | 5,323 | 3,215 | 26,072 |
| 70,123 | 89  | 17,521 | 5,342 | 3,195 | 26,147 |
| 70,124 | 87  | 17,589 | 5,379 | 3,208 | 26,263 |
| 70,125 | 87  | 17,670 | 5,370 | 3,208 | 26,335 |
| 70,126 | 88  | 17,869 | 5,394 | 3,209 | 26,560 |
| 70,127 | 90  | 17,877 | 5,399 | 3,205 | 26,571 |
| 70,128 | 89  | 17,911 | 5,374 | 3,180 | 26,554 |
| 70,129 | 85  | 17,667 | 5,321 | 3,144 | 26,217 |
| 70,130 | 91  | 17,939 | 5,418 | 3,197 | 26,645 |
| 70,131 | 92  | 18,051 | 5,435 | 3,214 | 26,792 |
| 70,132 | 93  | 18,069 | 5,466 | 3,217 | 26,845 |
| 70,133 | 93  | 17,912 | 5,389 | 3,192 | 26,586 |
| 70,134 | 103 | 18,152 | 5,479 | 3,231 | 26,965 |
| 70,135 | 107 | 18,213 | 5,498 | 3,253 | 27,071 |



|        |     |        |       |       |        |
|--------|-----|--------|-------|-------|--------|
| 70,136 | 106 | 18,280 | 5,532 | 3,285 | 27,203 |
| 70,137 | 107 | 18,314 | 5,515 | 3,313 | 27,249 |
| 70,138 | 108 | 18,194 | 5,452 | 3,305 | 27,059 |
| 70,139 | 114 | 18,468 | 5,490 | 3,316 | 27,388 |
| 70,140 | 121 | 18,796 | 5,510 | 3,313 | 27,740 |
| 70,141 | 115 | 19,019 | 5,478 | 3,288 | 27,900 |
| 70,142 | 117 | 19,283 | 5,492 | 3,321 | 28,213 |
| 70,143 | 120 | 19,641 | 5,570 | 3,354 | 28,685 |
| 70,144 | 115 | 19,549 | 5,487 | 3,326 | 28,477 |
| 70,145 | 115 | 19,738 | 5,483 | 3,321 | 28,657 |
| 70,146 | 116 | 19,947 | 5,558 | 3,370 | 28,991 |
| 70,147 | 117 | 19,899 | 5,533 | 3,376 | 28,925 |
| 70,148 | 113 | 19,866 | 5,524 | 3,378 | 28,881 |
| 70,149 | 120 | 20,039 | 5,610 | 3,429 | 29,198 |
| 70,150 | 115 | 19,713 | 5,561 | 3,385 | 28,774 |
| 70,151 | 125 | 19,712 | 5,628 | 3,403 | 28,868 |
| 70,152 | 128 | 19,672 | 5,634 | 3,391 | 28,825 |
| 70,153 | 125 | 19,521 | 5,598 | 3,362 | 28,606 |
| 70,154 | 130 | 19,596 | 5,607 | 3,382 | 28,715 |
| 70,155 | 130 | 19,796 | 5,639 | 3,393 | 28,958 |
| 70,156 | 130 | 19,816 | 5,629 | 3,389 | 28,964 |
| 70,157 | 127 | 19,962 | 5,698 | 3,414 | 29,201 |
| 70,158 | 125 | 19,971 | 5,760 | 3,430 | 29,286 |
| 70,159 | 127 | 19,779 | 5,798 | 3,451 | 29,155 |
| 70,160 | 128 | 19,866 | 5,830 | 3,465 | 29,289 |
| 70,161 | 122 | 19,800 | 5,760 | 3,418 | 29,100 |
| 70,162 | 123 | 19,672 | 5,722 | 3,397 | 28,914 |
| 70,163 | 121 | 19,468 | 5,633 | 3,359 | 28,581 |
| 70,164 | 121 | 19,500 | 5,641 | 3,358 | 28,620 |
| 70,165 | 120 | 19,325 | 5,599 | 3,338 | 28,382 |
| 70,166 | 120 | 19,071 | 5,587 | 3,317 | 28,095 |
| 70,167 | 128 | 20,087 | 5,999 | 3,558 | 29,772 |

|        |     |        |       |       |        |
|--------|-----|--------|-------|-------|--------|
| 70,168 | 131 | 20,144 | 6,043 | 3,582 | 29,900 |
| 70,169 | 130 | 20,237 | 6,074 | 3,607 | 30,048 |
| 70,170 | 140 | 20,042 | 6,032 | 3,579 | 29,793 |
| 70,171 | 139 | 19,855 | 5,999 | 3,560 | 29,553 |
| 70,172 | 142 | 20,394 | 6,181 | 3,635 | 30,352 |
| 70,173 | 148 | 20,376 | 6,213 | 3,633 | 30,370 |
| 70,174 | 148 | 20,103 | 6,110 | 3,593 | 29,954 |
| 70,175 | 149 | 20,030 | 6,088 | 3,589 | 29,856 |
| 70,176 | 152 | 20,129 | 6,144 | 3,618 | 30,043 |
| 70,177 | 149 | 19,655 | 6,038 | 3,551 | 29,393 |
| 70,178 | 147 | 19,574 | 6,026 | 3,549 | 29,296 |
| 70,179 | 146 | 19,510 | 6,038 | 3,556 | 29,250 |
| 70,180 | 144 | 19,606 | 6,129 | 3,604 | 29,483 |
| 70,181 | 142 | 19,677 | 6,127 | 3,619 | 29,565 |
| 70,182 | 143 | 19,954 | 6,170 | 3,670 | 29,937 |
| 70,183 | 143 | 20,019 | 6,173 | 3,673 | 30,008 |
| 70,184 | 143 | 19,990 | 6,193 | 3,669 | 29,995 |
| 70,185 | 138 | 20,147 | 6,208 | 3,676 | 30,169 |
| 70,186 | 134 | 20,059 | 6,141 | 3,652 | 29,986 |
| 70,187 | 138 | 20,331 | 6,215 | 3,699 | 30,383 |
| 70,188 | 138 | 20,309 | 6,212 | 3,677 | 30,336 |
| 70,189 | 139 | 20,532 | 6,271 | 3,716 | 30,658 |
| 70,190 | 133 | 20,321 | 6,248 | 3,731 | 30,433 |
| 70,191 | 126 | 19,668 | 6,118 | 3,659 | 29,571 |
| 70,192 | 127 | 19,496 | 6,097 | 3,641 | 29,361 |
| 70,193 | 127 | 19,318 | 6,059 | 3,613 | 29,117 |
| 70,194 | 126 | 19,412 | 6,061 | 3,610 | 29,209 |
| 70,195 | 126 | 19,316 | 6,051 | 3,607 | 29,100 |
| 70,196 | 128 | 19,227 | 6,085 | 3,606 | 29,046 |
| 70,197 | 126 | 19,087 | 6,040 | 3,545 | 28,798 |
| 70,198 | 128 | 19,304 | 6,098 | 3,565 | 29,095 |
| 70,199 | 129 | 19,564 | 6,149 | 3,599 | 29,441 |

|        |     |        |       |       |        |
|--------|-----|--------|-------|-------|--------|
| 70,200 | 130 | 19,425 | 6,105 | 3,564 | 29,224 |
| 70,201 | 128 | 19,463 | 6,119 | 3,568 | 29,278 |
| 70,202 | 121 | 19,685 | 6,151 | 3,613 | 29,570 |
| 70,203 | 121 | 19,696 | 6,183 | 3,630 | 29,630 |
| 70,204 | 125 | 19,765 | 6,193 | 3,634 | 29,717 |
| 70,205 | 126 | 19,799 | 6,214 | 3,655 | 29,794 |
| 70,206 | 127 | 19,720 | 6,206 | 3,652 | 29,705 |
| 70,207 | 127 | 19,811 | 6,213 | 3,665 | 29,816 |
| 70,208 | 128 | 19,844 | 6,158 | 3,661 | 29,791 |
| 70,209 | 132 | 19,931 | 6,105 | 3,615 | 29,783 |
| 70,210 | 132 | 20,087 | 6,106 | 3,620 | 29,945 |
| 70,211 | 132 | 19,917 | 6,051 | 3,593 | 29,693 |
| 70,212 | 131 | 19,928 | 6,044 | 3,595 | 29,698 |
| 70,213 | 124 | 19,751 | 5,985 | 3,561 | 29,421 |
| 70,214 | 126 | 19,882 | 5,982 | 3,563 | 29,553 |
| 70,215 | 128 | 19,874 | 5,934 | 3,557 | 29,493 |
| 70,216 | 130 | 20,001 | 5,883 | 3,548 | 29,562 |
| 70,217 | 127 | 19,995 | 5,865 | 3,555 | 29,542 |
| 70,218 | 126 | 19,912 | 5,832 | 3,511 | 29,381 |
| 70,219 | 127 | 20,068 | 5,863 | 3,548 | 29,606 |
| 70,220 | 123 | 20,200 | 5,878 | 3,555 | 29,756 |
| 70,221 | 116 | 20,322 | 5,855 | 3,546 | 29,839 |
| 70,222 | 122 | 20,311 | 5,845 | 3,547 | 29,825 |
| 70,223 | 123 | 20,150 | 5,765 | 3,519 | 29,557 |
| 70,224 | 117 | 20,069 | 5,692 | 3,487 | 29,365 |
| 70,225 | 116 | 20,429 | 5,815 | 3,562 | 29,922 |
| 70,226 | 114 | 20,502 | 5,804 | 3,554 | 29,974 |
| 70,227 | 113 | 20,422 | 5,783 | 3,530 | 29,848 |
| 70,228 | 118 | 20,728 | 5,760 | 3,533 | 30,139 |
| 70,229 | 118 | 20,842 | 5,787 | 3,536 | 30,283 |
| 70,230 | 120 | 21,050 | 5,784 | 3,537 | 30,491 |
| 70,231 | 120 | 20,942 | 5,690 | 3,487 | 30,239 |

|        |     |        |       |       |        |
|--------|-----|--------|-------|-------|--------|
| 70,232 | 121 | 21,142 | 5,734 | 3,501 | 30,498 |
| 70,233 | 126 | 20,984 | 5,687 | 3,467 | 30,264 |
| 70,234 | 129 | 20,762 | 5,608 | 3,420 | 29,919 |
| 70,235 | 128 | 20,584 | 5,557 | 3,391 | 29,660 |
| 70,236 | 129 | 20,769 | 5,621 | 3,420 | 29,939 |
| 70,237 | 130 | 20,498 | 5,581 | 3,367 | 29,576 |
| 70,238 | 125 | 20,343 | 5,501 | 3,317 | 29,286 |
| 70,239 | 128 | 20,297 | 5,474 | 3,308 | 29,207 |
| 70,240 | 127 | 20,123 | 5,400 | 3,271 | 28,921 |
| 70,241 | 126 | 20,082 | 5,356 | 3,242 | 28,806 |
| 70,242 | 124 | 19,982 | 5,318 | 3,230 | 28,654 |
| 70,243 | 123 | 19,927 | 5,264 | 3,215 | 28,529 |
| 70,244 | 124 | 19,966 | 5,253 | 3,202 | 28,545 |
| 70,245 | 128 | 19,749 | 5,213 | 3,183 | 28,273 |
| 70,246 | 126 | 19,662 | 5,153 | 3,153 | 28,094 |
| 70,247 | 126 | 19,625 | 5,123 | 3,140 | 28,014 |
| 70,248 | 126 | 19,628 | 5,065 | 3,116 | 27,935 |
| 70,249 | 127 | 19,830 | 5,097 | 3,153 | 28,207 |
| 70,250 | 128 | 19,897 | 5,063 | 3,145 | 28,233 |
| 70,251 | 123 | 19,705 | 4,991 | 3,116 | 27,935 |
| 70,252 | 122 | 19,888 | 5,006 | 3,128 | 28,144 |
| 70,253 | 128 | 19,934 | 5,000 | 3,110 | 28,172 |
| 70,254 | 126 | 20,138 | 5,030 | 3,157 | 28,451 |
| 70,255 | 124 | 20,211 | 5,043 | 3,177 | 28,555 |
| 70,256 | 120 | 20,176 | 5,031 | 3,162 | 28,489 |
| 70,257 | 126 | 20,301 | 5,050 | 3,163 | 28,640 |
| 70,258 | 128 | 20,277 | 5,008 | 3,141 | 28,554 |
| 70,259 | 127 | 20,055 | 4,968 | 3,092 | 28,242 |
| 70,260 | 124 | 20,119 | 4,948 | 3,097 | 28,288 |
| 70,261 | 129 | 20,057 | 4,958 | 3,111 | 28,255 |
| 70,262 | 129 | 20,079 | 4,962 | 3,115 | 28,285 |
| 70,263 | 131 | 20,072 | 4,959 | 3,106 | 28,268 |

|        |     |        |       |       |        |
|--------|-----|--------|-------|-------|--------|
| 70,264 | 130 | 19,444 | 4,848 | 3,017 | 27,439 |
| 70,265 | 131 | 19,557 | 4,860 | 3,036 | 27,584 |
| 70,266 | 127 | 19,777 | 4,912 | 3,063 | 27,879 |
| 70,267 | 128 | 19,713 | 4,911 | 3,058 | 27,810 |
| 70,268 | 123 | 20,013 | 4,959 | 3,120 | 28,215 |
| 70,269 | 128 | 20,240 | 4,992 | 3,144 | 28,504 |
| 70,270 | 127 | 20,428 | 4,978 | 3,140 | 28,673 |
| 70,271 | 126 | 20,343 | 4,919 | 3,125 | 28,513 |
| 70,272 | 120 | 19,998 | 4,841 | 3,083 | 28,042 |
| 70,273 | 119 | 20,111 | 4,832 | 3,080 | 28,142 |
| 70,274 | 121 | 20,109 | 4,856 | 3,107 | 28,193 |
| 70,275 | 122 | 19,802 | 4,803 | 3,078 | 27,805 |
| 70,276 | 122 | 19,820 | 4,781 | 3,071 | 27,794 |
| 70,277 | 123 | 19,847 | 4,786 | 3,067 | 27,823 |
| 70,278 | 120 | 20,018 | 4,827 | 3,098 | 28,063 |
| 70,279 | 124 | 19,802 | 4,795 | 3,086 | 27,807 |
| 70,280 | 124 | 19,785 | 4,783 | 3,080 | 27,772 |
| 70,281 | 129 | 19,775 | 4,797 | 3,088 | 27,789 |
| 70,282 | 129 | 19,792 | 4,823 | 3,090 | 27,834 |
| 70,283 | 129 | 19,958 | 4,859 | 3,111 | 28,057 |
| 70,284 | 123 | 19,869 | 4,865 | 3,083 | 27,940 |
| 70,285 | 115 | 19,756 | 4,807 | 3,068 | 27,746 |
| 70,286 | 115 | 19,750 | 4,793 | 3,052 | 27,710 |
| 70,287 | 116 | 19,646 | 4,762 | 3,031 | 27,555 |
| 70,288 | 116 | 19,710 | 4,768 | 3,030 | 27,624 |
| 70,289 | 115 | 19,699 | 4,785 | 3,037 | 27,636 |
| 70,290 | 118 | 19,696 | 4,803 | 3,036 | 27,653 |
| 70,291 | 122 | 19,631 | 4,777 | 3,036 | 27,566 |
| 70,292 | 126 | 19,511 | 4,768 | 3,010 | 27,415 |
| 70,293 | 128 | 19,662 | 4,781 | 3,028 | 27,599 |
| 70,294 | 129 | 19,649 | 4,805 | 3,023 | 27,606 |
| 70,295 | 129 | 19,770 | 4,824 | 3,037 | 27,760 |

|        |     |        |       |       |        |
|--------|-----|--------|-------|-------|--------|
| 70,296 | 125 | 19,793 | 4,839 | 3,051 | 27,808 |
| 70,297 | 130 | 19,786 | 4,864 | 3,060 | 27,840 |
| 70,298 | 132 | 19,822 | 4,872 | 3,075 | 27,901 |
| 70,299 | 128 | 19,506 | 4,841 | 3,023 | 27,498 |
| 70,300 | 129 | 19,735 | 4,870 | 3,048 | 27,782 |
| 70,301 | 129 | 20,000 | 4,933 | 3,088 | 28,150 |
| 70,302 | 129 | 20,060 | 4,944 | 3,094 | 28,227 |
| 70,303 | 123 | 19,900 | 4,891 | 3,068 | 27,982 |
| 70,304 | 123 | 19,825 | 4,876 | 3,074 | 27,898 |
| 70,305 | 122 | 19,915 | 4,880 | 3,067 | 27,984 |
| 70,306 | 118 | 19,570 | 4,841 | 3,038 | 27,567 |
| 70,307 | 118 | 19,469 | 4,823 | 3,030 | 27,440 |
| 70,308 | 112 | 19,546 | 4,838 | 3,071 | 27,567 |
| 70,309 | 115 | 19,504 | 4,865 | 3,090 | 27,574 |
| 70,310 | 114 | 19,448 | 4,850 | 3,092 | 27,504 |
| 70,311 | 118 | 19,374 | 4,819 | 3,068 | 27,379 |
| 70,312 | 121 | 19,477 | 4,830 | 3,065 | 27,493 |
| 70,313 | 126 | 19,768 | 4,877 | 3,099 | 27,870 |
| 70,314 | 122 | 19,669 | 4,842 | 3,093 | 27,726 |
| 70,315 | 120 | 19,716 | 4,839 | 3,110 | 27,785 |
| 70,316 | 121 | 19,760 | 4,909 | 3,118 | 27,908 |
| 70,317 | 119 | 19,936 | 4,983 | 3,158 | 28,196 |
| 70,318 | 120 | 19,951 | 5,024 | 3,153 | 28,248 |
| 70,319 | 126 | 20,293 | 5,119 | 3,201 | 28,739 |
| 70,320 | 131 | 20,137 | 5,105 | 3,186 | 28,559 |
| 70,321 | 129 | 19,746 | 5,056 | 3,157 | 28,088 |
| 70,322 | 132 | 20,248 | 5,273 | 3,272 | 28,925 |
| 70,323 | 130 | 20,285 | 5,307 | 3,312 | 29,034 |
| 70,324 | 132 | 20,164 | 5,293 | 3,289 | 28,878 |
| 70,325 | 132 | 20,316 | 5,349 | 3,316 | 29,113 |
| 70,326 | 134 | 20,407 | 5,335 | 3,299 | 29,175 |
| 70,327 | 133 | 20,151 | 5,293 | 3,265 | 28,842 |

|        |     |        |       |       |        |
|--------|-----|--------|-------|-------|--------|
| 70,328 | 140 | 20,473 | 5,394 | 3,333 | 29,340 |
| 70,329 | 151 | 20,742 | 5,476 | 3,388 | 29,757 |
| 70,330 | 147 | 20,757 | 5,488 | 3,404 | 29,796 |
| 70,331 | 150 | 20,715 | 5,531 | 3,426 | 29,822 |
| 70,332 | 144 | 20,637 | 5,562 | 3,436 | 29,779 |
| 70,333 | 143 | 20,362 | 5,485 | 3,414 | 29,404 |
| 70,334 | 148 | 20,420 | 5,536 | 3,435 | 29,539 |
| 70,335 | 152 | 20,433 | 5,523 | 3,448 | 29,556 |
| 70,336 | 156 | 20,297 | 5,534 | 3,423 | 29,410 |
| 70,337 | 161 | 20,361 | 5,558 | 3,464 | 29,544 |
| 70,338 | 158 | 20,245 | 5,529 | 3,443 | 29,375 |
| 70,339 | 163 | 20,569 | 5,599 | 3,511 | 29,842 |
| 70,340 | 163 | 20,377 | 5,527 | 3,461 | 29,528 |
| 70,341 | 163 | 20,412 | 5,532 | 3,471 | 29,578 |
| 70,342 | 162 | 20,593 | 5,613 | 3,499 | 29,867 |
| 70,343 | 159 | 20,597 | 5,639 | 3,526 | 29,921 |
| 70,344 | 157 | 20,390 | 5,584 | 3,510 | 29,641 |
| 70,345 | 156 | 20,825 | 5,669 | 3,565 | 30,215 |
| 70,346 | 157 | 20,712 | 5,619 | 3,551 | 30,039 |
| 70,347 | 158 | 20,953 | 5,679 | 3,578 | 30,368 |
| 70,348 | 153 | 20,644 | 5,613 | 3,545 | 29,955 |
| 70,349 | 152 | 20,546 | 5,608 | 3,544 | 29,850 |
| 70,350 | 153 | 20,536 | 5,648 | 3,568 | 29,905 |
| 70,351 | 153 | 20,609 | 5,661 | 3,573 | 29,996 |
| 70,352 | 151 | 20,429 | 5,638 | 3,563 | 29,781 |
| 70,353 | 156 | 20,309 | 5,619 | 3,561 | 29,645 |
| 70,354 | 157 | 20,129 | 5,571 | 3,506 | 29,363 |
| 70,355 | 158 | 20,018 | 5,547 | 3,491 | 29,214 |
| 70,356 | 161 | 20,257 | 5,573 | 3,520 | 29,511 |
| 70,357 | 161 | 20,086 | 5,536 | 3,480 | 29,263 |
| 70,358 | 161 | 19,967 | 5,517 | 3,447 | 29,092 |
| 70,359 | 159 | 20,041 | 5,556 | 3,471 | 29,227 |

|        |     |        |       |       |        |
|--------|-----|--------|-------|-------|--------|
| 70,360 | 150 | 19,577 | 5,463 | 3,423 | 28,613 |
| 70,361 | 153 | 19,708 | 5,505 | 3,449 | 28,815 |
| 70,362 | 147 | 19,922 | 5,548 | 3,466 | 29,083 |
| 70,363 | 144 | 19,704 | 5,490 | 3,427 | 28,765 |
| 70,364 | 143 | 19,878 | 5,558 | 3,456 | 29,035 |
| 70,365 | 144 | 19,936 | 5,558 | 3,443 | 29,081 |
| 70,366 | 154 | 19,808 | 5,512 | 3,422 | 28,896 |
| 70,367 | 163 | 19,900 | 5,568 | 3,439 | 29,070 |
| 70,368 | 162 | 19,750 | 5,493 | 3,394 | 28,799 |
| 70,369 | 163 | 19,860 | 5,510 | 3,421 | 28,954 |
| 70,370 | 159 | 19,783 | 5,454 | 3,399 | 28,795 |
| 70,371 | 149 | 19,650 | 5,385 | 3,363 | 28,547 |
| 70,372 | 150 | 19,599 | 5,294 | 3,309 | 28,352 |
| 70,373 | 155 | 19,562 | 5,255 | 3,284 | 28,256 |
| 70,374 | 156 | 19,729 | 5,226 | 3,265 | 28,376 |
| 70,375 | 156 | 19,795 | 5,205 | 3,254 | 28,410 |
| 70,376 | 157 | 19,783 | 5,170 | 3,248 | 28,358 |
| 70,377 | 153 | 19,984 | 5,220 | 3,286 | 28,643 |
| 70,378 | 163 | 19,714 | 5,081 | 3,159 | 28,117 |
| 70,379 | 166 | 19,899 | 5,087 | 3,168 | 28,320 |
| 70,380 | 162 | 20,196 | 5,125 | 3,201 | 28,684 |
| 70,381 | 163 | 20,208 | 5,098 | 3,184 | 28,653 |
| 70,382 | 167 | 20,242 | 5,059 | 3,179 | 28,647 |
| 70,383 | 165 | 20,308 | 5,036 | 3,171 | 28,680 |
| 70,384 | 169 | 20,545 | 5,029 | 3,162 | 28,905 |
| 70,385 | 169 | 20,608 | 5,027 | 3,148 | 28,952 |
| 70,386 | 166 | 20,630 | 5,014 | 3,140 | 28,950 |
| 70,387 | 164 | 20,695 | 4,999 | 3,149 | 29,007 |
| 70,388 | 160 | 20,583 | 5,007 | 3,134 | 28,884 |
| 70,389 | 158 | 20,581 | 5,028 | 3,110 | 28,877 |
| 70,390 | 161 | 20,674 | 5,021 | 3,098 | 28,954 |
| 70,391 | 155 | 20,591 | 4,983 | 3,099 | 28,828 |



|        |     |        |       |       |        |
|--------|-----|--------|-------|-------|--------|
| 70,392 | 160 | 20,951 | 5,051 | 3,133 | 29,295 |
| 70,393 | 169 | 21,188 | 5,101 | 3,162 | 29,620 |
| 70,394 | 170 | 21,045 | 5,054 | 3,115 | 29,384 |
| 70,395 | 171 | 21,114 | 5,107 | 3,126 | 29,518 |
| 70,396 | 169 | 21,041 | 5,119 | 3,121 | 29,450 |
| 70,397 | 170 | 21,040 | 5,097 | 3,097 | 29,404 |
| 70,398 | 169 | 20,993 | 5,072 | 3,079 | 29,313 |
| 70,399 | 173 | 21,248 | 5,103 | 3,082 | 29,606 |
| 70,400 | 173 | 21,250 | 5,071 | 3,067 | 29,561 |
| 70,401 | 178 | 21,440 | 5,078 | 3,086 | 29,782 |
| 70,402 | 179 | 21,169 | 5,004 | 3,026 | 29,378 |
| 70,403 | 178 | 21,182 | 5,001 | 3,019 | 29,380 |
| 70,404 | 177 | 21,126 | 4,986 | 3,005 | 29,294 |
| 70,405 | 178 | 21,121 | 4,998 | 3,020 | 29,317 |
| 70,406 | 174 | 21,003 | 4,935 | 2,984 | 29,096 |
| 70,407 | 175 | 20,951 | 4,909 | 2,958 | 28,993 |
| 70,408 | 177 | 21,039 | 4,874 | 2,939 | 29,029 |
| 70,409 | 179 | 20,836 | 4,826 | 2,898 | 28,739 |
| 70,410 | 183 | 20,930 | 4,845 | 2,911 | 28,869 |
| 70,411 | 184 | 20,700 | 4,777 | 2,872 | 28,533 |
| 70,412 | 181 | 20,890 | 4,783 | 2,876 | 28,730 |
| 70,413 | 182 | 20,754 | 4,766 | 2,854 | 28,556 |
| 70,414 | 184 | 20,633 | 4,734 | 2,845 | 28,396 |
| 70,415 | 180 | 20,408 | 4,672 | 2,806 | 28,066 |
| 70,416 | 180 | 20,343 | 4,662 | 2,812 | 27,997 |
| 70,417 | 169 | 20,327 | 4,611 | 2,786 | 27,893 |
| 70,418 | 160 | 20,284 | 4,537 | 2,759 | 27,740 |
| 70,419 | 160 | 20,097 | 4,484 | 2,699 | 27,440 |
| 70,420 | 160 | 20,051 | 4,477 | 2,705 | 27,393 |
| 70,421 | 163 | 20,103 | 4,486 | 2,729 | 27,481 |
| 70,422 | 164 | 19,576 | 4,392 | 2,669 | 26,801 |
| 70,423 | 164 | 19,572 | 4,391 | 2,667 | 26,794 |

|        |     |        |       |       |        |
|--------|-----|--------|-------|-------|--------|
| 70,424 | 158 | 19,441 | 4,407 | 2,668 | 26,674 |
| 70,425 | 151 | 19,119 | 4,347 | 2,632 | 26,249 |
| 70,426 | 147 | 19,007 | 4,318 | 2,602 | 26,074 |
| 70,427 | 153 | 19,222 | 4,361 | 2,647 | 26,383 |
| 70,428 | 149 | 19,090 | 4,354 | 2,631 | 26,224 |
| 70,429 | 137 | 18,801 | 4,277 | 2,601 | 25,816 |
| 70,430 | 136 | 18,949 | 4,350 | 2,642 | 26,077 |
| 70,431 | 126 | 18,521 | 4,272 | 2,594 | 25,513 |
| 70,432 | 125 | 18,648 | 4,276 | 2,595 | 25,644 |
| 70,433 | 126 | 18,583 | 4,285 | 2,580 | 25,574 |
| 70,434 | 127 | 18,623 | 4,300 | 2,595 | 25,645 |
| 70,435 | 119 | 18,736 | 4,352 | 2,632 | 25,839 |
| 70,436 | 116 | 18,449 | 4,305 | 2,621 | 25,491 |
| 70,437 | 120 | 18,483 | 4,324 | 2,608 | 25,535 |
| 70,438 | 120 | 18,523 | 4,302 | 2,606 | 25,551 |
| 70,439 | 111 | 17,442 | 4,060 | 2,474 | 24,087 |
| 70,440 | 111 | 17,645 | 4,091 | 2,502 | 24,349 |
| 70,441 | 114 | 17,948 | 4,129 | 2,549 | 24,740 |
| 70,442 | 114 | 17,966 | 4,137 | 2,554 | 24,771 |
| 70,443 | 112 | 18,370 | 4,238 | 2,616 | 25,336 |
| 70,444 | 119 | 18,617 | 4,309 | 2,637 | 25,682 |
| 70,445 | 115 | 18,469 | 4,248 | 2,595 | 25,427 |
| 70,446 | 118 | 18,327 | 4,189 | 2,579 | 25,213 |
| 70,447 | 118 | 18,357 | 4,189 | 2,589 | 25,253 |
| 70,448 | 120 | 18,659 | 4,258 | 2,652 | 25,689 |
| 70,449 | 120 | 18,495 | 4,205 | 2,625 | 25,445 |
| 70,450 | 118 | 18,561 | 4,206 | 2,642 | 25,527 |
| 70,451 | 118 | 18,646 | 4,210 | 2,643 | 25,617 |
| 70,452 | 115 | 19,153 | 4,312 | 2,707 | 26,287 |
| 70,453 | 112 | 19,321 | 4,370 | 2,750 | 26,553 |
| 70,454 | 110 | 19,474 | 4,344 | 2,766 | 26,694 |
| 70,455 | 109 | 19,517 | 4,330 | 2,774 | 26,730 |

|        |     |        |       |       |        |
|--------|-----|--------|-------|-------|--------|
| 70,456 | 109 | 19,567 | 4,339 | 2,776 | 26,791 |
| 70,457 | 109 | 19,769 | 4,393 | 2,819 | 27,090 |
| 70,458 | 108 | 19,711 | 4,421 | 2,828 | 27,068 |
| 70,459 | 107 | 19,869 | 4,457 | 2,851 | 27,284 |
| 70,460 | 108 | 20,299 | 4,548 | 2,904 | 27,859 |
| 70,461 | 115 | 20,595 | 4,608 | 2,937 | 28,255 |
| 70,462 | 117 | 20,559 | 4,604 | 2,938 | 28,218 |
| 70,463 | 127 | 20,791 | 4,661 | 2,973 | 28,552 |
| 70,464 | 122 | 20,733 | 4,643 | 2,989 | 28,487 |
| 70,465 | 124 | 20,862 | 4,692 | 3,027 | 28,705 |
| 70,466 | 126 | 20,720 | 4,666 | 3,006 | 28,518 |
| 70,467 | 125 | 20,629 | 4,638 | 2,985 | 28,377 |
| 70,468 | 132 | 20,948 | 4,700 | 3,043 | 28,823 |
| 70,469 | 141 | 20,709 | 4,673 | 3,028 | 28,551 |
| 70,470 | 142 | 20,583 | 4,664 | 3,015 | 28,404 |
| 70,471 | 141 | 20,939 | 4,716 | 3,034 | 28,830 |
| 70,472 | 140 | 21,189 | 4,787 | 3,093 | 29,209 |
| 70,473 | 144 | 21,192 | 4,793 | 3,099 | 29,228 |
| 70,474 | 145 | 21,286 | 4,827 | 3,117 | 29,375 |
| 70,475 | 145 | 21,187 | 4,765 | 3,087 | 29,184 |
| 70,476 | 155 | 21,180 | 4,764 | 3,103 | 29,202 |
| 70,477 | 159 | 21,202 | 4,762 | 3,111 | 29,234 |
| 70,478 | 162 | 20,922 | 4,729 | 3,070 | 28,883 |
| 70,479 | 166 | 21,110 | 4,770 | 3,103 | 29,149 |
| 70,480 | 167 | 21,437 | 4,813 | 3,141 | 29,558 |
| 70,481 | 166 | 21,148 | 4,753 | 3,104 | 29,171 |
| 70,482 | 167 | 21,326 | 4,794 | 3,131 | 29,418 |
| 70,483 | 169 | 21,345 | 4,798 | 3,118 | 29,430 |
| 70,484 | 163 | 21,090 | 4,750 | 3,117 | 29,120 |
| 70,485 | 165 | 21,296 | 4,801 | 3,140 | 29,402 |
| 70,486 | 161 | 20,944 | 4,679 | 3,084 | 28,868 |
| 70,487 | 161 | 21,250 | 4,729 | 3,091 | 29,231 |

|        |     |        |       |       |        |
|--------|-----|--------|-------|-------|--------|
| 70,488 | 158 | 21,289 | 4,720 | 3,110 | 29,277 |
| 70,489 | 157 | 21,146 | 4,719 | 3,103 | 29,125 |
| 70,490 | 161 | 21,394 | 4,751 | 3,153 | 29,459 |
| 70,491 | 163 | 21,400 | 4,740 | 3,148 | 29,451 |
| 70,492 | 162 | 21,547 | 4,785 | 3,161 | 29,655 |
| 70,493 | 161 | 21,404 | 4,739 | 3,142 | 29,446 |
| 70,494 | 167 | 21,638 | 4,774 | 3,158 | 29,737 |
| 70,495 | 157 | 21,298 | 4,696 | 3,133 | 29,284 |
| 70,496 | 158 | 21,575 | 4,744 | 3,160 | 29,637 |
| 70,497 | 155 | 21,547 | 4,741 | 3,141 | 29,584 |
| 70,498 | 155 | 21,438 | 4,746 | 3,147 | 29,486 |
| 70,499 | 150 | 21,670 | 4,793 | 3,166 | 29,779 |
| 70,500 | 150 | 21,386 | 4,739 | 3,144 | 29,419 |
| 70,501 | 148 | 21,178 | 4,712 | 3,133 | 29,171 |
| 70,502 | 152 | 21,465 | 4,869 | 3,228 | 29,714 |
| 70,503 | 151 | 21,401 | 4,878 | 3,223 | 29,653 |
| 70,504 | 153 | 21,039 | 4,833 | 3,189 | 29,214 |
| 70,505 | 153 | 21,036 | 4,855 | 3,188 | 29,232 |
| 70,506 | 154 | 21,149 | 4,856 | 3,194 | 29,353 |
| 70,507 | 156 | 21,427 | 4,918 | 3,225 | 29,726 |
| 70,508 | 157 | 21,135 | 4,849 | 3,186 | 29,327 |
| 70,509 | 159 | 21,197 | 4,827 | 3,188 | 29,371 |
| 70,510 | 160 | 21,166 | 4,811 | 3,170 | 29,307 |
| 70,511 | 164 | 21,288 | 4,845 | 3,188 | 29,485 |
| 70,512 | 163 | 21,239 | 4,827 | 3,176 | 29,405 |
| 70,513 | 160 | 21,001 | 4,769 | 3,141 | 29,071 |
| 70,514 | 152 | 21,053 | 4,783 | 3,136 | 29,124 |
| 70,515 | 153 | 21,153 | 4,776 | 3,125 | 29,207 |
| 70,516 | 154 | 21,297 | 4,782 | 3,112 | 29,345 |
| 70,517 | 152 | 21,516 | 4,825 | 3,149 | 29,642 |
| 70,518 | 147 | 21,327 | 4,784 | 3,143 | 29,401 |
| 70,519 | 146 | 21,372 | 4,807 | 3,150 | 29,475 |

|        |     |        |       |       |        |
|--------|-----|--------|-------|-------|--------|
| 70,520 | 138 | 21,424 | 4,840 | 3,161 | 29,563 |
| 70,521 | 133 | 21,541 | 4,830 | 3,168 | 29,672 |
| 70,522 | 138 | 21,212 | 4,786 | 3,131 | 29,267 |
| 70,523 | 139 | 21,468 | 4,837 | 3,169 | 29,613 |
| 70,524 | 139 | 21,561 | 4,851 | 3,149 | 29,700 |
| 70,525 | 142 | 21,770 | 4,898 | 3,181 | 29,991 |
| 70,526 | 132 | 21,812 | 4,915 | 3,180 | 30,039 |
| 70,527 | 133 | 22,033 | 4,964 | 3,217 | 30,347 |
| 70,528 | 128 | 22,436 | 5,027 | 3,265 | 30,856 |
| 70,529 | 129 | 22,519 | 5,044 | 3,296 | 30,988 |
| 70,530 | 125 | 22,388 | 5,004 | 3,268 | 30,785 |
| 70,531 | 128 | 22,594 | 5,060 | 3,313 | 31,095 |
| 70,532 | 128 | 22,387 | 5,026 | 3,282 | 30,823 |
| 70,533 | 130 | 22,535 | 5,067 | 3,310 | 31,042 |
| 70,534 | 129 | 22,716 | 5,109 | 3,333 | 31,287 |
| 70,535 | 129 | 22,712 | 5,108 | 3,340 | 31,289 |
| 70,536 | 128 | 22,711 | 5,096 | 3,335 | 31,270 |
| 70,537 | 129 | 22,679 | 5,115 | 3,322 | 31,245 |
| 70,538 | 132 | 22,874 | 5,165 | 3,343 | 31,514 |
| 70,539 | 130 | 22,475 | 5,090 | 3,257 | 30,952 |
| 70,540 | 130 | 22,844 | 5,162 | 3,318 | 31,454 |
| 70,541 | 126 | 22,841 | 5,170 | 3,310 | 31,447 |
| 70,542 | 123 | 22,674 | 5,180 | 3,286 | 31,263 |
| 70,543 | 120 | 22,554 | 5,161 | 3,279 | 31,114 |
| 70,544 | 127 | 23,439 | 5,308 | 3,392 | 32,266 |
| 70,545 | 124 | 23,131 | 5,272 | 3,376 | 31,903 |
| 70,546 | 123 | 23,454 | 5,343 | 3,453 | 32,373 |
| 70,547 | 123 | 23,252 | 5,316 | 3,384 | 32,075 |
| 70,548 | 126 | 23,434 | 5,354 | 3,417 | 32,331 |
| 70,549 | 126 | 23,556 | 5,392 | 3,432 | 32,506 |
| 70,550 | 127 | 23,528 | 5,398 | 3,443 | 32,496 |
| 70,551 | 130 | 23,569 | 5,439 | 3,435 | 32,573 |

|        |     |        |       |       |        |
|--------|-----|--------|-------|-------|--------|
| 70,552 | 139 | 23,776 | 5,446 | 3,433 | 32,794 |
| 70,553 | 140 | 23,946 | 5,450 | 3,450 | 32,986 |
| 70,554 | 148 | 23,955 | 5,412 | 3,465 | 32,980 |
| 70,555 | 146 | 23,732 | 5,350 | 3,404 | 32,632 |
| 70,556 | 157 | 23,793 | 5,374 | 3,401 | 32,725 |
| 70,557 | 158 | 23,768 | 5,389 | 3,408 | 32,723 |
| 70,558 | 167 | 23,933 | 5,401 | 3,419 | 32,920 |
| 70,559 | 165 | 23,942 | 5,409 | 3,417 | 32,933 |
| 70,560 | 161 | 24,103 | 5,454 | 3,444 | 33,162 |
| 70,561 | 172 | 23,902 | 5,425 | 3,422 | 32,921 |
| 70,562 | 168 | 23,795 | 5,373 | 3,412 | 32,748 |
| 70,563 | 163 | 24,143 | 5,435 | 3,459 | 33,200 |
| 70,564 | 168 | 24,352 | 5,477 | 3,494 | 33,491 |
| 70,565 | 169 | 24,153 | 5,430 | 3,467 | 33,219 |
| 70,566 | 167 | 24,163 | 5,448 | 3,478 | 33,256 |
| 70,567 | 164 | 24,267 | 5,499 | 3,509 | 33,439 |
| 70,568 | 172 | 24,298 | 5,507 | 3,500 | 33,477 |
| 70,569 | 172 | 24,305 | 5,532 | 3,490 | 33,499 |
| 70,570 | 176 | 24,530 | 5,539 | 3,491 | 33,736 |
| 70,571 | 176 | 24,864 | 5,610 | 3,529 | 34,179 |
| 70,572 | 175 | 24,682 | 5,584 | 3,501 | 33,942 |
| 70,573 | 173 | 24,310 | 5,487 | 3,443 | 33,413 |
| 70,574 | 174 | 24,531 | 5,505 | 3,463 | 33,673 |
| 70,575 | 173 | 24,793 | 5,580 | 3,507 | 34,053 |
| 70,576 | 173 | 24,541 | 5,510 | 3,470 | 33,694 |
| 70,577 | 173 | 24,522 | 5,522 | 3,471 | 33,688 |
| 70,578 | 169 | 24,694 | 5,552 | 3,507 | 33,922 |
| 70,579 | 168 | 24,742 | 5,542 | 3,501 | 33,953 |
| 70,580 | 171 | 24,631 | 5,505 | 3,484 | 33,791 |
| 70,581 | 179 | 24,413 | 5,431 | 3,435 | 33,458 |
| 70,582 | 175 | 24,252 | 5,422 | 3,422 | 33,271 |
| 70,583 | 174 | 24,442 | 5,445 | 3,420 | 33,481 |

|        |     |        |       |       |        |
|--------|-----|--------|-------|-------|--------|
| 70,584 | 174 | 24,239 | 5,411 | 3,414 | 33,238 |
| 70,585 | 178 | 24,216 | 5,403 | 3,391 | 33,188 |
| 70,586 | 178 | 24,252 | 5,405 | 3,402 | 33,237 |
| 70,587 | 182 | 24,202 | 5,401 | 3,394 | 33,179 |
| 70,588 | 181 | 24,084 | 5,353 | 3,392 | 33,010 |
| 70,589 | 183 | 24,216 | 5,405 | 3,460 | 33,264 |
| 70,590 | 185 | 24,144 | 5,371 | 3,451 | 33,151 |
| 70,591 | 193 | 24,251 | 5,390 | 3,449 | 33,283 |
| 70,592 | 185 | 24,016 | 5,343 | 3,428 | 32,972 |
| 70,593 | 187 | 24,108 | 5,362 | 3,453 | 33,110 |
| 70,594 | 190 | 23,792 | 5,306 | 3,410 | 32,698 |
| 70,595 | 188 | 23,923 | 5,274 | 3,406 | 32,791 |
| 70,596 | 193 | 24,035 | 5,306 | 3,409 | 32,943 |
| 70,597 | 195 | 23,548 | 5,172 | 3,353 | 32,268 |
| 70,598 | 197 | 23,466 | 5,185 | 3,355 | 32,203 |
| 70,599 | 196 | 23,378 | 5,166 | 3,358 | 32,098 |
| 70,600 | 196 | 23,321 | 5,158 | 3,361 | 32,036 |
| 70,601 | 194 | 23,146 | 5,120 | 3,343 | 31,803 |
| 70,602 | 192 | 23,034 | 5,085 | 3,340 | 31,651 |
| 70,603 | 178 | 22,827 | 5,088 | 3,319 | 31,412 |
| 70,604 | 185 | 22,929 | 5,110 | 3,329 | 31,553 |
| 70,605 | 176 | 22,678 | 5,081 | 3,295 | 31,230 |
| 70,606 | 169 | 22,607 | 5,067 | 3,303 | 31,146 |
| 70,607 | 158 | 22,449 | 5,038 | 3,303 | 30,948 |
| 70,608 | 159 | 22,813 | 5,116 | 3,351 | 31,439 |
| 70,609 | 151 | 22,936 | 5,137 | 3,364 | 31,588 |
| 70,610 | 152 | 22,668 | 5,078 | 3,339 | 31,237 |
| 70,611 | 160 | 22,702 | 5,104 | 3,340 | 31,306 |
| 70,612 | 149 | 22,574 | 5,060 | 3,322 | 31,105 |
| 70,613 | 147 | 22,508 | 5,126 | 3,359 | 31,140 |
| 70,614 | 148 | 22,587 | 5,134 | 3,369 | 31,238 |
| 70,615 | 140 | 22,423 | 5,157 | 3,361 | 31,081 |

|        |     |        |       |       |        |
|--------|-----|--------|-------|-------|--------|
| 70,616 | 139 | 22,437 | 5,126 | 3,365 | 31,067 |
| 70,617 | 140 | 22,412 | 5,095 | 3,350 | 30,997 |
| 70,618 | 143 | 22,415 | 5,115 | 3,350 | 31,023 |
| 70,619 | 135 | 22,125 | 5,085 | 3,322 | 30,667 |
| 70,620 | 137 | 22,294 | 5,182 | 3,388 | 31,001 |
| 70,621 | 140 | 22,224 | 5,189 | 3,406 | 30,959 |
| 70,622 | 144 | 22,152 | 5,199 | 3,444 | 30,939 |
| 70,623 | 141 | 21,750 | 5,119 | 3,393 | 30,403 |
| 70,624 | 145 | 21,842 | 5,129 | 3,401 | 30,517 |
| 70,625 | 144 | 21,643 | 5,116 | 3,370 | 30,273 |
| 70,626 | 150 | 21,999 | 5,173 | 3,381 | 30,703 |
| 70,627 | 147 | 21,874 | 5,139 | 3,363 | 30,523 |
| 70,628 | 148 | 21,824 | 5,142 | 3,361 | 30,475 |
| 70,629 | 149 | 22,087 | 5,196 | 3,390 | 30,822 |
| 70,630 | 155 | 22,040 | 5,198 | 3,390 | 30,783 |
| 70,631 | 148 | 21,836 | 5,161 | 3,367 | 30,512 |
| 70,632 | 138 | 21,876 | 5,209 | 3,385 | 30,608 |
| 70,633 | 142 | 21,951 | 5,219 | 3,395 | 30,707 |
| 70,634 | 142 | 21,980 | 5,225 | 3,388 | 30,735 |
| 70,635 | 142 | 22,243 | 5,250 | 3,420 | 31,055 |
| 70,636 | 140 | 22,131 | 5,255 | 3,416 | 30,942 |
| 70,637 | 136 | 22,104 | 5,261 | 3,407 | 30,908 |
| 70,638 | 140 | 22,389 | 5,332 | 3,459 | 31,320 |
| 70,639 | 137 | 22,346 | 5,365 | 3,480 | 31,328 |
| 70,640 | 138 | 22,397 | 5,384 | 3,476 | 31,395 |
| 70,641 | 132 | 22,127 | 5,363 | 3,454 | 31,076 |
| 70,642 | 133 | 22,365 | 5,433 | 3,495 | 31,426 |
| 70,643 | 136 | 22,415 | 5,453 | 3,502 | 31,506 |
| 70,644 | 133 | 22,469 | 5,494 | 3,501 | 31,597 |
| 70,645 | 131 | 22,436 | 5,484 | 3,506 | 31,557 |
| 70,646 | 125 | 22,312 | 5,466 | 3,478 | 31,381 |
| 70,647 | 122 | 22,241 | 5,425 | 3,447 | 31,235 |



|        |     |        |       |       |        |
|--------|-----|--------|-------|-------|--------|
| 70,648 | 125 | 22,522 | 5,509 | 3,498 | 31,654 |
| 70,649 | 125 | 22,748 | 5,553 | 3,537 | 31,963 |
| 70,650 | 127 | 22,598 | 5,562 | 3,543 | 31,830 |
| 70,651 | 126 | 22,654 | 5,592 | 3,541 | 31,913 |
| 70,652 | 125 | 22,619 | 5,583 | 3,529 | 31,856 |
| 70,653 | 126 | 22,707 | 5,590 | 3,540 | 31,963 |
| 70,654 | 127 | 22,796 | 5,582 | 3,544 | 32,049 |
| 70,655 | 119 | 22,561 | 5,508 | 3,498 | 31,686 |
| 70,656 | 123 | 22,337 | 5,479 | 3,449 | 31,388 |
| 70,657 | 123 | 22,094 | 5,433 | 3,428 | 31,078 |
| 70,658 | 130 | 22,339 | 5,592 | 3,526 | 31,587 |
| 70,659 | 130 | 22,122 | 5,597 | 3,527 | 31,376 |
| 70,660 | 135 | 22,032 | 5,573 | 3,524 | 31,264 |
| 70,661 | 129 | 21,749 | 5,493 | 3,475 | 30,846 |
| 70,662 | 128 | 21,764 | 5,496 | 3,461 | 30,849 |
| 70,663 | 131 | 22,313 | 5,616 | 3,524 | 31,584 |
| 70,664 | 132 | 21,501 | 5,477 | 3,428 | 30,538 |
| 70,665 | 132 | 21,820 | 5,528 | 3,464 | 30,944 |
| 70,666 | 133 | 22,122 | 5,615 | 3,518 | 31,388 |
| 70,667 | 134 | 22,250 | 5,694 | 3,549 | 31,627 |
| 70,668 | 129 | 21,975 | 5,639 | 3,528 | 31,271 |
| 70,669 | 129 | 22,056 | 5,632 | 3,534 | 31,351 |
| 70,670 | 133 | 21,870 | 5,534 | 3,479 | 31,016 |
| 70,671 | 134 | 22,128 | 5,578 | 3,516 | 31,356 |
| 70,672 | 130 | 22,289 | 5,634 | 3,553 | 31,606 |
| 70,673 | 128 | 21,871 | 5,512 | 3,474 | 30,985 |
| 70,674 | 128 | 21,874 | 5,506 | 3,468 | 30,976 |
| 70,675 | 122 | 21,607 | 5,458 | 3,439 | 30,626 |
| 70,676 | 131 | 21,717 | 5,528 | 3,501 | 30,877 |
| 70,677 | 129 | 21,866 | 5,603 | 3,540 | 31,138 |
| 70,678 | 131 | 21,598 | 5,537 | 3,489 | 30,755 |
| 70,679 | 129 | 21,386 | 5,502 | 3,469 | 30,486 |

|        |     |        |       |       |        |
|--------|-----|--------|-------|-------|--------|
| 70,680 | 136 | 21,567 | 5,550 | 3,515 | 30,768 |
| 70,681 | 136 | 21,312 | 5,463 | 3,467 | 30,378 |
| 70,682 | 139 | 21,422 | 5,500 | 3,505 | 30,566 |
| 70,683 | 138 | 21,597 | 5,530 | 3,543 | 30,808 |
| 70,684 | 139 | 21,585 | 5,543 | 3,557 | 30,824 |
| 70,685 | 137 | 21,442 | 5,517 | 3,544 | 30,640 |
| 70,686 | 142 | 21,497 | 5,528 | 3,545 | 30,712 |
| 70,687 | 140 | 21,292 | 5,480 | 3,526 | 30,438 |
| 70,688 | 140 | 21,313 | 5,469 | 3,536 | 30,458 |
| 70,689 | 138 | 21,510 | 5,527 | 3,537 | 30,712 |
| 70,690 | 140 | 21,532 | 5,489 | 3,522 | 30,683 |
| 70,691 | 138 | 21,246 | 5,421 | 3,482 | 30,287 |
| 70,692 | 138 | 21,182 | 5,398 | 3,492 | 30,210 |
| 70,693 | 134 | 21,119 | 5,396 | 3,506 | 30,155 |
| 70,694 | 136 | 21,117 | 5,376 | 3,505 | 30,134 |
| 70,695 | 137 | 21,483 | 5,406 | 3,576 | 30,602 |
| 70,696 | 137 | 21,638 | 5,465 | 3,598 | 30,838 |
| 70,697 | 136 | 21,337 | 5,381 | 3,565 | 30,419 |
| 70,698 | 136 | 21,458 | 5,445 | 3,590 | 30,629 |
| 70,699 | 135 | 21,668 | 5,502 | 3,618 | 30,923 |
| 70,700 | 136 | 21,688 | 5,499 | 3,613 | 30,936 |
| 70,701 | 139 | 21,936 | 5,568 | 3,654 | 31,297 |
| 70,702 | 143 | 21,997 | 5,574 | 3,666 | 31,380 |
| 70,703 | 143 | 22,032 | 5,573 | 3,678 | 31,426 |
| 70,704 | 142 | 22,062 | 5,599 | 3,665 | 31,468 |
| 70,705 | 141 | 22,060 | 5,598 | 3,653 | 31,452 |
| 70,706 | 138 | 22,090 | 5,549 | 3,641 | 31,418 |
| 70,707 | 137 | 21,915 | 5,437 | 3,563 | 31,052 |
| 70,708 | 137 | 22,256 | 5,480 | 3,605 | 31,478 |
| 70,709 | 133 | 22,320 | 5,516 | 3,605 | 31,574 |
| 70,710 | 133 | 22,671 | 5,548 | 3,631 | 31,983 |
| 70,711 | 130 | 22,919 | 5,586 | 3,665 | 32,300 |

|        |     |        |       |       |        |
|--------|-----|--------|-------|-------|--------|
| 70,712 | 124 | 22,735 | 5,568 | 3,646 | 32,073 |
| 70,713 | 131 | 22,782 | 5,614 | 3,667 | 32,194 |
| 70,714 | 129 | 22,716 | 5,591 | 3,652 | 32,088 |
| 70,715 | 127 | 22,794 | 5,591 | 3,658 | 32,170 |
| 70,716 | 135 | 22,754 | 5,587 | 3,613 | 32,089 |
| 70,717 | 135 | 22,895 | 5,561 | 3,622 | 32,213 |
| 70,718 | 138 | 23,075 | 5,568 | 3,604 | 32,385 |
| 70,719 | 140 | 22,967 | 5,520 | 3,564 | 32,191 |
| 70,720 | 142 | 23,261 | 5,582 | 3,584 | 32,569 |
| 70,721 | 138 | 23,336 | 5,585 | 3,591 | 32,650 |
| 70,722 | 149 | 23,729 | 5,683 | 3,628 | 33,189 |
| 70,723 | 148 | 23,663 | 5,634 | 3,590 | 33,035 |
| 70,724 | 149 | 23,999 | 5,723 | 3,617 | 33,488 |
| 70,725 | 137 | 23,879 | 5,696 | 3,593 | 33,305 |
| 70,726 | 141 | 24,227 | 5,699 | 3,626 | 33,693 |
| 70,727 | 142 | 24,276 | 5,676 | 3,637 | 33,731 |
| 70,728 | 143 | 24,313 | 5,683 | 3,646 | 33,785 |
| 70,729 | 144 | 24,295 | 5,664 | 3,642 | 33,745 |
| 70,730 | 146 | 24,638 | 5,757 | 3,664 | 34,205 |
| 70,731 | 147 | 24,644 | 5,791 | 3,660 | 34,242 |
| 70,732 | 142 | 24,298 | 5,745 | 3,598 | 33,783 |
| 70,733 | 146 | 24,395 | 5,776 | 3,603 | 33,920 |
| 70,734 | 147 | 24,471 | 5,778 | 3,592 | 33,988 |
| 70,735 | 144 | 24,481 | 5,752 | 3,581 | 33,958 |
| 70,736 | 141 | 24,254 | 5,670 | 3,537 | 33,602 |
| 70,737 | 142 | 24,342 | 5,665 | 3,543 | 33,692 |
| 70,738 | 144 | 24,548 | 5,718 | 3,566 | 33,976 |
| 70,739 | 147 | 24,495 | 5,728 | 3,561 | 33,931 |
| 70,740 | 146 | 24,490 | 5,711 | 3,560 | 33,907 |
| 70,741 | 142 | 24,297 | 5,707 | 3,558 | 33,704 |
| 70,742 | 150 | 24,503 | 5,764 | 3,613 | 34,030 |
| 70,743 | 151 | 24,346 | 5,696 | 3,547 | 33,740 |

|        |     |        |       |       |        |
|--------|-----|--------|-------|-------|--------|
| 70,744 | 151 | 24,514 | 5,743 | 3,597 | 34,005 |
| 70,745 | 154 | 24,365 | 5,729 | 3,605 | 33,853 |
| 70,746 | 156 | 24,335 | 5,731 | 3,580 | 33,802 |
| 70,747 | 159 | 24,105 | 5,642 | 3,516 | 33,422 |
| 70,748 | 159 | 23,914 | 5,619 | 3,479 | 33,171 |
| 70,749 | 159 | 24,118 | 5,656 | 3,517 | 33,450 |
| 70,750 | 159 | 24,075 | 5,647 | 3,508 | 33,389 |
| 70,751 | 154 | 24,153 | 5,668 | 3,496 | 33,471 |
| 70,752 | 153 | 24,124 | 5,645 | 3,481 | 33,403 |
| 70,753 | 157 | 24,102 | 5,632 | 3,491 | 33,382 |
| 70,754 | 159 | 24,074 | 5,629 | 3,469 | 33,331 |
| 70,755 | 159 | 24,237 | 5,635 | 3,498 | 33,529 |
| 70,756 | 161 | 23,999 | 5,595 | 3,467 | 33,222 |
| 70,757 | 171 | 24,258 | 5,642 | 3,508 | 33,579 |
| 70,758 | 174 | 24,209 | 5,640 | 3,491 | 33,514 |
| 70,759 | 175 | 23,905 | 5,583 | 3,456 | 33,119 |
| 70,760 | 176 | 23,907 | 5,565 | 3,433 | 33,081 |
| 70,761 | 181 | 24,083 | 5,599 | 3,457 | 33,320 |
| 70,762 | 178 | 23,965 | 5,596 | 3,448 | 33,187 |
| 70,763 | 178 | 23,670 | 5,523 | 3,401 | 32,772 |
| 70,764 | 171 | 23,734 | 5,500 | 3,415 | 32,820 |
| 70,765 | 170 | 23,444 | 5,390 | 3,392 | 32,396 |
| 70,766 | 171 | 23,469 | 5,384 | 3,389 | 32,413 |
| 70,767 | 164 | 23,453 | 5,416 | 3,422 | 32,455 |
| 70,768 | 162 | 23,128 | 5,344 | 3,368 | 32,002 |
| 70,769 | 160 | 22,864 | 5,319 | 3,366 | 31,709 |
| 70,770 | 156 | 22,617 | 5,284 | 3,366 | 31,423 |
| 70,771 | 156 | 22,462 | 5,266 | 3,352 | 31,236 |
| 70,772 | 152 | 22,394 | 5,275 | 3,361 | 31,182 |
| 70,773 | 146 | 22,324 | 5,278 | 3,387 | 31,135 |
| 70,774 | 140 | 21,979 | 5,216 | 3,345 | 30,680 |
| 70,775 | 142 | 21,935 | 5,180 | 3,334 | 30,591 |

|        |     |        |       |       |        |
|--------|-----|--------|-------|-------|--------|
| 70,776 | 142 | 21,860 | 5,201 | 3,311 | 30,514 |
| 70,777 | 139 | 22,121 | 5,239 | 3,349 | 30,848 |
| 70,778 | 137 | 22,119 | 5,258 | 3,349 | 30,863 |
| 70,779 | 131 | 22,083 | 5,260 | 3,332 | 30,806 |
| 70,780 | 129 | 21,999 | 5,250 | 3,329 | 30,707 |
| 70,781 | 121 | 21,788 | 5,208 | 3,298 | 30,415 |
| 70,782 | 123 | 21,538 | 5,115 | 3,285 | 30,061 |
| 70,783 | 121 | 21,533 | 5,144 | 3,293 | 30,091 |
| 70,784 | 111 | 21,226 | 5,075 | 3,249 | 29,661 |
| 70,785 | 111 | 21,278 | 5,098 | 3,252 | 29,739 |
| 70,786 | 118 | 21,143 | 5,133 | 3,251 | 29,645 |
| 70,787 | 120 | 21,278 | 5,193 | 3,286 | 29,877 |
| 70,788 | 120 | 21,271 | 5,189 | 3,290 | 29,870 |
| 70,789 | 123 | 21,105 | 5,219 | 3,290 | 29,737 |
| 70,790 | 122 | 20,862 | 5,166 | 3,261 | 29,411 |
| 70,791 | 125 | 20,892 | 5,157 | 3,248 | 29,422 |
| 70,792 | 123 | 20,804 | 5,132 | 3,204 | 29,263 |
| 70,793 | 117 | 21,061 | 5,185 | 3,260 | 29,623 |
| 70,794 | 116 | 21,013 | 5,164 | 3,230 | 29,523 |
| 70,795 | 120 | 21,025 | 5,157 | 3,211 | 29,513 |
| 70,796 | 115 | 20,921 | 5,111 | 3,164 | 29,311 |
| 70,797 | 113 | 21,000 | 5,172 | 3,197 | 29,482 |
| 70,798 | 113 | 20,998 | 5,154 | 3,188 | 29,453 |
| 70,799 | 112 | 20,956 | 5,157 | 3,202 | 29,427 |
| 70,800 | 110 | 20,949 | 5,148 | 3,215 | 29,422 |
| 70,801 | 112 | 20,626 | 5,060 | 3,187 | 28,985 |
| 70,802 | 112 | 20,825 | 5,093 | 3,225 | 29,255 |
| 70,803 | 115 | 20,857 | 5,102 | 3,219 | 29,293 |
| 70,804 | 113 | 20,692 | 5,061 | 3,209 | 29,075 |
| 70,805 | 120 | 20,723 | 5,060 | 3,228 | 29,131 |
| 70,806 | 119 | 20,484 | 5,029 | 3,193 | 28,825 |
| 70,807 | 120 | 21,516 | 5,232 | 3,342 | 30,210 |

|        |     |        |       |       |        |
|--------|-----|--------|-------|-------|--------|
| 70,808 | 111 | 21,431 | 5,276 | 3,332 | 30,150 |
| 70,809 | 108 | 21,300 | 5,242 | 3,306 | 29,956 |
| 70,810 | 108 | 21,334 | 5,234 | 3,296 | 29,972 |
| 70,811 | 108 | 21,563 | 5,322 | 3,346 | 30,339 |
| 70,812 | 104 | 21,243 | 5,267 | 3,315 | 29,929 |
| 70,813 | 105 | 21,262 | 5,279 | 3,315 | 29,961 |
| 70,814 | 105 | 21,401 | 5,317 | 3,337 | 30,160 |
| 70,815 | 105 | 21,330 | 5,317 | 3,325 | 30,077 |
| 70,816 | 105 | 21,233 | 5,317 | 3,315 | 29,970 |
| 70,817 | 108 | 21,190 | 5,293 | 3,289 | 29,880 |
| 70,818 | 110 | 21,149 | 5,262 | 3,285 | 29,806 |
| 70,819 | 109 | 21,055 | 5,208 | 3,243 | 29,615 |
| 70,820 | 110 | 21,343 | 5,248 | 3,270 | 29,971 |
| 70,821 | 107 | 21,009 | 5,156 | 3,224 | 29,496 |
| 70,822 | 106 | 21,081 | 5,171 | 3,226 | 29,584 |
| 70,823 | 108 | 20,823 | 5,109 | 3,180 | 29,220 |
| 70,824 | 108 | 20,474 | 5,021 | 3,119 | 28,722 |
| 70,825 | 123 | 21,026 | 5,184 | 3,205 | 29,538 |
| 70,826 | 125 | 21,312 | 5,247 | 3,228 | 29,912 |
| 70,827 | 125 | 21,286 | 5,261 | 3,240 | 29,912 |
| 70,828 | 129 | 21,184 | 5,273 | 3,226 | 29,812 |
| 70,829 | 128 | 20,901 | 5,217 | 3,182 | 29,428 |
| 70,830 | 135 | 20,807 | 5,213 | 3,210 | 29,365 |
| 70,831 | 137 | 20,786 | 5,194 | 3,217 | 29,334 |
| 70,832 | 134 | 20,752 | 5,176 | 3,193 | 29,255 |
| 70,833 | 134 | 20,981 | 5,218 | 3,240 | 29,573 |
| 70,834 | 134 | 20,691 | 5,111 | 3,187 | 29,123 |
| 70,835 | 134 | 20,882 | 5,130 | 3,216 | 29,362 |
| 70,836 | 130 | 21,103 | 5,132 | 3,244 | 29,609 |
| 70,837 | 126 | 20,820 | 5,106 | 3,219 | 29,271 |
| 70,838 | 124 | 20,975 | 5,115 | 3,222 | 29,436 |
| 70,839 | 124 | 21,001 | 5,105 | 3,216 | 29,446 |

|        |     |        |       |       |        |
|--------|-----|--------|-------|-------|--------|
| 70,840 | 119 | 20,985 | 5,066 | 3,204 | 29,374 |
| 70,841 | 117 | 20,973 | 5,074 | 3,199 | 29,363 |
| 70,842 | 117 | 20,982 | 5,089 | 3,202 | 29,390 |
| 70,843 | 115 | 20,817 | 5,016 | 3,160 | 29,108 |
| 70,844 | 115 | 20,784 | 5,054 | 3,169 | 29,122 |
| 70,845 | 114 | 20,692 | 5,059 | 3,171 | 29,036 |
| 70,846 | 107 | 20,682 | 5,032 | 3,164 | 28,985 |
| 70,847 | 110 | 20,836 | 5,070 | 3,188 | 29,204 |
| 70,848 | 105 | 20,798 | 5,068 | 3,175 | 29,146 |
| 70,849 | 107 | 20,884 | 5,078 | 3,166 | 29,235 |
| 70,850 | 109 | 20,863 | 5,020 | 3,141 | 29,133 |
| 70,851 | 117 | 20,997 | 5,034 | 3,153 | 29,301 |
| 70,852 | 118 | 21,302 | 5,091 | 3,184 | 29,695 |
| 70,853 | 110 | 21,094 | 5,067 | 3,107 | 29,378 |
| 70,854 | 113 | 20,972 | 5,066 | 3,096 | 29,247 |
| 70,855 | 113 | 20,646 | 5,000 | 3,058 | 28,817 |
| 70,856 | 118 | 21,206 | 5,092 | 3,137 | 29,553 |
| 70,857 | 121 | 21,391 | 5,137 | 3,149 | 29,798 |
| 70,858 | 123 | 21,224 | 5,089 | 3,115 | 29,551 |
| 70,859 | 124 | 20,894 | 4,991 | 3,079 | 29,088 |
| 70,860 | 124 | 21,104 | 5,038 | 3,126 | 29,392 |
| 70,861 | 123 | 20,879 | 4,985 | 3,089 | 29,076 |
| 70,862 | 124 | 20,840 | 4,992 | 3,081 | 29,037 |
| 70,863 | 127 | 20,930 | 5,010 | 3,082 | 29,149 |
| 70,864 | 126 | 20,959 | 4,986 | 3,082 | 29,153 |
| 70,865 | 131 | 21,167 | 5,020 | 3,106 | 29,424 |
| 70,866 | 131 | 21,157 | 5,009 | 3,103 | 29,400 |
| 70,867 | 126 | 21,396 | 5,037 | 3,125 | 29,684 |
| 70,868 | 126 | 21,357 | 5,075 | 3,129 | 29,687 |
| 70,869 | 125 | 21,444 | 5,111 | 3,154 | 29,834 |
| 70,870 | 134 | 21,657 | 5,198 | 3,200 | 30,189 |
| 70,871 | 133 | 21,596 | 5,208 | 3,201 | 30,138 |

|        |     |        |       |       |        |
|--------|-----|--------|-------|-------|--------|
| 70,872 | 135 | 21,800 | 5,224 | 3,255 | 30,414 |
| 70,873 | 134 | 21,736 | 5,237 | 3,249 | 30,356 |
| 70,874 | 132 | 22,100 | 5,339 | 3,331 | 30,902 |
| 70,875 | 138 | 22,276 | 5,380 | 3,344 | 31,138 |
| 70,876 | 133 | 22,207 | 5,370 | 3,362 | 31,072 |
| 70,877 | 142 | 22,388 | 5,422 | 3,399 | 31,351 |
| 70,878 | 142 | 22,545 | 5,430 | 3,399 | 31,516 |
| 70,879 | 142 | 22,395 | 5,395 | 3,407 | 31,339 |
| 70,880 | 144 | 22,189 | 5,345 | 3,361 | 31,039 |
| 70,881 | 140 | 22,204 | 5,344 | 3,362 | 31,050 |
| 70,882 | 137 | 21,993 | 5,297 | 3,329 | 30,756 |
| 70,883 | 140 | 22,015 | 5,338 | 3,341 | 30,834 |
| 70,884 | 143 | 22,197 | 5,392 | 3,361 | 31,093 |
| 70,885 | 145 | 21,856 | 5,305 | 3,309 | 30,615 |
| 70,886 | 145 | 21,815 | 5,310 | 3,305 | 30,575 |
| 70,887 | 146 | 21,730 | 5,329 | 3,303 | 30,508 |
| 70,888 | 148 | 21,817 | 5,382 | 3,342 | 30,689 |
| 70,889 | 148 | 21,543 | 5,333 | 3,291 | 30,315 |
| 70,890 | 151 | 21,494 | 5,331 | 3,273 | 30,249 |
| 70,891 | 155 | 21,680 | 5,372 | 3,302 | 30,509 |
| 70,892 | 161 | 21,677 | 5,361 | 3,293 | 30,492 |
| 70,893 | 159 | 21,356 | 5,307 | 3,249 | 30,071 |
| 70,894 | 165 | 21,296 | 5,263 | 3,223 | 29,947 |
| 70,895 | 165 | 21,305 | 5,244 | 3,222 | 29,936 |
| 70,896 | 169 | 21,295 | 5,250 | 3,232 | 29,946 |
| 70,897 | 171 | 21,194 | 5,247 | 3,220 | 29,832 |
| 70,898 | 175 | 21,204 | 5,271 | 3,227 | 29,877 |
| 70,899 | 175 | 20,949 | 5,247 | 3,210 | 29,581 |
| 70,900 | 177 | 20,789 | 5,221 | 3,199 | 29,386 |
| 70,901 | 182 | 20,638 | 5,238 | 3,197 | 29,255 |
| 70,902 | 176 | 20,383 | 5,183 | 3,140 | 28,882 |
| 70,903 | 182 | 20,086 | 5,093 | 3,090 | 28,451 |



|        |     |        |       |       |        |
|--------|-----|--------|-------|-------|--------|
| 70,904 | 181 | 19,997 | 5,077 | 3,090 | 28,345 |
| 70,905 | 178 | 19,730 | 5,029 | 3,050 | 27,987 |
| 70,906 | 181 | 19,472 | 5,011 | 3,016 | 27,680 |
| 70,907 | 184 | 19,723 | 5,144 | 3,059 | 28,110 |
| 70,908 | 188 | 19,147 | 5,048 | 3,009 | 27,392 |
| 70,909 | 180 | 17,712 | 4,805 | 2,764 | 25,461 |
| 70,910 | 182 | 18,724 | 5,000 | 2,932 | 26,838 |
| 70,911 | 180 | 18,619 | 4,944 | 2,910 | 26,653 |
| 70,912 | 179 | 18,487 | 4,919 | 2,896 | 26,481 |
| 70,913 | 177 | 18,257 | 4,914 | 2,883 | 26,231 |
| 70,914 | 173 | 18,054 | 4,877 | 2,857 | 25,961 |
| 70,915 | 173 | 17,986 | 4,875 | 2,831 | 25,865 |
| 70,916 | 172 | 17,885 | 4,926 | 2,825 | 25,808 |
| 70,917 | 172 | 17,773 | 4,937 | 2,818 | 25,700 |
| 70,918 | 175 | 17,865 | 4,983 | 2,837 | 25,860 |
| 70,919 | 179 | 17,874 | 4,962 | 2,849 | 25,864 |
| 70,920 | 182 | 18,003 | 4,973 | 2,866 | 26,024 |
| 70,921 | 176 | 17,940 | 4,973 | 2,865 | 25,954 |
| 70,922 | 174 | 18,154 | 5,092 | 2,897 | 26,317 |
| 70,923 | 174 | 18,268 | 5,114 | 2,895 | 26,451 |
| 70,924 | 171 | 18,405 | 5,123 | 2,897 | 26,596 |
| 70,925 | 168 | 18,466 | 5,156 | 2,881 | 26,671 |
| 70,926 | 168 | 18,257 | 5,111 | 2,876 | 26,412 |
| 70,927 | 168 | 18,298 | 5,129 | 2,896 | 26,491 |
| 70,928 | 162 | 18,687 | 5,225 | 2,929 | 27,003 |
| 70,929 | 162 | 18,722 | 5,222 | 2,949 | 27,055 |
| 70,930 | 154 | 18,774 | 5,216 | 2,932 | 27,076 |
| 70,931 | 156 | 19,016 | 5,279 | 2,958 | 27,409 |
| 70,932 | 157 | 19,068 | 5,298 | 2,963 | 27,486 |
| 70,933 | 159 | 19,262 | 5,324 | 2,984 | 27,729 |
| 70,934 | 158 | 19,403 | 5,339 | 2,969 | 27,869 |
| 70,935 | 161 | 19,353 | 5,316 | 2,957 | 27,787 |

|        |     |        |       |       |        |
|--------|-----|--------|-------|-------|--------|
| 70,936 | 161 | 19,371 | 5,319 | 2,961 | 27,812 |
| 70,937 | 162 | 20,104 | 5,467 | 3,073 | 28,806 |
| 70,938 | 161 | 20,030 | 5,433 | 3,050 | 28,674 |
| 70,939 | 163 | 20,119 | 5,467 | 3,062 | 28,811 |
| 70,940 | 163 | 20,052 | 5,471 | 3,049 | 28,735 |
| 70,941 | 162 | 20,327 | 5,556 | 3,088 | 29,133 |
| 70,942 | 164 | 20,217 | 5,512 | 3,054 | 28,947 |
| 70,943 | 157 | 20,112 | 5,448 | 3,049 | 28,766 |
| 70,944 | 163 | 20,132 | 5,445 | 3,038 | 28,778 |
| 70,945 | 159 | 20,016 | 5,425 | 3,031 | 28,631 |
| 70,946 | 160 | 20,353 | 5,539 | 3,062 | 29,114 |
| 70,947 | 159 | 20,306 | 5,489 | 3,059 | 29,013 |
| 70,948 | 158 | 20,355 | 5,483 | 3,059 | 29,055 |
| 70,949 | 151 | 20,285 | 5,471 | 3,052 | 28,959 |
| 70,950 | 156 | 20,418 | 5,531 | 3,087 | 29,192 |
| 70,951 | 150 | 20,191 | 5,471 | 3,049 | 28,861 |
| 70,952 | 151 | 20,334 | 5,496 | 3,070 | 29,051 |
| 70,953 | 138 | 19,993 | 5,426 | 3,039 | 28,596 |
| 70,954 | 138 | 20,171 | 5,469 | 3,063 | 28,841 |
| 70,955 | 138 | 20,314 | 5,504 | 3,095 | 29,051 |
| 70,956 | 130 | 20,444 | 5,503 | 3,139 | 29,216 |
| 70,957 | 135 | 20,634 | 5,499 | 3,142 | 29,410 |
| 70,958 | 132 | 20,770 | 5,503 | 3,130 | 29,535 |
| 70,959 | 131 | 20,955 | 5,471 | 3,122 | 29,679 |
| 70,960 | 132 | 20,840 | 5,467 | 3,115 | 29,554 |
| 70,961 | 136 | 20,937 | 5,513 | 3,142 | 29,728 |
| 70,962 | 141 | 20,987 | 5,539 | 3,139 | 29,806 |
| 70,963 | 145 | 21,032 | 5,523 | 3,140 | 29,840 |
| 70,964 | 145 | 20,906 | 5,483 | 3,123 | 29,657 |
| 70,965 | 144 | 21,184 | 5,500 | 3,162 | 29,990 |
| 70,966 | 146 | 20,864 | 5,430 | 3,123 | 29,563 |
| 70,967 | 146 | 20,685 | 5,345 | 3,090 | 29,266 |

|        |     |        |       |       |        |
|--------|-----|--------|-------|-------|--------|
| 70,968 | 144 | 21,277 | 5,445 | 3,168 | 30,034 |
| 70,969 | 137 | 20,761 | 5,317 | 3,095 | 29,310 |
| 70,970 | 139 | 20,901 | 5,370 | 3,117 | 29,527 |
| 70,971 | 132 | 20,565 | 5,250 | 3,065 | 29,012 |
| 70,972 | 135 | 19,986 | 5,064 | 2,960 | 28,145 |
| 70,973 | 135 | 20,123 | 5,078 | 2,978 | 28,314 |
| 70,974 | 135 | 19,873 | 5,003 | 2,935 | 27,946 |
| 70,975 | 138 | 19,483 | 4,894 | 2,872 | 27,387 |
| 70,976 | 134 | 19,178 | 4,781 | 2,817 | 26,910 |
| 70,977 | 140 | 19,390 | 4,814 | 2,801 | 27,145 |
| 70,978 | 142 | 19,493 | 4,856 | 2,803 | 27,294 |
| 70,979 | 145 | 18,704 | 4,689 | 2,707 | 26,245 |
| 70,980 | 144 | 18,708 | 4,717 | 2,710 | 26,279 |
| 70,981 | 144 | 18,629 | 4,686 | 2,705 | 26,164 |
| 70,982 | 150 | 18,360 | 4,608 | 2,664 | 25,782 |
| 70,983 | 153 | 18,332 | 4,588 | 2,641 | 25,714 |
| 70,984 | 151 | 18,171 | 4,568 | 2,625 | 25,515 |
| 70,985 | 151 | 18,138 | 4,564 | 2,644 | 25,497 |
| 70,986 | 145 | 17,901 | 4,532 | 2,631 | 25,209 |
| 70,987 | 150 | 17,881 | 4,555 | 2,646 | 25,232 |
| 70,988 | 152 | 17,759 | 4,527 | 2,605 | 25,043 |
| 70,989 | 159 | 17,505 | 4,455 | 2,576 | 24,695 |
| 70,990 | 172 | 17,654 | 4,456 | 2,582 | 24,864 |
| 70,991 | 173 | 17,603 | 4,414 | 2,569 | 24,759 |
| 70,992 | 171 | 17,790 | 4,432 | 2,575 | 24,968 |
| 70,993 | 172 | 17,663 | 4,391 | 2,578 | 24,804 |
| 70,994 | 172 | 17,732 | 4,380 | 2,587 | 24,871 |
| 70,995 | 166 | 17,813 | 4,387 | 2,602 | 24,968 |
| 70,996 | 166 | 17,717 | 4,376 | 2,596 | 24,855 |
| 70,997 | 166 | 17,739 | 4,376 | 2,607 | 24,888 |
| 70,998 | 165 | 17,759 | 4,394 | 2,617 | 24,935 |
| 70,999 | 173 | 17,829 | 4,373 | 2,599 | 24,974 |

|        |     |        |       |       |        |
|--------|-----|--------|-------|-------|--------|
| 71,000 | 174 | 17,915 | 4,379 | 2,594 | 25,062 |
| 71,001 | 170 | 18,071 | 4,378 | 2,594 | 25,213 |
| 71,002 | 166 | 17,985 | 4,361 | 2,588 | 25,100 |
| 71,003 | 168 | 18,098 | 4,380 | 2,592 | 25,238 |
| 71,004 | 173 | 18,071 | 4,357 | 2,590 | 25,191 |
| 71,005 | 173 | 18,103 | 4,375 | 2,603 | 25,254 |
| 71,006 | 169 | 18,215 | 4,375 | 2,603 | 25,362 |
| 71,007 | 167 | 18,414 | 4,423 | 2,608 | 25,612 |
| 71,008 | 159 | 18,264 | 4,379 | 2,594 | 25,396 |
| 71,009 | 163 | 18,479 | 4,396 | 2,621 | 25,659 |
| 71,010 | 161 | 18,381 | 4,402 | 2,634 | 25,578 |
| 71,011 | 156 | 18,504 | 4,457 | 2,654 | 25,771 |
| 71,012 | 151 | 18,427 | 4,420 | 2,641 | 25,639 |
| 71,013 | 156 | 18,387 | 4,403 | 2,644 | 25,590 |
| 71,014 | 154 | 18,392 | 4,422 | 2,643 | 25,611 |
| 71,015 | 158 | 18,845 | 4,535 | 2,707 | 26,245 |
| 71,016 | 163 | 19,127 | 4,626 | 2,750 | 26,666 |
| 71,017 | 163 | 18,775 | 4,539 | 2,697 | 26,174 |
| 71,018 | 163 | 18,937 | 4,597 | 2,729 | 26,426 |
| 71,019 | 167 | 19,190 | 4,671 | 2,777 | 26,805 |
| 71,020 | 166 | 19,308 | 4,668 | 2,792 | 26,934 |
| 71,021 | 167 | 19,407 | 4,658 | 2,791 | 27,023 |
| 71,022 | 166 | 19,517 | 4,671 | 2,805 | 27,159 |
| 71,023 | 169 | 19,501 | 4,680 | 2,798 | 27,148 |
| 71,024 | 169 | 19,503 | 4,679 | 2,802 | 27,153 |
| 71,025 | 163 | 19,394 | 4,687 | 2,815 | 27,059 |
| 71,026 | 167 | 19,611 | 4,712 | 2,848 | 27,338 |
| 71,027 | 162 | 19,708 | 4,736 | 2,868 | 27,474 |
| 71,028 | 162 | 19,582 | 4,701 | 2,832 | 27,277 |
| 71,029 | 163 | 19,615 | 4,699 | 2,853 | 27,330 |
| 71,030 | 171 | 19,877 | 4,757 | 2,900 | 27,705 |
| 71,031 | 164 | 19,559 | 4,663 | 2,837 | 27,223 |

|        |     |        |       |       |        |
|--------|-----|--------|-------|-------|--------|
| 71,032 | 166 | 19,866 | 4,707 | 2,882 | 27,621 |
| 71,033 | 170 | 20,191 | 4,791 | 2,920 | 28,072 |
| 71,034 | 170 | 20,475 | 4,865 | 2,975 | 28,485 |
| 71,035 | 170 | 20,356 | 4,834 | 2,976 | 28,336 |
| 71,036 | 169 | 20,319 | 4,832 | 2,958 | 28,278 |
| 71,037 | 176 | 20,724 | 4,887 | 2,993 | 28,780 |
| 71,038 | 172 | 20,611 | 4,867 | 2,984 | 28,634 |
| 71,039 | 169 | 20,368 | 4,847 | 2,985 | 28,369 |
| 71,040 | 152 | 20,548 | 4,906 | 3,000 | 28,606 |
| 71,041 | 157 | 20,654 | 4,960 | 3,025 | 28,796 |
| 71,042 | 158 | 20,592 | 4,955 | 3,047 | 28,752 |
| 71,043 | 162 | 20,393 | 4,895 | 3,037 | 28,487 |
| 71,044 | 156 | 20,274 | 4,889 | 3,007 | 28,326 |
| 71,045 | 162 | 20,378 | 4,953 | 3,040 | 28,533 |
| 71,046 | 162 | 20,143 | 4,907 | 3,005 | 28,217 |
| 71,047 | 162 | 20,233 | 4,903 | 3,001 | 28,299 |
| 71,048 | 164 | 20,110 | 4,878 | 2,968 | 28,120 |
| 71,049 | 161 | 19,995 | 4,846 | 2,957 | 27,959 |
| 71,050 | 171 | 20,802 | 5,059 | 3,075 | 29,107 |
| 71,051 | 173 | 21,048 | 5,143 | 3,111 | 29,475 |
| 71,052 | 178 | 20,825 | 5,098 | 3,080 | 29,181 |
| 71,053 | 177 | 20,845 | 5,082 | 3,094 | 29,198 |
| 71,054 | 179 | 21,075 | 5,153 | 3,120 | 29,527 |
| 71,055 | 179 | 21,094 | 5,194 | 3,127 | 29,594 |
| 71,056 | 180 | 21,221 | 5,204 | 3,120 | 29,725 |
| 71,057 | 179 | 20,605 | 5,071 | 3,031 | 28,886 |
| 71,058 | 182 | 20,793 | 5,097 | 3,069 | 29,141 |
| 71,059 | 184 | 21,069 | 5,144 | 3,095 | 29,492 |
| 71,060 | 178 | 20,897 | 5,106 | 3,087 | 29,268 |
| 71,061 | 179 | 21,035 | 5,119 | 3,095 | 29,428 |
| 71,062 | 182 | 21,153 | 5,115 | 3,110 | 29,560 |
| 71,063 | 182 | 20,949 | 5,083 | 3,093 | 29,307 |

|        |     |        |       |       |        |
|--------|-----|--------|-------|-------|--------|
| 71,064 | 185 | 21,535 | 5,241 | 3,180 | 30,141 |
| 71,065 | 186 | 21,191 | 5,177 | 3,139 | 29,693 |
| 71,066 | 185 | 20,924 | 5,131 | 3,120 | 29,360 |
| 71,067 | 185 | 21,092 | 5,194 | 3,168 | 29,639 |
| 71,068 | 184 | 20,876 | 5,139 | 3,128 | 29,327 |
| 71,069 | 184 | 20,760 | 5,104 | 3,138 | 29,186 |
| 71,070 | 182 | 20,886 | 5,116 | 3,146 | 29,330 |
| 71,071 | 188 | 21,072 | 5,170 | 3,171 | 29,601 |
| 71,072 | 186 | 21,140 | 5,185 | 3,165 | 29,676 |
| 71,073 | 184 | 21,049 | 5,149 | 3,148 | 29,530 |
| 71,074 | 187 | 21,138 | 5,171 | 3,144 | 29,640 |
| 71,075 | 187 | 21,181 | 5,172 | 3,156 | 29,696 |
| 71,076 | 186 | 21,301 | 5,166 | 3,154 | 29,807 |
| 71,077 | 185 | 21,237 | 5,162 | 3,121 | 29,705 |
| 71,078 | 185 | 21,212 | 5,168 | 3,139 | 29,704 |
| 71,079 | 181 | 21,274 | 5,170 | 3,181 | 29,806 |
| 71,080 | 183 | 21,693 | 5,254 | 3,208 | 30,338 |
| 71,081 | 172 | 21,428 | 5,191 | 3,181 | 29,972 |
| 71,082 | 172 | 21,496 | 5,181 | 3,196 | 30,045 |
| 71,083 | 175 | 21,876 | 5,250 | 3,225 | 30,526 |
| 71,084 | 166 | 21,638 | 5,180 | 3,188 | 30,172 |
| 71,085 | 176 | 22,050 | 5,272 | 3,214 | 30,712 |
| 71,086 | 172 | 21,866 | 5,187 | 3,153 | 30,378 |
| 71,087 | 175 | 21,936 | 5,206 | 3,163 | 30,480 |
| 71,088 | 176 | 21,776 | 5,179 | 3,161 | 30,292 |
| 71,089 | 175 | 22,225 | 5,246 | 3,208 | 30,854 |
| 71,090 | 174 | 22,486 | 5,239 | 3,209 | 31,108 |
| 71,091 | 164 | 22,389 | 5,207 | 3,177 | 30,937 |
| 71,092 | 165 | 22,469 | 5,202 | 3,163 | 30,999 |
| 71,093 | 172 | 22,662 | 5,268 | 3,197 | 31,299 |
| 71,094 | 164 | 22,450 | 5,219 | 3,168 | 31,001 |
| 71,095 | 163 | 22,413 | 5,214 | 3,160 | 30,950 |

|        |     |        |       |       |        |
|--------|-----|--------|-------|-------|--------|
| 71,096 | 163 | 22,425 | 5,219 | 3,164 | 30,971 |
| 71,097 | 158 | 22,580 | 5,241 | 3,206 | 31,185 |
| 71,098 | 163 | 22,347 | 5,202 | 3,208 | 30,920 |
| 71,099 | 159 | 22,189 | 5,165 | 3,193 | 30,706 |
| 71,100 | 161 | 22,309 | 5,167 | 3,173 | 30,810 |
| 71,101 | 162 | 22,234 | 5,182 | 3,186 | 30,764 |
| 71,102 | 162 | 22,255 | 5,148 | 3,196 | 30,761 |
| 71,103 | 159 | 22,281 | 5,140 | 3,202 | 30,782 |
| 71,104 | 160 | 22,421 | 5,159 | 3,203 | 30,943 |
| 71,105 | 159 | 22,478 | 5,195 | 3,212 | 31,044 |
| 71,106 | 153 | 22,372 | 5,131 | 3,189 | 30,845 |
| 71,107 | 153 | 22,174 | 5,073 | 3,148 | 30,548 |
| 71,108 | 153 | 22,137 | 5,087 | 3,161 | 30,538 |
| 71,109 | 150 | 22,173 | 5,116 | 3,174 | 30,613 |
| 71,110 | 145 | 22,107 | 5,076 | 3,155 | 30,483 |
| 71,111 | 149 | 22,280 | 5,126 | 3,189 | 30,744 |
| 71,112 | 152 | 22,317 | 5,130 | 3,183 | 30,782 |
| 71,113 | 141 | 22,279 | 5,130 | 3,188 | 30,738 |
| 71,114 | 146 | 22,151 | 5,108 | 3,200 | 30,605 |
| 71,115 | 146 | 22,018 | 5,080 | 3,193 | 30,437 |
| 71,116 | 141 | 22,014 | 5,041 | 3,157 | 30,353 |
| 71,117 | 146 | 21,973 | 4,982 | 3,132 | 30,233 |
| 71,118 | 147 | 22,035 | 5,005 | 3,142 | 30,329 |
| 71,119 | 143 | 22,080 | 5,029 | 3,139 | 30,391 |
| 71,120 | 146 | 22,169 | 5,006 | 3,076 | 30,397 |
| 71,121 | 144 | 22,095 | 4,987 | 3,084 | 30,310 |
| 71,122 | 145 | 21,966 | 4,960 | 3,057 | 30,128 |
| 71,123 | 153 | 21,915 | 4,973 | 3,074 | 30,115 |
| 71,124 | 148 | 21,643 | 4,933 | 3,057 | 29,781 |
| 71,125 | 153 | 21,584 | 4,955 | 3,093 | 29,785 |
| 71,126 | 153 | 21,407 | 4,936 | 3,083 | 29,579 |
| 71,127 | 162 | 21,764 | 5,073 | 3,157 | 30,156 |

|        |     |        |       |       |        |
|--------|-----|--------|-------|-------|--------|
| 71,128 | 160 | 21,672 | 5,117 | 3,184 | 30,133 |
| 71,129 | 170 | 21,850 | 5,151 | 3,192 | 30,363 |
| 71,130 | 171 | 22,017 | 5,205 | 3,214 | 30,607 |
| 71,131 | 173 | 21,978 | 5,173 | 3,200 | 30,524 |
| 71,132 | 171 | 22,044 | 5,193 | 3,216 | 30,624 |
| 71,133 | 173 | 21,331 | 5,085 | 3,142 | 29,731 |
| 71,134 | 174 | 21,484 | 5,114 | 3,176 | 29,948 |
| 71,135 | 168 | 21,775 | 5,163 | 3,215 | 30,321 |
| 71,136 | 169 | 21,884 | 5,247 | 3,276 | 30,576 |
| 71,137 | 166 | 21,777 | 5,244 | 3,278 | 30,465 |
| 71,138 | 167 | 22,054 | 5,324 | 3,326 | 30,871 |
| 71,139 | 168 | 22,202 | 5,384 | 3,348 | 31,102 |
| 71,140 | 166 | 22,287 | 5,416 | 3,376 | 31,245 |
| 71,141 | 173 | 22,178 | 5,436 | 3,380 | 31,167 |
| 71,142 | 172 | 22,080 | 5,421 | 3,381 | 31,054 |
| 71,143 | 174 | 22,142 | 5,421 | 3,390 | 31,127 |
| 71,144 | 166 | 21,960 | 5,353 | 3,367 | 30,846 |
| 71,145 | 182 | 22,284 | 5,414 | 3,400 | 31,280 |
| 71,146 | 180 | 22,146 | 5,365 | 3,368 | 31,059 |
| 71,147 | 181 | 22,261 | 5,392 | 3,389 | 31,223 |
| 71,148 | 183 | 21,928 | 5,337 | 3,349 | 30,797 |
| 71,149 | 170 | 21,594 | 5,285 | 3,301 | 30,350 |
| 71,150 | 170 | 22,017 | 5,373 | 3,367 | 30,927 |
| 71,151 | 167 | 22,025 | 5,392 | 3,382 | 30,966 |
| 71,152 | 164 | 22,049 | 5,394 | 3,388 | 30,995 |
| 71,153 | 165 | 22,030 | 5,412 | 3,372 | 30,979 |
| 71,154 | 162 | 22,064 | 5,417 | 3,374 | 31,017 |
| 71,155 | 159 | 21,806 | 5,345 | 3,344 | 30,654 |
| 71,156 | 160 | 21,821 | 5,353 | 3,358 | 30,692 |
| 71,157 | 160 | 21,735 | 5,328 | 3,380 | 30,603 |
| 71,158 | 164 | 21,801 | 5,364 | 3,413 | 30,742 |
| 71,159 | 166 | 22,046 | 5,437 | 3,469 | 31,118 |



|        |     |        |       |       |        |
|--------|-----|--------|-------|-------|--------|
| 71,160 | 170 | 22,155 | 5,419 | 3,480 | 31,224 |
| 71,161 | 170 | 22,392 | 5,463 | 3,502 | 31,527 |
| 71,162 | 169 | 22,546 | 5,457 | 3,505 | 31,677 |
| 71,163 | 169 | 22,227 | 5,365 | 3,465 | 31,226 |
| 71,164 | 171 | 22,617 | 5,425 | 3,504 | 31,717 |
| 71,165 | 166 | 22,443 | 5,356 | 3,434 | 31,399 |
| 71,166 | 170 | 22,572 | 5,390 | 3,439 | 31,571 |
| 71,167 | 170 | 22,337 | 5,316 | 3,427 | 31,250 |
| 71,168 | 169 | 22,682 | 5,396 | 3,471 | 31,718 |
| 71,169 | 169 | 22,933 | 5,415 | 3,521 | 32,038 |
| 71,170 | 164 | 22,934 | 5,407 | 3,539 | 32,044 |
| 71,171 | 165 | 22,976 | 5,401 | 3,533 | 32,075 |
| 71,172 | 159 | 23,154 | 5,444 | 3,555 | 32,312 |
| 71,173 | 153 | 23,010 | 5,363 | 3,510 | 32,036 |
| 71,174 | 155 | 23,265 | 5,408 | 3,539 | 32,367 |
| 71,175 | 147 | 23,297 | 5,423 | 3,558 | 32,425 |
| 71,176 | 142 | 23,566 | 5,446 | 3,546 | 32,700 |
| 71,177 | 145 | 23,191 | 5,286 | 3,434 | 32,056 |
| 71,178 | 148 | 23,483 | 5,327 | 3,467 | 32,425 |
| 71,179 | 142 | 23,634 | 5,386 | 3,498 | 32,660 |
| 71,180 | 139 | 23,331 | 5,314 | 3,464 | 32,248 |
| 71,181 | 136 | 23,229 | 5,286 | 3,458 | 32,109 |
| 71,182 | 137 | 22,944 | 5,231 | 3,397 | 31,709 |
| 71,183 | 137 | 22,971 | 5,236 | 3,409 | 31,753 |
| 71,184 | 130 | 22,783 | 5,192 | 3,397 | 31,502 |
| 71,185 | 127 | 22,647 | 5,203 | 3,394 | 31,371 |
| 71,186 | 125 | 22,473 | 5,217 | 3,396 | 31,211 |
| 71,187 | 126 | 22,558 | 5,183 | 3,363 | 31,230 |
| 71,188 | 125 | 22,777 | 5,227 | 3,393 | 31,522 |
| 71,189 | 126 | 22,787 | 5,231 | 3,381 | 31,525 |
| 71,190 | 120 | 21,731 | 4,905 | 3,191 | 29,947 |
| 71,191 | 121 | 21,910 | 4,955 | 3,206 | 30,192 |

|        |     |        |       |       |        |
|--------|-----|--------|-------|-------|--------|
| 71,192 | 117 | 22,204 | 5,003 | 3,215 | 30,539 |
| 71,193 | 117 | 22,317 | 5,033 | 3,237 | 30,704 |
| 71,194 | 115 | 22,503 | 5,056 | 3,253 | 30,927 |
| 71,195 | 115 | 22,621 | 5,109 | 3,294 | 31,139 |
| 71,196 | 115 | 22,820 | 5,167 | 3,327 | 31,429 |
| 71,197 | 118 | 22,974 | 5,190 | 3,343 | 31,625 |
| 71,198 | 115 | 22,919 | 5,168 | 3,342 | 31,544 |
| 71,199 | 113 | 23,015 | 5,187 | 3,348 | 31,663 |
| 71,200 | 111 | 23,042 | 5,197 | 3,376 | 31,726 |
| 71,201 | 113 | 23,215 | 5,284 | 3,429 | 32,041 |
| 71,202 | 121 | 23,191 | 5,270 | 3,402 | 31,984 |
| 71,203 | 122 | 23,364 | 5,331 | 3,416 | 32,233 |
| 71,204 | 128 | 23,546 | 5,411 | 3,447 | 32,532 |
| 71,205 | 129 | 23,591 | 5,419 | 3,439 | 32,578 |
| 71,206 | 134 | 23,752 | 5,436 | 3,456 | 32,778 |
| 71,207 | 134 | 23,787 | 5,449 | 3,456 | 32,826 |
| 71,208 | 129 | 23,836 | 5,499 | 3,445 | 32,909 |
| 71,209 | 140 | 23,810 | 5,507 | 3,446 | 32,903 |
| 71,210 | 137 | 23,581 | 5,460 | 3,406 | 32,584 |
| 71,211 | 133 | 23,552 | 5,571 | 3,445 | 32,701 |
| 71,212 | 136 | 23,709 | 5,602 | 3,496 | 32,943 |
| 71,213 | 138 | 23,477 | 5,596 | 3,479 | 32,690 |
| 71,214 | 134 | 23,396 | 5,591 | 3,452 | 32,573 |
| 71,215 | 134 | 23,813 | 5,699 | 3,532 | 33,178 |
| 71,216 | 131 | 23,434 | 5,648 | 3,509 | 32,722 |
| 71,217 | 129 | 23,859 | 5,751 | 3,578 | 33,317 |
| 71,218 | 123 | 23,509 | 5,702 | 3,540 | 32,874 |
| 71,219 | 131 | 24,056 | 5,826 | 3,609 | 33,622 |
| 71,220 | 135 | 24,259 | 5,882 | 3,639 | 33,915 |
| 71,221 | 134 | 23,991 | 5,827 | 3,612 | 33,564 |
| 71,222 | 133 | 24,149 | 5,893 | 3,652 | 33,827 |
| 71,223 | 133 | 24,126 | 5,884 | 3,645 | 33,788 |

|        |     |        |       |       |        |
|--------|-----|--------|-------|-------|--------|
| 71,224 | 131 | 24,219 | 5,924 | 3,653 | 33,927 |
| 71,225 | 132 | 24,272 | 5,934 | 3,655 | 33,993 |
| 71,226 | 129 | 24,029 | 5,882 | 3,641 | 33,681 |
| 71,227 | 132 | 24,136 | 5,902 | 3,669 | 33,839 |
| 71,228 | 131 | 24,124 | 5,896 | 3,669 | 33,820 |
| 71,229 | 124 | 23,824 | 5,824 | 3,624 | 33,396 |
| 71,230 | 123 | 23,606 | 5,741 | 3,564 | 33,034 |
| 71,231 | 126 | 23,811 | 5,775 | 3,590 | 33,302 |
| 71,232 | 124 | 23,827 | 5,778 | 3,597 | 33,326 |
| 71,233 | 127 | 24,084 | 5,841 | 3,653 | 33,705 |
| 71,234 | 134 | 24,082 | 5,871 | 3,655 | 33,742 |
| 71,235 | 134 | 23,909 | 5,737 | 3,576 | 33,356 |
| 71,236 | 140 | 24,074 | 5,768 | 3,608 | 33,590 |
| 71,237 | 144 | 24,225 | 5,814 | 3,643 | 33,826 |
| 71,238 | 142 | 24,162 | 5,811 | 3,643 | 33,758 |
| 71,239 | 143 | 24,030 | 5,761 | 3,627 | 33,561 |
| 71,240 | 142 | 23,782 | 5,692 | 3,592 | 33,208 |
| 71,241 | 141 | 23,914 | 5,720 | 3,642 | 33,417 |
| 71,242 | 140 | 23,630 | 5,648 | 3,616 | 33,034 |
| 71,243 | 140 | 23,551 | 5,631 | 3,627 | 32,949 |
| 71,244 | 134 | 23,374 | 5,589 | 3,607 | 32,704 |
| 71,245 | 135 | 23,327 | 5,586 | 3,601 | 32,649 |
| 71,246 | 135 | 23,189 | 5,529 | 3,557 | 32,410 |
| 71,247 | 128 | 23,503 | 5,596 | 3,594 | 32,821 |
| 71,248 | 124 | 23,403 | 5,562 | 3,582 | 32,671 |
| 71,249 | 123 | 23,201 | 5,510 | 3,559 | 32,393 |
| 71,250 | 121 | 23,306 | 5,495 | 3,545 | 32,467 |
| 71,251 | 120 | 23,293 | 5,459 | 3,536 | 32,408 |
| 71,252 | 119 | 23,328 | 5,436 | 3,534 | 32,417 |
| 71,253 | 120 | 23,486 | 5,451 | 3,568 | 32,625 |
| 71,254 | 121 | 23,348 | 5,406 | 3,577 | 32,452 |
| 71,255 | 123 | 23,463 | 5,377 | 3,593 | 32,556 |

|        |     |        |       |       |        |
|--------|-----|--------|-------|-------|--------|
| 71,256 | 126 | 23,567 | 5,409 | 3,622 | 32,724 |
| 71,257 | 129 | 23,610 | 5,437 | 3,628 | 32,804 |
| 71,258 | 134 | 23,680 | 5,432 | 3,648 | 32,894 |
| 71,259 | 127 | 23,243 | 5,284 | 3,541 | 32,195 |
| 71,260 | 127 | 23,428 | 5,321 | 3,575 | 32,451 |
| 71,261 | 125 | 23,552 | 5,332 | 3,574 | 32,583 |
| 71,262 | 124 | 23,398 | 5,259 | 3,547 | 32,328 |
| 71,263 | 122 | 23,036 | 5,191 | 3,474 | 31,823 |
| 71,264 | 122 | 22,970 | 5,196 | 3,475 | 31,763 |
| 71,265 | 123 | 22,662 | 5,148 | 3,452 | 31,385 |
| 71,266 | 125 | 22,510 | 5,112 | 3,444 | 31,191 |
| 71,267 | 126 | 22,263 | 5,036 | 3,421 | 30,846 |
| 71,268 | 125 | 22,345 | 5,054 | 3,456 | 30,980 |
| 71,269 | 124 | 22,516 | 5,088 | 3,442 | 31,170 |
| 71,270 | 132 | 22,241 | 4,997 | 3,399 | 30,769 |
| 71,271 | 126 | 21,857 | 4,915 | 3,336 | 30,234 |
| 71,272 | 130 | 22,080 | 4,981 | 3,370 | 30,561 |
| 71,273 | 130 | 22,080 | 4,966 | 3,378 | 30,554 |
| 71,274 | 135 | 22,714 | 5,123 | 3,474 | 31,446 |
| 71,275 | 133 | 22,872 | 5,148 | 3,495 | 31,648 |
| 71,276 | 138 | 22,728 | 5,139 | 3,474 | 31,479 |
| 71,277 | 139 | 22,616 | 5,126 | 3,485 | 31,366 |
| 71,278 | 136 | 22,480 | 5,100 | 3,455 | 31,171 |
| 71,279 | 137 | 23,389 | 5,296 | 3,628 | 32,450 |
| 71,280 | 138 | 23,072 | 5,251 | 3,611 | 32,072 |
| 71,281 | 139 | 23,194 | 5,296 | 3,659 | 32,288 |
| 71,282 | 145 | 23,463 | 5,362 | 3,688 | 32,658 |
| 71,283 | 149 | 23,983 | 5,470 | 3,757 | 33,359 |
| 71,284 | 147 | 24,205 | 5,493 | 3,786 | 33,631 |
| 71,285 | 140 | 24,083 | 5,442 | 3,752 | 33,417 |
| 71,286 | 139 | 24,364 | 5,514 | 3,819 | 33,836 |
| 71,287 | 133 | 24,389 | 5,516 | 3,824 | 33,862 |

|        |     |        |       |       |        |
|--------|-----|--------|-------|-------|--------|
| 71,288 | 129 | 24,125 | 5,461 | 3,794 | 33,509 |
| 71,289 | 132 | 24,324 | 5,479 | 3,817 | 33,752 |
| 71,290 | 131 | 23,962 | 5,389 | 3,754 | 33,236 |
| 71,291 | 134 | 24,276 | 5,437 | 3,777 | 33,624 |
| 71,292 | 135 | 24,246 | 5,429 | 3,753 | 33,563 |
| 71,293 | 143 | 24,271 | 5,410 | 3,753 | 33,577 |
| 71,294 | 142 | 24,040 | 5,365 | 3,715 | 33,262 |
| 71,295 | 148 | 24,073 | 5,349 | 3,717 | 33,287 |
| 71,296 | 151 | 24,002 | 5,338 | 3,705 | 33,196 |
| 71,297 | 158 | 24,231 | 5,377 | 3,752 | 33,518 |
| 71,298 | 155 | 23,994 | 5,307 | 3,720 | 33,176 |
| 71,299 | 155 | 23,629 | 5,240 | 3,664 | 32,688 |
| 71,300 | 157 | 23,888 | 5,312 | 3,678 | 33,035 |
| 71,301 | 157 | 23,873 | 5,284 | 3,684 | 32,998 |
| 71,302 | 161 | 23,998 | 5,314 | 3,704 | 33,177 |
| 71,303 | 162 | 23,870 | 5,314 | 3,686 | 33,032 |
| 71,304 | 153 | 23,863 | 5,334 | 3,693 | 33,043 |
| 71,305 | 156 | 24,312 | 5,416 | 3,734 | 33,618 |
| 71,306 | 151 | 24,324 | 5,414 | 3,748 | 33,637 |
| 71,307 | 150 | 24,310 | 5,419 | 3,758 | 33,637 |
| 71,308 | 145 | 24,345 | 5,389 | 3,767 | 33,646 |
| 71,309 | 140 | 24,339 | 5,369 | 3,758 | 33,606 |
| 71,310 | 137 | 24,252 | 5,320 | 3,749 | 33,458 |
| 71,311 | 137 | 24,165 | 5,287 | 3,702 | 33,291 |
| 71,312 | 138 | 24,569 | 5,353 | 3,736 | 33,796 |
| 71,313 | 140 | 24,788 | 5,379 | 3,770 | 34,077 |
| 71,314 | 135 | 24,812 | 5,377 | 3,791 | 34,115 |
| 71,315 | 133 | 24,676 | 5,320 | 3,758 | 33,887 |
| 71,316 | 134 | 24,801 | 5,330 | 3,769 | 34,034 |
| 71,317 | 132 | 24,736 | 5,296 | 3,718 | 33,882 |
| 71,318 | 135 | 24,937 | 5,339 | 3,745 | 34,156 |
| 71,319 | 135 | 24,923 | 5,306 | 3,733 | 34,097 |

|        |     |        |       |       |        |
|--------|-----|--------|-------|-------|--------|
| 71,320 | 134 | 24,746 | 5,230 | 3,706 | 33,816 |
| 71,321 | 120 | 24,345 | 5,151 | 3,651 | 33,267 |
| 71,322 | 130 | 24,480 | 5,163 | 3,658 | 33,431 |
| 71,323 | 131 | 24,381 | 5,144 | 3,660 | 33,316 |
| 71,324 | 134 | 24,177 | 5,061 | 3,594 | 32,966 |
| 71,325 | 133 | 23,981 | 4,993 | 3,548 | 32,655 |
| 71,326 | 137 | 24,029 | 4,990 | 3,563 | 32,719 |
| 71,327 | 129 | 23,776 | 4,911 | 3,521 | 32,337 |
| 71,328 | 127 | 23,870 | 4,910 | 3,490 | 32,397 |
| 71,329 | 132 | 23,925 | 4,857 | 3,459 | 32,373 |
| 71,330 | 130 | 23,859 | 4,810 | 3,429 | 32,228 |
| 71,331 | 134 | 24,136 | 4,859 | 3,442 | 32,571 |
| 71,332 | 126 | 24,000 | 4,780 | 3,411 | 32,317 |
| 71,333 | 123 | 24,045 | 4,770 | 3,411 | 32,349 |
| 71,334 | 126 | 24,164 | 4,798 | 3,437 | 32,525 |
| 71,335 | 127 | 24,269 | 4,822 | 3,432 | 32,650 |
| 71,336 | 130 | 24,411 | 4,874 | 3,421 | 32,836 |
| 71,337 | 139 | 24,551 | 4,900 | 3,436 | 33,026 |
| 71,338 | 142 | 24,742 | 4,930 | 3,446 | 33,260 |
| 71,339 | 145 | 25,111 | 4,958 | 3,462 | 33,676 |
| 71,340 | 148 | 24,790 | 4,908 | 3,427 | 33,273 |
| 71,341 | 145 | 24,904 | 4,910 | 3,442 | 33,401 |
| 71,342 | 147 | 24,666 | 4,881 | 3,425 | 33,119 |
| 71,343 | 148 | 24,487 | 4,869 | 3,423 | 32,927 |
| 71,344 | 145 | 25,457 | 5,159 | 3,596 | 34,357 |
| 71,345 | 146 | 25,379 | 5,166 | 3,604 | 34,295 |
| 71,346 | 137 | 25,278 | 5,222 | 3,636 | 34,273 |
| 71,347 | 134 | 25,251 | 5,262 | 3,672 | 34,319 |
| 71,348 | 133 | 25,289 | 5,344 | 3,747 | 34,513 |
| 71,349 | 140 | 25,258 | 5,373 | 3,774 | 34,545 |
| 71,350 | 138 | 25,245 | 5,329 | 3,742 | 34,454 |
| 71,351 | 146 | 25,280 | 5,351 | 3,761 | 34,538 |

|        |     |        |       |       |        |
|--------|-----|--------|-------|-------|--------|
| 71,352 | 147 | 25,252 | 5,366 | 3,762 | 34,527 |
| 71,353 | 147 | 25,359 | 5,404 | 3,752 | 34,662 |
| 71,354 | 163 | 25,570 | 5,419 | 3,768 | 34,920 |
| 71,355 | 177 | 25,726 | 5,467 | 3,810 | 35,180 |
| 71,356 | 171 | 25,789 | 5,471 | 3,818 | 35,249 |
| 71,357 | 175 | 25,912 | 5,529 | 3,864 | 35,480 |
| 71,358 | 181 | 25,902 | 5,510 | 3,843 | 35,436 |
| 71,359 | 179 | 25,751 | 5,477 | 3,814 | 35,221 |
| 71,360 | 179 | 25,769 | 5,466 | 3,799 | 35,213 |
| 71,361 | 179 | 25,771 | 5,482 | 3,840 | 35,272 |
| 71,362 | 179 | 25,793 | 5,516 | 3,884 | 35,372 |
| 71,363 | 185 | 26,324 | 5,632 | 3,967 | 36,108 |
| 71,364 | 187 | 26,326 | 5,654 | 3,977 | 36,144 |
| 71,365 | 201 | 26,530 | 5,700 | 3,990 | 36,421 |
| 71,366 | 201 | 26,619 | 5,715 | 3,995 | 36,530 |
| 71,367 | 205 | 27,133 | 5,881 | 4,072 | 37,291 |
| 71,368 | 204 | 27,287 | 5,925 | 4,100 | 37,516 |
| 71,369 | 208 | 27,500 | 5,976 | 4,109 | 37,793 |
| 71,370 | 207 | 27,459 | 5,993 | 4,104 | 37,763 |
| 71,371 | 206 | 27,975 | 6,130 | 4,152 | 38,463 |
| 71,372 | 202 | 27,840 | 6,087 | 4,132 | 38,261 |
| 71,373 | 194 | 27,971 | 6,138 | 4,165 | 38,468 |
| 71,374 | 205 | 27,948 | 6,126 | 4,158 | 38,437 |
| 71,375 | 202 | 27,666 | 6,098 | 4,158 | 38,124 |
| 71,376 | 197 | 27,692 | 6,114 | 4,212 | 38,215 |
| 71,377 | 197 | 27,760 | 6,130 | 4,209 | 38,296 |
| 71,378 | 198 | 27,406 | 6,093 | 4,201 | 37,898 |
| 71,379 | 195 | 27,199 | 6,062 | 4,178 | 37,634 |
| 71,380 | 193 | 27,110 | 6,050 | 4,175 | 37,528 |
| 71,381 | 190 | 26,999 | 6,068 | 4,183 | 37,440 |
| 71,382 | 192 | 27,072 | 6,106 | 4,194 | 37,564 |
| 71,383 | 192 | 26,571 | 6,062 | 4,145 | 36,970 |

|        |     |        |       |       |        |
|--------|-----|--------|-------|-------|--------|
| 71,384 | 192 | 26,301 | 6,044 | 4,111 | 36,648 |
| 71,385 | 189 | 26,367 | 6,097 | 4,118 | 36,771 |
| 71,386 | 192 | 25,558 | 5,947 | 4,048 | 35,745 |
| 71,387 | 191 | 25,622 | 5,947 | 4,082 | 35,842 |
| 71,388 | 182 | 25,575 | 5,954 | 4,089 | 35,800 |
| 71,389 | 189 | 25,161 | 5,918 | 4,073 | 35,341 |
| 71,390 | 184 | 24,860 | 5,910 | 4,063 | 35,017 |
| 71,391 | 191 | 24,898 | 5,986 | 4,087 | 35,162 |
| 71,392 | 187 | 24,878 | 5,941 | 4,070 | 35,076 |
| 71,393 | 186 | 24,905 | 5,911 | 4,060 | 35,062 |
| 71,394 | 183 | 24,857 | 5,879 | 4,047 | 34,966 |
| 71,395 | 184 | 24,950 | 5,841 | 4,026 | 35,001 |
| 71,396 | 184 | 25,012 | 5,845 | 4,027 | 35,068 |
| 71,397 | 183 | 25,276 | 5,841 | 4,020 | 35,320 |
| 71,398 | 181 | 25,395 | 5,859 | 3,999 | 35,434 |
| 71,399 | 182 | 25,412 | 5,843 | 3,985 | 35,422 |
| 71,400 | 180 | 25,415 | 5,859 | 3,975 | 35,429 |
| 71,401 | 171 | 25,056 | 5,804 | 3,960 | 34,991 |
| 71,402 | 170 | 25,005 | 5,803 | 3,934 | 34,912 |
| 71,403 | 168 | 25,114 | 5,844 | 3,977 | 35,103 |
| 71,404 | 163 | 25,064 | 5,824 | 3,981 | 35,032 |
| 71,405 | 159 | 24,996 | 5,827 | 3,976 | 34,958 |
| 71,406 | 148 | 24,768 | 5,801 | 3,945 | 34,662 |
| 71,407 | 150 | 24,624 | 5,749 | 3,901 | 34,424 |
| 71,408 | 148 | 24,585 | 5,765 | 3,894 | 34,392 |
| 71,409 | 144 | 24,515 | 5,756 | 3,911 | 34,326 |
| 71,410 | 142 | 24,453 | 5,746 | 3,903 | 34,244 |
| 71,411 | 147 | 24,346 | 5,698 | 3,849 | 34,040 |
| 71,412 | 147 | 24,350 | 5,715 | 3,846 | 34,058 |
| 71,413 | 145 | 24,301 | 5,672 | 3,834 | 33,952 |
| 71,414 | 141 | 24,192 | 5,657 | 3,824 | 33,814 |
| 71,415 | 141 | 24,074 | 5,680 | 3,831 | 33,726 |



|        |     |        |       |       |        |
|--------|-----|--------|-------|-------|--------|
| 71,416 | 127 | 24,206 | 5,713 | 3,849 | 33,895 |
| 71,417 | 125 | 24,233 | 5,703 | 3,848 | 33,909 |
| 71,418 | 123 | 24,334 | 5,779 | 3,891 | 34,127 |
| 71,419 | 122 | 24,077 | 5,762 | 3,901 | 33,862 |
| 71,420 | 121 | 24,078 | 5,755 | 3,921 | 33,875 |
| 71,421 | 126 | 23,935 | 5,764 | 3,944 | 33,769 |
| 71,422 | 131 | 23,904 | 5,787 | 3,966 | 33,788 |
| 71,423 | 132 | 23,878 | 5,777 | 3,969 | 33,756 |
| 71,424 | 133 | 23,935 | 5,760 | 3,974 | 33,802 |
| 71,425 | 127 | 23,964 | 5,799 | 3,963 | 33,853 |
| 71,426 | 134 | 24,034 | 5,818 | 3,956 | 33,942 |
| 71,427 | 132 | 23,866 | 5,772 | 3,915 | 33,685 |
| 71,428 | 135 | 24,069 | 5,785 | 3,953 | 33,942 |
| 71,429 | 132 | 23,836 | 5,744 | 3,909 | 33,621 |
| 71,430 | 132 | 23,761 | 5,774 | 3,916 | 33,583 |
| 71,431 | 135 | 23,709 | 5,716 | 3,898 | 33,458 |
| 71,432 | 135 | 23,667 | 5,695 | 3,888 | 33,385 |
| 71,433 | 133 | 23,450 | 5,655 | 3,857 | 33,095 |
| 71,434 | 132 | 23,734 | 5,690 | 3,881 | 33,437 |
| 71,435 | 132 | 23,974 | 5,689 | 3,910 | 33,705 |
| 71,436 | 134 | 23,945 | 5,664 | 3,910 | 33,653 |
| 71,437 | 130 | 23,887 | 5,621 | 3,852 | 33,490 |
| 71,438 | 133 | 23,916 | 5,629 | 3,827 | 33,505 |
| 71,439 | 123 | 23,962 | 5,564 | 3,792 | 33,441 |
| 71,440 | 130 | 24,319 | 5,633 | 3,808 | 33,890 |
| 71,441 | 123 | 24,042 | 5,502 | 3,735 | 33,402 |
| 71,442 | 123 | 24,355 | 5,549 | 3,781 | 33,808 |
| 71,443 | 127 | 24,409 | 5,550 | 3,792 | 33,878 |
| 71,444 | 129 | 24,432 | 5,555 | 3,779 | 33,895 |
| 71,445 | 130 | 24,166 | 5,527 | 3,754 | 33,577 |
| 71,446 | 131 | 24,175 | 5,542 | 3,750 | 33,598 |
| 71,447 | 131 | 23,956 | 5,513 | 3,721 | 33,321 |

|        |     |        |       |       |        |
|--------|-----|--------|-------|-------|--------|
| 71,448 | 132 | 24,042 | 5,551 | 3,725 | 33,450 |
| 71,449 | 131 | 23,883 | 5,491 | 3,673 | 33,178 |
| 71,450 | 132 | 23,936 | 5,500 | 3,680 | 33,248 |
| 71,451 | 130 | 23,796 | 5,450 | 3,644 | 33,020 |
| 71,452 | 130 | 23,728 | 5,466 | 3,637 | 32,961 |
| 71,453 | 133 | 23,939 | 5,486 | 3,644 | 33,202 |
| 71,454 | 133 | 23,732 | 5,426 | 3,608 | 32,899 |
| 71,455 | 128 | 23,622 | 5,400 | 3,585 | 32,735 |
| 71,456 | 127 | 23,652 | 5,400 | 3,598 | 32,777 |
| 71,457 | 131 | 23,631 | 5,367 | 3,585 | 32,714 |
| 71,458 | 126 | 23,419 | 5,300 | 3,529 | 32,374 |
| 71,459 | 137 | 23,447 | 5,311 | 3,522 | 32,417 |
| 71,460 | 135 | 23,208 | 5,270 | 3,503 | 32,116 |
| 71,461 | 136 | 23,161 | 5,270 | 3,500 | 32,067 |
| 71,462 | 130 | 22,983 | 5,261 | 3,481 | 31,855 |
| 71,463 | 131 | 23,401 | 5,309 | 3,506 | 32,347 |
| 71,464 | 136 | 23,474 | 5,345 | 3,534 | 32,489 |
| 71,465 | 137 | 23,162 | 5,215 | 3,438 | 31,952 |
| 71,466 | 137 | 23,085 | 5,237 | 3,443 | 31,902 |
| 71,467 | 137 | 22,973 | 5,250 | 3,437 | 31,797 |
| 71,468 | 137 | 22,464 | 5,054 | 3,352 | 31,007 |
| 71,469 | 135 | 22,437 | 5,008 | 3,325 | 30,905 |
| 71,470 | 136 | 22,246 | 4,988 | 3,302 | 30,672 |
| 71,471 | 137 | 22,304 | 5,010 | 3,301 | 30,752 |
| 71,472 | 132 | 22,038 | 4,935 | 3,223 | 30,328 |
| 71,473 | 129 | 22,220 | 4,935 | 3,271 | 30,555 |
| 71,474 | 133 | 21,827 | 4,876 | 3,214 | 30,050 |
| 71,475 | 132 | 21,460 | 4,829 | 3,182 | 29,603 |
| 71,476 | 132 | 21,632 | 4,945 | 3,290 | 29,999 |
| 71,477 | 128 | 21,675 | 4,963 | 3,279 | 30,045 |
| 71,478 | 128 | 21,710 | 5,000 | 3,271 | 30,109 |
| 71,479 | 132 | 21,373 | 4,909 | 3,207 | 29,621 |

|        |     |        |       |       |        |
|--------|-----|--------|-------|-------|--------|
| 71,480 | 138 | 21,905 | 4,980 | 3,262 | 30,285 |
| 71,481 | 135 | 21,877 | 5,026 | 3,273 | 30,311 |
| 71,482 | 136 | 21,981 | 5,075 | 3,302 | 30,494 |
| 71,483 | 135 | 22,016 | 5,108 | 3,333 | 30,592 |
| 71,484 | 135 | 22,123 | 5,149 | 3,337 | 30,744 |
| 71,485 | 142 | 21,844 | 5,111 | 3,308 | 30,405 |
| 71,486 | 142 | 21,572 | 5,088 | 3,279 | 30,081 |
| 71,487 | 139 | 21,956 | 5,225 | 3,371 | 30,691 |
| 71,488 | 137 | 21,950 | 5,280 | 3,415 | 30,782 |
| 71,489 | 134 | 21,601 | 5,233 | 3,394 | 30,362 |
| 71,490 | 134 | 21,585 | 5,272 | 3,414 | 30,405 |
| 71,491 | 130 | 21,749 | 5,344 | 3,467 | 30,690 |
| 71,492 | 131 | 21,791 | 5,387 | 3,516 | 30,825 |
| 71,493 | 128 | 21,700 | 5,443 | 3,531 | 30,802 |
| 71,494 | 124 | 21,662 | 5,459 | 3,537 | 30,782 |
| 71,495 | 129 | 21,597 | 5,495 | 3,541 | 30,762 |
| 71,496 | 126 | 21,472 | 5,492 | 3,535 | 30,625 |
| 71,497 | 134 | 21,875 | 5,566 | 3,574 | 31,149 |
| 71,498 | 135 | 21,725 | 5,556 | 3,584 | 31,000 |
| 71,499 | 136 | 21,948 | 5,607 | 3,611 | 31,302 |
| 71,500 | 140 | 21,923 | 5,609 | 3,616 | 31,288 |
| 71,501 | 139 | 21,746 | 5,570 | 3,588 | 31,043 |
| 71,502 | 138 | 21,817 | 5,576 | 3,602 | 31,133 |
| 71,503 | 139 | 21,951 | 5,589 | 3,608 | 31,287 |
| 71,504 | 136 | 21,881 | 5,571 | 3,592 | 31,180 |
| 71,505 | 141 | 22,064 | 5,630 | 3,632 | 31,467 |
| 71,506 | 141 | 21,846 | 5,567 | 3,588 | 31,142 |
| 71,507 | 140 | 21,962 | 5,621 | 3,618 | 31,341 |
| 71,508 | 133 | 22,047 | 5,649 | 3,622 | 31,451 |
| 71,509 | 131 | 21,700 | 5,584 | 3,599 | 31,014 |
| 71,510 | 120 | 22,022 | 5,703 | 3,636 | 31,481 |
| 71,511 | 120 | 21,985 | 5,725 | 3,634 | 31,464 |

|        |     |        |       |       |        |
|--------|-----|--------|-------|-------|--------|
| 71,512 | 118 | 21,932 | 5,734 | 3,653 | 31,437 |
| 71,513 | 116 | 21,915 | 5,720 | 3,654 | 31,405 |
| 71,514 | 110 | 21,695 | 5,689 | 3,620 | 31,114 |
| 71,515 | 110 | 21,811 | 5,680 | 3,605 | 31,206 |
| 71,516 | 107 | 21,583 | 5,697 | 3,622 | 31,009 |
| 71,517 | 108 | 22,008 | 5,756 | 3,673 | 31,545 |
| 71,518 | 107 | 21,824 | 5,678 | 3,641 | 31,250 |
| 71,519 | 108 | 21,630 | 5,633 | 3,611 | 30,982 |
| 71,520 | 108 | 21,710 | 5,655 | 3,628 | 31,101 |
| 71,521 | 105 | 21,575 | 5,628 | 3,614 | 30,922 |
| 71,522 | 106 | 21,699 | 5,660 | 3,615 | 31,080 |
| 71,523 | 105 | 21,758 | 5,656 | 3,612 | 31,131 |
| 71,524 | 108 | 21,900 | 5,691 | 3,639 | 31,338 |
| 71,525 | 106 | 22,019 | 5,645 | 3,588 | 31,358 |
| 71,526 | 101 | 22,202 | 5,662 | 3,591 | 31,556 |
| 71,527 | 101 | 22,477 | 5,744 | 3,617 | 31,939 |
| 71,528 | 102 | 22,360 | 5,735 | 3,617 | 31,814 |
| 71,529 | 100 | 22,074 | 5,670 | 3,585 | 31,429 |
| 71,530 | 96  | 21,899 | 5,642 | 3,591 | 31,228 |
| 71,531 | 95  | 22,190 | 5,747 | 3,669 | 31,701 |
| 71,532 | 97  | 22,019 | 5,661 | 3,630 | 31,407 |
| 71,533 | 97  | 21,860 | 5,648 | 3,602 | 31,207 |
| 71,534 | 99  | 22,125 | 5,724 | 3,653 | 31,601 |
| 71,535 | 97  | 21,944 | 5,655 | 3,626 | 31,322 |
| 71,536 | 99  | 22,231 | 5,689 | 3,652 | 31,671 |
| 71,537 | 100 | 22,186 | 5,672 | 3,595 | 31,553 |
| 71,538 | 104 | 22,164 | 5,691 | 3,601 | 31,560 |
| 71,539 | 106 | 22,311 | 5,663 | 3,577 | 31,657 |
| 71,540 | 111 | 22,312 | 5,660 | 3,582 | 31,665 |
| 71,541 | 111 | 22,340 | 5,661 | 3,592 | 31,704 |
| 71,542 | 115 | 22,692 | 5,695 | 3,629 | 32,131 |
| 71,543 | 113 | 22,387 | 5,583 | 3,558 | 31,641 |

|        |     |        |       |       |        |
|--------|-----|--------|-------|-------|--------|
| 71,544 | 119 | 22,539 | 5,608 | 3,569 | 31,835 |
| 71,545 | 120 | 22,227 | 5,543 | 3,523 | 31,413 |
| 71,546 | 114 | 22,199 | 5,487 | 3,512 | 31,312 |
| 71,547 | 122 | 22,480 | 5,538 | 3,546 | 31,686 |
| 71,548 | 115 | 22,551 | 5,571 | 3,555 | 31,792 |
| 71,549 | 113 | 22,627 | 5,575 | 3,557 | 31,872 |
| 71,550 | 116 | 22,469 | 5,534 | 3,523 | 31,642 |
| 71,551 | 112 | 22,463 | 5,544 | 3,547 | 31,666 |
| 71,552 | 115 | 22,524 | 5,583 | 3,577 | 31,799 |
| 71,553 | 121 | 22,758 | 5,664 | 3,639 | 32,182 |
| 71,554 | 120 | 22,649 | 5,625 | 3,634 | 32,028 |
| 71,555 | 119 | 22,600 | 5,629 | 3,642 | 31,990 |
| 71,556 | 119 | 22,715 | 5,687 | 3,681 | 32,202 |
| 71,557 | 119 | 22,463 | 5,648 | 3,657 | 31,887 |
| 71,558 | 129 | 22,747 | 5,729 | 3,694 | 32,299 |
| 71,559 | 129 | 22,658 | 5,743 | 3,713 | 32,243 |
| 71,560 | 133 | 22,764 | 5,772 | 3,729 | 32,398 |
| 71,561 | 137 | 22,767 | 5,755 | 3,726 | 32,385 |
| 71,562 | 137 | 22,504 | 5,690 | 3,669 | 32,000 |
| 71,563 | 137 | 22,170 | 5,659 | 3,637 | 31,603 |
| 71,564 | 145 | 22,460 | 5,737 | 3,670 | 32,012 |
| 71,565 | 146 | 22,460 | 5,769 | 3,680 | 32,055 |
| 71,566 | 147 | 22,796 | 5,835 | 3,691 | 32,469 |
| 71,567 | 149 | 22,983 | 5,817 | 3,706 | 32,655 |
| 71,568 | 150 | 22,794 | 5,789 | 3,682 | 32,415 |
| 71,569 | 153 | 23,034 | 5,875 | 3,721 | 32,783 |
| 71,570 | 156 | 22,780 | 5,849 | 3,691 | 32,476 |
| 71,571 | 156 | 22,832 | 5,845 | 3,695 | 32,528 |
| 71,572 | 154 | 22,863 | 5,896 | 3,709 | 32,622 |
| 71,573 | 157 | 22,643 | 5,901 | 3,699 | 32,400 |
| 71,574 | 161 | 22,623 | 5,869 | 3,698 | 32,351 |
| 71,575 | 159 | 22,434 | 5,795 | 3,656 | 32,044 |

|        |     |        |       |       |        |
|--------|-----|--------|-------|-------|--------|
| 71,576 | 160 | 22,324 | 5,811 | 3,681 | 31,976 |
| 71,577 | 162 | 22,420 | 5,840 | 3,711 | 32,133 |
| 71,578 | 162 | 22,098 | 5,750 | 3,663 | 31,673 |
| 71,579 | 159 | 21,963 | 5,687 | 3,636 | 31,445 |
| 71,580 | 160 | 22,138 | 5,776 | 3,652 | 31,726 |
| 71,581 | 159 | 22,140 | 5,767 | 3,621 | 31,687 |
| 71,582 | 156 | 22,168 | 5,778 | 3,621 | 31,723 |
| 71,583 | 154 | 21,795 | 5,681 | 3,568 | 31,198 |
| 71,584 | 155 | 21,507 | 5,621 | 3,517 | 30,800 |
| 71,585 | 154 | 21,540 | 5,621 | 3,506 | 30,821 |
| 71,586 | 151 | 21,210 | 5,571 | 3,468 | 30,400 |
| 71,587 | 150 | 21,005 | 5,541 | 3,440 | 30,136 |
| 71,588 | 157 | 21,550 | 5,683 | 3,570 | 30,960 |
| 71,589 | 152 | 21,260 | 5,600 | 3,526 | 30,538 |
| 71,590 | 152 | 21,213 | 5,599 | 3,520 | 30,484 |
| 71,591 | 150 | 21,234 | 5,640 | 3,530 | 30,554 |
| 71,592 | 154 | 21,109 | 5,639 | 3,516 | 30,418 |
| 71,593 | 148 | 20,867 | 5,622 | 3,502 | 30,139 |
| 71,594 | 152 | 20,936 | 5,632 | 3,503 | 30,223 |
| 71,595 | 150 | 20,894 | 5,643 | 3,507 | 30,194 |
| 71,596 | 142 | 20,726 | 5,616 | 3,485 | 29,969 |
| 71,597 | 145 | 20,894 | 5,711 | 3,512 | 30,262 |
| 71,598 | 143 | 20,684 | 5,680 | 3,488 | 29,995 |
| 71,599 | 142 | 20,434 | 5,621 | 3,456 | 29,653 |
| 71,600 | 143 | 20,685 | 5,692 | 3,489 | 30,009 |
| 71,601 | 139 | 20,672 | 5,695 | 3,483 | 29,989 |
| 71,602 | 137 | 20,712 | 5,657 | 3,444 | 29,950 |
| 71,603 | 133 | 20,519 | 5,609 | 3,407 | 29,668 |
| 71,604 | 132 | 20,548 | 5,622 | 3,404 | 29,706 |
| 71,605 | 136 | 20,461 | 5,633 | 3,411 | 29,641 |
| 71,606 | 136 | 20,504 | 5,621 | 3,394 | 29,655 |
| 71,607 | 131 | 20,551 | 5,622 | 3,397 | 29,701 |

|        |     |        |       |       |        |
|--------|-----|--------|-------|-------|--------|
| 71,608 | 137 | 20,587 | 5,593 | 3,406 | 29,723 |
| 71,609 | 133 | 20,591 | 5,560 | 3,413 | 29,697 |
| 71,610 | 133 | 20,461 | 5,551 | 3,396 | 29,541 |
| 71,611 | 134 | 20,611 | 5,588 | 3,409 | 29,742 |
| 71,612 | 135 | 20,263 | 5,494 | 3,381 | 29,273 |
| 71,613 | 131 | 20,202 | 5,509 | 3,374 | 29,216 |
| 71,614 | 137 | 20,360 | 5,531 | 3,397 | 29,425 |
| 71,615 | 136 | 20,281 | 5,571 | 3,432 | 29,420 |
| 71,616 | 138 | 20,307 | 5,606 | 3,439 | 29,490 |
| 71,617 | 135 | 19,876 | 5,529 | 3,390 | 28,930 |
| 71,618 | 136 | 19,886 | 5,575 | 3,417 | 29,014 |
| 71,619 | 135 | 20,120 | 5,634 | 3,452 | 29,341 |
| 71,620 | 137 | 20,249 | 5,658 | 3,478 | 29,522 |
| 71,621 | 134 | 20,449 | 5,732 | 3,512 | 29,827 |
| 71,622 | 135 | 20,807 | 5,743 | 3,533 | 30,218 |
| 71,623 | 131 | 21,053 | 5,780 | 3,561 | 30,525 |
| 71,624 | 129 | 20,961 | 5,749 | 3,542 | 30,381 |
| 71,625 | 129 | 21,004 | 5,749 | 3,541 | 30,423 |
| 71,626 | 128 | 21,592 | 5,957 | 3,623 | 31,300 |
| 71,627 | 128 | 21,491 | 5,954 | 3,613 | 31,186 |
| 71,628 | 127 | 21,485 | 5,940 | 3,609 | 31,161 |
| 71,629 | 128 | 21,565 | 5,991 | 3,620 | 31,304 |
| 71,630 | 130 | 22,166 | 6,173 | 3,701 | 32,170 |
| 71,631 | 134 | 22,336 | 6,208 | 3,738 | 32,416 |
| 71,632 | 134 | 22,208 | 6,157 | 3,742 | 32,241 |
| 71,633 | 135 | 22,275 | 6,184 | 3,758 | 32,352 |
| 71,634 | 136 | 22,301 | 6,187 | 3,737 | 32,361 |
| 71,635 | 131 | 22,188 | 6,154 | 3,719 | 32,192 |
| 71,636 | 131 | 22,537 | 6,261 | 3,822 | 32,751 |
| 71,637 | 133 | 22,606 | 6,243 | 3,828 | 32,810 |
| 71,638 | 131 | 22,484 | 6,227 | 3,803 | 32,645 |
| 71,639 | 129 | 22,559 | 6,229 | 3,813 | 32,730 |

|        |     |        |       |       |        |
|--------|-----|--------|-------|-------|--------|
| 71,640 | 130 | 22,670 | 6,220 | 3,834 | 32,854 |
| 71,641 | 130 | 22,722 | 6,224 | 3,821 | 32,897 |
| 71,642 | 129 | 23,040 | 6,246 | 3,873 | 33,288 |
| 71,643 | 124 | 22,736 | 6,171 | 3,828 | 32,859 |
| 71,644 | 121 | 22,829 | 6,225 | 3,888 | 33,063 |
| 71,645 | 118 | 22,598 | 6,169 | 3,850 | 32,735 |
| 71,646 | 118 | 22,519 | 6,139 | 3,823 | 32,599 |
| 71,647 | 120 | 23,067 | 6,244 | 3,946 | 33,377 |
| 71,648 | 120 | 22,700 | 6,187 | 3,898 | 32,905 |
| 71,649 | 114 | 22,866 | 6,236 | 3,934 | 33,150 |
| 71,650 | 121 | 22,659 | 6,170 | 3,912 | 32,862 |
| 71,651 | 123 | 22,739 | 6,178 | 3,931 | 32,971 |
| 71,652 | 137 | 23,055 | 6,243 | 3,976 | 33,411 |
| 71,653 | 138 | 23,002 | 6,259 | 3,978 | 33,377 |
| 71,654 | 138 | 22,692 | 6,184 | 3,942 | 32,956 |
| 71,655 | 139 | 22,642 | 6,168 | 3,938 | 32,887 |
| 71,656 | 144 | 22,334 | 6,078 | 3,856 | 32,412 |
| 71,657 | 146 | 22,525 | 6,142 | 3,895 | 32,708 |
| 71,658 | 139 | 22,456 | 6,158 | 3,888 | 32,641 |
| 71,659 | 139 | 22,632 | 6,174 | 3,896 | 32,841 |
| 71,660 | 145 | 22,785 | 6,227 | 3,903 | 33,060 |
| 71,661 | 142 | 22,496 | 6,139 | 3,852 | 32,629 |
| 71,662 | 143 | 22,524 | 6,151 | 3,848 | 32,666 |
| 71,663 | 135 | 22,201 | 6,084 | 3,787 | 32,207 |
| 71,664 | 137 | 22,309 | 6,064 | 3,781 | 32,291 |
| 71,665 | 128 | 22,032 | 5,976 | 3,734 | 31,870 |
| 71,666 | 131 | 22,074 | 5,974 | 3,746 | 31,925 |
| 71,667 | 132 | 22,008 | 5,930 | 3,739 | 31,809 |
| 71,668 | 137 | 21,695 | 5,835 | 3,690 | 31,357 |
| 71,669 | 137 | 21,891 | 5,871 | 3,714 | 31,613 |
| 71,670 | 132 | 21,409 | 5,773 | 3,629 | 30,943 |
| 71,671 | 134 | 21,485 | 5,805 | 3,648 | 31,072 |



|        |     |        |       |       |        |
|--------|-----|--------|-------|-------|--------|
| 71,672 | 140 | 21,488 | 5,766 | 3,623 | 31,017 |
| 71,673 | 145 | 21,393 | 5,747 | 3,618 | 30,903 |
| 71,674 | 144 | 21,077 | 5,692 | 3,595 | 30,508 |
| 71,675 | 141 | 20,973 | 5,715 | 3,601 | 30,430 |
| 71,676 | 147 | 21,012 | 5,706 | 3,616 | 30,481 |
| 71,677 | 145 | 21,057 | 5,676 | 3,613 | 30,491 |
| 71,678 | 152 | 21,018 | 5,646 | 3,591 | 30,407 |
| 71,679 | 154 | 20,985 | 5,612 | 3,592 | 30,343 |
| 71,680 | 155 | 20,834 | 5,638 | 3,624 | 30,251 |
| 71,681 | 156 | 20,693 | 5,602 | 3,629 | 30,080 |
| 71,682 | 152 | 20,474 | 5,554 | 3,619 | 29,799 |
| 71,683 | 152 | 20,195 | 5,545 | 3,592 | 29,484 |
| 71,684 | 151 | 20,227 | 5,558 | 3,608 | 29,544 |
| 71,685 | 155 | 20,027 | 5,457 | 3,562 | 29,201 |
| 71,686 | 155 | 20,118 | 5,453 | 3,558 | 29,284 |
| 71,687 | 153 | 20,083 | 5,457 | 3,565 | 29,258 |
| 71,688 | 149 | 20,129 | 5,444 | 3,579 | 29,301 |
| 71,689 | 151 | 20,070 | 5,443 | 3,587 | 29,251 |
| 71,690 | 152 | 19,931 | 5,447 | 3,589 | 29,119 |
| 71,691 | 153 | 19,928 | 5,457 | 3,570 | 29,108 |
| 71,692 | 153 | 19,994 | 5,479 | 3,564 | 29,190 |
| 71,693 | 158 | 20,045 | 5,496 | 3,544 | 29,243 |
| 71,694 | 157 | 20,150 | 5,474 | 3,520 | 29,301 |
| 71,695 | 159 | 20,285 | 5,460 | 3,507 | 29,411 |
| 71,696 | 165 | 20,536 | 5,538 | 3,522 | 29,761 |
| 71,697 | 169 | 20,431 | 5,498 | 3,490 | 29,588 |
| 71,698 | 171 | 20,648 | 5,490 | 3,471 | 29,780 |
| 71,699 | 181 | 20,802 | 5,507 | 3,479 | 29,969 |
| 71,700 | 181 | 20,762 | 5,500 | 3,476 | 29,919 |
| 71,701 | 180 | 20,774 | 5,518 | 3,494 | 29,966 |
| 71,702 | 186 | 21,077 | 5,564 | 3,520 | 30,347 |
| 71,703 | 175 | 21,116 | 5,577 | 3,522 | 30,390 |

|        |     |        |       |       |        |
|--------|-----|--------|-------|-------|--------|
| 71,704 | 171 | 21,047 | 5,532 | 3,515 | 30,265 |
| 71,705 | 171 | 21,035 | 5,538 | 3,519 | 30,263 |
| 71,706 | 164 | 21,300 | 5,608 | 3,551 | 30,623 |
| 71,707 | 160 | 20,928 | 5,488 | 3,465 | 30,041 |
| 71,708 | 159 | 21,145 | 5,510 | 3,491 | 30,305 |
| 71,709 | 164 | 21,490 | 5,554 | 3,518 | 30,726 |
| 71,710 | 165 | 21,539 | 5,560 | 3,523 | 30,787 |
| 71,711 | 163 | 22,159 | 5,691 | 3,623 | 31,636 |
| 71,712 | 162 | 22,042 | 5,718 | 3,641 | 31,563 |
| 71,713 | 162 | 22,081 | 5,715 | 3,655 | 31,613 |
| 71,714 | 162 | 22,258 | 5,747 | 3,714 | 31,881 |
| 71,715 | 162 | 22,360 | 5,781 | 3,728 | 32,031 |
| 71,716 | 165 | 22,577 | 5,837 | 3,766 | 32,345 |
| 71,717 | 166 | 22,390 | 5,755 | 3,727 | 32,038 |
| 71,718 | 170 | 22,567 | 5,783 | 3,740 | 32,260 |
| 71,719 | 168 | 22,846 | 5,841 | 3,772 | 32,627 |
| 71,720 | 170 | 22,720 | 5,814 | 3,743 | 32,447 |
| 71,721 | 170 | 22,509 | 5,769 | 3,732 | 32,180 |
| 71,722 | 172 | 22,815 | 5,845 | 3,781 | 32,613 |
| 71,723 | 165 | 22,644 | 5,836 | 3,780 | 32,425 |
| 71,724 | 166 | 22,384 | 5,768 | 3,722 | 32,040 |
| 71,725 | 168 | 22,372 | 5,763 | 3,724 | 32,027 |
| 71,726 | 166 | 22,086 | 5,684 | 3,668 | 31,604 |
| 71,727 | 170 | 22,532 | 5,823 | 3,728 | 32,253 |
| 71,728 | 170 | 22,480 | 5,785 | 3,722 | 32,157 |
| 71,729 | 167 | 22,337 | 5,762 | 3,690 | 31,956 |
| 71,730 | 164 | 22,120 | 5,668 | 3,626 | 31,578 |
| 71,731 | 163 | 21,797 | 5,575 | 3,574 | 31,109 |
| 71,732 | 171 | 22,306 | 5,666 | 3,581 | 31,724 |
| 71,733 | 172 | 22,259 | 5,591 | 3,522 | 31,544 |
| 71,734 | 179 | 22,286 | 5,602 | 3,513 | 31,580 |
| 71,735 | 179 | 22,301 | 5,608 | 3,514 | 31,602 |

|        |     |        |       |       |        |
|--------|-----|--------|-------|-------|--------|
| 71,736 | 173 | 22,263 | 5,627 | 3,514 | 31,577 |
| 71,737 | 172 | 22,504 | 5,660 | 3,537 | 31,873 |
| 71,738 | 173 | 22,498 | 5,685 | 3,523 | 31,879 |
| 71,739 | 181 | 22,391 | 5,644 | 3,471 | 31,687 |
| 71,740 | 181 | 22,512 | 5,655 | 3,464 | 31,812 |
| 71,741 | 180 | 22,572 | 5,643 | 3,473 | 31,868 |
| 71,742 | 182 | 22,504 | 5,649 | 3,478 | 31,813 |
| 71,743 | 179 | 22,409 | 5,617 | 3,496 | 31,701 |
| 71,744 | 177 | 22,119 | 5,559 | 3,470 | 31,325 |
| 71,745 | 175 | 21,754 | 5,530 | 3,438 | 30,897 |
| 71,746 | 175 | 22,036 | 5,608 | 3,488 | 31,307 |
| 71,747 | 174 | 21,836 | 5,546 | 3,485 | 31,041 |
| 71,748 | 169 | 21,681 | 5,557 | 3,478 | 30,885 |
| 71,749 | 169 | 21,828 | 5,603 | 3,513 | 31,113 |
| 71,750 | 159 | 21,749 | 5,552 | 3,486 | 30,946 |
| 71,751 | 155 | 21,803 | 5,519 | 3,475 | 30,952 |
| 71,752 | 151 | 21,745 | 5,487 | 3,422 | 30,805 |
| 71,753 | 142 | 21,190 | 5,377 | 3,352 | 30,061 |
| 71,754 | 144 | 21,503 | 5,418 | 3,380 | 30,445 |
| 71,755 | 146 | 21,240 | 5,322 | 3,295 | 30,003 |
| 71,756 | 146 | 21,346 | 5,350 | 3,299 | 30,141 |
| 71,757 | 147 | 21,183 | 5,310 | 3,292 | 29,932 |
| 71,758 | 151 | 21,147 | 5,303 | 3,288 | 29,889 |
| 71,759 | 150 | 20,830 | 5,284 | 3,264 | 29,528 |
| 71,760 | 143 | 21,228 | 5,401 | 3,346 | 30,118 |
| 71,761 | 147 | 21,200 | 5,401 | 3,327 | 30,075 |
| 71,762 | 148 | 21,076 | 5,362 | 3,290 | 29,876 |
| 71,763 | 151 | 21,162 | 5,331 | 3,270 | 29,914 |
| 71,764 | 152 | 21,267 | 5,327 | 3,272 | 30,018 |
| 71,765 | 154 | 21,315 | 5,329 | 3,239 | 30,037 |
| 71,766 | 164 | 21,491 | 5,352 | 3,256 | 30,263 |
| 71,767 | 161 | 21,214 | 5,270 | 3,191 | 29,836 |

|        |     |        |       |       |        |
|--------|-----|--------|-------|-------|--------|
| 71,768 | 157 | 21,143 | 5,290 | 3,192 | 29,782 |
| 71,769 | 152 | 21,144 | 5,307 | 3,202 | 29,805 |
| 71,770 | 147 | 21,121 | 5,316 | 3,200 | 29,784 |
| 71,771 | 145 | 21,128 | 5,282 | 3,177 | 29,732 |
| 71,772 | 147 | 21,148 | 5,254 | 3,187 | 29,736 |
| 71,773 | 149 | 21,172 | 5,251 | 3,188 | 29,760 |
| 71,774 | 145 | 21,030 | 5,214 | 3,175 | 29,564 |
| 71,775 | 141 | 21,219 | 5,268 | 3,208 | 29,836 |
| 71,776 | 142 | 21,207 | 5,288 | 3,213 | 29,850 |
| 71,777 | 150 | 21,622 | 5,320 | 3,259 | 30,351 |
| 71,778 | 146 | 21,393 | 5,277 | 3,249 | 30,065 |
| 71,779 | 148 | 21,686 | 5,362 | 3,285 | 30,481 |
| 71,780 | 149 | 21,575 | 5,388 | 3,315 | 30,427 |
| 71,781 | 152 | 21,572 | 5,427 | 3,345 | 30,496 |
| 71,782 | 147 | 21,373 | 5,363 | 3,311 | 30,194 |
| 71,783 | 142 | 21,272 | 5,421 | 3,353 | 30,188 |
| 71,784 | 148 | 21,262 | 5,419 | 3,376 | 30,205 |
| 71,785 | 140 | 21,200 | 5,408 | 3,367 | 30,115 |
| 71,786 | 143 | 21,063 | 5,404 | 3,344 | 29,954 |
| 71,787 | 143 | 21,046 | 5,386 | 3,340 | 29,915 |
| 71,788 | 144 | 21,035 | 5,379 | 3,363 | 29,921 |
| 71,789 | 143 | 21,187 | 5,419 | 3,395 | 30,144 |
| 71,790 | 141 | 21,458 | 5,484 | 3,441 | 30,524 |
| 71,791 | 140 | 21,457 | 5,491 | 3,447 | 30,535 |
| 71,792 | 140 | 21,488 | 5,522 | 3,452 | 30,602 |
| 71,793 | 138 | 21,401 | 5,488 | 3,445 | 30,472 |
| 71,794 | 143 | 21,693 | 5,563 | 3,490 | 30,889 |
| 71,795 | 142 | 21,992 | 5,611 | 3,512 | 31,257 |
| 71,796 | 140 | 22,193 | 5,598 | 3,500 | 31,431 |
| 71,797 | 138 | 22,156 | 5,553 | 3,455 | 31,302 |
| 71,798 | 142 | 22,182 | 5,554 | 3,454 | 31,332 |
| 71,799 | 140 | 22,012 | 5,494 | 3,435 | 31,081 |

|        |     |        |       |       |        |
|--------|-----|--------|-------|-------|--------|
| 71,800 | 140 | 22,155 | 5,577 | 3,487 | 31,359 |
| 71,801 | 139 | 21,870 | 5,529 | 3,462 | 31,000 |
| 71,802 | 141 | 21,603 | 5,487 | 3,431 | 30,662 |
| 71,803 | 142 | 21,386 | 5,465 | 3,429 | 30,422 |
| 71,804 | 154 | 22,328 | 5,758 | 3,568 | 31,808 |
| 71,805 | 152 | 21,974 | 5,712 | 3,546 | 31,384 |
| 71,806 | 152 | 21,994 | 5,788 | 3,596 | 31,530 |
| 71,807 | 153 | 21,949 | 5,776 | 3,612 | 31,490 |
| 71,808 | 158 | 21,724 | 5,730 | 3,583 | 31,195 |
| 71,809 | 154 | 21,578 | 5,708 | 3,565 | 31,005 |
| 71,810 | 156 | 21,693 | 5,751 | 3,587 | 31,187 |
| 71,811 | 159 | 21,734 | 5,739 | 3,593 | 31,225 |
| 71,812 | 151 | 21,635 | 5,743 | 3,578 | 31,107 |
| 71,813 | 149 | 21,080 | 5,636 | 3,520 | 30,385 |
| 71,814 | 149 | 21,195 | 5,652 | 3,519 | 30,515 |
| 71,815 | 150 | 20,917 | 5,614 | 3,491 | 30,172 |
| 71,816 | 148 | 20,701 | 5,547 | 3,471 | 29,867 |
| 71,817 | 142 | 21,461 | 5,735 | 3,583 | 30,921 |
| 71,818 | 140 | 21,294 | 5,679 | 3,561 | 30,674 |
| 71,819 | 146 | 21,290 | 5,664 | 3,552 | 30,652 |
| 71,820 | 150 | 21,184 | 5,651 | 3,554 | 30,539 |
| 71,821 | 149 | 20,897 | 5,580 | 3,524 | 30,150 |
| 71,822 | 153 | 21,160 | 5,640 | 3,578 | 30,531 |
| 71,823 | 152 | 21,161 | 5,635 | 3,553 | 30,501 |
| 71,824 | 156 | 21,188 | 5,651 | 3,548 | 30,543 |
| 71,825 | 156 | 21,120 | 5,645 | 3,537 | 30,458 |
| 71,826 | 151 | 20,993 | 5,606 | 3,537 | 30,287 |
| 71,827 | 147 | 20,854 | 5,619 | 3,520 | 30,140 |
| 71,828 | 142 | 20,865 | 5,645 | 3,555 | 30,207 |
| 71,829 | 139 | 20,964 | 5,645 | 3,558 | 30,306 |
| 71,830 | 137 | 21,045 | 5,665 | 3,572 | 30,419 |
| 71,831 | 132 | 21,197 | 5,643 | 3,557 | 30,529 |

|        |     |        |       |       |        |
|--------|-----|--------|-------|-------|--------|
| 71,832 | 126 | 20,772 | 5,445 | 3,437 | 29,780 |
| 71,833 | 127 | 21,091 | 5,464 | 3,461 | 30,143 |
| 71,834 | 125 | 21,090 | 5,471 | 3,457 | 30,143 |
| 71,835 | 122 | 20,969 | 5,418 | 3,453 | 29,962 |
| 71,836 | 126 | 21,331 | 5,491 | 3,496 | 30,444 |
| 71,837 | 124 | 21,313 | 5,453 | 3,483 | 30,373 |
| 71,838 | 122 | 21,066 | 5,368 | 3,431 | 29,987 |
| 71,839 | 117 | 20,757 | 5,309 | 3,396 | 29,579 |
| 71,840 | 122 | 20,902 | 5,339 | 3,429 | 29,792 |
| 71,841 | 120 | 20,685 | 5,288 | 3,412 | 29,505 |
| 71,842 | 120 | 20,776 | 5,316 | 3,431 | 29,643 |
| 71,843 | 122 | 20,780 | 5,259 | 3,440 | 29,601 |
| 71,844 | 118 | 20,480 | 5,200 | 3,394 | 29,192 |
| 71,845 | 116 | 20,338 | 5,237 | 3,404 | 29,095 |
| 71,846 | 123 | 20,264 | 5,224 | 3,407 | 29,018 |
| 71,847 | 125 | 20,299 | 5,246 | 3,429 | 29,099 |
| 71,848 | 117 | 19,607 | 5,070 | 3,307 | 28,101 |
| 71,849 | 119 | 19,796 | 5,105 | 3,320 | 28,340 |
| 71,850 | 122 | 20,064 | 5,144 | 3,338 | 28,668 |
| 71,851 | 122 | 20,122 | 5,143 | 3,353 | 28,740 |
| 71,852 | 114 | 20,455 | 5,204 | 3,415 | 29,188 |
| 71,853 | 108 | 20,413 | 5,189 | 3,411 | 29,121 |
| 71,854 | 109 | 20,352 | 5,171 | 3,400 | 29,032 |
| 71,855 | 113 | 20,269 | 5,119 | 3,397 | 28,898 |
| 71,856 | 115 | 20,347 | 5,087 | 3,381 | 28,930 |
| 71,857 | 114 | 20,454 | 5,071 | 3,369 | 29,008 |
| 71,858 | 108 | 20,483 | 5,077 | 3,372 | 29,040 |
| 71,859 | 108 | 20,460 | 5,051 | 3,360 | 28,979 |
| 71,860 | 106 | 20,315 | 5,031 | 3,343 | 28,795 |
| 71,861 | 107 | 20,610 | 5,130 | 3,402 | 29,249 |
| 71,862 | 106 | 20,232 | 5,037 | 3,381 | 28,756 |
| 71,863 | 106 | 20,036 | 5,010 | 3,361 | 28,513 |

|        |     |        |       |       |        |
|--------|-----|--------|-------|-------|--------|
| 71,864 | 106 | 20,038 | 4,997 | 3,369 | 28,510 |
| 71,865 | 105 | 20,006 | 5,032 | 3,358 | 28,501 |
| 71,866 | 101 | 20,013 | 5,039 | 3,380 | 28,533 |
| 71,867 | 105 | 20,531 | 5,187 | 3,448 | 29,271 |
| 71,868 | 102 | 20,295 | 5,119 | 3,433 | 28,949 |
| 71,869 | 107 | 20,754 | 5,179 | 3,478 | 29,518 |
| 71,870 | 104 | 21,175 | 5,284 | 3,546 | 30,109 |
| 71,871 | 96  | 21,106 | 5,228 | 3,501 | 29,931 |
| 71,872 | 93  | 21,266 | 5,260 | 3,504 | 30,123 |
| 71,873 | 96  | 21,612 | 5,365 | 3,547 | 30,620 |
| 71,874 | 93  | 21,612 | 5,372 | 3,547 | 30,624 |
| 71,875 | 91  | 21,820 | 5,411 | 3,575 | 30,897 |
| 71,876 | 93  | 21,934 | 5,487 | 3,611 | 31,125 |
| 71,877 | 95  | 22,066 | 5,446 | 3,593 | 31,200 |
| 71,878 | 97  | 22,031 | 5,448 | 3,567 | 31,143 |
| 71,879 | 105 | 22,264 | 5,481 | 3,587 | 31,437 |
| 71,880 | 107 | 22,209 | 5,461 | 3,568 | 31,345 |
| 71,881 | 107 | 22,023 | 5,422 | 3,552 | 31,104 |
| 71,882 | 109 | 21,764 | 5,342 | 3,513 | 30,728 |
| 71,883 | 109 | 21,780 | 5,344 | 3,519 | 30,752 |
| 71,884 | 124 | 22,039 | 5,422 | 3,544 | 31,129 |
| 71,885 | 130 | 21,895 | 5,382 | 3,494 | 30,901 |
| 71,886 | 130 | 21,919 | 5,381 | 3,484 | 30,914 |
| 71,887 | 131 | 21,830 | 5,380 | 3,483 | 30,824 |
| 71,888 | 134 | 22,054 | 5,431 | 3,514 | 31,133 |
| 71,889 | 133 | 22,217 | 5,495 | 3,569 | 31,414 |
| 71,890 | 133 | 22,348 | 5,531 | 3,549 | 31,561 |
| 71,891 | 137 | 22,617 | 5,593 | 3,590 | 31,937 |
| 71,892 | 136 | 22,778 | 5,658 | 3,593 | 32,165 |
| 71,893 | 137 | 22,768 | 5,634 | 3,576 | 32,115 |
| 71,894 | 141 | 22,782 | 5,690 | 3,581 | 32,194 |
| 71,895 | 141 | 22,682 | 5,658 | 3,546 | 32,027 |

|        |     |        |       |       |        |
|--------|-----|--------|-------|-------|--------|
| 71,896 | 141 | 22,780 | 5,642 | 3,553 | 32,116 |
| 71,897 | 139 | 22,952 | 5,698 | 3,605 | 32,394 |
| 71,898 | 139 | 22,844 | 5,685 | 3,600 | 32,268 |
| 71,899 | 136 | 22,783 | 5,651 | 3,598 | 32,168 |
| 71,900 | 134 | 22,806 | 5,660 | 3,607 | 32,207 |
| 71,901 | 136 | 22,811 | 5,650 | 3,622 | 32,219 |
| 71,902 | 135 | 22,541 | 5,647 | 3,582 | 31,905 |
| 71,903 | 144 | 22,749 | 5,704 | 3,621 | 32,218 |
| 71,904 | 144 | 22,478 | 5,623 | 3,605 | 31,850 |
| 71,905 | 144 | 22,441 | 5,629 | 3,595 | 31,809 |
| 71,906 | 147 | 22,375 | 5,623 | 3,593 | 31,738 |
| 71,907 | 143 | 22,272 | 5,618 | 3,574 | 31,607 |
| 71,908 | 141 | 22,278 | 5,614 | 3,573 | 31,606 |
| 71,909 | 138 | 22,184 | 5,594 | 3,554 | 31,470 |
| 71,910 | 138 | 21,955 | 5,539 | 3,533 | 31,165 |
| 71,911 | 138 | 22,371 | 5,621 | 3,588 | 31,718 |
| 71,912 | 137 | 22,377 | 5,590 | 3,564 | 31,668 |
| 71,913 | 131 | 22,289 | 5,552 | 3,539 | 31,511 |
| 71,914 | 131 | 22,342 | 5,562 | 3,541 | 31,576 |
| 71,915 | 134 | 22,774 | 5,664 | 3,616 | 32,188 |
| 71,916 | 140 | 22,356 | 5,566 | 3,554 | 31,616 |
| 71,917 | 139 | 22,307 | 5,538 | 3,558 | 31,542 |
| 71,918 | 140 | 22,638 | 5,591 | 3,618 | 31,987 |
| 71,919 | 150 | 22,345 | 5,538 | 3,592 | 31,625 |
| 71,920 | 145 | 22,046 | 5,501 | 3,561 | 31,253 |
| 71,921 | 149 | 22,380 | 5,600 | 3,626 | 31,755 |
| 71,922 | 150 | 22,044 | 5,535 | 3,594 | 31,323 |
| 71,923 | 150 | 21,982 | 5,540 | 3,596 | 31,268 |
| 71,924 | 151 | 22,184 | 5,572 | 3,658 | 31,565 |
| 71,925 | 154 | 21,997 | 5,534 | 3,643 | 31,328 |
| 71,926 | 155 | 22,004 | 5,509 | 3,636 | 31,304 |
| 71,927 | 156 | 21,951 | 5,501 | 3,613 | 31,221 |



|        |     |        |       |       |        |
|--------|-----|--------|-------|-------|--------|
| 71,928 | 157 | 21,903 | 5,474 | 3,601 | 31,135 |
| 71,929 | 160 | 21,900 | 5,463 | 3,599 | 31,122 |
| 71,930 | 154 | 21,901 | 5,482 | 3,605 | 31,142 |
| 71,931 | 156 | 21,887 | 5,485 | 3,608 | 31,136 |
| 71,932 | 155 | 21,958 | 5,478 | 3,606 | 31,197 |
| 71,933 | 154 | 21,805 | 5,456 | 3,619 | 31,034 |
| 71,934 | 152 | 21,814 | 5,441 | 3,627 | 31,034 |
| 71,935 | 140 | 22,195 | 5,507 | 3,676 | 31,518 |
| 71,936 | 140 | 22,275 | 5,508 | 3,682 | 31,605 |
| 71,937 | 133 | 22,041 | 5,461 | 3,682 | 31,317 |
| 71,938 | 131 | 21,955 | 5,501 | 3,680 | 31,267 |
| 71,939 | 126 | 21,893 | 5,544 | 3,720 | 31,283 |
| 71,940 | 136 | 21,689 | 5,487 | 3,702 | 31,014 |
| 71,941 | 135 | 21,987 | 5,538 | 3,760 | 31,420 |
| 71,942 | 133 | 22,181 | 5,612 | 3,789 | 31,715 |
| 71,943 | 136 | 22,305 | 5,593 | 3,798 | 31,832 |
| 71,944 | 134 | 22,499 | 5,601 | 3,821 | 32,055 |
| 71,945 | 134 | 22,461 | 5,584 | 3,810 | 31,989 |
| 71,946 | 134 | 22,591 | 5,588 | 3,832 | 32,145 |
| 71,947 | 136 | 22,654 | 5,631 | 3,837 | 32,258 |
| 71,948 | 139 | 22,899 | 5,668 | 3,857 | 32,563 |
| 71,949 | 136 | 22,781 | 5,616 | 3,826 | 32,359 |
| 71,950 | 137 | 23,135 | 5,669 | 3,877 | 32,818 |
| 71,951 | 135 | 23,052 | 5,680 | 3,859 | 32,726 |
| 71,952 | 130 | 22,955 | 5,670 | 3,860 | 32,615 |
| 71,953 | 131 | 23,202 | 5,673 | 3,882 | 32,888 |
| 71,954 | 127 | 23,382 | 5,727 | 3,901 | 33,137 |
| 71,955 | 126 | 23,477 | 5,727 | 3,913 | 33,243 |
| 71,956 | 123 | 23,452 | 5,696 | 3,890 | 33,161 |
| 71,957 | 124 | 23,423 | 5,723 | 3,893 | 33,163 |
| 71,958 | 123 | 23,672 | 5,760 | 3,921 | 33,476 |
| 71,959 | 124 | 23,671 | 5,741 | 3,941 | 33,477 |

|        |     |        |       |       |        |
|--------|-----|--------|-------|-------|--------|
| 71,960 | 124 | 23,475 | 5,685 | 3,915 | 33,199 |
| 71,961 | 124 | 23,610 | 5,698 | 3,939 | 33,371 |
| 71,962 | 124 | 23,556 | 5,704 | 3,938 | 33,322 |
| 71,963 | 124 | 23,416 | 5,684 | 3,909 | 33,133 |
| 71,964 | 124 | 23,566 | 5,725 | 3,940 | 33,355 |
| 71,965 | 123 | 23,747 | 5,766 | 3,982 | 33,618 |
| 71,966 | 131 | 23,822 | 5,810 | 3,998 | 33,761 |
| 71,967 | 127 | 23,600 | 5,748 | 3,957 | 33,432 |
| 71,968 | 127 | 23,337 | 5,724 | 3,917 | 33,105 |
| 71,969 | 127 | 23,756 | 5,835 | 3,986 | 33,704 |
| 71,970 | 120 | 23,490 | 5,819 | 3,933 | 33,362 |
| 71,971 | 121 | 23,325 | 5,796 | 3,914 | 33,156 |
| 71,972 | 115 | 23,060 | 5,716 | 3,878 | 32,769 |
| 71,973 | 113 | 23,137 | 5,706 | 3,871 | 32,827 |
| 71,974 | 117 | 22,919 | 5,679 | 3,848 | 32,563 |
| 71,975 | 118 | 23,078 | 5,710 | 3,843 | 32,749 |
| 71,976 | 114 | 22,952 | 5,700 | 3,835 | 32,601 |
| 71,977 | 108 | 22,661 | 5,629 | 3,806 | 32,204 |
| 71,978 | 109 | 22,746 | 5,625 | 3,791 | 32,271 |
| 71,979 | 107 | 22,722 | 5,618 | 3,789 | 32,236 |
| 71,980 | 102 | 22,677 | 5,627 | 3,795 | 32,201 |
| 71,981 | 104 | 22,799 | 5,655 | 3,830 | 32,388 |
| 71,982 | 104 | 22,778 | 5,656 | 3,811 | 32,349 |
| 71,983 | 105 | 22,511 | 5,623 | 3,759 | 31,998 |
| 71,984 | 104 | 22,544 | 5,628 | 3,739 | 32,015 |
| 71,985 | 108 | 22,697 | 5,663 | 3,787 | 32,255 |
| 71,986 | 109 | 22,600 | 5,646 | 3,781 | 32,136 |
| 71,987 | 101 | 22,469 | 5,638 | 3,772 | 31,980 |
| 71,988 | 100 | 22,292 | 5,542 | 3,728 | 31,662 |
| 71,989 | 102 | 22,080 | 5,450 | 3,641 | 31,273 |
| 71,990 | 102 | 22,229 | 5,482 | 3,651 | 31,464 |
| 71,991 | 95  | 22,513 | 5,505 | 3,673 | 31,786 |

|        |     |        |       |       |        |
|--------|-----|--------|-------|-------|--------|
| 71,992 | 96  | 22,578 | 5,495 | 3,669 | 31,838 |
| 71,993 | 94  | 22,291 | 5,411 | 3,630 | 31,426 |
| 71,994 | 95  | 22,050 | 5,405 | 3,625 | 31,175 |
| 71,995 | 96  | 22,234 | 5,450 | 3,640 | 31,420 |
| 71,996 | 94  | 21,778 | 5,340 | 3,576 | 30,788 |
| 71,997 | 96  | 22,081 | 5,388 | 3,607 | 31,172 |
| 71,998 | 90  | 22,071 | 5,379 | 3,591 | 31,131 |
| 71,999 | 92  | 22,045 | 5,368 | 3,586 | 31,091 |
| 72,000 | 93  | 21,974 | 5,379 | 3,580 | 31,026 |
| 72,001 | 97  | 22,091 | 5,415 | 3,579 | 31,182 |
| 72,002 | 96  | 21,771 | 5,335 | 3,548 | 30,750 |
| 72,003 | 97  | 21,809 | 5,318 | 3,568 | 30,792 |
| 72,004 | 100 | 21,972 | 5,341 | 3,606 | 31,019 |
| 72,005 | 104 | 21,743 | 5,267 | 3,530 | 30,644 |
| 72,006 | 109 | 21,975 | 5,344 | 3,558 | 30,986 |
| 72,007 | 105 | 22,031 | 5,362 | 3,563 | 31,061 |
| 72,008 | 111 | 22,088 | 5,401 | 3,556 | 31,156 |
| 72,009 | 111 | 22,076 | 5,417 | 3,533 | 31,137 |
| 72,010 | 114 | 22,288 | 5,456 | 3,562 | 31,420 |
| 72,011 | 116 | 22,182 | 5,427 | 3,523 | 31,248 |
| 72,012 | 119 | 22,434 | 5,459 | 3,557 | 31,569 |
| 72,013 | 119 | 22,240 | 5,399 | 3,527 | 31,285 |
| 72,014 | 120 | 22,274 | 5,394 | 3,530 | 31,318 |
| 72,015 | 121 | 22,299 | 5,363 | 3,478 | 31,261 |
| 72,016 | 122 | 22,178 | 5,364 | 3,474 | 31,138 |
| 72,017 | 116 | 22,272 | 5,384 | 3,487 | 31,259 |
| 72,018 | 112 | 21,897 | 5,308 | 3,456 | 30,773 |
| 72,019 | 114 | 22,198 | 5,337 | 3,499 | 31,148 |
| 72,020 | 116 | 22,433 | 5,365 | 3,492 | 31,406 |
| 72,021 | 112 | 22,377 | 5,292 | 3,460 | 31,241 |
| 72,022 | 113 | 22,467 | 5,309 | 3,458 | 31,347 |
| 72,023 | 113 | 22,814 | 5,381 | 3,501 | 31,809 |

|        |     |        |       |       |        |
|--------|-----|--------|-------|-------|--------|
| 72,024 | 110 | 23,048 | 5,400 | 3,529 | 32,087 |
| 72,025 | 109 | 23,182 | 5,413 | 3,539 | 32,243 |
| 72,026 | 108 | 22,994 | 5,369 | 3,511 | 31,982 |
| 72,027 | 108 | 23,171 | 5,416 | 3,538 | 32,233 |
| 72,028 | 108 | 22,685 | 5,296 | 3,475 | 31,564 |
| 72,029 | 112 | 22,902 | 5,329 | 3,503 | 31,846 |
| 72,030 | 114 | 22,451 | 5,210 | 3,416 | 31,191 |
| 72,031 | 114 | 22,679 | 5,251 | 3,464 | 31,508 |
| 72,032 | 110 | 22,870 | 5,309 | 3,497 | 31,786 |
| 72,033 | 109 | 22,810 | 5,311 | 3,487 | 31,717 |
| 72,034 | 108 | 23,176 | 5,420 | 3,563 | 32,267 |
| 72,035 | 109 | 23,434 | 5,498 | 3,609 | 32,650 |
| 72,036 | 103 | 23,051 | 5,435 | 3,545 | 32,134 |
| 72,037 | 105 | 23,043 | 5,442 | 3,533 | 32,123 |
| 72,038 | 105 | 22,848 | 5,388 | 3,510 | 31,851 |
| 72,039 | 108 | 23,276 | 5,478 | 3,576 | 32,438 |
| 72,040 | 109 | 23,036 | 5,447 | 3,562 | 32,154 |
| 72,041 | 109 | 22,903 | 5,413 | 3,535 | 31,960 |
| 72,042 | 115 | 23,149 | 5,504 | 3,564 | 32,332 |
| 72,043 | 114 | 23,065 | 5,507 | 3,549 | 32,235 |
| 72,044 | 110 | 22,778 | 5,455 | 3,523 | 31,866 |
| 72,045 | 111 | 22,846 | 5,478 | 3,521 | 31,956 |
| 72,046 | 112 | 22,696 | 5,495 | 3,544 | 31,847 |
| 72,047 | 116 | 22,937 | 5,571 | 3,582 | 32,206 |
| 72,048 | 120 | 23,004 | 5,586 | 3,570 | 32,280 |
| 72,049 | 114 | 22,842 | 5,581 | 3,567 | 32,104 |
| 72,050 | 118 | 22,840 | 5,592 | 3,598 | 32,148 |
| 72,051 | 118 | 22,844 | 5,611 | 3,614 | 32,187 |
| 72,052 | 114 | 22,902 | 5,590 | 3,606 | 32,212 |
| 72,053 | 116 | 22,385 | 5,497 | 3,516 | 31,514 |
| 72,054 | 117 | 22,576 | 5,533 | 3,554 | 31,780 |
| 72,055 | 113 | 22,539 | 5,509 | 3,541 | 31,702 |

|        |     |        |       |       |        |
|--------|-----|--------|-------|-------|--------|
| 72,056 | 111 | 22,690 | 5,551 | 3,587 | 31,939 |
| 72,057 | 107 | 22,734 | 5,562 | 3,589 | 31,992 |
| 72,058 | 106 | 22,546 | 5,530 | 3,567 | 31,749 |
| 72,059 | 104 | 22,676 | 5,556 | 3,628 | 31,964 |
| 72,060 | 105 | 22,617 | 5,562 | 3,635 | 31,919 |
| 72,061 | 109 | 22,831 | 5,623 | 3,693 | 32,256 |
| 72,062 | 110 | 22,786 | 5,633 | 3,697 | 32,226 |
| 72,063 | 107 | 22,536 | 5,607 | 3,669 | 31,919 |
| 72,064 | 106 | 22,412 | 5,577 | 3,638 | 31,733 |
| 72,065 | 108 | 22,729 | 5,655 | 3,672 | 32,164 |
| 72,066 | 106 | 22,037 | 5,444 | 3,545 | 31,132 |
| 72,067 | 107 | 22,236 | 5,469 | 3,589 | 31,401 |
| 72,068 | 106 | 22,587 | 5,513 | 3,621 | 31,827 |
| 72,069 | 106 | 22,610 | 5,527 | 3,624 | 31,867 |
| 72,070 | 102 | 22,882 | 5,616 | 3,672 | 32,272 |
| 72,071 | 103 | 22,566 | 5,609 | 3,646 | 31,924 |
| 72,072 | 104 | 22,208 | 5,540 | 3,612 | 31,464 |
| 72,073 | 103 | 21,915 | 5,497 | 3,589 | 31,104 |
| 72,074 | 105 | 21,981 | 5,539 | 3,656 | 31,281 |
| 72,075 | 106 | 21,772 | 5,502 | 3,634 | 31,014 |
| 72,076 | 105 | 21,494 | 5,459 | 3,602 | 30,660 |
| 72,077 | 104 | 21,410 | 5,390 | 3,574 | 30,478 |
| 72,078 | 105 | 21,331 | 5,331 | 3,543 | 30,310 |
| 72,079 | 105 | 21,307 | 5,348 | 3,526 | 30,286 |
| 72,080 | 104 | 21,260 | 5,342 | 3,525 | 30,231 |
| 72,081 | 101 | 21,332 | 5,391 | 3,567 | 30,391 |
| 72,082 | 104 | 21,333 | 5,436 | 3,564 | 30,437 |
| 72,083 | 108 | 21,549 | 5,474 | 3,602 | 30,733 |
| 72,084 | 108 | 21,549 | 5,482 | 3,602 | 30,741 |
| 72,085 | 112 | 21,514 | 5,452 | 3,606 | 30,684 |
| 72,086 | 112 | 21,407 | 5,428 | 3,582 | 30,529 |
| 72,087 | 112 | 21,604 | 5,479 | 3,627 | 30,822 |

|        |     |        |       |       |        |
|--------|-----|--------|-------|-------|--------|
| 72,088 | 111 | 21,540 | 5,475 | 3,651 | 30,777 |
| 72,089 | 112 | 21,488 | 5,506 | 3,650 | 30,756 |
| 72,090 | 111 | 21,265 | 5,465 | 3,610 | 30,451 |
| 72,091 | 108 | 21,273 | 5,475 | 3,635 | 30,491 |
| 72,092 | 106 | 21,361 | 5,482 | 3,648 | 30,597 |
| 72,093 | 103 | 21,351 | 5,472 | 3,653 | 30,579 |
| 72,094 | 104 | 21,430 | 5,512 | 3,683 | 30,729 |
| 72,095 | 109 | 21,593 | 5,533 | 3,673 | 30,908 |
| 72,096 | 105 | 21,366 | 5,480 | 3,620 | 30,571 |
| 72,097 | 116 | 21,325 | 5,485 | 3,613 | 30,539 |
| 72,098 | 112 | 21,069 | 5,420 | 3,574 | 30,175 |
| 72,099 | 112 | 21,259 | 5,522 | 3,661 | 30,554 |
| 72,100 | 110 | 20,966 | 5,426 | 3,593 | 30,095 |
| 72,101 | 110 | 20,909 | 5,435 | 3,584 | 30,038 |
| 72,102 | 111 | 20,876 | 5,441 | 3,577 | 30,005 |
| 72,103 | 113 | 20,751 | 5,440 | 3,569 | 29,873 |
| 72,104 | 107 | 20,862 | 5,500 | 3,609 | 30,078 |
| 72,105 | 106 | 20,578 | 5,460 | 3,575 | 29,719 |
| 72,106 | 108 | 20,697 | 5,477 | 3,582 | 29,864 |
| 72,107 | 110 | 20,896 | 5,562 | 3,594 | 30,162 |
| 72,108 | 104 | 20,848 | 5,591 | 3,597 | 30,140 |
| 72,109 | 103 | 20,494 | 5,458 | 3,540 | 29,595 |
| 72,110 | 104 | 20,717 | 5,496 | 3,564 | 29,881 |
| 72,111 | 100 | 20,925 | 5,531 | 3,585 | 30,141 |
| 72,112 | 99  | 21,067 | 5,590 | 3,591 | 30,347 |
| 72,113 | 98  | 20,852 | 5,535 | 3,548 | 30,033 |
| 72,114 | 100 | 20,769 | 5,527 | 3,546 | 29,942 |
| 72,115 | 100 | 20,562 | 5,510 | 3,533 | 29,705 |
| 72,116 | 101 | 21,287 | 5,669 | 3,674 | 30,731 |
| 72,117 | 99  | 21,320 | 5,705 | 3,694 | 30,818 |
| 72,118 | 100 | 21,483 | 5,769 | 3,711 | 31,063 |
| 72,119 | 99  | 21,589 | 5,800 | 3,712 | 31,200 |

|        |     |        |       |       |        |
|--------|-----|--------|-------|-------|--------|
| 72,120 | 102 | 21,511 | 5,791 | 3,709 | 31,113 |
| 72,121 | 102 | 21,549 | 5,806 | 3,722 | 31,179 |
| 72,122 | 103 | 21,988 | 5,903 | 3,788 | 31,782 |
| 72,123 | 100 | 22,103 | 5,909 | 3,762 | 31,874 |
| 72,124 | 98  | 22,232 | 5,933 | 3,733 | 31,996 |
| 72,125 | 100 | 22,265 | 5,935 | 3,724 | 32,024 |
| 72,126 | 99  | 21,982 | 5,894 | 3,685 | 31,660 |
| 72,127 | 97  | 22,237 | 5,961 | 3,746 | 32,041 |
| 72,128 | 100 | 21,941 | 5,933 | 3,717 | 31,691 |
| 72,129 | 98  | 21,706 | 5,911 | 3,692 | 31,407 |
| 72,130 | 99  | 22,239 | 6,058 | 3,783 | 32,179 |
| 72,131 | 101 | 22,344 | 6,087 | 3,794 | 32,326 |
| 72,132 | 104 | 22,313 | 6,076 | 3,798 | 32,291 |
| 72,133 | 107 | 22,097 | 6,042 | 3,763 | 32,009 |
| 72,134 | 104 | 22,292 | 6,109 | 3,794 | 32,299 |
| 72,135 | 104 | 22,022 | 6,035 | 3,750 | 31,911 |
| 72,136 | 102 | 22,091 | 6,012 | 3,733 | 31,938 |
| 72,137 | 101 | 21,779 | 5,959 | 3,697 | 31,536 |
| 72,138 | 101 | 21,704 | 5,928 | 3,654 | 31,387 |
| 72,139 | 102 | 22,418 | 6,059 | 3,729 | 32,308 |
| 72,140 | 102 | 22,364 | 6,035 | 3,719 | 32,220 |
| 72,141 | 103 | 22,501 | 6,079 | 3,734 | 32,417 |
| 72,142 | 110 | 22,946 | 6,184 | 3,800 | 33,040 |
| 72,143 | 109 | 23,076 | 6,223 | 3,817 | 33,225 |
| 72,144 | 107 | 22,317 | 5,995 | 3,718 | 32,137 |
| 72,145 | 108 | 22,476 | 6,036 | 3,735 | 32,355 |
| 72,146 | 109 | 22,654 | 6,084 | 3,763 | 32,610 |
| 72,147 | 99  | 22,836 | 6,085 | 3,769 | 32,789 |
| 72,148 | 103 | 22,602 | 5,984 | 3,714 | 32,403 |
| 72,149 | 103 | 22,724 | 6,062 | 3,734 | 32,623 |
| 72,150 | 100 | 22,938 | 6,113 | 3,771 | 32,922 |
| 72,151 | 98  | 22,905 | 6,132 | 3,748 | 32,883 |

|        |     |        |       |       |        |
|--------|-----|--------|-------|-------|--------|
| 72,152 | 98  | 22,900 | 6,144 | 3,779 | 32,921 |
| 72,153 | 100 | 22,932 | 6,158 | 3,756 | 32,946 |
| 72,154 | 102 | 22,716 | 6,090 | 3,722 | 32,630 |
| 72,155 | 103 | 22,890 | 6,142 | 3,739 | 32,874 |
| 72,156 | 101 | 22,760 | 6,103 | 3,729 | 32,693 |
| 72,157 | 99  | 22,649 | 6,085 | 3,707 | 32,540 |
| 72,158 | 99  | 22,438 | 6,018 | 3,690 | 32,245 |
| 72,159 | 99  | 22,246 | 5,938 | 3,638 | 31,921 |
| 72,160 | 109 | 22,287 | 5,980 | 3,647 | 32,023 |
| 72,161 | 108 | 22,230 | 5,965 | 3,641 | 31,944 |
| 72,162 | 112 | 22,349 | 5,983 | 3,688 | 32,132 |
| 72,163 | 113 | 22,214 | 5,933 | 3,673 | 31,933 |
| 72,164 | 120 | 21,925 | 5,886 | 3,653 | 31,584 |
| 72,165 | 118 | 21,829 | 5,865 | 3,639 | 31,451 |
| 72,166 | 118 | 22,075 | 5,921 | 3,676 | 31,790 |
| 72,167 | 124 | 21,785 | 5,870 | 3,637 | 31,416 |
| 72,168 | 124 | 21,578 | 5,816 | 3,584 | 31,102 |
| 72,169 | 123 | 21,640 | 5,886 | 3,613 | 31,262 |
| 72,170 | 121 | 21,322 | 5,903 | 3,621 | 30,967 |
| 72,171 | 123 | 21,281 | 5,926 | 3,639 | 30,969 |
| 72,172 | 121 | 21,127 | 5,858 | 3,614 | 30,720 |
| 72,173 | 126 | 21,081 | 5,877 | 3,631 | 30,715 |
| 72,174 | 132 | 20,942 | 5,834 | 3,599 | 30,507 |
| 72,175 | 134 | 20,712 | 5,806 | 3,579 | 30,231 |
| 72,176 | 139 | 20,661 | 5,783 | 3,554 | 30,137 |
| 72,177 | 140 | 20,714 | 5,799 | 3,553 | 30,206 |
| 72,178 | 139 | 20,736 | 5,797 | 3,556 | 30,228 |
| 72,179 | 141 | 20,811 | 5,777 | 3,570 | 30,299 |
| 72,180 | 143 | 20,783 | 5,759 | 3,532 | 30,217 |
| 72,181 | 143 | 20,745 | 5,774 | 3,529 | 30,191 |
| 72,182 | 143 | 20,632 | 5,759 | 3,485 | 30,019 |
| 72,183 | 137 | 20,674 | 5,749 | 3,473 | 30,033 |



|        |     |        |       |       |        |
|--------|-----|--------|-------|-------|--------|
| 72,184 | 136 | 20,721 | 5,768 | 3,470 | 30,095 |
| 72,185 | 136 | 20,726 | 5,759 | 3,466 | 30,087 |
| 72,186 | 133 | 20,747 | 5,797 | 3,489 | 30,166 |
| 72,187 | 133 | 20,707 | 5,865 | 3,524 | 30,229 |
| 72,188 | 130 | 20,538 | 5,891 | 3,519 | 30,078 |
| 72,189 | 130 | 20,334 | 5,845 | 3,508 | 29,817 |
| 72,190 | 130 | 20,431 | 5,876 | 3,522 | 29,959 |
| 72,191 | 128 | 20,620 | 5,948 | 3,553 | 30,249 |
| 72,192 | 127 | 20,437 | 5,939 | 3,554 | 30,057 |
| 72,193 | 123 | 20,269 | 5,915 | 3,537 | 29,844 |
| 72,194 | 121 | 20,187 | 5,911 | 3,546 | 29,765 |
| 72,195 | 123 | 19,706 | 5,837 | 3,499 | 29,165 |
| 72,196 | 124 | 19,911 | 5,884 | 3,533 | 29,452 |
| 72,197 | 119 | 20,174 | 5,944 | 3,556 | 29,793 |
| 72,198 | 118 | 20,071 | 5,956 | 3,545 | 29,690 |
| 72,199 | 119 | 19,898 | 5,908 | 3,508 | 29,433 |
| 72,200 | 122 | 20,166 | 5,946 | 3,541 | 29,775 |
| 72,201 | 125 | 19,717 | 5,823 | 3,462 | 29,127 |
| 72,202 | 125 | 19,740 | 5,820 | 3,469 | 29,154 |
| 72,203 | 125 | 19,561 | 5,768 | 3,426 | 28,880 |
| 72,204 | 122 | 19,363 | 5,698 | 3,412 | 28,595 |
| 72,205 | 134 | 20,218 | 5,917 | 3,543 | 29,812 |
| 72,206 | 139 | 20,348 | 5,941 | 3,552 | 29,980 |
| 72,207 | 143 | 20,514 | 5,992 | 3,558 | 30,207 |
| 72,208 | 143 | 20,464 | 5,981 | 3,561 | 30,149 |
| 72,209 | 148 | 20,761 | 6,088 | 3,626 | 30,623 |
| 72,210 | 144 | 20,810 | 6,098 | 3,645 | 30,697 |
| 72,211 | 138 | 20,716 | 6,053 | 3,620 | 30,527 |
| 72,212 | 143 | 20,939 | 6,127 | 3,652 | 30,861 |
| 72,213 | 138 | 20,801 | 6,093 | 3,642 | 30,674 |
| 72,214 | 136 | 20,641 | 6,089 | 3,645 | 30,511 |
| 72,215 | 128 | 20,807 | 6,102 | 3,676 | 30,713 |

|        |     |        |       |       |        |
|--------|-----|--------|-------|-------|--------|
| 72,216 | 129 | 20,731 | 6,070 | 3,682 | 30,612 |
| 72,217 | 123 | 20,518 | 6,010 | 3,631 | 30,282 |
| 72,218 | 124 | 20,702 | 6,050 | 3,650 | 30,526 |
| 72,219 | 128 | 20,598 | 6,057 | 3,660 | 30,443 |
| 72,220 | 128 | 20,584 | 6,025 | 3,646 | 30,383 |
| 72,221 | 128 | 20,751 | 6,019 | 3,650 | 30,548 |
| 72,222 | 126 | 20,812 | 6,046 | 3,648 | 30,632 |
| 72,223 | 133 | 20,943 | 6,068 | 3,656 | 30,800 |
| 72,224 | 129 | 21,056 | 6,090 | 3,656 | 30,931 |
| 72,225 | 127 | 21,082 | 6,102 | 3,682 | 30,993 |
| 72,226 | 126 | 21,171 | 6,098 | 3,720 | 31,115 |
| 72,227 | 122 | 20,927 | 6,059 | 3,690 | 30,798 |
| 72,228 | 121 | 20,670 | 5,994 | 3,657 | 30,442 |
| 72,229 | 116 | 21,087 | 6,116 | 3,700 | 31,019 |
| 72,230 | 120 | 21,021 | 6,110 | 3,701 | 30,952 |
| 72,231 | 118 | 20,735 | 6,053 | 3,672 | 30,578 |
| 72,232 | 116 | 20,850 | 6,081 | 3,720 | 30,767 |
| 72,233 | 112 | 20,826 | 6,073 | 3,752 | 30,763 |
| 72,234 | 113 | 21,081 | 6,135 | 3,820 | 31,149 |
| 72,235 | 113 | 20,970 | 6,115 | 3,800 | 30,998 |
| 72,236 | 112 | 20,961 | 6,100 | 3,792 | 30,965 |
| 72,237 | 116 | 20,738 | 5,973 | 3,723 | 30,550 |
| 72,238 | 121 | 20,956 | 6,021 | 3,752 | 30,850 |
| 72,239 | 125 | 20,816 | 5,922 | 3,691 | 30,554 |
| 72,240 | 124 | 20,434 | 5,848 | 3,635 | 30,041 |
| 72,241 | 128 | 20,575 | 5,941 | 3,668 | 30,312 |
| 72,242 | 128 | 20,164 | 5,809 | 3,596 | 29,697 |
| 72,243 | 127 | 20,191 | 5,771 | 3,564 | 29,653 |
| 72,244 | 128 | 19,987 | 5,735 | 3,521 | 29,371 |
| 72,245 | 132 | 20,193 | 5,782 | 3,529 | 29,636 |
| 72,246 | 129 | 20,242 | 5,782 | 3,529 | 29,682 |
| 72,247 | 128 | 20,158 | 5,748 | 3,511 | 29,545 |

|        |     |        |       |       |        |
|--------|-----|--------|-------|-------|--------|
| 72,248 | 136 | 19,944 | 5,662 | 3,522 | 29,264 |
| 72,249 | 136 | 20,129 | 5,691 | 3,550 | 29,506 |
| 72,250 | 127 | 20,276 | 5,702 | 3,560 | 29,665 |
| 72,251 | 127 | 20,306 | 5,735 | 3,571 | 29,739 |
| 72,252 | 120 | 20,254 | 5,730 | 3,559 | 29,663 |
| 72,253 | 122 | 20,059 | 5,714 | 3,538 | 29,433 |
| 72,254 | 119 | 19,876 | 5,670 | 3,515 | 29,180 |
| 72,255 | 120 | 20,284 | 5,766 | 3,576 | 29,746 |
| 72,256 | 119 | 19,996 | 5,697 | 3,527 | 29,339 |
| 72,257 | 114 | 20,253 | 5,769 | 3,575 | 29,711 |
| 72,258 | 117 | 20,334 | 5,764 | 3,604 | 29,819 |
| 72,259 | 119 | 20,466 | 5,788 | 3,613 | 29,986 |
| 72,260 | 121 | 20,490 | 5,792 | 3,636 | 30,039 |
| 72,261 | 130 | 20,120 | 5,693 | 3,583 | 29,526 |
| 72,262 | 130 | 20,231 | 5,701 | 3,575 | 29,637 |
| 72,263 | 130 | 20,133 | 5,691 | 3,562 | 29,516 |
| 72,264 | 130 | 20,035 | 5,710 | 3,543 | 29,418 |
| 72,265 | 135 | 20,277 | 5,761 | 3,561 | 29,734 |
| 72,266 | 135 | 19,925 | 5,712 | 3,524 | 29,296 |
| 72,267 | 132 | 19,979 | 5,703 | 3,493 | 29,307 |
| 72,268 | 131 | 19,933 | 5,703 | 3,479 | 29,246 |
| 72,269 | 134 | 20,080 | 5,729 | 3,522 | 29,465 |
| 72,270 | 132 | 20,101 | 5,720 | 3,502 | 29,455 |
| 72,271 | 132 | 20,136 | 5,745 | 3,525 | 29,538 |
| 72,272 | 132 | 20,121 | 5,738 | 3,527 | 29,518 |
| 72,273 | 130 | 20,090 | 5,757 | 3,535 | 29,512 |
| 72,274 | 124 | 20,242 | 5,861 | 3,569 | 29,796 |
| 72,275 | 119 | 20,172 | 5,816 | 3,556 | 29,663 |
| 72,276 | 131 | 20,338 | 5,876 | 3,606 | 29,951 |
| 72,277 | 127 | 20,369 | 5,910 | 3,608 | 30,014 |
| 72,278 | 127 | 20,461 | 5,914 | 3,621 | 30,123 |
| 72,279 | 129 | 20,619 | 5,935 | 3,618 | 30,301 |

|        |     |        |       |       |        |
|--------|-----|--------|-------|-------|--------|
| 72,280 | 125 | 20,581 | 5,889 | 3,617 | 30,212 |
| 72,281 | 132 | 20,834 | 5,933 | 3,648 | 30,547 |
| 72,282 | 132 | 20,937 | 5,953 | 3,656 | 30,678 |
| 72,283 | 137 | 21,080 | 6,019 | 3,698 | 30,934 |
| 72,284 | 137 | 21,211 | 6,064 | 3,724 | 31,136 |
| 72,285 | 135 | 21,150 | 6,056 | 3,728 | 31,069 |
| 72,286 | 136 | 21,305 | 6,086 | 3,755 | 31,282 |
| 72,287 | 132 | 21,003 | 6,010 | 3,686 | 30,831 |
| 72,288 | 130 | 21,193 | 6,077 | 3,721 | 31,121 |
| 72,289 | 127 | 21,453 | 6,137 | 3,761 | 31,478 |
| 72,290 | 119 | 21,335 | 6,092 | 3,773 | 31,319 |
| 72,291 | 118 | 21,252 | 6,035 | 3,717 | 31,122 |
| 72,292 | 119 | 21,263 | 6,011 | 3,745 | 31,138 |
| 72,293 | 118 | 21,535 | 6,052 | 3,775 | 31,480 |
| 72,294 | 120 | 21,364 | 6,005 | 3,755 | 31,244 |
| 72,295 | 119 | 21,267 | 5,957 | 3,732 | 31,075 |
| 72,296 | 122 | 21,355 | 5,959 | 3,746 | 31,182 |
| 72,297 | 125 | 21,414 | 5,992 | 3,761 | 31,292 |
| 72,298 | 125 | 21,634 | 6,024 | 3,806 | 31,589 |
| 72,299 | 123 | 21,351 | 5,977 | 3,757 | 31,208 |
| 72,300 | 125 | 21,280 | 5,937 | 3,736 | 31,078 |
| 72,301 | 134 | 21,206 | 5,980 | 3,768 | 31,088 |
| 72,302 | 135 | 20,954 | 5,884 | 3,714 | 30,687 |
| 72,303 | 135 | 21,014 | 5,876 | 3,720 | 30,745 |
| 72,304 | 135 | 20,861 | 5,820 | 3,685 | 30,501 |
| 72,305 | 133 | 20,659 | 5,765 | 3,662 | 30,219 |
| 72,306 | 137 | 21,177 | 5,976 | 3,742 | 31,032 |
| 72,307 | 135 | 20,962 | 5,904 | 3,720 | 30,721 |
| 72,308 | 138 | 21,468 | 6,081 | 3,805 | 31,492 |
| 72,309 | 132 | 21,365 | 6,070 | 3,786 | 31,353 |
| 72,310 | 132 | 21,303 | 6,054 | 3,787 | 31,276 |
| 72,311 | 124 | 21,132 | 5,985 | 3,725 | 30,966 |

|        |     |        |       |       |        |
|--------|-----|--------|-------|-------|--------|
| 72,312 | 118 | 20,863 | 5,914 | 3,677 | 30,572 |
| 72,313 | 118 | 20,874 | 5,928 | 3,666 | 30,586 |
| 72,314 | 116 | 20,614 | 5,888 | 3,624 | 30,242 |
| 72,315 | 116 | 20,559 | 5,831 | 3,601 | 30,107 |
| 72,316 | 116 | 21,076 | 5,986 | 3,719 | 30,897 |
| 72,317 | 116 | 20,826 | 5,933 | 3,698 | 30,573 |
| 72,318 | 122 | 21,068 | 5,963 | 3,729 | 30,882 |
| 72,319 | 124 | 20,982 | 5,929 | 3,714 | 30,749 |
| 72,320 | 121 | 21,004 | 5,882 | 3,699 | 30,706 |
| 72,321 | 127 | 20,680 | 5,773 | 3,619 | 30,199 |
| 72,322 | 129 | 20,778 | 5,771 | 3,620 | 30,298 |
| 72,323 | 136 | 20,590 | 5,694 | 3,554 | 29,974 |
| 72,324 | 136 | 20,558 | 5,673 | 3,561 | 29,928 |
| 72,325 | 138 | 20,599 | 5,672 | 3,558 | 29,967 |
| 72,326 | 142 | 20,465 | 5,620 | 3,544 | 29,771 |
| 72,327 | 130 | 20,083 | 5,533 | 3,462 | 29,208 |
| 72,328 | 131 | 19,857 | 5,472 | 3,432 | 28,892 |
| 72,329 | 135 | 19,617 | 5,419 | 3,416 | 28,587 |
| 72,330 | 135 | 19,739 | 5,479 | 3,457 | 28,810 |
| 72,331 | 137 | 19,808 | 5,472 | 3,455 | 28,872 |
| 72,332 | 131 | 19,600 | 5,434 | 3,427 | 28,592 |
| 72,333 | 132 | 19,588 | 5,456 | 3,458 | 28,634 |
| 72,334 | 129 | 19,552 | 5,456 | 3,424 | 28,561 |
| 72,335 | 130 | 19,209 | 5,371 | 3,366 | 28,076 |
| 72,336 | 133 | 19,465 | 5,416 | 3,377 | 28,391 |
| 72,337 | 137 | 19,287 | 5,391 | 3,355 | 28,170 |
| 72,338 | 135 | 19,226 | 5,409 | 3,372 | 28,142 |
| 72,339 | 135 | 19,046 | 5,352 | 3,335 | 27,868 |
| 72,340 | 136 | 18,938 | 5,337 | 3,320 | 27,731 |
| 72,341 | 139 | 19,154 | 5,410 | 3,358 | 28,061 |
| 72,342 | 140 | 19,091 | 5,423 | 3,362 | 28,016 |
| 72,343 | 140 | 18,880 | 5,378 | 3,308 | 27,706 |

|        |     |        |       |       |        |
|--------|-----|--------|-------|-------|--------|
| 72,344 | 140 | 18,811 | 5,360 | 3,294 | 27,605 |
| 72,345 | 139 | 18,916 | 5,444 | 3,335 | 27,834 |
| 72,346 | 139 | 18,774 | 5,424 | 3,316 | 27,653 |
| 72,347 | 134 | 18,783 | 5,385 | 3,303 | 27,605 |
| 72,348 | 133 | 18,684 | 5,361 | 3,283 | 27,461 |
| 72,349 | 132 | 18,815 | 5,393 | 3,285 | 27,625 |
| 72,350 | 119 | 18,565 | 5,307 | 3,230 | 27,221 |
| 72,351 | 117 | 18,682 | 5,287 | 3,232 | 27,318 |
| 72,352 | 116 | 18,830 | 5,306 | 3,250 | 27,502 |
| 72,353 | 113 | 18,810 | 5,293 | 3,243 | 27,459 |
| 72,354 | 111 | 18,696 | 5,264 | 3,229 | 27,300 |
| 72,355 | 111 | 18,812 | 5,268 | 3,222 | 27,413 |
| 72,356 | 111 | 18,709 | 5,257 | 3,215 | 27,292 |
| 72,357 | 112 | 19,135 | 5,335 | 3,256 | 27,838 |
| 72,358 | 113 | 18,997 | 5,267 | 3,220 | 27,597 |
| 72,359 | 118 | 19,215 | 5,328 | 3,241 | 27,902 |
| 72,360 | 117 | 19,151 | 5,301 | 3,251 | 27,820 |
| 72,361 | 115 | 18,887 | 5,198 | 3,181 | 27,381 |
| 72,362 | 111 | 19,025 | 5,235 | 3,207 | 27,578 |
| 72,363 | 111 | 19,100 | 5,241 | 3,204 | 27,656 |
| 72,364 | 109 | 19,331 | 5,223 | 3,259 | 27,922 |
| 72,365 | 108 | 19,413 | 5,213 | 3,276 | 28,010 |
| 72,366 | 108 | 19,415 | 5,226 | 3,273 | 28,022 |
| 72,367 | 109 | 19,302 | 5,205 | 3,271 | 27,887 |
| 72,368 | 121 | 19,883 | 5,360 | 3,379 | 28,743 |
| 72,369 | 118 | 19,633 | 5,323 | 3,340 | 28,414 |
| 72,370 | 118 | 19,655 | 5,322 | 3,337 | 28,432 |
| 72,371 | 112 | 19,901 | 5,377 | 3,384 | 28,774 |
| 72,372 | 115 | 20,180 | 5,452 | 3,424 | 29,171 |
| 72,373 | 107 | 20,121 | 5,413 | 3,425 | 29,066 |
| 72,374 | 108 | 20,178 | 5,437 | 3,439 | 29,162 |
| 72,375 | 104 | 20,286 | 5,429 | 3,444 | 29,263 |

|        |     |        |       |       |        |
|--------|-----|--------|-------|-------|--------|
| 72,376 | 108 | 20,483 | 5,515 | 3,520 | 29,626 |
| 72,377 | 103 | 20,453 | 5,509 | 3,506 | 29,571 |
| 72,378 | 102 | 20,382 | 5,506 | 3,503 | 29,493 |
| 72,379 | 96  | 20,148 | 5,479 | 3,486 | 29,209 |
| 72,380 | 101 | 20,690 | 5,652 | 3,589 | 30,032 |
| 72,381 | 102 | 20,693 | 5,666 | 3,595 | 30,056 |
| 72,382 | 100 | 20,459 | 5,670 | 3,603 | 29,832 |
| 72,383 | 99  | 20,586 | 5,704 | 3,622 | 30,011 |
| 72,384 | 100 | 20,694 | 5,690 | 3,609 | 30,093 |
| 72,385 | 97  | 20,495 | 5,601 | 3,548 | 29,741 |
| 72,386 | 97  | 20,815 | 5,650 | 3,583 | 30,145 |
| 72,387 | 95  | 20,916 | 5,662 | 3,604 | 30,277 |
| 72,388 | 91  | 20,974 | 5,645 | 3,603 | 30,313 |
| 72,389 | 93  | 21,147 | 5,653 | 3,614 | 30,507 |
| 72,390 | 97  | 20,921 | 5,599 | 3,592 | 30,209 |
| 72,391 | 96  | 21,216 | 5,655 | 3,635 | 30,602 |
| 72,392 | 102 | 21,559 | 5,703 | 3,659 | 31,023 |
| 72,393 | 101 | 21,323 | 5,614 | 3,633 | 30,671 |
| 72,394 | 107 | 21,383 | 5,669 | 3,668 | 30,827 |
| 72,395 | 109 | 21,684 | 5,750 | 3,726 | 31,269 |
| 72,396 | 105 | 21,417 | 5,673 | 3,704 | 30,899 |
| 72,397 | 107 | 21,703 | 5,730 | 3,721 | 31,261 |
| 72,398 | 107 | 21,715 | 5,736 | 3,703 | 31,261 |
| 72,399 | 108 | 21,693 | 5,724 | 3,712 | 31,237 |
| 72,400 | 108 | 21,513 | 5,707 | 3,673 | 31,001 |
| 72,401 | 108 | 21,810 | 5,834 | 3,723 | 31,475 |
| 72,402 | 106 | 21,697 | 5,800 | 3,715 | 31,318 |
| 72,403 | 106 | 21,846 | 5,869 | 3,744 | 31,565 |
| 72,404 | 106 | 21,572 | 5,806 | 3,720 | 31,204 |
| 72,405 | 106 | 21,605 | 5,840 | 3,746 | 31,297 |
| 72,406 | 106 | 21,922 | 5,907 | 3,807 | 31,742 |
| 72,407 | 103 | 22,149 | 5,876 | 3,810 | 31,938 |

|        |     |        |       |       |        |
|--------|-----|--------|-------|-------|--------|
| 72,408 | 102 | 21,944 | 5,819 | 3,784 | 31,649 |
| 72,409 | 100 | 21,970 | 5,864 | 3,826 | 31,760 |
| 72,410 | 106 | 21,961 | 5,848 | 3,803 | 31,718 |
| 72,411 | 113 | 22,266 | 5,922 | 3,835 | 32,136 |
| 72,412 | 111 | 22,060 | 5,913 | 3,823 | 31,907 |
| 72,413 | 115 | 22,127 | 5,895 | 3,810 | 31,947 |
| 72,414 | 116 | 22,356 | 5,960 | 3,843 | 32,275 |
| 72,415 | 111 | 22,002 | 5,890 | 3,743 | 31,746 |
| 72,416 | 111 | 22,191 | 5,930 | 3,783 | 32,015 |
| 72,417 | 107 | 22,216 | 5,978 | 3,786 | 32,087 |
| 72,418 | 101 | 22,050 | 5,938 | 3,740 | 31,829 |
| 72,419 | 97  | 22,218 | 5,950 | 3,731 | 31,996 |
| 72,420 | 99  | 22,431 | 5,998 | 3,755 | 32,283 |
| 72,421 | 105 | 22,230 | 5,928 | 3,734 | 31,997 |
| 72,422 | 103 | 21,964 | 5,881 | 3,700 | 31,648 |
| 72,423 | 100 | 22,140 | 5,942 | 3,724 | 31,906 |
| 72,424 | 97  | 21,891 | 5,963 | 3,706 | 31,657 |
| 72,425 | 98  | 22,029 | 5,979 | 3,713 | 31,819 |
| 72,426 | 96  | 22,110 | 5,994 | 3,695 | 31,895 |
| 72,427 | 95  | 21,982 | 5,940 | 3,675 | 31,692 |
| 72,428 | 96  | 22,233 | 5,988 | 3,698 | 32,015 |
| 72,429 | 98  | 22,433 | 6,012 | 3,705 | 32,248 |
| 72,430 | 96  | 22,676 | 5,998 | 3,698 | 32,468 |
| 72,431 | 99  | 22,942 | 6,013 | 3,702 | 32,756 |
| 72,432 | 99  | 22,806 | 5,919 | 3,642 | 32,466 |
| 72,433 | 100 | 22,773 | 5,860 | 3,643 | 32,376 |
| 72,434 | 102 | 22,911 | 5,888 | 3,635 | 32,536 |
| 72,435 | 101 | 22,738 | 5,865 | 3,617 | 32,321 |
| 72,436 | 105 | 22,913 | 5,909 | 3,677 | 32,604 |
| 72,437 | 105 | 22,886 | 5,910 | 3,671 | 32,572 |
| 72,438 | 108 | 22,837 | 5,901 | 3,658 | 32,504 |
| 72,439 | 108 | 22,911 | 5,890 | 3,671 | 32,580 |



|        |     |        |       |       |        |
|--------|-----|--------|-------|-------|--------|
| 72,440 | 114 | 23,095 | 5,941 | 3,693 | 32,843 |
| 72,441 | 111 | 22,878 | 5,881 | 3,657 | 32,527 |
| 72,442 | 116 | 23,213 | 5,984 | 3,676 | 32,989 |
| 72,443 | 109 | 23,470 | 6,063 | 3,733 | 33,375 |
| 72,444 | 103 | 23,509 | 6,070 | 3,736 | 33,418 |
| 72,445 | 101 | 23,264 | 5,973 | 3,693 | 33,031 |
| 72,446 | 103 | 23,198 | 5,984 | 3,697 | 32,982 |
| 72,447 | 103 | 23,284 | 5,991 | 3,707 | 33,085 |
| 72,448 | 102 | 23,196 | 5,994 | 3,730 | 33,022 |
| 72,449 | 103 | 23,133 | 5,996 | 3,753 | 32,985 |
| 72,450 | 100 | 23,124 | 5,966 | 3,738 | 32,928 |
| 72,451 | 100 | 23,078 | 5,927 | 3,738 | 32,843 |
| 72,452 | 105 | 23,317 | 5,969 | 3,769 | 33,160 |
| 72,453 | 105 | 23,242 | 5,938 | 3,728 | 33,013 |
| 72,454 | 110 | 23,499 | 5,952 | 3,719 | 33,280 |
| 72,455 | 114 | 23,590 | 5,913 | 3,720 | 33,337 |
| 72,456 | 114 | 23,498 | 5,915 | 3,715 | 33,242 |
| 72,457 | 112 | 23,401 | 5,910 | 3,734 | 33,157 |
| 72,458 | 115 | 23,683 | 6,004 | 3,803 | 33,605 |
| 72,459 | 110 | 23,491 | 5,944 | 3,762 | 33,307 |
| 72,460 | 117 | 23,799 | 6,000 | 3,798 | 33,714 |
| 72,461 | 113 | 23,971 | 6,046 | 3,850 | 33,980 |
| 72,462 | 106 | 23,561 | 5,976 | 3,821 | 33,464 |
| 72,463 | 107 | 23,871 | 6,005 | 3,848 | 33,831 |
| 72,464 | 103 | 23,576 | 5,980 | 3,819 | 33,478 |
| 72,465 | 103 | 23,645 | 6,000 | 3,844 | 33,592 |
| 72,466 | 103 | 23,501 | 6,028 | 3,859 | 33,491 |
| 72,467 | 102 | 23,465 | 6,006 | 3,855 | 33,428 |
| 72,468 | 100 | 23,506 | 5,980 | 3,855 | 33,441 |
| 72,469 | 101 | 23,462 | 5,967 | 3,852 | 33,382 |
| 72,470 | 102 | 23,322 | 5,969 | 3,865 | 33,258 |
| 72,471 | 100 | 23,106 | 5,900 | 3,828 | 32,934 |

|        |     |        |       |       |        |
|--------|-----|--------|-------|-------|--------|
| 72,472 | 94  | 22,837 | 5,876 | 3,794 | 32,601 |
| 72,473 | 100 | 23,071 | 5,956 | 3,820 | 32,947 |
| 72,474 | 100 | 22,641 | 5,808 | 3,790 | 32,339 |
| 72,475 | 103 | 23,011 | 5,840 | 3,837 | 32,791 |
| 72,476 | 103 | 23,012 | 5,877 | 3,827 | 32,819 |
| 72,477 | 102 | 22,767 | 5,799 | 3,794 | 32,462 |
| 72,478 | 106 | 22,755 | 5,787 | 3,794 | 32,442 |
| 72,479 | 106 | 22,967 | 5,821 | 3,827 | 32,721 |
| 72,480 | 105 | 22,828 | 5,778 | 3,805 | 32,516 |
| 72,481 | 102 | 22,111 | 5,618 | 3,694 | 31,525 |
| 72,482 | 102 | 22,273 | 5,668 | 3,737 | 31,780 |
| 72,483 | 101 | 22,269 | 5,695 | 3,748 | 31,813 |
| 72,484 | 101 | 22,186 | 5,694 | 3,738 | 31,719 |
| 72,485 | 102 | 22,134 | 5,662 | 3,717 | 31,615 |
| 72,486 | 106 | 22,338 | 5,710 | 3,748 | 31,902 |
| 72,487 | 105 | 22,183 | 5,672 | 3,716 | 31,676 |
| 72,488 | 102 | 22,140 | 5,673 | 3,725 | 31,640 |
| 72,489 | 106 | 22,158 | 5,677 | 3,740 | 31,681 |
| 72,490 | 105 | 22,103 | 5,681 | 3,736 | 31,625 |
| 72,491 | 101 | 22,206 | 5,711 | 3,765 | 31,783 |
| 72,492 | 100 | 21,952 | 5,686 | 3,752 | 31,490 |
| 72,493 | 108 | 21,741 | 5,639 | 3,759 | 31,247 |
| 72,494 | 111 | 21,663 | 5,655 | 3,743 | 31,172 |
| 72,495 | 116 | 21,464 | 5,583 | 3,688 | 30,851 |
| 72,496 | 116 | 21,591 | 5,589 | 3,691 | 30,987 |
| 72,497 | 118 | 21,771 | 5,577 | 3,677 | 31,143 |
| 72,498 | 117 | 21,791 | 5,595 | 3,665 | 31,168 |
| 72,499 | 120 | 21,854 | 5,610 | 3,680 | 31,264 |
| 72,500 | 120 | 21,887 | 5,616 | 3,683 | 31,306 |
| 72,501 | 119 | 21,726 | 5,615 | 3,659 | 31,119 |
| 72,502 | 119 | 21,889 | 5,627 | 3,695 | 31,330 |
| 72,503 | 123 | 21,641 | 5,552 | 3,650 | 30,966 |

|        |     |        |       |       |        |
|--------|-----|--------|-------|-------|--------|
| 72,504 | 124 | 21,310 | 5,491 | 3,652 | 30,577 |
| 72,505 | 114 | 21,390 | 5,616 | 3,768 | 30,888 |
| 72,506 | 114 | 21,472 | 5,684 | 3,785 | 31,055 |
| 72,507 | 112 | 20,978 | 5,579 | 3,688 | 30,357 |
| 72,508 | 111 | 21,182 | 5,599 | 3,715 | 30,607 |
| 72,509 | 115 | 21,341 | 5,641 | 3,746 | 30,843 |
| 72,510 | 118 | 21,219 | 5,620 | 3,721 | 30,678 |
| 72,511 | 111 | 21,095 | 5,576 | 3,700 | 30,482 |
| 72,512 | 114 | 20,542 | 5,476 | 3,593 | 29,725 |
| 72,513 | 122 | 20,779 | 5,520 | 3,593 | 30,014 |
| 72,514 | 122 | 20,410 | 5,471 | 3,545 | 29,548 |
| 72,515 | 124 | 20,569 | 5,451 | 3,546 | 29,690 |
| 72,516 | 124 | 20,652 | 5,427 | 3,514 | 29,717 |
| 72,517 | 129 | 20,662 | 5,432 | 3,514 | 29,737 |
| 72,518 | 129 | 20,409 | 5,406 | 3,463 | 29,407 |
| 72,519 | 129 | 20,785 | 5,494 | 3,503 | 29,911 |
| 72,520 | 130 | 21,031 | 5,531 | 3,511 | 30,203 |
| 72,521 | 130 | 21,134 | 5,522 | 3,494 | 30,280 |
| 72,522 | 127 | 21,011 | 5,491 | 3,460 | 30,089 |
| 72,523 | 128 | 21,248 | 5,517 | 3,488 | 30,381 |
| 72,524 | 126 | 21,216 | 5,520 | 3,487 | 30,349 |
| 72,525 | 127 | 21,437 | 5,588 | 3,514 | 30,666 |
| 72,526 | 126 | 21,237 | 5,601 | 3,527 | 30,491 |
| 72,527 | 126 | 21,206 | 5,573 | 3,525 | 30,430 |
| 72,528 | 128 | 21,126 | 5,594 | 3,543 | 30,391 |
| 72,529 | 130 | 21,240 | 5,669 | 3,571 | 30,610 |
| 72,530 | 135 | 21,055 | 5,648 | 3,537 | 30,375 |
| 72,531 | 134 | 20,706 | 5,600 | 3,503 | 29,943 |
| 72,532 | 129 | 21,071 | 5,667 | 3,571 | 30,438 |
| 72,533 | 132 | 21,390 | 5,740 | 3,609 | 30,871 |
| 72,534 | 132 | 21,239 | 5,653 | 3,539 | 30,563 |
| 72,535 | 132 | 21,334 | 5,716 | 3,573 | 30,755 |

|        |     |        |       |       |        |
|--------|-----|--------|-------|-------|--------|
| 72,536 | 127 | 21,175 | 5,664 | 3,545 | 30,511 |
| 72,537 | 127 | 21,240 | 5,661 | 3,541 | 30,569 |
| 72,538 | 129 | 21,424 | 5,735 | 3,576 | 30,864 |
| 72,539 | 130 | 21,549 | 5,789 | 3,583 | 31,051 |
| 72,540 | 131 | 21,608 | 5,809 | 3,583 | 31,131 |
| 72,541 | 129 | 21,390 | 5,742 | 3,553 | 30,814 |
| 72,542 | 131 | 21,585 | 5,753 | 3,563 | 31,032 |
| 72,543 | 121 | 21,410 | 5,649 | 3,518 | 30,698 |
| 72,544 | 123 | 21,540 | 5,705 | 3,557 | 30,925 |
| 72,545 | 124 | 21,769 | 5,774 | 3,600 | 31,267 |
| 72,546 | 118 | 21,768 | 5,821 | 3,580 | 31,287 |
| 72,547 | 115 | 21,717 | 5,840 | 3,593 | 31,265 |
| 72,548 | 115 | 21,766 | 5,894 | 3,610 | 31,385 |
| 72,549 | 113 | 21,550 | 5,853 | 3,582 | 31,098 |
| 72,550 | 112 | 21,717 | 5,919 | 3,625 | 31,373 |
| 72,551 | 111 | 21,597 | 5,927 | 3,618 | 31,253 |
| 72,552 | 111 | 21,405 | 5,902 | 3,588 | 31,006 |
| 72,553 | 114 | 21,482 | 5,913 | 3,614 | 31,123 |
| 72,554 | 110 | 21,562 | 5,900 | 3,586 | 31,158 |
| 72,555 | 111 | 21,666 | 5,894 | 3,559 | 31,230 |
| 72,556 | 111 | 21,489 | 5,824 | 3,513 | 30,937 |
| 72,557 | 117 | 21,441 | 5,819 | 3,502 | 30,879 |
| 72,558 | 120 | 21,510 | 5,806 | 3,489 | 30,925 |
| 72,559 | 121 | 21,623 | 5,844 | 3,515 | 31,103 |
| 72,560 | 122 | 21,614 | 5,825 | 3,496 | 31,057 |
| 72,561 | 121 | 21,291 | 5,777 | 3,452 | 30,641 |
| 72,562 | 122 | 21,305 | 5,796 | 3,462 | 30,685 |
| 72,563 | 122 | 21,501 | 5,819 | 3,497 | 30,939 |
| 72,564 | 114 | 21,278 | 5,774 | 3,473 | 30,639 |
| 72,565 | 114 | 21,302 | 5,758 | 3,470 | 30,644 |
| 72,566 | 112 | 21,684 | 5,859 | 3,495 | 31,150 |
| 72,567 | 111 | 21,547 | 5,842 | 3,471 | 30,971 |

|        |     |        |       |       |        |
|--------|-----|--------|-------|-------|--------|
| 72,568 | 109 | 21,347 | 5,766 | 3,456 | 30,678 |
| 72,569 | 108 | 21,441 | 5,808 | 3,487 | 30,844 |
| 72,570 | 109 | 21,526 | 5,855 | 3,530 | 31,020 |
| 72,571 | 108 | 21,485 | 5,886 | 3,547 | 31,026 |
| 72,572 | 110 | 21,302 | 5,881 | 3,546 | 30,839 |
| 72,573 | 110 | 21,219 | 5,835 | 3,544 | 30,708 |
| 72,574 | 115 | 21,244 | 5,832 | 3,548 | 30,739 |
| 72,575 | 119 | 21,406 | 5,851 | 3,548 | 30,924 |
| 72,576 | 122 | 21,253 | 5,743 | 3,486 | 30,604 |
| 72,577 | 122 | 21,206 | 5,744 | 3,475 | 30,547 |
| 72,578 | 130 | 20,871 | 5,647 | 3,430 | 30,078 |
| 72,579 | 129 | 20,620 | 5,546 | 3,378 | 29,673 |
| 72,580 | 131 | 21,174 | 5,705 | 3,461 | 30,471 |
| 72,581 | 136 | 20,839 | 5,625 | 3,388 | 29,988 |
| 72,582 | 136 | 20,548 | 5,577 | 3,356 | 29,617 |
| 72,583 | 137 | 20,586 | 5,584 | 3,369 | 29,676 |
| 72,584 | 137 | 20,660 | 5,594 | 3,361 | 29,752 |
| 72,585 | 137 | 20,411 | 5,543 | 3,323 | 29,414 |
| 72,586 | 137 | 20,530 | 5,538 | 3,326 | 29,531 |
| 72,587 | 138 | 20,383 | 5,510 | 3,299 | 29,330 |
| 72,588 | 137 | 20,312 | 5,500 | 3,306 | 29,255 |
| 72,589 | 129 | 20,191 | 5,450 | 3,271 | 29,041 |
| 72,590 | 128 | 20,166 | 5,443 | 3,275 | 29,012 |
| 72,591 | 127 | 20,197 | 5,500 | 3,282 | 29,106 |
| 72,592 | 127 | 20,027 | 5,497 | 3,267 | 28,918 |
| 72,593 | 126 | 20,011 | 5,504 | 3,258 | 28,899 |
| 72,594 | 122 | 19,711 | 5,425 | 3,179 | 28,437 |
| 72,595 | 126 | 20,043 | 5,474 | 3,183 | 28,826 |
| 72,596 | 127 | 20,053 | 5,471 | 3,177 | 28,828 |
| 72,597 | 129 | 19,912 | 5,404 | 3,169 | 28,614 |
| 72,598 | 131 | 19,880 | 5,379 | 3,144 | 28,534 |
| 72,599 | 131 | 19,971 | 5,367 | 3,148 | 28,617 |

|        |     |        |       |       |        |
|--------|-----|--------|-------|-------|--------|
| 72,600 | 132 | 19,961 | 5,350 | 3,142 | 28,585 |
| 72,601 | 133 | 20,228 | 5,388 | 3,174 | 28,923 |
| 72,602 | 133 | 20,106 | 5,325 | 3,146 | 28,710 |
| 72,603 | 134 | 20,223 | 5,343 | 3,160 | 28,860 |
| 72,604 | 138 | 20,168 | 5,292 | 3,131 | 28,729 |
| 72,605 | 133 | 19,843 | 5,236 | 3,109 | 28,321 |
| 72,606 | 133 | 19,816 | 5,234 | 3,113 | 28,296 |
| 72,607 | 129 | 19,747 | 5,208 | 3,083 | 28,167 |
| 72,608 | 127 | 19,834 | 5,185 | 3,077 | 28,223 |
| 72,609 | 126 | 19,772 | 5,203 | 3,069 | 28,170 |
| 72,610 | 131 | 19,971 | 5,259 | 3,094 | 28,455 |
| 72,611 | 128 | 19,839 | 5,216 | 3,058 | 28,241 |
| 72,612 | 127 | 19,877 | 5,235 | 3,067 | 28,306 |
| 72,613 | 124 | 19,966 | 5,239 | 3,077 | 28,406 |
| 72,614 | 126 | 20,134 | 5,316 | 3,116 | 28,692 |
| 72,615 | 126 | 20,175 | 5,287 | 3,131 | 28,719 |
| 72,616 | 126 | 20,181 | 5,290 | 3,150 | 28,747 |
| 72,617 | 126 | 20,004 | 5,235 | 3,146 | 28,511 |
| 72,618 | 129 | 19,885 | 5,188 | 3,129 | 28,331 |
| 72,619 | 129 | 19,795 | 5,169 | 3,120 | 28,213 |
| 72,620 | 127 | 20,177 | 5,244 | 3,186 | 28,734 |
| 72,621 | 127 | 20,175 | 5,235 | 3,182 | 28,719 |
| 72,622 | 128 | 20,212 | 5,235 | 3,173 | 28,748 |
| 72,623 | 130 | 20,371 | 5,312 | 3,218 | 29,031 |
| 72,624 | 132 | 20,540 | 5,344 | 3,229 | 29,245 |
| 72,625 | 130 | 20,528 | 5,333 | 3,216 | 29,207 |
| 72,626 | 127 | 20,521 | 5,342 | 3,226 | 29,216 |
| 72,627 | 125 | 20,411 | 5,373 | 3,219 | 29,128 |
| 72,628 | 116 | 20,294 | 5,324 | 3,181 | 28,915 |
| 72,629 | 117 | 20,554 | 5,360 | 3,219 | 29,250 |
| 72,630 | 114 | 20,419 | 5,309 | 3,183 | 29,025 |
| 72,631 | 106 | 20,486 | 5,296 | 3,196 | 29,084 |

|        |     |        |       |       |        |
|--------|-----|--------|-------|-------|--------|
| 72,632 | 105 | 20,632 | 5,326 | 3,203 | 29,266 |
| 72,633 | 109 | 21,047 | 5,402 | 3,253 | 29,811 |
| 72,634 | 107 | 21,004 | 5,456 | 3,277 | 29,844 |
| 72,635 | 105 | 20,813 | 5,421 | 3,262 | 29,601 |
| 72,636 | 108 | 20,816 | 5,410 | 3,252 | 29,586 |
| 72,637 | 116 | 20,911 | 5,426 | 3,265 | 29,718 |
| 72,638 | 114 | 20,723 | 5,423 | 3,260 | 29,520 |
| 72,639 | 114 | 21,068 | 5,519 | 3,324 | 30,025 |
| 72,640 | 117 | 21,125 | 5,497 | 3,343 | 30,082 |
| 72,641 | 119 | 21,182 | 5,508 | 3,366 | 30,175 |
| 72,642 | 120 | 21,109 | 5,450 | 3,342 | 30,021 |
| 72,643 | 120 | 21,213 | 5,478 | 3,357 | 30,168 |
| 72,644 | 119 | 21,042 | 5,419 | 3,355 | 29,935 |
| 72,645 | 125 | 21,120 | 5,472 | 3,402 | 30,119 |
| 72,646 | 117 | 20,861 | 5,405 | 3,384 | 29,767 |
| 72,647 | 115 | 20,788 | 5,385 | 3,368 | 29,656 |
| 72,648 | 116 | 21,145 | 5,461 | 3,422 | 30,144 |
| 72,649 | 116 | 21,186 | 5,445 | 3,409 | 30,156 |
| 72,650 | 113 | 20,921 | 5,392 | 3,354 | 29,780 |
| 72,651 | 116 | 21,295 | 5,467 | 3,411 | 30,289 |
| 72,652 | 117 | 20,971 | 5,387 | 3,363 | 29,838 |
| 72,653 | 124 | 21,285 | 5,461 | 3,401 | 30,271 |
| 72,654 | 126 | 21,318 | 5,486 | 3,410 | 30,340 |
| 72,655 | 120 | 21,175 | 5,474 | 3,378 | 30,147 |
| 72,656 | 121 | 21,514 | 5,577 | 3,424 | 30,636 |
| 72,657 | 120 | 21,415 | 5,588 | 3,405 | 30,528 |
| 72,658 | 119 | 21,408 | 5,578 | 3,425 | 30,530 |
| 72,659 | 124 | 21,110 | 5,541 | 3,406 | 30,181 |
| 72,660 | 125 | 20,910 | 5,495 | 3,389 | 29,919 |
| 72,661 | 121 | 20,950 | 5,516 | 3,418 | 30,005 |
| 72,662 | 116 | 21,004 | 5,558 | 3,452 | 30,130 |
| 72,663 | 119 | 21,000 | 5,570 | 3,471 | 30,160 |

|        |     |        |       |       |        |
|--------|-----|--------|-------|-------|--------|
| 72,664 | 119 | 20,959 | 5,550 | 3,464 | 30,092 |
| 72,665 | 118 | 20,965 | 5,514 | 3,453 | 30,050 |
| 72,666 | 116 | 20,688 | 5,454 | 3,410 | 29,668 |
| 72,667 | 119 | 20,536 | 5,419 | 3,386 | 29,460 |
| 72,668 | 117 | 20,474 | 5,362 | 3,351 | 29,304 |
| 72,669 | 116 | 20,469 | 5,315 | 3,331 | 29,231 |
| 72,670 | 117 | 20,658 | 5,370 | 3,361 | 29,506 |
| 72,671 | 119 | 20,680 | 5,424 | 3,365 | 29,588 |
| 72,672 | 128 | 20,728 | 5,479 | 3,386 | 29,721 |
| 72,673 | 128 | 20,818 | 5,497 | 3,391 | 29,834 |
| 72,674 | 127 | 20,955 | 5,507 | 3,415 | 30,004 |
| 72,675 | 130 | 20,805 | 5,508 | 3,413 | 29,856 |
| 72,676 | 126 | 20,534 | 5,456 | 3,380 | 29,496 |
| 72,677 | 126 | 20,604 | 5,502 | 3,393 | 29,625 |
| 72,678 | 122 | 20,335 | 5,418 | 3,356 | 29,231 |
| 72,679 | 124 | 20,254 | 5,407 | 3,346 | 29,131 |
| 72,680 | 129 | 20,418 | 5,465 | 3,369 | 29,381 |
| 72,681 | 128 | 20,125 | 5,411 | 3,339 | 29,003 |
| 72,682 | 125 | 19,845 | 5,348 | 3,317 | 28,635 |
| 72,683 | 128 | 20,161 | 5,422 | 3,376 | 29,087 |
| 72,684 | 129 | 20,138 | 5,453 | 3,386 | 29,106 |
| 72,685 | 135 | 20,142 | 5,429 | 3,381 | 29,087 |
| 72,686 | 137 | 20,097 | 5,431 | 3,349 | 29,014 |
| 72,687 | 129 | 19,911 | 5,412 | 3,347 | 28,799 |
| 72,688 | 130 | 19,990 | 5,426 | 3,349 | 28,895 |
| 72,689 | 134 | 19,839 | 5,416 | 3,348 | 28,737 |
| 72,690 | 133 | 19,776 | 5,430 | 3,337 | 28,676 |
| 72,691 | 132 | 19,215 | 5,305 | 3,281 | 27,933 |
| 72,692 | 131 | 19,326 | 5,349 | 3,279 | 28,085 |
| 72,693 | 129 | 19,394 | 5,343 | 3,277 | 28,143 |
| 72,694 | 131 | 19,494 | 5,396 | 3,296 | 28,317 |
| 72,695 | 130 | 19,365 | 5,377 | 3,256 | 28,128 |



|        |     |        |       |       |        |
|--------|-----|--------|-------|-------|--------|
| 72,696 | 129 | 19,331 | 5,383 | 3,256 | 28,099 |
| 72,697 | 129 | 19,200 | 5,386 | 3,243 | 27,958 |
| 72,698 | 127 | 19,369 | 5,456 | 3,274 | 28,226 |
| 72,699 | 126 | 19,062 | 5,403 | 3,238 | 27,829 |
| 72,700 | 125 | 18,923 | 5,404 | 3,243 | 27,695 |
| 72,701 | 128 | 19,053 | 5,466 | 3,281 | 27,928 |
| 72,702 | 125 | 18,992 | 5,501 | 3,273 | 27,891 |
| 72,703 | 122 | 18,913 | 5,522 | 3,250 | 27,807 |
| 72,704 | 118 | 18,907 | 5,524 | 3,259 | 27,808 |
| 72,705 | 117 | 18,603 | 5,479 | 3,215 | 27,414 |
| 72,706 | 117 | 18,661 | 5,487 | 3,236 | 27,501 |
| 72,707 | 119 | 18,539 | 5,508 | 3,261 | 27,427 |
| 72,708 | 119 | 18,432 | 5,495 | 3,251 | 27,297 |
| 72,709 | 113 | 18,459 | 5,497 | 3,240 | 27,309 |
| 72,710 | 115 | 18,460 | 5,493 | 3,228 | 27,296 |
| 72,711 | 113 | 18,314 | 5,455 | 3,201 | 27,083 |
| 72,712 | 116 | 18,685 | 5,574 | 3,262 | 27,637 |
| 72,713 | 121 | 18,925 | 5,633 | 3,294 | 27,973 |
| 72,714 | 118 | 18,846 | 5,609 | 3,265 | 27,838 |
| 72,715 | 121 | 18,997 | 5,717 | 3,300 | 28,135 |
| 72,716 | 121 | 18,998 | 5,753 | 3,321 | 28,193 |
| 72,717 | 118 | 19,205 | 5,801 | 3,360 | 28,484 |
| 72,718 | 125 | 19,023 | 5,794 | 3,350 | 28,292 |
| 72,719 | 124 | 18,794 | 5,790 | 3,332 | 28,040 |
| 72,720 | 124 | 19,749 | 6,026 | 3,477 | 29,376 |
| 72,721 | 124 | 19,854 | 5,990 | 3,481 | 29,449 |
| 72,722 | 126 | 20,194 | 6,110 | 3,531 | 29,961 |
| 72,723 | 120 | 20,679 | 6,287 | 3,609 | 30,695 |
| 72,724 | 133 | 20,644 | 6,289 | 3,585 | 30,651 |
| 72,725 | 138 | 20,913 | 6,366 | 3,627 | 31,044 |
| 72,726 | 147 | 21,294 | 6,478 | 3,692 | 31,611 |
| 72,727 | 157 | 21,306 | 6,502 | 3,715 | 31,680 |

|        |     |        |       |       |        |
|--------|-----|--------|-------|-------|--------|
| 72,728 | 157 | 21,303 | 6,489 | 3,732 | 31,681 |
| 72,729 | 157 | 21,480 | 6,564 | 3,742 | 31,943 |
| 72,730 | 151 | 21,391 | 6,563 | 3,713 | 31,818 |
| 72,731 | 156 | 21,545 | 6,605 | 3,735 | 32,041 |
| 72,732 | 151 | 21,733 | 6,694 | 3,765 | 32,343 |
| 72,733 | 154 | 21,715 | 6,686 | 3,743 | 32,298 |
| 72,734 | 153 | 21,885 | 6,742 | 3,766 | 32,546 |
| 72,735 | 159 | 22,012 | 6,758 | 3,793 | 32,722 |
| 72,736 | 155 | 21,960 | 6,752 | 3,766 | 32,633 |
| 72,737 | 162 | 21,951 | 6,745 | 3,781 | 32,639 |
| 72,738 | 163 | 21,998 | 6,767 | 3,788 | 32,716 |
| 72,739 | 165 | 22,085 | 6,778 | 3,776 | 32,804 |
| 72,740 | 167 | 22,166 | 6,773 | 3,762 | 32,868 |
| 72,741 | 167 | 22,004 | 6,741 | 3,724 | 32,636 |
| 72,742 | 169 | 21,775 | 6,711 | 3,691 | 32,346 |
| 72,743 | 170 | 21,665 | 6,662 | 3,654 | 32,151 |
| 72,744 | 180 | 22,368 | 6,827 | 3,753 | 33,128 |
| 72,745 | 182 | 22,596 | 6,888 | 3,789 | 33,455 |
| 72,746 | 177 | 22,703 | 6,881 | 3,809 | 33,570 |
| 72,747 | 176 | 22,690 | 6,857 | 3,802 | 33,525 |
| 72,748 | 179 | 22,627 | 6,809 | 3,774 | 33,389 |
| 72,749 | 179 | 22,846 | 6,842 | 3,802 | 33,669 |
| 72,750 | 181 | 22,858 | 6,860 | 3,799 | 33,698 |
| 72,751 | 181 | 22,588 | 6,802 | 3,761 | 33,332 |
| 72,752 | 189 | 22,966 | 6,870 | 3,775 | 33,800 |
| 72,753 | 189 | 23,103 | 6,933 | 3,811 | 34,036 |
| 72,754 | 189 | 22,974 | 6,906 | 3,809 | 33,878 |
| 72,755 | 187 | 22,866 | 6,897 | 3,816 | 33,766 |
| 72,756 | 183 | 22,712 | 6,861 | 3,786 | 33,542 |
| 72,757 | 187 | 22,771 | 6,869 | 3,757 | 33,584 |
| 72,758 | 194 | 22,783 | 6,847 | 3,723 | 33,547 |
| 72,759 | 193 | 22,623 | 6,784 | 3,686 | 33,286 |

|        |     |        |       |       |        |
|--------|-----|--------|-------|-------|--------|
| 72,760 | 193 | 22,617 | 6,790 | 3,709 | 33,309 |
| 72,761 | 195 | 22,648 | 6,822 | 3,721 | 33,386 |
| 72,762 | 196 | 22,618 | 6,806 | 3,717 | 33,337 |
| 72,763 | 210 | 22,520 | 6,774 | 3,684 | 33,188 |
| 72,764 | 207 | 22,239 | 6,726 | 3,653 | 32,825 |
| 72,765 | 208 | 22,161 | 6,672 | 3,636 | 32,677 |
| 72,766 | 211 | 22,208 | 6,682 | 3,618 | 32,719 |
| 72,767 | 216 | 22,159 | 6,653 | 3,594 | 32,622 |
| 72,768 | 235 | 21,864 | 6,615 | 3,540 | 32,254 |
| 72,769 | 227 | 21,655 | 6,574 | 3,513 | 31,969 |
| 72,770 | 230 | 21,500 | 6,517 | 3,465 | 31,712 |
| 72,771 | 233 | 21,179 | 6,409 | 3,392 | 31,213 |
| 72,772 | 240 | 21,511 | 6,500 | 3,431 | 31,682 |
| 72,773 | 238 | 21,081 | 6,385 | 3,405 | 31,109 |
| 72,774 | 237 | 20,879 | 6,303 | 3,370 | 30,789 |
| 72,775 | 222 | 20,709 | 6,261 | 3,355 | 30,547 |
| 72,776 | 221 | 20,756 | 6,270 | 3,356 | 30,603 |
| 72,777 | 208 | 20,623 | 6,186 | 3,313 | 30,330 |
| 72,778 | 200 | 20,464 | 6,078 | 3,231 | 29,973 |
| 72,779 | 201 | 20,427 | 6,027 | 3,218 | 29,873 |
| 72,780 | 199 | 20,395 | 5,981 | 3,200 | 29,775 |
| 72,781 | 199 | 20,491 | 5,995 | 3,193 | 29,878 |
| 72,782 | 196 | 20,568 | 6,002 | 3,210 | 29,976 |
| 72,783 | 196 | 20,566 | 5,994 | 3,225 | 29,981 |
| 72,784 | 197 | 19,893 | 5,788 | 3,108 | 28,986 |
| 72,785 | 197 | 20,036 | 5,830 | 3,119 | 29,182 |
| 72,786 | 200 | 20,181 | 5,904 | 3,152 | 29,437 |
| 72,787 | 200 | 20,189 | 5,896 | 3,159 | 29,444 |
| 72,788 | 191 | 20,143 | 5,899 | 3,172 | 29,405 |
| 72,789 | 188 | 20,082 | 5,882 | 3,161 | 29,313 |
| 72,790 | 181 | 20,112 | 5,858 | 3,174 | 29,325 |
| 72,791 | 183 | 20,132 | 5,832 | 3,203 | 29,350 |

|        |     |        |       |       |        |
|--------|-----|--------|-------|-------|--------|
| 72,792 | 191 | 20,168 | 5,876 | 3,211 | 29,446 |
| 72,793 | 188 | 20,175 | 5,893 | 3,208 | 29,464 |
| 72,794 | 184 | 19,978 | 5,825 | 3,202 | 29,189 |
| 72,795 | 181 | 20,019 | 5,873 | 3,202 | 29,275 |
| 72,796 | 179 | 20,050 | 5,887 | 3,198 | 29,314 |
| 72,797 | 183 | 19,883 | 5,845 | 3,179 | 29,090 |
| 72,798 | 183 | 19,858 | 5,847 | 3,174 | 29,062 |
| 72,799 | 180 | 19,975 | 5,927 | 3,202 | 29,284 |
| 72,800 | 179 | 19,918 | 5,903 | 3,195 | 29,195 |
| 72,801 | 180 | 19,818 | 5,906 | 3,193 | 29,097 |
| 72,802 | 177 | 19,932 | 5,907 | 3,235 | 29,251 |
| 72,803 | 177 | 20,063 | 5,929 | 3,280 | 29,449 |
| 72,804 | 184 | 20,236 | 5,965 | 3,297 | 29,682 |
| 72,805 | 183 | 20,151 | 5,961 | 3,295 | 29,590 |
| 72,806 | 185 | 20,217 | 5,959 | 3,318 | 29,679 |
| 72,807 | 185 | 20,266 | 5,982 | 3,316 | 29,749 |
| 72,808 | 184 | 20,240 | 6,000 | 3,350 | 29,774 |
| 72,809 | 175 | 20,179 | 5,988 | 3,345 | 29,687 |
| 72,810 | 175 | 20,222 | 5,992 | 3,332 | 29,721 |
| 72,811 | 168 | 19,866 | 5,848 | 3,233 | 29,115 |
| 72,812 | 167 | 19,963 | 5,873 | 3,244 | 29,247 |
| 72,813 | 166 | 19,950 | 5,872 | 3,242 | 29,230 |
| 72,814 | 153 | 19,948 | 5,873 | 3,266 | 29,240 |
| 72,815 | 150 | 19,811 | 5,809 | 3,240 | 29,010 |
| 72,816 | 149 | 19,681 | 5,798 | 3,246 | 28,874 |
| 72,817 | 146 | 19,464 | 5,780 | 3,237 | 28,627 |
| 72,818 | 141 | 19,474 | 5,773 | 3,232 | 28,620 |
| 72,819 | 118 | 18,784 | 5,545 | 3,121 | 27,568 |
| 72,820 | 115 | 18,902 | 5,568 | 3,140 | 27,725 |
| 72,821 | 111 | 19,037 | 5,596 | 3,164 | 27,908 |
| 72,822 | 111 | 18,793 | 5,574 | 3,156 | 27,634 |
| 72,823 | 107 | 18,404 | 5,427 | 3,094 | 27,032 |

|        |     |        |       |       |        |
|--------|-----|--------|-------|-------|--------|
| 72,824 | 107 | 18,436 | 5,427 | 3,075 | 27,045 |
| 72,825 | 107 | 18,239 | 5,380 | 3,043 | 26,769 |
| 72,826 | 110 | 18,288 | 5,384 | 3,035 | 26,817 |
| 72,827 | 107 | 17,924 | 5,299 | 2,997 | 26,327 |
| 72,828 | 106 | 17,876 | 5,371 | 3,033 | 26,386 |
| 72,829 | 107 | 17,558 | 5,356 | 3,009 | 26,030 |
| 72,830 | 105 | 17,175 | 5,275 | 2,959 | 25,514 |
| 72,831 | 105 | 17,172 | 5,290 | 2,967 | 25,534 |
| 72,832 | 106 | 17,091 | 5,263 | 2,964 | 25,424 |
| 72,833 | 108 | 16,965 | 5,226 | 2,932 | 25,231 |
| 72,834 | 107 | 16,655 | 5,146 | 2,868 | 24,776 |
| 72,835 | 108 | 16,869 | 5,190 | 2,882 | 25,049 |
| 72,836 | 95  | 16,121 | 4,995 | 2,770 | 23,981 |
| 72,837 | 97  | 16,363 | 5,040 | 2,786 | 24,286 |
| 72,838 | 101 | 16,524 | 5,091 | 2,800 | 24,516 |
| 72,839 | 101 | 16,531 | 5,082 | 2,799 | 24,513 |
| 72,840 | 103 | 16,612 | 5,117 | 2,806 | 24,638 |
| 72,841 | 103 | 16,558 | 5,119 | 2,799 | 24,579 |
| 72,842 | 92  | 16,382 | 5,108 | 2,767 | 24,349 |
| 72,843 | 93  | 16,469 | 5,134 | 2,788 | 24,484 |
| 72,844 | 86  | 16,083 | 5,012 | 2,730 | 23,911 |
| 72,845 | 87  | 16,250 | 5,073 | 2,762 | 24,172 |
| 72,846 | 88  | 16,174 | 5,034 | 2,744 | 24,040 |
| 72,847 | 87  | 15,887 | 4,965 | 2,694 | 23,633 |
| 72,848 | 87  | 16,200 | 5,061 | 2,741 | 24,089 |
| 72,849 | 88  | 16,025 | 4,977 | 2,728 | 23,818 |
| 72,850 | 88  | 16,307 | 5,066 | 2,777 | 24,238 |
| 72,851 | 86  | 16,388 | 5,121 | 2,785 | 24,380 |
| 72,852 | 85  | 16,488 | 5,190 | 2,824 | 24,587 |
| 72,853 | 83  | 16,594 | 5,281 | 2,854 | 24,812 |
| 72,854 | 78  | 16,402 | 5,292 | 2,877 | 24,649 |
| 72,855 | 74  | 16,477 | 5,345 | 2,890 | 24,786 |

|        |     |        |       |       |        |
|--------|-----|--------|-------|-------|--------|
| 72,856 | 78  | 16,781 | 5,402 | 2,929 | 25,190 |
| 72,857 | 85  | 16,912 | 5,518 | 2,952 | 25,467 |
| 72,858 | 88  | 16,928 | 5,562 | 2,968 | 25,546 |
| 72,859 | 88  | 17,035 | 5,567 | 2,974 | 25,664 |
| 72,860 | 93  | 17,169 | 5,634 | 3,025 | 25,921 |
| 72,861 | 95  | 17,258 | 5,687 | 3,059 | 26,099 |
| 72,862 | 95  | 17,417 | 5,758 | 3,105 | 26,375 |
| 72,863 | 95  | 17,548 | 5,800 | 3,148 | 26,591 |
| 72,864 | 100 | 17,918 | 5,935 | 3,218 | 27,171 |
| 72,865 | 98  | 18,012 | 5,955 | 3,211 | 27,276 |
| 72,866 | 97  | 18,144 | 5,978 | 3,242 | 27,461 |
| 72,867 | 100 | 18,248 | 5,991 | 3,256 | 27,595 |
| 72,868 | 100 | 18,182 | 5,982 | 3,244 | 27,508 |
| 72,869 | 103 | 18,522 | 6,112 | 3,339 | 28,076 |
| 72,870 | 102 | 18,254 | 6,078 | 3,312 | 27,746 |
| 72,871 | 104 | 18,277 | 6,137 | 3,321 | 27,839 |
| 72,872 | 104 | 18,204 | 6,129 | 3,311 | 27,748 |
| 72,873 | 101 | 18,402 | 6,198 | 3,352 | 28,053 |
| 72,874 | 99  | 18,410 | 6,250 | 3,374 | 28,133 |
| 72,875 | 100 | 18,517 | 6,267 | 3,400 | 28,284 |
| 72,876 | 106 | 18,550 | 6,259 | 3,407 | 28,322 |
| 72,877 | 108 | 18,700 | 6,298 | 3,421 | 28,527 |
| 72,878 | 117 | 19,047 | 6,392 | 3,456 | 29,012 |
| 72,879 | 122 | 18,823 | 6,349 | 3,445 | 28,739 |
| 72,880 | 129 | 19,213 | 6,423 | 3,497 | 29,262 |
| 72,881 | 139 | 19,566 | 6,518 | 3,543 | 29,766 |
| 72,882 | 140 | 19,518 | 6,535 | 3,520 | 29,713 |
| 72,883 | 140 | 19,525 | 6,540 | 3,520 | 29,725 |
| 72,884 | 149 | 19,830 | 6,669 | 3,576 | 30,224 |
| 72,885 | 146 | 19,898 | 6,699 | 3,599 | 30,342 |
| 72,886 | 147 | 19,790 | 6,664 | 3,573 | 30,174 |
| 72,887 | 150 | 20,147 | 6,757 | 3,636 | 30,690 |

|        |     |        |       |       |        |
|--------|-----|--------|-------|-------|--------|
| 72,888 | 148 | 20,242 | 6,806 | 3,673 | 30,869 |
| 72,889 | 143 | 20,041 | 6,754 | 3,651 | 30,589 |
| 72,890 | 152 | 20,510 | 6,897 | 3,720 | 31,279 |
| 72,891 | 153 | 20,596 | 6,886 | 3,710 | 31,345 |
| 72,892 | 155 | 20,745 | 6,910 | 3,729 | 31,539 |
| 72,893 | 155 | 20,763 | 6,918 | 3,739 | 31,575 |
| 72,894 | 167 | 20,936 | 6,966 | 3,778 | 31,847 |
| 72,895 | 171 | 20,976 | 6,981 | 3,774 | 31,902 |
| 72,896 | 174 | 21,191 | 7,118 | 3,832 | 32,315 |
| 72,897 | 174 | 21,078 | 7,163 | 3,843 | 32,258 |
| 72,898 | 172 | 20,927 | 7,107 | 3,817 | 32,023 |
| 72,899 | 178 | 21,107 | 7,174 | 3,848 | 32,307 |
| 72,900 | 179 | 21,100 | 7,181 | 3,820 | 32,280 |
| 72,901 | 191 | 21,222 | 7,169 | 3,836 | 32,418 |
| 72,902 | 200 | 21,214 | 7,178 | 3,849 | 32,441 |
| 72,903 | 202 | 21,213 | 7,109 | 3,803 | 32,327 |
| 72,904 | 209 | 21,076 | 7,041 | 3,744 | 32,070 |
| 72,905 | 215 | 21,280 | 7,117 | 3,741 | 32,353 |
| 72,906 | 218 | 21,370 | 7,134 | 3,746 | 32,468 |
| 72,907 | 216 | 21,000 | 7,070 | 3,707 | 31,993 |
| 72,908 | 213 | 20,752 | 6,952 | 3,656 | 31,573 |
| 72,909 | 209 | 20,353 | 6,770 | 3,541 | 30,873 |
| 72,910 | 209 | 20,695 | 6,815 | 3,585 | 31,304 |
| 72,911 | 208 | 20,703 | 6,834 | 3,597 | 31,342 |
| 72,912 | 208 | 20,540 | 6,829 | 3,591 | 31,168 |
| 72,913 | 209 | 20,451 | 6,822 | 3,585 | 31,067 |
| 72,914 | 212 | 20,489 | 6,804 | 3,561 | 31,066 |
| 72,915 | 215 | 20,498 | 6,813 | 3,552 | 31,078 |
| 72,916 | 218 | 20,470 | 6,796 | 3,560 | 31,044 |
| 72,917 | 220 | 20,454 | 6,774 | 3,546 | 30,994 |
| 72,918 | 221 | 20,494 | 6,743 | 3,531 | 30,989 |
| 72,919 | 222 | 20,550 | 6,738 | 3,525 | 31,035 |

|        |     |        |       |       |        |
|--------|-----|--------|-------|-------|--------|
| 72,920 | 225 | 20,595 | 6,731 | 3,489 | 31,040 |
| 72,921 | 230 | 20,636 | 6,712 | 3,485 | 31,063 |
| 72,922 | 228 | 20,737 | 6,680 | 3,502 | 31,147 |
| 72,923 | 230 | 20,851 | 6,679 | 3,535 | 31,295 |
| 72,924 | 233 | 20,987 | 6,689 | 3,549 | 31,458 |
| 72,925 | 236 | 20,459 | 6,489 | 3,435 | 30,619 |
| 72,926 | 235 | 20,643 | 6,567 | 3,462 | 30,907 |
| 72,927 | 233 | 20,908 | 6,615 | 3,486 | 31,242 |
| 72,928 | 232 | 20,950 | 6,637 | 3,472 | 31,291 |
| 72,929 | 224 | 21,281 | 6,742 | 3,549 | 31,796 |
| 72,930 | 216 | 21,278 | 6,743 | 3,537 | 31,774 |
| 72,931 | 208 | 21,309 | 6,774 | 3,531 | 31,822 |
| 72,932 | 208 | 21,170 | 6,703 | 3,514 | 31,595 |
| 72,933 | 208 | 21,255 | 6,691 | 3,512 | 31,666 |
| 72,934 | 203 | 21,319 | 6,700 | 3,519 | 31,741 |
| 72,935 | 201 | 21,302 | 6,690 | 3,520 | 31,713 |
| 72,936 | 199 | 21,369 | 6,726 | 3,557 | 31,851 |
| 72,937 | 197 | 21,450 | 6,744 | 3,567 | 31,958 |
| 72,938 | 203 | 21,507 | 6,722 | 3,566 | 31,998 |
| 72,939 | 211 | 21,670 | 6,770 | 3,601 | 32,252 |
| 72,940 | 203 | 21,651 | 6,707 | 3,595 | 32,156 |
| 72,941 | 205 | 21,901 | 6,743 | 3,641 | 32,490 |
| 72,942 | 205 | 21,787 | 6,699 | 3,611 | 32,302 |
| 72,943 | 206 | 21,918 | 6,714 | 3,637 | 32,475 |
| 72,944 | 193 | 21,847 | 6,729 | 3,640 | 32,409 |
| 72,945 | 190 | 21,893 | 6,718 | 3,665 | 32,466 |
| 72,946 | 191 | 22,138 | 6,755 | 3,682 | 32,766 |
| 72,947 | 188 | 22,148 | 6,670 | 3,634 | 32,640 |
| 72,948 | 196 | 22,226 | 6,640 | 3,632 | 32,694 |
| 72,949 | 195 | 22,072 | 6,601 | 3,597 | 32,465 |
| 72,950 | 196 | 21,928 | 6,577 | 3,605 | 32,306 |
| 72,951 | 197 | 21,648 | 6,512 | 3,578 | 31,935 |



|        |     |        |       |       |        |
|--------|-----|--------|-------|-------|--------|
| 72,952 | 201 | 21,658 | 6,578 | 3,602 | 32,039 |
| 72,953 | 196 | 21,631 | 6,574 | 3,597 | 31,998 |
| 72,954 | 192 | 21,389 | 6,514 | 3,567 | 31,662 |
| 72,955 | 184 | 21,113 | 6,406 | 3,525 | 31,228 |
| 72,956 | 180 | 21,093 | 6,336 | 3,510 | 31,119 |
| 72,957 | 172 | 20,607 | 6,112 | 3,425 | 30,316 |
| 72,958 | 172 | 20,632 | 6,122 | 3,426 | 30,352 |
| 72,959 | 162 | 20,529 | 6,085 | 3,404 | 30,180 |
| 72,960 | 164 | 20,431 | 6,096 | 3,433 | 30,124 |
| 72,961 | 165 | 20,005 | 5,966 | 3,346 | 29,482 |
| 72,962 | 164 | 20,094 | 5,923 | 3,323 | 29,504 |
| 72,963 | 164 | 20,145 | 5,922 | 3,323 | 29,554 |
| 72,964 | 161 | 20,232 | 5,923 | 3,359 | 29,675 |
| 72,965 | 157 | 20,145 | 5,895 | 3,357 | 29,554 |
| 72,966 | 152 | 20,041 | 5,854 | 3,321 | 29,368 |
| 72,967 | 149 | 19,823 | 5,794 | 3,268 | 29,034 |
| 72,968 | 144 | 19,809 | 5,819 | 3,276 | 29,048 |
| 72,969 | 145 | 20,097 | 5,894 | 3,326 | 29,462 |
| 72,970 | 145 | 20,004 | 5,893 | 3,334 | 29,376 |
| 72,971 | 138 | 19,634 | 5,799 | 3,295 | 28,866 |
| 72,972 | 136 | 19,609 | 5,808 | 3,286 | 28,839 |
| 72,973 | 136 | 19,274 | 5,755 | 3,231 | 28,396 |
| 72,974 | 134 | 19,085 | 5,692 | 3,168 | 28,079 |
| 72,975 | 131 | 19,552 | 5,891 | 3,306 | 28,880 |
| 72,976 | 128 | 19,457 | 5,896 | 3,309 | 28,790 |
| 72,977 | 133 | 19,413 | 5,867 | 3,320 | 28,733 |
| 72,978 | 127 | 18,946 | 5,730 | 3,274 | 28,077 |
| 72,979 | 128 | 19,063 | 5,771 | 3,294 | 28,256 |
| 72,980 | 128 | 18,243 | 5,499 | 3,148 | 27,018 |
| 72,981 | 129 | 18,428 | 5,529 | 3,170 | 27,256 |
| 72,982 | 128 | 18,458 | 5,511 | 3,178 | 27,275 |
| 72,983 | 120 | 18,336 | 5,498 | 3,163 | 27,117 |

|        |     |        |       |       |        |
|--------|-----|--------|-------|-------|--------|
| 72,984 | 127 | 18,346 | 5,514 | 3,194 | 27,181 |
| 72,985 | 122 | 18,015 | 5,403 | 3,156 | 26,696 |
| 72,986 | 122 | 17,970 | 5,398 | 3,151 | 26,641 |
| 72,987 | 128 | 17,755 | 5,346 | 3,114 | 26,343 |
| 72,988 | 130 | 17,940 | 5,413 | 3,151 | 26,634 |
| 72,989 | 125 | 17,544 | 5,333 | 3,088 | 26,090 |
| 72,990 | 117 | 17,231 | 5,240 | 3,030 | 25,618 |
| 72,991 | 116 | 17,377 | 5,282 | 3,058 | 25,833 |
| 72,992 | 124 | 17,306 | 5,324 | 3,057 | 25,811 |
| 72,993 | 118 | 16,848 | 5,218 | 2,984 | 25,168 |
| 72,994 | 118 | 16,844 | 5,223 | 2,988 | 25,173 |
| 72,995 | 121 | 17,048 | 5,221 | 2,999 | 25,389 |
| 72,996 | 119 | 16,665 | 5,115 | 2,939 | 24,838 |
| 72,997 | 123 | 16,749 | 5,169 | 2,954 | 24,995 |
| 72,998 | 124 | 16,773 | 5,175 | 2,976 | 25,048 |
| 72,999 | 111 | 16,451 | 4,996 | 2,897 | 24,455 |
| 73,000 | 110 | 16,750 | 5,064 | 2,918 | 24,842 |
| 73,001 | 103 | 17,032 | 5,116 | 2,967 | 25,218 |
| 73,002 | 102 | 17,097 | 5,130 | 2,967 | 25,296 |
| 73,003 | 108 | 17,264 | 5,168 | 2,994 | 25,534 |
| 73,004 | 108 | 17,140 | 5,073 | 2,960 | 25,281 |
| 73,005 | 115 | 17,437 | 5,135 | 2,976 | 25,663 |
| 73,006 | 113 | 17,389 | 5,092 | 2,958 | 25,552 |
| 73,007 | 117 | 17,419 | 5,086 | 2,958 | 25,580 |
| 73,008 | 117 | 17,247 | 5,056 | 2,938 | 25,358 |
| 73,009 | 121 | 17,711 | 5,120 | 2,976 | 25,928 |
| 73,010 | 121 | 18,167 | 5,199 | 3,048 | 26,535 |
| 73,011 | 118 | 17,967 | 5,142 | 3,006 | 26,233 |
| 73,012 | 117 | 17,937 | 5,131 | 3,007 | 26,192 |
| 73,013 | 118 | 18,295 | 5,191 | 3,056 | 26,660 |
| 73,014 | 123 | 18,283 | 5,207 | 3,065 | 26,678 |
| 73,015 | 123 | 18,306 | 5,222 | 3,062 | 26,713 |

|        |     |        |       |       |        |
|--------|-----|--------|-------|-------|--------|
| 73,016 | 126 | 18,186 | 5,192 | 3,047 | 26,551 |
| 73,017 | 126 | 17,972 | 5,152 | 3,032 | 26,282 |
| 73,018 | 126 | 18,181 | 5,239 | 3,075 | 26,621 |
| 73,019 | 125 | 18,210 | 5,235 | 3,071 | 26,641 |
| 73,020 | 127 | 18,199 | 5,212 | 3,067 | 26,605 |
| 73,021 | 130 | 18,310 | 5,202 | 3,051 | 26,693 |
| 73,022 | 137 | 18,439 | 5,176 | 3,045 | 26,797 |
| 73,023 | 137 | 18,427 | 5,140 | 3,034 | 26,738 |
| 73,024 | 137 | 18,573 | 5,123 | 3,030 | 26,863 |
| 73,025 | 139 | 18,938 | 5,227 | 3,063 | 27,367 |
| 73,026 | 139 | 18,874 | 5,169 | 3,037 | 27,219 |
| 73,027 | 134 | 18,925 | 5,163 | 3,030 | 27,252 |
| 73,028 | 144 | 19,207 | 5,225 | 3,050 | 27,626 |
| 73,029 | 152 | 19,093 | 5,185 | 3,027 | 27,457 |
| 73,030 | 153 | 19,134 | 5,187 | 3,030 | 27,504 |
| 73,031 | 148 | 19,098 | 5,232 | 3,055 | 27,533 |
| 73,032 | 149 | 19,267 | 5,240 | 3,076 | 27,732 |
| 73,033 | 149 | 18,590 | 5,021 | 2,928 | 26,688 |
| 73,034 | 148 | 18,804 | 5,037 | 2,927 | 26,916 |
| 73,035 | 147 | 19,021 | 5,074 | 2,948 | 27,190 |
| 73,036 | 147 | 18,988 | 5,042 | 2,959 | 27,136 |
| 73,037 | 149 | 19,612 | 5,185 | 3,068 | 28,014 |
| 73,038 | 150 | 19,828 | 5,225 | 3,108 | 28,311 |
| 73,039 | 145 | 19,829 | 5,219 | 3,116 | 28,309 |
| 73,040 | 153 | 20,084 | 5,302 | 3,137 | 28,676 |
| 73,041 | 159 | 19,694 | 5,176 | 3,057 | 28,086 |
| 73,042 | 158 | 19,872 | 5,212 | 3,071 | 28,313 |
| 73,043 | 154 | 19,966 | 5,225 | 3,071 | 28,416 |
| 73,044 | 154 | 20,225 | 5,263 | 3,093 | 28,735 |
| 73,045 | 153 | 20,072 | 5,233 | 3,076 | 28,534 |
| 73,046 | 151 | 20,100 | 5,247 | 3,095 | 28,593 |
| 73,047 | 148 | 20,158 | 5,296 | 3,134 | 28,736 |

|        |     |        |       |       |        |
|--------|-----|--------|-------|-------|--------|
| 73,048 | 148 | 20,132 | 5,278 | 3,137 | 28,695 |
| 73,049 | 154 | 20,063 | 5,265 | 3,131 | 28,613 |
| 73,050 | 156 | 20,060 | 5,329 | 3,150 | 28,695 |
| 73,051 | 162 | 20,034 | 5,344 | 3,175 | 28,715 |
| 73,052 | 173 | 20,233 | 5,469 | 3,193 | 29,068 |
| 73,053 | 166 | 20,385 | 5,455 | 3,224 | 29,230 |
| 73,054 | 160 | 20,313 | 5,420 | 3,189 | 29,082 |
| 73,055 | 176 | 20,451 | 5,517 | 3,192 | 29,336 |
| 73,056 | 169 | 20,323 | 5,480 | 3,195 | 29,167 |
| 73,057 | 170 | 20,378 | 5,494 | 3,230 | 29,272 |
| 73,058 | 170 | 20,358 | 5,497 | 3,241 | 29,266 |
| 73,059 | 167 | 20,502 | 5,518 | 3,237 | 29,424 |
| 73,060 | 168 | 20,663 | 5,603 | 3,277 | 29,711 |
| 73,061 | 169 | 20,833 | 5,646 | 3,295 | 29,943 |
| 73,062 | 169 | 20,632 | 5,602 | 3,263 | 29,666 |
| 73,063 | 170 | 20,980 | 5,702 | 3,336 | 30,188 |
| 73,064 | 170 | 20,899 | 5,720 | 3,340 | 30,129 |
| 73,065 | 164 | 20,927 | 5,740 | 3,324 | 30,155 |
| 73,066 | 164 | 21,067 | 5,798 | 3,350 | 30,379 |
| 73,067 | 165 | 21,101 | 5,792 | 3,353 | 30,411 |
| 73,068 | 164 | 20,994 | 5,733 | 3,330 | 30,221 |
| 73,069 | 164 | 21,354 | 5,794 | 3,364 | 30,676 |
| 73,070 | 171 | 21,540 | 5,865 | 3,411 | 30,987 |
| 73,071 | 173 | 21,508 | 5,854 | 3,402 | 30,937 |
| 73,072 | 167 | 21,283 | 5,797 | 3,373 | 30,620 |
| 73,073 | 157 | 21,068 | 5,844 | 3,370 | 30,439 |
| 73,074 | 159 | 21,306 | 5,882 | 3,388 | 30,735 |
| 73,075 | 156 | 20,470 | 5,713 | 3,315 | 29,654 |
| 73,076 | 157 | 20,615 | 5,735 | 3,334 | 29,841 |
| 73,077 | 155 | 20,706 | 5,744 | 3,352 | 29,957 |
| 73,078 | 158 | 20,974 | 5,783 | 3,372 | 30,287 |
| 73,079 | 150 | 21,156 | 5,806 | 3,401 | 30,513 |

|        |     |        |       |       |        |
|--------|-----|--------|-------|-------|--------|
| 73,080 | 139 | 20,970 | 5,758 | 3,370 | 30,237 |
| 73,081 | 144 | 21,232 | 5,801 | 3,409 | 30,586 |
| 73,082 | 144 | 21,031 | 5,764 | 3,385 | 30,324 |
| 73,083 | 145 | 21,335 | 5,807 | 3,424 | 30,711 |
| 73,084 | 146 | 21,030 | 5,769 | 3,413 | 30,358 |
| 73,085 | 146 | 20,990 | 5,766 | 3,421 | 30,323 |
| 73,086 | 143 | 21,023 | 5,762 | 3,438 | 30,366 |
| 73,087 | 143 | 21,239 | 5,803 | 3,408 | 30,593 |
| 73,088 | 137 | 21,085 | 5,761 | 3,361 | 30,344 |
| 73,089 | 135 | 20,803 | 5,689 | 3,301 | 29,928 |
| 73,090 | 134 | 20,745 | 5,660 | 3,304 | 29,843 |
| 73,091 | 128 | 20,828 | 5,676 | 3,322 | 29,954 |
| 73,092 | 122 | 20,580 | 5,614 | 3,300 | 29,616 |
| 73,093 | 120 | 20,487 | 5,596 | 3,302 | 29,505 |
| 73,094 | 119 | 20,542 | 5,635 | 3,338 | 29,634 |
| 73,095 | 118 | 20,433 | 5,624 | 3,330 | 29,505 |
| 73,096 | 118 | 20,326 | 5,622 | 3,330 | 29,396 |
| 73,097 | 116 | 20,392 | 5,625 | 3,316 | 29,449 |
| 73,098 | 116 | 20,409 | 5,611 | 3,320 | 29,456 |
| 73,099 | 120 | 20,871 | 5,702 | 3,385 | 30,078 |
| 73,100 | 122 | 21,037 | 5,721 | 3,421 | 30,301 |
| 73,101 | 122 | 21,163 | 5,714 | 3,431 | 30,430 |
| 73,102 | 116 | 21,273 | 5,691 | 3,434 | 30,514 |
| 73,103 | 108 | 20,548 | 5,515 | 3,329 | 29,500 |
| 73,104 | 108 | 20,740 | 5,603 | 3,400 | 29,851 |
| 73,105 | 100 | 20,978 | 5,641 | 3,455 | 30,174 |
| 73,106 | 90  | 20,694 | 5,556 | 3,426 | 29,766 |
| 73,107 | 89  | 20,829 | 5,614 | 3,445 | 29,977 |
| 73,108 | 86  | 20,801 | 5,631 | 3,437 | 29,955 |
| 73,109 | 87  | 20,612 | 5,630 | 3,441 | 29,770 |
| 73,110 | 88  | 20,555 | 5,627 | 3,454 | 29,724 |
| 73,111 | 94  | 20,717 | 5,626 | 3,478 | 29,915 |

|        |     |        |       |       |        |
|--------|-----|--------|-------|-------|--------|
| 73,112 | 95  | 20,485 | 5,571 | 3,444 | 29,595 |
| 73,113 | 95  | 20,303 | 5,448 | 3,378 | 29,224 |
| 73,114 | 96  | 20,280 | 5,419 | 3,366 | 29,161 |
| 73,115 | 95  | 20,252 | 5,428 | 3,372 | 29,147 |
| 73,116 | 95  | 20,409 | 5,477 | 3,422 | 29,403 |
| 73,117 | 95  | 20,436 | 5,452 | 3,435 | 29,418 |
| 73,118 | 92  | 20,170 | 5,390 | 3,396 | 29,048 |
| 73,119 | 94  | 20,296 | 5,423 | 3,413 | 29,226 |
| 73,120 | 98  | 20,301 | 5,411 | 3,419 | 29,229 |
| 73,121 | 94  | 20,406 | 5,403 | 3,400 | 29,303 |
| 73,122 | 90  | 20,504 | 5,434 | 3,399 | 29,427 |
| 73,123 | 105 | 19,682 | 5,229 | 3,291 | 28,307 |
| 73,124 | 106 | 20,036 | 5,280 | 3,320 | 28,742 |
| 73,125 | 108 | 20,334 | 5,343 | 3,357 | 29,142 |
| 73,126 | 108 | 20,400 | 5,359 | 3,349 | 29,216 |
| 73,127 | 115 | 20,660 | 5,422 | 3,402 | 29,599 |
| 73,128 | 114 | 20,628 | 5,421 | 3,405 | 29,568 |
| 73,129 | 117 | 20,873 | 5,466 | 3,440 | 29,896 |
| 73,130 | 121 | 20,729 | 5,437 | 3,417 | 29,704 |
| 73,131 | 123 | 20,675 | 5,444 | 3,394 | 29,636 |
| 73,132 | 122 | 20,976 | 5,552 | 3,422 | 30,072 |
| 73,133 | 123 | 21,153 | 5,592 | 3,431 | 30,299 |
| 73,134 | 125 | 21,021 | 5,563 | 3,401 | 30,110 |
| 73,135 | 119 | 20,928 | 5,563 | 3,387 | 29,997 |
| 73,136 | 135 | 21,517 | 5,684 | 3,452 | 30,788 |
| 73,137 | 134 | 21,342 | 5,658 | 3,469 | 30,603 |
| 73,138 | 134 | 21,265 | 5,660 | 3,484 | 30,543 |
| 73,139 | 136 | 21,430 | 5,725 | 3,555 | 30,846 |
| 73,140 | 136 | 21,247 | 5,721 | 3,538 | 30,642 |
| 73,141 | 137 | 21,316 | 5,750 | 3,543 | 30,746 |
| 73,142 | 136 | 21,350 | 5,744 | 3,550 | 30,780 |
| 73,143 | 142 | 21,196 | 5,722 | 3,520 | 30,580 |

|        |     |        |       |       |        |
|--------|-----|--------|-------|-------|--------|
| 73,144 | 143 | 21,101 | 5,663 | 3,486 | 30,393 |
| 73,145 | 143 | 21,223 | 5,690 | 3,543 | 30,599 |
| 73,146 | 148 | 20,986 | 5,608 | 3,481 | 30,223 |
| 73,147 | 148 | 21,001 | 5,597 | 3,465 | 30,211 |
| 73,148 | 149 | 21,199 | 5,617 | 3,493 | 30,458 |
| 73,149 | 148 | 21,461 | 5,678 | 3,532 | 30,819 |
| 73,150 | 137 | 21,249 | 5,624 | 3,501 | 30,511 |
| 73,151 | 131 | 21,197 | 5,588 | 3,483 | 30,399 |
| 73,152 | 125 | 21,012 | 5,544 | 3,463 | 30,144 |
| 73,153 | 132 | 21,126 | 5,566 | 3,488 | 30,312 |
| 73,154 | 133 | 21,321 | 5,542 | 3,493 | 30,489 |
| 73,155 | 133 | 21,459 | 5,560 | 3,482 | 30,634 |
| 73,156 | 138 | 21,873 | 5,640 | 3,529 | 31,180 |
| 73,157 | 141 | 22,010 | 5,652 | 3,548 | 31,351 |
| 73,158 | 141 | 21,968 | 5,613 | 3,527 | 31,249 |
| 73,159 | 144 | 22,154 | 5,641 | 3,548 | 31,487 |
| 73,160 | 149 | 22,463 | 5,698 | 3,583 | 31,893 |
| 73,161 | 144 | 22,346 | 5,679 | 3,553 | 31,722 |
| 73,162 | 142 | 22,383 | 5,678 | 3,560 | 31,763 |
| 73,163 | 141 | 22,304 | 5,692 | 3,573 | 31,710 |
| 73,164 | 144 | 22,306 | 5,711 | 3,574 | 31,735 |
| 73,165 | 145 | 22,331 | 5,723 | 3,554 | 31,753 |
| 73,166 | 145 | 22,357 | 5,697 | 3,548 | 31,747 |
| 73,167 | 148 | 22,610 | 5,731 | 3,582 | 32,071 |
| 73,168 | 146 | 22,288 | 5,656 | 3,512 | 31,602 |
| 73,169 | 145 | 22,266 | 5,642 | 3,495 | 31,548 |
| 73,170 | 145 | 22,319 | 5,646 | 3,492 | 31,602 |
| 73,171 | 142 | 22,317 | 5,677 | 3,504 | 31,640 |
| 73,172 | 143 | 22,141 | 5,635 | 3,493 | 31,412 |
| 73,173 | 143 | 21,864 | 5,574 | 3,466 | 31,047 |
| 73,174 | 131 | 22,457 | 5,745 | 3,558 | 31,891 |
| 73,175 | 131 | 22,628 | 5,801 | 3,617 | 32,177 |

|        |     |        |       |       |        |
|--------|-----|--------|-------|-------|--------|
| 73,176 | 129 | 22,343 | 5,714 | 3,562 | 31,748 |
| 73,177 | 128 | 22,610 | 5,776 | 3,588 | 32,102 |
| 73,178 | 122 | 22,608 | 5,785 | 3,598 | 32,113 |
| 73,179 | 119 | 22,765 | 5,846 | 3,622 | 32,352 |
| 73,180 | 118 | 22,836 | 5,881 | 3,661 | 32,496 |
| 73,181 | 113 | 22,869 | 5,888 | 3,697 | 32,567 |
| 73,182 | 113 | 22,896 | 5,893 | 3,705 | 32,607 |
| 73,183 | 107 | 22,844 | 5,838 | 3,700 | 32,489 |
| 73,184 | 106 | 23,015 | 5,930 | 3,763 | 32,814 |
| 73,185 | 91  | 23,023 | 5,937 | 3,766 | 32,817 |
| 73,186 | 91  | 22,690 | 5,898 | 3,754 | 32,433 |
| 73,187 | 90  | 23,479 | 6,117 | 3,870 | 33,556 |
| 73,188 | 94  | 23,531 | 6,145 | 3,868 | 33,638 |
| 73,189 | 95  | 23,852 | 6,241 | 3,923 | 34,111 |
| 73,190 | 94  | 23,780 | 6,156 | 3,866 | 33,896 |
| 73,191 | 97  | 24,162 | 6,218 | 3,895 | 34,372 |
| 73,192 | 98  | 24,496 | 6,285 | 3,938 | 34,817 |
| 73,193 | 92  | 24,412 | 6,296 | 3,951 | 34,751 |
| 73,194 | 92  | 24,617 | 6,307 | 3,971 | 34,987 |
| 73,195 | 95  | 24,907 | 6,383 | 3,997 | 35,382 |
| 73,196 | 97  | 24,915 | 6,414 | 4,003 | 35,429 |
| 73,197 | 92  | 24,848 | 6,422 | 4,014 | 35,376 |
| 73,198 | 93  | 24,671 | 6,391 | 4,006 | 35,161 |
| 73,199 | 96  | 24,496 | 6,384 | 4,007 | 34,983 |
| 73,200 | 100 | 24,313 | 6,380 | 3,989 | 34,782 |
| 73,201 | 101 | 24,137 | 6,359 | 3,978 | 34,575 |
| 73,202 | 106 | 23,918 | 6,326 | 3,923 | 34,273 |
| 73,203 | 106 | 23,641 | 6,280 | 3,870 | 33,897 |
| 73,204 | 98  | 23,555 | 6,313 | 3,914 | 33,880 |
| 73,205 | 100 | 23,163 | 6,213 | 3,849 | 33,325 |
| 73,206 | 107 | 23,205 | 6,237 | 3,853 | 33,402 |
| 73,207 | 107 | 23,327 | 6,259 | 3,871 | 33,564 |



|        |     |        |       |       |        |
|--------|-----|--------|-------|-------|--------|
| 73,208 | 104 | 22,863 | 6,181 | 3,821 | 32,969 |
| 73,209 | 105 | 22,624 | 6,140 | 3,800 | 32,669 |
| 73,210 | 105 | 22,522 | 6,117 | 3,775 | 32,519 |
| 73,211 | 103 | 22,685 | 6,122 | 3,806 | 32,716 |
| 73,212 | 101 | 22,395 | 6,047 | 3,752 | 32,295 |
| 73,213 | 102 | 22,463 | 6,023 | 3,742 | 32,330 |
| 73,214 | 100 | 22,451 | 6,026 | 3,748 | 32,325 |
| 73,215 | 100 | 22,426 | 6,015 | 3,736 | 32,277 |
| 73,216 | 101 | 22,384 | 6,026 | 3,741 | 32,252 |
| 73,217 | 98  | 22,214 | 6,020 | 3,726 | 32,058 |
| 73,218 | 98  | 22,173 | 6,020 | 3,724 | 32,015 |
| 73,219 | 99  | 22,357 | 6,089 | 3,751 | 32,296 |
| 73,220 | 102 | 22,318 | 6,090 | 3,779 | 32,289 |
| 73,221 | 104 | 22,158 | 6,073 | 3,774 | 32,109 |
| 73,222 | 103 | 21,917 | 6,048 | 3,779 | 31,847 |
| 73,223 | 100 | 21,725 | 6,040 | 3,773 | 31,638 |
| 73,224 | 104 | 21,704 | 6,031 | 3,781 | 31,620 |
| 73,225 | 114 | 21,510 | 5,991 | 3,748 | 31,363 |
| 73,226 | 113 | 21,212 | 5,927 | 3,696 | 30,948 |
| 73,227 | 113 | 21,082 | 5,910 | 3,699 | 30,804 |
| 73,228 | 111 | 20,826 | 5,895 | 3,681 | 30,513 |
| 73,229 | 112 | 20,862 | 5,895 | 3,688 | 30,557 |
| 73,230 | 112 | 20,442 | 5,810 | 3,597 | 29,961 |
| 73,231 | 112 | 20,369 | 5,788 | 3,579 | 29,848 |
| 73,232 | 111 | 20,395 | 5,801 | 3,601 | 29,908 |
| 73,233 | 111 | 20,297 | 5,768 | 3,597 | 29,773 |
| 73,234 | 109 | 19,985 | 5,730 | 3,583 | 29,407 |
| 73,235 | 108 | 19,629 | 5,673 | 3,558 | 28,968 |
| 73,236 | 106 | 19,286 | 5,647 | 3,561 | 28,600 |
| 73,237 | 111 | 19,165 | 5,614 | 3,539 | 28,429 |
| 73,238 | 112 | 19,256 | 5,634 | 3,562 | 28,564 |
| 73,239 | 108 | 19,009 | 5,575 | 3,546 | 28,238 |

|        |     |        |       |       |        |
|--------|-----|--------|-------|-------|--------|
| 73,240 | 107 | 18,740 | 5,553 | 3,514 | 27,914 |
| 73,241 | 104 | 18,930 | 5,665 | 3,594 | 28,293 |
| 73,242 | 102 | 19,022 | 5,733 | 3,645 | 28,502 |
| 73,243 | 101 | 18,994 | 5,722 | 3,642 | 28,459 |
| 73,244 | 103 | 19,201 | 5,801 | 3,685 | 28,790 |
| 73,245 | 104 | 19,207 | 5,837 | 3,699 | 28,847 |
| 73,246 | 101 | 19,506 | 5,896 | 3,772 | 29,275 |
| 73,247 | 97  | 19,801 | 5,942 | 3,806 | 29,646 |
| 73,248 | 97  | 19,897 | 5,961 | 3,809 | 29,764 |
| 73,249 | 94  | 19,996 | 5,993 | 3,812 | 29,895 |
| 73,250 | 92  | 20,056 | 6,000 | 3,805 | 29,953 |
| 73,251 | 86  | 19,897 | 5,937 | 3,756 | 29,676 |
| 73,252 | 89  | 20,165 | 6,030 | 3,804 | 30,088 |
| 73,253 | 85  | 20,324 | 6,053 | 3,824 | 30,286 |
| 73,254 | 85  | 20,143 | 5,993 | 3,777 | 29,998 |
| 73,255 | 76  | 19,759 | 5,907 | 3,719 | 29,461 |
| 73,256 | 76  | 19,843 | 5,951 | 3,742 | 29,612 |
| 73,257 | 73  | 19,981 | 6,005 | 3,770 | 29,829 |
| 73,258 | 76  | 20,130 | 6,082 | 3,805 | 30,093 |
| 73,259 | 77  | 19,870 | 6,028 | 3,751 | 29,726 |
| 73,260 | 76  | 19,594 | 5,951 | 3,697 | 29,318 |
| 73,261 | 74  | 19,743 | 5,980 | 3,719 | 29,516 |
| 73,262 | 76  | 19,830 | 6,068 | 3,746 | 29,720 |
| 73,263 | 78  | 19,894 | 6,098 | 3,763 | 29,833 |
| 73,264 | 80  | 19,874 | 6,129 | 3,784 | 29,867 |
| 73,265 | 77  | 19,964 | 6,185 | 3,811 | 30,037 |
| 73,266 | 76  | 19,900 | 6,160 | 3,811 | 29,947 |
| 73,267 | 79  | 19,826 | 6,102 | 3,761 | 29,768 |
| 73,268 | 80  | 20,129 | 6,144 | 3,784 | 30,137 |
| 73,269 | 81  | 20,222 | 6,161 | 3,781 | 30,245 |
| 73,270 | 82  | 20,285 | 6,142 | 3,790 | 30,299 |
| 73,271 | 78  | 20,317 | 6,135 | 3,779 | 30,309 |

|        |     |        |       |       |        |
|--------|-----|--------|-------|-------|--------|
| 73,272 | 74  | 20,271 | 6,036 | 3,710 | 30,091 |
| 73,273 | 74  | 20,474 | 6,095 | 3,734 | 30,377 |
| 73,274 | 75  | 20,736 | 6,174 | 3,773 | 30,758 |
| 73,275 | 78  | 20,698 | 6,155 | 3,766 | 30,697 |
| 73,276 | 67  | 20,416 | 6,056 | 3,729 | 30,268 |
| 73,277 | 71  | 20,461 | 6,120 | 3,757 | 30,409 |
| 73,278 | 73  | 20,518 | 6,139 | 3,777 | 30,507 |
| 73,279 | 73  | 20,468 | 6,091 | 3,767 | 30,399 |
| 73,280 | 73  | 20,553 | 6,095 | 3,777 | 30,498 |
| 73,281 | 72  | 20,499 | 6,075 | 3,773 | 30,419 |
| 73,282 | 76  | 20,534 | 6,111 | 3,758 | 30,479 |
| 73,283 | 77  | 20,638 | 6,082 | 3,741 | 30,538 |
| 73,284 | 79  | 20,671 | 6,062 | 3,705 | 30,517 |
| 73,285 | 82  | 20,788 | 5,993 | 3,639 | 30,502 |
| 73,286 | 85  | 21,204 | 6,027 | 3,662 | 30,978 |
| 73,287 | 88  | 21,581 | 6,080 | 3,678 | 31,427 |
| 73,288 | 87  | 21,630 | 6,056 | 3,681 | 31,454 |
| 73,289 | 86  | 21,412 | 5,971 | 3,635 | 31,104 |
| 73,290 | 86  | 21,384 | 5,959 | 3,623 | 31,052 |
| 73,291 | 86  | 21,503 | 5,938 | 3,597 | 31,124 |
| 73,292 | 91  | 21,504 | 5,899 | 3,567 | 31,061 |
| 73,293 | 91  | 21,279 | 5,845 | 3,516 | 30,731 |
| 73,294 | 88  | 20,992 | 5,708 | 3,462 | 30,250 |
| 73,295 | 86  | 20,904 | 5,658 | 3,422 | 30,070 |
| 73,296 | 93  | 21,232 | 5,752 | 3,478 | 30,555 |
| 73,297 | 97  | 21,013 | 5,704 | 3,417 | 30,231 |
| 73,298 | 97  | 20,922 | 5,648 | 3,396 | 30,063 |
| 73,299 | 97  | 20,716 | 5,579 | 3,372 | 29,764 |
| 73,300 | 99  | 20,885 | 5,597 | 3,376 | 29,957 |
| 73,301 | 98  | 21,146 | 5,614 | 3,418 | 30,276 |
| 73,302 | 96  | 21,226 | 5,582 | 3,404 | 30,308 |
| 73,303 | 101 | 21,340 | 5,598 | 3,422 | 30,461 |

|        |     |        |       |       |        |
|--------|-----|--------|-------|-------|--------|
| 73,304 | 102 | 21,189 | 5,563 | 3,422 | 30,276 |
| 73,305 | 104 | 21,338 | 5,574 | 3,429 | 30,445 |
| 73,306 | 105 | 21,369 | 5,552 | 3,397 | 30,423 |
| 73,307 | 110 | 21,465 | 5,555 | 3,389 | 30,519 |
| 73,308 | 113 | 21,770 | 5,612 | 3,420 | 30,915 |
| 73,309 | 109 | 21,780 | 5,549 | 3,388 | 30,826 |
| 73,310 | 107 | 21,717 | 5,562 | 3,386 | 30,772 |
| 73,311 | 113 | 21,799 | 5,583 | 3,421 | 30,916 |
| 73,312 | 114 | 22,010 | 5,629 | 3,426 | 31,179 |
| 73,313 | 115 | 22,070 | 5,670 | 3,463 | 31,318 |
| 73,314 | 125 | 22,132 | 5,660 | 3,463 | 31,380 |
| 73,315 | 122 | 22,151 | 5,627 | 3,437 | 31,337 |
| 73,316 | 129 | 21,844 | 5,511 | 3,364 | 30,848 |
| 73,317 | 130 | 21,891 | 5,510 | 3,375 | 30,906 |
| 73,318 | 130 | 21,926 | 5,480 | 3,381 | 30,917 |
| 73,319 | 130 | 21,985 | 5,501 | 3,414 | 31,030 |
| 73,320 | 130 | 21,883 | 5,498 | 3,427 | 30,938 |
| 73,321 | 136 | 22,191 | 5,584 | 3,487 | 31,398 |
| 73,322 | 136 | 22,034 | 5,564 | 3,457 | 31,191 |
| 73,323 | 135 | 21,993 | 5,542 | 3,465 | 31,135 |
| 73,324 | 138 | 22,088 | 5,579 | 3,496 | 31,301 |
| 73,325 | 140 | 22,073 | 5,572 | 3,497 | 31,282 |
| 73,326 | 133 | 22,069 | 5,570 | 3,500 | 31,272 |
| 73,327 | 130 | 22,169 | 5,523 | 3,484 | 31,306 |
| 73,328 | 131 | 22,233 | 5,518 | 3,483 | 31,365 |
| 73,329 | 132 | 22,382 | 5,531 | 3,463 | 31,508 |
| 73,330 | 131 | 22,635 | 5,591 | 3,503 | 31,860 |
| 73,331 | 132 | 22,336 | 5,558 | 3,462 | 31,488 |
| 73,332 | 131 | 22,275 | 5,546 | 3,461 | 31,413 |
| 73,333 | 127 | 22,114 | 5,529 | 3,455 | 31,225 |
| 73,334 | 136 | 22,246 | 5,636 | 3,495 | 31,513 |
| 73,335 | 135 | 22,156 | 5,633 | 3,487 | 31,411 |

|        |     |        |       |       |        |
|--------|-----|--------|-------|-------|--------|
| 73,336 | 137 | 22,076 | 5,632 | 3,484 | 31,329 |
| 73,337 | 138 | 22,096 | 5,665 | 3,503 | 31,402 |
| 73,338 | 134 | 21,803 | 5,612 | 3,486 | 31,035 |
| 73,339 | 134 | 21,907 | 5,689 | 3,528 | 31,258 |
| 73,340 | 137 | 21,862 | 5,718 | 3,494 | 31,211 |
| 73,341 | 140 | 21,674 | 5,679 | 3,488 | 30,981 |
| 73,342 | 140 | 21,475 | 5,633 | 3,463 | 30,711 |
| 73,343 | 140 | 21,266 | 5,613 | 3,450 | 30,469 |
| 73,344 | 139 | 21,165 | 5,542 | 3,428 | 30,274 |
| 73,345 | 144 | 21,189 | 5,644 | 3,457 | 30,434 |
| 73,346 | 144 | 21,106 | 5,654 | 3,448 | 30,352 |
| 73,347 | 144 | 21,232 | 5,691 | 3,455 | 30,522 |
| 73,348 | 141 | 20,999 | 5,640 | 3,417 | 30,197 |
| 73,349 | 148 | 20,978 | 5,686 | 3,433 | 30,245 |
| 73,350 | 151 | 20,897 | 5,688 | 3,444 | 30,180 |
| 73,351 | 157 | 20,715 | 5,675 | 3,417 | 29,964 |
| 73,352 | 157 | 20,408 | 5,590 | 3,384 | 29,539 |
| 73,353 | 157 | 20,393 | 5,591 | 3,404 | 29,545 |
| 73,354 | 155 | 20,445 | 5,598 | 3,414 | 29,612 |
| 73,355 | 159 | 20,307 | 5,590 | 3,407 | 29,463 |
| 73,356 | 160 | 20,282 | 5,606 | 3,414 | 29,462 |
| 73,357 | 161 | 19,866 | 5,529 | 3,391 | 28,947 |
| 73,358 | 157 | 19,832 | 5,501 | 3,388 | 28,878 |
| 73,359 | 157 | 19,784 | 5,529 | 3,396 | 28,866 |
| 73,360 | 154 | 19,685 | 5,546 | 3,413 | 28,798 |
| 73,361 | 153 | 20,042 | 5,661 | 3,494 | 29,350 |
| 73,362 | 151 | 20,241 | 5,727 | 3,503 | 29,622 |
| 73,363 | 145 | 19,583 | 5,544 | 3,398 | 28,670 |
| 73,364 | 145 | 19,834 | 5,602 | 3,447 | 29,028 |
| 73,365 | 135 | 19,911 | 5,647 | 3,473 | 29,166 |
| 73,366 | 135 | 19,894 | 5,672 | 3,475 | 29,176 |
| 73,367 | 127 | 19,761 | 5,678 | 3,492 | 29,058 |

|        |     |        |       |       |        |
|--------|-----|--------|-------|-------|--------|
| 73,368 | 123 | 20,162 | 5,844 | 3,567 | 29,696 |
| 73,369 | 123 | 19,835 | 5,775 | 3,518 | 29,251 |
| 73,370 | 121 | 19,833 | 5,837 | 3,538 | 29,329 |
| 73,371 | 120 | 19,878 | 5,881 | 3,543 | 29,422 |
| 73,372 | 114 | 19,835 | 5,877 | 3,541 | 29,367 |
| 73,373 | 116 | 19,850 | 5,905 | 3,567 | 29,438 |
| 73,374 | 114 | 19,867 | 5,936 | 3,594 | 29,511 |
| 73,375 | 110 | 19,609 | 5,861 | 3,544 | 29,124 |
| 73,376 | 111 | 19,678 | 5,877 | 3,533 | 29,199 |
| 73,377 | 115 | 19,848 | 5,936 | 3,571 | 29,470 |
| 73,378 | 115 | 19,795 | 5,942 | 3,551 | 29,403 |
| 73,379 | 117 | 19,751 | 5,950 | 3,550 | 29,368 |
| 73,380 | 116 | 19,496 | 5,891 | 3,530 | 29,033 |
| 73,381 | 115 | 19,434 | 5,865 | 3,533 | 28,947 |
| 73,382 | 116 | 19,420 | 5,864 | 3,528 | 28,928 |
| 73,383 | 116 | 19,232 | 5,812 | 3,503 | 28,663 |
| 73,384 | 120 | 19,634 | 5,957 | 3,578 | 29,289 |
| 73,385 | 119 | 19,576 | 5,900 | 3,555 | 29,150 |
| 73,386 | 118 | 19,576 | 5,881 | 3,565 | 29,140 |
| 73,387 | 113 | 19,291 | 5,815 | 3,536 | 28,755 |
| 73,388 | 110 | 19,091 | 5,773 | 3,522 | 28,496 |
| 73,389 | 112 | 19,159 | 5,746 | 3,514 | 28,531 |
| 73,390 | 114 | 19,274 | 5,749 | 3,499 | 28,636 |
| 73,391 | 117 | 19,309 | 5,721 | 3,509 | 28,656 |
| 73,392 | 114 | 19,448 | 5,743 | 3,497 | 28,802 |
| 73,393 | 108 | 19,278 | 5,703 | 3,499 | 28,588 |
| 73,394 | 115 | 18,861 | 5,577 | 3,424 | 27,977 |
| 73,395 | 120 | 19,149 | 5,615 | 3,471 | 28,355 |
| 73,396 | 121 | 19,443 | 5,648 | 3,504 | 28,716 |
| 73,397 | 125 | 19,721 | 5,678 | 3,522 | 29,046 |
| 73,398 | 118 | 19,513 | 5,608 | 3,505 | 28,744 |
| 73,399 | 116 | 19,589 | 5,615 | 3,508 | 28,828 |

|        |     |        |       |       |        |
|--------|-----|--------|-------|-------|--------|
| 73,400 | 107 | 19,759 | 5,632 | 3,514 | 29,012 |
| 73,401 | 108 | 19,923 | 5,702 | 3,539 | 29,272 |
| 73,402 | 102 | 19,688 | 5,672 | 3,503 | 28,965 |
| 73,403 | 102 | 19,600 | 5,660 | 3,473 | 28,835 |
| 73,404 | 101 | 19,532 | 5,668 | 3,470 | 28,771 |
| 73,405 | 94  | 19,915 | 5,774 | 3,520 | 29,303 |
| 73,406 | 88  | 19,928 | 5,735 | 3,509 | 29,260 |
| 73,407 | 88  | 20,213 | 5,814 | 3,542 | 29,657 |
| 73,408 | 84  | 20,365 | 5,828 | 3,568 | 29,845 |
| 73,409 | 81  | 20,557 | 5,863 | 3,600 | 30,101 |
| 73,410 | 81  | 20,553 | 5,870 | 3,613 | 30,117 |
| 73,411 | 78  | 20,693 | 5,820 | 3,607 | 30,198 |
| 73,412 | 79  | 20,677 | 5,779 | 3,591 | 30,126 |
| 73,413 | 87  | 20,401 | 5,724 | 3,587 | 29,799 |
| 73,414 | 88  | 20,229 | 5,682 | 3,539 | 29,538 |
| 73,415 | 94  | 20,359 | 5,667 | 3,530 | 29,650 |
| 73,416 | 96  | 20,785 | 5,725 | 3,571 | 30,177 |
| 73,417 | 102 | 20,892 | 5,724 | 3,597 | 30,315 |
| 73,418 | 107 | 20,688 | 5,640 | 3,521 | 29,956 |
| 73,419 | 107 | 20,786 | 5,637 | 3,534 | 30,064 |
| 73,420 | 107 | 20,996 | 5,659 | 3,554 | 30,316 |
| 73,421 | 114 | 21,207 | 5,613 | 3,575 | 30,509 |
| 73,422 | 115 | 21,257 | 5,624 | 3,568 | 30,564 |
| 73,423 | 117 | 21,150 | 5,563 | 3,525 | 30,355 |
| 73,424 | 117 | 21,483 | 5,621 | 3,537 | 30,758 |
| 73,425 | 118 | 21,807 | 5,662 | 3,563 | 31,150 |
| 73,426 | 120 | 21,971 | 5,697 | 3,576 | 31,364 |
| 73,427 | 126 | 22,193 | 5,722 | 3,620 | 31,661 |
| 73,428 | 122 | 22,217 | 5,685 | 3,610 | 31,634 |
| 73,429 | 121 | 22,312 | 5,738 | 3,627 | 31,798 |
| 73,430 | 129 | 22,474 | 5,763 | 3,634 | 32,000 |
| 73,431 | 134 | 22,564 | 5,746 | 3,642 | 32,086 |

|        |     |        |       |       |        |
|--------|-----|--------|-------|-------|--------|
| 73,432 | 139 | 22,844 | 5,826 | 3,666 | 32,475 |
| 73,433 | 134 | 23,142 | 5,896 | 3,697 | 32,869 |
| 73,434 | 141 | 23,139 | 5,852 | 3,665 | 32,797 |
| 73,435 | 142 | 23,166 | 5,848 | 3,664 | 32,820 |
| 73,436 | 142 | 23,190 | 5,815 | 3,654 | 32,801 |
| 73,437 | 146 | 23,389 | 5,871 | 3,700 | 33,106 |
| 73,438 | 148 | 23,382 | 5,832 | 3,668 | 33,030 |
| 73,439 | 145 | 23,367 | 5,835 | 3,676 | 33,023 |
| 73,440 | 145 | 23,378 | 5,826 | 3,671 | 33,020 |
| 73,441 | 145 | 23,453 | 5,852 | 3,670 | 33,120 |
| 73,442 | 142 | 23,710 | 5,912 | 3,707 | 33,471 |
| 73,443 | 145 | 23,564 | 5,852 | 3,685 | 33,246 |
| 73,444 | 142 | 23,329 | 5,798 | 3,647 | 32,916 |
| 73,445 | 142 | 23,661 | 5,857 | 3,699 | 33,359 |
| 73,446 | 136 | 23,983 | 5,943 | 3,742 | 33,804 |
| 73,447 | 136 | 24,102 | 6,035 | 3,780 | 34,053 |
| 73,448 | 137 | 24,127 | 6,091 | 3,802 | 34,157 |
| 73,449 | 137 | 24,035 | 6,091 | 3,809 | 34,072 |
| 73,450 | 138 | 23,903 | 6,123 | 3,806 | 33,970 |
| 73,451 | 138 | 23,955 | 6,147 | 3,810 | 34,050 |
| 73,452 | 139 | 24,066 | 6,123 | 3,826 | 34,154 |
| 73,453 | 144 | 23,919 | 6,086 | 3,806 | 33,955 |
| 73,454 | 144 | 24,083 | 6,093 | 3,820 | 34,140 |
| 73,455 | 146 | 24,011 | 6,064 | 3,814 | 34,035 |
| 73,456 | 153 | 24,226 | 6,113 | 3,829 | 34,321 |
| 73,457 | 163 | 24,104 | 6,119 | 3,828 | 34,214 |
| 73,458 | 175 | 24,053 | 6,105 | 3,816 | 34,149 |
| 73,459 | 178 | 23,849 | 6,067 | 3,761 | 33,855 |
| 73,460 | 179 | 23,814 | 6,043 | 3,734 | 33,770 |
| 73,461 | 189 | 23,948 | 6,042 | 3,743 | 33,922 |
| 73,462 | 190 | 23,646 | 5,997 | 3,688 | 33,521 |
| 73,463 | 190 | 24,058 | 6,078 | 3,707 | 34,033 |



|        |     |        |       |       |        |
|--------|-----|--------|-------|-------|--------|
| 73,464 | 193 | 24,010 | 6,065 | 3,714 | 33,982 |
| 73,465 | 192 | 23,901 | 6,063 | 3,726 | 33,882 |
| 73,466 | 187 | 23,966 | 6,118 | 3,738 | 34,009 |
| 73,467 | 190 | 23,923 | 6,147 | 3,747 | 34,007 |
| 73,468 | 188 | 23,701 | 6,086 | 3,713 | 33,688 |
| 73,469 | 183 | 23,582 | 6,045 | 3,698 | 33,508 |
| 73,470 | 184 | 23,891 | 6,175 | 3,773 | 34,023 |
| 73,471 | 185 | 24,229 | 6,239 | 3,798 | 34,451 |
| 73,472 | 180 | 24,003 | 6,219 | 3,762 | 34,164 |
| 73,473 | 178 | 24,017 | 6,219 | 3,767 | 34,181 |
| 73,474 | 176 | 24,181 | 6,312 | 3,834 | 34,503 |
| 73,475 | 180 | 23,983 | 6,271 | 3,821 | 34,255 |
| 73,476 | 180 | 23,851 | 6,233 | 3,793 | 34,057 |
| 73,477 | 173 | 23,091 | 6,116 | 3,694 | 33,074 |
| 73,478 | 173 | 23,297 | 6,164 | 3,717 | 33,351 |
| 73,479 | 173 | 23,324 | 6,148 | 3,716 | 33,361 |
| 73,480 | 173 | 23,567 | 6,182 | 3,739 | 33,661 |
| 73,481 | 165 | 23,816 | 6,232 | 3,790 | 34,003 |
| 73,482 | 168 | 23,568 | 6,199 | 3,736 | 33,671 |
| 73,483 | 164 | 23,392 | 6,142 | 3,711 | 33,409 |
| 73,484 | 168 | 23,724 | 6,199 | 3,754 | 33,845 |
| 73,485 | 160 | 23,553 | 6,140 | 3,738 | 33,591 |
| 73,486 | 159 | 23,608 | 6,133 | 3,732 | 33,632 |
| 73,487 | 158 | 23,652 | 6,138 | 3,732 | 33,680 |
| 73,488 | 157 | 23,637 | 6,134 | 3,731 | 33,659 |
| 73,489 | 155 | 23,568 | 6,149 | 3,735 | 33,607 |
| 73,490 | 155 | 23,801 | 6,171 | 3,773 | 33,900 |
| 73,491 | 155 | 23,482 | 6,082 | 3,755 | 33,474 |
| 73,492 | 155 | 23,517 | 6,099 | 3,756 | 33,527 |
| 73,493 | 158 | 23,656 | 6,109 | 3,768 | 33,691 |
| 73,494 | 155 | 23,649 | 6,106 | 3,763 | 33,673 |
| 73,495 | 154 | 23,462 | 6,069 | 3,717 | 33,402 |

|        |     |        |       |       |        |
|--------|-----|--------|-------|-------|--------|
| 73,496 | 154 | 23,510 | 6,066 | 3,717 | 33,447 |
| 73,497 | 155 | 23,526 | 6,012 | 3,711 | 33,404 |
| 73,498 | 165 | 23,827 | 6,060 | 3,735 | 33,787 |
| 73,499 | 159 | 23,933 | 6,018 | 3,727 | 33,837 |
| 73,500 | 161 | 23,798 | 5,917 | 3,685 | 33,561 |
| 73,501 | 164 | 23,700 | 5,898 | 3,684 | 33,446 |
| 73,502 | 168 | 23,055 | 5,729 | 3,570 | 32,522 |
| 73,503 | 166 | 23,368 | 5,772 | 3,593 | 32,899 |
| 73,504 | 167 | 23,722 | 5,835 | 3,623 | 33,347 |
| 73,505 | 167 | 23,718 | 5,837 | 3,632 | 33,354 |
| 73,506 | 162 | 23,627 | 5,778 | 3,607 | 33,174 |
| 73,507 | 174 | 23,676 | 5,791 | 3,611 | 33,252 |
| 73,508 | 164 | 23,475 | 5,717 | 3,568 | 32,924 |
| 73,509 | 157 | 23,615 | 5,751 | 3,595 | 33,118 |
| 73,510 | 157 | 23,300 | 5,658 | 3,554 | 32,669 |
| 73,511 | 157 | 23,046 | 5,607 | 3,533 | 32,343 |
| 73,512 | 144 | 23,377 | 5,699 | 3,613 | 32,833 |
| 73,513 | 142 | 23,043 | 5,629 | 3,576 | 32,390 |
| 73,514 | 141 | 23,214 | 5,631 | 3,595 | 32,581 |
| 73,515 | 137 | 23,524 | 5,644 | 3,584 | 32,889 |
| 73,516 | 140 | 23,681 | 5,612 | 3,594 | 33,027 |
| 73,517 | 134 | 23,446 | 5,545 | 3,566 | 32,691 |
| 73,518 | 137 | 23,585 | 5,576 | 3,575 | 32,873 |
| 73,519 | 135 | 23,543 | 5,570 | 3,579 | 32,827 |
| 73,520 | 138 | 23,529 | 5,576 | 3,585 | 32,828 |
| 73,521 | 136 | 23,228 | 5,502 | 3,549 | 32,415 |
| 73,522 | 139 | 23,899 | 5,632 | 3,687 | 33,357 |
| 73,523 | 144 | 23,832 | 5,689 | 3,688 | 33,353 |
| 73,524 | 147 | 23,963 | 5,727 | 3,738 | 33,575 |
| 73,525 | 142 | 23,806 | 5,658 | 3,661 | 33,267 |
| 73,526 | 147 | 23,897 | 5,669 | 3,676 | 33,389 |
| 73,527 | 146 | 23,625 | 5,603 | 3,653 | 33,027 |

|        |     |        |       |       |        |
|--------|-----|--------|-------|-------|--------|
| 73,528 | 144 | 24,345 | 5,735 | 3,762 | 33,986 |
| 73,529 | 144 | 24,074 | 5,676 | 3,735 | 33,629 |
| 73,530 | 142 | 24,232 | 5,714 | 3,768 | 33,856 |
| 73,531 | 151 | 24,424 | 5,756 | 3,775 | 34,106 |
| 73,532 | 142 | 24,374 | 5,776 | 3,750 | 34,042 |
| 73,533 | 146 | 24,647 | 5,834 | 3,797 | 34,424 |
| 73,534 | 140 | 24,420 | 5,798 | 3,799 | 34,157 |
| 73,535 | 145 | 24,669 | 5,836 | 3,844 | 34,494 |
| 73,536 | 149 | 24,367 | 5,768 | 3,786 | 34,070 |
| 73,537 | 149 | 24,588 | 5,849 | 3,838 | 34,424 |
| 73,538 | 147 | 24,549 | 5,844 | 3,840 | 34,380 |
| 73,539 | 153 | 24,883 | 5,893 | 3,866 | 34,795 |
| 73,540 | 151 | 24,726 | 5,859 | 3,842 | 34,578 |
| 73,541 | 152 | 24,815 | 5,962 | 3,840 | 34,769 |
| 73,542 | 153 | 24,704 | 5,957 | 3,829 | 34,643 |
| 73,543 | 149 | 24,638 | 5,964 | 3,834 | 34,585 |
| 73,544 | 152 | 24,782 | 6,044 | 3,899 | 34,877 |
| 73,545 | 151 | 24,724 | 6,031 | 3,907 | 34,813 |
| 73,546 | 152 | 24,705 | 6,018 | 3,921 | 34,796 |
| 73,547 | 155 | 24,756 | 6,025 | 3,935 | 34,871 |
| 73,548 | 154 | 24,778 | 6,023 | 3,912 | 34,867 |
| 73,549 | 144 | 24,828 | 6,010 | 3,920 | 34,902 |
| 73,550 | 144 | 24,503 | 5,956 | 3,890 | 34,493 |
| 73,551 | 143 | 24,494 | 5,953 | 3,878 | 34,468 |
| 73,552 | 143 | 24,556 | 5,955 | 3,868 | 34,522 |
| 73,553 | 138 | 24,614 | 5,976 | 3,882 | 34,610 |
| 73,554 | 143 | 24,966 | 6,069 | 3,919 | 35,097 |
| 73,555 | 140 | 24,974 | 6,070 | 3,918 | 35,102 |
| 73,556 | 140 | 25,062 | 6,047 | 3,921 | 35,170 |
| 73,557 | 130 | 24,730 | 5,914 | 3,859 | 34,633 |
| 73,558 | 131 | 24,906 | 5,964 | 3,886 | 34,887 |
| 73,559 | 130 | 25,256 | 6,040 | 3,925 | 35,351 |

|        |     |        |       |       |        |
|--------|-----|--------|-------|-------|--------|
| 73,560 | 131 | 25,055 | 6,031 | 3,905 | 35,122 |
| 73,561 | 133 | 25,168 | 6,007 | 3,879 | 35,187 |
| 73,562 | 133 | 25,189 | 5,998 | 3,880 | 35,200 |
| 73,563 | 135 | 25,445 | 6,034 | 3,901 | 35,515 |
| 73,564 | 135 | 25,559 | 6,051 | 3,899 | 35,644 |
| 73,565 | 140 | 25,454 | 6,038 | 3,879 | 35,511 |
| 73,566 | 140 | 24,958 | 5,951 | 3,826 | 34,875 |
| 73,567 | 141 | 25,184 | 5,997 | 3,845 | 35,167 |
| 73,568 | 143 | 24,762 | 5,869 | 3,775 | 34,549 |
| 73,569 | 141 | 24,992 | 5,897 | 3,774 | 34,804 |
| 73,570 | 146 | 25,209 | 5,911 | 3,784 | 35,050 |
| 73,571 | 144 | 25,296 | 5,892 | 3,760 | 35,092 |
| 73,572 | 146 | 25,221 | 5,823 | 3,710 | 34,900 |
| 73,573 | 150 | 25,256 | 5,860 | 3,733 | 34,999 |
| 73,574 | 146 | 25,169 | 5,742 | 3,715 | 34,772 |
| 73,575 | 146 | 24,944 | 5,656 | 3,650 | 34,396 |
| 73,576 | 143 | 24,570 | 5,550 | 3,583 | 33,846 |
| 73,577 | 142 | 24,532 | 5,533 | 3,576 | 33,783 |
| 73,578 | 143 | 24,417 | 5,512 | 3,534 | 33,606 |
| 73,579 | 144 | 24,229 | 5,465 | 3,531 | 33,369 |
| 73,580 | 150 | 24,206 | 5,456 | 3,515 | 33,327 |
| 73,581 | 147 | 23,938 | 5,392 | 3,458 | 32,935 |
| 73,582 | 152 | 23,721 | 5,329 | 3,452 | 32,654 |
| 73,583 | 151 | 23,669 | 5,292 | 3,420 | 32,532 |
| 73,584 | 155 | 23,606 | 5,233 | 3,388 | 32,382 |
| 73,585 | 157 | 23,523 | 5,223 | 3,370 | 32,273 |
| 73,586 | 147 | 23,528 | 5,227 | 3,355 | 32,257 |
| 73,587 | 145 | 23,488 | 5,215 | 3,331 | 32,179 |
| 73,588 | 158 | 23,388 | 5,185 | 3,311 | 32,042 |
| 73,589 | 155 | 23,209 | 5,132 | 3,273 | 31,769 |
| 73,590 | 158 | 23,881 | 5,247 | 3,359 | 32,645 |
| 73,591 | 162 | 23,971 | 5,246 | 3,389 | 32,768 |

|        |     |        |       |       |        |
|--------|-----|--------|-------|-------|--------|
| 73,592 | 162 | 24,037 | 5,279 | 3,459 | 32,937 |
| 73,593 | 166 | 24,250 | 5,270 | 3,445 | 33,131 |
| 73,594 | 173 | 24,649 | 5,334 | 3,491 | 33,647 |
| 73,595 | 173 | 24,724 | 5,293 | 3,457 | 33,647 |
| 73,596 | 174 | 24,711 | 5,290 | 3,455 | 33,630 |
| 73,597 | 175 | 25,325 | 5,404 | 3,518 | 34,422 |
| 73,598 | 171 | 24,950 | 5,312 | 3,462 | 33,895 |
| 73,599 | 172 | 25,133 | 5,366 | 3,499 | 34,170 |
| 73,600 | 177 | 25,387 | 5,438 | 3,534 | 34,536 |
| 73,601 | 175 | 25,361 | 5,459 | 3,530 | 34,525 |
| 73,602 | 174 | 25,305 | 5,441 | 3,524 | 34,444 |
| 73,603 | 174 | 25,635 | 5,538 | 3,577 | 34,924 |
| 73,604 | 172 | 25,444 | 5,488 | 3,566 | 34,670 |
| 73,605 | 173 | 25,404 | 5,465 | 3,559 | 34,601 |
| 73,606 | 179 | 25,530 | 5,493 | 3,585 | 34,787 |
| 73,607 | 178 | 25,339 | 5,507 | 3,568 | 34,592 |
| 73,608 | 179 | 25,284 | 5,514 | 3,558 | 34,535 |
| 73,609 | 182 | 25,364 | 5,535 | 3,579 | 34,660 |
| 73,610 | 186 | 25,287 | 5,510 | 3,549 | 34,532 |
| 73,611 | 188 | 25,252 | 5,494 | 3,559 | 34,493 |
| 73,612 | 185 | 25,133 | 5,495 | 3,546 | 34,359 |
| 73,613 | 189 | 25,600 | 5,673 | 3,616 | 35,078 |
| 73,614 | 193 | 25,761 | 5,758 | 3,640 | 35,352 |
| 73,615 | 191 | 25,484 | 5,740 | 3,634 | 35,049 |
| 73,616 | 189 | 25,505 | 5,743 | 3,647 | 35,084 |
| 73,617 | 187 | 25,266 | 5,723 | 3,642 | 34,818 |
| 73,618 | 186 | 25,101 | 5,725 | 3,634 | 34,646 |
| 73,619 | 183 | 24,787 | 5,673 | 3,595 | 34,238 |
| 73,620 | 182 | 24,472 | 5,638 | 3,576 | 33,868 |
| 73,621 | 185 | 25,501 | 5,913 | 3,736 | 35,335 |
| 73,622 | 195 | 25,706 | 5,998 | 3,790 | 35,689 |
| 73,623 | 188 | 25,703 | 6,016 | 3,777 | 35,684 |

|        |     |        |       |       |        |
|--------|-----|--------|-------|-------|--------|
| 73,624 | 185 | 25,355 | 6,014 | 3,751 | 35,305 |
| 73,625 | 185 | 25,537 | 6,013 | 3,750 | 35,485 |
| 73,626 | 182 | 25,458 | 5,992 | 3,747 | 35,379 |
| 73,627 | 187 | 25,735 | 6,062 | 3,767 | 35,751 |
| 73,628 | 183 | 25,791 | 6,076 | 3,779 | 35,829 |
| 73,629 | 182 | 25,820 | 6,088 | 3,779 | 35,869 |
| 73,630 | 181 | 25,611 | 6,051 | 3,733 | 35,576 |
| 73,631 | 179 | 25,885 | 6,119 | 3,765 | 35,948 |
| 73,632 | 169 | 25,375 | 6,019 | 3,729 | 35,292 |
| 73,633 | 175 | 25,699 | 6,052 | 3,763 | 35,689 |
| 73,634 | 178 | 25,685 | 6,070 | 3,773 | 35,706 |
| 73,635 | 173 | 25,325 | 6,041 | 3,755 | 35,294 |
| 73,636 | 175 | 25,590 | 6,133 | 3,826 | 35,724 |
| 73,637 | 178 | 25,576 | 6,152 | 3,855 | 35,761 |
| 73,638 | 178 | 25,566 | 6,156 | 3,873 | 35,773 |
| 73,639 | 167 | 25,498 | 6,156 | 3,866 | 35,687 |
| 73,640 | 162 | 25,308 | 6,173 | 3,841 | 35,484 |
| 73,641 | 162 | 25,198 | 6,136 | 3,826 | 35,322 |
| 73,642 | 160 | 25,070 | 6,109 | 3,800 | 35,139 |
| 73,643 | 164 | 25,418 | 6,170 | 3,825 | 35,577 |
| 73,644 | 161 | 25,384 | 6,165 | 3,812 | 35,522 |
| 73,645 | 162 | 25,020 | 6,124 | 3,749 | 35,055 |
| 73,646 | 160 | 24,628 | 6,054 | 3,697 | 34,539 |
| 73,647 | 160 | 25,122 | 6,185 | 3,822 | 35,289 |
| 73,648 | 159 | 24,719 | 6,112 | 3,771 | 34,761 |
| 73,649 | 168 | 24,550 | 6,110 | 3,754 | 34,582 |
| 73,650 | 168 | 24,381 | 6,093 | 3,738 | 34,380 |
| 73,651 | 166 | 24,321 | 6,082 | 3,731 | 34,300 |
| 73,652 | 169 | 24,337 | 6,088 | 3,743 | 34,337 |
| 73,653 | 172 | 24,291 | 6,048 | 3,732 | 34,243 |
| 73,654 | 171 | 24,270 | 6,035 | 3,740 | 34,216 |
| 73,655 | 173 | 24,292 | 6,080 | 3,749 | 34,294 |

|        |     |        |       |       |        |
|--------|-----|--------|-------|-------|--------|
| 73,656 | 171 | 24,283 | 6,085 | 3,746 | 34,285 |
| 73,657 | 163 | 24,068 | 6,066 | 3,743 | 34,040 |
| 73,658 | 161 | 24,033 | 6,069 | 3,747 | 34,010 |
| 73,659 | 161 | 24,090 | 6,044 | 3,742 | 34,037 |
| 73,660 | 161 | 23,957 | 6,024 | 3,746 | 33,888 |
| 73,661 | 155 | 24,274 | 6,096 | 3,811 | 34,336 |
| 73,662 | 150 | 24,192 | 6,112 | 3,800 | 34,254 |
| 73,663 | 149 | 24,107 | 6,095 | 3,809 | 34,160 |
| 73,664 | 149 | 24,099 | 6,085 | 3,820 | 34,153 |
| 73,665 | 144 | 23,928 | 5,994 | 3,793 | 33,859 |
| 73,666 | 144 | 23,967 | 5,990 | 3,781 | 33,882 |
| 73,667 | 144 | 23,941 | 6,016 | 3,776 | 33,877 |
| 73,668 | 140 | 24,012 | 5,997 | 3,794 | 33,943 |
| 73,669 | 140 | 24,198 | 5,981 | 3,817 | 34,136 |
| 73,670 | 140 | 24,158 | 5,986 | 3,819 | 34,103 |
| 73,671 | 138 | 23,903 | 5,960 | 3,802 | 33,803 |
| 73,672 | 154 | 24,489 | 6,041 | 3,897 | 34,581 |
| 73,673 | 142 | 24,226 | 6,006 | 3,847 | 34,221 |
| 73,674 | 149 | 23,805 | 5,869 | 3,790 | 33,613 |
| 73,675 | 148 | 23,985 | 5,874 | 3,821 | 33,828 |
| 73,676 | 152 | 24,094 | 5,954 | 3,869 | 34,069 |
| 73,677 | 153 | 24,057 | 5,946 | 3,874 | 34,030 |
| 73,678 | 154 | 24,116 | 5,935 | 3,875 | 34,080 |
| 73,679 | 156 | 24,125 | 5,966 | 3,895 | 34,142 |
| 73,680 | 155 | 23,921 | 5,926 | 3,864 | 33,866 |
| 73,681 | 158 | 23,917 | 5,933 | 3,878 | 33,886 |
| 73,682 | 154 | 23,554 | 5,834 | 3,838 | 33,380 |
| 73,683 | 155 | 23,695 | 5,861 | 3,839 | 33,550 |
| 73,684 | 150 | 23,749 | 5,856 | 3,827 | 33,582 |
| 73,685 | 152 | 23,841 | 5,897 | 3,842 | 33,732 |
| 73,686 | 156 | 24,050 | 5,953 | 3,853 | 34,012 |
| 73,687 | 154 | 23,949 | 5,906 | 3,804 | 33,813 |

|        |     |        |       |       |        |
|--------|-----|--------|-------|-------|--------|
| 73,688 | 152 | 23,922 | 5,897 | 3,812 | 33,783 |
| 73,689 | 151 | 23,789 | 5,908 | 3,796 | 33,644 |
| 73,690 | 148 | 23,332 | 5,819 | 3,763 | 33,062 |
| 73,691 | 150 | 23,301 | 5,850 | 3,771 | 33,072 |
| 73,692 | 147 | 22,965 | 5,780 | 3,713 | 32,605 |
| 73,693 | 148 | 22,776 | 5,742 | 3,691 | 32,357 |
| 73,694 | 144 | 22,664 | 5,749 | 3,676 | 32,233 |
| 73,695 | 135 | 22,212 | 5,664 | 3,624 | 31,635 |
| 73,696 | 134 | 22,197 | 5,651 | 3,623 | 31,605 |
| 73,697 | 134 | 22,180 | 5,639 | 3,602 | 31,555 |
| 73,698 | 135 | 22,211 | 5,623 | 3,584 | 31,553 |
| 73,699 | 131 | 21,840 | 5,536 | 3,529 | 31,036 |
| 73,700 | 127 | 21,796 | 5,600 | 3,586 | 31,109 |
| 73,701 | 127 | 21,709 | 5,608 | 3,591 | 31,035 |
| 73,702 | 129 | 21,797 | 5,654 | 3,631 | 31,211 |
| 73,703 | 134 | 21,742 | 5,730 | 3,646 | 31,252 |
| 73,704 | 133 | 21,882 | 5,797 | 3,677 | 31,489 |
| 73,705 | 132 | 21,906 | 5,823 | 3,666 | 31,527 |
| 73,706 | 130 | 21,908 | 5,823 | 3,691 | 31,552 |
| 73,707 | 130 | 21,661 | 5,766 | 3,669 | 31,226 |
| 73,708 | 131 | 21,776 | 5,789 | 3,663 | 31,359 |
| 73,709 | 132 | 21,706 | 5,789 | 3,680 | 31,307 |
| 73,710 | 130 | 21,657 | 5,780 | 3,692 | 31,259 |
| 73,711 | 132 | 21,722 | 5,791 | 3,686 | 31,331 |
| 73,712 | 128 | 21,495 | 5,739 | 3,673 | 31,035 |
| 73,713 | 133 | 21,776 | 5,760 | 3,711 | 31,380 |
| 73,714 | 136 | 21,515 | 5,683 | 3,665 | 30,999 |
| 73,715 | 135 | 21,526 | 5,666 | 3,674 | 31,001 |
| 73,716 | 136 | 21,540 | 5,681 | 3,679 | 31,036 |
| 73,717 | 139 | 21,704 | 5,673 | 3,680 | 31,196 |
| 73,718 | 140 | 22,062 | 5,775 | 3,743 | 31,720 |
| 73,719 | 139 | 21,927 | 5,754 | 3,718 | 31,538 |



|        |     |        |       |       |        |
|--------|-----|--------|-------|-------|--------|
| 73,720 | 144 | 21,964 | 5,712 | 3,681 | 31,501 |
| 73,721 | 147 | 22,250 | 5,806 | 3,695 | 31,898 |
| 73,722 | 138 | 22,513 | 5,879 | 3,746 | 32,276 |
| 73,723 | 128 | 21,562 | 5,699 | 3,588 | 30,977 |
| 73,724 | 138 | 21,882 | 5,766 | 3,633 | 31,419 |
| 73,725 | 132 | 21,911 | 5,771 | 3,632 | 31,446 |
| 73,726 | 133 | 22,152 | 5,832 | 3,670 | 31,787 |
| 73,727 | 132 | 22,415 | 5,908 | 3,700 | 32,155 |
| 73,728 | 131 | 22,306 | 5,903 | 3,685 | 32,025 |
| 73,729 | 130 | 22,426 | 5,928 | 3,690 | 32,174 |
| 73,730 | 132 | 22,464 | 5,944 | 3,677 | 32,217 |
| 73,731 | 126 | 22,284 | 5,867 | 3,636 | 31,913 |
| 73,732 | 126 | 22,156 | 5,880 | 3,629 | 31,791 |
| 73,733 | 121 | 22,178 | 5,912 | 3,637 | 31,848 |
| 73,734 | 120 | 22,034 | 5,882 | 3,639 | 31,675 |
| 73,735 | 123 | 22,238 | 5,929 | 3,659 | 31,949 |
| 73,736 | 122 | 22,344 | 5,947 | 3,661 | 32,074 |
| 73,737 | 118 | 22,325 | 5,936 | 3,684 | 32,063 |
| 73,738 | 118 | 22,364 | 5,935 | 3,683 | 32,100 |
| 73,739 | 118 | 22,528 | 5,941 | 3,681 | 32,268 |
| 73,740 | 116 | 22,182 | 5,759 | 3,599 | 31,656 |
| 73,741 | 117 | 22,512 | 5,813 | 3,608 | 32,050 |
| 73,742 | 117 | 22,766 | 5,856 | 3,649 | 32,388 |
| 73,743 | 119 | 23,041 | 5,910 | 3,706 | 32,776 |
| 73,744 | 119 | 22,855 | 5,853 | 3,678 | 32,505 |
| 73,745 | 120 | 22,586 | 5,783 | 3,632 | 32,121 |
| 73,746 | 122 | 22,971 | 5,857 | 3,673 | 32,623 |
| 73,747 | 122 | 22,924 | 5,856 | 3,646 | 32,548 |
| 73,748 | 119 | 22,930 | 5,866 | 3,648 | 32,563 |
| 73,749 | 122 | 22,897 | 5,846 | 3,635 | 32,500 |
| 73,750 | 123 | 22,972 | 5,809 | 3,590 | 32,494 |
| 73,751 | 128 | 23,268 | 5,851 | 3,622 | 32,869 |

|        |     |        |       |       |        |
|--------|-----|--------|-------|-------|--------|
| 73,752 | 133 | 23,590 | 5,917 | 3,669 | 33,309 |
| 73,753 | 129 | 23,420 | 5,862 | 3,626 | 33,037 |
| 73,754 | 132 | 23,455 | 5,802 | 3,612 | 33,001 |
| 73,755 | 133 | 23,465 | 5,787 | 3,614 | 32,999 |
| 73,756 | 143 | 23,640 | 5,843 | 3,649 | 33,275 |
| 73,757 | 142 | 23,572 | 5,831 | 3,635 | 33,180 |
| 73,758 | 153 | 23,674 | 5,820 | 3,621 | 33,268 |
| 73,759 | 152 | 23,686 | 5,831 | 3,613 | 33,282 |
| 73,760 | 149 | 23,763 | 5,845 | 3,600 | 33,357 |
| 73,761 | 148 | 23,836 | 5,841 | 3,603 | 33,428 |
| 73,762 | 154 | 24,167 | 5,904 | 3,644 | 33,869 |
| 73,763 | 155 | 23,883 | 5,856 | 3,577 | 33,471 |
| 73,764 | 153 | 23,839 | 5,868 | 3,575 | 33,435 |
| 73,765 | 150 | 24,027 | 5,935 | 3,602 | 33,714 |
| 73,766 | 155 | 23,743 | 5,891 | 3,566 | 33,355 |
| 73,767 | 152 | 23,443 | 5,845 | 3,538 | 32,978 |
| 73,768 | 150 | 23,490 | 5,887 | 3,570 | 33,097 |
| 73,769 | 149 | 23,178 | 5,831 | 3,497 | 32,655 |
| 73,770 | 158 | 23,398 | 5,879 | 3,534 | 32,969 |
| 73,771 | 153 | 23,388 | 5,879 | 3,520 | 32,940 |
| 73,772 | 151 | 23,364 | 5,820 | 3,522 | 32,857 |
| 73,773 | 153 | 22,999 | 5,726 | 3,465 | 32,343 |
| 73,774 | 153 | 23,056 | 5,741 | 3,469 | 32,419 |
| 73,775 | 149 | 23,322 | 5,771 | 3,479 | 32,721 |
| 73,776 | 156 | 23,001 | 5,699 | 3,451 | 32,307 |
| 73,777 | 155 | 23,075 | 5,750 | 3,458 | 32,438 |
| 73,778 | 156 | 22,915 | 5,673 | 3,433 | 32,177 |
| 73,779 | 161 | 23,092 | 5,707 | 3,442 | 32,402 |
| 73,780 | 158 | 23,143 | 5,716 | 3,465 | 32,482 |
| 73,781 | 155 | 22,893 | 5,646 | 3,442 | 32,136 |
| 73,782 | 155 | 23,078 | 5,707 | 3,470 | 32,410 |
| 73,783 | 165 | 23,226 | 5,729 | 3,490 | 32,610 |

|        |     |        |       |       |        |
|--------|-----|--------|-------|-------|--------|
| 73,784 | 167 | 23,471 | 5,747 | 3,533 | 32,918 |
| 73,785 | 167 | 23,393 | 5,742 | 3,528 | 32,830 |
| 73,786 | 164 | 23,316 | 5,760 | 3,532 | 32,772 |
| 73,787 | 166 | 23,440 | 5,808 | 3,569 | 32,983 |
| 73,788 | 168 | 23,491 | 5,821 | 3,586 | 33,066 |
| 73,789 | 170 | 23,244 | 5,770 | 3,561 | 32,745 |
| 73,790 | 171 | 23,312 | 5,809 | 3,585 | 32,877 |
| 73,791 | 181 | 23,055 | 5,789 | 3,555 | 32,580 |
| 73,792 | 181 | 22,890 | 5,770 | 3,552 | 32,393 |
| 73,793 | 188 | 22,891 | 5,847 | 3,582 | 32,508 |
| 73,794 | 189 | 22,826 | 5,850 | 3,574 | 32,439 |
| 73,795 | 186 | 22,872 | 5,877 | 3,585 | 32,520 |
| 73,796 | 185 | 22,695 | 5,831 | 3,577 | 32,288 |
| 73,797 | 185 | 22,548 | 5,791 | 3,559 | 32,083 |
| 73,798 | 185 | 22,731 | 5,844 | 3,606 | 32,366 |
| 73,799 | 185 | 22,776 | 5,842 | 3,589 | 32,392 |
| 73,800 | 181 | 22,869 | 5,860 | 3,603 | 32,513 |
| 73,801 | 176 | 22,875 | 5,850 | 3,597 | 32,498 |
| 73,802 | 173 | 23,120 | 5,918 | 3,612 | 32,823 |
| 73,803 | 164 | 22,826 | 5,827 | 3,554 | 32,371 |
| 73,804 | 163 | 22,775 | 5,837 | 3,557 | 32,332 |
| 73,805 | 152 | 22,594 | 5,840 | 3,567 | 32,153 |
| 73,806 | 146 | 22,198 | 5,776 | 3,522 | 31,642 |
| 73,807 | 143 | 21,965 | 5,670 | 3,473 | 31,251 |
| 73,808 | 144 | 22,026 | 5,689 | 3,473 | 31,332 |
| 73,809 | 134 | 21,815 | 5,656 | 3,452 | 31,057 |
| 73,810 | 133 | 21,729 | 5,663 | 3,454 | 30,979 |
| 73,811 | 133 | 21,809 | 5,725 | 3,495 | 31,162 |
| 73,812 | 140 | 21,778 | 5,747 | 3,509 | 31,174 |
| 73,813 | 136 | 21,723 | 5,758 | 3,498 | 31,115 |
| 73,814 | 132 | 21,542 | 5,733 | 3,486 | 30,893 |
| 73,815 | 133 | 21,691 | 5,794 | 3,521 | 31,139 |

|        |     |        |       |       |        |
|--------|-----|--------|-------|-------|--------|
| 73,816 | 124 | 21,714 | 5,806 | 3,515 | 31,159 |
| 73,817 | 127 | 21,757 | 5,802 | 3,505 | 31,191 |
| 73,818 | 129 | 21,794 | 5,823 | 3,517 | 31,263 |
| 73,819 | 130 | 21,698 | 5,868 | 3,520 | 31,216 |
| 73,820 | 131 | 21,635 | 5,846 | 3,521 | 31,133 |
| 73,821 | 124 | 21,497 | 5,836 | 3,532 | 30,989 |
| 73,822 | 125 | 21,518 | 5,882 | 3,539 | 31,064 |
| 73,823 | 131 | 21,340 | 5,924 | 3,556 | 30,951 |
| 73,824 | 129 | 21,247 | 5,932 | 3,584 | 30,892 |
| 73,825 | 124 | 21,012 | 5,886 | 3,568 | 30,590 |
| 73,826 | 125 | 21,213 | 5,979 | 3,631 | 30,948 |
| 73,827 | 123 | 21,180 | 5,941 | 3,607 | 30,851 |
| 73,828 | 123 | 21,277 | 5,956 | 3,612 | 30,968 |
| 73,829 | 118 | 21,409 | 6,056 | 3,650 | 31,233 |
| 73,830 | 115 | 21,215 | 6,028 | 3,637 | 30,995 |
| 73,831 | 119 | 21,001 | 5,986 | 3,636 | 30,742 |
| 73,832 | 122 | 21,037 | 5,998 | 3,680 | 30,837 |
| 73,833 | 114 | 21,175 | 6,051 | 3,720 | 31,060 |
| 73,834 | 114 | 21,059 | 6,065 | 3,721 | 30,959 |
| 73,835 | 112 | 21,189 | 6,162 | 3,770 | 31,233 |
| 73,836 | 121 | 21,348 | 6,192 | 3,780 | 31,441 |
| 73,837 | 124 | 21,595 | 6,246 | 3,799 | 31,764 |
| 73,838 | 122 | 21,609 | 6,286 | 3,816 | 31,833 |
| 73,839 | 117 | 21,618 | 6,307 | 3,825 | 31,867 |
| 73,840 | 101 | 21,027 | 6,125 | 3,722 | 30,975 |
| 73,841 | 101 | 21,350 | 6,206 | 3,773 | 31,430 |
| 73,842 | 100 | 21,695 | 6,280 | 3,801 | 31,876 |
| 73,843 | 98  | 21,976 | 6,358 | 3,853 | 32,285 |
| 73,844 | 98  | 22,021 | 6,350 | 3,853 | 32,322 |
| 73,845 | 103 | 22,016 | 6,325 | 3,834 | 32,278 |
| 73,846 | 101 | 21,958 | 6,272 | 3,808 | 32,139 |
| 73,847 | 104 | 21,966 | 6,280 | 3,817 | 32,167 |

|        |     |        |       |       |        |
|--------|-----|--------|-------|-------|--------|
| 73,848 | 104 | 21,606 | 6,238 | 3,792 | 31,740 |
| 73,849 | 112 | 22,126 | 6,380 | 3,892 | 32,510 |
| 73,850 | 117 | 22,061 | 6,393 | 3,899 | 32,470 |
| 73,851 | 119 | 21,973 | 6,410 | 3,897 | 32,399 |
| 73,852 | 123 | 21,825 | 6,402 | 3,907 | 32,257 |
| 73,853 | 124 | 21,611 | 6,372 | 3,883 | 31,990 |
| 73,854 | 125 | 21,634 | 6,411 | 3,890 | 32,060 |
| 73,855 | 135 | 21,682 | 6,369 | 3,853 | 32,039 |
| 73,856 | 136 | 21,981 | 6,422 | 3,886 | 32,425 |
| 73,857 | 136 | 22,050 | 6,435 | 3,897 | 32,518 |
| 73,858 | 137 | 22,025 | 6,450 | 3,916 | 32,528 |
| 73,859 | 139 | 22,411 | 6,537 | 3,990 | 33,077 |
| 73,860 | 140 | 22,392 | 6,529 | 4,004 | 33,065 |
| 73,861 | 138 | 22,348 | 6,451 | 3,970 | 32,907 |
| 73,862 | 142 | 22,564 | 6,567 | 4,031 | 33,304 |
| 73,863 | 134 | 22,308 | 6,501 | 3,991 | 32,934 |
| 73,864 | 133 | 22,246 | 6,496 | 3,982 | 32,857 |
| 73,865 | 132 | 22,063 | 6,428 | 3,941 | 32,564 |
| 73,866 | 132 | 22,054 | 6,479 | 3,970 | 32,635 |
| 73,867 | 133 | 22,260 | 6,549 | 4,010 | 32,952 |
| 73,868 | 130 | 22,434 | 6,567 | 4,034 | 33,165 |
| 73,869 | 129 | 22,500 | 6,533 | 4,027 | 33,189 |
| 73,870 | 125 | 22,511 | 6,492 | 4,023 | 33,151 |
| 73,871 | 123 | 22,611 | 6,506 | 4,014 | 33,254 |
| 73,872 | 127 | 22,713 | 6,513 | 4,026 | 33,379 |
| 73,873 | 121 | 22,630 | 6,402 | 3,988 | 33,141 |
| 73,874 | 120 | 22,560 | 6,376 | 3,997 | 33,053 |
| 73,875 | 123 | 22,794 | 6,403 | 3,994 | 33,314 |
| 73,876 | 126 | 23,098 | 6,478 | 4,057 | 33,759 |
| 73,877 | 124 | 22,968 | 6,456 | 4,029 | 33,577 |
| 73,878 | 119 | 23,135 | 6,495 | 4,043 | 33,792 |
| 73,879 | 124 | 22,888 | 6,405 | 3,999 | 33,416 |

|        |     |        |       |       |        |
|--------|-----|--------|-------|-------|--------|
| 73,880 | 125 | 22,941 | 6,389 | 4,007 | 33,462 |
| 73,881 | 123 | 22,781 | 6,409 | 4,004 | 33,317 |
| 73,882 | 129 | 22,857 | 6,446 | 4,034 | 33,466 |
| 73,883 | 126 | 22,854 | 6,440 | 4,007 | 33,427 |
| 73,884 | 127 | 22,812 | 6,391 | 3,970 | 33,300 |
| 73,885 | 129 | 22,317 | 6,254 | 3,881 | 32,581 |
| 73,886 | 135 | 22,435 | 6,293 | 3,880 | 32,743 |
| 73,887 | 134 | 22,618 | 6,335 | 3,902 | 32,989 |
| 73,888 | 133 | 22,572 | 6,324 | 3,892 | 32,921 |
| 73,889 | 140 | 22,385 | 6,239 | 3,845 | 32,609 |
| 73,890 | 140 | 22,084 | 6,166 | 3,797 | 32,187 |
| 73,891 | 149 | 22,152 | 6,211 | 3,826 | 32,338 |
| 73,892 | 156 | 22,406 | 6,257 | 3,851 | 32,670 |
| 73,893 | 156 | 22,307 | 6,195 | 3,838 | 32,496 |
| 73,894 | 158 | 22,237 | 6,190 | 3,822 | 32,407 |
| 73,895 | 151 | 22,000 | 6,162 | 3,796 | 32,109 |
| 73,896 | 149 | 22,244 | 6,231 | 3,854 | 32,478 |
| 73,897 | 151 | 22,349 | 6,280 | 3,846 | 32,626 |
| 73,898 | 148 | 22,830 | 6,376 | 3,889 | 33,243 |
| 73,899 | 147 | 22,793 | 6,344 | 3,836 | 33,120 |
| 73,900 | 145 | 23,132 | 6,417 | 3,862 | 33,556 |
| 73,901 | 140 | 23,184 | 6,384 | 3,874 | 33,582 |
| 73,902 | 131 | 22,928 | 6,294 | 3,841 | 33,194 |
| 73,903 | 131 | 22,917 | 6,298 | 3,837 | 33,183 |
| 73,904 | 130 | 22,562 | 6,186 | 3,820 | 32,698 |
| 73,905 | 130 | 22,477 | 6,150 | 3,817 | 32,574 |
| 73,906 | 124 | 22,581 | 6,146 | 3,838 | 32,689 |
| 73,907 | 124 | 22,414 | 6,113 | 3,818 | 32,469 |
| 73,908 | 121 | 22,368 | 6,118 | 3,808 | 32,415 |
| 73,909 | 121 | 22,487 | 6,117 | 3,792 | 32,517 |
| 73,910 | 118 | 22,546 | 6,124 | 3,804 | 32,592 |
| 73,911 | 115 | 22,633 | 6,121 | 3,789 | 32,658 |

|        |     |        |       |       |        |
|--------|-----|--------|-------|-------|--------|
| 73,912 | 116 | 22,710 | 6,104 | 3,796 | 32,726 |
| 73,913 | 118 | 22,720 | 6,066 | 3,786 | 32,690 |
| 73,914 | 124 | 22,474 | 5,978 | 3,736 | 32,312 |
| 73,915 | 124 | 22,545 | 6,002 | 3,752 | 32,423 |
| 73,916 | 124 | 22,473 | 5,934 | 3,747 | 32,278 |
| 73,917 | 125 | 22,400 | 5,914 | 3,729 | 32,168 |
| 73,918 | 127 | 22,328 | 5,899 | 3,725 | 32,079 |
| 73,919 | 127 | 21,878 | 5,801 | 3,657 | 31,463 |
| 73,920 | 128 | 21,963 | 5,828 | 3,669 | 31,588 |
| 73,921 | 128 | 22,266 | 5,876 | 3,707 | 31,977 |
| 73,922 | 131 | 22,216 | 5,877 | 3,715 | 31,939 |
| 73,923 | 128 | 21,853 | 5,821 | 3,658 | 31,460 |
| 73,924 | 129 | 21,745 | 5,808 | 3,651 | 31,333 |
| 73,925 | 132 | 22,032 | 5,866 | 3,673 | 31,703 |
| 73,926 | 128 | 21,958 | 5,834 | 3,670 | 31,590 |
| 73,927 | 126 | 21,595 | 5,767 | 3,658 | 31,146 |
| 73,928 | 130 | 21,835 | 5,865 | 3,702 | 31,532 |
| 73,929 | 132 | 21,784 | 5,886 | 3,709 | 31,511 |
| 73,930 | 134 | 21,935 | 5,893 | 3,722 | 31,684 |
| 73,931 | 139 | 22,013 | 5,895 | 3,698 | 31,745 |
| 73,932 | 128 | 21,779 | 5,824 | 3,644 | 31,375 |
| 73,933 | 133 | 21,952 | 5,835 | 3,643 | 31,563 |
| 73,934 | 132 | 21,860 | 5,783 | 3,614 | 31,389 |
| 73,935 | 128 | 21,851 | 5,796 | 3,628 | 31,403 |
| 73,936 | 129 | 21,836 | 5,791 | 3,638 | 31,394 |
| 73,937 | 129 | 22,111 | 5,841 | 3,659 | 31,740 |
| 73,938 | 122 | 21,907 | 5,801 | 3,621 | 31,451 |
| 73,939 | 124 | 21,958 | 5,814 | 3,640 | 31,536 |
| 73,940 | 113 | 21,686 | 5,767 | 3,619 | 31,185 |
| 73,941 | 106 | 21,653 | 5,780 | 3,578 | 31,117 |
| 73,942 | 100 | 21,743 | 5,829 | 3,606 | 31,278 |
| 73,943 | 103 | 21,698 | 5,827 | 3,593 | 31,221 |

|        |     |        |       |       |        |
|--------|-----|--------|-------|-------|--------|
| 73,944 | 103 | 21,660 | 5,830 | 3,587 | 31,180 |
| 73,945 | 99  | 21,835 | 5,938 | 3,630 | 31,502 |
| 73,946 | 98  | 21,811 | 5,931 | 3,658 | 31,498 |
| 73,947 | 95  | 21,565 | 5,889 | 3,636 | 31,185 |
| 73,948 | 95  | 21,591 | 5,946 | 3,668 | 31,300 |
| 73,949 | 96  | 21,782 | 5,981 | 3,712 | 31,571 |
| 73,950 | 95  | 21,782 | 5,965 | 3,717 | 31,559 |
| 73,951 | 92  | 21,632 | 5,967 | 3,725 | 31,416 |
| 73,952 | 95  | 20,951 | 5,809 | 3,596 | 30,451 |
| 73,953 | 98  | 21,206 | 5,868 | 3,613 | 30,785 |
| 73,954 | 95  | 21,401 | 5,927 | 3,643 | 31,066 |
| 73,955 | 97  | 21,578 | 5,965 | 3,677 | 31,317 |
| 73,956 | 94  | 21,663 | 6,024 | 3,689 | 31,470 |
| 73,957 | 94  | 21,470 | 6,021 | 3,675 | 31,260 |
| 73,958 | 94  | 21,537 | 6,015 | 3,678 | 31,324 |
| 73,959 | 94  | 21,270 | 5,939 | 3,633 | 30,936 |
| 73,960 | 96  | 21,007 | 5,931 | 3,624 | 30,658 |
| 73,961 | 98  | 20,895 | 5,986 | 3,637 | 30,616 |
| 73,962 | 99  | 20,834 | 6,007 | 3,638 | 30,578 |
| 73,963 | 97  | 20,794 | 6,016 | 3,615 | 30,522 |
| 73,964 | 93  | 20,785 | 6,013 | 3,616 | 30,507 |
| 73,965 | 96  | 20,714 | 6,009 | 3,608 | 30,427 |
| 73,966 | 92  | 20,318 | 5,848 | 3,515 | 29,773 |
| 73,967 | 93  | 20,552 | 5,911 | 3,547 | 30,103 |
| 73,968 | 91  | 20,760 | 5,968 | 3,591 | 30,410 |
| 73,969 | 93  | 21,004 | 6,033 | 3,639 | 30,769 |
| 73,970 | 91  | 20,847 | 6,015 | 3,612 | 30,565 |
| 73,971 | 91  | 21,045 | 6,062 | 3,631 | 30,829 |
| 73,972 | 96  | 21,024 | 6,095 | 3,632 | 30,847 |
| 73,973 | 91  | 21,054 | 6,065 | 3,620 | 30,830 |
| 73,974 | 92  | 21,011 | 6,074 | 3,616 | 30,793 |
| 73,975 | 90  | 20,709 | 6,022 | 3,573 | 30,394 |



|        |     |        |       |       |        |
|--------|-----|--------|-------|-------|--------|
| 73,976 | 89  | 21,144 | 6,105 | 3,657 | 30,995 |
| 73,977 | 87  | 20,872 | 6,028 | 3,534 | 30,521 |
| 73,978 | 88  | 21,113 | 6,088 | 3,560 | 30,849 |
| 73,979 | 93  | 21,396 | 6,148 | 3,612 | 31,249 |
| 73,980 | 92  | 21,204 | 6,114 | 3,578 | 30,988 |
| 73,981 | 85  | 20,839 | 6,041 | 3,518 | 30,483 |
| 73,982 | 89  | 20,651 | 6,007 | 3,487 | 30,234 |
| 73,983 | 88  | 20,683 | 6,001 | 3,480 | 30,252 |
| 73,984 | 82  | 20,660 | 6,035 | 3,497 | 30,274 |
| 73,985 | 86  | 20,972 | 6,125 | 3,555 | 30,738 |
| 73,986 | 88  | 20,999 | 6,099 | 3,561 | 30,747 |
| 73,987 | 88  | 21,130 | 6,163 | 3,588 | 30,969 |
| 73,988 | 86  | 21,009 | 6,080 | 3,582 | 30,757 |
| 73,989 | 86  | 20,914 | 6,055 | 3,569 | 30,624 |
| 73,990 | 89  | 20,934 | 6,068 | 3,593 | 30,684 |
| 73,991 | 90  | 20,939 | 6,050 | 3,596 | 30,675 |
| 73,992 | 94  | 21,156 | 6,098 | 3,620 | 30,968 |
| 73,993 | 98  | 21,211 | 6,093 | 3,626 | 31,028 |
| 73,994 | 99  | 21,262 | 6,097 | 3,628 | 31,086 |
| 73,995 | 102 | 21,335 | 6,106 | 3,628 | 31,171 |
| 73,996 | 101 | 21,243 | 6,009 | 3,557 | 30,910 |
| 73,997 | 104 | 21,484 | 6,063 | 3,590 | 31,241 |
| 73,998 | 107 | 21,142 | 5,930 | 3,519 | 30,698 |
| 73,999 | 115 | 21,405 | 5,991 | 3,564 | 31,075 |
| 74,000 | 117 | 21,189 | 5,937 | 3,507 | 30,750 |
| 74,001 | 117 | 20,989 | 5,893 | 3,471 | 30,470 |
| 74,002 | 117 | 20,920 | 5,890 | 3,460 | 30,387 |
| 74,003 | 115 | 21,320 | 5,999 | 3,508 | 30,942 |
| 74,004 | 113 | 21,324 | 5,955 | 3,503 | 30,895 |
| 74,005 | 113 | 21,596 | 6,033 | 3,526 | 31,268 |
| 74,006 | 115 | 21,613 | 6,068 | 3,522 | 31,318 |
| 74,007 | 116 | 21,616 | 6,047 | 3,522 | 31,301 |

|        |     |        |       |       |        |
|--------|-----|--------|-------|-------|--------|
| 74,008 | 116 | 21,496 | 6,008 | 3,498 | 31,118 |
| 74,009 | 114 | 21,684 | 6,055 | 3,533 | 31,386 |
| 74,010 | 112 | 21,902 | 6,066 | 3,538 | 31,618 |
| 74,011 | 111 | 22,107 | 6,051 | 3,540 | 31,809 |
| 74,012 | 110 | 22,087 | 6,027 | 3,538 | 31,762 |
| 74,013 | 111 | 22,557 | 6,113 | 3,599 | 32,380 |
| 74,014 | 115 | 22,648 | 6,145 | 3,635 | 32,543 |
| 74,015 | 117 | 22,691 | 6,179 | 3,671 | 32,658 |
| 74,016 | 109 | 22,609 | 6,183 | 3,672 | 32,573 |
| 74,017 | 109 | 22,366 | 6,140 | 3,637 | 32,252 |
| 74,018 | 111 | 22,326 | 6,125 | 3,633 | 32,195 |
| 74,019 | 111 | 22,291 | 6,113 | 3,613 | 32,128 |
| 74,020 | 110 | 22,334 | 6,133 | 3,611 | 32,188 |
| 74,021 | 114 | 22,067 | 6,074 | 3,584 | 31,839 |
| 74,022 | 114 | 21,786 | 6,040 | 3,562 | 31,502 |
| 74,023 | 119 | 21,902 | 6,080 | 3,585 | 31,686 |
| 74,024 | 121 | 21,657 | 6,045 | 3,542 | 31,365 |
| 74,025 | 127 | 22,098 | 6,166 | 3,605 | 31,996 |
| 74,026 | 132 | 22,092 | 6,193 | 3,593 | 32,010 |
| 74,027 | 129 | 21,837 | 6,153 | 3,520 | 31,639 |
| 74,028 | 126 | 21,112 | 5,949 | 3,430 | 30,617 |
| 74,029 | 127 | 21,358 | 5,969 | 3,448 | 30,902 |
| 74,030 | 125 | 21,463 | 5,981 | 3,453 | 31,022 |
| 74,031 | 127 | 21,484 | 5,964 | 3,455 | 31,030 |
| 74,032 | 123 | 21,613 | 6,014 | 3,499 | 31,249 |
| 74,033 | 118 | 21,659 | 6,037 | 3,522 | 31,336 |
| 74,034 | 123 | 21,815 | 6,057 | 3,522 | 31,517 |
| 74,035 | 124 | 21,807 | 6,064 | 3,496 | 31,491 |
| 74,036 | 121 | 21,640 | 5,998 | 3,466 | 31,225 |
| 74,037 | 124 | 21,785 | 6,115 | 3,503 | 31,527 |
| 74,038 | 133 | 21,737 | 6,080 | 3,486 | 31,436 |
| 74,039 | 132 | 21,549 | 6,044 | 3,458 | 31,183 |

|        |     |        |       |       |        |
|--------|-----|--------|-------|-------|--------|
| 74,040 | 132 | 21,903 | 6,132 | 3,513 | 31,680 |
| 74,041 | 134 | 21,932 | 6,124 | 3,518 | 31,708 |
| 74,042 | 134 | 21,850 | 6,102 | 3,509 | 31,595 |
| 74,043 | 133 | 21,794 | 6,097 | 3,499 | 31,523 |
| 74,044 | 132 | 21,771 | 6,105 | 3,531 | 31,539 |
| 74,045 | 129 | 21,862 | 6,126 | 3,558 | 31,675 |
| 74,046 | 127 | 21,633 | 6,072 | 3,505 | 31,337 |
| 74,047 | 132 | 21,756 | 6,117 | 3,533 | 31,538 |
| 74,048 | 133 | 21,550 | 6,083 | 3,506 | 31,272 |
| 74,049 | 130 | 21,455 | 6,101 | 3,502 | 31,188 |
| 74,050 | 123 | 21,544 | 6,133 | 3,496 | 31,296 |
| 74,051 | 125 | 21,762 | 6,209 | 3,566 | 31,662 |
| 74,052 | 130 | 21,479 | 6,139 | 3,533 | 31,281 |
| 74,053 | 131 | 21,266 | 6,073 | 3,499 | 30,969 |
| 74,054 | 135 | 21,638 | 6,172 | 3,549 | 31,494 |
| 74,055 | 137 | 21,501 | 6,172 | 3,567 | 31,377 |
| 74,056 | 137 | 21,401 | 6,121 | 3,562 | 31,221 |
| 74,057 | 135 | 21,365 | 6,105 | 3,553 | 31,158 |
| 74,058 | 135 | 21,295 | 6,109 | 3,556 | 31,095 |
| 74,059 | 134 | 21,228 | 6,101 | 3,555 | 31,018 |
| 74,060 | 136 | 21,224 | 6,085 | 3,552 | 30,997 |
| 74,061 | 139 | 21,407 | 6,154 | 3,608 | 31,308 |
| 74,062 | 140 | 21,397 | 6,168 | 3,642 | 31,347 |
| 74,063 | 142 | 21,201 | 6,173 | 3,625 | 31,141 |
| 74,064 | 140 | 21,006 | 6,133 | 3,621 | 30,900 |
| 74,065 | 139 | 21,002 | 6,131 | 3,603 | 30,875 |
| 74,066 | 137 | 21,010 | 6,127 | 3,573 | 30,847 |
| 74,067 | 137 | 21,128 | 6,102 | 3,582 | 30,949 |
| 74,068 | 137 | 20,994 | 6,033 | 3,529 | 30,693 |
| 74,069 | 136 | 21,101 | 6,048 | 3,547 | 30,832 |
| 74,070 | 145 | 21,428 | 6,123 | 3,578 | 31,274 |
| 74,071 | 142 | 21,356 | 6,066 | 3,543 | 31,107 |

|        |     |        |       |       |        |
|--------|-----|--------|-------|-------|--------|
| 74,072 | 143 | 21,295 | 6,054 | 3,535 | 31,027 |
| 74,073 | 144 | 21,417 | 6,115 | 3,572 | 31,248 |
| 74,074 | 132 | 21,227 | 6,073 | 3,563 | 30,995 |
| 74,075 | 129 | 21,226 | 6,088 | 3,566 | 31,009 |
| 74,076 | 125 | 21,390 | 6,091 | 3,597 | 31,203 |
| 74,077 | 120 | 21,136 | 5,990 | 3,559 | 30,805 |
| 74,078 | 120 | 21,095 | 5,949 | 3,563 | 30,727 |
| 74,079 | 124 | 21,339 | 6,013 | 3,584 | 31,060 |
| 74,080 | 121 | 21,069 | 5,964 | 3,540 | 30,694 |
| 74,081 | 120 | 21,144 | 5,965 | 3,551 | 30,780 |
| 74,082 | 120 | 21,165 | 5,956 | 3,552 | 30,793 |
| 74,083 | 122 | 21,505 | 6,029 | 3,584 | 31,240 |
| 74,084 | 120 | 21,526 | 6,023 | 3,582 | 31,251 |
| 74,085 | 118 | 21,400 | 6,000 | 3,581 | 31,099 |
| 74,086 | 114 | 21,226 | 5,944 | 3,576 | 30,860 |
| 74,087 | 117 | 21,112 | 5,921 | 3,570 | 30,720 |
| 74,088 | 115 | 20,838 | 5,852 | 3,533 | 30,338 |
| 74,089 | 108 | 20,738 | 5,848 | 3,546 | 30,240 |
| 74,090 | 109 | 20,735 | 5,812 | 3,518 | 30,174 |
| 74,091 | 106 | 20,694 | 5,809 | 3,520 | 30,129 |
| 74,092 | 103 | 20,564 | 5,776 | 3,488 | 29,931 |
| 74,093 | 101 | 20,655 | 5,795 | 3,503 | 30,054 |
| 74,094 | 100 | 20,800 | 5,797 | 3,494 | 30,191 |
| 74,095 | 101 | 20,770 | 5,798 | 3,484 | 30,153 |
| 74,096 | 101 | 20,997 | 5,895 | 3,550 | 30,543 |
| 74,097 | 98  | 20,700 | 5,787 | 3,552 | 30,137 |
| 74,098 | 98  | 20,568 | 5,766 | 3,532 | 29,964 |
| 74,099 | 99  | 20,566 | 5,820 | 3,589 | 30,074 |
| 74,100 | 98  | 20,689 | 5,834 | 3,600 | 30,221 |
| 74,101 | 99  | 20,729 | 5,827 | 3,610 | 30,265 |
| 74,102 | 96  | 20,539 | 5,781 | 3,553 | 29,969 |
| 74,103 | 92  | 20,353 | 5,739 | 3,527 | 29,711 |

|        |     |        |       |       |        |
|--------|-----|--------|-------|-------|--------|
| 74,104 | 92  | 20,444 | 5,749 | 3,586 | 29,871 |
| 74,105 | 93  | 20,419 | 5,780 | 3,587 | 29,879 |
| 74,106 | 95  | 20,326 | 5,800 | 3,560 | 29,781 |
| 74,107 | 97  | 20,498 | 5,836 | 3,597 | 30,028 |
| 74,108 | 101 | 20,612 | 5,827 | 3,590 | 30,130 |
| 74,109 | 103 | 20,406 | 5,798 | 3,561 | 29,868 |
| 74,110 | 103 | 20,225 | 5,765 | 3,535 | 29,628 |
| 74,111 | 102 | 20,570 | 5,872 | 3,570 | 30,114 |
| 74,112 | 103 | 20,549 | 5,840 | 3,548 | 30,040 |
| 74,113 | 104 | 20,562 | 5,831 | 3,530 | 30,027 |
| 74,114 | 102 | 20,541 | 5,796 | 3,518 | 29,957 |
| 74,115 | 103 | 20,500 | 5,799 | 3,504 | 29,906 |
| 74,116 | 100 | 20,216 | 5,716 | 3,475 | 29,507 |
| 74,117 | 104 | 20,472 | 5,780 | 3,496 | 29,852 |
| 74,118 | 104 | 20,205 | 5,703 | 3,471 | 29,483 |
| 74,119 | 105 | 20,390 | 5,764 | 3,498 | 29,757 |
| 74,120 | 104 | 20,647 | 5,839 | 3,535 | 30,125 |
| 74,121 | 101 | 20,625 | 5,838 | 3,556 | 30,120 |
| 74,122 | 105 | 20,274 | 5,748 | 3,492 | 29,619 |
| 74,123 | 111 | 20,474 | 5,798 | 3,515 | 29,898 |
| 74,124 | 112 | 20,564 | 5,793 | 3,520 | 29,989 |
| 74,125 | 115 | 20,591 | 5,803 | 3,530 | 30,039 |
| 74,126 | 119 | 20,513 | 5,778 | 3,528 | 29,938 |
| 74,127 | 119 | 20,371 | 5,767 | 3,505 | 29,762 |
| 74,128 | 118 | 20,392 | 5,859 | 3,522 | 29,891 |
| 74,129 | 118 | 20,384 | 5,851 | 3,535 | 29,888 |
| 74,130 | 114 | 20,067 | 5,797 | 3,530 | 29,508 |
| 74,131 | 114 | 19,904 | 5,825 | 3,537 | 29,380 |
| 74,132 | 118 | 19,902 | 5,893 | 3,548 | 29,461 |
| 74,133 | 119 | 19,853 | 5,914 | 3,540 | 29,426 |
| 74,134 | 119 | 19,804 | 5,938 | 3,538 | 29,399 |
| 74,135 | 118 | 19,735 | 5,939 | 3,531 | 29,323 |

|        |     |        |       |       |        |
|--------|-----|--------|-------|-------|--------|
| 74,136 | 121 | 19,692 | 5,924 | 3,487 | 29,224 |
| 74,137 | 118 | 19,647 | 5,910 | 3,478 | 29,153 |
| 74,138 | 120 | 19,809 | 5,925 | 3,497 | 29,351 |
| 74,139 | 120 | 19,824 | 5,945 | 3,503 | 29,392 |
| 74,140 | 118 | 19,784 | 5,977 | 3,491 | 29,370 |
| 74,141 | 119 | 19,892 | 6,005 | 3,518 | 29,534 |
| 74,142 | 117 | 19,825 | 6,027 | 3,515 | 29,484 |
| 74,143 | 123 | 19,710 | 6,031 | 3,517 | 29,381 |
| 74,144 | 121 | 19,662 | 6,065 | 3,534 | 29,382 |
| 74,145 | 122 | 19,536 | 6,032 | 3,519 | 29,209 |
| 74,146 | 122 | 19,518 | 6,003 | 3,502 | 29,145 |
| 74,147 | 124 | 19,696 | 6,101 | 3,517 | 29,438 |
| 74,148 | 124 | 19,633 | 6,065 | 3,485 | 29,307 |
| 74,149 | 125 | 19,785 | 6,084 | 3,485 | 29,479 |
| 74,150 | 124 | 20,055 | 6,144 | 3,511 | 29,834 |
| 74,151 | 124 | 19,599 | 6,044 | 3,464 | 29,231 |
| 74,152 | 123 | 19,070 | 5,874 | 3,388 | 28,455 |
| 74,153 | 123 | 19,237 | 5,917 | 3,412 | 28,689 |
| 74,154 | 119 | 19,492 | 5,988 | 3,452 | 29,051 |
| 74,155 | 121 | 19,278 | 5,920 | 3,407 | 28,726 |
| 74,156 | 118 | 19,536 | 5,999 | 3,461 | 29,114 |
| 74,157 | 120 | 19,766 | 6,058 | 3,511 | 29,455 |
| 74,158 | 121 | 19,762 | 6,076 | 3,505 | 29,464 |
| 74,159 | 121 | 19,730 | 6,074 | 3,492 | 29,417 |
| 74,160 | 121 | 19,781 | 6,062 | 3,494 | 29,458 |
| 74,161 | 124 | 19,853 | 6,048 | 3,490 | 29,515 |
| 74,162 | 123 | 19,751 | 6,029 | 3,473 | 29,376 |
| 74,163 | 124 | 19,818 | 6,044 | 3,483 | 29,469 |
| 74,164 | 122 | 19,514 | 6,007 | 3,439 | 29,082 |
| 74,165 | 122 | 19,493 | 6,034 | 3,440 | 29,089 |
| 74,166 | 126 | 19,777 | 6,125 | 3,476 | 29,504 |
| 74,167 | 132 | 19,806 | 6,131 | 3,493 | 29,562 |

|        |     |        |       |       |        |
|--------|-----|--------|-------|-------|--------|
| 74,168 | 131 | 19,895 | 6,153 | 3,511 | 29,690 |
| 74,169 | 130 | 19,864 | 6,150 | 3,481 | 29,625 |
| 74,170 | 124 | 19,025 | 5,964 | 3,353 | 28,466 |
| 74,171 | 123 | 19,259 | 6,010 | 3,401 | 28,793 |
| 74,172 | 122 | 19,591 | 6,101 | 3,470 | 29,284 |
| 74,173 | 110 | 19,019 | 5,923 | 3,358 | 28,410 |
| 74,174 | 110 | 19,287 | 5,965 | 3,399 | 28,761 |
| 74,175 | 110 | 19,558 | 6,021 | 3,425 | 29,114 |
| 74,176 | 110 | 19,656 | 6,053 | 3,450 | 29,269 |
| 74,177 | 116 | 20,042 | 6,146 | 3,535 | 29,839 |
| 74,178 | 121 | 20,307 | 6,221 | 3,599 | 30,248 |
| 74,179 | 119 | 20,316 | 6,161 | 3,573 | 30,169 |
| 74,180 | 128 | 20,244 | 6,018 | 3,480 | 29,870 |
| 74,181 | 130 | 20,516 | 6,048 | 3,494 | 30,188 |
| 74,182 | 125 | 20,821 | 6,101 | 3,545 | 30,592 |
| 74,183 | 133 | 21,095 | 6,158 | 3,580 | 30,966 |
| 74,184 | 129 | 20,887 | 6,080 | 3,553 | 30,649 |
| 74,185 | 133 | 21,169 | 6,108 | 3,580 | 30,990 |
| 74,186 | 137 | 21,123 | 6,071 | 3,570 | 30,901 |
| 74,187 | 138 | 20,932 | 5,992 | 3,550 | 30,612 |
| 74,188 | 137 | 20,759 | 5,957 | 3,520 | 30,373 |
| 74,189 | 142 | 20,784 | 5,959 | 3,493 | 30,378 |
| 74,190 | 144 | 20,691 | 5,899 | 3,476 | 30,210 |
| 74,191 | 151 | 21,042 | 6,066 | 3,534 | 30,793 |
| 74,192 | 152 | 21,149 | 6,117 | 3,560 | 30,978 |
| 74,193 | 150 | 21,049 | 5,996 | 3,502 | 30,697 |
| 74,194 | 150 | 21,234 | 6,028 | 3,527 | 30,939 |
| 74,195 | 150 | 21,222 | 6,006 | 3,488 | 30,866 |
| 74,196 | 146 | 21,132 | 5,943 | 3,473 | 30,694 |
| 74,197 | 145 | 20,898 | 5,877 | 3,447 | 30,367 |
| 74,198 | 145 | 21,220 | 5,930 | 3,476 | 30,771 |
| 74,199 | 142 | 21,010 | 5,858 | 3,446 | 30,456 |

|        |     |        |       |       |        |
|--------|-----|--------|-------|-------|--------|
| 74,200 | 144 | 21,270 | 5,913 | 3,467 | 30,794 |
| 74,201 | 148 | 21,202 | 5,922 | 3,483 | 30,755 |
| 74,202 | 144 | 20,954 | 5,842 | 3,438 | 30,378 |
| 74,203 | 146 | 20,864 | 5,815 | 3,419 | 30,244 |
| 74,204 | 155 | 20,911 | 5,816 | 3,413 | 30,295 |
| 74,205 | 154 | 20,551 | 5,727 | 3,366 | 29,798 |
| 74,206 | 154 | 20,774 | 5,824 | 3,421 | 30,173 |
| 74,207 | 163 | 20,744 | 5,796 | 3,402 | 30,105 |
| 74,208 | 158 | 20,472 | 5,725 | 3,358 | 29,713 |
| 74,209 | 155 | 20,390 | 5,713 | 3,345 | 29,603 |
| 74,210 | 151 | 20,509 | 5,765 | 3,355 | 29,780 |
| 74,211 | 155 | 20,410 | 5,765 | 3,329 | 29,659 |
| 74,212 | 151 | 20,251 | 5,748 | 3,287 | 29,437 |
| 74,213 | 151 | 20,145 | 5,692 | 3,238 | 29,226 |
| 74,214 | 151 | 20,299 | 5,679 | 3,227 | 29,356 |
| 74,215 | 162 | 20,390 | 5,680 | 3,222 | 29,454 |
| 74,216 | 162 | 20,249 | 5,624 | 3,207 | 29,242 |
| 74,217 | 166 | 20,202 | 5,592 | 3,200 | 29,160 |
| 74,218 | 159 | 20,041 | 5,554 | 3,159 | 28,913 |
| 74,219 | 164 | 20,078 | 5,547 | 3,159 | 28,948 |
| 74,220 | 166 | 19,861 | 5,496 | 3,149 | 28,672 |
| 74,221 | 163 | 20,167 | 5,602 | 3,234 | 29,166 |
| 74,222 | 167 | 20,196 | 5,586 | 3,179 | 29,128 |
| 74,223 | 167 | 20,218 | 5,575 | 3,178 | 29,138 |
| 74,224 | 171 | 20,443 | 5,628 | 3,200 | 29,442 |
| 74,225 | 177 | 20,542 | 5,653 | 3,199 | 29,571 |
| 74,226 | 176 | 20,390 | 5,625 | 3,196 | 29,387 |
| 74,227 | 174 | 20,515 | 5,636 | 3,201 | 29,526 |
| 74,228 | 171 | 20,566 | 5,670 | 3,194 | 29,601 |
| 74,229 | 169 | 20,507 | 5,654 | 3,195 | 29,525 |
| 74,230 | 172 | 20,486 | 5,655 | 3,193 | 29,506 |
| 74,231 | 165 | 20,273 | 5,624 | 3,182 | 29,244 |



|        |     |        |       |       |        |
|--------|-----|--------|-------|-------|--------|
| 74,232 | 165 | 20,510 | 5,750 | 3,240 | 29,665 |
| 74,233 | 171 | 20,640 | 5,829 | 3,269 | 29,909 |
| 74,234 | 171 | 20,667 | 5,863 | 3,281 | 29,982 |
| 74,235 | 174 | 20,463 | 5,818 | 3,241 | 29,696 |
| 74,236 | 174 | 20,510 | 5,838 | 3,268 | 29,790 |
| 74,237 | 167 | 20,491 | 5,844 | 3,290 | 29,792 |
| 74,238 | 168 | 20,561 | 5,842 | 3,305 | 29,876 |
| 74,239 | 168 | 20,561 | 5,820 | 3,316 | 29,865 |
| 74,240 | 165 | 20,857 | 5,884 | 3,350 | 30,256 |
| 74,241 | 166 | 21,041 | 5,907 | 3,347 | 30,461 |
| 74,242 | 171 | 21,038 | 5,887 | 3,319 | 30,415 |
| 74,243 | 169 | 21,358 | 5,920 | 3,361 | 30,808 |
| 74,244 | 171 | 21,203 | 5,895 | 3,339 | 30,608 |
| 74,245 | 171 | 21,400 | 5,954 | 3,355 | 30,880 |
| 74,246 | 175 | 21,222 | 5,871 | 3,338 | 30,606 |
| 74,247 | 174 | 21,083 | 5,851 | 3,309 | 30,417 |
| 74,248 | 182 | 21,263 | 5,884 | 3,325 | 30,654 |
| 74,249 | 187 | 21,334 | 5,899 | 3,333 | 30,753 |
| 74,250 | 193 | 21,611 | 5,966 | 3,360 | 31,130 |
| 74,251 | 192 | 21,689 | 5,960 | 3,364 | 31,205 |
| 74,252 | 192 | 21,730 | 5,947 | 3,360 | 31,229 |
| 74,253 | 190 | 21,464 | 5,886 | 3,330 | 30,870 |
| 74,254 | 191 | 21,544 | 5,916 | 3,348 | 30,999 |
| 74,255 | 184 | 21,604 | 5,956 | 3,378 | 31,122 |
| 74,256 | 185 | 21,755 | 5,942 | 3,378 | 31,260 |
| 74,257 | 185 | 21,862 | 5,953 | 3,372 | 31,372 |
| 74,258 | 178 | 21,866 | 5,960 | 3,394 | 31,398 |
| 74,259 | 178 | 21,916 | 5,952 | 3,407 | 31,453 |
| 74,260 | 179 | 21,865 | 5,912 | 3,398 | 31,354 |
| 74,261 | 183 | 22,110 | 5,979 | 3,444 | 31,716 |
| 74,262 | 179 | 21,816 | 5,893 | 3,408 | 31,296 |
| 74,263 | 179 | 21,807 | 5,867 | 3,422 | 31,275 |

|        |     |        |       |       |        |
|--------|-----|--------|-------|-------|--------|
| 74,264 | 180 | 22,124 | 5,964 | 3,514 | 31,782 |
| 74,265 | 184 | 22,147 | 6,013 | 3,548 | 31,892 |
| 74,266 | 173 | 22,012 | 6,009 | 3,534 | 31,728 |
| 74,267 | 173 | 22,028 | 6,020 | 3,536 | 31,757 |
| 74,268 | 166 | 22,077 | 6,048 | 3,547 | 31,838 |
| 74,269 | 167 | 22,206 | 6,075 | 3,567 | 32,015 |
| 74,270 | 159 | 21,970 | 6,005 | 3,550 | 31,684 |
| 74,271 | 156 | 21,698 | 5,946 | 3,499 | 31,299 |
| 74,272 | 155 | 22,167 | 6,034 | 3,569 | 31,925 |
| 74,273 | 152 | 21,761 | 5,969 | 3,530 | 31,412 |
| 74,274 | 159 | 21,942 | 6,003 | 3,560 | 31,664 |
| 74,275 | 152 | 21,629 | 5,917 | 3,514 | 31,212 |
| 74,276 | 150 | 21,653 | 5,914 | 3,511 | 31,228 |
| 74,277 | 148 | 21,339 | 5,837 | 3,457 | 30,781 |
| 74,278 | 156 | 21,537 | 5,822 | 3,463 | 30,978 |
| 74,279 | 157 | 21,829 | 5,883 | 3,495 | 31,364 |
| 74,280 | 151 | 21,750 | 5,857 | 3,484 | 31,242 |
| 74,281 | 151 | 21,340 | 5,697 | 3,395 | 30,583 |
| 74,282 | 152 | 21,710 | 5,785 | 3,428 | 31,075 |
| 74,283 | 153 | 21,636 | 5,784 | 3,432 | 31,005 |
| 74,284 | 155 | 21,841 | 5,824 | 3,470 | 31,290 |
| 74,285 | 150 | 21,819 | 5,812 | 3,464 | 31,245 |
| 74,286 | 144 | 21,744 | 5,775 | 3,443 | 31,106 |
| 74,287 | 144 | 21,616 | 5,733 | 3,403 | 30,896 |
| 74,288 | 144 | 21,638 | 5,729 | 3,402 | 30,913 |
| 74,289 | 144 | 21,669 | 5,727 | 3,401 | 30,941 |
| 74,290 | 139 | 21,769 | 5,767 | 3,422 | 31,097 |
| 74,291 | 136 | 21,763 | 5,777 | 3,437 | 31,113 |
| 74,292 | 131 | 21,691 | 5,765 | 3,452 | 31,039 |
| 74,293 | 117 | 20,561 | 5,503 | 3,300 | 29,481 |
| 74,294 | 120 | 20,697 | 5,555 | 3,329 | 29,701 |
| 74,295 | 118 | 20,864 | 5,617 | 3,358 | 29,957 |

|        |     |        |       |       |        |
|--------|-----|--------|-------|-------|--------|
| 74,296 | 118 | 20,889 | 5,618 | 3,363 | 29,988 |
| 74,297 | 117 | 21,050 | 5,642 | 3,403 | 30,212 |
| 74,298 | 117 | 21,015 | 5,653 | 3,414 | 30,199 |
| 74,299 | 112 | 21,110 | 5,682 | 3,427 | 30,331 |
| 74,300 | 106 | 21,199 | 5,695 | 3,462 | 30,462 |
| 74,301 | 106 | 21,037 | 5,667 | 3,456 | 30,266 |
| 74,302 | 103 | 20,914 | 5,633 | 3,434 | 30,084 |
| 74,303 | 98  | 21,278 | 5,747 | 3,495 | 30,618 |
| 74,304 | 95  | 21,165 | 5,721 | 3,462 | 30,443 |
| 74,305 | 92  | 21,483 | 5,794 | 3,521 | 30,890 |
| 74,306 | 94  | 21,928 | 5,922 | 3,602 | 31,546 |
| 74,307 | 91  | 22,002 | 5,956 | 3,618 | 31,667 |
| 74,308 | 89  | 22,051 | 5,988 | 3,644 | 31,772 |
| 74,309 | 88  | 21,996 | 6,027 | 3,660 | 31,771 |
| 74,310 | 88  | 22,091 | 6,088 | 3,715 | 31,982 |
| 74,311 | 88  | 22,157 | 6,100 | 3,723 | 32,068 |
| 74,312 | 84  | 22,171 | 6,082 | 3,763 | 32,100 |
| 74,313 | 88  | 22,398 | 6,171 | 3,833 | 32,490 |
| 74,314 | 88  | 22,696 | 6,248 | 3,845 | 32,877 |
| 74,315 | 87  | 22,827 | 6,263 | 3,866 | 33,043 |
| 74,316 | 85  | 22,927 | 6,278 | 3,879 | 33,169 |
| 74,317 | 99  | 22,939 | 6,308 | 3,916 | 33,262 |
| 74,318 | 100 | 22,843 | 6,310 | 3,898 | 33,151 |
| 74,319 | 100 | 22,865 | 6,330 | 3,896 | 33,191 |
| 74,320 | 99  | 22,772 | 6,414 | 3,919 | 33,204 |
| 74,321 | 98  | 22,679 | 6,429 | 3,920 | 33,126 |
| 74,322 | 102 | 22,634 | 6,404 | 3,911 | 33,051 |
| 74,323 | 100 | 22,387 | 6,375 | 3,903 | 32,765 |
| 74,324 | 103 | 22,594 | 6,416 | 3,931 | 33,044 |
| 74,325 | 99  | 22,639 | 6,438 | 3,933 | 33,109 |
| 74,326 | 117 | 22,562 | 6,418 | 3,941 | 33,038 |
| 74,327 | 116 | 22,479 | 6,417 | 3,940 | 32,952 |

|        |     |        |       |       |        |
|--------|-----|--------|-------|-------|--------|
| 74,328 | 113 | 22,578 | 6,521 | 3,988 | 33,200 |
| 74,329 | 115 | 22,400 | 6,473 | 3,958 | 32,946 |
| 74,330 | 114 | 22,162 | 6,438 | 3,916 | 32,630 |
| 74,331 | 120 | 22,208 | 6,443 | 3,942 | 32,713 |
| 74,332 | 116 | 22,237 | 6,493 | 3,951 | 32,797 |
| 74,333 | 124 | 22,410 | 6,565 | 4,001 | 33,100 |
| 74,334 | 128 | 22,508 | 6,613 | 4,040 | 33,289 |
| 74,335 | 130 | 22,605 | 6,670 | 4,091 | 33,496 |
| 74,336 | 141 | 22,719 | 6,729 | 4,131 | 33,720 |
| 74,337 | 145 | 22,613 | 6,764 | 4,141 | 33,663 |
| 74,338 | 148 | 22,655 | 6,774 | 4,143 | 33,720 |
| 74,339 | 146 | 22,614 | 6,754 | 4,152 | 33,666 |
| 74,340 | 150 | 22,286 | 6,710 | 4,106 | 33,252 |
| 74,341 | 150 | 22,267 | 6,707 | 4,107 | 33,231 |
| 74,342 | 151 | 22,311 | 6,759 | 4,132 | 33,353 |
| 74,343 | 153 | 22,175 | 6,714 | 4,109 | 33,151 |
| 74,344 | 153 | 22,252 | 6,701 | 4,096 | 33,202 |
| 74,345 | 151 | 22,312 | 6,690 | 4,099 | 33,252 |
| 74,346 | 149 | 22,344 | 6,662 | 4,102 | 33,257 |
| 74,347 | 147 | 21,960 | 6,608 | 4,053 | 32,768 |
| 74,348 | 148 | 22,103 | 6,637 | 4,070 | 32,958 |
| 74,349 | 150 | 22,260 | 6,675 | 4,106 | 33,191 |
| 74,350 | 150 | 22,214 | 6,673 | 4,107 | 33,144 |
| 74,351 | 151 | 22,144 | 6,667 | 4,055 | 33,017 |
| 74,352 | 146 | 22,035 | 6,640 | 4,043 | 32,864 |
| 74,353 | 149 | 22,111 | 6,672 | 4,065 | 32,997 |
| 74,354 | 151 | 21,891 | 6,590 | 4,051 | 32,683 |
| 74,355 | 151 | 22,190 | 6,636 | 4,085 | 33,062 |
| 74,356 | 151 | 22,166 | 6,582 | 4,054 | 32,953 |
| 74,357 | 150 | 22,133 | 6,541 | 4,022 | 32,846 |
| 74,358 | 151 | 22,150 | 6,525 | 4,019 | 32,845 |
| 74,359 | 154 | 22,038 | 6,462 | 3,988 | 32,642 |

|        |     |        |       |       |        |
|--------|-----|--------|-------|-------|--------|
| 74,360 | 156 | 22,235 | 6,437 | 3,959 | 32,787 |
| 74,361 | 156 | 22,540 | 6,518 | 3,988 | 33,202 |
| 74,362 | 156 | 22,332 | 6,466 | 3,951 | 32,905 |
| 74,363 | 155 | 22,265 | 6,412 | 3,917 | 32,749 |
| 74,364 | 155 | 22,434 | 6,451 | 3,935 | 32,975 |
| 74,365 | 166 | 22,321 | 6,405 | 3,902 | 32,794 |
| 74,366 | 163 | 21,645 | 6,154 | 3,741 | 31,703 |
| 74,367 | 165 | 21,878 | 6,181 | 3,781 | 32,005 |
| 74,368 | 156 | 22,126 | 6,207 | 3,795 | 32,284 |
| 74,369 | 156 | 22,014 | 6,176 | 3,780 | 32,126 |
| 74,370 | 162 | 22,057 | 6,091 | 3,771 | 32,081 |
| 74,371 | 161 | 22,079 | 6,095 | 3,751 | 32,086 |
| 74,372 | 163 | 22,155 | 6,085 | 3,751 | 32,154 |
| 74,373 | 163 | 22,153 | 6,080 | 3,732 | 32,128 |
| 74,374 | 167 | 22,507 | 6,125 | 3,775 | 32,574 |
| 74,375 | 168 | 21,998 | 5,959 | 3,690 | 31,815 |
| 74,376 | 170 | 22,243 | 6,016 | 3,748 | 32,177 |
| 74,377 | 153 | 22,544 | 6,102 | 3,784 | 32,583 |
| 74,378 | 157 | 22,398 | 6,083 | 3,759 | 32,397 |
| 74,379 | 156 | 22,442 | 6,052 | 3,766 | 32,416 |
| 74,380 | 150 | 22,119 | 5,994 | 3,772 | 32,035 |
| 74,381 | 150 | 22,154 | 6,002 | 3,774 | 32,080 |
| 74,382 | 145 | 22,381 | 6,011 | 3,751 | 32,288 |
| 74,383 | 144 | 22,301 | 6,002 | 3,781 | 32,228 |
| 74,384 | 134 | 22,149 | 5,941 | 3,767 | 31,991 |
| 74,385 | 125 | 21,910 | 5,827 | 3,672 | 31,534 |
| 74,386 | 130 | 22,109 | 5,869 | 3,691 | 31,799 |
| 74,387 | 121 | 22,234 | 5,850 | 3,693 | 31,898 |
| 74,388 | 115 | 22,376 | 5,835 | 3,700 | 32,026 |
| 74,389 | 114 | 22,026 | 5,743 | 3,634 | 31,517 |
| 74,390 | 116 | 22,153 | 5,779 | 3,653 | 31,701 |
| 74,391 | 114 | 22,292 | 5,820 | 3,683 | 31,909 |

|        |     |        |       |       |        |
|--------|-----|--------|-------|-------|--------|
| 74,392 | 115 | 22,523 | 5,839 | 3,725 | 32,202 |
| 74,393 | 118 | 22,483 | 5,799 | 3,681 | 32,081 |
| 74,394 | 115 | 22,369 | 5,782 | 3,663 | 31,929 |
| 74,395 | 125 | 22,694 | 5,923 | 3,723 | 32,465 |
| 74,396 | 124 | 22,819 | 5,975 | 3,754 | 32,672 |
| 74,397 | 124 | 22,826 | 6,058 | 3,786 | 32,794 |
| 74,398 | 126 | 23,210 | 6,096 | 3,823 | 33,255 |
| 74,399 | 127 | 23,437 | 6,148 | 3,835 | 33,547 |
| 74,400 | 128 | 23,416 | 6,133 | 3,817 | 33,494 |
| 74,401 | 128 | 23,370 | 6,126 | 3,827 | 33,451 |
| 74,402 | 130 | 23,550 | 6,229 | 3,908 | 33,817 |
| 74,403 | 131 | 23,605 | 6,254 | 3,909 | 33,899 |
| 74,404 | 136 | 23,600 | 6,237 | 3,877 | 33,850 |
| 74,405 | 146 | 23,351 | 6,196 | 3,812 | 33,505 |
| 74,406 | 146 | 23,072 | 6,168 | 3,788 | 33,174 |
| 74,407 | 146 | 23,216 | 6,214 | 3,810 | 33,386 |
| 74,408 | 146 | 22,951 | 6,145 | 3,776 | 33,018 |
| 74,409 | 146 | 22,959 | 6,140 | 3,777 | 33,022 |
| 74,410 | 147 | 22,794 | 6,080 | 3,759 | 32,780 |
| 74,411 | 146 | 22,935 | 6,052 | 3,745 | 32,878 |
| 74,412 | 146 | 22,939 | 6,046 | 3,742 | 32,873 |
| 74,413 | 144 | 23,155 | 6,093 | 3,770 | 33,162 |
| 74,414 | 145 | 23,080 | 6,044 | 3,743 | 33,012 |
| 74,415 | 144 | 23,062 | 6,054 | 3,739 | 32,999 |
| 74,416 | 140 | 23,368 | 6,104 | 3,784 | 33,396 |
| 74,417 | 130 | 23,396 | 6,112 | 3,806 | 33,444 |
| 74,418 | 130 | 23,342 | 6,141 | 3,779 | 33,392 |
| 74,419 | 130 | 23,048 | 6,107 | 3,753 | 33,038 |
| 74,420 | 130 | 23,145 | 6,089 | 3,756 | 33,120 |
| 74,421 | 125 | 23,199 | 6,093 | 3,770 | 33,187 |
| 74,422 | 125 | 23,076 | 6,098 | 3,755 | 33,054 |
| 74,423 | 120 | 23,410 | 6,171 | 3,796 | 33,497 |

|        |     |        |       |       |        |
|--------|-----|--------|-------|-------|--------|
| 74,424 | 113 | 22,956 | 6,085 | 3,722 | 32,876 |
| 74,425 | 111 | 22,999 | 6,127 | 3,751 | 32,988 |
| 74,426 | 109 | 23,155 | 6,175 | 3,776 | 33,215 |
| 74,427 | 111 | 23,008 | 6,186 | 3,781 | 33,086 |
| 74,428 | 110 | 22,909 | 6,154 | 3,779 | 32,952 |
| 74,429 | 105 | 22,868 | 6,106 | 3,759 | 32,838 |
| 74,430 | 106 | 22,900 | 6,099 | 3,747 | 32,852 |
| 74,431 | 109 | 23,167 | 6,133 | 3,754 | 33,163 |
| 74,432 | 110 | 23,130 | 6,122 | 3,743 | 33,105 |
| 74,433 | 110 | 22,936 | 6,036 | 3,692 | 32,774 |
| 74,434 | 110 | 22,976 | 6,052 | 3,697 | 32,835 |
| 74,435 | 112 | 23,101 | 6,084 | 3,702 | 32,999 |
| 74,436 | 104 | 22,763 | 5,977 | 3,650 | 32,494 |
| 74,437 | 102 | 22,593 | 5,959 | 3,619 | 32,273 |
| 74,438 | 104 | 22,606 | 5,966 | 3,607 | 32,283 |
| 74,439 | 107 | 22,873 | 6,048 | 3,639 | 32,667 |
| 74,440 | 108 | 22,843 | 6,066 | 3,628 | 32,645 |
| 74,441 | 104 | 22,728 | 5,998 | 3,610 | 32,440 |
| 74,442 | 104 | 22,651 | 5,991 | 3,626 | 32,372 |
| 74,443 | 106 | 22,584 | 5,992 | 3,602 | 32,284 |
| 74,444 | 94  | 22,689 | 6,009 | 3,651 | 32,443 |
| 74,445 | 98  | 22,638 | 5,995 | 3,651 | 32,382 |
| 74,446 | 99  | 22,619 | 5,958 | 3,646 | 32,322 |
| 74,447 | 99  | 22,836 | 5,965 | 3,662 | 32,562 |
| 74,448 | 100 | 23,118 | 6,041 | 3,694 | 32,953 |
| 74,449 | 98  | 22,992 | 6,055 | 3,686 | 32,831 |
| 74,450 | 103 | 22,779 | 6,014 | 3,683 | 32,579 |
| 74,451 | 104 | 22,776 | 6,039 | 3,697 | 32,616 |
| 74,452 | 101 | 22,512 | 5,963 | 3,652 | 32,228 |
| 74,453 | 101 | 22,399 | 5,910 | 3,626 | 32,036 |
| 74,454 | 103 | 22,337 | 5,903 | 3,615 | 31,958 |
| 74,455 | 95  | 21,896 | 5,797 | 3,553 | 31,341 |

|        |     |        |       |       |        |
|--------|-----|--------|-------|-------|--------|
| 74,456 | 89  | 22,226 | 5,834 | 3,610 | 31,759 |
| 74,457 | 92  | 22,214 | 5,816 | 3,610 | 31,732 |
| 74,458 | 98  | 22,016 | 5,838 | 3,607 | 31,559 |
| 74,459 | 99  | 22,009 | 5,820 | 3,616 | 31,544 |
| 74,460 | 96  | 21,918 | 5,853 | 3,607 | 31,474 |
| 74,461 | 96  | 21,934 | 5,884 | 3,615 | 31,529 |
| 74,462 | 96  | 21,959 | 5,908 | 3,628 | 31,591 |
| 74,463 | 100 | 21,988 | 5,931 | 3,634 | 31,653 |
| 74,464 | 100 | 21,979 | 5,973 | 3,647 | 31,699 |
| 74,465 | 101 | 22,385 | 6,106 | 3,706 | 32,298 |
| 74,466 | 100 | 22,446 | 6,157 | 3,739 | 32,442 |
| 74,467 | 100 | 22,262 | 6,234 | 3,762 | 32,358 |
| 74,468 | 103 | 22,347 | 6,255 | 3,772 | 32,477 |
| 74,469 | 101 | 22,010 | 6,184 | 3,764 | 32,059 |
| 74,470 | 103 | 21,898 | 6,165 | 3,781 | 31,947 |
| 74,471 | 107 | 22,050 | 6,271 | 3,851 | 32,279 |
| 74,472 | 106 | 22,214 | 6,299 | 3,853 | 32,472 |
| 74,473 | 109 | 22,480 | 6,328 | 3,892 | 32,809 |
| 74,474 | 113 | 22,450 | 6,314 | 3,886 | 32,763 |
| 74,475 | 114 | 22,201 | 6,262 | 3,854 | 32,431 |
| 74,476 | 123 | 22,379 | 6,335 | 3,880 | 32,717 |
| 74,477 | 123 | 22,186 | 6,239 | 3,818 | 32,366 |
| 74,478 | 125 | 22,201 | 6,218 | 3,808 | 32,352 |
| 74,479 | 131 | 22,470 | 6,309 | 3,855 | 32,765 |
| 74,480 | 138 | 22,594 | 6,372 | 3,875 | 32,979 |
| 74,481 | 142 | 22,404 | 6,323 | 3,841 | 32,710 |
| 74,482 | 139 | 22,200 | 6,294 | 3,833 | 32,466 |
| 74,483 | 145 | 22,106 | 6,304 | 3,819 | 32,374 |
| 74,484 | 143 | 21,834 | 6,266 | 3,788 | 32,031 |
| 74,485 | 156 | 22,672 | 6,498 | 3,915 | 33,241 |
| 74,486 | 154 | 22,476 | 6,478 | 3,894 | 33,002 |
| 74,487 | 163 | 22,659 | 6,510 | 3,907 | 33,239 |



|        |     |        |       |       |        |
|--------|-----|--------|-------|-------|--------|
| 74,488 | 163 | 22,729 | 6,531 | 3,942 | 33,365 |
| 74,489 | 160 | 22,789 | 6,623 | 4,008 | 33,580 |
| 74,490 | 160 | 22,893 | 6,620 | 4,012 | 33,685 |
| 74,491 | 156 | 22,758 | 6,579 | 3,971 | 33,464 |
| 74,492 | 156 | 22,752 | 6,601 | 3,985 | 33,494 |
| 74,493 | 153 | 23,156 | 6,661 | 4,035 | 34,005 |
| 74,494 | 152 | 22,861 | 6,600 | 4,000 | 33,613 |
| 74,495 | 160 | 23,249 | 6,728 | 4,062 | 34,199 |
| 74,496 | 162 | 23,292 | 6,738 | 4,091 | 34,283 |
| 74,497 | 165 | 23,313 | 6,716 | 4,081 | 34,275 |
| 74,498 | 166 | 23,213 | 6,677 | 4,077 | 34,133 |
| 74,499 | 167 | 22,686 | 6,572 | 4,025 | 33,450 |
| 74,500 | 162 | 22,735 | 6,586 | 4,022 | 33,505 |
| 74,501 | 165 | 23,014 | 6,629 | 4,051 | 33,859 |
| 74,502 | 163 | 22,896 | 6,554 | 3,996 | 33,609 |
| 74,503 | 162 | 22,945 | 6,573 | 4,002 | 33,682 |
| 74,504 | 161 | 22,970 | 6,583 | 4,007 | 33,721 |
| 74,505 | 160 | 23,045 | 6,633 | 4,019 | 33,857 |
| 74,506 | 160 | 23,164 | 6,731 | 4,076 | 34,131 |
| 74,507 | 157 | 23,180 | 6,740 | 4,091 | 34,168 |
| 74,508 | 152 | 23,405 | 6,716 | 4,085 | 34,358 |
| 74,509 | 161 | 23,327 | 6,668 | 4,049 | 34,205 |
| 74,510 | 161 | 23,380 | 6,663 | 4,056 | 34,260 |
| 74,511 | 162 | 23,685 | 6,689 | 4,079 | 34,615 |
| 74,512 | 162 | 23,341 | 6,578 | 4,009 | 34,090 |
| 74,513 | 162 | 23,226 | 6,542 | 4,020 | 33,950 |
| 74,514 | 158 | 23,034 | 6,495 | 4,018 | 33,705 |
| 74,515 | 159 | 22,952 | 6,471 | 4,012 | 33,594 |
| 74,516 | 153 | 22,767 | 6,403 | 3,950 | 33,273 |
| 74,517 | 153 | 22,730 | 6,337 | 3,911 | 33,131 |
| 74,518 | 147 | 22,655 | 6,223 | 3,858 | 32,883 |
| 74,519 | 144 | 22,598 | 6,238 | 3,837 | 32,817 |

|        |     |        |       |       |        |
|--------|-----|--------|-------|-------|--------|
| 74,520 | 143 | 22,700 | 6,199 | 3,808 | 32,850 |
| 74,521 | 140 | 22,597 | 6,082 | 3,738 | 32,557 |
| 74,522 | 146 | 22,512 | 6,052 | 3,720 | 32,430 |
| 74,523 | 146 | 22,503 | 6,053 | 3,717 | 32,419 |
| 74,524 | 146 | 22,539 | 6,108 | 3,697 | 32,490 |
| 74,525 | 140 | 22,439 | 6,072 | 3,664 | 32,315 |
| 74,526 | 143 | 22,717 | 6,124 | 3,704 | 32,688 |
| 74,527 | 136 | 22,602 | 6,093 | 3,687 | 32,518 |
| 74,528 | 135 | 22,679 | 6,127 | 3,691 | 32,632 |
| 74,529 | 129 | 22,766 | 6,128 | 3,691 | 32,714 |
| 74,530 | 129 | 22,775 | 6,124 | 3,680 | 32,708 |
| 74,531 | 121 | 22,862 | 6,144 | 3,701 | 32,828 |
| 74,532 | 113 | 22,674 | 6,099 | 3,683 | 32,569 |
| 74,533 | 113 | 22,595 | 6,060 | 3,672 | 32,440 |
| 74,534 | 106 | 22,489 | 6,025 | 3,705 | 32,325 |
| 74,535 | 106 | 22,602 | 6,050 | 3,729 | 32,487 |
| 74,536 | 102 | 22,569 | 6,069 | 3,760 | 32,500 |
| 74,537 | 93  | 22,466 | 6,031 | 3,770 | 32,360 |
| 74,538 | 92  | 22,419 | 6,034 | 3,754 | 32,299 |
| 74,539 | 92  | 22,496 | 6,044 | 3,754 | 32,386 |
| 74,540 | 94  | 22,552 | 6,012 | 3,741 | 32,399 |
| 74,541 | 91  | 22,151 | 5,943 | 3,705 | 31,890 |
| 74,542 | 91  | 22,014 | 5,909 | 3,691 | 31,705 |
| 74,543 | 90  | 22,042 | 5,891 | 3,681 | 31,704 |
| 74,544 | 90  | 22,046 | 5,922 | 3,691 | 31,749 |
| 74,545 | 91  | 22,128 | 5,950 | 3,730 | 31,899 |
| 74,546 | 83  | 21,933 | 5,928 | 3,715 | 31,659 |
| 74,547 | 77  | 21,675 | 5,902 | 3,713 | 31,367 |
| 74,548 | 74  | 21,269 | 5,846 | 3,668 | 30,857 |
| 74,549 | 78  | 21,298 | 5,840 | 3,656 | 30,872 |
| 74,550 | 76  | 21,354 | 5,838 | 3,666 | 30,934 |
| 74,551 | 76  | 21,417 | 5,854 | 3,671 | 31,018 |

|        |    |        |       |       |        |
|--------|----|--------|-------|-------|--------|
| 74,552 | 72 | 21,463 | 5,850 | 3,675 | 31,060 |
| 74,553 | 72 | 21,518 | 5,850 | 3,670 | 31,110 |
| 74,554 | 80 | 21,794 | 5,896 | 3,713 | 31,483 |
| 74,555 | 80 | 21,913 | 5,879 | 3,731 | 31,603 |
| 74,556 | 78 | 21,843 | 5,824 | 3,694 | 31,439 |
| 74,557 | 80 | 21,685 | 5,780 | 3,652 | 31,197 |
| 74,558 | 82 | 21,778 | 5,838 | 3,667 | 31,365 |
| 74,559 | 81 | 21,712 | 5,875 | 3,672 | 31,340 |
| 74,560 | 72 | 21,483 | 5,869 | 3,634 | 31,058 |
| 74,561 | 75 | 21,694 | 5,918 | 3,668 | 31,355 |
| 74,562 | 75 | 21,558 | 5,929 | 3,675 | 31,237 |
| 74,563 | 74 | 21,392 | 5,887 | 3,626 | 30,979 |
| 74,564 | 75 | 21,513 | 5,899 | 3,608 | 31,095 |
| 74,565 | 75 | 21,542 | 5,916 | 3,619 | 31,152 |
| 74,566 | 81 | 21,627 | 5,975 | 3,675 | 31,358 |
| 74,567 | 84 | 21,544 | 5,948 | 3,679 | 31,255 |
| 74,568 | 88 | 21,154 | 5,886 | 3,635 | 30,763 |
| 74,569 | 89 | 20,824 | 5,837 | 3,610 | 30,360 |
| 74,570 | 91 | 21,306 | 5,998 | 3,711 | 31,106 |
| 74,571 | 96 | 20,963 | 5,949 | 3,691 | 30,699 |
| 74,572 | 95 | 20,547 | 5,892 | 3,641 | 30,175 |
| 74,573 | 88 | 20,700 | 5,950 | 3,675 | 30,413 |
| 74,574 | 89 | 20,672 | 5,957 | 3,679 | 30,397 |
| 74,575 | 88 | 20,603 | 5,939 | 3,681 | 30,311 |
| 74,576 | 88 | 20,315 | 5,879 | 3,663 | 29,945 |
| 74,577 | 84 | 20,119 | 5,830 | 3,623 | 29,656 |
| 74,578 | 82 | 20,916 | 6,064 | 3,767 | 30,829 |
| 74,579 | 84 | 21,095 | 6,073 | 3,800 | 31,052 |
| 74,580 | 82 | 21,109 | 6,083 | 3,811 | 31,085 |
| 74,581 | 83 | 20,540 | 5,956 | 3,741 | 30,320 |
| 74,582 | 84 | 20,864 | 6,040 | 3,790 | 30,778 |
| 74,583 | 80 | 21,263 | 6,121 | 3,829 | 31,293 |

|        |     |        |       |       |        |
|--------|-----|--------|-------|-------|--------|
| 74,584 | 89  | 21,301 | 6,150 | 3,811 | 31,351 |
| 74,585 | 90  | 21,291 | 6,120 | 3,779 | 31,280 |
| 74,586 | 90  | 21,388 | 6,136 | 3,783 | 31,397 |
| 74,587 | 91  | 21,697 | 6,214 | 3,825 | 31,827 |
| 74,588 | 103 | 21,799 | 6,236 | 3,827 | 31,965 |
| 74,589 | 103 | 21,573 | 6,143 | 3,767 | 31,586 |
| 74,590 | 104 | 21,913 | 6,214 | 3,832 | 32,063 |
| 74,591 | 107 | 21,826 | 6,204 | 3,841 | 31,978 |
| 74,592 | 109 | 21,723 | 6,197 | 3,834 | 31,863 |
| 74,593 | 111 | 21,802 | 6,254 | 3,856 | 32,023 |
| 74,594 | 115 | 21,862 | 6,241 | 3,842 | 32,060 |
| 74,595 | 116 | 21,929 | 6,247 | 3,813 | 32,105 |
| 74,596 | 116 | 21,871 | 6,215 | 3,784 | 31,986 |
| 74,597 | 117 | 22,011 | 6,172 | 3,732 | 32,032 |
| 74,598 | 119 | 22,130 | 6,161 | 3,720 | 32,130 |
| 74,599 | 117 | 21,852 | 6,076 | 3,658 | 31,703 |
| 74,600 | 116 | 21,952 | 6,097 | 3,683 | 31,848 |
| 74,601 | 116 | 21,960 | 6,093 | 3,678 | 31,847 |
| 74,602 | 119 | 22,031 | 6,118 | 3,681 | 31,949 |
| 74,603 | 123 | 22,234 | 6,173 | 3,693 | 32,223 |
| 74,604 | 119 | 22,318 | 6,156 | 3,698 | 32,291 |
| 74,605 | 119 | 22,298 | 6,200 | 3,707 | 32,324 |
| 74,606 | 119 | 22,228 | 6,212 | 3,694 | 32,253 |
| 74,607 | 116 | 22,036 | 6,171 | 3,664 | 31,987 |
| 74,608 | 116 | 22,164 | 6,138 | 3,667 | 32,085 |
| 74,609 | 121 | 22,449 | 6,190 | 3,689 | 32,449 |
| 74,610 | 125 | 22,417 | 6,160 | 3,684 | 32,386 |
| 74,611 | 122 | 22,416 | 6,129 | 3,695 | 32,362 |
| 74,612 | 124 | 22,408 | 6,148 | 3,680 | 32,360 |
| 74,613 | 122 | 22,129 | 6,080 | 3,637 | 31,968 |
| 74,614 | 122 | 22,145 | 6,129 | 3,658 | 32,054 |
| 74,615 | 126 | 22,391 | 6,225 | 3,700 | 32,442 |

|        |     |        |       |       |        |
|--------|-----|--------|-------|-------|--------|
| 74,616 | 127 | 22,571 | 6,239 | 3,682 | 32,619 |
| 74,617 | 125 | 22,440 | 6,176 | 3,639 | 32,380 |
| 74,618 | 122 | 22,294 | 6,115 | 3,604 | 32,135 |
| 74,619 | 127 | 22,721 | 6,201 | 3,660 | 32,709 |
| 74,620 | 133 | 22,913 | 6,259 | 3,699 | 33,004 |
| 74,621 | 132 | 23,024 | 6,270 | 3,679 | 33,105 |
| 74,622 | 131 | 23,166 | 6,245 | 3,649 | 33,191 |
| 74,623 | 132 | 23,185 | 6,259 | 3,643 | 33,219 |
| 74,624 | 133 | 23,560 | 6,337 | 3,697 | 33,727 |
| 74,625 | 133 | 23,363 | 6,294 | 3,677 | 33,467 |
| 74,626 | 141 | 23,619 | 6,373 | 3,705 | 33,838 |
| 74,627 | 142 | 23,523 | 6,347 | 3,694 | 33,706 |
| 74,628 | 143 | 23,672 | 6,393 | 3,708 | 33,916 |
| 74,629 | 143 | 23,515 | 6,382 | 3,722 | 33,762 |
| 74,630 | 145 | 23,354 | 6,331 | 3,682 | 33,512 |
| 74,631 | 145 | 23,138 | 6,255 | 3,636 | 33,174 |
| 74,632 | 145 | 23,292 | 6,258 | 3,637 | 33,332 |
| 74,633 | 146 | 23,165 | 6,194 | 3,588 | 33,093 |
| 74,634 | 147 | 23,266 | 6,204 | 3,611 | 33,228 |
| 74,635 | 137 | 23,188 | 6,192 | 3,612 | 33,129 |
| 74,636 | 139 | 23,243 | 6,266 | 3,634 | 33,282 |
| 74,637 | 141 | 23,063 | 6,185 | 3,574 | 32,963 |
| 74,638 | 144 | 23,226 | 6,230 | 3,582 | 33,182 |
| 74,639 | 136 | 23,057 | 6,209 | 3,576 | 32,978 |
| 74,640 | 141 | 23,378 | 6,312 | 3,651 | 33,482 |
| 74,641 | 143 | 23,432 | 6,354 | 3,651 | 33,580 |
| 74,642 | 139 | 23,606 | 6,381 | 3,638 | 33,764 |
| 74,643 | 141 | 23,607 | 6,324 | 3,623 | 33,695 |
| 74,644 | 141 | 23,645 | 6,314 | 3,610 | 33,710 |
| 74,645 | 139 | 23,612 | 6,321 | 3,631 | 33,703 |
| 74,646 | 138 | 23,630 | 6,311 | 3,652 | 33,731 |
| 74,647 | 137 | 23,452 | 6,267 | 3,642 | 33,498 |

|        |     |        |       |       |        |
|--------|-----|--------|-------|-------|--------|
| 74,648 | 137 | 23,485 | 6,287 | 3,648 | 33,557 |
| 74,649 | 148 | 23,467 | 6,280 | 3,642 | 33,537 |
| 74,650 | 148 | 23,468 | 6,273 | 3,631 | 33,520 |
| 74,651 | 147 | 23,550 | 6,301 | 3,641 | 33,639 |
| 74,652 | 149 | 23,459 | 6,293 | 3,633 | 33,534 |
| 74,653 | 148 | 23,338 | 6,260 | 3,625 | 33,371 |
| 74,654 | 155 | 23,390 | 6,268 | 3,637 | 33,450 |
| 74,655 | 155 | 23,106 | 6,235 | 3,599 | 33,095 |
| 74,656 | 158 | 23,634 | 6,336 | 3,693 | 33,821 |
| 74,657 | 159 | 23,595 | 6,322 | 3,683 | 33,759 |
| 74,658 | 161 | 23,724 | 6,369 | 3,708 | 33,962 |
| 74,659 | 164 | 23,491 | 6,358 | 3,673 | 33,686 |
| 74,660 | 162 | 23,449 | 6,358 | 3,674 | 33,643 |
| 74,661 | 162 | 23,326 | 6,364 | 3,665 | 33,517 |
| 74,662 | 165 | 23,255 | 6,358 | 3,657 | 33,435 |
| 74,663 | 162 | 23,152 | 6,340 | 3,667 | 33,321 |
| 74,664 | 165 | 23,010 | 6,308 | 3,650 | 33,133 |
| 74,665 | 161 | 22,859 | 6,272 | 3,621 | 32,913 |
| 74,666 | 167 | 22,864 | 6,294 | 3,652 | 32,977 |
| 74,667 | 165 | 22,600 | 6,246 | 3,630 | 32,641 |
| 74,668 | 160 | 22,946 | 6,356 | 3,699 | 33,161 |
| 74,669 | 160 | 22,655 | 6,316 | 3,658 | 32,789 |
| 74,670 | 158 | 22,441 | 6,256 | 3,626 | 32,481 |
| 74,671 | 155 | 22,625 | 6,358 | 3,664 | 32,802 |
| 74,672 | 157 | 22,656 | 6,380 | 3,695 | 32,888 |
| 74,673 | 151 | 22,464 | 6,348 | 3,699 | 32,662 |
| 74,674 | 154 | 21,967 | 6,170 | 3,618 | 31,909 |
| 74,675 | 155 | 22,032 | 6,200 | 3,636 | 32,023 |
| 74,676 | 152 | 22,127 | 6,216 | 3,639 | 32,134 |
| 74,677 | 154 | 22,033 | 6,142 | 3,602 | 31,931 |
| 74,678 | 151 | 21,849 | 6,077 | 3,558 | 31,635 |
| 74,679 | 154 | 21,715 | 6,018 | 3,540 | 31,427 |

|        |     |        |       |       |        |
|--------|-----|--------|-------|-------|--------|
| 74,680 | 156 | 21,717 | 6,026 | 3,534 | 31,433 |
| 74,681 | 154 | 21,570 | 6,043 | 3,530 | 31,297 |
| 74,682 | 152 | 21,414 | 6,032 | 3,512 | 31,110 |
| 74,683 | 155 | 21,254 | 5,985 | 3,489 | 30,883 |
| 74,684 | 157 | 21,162 | 5,981 | 3,493 | 30,793 |
| 74,685 | 157 | 20,820 | 5,843 | 3,412 | 30,232 |
| 74,686 | 156 | 20,918 | 5,860 | 3,440 | 30,374 |
| 74,687 | 154 | 20,948 | 5,856 | 3,446 | 30,404 |
| 74,688 | 150 | 20,830 | 5,839 | 3,461 | 30,280 |
| 74,689 | 146 | 20,745 | 5,836 | 3,463 | 30,190 |
| 74,690 | 144 | 20,706 | 5,789 | 3,421 | 30,060 |
| 74,691 | 148 | 20,911 | 5,825 | 3,434 | 30,318 |
| 74,692 | 145 | 20,578 | 5,735 | 3,382 | 29,840 |
| 74,693 | 150 | 20,788 | 5,751 | 3,404 | 30,093 |
| 74,694 | 150 | 20,760 | 5,750 | 3,392 | 30,052 |
| 74,695 | 151 | 20,509 | 5,709 | 3,335 | 29,704 |
| 74,696 | 158 | 20,409 | 5,699 | 3,313 | 29,579 |
| 74,697 | 159 | 20,521 | 5,711 | 3,311 | 29,702 |
| 74,698 | 158 | 20,257 | 5,682 | 3,303 | 29,400 |
| 74,699 | 159 | 20,202 | 5,672 | 3,306 | 29,339 |
| 74,700 | 150 | 20,021 | 5,649 | 3,271 | 29,091 |
| 74,701 | 150 | 19,881 | 5,618 | 3,256 | 28,905 |
| 74,702 | 154 | 20,303 | 5,714 | 3,319 | 29,490 |
| 74,703 | 149 | 20,076 | 5,684 | 3,293 | 29,202 |
| 74,704 | 146 | 20,388 | 5,785 | 3,368 | 29,687 |
| 74,705 | 134 | 20,309 | 5,727 | 3,359 | 29,529 |
| 74,706 | 133 | 20,540 | 5,771 | 3,397 | 29,841 |
| 74,707 | 136 | 20,227 | 5,689 | 3,364 | 29,416 |
| 74,708 | 139 | 20,322 | 5,718 | 3,393 | 29,572 |
| 74,709 | 133 | 20,119 | 5,617 | 3,360 | 29,229 |
| 74,710 | 134 | 20,072 | 5,635 | 3,366 | 29,207 |
| 74,711 | 131 | 20,201 | 5,664 | 3,409 | 29,405 |

|        |     |        |       |       |        |
|--------|-----|--------|-------|-------|--------|
| 74,712 | 124 | 20,171 | 5,606 | 3,383 | 29,284 |
| 74,713 | 122 | 20,070 | 5,567 | 3,363 | 29,122 |
| 74,714 | 125 | 20,151 | 5,548 | 3,357 | 29,181 |
| 74,715 | 120 | 19,944 | 5,502 | 3,313 | 28,879 |
| 74,716 | 119 | 20,251 | 5,536 | 3,351 | 29,257 |
| 74,717 | 118 | 20,331 | 5,590 | 3,381 | 29,420 |
| 74,718 | 119 | 20,369 | 5,606 | 3,389 | 29,483 |
| 74,719 | 115 | 20,238 | 5,528 | 3,365 | 29,246 |
| 74,720 | 116 | 20,403 | 5,556 | 3,382 | 29,457 |
| 74,721 | 117 | 20,748 | 5,636 | 3,432 | 29,933 |
| 74,722 | 119 | 20,832 | 5,670 | 3,465 | 30,086 |
| 74,723 | 117 | 20,964 | 5,643 | 3,463 | 30,187 |
| 74,724 | 118 | 20,974 | 5,669 | 3,467 | 30,228 |
| 74,725 | 110 | 20,792 | 5,604 | 3,418 | 29,924 |
| 74,726 | 110 | 20,813 | 5,587 | 3,416 | 29,926 |
| 74,727 | 106 | 20,813 | 5,622 | 3,445 | 29,986 |
| 74,728 | 103 | 20,742 | 5,644 | 3,469 | 29,958 |
| 74,729 | 111 | 21,067 | 5,786 | 3,537 | 30,501 |
| 74,730 | 104 | 20,981 | 5,753 | 3,516 | 30,354 |
| 74,731 | 105 | 21,097 | 5,813 | 3,561 | 30,576 |
| 74,732 | 107 | 21,058 | 5,850 | 3,579 | 30,594 |
| 74,733 | 106 | 21,088 | 5,882 | 3,597 | 30,673 |
| 74,734 | 105 | 21,080 | 5,901 | 3,611 | 30,697 |
| 74,735 | 104 | 21,057 | 5,932 | 3,635 | 30,728 |
| 74,736 | 105 | 21,033 | 5,932 | 3,649 | 30,719 |
| 74,737 | 108 | 21,092 | 5,971 | 3,632 | 30,803 |
| 74,738 | 107 | 20,809 | 5,910 | 3,582 | 30,408 |
| 74,739 | 108 | 20,794 | 5,914 | 3,573 | 30,389 |
| 74,740 | 113 | 20,746 | 5,894 | 3,589 | 30,342 |
| 74,741 | 122 | 21,058 | 5,963 | 3,658 | 30,801 |
| 74,742 | 127 | 21,079 | 5,996 | 3,663 | 30,865 |
| 74,743 | 130 | 20,825 | 5,928 | 3,635 | 30,518 |



|        |     |        |       |       |        |
|--------|-----|--------|-------|-------|--------|
| 74,744 | 125 | 20,568 | 5,910 | 3,602 | 30,205 |
| 74,745 | 121 | 20,756 | 5,994 | 3,649 | 30,520 |
| 74,746 | 120 | 20,702 | 5,976 | 3,651 | 30,449 |
| 74,747 | 114 | 20,592 | 6,010 | 3,668 | 30,384 |
| 74,748 | 115 | 20,846 | 6,094 | 3,718 | 30,773 |
| 74,749 | 112 | 20,709 | 6,085 | 3,692 | 30,598 |
| 74,750 | 110 | 20,771 | 6,142 | 3,741 | 30,764 |
| 74,751 | 106 | 20,545 | 6,066 | 3,717 | 30,434 |
| 74,752 | 105 | 20,166 | 5,954 | 3,655 | 29,880 |
| 74,753 | 106 | 20,367 | 6,021 | 3,666 | 30,160 |
| 74,754 | 106 | 20,257 | 6,022 | 3,668 | 30,053 |
| 74,755 | 106 | 20,310 | 6,071 | 3,687 | 30,174 |
| 74,756 | 110 | 20,246 | 6,093 | 3,673 | 30,122 |
| 74,757 | 113 | 20,236 | 6,120 | 3,674 | 30,143 |
| 74,758 | 108 | 20,231 | 6,143 | 3,664 | 30,146 |
| 74,759 | 104 | 20,350 | 6,186 | 3,692 | 30,332 |
| 74,760 | 103 | 20,039 | 6,099 | 3,627 | 29,868 |
| 74,761 | 107 | 20,348 | 6,188 | 3,666 | 30,309 |
| 74,762 | 109 | 20,543 | 6,276 | 3,697 | 30,625 |
| 74,763 | 111 | 20,285 | 6,246 | 3,665 | 30,307 |
| 74,764 | 111 | 20,244 | 6,263 | 3,668 | 30,286 |
| 74,765 | 105 | 20,328 | 6,330 | 3,706 | 30,469 |
| 74,766 | 104 | 20,236 | 6,278 | 3,703 | 30,321 |
| 74,767 | 105 | 20,053 | 6,252 | 3,684 | 30,094 |
| 74,768 | 105 | 19,932 | 6,236 | 3,657 | 29,930 |
| 74,769 | 106 | 20,046 | 6,273 | 3,698 | 30,123 |
| 74,770 | 108 | 19,934 | 6,292 | 3,681 | 30,015 |
| 74,771 | 110 | 20,213 | 6,351 | 3,697 | 30,371 |
| 74,772 | 112 | 20,248 | 6,376 | 3,714 | 30,450 |
| 74,773 | 118 | 20,225 | 6,374 | 3,706 | 30,423 |
| 74,774 | 116 | 19,989 | 6,345 | 3,674 | 30,124 |
| 74,775 | 117 | 20,216 | 6,439 | 3,699 | 30,471 |

|        |     |        |       |       |        |
|--------|-----|--------|-------|-------|--------|
| 74,776 | 118 | 19,813 | 6,356 | 3,636 | 29,923 |
| 74,777 | 119 | 19,925 | 6,395 | 3,651 | 30,090 |
| 74,778 | 118 | 19,994 | 6,375 | 3,633 | 30,120 |
| 74,779 | 119 | 20,137 | 6,401 | 3,666 | 30,323 |
| 74,780 | 120 | 20,235 | 6,447 | 3,694 | 30,496 |
| 74,781 | 121 | 20,226 | 6,427 | 3,664 | 30,438 |
| 74,782 | 120 | 20,358 | 6,406 | 3,663 | 30,547 |
| 74,783 | 130 | 20,374 | 6,413 | 3,672 | 30,589 |
| 74,784 | 128 | 20,157 | 6,360 | 3,637 | 30,282 |
| 74,785 | 137 | 20,327 | 6,404 | 3,658 | 30,526 |
| 74,786 | 140 | 20,303 | 6,366 | 3,633 | 30,442 |
| 74,787 | 140 | 20,279 | 6,390 | 3,634 | 30,443 |
| 74,788 | 141 | 20,387 | 6,401 | 3,632 | 30,561 |
| 74,789 | 142 | 20,429 | 6,400 | 3,649 | 30,620 |
| 74,790 | 142 | 20,718 | 6,480 | 3,674 | 31,014 |
| 74,791 | 138 | 20,612 | 6,483 | 3,695 | 30,928 |
| 74,792 | 133 | 20,806 | 6,548 | 3,705 | 31,192 |
| 74,793 | 128 | 20,894 | 6,553 | 3,717 | 31,292 |
| 74,794 | 124 | 20,848 | 6,536 | 3,704 | 31,212 |
| 74,795 | 124 | 20,971 | 6,587 | 3,744 | 31,426 |
| 74,796 | 127 | 20,825 | 6,469 | 3,684 | 31,105 |
| 74,797 | 129 | 21,027 | 6,514 | 3,709 | 31,379 |
| 74,798 | 140 | 21,318 | 6,602 | 3,744 | 31,804 |
| 74,799 | 147 | 21,376 | 6,588 | 3,748 | 31,859 |
| 74,800 | 146 | 21,223 | 6,548 | 3,748 | 31,665 |
| 74,801 | 149 | 21,425 | 6,575 | 3,736 | 31,885 |
| 74,802 | 150 | 21,299 | 6,554 | 3,705 | 31,708 |
| 74,803 | 150 | 21,152 | 6,554 | 3,696 | 31,552 |
| 74,804 | 150 | 21,379 | 6,608 | 3,736 | 31,873 |
| 74,805 | 152 | 21,206 | 6,521 | 3,696 | 31,575 |
| 74,806 | 154 | 21,104 | 6,501 | 3,666 | 31,425 |
| 74,807 | 169 | 21,880 | 6,716 | 3,772 | 32,537 |

|        |     |        |       |       |        |
|--------|-----|--------|-------|-------|--------|
| 74,808 | 172 | 21,687 | 6,641 | 3,721 | 32,221 |
| 74,809 | 180 | 21,649 | 6,640 | 3,689 | 32,158 |
| 74,810 | 180 | 21,604 | 6,639 | 3,671 | 32,094 |
| 74,811 | 189 | 21,729 | 6,687 | 3,715 | 32,320 |
| 74,812 | 186 | 21,688 | 6,702 | 3,720 | 32,296 |
| 74,813 | 186 | 21,539 | 6,641 | 3,689 | 32,055 |
| 74,814 | 184 | 21,619 | 6,642 | 3,703 | 32,148 |
| 74,815 | 193 | 21,628 | 6,639 | 3,703 | 32,163 |
| 74,816 | 190 | 21,534 | 6,600 | 3,671 | 31,995 |
| 74,817 | 189 | 21,579 | 6,652 | 3,696 | 32,116 |
| 74,818 | 193 | 21,473 | 6,584 | 3,663 | 31,913 |
| 74,819 | 194 | 21,694 | 6,590 | 3,690 | 32,168 |
| 74,820 | 191 | 21,596 | 6,546 | 3,642 | 31,975 |
| 74,821 | 194 | 21,932 | 6,646 | 3,707 | 32,479 |
| 74,822 | 196 | 21,981 | 6,641 | 3,705 | 32,523 |
| 74,823 | 193 | 21,971 | 6,590 | 3,665 | 32,419 |
| 74,824 | 187 | 21,681 | 6,494 | 3,613 | 31,975 |
| 74,825 | 189 | 21,951 | 6,554 | 3,653 | 32,347 |
| 74,826 | 188 | 21,576 | 6,444 | 3,603 | 31,811 |
| 74,827 | 191 | 21,654 | 6,407 | 3,600 | 31,852 |
| 74,828 | 197 | 21,627 | 6,408 | 3,606 | 31,838 |
| 74,829 | 197 | 21,648 | 6,415 | 3,610 | 31,870 |
| 74,830 | 202 | 21,779 | 6,474 | 3,621 | 32,076 |
| 74,831 | 195 | 21,697 | 6,461 | 3,601 | 31,954 |
| 74,832 | 193 | 21,392 | 6,366 | 3,537 | 31,488 |
| 74,833 | 181 | 21,267 | 6,283 | 3,473 | 31,204 |
| 74,834 | 182 | 21,527 | 6,320 | 3,500 | 31,529 |
| 74,835 | 172 | 21,547 | 6,347 | 3,508 | 31,574 |
| 74,836 | 169 | 21,419 | 6,312 | 3,502 | 31,402 |
| 74,837 | 171 | 21,579 | 6,357 | 3,518 | 31,625 |
| 74,838 | 171 | 21,304 | 6,299 | 3,481 | 31,255 |
| 74,839 | 174 | 21,420 | 6,332 | 3,494 | 31,420 |

|        |     |        |       |       |        |
|--------|-----|--------|-------|-------|--------|
| 74,840 | 173 | 21,283 | 6,304 | 3,424 | 31,184 |
| 74,841 | 171 | 20,965 | 6,194 | 3,343 | 30,673 |
| 74,842 | 171 | 20,945 | 6,194 | 3,348 | 30,658 |
| 74,843 | 169 | 20,919 | 6,213 | 3,353 | 30,654 |
| 74,844 | 164 | 20,330 | 6,043 | 3,280 | 29,817 |
| 74,845 | 163 | 20,325 | 6,049 | 3,294 | 29,831 |
| 74,846 | 165 | 20,123 | 6,026 | 3,270 | 29,584 |
| 74,847 | 161 | 19,737 | 5,925 | 3,202 | 29,025 |
| 74,848 | 159 | 19,712 | 5,937 | 3,196 | 29,004 |
| 74,849 | 147 | 19,675 | 5,970 | 3,215 | 29,007 |
| 74,850 | 145 | 19,399 | 5,904 | 3,168 | 28,616 |
| 74,851 | 144 | 19,312 | 5,849 | 3,129 | 28,434 |
| 74,852 | 138 | 19,335 | 5,887 | 3,159 | 28,519 |
| 74,853 | 138 | 19,227 | 5,872 | 3,150 | 28,387 |
| 74,854 | 141 | 19,179 | 5,840 | 3,125 | 28,285 |
| 74,855 | 143 | 19,334 | 5,916 | 3,181 | 28,574 |
| 74,856 | 137 | 19,252 | 5,907 | 3,173 | 28,469 |
| 74,857 | 129 | 19,221 | 5,862 | 3,176 | 28,388 |
| 74,858 | 124 | 19,277 | 5,857 | 3,190 | 28,448 |
| 74,859 | 119 | 19,181 | 5,867 | 3,185 | 28,352 |
| 74,860 | 113 | 19,226 | 5,889 | 3,213 | 28,441 |
| 74,861 | 107 | 19,324 | 5,890 | 3,230 | 28,551 |
| 74,862 | 102 | 19,260 | 5,844 | 3,196 | 28,402 |
| 74,863 | 103 | 19,143 | 5,835 | 3,198 | 28,279 |
| 74,864 | 105 | 19,134 | 5,814 | 3,194 | 28,247 |
| 74,865 | 99  | 19,114 | 5,838 | 3,201 | 28,252 |
| 74,866 | 104 | 19,133 | 5,836 | 3,205 | 28,278 |
| 74,867 | 104 | 18,968 | 5,793 | 3,175 | 28,040 |
| 74,868 | 100 | 19,182 | 5,903 | 3,196 | 28,381 |
| 74,869 | 106 | 19,154 | 5,918 | 3,198 | 28,376 |
| 74,870 | 110 | 19,109 | 5,889 | 3,201 | 28,309 |
| 74,871 | 112 | 19,366 | 5,972 | 3,232 | 28,682 |

|        |     |        |       |       |        |
|--------|-----|--------|-------|-------|--------|
| 74,872 | 113 | 19,395 | 5,975 | 3,229 | 28,712 |
| 74,873 | 107 | 19,145 | 5,942 | 3,204 | 28,398 |
| 74,874 | 108 | 18,853 | 5,938 | 3,195 | 28,094 |
| 74,875 | 110 | 19,031 | 5,984 | 3,217 | 28,342 |
| 74,876 | 111 | 18,982 | 6,002 | 3,211 | 28,306 |
| 74,877 | 113 | 19,310 | 6,085 | 3,265 | 28,773 |
| 74,878 | 110 | 19,350 | 6,135 | 3,284 | 28,879 |
| 74,879 | 106 | 19,244 | 6,127 | 3,272 | 28,749 |
| 74,880 | 100 | 19,174 | 6,123 | 3,282 | 28,679 |
| 74,881 | 100 | 19,126 | 6,095 | 3,261 | 28,582 |
| 74,882 | 103 | 19,487 | 6,142 | 3,293 | 29,025 |
| 74,883 | 107 | 19,449 | 6,142 | 3,321 | 29,019 |
| 74,884 | 108 | 19,484 | 6,149 | 3,327 | 29,068 |
| 74,885 | 105 | 18,875 | 5,991 | 3,267 | 28,238 |
| 74,886 | 105 | 19,006 | 6,058 | 3,305 | 28,474 |
| 74,887 | 104 | 19,055 | 6,034 | 3,295 | 28,488 |
| 74,888 | 104 | 19,274 | 6,089 | 3,321 | 28,788 |
| 74,889 | 103 | 19,301 | 6,092 | 3,327 | 28,823 |
| 74,890 | 100 | 19,008 | 6,057 | 3,305 | 28,470 |
| 74,891 | 103 | 19,350 | 6,180 | 3,398 | 29,031 |
| 74,892 | 102 | 19,169 | 6,131 | 3,357 | 28,759 |
| 74,893 | 108 | 19,289 | 6,165 | 3,373 | 28,935 |
| 74,894 | 108 | 19,153 | 6,124 | 3,372 | 28,757 |
| 74,895 | 107 | 18,957 | 6,071 | 3,322 | 28,457 |
| 74,896 | 113 | 19,151 | 6,147 | 3,363 | 28,774 |
| 74,897 | 110 | 19,177 | 6,129 | 3,367 | 28,783 |
| 74,898 | 110 | 19,042 | 6,078 | 3,337 | 28,567 |
| 74,899 | 110 | 19,196 | 6,094 | 3,356 | 28,756 |
| 74,900 | 111 | 19,023 | 6,029 | 3,310 | 28,473 |
| 74,901 | 105 | 18,854 | 5,961 | 3,270 | 28,190 |
| 74,902 | 107 | 19,200 | 6,052 | 3,304 | 28,663 |
| 74,903 | 106 | 19,173 | 6,042 | 3,305 | 28,626 |

|        |     |        |       |       |        |
|--------|-----|--------|-------|-------|--------|
| 74,904 | 102 | 19,300 | 6,066 | 3,302 | 28,770 |
| 74,905 | 101 | 18,804 | 5,956 | 3,246 | 28,107 |
| 74,906 | 103 | 18,971 | 6,007 | 3,262 | 28,343 |
| 74,907 | 101 | 18,952 | 5,982 | 3,249 | 28,284 |
| 74,908 | 99  | 19,070 | 6,056 | 3,281 | 28,506 |
| 74,909 | 98  | 19,027 | 6,061 | 3,293 | 28,479 |
| 74,910 | 97  | 19,036 | 6,028 | 3,294 | 28,455 |
| 74,911 | 96  | 19,055 | 6,022 | 3,297 | 28,470 |
| 74,912 | 95  | 18,836 | 5,960 | 3,256 | 28,147 |
| 74,913 | 96  | 18,888 | 5,995 | 3,286 | 28,265 |
| 74,914 | 97  | 19,021 | 5,991 | 3,281 | 28,390 |
| 74,915 | 96  | 19,249 | 6,071 | 3,341 | 28,757 |
| 74,916 | 99  | 19,425 | 6,134 | 3,392 | 29,050 |
| 74,917 | 94  | 19,054 | 6,028 | 3,352 | 28,528 |
| 74,918 | 97  | 19,277 | 6,074 | 3,396 | 28,844 |
| 74,919 | 95  | 19,285 | 6,075 | 3,408 | 28,863 |
| 74,920 | 93  | 19,171 | 6,037 | 3,359 | 28,660 |
| 74,921 | 101 | 19,838 | 6,209 | 3,479 | 29,627 |
| 74,922 | 96  | 19,549 | 6,099 | 3,429 | 29,173 |
| 74,923 | 97  | 19,730 | 6,124 | 3,509 | 29,460 |
| 74,924 | 97  | 19,686 | 6,116 | 3,512 | 29,411 |
| 74,925 | 97  | 20,171 | 6,245 | 3,577 | 30,090 |
| 74,926 | 92  | 19,819 | 6,195 | 3,553 | 29,659 |
| 74,927 | 94  | 20,132 | 6,325 | 3,609 | 30,160 |
| 74,928 | 92  | 20,027 | 6,313 | 3,640 | 30,072 |
| 74,929 | 91  | 19,977 | 6,329 | 3,653 | 30,050 |
| 74,930 | 90  | 19,893 | 6,291 | 3,619 | 29,893 |
| 74,931 | 89  | 20,043 | 6,327 | 3,628 | 30,087 |
| 74,932 | 88  | 19,666 | 6,228 | 3,583 | 29,565 |
| 74,933 | 88  | 19,853 | 6,302 | 3,616 | 29,859 |
| 74,934 | 92  | 20,111 | 6,376 | 3,652 | 30,231 |
| 74,935 | 97  | 19,898 | 6,298 | 3,597 | 29,890 |

|        |     |        |       |       |        |
|--------|-----|--------|-------|-------|--------|
| 74,936 | 99  | 20,271 | 6,390 | 3,641 | 30,401 |
| 74,937 | 103 | 20,687 | 6,513 | 3,674 | 30,977 |
| 74,938 | 109 | 20,910 | 6,591 | 3,721 | 31,331 |
| 74,939 | 109 | 20,734 | 6,567 | 3,702 | 31,112 |
| 74,940 | 107 | 20,506 | 6,528 | 3,675 | 30,816 |
| 74,941 | 115 | 21,524 | 6,815 | 3,831 | 32,285 |
| 74,942 | 114 | 21,677 | 6,874 | 3,848 | 32,513 |
| 74,943 | 119 | 21,860 | 6,931 | 3,891 | 32,801 |
| 74,944 | 113 | 21,904 | 6,938 | 3,899 | 32,854 |
| 74,945 | 113 | 21,895 | 6,932 | 3,910 | 32,850 |
| 74,946 | 117 | 22,094 | 7,037 | 3,959 | 33,207 |
| 74,947 | 118 | 22,083 | 7,033 | 3,951 | 33,185 |
| 74,948 | 121 | 22,074 | 7,060 | 3,983 | 33,238 |
| 74,949 | 127 | 21,964 | 7,015 | 3,978 | 33,084 |
| 74,950 | 128 | 21,868 | 6,996 | 3,960 | 32,952 |
| 74,951 | 134 | 21,841 | 6,993 | 3,965 | 32,933 |
| 74,952 | 135 | 21,533 | 6,923 | 3,930 | 32,521 |
| 74,953 | 148 | 21,939 | 7,089 | 4,048 | 33,224 |
| 74,954 | 149 | 21,807 | 7,064 | 4,025 | 33,045 |
| 74,955 | 149 | 22,000 | 7,091 | 4,056 | 33,296 |
| 74,956 | 148 | 21,979 | 7,037 | 4,038 | 33,202 |
| 74,957 | 147 | 22,042 | 7,063 | 4,053 | 33,305 |
| 74,958 | 149 | 21,899 | 7,010 | 4,009 | 33,067 |
| 74,959 | 149 | 21,966 | 7,005 | 4,000 | 33,120 |
| 74,960 | 156 | 21,899 | 7,036 | 3,998 | 33,089 |
| 74,961 | 156 | 21,939 | 7,036 | 3,993 | 33,124 |
| 74,962 | 158 | 22,082 | 7,087 | 4,035 | 33,362 |
| 74,963 | 156 | 22,095 | 7,068 | 4,032 | 33,351 |
| 74,964 | 153 | 22,063 | 7,074 | 4,022 | 33,312 |
| 74,965 | 150 | 22,049 | 7,034 | 3,999 | 33,232 |
| 74,966 | 152 | 21,878 | 6,993 | 3,962 | 32,985 |
| 74,967 | 150 | 22,021 | 6,973 | 3,941 | 33,085 |

|        |     |        |       |       |        |
|--------|-----|--------|-------|-------|--------|
| 74,968 | 151 | 22,157 | 6,969 | 3,922 | 33,199 |
| 74,969 | 145 | 22,052 | 6,948 | 3,891 | 33,036 |
| 74,970 | 147 | 21,933 | 6,923 | 3,874 | 32,877 |
| 74,971 | 143 | 21,587 | 6,887 | 3,833 | 32,450 |
| 74,972 | 141 | 22,039 | 7,005 | 3,882 | 33,067 |
| 74,973 | 151 | 21,780 | 6,975 | 3,810 | 32,716 |
| 74,974 | 155 | 21,654 | 6,943 | 3,775 | 32,527 |
| 74,975 | 162 | 21,553 | 6,911 | 3,749 | 32,375 |
| 74,976 | 165 | 21,355 | 6,813 | 3,703 | 32,036 |
| 74,977 | 164 | 21,285 | 6,730 | 3,681 | 31,860 |
| 74,978 | 168 | 21,267 | 6,684 | 3,658 | 31,777 |
| 74,979 | 175 | 21,092 | 6,583 | 3,575 | 31,425 |
| 74,980 | 176 | 21,028 | 6,546 | 3,554 | 31,304 |
| 74,981 | 185 | 20,636 | 6,438 | 3,495 | 30,754 |
| 74,982 | 186 | 20,199 | 6,317 | 3,432 | 30,134 |
| 74,983 | 183 | 20,666 | 6,444 | 3,516 | 30,809 |
| 74,984 | 184 | 20,684 | 6,446 | 3,524 | 30,838 |
| 74,985 | 182 | 20,526 | 6,430 | 3,512 | 30,650 |
| 74,986 | 176 | 20,284 | 6,418 | 3,516 | 30,394 |
| 74,987 | 176 | 20,253 | 6,420 | 3,512 | 30,361 |
| 74,988 | 176 | 20,248 | 6,410 | 3,528 | 30,362 |
| 74,989 | 172 | 20,239 | 6,429 | 3,554 | 30,394 |
| 74,990 | 175 | 20,036 | 6,425 | 3,567 | 30,203 |
| 74,991 | 170 | 20,413 | 6,500 | 3,632 | 30,715 |
| 74,992 | 164 | 20,271 | 6,410 | 3,612 | 30,457 |
| 74,993 | 164 | 20,460 | 6,443 | 3,639 | 30,706 |
| 74,994 | 160 | 20,656 | 6,447 | 3,652 | 30,915 |
| 74,995 | 163 | 20,611 | 6,376 | 3,581 | 30,731 |
| 74,996 | 163 | 20,973 | 6,421 | 3,618 | 31,175 |
| 74,997 | 161 | 21,290 | 6,484 | 3,669 | 31,604 |
| 74,998 | 150 | 21,130 | 6,413 | 3,608 | 31,301 |
| 74,999 | 150 | 21,470 | 6,480 | 3,623 | 31,723 |



|        |     |        |       |       |        |
|--------|-----|--------|-------|-------|--------|
| 75,000 | 145 | 21,621 | 6,553 | 3,660 | 31,979 |
| 75,001 | 139 | 21,558 | 6,469 | 3,613 | 31,779 |
| 75,002 | 142 | 21,657 | 6,493 | 3,629 | 31,921 |
| 75,003 | 139 | 21,670 | 6,502 | 3,623 | 31,934 |
| 75,004 | 138 | 21,988 | 6,562 | 3,638 | 32,326 |
| 75,005 | 143 | 22,011 | 6,542 | 3,645 | 32,341 |
| 75,006 | 148 | 22,076 | 6,571 | 3,647 | 32,442 |
| 75,007 | 151 | 21,839 | 6,510 | 3,616 | 32,116 |
| 75,008 | 157 | 21,779 | 6,514 | 3,613 | 32,063 |
| 75,009 | 158 | 21,829 | 6,520 | 3,613 | 32,120 |
| 75,010 | 164 | 21,877 | 6,551 | 3,643 | 32,235 |
| 75,011 | 160 | 21,613 | 6,471 | 3,591 | 31,835 |
| 75,012 | 157 | 21,636 | 6,445 | 3,558 | 31,796 |
| 75,013 | 159 | 21,560 | 6,415 | 3,552 | 31,686 |
| 75,014 | 159 | 21,651 | 6,440 | 3,564 | 31,814 |
| 75,015 | 163 | 21,247 | 6,325 | 3,504 | 31,239 |
| 75,016 | 165 | 21,267 | 6,312 | 3,515 | 31,259 |
| 75,017 | 162 | 21,350 | 6,351 | 3,523 | 31,386 |
| 75,018 | 161 | 21,014 | 6,245 | 3,491 | 30,911 |
| 75,019 | 160 | 20,991 | 6,233 | 3,497 | 30,881 |
| 75,020 | 159 | 20,920 | 6,216 | 3,500 | 30,795 |
| 75,021 | 159 | 20,914 | 6,173 | 3,501 | 30,747 |
| 75,022 | 161 | 21,086 | 6,230 | 3,550 | 31,027 |
| 75,023 | 158 | 21,071 | 6,182 | 3,561 | 30,972 |
| 75,024 | 147 | 20,797 | 6,105 | 3,548 | 30,597 |
| 75,025 | 141 | 20,798 | 6,083 | 3,529 | 30,551 |
| 75,026 | 134 | 20,771 | 6,044 | 3,541 | 30,490 |
| 75,027 | 138 | 20,909 | 6,089 | 3,552 | 30,688 |
| 75,028 | 139 | 20,729 | 6,090 | 3,551 | 30,509 |
| 75,029 | 137 | 20,737 | 6,103 | 3,552 | 30,529 |
| 75,030 | 131 | 20,637 | 6,079 | 3,516 | 30,363 |
| 75,031 | 122 | 20,819 | 6,078 | 3,529 | 30,548 |

|        |     |        |       |       |        |
|--------|-----|--------|-------|-------|--------|
| 75,032 | 122 | 20,782 | 6,064 | 3,527 | 30,495 |
| 75,033 | 121 | 21,018 | 6,169 | 3,569 | 30,877 |
| 75,034 | 121 | 21,103 | 6,165 | 3,574 | 30,963 |
| 75,035 | 118 | 20,867 | 6,109 | 3,550 | 30,644 |
| 75,036 | 117 | 20,908 | 6,088 | 3,561 | 30,674 |
| 75,037 | 117 | 20,901 | 6,105 | 3,577 | 30,700 |
| 75,038 | 113 | 20,793 | 6,057 | 3,574 | 30,537 |
| 75,039 | 109 | 20,557 | 5,974 | 3,525 | 30,165 |
| 75,040 | 105 | 20,255 | 5,848 | 3,456 | 29,664 |
| 75,041 | 105 | 20,492 | 5,847 | 3,432 | 29,876 |
| 75,042 | 109 | 20,208 | 5,736 | 3,378 | 29,431 |
| 75,043 | 107 | 19,933 | 5,664 | 3,337 | 29,041 |
| 75,044 | 106 | 19,578 | 5,614 | 3,285 | 28,583 |
| 75,045 | 106 | 19,540 | 5,625 | 3,289 | 28,560 |
| 75,046 | 108 | 19,208 | 5,604 | 3,284 | 28,204 |
| 75,047 | 108 | 19,056 | 5,562 | 3,273 | 27,999 |
| 75,048 | 109 | 19,117 | 5,621 | 3,284 | 28,131 |
| 75,049 | 106 | 18,559 | 5,462 | 3,221 | 27,348 |
| 75,050 | 105 | 18,598 | 5,500 | 3,233 | 27,436 |
| 75,051 | 104 | 18,773 | 5,558 | 3,245 | 27,680 |
| 75,052 | 101 | 18,677 | 5,549 | 3,257 | 27,584 |
| 75,053 | 99  | 18,585 | 5,537 | 3,256 | 27,477 |
| 75,054 | 96  | 18,778 | 5,592 | 3,307 | 27,773 |
| 75,055 | 98  | 18,752 | 5,657 | 3,300 | 27,807 |
| 75,056 | 95  | 18,748 | 5,657 | 3,287 | 27,787 |
| 75,057 | 90  | 18,692 | 5,625 | 3,266 | 27,673 |
| 75,058 | 84  | 18,713 | 5,621 | 3,252 | 27,670 |
| 75,059 | 81  | 18,836 | 5,630 | 3,275 | 27,822 |
| 75,060 | 73  | 19,018 | 5,636 | 3,279 | 28,006 |
| 75,061 | 72  | 18,822 | 5,600 | 3,252 | 27,746 |
| 75,062 | 77  | 18,969 | 5,708 | 3,298 | 28,052 |
| 75,063 | 77  | 18,939 | 5,712 | 3,303 | 28,031 |

|        |     |        |       |       |        |
|--------|-----|--------|-------|-------|--------|
| 75,064 | 76  | 18,875 | 5,690 | 3,295 | 27,936 |
| 75,065 | 76  | 18,814 | 5,678 | 3,292 | 27,860 |
| 75,066 | 71  | 18,944 | 5,771 | 3,330 | 28,116 |
| 75,067 | 69  | 19,047 | 5,853 | 3,351 | 28,320 |
| 75,068 | 72  | 19,148 | 5,883 | 3,362 | 28,465 |
| 75,069 | 74  | 19,275 | 5,941 | 3,352 | 28,642 |
| 75,070 | 75  | 19,297 | 5,970 | 3,356 | 28,698 |
| 75,071 | 79  | 19,509 | 6,075 | 3,412 | 29,075 |
| 75,072 | 83  | 19,396 | 6,135 | 3,430 | 29,044 |
| 75,073 | 83  | 19,371 | 6,150 | 3,429 | 29,033 |
| 75,074 | 83  | 19,105 | 6,098 | 3,365 | 28,651 |
| 75,075 | 83  | 19,206 | 6,178 | 3,419 | 28,886 |
| 75,076 | 85  | 19,222 | 6,192 | 3,428 | 28,927 |
| 75,077 | 84  | 19,282 | 6,244 | 3,420 | 29,030 |
| 75,078 | 78  | 19,130 | 6,189 | 3,392 | 28,789 |
| 75,079 | 77  | 19,117 | 6,214 | 3,402 | 28,810 |
| 75,080 | 80  | 19,353 | 6,291 | 3,429 | 29,153 |
| 75,081 | 78  | 19,429 | 6,322 | 3,433 | 29,262 |
| 75,082 | 82  | 19,415 | 6,365 | 3,444 | 29,306 |
| 75,083 | 85  | 19,335 | 6,334 | 3,410 | 29,164 |
| 75,084 | 85  | 19,173 | 6,321 | 3,408 | 28,987 |
| 75,085 | 92  | 19,212 | 6,379 | 3,422 | 29,105 |
| 75,086 | 98  | 19,401 | 6,429 | 3,443 | 29,371 |
| 75,087 | 97  | 19,472 | 6,455 | 3,426 | 29,450 |
| 75,088 | 99  | 19,381 | 6,436 | 3,419 | 29,335 |
| 75,089 | 104 | 19,054 | 6,320 | 3,332 | 28,810 |
| 75,090 | 105 | 19,065 | 6,333 | 3,350 | 28,853 |
| 75,091 | 106 | 18,872 | 6,287 | 3,324 | 28,589 |
| 75,092 | 106 | 18,539 | 6,227 | 3,301 | 28,173 |
| 75,093 | 106 | 18,873 | 6,453 | 3,386 | 28,818 |
| 75,094 | 108 | 19,008 | 6,482 | 3,427 | 29,025 |
| 75,095 | 112 | 19,171 | 6,484 | 3,433 | 29,200 |

|        |     |        |       |       |        |
|--------|-----|--------|-------|-------|--------|
| 75,096 | 111 | 19,132 | 6,463 | 3,438 | 29,144 |
| 75,097 | 109 | 19,171 | 6,481 | 3,439 | 29,200 |
| 75,098 | 114 | 19,304 | 6,508 | 3,450 | 29,376 |
| 75,099 | 115 | 19,397 | 6,502 | 3,460 | 29,474 |
| 75,100 | 116 | 19,241 | 6,419 | 3,411 | 29,187 |
| 75,101 | 125 | 19,312 | 6,423 | 3,426 | 29,286 |
| 75,102 | 124 | 19,121 | 6,367 | 3,407 | 29,019 |
| 75,103 | 124 | 19,312 | 6,413 | 3,407 | 29,256 |
| 75,104 | 138 | 19,443 | 6,452 | 3,428 | 29,461 |
| 75,105 | 139 | 19,407 | 6,437 | 3,425 | 29,408 |
| 75,106 | 135 | 19,133 | 6,303 | 3,397 | 28,968 |
| 75,107 | 134 | 19,307 | 6,384 | 3,447 | 29,272 |
| 75,108 | 137 | 19,070 | 6,341 | 3,430 | 28,978 |
| 75,109 | 139 | 18,879 | 6,287 | 3,405 | 28,710 |
| 75,110 | 139 | 19,177 | 6,402 | 3,458 | 29,176 |
| 75,111 | 140 | 18,976 | 6,343 | 3,420 | 28,879 |
| 75,112 | 139 | 18,997 | 6,292 | 3,410 | 28,838 |
| 75,113 | 137 | 19,238 | 6,324 | 3,438 | 29,137 |
| 75,114 | 141 | 19,331 | 6,361 | 3,465 | 29,298 |
| 75,115 | 143 | 19,105 | 6,253 | 3,383 | 28,884 |
| 75,116 | 142 | 18,986 | 6,239 | 3,377 | 28,744 |
| 75,117 | 142 | 19,081 | 6,280 | 3,400 | 28,903 |
| 75,118 | 142 | 19,053 | 6,239 | 3,402 | 28,836 |
| 75,119 | 138 | 18,971 | 6,263 | 3,405 | 28,777 |
| 75,120 | 136 | 18,917 | 6,252 | 3,403 | 28,708 |
| 75,121 | 132 | 18,828 | 6,129 | 3,367 | 28,456 |
| 75,122 | 129 | 18,995 | 6,153 | 3,370 | 28,647 |
| 75,123 | 128 | 19,249 | 6,171 | 3,371 | 28,919 |
| 75,124 | 126 | 19,081 | 6,081 | 3,339 | 28,627 |
| 75,125 | 126 | 19,181 | 6,043 | 3,314 | 28,664 |
| 75,126 | 126 | 19,204 | 6,051 | 3,312 | 28,693 |
| 75,127 | 124 | 19,134 | 6,021 | 3,319 | 28,598 |

|        |     |        |       |       |        |
|--------|-----|--------|-------|-------|--------|
| 75,128 | 124 | 19,421 | 6,108 | 3,369 | 29,022 |
| 75,129 | 122 | 19,559 | 6,139 | 3,412 | 29,232 |
| 75,130 | 121 | 19,418 | 6,099 | 3,420 | 29,058 |
| 75,131 | 123 | 19,819 | 6,204 | 3,487 | 29,633 |
| 75,132 | 121 | 19,994 | 6,234 | 3,538 | 29,887 |
| 75,133 | 112 | 19,839 | 6,095 | 3,478 | 29,524 |
| 75,134 | 114 | 20,305 | 6,198 | 3,551 | 30,168 |
| 75,135 | 112 | 20,683 | 6,280 | 3,581 | 30,656 |
| 75,136 | 107 | 20,762 | 6,284 | 3,598 | 30,751 |
| 75,137 | 105 | 20,796 | 6,320 | 3,610 | 30,831 |
| 75,138 | 105 | 20,705 | 6,284 | 3,611 | 30,705 |
| 75,139 | 103 | 20,651 | 6,258 | 3,579 | 30,591 |
| 75,140 | 106 | 20,849 | 6,301 | 3,602 | 30,858 |
| 75,141 | 109 | 21,059 | 6,345 | 3,635 | 31,148 |
| 75,142 | 115 | 20,941 | 6,283 | 3,613 | 30,952 |
| 75,143 | 115 | 20,884 | 6,223 | 3,591 | 30,813 |
| 75,144 | 116 | 21,121 | 6,238 | 3,581 | 31,056 |
| 75,145 | 115 | 20,965 | 6,168 | 3,529 | 30,777 |
| 75,146 | 125 | 21,336 | 6,370 | 3,635 | 31,466 |
| 75,147 | 123 | 21,165 | 6,330 | 3,584 | 31,202 |
| 75,148 | 127 | 21,404 | 6,384 | 3,618 | 31,533 |
| 75,149 | 124 | 21,048 | 6,329 | 3,562 | 31,063 |
| 75,150 | 127 | 21,342 | 6,422 | 3,605 | 31,496 |
| 75,151 | 125 | 21,074 | 6,371 | 3,584 | 31,154 |
| 75,152 | 120 | 21,251 | 6,447 | 3,612 | 31,430 |
| 75,153 | 121 | 21,015 | 6,359 | 3,563 | 31,058 |
| 75,154 | 123 | 21,305 | 6,405 | 3,602 | 31,435 |
| 75,155 | 111 | 21,249 | 6,399 | 3,616 | 31,375 |
| 75,156 | 111 | 21,182 | 6,383 | 3,613 | 31,289 |
| 75,157 | 112 | 21,100 | 6,397 | 3,586 | 31,195 |
| 75,158 | 109 | 21,340 | 6,448 | 3,630 | 31,527 |
| 75,159 | 105 | 21,196 | 6,379 | 3,590 | 31,270 |

|        |     |        |       |       |        |
|--------|-----|--------|-------|-------|--------|
| 75,160 | 104 | 21,351 | 6,452 | 3,615 | 31,522 |
| 75,161 | 104 | 21,342 | 6,450 | 3,627 | 31,523 |
| 75,162 | 105 | 21,330 | 6,444 | 3,631 | 31,510 |
| 75,163 | 109 | 21,254 | 6,450 | 3,618 | 31,431 |
| 75,164 | 104 | 21,063 | 6,392 | 3,596 | 31,155 |
| 75,165 | 103 | 20,984 | 6,383 | 3,595 | 31,065 |
| 75,166 | 107 | 21,044 | 6,452 | 3,627 | 31,230 |
| 75,167 | 111 | 21,192 | 6,440 | 3,632 | 31,375 |
| 75,168 | 111 | 21,380 | 6,462 | 3,650 | 31,603 |
| 75,169 | 113 | 21,234 | 6,430 | 3,628 | 31,405 |
| 75,170 | 113 | 21,145 | 6,385 | 3,620 | 31,263 |
| 75,171 | 113 | 20,878 | 6,302 | 3,587 | 30,880 |
| 75,172 | 116 | 20,903 | 6,381 | 3,611 | 31,011 |
| 75,173 | 116 | 20,679 | 6,302 | 3,581 | 30,678 |
| 75,174 | 119 | 20,748 | 6,370 | 3,607 | 30,844 |
| 75,175 | 118 | 20,736 | 6,370 | 3,599 | 30,823 |
| 75,176 | 124 | 20,691 | 6,356 | 3,598 | 30,769 |
| 75,177 | 124 | 20,683 | 6,367 | 3,600 | 30,774 |
| 75,178 | 126 | 20,473 | 6,346 | 3,579 | 30,524 |
| 75,179 | 127 | 20,812 | 6,433 | 3,668 | 31,040 |
| 75,180 | 126 | 20,421 | 6,312 | 3,570 | 30,429 |
| 75,181 | 134 | 20,675 | 6,375 | 3,596 | 30,780 |
| 75,182 | 149 | 20,437 | 6,298 | 3,550 | 30,434 |
| 75,183 | 149 | 20,021 | 6,232 | 3,476 | 29,878 |
| 75,184 | 155 | 19,986 | 6,291 | 3,463 | 29,895 |
| 75,185 | 159 | 20,021 | 6,290 | 3,470 | 29,940 |
| 75,186 | 160 | 19,749 | 6,216 | 3,444 | 29,569 |
| 75,187 | 163 | 19,727 | 6,188 | 3,435 | 29,513 |
| 75,188 | 164 | 19,710 | 6,171 | 3,425 | 29,470 |
| 75,189 | 166 | 19,715 | 6,177 | 3,410 | 29,468 |
| 75,190 | 163 | 19,725 | 6,158 | 3,406 | 29,452 |
| 75,191 | 165 | 19,850 | 6,217 | 3,431 | 29,663 |

|        |     |        |       |       |        |
|--------|-----|--------|-------|-------|--------|
| 75,192 | 165 | 19,961 | 6,257 | 3,467 | 29,850 |
| 75,193 | 167 | 19,982 | 6,270 | 3,467 | 29,886 |
| 75,194 | 179 | 19,544 | 6,184 | 3,420 | 29,327 |
| 75,195 | 180 | 19,854 | 6,256 | 3,454 | 29,744 |
| 75,196 | 171 | 20,058 | 6,300 | 3,491 | 30,020 |
| 75,197 | 170 | 20,156 | 6,257 | 3,488 | 30,071 |
| 75,198 | 171 | 20,149 | 6,245 | 3,485 | 30,050 |
| 75,199 | 168 | 19,919 | 6,203 | 3,459 | 29,749 |
| 75,200 | 163 | 20,391 | 6,322 | 3,557 | 30,433 |
| 75,201 | 164 | 20,342 | 6,285 | 3,546 | 30,337 |
| 75,202 | 166 | 20,232 | 6,279 | 3,535 | 30,212 |
| 75,203 | 166 | 20,182 | 6,285 | 3,540 | 30,173 |
| 75,204 | 163 | 20,413 | 6,344 | 3,576 | 30,496 |
| 75,205 | 161 | 20,378 | 6,350 | 3,569 | 30,458 |
| 75,206 | 162 | 20,506 | 6,371 | 3,553 | 30,592 |
| 75,207 | 165 | 20,559 | 6,352 | 3,564 | 30,640 |
| 75,208 | 165 | 20,571 | 6,327 | 3,555 | 30,618 |
| 75,209 | 167 | 20,635 | 6,397 | 3,601 | 30,800 |
| 75,210 | 173 | 20,512 | 6,309 | 3,578 | 30,572 |
| 75,211 | 173 | 20,354 | 6,277 | 3,557 | 30,361 |
| 75,212 | 174 | 20,156 | 6,203 | 3,511 | 30,044 |
| 75,213 | 177 | 20,288 | 6,255 | 3,532 | 30,252 |
| 75,214 | 175 | 20,597 | 6,277 | 3,564 | 30,613 |
| 75,215 | 184 | 20,878 | 6,371 | 3,618 | 31,051 |
| 75,216 | 179 | 21,137 | 6,452 | 3,676 | 31,444 |
| 75,217 | 179 | 20,901 | 6,383 | 3,632 | 31,095 |
| 75,218 | 184 | 21,269 | 6,543 | 3,691 | 31,687 |
| 75,219 | 185 | 21,147 | 6,501 | 3,699 | 31,532 |
| 75,220 | 183 | 20,984 | 6,438 | 3,638 | 31,243 |
| 75,221 | 183 | 21,192 | 6,482 | 3,671 | 31,528 |
| 75,222 | 186 | 21,397 | 6,522 | 3,688 | 31,793 |
| 75,223 | 189 | 21,112 | 6,430 | 3,634 | 31,365 |

|        |     |        |       |       |        |
|--------|-----|--------|-------|-------|--------|
| 75,224 | 189 | 21,169 | 6,410 | 3,633 | 31,401 |
| 75,225 | 192 | 20,980 | 6,328 | 3,604 | 31,104 |
| 75,226 | 193 | 20,797 | 6,294 | 3,568 | 30,852 |
| 75,227 | 197 | 21,456 | 6,482 | 3,677 | 31,812 |
| 75,228 | 200 | 21,419 | 6,444 | 3,683 | 31,746 |
| 75,229 | 197 | 21,150 | 6,343 | 3,577 | 31,267 |
| 75,230 | 200 | 21,044 | 6,308 | 3,557 | 31,109 |
| 75,231 | 200 | 21,006 | 6,284 | 3,549 | 31,039 |
| 75,232 | 194 | 21,159 | 6,300 | 3,582 | 31,235 |
| 75,233 | 174 | 20,898 | 6,207 | 3,532 | 30,811 |
| 75,234 | 176 | 20,881 | 6,183 | 3,527 | 30,767 |
| 75,235 | 169 | 20,770 | 6,141 | 3,536 | 30,616 |
| 75,236 | 169 | 20,787 | 6,127 | 3,526 | 30,609 |
| 75,237 | 163 | 20,688 | 6,116 | 3,515 | 30,482 |
| 75,238 | 161 | 20,668 | 6,123 | 3,516 | 30,468 |
| 75,239 | 154 | 20,659 | 6,126 | 3,525 | 30,464 |
| 75,240 | 153 | 20,649 | 6,106 | 3,520 | 30,428 |
| 75,241 | 151 | 20,942 | 6,188 | 3,565 | 30,846 |
| 75,242 | 150 | 21,024 | 6,167 | 3,566 | 30,907 |
| 75,243 | 143 | 20,973 | 6,144 | 3,548 | 30,808 |
| 75,244 | 133 | 20,605 | 6,080 | 3,523 | 30,341 |
| 75,245 | 135 | 20,687 | 6,144 | 3,539 | 30,505 |
| 75,246 | 138 | 20,232 | 6,053 | 3,473 | 29,896 |
| 75,247 | 140 | 20,526 | 6,082 | 3,485 | 30,233 |
| 75,248 | 139 | 20,627 | 6,140 | 3,502 | 30,408 |
| 75,249 | 139 | 20,666 | 6,115 | 3,506 | 30,426 |
| 75,250 | 139 | 20,422 | 6,026 | 3,463 | 30,050 |
| 75,251 | 143 | 20,519 | 6,051 | 3,493 | 30,206 |
| 75,252 | 138 | 20,185 | 5,927 | 3,443 | 29,693 |
| 75,253 | 140 | 20,331 | 5,979 | 3,452 | 29,902 |
| 75,254 | 138 | 20,395 | 5,957 | 3,441 | 29,931 |
| 75,255 | 138 | 20,364 | 5,932 | 3,441 | 29,875 |



|        |     |        |       |       |        |
|--------|-----|--------|-------|-------|--------|
| 75,256 | 142 | 20,358 | 5,928 | 3,438 | 29,866 |
| 75,257 | 141 | 20,258 | 5,878 | 3,430 | 29,707 |
| 75,258 | 144 | 20,201 | 5,853 | 3,398 | 29,596 |
| 75,259 | 149 | 20,466 | 5,903 | 3,400 | 29,918 |
| 75,260 | 143 | 20,222 | 5,833 | 3,354 | 29,552 |
| 75,261 | 143 | 20,305 | 5,849 | 3,342 | 29,639 |
| 75,262 | 147 | 19,966 | 5,748 | 3,301 | 29,162 |
| 75,263 | 146 | 19,989 | 5,778 | 3,337 | 29,250 |
| 75,264 | 147 | 20,038 | 5,785 | 3,343 | 29,313 |
| 75,265 | 148 | 20,184 | 5,826 | 3,338 | 29,496 |
| 75,266 | 142 | 20,220 | 5,841 | 3,337 | 29,540 |
| 75,267 | 151 | 20,065 | 5,794 | 3,289 | 29,299 |
| 75,268 | 149 | 20,024 | 5,702 | 3,252 | 29,127 |
| 75,269 | 149 | 20,126 | 5,698 | 3,266 | 29,239 |
| 75,270 | 149 | 20,198 | 5,706 | 3,245 | 29,298 |
| 75,271 | 148 | 20,229 | 5,674 | 3,234 | 29,285 |
| 75,272 | 144 | 20,177 | 5,655 | 3,223 | 29,199 |
| 75,273 | 147 | 20,124 | 5,647 | 3,213 | 29,131 |
| 75,274 | 146 | 20,303 | 5,706 | 3,241 | 29,396 |
| 75,275 | 145 | 20,136 | 5,677 | 3,214 | 29,172 |
| 75,276 | 137 | 20,154 | 5,662 | 3,200 | 29,153 |
| 75,277 | 139 | 20,130 | 5,673 | 3,211 | 29,153 |
| 75,278 | 135 | 20,279 | 5,723 | 3,232 | 29,369 |
| 75,279 | 131 | 20,052 | 5,645 | 3,176 | 29,004 |
| 75,280 | 130 | 20,121 | 5,633 | 3,164 | 29,048 |
| 75,281 | 132 | 20,563 | 5,751 | 3,216 | 29,662 |
| 75,282 | 144 | 20,587 | 5,764 | 3,214 | 29,709 |
| 75,283 | 148 | 20,843 | 5,827 | 3,251 | 30,069 |
| 75,284 | 147 | 20,642 | 5,746 | 3,238 | 29,773 |
| 75,285 | 151 | 20,909 | 5,804 | 3,253 | 30,117 |
| 75,286 | 152 | 20,892 | 5,808 | 3,231 | 30,083 |
| 75,287 | 157 | 21,139 | 5,863 | 3,260 | 30,419 |

|        |     |        |       |       |        |
|--------|-----|--------|-------|-------|--------|
| 75,288 | 156 | 21,109 | 5,811 | 3,234 | 30,310 |
| 75,289 | 158 | 21,043 | 5,815 | 3,218 | 30,234 |
| 75,290 | 158 | 21,005 | 5,799 | 3,207 | 30,169 |
| 75,291 | 160 | 20,966 | 5,784 | 3,207 | 30,117 |
| 75,292 | 162 | 20,844 | 5,757 | 3,191 | 29,954 |
| 75,293 | 159 | 20,636 | 5,715 | 3,168 | 29,678 |
| 75,294 | 165 | 20,458 | 5,622 | 3,112 | 29,357 |
| 75,295 | 165 | 20,531 | 5,619 | 3,110 | 29,425 |
| 75,296 | 165 | 20,505 | 5,619 | 3,110 | 29,399 |
| 75,297 | 160 | 20,276 | 5,567 | 3,080 | 29,083 |
| 75,298 | 160 | 20,171 | 5,573 | 3,078 | 28,982 |
| 75,299 | 164 | 20,218 | 5,598 | 3,085 | 29,065 |
| 75,300 | 165 | 19,937 | 5,544 | 3,040 | 28,686 |
| 75,301 | 164 | 19,895 | 5,517 | 3,027 | 28,603 |
| 75,302 | 169 | 20,283 | 5,581 | 3,069 | 29,102 |
| 75,303 | 177 | 20,552 | 5,612 | 3,079 | 29,420 |
| 75,304 | 177 | 20,564 | 5,613 | 3,078 | 29,432 |
| 75,305 | 177 | 20,558 | 5,617 | 3,074 | 29,426 |
| 75,306 | 178 | 20,710 | 5,669 | 3,085 | 29,642 |
| 75,307 | 166 | 19,320 | 5,339 | 2,926 | 27,751 |
| 75,308 | 166 | 19,469 | 5,353 | 2,934 | 27,922 |
| 75,309 | 160 | 19,703 | 5,400 | 2,968 | 28,231 |
| 75,310 | 160 | 19,623 | 5,380 | 2,978 | 28,141 |
| 75,311 | 163 | 20,114 | 5,472 | 3,039 | 28,788 |
| 75,312 | 162 | 20,332 | 5,541 | 3,067 | 29,102 |
| 75,313 | 162 | 20,153 | 5,473 | 3,027 | 28,815 |
| 75,314 | 163 | 20,401 | 5,530 | 3,055 | 29,149 |
| 75,315 | 160 | 20,615 | 5,573 | 3,094 | 29,442 |
| 75,316 | 158 | 20,345 | 5,496 | 3,061 | 29,060 |
| 75,317 | 153 | 20,321 | 5,440 | 3,047 | 28,961 |
| 75,318 | 158 | 20,327 | 5,435 | 3,030 | 28,950 |
| 75,319 | 155 | 20,085 | 5,383 | 3,010 | 28,633 |

|        |     |        |       |       |        |
|--------|-----|--------|-------|-------|--------|
| 75,320 | 151 | 19,984 | 5,377 | 3,011 | 28,523 |
| 75,321 | 151 | 19,725 | 5,311 | 3,002 | 28,189 |
| 75,322 | 160 | 19,966 | 5,458 | 3,078 | 28,662 |
| 75,323 | 155 | 19,949 | 5,467 | 3,112 | 28,683 |
| 75,324 | 154 | 19,832 | 5,430 | 3,097 | 28,513 |
| 75,325 | 156 | 20,048 | 5,474 | 3,112 | 28,790 |
| 75,326 | 160 | 20,054 | 5,481 | 3,110 | 28,805 |
| 75,327 | 158 | 20,064 | 5,491 | 3,107 | 28,820 |
| 75,328 | 159 | 19,853 | 5,425 | 3,083 | 28,520 |
| 75,329 | 159 | 19,873 | 5,426 | 3,083 | 28,541 |
| 75,330 | 159 | 19,986 | 5,454 | 3,123 | 28,722 |
| 75,331 | 157 | 20,006 | 5,454 | 3,132 | 28,749 |
| 75,332 | 156 | 19,946 | 5,411 | 3,142 | 28,655 |
| 75,333 | 142 | 19,936 | 5,398 | 3,106 | 28,582 |
| 75,334 | 144 | 19,639 | 5,354 | 3,035 | 28,172 |
| 75,335 | 145 | 19,728 | 5,375 | 3,044 | 28,292 |
| 75,336 | 141 | 19,899 | 5,423 | 3,115 | 28,578 |
| 75,337 | 139 | 19,640 | 5,329 | 3,086 | 28,194 |
| 75,338 | 144 | 19,760 | 5,390 | 3,122 | 28,416 |
| 75,339 | 148 | 19,623 | 5,365 | 3,124 | 28,260 |
| 75,340 | 151 | 19,795 | 5,400 | 3,128 | 28,474 |
| 75,341 | 148 | 19,891 | 5,446 | 3,137 | 28,622 |
| 75,342 | 156 | 19,742 | 5,427 | 3,114 | 28,439 |
| 75,343 | 153 | 19,637 | 5,395 | 3,099 | 28,284 |
| 75,344 | 155 | 19,877 | 5,398 | 3,113 | 28,543 |
| 75,345 | 151 | 19,768 | 5,364 | 3,101 | 28,384 |
| 75,346 | 148 | 19,853 | 5,379 | 3,099 | 28,479 |
| 75,347 | 142 | 19,844 | 5,377 | 3,100 | 28,463 |
| 75,348 | 147 | 20,224 | 5,432 | 3,157 | 28,960 |
| 75,349 | 143 | 20,210 | 5,387 | 3,122 | 28,862 |
| 75,350 | 143 | 20,185 | 5,397 | 3,123 | 28,848 |
| 75,351 | 132 | 20,130 | 5,361 | 3,099 | 28,722 |

|        |     |        |       |       |        |
|--------|-----|--------|-------|-------|--------|
| 75,352 | 133 | 20,352 | 5,412 | 3,116 | 29,013 |
| 75,353 | 129 | 20,366 | 5,449 | 3,124 | 29,068 |
| 75,354 | 126 | 20,425 | 5,436 | 3,112 | 29,099 |
| 75,355 | 123 | 20,252 | 5,386 | 3,088 | 28,849 |
| 75,356 | 126 | 20,465 | 5,439 | 3,139 | 29,169 |
| 75,357 | 125 | 20,379 | 5,413 | 3,133 | 29,050 |
| 75,358 | 133 | 20,750 | 5,475 | 3,174 | 29,532 |
| 75,359 | 134 | 20,638 | 5,450 | 3,145 | 29,367 |
| 75,360 | 134 | 20,863 | 5,470 | 3,175 | 29,642 |
| 75,361 | 133 | 21,193 | 5,538 | 3,222 | 30,086 |
| 75,362 | 134 | 20,952 | 5,494 | 3,190 | 29,770 |
| 75,363 | 132 | 20,691 | 5,434 | 3,157 | 29,414 |
| 75,364 | 129 | 21,140 | 5,583 | 3,231 | 30,083 |
| 75,365 | 129 | 21,174 | 5,574 | 3,235 | 30,112 |
| 75,366 | 128 | 21,310 | 5,605 | 3,262 | 30,305 |
| 75,367 | 129 | 21,647 | 5,703 | 3,311 | 30,790 |
| 75,368 | 117 | 21,648 | 5,711 | 3,315 | 30,791 |
| 75,369 | 117 | 21,599 | 5,731 | 3,315 | 30,762 |
| 75,370 | 119 | 21,843 | 5,799 | 3,361 | 31,122 |
| 75,371 | 120 | 21,887 | 5,792 | 3,344 | 31,143 |
| 75,372 | 119 | 22,031 | 5,783 | 3,333 | 31,266 |
| 75,373 | 119 | 21,933 | 5,753 | 3,278 | 31,083 |
| 75,374 | 119 | 22,025 | 5,739 | 3,279 | 31,162 |
| 75,375 | 120 | 22,276 | 5,813 | 3,309 | 31,518 |
| 75,376 | 112 | 22,030 | 5,750 | 3,286 | 31,178 |
| 75,377 | 112 | 22,061 | 5,754 | 3,292 | 31,219 |
| 75,378 | 113 | 22,108 | 5,756 | 3,310 | 31,287 |
| 75,379 | 119 | 22,285 | 5,835 | 3,341 | 31,580 |
| 75,380 | 120 | 22,131 | 5,816 | 3,295 | 31,362 |
| 75,381 | 122 | 22,118 | 5,818 | 3,298 | 31,356 |
| 75,382 | 128 | 22,373 | 5,889 | 3,339 | 31,729 |
| 75,383 | 129 | 22,179 | 5,845 | 3,302 | 31,455 |

|        |     |        |       |       |        |
|--------|-----|--------|-------|-------|--------|
| 75,384 | 128 | 21,967 | 5,783 | 3,295 | 31,173 |
| 75,385 | 124 | 22,225 | 5,879 | 3,385 | 31,613 |
| 75,386 | 125 | 22,246 | 5,888 | 3,384 | 31,643 |
| 75,387 | 125 | 22,412 | 5,945 | 3,413 | 31,895 |
| 75,388 | 114 | 21,887 | 5,869 | 3,342 | 31,212 |
| 75,389 | 117 | 22,070 | 5,909 | 3,392 | 31,488 |
| 75,390 | 116 | 22,144 | 5,967 | 3,411 | 31,638 |
| 75,391 | 119 | 22,002 | 5,934 | 3,406 | 31,461 |
| 75,392 | 121 | 22,115 | 5,902 | 3,417 | 31,555 |
| 75,393 | 117 | 21,985 | 5,884 | 3,396 | 31,382 |
| 75,394 | 118 | 21,880 | 5,870 | 3,382 | 31,250 |
| 75,395 | 116 | 22,002 | 5,974 | 3,415 | 31,507 |
| 75,396 | 116 | 21,755 | 5,911 | 3,372 | 31,154 |
| 75,397 | 116 | 21,590 | 5,871 | 3,355 | 30,932 |
| 75,398 | 119 | 22,287 | 6,013 | 3,428 | 31,847 |
| 75,399 | 120 | 22,059 | 5,961 | 3,403 | 31,543 |
| 75,400 | 118 | 21,794 | 5,912 | 3,369 | 31,193 |
| 75,401 | 121 | 21,780 | 5,856 | 3,343 | 31,100 |
| 75,402 | 121 | 21,751 | 5,858 | 3,336 | 31,066 |
| 75,403 | 122 | 21,470 | 5,801 | 3,322 | 30,715 |
| 75,404 | 122 | 21,172 | 5,716 | 3,296 | 30,306 |
| 75,405 | 130 | 21,713 | 5,881 | 3,378 | 31,102 |
| 75,406 | 130 | 21,887 | 5,916 | 3,401 | 31,334 |
| 75,407 | 134 | 21,470 | 5,817 | 3,325 | 30,746 |
| 75,408 | 134 | 21,630 | 5,858 | 3,331 | 30,953 |
| 75,409 | 136 | 21,854 | 5,920 | 3,360 | 31,270 |
| 75,410 | 143 | 21,820 | 5,926 | 3,363 | 31,252 |
| 75,411 | 145 | 21,821 | 5,931 | 3,339 | 31,236 |
| 75,412 | 145 | 21,508 | 5,862 | 3,275 | 30,790 |
| 75,413 | 146 | 21,472 | 5,859 | 3,267 | 30,744 |
| 75,414 | 147 | 21,539 | 5,854 | 3,269 | 30,809 |
| 75,415 | 151 | 21,257 | 5,758 | 3,218 | 30,384 |

|        |     |        |       |       |        |
|--------|-----|--------|-------|-------|--------|
| 75,416 | 152 | 20,997 | 5,734 | 3,186 | 30,069 |
| 75,417 | 156 | 21,036 | 5,770 | 3,197 | 30,159 |
| 75,418 | 155 | 20,931 | 5,777 | 3,200 | 30,063 |
| 75,419 | 162 | 20,783 | 5,768 | 3,185 | 29,898 |
| 75,420 | 157 | 20,381 | 5,663 | 3,119 | 29,320 |
| 75,421 | 158 | 20,529 | 5,670 | 3,143 | 29,500 |
| 75,422 | 154 | 20,461 | 5,660 | 3,141 | 29,416 |
| 75,423 | 152 | 20,420 | 5,700 | 3,167 | 29,439 |
| 75,424 | 150 | 20,433 | 5,694 | 3,200 | 29,477 |
| 75,425 | 151 | 20,437 | 5,700 | 3,205 | 29,493 |
| 75,426 | 151 | 20,463 | 5,674 | 3,222 | 29,510 |
| 75,427 | 149 | 20,461 | 5,662 | 3,220 | 29,492 |
| 75,428 | 147 | 20,408 | 5,654 | 3,224 | 29,433 |
| 75,429 | 150 | 20,640 | 5,727 | 3,257 | 29,774 |
| 75,430 | 144 | 20,527 | 5,687 | 3,242 | 29,600 |
| 75,431 | 149 | 20,741 | 5,770 | 3,288 | 29,948 |
| 75,432 | 149 | 20,796 | 5,826 | 3,292 | 30,063 |
| 75,433 | 141 | 20,357 | 5,731 | 3,221 | 29,450 |
| 75,434 | 141 | 20,332 | 5,746 | 3,227 | 29,446 |
| 75,435 | 142 | 20,426 | 5,764 | 3,254 | 29,586 |
| 75,436 | 142 | 20,504 | 5,794 | 3,258 | 29,698 |
| 75,437 | 142 | 20,619 | 5,801 | 3,257 | 29,819 |
| 75,438 | 143 | 20,125 | 5,669 | 3,170 | 29,107 |
| 75,439 | 149 | 20,399 | 5,697 | 3,177 | 29,422 |
| 75,440 | 148 | 20,607 | 5,733 | 3,199 | 29,687 |
| 75,441 | 146 | 20,461 | 5,658 | 3,171 | 29,436 |
| 75,442 | 144 | 20,493 | 5,640 | 3,165 | 29,442 |
| 75,443 | 140 | 20,320 | 5,645 | 3,147 | 29,252 |
| 75,444 | 146 | 20,329 | 5,605 | 3,142 | 29,222 |
| 75,445 | 148 | 20,581 | 5,648 | 3,165 | 29,542 |
| 75,446 | 146 | 20,452 | 5,590 | 3,164 | 29,352 |
| 75,447 | 151 | 20,387 | 5,601 | 3,163 | 29,302 |

|        |     |        |       |       |        |
|--------|-----|--------|-------|-------|--------|
| 75,448 | 152 | 20,300 | 5,569 | 3,140 | 29,161 |
| 75,449 | 150 | 20,455 | 5,617 | 3,175 | 29,397 |
| 75,450 | 152 | 20,349 | 5,624 | 3,190 | 29,315 |
| 75,451 | 152 | 20,348 | 5,641 | 3,189 | 29,330 |
| 75,452 | 148 | 20,300 | 5,671 | 3,202 | 29,321 |
| 75,453 | 150 | 20,289 | 5,713 | 3,231 | 29,383 |
| 75,454 | 142 | 20,123 | 5,676 | 3,207 | 29,148 |
| 75,455 | 150 | 19,984 | 5,629 | 3,199 | 28,962 |
| 75,456 | 152 | 19,943 | 5,610 | 3,195 | 28,900 |
| 75,457 | 151 | 19,937 | 5,612 | 3,199 | 28,899 |
| 75,458 | 144 | 20,037 | 5,643 | 3,215 | 29,039 |
| 75,459 | 144 | 20,212 | 5,721 | 3,254 | 29,331 |
| 75,460 | 129 | 19,992 | 5,671 | 3,235 | 29,027 |
| 75,461 | 135 | 19,947 | 5,689 | 3,216 | 28,987 |
| 75,462 | 133 | 19,762 | 5,684 | 3,231 | 28,810 |
| 75,463 | 133 | 20,417 | 5,893 | 3,371 | 29,814 |
| 75,464 | 131 | 20,488 | 5,944 | 3,390 | 29,953 |
| 75,465 | 125 | 20,240 | 5,910 | 3,391 | 29,666 |
| 75,466 | 124 | 20,237 | 5,916 | 3,385 | 29,662 |
| 75,467 | 121 | 20,518 | 5,975 | 3,416 | 30,030 |
| 75,468 | 122 | 20,730 | 6,054 | 3,426 | 30,332 |
| 75,469 | 118 | 20,810 | 6,047 | 3,441 | 30,416 |
| 75,470 | 120 | 20,654 | 5,987 | 3,416 | 30,177 |
| 75,471 | 120 | 20,592 | 5,994 | 3,409 | 30,115 |
| 75,472 | 121 | 20,791 | 6,092 | 3,435 | 30,439 |
| 75,473 | 126 | 20,615 | 6,031 | 3,414 | 30,186 |
| 75,474 | 126 | 20,468 | 5,996 | 3,379 | 29,969 |
| 75,475 | 134 | 20,957 | 6,134 | 3,392 | 30,617 |
| 75,476 | 134 | 20,897 | 6,145 | 3,373 | 30,549 |
| 75,477 | 134 | 20,913 | 6,143 | 3,385 | 30,575 |
| 75,478 | 139 | 21,066 | 6,158 | 3,394 | 30,757 |
| 75,479 | 138 | 21,140 | 6,165 | 3,405 | 30,848 |

|        |     |        |       |       |        |
|--------|-----|--------|-------|-------|--------|
| 75,480 | 137 | 20,636 | 6,003 | 3,316 | 30,092 |
| 75,481 | 138 | 20,858 | 6,094 | 3,368 | 30,458 |
| 75,482 | 133 | 21,135 | 6,186 | 3,410 | 30,864 |
| 75,483 | 135 | 21,178 | 6,187 | 3,431 | 30,931 |
| 75,484 | 135 | 20,968 | 6,152 | 3,405 | 30,660 |
| 75,485 | 132 | 21,040 | 6,181 | 3,409 | 30,762 |
| 75,486 | 131 | 20,771 | 6,095 | 3,364 | 30,361 |
| 75,487 | 131 | 20,988 | 6,131 | 3,380 | 30,630 |
| 75,488 | 131 | 21,174 | 6,175 | 3,410 | 30,890 |
| 75,489 | 130 | 20,971 | 6,117 | 3,369 | 30,587 |
| 75,490 | 124 | 20,826 | 6,106 | 3,358 | 30,414 |
| 75,491 | 124 | 21,188 | 6,204 | 3,406 | 30,922 |
| 75,492 | 119 | 21,000 | 6,177 | 3,379 | 30,675 |
| 75,493 | 119 | 21,118 | 6,210 | 3,384 | 30,831 |
| 75,494 | 116 | 20,974 | 6,165 | 3,380 | 30,635 |
| 75,495 | 110 | 21,008 | 6,179 | 3,391 | 30,688 |
| 75,496 | 108 | 20,857 | 6,178 | 3,390 | 30,533 |
| 75,497 | 106 | 20,616 | 6,118 | 3,348 | 30,188 |
| 75,498 | 107 | 20,824 | 6,195 | 3,390 | 30,516 |
| 75,499 | 109 | 20,669 | 6,181 | 3,366 | 30,325 |
| 75,500 | 106 | 20,768 | 6,187 | 3,375 | 30,436 |
| 75,501 | 104 | 20,677 | 6,133 | 3,378 | 30,292 |
| 75,502 | 100 | 20,617 | 6,111 | 3,364 | 30,192 |
| 75,503 | 98  | 20,331 | 6,038 | 3,318 | 29,785 |
| 75,504 | 98  | 20,407 | 6,066 | 3,326 | 29,897 |
| 75,505 | 93  | 20,389 | 6,071 | 3,318 | 29,871 |
| 75,506 | 88  | 20,260 | 6,051 | 3,295 | 29,694 |
| 75,507 | 87  | 20,429 | 6,146 | 3,320 | 29,982 |
| 75,508 | 89  | 20,347 | 6,149 | 3,317 | 29,902 |
| 75,509 | 89  | 20,025 | 6,041 | 3,268 | 29,423 |
| 75,510 | 89  | 20,169 | 6,089 | 3,304 | 29,651 |
| 75,511 | 89  | 20,058 | 6,073 | 3,289 | 29,509 |



|        |     |        |       |       |        |
|--------|-----|--------|-------|-------|--------|
| 75,512 | 86  | 19,895 | 5,996 | 3,271 | 29,248 |
| 75,513 | 92  | 19,520 | 5,897 | 3,196 | 28,705 |
| 75,514 | 100 | 19,762 | 5,950 | 3,209 | 29,021 |
| 75,515 | 101 | 19,546 | 5,871 | 3,130 | 28,648 |
| 75,516 | 111 | 19,514 | 5,885 | 3,123 | 28,633 |
| 75,517 | 110 | 19,389 | 5,843 | 3,106 | 28,448 |
| 75,518 | 112 | 19,723 | 5,950 | 3,161 | 28,946 |
| 75,519 | 117 | 19,273 | 5,791 | 3,086 | 28,267 |
| 75,520 | 116 | 19,199 | 5,755 | 3,059 | 28,129 |
| 75,521 | 118 | 19,205 | 5,761 | 3,061 | 28,145 |
| 75,522 | 122 | 19,243 | 5,735 | 3,054 | 28,154 |
| 75,523 | 122 | 19,139 | 5,729 | 3,058 | 28,048 |
| 75,524 | 117 | 19,462 | 5,827 | 3,108 | 28,514 |
| 75,525 | 117 | 19,331 | 5,760 | 3,089 | 28,297 |
| 75,526 | 117 | 19,393 | 5,770 | 3,095 | 28,375 |
| 75,527 | 117 | 19,415 | 5,787 | 3,094 | 28,413 |
| 75,528 | 117 | 19,509 | 5,821 | 3,115 | 28,562 |
| 75,529 | 116 | 19,506 | 5,862 | 3,133 | 28,617 |
| 75,530 | 119 | 19,584 | 5,868 | 3,139 | 28,710 |
| 75,531 | 119 | 19,664 | 5,910 | 3,149 | 28,842 |
| 75,532 | 119 | 19,664 | 5,862 | 3,152 | 28,797 |
| 75,533 | 121 | 19,618 | 5,932 | 3,179 | 28,850 |
| 75,534 | 122 | 19,776 | 6,019 | 3,225 | 29,142 |
| 75,535 | 124 | 19,782 | 6,051 | 3,233 | 29,190 |
| 75,536 | 129 | 19,829 | 6,097 | 3,247 | 29,302 |
| 75,537 | 138 | 19,524 | 6,060 | 3,227 | 28,949 |
| 75,538 | 139 | 19,275 | 6,054 | 3,224 | 28,692 |
| 75,539 | 144 | 19,630 | 6,230 | 3,297 | 29,301 |
| 75,540 | 148 | 19,605 | 6,231 | 3,295 | 29,279 |
| 75,541 | 149 | 19,621 | 6,249 | 3,282 | 29,301 |
| 75,542 | 152 | 19,684 | 6,273 | 3,309 | 29,418 |
| 75,543 | 155 | 19,728 | 6,258 | 3,334 | 29,475 |

|        |     |        |       |       |        |
|--------|-----|--------|-------|-------|--------|
| 75,544 | 155 | 19,582 | 6,222 | 3,325 | 29,284 |
| 75,545 | 155 | 19,724 | 6,239 | 3,337 | 29,455 |
| 75,546 | 156 | 19,480 | 6,186 | 3,301 | 29,123 |
| 75,547 | 156 | 19,330 | 6,149 | 3,269 | 28,904 |
| 75,548 | 154 | 20,158 | 6,268 | 3,393 | 29,973 |
| 75,549 | 155 | 20,331 | 6,315 | 3,428 | 30,229 |
| 75,550 | 151 | 20,313 | 6,331 | 3,454 | 30,249 |
| 75,551 | 153 | 20,279 | 6,369 | 3,451 | 30,252 |
| 75,552 | 156 | 20,197 | 6,349 | 3,424 | 30,126 |
| 75,553 | 159 | 20,456 | 6,411 | 3,438 | 30,464 |
| 75,554 | 158 | 20,595 | 6,416 | 3,445 | 30,614 |
| 75,555 | 158 | 20,643 | 6,435 | 3,439 | 30,675 |
| 75,556 | 160 | 20,868 | 6,497 | 3,474 | 30,999 |
| 75,557 | 163 | 20,788 | 6,450 | 3,464 | 30,865 |
| 75,558 | 166 | 20,973 | 6,508 | 3,520 | 31,167 |
| 75,559 | 168 | 20,859 | 6,494 | 3,500 | 31,021 |
| 75,560 | 166 | 21,152 | 6,577 | 3,538 | 31,433 |
| 75,561 | 164 | 20,580 | 6,429 | 3,454 | 30,627 |
| 75,562 | 165 | 20,643 | 6,462 | 3,466 | 30,736 |
| 75,563 | 162 | 20,865 | 6,537 | 3,480 | 31,044 |
| 75,564 | 148 | 20,559 | 6,425 | 3,442 | 30,574 |
| 75,565 | 148 | 20,530 | 6,445 | 3,436 | 30,559 |
| 75,566 | 147 | 20,648 | 6,495 | 3,480 | 30,770 |
| 75,567 | 140 | 20,629 | 6,459 | 3,469 | 30,697 |
| 75,568 | 137 | 20,522 | 6,454 | 3,448 | 30,561 |
| 75,569 | 139 | 20,324 | 6,388 | 3,420 | 30,271 |
| 75,570 | 133 | 20,491 | 6,436 | 3,456 | 30,516 |
| 75,571 | 131 | 20,273 | 6,404 | 3,436 | 30,244 |
| 75,572 | 132 | 20,348 | 6,471 | 3,446 | 30,397 |
| 75,573 | 130 | 20,279 | 6,461 | 3,461 | 30,331 |
| 75,574 | 128 | 20,274 | 6,475 | 3,472 | 30,349 |
| 75,575 | 128 | 20,011 | 6,410 | 3,441 | 29,990 |

|        |     |        |       |       |        |
|--------|-----|--------|-------|-------|--------|
| 75,576 | 125 | 19,692 | 6,345 | 3,418 | 29,580 |
| 75,577 | 128 | 19,854 | 6,401 | 3,456 | 29,839 |
| 75,578 | 129 | 19,852 | 6,380 | 3,442 | 29,803 |
| 75,579 | 128 | 19,740 | 6,374 | 3,436 | 29,678 |
| 75,580 | 127 | 19,595 | 6,357 | 3,460 | 29,539 |
| 75,581 | 128 | 19,713 | 6,426 | 3,497 | 29,764 |
| 75,582 | 127 | 19,425 | 6,352 | 3,451 | 29,355 |
| 75,583 | 123 | 18,816 | 6,011 | 3,278 | 28,228 |
| 75,584 | 125 | 19,087 | 6,081 | 3,308 | 28,601 |
| 75,585 | 120 | 19,321 | 6,134 | 3,345 | 28,920 |
| 75,586 | 106 | 19,105 | 6,016 | 3,270 | 28,497 |
| 75,587 | 105 | 19,341 | 6,055 | 3,300 | 28,801 |
| 75,588 | 101 | 19,567 | 6,118 | 3,335 | 29,121 |
| 75,589 | 103 | 19,495 | 6,032 | 3,310 | 28,940 |
| 75,590 | 103 | 19,583 | 6,049 | 3,306 | 29,041 |
| 75,591 | 97  | 19,481 | 6,041 | 3,316 | 28,935 |
| 75,592 | 97  | 19,439 | 6,059 | 3,333 | 28,928 |
| 75,593 | 96  | 19,397 | 6,122 | 3,358 | 28,973 |
| 75,594 | 103 | 19,385 | 6,147 | 3,348 | 28,983 |
| 75,595 | 104 | 19,284 | 6,128 | 3,322 | 28,838 |
| 75,596 | 105 | 19,297 | 6,170 | 3,351 | 28,923 |
| 75,597 | 106 | 19,319 | 6,196 | 3,358 | 28,979 |
| 75,598 | 106 | 19,193 | 6,180 | 3,330 | 28,809 |
| 75,599 | 109 | 19,157 | 6,200 | 3,324 | 28,790 |
| 75,600 | 107 | 19,033 | 6,187 | 3,295 | 28,622 |
| 75,601 | 111 | 19,223 | 6,274 | 3,317 | 28,925 |
| 75,602 | 111 | 19,212 | 6,282 | 3,321 | 28,926 |
| 75,603 | 117 | 19,305 | 6,405 | 3,369 | 29,196 |
| 75,604 | 116 | 19,070 | 6,366 | 3,361 | 28,913 |
| 75,605 | 117 | 18,978 | 6,338 | 3,362 | 28,795 |
| 75,606 | 119 | 19,311 | 6,564 | 3,506 | 29,500 |
| 75,607 | 118 | 19,237 | 6,528 | 3,512 | 29,395 |

|        |     |        |       |       |        |
|--------|-----|--------|-------|-------|--------|
| 75,608 | 116 | 19,187 | 6,503 | 3,505 | 29,311 |
| 75,609 | 116 | 19,350 | 6,574 | 3,518 | 29,558 |
| 75,610 | 116 | 19,568 | 6,614 | 3,559 | 29,857 |
| 75,611 | 116 | 19,581 | 6,610 | 3,566 | 29,873 |
| 75,612 | 121 | 19,452 | 6,561 | 3,549 | 29,683 |
| 75,613 | 121 | 19,447 | 6,571 | 3,557 | 29,696 |
| 75,614 | 123 | 19,537 | 6,628 | 3,577 | 29,865 |
| 75,615 | 122 | 19,477 | 6,657 | 3,590 | 29,846 |
| 75,616 | 127 | 19,636 | 6,670 | 3,614 | 30,047 |
| 75,617 | 126 | 19,708 | 6,667 | 3,623 | 30,124 |
| 75,618 | 127 | 19,810 | 6,700 | 3,628 | 30,265 |
| 75,619 | 131 | 19,872 | 6,702 | 3,636 | 30,341 |
| 75,620 | 130 | 19,740 | 6,693 | 3,628 | 30,191 |
| 75,621 | 134 | 19,824 | 6,708 | 3,623 | 30,289 |
| 75,622 | 139 | 20,149 | 6,780 | 3,682 | 30,750 |
| 75,623 | 137 | 19,959 | 6,711 | 3,666 | 30,473 |
| 75,624 | 135 | 20,003 | 6,732 | 3,663 | 30,533 |
| 75,625 | 130 | 20,035 | 6,688 | 3,670 | 30,523 |
| 75,626 | 129 | 20,136 | 6,730 | 3,692 | 30,687 |
| 75,627 | 130 | 20,151 | 6,716 | 3,679 | 30,676 |
| 75,628 | 128 | 20,030 | 6,675 | 3,661 | 30,494 |
| 75,629 | 130 | 20,033 | 6,643 | 3,674 | 30,480 |
| 75,630 | 130 | 20,264 | 6,688 | 3,684 | 30,766 |
| 75,631 | 133 | 20,407 | 6,715 | 3,677 | 30,932 |
| 75,632 | 131 | 20,497 | 6,706 | 3,683 | 31,017 |
| 75,633 | 134 | 20,205 | 6,628 | 3,638 | 30,605 |
| 75,634 | 130 | 19,929 | 6,600 | 3,614 | 30,273 |
| 75,635 | 136 | 20,220 | 6,728 | 3,669 | 30,753 |
| 75,636 | 136 | 19,991 | 6,622 | 3,655 | 30,404 |
| 75,637 | 140 | 20,080 | 6,701 | 3,679 | 30,600 |
| 75,638 | 141 | 19,933 | 6,695 | 3,684 | 30,453 |
| 75,639 | 147 | 19,904 | 6,706 | 3,685 | 30,442 |

|        |     |        |       |       |        |
|--------|-----|--------|-------|-------|--------|
| 75,640 | 144 | 19,872 | 6,720 | 3,682 | 30,418 |
| 75,641 | 146 | 19,960 | 6,697 | 3,699 | 30,502 |
| 75,642 | 147 | 20,021 | 6,701 | 3,693 | 30,562 |
| 75,643 | 138 | 19,392 | 6,460 | 3,560 | 29,550 |
| 75,644 | 136 | 19,509 | 6,509 | 3,584 | 29,738 |
| 75,645 | 130 | 19,743 | 6,577 | 3,617 | 30,067 |
| 75,646 | 129 | 19,818 | 6,580 | 3,620 | 30,147 |
| 75,647 | 125 | 19,778 | 6,546 | 3,587 | 30,036 |
| 75,648 | 125 | 19,873 | 6,574 | 3,606 | 30,178 |
| 75,649 | 124 | 19,800 | 6,548 | 3,618 | 30,090 |
| 75,650 | 118 | 19,736 | 6,495 | 3,633 | 29,982 |
| 75,651 | 118 | 19,755 | 6,452 | 3,623 | 29,948 |
| 75,652 | 111 | 19,812 | 6,414 | 3,624 | 29,961 |
| 75,653 | 106 | 19,937 | 6,425 | 3,615 | 30,083 |
| 75,654 | 104 | 20,015 | 6,423 | 3,613 | 30,155 |
| 75,655 | 110 | 19,051 | 6,081 | 3,398 | 28,640 |
| 75,656 | 114 | 19,369 | 6,165 | 3,423 | 29,071 |
| 75,657 | 118 | 19,773 | 6,250 | 3,458 | 29,599 |
| 75,658 | 119 | 19,843 | 6,276 | 3,446 | 29,684 |
| 75,659 | 122 | 20,132 | 6,392 | 3,515 | 30,161 |
| 75,660 | 119 | 19,932 | 6,357 | 3,486 | 29,894 |
| 75,661 | 121 | 19,540 | 6,261 | 3,416 | 29,338 |
| 75,662 | 121 | 19,734 | 6,307 | 3,446 | 29,608 |
| 75,663 | 116 | 19,769 | 6,327 | 3,469 | 29,681 |
| 75,664 | 114 | 19,762 | 6,339 | 3,479 | 29,694 |
| 75,665 | 116 | 20,027 | 6,427 | 3,512 | 30,082 |
| 75,666 | 112 | 19,868 | 6,320 | 3,459 | 29,759 |
| 75,667 | 114 | 19,868 | 6,321 | 3,465 | 29,768 |
| 75,668 | 113 | 19,570 | 6,260 | 3,440 | 29,383 |
| 75,669 | 114 | 19,816 | 6,352 | 3,500 | 29,782 |
| 75,670 | 108 | 19,596 | 6,293 | 3,462 | 29,459 |
| 75,671 | 109 | 19,757 | 6,352 | 3,507 | 29,725 |

|        |     |        |       |       |        |
|--------|-----|--------|-------|-------|--------|
| 75,672 | 107 | 19,985 | 6,412 | 3,565 | 30,069 |
| 75,673 | 113 | 20,242 | 6,503 | 3,637 | 30,495 |
| 75,674 | 125 | 20,388 | 6,541 | 3,645 | 30,699 |
| 75,675 | 128 | 20,363 | 6,526 | 3,614 | 30,631 |
| 75,676 | 131 | 20,277 | 6,549 | 3,604 | 30,561 |
| 75,677 | 132 | 20,351 | 6,565 | 3,606 | 30,654 |
| 75,678 | 132 | 19,902 | 6,479 | 3,555 | 30,068 |
| 75,679 | 132 | 19,919 | 6,462 | 3,557 | 30,070 |
| 75,680 | 129 | 19,713 | 6,413 | 3,519 | 29,774 |
| 75,681 | 128 | 19,619 | 6,373 | 3,505 | 29,625 |
| 75,682 | 128 | 20,016 | 6,551 | 3,580 | 30,275 |
| 75,683 | 126 | 19,899 | 6,488 | 3,537 | 30,050 |
| 75,684 | 127 | 19,935 | 6,502 | 3,548 | 30,112 |
| 75,685 | 123 | 19,917 | 6,477 | 3,545 | 30,062 |
| 75,686 | 121 | 20,175 | 6,610 | 3,577 | 30,483 |
| 75,687 | 121 | 20,352 | 6,699 | 3,609 | 30,781 |
| 75,688 | 114 | 19,931 | 6,519 | 3,517 | 30,081 |
| 75,689 | 114 | 20,302 | 6,617 | 3,548 | 30,581 |
| 75,690 | 108 | 20,450 | 6,681 | 3,604 | 30,843 |
| 75,691 | 109 | 20,566 | 6,737 | 3,624 | 31,036 |
| 75,692 | 109 | 20,596 | 6,786 | 3,655 | 31,146 |
| 75,693 | 109 | 20,568 | 6,785 | 3,655 | 31,117 |
| 75,694 | 110 | 20,662 | 6,812 | 3,679 | 31,263 |
| 75,695 | 110 | 20,423 | 6,737 | 3,655 | 30,925 |
| 75,696 | 112 | 20,443 | 6,762 | 3,669 | 30,986 |
| 75,697 | 113 | 20,480 | 6,777 | 3,677 | 31,047 |
| 75,698 | 116 | 20,492 | 6,807 | 3,687 | 31,102 |
| 75,699 | 118 | 20,647 | 6,882 | 3,706 | 31,353 |
| 75,700 | 120 | 20,653 | 6,877 | 3,700 | 31,350 |
| 75,701 | 127 | 20,405 | 6,828 | 3,648 | 31,008 |
| 75,702 | 127 | 20,141 | 6,788 | 3,624 | 30,680 |
| 75,703 | 128 | 20,304 | 6,878 | 3,655 | 30,965 |

|        |     |        |       |       |        |
|--------|-----|--------|-------|-------|--------|
| 75,704 | 122 | 20,014 | 6,768 | 3,595 | 30,499 |
| 75,705 | 123 | 20,294 | 6,836 | 3,623 | 30,876 |
| 75,706 | 118 | 20,601 | 6,899 | 3,676 | 31,294 |
| 75,707 | 120 | 20,617 | 6,872 | 3,665 | 31,274 |
| 75,708 | 115 | 20,510 | 6,853 | 3,646 | 31,124 |
| 75,709 | 111 | 20,196 | 6,771 | 3,590 | 30,668 |
| 75,710 | 111 | 20,220 | 6,770 | 3,581 | 30,682 |
| 75,711 | 115 | 20,303 | 6,759 | 3,603 | 30,780 |
| 75,712 | 111 | 20,164 | 6,732 | 3,595 | 30,602 |
| 75,713 | 119 | 19,928 | 6,690 | 3,558 | 30,295 |
| 75,714 | 122 | 19,767 | 6,625 | 3,526 | 30,040 |
| 75,715 | 121 | 20,152 | 6,769 | 3,618 | 30,660 |
| 75,716 | 128 | 20,308 | 6,813 | 3,641 | 30,890 |
| 75,717 | 134 | 20,097 | 6,770 | 3,598 | 30,599 |
| 75,718 | 129 | 19,897 | 6,733 | 3,588 | 30,347 |
| 75,719 | 127 | 19,851 | 6,718 | 3,570 | 30,266 |
| 75,720 | 127 | 19,617 | 6,618 | 3,526 | 29,888 |
| 75,721 | 126 | 19,777 | 6,693 | 3,588 | 30,184 |
| 75,722 | 126 | 19,850 | 6,739 | 3,609 | 30,324 |
| 75,723 | 125 | 19,718 | 6,724 | 3,590 | 30,157 |
| 75,724 | 119 | 19,506 | 6,665 | 3,550 | 29,840 |
| 75,725 | 115 | 19,488 | 6,650 | 3,557 | 29,810 |
| 75,726 | 113 | 19,543 | 6,667 | 3,547 | 29,870 |
| 75,727 | 108 | 19,422 | 6,647 | 3,516 | 29,693 |
| 75,728 | 111 | 19,563 | 6,675 | 3,534 | 29,883 |
| 75,729 | 109 | 19,416 | 6,671 | 3,507 | 29,703 |
| 75,730 | 115 | 19,485 | 6,660 | 3,495 | 29,755 |
| 75,731 | 115 | 19,522 | 6,652 | 3,506 | 29,795 |
| 75,732 | 113 | 19,552 | 6,654 | 3,505 | 29,824 |
| 75,733 | 115 | 19,513 | 6,682 | 3,536 | 29,846 |
| 75,734 | 115 | 19,715 | 6,767 | 3,585 | 30,182 |
| 75,735 | 113 | 19,621 | 6,711 | 3,559 | 30,004 |

|        |     |        |       |       |        |
|--------|-----|--------|-------|-------|--------|
| 75,736 | 119 | 19,942 | 6,760 | 3,616 | 30,437 |
| 75,737 | 121 | 19,827 | 6,733 | 3,618 | 30,299 |
| 75,738 | 122 | 19,368 | 6,599 | 3,511 | 29,600 |
| 75,739 | 121 | 19,436 | 6,653 | 3,542 | 29,752 |
| 75,740 | 123 | 19,529 | 6,672 | 3,578 | 29,902 |
| 75,741 | 128 | 19,646 | 6,664 | 3,570 | 30,008 |
| 75,742 | 131 | 19,848 | 6,665 | 3,571 | 30,215 |
| 75,743 | 134 | 19,885 | 6,641 | 3,549 | 30,209 |
| 75,744 | 132 | 19,662 | 6,598 | 3,513 | 29,905 |
| 75,745 | 134 | 19,794 | 6,634 | 3,540 | 30,102 |
| 75,746 | 138 | 19,869 | 6,612 | 3,515 | 30,134 |
| 75,747 | 138 | 19,920 | 6,619 | 3,517 | 30,194 |
| 75,748 | 139 | 19,910 | 6,576 | 3,490 | 30,115 |
| 75,749 | 146 | 20,086 | 6,620 | 3,509 | 30,361 |
| 75,750 | 149 | 20,157 | 6,595 | 3,516 | 30,417 |
| 75,751 | 153 | 20,189 | 6,653 | 3,528 | 30,523 |
| 75,752 | 147 | 19,964 | 6,605 | 3,488 | 30,204 |
| 75,753 | 156 | 19,922 | 6,585 | 3,482 | 30,145 |
| 75,754 | 155 | 19,721 | 6,506 | 3,458 | 29,840 |
| 75,755 | 163 | 20,071 | 6,650 | 3,539 | 30,423 |
| 75,756 | 166 | 20,128 | 6,683 | 3,571 | 30,548 |
| 75,757 | 174 | 20,129 | 6,689 | 3,598 | 30,590 |
| 75,758 | 171 | 19,881 | 6,609 | 3,580 | 30,241 |
| 75,759 | 176 | 19,927 | 6,641 | 3,574 | 30,318 |
| 75,760 | 176 | 20,014 | 6,656 | 3,584 | 30,430 |
| 75,761 | 172 | 20,229 | 6,709 | 3,640 | 30,750 |
| 75,762 | 172 | 20,308 | 6,710 | 3,637 | 30,827 |
| 75,763 | 164 | 20,426 | 6,683 | 3,639 | 30,912 |
| 75,764 | 161 | 20,415 | 6,659 | 3,609 | 30,844 |
| 75,765 | 162 | 20,602 | 6,707 | 3,654 | 31,125 |
| 75,766 | 165 | 20,720 | 6,769 | 3,711 | 31,365 |
| 75,767 | 159 | 20,743 | 6,753 | 3,744 | 31,399 |



|        |     |        |       |       |        |
|--------|-----|--------|-------|-------|--------|
| 75,768 | 157 | 20,596 | 6,702 | 3,727 | 31,182 |
| 75,769 | 157 | 20,479 | 6,651 | 3,690 | 30,977 |
| 75,770 | 162 | 21,044 | 6,777 | 3,765 | 31,748 |
| 75,771 | 161 | 20,888 | 6,718 | 3,720 | 31,487 |
| 75,772 | 161 | 20,632 | 6,556 | 3,576 | 30,925 |
| 75,773 | 161 | 20,868 | 6,618 | 3,602 | 31,249 |
| 75,774 | 155 | 20,827 | 6,580 | 3,579 | 31,141 |
| 75,775 | 155 | 20,897 | 6,601 | 3,573 | 31,226 |
| 75,776 | 154 | 20,995 | 6,632 | 3,599 | 31,380 |
| 75,777 | 155 | 20,886 | 6,583 | 3,582 | 31,206 |
| 75,778 | 156 | 20,928 | 6,547 | 3,587 | 31,218 |
| 75,779 | 153 | 20,858 | 6,501 | 3,582 | 31,094 |
| 75,780 | 153 | 20,959 | 6,491 | 3,597 | 31,200 |
| 75,781 | 147 | 20,998 | 6,521 | 3,612 | 31,278 |
| 75,782 | 153 | 21,302 | 6,639 | 3,651 | 31,745 |
| 75,783 | 152 | 21,268 | 6,614 | 3,644 | 31,678 |
| 75,784 | 154 | 21,426 | 6,565 | 3,629 | 31,774 |
| 75,785 | 158 | 20,893 | 6,425 | 3,536 | 31,012 |
| 75,786 | 158 | 20,959 | 6,417 | 3,540 | 31,074 |
| 75,787 | 155 | 20,739 | 6,336 | 3,483 | 30,713 |
| 75,788 | 153 | 20,547 | 6,220 | 3,446 | 30,366 |
| 75,789 | 156 | 21,185 | 6,440 | 3,585 | 31,366 |
| 75,790 | 156 | 21,108 | 6,400 | 3,550 | 31,214 |
| 75,791 | 160 | 21,098 | 6,393 | 3,546 | 31,197 |
| 75,792 | 156 | 20,779 | 6,319 | 3,502 | 30,756 |
| 75,793 | 154 | 20,796 | 6,370 | 3,553 | 30,873 |
| 75,794 | 151 | 20,805 | 6,380 | 3,564 | 30,900 |
| 75,795 | 150 | 19,985 | 6,130 | 3,429 | 29,694 |
| 75,796 | 152 | 20,201 | 6,189 | 3,432 | 29,974 |
| 75,797 | 155 | 20,431 | 6,226 | 3,449 | 30,261 |
| 75,798 | 155 | 20,411 | 6,228 | 3,453 | 30,247 |
| 75,799 | 155 | 20,612 | 6,314 | 3,504 | 30,585 |

|        |     |        |       |       |        |
|--------|-----|--------|-------|-------|--------|
| 75,800 | 148 | 20,714 | 6,362 | 3,530 | 30,754 |
| 75,801 | 146 | 20,961 | 6,449 | 3,587 | 31,143 |
| 75,802 | 143 | 21,060 | 6,420 | 3,584 | 31,207 |
| 75,803 | 135 | 20,960 | 6,366 | 3,559 | 31,020 |
| 75,804 | 136 | 20,872 | 6,348 | 3,564 | 30,920 |
| 75,805 | 129 | 20,916 | 6,338 | 3,570 | 30,953 |
| 75,806 | 129 | 21,046 | 6,379 | 3,604 | 31,158 |
| 75,807 | 124 | 21,101 | 6,361 | 3,601 | 31,187 |
| 75,808 | 115 | 20,735 | 6,293 | 3,524 | 30,667 |
| 75,809 | 112 | 20,469 | 6,230 | 3,492 | 30,303 |
| 75,810 | 108 | 20,767 | 6,298 | 3,554 | 30,727 |
| 75,811 | 111 | 20,906 | 6,346 | 3,578 | 30,941 |
| 75,812 | 112 | 20,880 | 6,342 | 3,547 | 30,881 |
| 75,813 | 112 | 20,768 | 6,376 | 3,571 | 30,827 |
| 75,814 | 119 | 20,692 | 6,441 | 3,602 | 30,854 |
| 75,815 | 118 | 20,696 | 6,408 | 3,594 | 30,816 |
| 75,816 | 117 | 20,485 | 6,296 | 3,501 | 30,399 |
| 75,817 | 119 | 20,590 | 6,288 | 3,496 | 30,493 |
| 75,818 | 119 | 20,331 | 6,227 | 3,444 | 30,121 |
| 75,819 | 118 | 20,557 | 6,298 | 3,492 | 30,465 |
| 75,820 | 126 | 20,787 | 6,338 | 3,525 | 30,776 |
| 75,821 | 124 | 20,756 | 6,312 | 3,516 | 30,708 |
| 75,822 | 123 | 20,591 | 6,252 | 3,497 | 30,463 |
| 75,823 | 123 | 20,292 | 6,189 | 3,467 | 30,071 |
| 75,824 | 123 | 20,066 | 6,112 | 3,430 | 29,731 |
| 75,825 | 128 | 20,583 | 6,271 | 3,499 | 30,481 |
| 75,826 | 127 | 20,501 | 6,221 | 3,484 | 30,333 |
| 75,827 | 126 | 20,565 | 6,224 | 3,494 | 30,409 |
| 75,828 | 125 | 20,420 | 6,195 | 3,480 | 30,220 |
| 75,829 | 123 | 20,749 | 6,270 | 3,538 | 30,680 |
| 75,830 | 122 | 20,666 | 6,213 | 3,501 | 30,502 |
| 75,831 | 123 | 20,891 | 6,278 | 3,527 | 30,819 |

|        |     |        |       |       |        |
|--------|-----|--------|-------|-------|--------|
| 75,832 | 118 | 20,917 | 6,296 | 3,529 | 30,860 |
| 75,833 | 119 | 20,651 | 6,246 | 3,497 | 30,513 |
| 75,834 | 122 | 20,500 | 6,225 | 3,465 | 30,312 |
| 75,835 | 122 | 20,718 | 6,296 | 3,513 | 30,649 |
| 75,836 | 126 | 20,758 | 6,327 | 3,540 | 30,751 |
| 75,837 | 130 | 20,579 | 6,232 | 3,508 | 30,449 |
| 75,838 | 127 | 20,400 | 6,175 | 3,486 | 30,188 |
| 75,839 | 128 | 20,505 | 6,256 | 3,501 | 30,390 |
| 75,840 | 127 | 20,507 | 6,251 | 3,486 | 30,371 |
| 75,841 | 123 | 20,543 | 6,190 | 3,465 | 30,321 |
| 75,842 | 125 | 20,605 | 6,141 | 3,452 | 30,323 |
| 75,843 | 126 | 20,829 | 6,202 | 3,485 | 30,642 |
| 75,844 | 128 | 20,742 | 6,156 | 3,448 | 30,474 |
| 75,845 | 125 | 20,839 | 6,170 | 3,450 | 30,584 |
| 75,846 | 130 | 21,245 | 6,248 | 3,501 | 31,124 |
| 75,847 | 125 | 21,194 | 6,238 | 3,527 | 31,084 |
| 75,848 | 124 | 21,199 | 6,241 | 3,540 | 31,104 |
| 75,849 | 123 | 21,569 | 6,362 | 3,600 | 31,654 |
| 75,850 | 123 | 21,519 | 6,362 | 3,613 | 31,617 |
| 75,851 | 122 | 21,330 | 6,317 | 3,571 | 31,340 |
| 75,852 | 122 | 21,115 | 6,236 | 3,549 | 31,022 |
| 75,853 | 118 | 20,878 | 6,286 | 3,622 | 30,904 |
| 75,854 | 119 | 20,865 | 6,274 | 3,616 | 30,874 |
| 75,855 | 121 | 21,009 | 6,352 | 3,643 | 31,125 |
| 75,856 | 121 | 20,882 | 6,352 | 3,638 | 30,993 |
| 75,857 | 127 | 20,954 | 6,360 | 3,633 | 31,074 |
| 75,858 | 132 | 20,646 | 6,230 | 3,558 | 30,566 |
| 75,859 | 132 | 20,590 | 6,238 | 3,567 | 30,527 |
| 75,860 | 136 | 20,660 | 6,228 | 3,561 | 30,585 |
| 75,861 | 137 | 20,792 | 6,272 | 3,593 | 30,794 |
| 75,862 | 135 | 20,850 | 6,296 | 3,612 | 30,893 |
| 75,863 | 132 | 20,187 | 6,024 | 3,454 | 29,797 |

|        |     |        |       |       |        |
|--------|-----|--------|-------|-------|--------|
| 75,864 | 133 | 20,462 | 6,079 | 3,465 | 30,139 |
| 75,865 | 134 | 20,823 | 6,112 | 3,501 | 30,570 |
| 75,866 | 134 | 20,845 | 6,105 | 3,503 | 30,587 |
| 75,867 | 130 | 20,894 | 6,086 | 3,503 | 30,613 |
| 75,868 | 134 | 21,154 | 6,150 | 3,550 | 30,988 |
| 75,869 | 127 | 21,138 | 6,151 | 3,553 | 30,969 |
| 75,870 | 132 | 21,197 | 6,198 | 3,574 | 31,101 |
| 75,871 | 127 | 21,328 | 6,238 | 3,610 | 31,303 |
| 75,872 | 123 | 21,127 | 6,210 | 3,599 | 31,059 |
| 75,873 | 127 | 21,214 | 6,204 | 3,609 | 31,154 |
| 75,874 | 127 | 21,170 | 6,191 | 3,607 | 31,095 |
| 75,875 | 124 | 21,265 | 6,207 | 3,642 | 31,238 |
| 75,876 | 128 | 21,436 | 6,318 | 3,684 | 31,566 |
| 75,877 | 128 | 21,179 | 6,274 | 3,661 | 31,242 |
| 75,878 | 138 | 21,356 | 6,312 | 3,682 | 31,488 |
| 75,879 | 148 | 21,649 | 6,410 | 3,715 | 31,922 |
| 75,880 | 151 | 21,811 | 6,496 | 3,758 | 32,216 |
| 75,881 | 151 | 21,774 | 6,516 | 3,794 | 32,235 |
| 75,882 | 151 | 21,454 | 6,396 | 3,765 | 31,766 |
| 75,883 | 151 | 21,578 | 6,413 | 3,791 | 31,933 |
| 75,884 | 148 | 21,741 | 6,480 | 3,817 | 32,186 |
| 75,885 | 138 | 21,081 | 6,284 | 3,739 | 31,242 |
| 75,886 | 139 | 21,386 | 6,330 | 3,778 | 31,633 |
| 75,887 | 135 | 21,613 | 6,409 | 3,834 | 31,991 |
| 75,888 | 136 | 21,693 | 6,408 | 3,837 | 32,074 |
| 75,889 | 137 | 21,767 | 6,416 | 3,838 | 32,158 |
| 75,890 | 137 | 21,562 | 6,336 | 3,824 | 31,859 |
| 75,891 | 161 | 22,119 | 6,542 | 3,927 | 32,749 |
| 75,892 | 162 | 21,988 | 6,556 | 3,942 | 32,648 |
| 75,893 | 169 | 22,327 | 6,670 | 3,985 | 33,151 |
| 75,894 | 169 | 22,508 | 6,718 | 4,023 | 33,418 |
| 75,895 | 168 | 22,441 | 6,772 | 4,047 | 33,428 |

|        |     |        |       |       |        |
|--------|-----|--------|-------|-------|--------|
| 75,896 | 170 | 22,550 | 6,850 | 4,060 | 33,630 |
| 75,897 | 166 | 22,570 | 6,849 | 4,059 | 33,644 |
| 75,898 | 163 | 22,613 | 6,856 | 4,056 | 33,688 |
| 75,899 | 167 | 22,674 | 6,860 | 4,076 | 33,777 |
| 75,900 | 168 | 22,790 | 6,880 | 4,075 | 33,913 |
| 75,901 | 167 | 22,958 | 6,878 | 4,073 | 34,076 |
| 75,902 | 170 | 22,799 | 6,769 | 4,005 | 33,743 |
| 75,903 | 171 | 23,062 | 6,788 | 3,986 | 34,007 |
| 75,904 | 172 | 23,253 | 6,757 | 3,993 | 34,175 |
| 75,905 | 176 | 23,580 | 6,817 | 4,042 | 34,615 |
| 75,906 | 176 | 23,181 | 6,670 | 3,957 | 33,984 |
| 75,907 | 176 | 23,249 | 6,664 | 3,966 | 34,055 |
| 75,908 | 172 | 23,045 | 6,570 | 3,936 | 33,723 |
| 75,909 | 167 | 22,746 | 6,495 | 3,915 | 33,323 |
| 75,910 | 165 | 23,186 | 6,638 | 4,021 | 34,010 |
| 75,911 | 166 | 23,252 | 6,597 | 4,006 | 34,021 |
| 75,912 | 169 | 23,012 | 6,499 | 3,963 | 33,643 |
| 75,913 | 168 | 23,063 | 6,487 | 3,962 | 33,680 |
| 75,914 | 166 | 22,954 | 6,498 | 3,991 | 33,609 |
| 75,915 | 163 | 22,858 | 6,471 | 3,993 | 33,485 |
| 75,916 | 165 | 22,910 | 6,493 | 3,987 | 33,555 |
| 75,917 | 168 | 22,202 | 6,316 | 3,874 | 32,560 |
| 75,918 | 166 | 22,287 | 6,350 | 3,901 | 32,704 |
| 75,919 | 164 | 22,492 | 6,399 | 3,937 | 32,992 |
| 75,920 | 162 | 22,476 | 6,383 | 3,913 | 32,934 |
| 75,921 | 159 | 22,438 | 6,385 | 3,903 | 32,885 |
| 75,922 | 159 | 22,484 | 6,397 | 3,896 | 32,936 |
| 75,923 | 156 | 22,665 | 6,449 | 3,935 | 33,205 |
| 75,924 | 153 | 22,488 | 6,425 | 3,910 | 32,976 |
| 75,925 | 153 | 22,721 | 6,504 | 3,923 | 33,301 |
| 75,926 | 150 | 22,310 | 6,420 | 3,870 | 32,750 |
| 75,927 | 152 | 22,510 | 6,431 | 3,898 | 32,991 |

|        |     |        |       |       |        |
|--------|-----|--------|-------|-------|--------|
| 75,928 | 146 | 22,614 | 6,460 | 3,921 | 33,141 |
| 75,929 | 141 | 22,476 | 6,445 | 3,942 | 33,004 |
| 75,930 | 136 | 22,152 | 6,317 | 3,891 | 32,496 |
| 75,931 | 133 | 22,117 | 6,298 | 3,896 | 32,444 |
| 75,932 | 139 | 22,114 | 6,269 | 3,860 | 32,382 |
| 75,933 | 142 | 22,182 | 6,280 | 3,858 | 32,462 |
| 75,934 | 146 | 22,090 | 6,256 | 3,862 | 32,354 |
| 75,935 | 146 | 22,129 | 6,250 | 3,869 | 32,394 |
| 75,936 | 145 | 22,104 | 6,271 | 3,854 | 32,374 |
| 75,937 | 147 | 22,159 | 6,317 | 3,853 | 32,476 |
| 75,938 | 146 | 22,187 | 6,312 | 3,837 | 32,482 |
| 75,939 | 141 | 22,231 | 6,339 | 3,843 | 32,554 |
| 75,940 | 136 | 22,466 | 6,373 | 3,867 | 32,842 |
| 75,941 | 138 | 22,706 | 6,425 | 3,902 | 33,171 |
| 75,942 | 136 | 22,563 | 6,396 | 3,903 | 32,998 |
| 75,943 | 133 | 22,547 | 6,406 | 3,880 | 32,966 |
| 75,944 | 127 | 22,803 | 6,461 | 3,940 | 33,331 |
| 75,945 | 130 | 22,627 | 6,382 | 3,900 | 33,039 |
| 75,946 | 127 | 22,452 | 6,289 | 3,863 | 32,731 |
| 75,947 | 133 | 22,876 | 6,357 | 3,958 | 33,324 |
| 75,948 | 134 | 22,845 | 6,340 | 3,916 | 33,235 |
| 75,949 | 130 | 22,758 | 6,326 | 3,914 | 33,128 |
| 75,950 | 134 | 23,011 | 6,353 | 3,938 | 33,436 |
| 75,951 | 138 | 22,892 | 6,368 | 3,954 | 33,352 |
| 75,952 | 140 | 22,520 | 6,317 | 3,927 | 32,904 |
| 75,953 | 135 | 22,283 | 6,301 | 3,893 | 32,612 |
| 75,954 | 139 | 22,563 | 6,419 | 3,974 | 33,095 |
| 75,955 | 139 | 22,561 | 6,429 | 3,967 | 33,096 |
| 75,956 | 139 | 22,748 | 6,461 | 3,968 | 33,316 |
| 75,957 | 134 | 22,569 | 6,417 | 3,944 | 33,064 |
| 75,958 | 135 | 22,882 | 6,492 | 3,979 | 33,488 |
| 75,959 | 137 | 22,762 | 6,470 | 3,929 | 33,298 |

|        |     |        |       |       |        |
|--------|-----|--------|-------|-------|--------|
| 75,960 | 136 | 22,739 | 6,456 | 3,922 | 33,253 |
| 75,961 | 139 | 22,824 | 6,489 | 3,935 | 33,387 |
| 75,962 | 137 | 22,696 | 6,498 | 3,915 | 33,246 |
| 75,963 | 132 | 22,154 | 6,374 | 3,806 | 32,466 |
| 75,964 | 133 | 22,412 | 6,423 | 3,835 | 32,803 |
| 75,965 | 130 | 22,450 | 6,446 | 3,839 | 32,865 |
| 75,966 | 130 | 22,247 | 6,395 | 3,817 | 32,589 |
| 75,967 | 130 | 22,368 | 6,445 | 3,867 | 32,810 |
| 75,968 | 127 | 22,434 | 6,502 | 3,881 | 32,944 |
| 75,969 | 127 | 22,026 | 6,406 | 3,804 | 32,363 |
| 75,970 | 129 | 21,977 | 6,399 | 3,823 | 32,328 |
| 75,971 | 130 | 21,828 | 6,350 | 3,799 | 32,107 |
| 75,972 | 130 | 22,182 | 6,432 | 3,840 | 32,584 |
| 75,973 | 132 | 22,131 | 6,411 | 3,805 | 32,479 |
| 75,974 | 130 | 21,945 | 6,334 | 3,771 | 32,180 |
| 75,975 | 133 | 22,032 | 6,302 | 3,781 | 32,248 |
| 75,976 | 134 | 21,974 | 6,270 | 3,779 | 32,157 |
| 75,977 | 134 | 21,740 | 6,171 | 3,716 | 31,761 |
| 75,978 | 134 | 21,799 | 6,179 | 3,711 | 31,823 |
| 75,979 | 130 | 21,953 | 6,192 | 3,685 | 31,960 |
| 75,980 | 130 | 21,971 | 6,190 | 3,683 | 31,974 |
| 75,981 | 129 | 21,791 | 6,127 | 3,631 | 31,678 |
| 75,982 | 133 | 21,885 | 6,144 | 3,651 | 31,813 |
| 75,983 | 128 | 22,012 | 6,204 | 3,686 | 32,030 |
| 75,984 | 126 | 22,052 | 6,203 | 3,687 | 32,068 |
| 75,985 | 124 | 21,969 | 6,152 | 3,652 | 31,897 |
| 75,986 | 125 | 21,757 | 6,103 | 3,627 | 31,612 |
| 75,987 | 127 | 22,132 | 6,160 | 3,654 | 32,073 |
| 75,988 | 126 | 21,848 | 6,113 | 3,632 | 31,719 |
| 75,989 | 132 | 22,131 | 6,193 | 3,672 | 32,128 |
| 75,990 | 133 | 21,914 | 6,158 | 3,641 | 31,846 |
| 75,991 | 131 | 21,659 | 6,088 | 3,610 | 31,488 |

|        |     |        |       |       |        |
|--------|-----|--------|-------|-------|--------|
| 75,992 | 132 | 21,666 | 6,086 | 3,612 | 31,496 |
| 75,993 | 129 | 21,111 | 5,882 | 3,508 | 30,630 |
| 75,994 | 129 | 21,212 | 5,902 | 3,511 | 30,754 |
| 75,995 | 128 | 20,960 | 5,864 | 3,461 | 30,413 |
| 75,996 | 128 | 20,972 | 5,855 | 3,465 | 30,420 |
| 75,997 | 128 | 20,984 | 5,843 | 3,433 | 30,388 |
| 75,998 | 123 | 20,543 | 5,745 | 3,376 | 29,787 |
| 75,999 | 128 | 20,746 | 5,829 | 3,427 | 30,130 |
| 76,000 | 130 | 20,361 | 5,736 | 3,370 | 29,597 |
| 76,001 | 129 | 20,417 | 5,759 | 3,390 | 29,695 |
| 76,002 | 125 | 20,320 | 5,718 | 3,368 | 29,531 |
| 76,003 | 120 | 20,293 | 5,667 | 3,319 | 29,399 |
| 76,004 | 121 | 20,251 | 5,652 | 3,298 | 29,322 |
| 76,005 | 125 | 20,574 | 5,716 | 3,319 | 29,734 |
| 76,006 | 122 | 20,874 | 5,780 | 3,343 | 30,119 |
| 76,007 | 123 | 20,822 | 5,803 | 3,355 | 30,103 |
| 76,008 | 122 | 20,632 | 5,770 | 3,340 | 29,864 |
| 76,009 | 124 | 20,979 | 5,904 | 3,418 | 30,425 |
| 76,010 | 119 | 20,873 | 5,866 | 3,399 | 30,257 |
| 76,011 | 119 | 20,877 | 5,879 | 3,408 | 30,283 |
| 76,012 | 122 | 21,347 | 6,079 | 3,534 | 31,082 |
| 76,013 | 124 | 21,284 | 6,087 | 3,555 | 31,050 |
| 76,014 | 127 | 21,257 | 6,049 | 3,535 | 30,968 |
| 76,015 | 132 | 21,468 | 6,110 | 3,584 | 31,294 |
| 76,016 | 131 | 21,520 | 6,125 | 3,586 | 31,362 |
| 76,017 | 131 | 21,127 | 5,951 | 3,506 | 30,715 |
| 76,018 | 132 | 21,327 | 5,978 | 3,533 | 30,970 |
| 76,019 | 133 | 21,602 | 6,023 | 3,579 | 31,337 |
| 76,020 | 138 | 21,930 | 6,091 | 3,627 | 31,786 |
| 76,021 | 136 | 21,838 | 6,110 | 3,592 | 31,676 |
| 76,022 | 139 | 22,116 | 6,201 | 3,629 | 32,085 |
| 76,023 | 138 | 22,170 | 6,214 | 3,652 | 32,174 |



|        |     |        |       |       |        |
|--------|-----|--------|-------|-------|--------|
| 76,024 | 141 | 21,973 | 6,174 | 3,628 | 31,916 |
| 76,025 | 141 | 21,772 | 6,143 | 3,615 | 31,671 |
| 76,026 | 141 | 21,675 | 6,199 | 3,627 | 31,642 |
| 76,027 | 140 | 21,415 | 6,183 | 3,610 | 31,348 |
| 76,028 | 141 | 21,822 | 6,365 | 3,679 | 32,007 |
| 76,029 | 141 | 21,753 | 6,359 | 3,685 | 31,938 |
| 76,030 | 143 | 21,597 | 6,324 | 3,678 | 31,742 |
| 76,031 | 145 | 21,533 | 6,306 | 3,656 | 31,640 |
| 76,032 | 145 | 22,100 | 6,403 | 3,703 | 32,351 |
| 76,033 | 142 | 21,900 | 6,362 | 3,667 | 32,071 |
| 76,034 | 139 | 22,144 | 6,388 | 3,682 | 32,353 |
| 76,035 | 138 | 21,525 | 6,269 | 3,609 | 31,541 |
| 76,036 | 140 | 21,638 | 6,297 | 3,645 | 31,720 |
| 76,037 | 138 | 21,623 | 6,297 | 3,656 | 31,714 |
| 76,038 | 137 | 21,717 | 6,327 | 3,677 | 31,858 |
| 76,039 | 135 | 21,815 | 6,328 | 3,715 | 31,993 |
| 76,040 | 136 | 21,725 | 6,302 | 3,689 | 31,852 |
| 76,041 | 135 | 21,535 | 6,206 | 3,627 | 31,503 |
| 76,042 | 135 | 21,584 | 6,204 | 3,621 | 31,544 |
| 76,043 | 122 | 21,503 | 6,213 | 3,623 | 31,461 |
| 76,044 | 124 | 21,720 | 6,268 | 3,657 | 31,769 |
| 76,045 | 133 | 21,725 | 6,303 | 3,697 | 31,858 |
| 76,046 | 130 | 21,838 | 6,356 | 3,717 | 32,041 |
| 76,047 | 130 | 21,721 | 6,316 | 3,691 | 31,858 |
| 76,048 | 129 | 21,889 | 6,368 | 3,721 | 32,107 |
| 76,049 | 130 | 21,925 | 6,391 | 3,729 | 32,175 |
| 76,050 | 124 | 21,839 | 6,370 | 3,754 | 32,087 |
| 76,051 | 121 | 22,011 | 6,395 | 3,760 | 32,287 |
| 76,052 | 121 | 22,094 | 6,388 | 3,748 | 32,351 |
| 76,053 | 124 | 22,046 | 6,299 | 3,737 | 32,206 |
| 76,054 | 125 | 21,971 | 6,292 | 3,736 | 32,124 |
| 76,055 | 122 | 21,851 | 6,271 | 3,750 | 31,994 |

|        |     |        |       |       |        |
|--------|-----|--------|-------|-------|--------|
| 76,056 | 118 | 21,945 | 6,333 | 3,796 | 32,192 |
| 76,057 | 120 | 21,730 | 6,282 | 3,786 | 31,918 |
| 76,058 | 117 | 21,778 | 6,260 | 3,793 | 31,948 |
| 76,059 | 121 | 21,999 | 6,261 | 3,779 | 32,160 |
| 76,060 | 119 | 22,005 | 6,258 | 3,768 | 32,150 |
| 76,061 | 117 | 22,042 | 6,272 | 3,767 | 32,198 |
| 76,062 | 114 | 21,802 | 6,126 | 3,656 | 31,698 |
| 76,063 | 116 | 22,014 | 6,199 | 3,673 | 32,002 |
| 76,064 | 115 | 22,178 | 6,229 | 3,682 | 32,204 |
| 76,065 | 112 | 22,082 | 6,244 | 3,694 | 32,132 |
| 76,066 | 108 | 22,045 | 6,220 | 3,663 | 32,036 |
| 76,067 | 108 | 22,075 | 6,234 | 3,652 | 32,069 |
| 76,068 | 105 | 21,992 | 6,263 | 3,666 | 32,026 |
| 76,069 | 104 | 22,025 | 6,290 | 3,685 | 32,104 |
| 76,070 | 102 | 22,236 | 6,341 | 3,732 | 32,411 |
| 76,071 | 96  | 22,110 | 6,291 | 3,697 | 32,194 |
| 76,072 | 99  | 22,395 | 6,333 | 3,767 | 32,594 |
| 76,073 | 98  | 22,566 | 6,357 | 3,783 | 32,804 |
| 76,074 | 99  | 22,545 | 6,329 | 3,770 | 32,743 |
| 76,075 | 96  | 22,629 | 6,335 | 3,791 | 32,851 |
| 76,076 | 93  | 22,439 | 6,267 | 3,758 | 32,557 |
| 76,077 | 89  | 22,944 | 6,357 | 3,848 | 33,238 |
| 76,078 | 91  | 23,278 | 6,397 | 3,873 | 33,639 |
| 76,079 | 91  | 23,250 | 6,392 | 3,872 | 33,605 |
| 76,080 | 93  | 23,698 | 6,560 | 3,960 | 34,311 |
| 76,081 | 98  | 23,659 | 6,653 | 3,994 | 34,404 |
| 76,082 | 96  | 23,732 | 6,699 | 4,014 | 34,541 |
| 76,083 | 98  | 23,780 | 6,709 | 4,023 | 34,610 |
| 76,084 | 99  | 23,715 | 6,728 | 4,024 | 34,566 |
| 76,085 | 99  | 23,822 | 6,737 | 4,028 | 34,686 |
| 76,086 | 99  | 23,730 | 6,711 | 4,016 | 34,556 |
| 76,087 | 101 | 23,807 | 6,759 | 4,004 | 34,671 |

|        |     |        |       |       |        |
|--------|-----|--------|-------|-------|--------|
| 76,088 | 100 | 23,766 | 6,746 | 3,977 | 34,589 |
| 76,089 | 101 | 24,071 | 6,830 | 3,999 | 35,001 |
| 76,090 | 100 | 24,022 | 6,827 | 3,985 | 34,934 |
| 76,091 | 101 | 24,047 | 6,844 | 3,974 | 34,966 |
| 76,092 | 99  | 24,123 | 6,904 | 4,009 | 35,135 |
| 76,093 | 95  | 23,905 | 6,849 | 3,977 | 34,826 |
| 76,094 | 95  | 23,815 | 6,858 | 3,994 | 34,762 |
| 76,095 | 95  | 24,049 | 6,905 | 4,037 | 35,086 |
| 76,096 | 90  | 24,030 | 6,901 | 4,013 | 35,034 |
| 76,097 | 92  | 23,911 | 6,899 | 4,019 | 34,921 |
| 76,098 | 97  | 23,947 | 6,897 | 4,061 | 35,002 |
| 76,099 | 103 | 23,953 | 6,878 | 4,048 | 34,982 |
| 76,100 | 105 | 24,126 | 6,875 | 4,028 | 35,134 |
| 76,101 | 106 | 24,153 | 6,891 | 4,017 | 35,167 |
| 76,102 | 111 | 24,345 | 6,962 | 4,056 | 35,474 |
| 76,103 | 110 | 24,299 | 6,980 | 4,080 | 35,469 |
| 76,104 | 108 | 24,337 | 7,005 | 4,090 | 35,540 |
| 76,105 | 109 | 24,505 | 7,009 | 4,062 | 35,685 |
| 76,106 | 109 | 24,330 | 6,985 | 4,056 | 35,480 |
| 76,107 | 109 | 24,309 | 6,988 | 4,063 | 35,469 |
| 76,108 | 110 | 24,450 | 7,019 | 4,088 | 35,667 |
| 76,109 | 108 | 24,098 | 6,990 | 4,061 | 35,257 |
| 76,110 | 105 | 23,724 | 6,930 | 4,043 | 34,802 |
| 76,111 | 105 | 23,697 | 6,903 | 4,031 | 34,736 |
| 76,112 | 104 | 23,380 | 6,812 | 3,979 | 34,275 |
| 76,113 | 105 | 23,305 | 6,814 | 3,998 | 34,222 |
| 76,114 | 103 | 23,311 | 6,762 | 3,985 | 34,161 |
| 76,115 | 102 | 23,347 | 6,727 | 3,980 | 34,156 |
| 76,116 | 100 | 23,078 | 6,686 | 3,953 | 33,817 |
| 76,117 | 105 | 23,063 | 6,654 | 3,956 | 33,778 |
| 76,118 | 109 | 23,080 | 6,636 | 3,945 | 33,770 |
| 76,119 | 109 | 22,909 | 6,594 | 3,896 | 33,508 |

|        |     |        |       |       |        |
|--------|-----|--------|-------|-------|--------|
| 76,120 | 114 | 23,317 | 6,697 | 3,968 | 34,096 |
| 76,121 | 118 | 23,099 | 6,619 | 3,904 | 33,740 |
| 76,122 | 118 | 22,809 | 6,546 | 3,875 | 33,348 |
| 76,123 | 119 | 23,125 | 6,689 | 3,896 | 33,829 |
| 76,124 | 122 | 23,111 | 6,716 | 3,917 | 33,866 |
| 76,125 | 120 | 22,761 | 6,653 | 3,879 | 33,413 |
| 76,126 | 125 | 22,879 | 6,662 | 3,892 | 33,558 |
| 76,127 | 126 | 22,848 | 6,656 | 3,888 | 33,518 |
| 76,128 | 126 | 22,848 | 6,651 | 3,882 | 33,507 |
| 76,129 | 125 | 22,648 | 6,569 | 3,855 | 33,197 |
| 76,130 | 124 | 22,594 | 6,550 | 3,817 | 33,085 |
| 76,131 | 126 | 22,684 | 6,531 | 3,815 | 33,156 |
| 76,132 | 118 | 22,462 | 6,409 | 3,773 | 32,762 |
| 76,133 | 123 | 22,340 | 6,346 | 3,750 | 32,559 |
| 76,134 | 133 | 22,605 | 6,436 | 3,791 | 32,965 |
| 76,135 | 131 | 22,419 | 6,354 | 3,741 | 32,645 |
| 76,136 | 131 | 22,383 | 6,381 | 3,749 | 32,644 |
| 76,137 | 132 | 22,339 | 6,369 | 3,726 | 32,566 |
| 76,138 | 130 | 22,579 | 6,393 | 3,772 | 32,874 |
| 76,139 | 132 | 22,450 | 6,383 | 3,771 | 32,736 |
| 76,140 | 132 | 22,366 | 6,360 | 3,796 | 32,654 |
| 76,141 | 131 | 22,682 | 6,418 | 3,896 | 33,127 |
| 76,142 | 131 | 22,707 | 6,409 | 3,900 | 33,147 |
| 76,143 | 130 | 22,834 | 6,402 | 3,922 | 33,288 |
| 76,144 | 132 | 22,946 | 6,407 | 3,911 | 33,396 |
| 76,145 | 132 | 22,871 | 6,392 | 3,900 | 33,295 |
| 76,146 | 130 | 22,936 | 6,407 | 3,895 | 33,368 |
| 76,147 | 126 | 23,012 | 6,352 | 3,867 | 33,357 |
| 76,148 | 127 | 23,133 | 6,390 | 3,882 | 33,532 |
| 76,149 | 114 | 22,715 | 6,327 | 3,786 | 32,942 |
| 76,150 | 113 | 22,683 | 6,326 | 3,805 | 32,927 |
| 76,151 | 112 | 22,668 | 6,328 | 3,858 | 32,966 |

|        |     |        |       |       |        |
|--------|-----|--------|-------|-------|--------|
| 76,152 | 110 | 22,628 | 6,345 | 3,864 | 32,947 |
| 76,153 | 111 | 22,596 | 6,353 | 3,877 | 32,937 |
| 76,154 | 114 | 22,480 | 6,355 | 3,860 | 32,809 |
| 76,155 | 119 | 22,422 | 6,337 | 3,851 | 32,729 |
| 76,156 | 122 | 22,276 | 6,322 | 3,864 | 32,584 |
| 76,157 | 122 | 22,132 | 6,255 | 3,838 | 32,347 |
| 76,158 | 123 | 22,201 | 6,274 | 3,826 | 32,424 |
| 76,159 | 122 | 22,062 | 6,265 | 3,797 | 32,246 |
| 76,160 | 126 | 21,780 | 6,141 | 3,715 | 31,762 |
| 76,161 | 127 | 21,814 | 6,136 | 3,709 | 31,786 |
| 76,162 | 138 | 21,470 | 6,078 | 3,669 | 31,355 |
| 76,163 | 138 | 21,318 | 6,032 | 3,632 | 31,120 |
| 76,164 | 139 | 22,090 | 6,332 | 3,819 | 32,380 |
| 76,165 | 139 | 21,962 | 6,338 | 3,822 | 32,261 |
| 76,166 | 144 | 22,071 | 6,392 | 3,847 | 32,454 |
| 76,167 | 140 | 21,835 | 6,334 | 3,806 | 32,115 |
| 76,168 | 138 | 21,855 | 6,339 | 3,807 | 32,139 |
| 76,169 | 139 | 21,688 | 6,313 | 3,800 | 31,940 |
| 76,170 | 139 | 21,691 | 6,318 | 3,793 | 31,941 |
| 76,171 | 139 | 21,831 | 6,374 | 3,803 | 32,147 |
| 76,172 | 133 | 21,832 | 6,395 | 3,810 | 32,170 |
| 76,173 | 137 | 21,737 | 6,396 | 3,801 | 32,071 |
| 76,174 | 138 | 21,615 | 6,393 | 3,816 | 31,962 |
| 76,175 | 136 | 21,467 | 6,361 | 3,778 | 31,742 |
| 76,176 | 136 | 21,525 | 6,368 | 3,786 | 31,815 |
| 76,177 | 132 | 21,617 | 6,414 | 3,786 | 31,949 |
| 76,178 | 134 | 21,500 | 6,415 | 3,770 | 31,819 |
| 76,179 | 137 | 21,581 | 6,448 | 3,803 | 31,969 |
| 76,180 | 141 | 20,937 | 6,314 | 3,709 | 31,101 |
| 76,181 | 142 | 20,872 | 6,287 | 3,719 | 31,020 |
| 76,182 | 141 | 20,452 | 6,184 | 3,667 | 30,444 |
| 76,183 | 143 | 20,115 | 6,114 | 3,601 | 29,973 |

|        |     |        |       |       |        |
|--------|-----|--------|-------|-------|--------|
| 76,184 | 140 | 20,791 | 6,364 | 3,757 | 31,052 |
| 76,185 | 142 | 20,450 | 6,284 | 3,696 | 30,572 |
| 76,186 | 142 | 20,180 | 6,239 | 3,665 | 30,226 |
| 76,187 | 136 | 20,452 | 6,360 | 3,739 | 30,687 |
| 76,188 | 146 | 20,619 | 6,419 | 3,777 | 30,961 |
| 76,189 | 151 | 20,514 | 6,415 | 3,770 | 30,850 |
| 76,190 | 149 | 20,287 | 6,374 | 3,735 | 30,545 |
| 76,191 | 147 | 20,681 | 6,470 | 3,798 | 31,096 |
| 76,192 | 147 | 20,937 | 6,556 | 3,840 | 31,480 |
| 76,193 | 155 | 20,546 | 6,488 | 3,797 | 30,986 |
| 76,194 | 154 | 20,188 | 6,441 | 3,739 | 30,522 |
| 76,195 | 160 | 20,474 | 6,624 | 3,827 | 31,085 |
| 76,196 | 161 | 20,332 | 6,663 | 3,820 | 30,976 |
| 76,197 | 163 | 20,317 | 6,655 | 3,844 | 30,979 |
| 76,198 | 163 | 20,273 | 6,665 | 3,851 | 30,952 |
| 76,199 | 161 | 19,944 | 6,616 | 3,815 | 30,536 |
| 76,200 | 163 | 19,799 | 6,590 | 3,831 | 30,383 |
| 76,201 | 164 | 19,751 | 6,579 | 3,809 | 30,303 |
| 76,202 | 162 | 19,635 | 6,543 | 3,784 | 30,124 |
| 76,203 | 164 | 19,928 | 6,601 | 3,830 | 30,523 |
| 76,204 | 163 | 20,006 | 6,585 | 3,834 | 30,588 |
| 76,205 | 160 | 20,100 | 6,573 | 3,841 | 30,674 |
| 76,206 | 153 | 20,141 | 6,554 | 3,818 | 30,666 |
| 76,207 | 148 | 19,826 | 6,495 | 3,763 | 30,232 |
| 76,208 | 148 | 20,303 | 6,602 | 3,811 | 30,864 |
| 76,209 | 147 | 20,406 | 6,656 | 3,854 | 31,063 |
| 76,210 | 147 | 20,429 | 6,644 | 3,868 | 31,088 |
| 76,211 | 143 | 20,562 | 6,679 | 3,889 | 31,273 |
| 76,212 | 135 | 20,251 | 6,529 | 3,789 | 30,704 |
| 76,213 | 137 | 20,456 | 6,551 | 3,797 | 30,941 |
| 76,214 | 134 | 20,699 | 6,589 | 3,839 | 31,261 |
| 76,215 | 136 | 20,744 | 6,585 | 3,845 | 31,310 |

|        |     |        |       |       |        |
|--------|-----|--------|-------|-------|--------|
| 76,216 | 135 | 20,451 | 6,529 | 3,812 | 30,927 |
| 76,217 | 136 | 20,936 | 6,625 | 3,898 | 31,595 |
| 76,218 | 134 | 20,738 | 6,582 | 3,876 | 31,330 |
| 76,219 | 136 | 20,739 | 6,586 | 3,874 | 31,335 |
| 76,220 | 136 | 20,715 | 6,587 | 3,888 | 31,326 |
| 76,221 | 134 | 20,671 | 6,587 | 3,904 | 31,296 |
| 76,222 | 135 | 20,727 | 6,673 | 3,957 | 31,492 |
| 76,223 | 132 | 20,531 | 6,632 | 3,961 | 31,256 |
| 76,224 | 133 | 20,368 | 6,560 | 3,939 | 31,000 |
| 76,225 | 132 | 20,163 | 6,487 | 3,903 | 30,685 |
| 76,226 | 130 | 20,408 | 6,545 | 3,940 | 31,023 |
| 76,227 | 133 | 20,615 | 6,569 | 3,969 | 31,286 |
| 76,228 | 132 | 20,570 | 6,545 | 3,979 | 31,226 |
| 76,229 | 127 | 20,366 | 6,462 | 3,944 | 30,899 |
| 76,230 | 130 | 20,335 | 6,454 | 3,941 | 30,860 |
| 76,231 | 125 | 20,101 | 6,396 | 3,901 | 30,523 |
| 76,232 | 130 | 20,152 | 6,397 | 3,924 | 30,603 |
| 76,233 | 128 | 20,086 | 6,336 | 3,895 | 30,445 |
| 76,234 | 129 | 20,629 | 6,521 | 3,990 | 31,269 |
| 76,235 | 130 | 20,413 | 6,461 | 3,948 | 30,952 |
| 76,236 | 123 | 19,936 | 6,292 | 3,848 | 30,199 |
| 76,237 | 124 | 19,910 | 6,323 | 3,868 | 30,225 |
| 76,238 | 117 | 19,920 | 6,358 | 3,867 | 30,262 |
| 76,239 | 109 | 19,631 | 6,223 | 3,782 | 29,745 |
| 76,240 | 117 | 19,624 | 6,221 | 3,757 | 29,719 |
| 76,241 | 117 | 19,446 | 6,163 | 3,719 | 29,445 |
| 76,242 | 118 | 19,873 | 6,263 | 3,776 | 30,030 |
| 76,243 | 121 | 19,998 | 6,277 | 3,766 | 30,162 |
| 76,244 | 127 | 20,045 | 6,195 | 3,728 | 30,095 |
| 76,245 | 126 | 20,145 | 6,156 | 3,719 | 30,146 |
| 76,246 | 128 | 20,165 | 6,115 | 3,728 | 30,136 |
| 76,247 | 129 | 20,152 | 6,094 | 3,730 | 30,105 |

|        |     |        |       |       |        |
|--------|-----|--------|-------|-------|--------|
| 76,248 | 128 | 20,006 | 6,085 | 3,708 | 29,927 |
| 76,249 | 130 | 20,113 | 6,125 | 3,753 | 30,121 |
| 76,250 | 128 | 20,018 | 6,090 | 3,728 | 29,964 |
| 76,251 | 131 | 20,010 | 6,134 | 3,724 | 29,999 |
| 76,252 | 135 | 20,025 | 6,170 | 3,722 | 30,052 |
| 76,253 | 137 | 20,076 | 6,227 | 3,718 | 30,158 |
| 76,254 | 142 | 20,172 | 6,290 | 3,723 | 30,327 |
| 76,255 | 143 | 20,175 | 6,323 | 3,713 | 30,354 |
| 76,256 | 152 | 20,064 | 6,273 | 3,656 | 30,145 |
| 76,257 | 152 | 19,866 | 6,259 | 3,661 | 29,938 |
| 76,258 | 153 | 20,054 | 6,345 | 3,726 | 30,278 |
| 76,259 | 153 | 20,012 | 6,387 | 3,728 | 30,280 |
| 76,260 | 154 | 19,944 | 6,347 | 3,700 | 30,145 |
| 76,261 | 153 | 19,917 | 6,316 | 3,704 | 30,090 |
| 76,262 | 161 | 20,097 | 6,357 | 3,740 | 30,355 |
| 76,263 | 162 | 20,066 | 6,375 | 3,745 | 30,348 |
| 76,264 | 164 | 19,955 | 6,348 | 3,732 | 30,199 |
| 76,265 | 164 | 19,830 | 6,360 | 3,715 | 30,069 |
| 76,266 | 164 | 19,848 | 6,418 | 3,728 | 30,158 |
| 76,267 | 166 | 19,989 | 6,448 | 3,736 | 30,339 |
| 76,268 | 178 | 19,941 | 6,478 | 3,733 | 30,330 |
| 76,269 | 180 | 19,921 | 6,506 | 3,736 | 30,343 |
| 76,270 | 183 | 19,948 | 6,527 | 3,740 | 30,398 |
| 76,271 | 186 | 19,685 | 6,378 | 3,641 | 29,890 |
| 76,272 | 187 | 19,754 | 6,419 | 3,657 | 30,017 |
| 76,273 | 187 | 19,868 | 6,442 | 3,676 | 30,173 |
| 76,274 | 192 | 20,030 | 6,493 | 3,698 | 30,413 |
| 76,275 | 193 | 19,854 | 6,411 | 3,642 | 30,100 |
| 76,276 | 193 | 19,578 | 6,333 | 3,592 | 29,696 |
| 76,277 | 192 | 19,706 | 6,430 | 3,635 | 29,963 |
| 76,278 | 188 | 19,691 | 6,441 | 3,618 | 29,938 |
| 76,279 | 186 | 19,831 | 6,477 | 3,626 | 30,120 |



|        |     |        |       |       |        |
|--------|-----|--------|-------|-------|--------|
| 76,280 | 186 | 19,772 | 6,482 | 3,613 | 30,053 |
| 76,281 | 181 | 19,916 | 6,609 | 3,669 | 30,375 |
| 76,282 | 180 | 19,886 | 6,620 | 3,684 | 30,370 |
| 76,283 | 172 | 19,963 | 6,666 | 3,696 | 30,497 |
| 76,284 | 176 | 19,325 | 6,492 | 3,564 | 29,557 |
| 76,285 | 178 | 19,744 | 6,627 | 3,622 | 30,171 |
| 76,286 | 179 | 19,951 | 6,703 | 3,674 | 30,507 |
| 76,287 | 179 | 20,035 | 6,730 | 3,692 | 30,636 |
| 76,288 | 179 | 20,176 | 6,716 | 3,693 | 30,764 |
| 76,289 | 179 | 20,205 | 6,710 | 3,702 | 30,796 |
| 76,290 | 179 | 20,454 | 6,794 | 3,768 | 31,195 |
| 76,291 | 173 | 20,111 | 6,697 | 3,729 | 30,710 |
| 76,292 | 172 | 19,991 | 6,674 | 3,725 | 30,562 |
| 76,293 | 176 | 19,911 | 6,706 | 3,741 | 30,534 |
| 76,294 | 174 | 19,836 | 6,696 | 3,726 | 30,432 |
| 76,295 | 162 | 19,744 | 6,686 | 3,710 | 30,302 |
| 76,296 | 162 | 19,717 | 6,741 | 3,732 | 30,352 |
| 76,297 | 158 | 19,569 | 6,752 | 3,718 | 30,197 |
| 76,298 | 160 | 19,779 | 6,764 | 3,732 | 30,435 |
| 76,299 | 157 | 19,779 | 6,727 | 3,691 | 30,354 |
| 76,300 | 157 | 19,998 | 6,766 | 3,732 | 30,653 |
| 76,301 | 155 | 20,036 | 6,737 | 3,741 | 30,669 |
| 76,302 | 157 | 20,346 | 6,811 | 3,775 | 31,089 |
| 76,303 | 148 | 20,510 | 6,792 | 3,792 | 31,242 |
| 76,304 | 145 | 20,422 | 6,694 | 3,769 | 31,030 |
| 76,305 | 139 | 20,247 | 6,669 | 3,781 | 30,836 |
| 76,306 | 135 | 20,040 | 6,663 | 3,783 | 30,621 |
| 76,307 | 126 | 19,820 | 6,608 | 3,771 | 30,325 |
| 76,308 | 128 | 19,448 | 6,470 | 3,675 | 29,721 |
| 76,309 | 130 | 19,723 | 6,518 | 3,680 | 30,051 |
| 76,310 | 131 | 19,653 | 6,498 | 3,659 | 29,941 |
| 76,311 | 131 | 19,549 | 6,471 | 3,649 | 29,800 |

|        |     |        |       |       |        |
|--------|-----|--------|-------|-------|--------|
| 76,312 | 129 | 19,392 | 6,453 | 3,636 | 29,610 |
| 76,313 | 123 | 19,295 | 6,413 | 3,620 | 29,451 |
| 76,314 | 125 | 19,258 | 6,378 | 3,611 | 29,372 |
| 76,315 | 121 | 19,112 | 6,356 | 3,619 | 29,208 |
| 76,316 | 120 | 18,989 | 6,302 | 3,588 | 28,999 |
| 76,317 | 125 | 19,012 | 6,317 | 3,611 | 29,065 |
| 76,318 | 130 | 19,216 | 6,400 | 3,669 | 29,415 |
| 76,319 | 114 | 18,730 | 6,195 | 3,575 | 28,614 |
| 76,320 | 115 | 18,909 | 6,277 | 3,621 | 28,922 |
| 76,321 | 113 | 19,063 | 6,353 | 3,666 | 29,195 |
| 76,322 | 111 | 19,047 | 6,376 | 3,670 | 29,204 |
| 76,323 | 110 | 18,950 | 6,376 | 3,681 | 29,117 |
| 76,324 | 106 | 18,872 | 6,355 | 3,671 | 29,004 |
| 76,325 | 109 | 19,009 | 6,407 | 3,708 | 29,233 |
| 76,326 | 100 | 18,954 | 6,386 | 3,708 | 29,148 |
| 76,327 | 101 | 18,943 | 6,371 | 3,716 | 29,131 |
| 76,328 | 102 | 18,823 | 6,341 | 3,723 | 28,989 |
| 76,329 | 104 | 18,712 | 6,338 | 3,717 | 28,871 |
| 76,330 | 108 | 18,542 | 6,255 | 3,689 | 28,594 |
| 76,331 | 112 | 18,699 | 6,260 | 3,701 | 28,772 |
| 76,332 | 115 | 18,770 | 6,219 | 3,674 | 28,778 |
| 76,333 | 113 | 18,839 | 6,185 | 3,662 | 28,799 |
| 76,334 | 115 | 18,831 | 6,114 | 3,621 | 28,681 |
| 76,335 | 107 | 18,599 | 6,019 | 3,591 | 28,316 |
| 76,336 | 113 | 18,778 | 6,006 | 3,636 | 28,533 |
| 76,337 | 119 | 18,579 | 5,935 | 3,589 | 28,222 |
| 76,338 | 119 | 18,238 | 5,871 | 3,562 | 27,790 |
| 76,339 | 126 | 18,493 | 6,041 | 3,619 | 28,279 |
| 76,340 | 129 | 18,352 | 5,982 | 3,581 | 28,044 |
| 76,341 | 130 | 18,289 | 5,968 | 3,574 | 27,961 |
| 76,342 | 133 | 18,427 | 5,969 | 3,544 | 28,073 |
| 76,343 | 133 | 18,476 | 5,966 | 3,538 | 28,113 |

|        |     |        |       |       |        |
|--------|-----|--------|-------|-------|--------|
| 76,344 | 129 | 18,477 | 5,983 | 3,534 | 28,123 |
| 76,345 | 136 | 18,273 | 5,921 | 3,524 | 27,854 |
| 76,346 | 137 | 18,196 | 5,916 | 3,516 | 27,765 |
| 76,347 | 136 | 18,039 | 5,810 | 3,488 | 27,473 |
| 76,348 | 135 | 18,369 | 5,840 | 3,516 | 27,860 |
| 76,349 | 136 | 18,307 | 5,820 | 3,498 | 27,761 |
| 76,350 | 139 | 18,188 | 5,802 | 3,475 | 27,604 |
| 76,351 | 147 | 18,221 | 5,844 | 3,458 | 27,670 |
| 76,352 | 145 | 18,041 | 5,762 | 3,415 | 27,363 |
| 76,353 | 148 | 18,168 | 5,786 | 3,452 | 27,554 |
| 76,354 | 150 | 18,273 | 5,799 | 3,459 | 27,681 |
| 76,355 | 150 | 18,226 | 5,721 | 3,413 | 27,510 |
| 76,356 | 151 | 18,113 | 5,622 | 3,358 | 27,244 |
| 76,357 | 153 | 18,512 | 5,703 | 3,409 | 27,777 |
| 76,358 | 152 | 18,566 | 5,713 | 3,416 | 27,847 |
| 76,359 | 151 | 18,492 | 5,701 | 3,419 | 27,763 |
| 76,360 | 154 | 18,237 | 5,642 | 3,407 | 27,440 |
| 76,361 | 153 | 17,966 | 5,544 | 3,355 | 27,018 |
| 76,362 | 153 | 18,122 | 5,592 | 3,404 | 27,271 |
| 76,363 | 155 | 18,277 | 5,641 | 3,423 | 27,496 |
| 76,364 | 153 | 18,278 | 5,632 | 3,427 | 27,490 |
| 76,365 | 145 | 17,943 | 5,544 | 3,354 | 26,986 |
| 76,366 | 146 | 18,144 | 5,567 | 3,354 | 27,211 |
| 76,367 | 140 | 18,255 | 5,570 | 3,359 | 27,324 |
| 76,368 | 137 | 18,287 | 5,525 | 3,366 | 27,315 |
| 76,369 | 135 | 18,209 | 5,511 | 3,352 | 27,207 |
| 76,370 | 134 | 18,421 | 5,539 | 3,379 | 27,473 |
| 76,371 | 144 | 18,640 | 5,524 | 3,371 | 27,679 |
| 76,372 | 144 | 18,736 | 5,519 | 3,362 | 27,761 |
| 76,373 | 151 | 18,764 | 5,422 | 3,332 | 27,669 |
| 76,374 | 157 | 18,886 | 5,416 | 3,328 | 27,787 |
| 76,375 | 157 | 19,282 | 5,495 | 3,354 | 28,288 |

|        |     |        |       |       |        |
|--------|-----|--------|-------|-------|--------|
| 76,376 | 154 | 19,326 | 5,471 | 3,327 | 28,278 |
| 76,377 | 155 | 19,461 | 5,481 | 3,324 | 28,421 |
| 76,378 | 165 | 19,724 | 5,521 | 3,330 | 28,740 |
| 76,379 | 164 | 19,682 | 5,516 | 3,324 | 28,686 |
| 76,380 | 165 | 19,777 | 5,503 | 3,318 | 28,763 |
| 76,381 | 162 | 19,792 | 5,526 | 3,326 | 28,806 |
| 76,382 | 164 | 19,923 | 5,550 | 3,343 | 28,980 |
| 76,383 | 160 | 19,693 | 5,499 | 3,301 | 28,653 |
| 76,384 | 159 | 19,568 | 5,479 | 3,284 | 28,490 |
| 76,385 | 159 | 19,451 | 5,442 | 3,264 | 28,316 |
| 76,386 | 163 | 19,694 | 5,501 | 3,294 | 28,652 |
| 76,387 | 153 | 19,491 | 5,407 | 3,244 | 28,295 |
| 76,388 | 153 | 19,512 | 5,379 | 3,238 | 28,282 |
| 76,389 | 154 | 19,548 | 5,389 | 3,241 | 28,332 |
| 76,390 | 152 | 19,824 | 5,422 | 3,273 | 28,671 |
| 76,391 | 149 | 19,732 | 5,422 | 3,275 | 28,578 |
| 76,392 | 143 | 19,672 | 5,410 | 3,278 | 28,503 |
| 76,393 | 146 | 19,608 | 5,377 | 3,286 | 28,417 |
| 76,394 | 147 | 19,897 | 5,432 | 3,340 | 28,816 |
| 76,395 | 138 | 20,132 | 5,482 | 3,394 | 29,146 |
| 76,396 | 139 | 20,390 | 5,514 | 3,395 | 29,438 |
| 76,397 | 140 | 20,400 | 5,532 | 3,383 | 29,455 |
| 76,398 | 137 | 20,373 | 5,517 | 3,354 | 29,381 |
| 76,399 | 138 | 20,375 | 5,520 | 3,351 | 29,384 |
| 76,400 | 130 | 20,724 | 5,609 | 3,397 | 29,860 |
| 76,401 | 130 | 20,703 | 5,603 | 3,402 | 29,838 |
| 76,402 | 124 | 21,070 | 5,691 | 3,479 | 30,364 |
| 76,403 | 121 | 20,887 | 5,664 | 3,475 | 30,147 |
| 76,404 | 121 | 20,885 | 5,684 | 3,467 | 30,157 |
| 76,405 | 123 | 20,849 | 5,687 | 3,463 | 30,122 |
| 76,406 | 123 | 20,557 | 5,655 | 3,439 | 29,774 |
| 76,407 | 127 | 21,298 | 5,859 | 3,592 | 30,876 |

|        |     |        |       |       |        |
|--------|-----|--------|-------|-------|--------|
| 76,408 | 136 | 21,535 | 5,911 | 3,611 | 31,193 |
| 76,409 | 140 | 21,706 | 5,926 | 3,615 | 31,387 |
| 76,410 | 137 | 21,962 | 5,957 | 3,647 | 31,703 |
| 76,411 | 141 | 22,155 | 5,999 | 3,662 | 31,957 |
| 76,412 | 142 | 22,467 | 6,097 | 3,706 | 32,412 |
| 76,413 | 141 | 22,417 | 6,092 | 3,698 | 32,348 |
| 76,414 | 143 | 22,384 | 6,099 | 3,700 | 32,326 |
| 76,415 | 148 | 22,433 | 6,101 | 3,709 | 32,391 |
| 76,416 | 148 | 22,431 | 6,089 | 3,700 | 32,368 |
| 76,417 | 147 | 22,466 | 6,104 | 3,728 | 32,445 |
| 76,418 | 152 | 22,520 | 6,126 | 3,755 | 32,553 |
| 76,419 | 151 | 22,495 | 6,117 | 3,723 | 32,486 |
| 76,420 | 153 | 22,770 | 6,171 | 3,773 | 32,867 |
| 76,421 | 144 | 22,309 | 6,082 | 3,718 | 32,253 |
| 76,422 | 147 | 22,380 | 6,101 | 3,742 | 32,370 |
| 76,423 | 151 | 22,649 | 6,143 | 3,773 | 32,716 |
| 76,424 | 136 | 22,481 | 6,123 | 3,741 | 32,481 |
| 76,425 | 135 | 22,311 | 6,097 | 3,736 | 32,279 |
| 76,426 | 135 | 22,484 | 6,160 | 3,770 | 32,549 |
| 76,427 | 137 | 22,769 | 6,226 | 3,836 | 32,968 |
| 76,428 | 133 | 22,884 | 6,276 | 3,878 | 33,171 |
| 76,429 | 129 | 23,018 | 6,289 | 3,889 | 33,325 |
| 76,430 | 128 | 23,006 | 6,266 | 3,886 | 33,286 |
| 76,431 | 129 | 23,302 | 6,350 | 3,924 | 33,705 |
| 76,432 | 129 | 23,589 | 6,400 | 3,974 | 34,092 |
| 76,433 | 128 | 23,703 | 6,449 | 4,002 | 34,282 |
| 76,434 | 129 | 23,625 | 6,408 | 4,002 | 34,164 |
| 76,435 | 129 | 23,596 | 6,397 | 4,002 | 34,124 |
| 76,436 | 131 | 23,772 | 6,484 | 4,084 | 34,471 |
| 76,437 | 126 | 23,642 | 6,468 | 4,072 | 34,308 |
| 76,438 | 126 | 23,544 | 6,470 | 4,058 | 34,198 |
| 76,439 | 123 | 23,364 | 6,406 | 4,022 | 33,915 |

|        |     |        |       |       |        |
|--------|-----|--------|-------|-------|--------|
| 76,440 | 124 | 23,360 | 6,394 | 4,021 | 33,899 |
| 76,441 | 130 | 23,262 | 6,398 | 4,020 | 33,810 |
| 76,442 | 131 | 23,261 | 6,415 | 4,013 | 33,820 |
| 76,443 | 132 | 23,133 | 6,388 | 3,976 | 33,629 |
| 76,444 | 133 | 23,178 | 6,371 | 3,957 | 33,639 |
| 76,445 | 139 | 22,994 | 6,306 | 3,914 | 33,353 |
| 76,446 | 139 | 22,848 | 6,276 | 3,879 | 33,142 |
| 76,447 | 142 | 22,984 | 6,306 | 3,902 | 33,334 |
| 76,448 | 142 | 22,978 | 6,297 | 3,893 | 33,310 |
| 76,449 | 142 | 22,911 | 6,313 | 3,920 | 33,286 |
| 76,450 | 147 | 23,069 | 6,372 | 3,943 | 33,531 |
| 76,451 | 147 | 22,926 | 6,308 | 3,901 | 33,282 |
| 76,452 | 152 | 22,930 | 6,312 | 3,901 | 33,295 |
| 76,453 | 153 | 22,824 | 6,274 | 3,872 | 33,123 |
| 76,454 | 157 | 23,151 | 6,324 | 3,873 | 33,505 |
| 76,455 | 166 | 22,930 | 6,256 | 3,830 | 33,182 |
| 76,456 | 167 | 22,899 | 6,225 | 3,824 | 33,115 |
| 76,457 | 166 | 23,091 | 6,237 | 3,821 | 33,315 |
| 76,458 | 166 | 23,382 | 6,295 | 3,865 | 33,708 |
| 76,459 | 162 | 23,199 | 6,258 | 3,858 | 33,477 |
| 76,460 | 158 | 22,889 | 6,193 | 3,821 | 33,061 |
| 76,461 | 156 | 22,826 | 6,206 | 3,815 | 33,003 |
| 76,462 | 154 | 22,805 | 6,235 | 3,830 | 33,024 |
| 76,463 | 154 | 22,827 | 6,240 | 3,848 | 33,069 |
| 76,464 | 151 | 22,696 | 6,208 | 3,820 | 32,875 |
| 76,465 | 149 | 22,769 | 6,204 | 3,802 | 32,924 |
| 76,466 | 153 | 22,630 | 6,154 | 3,784 | 32,721 |
| 76,467 | 155 | 22,650 | 6,179 | 3,777 | 32,761 |
| 76,468 | 158 | 22,545 | 6,152 | 3,745 | 32,600 |
| 76,469 | 159 | 22,488 | 6,130 | 3,719 | 32,496 |
| 76,470 | 162 | 22,849 | 6,233 | 3,784 | 33,028 |
| 76,471 | 164 | 22,789 | 6,192 | 3,754 | 32,899 |

|        |     |        |       |       |        |
|--------|-----|--------|-------|-------|--------|
| 76,472 | 164 | 22,720 | 6,184 | 3,746 | 32,814 |
| 76,473 | 158 | 22,821 | 6,222 | 3,755 | 32,956 |
| 76,474 | 153 | 22,470 | 6,188 | 3,732 | 32,543 |
| 76,475 | 154 | 22,212 | 6,197 | 3,718 | 32,281 |
| 76,476 | 154 | 22,351 | 6,223 | 3,753 | 32,481 |
| 76,477 | 154 | 22,298 | 6,224 | 3,746 | 32,422 |
| 76,478 | 159 | 22,283 | 6,191 | 3,733 | 32,366 |
| 76,479 | 160 | 22,260 | 6,152 | 3,708 | 32,280 |
| 76,480 | 159 | 22,096 | 6,117 | 3,691 | 32,063 |
| 76,481 | 158 | 22,135 | 6,121 | 3,690 | 32,104 |
| 76,482 | 156 | 21,993 | 6,114 | 3,669 | 31,932 |
| 76,483 | 155 | 22,007 | 6,089 | 3,690 | 31,941 |
| 76,484 | 157 | 21,961 | 6,070 | 3,691 | 31,879 |
| 76,485 | 160 | 22,103 | 6,149 | 3,717 | 32,129 |
| 76,486 | 160 | 22,390 | 6,221 | 3,749 | 32,520 |
| 76,487 | 165 | 22,136 | 6,158 | 3,692 | 32,151 |
| 76,488 | 167 | 22,416 | 6,197 | 3,715 | 32,495 |
| 76,489 | 166 | 22,574 | 6,245 | 3,744 | 32,729 |
| 76,490 | 163 | 22,677 | 6,273 | 3,743 | 32,856 |
| 76,491 | 156 | 22,671 | 6,245 | 3,730 | 32,802 |
| 76,492 | 155 | 22,668 | 6,254 | 3,742 | 32,819 |
| 76,493 | 158 | 23,027 | 6,313 | 3,790 | 33,288 |
| 76,494 | 157 | 22,822 | 6,267 | 3,763 | 33,009 |
| 76,495 | 155 | 22,521 | 6,220 | 3,734 | 32,630 |
| 76,496 | 147 | 22,135 | 6,179 | 3,700 | 32,161 |
| 76,497 | 149 | 22,808 | 6,356 | 3,881 | 33,194 |
| 76,498 | 151 | 22,477 | 6,299 | 3,844 | 32,771 |
| 76,499 | 150 | 22,394 | 6,238 | 3,803 | 32,585 |
| 76,500 | 151 | 22,712 | 6,327 | 3,850 | 33,040 |
| 76,501 | 147 | 22,714 | 6,309 | 3,874 | 33,044 |
| 76,502 | 148 | 22,670 | 6,307 | 3,870 | 32,995 |
| 76,503 | 141 | 22,397 | 6,251 | 3,820 | 32,609 |

|        |     |        |       |       |        |
|--------|-----|--------|-------|-------|--------|
| 76,504 | 141 | 22,329 | 6,235 | 3,814 | 32,519 |
| 76,505 | 137 | 22,237 | 6,221 | 3,832 | 32,427 |
| 76,506 | 126 | 22,347 | 6,254 | 3,862 | 32,589 |
| 76,507 | 125 | 22,309 | 6,246 | 3,847 | 32,527 |
| 76,508 | 127 | 22,095 | 6,212 | 3,827 | 32,261 |
| 76,509 | 127 | 22,026 | 6,209 | 3,819 | 32,181 |
| 76,510 | 120 | 21,692 | 6,153 | 3,760 | 31,725 |
| 76,511 | 119 | 21,567 | 6,110 | 3,715 | 31,511 |
| 76,512 | 122 | 21,783 | 6,183 | 3,738 | 31,826 |
| 76,513 | 127 | 21,521 | 6,031 | 3,656 | 31,335 |
| 76,514 | 127 | 21,585 | 6,050 | 3,666 | 31,428 |
| 76,515 | 125 | 21,471 | 6,060 | 3,663 | 31,319 |
| 76,516 | 128 | 21,694 | 6,130 | 3,708 | 31,660 |
| 76,517 | 124 | 21,602 | 6,136 | 3,693 | 31,555 |
| 76,518 | 115 | 21,434 | 6,020 | 3,641 | 31,210 |
| 76,519 | 115 | 21,462 | 6,011 | 3,653 | 31,241 |
| 76,520 | 118 | 21,517 | 6,015 | 3,651 | 31,301 |
| 76,521 | 115 | 21,373 | 6,002 | 3,626 | 31,116 |
| 76,522 | 116 | 21,682 | 6,098 | 3,699 | 31,595 |
| 76,523 | 116 | 21,824 | 6,128 | 3,716 | 31,784 |
| 76,524 | 117 | 21,911 | 6,145 | 3,753 | 31,926 |
| 76,525 | 116 | 21,801 | 6,052 | 3,709 | 31,678 |
| 76,526 | 116 | 21,846 | 5,998 | 3,702 | 31,662 |
| 76,527 | 114 | 21,317 | 5,852 | 3,596 | 30,879 |
| 76,528 | 116 | 21,491 | 5,904 | 3,622 | 31,133 |
| 76,529 | 113 | 21,491 | 5,930 | 3,639 | 31,173 |
| 76,530 | 112 | 21,609 | 5,964 | 3,653 | 31,338 |
| 76,531 | 113 | 21,565 | 5,949 | 3,627 | 31,254 |
| 76,532 | 113 | 21,171 | 5,857 | 3,570 | 30,711 |
| 76,533 | 112 | 20,803 | 5,751 | 3,487 | 30,153 |
| 76,534 | 115 | 21,065 | 5,804 | 3,520 | 30,504 |
| 76,535 | 112 | 21,323 | 5,868 | 3,571 | 30,874 |



|        |     |        |       |       |        |
|--------|-----|--------|-------|-------|--------|
| 76,536 | 109 | 20,626 | 5,641 | 3,453 | 29,829 |
| 76,537 | 108 | 20,885 | 5,669 | 3,466 | 30,128 |
| 76,538 | 109 | 21,118 | 5,701 | 3,471 | 30,399 |
| 76,539 | 105 | 20,922 | 5,631 | 3,439 | 30,097 |
| 76,540 | 104 | 21,169 | 5,656 | 3,479 | 30,408 |
| 76,541 | 103 | 20,898 | 5,556 | 3,437 | 29,994 |
| 76,542 | 111 | 21,017 | 5,590 | 3,463 | 30,181 |
| 76,543 | 114 | 21,219 | 5,588 | 3,462 | 30,383 |
| 76,544 | 110 | 21,121 | 5,544 | 3,445 | 30,220 |
| 76,545 | 116 | 21,525 | 5,617 | 3,491 | 30,749 |
| 76,546 | 117 | 21,613 | 5,586 | 3,472 | 30,788 |
| 76,547 | 112 | 21,952 | 5,575 | 3,477 | 31,116 |
| 76,548 | 111 | 21,802 | 5,514 | 3,453 | 30,880 |
| 76,549 | 104 | 21,822 | 5,530 | 3,476 | 30,932 |
| 76,550 | 105 | 21,974 | 5,495 | 3,466 | 31,040 |
| 76,551 | 107 | 21,927 | 5,475 | 3,468 | 30,977 |
| 76,552 | 110 | 22,160 | 5,523 | 3,515 | 31,308 |
| 76,553 | 110 | 21,863 | 5,462 | 3,516 | 30,951 |
| 76,554 | 111 | 22,034 | 5,447 | 3,534 | 31,126 |
| 76,555 | 111 | 21,988 | 5,398 | 3,508 | 31,005 |
| 76,556 | 115 | 21,977 | 5,388 | 3,497 | 30,977 |
| 76,557 | 115 | 21,946 | 5,376 | 3,509 | 30,946 |
| 76,558 | 113 | 21,913 | 5,362 | 3,491 | 30,879 |
| 76,559 | 110 | 21,896 | 5,334 | 3,466 | 30,806 |
| 76,560 | 118 | 21,830 | 5,284 | 3,430 | 30,662 |
| 76,561 | 118 | 21,835 | 5,296 | 3,427 | 30,676 |
| 76,562 | 119 | 21,884 | 5,326 | 3,436 | 30,765 |
| 76,563 | 125 | 22,332 | 5,376 | 3,510 | 31,343 |
| 76,564 | 126 | 22,367 | 5,374 | 3,506 | 31,373 |
| 76,565 | 126 | 22,418 | 5,391 | 3,504 | 31,439 |
| 76,566 | 124 | 22,647 | 5,437 | 3,502 | 31,710 |
| 76,567 | 124 | 22,908 | 5,517 | 3,539 | 32,088 |

|        |     |        |       |       |        |
|--------|-----|--------|-------|-------|--------|
| 76,568 | 118 | 22,731 | 5,509 | 3,537 | 31,895 |
| 76,569 | 117 | 22,851 | 5,551 | 3,558 | 32,077 |
| 76,570 | 115 | 22,854 | 5,556 | 3,546 | 32,071 |
| 76,571 | 114 | 22,986 | 5,619 | 3,573 | 32,292 |
| 76,572 | 115 | 23,232 | 5,655 | 3,603 | 32,605 |
| 76,573 | 118 | 23,339 | 5,671 | 3,616 | 32,744 |
| 76,574 | 121 | 23,348 | 5,697 | 3,603 | 32,769 |
| 76,575 | 122 | 23,331 | 5,729 | 3,632 | 32,814 |
| 76,576 | 124 | 23,113 | 5,727 | 3,586 | 32,550 |
| 76,577 | 122 | 22,905 | 5,669 | 3,568 | 32,264 |
| 76,578 | 122 | 22,883 | 5,666 | 3,570 | 32,241 |
| 76,579 | 120 | 22,692 | 5,641 | 3,557 | 32,010 |
| 76,580 | 119 | 22,660 | 5,674 | 3,560 | 32,013 |
| 76,581 | 117 | 22,542 | 5,649 | 3,537 | 31,845 |
| 76,582 | 116 | 22,377 | 5,617 | 3,514 | 31,624 |
| 76,583 | 115 | 22,167 | 5,564 | 3,472 | 31,318 |
| 76,584 | 121 | 22,165 | 5,565 | 3,476 | 31,327 |
| 76,585 | 122 | 21,704 | 5,501 | 3,402 | 30,729 |
| 76,586 | 123 | 21,808 | 5,536 | 3,404 | 30,871 |
| 76,587 | 122 | 21,522 | 5,484 | 3,400 | 30,528 |
| 76,588 | 123 | 21,624 | 5,519 | 3,422 | 30,688 |
| 76,589 | 119 | 21,814 | 5,596 | 3,452 | 30,981 |
| 76,590 | 118 | 21,763 | 5,597 | 3,438 | 30,916 |
| 76,591 | 122 | 21,706 | 5,616 | 3,427 | 30,871 |
| 76,592 | 126 | 22,073 | 5,701 | 3,495 | 31,395 |
| 76,593 | 119 | 22,242 | 5,763 | 3,520 | 31,644 |
| 76,594 | 115 | 22,050 | 5,797 | 3,534 | 31,496 |
| 76,595 | 115 | 22,301 | 5,847 | 3,566 | 31,829 |
| 76,596 | 113 | 22,321 | 5,865 | 3,587 | 31,886 |
| 76,597 | 112 | 22,141 | 5,890 | 3,581 | 31,724 |
| 76,598 | 117 | 21,459 | 5,757 | 3,450 | 30,783 |
| 76,599 | 121 | 21,784 | 5,797 | 3,472 | 31,174 |

|        |     |        |       |       |        |
|--------|-----|--------|-------|-------|--------|
| 76,600 | 120 | 21,757 | 5,802 | 3,492 | 31,171 |
| 76,601 | 120 | 21,822 | 5,836 | 3,525 | 31,303 |
| 76,602 | 122 | 22,123 | 5,919 | 3,569 | 31,733 |
| 76,603 | 123 | 22,291 | 5,951 | 3,543 | 31,908 |
| 76,604 | 123 | 22,261 | 5,952 | 3,532 | 31,868 |
| 76,605 | 121 | 22,387 | 6,022 | 3,557 | 32,087 |
| 76,606 | 120 | 22,656 | 6,124 | 3,617 | 32,517 |
| 76,607 | 128 | 22,767 | 6,190 | 3,632 | 32,717 |
| 76,608 | 128 | 22,772 | 6,206 | 3,646 | 32,752 |
| 76,609 | 138 | 23,117 | 6,288 | 3,678 | 33,221 |
| 76,610 | 137 | 23,098 | 6,304 | 3,701 | 33,240 |
| 76,611 | 134 | 23,315 | 6,395 | 3,758 | 33,602 |
| 76,612 | 132 | 23,366 | 6,497 | 3,812 | 33,807 |
| 76,613 | 132 | 23,243 | 6,537 | 3,845 | 33,757 |
| 76,614 | 134 | 23,294 | 6,575 | 3,857 | 33,860 |
| 76,615 | 131 | 23,230 | 6,581 | 3,856 | 33,798 |
| 76,616 | 134 | 23,267 | 6,606 | 3,908 | 33,915 |
| 76,617 | 133 | 23,030 | 6,521 | 3,884 | 33,568 |
| 76,618 | 134 | 22,894 | 6,507 | 3,866 | 33,401 |
| 76,619 | 134 | 22,921 | 6,517 | 3,877 | 33,449 |
| 76,620 | 139 | 23,175 | 6,573 | 3,919 | 33,806 |
| 76,621 | 139 | 23,047 | 6,584 | 3,921 | 33,691 |
| 76,622 | 143 | 23,087 | 6,600 | 3,932 | 33,762 |
| 76,623 | 140 | 22,842 | 6,565 | 3,899 | 33,446 |
| 76,624 | 144 | 22,813 | 6,551 | 3,870 | 33,378 |
| 76,625 | 142 | 23,051 | 6,593 | 3,894 | 33,680 |
| 76,626 | 142 | 23,184 | 6,579 | 3,887 | 33,792 |
| 76,627 | 142 | 23,083 | 6,561 | 3,864 | 33,650 |
| 76,628 | 142 | 23,162 | 6,563 | 3,878 | 33,745 |
| 76,629 | 142 | 23,218 | 6,587 | 3,877 | 33,824 |
| 76,630 | 147 | 23,519 | 6,694 | 3,919 | 34,279 |
| 76,631 | 149 | 23,444 | 6,656 | 3,906 | 34,155 |

|        |     |        |       |       |        |
|--------|-----|--------|-------|-------|--------|
| 76,632 | 149 | 23,104 | 6,540 | 3,826 | 33,619 |
| 76,633 | 149 | 23,421 | 6,603 | 3,864 | 34,037 |
| 76,634 | 141 | 23,540 | 6,645 | 3,892 | 34,218 |
| 76,635 | 140 | 23,739 | 6,686 | 3,920 | 34,485 |
| 76,636 | 135 | 23,751 | 6,675 | 3,907 | 34,468 |
| 76,637 | 135 | 23,850 | 6,688 | 3,934 | 34,607 |
| 76,638 | 137 | 23,885 | 6,718 | 3,934 | 34,674 |
| 76,639 | 136 | 23,963 | 6,731 | 3,947 | 34,777 |
| 76,640 | 138 | 23,857 | 6,655 | 3,930 | 34,580 |
| 76,641 | 139 | 23,740 | 6,647 | 3,937 | 34,463 |
| 76,642 | 140 | 23,856 | 6,707 | 3,950 | 34,653 |
| 76,643 | 136 | 23,848 | 6,694 | 3,927 | 34,605 |
| 76,644 | 145 | 23,826 | 6,687 | 3,936 | 34,594 |
| 76,645 | 149 | 23,831 | 6,677 | 3,907 | 34,564 |
| 76,646 | 149 | 23,533 | 6,600 | 3,881 | 34,163 |
| 76,647 | 146 | 23,109 | 6,503 | 3,792 | 33,550 |
| 76,648 | 146 | 23,134 | 6,502 | 3,787 | 33,569 |
| 76,649 | 140 | 22,984 | 6,527 | 3,793 | 33,444 |
| 76,650 | 137 | 22,823 | 6,523 | 3,783 | 33,266 |
| 76,651 | 148 | 22,843 | 6,554 | 3,777 | 33,322 |
| 76,652 | 155 | 22,613 | 6,538 | 3,755 | 33,061 |
| 76,653 | 154 | 22,438 | 6,489 | 3,739 | 32,820 |
| 76,654 | 159 | 22,216 | 6,428 | 3,699 | 32,502 |
| 76,655 | 161 | 22,113 | 6,408 | 3,691 | 32,373 |
| 76,656 | 169 | 22,050 | 6,372 | 3,634 | 32,225 |
| 76,657 | 171 | 21,992 | 6,356 | 3,618 | 32,137 |
| 76,658 | 164 | 21,877 | 6,287 | 3,578 | 31,906 |
| 76,659 | 165 | 21,763 | 6,265 | 3,578 | 31,771 |
| 76,660 | 157 | 21,996 | 6,366 | 3,637 | 32,156 |
| 76,661 | 158 | 21,719 | 6,227 | 3,579 | 31,683 |
| 76,662 | 162 | 21,767 | 6,177 | 3,556 | 31,662 |
| 76,663 | 158 | 21,672 | 6,102 | 3,513 | 31,445 |

|        |     |        |       |       |        |
|--------|-----|--------|-------|-------|--------|
| 76,664 | 168 | 21,722 | 6,083 | 3,499 | 31,472 |
| 76,665 | 163 | 21,348 | 5,981 | 3,444 | 30,936 |
| 76,666 | 160 | 21,139 | 5,931 | 3,404 | 30,634 |
| 76,667 | 161 | 21,154 | 5,928 | 3,409 | 30,652 |
| 76,668 | 160 | 21,121 | 5,945 | 3,418 | 30,644 |
| 76,669 | 166 | 21,069 | 5,964 | 3,432 | 30,631 |
| 76,670 | 172 | 21,287 | 6,054 | 3,485 | 30,998 |
| 76,671 | 170 | 20,982 | 5,941 | 3,404 | 30,497 |
| 76,672 | 169 | 20,992 | 5,936 | 3,406 | 30,503 |
| 76,673 | 174 | 20,880 | 5,893 | 3,360 | 30,307 |
| 76,674 | 173 | 20,603 | 5,841 | 3,351 | 29,968 |
| 76,675 | 166 | 21,009 | 6,032 | 3,484 | 30,691 |
| 76,676 | 166 | 21,065 | 6,044 | 3,481 | 30,756 |
| 76,677 | 166 | 21,068 | 6,075 | 3,492 | 30,801 |
| 76,678 | 171 | 20,956 | 6,024 | 3,479 | 30,630 |
| 76,679 | 173 | 21,045 | 6,024 | 3,461 | 30,703 |
| 76,680 | 176 | 21,269 | 6,073 | 3,515 | 31,033 |
| 76,681 | 176 | 21,274 | 6,070 | 3,508 | 31,028 |
| 76,682 | 178 | 21,457 | 6,177 | 3,563 | 31,375 |
| 76,683 | 179 | 21,355 | 6,143 | 3,561 | 31,238 |
| 76,684 | 181 | 21,341 | 6,141 | 3,553 | 31,216 |
| 76,685 | 186 | 21,555 | 6,206 | 3,579 | 31,526 |
| 76,686 | 188 | 21,292 | 6,182 | 3,548 | 31,210 |
| 76,687 | 188 | 21,253 | 6,194 | 3,553 | 31,188 |
| 76,688 | 189 | 21,411 | 6,228 | 3,570 | 31,398 |
| 76,689 | 193 | 21,105 | 6,121 | 3,515 | 30,934 |
| 76,690 | 193 | 21,072 | 6,131 | 3,504 | 30,900 |
| 76,691 | 190 | 20,877 | 6,098 | 3,489 | 30,654 |
| 76,692 | 187 | 20,926 | 6,097 | 3,489 | 30,699 |
| 76,693 | 179 | 21,197 | 6,030 | 3,542 | 30,948 |
| 76,694 | 180 | 21,347 | 6,077 | 3,571 | 31,175 |
| 76,695 | 172 | 21,471 | 6,117 | 3,593 | 31,353 |

|        |     |        |       |       |        |
|--------|-----|--------|-------|-------|--------|
| 76,696 | 174 | 21,444 | 6,132 | 3,583 | 31,333 |
| 76,697 | 173 | 21,275 | 6,115 | 3,549 | 31,112 |
| 76,698 | 176 | 21,694 | 6,184 | 3,630 | 31,684 |
| 76,699 | 177 | 21,798 | 6,147 | 3,642 | 31,764 |
| 76,700 | 177 | 21,864 | 6,125 | 3,639 | 31,805 |
| 76,701 | 174 | 21,951 | 6,117 | 3,628 | 31,870 |
| 76,702 | 165 | 21,808 | 6,063 | 3,602 | 31,638 |
| 76,703 | 154 | 21,420 | 5,962 | 3,533 | 31,069 |
| 76,704 | 153 | 21,445 | 5,968 | 3,536 | 31,102 |
| 76,705 | 146 | 21,297 | 5,898 | 3,505 | 30,846 |
| 76,706 | 149 | 21,533 | 5,931 | 3,536 | 31,149 |
| 76,707 | 139 | 21,309 | 5,901 | 3,523 | 30,872 |
| 76,708 | 137 | 20,998 | 5,839 | 3,503 | 30,477 |
| 76,709 | 134 | 21,165 | 5,866 | 3,520 | 30,685 |
| 76,710 | 132 | 21,251 | 5,884 | 3,513 | 30,780 |
| 76,711 | 132 | 21,192 | 5,808 | 3,488 | 30,620 |
| 76,712 | 127 | 21,166 | 5,795 | 3,460 | 30,548 |
| 76,713 | 125 | 21,017 | 5,706 | 3,443 | 30,291 |
| 76,714 | 122 | 21,068 | 5,701 | 3,437 | 30,328 |
| 76,715 | 123 | 21,110 | 5,698 | 3,436 | 30,367 |
| 76,716 | 123 | 20,834 | 5,646 | 3,391 | 29,994 |
| 76,717 | 121 | 21,243 | 5,760 | 3,464 | 30,588 |
| 76,718 | 121 | 21,201 | 5,740 | 3,446 | 30,508 |
| 76,719 | 113 | 21,015 | 5,697 | 3,425 | 30,250 |
| 76,720 | 113 | 20,864 | 5,652 | 3,409 | 30,038 |
| 76,721 | 110 | 20,773 | 5,624 | 3,385 | 29,892 |
| 76,722 | 111 | 20,492 | 5,549 | 3,346 | 29,498 |
| 76,723 | 104 | 20,480 | 5,490 | 3,337 | 29,411 |
| 76,724 | 105 | 20,543 | 5,486 | 3,332 | 29,466 |
| 76,725 | 105 | 20,509 | 5,459 | 3,306 | 29,379 |
| 76,726 | 107 | 20,343 | 5,399 | 3,287 | 29,136 |
| 76,727 | 106 | 20,209 | 5,354 | 3,266 | 28,935 |

|        |     |        |       |       |        |
|--------|-----|--------|-------|-------|--------|
| 76,728 | 94  | 20,026 | 5,307 | 3,238 | 28,665 |
| 76,729 | 101 | 20,230 | 5,400 | 3,274 | 29,005 |
| 76,730 | 96  | 20,110 | 5,372 | 3,291 | 28,869 |
| 76,731 | 90  | 20,186 | 5,369 | 3,330 | 28,975 |
| 76,732 | 94  | 20,527 | 5,395 | 3,371 | 29,387 |
| 76,733 | 90  | 20,418 | 5,326 | 3,330 | 29,164 |
| 76,734 | 99  | 20,211 | 5,281 | 3,293 | 28,884 |
| 76,735 | 97  | 20,050 | 5,233 | 3,270 | 28,650 |
| 76,736 | 94  | 20,616 | 5,466 | 3,399 | 29,575 |
| 76,737 | 92  | 20,412 | 5,390 | 3,370 | 29,264 |
| 76,738 | 93  | 20,713 | 5,416 | 3,400 | 29,622 |
| 76,739 | 91  | 20,473 | 5,361 | 3,365 | 29,290 |
| 76,740 | 86  | 20,645 | 5,418 | 3,398 | 29,547 |
| 76,741 | 86  | 20,433 | 5,373 | 3,374 | 29,266 |
| 76,742 | 85  | 20,275 | 5,369 | 3,364 | 29,093 |
| 76,743 | 94  | 20,259 | 5,348 | 3,342 | 29,043 |
| 76,744 | 98  | 20,500 | 5,436 | 3,366 | 29,400 |
| 76,745 | 101 | 20,264 | 5,392 | 3,330 | 29,087 |
| 76,746 | 101 | 20,352 | 5,388 | 3,330 | 29,171 |
| 76,747 | 99  | 20,684 | 5,478 | 3,397 | 29,658 |
| 76,748 | 98  | 20,652 | 5,423 | 3,402 | 29,575 |
| 76,749 | 96  | 20,317 | 5,403 | 3,341 | 29,157 |
| 76,750 | 103 | 20,439 | 5,464 | 3,373 | 29,379 |
| 76,751 | 116 | 20,454 | 5,470 | 3,396 | 29,436 |
| 76,752 | 122 | 20,219 | 5,403 | 3,385 | 29,129 |
| 76,753 | 120 | 20,109 | 5,380 | 3,351 | 28,960 |
| 76,754 | 131 | 20,203 | 5,412 | 3,372 | 29,118 |
| 76,755 | 131 | 20,072 | 5,367 | 3,337 | 28,907 |
| 76,756 | 138 | 20,531 | 5,532 | 3,452 | 29,653 |
| 76,757 | 140 | 20,496 | 5,523 | 3,448 | 29,607 |
| 76,758 | 138 | 20,289 | 5,450 | 3,421 | 29,298 |
| 76,759 | 140 | 20,712 | 5,542 | 3,486 | 29,880 |

|        |     |        |       |       |        |
|--------|-----|--------|-------|-------|--------|
| 76,760 | 138 | 20,410 | 5,491 | 3,453 | 29,492 |
| 76,761 | 140 | 20,334 | 5,492 | 3,445 | 29,411 |
| 76,762 | 140 | 20,380 | 5,529 | 3,483 | 29,532 |
| 76,763 | 140 | 20,064 | 5,482 | 3,452 | 29,138 |
| 76,764 | 139 | 19,898 | 5,478 | 3,440 | 28,955 |
| 76,765 | 135 | 20,012 | 5,522 | 3,461 | 29,130 |
| 76,766 | 137 | 20,078 | 5,518 | 3,454 | 29,187 |
| 76,767 | 138 | 20,298 | 5,546 | 3,478 | 29,460 |
| 76,768 | 138 | 20,365 | 5,523 | 3,466 | 29,492 |
| 76,769 | 139 | 20,271 | 5,511 | 3,454 | 29,375 |
| 76,770 | 143 | 19,702 | 5,273 | 3,341 | 28,459 |
| 76,771 | 147 | 20,019 | 5,307 | 3,368 | 28,841 |
| 76,772 | 146 | 20,385 | 5,359 | 3,403 | 29,293 |
| 76,773 | 146 | 20,655 | 5,403 | 3,426 | 29,630 |
| 76,774 | 144 | 20,659 | 5,389 | 3,417 | 29,609 |
| 76,775 | 143 | 20,645 | 5,387 | 3,407 | 29,582 |
| 76,776 | 143 | 20,735 | 5,394 | 3,391 | 29,663 |
| 76,777 | 142 | 20,662 | 5,376 | 3,389 | 29,569 |
| 76,778 | 143 | 20,895 | 5,438 | 3,429 | 29,905 |
| 76,779 | 143 | 20,861 | 5,394 | 3,421 | 29,819 |
| 76,780 | 136 | 20,993 | 5,348 | 3,404 | 29,881 |
| 76,781 | 137 | 20,954 | 5,319 | 3,382 | 29,792 |
| 76,782 | 140 | 21,014 | 5,283 | 3,357 | 29,794 |
| 76,783 | 137 | 20,730 | 5,171 | 3,295 | 29,333 |
| 76,784 | 137 | 20,754 | 5,115 | 3,250 | 29,256 |
| 76,785 | 139 | 20,885 | 5,103 | 3,224 | 29,351 |
| 76,786 | 140 | 20,706 | 5,029 | 3,182 | 29,057 |
| 76,787 | 140 | 20,822 | 5,022 | 3,192 | 29,176 |
| 76,788 | 142 | 20,889 | 5,069 | 3,194 | 29,294 |
| 76,789 | 146 | 21,264 | 5,164 | 3,261 | 29,835 |
| 76,790 | 148 | 21,318 | 5,147 | 3,262 | 29,875 |
| 76,791 | 151 | 21,550 | 5,194 | 3,257 | 30,152 |



|        |     |        |       |       |        |
|--------|-----|--------|-------|-------|--------|
| 76,792 | 154 | 21,841 | 5,240 | 3,297 | 30,532 |
| 76,793 | 147 | 21,839 | 5,220 | 3,277 | 30,483 |
| 76,794 | 145 | 22,187 | 5,290 | 3,336 | 30,958 |
| 76,795 | 143 | 22,078 | 5,214 | 3,336 | 30,771 |
| 76,796 | 144 | 22,551 | 5,293 | 3,357 | 31,345 |
| 76,797 | 145 | 22,776 | 5,337 | 3,370 | 31,628 |
| 76,798 | 145 | 22,901 | 5,339 | 3,380 | 31,765 |
| 76,799 | 143 | 23,218 | 5,407 | 3,417 | 32,185 |
| 76,800 | 137 | 23,049 | 5,358 | 3,351 | 31,895 |
| 76,801 | 136 | 23,405 | 5,410 | 3,381 | 32,332 |
| 76,802 | 133 | 23,708 | 5,459 | 3,390 | 32,690 |
| 76,803 | 122 | 23,553 | 5,406 | 3,345 | 32,426 |
| 76,804 | 128 | 23,739 | 5,426 | 3,373 | 32,666 |
| 76,805 | 119 | 23,632 | 5,385 | 3,331 | 32,467 |
| 76,806 | 122 | 23,613 | 5,372 | 3,334 | 32,441 |
| 76,807 | 119 | 23,802 | 5,407 | 3,322 | 32,650 |
| 76,808 | 120 | 23,889 | 5,403 | 3,328 | 32,740 |
| 76,809 | 120 | 23,914 | 5,381 | 3,323 | 32,738 |
| 76,810 | 124 | 24,351 | 5,458 | 3,357 | 33,290 |
| 76,811 | 129 | 24,631 | 5,479 | 3,410 | 33,649 |
| 76,812 | 134 | 24,912 | 5,536 | 3,417 | 33,999 |
| 76,813 | 136 | 25,073 | 5,556 | 3,419 | 34,184 |
| 76,814 | 142 | 25,272 | 5,580 | 3,431 | 34,425 |
| 76,815 | 149 | 25,643 | 5,627 | 3,450 | 34,869 |
| 76,816 | 143 | 25,506 | 5,608 | 3,433 | 34,690 |
| 76,817 | 144 | 25,849 | 5,681 | 3,487 | 35,161 |
| 76,818 | 142 | 25,667 | 5,657 | 3,467 | 34,933 |
| 76,819 | 144 | 25,756 | 5,667 | 3,471 | 35,038 |
| 76,820 | 148 | 26,082 | 5,722 | 3,521 | 35,473 |
| 76,821 | 146 | 26,244 | 5,748 | 3,548 | 35,686 |
| 76,822 | 144 | 26,074 | 5,749 | 3,513 | 35,480 |
| 76,823 | 144 | 26,245 | 5,791 | 3,537 | 35,717 |

|        |     |        |       |       |        |
|--------|-----|--------|-------|-------|--------|
| 76,824 | 141 | 26,289 | 5,773 | 3,535 | 35,738 |
| 76,825 | 146 | 26,177 | 5,739 | 3,504 | 35,566 |
| 76,826 | 146 | 26,045 | 5,725 | 3,481 | 35,397 |
| 76,827 | 155 | 26,247 | 5,823 | 3,516 | 35,741 |
| 76,828 | 157 | 26,484 | 5,866 | 3,544 | 36,051 |
| 76,829 | 156 | 26,510 | 5,839 | 3,540 | 36,045 |
| 76,830 | 158 | 26,510 | 5,876 | 3,540 | 36,084 |
| 76,831 | 157 | 26,370 | 5,886 | 3,547 | 35,960 |
| 76,832 | 160 | 26,525 | 5,925 | 3,567 | 36,177 |
| 76,833 | 160 | 26,128 | 5,886 | 3,495 | 35,669 |
| 76,834 | 159 | 26,110 | 5,890 | 3,492 | 35,651 |
| 76,835 | 154 | 25,915 | 5,860 | 3,507 | 35,436 |
| 76,836 | 147 | 25,772 | 5,859 | 3,505 | 35,283 |
| 76,837 | 148 | 25,889 | 5,879 | 3,528 | 35,444 |
| 76,838 | 147 | 25,704 | 5,836 | 3,504 | 35,191 |
| 76,839 | 145 | 25,856 | 5,902 | 3,522 | 35,425 |
| 76,840 | 145 | 25,699 | 5,869 | 3,505 | 35,218 |
| 76,841 | 148 | 25,519 | 5,850 | 3,485 | 35,002 |
| 76,842 | 156 | 25,533 | 5,831 | 3,489 | 35,009 |
| 76,843 | 155 | 25,417 | 5,783 | 3,447 | 34,802 |
| 76,844 | 165 | 25,175 | 5,734 | 3,418 | 34,492 |
| 76,845 | 162 | 24,794 | 5,686 | 3,379 | 34,021 |
| 76,846 | 164 | 25,131 | 5,818 | 3,448 | 34,561 |
| 76,847 | 170 | 25,081 | 5,837 | 3,473 | 34,561 |
| 76,848 | 171 | 24,631 | 5,741 | 3,429 | 33,972 |
| 76,849 | 175 | 24,574 | 5,766 | 3,438 | 33,953 |
| 76,850 | 176 | 24,491 | 5,748 | 3,445 | 33,860 |
| 76,851 | 178 | 24,385 | 5,731 | 3,446 | 33,740 |
| 76,852 | 179 | 24,371 | 5,733 | 3,450 | 33,733 |
| 76,853 | 178 | 24,233 | 5,709 | 3,448 | 33,568 |
| 76,854 | 178 | 24,225 | 5,709 | 3,449 | 33,561 |
| 76,855 | 170 | 24,337 | 5,767 | 3,471 | 33,745 |

|        |     |        |       |       |        |
|--------|-----|--------|-------|-------|--------|
| 76,856 | 171 | 24,439 | 5,752 | 3,509 | 33,871 |
| 76,857 | 173 | 24,226 | 5,740 | 3,508 | 33,647 |
| 76,858 | 173 | 24,218 | 5,756 | 3,519 | 33,666 |
| 76,859 | 173 | 24,285 | 5,748 | 3,533 | 33,739 |
| 76,860 | 173 | 23,950 | 5,733 | 3,496 | 33,352 |
| 76,861 | 172 | 24,146 | 5,746 | 3,525 | 33,589 |
| 76,862 | 168 | 24,461 | 5,794 | 3,541 | 33,964 |
| 76,863 | 167 | 24,505 | 5,787 | 3,543 | 34,002 |
| 76,864 | 170 | 24,241 | 5,755 | 3,534 | 33,700 |
| 76,865 | 165 | 24,445 | 5,758 | 3,543 | 33,911 |
| 76,866 | 160 | 24,339 | 5,789 | 3,571 | 33,859 |
| 76,867 | 163 | 24,438 | 5,791 | 3,581 | 33,973 |
| 76,868 | 164 | 24,443 | 5,791 | 3,571 | 33,969 |
| 76,869 | 167 | 24,688 | 5,823 | 3,614 | 34,292 |
| 76,870 | 164 | 24,462 | 5,768 | 3,584 | 33,978 |
| 76,871 | 162 | 24,761 | 5,844 | 3,608 | 34,375 |
| 76,872 | 162 | 24,837 | 5,865 | 3,605 | 34,469 |
| 76,873 | 162 | 24,829 | 5,838 | 3,642 | 34,471 |
| 76,874 | 160 | 24,642 | 5,800 | 3,617 | 34,219 |
| 76,875 | 160 | 24,752 | 5,789 | 3,612 | 34,313 |
| 76,876 | 159 | 24,745 | 5,782 | 3,615 | 34,301 |
| 76,877 | 159 | 25,037 | 5,788 | 3,648 | 34,632 |
| 76,878 | 156 | 25,122 | 5,793 | 3,663 | 34,734 |
| 76,879 | 154 | 25,173 | 5,781 | 3,685 | 34,793 |
| 76,880 | 156 | 25,204 | 5,769 | 3,683 | 34,812 |
| 76,881 | 157 | 25,057 | 5,729 | 3,640 | 34,583 |
| 76,882 | 159 | 25,128 | 5,719 | 3,657 | 34,663 |
| 76,883 | 161 | 25,211 | 5,724 | 3,648 | 34,744 |
| 76,884 | 162 | 25,248 | 5,703 | 3,658 | 34,771 |
| 76,885 | 166 | 25,460 | 5,740 | 3,672 | 35,038 |
| 76,886 | 167 | 25,415 | 5,700 | 3,663 | 34,945 |
| 76,887 | 167 | 25,462 | 5,711 | 3,665 | 35,005 |

|        |     |        |       |       |        |
|--------|-----|--------|-------|-------|--------|
| 76,888 | 166 | 25,636 | 5,762 | 3,682 | 35,246 |
| 76,889 | 167 | 25,450 | 5,668 | 3,647 | 34,932 |
| 76,890 | 166 | 25,403 | 5,608 | 3,631 | 34,808 |
| 76,891 | 167 | 25,356 | 5,619 | 3,624 | 34,766 |
| 76,892 | 161 | 25,096 | 5,558 | 3,584 | 34,399 |
| 76,893 | 153 | 25,316 | 5,603 | 3,635 | 34,707 |
| 76,894 | 150 | 25,193 | 5,591 | 3,616 | 34,550 |
| 76,895 | 146 | 25,197 | 5,576 | 3,584 | 34,503 |
| 76,896 | 148 | 25,118 | 5,461 | 3,519 | 34,246 |
| 76,897 | 142 | 25,109 | 5,404 | 3,497 | 34,152 |
| 76,898 | 142 | 25,176 | 5,403 | 3,499 | 34,220 |
| 76,899 | 135 | 25,086 | 5,299 | 3,466 | 33,986 |
| 76,900 | 135 | 25,099 | 5,286 | 3,454 | 33,974 |
| 76,901 | 133 | 24,910 | 5,205 | 3,400 | 33,648 |
| 76,902 | 135 | 25,045 | 5,230 | 3,426 | 33,836 |
| 76,903 | 128 | 24,848 | 5,174 | 3,389 | 33,539 |
| 76,904 | 131 | 25,115 | 5,222 | 3,431 | 33,899 |
| 76,905 | 134 | 25,126 | 5,157 | 3,417 | 33,834 |
| 76,906 | 131 | 25,124 | 5,132 | 3,399 | 33,786 |
| 76,907 | 132 | 24,946 | 5,080 | 3,363 | 33,521 |
| 76,908 | 141 | 25,278 | 5,142 | 3,394 | 33,955 |
| 76,909 | 142 | 24,927 | 5,087 | 3,352 | 33,508 |
| 76,910 | 145 | 25,060 | 5,093 | 3,358 | 33,656 |
| 76,911 | 148 | 24,991 | 5,072 | 3,353 | 33,564 |
| 76,912 | 151 | 24,890 | 5,050 | 3,325 | 33,416 |
| 76,913 | 150 | 24,856 | 5,045 | 3,333 | 33,384 |
| 76,914 | 145 | 24,801 | 5,024 | 3,333 | 33,303 |
| 76,915 | 139 | 24,590 | 4,989 | 3,311 | 33,029 |
| 76,916 | 140 | 24,541 | 4,980 | 3,295 | 32,956 |
| 76,917 | 139 | 24,592 | 4,992 | 3,295 | 33,018 |
| 76,918 | 137 | 24,712 | 5,041 | 3,328 | 33,218 |
| 76,919 | 140 | 24,679 | 5,047 | 3,346 | 33,212 |

|        |     |        |       |       |        |
|--------|-----|--------|-------|-------|--------|
| 76,920 | 143 | 24,421 | 4,995 | 3,326 | 32,885 |
| 76,921 | 139 | 24,426 | 4,957 | 3,298 | 32,820 |
| 76,922 | 148 | 24,738 | 4,988 | 3,341 | 33,215 |
| 76,923 | 147 | 24,650 | 4,982 | 3,333 | 33,112 |
| 76,924 | 149 | 24,382 | 4,947 | 3,274 | 32,752 |
| 76,925 | 149 | 24,312 | 4,944 | 3,285 | 32,690 |
| 76,926 | 147 | 24,509 | 5,013 | 3,341 | 33,010 |
| 76,927 | 148 | 23,268 | 4,778 | 3,176 | 31,370 |
| 76,928 | 147 | 23,466 | 4,812 | 3,208 | 31,633 |
| 76,929 | 150 | 23,780 | 4,856 | 3,263 | 32,049 |
| 76,930 | 150 | 23,779 | 4,859 | 3,268 | 32,056 |
| 76,931 | 153 | 24,333 | 4,949 | 3,323 | 32,758 |
| 76,932 | 154 | 24,182 | 4,930 | 3,312 | 32,578 |
| 76,933 | 154 | 24,166 | 4,934 | 3,298 | 32,552 |
| 76,934 | 156 | 23,892 | 4,892 | 3,270 | 32,210 |
| 76,935 | 155 | 23,706 | 4,880 | 3,267 | 32,008 |
| 76,936 | 160 | 24,725 | 5,096 | 3,416 | 33,397 |
| 76,937 | 160 | 24,524 | 5,026 | 3,397 | 33,107 |
| 76,938 | 166 | 24,859 | 5,063 | 3,423 | 33,511 |
| 76,939 | 163 | 24,649 | 5,008 | 3,393 | 33,213 |
| 76,940 | 161 | 24,598 | 5,012 | 3,397 | 33,168 |
| 76,941 | 161 | 24,575 | 5,030 | 3,399 | 33,165 |
| 76,942 | 165 | 24,944 | 5,079 | 3,436 | 33,624 |
| 76,943 | 165 | 24,622 | 5,030 | 3,389 | 33,206 |
| 76,944 | 163 | 24,549 | 5,041 | 3,395 | 33,148 |
| 76,945 | 170 | 24,961 | 5,091 | 3,469 | 33,691 |
| 76,946 | 165 | 24,813 | 5,088 | 3,483 | 33,549 |
| 76,947 | 165 | 24,766 | 5,124 | 3,498 | 33,553 |
| 76,948 | 164 | 24,819 | 5,156 | 3,509 | 33,648 |
| 76,949 | 163 | 24,568 | 5,116 | 3,473 | 33,320 |
| 76,950 | 163 | 24,900 | 5,219 | 3,513 | 33,795 |
| 76,951 | 161 | 24,897 | 5,249 | 3,499 | 33,806 |

|        |     |        |       |       |        |
|--------|-----|--------|-------|-------|--------|
| 76,952 | 158 | 24,726 | 5,217 | 3,476 | 33,577 |
| 76,953 | 158 | 24,690 | 5,187 | 3,457 | 33,492 |
| 76,954 | 160 | 24,840 | 5,233 | 3,480 | 33,713 |
| 76,955 | 156 | 24,593 | 5,179 | 3,425 | 33,353 |
| 76,956 | 153 | 24,250 | 5,157 | 3,403 | 32,963 |
| 76,957 | 153 | 24,557 | 5,211 | 3,449 | 33,370 |
| 76,958 | 149 | 24,461 | 5,203 | 3,424 | 33,237 |
| 76,959 | 138 | 24,464 | 5,190 | 3,406 | 33,198 |
| 76,960 | 147 | 24,732 | 5,259 | 3,431 | 33,569 |
| 76,961 | 142 | 24,789 | 5,257 | 3,404 | 33,592 |
| 76,962 | 141 | 24,768 | 5,254 | 3,400 | 33,563 |
| 76,963 | 145 | 24,734 | 5,258 | 3,402 | 33,539 |
| 76,964 | 145 | 24,463 | 5,210 | 3,373 | 33,191 |
| 76,965 | 155 | 24,776 | 5,302 | 3,385 | 33,618 |
| 76,966 | 154 | 24,502 | 5,250 | 3,364 | 33,270 |
| 76,967 | 152 | 24,506 | 5,210 | 3,342 | 33,210 |
| 76,968 | 152 | 24,154 | 5,077 | 3,269 | 32,652 |
| 76,969 | 156 | 24,196 | 5,128 | 3,298 | 32,778 |
| 76,970 | 152 | 24,078 | 5,145 | 3,295 | 32,670 |
| 76,971 | 148 | 23,873 | 5,128 | 3,260 | 32,409 |
| 76,972 | 148 | 23,873 | 5,123 | 3,281 | 32,425 |
| 76,973 | 141 | 23,738 | 5,117 | 3,267 | 32,263 |
| 76,974 | 141 | 23,670 | 5,115 | 3,245 | 32,171 |
| 76,975 | 140 | 23,846 | 5,117 | 3,259 | 32,362 |
| 76,976 | 141 | 23,801 | 5,090 | 3,215 | 32,247 |
| 76,977 | 147 | 24,020 | 5,115 | 3,232 | 32,514 |
| 76,978 | 143 | 23,776 | 5,058 | 3,204 | 32,181 |
| 76,979 | 145 | 23,542 | 5,042 | 3,191 | 31,920 |
| 76,980 | 140 | 23,424 | 5,041 | 3,157 | 31,762 |
| 76,981 | 129 | 23,435 | 4,997 | 3,125 | 31,686 |
| 76,982 | 130 | 23,613 | 5,036 | 3,146 | 31,925 |
| 76,983 | 135 | 23,779 | 5,032 | 3,172 | 32,118 |

|        |     |        |       |       |        |
|--------|-----|--------|-------|-------|--------|
| 76,984 | 135 | 23,689 | 5,036 | 3,167 | 32,027 |
| 76,985 | 139 | 23,892 | 5,088 | 3,206 | 32,325 |
| 76,986 | 144 | 23,991 | 5,093 | 3,210 | 32,438 |
| 76,987 | 151 | 24,172 | 5,131 | 3,223 | 32,677 |
| 76,988 | 165 | 24,288 | 5,171 | 3,233 | 32,857 |
| 76,989 | 162 | 24,398 | 5,183 | 3,250 | 32,993 |
| 76,990 | 168 | 24,273 | 5,164 | 3,226 | 32,831 |
| 76,991 | 170 | 24,233 | 5,180 | 3,231 | 32,814 |
| 76,992 | 163 | 24,256 | 5,141 | 3,226 | 32,786 |
| 76,993 | 166 | 24,374 | 5,188 | 3,259 | 32,987 |
| 76,994 | 172 | 24,378 | 5,186 | 3,260 | 32,996 |
| 76,995 | 170 | 24,397 | 5,209 | 3,229 | 33,005 |
| 76,996 | 172 | 24,266 | 5,229 | 3,230 | 32,897 |
| 76,997 | 192 | 24,151 | 5,185 | 3,201 | 32,729 |
| 76,998 | 189 | 23,890 | 5,118 | 3,168 | 32,365 |
| 76,999 | 192 | 23,872 | 5,138 | 3,198 | 32,400 |
| 77,000 | 193 | 23,690 | 5,099 | 3,163 | 32,145 |
| 77,001 | 194 | 23,556 | 5,072 | 3,168 | 31,990 |
| 77,002 | 199 | 23,539 | 5,046 | 3,163 | 31,947 |
| 77,003 | 199 | 23,437 | 5,040 | 3,164 | 31,840 |
| 77,004 | 196 | 23,451 | 5,086 | 3,172 | 31,905 |
| 77,005 | 198 | 23,479 | 5,092 | 3,200 | 31,969 |
| 77,006 | 205 | 23,710 | 5,160 | 3,227 | 32,302 |
| 77,007 | 213 | 23,473 | 5,135 | 3,198 | 32,019 |
| 77,008 | 213 | 23,279 | 5,119 | 3,196 | 31,807 |
| 77,009 | 215 | 23,311 | 5,156 | 3,211 | 31,893 |
| 77,010 | 215 | 23,083 | 5,118 | 3,191 | 31,607 |
| 77,011 | 208 | 23,586 | 5,242 | 3,265 | 32,301 |
| 77,012 | 208 | 23,105 | 5,210 | 3,231 | 31,754 |
| 77,013 | 211 | 23,229 | 5,244 | 3,258 | 31,942 |
| 77,014 | 199 | 22,673 | 5,103 | 3,186 | 31,161 |
| 77,015 | 200 | 22,785 | 5,121 | 3,212 | 31,318 |

|        |     |        |       |       |        |
|--------|-----|--------|-------|-------|--------|
| 77,016 | 194 | 22,937 | 5,140 | 3,225 | 31,496 |
| 77,017 | 194 | 22,748 | 5,094 | 3,205 | 31,241 |
| 77,018 | 195 | 22,690 | 5,093 | 3,185 | 31,163 |
| 77,019 | 192 | 22,665 | 5,086 | 3,200 | 31,143 |
| 77,020 | 192 | 22,688 | 5,075 | 3,187 | 31,142 |
| 77,021 | 193 | 23,004 | 5,137 | 3,207 | 31,541 |
| 77,022 | 202 | 23,015 | 5,160 | 3,216 | 31,593 |
| 77,023 | 205 | 22,859 | 5,144 | 3,178 | 31,386 |
| 77,024 | 205 | 22,759 | 5,093 | 3,189 | 31,246 |
| 77,025 | 206 | 22,689 | 5,103 | 3,176 | 31,174 |
| 77,026 | 208 | 22,338 | 5,047 | 3,159 | 30,752 |
| 77,027 | 208 | 22,485 | 5,108 | 3,182 | 30,983 |
| 77,028 | 201 | 22,128 | 5,028 | 3,129 | 30,486 |
| 77,029 | 201 | 21,941 | 5,013 | 3,108 | 30,263 |
| 77,030 | 198 | 21,838 | 4,971 | 3,086 | 30,093 |
| 77,031 | 194 | 21,500 | 4,947 | 3,059 | 29,700 |
| 77,032 | 197 | 21,571 | 5,000 | 3,073 | 29,841 |
| 77,033 | 197 | 21,322 | 4,978 | 3,061 | 29,558 |
| 77,034 | 193 | 21,322 | 4,996 | 3,071 | 29,582 |
| 77,035 | 176 | 20,646 | 4,823 | 2,946 | 28,591 |
| 77,036 | 179 | 20,880 | 4,858 | 2,967 | 28,884 |
| 77,037 | 175 | 21,099 | 4,912 | 2,996 | 29,182 |
| 77,038 | 175 | 21,022 | 4,935 | 2,994 | 29,126 |
| 77,039 | 173 | 21,316 | 5,026 | 3,052 | 29,567 |
| 77,040 | 174 | 21,224 | 5,037 | 3,065 | 29,500 |
| 77,041 | 167 | 20,913 | 4,987 | 3,052 | 29,119 |
| 77,042 | 171 | 21,643 | 5,228 | 3,188 | 30,230 |
| 77,043 | 173 | 21,711 | 5,276 | 3,220 | 30,380 |
| 77,044 | 165 | 21,737 | 5,273 | 3,224 | 30,399 |
| 77,045 | 164 | 21,942 | 5,316 | 3,275 | 30,697 |
| 77,046 | 165 | 21,946 | 5,321 | 3,286 | 30,718 |
| 77,047 | 162 | 21,887 | 5,289 | 3,256 | 30,594 |



|        |     |        |       |       |        |
|--------|-----|--------|-------|-------|--------|
| 77,048 | 143 | 21,769 | 5,302 | 3,252 | 30,466 |
| 77,049 | 142 | 21,705 | 5,285 | 3,238 | 30,370 |
| 77,050 | 141 | 21,546 | 5,247 | 3,192 | 30,126 |
| 77,051 | 141 | 21,290 | 5,206 | 3,175 | 29,812 |
| 77,052 | 140 | 21,081 | 5,155 | 3,146 | 29,522 |
| 77,053 | 142 | 21,647 | 5,295 | 3,222 | 30,306 |
| 77,054 | 147 | 21,799 | 5,317 | 3,259 | 30,522 |
| 77,055 | 151 | 21,653 | 5,292 | 3,229 | 30,325 |
| 77,056 | 158 | 21,847 | 5,362 | 3,254 | 30,621 |
| 77,057 | 155 | 21,512 | 5,293 | 3,216 | 30,176 |
| 77,058 | 142 | 21,159 | 5,215 | 3,169 | 29,685 |
| 77,059 | 151 | 21,225 | 5,239 | 3,206 | 29,821 |
| 77,060 | 153 | 21,104 | 5,204 | 3,203 | 29,664 |
| 77,061 | 154 | 21,131 | 5,199 | 3,202 | 29,686 |
| 77,062 | 153 | 20,903 | 5,178 | 3,174 | 29,408 |
| 77,063 | 150 | 21,178 | 5,237 | 3,206 | 29,771 |
| 77,064 | 148 | 21,028 | 5,223 | 3,212 | 29,611 |
| 77,065 | 151 | 20,927 | 5,218 | 3,214 | 29,510 |
| 77,066 | 154 | 20,873 | 5,241 | 3,228 | 29,496 |
| 77,067 | 154 | 20,630 | 5,208 | 3,209 | 29,201 |
| 77,068 | 165 | 21,148 | 5,344 | 3,308 | 29,965 |
| 77,069 | 162 | 20,814 | 5,273 | 3,303 | 29,552 |
| 77,070 | 159 | 20,957 | 5,287 | 3,314 | 29,717 |
| 77,071 | 154 | 20,916 | 5,292 | 3,305 | 29,667 |
| 77,072 | 154 | 21,122 | 5,339 | 3,354 | 29,969 |
| 77,073 | 153 | 21,336 | 5,359 | 3,388 | 30,236 |
| 77,074 | 150 | 21,274 | 5,321 | 3,394 | 30,139 |
| 77,075 | 145 | 21,042 | 5,289 | 3,368 | 29,844 |
| 77,076 | 145 | 21,043 | 5,288 | 3,373 | 29,849 |
| 77,077 | 138 | 21,040 | 5,296 | 3,386 | 29,860 |
| 77,078 | 145 | 21,224 | 5,337 | 3,430 | 30,136 |
| 77,079 | 145 | 21,183 | 5,358 | 3,427 | 30,113 |

|        |     |        |       |       |        |
|--------|-----|--------|-------|-------|--------|
| 77,080 | 155 | 20,956 | 5,311 | 3,409 | 29,831 |
| 77,081 | 158 | 21,098 | 5,344 | 3,442 | 30,042 |
| 77,082 | 159 | 21,015 | 5,337 | 3,442 | 29,953 |
| 77,083 | 156 | 20,803 | 5,283 | 3,426 | 29,668 |
| 77,084 | 158 | 21,246 | 5,387 | 3,467 | 30,258 |
| 77,085 | 160 | 21,037 | 5,330 | 3,413 | 29,940 |
| 77,086 | 159 | 20,778 | 5,281 | 3,399 | 29,617 |
| 77,087 | 166 | 21,335 | 5,447 | 3,478 | 30,426 |
| 77,088 | 161 | 21,046 | 5,402 | 3,461 | 30,070 |
| 77,089 | 161 | 21,478 | 5,497 | 3,514 | 30,650 |
| 77,090 | 151 | 21,014 | 5,417 | 3,448 | 30,030 |
| 77,091 | 151 | 21,239 | 5,450 | 3,483 | 30,323 |
| 77,092 | 146 | 21,426 | 5,506 | 3,536 | 30,614 |
| 77,093 | 154 | 21,117 | 5,445 | 3,490 | 30,206 |
| 77,094 | 153 | 20,882 | 5,392 | 3,435 | 29,862 |
| 77,095 | 163 | 21,164 | 5,498 | 3,499 | 30,324 |
| 77,096 | 164 | 21,131 | 5,504 | 3,477 | 30,276 |
| 77,097 | 162 | 21,172 | 5,489 | 3,497 | 30,320 |
| 77,098 | 167 | 21,468 | 5,559 | 3,536 | 30,730 |
| 77,099 | 165 | 21,363 | 5,541 | 3,530 | 30,599 |
| 77,100 | 167 | 21,605 | 5,602 | 3,572 | 30,946 |
| 77,101 | 166 | 21,448 | 5,596 | 3,575 | 30,785 |
| 77,102 | 163 | 21,464 | 5,629 | 3,580 | 30,836 |
| 77,103 | 164 | 21,458 | 5,659 | 3,579 | 30,860 |
| 77,104 | 167 | 21,927 | 5,737 | 3,625 | 31,456 |
| 77,105 | 166 | 22,128 | 5,809 | 3,649 | 31,752 |
| 77,106 | 162 | 22,177 | 5,836 | 3,666 | 31,841 |
| 77,107 | 153 | 22,244 | 5,814 | 3,690 | 31,901 |
| 77,108 | 146 | 21,937 | 5,708 | 3,615 | 31,406 |
| 77,109 | 146 | 22,241 | 5,764 | 3,651 | 31,802 |
| 77,110 | 142 | 22,174 | 5,773 | 3,652 | 31,741 |
| 77,111 | 145 | 22,241 | 5,796 | 3,647 | 31,829 |

|        |     |        |       |       |        |
|--------|-----|--------|-------|-------|--------|
| 77,112 | 153 | 22,447 | 5,824 | 3,700 | 32,124 |
| 77,113 | 155 | 22,551 | 5,830 | 3,705 | 32,241 |
| 77,114 | 156 | 22,702 | 5,860 | 3,697 | 32,415 |
| 77,115 | 155 | 22,553 | 5,860 | 3,682 | 32,250 |
| 77,116 | 159 | 22,878 | 6,002 | 3,770 | 32,809 |
| 77,117 | 154 | 23,009 | 6,004 | 3,759 | 32,926 |
| 77,118 | 151 | 22,858 | 5,984 | 3,730 | 32,723 |
| 77,119 | 152 | 23,100 | 6,012 | 3,764 | 33,028 |
| 77,120 | 154 | 23,239 | 6,002 | 3,745 | 33,140 |
| 77,121 | 186 | 23,272 | 6,105 | 3,796 | 33,359 |
| 77,122 | 195 | 23,255 | 6,119 | 3,799 | 33,368 |
| 77,123 | 199 | 23,474 | 6,213 | 3,820 | 33,706 |
| 77,124 | 200 | 23,359 | 6,240 | 3,803 | 33,602 |
| 77,125 | 205 | 23,497 | 6,303 | 3,829 | 33,834 |
| 77,126 | 210 | 23,668 | 6,307 | 3,820 | 34,005 |
| 77,127 | 212 | 23,674 | 6,341 | 3,812 | 34,039 |
| 77,128 | 212 | 23,642 | 6,354 | 3,806 | 34,014 |
| 77,129 | 205 | 23,659 | 6,379 | 3,790 | 34,033 |
| 77,130 | 206 | 23,842 | 6,417 | 3,814 | 34,279 |
| 77,131 | 194 | 23,845 | 6,448 | 3,835 | 34,322 |
| 77,132 | 194 | 23,658 | 6,422 | 3,803 | 34,077 |
| 77,133 | 191 | 23,470 | 6,397 | 3,778 | 33,836 |
| 77,134 | 187 | 23,679 | 6,471 | 3,834 | 34,171 |
| 77,135 | 186 | 23,671 | 6,509 | 3,873 | 34,239 |
| 77,136 | 181 | 23,514 | 6,503 | 3,876 | 34,074 |
| 77,137 | 176 | 23,364 | 6,479 | 3,868 | 33,887 |
| 77,138 | 174 | 23,188 | 6,475 | 3,870 | 33,707 |
| 77,139 | 177 | 23,086 | 6,500 | 3,862 | 33,625 |
| 77,140 | 179 | 22,911 | 6,473 | 3,838 | 33,401 |
| 77,141 | 178 | 22,778 | 6,407 | 3,803 | 33,166 |
| 77,142 | 179 | 22,607 | 6,415 | 3,789 | 32,990 |
| 77,143 | 183 | 22,426 | 6,413 | 3,770 | 32,792 |

|        |     |        |       |       |        |
|--------|-----|--------|-------|-------|--------|
| 77,144 | 175 | 22,254 | 6,367 | 3,738 | 32,534 |
| 77,145 | 178 | 21,986 | 6,356 | 3,743 | 32,263 |
| 77,146 | 174 | 21,774 | 6,322 | 3,708 | 31,978 |
| 77,147 | 173 | 21,599 | 6,321 | 3,685 | 31,778 |
| 77,148 | 173 | 21,402 | 6,298 | 3,643 | 31,516 |
| 77,149 | 172 | 21,230 | 6,315 | 3,641 | 31,358 |
| 77,150 | 183 | 21,442 | 6,365 | 3,671 | 31,661 |
| 77,151 | 178 | 21,273 | 6,319 | 3,658 | 31,428 |
| 77,152 | 179 | 21,274 | 6,353 | 3,674 | 31,480 |
| 77,153 | 176 | 21,228 | 6,338 | 3,683 | 31,425 |
| 77,154 | 173 | 21,247 | 6,385 | 3,709 | 31,514 |
| 77,155 | 178 | 21,090 | 6,343 | 3,697 | 31,308 |
| 77,156 | 177 | 20,974 | 6,356 | 3,708 | 31,215 |
| 77,157 | 177 | 20,752 | 6,278 | 3,667 | 30,874 |
| 77,158 | 175 | 20,538 | 6,242 | 3,646 | 30,601 |
| 77,159 | 176 | 20,430 | 6,249 | 3,639 | 30,494 |
| 77,160 | 176 | 20,341 | 6,243 | 3,631 | 30,391 |
| 77,161 | 172 | 20,018 | 6,180 | 3,570 | 29,940 |
| 77,162 | 165 | 20,166 | 6,256 | 3,609 | 30,196 |
| 77,163 | 164 | 20,158 | 6,283 | 3,619 | 30,224 |
| 77,164 | 167 | 20,165 | 6,317 | 3,632 | 30,281 |
| 77,165 | 168 | 20,263 | 6,355 | 3,642 | 30,428 |
| 77,166 | 166 | 20,327 | 6,357 | 3,651 | 30,501 |
| 77,167 | 164 | 20,489 | 6,388 | 3,669 | 30,710 |
| 77,168 | 162 | 20,596 | 6,402 | 3,714 | 30,874 |
| 77,169 | 162 | 20,429 | 6,401 | 3,665 | 30,657 |
| 77,170 | 163 | 20,667 | 6,523 | 3,715 | 31,068 |
| 77,171 | 147 | 20,996 | 6,502 | 3,705 | 31,350 |
| 77,172 | 134 | 21,131 | 6,488 | 3,711 | 31,464 |
| 77,173 | 125 | 21,112 | 6,467 | 3,705 | 31,409 |
| 77,174 | 124 | 20,940 | 6,398 | 3,718 | 31,180 |
| 77,175 | 122 | 21,202 | 6,447 | 3,761 | 31,532 |

|        |     |        |       |       |        |
|--------|-----|--------|-------|-------|--------|
| 77,176 | 119 | 21,194 | 6,430 | 3,764 | 31,507 |
| 77,177 | 118 | 21,100 | 6,466 | 3,810 | 31,494 |
| 77,178 | 123 | 21,035 | 6,444 | 3,825 | 31,427 |
| 77,179 | 122 | 20,860 | 6,368 | 3,787 | 31,137 |
| 77,180 | 130 | 20,915 | 6,402 | 3,821 | 31,268 |
| 77,181 | 129 | 20,907 | 6,414 | 3,831 | 31,281 |
| 77,182 | 133 | 20,707 | 6,349 | 3,776 | 30,965 |
| 77,183 | 130 | 20,652 | 6,328 | 3,758 | 30,868 |
| 77,184 | 141 | 20,893 | 6,356 | 3,780 | 31,170 |
| 77,185 | 141 | 21,024 | 6,387 | 3,799 | 31,351 |
| 77,186 | 142 | 20,819 | 6,338 | 3,754 | 31,053 |
| 77,187 | 142 | 20,704 | 6,333 | 3,753 | 30,932 |
| 77,188 | 143 | 20,801 | 6,384 | 3,781 | 31,109 |
| 77,189 | 142 | 20,791 | 6,379 | 3,754 | 31,066 |
| 77,190 | 138 | 20,778 | 6,357 | 3,731 | 31,004 |
| 77,191 | 138 | 20,759 | 6,316 | 3,712 | 30,925 |
| 77,192 | 137 | 20,747 | 6,296 | 3,696 | 30,876 |
| 77,193 | 137 | 20,408 | 6,079 | 3,586 | 30,210 |
| 77,194 | 139 | 20,584 | 6,095 | 3,588 | 30,406 |
| 77,195 | 142 | 20,806 | 6,137 | 3,612 | 30,697 |
| 77,196 | 139 | 20,653 | 6,053 | 3,585 | 30,430 |
| 77,197 | 136 | 20,600 | 5,975 | 3,573 | 30,284 |
| 77,198 | 136 | 20,564 | 5,969 | 3,581 | 30,250 |
| 77,199 | 133 | 20,816 | 5,988 | 3,616 | 30,553 |
| 77,200 | 133 | 20,833 | 5,971 | 3,609 | 30,546 |
| 77,201 | 124 | 20,444 | 5,839 | 3,518 | 29,925 |
| 77,202 | 128 | 20,401 | 5,795 | 3,499 | 29,823 |
| 77,203 | 129 | 20,444 | 5,790 | 3,504 | 29,867 |
| 77,204 | 132 | 20,401 | 5,762 | 3,499 | 29,794 |
| 77,205 | 131 | 20,085 | 5,663 | 3,456 | 29,335 |
| 77,206 | 131 | 20,078 | 5,639 | 3,439 | 29,287 |
| 77,207 | 129 | 19,839 | 5,620 | 3,437 | 29,025 |

|        |     |        |       |       |        |
|--------|-----|--------|-------|-------|--------|
| 77,208 | 129 | 19,840 | 5,624 | 3,433 | 29,026 |
| 77,209 | 128 | 19,742 | 5,610 | 3,423 | 28,903 |
| 77,210 | 128 | 19,697 | 5,574 | 3,396 | 28,795 |
| 77,211 | 128 | 19,855 | 5,588 | 3,408 | 28,979 |
| 77,212 | 128 | 19,335 | 5,366 | 3,314 | 28,143 |
| 77,213 | 133 | 19,575 | 5,407 | 3,339 | 28,454 |
| 77,214 | 131 | 19,686 | 5,424 | 3,348 | 28,589 |
| 77,215 | 128 | 19,464 | 5,296 | 3,297 | 28,185 |
| 77,216 | 125 | 19,331 | 5,240 | 3,275 | 27,971 |
| 77,217 | 128 | 19,517 | 5,288 | 3,305 | 28,238 |
| 77,218 | 125 | 18,843 | 5,076 | 3,189 | 27,233 |
| 77,219 | 125 | 18,819 | 5,098 | 3,194 | 27,236 |
| 77,220 | 120 | 18,483 | 5,011 | 3,153 | 26,767 |
| 77,221 | 123 | 18,606 | 5,049 | 3,175 | 26,953 |
| 77,222 | 120 | 18,401 | 5,064 | 3,173 | 26,758 |
| 77,223 | 117 | 17,521 | 4,844 | 3,002 | 25,484 |
| 77,224 | 119 | 17,791 | 4,909 | 3,028 | 25,847 |
| 77,225 | 118 | 18,092 | 5,024 | 3,075 | 26,309 |
| 77,226 | 115 | 18,067 | 5,047 | 3,068 | 26,297 |
| 77,227 | 114 | 17,872 | 5,011 | 3,033 | 26,030 |
| 77,228 | 104 | 17,646 | 4,909 | 2,957 | 25,616 |
| 77,229 | 97  | 16,825 | 4,689 | 2,831 | 24,442 |
| 77,230 | 98  | 16,989 | 4,746 | 2,843 | 24,676 |
| 77,231 | 96  | 17,222 | 4,804 | 2,877 | 24,999 |
| 77,232 | 96  | 17,277 | 4,794 | 2,881 | 25,048 |
| 77,233 | 98  | 17,200 | 4,742 | 2,871 | 24,911 |
| 77,234 | 98  | 17,311 | 4,785 | 2,887 | 25,081 |
| 77,235 | 94  | 17,560 | 4,841 | 2,905 | 25,400 |
| 77,236 | 97  | 17,551 | 4,823 | 2,882 | 25,353 |
| 77,237 | 105 | 17,779 | 4,853 | 2,915 | 25,652 |
| 77,238 | 107 | 17,971 | 4,859 | 2,907 | 25,844 |
| 77,239 | 107 | 17,899 | 4,833 | 2,882 | 25,721 |

|        |     |        |       |       |        |
|--------|-----|--------|-------|-------|--------|
| 77,240 | 109 | 17,853 | 4,844 | 2,889 | 25,695 |
| 77,241 | 109 | 17,699 | 4,804 | 2,894 | 25,506 |
| 77,242 | 116 | 17,775 | 4,874 | 2,915 | 25,680 |
| 77,243 | 118 | 17,851 | 4,925 | 2,950 | 25,844 |
| 77,244 | 116 | 17,677 | 4,887 | 2,944 | 25,624 |
| 77,245 | 114 | 17,482 | 4,856 | 2,921 | 25,373 |
| 77,246 | 107 | 17,500 | 4,872 | 2,951 | 25,430 |
| 77,247 | 111 | 17,355 | 4,885 | 2,955 | 25,306 |
| 77,248 | 110 | 17,202 | 4,875 | 2,931 | 25,118 |
| 77,249 | 111 | 17,338 | 4,893 | 2,945 | 25,287 |
| 77,250 | 109 | 17,351 | 4,938 | 2,937 | 25,335 |
| 77,251 | 102 | 16,983 | 4,856 | 2,900 | 24,841 |
| 77,252 | 104 | 17,307 | 4,928 | 2,936 | 25,275 |
| 77,253 | 102 | 17,710 | 5,003 | 2,977 | 25,792 |
| 77,254 | 99  | 17,697 | 4,988 | 2,960 | 25,744 |
| 77,255 | 102 | 17,991 | 5,051 | 2,994 | 26,138 |
| 77,256 | 100 | 17,887 | 5,009 | 2,947 | 25,943 |
| 77,257 | 99  | 18,190 | 5,091 | 2,996 | 26,376 |
| 77,258 | 97  | 18,380 | 5,151 | 3,036 | 26,664 |
| 77,259 | 96  | 18,360 | 5,140 | 3,029 | 26,625 |
| 77,260 | 97  | 18,498 | 5,157 | 3,039 | 26,791 |
| 77,261 | 97  | 18,538 | 5,176 | 3,036 | 26,847 |
| 77,262 | 99  | 18,590 | 5,194 | 3,059 | 26,942 |
| 77,263 | 97  | 18,395 | 5,162 | 3,044 | 26,698 |
| 77,264 | 93  | 18,823 | 5,240 | 3,104 | 27,260 |
| 77,265 | 90  | 18,579 | 5,204 | 3,059 | 26,932 |
| 77,266 | 90  | 18,556 | 5,227 | 3,069 | 26,942 |
| 77,267 | 94  | 18,764 | 5,314 | 3,104 | 27,276 |
| 77,268 | 90  | 18,583 | 5,293 | 3,078 | 27,044 |
| 77,269 | 95  | 18,707 | 5,366 | 3,087 | 27,255 |
| 77,270 | 100 | 18,630 | 5,324 | 3,073 | 27,127 |
| 77,271 | 100 | 18,475 | 5,279 | 3,046 | 26,900 |

|        |     |        |       |       |        |
|--------|-----|--------|-------|-------|--------|
| 77,272 | 101 | 18,579 | 5,322 | 3,056 | 27,058 |
| 77,273 | 101 | 18,647 | 5,337 | 3,065 | 27,150 |
| 77,274 | 108 | 18,351 | 5,252 | 3,024 | 26,735 |
| 77,275 | 108 | 18,487 | 5,316 | 3,040 | 26,951 |
| 77,276 | 112 | 18,636 | 5,391 | 3,086 | 27,225 |
| 77,277 | 114 | 18,522 | 5,380 | 3,092 | 27,108 |
| 77,278 | 116 | 18,444 | 5,333 | 3,063 | 26,956 |
| 77,279 | 115 | 18,451 | 5,349 | 3,060 | 26,975 |
| 77,280 | 119 | 18,745 | 5,408 | 3,090 | 27,362 |
| 77,281 | 120 | 18,883 | 5,422 | 3,108 | 27,533 |
| 77,282 | 121 | 18,824 | 5,413 | 3,090 | 27,448 |
| 77,283 | 120 | 18,964 | 5,440 | 3,100 | 27,624 |
| 77,284 | 125 | 19,187 | 5,525 | 3,147 | 27,984 |
| 77,285 | 125 | 19,269 | 5,547 | 3,146 | 28,087 |
| 77,286 | 121 | 19,485 | 5,563 | 3,189 | 28,358 |
| 77,287 | 117 | 19,531 | 5,571 | 3,217 | 28,436 |
| 77,288 | 111 | 19,567 | 5,611 | 3,218 | 28,507 |
| 77,289 | 107 | 19,477 | 5,587 | 3,223 | 28,394 |
| 77,290 | 104 | 19,632 | 5,579 | 3,240 | 28,555 |
| 77,291 | 105 | 19,800 | 5,606 | 3,237 | 28,748 |
| 77,292 | 105 | 19,707 | 5,594 | 3,230 | 28,636 |
| 77,293 | 97  | 20,033 | 5,663 | 3,279 | 29,072 |
| 77,294 | 98  | 20,053 | 5,649 | 3,262 | 29,062 |
| 77,295 | 99  | 19,796 | 5,501 | 3,146 | 28,542 |
| 77,296 | 99  | 20,103 | 5,546 | 3,178 | 28,926 |
| 77,297 | 98  | 20,373 | 5,599 | 3,206 | 29,276 |
| 77,298 | 106 | 20,510 | 5,607 | 3,211 | 29,434 |
| 77,299 | 106 | 20,566 | 5,610 | 3,227 | 29,509 |
| 77,300 | 115 | 20,860 | 5,701 | 3,265 | 29,941 |
| 77,301 | 115 | 20,621 | 5,637 | 3,247 | 29,620 |
| 77,302 | 115 | 20,438 | 5,604 | 3,208 | 29,365 |
| 77,303 | 117 | 21,009 | 5,753 | 3,286 | 30,165 |



|        |     |        |       |       |        |
|--------|-----|--------|-------|-------|--------|
| 77,304 | 121 | 20,895 | 5,741 | 3,292 | 30,049 |
| 77,305 | 128 | 20,644 | 5,687 | 3,259 | 29,718 |
| 77,306 | 128 | 20,467 | 5,644 | 3,227 | 29,466 |
| 77,307 | 129 | 20,881 | 5,707 | 3,307 | 30,024 |
| 77,308 | 133 | 20,673 | 5,644 | 3,261 | 29,711 |
| 77,309 | 134 | 20,503 | 5,582 | 3,216 | 29,435 |
| 77,310 | 140 | 20,961 | 5,695 | 3,290 | 30,086 |
| 77,311 | 138 | 20,731 | 5,625 | 3,254 | 29,748 |
| 77,312 | 144 | 20,587 | 5,631 | 3,272 | 29,634 |
| 77,313 | 142 | 20,553 | 5,663 | 3,260 | 29,618 |
| 77,314 | 149 | 20,699 | 5,734 | 3,284 | 29,866 |
| 77,315 | 152 | 20,707 | 5,761 | 3,295 | 29,915 |
| 77,316 | 159 | 20,545 | 5,710 | 3,280 | 29,694 |
| 77,317 | 158 | 20,449 | 5,665 | 3,249 | 29,521 |
| 77,318 | 163 | 20,505 | 5,653 | 3,236 | 29,557 |
| 77,319 | 162 | 20,446 | 5,571 | 3,199 | 29,378 |
| 77,320 | 160 | 21,014 | 5,676 | 3,263 | 30,113 |
| 77,321 | 160 | 21,070 | 5,671 | 3,273 | 30,174 |
| 77,322 | 156 | 20,586 | 5,488 | 3,174 | 29,404 |
| 77,323 | 157 | 20,910 | 5,563 | 3,224 | 29,854 |
| 77,324 | 155 | 21,239 | 5,636 | 3,280 | 30,310 |
| 77,325 | 154 | 21,250 | 5,631 | 3,309 | 30,344 |
| 77,326 | 148 | 21,338 | 5,596 | 3,298 | 30,380 |
| 77,327 | 149 | 21,711 | 5,670 | 3,347 | 30,877 |
| 77,328 | 148 | 21,757 | 5,659 | 3,330 | 30,894 |
| 77,329 | 147 | 21,518 | 5,612 | 3,312 | 30,589 |
| 77,330 | 149 | 21,844 | 5,687 | 3,372 | 31,052 |
| 77,331 | 144 | 21,644 | 5,641 | 3,351 | 30,780 |
| 77,332 | 142 | 21,573 | 5,643 | 3,358 | 30,716 |
| 77,333 | 146 | 21,711 | 5,660 | 3,389 | 30,906 |
| 77,334 | 147 | 21,716 | 5,633 | 3,372 | 30,868 |
| 77,335 | 141 | 21,443 | 5,568 | 3,356 | 30,508 |

|        |     |        |       |       |        |
|--------|-----|--------|-------|-------|--------|
| 77,336 | 141 | 21,502 | 5,579 | 3,361 | 30,583 |
| 77,337 | 140 | 21,448 | 5,614 | 3,385 | 30,587 |
| 77,338 | 144 | 21,700 | 5,638 | 3,399 | 30,881 |
| 77,339 | 145 | 21,534 | 5,562 | 3,375 | 30,616 |
| 77,340 | 149 | 21,305 | 5,551 | 3,355 | 30,360 |
| 77,341 | 149 | 21,202 | 5,551 | 3,367 | 30,269 |
| 77,342 | 149 | 21,313 | 5,547 | 3,374 | 30,383 |
| 77,343 | 152 | 21,320 | 5,554 | 3,384 | 30,410 |
| 77,344 | 152 | 21,552 | 5,621 | 3,435 | 30,760 |
| 77,345 | 150 | 21,349 | 5,567 | 3,412 | 30,478 |
| 77,346 | 147 | 21,369 | 5,576 | 3,423 | 30,515 |
| 77,347 | 147 | 21,321 | 5,606 | 3,421 | 30,495 |
| 77,348 | 145 | 21,381 | 5,629 | 3,430 | 30,585 |
| 77,349 | 138 | 21,686 | 5,688 | 3,493 | 31,005 |
| 77,350 | 132 | 21,747 | 5,674 | 3,499 | 31,052 |
| 77,351 | 130 | 21,789 | 5,675 | 3,507 | 31,101 |
| 77,352 | 130 | 21,779 | 5,660 | 3,509 | 31,078 |
| 77,353 | 128 | 21,579 | 5,587 | 3,472 | 30,766 |
| 77,354 | 128 | 21,690 | 5,631 | 3,500 | 30,949 |
| 77,355 | 123 | 21,511 | 5,584 | 3,477 | 30,695 |
| 77,356 | 114 | 21,585 | 5,610 | 3,485 | 30,794 |
| 77,357 | 112 | 21,514 | 5,634 | 3,478 | 30,738 |
| 77,358 | 107 | 21,307 | 5,559 | 3,425 | 30,398 |
| 77,359 | 107 | 21,396 | 5,586 | 3,467 | 30,556 |
| 77,360 | 103 | 21,547 | 5,652 | 3,489 | 30,791 |
| 77,361 | 102 | 21,603 | 5,704 | 3,505 | 30,914 |
| 77,362 | 98  | 21,574 | 5,640 | 3,480 | 30,792 |
| 77,363 | 101 | 21,794 | 5,660 | 3,507 | 31,062 |
| 77,364 | 97  | 21,867 | 5,673 | 3,503 | 31,140 |
| 77,365 | 92  | 22,018 | 5,664 | 3,522 | 31,296 |
| 77,366 | 92  | 21,997 | 5,655 | 3,523 | 31,267 |
| 77,367 | 87  | 22,147 | 5,706 | 3,569 | 31,509 |

|        |     |        |       |       |        |
|--------|-----|--------|-------|-------|--------|
| 77,368 | 86  | 21,903 | 5,650 | 3,537 | 31,176 |
| 77,369 | 79  | 22,117 | 5,744 | 3,579 | 31,519 |
| 77,370 | 78  | 22,043 | 5,763 | 3,597 | 31,481 |
| 77,371 | 75  | 22,026 | 5,819 | 3,585 | 31,505 |
| 77,372 | 90  | 21,815 | 5,776 | 3,582 | 31,263 |
| 77,373 | 89  | 21,658 | 5,753 | 3,559 | 31,059 |
| 77,374 | 86  | 22,072 | 5,887 | 3,647 | 31,692 |
| 77,375 | 90  | 22,043 | 5,885 | 3,616 | 31,634 |
| 77,376 | 93  | 22,291 | 5,937 | 3,649 | 31,970 |
| 77,377 | 97  | 22,623 | 5,969 | 3,693 | 32,382 |
| 77,378 | 95  | 22,488 | 5,912 | 3,673 | 32,168 |
| 77,379 | 94  | 22,520 | 5,917 | 3,679 | 32,210 |
| 77,380 | 98  | 22,615 | 5,906 | 3,682 | 32,301 |
| 77,381 | 95  | 22,958 | 5,973 | 3,744 | 32,770 |
| 77,382 | 96  | 22,670 | 5,891 | 3,685 | 32,342 |
| 77,383 | 95  | 22,935 | 5,958 | 3,711 | 32,699 |
| 77,384 | 93  | 22,954 | 5,969 | 3,721 | 32,737 |
| 77,385 | 91  | 22,772 | 5,947 | 3,685 | 32,495 |
| 77,386 | 94  | 22,676 | 5,912 | 3,685 | 32,367 |
| 77,387 | 96  | 22,769 | 5,958 | 3,694 | 32,517 |
| 77,388 | 98  | 22,749 | 5,994 | 3,703 | 32,544 |
| 77,389 | 96  | 22,591 | 6,015 | 3,718 | 32,420 |
| 77,390 | 93  | 22,563 | 5,985 | 3,689 | 32,330 |
| 77,391 | 94  | 22,561 | 5,954 | 3,685 | 32,294 |
| 77,392 | 96  | 22,696 | 5,996 | 3,703 | 32,491 |
| 77,393 | 100 | 22,755 | 6,040 | 3,706 | 32,601 |
| 77,394 | 100 | 22,926 | 6,089 | 3,721 | 32,836 |
| 77,395 | 102 | 23,045 | 6,059 | 3,741 | 32,947 |
| 77,396 | 104 | 22,749 | 5,982 | 3,697 | 32,532 |
| 77,397 | 101 | 22,592 | 5,935 | 3,664 | 32,292 |
| 77,398 | 101 | 22,706 | 5,940 | 3,692 | 32,439 |
| 77,399 | 100 | 22,672 | 5,928 | 3,680 | 32,380 |

|        |     |        |       |       |        |
|--------|-----|--------|-------|-------|--------|
| 77,400 | 103 | 22,344 | 5,863 | 3,625 | 31,935 |
| 77,401 | 102 | 21,967 | 5,809 | 3,579 | 31,457 |
| 77,402 | 103 | 22,845 | 6,090 | 3,745 | 32,783 |
| 77,403 | 105 | 22,531 | 5,986 | 3,696 | 32,318 |
| 77,404 | 107 | 22,537 | 5,961 | 3,688 | 32,293 |
| 77,405 | 105 | 22,376 | 5,911 | 3,657 | 32,049 |
| 77,406 | 111 | 22,739 | 6,058 | 3,689 | 32,597 |
| 77,407 | 110 | 22,724 | 6,052 | 3,669 | 32,555 |
| 77,408 | 109 | 22,521 | 5,977 | 3,639 | 32,246 |
| 77,409 | 112 | 21,989 | 5,843 | 3,542 | 31,486 |
| 77,410 | 115 | 22,263 | 5,862 | 3,565 | 31,805 |
| 77,411 | 115 | 22,502 | 5,887 | 3,602 | 32,106 |
| 77,412 | 116 | 22,694 | 5,954 | 3,639 | 32,403 |
| 77,413 | 114 | 22,602 | 5,973 | 3,636 | 32,325 |
| 77,414 | 111 | 22,445 | 5,950 | 3,601 | 32,107 |
| 77,415 | 113 | 22,583 | 5,974 | 3,625 | 32,295 |
| 77,416 | 118 | 22,651 | 6,021 | 3,649 | 32,439 |
| 77,417 | 119 | 22,817 | 6,032 | 3,650 | 32,618 |
| 77,418 | 119 | 22,389 | 5,942 | 3,606 | 32,056 |
| 77,419 | 122 | 22,474 | 5,947 | 3,632 | 32,175 |
| 77,420 | 122 | 22,490 | 5,946 | 3,630 | 32,188 |
| 77,421 | 121 | 22,463 | 5,914 | 3,623 | 32,121 |
| 77,422 | 104 | 22,357 | 5,833 | 3,598 | 31,892 |
| 77,423 | 110 | 22,247 | 5,816 | 3,596 | 31,769 |
| 77,424 | 116 | 21,949 | 5,733 | 3,545 | 31,343 |
| 77,425 | 118 | 22,086 | 5,735 | 3,562 | 31,501 |
| 77,426 | 126 | 22,125 | 5,697 | 3,560 | 31,508 |
| 77,427 | 124 | 22,073 | 5,662 | 3,544 | 31,403 |
| 77,428 | 130 | 22,004 | 5,695 | 3,540 | 31,369 |
| 77,429 | 129 | 21,742 | 5,672 | 3,516 | 31,059 |
| 77,430 | 131 | 22,069 | 5,746 | 3,564 | 31,510 |
| 77,431 | 129 | 21,607 | 5,645 | 3,501 | 30,882 |

|        |     |        |       |       |        |
|--------|-----|--------|-------|-------|--------|
| 77,432 | 129 | 21,747 | 5,672 | 3,537 | 31,085 |
| 77,433 | 131 | 22,023 | 5,697 | 3,570 | 31,421 |
| 77,434 | 130 | 22,115 | 5,675 | 3,583 | 31,503 |
| 77,435 | 130 | 22,159 | 5,663 | 3,597 | 31,549 |
| 77,436 | 132 | 22,256 | 5,668 | 3,614 | 31,670 |
| 77,437 | 128 | 22,423 | 5,703 | 3,630 | 31,884 |
| 77,438 | 129 | 22,226 | 5,595 | 3,556 | 31,506 |
| 77,439 | 129 | 22,531 | 5,609 | 3,585 | 31,854 |
| 77,440 | 130 | 22,555 | 5,612 | 3,599 | 31,896 |
| 77,441 | 131 | 22,600 | 5,624 | 3,620 | 31,975 |
| 77,442 | 133 | 22,610 | 5,608 | 3,604 | 31,955 |
| 77,443 | 131 | 22,655 | 5,593 | 3,596 | 31,975 |
| 77,444 | 130 | 23,069 | 5,656 | 3,642 | 32,497 |
| 77,445 | 131 | 23,091 | 5,651 | 3,629 | 32,502 |
| 77,446 | 127 | 22,913 | 5,644 | 3,574 | 32,258 |
| 77,447 | 134 | 22,829 | 5,605 | 3,554 | 32,122 |
| 77,448 | 134 | 22,876 | 5,606 | 3,552 | 32,168 |
| 77,449 | 140 | 22,958 | 5,674 | 3,595 | 32,367 |
| 77,450 | 144 | 23,025 | 5,685 | 3,595 | 32,449 |
| 77,451 | 144 | 23,102 | 5,649 | 3,575 | 32,470 |
| 77,452 | 143 | 23,216 | 5,629 | 3,563 | 32,551 |
| 77,453 | 148 | 23,264 | 5,641 | 3,545 | 32,598 |
| 77,454 | 147 | 23,333 | 5,643 | 3,540 | 32,663 |
| 77,455 | 144 | 23,394 | 5,691 | 3,558 | 32,787 |
| 77,456 | 144 | 23,439 | 5,678 | 3,562 | 32,823 |
| 77,457 | 144 | 23,235 | 5,654 | 3,556 | 32,589 |
| 77,458 | 145 | 23,278 | 5,664 | 3,560 | 32,647 |
| 77,459 | 146 | 23,256 | 5,662 | 3,552 | 32,616 |
| 77,460 | 145 | 23,659 | 5,720 | 3,632 | 33,156 |
| 77,461 | 143 | 23,849 | 5,789 | 3,645 | 33,426 |
| 77,462 | 143 | 23,844 | 5,766 | 3,595 | 33,348 |
| 77,463 | 145 | 23,897 | 5,750 | 3,550 | 33,342 |

|        |     |        |       |       |        |
|--------|-----|--------|-------|-------|--------|
| 77,464 | 145 | 23,868 | 5,763 | 3,562 | 33,338 |
| 77,465 | 147 | 24,102 | 5,827 | 3,635 | 33,711 |
| 77,466 | 148 | 23,999 | 5,825 | 3,643 | 33,615 |
| 77,467 | 143 | 24,085 | 5,834 | 3,643 | 33,705 |
| 77,468 | 141 | 23,771 | 5,756 | 3,600 | 33,268 |
| 77,469 | 145 | 23,951 | 5,791 | 3,594 | 33,481 |
| 77,470 | 143 | 23,886 | 5,760 | 3,567 | 33,356 |
| 77,471 | 149 | 24,121 | 5,827 | 3,608 | 33,705 |
| 77,472 | 154 | 23,988 | 5,813 | 3,570 | 33,525 |
| 77,473 | 156 | 24,008 | 5,815 | 3,583 | 33,562 |
| 77,474 | 148 | 23,891 | 5,785 | 3,579 | 33,403 |
| 77,475 | 144 | 23,800 | 5,764 | 3,557 | 33,265 |
| 77,476 | 149 | 23,980 | 5,860 | 3,603 | 33,592 |
| 77,477 | 142 | 23,974 | 5,851 | 3,595 | 33,562 |
| 77,478 | 129 | 23,511 | 5,741 | 3,516 | 32,897 |
| 77,479 | 132 | 23,779 | 5,832 | 3,551 | 33,294 |
| 77,480 | 136 | 23,764 | 5,803 | 3,538 | 33,241 |
| 77,481 | 141 | 23,429 | 5,723 | 3,490 | 32,783 |
| 77,482 | 146 | 23,413 | 5,713 | 3,491 | 32,763 |
| 77,483 | 146 | 23,684 | 5,781 | 3,531 | 33,142 |
| 77,484 | 141 | 23,236 | 5,707 | 3,472 | 32,556 |
| 77,485 | 142 | 23,203 | 5,722 | 3,463 | 32,530 |
| 77,486 | 142 | 23,151 | 5,720 | 3,479 | 32,492 |
| 77,487 | 143 | 23,536 | 5,815 | 3,515 | 33,009 |
| 77,488 | 147 | 23,658 | 5,830 | 3,520 | 33,155 |
| 77,489 | 145 | 23,535 | 5,788 | 3,504 | 32,972 |
| 77,490 | 144 | 23,387 | 5,763 | 3,493 | 32,787 |
| 77,491 | 139 | 23,498 | 5,791 | 3,543 | 32,971 |
| 77,492 | 141 | 23,783 | 5,860 | 3,580 | 33,364 |
| 77,493 | 136 | 23,591 | 5,807 | 3,564 | 33,098 |
| 77,494 | 137 | 23,665 | 5,858 | 3,572 | 33,232 |
| 77,495 | 136 | 23,628 | 5,823 | 3,582 | 33,169 |

|        |     |        |       |       |        |
|--------|-----|--------|-------|-------|--------|
| 77,496 | 127 | 22,871 | 5,677 | 3,514 | 32,189 |
| 77,497 | 129 | 23,111 | 5,724 | 3,539 | 32,503 |
| 77,498 | 129 | 23,141 | 5,732 | 3,546 | 32,548 |
| 77,499 | 123 | 23,202 | 5,710 | 3,543 | 32,578 |
| 77,500 | 123 | 23,478 | 5,752 | 3,569 | 32,922 |
| 77,501 | 120 | 23,408 | 5,766 | 3,577 | 32,871 |
| 77,502 | 115 | 22,644 | 5,611 | 3,496 | 31,866 |
| 77,503 | 118 | 22,857 | 5,642 | 3,538 | 32,155 |
| 77,504 | 116 | 23,253 | 5,700 | 3,589 | 32,658 |
| 77,505 | 117 | 23,414 | 5,737 | 3,623 | 32,891 |
| 77,506 | 114 | 23,413 | 5,749 | 3,635 | 32,911 |
| 77,507 | 117 | 23,210 | 5,715 | 3,602 | 32,644 |
| 77,508 | 117 | 23,023 | 5,672 | 3,587 | 32,399 |
| 77,509 | 117 | 23,386 | 5,761 | 3,660 | 32,924 |
| 77,510 | 117 | 23,229 | 5,731 | 3,634 | 32,711 |
| 77,511 | 115 | 22,987 | 5,678 | 3,592 | 32,372 |
| 77,512 | 118 | 22,935 | 5,697 | 3,604 | 32,354 |
| 77,513 | 118 | 22,592 | 5,652 | 3,579 | 31,941 |
| 77,514 | 121 | 22,683 | 5,612 | 3,586 | 32,002 |
| 77,515 | 121 | 22,633 | 5,597 | 3,569 | 31,920 |
| 77,516 | 121 | 22,646 | 5,575 | 3,544 | 31,886 |
| 77,517 | 129 | 22,787 | 5,588 | 3,528 | 32,032 |
| 77,518 | 128 | 22,803 | 5,606 | 3,579 | 32,116 |
| 77,519 | 124 | 22,206 | 5,468 | 3,522 | 31,320 |
| 77,520 | 126 | 22,453 | 5,515 | 3,543 | 31,637 |
| 77,521 | 124 | 22,631 | 5,535 | 3,571 | 31,861 |
| 77,522 | 117 | 22,362 | 5,467 | 3,530 | 31,476 |
| 77,523 | 120 | 22,529 | 5,465 | 3,537 | 31,651 |
| 77,524 | 121 | 22,655 | 5,493 | 3,545 | 31,814 |
| 77,525 | 124 | 22,763 | 5,508 | 3,552 | 31,947 |
| 77,526 | 124 | 22,686 | 5,505 | 3,557 | 31,872 |
| 77,527 | 117 | 22,854 | 5,518 | 3,582 | 32,071 |

|        |     |        |       |       |        |
|--------|-----|--------|-------|-------|--------|
| 77,528 | 111 | 22,698 | 5,526 | 3,569 | 31,904 |
| 77,529 | 108 | 22,362 | 5,458 | 3,508 | 31,436 |
| 77,530 | 111 | 22,684 | 5,491 | 3,540 | 31,826 |
| 77,531 | 111 | 22,822 | 5,552 | 3,582 | 32,067 |
| 77,532 | 106 | 22,707 | 5,514 | 3,567 | 31,894 |
| 77,533 | 101 | 22,477 | 5,469 | 3,521 | 31,568 |
| 77,534 | 105 | 22,245 | 5,421 | 3,476 | 31,247 |
| 77,535 | 105 | 22,042 | 5,377 | 3,435 | 30,959 |
| 77,536 | 111 | 22,726 | 5,505 | 3,524 | 31,866 |
| 77,537 | 113 | 22,979 | 5,578 | 3,574 | 32,244 |
| 77,538 | 110 | 22,966 | 5,576 | 3,575 | 32,227 |
| 77,539 | 105 | 22,589 | 5,506 | 3,547 | 31,747 |
| 77,540 | 103 | 22,865 | 5,591 | 3,562 | 32,121 |
| 77,541 | 104 | 22,903 | 5,628 | 3,574 | 32,209 |
| 77,542 | 104 | 22,897 | 5,616 | 3,571 | 32,188 |
| 77,543 | 103 | 23,253 | 5,669 | 3,603 | 32,628 |
| 77,544 | 107 | 23,298 | 5,656 | 3,594 | 32,655 |
| 77,545 | 104 | 23,301 | 5,609 | 3,575 | 32,589 |
| 77,546 | 108 | 23,365 | 5,622 | 3,569 | 32,664 |
| 77,547 | 111 | 23,648 | 5,669 | 3,600 | 33,028 |
| 77,548 | 112 | 23,465 | 5,619 | 3,566 | 32,762 |
| 77,549 | 113 | 23,368 | 5,623 | 3,552 | 32,656 |
| 77,550 | 119 | 23,553 | 5,669 | 3,578 | 32,919 |
| 77,551 | 119 | 23,261 | 5,621 | 3,552 | 32,553 |
| 77,552 | 121 | 23,224 | 5,602 | 3,540 | 32,487 |
| 77,553 | 120 | 22,921 | 5,577 | 3,519 | 32,137 |
| 77,554 | 119 | 23,342 | 5,718 | 3,601 | 32,780 |
| 77,555 | 122 | 23,165 | 5,670 | 3,569 | 32,526 |
| 77,556 | 130 | 23,451 | 5,718 | 3,609 | 32,908 |
| 77,557 | 139 | 23,395 | 5,679 | 3,601 | 32,814 |
| 77,558 | 144 | 23,321 | 5,583 | 3,572 | 32,620 |
| 77,559 | 145 | 23,429 | 5,600 | 3,590 | 32,764 |



|        |     |        |       |       |        |
|--------|-----|--------|-------|-------|--------|
| 77,560 | 142 | 23,500 | 5,620 | 3,574 | 32,836 |
| 77,561 | 145 | 23,600 | 5,638 | 3,588 | 32,971 |
| 77,562 | 145 | 23,595 | 5,639 | 3,592 | 32,971 |
| 77,563 | 140 | 23,824 | 5,703 | 3,614 | 33,281 |
| 77,564 | 140 | 23,786 | 5,704 | 3,628 | 33,258 |
| 77,565 | 148 | 23,751 | 5,717 | 3,634 | 33,250 |
| 77,566 | 148 | 23,810 | 5,765 | 3,670 | 33,393 |
| 77,567 | 143 | 23,935 | 5,830 | 3,717 | 33,625 |
| 77,568 | 141 | 23,787 | 5,797 | 3,671 | 33,396 |
| 77,569 | 147 | 24,071 | 5,857 | 3,678 | 33,753 |
| 77,570 | 145 | 23,888 | 5,820 | 3,644 | 33,497 |
| 77,571 | 148 | 23,913 | 5,822 | 3,640 | 33,523 |
| 77,572 | 148 | 23,851 | 5,839 | 3,639 | 33,477 |
| 77,573 | 142 | 23,710 | 5,837 | 3,648 | 33,337 |
| 77,574 | 145 | 23,770 | 5,883 | 3,695 | 33,493 |
| 77,575 | 143 | 23,674 | 5,932 | 3,699 | 33,448 |
| 77,576 | 141 | 23,655 | 5,990 | 3,696 | 33,482 |
| 77,577 | 141 | 23,640 | 5,984 | 3,687 | 33,452 |
| 77,578 | 142 | 23,639 | 5,985 | 3,689 | 33,455 |
| 77,579 | 142 | 23,999 | 6,071 | 3,721 | 33,933 |
| 77,580 | 140 | 23,969 | 6,072 | 3,730 | 33,911 |
| 77,581 | 144 | 24,012 | 6,106 | 3,738 | 34,000 |
| 77,582 | 140 | 23,753 | 6,037 | 3,688 | 33,618 |
| 77,583 | 145 | 23,866 | 6,093 | 3,706 | 33,810 |
| 77,584 | 153 | 24,138 | 6,192 | 3,740 | 34,223 |
| 77,585 | 152 | 24,112 | 6,147 | 3,749 | 34,160 |
| 77,586 | 156 | 24,267 | 6,233 | 3,782 | 34,438 |
| 77,587 | 155 | 24,222 | 6,269 | 3,798 | 34,444 |
| 77,588 | 153 | 24,168 | 6,255 | 3,787 | 34,363 |
| 77,589 | 154 | 24,170 | 6,271 | 3,797 | 34,392 |
| 77,590 | 162 | 24,063 | 6,250 | 3,766 | 34,241 |
| 77,591 | 162 | 23,775 | 6,214 | 3,757 | 33,908 |

|        |     |        |       |       |        |
|--------|-----|--------|-------|-------|--------|
| 77,592 | 165 | 23,554 | 6,165 | 3,727 | 33,611 |
| 77,593 | 166 | 23,694 | 6,185 | 3,717 | 33,762 |
| 77,594 | 172 | 23,575 | 6,195 | 3,713 | 33,655 |
| 77,595 | 170 | 23,449 | 6,197 | 3,710 | 33,526 |
| 77,596 | 164 | 23,310 | 6,231 | 3,716 | 33,421 |
| 77,597 | 165 | 23,227 | 6,218 | 3,693 | 33,303 |
| 77,598 | 164 | 23,101 | 6,211 | 3,680 | 33,156 |
| 77,599 | 165 | 23,062 | 6,202 | 3,685 | 33,114 |
| 77,600 | 165 | 23,077 | 6,217 | 3,686 | 33,145 |
| 77,601 | 164 | 23,094 | 6,200 | 3,683 | 33,141 |
| 77,602 | 160 | 23,229 | 6,214 | 3,679 | 33,282 |
| 77,603 | 160 | 23,371 | 6,202 | 3,699 | 33,432 |
| 77,604 | 166 | 23,743 | 6,273 | 3,734 | 33,916 |
| 77,605 | 171 | 23,488 | 6,238 | 3,703 | 33,600 |
| 77,606 | 166 | 23,287 | 6,201 | 3,677 | 33,331 |
| 77,607 | 162 | 23,307 | 6,234 | 3,677 | 33,380 |
| 77,608 | 153 | 22,902 | 6,190 | 3,639 | 32,884 |
| 77,609 | 145 | 23,147 | 6,342 | 3,710 | 33,344 |
| 77,610 | 145 | 22,911 | 6,306 | 3,664 | 33,026 |
| 77,611 | 147 | 22,976 | 6,362 | 3,691 | 33,176 |
| 77,612 | 148 | 22,980 | 6,384 | 3,709 | 33,221 |
| 77,613 | 151 | 22,900 | 6,346 | 3,706 | 33,103 |
| 77,614 | 152 | 22,768 | 6,315 | 3,701 | 32,936 |
| 77,615 | 142 | 22,669 | 6,281 | 3,684 | 32,776 |
| 77,616 | 143 | 22,178 | 6,151 | 3,593 | 32,065 |
| 77,617 | 141 | 22,531 | 6,236 | 3,630 | 32,538 |
| 77,618 | 138 | 22,493 | 6,234 | 3,622 | 32,487 |
| 77,619 | 139 | 22,452 | 6,219 | 3,636 | 32,446 |
| 77,620 | 135 | 22,400 | 6,218 | 3,656 | 32,409 |
| 77,621 | 133 | 22,235 | 6,203 | 3,632 | 32,203 |
| 77,622 | 130 | 22,195 | 6,201 | 3,634 | 32,160 |
| 77,623 | 132 | 22,422 | 6,265 | 3,668 | 32,487 |

|        |     |        |       |       |        |
|--------|-----|--------|-------|-------|--------|
| 77,624 | 129 | 22,420 | 6,241 | 3,658 | 32,448 |
| 77,625 | 131 | 22,318 | 6,179 | 3,626 | 32,254 |
| 77,626 | 133 | 22,341 | 6,107 | 3,597 | 32,178 |
| 77,627 | 137 | 22,227 | 6,073 | 3,566 | 32,003 |
| 77,628 | 137 | 22,244 | 6,098 | 3,581 | 32,060 |
| 77,629 | 136 | 22,155 | 6,069 | 3,598 | 31,958 |
| 77,630 | 136 | 21,978 | 6,033 | 3,559 | 31,706 |
| 77,631 | 135 | 21,847 | 6,026 | 3,553 | 31,561 |
| 77,632 | 128 | 21,970 | 6,108 | 3,609 | 31,815 |
| 77,633 | 123 | 21,938 | 6,135 | 3,621 | 31,817 |
| 77,634 | 118 | 21,957 | 6,124 | 3,655 | 31,854 |
| 77,635 | 119 | 22,014 | 6,150 | 3,662 | 31,945 |
| 77,636 | 116 | 22,143 | 6,203 | 3,664 | 32,126 |
| 77,637 | 114 | 22,225 | 6,163 | 3,650 | 32,152 |
| 77,638 | 111 | 21,862 | 6,068 | 3,602 | 31,643 |
| 77,639 | 112 | 21,888 | 6,077 | 3,626 | 31,703 |
| 77,640 | 104 | 21,416 | 5,981 | 3,554 | 31,055 |
| 77,641 | 105 | 21,232 | 5,948 | 3,533 | 30,818 |
| 77,642 | 101 | 21,042 | 5,877 | 3,482 | 30,502 |
| 77,643 | 103 | 21,161 | 5,927 | 3,510 | 30,701 |
| 77,644 | 102 | 21,014 | 5,928 | 3,511 | 30,555 |
| 77,645 | 98  | 20,874 | 5,890 | 3,511 | 30,373 |
| 77,646 | 99  | 20,845 | 5,879 | 3,501 | 30,324 |
| 77,647 | 99  | 20,430 | 5,754 | 3,456 | 29,739 |
| 77,648 | 100 | 20,578 | 5,788 | 3,492 | 29,958 |
| 77,649 | 97  | 20,524 | 5,790 | 3,462 | 29,873 |
| 77,650 | 103 | 20,716 | 5,864 | 3,508 | 30,191 |
| 77,651 | 111 | 20,734 | 5,862 | 3,514 | 30,221 |
| 77,652 | 108 | 20,773 | 5,929 | 3,523 | 30,333 |
| 77,653 | 108 | 20,811 | 6,003 | 3,560 | 30,482 |
| 77,654 | 107 | 20,698 | 6,034 | 3,544 | 30,383 |
| 77,655 | 92  | 19,918 | 5,781 | 3,393 | 29,184 |

|        |     |        |       |       |        |
|--------|-----|--------|-------|-------|--------|
| 77,656 | 94  | 20,126 | 5,840 | 3,425 | 29,485 |
| 77,657 | 95  | 20,398 | 5,879 | 3,458 | 29,830 |
| 77,658 | 97  | 20,512 | 5,848 | 3,435 | 29,892 |
| 77,659 | 99  | 20,562 | 5,851 | 3,431 | 29,943 |
| 77,660 | 98  | 20,516 | 5,840 | 3,434 | 29,888 |
| 77,661 | 103 | 20,255 | 5,774 | 3,402 | 29,534 |
| 77,662 | 101 | 20,013 | 5,713 | 3,375 | 29,202 |
| 77,663 | 103 | 20,350 | 5,826 | 3,452 | 29,731 |
| 77,664 | 100 | 20,145 | 5,757 | 3,416 | 29,418 |
| 77,665 | 100 | 20,154 | 5,743 | 3,410 | 29,407 |
| 77,666 | 102 | 20,169 | 5,739 | 3,398 | 29,408 |
| 77,667 | 99  | 20,239 | 5,741 | 3,437 | 29,516 |
| 77,668 | 103 | 20,273 | 5,790 | 3,469 | 29,635 |
| 77,669 | 108 | 20,381 | 5,807 | 3,478 | 29,774 |
| 77,670 | 109 | 20,567 | 5,832 | 3,497 | 30,005 |
| 77,671 | 113 | 20,668 | 5,891 | 3,523 | 30,195 |
| 77,672 | 117 | 20,726 | 5,912 | 3,527 | 30,282 |
| 77,673 | 119 | 20,530 | 5,861 | 3,536 | 30,046 |
| 77,674 | 123 | 20,650 | 5,913 | 3,556 | 30,242 |
| 77,675 | 128 | 20,372 | 5,814 | 3,502 | 29,816 |
| 77,676 | 128 | 20,165 | 5,764 | 3,469 | 29,526 |
| 77,677 | 123 | 20,258 | 5,801 | 3,506 | 29,688 |
| 77,678 | 125 | 20,222 | 5,830 | 3,527 | 29,704 |
| 77,679 | 125 | 19,933 | 5,756 | 3,471 | 29,285 |
| 77,680 | 129 | 19,867 | 5,710 | 3,486 | 29,192 |
| 77,681 | 129 | 19,825 | 5,722 | 3,497 | 29,173 |
| 77,682 | 130 | 19,757 | 5,682 | 3,492 | 29,061 |
| 77,683 | 131 | 19,556 | 5,592 | 3,441 | 28,720 |
| 77,684 | 130 | 19,643 | 5,613 | 3,446 | 28,832 |
| 77,685 | 132 | 19,353 | 5,528 | 3,377 | 28,390 |
| 77,686 | 129 | 18,949 | 5,447 | 3,342 | 27,867 |
| 77,687 | 130 | 19,063 | 5,492 | 3,374 | 28,059 |

|        |     |        |       |       |        |
|--------|-----|--------|-------|-------|--------|
| 77,688 | 130 | 19,087 | 5,547 | 3,383 | 28,147 |
| 77,689 | 128 | 19,115 | 5,535 | 3,338 | 28,116 |
| 77,690 | 135 | 19,363 | 5,621 | 3,378 | 28,497 |
| 77,691 | 137 | 19,385 | 5,619 | 3,389 | 28,530 |
| 77,692 | 136 | 19,458 | 5,629 | 3,394 | 28,617 |
| 77,693 | 137 | 19,403 | 5,602 | 3,373 | 28,515 |
| 77,694 | 138 | 19,752 | 5,650 | 3,419 | 28,959 |
| 77,695 | 139 | 19,999 | 5,717 | 3,451 | 29,306 |
| 77,696 | 139 | 19,594 | 5,636 | 3,383 | 28,752 |
| 77,697 | 144 | 19,753 | 5,659 | 3,418 | 28,974 |
| 77,698 | 141 | 19,701 | 5,676 | 3,420 | 28,938 |
| 77,699 | 142 | 19,989 | 5,769 | 3,455 | 29,355 |
| 77,700 | 140 | 19,905 | 5,762 | 3,453 | 29,260 |
| 77,701 | 135 | 20,028 | 5,762 | 3,454 | 29,379 |
| 77,702 | 130 | 20,110 | 5,800 | 3,458 | 29,498 |
| 77,703 | 143 | 20,194 | 5,785 | 3,452 | 29,574 |
| 77,704 | 149 | 20,030 | 5,667 | 3,424 | 29,270 |
| 77,705 | 151 | 20,094 | 5,674 | 3,418 | 29,337 |
| 77,706 | 153 | 20,000 | 5,766 | 3,463 | 29,382 |
| 77,707 | 156 | 20,018 | 5,792 | 3,483 | 29,449 |
| 77,708 | 158 | 20,020 | 5,855 | 3,461 | 29,494 |
| 77,709 | 158 | 20,031 | 5,883 | 3,461 | 29,533 |
| 77,710 | 156 | 20,182 | 5,909 | 3,501 | 29,748 |
| 77,711 | 149 | 20,206 | 5,897 | 3,503 | 29,755 |
| 77,712 | 151 | 20,114 | 5,848 | 3,480 | 29,593 |
| 77,713 | 151 | 20,125 | 5,847 | 3,473 | 29,596 |
| 77,714 | 149 | 20,012 | 5,825 | 3,444 | 29,430 |
| 77,715 | 148 | 19,764 | 5,802 | 3,425 | 29,139 |
| 77,716 | 149 | 20,500 | 6,050 | 3,563 | 30,262 |
| 77,717 | 147 | 20,693 | 6,057 | 3,565 | 30,462 |
| 77,718 | 153 | 20,407 | 5,965 | 3,439 | 29,964 |
| 77,719 | 150 | 20,710 | 6,027 | 3,495 | 30,382 |

|        |     |        |       |       |        |
|--------|-----|--------|-------|-------|--------|
| 77,720 | 144 | 20,575 | 6,017 | 3,498 | 30,234 |
| 77,721 | 144 | 20,597 | 6,084 | 3,513 | 30,338 |
| 77,722 | 139 | 20,536 | 6,081 | 3,506 | 30,262 |
| 77,723 | 136 | 20,682 | 6,110 | 3,542 | 30,470 |
| 77,724 | 134 | 20,754 | 6,130 | 3,547 | 30,565 |
| 77,725 | 139 | 20,864 | 6,169 | 3,589 | 30,761 |
| 77,726 | 133 | 20,818 | 6,213 | 3,591 | 30,755 |
| 77,727 | 131 | 20,795 | 6,198 | 3,599 | 30,723 |
| 77,728 | 130 | 20,769 | 6,180 | 3,575 | 30,654 |
| 77,729 | 129 | 20,837 | 6,187 | 3,581 | 30,734 |
| 77,730 | 130 | 20,933 | 6,210 | 3,607 | 30,880 |
| 77,731 | 125 | 20,952 | 6,223 | 3,607 | 30,907 |
| 77,732 | 128 | 20,881 | 6,174 | 3,574 | 30,757 |
| 77,733 | 127 | 20,775 | 6,161 | 3,570 | 30,633 |
| 77,734 | 133 | 21,153 | 6,295 | 3,628 | 31,209 |
| 77,735 | 135 | 21,088 | 6,262 | 3,608 | 31,093 |
| 77,736 | 130 | 20,917 | 6,165 | 3,563 | 30,775 |
| 77,737 | 130 | 20,889 | 6,152 | 3,561 | 30,732 |
| 77,738 | 133 | 20,884 | 6,195 | 3,577 | 30,789 |
| 77,739 | 133 | 20,809 | 6,145 | 3,548 | 30,635 |
| 77,740 | 131 | 20,466 | 6,063 | 3,502 | 30,162 |
| 77,741 | 131 | 20,406 | 6,049 | 3,486 | 30,072 |
| 77,742 | 128 | 20,376 | 6,037 | 3,473 | 30,014 |
| 77,743 | 138 | 20,585 | 6,137 | 3,503 | 30,363 |
| 77,744 | 135 | 20,431 | 6,084 | 3,477 | 30,127 |
| 77,745 | 136 | 20,511 | 6,185 | 3,508 | 30,340 |
| 77,746 | 132 | 20,338 | 6,159 | 3,485 | 30,114 |
| 77,747 | 132 | 20,413 | 6,156 | 3,482 | 30,183 |
| 77,748 | 130 | 20,706 | 6,239 | 3,506 | 30,581 |
| 77,749 | 130 | 20,694 | 6,249 | 3,497 | 30,570 |
| 77,750 | 128 | 20,732 | 6,232 | 3,490 | 30,582 |
| 77,751 | 128 | 20,697 | 6,204 | 3,478 | 30,507 |

|        |     |        |       |       |        |
|--------|-----|--------|-------|-------|--------|
| 77,752 | 126 | 20,646 | 6,137 | 3,464 | 30,373 |
| 77,753 | 125 | 20,772 | 6,188 | 3,493 | 30,578 |
| 77,754 | 111 | 20,495 | 6,144 | 3,473 | 30,223 |
| 77,755 | 108 | 20,337 | 6,092 | 3,447 | 29,984 |
| 77,756 | 106 | 20,231 | 6,058 | 3,439 | 29,834 |
| 77,757 | 106 | 20,035 | 5,968 | 3,378 | 29,487 |
| 77,758 | 102 | 19,884 | 5,918 | 3,366 | 29,270 |
| 77,759 | 101 | 20,004 | 5,974 | 3,426 | 29,505 |
| 77,760 | 106 | 20,061 | 5,977 | 3,434 | 29,578 |
| 77,761 | 106 | 20,030 | 5,977 | 3,434 | 29,547 |
| 77,762 | 107 | 20,144 | 5,990 | 3,449 | 29,690 |
| 77,763 | 108 | 20,105 | 6,032 | 3,459 | 29,704 |
| 77,764 | 110 | 19,965 | 6,051 | 3,437 | 29,563 |
| 77,765 | 117 | 19,912 | 6,025 | 3,424 | 29,478 |
| 77,766 | 117 | 19,968 | 6,015 | 3,423 | 29,523 |
| 77,767 | 116 | 19,775 | 5,955 | 3,384 | 29,230 |
| 77,768 | 121 | 20,039 | 6,021 | 3,401 | 29,582 |
| 77,769 | 121 | 19,676 | 5,940 | 3,352 | 29,089 |
| 77,770 | 122 | 19,777 | 5,931 | 3,360 | 29,190 |
| 77,771 | 126 | 19,992 | 5,890 | 3,335 | 29,343 |
| 77,772 | 129 | 20,136 | 5,891 | 3,358 | 29,514 |
| 77,773 | 134 | 20,430 | 5,928 | 3,395 | 29,887 |
| 77,774 | 131 | 20,191 | 5,893 | 3,323 | 29,538 |
| 77,775 | 131 | 20,625 | 5,993 | 3,377 | 30,126 |
| 77,776 | 122 | 20,880 | 6,043 | 3,381 | 30,426 |
| 77,777 | 122 | 20,812 | 5,987 | 3,362 | 30,283 |
| 77,778 | 121 | 20,835 | 6,000 | 3,357 | 30,313 |
| 77,779 | 124 | 21,135 | 6,061 | 3,400 | 30,720 |
| 77,780 | 127 | 21,342 | 6,080 | 3,407 | 30,956 |
| 77,781 | 125 | 21,335 | 6,076 | 3,403 | 30,939 |
| 77,782 | 127 | 21,511 | 6,125 | 3,423 | 31,186 |
| 77,783 | 129 | 21,568 | 6,105 | 3,408 | 31,210 |

|        |     |        |       |       |        |
|--------|-----|--------|-------|-------|--------|
| 77,784 | 129 | 21,550 | 6,066 | 3,383 | 31,128 |
| 77,785 | 133 | 22,002 | 6,192 | 3,458 | 31,785 |
| 77,786 | 132 | 21,846 | 6,150 | 3,441 | 31,569 |
| 77,787 | 137 | 22,078 | 6,170 | 3,470 | 31,855 |
| 77,788 | 132 | 22,023 | 6,133 | 3,456 | 31,744 |
| 77,789 | 135 | 22,219 | 6,191 | 3,477 | 32,022 |
| 77,790 | 135 | 21,996 | 6,133 | 3,453 | 31,717 |
| 77,791 | 134 | 21,902 | 6,111 | 3,455 | 31,602 |
| 77,792 | 139 | 22,043 | 6,151 | 3,510 | 31,843 |
| 77,793 | 144 | 22,017 | 6,111 | 3,513 | 31,785 |
| 77,794 | 142 | 21,843 | 6,027 | 3,466 | 31,478 |
| 77,795 | 142 | 21,776 | 5,979 | 3,436 | 31,333 |
| 77,796 | 140 | 21,851 | 5,955 | 3,434 | 31,380 |
| 77,797 | 140 | 21,834 | 5,932 | 3,423 | 31,329 |
| 77,798 | 141 | 21,913 | 5,962 | 3,454 | 31,470 |
| 77,799 | 139 | 21,634 | 5,902 | 3,428 | 31,103 |
| 77,800 | 140 | 21,704 | 5,870 | 3,436 | 31,150 |
| 77,801 | 145 | 21,431 | 5,819 | 3,397 | 30,792 |
| 77,802 | 146 | 21,235 | 5,781 | 3,374 | 30,536 |
| 77,803 | 147 | 21,373 | 5,799 | 3,382 | 30,701 |
| 77,804 | 155 | 21,382 | 5,770 | 3,371 | 30,678 |
| 77,805 | 153 | 21,351 | 5,752 | 3,370 | 30,626 |
| 77,806 | 154 | 21,229 | 5,708 | 3,343 | 30,434 |
| 77,807 | 154 | 21,352 | 5,725 | 3,359 | 30,590 |
| 77,808 | 148 | 20,987 | 5,585 | 3,281 | 30,001 |
| 77,809 | 150 | 21,221 | 5,590 | 3,296 | 30,257 |
| 77,810 | 150 | 21,139 | 5,537 | 3,287 | 30,113 |
| 77,811 | 145 | 21,059 | 5,501 | 3,265 | 29,970 |
| 77,812 | 146 | 21,179 | 5,493 | 3,263 | 30,081 |
| 77,813 | 141 | 21,178 | 5,462 | 3,248 | 30,029 |
| 77,814 | 144 | 21,083 | 5,385 | 3,237 | 29,849 |
| 77,815 | 138 | 20,916 | 5,303 | 3,213 | 29,570 |



|        |     |        |       |       |        |
|--------|-----|--------|-------|-------|--------|
| 77,816 | 138 | 20,934 | 5,273 | 3,195 | 29,540 |
| 77,817 | 139 | 21,067 | 5,283 | 3,185 | 29,674 |
| 77,818 | 135 | 20,844 | 5,212 | 3,151 | 29,342 |
| 77,819 | 131 | 21,023 | 5,228 | 3,199 | 29,581 |
| 77,820 | 123 | 20,604 | 5,153 | 3,142 | 29,022 |
| 77,821 | 123 | 20,484 | 5,128 | 3,120 | 28,855 |
| 77,822 | 121 | 20,509 | 5,164 | 3,124 | 28,918 |
| 77,823 | 119 | 20,276 | 5,115 | 3,090 | 28,600 |
| 77,824 | 114 | 19,904 | 5,016 | 3,037 | 28,071 |
| 77,825 | 120 | 19,845 | 4,990 | 3,039 | 27,994 |
| 77,826 | 122 | 19,690 | 4,897 | 3,003 | 27,712 |
| 77,827 | 125 | 19,465 | 4,793 | 2,952 | 27,335 |
| 77,828 | 128 | 19,244 | 4,709 | 2,917 | 26,998 |
| 77,829 | 129 | 19,362 | 4,670 | 2,914 | 27,075 |
| 77,830 | 131 | 19,176 | 4,612 | 2,857 | 26,776 |
| 77,831 | 131 | 19,344 | 4,648 | 2,862 | 26,985 |
| 77,832 | 133 | 19,068 | 4,538 | 2,799 | 26,538 |
| 77,833 | 133 | 19,154 | 4,499 | 2,791 | 26,577 |
| 77,834 | 129 | 18,889 | 4,442 | 2,757 | 26,217 |
| 77,835 | 129 | 18,871 | 4,403 | 2,755 | 26,158 |
| 77,836 | 127 | 18,914 | 4,426 | 2,767 | 26,234 |
| 77,837 | 122 | 18,811 | 4,359 | 2,730 | 26,022 |
| 77,838 | 128 | 18,706 | 4,358 | 2,703 | 25,895 |
| 77,839 | 131 | 18,768 | 4,355 | 2,701 | 25,955 |
| 77,840 | 141 | 18,849 | 4,368 | 2,704 | 26,062 |
| 77,841 | 141 | 18,862 | 4,343 | 2,684 | 26,030 |
| 77,842 | 137 | 18,902 | 4,341 | 2,669 | 26,049 |
| 77,843 | 147 | 19,057 | 4,359 | 2,656 | 26,219 |
| 77,844 | 148 | 19,031 | 4,308 | 2,630 | 26,117 |
| 77,845 | 141 | 18,830 | 4,227 | 2,594 | 25,792 |
| 77,846 | 140 | 18,851 | 4,256 | 2,592 | 25,839 |
| 77,847 | 140 | 18,891 | 4,266 | 2,603 | 25,900 |

|        |     |        |       |       |        |
|--------|-----|--------|-------|-------|--------|
| 77,848 | 144 | 18,911 | 4,259 | 2,595 | 25,909 |
| 77,849 | 143 | 19,005 | 4,244 | 2,580 | 25,972 |
| 77,850 | 148 | 19,118 | 4,269 | 2,617 | 26,152 |
| 77,851 | 142 | 19,083 | 4,218 | 2,597 | 26,040 |
| 77,852 | 138 | 19,011 | 4,165 | 2,590 | 25,904 |
| 77,853 | 140 | 18,964 | 4,169 | 2,584 | 25,857 |
| 77,854 | 142 | 18,912 | 4,135 | 2,575 | 25,764 |
| 77,855 | 138 | 19,501 | 4,275 | 2,654 | 26,568 |
| 77,856 | 137 | 19,391 | 4,241 | 2,640 | 26,409 |
| 77,857 | 137 | 19,422 | 4,225 | 2,627 | 26,411 |
| 77,858 | 139 | 19,633 | 4,279 | 2,677 | 26,728 |
| 77,859 | 138 | 19,712 | 4,299 | 2,665 | 26,814 |
| 77,860 | 135 | 19,990 | 4,355 | 2,694 | 27,174 |
| 77,861 | 136 | 19,772 | 4,292 | 2,655 | 26,855 |
| 77,862 | 139 | 20,124 | 4,339 | 2,693 | 27,295 |
| 77,863 | 143 | 20,192 | 4,332 | 2,683 | 27,350 |
| 77,864 | 147 | 20,140 | 4,332 | 2,669 | 27,288 |
| 77,865 | 147 | 20,239 | 4,337 | 2,671 | 27,394 |
| 77,866 | 148 | 20,518 | 4,423 | 2,724 | 27,813 |
| 77,867 | 153 | 20,769 | 4,487 | 2,777 | 28,186 |
| 77,868 | 153 | 20,704 | 4,514 | 2,792 | 28,163 |
| 77,869 | 157 | 21,093 | 4,618 | 2,841 | 28,709 |
| 77,870 | 162 | 21,248 | 4,644 | 2,873 | 28,927 |
| 77,871 | 162 | 21,108 | 4,584 | 2,854 | 28,708 |
| 77,872 | 168 | 21,618 | 4,634 | 2,906 | 29,326 |
| 77,873 | 166 | 21,439 | 4,611 | 2,916 | 29,132 |
| 77,874 | 167 | 21,821 | 4,643 | 2,939 | 29,570 |
| 77,875 | 165 | 21,927 | 4,619 | 2,934 | 29,645 |
| 77,876 | 163 | 22,097 | 4,647 | 2,957 | 29,864 |
| 77,877 | 161 | 21,868 | 4,667 | 2,939 | 29,635 |
| 77,878 | 162 | 21,912 | 4,643 | 2,935 | 29,652 |
| 77,879 | 158 | 21,670 | 4,660 | 2,957 | 29,445 |

|        |     |        |       |       |        |
|--------|-----|--------|-------|-------|--------|
| 77,880 | 166 | 21,805 | 4,682 | 2,977 | 29,630 |
| 77,881 | 166 | 21,575 | 4,636 | 2,955 | 29,332 |
| 77,882 | 164 | 21,643 | 4,662 | 2,981 | 29,450 |
| 77,883 | 165 | 21,757 | 4,680 | 2,981 | 29,583 |
| 77,884 | 164 | 21,809 | 4,706 | 3,023 | 29,702 |
| 77,885 | 166 | 22,007 | 4,751 | 3,019 | 29,943 |
| 77,886 | 168 | 22,017 | 4,762 | 3,037 | 29,984 |
| 77,887 | 173 | 22,103 | 4,745 | 3,026 | 30,047 |
| 77,888 | 171 | 21,981 | 4,711 | 2,997 | 29,860 |
| 77,889 | 175 | 22,380 | 4,786 | 3,058 | 30,399 |
| 77,890 | 181 | 22,882 | 4,927 | 3,136 | 31,126 |
| 77,891 | 173 | 22,850 | 4,885 | 3,129 | 31,037 |
| 77,892 | 175 | 22,871 | 4,918 | 3,178 | 31,142 |
| 77,893 | 183 | 22,900 | 4,888 | 3,180 | 31,151 |
| 77,894 | 173 | 22,756 | 4,868 | 3,179 | 30,976 |
| 77,895 | 173 | 23,051 | 4,987 | 3,227 | 31,438 |
| 77,896 | 178 | 23,291 | 5,043 | 3,300 | 31,812 |
| 77,897 | 177 | 23,033 | 4,991 | 3,256 | 31,457 |
| 77,898 | 177 | 22,855 | 4,957 | 3,248 | 31,237 |
| 77,899 | 178 | 22,973 | 4,976 | 3,262 | 31,389 |
| 77,900 | 180 | 22,904 | 4,984 | 3,274 | 31,342 |
| 77,901 | 174 | 22,877 | 4,994 | 3,260 | 31,305 |
| 77,902 | 176 | 22,949 | 5,025 | 3,291 | 31,441 |
| 77,903 | 178 | 23,097 | 5,061 | 3,304 | 31,640 |
| 77,904 | 180 | 23,146 | 5,020 | 3,298 | 31,644 |
| 77,905 | 189 | 23,144 | 5,029 | 3,282 | 31,644 |
| 77,906 | 192 | 22,978 | 5,008 | 3,260 | 31,438 |
| 77,907 | 197 | 23,220 | 5,057 | 3,272 | 31,746 |
| 77,908 | 197 | 23,286 | 5,047 | 3,261 | 31,791 |
| 77,909 | 198 | 23,311 | 5,089 | 3,264 | 31,862 |
| 77,910 | 201 | 23,221 | 5,097 | 3,279 | 31,798 |
| 77,911 | 207 | 23,284 | 5,125 | 3,297 | 31,913 |

|        |     |        |       |       |        |
|--------|-----|--------|-------|-------|--------|
| 77,912 | 204 | 23,076 | 5,085 | 3,279 | 31,644 |
| 77,913 | 204 | 23,199 | 5,112 | 3,286 | 31,801 |
| 77,914 | 204 | 23,324 | 5,127 | 3,328 | 31,983 |
| 77,915 | 206 | 23,267 | 5,065 | 3,304 | 31,842 |
| 77,916 | 211 | 23,313 | 5,052 | 3,298 | 31,874 |
| 77,917 | 208 | 23,622 | 5,073 | 3,312 | 32,215 |
| 77,918 | 210 | 23,555 | 5,025 | 3,271 | 32,061 |
| 77,919 | 211 | 23,543 | 4,976 | 3,273 | 32,003 |
| 77,920 | 204 | 23,404 | 4,921 | 3,235 | 31,764 |
| 77,921 | 212 | 23,596 | 4,959 | 3,261 | 32,028 |
| 77,922 | 215 | 23,344 | 4,929 | 3,229 | 31,717 |
| 77,923 | 215 | 23,452 | 4,948 | 3,227 | 31,842 |
| 77,924 | 219 | 23,617 | 4,958 | 3,230 | 32,024 |
| 77,925 | 220 | 23,530 | 4,924 | 3,216 | 31,890 |
| 77,926 | 221 | 23,422 | 4,926 | 3,213 | 31,782 |
| 77,927 | 222 | 23,446 | 4,915 | 3,213 | 31,796 |
| 77,928 | 218 | 23,553 | 4,909 | 3,222 | 31,902 |
| 77,929 | 226 | 23,687 | 4,914 | 3,213 | 32,040 |
| 77,930 | 227 | 23,740 | 4,937 | 3,205 | 32,109 |
| 77,931 | 219 | 23,871 | 4,938 | 3,244 | 32,272 |
| 77,932 | 215 | 23,952 | 4,948 | 3,271 | 32,386 |
| 77,933 | 212 | 23,974 | 4,970 | 3,261 | 32,417 |
| 77,934 | 216 | 23,968 | 4,982 | 3,280 | 32,446 |
| 77,935 | 223 | 24,148 | 5,030 | 3,275 | 32,676 |
| 77,936 | 224 | 23,964 | 4,976 | 3,255 | 32,419 |
| 77,937 | 216 | 24,045 | 4,970 | 3,256 | 32,487 |
| 77,938 | 212 | 23,943 | 4,967 | 3,245 | 32,367 |
| 77,939 | 208 | 23,931 | 5,002 | 3,260 | 32,401 |
| 77,940 | 208 | 24,019 | 4,990 | 3,286 | 32,503 |
| 77,941 | 203 | 23,899 | 4,955 | 3,257 | 32,314 |
| 77,942 | 199 | 23,829 | 4,903 | 3,219 | 32,150 |
| 77,943 | 196 | 23,836 | 4,893 | 3,214 | 32,139 |

|        |     |        |       |       |        |
|--------|-----|--------|-------|-------|--------|
| 77,944 | 189 | 23,839 | 4,892 | 3,213 | 32,133 |
| 77,945 | 195 | 23,999 | 4,906 | 3,245 | 32,345 |
| 77,946 | 190 | 23,742 | 4,810 | 3,177 | 31,919 |
| 77,947 | 190 | 23,769 | 4,820 | 3,161 | 31,940 |
| 77,948 | 190 | 23,738 | 4,821 | 3,179 | 31,928 |
| 77,949 | 188 | 23,835 | 4,845 | 3,180 | 32,048 |
| 77,950 | 190 | 24,043 | 4,864 | 3,183 | 32,280 |
| 77,951 | 192 | 24,246 | 4,867 | 3,204 | 32,509 |
| 77,952 | 192 | 24,402 | 4,857 | 3,221 | 32,672 |
| 77,953 | 191 | 24,421 | 4,849 | 3,221 | 32,682 |
| 77,954 | 190 | 24,475 | 4,831 | 3,227 | 32,723 |
| 77,955 | 189 | 24,520 | 4,839 | 3,223 | 32,771 |
| 77,956 | 180 | 24,595 | 4,847 | 3,250 | 32,872 |
| 77,957 | 175 | 24,525 | 4,837 | 3,256 | 32,793 |
| 77,958 | 168 | 24,555 | 4,862 | 3,272 | 32,857 |
| 77,959 | 177 | 24,539 | 4,796 | 3,256 | 32,768 |
| 77,960 | 186 | 24,733 | 4,808 | 3,251 | 32,978 |
| 77,961 | 186 | 24,667 | 4,777 | 3,229 | 32,859 |
| 77,962 | 190 | 24,630 | 4,768 | 3,244 | 32,832 |
| 77,963 | 189 | 24,629 | 4,772 | 3,254 | 32,844 |
| 77,964 | 186 | 24,034 | 4,657 | 3,164 | 32,041 |
| 77,965 | 185 | 24,170 | 4,670 | 3,178 | 32,203 |
| 77,966 | 177 | 24,146 | 4,680 | 3,176 | 32,179 |
| 77,967 | 175 | 24,042 | 4,656 | 3,168 | 32,041 |
| 77,968 | 175 | 23,925 | 4,637 | 3,143 | 31,880 |
| 77,969 | 168 | 23,823 | 4,610 | 3,143 | 31,744 |
| 77,970 | 165 | 23,642 | 4,592 | 3,102 | 31,501 |
| 77,971 | 161 | 23,365 | 4,502 | 3,055 | 31,083 |
| 77,972 | 162 | 23,693 | 4,526 | 3,082 | 31,463 |
| 77,973 | 149 | 22,832 | 4,387 | 2,981 | 30,349 |
| 77,974 | 157 | 23,039 | 4,399 | 3,002 | 30,597 |
| 77,975 | 156 | 23,381 | 4,442 | 3,010 | 30,989 |

|        |     |        |       |       |        |
|--------|-----|--------|-------|-------|--------|
| 77,976 | 158 | 23,172 | 4,399 | 2,964 | 30,693 |
| 77,977 | 157 | 23,138 | 4,372 | 2,954 | 30,621 |
| 77,978 | 163 | 23,305 | 4,359 | 2,969 | 30,796 |
| 77,979 | 154 | 22,838 | 4,237 | 2,918 | 30,147 |
| 77,980 | 154 | 22,923 | 4,246 | 2,925 | 30,248 |
| 77,981 | 156 | 23,204 | 4,268 | 2,929 | 30,557 |
| 77,982 | 154 | 22,809 | 4,195 | 2,872 | 30,030 |
| 77,983 | 159 | 22,893 | 4,183 | 2,863 | 30,098 |
| 77,984 | 154 | 22,640 | 4,116 | 2,831 | 29,741 |
| 77,985 | 148 | 22,300 | 3,994 | 2,765 | 29,207 |
| 77,986 | 145 | 22,200 | 3,939 | 2,756 | 29,040 |
| 77,987 | 145 | 22,226 | 3,934 | 2,748 | 29,053 |
| 77,988 | 146 | 22,171 | 3,892 | 2,727 | 28,936 |
| 77,989 | 148 | 22,065 | 3,824 | 2,692 | 28,729 |
| 77,990 | 146 | 22,016 | 3,785 | 2,673 | 28,620 |
| 77,991 | 148 | 21,967 | 3,745 | 2,649 | 28,509 |
| 77,992 | 148 | 21,961 | 3,732 | 2,653 | 28,494 |
| 77,993 | 150 | 21,750 | 3,710 | 2,629 | 28,239 |
| 77,994 | 149 | 21,320 | 3,624 | 2,602 | 27,695 |
| 77,995 | 149 | 21,744 | 3,669 | 2,622 | 28,184 |
| 77,996 | 148 | 21,861 | 3,640 | 2,607 | 28,256 |
| 77,997 | 143 | 21,579 | 3,593 | 2,580 | 27,895 |
| 77,998 | 140 | 21,609 | 3,641 | 2,595 | 27,985 |
| 77,999 | 145 | 21,956 | 3,661 | 2,594 | 28,356 |
| 78,000 | 153 | 21,757 | 3,553 | 2,552 | 28,015 |
| 78,001 | 154 | 21,749 | 3,539 | 2,543 | 27,985 |
| 78,002 | 157 | 21,971 | 3,562 | 2,559 | 28,249 |
| 78,003 | 160 | 21,872 | 3,558 | 2,525 | 28,115 |
| 78,004 | 158 | 21,489 | 3,503 | 2,484 | 27,634 |
| 78,005 | 160 | 21,671 | 3,520 | 2,489 | 27,840 |
| 78,006 | 161 | 21,517 | 3,442 | 2,441 | 27,561 |
| 78,007 | 164 | 21,504 | 3,391 | 2,417 | 27,476 |

|        |     |        |       |       |        |
|--------|-----|--------|-------|-------|--------|
| 78,008 | 169 | 21,288 | 3,314 | 2,369 | 27,140 |
| 78,009 | 172 | 21,569 | 3,329 | 2,380 | 27,450 |
| 78,010 | 152 | 20,505 | 3,087 | 2,233 | 25,977 |
| 78,011 | 153 | 20,841 | 3,120 | 2,249 | 26,363 |
| 78,012 | 160 | 21,175 | 3,162 | 2,268 | 26,765 |
| 78,013 | 161 | 20,472 | 3,012 | 2,171 | 25,816 |
| 78,014 | 165 | 20,715 | 3,023 | 2,180 | 26,083 |
| 78,015 | 165 | 20,927 | 3,061 | 2,201 | 26,354 |
| 78,016 | 165 | 20,954 | 3,061 | 2,196 | 26,376 |
| 78,017 | 163 | 21,169 | 3,113 | 2,244 | 26,689 |
| 78,018 | 166 | 21,257 | 3,094 | 2,253 | 26,770 |
| 78,019 | 166 | 21,338 | 3,107 | 2,253 | 26,864 |
| 78,020 | 165 | 21,336 | 3,105 | 2,247 | 26,853 |
| 78,021 | 166 | 21,129 | 3,060 | 2,211 | 26,566 |
| 78,022 | 164 | 21,097 | 3,064 | 2,224 | 26,549 |
| 78,023 | 163 | 20,857 | 3,025 | 2,201 | 26,246 |
| 78,024 | 160 | 20,551 | 2,989 | 2,177 | 25,877 |
| 78,025 | 155 | 21,162 | 3,131 | 2,280 | 26,728 |
| 78,026 | 156 | 21,315 | 3,197 | 2,320 | 26,988 |
| 78,027 | 153 | 21,176 | 3,149 | 2,318 | 26,796 |
| 78,028 | 155 | 21,437 | 3,195 | 2,334 | 27,121 |
| 78,029 | 151 | 21,280 | 3,186 | 2,313 | 26,930 |
| 78,030 | 150 | 20,938 | 3,154 | 2,291 | 26,533 |
| 78,031 | 150 | 21,262 | 3,230 | 2,346 | 26,988 |
| 78,032 | 150 | 21,230 | 3,240 | 2,342 | 26,962 |
| 78,033 | 153 | 21,256 | 3,224 | 2,329 | 26,962 |
| 78,034 | 152 | 20,940 | 3,182 | 2,315 | 26,589 |
| 78,035 | 152 | 20,918 | 3,185 | 2,316 | 26,571 |
| 78,036 | 146 | 20,903 | 3,217 | 2,320 | 26,586 |
| 78,037 | 160 | 21,126 | 3,239 | 2,339 | 26,864 |
| 78,038 | 161 | 21,225 | 3,245 | 2,346 | 26,977 |
| 78,039 | 162 | 21,041 | 3,212 | 2,323 | 26,738 |

|        |     |        |       |       |        |
|--------|-----|--------|-------|-------|--------|
| 78,040 | 162 | 20,940 | 3,188 | 2,317 | 26,607 |
| 78,041 | 167 | 21,337 | 3,257 | 2,357 | 27,118 |
| 78,042 | 162 | 21,350 | 3,275 | 2,360 | 27,147 |
| 78,043 | 158 | 21,338 | 3,275 | 2,346 | 27,117 |
| 78,044 | 154 | 21,308 | 3,266 | 2,329 | 27,057 |
| 78,045 | 160 | 21,562 | 3,307 | 2,353 | 27,382 |
| 78,046 | 162 | 21,418 | 3,299 | 2,346 | 27,225 |
| 78,047 | 164 | 21,279 | 3,268 | 2,348 | 27,059 |
| 78,048 | 165 | 21,494 | 3,285 | 2,353 | 27,297 |
| 78,049 | 165 | 21,267 | 3,254 | 2,335 | 27,021 |
| 78,050 | 167 | 21,588 | 3,270 | 2,374 | 27,399 |
| 78,051 | 162 | 21,793 | 3,360 | 2,396 | 27,711 |
| 78,052 | 160 | 21,816 | 3,386 | 2,400 | 27,762 |
| 78,053 | 155 | 20,960 | 3,300 | 2,347 | 26,762 |
| 78,054 | 160 | 21,305 | 3,341 | 2,387 | 27,193 |
| 78,055 | 172 | 21,596 | 3,380 | 2,409 | 27,557 |
| 78,056 | 171 | 21,626 | 3,375 | 2,412 | 27,584 |
| 78,057 | 169 | 21,826 | 3,454 | 2,449 | 27,898 |
| 78,058 | 167 | 21,820 | 3,449 | 2,444 | 27,880 |
| 78,059 | 161 | 21,730 | 3,501 | 2,458 | 27,850 |
| 78,060 | 160 | 21,703 | 3,510 | 2,467 | 27,840 |
| 78,061 | 151 | 21,411 | 3,518 | 2,468 | 27,548 |
| 78,062 | 149 | 21,477 | 3,551 | 2,501 | 27,678 |
| 78,063 | 139 | 21,407 | 3,547 | 2,508 | 27,601 |
| 78,064 | 141 | 21,519 | 3,586 | 2,539 | 27,785 |
| 78,065 | 135 | 21,495 | 3,672 | 2,587 | 27,889 |
| 78,066 | 139 | 21,738 | 3,725 | 2,631 | 28,233 |
| 78,067 | 146 | 21,840 | 3,785 | 2,639 | 28,410 |
| 78,068 | 153 | 21,937 | 3,818 | 2,651 | 28,559 |
| 78,069 | 157 | 21,965 | 3,853 | 2,668 | 28,643 |
| 78,070 | 162 | 21,807 | 3,857 | 2,682 | 28,508 |
| 78,071 | 170 | 22,055 | 3,881 | 2,713 | 28,819 |



|        |     |        |       |       |        |
|--------|-----|--------|-------|-------|--------|
| 78,072 | 171 | 22,223 | 3,954 | 2,751 | 29,099 |
| 78,073 | 178 | 22,230 | 3,983 | 2,768 | 29,159 |
| 78,074 | 186 | 22,421 | 4,014 | 2,815 | 29,436 |
| 78,075 | 188 | 22,378 | 4,015 | 2,771 | 29,352 |
| 78,076 | 190 | 22,844 | 4,066 | 2,825 | 29,925 |
| 78,077 | 189 | 22,854 | 4,058 | 2,844 | 29,945 |
| 78,078 | 190 | 22,834 | 4,096 | 2,842 | 29,962 |
| 78,079 | 189 | 22,866 | 4,141 | 2,867 | 30,063 |
| 78,080 | 189 | 23,100 | 4,174 | 2,877 | 30,340 |
| 78,081 | 192 | 23,164 | 4,188 | 2,863 | 30,407 |
| 78,082 | 195 | 23,089 | 4,190 | 2,875 | 30,349 |
| 78,083 | 195 | 23,134 | 4,193 | 2,887 | 30,409 |
| 78,084 | 194 | 23,558 | 4,274 | 2,941 | 30,967 |
| 78,085 | 189 | 23,403 | 4,277 | 2,937 | 30,806 |
| 78,086 | 198 | 23,541 | 4,321 | 2,968 | 31,028 |
| 78,087 | 198 | 23,512 | 4,335 | 2,974 | 31,019 |
| 78,088 | 195 | 23,902 | 4,422 | 3,016 | 31,535 |
| 78,089 | 202 | 23,779 | 4,405 | 3,026 | 31,412 |
| 78,090 | 199 | 23,592 | 4,408 | 3,042 | 31,241 |
| 78,091 | 209 | 23,995 | 4,506 | 3,105 | 31,815 |
| 78,092 | 210 | 24,429 | 4,608 | 3,150 | 32,397 |
| 78,093 | 212 | 24,703 | 4,656 | 3,176 | 32,747 |
| 78,094 | 214 | 25,003 | 4,692 | 3,201 | 33,110 |
| 78,095 | 214 | 25,050 | 4,703 | 3,224 | 33,191 |
| 78,096 | 213 | 25,388 | 4,758 | 3,241 | 33,600 |
| 78,097 | 218 | 25,709 | 4,816 | 3,301 | 34,044 |
| 78,098 | 214 | 25,825 | 4,839 | 3,315 | 34,193 |
| 78,099 | 208 | 25,607 | 4,827 | 3,314 | 33,956 |
| 78,100 | 210 | 25,857 | 4,895 | 3,345 | 34,307 |
| 78,101 | 212 | 25,784 | 4,917 | 3,346 | 34,259 |
| 78,102 | 209 | 25,514 | 4,853 | 3,321 | 33,897 |
| 78,103 | 205 | 25,487 | 4,850 | 3,322 | 33,864 |

|        |     |        |       |       |        |
|--------|-----|--------|-------|-------|--------|
| 78,104 | 206 | 25,589 | 4,870 | 3,330 | 33,995 |
| 78,105 | 203 | 25,466 | 4,878 | 3,310 | 33,857 |
| 78,106 | 190 | 25,140 | 4,854 | 3,298 | 33,482 |
| 78,107 | 189 | 25,005 | 4,873 | 3,288 | 33,355 |
| 78,108 | 191 | 24,903 | 4,858 | 3,280 | 33,232 |
| 78,109 | 190 | 24,901 | 4,832 | 3,280 | 33,203 |
| 78,110 | 193 | 24,840 | 4,825 | 3,271 | 33,129 |
| 78,111 | 194 | 24,699 | 4,803 | 3,250 | 32,946 |
| 78,112 | 199 | 24,648 | 4,828 | 3,212 | 32,887 |
| 78,113 | 202 | 24,641 | 4,835 | 3,205 | 32,883 |
| 78,114 | 204 | 24,688 | 4,843 | 3,186 | 32,921 |
| 78,115 | 200 | 24,538 | 4,796 | 3,151 | 32,685 |
| 78,116 | 201 | 24,343 | 4,752 | 3,128 | 32,424 |
| 78,117 | 197 | 24,177 | 4,738 | 3,096 | 32,208 |
| 78,118 | 193 | 24,040 | 4,722 | 3,082 | 32,037 |
| 78,119 | 177 | 23,579 | 4,654 | 3,028 | 31,438 |
| 78,120 | 180 | 23,388 | 4,596 | 2,982 | 31,146 |
| 78,121 | 176 | 23,350 | 4,611 | 2,978 | 31,115 |
| 78,122 | 165 | 22,939 | 4,557 | 2,916 | 30,577 |
| 78,123 | 170 | 22,917 | 4,550 | 2,918 | 30,555 |
| 78,124 | 167 | 22,465 | 4,469 | 2,848 | 29,949 |
| 78,125 | 159 | 22,036 | 4,403 | 2,786 | 29,384 |
| 78,126 | 161 | 21,653 | 4,320 | 2,729 | 28,863 |
| 78,127 | 163 | 21,461 | 4,315 | 2,718 | 28,657 |
| 78,128 | 170 | 21,028 | 4,225 | 2,660 | 28,083 |
| 78,129 | 169 | 20,909 | 4,206 | 2,640 | 27,924 |
| 78,130 | 169 | 20,505 | 4,128 | 2,587 | 27,389 |
| 78,131 | 172 | 20,330 | 4,127 | 2,572 | 27,201 |
| 78,132 | 173 | 20,048 | 4,095 | 2,553 | 26,869 |
| 78,133 | 169 | 19,805 | 4,044 | 2,508 | 26,526 |
| 78,134 | 168 | 19,494 | 4,002 | 2,473 | 26,137 |
| 78,135 | 168 | 19,326 | 3,979 | 2,458 | 25,931 |

|        |     |        |       |       |        |
|--------|-----|--------|-------|-------|--------|
| 78,136 | 171 | 19,265 | 3,936 | 2,456 | 25,828 |
| 78,137 | 161 | 19,191 | 3,889 | 2,415 | 25,656 |
| 78,138 | 156 | 19,094 | 3,893 | 2,425 | 25,568 |
| 78,139 | 150 | 18,839 | 3,916 | 2,423 | 25,328 |
| 78,140 | 136 | 18,514 | 3,915 | 2,395 | 24,960 |
| 78,141 | 128 | 18,333 | 3,928 | 2,413 | 24,802 |
| 78,142 | 128 | 18,044 | 3,962 | 2,433 | 24,567 |
| 78,143 | 125 | 17,845 | 4,005 | 2,464 | 24,439 |
| 78,144 | 128 | 17,645 | 4,048 | 2,506 | 24,327 |
| 78,145 | 130 | 17,427 | 4,043 | 2,472 | 24,072 |
| 78,146 | 128 | 17,040 | 4,029 | 2,441 | 23,638 |
| 78,147 | 126 | 16,259 | 3,906 | 2,345 | 22,636 |
| 78,148 | 127 | 16,342 | 3,939 | 2,370 | 22,778 |
| 78,149 | 122 | 16,428 | 3,993 | 2,410 | 22,953 |
| 78,150 | 118 | 16,299 | 3,997 | 2,412 | 22,826 |
| 78,151 | 127 | 16,289 | 4,087 | 2,455 | 22,958 |
| 78,152 | 132 | 16,285 | 4,080 | 2,456 | 22,953 |
| 78,153 | 131 | 16,266 | 4,101 | 2,444 | 22,942 |
| 78,154 | 133 | 16,545 | 4,152 | 2,481 | 23,311 |
| 78,155 | 133 | 16,641 | 4,155 | 2,502 | 23,431 |
| 78,156 | 134 | 16,544 | 4,109 | 2,480 | 23,267 |
| 78,157 | 133 | 16,546 | 4,131 | 2,491 | 23,301 |
| 78,158 | 135 | 16,475 | 4,115 | 2,501 | 23,226 |
| 78,159 | 134 | 16,375 | 4,139 | 2,510 | 23,158 |
| 78,160 | 135 | 16,520 | 4,188 | 2,552 | 23,395 |
| 78,161 | 135 | 16,564 | 4,217 | 2,567 | 23,483 |
| 78,162 | 130 | 16,662 | 4,232 | 2,622 | 23,646 |
| 78,163 | 127 | 16,618 | 4,236 | 2,629 | 23,610 |
| 78,164 | 127 | 16,513 | 4,228 | 2,618 | 23,486 |
| 78,165 | 129 | 16,652 | 4,264 | 2,639 | 23,684 |
| 78,166 | 129 | 16,618 | 4,237 | 2,623 | 23,607 |
| 78,167 | 131 | 16,487 | 4,197 | 2,608 | 23,423 |

|        |     |        |       |       |        |
|--------|-----|--------|-------|-------|--------|
| 78,168 | 130 | 16,542 | 4,205 | 2,623 | 23,500 |
| 78,169 | 127 | 16,339 | 4,173 | 2,603 | 23,242 |
| 78,170 | 131 | 16,226 | 4,144 | 2,608 | 23,109 |
| 78,171 | 131 | 16,274 | 4,175 | 2,624 | 23,204 |
| 78,172 | 128 | 16,436 | 4,200 | 2,637 | 23,401 |
| 78,173 | 123 | 16,458 | 4,226 | 2,649 | 23,456 |
| 78,174 | 120 | 16,316 | 4,229 | 2,654 | 23,319 |
| 78,175 | 112 | 16,224 | 4,199 | 2,649 | 23,184 |
| 78,176 | 111 | 16,371 | 4,228 | 2,672 | 23,382 |
| 78,177 | 112 | 16,512 | 4,290 | 2,686 | 23,600 |
| 78,178 | 111 | 16,545 | 4,332 | 2,715 | 23,703 |
| 78,179 | 111 | 16,592 | 4,355 | 2,728 | 23,786 |
| 78,180 | 117 | 16,636 | 4,358 | 2,741 | 23,852 |
| 78,181 | 117 | 16,629 | 4,381 | 2,755 | 23,882 |
| 78,182 | 117 | 16,654 | 4,394 | 2,781 | 23,946 |
| 78,183 | 115 | 16,728 | 4,420 | 2,800 | 24,063 |
| 78,184 | 120 | 16,868 | 4,456 | 2,819 | 24,263 |
| 78,185 | 122 | 16,968 | 4,508 | 2,837 | 24,435 |
| 78,186 | 122 | 17,084 | 4,556 | 2,860 | 24,622 |
| 78,187 | 125 | 17,000 | 4,568 | 2,851 | 24,544 |
| 78,188 | 127 | 17,036 | 4,547 | 2,832 | 24,542 |
| 78,189 | 130 | 17,100 | 4,496 | 2,803 | 24,529 |
| 78,190 | 133 | 17,166 | 4,502 | 2,817 | 24,618 |
| 78,191 | 133 | 17,280 | 4,514 | 2,814 | 24,741 |
| 78,192 | 131 | 16,998 | 4,328 | 2,686 | 24,143 |
| 78,193 | 134 | 16,766 | 4,235 | 2,611 | 23,746 |
| 78,194 | 130 | 16,514 | 4,139 | 2,520 | 23,303 |
| 78,195 | 142 | 16,587 | 4,195 | 2,549 | 23,473 |
| 78,196 | 136 | 16,254 | 4,128 | 2,505 | 23,023 |
| 78,197 | 131 | 15,461 | 3,931 | 2,395 | 21,918 |
| 78,198 | 131 | 15,205 | 3,907 | 2,372 | 21,615 |
| 78,199 | 131 | 14,940 | 3,828 | 2,310 | 21,209 |

|        |     |        |       |       |        |
|--------|-----|--------|-------|-------|--------|
| 78,200 | 133 | 15,125 | 3,882 | 2,330 | 21,470 |
| 78,201 | 126 | 14,671 | 3,704 | 2,234 | 20,735 |
| 78,202 | 126 | 14,737 | 3,730 | 2,249 | 20,842 |
| 78,203 | 121 | 14,594 | 3,701 | 2,236 | 20,652 |
| 78,204 | 123 | 14,556 | 3,705 | 2,242 | 20,626 |
| 78,205 | 121 | 14,096 | 3,653 | 2,182 | 20,052 |
| 78,206 | 122 | 14,156 | 3,688 | 2,200 | 20,166 |
| 78,207 | 119 | 13,923 | 3,648 | 2,178 | 19,868 |
| 78,208 | 122 | 14,043 | 3,679 | 2,204 | 20,048 |
| 78,209 | 120 | 14,052 | 3,677 | 2,199 | 20,048 |
| 78,210 | 120 | 14,127 | 3,703 | 2,203 | 20,153 |
| 78,211 | 121 | 14,132 | 3,719 | 2,192 | 20,164 |
| 78,212 | 123 | 14,114 | 3,728 | 2,190 | 20,155 |
| 78,213 | 124 | 13,851 | 3,682 | 2,139 | 19,796 |
| 78,214 | 124 | 14,012 | 3,703 | 2,163 | 20,002 |
| 78,215 | 119 | 13,937 | 3,693 | 2,150 | 19,899 |
| 78,216 | 120 | 13,885 | 3,691 | 2,162 | 19,858 |
| 78,217 | 123 | 13,962 | 3,712 | 2,186 | 19,983 |
| 78,218 | 124 | 14,145 | 3,752 | 2,200 | 20,221 |
| 78,219 | 127 | 14,134 | 3,757 | 2,179 | 20,197 |
| 78,220 | 128 | 14,184 | 3,767 | 2,188 | 20,267 |
| 78,221 | 129 | 14,465 | 3,835 | 2,224 | 20,653 |
| 78,222 | 132 | 14,365 | 3,801 | 2,208 | 20,506 |
| 78,223 | 134 | 14,503 | 3,855 | 2,232 | 20,724 |
| 78,224 | 134 | 14,476 | 3,824 | 2,200 | 20,634 |
| 78,225 | 143 | 14,647 | 3,876 | 2,230 | 20,896 |
| 78,226 | 146 | 14,583 | 3,892 | 2,227 | 20,848 |
| 78,227 | 145 | 14,577 | 3,909 | 2,239 | 20,870 |
| 78,228 | 141 | 14,603 | 3,919 | 2,233 | 20,896 |
| 78,229 | 134 | 14,464 | 3,868 | 2,211 | 20,677 |
| 78,230 | 138 | 14,725 | 3,957 | 2,239 | 21,059 |
| 78,231 | 135 | 14,994 | 4,027 | 2,269 | 21,425 |

|        |     |        |       |       |        |
|--------|-----|--------|-------|-------|--------|
| 78,232 | 135 | 15,023 | 4,004 | 2,246 | 21,408 |
| 78,233 | 136 | 15,105 | 4,029 | 2,272 | 21,542 |
| 78,234 | 138 | 15,176 | 4,044 | 2,276 | 21,634 |
| 78,235 | 138 | 15,232 | 4,041 | 2,275 | 21,686 |
| 78,236 | 145 | 15,349 | 4,058 | 2,288 | 21,840 |
| 78,237 | 141 | 15,270 | 4,044 | 2,267 | 21,722 |
| 78,238 | 141 | 15,605 | 4,204 | 2,352 | 22,302 |
| 78,239 | 145 | 15,748 | 4,269 | 2,377 | 22,539 |
| 78,240 | 139 | 15,673 | 4,272 | 2,383 | 22,467 |
| 78,241 | 142 | 15,893 | 4,350 | 2,424 | 22,809 |
| 78,242 | 147 | 16,013 | 4,433 | 2,446 | 23,039 |
| 78,243 | 145 | 15,897 | 4,411 | 2,429 | 22,882 |
| 78,244 | 145 | 16,013 | 4,432 | 2,453 | 23,043 |
| 78,245 | 146 | 16,345 | 4,529 | 2,495 | 23,515 |
| 78,246 | 134 | 16,362 | 4,518 | 2,478 | 23,492 |
| 78,247 | 134 | 16,423 | 4,550 | 2,497 | 23,604 |
| 78,248 | 132 | 16,253 | 4,504 | 2,469 | 23,358 |
| 78,249 | 133 | 16,355 | 4,531 | 2,471 | 23,490 |
| 78,250 | 130 | 16,470 | 4,589 | 2,519 | 23,708 |
| 78,251 | 130 | 16,644 | 4,661 | 2,569 | 24,004 |
| 78,252 | 130 | 16,562 | 4,660 | 2,569 | 23,921 |
| 78,253 | 127 | 16,550 | 4,651 | 2,585 | 23,913 |
| 78,254 | 129 | 16,784 | 4,732 | 2,608 | 24,253 |
| 78,255 | 130 | 16,701 | 4,723 | 2,604 | 24,158 |
| 78,256 | 131 | 16,894 | 4,776 | 2,628 | 24,429 |
| 78,257 | 129 | 16,956 | 4,834 | 2,649 | 24,568 |
| 78,258 | 136 | 17,135 | 4,876 | 2,647 | 24,794 |
| 78,259 | 140 | 17,384 | 4,922 | 2,664 | 25,110 |
| 78,260 | 139 | 17,531 | 4,950 | 2,673 | 25,293 |
| 78,261 | 142 | 17,587 | 4,948 | 2,690 | 25,367 |
| 78,262 | 138 | 17,587 | 4,915 | 2,700 | 25,340 |
| 78,263 | 143 | 17,431 | 4,876 | 2,678 | 25,128 |

|        |     |        |       |       |        |
|--------|-----|--------|-------|-------|--------|
| 78,264 | 138 | 17,317 | 4,845 | 2,659 | 24,959 |
| 78,265 | 139 | 17,380 | 4,883 | 2,671 | 25,073 |
| 78,266 | 139 | 17,185 | 4,866 | 2,635 | 24,825 |
| 78,267 | 139 | 17,177 | 4,870 | 2,638 | 24,824 |
| 78,268 | 134 | 17,147 | 4,888 | 2,643 | 24,812 |
| 78,269 | 134 | 17,150 | 4,929 | 2,662 | 24,875 |
| 78,270 | 132 | 17,035 | 4,943 | 2,671 | 24,781 |
| 78,271 | 130 | 17,163 | 4,992 | 2,685 | 24,970 |
| 78,272 | 126 | 17,207 | 5,020 | 2,689 | 25,042 |
| 78,273 | 125 | 17,266 | 5,025 | 2,683 | 25,099 |
| 78,274 | 123 | 17,260 | 5,041 | 2,708 | 25,132 |
| 78,275 | 130 | 17,258 | 5,063 | 2,731 | 25,182 |
| 78,276 | 122 | 17,359 | 5,072 | 2,729 | 25,282 |
| 78,277 | 116 | 17,137 | 5,009 | 2,678 | 24,940 |
| 78,278 | 119 | 17,206 | 5,009 | 2,677 | 25,011 |
| 78,279 | 119 | 17,352 | 5,018 | 2,693 | 25,182 |
| 78,280 | 113 | 16,525 | 4,843 | 2,579 | 24,060 |
| 78,281 | 111 | 16,712 | 4,874 | 2,618 | 24,315 |
| 78,282 | 111 | 16,940 | 4,909 | 2,638 | 24,598 |
| 78,283 | 110 | 16,970 | 4,919 | 2,641 | 24,640 |
| 78,284 | 110 | 17,400 | 5,023 | 2,715 | 25,248 |
| 78,285 | 116 | 17,687 | 5,081 | 2,747 | 25,631 |
| 78,286 | 119 | 17,688 | 5,122 | 2,756 | 25,685 |
| 78,287 | 109 | 17,626 | 5,104 | 2,745 | 25,584 |
| 78,288 | 107 | 17,615 | 5,073 | 2,742 | 25,537 |
| 78,289 | 114 | 17,464 | 5,024 | 2,712 | 25,314 |
| 78,290 | 113 | 17,626 | 5,037 | 2,735 | 25,511 |
| 78,291 | 115 | 17,603 | 5,050 | 2,740 | 25,508 |
| 78,292 | 121 | 17,431 | 4,966 | 2,715 | 25,233 |
| 78,293 | 125 | 17,383 | 4,927 | 2,716 | 25,151 |
| 78,294 | 125 | 17,234 | 4,919 | 2,682 | 24,960 |
| 78,295 | 127 | 17,475 | 4,953 | 2,734 | 25,289 |

|        |     |        |       |       |        |
|--------|-----|--------|-------|-------|--------|
| 78,296 | 139 | 17,274 | 4,874 | 2,708 | 24,995 |
| 78,297 | 139 | 17,385 | 4,878 | 2,729 | 25,131 |
| 78,298 | 136 | 17,467 | 4,898 | 2,734 | 25,235 |
| 78,299 | 136 | 17,542 | 4,912 | 2,747 | 25,337 |
| 78,300 | 139 | 17,687 | 4,938 | 2,776 | 25,540 |
| 78,301 | 147 | 17,746 | 4,924 | 2,751 | 25,568 |
| 78,302 | 148 | 17,928 | 4,926 | 2,733 | 25,735 |
| 78,303 | 154 | 17,660 | 4,797 | 2,671 | 25,282 |
| 78,304 | 153 | 17,952 | 4,870 | 2,708 | 25,683 |
| 78,305 | 151 | 18,286 | 4,947 | 2,761 | 26,145 |
| 78,306 | 150 | 18,576 | 4,986 | 2,776 | 26,488 |
| 78,307 | 151 | 18,588 | 4,955 | 2,770 | 26,464 |
| 78,308 | 150 | 18,876 | 5,025 | 2,812 | 26,863 |
| 78,309 | 142 | 18,986 | 5,057 | 2,827 | 27,012 |
| 78,310 | 142 | 18,970 | 5,061 | 2,818 | 26,991 |
| 78,311 | 142 | 18,999 | 5,039 | 2,815 | 26,995 |
| 78,312 | 141 | 19,156 | 5,076 | 2,828 | 27,201 |
| 78,313 | 138 | 19,124 | 5,047 | 2,811 | 27,120 |
| 78,314 | 148 | 19,456 | 5,116 | 2,847 | 27,567 |
| 78,315 | 155 | 19,320 | 5,078 | 2,822 | 27,375 |
| 78,316 | 155 | 19,364 | 5,060 | 2,840 | 27,419 |
| 78,317 | 157 | 19,539 | 5,116 | 2,885 | 27,697 |
| 78,318 | 160 | 19,724 | 5,120 | 2,893 | 27,897 |
| 78,319 | 163 | 19,780 | 5,092 | 2,876 | 27,911 |
| 78,320 | 163 | 19,802 | 5,071 | 2,871 | 27,907 |
| 78,321 | 165 | 20,089 | 5,103 | 2,902 | 28,259 |
| 78,322 | 171 | 20,198 | 5,145 | 2,901 | 28,415 |
| 78,323 | 169 | 19,931 | 5,067 | 2,876 | 28,043 |
| 78,324 | 165 | 19,691 | 4,999 | 2,826 | 27,681 |
| 78,325 | 168 | 19,961 | 5,057 | 2,838 | 28,024 |
| 78,326 | 169 | 20,197 | 5,090 | 2,868 | 28,324 |
| 78,327 | 169 | 19,992 | 5,033 | 2,843 | 28,037 |



|        |     |        |       |       |        |
|--------|-----|--------|-------|-------|--------|
| 78,328 | 168 | 20,024 | 5,020 | 2,862 | 28,074 |
| 78,329 | 166 | 20,153 | 5,080 | 2,877 | 28,276 |
| 78,330 | 167 | 20,029 | 5,052 | 2,844 | 28,092 |
| 78,331 | 165 | 19,897 | 5,000 | 2,824 | 27,886 |
| 78,332 | 165 | 20,109 | 5,029 | 2,827 | 28,130 |
| 78,333 | 164 | 20,194 | 5,027 | 2,847 | 28,232 |
| 78,334 | 162 | 20,368 | 5,063 | 2,859 | 28,452 |
| 78,335 | 167 | 20,736 | 5,151 | 2,898 | 28,952 |
| 78,336 | 164 | 20,530 | 5,113 | 2,895 | 28,702 |
| 78,337 | 169 | 20,496 | 5,092 | 2,899 | 28,656 |
| 78,338 | 172 | 20,597 | 5,110 | 2,917 | 28,796 |
| 78,339 | 177 | 20,843 | 5,176 | 2,956 | 29,152 |
| 78,340 | 166 | 20,593 | 5,106 | 2,941 | 28,806 |
| 78,341 | 155 | 19,990 | 4,917 | 2,826 | 27,888 |
| 78,342 | 156 | 20,185 | 4,963 | 2,851 | 28,155 |
| 78,343 | 154 | 20,366 | 5,024 | 2,882 | 28,426 |
| 78,344 | 154 | 20,407 | 5,045 | 2,889 | 28,495 |
| 78,345 | 153 | 20,486 | 5,111 | 2,885 | 28,635 |
| 78,346 | 152 | 20,511 | 5,120 | 2,904 | 28,687 |
| 78,347 | 147 | 20,684 | 5,137 | 2,920 | 28,888 |
| 78,348 | 151 | 20,574 | 5,081 | 2,900 | 28,706 |
| 78,349 | 150 | 20,561 | 5,080 | 2,904 | 28,695 |
| 78,350 | 147 | 20,936 | 5,152 | 2,962 | 29,197 |
| 78,351 | 154 | 20,802 | 5,118 | 2,931 | 29,005 |
| 78,352 | 150 | 20,719 | 5,116 | 2,925 | 28,910 |
| 78,353 | 145 | 20,668 | 5,143 | 2,943 | 28,899 |
| 78,354 | 147 | 20,942 | 5,208 | 2,984 | 29,281 |
| 78,355 | 147 | 20,381 | 5,073 | 2,916 | 28,517 |
| 78,356 | 151 | 20,757 | 5,128 | 2,961 | 28,997 |
| 78,357 | 153 | 21,041 | 5,191 | 2,993 | 29,378 |
| 78,358 | 151 | 20,739 | 5,146 | 2,967 | 29,003 |
| 78,359 | 155 | 21,089 | 5,205 | 3,004 | 29,453 |

|        |     |        |       |       |        |
|--------|-----|--------|-------|-------|--------|
| 78,360 | 152 | 20,733 | 5,092 | 2,960 | 28,937 |
| 78,361 | 152 | 20,723 | 5,112 | 2,960 | 28,947 |
| 78,362 | 153 | 20,731 | 5,127 | 2,971 | 28,982 |
| 78,363 | 150 | 20,885 | 5,186 | 3,024 | 29,245 |
| 78,364 | 154 | 20,906 | 5,188 | 3,037 | 29,285 |
| 78,365 | 144 | 21,024 | 5,180 | 3,069 | 29,417 |
| 78,366 | 136 | 20,818 | 5,140 | 3,038 | 29,132 |
| 78,367 | 135 | 20,955 | 5,173 | 3,030 | 29,293 |
| 78,368 | 139 | 21,229 | 5,209 | 3,070 | 29,647 |
| 78,369 | 137 | 21,143 | 5,210 | 3,053 | 29,543 |
| 78,370 | 140 | 21,144 | 5,196 | 3,057 | 29,537 |
| 78,371 | 137 | 21,017 | 5,147 | 3,033 | 29,334 |
| 78,372 | 142 | 21,383 | 5,204 | 3,072 | 29,801 |
| 78,373 | 138 | 21,487 | 5,194 | 3,084 | 29,903 |
| 78,374 | 140 | 21,326 | 5,137 | 3,058 | 29,661 |
| 78,375 | 138 | 21,551 | 5,189 | 3,093 | 29,971 |
| 78,376 | 135 | 21,276 | 5,134 | 3,092 | 29,637 |
| 78,377 | 138 | 21,492 | 5,200 | 3,109 | 29,939 |
| 78,378 | 142 | 21,419 | 5,171 | 3,091 | 29,823 |
| 78,379 | 143 | 21,229 | 5,069 | 3,078 | 29,519 |
| 78,380 | 145 | 21,513 | 5,110 | 3,107 | 29,875 |
| 78,381 | 143 | 21,475 | 5,098 | 3,119 | 29,835 |
| 78,382 | 143 | 21,408 | 5,107 | 3,117 | 29,775 |
| 78,383 | 144 | 21,300 | 5,133 | 3,136 | 29,713 |
| 78,384 | 144 | 21,048 | 5,109 | 3,128 | 29,429 |
| 78,385 | 147 | 21,093 | 5,170 | 3,160 | 29,570 |
| 78,386 | 143 | 20,936 | 5,128 | 3,166 | 29,373 |
| 78,387 | 135 | 20,833 | 5,131 | 3,158 | 29,257 |
| 78,388 | 130 | 20,676 | 5,142 | 3,153 | 29,101 |
| 78,389 | 128 | 20,502 | 5,143 | 3,138 | 28,911 |
| 78,390 | 128 | 20,566 | 5,141 | 3,144 | 28,979 |
| 78,391 | 131 | 20,623 | 5,132 | 3,114 | 29,000 |

|        |     |        |       |       |        |
|--------|-----|--------|-------|-------|--------|
| 78,392 | 127 | 20,527 | 5,095 | 3,089 | 28,838 |
| 78,393 | 123 | 20,566 | 5,082 | 3,057 | 28,828 |
| 78,394 | 124 | 20,758 | 5,097 | 3,061 | 29,040 |
| 78,395 | 123 | 20,681 | 5,043 | 3,034 | 28,881 |
| 78,396 | 123 | 20,636 | 5,038 | 3,045 | 28,842 |
| 78,397 | 121 | 20,561 | 5,062 | 3,051 | 28,795 |
| 78,398 | 127 | 20,667 | 5,098 | 3,061 | 28,953 |
| 78,399 | 126 | 20,589 | 5,086 | 3,059 | 28,860 |
| 78,400 | 127 | 20,638 | 5,075 | 3,060 | 28,900 |
| 78,401 | 127 | 20,505 | 5,064 | 3,045 | 28,741 |
| 78,402 | 117 | 20,097 | 4,909 | 2,985 | 28,108 |
| 78,403 | 117 | 20,235 | 4,924 | 3,007 | 28,283 |
| 78,404 | 115 | 20,219 | 4,909 | 3,000 | 28,243 |
| 78,405 | 115 | 20,126 | 4,888 | 2,958 | 28,087 |
| 78,406 | 117 | 20,259 | 4,905 | 2,987 | 28,268 |
| 78,407 | 115 | 20,210 | 4,900 | 2,985 | 28,210 |
| 78,408 | 119 | 20,260 | 4,890 | 3,002 | 28,271 |
| 78,409 | 130 | 20,267 | 4,844 | 2,985 | 28,226 |
| 78,410 | 126 | 20,109 | 4,814 | 2,977 | 28,026 |
| 78,411 | 127 | 20,334 | 4,872 | 3,010 | 28,343 |
| 78,412 | 133 | 20,682 | 4,904 | 3,040 | 28,759 |
| 78,413 | 135 | 20,731 | 4,915 | 3,035 | 28,816 |
| 78,414 | 138 | 20,949 | 4,963 | 3,069 | 29,119 |
| 78,415 | 131 | 20,767 | 4,897 | 3,012 | 28,807 |
| 78,416 | 133 | 20,719 | 4,902 | 3,011 | 28,765 |
| 78,417 | 135 | 20,627 | 4,858 | 2,983 | 28,603 |
| 78,418 | 136 | 20,661 | 4,855 | 2,993 | 28,645 |
| 78,419 | 139 | 20,526 | 4,821 | 2,966 | 28,452 |
| 78,420 | 141 | 20,438 | 4,786 | 2,962 | 28,327 |
| 78,421 | 139 | 20,856 | 4,919 | 3,043 | 28,957 |
| 78,422 | 139 | 20,645 | 4,883 | 3,010 | 28,677 |
| 78,423 | 135 | 21,042 | 4,960 | 3,071 | 29,208 |

|        |     |        |       |       |        |
|--------|-----|--------|-------|-------|--------|
| 78,424 | 134 | 21,003 | 4,973 | 3,087 | 29,197 |
| 78,425 | 137 | 20,986 | 4,958 | 3,087 | 29,168 |
| 78,426 | 139 | 21,051 | 4,942 | 3,091 | 29,223 |
| 78,427 | 137 | 21,278 | 4,974 | 3,107 | 29,496 |
| 78,428 | 142 | 21,358 | 5,019 | 3,134 | 29,653 |
| 78,429 | 143 | 21,303 | 5,042 | 3,144 | 29,632 |
| 78,430 | 142 | 21,291 | 5,104 | 3,148 | 29,685 |
| 78,431 | 152 | 21,596 | 5,177 | 3,169 | 30,094 |
| 78,432 | 158 | 21,867 | 5,237 | 3,181 | 30,443 |
| 78,433 | 160 | 22,010 | 5,256 | 3,201 | 30,627 |
| 78,434 | 160 | 22,151 | 5,302 | 3,210 | 30,823 |
| 78,435 | 162 | 22,500 | 5,353 | 3,244 | 31,259 |
| 78,436 | 162 | 22,768 | 5,374 | 3,250 | 31,554 |
| 78,437 | 164 | 22,892 | 5,382 | 3,253 | 31,691 |
| 78,438 | 166 | 22,907 | 5,279 | 3,202 | 31,554 |
| 78,439 | 169 | 22,857 | 5,249 | 3,188 | 31,463 |
| 78,440 | 176 | 23,119 | 5,278 | 3,199 | 31,772 |
| 78,441 | 175 | 23,120 | 5,276 | 3,194 | 31,765 |
| 78,442 | 176 | 22,913 | 5,241 | 3,163 | 31,493 |
| 78,443 | 176 | 22,951 | 5,245 | 3,171 | 31,543 |
| 78,444 | 176 | 22,868 | 5,258 | 3,203 | 31,505 |
| 78,445 | 175 | 22,965 | 5,272 | 3,224 | 31,636 |
| 78,446 | 176 | 23,163 | 5,302 | 3,264 | 31,905 |
| 78,447 | 174 | 23,136 | 5,263 | 3,234 | 31,807 |
| 78,448 | 174 | 23,326 | 5,264 | 3,246 | 32,010 |
| 78,449 | 167 | 23,488 | 5,289 | 3,260 | 32,204 |
| 78,450 | 173 | 23,891 | 5,426 | 3,313 | 32,803 |
| 78,451 | 176 | 23,559 | 5,361 | 3,260 | 32,356 |
| 78,452 | 180 | 23,777 | 5,419 | 3,301 | 32,677 |
| 78,453 | 179 | 23,582 | 5,401 | 3,275 | 32,437 |
| 78,454 | 183 | 23,652 | 5,460 | 3,302 | 32,597 |
| 78,455 | 183 | 23,559 | 5,484 | 3,299 | 32,525 |

|        |     |        |       |       |        |
|--------|-----|--------|-------|-------|--------|
| 78,456 | 183 | 23,258 | 5,431 | 3,269 | 32,141 |
| 78,457 | 182 | 23,279 | 5,433 | 3,278 | 32,172 |
| 78,458 | 183 | 23,095 | 5,419 | 3,272 | 31,969 |
| 78,459 | 176 | 22,889 | 5,399 | 3,233 | 31,697 |
| 78,460 | 165 | 22,543 | 5,335 | 3,212 | 31,255 |
| 78,461 | 166 | 22,253 | 5,287 | 3,182 | 30,888 |
| 78,462 | 164 | 22,437 | 5,327 | 3,237 | 31,165 |
| 78,463 | 170 | 22,353 | 5,356 | 3,242 | 31,121 |
| 78,464 | 173 | 22,357 | 5,349 | 3,235 | 31,114 |
| 78,465 | 174 | 22,368 | 5,373 | 3,251 | 31,166 |
| 78,466 | 170 | 22,336 | 5,404 | 3,245 | 31,155 |
| 78,467 | 167 | 22,293 | 5,410 | 3,248 | 31,118 |
| 78,468 | 169 | 22,572 | 5,478 | 3,284 | 31,503 |
| 78,469 | 169 | 22,535 | 5,468 | 3,273 | 31,445 |
| 78,470 | 165 | 22,517 | 5,460 | 3,270 | 31,412 |
| 78,471 | 161 | 22,281 | 5,415 | 3,221 | 31,078 |
| 78,472 | 161 | 22,315 | 5,412 | 3,220 | 31,108 |
| 78,473 | 163 | 22,091 | 5,367 | 3,209 | 30,830 |
| 78,474 | 161 | 22,059 | 5,348 | 3,193 | 30,761 |
| 78,475 | 161 | 21,990 | 5,323 | 3,186 | 30,660 |
| 78,476 | 157 | 21,837 | 5,314 | 3,175 | 30,483 |
| 78,477 | 152 | 21,874 | 5,370 | 3,175 | 30,571 |
| 78,478 | 148 | 21,448 | 5,246 | 3,094 | 29,936 |
| 78,479 | 149 | 21,730 | 5,293 | 3,135 | 30,307 |
| 78,480 | 149 | 21,964 | 5,330 | 3,154 | 30,597 |
| 78,481 | 149 | 21,757 | 5,268 | 3,142 | 30,316 |
| 78,482 | 149 | 21,655 | 5,202 | 3,131 | 30,137 |
| 78,483 | 150 | 21,635 | 5,153 | 3,124 | 30,062 |
| 78,484 | 155 | 21,516 | 5,094 | 3,079 | 29,844 |
| 78,485 | 155 | 21,450 | 5,046 | 3,059 | 29,710 |
| 78,486 | 154 | 21,295 | 5,008 | 3,046 | 29,503 |
| 78,487 | 150 | 21,215 | 4,982 | 3,066 | 29,413 |

|        |     |        |       |       |        |
|--------|-----|--------|-------|-------|--------|
| 78,488 | 148 | 20,791 | 4,939 | 3,020 | 28,898 |
| 78,489 | 148 | 20,800 | 4,940 | 3,017 | 28,905 |
| 78,490 | 144 | 20,804 | 4,940 | 3,018 | 28,906 |
| 78,491 | 137 | 20,844 | 4,957 | 3,044 | 28,982 |
| 78,492 | 136 | 20,826 | 4,978 | 3,040 | 28,980 |
| 78,493 | 139 | 20,715 | 4,949 | 3,029 | 28,832 |
| 78,494 | 139 | 20,801 | 4,966 | 3,028 | 28,934 |
| 78,495 | 147 | 21,140 | 5,064 | 3,076 | 29,427 |
| 78,496 | 147 | 21,126 | 5,035 | 3,060 | 29,368 |
| 78,497 | 146 | 21,022 | 5,027 | 3,060 | 29,255 |
| 78,498 | 155 | 21,066 | 5,100 | 3,084 | 29,405 |
| 78,499 | 160 | 21,512 | 5,232 | 3,169 | 30,073 |
| 78,500 | 168 | 21,590 | 5,209 | 3,162 | 30,129 |
| 78,501 | 167 | 21,333 | 5,180 | 3,132 | 29,812 |
| 78,502 | 169 | 21,185 | 5,166 | 3,132 | 29,652 |
| 78,503 | 169 | 21,724 | 5,285 | 3,191 | 30,369 |
| 78,504 | 167 | 21,507 | 5,220 | 3,163 | 30,057 |
| 78,505 | 163 | 21,779 | 5,242 | 3,187 | 30,371 |
| 78,506 | 160 | 21,846 | 5,250 | 3,190 | 30,446 |
| 78,507 | 158 | 21,712 | 5,216 | 3,158 | 30,244 |
| 78,508 | 155 | 21,713 | 5,199 | 3,154 | 30,221 |
| 78,509 | 162 | 21,578 | 5,148 | 3,123 | 30,011 |
| 78,510 | 163 | 21,552 | 5,130 | 3,117 | 29,962 |
| 78,511 | 165 | 22,182 | 5,260 | 3,208 | 30,815 |
| 78,512 | 166 | 21,980 | 5,196 | 3,125 | 30,467 |
| 78,513 | 167 | 22,101 | 5,228 | 3,148 | 30,644 |
| 78,514 | 167 | 22,291 | 5,269 | 3,159 | 30,886 |
| 78,515 | 169 | 22,185 | 5,261 | 3,155 | 30,770 |
| 78,516 | 169 | 22,263 | 5,228 | 3,158 | 30,818 |
| 78,517 | 176 | 22,193 | 5,220 | 3,155 | 30,744 |
| 78,518 | 176 | 22,041 | 5,170 | 3,124 | 30,511 |
| 78,519 | 179 | 21,999 | 5,154 | 3,140 | 30,472 |

|        |     |        |       |       |        |
|--------|-----|--------|-------|-------|--------|
| 78,520 | 178 | 21,777 | 5,086 | 3,102 | 30,143 |
| 78,521 | 176 | 21,716 | 5,087 | 3,100 | 30,079 |
| 78,522 | 177 | 21,646 | 5,057 | 3,099 | 29,979 |
| 78,523 | 183 | 21,777 | 5,093 | 3,111 | 30,164 |
| 78,524 | 185 | 21,763 | 5,080 | 3,111 | 30,139 |
| 78,525 | 186 | 21,742 | 5,095 | 3,107 | 30,130 |
| 78,526 | 190 | 21,624 | 5,076 | 3,090 | 29,980 |
| 78,527 | 190 | 21,593 | 5,062 | 3,084 | 29,929 |
| 78,528 | 195 | 21,749 | 5,173 | 3,176 | 30,293 |
| 78,529 | 196 | 21,816 | 5,160 | 3,173 | 30,345 |
| 78,530 | 199 | 22,022 | 5,209 | 3,215 | 30,645 |
| 78,531 | 197 | 21,962 | 5,180 | 3,201 | 30,540 |
| 78,532 | 199 | 21,948 | 5,174 | 3,201 | 30,522 |
| 78,533 | 190 | 22,334 | 5,272 | 3,251 | 31,047 |
| 78,534 | 184 | 22,326 | 5,315 | 3,277 | 31,102 |
| 78,535 | 179 | 22,144 | 5,299 | 3,269 | 30,891 |
| 78,536 | 180 | 22,170 | 5,297 | 3,269 | 30,916 |
| 78,537 | 181 | 22,275 | 5,343 | 3,290 | 31,089 |
| 78,538 | 181 | 22,257 | 5,357 | 3,289 | 31,084 |
| 78,539 | 181 | 22,372 | 5,357 | 3,308 | 31,218 |
| 78,540 | 186 | 22,446 | 5,348 | 3,317 | 31,297 |
| 78,541 | 191 | 22,699 | 5,395 | 3,351 | 31,636 |
| 78,542 | 193 | 22,728 | 5,385 | 3,362 | 31,668 |
| 78,543 | 189 | 22,484 | 5,328 | 3,348 | 31,349 |
| 78,544 | 187 | 22,607 | 5,351 | 3,371 | 31,516 |
| 78,545 | 197 | 22,695 | 5,370 | 3,388 | 31,650 |
| 78,546 | 189 | 22,532 | 5,333 | 3,361 | 31,415 |
| 78,547 | 182 | 22,570 | 5,311 | 3,341 | 31,404 |
| 78,548 | 182 | 22,588 | 5,324 | 3,368 | 31,462 |
| 78,549 | 184 | 22,883 | 5,371 | 3,401 | 31,839 |
| 78,550 | 187 | 22,813 | 5,336 | 3,381 | 31,717 |
| 78,551 | 185 | 22,594 | 5,229 | 3,344 | 31,352 |

|        |     |        |       |       |        |
|--------|-----|--------|-------|-------|--------|
| 78,552 | 185 | 22,714 | 5,216 | 3,350 | 31,465 |
| 78,553 | 180 | 22,777 | 5,193 | 3,346 | 31,496 |
| 78,554 | 189 | 22,909 | 5,251 | 3,355 | 31,704 |
| 78,555 | 201 | 22,875 | 5,246 | 3,352 | 31,674 |
| 78,556 | 204 | 22,583 | 5,150 | 3,303 | 31,240 |
| 78,557 | 207 | 22,695 | 5,159 | 3,309 | 31,370 |
| 78,558 | 208 | 22,684 | 5,166 | 3,316 | 31,374 |
| 78,559 | 202 | 22,748 | 5,191 | 3,331 | 31,472 |
| 78,560 | 201 | 22,815 | 5,191 | 3,328 | 31,535 |
| 78,561 | 199 | 22,779 | 5,177 | 3,303 | 31,458 |
| 78,562 | 199 | 22,794 | 5,189 | 3,301 | 31,483 |
| 78,563 | 201 | 22,797 | 5,148 | 3,298 | 31,444 |
| 78,564 | 205 | 22,807 | 5,169 | 3,296 | 31,477 |
| 78,565 | 198 | 22,680 | 5,108 | 3,275 | 31,261 |
| 78,566 | 200 | 23,341 | 5,235 | 3,346 | 32,122 |
| 78,567 | 196 | 23,325 | 5,243 | 3,340 | 32,104 |
| 78,568 | 187 | 23,020 | 5,191 | 3,307 | 31,705 |
| 78,569 | 184 | 23,162 | 5,202 | 3,336 | 31,884 |
| 78,570 | 186 | 23,068 | 5,219 | 3,305 | 31,778 |
| 78,571 | 187 | 23,278 | 5,258 | 3,330 | 32,053 |
| 78,572 | 184 | 23,120 | 5,263 | 3,326 | 31,893 |
| 78,573 | 178 | 23,016 | 5,299 | 3,340 | 31,833 |
| 78,574 | 181 | 23,168 | 5,315 | 3,363 | 32,027 |
| 78,575 | 180 | 23,134 | 5,322 | 3,357 | 31,993 |
| 78,576 | 179 | 23,016 | 5,251 | 3,337 | 31,783 |
| 78,577 | 180 | 23,176 | 5,295 | 3,360 | 32,011 |
| 78,578 | 178 | 23,391 | 5,347 | 3,367 | 32,283 |
| 78,579 | 177 | 23,185 | 5,287 | 3,341 | 31,990 |
| 78,580 | 180 | 23,422 | 5,312 | 3,344 | 32,258 |
| 78,581 | 183 | 23,253 | 5,314 | 3,338 | 32,088 |
| 78,582 | 181 | 23,067 | 5,281 | 3,306 | 31,835 |
| 78,583 | 180 | 22,852 | 5,225 | 3,287 | 31,544 |



|        |     |        |       |       |        |
|--------|-----|--------|-------|-------|--------|
| 78,584 | 183 | 23,072 | 5,286 | 3,309 | 31,850 |
| 78,585 | 183 | 22,699 | 5,214 | 3,273 | 31,369 |
| 78,586 | 183 | 22,836 | 5,207 | 3,275 | 31,501 |
| 78,587 | 184 | 22,783 | 5,188 | 3,250 | 31,405 |
| 78,588 | 184 | 22,718 | 5,172 | 3,257 | 31,331 |
| 78,589 | 185 | 22,798 | 5,188 | 3,245 | 31,416 |
| 78,590 | 185 | 22,646 | 5,188 | 3,242 | 31,261 |
| 78,591 | 184 | 22,883 | 5,253 | 3,275 | 31,595 |
| 78,592 | 181 | 22,681 | 5,218 | 3,242 | 31,322 |
| 78,593 | 185 | 22,583 | 5,201 | 3,224 | 31,193 |
| 78,594 | 187 | 22,569 | 5,214 | 3,220 | 31,190 |
| 78,595 | 183 | 22,525 | 5,232 | 3,210 | 31,150 |
| 78,596 | 184 | 22,389 | 5,205 | 3,207 | 30,985 |
| 78,597 | 183 | 22,330 | 5,190 | 3,213 | 30,916 |
| 78,598 | 186 | 22,496 | 5,249 | 3,258 | 31,189 |
| 78,599 | 182 | 22,411 | 5,207 | 3,247 | 31,047 |
| 78,600 | 180 | 22,279 | 5,236 | 3,273 | 30,968 |
| 78,601 | 178 | 22,178 | 5,219 | 3,272 | 30,847 |
| 78,602 | 168 | 22,285 | 5,304 | 3,323 | 31,080 |
| 78,603 | 164 | 22,328 | 5,342 | 3,327 | 31,161 |
| 78,604 | 152 | 21,657 | 5,206 | 3,240 | 30,255 |
| 78,605 | 151 | 21,921 | 5,266 | 3,286 | 30,624 |
| 78,606 | 148 | 22,160 | 5,342 | 3,322 | 30,972 |
| 78,607 | 149 | 22,173 | 5,343 | 3,316 | 30,981 |
| 78,608 | 150 | 22,122 | 5,334 | 3,318 | 30,924 |
| 78,609 | 148 | 21,932 | 5,326 | 3,291 | 30,697 |
| 78,610 | 154 | 22,153 | 5,340 | 3,325 | 30,972 |
| 78,611 | 156 | 22,167 | 5,379 | 3,349 | 31,051 |
| 78,612 | 156 | 22,182 | 5,374 | 3,343 | 31,055 |
| 78,613 | 173 | 22,621 | 5,488 | 3,402 | 31,684 |
| 78,614 | 171 | 22,615 | 5,508 | 3,418 | 31,712 |
| 78,615 | 168 | 22,509 | 5,499 | 3,433 | 31,609 |

|        |     |        |       |       |        |
|--------|-----|--------|-------|-------|--------|
| 78,616 | 162 | 22,169 | 5,442 | 3,401 | 31,174 |
| 78,617 | 162 | 22,076 | 5,423 | 3,399 | 31,060 |
| 78,618 | 166 | 22,097 | 5,426 | 3,404 | 31,093 |
| 78,619 | 170 | 22,338 | 5,481 | 3,455 | 31,444 |
| 78,620 | 176 | 22,349 | 5,467 | 3,448 | 31,440 |
| 78,621 | 174 | 22,500 | 5,466 | 3,470 | 31,610 |
| 78,622 | 176 | 22,499 | 5,436 | 3,431 | 31,542 |
| 78,623 | 178 | 22,486 | 5,430 | 3,414 | 31,508 |
| 78,624 | 179 | 22,549 | 5,459 | 3,452 | 31,639 |
| 78,625 | 181 | 22,521 | 5,468 | 3,438 | 31,608 |
| 78,626 | 181 | 22,506 | 5,452 | 3,445 | 31,584 |
| 78,627 | 183 | 22,647 | 5,483 | 3,482 | 31,795 |
| 78,628 | 183 | 22,554 | 5,438 | 3,461 | 31,636 |
| 78,629 | 180 | 22,610 | 5,432 | 3,480 | 31,702 |
| 78,630 | 175 | 22,485 | 5,422 | 3,468 | 31,550 |
| 78,631 | 175 | 22,451 | 5,428 | 3,469 | 31,523 |
| 78,632 | 169 | 22,348 | 5,423 | 3,472 | 31,412 |
| 78,633 | 170 | 22,247 | 5,428 | 3,474 | 31,319 |
| 78,634 | 166 | 22,088 | 5,397 | 3,455 | 31,106 |
| 78,635 | 169 | 22,208 | 5,406 | 3,469 | 31,252 |
| 78,636 | 168 | 22,011 | 5,358 | 3,428 | 30,965 |
| 78,637 | 168 | 21,892 | 5,354 | 3,408 | 30,822 |
| 78,638 | 167 | 22,246 | 5,438 | 3,483 | 31,334 |
| 78,639 | 165 | 22,134 | 5,415 | 3,458 | 31,172 |
| 78,640 | 165 | 22,239 | 5,422 | 3,451 | 31,277 |
| 78,641 | 168 | 22,394 | 5,444 | 3,485 | 31,491 |
| 78,642 | 166 | 22,294 | 5,441 | 3,463 | 31,364 |
| 78,643 | 159 | 22,084 | 5,371 | 3,424 | 31,038 |
| 78,644 | 160 | 22,252 | 5,430 | 3,455 | 31,297 |
| 78,645 | 155 | 22,089 | 5,351 | 3,453 | 31,048 |
| 78,646 | 151 | 22,051 | 5,345 | 3,442 | 30,989 |
| 78,647 | 152 | 22,430 | 5,387 | 3,477 | 31,446 |

|        |     |        |       |       |        |
|--------|-----|--------|-------|-------|--------|
| 78,648 | 155 | 22,582 | 5,435 | 3,493 | 31,665 |
| 78,649 | 156 | 22,501 | 5,428 | 3,463 | 31,548 |
| 78,650 | 158 | 22,342 | 5,371 | 3,413 | 31,284 |
| 78,651 | 153 | 22,021 | 5,300 | 3,366 | 30,840 |
| 78,652 | 150 | 21,936 | 5,254 | 3,340 | 30,680 |
| 78,653 | 153 | 21,939 | 5,231 | 3,311 | 30,634 |
| 78,654 | 151 | 21,505 | 5,138 | 3,274 | 30,068 |
| 78,655 | 144 | 21,811 | 5,214 | 3,375 | 30,544 |
| 78,656 | 144 | 21,788 | 5,220 | 3,388 | 30,540 |
| 78,657 | 145 | 21,703 | 5,181 | 3,389 | 30,418 |
| 78,658 | 145 | 22,000 | 5,223 | 3,434 | 30,802 |
| 78,659 | 143 | 21,985 | 5,215 | 3,435 | 30,778 |
| 78,660 | 142 | 22,100 | 5,219 | 3,437 | 30,898 |
| 78,661 | 142 | 22,378 | 5,310 | 3,494 | 31,324 |
| 78,662 | 143 | 22,273 | 5,280 | 3,476 | 31,172 |
| 78,663 | 131 | 22,649 | 5,400 | 3,527 | 31,707 |
| 78,664 | 128 | 22,695 | 5,419 | 3,551 | 31,793 |
| 78,665 | 127 | 22,561 | 5,385 | 3,503 | 31,576 |
| 78,666 | 121 | 22,574 | 5,404 | 3,504 | 31,603 |
| 78,667 | 121 | 22,524 | 5,402 | 3,493 | 31,540 |
| 78,668 | 124 | 22,722 | 5,491 | 3,525 | 31,862 |
| 78,669 | 121 | 22,126 | 5,375 | 3,461 | 31,083 |
| 78,670 | 128 | 22,332 | 5,420 | 3,468 | 31,348 |
| 78,671 | 125 | 22,357 | 5,423 | 3,465 | 31,370 |
| 78,672 | 124 | 22,184 | 5,387 | 3,436 | 31,131 |
| 78,673 | 132 | 22,495 | 5,497 | 3,552 | 31,676 |
| 78,674 | 136 | 22,503 | 5,474 | 3,534 | 31,647 |
| 78,675 | 137 | 22,485 | 5,472 | 3,520 | 31,614 |
| 78,676 | 131 | 22,427 | 5,502 | 3,540 | 31,600 |
| 78,677 | 128 | 22,615 | 5,571 | 3,562 | 31,876 |
| 78,678 | 130 | 22,511 | 5,600 | 3,532 | 31,773 |
| 78,679 | 132 | 22,639 | 5,616 | 3,516 | 31,903 |

|        |     |        |       |       |        |
|--------|-----|--------|-------|-------|--------|
| 78,680 | 131 | 22,569 | 5,588 | 3,493 | 31,781 |
| 78,681 | 143 | 22,789 | 5,646 | 3,519 | 32,097 |
| 78,682 | 143 | 22,742 | 5,658 | 3,512 | 32,055 |
| 78,683 | 140 | 22,876 | 5,686 | 3,517 | 32,219 |
| 78,684 | 140 | 22,736 | 5,679 | 3,518 | 32,073 |
| 78,685 | 145 | 23,112 | 5,738 | 3,553 | 32,548 |
| 78,686 | 157 | 23,224 | 5,772 | 3,562 | 32,715 |
| 78,687 | 157 | 23,313 | 5,797 | 3,580 | 32,847 |
| 78,688 | 158 | 23,082 | 5,703 | 3,555 | 32,498 |
| 78,689 | 159 | 23,138 | 5,720 | 3,548 | 32,565 |
| 78,690 | 161 | 23,230 | 5,770 | 3,571 | 32,732 |
| 78,691 | 161 | 23,223 | 5,790 | 3,572 | 32,746 |
| 78,692 | 160 | 23,089 | 5,798 | 3,569 | 32,616 |
| 78,693 | 165 | 23,282 | 5,858 | 3,597 | 32,902 |
| 78,694 | 169 | 23,230 | 5,868 | 3,611 | 32,878 |
| 78,695 | 170 | 23,235 | 5,875 | 3,617 | 32,897 |
| 78,696 | 175 | 22,945 | 5,811 | 3,567 | 32,498 |
| 78,697 | 175 | 22,674 | 5,780 | 3,536 | 32,165 |
| 78,698 | 178 | 22,949 | 5,885 | 3,601 | 32,613 |
| 78,699 | 181 | 22,775 | 5,839 | 3,591 | 32,386 |
| 78,700 | 177 | 22,615 | 5,800 | 3,583 | 32,175 |
| 78,701 | 179 | 22,442 | 5,780 | 3,554 | 31,955 |
| 78,702 | 179 | 22,258 | 5,744 | 3,527 | 31,708 |
| 78,703 | 182 | 22,630 | 5,854 | 3,612 | 32,278 |
| 78,704 | 178 | 22,440 | 5,867 | 3,593 | 32,078 |
| 78,705 | 183 | 22,313 | 5,867 | 3,545 | 31,908 |
| 78,706 | 184 | 22,225 | 5,783 | 3,499 | 31,691 |
| 78,707 | 184 | 22,145 | 5,800 | 3,503 | 31,632 |
| 78,708 | 183 | 22,277 | 5,870 | 3,515 | 31,845 |
| 78,709 | 183 | 22,128 | 5,879 | 3,502 | 31,692 |
| 78,710 | 181 | 21,938 | 5,868 | 3,489 | 31,476 |
| 78,711 | 184 | 21,720 | 5,803 | 3,455 | 31,162 |

|        |     |        |       |       |        |
|--------|-----|--------|-------|-------|--------|
| 78,712 | 181 | 21,411 | 5,776 | 3,414 | 30,782 |
| 78,713 | 183 | 21,838 | 5,874 | 3,480 | 31,375 |
| 78,714 | 185 | 21,739 | 5,892 | 3,488 | 31,304 |
| 78,715 | 184 | 21,469 | 5,845 | 3,449 | 30,947 |
| 78,716 | 183 | 21,368 | 5,833 | 3,460 | 30,844 |
| 78,717 | 186 | 21,270 | 5,805 | 3,466 | 30,727 |
| 78,718 | 184 | 21,202 | 5,759 | 3,436 | 30,581 |
| 78,719 | 186 | 21,187 | 5,769 | 3,421 | 30,563 |
| 78,720 | 186 | 21,267 | 5,770 | 3,423 | 30,646 |
| 78,721 | 183 | 21,340 | 5,790 | 3,438 | 30,751 |
| 78,722 | 183 | 21,357 | 5,795 | 3,431 | 30,766 |
| 78,723 | 181 | 21,309 | 5,792 | 3,420 | 30,702 |
| 78,724 | 182 | 21,377 | 5,834 | 3,454 | 30,847 |
| 78,725 | 179 | 21,375 | 5,870 | 3,470 | 30,894 |
| 78,726 | 175 | 21,502 | 5,926 | 3,499 | 31,102 |
| 78,727 | 171 | 20,706 | 5,738 | 3,401 | 30,016 |
| 78,728 | 174 | 20,918 | 5,781 | 3,444 | 30,317 |
| 78,729 | 177 | 20,996 | 5,790 | 3,449 | 30,412 |
| 78,730 | 181 | 21,176 | 5,838 | 3,475 | 30,670 |
| 78,731 | 177 | 21,402 | 5,935 | 3,509 | 31,023 |
| 78,732 | 186 | 21,401 | 5,876 | 3,511 | 30,974 |
| 78,733 | 186 | 21,479 | 5,878 | 3,524 | 31,067 |
| 78,734 | 195 | 21,533 | 5,950 | 3,549 | 31,227 |
| 78,735 | 193 | 21,462 | 5,949 | 3,560 | 31,164 |
| 78,736 | 186 | 21,700 | 6,045 | 3,626 | 31,557 |
| 78,737 | 175 | 21,733 | 6,063 | 3,665 | 31,636 |
| 78,738 | 168 | 21,424 | 5,995 | 3,622 | 31,209 |
| 78,739 | 167 | 21,553 | 6,059 | 3,639 | 31,418 |
| 78,740 | 164 | 21,588 | 6,072 | 3,666 | 31,490 |
| 78,741 | 163 | 21,637 | 6,089 | 3,670 | 31,559 |
| 78,742 | 159 | 21,268 | 5,956 | 3,625 | 31,008 |
| 78,743 | 159 | 21,400 | 5,977 | 3,640 | 31,176 |

|        |     |        |       |       |        |
|--------|-----|--------|-------|-------|--------|
| 78,744 | 162 | 21,708 | 6,023 | 3,674 | 31,567 |
| 78,745 | 157 | 21,792 | 6,033 | 3,674 | 31,656 |
| 78,746 | 149 | 21,719 | 6,035 | 3,656 | 31,559 |
| 78,747 | 149 | 21,707 | 6,030 | 3,640 | 31,526 |
| 78,748 | 147 | 21,944 | 6,063 | 3,673 | 31,827 |
| 78,749 | 145 | 21,970 | 6,038 | 3,677 | 31,830 |
| 78,750 | 139 | 21,870 | 5,998 | 3,645 | 31,652 |
| 78,751 | 138 | 21,667 | 5,947 | 3,612 | 31,364 |
| 78,752 | 134 | 21,863 | 6,018 | 3,661 | 31,676 |
| 78,753 | 135 | 21,703 | 5,944 | 3,592 | 31,374 |
| 78,754 | 135 | 21,584 | 5,885 | 3,571 | 31,175 |
| 78,755 | 135 | 21,608 | 5,880 | 3,565 | 31,188 |
| 78,756 | 136 | 21,753 | 5,923 | 3,587 | 31,399 |
| 78,757 | 136 | 21,516 | 5,852 | 3,514 | 31,018 |
| 78,758 | 138 | 21,812 | 5,909 | 3,556 | 31,415 |
| 78,759 | 139 | 21,495 | 5,796 | 3,509 | 30,939 |
| 78,760 | 139 | 21,648 | 5,835 | 3,555 | 31,177 |
| 78,761 | 140 | 21,169 | 5,718 | 3,467 | 30,494 |
| 78,762 | 139 | 21,480 | 5,777 | 3,499 | 30,895 |
| 78,763 | 137 | 21,426 | 5,713 | 3,488 | 30,764 |
| 78,764 | 137 | 21,090 | 5,638 | 3,436 | 30,301 |
| 78,765 | 139 | 21,232 | 5,657 | 3,480 | 30,508 |
| 78,766 | 139 | 21,013 | 5,582 | 3,442 | 30,176 |
| 78,767 | 140 | 21,047 | 5,581 | 3,431 | 30,199 |
| 78,768 | 140 | 21,119 | 5,591 | 3,447 | 30,297 |
| 78,769 | 140 | 21,122 | 5,595 | 3,440 | 30,297 |
| 78,770 | 136 | 21,359 | 5,644 | 3,470 | 30,609 |
| 78,771 | 136 | 21,368 | 5,663 | 3,459 | 30,626 |
| 78,772 | 131 | 21,289 | 5,625 | 3,449 | 30,494 |
| 78,773 | 130 | 21,308 | 5,602 | 3,423 | 30,463 |
| 78,774 | 126 | 21,150 | 5,521 | 3,361 | 30,158 |
| 78,775 | 127 | 21,411 | 5,589 | 3,389 | 30,516 |

|        |     |        |       |       |        |
|--------|-----|--------|-------|-------|--------|
| 78,776 | 124 | 21,053 | 5,424 | 3,301 | 29,902 |
| 78,777 | 128 | 21,015 | 5,379 | 3,273 | 29,795 |
| 78,778 | 126 | 21,101 | 5,382 | 3,279 | 29,888 |
| 78,779 | 124 | 21,025 | 5,354 | 3,264 | 29,767 |
| 78,780 | 121 | 20,929 | 5,324 | 3,268 | 29,642 |
| 78,781 | 120 | 21,004 | 5,333 | 3,278 | 29,735 |
| 78,782 | 116 | 21,081 | 5,362 | 3,282 | 29,841 |
| 78,783 | 105 | 20,961 | 5,348 | 3,265 | 29,679 |
| 78,784 | 95  | 20,711 | 5,239 | 3,199 | 29,244 |
| 78,785 | 95  | 20,944 | 5,265 | 3,221 | 29,525 |
| 78,786 | 96  | 20,913 | 5,269 | 3,214 | 29,492 |
| 78,787 | 98  | 20,805 | 5,246 | 3,200 | 29,349 |
| 78,788 | 109 | 20,695 | 5,208 | 3,156 | 29,168 |
| 78,789 | 109 | 20,423 | 5,132 | 3,113 | 28,777 |
| 78,790 | 113 | 20,429 | 5,145 | 3,121 | 28,808 |
| 78,791 | 112 | 20,323 | 5,116 | 3,101 | 28,652 |
| 78,792 | 117 | 20,473 | 5,100 | 3,104 | 28,794 |
| 78,793 | 118 | 20,208 | 5,041 | 3,062 | 28,429 |
| 78,794 | 119 | 20,210 | 5,045 | 3,062 | 28,436 |
| 78,795 | 122 | 20,400 | 5,103 | 3,088 | 28,713 |
| 78,796 | 121 | 20,417 | 5,081 | 3,072 | 28,691 |
| 78,797 | 124 | 20,304 | 5,046 | 3,069 | 28,543 |
| 78,798 | 124 | 20,333 | 5,064 | 3,061 | 28,582 |
| 78,799 | 125 | 20,376 | 5,111 | 3,066 | 28,678 |
| 78,800 | 127 | 20,484 | 5,118 | 3,071 | 28,800 |
| 78,801 | 127 | 20,369 | 5,135 | 3,067 | 28,698 |
| 78,802 | 130 | 20,364 | 5,124 | 3,052 | 28,670 |
| 78,803 | 130 | 20,133 | 5,051 | 3,013 | 28,327 |
| 78,804 | 138 | 19,827 | 4,983 | 2,980 | 27,928 |
| 78,805 | 138 | 19,971 | 5,007 | 2,985 | 28,101 |
| 78,806 | 136 | 19,834 | 4,983 | 2,966 | 27,919 |
| 78,807 | 135 | 19,685 | 4,942 | 2,967 | 27,729 |

|        |     |        |       |       |        |
|--------|-----|--------|-------|-------|--------|
| 78,808 | 137 | 20,683 | 5,261 | 3,155 | 29,236 |
| 78,809 | 137 | 20,958 | 5,379 | 3,197 | 29,671 |
| 78,810 | 130 | 20,700 | 5,344 | 3,177 | 29,351 |
| 78,811 | 130 | 20,635 | 5,347 | 3,177 | 29,289 |
| 78,812 | 129 | 21,033 | 5,468 | 3,250 | 29,880 |
| 78,813 | 132 | 21,115 | 5,496 | 3,279 | 30,022 |
| 78,814 | 133 | 21,042 | 5,496 | 3,262 | 29,933 |
| 78,815 | 136 | 21,356 | 5,573 | 3,311 | 30,376 |
| 78,816 | 131 | 20,986 | 5,464 | 3,239 | 29,820 |
| 78,817 | 132 | 21,060 | 5,491 | 3,242 | 29,925 |
| 78,818 | 129 | 21,062 | 5,496 | 3,256 | 29,943 |
| 78,819 | 128 | 20,901 | 5,513 | 3,259 | 29,801 |
| 78,820 | 128 | 20,636 | 5,507 | 3,269 | 29,540 |
| 78,821 | 132 | 20,522 | 5,474 | 3,270 | 29,398 |
| 78,822 | 137 | 20,485 | 5,462 | 3,269 | 29,353 |
| 78,823 | 133 | 20,190 | 5,432 | 3,238 | 28,993 |
| 78,824 | 133 | 20,318 | 5,505 | 3,287 | 29,243 |
| 78,825 | 133 | 20,023 | 5,475 | 3,257 | 28,888 |
| 78,826 | 131 | 19,890 | 5,434 | 3,249 | 28,704 |
| 78,827 | 143 | 20,530 | 5,641 | 3,354 | 29,668 |
| 78,828 | 143 | 20,507 | 5,683 | 3,378 | 29,711 |
| 78,829 | 143 | 20,258 | 5,663 | 3,350 | 29,414 |
| 78,830 | 146 | 20,489 | 5,721 | 3,369 | 29,725 |
| 78,831 | 145 | 20,655 | 5,763 | 3,400 | 29,963 |
| 78,832 | 145 | 20,495 | 5,704 | 3,377 | 29,721 |
| 78,833 | 143 | 20,361 | 5,657 | 3,366 | 29,527 |
| 78,834 | 143 | 20,308 | 5,655 | 3,369 | 29,475 |
| 78,835 | 144 | 20,347 | 5,664 | 3,387 | 29,542 |
| 78,836 | 148 | 20,601 | 5,728 | 3,462 | 29,939 |
| 78,837 | 148 | 20,466 | 5,692 | 3,416 | 29,722 |
| 78,838 | 148 | 20,475 | 5,703 | 3,413 | 29,739 |
| 78,839 | 148 | 20,625 | 5,813 | 3,459 | 30,045 |



|        |     |        |       |       |        |
|--------|-----|--------|-------|-------|--------|
| 78,840 | 145 | 20,496 | 5,784 | 3,435 | 29,860 |
| 78,841 | 151 | 20,454 | 5,796 | 3,429 | 29,830 |
| 78,842 | 149 | 20,269 | 5,810 | 3,424 | 29,652 |
| 78,843 | 148 | 20,630 | 5,993 | 3,499 | 30,270 |
| 78,844 | 146 | 20,636 | 6,006 | 3,516 | 30,304 |
| 78,845 | 152 | 20,621 | 6,024 | 3,526 | 30,323 |
| 78,846 | 147 | 20,362 | 5,990 | 3,502 | 30,001 |
| 78,847 | 148 | 20,122 | 5,969 | 3,491 | 29,730 |
| 78,848 | 144 | 20,312 | 6,062 | 3,538 | 30,056 |
| 78,849 | 148 | 20,029 | 6,022 | 3,509 | 29,708 |
| 78,850 | 146 | 19,964 | 6,000 | 3,498 | 29,608 |
| 78,851 | 160 | 20,250 | 6,204 | 3,602 | 30,216 |
| 78,852 | 160 | 20,245 | 6,204 | 3,608 | 30,217 |
| 78,853 | 161 | 20,312 | 6,234 | 3,629 | 30,336 |
| 78,854 | 151 | 20,365 | 6,270 | 3,659 | 30,445 |
| 78,855 | 151 | 20,611 | 6,352 | 3,697 | 30,811 |
| 78,856 | 147 | 20,433 | 6,336 | 3,686 | 30,602 |
| 78,857 | 148 | 20,584 | 6,392 | 3,700 | 30,824 |
| 78,858 | 148 | 20,461 | 6,391 | 3,691 | 30,691 |
| 78,859 | 148 | 20,452 | 6,376 | 3,686 | 30,662 |
| 78,860 | 148 | 20,295 | 6,321 | 3,646 | 30,410 |
| 78,861 | 148 | 20,429 | 6,327 | 3,650 | 30,554 |
| 78,862 | 150 | 20,399 | 6,299 | 3,645 | 30,493 |
| 78,863 | 155 | 20,595 | 6,357 | 3,671 | 30,778 |
| 78,864 | 152 | 20,029 | 6,201 | 3,555 | 29,937 |
| 78,865 | 153 | 20,243 | 6,276 | 3,594 | 30,266 |
| 78,866 | 155 | 20,488 | 6,329 | 3,604 | 30,576 |
| 78,867 | 155 | 20,351 | 6,322 | 3,605 | 30,433 |
| 78,868 | 158 | 20,535 | 6,352 | 3,630 | 30,675 |
| 78,869 | 160 | 20,692 | 6,328 | 3,625 | 30,805 |
| 78,870 | 161 | 20,854 | 6,323 | 3,628 | 30,966 |
| 78,871 | 161 | 20,944 | 6,353 | 3,622 | 31,080 |

|        |     |        |       |       |        |
|--------|-----|--------|-------|-------|--------|
| 78,872 | 151 | 21,247 | 6,387 | 3,645 | 31,430 |
| 78,873 | 153 | 21,413 | 6,405 | 3,648 | 31,619 |
| 78,874 | 152 | 21,303 | 6,412 | 3,653 | 31,520 |
| 78,875 | 157 | 21,696 | 6,542 | 3,706 | 32,101 |
| 78,876 | 153 | 21,785 | 6,516 | 3,721 | 32,175 |
| 78,877 | 150 | 21,724 | 6,507 | 3,720 | 32,101 |
| 78,878 | 148 | 21,734 | 6,462 | 3,727 | 32,071 |
| 78,879 | 142 | 21,482 | 6,338 | 3,658 | 31,620 |
| 78,880 | 144 | 21,612 | 6,405 | 3,683 | 31,844 |
| 78,881 | 145 | 21,729 | 6,446 | 3,728 | 32,048 |
| 78,882 | 143 | 21,447 | 6,410 | 3,697 | 31,697 |
| 78,883 | 152 | 21,610 | 6,470 | 3,716 | 31,948 |
| 78,884 | 154 | 21,457 | 6,439 | 3,703 | 31,753 |
| 78,885 | 152 | 21,310 | 6,402 | 3,696 | 31,560 |
| 78,886 | 150 | 21,534 | 6,495 | 3,711 | 31,890 |
| 78,887 | 149 | 21,499 | 6,530 | 3,711 | 31,889 |
| 78,888 | 147 | 21,143 | 6,366 | 3,640 | 31,296 |
| 78,889 | 148 | 21,345 | 6,379 | 3,643 | 31,515 |
| 78,890 | 148 | 21,382 | 6,386 | 3,655 | 31,571 |
| 78,891 | 148 | 21,258 | 6,370 | 3,617 | 31,393 |
| 78,892 | 142 | 21,552 | 6,359 | 3,606 | 31,659 |
| 78,893 | 145 | 21,609 | 6,338 | 3,619 | 31,711 |
| 78,894 | 145 | 21,674 | 6,342 | 3,630 | 31,791 |
| 78,895 | 137 | 21,722 | 6,319 | 3,611 | 31,789 |
| 78,896 | 138 | 21,724 | 6,298 | 3,601 | 31,761 |
| 78,897 | 140 | 21,740 | 6,273 | 3,585 | 31,738 |
| 78,898 | 140 | 21,761 | 6,250 | 3,578 | 31,729 |
| 78,899 | 140 | 21,989 | 6,330 | 3,622 | 32,081 |
| 78,900 | 133 | 22,068 | 6,339 | 3,627 | 32,167 |
| 78,901 | 127 | 22,179 | 6,323 | 3,606 | 32,235 |
| 78,902 | 123 | 22,251 | 6,302 | 3,614 | 32,290 |
| 78,903 | 123 | 22,163 | 6,297 | 3,594 | 32,177 |

|        |     |        |       |       |        |
|--------|-----|--------|-------|-------|--------|
| 78,904 | 125 | 22,098 | 6,296 | 3,600 | 32,119 |
| 78,905 | 126 | 22,232 | 6,316 | 3,620 | 32,294 |
| 78,906 | 126 | 22,149 | 6,267 | 3,595 | 32,137 |
| 78,907 | 128 | 22,171 | 6,254 | 3,578 | 32,131 |
| 78,908 | 130 | 22,118 | 6,216 | 3,547 | 32,011 |
| 78,909 | 134 | 22,136 | 6,175 | 3,537 | 31,982 |
| 78,910 | 135 | 22,353 | 6,241 | 3,570 | 32,299 |
| 78,911 | 141 | 21,988 | 6,169 | 3,520 | 31,818 |
| 78,912 | 139 | 22,047 | 6,212 | 3,536 | 31,934 |
| 78,913 | 138 | 22,076 | 6,219 | 3,523 | 31,956 |
| 78,914 | 136 | 22,265 | 6,260 | 3,563 | 32,224 |
| 78,915 | 131 | 22,053 | 6,212 | 3,557 | 31,953 |
| 78,916 | 134 | 22,008 | 6,221 | 3,571 | 31,934 |
| 78,917 | 130 | 21,984 | 6,272 | 3,631 | 32,017 |
| 78,918 | 131 | 21,985 | 6,268 | 3,660 | 32,044 |
| 78,919 | 137 | 22,024 | 6,278 | 3,675 | 32,114 |
| 78,920 | 134 | 21,931 | 6,298 | 3,686 | 32,049 |
| 78,921 | 135 | 22,501 | 6,477 | 3,771 | 32,884 |
| 78,922 | 134 | 22,679 | 6,538 | 3,810 | 33,161 |
| 78,923 | 134 | 22,464 | 6,460 | 3,750 | 32,808 |
| 78,924 | 134 | 22,659 | 6,464 | 3,768 | 33,025 |
| 78,925 | 129 | 22,865 | 6,521 | 3,798 | 33,313 |
| 78,926 | 132 | 22,861 | 6,503 | 3,821 | 33,317 |
| 78,927 | 132 | 22,603 | 6,500 | 3,790 | 33,025 |
| 78,928 | 136 | 22,817 | 6,598 | 3,831 | 33,382 |
| 78,929 | 137 | 22,726 | 6,615 | 3,843 | 33,321 |
| 78,930 | 139 | 22,748 | 6,648 | 3,851 | 33,386 |
| 78,931 | 136 | 22,750 | 6,627 | 3,864 | 33,377 |
| 78,932 | 136 | 22,761 | 6,613 | 3,832 | 33,342 |
| 78,933 | 135 | 22,564 | 6,547 | 3,800 | 33,046 |
| 78,934 | 136 | 22,750 | 6,628 | 3,873 | 33,387 |
| 78,935 | 141 | 22,668 | 6,601 | 3,870 | 33,280 |

|        |     |        |       |       |        |
|--------|-----|--------|-------|-------|--------|
| 78,936 | 142 | 22,623 | 6,598 | 3,863 | 33,226 |
| 78,937 | 143 | 22,519 | 6,545 | 3,830 | 33,037 |
| 78,938 | 144 | 22,798 | 6,622 | 3,867 | 33,431 |
| 78,939 | 147 | 22,554 | 6,591 | 3,839 | 33,131 |
| 78,940 | 147 | 22,415 | 6,558 | 3,847 | 32,967 |
| 78,941 | 137 | 22,504 | 6,601 | 3,895 | 33,137 |
| 78,942 | 139 | 22,155 | 6,480 | 3,861 | 32,635 |
| 78,943 | 138 | 21,958 | 6,443 | 3,855 | 32,394 |
| 78,944 | 138 | 22,224 | 6,575 | 3,935 | 32,872 |
| 78,945 | 140 | 22,363 | 6,651 | 3,971 | 33,125 |
| 78,946 | 139 | 22,234 | 6,645 | 3,974 | 32,992 |
| 78,947 | 135 | 22,172 | 6,668 | 3,982 | 32,957 |
| 78,948 | 135 | 22,149 | 6,689 | 4,031 | 33,004 |
| 78,949 | 135 | 22,064 | 6,689 | 4,029 | 32,917 |
| 78,950 | 137 | 21,900 | 6,635 | 4,020 | 32,692 |
| 78,951 | 136 | 21,738 | 6,597 | 4,005 | 32,476 |
| 78,952 | 138 | 21,688 | 6,583 | 4,012 | 32,421 |
| 78,953 | 137 | 21,747 | 6,560 | 3,988 | 32,432 |
| 78,954 | 134 | 21,561 | 6,480 | 3,961 | 32,136 |
| 78,955 | 130 | 21,527 | 6,464 | 3,942 | 32,063 |
| 78,956 | 126 | 21,518 | 6,450 | 3,949 | 32,043 |
| 78,957 | 125 | 21,469 | 6,441 | 3,929 | 31,964 |
| 78,958 | 120 | 21,028 | 6,337 | 3,895 | 31,380 |
| 78,959 | 120 | 20,979 | 6,347 | 3,901 | 31,347 |
| 78,960 | 117 | 20,669 | 6,284 | 3,864 | 30,934 |
| 78,961 | 117 | 20,522 | 6,248 | 3,831 | 30,718 |
| 78,962 | 117 | 21,337 | 6,452 | 3,973 | 31,879 |
| 78,963 | 117 | 21,391 | 6,413 | 3,958 | 31,879 |
| 78,964 | 114 | 21,445 | 6,393 | 3,958 | 31,910 |
| 78,965 | 115 | 21,111 | 6,326 | 3,932 | 31,484 |
| 78,966 | 116 | 21,020 | 6,328 | 3,904 | 31,368 |
| 78,967 | 120 | 21,086 | 6,336 | 3,890 | 31,432 |

|        |     |        |       |       |        |
|--------|-----|--------|-------|-------|--------|
| 78,968 | 122 | 20,889 | 6,248 | 3,821 | 31,080 |
| 78,969 | 121 | 20,652 | 6,209 | 3,764 | 30,746 |
| 78,970 | 115 | 20,648 | 6,245 | 3,789 | 30,797 |
| 78,971 | 117 | 20,542 | 6,189 | 3,789 | 30,637 |
| 78,972 | 116 | 20,078 | 6,034 | 3,715 | 29,943 |
| 78,973 | 115 | 19,836 | 5,987 | 3,712 | 29,650 |
| 78,974 | 120 | 19,700 | 5,971 | 3,692 | 29,483 |
| 78,975 | 123 | 19,920 | 6,030 | 3,735 | 29,808 |
| 78,976 | 122 | 19,786 | 6,004 | 3,726 | 29,638 |
| 78,977 | 119 | 19,940 | 6,064 | 3,717 | 29,840 |
| 78,978 | 118 | 19,888 | 6,010 | 3,702 | 29,718 |
| 78,979 | 111 | 19,948 | 5,959 | 3,687 | 29,705 |
| 78,980 | 111 | 20,132 | 5,971 | 3,689 | 29,903 |
| 78,981 | 111 | 19,986 | 5,889 | 3,655 | 29,641 |
| 78,982 | 112 | 20,244 | 5,937 | 3,682 | 29,975 |
| 78,983 | 110 | 20,534 | 5,990 | 3,719 | 30,353 |
| 78,984 | 112 | 20,685 | 5,975 | 3,718 | 30,490 |
| 78,985 | 108 | 20,618 | 5,978 | 3,704 | 30,408 |
| 78,986 | 110 | 20,700 | 6,004 | 3,704 | 30,518 |
| 78,987 | 107 | 20,545 | 5,926 | 3,685 | 30,263 |
| 78,988 | 113 | 20,825 | 5,998 | 3,731 | 30,667 |
| 78,989 | 112 | 20,949 | 6,010 | 3,751 | 30,822 |
| 78,990 | 107 | 20,869 | 5,979 | 3,735 | 30,690 |
| 78,991 | 103 | 20,459 | 5,880 | 3,638 | 30,080 |
| 78,992 | 103 | 20,669 | 5,891 | 3,657 | 30,320 |
| 78,993 | 101 | 20,817 | 5,921 | 3,653 | 30,492 |
| 78,994 | 100 | 20,739 | 5,874 | 3,644 | 30,357 |
| 78,995 | 101 | 20,883 | 5,884 | 3,666 | 30,534 |
| 78,996 | 99  | 21,030 | 5,866 | 3,638 | 30,633 |
| 78,997 | 100 | 21,219 | 5,862 | 3,646 | 30,827 |
| 78,998 | 102 | 21,351 | 5,867 | 3,640 | 30,960 |
| 78,999 | 103 | 21,451 | 5,877 | 3,638 | 31,069 |

|        |     |        |       |       |        |
|--------|-----|--------|-------|-------|--------|
| 79,000 | 104 | 21,383 | 5,825 | 3,610 | 30,922 |
| 79,001 | 104 | 21,791 | 5,888 | 3,646 | 31,429 |
| 79,002 | 105 | 21,957 | 5,934 | 3,659 | 31,655 |
| 79,003 | 108 | 21,993 | 5,920 | 3,652 | 31,673 |
| 79,004 | 107 | 21,855 | 5,875 | 3,625 | 31,462 |
| 79,005 | 109 | 22,048 | 5,886 | 3,624 | 31,667 |
| 79,006 | 112 | 22,337 | 5,940 | 3,685 | 32,074 |
| 79,007 | 111 | 22,169 | 5,887 | 3,643 | 31,810 |
| 79,008 | 112 | 22,399 | 5,946 | 3,691 | 32,148 |
| 79,009 | 108 | 21,392 | 5,681 | 3,549 | 30,730 |
| 79,010 | 109 | 21,486 | 5,739 | 3,562 | 30,896 |
| 79,011 | 114 | 21,846 | 5,859 | 3,608 | 31,427 |
| 79,012 | 114 | 21,757 | 5,869 | 3,620 | 31,360 |
| 79,013 | 124 | 22,405 | 6,078 | 3,732 | 32,339 |
| 79,014 | 128 | 22,906 | 6,228 | 3,802 | 33,064 |
| 79,015 | 128 | 22,793 | 6,283 | 3,822 | 33,026 |
| 79,016 | 126 | 22,599 | 6,213 | 3,788 | 32,726 |
| 79,017 | 127 | 22,686 | 6,206 | 3,795 | 32,814 |
| 79,018 | 125 | 22,913 | 6,287 | 3,825 | 33,150 |
| 79,019 | 117 | 22,786 | 6,200 | 3,791 | 32,894 |
| 79,020 | 123 | 22,991 | 6,216 | 3,798 | 33,128 |
| 79,021 | 123 | 23,050 | 6,224 | 3,816 | 33,213 |
| 79,022 | 128 | 23,393 | 6,307 | 3,839 | 33,667 |
| 79,023 | 130 | 23,500 | 6,326 | 3,837 | 33,793 |
| 79,024 | 136 | 23,789 | 6,439 | 3,889 | 34,253 |
| 79,025 | 132 | 23,804 | 6,508 | 3,910 | 34,354 |
| 79,026 | 131 | 23,735 | 6,550 | 3,907 | 34,323 |
| 79,027 | 131 | 23,557 | 6,509 | 3,898 | 34,095 |
| 79,028 | 131 | 23,449 | 6,516 | 3,942 | 34,038 |
| 79,029 | 135 | 23,618 | 6,599 | 4,005 | 34,357 |
| 79,030 | 143 | 23,307 | 6,528 | 3,962 | 33,940 |
| 79,031 | 141 | 22,988 | 6,482 | 3,925 | 33,536 |

|        |     |        |       |       |        |
|--------|-----|--------|-------|-------|--------|
| 79,032 | 140 | 22,948 | 6,553 | 3,968 | 33,609 |
| 79,033 | 141 | 22,910 | 6,581 | 3,999 | 33,631 |
| 79,034 | 144 | 22,997 | 6,662 | 4,042 | 33,845 |
| 79,035 | 141 | 22,806 | 6,620 | 3,992 | 33,559 |
| 79,036 | 140 | 22,814 | 6,620 | 4,008 | 33,582 |
| 79,037 | 133 | 23,160 | 6,707 | 4,058 | 34,058 |
| 79,038 | 138 | 23,234 | 6,738 | 4,063 | 34,173 |
| 79,039 | 135 | 23,307 | 6,818 | 4,097 | 34,357 |
| 79,040 | 146 | 23,443 | 6,843 | 4,129 | 34,561 |
| 79,041 | 144 | 23,282 | 6,801 | 4,112 | 34,339 |
| 79,042 | 148 | 23,741 | 6,941 | 4,190 | 35,020 |
| 79,043 | 150 | 23,584 | 6,915 | 4,163 | 34,812 |
| 79,044 | 150 | 23,351 | 6,854 | 4,156 | 34,511 |
| 79,045 | 157 | 23,750 | 6,985 | 4,213 | 35,105 |
| 79,046 | 155 | 23,756 | 7,009 | 4,223 | 35,143 |
| 79,047 | 155 | 23,167 | 6,862 | 4,166 | 34,350 |
| 79,048 | 155 | 23,305 | 6,927 | 4,186 | 34,573 |
| 79,049 | 153 | 23,333 | 6,996 | 4,223 | 34,705 |
| 79,050 | 150 | 23,129 | 7,009 | 4,236 | 34,524 |
| 79,051 | 149 | 23,051 | 7,017 | 4,232 | 34,449 |
| 79,052 | 150 | 23,048 | 7,031 | 4,257 | 34,486 |
| 79,053 | 149 | 22,895 | 6,978 | 4,237 | 34,259 |
| 79,054 | 143 | 22,639 | 6,924 | 4,197 | 33,903 |
| 79,055 | 148 | 22,980 | 7,037 | 4,259 | 34,424 |
| 79,056 | 146 | 22,924 | 7,041 | 4,274 | 34,385 |
| 79,057 | 144 | 22,715 | 6,994 | 4,244 | 34,097 |
| 79,058 | 145 | 23,002 | 7,064 | 4,274 | 34,485 |
| 79,059 | 143 | 22,874 | 7,024 | 4,243 | 34,284 |
| 79,060 | 142 | 22,772 | 6,946 | 4,220 | 34,080 |
| 79,061 | 143 | 23,123 | 7,012 | 4,285 | 34,563 |
| 79,062 | 142 | 23,298 | 7,043 | 4,318 | 34,801 |
| 79,063 | 135 | 23,334 | 7,018 | 4,339 | 34,826 |

|        |     |        |       |       |        |
|--------|-----|--------|-------|-------|--------|
| 79,064 | 135 | 23,264 | 6,983 | 4,327 | 34,709 |
| 79,065 | 133 | 23,093 | 6,932 | 4,320 | 34,478 |
| 79,066 | 132 | 22,930 | 6,839 | 4,266 | 34,167 |
| 79,067 | 133 | 23,020 | 6,847 | 4,285 | 34,285 |
| 79,068 | 134 | 23,064 | 6,896 | 4,333 | 34,427 |
| 79,069 | 135 | 22,936 | 6,890 | 4,340 | 34,301 |
| 79,070 | 134 | 22,843 | 6,897 | 4,328 | 34,202 |
| 79,071 | 136 | 23,001 | 6,945 | 4,329 | 34,411 |
| 79,072 | 138 | 22,979 | 6,952 | 4,332 | 34,401 |
| 79,073 | 132 | 22,940 | 6,925 | 4,315 | 34,312 |
| 79,074 | 132 | 22,916 | 6,895 | 4,318 | 34,261 |
| 79,075 | 126 | 22,699 | 6,750 | 4,276 | 33,851 |
| 79,076 | 130 | 22,813 | 6,715 | 4,280 | 33,938 |
| 79,077 | 126 | 22,617 | 6,577 | 4,169 | 33,489 |
| 79,078 | 130 | 22,887 | 6,586 | 4,177 | 33,780 |
| 79,079 | 135 | 23,231 | 6,663 | 4,210 | 34,239 |
| 79,080 | 130 | 23,258 | 6,659 | 4,177 | 34,224 |
| 79,081 | 131 | 23,350 | 6,641 | 4,165 | 34,287 |
| 79,082 | 134 | 23,552 | 6,657 | 4,155 | 34,498 |
| 79,083 | 134 | 23,523 | 6,629 | 4,140 | 34,426 |
| 79,084 | 136 | 23,882 | 6,685 | 4,181 | 34,884 |
| 79,085 | 135 | 23,666 | 6,647 | 4,152 | 34,600 |
| 79,086 | 135 | 23,764 | 6,629 | 4,130 | 34,658 |
| 79,087 | 135 | 23,772 | 6,628 | 4,137 | 34,672 |
| 79,088 | 134 | 23,434 | 6,599 | 4,126 | 34,293 |
| 79,089 | 128 | 23,438 | 6,657 | 4,177 | 34,400 |
| 79,090 | 125 | 23,638 | 6,671 | 4,186 | 34,620 |
| 79,091 | 114 | 23,153 | 6,591 | 4,123 | 33,981 |
| 79,092 | 113 | 23,090 | 6,628 | 4,156 | 33,987 |
| 79,093 | 112 | 23,002 | 6,623 | 4,154 | 33,891 |
| 79,094 | 105 | 22,990 | 6,663 | 4,148 | 33,906 |
| 79,095 | 105 | 23,044 | 6,672 | 4,146 | 33,967 |



|        |     |        |       |       |        |
|--------|-----|--------|-------|-------|--------|
| 79,096 | 106 | 23,200 | 6,682 | 4,134 | 34,122 |
| 79,097 | 106 | 22,894 | 6,608 | 4,083 | 33,691 |
| 79,098 | 106 | 22,973 | 6,643 | 4,096 | 33,818 |
| 79,099 | 110 | 23,220 | 6,707 | 4,123 | 34,160 |
| 79,100 | 112 | 23,424 | 6,660 | 4,083 | 34,279 |
| 79,101 | 112 | 23,500 | 6,657 | 4,093 | 34,362 |
| 79,102 | 114 | 23,665 | 6,732 | 4,135 | 34,646 |
| 79,103 | 117 | 23,524 | 6,724 | 4,116 | 34,481 |
| 79,104 | 119 | 23,375 | 6,735 | 4,110 | 34,339 |
| 79,105 | 120 | 23,120 | 6,662 | 4,090 | 33,992 |
| 79,106 | 123 | 23,253 | 6,701 | 4,125 | 34,202 |
| 79,107 | 126 | 23,002 | 6,640 | 4,078 | 33,846 |
| 79,108 | 125 | 22,754 | 6,577 | 4,031 | 33,487 |
| 79,109 | 125 | 22,887 | 6,597 | 4,068 | 33,677 |
| 79,110 | 125 | 22,786 | 6,575 | 4,076 | 33,562 |
| 79,111 | 124 | 22,701 | 6,589 | 4,042 | 33,456 |
| 79,112 | 128 | 22,937 | 6,638 | 4,057 | 33,760 |
| 79,113 | 127 | 22,726 | 6,597 | 4,011 | 33,461 |
| 79,114 | 117 | 22,010 | 6,389 | 3,877 | 32,393 |
| 79,115 | 118 | 22,202 | 6,441 | 3,904 | 32,665 |
| 79,116 | 119 | 22,406 | 6,503 | 3,946 | 32,974 |
| 79,117 | 126 | 22,534 | 6,556 | 3,966 | 33,182 |
| 79,118 | 127 | 22,486 | 6,534 | 3,942 | 33,089 |
| 79,119 | 129 | 22,411 | 6,473 | 3,899 | 32,912 |
| 79,120 | 130 | 22,393 | 6,437 | 3,914 | 32,874 |
| 79,121 | 130 | 22,146 | 6,368 | 3,869 | 32,513 |
| 79,122 | 127 | 21,875 | 6,297 | 3,841 | 32,140 |
| 79,123 | 127 | 22,025 | 6,420 | 3,894 | 32,466 |
| 79,124 | 126 | 21,929 | 6,431 | 3,885 | 32,371 |
| 79,125 | 125 | 21,737 | 6,435 | 3,877 | 32,174 |
| 79,126 | 129 | 21,797 | 6,471 | 3,882 | 32,279 |
| 79,127 | 123 | 21,463 | 6,362 | 3,818 | 31,766 |

|        |     |        |       |       |        |
|--------|-----|--------|-------|-------|--------|
| 79,128 | 119 | 21,368 | 6,345 | 3,845 | 31,677 |
| 79,129 | 116 | 21,310 | 6,376 | 3,861 | 31,663 |
| 79,130 | 111 | 21,176 | 6,339 | 3,875 | 31,501 |
| 79,131 | 116 | 21,373 | 6,389 | 3,906 | 31,784 |
| 79,132 | 115 | 21,496 | 6,394 | 3,957 | 31,962 |
| 79,133 | 118 | 21,603 | 6,452 | 3,996 | 32,169 |
| 79,134 | 117 | 21,668 | 6,497 | 3,993 | 32,275 |
| 79,135 | 112 | 21,308 | 6,378 | 3,950 | 31,748 |
| 79,136 | 113 | 21,472 | 6,408 | 3,957 | 31,950 |
| 79,137 | 115 | 21,488 | 6,441 | 3,969 | 32,013 |
| 79,138 | 113 | 21,286 | 6,398 | 3,952 | 31,749 |
| 79,139 | 115 | 21,651 | 6,419 | 3,974 | 32,159 |
| 79,140 | 115 | 21,828 | 6,430 | 3,968 | 32,341 |
| 79,141 | 116 | 21,601 | 6,321 | 3,919 | 31,957 |
| 79,142 | 116 | 21,612 | 6,192 | 3,846 | 31,766 |
| 79,143 | 119 | 21,987 | 6,263 | 3,887 | 32,256 |
| 79,144 | 117 | 20,952 | 5,943 | 3,723 | 30,735 |
| 79,145 | 118 | 21,259 | 5,970 | 3,756 | 31,103 |
| 79,146 | 119 | 21,613 | 6,070 | 3,829 | 31,631 |
| 79,147 | 121 | 21,598 | 6,086 | 3,851 | 31,656 |
| 79,148 | 122 | 21,952 | 6,160 | 3,898 | 32,132 |
| 79,149 | 133 | 22,038 | 6,182 | 3,903 | 32,256 |
| 79,150 | 131 | 21,996 | 6,185 | 3,933 | 32,245 |
| 79,151 | 131 | 21,792 | 6,203 | 3,933 | 32,059 |
| 79,152 | 131 | 21,722 | 6,162 | 3,890 | 31,905 |
| 79,153 | 127 | 21,713 | 6,163 | 3,899 | 31,902 |
| 79,154 | 121 | 21,529 | 6,083 | 3,831 | 31,564 |
| 79,155 | 122 | 21,689 | 6,116 | 3,850 | 31,777 |
| 79,156 | 120 | 21,683 | 6,118 | 3,845 | 31,766 |
| 79,157 | 122 | 21,466 | 6,050 | 3,801 | 31,439 |
| 79,158 | 117 | 21,276 | 5,990 | 3,794 | 31,177 |
| 79,159 | 121 | 21,717 | 6,109 | 3,820 | 31,767 |

|        |     |        |       |       |        |
|--------|-----|--------|-------|-------|--------|
| 79,160 | 125 | 21,870 | 6,178 | 3,807 | 31,980 |
| 79,161 | 126 | 21,892 | 6,180 | 3,808 | 32,006 |
| 79,162 | 126 | 22,307 | 6,301 | 3,873 | 32,607 |
| 79,163 | 125 | 22,249 | 6,311 | 3,882 | 32,567 |
| 79,164 | 123 | 21,934 | 6,230 | 3,829 | 32,116 |
| 79,165 | 121 | 21,847 | 6,199 | 3,820 | 31,987 |
| 79,166 | 122 | 21,877 | 6,196 | 3,813 | 32,008 |
| 79,167 | 123 | 22,104 | 6,199 | 3,857 | 32,283 |
| 79,168 | 121 | 22,309 | 6,224 | 3,878 | 32,532 |
| 79,169 | 116 | 22,004 | 6,143 | 3,832 | 32,095 |
| 79,170 | 109 | 22,023 | 6,136 | 3,836 | 32,104 |
| 79,171 | 110 | 22,315 | 6,221 | 3,858 | 32,504 |
| 79,172 | 108 | 22,216 | 6,232 | 3,865 | 32,421 |
| 79,173 | 107 | 22,050 | 6,144 | 3,855 | 32,156 |
| 79,174 | 109 | 22,375 | 6,232 | 3,890 | 32,606 |
| 79,175 | 109 | 22,147 | 6,113 | 3,825 | 32,194 |
| 79,176 | 108 | 22,083 | 6,103 | 3,821 | 32,115 |
| 79,177 | 108 | 21,873 | 6,048 | 3,789 | 31,818 |
| 79,178 | 108 | 21,721 | 6,025 | 3,753 | 31,607 |
| 79,179 | 115 | 22,673 | 6,346 | 3,941 | 33,075 |
| 79,180 | 115 | 22,502 | 6,278 | 3,883 | 32,778 |
| 79,181 | 115 | 22,373 | 6,346 | 3,897 | 32,731 |
| 79,182 | 110 | 22,229 | 6,305 | 3,865 | 32,509 |
| 79,183 | 110 | 22,035 | 6,307 | 3,836 | 32,288 |
| 79,184 | 107 | 22,222 | 6,312 | 3,846 | 32,487 |
| 79,185 | 112 | 22,308 | 6,326 | 3,872 | 32,618 |
| 79,186 | 114 | 22,255 | 6,372 | 3,881 | 32,622 |
| 79,187 | 120 | 22,261 | 6,429 | 3,915 | 32,725 |
| 79,188 | 117 | 22,136 | 6,370 | 3,851 | 32,474 |
| 79,189 | 117 | 22,255 | 6,371 | 3,857 | 32,600 |
| 79,190 | 117 | 22,275 | 6,389 | 3,872 | 32,653 |
| 79,191 | 117 | 22,358 | 6,421 | 3,885 | 32,781 |

|        |     |        |       |       |        |
|--------|-----|--------|-------|-------|--------|
| 79,192 | 117 | 21,898 | 6,364 | 3,853 | 32,232 |
| 79,193 | 123 | 22,171 | 6,437 | 3,876 | 32,607 |
| 79,194 | 121 | 22,074 | 6,436 | 3,869 | 32,500 |
| 79,195 | 122 | 22,049 | 6,472 | 3,900 | 32,543 |
| 79,196 | 124 | 22,066 | 6,504 | 3,943 | 32,637 |
| 79,197 | 124 | 22,215 | 6,552 | 3,976 | 32,867 |
| 79,198 | 122 | 22,576 | 6,629 | 4,010 | 33,337 |
| 79,199 | 121 | 22,886 | 6,675 | 4,042 | 33,724 |
| 79,200 | 110 | 22,898 | 6,695 | 4,071 | 33,774 |
| 79,201 | 107 | 22,870 | 6,671 | 4,056 | 33,704 |
| 79,202 | 102 | 22,837 | 6,597 | 4,038 | 33,574 |
| 79,203 | 102 | 22,476 | 6,545 | 3,986 | 33,109 |
| 79,204 | 104 | 22,756 | 6,608 | 4,003 | 33,471 |
| 79,205 | 105 | 22,668 | 6,567 | 3,994 | 33,334 |
| 79,206 | 109 | 22,743 | 6,564 | 4,002 | 33,418 |
| 79,207 | 108 | 22,582 | 6,518 | 3,976 | 33,184 |
| 79,208 | 106 | 23,084 | 6,664 | 4,051 | 33,905 |
| 79,209 | 112 | 23,090 | 6,670 | 4,058 | 33,930 |
| 79,210 | 110 | 22,565 | 6,504 | 3,984 | 33,163 |
| 79,211 | 109 | 22,546 | 6,505 | 3,999 | 33,159 |
| 79,212 | 111 | 22,591 | 6,545 | 4,015 | 33,262 |
| 79,213 | 110 | 21,579 | 6,260 | 3,889 | 31,838 |
| 79,214 | 110 | 21,774 | 6,293 | 3,911 | 32,088 |
| 79,215 | 115 | 22,010 | 6,321 | 3,943 | 32,389 |
| 79,216 | 115 | 22,040 | 6,332 | 3,943 | 32,430 |
| 79,217 | 116 | 22,146 | 6,391 | 3,959 | 32,612 |
| 79,218 | 114 | 22,033 | 6,422 | 3,949 | 32,518 |
| 79,219 | 112 | 21,723 | 6,344 | 3,906 | 32,085 |
| 79,220 | 112 | 21,595 | 6,311 | 3,870 | 31,888 |
| 79,221 | 117 | 22,198 | 6,494 | 3,959 | 32,768 |
| 79,222 | 117 | 22,144 | 6,500 | 3,948 | 32,709 |
| 79,223 | 116 | 21,892 | 6,372 | 3,886 | 32,266 |

|        |     |        |       |       |        |
|--------|-----|--------|-------|-------|--------|
| 79,224 | 114 | 21,972 | 6,402 | 3,899 | 32,387 |
| 79,225 | 113 | 22,096 | 6,397 | 3,894 | 32,500 |
| 79,226 | 113 | 22,270 | 6,466 | 3,938 | 32,787 |
| 79,227 | 113 | 22,397 | 6,478 | 3,942 | 32,930 |
| 79,228 | 106 | 22,380 | 6,445 | 3,924 | 32,855 |
| 79,229 | 107 | 22,250 | 6,438 | 3,917 | 32,712 |
| 79,230 | 102 | 22,164 | 6,428 | 3,892 | 32,586 |
| 79,231 | 100 | 21,938 | 6,269 | 3,837 | 32,144 |
| 79,232 | 105 | 22,174 | 6,310 | 3,848 | 32,437 |
| 79,233 | 105 | 22,130 | 6,307 | 3,851 | 32,393 |
| 79,234 | 105 | 22,268 | 6,297 | 3,865 | 32,535 |
| 79,235 | 110 | 21,980 | 6,219 | 3,838 | 32,147 |
| 79,236 | 104 | 21,732 | 6,128 | 3,762 | 31,726 |
| 79,237 | 104 | 21,765 | 6,045 | 3,723 | 31,637 |
| 79,238 | 104 | 21,662 | 6,029 | 3,720 | 31,515 |
| 79,239 | 106 | 21,681 | 6,057 | 3,749 | 31,593 |
| 79,240 | 107 | 21,440 | 5,979 | 3,686 | 31,212 |
| 79,241 | 110 | 21,327 | 5,929 | 3,637 | 31,003 |
| 79,242 | 110 | 21,374 | 5,956 | 3,641 | 31,081 |
| 79,243 | 109 | 21,410 | 5,987 | 3,650 | 31,156 |
| 79,244 | 106 | 21,497 | 5,980 | 3,699 | 31,282 |
| 79,245 | 102 | 21,407 | 5,916 | 3,665 | 31,090 |
| 79,246 | 101 | 21,136 | 5,868 | 3,601 | 30,706 |
| 79,247 | 101 | 21,309 | 5,935 | 3,645 | 30,990 |
| 79,248 | 101 | 21,161 | 5,945 | 3,623 | 30,830 |
| 79,249 | 102 | 20,957 | 5,908 | 3,604 | 30,571 |
| 79,250 | 105 | 20,507 | 5,853 | 3,558 | 30,023 |
| 79,251 | 114 | 20,653 | 5,846 | 3,533 | 30,146 |
| 79,252 | 115 | 20,499 | 5,828 | 3,503 | 29,945 |
| 79,253 | 119 | 20,852 | 5,890 | 3,533 | 30,394 |
| 79,254 | 117 | 20,738 | 5,826 | 3,515 | 30,196 |
| 79,255 | 117 | 20,681 | 5,823 | 3,530 | 30,151 |

|        |     |        |       |       |        |
|--------|-----|--------|-------|-------|--------|
| 79,256 | 115 | 20,582 | 5,864 | 3,533 | 30,094 |
| 79,257 | 113 | 20,605 | 5,911 | 3,591 | 30,220 |
| 79,258 | 114 | 20,695 | 5,963 | 3,621 | 30,393 |
| 79,259 | 110 | 20,627 | 5,946 | 3,620 | 30,303 |
| 79,260 | 106 | 20,658 | 5,956 | 3,628 | 30,348 |
| 79,261 | 100 | 20,002 | 5,795 | 3,523 | 29,420 |
| 79,262 | 101 | 20,220 | 5,858 | 3,557 | 29,736 |
| 79,263 | 102 | 20,487 | 5,902 | 3,609 | 30,100 |
| 79,264 | 107 | 20,520 | 5,937 | 3,616 | 30,180 |
| 79,265 | 107 | 20,437 | 5,955 | 3,615 | 30,114 |
| 79,266 | 111 | 20,456 | 6,082 | 3,667 | 30,316 |
| 79,267 | 114 | 20,606 | 6,136 | 3,673 | 30,529 |
| 79,268 | 118 | 20,654 | 6,170 | 3,690 | 30,632 |
| 79,269 | 120 | 20,853 | 6,203 | 3,757 | 30,933 |
| 79,270 | 122 | 20,876 | 6,236 | 3,765 | 30,999 |
| 79,271 | 120 | 20,378 | 6,073 | 3,679 | 30,250 |
| 79,272 | 123 | 20,564 | 6,110 | 3,707 | 30,504 |
| 79,273 | 122 | 20,597 | 6,121 | 3,725 | 30,565 |
| 79,274 | 130 | 20,731 | 6,202 | 3,745 | 30,808 |
| 79,275 | 135 | 20,827 | 6,240 | 3,747 | 30,949 |
| 79,276 | 137 | 20,825 | 6,264 | 3,781 | 31,007 |
| 79,277 | 137 | 20,641 | 6,184 | 3,749 | 30,711 |
| 79,278 | 138 | 20,740 | 6,208 | 3,788 | 30,874 |
| 79,279 | 145 | 21,040 | 6,333 | 3,857 | 31,375 |
| 79,280 | 143 | 20,730 | 6,283 | 3,815 | 30,971 |
| 79,281 | 143 | 20,798 | 6,286 | 3,819 | 31,046 |
| 79,282 | 144 | 20,821 | 6,343 | 3,842 | 31,150 |
| 79,283 | 146 | 21,011 | 6,469 | 3,909 | 31,535 |
| 79,284 | 145 | 20,767 | 6,420 | 3,876 | 31,208 |
| 79,285 | 140 | 20,591 | 6,405 | 3,841 | 30,977 |
| 79,286 | 143 | 20,859 | 6,474 | 3,884 | 31,360 |
| 79,287 | 137 | 20,859 | 6,468 | 3,882 | 31,346 |

|        |     |        |       |       |        |
|--------|-----|--------|-------|-------|--------|
| 79,288 | 138 | 20,737 | 6,416 | 3,863 | 31,154 |
| 79,289 | 137 | 20,735 | 6,409 | 3,876 | 31,157 |
| 79,290 | 138 | 20,608 | 6,347 | 3,844 | 30,937 |
| 79,291 | 137 | 20,407 | 6,309 | 3,849 | 30,702 |
| 79,292 | 140 | 21,189 | 6,513 | 4,005 | 31,847 |
| 79,293 | 146 | 21,165 | 6,520 | 4,017 | 31,848 |
| 79,294 | 154 | 21,355 | 6,599 | 4,036 | 32,144 |
| 79,295 | 156 | 21,221 | 6,621 | 4,009 | 32,007 |
| 79,296 | 155 | 21,252 | 6,618 | 3,999 | 32,024 |
| 79,297 | 157 | 21,552 | 6,678 | 4,050 | 32,437 |
| 79,298 | 159 | 21,784 | 6,695 | 4,053 | 32,691 |
| 79,299 | 159 | 21,976 | 6,679 | 4,045 | 32,859 |
| 79,300 | 161 | 21,714 | 6,575 | 3,977 | 32,427 |
| 79,301 | 161 | 21,716 | 6,590 | 3,988 | 32,455 |
| 79,302 | 160 | 22,029 | 6,706 | 4,034 | 32,929 |
| 79,303 | 166 | 21,858 | 6,670 | 4,010 | 32,704 |
| 79,304 | 162 | 21,658 | 6,633 | 3,998 | 32,451 |
| 79,305 | 163 | 21,536 | 6,632 | 3,991 | 32,322 |
| 79,306 | 164 | 21,334 | 6,599 | 3,964 | 32,061 |
| 79,307 | 164 | 22,014 | 6,788 | 4,096 | 33,062 |
| 79,308 | 168 | 22,152 | 6,793 | 4,085 | 33,198 |
| 79,309 | 168 | 22,073 | 6,750 | 4,062 | 33,053 |
| 79,310 | 169 | 21,910 | 6,710 | 4,041 | 32,830 |
| 79,311 | 168 | 22,294 | 6,848 | 4,085 | 33,395 |
| 79,312 | 167 | 22,276 | 6,824 | 4,070 | 33,337 |
| 79,313 | 167 | 22,339 | 6,809 | 4,061 | 33,376 |
| 79,314 | 164 | 22,399 | 6,801 | 4,045 | 33,409 |
| 79,315 | 161 | 22,230 | 6,672 | 3,980 | 33,043 |
| 79,316 | 165 | 22,526 | 6,684 | 4,001 | 33,376 |
| 79,317 | 161 | 22,859 | 6,731 | 4,037 | 33,788 |
| 79,318 | 154 | 22,588 | 6,622 | 4,007 | 33,371 |
| 79,319 | 159 | 22,939 | 6,667 | 4,051 | 33,816 |

|        |     |        |       |       |        |
|--------|-----|--------|-------|-------|--------|
| 79,320 | 166 | 22,932 | 6,674 | 4,008 | 33,780 |
| 79,321 | 161 | 22,823 | 6,617 | 3,967 | 33,568 |
| 79,322 | 160 | 22,960 | 6,649 | 3,989 | 33,758 |
| 79,323 | 160 | 22,892 | 6,671 | 3,998 | 33,721 |
| 79,324 | 156 | 23,075 | 6,691 | 4,035 | 33,957 |
| 79,325 | 153 | 23,128 | 6,740 | 4,053 | 34,074 |
| 79,326 | 153 | 23,325 | 6,787 | 4,081 | 34,346 |
| 79,327 | 152 | 23,322 | 6,758 | 4,057 | 34,289 |
| 79,328 | 155 | 23,384 | 6,746 | 4,020 | 34,305 |
| 79,329 | 150 | 23,308 | 6,686 | 3,987 | 34,131 |
| 79,330 | 152 | 23,243 | 6,627 | 3,958 | 33,980 |
| 79,331 | 155 | 23,268 | 6,555 | 3,922 | 33,900 |
| 79,332 | 157 | 23,615 | 6,634 | 3,937 | 34,343 |
| 79,333 | 152 | 23,677 | 6,614 | 3,941 | 34,384 |
| 79,334 | 161 | 23,879 | 6,683 | 3,994 | 34,717 |
| 79,335 | 162 | 23,886 | 6,722 | 3,997 | 34,767 |
| 79,336 | 160 | 23,806 | 6,712 | 3,995 | 34,673 |
| 79,337 | 165 | 23,851 | 6,716 | 4,000 | 34,732 |
| 79,338 | 165 | 23,897 | 6,753 | 3,998 | 34,813 |
| 79,339 | 158 | 24,056 | 6,782 | 4,009 | 35,005 |
| 79,340 | 159 | 24,169 | 6,810 | 4,012 | 35,150 |
| 79,341 | 155 | 24,180 | 6,813 | 4,031 | 35,179 |
| 79,342 | 156 | 24,027 | 6,802 | 3,990 | 34,975 |
| 79,343 | 156 | 24,150 | 6,803 | 3,977 | 35,086 |
| 79,344 | 150 | 24,064 | 6,748 | 3,940 | 34,902 |
| 79,345 | 146 | 23,983 | 6,759 | 3,940 | 34,828 |
| 79,346 | 147 | 23,907 | 6,763 | 3,922 | 34,739 |
| 79,347 | 148 | 23,794 | 6,678 | 3,881 | 34,501 |
| 79,348 | 153 | 23,807 | 6,703 | 3,879 | 34,542 |
| 79,349 | 150 | 23,454 | 6,616 | 3,826 | 34,046 |
| 79,350 | 150 | 23,335 | 6,625 | 3,836 | 33,946 |
| 79,351 | 143 | 23,178 | 6,598 | 3,821 | 33,740 |



|        |     |        |       |       |        |
|--------|-----|--------|-------|-------|--------|
| 79,352 | 140 | 23,807 | 6,691 | 3,930 | 34,568 |
| 79,353 | 139 | 23,835 | 6,678 | 3,932 | 34,584 |
| 79,354 | 132 | 23,700 | 6,624 | 3,905 | 34,361 |
| 79,355 | 137 | 23,848 | 6,671 | 3,956 | 34,612 |
| 79,356 | 136 | 23,717 | 6,553 | 3,877 | 34,283 |
| 79,357 | 139 | 23,903 | 6,584 | 3,906 | 34,532 |
| 79,358 | 140 | 24,083 | 6,633 | 3,946 | 34,802 |
| 79,359 | 146 | 23,857 | 6,586 | 3,904 | 34,493 |
| 79,360 | 147 | 23,699 | 6,514 | 3,857 | 34,217 |
| 79,361 | 153 | 23,806 | 6,501 | 3,886 | 34,346 |
| 79,362 | 156 | 23,847 | 6,504 | 3,905 | 34,412 |
| 79,363 | 156 | 23,833 | 6,488 | 3,911 | 34,388 |
| 79,364 | 160 | 23,732 | 6,474 | 3,913 | 34,279 |
| 79,365 | 161 | 23,625 | 6,471 | 3,913 | 34,170 |
| 79,366 | 159 | 23,596 | 6,465 | 3,906 | 34,126 |
| 79,367 | 163 | 23,758 | 6,530 | 3,946 | 34,397 |
| 79,368 | 157 | 23,486 | 6,446 | 3,914 | 34,003 |
| 79,369 | 157 | 23,541 | 6,451 | 3,914 | 34,063 |
| 79,370 | 152 | 23,753 | 6,512 | 3,926 | 34,343 |
| 79,371 | 148 | 23,420 | 6,446 | 3,898 | 33,912 |
| 79,372 | 147 | 23,075 | 6,378 | 3,863 | 33,463 |
| 79,373 | 146 | 23,321 | 6,423 | 3,916 | 33,806 |
| 79,374 | 144 | 23,474 | 6,452 | 3,917 | 33,987 |
| 79,375 | 146 | 23,571 | 6,431 | 3,905 | 34,053 |
| 79,376 | 144 | 23,389 | 6,374 | 3,872 | 33,779 |
| 79,377 | 144 | 23,451 | 6,361 | 3,906 | 33,862 |
| 79,378 | 143 | 23,136 | 6,295 | 3,855 | 33,429 |
| 79,379 | 145 | 22,727 | 6,232 | 3,833 | 32,937 |
| 79,380 | 145 | 22,738 | 6,241 | 3,832 | 32,956 |
| 79,381 | 142 | 22,481 | 6,236 | 3,842 | 32,701 |
| 79,382 | 144 | 22,434 | 6,228 | 3,828 | 32,634 |
| 79,383 | 143 | 22,381 | 6,218 | 3,807 | 32,549 |

|        |     |        |       |       |        |
|--------|-----|--------|-------|-------|--------|
| 79,384 | 143 | 22,226 | 6,194 | 3,780 | 32,343 |
| 79,385 | 134 | 22,464 | 6,219 | 3,830 | 32,647 |
| 79,386 | 134 | 22,362 | 6,166 | 3,825 | 32,487 |
| 79,387 | 134 | 22,211 | 6,126 | 3,813 | 32,284 |
| 79,388 | 128 | 22,329 | 6,182 | 3,851 | 32,490 |
| 79,389 | 130 | 22,278 | 6,160 | 3,878 | 32,446 |
| 79,390 | 129 | 22,239 | 6,217 | 3,907 | 32,492 |
| 79,391 | 128 | 22,188 | 6,179 | 3,897 | 32,392 |
| 79,392 | 127 | 22,048 | 6,117 | 3,840 | 32,132 |
| 79,393 | 127 | 22,129 | 6,156 | 3,866 | 32,278 |
| 79,394 | 126 | 22,111 | 6,165 | 3,888 | 32,290 |
| 79,395 | 123 | 22,030 | 6,121 | 3,895 | 32,169 |
| 79,396 | 124 | 22,410 | 6,193 | 3,941 | 32,668 |
| 79,397 | 117 | 22,158 | 6,131 | 3,914 | 32,320 |
| 79,398 | 117 | 22,075 | 6,111 | 3,896 | 32,199 |
| 79,399 | 118 | 22,071 | 6,098 | 3,893 | 32,180 |
| 79,400 | 121 | 22,349 | 6,117 | 3,931 | 32,518 |
| 79,401 | 124 | 22,275 | 6,097 | 3,910 | 32,406 |
| 79,402 | 128 | 22,239 | 6,096 | 3,898 | 32,361 |
| 79,403 | 135 | 22,177 | 6,111 | 3,897 | 32,320 |
| 79,404 | 136 | 21,804 | 6,004 | 3,843 | 31,787 |
| 79,405 | 135 | 21,906 | 6,015 | 3,851 | 31,907 |
| 79,406 | 134 | 21,680 | 5,979 | 3,807 | 31,600 |
| 79,407 | 140 | 22,029 | 6,057 | 3,861 | 32,087 |
| 79,408 | 142 | 22,403 | 6,116 | 3,918 | 32,579 |
| 79,409 | 141 | 22,223 | 6,049 | 3,867 | 32,280 |
| 79,410 | 129 | 21,991 | 5,997 | 3,814 | 31,931 |
| 79,411 | 121 | 22,055 | 6,019 | 3,857 | 32,052 |
| 79,412 | 123 | 22,387 | 6,085 | 3,903 | 32,498 |
| 79,413 | 120 | 22,177 | 6,038 | 3,848 | 32,183 |
| 79,414 | 120 | 22,195 | 6,041 | 3,854 | 32,210 |
| 79,415 | 116 | 22,583 | 6,135 | 3,911 | 32,745 |

|        |     |        |       |       |        |
|--------|-----|--------|-------|-------|--------|
| 79,416 | 114 | 22,471 | 6,092 | 3,878 | 32,555 |
| 79,417 | 114 | 22,764 | 6,177 | 3,915 | 32,970 |
| 79,418 | 108 | 22,503 | 6,105 | 3,868 | 32,584 |
| 79,419 | 108 | 22,758 | 6,162 | 3,900 | 32,928 |
| 79,420 | 102 | 22,286 | 6,008 | 3,820 | 32,216 |
| 79,421 | 103 | 22,442 | 6,047 | 3,853 | 32,445 |
| 79,422 | 103 | 22,410 | 6,039 | 3,869 | 32,421 |
| 79,423 | 103 | 22,121 | 5,987 | 3,827 | 32,038 |
| 79,424 | 108 | 22,341 | 6,081 | 3,889 | 32,419 |
| 79,425 | 109 | 22,215 | 6,011 | 3,868 | 32,203 |
| 79,426 | 115 | 22,093 | 5,984 | 3,852 | 32,044 |
| 79,427 | 112 | 22,085 | 6,022 | 3,853 | 32,072 |
| 79,428 | 113 | 21,928 | 6,006 | 3,840 | 31,887 |
| 79,429 | 111 | 21,577 | 5,914 | 3,759 | 31,361 |
| 79,430 | 113 | 21,897 | 5,967 | 3,789 | 31,766 |
| 79,431 | 112 | 21,949 | 5,962 | 3,792 | 31,815 |
| 79,432 | 114 | 22,243 | 5,974 | 3,805 | 32,136 |
| 79,433 | 115 | 22,244 | 5,969 | 3,794 | 32,122 |
| 79,434 | 114 | 22,082 | 5,890 | 3,763 | 31,849 |
| 79,435 | 118 | 22,019 | 5,807 | 3,700 | 31,644 |
| 79,436 | 118 | 22,063 | 5,834 | 3,709 | 31,724 |
| 79,437 | 115 | 21,976 | 5,820 | 3,706 | 31,617 |
| 79,438 | 115 | 22,035 | 5,829 | 3,718 | 31,697 |
| 79,439 | 115 | 21,838 | 5,787 | 3,676 | 31,416 |
| 79,440 | 113 | 21,702 | 5,768 | 3,642 | 31,225 |
| 79,441 | 113 | 21,583 | 5,692 | 3,607 | 30,995 |
| 79,442 | 116 | 21,567 | 5,722 | 3,609 | 31,014 |
| 79,443 | 116 | 21,725 | 5,742 | 3,617 | 31,200 |
| 79,444 | 116 | 21,651 | 5,705 | 3,589 | 31,061 |
| 79,445 | 117 | 21,668 | 5,762 | 3,625 | 31,172 |
| 79,446 | 117 | 21,608 | 5,755 | 3,620 | 31,100 |
| 79,447 | 116 | 21,475 | 5,756 | 3,619 | 30,966 |

|        |     |        |       |       |        |
|--------|-----|--------|-------|-------|--------|
| 79,448 | 119 | 21,530 | 5,767 | 3,642 | 31,058 |
| 79,449 | 115 | 21,405 | 5,783 | 3,653 | 30,956 |
| 79,450 | 118 | 21,468 | 5,824 | 3,683 | 31,093 |
| 79,451 | 116 | 21,156 | 5,777 | 3,642 | 30,691 |
| 79,452 | 113 | 21,288 | 5,788 | 3,673 | 30,862 |
| 79,453 | 113 | 21,308 | 5,793 | 3,683 | 30,897 |
| 79,454 | 113 | 21,314 | 5,826 | 3,683 | 30,936 |
| 79,455 | 110 | 21,468 | 5,865 | 3,714 | 31,157 |
| 79,456 | 110 | 21,577 | 5,970 | 3,756 | 31,413 |
| 79,457 | 110 | 21,840 | 6,004 | 3,751 | 31,705 |
| 79,458 | 108 | 21,650 | 5,932 | 3,696 | 31,386 |
| 79,459 | 104 | 21,350 | 5,920 | 3,647 | 31,021 |
| 79,460 | 102 | 21,552 | 6,077 | 3,749 | 31,480 |
| 79,461 | 101 | 21,441 | 6,064 | 3,737 | 31,343 |
| 79,462 | 107 | 21,704 | 6,151 | 3,787 | 31,749 |
| 79,463 | 110 | 21,733 | 6,182 | 3,795 | 31,820 |
| 79,464 | 109 | 21,531 | 6,134 | 3,760 | 31,534 |
| 79,465 | 119 | 21,889 | 6,181 | 3,812 | 32,001 |
| 79,466 | 126 | 21,631 | 6,140 | 3,769 | 31,666 |
| 79,467 | 125 | 21,476 | 6,106 | 3,750 | 31,457 |
| 79,468 | 139 | 21,830 | 6,218 | 3,803 | 31,990 |
| 79,469 | 147 | 21,768 | 6,212 | 3,809 | 31,936 |
| 79,470 | 151 | 21,787 | 6,224 | 3,803 | 31,965 |
| 79,471 | 154 | 21,820 | 6,209 | 3,798 | 31,981 |
| 79,472 | 154 | 22,054 | 6,237 | 3,809 | 32,254 |
| 79,473 | 159 | 22,237 | 6,245 | 3,787 | 32,428 |
| 79,474 | 159 | 22,214 | 6,234 | 3,782 | 32,389 |
| 79,475 | 157 | 22,754 | 6,348 | 3,843 | 33,102 |
| 79,476 | 156 | 22,563 | 6,335 | 3,830 | 32,884 |
| 79,477 | 154 | 22,601 | 6,297 | 3,829 | 32,881 |
| 79,478 | 154 | 22,582 | 6,310 | 3,812 | 32,858 |
| 79,479 | 159 | 22,773 | 6,347 | 3,837 | 33,116 |

|        |     |        |       |       |        |
|--------|-----|--------|-------|-------|--------|
| 79,480 | 161 | 22,871 | 6,366 | 3,871 | 33,269 |
| 79,481 | 173 | 23,064 | 6,405 | 3,891 | 33,533 |
| 79,482 | 173 | 23,154 | 6,453 | 3,924 | 33,704 |
| 79,483 | 172 | 22,994 | 6,424 | 3,902 | 33,492 |
| 79,484 | 166 | 22,807 | 6,385 | 3,878 | 33,236 |
| 79,485 | 167 | 23,133 | 6,484 | 3,947 | 33,731 |
| 79,486 | 170 | 23,400 | 6,543 | 3,991 | 34,104 |
| 79,487 | 176 | 23,712 | 6,657 | 4,067 | 34,612 |
| 79,488 | 187 | 23,861 | 6,746 | 4,083 | 34,877 |
| 79,489 | 190 | 24,021 | 6,780 | 4,098 | 35,089 |
| 79,490 | 198 | 23,948 | 6,776 | 4,089 | 35,011 |
| 79,491 | 202 | 24,077 | 6,823 | 4,103 | 35,205 |
| 79,492 | 210 | 23,957 | 6,779 | 4,074 | 35,020 |
| 79,493 | 206 | 23,735 | 6,693 | 4,043 | 34,677 |
| 79,494 | 208 | 23,816 | 6,693 | 4,068 | 34,785 |
| 79,495 | 209 | 23,761 | 6,666 | 4,051 | 34,687 |
| 79,496 | 215 | 23,885 | 6,670 | 4,024 | 34,794 |
| 79,497 | 217 | 23,925 | 6,672 | 4,021 | 34,835 |
| 79,498 | 216 | 24,032 | 6,648 | 4,020 | 34,916 |
| 79,499 | 219 | 24,258 | 6,694 | 4,053 | 35,224 |
| 79,500 | 216 | 24,455 | 6,699 | 4,057 | 35,427 |
| 79,501 | 212 | 24,270 | 6,620 | 3,990 | 35,092 |
| 79,502 | 212 | 24,474 | 6,660 | 4,011 | 35,357 |
| 79,503 | 207 | 24,509 | 6,655 | 4,029 | 35,400 |
| 79,504 | 211 | 24,420 | 6,627 | 4,030 | 35,288 |
| 79,505 | 210 | 24,396 | 6,607 | 4,001 | 35,214 |
| 79,506 | 211 | 24,398 | 6,597 | 4,000 | 35,206 |
| 79,507 | 217 | 24,415 | 6,631 | 4,007 | 35,270 |
| 79,508 | 217 | 24,360 | 6,613 | 4,034 | 35,224 |
| 79,509 | 217 | 24,104 | 6,464 | 3,974 | 34,759 |
| 79,510 | 220 | 24,240 | 6,411 | 3,945 | 34,816 |
| 79,511 | 223 | 24,282 | 6,429 | 3,916 | 34,850 |

|        |     |        |       |       |        |
|--------|-----|--------|-------|-------|--------|
| 79,512 | 223 | 24,345 | 6,419 | 3,908 | 34,895 |
| 79,513 | 227 | 24,646 | 6,442 | 3,939 | 35,254 |
| 79,514 | 222 | 24,327 | 6,351 | 3,892 | 34,792 |
| 79,515 | 220 | 24,306 | 6,327 | 3,883 | 34,736 |
| 79,516 | 212 | 24,207 | 6,333 | 3,888 | 34,640 |
| 79,517 | 204 | 24,108 | 6,294 | 3,877 | 34,483 |
| 79,518 | 200 | 24,033 | 6,286 | 3,874 | 34,393 |
| 79,519 | 189 | 23,891 | 6,204 | 3,854 | 34,138 |
| 79,520 | 184 | 24,031 | 6,230 | 3,852 | 34,297 |
| 79,521 | 180 | 24,059 | 6,219 | 3,834 | 34,292 |
| 79,522 | 194 | 24,279 | 6,267 | 3,850 | 34,590 |
| 79,523 | 195 | 24,388 | 6,307 | 3,869 | 34,759 |
| 79,524 | 189 | 24,026 | 6,212 | 3,820 | 34,247 |
| 79,525 | 189 | 24,063 | 6,234 | 3,834 | 34,320 |
| 79,526 | 204 | 24,159 | 6,283 | 3,832 | 34,478 |
| 79,527 | 199 | 23,933 | 6,202 | 3,752 | 34,086 |
| 79,528 | 199 | 23,748 | 6,185 | 3,723 | 33,855 |
| 79,529 | 198 | 23,776 | 6,157 | 3,727 | 33,858 |
| 79,530 | 193 | 23,756 | 6,136 | 3,722 | 33,807 |
| 79,531 | 187 | 23,674 | 6,090 | 3,700 | 33,651 |
| 79,532 | 169 | 23,381 | 6,051 | 3,665 | 33,266 |
| 79,533 | 170 | 23,315 | 6,016 | 3,649 | 33,150 |
| 79,534 | 171 | 23,369 | 6,028 | 3,637 | 33,205 |
| 79,535 | 171 | 23,502 | 6,071 | 3,684 | 33,428 |
| 79,536 | 169 | 23,387 | 6,029 | 3,682 | 33,267 |
| 79,537 | 160 | 23,297 | 5,954 | 3,609 | 33,020 |
| 79,538 | 161 | 23,426 | 5,952 | 3,611 | 33,150 |
| 79,539 | 158 | 23,611 | 5,957 | 3,654 | 33,380 |
| 79,540 | 158 | 23,860 | 5,970 | 3,677 | 33,665 |
| 79,541 | 150 | 23,718 | 5,911 | 3,634 | 33,413 |
| 79,542 | 145 | 23,740 | 5,917 | 3,653 | 33,455 |
| 79,543 | 135 | 23,493 | 5,850 | 3,619 | 33,097 |

|        |     |        |       |       |        |
|--------|-----|--------|-------|-------|--------|
| 79,544 | 138 | 23,703 | 5,870 | 3,618 | 33,329 |
| 79,545 | 136 | 23,500 | 5,819 | 3,586 | 33,041 |
| 79,546 | 137 | 23,745 | 5,847 | 3,635 | 33,364 |
| 79,547 | 130 | 23,538 | 5,768 | 3,585 | 33,021 |
| 79,548 | 130 | 23,832 | 5,833 | 3,615 | 33,410 |
| 79,549 | 133 | 23,689 | 5,806 | 3,589 | 33,217 |
| 79,550 | 130 | 23,593 | 5,795 | 3,575 | 33,093 |
| 79,551 | 134 | 23,699 | 5,825 | 3,584 | 33,242 |
| 79,552 | 132 | 23,531 | 5,812 | 3,572 | 33,047 |
| 79,553 | 132 | 23,287 | 5,742 | 3,539 | 32,700 |
| 79,554 | 132 | 23,138 | 5,714 | 3,514 | 32,498 |
| 79,555 | 125 | 23,133 | 5,668 | 3,476 | 32,402 |
| 79,556 | 122 | 23,082 | 5,617 | 3,464 | 32,285 |
| 79,557 | 124 | 23,364 | 5,655 | 3,489 | 32,632 |
| 79,558 | 129 | 23,373 | 5,611 | 3,472 | 32,585 |
| 79,559 | 139 | 23,148 | 5,567 | 3,416 | 32,270 |
| 79,560 | 137 | 22,725 | 5,525 | 3,372 | 31,759 |
| 79,561 | 136 | 22,374 | 5,448 | 3,338 | 31,296 |
| 79,562 | 138 | 22,627 | 5,487 | 3,371 | 31,623 |
| 79,563 | 135 | 22,811 | 5,509 | 3,373 | 31,828 |
| 79,564 | 132 | 22,503 | 5,435 | 3,340 | 31,410 |
| 79,565 | 134 | 22,302 | 5,395 | 3,299 | 31,130 |
| 79,566 | 135 | 22,072 | 5,321 | 3,251 | 30,779 |
| 79,567 | 140 | 22,454 | 5,439 | 3,298 | 31,331 |
| 79,568 | 146 | 22,349 | 5,406 | 3,301 | 31,202 |
| 79,569 | 146 | 22,280 | 5,402 | 3,314 | 31,142 |
| 79,570 | 147 | 22,216 | 5,390 | 3,311 | 31,064 |
| 79,571 | 147 | 22,147 | 5,368 | 3,305 | 30,967 |
| 79,572 | 149 | 22,412 | 5,452 | 3,342 | 31,355 |
| 79,573 | 137 | 22,495 | 5,435 | 3,361 | 31,428 |
| 79,574 | 134 | 22,249 | 5,385 | 3,323 | 31,091 |
| 79,575 | 126 | 21,666 | 5,201 | 3,278 | 30,271 |

|        |     |        |       |       |        |
|--------|-----|--------|-------|-------|--------|
| 79,576 | 128 | 21,896 | 5,244 | 3,294 | 30,562 |
| 79,577 | 122 | 21,976 | 5,233 | 3,307 | 30,638 |
| 79,578 | 122 | 21,921 | 5,207 | 3,305 | 30,555 |
| 79,579 | 122 | 21,975 | 5,181 | 3,303 | 30,581 |
| 79,580 | 123 | 22,243 | 5,217 | 3,329 | 30,912 |
| 79,581 | 122 | 22,135 | 5,176 | 3,298 | 30,731 |
| 79,582 | 123 | 22,223 | 5,158 | 3,302 | 30,806 |
| 79,583 | 121 | 22,196 | 5,144 | 3,295 | 30,756 |
| 79,584 | 122 | 22,397 | 5,164 | 3,339 | 31,022 |
| 79,585 | 122 | 22,397 | 5,184 | 3,365 | 31,068 |
| 79,586 | 118 | 21,853 | 5,069 | 3,264 | 30,304 |
| 79,587 | 120 | 21,737 | 5,054 | 3,263 | 30,174 |
| 79,588 | 124 | 22,178 | 5,142 | 3,322 | 30,766 |
| 79,589 | 126 | 22,034 | 5,143 | 3,322 | 30,625 |
| 79,590 | 122 | 21,806 | 5,133 | 3,303 | 30,364 |
| 79,591 | 119 | 21,604 | 5,094 | 3,271 | 30,088 |
| 79,592 | 119 | 21,363 | 4,997 | 3,241 | 29,720 |
| 79,593 | 122 | 21,470 | 5,031 | 3,240 | 29,863 |
| 79,594 | 121 | 21,310 | 5,001 | 3,217 | 29,649 |
| 79,595 | 124 | 21,229 | 5,001 | 3,218 | 29,572 |
| 79,596 | 125 | 21,084 | 4,981 | 3,176 | 29,366 |
| 79,597 | 130 | 21,522 | 5,079 | 3,223 | 29,954 |
| 79,598 | 139 | 21,739 | 5,105 | 3,241 | 30,224 |
| 79,599 | 137 | 21,521 | 5,036 | 3,214 | 29,908 |
| 79,600 | 138 | 21,627 | 5,011 | 3,211 | 29,987 |
| 79,601 | 140 | 21,833 | 5,047 | 3,224 | 30,244 |
| 79,602 | 136 | 21,571 | 4,975 | 3,185 | 29,867 |
| 79,603 | 138 | 21,588 | 4,972 | 3,152 | 29,850 |
| 79,604 | 141 | 21,648 | 4,995 | 3,166 | 29,950 |
| 79,605 | 140 | 21,487 | 4,957 | 3,140 | 29,724 |
| 79,606 | 148 | 22,009 | 5,089 | 3,227 | 30,473 |
| 79,607 | 151 | 21,963 | 5,098 | 3,204 | 30,416 |



|        |     |        |       |       |        |
|--------|-----|--------|-------|-------|--------|
| 79,608 | 150 | 22,007 | 5,111 | 3,205 | 30,473 |
| 79,609 | 151 | 22,265 | 5,145 | 3,245 | 30,806 |
| 79,610 | 148 | 22,343 | 5,143 | 3,254 | 30,888 |
| 79,611 | 145 | 22,205 | 5,082 | 3,247 | 30,679 |
| 79,612 | 150 | 22,225 | 5,091 | 3,246 | 30,712 |
| 79,613 | 150 | 22,279 | 5,090 | 3,236 | 30,755 |
| 79,614 | 149 | 22,158 | 5,124 | 3,216 | 30,647 |
| 79,615 | 148 | 22,161 | 5,128 | 3,201 | 30,638 |
| 79,616 | 145 | 22,307 | 5,152 | 3,227 | 30,831 |
| 79,617 | 147 | 22,133 | 5,117 | 3,215 | 30,612 |
| 79,618 | 147 | 22,198 | 5,133 | 3,208 | 30,686 |
| 79,619 | 146 | 22,442 | 5,191 | 3,212 | 30,991 |
| 79,620 | 145 | 22,379 | 5,211 | 3,221 | 30,956 |
| 79,621 | 146 | 22,264 | 5,235 | 3,240 | 30,885 |
| 79,622 | 146 | 22,537 | 5,317 | 3,313 | 31,313 |
| 79,623 | 149 | 22,591 | 5,322 | 3,318 | 31,380 |
| 79,624 | 149 | 21,907 | 5,198 | 3,208 | 30,462 |
| 79,625 | 147 | 22,306 | 5,245 | 3,267 | 30,965 |
| 79,626 | 146 | 22,379 | 5,295 | 3,268 | 31,088 |
| 79,627 | 147 | 22,411 | 5,310 | 3,278 | 31,146 |
| 79,628 | 149 | 22,599 | 5,391 | 3,327 | 31,466 |
| 79,629 | 152 | 22,344 | 5,358 | 3,309 | 31,163 |
| 79,630 | 151 | 22,097 | 5,339 | 3,306 | 30,893 |
| 79,631 | 158 | 22,706 | 5,471 | 3,377 | 31,712 |
| 79,632 | 163 | 22,818 | 5,507 | 3,422 | 31,910 |
| 79,633 | 167 | 22,836 | 5,559 | 3,421 | 31,983 |
| 79,634 | 179 | 22,816 | 5,590 | 3,430 | 32,015 |
| 79,635 | 177 | 22,620 | 5,548 | 3,383 | 31,728 |
| 79,636 | 183 | 22,682 | 5,537 | 3,382 | 31,784 |
| 79,637 | 182 | 22,858 | 5,529 | 3,384 | 31,953 |
| 79,638 | 190 | 23,132 | 5,597 | 3,415 | 32,334 |
| 79,639 | 188 | 23,109 | 5,576 | 3,408 | 32,281 |

|        |     |        |       |       |        |
|--------|-----|--------|-------|-------|--------|
| 79,640 | 185 | 23,293 | 5,563 | 3,398 | 32,439 |
| 79,641 | 185 | 23,232 | 5,542 | 3,391 | 32,350 |
| 79,642 | 184 | 23,301 | 5,570 | 3,411 | 32,466 |
| 79,643 | 184 | 23,450 | 5,608 | 3,438 | 32,680 |
| 79,644 | 185 | 23,414 | 5,623 | 3,452 | 32,674 |
| 79,645 | 191 | 23,369 | 5,636 | 3,450 | 32,646 |
| 79,646 | 191 | 23,653 | 5,723 | 3,514 | 33,081 |
| 79,647 | 188 | 23,367 | 5,685 | 3,484 | 32,724 |
| 79,648 | 187 | 23,287 | 5,673 | 3,488 | 32,635 |
| 79,649 | 180 | 23,610 | 5,803 | 3,541 | 33,134 |
| 79,650 | 178 | 23,369 | 5,797 | 3,536 | 32,880 |
| 79,651 | 179 | 23,460 | 5,824 | 3,563 | 33,026 |
| 79,652 | 184 | 23,437 | 5,831 | 3,569 | 33,021 |
| 79,653 | 184 | 23,452 | 5,847 | 3,578 | 33,061 |
| 79,654 | 181 | 23,515 | 5,842 | 3,600 | 33,138 |
| 79,655 | 177 | 23,657 | 5,882 | 3,620 | 33,336 |
| 79,656 | 178 | 23,507 | 5,824 | 3,591 | 33,100 |
| 79,657 | 171 | 23,088 | 5,755 | 3,571 | 32,585 |
| 79,658 | 175 | 23,270 | 5,785 | 3,617 | 32,847 |
| 79,659 | 164 | 23,472 | 5,865 | 3,644 | 33,145 |
| 79,660 | 164 | 23,504 | 5,867 | 3,645 | 33,180 |
| 79,661 | 156 | 23,468 | 5,878 | 3,653 | 33,155 |
| 79,662 | 152 | 23,368 | 5,860 | 3,643 | 33,023 |
| 79,663 | 146 | 23,457 | 5,863 | 3,657 | 33,123 |
| 79,664 | 150 | 23,370 | 5,821 | 3,635 | 32,976 |
| 79,665 | 161 | 23,692 | 5,871 | 3,683 | 33,407 |
| 79,666 | 165 | 23,470 | 5,845 | 3,666 | 33,146 |
| 79,667 | 171 | 23,861 | 5,945 | 3,699 | 33,676 |
| 79,668 | 168 | 23,946 | 5,945 | 3,702 | 33,761 |
| 79,669 | 163 | 23,586 | 5,771 | 3,610 | 33,130 |
| 79,670 | 166 | 23,697 | 5,795 | 3,639 | 33,297 |
| 79,671 | 168 | 23,946 | 5,842 | 3,658 | 33,614 |

|        |     |        |       |       |        |
|--------|-----|--------|-------|-------|--------|
| 79,672 | 169 | 24,231 | 5,886 | 3,674 | 33,960 |
| 79,673 | 174 | 23,879 | 5,834 | 3,607 | 33,494 |
| 79,674 | 171 | 23,604 | 5,744 | 3,564 | 33,083 |
| 79,675 | 171 | 23,899 | 5,852 | 3,621 | 33,543 |
| 79,676 | 176 | 23,620 | 5,809 | 3,576 | 33,181 |
| 79,677 | 176 | 23,735 | 5,827 | 3,576 | 33,314 |
| 79,678 | 172 | 23,729 | 5,823 | 3,575 | 33,299 |
| 79,679 | 177 | 24,057 | 5,872 | 3,608 | 33,714 |
| 79,680 | 171 | 23,548 | 5,708 | 3,488 | 32,915 |
| 79,681 | 173 | 23,841 | 5,759 | 3,513 | 33,286 |
| 79,682 | 172 | 24,172 | 5,814 | 3,553 | 33,711 |
| 79,683 | 178 | 24,157 | 5,809 | 3,543 | 33,687 |
| 79,684 | 172 | 23,950 | 5,755 | 3,509 | 33,386 |
| 79,685 | 167 | 24,259 | 5,789 | 3,516 | 33,731 |
| 79,686 | 167 | 24,231 | 5,784 | 3,525 | 33,707 |
| 79,687 | 162 | 24,007 | 5,731 | 3,489 | 33,389 |
| 79,688 | 166 | 24,210 | 5,772 | 3,521 | 33,669 |
| 79,689 | 160 | 24,103 | 5,783 | 3,515 | 33,561 |
| 79,690 | 158 | 23,856 | 5,770 | 3,505 | 33,289 |
| 79,691 | 161 | 23,727 | 5,772 | 3,509 | 33,169 |
| 79,692 | 161 | 23,871 | 5,761 | 3,471 | 33,264 |
| 79,693 | 162 | 23,812 | 5,775 | 3,433 | 33,182 |
| 79,694 | 164 | 23,925 | 5,759 | 3,438 | 33,286 |
| 79,695 | 159 | 23,847 | 5,692 | 3,398 | 33,096 |
| 79,696 | 162 | 24,140 | 5,730 | 3,425 | 33,457 |
| 79,697 | 160 | 23,917 | 5,676 | 3,399 | 33,152 |
| 79,698 | 162 | 23,850 | 5,676 | 3,420 | 33,108 |
| 79,699 | 160 | 23,895 | 5,676 | 3,418 | 33,149 |
| 79,700 | 158 | 23,768 | 5,643 | 3,413 | 32,982 |
| 79,701 | 163 | 23,971 | 5,701 | 3,431 | 33,266 |
| 79,702 | 160 | 24,169 | 5,754 | 3,438 | 33,521 |
| 79,703 | 158 | 24,216 | 5,813 | 3,466 | 33,653 |

|        |     |        |       |       |        |
|--------|-----|--------|-------|-------|--------|
| 79,704 | 162 | 24,055 | 5,760 | 3,433 | 33,410 |
| 79,705 | 162 | 24,106 | 5,787 | 3,457 | 33,512 |
| 79,706 | 164 | 24,060 | 5,753 | 3,436 | 33,413 |
| 79,707 | 164 | 24,135 | 5,771 | 3,441 | 33,511 |
| 79,708 | 162 | 24,098 | 5,780 | 3,434 | 33,474 |
| 79,709 | 156 | 23,758 | 5,696 | 3,391 | 33,001 |
| 79,710 | 161 | 23,949 | 5,707 | 3,409 | 33,226 |
| 79,711 | 162 | 23,642 | 5,636 | 3,363 | 32,803 |
| 79,712 | 168 | 23,630 | 5,632 | 3,356 | 32,786 |
| 79,713 | 168 | 23,663 | 5,644 | 3,355 | 32,830 |
| 79,714 | 168 | 23,815 | 5,681 | 3,389 | 33,053 |
| 79,715 | 162 | 23,724 | 5,657 | 3,400 | 32,943 |
| 79,716 | 155 | 23,621 | 5,616 | 3,361 | 32,753 |
| 79,717 | 154 | 23,474 | 5,604 | 3,352 | 32,584 |
| 79,718 | 150 | 23,638 | 5,618 | 3,378 | 32,784 |
| 79,719 | 157 | 23,470 | 5,623 | 3,374 | 32,624 |
| 79,720 | 157 | 23,341 | 5,633 | 3,378 | 32,509 |
| 79,721 | 154 | 23,162 | 5,628 | 3,357 | 32,301 |
| 79,722 | 151 | 23,173 | 5,622 | 3,383 | 32,329 |
| 79,723 | 153 | 23,161 | 5,644 | 3,390 | 32,348 |
| 79,724 | 146 | 23,122 | 5,599 | 3,357 | 32,224 |
| 79,725 | 148 | 22,989 | 5,547 | 3,325 | 32,009 |
| 79,726 | 147 | 22,946 | 5,561 | 3,331 | 31,985 |
| 79,727 | 145 | 22,954 | 5,537 | 3,363 | 31,999 |
| 79,728 | 158 | 23,020 | 5,527 | 3,366 | 32,071 |
| 79,729 | 163 | 23,198 | 5,566 | 3,396 | 32,323 |
| 79,730 | 151 | 22,551 | 5,476 | 3,347 | 31,525 |
| 79,731 | 151 | 22,719 | 5,517 | 3,354 | 31,741 |
| 79,732 | 160 | 22,664 | 5,532 | 3,358 | 31,714 |
| 79,733 | 158 | 22,365 | 5,507 | 3,337 | 31,367 |
| 79,734 | 156 | 22,706 | 5,589 | 3,401 | 31,852 |
| 79,735 | 169 | 22,333 | 5,489 | 3,363 | 31,354 |

|        |     |        |       |       |        |
|--------|-----|--------|-------|-------|--------|
| 79,736 | 165 | 22,028 | 5,455 | 3,336 | 30,984 |
| 79,737 | 164 | 22,241 | 5,493 | 3,354 | 31,252 |
| 79,738 | 172 | 22,351 | 5,517 | 3,376 | 31,416 |
| 79,739 | 170 | 22,244 | 5,462 | 3,338 | 31,214 |
| 79,740 | 170 | 22,252 | 5,458 | 3,330 | 31,210 |
| 79,741 | 170 | 22,486 | 5,490 | 3,343 | 31,489 |
| 79,742 | 169 | 22,330 | 5,458 | 3,323 | 31,280 |
| 79,743 | 172 | 22,253 | 5,420 | 3,335 | 31,180 |
| 79,744 | 172 | 22,037 | 5,408 | 3,337 | 30,954 |
| 79,745 | 178 | 22,007 | 5,432 | 3,351 | 30,968 |
| 79,746 | 171 | 21,810 | 5,434 | 3,336 | 30,751 |
| 79,747 | 172 | 21,690 | 5,466 | 3,355 | 30,683 |
| 79,748 | 167 | 21,731 | 5,439 | 3,332 | 30,669 |
| 79,749 | 166 | 21,482 | 5,368 | 3,271 | 30,287 |
| 79,750 | 166 | 21,320 | 5,324 | 3,279 | 30,089 |
| 79,751 | 172 | 21,220 | 5,306 | 3,271 | 29,969 |
| 79,752 | 167 | 21,155 | 5,312 | 3,249 | 29,883 |
| 79,753 | 170 | 21,123 | 5,287 | 3,260 | 29,840 |
| 79,754 | 167 | 20,992 | 5,195 | 3,223 | 29,577 |
| 79,755 | 166 | 20,974 | 5,196 | 3,225 | 29,561 |
| 79,756 | 166 | 20,959 | 5,216 | 3,226 | 29,567 |
| 79,757 | 162 | 20,801 | 5,205 | 3,208 | 29,376 |
| 79,758 | 163 | 20,699 | 5,156 | 3,179 | 29,197 |
| 79,759 | 163 | 20,717 | 5,152 | 3,185 | 29,217 |
| 79,760 | 164 | 20,541 | 5,123 | 3,134 | 28,962 |
| 79,761 | 158 | 20,282 | 5,085 | 3,115 | 28,640 |
| 79,762 | 161 | 20,926 | 5,263 | 3,192 | 29,542 |
| 79,763 | 153 | 20,617 | 5,216 | 3,168 | 29,154 |
| 79,764 | 160 | 20,813 | 5,283 | 3,191 | 29,447 |
| 79,765 | 162 | 20,230 | 5,177 | 3,110 | 28,679 |
| 79,766 | 162 | 20,209 | 5,180 | 3,106 | 28,657 |
| 79,767 | 158 | 19,854 | 5,112 | 3,084 | 28,208 |

|        |     |        |       |       |        |
|--------|-----|--------|-------|-------|--------|
| 79,768 | 156 | 19,760 | 5,084 | 3,065 | 28,065 |
| 79,769 | 160 | 20,315 | 5,221 | 3,135 | 28,831 |
| 79,770 | 152 | 20,165 | 5,156 | 3,091 | 28,564 |
| 79,771 | 155 | 19,939 | 5,091 | 3,029 | 28,214 |
| 79,772 | 155 | 19,898 | 5,104 | 3,024 | 28,181 |
| 79,773 | 160 | 19,783 | 5,058 | 3,005 | 28,006 |
| 79,774 | 160 | 19,753 | 5,062 | 3,018 | 27,993 |
| 79,775 | 156 | 19,719 | 5,113 | 3,032 | 28,020 |
| 79,776 | 156 | 19,888 | 5,189 | 3,078 | 28,311 |
| 79,777 | 156 | 19,695 | 5,142 | 3,019 | 28,012 |
| 79,778 | 157 | 19,705 | 5,199 | 3,029 | 28,090 |
| 79,779 | 146 | 19,772 | 5,230 | 3,027 | 28,175 |
| 79,780 | 141 | 19,484 | 5,187 | 3,000 | 27,812 |
| 79,781 | 142 | 19,758 | 5,271 | 3,035 | 28,206 |
| 79,782 | 147 | 19,719 | 5,301 | 3,029 | 28,196 |
| 79,783 | 134 | 19,551 | 5,234 | 2,998 | 27,917 |
| 79,784 | 134 | 19,681 | 5,345 | 3,071 | 28,231 |
| 79,785 | 119 | 19,611 | 5,374 | 3,059 | 28,163 |
| 79,786 | 123 | 19,552 | 5,342 | 3,051 | 28,068 |
| 79,787 | 124 | 19,833 | 5,428 | 3,119 | 28,504 |
| 79,788 | 119 | 20,171 | 5,525 | 3,197 | 29,012 |
| 79,789 | 116 | 19,948 | 5,498 | 3,171 | 28,733 |
| 79,790 | 116 | 20,162 | 5,590 | 3,221 | 29,089 |
| 79,791 | 120 | 20,506 | 5,681 | 3,287 | 29,594 |
| 79,792 | 123 | 20,652 | 5,744 | 3,316 | 29,835 |
| 79,793 | 124 | 20,761 | 5,775 | 3,336 | 29,996 |
| 79,794 | 124 | 21,004 | 5,853 | 3,369 | 30,350 |
| 79,795 | 123 | 21,363 | 5,908 | 3,385 | 30,779 |
| 79,796 | 119 | 21,266 | 5,874 | 3,364 | 30,623 |
| 79,797 | 124 | 21,482 | 5,860 | 3,390 | 30,856 |
| 79,798 | 124 | 21,517 | 5,841 | 3,379 | 30,861 |
| 79,799 | 128 | 21,795 | 5,897 | 3,422 | 31,242 |

|        |     |        |       |       |        |
|--------|-----|--------|-------|-------|--------|
| 79,800 | 128 | 21,739 | 5,907 | 3,428 | 31,202 |
| 79,801 | 129 | 22,065 | 5,993 | 3,445 | 31,632 |
| 79,802 | 135 | 22,256 | 6,055 | 3,496 | 31,942 |
| 79,803 | 141 | 22,383 | 6,040 | 3,527 | 32,091 |
| 79,804 | 150 | 22,130 | 6,000 | 3,491 | 31,771 |
| 79,805 | 151 | 21,944 | 6,007 | 3,484 | 31,586 |
| 79,806 | 151 | 21,966 | 6,054 | 3,500 | 31,671 |
| 79,807 | 155 | 22,198 | 6,097 | 3,519 | 31,969 |
| 79,808 | 161 | 21,943 | 6,030 | 3,493 | 31,627 |
| 79,809 | 158 | 21,743 | 6,018 | 3,462 | 31,381 |
| 79,810 | 165 | 21,983 | 6,132 | 3,524 | 31,804 |
| 79,811 | 170 | 22,117 | 6,193 | 3,576 | 32,056 |
| 79,812 | 171 | 22,016 | 6,152 | 3,536 | 31,875 |
| 79,813 | 173 | 22,109 | 6,212 | 3,583 | 32,077 |
| 79,814 | 179 | 22,232 | 6,202 | 3,606 | 32,219 |
| 79,815 | 174 | 22,005 | 6,146 | 3,591 | 31,916 |
| 79,816 | 170 | 21,869 | 6,113 | 3,582 | 31,734 |
| 79,817 | 172 | 22,116 | 6,212 | 3,617 | 32,117 |
| 79,818 | 183 | 22,411 | 6,297 | 3,647 | 32,538 |
| 79,819 | 187 | 22,183 | 6,244 | 3,626 | 32,240 |
| 79,820 | 183 | 21,907 | 6,219 | 3,616 | 31,925 |
| 79,821 | 190 | 22,252 | 6,312 | 3,687 | 32,441 |
| 79,822 | 196 | 22,662 | 6,423 | 3,747 | 33,028 |
| 79,823 | 199 | 22,754 | 6,460 | 3,755 | 33,168 |
| 79,824 | 201 | 22,739 | 6,503 | 3,779 | 33,222 |
| 79,825 | 202 | 22,690 | 6,494 | 3,752 | 33,138 |
| 79,826 | 203 | 22,634 | 6,478 | 3,756 | 33,071 |
| 79,827 | 211 | 22,878 | 6,540 | 3,801 | 33,430 |
| 79,828 | 212 | 22,639 | 6,500 | 3,784 | 33,135 |
| 79,829 | 210 | 22,597 | 6,466 | 3,767 | 33,040 |
| 79,830 | 215 | 22,843 | 6,593 | 3,829 | 33,480 |
| 79,831 | 216 | 22,771 | 6,605 | 3,841 | 33,433 |

|        |     |        |       |       |        |
|--------|-----|--------|-------|-------|--------|
| 79,832 | 215 | 22,581 | 6,538 | 3,805 | 33,139 |
| 79,833 | 211 | 22,576 | 6,547 | 3,815 | 33,149 |
| 79,834 | 217 | 22,258 | 6,432 | 3,750 | 32,657 |
| 79,835 | 222 | 22,473 | 6,451 | 3,739 | 32,885 |
| 79,836 | 223 | 22,574 | 6,468 | 3,753 | 33,018 |
| 79,837 | 218 | 22,407 | 6,423 | 3,712 | 32,760 |
| 79,838 | 221 | 22,507 | 6,450 | 3,691 | 32,869 |
| 79,839 | 220 | 22,522 | 6,440 | 3,655 | 32,837 |
| 79,840 | 220 | 22,468 | 6,426 | 3,666 | 32,780 |
| 79,841 | 229 | 22,683 | 6,561 | 3,729 | 33,202 |
| 79,842 | 235 | 22,592 | 6,555 | 3,731 | 33,113 |
| 79,843 | 238 | 22,409 | 6,521 | 3,717 | 32,885 |
| 79,844 | 237 | 22,507 | 6,568 | 3,737 | 33,049 |
| 79,845 | 248 | 22,128 | 6,484 | 3,692 | 32,552 |
| 79,846 | 247 | 21,924 | 6,437 | 3,661 | 32,269 |
| 79,847 | 259 | 22,523 | 6,573 | 3,726 | 33,081 |
| 79,848 | 263 | 22,497 | 6,582 | 3,707 | 33,049 |
| 79,849 | 273 | 22,600 | 6,612 | 3,716 | 33,201 |
| 79,850 | 272 | 22,561 | 6,605 | 3,713 | 33,151 |
| 79,851 | 273 | 22,641 | 6,604 | 3,718 | 33,236 |
| 79,852 | 273 | 22,574 | 6,595 | 3,713 | 33,155 |
| 79,853 | 267 | 22,610 | 6,605 | 3,710 | 33,192 |
| 79,854 | 261 | 22,509 | 6,605 | 3,693 | 33,068 |
| 79,855 | 257 | 22,535 | 6,548 | 3,647 | 32,987 |
| 79,856 | 257 | 22,588 | 6,551 | 3,652 | 33,048 |
| 79,857 | 255 | 22,616 | 6,556 | 3,659 | 33,086 |
| 79,858 | 253 | 22,541 | 6,542 | 3,656 | 32,992 |
| 79,859 | 246 | 22,629 | 6,552 | 3,640 | 33,067 |
| 79,860 | 247 | 22,520 | 6,447 | 3,604 | 32,818 |
| 79,861 | 255 | 22,633 | 6,444 | 3,604 | 32,936 |
| 79,862 | 252 | 22,592 | 6,426 | 3,571 | 32,841 |
| 79,863 | 250 | 22,794 | 6,461 | 3,618 | 33,123 |



|        |     |        |       |       |        |
|--------|-----|--------|-------|-------|--------|
| 79,864 | 251 | 22,848 | 6,457 | 3,616 | 33,172 |
| 79,865 | 244 | 22,770 | 6,457 | 3,599 | 33,070 |
| 79,866 | 246 | 22,888 | 6,456 | 3,637 | 33,227 |
| 79,867 | 246 | 22,889 | 6,469 | 3,643 | 33,247 |
| 79,868 | 234 | 23,117 | 6,517 | 3,666 | 33,534 |
| 79,869 | 231 | 23,256 | 6,541 | 3,695 | 33,723 |
| 79,870 | 231 | 23,232 | 6,549 | 3,696 | 33,708 |
| 79,871 | 221 | 23,347 | 6,641 | 3,773 | 33,982 |
| 79,872 | 214 | 23,772 | 6,780 | 3,872 | 34,638 |
| 79,873 | 210 | 23,654 | 6,699 | 3,861 | 34,424 |
| 79,874 | 209 | 23,959 | 6,764 | 3,897 | 34,829 |
| 79,875 | 201 | 24,282 | 6,830 | 3,942 | 35,255 |
| 79,876 | 205 | 24,025 | 6,781 | 3,909 | 34,920 |
| 79,877 | 212 | 24,261 | 6,819 | 3,940 | 35,232 |
| 79,878 | 205 | 24,528 | 6,901 | 3,959 | 35,593 |
| 79,879 | 203 | 24,644 | 6,877 | 3,952 | 35,676 |
| 79,880 | 203 | 24,747 | 6,850 | 3,947 | 35,747 |
| 79,881 | 207 | 24,585 | 6,779 | 3,915 | 35,486 |
| 79,882 | 215 | 24,668 | 6,739 | 3,908 | 35,530 |
| 79,883 | 222 | 24,575 | 6,681 | 3,884 | 35,362 |
| 79,884 | 222 | 24,692 | 6,711 | 3,888 | 35,513 |
| 79,885 | 215 | 24,632 | 6,696 | 3,876 | 35,419 |
| 79,886 | 223 | 24,691 | 6,700 | 3,875 | 35,489 |
| 79,887 | 220 | 24,533 | 6,672 | 3,872 | 35,297 |
| 79,888 | 222 | 24,652 | 6,735 | 3,924 | 35,533 |
| 79,889 | 221 | 24,504 | 6,707 | 3,903 | 35,335 |
| 79,890 | 221 | 24,431 | 6,576 | 3,853 | 35,081 |
| 79,891 | 220 | 24,632 | 6,591 | 3,855 | 35,298 |
| 79,892 | 222 | 24,660 | 6,617 | 3,872 | 35,371 |
| 79,893 | 210 | 24,301 | 6,535 | 3,835 | 34,881 |
| 79,894 | 208 | 24,302 | 6,490 | 3,818 | 34,818 |
| 79,895 | 207 | 24,094 | 6,410 | 3,799 | 34,510 |

|        |     |        |       |       |        |
|--------|-----|--------|-------|-------|--------|
| 79,896 | 191 | 24,219 | 6,389 | 3,841 | 34,640 |
| 79,897 | 194 | 24,040 | 6,342 | 3,828 | 34,404 |
| 79,898 | 174 | 23,663 | 6,255 | 3,781 | 33,873 |
| 79,899 | 166 | 23,242 | 6,163 | 3,743 | 33,314 |
| 79,900 | 166 | 23,527 | 6,219 | 3,784 | 33,696 |
| 79,901 | 166 | 23,702 | 6,275 | 3,803 | 33,946 |
| 79,902 | 161 | 23,347 | 6,194 | 3,766 | 33,468 |
| 79,903 | 165 | 23,590 | 6,222 | 3,792 | 33,769 |
| 79,904 | 169 | 23,577 | 6,215 | 3,801 | 33,762 |
| 79,905 | 167 | 23,461 | 6,221 | 3,807 | 33,656 |
| 79,906 | 168 | 23,356 | 6,209 | 3,830 | 33,563 |
| 79,907 | 175 | 23,379 | 6,226 | 3,858 | 33,638 |
| 79,908 | 175 | 23,124 | 6,148 | 3,826 | 33,273 |
| 79,909 | 180 | 23,157 | 6,156 | 3,843 | 33,336 |
| 79,910 | 187 | 23,309 | 6,219 | 3,879 | 33,594 |
| 79,911 | 183 | 23,243 | 6,231 | 3,876 | 33,533 |
| 79,912 | 176 | 23,179 | 6,225 | 3,859 | 33,439 |
| 79,913 | 173 | 23,031 | 6,173 | 3,841 | 33,218 |
| 79,914 | 169 | 22,897 | 6,123 | 3,822 | 33,011 |
| 79,915 | 172 | 22,550 | 6,026 | 3,747 | 32,495 |
| 79,916 | 173 | 22,745 | 6,068 | 3,768 | 32,754 |
| 79,917 | 172 | 22,988 | 6,090 | 3,790 | 33,040 |
| 79,918 | 182 | 22,820 | 6,016 | 3,739 | 32,757 |
| 79,919 | 182 | 22,605 | 5,936 | 3,700 | 32,423 |
| 79,920 | 183 | 22,827 | 5,962 | 3,720 | 32,692 |
| 79,921 | 204 | 21,815 | 5,584 | 3,451 | 31,054 |
| 79,922 | 204 | 22,050 | 5,617 | 3,486 | 31,357 |
| 79,923 | 206 | 22,331 | 5,685 | 3,508 | 31,730 |
| 79,924 | 214 | 22,177 | 5,636 | 3,504 | 31,531 |
| 79,925 | 217 | 22,122 | 5,596 | 3,494 | 31,429 |
| 79,926 | 211 | 21,737 | 5,480 | 3,428 | 30,856 |
| 79,927 | 208 | 22,068 | 5,548 | 3,481 | 31,305 |

|        |     |        |       |       |        |
|--------|-----|--------|-------|-------|--------|
| 79,928 | 204 | 22,239 | 5,597 | 3,528 | 31,568 |
| 79,929 | 203 | 21,918 | 5,495 | 3,490 | 31,106 |
| 79,930 | 197 | 21,812 | 5,492 | 3,488 | 30,989 |
| 79,931 | 201 | 21,775 | 5,527 | 3,516 | 31,019 |
| 79,932 | 197 | 21,711 | 5,500 | 3,532 | 30,940 |
| 79,933 | 189 | 21,570 | 5,461 | 3,506 | 30,726 |
| 79,934 | 184 | 21,704 | 5,477 | 3,534 | 30,899 |
| 79,935 | 185 | 21,653 | 5,486 | 3,531 | 30,855 |
| 79,936 | 189 | 21,738 | 5,466 | 3,525 | 30,918 |
| 79,937 | 183 | 21,950 | 5,472 | 3,545 | 31,150 |
| 79,938 | 184 | 21,994 | 5,442 | 3,517 | 31,137 |
| 79,939 | 184 | 21,732 | 5,357 | 3,480 | 30,753 |
| 79,940 | 189 | 21,522 | 5,296 | 3,452 | 30,459 |
| 79,941 | 192 | 21,490 | 5,274 | 3,440 | 30,396 |
| 79,942 | 193 | 21,539 | 5,269 | 3,443 | 30,444 |
| 79,943 | 189 | 21,485 | 5,235 | 3,417 | 30,326 |
| 79,944 | 187 | 21,957 | 5,308 | 3,466 | 30,918 |
| 79,945 | 190 | 22,024 | 5,313 | 3,433 | 30,960 |
| 79,946 | 190 | 21,626 | 5,249 | 3,343 | 30,408 |
| 79,947 | 191 | 21,885 | 5,315 | 3,387 | 30,778 |
| 79,948 | 191 | 21,532 | 5,201 | 3,340 | 30,264 |
| 79,949 | 197 | 21,797 | 5,266 | 3,372 | 30,632 |
| 79,950 | 191 | 21,652 | 5,223 | 3,341 | 30,407 |
| 79,951 | 191 | 21,587 | 5,211 | 3,346 | 30,335 |
| 79,952 | 193 | 21,643 | 5,205 | 3,348 | 30,389 |
| 79,953 | 193 | 21,550 | 5,164 | 3,302 | 30,209 |
| 79,954 | 191 | 22,198 | 5,286 | 3,405 | 31,080 |
| 79,955 | 194 | 22,123 | 5,265 | 3,379 | 30,961 |
| 79,956 | 195 | 22,579 | 5,301 | 3,393 | 31,468 |
| 79,957 | 190 | 22,928 | 5,339 | 3,416 | 31,873 |
| 79,958 | 192 | 22,941 | 5,344 | 3,398 | 31,875 |
| 79,959 | 185 | 23,090 | 5,354 | 3,390 | 32,019 |

|        |     |        |       |       |        |
|--------|-----|--------|-------|-------|--------|
| 79,960 | 177 | 22,941 | 5,325 | 3,383 | 31,826 |
| 79,961 | 183 | 23,212 | 5,369 | 3,397 | 32,161 |
| 79,962 | 184 | 23,225 | 5,346 | 3,399 | 32,154 |
| 79,963 | 194 | 23,326 | 5,357 | 3,400 | 32,277 |
| 79,964 | 193 | 23,324 | 5,345 | 3,401 | 32,263 |
| 79,965 | 193 | 23,469 | 5,411 | 3,424 | 32,497 |
| 79,966 | 194 | 23,557 | 5,420 | 3,430 | 32,601 |
| 79,967 | 196 | 23,806 | 5,471 | 3,444 | 32,917 |
| 79,968 | 195 | 23,863 | 5,477 | 3,452 | 32,987 |
| 79,969 | 180 | 23,692 | 5,498 | 3,454 | 32,824 |
| 79,970 | 180 | 23,963 | 5,545 | 3,485 | 33,173 |
| 79,971 | 164 | 23,884 | 5,529 | 3,470 | 33,047 |
| 79,972 | 161 | 23,868 | 5,550 | 3,481 | 33,060 |
| 79,973 | 162 | 23,343 | 5,470 | 3,415 | 32,390 |
| 79,974 | 164 | 23,592 | 5,489 | 3,432 | 32,677 |
| 79,975 | 154 | 23,773 | 5,518 | 3,453 | 32,898 |
| 79,976 | 157 | 23,744 | 5,518 | 3,433 | 32,852 |
| 79,977 | 167 | 23,902 | 5,536 | 3,467 | 33,072 |
| 79,978 | 167 | 24,055 | 5,545 | 3,480 | 33,247 |
| 79,979 | 173 | 24,374 | 5,563 | 3,487 | 33,597 |
| 79,980 | 182 | 24,321 | 5,555 | 3,480 | 33,538 |
| 79,981 | 184 | 24,465 | 5,565 | 3,492 | 33,706 |
| 79,982 | 180 | 24,451 | 5,620 | 3,511 | 33,762 |
| 79,983 | 180 | 24,425 | 5,619 | 3,515 | 33,739 |
| 79,984 | 178 | 24,377 | 5,596 | 3,505 | 33,656 |
| 79,985 | 182 | 24,512 | 5,641 | 3,515 | 33,850 |
| 79,986 | 175 | 24,303 | 5,623 | 3,490 | 33,591 |
| 79,987 | 176 | 24,257 | 5,617 | 3,494 | 33,544 |
| 79,988 | 172 | 24,250 | 5,624 | 3,504 | 33,550 |
| 79,989 | 170 | 23,866 | 5,555 | 3,447 | 33,038 |
| 79,990 | 172 | 23,892 | 5,552 | 3,433 | 33,049 |
| 79,991 | 165 | 23,861 | 5,584 | 3,442 | 33,052 |

|        |     |        |       |       |        |
|--------|-----|--------|-------|-------|--------|
| 79,992 | 163 | 23,772 | 5,579 | 3,439 | 32,953 |
| 79,993 | 158 | 23,700 | 5,612 | 3,463 | 32,933 |
| 79,994 | 160 | 23,978 | 5,695 | 3,476 | 33,309 |
| 79,995 | 167 | 23,979 | 5,675 | 3,495 | 33,316 |
| 79,996 | 170 | 23,687 | 5,612 | 3,486 | 32,955 |
| 79,997 | 170 | 23,677 | 5,579 | 3,482 | 32,908 |
| 79,998 | 170 | 23,611 | 5,561 | 3,462 | 32,804 |
| 79,999 | 164 | 23,532 | 5,568 | 3,461 | 32,725 |
| 80,000 | 159 | 23,452 | 5,576 | 3,451 | 32,638 |
| 80,001 | 162 | 23,550 | 5,631 | 3,465 | 32,808 |
| 80,002 | 161 | 23,443 | 5,597 | 3,446 | 32,647 |
| 80,003 | 161 | 23,481 | 5,656 | 3,467 | 32,765 |
| 80,004 | 164 | 23,142 | 5,609 | 3,424 | 32,339 |
| 80,005 | 163 | 22,939 | 5,558 | 3,385 | 32,045 |
| 80,006 | 159 | 23,463 | 5,630 | 3,461 | 32,713 |
| 80,007 | 156 | 22,978 | 5,555 | 3,417 | 32,106 |
| 80,008 | 156 | 23,065 | 5,602 | 3,445 | 32,268 |
| 80,009 | 150 | 23,120 | 5,602 | 3,455 | 32,327 |
| 80,010 | 152 | 22,940 | 5,569 | 3,417 | 32,078 |
| 80,011 | 151 | 22,859 | 5,555 | 3,411 | 31,976 |
| 80,012 | 145 | 22,688 | 5,562 | 3,407 | 31,802 |
| 80,013 | 144 | 22,668 | 5,608 | 3,429 | 31,849 |
| 80,014 | 136 | 22,728 | 5,637 | 3,443 | 31,944 |
| 80,015 | 136 | 22,780 | 5,658 | 3,474 | 32,048 |
| 80,016 | 137 | 22,884 | 5,658 | 3,505 | 32,184 |
| 80,017 | 142 | 22,991 | 5,677 | 3,519 | 32,329 |
| 80,018 | 143 | 23,061 | 5,683 | 3,522 | 32,409 |
| 80,019 | 144 | 23,061 | 5,653 | 3,502 | 32,360 |
| 80,020 | 143 | 22,855 | 5,600 | 3,474 | 32,072 |
| 80,021 | 149 | 23,110 | 5,630 | 3,512 | 32,401 |
| 80,022 | 151 | 22,815 | 5,561 | 3,457 | 31,984 |
| 80,023 | 149 | 22,903 | 5,544 | 3,442 | 32,038 |

|        |     |        |       |       |        |
|--------|-----|--------|-------|-------|--------|
| 80,024 | 148 | 22,979 | 5,539 | 3,431 | 32,097 |
| 80,025 | 154 | 23,252 | 5,636 | 3,501 | 32,543 |
| 80,026 | 154 | 23,060 | 5,581 | 3,470 | 32,265 |
| 80,027 | 152 | 22,994 | 5,560 | 3,469 | 32,175 |
| 80,028 | 144 | 22,975 | 5,554 | 3,470 | 32,143 |
| 80,029 | 149 | 23,167 | 5,641 | 3,512 | 32,469 |
| 80,030 | 142 | 23,156 | 5,722 | 3,528 | 32,548 |
| 80,031 | 141 | 23,312 | 5,735 | 3,551 | 32,739 |
| 80,032 | 146 | 23,419 | 5,711 | 3,536 | 32,812 |
| 80,033 | 144 | 23,297 | 5,681 | 3,515 | 32,637 |
| 80,034 | 143 | 23,523 | 5,736 | 3,540 | 32,942 |
| 80,035 | 147 | 23,748 | 5,812 | 3,583 | 33,290 |
| 80,036 | 152 | 23,625 | 5,768 | 3,570 | 33,115 |
| 80,037 | 152 | 23,698 | 5,789 | 3,579 | 33,218 |
| 80,038 | 152 | 23,518 | 5,829 | 3,574 | 33,073 |
| 80,039 | 157 | 23,520 | 5,886 | 3,602 | 33,165 |
| 80,040 | 155 | 23,662 | 5,935 | 3,615 | 33,367 |
| 80,041 | 153 | 23,506 | 5,905 | 3,609 | 33,173 |
| 80,042 | 157 | 23,344 | 5,864 | 3,587 | 32,952 |
| 80,043 | 156 | 23,303 | 5,840 | 3,576 | 32,875 |
| 80,044 | 158 | 23,684 | 5,939 | 3,632 | 33,413 |
| 80,045 | 164 | 23,854 | 6,008 | 3,662 | 33,688 |
| 80,046 | 158 | 24,135 | 6,097 | 3,718 | 34,108 |
| 80,047 | 152 | 23,985 | 6,050 | 3,696 | 33,883 |
| 80,048 | 152 | 23,963 | 6,072 | 3,702 | 33,889 |
| 80,049 | 149 | 23,911 | 6,108 | 3,717 | 33,885 |
| 80,050 | 149 | 23,965 | 6,104 | 3,732 | 33,950 |
| 80,051 | 150 | 24,058 | 6,096 | 3,749 | 34,053 |
| 80,052 | 150 | 24,053 | 6,070 | 3,732 | 34,005 |
| 80,053 | 153 | 24,265 | 6,109 | 3,766 | 34,293 |
| 80,054 | 151 | 24,257 | 6,126 | 3,767 | 34,301 |
| 80,055 | 154 | 23,763 | 6,046 | 3,697 | 33,660 |

|        |     |        |       |       |        |
|--------|-----|--------|-------|-------|--------|
| 80,056 | 159 | 23,856 | 6,100 | 3,746 | 33,861 |
| 80,057 | 160 | 24,210 | 6,188 | 3,787 | 34,345 |
| 80,058 | 164 | 24,081 | 6,188 | 3,745 | 34,178 |
| 80,059 | 169 | 24,098 | 6,171 | 3,736 | 34,174 |
| 80,060 | 169 | 24,215 | 6,187 | 3,743 | 34,314 |
| 80,061 | 167 | 24,280 | 6,178 | 3,762 | 34,387 |
| 80,062 | 168 | 24,639 | 6,230 | 3,810 | 34,847 |
| 80,063 | 180 | 24,909 | 6,252 | 3,845 | 35,186 |
| 80,064 | 181 | 24,717 | 6,177 | 3,790 | 34,865 |
| 80,065 | 182 | 24,743 | 6,150 | 3,768 | 34,843 |
| 80,066 | 182 | 24,714 | 6,179 | 3,763 | 34,838 |
| 80,067 | 177 | 24,860 | 6,251 | 3,782 | 35,070 |
| 80,068 | 175 | 24,699 | 6,245 | 3,773 | 34,892 |
| 80,069 | 177 | 24,337 | 6,157 | 3,737 | 34,408 |
| 80,070 | 176 | 24,258 | 6,155 | 3,730 | 34,319 |
| 80,071 | 174 | 24,245 | 6,171 | 3,733 | 34,323 |
| 80,072 | 170 | 24,168 | 6,189 | 3,751 | 34,278 |
| 80,073 | 167 | 24,079 | 6,223 | 3,775 | 34,244 |
| 80,074 | 168 | 23,790 | 6,179 | 3,791 | 33,928 |
| 80,075 | 175 | 24,028 | 6,225 | 3,800 | 34,228 |
| 80,076 | 167 | 24,003 | 6,222 | 3,808 | 34,200 |
| 80,077 | 164 | 23,995 | 6,237 | 3,835 | 34,231 |
| 80,078 | 163 | 23,817 | 6,244 | 3,832 | 34,056 |
| 80,079 | 163 | 23,635 | 6,257 | 3,811 | 33,866 |
| 80,080 | 160 | 23,452 | 6,147 | 3,777 | 33,536 |
| 80,081 | 161 | 23,423 | 6,183 | 3,810 | 33,577 |
| 80,082 | 153 | 23,263 | 6,149 | 3,791 | 33,356 |
| 80,083 | 146 | 23,174 | 6,131 | 3,779 | 33,230 |
| 80,084 | 145 | 23,075 | 6,086 | 3,790 | 33,096 |
| 80,085 | 146 | 22,997 | 6,071 | 3,767 | 32,981 |
| 80,086 | 140 | 23,028 | 6,032 | 3,746 | 32,946 |
| 80,087 | 136 | 23,114 | 6,028 | 3,760 | 33,038 |

|        |     |        |       |       |        |
|--------|-----|--------|-------|-------|--------|
| 80,088 | 135 | 23,208 | 6,022 | 3,767 | 33,132 |
| 80,089 | 130 | 23,128 | 5,933 | 3,730 | 32,921 |
| 80,090 | 130 | 23,115 | 5,922 | 3,738 | 32,905 |
| 80,091 | 128 | 22,862 | 5,886 | 3,727 | 32,603 |
| 80,092 | 127 | 22,744 | 5,870 | 3,707 | 32,448 |
| 80,093 | 117 | 22,786 | 5,893 | 3,722 | 32,518 |
| 80,094 | 114 | 22,666 | 5,865 | 3,706 | 32,351 |
| 80,095 | 114 | 22,538 | 5,847 | 3,692 | 32,191 |
| 80,096 | 108 | 22,504 | 5,838 | 3,710 | 32,160 |
| 80,097 | 108 | 22,420 | 5,795 | 3,659 | 31,982 |
| 80,098 | 113 | 22,194 | 5,730 | 3,621 | 31,658 |
| 80,099 | 113 | 22,163 | 5,737 | 3,616 | 31,629 |
| 80,100 | 119 | 22,389 | 5,785 | 3,628 | 31,921 |
| 80,101 | 117 | 22,066 | 5,723 | 3,575 | 31,481 |
| 80,102 | 119 | 21,929 | 5,729 | 3,588 | 31,365 |
| 80,103 | 117 | 21,810 | 5,732 | 3,568 | 31,227 |
| 80,104 | 113 | 21,799 | 5,726 | 3,561 | 31,199 |
| 80,105 | 115 | 21,700 | 5,710 | 3,559 | 31,084 |
| 80,106 | 109 | 21,781 | 5,704 | 3,589 | 31,183 |
| 80,107 | 106 | 21,684 | 5,643 | 3,536 | 30,969 |
| 80,108 | 102 | 21,407 | 5,577 | 3,507 | 30,593 |
| 80,109 | 102 | 21,318 | 5,570 | 3,516 | 30,506 |
| 80,110 | 97  | 21,366 | 5,591 | 3,531 | 30,585 |
| 80,111 | 99  | 21,445 | 5,608 | 3,557 | 30,709 |
| 80,112 | 108 | 21,602 | 5,661 | 3,596 | 30,967 |
| 80,113 | 107 | 21,595 | 5,643 | 3,612 | 30,957 |
| 80,114 | 95  | 21,625 | 5,695 | 3,618 | 31,033 |
| 80,115 | 92  | 21,292 | 5,660 | 3,583 | 30,627 |
| 80,116 | 92  | 21,267 | 5,664 | 3,583 | 30,606 |
| 80,117 | 92  | 21,162 | 5,592 | 3,550 | 30,396 |
| 80,118 | 94  | 21,253 | 5,631 | 3,590 | 30,568 |
| 80,119 | 93  | 21,265 | 5,630 | 3,593 | 30,581 |



|        |     |        |       |       |        |
|--------|-----|--------|-------|-------|--------|
| 80,120 | 91  | 20,984 | 5,591 | 3,564 | 30,230 |
| 80,121 | 90  | 20,828 | 5,553 | 3,542 | 30,013 |
| 80,122 | 99  | 21,077 | 5,591 | 3,528 | 30,295 |
| 80,123 | 101 | 21,203 | 5,622 | 3,553 | 30,479 |
| 80,124 | 100 | 20,811 | 5,517 | 3,469 | 29,897 |
| 80,125 | 100 | 21,010 | 5,573 | 3,494 | 30,177 |
| 80,126 | 93  | 21,111 | 5,591 | 3,524 | 30,319 |
| 80,127 | 94  | 21,072 | 5,574 | 3,491 | 30,231 |
| 80,128 | 93  | 20,662 | 5,415 | 3,383 | 29,553 |
| 80,129 | 95  | 20,828 | 5,433 | 3,397 | 29,753 |
| 80,130 | 94  | 21,099 | 5,474 | 3,417 | 30,084 |
| 80,131 | 94  | 20,791 | 5,337 | 3,345 | 29,567 |
| 80,132 | 100 | 20,756 | 5,349 | 3,325 | 29,530 |
| 80,133 | 100 | 20,396 | 5,273 | 3,270 | 29,039 |
| 80,134 | 103 | 20,388 | 5,251 | 3,251 | 28,993 |
| 80,135 | 103 | 20,618 | 5,303 | 3,260 | 29,284 |
| 80,136 | 104 | 20,542 | 5,291 | 3,254 | 29,191 |
| 80,137 | 106 | 20,347 | 5,268 | 3,238 | 28,959 |
| 80,138 | 104 | 20,467 | 5,329 | 3,260 | 29,160 |
| 80,139 | 105 | 20,556 | 5,341 | 3,269 | 29,271 |
| 80,140 | 108 | 20,733 | 5,323 | 3,273 | 29,437 |
| 80,141 | 108 | 20,736 | 5,325 | 3,266 | 29,435 |
| 80,142 | 112 | 21,378 | 5,467 | 3,364 | 30,321 |
| 80,143 | 114 | 21,508 | 5,463 | 3,359 | 30,444 |
| 80,144 | 113 | 21,380 | 5,385 | 3,332 | 30,210 |
| 80,145 | 115 | 21,414 | 5,416 | 3,340 | 30,285 |
| 80,146 | 114 | 21,421 | 5,450 | 3,358 | 30,343 |
| 80,147 | 114 | 21,341 | 5,440 | 3,359 | 30,254 |
| 80,148 | 114 | 21,220 | 5,429 | 3,353 | 30,116 |
| 80,149 | 111 | 21,329 | 5,479 | 3,373 | 30,292 |
| 80,150 | 111 | 21,356 | 5,460 | 3,369 | 30,296 |
| 80,151 | 106 | 21,315 | 5,451 | 3,366 | 30,238 |

|        |     |        |       |       |        |
|--------|-----|--------|-------|-------|--------|
| 80,152 | 106 | 21,321 | 5,399 | 3,340 | 30,166 |
| 80,153 | 108 | 21,528 | 5,491 | 3,371 | 30,498 |
| 80,154 | 114 | 21,317 | 5,427 | 3,343 | 30,201 |
| 80,155 | 113 | 21,115 | 5,354 | 3,301 | 29,883 |
| 80,156 | 122 | 21,242 | 5,471 | 3,329 | 30,164 |
| 80,157 | 122 | 21,219 | 5,483 | 3,309 | 30,133 |
| 80,158 | 125 | 21,115 | 5,481 | 3,300 | 30,021 |
| 80,159 | 124 | 20,883 | 5,416 | 3,285 | 29,708 |
| 80,160 | 123 | 20,734 | 5,359 | 3,243 | 29,459 |
| 80,161 | 123 | 20,535 | 5,339 | 3,166 | 29,163 |
| 80,162 | 125 | 20,704 | 5,386 | 3,177 | 29,392 |
| 80,163 | 120 | 20,869 | 5,420 | 3,193 | 29,602 |
| 80,164 | 123 | 21,021 | 5,473 | 3,206 | 29,823 |
| 80,165 | 120 | 20,056 | 5,222 | 3,068 | 28,466 |
| 80,166 | 120 | 20,216 | 5,256 | 3,087 | 28,679 |
| 80,167 | 122 | 20,415 | 5,302 | 3,103 | 28,942 |
| 80,168 | 122 | 20,400 | 5,312 | 3,105 | 28,939 |
| 80,169 | 120 | 20,527 | 5,369 | 3,126 | 29,142 |
| 80,170 | 117 | 20,197 | 5,288 | 3,074 | 28,676 |
| 80,171 | 112 | 19,924 | 5,247 | 3,039 | 28,322 |
| 80,172 | 117 | 20,191 | 5,351 | 3,113 | 28,772 |
| 80,173 | 120 | 19,978 | 5,291 | 3,075 | 28,464 |
| 80,174 | 121 | 19,725 | 5,256 | 3,056 | 28,158 |
| 80,175 | 122 | 19,857 | 5,312 | 3,100 | 28,391 |
| 80,176 | 128 | 19,621 | 5,259 | 3,057 | 28,065 |
| 80,177 | 128 | 19,481 | 5,227 | 3,009 | 27,845 |
| 80,178 | 136 | 19,606 | 5,305 | 3,047 | 28,094 |
| 80,179 | 136 | 19,447 | 5,285 | 3,016 | 27,884 |
| 80,180 | 139 | 19,952 | 5,419 | 3,113 | 28,623 |
| 80,181 | 139 | 19,857 | 5,430 | 3,108 | 28,534 |
| 80,182 | 137 | 19,836 | 5,455 | 3,110 | 28,538 |
| 80,183 | 135 | 20,057 | 5,511 | 3,165 | 28,868 |

|        |     |        |       |       |        |
|--------|-----|--------|-------|-------|--------|
| 80,184 | 135 | 20,041 | 5,518 | 3,147 | 28,841 |
| 80,185 | 135 | 19,998 | 5,539 | 3,138 | 28,810 |
| 80,186 | 132 | 19,893 | 5,525 | 3,124 | 28,674 |
| 80,187 | 132 | 19,888 | 5,496 | 3,123 | 28,639 |
| 80,188 | 135 | 20,153 | 5,556 | 3,141 | 28,985 |
| 80,189 | 139 | 20,206 | 5,535 | 3,159 | 29,039 |
| 80,190 | 144 | 20,171 | 5,542 | 3,148 | 29,005 |
| 80,191 | 145 | 20,048 | 5,544 | 3,127 | 28,864 |
| 80,192 | 150 | 20,027 | 5,531 | 3,108 | 28,816 |
| 80,193 | 153 | 19,793 | 5,522 | 3,056 | 28,524 |
| 80,194 | 156 | 19,804 | 5,523 | 3,053 | 28,536 |
| 80,195 | 164 | 19,852 | 5,498 | 3,030 | 28,544 |
| 80,196 | 166 | 19,845 | 5,484 | 2,992 | 28,487 |
| 80,197 | 170 | 19,867 | 5,463 | 2,980 | 28,480 |
| 80,198 | 170 | 19,891 | 5,473 | 2,982 | 28,516 |
| 80,199 | 175 | 20,024 | 5,471 | 2,990 | 28,660 |
| 80,200 | 173 | 20,004 | 5,448 | 2,968 | 28,593 |
| 80,201 | 175 | 20,068 | 5,449 | 2,974 | 28,666 |
| 80,202 | 175 | 20,119 | 5,470 | 2,988 | 28,752 |
| 80,203 | 172 | 20,099 | 5,486 | 2,993 | 28,750 |
| 80,204 | 168 | 19,937 | 5,433 | 2,977 | 28,515 |
| 80,205 | 167 | 20,182 | 5,477 | 2,991 | 28,817 |
| 80,206 | 161 | 20,324 | 5,470 | 2,984 | 28,939 |
| 80,207 | 158 | 20,426 | 5,481 | 2,997 | 29,062 |
| 80,208 | 152 | 20,237 | 5,444 | 3,002 | 28,835 |
| 80,209 | 154 | 20,458 | 5,451 | 2,999 | 29,062 |
| 80,210 | 157 | 20,267 | 5,423 | 2,965 | 28,812 |
| 80,211 | 162 | 20,241 | 5,407 | 2,945 | 28,755 |
| 80,212 | 159 | 20,106 | 5,375 | 2,921 | 28,561 |
| 80,213 | 165 | 20,280 | 5,415 | 2,958 | 28,818 |
| 80,214 | 165 | 20,274 | 5,431 | 2,957 | 28,827 |
| 80,215 | 163 | 20,310 | 5,426 | 2,966 | 28,865 |

|        |     |        |       |       |        |
|--------|-----|--------|-------|-------|--------|
| 80,216 | 162 | 20,337 | 5,412 | 2,975 | 28,886 |
| 80,217 | 160 | 20,303 | 5,390 | 2,983 | 28,836 |
| 80,218 | 161 | 20,348 | 5,377 | 2,988 | 28,874 |
| 80,219 | 162 | 20,433 | 5,369 | 2,984 | 28,948 |
| 80,220 | 164 | 20,678 | 5,424 | 3,007 | 29,273 |
| 80,221 | 161 | 20,628 | 5,373 | 2,986 | 29,148 |
| 80,222 | 161 | 20,724 | 5,399 | 2,981 | 29,265 |
| 80,223 | 147 | 20,754 | 5,401 | 2,982 | 29,284 |
| 80,224 | 144 | 20,849 | 5,370 | 2,956 | 29,319 |
| 80,225 | 142 | 21,131 | 5,436 | 2,971 | 29,680 |
| 80,226 | 131 | 21,211 | 5,441 | 2,982 | 29,765 |
| 80,227 | 129 | 21,493 | 5,501 | 3,024 | 30,147 |
| 80,228 | 132 | 21,710 | 5,567 | 3,064 | 30,473 |
| 80,229 | 126 | 21,569 | 5,491 | 3,049 | 30,235 |
| 80,230 | 128 | 21,902 | 5,562 | 3,086 | 30,678 |
| 80,231 | 128 | 22,199 | 5,628 | 3,106 | 31,061 |
| 80,232 | 131 | 22,029 | 5,582 | 3,072 | 30,814 |
| 80,233 | 133 | 21,995 | 5,565 | 3,067 | 30,760 |
| 80,234 | 135 | 21,791 | 5,537 | 3,026 | 30,489 |
| 80,235 | 134 | 21,611 | 5,510 | 3,034 | 30,289 |
| 80,236 | 141 | 22,110 | 5,609 | 3,118 | 30,978 |
| 80,237 | 142 | 21,838 | 5,551 | 3,101 | 30,632 |
| 80,238 | 142 | 22,066 | 5,624 | 3,134 | 30,966 |
| 80,239 | 144 | 22,136 | 5,644 | 3,139 | 31,063 |
| 80,240 | 141 | 21,706 | 5,591 | 3,085 | 30,523 |
| 80,241 | 141 | 21,708 | 5,602 | 3,064 | 30,515 |
| 80,242 | 135 | 21,438 | 5,548 | 3,018 | 30,139 |
| 80,243 | 135 | 21,365 | 5,546 | 3,024 | 30,070 |
| 80,244 | 140 | 21,416 | 5,565 | 3,052 | 30,173 |
| 80,245 | 135 | 21,079 | 5,522 | 3,021 | 29,757 |
| 80,246 | 131 | 21,056 | 5,545 | 3,018 | 29,750 |
| 80,247 | 135 | 21,004 | 5,516 | 3,051 | 29,706 |

|        |     |        |       |       |        |
|--------|-----|--------|-------|-------|--------|
| 80,248 | 136 | 21,018 | 5,530 | 3,055 | 29,739 |
| 80,249 | 136 | 21,064 | 5,528 | 3,067 | 29,795 |
| 80,250 | 136 | 20,882 | 5,547 | 3,088 | 29,653 |
| 80,251 | 138 | 20,790 | 5,584 | 3,083 | 29,595 |
| 80,252 | 143 | 20,687 | 5,564 | 3,062 | 29,456 |
| 80,253 | 147 | 20,828 | 5,621 | 3,080 | 29,676 |
| 80,254 | 150 | 20,758 | 5,633 | 3,084 | 29,625 |
| 80,255 | 147 | 20,543 | 5,592 | 3,056 | 29,338 |
| 80,256 | 151 | 20,613 | 5,626 | 3,072 | 29,462 |
| 80,257 | 152 | 20,193 | 5,566 | 3,034 | 28,945 |
| 80,258 | 150 | 20,215 | 5,595 | 3,041 | 29,001 |
| 80,259 | 150 | 20,086 | 5,610 | 3,035 | 28,881 |
| 80,260 | 145 | 19,900 | 5,610 | 3,044 | 28,699 |
| 80,261 | 141 | 19,507 | 5,548 | 3,016 | 28,212 |
| 80,262 | 135 | 19,211 | 5,526 | 3,004 | 27,876 |
| 80,263 | 137 | 19,455 | 5,610 | 3,053 | 28,255 |
| 80,264 | 133 | 19,288 | 5,586 | 3,056 | 28,063 |
| 80,265 | 134 | 19,240 | 5,597 | 3,042 | 28,013 |
| 80,266 | 137 | 19,102 | 5,597 | 3,033 | 27,869 |
| 80,267 | 137 | 18,797 | 5,542 | 2,989 | 27,465 |
| 80,268 | 136 | 18,800 | 5,543 | 2,983 | 27,462 |
| 80,269 | 134 | 18,766 | 5,553 | 2,967 | 27,420 |
| 80,270 | 133 | 18,749 | 5,576 | 3,000 | 27,458 |
| 80,271 | 132 | 18,640 | 5,545 | 2,998 | 27,315 |
| 80,272 | 136 | 18,365 | 5,464 | 2,964 | 26,929 |
| 80,273 | 142 | 18,449 | 5,508 | 2,986 | 27,085 |
| 80,274 | 149 | 18,358 | 5,519 | 2,988 | 27,014 |
| 80,275 | 155 | 18,331 | 5,531 | 3,000 | 27,017 |
| 80,276 | 163 | 18,226 | 5,534 | 2,997 | 26,920 |
| 80,277 | 178 | 17,875 | 5,449 | 2,949 | 26,451 |
| 80,278 | 177 | 17,681 | 5,423 | 2,918 | 26,199 |
| 80,279 | 181 | 17,494 | 5,402 | 2,911 | 25,988 |

|        |     |        |       |       |        |
|--------|-----|--------|-------|-------|--------|
| 80,280 | 181 | 17,135 | 5,349 | 2,870 | 25,535 |
| 80,281 | 180 | 17,210 | 5,484 | 2,902 | 25,776 |
| 80,282 | 176 | 17,144 | 5,529 | 2,930 | 25,779 |
| 80,283 | 179 | 17,123 | 5,597 | 2,952 | 25,851 |
| 80,284 | 172 | 17,095 | 5,563 | 2,933 | 25,763 |
| 80,285 | 177 | 17,043 | 5,562 | 2,910 | 25,692 |
| 80,286 | 179 | 17,081 | 5,588 | 2,924 | 25,772 |
| 80,287 | 173 | 16,979 | 5,594 | 2,921 | 25,667 |
| 80,288 | 174 | 16,973 | 5,611 | 2,931 | 25,689 |
| 80,289 | 177 | 17,174 | 5,646 | 2,968 | 25,965 |
| 80,290 | 171 | 17,299 | 5,679 | 3,001 | 26,150 |
| 80,291 | 171 | 17,320 | 5,683 | 3,046 | 26,220 |
| 80,292 | 173 | 17,486 | 5,726 | 3,087 | 26,472 |
| 80,293 | 172 | 17,481 | 5,770 | 3,117 | 26,540 |
| 80,294 | 171 | 17,879 | 5,911 | 3,182 | 27,143 |
| 80,295 | 165 | 18,119 | 5,938 | 3,239 | 27,461 |
| 80,296 | 165 | 18,316 | 6,032 | 3,298 | 27,811 |
| 80,297 | 162 | 18,532 | 6,102 | 3,358 | 28,154 |
| 80,298 | 155 | 18,740 | 6,198 | 3,388 | 28,481 |
| 80,299 | 148 | 18,860 | 6,246 | 3,379 | 28,633 |
| 80,300 | 148 | 19,036 | 6,253 | 3,399 | 28,836 |
| 80,301 | 144 | 19,144 | 6,232 | 3,397 | 28,917 |
| 80,302 | 147 | 19,347 | 6,281 | 3,452 | 29,227 |
| 80,303 | 145 | 19,503 | 6,323 | 3,481 | 29,452 |
| 80,304 | 144 | 19,605 | 6,320 | 3,503 | 29,572 |
| 80,305 | 142 | 19,430 | 6,247 | 3,462 | 29,281 |
| 80,306 | 147 | 19,850 | 6,319 | 3,517 | 29,833 |
| 80,307 | 143 | 19,867 | 6,335 | 3,527 | 29,872 |
| 80,308 | 146 | 19,988 | 6,313 | 3,516 | 29,963 |
| 80,309 | 151 | 20,000 | 6,261 | 3,516 | 29,928 |
| 80,310 | 151 | 20,042 | 6,261 | 3,527 | 29,981 |
| 80,311 | 152 | 20,121 | 6,292 | 3,529 | 30,094 |

|        |     |        |       |       |        |
|--------|-----|--------|-------|-------|--------|
| 80,312 | 151 | 20,367 | 6,320 | 3,554 | 30,392 |
| 80,313 | 155 | 20,471 | 6,344 | 3,577 | 30,547 |
| 80,314 | 155 | 20,564 | 6,371 | 3,573 | 30,663 |
| 80,315 | 155 | 20,823 | 6,446 | 3,613 | 31,037 |
| 80,316 | 160 | 20,892 | 6,454 | 3,631 | 31,137 |
| 80,317 | 163 | 20,929 | 6,433 | 3,637 | 31,162 |
| 80,318 | 164 | 20,951 | 6,450 | 3,655 | 31,220 |
| 80,319 | 165 | 21,158 | 6,532 | 3,690 | 31,545 |
| 80,320 | 168 | 21,237 | 6,544 | 3,684 | 31,633 |
| 80,321 | 169 | 21,233 | 6,545 | 3,632 | 31,579 |
| 80,322 | 172 | 21,491 | 6,620 | 3,689 | 31,972 |
| 80,323 | 169 | 21,437 | 6,639 | 3,697 | 31,942 |
| 80,324 | 163 | 21,497 | 6,669 | 3,721 | 32,050 |
| 80,325 | 162 | 21,577 | 6,716 | 3,740 | 32,195 |
| 80,326 | 161 | 21,565 | 6,736 | 3,732 | 32,194 |
| 80,327 | 152 | 21,559 | 6,708 | 3,725 | 32,144 |
| 80,328 | 140 | 21,583 | 6,698 | 3,720 | 32,141 |
| 80,329 | 141 | 21,463 | 6,652 | 3,706 | 31,962 |
| 80,330 | 136 | 21,435 | 6,612 | 3,699 | 31,882 |
| 80,331 | 135 | 21,504 | 6,570 | 3,687 | 31,896 |
| 80,332 | 140 | 21,602 | 6,481 | 3,639 | 31,862 |
| 80,333 | 142 | 21,617 | 6,437 | 3,646 | 31,842 |
| 80,334 | 141 | 21,629 | 6,419 | 3,638 | 31,827 |
| 80,335 | 138 | 21,645 | 6,398 | 3,631 | 31,812 |
| 80,336 | 137 | 21,716 | 6,407 | 3,619 | 31,879 |
| 80,337 | 137 | 21,726 | 6,432 | 3,630 | 31,925 |
| 80,338 | 132 | 22,014 | 6,506 | 3,673 | 32,325 |
| 80,339 | 130 | 22,135 | 6,534 | 3,685 | 32,484 |
| 80,340 | 124 | 22,038 | 6,532 | 3,664 | 32,358 |
| 80,341 | 125 | 21,869 | 6,472 | 3,634 | 32,100 |
| 80,342 | 125 | 21,806 | 6,484 | 3,600 | 32,015 |
| 80,343 | 128 | 21,444 | 6,325 | 3,481 | 31,378 |

|        |     |        |       |       |        |
|--------|-----|--------|-------|-------|--------|
| 80,344 | 128 | 21,444 | 6,329 | 3,477 | 31,378 |
| 80,345 | 126 | 21,665 | 6,391 | 3,505 | 31,687 |
| 80,346 | 133 | 21,568 | 6,372 | 3,496 | 31,569 |
| 80,347 | 132 | 21,281 | 6,301 | 3,428 | 31,142 |
| 80,348 | 133 | 21,450 | 6,383 | 3,473 | 31,439 |
| 80,349 | 131 | 20,943 | 6,244 | 3,405 | 30,723 |
| 80,350 | 130 | 20,765 | 6,209 | 3,398 | 30,502 |
| 80,351 | 131 | 20,594 | 6,196 | 3,369 | 30,290 |
| 80,352 | 131 | 20,472 | 6,197 | 3,362 | 30,162 |
| 80,353 | 126 | 20,300 | 6,193 | 3,345 | 29,964 |
| 80,354 | 126 | 20,055 | 6,112 | 3,295 | 29,588 |
| 80,355 | 124 | 19,801 | 6,053 | 3,251 | 29,229 |
| 80,356 | 124 | 20,410 | 6,279 | 3,372 | 30,185 |
| 80,357 | 121 | 20,237 | 6,237 | 3,330 | 29,925 |
| 80,358 | 122 | 20,163 | 6,229 | 3,310 | 29,824 |
| 80,359 | 124 | 20,513 | 6,440 | 3,427 | 30,504 |
| 80,360 | 122 | 20,394 | 6,398 | 3,409 | 30,323 |
| 80,361 | 121 | 20,446 | 6,381 | 3,413 | 30,361 |
| 80,362 | 121 | 20,486 | 6,447 | 3,435 | 30,489 |
| 80,363 | 121 | 20,416 | 6,438 | 3,424 | 30,399 |
| 80,364 | 119 | 20,208 | 6,387 | 3,385 | 30,099 |
| 80,365 | 121 | 20,184 | 6,346 | 3,369 | 30,020 |
| 80,366 | 121 | 20,196 | 6,356 | 3,381 | 30,054 |
| 80,367 | 118 | 20,294 | 6,359 | 3,397 | 30,168 |
| 80,368 | 113 | 20,272 | 6,436 | 3,409 | 30,230 |
| 80,369 | 118 | 20,503 | 6,490 | 3,425 | 30,536 |
| 80,370 | 120 | 20,384 | 6,414 | 3,402 | 30,320 |
| 80,371 | 118 | 20,392 | 6,421 | 3,424 | 30,355 |
| 80,372 | 122 | 20,533 | 6,468 | 3,473 | 30,596 |
| 80,373 | 120 | 20,619 | 6,468 | 3,468 | 30,675 |
| 80,374 | 117 | 20,674 | 6,491 | 3,460 | 30,742 |
| 80,375 | 124 | 20,563 | 6,473 | 3,437 | 30,597 |



|        |     |        |       |       |        |
|--------|-----|--------|-------|-------|--------|
| 80,376 | 124 | 20,618 | 6,476 | 3,471 | 30,689 |
| 80,377 | 125 | 20,605 | 6,473 | 3,488 | 30,691 |
| 80,378 | 125 | 20,486 | 6,479 | 3,502 | 30,592 |
| 80,379 | 122 | 20,279 | 6,462 | 3,494 | 30,357 |
| 80,380 | 122 | 20,063 | 6,449 | 3,507 | 30,141 |
| 80,381 | 120 | 20,234 | 6,486 | 3,528 | 30,368 |
| 80,382 | 120 | 20,090 | 6,485 | 3,543 | 30,238 |
| 80,383 | 116 | 20,068 | 6,534 | 3,565 | 30,283 |
| 80,384 | 120 | 20,001 | 6,505 | 3,551 | 30,177 |
| 80,385 | 116 | 19,941 | 6,457 | 3,526 | 30,040 |
| 80,386 | 118 | 20,171 | 6,567 | 3,576 | 30,432 |
| 80,387 | 117 | 20,038 | 6,507 | 3,558 | 30,220 |
| 80,388 | 120 | 20,123 | 6,498 | 3,520 | 30,261 |
| 80,389 | 125 | 20,325 | 6,561 | 3,537 | 30,548 |
| 80,390 | 123 | 20,111 | 6,447 | 3,505 | 30,186 |
| 80,391 | 126 | 20,277 | 6,492 | 3,561 | 30,456 |
| 80,392 | 126 | 20,211 | 6,478 | 3,546 | 30,361 |
| 80,393 | 126 | 20,164 | 6,457 | 3,573 | 30,320 |
| 80,394 | 125 | 19,826 | 6,400 | 3,535 | 29,886 |
| 80,395 | 124 | 19,647 | 6,376 | 3,511 | 29,658 |
| 80,396 | 122 | 19,695 | 6,385 | 3,549 | 29,751 |
| 80,397 | 124 | 19,902 | 6,419 | 3,577 | 30,022 |
| 80,398 | 123 | 19,940 | 6,401 | 3,578 | 30,042 |
| 80,399 | 122 | 19,839 | 6,349 | 3,555 | 29,865 |
| 80,400 | 122 | 19,849 | 6,308 | 3,527 | 29,806 |
| 80,401 | 120 | 19,708 | 6,261 | 3,510 | 29,599 |
| 80,402 | 124 | 19,810 | 6,291 | 3,503 | 29,728 |
| 80,403 | 125 | 19,879 | 6,302 | 3,512 | 29,818 |
| 80,404 | 132 | 19,642 | 6,220 | 3,465 | 29,459 |
| 80,405 | 136 | 19,813 | 6,252 | 3,477 | 29,678 |
| 80,406 | 134 | 19,805 | 6,284 | 3,501 | 29,724 |
| 80,407 | 135 | 19,675 | 6,240 | 3,491 | 29,541 |

|        |     |        |       |       |        |
|--------|-----|--------|-------|-------|--------|
| 80,408 | 138 | 19,564 | 6,261 | 3,505 | 29,468 |
| 80,409 | 139 | 19,498 | 6,238 | 3,492 | 29,367 |
| 80,410 | 140 | 19,535 | 6,189 | 3,483 | 29,347 |
| 80,411 | 138 | 19,406 | 6,151 | 3,456 | 29,151 |
| 80,412 | 139 | 19,475 | 6,141 | 3,457 | 29,212 |
| 80,413 | 143 | 19,492 | 6,145 | 3,454 | 29,234 |
| 80,414 | 143 | 19,577 | 6,151 | 3,458 | 29,329 |
| 80,415 | 140 | 19,568 | 6,176 | 3,463 | 29,347 |
| 80,416 | 145 | 19,587 | 6,214 | 3,503 | 29,449 |
| 80,417 | 143 | 19,435 | 6,201 | 3,493 | 29,272 |
| 80,418 | 151 | 19,571 | 6,253 | 3,510 | 29,485 |
| 80,419 | 158 | 19,571 | 6,214 | 3,511 | 29,454 |
| 80,420 | 159 | 19,515 | 6,219 | 3,529 | 29,422 |
| 80,421 | 161 | 19,424 | 6,232 | 3,530 | 29,347 |
| 80,422 | 159 | 19,427 | 6,232 | 3,531 | 29,349 |
| 80,423 | 162 | 19,659 | 6,268 | 3,560 | 29,649 |
| 80,424 | 157 | 19,134 | 6,129 | 3,506 | 28,926 |
| 80,425 | 159 | 19,379 | 6,191 | 3,530 | 29,259 |
| 80,426 | 160 | 19,570 | 6,228 | 3,549 | 29,507 |
| 80,427 | 164 | 19,613 | 6,218 | 3,520 | 29,515 |
| 80,428 | 162 | 19,521 | 6,123 | 3,477 | 29,283 |
| 80,429 | 162 | 19,785 | 6,138 | 3,500 | 29,585 |
| 80,430 | 161 | 19,892 | 6,154 | 3,503 | 29,710 |
| 80,431 | 161 | 19,985 | 6,151 | 3,502 | 29,799 |
| 80,432 | 164 | 20,203 | 6,191 | 3,529 | 30,087 |
| 80,433 | 159 | 19,351 | 5,928 | 3,354 | 28,792 |
| 80,434 | 159 | 19,623 | 5,944 | 3,372 | 29,098 |
| 80,435 | 159 | 19,350 | 5,855 | 3,335 | 28,699 |
| 80,436 | 159 | 19,436 | 5,861 | 3,358 | 28,814 |
| 80,437 | 159 | 19,627 | 5,897 | 3,386 | 29,069 |
| 80,438 | 163 | 19,659 | 5,876 | 3,395 | 29,093 |
| 80,439 | 160 | 19,421 | 5,824 | 3,388 | 28,793 |

|        |     |        |       |       |        |
|--------|-----|--------|-------|-------|--------|
| 80,440 | 160 | 19,363 | 5,838 | 3,396 | 28,757 |
| 80,441 | 160 | 19,007 | 5,800 | 3,353 | 28,320 |
| 80,442 | 159 | 19,356 | 5,935 | 3,412 | 28,862 |
| 80,443 | 159 | 19,404 | 5,910 | 3,411 | 28,884 |
| 80,444 | 159 | 19,376 | 5,895 | 3,395 | 28,825 |
| 80,445 | 151 | 19,541 | 5,831 | 3,385 | 28,908 |
| 80,446 | 151 | 19,595 | 5,816 | 3,389 | 28,951 |
| 80,447 | 147 | 19,939 | 5,947 | 3,452 | 29,485 |
| 80,448 | 149 | 19,934 | 5,985 | 3,465 | 29,533 |
| 80,449 | 153 | 19,833 | 5,991 | 3,444 | 29,421 |
| 80,450 | 151 | 19,867 | 5,997 | 3,452 | 29,467 |
| 80,451 | 153 | 19,824 | 6,069 | 3,486 | 29,532 |
| 80,452 | 152 | 19,804 | 6,105 | 3,507 | 29,568 |
| 80,453 | 151 | 19,764 | 6,102 | 3,506 | 29,523 |
| 80,454 | 151 | 19,815 | 6,145 | 3,532 | 29,643 |
| 80,455 | 145 | 19,871 | 6,124 | 3,530 | 29,670 |
| 80,456 | 142 | 19,772 | 6,092 | 3,516 | 29,522 |
| 80,457 | 140 | 19,779 | 6,061 | 3,505 | 29,485 |
| 80,458 | 143 | 20,099 | 6,189 | 3,563 | 29,994 |
| 80,459 | 148 | 20,204 | 6,147 | 3,570 | 30,069 |
| 80,460 | 147 | 20,010 | 6,079 | 3,532 | 29,768 |
| 80,461 | 147 | 20,027 | 6,066 | 3,542 | 29,782 |
| 80,462 | 159 | 19,748 | 6,045 | 3,531 | 29,483 |
| 80,463 | 161 | 19,731 | 6,047 | 3,522 | 29,461 |
| 80,464 | 169 | 19,989 | 6,122 | 3,561 | 29,841 |
| 80,465 | 168 | 20,101 | 6,130 | 3,563 | 29,962 |
| 80,466 | 162 | 20,122 | 6,120 | 3,554 | 29,958 |
| 80,467 | 162 | 20,015 | 6,046 | 3,489 | 29,712 |
| 80,468 | 162 | 20,037 | 6,051 | 3,484 | 29,734 |
| 80,469 | 157 | 20,231 | 6,062 | 3,505 | 29,955 |
| 80,470 | 147 | 20,402 | 6,098 | 3,540 | 30,187 |
| 80,471 | 147 | 20,436 | 6,111 | 3,534 | 30,228 |

|        |     |        |       |       |        |
|--------|-----|--------|-------|-------|--------|
| 80,472 | 142 | 20,836 | 6,163 | 3,568 | 30,709 |
| 80,473 | 141 | 20,919 | 6,167 | 3,579 | 30,806 |
| 80,474 | 133 | 20,559 | 6,079 | 3,497 | 30,268 |
| 80,475 | 134 | 20,452 | 6,001 | 3,474 | 30,061 |
| 80,476 | 140 | 20,666 | 6,022 | 3,524 | 30,352 |
| 80,477 | 133 | 20,716 | 6,007 | 3,539 | 30,395 |
| 80,478 | 131 | 21,023 | 6,090 | 3,578 | 30,822 |
| 80,479 | 136 | 20,994 | 6,096 | 3,565 | 30,791 |
| 80,480 | 147 | 20,893 | 6,096 | 3,552 | 30,688 |
| 80,481 | 147 | 20,831 | 6,094 | 3,546 | 30,618 |
| 80,482 | 151 | 21,291 | 6,217 | 3,617 | 31,276 |
| 80,483 | 149 | 21,081 | 6,156 | 3,601 | 30,987 |
| 80,484 | 147 | 20,789 | 6,129 | 3,591 | 30,656 |
| 80,485 | 158 | 21,318 | 6,324 | 3,721 | 31,521 |
| 80,486 | 161 | 21,172 | 6,277 | 3,697 | 31,307 |
| 80,487 | 163 | 21,451 | 6,346 | 3,745 | 31,705 |
| 80,488 | 171 | 21,538 | 6,364 | 3,761 | 31,834 |
| 80,489 | 170 | 21,616 | 6,340 | 3,775 | 31,901 |
| 80,490 | 168 | 21,601 | 6,315 | 3,744 | 31,828 |
| 80,491 | 168 | 21,588 | 6,325 | 3,737 | 31,818 |
| 80,492 | 172 | 21,787 | 6,361 | 3,775 | 32,095 |
| 80,493 | 173 | 21,786 | 6,371 | 3,782 | 32,112 |
| 80,494 | 167 | 21,723 | 6,374 | 3,796 | 32,060 |
| 80,495 | 169 | 21,648 | 6,340 | 3,775 | 31,932 |
| 80,496 | 169 | 21,485 | 6,313 | 3,747 | 31,714 |
| 80,497 | 173 | 21,528 | 6,303 | 3,719 | 31,723 |
| 80,498 | 173 | 21,582 | 6,294 | 3,720 | 31,769 |
| 80,499 | 170 | 21,454 | 6,216 | 3,704 | 31,544 |
| 80,500 | 172 | 21,549 | 6,199 | 3,732 | 31,652 |
| 80,501 | 172 | 21,586 | 6,104 | 3,673 | 31,535 |
| 80,502 | 176 | 21,765 | 6,100 | 3,664 | 31,705 |
| 80,503 | 182 | 21,922 | 6,091 | 3,646 | 31,841 |

|        |     |        |       |       |        |
|--------|-----|--------|-------|-------|--------|
| 80,504 | 183 | 22,098 | 6,091 | 3,634 | 32,006 |
| 80,505 | 183 | 22,234 | 6,072 | 3,641 | 32,130 |
| 80,506 | 178 | 22,157 | 6,024 | 3,617 | 31,976 |
| 80,507 | 181 | 22,184 | 5,960 | 3,613 | 31,938 |
| 80,508 | 181 | 22,112 | 5,955 | 3,602 | 31,850 |
| 80,509 | 178 | 22,330 | 5,999 | 3,636 | 32,143 |
| 80,510 | 173 | 22,314 | 5,985 | 3,637 | 32,109 |
| 80,511 | 169 | 22,284 | 5,953 | 3,615 | 32,021 |
| 80,512 | 158 | 22,295 | 5,939 | 3,602 | 31,994 |
| 80,513 | 158 | 22,338 | 5,954 | 3,597 | 32,047 |
| 80,514 | 151 | 22,450 | 5,991 | 3,643 | 32,235 |
| 80,515 | 146 | 22,114 | 5,871 | 3,605 | 31,736 |
| 80,516 | 147 | 22,095 | 5,826 | 3,600 | 31,668 |
| 80,517 | 152 | 22,062 | 5,826 | 3,599 | 31,639 |
| 80,518 | 150 | 21,788 | 5,772 | 3,578 | 31,288 |
| 80,519 | 151 | 22,158 | 5,840 | 3,635 | 31,784 |
| 80,520 | 152 | 21,934 | 5,789 | 3,564 | 31,439 |
| 80,521 | 151 | 21,772 | 5,723 | 3,536 | 31,182 |
| 80,522 | 153 | 21,904 | 5,751 | 3,578 | 31,386 |
| 80,523 | 156 | 21,845 | 5,773 | 3,572 | 31,346 |
| 80,524 | 158 | 21,762 | 5,759 | 3,564 | 31,243 |
| 80,525 | 158 | 21,514 | 5,734 | 3,547 | 30,953 |
| 80,526 | 159 | 21,483 | 5,757 | 3,548 | 30,947 |
| 80,527 | 156 | 21,434 | 5,772 | 3,527 | 30,889 |
| 80,528 | 154 | 21,404 | 5,724 | 3,513 | 30,795 |
| 80,529 | 158 | 21,421 | 5,734 | 3,515 | 30,828 |
| 80,530 | 151 | 21,220 | 5,688 | 3,499 | 30,558 |
| 80,531 | 142 | 21,440 | 5,728 | 3,528 | 30,838 |
| 80,532 | 143 | 21,559 | 5,764 | 3,565 | 31,031 |
| 80,533 | 141 | 21,558 | 5,754 | 3,545 | 30,998 |
| 80,534 | 137 | 21,478 | 5,679 | 3,508 | 30,802 |
| 80,535 | 137 | 21,674 | 5,711 | 3,523 | 31,045 |

|        |     |        |       |       |        |
|--------|-----|--------|-------|-------|--------|
| 80,536 | 129 | 21,938 | 5,739 | 3,569 | 31,375 |
| 80,537 | 123 | 21,832 | 5,681 | 3,520 | 31,156 |
| 80,538 | 123 | 21,748 | 5,677 | 3,529 | 31,077 |
| 80,539 | 117 | 21,865 | 5,775 | 3,569 | 31,326 |
| 80,540 | 118 | 22,027 | 5,850 | 3,586 | 31,581 |
| 80,541 | 123 | 21,770 | 5,804 | 3,572 | 31,269 |
| 80,542 | 123 | 21,740 | 5,772 | 3,559 | 31,194 |
| 80,543 | 123 | 22,181 | 5,891 | 3,633 | 31,828 |
| 80,544 | 122 | 22,267 | 5,870 | 3,634 | 31,893 |
| 80,545 | 125 | 22,263 | 5,847 | 3,621 | 31,856 |
| 80,546 | 123 | 22,022 | 5,806 | 3,591 | 31,542 |
| 80,547 | 123 | 21,915 | 5,794 | 3,580 | 31,412 |
| 80,548 | 121 | 21,727 | 5,765 | 3,583 | 31,196 |
| 80,549 | 123 | 21,383 | 5,668 | 3,514 | 30,688 |
| 80,550 | 123 | 21,381 | 5,675 | 3,514 | 30,693 |
| 80,551 | 120 | 21,432 | 5,737 | 3,524 | 30,813 |
| 80,552 | 119 | 21,310 | 5,720 | 3,528 | 30,677 |
| 80,553 | 121 | 21,195 | 5,699 | 3,524 | 30,539 |
| 80,554 | 121 | 21,213 | 5,699 | 3,538 | 30,571 |
| 80,555 | 123 | 21,028 | 5,643 | 3,509 | 30,303 |
| 80,556 | 124 | 20,797 | 5,588 | 3,484 | 29,993 |
| 80,557 | 126 | 21,002 | 5,655 | 3,534 | 30,317 |
| 80,558 | 125 | 21,296 | 5,745 | 3,559 | 30,725 |
| 80,559 | 126 | 21,276 | 5,693 | 3,547 | 30,642 |
| 80,560 | 121 | 21,043 | 5,681 | 3,539 | 30,384 |
| 80,561 | 120 | 20,961 | 5,656 | 3,523 | 30,260 |
| 80,562 | 119 | 21,224 | 5,704 | 3,566 | 30,613 |
| 80,563 | 115 | 21,221 | 5,675 | 3,552 | 30,563 |
| 80,564 | 113 | 21,274 | 5,655 | 3,538 | 30,580 |
| 80,565 | 117 | 21,126 | 5,631 | 3,520 | 30,394 |
| 80,566 | 117 | 21,253 | 5,633 | 3,525 | 30,528 |
| 80,567 | 111 | 21,143 | 5,612 | 3,512 | 30,378 |

|        |     |        |       |       |        |
|--------|-----|--------|-------|-------|--------|
| 80,568 | 116 | 21,121 | 5,600 | 3,506 | 30,343 |
| 80,569 | 114 | 21,061 | 5,546 | 3,484 | 30,205 |
| 80,570 | 106 | 21,016 | 5,580 | 3,487 | 30,189 |
| 80,571 | 110 | 21,018 | 5,537 | 3,468 | 30,133 |
| 80,572 | 108 | 20,827 | 5,482 | 3,410 | 29,827 |
| 80,573 | 107 | 20,808 | 5,434 | 3,400 | 29,749 |
| 80,574 | 107 | 20,727 | 5,413 | 3,382 | 29,629 |
| 80,575 | 107 | 20,799 | 5,401 | 3,390 | 29,697 |
| 80,576 | 107 | 20,767 | 5,345 | 3,370 | 29,589 |
| 80,577 | 107 | 20,666 | 5,342 | 3,368 | 29,483 |
| 80,578 | 105 | 20,507 | 5,314 | 3,353 | 29,279 |
| 80,579 | 107 | 20,708 | 5,395 | 3,383 | 29,593 |
| 80,580 | 104 | 20,666 | 5,401 | 3,394 | 29,565 |
| 80,581 | 104 | 20,636 | 5,364 | 3,373 | 29,477 |
| 80,582 | 109 | 20,703 | 5,370 | 3,372 | 29,554 |
| 80,583 | 107 | 20,335 | 5,277 | 3,325 | 29,044 |
| 80,584 | 108 | 20,303 | 5,267 | 3,344 | 29,022 |
| 80,585 | 111 | 20,704 | 5,353 | 3,385 | 29,553 |
| 80,586 | 111 | 20,429 | 5,273 | 3,334 | 29,147 |
| 80,587 | 112 | 20,309 | 5,266 | 3,343 | 29,030 |
| 80,588 | 114 | 20,441 | 5,388 | 3,443 | 29,386 |
| 80,589 | 111 | 20,347 | 5,331 | 3,411 | 29,200 |
| 80,590 | 102 | 20,071 | 5,155 | 3,359 | 28,687 |
| 80,591 | 103 | 20,270 | 5,196 | 3,389 | 28,958 |
| 80,592 | 102 | 20,506 | 5,275 | 3,433 | 29,316 |
| 80,593 | 107 | 20,590 | 5,288 | 3,427 | 29,412 |
| 80,594 | 110 | 20,620 | 5,261 | 3,412 | 29,403 |
| 80,595 | 113 | 20,920 | 5,359 | 3,456 | 29,848 |
| 80,596 | 112 | 20,728 | 5,311 | 3,426 | 29,577 |
| 80,597 | 120 | 20,817 | 5,340 | 3,443 | 29,720 |
| 80,598 | 120 | 20,876 | 5,341 | 3,445 | 29,782 |
| 80,599 | 123 | 20,955 | 5,371 | 3,464 | 29,913 |

|        |     |        |       |       |        |
|--------|-----|--------|-------|-------|--------|
| 80,600 | 121 | 21,081 | 5,392 | 3,481 | 30,075 |
| 80,601 | 121 | 21,303 | 5,409 | 3,489 | 30,322 |
| 80,602 | 123 | 21,571 | 5,459 | 3,501 | 30,654 |
| 80,603 | 117 | 21,368 | 5,402 | 3,458 | 30,345 |
| 80,604 | 116 | 21,365 | 5,421 | 3,461 | 30,363 |
| 80,605 | 112 | 21,572 | 5,480 | 3,494 | 30,658 |
| 80,606 | 103 | 21,318 | 5,429 | 3,455 | 30,305 |
| 80,607 | 103 | 21,385 | 5,453 | 3,479 | 30,420 |
| 80,608 | 102 | 21,362 | 5,471 | 3,486 | 30,421 |
| 80,609 | 103 | 21,196 | 5,457 | 3,480 | 30,236 |
| 80,610 | 103 | 21,308 | 5,487 | 3,482 | 30,380 |
| 80,611 | 105 | 21,514 | 5,492 | 3,502 | 30,613 |
| 80,612 | 106 | 21,627 | 5,537 | 3,516 | 30,786 |
| 80,613 | 106 | 21,608 | 5,573 | 3,517 | 30,804 |
| 80,614 | 107 | 21,294 | 5,529 | 3,492 | 30,422 |
| 80,615 | 114 | 21,579 | 5,569 | 3,528 | 30,790 |
| 80,616 | 115 | 21,700 | 5,545 | 3,502 | 30,862 |
| 80,617 | 115 | 21,498 | 5,494 | 3,477 | 30,584 |
| 80,618 | 120 | 22,276 | 5,639 | 3,558 | 31,593 |
| 80,619 | 118 | 21,403 | 5,418 | 3,451 | 30,390 |
| 80,620 | 119 | 21,774 | 5,474 | 3,475 | 30,842 |
| 80,621 | 130 | 22,132 | 5,536 | 3,539 | 31,337 |
| 80,622 | 132 | 22,163 | 5,540 | 3,540 | 31,375 |
| 80,623 | 137 | 22,731 | 5,662 | 3,638 | 32,168 |
| 80,624 | 134 | 22,575 | 5,617 | 3,620 | 31,946 |
| 80,625 | 137 | 22,665 | 5,605 | 3,622 | 32,029 |
| 80,626 | 139 | 22,694 | 5,604 | 3,627 | 32,064 |
| 80,627 | 136 | 22,502 | 5,574 | 3,616 | 31,828 |
| 80,628 | 134 | 22,875 | 5,648 | 3,661 | 32,318 |
| 80,629 | 132 | 22,877 | 5,629 | 3,662 | 32,300 |
| 80,630 | 132 | 23,126 | 5,686 | 3,687 | 32,631 |
| 80,631 | 131 | 22,874 | 5,616 | 3,651 | 32,272 |



|        |     |        |       |       |        |
|--------|-----|--------|-------|-------|--------|
| 80,632 | 131 | 22,635 | 5,577 | 3,618 | 31,961 |
| 80,633 | 128 | 22,643 | 5,624 | 3,631 | 32,026 |
| 80,634 | 131 | 22,523 | 5,623 | 3,592 | 31,869 |
| 80,635 | 133 | 22,376 | 5,603 | 3,565 | 31,677 |
| 80,636 | 138 | 22,184 | 5,599 | 3,540 | 31,461 |
| 80,637 | 143 | 21,736 | 5,521 | 3,457 | 30,857 |
| 80,638 | 146 | 22,067 | 5,593 | 3,471 | 31,277 |
| 80,639 | 146 | 22,285 | 5,650 | 3,488 | 31,569 |
| 80,640 | 149 | 22,301 | 5,664 | 3,458 | 31,572 |
| 80,641 | 146 | 22,042 | 5,629 | 3,418 | 31,235 |
| 80,642 | 148 | 22,534 | 5,783 | 3,484 | 31,949 |
| 80,643 | 146 | 22,447 | 5,787 | 3,493 | 31,873 |
| 80,644 | 142 | 22,269 | 5,772 | 3,502 | 31,685 |
| 80,645 | 141 | 22,467 | 5,836 | 3,544 | 31,988 |
| 80,646 | 140 | 22,374 | 5,763 | 3,525 | 31,802 |
| 80,647 | 139 | 22,359 | 5,778 | 3,519 | 31,795 |
| 80,648 | 132 | 22,610 | 5,867 | 3,575 | 32,184 |
| 80,649 | 127 | 22,511 | 5,802 | 3,545 | 31,985 |
| 80,650 | 134 | 22,572 | 5,838 | 3,532 | 32,076 |
| 80,651 | 137 | 22,532 | 5,824 | 3,557 | 32,050 |
| 80,652 | 135 | 22,452 | 5,811 | 3,549 | 31,947 |
| 80,653 | 134 | 22,299 | 5,811 | 3,560 | 31,804 |
| 80,654 | 139 | 22,423 | 5,839 | 3,579 | 31,980 |
| 80,655 | 138 | 22,182 | 5,780 | 3,557 | 31,657 |
| 80,656 | 139 | 22,083 | 5,750 | 3,553 | 31,525 |
| 80,657 | 143 | 22,189 | 5,764 | 3,563 | 31,659 |
| 80,658 | 147 | 22,147 | 5,734 | 3,550 | 31,578 |
| 80,659 | 148 | 22,127 | 5,756 | 3,545 | 31,576 |
| 80,660 | 149 | 22,282 | 5,767 | 3,543 | 31,741 |
| 80,661 | 150 | 22,127 | 5,780 | 3,522 | 31,579 |
| 80,662 | 149 | 22,136 | 5,816 | 3,517 | 31,618 |
| 80,663 | 150 | 22,257 | 5,819 | 3,508 | 31,734 |

|        |     |        |       |       |        |
|--------|-----|--------|-------|-------|--------|
| 80,664 | 155 | 22,362 | 5,817 | 3,529 | 31,863 |
| 80,665 | 154 | 22,352 | 5,834 | 3,540 | 31,880 |
| 80,666 | 147 | 22,402 | 5,898 | 3,587 | 32,034 |
| 80,667 | 140 | 22,475 | 5,932 | 3,639 | 32,186 |
| 80,668 | 141 | 22,556 | 6,003 | 3,668 | 32,368 |
| 80,669 | 138 | 22,704 | 6,103 | 3,721 | 32,666 |
| 80,670 | 132 | 22,342 | 6,076 | 3,718 | 32,268 |
| 80,671 | 137 | 22,608 | 6,145 | 3,751 | 32,641 |
| 80,672 | 128 | 22,937 | 6,208 | 3,772 | 33,045 |
| 80,673 | 122 | 22,670 | 6,165 | 3,747 | 32,704 |
| 80,674 | 122 | 22,436 | 6,144 | 3,712 | 32,414 |
| 80,675 | 120 | 22,240 | 6,110 | 3,708 | 32,178 |
| 80,676 | 129 | 23,048 | 6,351 | 3,835 | 33,363 |
| 80,677 | 127 | 23,147 | 6,399 | 3,864 | 33,537 |
| 80,678 | 128 | 22,972 | 6,359 | 3,839 | 33,298 |
| 80,679 | 133 | 23,065 | 6,357 | 3,843 | 33,398 |
| 80,680 | 134 | 23,243 | 6,398 | 3,867 | 33,642 |
| 80,681 | 137 | 23,353 | 6,397 | 3,878 | 33,765 |
| 80,682 | 136 | 23,463 | 6,397 | 3,868 | 33,864 |
| 80,683 | 134 | 23,457 | 6,372 | 3,852 | 33,815 |
| 80,684 | 131 | 23,607 | 6,318 | 3,866 | 33,922 |
| 80,685 | 131 | 23,621 | 6,326 | 3,872 | 33,950 |
| 80,686 | 134 | 23,698 | 6,368 | 3,911 | 34,111 |
| 80,687 | 122 | 23,316 | 6,257 | 3,846 | 33,541 |
| 80,688 | 129 | 23,670 | 6,335 | 3,897 | 34,031 |
| 80,689 | 126 | 23,693 | 6,345 | 3,894 | 34,058 |
| 80,690 | 125 | 23,539 | 6,306 | 3,890 | 33,860 |
| 80,691 | 123 | 23,351 | 6,282 | 3,909 | 33,665 |
| 80,692 | 122 | 23,235 | 6,247 | 3,911 | 33,515 |
| 80,693 | 122 | 23,102 | 6,171 | 3,873 | 33,268 |
| 80,694 | 132 | 23,256 | 6,185 | 3,874 | 33,447 |
| 80,695 | 134 | 23,024 | 6,133 | 3,830 | 33,121 |

|        |     |        |       |       |        |
|--------|-----|--------|-------|-------|--------|
| 80,696 | 133 | 23,132 | 6,140 | 3,838 | 33,243 |
| 80,697 | 131 | 22,970 | 6,115 | 3,831 | 33,047 |
| 80,698 | 131 | 23,000 | 6,090 | 3,837 | 33,058 |
| 80,699 | 129 | 22,446 | 5,927 | 3,743 | 32,245 |
| 80,700 | 131 | 22,701 | 5,977 | 3,783 | 32,592 |
| 80,701 | 129 | 22,987 | 6,042 | 3,811 | 32,969 |
| 80,702 | 132 | 23,082 | 6,039 | 3,807 | 33,060 |
| 80,703 | 132 | 23,093 | 6,048 | 3,808 | 33,081 |
| 80,704 | 134 | 23,248 | 6,057 | 3,844 | 33,283 |
| 80,705 | 131 | 23,303 | 6,081 | 3,873 | 33,388 |
| 80,706 | 132 | 23,239 | 6,080 | 3,849 | 33,300 |
| 80,707 | 131 | 23,160 | 6,084 | 3,847 | 33,222 |
| 80,708 | 131 | 23,350 | 6,188 | 3,877 | 33,546 |
| 80,709 | 132 | 23,433 | 6,208 | 3,873 | 33,646 |
| 80,710 | 127 | 23,499 | 6,218 | 3,919 | 33,763 |
| 80,711 | 125 | 23,380 | 6,188 | 3,915 | 33,608 |
| 80,712 | 124 | 23,041 | 6,100 | 3,891 | 33,156 |
| 80,713 | 127 | 22,890 | 6,084 | 3,889 | 32,990 |
| 80,714 | 129 | 22,922 | 6,073 | 3,933 | 33,057 |
| 80,715 | 126 | 22,671 | 5,956 | 3,840 | 32,593 |
| 80,716 | 126 | 22,634 | 5,933 | 3,800 | 32,493 |
| 80,717 | 126 | 22,507 | 5,921 | 3,757 | 32,311 |
| 80,718 | 126 | 22,333 | 5,846 | 3,707 | 32,012 |
| 80,719 | 131 | 22,633 | 5,884 | 3,750 | 32,398 |
| 80,720 | 128 | 21,956 | 5,678 | 3,632 | 31,394 |
| 80,721 | 128 | 22,061 | 5,684 | 3,624 | 31,497 |
| 80,722 | 123 | 21,496 | 5,520 | 3,538 | 30,677 |
| 80,723 | 123 | 21,673 | 5,569 | 3,554 | 30,919 |
| 80,724 | 124 | 21,828 | 5,577 | 3,562 | 31,091 |
| 80,725 | 130 | 21,947 | 5,610 | 3,602 | 31,289 |
| 80,726 | 129 | 21,863 | 5,582 | 3,575 | 31,149 |
| 80,727 | 131 | 21,518 | 5,472 | 3,510 | 30,631 |

|        |     |        |       |       |        |
|--------|-----|--------|-------|-------|--------|
| 80,728 | 134 | 21,435 | 5,467 | 3,507 | 30,543 |
| 80,729 | 131 | 21,536 | 5,492 | 3,524 | 30,683 |
| 80,730 | 128 | 21,233 | 5,443 | 3,495 | 30,299 |
| 80,731 | 127 | 21,244 | 5,483 | 3,507 | 30,361 |
| 80,732 | 127 | 21,048 | 5,482 | 3,514 | 30,171 |
| 80,733 | 127 | 20,909 | 5,444 | 3,528 | 30,008 |
| 80,734 | 131 | 20,906 | 5,457 | 3,535 | 30,029 |
| 80,735 | 133 | 21,268 | 5,557 | 3,577 | 30,535 |
| 80,736 | 131 | 21,493 | 5,564 | 3,577 | 30,765 |
| 80,737 | 131 | 21,205 | 5,469 | 3,512 | 30,317 |
| 80,738 | 135 | 21,414 | 5,503 | 3,529 | 30,581 |
| 80,739 | 136 | 21,456 | 5,580 | 3,567 | 30,739 |
| 80,740 | 136 | 21,285 | 5,515 | 3,537 | 30,473 |
| 80,741 | 134 | 21,449 | 5,454 | 3,529 | 30,566 |
| 80,742 | 135 | 21,719 | 5,512 | 3,541 | 30,907 |
| 80,743 | 135 | 21,564 | 5,491 | 3,534 | 30,724 |
| 80,744 | 136 | 21,271 | 5,412 | 3,487 | 30,306 |
| 80,745 | 128 | 21,146 | 5,440 | 3,505 | 30,219 |
| 80,746 | 124 | 21,063 | 5,427 | 3,495 | 30,109 |
| 80,747 | 125 | 20,867 | 5,410 | 3,468 | 29,870 |
| 80,748 | 125 | 20,312 | 5,306 | 3,389 | 29,132 |
| 80,749 | 125 | 20,397 | 5,364 | 3,394 | 29,280 |
| 80,750 | 126 | 20,585 | 5,435 | 3,419 | 29,565 |
| 80,751 | 126 | 20,461 | 5,409 | 3,405 | 29,401 |
| 80,752 | 128 | 20,539 | 5,471 | 3,450 | 29,588 |
| 80,753 | 125 | 20,539 | 5,481 | 3,449 | 29,594 |
| 80,754 | 122 | 20,570 | 5,480 | 3,455 | 29,627 |
| 80,755 | 124 | 20,524 | 5,481 | 3,448 | 29,577 |
| 80,756 | 124 | 20,364 | 5,396 | 3,389 | 29,273 |
| 80,757 | 125 | 20,300 | 5,398 | 3,390 | 29,213 |
| 80,758 | 124 | 20,564 | 5,461 | 3,447 | 29,596 |
| 80,759 | 122 | 20,656 | 5,462 | 3,467 | 29,707 |

|        |     |        |       |       |        |
|--------|-----|--------|-------|-------|--------|
| 80,760 | 118 | 20,676 | 5,467 | 3,471 | 29,732 |
| 80,761 | 118 | 20,525 | 5,442 | 3,449 | 29,534 |
| 80,762 | 117 | 20,347 | 5,381 | 3,415 | 29,260 |
| 80,763 | 112 | 20,199 | 5,360 | 3,392 | 29,063 |
| 80,764 | 118 | 20,258 | 5,420 | 3,402 | 29,198 |
| 80,765 | 121 | 20,181 | 5,428 | 3,398 | 29,128 |
| 80,766 | 121 | 20,072 | 5,427 | 3,397 | 29,017 |
| 80,767 | 125 | 20,039 | 5,390 | 3,386 | 28,940 |
| 80,768 | 131 | 19,773 | 5,343 | 3,377 | 28,624 |
| 80,769 | 130 | 19,560 | 5,330 | 3,355 | 28,375 |
| 80,770 | 126 | 19,739 | 5,398 | 3,409 | 28,672 |
| 80,771 | 134 | 19,859 | 5,490 | 3,430 | 28,913 |
| 80,772 | 142 | 19,911 | 5,498 | 3,433 | 28,984 |
| 80,773 | 142 | 19,693 | 5,463 | 3,393 | 28,691 |
| 80,774 | 137 | 19,696 | 5,474 | 3,404 | 28,711 |
| 80,775 | 140 | 19,883 | 5,534 | 3,438 | 28,995 |
| 80,776 | 134 | 19,459 | 5,427 | 3,357 | 28,377 |
| 80,777 | 134 | 19,499 | 5,444 | 3,358 | 28,435 |
| 80,778 | 132 | 19,267 | 5,403 | 3,330 | 28,132 |
| 80,779 | 129 | 19,203 | 5,385 | 3,320 | 28,037 |
| 80,780 | 136 | 20,124 | 5,624 | 3,483 | 29,367 |
| 80,781 | 136 | 20,070 | 5,617 | 3,489 | 29,312 |
| 80,782 | 132 | 19,979 | 5,625 | 3,485 | 29,221 |
| 80,783 | 132 | 20,146 | 5,691 | 3,527 | 29,496 |
| 80,784 | 133 | 20,254 | 5,723 | 3,502 | 29,612 |
| 80,785 | 129 | 20,297 | 5,766 | 3,524 | 29,716 |
| 80,786 | 128 | 20,174 | 5,778 | 3,524 | 29,604 |
| 80,787 | 124 | 19,813 | 5,741 | 3,480 | 29,158 |
| 80,788 | 124 | 19,812 | 5,755 | 3,491 | 29,182 |
| 80,789 | 133 | 20,074 | 5,863 | 3,554 | 29,624 |
| 80,790 | 131 | 19,955 | 5,780 | 3,520 | 29,386 |
| 80,791 | 132 | 19,508 | 5,680 | 3,497 | 28,817 |

|        |     |        |       |       |        |
|--------|-----|--------|-------|-------|--------|
| 80,792 | 132 | 19,650 | 5,819 | 3,545 | 29,146 |
| 80,793 | 130 | 19,771 | 5,835 | 3,576 | 29,312 |
| 80,794 | 125 | 19,379 | 5,674 | 3,466 | 28,644 |
| 80,795 | 126 | 19,637 | 5,709 | 3,504 | 28,976 |
| 80,796 | 127 | 19,911 | 5,747 | 3,513 | 29,298 |
| 80,797 | 119 | 18,891 | 5,437 | 3,363 | 27,810 |
| 80,798 | 118 | 19,226 | 5,497 | 3,400 | 28,241 |
| 80,799 | 120 | 19,383 | 5,552 | 3,427 | 28,482 |
| 80,800 | 120 | 19,424 | 5,544 | 3,433 | 28,521 |
| 80,801 | 119 | 19,849 | 5,638 | 3,489 | 29,095 |
| 80,802 | 121 | 20,008 | 5,706 | 3,534 | 29,369 |
| 80,803 | 119 | 20,061 | 5,692 | 3,531 | 29,403 |
| 80,804 | 117 | 19,834 | 5,620 | 3,488 | 29,059 |
| 80,805 | 118 | 19,927 | 5,690 | 3,520 | 29,255 |
| 80,806 | 117 | 19,906 | 5,692 | 3,536 | 29,251 |
| 80,807 | 114 | 19,880 | 5,710 | 3,568 | 29,272 |
| 80,808 | 114 | 20,038 | 5,773 | 3,577 | 29,502 |
| 80,809 | 119 | 20,035 | 5,752 | 3,595 | 29,501 |
| 80,810 | 120 | 19,925 | 5,723 | 3,571 | 29,339 |
| 80,811 | 121 | 19,930 | 5,735 | 3,581 | 29,367 |
| 80,812 | 116 | 19,446 | 5,478 | 3,426 | 28,466 |
| 80,813 | 118 | 19,612 | 5,484 | 3,425 | 28,639 |
| 80,814 | 122 | 19,763 | 5,484 | 3,435 | 28,804 |
| 80,815 | 121 | 19,927 | 5,515 | 3,463 | 29,026 |
| 80,816 | 120 | 19,959 | 5,539 | 3,465 | 29,083 |
| 80,817 | 120 | 19,985 | 5,545 | 3,483 | 29,133 |
| 80,818 | 122 | 21,114 | 5,848 | 3,644 | 30,728 |
| 80,819 | 116 | 20,922 | 5,779 | 3,613 | 30,430 |
| 80,820 | 118 | 21,055 | 5,817 | 3,660 | 30,650 |
| 80,821 | 110 | 20,789 | 5,736 | 3,610 | 30,245 |
| 80,822 | 112 | 21,027 | 5,793 | 3,653 | 30,585 |
| 80,823 | 107 | 20,968 | 5,796 | 3,672 | 30,543 |

|        |     |        |       |       |        |
|--------|-----|--------|-------|-------|--------|
| 80,824 | 104 | 20,686 | 5,753 | 3,661 | 30,204 |
| 80,825 | 100 | 20,629 | 5,760 | 3,658 | 30,147 |
| 80,826 | 105 | 20,875 | 5,842 | 3,696 | 30,518 |
| 80,827 | 104 | 20,968 | 5,867 | 3,716 | 30,655 |
| 80,828 | 109 | 21,122 | 5,936 | 3,738 | 30,905 |
| 80,829 | 116 | 21,326 | 5,997 | 3,757 | 31,196 |
| 80,830 | 112 | 21,186 | 5,960 | 3,749 | 31,007 |
| 80,831 | 113 | 21,353 | 5,978 | 3,756 | 31,200 |
| 80,832 | 120 | 21,560 | 5,990 | 3,781 | 31,451 |
| 80,833 | 120 | 21,632 | 5,994 | 3,790 | 31,536 |
| 80,834 | 119 | 21,545 | 5,952 | 3,759 | 31,375 |
| 80,835 | 117 | 21,821 | 5,993 | 3,827 | 31,758 |
| 80,836 | 119 | 21,666 | 5,986 | 3,816 | 31,587 |
| 80,837 | 115 | 21,612 | 5,906 | 3,775 | 31,408 |
| 80,838 | 118 | 21,859 | 5,934 | 3,813 | 31,724 |
| 80,839 | 120 | 22,109 | 5,993 | 3,869 | 32,091 |
| 80,840 | 115 | 22,025 | 5,950 | 3,836 | 31,926 |
| 80,841 | 114 | 22,205 | 5,973 | 3,833 | 32,125 |
| 80,842 | 117 | 22,296 | 5,991 | 3,851 | 32,255 |
| 80,843 | 117 | 22,221 | 5,950 | 3,843 | 32,131 |
| 80,844 | 128 | 22,570 | 6,034 | 3,872 | 32,604 |
| 80,845 | 134 | 22,609 | 6,055 | 3,873 | 32,671 |
| 80,846 | 133 | 22,496 | 6,032 | 3,859 | 32,520 |
| 80,847 | 138 | 23,004 | 6,152 | 3,948 | 33,242 |
| 80,848 | 137 | 23,192 | 6,189 | 3,984 | 33,502 |
| 80,849 | 140 | 23,433 | 6,278 | 4,048 | 33,899 |
| 80,850 | 138 | 23,508 | 6,302 | 4,048 | 33,996 |
| 80,851 | 136 | 23,512 | 6,369 | 4,062 | 34,079 |
| 80,852 | 137 | 23,531 | 6,443 | 4,103 | 34,214 |
| 80,853 | 139 | 23,628 | 6,461 | 4,117 | 34,345 |
| 80,854 | 142 | 23,616 | 6,469 | 4,128 | 34,355 |
| 80,855 | 143 | 23,456 | 6,466 | 4,146 | 34,211 |

|        |     |        |       |       |        |
|--------|-----|--------|-------|-------|--------|
| 80,856 | 145 | 23,497 | 6,472 | 4,151 | 34,265 |
| 80,857 | 146 | 23,504 | 6,450 | 4,132 | 34,232 |
| 80,858 | 145 | 23,492 | 6,465 | 4,111 | 34,213 |
| 80,859 | 145 | 23,564 | 6,471 | 4,120 | 34,300 |
| 80,860 | 143 | 23,661 | 6,467 | 4,102 | 34,373 |
| 80,861 | 151 | 23,421 | 6,426 | 4,059 | 34,057 |
| 80,862 | 149 | 23,115 | 6,363 | 4,010 | 33,637 |
| 80,863 | 147 | 22,863 | 6,377 | 4,024 | 33,411 |
| 80,864 | 146 | 22,889 | 6,412 | 4,042 | 33,489 |
| 80,865 | 149 | 22,654 | 6,414 | 4,011 | 33,228 |
| 80,866 | 147 | 22,435 | 6,365 | 4,002 | 32,949 |
| 80,867 | 146 | 22,301 | 6,355 | 3,987 | 32,789 |
| 80,868 | 146 | 22,374 | 6,410 | 3,999 | 32,929 |
| 80,869 | 148 | 22,369 | 6,391 | 3,978 | 32,886 |
| 80,870 | 146 | 22,410 | 6,402 | 3,986 | 32,944 |
| 80,871 | 149 | 22,500 | 6,402 | 3,981 | 33,032 |
| 80,872 | 150 | 22,560 | 6,400 | 3,981 | 33,091 |
| 80,873 | 152 | 22,697 | 6,465 | 4,003 | 33,317 |
| 80,874 | 152 | 22,698 | 6,476 | 3,995 | 33,321 |
| 80,875 | 164 | 22,512 | 6,430 | 3,970 | 33,076 |
| 80,876 | 164 | 22,606 | 6,424 | 3,980 | 33,174 |
| 80,877 | 162 | 22,857 | 6,487 | 4,022 | 33,528 |
| 80,878 | 164 | 22,946 | 6,552 | 4,074 | 33,736 |
| 80,879 | 156 | 22,892 | 6,466 | 4,041 | 33,555 |
| 80,880 | 149 | 22,859 | 6,428 | 4,034 | 33,470 |
| 80,881 | 152 | 22,591 | 6,331 | 3,959 | 33,033 |
| 80,882 | 154 | 22,649 | 6,320 | 3,959 | 33,082 |
| 80,883 | 149 | 22,810 | 6,350 | 3,977 | 33,286 |
| 80,884 | 149 | 22,566 | 6,303 | 3,949 | 32,967 |
| 80,885 | 154 | 22,524 | 6,275 | 3,931 | 32,884 |
| 80,886 | 155 | 22,480 | 6,223 | 3,915 | 32,773 |
| 80,887 | 158 | 22,176 | 6,144 | 3,853 | 32,331 |



|        |     |        |       |       |        |
|--------|-----|--------|-------|-------|--------|
| 80,888 | 161 | 22,405 | 6,184 | 3,882 | 32,632 |
| 80,889 | 162 | 22,424 | 6,175 | 3,877 | 32,638 |
| 80,890 | 157 | 22,333 | 6,138 | 3,838 | 32,466 |
| 80,891 | 157 | 22,282 | 6,103 | 3,845 | 32,387 |
| 80,892 | 157 | 22,292 | 6,090 | 3,830 | 32,369 |
| 80,893 | 152 | 22,210 | 6,096 | 3,844 | 32,302 |
| 80,894 | 152 | 22,019 | 6,085 | 3,836 | 32,092 |
| 80,895 | 146 | 21,706 | 6,055 | 3,822 | 31,729 |
| 80,896 | 139 | 21,283 | 5,961 | 3,797 | 31,180 |
| 80,897 | 144 | 22,024 | 6,188 | 3,953 | 32,309 |
| 80,898 | 149 | 22,096 | 6,230 | 3,961 | 32,436 |
| 80,899 | 150 | 22,360 | 6,274 | 3,980 | 32,764 |
| 80,900 | 149 | 22,503 | 6,284 | 3,983 | 32,919 |
| 80,901 | 149 | 22,551 | 6,291 | 3,998 | 32,989 |
| 80,902 | 147 | 22,247 | 6,108 | 3,903 | 32,405 |
| 80,903 | 149 | 22,592 | 6,153 | 3,952 | 32,846 |
| 80,904 | 147 | 22,650 | 6,162 | 3,956 | 32,915 |
| 80,905 | 143 | 22,904 | 6,221 | 3,978 | 33,246 |
| 80,906 | 142 | 22,826 | 6,163 | 3,935 | 33,066 |
| 80,907 | 144 | 23,007 | 6,217 | 3,933 | 33,301 |
| 80,908 | 144 | 22,998 | 6,233 | 3,925 | 33,300 |
| 80,909 | 144 | 22,842 | 6,155 | 3,911 | 33,052 |
| 80,910 | 145 | 22,929 | 6,181 | 3,953 | 33,208 |
| 80,911 | 146 | 22,940 | 6,172 | 3,957 | 33,215 |
| 80,912 | 134 | 22,814 | 6,095 | 3,918 | 32,961 |
| 80,913 | 157 | 23,362 | 6,216 | 4,009 | 33,744 |
| 80,914 | 156 | 23,025 | 6,050 | 3,907 | 33,138 |
| 80,915 | 162 | 23,346 | 6,100 | 3,955 | 33,563 |
| 80,916 | 161 | 23,606 | 6,149 | 3,993 | 33,909 |
| 80,917 | 166 | 23,897 | 6,201 | 4,022 | 34,286 |
| 80,918 | 165 | 23,880 | 6,179 | 4,001 | 34,225 |
| 80,919 | 160 | 23,660 | 6,088 | 3,970 | 33,878 |

|        |     |        |       |       |        |
|--------|-----|--------|-------|-------|--------|
| 80,920 | 167 | 23,761 | 6,106 | 3,966 | 34,000 |
| 80,921 | 171 | 24,021 | 6,179 | 4,009 | 34,380 |
| 80,922 | 167 | 24,040 | 6,188 | 4,011 | 34,406 |
| 80,923 | 163 | 23,931 | 6,142 | 3,987 | 34,223 |
| 80,924 | 158 | 23,757 | 6,091 | 3,947 | 33,953 |
| 80,925 | 159 | 24,038 | 6,136 | 3,971 | 34,304 |
| 80,926 | 149 | 24,094 | 6,144 | 3,985 | 34,372 |
| 80,927 | 150 | 23,996 | 6,158 | 3,965 | 34,269 |
| 80,928 | 148 | 23,796 | 6,103 | 3,957 | 34,004 |
| 80,929 | 145 | 23,747 | 6,064 | 3,928 | 33,884 |
| 80,930 | 148 | 23,609 | 6,075 | 3,937 | 33,769 |
| 80,931 | 148 | 23,331 | 6,030 | 3,907 | 33,416 |
| 80,932 | 144 | 23,113 | 6,024 | 3,902 | 33,183 |
| 80,933 | 144 | 23,131 | 6,031 | 3,913 | 33,219 |
| 80,934 | 143 | 23,036 | 6,020 | 3,897 | 33,096 |
| 80,935 | 143 | 22,953 | 6,043 | 3,887 | 33,026 |
| 80,936 | 139 | 23,126 | 6,109 | 3,946 | 33,320 |
| 80,937 | 134 | 22,881 | 6,065 | 3,937 | 33,017 |
| 80,938 | 129 | 22,962 | 6,113 | 3,974 | 33,178 |
| 80,939 | 132 | 22,897 | 6,104 | 3,961 | 33,094 |
| 80,940 | 126 | 22,787 | 6,094 | 3,935 | 32,942 |
| 80,941 | 130 | 23,441 | 6,306 | 4,059 | 33,936 |
| 80,942 | 127 | 23,331 | 6,337 | 4,062 | 33,857 |
| 80,943 | 130 | 23,197 | 6,318 | 4,017 | 33,662 |
| 80,944 | 129 | 23,066 | 6,272 | 3,972 | 33,439 |
| 80,945 | 137 | 23,130 | 6,274 | 3,953 | 33,494 |
| 80,946 | 138 | 23,160 | 6,268 | 3,958 | 33,524 |
| 80,947 | 137 | 23,453 | 6,314 | 3,950 | 33,854 |
| 80,948 | 128 | 23,478 | 6,275 | 3,943 | 33,824 |
| 80,949 | 124 | 22,887 | 6,138 | 3,846 | 32,995 |
| 80,950 | 140 | 22,633 | 6,146 | 3,851 | 32,770 |
| 80,951 | 149 | 22,929 | 6,217 | 3,884 | 33,179 |

|        |     |        |       |       |        |
|--------|-----|--------|-------|-------|--------|
| 80,952 | 163 | 22,627 | 6,136 | 3,837 | 32,763 |
| 80,953 | 164 | 22,371 | 6,129 | 3,823 | 32,487 |
| 80,954 | 169 | 22,801 | 6,269 | 3,899 | 33,138 |
| 80,955 | 175 | 22,875 | 6,300 | 3,905 | 33,255 |
| 80,956 | 178 | 22,801 | 6,306 | 3,920 | 33,205 |
| 80,957 | 175 | 22,830 | 6,334 | 3,947 | 33,286 |
| 80,958 | 175 | 22,958 | 6,355 | 3,972 | 33,460 |
| 80,959 | 181 | 23,006 | 6,346 | 3,966 | 33,499 |
| 80,960 | 185 | 23,188 | 6,390 | 3,991 | 33,754 |
| 80,961 | 184 | 23,224 | 6,408 | 3,993 | 33,809 |
| 80,962 | 184 | 23,260 | 6,451 | 4,013 | 33,908 |
| 80,963 | 185 | 23,530 | 6,541 | 4,058 | 34,314 |
| 80,964 | 173 | 23,897 | 6,655 | 4,111 | 34,836 |
| 80,965 | 175 | 23,937 | 6,684 | 4,154 | 34,950 |
| 80,966 | 177 | 23,850 | 6,687 | 4,143 | 34,857 |
| 80,967 | 177 | 23,859 | 6,706 | 4,160 | 34,902 |
| 80,968 | 181 | 24,058 | 6,777 | 4,230 | 35,246 |
| 80,969 | 183 | 24,042 | 6,772 | 4,238 | 35,235 |
| 80,970 | 185 | 24,307 | 6,839 | 4,294 | 35,625 |
| 80,971 | 178 | 24,044 | 6,781 | 4,271 | 35,274 |
| 80,972 | 175 | 24,301 | 6,851 | 4,325 | 35,652 |
| 80,973 | 175 | 24,194 | 6,892 | 4,331 | 35,592 |
| 80,974 | 177 | 24,020 | 6,872 | 4,331 | 35,400 |
| 80,975 | 177 | 23,984 | 6,892 | 4,355 | 35,408 |
| 80,976 | 177 | 23,917 | 6,863 | 4,363 | 35,320 |
| 80,977 | 177 | 23,975 | 6,889 | 4,360 | 35,401 |
| 80,978 | 177 | 24,081 | 6,920 | 4,342 | 35,520 |
| 80,979 | 176 | 23,993 | 6,896 | 4,310 | 35,375 |
| 80,980 | 174 | 23,832 | 6,824 | 4,255 | 35,085 |
| 80,981 | 174 | 23,940 | 6,841 | 4,265 | 35,220 |
| 80,982 | 177 | 24,056 | 6,887 | 4,296 | 35,416 |
| 80,983 | 178 | 24,026 | 6,894 | 4,273 | 35,371 |

|        |     |        |       |       |        |
|--------|-----|--------|-------|-------|--------|
| 80,984 | 182 | 24,220 | 6,954 | 4,280 | 35,636 |
| 80,985 | 182 | 24,040 | 6,948 | 4,268 | 35,438 |
| 80,986 | 182 | 23,981 | 6,951 | 4,262 | 35,376 |
| 80,987 | 182 | 23,952 | 6,989 | 4,293 | 35,416 |
| 80,988 | 180 | 23,705 | 6,951 | 4,256 | 35,092 |
| 80,989 | 180 | 23,422 | 6,910 | 4,203 | 34,715 |
| 80,990 | 189 | 24,056 | 7,054 | 4,311 | 35,610 |
| 80,991 | 192 | 23,930 | 7,005 | 4,296 | 35,423 |
| 80,992 | 187 | 23,803 | 6,946 | 4,266 | 35,202 |
| 80,993 | 188 | 23,574 | 6,791 | 4,189 | 34,742 |
| 80,994 | 191 | 23,638 | 6,809 | 4,185 | 34,823 |
| 80,995 | 186 | 23,487 | 6,756 | 4,166 | 34,595 |
| 80,996 | 191 | 23,519 | 6,763 | 4,172 | 34,645 |
| 80,997 | 190 | 23,219 | 6,703 | 4,125 | 34,237 |
| 80,998 | 190 | 23,380 | 6,777 | 4,156 | 34,503 |
| 80,999 | 194 | 23,455 | 6,818 | 4,153 | 34,620 |
| 81,000 | 192 | 23,335 | 6,797 | 4,147 | 34,471 |
| 81,001 | 182 | 23,164 | 6,702 | 4,089 | 34,137 |
| 81,002 | 174 | 22,908 | 6,654 | 4,062 | 33,798 |
| 81,003 | 159 | 22,777 | 6,618 | 4,029 | 33,583 |
| 81,004 | 158 | 22,495 | 6,510 | 3,951 | 33,114 |
| 81,005 | 170 | 23,154 | 6,649 | 4,064 | 34,037 |
| 81,006 | 167 | 22,958 | 6,561 | 4,024 | 33,710 |
| 81,007 | 176 | 23,179 | 6,570 | 4,017 | 33,942 |
| 81,008 | 174 | 23,050 | 6,558 | 4,022 | 33,804 |
| 81,009 | 170 | 23,169 | 6,576 | 4,031 | 33,946 |
| 81,010 | 175 | 23,146 | 6,563 | 4,022 | 33,906 |
| 81,011 | 175 | 23,076 | 6,499 | 3,989 | 33,739 |
| 81,012 | 174 | 22,997 | 6,476 | 3,946 | 33,593 |
| 81,013 | 173 | 22,893 | 6,461 | 3,939 | 33,466 |
| 81,014 | 171 | 23,024 | 6,506 | 3,991 | 33,692 |
| 81,015 | 165 | 22,941 | 6,483 | 3,981 | 33,570 |

|        |     |        |       |       |        |
|--------|-----|--------|-------|-------|--------|
| 81,016 | 152 | 22,528 | 6,302 | 3,883 | 32,865 |
| 81,017 | 162 | 22,601 | 6,328 | 3,884 | 32,975 |
| 81,018 | 156 | 22,198 | 6,273 | 3,824 | 32,451 |
| 81,019 | 161 | 22,549 | 6,414 | 3,909 | 33,033 |
| 81,020 | 161 | 22,311 | 6,365 | 3,862 | 32,699 |
| 81,021 | 160 | 21,963 | 6,301 | 3,817 | 32,241 |
| 81,022 | 168 | 22,516 | 6,464 | 3,924 | 33,072 |
| 81,023 | 165 | 22,310 | 6,328 | 3,828 | 32,631 |
| 81,024 | 165 | 22,486 | 6,372 | 3,858 | 32,881 |
| 81,025 | 165 | 22,795 | 6,429 | 3,905 | 33,294 |
| 81,026 | 165 | 22,794 | 6,417 | 3,872 | 33,248 |
| 81,027 | 166 | 22,684 | 6,399 | 3,847 | 33,096 |
| 81,028 | 166 | 22,606 | 6,369 | 3,852 | 32,993 |
| 81,029 | 168 | 22,710 | 6,357 | 3,886 | 33,121 |
| 81,030 | 168 | 22,809 | 6,345 | 3,890 | 33,212 |
| 81,031 | 167 | 22,930 | 6,347 | 3,900 | 33,344 |
| 81,032 | 162 | 22,934 | 6,363 | 3,900 | 33,359 |
| 81,033 | 159 | 22,762 | 6,346 | 3,855 | 33,122 |
| 81,034 | 159 | 23,156 | 6,386 | 3,903 | 33,604 |
| 81,035 | 158 | 23,048 | 6,349 | 3,915 | 33,470 |
| 81,036 | 157 | 23,223 | 6,307 | 3,904 | 33,591 |
| 81,037 | 160 | 23,345 | 6,259 | 3,871 | 33,635 |
| 81,038 | 160 | 23,406 | 6,256 | 3,851 | 33,673 |
| 81,039 | 154 | 23,814 | 6,305 | 3,900 | 34,173 |
| 81,040 | 154 | 23,720 | 6,253 | 3,868 | 33,995 |
| 81,041 | 151 | 23,945 | 6,294 | 3,897 | 34,287 |
| 81,042 | 156 | 23,689 | 6,220 | 3,861 | 33,926 |
| 81,043 | 155 | 23,705 | 6,236 | 3,862 | 33,958 |
| 81,044 | 151 | 23,969 | 6,317 | 3,930 | 34,367 |
| 81,045 | 148 | 23,776 | 6,237 | 3,918 | 34,079 |
| 81,046 | 144 | 23,790 | 6,226 | 3,906 | 34,066 |
| 81,047 | 144 | 23,752 | 6,207 | 3,898 | 34,001 |

|        |     |        |       |       |        |
|--------|-----|--------|-------|-------|--------|
| 81,048 | 144 | 23,954 | 6,239 | 3,949 | 34,286 |
| 81,049 | 140 | 23,680 | 6,157 | 3,925 | 33,902 |
| 81,050 | 143 | 23,594 | 6,130 | 3,904 | 33,771 |
| 81,051 | 137 | 23,490 | 6,096 | 3,875 | 33,598 |
| 81,052 | 138 | 23,472 | 6,085 | 3,870 | 33,565 |
| 81,053 | 136 | 23,758 | 6,118 | 3,901 | 33,913 |
| 81,054 | 134 | 23,596 | 6,057 | 3,879 | 33,666 |
| 81,055 | 131 | 23,595 | 6,049 | 3,875 | 33,650 |
| 81,056 | 123 | 23,230 | 5,985 | 3,815 | 33,153 |
| 81,057 | 121 | 23,410 | 6,037 | 3,863 | 33,431 |
| 81,058 | 122 | 23,251 | 6,043 | 3,830 | 33,246 |
| 81,059 | 120 | 23,345 | 6,070 | 3,868 | 33,403 |
| 81,060 | 114 | 23,246 | 6,052 | 3,863 | 33,275 |
| 81,061 | 113 | 23,004 | 6,080 | 3,851 | 33,048 |
| 81,062 | 114 | 23,070 | 6,121 | 3,883 | 33,188 |
| 81,063 | 111 | 22,989 | 6,073 | 3,853 | 33,026 |
| 81,064 | 111 | 22,985 | 6,117 | 3,867 | 33,080 |
| 81,065 | 109 | 23,135 | 6,151 | 3,892 | 33,287 |
| 81,066 | 108 | 22,705 | 6,057 | 3,826 | 32,696 |
| 81,067 | 110 | 22,782 | 6,099 | 3,846 | 32,837 |
| 81,068 | 102 | 22,806 | 6,069 | 3,844 | 32,821 |
| 81,069 | 100 | 22,858 | 6,016 | 3,830 | 32,804 |
| 81,070 | 95  | 22,729 | 5,989 | 3,801 | 32,614 |
| 81,071 | 91  | 22,606 | 5,941 | 3,764 | 32,402 |
| 81,072 | 95  | 22,746 | 5,933 | 3,746 | 32,520 |
| 81,073 | 96  | 22,561 | 5,907 | 3,717 | 32,281 |
| 81,074 | 100 | 22,653 | 5,915 | 3,714 | 32,382 |
| 81,075 | 100 | 22,443 | 5,871 | 3,672 | 32,086 |
| 81,076 | 112 | 22,889 | 6,000 | 3,758 | 32,759 |
| 81,077 | 112 | 22,667 | 5,936 | 3,732 | 32,447 |
| 81,078 | 109 | 22,782 | 5,916 | 3,731 | 32,538 |
| 81,079 | 109 | 22,637 | 5,905 | 3,723 | 32,374 |

|        |     |        |       |       |        |
|--------|-----|--------|-------|-------|--------|
| 81,080 | 107 | 22,973 | 6,011 | 3,778 | 32,869 |
| 81,081 | 107 | 23,000 | 6,041 | 3,800 | 32,948 |
| 81,082 | 109 | 22,838 | 6,012 | 3,769 | 32,728 |
| 81,083 | 109 | 22,627 | 5,925 | 3,747 | 32,408 |
| 81,084 | 109 | 22,625 | 5,904 | 3,783 | 32,421 |
| 81,085 | 105 | 22,504 | 5,922 | 3,776 | 32,307 |
| 81,086 | 110 | 22,776 | 5,960 | 3,791 | 32,637 |
| 81,087 | 113 | 22,757 | 5,987 | 3,805 | 32,662 |
| 81,088 | 121 | 22,761 | 6,004 | 3,809 | 32,695 |
| 81,089 | 124 | 22,711 | 6,036 | 3,807 | 32,678 |
| 81,090 | 120 | 22,442 | 5,967 | 3,780 | 32,309 |
| 81,091 | 122 | 22,447 | 5,966 | 3,781 | 32,316 |
| 81,092 | 130 | 22,481 | 6,013 | 3,788 | 32,412 |
| 81,093 | 122 | 22,133 | 5,962 | 3,742 | 31,959 |
| 81,094 | 126 | 22,311 | 6,026 | 3,778 | 32,241 |
| 81,095 | 129 | 22,079 | 6,014 | 3,740 | 31,962 |
| 81,096 | 136 | 22,274 | 6,081 | 3,764 | 32,255 |
| 81,097 | 135 | 22,198 | 6,066 | 3,749 | 32,148 |
| 81,098 | 135 | 22,303 | 6,089 | 3,742 | 32,269 |
| 81,099 | 139 | 22,296 | 6,115 | 3,710 | 32,260 |
| 81,100 | 139 | 22,283 | 6,119 | 3,711 | 32,252 |
| 81,101 | 138 | 22,504 | 6,191 | 3,778 | 32,611 |
| 81,102 | 136 | 22,495 | 6,206 | 3,798 | 32,635 |
| 81,103 | 136 | 22,376 | 6,168 | 3,784 | 32,464 |
| 81,104 | 133 | 22,586 | 6,336 | 3,883 | 32,938 |
| 81,105 | 135 | 22,714 | 6,432 | 3,914 | 33,195 |
| 81,106 | 136 | 22,872 | 6,494 | 3,942 | 33,444 |
| 81,107 | 130 | 22,930 | 6,536 | 3,965 | 33,561 |
| 81,108 | 133 | 22,626 | 6,465 | 3,955 | 33,179 |
| 81,109 | 132 | 22,565 | 6,438 | 3,943 | 33,078 |
| 81,110 | 134 | 22,687 | 6,483 | 3,976 | 33,280 |
| 81,111 | 135 | 22,983 | 6,517 | 4,005 | 33,640 |

|        |     |        |       |       |        |
|--------|-----|--------|-------|-------|--------|
| 81,112 | 134 | 22,856 | 6,460 | 3,967 | 33,417 |
| 81,113 | 132 | 22,910 | 6,475 | 3,965 | 33,482 |
| 81,114 | 133 | 23,044 | 6,525 | 3,998 | 33,700 |
| 81,115 | 134 | 22,926 | 6,450 | 3,950 | 33,460 |
| 81,116 | 136 | 23,023 | 6,459 | 3,953 | 33,571 |
| 81,117 | 135 | 22,818 | 6,380 | 3,917 | 33,250 |
| 81,118 | 145 | 23,040 | 6,478 | 3,988 | 33,651 |
| 81,119 | 141 | 22,733 | 6,428 | 3,931 | 33,233 |
| 81,120 | 148 | 22,832 | 6,532 | 3,971 | 33,483 |
| 81,121 | 146 | 22,593 | 6,467 | 3,944 | 33,150 |
| 81,122 | 148 | 22,650 | 6,498 | 3,959 | 33,255 |
| 81,123 | 145 | 22,937 | 6,598 | 4,036 | 33,716 |
| 81,124 | 144 | 22,774 | 6,567 | 4,024 | 33,509 |
| 81,125 | 138 | 22,679 | 6,527 | 4,018 | 33,362 |
| 81,126 | 137 | 22,347 | 6,439 | 3,965 | 32,888 |
| 81,127 | 133 | 22,107 | 6,397 | 3,943 | 32,580 |
| 81,128 | 139 | 22,435 | 6,533 | 4,018 | 33,125 |
| 81,129 | 142 | 22,356 | 6,537 | 4,003 | 33,038 |
| 81,130 | 148 | 22,385 | 6,525 | 3,986 | 33,044 |
| 81,131 | 147 | 22,198 | 6,451 | 3,950 | 32,746 |
| 81,132 | 152 | 22,432 | 6,497 | 3,988 | 33,069 |
| 81,133 | 150 | 22,174 | 6,456 | 3,959 | 32,739 |
| 81,134 | 155 | 22,357 | 6,476 | 3,958 | 32,946 |
| 81,135 | 155 | 22,310 | 6,459 | 3,941 | 32,865 |
| 81,136 | 158 | 22,312 | 6,537 | 3,966 | 32,973 |
| 81,137 | 155 | 22,032 | 6,482 | 3,937 | 32,606 |
| 81,138 | 154 | 22,133 | 6,497 | 3,952 | 32,736 |
| 81,139 | 142 | 22,187 | 6,515 | 3,957 | 32,801 |
| 81,140 | 137 | 21,463 | 6,338 | 3,840 | 31,778 |
| 81,141 | 137 | 21,503 | 6,400 | 3,869 | 31,909 |
| 81,142 | 132 | 21,640 | 6,495 | 3,925 | 32,192 |
| 81,143 | 133 | 21,828 | 6,536 | 3,957 | 32,454 |



|        |     |        |       |       |        |
|--------|-----|--------|-------|-------|--------|
| 81,144 | 132 | 21,654 | 6,458 | 3,926 | 32,170 |
| 81,145 | 133 | 21,848 | 6,491 | 3,969 | 32,441 |
| 81,146 | 126 | 22,016 | 6,528 | 4,012 | 32,682 |
| 81,147 | 120 | 22,026 | 6,520 | 4,002 | 32,668 |
| 81,148 | 119 | 22,024 | 6,526 | 4,013 | 32,682 |
| 81,149 | 119 | 21,961 | 6,506 | 4,044 | 32,630 |
| 81,150 | 120 | 22,036 | 6,486 | 4,059 | 32,701 |
| 81,151 | 119 | 21,771 | 6,420 | 4,019 | 32,329 |
| 81,152 | 121 | 22,049 | 6,500 | 4,047 | 32,717 |
| 81,153 | 122 | 21,688 | 6,370 | 3,960 | 32,140 |
| 81,154 | 122 | 21,923 | 6,365 | 3,965 | 32,375 |
| 81,155 | 124 | 22,140 | 6,432 | 4,009 | 32,705 |
| 81,156 | 125 | 22,061 | 6,346 | 3,982 | 32,514 |
| 81,157 | 125 | 21,844 | 6,307 | 3,944 | 32,220 |
| 81,158 | 126 | 21,878 | 6,289 | 3,927 | 32,220 |
| 81,159 | 123 | 21,723 | 6,231 | 3,857 | 31,934 |
| 81,160 | 126 | 21,778 | 6,193 | 3,862 | 31,959 |
| 81,161 | 127 | 21,880 | 6,204 | 3,855 | 32,066 |
| 81,162 | 124 | 21,879 | 6,209 | 3,885 | 32,097 |
| 81,163 | 125 | 22,020 | 6,228 | 3,912 | 32,285 |
| 81,164 | 125 | 22,101 | 6,230 | 3,924 | 32,380 |
| 81,165 | 124 | 22,115 | 6,216 | 3,920 | 32,375 |
| 81,166 | 124 | 21,935 | 6,191 | 3,884 | 32,134 |
| 81,167 | 122 | 22,125 | 6,224 | 3,896 | 32,367 |
| 81,168 | 113 | 22,174 | 6,217 | 3,882 | 32,386 |
| 81,169 | 113 | 22,575 | 6,331 | 3,953 | 32,972 |
| 81,170 | 109 | 22,767 | 6,333 | 3,988 | 33,197 |
| 81,171 | 105 | 22,532 | 6,266 | 3,939 | 32,842 |
| 81,172 | 108 | 22,699 | 6,288 | 3,962 | 33,057 |
| 81,173 | 106 | 22,964 | 6,353 | 3,983 | 33,406 |
| 81,174 | 104 | 22,787 | 6,272 | 3,922 | 33,085 |
| 81,175 | 102 | 22,654 | 6,205 | 3,867 | 32,828 |

|        |     |        |       |       |        |
|--------|-----|--------|-------|-------|--------|
| 81,176 | 105 | 22,734 | 6,231 | 3,877 | 32,947 |
| 81,177 | 104 | 22,880 | 6,260 | 3,907 | 33,151 |
| 81,178 | 113 | 23,071 | 6,300 | 3,924 | 33,408 |
| 81,179 | 112 | 22,987 | 6,278 | 3,884 | 33,261 |
| 81,180 | 112 | 22,907 | 6,255 | 3,881 | 33,155 |
| 81,181 | 107 | 22,953 | 6,283 | 3,920 | 33,263 |
| 81,182 | 111 | 23,340 | 6,365 | 4,002 | 33,818 |
| 81,183 | 105 | 23,125 | 6,362 | 3,995 | 33,587 |
| 81,184 | 109 | 23,145 | 6,367 | 3,993 | 33,614 |
| 81,185 | 112 | 23,220 | 6,374 | 3,976 | 33,682 |
| 81,186 | 110 | 23,410 | 6,401 | 4,011 | 33,932 |
| 81,187 | 112 | 23,550 | 6,393 | 4,013 | 34,068 |
| 81,188 | 110 | 23,376 | 6,359 | 3,974 | 33,819 |
| 81,189 | 111 | 23,534 | 6,439 | 4,003 | 34,087 |
| 81,190 | 112 | 23,411 | 6,424 | 3,987 | 33,934 |
| 81,191 | 113 | 23,383 | 6,414 | 3,996 | 33,906 |
| 81,192 | 119 | 23,161 | 6,292 | 3,922 | 33,494 |
| 81,193 | 121 | 23,377 | 6,329 | 3,939 | 33,766 |
| 81,194 | 128 | 23,620 | 6,371 | 3,955 | 34,074 |
| 81,195 | 131 | 23,340 | 6,335 | 3,915 | 33,721 |
| 81,196 | 131 | 23,297 | 6,351 | 3,898 | 33,677 |
| 81,197 | 133 | 23,059 | 6,295 | 3,854 | 33,341 |
| 81,198 | 132 | 22,804 | 6,227 | 3,818 | 32,981 |
| 81,199 | 135 | 23,256 | 6,380 | 3,887 | 33,658 |
| 81,200 | 141 | 23,194 | 6,427 | 3,874 | 33,636 |
| 81,201 | 139 | 23,164 | 6,466 | 3,901 | 33,670 |
| 81,202 | 137 | 23,184 | 6,484 | 3,918 | 33,723 |
| 81,203 | 136 | 23,405 | 6,523 | 3,962 | 34,026 |
| 81,204 | 133 | 23,233 | 6,464 | 3,938 | 33,768 |
| 81,205 | 131 | 22,386 | 6,197 | 3,806 | 32,520 |
| 81,206 | 132 | 22,691 | 6,253 | 3,823 | 32,899 |
| 81,207 | 128 | 23,025 | 6,322 | 3,848 | 33,323 |

|        |     |        |       |       |        |
|--------|-----|--------|-------|-------|--------|
| 81,208 | 128 | 23,071 | 6,319 | 3,841 | 33,359 |
| 81,209 | 127 | 23,366 | 6,375 | 3,920 | 33,788 |
| 81,210 | 124 | 22,996 | 6,308 | 3,897 | 33,325 |
| 81,211 | 121 | 22,967 | 6,367 | 3,913 | 33,368 |
| 81,212 | 124 | 22,842 | 6,333 | 3,869 | 33,168 |
| 81,213 | 126 | 22,961 | 6,376 | 3,888 | 33,351 |
| 81,214 | 128 | 22,923 | 6,382 | 3,877 | 33,310 |
| 81,215 | 129 | 22,832 | 6,370 | 3,877 | 33,208 |
| 81,216 | 139 | 23,094 | 6,448 | 3,932 | 33,613 |
| 81,217 | 142 | 22,915 | 6,390 | 3,891 | 33,338 |
| 81,218 | 142 | 22,586 | 6,314 | 3,863 | 32,905 |
| 81,219 | 148 | 22,913 | 6,418 | 3,937 | 33,416 |
| 81,220 | 151 | 22,659 | 6,354 | 3,886 | 33,050 |
| 81,221 | 157 | 22,344 | 6,255 | 3,832 | 32,588 |
| 81,222 | 157 | 22,350 | 6,241 | 3,833 | 32,581 |
| 81,223 | 154 | 22,197 | 6,233 | 3,840 | 32,424 |
| 81,224 | 153 | 22,214 | 6,250 | 3,884 | 32,501 |
| 81,225 | 151 | 22,033 | 6,226 | 3,897 | 32,307 |
| 81,226 | 149 | 21,891 | 6,180 | 3,858 | 32,078 |
| 81,227 | 154 | 22,085 | 6,178 | 3,847 | 32,264 |
| 81,228 | 153 | 22,115 | 6,188 | 3,864 | 32,320 |
| 81,229 | 148 | 22,149 | 6,202 | 3,884 | 32,383 |
| 81,230 | 145 | 22,266 | 6,245 | 3,897 | 32,553 |
| 81,231 | 144 | 22,336 | 6,285 | 3,916 | 32,681 |
| 81,232 | 143 | 22,123 | 6,249 | 3,870 | 32,385 |
| 81,233 | 142 | 21,736 | 6,128 | 3,759 | 31,765 |
| 81,234 | 146 | 21,865 | 6,177 | 3,781 | 31,969 |
| 81,235 | 140 | 21,920 | 6,180 | 3,777 | 32,017 |
| 81,236 | 137 | 21,764 | 6,175 | 3,780 | 31,856 |
| 81,237 | 144 | 21,670 | 6,175 | 3,774 | 31,763 |
| 81,238 | 142 | 21,403 | 6,132 | 3,769 | 31,446 |
| 81,239 | 139 | 21,658 | 6,190 | 3,819 | 31,806 |

|        |     |        |       |       |        |
|--------|-----|--------|-------|-------|--------|
| 81,240 | 139 | 21,692 | 6,178 | 3,828 | 31,837 |
| 81,241 | 137 | 21,571 | 6,133 | 3,802 | 31,643 |
| 81,242 | 130 | 21,483 | 6,111 | 3,791 | 31,515 |
| 81,243 | 133 | 21,447 | 6,135 | 3,814 | 31,529 |
| 81,244 | 133 | 21,443 | 6,128 | 3,816 | 31,520 |
| 81,245 | 128 | 21,601 | 6,184 | 3,852 | 31,765 |
| 81,246 | 129 | 21,472 | 6,125 | 3,835 | 31,561 |
| 81,247 | 127 | 21,307 | 6,077 | 3,816 | 31,327 |
| 81,248 | 128 | 21,697 | 6,151 | 3,885 | 31,861 |
| 81,249 | 128 | 21,703 | 6,133 | 3,904 | 31,868 |
| 81,250 | 120 | 21,894 | 6,120 | 3,890 | 32,024 |
| 81,251 | 118 | 21,837 | 6,005 | 3,832 | 31,792 |
| 81,252 | 118 | 21,834 | 5,991 | 3,846 | 31,789 |
| 81,253 | 118 | 21,876 | 6,021 | 3,847 | 31,862 |
| 81,254 | 122 | 21,885 | 6,052 | 3,814 | 31,873 |
| 81,255 | 127 | 22,084 | 6,101 | 3,859 | 32,171 |
| 81,256 | 125 | 21,917 | 6,100 | 3,855 | 31,997 |
| 81,257 | 125 | 21,937 | 6,132 | 3,887 | 32,081 |
| 81,258 | 126 | 21,871 | 6,190 | 3,936 | 32,123 |
| 81,259 | 125 | 21,788 | 6,222 | 3,912 | 32,047 |
| 81,260 | 126 | 22,076 | 6,217 | 3,913 | 32,332 |
| 81,261 | 129 | 21,943 | 6,161 | 3,866 | 32,099 |
| 81,262 | 129 | 21,974 | 6,159 | 3,866 | 32,128 |
| 81,263 | 127 | 21,699 | 6,083 | 3,833 | 31,742 |
| 81,264 | 123 | 21,498 | 6,040 | 3,808 | 31,469 |
| 81,265 | 123 | 22,017 | 6,230 | 3,927 | 32,297 |
| 81,266 | 125 | 21,999 | 6,231 | 3,941 | 32,296 |
| 81,267 | 115 | 21,986 | 6,233 | 3,914 | 32,248 |
| 81,268 | 112 | 21,769 | 6,240 | 3,926 | 32,047 |
| 81,269 | 109 | 21,853 | 6,270 | 3,937 | 32,169 |
| 81,270 | 103 | 21,710 | 6,211 | 3,903 | 31,927 |
| 81,271 | 105 | 22,052 | 6,291 | 3,935 | 32,383 |

|        |     |        |       |       |        |
|--------|-----|--------|-------|-------|--------|
| 81,272 | 104 | 21,980 | 6,278 | 3,931 | 32,293 |
| 81,273 | 103 | 21,814 | 6,240 | 3,891 | 32,048 |
| 81,274 | 104 | 22,137 | 6,274 | 3,916 | 32,431 |
| 81,275 | 114 | 22,095 | 6,243 | 3,914 | 32,366 |
| 81,276 | 114 | 22,172 | 6,250 | 3,891 | 32,427 |
| 81,277 | 109 | 22,108 | 6,287 | 3,914 | 32,418 |
| 81,278 | 105 | 22,150 | 6,364 | 3,989 | 32,608 |
| 81,279 | 101 | 22,430 | 6,450 | 4,042 | 33,023 |
| 81,280 | 101 | 22,714 | 6,512 | 4,102 | 33,429 |
| 81,281 | 99  | 22,748 | 6,516 | 4,132 | 33,495 |
| 81,282 | 99  | 22,803 | 6,542 | 4,136 | 33,580 |
| 81,283 | 95  | 22,687 | 6,513 | 4,124 | 33,419 |
| 81,284 | 93  | 22,733 | 6,474 | 4,135 | 33,435 |
| 81,285 | 95  | 23,149 | 6,586 | 4,193 | 34,023 |
| 81,286 | 99  | 23,085 | 6,595 | 4,212 | 33,991 |
| 81,287 | 95  | 22,953 | 6,497 | 4,195 | 33,740 |
| 81,288 | 95  | 22,933 | 6,448 | 4,159 | 33,635 |
| 81,289 | 104 | 23,112 | 6,550 | 4,208 | 33,974 |
| 81,290 | 108 | 23,137 | 6,530 | 4,210 | 33,985 |
| 81,291 | 111 | 23,161 | 6,561 | 4,216 | 34,049 |
| 81,292 | 113 | 23,359 | 6,606 | 4,228 | 34,306 |
| 81,293 | 113 | 23,217 | 6,519 | 4,174 | 34,023 |
| 81,294 | 115 | 23,608 | 6,585 | 4,191 | 34,499 |
| 81,295 | 115 | 23,657 | 6,611 | 4,209 | 34,592 |
| 81,296 | 115 | 23,872 | 6,696 | 4,252 | 34,935 |
| 81,297 | 115 | 23,813 | 6,699 | 4,235 | 34,862 |
| 81,298 | 115 | 23,633 | 6,643 | 4,181 | 34,572 |
| 81,299 | 116 | 23,377 | 6,590 | 4,132 | 34,215 |
| 81,300 | 117 | 23,054 | 6,524 | 4,077 | 33,772 |
| 81,301 | 120 | 23,077 | 6,560 | 4,110 | 33,867 |
| 81,302 | 120 | 22,771 | 6,514 | 4,056 | 33,461 |
| 81,303 | 121 | 23,048 | 6,544 | 4,093 | 33,806 |

|        |     |        |       |       |        |
|--------|-----|--------|-------|-------|--------|
| 81,304 | 121 | 22,837 | 6,477 | 4,058 | 33,493 |
| 81,305 | 121 | 23,392 | 6,632 | 4,171 | 34,316 |
| 81,306 | 115 | 23,167 | 6,581 | 4,128 | 33,991 |
| 81,307 | 116 | 23,285 | 6,611 | 4,150 | 34,162 |
| 81,308 | 119 | 23,470 | 6,680 | 4,185 | 34,454 |
| 81,309 | 127 | 23,598 | 6,678 | 4,173 | 34,576 |
| 81,310 | 124 | 23,045 | 6,571 | 4,120 | 33,860 |
| 81,311 | 129 | 23,313 | 6,631 | 4,166 | 34,239 |
| 81,312 | 129 | 23,268 | 6,638 | 4,175 | 34,210 |
| 81,313 | 131 | 23,465 | 6,705 | 4,181 | 34,482 |
| 81,314 | 135 | 23,600 | 6,699 | 4,186 | 34,620 |
| 81,315 | 135 | 23,649 | 6,667 | 4,164 | 34,615 |
| 81,316 | 135 | 23,652 | 6,674 | 4,155 | 34,616 |
| 81,317 | 133 | 23,550 | 6,667 | 4,129 | 34,479 |
| 81,318 | 136 | 23,737 | 6,665 | 4,175 | 34,713 |
| 81,319 | 133 | 23,326 | 6,482 | 4,078 | 34,019 |
| 81,320 | 133 | 23,319 | 6,482 | 4,077 | 34,011 |
| 81,321 | 134 | 23,057 | 6,440 | 4,036 | 33,667 |
| 81,322 | 132 | 22,922 | 6,420 | 4,014 | 33,488 |
| 81,323 | 145 | 24,089 | 6,712 | 4,204 | 35,150 |
| 81,324 | 147 | 24,189 | 6,739 | 4,207 | 35,282 |
| 81,325 | 145 | 24,108 | 6,773 | 4,194 | 35,220 |
| 81,326 | 139 | 23,920 | 6,740 | 4,142 | 34,941 |
| 81,327 | 147 | 24,136 | 6,799 | 4,167 | 35,249 |
| 81,328 | 146 | 24,041 | 6,758 | 4,144 | 35,089 |
| 81,329 | 149 | 24,128 | 6,727 | 4,111 | 35,115 |
| 81,330 | 155 | 23,508 | 6,543 | 3,972 | 34,178 |
| 81,331 | 156 | 23,555 | 6,557 | 3,975 | 34,243 |
| 81,332 | 164 | 23,583 | 6,565 | 3,959 | 34,271 |
| 81,333 | 163 | 23,477 | 6,517 | 3,943 | 34,100 |
| 81,334 | 167 | 23,729 | 6,549 | 3,982 | 34,427 |
| 81,335 | 167 | 23,885 | 6,587 | 3,980 | 34,619 |

|        |     |        |       |       |        |
|--------|-----|--------|-------|-------|--------|
| 81,336 | 170 | 23,947 | 6,581 | 3,945 | 34,643 |
| 81,337 | 170 | 23,951 | 6,565 | 3,927 | 34,613 |
| 81,338 | 168 | 24,123 | 6,575 | 3,915 | 34,781 |
| 81,339 | 168 | 24,019 | 6,578 | 3,919 | 34,684 |
| 81,340 | 159 | 24,458 | 6,664 | 3,958 | 35,239 |
| 81,341 | 154 | 24,164 | 6,633 | 3,906 | 34,857 |
| 81,342 | 152 | 24,184 | 6,618 | 3,917 | 34,871 |
| 81,343 | 151 | 24,213 | 6,626 | 3,946 | 34,936 |
| 81,344 | 150 | 24,125 | 6,667 | 3,985 | 34,927 |
| 81,345 | 150 | 24,039 | 6,692 | 3,994 | 34,875 |
| 81,346 | 159 | 23,615 | 6,467 | 3,893 | 34,134 |
| 81,347 | 160 | 23,851 | 6,509 | 3,923 | 34,443 |
| 81,348 | 160 | 24,207 | 6,573 | 3,956 | 34,896 |
| 81,349 | 161 | 24,271 | 6,598 | 3,958 | 34,988 |
| 81,350 | 163 | 24,269 | 6,592 | 3,956 | 34,980 |
| 81,351 | 168 | 24,518 | 6,647 | 3,975 | 35,308 |
| 81,352 | 164 | 24,451 | 6,579 | 3,953 | 35,147 |
| 81,353 | 164 | 24,422 | 6,566 | 3,954 | 35,106 |
| 81,354 | 161 | 24,522 | 6,583 | 3,968 | 35,234 |
| 81,355 | 161 | 24,666 | 6,600 | 3,987 | 35,414 |
| 81,356 | 160 | 24,549 | 6,545 | 3,942 | 35,196 |
| 81,357 | 159 | 24,696 | 6,557 | 3,963 | 35,375 |
| 81,358 | 160 | 24,874 | 6,616 | 3,993 | 35,643 |
| 81,359 | 161 | 24,840 | 6,649 | 3,997 | 35,647 |
| 81,360 | 152 | 24,718 | 6,593 | 3,990 | 35,453 |
| 81,361 | 152 | 24,718 | 6,590 | 3,987 | 35,447 |
| 81,362 | 148 | 24,704 | 6,632 | 3,951 | 35,435 |
| 81,363 | 162 | 24,574 | 6,556 | 3,912 | 35,204 |
| 81,364 | 161 | 24,476 | 6,511 | 3,885 | 35,033 |
| 81,365 | 166 | 24,724 | 6,546 | 3,919 | 35,355 |
| 81,366 | 166 | 24,780 | 6,538 | 3,919 | 35,403 |
| 81,367 | 166 | 24,790 | 6,544 | 3,941 | 35,441 |

|        |     |        |       |       |        |
|--------|-----|--------|-------|-------|--------|
| 81,368 | 174 | 24,705 | 6,538 | 3,929 | 35,346 |
| 81,369 | 173 | 24,664 | 6,567 | 3,929 | 35,333 |
| 81,370 | 171 | 24,522 | 6,567 | 3,937 | 35,197 |
| 81,371 | 168 | 24,660 | 6,538 | 3,935 | 35,301 |
| 81,372 | 172 | 24,554 | 6,507 | 3,919 | 35,152 |
| 81,373 | 172 | 24,784 | 6,570 | 3,962 | 35,488 |
| 81,374 | 176 | 24,897 | 6,590 | 3,969 | 35,632 |
| 81,375 | 178 | 24,844 | 6,580 | 3,968 | 35,570 |
| 81,376 | 180 | 24,775 | 6,508 | 3,930 | 35,393 |
| 81,377 | 178 | 24,586 | 6,450 | 3,923 | 35,137 |
| 81,378 | 177 | 24,815 | 6,526 | 3,954 | 35,472 |
| 81,379 | 177 | 24,604 | 6,479 | 3,905 | 35,165 |
| 81,380 | 173 | 24,606 | 6,484 | 3,933 | 35,196 |
| 81,381 | 168 | 24,472 | 6,435 | 3,937 | 35,012 |
| 81,382 | 167 | 24,303 | 6,378 | 3,905 | 34,753 |
| 81,383 | 162 | 23,986 | 6,309 | 3,868 | 34,325 |
| 81,384 | 164 | 23,616 | 6,240 | 3,811 | 33,831 |
| 81,385 | 162 | 23,910 | 6,310 | 3,895 | 34,277 |
| 81,386 | 160 | 23,639 | 6,220 | 3,858 | 33,877 |
| 81,387 | 153 | 23,491 | 6,151 | 3,837 | 33,632 |
| 81,388 | 153 | 23,459 | 6,178 | 3,867 | 33,657 |
| 81,389 | 153 | 23,490 | 6,217 | 3,885 | 33,745 |
| 81,390 | 155 | 23,043 | 6,031 | 3,801 | 33,030 |
| 81,391 | 155 | 23,098 | 6,038 | 3,817 | 33,108 |
| 81,392 | 154 | 23,178 | 6,079 | 3,847 | 33,258 |
| 81,393 | 155 | 23,065 | 6,058 | 3,822 | 33,100 |
| 81,394 | 151 | 22,726 | 5,925 | 3,755 | 32,557 |
| 81,395 | 149 | 22,611 | 5,883 | 3,744 | 32,387 |
| 81,396 | 149 | 22,674 | 5,860 | 3,733 | 32,416 |
| 81,397 | 132 | 22,470 | 5,846 | 3,717 | 32,165 |
| 81,398 | 137 | 22,327 | 5,836 | 3,699 | 31,999 |
| 81,399 | 133 | 22,341 | 5,847 | 3,712 | 32,033 |



|        |     |        |       |       |        |
|--------|-----|--------|-------|-------|--------|
| 81,400 | 130 | 22,089 | 5,780 | 3,680 | 31,679 |
| 81,401 | 127 | 21,846 | 5,735 | 3,641 | 31,349 |
| 81,402 | 124 | 21,841 | 5,768 | 3,657 | 31,390 |
| 81,403 | 126 | 21,847 | 5,833 | 3,671 | 31,477 |
| 81,404 | 133 | 21,788 | 5,836 | 3,658 | 31,415 |
| 81,405 | 134 | 21,674 | 5,810 | 3,646 | 31,264 |
| 81,406 | 139 | 21,494 | 5,807 | 3,621 | 31,061 |
| 81,407 | 139 | 21,235 | 5,743 | 3,591 | 30,708 |
| 81,408 | 134 | 20,125 | 5,449 | 3,425 | 29,133 |
| 81,409 | 134 | 20,429 | 5,488 | 3,448 | 29,499 |
| 81,410 | 135 | 20,623 | 5,495 | 3,452 | 29,705 |
| 81,411 | 136 | 20,879 | 5,543 | 3,465 | 30,023 |
| 81,412 | 135 | 20,471 | 5,394 | 3,400 | 29,400 |
| 81,413 | 139 | 20,650 | 5,416 | 3,433 | 29,638 |
| 81,414 | 122 | 20,133 | 5,275 | 3,375 | 28,905 |
| 81,415 | 113 | 20,082 | 5,241 | 3,372 | 28,808 |
| 81,416 | 111 | 19,338 | 5,041 | 3,259 | 27,749 |
| 81,417 | 112 | 19,521 | 5,090 | 3,278 | 28,001 |
| 81,418 | 104 | 19,818 | 5,140 | 3,303 | 28,365 |
| 81,419 | 104 | 19,856 | 5,135 | 3,301 | 28,396 |
| 81,420 | 101 | 20,072 | 5,209 | 3,332 | 28,714 |
| 81,421 | 98  | 20,011 | 5,191 | 3,321 | 28,621 |
| 81,422 | 97  | 19,856 | 5,165 | 3,318 | 28,436 |
| 81,423 | 92  | 19,910 | 5,179 | 3,331 | 28,512 |
| 81,424 | 89  | 20,106 | 5,185 | 3,339 | 28,719 |
| 81,425 | 83  | 19,849 | 5,140 | 3,310 | 28,382 |
| 81,426 | 77  | 19,893 | 5,116 | 3,287 | 28,373 |
| 81,427 | 69  | 19,495 | 5,021 | 3,260 | 27,845 |
| 81,428 | 72  | 19,757 | 5,083 | 3,268 | 28,180 |
| 81,429 | 71  | 19,647 | 5,005 | 3,271 | 27,994 |
| 81,430 | 71  | 19,790 | 5,011 | 3,266 | 28,138 |
| 81,431 | 71  | 19,987 | 5,080 | 3,302 | 28,440 |

|        |     |        |       |       |        |
|--------|-----|--------|-------|-------|--------|
| 81,432 | 84  | 20,013 | 5,150 | 3,318 | 28,565 |
| 81,433 | 89  | 20,121 | 5,176 | 3,328 | 28,714 |
| 81,434 | 86  | 20,207 | 5,199 | 3,328 | 28,820 |
| 81,435 | 84  | 20,159 | 5,176 | 3,290 | 28,709 |
| 81,436 | 91  | 20,207 | 5,195 | 3,289 | 28,782 |
| 81,437 | 93  | 20,588 | 5,267 | 3,318 | 29,266 |
| 81,438 | 95  | 20,317 | 5,214 | 3,283 | 28,909 |
| 81,439 | 95  | 20,219 | 5,169 | 3,259 | 28,742 |
| 81,440 | 111 | 20,851 | 5,334 | 3,332 | 29,628 |
| 81,441 | 113 | 21,138 | 5,427 | 3,393 | 30,071 |
| 81,442 | 112 | 21,250 | 5,450 | 3,393 | 30,205 |
| 81,443 | 112 | 21,221 | 5,433 | 3,397 | 30,163 |
| 81,444 | 117 | 21,496 | 5,513 | 3,452 | 30,578 |
| 81,445 | 121 | 21,581 | 5,531 | 3,484 | 30,717 |
| 81,446 | 125 | 21,679 | 5,550 | 3,498 | 30,852 |
| 81,447 | 129 | 22,074 | 5,668 | 3,559 | 31,430 |
| 81,448 | 126 | 22,026 | 5,619 | 3,526 | 31,297 |
| 81,449 | 124 | 21,907 | 5,576 | 3,528 | 31,135 |
| 81,450 | 127 | 22,605 | 5,639 | 3,628 | 31,999 |
| 81,451 | 132 | 22,796 | 5,701 | 3,650 | 32,279 |
| 81,452 | 131 | 22,860 | 5,712 | 3,663 | 32,366 |
| 81,453 | 143 | 23,265 | 5,781 | 3,720 | 32,909 |
| 81,454 | 144 | 23,253 | 5,771 | 3,722 | 32,890 |
| 81,455 | 137 | 23,387 | 5,807 | 3,776 | 33,107 |
| 81,456 | 139 | 23,577 | 5,860 | 3,788 | 33,364 |
| 81,457 | 139 | 23,377 | 5,769 | 3,754 | 33,039 |
| 81,458 | 138 | 23,140 | 5,713 | 3,716 | 32,707 |
| 81,459 | 139 | 23,399 | 5,785 | 3,740 | 33,063 |
| 81,460 | 143 | 23,337 | 5,812 | 3,754 | 33,046 |
| 81,461 | 144 | 23,339 | 5,801 | 3,763 | 33,047 |
| 81,462 | 145 | 23,352 | 5,790 | 3,766 | 33,053 |
| 81,463 | 143 | 23,140 | 5,741 | 3,746 | 32,770 |

|        |     |        |       |       |        |
|--------|-----|--------|-------|-------|--------|
| 81,464 | 144 | 23,581 | 5,930 | 3,860 | 33,515 |
| 81,465 | 154 | 23,515 | 5,979 | 3,825 | 33,473 |
| 81,466 | 160 | 23,567 | 6,006 | 3,845 | 33,578 |
| 81,467 | 163 | 23,779 | 6,083 | 3,882 | 33,907 |
| 81,468 | 164 | 23,830 | 6,146 | 3,905 | 34,045 |
| 81,469 | 165 | 23,926 | 6,216 | 3,951 | 34,258 |
| 81,470 | 166 | 24,079 | 6,232 | 3,984 | 34,461 |
| 81,471 | 166 | 24,250 | 6,302 | 4,015 | 34,733 |
| 81,472 | 173 | 24,327 | 6,339 | 4,031 | 34,870 |
| 81,473 | 172 | 24,231 | 6,306 | 4,019 | 34,728 |
| 81,474 | 173 | 24,342 | 6,350 | 4,024 | 34,889 |
| 81,475 | 175 | 24,527 | 6,456 | 4,067 | 35,225 |
| 81,476 | 175 | 24,428 | 6,410 | 4,034 | 35,047 |
| 81,477 | 186 | 24,945 | 6,620 | 4,148 | 35,899 |
| 81,478 | 195 | 25,199 | 6,699 | 4,203 | 36,296 |
| 81,479 | 196 | 25,312 | 6,743 | 4,230 | 36,481 |
| 81,480 | 195 | 25,477 | 6,907 | 4,279 | 36,858 |
| 81,481 | 199 | 25,484 | 6,926 | 4,259 | 36,868 |
| 81,482 | 208 | 25,772 | 7,036 | 4,291 | 37,307 |
| 81,483 | 201 | 26,107 | 7,065 | 4,344 | 37,717 |
| 81,484 | 196 | 25,881 | 7,015 | 4,300 | 37,392 |
| 81,485 | 199 | 26,249 | 7,128 | 4,342 | 37,918 |
| 81,486 | 200 | 26,236 | 7,100 | 4,342 | 37,878 |
| 81,487 | 198 | 26,668 | 7,248 | 4,436 | 38,550 |
| 81,488 | 196 | 26,632 | 7,240 | 4,432 | 38,500 |
| 81,489 | 192 | 26,900 | 7,311 | 4,496 | 38,899 |
| 81,490 | 186 | 26,679 | 7,271 | 4,463 | 38,599 |
| 81,491 | 192 | 26,948 | 7,407 | 4,502 | 39,049 |
| 81,492 | 191 | 26,877 | 7,375 | 4,471 | 38,914 |
| 81,493 | 192 | 26,922 | 7,372 | 4,459 | 38,945 |
| 81,494 | 197 | 27,136 | 7,423 | 4,477 | 39,233 |
| 81,495 | 194 | 27,058 | 7,396 | 4,436 | 39,084 |

|        |     |        |       |       |        |
|--------|-----|--------|-------|-------|--------|
| 81,496 | 189 | 27,035 | 7,402 | 4,431 | 39,057 |
| 81,497 | 187 | 26,950 | 7,396 | 4,415 | 38,948 |
| 81,498 | 185 | 26,837 | 7,393 | 4,394 | 38,809 |
| 81,499 | 195 | 26,555 | 7,422 | 4,346 | 38,518 |
| 81,500 | 196 | 26,639 | 7,483 | 4,351 | 38,669 |
| 81,501 | 197 | 26,195 | 7,388 | 4,267 | 38,047 |
| 81,502 | 197 | 26,394 | 7,414 | 4,293 | 38,298 |
| 81,503 | 184 | 26,410 | 7,428 | 4,283 | 38,305 |
| 81,504 | 180 | 26,396 | 7,455 | 4,284 | 38,315 |
| 81,505 | 182 | 26,235 | 7,447 | 4,257 | 38,121 |
| 81,506 | 182 | 26,231 | 7,421 | 4,240 | 38,074 |
| 81,507 | 186 | 26,191 | 7,422 | 4,245 | 38,044 |
| 81,508 | 187 | 26,161 | 7,396 | 4,244 | 37,988 |
| 81,509 | 184 | 25,977 | 7,392 | 4,248 | 37,801 |
| 81,510 | 185 | 25,966 | 7,390 | 4,246 | 37,787 |
| 81,511 | 181 | 25,885 | 7,364 | 4,243 | 37,673 |
| 81,512 | 183 | 25,834 | 7,395 | 4,222 | 37,634 |
| 81,513 | 182 | 25,712 | 7,373 | 4,230 | 37,497 |
| 81,514 | 183 | 25,438 | 7,263 | 4,172 | 37,056 |
| 81,515 | 185 | 25,708 | 7,299 | 4,197 | 37,389 |
| 81,516 | 181 | 25,821 | 7,331 | 4,237 | 37,570 |
| 81,517 | 175 | 25,576 | 7,296 | 4,202 | 37,249 |
| 81,518 | 172 | 25,604 | 7,308 | 4,202 | 37,286 |
| 81,519 | 171 | 25,535 | 7,219 | 4,159 | 37,084 |
| 81,520 | 170 | 25,640 | 7,204 | 4,126 | 37,140 |
| 81,521 | 178 | 25,660 | 7,173 | 4,095 | 37,106 |
| 81,522 | 178 | 25,650 | 7,168 | 4,088 | 37,084 |
| 81,523 | 174 | 25,600 | 7,149 | 4,078 | 37,001 |
| 81,524 | 179 | 25,705 | 7,151 | 4,089 | 37,124 |
| 81,525 | 178 | 25,470 | 7,106 | 4,066 | 36,820 |
| 81,526 | 179 | 25,591 | 7,107 | 4,082 | 36,959 |
| 81,527 | 170 | 25,314 | 7,048 | 4,069 | 36,601 |

|        |     |        |       |       |        |
|--------|-----|--------|-------|-------|--------|
| 81,528 | 171 | 25,354 | 7,025 | 4,061 | 36,611 |
| 81,529 | 164 | 25,286 | 6,969 | 4,044 | 36,463 |
| 81,530 | 165 | 25,296 | 6,926 | 4,032 | 36,419 |
| 81,531 | 175 | 25,622 | 6,946 | 4,089 | 36,832 |
| 81,532 | 173 | 25,474 | 6,869 | 4,079 | 36,595 |
| 81,533 | 184 | 25,681 | 6,863 | 4,091 | 36,819 |
| 81,534 | 178 | 25,237 | 6,820 | 4,053 | 36,288 |
| 81,535 | 183 | 25,608 | 6,948 | 4,140 | 36,879 |
| 81,536 | 181 | 25,222 | 6,868 | 4,125 | 36,396 |
| 81,537 | 187 | 25,157 | 6,894 | 4,146 | 36,384 |
| 81,538 | 187 | 25,215 | 6,899 | 4,157 | 36,458 |
| 81,539 | 186 | 24,936 | 6,827 | 4,123 | 36,072 |
| 81,540 | 180 | 24,870 | 6,848 | 4,122 | 36,020 |
| 81,541 | 178 | 24,700 | 6,810 | 4,137 | 35,825 |
| 81,542 | 169 | 24,779 | 6,780 | 4,140 | 35,868 |
| 81,543 | 169 | 24,334 | 6,688 | 4,091 | 35,282 |
| 81,544 | 171 | 24,332 | 6,706 | 4,109 | 35,318 |
| 81,545 | 167 | 24,035 | 6,627 | 4,063 | 34,892 |
| 81,546 | 164 | 23,901 | 6,610 | 4,063 | 34,738 |
| 81,547 | 169 | 24,053 | 6,662 | 4,075 | 34,959 |
| 81,548 | 166 | 23,739 | 6,593 | 4,035 | 34,533 |
| 81,549 | 173 | 23,788 | 6,602 | 4,058 | 34,621 |
| 81,550 | 161 | 23,374 | 6,417 | 3,978 | 33,930 |
| 81,551 | 169 | 23,458 | 6,414 | 3,977 | 34,018 |
| 81,552 | 163 | 23,055 | 6,360 | 3,943 | 33,521 |
| 81,553 | 158 | 23,027 | 6,391 | 3,970 | 33,546 |
| 81,554 | 162 | 23,061 | 6,353 | 3,959 | 33,535 |
| 81,555 | 164 | 22,764 | 6,254 | 3,928 | 33,110 |
| 81,556 | 164 | 22,968 | 6,292 | 3,950 | 33,374 |
| 81,557 | 164 | 23,009 | 6,293 | 3,938 | 33,404 |
| 81,558 | 157 | 23,084 | 6,279 | 3,957 | 33,477 |
| 81,559 | 157 | 23,258 | 6,323 | 3,971 | 33,709 |

|        |     |        |       |       |        |
|--------|-----|--------|-------|-------|--------|
| 81,560 | 161 | 23,253 | 6,294 | 3,944 | 33,652 |
| 81,561 | 161 | 23,353 | 6,298 | 3,945 | 33,757 |
| 81,562 | 161 | 23,691 | 6,341 | 3,981 | 34,174 |
| 81,563 | 156 | 23,473 | 6,270 | 3,937 | 33,836 |
| 81,564 | 158 | 23,779 | 6,332 | 3,980 | 34,249 |
| 81,565 | 158 | 23,797 | 6,328 | 3,984 | 34,267 |
| 81,566 | 154 | 23,725 | 6,329 | 4,000 | 34,208 |
| 81,567 | 148 | 23,495 | 6,256 | 3,946 | 33,845 |
| 81,568 | 147 | 23,326 | 6,200 | 3,920 | 33,593 |
| 81,569 | 147 | 23,761 | 6,283 | 4,001 | 34,192 |
| 81,570 | 148 | 23,471 | 6,215 | 3,965 | 33,799 |
| 81,571 | 151 | 23,683 | 6,239 | 4,005 | 34,078 |
| 81,572 | 145 | 23,342 | 6,170 | 3,963 | 33,620 |
| 81,573 | 145 | 23,152 | 6,100 | 3,937 | 33,334 |
| 81,574 | 143 | 23,469 | 6,145 | 3,961 | 33,718 |
| 81,575 | 142 | 23,080 | 6,045 | 3,895 | 33,162 |
| 81,576 | 140 | 23,009 | 5,973 | 3,851 | 32,973 |
| 81,577 | 138 | 21,763 | 5,673 | 3,656 | 31,230 |
| 81,578 | 139 | 22,036 | 5,709 | 3,665 | 31,549 |
| 81,579 | 136 | 22,247 | 5,754 | 3,695 | 31,832 |
| 81,580 | 144 | 22,428 | 5,796 | 3,714 | 32,082 |
| 81,581 | 146 | 21,975 | 5,705 | 3,668 | 31,494 |
| 81,582 | 140 | 21,620 | 5,612 | 3,613 | 30,985 |
| 81,583 | 142 | 21,288 | 5,554 | 3,550 | 30,534 |
| 81,584 | 122 | 20,857 | 5,451 | 3,490 | 29,920 |
| 81,585 | 126 | 21,277 | 5,505 | 3,515 | 30,423 |
| 81,586 | 120 | 21,148 | 5,433 | 3,447 | 30,148 |
| 81,587 | 122 | 21,105 | 5,404 | 3,396 | 30,027 |
| 81,588 | 116 | 21,077 | 5,342 | 3,340 | 29,875 |
| 81,589 | 110 | 20,853 | 5,263 | 3,291 | 29,517 |
| 81,590 | 109 | 20,813 | 5,187 | 3,245 | 29,354 |
| 81,591 | 109 | 20,698 | 5,142 | 3,203 | 29,152 |

|        |     |        |       |       |        |
|--------|-----|--------|-------|-------|--------|
| 81,592 | 109 | 20,744 | 5,163 | 3,228 | 29,244 |
| 81,593 | 111 | 20,804 | 5,177 | 3,244 | 29,336 |
| 81,594 | 109 | 20,688 | 5,106 | 3,212 | 29,115 |
| 81,595 | 108 | 20,777 | 5,079 | 3,206 | 29,170 |
| 81,596 | 108 | 20,857 | 5,038 | 3,189 | 29,192 |
| 81,597 | 104 | 20,826 | 5,037 | 3,173 | 29,140 |
| 81,598 | 112 | 21,014 | 5,088 | 3,187 | 29,401 |
| 81,599 | 114 | 21,087 | 5,088 | 3,198 | 29,487 |
| 81,600 | 112 | 21,107 | 5,083 | 3,171 | 29,473 |
| 81,601 | 104 | 21,125 | 5,077 | 3,184 | 29,490 |
| 81,602 | 106 | 21,271 | 5,091 | 3,192 | 29,660 |
| 81,603 | 106 | 21,419 | 5,078 | 3,186 | 29,789 |
| 81,604 | 110 | 21,172 | 4,998 | 3,140 | 29,420 |
| 81,605 | 112 | 21,378 | 5,048 | 3,178 | 29,716 |
| 81,606 | 108 | 21,637 | 5,123 | 3,214 | 30,082 |
| 81,607 | 108 | 21,581 | 5,126 | 3,220 | 30,035 |
| 81,608 | 107 | 21,534 | 5,185 | 3,247 | 30,073 |
| 81,609 | 110 | 21,371 | 5,245 | 3,252 | 29,978 |
| 81,610 | 110 | 21,289 | 5,223 | 3,260 | 29,882 |
| 81,611 | 108 | 21,298 | 5,238 | 3,254 | 29,898 |
| 81,612 | 119 | 21,207 | 5,251 | 3,252 | 29,829 |
| 81,613 | 119 | 21,113 | 5,240 | 3,249 | 29,721 |
| 81,614 | 118 | 21,333 | 5,314 | 3,269 | 30,034 |
| 81,615 | 117 | 21,404 | 5,339 | 3,278 | 30,138 |
| 81,616 | 116 | 21,439 | 5,369 | 3,288 | 30,212 |
| 81,617 | 122 | 21,489 | 5,369 | 3,271 | 30,251 |
| 81,618 | 124 | 21,721 | 5,426 | 3,283 | 30,554 |
| 81,619 | 126 | 21,701 | 5,387 | 3,262 | 30,476 |
| 81,620 | 129 | 21,768 | 5,380 | 3,245 | 30,522 |
| 81,621 | 129 | 22,149 | 5,451 | 3,278 | 31,007 |
| 81,622 | 128 | 22,103 | 5,452 | 3,257 | 30,940 |
| 81,623 | 128 | 22,061 | 5,447 | 3,253 | 30,889 |

|        |     |        |       |       |        |
|--------|-----|--------|-------|-------|--------|
| 81,624 | 125 | 22,046 | 5,537 | 3,308 | 31,016 |
| 81,625 | 128 | 22,021 | 5,555 | 3,317 | 31,021 |
| 81,626 | 131 | 21,845 | 5,531 | 3,284 | 30,791 |
| 81,627 | 134 | 21,902 | 5,574 | 3,332 | 30,942 |
| 81,628 | 132 | 22,085 | 5,600 | 3,355 | 31,172 |
| 81,629 | 131 | 21,944 | 5,585 | 3,355 | 31,015 |
| 81,630 | 126 | 22,028 | 5,629 | 3,347 | 31,130 |
| 81,631 | 129 | 22,055 | 5,621 | 3,350 | 31,155 |
| 81,632 | 128 | 22,097 | 5,643 | 3,351 | 31,219 |
| 81,633 | 124 | 22,003 | 5,641 | 3,324 | 31,092 |
| 81,634 | 121 | 21,860 | 5,644 | 3,338 | 30,963 |
| 81,635 | 124 | 22,139 | 5,712 | 3,379 | 31,354 |
| 81,636 | 126 | 22,177 | 5,685 | 3,363 | 31,351 |
| 81,637 | 130 | 22,169 | 5,689 | 3,373 | 31,361 |
| 81,638 | 128 | 22,194 | 5,704 | 3,405 | 31,431 |
| 81,639 | 131 | 22,134 | 5,705 | 3,435 | 31,405 |
| 81,640 | 131 | 21,883 | 5,663 | 3,424 | 31,101 |
| 81,641 | 139 | 21,961 | 5,705 | 3,442 | 31,247 |
| 81,642 | 142 | 22,102 | 5,699 | 3,442 | 31,385 |
| 81,643 | 144 | 22,573 | 5,835 | 3,506 | 32,058 |
| 81,644 | 150 | 22,700 | 5,885 | 3,518 | 32,253 |
| 81,645 | 149 | 22,475 | 5,870 | 3,497 | 31,991 |
| 81,646 | 149 | 22,471 | 5,852 | 3,491 | 31,963 |
| 81,647 | 149 | 22,141 | 5,803 | 3,469 | 31,562 |
| 81,648 | 155 | 22,551 | 5,916 | 3,558 | 32,180 |
| 81,649 | 145 | 22,312 | 5,837 | 3,528 | 31,822 |
| 81,650 | 140 | 22,237 | 5,820 | 3,506 | 31,703 |
| 81,651 | 143 | 22,446 | 5,868 | 3,533 | 31,990 |
| 81,652 | 146 | 22,553 | 5,900 | 3,544 | 32,143 |
| 81,653 | 141 | 22,300 | 5,845 | 3,534 | 31,820 |
| 81,654 | 148 | 22,583 | 5,893 | 3,575 | 32,199 |
| 81,655 | 145 | 22,853 | 5,946 | 3,631 | 32,575 |



|        |     |        |       |       |        |
|--------|-----|--------|-------|-------|--------|
| 81,656 | 144 | 22,993 | 5,975 | 3,646 | 32,758 |
| 81,657 | 144 | 23,080 | 5,997 | 3,656 | 32,877 |
| 81,658 | 139 | 22,737 | 5,833 | 3,523 | 32,232 |
| 81,659 | 139 | 23,110 | 5,883 | 3,559 | 32,691 |
| 81,660 | 142 | 23,416 | 5,923 | 3,598 | 33,079 |
| 81,661 | 145 | 23,437 | 5,910 | 3,600 | 33,092 |
| 81,662 | 142 | 23,156 | 5,823 | 3,572 | 32,693 |
| 81,663 | 131 | 23,508 | 5,868 | 3,614 | 33,121 |
| 81,664 | 135 | 23,749 | 5,880 | 3,638 | 33,402 |
| 81,665 | 136 | 23,523 | 5,805 | 3,588 | 33,052 |
| 81,666 | 136 | 23,530 | 5,809 | 3,572 | 33,047 |
| 81,667 | 131 | 23,480 | 5,776 | 3,569 | 32,956 |
| 81,668 | 135 | 23,652 | 5,853 | 3,593 | 33,233 |
| 81,669 | 134 | 23,607 | 5,840 | 3,583 | 33,164 |
| 81,670 | 133 | 23,332 | 5,768 | 3,542 | 32,775 |
| 81,671 | 130 | 23,029 | 5,729 | 3,526 | 32,414 |
| 81,672 | 129 | 23,261 | 5,798 | 3,606 | 32,794 |
| 81,673 | 127 | 22,897 | 5,713 | 3,559 | 32,296 |
| 81,674 | 129 | 23,036 | 5,692 | 3,542 | 32,399 |
| 81,675 | 126 | 23,101 | 5,668 | 3,546 | 32,441 |
| 81,676 | 125 | 23,369 | 5,704 | 3,567 | 32,765 |
| 81,677 | 121 | 23,241 | 5,659 | 3,540 | 32,561 |
| 81,678 | 121 | 23,510 | 5,733 | 3,565 | 32,929 |
| 81,679 | 126 | 23,428 | 5,743 | 3,555 | 32,852 |
| 81,680 | 125 | 23,438 | 5,745 | 3,544 | 32,852 |
| 81,681 | 123 | 23,419 | 5,750 | 3,563 | 32,855 |
| 81,682 | 118 | 23,181 | 5,701 | 3,529 | 32,529 |
| 81,683 | 119 | 23,169 | 5,694 | 3,545 | 32,527 |
| 81,684 | 126 | 23,447 | 5,757 | 3,594 | 32,924 |
| 81,685 | 127 | 23,574 | 5,757 | 3,607 | 33,065 |
| 81,686 | 127 | 23,512 | 5,757 | 3,604 | 33,000 |
| 81,687 | 122 | 23,115 | 5,685 | 3,580 | 32,502 |

|        |     |        |       |       |        |
|--------|-----|--------|-------|-------|--------|
| 81,688 | 121 | 22,875 | 5,685 | 3,587 | 32,268 |
| 81,689 | 123 | 23,044 | 5,714 | 3,622 | 32,503 |
| 81,690 | 124 | 22,738 | 5,639 | 3,556 | 32,057 |
| 81,691 | 124 | 22,428 | 5,573 | 3,514 | 31,639 |
| 81,692 | 115 | 22,383 | 5,592 | 3,539 | 31,629 |
| 81,693 | 113 | 22,301 | 5,588 | 3,519 | 31,521 |
| 81,694 | 113 | 22,471 | 5,614 | 3,542 | 31,740 |
| 81,695 | 110 | 22,409 | 5,592 | 3,554 | 31,665 |
| 81,696 | 112 | 22,356 | 5,587 | 3,567 | 31,622 |
| 81,697 | 111 | 22,291 | 5,552 | 3,542 | 31,496 |
| 81,698 | 118 | 22,408 | 5,638 | 3,557 | 31,721 |
| 81,699 | 112 | 22,432 | 5,646 | 3,541 | 31,731 |
| 81,700 | 117 | 22,556 | 5,680 | 3,564 | 31,917 |
| 81,701 | 116 | 22,542 | 5,665 | 3,549 | 31,872 |
| 81,702 | 114 | 22,715 | 5,724 | 3,600 | 32,153 |
| 81,703 | 118 | 22,198 | 5,615 | 3,529 | 31,460 |
| 81,704 | 120 | 22,280 | 5,612 | 3,513 | 31,525 |
| 81,705 | 116 | 22,491 | 5,661 | 3,534 | 31,802 |
| 81,706 | 118 | 22,517 | 5,674 | 3,529 | 31,838 |
| 81,707 | 134 | 22,441 | 5,641 | 3,529 | 31,745 |
| 81,708 | 134 | 22,186 | 5,552 | 3,479 | 31,351 |
| 81,709 | 148 | 22,359 | 5,584 | 3,502 | 31,593 |
| 81,710 | 148 | 22,310 | 5,584 | 3,506 | 31,548 |
| 81,711 | 150 | 22,527 | 5,628 | 3,540 | 31,845 |
| 81,712 | 151 | 22,499 | 5,615 | 3,526 | 31,791 |
| 81,713 | 154 | 22,622 | 5,667 | 3,550 | 31,993 |
| 81,714 | 155 | 22,523 | 5,678 | 3,554 | 31,910 |
| 81,715 | 160 | 22,459 | 5,696 | 3,556 | 31,871 |
| 81,716 | 161 | 22,333 | 5,645 | 3,550 | 31,689 |
| 81,717 | 166 | 22,322 | 5,621 | 3,529 | 31,638 |
| 81,718 | 165 | 22,121 | 5,587 | 3,505 | 31,378 |
| 81,719 | 159 | 22,233 | 5,636 | 3,542 | 31,570 |

|        |     |        |       |       |        |
|--------|-----|--------|-------|-------|--------|
| 81,720 | 161 | 22,178 | 5,648 | 3,545 | 31,532 |
| 81,721 | 160 | 21,903 | 5,604 | 3,488 | 31,155 |
| 81,722 | 167 | 21,837 | 5,574 | 3,475 | 31,053 |
| 81,723 | 168 | 21,825 | 5,583 | 3,462 | 31,038 |
| 81,724 | 168 | 21,738 | 5,553 | 3,448 | 30,907 |
| 81,725 | 169 | 21,792 | 5,558 | 3,450 | 30,969 |
| 81,726 | 185 | 21,691 | 5,526 | 3,429 | 30,831 |
| 81,727 | 185 | 21,599 | 5,498 | 3,427 | 30,709 |
| 81,728 | 193 | 21,532 | 5,462 | 3,407 | 30,594 |
| 81,729 | 194 | 21,478 | 5,436 | 3,387 | 30,495 |
| 81,730 | 191 | 21,715 | 5,495 | 3,429 | 30,830 |
| 81,731 | 194 | 21,713 | 5,498 | 3,427 | 30,832 |
| 81,732 | 194 | 21,833 | 5,473 | 3,404 | 30,904 |
| 81,733 | 192 | 22,000 | 5,509 | 3,406 | 31,107 |
| 81,734 | 191 | 22,124 | 5,506 | 3,413 | 31,234 |
| 81,735 | 186 | 22,090 | 5,466 | 3,378 | 31,120 |
| 81,736 | 185 | 22,187 | 5,442 | 3,374 | 31,188 |
| 81,737 | 180 | 22,124 | 5,399 | 3,351 | 31,054 |
| 81,738 | 181 | 22,327 | 5,394 | 3,360 | 31,262 |
| 81,739 | 181 | 22,425 | 5,399 | 3,348 | 31,353 |
| 81,740 | 177 | 22,117 | 5,280 | 3,278 | 30,852 |
| 81,741 | 177 | 22,194 | 5,260 | 3,267 | 30,898 |
| 81,742 | 179 | 22,220 | 5,257 | 3,246 | 30,902 |
| 81,743 | 180 | 22,242 | 5,217 | 3,244 | 30,883 |
| 81,744 | 185 | 22,196 | 5,195 | 3,235 | 30,811 |
| 81,745 | 185 | 22,031 | 5,156 | 3,226 | 30,598 |
| 81,746 | 181 | 22,196 | 5,196 | 3,264 | 30,837 |
| 81,747 | 181 | 22,184 | 5,178 | 3,257 | 30,800 |
| 81,748 | 180 | 21,912 | 5,094 | 3,223 | 30,409 |
| 81,749 | 177 | 22,010 | 5,093 | 3,234 | 30,514 |
| 81,750 | 180 | 22,066 | 5,072 | 3,229 | 30,547 |
| 81,751 | 180 | 21,920 | 5,047 | 3,211 | 30,358 |

|        |     |        |       |       |        |
|--------|-----|--------|-------|-------|--------|
| 81,752 | 183 | 21,758 | 5,056 | 3,244 | 30,241 |
| 81,753 | 183 | 21,744 | 5,050 | 3,238 | 30,215 |
| 81,754 | 176 | 21,571 | 5,053 | 3,225 | 30,025 |
| 81,755 | 172 | 21,307 | 5,039 | 3,237 | 29,755 |
| 81,756 | 178 | 21,089 | 4,991 | 3,212 | 29,470 |
| 81,757 | 178 | 21,118 | 4,984 | 3,202 | 29,482 |
| 81,758 | 162 | 21,156 | 4,993 | 3,204 | 29,515 |
| 81,759 | 159 | 21,067 | 4,978 | 3,206 | 29,410 |
| 81,760 | 151 | 20,898 | 4,945 | 3,160 | 29,154 |
| 81,761 | 146 | 20,727 | 4,934 | 3,146 | 28,953 |
| 81,762 | 147 | 20,923 | 4,951 | 3,158 | 29,179 |
| 81,763 | 145 | 20,822 | 4,929 | 3,112 | 29,008 |
| 81,764 | 138 | 20,374 | 4,792 | 3,052 | 28,356 |
| 81,765 | 139 | 20,665 | 4,838 | 3,088 | 28,730 |
| 81,766 | 139 | 20,953 | 4,884 | 3,139 | 29,115 |
| 81,767 | 134 | 20,996 | 4,879 | 3,141 | 29,150 |
| 81,768 | 138 | 20,990 | 4,832 | 3,118 | 29,078 |
| 81,769 | 143 | 21,300 | 4,885 | 3,150 | 29,478 |
| 81,770 | 154 | 21,469 | 4,869 | 3,170 | 29,662 |
| 81,771 | 152 | 21,404 | 4,868 | 3,187 | 29,611 |
| 81,772 | 152 | 21,432 | 4,872 | 3,199 | 29,655 |
| 81,773 | 150 | 21,796 | 4,949 | 3,242 | 30,137 |
| 81,774 | 147 | 21,614 | 4,908 | 3,226 | 29,895 |
| 81,775 | 147 | 21,726 | 4,939 | 3,255 | 30,067 |
| 81,776 | 147 | 21,660 | 4,949 | 3,264 | 30,020 |
| 81,777 | 129 | 21,651 | 4,958 | 3,254 | 29,992 |
| 81,778 | 132 | 21,959 | 4,983 | 3,292 | 30,366 |
| 81,779 | 129 | 21,962 | 4,986 | 3,294 | 30,371 |
| 81,780 | 134 | 21,943 | 4,983 | 3,300 | 30,360 |
| 81,781 | 131 | 21,639 | 4,927 | 3,260 | 29,957 |
| 81,782 | 130 | 21,662 | 4,918 | 3,269 | 29,979 |
| 81,783 | 132 | 21,897 | 4,965 | 3,321 | 30,315 |

|        |     |        |       |       |        |
|--------|-----|--------|-------|-------|--------|
| 81,784 | 132 | 21,711 | 4,921 | 3,305 | 30,069 |
| 81,785 | 137 | 21,374 | 4,865 | 3,261 | 29,637 |
| 81,786 | 137 | 21,129 | 4,843 | 3,247 | 29,356 |
| 81,787 | 139 | 21,456 | 4,988 | 3,332 | 29,915 |
| 81,788 | 142 | 21,727 | 5,041 | 3,361 | 30,271 |
| 81,789 | 141 | 21,833 | 5,039 | 3,348 | 30,361 |
| 81,790 | 138 | 21,628 | 4,992 | 3,313 | 30,071 |
| 81,791 | 138 | 21,893 | 5,049 | 3,350 | 30,430 |
| 81,792 | 140 | 21,894 | 5,051 | 3,354 | 30,439 |
| 81,793 | 137 | 21,800 | 5,015 | 3,333 | 30,285 |
| 81,794 | 133 | 21,724 | 4,984 | 3,321 | 30,162 |
| 81,795 | 132 | 21,765 | 5,004 | 3,349 | 30,250 |
| 81,796 | 132 | 21,689 | 4,977 | 3,326 | 30,124 |
| 81,797 | 134 | 21,243 | 4,912 | 3,254 | 29,543 |
| 81,798 | 133 | 21,300 | 4,888 | 3,267 | 29,588 |
| 81,799 | 136 | 21,440 | 4,864 | 3,259 | 29,699 |
| 81,800 | 130 | 21,525 | 4,841 | 3,247 | 29,743 |
| 81,801 | 133 | 21,564 | 4,812 | 3,241 | 29,750 |
| 81,802 | 141 | 21,879 | 4,869 | 3,281 | 30,170 |
| 81,803 | 139 | 21,934 | 4,855 | 3,252 | 30,180 |
| 81,804 | 145 | 22,265 | 4,925 | 3,302 | 30,637 |
| 81,805 | 149 | 21,930 | 4,823 | 3,232 | 30,134 |
| 81,806 | 154 | 22,178 | 4,886 | 3,263 | 30,481 |
| 81,807 | 145 | 22,104 | 4,885 | 3,238 | 30,372 |
| 81,808 | 147 | 22,015 | 4,889 | 3,240 | 30,291 |
| 81,809 | 148 | 22,251 | 4,930 | 3,257 | 30,586 |
| 81,810 | 146 | 21,814 | 4,834 | 3,206 | 30,000 |
| 81,811 | 146 | 21,810 | 4,820 | 3,200 | 29,976 |
| 81,812 | 143 | 21,763 | 4,821 | 3,193 | 29,920 |
| 81,813 | 143 | 21,663 | 4,812 | 3,198 | 29,816 |
| 81,814 | 144 | 21,434 | 4,808 | 3,206 | 29,592 |
| 81,815 | 147 | 21,296 | 4,783 | 3,198 | 29,424 |

|        |     |        |       |       |        |
|--------|-----|--------|-------|-------|--------|
| 81,816 | 152 | 21,477 | 4,823 | 3,201 | 29,653 |
| 81,817 | 149 | 21,175 | 4,781 | 3,153 | 29,258 |
| 81,818 | 148 | 21,136 | 4,789 | 3,155 | 29,228 |
| 81,819 | 147 | 21,191 | 4,852 | 3,162 | 29,352 |
| 81,820 | 150 | 21,559 | 4,904 | 3,205 | 29,818 |
| 81,821 | 138 | 21,258 | 4,844 | 3,147 | 29,387 |
| 81,822 | 141 | 21,126 | 4,759 | 3,106 | 29,132 |
| 81,823 | 144 | 21,276 | 4,829 | 3,158 | 29,407 |
| 81,824 | 144 | 21,179 | 4,832 | 3,163 | 29,318 |
| 81,825 | 148 | 21,355 | 4,881 | 3,194 | 29,578 |
| 81,826 | 145 | 21,244 | 4,822 | 3,176 | 29,387 |
| 81,827 | 145 | 21,222 | 4,853 | 3,177 | 29,397 |
| 81,828 | 146 | 20,937 | 4,807 | 3,147 | 29,037 |
| 81,829 | 144 | 20,698 | 4,780 | 3,121 | 28,743 |
| 81,830 | 150 | 20,852 | 4,853 | 3,182 | 29,037 |
| 81,831 | 145 | 20,750 | 4,833 | 3,171 | 28,899 |
| 81,832 | 145 | 20,813 | 4,840 | 3,162 | 28,960 |
| 81,833 | 145 | 20,741 | 4,835 | 3,154 | 28,875 |
| 81,834 | 148 | 20,827 | 4,881 | 3,179 | 29,035 |
| 81,835 | 141 | 20,752 | 4,806 | 3,139 | 28,838 |
| 81,836 | 144 | 20,836 | 4,793 | 3,120 | 28,893 |
| 81,837 | 145 | 20,718 | 4,760 | 3,108 | 28,731 |
| 81,838 | 143 | 21,249 | 4,840 | 3,133 | 29,365 |
| 81,839 | 140 | 20,989 | 4,781 | 3,110 | 29,020 |
| 81,840 | 142 | 21,241 | 4,825 | 3,132 | 29,340 |
| 81,841 | 141 | 20,626 | 4,708 | 3,047 | 28,522 |
| 81,842 | 147 | 20,849 | 4,737 | 3,072 | 28,805 |
| 81,843 | 145 | 21,090 | 4,807 | 3,101 | 29,143 |
| 81,844 | 144 | 21,097 | 4,805 | 3,097 | 29,143 |
| 81,845 | 143 | 21,036 | 4,798 | 3,083 | 29,060 |
| 81,846 | 147 | 21,249 | 4,841 | 3,124 | 29,361 |
| 81,847 | 144 | 20,995 | 4,770 | 3,057 | 28,966 |

|        |     |        |       |       |        |
|--------|-----|--------|-------|-------|--------|
| 81,848 | 146 | 21,046 | 4,771 | 3,067 | 29,030 |
| 81,849 | 144 | 20,744 | 4,720 | 3,020 | 28,628 |
| 81,850 | 142 | 20,721 | 4,799 | 3,031 | 28,693 |
| 81,851 | 145 | 21,038 | 4,889 | 3,092 | 29,164 |
| 81,852 | 140 | 20,968 | 4,881 | 3,109 | 29,098 |
| 81,853 | 132 | 21,042 | 4,903 | 3,106 | 29,183 |
| 81,854 | 134 | 21,115 | 4,907 | 3,115 | 29,271 |
| 81,855 | 128 | 20,964 | 4,855 | 3,093 | 29,040 |
| 81,856 | 126 | 21,149 | 4,901 | 3,148 | 29,324 |
| 81,857 | 122 | 20,976 | 4,863 | 3,114 | 29,075 |
| 81,858 | 122 | 21,236 | 4,894 | 3,131 | 29,383 |
| 81,859 | 132 | 21,760 | 4,951 | 3,188 | 30,031 |
| 81,860 | 128 | 21,840 | 4,997 | 3,200 | 30,165 |
| 81,861 | 129 | 21,963 | 5,046 | 3,228 | 30,366 |
| 81,862 | 134 | 22,306 | 5,136 | 3,265 | 30,841 |
| 81,863 | 134 | 22,463 | 5,121 | 3,277 | 30,995 |
| 81,864 | 131 | 22,477 | 5,131 | 3,279 | 31,018 |
| 81,865 | 126 | 22,354 | 5,107 | 3,249 | 30,836 |
| 81,866 | 125 | 22,973 | 5,299 | 3,358 | 31,755 |
| 81,867 | 121 | 22,660 | 5,268 | 3,343 | 31,392 |
| 81,868 | 122 | 22,798 | 5,278 | 3,355 | 31,553 |
| 81,869 | 124 | 22,932 | 5,311 | 3,387 | 31,754 |
| 81,870 | 114 | 22,830 | 5,325 | 3,394 | 31,663 |
| 81,871 | 116 | 22,784 | 5,325 | 3,415 | 31,640 |
| 81,872 | 111 | 22,125 | 5,215 | 3,333 | 30,784 |
| 81,873 | 112 | 22,347 | 5,303 | 3,343 | 31,105 |
| 81,874 | 110 | 22,558 | 5,350 | 3,356 | 31,374 |
| 81,875 | 107 | 22,620 | 5,336 | 3,366 | 31,429 |
| 81,876 | 114 | 22,431 | 5,316 | 3,311 | 31,172 |
| 81,877 | 125 | 22,587 | 5,382 | 3,350 | 31,444 |
| 81,878 | 121 | 22,892 | 5,451 | 3,393 | 31,857 |
| 81,879 | 123 | 22,306 | 5,321 | 3,315 | 31,065 |

|        |     |        |       |       |        |
|--------|-----|--------|-------|-------|--------|
| 81,880 | 123 | 22,585 | 5,384 | 3,336 | 31,428 |
| 81,881 | 118 | 22,551 | 5,394 | 3,328 | 31,391 |
| 81,882 | 128 | 22,665 | 5,461 | 3,367 | 31,621 |
| 81,883 | 129 | 22,432 | 5,409 | 3,328 | 31,298 |
| 81,884 | 132 | 22,462 | 5,417 | 3,332 | 31,343 |
| 81,885 | 137 | 22,462 | 5,425 | 3,320 | 31,344 |
| 81,886 | 137 | 22,211 | 5,394 | 3,294 | 31,036 |
| 81,887 | 140 | 22,179 | 5,456 | 3,301 | 31,076 |
| 81,888 | 139 | 21,854 | 5,411 | 3,271 | 30,675 |
| 81,889 | 140 | 22,460 | 5,613 | 3,396 | 31,609 |
| 81,890 | 140 | 22,154 | 5,554 | 3,376 | 31,224 |
| 81,891 | 140 | 22,329 | 5,671 | 3,422 | 31,562 |
| 81,892 | 140 | 22,358 | 5,673 | 3,417 | 31,588 |
| 81,893 | 141 | 22,349 | 5,695 | 3,445 | 31,630 |
| 81,894 | 142 | 22,251 | 5,699 | 3,445 | 31,537 |
| 81,895 | 146 | 22,172 | 5,702 | 3,428 | 31,448 |
| 81,896 | 146 | 22,284 | 5,723 | 3,428 | 31,581 |
| 81,897 | 143 | 22,521 | 5,808 | 3,421 | 31,893 |
| 81,898 | 141 | 22,195 | 5,722 | 3,381 | 31,439 |
| 81,899 | 141 | 22,130 | 5,698 | 3,388 | 31,357 |
| 81,900 | 142 | 22,296 | 5,742 | 3,420 | 31,600 |
| 81,901 | 144 | 22,317 | 5,736 | 3,411 | 31,608 |
| 81,902 | 143 | 22,187 | 5,744 | 3,408 | 31,482 |
| 81,903 | 152 | 22,283 | 5,773 | 3,406 | 31,614 |
| 81,904 | 159 | 22,205 | 5,762 | 3,429 | 31,555 |
| 81,905 | 158 | 21,642 | 5,669 | 3,379 | 30,848 |
| 81,906 | 159 | 21,534 | 5,667 | 3,359 | 30,719 |
| 81,907 | 159 | 21,611 | 5,679 | 3,379 | 30,828 |
| 81,908 | 157 | 21,351 | 5,645 | 3,354 | 30,507 |
| 81,909 | 157 | 21,346 | 5,664 | 3,364 | 30,531 |
| 81,910 | 151 | 21,495 | 5,732 | 3,393 | 30,771 |
| 81,911 | 151 | 21,325 | 5,669 | 3,387 | 30,532 |



|        |     |        |       |       |        |
|--------|-----|--------|-------|-------|--------|
| 81,912 | 153 | 21,586 | 5,711 | 3,407 | 30,857 |
| 81,913 | 159 | 21,649 | 5,708 | 3,416 | 30,932 |
| 81,914 | 156 | 21,506 | 5,695 | 3,385 | 30,742 |
| 81,915 | 158 | 21,315 | 5,614 | 3,347 | 30,434 |
| 81,916 | 160 | 21,425 | 5,639 | 3,333 | 30,557 |
| 81,917 | 163 | 21,663 | 5,654 | 3,382 | 30,862 |
| 81,918 | 173 | 21,557 | 5,566 | 3,342 | 30,638 |
| 81,919 | 174 | 21,555 | 5,563 | 3,331 | 30,623 |
| 81,920 | 177 | 21,506 | 5,527 | 3,326 | 30,536 |
| 81,921 | 177 | 21,528 | 5,540 | 3,343 | 30,588 |
| 81,922 | 170 | 21,549 | 5,518 | 3,292 | 30,529 |
| 81,923 | 170 | 21,658 | 5,520 | 3,316 | 30,664 |
| 81,924 | 169 | 21,698 | 5,511 | 3,317 | 30,695 |
| 81,925 | 168 | 21,739 | 5,534 | 3,304 | 30,745 |
| 81,926 | 168 | 21,630 | 5,516 | 3,302 | 30,616 |
| 81,927 | 163 | 21,807 | 5,553 | 3,372 | 30,895 |
| 81,928 | 153 | 21,955 | 5,556 | 3,365 | 31,029 |
| 81,929 | 154 | 21,987 | 5,562 | 3,376 | 31,079 |
| 81,930 | 150 | 21,860 | 5,523 | 3,344 | 30,877 |
| 81,931 | 156 | 22,099 | 5,570 | 3,380 | 31,205 |
| 81,932 | 156 | 22,235 | 5,585 | 3,388 | 31,364 |
| 81,933 | 149 | 22,104 | 5,527 | 3,349 | 31,129 |
| 81,934 | 151 | 22,425 | 5,593 | 3,406 | 31,575 |
| 81,935 | 143 | 22,240 | 5,547 | 3,380 | 31,310 |
| 81,936 | 138 | 22,431 | 5,547 | 3,415 | 31,531 |
| 81,937 | 140 | 22,445 | 5,509 | 3,415 | 31,509 |
| 81,938 | 143 | 22,448 | 5,470 | 3,400 | 31,461 |
| 81,939 | 142 | 22,434 | 5,499 | 3,398 | 31,473 |
| 81,940 | 148 | 22,531 | 5,495 | 3,397 | 31,571 |
| 81,941 | 151 | 22,065 | 5,367 | 3,330 | 30,913 |
| 81,942 | 161 | 22,287 | 5,379 | 3,323 | 31,150 |
| 81,943 | 159 | 22,431 | 5,412 | 3,352 | 31,354 |

|        |     |        |       |       |        |
|--------|-----|--------|-------|-------|--------|
| 81,944 | 158 | 22,160 | 5,376 | 3,311 | 31,005 |
| 81,945 | 158 | 22,097 | 5,348 | 3,321 | 30,924 |
| 81,946 | 156 | 22,219 | 5,376 | 3,375 | 31,126 |
| 81,947 | 158 | 21,931 | 5,316 | 3,368 | 30,773 |
| 81,948 | 158 | 21,832 | 5,290 | 3,363 | 30,643 |
| 81,949 | 156 | 21,784 | 5,315 | 3,387 | 30,642 |
| 81,950 | 155 | 21,915 | 5,345 | 3,400 | 30,815 |
| 81,951 | 156 | 22,028 | 5,347 | 3,403 | 30,934 |
| 81,952 | 154 | 21,801 | 5,325 | 3,394 | 30,674 |
| 81,953 | 155 | 21,799 | 5,308 | 3,404 | 30,666 |
| 81,954 | 146 | 21,934 | 5,356 | 3,405 | 30,841 |
| 81,955 | 137 | 21,804 | 5,337 | 3,368 | 30,646 |
| 81,956 | 138 | 22,054 | 5,373 | 3,362 | 30,927 |
| 81,957 | 141 | 22,184 | 5,366 | 3,349 | 31,040 |
| 81,958 | 141 | 22,500 | 5,430 | 3,380 | 31,451 |
| 81,959 | 144 | 21,930 | 5,324 | 3,326 | 30,724 |
| 81,960 | 146 | 22,119 | 5,379 | 3,359 | 31,003 |
| 81,961 | 141 | 22,098 | 5,397 | 3,355 | 30,991 |
| 81,962 | 140 | 21,945 | 5,390 | 3,341 | 30,816 |
| 81,963 | 145 | 22,078 | 5,414 | 3,362 | 30,999 |
| 81,964 | 137 | 21,930 | 5,452 | 3,372 | 30,891 |
| 81,965 | 136 | 21,583 | 5,435 | 3,311 | 30,465 |
| 81,966 | 135 | 21,528 | 5,399 | 3,307 | 30,369 |
| 81,967 | 136 | 21,681 | 5,445 | 3,334 | 30,596 |
| 81,968 | 135 | 21,617 | 5,440 | 3,320 | 30,512 |
| 81,969 | 125 | 21,232 | 5,404 | 3,296 | 30,057 |
| 81,970 | 124 | 21,424 | 5,481 | 3,343 | 30,372 |
| 81,971 | 128 | 21,321 | 5,492 | 3,342 | 30,283 |
| 81,972 | 134 | 21,297 | 5,463 | 3,346 | 30,240 |
| 81,973 | 142 | 21,080 | 5,415 | 3,316 | 29,953 |
| 81,974 | 142 | 20,883 | 5,383 | 3,286 | 29,694 |
| 81,975 | 142 | 21,124 | 5,430 | 3,323 | 30,019 |

|        |     |        |       |       |        |
|--------|-----|--------|-------|-------|--------|
| 81,976 | 148 | 21,323 | 5,453 | 3,309 | 30,233 |
| 81,977 | 148 | 21,313 | 5,442 | 3,311 | 30,214 |
| 81,978 | 148 | 21,097 | 5,358 | 3,243 | 29,846 |
| 81,979 | 148 | 21,019 | 5,350 | 3,255 | 29,772 |
| 81,980 | 143 | 20,643 | 5,271 | 3,199 | 29,256 |
| 81,981 | 139 | 20,392 | 5,242 | 3,171 | 28,944 |
| 81,982 | 145 | 21,233 | 5,407 | 3,302 | 30,087 |
| 81,983 | 144 | 21,293 | 5,434 | 3,321 | 30,192 |
| 81,984 | 150 | 21,397 | 5,466 | 3,325 | 30,338 |
| 81,985 | 152 | 21,257 | 5,441 | 3,301 | 30,151 |
| 81,986 | 153 | 21,273 | 5,446 | 3,302 | 30,174 |
| 81,987 | 148 | 20,599 | 5,330 | 3,209 | 29,286 |
| 81,988 | 148 | 20,801 | 5,375 | 3,236 | 29,560 |
| 81,989 | 145 | 21,026 | 5,457 | 3,279 | 29,907 |
| 81,990 | 145 | 21,010 | 5,464 | 3,273 | 29,892 |
| 81,991 | 142 | 21,266 | 5,514 | 3,326 | 30,248 |
| 81,992 | 138 | 21,555 | 5,566 | 3,359 | 30,618 |
| 81,993 | 133 | 21,617 | 5,606 | 3,362 | 30,718 |
| 81,994 | 128 | 21,523 | 5,544 | 3,334 | 30,529 |
| 81,995 | 128 | 21,695 | 5,560 | 3,302 | 30,685 |
| 81,996 | 131 | 21,799 | 5,619 | 3,341 | 30,890 |
| 81,997 | 129 | 21,850 | 5,632 | 3,325 | 30,936 |
| 81,998 | 127 | 21,745 | 5,591 | 3,311 | 30,774 |
| 81,999 | 138 | 21,784 | 5,667 | 3,343 | 30,932 |
| 82,000 | 140 | 21,695 | 5,637 | 3,313 | 30,785 |
| 82,001 | 140 | 21,714 | 5,640 | 3,291 | 30,785 |
| 82,002 | 142 | 21,876 | 5,668 | 3,295 | 30,981 |
| 82,003 | 148 | 21,797 | 5,633 | 3,287 | 30,865 |
| 82,004 | 145 | 21,531 | 5,580 | 3,268 | 30,524 |
| 82,005 | 148 | 21,615 | 5,581 | 3,288 | 30,632 |
| 82,006 | 149 | 21,430 | 5,536 | 3,251 | 30,366 |
| 82,007 | 150 | 21,525 | 5,524 | 3,306 | 30,505 |

|        |     |        |       |       |        |
|--------|-----|--------|-------|-------|--------|
| 82,008 | 145 | 21,417 | 5,541 | 3,318 | 30,421 |
| 82,009 | 148 | 21,425 | 5,543 | 3,312 | 30,428 |
| 82,010 | 144 | 21,381 | 5,526 | 3,324 | 30,375 |
| 82,011 | 144 | 21,467 | 5,517 | 3,316 | 30,444 |
| 82,012 | 145 | 21,348 | 5,470 | 3,278 | 30,241 |
| 82,013 | 150 | 21,233 | 5,483 | 3,271 | 30,137 |
| 82,014 | 144 | 21,104 | 5,479 | 3,277 | 30,004 |
| 82,015 | 145 | 21,273 | 5,482 | 3,285 | 30,185 |
| 82,016 | 147 | 21,307 | 5,447 | 3,291 | 30,192 |
| 82,017 | 150 | 21,336 | 5,447 | 3,283 | 30,216 |
| 82,018 | 150 | 21,063 | 5,365 | 3,230 | 29,808 |
| 82,019 | 152 | 20,999 | 5,387 | 3,236 | 29,774 |
| 82,020 | 151 | 21,070 | 5,369 | 3,256 | 29,846 |
| 82,021 | 143 | 20,788 | 5,293 | 3,206 | 29,430 |
| 82,022 | 145 | 20,804 | 5,282 | 3,199 | 29,430 |
| 82,023 | 138 | 20,591 | 5,246 | 3,149 | 29,124 |
| 82,024 | 132 | 20,830 | 5,307 | 3,200 | 29,469 |
| 82,025 | 133 | 20,971 | 5,310 | 3,223 | 29,637 |
| 82,026 | 136 | 20,929 | 5,291 | 3,206 | 29,562 |
| 82,027 | 135 | 20,663 | 5,250 | 3,169 | 29,217 |
| 82,028 | 143 | 20,875 | 5,283 | 3,211 | 29,512 |
| 82,029 | 138 | 20,717 | 5,239 | 3,211 | 29,305 |
| 82,030 | 142 | 20,716 | 5,250 | 3,216 | 29,324 |
| 82,031 | 143 | 20,610 | 5,209 | 3,187 | 29,149 |
| 82,032 | 144 | 20,638 | 5,191 | 3,180 | 29,153 |
| 82,033 | 142 | 20,410 | 5,150 | 3,156 | 28,858 |
| 82,034 | 142 | 20,747 | 5,226 | 3,207 | 29,322 |
| 82,035 | 148 | 20,926 | 5,241 | 3,249 | 29,564 |
| 82,036 | 146 | 20,687 | 5,142 | 3,214 | 29,189 |
| 82,037 | 144 | 20,714 | 5,132 | 3,210 | 29,200 |
| 82,038 | 145 | 20,790 | 5,128 | 3,206 | 29,269 |
| 82,039 | 149 | 20,778 | 5,134 | 3,228 | 29,289 |

|        |     |        |       |       |        |
|--------|-----|--------|-------|-------|--------|
| 82,040 | 157 | 20,761 | 5,117 | 3,216 | 29,251 |
| 82,041 | 155 | 20,713 | 5,098 | 3,190 | 29,156 |
| 82,042 | 157 | 20,689 | 5,061 | 3,211 | 29,118 |
| 82,043 | 156 | 20,401 | 5,027 | 3,193 | 28,777 |
| 82,044 | 164 | 20,892 | 5,164 | 3,286 | 29,506 |
| 82,045 | 169 | 20,835 | 5,164 | 3,303 | 29,471 |
| 82,046 | 167 | 20,910 | 5,169 | 3,287 | 29,533 |
| 82,047 | 168 | 21,015 | 5,166 | 3,289 | 29,638 |
| 82,048 | 161 | 20,522 | 4,994 | 3,175 | 28,852 |
| 82,049 | 163 | 20,779 | 5,042 | 3,215 | 29,199 |
| 82,050 | 160 | 21,079 | 5,084 | 3,239 | 29,562 |
| 82,051 | 161 | 21,110 | 5,086 | 3,240 | 29,597 |
| 82,052 | 161 | 21,463 | 5,167 | 3,301 | 30,092 |
| 82,053 | 159 | 21,296 | 5,131 | 3,290 | 29,876 |
| 82,054 | 153 | 21,271 | 5,133 | 3,288 | 29,845 |
| 82,055 | 154 | 21,376 | 5,144 | 3,294 | 29,968 |
| 82,056 | 158 | 21,610 | 5,234 | 3,351 | 30,353 |
| 82,057 | 164 | 21,822 | 5,252 | 3,349 | 30,587 |
| 82,058 | 165 | 21,930 | 5,248 | 3,312 | 30,655 |
| 82,059 | 169 | 22,320 | 5,328 | 3,366 | 31,183 |
| 82,060 | 166 | 22,193 | 5,283 | 3,352 | 30,994 |
| 82,061 | 165 | 22,000 | 5,227 | 3,321 | 30,713 |
| 82,062 | 165 | 22,296 | 5,270 | 3,345 | 31,076 |
| 82,063 | 162 | 22,596 | 5,329 | 3,395 | 31,482 |
| 82,064 | 160 | 22,540 | 5,296 | 3,351 | 31,347 |
| 82,065 | 169 | 22,572 | 5,261 | 3,354 | 31,356 |
| 82,066 | 170 | 22,792 | 5,289 | 3,380 | 31,631 |
| 82,067 | 167 | 22,752 | 5,317 | 3,407 | 31,643 |
| 82,068 | 160 | 22,465 | 5,273 | 3,363 | 31,261 |
| 82,069 | 162 | 22,560 | 5,260 | 3,380 | 31,362 |
| 82,070 | 165 | 22,806 | 5,279 | 3,411 | 31,661 |
| 82,071 | 169 | 22,852 | 5,307 | 3,401 | 31,729 |

|        |     |        |       |       |        |
|--------|-----|--------|-------|-------|--------|
| 82,072 | 170 | 23,201 | 5,382 | 3,447 | 32,200 |
| 82,073 | 175 | 23,199 | 5,407 | 3,450 | 32,231 |
| 82,074 | 176 | 23,275 | 5,436 | 3,479 | 32,366 |
| 82,075 | 175 | 23,099 | 5,417 | 3,447 | 32,138 |
| 82,076 | 177 | 22,976 | 5,456 | 3,446 | 32,055 |
| 82,077 | 176 | 22,925 | 5,468 | 3,463 | 32,032 |
| 82,078 | 172 | 22,732 | 5,417 | 3,436 | 31,757 |
| 82,079 | 166 | 22,960 | 5,483 | 3,443 | 32,052 |
| 82,080 | 164 | 22,813 | 5,459 | 3,394 | 31,830 |
| 82,081 | 167 | 22,955 | 5,487 | 3,386 | 31,995 |
| 82,082 | 166 | 22,996 | 5,475 | 3,386 | 32,023 |
| 82,083 | 166 | 22,721 | 5,397 | 3,337 | 31,621 |
| 82,084 | 171 | 23,014 | 5,423 | 3,347 | 31,955 |
| 82,085 | 169 | 23,268 | 5,481 | 3,382 | 32,300 |
| 82,086 | 162 | 23,136 | 5,436 | 3,340 | 32,074 |
| 82,087 | 161 | 22,658 | 5,330 | 3,288 | 31,437 |
| 82,088 | 163 | 22,921 | 5,341 | 3,317 | 31,742 |
| 82,089 | 159 | 23,263 | 5,419 | 3,356 | 32,197 |
| 82,090 | 161 | 23,499 | 5,482 | 3,390 | 32,532 |
| 82,091 | 159 | 23,346 | 5,415 | 3,369 | 32,289 |
| 82,092 | 156 | 23,353 | 5,413 | 3,371 | 32,293 |
| 82,093 | 159 | 23,465 | 5,407 | 3,371 | 32,402 |
| 82,094 | 158 | 23,327 | 5,363 | 3,328 | 32,176 |
| 82,095 | 152 | 23,806 | 5,455 | 3,383 | 32,796 |
| 82,096 | 145 | 23,343 | 5,355 | 3,323 | 32,166 |
| 82,097 | 146 | 23,566 | 5,404 | 3,357 | 32,473 |
| 82,098 | 142 | 22,865 | 5,256 | 3,271 | 31,534 |
| 82,099 | 143 | 23,182 | 5,307 | 3,316 | 31,948 |
| 82,100 | 143 | 23,526 | 5,383 | 3,350 | 32,402 |
| 82,101 | 145 | 23,699 | 5,396 | 3,366 | 32,606 |
| 82,102 | 143 | 23,675 | 5,376 | 3,363 | 32,557 |
| 82,103 | 146 | 23,741 | 5,377 | 3,361 | 32,625 |

|        |     |        |       |       |        |
|--------|-----|--------|-------|-------|--------|
| 82,104 | 143 | 23,606 | 5,353 | 3,351 | 32,453 |
| 82,105 | 145 | 23,697 | 5,356 | 3,334 | 32,532 |
| 82,106 | 145 | 23,700 | 5,378 | 3,348 | 32,571 |
| 82,107 | 141 | 23,881 | 5,397 | 3,369 | 32,788 |
| 82,108 | 138 | 23,744 | 5,382 | 3,384 | 32,648 |
| 82,109 | 137 | 23,510 | 5,310 | 3,360 | 32,317 |
| 82,110 | 133 | 22,921 | 5,187 | 3,289 | 31,530 |
| 82,111 | 135 | 23,240 | 5,254 | 3,314 | 31,943 |
| 82,112 | 134 | 22,402 | 5,069 | 3,220 | 30,825 |
| 82,113 | 140 | 22,668 | 5,088 | 3,244 | 31,140 |
| 82,114 | 134 | 22,418 | 5,040 | 3,218 | 30,810 |
| 82,115 | 134 | 22,683 | 5,083 | 3,262 | 31,162 |
| 82,116 | 129 | 22,949 | 5,141 | 3,296 | 31,515 |
| 82,117 | 129 | 22,771 | 5,089 | 3,275 | 31,264 |
| 82,118 | 128 | 22,844 | 5,060 | 3,288 | 31,320 |
| 82,119 | 124 | 22,855 | 5,048 | 3,289 | 31,316 |
| 82,120 | 124 | 22,987 | 5,104 | 3,328 | 31,543 |
| 82,121 | 123 | 22,912 | 5,113 | 3,329 | 31,477 |
| 82,122 | 118 | 22,995 | 5,110 | 3,359 | 31,582 |
| 82,123 | 118 | 23,046 | 5,099 | 3,376 | 31,639 |
| 82,124 | 112 | 23,124 | 5,115 | 3,386 | 31,737 |
| 82,125 | 113 | 23,293 | 5,119 | 3,397 | 31,922 |
| 82,126 | 111 | 23,409 | 5,057 | 3,394 | 31,971 |
| 82,127 | 110 | 23,810 | 5,113 | 3,454 | 32,487 |
| 82,128 | 114 | 24,172 | 5,136 | 3,495 | 32,917 |
| 82,129 | 114 | 24,232 | 5,131 | 3,511 | 32,988 |
| 82,130 | 116 | 24,624 | 5,228 | 3,601 | 33,569 |
| 82,131 | 111 | 24,407 | 5,161 | 3,579 | 33,258 |
| 82,132 | 111 | 24,480 | 5,193 | 3,650 | 33,434 |
| 82,133 | 108 | 24,280 | 5,156 | 3,623 | 33,167 |
| 82,134 | 106 | 24,248 | 5,141 | 3,618 | 33,113 |
| 82,135 | 105 | 24,498 | 5,221 | 3,670 | 33,494 |

|        |     |        |       |       |        |
|--------|-----|--------|-------|-------|--------|
| 82,136 | 104 | 24,130 | 5,156 | 3,632 | 33,022 |
| 82,137 | 104 | 24,142 | 5,166 | 3,651 | 33,063 |
| 82,138 | 101 | 24,195 | 5,199 | 3,658 | 33,153 |
| 82,139 | 99  | 24,157 | 5,213 | 3,651 | 33,120 |
| 82,140 | 110 | 24,423 | 5,224 | 3,679 | 33,436 |
| 82,141 | 105 | 24,203 | 5,169 | 3,629 | 33,106 |
| 82,142 | 105 | 24,384 | 5,246 | 3,670 | 33,405 |
| 82,143 | 107 | 24,428 | 5,265 | 3,696 | 33,496 |
| 82,144 | 105 | 24,532 | 5,266 | 3,735 | 33,638 |
| 82,145 | 110 | 24,248 | 5,225 | 3,704 | 33,287 |
| 82,146 | 109 | 24,166 | 5,220 | 3,687 | 33,182 |
| 82,147 | 115 | 24,339 | 5,222 | 3,700 | 33,376 |
| 82,148 | 115 | 24,350 | 5,219 | 3,712 | 33,396 |
| 82,149 | 112 | 24,245 | 5,246 | 3,717 | 33,320 |
| 82,150 | 117 | 24,405 | 5,299 | 3,744 | 33,565 |
| 82,151 | 120 | 24,427 | 5,294 | 3,773 | 33,614 |
| 82,152 | 123 | 24,374 | 5,291 | 3,783 | 33,571 |
| 82,153 | 124 | 24,253 | 5,266 | 3,767 | 33,410 |
| 82,154 | 124 | 24,247 | 5,271 | 3,779 | 33,421 |
| 82,155 | 120 | 24,230 | 5,280 | 3,771 | 33,401 |
| 82,156 | 119 | 24,049 | 5,276 | 3,759 | 33,203 |
| 82,157 | 123 | 24,473 | 5,333 | 3,803 | 33,732 |
| 82,158 | 122 | 24,454 | 5,339 | 3,811 | 33,726 |
| 82,159 | 122 | 24,131 | 5,275 | 3,735 | 33,263 |
| 82,160 | 120 | 24,243 | 5,297 | 3,745 | 33,405 |
| 82,161 | 125 | 24,635 | 5,426 | 3,792 | 33,978 |
| 82,162 | 120 | 24,113 | 5,354 | 3,766 | 33,353 |
| 82,163 | 122 | 24,383 | 5,411 | 3,787 | 33,703 |
| 82,164 | 120 | 24,697 | 5,495 | 3,822 | 34,134 |
| 82,165 | 119 | 24,412 | 5,470 | 3,777 | 33,778 |
| 82,166 | 119 | 24,606 | 5,543 | 3,806 | 34,074 |
| 82,167 | 119 | 24,293 | 5,501 | 3,771 | 33,684 |



|        |     |        |       |       |        |
|--------|-----|--------|-------|-------|--------|
| 82,168 | 121 | 24,059 | 5,474 | 3,740 | 33,394 |
| 82,169 | 128 | 24,566 | 5,596 | 3,800 | 34,090 |
| 82,170 | 131 | 24,387 | 5,552 | 3,766 | 33,836 |
| 82,171 | 130 | 24,303 | 5,513 | 3,737 | 33,683 |
| 82,172 | 132 | 24,427 | 5,559 | 3,748 | 33,866 |
| 82,173 | 137 | 24,128 | 5,498 | 3,684 | 33,447 |
| 82,174 | 136 | 23,738 | 5,433 | 3,625 | 32,932 |
| 82,175 | 140 | 24,355 | 5,514 | 3,688 | 33,697 |
| 82,176 | 147 | 24,479 | 5,589 | 3,705 | 33,920 |
| 82,177 | 158 | 24,487 | 5,622 | 3,730 | 33,997 |
| 82,178 | 166 | 24,414 | 5,643 | 3,705 | 33,928 |
| 82,179 | 167 | 24,300 | 5,647 | 3,693 | 33,807 |
| 82,180 | 168 | 24,143 | 5,585 | 3,640 | 33,536 |
| 82,181 | 168 | 24,319 | 5,641 | 3,663 | 33,791 |
| 82,182 | 166 | 24,022 | 5,585 | 3,599 | 33,372 |
| 82,183 | 169 | 24,171 | 5,603 | 3,588 | 33,531 |
| 82,184 | 170 | 24,237 | 5,606 | 3,588 | 33,601 |
| 82,185 | 170 | 24,206 | 5,597 | 3,583 | 33,556 |
| 82,186 | 171 | 24,153 | 5,594 | 3,589 | 33,507 |
| 82,187 | 170 | 24,157 | 5,595 | 3,591 | 33,513 |
| 82,188 | 175 | 24,496 | 5,687 | 3,626 | 33,984 |
| 82,189 | 180 | 24,168 | 5,615 | 3,579 | 33,542 |
| 82,190 | 179 | 24,133 | 5,619 | 3,577 | 33,508 |
| 82,191 | 170 | 23,906 | 5,610 | 3,574 | 33,260 |
| 82,192 | 170 | 23,899 | 5,598 | 3,577 | 33,244 |
| 82,193 | 166 | 23,862 | 5,600 | 3,572 | 33,200 |
| 82,194 | 168 | 23,689 | 5,577 | 3,543 | 32,977 |
| 82,195 | 172 | 23,706 | 5,584 | 3,546 | 33,008 |
| 82,196 | 165 | 23,520 | 5,537 | 3,521 | 32,743 |
| 82,197 | 175 | 24,095 | 5,640 | 3,608 | 33,518 |
| 82,198 | 169 | 23,925 | 5,621 | 3,589 | 33,304 |
| 82,199 | 169 | 23,768 | 5,601 | 3,572 | 33,110 |

|        |     |        |       |       |        |
|--------|-----|--------|-------|-------|--------|
| 82,200 | 175 | 24,076 | 5,655 | 3,590 | 33,496 |
| 82,201 | 171 | 23,824 | 5,600 | 3,546 | 33,141 |
| 82,202 | 174 | 23,812 | 5,599 | 3,541 | 33,126 |
| 82,203 | 169 | 23,662 | 5,579 | 3,504 | 32,914 |
| 82,204 | 172 | 24,245 | 5,649 | 3,550 | 33,616 |
| 82,205 | 172 | 24,262 | 5,633 | 3,556 | 33,623 |
| 82,206 | 173 | 24,191 | 5,577 | 3,533 | 33,474 |
| 82,207 | 173 | 24,894 | 5,749 | 3,658 | 34,474 |
| 82,208 | 176 | 24,694 | 5,688 | 3,607 | 34,165 |
| 82,209 | 180 | 25,033 | 5,743 | 3,650 | 34,606 |
| 82,210 | 182 | 24,705 | 5,652 | 3,612 | 34,151 |
| 82,211 | 182 | 24,880 | 5,697 | 3,637 | 34,396 |
| 82,212 | 184 | 25,049 | 5,692 | 3,668 | 34,593 |
| 82,213 | 192 | 24,690 | 5,625 | 3,617 | 34,124 |
| 82,214 | 191 | 24,426 | 5,592 | 3,605 | 33,814 |
| 82,215 | 190 | 24,724 | 5,660 | 3,680 | 34,254 |
| 82,216 | 190 | 24,760 | 5,657 | 3,688 | 34,295 |
| 82,217 | 191 | 24,651 | 5,644 | 3,692 | 34,178 |
| 82,218 | 187 | 24,652 | 5,629 | 3,696 | 34,164 |
| 82,219 | 179 | 24,622 | 5,627 | 3,698 | 34,126 |
| 82,220 | 177 | 24,627 | 5,642 | 3,681 | 34,127 |
| 82,221 | 177 | 24,606 | 5,618 | 3,699 | 34,100 |
| 82,222 | 175 | 24,618 | 5,631 | 3,709 | 34,133 |
| 82,223 | 172 | 24,617 | 5,621 | 3,750 | 34,160 |
| 82,224 | 170 | 24,978 | 5,736 | 3,799 | 34,683 |
| 82,225 | 167 | 24,880 | 5,666 | 3,745 | 34,458 |
| 82,226 | 173 | 25,143 | 5,704 | 3,787 | 34,807 |
| 82,227 | 172 | 25,482 | 5,758 | 3,849 | 35,261 |
| 82,228 | 163 | 25,416 | 5,726 | 3,828 | 35,133 |
| 82,229 | 157 | 25,049 | 5,639 | 3,781 | 34,626 |
| 82,230 | 151 | 24,717 | 5,618 | 3,761 | 34,247 |
| 82,231 | 157 | 24,813 | 5,690 | 3,808 | 34,468 |

|        |     |        |       |       |        |
|--------|-----|--------|-------|-------|--------|
| 82,232 | 156 | 24,653 | 5,659 | 3,808 | 34,276 |
| 82,233 | 158 | 24,763 | 5,686 | 3,829 | 34,436 |
| 82,234 | 157 | 24,746 | 5,676 | 3,841 | 34,420 |
| 82,235 | 153 | 24,505 | 5,642 | 3,827 | 34,127 |
| 82,236 | 154 | 24,461 | 5,648 | 3,845 | 34,108 |
| 82,237 | 153 | 24,322 | 5,629 | 3,832 | 33,936 |
| 82,238 | 153 | 24,508 | 5,664 | 3,851 | 34,176 |
| 82,239 | 147 | 24,507 | 5,674 | 3,855 | 34,183 |
| 82,240 | 146 | 24,363 | 5,609 | 3,832 | 33,950 |
| 82,241 | 146 | 24,410 | 5,617 | 3,841 | 34,014 |
| 82,242 | 144 | 24,341 | 5,643 | 3,826 | 33,954 |
| 82,243 | 144 | 24,330 | 5,645 | 3,816 | 33,935 |
| 82,244 | 141 | 24,446 | 5,632 | 3,825 | 34,044 |
| 82,245 | 141 | 24,620 | 5,683 | 3,847 | 34,291 |
| 82,246 | 133 | 24,579 | 5,678 | 3,834 | 34,224 |
| 82,247 | 126 | 24,535 | 5,676 | 3,827 | 34,164 |
| 82,248 | 128 | 24,206 | 5,620 | 3,784 | 33,738 |
| 82,249 | 127 | 24,186 | 5,625 | 3,778 | 33,716 |
| 82,250 | 127 | 24,293 | 5,637 | 3,777 | 33,834 |
| 82,251 | 123 | 24,219 | 5,598 | 3,764 | 33,704 |
| 82,252 | 123 | 24,069 | 5,570 | 3,753 | 33,515 |
| 82,253 | 122 | 24,066 | 5,611 | 3,782 | 33,581 |
| 82,254 | 122 | 23,862 | 5,609 | 3,772 | 33,365 |
| 82,255 | 125 | 23,775 | 5,623 | 3,765 | 33,288 |
| 82,256 | 128 | 23,769 | 5,635 | 3,749 | 33,281 |
| 82,257 | 124 | 23,451 | 5,605 | 3,715 | 32,895 |
| 82,258 | 124 | 23,376 | 5,607 | 3,700 | 32,807 |
| 82,259 | 126 | 23,532 | 5,645 | 3,710 | 33,013 |
| 82,260 | 125 | 23,434 | 5,627 | 3,697 | 32,883 |
| 82,261 | 119 | 23,092 | 5,592 | 3,654 | 32,457 |
| 82,262 | 120 | 23,051 | 5,595 | 3,675 | 32,441 |
| 82,263 | 115 | 22,839 | 5,616 | 3,671 | 32,241 |

|        |     |        |       |       |        |
|--------|-----|--------|-------|-------|--------|
| 82,264 | 108 | 22,934 | 5,630 | 3,683 | 32,355 |
| 82,265 | 108 | 22,714 | 5,554 | 3,612 | 31,988 |
| 82,266 | 109 | 22,548 | 5,539 | 3,593 | 31,789 |
| 82,267 | 108 | 22,643 | 5,534 | 3,586 | 31,871 |
| 82,268 | 108 | 22,621 | 5,531 | 3,582 | 31,842 |
| 82,269 | 114 | 22,623 | 5,525 | 3,587 | 31,849 |
| 82,270 | 114 | 22,409 | 5,479 | 3,542 | 31,544 |
| 82,271 | 118 | 22,554 | 5,528 | 3,579 | 31,779 |
| 82,272 | 118 | 22,880 | 5,608 | 3,592 | 32,198 |
| 82,273 | 122 | 22,723 | 5,571 | 3,522 | 31,938 |
| 82,274 | 119 | 22,662 | 5,589 | 3,520 | 31,890 |
| 82,275 | 116 | 22,555 | 5,544 | 3,505 | 31,720 |
| 82,276 | 115 | 22,697 | 5,596 | 3,543 | 31,951 |
| 82,277 | 109 | 22,552 | 5,600 | 3,538 | 31,799 |
| 82,278 | 105 | 22,369 | 5,591 | 3,507 | 31,572 |
| 82,279 | 102 | 22,138 | 5,560 | 3,482 | 31,282 |
| 82,280 | 93  | 21,873 | 5,521 | 3,470 | 30,957 |
| 82,281 | 92  | 21,748 | 5,434 | 3,405 | 30,679 |
| 82,282 | 95  | 21,640 | 5,420 | 3,389 | 30,544 |
| 82,283 | 96  | 21,783 | 5,465 | 3,418 | 30,762 |
| 82,284 | 95  | 21,312 | 5,346 | 3,301 | 30,054 |
| 82,285 | 95  | 21,448 | 5,374 | 3,315 | 30,232 |
| 82,286 | 94  | 21,391 | 5,378 | 3,317 | 30,180 |
| 82,287 | 92  | 21,479 | 5,427 | 3,330 | 30,328 |
| 82,288 | 93  | 21,746 | 5,470 | 3,359 | 30,668 |
| 82,289 | 92  | 21,498 | 5,443 | 3,329 | 30,362 |
| 82,290 | 91  | 21,607 | 5,456 | 3,340 | 30,494 |
| 82,291 | 93  | 21,650 | 5,532 | 3,383 | 30,658 |
| 82,292 | 94  | 21,631 | 5,560 | 3,395 | 30,680 |
| 82,293 | 98  | 21,428 | 5,495 | 3,382 | 30,403 |
| 82,294 | 98  | 21,227 | 5,474 | 3,361 | 30,160 |
| 82,295 | 98  | 21,598 | 5,643 | 3,438 | 30,777 |

|        |     |        |       |       |        |
|--------|-----|--------|-------|-------|--------|
| 82,296 | 97  | 21,340 | 5,617 | 3,409 | 30,463 |
| 82,297 | 96  | 21,227 | 5,636 | 3,430 | 30,389 |
| 82,298 | 104 | 21,535 | 5,717 | 3,472 | 30,828 |
| 82,299 | 105 | 21,421 | 5,663 | 3,454 | 30,643 |
| 82,300 | 113 | 21,623 | 5,734 | 3,497 | 30,967 |
| 82,301 | 114 | 21,633 | 5,727 | 3,529 | 31,003 |
| 82,302 | 112 | 21,557 | 5,720 | 3,524 | 30,913 |
| 82,303 | 112 | 21,663 | 5,728 | 3,530 | 31,033 |
| 82,304 | 100 | 21,001 | 5,525 | 3,436 | 30,062 |
| 82,305 | 103 | 21,161 | 5,553 | 3,452 | 30,269 |
| 82,306 | 99  | 21,368 | 5,615 | 3,479 | 30,561 |
| 82,307 | 108 | 21,198 | 5,577 | 3,457 | 30,340 |
| 82,308 | 108 | 21,119 | 5,538 | 3,441 | 30,206 |
| 82,309 | 109 | 21,193 | 5,591 | 3,477 | 30,370 |
| 82,310 | 104 | 21,093 | 5,603 | 3,503 | 30,303 |
| 82,311 | 109 | 21,114 | 5,637 | 3,530 | 30,390 |
| 82,312 | 114 | 21,226 | 5,645 | 3,520 | 30,505 |
| 82,313 | 122 | 21,308 | 5,651 | 3,516 | 30,597 |
| 82,314 | 128 | 21,492 | 5,706 | 3,554 | 30,880 |
| 82,315 | 125 | 21,356 | 5,696 | 3,539 | 30,716 |
| 82,316 | 129 | 21,365 | 5,700 | 3,543 | 30,737 |
| 82,317 | 130 | 21,468 | 5,702 | 3,542 | 30,842 |
| 82,318 | 133 | 21,795 | 5,803 | 3,602 | 31,333 |
| 82,319 | 128 | 21,675 | 5,777 | 3,594 | 31,174 |
| 82,320 | 126 | 21,626 | 5,769 | 3,604 | 31,125 |
| 82,321 | 124 | 21,538 | 5,778 | 3,616 | 31,056 |
| 82,322 | 130 | 21,658 | 5,826 | 3,659 | 31,273 |
| 82,323 | 129 | 21,772 | 5,860 | 3,666 | 31,427 |
| 82,324 | 130 | 21,772 | 5,869 | 3,678 | 31,449 |
| 82,325 | 134 | 21,965 | 5,911 | 3,708 | 31,718 |
| 82,326 | 139 | 21,738 | 5,872 | 3,696 | 31,445 |
| 82,327 | 137 | 21,340 | 5,794 | 3,649 | 30,920 |

|        |     |        |       |       |        |
|--------|-----|--------|-------|-------|--------|
| 82,328 | 139 | 21,457 | 5,821 | 3,668 | 31,085 |
| 82,329 | 139 | 21,501 | 5,847 | 3,669 | 31,156 |
| 82,330 | 137 | 21,170 | 5,748 | 3,614 | 30,669 |
| 82,331 | 139 | 21,480 | 5,814 | 3,644 | 31,077 |
| 82,332 | 137 | 21,604 | 5,861 | 3,653 | 31,255 |
| 82,333 | 137 | 21,201 | 5,782 | 3,611 | 30,731 |
| 82,334 | 136 | 21,479 | 5,815 | 3,633 | 31,063 |
| 82,335 | 133 | 21,449 | 5,820 | 3,643 | 31,045 |
| 82,336 | 135 | 21,485 | 5,830 | 3,627 | 31,077 |
| 82,337 | 137 | 21,503 | 5,880 | 3,637 | 31,157 |
| 82,338 | 136 | 21,696 | 5,929 | 3,674 | 31,435 |
| 82,339 | 140 | 21,648 | 5,958 | 3,707 | 31,453 |
| 82,340 | 140 | 21,405 | 5,938 | 3,687 | 31,170 |
| 82,341 | 135 | 20,697 | 5,762 | 3,565 | 30,159 |
| 82,342 | 135 | 20,987 | 5,787 | 3,585 | 30,494 |
| 82,343 | 136 | 21,239 | 5,829 | 3,625 | 30,829 |
| 82,344 | 137 | 21,346 | 5,814 | 3,604 | 30,901 |
| 82,345 | 139 | 21,707 | 5,844 | 3,627 | 31,317 |
| 82,346 | 143 | 21,368 | 5,673 | 3,552 | 30,736 |
| 82,347 | 143 | 21,658 | 5,724 | 3,585 | 31,110 |
| 82,348 | 140 | 21,609 | 5,736 | 3,590 | 31,075 |
| 82,349 | 143 | 21,802 | 5,792 | 3,616 | 31,353 |
| 82,350 | 142 | 21,784 | 5,806 | 3,636 | 31,368 |
| 82,351 | 135 | 21,594 | 5,761 | 3,577 | 31,067 |
| 82,352 | 139 | 21,456 | 5,766 | 3,544 | 30,905 |
| 82,353 | 139 | 21,417 | 5,745 | 3,537 | 30,838 |
| 82,354 | 146 | 21,455 | 5,767 | 3,529 | 30,897 |
| 82,355 | 144 | 21,482 | 5,774 | 3,537 | 30,937 |
| 82,356 | 144 | 21,561 | 5,821 | 3,551 | 31,077 |
| 82,357 | 144 | 21,560 | 5,817 | 3,558 | 31,079 |
| 82,358 | 135 | 21,508 | 5,809 | 3,573 | 31,025 |
| 82,359 | 140 | 22,109 | 5,931 | 3,637 | 31,817 |

|        |     |        |       |       |        |
|--------|-----|--------|-------|-------|--------|
| 82,360 | 140 | 22,034 | 5,904 | 3,594 | 31,672 |
| 82,361 | 140 | 22,293 | 6,002 | 3,644 | 32,079 |
| 82,362 | 133 | 22,113 | 5,919 | 3,595 | 31,760 |
| 82,363 | 123 | 22,137 | 5,927 | 3,591 | 31,778 |
| 82,364 | 122 | 22,431 | 6,003 | 3,634 | 32,190 |
| 82,365 | 117 | 21,959 | 5,821 | 3,537 | 31,434 |
| 82,366 | 120 | 22,146 | 5,883 | 3,563 | 31,712 |
| 82,367 | 115 | 22,090 | 5,886 | 3,571 | 31,662 |
| 82,368 | 116 | 22,212 | 5,913 | 3,591 | 31,832 |
| 82,369 | 115 | 22,477 | 5,965 | 3,601 | 32,158 |
| 82,370 | 117 | 22,308 | 5,923 | 3,565 | 31,913 |
| 82,371 | 121 | 22,776 | 6,001 | 3,598 | 32,496 |
| 82,372 | 112 | 22,780 | 5,932 | 3,565 | 32,389 |
| 82,373 | 115 | 22,681 | 5,866 | 3,535 | 32,197 |
| 82,374 | 135 | 22,875 | 5,940 | 3,587 | 32,537 |
| 82,375 | 132 | 23,054 | 6,002 | 3,631 | 32,819 |
| 82,376 | 133 | 23,043 | 6,000 | 3,633 | 32,809 |
| 82,377 | 128 | 22,850 | 5,961 | 3,599 | 32,538 |
| 82,378 | 128 | 22,881 | 5,972 | 3,606 | 32,587 |
| 82,379 | 131 | 22,908 | 6,013 | 3,633 | 32,685 |
| 82,380 | 136 | 22,792 | 5,966 | 3,612 | 32,506 |
| 82,381 | 136 | 22,662 | 5,902 | 3,583 | 32,283 |
| 82,382 | 137 | 22,620 | 5,891 | 3,598 | 32,246 |
| 82,383 | 136 | 22,579 | 5,892 | 3,599 | 32,206 |
| 82,384 | 135 | 22,416 | 5,899 | 3,600 | 32,050 |
| 82,385 | 142 | 22,437 | 5,994 | 3,630 | 32,203 |
| 82,386 | 145 | 22,521 | 6,010 | 3,630 | 32,306 |
| 82,387 | 145 | 22,473 | 6,019 | 3,618 | 32,255 |
| 82,388 | 146 | 22,628 | 6,030 | 3,645 | 32,449 |
| 82,389 | 150 | 22,609 | 6,016 | 3,630 | 32,405 |
| 82,390 | 148 | 22,300 | 5,968 | 3,560 | 31,976 |
| 82,391 | 156 | 22,307 | 5,936 | 3,564 | 31,963 |

|        |     |        |       |       |        |
|--------|-----|--------|-------|-------|--------|
| 82,392 | 155 | 22,395 | 5,954 | 3,573 | 32,077 |
| 82,393 | 161 | 22,256 | 5,944 | 3,534 | 31,895 |
| 82,394 | 160 | 22,158 | 5,925 | 3,511 | 31,754 |
| 82,395 | 160 | 22,293 | 5,981 | 3,551 | 31,985 |
| 82,396 | 163 | 22,279 | 6,032 | 3,584 | 32,058 |
| 82,397 | 160 | 22,148 | 6,025 | 3,597 | 31,930 |
| 82,398 | 165 | 22,115 | 6,026 | 3,576 | 31,882 |
| 82,399 | 166 | 21,819 | 5,949 | 3,525 | 31,459 |
| 82,400 | 162 | 21,561 | 5,891 | 3,495 | 31,109 |
| 82,401 | 163 | 21,804 | 6,002 | 3,550 | 31,519 |
| 82,402 | 154 | 21,603 | 5,956 | 3,531 | 31,244 |
| 82,403 | 155 | 21,583 | 5,951 | 3,521 | 31,210 |
| 82,404 | 157 | 21,716 | 6,014 | 3,553 | 31,440 |
| 82,405 | 149 | 21,514 | 5,975 | 3,516 | 31,154 |
| 82,406 | 152 | 21,726 | 6,027 | 3,559 | 31,464 |
| 82,407 | 150 | 21,671 | 6,014 | 3,568 | 31,403 |
| 82,408 | 149 | 21,378 | 5,967 | 3,541 | 31,035 |
| 82,409 | 154 | 21,672 | 6,026 | 3,594 | 31,446 |
| 82,410 | 149 | 21,509 | 6,024 | 3,602 | 31,284 |
| 82,411 | 154 | 21,553 | 6,012 | 3,597 | 31,316 |
| 82,412 | 154 | 21,417 | 5,988 | 3,574 | 31,133 |
| 82,413 | 150 | 21,101 | 5,935 | 3,537 | 30,723 |
| 82,414 | 151 | 21,099 | 5,921 | 3,542 | 30,713 |
| 82,415 | 152 | 20,786 | 5,879 | 3,518 | 30,335 |
| 82,416 | 157 | 21,046 | 5,943 | 3,539 | 30,685 |
| 82,417 | 157 | 20,642 | 5,823 | 3,466 | 30,088 |
| 82,418 | 156 | 20,599 | 5,833 | 3,464 | 30,052 |
| 82,419 | 160 | 20,325 | 5,763 | 3,422 | 29,670 |
| 82,420 | 161 | 20,084 | 5,723 | 3,391 | 29,359 |
| 82,421 | 165 | 20,718 | 5,879 | 3,530 | 30,292 |
| 82,422 | 165 | 20,652 | 5,895 | 3,517 | 30,229 |
| 82,423 | 167 | 20,504 | 5,880 | 3,514 | 30,065 |



|        |     |        |       |       |        |
|--------|-----|--------|-------|-------|--------|
| 82,424 | 164 | 20,507 | 5,923 | 3,524 | 30,118 |
| 82,425 | 148 | 20,455 | 5,961 | 3,539 | 30,103 |
| 82,426 | 143 | 20,117 | 5,857 | 3,480 | 29,597 |
| 82,427 | 142 | 20,158 | 5,852 | 3,465 | 29,617 |
| 82,428 | 143 | 20,175 | 5,855 | 3,461 | 29,634 |
| 82,429 | 143 | 20,234 | 5,863 | 3,464 | 29,704 |
| 82,430 | 142 | 20,235 | 5,865 | 3,460 | 29,702 |
| 82,431 | 139 | 20,151 | 5,870 | 3,459 | 29,619 |
| 82,432 | 137 | 20,255 | 5,941 | 3,484 | 29,817 |
| 82,433 | 137 | 20,003 | 5,800 | 3,416 | 29,356 |
| 82,434 | 138 | 20,246 | 5,881 | 3,445 | 29,710 |
| 82,435 | 135 | 20,672 | 5,940 | 3,503 | 30,250 |
| 82,436 | 134 | 20,634 | 5,936 | 3,504 | 30,208 |
| 82,437 | 137 | 20,496 | 5,917 | 3,504 | 30,054 |
| 82,438 | 137 | 20,686 | 5,940 | 3,540 | 30,303 |
| 82,439 | 136 | 20,698 | 5,971 | 3,548 | 30,353 |
| 82,440 | 133 | 20,710 | 5,995 | 3,566 | 30,404 |
| 82,441 | 131 | 20,798 | 5,979 | 3,569 | 30,477 |
| 82,442 | 125 | 20,716 | 5,952 | 3,559 | 30,352 |
| 82,443 | 123 | 20,692 | 5,945 | 3,571 | 30,331 |
| 82,444 | 121 | 20,567 | 5,957 | 3,600 | 30,245 |
| 82,445 | 120 | 20,564 | 6,007 | 3,618 | 30,309 |
| 82,446 | 123 | 20,856 | 6,057 | 3,643 | 30,679 |
| 82,447 | 122 | 20,750 | 6,038 | 3,610 | 30,520 |
| 82,448 | 123 | 20,796 | 6,070 | 3,602 | 30,591 |
| 82,449 | 117 | 20,451 | 6,029 | 3,564 | 30,161 |
| 82,450 | 112 | 20,342 | 6,015 | 3,557 | 30,026 |
| 82,451 | 114 | 20,435 | 6,062 | 3,580 | 30,191 |
| 82,452 | 110 | 20,456 | 6,056 | 3,593 | 30,215 |
| 82,453 | 115 | 20,472 | 6,050 | 3,625 | 30,262 |
| 82,454 | 114 | 20,330 | 6,023 | 3,609 | 30,076 |
| 82,455 | 114 | 20,324 | 6,038 | 3,616 | 30,092 |

|        |     |        |       |       |        |
|--------|-----|--------|-------|-------|--------|
| 82,456 | 114 | 20,366 | 6,064 | 3,638 | 30,182 |
| 82,457 | 117 | 20,627 | 6,157 | 3,666 | 30,567 |
| 82,458 | 119 | 20,575 | 6,155 | 3,674 | 30,523 |
| 82,459 | 120 | 20,707 | 6,188 | 3,663 | 30,678 |
| 82,460 | 117 | 20,032 | 6,023 | 3,551 | 29,723 |
| 82,461 | 117 | 20,168 | 6,083 | 3,596 | 29,964 |
| 82,462 | 119 | 19,723 | 5,993 | 3,553 | 29,388 |
| 82,463 | 119 | 19,938 | 6,070 | 3,591 | 29,718 |
| 82,464 | 117 | 20,142 | 6,124 | 3,617 | 30,000 |
| 82,465 | 120 | 20,377 | 6,173 | 3,635 | 30,305 |
| 82,466 | 118 | 20,387 | 6,174 | 3,655 | 30,334 |
| 82,467 | 116 | 20,096 | 6,107 | 3,631 | 29,950 |
| 82,468 | 113 | 19,752 | 6,058 | 3,587 | 29,510 |
| 82,469 | 112 | 19,916 | 6,142 | 3,635 | 29,805 |
| 82,470 | 106 | 19,962 | 6,167 | 3,663 | 29,898 |
| 82,471 | 105 | 19,843 | 6,143 | 3,665 | 29,756 |
| 82,472 | 101 | 19,670 | 6,166 | 3,657 | 29,594 |
| 82,473 | 100 | 19,586 | 6,168 | 3,673 | 29,527 |
| 82,474 | 102 | 19,562 | 6,144 | 3,670 | 29,478 |
| 82,475 | 104 | 19,504 | 6,131 | 3,652 | 29,391 |
| 82,476 | 101 | 19,384 | 6,053 | 3,611 | 29,149 |
| 82,477 | 103 | 19,618 | 6,170 | 3,650 | 29,541 |
| 82,478 | 103 | 19,524 | 6,148 | 3,636 | 29,411 |
| 82,479 | 100 | 19,451 | 6,091 | 3,613 | 29,255 |
| 82,480 | 99  | 19,574 | 6,095 | 3,617 | 29,385 |
| 82,481 | 100 | 19,772 | 6,173 | 3,658 | 29,703 |
| 82,482 | 98  | 19,676 | 6,133 | 3,661 | 29,568 |
| 82,483 | 110 | 19,916 | 6,218 | 3,716 | 29,960 |
| 82,484 | 109 | 20,047 | 6,270 | 3,739 | 30,165 |
| 82,485 | 110 | 20,244 | 6,303 | 3,761 | 30,418 |
| 82,486 | 113 | 20,131 | 6,296 | 3,741 | 30,281 |
| 82,487 | 111 | 20,128 | 6,304 | 3,756 | 30,299 |

|        |     |        |       |       |        |
|--------|-----|--------|-------|-------|--------|
| 82,488 | 106 | 19,971 | 6,247 | 3,712 | 30,036 |
| 82,489 | 109 | 19,709 | 6,145 | 3,643 | 29,606 |
| 82,490 | 110 | 19,908 | 6,191 | 3,649 | 29,858 |
| 82,491 | 110 | 20,091 | 6,209 | 3,688 | 30,098 |
| 82,492 | 108 | 19,960 | 6,184 | 3,690 | 29,942 |
| 82,493 | 102 | 19,812 | 6,144 | 3,658 | 29,716 |
| 82,494 | 104 | 19,719 | 6,088 | 3,593 | 29,504 |
| 82,495 | 105 | 19,758 | 6,056 | 3,580 | 29,499 |
| 82,496 | 103 | 19,500 | 5,988 | 3,548 | 29,139 |
| 82,497 | 105 | 19,682 | 6,071 | 3,574 | 29,432 |
| 82,498 | 103 | 19,533 | 6,030 | 3,550 | 29,216 |
| 82,499 | 101 | 19,408 | 5,930 | 3,503 | 28,942 |
| 82,500 | 103 | 19,372 | 5,930 | 3,497 | 28,902 |
| 82,501 | 103 | 19,540 | 5,982 | 3,517 | 29,142 |
| 82,502 | 103 | 19,479 | 5,948 | 3,500 | 29,030 |
| 82,503 | 101 | 19,312 | 5,855 | 3,438 | 28,706 |
| 82,504 | 103 | 19,384 | 5,894 | 3,409 | 28,790 |
| 82,505 | 109 | 19,422 | 5,879 | 3,391 | 28,801 |
| 82,506 | 111 | 19,518 | 5,869 | 3,382 | 28,880 |
| 82,507 | 106 | 19,373 | 5,781 | 3,342 | 28,602 |
| 82,508 | 104 | 19,331 | 5,752 | 3,336 | 28,523 |
| 82,509 | 104 | 19,044 | 5,687 | 3,308 | 28,143 |
| 82,510 | 106 | 19,291 | 5,713 | 3,337 | 28,447 |
| 82,511 | 109 | 19,494 | 5,755 | 3,342 | 28,700 |
| 82,512 | 114 | 19,544 | 5,724 | 3,317 | 28,699 |
| 82,513 | 109 | 19,434 | 5,649 | 3,278 | 28,470 |
| 82,514 | 109 | 19,429 | 5,603 | 3,250 | 28,391 |
| 82,515 | 111 | 19,507 | 5,654 | 3,270 | 28,542 |
| 82,516 | 111 | 19,272 | 5,588 | 3,232 | 28,203 |
| 82,517 | 111 | 19,209 | 5,588 | 3,225 | 28,133 |
| 82,518 | 106 | 19,340 | 5,655 | 3,251 | 28,352 |
| 82,519 | 109 | 19,489 | 5,662 | 3,261 | 28,521 |

|        |     |        |       |       |        |
|--------|-----|--------|-------|-------|--------|
| 82,520 | 110 | 19,286 | 5,614 | 3,195 | 28,205 |
| 82,521 | 110 | 19,140 | 5,559 | 3,159 | 27,968 |
| 82,522 | 109 | 19,574 | 5,642 | 3,206 | 28,531 |
| 82,523 | 113 | 19,698 | 5,696 | 3,230 | 28,737 |
| 82,524 | 115 | 19,800 | 5,706 | 3,198 | 28,819 |
| 82,525 | 110 | 19,644 | 5,665 | 3,169 | 28,588 |
| 82,526 | 110 | 19,836 | 5,754 | 3,218 | 28,918 |
| 82,527 | 109 | 19,756 | 5,712 | 3,184 | 28,761 |
| 82,528 | 113 | 19,681 | 5,654 | 3,151 | 28,599 |
| 82,529 | 113 | 19,645 | 5,639 | 3,154 | 28,551 |
| 82,530 | 113 | 19,810 | 5,718 | 3,178 | 28,819 |
| 82,531 | 115 | 19,782 | 5,719 | 3,160 | 28,776 |
| 82,532 | 117 | 19,560 | 5,574 | 3,068 | 28,319 |
| 82,533 | 117 | 19,673 | 5,598 | 3,046 | 28,434 |
| 82,534 | 109 | 19,881 | 5,638 | 3,070 | 28,698 |
| 82,535 | 116 | 19,946 | 5,632 | 3,072 | 28,766 |
| 82,536 | 116 | 19,869 | 5,629 | 3,056 | 28,670 |
| 82,537 | 111 | 19,600 | 5,594 | 3,026 | 28,331 |
| 82,538 | 111 | 19,442 | 5,598 | 3,024 | 28,175 |
| 82,539 | 115 | 19,474 | 5,640 | 3,055 | 28,284 |
| 82,540 | 113 | 19,383 | 5,600 | 3,050 | 28,146 |
| 82,541 | 117 | 19,355 | 5,617 | 3,045 | 28,134 |
| 82,542 | 119 | 19,356 | 5,604 | 3,014 | 28,093 |
| 82,543 | 120 | 19,376 | 5,574 | 2,994 | 28,064 |
| 82,544 | 124 | 19,407 | 5,566 | 2,989 | 28,086 |
| 82,545 | 124 | 19,268 | 5,511 | 2,970 | 27,873 |
| 82,546 | 123 | 19,294 | 5,501 | 2,979 | 27,897 |
| 82,547 | 125 | 19,133 | 5,430 | 2,940 | 27,628 |
| 82,548 | 124 | 19,026 | 5,391 | 2,921 | 27,462 |
| 82,549 | 125 | 19,768 | 5,575 | 3,043 | 28,511 |
| 82,550 | 133 | 19,839 | 5,578 | 3,059 | 28,609 |
| 82,551 | 135 | 20,090 | 5,616 | 3,094 | 28,935 |

|        |     |        |       |       |        |
|--------|-----|--------|-------|-------|--------|
| 82,552 | 131 | 19,516 | 5,446 | 3,021 | 28,114 |
| 82,553 | 131 | 19,642 | 5,519 | 3,035 | 28,327 |
| 82,554 | 131 | 19,842 | 5,576 | 3,048 | 28,597 |
| 82,555 | 131 | 19,812 | 5,586 | 3,062 | 28,591 |
| 82,556 | 128 | 20,009 | 5,642 | 3,084 | 28,863 |
| 82,557 | 126 | 19,714 | 5,577 | 3,055 | 28,472 |
| 82,558 | 126 | 19,551 | 5,540 | 3,040 | 28,257 |
| 82,559 | 128 | 19,942 | 5,691 | 3,092 | 28,853 |
| 82,560 | 129 | 20,152 | 5,727 | 3,106 | 29,114 |
| 82,561 | 123 | 19,904 | 5,707 | 3,069 | 28,803 |
| 82,562 | 123 | 19,943 | 5,746 | 3,093 | 28,905 |
| 82,563 | 120 | 19,883 | 5,748 | 3,085 | 28,836 |
| 82,564 | 120 | 19,847 | 5,742 | 3,075 | 28,784 |
| 82,565 | 116 | 19,825 | 5,729 | 3,073 | 28,743 |
| 82,566 | 116 | 19,974 | 5,752 | 3,072 | 28,914 |
| 82,567 | 114 | 20,143 | 5,799 | 3,094 | 29,150 |
| 82,568 | 115 | 20,254 | 5,779 | 3,114 | 29,262 |
| 82,569 | 113 | 20,154 | 5,735 | 3,087 | 29,089 |
| 82,570 | 109 | 20,043 | 5,684 | 3,067 | 28,903 |
| 82,571 | 111 | 20,157 | 5,718 | 3,087 | 29,073 |
| 82,572 | 111 | 20,047 | 5,649 | 3,062 | 28,869 |
| 82,573 | 107 | 19,817 | 5,540 | 3,014 | 28,478 |
| 82,574 | 111 | 19,966 | 5,591 | 3,031 | 28,699 |
| 82,575 | 116 | 19,884 | 5,554 | 3,027 | 28,581 |
| 82,576 | 114 | 19,799 | 5,487 | 2,978 | 28,378 |
| 82,577 | 118 | 19,774 | 5,465 | 2,977 | 28,334 |
| 82,578 | 115 | 19,705 | 5,447 | 2,982 | 28,249 |
| 82,579 | 119 | 19,930 | 5,507 | 3,009 | 28,565 |
| 82,580 | 121 | 19,578 | 5,420 | 2,955 | 28,074 |
| 82,581 | 119 | 19,621 | 5,426 | 2,963 | 28,129 |
| 82,582 | 120 | 19,634 | 5,410 | 2,998 | 28,162 |
| 82,583 | 129 | 19,562 | 5,439 | 3,009 | 28,139 |

|        |     |        |       |       |        |
|--------|-----|--------|-------|-------|--------|
| 82,584 | 129 | 19,455 | 5,424 | 3,002 | 28,010 |
| 82,585 | 139 | 19,434 | 5,465 | 3,031 | 28,069 |
| 82,586 | 131 | 19,126 | 5,369 | 2,988 | 27,614 |
| 82,587 | 133 | 19,121 | 5,294 | 2,980 | 27,528 |
| 82,588 | 134 | 19,175 | 5,326 | 2,982 | 27,617 |
| 82,589 | 132 | 19,339 | 5,345 | 2,991 | 27,807 |
| 82,590 | 128 | 19,139 | 5,236 | 2,950 | 27,453 |
| 82,591 | 131 | 19,255 | 5,253 | 2,952 | 27,591 |
| 82,592 | 130 | 19,042 | 5,200 | 2,948 | 27,320 |
| 82,593 | 130 | 19,031 | 5,216 | 2,956 | 27,333 |
| 82,594 | 130 | 18,992 | 5,258 | 2,974 | 27,354 |
| 82,595 | 126 | 18,974 | 5,286 | 2,997 | 27,383 |
| 82,596 | 128 | 18,861 | 5,322 | 2,996 | 27,307 |
| 82,597 | 135 | 18,753 | 5,317 | 2,995 | 27,200 |
| 82,598 | 138 | 18,929 | 5,367 | 3,010 | 27,444 |
| 82,599 | 138 | 18,699 | 5,295 | 2,988 | 27,120 |
| 82,600 | 135 | 18,623 | 5,287 | 2,996 | 27,041 |
| 82,601 | 134 | 18,795 | 5,376 | 3,038 | 27,343 |
| 82,602 | 133 | 18,495 | 5,315 | 3,001 | 26,944 |
| 82,603 | 136 | 18,406 | 5,302 | 2,994 | 26,838 |
| 82,604 | 137 | 18,407 | 5,283 | 3,005 | 26,832 |
| 82,605 | 134 | 18,291 | 5,287 | 3,023 | 26,735 |
| 82,606 | 139 | 18,380 | 5,334 | 3,047 | 26,900 |
| 82,607 | 137 | 18,206 | 5,260 | 3,028 | 26,631 |
| 82,608 | 141 | 18,345 | 5,301 | 3,057 | 26,844 |
| 82,609 | 142 | 18,460 | 5,352 | 3,084 | 27,038 |
| 82,610 | 142 | 18,560 | 5,388 | 3,088 | 27,178 |
| 82,611 | 137 | 18,424 | 5,342 | 3,074 | 26,977 |
| 82,612 | 141 | 18,513 | 5,320 | 3,067 | 27,041 |
| 82,613 | 141 | 18,532 | 5,324 | 3,083 | 27,080 |
| 82,614 | 140 | 18,586 | 5,429 | 3,119 | 27,274 |
| 82,615 | 145 | 18,466 | 5,420 | 3,124 | 27,155 |

|        |     |        |       |       |        |
|--------|-----|--------|-------|-------|--------|
| 82,616 | 144 | 18,473 | 5,420 | 3,145 | 27,182 |
| 82,617 | 145 | 18,705 | 5,492 | 3,185 | 27,527 |
| 82,618 | 150 | 18,525 | 5,435 | 3,146 | 27,256 |
| 82,619 | 150 | 18,265 | 5,398 | 3,092 | 26,905 |
| 82,620 | 152 | 18,811 | 5,569 | 3,187 | 27,719 |
| 82,621 | 154 | 18,505 | 5,485 | 3,115 | 27,259 |
| 82,622 | 154 | 18,484 | 5,487 | 3,118 | 27,243 |
| 82,623 | 163 | 18,178 | 5,435 | 3,082 | 26,858 |
| 82,624 | 162 | 18,005 | 5,399 | 3,077 | 26,643 |
| 82,625 | 163 | 18,880 | 5,595 | 3,207 | 27,845 |
| 82,626 | 156 | 18,603 | 5,543 | 3,171 | 27,473 |
| 82,627 | 164 | 18,971 | 5,648 | 3,235 | 28,018 |
| 82,628 | 165 | 19,102 | 5,703 | 3,257 | 28,227 |
| 82,629 | 162 | 18,941 | 5,664 | 3,242 | 28,009 |
| 82,630 | 162 | 19,057 | 5,681 | 3,237 | 28,137 |
| 82,631 | 162 | 18,906 | 5,633 | 3,207 | 27,908 |
| 82,632 | 161 | 19,082 | 5,677 | 3,207 | 28,127 |
| 82,633 | 157 | 19,369 | 5,730 | 3,247 | 28,503 |
| 82,634 | 146 | 18,964 | 5,620 | 3,193 | 27,923 |
| 82,635 | 146 | 19,307 | 5,667 | 3,224 | 28,344 |
| 82,636 | 141 | 19,340 | 5,661 | 3,220 | 28,362 |
| 82,637 | 138 | 19,295 | 5,686 | 3,237 | 28,356 |
| 82,638 | 138 | 19,308 | 5,672 | 3,222 | 28,340 |
| 82,639 | 146 | 19,348 | 5,680 | 3,215 | 28,389 |
| 82,640 | 149 | 19,386 | 5,669 | 3,224 | 28,428 |
| 82,641 | 153 | 19,693 | 5,736 | 3,238 | 28,820 |
| 82,642 | 150 | 19,603 | 5,711 | 3,210 | 28,674 |
| 82,643 | 153 | 19,958 | 5,795 | 3,243 | 29,149 |
| 82,644 | 154 | 20,251 | 5,859 | 3,287 | 29,551 |
| 82,645 | 162 | 20,189 | 5,839 | 3,272 | 29,462 |
| 82,646 | 159 | 20,159 | 5,823 | 3,265 | 29,406 |
| 82,647 | 160 | 20,386 | 5,879 | 3,296 | 29,721 |

|        |     |        |       |       |        |
|--------|-----|--------|-------|-------|--------|
| 82,648 | 152 | 20,636 | 5,962 | 3,342 | 30,092 |
| 82,649 | 154 | 20,722 | 5,981 | 3,359 | 30,216 |
| 82,650 | 154 | 20,736 | 6,036 | 3,367 | 30,293 |
| 82,651 | 160 | 20,734 | 6,048 | 3,356 | 30,298 |
| 82,652 | 157 | 20,636 | 6,022 | 3,343 | 30,158 |
| 82,653 | 154 | 20,447 | 5,955 | 3,320 | 29,876 |
| 82,654 | 151 | 20,611 | 5,965 | 3,332 | 30,059 |
| 82,655 | 153 | 20,393 | 5,845 | 3,259 | 29,650 |
| 82,656 | 153 | 20,399 | 5,838 | 3,264 | 29,654 |
| 82,657 | 150 | 20,241 | 5,762 | 3,240 | 29,393 |
| 82,658 | 150 | 19,939 | 5,697 | 3,194 | 28,980 |
| 82,659 | 152 | 20,365 | 5,782 | 3,249 | 29,548 |
| 82,660 | 150 | 20,080 | 5,653 | 3,196 | 29,079 |
| 82,661 | 154 | 20,235 | 5,689 | 3,215 | 29,293 |
| 82,662 | 157 | 20,170 | 5,656 | 3,204 | 29,187 |
| 82,663 | 152 | 19,986 | 5,659 | 3,182 | 28,979 |
| 82,664 | 153 | 20,328 | 5,661 | 3,188 | 29,330 |
| 82,665 | 163 | 20,344 | 5,642 | 3,196 | 29,345 |
| 82,666 | 158 | 20,112 | 5,592 | 3,173 | 29,035 |
| 82,667 | 170 | 20,423 | 5,676 | 3,236 | 29,505 |
| 82,668 | 171 | 20,373 | 5,617 | 3,219 | 29,380 |
| 82,669 | 168 | 20,094 | 5,566 | 3,206 | 29,034 |
| 82,670 | 167 | 20,028 | 5,558 | 3,197 | 28,950 |
| 82,671 | 163 | 20,044 | 5,562 | 3,209 | 28,978 |
| 82,672 | 168 | 20,260 | 5,598 | 3,232 | 29,258 |
| 82,673 | 171 | 20,182 | 5,579 | 3,205 | 29,137 |
| 82,674 | 161 | 20,082 | 5,562 | 3,190 | 28,995 |
| 82,675 | 176 | 20,211 | 5,608 | 3,203 | 29,198 |
| 82,676 | 176 | 20,243 | 5,628 | 3,217 | 29,264 |
| 82,677 | 176 | 20,307 | 5,604 | 3,215 | 29,302 |
| 82,678 | 177 | 20,301 | 5,601 | 3,210 | 29,289 |
| 82,679 | 177 | 20,237 | 5,555 | 3,191 | 29,160 |



|        |     |        |       |       |        |
|--------|-----|--------|-------|-------|--------|
| 82,680 | 177 | 20,235 | 5,559 | 3,217 | 29,188 |
| 82,681 | 175 | 20,288 | 5,557 | 3,218 | 29,238 |
| 82,682 | 183 | 20,021 | 5,498 | 3,175 | 28,877 |
| 82,683 | 182 | 20,053 | 5,526 | 3,181 | 28,942 |
| 82,684 | 184 | 19,956 | 5,487 | 3,140 | 28,767 |
| 82,685 | 185 | 20,004 | 5,519 | 3,118 | 28,826 |
| 82,686 | 185 | 20,013 | 5,513 | 3,122 | 28,833 |
| 82,687 | 185 | 20,071 | 5,572 | 3,151 | 28,979 |
| 82,688 | 187 | 19,907 | 5,540 | 3,124 | 28,758 |
| 82,689 | 187 | 19,885 | 5,538 | 3,130 | 28,740 |
| 82,690 | 179 | 19,853 | 5,589 | 3,148 | 28,769 |
| 82,691 | 177 | 19,866 | 5,647 | 3,169 | 28,859 |
| 82,692 | 173 | 19,743 | 5,694 | 3,195 | 28,805 |
| 82,693 | 171 | 19,955 | 5,809 | 3,237 | 29,172 |
| 82,694 | 166 | 19,529 | 5,693 | 3,171 | 28,559 |
| 82,695 | 164 | 19,794 | 5,753 | 3,207 | 28,918 |
| 82,696 | 155 | 20,182 | 5,820 | 3,254 | 29,411 |
| 82,697 | 152 | 20,137 | 5,806 | 3,234 | 29,329 |
| 82,698 | 150 | 20,235 | 5,828 | 3,243 | 29,456 |
| 82,699 | 157 | 20,251 | 5,821 | 3,238 | 29,467 |
| 82,700 | 155 | 20,263 | 5,817 | 3,233 | 29,468 |
| 82,701 | 157 | 20,269 | 5,786 | 3,202 | 29,414 |
| 82,702 | 154 | 20,203 | 5,744 | 3,173 | 29,274 |
| 82,703 | 155 | 20,236 | 5,753 | 3,184 | 29,328 |
| 82,704 | 160 | 20,342 | 5,800 | 3,197 | 29,499 |
| 82,705 | 162 | 20,659 | 5,920 | 3,257 | 29,998 |
| 82,706 | 160 | 20,468 | 5,874 | 3,236 | 29,738 |
| 82,707 | 160 | 20,478 | 5,870 | 3,235 | 29,743 |
| 82,708 | 155 | 20,364 | 5,880 | 3,254 | 29,653 |
| 82,709 | 159 | 20,471 | 5,939 | 3,284 | 29,853 |
| 82,710 | 159 | 20,397 | 5,905 | 3,268 | 29,729 |
| 82,711 | 161 | 20,404 | 5,924 | 3,273 | 29,762 |

|        |     |        |       |       |        |
|--------|-----|--------|-------|-------|--------|
| 82,712 | 157 | 20,214 | 5,888 | 3,260 | 29,519 |
| 82,713 | 156 | 20,383 | 5,975 | 3,315 | 29,829 |
| 82,714 | 157 | 20,440 | 5,966 | 3,310 | 29,873 |
| 82,715 | 158 | 20,527 | 5,989 | 3,328 | 30,002 |
| 82,716 | 145 | 20,553 | 5,965 | 3,313 | 29,976 |
| 82,717 | 145 | 20,460 | 5,954 | 3,285 | 29,844 |
| 82,718 | 140 | 20,572 | 6,030 | 3,292 | 30,034 |
| 82,719 | 137 | 20,359 | 5,961 | 3,241 | 29,698 |
| 82,720 | 137 | 20,429 | 5,964 | 3,244 | 29,774 |
| 82,721 | 140 | 20,578 | 5,984 | 3,255 | 29,957 |
| 82,722 | 137 | 20,225 | 5,907 | 3,213 | 29,482 |
| 82,723 | 135 | 20,393 | 5,999 | 3,222 | 29,749 |
| 82,724 | 120 | 19,768 | 5,846 | 3,137 | 28,871 |
| 82,725 | 121 | 19,968 | 5,928 | 3,184 | 29,201 |
| 82,726 | 121 | 20,151 | 5,980 | 3,226 | 29,478 |
| 82,727 | 122 | 20,023 | 5,974 | 3,248 | 29,367 |
| 82,728 | 123 | 20,105 | 6,008 | 3,247 | 29,483 |
| 82,729 | 122 | 19,980 | 5,992 | 3,238 | 29,332 |
| 82,730 | 126 | 20,238 | 6,079 | 3,298 | 29,741 |
| 82,731 | 126 | 19,985 | 6,066 | 3,275 | 29,452 |
| 82,732 | 128 | 19,972 | 6,066 | 3,276 | 29,442 |
| 82,733 | 122 | 19,743 | 6,017 | 3,246 | 29,128 |
| 82,734 | 124 | 19,941 | 6,089 | 3,304 | 29,458 |
| 82,735 | 118 | 19,830 | 6,104 | 3,324 | 29,376 |
| 82,736 | 117 | 19,589 | 6,030 | 3,324 | 29,060 |
| 82,737 | 116 | 19,612 | 6,002 | 3,324 | 29,054 |
| 82,738 | 120 | 20,005 | 6,068 | 3,347 | 29,540 |
| 82,739 | 125 | 19,777 | 6,013 | 3,328 | 29,243 |
| 82,740 | 124 | 19,664 | 5,968 | 3,302 | 29,058 |
| 82,741 | 128 | 19,848 | 5,982 | 3,308 | 29,266 |
| 82,742 | 131 | 20,049 | 6,053 | 3,365 | 29,598 |
| 82,743 | 133 | 19,938 | 6,001 | 3,352 | 29,424 |

|        |     |        |       |       |        |
|--------|-----|--------|-------|-------|--------|
| 82,744 | 139 | 19,594 | 5,878 | 3,311 | 28,922 |
| 82,745 | 139 | 19,229 | 5,776 | 3,258 | 28,402 |
| 82,746 | 142 | 19,388 | 5,869 | 3,316 | 28,715 |
| 82,747 | 146 | 18,968 | 5,771 | 3,250 | 28,135 |
| 82,748 | 146 | 18,713 | 5,697 | 3,221 | 27,777 |
| 82,749 | 150 | 19,288 | 5,860 | 3,326 | 28,624 |
| 82,750 | 139 | 19,006 | 5,740 | 3,277 | 28,162 |
| 82,751 | 139 | 19,066 | 5,736 | 3,287 | 28,228 |
| 82,752 | 137 | 18,933 | 5,633 | 3,274 | 27,977 |
| 82,753 | 139 | 19,139 | 5,703 | 3,316 | 28,297 |
| 82,754 | 132 | 19,248 | 5,759 | 3,339 | 28,478 |
| 82,755 | 134 | 19,304 | 5,764 | 3,325 | 28,527 |
| 82,756 | 136 | 19,334 | 5,784 | 3,337 | 28,591 |
| 82,757 | 133 | 19,152 | 5,756 | 3,326 | 28,367 |
| 82,758 | 141 | 19,480 | 5,846 | 3,343 | 28,810 |
| 82,759 | 139 | 19,620 | 5,838 | 3,348 | 28,945 |
| 82,760 | 141 | 19,827 | 5,898 | 3,376 | 29,242 |
| 82,761 | 144 | 19,828 | 5,939 | 3,391 | 29,302 |
| 82,762 | 142 | 19,709 | 5,899 | 3,366 | 29,116 |
| 82,763 | 140 | 19,590 | 5,843 | 3,329 | 28,902 |
| 82,764 | 146 | 19,774 | 5,880 | 3,341 | 29,141 |
| 82,765 | 143 | 19,500 | 5,830 | 3,308 | 28,781 |
| 82,766 | 146 | 19,586 | 5,880 | 3,319 | 28,931 |
| 82,767 | 151 | 19,459 | 5,819 | 3,292 | 28,721 |
| 82,768 | 150 | 19,375 | 5,795 | 3,274 | 28,594 |
| 82,769 | 148 | 19,280 | 5,795 | 3,270 | 28,493 |
| 82,770 | 152 | 19,321 | 5,806 | 3,285 | 28,564 |
| 82,771 | 152 | 19,138 | 5,774 | 3,273 | 28,337 |
| 82,772 | 155 | 19,121 | 5,692 | 3,252 | 28,220 |
| 82,773 | 156 | 19,248 | 5,717 | 3,273 | 28,394 |
| 82,774 | 155 | 19,171 | 5,688 | 3,283 | 28,297 |
| 82,775 | 155 | 18,999 | 5,631 | 3,266 | 28,051 |

|        |     |        |       |       |        |
|--------|-----|--------|-------|-------|--------|
| 82,776 | 161 | 19,090 | 5,640 | 3,263 | 28,154 |
| 82,777 | 161 | 18,725 | 5,503 | 3,196 | 27,585 |
| 82,778 | 162 | 18,893 | 5,525 | 3,224 | 27,804 |
| 82,779 | 156 | 19,020 | 5,567 | 3,268 | 28,011 |
| 82,780 | 152 | 18,866 | 5,531 | 3,237 | 27,786 |
| 82,781 | 152 | 18,818 | 5,548 | 3,236 | 27,754 |
| 82,782 | 149 | 18,810 | 5,532 | 3,231 | 27,722 |
| 82,783 | 149 | 18,835 | 5,499 | 3,230 | 27,713 |
| 82,784 | 148 | 18,817 | 5,510 | 3,242 | 27,717 |
| 82,785 | 151 | 18,902 | 5,561 | 3,247 | 27,861 |
| 82,786 | 151 | 18,824 | 5,532 | 3,237 | 27,744 |
| 82,787 | 151 | 19,022 | 5,620 | 3,268 | 28,061 |
| 82,788 | 150 | 18,868 | 5,647 | 3,271 | 27,936 |
| 82,789 | 146 | 18,633 | 5,623 | 3,277 | 27,679 |
| 82,790 | 138 | 18,469 | 5,664 | 3,263 | 27,534 |
| 82,791 | 139 | 18,415 | 5,690 | 3,270 | 27,514 |
| 82,792 | 143 | 18,492 | 5,691 | 3,268 | 27,594 |
| 82,793 | 143 | 18,616 | 5,718 | 3,270 | 27,747 |
| 82,794 | 142 | 18,761 | 5,755 | 3,259 | 27,917 |
| 82,795 | 137 | 18,795 | 5,757 | 3,256 | 27,945 |
| 82,796 | 142 | 18,869 | 5,746 | 3,250 | 28,007 |
| 82,797 | 138 | 18,676 | 5,687 | 3,242 | 27,743 |
| 82,798 | 137 | 18,804 | 5,696 | 3,241 | 27,878 |
| 82,799 | 147 | 18,762 | 5,743 | 3,245 | 27,897 |
| 82,800 | 148 | 18,782 | 5,746 | 3,250 | 27,926 |
| 82,801 | 153 | 18,771 | 5,805 | 3,246 | 27,975 |
| 82,802 | 152 | 18,787 | 5,849 | 3,264 | 28,052 |
| 82,803 | 148 | 18,885 | 5,887 | 3,256 | 28,176 |
| 82,804 | 155 | 19,010 | 5,938 | 3,276 | 28,379 |
| 82,805 | 153 | 18,739 | 5,807 | 3,210 | 27,909 |
| 82,806 | 156 | 18,880 | 5,862 | 3,271 | 28,169 |
| 82,807 | 156 | 19,152 | 5,935 | 3,313 | 28,556 |

|        |     |        |       |       |        |
|--------|-----|--------|-------|-------|--------|
| 82,808 | 153 | 19,107 | 5,901 | 3,295 | 28,456 |
| 82,809 | 148 | 19,375 | 5,956 | 3,346 | 28,825 |
| 82,810 | 147 | 19,537 | 6,016 | 3,399 | 29,099 |
| 82,811 | 147 | 19,673 | 6,069 | 3,424 | 29,313 |
| 82,812 | 144 | 19,460 | 5,992 | 3,387 | 28,983 |
| 82,813 | 150 | 19,679 | 6,084 | 3,425 | 29,338 |
| 82,814 | 155 | 19,761 | 6,107 | 3,456 | 29,479 |
| 82,815 | 158 | 19,542 | 6,059 | 3,445 | 29,204 |
| 82,816 | 158 | 19,375 | 5,996 | 3,436 | 28,965 |
| 82,817 | 162 | 19,771 | 6,086 | 3,500 | 29,519 |
| 82,818 | 159 | 19,579 | 6,035 | 3,475 | 29,248 |
| 82,819 | 163 | 19,254 | 5,918 | 3,425 | 28,760 |
| 82,820 | 164 | 19,334 | 5,925 | 3,426 | 28,849 |
| 82,821 | 160 | 19,122 | 5,866 | 3,396 | 28,544 |
| 82,822 | 160 | 18,997 | 5,805 | 3,365 | 28,327 |
| 82,823 | 158 | 20,220 | 6,165 | 3,550 | 30,093 |
| 82,824 | 163 | 20,378 | 6,178 | 3,551 | 30,270 |
| 82,825 | 162 | 20,347 | 6,176 | 3,551 | 30,236 |
| 82,826 | 157 | 20,656 | 6,266 | 3,628 | 30,707 |
| 82,827 | 160 | 20,628 | 6,284 | 3,639 | 30,711 |
| 82,828 | 153 | 20,740 | 6,320 | 3,659 | 30,872 |
| 82,829 | 152 | 20,618 | 6,287 | 3,618 | 30,675 |
| 82,830 | 152 | 20,705 | 6,384 | 3,637 | 30,878 |
| 82,831 | 152 | 20,696 | 6,392 | 3,645 | 30,885 |
| 82,832 | 149 | 20,670 | 6,348 | 3,634 | 30,801 |
| 82,833 | 149 | 20,674 | 6,340 | 3,624 | 30,787 |
| 82,834 | 151 | 20,565 | 6,336 | 3,630 | 30,682 |
| 82,835 | 150 | 20,444 | 6,292 | 3,588 | 30,474 |
| 82,836 | 156 | 20,522 | 6,337 | 3,631 | 30,646 |
| 82,837 | 156 | 20,585 | 6,382 | 3,641 | 30,764 |
| 82,838 | 158 | 20,681 | 6,387 | 3,630 | 30,856 |
| 82,839 | 159 | 20,709 | 6,280 | 3,568 | 30,716 |

|        |     |        |       |       |        |
|--------|-----|--------|-------|-------|--------|
| 82,840 | 166 | 21,012 | 6,363 | 3,598 | 31,139 |
| 82,841 | 165 | 21,074 | 6,343 | 3,617 | 31,199 |
| 82,842 | 172 | 21,410 | 6,409 | 3,665 | 31,656 |
| 82,843 | 163 | 21,275 | 6,344 | 3,636 | 31,418 |
| 82,844 | 160 | 21,121 | 6,353 | 3,651 | 31,285 |
| 82,845 | 163 | 21,438 | 6,448 | 3,727 | 31,776 |
| 82,846 | 151 | 21,177 | 6,414 | 3,695 | 31,437 |
| 82,847 | 145 | 20,256 | 6,143 | 3,523 | 30,067 |
| 82,848 | 145 | 20,439 | 6,232 | 3,562 | 30,378 |
| 82,849 | 139 | 20,717 | 6,276 | 3,596 | 30,728 |
| 82,850 | 140 | 20,755 | 6,267 | 3,601 | 30,763 |
| 82,851 | 139 | 21,171 | 6,393 | 3,680 | 31,383 |
| 82,852 | 139 | 21,369 | 6,468 | 3,736 | 31,712 |
| 82,853 | 137 | 20,983 | 6,345 | 3,663 | 31,128 |
| 82,854 | 141 | 21,105 | 6,380 | 3,706 | 31,332 |
| 82,855 | 139 | 21,316 | 6,436 | 3,735 | 31,626 |
| 82,856 | 146 | 21,118 | 6,374 | 3,691 | 31,329 |
| 82,857 | 143 | 21,213 | 6,374 | 3,679 | 31,409 |
| 82,858 | 141 | 21,148 | 6,362 | 3,673 | 31,324 |
| 82,859 | 145 | 21,241 | 6,392 | 3,675 | 31,453 |
| 82,860 | 161 | 21,530 | 6,453 | 3,695 | 31,839 |
| 82,861 | 159 | 21,181 | 6,341 | 3,631 | 31,312 |
| 82,862 | 163 | 21,427 | 6,348 | 3,648 | 31,586 |
| 82,863 | 162 | 21,280 | 6,298 | 3,626 | 31,366 |
| 82,864 | 158 | 21,377 | 6,252 | 3,606 | 31,393 |
| 82,865 | 160 | 21,296 | 6,255 | 3,613 | 31,324 |
| 82,866 | 151 | 21,411 | 6,307 | 3,644 | 31,513 |
| 82,867 | 155 | 21,466 | 6,321 | 3,637 | 31,579 |
| 82,868 | 159 | 21,338 | 6,285 | 3,616 | 31,398 |
| 82,869 | 156 | 21,122 | 6,256 | 3,607 | 31,141 |
| 82,870 | 155 | 21,313 | 6,325 | 3,647 | 31,440 |
| 82,871 | 152 | 21,349 | 6,336 | 3,663 | 31,500 |

|        |     |        |       |       |        |
|--------|-----|--------|-------|-------|--------|
| 82,872 | 148 | 21,274 | 6,384 | 3,630 | 31,436 |
| 82,873 | 150 | 21,247 | 6,372 | 3,619 | 31,388 |
| 82,874 | 150 | 21,058 | 6,358 | 3,628 | 31,194 |
| 82,875 | 146 | 21,283 | 6,454 | 3,677 | 31,560 |
| 82,876 | 154 | 21,198 | 6,443 | 3,652 | 31,447 |
| 82,877 | 155 | 21,035 | 6,418 | 3,623 | 31,231 |
| 82,878 | 152 | 21,419 | 6,533 | 3,698 | 31,802 |
| 82,879 | 155 | 21,243 | 6,516 | 3,695 | 31,609 |
| 82,880 | 154 | 21,329 | 6,493 | 3,661 | 31,637 |
| 82,881 | 155 | 21,525 | 6,507 | 3,675 | 31,862 |
| 82,882 | 164 | 21,707 | 6,582 | 3,694 | 32,147 |
| 82,883 | 169 | 21,559 | 6,531 | 3,644 | 31,903 |
| 82,884 | 167 | 21,836 | 6,582 | 3,694 | 32,279 |
| 82,885 | 163 | 21,964 | 6,610 | 3,686 | 32,423 |
| 82,886 | 163 | 22,274 | 6,684 | 3,712 | 32,833 |
| 82,887 | 157 | 22,578 | 6,767 | 3,773 | 33,275 |
| 82,888 | 160 | 22,582 | 6,777 | 3,789 | 33,308 |
| 82,889 | 158 | 22,285 | 6,714 | 3,758 | 32,915 |
| 82,890 | 156 | 21,990 | 6,678 | 3,740 | 32,564 |
| 82,891 | 153 | 22,304 | 6,747 | 3,830 | 33,034 |
| 82,892 | 152 | 22,152 | 6,754 | 3,826 | 32,884 |
| 82,893 | 149 | 22,159 | 6,725 | 3,807 | 32,840 |
| 82,894 | 149 | 22,146 | 6,720 | 3,829 | 32,844 |
| 82,895 | 154 | 22,184 | 6,710 | 3,806 | 32,854 |
| 82,896 | 157 | 22,159 | 6,681 | 3,770 | 32,767 |
| 82,897 | 159 | 21,885 | 6,555 | 3,722 | 32,321 |
| 82,898 | 159 | 22,060 | 6,571 | 3,745 | 32,535 |
| 82,899 | 159 | 22,066 | 6,556 | 3,766 | 32,547 |
| 82,900 | 160 | 21,981 | 6,571 | 3,757 | 32,469 |
| 82,901 | 170 | 21,868 | 6,549 | 3,724 | 32,311 |
| 82,902 | 174 | 21,793 | 6,496 | 3,689 | 32,152 |
| 82,903 | 173 | 21,840 | 6,502 | 3,687 | 32,202 |

|        |     |        |       |       |        |
|--------|-----|--------|-------|-------|--------|
| 82,904 | 173 | 21,812 | 6,506 | 3,677 | 32,168 |
| 82,905 | 172 | 21,739 | 6,495 | 3,670 | 32,076 |
| 82,906 | 172 | 21,674 | 6,483 | 3,669 | 31,998 |
| 82,907 | 173 | 21,755 | 6,539 | 3,715 | 32,182 |
| 82,908 | 176 | 21,734 | 6,544 | 3,718 | 32,172 |
| 82,909 | 173 | 21,320 | 6,422 | 3,652 | 31,567 |
| 82,910 | 177 | 21,422 | 6,492 | 3,673 | 31,764 |
| 82,911 | 175 | 21,554 | 6,518 | 3,690 | 31,937 |
| 82,912 | 173 | 21,246 | 6,492 | 3,655 | 31,566 |
| 82,913 | 169 | 21,495 | 6,600 | 3,706 | 31,970 |
| 82,914 | 171 | 21,322 | 6,604 | 3,690 | 31,787 |
| 82,915 | 165 | 21,342 | 6,616 | 3,735 | 31,858 |
| 82,916 | 171 | 21,209 | 6,538 | 3,685 | 31,603 |
| 82,917 | 171 | 21,071 | 6,481 | 3,652 | 31,375 |
| 82,918 | 166 | 20,994 | 6,446 | 3,631 | 31,237 |
| 82,919 | 157 | 20,772 | 6,365 | 3,577 | 30,871 |
| 82,920 | 163 | 21,283 | 6,481 | 3,672 | 31,599 |
| 82,921 | 164 | 21,312 | 6,441 | 3,665 | 31,582 |
| 82,922 | 164 | 20,859 | 6,296 | 3,577 | 30,896 |
| 82,923 | 165 | 21,131 | 6,342 | 3,629 | 31,267 |
| 82,924 | 166 | 21,123 | 6,355 | 3,635 | 31,279 |
| 82,925 | 166 | 20,891 | 6,255 | 3,588 | 30,900 |
| 82,926 | 178 | 21,252 | 6,388 | 3,661 | 31,479 |
| 82,927 | 174 | 21,152 | 6,341 | 3,624 | 31,291 |
| 82,928 | 173 | 21,237 | 6,329 | 3,639 | 31,378 |
| 82,929 | 172 | 21,003 | 6,262 | 3,552 | 30,989 |
| 82,930 | 172 | 21,145 | 6,276 | 3,558 | 31,151 |
| 82,931 | 177 | 20,599 | 6,118 | 3,504 | 30,398 |
| 82,932 | 178 | 20,665 | 6,152 | 3,517 | 30,512 |
| 82,933 | 176 | 20,695 | 6,137 | 3,518 | 30,526 |
| 82,934 | 169 | 20,463 | 6,081 | 3,483 | 30,196 |
| 82,935 | 171 | 20,551 | 6,124 | 3,520 | 30,366 |



|        |     |        |       |       |        |
|--------|-----|--------|-------|-------|--------|
| 82,936 | 173 | 20,666 | 6,164 | 3,549 | 30,552 |
| 82,937 | 177 | 20,110 | 5,987 | 3,421 | 29,695 |
| 82,938 | 176 | 20,296 | 6,014 | 3,454 | 29,940 |
| 82,939 | 174 | 20,267 | 5,989 | 3,453 | 29,883 |
| 82,940 | 173 | 20,378 | 5,952 | 3,448 | 29,951 |
| 82,941 | 179 | 20,629 | 5,980 | 3,445 | 30,233 |
| 82,942 | 177 | 20,596 | 5,919 | 3,406 | 30,098 |
| 82,943 | 180 | 20,594 | 5,915 | 3,398 | 30,087 |
| 82,944 | 184 | 20,847 | 5,981 | 3,446 | 30,458 |
| 82,945 | 180 | 19,971 | 5,718 | 3,297 | 29,166 |
| 82,946 | 182 | 20,300 | 5,788 | 3,345 | 29,615 |
| 82,947 | 188 | 20,584 | 5,883 | 3,380 | 30,035 |
| 82,948 | 188 | 19,948 | 5,668 | 3,252 | 29,056 |
| 82,949 | 190 | 20,147 | 5,727 | 3,265 | 29,329 |
| 82,950 | 191 | 20,348 | 5,752 | 3,284 | 29,575 |
| 82,951 | 190 | 20,316 | 5,735 | 3,289 | 29,530 |
| 82,952 | 183 | 20,488 | 5,783 | 3,335 | 29,789 |
| 82,953 | 183 | 20,619 | 5,856 | 3,396 | 30,054 |
| 82,954 | 182 | 20,579 | 5,830 | 3,396 | 29,987 |
| 82,955 | 177 | 20,481 | 5,744 | 3,361 | 29,763 |
| 82,956 | 182 | 20,585 | 5,783 | 3,376 | 29,926 |
| 82,957 | 174 | 20,301 | 5,702 | 3,307 | 29,484 |
| 82,958 | 175 | 20,357 | 5,675 | 3,307 | 29,514 |
| 82,959 | 173 | 20,293 | 5,633 | 3,299 | 29,398 |
| 82,960 | 174 | 20,299 | 5,631 | 3,289 | 29,393 |
| 82,961 | 159 | 20,365 | 5,603 | 3,286 | 29,413 |
| 82,962 | 163 | 20,633 | 5,662 | 3,324 | 29,782 |
| 82,963 | 164 | 20,537 | 5,579 | 3,283 | 29,563 |
| 82,964 | 170 | 20,574 | 5,607 | 3,279 | 29,630 |
| 82,965 | 172 | 20,562 | 5,612 | 3,278 | 29,624 |
| 82,966 | 172 | 20,864 | 5,699 | 3,312 | 30,047 |
| 82,967 | 164 | 20,901 | 5,727 | 3,329 | 30,121 |

|        |     |        |       |       |        |
|--------|-----|--------|-------|-------|--------|
| 82,968 | 163 | 20,833 | 5,707 | 3,327 | 30,030 |
| 82,969 | 163 | 20,810 | 5,673 | 3,307 | 29,953 |
| 82,970 | 165 | 21,014 | 5,712 | 3,334 | 30,225 |
| 82,971 | 161 | 21,231 | 5,740 | 3,346 | 30,478 |
| 82,972 | 160 | 20,994 | 5,709 | 3,311 | 30,174 |
| 82,973 | 158 | 21,076 | 5,725 | 3,331 | 30,290 |
| 82,974 | 159 | 21,400 | 5,829 | 3,387 | 30,775 |
| 82,975 | 160 | 21,397 | 5,758 | 3,329 | 30,644 |
| 82,976 | 161 | 21,672 | 5,797 | 3,352 | 30,982 |
| 82,977 | 158 | 21,844 | 5,836 | 3,405 | 31,243 |
| 82,978 | 155 | 21,707 | 5,796 | 3,395 | 31,053 |
| 82,979 | 153 | 21,775 | 5,783 | 3,401 | 31,112 |
| 82,980 | 155 | 22,096 | 5,838 | 3,437 | 31,526 |
| 82,981 | 154 | 22,002 | 5,813 | 3,435 | 31,404 |
| 82,982 | 148 | 21,955 | 5,776 | 3,427 | 31,306 |
| 82,983 | 144 | 21,934 | 5,770 | 3,417 | 31,265 |
| 82,984 | 145 | 22,217 | 5,836 | 3,439 | 31,637 |
| 82,985 | 143 | 22,126 | 5,792 | 3,396 | 31,457 |
| 82,986 | 142 | 21,933 | 5,755 | 3,365 | 31,195 |
| 82,987 | 141 | 22,030 | 5,774 | 3,379 | 31,324 |
| 82,988 | 136 | 22,052 | 5,771 | 3,391 | 31,350 |
| 82,989 | 141 | 22,151 | 5,786 | 3,384 | 31,462 |
| 82,990 | 141 | 22,115 | 5,794 | 3,374 | 31,424 |
| 82,991 | 141 | 22,183 | 5,840 | 3,412 | 31,576 |
| 82,992 | 145 | 22,570 | 5,989 | 3,512 | 32,216 |
| 82,993 | 146 | 22,360 | 5,973 | 3,492 | 31,971 |
| 82,994 | 140 | 22,338 | 5,973 | 3,480 | 31,931 |
| 82,995 | 143 | 22,662 | 6,021 | 3,525 | 32,351 |
| 82,996 | 129 | 21,974 | 5,853 | 3,440 | 31,396 |
| 82,997 | 132 | 22,240 | 5,899 | 3,481 | 31,752 |
| 82,998 | 135 | 22,562 | 5,946 | 3,536 | 32,179 |
| 82,999 | 135 | 22,494 | 5,947 | 3,521 | 32,097 |

|        |     |        |       |       |        |
|--------|-----|--------|-------|-------|--------|
| 83,000 | 136 | 22,695 | 6,021 | 3,566 | 32,418 |
| 83,001 | 132 | 22,706 | 6,056 | 3,592 | 32,486 |
| 83,002 | 130 | 22,838 | 6,052 | 3,610 | 32,630 |
| 83,003 | 127 | 22,940 | 6,079 | 3,606 | 32,752 |
| 83,004 | 126 | 22,945 | 6,077 | 3,592 | 32,740 |
| 83,005 | 130 | 22,908 | 6,096 | 3,598 | 32,732 |
| 83,006 | 130 | 22,998 | 6,117 | 3,595 | 32,840 |
| 83,007 | 129 | 23,049 | 6,136 | 3,636 | 32,950 |
| 83,008 | 137 | 23,299 | 6,207 | 3,688 | 33,331 |
| 83,009 | 131 | 23,230 | 6,228 | 3,695 | 33,284 |
| 83,010 | 132 | 23,315 | 6,240 | 3,703 | 33,390 |
| 83,011 | 140 | 23,210 | 6,247 | 3,718 | 33,315 |
| 83,012 | 141 | 23,419 | 6,313 | 3,765 | 33,638 |
| 83,013 | 137 | 23,032 | 6,202 | 3,729 | 33,100 |
| 83,014 | 138 | 23,205 | 6,241 | 3,764 | 33,348 |
| 83,015 | 132 | 23,441 | 6,276 | 3,799 | 33,648 |
| 83,016 | 134 | 23,515 | 6,348 | 3,810 | 33,807 |
| 83,017 | 134 | 23,488 | 6,335 | 3,839 | 33,796 |
| 83,018 | 139 | 23,280 | 6,297 | 3,801 | 33,517 |
| 83,019 | 138 | 23,032 | 6,246 | 3,766 | 33,182 |
| 83,020 | 145 | 23,226 | 6,335 | 3,769 | 33,475 |
| 83,021 | 145 | 23,258 | 6,327 | 3,757 | 33,487 |
| 83,022 | 152 | 23,359 | 6,351 | 3,793 | 33,655 |
| 83,023 | 152 | 23,359 | 6,355 | 3,783 | 33,649 |
| 83,024 | 149 | 22,996 | 6,255 | 3,710 | 33,110 |
| 83,025 | 151 | 23,096 | 6,282 | 3,731 | 33,260 |
| 83,026 | 151 | 23,170 | 6,317 | 3,769 | 33,407 |
| 83,027 | 152 | 22,915 | 6,275 | 3,763 | 33,105 |
| 83,028 | 158 | 23,098 | 6,344 | 3,777 | 33,377 |
| 83,029 | 156 | 22,983 | 6,358 | 3,774 | 33,271 |
| 83,030 | 164 | 22,950 | 6,354 | 3,781 | 33,249 |
| 83,031 | 166 | 22,998 | 6,352 | 3,774 | 33,290 |

|        |     |        |       |       |        |
|--------|-----|--------|-------|-------|--------|
| 83,032 | 182 | 22,814 | 6,332 | 3,750 | 33,078 |
| 83,033 | 182 | 22,905 | 6,350 | 3,759 | 33,196 |
| 83,034 | 182 | 23,050 | 6,369 | 3,789 | 33,390 |
| 83,035 | 186 | 23,091 | 6,361 | 3,782 | 33,420 |
| 83,036 | 188 | 23,059 | 6,336 | 3,789 | 33,372 |
| 83,037 | 193 | 23,177 | 6,404 | 3,838 | 33,612 |
| 83,038 | 192 | 23,127 | 6,398 | 3,838 | 33,555 |
| 83,039 | 194 | 22,951 | 6,378 | 3,832 | 33,355 |
| 83,040 | 192 | 23,196 | 6,457 | 3,874 | 33,719 |
| 83,041 | 191 | 23,058 | 6,445 | 3,854 | 33,548 |
| 83,042 | 186 | 22,928 | 6,415 | 3,848 | 33,377 |
| 83,043 | 182 | 22,908 | 6,386 | 3,828 | 33,304 |
| 83,044 | 187 | 22,871 | 6,364 | 3,823 | 33,245 |
| 83,045 | 186 | 22,625 | 6,318 | 3,786 | 32,915 |
| 83,046 | 183 | 22,446 | 6,321 | 3,774 | 32,724 |
| 83,047 | 184 | 22,363 | 6,305 | 3,778 | 32,630 |
| 83,048 | 185 | 22,377 | 6,304 | 3,776 | 32,642 |
| 83,049 | 177 | 22,184 | 6,274 | 3,748 | 32,383 |
| 83,050 | 179 | 21,924 | 6,165 | 3,703 | 31,971 |
| 83,051 | 178 | 21,873 | 6,173 | 3,698 | 31,922 |
| 83,052 | 177 | 21,899 | 6,169 | 3,671 | 31,916 |
| 83,053 | 179 | 21,858 | 6,161 | 3,663 | 31,861 |
| 83,054 | 180 | 21,888 | 6,166 | 3,665 | 31,899 |
| 83,055 | 176 | 21,863 | 6,115 | 3,653 | 31,807 |
| 83,056 | 178 | 22,084 | 6,178 | 3,676 | 32,116 |
| 83,057 | 176 | 21,396 | 5,976 | 3,574 | 31,122 |
| 83,058 | 176 | 21,673 | 6,003 | 3,597 | 31,449 |
| 83,059 | 169 | 21,854 | 6,058 | 3,628 | 31,709 |
| 83,060 | 169 | 21,065 | 5,879 | 3,536 | 30,649 |
| 83,061 | 167 | 21,292 | 5,922 | 3,558 | 30,939 |
| 83,062 | 160 | 21,418 | 5,955 | 3,583 | 31,116 |
| 83,063 | 163 | 21,647 | 5,984 | 3,607 | 31,401 |

|        |     |        |       |       |        |
|--------|-----|--------|-------|-------|--------|
| 83,064 | 158 | 21,674 | 5,953 | 3,592 | 31,377 |
| 83,065 | 162 | 21,502 | 5,880 | 3,532 | 31,076 |
| 83,066 | 162 | 21,545 | 5,886 | 3,523 | 31,116 |
| 83,067 | 158 | 21,289 | 5,825 | 3,485 | 30,757 |
| 83,068 | 159 | 21,275 | 5,819 | 3,472 | 30,725 |
| 83,069 | 159 | 21,244 | 5,811 | 3,466 | 30,680 |
| 83,070 | 157 | 21,149 | 5,793 | 3,475 | 30,574 |
| 83,071 | 158 | 21,167 | 5,868 | 3,507 | 30,700 |
| 83,072 | 158 | 21,098 | 5,864 | 3,507 | 30,627 |
| 83,073 | 154 | 20,953 | 5,876 | 3,500 | 30,483 |
| 83,074 | 153 | 20,669 | 5,849 | 3,503 | 30,174 |
| 83,075 | 153 | 20,756 | 5,866 | 3,511 | 30,286 |
| 83,076 | 146 | 20,660 | 5,828 | 3,487 | 30,121 |
| 83,077 | 146 | 20,544 | 5,811 | 3,455 | 29,956 |
| 83,078 | 146 | 20,577 | 5,809 | 3,455 | 29,987 |
| 83,079 | 144 | 20,663 | 5,768 | 3,433 | 30,008 |
| 83,080 | 143 | 20,647 | 5,767 | 3,437 | 29,994 |
| 83,081 | 137 | 20,262 | 5,668 | 3,374 | 29,441 |
| 83,082 | 139 | 20,385 | 5,699 | 3,387 | 29,610 |
| 83,083 | 121 | 20,701 | 5,800 | 3,422 | 30,044 |
| 83,084 | 119 | 21,021 | 5,855 | 3,464 | 30,459 |
| 83,085 | 117 | 20,724 | 5,780 | 3,425 | 30,046 |
| 83,086 | 116 | 20,974 | 5,843 | 3,451 | 30,384 |
| 83,087 | 113 | 21,348 | 5,896 | 3,492 | 30,849 |
| 83,088 | 115 | 21,347 | 5,857 | 3,484 | 30,803 |
| 83,089 | 114 | 21,485 | 5,878 | 3,480 | 30,957 |
| 83,090 | 114 | 22,201 | 6,039 | 3,561 | 31,915 |
| 83,091 | 114 | 22,336 | 6,019 | 3,570 | 32,039 |
| 83,092 | 116 | 22,175 | 5,944 | 3,539 | 31,774 |
| 83,093 | 118 | 21,652 | 5,782 | 3,459 | 31,011 |
| 83,094 | 118 | 21,763 | 5,833 | 3,491 | 31,205 |
| 83,095 | 117 | 21,986 | 5,883 | 3,518 | 31,504 |

|        |     |        |       |       |        |
|--------|-----|--------|-------|-------|--------|
| 83,096 | 117 | 22,065 | 5,942 | 3,544 | 31,668 |
| 83,097 | 115 | 22,075 | 5,934 | 3,552 | 31,676 |
| 83,098 | 115 | 22,013 | 5,943 | 3,570 | 31,641 |
| 83,099 | 113 | 21,942 | 5,963 | 3,571 | 31,589 |
| 83,100 | 113 | 22,058 | 6,003 | 3,569 | 31,743 |
| 83,101 | 108 | 21,898 | 5,956 | 3,529 | 31,491 |
| 83,102 | 111 | 21,472 | 5,858 | 3,502 | 30,943 |
| 83,103 | 112 | 21,603 | 5,921 | 3,509 | 31,145 |
| 83,104 | 115 | 21,832 | 5,968 | 3,535 | 31,450 |
| 83,105 | 115 | 21,756 | 5,987 | 3,543 | 31,401 |
| 83,106 | 119 | 21,917 | 6,054 | 3,577 | 31,667 |
| 83,107 | 116 | 21,938 | 6,036 | 3,571 | 31,661 |
| 83,108 | 113 | 21,779 | 5,968 | 3,518 | 31,378 |
| 83,109 | 112 | 21,581 | 5,929 | 3,491 | 31,113 |
| 83,110 | 113 | 21,698 | 5,905 | 3,478 | 31,194 |
| 83,111 | 113 | 22,008 | 5,969 | 3,498 | 31,588 |
| 83,112 | 112 | 21,768 | 5,933 | 3,466 | 31,279 |
| 83,113 | 112 | 21,771 | 5,930 | 3,452 | 31,265 |
| 83,114 | 108 | 22,013 | 6,036 | 3,495 | 31,652 |
| 83,115 | 105 | 21,810 | 6,010 | 3,480 | 31,405 |
| 83,116 | 103 | 21,620 | 5,958 | 3,489 | 31,170 |
| 83,117 | 104 | 21,717 | 5,957 | 3,478 | 31,256 |
| 83,118 | 106 | 21,889 | 6,016 | 3,503 | 31,514 |
| 83,119 | 105 | 21,754 | 5,945 | 3,472 | 31,276 |
| 83,120 | 109 | 22,018 | 6,000 | 3,484 | 31,611 |
| 83,121 | 108 | 21,935 | 6,010 | 3,476 | 31,529 |
| 83,122 | 103 | 21,814 | 5,898 | 3,442 | 31,257 |
| 83,123 | 106 | 21,921 | 5,916 | 3,448 | 31,391 |
| 83,124 | 109 | 21,874 | 5,852 | 3,419 | 31,254 |
| 83,125 | 109 | 21,833 | 5,813 | 3,388 | 31,143 |
| 83,126 | 109 | 21,903 | 5,829 | 3,381 | 31,222 |
| 83,127 | 108 | 22,181 | 5,892 | 3,413 | 31,594 |

|        |     |        |       |       |        |
|--------|-----|--------|-------|-------|--------|
| 83,128 | 108 | 21,915 | 5,832 | 3,367 | 31,222 |
| 83,129 | 108 | 21,900 | 5,819 | 3,372 | 31,199 |
| 83,130 | 112 | 21,726 | 5,786 | 3,364 | 30,988 |
| 83,131 | 111 | 21,677 | 5,806 | 3,365 | 30,959 |
| 83,132 | 107 | 21,305 | 5,720 | 3,324 | 30,456 |
| 83,133 | 105 | 21,215 | 5,729 | 3,351 | 30,400 |
| 83,134 | 105 | 21,011 | 5,653 | 3,340 | 30,109 |
| 83,135 | 106 | 20,743 | 5,599 | 3,307 | 29,755 |
| 83,136 | 101 | 20,276 | 5,496 | 3,240 | 29,113 |
| 83,137 | 101 | 20,078 | 5,447 | 3,254 | 28,880 |
| 83,138 | 100 | 19,875 | 5,412 | 3,234 | 28,621 |
| 83,139 | 97  | 19,936 | 5,440 | 3,229 | 28,702 |
| 83,140 | 97  | 19,765 | 5,385 | 3,213 | 28,460 |
| 83,141 | 99  | 18,990 | 5,183 | 3,093 | 27,365 |
| 83,142 | 101 | 19,220 | 5,256 | 3,134 | 27,711 |
| 83,143 | 98  | 19,262 | 5,299 | 3,170 | 27,829 |
| 83,144 | 96  | 19,152 | 5,219 | 3,115 | 27,582 |
| 83,145 | 96  | 19,421 | 5,270 | 3,133 | 27,920 |
| 83,146 | 92  | 19,696 | 5,314 | 3,167 | 28,269 |
| 83,147 | 93  | 19,949 | 5,366 | 3,203 | 28,611 |
| 83,148 | 93  | 20,108 | 5,384 | 3,196 | 28,781 |
| 83,149 | 90  | 19,942 | 5,303 | 3,149 | 28,484 |
| 83,150 | 93  | 20,088 | 5,362 | 3,174 | 28,717 |
| 83,151 | 93  | 19,955 | 5,325 | 3,173 | 28,546 |
| 83,152 | 91  | 19,870 | 5,295 | 3,166 | 28,422 |
| 83,153 | 89  | 19,746 | 5,257 | 3,148 | 28,240 |
| 83,154 | 92  | 19,821 | 5,289 | 3,158 | 28,360 |
| 83,155 | 93  | 20,022 | 5,354 | 3,201 | 28,670 |
| 83,156 | 96  | 19,951 | 5,282 | 3,174 | 28,503 |
| 83,157 | 93  | 19,827 | 5,244 | 3,144 | 28,308 |
| 83,158 | 97  | 19,860 | 5,263 | 3,158 | 28,378 |
| 83,159 | 97  | 19,747 | 5,325 | 3,177 | 28,346 |

|        |     |        |       |       |        |
|--------|-----|--------|-------|-------|--------|
| 83,160 | 103 | 19,680 | 5,301 | 3,159 | 28,243 |
| 83,161 | 102 | 19,439 | 5,310 | 3,138 | 27,989 |
| 83,162 | 103 | 19,642 | 5,380 | 3,205 | 28,330 |
| 83,163 | 104 | 19,844 | 5,436 | 3,207 | 28,591 |
| 83,164 | 104 | 19,930 | 5,485 | 3,209 | 28,728 |
| 83,165 | 103 | 19,610 | 5,397 | 3,183 | 28,293 |
| 83,166 | 106 | 19,742 | 5,456 | 3,201 | 28,505 |
| 83,167 | 105 | 19,444 | 5,378 | 3,143 | 28,070 |
| 83,168 | 104 | 19,428 | 5,361 | 3,143 | 28,036 |
| 83,169 | 105 | 19,440 | 5,363 | 3,140 | 28,048 |
| 83,170 | 102 | 19,588 | 5,434 | 3,156 | 28,280 |
| 83,171 | 98  | 19,624 | 5,458 | 3,169 | 28,349 |
| 83,172 | 97  | 19,383 | 5,400 | 3,128 | 28,008 |
| 83,173 | 96  | 19,255 | 5,414 | 3,119 | 27,884 |
| 83,174 | 98  | 19,526 | 5,503 | 3,156 | 28,283 |
| 83,175 | 96  | 19,328 | 5,519 | 3,147 | 28,090 |
| 83,176 | 95  | 19,159 | 5,493 | 3,136 | 27,883 |
| 83,177 | 96  | 19,553 | 5,622 | 3,199 | 28,470 |
| 83,178 | 93  | 19,308 | 5,570 | 3,190 | 28,161 |
| 83,179 | 95  | 19,466 | 5,631 | 3,209 | 28,401 |
| 83,180 | 92  | 19,505 | 5,624 | 3,213 | 28,434 |
| 83,181 | 90  | 19,417 | 5,551 | 3,162 | 28,220 |
| 83,182 | 91  | 19,663 | 5,594 | 3,195 | 28,543 |
| 83,183 | 92  | 19,613 | 5,559 | 3,173 | 28,437 |
| 83,184 | 94  | 19,825 | 5,604 | 3,190 | 28,713 |
| 83,185 | 93  | 19,528 | 5,564 | 3,163 | 28,348 |
| 83,186 | 98  | 19,589 | 5,628 | 3,173 | 28,488 |
| 83,187 | 101 | 19,565 | 5,641 | 3,190 | 28,497 |
| 83,188 | 102 | 19,498 | 5,642 | 3,152 | 28,394 |
| 83,189 | 101 | 19,382 | 5,652 | 3,148 | 28,283 |
| 83,190 | 104 | 19,305 | 5,636 | 3,151 | 28,196 |
| 83,191 | 106 | 19,186 | 5,623 | 3,121 | 28,036 |



|        |     |        |       |       |        |
|--------|-----|--------|-------|-------|--------|
| 83,192 | 102 | 19,097 | 5,610 | 3,102 | 27,911 |
| 83,193 | 101 | 19,100 | 5,583 | 3,104 | 27,888 |
| 83,194 | 106 | 19,291 | 5,649 | 3,135 | 28,181 |
| 83,195 | 125 | 19,092 | 5,618 | 3,113 | 27,948 |
| 83,196 | 126 | 18,877 | 5,590 | 3,103 | 27,696 |
| 83,197 | 133 | 19,055 | 5,762 | 3,199 | 28,149 |
| 83,198 | 138 | 19,119 | 5,787 | 3,197 | 28,241 |
| 83,199 | 142 | 18,885 | 5,759 | 3,161 | 27,947 |
| 83,200 | 140 | 18,874 | 5,740 | 3,141 | 27,895 |
| 83,201 | 141 | 18,957 | 5,750 | 3,136 | 27,984 |
| 83,202 | 141 | 19,091 | 5,754 | 3,144 | 28,130 |
| 83,203 | 141 | 18,903 | 5,709 | 3,108 | 27,861 |
| 83,204 | 141 | 18,883 | 5,713 | 3,102 | 27,839 |
| 83,205 | 147 | 18,800 | 5,679 | 3,082 | 27,708 |
| 83,206 | 144 | 18,642 | 5,626 | 3,046 | 27,458 |
| 83,207 | 146 | 19,304 | 5,882 | 3,179 | 28,511 |
| 83,208 | 143 | 19,166 | 5,882 | 3,183 | 28,374 |
| 83,209 | 141 | 19,008 | 5,789 | 3,149 | 28,087 |
| 83,210 | 139 | 19,033 | 5,772 | 3,159 | 28,103 |
| 83,211 | 140 | 19,145 | 5,782 | 3,156 | 28,223 |
| 83,212 | 141 | 18,923 | 5,710 | 3,113 | 27,887 |
| 83,213 | 145 | 19,198 | 5,810 | 3,169 | 28,322 |
| 83,214 | 146 | 19,181 | 5,798 | 3,184 | 28,309 |
| 83,215 | 150 | 18,987 | 5,732 | 3,159 | 28,028 |
| 83,216 | 153 | 19,364 | 5,807 | 3,214 | 28,538 |
| 83,217 | 154 | 19,627 | 5,895 | 3,237 | 28,913 |
| 83,218 | 156 | 19,446 | 5,873 | 3,224 | 28,699 |
| 83,219 | 158 | 19,603 | 5,931 | 3,242 | 28,934 |
| 83,220 | 159 | 19,478 | 5,867 | 3,219 | 28,723 |
| 83,221 | 159 | 19,209 | 5,782 | 3,216 | 28,366 |
| 83,222 | 160 | 19,300 | 5,824 | 3,252 | 28,536 |
| 83,223 | 157 | 19,358 | 5,831 | 3,278 | 28,624 |

|        |     |        |       |       |        |
|--------|-----|--------|-------|-------|--------|
| 83,224 | 158 | 19,362 | 5,826 | 3,307 | 28,653 |
| 83,225 | 158 | 19,324 | 5,791 | 3,320 | 28,593 |
| 83,226 | 156 | 19,347 | 5,775 | 3,334 | 28,612 |
| 83,227 | 155 | 19,256 | 5,732 | 3,293 | 28,436 |
| 83,228 | 155 | 19,410 | 5,749 | 3,309 | 28,623 |
| 83,229 | 158 | 19,729 | 5,845 | 3,354 | 29,086 |
| 83,230 | 156 | 19,742 | 5,887 | 3,382 | 29,167 |
| 83,231 | 162 | 19,756 | 5,925 | 3,374 | 29,217 |
| 83,232 | 167 | 19,705 | 5,939 | 3,384 | 29,195 |
| 83,233 | 168 | 19,913 | 5,989 | 3,399 | 29,469 |
| 83,234 | 171 | 19,884 | 6,030 | 3,418 | 29,503 |
| 83,235 | 172 | 19,937 | 6,039 | 3,418 | 29,566 |
| 83,236 | 178 | 20,055 | 6,063 | 3,440 | 29,736 |
| 83,237 | 172 | 20,015 | 6,005 | 3,426 | 29,618 |
| 83,238 | 172 | 20,065 | 5,985 | 3,424 | 29,646 |
| 83,239 | 172 | 20,105 | 5,998 | 3,418 | 29,693 |
| 83,240 | 173 | 19,960 | 5,990 | 3,409 | 29,532 |
| 83,241 | 173 | 20,119 | 6,033 | 3,440 | 29,765 |
| 83,242 | 171 | 20,064 | 6,030 | 3,459 | 29,724 |
| 83,243 | 168 | 20,005 | 6,009 | 3,454 | 29,636 |
| 83,244 | 164 | 19,824 | 5,975 | 3,417 | 29,380 |
| 83,245 | 164 | 20,198 | 6,040 | 3,469 | 29,871 |
| 83,246 | 146 | 20,246 | 5,993 | 3,443 | 29,828 |
| 83,247 | 145 | 20,334 | 5,944 | 3,429 | 29,852 |
| 83,248 | 135 | 20,148 | 5,848 | 3,389 | 29,520 |
| 83,249 | 136 | 20,389 | 5,870 | 3,405 | 29,800 |
| 83,250 | 131 | 20,045 | 5,746 | 3,386 | 29,308 |
| 83,251 | 132 | 20,134 | 5,774 | 3,394 | 29,434 |
| 83,252 | 131 | 20,321 | 5,816 | 3,457 | 29,725 |
| 83,253 | 129 | 20,082 | 5,763 | 3,423 | 29,397 |
| 83,254 | 127 | 20,202 | 5,768 | 3,441 | 29,538 |
| 83,255 | 131 | 20,253 | 5,810 | 3,476 | 29,670 |

|        |     |        |       |       |        |
|--------|-----|--------|-------|-------|--------|
| 83,256 | 121 | 20,212 | 5,797 | 3,496 | 29,626 |
| 83,257 | 119 | 19,986 | 5,772 | 3,458 | 29,335 |
| 83,258 | 121 | 20,068 | 5,772 | 3,444 | 29,405 |
| 83,259 | 121 | 20,047 | 5,771 | 3,439 | 29,378 |
| 83,260 | 121 | 20,027 | 5,776 | 3,436 | 29,360 |
| 83,261 | 117 | 20,111 | 5,841 | 3,457 | 29,526 |
| 83,262 | 116 | 19,992 | 5,848 | 3,481 | 29,437 |
| 83,263 | 118 | 19,765 | 5,779 | 3,445 | 29,107 |
| 83,264 | 116 | 19,762 | 5,771 | 3,430 | 29,079 |
| 83,265 | 117 | 19,996 | 5,833 | 3,467 | 29,413 |
| 83,266 | 109 | 19,800 | 5,801 | 3,429 | 29,139 |
| 83,267 | 106 | 19,742 | 5,812 | 3,415 | 29,075 |
| 83,268 | 108 | 19,642 | 5,800 | 3,434 | 28,984 |
| 83,269 | 96  | 19,344 | 5,730 | 3,401 | 28,571 |
| 83,270 | 98  | 19,538 | 5,776 | 3,419 | 28,831 |
| 83,271 | 99  | 19,757 | 5,815 | 3,456 | 29,127 |
| 83,272 | 102 | 19,816 | 5,855 | 3,455 | 29,228 |
| 83,273 | 103 | 19,852 | 5,851 | 3,447 | 29,253 |
| 83,274 | 102 | 19,875 | 5,785 | 3,400 | 29,162 |
| 83,275 | 102 | 19,887 | 5,778 | 3,420 | 29,187 |
| 83,276 | 101 | 20,111 | 5,849 | 3,402 | 29,463 |
| 83,277 | 102 | 19,690 | 5,690 | 3,350 | 28,832 |
| 83,278 | 103 | 19,837 | 5,732 | 3,378 | 29,050 |
| 83,279 | 108 | 20,128 | 5,805 | 3,427 | 29,468 |
| 83,280 | 109 | 20,091 | 5,776 | 3,400 | 29,376 |
| 83,281 | 97  | 19,603 | 5,666 | 3,343 | 28,709 |
| 83,282 | 99  | 19,812 | 5,687 | 3,378 | 28,976 |
| 83,283 | 95  | 20,007 | 5,778 | 3,397 | 29,277 |
| 83,284 | 91  | 19,839 | 5,741 | 3,379 | 29,050 |
| 83,285 | 94  | 20,086 | 5,770 | 3,397 | 29,347 |
| 83,286 | 92  | 20,071 | 5,756 | 3,408 | 29,327 |
| 83,287 | 83  | 19,652 | 5,648 | 3,340 | 28,723 |

|        |     |        |       |       |        |
|--------|-----|--------|-------|-------|--------|
| 83,288 | 85  | 19,840 | 5,699 | 3,368 | 28,992 |
| 83,289 | 85  | 20,122 | 5,742 | 3,395 | 29,344 |
| 83,290 | 83  | 20,184 | 5,746 | 3,384 | 29,397 |
| 83,291 | 83  | 20,238 | 5,736 | 3,382 | 29,439 |
| 83,292 | 81  | 20,261 | 5,812 | 3,414 | 29,568 |
| 83,293 | 84  | 20,392 | 5,800 | 3,425 | 29,701 |
| 83,294 | 86  | 20,155 | 5,733 | 3,374 | 29,348 |
| 83,295 | 87  | 20,376 | 5,791 | 3,409 | 29,663 |
| 83,296 | 88  | 20,271 | 5,783 | 3,399 | 29,541 |
| 83,297 | 85  | 19,853 | 5,742 | 3,360 | 29,040 |
| 83,298 | 83  | 19,665 | 5,725 | 3,341 | 28,814 |
| 83,299 | 86  | 19,973 | 5,759 | 3,368 | 29,186 |
| 83,300 | 91  | 19,979 | 5,792 | 3,378 | 29,240 |
| 83,301 | 93  | 20,006 | 5,842 | 3,386 | 29,327 |
| 83,302 | 98  | 20,084 | 5,858 | 3,390 | 29,430 |
| 83,303 | 98  | 19,880 | 5,827 | 3,336 | 29,141 |
| 83,304 | 101 | 20,076 | 5,863 | 3,350 | 29,390 |
| 83,305 | 106 | 19,996 | 5,803 | 3,306 | 29,211 |
| 83,306 | 112 | 20,231 | 5,860 | 3,344 | 29,547 |
| 83,307 | 111 | 19,934 | 5,768 | 3,310 | 29,123 |
| 83,308 | 114 | 20,214 | 5,825 | 3,338 | 29,491 |
| 83,309 | 112 | 20,185 | 5,813 | 3,335 | 29,445 |
| 83,310 | 113 | 20,217 | 5,811 | 3,338 | 29,479 |
| 83,311 | 117 | 20,089 | 5,750 | 3,308 | 29,264 |
| 83,312 | 117 | 20,172 | 5,738 | 3,312 | 29,339 |
| 83,313 | 119 | 20,480 | 5,783 | 3,330 | 29,712 |
| 83,314 | 118 | 20,271 | 5,694 | 3,284 | 29,367 |
| 83,315 | 121 | 20,511 | 5,749 | 3,331 | 29,712 |
| 83,316 | 120 | 20,345 | 5,692 | 3,298 | 29,455 |
| 83,317 | 128 | 20,255 | 5,659 | 3,275 | 29,317 |
| 83,318 | 125 | 20,177 | 5,619 | 3,240 | 29,161 |
| 83,319 | 128 | 20,215 | 5,618 | 3,229 | 29,190 |

|        |     |        |       |       |        |
|--------|-----|--------|-------|-------|--------|
| 83,320 | 128 | 20,210 | 5,600 | 3,222 | 29,160 |
| 83,321 | 128 | 20,224 | 5,629 | 3,251 | 29,232 |
| 83,322 | 128 | 19,975 | 5,557 | 3,173 | 28,833 |
| 83,323 | 127 | 20,037 | 5,543 | 3,162 | 28,869 |
| 83,324 | 133 | 20,193 | 5,613 | 3,189 | 29,128 |
| 83,325 | 132 | 20,302 | 5,630 | 3,202 | 29,266 |
| 83,326 | 131 | 20,258 | 5,623 | 3,178 | 29,190 |
| 83,327 | 131 | 20,309 | 5,628 | 3,190 | 29,258 |
| 83,328 | 135 | 20,582 | 5,709 | 3,242 | 29,668 |
| 83,329 | 135 | 20,736 | 5,719 | 3,248 | 29,838 |
| 83,330 | 135 | 20,700 | 5,751 | 3,253 | 29,839 |
| 83,331 | 132 | 20,616 | 5,731 | 3,229 | 29,708 |
| 83,332 | 136 | 20,737 | 5,737 | 3,238 | 29,848 |
| 83,333 | 139 | 20,628 | 5,694 | 3,201 | 29,662 |
| 83,334 | 141 | 20,703 | 5,721 | 3,214 | 29,779 |
| 83,335 | 141 | 20,775 | 5,729 | 3,226 | 29,871 |
| 83,336 | 143 | 21,203 | 5,871 | 3,280 | 30,497 |
| 83,337 | 143 | 21,145 | 5,851 | 3,245 | 30,384 |
| 83,338 | 145 | 21,166 | 5,843 | 3,245 | 30,399 |
| 83,339 | 143 | 20,996 | 5,790 | 3,222 | 30,151 |
| 83,340 | 145 | 21,180 | 5,899 | 3,259 | 30,483 |
| 83,341 | 150 | 21,106 | 5,827 | 3,243 | 30,326 |
| 83,342 | 152 | 21,243 | 5,805 | 3,228 | 30,428 |
| 83,343 | 153 | 21,349 | 5,816 | 3,228 | 30,546 |
| 83,344 | 148 | 21,055 | 5,770 | 3,180 | 30,153 |
| 83,345 | 149 | 21,386 | 5,854 | 3,229 | 30,618 |
| 83,346 | 157 | 21,432 | 5,871 | 3,230 | 30,690 |
| 83,347 | 162 | 21,306 | 5,815 | 3,181 | 30,464 |
| 83,348 | 164 | 21,533 | 5,822 | 3,202 | 30,721 |
| 83,349 | 169 | 21,913 | 5,914 | 3,241 | 31,237 |
| 83,350 | 162 | 21,812 | 5,910 | 3,247 | 31,131 |
| 83,351 | 161 | 21,725 | 5,912 | 3,240 | 31,038 |

|        |     |        |       |       |        |
|--------|-----|--------|-------|-------|--------|
| 83,352 | 163 | 22,046 | 5,998 | 3,286 | 31,493 |
| 83,353 | 164 | 22,024 | 5,991 | 3,292 | 31,471 |
| 83,354 | 164 | 21,974 | 5,939 | 3,302 | 31,379 |
| 83,355 | 163 | 22,066 | 5,946 | 3,305 | 31,480 |
| 83,356 | 160 | 22,461 | 6,028 | 3,345 | 31,994 |
| 83,357 | 157 | 22,573 | 5,997 | 3,338 | 32,065 |
| 83,358 | 155 | 22,435 | 5,913 | 3,297 | 31,800 |
| 83,359 | 154 | 22,414 | 5,903 | 3,294 | 31,765 |
| 83,360 | 153 | 22,347 | 5,889 | 3,295 | 31,684 |
| 83,361 | 154 | 22,526 | 5,957 | 3,317 | 31,954 |
| 83,362 | 150 | 22,412 | 5,897 | 3,276 | 31,735 |
| 83,363 | 150 | 22,597 | 5,932 | 3,303 | 31,982 |
| 83,364 | 147 | 22,589 | 5,907 | 3,310 | 31,953 |
| 83,365 | 156 | 21,928 | 5,750 | 3,222 | 31,056 |
| 83,366 | 155 | 22,099 | 5,778 | 3,257 | 31,289 |
| 83,367 | 153 | 22,321 | 5,836 | 3,303 | 31,613 |
| 83,368 | 152 | 22,367 | 5,845 | 3,303 | 31,667 |
| 83,369 | 153 | 22,635 | 5,870 | 3,326 | 31,984 |
| 83,370 | 150 | 22,628 | 5,844 | 3,321 | 31,943 |
| 83,371 | 153 | 22,629 | 5,782 | 3,280 | 31,844 |
| 83,372 | 153 | 22,743 | 5,802 | 3,294 | 31,992 |
| 83,373 | 152 | 22,789 | 5,831 | 3,330 | 32,102 |
| 83,374 | 150 | 22,537 | 5,751 | 3,298 | 31,736 |
| 83,375 | 149 | 22,713 | 5,775 | 3,327 | 31,964 |
| 83,376 | 155 | 22,377 | 5,711 | 3,271 | 31,514 |
| 83,377 | 154 | 22,332 | 5,691 | 3,278 | 31,455 |
| 83,378 | 157 | 22,606 | 5,735 | 3,305 | 31,803 |
| 83,379 | 154 | 21,719 | 5,531 | 3,172 | 30,576 |
| 83,380 | 158 | 21,941 | 5,544 | 3,188 | 30,831 |
| 83,381 | 154 | 22,213 | 5,553 | 3,195 | 31,115 |
| 83,382 | 162 | 22,570 | 5,598 | 3,248 | 31,578 |
| 83,383 | 157 | 22,431 | 5,546 | 3,246 | 31,380 |

|        |     |        |       |       |        |
|--------|-----|--------|-------|-------|--------|
| 83,384 | 159 | 22,392 | 5,500 | 3,226 | 31,277 |
| 83,385 | 162 | 22,586 | 5,528 | 3,261 | 31,537 |
| 83,386 | 164 | 22,505 | 5,527 | 3,275 | 31,471 |
| 83,387 | 164 | 22,326 | 5,487 | 3,265 | 31,242 |
| 83,388 | 163 | 22,257 | 5,496 | 3,308 | 31,224 |
| 83,389 | 167 | 22,126 | 5,489 | 3,304 | 31,086 |
| 83,390 | 168 | 22,105 | 5,469 | 3,304 | 31,046 |
| 83,391 | 165 | 22,140 | 5,426 | 3,312 | 31,043 |
| 83,392 | 162 | 22,052 | 5,443 | 3,309 | 30,966 |
| 83,393 | 163 | 22,101 | 5,440 | 3,338 | 31,042 |
| 83,394 | 174 | 22,116 | 5,430 | 3,349 | 31,069 |
| 83,395 | 180 | 22,083 | 5,435 | 3,345 | 31,043 |
| 83,396 | 180 | 22,130 | 5,460 | 3,361 | 31,131 |
| 83,397 | 173 | 22,335 | 5,477 | 3,385 | 31,370 |
| 83,398 | 165 | 22,343 | 5,506 | 3,389 | 31,403 |
| 83,399 | 163 | 22,545 | 5,501 | 3,394 | 31,603 |
| 83,400 | 164 | 22,474 | 5,430 | 3,369 | 31,437 |
| 83,401 | 164 | 22,763 | 5,471 | 3,403 | 31,801 |
| 83,402 | 166 | 23,115 | 5,551 | 3,475 | 32,307 |
| 83,403 | 166 | 23,021 | 5,521 | 3,472 | 32,180 |
| 83,404 | 164 | 23,357 | 5,581 | 3,526 | 32,628 |
| 83,405 | 164 | 23,491 | 5,605 | 3,554 | 32,814 |
| 83,406 | 163 | 23,565 | 5,595 | 3,568 | 32,891 |
| 83,407 | 164 | 23,333 | 5,560 | 3,534 | 32,591 |
| 83,408 | 161 | 23,154 | 5,540 | 3,533 | 32,388 |
| 83,409 | 162 | 23,247 | 5,620 | 3,572 | 32,601 |
| 83,410 | 162 | 23,390 | 5,611 | 3,560 | 32,723 |
| 83,411 | 160 | 23,395 | 5,600 | 3,556 | 32,711 |
| 83,412 | 163 | 23,581 | 5,634 | 3,596 | 32,974 |
| 83,413 | 162 | 23,577 | 5,642 | 3,620 | 33,001 |
| 83,414 | 152 | 22,706 | 5,435 | 3,493 | 31,786 |
| 83,415 | 154 | 22,958 | 5,495 | 3,522 | 32,129 |

|        |     |        |       |       |        |
|--------|-----|--------|-------|-------|--------|
| 83,416 | 146 | 22,163 | 5,304 | 3,415 | 31,028 |
| 83,417 | 148 | 22,437 | 5,339 | 3,439 | 31,363 |
| 83,418 | 156 | 22,719 | 5,394 | 3,483 | 31,752 |
| 83,419 | 156 | 22,732 | 5,384 | 3,489 | 31,761 |
| 83,420 | 157 | 23,281 | 5,495 | 3,581 | 32,514 |
| 83,421 | 160 | 23,593 | 5,546 | 3,622 | 32,921 |
| 83,422 | 155 | 23,478 | 5,499 | 3,593 | 32,725 |
| 83,423 | 154 | 23,520 | 5,475 | 3,623 | 32,772 |
| 83,424 | 154 | 23,598 | 5,463 | 3,627 | 32,842 |
| 83,425 | 155 | 23,769 | 5,523 | 3,635 | 33,082 |
| 83,426 | 157 | 24,170 | 5,586 | 3,677 | 33,590 |
| 83,427 | 153 | 23,865 | 5,504 | 3,646 | 33,168 |
| 83,428 | 153 | 23,842 | 5,509 | 3,647 | 33,151 |
| 83,429 | 149 | 24,161 | 5,563 | 3,705 | 33,578 |
| 83,430 | 145 | 23,963 | 5,559 | 3,701 | 33,368 |
| 83,431 | 142 | 23,822 | 5,552 | 3,699 | 33,215 |
| 83,432 | 143 | 24,034 | 5,609 | 3,749 | 33,535 |
| 83,433 | 136 | 23,920 | 5,636 | 3,731 | 33,423 |
| 83,434 | 137 | 23,700 | 5,607 | 3,714 | 33,158 |
| 83,435 | 132 | 23,730 | 5,632 | 3,731 | 33,225 |
| 83,436 | 119 | 23,488 | 5,523 | 3,660 | 32,790 |
| 83,437 | 121 | 23,596 | 5,502 | 3,645 | 32,864 |
| 83,438 | 121 | 23,408 | 5,470 | 3,572 | 32,571 |
| 83,439 | 123 | 23,712 | 5,530 | 3,613 | 32,978 |
| 83,440 | 119 | 24,022 | 5,588 | 3,640 | 33,369 |
| 83,441 | 118 | 24,098 | 5,588 | 3,644 | 33,448 |
| 83,442 | 117 | 23,987 | 5,547 | 3,623 | 33,274 |
| 83,443 | 119 | 24,113 | 5,601 | 3,660 | 33,493 |
| 83,444 | 109 | 24,094 | 5,561 | 3,670 | 33,434 |
| 83,445 | 99  | 23,953 | 5,513 | 3,632 | 33,197 |
| 83,446 | 107 | 24,159 | 5,553 | 3,669 | 33,488 |
| 83,447 | 109 | 24,075 | 5,520 | 3,659 | 33,363 |



|        |     |        |       |       |        |
|--------|-----|--------|-------|-------|--------|
| 83,448 | 108 | 23,809 | 5,458 | 3,620 | 32,995 |
| 83,449 | 110 | 23,762 | 5,465 | 3,630 | 32,967 |
| 83,450 | 109 | 23,490 | 5,444 | 3,608 | 32,651 |
| 83,451 | 107 | 23,407 | 5,441 | 3,600 | 32,555 |
| 83,452 | 109 | 23,359 | 5,427 | 3,599 | 32,494 |
| 83,453 | 111 | 23,393 | 5,440 | 3,611 | 32,555 |
| 83,454 | 113 | 23,211 | 5,413 | 3,569 | 32,306 |
| 83,455 | 110 | 22,728 | 5,324 | 3,469 | 31,631 |
| 83,456 | 115 | 23,003 | 5,368 | 3,522 | 32,008 |
| 83,457 | 109 | 22,613 | 5,283 | 3,469 | 31,474 |
| 83,458 | 113 | 22,544 | 5,254 | 3,452 | 31,363 |
| 83,459 | 113 | 22,642 | 5,252 | 3,461 | 31,468 |
| 83,460 | 115 | 22,646 | 5,236 | 3,453 | 31,450 |
| 83,461 | 118 | 22,702 | 5,255 | 3,472 | 31,547 |
| 83,462 | 116 | 22,864 | 5,257 | 3,495 | 31,732 |
| 83,463 | 117 | 22,820 | 5,267 | 3,477 | 31,681 |
| 83,464 | 119 | 23,146 | 5,321 | 3,508 | 32,094 |
| 83,465 | 117 | 23,087 | 5,317 | 3,486 | 32,007 |
| 83,466 | 114 | 23,185 | 5,335 | 3,508 | 32,142 |
| 83,467 | 115 | 23,270 | 5,343 | 3,521 | 32,249 |
| 83,468 | 115 | 22,668 | 5,206 | 3,462 | 31,451 |
| 83,469 | 118 | 23,505 | 5,391 | 3,572 | 32,586 |
| 83,470 | 123 | 23,593 | 5,437 | 3,598 | 32,751 |
| 83,471 | 127 | 23,612 | 5,482 | 3,609 | 32,830 |
| 83,472 | 131 | 23,573 | 5,511 | 3,638 | 32,853 |
| 83,473 | 138 | 23,652 | 5,541 | 3,653 | 32,984 |
| 83,474 | 136 | 23,655 | 5,537 | 3,632 | 32,960 |
| 83,475 | 137 | 23,778 | 5,589 | 3,668 | 33,172 |
| 83,476 | 141 | 23,874 | 5,617 | 3,688 | 33,320 |
| 83,477 | 139 | 23,867 | 5,644 | 3,722 | 33,372 |
| 83,478 | 135 | 23,670 | 5,612 | 3,714 | 33,131 |
| 83,479 | 135 | 23,822 | 5,669 | 3,739 | 33,365 |

|        |     |        |       |       |        |
|--------|-----|--------|-------|-------|--------|
| 83,480 | 136 | 23,758 | 5,705 | 3,751 | 33,350 |
| 83,481 | 138 | 23,745 | 5,698 | 3,749 | 33,330 |
| 83,482 | 143 | 23,889 | 5,714 | 3,766 | 33,512 |
| 83,483 | 147 | 23,673 | 5,611 | 3,696 | 33,127 |
| 83,484 | 149 | 23,963 | 5,649 | 3,726 | 33,487 |
| 83,485 | 146 | 24,298 | 5,695 | 3,764 | 33,903 |
| 83,486 | 156 | 24,347 | 5,687 | 3,758 | 33,948 |
| 83,487 | 157 | 24,269 | 5,666 | 3,753 | 33,845 |
| 83,488 | 156 | 24,294 | 5,680 | 3,754 | 33,884 |
| 83,489 | 156 | 24,315 | 5,691 | 3,786 | 33,948 |
| 83,490 | 163 | 24,441 | 5,743 | 3,837 | 34,184 |
| 83,491 | 168 | 24,401 | 5,730 | 3,832 | 34,131 |
| 83,492 | 167 | 24,210 | 5,696 | 3,798 | 33,871 |
| 83,493 | 168 | 24,253 | 5,691 | 3,786 | 33,898 |
| 83,494 | 172 | 24,228 | 5,710 | 3,778 | 33,888 |
| 83,495 | 170 | 24,290 | 5,739 | 3,772 | 33,971 |
| 83,496 | 168 | 24,283 | 5,738 | 3,773 | 33,962 |
| 83,497 | 166 | 24,355 | 5,730 | 3,729 | 33,980 |
| 83,498 | 168 | 24,275 | 5,747 | 3,736 | 33,926 |
| 83,499 | 182 | 24,535 | 5,816 | 3,766 | 34,299 |
| 83,500 | 190 | 24,537 | 5,820 | 3,788 | 34,335 |
| 83,501 | 197 | 24,561 | 5,832 | 3,780 | 34,370 |
| 83,502 | 204 | 24,589 | 5,843 | 3,786 | 34,422 |
| 83,503 | 200 | 24,290 | 5,786 | 3,740 | 34,016 |
| 83,504 | 199 | 24,381 | 5,781 | 3,734 | 34,095 |
| 83,505 | 195 | 24,409 | 5,788 | 3,751 | 34,143 |
| 83,506 | 192 | 24,368 | 5,745 | 3,735 | 34,040 |
| 83,507 | 203 | 24,429 | 5,770 | 3,737 | 34,139 |
| 83,508 | 204 | 24,355 | 5,751 | 3,736 | 34,046 |
| 83,509 | 201 | 24,462 | 5,779 | 3,725 | 34,167 |
| 83,510 | 204 | 24,910 | 5,891 | 3,760 | 34,765 |
| 83,511 | 202 | 24,733 | 5,848 | 3,736 | 34,519 |

|        |     |        |       |       |        |
|--------|-----|--------|-------|-------|--------|
| 83,512 | 205 | 24,866 | 5,893 | 3,762 | 34,726 |
| 83,513 | 216 | 24,992 | 5,940 | 3,802 | 34,950 |
| 83,514 | 224 | 25,073 | 5,973 | 3,815 | 35,085 |
| 83,515 | 227 | 24,976 | 5,974 | 3,788 | 34,965 |
| 83,516 | 234 | 24,466 | 5,870 | 3,718 | 34,288 |
| 83,517 | 235 | 24,414 | 5,872 | 3,706 | 34,227 |
| 83,518 | 234 | 24,201 | 5,857 | 3,659 | 33,951 |
| 83,519 | 229 | 23,982 | 5,828 | 3,618 | 33,657 |
| 83,520 | 232 | 24,571 | 5,933 | 3,692 | 34,428 |
| 83,521 | 230 | 24,647 | 5,938 | 3,679 | 34,494 |
| 83,522 | 217 | 24,359 | 5,844 | 3,602 | 34,022 |
| 83,523 | 219 | 24,446 | 5,878 | 3,616 | 34,159 |
| 83,524 | 211 | 24,138 | 5,835 | 3,593 | 33,777 |
| 83,525 | 214 | 23,894 | 5,781 | 3,576 | 33,465 |
| 83,526 | 216 | 23,737 | 5,763 | 3,552 | 33,268 |
| 83,527 | 219 | 23,950 | 5,808 | 3,574 | 33,551 |
| 83,528 | 219 | 23,659 | 5,713 | 3,478 | 33,069 |
| 83,529 | 226 | 23,556 | 5,660 | 3,450 | 32,892 |
| 83,530 | 228 | 23,641 | 5,652 | 3,447 | 32,968 |
| 83,531 | 225 | 23,751 | 5,642 | 3,432 | 33,050 |
| 83,532 | 224 | 23,461 | 5,547 | 3,377 | 32,609 |
| 83,533 | 222 | 23,314 | 5,503 | 3,341 | 32,380 |
| 83,534 | 221 | 23,510 | 5,563 | 3,377 | 32,671 |
| 83,535 | 219 | 22,937 | 5,443 | 3,331 | 31,930 |
| 83,536 | 225 | 23,059 | 5,489 | 3,355 | 32,128 |
| 83,537 | 225 | 23,068 | 5,503 | 3,378 | 32,174 |
| 83,538 | 226 | 23,113 | 5,523 | 3,394 | 32,256 |
| 83,539 | 231 | 23,098 | 5,505 | 3,363 | 32,197 |
| 83,540 | 231 | 23,020 | 5,506 | 3,356 | 32,113 |
| 83,541 | 227 | 23,095 | 5,527 | 3,354 | 32,203 |
| 83,542 | 222 | 22,885 | 5,467 | 3,325 | 31,899 |
| 83,543 | 223 | 22,756 | 5,456 | 3,315 | 31,750 |

|        |     |        |       |       |        |
|--------|-----|--------|-------|-------|--------|
| 83,544 | 222 | 22,597 | 5,456 | 3,315 | 31,590 |
| 83,545 | 218 | 22,586 | 5,447 | 3,320 | 31,571 |
| 83,546 | 218 | 22,507 | 5,459 | 3,328 | 31,512 |
| 83,547 | 221 | 22,171 | 5,415 | 3,308 | 31,115 |
| 83,548 | 214 | 21,949 | 5,384 | 3,289 | 30,836 |
| 83,549 | 219 | 22,850 | 5,505 | 3,409 | 31,983 |
| 83,550 | 213 | 23,028 | 5,544 | 3,436 | 32,221 |
| 83,551 | 214 | 22,969 | 5,533 | 3,458 | 32,174 |
| 83,552 | 214 | 22,993 | 5,544 | 3,472 | 32,223 |
| 83,553 | 208 | 23,047 | 5,559 | 3,491 | 32,305 |
| 83,554 | 202 | 23,024 | 5,538 | 3,508 | 32,272 |
| 83,555 | 203 | 23,310 | 5,658 | 3,577 | 32,748 |
| 83,556 | 197 | 22,562 | 5,459 | 3,439 | 31,657 |
| 83,557 | 195 | 22,844 | 5,537 | 3,476 | 32,052 |
| 83,558 | 204 | 23,105 | 5,589 | 3,538 | 32,436 |
| 83,559 | 203 | 22,985 | 5,633 | 3,563 | 32,384 |
| 83,560 | 198 | 23,028 | 5,690 | 3,601 | 32,517 |
| 83,561 | 205 | 23,025 | 5,720 | 3,624 | 32,574 |
| 83,562 | 208 | 23,021 | 5,793 | 3,636 | 32,658 |
| 83,563 | 180 | 22,006 | 5,490 | 3,477 | 31,153 |
| 83,564 | 183 | 22,346 | 5,551 | 3,511 | 31,591 |
| 83,565 | 184 | 22,642 | 5,625 | 3,548 | 31,999 |
| 83,566 | 184 | 22,725 | 5,630 | 3,573 | 32,112 |
| 83,567 | 180 | 22,753 | 5,619 | 3,597 | 32,149 |
| 83,568 | 180 | 22,983 | 5,704 | 3,636 | 32,503 |
| 83,569 | 178 | 23,300 | 5,782 | 3,694 | 32,954 |
| 83,570 | 182 | 23,506 | 5,865 | 3,738 | 33,291 |
| 83,571 | 182 | 23,596 | 5,916 | 3,779 | 33,473 |
| 83,572 | 180 | 23,697 | 5,925 | 3,798 | 33,600 |
| 83,573 | 179 | 23,285 | 5,813 | 3,716 | 32,993 |
| 83,574 | 179 | 23,384 | 5,858 | 3,755 | 33,176 |
| 83,575 | 179 | 23,553 | 5,900 | 3,779 | 33,411 |

|        |     |        |       |       |        |
|--------|-----|--------|-------|-------|--------|
| 83,576 | 172 | 23,225 | 5,840 | 3,744 | 32,981 |
| 83,577 | 169 | 22,991 | 5,765 | 3,729 | 32,654 |
| 83,578 | 164 | 22,732 | 5,750 | 3,712 | 32,358 |
| 83,579 | 166 | 22,701 | 5,807 | 3,744 | 32,418 |
| 83,580 | 170 | 22,715 | 5,826 | 3,738 | 32,449 |
| 83,581 | 168 | 22,685 | 5,849 | 3,747 | 32,449 |
| 83,582 | 169 | 22,682 | 5,880 | 3,746 | 32,477 |
| 83,583 | 166 | 22,499 | 5,873 | 3,731 | 32,269 |
| 83,584 | 165 | 22,053 | 5,760 | 3,672 | 31,650 |
| 83,585 | 168 | 22,291 | 5,798 | 3,696 | 31,953 |
| 83,586 | 164 | 22,197 | 5,804 | 3,677 | 31,842 |
| 83,587 | 158 | 22,139 | 5,792 | 3,665 | 31,754 |
| 83,588 | 153 | 22,100 | 5,773 | 3,638 | 31,664 |
| 83,589 | 147 | 21,910 | 5,743 | 3,636 | 31,436 |
| 83,590 | 145 | 21,777 | 5,677 | 3,617 | 31,216 |
| 83,591 | 143 | 21,810 | 5,653 | 3,617 | 31,223 |
| 83,592 | 145 | 21,962 | 5,699 | 3,646 | 31,452 |
| 83,593 | 146 | 22,014 | 5,746 | 3,632 | 31,538 |
| 83,594 | 141 | 21,932 | 5,693 | 3,621 | 31,387 |
| 83,595 | 152 | 22,161 | 5,727 | 3,622 | 31,662 |
| 83,596 | 152 | 22,174 | 5,717 | 3,634 | 31,677 |
| 83,597 | 145 | 22,376 | 5,782 | 3,665 | 31,968 |
| 83,598 | 137 | 22,408 | 5,800 | 3,655 | 32,000 |
| 83,599 | 130 | 22,299 | 5,754 | 3,649 | 31,832 |
| 83,600 | 129 | 22,222 | 5,754 | 3,625 | 31,730 |
| 83,601 | 130 | 22,246 | 5,767 | 3,621 | 31,764 |
| 83,602 | 122 | 22,091 | 5,721 | 3,575 | 31,509 |
| 83,603 | 123 | 22,404 | 5,784 | 3,612 | 31,923 |
| 83,604 | 121 | 22,063 | 5,702 | 3,542 | 31,428 |
| 83,605 | 121 | 22,069 | 5,751 | 3,536 | 31,477 |
| 83,606 | 121 | 22,366 | 5,760 | 3,553 | 31,800 |
| 83,607 | 122 | 21,955 | 5,679 | 3,522 | 31,278 |

|        |     |        |       |       |        |
|--------|-----|--------|-------|-------|--------|
| 83,608 | 122 | 21,956 | 5,670 | 3,519 | 31,267 |
| 83,609 | 112 | 21,865 | 5,656 | 3,468 | 31,101 |
| 83,610 | 112 | 21,849 | 5,660 | 3,471 | 31,092 |
| 83,611 | 106 | 21,946 | 5,609 | 3,501 | 31,162 |
| 83,612 | 106 | 21,918 | 5,596 | 3,492 | 31,112 |
| 83,613 | 100 | 21,733 | 5,511 | 3,462 | 30,806 |
| 83,614 | 118 | 21,957 | 5,595 | 3,483 | 31,153 |
| 83,615 | 121 | 22,005 | 5,625 | 3,509 | 31,260 |
| 83,616 | 124 | 21,986 | 5,625 | 3,511 | 31,246 |
| 83,617 | 124 | 21,730 | 5,546 | 3,448 | 30,848 |
| 83,618 | 125 | 21,569 | 5,537 | 3,445 | 30,676 |
| 83,619 | 140 | 21,678 | 5,589 | 3,467 | 30,874 |
| 83,620 | 144 | 21,647 | 5,574 | 3,453 | 30,818 |
| 83,621 | 140 | 21,296 | 5,517 | 3,429 | 30,382 |
| 83,622 | 143 | 21,569 | 5,575 | 3,464 | 30,751 |
| 83,623 | 146 | 21,376 | 5,518 | 3,449 | 30,489 |
| 83,624 | 150 | 21,586 | 5,505 | 3,471 | 30,712 |
| 83,625 | 156 | 21,882 | 5,553 | 3,496 | 31,087 |
| 83,626 | 160 | 22,182 | 5,617 | 3,536 | 31,495 |
| 83,627 | 165 | 22,543 | 5,683 | 3,572 | 31,963 |
| 83,628 | 165 | 22,575 | 5,674 | 3,580 | 31,994 |
| 83,629 | 162 | 22,953 | 5,728 | 3,653 | 32,496 |
| 83,630 | 165 | 23,259 | 5,773 | 3,702 | 32,899 |
| 83,631 | 163 | 23,337 | 5,779 | 3,696 | 32,975 |
| 83,632 | 165 | 23,072 | 5,732 | 3,675 | 32,644 |
| 83,633 | 168 | 23,592 | 5,856 | 3,770 | 33,386 |
| 83,634 | 166 | 23,430 | 5,808 | 3,747 | 33,151 |
| 83,635 | 170 | 23,822 | 5,885 | 3,794 | 33,671 |
| 83,636 | 165 | 23,802 | 5,957 | 3,835 | 33,759 |
| 83,637 | 170 | 24,058 | 5,999 | 3,862 | 34,089 |
| 83,638 | 170 | 24,212 | 6,049 | 3,883 | 34,314 |
| 83,639 | 175 | 24,267 | 6,065 | 3,884 | 34,391 |

|        |     |        |       |       |        |
|--------|-----|--------|-------|-------|--------|
| 83,640 | 176 | 24,469 | 6,128 | 3,921 | 34,694 |
| 83,641 | 187 | 24,499 | 6,134 | 3,926 | 34,746 |
| 83,642 | 185 | 24,452 | 6,112 | 3,937 | 34,686 |
| 83,643 | 185 | 24,537 | 6,104 | 3,935 | 34,761 |
| 83,644 | 191 | 24,560 | 6,115 | 3,975 | 34,841 |
| 83,645 | 188 | 24,526 | 6,084 | 3,960 | 34,758 |
| 83,646 | 185 | 24,332 | 6,059 | 3,944 | 34,520 |
| 83,647 | 188 | 24,556 | 6,105 | 3,973 | 34,822 |
| 83,648 | 193 | 24,019 | 5,992 | 3,892 | 34,096 |
| 83,649 | 195 | 24,164 | 6,008 | 3,923 | 34,290 |
| 83,650 | 194 | 24,081 | 6,023 | 3,933 | 34,231 |
| 83,651 | 195 | 24,111 | 6,034 | 3,941 | 34,281 |
| 83,652 | 194 | 23,863 | 5,948 | 3,945 | 33,950 |
| 83,653 | 194 | 23,505 | 5,893 | 3,893 | 33,485 |
| 83,654 | 204 | 23,584 | 5,945 | 3,920 | 33,653 |
| 83,655 | 204 | 23,197 | 5,859 | 3,860 | 33,120 |
| 83,656 | 205 | 23,190 | 5,855 | 3,851 | 33,101 |
| 83,657 | 208 | 23,049 | 5,873 | 3,854 | 32,984 |
| 83,658 | 204 | 22,914 | 5,854 | 3,852 | 32,824 |
| 83,659 | 207 | 22,922 | 5,843 | 3,867 | 32,839 |
| 83,660 | 207 | 22,860 | 5,847 | 3,880 | 32,794 |
| 83,661 | 206 | 22,859 | 5,873 | 3,872 | 32,810 |
| 83,662 | 207 | 22,850 | 5,869 | 3,861 | 32,787 |
| 83,663 | 205 | 22,432 | 5,779 | 3,796 | 32,212 |
| 83,664 | 205 | 22,521 | 5,843 | 3,849 | 32,418 |
| 83,665 | 194 | 22,184 | 5,772 | 3,824 | 31,974 |
| 83,666 | 192 | 22,287 | 5,811 | 3,849 | 32,139 |
| 83,667 | 187 | 22,374 | 5,819 | 3,859 | 32,239 |
| 83,668 | 198 | 22,541 | 5,889 | 3,889 | 32,517 |
| 83,669 | 190 | 22,570 | 5,901 | 3,897 | 32,558 |
| 83,670 | 191 | 22,699 | 5,923 | 3,942 | 32,755 |
| 83,671 | 192 | 22,782 | 5,916 | 3,919 | 32,809 |

|        |     |        |       |       |        |
|--------|-----|--------|-------|-------|--------|
| 83,672 | 189 | 22,855 | 5,943 | 3,910 | 32,897 |
| 83,673 | 189 | 22,722 | 5,932 | 3,918 | 32,761 |
| 83,674 | 192 | 22,794 | 5,968 | 3,933 | 32,887 |
| 83,675 | 189 | 22,893 | 6,085 | 3,981 | 33,148 |
| 83,676 | 184 | 22,905 | 6,130 | 4,004 | 33,223 |
| 83,677 | 185 | 22,910 | 6,181 | 4,012 | 33,288 |
| 83,678 | 180 | 22,853 | 6,221 | 4,032 | 33,286 |
| 83,679 | 183 | 22,837 | 6,272 | 4,055 | 33,347 |
| 83,680 | 185 | 22,909 | 6,294 | 4,086 | 33,474 |
| 83,681 | 180 | 22,791 | 6,290 | 4,055 | 33,316 |
| 83,682 | 181 | 22,886 | 6,293 | 4,054 | 33,414 |
| 83,683 | 178 | 23,052 | 6,374 | 4,100 | 33,704 |
| 83,684 | 179 | 23,093 | 6,417 | 4,129 | 33,818 |
| 83,685 | 177 | 23,177 | 6,447 | 4,158 | 33,959 |
| 83,686 | 178 | 23,091 | 6,434 | 4,173 | 33,876 |
| 83,687 | 178 | 23,357 | 6,477 | 4,190 | 34,202 |
| 83,688 | 178 | 23,660 | 6,561 | 4,245 | 34,644 |
| 83,689 | 178 | 23,750 | 6,576 | 4,285 | 34,789 |
| 83,690 | 177 | 23,415 | 6,520 | 4,240 | 34,352 |
| 83,691 | 178 | 23,880 | 6,616 | 4,308 | 34,982 |
| 83,692 | 168 | 23,952 | 6,628 | 4,320 | 35,068 |
| 83,693 | 168 | 24,325 | 6,778 | 4,401 | 35,672 |
| 83,694 | 160 | 24,072 | 6,747 | 4,370 | 35,349 |
| 83,695 | 163 | 24,319 | 6,805 | 4,414 | 35,701 |
| 83,696 | 161 | 24,623 | 6,873 | 4,457 | 36,114 |
| 83,697 | 160 | 24,593 | 6,865 | 4,456 | 36,074 |
| 83,698 | 157 | 24,336 | 6,785 | 4,438 | 35,716 |
| 83,699 | 151 | 24,385 | 6,777 | 4,463 | 35,776 |
| 83,700 | 156 | 24,156 | 6,719 | 4,421 | 35,452 |
| 83,701 | 156 | 24,024 | 6,654 | 4,383 | 35,217 |
| 83,702 | 160 | 24,738 | 6,800 | 4,487 | 36,185 |
| 83,703 | 160 | 24,662 | 6,798 | 4,468 | 36,088 |



|        |     |        |       |       |        |
|--------|-----|--------|-------|-------|--------|
| 83,704 | 149 | 24,715 | 6,784 | 4,485 | 36,133 |
| 83,705 | 152 | 24,889 | 6,809 | 4,523 | 36,373 |
| 83,706 | 151 | 25,001 | 6,833 | 4,547 | 36,532 |
| 83,707 | 152 | 24,668 | 6,724 | 4,492 | 36,036 |
| 83,708 | 156 | 24,877 | 6,796 | 4,525 | 36,354 |
| 83,709 | 155 | 25,112 | 6,857 | 4,545 | 36,669 |
| 83,710 | 152 | 24,930 | 6,797 | 4,485 | 36,364 |
| 83,711 | 151 | 25,204 | 6,851 | 4,509 | 36,715 |
| 83,712 | 151 | 25,471 | 6,909 | 4,549 | 37,080 |
| 83,713 | 145 | 25,500 | 6,914 | 4,552 | 37,111 |
| 83,714 | 143 | 25,442 | 6,855 | 4,572 | 37,012 |
| 83,715 | 139 | 25,225 | 6,778 | 4,533 | 36,675 |
| 83,716 | 141 | 25,350 | 6,803 | 4,552 | 36,846 |
| 83,717 | 141 | 25,241 | 6,785 | 4,535 | 36,702 |
| 83,718 | 141 | 25,453 | 6,814 | 4,545 | 36,953 |
| 83,719 | 131 | 25,579 | 6,839 | 4,579 | 37,128 |
| 83,720 | 129 | 25,291 | 6,749 | 4,520 | 36,689 |
| 83,721 | 127 | 25,180 | 6,707 | 4,493 | 36,507 |
| 83,722 | 123 | 25,220 | 6,723 | 4,493 | 36,559 |
| 83,723 | 126 | 25,312 | 6,734 | 4,522 | 36,694 |
| 83,724 | 121 | 25,475 | 6,781 | 4,533 | 36,910 |
| 83,725 | 118 | 25,216 | 6,690 | 4,495 | 36,519 |
| 83,726 | 122 | 25,184 | 6,612 | 4,446 | 36,364 |
| 83,727 | 121 | 25,107 | 6,576 | 4,445 | 36,249 |
| 83,728 | 121 | 25,182 | 6,530 | 4,445 | 36,278 |
| 83,729 | 122 | 25,124 | 6,494 | 4,419 | 36,159 |
| 83,730 | 121 | 24,797 | 6,361 | 4,338 | 35,617 |
| 83,731 | 118 | 24,407 | 6,253 | 4,251 | 35,029 |
| 83,732 | 120 | 24,358 | 6,168 | 4,218 | 34,864 |
| 83,733 | 121 | 24,506 | 6,156 | 4,249 | 35,032 |
| 83,734 | 120 | 24,789 | 6,198 | 4,265 | 35,372 |
| 83,735 | 123 | 24,636 | 6,135 | 4,221 | 35,115 |

|        |     |        |       |       |        |
|--------|-----|--------|-------|-------|--------|
| 83,736 | 122 | 24,639 | 6,108 | 4,211 | 35,080 |
| 83,737 | 121 | 24,039 | 5,959 | 4,119 | 34,238 |
| 83,738 | 125 | 24,049 | 5,984 | 4,141 | 34,299 |
| 83,739 | 122 | 23,910 | 5,966 | 4,111 | 34,109 |
| 83,740 | 123 | 23,626 | 5,933 | 4,073 | 33,755 |
| 83,741 | 115 | 23,434 | 5,873 | 4,052 | 33,474 |
| 83,742 | 117 | 23,452 | 5,870 | 4,039 | 33,478 |
| 83,743 | 118 | 23,340 | 5,832 | 3,997 | 33,287 |
| 83,744 | 125 | 23,065 | 5,777 | 3,950 | 32,917 |
| 83,745 | 125 | 22,839 | 5,739 | 3,932 | 32,635 |
| 83,746 | 124 | 22,954 | 5,778 | 3,957 | 32,813 |
| 83,747 | 129 | 22,853 | 5,794 | 3,971 | 32,747 |
| 83,748 | 131 | 22,857 | 5,782 | 3,969 | 32,739 |
| 83,749 | 128 | 22,750 | 5,781 | 3,904 | 32,563 |
| 83,750 | 132 | 22,874 | 5,808 | 3,920 | 32,734 |
| 83,751 | 128 | 23,002 | 5,853 | 3,949 | 32,932 |
| 83,752 | 126 | 22,741 | 5,812 | 3,905 | 32,584 |
| 83,753 | 125 | 22,773 | 5,827 | 3,916 | 32,641 |
| 83,754 | 128 | 22,842 | 5,832 | 3,900 | 32,702 |
| 83,755 | 133 | 22,837 | 5,840 | 3,889 | 32,699 |
| 83,756 | 130 | 22,744 | 5,832 | 3,885 | 32,591 |
| 83,757 | 136 | 22,936 | 5,822 | 3,869 | 32,763 |
| 83,758 | 133 | 22,843 | 5,772 | 3,857 | 32,605 |
| 83,759 | 129 | 22,760 | 5,743 | 3,836 | 32,468 |
| 83,760 | 126 | 22,681 | 5,718 | 3,857 | 32,382 |
| 83,761 | 129 | 22,608 | 5,689 | 3,845 | 32,271 |
| 83,762 | 133 | 22,879 | 5,726 | 3,877 | 32,615 |
| 83,763 | 131 | 22,727 | 5,666 | 3,838 | 32,362 |
| 83,764 | 135 | 22,720 | 5,645 | 3,825 | 32,325 |
| 83,765 | 131 | 22,767 | 5,640 | 3,799 | 32,337 |
| 83,766 | 137 | 22,972 | 5,707 | 3,818 | 32,634 |
| 83,767 | 137 | 23,070 | 5,685 | 3,816 | 32,708 |

|        |     |        |       |       |        |
|--------|-----|--------|-------|-------|--------|
| 83,768 | 139 | 23,014 | 5,643 | 3,797 | 32,593 |
| 83,769 | 142 | 23,141 | 5,650 | 3,811 | 32,744 |
| 83,770 | 144 | 23,337 | 5,661 | 3,811 | 32,953 |
| 83,771 | 143 | 23,708 | 5,723 | 3,838 | 33,412 |
| 83,772 | 139 | 23,100 | 5,603 | 3,751 | 32,593 |
| 83,773 | 142 | 23,462 | 5,657 | 3,812 | 33,073 |
| 83,774 | 143 | 23,488 | 5,657 | 3,811 | 33,099 |
| 83,775 | 140 | 23,242 | 5,611 | 3,779 | 32,772 |
| 83,776 | 137 | 23,449 | 5,616 | 3,814 | 33,016 |
| 83,777 | 140 | 23,347 | 5,610 | 3,802 | 32,899 |
| 83,778 | 138 | 23,072 | 5,570 | 3,784 | 32,564 |
| 83,779 | 137 | 23,591 | 5,655 | 3,859 | 33,242 |
| 83,780 | 136 | 23,268 | 5,551 | 3,813 | 32,768 |
| 83,781 | 131 | 23,077 | 5,542 | 3,812 | 32,562 |
| 83,782 | 131 | 23,044 | 5,588 | 3,830 | 32,593 |
| 83,783 | 128 | 23,061 | 5,661 | 3,853 | 32,703 |
| 83,784 | 131 | 23,007 | 5,645 | 3,830 | 32,613 |
| 83,785 | 128 | 22,934 | 5,616 | 3,834 | 32,512 |
| 83,786 | 127 | 22,722 | 5,569 | 3,795 | 32,213 |
| 83,787 | 127 | 22,660 | 5,569 | 3,792 | 32,148 |
| 83,788 | 126 | 22,531 | 5,539 | 3,774 | 31,970 |
| 83,789 | 126 | 22,620 | 5,534 | 3,780 | 32,060 |
| 83,790 | 126 | 22,744 | 5,506 | 3,786 | 32,162 |
| 83,791 | 127 | 22,925 | 5,554 | 3,818 | 32,424 |
| 83,792 | 126 | 23,073 | 5,550 | 3,827 | 32,576 |
| 83,793 | 124 | 23,084 | 5,475 | 3,836 | 32,519 |
| 83,794 | 125 | 23,411 | 5,538 | 3,880 | 32,954 |
| 83,795 | 121 | 23,303 | 5,477 | 3,831 | 32,732 |
| 83,796 | 120 | 23,390 | 5,475 | 3,830 | 32,815 |
| 83,797 | 118 | 23,601 | 5,545 | 3,899 | 33,163 |
| 83,798 | 117 | 23,768 | 5,544 | 3,912 | 33,341 |
| 83,799 | 117 | 23,607 | 5,486 | 3,897 | 33,107 |

|        |     |        |       |       |        |
|--------|-----|--------|-------|-------|--------|
| 83,800 | 119 | 23,584 | 5,485 | 3,891 | 33,079 |
| 83,801 | 117 | 23,811 | 5,483 | 3,925 | 33,336 |
| 83,802 | 117 | 23,797 | 5,484 | 3,906 | 33,304 |
| 83,803 | 119 | 24,181 | 5,553 | 3,976 | 33,829 |
| 83,804 | 116 | 24,392 | 5,564 | 3,991 | 34,063 |
| 83,805 | 118 | 24,601 | 5,532 | 4,011 | 34,262 |
| 83,806 | 118 | 24,541 | 5,539 | 4,007 | 34,205 |
| 83,807 | 120 | 25,287 | 5,680 | 4,121 | 35,208 |
| 83,808 | 116 | 25,022 | 5,651 | 4,093 | 34,882 |
| 83,809 | 121 | 25,037 | 5,620 | 4,098 | 34,876 |
| 83,810 | 122 | 25,053 | 5,624 | 4,080 | 34,879 |
| 83,811 | 122 | 25,017 | 5,634 | 4,098 | 34,871 |
| 83,812 | 122 | 25,184 | 5,672 | 4,117 | 35,095 |
| 83,813 | 119 | 24,710 | 5,589 | 4,074 | 34,492 |
| 83,814 | 120 | 24,663 | 5,583 | 4,063 | 34,429 |
| 83,815 | 119 | 24,483 | 5,603 | 4,073 | 34,278 |
| 83,816 | 124 | 24,918 | 5,672 | 4,147 | 34,861 |
| 83,817 | 118 | 24,595 | 5,615 | 4,106 | 34,434 |
| 83,818 | 119 | 24,305 | 5,610 | 4,123 | 34,157 |
| 83,819 | 120 | 24,438 | 5,689 | 4,184 | 34,431 |
| 83,820 | 120 | 24,559 | 5,747 | 4,210 | 34,636 |
| 83,821 | 118 | 24,622 | 5,782 | 4,225 | 34,747 |
| 83,822 | 121 | 24,323 | 5,749 | 4,202 | 34,395 |
| 83,823 | 123 | 24,042 | 5,689 | 4,199 | 34,053 |
| 83,824 | 120 | 24,751 | 5,806 | 4,300 | 34,977 |
| 83,825 | 115 | 24,476 | 5,751 | 4,249 | 34,591 |
| 83,826 | 119 | 24,739 | 5,767 | 4,296 | 34,921 |
| 83,827 | 120 | 24,831 | 5,804 | 4,301 | 35,056 |
| 83,828 | 125 | 24,628 | 5,723 | 4,219 | 34,695 |
| 83,829 | 130 | 24,865 | 5,754 | 4,256 | 35,005 |
| 83,830 | 131 | 25,200 | 5,801 | 4,312 | 35,444 |
| 83,831 | 133 | 25,533 | 5,888 | 4,368 | 35,922 |

|        |     |        |       |       |        |
|--------|-----|--------|-------|-------|--------|
| 83,832 | 144 | 25,687 | 5,897 | 4,371 | 36,099 |
| 83,833 | 141 | 25,907 | 5,908 | 4,385 | 36,341 |
| 83,834 | 140 | 25,767 | 5,842 | 4,355 | 36,104 |
| 83,835 | 141 | 25,865 | 5,868 | 4,376 | 36,250 |
| 83,836 | 143 | 26,270 | 5,917 | 4,437 | 36,767 |
| 83,837 | 141 | 26,204 | 5,912 | 4,454 | 36,711 |
| 83,838 | 146 | 26,455 | 5,979 | 4,523 | 37,103 |
| 83,839 | 143 | 26,256 | 5,925 | 4,492 | 36,816 |
| 83,840 | 146 | 26,345 | 5,954 | 4,496 | 36,941 |
| 83,841 | 146 | 26,374 | 5,942 | 4,497 | 36,959 |
| 83,842 | 146 | 26,379 | 5,958 | 4,518 | 37,001 |
| 83,843 | 147 | 26,452 | 5,993 | 4,551 | 37,143 |
| 83,844 | 150 | 26,123 | 5,948 | 4,503 | 36,724 |
| 83,845 | 150 | 25,932 | 5,907 | 4,483 | 36,472 |
| 83,846 | 155 | 26,344 | 6,014 | 4,573 | 37,086 |
| 83,847 | 156 | 26,100 | 5,926 | 4,526 | 36,708 |
| 83,848 | 156 | 26,110 | 5,929 | 4,523 | 36,718 |
| 83,849 | 155 | 26,449 | 6,010 | 4,576 | 37,190 |
| 83,850 | 151 | 26,178 | 5,953 | 4,543 | 36,825 |
| 83,851 | 152 | 26,449 | 6,009 | 4,602 | 37,212 |
| 83,852 | 150 | 26,205 | 5,952 | 4,567 | 36,874 |
| 83,853 | 151 | 26,197 | 5,958 | 4,560 | 36,866 |
| 83,854 | 152 | 25,650 | 5,815 | 4,486 | 36,103 |
| 83,855 | 153 | 25,685 | 5,829 | 4,509 | 36,176 |
| 83,856 | 148 | 25,818 | 5,859 | 4,513 | 36,338 |
| 83,857 | 150 | 25,865 | 5,849 | 4,503 | 36,367 |
| 83,858 | 144 | 25,230 | 5,756 | 4,441 | 35,571 |
| 83,859 | 147 | 25,349 | 5,800 | 4,486 | 35,782 |
| 83,860 | 145 | 25,603 | 5,849 | 4,515 | 36,112 |
| 83,861 | 150 | 25,705 | 5,851 | 4,518 | 36,224 |
| 83,862 | 153 | 25,854 | 5,876 | 4,550 | 36,433 |
| 83,863 | 159 | 25,935 | 5,869 | 4,565 | 36,528 |

|        |     |        |       |       |        |
|--------|-----|--------|-------|-------|--------|
| 83,864 | 161 | 25,971 | 5,891 | 4,565 | 36,588 |
| 83,865 | 160 | 25,905 | 5,886 | 4,547 | 36,498 |
| 83,866 | 155 | 25,883 | 5,887 | 4,563 | 36,488 |
| 83,867 | 158 | 25,911 | 5,963 | 4,603 | 36,635 |
| 83,868 | 161 | 26,228 | 6,009 | 4,613 | 37,011 |
| 83,869 | 170 | 26,387 | 6,022 | 4,613 | 37,192 |
| 83,870 | 175 | 26,477 | 6,035 | 4,591 | 37,278 |
| 83,871 | 173 | 25,934 | 5,884 | 4,514 | 36,505 |
| 83,872 | 179 | 25,791 | 5,876 | 4,488 | 36,334 |
| 83,873 | 181 | 25,853 | 5,868 | 4,464 | 36,366 |
| 83,874 | 179 | 25,556 | 5,796 | 4,407 | 35,938 |
| 83,875 | 180 | 25,438 | 5,809 | 4,387 | 35,814 |
| 83,876 | 181 | 25,276 | 5,814 | 4,356 | 35,627 |
| 83,877 | 181 | 25,205 | 5,833 | 4,363 | 35,582 |
| 83,878 | 179 | 24,985 | 5,819 | 4,355 | 35,338 |
| 83,879 | 172 | 24,815 | 5,782 | 4,347 | 35,116 |
| 83,880 | 167 | 24,725 | 5,805 | 4,341 | 35,038 |
| 83,881 | 165 | 23,969 | 5,672 | 4,232 | 34,038 |
| 83,882 | 166 | 24,249 | 5,715 | 4,262 | 34,392 |
| 83,883 | 163 | 24,575 | 5,783 | 4,302 | 34,823 |
| 83,884 | 162 | 24,530 | 5,769 | 4,284 | 34,745 |
| 83,885 | 158 | 24,708 | 5,867 | 4,324 | 35,057 |
| 83,886 | 155 | 24,895 | 5,916 | 4,377 | 35,343 |
| 83,887 | 156 | 25,051 | 6,048 | 4,386 | 35,641 |
| 83,888 | 158 | 25,202 | 6,053 | 4,405 | 35,818 |
| 83,889 | 165 | 25,104 | 6,006 | 4,329 | 35,604 |
| 83,890 | 163 | 24,921 | 5,967 | 4,284 | 35,335 |
| 83,891 | 168 | 25,460 | 6,112 | 4,424 | 36,164 |
| 83,892 | 169 | 25,288 | 6,101 | 4,410 | 35,968 |
| 83,893 | 164 | 25,137 | 6,058 | 4,355 | 35,714 |
| 83,894 | 165 | 25,304 | 6,068 | 4,361 | 35,898 |
| 83,895 | 165 | 25,471 | 6,096 | 4,385 | 36,117 |

|        |     |        |       |       |        |
|--------|-----|--------|-------|-------|--------|
| 83,896 | 175 | 25,375 | 6,066 | 4,335 | 35,951 |
| 83,897 | 170 | 25,168 | 5,995 | 4,296 | 35,629 |
| 83,898 | 170 | 25,036 | 6,024 | 4,291 | 35,521 |
| 83,899 | 186 | 25,296 | 6,096 | 4,330 | 35,908 |
| 83,900 | 185 | 25,049 | 6,053 | 4,287 | 35,574 |
| 83,901 | 186 | 25,124 | 6,079 | 4,290 | 35,679 |
| 83,902 | 186 | 24,816 | 6,069 | 4,244 | 35,315 |
| 83,903 | 187 | 24,475 | 6,000 | 4,199 | 34,861 |
| 83,904 | 188 | 24,411 | 6,032 | 4,192 | 34,823 |
| 83,905 | 182 | 24,264 | 6,021 | 4,177 | 34,644 |
| 83,906 | 183 | 24,100 | 6,001 | 4,156 | 34,440 |
| 83,907 | 181 | 23,872 | 5,993 | 4,131 | 34,177 |
| 83,908 | 175 | 23,829 | 5,964 | 4,141 | 34,109 |
| 83,909 | 176 | 23,950 | 5,971 | 4,127 | 34,224 |
| 83,910 | 177 | 23,878 | 5,944 | 4,137 | 34,136 |
| 83,911 | 177 | 23,767 | 5,933 | 4,115 | 33,992 |
| 83,912 | 176 | 24,073 | 5,998 | 4,158 | 34,405 |
| 83,913 | 171 | 24,286 | 6,037 | 4,177 | 34,671 |
| 83,914 | 160 | 24,156 | 6,033 | 4,177 | 34,526 |
| 83,915 | 164 | 24,422 | 6,045 | 4,182 | 34,813 |
| 83,916 | 167 | 24,669 | 6,119 | 4,209 | 35,164 |
| 83,917 | 167 | 24,958 | 6,181 | 4,254 | 35,560 |
| 83,918 | 164 | 24,687 | 6,131 | 4,210 | 35,192 |
| 83,919 | 162 | 24,628 | 6,156 | 4,260 | 35,206 |
| 83,920 | 154 | 24,392 | 6,113 | 4,237 | 34,896 |
| 83,921 | 147 | 24,436 | 6,108 | 4,247 | 34,938 |
| 83,922 | 142 | 24,273 | 6,091 | 4,241 | 34,747 |
| 83,923 | 135 | 24,205 | 6,065 | 4,255 | 34,660 |
| 83,924 | 130 | 23,983 | 6,016 | 4,226 | 34,355 |
| 83,925 | 130 | 23,672 | 5,951 | 4,196 | 33,949 |
| 83,926 | 130 | 23,960 | 5,982 | 4,256 | 34,328 |
| 83,927 | 127 | 23,845 | 5,927 | 4,239 | 34,138 |

|        |     |        |       |       |        |
|--------|-----|--------|-------|-------|--------|
| 83,928 | 129 | 24,089 | 6,000 | 4,274 | 34,492 |
| 83,929 | 129 | 23,941 | 6,020 | 4,251 | 34,341 |
| 83,930 | 134 | 23,890 | 5,994 | 4,225 | 34,243 |
| 83,931 | 136 | 23,634 | 5,898 | 4,195 | 33,863 |
| 83,932 | 135 | 23,925 | 5,945 | 4,228 | 34,233 |
| 83,933 | 136 | 23,607 | 5,870 | 4,166 | 33,779 |
| 83,934 | 134 | 23,227 | 5,785 | 4,106 | 33,252 |
| 83,935 | 137 | 22,400 | 5,549 | 3,973 | 32,059 |
| 83,936 | 138 | 22,487 | 5,557 | 3,972 | 32,154 |
| 83,937 | 139 | 22,754 | 5,604 | 3,998 | 32,495 |
| 83,938 | 138 | 22,719 | 5,573 | 4,001 | 32,431 |
| 83,939 | 135 | 22,955 | 5,635 | 4,055 | 32,780 |
| 83,940 | 120 | 22,583 | 5,590 | 4,020 | 32,313 |
| 83,941 | 117 | 22,517 | 5,565 | 4,001 | 32,200 |
| 83,942 | 114 | 22,206 | 5,480 | 3,943 | 31,743 |
| 83,943 | 115 | 22,226 | 5,462 | 3,933 | 31,736 |
| 83,944 | 116 | 22,214 | 5,463 | 3,927 | 31,720 |
| 83,945 | 117 | 22,222 | 5,456 | 3,931 | 31,726 |
| 83,946 | 115 | 22,422 | 5,491 | 3,949 | 31,977 |
| 83,947 | 103 | 22,153 | 5,436 | 3,920 | 31,612 |
| 83,948 | 109 | 22,338 | 5,500 | 3,942 | 31,889 |
| 83,949 | 104 | 22,436 | 5,530 | 3,971 | 32,041 |
| 83,950 | 102 | 22,426 | 5,520 | 3,957 | 32,005 |
| 83,951 | 101 | 22,223 | 5,463 | 3,931 | 31,718 |
| 83,952 | 102 | 22,147 | 5,445 | 3,914 | 31,608 |
| 83,953 | 104 | 22,216 | 5,436 | 3,908 | 31,664 |
| 83,954 | 103 | 22,233 | 5,429 | 3,912 | 31,677 |
| 83,955 | 103 | 22,144 | 5,428 | 3,900 | 31,575 |
| 83,956 | 102 | 22,094 | 5,420 | 3,886 | 31,502 |
| 83,957 | 104 | 22,122 | 5,414 | 3,885 | 31,525 |
| 83,958 | 107 | 22,168 | 5,412 | 3,894 | 31,581 |
| 83,959 | 109 | 22,154 | 5,415 | 3,879 | 31,557 |



|        |     |        |       |       |        |
|--------|-----|--------|-------|-------|--------|
| 83,960 | 111 | 21,899 | 5,372 | 3,845 | 31,227 |
| 83,961 | 108 | 21,806 | 5,350 | 3,793 | 31,057 |
| 83,962 | 115 | 22,079 | 5,461 | 3,882 | 31,537 |
| 83,963 | 115 | 21,805 | 5,462 | 3,876 | 31,258 |
| 83,964 | 113 | 21,691 | 5,439 | 3,852 | 31,095 |
| 83,965 | 114 | 21,875 | 5,485 | 3,875 | 31,349 |
| 83,966 | 111 | 22,037 | 5,526 | 3,903 | 31,577 |
| 83,967 | 108 | 21,722 | 5,458 | 3,846 | 31,134 |
| 83,968 | 120 | 21,932 | 5,509 | 3,861 | 31,422 |
| 83,969 | 123 | 22,285 | 5,537 | 3,868 | 31,813 |
| 83,970 | 118 | 22,467 | 5,496 | 3,847 | 31,928 |
| 83,971 | 119 | 22,852 | 5,593 | 3,872 | 32,436 |
| 83,972 | 117 | 22,856 | 5,592 | 3,867 | 32,432 |
| 83,973 | 124 | 23,071 | 5,651 | 3,872 | 32,718 |
| 83,974 | 127 | 23,123 | 5,659 | 3,861 | 32,770 |
| 83,975 | 127 | 23,001 | 5,627 | 3,833 | 32,588 |
| 83,976 | 130 | 23,505 | 5,750 | 3,899 | 33,284 |
| 83,977 | 128 | 23,517 | 5,768 | 3,909 | 33,322 |
| 83,978 | 127 | 23,790 | 5,860 | 3,929 | 33,706 |
| 83,979 | 128 | 23,880 | 5,877 | 3,944 | 33,829 |
| 83,980 | 129 | 23,773 | 5,816 | 3,918 | 33,636 |
| 83,981 | 124 | 23,513 | 5,783 | 3,888 | 33,308 |
| 83,982 | 126 | 23,968 | 5,908 | 3,952 | 33,954 |
| 83,983 | 127 | 23,913 | 5,910 | 3,941 | 33,891 |
| 83,984 | 122 | 23,679 | 5,867 | 3,923 | 33,591 |
| 83,985 | 123 | 23,743 | 5,881 | 3,920 | 33,667 |
| 83,986 | 128 | 24,044 | 5,935 | 3,949 | 34,056 |
| 83,987 | 130 | 24,043 | 5,948 | 3,952 | 34,073 |
| 83,988 | 131 | 23,883 | 5,879 | 3,934 | 33,827 |
| 83,989 | 130 | 23,854 | 5,866 | 3,881 | 33,731 |
| 83,990 | 135 | 23,870 | 5,856 | 3,836 | 33,697 |
| 83,991 | 135 | 23,900 | 5,878 | 3,838 | 33,751 |

|        |     |        |       |       |        |
|--------|-----|--------|-------|-------|--------|
| 83,992 | 138 | 23,930 | 5,919 | 3,817 | 33,804 |
| 83,993 | 139 | 23,966 | 5,917 | 3,835 | 33,857 |
| 83,994 | 140 | 24,244 | 5,985 | 3,872 | 34,241 |
| 83,995 | 144 | 24,363 | 5,989 | 3,881 | 34,377 |
| 83,996 | 142 | 24,238 | 5,978 | 3,866 | 34,224 |
| 83,997 | 142 | 24,560 | 6,052 | 3,919 | 34,673 |
| 83,998 | 139 | 24,059 | 5,960 | 3,847 | 34,005 |
| 83,999 | 136 | 24,278 | 5,993 | 3,877 | 34,284 |
| 84,000 | 133 | 24,558 | 6,034 | 3,892 | 34,617 |
| 84,001 | 121 | 24,096 | 5,893 | 3,806 | 33,916 |
| 84,002 | 123 | 24,371 | 5,933 | 3,842 | 34,269 |
| 84,003 | 123 | 24,398 | 5,935 | 3,847 | 34,303 |
| 84,004 | 121 | 24,611 | 5,963 | 3,883 | 34,578 |
| 84,005 | 121 | 24,518 | 5,960 | 3,890 | 34,489 |
| 84,006 | 121 | 24,443 | 5,950 | 3,892 | 34,406 |
| 84,007 | 124 | 24,896 | 6,099 | 3,951 | 35,070 |
| 84,008 | 125 | 24,835 | 6,100 | 3,937 | 34,997 |
| 84,009 | 119 | 24,733 | 6,103 | 3,912 | 34,867 |
| 84,010 | 111 | 23,952 | 5,873 | 3,766 | 33,702 |
| 84,011 | 111 | 24,181 | 5,906 | 3,775 | 33,973 |
| 84,012 | 112 | 24,320 | 5,937 | 3,779 | 34,148 |
| 84,013 | 121 | 24,378 | 5,936 | 3,770 | 34,205 |
| 84,014 | 119 | 24,018 | 5,848 | 3,710 | 33,695 |
| 84,015 | 122 | 24,164 | 5,864 | 3,702 | 33,852 |
| 84,016 | 122 | 24,100 | 5,868 | 3,692 | 33,782 |
| 84,017 | 124 | 23,618 | 5,739 | 3,617 | 33,098 |
| 84,018 | 127 | 23,604 | 5,756 | 3,635 | 33,122 |
| 84,019 | 121 | 23,772 | 5,783 | 3,646 | 33,322 |
| 84,020 | 120 | 23,337 | 5,718 | 3,603 | 32,778 |
| 84,021 | 120 | 23,121 | 5,676 | 3,574 | 32,491 |
| 84,022 | 128 | 22,936 | 5,619 | 3,570 | 32,253 |
| 84,023 | 130 | 23,006 | 5,639 | 3,584 | 32,359 |

|        |     |        |       |       |        |
|--------|-----|--------|-------|-------|--------|
| 84,024 | 125 | 23,003 | 5,635 | 3,578 | 32,341 |
| 84,025 | 122 | 22,929 | 5,649 | 3,586 | 32,286 |
| 84,026 | 124 | 22,981 | 5,623 | 3,540 | 32,268 |
| 84,027 | 128 | 23,256 | 5,671 | 3,572 | 32,627 |
| 84,028 | 134 | 23,115 | 5,613 | 3,530 | 32,392 |
| 84,029 | 133 | 23,038 | 5,584 | 3,532 | 32,287 |
| 84,030 | 130 | 23,089 | 5,555 | 3,552 | 32,326 |
| 84,031 | 126 | 23,329 | 5,598 | 3,570 | 32,623 |
| 84,032 | 131 | 23,290 | 5,567 | 3,547 | 32,535 |
| 84,033 | 137 | 23,286 | 5,572 | 3,537 | 32,532 |
| 84,034 | 137 | 23,340 | 5,573 | 3,539 | 32,589 |
| 84,035 | 135 | 23,287 | 5,565 | 3,514 | 32,501 |
| 84,036 | 135 | 23,470 | 5,608 | 3,542 | 32,755 |
| 84,037 | 136 | 23,541 | 5,666 | 3,568 | 32,911 |
| 84,038 | 134 | 23,384 | 5,651 | 3,533 | 32,702 |
| 84,039 | 133 | 23,152 | 5,643 | 3,521 | 32,449 |
| 84,040 | 135 | 23,083 | 5,652 | 3,551 | 32,421 |
| 84,041 | 132 | 22,956 | 5,646 | 3,581 | 32,315 |
| 84,042 | 136 | 23,045 | 5,689 | 3,630 | 32,500 |
| 84,043 | 136 | 22,945 | 5,672 | 3,645 | 32,398 |
| 84,044 | 145 | 22,701 | 5,666 | 3,614 | 32,126 |
| 84,045 | 142 | 22,533 | 5,628 | 3,588 | 31,891 |
| 84,046 | 137 | 22,569 | 5,665 | 3,614 | 31,985 |
| 84,047 | 138 | 22,426 | 5,679 | 3,623 | 31,866 |
| 84,048 | 141 | 22,469 | 5,703 | 3,631 | 31,944 |
| 84,049 | 140 | 22,242 | 5,639 | 3,586 | 31,607 |
| 84,050 | 142 | 22,226 | 5,599 | 3,559 | 31,526 |
| 84,051 | 145 | 22,144 | 5,606 | 3,556 | 31,451 |
| 84,052 | 145 | 21,891 | 5,577 | 3,541 | 31,154 |
| 84,053 | 148 | 22,291 | 5,713 | 3,646 | 31,798 |
| 84,054 | 148 | 22,230 | 5,749 | 3,635 | 31,762 |
| 84,055 | 154 | 22,043 | 5,684 | 3,576 | 31,457 |

|        |     |        |       |       |        |
|--------|-----|--------|-------|-------|--------|
| 84,056 | 154 | 22,278 | 5,741 | 3,611 | 31,784 |
| 84,057 | 159 | 22,541 | 5,800 | 3,646 | 32,146 |
| 84,058 | 158 | 22,528 | 5,775 | 3,629 | 32,090 |
| 84,059 | 163 | 22,424 | 5,747 | 3,610 | 31,944 |
| 84,060 | 163 | 22,539 | 5,758 | 3,643 | 32,103 |
| 84,061 | 166 | 22,679 | 5,839 | 3,690 | 32,374 |
| 84,062 | 166 | 22,628 | 5,834 | 3,698 | 32,326 |
| 84,063 | 161 | 22,554 | 5,851 | 3,729 | 32,295 |
| 84,064 | 152 | 22,489 | 5,858 | 3,733 | 32,232 |
| 84,065 | 155 | 22,641 | 5,981 | 3,787 | 32,564 |
| 84,066 | 156 | 22,492 | 5,936 | 3,766 | 32,350 |
| 84,067 | 155 | 22,299 | 5,867 | 3,734 | 32,055 |
| 84,068 | 155 | 22,536 | 5,929 | 3,781 | 32,401 |
| 84,069 | 154 | 22,547 | 5,949 | 3,793 | 32,443 |
| 84,070 | 149 | 22,553 | 5,974 | 3,798 | 32,474 |
| 84,071 | 151 | 22,899 | 6,039 | 3,877 | 32,966 |
| 84,072 | 149 | 22,816 | 6,044 | 3,893 | 32,902 |
| 84,073 | 142 | 22,494 | 5,990 | 3,871 | 32,497 |
| 84,074 | 142 | 22,350 | 5,987 | 3,854 | 32,333 |
| 84,075 | 143 | 22,127 | 5,966 | 3,834 | 32,070 |
| 84,076 | 143 | 22,198 | 5,968 | 3,844 | 32,153 |
| 84,077 | 145 | 22,333 | 6,034 | 3,889 | 32,401 |
| 84,078 | 146 | 22,321 | 6,044 | 3,884 | 32,395 |
| 84,079 | 141 | 22,172 | 5,987 | 3,860 | 32,160 |
| 84,080 | 141 | 22,167 | 5,993 | 3,851 | 32,152 |
| 84,081 | 143 | 22,181 | 6,030 | 3,860 | 32,214 |
| 84,082 | 145 | 21,983 | 6,024 | 3,850 | 32,002 |
| 84,083 | 146 | 21,920 | 6,049 | 3,878 | 31,993 |
| 84,084 | 138 | 21,797 | 6,031 | 3,870 | 31,836 |
| 84,085 | 143 | 21,882 | 6,075 | 3,901 | 32,001 |
| 84,086 | 143 | 21,845 | 6,062 | 3,925 | 31,975 |
| 84,087 | 141 | 21,845 | 6,069 | 3,923 | 31,978 |

|        |     |        |       |       |        |
|--------|-----|--------|-------|-------|--------|
| 84,088 | 139 | 21,763 | 6,044 | 3,918 | 31,864 |
| 84,089 | 144 | 21,736 | 6,034 | 3,940 | 31,854 |
| 84,090 | 147 | 21,456 | 5,880 | 3,836 | 31,319 |
| 84,091 | 147 | 21,783 | 5,937 | 3,875 | 31,742 |
| 84,092 | 150 | 22,041 | 5,989 | 3,907 | 32,087 |
| 84,093 | 144 | 21,749 | 5,906 | 3,830 | 31,629 |
| 84,094 | 146 | 22,114 | 5,951 | 3,877 | 32,088 |
| 84,095 | 137 | 22,159 | 5,910 | 3,874 | 32,080 |
| 84,096 | 137 | 21,958 | 5,840 | 3,826 | 31,761 |
| 84,097 | 141 | 21,952 | 5,815 | 3,774 | 31,682 |
| 84,098 | 145 | 21,996 | 5,789 | 3,777 | 31,707 |
| 84,099 | 142 | 21,676 | 5,737 | 3,747 | 31,302 |
| 84,100 | 141 | 21,814 | 5,732 | 3,774 | 31,461 |
| 84,101 | 141 | 21,957 | 5,758 | 3,804 | 31,660 |
| 84,102 | 137 | 21,884 | 5,744 | 3,780 | 31,545 |
| 84,103 | 136 | 22,021 | 5,738 | 3,764 | 31,659 |
| 84,104 | 136 | 22,135 | 5,736 | 3,759 | 31,766 |
| 84,105 | 135 | 21,827 | 5,623 | 3,713 | 31,298 |
| 84,106 | 130 | 21,705 | 5,591 | 3,703 | 31,129 |
| 84,107 | 130 | 21,854 | 5,627 | 3,714 | 31,325 |
| 84,108 | 125 | 21,608 | 5,589 | 3,722 | 31,044 |
| 84,109 | 125 | 21,467 | 5,569 | 3,710 | 30,871 |
| 84,110 | 119 | 21,439 | 5,541 | 3,684 | 30,783 |
| 84,111 | 120 | 21,434 | 5,507 | 3,652 | 30,713 |
| 84,112 | 119 | 21,490 | 5,484 | 3,649 | 30,742 |
| 84,113 | 120 | 21,532 | 5,473 | 3,634 | 30,759 |
| 84,114 | 123 | 21,577 | 5,420 | 3,616 | 30,736 |
| 84,115 | 124 | 21,693 | 5,430 | 3,629 | 30,876 |
| 84,116 | 125 | 21,946 | 5,444 | 3,642 | 31,157 |
| 84,117 | 127 | 21,967 | 5,457 | 3,658 | 31,209 |
| 84,118 | 126 | 21,868 | 5,420 | 3,621 | 31,035 |
| 84,119 | 126 | 21,822 | 5,407 | 3,635 | 30,990 |

|        |     |        |       |       |        |
|--------|-----|--------|-------|-------|--------|
| 84,120 | 125 | 22,237 | 5,515 | 3,724 | 31,601 |
| 84,121 | 124 | 21,941 | 5,475 | 3,692 | 31,232 |
| 84,122 | 122 | 21,956 | 5,499 | 3,681 | 31,258 |
| 84,123 | 129 | 21,137 | 5,235 | 3,511 | 30,012 |
| 84,124 | 136 | 21,441 | 5,308 | 3,541 | 30,426 |
| 84,125 | 139 | 21,722 | 5,331 | 3,570 | 30,762 |
| 84,126 | 139 | 21,817 | 5,329 | 3,575 | 30,860 |
| 84,127 | 138 | 22,472 | 5,495 | 3,680 | 31,785 |
| 84,128 | 137 | 22,185 | 5,441 | 3,635 | 31,398 |
| 84,129 | 137 | 22,441 | 5,546 | 3,695 | 31,819 |
| 84,130 | 145 | 22,132 | 5,483 | 3,630 | 31,390 |
| 84,131 | 144 | 22,111 | 5,492 | 3,629 | 31,376 |
| 84,132 | 144 | 22,177 | 5,491 | 3,660 | 31,472 |
| 84,133 | 141 | 22,225 | 5,482 | 3,692 | 31,540 |
| 84,134 | 141 | 22,377 | 5,498 | 3,705 | 31,721 |
| 84,135 | 144 | 22,265 | 5,464 | 3,668 | 31,541 |
| 84,136 | 141 | 22,144 | 5,412 | 3,644 | 31,341 |
| 84,137 | 141 | 22,146 | 5,408 | 3,621 | 31,316 |
| 84,138 | 143 | 22,092 | 5,389 | 3,624 | 31,248 |
| 84,139 | 147 | 22,235 | 5,411 | 3,641 | 31,434 |
| 84,140 | 141 | 22,306 | 5,401 | 3,616 | 31,464 |
| 84,141 | 133 | 22,139 | 5,373 | 3,592 | 31,237 |
| 84,142 | 135 | 22,460 | 5,488 | 3,649 | 31,732 |
| 84,143 | 131 | 22,183 | 5,443 | 3,614 | 31,371 |
| 84,144 | 132 | 22,235 | 5,458 | 3,628 | 31,453 |
| 84,145 | 144 | 22,544 | 5,526 | 3,664 | 31,878 |
| 84,146 | 145 | 22,149 | 5,479 | 3,593 | 31,366 |
| 84,147 | 146 | 22,361 | 5,533 | 3,630 | 31,670 |
| 84,148 | 140 | 22,348 | 5,558 | 3,635 | 31,681 |
| 84,149 | 140 | 22,645 | 5,673 | 3,679 | 32,137 |
| 84,150 | 142 | 22,646 | 5,676 | 3,651 | 32,115 |
| 84,151 | 141 | 22,676 | 5,678 | 3,648 | 32,143 |

|        |     |        |       |       |        |
|--------|-----|--------|-------|-------|--------|
| 84,152 | 148 | 23,002 | 5,785 | 3,700 | 32,635 |
| 84,153 | 147 | 23,000 | 5,780 | 3,683 | 32,610 |
| 84,154 | 145 | 22,724 | 5,703 | 3,639 | 32,211 |
| 84,155 | 147 | 22,824 | 5,716 | 3,644 | 32,331 |
| 84,156 | 148 | 23,001 | 5,762 | 3,669 | 32,580 |
| 84,157 | 148 | 22,955 | 5,752 | 3,662 | 32,517 |
| 84,158 | 147 | 23,022 | 5,732 | 3,648 | 32,549 |
| 84,159 | 147 | 23,028 | 5,724 | 3,641 | 32,540 |
| 84,160 | 148 | 23,164 | 5,759 | 3,682 | 32,753 |
| 84,161 | 145 | 22,988 | 5,749 | 3,674 | 32,556 |
| 84,162 | 144 | 22,629 | 5,686 | 3,630 | 32,089 |
| 84,163 | 142 | 22,538 | 5,716 | 3,618 | 32,014 |
| 84,164 | 146 | 22,724 | 5,784 | 3,651 | 32,305 |
| 84,165 | 148 | 22,650 | 5,808 | 3,655 | 32,261 |
| 84,166 | 149 | 22,587 | 5,819 | 3,650 | 32,205 |
| 84,167 | 151 | 22,542 | 5,814 | 3,643 | 32,150 |
| 84,168 | 155 | 22,200 | 5,762 | 3,597 | 31,714 |
| 84,169 | 151 | 21,803 | 5,704 | 3,546 | 31,204 |
| 84,170 | 157 | 22,114 | 5,801 | 3,570 | 31,642 |
| 84,171 | 158 | 21,823 | 5,743 | 3,517 | 31,241 |
| 84,172 | 158 | 21,861 | 5,699 | 3,504 | 31,222 |
| 84,173 | 150 | 21,607 | 5,632 | 3,462 | 30,851 |
| 84,174 | 149 | 21,694 | 5,641 | 3,460 | 30,944 |
| 84,175 | 147 | 21,463 | 5,568 | 3,420 | 30,598 |
| 84,176 | 142 | 21,185 | 5,524 | 3,397 | 30,248 |
| 84,177 | 151 | 21,762 | 5,715 | 3,529 | 31,157 |
| 84,178 | 153 | 21,878 | 5,725 | 3,539 | 31,295 |
| 84,179 | 156 | 21,767 | 5,640 | 3,513 | 31,076 |
| 84,180 | 154 | 21,486 | 5,591 | 3,490 | 30,721 |
| 84,181 | 151 | 21,737 | 5,655 | 3,550 | 31,093 |
| 84,182 | 155 | 21,749 | 5,687 | 3,545 | 31,136 |
| 84,183 | 159 | 21,565 | 5,645 | 3,486 | 30,855 |

|        |     |        |       |       |        |
|--------|-----|--------|-------|-------|--------|
| 84,184 | 160 | 21,623 | 5,661 | 3,506 | 30,950 |
| 84,185 | 155 | 21,618 | 5,710 | 3,504 | 30,987 |
| 84,186 | 155 | 21,304 | 5,684 | 3,480 | 30,623 |
| 84,187 | 156 | 21,289 | 5,679 | 3,497 | 30,621 |
| 84,188 | 160 | 21,188 | 5,688 | 3,489 | 30,525 |
| 84,189 | 162 | 21,174 | 5,705 | 3,491 | 30,532 |
| 84,190 | 165 | 21,129 | 5,720 | 3,494 | 30,508 |
| 84,191 | 171 | 20,901 | 5,697 | 3,470 | 30,239 |
| 84,192 | 169 | 20,856 | 5,683 | 3,459 | 30,167 |
| 84,193 | 169 | 20,925 | 5,687 | 3,463 | 30,244 |
| 84,194 | 170 | 21,348 | 5,793 | 3,514 | 30,825 |
| 84,195 | 166 | 21,445 | 5,869 | 3,564 | 31,044 |
| 84,196 | 156 | 21,486 | 5,895 | 3,566 | 31,103 |
| 84,197 | 155 | 21,450 | 5,897 | 3,580 | 31,082 |
| 84,198 | 157 | 21,572 | 5,932 | 3,607 | 31,268 |
| 84,199 | 155 | 21,610 | 5,958 | 3,624 | 31,347 |
| 84,200 | 154 | 21,639 | 5,938 | 3,641 | 31,372 |
| 84,201 | 152 | 21,563 | 5,912 | 3,650 | 31,277 |
| 84,202 | 145 | 21,520 | 5,893 | 3,649 | 31,207 |
| 84,203 | 153 | 21,308 | 5,848 | 3,624 | 30,933 |
| 84,204 | 154 | 21,153 | 5,845 | 3,631 | 30,783 |
| 84,205 | 156 | 21,226 | 5,914 | 3,646 | 30,942 |
| 84,206 | 159 | 21,204 | 5,931 | 3,655 | 30,949 |
| 84,207 | 160 | 21,161 | 5,945 | 3,653 | 30,919 |
| 84,208 | 159 | 20,940 | 5,897 | 3,620 | 30,616 |
| 84,209 | 165 | 21,261 | 6,028 | 3,679 | 31,133 |
| 84,210 | 167 | 21,357 | 6,020 | 3,673 | 31,217 |
| 84,211 | 168 | 21,413 | 6,032 | 3,671 | 31,284 |
| 84,212 | 168 | 21,516 | 6,039 | 3,689 | 31,412 |
| 84,213 | 167 | 21,465 | 6,023 | 3,696 | 31,351 |
| 84,214 | 166 | 21,516 | 6,035 | 3,706 | 31,423 |
| 84,215 | 158 | 21,645 | 6,046 | 3,717 | 31,566 |



|        |     |        |       |       |        |
|--------|-----|--------|-------|-------|--------|
| 84,216 | 160 | 21,752 | 6,059 | 3,720 | 31,691 |
| 84,217 | 157 | 21,684 | 6,007 | 3,691 | 31,539 |
| 84,218 | 159 | 22,096 | 6,105 | 3,763 | 32,123 |
| 84,219 | 151 | 22,124 | 6,068 | 3,771 | 32,114 |
| 84,220 | 149 | 21,980 | 6,010 | 3,730 | 31,869 |
| 84,221 | 147 | 21,842 | 5,963 | 3,718 | 31,670 |
| 84,222 | 149 | 22,066 | 6,030 | 3,734 | 31,979 |
| 84,223 | 150 | 21,856 | 5,991 | 3,710 | 31,707 |
| 84,224 | 149 | 21,510 | 5,958 | 3,688 | 31,305 |
| 84,225 | 147 | 21,523 | 6,018 | 3,741 | 31,429 |
| 84,226 | 143 | 21,629 | 6,074 | 3,760 | 31,606 |
| 84,227 | 147 | 21,693 | 6,088 | 3,756 | 31,684 |
| 84,228 | 150 | 21,824 | 6,115 | 3,741 | 31,830 |
| 84,229 | 152 | 21,762 | 6,106 | 3,771 | 31,791 |
| 84,230 | 152 | 21,721 | 6,113 | 3,754 | 31,740 |
| 84,231 | 153 | 21,568 | 6,082 | 3,711 | 31,514 |
| 84,232 | 150 | 21,576 | 6,084 | 3,709 | 31,519 |
| 84,233 | 142 | 21,265 | 5,967 | 3,639 | 31,013 |
| 84,234 | 145 | 21,500 | 6,014 | 3,673 | 31,332 |
| 84,235 | 144 | 21,533 | 6,015 | 3,658 | 31,350 |
| 84,236 | 145 | 21,778 | 6,049 | 3,695 | 31,667 |
| 84,237 | 142 | 21,825 | 6,056 | 3,704 | 31,727 |
| 84,238 | 140 | 21,749 | 6,086 | 3,684 | 31,659 |
| 84,239 | 136 | 22,027 | 6,160 | 3,714 | 32,037 |
| 84,240 | 130 | 22,120 | 6,136 | 3,692 | 32,078 |
| 84,241 | 122 | 22,034 | 6,130 | 3,674 | 31,960 |
| 84,242 | 125 | 22,039 | 6,119 | 3,674 | 31,957 |
| 84,243 | 125 | 21,784 | 6,066 | 3,649 | 31,624 |
| 84,244 | 125 | 21,901 | 6,137 | 3,694 | 31,857 |
| 84,245 | 124 | 21,988 | 6,123 | 3,711 | 31,946 |
| 84,246 | 127 | 21,811 | 6,083 | 3,676 | 31,697 |
| 84,247 | 136 | 21,652 | 6,076 | 3,650 | 31,514 |

|        |     |        |       |       |        |
|--------|-----|--------|-------|-------|--------|
| 84,248 | 135 | 21,380 | 5,980 | 3,608 | 31,103 |
| 84,249 | 135 | 21,394 | 5,994 | 3,618 | 31,141 |
| 84,250 | 141 | 21,333 | 5,974 | 3,620 | 31,068 |
| 84,251 | 140 | 21,112 | 5,961 | 3,593 | 30,806 |
| 84,252 | 139 | 20,564 | 5,856 | 3,493 | 30,052 |
| 84,253 | 139 | 20,617 | 5,861 | 3,489 | 30,106 |
| 84,254 | 134 | 20,382 | 5,805 | 3,467 | 29,788 |
| 84,255 | 130 | 20,144 | 5,713 | 3,430 | 29,417 |
| 84,256 | 132 | 20,944 | 5,874 | 3,549 | 30,499 |
| 84,257 | 127 | 20,897 | 5,873 | 3,540 | 30,437 |
| 84,258 | 124 | 21,122 | 5,870 | 3,537 | 30,653 |
| 84,259 | 124 | 21,049 | 5,880 | 3,543 | 30,596 |
| 84,260 | 119 | 21,068 | 5,930 | 3,565 | 30,682 |
| 84,261 | 121 | 21,090 | 5,969 | 3,574 | 30,754 |
| 84,262 | 121 | 20,865 | 5,946 | 3,562 | 30,494 |
| 84,263 | 121 | 20,811 | 5,955 | 3,582 | 30,469 |
| 84,264 | 122 | 20,765 | 5,979 | 3,576 | 30,442 |
| 84,265 | 127 | 20,992 | 6,031 | 3,613 | 30,763 |
| 84,266 | 127 | 21,062 | 6,038 | 3,611 | 30,838 |
| 84,267 | 123 | 20,987 | 6,049 | 3,625 | 30,784 |
| 84,268 | 128 | 20,982 | 6,089 | 3,633 | 30,832 |
| 84,269 | 128 | 21,014 | 6,122 | 3,642 | 30,906 |
| 84,270 | 126 | 20,697 | 6,053 | 3,606 | 30,482 |
| 84,271 | 127 | 20,442 | 5,973 | 3,561 | 30,103 |
| 84,272 | 127 | 20,700 | 6,031 | 3,592 | 30,450 |
| 84,273 | 127 | 20,890 | 6,097 | 3,625 | 30,739 |
| 84,274 | 128 | 20,838 | 6,019 | 3,586 | 30,571 |
| 84,275 | 131 | 20,946 | 6,051 | 3,576 | 30,704 |
| 84,276 | 131 | 20,919 | 6,038 | 3,534 | 30,622 |
| 84,277 | 134 | 20,854 | 6,044 | 3,533 | 30,565 |
| 84,278 | 123 | 20,623 | 6,008 | 3,510 | 30,264 |
| 84,279 | 118 | 21,021 | 6,092 | 3,596 | 30,827 |

|        |     |        |       |       |        |
|--------|-----|--------|-------|-------|--------|
| 84,280 | 119 | 20,494 | 5,904 | 3,494 | 30,011 |
| 84,281 | 121 | 20,774 | 5,986 | 3,525 | 30,406 |
| 84,282 | 116 | 21,084 | 6,027 | 3,574 | 30,801 |
| 84,283 | 117 | 20,959 | 5,971 | 3,549 | 30,596 |
| 84,284 | 120 | 21,141 | 6,021 | 3,579 | 30,861 |
| 84,285 | 117 | 21,172 | 6,042 | 3,577 | 30,908 |
| 84,286 | 115 | 21,127 | 6,063 | 3,610 | 30,915 |
| 84,287 | 119 | 21,314 | 6,110 | 3,627 | 31,170 |
| 84,288 | 119 | 21,377 | 6,106 | 3,640 | 31,242 |
| 84,289 | 121 | 21,716 | 6,214 | 3,709 | 31,760 |
| 84,290 | 120 | 21,547 | 6,183 | 3,702 | 31,552 |
| 84,291 | 117 | 21,381 | 6,179 | 3,707 | 31,384 |
| 84,292 | 117 | 21,720 | 6,306 | 3,789 | 31,932 |
| 84,293 | 116 | 21,576 | 6,284 | 3,758 | 31,734 |
| 84,294 | 115 | 21,622 | 6,279 | 3,764 | 31,780 |
| 84,295 | 114 | 21,857 | 6,279 | 3,772 | 32,022 |
| 84,296 | 118 | 22,023 | 6,322 | 3,801 | 32,264 |
| 84,297 | 121 | 22,246 | 6,354 | 3,810 | 32,531 |
| 84,298 | 110 | 21,973 | 6,298 | 3,783 | 32,164 |
| 84,299 | 114 | 22,152 | 6,377 | 3,813 | 32,456 |
| 84,300 | 120 | 22,288 | 6,395 | 3,800 | 32,603 |
| 84,301 | 116 | 22,128 | 6,329 | 3,772 | 32,345 |
| 84,302 | 118 | 21,958 | 6,299 | 3,759 | 32,134 |
| 84,303 | 117 | 21,653 | 6,259 | 3,733 | 31,762 |
| 84,304 | 117 | 22,137 | 6,424 | 3,809 | 32,487 |
| 84,305 | 116 | 22,419 | 6,529 | 3,857 | 32,921 |
| 84,306 | 120 | 22,462 | 6,573 | 3,852 | 33,007 |
| 84,307 | 122 | 22,461 | 6,582 | 3,852 | 33,017 |
| 84,308 | 125 | 22,426 | 6,565 | 3,836 | 32,952 |
| 84,309 | 123 | 22,368 | 6,528 | 3,826 | 32,845 |
| 84,310 | 124 | 22,168 | 6,455 | 3,765 | 32,512 |
| 84,311 | 127 | 22,534 | 6,506 | 3,796 | 32,963 |

|        |     |        |       |       |        |
|--------|-----|--------|-------|-------|--------|
| 84,312 | 123 | 22,278 | 6,403 | 3,729 | 32,533 |
| 84,313 | 123 | 22,516 | 6,434 | 3,707 | 32,780 |
| 84,314 | 124 | 22,568 | 6,443 | 3,707 | 32,842 |
| 84,315 | 122 | 22,234 | 6,357 | 3,667 | 32,380 |
| 84,316 | 129 | 22,586 | 6,466 | 3,715 | 32,896 |
| 84,317 | 129 | 22,398 | 6,450 | 3,685 | 32,662 |
| 84,318 | 134 | 22,374 | 6,430 | 3,671 | 32,609 |
| 84,319 | 127 | 22,296 | 6,385 | 3,637 | 32,445 |
| 84,320 | 129 | 21,979 | 6,294 | 3,568 | 31,970 |
| 84,321 | 129 | 21,942 | 6,285 | 3,556 | 31,912 |
| 84,322 | 130 | 21,999 | 6,311 | 3,562 | 32,002 |
| 84,323 | 132 | 21,990 | 6,287 | 3,552 | 31,961 |
| 84,324 | 134 | 22,217 | 6,324 | 3,580 | 32,255 |
| 84,325 | 127 | 21,502 | 6,103 | 3,461 | 31,193 |
| 84,326 | 128 | 21,716 | 6,131 | 3,477 | 31,452 |
| 84,327 | 128 | 21,776 | 6,143 | 3,460 | 31,507 |
| 84,328 | 129 | 21,792 | 6,116 | 3,436 | 31,473 |
| 84,329 | 130 | 21,975 | 6,194 | 3,474 | 31,773 |
| 84,330 | 125 | 21,591 | 6,130 | 3,425 | 31,271 |
| 84,331 | 124 | 21,504 | 6,132 | 3,415 | 31,175 |
| 84,332 | 131 | 21,650 | 6,176 | 3,451 | 31,408 |
| 84,333 | 131 | 21,543 | 6,178 | 3,445 | 31,297 |
| 84,334 | 131 | 21,521 | 6,195 | 3,441 | 31,288 |
| 84,335 | 130 | 21,385 | 6,120 | 3,417 | 31,052 |
| 84,336 | 134 | 21,594 | 6,168 | 3,437 | 31,333 |
| 84,337 | 134 | 21,592 | 6,182 | 3,417 | 31,325 |
| 84,338 | 138 | 21,562 | 6,175 | 3,400 | 31,275 |
| 84,339 | 138 | 21,539 | 6,184 | 3,390 | 31,251 |
| 84,340 | 136 | 21,522 | 6,131 | 3,367 | 31,156 |
| 84,341 | 139 | 21,464 | 6,090 | 3,349 | 31,042 |
| 84,342 | 143 | 21,011 | 5,960 | 3,260 | 30,374 |
| 84,343 | 143 | 21,130 | 5,971 | 3,257 | 30,501 |

|        |     |        |       |       |        |
|--------|-----|--------|-------|-------|--------|
| 84,344 | 139 | 21,054 | 5,925 | 3,254 | 30,372 |
| 84,345 | 142 | 20,797 | 5,852 | 3,207 | 29,998 |
| 84,346 | 142 | 20,706 | 5,829 | 3,199 | 29,876 |
| 84,347 | 142 | 20,817 | 5,908 | 3,218 | 30,085 |
| 84,348 | 139 | 20,533 | 5,859 | 3,174 | 29,705 |
| 84,349 | 137 | 20,472 | 5,844 | 3,175 | 29,628 |
| 84,350 | 133 | 20,351 | 5,780 | 3,145 | 29,409 |
| 84,351 | 128 | 20,609 | 5,810 | 3,166 | 29,713 |
| 84,352 | 133 | 20,558 | 5,825 | 3,153 | 29,669 |
| 84,353 | 130 | 20,308 | 5,782 | 3,126 | 29,346 |
| 84,354 | 135 | 20,565 | 5,777 | 3,159 | 29,636 |
| 84,355 | 144 | 20,752 | 5,788 | 3,175 | 29,859 |
| 84,356 | 147 | 20,788 | 5,766 | 3,149 | 29,850 |
| 84,357 | 145 | 20,779 | 5,722 | 3,130 | 29,776 |
| 84,358 | 142 | 20,563 | 5,673 | 3,083 | 29,461 |
| 84,359 | 139 | 20,672 | 5,697 | 3,096 | 29,604 |
| 84,360 | 147 | 20,437 | 5,653 | 3,064 | 29,301 |
| 84,361 | 145 | 20,494 | 5,645 | 3,067 | 29,351 |
| 84,362 | 143 | 20,576 | 5,698 | 3,098 | 29,515 |
| 84,363 | 141 | 20,449 | 5,657 | 3,096 | 29,343 |
| 84,364 | 142 | 20,703 | 5,701 | 3,129 | 29,675 |
| 84,365 | 137 | 20,694 | 5,694 | 3,125 | 29,650 |
| 84,366 | 135 | 20,781 | 5,751 | 3,120 | 29,787 |
| 84,367 | 130 | 20,639 | 5,752 | 3,138 | 29,659 |
| 84,368 | 130 | 20,575 | 5,740 | 3,145 | 29,590 |
| 84,369 | 125 | 20,671 | 5,786 | 3,172 | 29,754 |
| 84,370 | 123 | 20,471 | 5,748 | 3,158 | 29,500 |
| 84,371 | 123 | 20,514 | 5,797 | 3,194 | 29,628 |
| 84,372 | 121 | 20,427 | 5,823 | 3,216 | 29,587 |
| 84,373 | 124 | 19,843 | 5,692 | 3,154 | 28,813 |
| 84,374 | 124 | 19,973 | 5,726 | 3,178 | 29,001 |
| 84,375 | 130 | 20,156 | 5,762 | 3,209 | 29,257 |

|        |     |        |       |       |        |
|--------|-----|--------|-------|-------|--------|
| 84,376 | 130 | 20,165 | 5,768 | 3,210 | 29,273 |
| 84,377 | 137 | 20,251 | 5,812 | 3,235 | 29,435 |
| 84,378 | 137 | 20,241 | 5,815 | 3,242 | 29,435 |
| 84,379 | 137 | 20,424 | 5,855 | 3,255 | 29,671 |
| 84,380 | 136 | 20,424 | 5,875 | 3,250 | 29,685 |
| 84,381 | 133 | 20,333 | 5,835 | 3,243 | 29,544 |
| 84,382 | 130 | 20,402 | 5,842 | 3,258 | 29,632 |
| 84,383 | 126 | 20,252 | 5,813 | 3,239 | 29,430 |
| 84,384 | 125 | 19,943 | 5,760 | 3,195 | 29,023 |
| 84,385 | 124 | 20,093 | 5,808 | 3,212 | 29,237 |
| 84,386 | 123 | 20,034 | 5,803 | 3,212 | 29,172 |
| 84,387 | 114 | 19,811 | 5,724 | 3,166 | 28,815 |
| 84,388 | 114 | 19,738 | 5,717 | 3,166 | 28,735 |
| 84,389 | 113 | 19,723 | 5,698 | 3,157 | 28,691 |
| 84,390 | 113 | 19,796 | 5,720 | 3,172 | 28,801 |
| 84,391 | 112 | 19,777 | 5,729 | 3,178 | 28,796 |
| 84,392 | 112 | 19,502 | 5,681 | 3,144 | 28,439 |
| 84,393 | 107 | 19,353 | 5,618 | 3,123 | 28,201 |
| 84,394 | 113 | 19,966 | 5,841 | 3,241 | 29,161 |
| 84,395 | 116 | 19,889 | 5,890 | 3,252 | 29,147 |
| 84,396 | 117 | 19,935 | 5,989 | 3,286 | 29,327 |
| 84,397 | 118 | 19,740 | 5,969 | 3,269 | 29,096 |
| 84,398 | 120 | 19,817 | 5,968 | 3,267 | 29,172 |
| 84,399 | 125 | 20,182 | 6,044 | 3,334 | 29,685 |
| 84,400 | 126 | 20,046 | 6,037 | 3,328 | 29,537 |
| 84,401 | 127 | 20,280 | 6,128 | 3,375 | 29,910 |
| 84,402 | 126 | 20,194 | 6,136 | 3,379 | 29,835 |
| 84,403 | 121 | 20,040 | 6,000 | 3,363 | 29,524 |
| 84,404 | 122 | 20,115 | 6,018 | 3,362 | 29,617 |
| 84,405 | 123 | 20,196 | 6,054 | 3,361 | 29,734 |
| 84,406 | 115 | 19,864 | 6,015 | 3,331 | 29,325 |
| 84,407 | 123 | 19,847 | 6,039 | 3,352 | 29,361 |

|        |     |        |       |       |        |
|--------|-----|--------|-------|-------|--------|
| 84,408 | 121 | 19,534 | 5,985 | 3,328 | 28,968 |
| 84,409 | 122 | 19,614 | 6,037 | 3,367 | 29,140 |
| 84,410 | 125 | 19,367 | 5,991 | 3,343 | 28,826 |
| 84,411 | 117 | 19,153 | 5,946 | 3,307 | 28,523 |
| 84,412 | 132 | 19,579 | 6,099 | 3,385 | 29,195 |
| 84,413 | 129 | 19,448 | 6,052 | 3,393 | 29,022 |
| 84,414 | 131 | 19,440 | 6,101 | 3,403 | 29,075 |
| 84,415 | 131 | 19,536 | 6,176 | 3,424 | 29,267 |
| 84,416 | 135 | 19,701 | 6,182 | 3,426 | 29,444 |
| 84,417 | 138 | 19,868 | 6,190 | 3,429 | 29,625 |
| 84,418 | 150 | 19,961 | 6,166 | 3,410 | 29,687 |
| 84,419 | 150 | 19,978 | 6,169 | 3,392 | 29,689 |
| 84,420 | 154 | 20,138 | 6,213 | 3,406 | 29,911 |
| 84,421 | 154 | 20,108 | 6,209 | 3,391 | 29,862 |
| 84,422 | 153 | 20,383 | 6,234 | 3,396 | 30,166 |
| 84,423 | 152 | 20,333 | 6,234 | 3,385 | 30,104 |
| 84,424 | 150 | 20,384 | 6,276 | 3,397 | 30,207 |
| 84,425 | 155 | 20,357 | 6,282 | 3,393 | 30,187 |
| 84,426 | 146 | 20,159 | 6,253 | 3,369 | 29,927 |
| 84,427 | 141 | 20,498 | 6,399 | 3,452 | 30,490 |
| 84,428 | 141 | 20,516 | 6,401 | 3,454 | 30,512 |
| 84,429 | 140 | 20,361 | 6,420 | 3,442 | 30,363 |
| 84,430 | 138 | 19,913 | 6,277 | 3,385 | 29,713 |
| 84,431 | 138 | 19,871 | 6,285 | 3,372 | 29,666 |
| 84,432 | 140 | 19,744 | 6,211 | 3,343 | 29,438 |
| 84,433 | 139 | 19,456 | 6,147 | 3,294 | 29,036 |
| 84,434 | 146 | 19,942 | 6,308 | 3,398 | 29,794 |
| 84,435 | 146 | 19,683 | 6,237 | 3,346 | 29,412 |
| 84,436 | 146 | 19,861 | 6,281 | 3,372 | 29,660 |
| 84,437 | 146 | 19,671 | 6,262 | 3,345 | 29,424 |
| 84,438 | 146 | 19,594 | 6,241 | 3,362 | 29,343 |
| 84,439 | 152 | 19,746 | 6,318 | 3,412 | 29,628 |

|        |     |        |       |       |        |
|--------|-----|--------|-------|-------|--------|
| 84,440 | 153 | 19,751 | 6,312 | 3,418 | 29,634 |
| 84,441 | 156 | 19,953 | 6,366 | 3,456 | 29,931 |
| 84,442 | 158 | 19,905 | 6,387 | 3,459 | 29,909 |
| 84,443 | 150 | 19,805 | 6,341 | 3,418 | 29,714 |
| 84,444 | 148 | 19,642 | 6,307 | 3,379 | 29,476 |
| 84,445 | 149 | 19,701 | 6,291 | 3,364 | 29,505 |
| 84,446 | 151 | 19,750 | 6,275 | 3,326 | 29,502 |
| 84,447 | 147 | 19,639 | 6,189 | 3,296 | 29,271 |
| 84,448 | 153 | 19,808 | 6,145 | 3,283 | 29,389 |
| 84,449 | 151 | 19,565 | 6,081 | 3,272 | 29,069 |
| 84,450 | 147 | 19,627 | 6,111 | 3,284 | 29,169 |
| 84,451 | 144 | 19,929 | 6,187 | 3,318 | 29,578 |
| 84,452 | 147 | 19,749 | 6,151 | 3,291 | 29,338 |
| 84,453 | 146 | 19,650 | 6,162 | 3,286 | 29,244 |
| 84,454 | 147 | 19,700 | 6,173 | 3,290 | 29,310 |
| 84,455 | 144 | 19,683 | 6,199 | 3,297 | 29,323 |
| 84,456 | 149 | 19,820 | 6,233 | 3,312 | 29,514 |
| 84,457 | 145 | 19,811 | 6,245 | 3,301 | 29,502 |
| 84,458 | 143 | 19,850 | 6,244 | 3,292 | 29,529 |
| 84,459 | 147 | 19,886 | 6,258 | 3,304 | 29,595 |
| 84,460 | 145 | 19,850 | 6,258 | 3,312 | 29,565 |
| 84,461 | 145 | 20,140 | 6,349 | 3,370 | 30,004 |
| 84,462 | 156 | 20,303 | 6,383 | 3,411 | 30,253 |
| 84,463 | 162 | 20,158 | 6,340 | 3,383 | 30,043 |
| 84,464 | 162 | 20,051 | 6,335 | 3,357 | 29,905 |
| 84,465 | 166 | 20,433 | 6,424 | 3,411 | 30,434 |
| 84,466 | 168 | 20,454 | 6,376 | 3,418 | 30,416 |
| 84,467 | 167 | 20,189 | 6,394 | 3,425 | 30,175 |
| 84,468 | 165 | 20,275 | 6,397 | 3,434 | 30,271 |
| 84,469 | 154 | 20,168 | 6,388 | 3,437 | 30,147 |
| 84,470 | 154 | 20,242 | 6,417 | 3,472 | 30,285 |
| 84,471 | 153 | 20,059 | 6,393 | 3,487 | 30,092 |



|        |     |        |       |       |        |
|--------|-----|--------|-------|-------|--------|
| 84,472 | 154 | 20,085 | 6,442 | 3,530 | 30,211 |
| 84,473 | 157 | 20,265 | 6,516 | 3,570 | 30,508 |
| 84,474 | 155 | 20,373 | 6,543 | 3,601 | 30,672 |
| 84,475 | 158 | 20,581 | 6,582 | 3,645 | 30,966 |
| 84,476 | 156 | 20,747 | 6,602 | 3,671 | 31,176 |
| 84,477 | 157 | 20,838 | 6,601 | 3,687 | 31,283 |
| 84,478 | 155 | 20,275 | 6,412 | 3,611 | 30,453 |
| 84,479 | 156 | 20,572 | 6,476 | 3,641 | 30,845 |
| 84,480 | 160 | 20,681 | 6,444 | 3,657 | 30,942 |
| 84,481 | 161 | 20,940 | 6,501 | 3,696 | 31,298 |
| 84,482 | 166 | 21,048 | 6,536 | 3,712 | 31,462 |
| 84,483 | 164 | 21,059 | 6,558 | 3,697 | 31,478 |
| 84,484 | 167 | 21,335 | 6,631 | 3,732 | 31,865 |
| 84,485 | 165 | 21,106 | 6,584 | 3,709 | 31,564 |
| 84,486 | 166 | 21,208 | 6,605 | 3,718 | 31,697 |
| 84,487 | 167 | 21,371 | 6,662 | 3,735 | 31,935 |
| 84,488 | 168 | 21,453 | 6,652 | 3,723 | 31,996 |
| 84,489 | 171 | 21,734 | 6,720 | 3,773 | 32,398 |
| 84,490 | 169 | 21,697 | 6,705 | 3,762 | 32,333 |
| 84,491 | 169 | 21,698 | 6,688 | 3,757 | 32,312 |
| 84,492 | 170 | 21,622 | 6,639 | 3,728 | 32,159 |
| 84,493 | 169 | 21,391 | 6,566 | 3,684 | 31,810 |
| 84,494 | 169 | 21,286 | 6,550 | 3,731 | 31,736 |
| 84,495 | 169 | 21,277 | 6,537 | 3,741 | 31,724 |
| 84,496 | 169 | 21,108 | 6,530 | 3,749 | 31,556 |
| 84,497 | 165 | 21,001 | 6,503 | 3,764 | 31,433 |
| 84,498 | 166 | 20,942 | 6,532 | 3,800 | 31,440 |
| 84,499 | 162 | 20,794 | 6,549 | 3,801 | 31,306 |
| 84,500 | 162 | 20,641 | 6,525 | 3,776 | 31,104 |
| 84,501 | 163 | 20,474 | 6,488 | 3,753 | 30,878 |
| 84,502 | 162 | 20,411 | 6,423 | 3,742 | 30,738 |
| 84,503 | 160 | 20,243 | 6,349 | 3,707 | 30,459 |

|        |     |        |       |       |        |
|--------|-----|--------|-------|-------|--------|
| 84,504 | 165 | 20,221 | 6,328 | 3,678 | 30,392 |
| 84,505 | 166 | 20,275 | 6,307 | 3,671 | 30,419 |
| 84,506 | 164 | 20,153 | 6,274 | 3,689 | 30,280 |
| 84,507 | 164 | 19,914 | 6,219 | 3,651 | 29,948 |
| 84,508 | 163 | 19,764 | 6,177 | 3,622 | 29,726 |
| 84,509 | 162 | 20,154 | 6,305 | 3,685 | 30,306 |
| 84,510 | 158 | 20,117 | 6,312 | 3,684 | 30,271 |
| 84,511 | 149 | 20,007 | 6,274 | 3,663 | 30,093 |
| 84,512 | 152 | 20,098 | 6,310 | 3,679 | 30,239 |
| 84,513 | 138 | 19,892 | 6,277 | 3,642 | 29,949 |
| 84,514 | 133 | 19,718 | 6,227 | 3,621 | 29,699 |
| 84,515 | 134 | 19,716 | 6,192 | 3,604 | 29,646 |
| 84,516 | 130 | 19,506 | 6,144 | 3,553 | 29,333 |
| 84,517 | 131 | 19,350 | 6,091 | 3,517 | 29,089 |
| 84,518 | 129 | 19,078 | 5,973 | 3,472 | 28,652 |
| 84,519 | 130 | 19,106 | 5,979 | 3,469 | 28,684 |
| 84,520 | 132 | 18,769 | 5,884 | 3,419 | 28,204 |
| 84,521 | 132 | 18,760 | 5,877 | 3,416 | 28,185 |
| 84,522 | 130 | 18,614 | 5,851 | 3,397 | 27,992 |
| 84,523 | 139 | 18,887 | 5,938 | 3,429 | 28,393 |
| 84,524 | 136 | 18,654 | 5,863 | 3,371 | 28,024 |
| 84,525 | 133 | 17,661 | 5,645 | 3,207 | 26,646 |
| 84,526 | 133 | 17,808 | 5,681 | 3,199 | 26,821 |
| 84,527 | 131 | 17,822 | 5,675 | 3,186 | 26,814 |
| 84,528 | 133 | 18,049 | 5,702 | 3,193 | 27,077 |
| 84,529 | 130 | 17,759 | 5,622 | 3,140 | 26,651 |
| 84,530 | 134 | 17,783 | 5,640 | 3,154 | 26,711 |
| 84,531 | 129 | 17,532 | 5,624 | 3,116 | 26,401 |
| 84,532 | 134 | 17,589 | 5,649 | 3,129 | 26,501 |
| 84,533 | 125 | 17,553 | 5,646 | 3,136 | 26,460 |
| 84,534 | 120 | 17,490 | 5,628 | 3,111 | 26,349 |
| 84,535 | 120 | 17,363 | 5,526 | 3,096 | 26,105 |

|        |     |        |       |       |        |
|--------|-----|--------|-------|-------|--------|
| 84,536 | 122 | 17,679 | 5,592 | 3,129 | 26,522 |
| 84,537 | 122 | 17,598 | 5,567 | 3,118 | 26,405 |
| 84,538 | 122 | 17,823 | 5,660 | 3,183 | 26,788 |
| 84,539 | 124 | 17,828 | 5,681 | 3,182 | 26,815 |
| 84,540 | 120 | 17,893 | 5,703 | 3,174 | 26,890 |
| 84,541 | 116 | 17,658 | 5,658 | 3,140 | 26,572 |
| 84,542 | 113 | 17,682 | 5,684 | 3,157 | 26,636 |
| 84,543 | 109 | 17,487 | 5,642 | 3,126 | 26,364 |
| 84,544 | 110 | 17,575 | 5,664 | 3,120 | 26,469 |
| 84,545 | 110 | 17,518 | 5,640 | 3,107 | 26,375 |
| 84,546 | 114 | 17,523 | 5,639 | 3,093 | 26,369 |
| 84,547 | 118 | 17,655 | 5,655 | 3,067 | 26,495 |
| 84,548 | 119 | 17,717 | 5,671 | 3,057 | 26,564 |
| 84,549 | 112 | 17,718 | 5,627 | 3,026 | 26,483 |
| 84,550 | 110 | 17,802 | 5,594 | 2,998 | 26,504 |
| 84,551 | 110 | 17,815 | 5,607 | 2,999 | 26,531 |
| 84,552 | 115 | 17,943 | 5,671 | 3,040 | 26,769 |
| 84,553 | 115 | 17,926 | 5,743 | 3,040 | 26,824 |
| 84,554 | 113 | 17,950 | 5,750 | 3,036 | 26,849 |
| 84,555 | 108 | 17,991 | 5,747 | 3,046 | 26,892 |
| 84,556 | 115 | 18,063 | 5,767 | 3,035 | 26,980 |
| 84,557 | 114 | 17,845 | 5,711 | 3,013 | 26,683 |
| 84,558 | 118 | 18,303 | 5,849 | 3,115 | 27,385 |
| 84,559 | 117 | 18,245 | 5,797 | 3,098 | 27,257 |
| 84,560 | 119 | 18,335 | 5,825 | 3,103 | 27,382 |
| 84,561 | 118 | 18,375 | 5,777 | 3,071 | 27,341 |
| 84,562 | 119 | 18,512 | 5,800 | 3,083 | 27,514 |
| 84,563 | 120 | 18,490 | 5,825 | 3,085 | 27,520 |
| 84,564 | 122 | 18,231 | 5,748 | 3,062 | 27,163 |
| 84,565 | 115 | 18,346 | 5,768 | 3,093 | 27,322 |
| 84,566 | 115 | 18,189 | 5,729 | 3,067 | 27,100 |
| 84,567 | 115 | 18,095 | 5,681 | 3,071 | 26,962 |

|        |     |        |       |       |        |
|--------|-----|--------|-------|-------|--------|
| 84,568 | 119 | 18,315 | 5,761 | 3,124 | 27,319 |
| 84,569 | 119 | 18,360 | 5,770 | 3,153 | 27,402 |
| 84,570 | 115 | 18,335 | 5,736 | 3,144 | 27,330 |
| 84,571 | 113 | 18,488 | 5,734 | 3,124 | 27,459 |
| 84,572 | 117 | 18,697 | 5,785 | 3,129 | 27,728 |
| 84,573 | 115 | 18,941 | 5,828 | 3,144 | 28,028 |
| 84,574 | 112 | 19,017 | 5,802 | 3,134 | 28,065 |
| 84,575 | 116 | 18,900 | 5,750 | 3,115 | 27,881 |
| 84,576 | 115 | 19,000 | 5,739 | 3,111 | 27,965 |
| 84,577 | 117 | 19,083 | 5,750 | 3,131 | 28,081 |
| 84,578 | 127 | 19,211 | 5,789 | 3,148 | 28,275 |
| 84,579 | 124 | 19,235 | 5,805 | 3,158 | 28,322 |
| 84,580 | 125 | 19,582 | 5,844 | 3,201 | 28,752 |
| 84,581 | 121 | 19,613 | 5,840 | 3,181 | 28,755 |
| 84,582 | 121 | 19,604 | 5,865 | 3,181 | 28,771 |
| 84,583 | 117 | 19,656 | 5,891 | 3,199 | 28,863 |
| 84,584 | 119 | 19,697 | 5,919 | 3,215 | 28,950 |
| 84,585 | 119 | 19,639 | 5,902 | 3,222 | 28,882 |
| 84,586 | 120 | 19,557 | 5,930 | 3,216 | 28,823 |
| 84,587 | 121 | 19,505 | 5,902 | 3,214 | 28,742 |
| 84,588 | 125 | 19,640 | 5,896 | 3,208 | 28,869 |
| 84,589 | 131 | 19,492 | 5,836 | 3,169 | 28,628 |
| 84,590 | 127 | 19,261 | 5,759 | 3,123 | 28,270 |
| 84,591 | 143 | 19,519 | 5,870 | 3,161 | 28,693 |
| 84,592 | 146 | 19,416 | 5,810 | 3,121 | 28,493 |
| 84,593 | 146 | 19,501 | 5,813 | 3,138 | 28,598 |
| 84,594 | 145 | 19,506 | 5,855 | 3,160 | 28,666 |
| 84,595 | 148 | 19,540 | 5,880 | 3,168 | 28,736 |
| 84,596 | 148 | 19,533 | 5,872 | 3,160 | 28,713 |
| 84,597 | 146 | 19,682 | 5,908 | 3,204 | 28,940 |
| 84,598 | 146 | 19,866 | 5,967 | 3,225 | 29,204 |
| 84,599 | 145 | 19,786 | 5,939 | 3,220 | 29,090 |

|        |     |        |       |       |        |
|--------|-----|--------|-------|-------|--------|
| 84,600 | 152 | 19,819 | 5,942 | 3,236 | 29,149 |
| 84,601 | 149 | 19,626 | 5,863 | 3,186 | 28,824 |
| 84,602 | 150 | 19,728 | 5,875 | 3,192 | 28,945 |
| 84,603 | 150 | 19,996 | 5,931 | 3,215 | 29,292 |
| 84,604 | 154 | 19,860 | 5,861 | 3,208 | 29,083 |
| 84,605 | 153 | 19,633 | 5,791 | 3,180 | 28,757 |
| 84,606 | 155 | 19,622 | 5,769 | 3,154 | 28,700 |
| 84,607 | 148 | 19,450 | 5,699 | 3,118 | 28,415 |
| 84,608 | 148 | 19,911 | 5,788 | 3,162 | 29,009 |
| 84,609 | 140 | 19,649 | 5,730 | 3,128 | 28,647 |
| 84,610 | 138 | 19,696 | 5,720 | 3,130 | 28,684 |
| 84,611 | 137 | 19,829 | 5,755 | 3,131 | 28,852 |
| 84,612 | 136 | 19,606 | 5,688 | 3,107 | 28,537 |
| 84,613 | 137 | 19,656 | 5,685 | 3,115 | 28,593 |
| 84,614 | 130 | 19,673 | 5,636 | 3,107 | 28,546 |
| 84,615 | 131 | 19,803 | 5,664 | 3,120 | 28,718 |
| 84,616 | 136 | 19,725 | 5,606 | 3,085 | 28,552 |
| 84,617 | 134 | 19,618 | 5,597 | 3,078 | 28,427 |
| 84,618 | 137 | 19,884 | 5,675 | 3,114 | 28,810 |
| 84,619 | 139 | 19,948 | 5,684 | 3,124 | 28,895 |
| 84,620 | 137 | 19,630 | 5,597 | 3,065 | 28,429 |
| 84,621 | 143 | 19,639 | 5,588 | 3,080 | 28,450 |
| 84,622 | 149 | 19,699 | 5,647 | 3,121 | 28,616 |
| 84,623 | 145 | 19,487 | 5,597 | 3,098 | 28,327 |
| 84,624 | 144 | 19,468 | 5,585 | 3,094 | 28,291 |
| 84,625 | 140 | 19,401 | 5,583 | 3,088 | 28,212 |
| 84,626 | 133 | 19,219 | 5,508 | 3,060 | 27,920 |
| 84,627 | 133 | 19,356 | 5,517 | 3,088 | 28,094 |
| 84,628 | 132 | 19,071 | 5,466 | 3,072 | 27,741 |
| 84,629 | 128 | 19,273 | 5,523 | 3,126 | 28,050 |
| 84,630 | 127 | 18,997 | 5,490 | 3,097 | 27,711 |
| 84,631 | 129 | 18,998 | 5,516 | 3,114 | 27,757 |

|        |     |        |       |       |        |
|--------|-----|--------|-------|-------|--------|
| 84,632 | 133 | 18,867 | 5,465 | 3,103 | 27,568 |
| 84,633 | 133 | 18,858 | 5,387 | 3,054 | 27,432 |
| 84,634 | 133 | 18,978 | 5,400 | 3,053 | 27,564 |
| 84,635 | 130 | 19,068 | 5,408 | 3,052 | 27,658 |
| 84,636 | 127 | 18,919 | 5,362 | 3,035 | 27,443 |
| 84,637 | 128 | 18,888 | 5,347 | 3,029 | 27,392 |
| 84,638 | 126 | 18,783 | 5,328 | 3,030 | 27,267 |
| 84,639 | 125 | 18,995 | 5,367 | 3,072 | 27,559 |
| 84,640 | 122 | 18,354 | 5,160 | 2,999 | 26,635 |
| 84,641 | 122 | 18,551 | 5,204 | 3,027 | 26,904 |
| 84,642 | 110 | 18,849 | 5,242 | 3,054 | 27,255 |
| 84,643 | 114 | 18,866 | 5,202 | 3,033 | 27,215 |
| 84,644 | 118 | 18,907 | 5,179 | 3,020 | 27,224 |
| 84,645 | 117 | 18,892 | 5,181 | 3,026 | 27,216 |
| 84,646 | 113 | 18,735 | 5,182 | 3,039 | 27,069 |
| 84,647 | 117 | 18,733 | 5,212 | 3,066 | 27,128 |
| 84,648 | 112 | 18,749 | 5,222 | 3,076 | 27,159 |
| 84,649 | 114 | 18,601 | 5,187 | 3,077 | 26,979 |
| 84,650 | 115 | 18,366 | 5,138 | 3,052 | 26,671 |
| 84,651 | 115 | 18,688 | 5,234 | 3,113 | 27,150 |
| 84,652 | 115 | 18,622 | 5,235 | 3,107 | 27,079 |
| 84,653 | 115 | 18,634 | 5,221 | 3,105 | 27,075 |
| 84,654 | 110 | 18,346 | 5,132 | 3,049 | 26,637 |
| 84,655 | 113 | 18,335 | 5,144 | 3,063 | 26,655 |
| 84,656 | 117 | 18,419 | 5,190 | 3,065 | 26,791 |
| 84,657 | 117 | 18,308 | 5,198 | 3,085 | 26,708 |
| 84,658 | 124 | 18,399 | 5,247 | 3,118 | 26,888 |
| 84,659 | 127 | 18,416 | 5,253 | 3,140 | 26,936 |
| 84,660 | 133 | 18,270 | 5,218 | 3,097 | 26,718 |
| 84,661 | 132 | 17,992 | 5,167 | 3,089 | 26,380 |
| 84,662 | 132 | 18,345 | 5,263 | 3,174 | 26,914 |
| 84,663 | 135 | 18,387 | 5,290 | 3,197 | 27,009 |

|        |     |        |       |       |        |
|--------|-----|--------|-------|-------|--------|
| 84,664 | 139 | 18,512 | 5,367 | 3,256 | 27,274 |
| 84,665 | 142 | 18,531 | 5,375 | 3,258 | 27,306 |
| 84,666 | 141 | 18,668 | 5,405 | 3,267 | 27,481 |
| 84,667 | 136 | 18,579 | 5,408 | 3,285 | 27,408 |
| 84,668 | 134 | 18,641 | 5,409 | 3,268 | 27,452 |
| 84,669 | 130 | 18,687 | 5,403 | 3,263 | 27,483 |
| 84,670 | 126 | 18,579 | 5,384 | 3,255 | 27,344 |
| 84,671 | 121 | 18,486 | 5,407 | 3,224 | 27,238 |
| 84,672 | 116 | 18,321 | 5,364 | 3,179 | 26,980 |
| 84,673 | 119 | 18,542 | 5,427 | 3,201 | 27,289 |
| 84,674 | 126 | 18,641 | 5,496 | 3,246 | 27,509 |
| 84,675 | 127 | 18,438 | 5,475 | 3,255 | 27,295 |
| 84,676 | 127 | 18,448 | 5,467 | 3,255 | 27,297 |
| 84,677 | 130 | 18,485 | 5,566 | 3,275 | 27,456 |
| 84,678 | 131 | 18,610 | 5,594 | 3,289 | 27,624 |
| 84,679 | 129 | 18,750 | 5,595 | 3,275 | 27,749 |
| 84,680 | 126 | 18,757 | 5,600 | 3,275 | 27,758 |
| 84,681 | 127 | 18,523 | 5,528 | 3,214 | 27,392 |
| 84,682 | 127 | 18,519 | 5,518 | 3,204 | 27,368 |
| 84,683 | 127 | 18,478 | 5,508 | 3,209 | 27,322 |
| 84,684 | 126 | 18,580 | 5,549 | 3,230 | 27,485 |
| 84,685 | 126 | 18,591 | 5,536 | 3,245 | 27,498 |
| 84,686 | 128 | 18,355 | 5,518 | 3,221 | 27,222 |
| 84,687 | 128 | 18,408 | 5,519 | 3,223 | 27,278 |
| 84,688 | 127 | 18,321 | 5,511 | 3,202 | 27,161 |
| 84,689 | 126 | 18,488 | 5,530 | 3,217 | 27,361 |
| 84,690 | 123 | 18,726 | 5,580 | 3,239 | 27,668 |
| 84,691 | 116 | 18,541 | 5,533 | 3,214 | 27,404 |
| 84,692 | 116 | 18,525 | 5,519 | 3,210 | 27,370 |
| 84,693 | 116 | 18,710 | 5,573 | 3,244 | 27,643 |
| 84,694 | 117 | 18,868 | 5,654 | 3,277 | 27,916 |
| 84,695 | 114 | 18,868 | 5,597 | 3,273 | 27,852 |

|        |     |        |       |       |        |
|--------|-----|--------|-------|-------|--------|
| 84,696 | 116 | 19,095 | 5,668 | 3,307 | 28,186 |
| 84,697 | 119 | 19,136 | 5,645 | 3,261 | 28,161 |
| 84,698 | 118 | 19,180 | 5,652 | 3,263 | 28,213 |
| 84,699 | 116 | 19,306 | 5,669 | 3,266 | 28,357 |
| 84,700 | 114 | 19,309 | 5,644 | 3,231 | 28,298 |
| 84,701 | 115 | 19,636 | 5,701 | 3,295 | 28,747 |
| 84,702 | 113 | 19,919 | 5,816 | 3,347 | 29,195 |
| 84,703 | 115 | 20,035 | 5,854 | 3,392 | 29,396 |
| 84,704 | 121 | 20,110 | 5,915 | 3,434 | 29,580 |
| 84,705 | 120 | 20,195 | 5,931 | 3,460 | 29,706 |
| 84,706 | 118 | 20,381 | 5,981 | 3,477 | 29,957 |
| 84,707 | 103 | 20,156 | 5,886 | 3,442 | 29,587 |
| 84,708 | 103 | 20,287 | 5,907 | 3,441 | 29,738 |
| 84,709 | 102 | 20,617 | 5,989 | 3,493 | 30,201 |
| 84,710 | 98  | 20,746 | 6,032 | 3,507 | 30,383 |
| 84,711 | 96  | 20,446 | 5,903 | 3,451 | 29,896 |
| 84,712 | 97  | 20,538 | 5,938 | 3,467 | 30,040 |
| 84,713 | 96  | 20,630 | 5,991 | 3,496 | 30,213 |
| 84,714 | 100 | 20,411 | 5,996 | 3,484 | 29,991 |
| 84,715 | 99  | 20,181 | 5,959 | 3,432 | 29,671 |
| 84,716 | 100 | 20,246 | 5,962 | 3,464 | 29,772 |
| 84,717 | 103 | 20,378 | 5,986 | 3,460 | 29,927 |
| 84,718 | 105 | 20,389 | 5,974 | 3,474 | 29,942 |
| 84,719 | 105 | 20,465 | 6,023 | 3,479 | 30,072 |
| 84,720 | 105 | 20,432 | 6,003 | 3,469 | 30,009 |
| 84,721 | 107 | 20,538 | 5,959 | 3,457 | 30,061 |
| 84,722 | 106 | 20,557 | 5,946 | 3,465 | 30,074 |
| 84,723 | 107 | 20,407 | 5,942 | 3,468 | 29,924 |
| 84,724 | 105 | 20,754 | 6,008 | 3,517 | 30,384 |
| 84,725 | 100 | 20,639 | 5,948 | 3,485 | 30,172 |
| 84,726 | 104 | 20,724 | 5,959 | 3,486 | 30,273 |
| 84,727 | 106 | 20,903 | 6,004 | 3,499 | 30,512 |



|        |     |        |       |       |        |
|--------|-----|--------|-------|-------|--------|
| 84,728 | 106 | 21,091 | 5,989 | 3,521 | 30,707 |
| 84,729 | 105 | 20,734 | 5,927 | 3,462 | 30,228 |
| 84,730 | 109 | 20,953 | 5,963 | 3,512 | 30,537 |
| 84,731 | 109 | 20,825 | 5,908 | 3,483 | 30,325 |
| 84,732 | 107 | 21,118 | 5,973 | 3,505 | 30,703 |
| 84,733 | 105 | 21,293 | 6,005 | 3,517 | 30,920 |
| 84,734 | 106 | 21,248 | 5,996 | 3,527 | 30,877 |
| 84,735 | 105 | 20,768 | 5,877 | 3,451 | 30,201 |
| 84,736 | 107 | 20,982 | 5,908 | 3,485 | 30,482 |
| 84,737 | 108 | 21,203 | 5,918 | 3,527 | 30,756 |
| 84,738 | 108 | 21,033 | 5,867 | 3,492 | 30,500 |
| 84,739 | 110 | 20,843 | 5,791 | 3,447 | 30,191 |
| 84,740 | 110 | 20,729 | 5,756 | 3,435 | 30,030 |
| 84,741 | 109 | 21,117 | 5,881 | 3,484 | 30,591 |
| 84,742 | 109 | 21,289 | 5,899 | 3,489 | 30,786 |
| 84,743 | 108 | 20,876 | 5,756 | 3,411 | 30,151 |
| 84,744 | 108 | 20,967 | 5,767 | 3,420 | 30,262 |
| 84,745 | 109 | 21,030 | 5,776 | 3,419 | 30,334 |
| 84,746 | 109 | 20,814 | 5,748 | 3,369 | 30,040 |
| 84,747 | 114 | 21,085 | 5,764 | 3,381 | 30,344 |
| 84,748 | 114 | 21,024 | 5,735 | 3,390 | 30,263 |
| 84,749 | 119 | 20,799 | 5,672 | 3,358 | 29,948 |
| 84,750 | 117 | 20,439 | 5,572 | 3,303 | 29,431 |
| 84,751 | 122 | 20,523 | 5,640 | 3,336 | 29,621 |
| 84,752 | 130 | 20,434 | 5,631 | 3,299 | 29,494 |
| 84,753 | 127 | 20,399 | 5,583 | 3,280 | 29,389 |
| 84,754 | 124 | 20,609 | 5,602 | 3,275 | 29,610 |
| 84,755 | 117 | 20,481 | 5,532 | 3,229 | 29,359 |
| 84,756 | 121 | 20,544 | 5,504 | 3,217 | 29,386 |
| 84,757 | 119 | 20,578 | 5,476 | 3,208 | 29,381 |
| 84,758 | 120 | 20,655 | 5,483 | 3,202 | 29,460 |
| 84,759 | 120 | 20,609 | 5,469 | 3,171 | 29,369 |

|        |     |        |       |       |        |
|--------|-----|--------|-------|-------|--------|
| 84,760 | 120 | 20,444 | 5,398 | 3,153 | 29,115 |
| 84,761 | 123 | 20,658 | 5,440 | 3,160 | 29,381 |
| 84,762 | 121 | 20,562 | 5,418 | 3,132 | 29,233 |
| 84,763 | 124 | 20,623 | 5,398 | 3,124 | 29,269 |
| 84,764 | 119 | 20,518 | 5,270 | 3,048 | 28,955 |
| 84,765 | 121 | 20,657 | 5,254 | 3,040 | 29,072 |
| 84,766 | 121 | 20,357 | 5,150 | 2,975 | 28,603 |
| 84,767 | 121 | 20,414 | 5,167 | 2,988 | 28,690 |
| 84,768 | 118 | 20,375 | 5,163 | 2,985 | 28,641 |
| 84,769 | 124 | 20,335 | 5,145 | 2,980 | 28,584 |
| 84,770 | 128 | 20,358 | 5,153 | 3,005 | 28,644 |
| 84,771 | 128 | 20,599 | 5,215 | 3,021 | 28,963 |
| 84,772 | 129 | 20,542 | 5,195 | 3,012 | 28,878 |
| 84,773 | 129 | 20,630 | 5,192 | 3,036 | 28,987 |
| 84,774 | 127 | 20,710 | 5,165 | 3,018 | 29,020 |
| 84,775 | 132 | 20,301 | 5,025 | 2,928 | 28,386 |
| 84,776 | 132 | 20,398 | 5,027 | 2,941 | 28,498 |
| 84,777 | 127 | 20,180 | 4,985 | 2,920 | 28,212 |
| 84,778 | 125 | 19,986 | 4,922 | 2,904 | 27,937 |
| 84,779 | 129 | 19,968 | 4,914 | 2,884 | 27,895 |
| 84,780 | 131 | 20,140 | 4,962 | 2,900 | 28,133 |
| 84,781 | 129 | 20,146 | 4,969 | 2,895 | 28,139 |
| 84,782 | 130 | 19,951 | 4,927 | 2,884 | 27,892 |
| 84,783 | 129 | 19,966 | 4,941 | 2,907 | 27,943 |
| 84,784 | 127 | 20,046 | 4,963 | 2,921 | 28,057 |
| 84,785 | 126 | 20,087 | 4,931 | 2,896 | 28,040 |
| 84,786 | 130 | 20,155 | 4,965 | 2,909 | 28,159 |
| 84,787 | 134 | 20,352 | 5,004 | 2,940 | 28,430 |
| 84,788 | 133 | 20,191 | 5,029 | 2,916 | 28,269 |
| 84,789 | 138 | 20,327 | 5,075 | 2,950 | 28,490 |
| 84,790 | 135 | 20,148 | 5,079 | 2,957 | 28,319 |
| 84,791 | 136 | 19,870 | 5,056 | 2,940 | 28,002 |

|        |     |        |       |       |        |
|--------|-----|--------|-------|-------|--------|
| 84,792 | 137 | 19,858 | 5,053 | 2,945 | 27,993 |
| 84,793 | 143 | 19,961 | 5,114 | 3,000 | 28,218 |
| 84,794 | 148 | 20,084 | 5,183 | 3,036 | 28,451 |
| 84,795 | 147 | 20,144 | 5,215 | 3,074 | 28,580 |
| 84,796 | 143 | 20,390 | 5,284 | 3,111 | 28,928 |
| 84,797 | 143 | 20,502 | 5,283 | 3,125 | 29,053 |
| 84,798 | 135 | 20,516 | 5,264 | 3,079 | 28,994 |
| 84,799 | 135 | 20,739 | 5,355 | 3,126 | 29,355 |
| 84,800 | 128 | 21,188 | 5,468 | 3,213 | 29,997 |
| 84,801 | 133 | 21,429 | 5,602 | 3,263 | 30,427 |
| 84,802 | 124 | 21,331 | 5,575 | 3,241 | 30,271 |
| 84,803 | 124 | 21,491 | 5,699 | 3,309 | 30,623 |
| 84,804 | 126 | 21,603 | 5,765 | 3,333 | 30,827 |
| 84,805 | 130 | 21,378 | 5,701 | 3,307 | 30,516 |
| 84,806 | 130 | 21,225 | 5,660 | 3,279 | 30,294 |
| 84,807 | 129 | 21,398 | 5,725 | 3,325 | 30,577 |
| 84,808 | 130 | 21,629 | 5,783 | 3,374 | 30,916 |
| 84,809 | 135 | 20,787 | 5,595 | 3,279 | 29,796 |
| 84,810 | 139 | 21,042 | 5,658 | 3,325 | 30,164 |
| 84,811 | 142 | 21,327 | 5,731 | 3,350 | 30,550 |
| 84,812 | 135 | 20,820 | 5,641 | 3,290 | 29,886 |
| 84,813 | 142 | 21,101 | 5,707 | 3,320 | 30,270 |
| 84,814 | 142 | 21,353 | 5,758 | 3,352 | 30,605 |
| 84,815 | 145 | 21,694 | 5,820 | 3,382 | 31,041 |
| 84,816 | 140 | 21,487 | 5,823 | 3,368 | 30,818 |
| 84,817 | 138 | 21,488 | 5,816 | 3,381 | 30,823 |
| 84,818 | 149 | 21,787 | 5,907 | 3,408 | 31,251 |
| 84,819 | 144 | 21,623 | 5,864 | 3,393 | 31,024 |
| 84,820 | 142 | 21,822 | 5,914 | 3,420 | 31,298 |
| 84,821 | 139 | 21,923 | 5,908 | 3,404 | 31,374 |
| 84,822 | 142 | 22,104 | 5,934 | 3,435 | 31,615 |
| 84,823 | 138 | 21,888 | 5,894 | 3,399 | 31,319 |

|        |     |        |       |       |        |
|--------|-----|--------|-------|-------|--------|
| 84,824 | 138 | 21,847 | 5,933 | 3,420 | 31,338 |
| 84,825 | 140 | 22,186 | 6,024 | 3,463 | 31,813 |
| 84,826 | 136 | 22,071 | 6,036 | 3,482 | 31,725 |
| 84,827 | 136 | 22,148 | 6,036 | 3,485 | 31,805 |
| 84,828 | 135 | 22,590 | 6,101 | 3,545 | 32,371 |
| 84,829 | 138 | 22,600 | 6,079 | 3,546 | 32,363 |
| 84,830 | 133 | 22,420 | 6,019 | 3,532 | 32,104 |
| 84,831 | 132 | 22,381 | 6,026 | 3,531 | 32,070 |
| 84,832 | 130 | 22,075 | 5,990 | 3,500 | 31,695 |
| 84,833 | 133 | 22,548 | 6,133 | 3,613 | 32,427 |
| 84,834 | 133 | 22,165 | 6,076 | 3,581 | 31,955 |
| 84,835 | 135 | 22,368 | 6,166 | 3,616 | 32,285 |
| 84,836 | 133 | 22,249 | 6,162 | 3,634 | 32,178 |
| 84,837 | 130 | 22,442 | 6,205 | 3,641 | 32,418 |
| 84,838 | 127 | 22,499 | 6,253 | 3,661 | 32,540 |
| 84,839 | 126 | 22,650 | 6,272 | 3,672 | 32,720 |
| 84,840 | 124 | 22,743 | 6,266 | 3,677 | 32,810 |
| 84,841 | 122 | 22,758 | 6,222 | 3,655 | 32,757 |
| 84,842 | 122 | 22,839 | 6,253 | 3,664 | 32,878 |
| 84,843 | 117 | 23,100 | 6,288 | 3,700 | 33,205 |
| 84,844 | 114 | 23,025 | 6,238 | 3,649 | 33,026 |
| 84,845 | 114 | 23,270 | 6,303 | 3,671 | 33,358 |
| 84,846 | 114 | 23,021 | 6,246 | 3,621 | 33,002 |
| 84,847 | 115 | 23,099 | 6,285 | 3,658 | 33,157 |
| 84,848 | 120 | 23,218 | 6,349 | 3,697 | 33,384 |
| 84,849 | 119 | 23,137 | 6,320 | 3,701 | 33,277 |
| 84,850 | 123 | 23,232 | 6,316 | 3,710 | 33,381 |
| 84,851 | 134 | 23,115 | 6,279 | 3,680 | 33,208 |
| 84,852 | 133 | 22,976 | 6,227 | 3,654 | 32,990 |
| 84,853 | 140 | 22,935 | 6,171 | 3,635 | 32,881 |
| 84,854 | 140 | 23,011 | 6,139 | 3,620 | 32,910 |
| 84,855 | 139 | 22,949 | 6,084 | 3,608 | 32,780 |

|        |     |        |       |       |        |
|--------|-----|--------|-------|-------|--------|
| 84,856 | 138 | 22,870 | 6,065 | 3,596 | 32,669 |
| 84,857 | 138 | 22,733 | 6,052 | 3,582 | 32,505 |
| 84,858 | 138 | 22,613 | 6,050 | 3,570 | 32,371 |
| 84,859 | 136 | 22,485 | 6,015 | 3,557 | 32,193 |
| 84,860 | 136 | 22,401 | 6,004 | 3,544 | 32,085 |
| 84,861 | 134 | 22,223 | 5,972 | 3,541 | 31,870 |
| 84,862 | 134 | 22,253 | 6,016 | 3,560 | 31,963 |
| 84,863 | 143 | 22,179 | 6,032 | 3,566 | 31,920 |
| 84,864 | 136 | 22,023 | 6,000 | 3,557 | 31,716 |
| 84,865 | 139 | 22,025 | 6,029 | 3,565 | 31,758 |
| 84,866 | 141 | 22,048 | 6,037 | 3,577 | 31,803 |
| 84,867 | 143 | 22,206 | 6,059 | 3,598 | 32,006 |
| 84,868 | 144 | 22,167 | 6,069 | 3,606 | 31,986 |
| 84,869 | 140 | 22,449 | 6,132 | 3,653 | 32,374 |
| 84,870 | 144 | 22,474 | 6,156 | 3,665 | 32,439 |
| 84,871 | 148 | 22,623 | 6,178 | 3,690 | 32,639 |
| 84,872 | 148 | 22,316 | 6,158 | 3,659 | 32,281 |
| 84,873 | 151 | 22,474 | 6,203 | 3,688 | 32,516 |
| 84,874 | 155 | 22,341 | 6,155 | 3,647 | 32,298 |
| 84,875 | 157 | 22,373 | 6,124 | 3,642 | 32,296 |
| 84,876 | 164 | 22,501 | 6,159 | 3,677 | 32,501 |
| 84,877 | 162 | 22,276 | 6,082 | 3,625 | 32,145 |
| 84,878 | 171 | 22,190 | 6,109 | 3,615 | 32,085 |
| 84,879 | 173 | 22,083 | 6,111 | 3,609 | 31,976 |
| 84,880 | 168 | 22,166 | 6,152 | 3,625 | 32,111 |
| 84,881 | 168 | 22,219 | 6,165 | 3,617 | 32,169 |
| 84,882 | 167 | 22,176 | 6,116 | 3,595 | 32,054 |
| 84,883 | 169 | 22,146 | 6,083 | 3,565 | 31,963 |
| 84,884 | 169 | 22,119 | 6,083 | 3,552 | 31,923 |
| 84,885 | 172 | 22,273 | 6,089 | 3,548 | 32,082 |
| 84,886 | 175 | 22,267 | 6,072 | 3,541 | 32,055 |
| 84,887 | 175 | 22,207 | 6,054 | 3,498 | 31,934 |

|        |     |        |       |       |        |
|--------|-----|--------|-------|-------|--------|
| 84,888 | 176 | 22,310 | 6,071 | 3,534 | 32,091 |
| 84,889 | 175 | 22,356 | 6,038 | 3,536 | 32,105 |
| 84,890 | 178 | 22,578 | 6,075 | 3,571 | 32,402 |
| 84,891 | 175 | 22,312 | 6,013 | 3,544 | 32,044 |
| 84,892 | 174 | 22,332 | 6,029 | 3,546 | 32,081 |
| 84,893 | 179 | 22,356 | 6,049 | 3,563 | 32,147 |
| 84,894 | 177 | 22,076 | 6,008 | 3,551 | 31,812 |
| 84,895 | 183 | 21,942 | 5,999 | 3,549 | 31,673 |
| 84,896 | 183 | 21,751 | 5,966 | 3,520 | 31,420 |
| 84,897 | 182 | 22,102 | 6,070 | 3,592 | 31,946 |
| 84,898 | 182 | 22,049 | 6,040 | 3,566 | 31,837 |
| 84,899 | 168 | 21,098 | 5,789 | 3,429 | 30,484 |
| 84,900 | 167 | 21,235 | 5,825 | 3,443 | 30,670 |
| 84,901 | 164 | 21,189 | 5,824 | 3,451 | 30,628 |
| 84,902 | 156 | 20,848 | 5,724 | 3,395 | 30,123 |
| 84,903 | 152 | 20,574 | 5,623 | 3,348 | 29,697 |
| 84,904 | 149 | 21,038 | 5,698 | 3,423 | 30,308 |
| 84,905 | 153 | 20,919 | 5,682 | 3,431 | 30,185 |
| 84,906 | 153 | 20,698 | 5,598 | 3,382 | 29,831 |
| 84,907 | 151 | 20,634 | 5,578 | 3,375 | 29,738 |
| 84,908 | 152 | 20,637 | 5,559 | 3,359 | 29,707 |
| 84,909 | 152 | 20,693 | 5,573 | 3,348 | 29,766 |
| 84,910 | 153 | 20,790 | 5,601 | 3,341 | 29,885 |
| 84,911 | 155 | 20,752 | 5,543 | 3,303 | 29,753 |
| 84,912 | 155 | 20,795 | 5,528 | 3,289 | 29,767 |
| 84,913 | 154 | 21,002 | 5,552 | 3,321 | 30,029 |
| 84,914 | 144 | 20,742 | 5,465 | 3,288 | 29,639 |
| 84,915 | 141 | 20,662 | 5,419 | 3,258 | 29,480 |
| 84,916 | 136 | 20,540 | 5,416 | 3,239 | 29,331 |
| 84,917 | 142 | 20,760 | 5,436 | 3,273 | 29,611 |
| 84,918 | 143 | 20,548 | 5,400 | 3,241 | 29,332 |
| 84,919 | 142 | 20,416 | 5,338 | 3,206 | 29,102 |

|        |     |        |       |       |        |
|--------|-----|--------|-------|-------|--------|
| 84,920 | 143 | 20,469 | 5,317 | 3,195 | 29,124 |
| 84,921 | 148 | 20,637 | 5,344 | 3,211 | 29,340 |
| 84,922 | 141 | 20,268 | 5,261 | 3,146 | 28,816 |
| 84,923 | 142 | 20,483 | 5,308 | 3,183 | 29,116 |
| 84,924 | 134 | 20,095 | 5,222 | 3,156 | 28,607 |
| 84,925 | 137 | 20,006 | 5,221 | 3,155 | 28,519 |
| 84,926 | 137 | 20,099 | 5,266 | 3,180 | 28,682 |
| 84,927 | 130 | 19,823 | 5,201 | 3,146 | 28,300 |
| 84,928 | 134 | 19,890 | 5,237 | 3,158 | 28,419 |
| 84,929 | 126 | 19,766 | 5,206 | 3,154 | 28,252 |
| 84,930 | 123 | 19,850 | 5,213 | 3,158 | 28,344 |
| 84,931 | 123 | 19,781 | 5,208 | 3,148 | 28,260 |
| 84,932 | 125 | 19,742 | 5,185 | 3,157 | 28,209 |
| 84,933 | 123 | 19,532 | 5,128 | 3,130 | 27,913 |
| 84,934 | 119 | 19,469 | 5,104 | 3,127 | 27,819 |
| 84,935 | 122 | 19,225 | 5,036 | 3,082 | 27,465 |
| 84,936 | 120 | 19,004 | 4,965 | 3,041 | 27,130 |
| 84,937 | 118 | 19,240 | 5,013 | 3,109 | 27,480 |
| 84,938 | 119 | 19,468 | 5,073 | 3,153 | 27,813 |
| 84,939 | 118 | 19,286 | 5,061 | 3,146 | 27,611 |
| 84,940 | 116 | 18,896 | 4,995 | 3,068 | 27,075 |
| 84,941 | 119 | 18,656 | 4,985 | 3,043 | 26,803 |
| 84,942 | 119 | 18,829 | 5,064 | 3,080 | 27,092 |
| 84,943 | 122 | 18,691 | 5,040 | 3,045 | 26,898 |
| 84,944 | 116 | 18,635 | 5,011 | 3,006 | 26,768 |
| 84,945 | 118 | 18,445 | 4,959 | 2,947 | 26,469 |
| 84,946 | 120 | 18,508 | 4,964 | 2,961 | 26,553 |
| 84,947 | 120 | 18,212 | 4,869 | 2,915 | 26,116 |
| 84,948 | 133 | 18,688 | 5,011 | 3,018 | 26,850 |
| 84,949 | 132 | 18,429 | 4,974 | 2,992 | 26,527 |
| 84,950 | 132 | 18,380 | 4,964 | 2,982 | 26,458 |
| 84,951 | 134 | 18,249 | 4,926 | 2,967 | 26,276 |

|        |     |        |       |       |        |
|--------|-----|--------|-------|-------|--------|
| 84,952 | 136 | 18,080 | 4,878 | 2,929 | 26,023 |
| 84,953 | 137 | 18,716 | 4,997 | 3,022 | 26,872 |
| 84,954 | 137 | 18,795 | 5,001 | 3,040 | 26,973 |
| 84,955 | 130 | 18,769 | 4,995 | 3,012 | 26,906 |
| 84,956 | 129 | 18,358 | 4,913 | 2,940 | 26,340 |
| 84,957 | 130 | 18,524 | 4,980 | 2,956 | 26,590 |
| 84,958 | 129 | 18,728 | 5,050 | 2,993 | 26,900 |
| 84,959 | 128 | 18,799 | 5,100 | 3,055 | 27,082 |
| 84,960 | 126 | 18,935 | 5,152 | 3,093 | 27,306 |
| 84,961 | 123 | 18,821 | 5,110 | 3,094 | 27,148 |
| 84,962 | 121 | 19,186 | 5,229 | 3,146 | 27,682 |
| 84,963 | 123 | 19,326 | 5,269 | 3,157 | 27,875 |
| 84,964 | 121 | 19,277 | 5,277 | 3,150 | 27,825 |
| 84,965 | 125 | 19,523 | 5,323 | 3,187 | 28,158 |
| 84,966 | 125 | 19,421 | 5,314 | 3,171 | 28,031 |
| 84,967 | 132 | 19,645 | 5,387 | 3,226 | 28,390 |
| 84,968 | 123 | 19,151 | 5,317 | 3,169 | 27,760 |
| 84,969 | 123 | 19,206 | 5,360 | 3,213 | 27,902 |
| 84,970 | 115 | 19,471 | 5,428 | 3,257 | 28,271 |
| 84,971 | 116 | 19,326 | 5,390 | 3,225 | 28,057 |
| 84,972 | 110 | 19,103 | 5,357 | 3,212 | 27,782 |
| 84,973 | 112 | 19,352 | 5,425 | 3,270 | 28,159 |
| 84,974 | 110 | 19,092 | 5,339 | 3,210 | 27,751 |
| 84,975 | 110 | 19,274 | 5,411 | 3,247 | 28,042 |
| 84,976 | 108 | 19,467 | 5,480 | 3,295 | 28,350 |
| 84,977 | 107 | 19,369 | 5,421 | 3,256 | 28,153 |
| 84,978 | 110 | 19,520 | 5,465 | 3,273 | 28,368 |
| 84,979 | 108 | 19,723 | 5,522 | 3,301 | 28,654 |
| 84,980 | 107 | 19,703 | 5,517 | 3,301 | 28,628 |
| 84,981 | 113 | 19,581 | 5,481 | 3,270 | 28,445 |
| 84,982 | 113 | 19,496 | 5,457 | 3,265 | 28,331 |
| 84,983 | 113 | 19,569 | 5,471 | 3,270 | 28,423 |



|        |     |        |       |       |        |
|--------|-----|--------|-------|-------|--------|
| 84,984 | 112 | 19,405 | 5,458 | 3,252 | 28,227 |
| 84,985 | 116 | 19,783 | 5,544 | 3,313 | 28,756 |
| 84,986 | 114 | 19,955 | 5,561 | 3,321 | 28,951 |
| 84,987 | 118 | 19,914 | 5,552 | 3,310 | 28,894 |
| 84,988 | 118 | 20,036 | 5,568 | 3,333 | 29,055 |
| 84,989 | 114 | 20,005 | 5,566 | 3,324 | 29,009 |
| 84,990 | 120 | 19,972 | 5,500 | 3,264 | 28,856 |
| 84,991 | 118 | 20,348 | 5,550 | 3,307 | 29,323 |
| 84,992 | 117 | 20,391 | 5,529 | 3,320 | 29,357 |
| 84,993 | 125 | 20,707 | 5,574 | 3,351 | 29,757 |
| 84,994 | 123 | 20,786 | 5,575 | 3,358 | 29,842 |
| 84,995 | 121 | 21,009 | 5,600 | 3,380 | 30,110 |
| 84,996 | 117 | 21,075 | 5,561 | 3,346 | 30,099 |
| 84,997 | 118 | 21,305 | 5,627 | 3,379 | 30,429 |
| 84,998 | 118 | 21,483 | 5,691 | 3,404 | 30,696 |
| 84,999 | 123 | 21,488 | 5,690 | 3,378 | 30,679 |
| 85,000 | 123 | 21,527 | 5,697 | 3,381 | 30,728 |
| 85,001 | 124 | 21,704 | 5,790 | 3,439 | 31,057 |
| 85,002 | 123 | 21,633 | 5,809 | 3,438 | 31,003 |
| 85,003 | 126 | 21,470 | 5,792 | 3,393 | 30,781 |
| 85,004 | 129 | 21,347 | 5,779 | 3,360 | 30,615 |
| 85,005 | 138 | 21,261 | 5,749 | 3,339 | 30,487 |
| 85,006 | 137 | 21,263 | 5,738 | 3,327 | 30,465 |
| 85,007 | 135 | 21,212 | 5,747 | 3,339 | 30,433 |
| 85,008 | 137 | 21,242 | 5,745 | 3,332 | 30,456 |
| 85,009 | 137 | 21,274 | 5,734 | 3,321 | 30,466 |
| 85,010 | 140 | 21,531 | 5,796 | 3,330 | 30,797 |
| 85,011 | 143 | 21,382 | 5,752 | 3,340 | 30,617 |
| 85,012 | 143 | 21,427 | 5,734 | 3,337 | 30,641 |
| 85,013 | 144 | 21,282 | 5,691 | 3,334 | 30,451 |
| 85,014 | 145 | 20,743 | 5,593 | 3,276 | 29,757 |
| 85,015 | 147 | 20,931 | 5,645 | 3,303 | 30,026 |

|        |     |        |       |       |        |
|--------|-----|--------|-------|-------|--------|
| 85,016 | 146 | 21,228 | 5,714 | 3,341 | 30,429 |
| 85,017 | 151 | 21,449 | 5,768 | 3,369 | 30,737 |
| 85,018 | 144 | 21,753 | 5,797 | 3,380 | 31,074 |
| 85,019 | 142 | 21,551 | 5,718 | 3,310 | 30,721 |
| 85,020 | 144 | 21,772 | 5,802 | 3,341 | 31,059 |
| 85,021 | 147 | 21,536 | 5,728 | 3,297 | 30,708 |
| 85,022 | 147 | 21,633 | 5,735 | 3,297 | 30,812 |
| 85,023 | 149 | 21,703 | 5,762 | 3,313 | 30,927 |
| 85,024 | 149 | 21,598 | 5,781 | 3,312 | 30,840 |
| 85,025 | 154 | 21,616 | 5,786 | 3,323 | 30,879 |
| 85,026 | 155 | 21,729 | 5,791 | 3,299 | 30,974 |
| 85,027 | 156 | 21,898 | 5,820 | 3,344 | 31,218 |
| 85,028 | 156 | 21,946 | 5,812 | 3,350 | 31,264 |
| 85,029 | 155 | 21,908 | 5,796 | 3,345 | 31,204 |
| 85,030 | 159 | 22,071 | 5,777 | 3,348 | 31,355 |
| 85,031 | 159 | 22,108 | 5,783 | 3,353 | 31,403 |
| 85,032 | 153 | 22,287 | 5,825 | 3,389 | 31,654 |
| 85,033 | 164 | 22,217 | 5,799 | 3,380 | 31,560 |
| 85,034 | 163 | 22,035 | 5,741 | 3,336 | 31,275 |
| 85,035 | 164 | 22,394 | 5,861 | 3,408 | 31,827 |
| 85,036 | 163 | 22,397 | 5,868 | 3,409 | 31,837 |
| 85,037 | 161 | 22,331 | 5,899 | 3,434 | 31,825 |
| 85,038 | 157 | 22,285 | 5,908 | 3,431 | 31,781 |
| 85,039 | 157 | 22,172 | 5,907 | 3,440 | 31,676 |
| 85,040 | 166 | 22,448 | 5,958 | 3,481 | 32,053 |
| 85,041 | 166 | 22,162 | 5,888 | 3,444 | 31,660 |
| 85,042 | 165 | 22,175 | 5,908 | 3,465 | 31,713 |
| 85,043 | 165 | 22,288 | 5,927 | 3,473 | 31,853 |
| 85,044 | 160 | 21,790 | 5,918 | 3,452 | 31,320 |
| 85,045 | 160 | 22,052 | 5,990 | 3,496 | 31,698 |
| 85,046 | 160 | 22,388 | 6,120 | 3,556 | 32,224 |
| 85,047 | 164 | 22,367 | 6,138 | 3,580 | 32,249 |

|        |     |        |       |       |        |
|--------|-----|--------|-------|-------|--------|
| 85,048 | 163 | 22,244 | 6,139 | 3,582 | 32,128 |
| 85,049 | 155 | 22,294 | 6,199 | 3,648 | 32,296 |
| 85,050 | 147 | 22,368 | 6,206 | 3,674 | 32,395 |
| 85,051 | 148 | 22,292 | 6,197 | 3,664 | 32,301 |
| 85,052 | 146 | 21,612 | 6,041 | 3,554 | 31,353 |
| 85,053 | 149 | 21,816 | 6,087 | 3,600 | 31,652 |
| 85,054 | 147 | 21,964 | 6,125 | 3,635 | 31,871 |
| 85,055 | 151 | 21,981 | 6,125 | 3,643 | 31,900 |
| 85,056 | 142 | 21,780 | 6,104 | 3,628 | 31,654 |
| 85,057 | 147 | 22,063 | 6,206 | 3,701 | 32,117 |
| 85,058 | 149 | 22,161 | 6,232 | 3,747 | 32,289 |
| 85,059 | 146 | 21,956 | 6,164 | 3,702 | 31,968 |
| 85,060 | 146 | 22,283 | 6,227 | 3,759 | 32,415 |
| 85,061 | 146 | 22,319 | 6,237 | 3,766 | 32,468 |
| 85,062 | 140 | 21,981 | 6,162 | 3,692 | 31,975 |
| 85,063 | 139 | 22,009 | 6,214 | 3,717 | 32,079 |
| 85,064 | 135 | 21,387 | 6,077 | 3,638 | 31,237 |
| 85,065 | 136 | 21,599 | 6,089 | 3,655 | 31,479 |
| 85,066 | 134 | 21,865 | 6,134 | 3,708 | 31,841 |
| 85,067 | 131 | 21,548 | 6,088 | 3,691 | 31,458 |
| 85,068 | 126 | 21,523 | 6,080 | 3,692 | 31,421 |
| 85,069 | 130 | 21,402 | 6,050 | 3,681 | 31,263 |
| 85,070 | 126 | 21,203 | 5,991 | 3,655 | 30,975 |
| 85,071 | 131 | 21,581 | 6,049 | 3,702 | 31,463 |
| 85,072 | 126 | 21,358 | 6,002 | 3,687 | 31,173 |
| 85,073 | 125 | 21,342 | 6,003 | 3,667 | 31,137 |
| 85,074 | 126 | 21,392 | 6,005 | 3,675 | 31,198 |
| 85,075 | 125 | 21,602 | 6,002 | 3,680 | 31,409 |
| 85,076 | 125 | 21,519 | 6,031 | 3,698 | 31,373 |
| 85,077 | 131 | 21,495 | 6,014 | 3,722 | 31,362 |
| 85,078 | 129 | 21,231 | 5,988 | 3,663 | 31,011 |
| 85,079 | 128 | 21,155 | 5,983 | 3,653 | 30,919 |

|        |     |        |       |       |        |
|--------|-----|--------|-------|-------|--------|
| 85,080 | 127 | 21,084 | 5,981 | 3,662 | 30,854 |
| 85,081 | 128 | 21,080 | 5,978 | 3,662 | 30,848 |
| 85,082 | 131 | 21,210 | 6,025 | 3,684 | 31,050 |
| 85,083 | 133 | 21,204 | 6,002 | 3,669 | 31,008 |
| 85,084 | 120 | 21,022 | 5,971 | 3,641 | 30,754 |
| 85,085 | 124 | 21,263 | 6,047 | 3,675 | 31,109 |
| 85,086 | 120 | 21,049 | 5,969 | 3,616 | 30,754 |
| 85,087 | 121 | 21,148 | 5,943 | 3,623 | 30,835 |
| 85,088 | 121 | 20,908 | 5,930 | 3,578 | 30,537 |
| 85,089 | 127 | 21,104 | 5,961 | 3,605 | 30,797 |
| 85,090 | 130 | 21,146 | 5,955 | 3,597 | 30,828 |
| 85,091 | 121 | 20,839 | 5,857 | 3,556 | 30,373 |
| 85,092 | 124 | 21,238 | 6,001 | 3,646 | 31,009 |
| 85,093 | 125 | 20,268 | 5,744 | 3,506 | 29,643 |
| 85,094 | 126 | 20,372 | 5,761 | 3,511 | 29,770 |
| 85,095 | 123 | 20,630 | 5,771 | 3,534 | 30,058 |
| 85,096 | 124 | 20,744 | 5,821 | 3,569 | 30,258 |
| 85,097 | 120 | 20,521 | 5,745 | 3,544 | 29,930 |
| 85,098 | 116 | 20,367 | 5,620 | 3,468 | 29,571 |
| 85,099 | 114 | 20,344 | 5,544 | 3,417 | 29,419 |
| 85,100 | 116 | 20,072 | 5,444 | 3,357 | 28,989 |
| 85,101 | 117 | 20,101 | 5,450 | 3,342 | 29,010 |
| 85,102 | 114 | 20,056 | 5,426 | 3,339 | 28,935 |
| 85,103 | 111 | 20,120 | 5,409 | 3,351 | 28,991 |
| 85,104 | 109 | 20,215 | 5,358 | 3,328 | 29,010 |
| 85,105 | 104 | 20,414 | 5,356 | 3,330 | 29,204 |
| 85,106 | 105 | 20,384 | 5,364 | 3,328 | 29,181 |
| 85,107 | 106 | 20,717 | 5,437 | 3,382 | 29,642 |
| 85,108 | 103 | 20,547 | 5,374 | 3,350 | 29,374 |
| 85,109 | 104 | 20,825 | 5,418 | 3,400 | 29,747 |
| 85,110 | 109 | 20,889 | 5,442 | 3,416 | 29,856 |
| 85,111 | 110 | 20,905 | 5,456 | 3,430 | 29,901 |

|        |     |        |       |       |        |
|--------|-----|--------|-------|-------|--------|
| 85,112 | 108 | 20,883 | 5,435 | 3,422 | 29,848 |
| 85,113 | 114 | 20,899 | 5,381 | 3,396 | 29,790 |
| 85,114 | 113 | 20,942 | 5,397 | 3,402 | 29,854 |
| 85,115 | 117 | 21,200 | 5,469 | 3,423 | 30,209 |
| 85,116 | 120 | 21,112 | 5,495 | 3,390 | 30,117 |
| 85,117 | 123 | 21,156 | 5,501 | 3,398 | 30,178 |
| 85,118 | 135 | 21,277 | 5,519 | 3,399 | 30,330 |
| 85,119 | 136 | 21,129 | 5,458 | 3,375 | 30,098 |
| 85,120 | 135 | 21,041 | 5,455 | 3,347 | 29,978 |
| 85,121 | 135 | 20,810 | 5,393 | 3,325 | 29,663 |
| 85,122 | 132 | 21,447 | 5,514 | 3,385 | 30,478 |
| 85,123 | 134 | 21,548 | 5,515 | 3,389 | 30,586 |
| 85,124 | 133 | 21,671 | 5,502 | 3,412 | 30,718 |
| 85,125 | 132 | 21,634 | 5,531 | 3,408 | 30,705 |
| 85,126 | 130 | 21,658 | 5,533 | 3,402 | 30,723 |
| 85,127 | 127 | 22,016 | 5,539 | 3,448 | 31,130 |
| 85,128 | 121 | 22,178 | 5,524 | 3,440 | 31,263 |
| 85,129 | 120 | 21,987 | 5,420 | 3,379 | 30,906 |
| 85,130 | 119 | 22,223 | 5,450 | 3,398 | 31,190 |
| 85,131 | 115 | 22,248 | 5,466 | 3,416 | 31,245 |
| 85,132 | 120 | 22,545 | 5,530 | 3,430 | 31,625 |
| 85,133 | 117 | 22,379 | 5,498 | 3,395 | 31,389 |
| 85,134 | 122 | 22,180 | 5,440 | 3,365 | 31,107 |
| 85,135 | 121 | 22,150 | 5,425 | 3,358 | 31,054 |
| 85,136 | 117 | 21,980 | 5,381 | 3,325 | 30,803 |
| 85,137 | 117 | 21,881 | 5,350 | 3,325 | 30,673 |
| 85,138 | 115 | 22,608 | 5,541 | 3,447 | 31,711 |
| 85,139 | 117 | 22,508 | 5,508 | 3,433 | 31,566 |
| 85,140 | 112 | 22,358 | 5,477 | 3,405 | 31,352 |
| 85,141 | 114 | 22,682 | 5,517 | 3,439 | 31,752 |
| 85,142 | 112 | 22,739 | 5,525 | 3,433 | 31,809 |
| 85,143 | 109 | 22,679 | 5,500 | 3,416 | 31,704 |

|        |     |        |       |       |        |
|--------|-----|--------|-------|-------|--------|
| 85,144 | 106 | 22,611 | 5,465 | 3,378 | 31,560 |
| 85,145 | 105 | 22,366 | 5,424 | 3,341 | 31,236 |
| 85,146 | 110 | 22,304 | 5,427 | 3,369 | 31,210 |
| 85,147 | 114 | 22,118 | 5,344 | 3,299 | 30,875 |
| 85,148 | 115 | 22,162 | 5,348 | 3,301 | 30,926 |
| 85,149 | 114 | 22,096 | 5,342 | 3,291 | 30,843 |
| 85,150 | 116 | 22,163 | 5,421 | 3,343 | 31,043 |
| 85,151 | 117 | 22,193 | 5,414 | 3,327 | 31,051 |
| 85,152 | 119 | 22,171 | 5,383 | 3,315 | 30,988 |
| 85,153 | 123 | 22,287 | 5,439 | 3,337 | 31,186 |
| 85,154 | 132 | 22,048 | 5,396 | 3,285 | 30,861 |
| 85,155 | 130 | 21,762 | 5,381 | 3,266 | 30,539 |
| 85,156 | 129 | 21,967 | 5,492 | 3,312 | 30,900 |
| 85,157 | 129 | 21,521 | 5,351 | 3,232 | 30,233 |
| 85,158 | 131 | 21,798 | 5,387 | 3,259 | 30,575 |
| 85,159 | 130 | 21,813 | 5,371 | 3,243 | 30,557 |
| 85,160 | 139 | 22,097 | 5,456 | 3,281 | 30,973 |
| 85,161 | 137 | 22,197 | 5,462 | 3,280 | 31,076 |
| 85,162 | 136 | 21,886 | 5,388 | 3,228 | 30,638 |
| 85,163 | 138 | 21,819 | 5,385 | 3,229 | 30,571 |
| 85,164 | 132 | 21,693 | 5,398 | 3,228 | 30,451 |
| 85,165 | 134 | 21,789 | 5,384 | 3,224 | 30,531 |
| 85,166 | 132 | 21,783 | 5,414 | 3,241 | 30,570 |
| 85,167 | 137 | 21,951 | 5,424 | 3,276 | 30,788 |
| 85,168 | 139 | 21,923 | 5,420 | 3,262 | 30,744 |
| 85,169 | 127 | 21,680 | 5,369 | 3,235 | 30,411 |
| 85,170 | 129 | 21,792 | 5,412 | 3,267 | 30,600 |
| 85,171 | 131 | 21,618 | 5,385 | 3,262 | 30,396 |
| 85,172 | 134 | 21,328 | 5,313 | 3,228 | 30,003 |
| 85,173 | 135 | 21,378 | 5,329 | 3,235 | 30,077 |
| 85,174 | 137 | 21,294 | 5,301 | 3,218 | 29,950 |
| 85,175 | 136 | 21,299 | 5,321 | 3,212 | 29,968 |

|        |     |        |       |       |        |
|--------|-----|--------|-------|-------|--------|
| 85,176 | 140 | 21,501 | 5,385 | 3,250 | 30,276 |
| 85,177 | 141 | 21,260 | 5,355 | 3,230 | 29,986 |
| 85,178 | 147 | 21,351 | 5,355 | 3,219 | 30,072 |
| 85,179 | 146 | 21,039 | 5,309 | 3,178 | 29,672 |
| 85,180 | 147 | 21,043 | 5,373 | 3,240 | 29,803 |
| 85,181 | 148 | 21,340 | 5,440 | 3,269 | 30,197 |
| 85,182 | 143 | 20,717 | 5,258 | 3,176 | 29,294 |
| 85,183 | 140 | 21,015 | 5,324 | 3,228 | 29,707 |
| 85,184 | 136 | 21,172 | 5,372 | 3,263 | 29,943 |
| 85,185 | 140 | 21,409 | 5,429 | 3,308 | 30,286 |
| 85,186 | 141 | 21,209 | 5,368 | 3,299 | 30,017 |
| 85,187 | 142 | 21,386 | 5,397 | 3,313 | 30,238 |
| 85,188 | 142 | 21,025 | 5,356 | 3,252 | 29,775 |
| 85,189 | 143 | 20,998 | 5,375 | 3,268 | 29,784 |
| 85,190 | 141 | 20,874 | 5,341 | 3,273 | 29,629 |
| 85,191 | 142 | 21,069 | 5,396 | 3,292 | 29,899 |
| 85,192 | 142 | 21,079 | 5,401 | 3,314 | 29,936 |
| 85,193 | 146 | 21,104 | 5,402 | 3,327 | 29,979 |
| 85,194 | 144 | 20,941 | 5,359 | 3,311 | 29,755 |
| 85,195 | 148 | 21,208 | 5,480 | 3,379 | 30,215 |
| 85,196 | 143 | 21,156 | 5,474 | 3,375 | 30,148 |
| 85,197 | 143 | 21,184 | 5,481 | 3,367 | 30,175 |
| 85,198 | 139 | 21,420 | 5,535 | 3,423 | 30,517 |
| 85,199 | 139 | 21,394 | 5,583 | 3,452 | 30,568 |
| 85,200 | 141 | 21,539 | 5,576 | 3,478 | 30,734 |
| 85,201 | 138 | 21,728 | 5,592 | 3,475 | 30,933 |
| 85,202 | 138 | 21,758 | 5,619 | 3,496 | 31,011 |
| 85,203 | 137 | 21,701 | 5,643 | 3,521 | 31,002 |
| 85,204 | 132 | 21,800 | 5,690 | 3,534 | 31,156 |
| 85,205 | 131 | 22,047 | 5,701 | 3,561 | 31,440 |
| 85,206 | 131 | 21,900 | 5,664 | 3,555 | 31,250 |
| 85,207 | 130 | 21,932 | 5,636 | 3,552 | 31,250 |

|        |     |        |       |       |        |
|--------|-----|--------|-------|-------|--------|
| 85,208 | 131 | 22,014 | 5,635 | 3,548 | 31,328 |
| 85,209 | 136 | 22,162 | 5,687 | 3,570 | 31,555 |
| 85,210 | 140 | 22,105 | 5,668 | 3,561 | 31,474 |
| 85,211 | 134 | 21,951 | 5,668 | 3,553 | 31,306 |
| 85,212 | 132 | 21,880 | 5,644 | 3,534 | 31,190 |
| 85,213 | 129 | 21,723 | 5,585 | 3,504 | 30,941 |
| 85,214 | 131 | 21,727 | 5,610 | 3,520 | 30,988 |
| 85,215 | 133 | 21,778 | 5,585 | 3,550 | 31,046 |
| 85,216 | 137 | 21,963 | 5,653 | 3,581 | 31,334 |
| 85,217 | 141 | 22,081 | 5,657 | 3,584 | 31,463 |
| 85,218 | 129 | 21,889 | 5,592 | 3,550 | 31,160 |
| 85,219 | 141 | 21,910 | 5,608 | 3,552 | 31,211 |
| 85,220 | 142 | 21,914 | 5,599 | 3,555 | 31,210 |
| 85,221 | 141 | 22,044 | 5,589 | 3,560 | 31,334 |
| 85,222 | 137 | 22,202 | 5,599 | 3,574 | 31,512 |
| 85,223 | 140 | 22,464 | 5,666 | 3,625 | 31,895 |
| 85,224 | 136 | 22,476 | 5,705 | 3,609 | 31,926 |
| 85,225 | 135 | 22,291 | 5,675 | 3,615 | 31,716 |
| 85,226 | 132 | 22,120 | 5,658 | 3,606 | 31,516 |
| 85,227 | 132 | 22,188 | 5,688 | 3,629 | 31,637 |
| 85,228 | 133 | 22,235 | 5,691 | 3,623 | 31,682 |
| 85,229 | 124 | 21,949 | 5,637 | 3,609 | 31,319 |
| 85,230 | 124 | 21,944 | 5,613 | 3,586 | 31,267 |
| 85,231 | 126 | 22,125 | 5,641 | 3,631 | 31,523 |
| 85,232 | 126 | 22,121 | 5,655 | 3,638 | 31,540 |
| 85,233 | 128 | 22,193 | 5,680 | 3,663 | 31,664 |
| 85,234 | 128 | 22,035 | 5,662 | 3,651 | 31,476 |
| 85,235 | 128 | 22,004 | 5,669 | 3,649 | 31,450 |
| 85,236 | 125 | 22,007 | 5,640 | 3,636 | 31,408 |
| 85,237 | 127 | 21,985 | 5,612 | 3,601 | 31,325 |
| 85,238 | 125 | 22,054 | 5,628 | 3,625 | 31,432 |
| 85,239 | 124 | 21,891 | 5,553 | 3,580 | 31,148 |



|        |     |        |       |       |        |
|--------|-----|--------|-------|-------|--------|
| 85,240 | 125 | 22,258 | 5,620 | 3,628 | 31,631 |
| 85,241 | 125 | 22,343 | 5,625 | 3,616 | 31,709 |
| 85,242 | 124 | 21,626 | 5,512 | 3,540 | 30,802 |
| 85,243 | 124 | 21,873 | 5,542 | 3,598 | 31,137 |
| 85,244 | 120 | 22,126 | 5,583 | 3,624 | 31,453 |
| 85,245 | 116 | 21,991 | 5,504 | 3,591 | 31,202 |
| 85,246 | 118 | 21,865 | 5,433 | 3,567 | 30,983 |
| 85,247 | 118 | 21,973 | 5,428 | 3,572 | 31,091 |
| 85,248 | 119 | 21,990 | 5,347 | 3,515 | 30,971 |
| 85,249 | 122 | 22,082 | 5,391 | 3,541 | 31,136 |
| 85,250 | 121 | 22,032 | 5,363 | 3,541 | 31,057 |
| 85,251 | 122 | 21,958 | 5,364 | 3,529 | 30,973 |
| 85,252 | 130 | 22,285 | 5,428 | 3,586 | 31,429 |
| 85,253 | 127 | 22,104 | 5,370 | 3,568 | 31,169 |
| 85,254 | 126 | 21,961 | 5,280 | 3,526 | 30,893 |
| 85,255 | 126 | 22,171 | 5,306 | 3,565 | 31,168 |
| 85,256 | 129 | 22,352 | 5,367 | 3,601 | 31,449 |
| 85,257 | 133 | 22,096 | 5,317 | 3,553 | 31,099 |
| 85,258 | 132 | 22,068 | 5,306 | 3,552 | 31,058 |
| 85,259 | 128 | 22,176 | 5,328 | 3,588 | 31,220 |
| 85,260 | 133 | 22,534 | 5,464 | 3,670 | 31,801 |
| 85,261 | 124 | 22,294 | 5,414 | 3,643 | 31,475 |
| 85,262 | 124 | 22,547 | 5,439 | 3,661 | 31,771 |
| 85,263 | 124 | 22,583 | 5,470 | 3,685 | 31,862 |
| 85,264 | 128 | 22,963 | 5,532 | 3,714 | 32,337 |
| 85,265 | 126 | 22,939 | 5,517 | 3,709 | 32,291 |
| 85,266 | 125 | 22,552 | 5,399 | 3,636 | 31,712 |
| 85,267 | 126 | 22,897 | 5,479 | 3,684 | 32,186 |
| 85,268 | 119 | 23,221 | 5,559 | 3,736 | 32,635 |
| 85,269 | 119 | 23,098 | 5,529 | 3,722 | 32,468 |
| 85,270 | 113 | 23,554 | 5,682 | 3,824 | 33,173 |
| 85,271 | 114 | 23,779 | 5,764 | 3,866 | 33,523 |

|        |     |        |       |       |        |
|--------|-----|--------|-------|-------|--------|
| 85,272 | 117 | 23,913 | 5,820 | 3,877 | 33,727 |
| 85,273 | 120 | 23,896 | 5,817 | 3,901 | 33,734 |
| 85,274 | 119 | 23,699 | 5,748 | 3,852 | 33,418 |
| 85,275 | 121 | 23,518 | 5,674 | 3,822 | 33,135 |
| 85,276 | 126 | 23,907 | 5,773 | 3,894 | 33,700 |
| 85,277 | 127 | 23,815 | 5,718 | 3,888 | 33,548 |
| 85,278 | 127 | 23,861 | 5,714 | 3,881 | 33,583 |
| 85,279 | 125 | 23,704 | 5,687 | 3,864 | 33,380 |
| 85,280 | 126 | 23,587 | 5,672 | 3,853 | 33,238 |
| 85,281 | 133 | 24,000 | 5,756 | 3,885 | 33,774 |
| 85,282 | 138 | 24,185 | 5,785 | 3,880 | 33,988 |
| 85,283 | 142 | 24,159 | 5,808 | 3,903 | 34,012 |
| 85,284 | 140 | 23,715 | 5,703 | 3,848 | 33,406 |
| 85,285 | 144 | 23,848 | 5,717 | 3,877 | 33,586 |
| 85,286 | 147 | 23,870 | 5,706 | 3,872 | 33,595 |
| 85,287 | 146 | 23,630 | 5,673 | 3,855 | 33,304 |
| 85,288 | 149 | 24,443 | 5,820 | 3,943 | 34,355 |
| 85,289 | 154 | 24,291 | 5,770 | 3,908 | 34,123 |
| 85,290 | 155 | 24,129 | 5,731 | 3,870 | 33,885 |
| 85,291 | 155 | 24,725 | 5,813 | 3,926 | 34,619 |
| 85,292 | 158 | 24,363 | 5,775 | 3,880 | 34,176 |
| 85,293 | 159 | 24,459 | 5,791 | 3,878 | 34,287 |
| 85,294 | 164 | 24,585 | 5,848 | 3,870 | 34,467 |
| 85,295 | 165 | 24,233 | 5,807 | 3,810 | 34,015 |
| 85,296 | 165 | 24,248 | 5,814 | 3,805 | 34,032 |
| 85,297 | 161 | 24,224 | 5,817 | 3,797 | 33,999 |
| 85,298 | 161 | 24,173 | 5,821 | 3,798 | 33,953 |
| 85,299 | 157 | 24,100 | 5,857 | 3,815 | 33,929 |
| 85,300 | 156 | 23,994 | 5,811 | 3,789 | 33,750 |
| 85,301 | 158 | 24,184 | 5,836 | 3,807 | 33,985 |
| 85,302 | 156 | 24,198 | 5,850 | 3,790 | 33,994 |
| 85,303 | 154 | 24,185 | 5,848 | 3,794 | 33,981 |

|        |     |        |       |       |        |
|--------|-----|--------|-------|-------|--------|
| 85,304 | 153 | 24,180 | 5,880 | 3,788 | 34,001 |
| 85,305 | 140 | 23,555 | 5,738 | 3,698 | 33,131 |
| 85,306 | 140 | 23,768 | 5,759 | 3,707 | 33,374 |
| 85,307 | 139 | 24,026 | 5,815 | 3,755 | 33,735 |
| 85,308 | 141 | 23,994 | 5,798 | 3,734 | 33,667 |
| 85,309 | 140 | 24,150 | 5,829 | 3,725 | 33,844 |
| 85,310 | 144 | 24,220 | 5,812 | 3,717 | 33,893 |
| 85,311 | 141 | 24,152 | 5,771 | 3,672 | 33,736 |
| 85,312 | 142 | 24,352 | 5,798 | 3,691 | 33,983 |
| 85,313 | 149 | 24,486 | 5,858 | 3,728 | 34,221 |
| 85,314 | 162 | 24,287 | 5,787 | 3,694 | 33,930 |
| 85,315 | 160 | 24,222 | 5,778 | 3,691 | 33,851 |
| 85,316 | 170 | 24,061 | 5,757 | 3,682 | 33,670 |
| 85,317 | 167 | 23,701 | 5,704 | 3,649 | 33,221 |
| 85,318 | 163 | 23,856 | 5,716 | 3,679 | 33,414 |
| 85,319 | 168 | 23,780 | 5,668 | 3,629 | 33,245 |
| 85,320 | 174 | 24,007 | 5,707 | 3,624 | 33,512 |
| 85,321 | 166 | 23,953 | 5,715 | 3,639 | 33,473 |
| 85,322 | 164 | 23,822 | 5,698 | 3,629 | 33,313 |
| 85,323 | 159 | 23,528 | 5,680 | 3,613 | 32,980 |
| 85,324 | 156 | 23,373 | 5,665 | 3,590 | 32,784 |
| 85,325 | 154 | 23,340 | 5,667 | 3,584 | 32,745 |
| 85,326 | 152 | 23,238 | 5,665 | 3,565 | 32,620 |
| 85,327 | 149 | 23,309 | 5,689 | 3,571 | 32,718 |
| 85,328 | 155 | 23,439 | 5,709 | 3,578 | 32,881 |
| 85,329 | 155 | 23,428 | 5,731 | 3,580 | 32,894 |
| 85,330 | 153 | 23,463 | 5,775 | 3,593 | 32,984 |
| 85,331 | 149 | 23,501 | 5,797 | 3,628 | 33,075 |
| 85,332 | 147 | 23,487 | 5,831 | 3,639 | 33,104 |
| 85,333 | 143 | 23,849 | 5,926 | 3,687 | 33,605 |
| 85,334 | 141 | 23,889 | 5,915 | 3,655 | 33,600 |
| 85,335 | 145 | 24,262 | 6,009 | 3,684 | 34,100 |

|        |     |        |       |       |        |
|--------|-----|--------|-------|-------|--------|
| 85,336 | 144 | 24,138 | 6,035 | 3,703 | 34,020 |
| 85,337 | 144 | 24,046 | 6,058 | 3,712 | 33,960 |
| 85,338 | 150 | 24,257 | 6,205 | 3,757 | 34,369 |
| 85,339 | 161 | 24,119 | 6,233 | 3,756 | 34,269 |
| 85,340 | 156 | 23,996 | 6,219 | 3,762 | 34,133 |
| 85,341 | 157 | 24,303 | 6,320 | 3,856 | 34,636 |
| 85,342 | 159 | 24,213 | 6,319 | 3,851 | 34,542 |
| 85,343 | 169 | 24,218 | 6,317 | 3,855 | 34,559 |
| 85,344 | 170 | 24,356 | 6,363 | 3,863 | 34,752 |
| 85,345 | 161 | 24,435 | 6,351 | 3,885 | 34,832 |
| 85,346 | 167 | 24,524 | 6,379 | 3,930 | 35,000 |
| 85,347 | 172 | 24,671 | 6,407 | 3,931 | 35,181 |
| 85,348 | 174 | 24,679 | 6,438 | 3,920 | 35,211 |
| 85,349 | 179 | 24,693 | 6,430 | 3,918 | 35,220 |
| 85,350 | 181 | 24,578 | 6,392 | 3,898 | 35,049 |
| 85,351 | 181 | 24,571 | 6,411 | 3,900 | 35,063 |
| 85,352 | 183 | 24,420 | 6,389 | 3,885 | 34,877 |
| 85,353 | 181 | 24,171 | 6,326 | 3,855 | 34,533 |
| 85,354 | 186 | 24,851 | 6,518 | 3,990 | 35,545 |
| 85,355 | 189 | 24,820 | 6,494 | 3,990 | 35,493 |
| 85,356 | 190 | 24,576 | 6,457 | 3,960 | 35,183 |
| 85,357 | 189 | 24,211 | 6,392 | 3,921 | 34,713 |
| 85,358 | 190 | 24,492 | 6,438 | 3,977 | 35,097 |
| 85,359 | 190 | 24,450 | 6,452 | 3,970 | 35,062 |
| 85,360 | 197 | 24,213 | 6,390 | 3,948 | 34,748 |
| 85,361 | 188 | 23,821 | 6,334 | 3,926 | 34,269 |
| 85,362 | 194 | 24,453 | 6,461 | 4,068 | 35,176 |
| 85,363 | 198 | 24,161 | 6,393 | 4,030 | 34,782 |
| 85,364 | 189 | 23,850 | 6,309 | 3,977 | 34,325 |
| 85,365 | 177 | 24,038 | 6,342 | 4,018 | 34,575 |
| 85,366 | 177 | 24,242 | 6,339 | 4,026 | 34,784 |
| 85,367 | 167 | 24,055 | 6,272 | 3,950 | 34,444 |

|        |     |        |       |       |        |
|--------|-----|--------|-------|-------|--------|
| 85,368 | 169 | 24,288 | 6,296 | 3,950 | 34,703 |
| 85,369 | 168 | 24,129 | 6,236 | 3,927 | 34,460 |
| 85,370 | 162 | 24,000 | 6,198 | 3,910 | 34,270 |
| 85,371 | 156 | 23,747 | 6,144 | 3,888 | 33,935 |
| 85,372 | 155 | 23,824 | 6,085 | 3,844 | 33,908 |
| 85,373 | 157 | 24,105 | 6,133 | 3,856 | 34,251 |
| 85,374 | 160 | 23,902 | 6,043 | 3,805 | 33,910 |
| 85,375 | 166 | 24,043 | 6,092 | 3,834 | 34,135 |
| 85,376 | 168 | 24,063 | 6,086 | 3,822 | 34,139 |
| 85,377 | 166 | 23,913 | 6,016 | 3,782 | 33,877 |
| 85,378 | 160 | 23,278 | 5,814 | 3,656 | 32,908 |
| 85,379 | 160 | 23,507 | 5,856 | 3,691 | 33,214 |
| 85,380 | 161 | 23,748 | 5,895 | 3,712 | 33,516 |
| 85,381 | 163 | 23,788 | 5,892 | 3,677 | 33,520 |
| 85,382 | 162 | 23,745 | 5,877 | 3,681 | 33,465 |
| 85,383 | 168 | 23,852 | 5,879 | 3,696 | 33,595 |
| 85,384 | 169 | 23,746 | 5,857 | 3,669 | 33,441 |
| 85,385 | 166 | 23,429 | 5,795 | 3,646 | 33,036 |
| 85,386 | 156 | 22,901 | 5,655 | 3,550 | 32,262 |
| 85,387 | 156 | 22,894 | 5,595 | 3,512 | 32,157 |
| 85,388 | 159 | 23,101 | 5,604 | 3,526 | 32,390 |
| 85,389 | 155 | 23,049 | 5,499 | 3,496 | 32,199 |
| 85,390 | 137 | 22,766 | 5,405 | 3,427 | 31,735 |
| 85,391 | 140 | 22,365 | 5,295 | 3,301 | 31,101 |
| 85,392 | 140 | 22,384 | 5,307 | 3,328 | 31,159 |
| 85,393 | 134 | 22,487 | 5,306 | 3,342 | 31,269 |
| 85,394 | 124 | 22,107 | 5,220 | 3,290 | 30,741 |
| 85,395 | 124 | 22,001 | 5,217 | 3,270 | 30,612 |
| 85,396 | 124 | 21,986 | 5,214 | 3,268 | 30,592 |
| 85,397 | 118 | 22,321 | 5,283 | 3,292 | 31,014 |
| 85,398 | 114 | 21,942 | 5,201 | 3,267 | 30,524 |
| 85,399 | 112 | 22,016 | 5,148 | 3,290 | 30,566 |

|        |     |        |       |       |        |
|--------|-----|--------|-------|-------|--------|
| 85,400 | 108 | 22,010 | 5,122 | 3,282 | 30,522 |
| 85,401 | 107 | 21,853 | 5,075 | 3,243 | 30,278 |
| 85,402 | 112 | 21,760 | 5,049 | 3,228 | 30,149 |
| 85,403 | 103 | 21,509 | 4,982 | 3,186 | 29,780 |
| 85,404 | 103 | 21,666 | 5,002 | 3,225 | 29,996 |
| 85,405 | 99  | 21,758 | 4,990 | 3,212 | 30,059 |
| 85,406 | 96  | 21,686 | 4,949 | 3,197 | 29,928 |
| 85,407 | 98  | 21,530 | 4,899 | 3,154 | 29,681 |
| 85,408 | 98  | 21,515 | 4,889 | 3,141 | 29,643 |
| 85,409 | 98  | 21,394 | 4,891 | 3,114 | 29,497 |
| 85,410 | 98  | 21,561 | 4,936 | 3,147 | 29,742 |
| 85,411 | 92  | 21,651 | 4,971 | 3,188 | 29,902 |
| 85,412 | 91  | 21,420 | 4,882 | 3,139 | 29,532 |
| 85,413 | 93  | 21,606 | 4,930 | 3,177 | 29,806 |
| 85,414 | 91  | 21,607 | 4,987 | 3,179 | 29,864 |
| 85,415 | 89  | 21,351 | 4,932 | 3,143 | 29,515 |
| 85,416 | 92  | 21,275 | 4,957 | 3,128 | 29,452 |
| 85,417 | 94  | 21,352 | 5,021 | 3,170 | 29,637 |
| 85,418 | 95  | 21,474 | 5,052 | 3,197 | 29,818 |
| 85,419 | 93  | 21,203 | 5,024 | 3,173 | 29,493 |
| 85,420 | 94  | 21,196 | 5,060 | 3,173 | 29,523 |
| 85,421 | 94  | 21,450 | 5,129 | 3,209 | 29,882 |
| 85,422 | 99  | 21,477 | 5,139 | 3,247 | 29,962 |
| 85,423 | 101 | 21,580 | 5,142 | 3,250 | 30,073 |
| 85,424 | 99  | 21,563 | 5,144 | 3,295 | 30,101 |
| 85,425 | 92  | 21,363 | 5,092 | 3,258 | 29,805 |
| 85,426 | 101 | 21,359 | 5,090 | 3,263 | 29,813 |
| 85,427 | 98  | 21,152 | 5,041 | 3,228 | 29,519 |
| 85,428 | 100 | 21,455 | 5,069 | 3,272 | 29,896 |
| 85,429 | 105 | 21,544 | 5,079 | 3,295 | 30,023 |
| 85,430 | 105 | 21,513 | 5,083 | 3,290 | 29,991 |
| 85,431 | 101 | 21,518 | 5,081 | 3,293 | 29,993 |

|        |     |        |       |       |        |
|--------|-----|--------|-------|-------|--------|
| 85,432 | 102 | 21,696 | 5,088 | 3,320 | 30,206 |
| 85,433 | 100 | 21,816 | 5,130 | 3,348 | 30,394 |
| 85,434 | 99  | 21,778 | 5,161 | 3,360 | 30,398 |
| 85,435 | 96  | 21,644 | 5,135 | 3,350 | 30,225 |
| 85,436 | 95  | 21,540 | 5,133 | 3,321 | 30,089 |
| 85,437 | 95  | 21,459 | 5,102 | 3,321 | 29,977 |
| 85,438 | 95  | 21,229 | 5,072 | 3,299 | 29,695 |
| 85,439 | 94  | 21,403 | 5,140 | 3,323 | 29,960 |
| 85,440 | 91  | 21,199 | 5,166 | 3,325 | 29,781 |
| 85,441 | 88  | 20,909 | 5,101 | 3,311 | 29,409 |
| 85,442 | 86  | 20,922 | 5,093 | 3,323 | 29,424 |
| 85,443 | 89  | 21,023 | 5,153 | 3,319 | 29,584 |
| 85,444 | 91  | 21,043 | 5,147 | 3,327 | 29,608 |
| 85,445 | 88  | 20,904 | 5,103 | 3,314 | 29,409 |
| 85,446 | 93  | 20,968 | 5,137 | 3,327 | 29,525 |
| 85,447 | 98  | 21,053 | 5,164 | 3,346 | 29,661 |
| 85,448 | 99  | 20,880 | 5,132 | 3,329 | 29,440 |
| 85,449 | 98  | 20,946 | 5,189 | 3,328 | 29,561 |
| 85,450 | 101 | 20,635 | 5,168 | 3,285 | 29,189 |
| 85,451 | 102 | 20,376 | 5,133 | 3,250 | 28,861 |
| 85,452 | 105 | 20,844 | 5,298 | 3,354 | 29,601 |
| 85,453 | 103 | 20,991 | 5,396 | 3,420 | 29,910 |
| 85,454 | 102 | 20,775 | 5,366 | 3,365 | 29,608 |
| 85,455 | 107 | 20,853 | 5,442 | 3,388 | 29,790 |
| 85,456 | 107 | 20,754 | 5,456 | 3,381 | 29,698 |
| 85,457 | 108 | 21,207 | 5,686 | 3,486 | 30,487 |
| 85,458 | 105 | 20,980 | 5,652 | 3,471 | 30,208 |
| 85,459 | 106 | 21,205 | 5,748 | 3,567 | 30,626 |
| 85,460 | 105 | 21,183 | 5,730 | 3,538 | 30,556 |
| 85,461 | 110 | 21,634 | 5,813 | 3,599 | 31,156 |
| 85,462 | 111 | 21,293 | 5,736 | 3,494 | 30,634 |
| 85,463 | 112 | 21,722 | 5,838 | 3,555 | 31,227 |

|        |     |        |       |       |        |
|--------|-----|--------|-------|-------|--------|
| 85,464 | 111 | 22,017 | 5,915 | 3,591 | 31,634 |
| 85,465 | 113 | 21,943 | 5,885 | 3,574 | 31,515 |
| 85,466 | 116 | 22,038 | 5,864 | 3,563 | 31,581 |
| 85,467 | 121 | 22,300 | 5,942 | 3,598 | 31,961 |
| 85,468 | 124 | 22,462 | 5,964 | 3,633 | 32,183 |
| 85,469 | 126 | 22,029 | 5,859 | 3,581 | 31,595 |
| 85,470 | 126 | 21,739 | 5,799 | 3,569 | 31,233 |
| 85,471 | 131 | 22,183 | 5,906 | 3,658 | 31,878 |
| 85,472 | 132 | 22,256 | 5,894 | 3,668 | 31,950 |
| 85,473 | 126 | 21,970 | 5,929 | 3,654 | 31,679 |
| 85,474 | 126 | 21,900 | 5,915 | 3,640 | 31,581 |
| 85,475 | 126 | 21,893 | 5,921 | 3,620 | 31,560 |
| 85,476 | 124 | 21,766 | 5,889 | 3,593 | 31,372 |
| 85,477 | 115 | 22,131 | 5,995 | 3,649 | 31,890 |
| 85,478 | 114 | 22,029 | 6,021 | 3,662 | 31,826 |
| 85,479 | 112 | 22,045 | 6,034 | 3,661 | 31,852 |
| 85,480 | 114 | 21,861 | 6,032 | 3,649 | 31,656 |
| 85,481 | 131 | 22,165 | 6,090 | 3,681 | 32,067 |
| 85,482 | 140 | 22,118 | 6,107 | 3,679 | 32,044 |
| 85,483 | 148 | 21,875 | 6,092 | 3,660 | 31,775 |
| 85,484 | 148 | 21,747 | 6,051 | 3,638 | 31,584 |
| 85,485 | 162 | 22,163 | 6,122 | 3,694 | 32,141 |
| 85,486 | 164 | 22,327 | 6,147 | 3,733 | 32,371 |
| 85,487 | 173 | 22,530 | 6,161 | 3,765 | 32,629 |
| 85,488 | 173 | 22,484 | 6,167 | 3,753 | 32,577 |
| 85,489 | 178 | 22,936 | 6,230 | 3,822 | 33,166 |
| 85,490 | 182 | 23,016 | 6,272 | 3,844 | 33,314 |
| 85,491 | 184 | 22,881 | 6,234 | 3,845 | 33,144 |
| 85,492 | 186 | 22,920 | 6,258 | 3,858 | 33,222 |
| 85,493 | 186 | 22,753 | 6,208 | 3,845 | 32,992 |
| 85,494 | 186 | 23,006 | 6,279 | 3,896 | 33,367 |
| 85,495 | 185 | 23,098 | 6,322 | 3,916 | 33,521 |



|        |     |        |       |       |        |
|--------|-----|--------|-------|-------|--------|
| 85,496 | 187 | 22,937 | 6,276 | 3,874 | 33,274 |
| 85,497 | 185 | 22,790 | 6,246 | 3,853 | 33,074 |
| 85,498 | 183 | 23,111 | 6,334 | 3,916 | 33,544 |
| 85,499 | 185 | 23,200 | 6,320 | 3,949 | 33,654 |
| 85,500 | 185 | 23,023 | 6,258 | 3,867 | 33,333 |
| 85,501 | 186 | 23,363 | 6,354 | 3,916 | 33,819 |
| 85,502 | 186 | 23,678 | 6,404 | 3,963 | 34,231 |
| 85,503 | 185 | 23,820 | 6,438 | 3,988 | 34,431 |
| 85,504 | 190 | 23,907 | 6,411 | 3,976 | 34,484 |
| 85,505 | 193 | 24,293 | 6,461 | 4,011 | 34,958 |
| 85,506 | 191 | 24,419 | 6,493 | 4,031 | 35,134 |
| 85,507 | 187 | 24,396 | 6,441 | 4,032 | 35,056 |
| 85,508 | 192 | 24,440 | 6,382 | 3,989 | 35,003 |
| 85,509 | 201 | 24,721 | 6,421 | 4,003 | 35,346 |
| 85,510 | 211 | 24,581 | 6,432 | 3,959 | 35,183 |
| 85,511 | 214 | 24,531 | 6,426 | 3,969 | 35,140 |
| 85,512 | 215 | 24,298 | 6,488 | 3,965 | 34,966 |
| 85,513 | 211 | 23,914 | 6,470 | 3,958 | 34,553 |
| 85,514 | 213 | 23,865 | 6,531 | 3,942 | 34,551 |
| 85,515 | 214 | 23,681 | 6,498 | 3,926 | 34,319 |
| 85,516 | 214 | 23,583 | 6,518 | 3,914 | 34,229 |
| 85,517 | 209 | 23,408 | 6,515 | 3,926 | 34,058 |
| 85,518 | 205 | 23,311 | 6,513 | 3,924 | 33,953 |
| 85,519 | 199 | 23,102 | 6,506 | 3,911 | 33,718 |
| 85,520 | 193 | 22,895 | 6,475 | 3,909 | 33,472 |
| 85,521 | 194 | 22,768 | 6,507 | 3,893 | 33,362 |
| 85,522 | 196 | 22,963 | 6,579 | 3,946 | 33,684 |
| 85,523 | 200 | 22,913 | 6,520 | 3,906 | 33,539 |
| 85,524 | 203 | 23,092 | 6,514 | 3,916 | 33,725 |
| 85,525 | 212 | 23,159 | 6,501 | 3,909 | 33,781 |
| 85,526 | 212 | 23,143 | 6,499 | 3,904 | 33,758 |
| 85,527 | 208 | 23,086 | 6,503 | 3,930 | 33,727 |

|        |     |        |       |       |        |
|--------|-----|--------|-------|-------|--------|
| 85,528 | 214 | 23,156 | 6,536 | 3,933 | 33,839 |
| 85,529 | 214 | 23,167 | 6,514 | 3,929 | 33,824 |
| 85,530 | 210 | 23,069 | 6,482 | 3,908 | 33,669 |
| 85,531 | 210 | 23,063 | 6,487 | 3,911 | 33,671 |
| 85,532 | 193 | 23,197 | 6,521 | 3,928 | 33,839 |
| 85,533 | 183 | 22,889 | 6,428 | 3,898 | 33,398 |
| 85,534 | 164 | 22,841 | 6,439 | 3,920 | 33,364 |
| 85,535 | 163 | 22,679 | 6,478 | 3,936 | 33,256 |
| 85,536 | 161 | 22,496 | 6,458 | 3,898 | 33,013 |
| 85,537 | 160 | 22,600 | 6,472 | 3,919 | 33,151 |
| 85,538 | 168 | 22,334 | 6,451 | 3,884 | 32,837 |
| 85,539 | 169 | 22,309 | 6,438 | 3,884 | 32,800 |
| 85,540 | 166 | 22,444 | 6,491 | 3,913 | 33,014 |
| 85,541 | 164 | 22,421 | 6,434 | 3,885 | 32,904 |
| 85,542 | 166 | 22,592 | 6,465 | 3,876 | 33,099 |
| 85,543 | 167 | 22,582 | 6,448 | 3,863 | 33,060 |
| 85,544 | 168 | 22,615 | 6,469 | 3,878 | 33,130 |
| 85,545 | 170 | 22,866 | 6,525 | 3,922 | 33,483 |
| 85,546 | 176 | 22,626 | 6,450 | 3,864 | 33,116 |
| 85,547 | 174 | 22,363 | 6,409 | 3,848 | 32,794 |
| 85,548 | 174 | 22,387 | 6,406 | 3,856 | 32,823 |
| 85,549 | 174 | 22,154 | 6,341 | 3,801 | 32,470 |
| 85,550 | 172 | 22,206 | 6,412 | 3,834 | 32,624 |
| 85,551 | 168 | 21,840 | 6,331 | 3,799 | 32,138 |
| 85,552 | 172 | 21,761 | 6,288 | 3,812 | 32,033 |
| 85,553 | 172 | 21,235 | 6,187 | 3,715 | 31,309 |
| 85,554 | 172 | 21,262 | 6,166 | 3,710 | 31,310 |
| 85,555 | 171 | 21,270 | 6,206 | 3,746 | 31,393 |
| 85,556 | 169 | 21,153 | 6,184 | 3,737 | 31,243 |
| 85,557 | 152 | 19,475 | 5,796 | 3,525 | 28,948 |
| 85,558 | 152 | 19,590 | 5,816 | 3,538 | 29,096 |
| 85,559 | 160 | 19,800 | 5,849 | 3,556 | 29,365 |

|        |     |        |       |       |        |
|--------|-----|--------|-------|-------|--------|
| 85,560 | 161 | 19,822 | 5,837 | 3,544 | 29,364 |
| 85,561 | 167 | 20,150 | 5,887 | 3,571 | 29,775 |
| 85,562 | 156 | 19,915 | 5,712 | 3,486 | 29,269 |
| 85,563 | 159 | 20,105 | 5,757 | 3,502 | 29,523 |
| 85,564 | 157 | 19,821 | 5,611 | 3,439 | 29,028 |
| 85,565 | 155 | 19,605 | 5,549 | 3,413 | 28,722 |
| 85,566 | 153 | 19,614 | 5,478 | 3,402 | 28,647 |
| 85,567 | 155 | 19,603 | 5,438 | 3,357 | 28,553 |
| 85,568 | 155 | 19,617 | 5,398 | 3,346 | 28,516 |
| 85,569 | 155 | 19,645 | 5,396 | 3,349 | 28,545 |
| 85,570 | 154 | 19,481 | 5,345 | 3,283 | 28,263 |
| 85,571 | 151 | 19,389 | 5,291 | 3,256 | 28,087 |
| 85,572 | 153 | 19,479 | 5,337 | 3,295 | 28,264 |
| 85,573 | 152 | 19,429 | 5,343 | 3,276 | 28,200 |
| 85,574 | 150 | 19,220 | 5,344 | 3,261 | 27,975 |
| 85,575 | 151 | 19,329 | 5,397 | 3,286 | 28,163 |
| 85,576 | 144 | 19,079 | 5,340 | 3,257 | 27,820 |
| 85,577 | 144 | 18,911 | 5,291 | 3,219 | 27,565 |
| 85,578 | 145 | 19,490 | 5,460 | 3,331 | 28,426 |
| 85,579 | 144 | 19,647 | 5,503 | 3,373 | 28,667 |
| 85,580 | 146 | 19,666 | 5,530 | 3,383 | 28,725 |
| 85,581 | 146 | 19,339 | 5,461 | 3,346 | 28,292 |
| 85,582 | 146 | 19,627 | 5,549 | 3,403 | 28,725 |
| 85,583 | 149 | 19,563 | 5,547 | 3,418 | 28,677 |
| 85,584 | 149 | 19,783 | 5,549 | 3,431 | 28,912 |
| 85,585 | 147 | 19,412 | 5,420 | 3,356 | 28,335 |
| 85,586 | 151 | 19,789 | 5,479 | 3,403 | 28,822 |
| 85,587 | 147 | 19,659 | 5,425 | 3,374 | 28,605 |
| 85,588 | 147 | 19,505 | 5,377 | 3,335 | 28,364 |
| 85,589 | 132 | 19,341 | 5,292 | 3,290 | 28,055 |
| 85,590 | 134 | 19,596 | 5,362 | 3,327 | 28,419 |
| 85,591 | 127 | 19,287 | 5,295 | 3,269 | 27,978 |

|        |     |        |       |       |        |
|--------|-----|--------|-------|-------|--------|
| 85,592 | 130 | 19,545 | 5,371 | 3,314 | 28,360 |
| 85,593 | 133 | 19,589 | 5,354 | 3,312 | 28,388 |
| 85,594 | 133 | 19,397 | 5,291 | 3,287 | 28,108 |
| 85,595 | 136 | 19,631 | 5,362 | 3,303 | 28,432 |
| 85,596 | 144 | 19,621 | 5,376 | 3,303 | 28,444 |
| 85,597 | 136 | 19,371 | 5,323 | 3,290 | 28,120 |
| 85,598 | 139 | 19,483 | 5,328 | 3,287 | 28,237 |
| 85,599 | 141 | 19,525 | 5,358 | 3,282 | 28,306 |
| 85,600 | 144 | 19,719 | 5,392 | 3,290 | 28,545 |
| 85,601 | 143 | 19,814 | 5,386 | 3,294 | 28,637 |
| 85,602 | 138 | 19,921 | 5,465 | 3,330 | 28,854 |
| 85,603 | 138 | 19,947 | 5,468 | 3,322 | 28,875 |
| 85,604 | 142 | 20,125 | 5,502 | 3,338 | 29,107 |
| 85,605 | 143 | 20,151 | 5,508 | 3,335 | 29,137 |
| 85,606 | 139 | 19,877 | 5,449 | 3,284 | 28,749 |
| 85,607 | 142 | 20,240 | 5,557 | 3,344 | 29,283 |
| 85,608 | 142 | 20,564 | 5,645 | 3,381 | 29,732 |
| 85,609 | 147 | 20,908 | 5,721 | 3,422 | 30,198 |
| 85,610 | 140 | 20,743 | 5,694 | 3,406 | 29,983 |
| 85,611 | 138 | 20,668 | 5,688 | 3,407 | 29,901 |
| 85,612 | 138 | 21,164 | 5,771 | 3,460 | 30,533 |
| 85,613 | 139 | 21,505 | 5,839 | 3,502 | 30,985 |
| 85,614 | 143 | 21,496 | 5,823 | 3,494 | 30,956 |
| 85,615 | 142 | 21,550 | 5,840 | 3,497 | 31,029 |
| 85,616 | 142 | 21,611 | 5,844 | 3,497 | 31,094 |
| 85,617 | 140 | 21,920 | 5,931 | 3,537 | 31,528 |
| 85,618 | 139 | 21,928 | 5,934 | 3,553 | 31,554 |
| 85,619 | 140 | 21,956 | 5,952 | 3,570 | 31,618 |
| 85,620 | 145 | 21,992 | 5,930 | 3,572 | 31,639 |
| 85,621 | 146 | 22,109 | 5,939 | 3,573 | 31,767 |
| 85,622 | 146 | 22,058 | 5,872 | 3,522 | 31,598 |
| 85,623 | 147 | 22,091 | 5,858 | 3,519 | 31,615 |

|        |     |        |       |       |        |
|--------|-----|--------|-------|-------|--------|
| 85,624 | 148 | 21,837 | 5,780 | 3,462 | 31,227 |
| 85,625 | 145 | 21,661 | 5,700 | 3,428 | 30,934 |
| 85,626 | 149 | 22,065 | 5,805 | 3,487 | 31,506 |
| 85,627 | 150 | 22,235 | 5,833 | 3,486 | 31,704 |
| 85,628 | 155 | 22,221 | 5,794 | 3,463 | 31,633 |
| 85,629 | 153 | 22,210 | 5,771 | 3,438 | 31,572 |
| 85,630 | 151 | 22,121 | 5,735 | 3,401 | 31,408 |
| 85,631 | 149 | 22,047 | 5,701 | 3,355 | 31,252 |
| 85,632 | 153 | 21,993 | 5,659 | 3,340 | 31,145 |
| 85,633 | 154 | 21,736 | 5,615 | 3,308 | 30,813 |
| 85,634 | 154 | 21,806 | 5,656 | 3,337 | 30,953 |
| 85,635 | 154 | 21,698 | 5,679 | 3,303 | 30,834 |
| 85,636 | 154 | 21,653 | 5,678 | 3,293 | 30,778 |
| 85,637 | 150 | 21,609 | 5,664 | 3,278 | 30,701 |
| 85,638 | 152 | 21,595 | 5,666 | 3,287 | 30,700 |
| 85,639 | 152 | 21,569 | 5,682 | 3,283 | 30,686 |
| 85,640 | 146 | 21,447 | 5,699 | 3,281 | 30,573 |
| 85,641 | 146 | 21,440 | 5,685 | 3,269 | 30,540 |
| 85,642 | 146 | 21,481 | 5,690 | 3,268 | 30,585 |
| 85,643 | 158 | 21,418 | 5,655 | 3,265 | 30,496 |
| 85,644 | 152 | 21,208 | 5,597 | 3,225 | 30,182 |
| 85,645 | 156 | 21,260 | 5,616 | 3,240 | 30,272 |
| 85,646 | 160 | 21,244 | 5,600 | 3,233 | 30,237 |
| 85,647 | 155 | 21,198 | 5,560 | 3,178 | 30,091 |
| 85,648 | 152 | 21,099 | 5,544 | 3,168 | 29,963 |
| 85,649 | 151 | 20,954 | 5,515 | 3,157 | 29,777 |
| 85,650 | 144 | 20,837 | 5,524 | 3,150 | 29,655 |
| 85,651 | 149 | 20,823 | 5,526 | 3,157 | 29,655 |
| 85,652 | 152 | 20,872 | 5,512 | 3,151 | 29,687 |
| 85,653 | 162 | 21,147 | 5,559 | 3,189 | 30,057 |
| 85,654 | 164 | 21,216 | 5,612 | 3,219 | 30,211 |
| 85,655 | 164 | 21,235 | 5,623 | 3,215 | 30,237 |

|        |     |        |       |       |        |
|--------|-----|--------|-------|-------|--------|
| 85,656 | 164 | 21,093 | 5,564 | 3,197 | 30,018 |
| 85,657 | 163 | 21,076 | 5,559 | 3,178 | 29,976 |
| 85,658 | 162 | 21,083 | 5,589 | 3,191 | 30,025 |
| 85,659 | 157 | 20,821 | 5,512 | 3,148 | 29,638 |
| 85,660 | 157 | 20,891 | 5,517 | 3,179 | 29,744 |
| 85,661 | 151 | 20,571 | 5,478 | 3,145 | 29,345 |
| 85,662 | 156 | 20,477 | 5,527 | 3,160 | 29,320 |
| 85,663 | 162 | 20,159 | 5,468 | 3,125 | 28,914 |
| 85,664 | 162 | 20,151 | 5,497 | 3,153 | 28,963 |
| 85,665 | 157 | 20,018 | 5,480 | 3,134 | 28,789 |
| 85,666 | 155 | 19,741 | 5,426 | 3,113 | 28,435 |
| 85,667 | 161 | 19,740 | 5,485 | 3,138 | 28,524 |
| 85,668 | 162 | 19,481 | 5,451 | 3,106 | 28,200 |
| 85,669 | 160 | 19,237 | 5,388 | 3,063 | 27,848 |
| 85,670 | 163 | 19,644 | 5,514 | 3,105 | 28,426 |
| 85,671 | 161 | 19,460 | 5,481 | 3,083 | 28,185 |
| 85,672 | 162 | 19,603 | 5,547 | 3,114 | 28,426 |
| 85,673 | 157 | 19,526 | 5,542 | 3,119 | 28,344 |
| 85,674 | 151 | 19,207 | 5,480 | 3,105 | 27,943 |
| 85,675 | 151 | 19,346 | 5,514 | 3,127 | 28,138 |
| 85,676 | 156 | 19,387 | 5,511 | 3,137 | 28,191 |
| 85,677 | 155 | 19,102 | 5,446 | 3,095 | 27,798 |
| 85,678 | 154 | 18,785 | 5,373 | 3,058 | 27,370 |
| 85,679 | 149 | 19,097 | 5,459 | 3,119 | 27,824 |
| 85,680 | 149 | 18,495 | 5,327 | 3,055 | 27,026 |
| 85,681 | 149 | 18,535 | 5,345 | 3,058 | 27,087 |
| 85,682 | 152 | 18,723 | 5,418 | 3,115 | 27,408 |
| 85,683 | 148 | 18,497 | 5,358 | 3,059 | 27,062 |
| 85,684 | 146 | 18,546 | 5,319 | 3,042 | 27,053 |
| 85,685 | 148 | 18,580 | 5,292 | 3,045 | 27,065 |
| 85,686 | 152 | 18,810 | 5,349 | 3,063 | 27,374 |
| 85,687 | 154 | 18,791 | 5,356 | 3,064 | 27,365 |

|        |     |        |       |       |        |
|--------|-----|--------|-------|-------|--------|
| 85,688 | 163 | 18,837 | 5,377 | 3,072 | 27,449 |
| 85,689 | 163 | 18,675 | 5,345 | 3,041 | 27,224 |
| 85,690 | 164 | 18,488 | 5,271 | 3,030 | 26,953 |
| 85,691 | 166 | 18,687 | 5,305 | 3,045 | 27,203 |
| 85,692 | 165 | 18,643 | 5,288 | 3,042 | 27,138 |
| 85,693 | 151 | 18,562 | 5,312 | 3,022 | 27,047 |
| 85,694 | 149 | 18,767 | 5,370 | 3,055 | 27,341 |
| 85,695 | 141 | 18,464 | 5,351 | 3,039 | 26,995 |
| 85,696 | 141 | 18,647 | 5,430 | 3,084 | 27,302 |
| 85,697 | 142 | 18,634 | 5,439 | 3,099 | 27,314 |
| 85,698 | 138 | 18,635 | 5,461 | 3,126 | 27,360 |
| 85,699 | 139 | 18,670 | 5,478 | 3,140 | 27,427 |
| 85,700 | 143 | 18,242 | 5,328 | 3,094 | 26,807 |
| 85,701 | 148 | 18,467 | 5,363 | 3,109 | 27,087 |
| 85,702 | 148 | 18,626 | 5,387 | 3,125 | 27,286 |
| 85,703 | 147 | 18,521 | 5,360 | 3,114 | 27,142 |
| 85,704 | 143 | 18,196 | 5,259 | 3,040 | 26,638 |
| 85,705 | 137 | 17,814 | 5,143 | 2,974 | 26,068 |
| 85,706 | 146 | 17,819 | 5,178 | 2,993 | 26,136 |
| 85,707 | 141 | 17,541 | 5,113 | 2,967 | 25,762 |
| 85,708 | 143 | 17,468 | 5,059 | 2,938 | 25,608 |
| 85,709 | 143 | 17,413 | 5,032 | 2,923 | 25,511 |
| 85,710 | 137 | 17,396 | 5,006 | 2,909 | 25,448 |
| 85,711 | 136 | 17,358 | 4,980 | 2,916 | 25,390 |
| 85,712 | 136 | 17,492 | 5,016 | 2,936 | 25,580 |
| 85,713 | 132 | 17,396 | 4,953 | 2,913 | 25,394 |
| 85,714 | 125 | 17,335 | 4,958 | 2,900 | 25,318 |
| 85,715 | 124 | 17,113 | 4,846 | 2,827 | 24,910 |
| 85,716 | 124 | 17,032 | 4,831 | 2,819 | 24,806 |
| 85,717 | 118 | 17,100 | 4,813 | 2,843 | 24,874 |
| 85,718 | 116 | 16,848 | 4,722 | 2,794 | 24,480 |
| 85,719 | 117 | 16,933 | 4,723 | 2,797 | 24,570 |

|        |     |        |       |       |        |
|--------|-----|--------|-------|-------|--------|
| 85,720 | 118 | 17,005 | 4,727 | 2,815 | 24,665 |
| 85,721 | 115 | 16,772 | 4,664 | 2,783 | 24,334 |
| 85,722 | 117 | 16,693 | 4,659 | 2,769 | 24,238 |
| 85,723 | 115 | 16,813 | 4,715 | 2,808 | 24,451 |
| 85,724 | 112 | 16,656 | 4,665 | 2,780 | 24,213 |
| 85,725 | 112 | 16,705 | 4,684 | 2,763 | 24,264 |
| 85,726 | 112 | 16,590 | 4,659 | 2,747 | 24,108 |
| 85,727 | 110 | 16,928 | 4,705 | 2,796 | 24,539 |
| 85,728 | 110 | 16,842 | 4,706 | 2,792 | 24,450 |
| 85,729 | 113 | 16,691 | 4,652 | 2,763 | 24,219 |
| 85,730 | 112 | 16,659 | 4,625 | 2,754 | 24,150 |
| 85,731 | 113 | 16,566 | 4,598 | 2,752 | 24,029 |
| 85,732 | 114 | 16,623 | 4,614 | 2,771 | 24,122 |
| 85,733 | 111 | 16,626 | 4,571 | 2,747 | 24,055 |
| 85,734 | 110 | 16,483 | 4,530 | 2,719 | 23,842 |
| 85,735 | 112 | 16,561 | 4,559 | 2,737 | 23,969 |
| 85,736 | 111 | 16,577 | 4,596 | 2,756 | 24,040 |
| 85,737 | 113 | 16,555 | 4,560 | 2,818 | 24,046 |
| 85,738 | 115 | 16,618 | 4,616 | 2,829 | 24,178 |
| 85,739 | 107 | 16,700 | 4,650 | 2,822 | 24,279 |
| 85,740 | 105 | 16,556 | 4,618 | 2,788 | 24,067 |
| 85,741 | 106 | 16,432 | 4,603 | 2,766 | 23,907 |
| 85,742 | 105 | 16,423 | 4,623 | 2,781 | 23,932 |
| 85,743 | 104 | 16,430 | 4,639 | 2,780 | 23,953 |
| 85,744 | 105 | 16,450 | 4,640 | 2,814 | 24,009 |
| 85,745 | 106 | 16,555 | 4,658 | 2,828 | 24,147 |
| 85,746 | 109 | 16,504 | 4,595 | 2,801 | 24,009 |
| 85,747 | 110 | 16,483 | 4,591 | 2,815 | 23,999 |
| 85,748 | 106 | 16,405 | 4,604 | 2,826 | 23,941 |
| 85,749 | 103 | 16,170 | 4,542 | 2,776 | 23,591 |
| 85,750 | 105 | 16,124 | 4,572 | 2,798 | 23,599 |
| 85,751 | 97  | 16,032 | 4,549 | 2,776 | 23,454 |



|        |     |        |       |       |        |
|--------|-----|--------|-------|-------|--------|
| 85,752 | 95  | 16,151 | 4,566 | 2,797 | 23,609 |
| 85,753 | 90  | 15,901 | 4,477 | 2,740 | 23,208 |
| 85,754 | 92  | 16,043 | 4,513 | 2,765 | 23,413 |
| 85,755 | 85  | 16,325 | 4,568 | 2,815 | 23,793 |
| 85,756 | 82  | 16,336 | 4,547 | 2,822 | 23,787 |
| 85,757 | 82  | 16,396 | 4,560 | 2,821 | 23,859 |
| 85,758 | 84  | 16,505 | 4,611 | 2,820 | 24,020 |
| 85,759 | 84  | 16,333 | 4,587 | 2,796 | 23,800 |
| 85,760 | 84  | 16,219 | 4,591 | 2,785 | 23,679 |
| 85,761 | 90  | 16,658 | 4,751 | 2,846 | 24,345 |
| 85,762 | 92  | 16,697 | 4,746 | 2,851 | 24,386 |
| 85,763 | 97  | 16,785 | 4,781 | 2,861 | 24,524 |
| 85,764 | 95  | 16,716 | 4,744 | 2,839 | 24,394 |
| 85,765 | 97  | 16,867 | 4,790 | 2,869 | 24,623 |
| 85,766 | 97  | 17,185 | 4,869 | 2,922 | 25,073 |
| 85,767 | 99  | 17,387 | 4,902 | 2,931 | 25,319 |
| 85,768 | 99  | 17,391 | 4,895 | 2,915 | 25,300 |
| 85,769 | 98  | 17,194 | 4,860 | 2,899 | 25,051 |
| 85,770 | 110 | 17,851 | 5,063 | 2,999 | 26,023 |
| 85,771 | 109 | 17,813 | 5,072 | 2,996 | 25,990 |
| 85,772 | 108 | 17,919 | 5,050 | 2,983 | 26,060 |
| 85,773 | 109 | 18,127 | 5,099 | 3,015 | 26,350 |
| 85,774 | 109 | 18,240 | 5,138 | 3,048 | 26,535 |
| 85,775 | 114 | 18,433 | 5,193 | 3,091 | 26,831 |
| 85,776 | 123 | 18,624 | 5,245 | 3,126 | 27,118 |
| 85,777 | 128 | 18,700 | 5,268 | 3,125 | 27,221 |
| 85,778 | 127 | 18,584 | 5,259 | 3,112 | 27,082 |
| 85,779 | 127 | 18,516 | 5,267 | 3,122 | 27,032 |
| 85,780 | 134 | 18,833 | 5,346 | 3,160 | 27,473 |
| 85,781 | 137 | 18,979 | 5,360 | 3,182 | 27,658 |
| 85,782 | 135 | 18,904 | 5,355 | 3,167 | 27,561 |
| 85,783 | 135 | 19,133 | 5,408 | 3,191 | 27,867 |

|        |     |        |       |       |        |
|--------|-----|--------|-------|-------|--------|
| 85,784 | 139 | 19,254 | 5,449 | 3,212 | 28,054 |
| 85,785 | 137 | 19,351 | 5,495 | 3,267 | 28,250 |
| 85,786 | 141 | 19,540 | 5,515 | 3,275 | 28,471 |
| 85,787 | 136 | 19,535 | 5,534 | 3,274 | 28,479 |
| 85,788 | 136 | 19,629 | 5,556 | 3,239 | 28,560 |
| 85,789 | 135 | 19,454 | 5,496 | 3,220 | 28,305 |
| 85,790 | 133 | 19,271 | 5,457 | 3,217 | 28,078 |
| 85,791 | 141 | 19,662 | 5,535 | 3,287 | 28,625 |
| 85,792 | 140 | 19,631 | 5,516 | 3,260 | 28,547 |
| 85,793 | 140 | 19,649 | 5,518 | 3,258 | 28,565 |
| 85,794 | 139 | 19,609 | 5,515 | 3,249 | 28,512 |
| 85,795 | 150 | 19,679 | 5,581 | 3,274 | 28,684 |
| 85,796 | 155 | 19,618 | 5,562 | 3,261 | 28,596 |
| 85,797 | 154 | 19,589 | 5,546 | 3,256 | 28,545 |
| 85,798 | 154 | 19,422 | 5,507 | 3,209 | 28,292 |
| 85,799 | 157 | 19,606 | 5,551 | 3,231 | 28,545 |
| 85,800 | 163 | 19,474 | 5,470 | 3,189 | 28,296 |
| 85,801 | 164 | 19,351 | 5,422 | 3,162 | 28,099 |
| 85,802 | 164 | 19,398 | 5,431 | 3,162 | 28,155 |
| 85,803 | 161 | 19,164 | 5,352 | 3,116 | 27,793 |
| 85,804 | 156 | 18,963 | 5,307 | 3,102 | 27,528 |
| 85,805 | 156 | 19,518 | 5,501 | 3,200 | 28,375 |
| 85,806 | 159 | 19,291 | 5,441 | 3,149 | 28,040 |
| 85,807 | 157 | 19,245 | 5,441 | 3,137 | 27,980 |
| 85,808 | 157 | 19,443 | 5,484 | 3,180 | 28,264 |
| 85,809 | 158 | 19,423 | 5,474 | 3,213 | 28,268 |
| 85,810 | 152 | 19,488 | 5,441 | 3,232 | 28,313 |
| 85,811 | 152 | 19,470 | 5,411 | 3,234 | 28,267 |
| 85,812 | 152 | 19,167 | 5,327 | 3,175 | 27,821 |
| 85,813 | 155 | 19,572 | 5,383 | 3,216 | 28,326 |
| 85,814 | 151 | 19,599 | 5,381 | 3,221 | 28,352 |
| 85,815 | 161 | 19,821 | 5,408 | 3,273 | 28,663 |

|        |     |        |       |       |        |
|--------|-----|--------|-------|-------|--------|
| 85,816 | 159 | 19,757 | 5,378 | 3,247 | 28,541 |
| 85,817 | 162 | 19,975 | 5,433 | 3,260 | 28,830 |
| 85,818 | 165 | 20,058 | 5,449 | 3,263 | 28,935 |
| 85,819 | 166 | 20,089 | 5,474 | 3,261 | 28,990 |
| 85,820 | 158 | 19,983 | 5,422 | 3,251 | 28,814 |
| 85,821 | 157 | 19,973 | 5,419 | 3,243 | 28,792 |
| 85,822 | 158 | 20,030 | 5,413 | 3,249 | 28,850 |
| 85,823 | 159 | 20,031 | 5,435 | 3,277 | 28,902 |
| 85,824 | 159 | 20,109 | 5,441 | 3,301 | 29,010 |
| 85,825 | 154 | 19,878 | 5,344 | 3,230 | 28,606 |
| 85,826 | 143 | 19,785 | 5,275 | 3,185 | 28,388 |
| 85,827 | 144 | 19,805 | 5,281 | 3,189 | 28,419 |
| 85,828 | 138 | 19,821 | 5,328 | 3,210 | 28,497 |
| 85,829 | 144 | 19,710 | 5,287 | 3,181 | 28,322 |
| 85,830 | 143 | 19,570 | 5,299 | 3,192 | 28,204 |
| 85,831 | 141 | 19,687 | 5,367 | 3,233 | 28,428 |
| 85,832 | 138 | 19,748 | 5,394 | 3,229 | 28,509 |
| 85,833 | 139 | 19,922 | 5,426 | 3,236 | 28,723 |
| 85,834 | 137 | 20,003 | 5,422 | 3,245 | 28,807 |
| 85,835 | 138 | 19,950 | 5,393 | 3,239 | 28,720 |
| 85,836 | 143 | 20,241 | 5,457 | 3,262 | 29,103 |
| 85,837 | 142 | 19,991 | 5,360 | 3,203 | 28,696 |
| 85,838 | 142 | 20,120 | 5,362 | 3,200 | 28,824 |
| 85,839 | 144 | 20,265 | 5,365 | 3,213 | 28,987 |
| 85,840 | 146 | 20,541 | 5,451 | 3,272 | 29,410 |
| 85,841 | 137 | 20,529 | 5,436 | 3,242 | 29,344 |
| 85,842 | 137 | 20,660 | 5,454 | 3,280 | 29,531 |
| 85,843 | 137 | 20,716 | 5,483 | 3,322 | 29,658 |
| 85,844 | 136 | 20,715 | 5,444 | 3,306 | 29,601 |
| 85,845 | 140 | 21,054 | 5,496 | 3,336 | 30,026 |
| 85,846 | 131 | 21,450 | 5,567 | 3,371 | 30,519 |
| 85,847 | 125 | 21,602 | 5,595 | 3,385 | 30,707 |

|        |     |        |       |       |        |
|--------|-----|--------|-------|-------|--------|
| 85,848 | 123 | 21,724 | 5,641 | 3,400 | 30,888 |
| 85,849 | 122 | 21,767 | 5,628 | 3,392 | 30,909 |
| 85,850 | 121 | 22,091 | 5,707 | 3,424 | 31,343 |
| 85,851 | 111 | 21,973 | 5,703 | 3,410 | 31,197 |
| 85,852 | 114 | 22,080 | 5,687 | 3,414 | 31,295 |
| 85,853 | 115 | 22,163 | 5,692 | 3,421 | 31,391 |
| 85,854 | 116 | 22,277 | 5,738 | 3,437 | 31,568 |
| 85,855 | 115 | 22,588 | 5,797 | 3,466 | 31,966 |
| 85,856 | 123 | 22,867 | 5,876 | 3,518 | 32,384 |
| 85,857 | 119 | 22,875 | 5,873 | 3,514 | 32,381 |
| 85,858 | 120 | 22,972 | 5,892 | 3,527 | 32,511 |
| 85,859 | 120 | 23,226 | 5,941 | 3,561 | 32,848 |
| 85,860 | 122 | 23,243 | 5,936 | 3,552 | 32,853 |
| 85,861 | 124 | 22,989 | 5,879 | 3,510 | 32,502 |
| 85,862 | 125 | 22,919 | 5,865 | 3,520 | 32,429 |
| 85,863 | 124 | 22,806 | 5,885 | 3,543 | 32,358 |
| 85,864 | 123 | 23,109 | 6,009 | 3,606 | 32,847 |
| 85,865 | 115 | 23,184 | 6,029 | 3,629 | 32,957 |
| 85,866 | 114 | 22,844 | 6,012 | 3,609 | 32,579 |
| 85,867 | 113 | 22,900 | 6,017 | 3,615 | 32,645 |
| 85,868 | 109 | 22,814 | 6,053 | 3,703 | 32,679 |
| 85,869 | 105 | 22,638 | 6,057 | 3,709 | 32,509 |
| 85,870 | 99  | 22,698 | 6,084 | 3,729 | 32,610 |
| 85,871 | 97  | 22,763 | 6,105 | 3,743 | 32,708 |
| 85,872 | 101 | 22,686 | 6,141 | 3,767 | 32,695 |
| 85,873 | 99  | 22,675 | 6,134 | 3,742 | 32,650 |
| 85,874 | 103 | 22,670 | 6,133 | 3,730 | 32,636 |
| 85,875 | 102 | 22,472 | 6,098 | 3,693 | 32,365 |
| 85,876 | 104 | 23,072 | 6,256 | 3,832 | 33,264 |
| 85,877 | 104 | 23,053 | 6,285 | 3,837 | 33,279 |
| 85,878 | 105 | 22,357 | 6,025 | 3,681 | 32,168 |
| 85,879 | 105 | 22,601 | 6,061 | 3,723 | 32,490 |

|        |     |        |       |       |        |
|--------|-----|--------|-------|-------|--------|
| 85,880 | 104 | 22,820 | 6,127 | 3,771 | 32,822 |
| 85,881 | 104 | 22,874 | 6,141 | 3,768 | 32,887 |
| 85,882 | 99  | 22,891 | 6,175 | 3,801 | 32,966 |
| 85,883 | 102 | 23,049 | 6,240 | 3,843 | 33,234 |
| 85,884 | 102 | 22,797 | 6,201 | 3,831 | 32,931 |
| 85,885 | 99  | 22,644 | 6,190 | 3,829 | 32,762 |
| 85,886 | 106 | 22,361 | 6,127 | 3,763 | 32,357 |
| 85,887 | 103 | 22,124 | 6,097 | 3,748 | 32,072 |
| 85,888 | 107 | 22,003 | 6,114 | 3,754 | 31,978 |
| 85,889 | 107 | 21,704 | 6,062 | 3,725 | 31,598 |
| 85,890 | 112 | 22,130 | 6,206 | 3,823 | 32,271 |
| 85,891 | 111 | 22,324 | 6,231 | 3,862 | 32,528 |
| 85,892 | 114 | 22,069 | 6,147 | 3,820 | 32,150 |
| 85,893 | 113 | 22,026 | 6,099 | 3,784 | 32,022 |
| 85,894 | 116 | 22,035 | 6,102 | 3,788 | 32,041 |
| 85,895 | 116 | 22,019 | 6,097 | 3,775 | 32,007 |
| 85,896 | 113 | 21,904 | 6,100 | 3,781 | 31,898 |
| 85,897 | 115 | 22,031 | 6,146 | 3,841 | 32,133 |
| 85,898 | 117 | 21,748 | 6,098 | 3,794 | 31,757 |
| 85,899 | 115 | 21,488 | 6,024 | 3,753 | 31,380 |
| 85,900 | 118 | 21,908 | 6,089 | 3,839 | 31,954 |
| 85,901 | 118 | 21,698 | 6,028 | 3,816 | 31,660 |
| 85,902 | 117 | 21,802 | 6,061 | 3,812 | 31,792 |
| 85,903 | 116 | 21,778 | 6,075 | 3,819 | 31,788 |
| 85,904 | 115 | 21,729 | 6,078 | 3,845 | 31,767 |
| 85,905 | 120 | 21,716 | 6,078 | 3,845 | 31,759 |
| 85,906 | 120 | 21,877 | 6,125 | 3,885 | 32,007 |
| 85,907 | 118 | 21,782 | 6,123 | 3,895 | 31,918 |
| 85,908 | 121 | 21,776 | 6,130 | 3,884 | 31,911 |
| 85,909 | 121 | 21,636 | 6,071 | 3,866 | 31,694 |
| 85,910 | 122 | 21,599 | 6,058 | 3,860 | 31,639 |
| 85,911 | 122 | 21,493 | 6,057 | 3,850 | 31,522 |

|        |     |        |       |       |        |
|--------|-----|--------|-------|-------|--------|
| 85,912 | 119 | 21,664 | 6,132 | 3,897 | 31,812 |
| 85,913 | 121 | 21,737 | 6,172 | 3,910 | 31,940 |
| 85,914 | 119 | 21,653 | 6,128 | 3,886 | 31,786 |
| 85,915 | 118 | 21,600 | 6,084 | 3,870 | 31,672 |
| 85,916 | 117 | 21,581 | 6,022 | 3,833 | 31,553 |
| 85,917 | 116 | 21,510 | 5,994 | 3,811 | 31,431 |
| 85,918 | 118 | 21,595 | 5,978 | 3,786 | 31,477 |
| 85,919 | 118 | 21,471 | 5,924 | 3,716 | 31,229 |
| 85,920 | 119 | 21,764 | 5,984 | 3,751 | 31,618 |
| 85,921 | 120 | 21,869 | 5,995 | 3,766 | 31,750 |
| 85,922 | 131 | 21,666 | 5,915 | 3,738 | 31,450 |
| 85,923 | 128 | 21,599 | 5,879 | 3,693 | 31,299 |
| 85,924 | 127 | 22,094 | 5,974 | 3,755 | 31,950 |
| 85,925 | 132 | 22,124 | 5,978 | 3,738 | 31,972 |
| 85,926 | 141 | 22,195 | 5,998 | 3,746 | 32,080 |
| 85,927 | 139 | 22,017 | 5,955 | 3,720 | 31,831 |
| 85,928 | 140 | 22,435 | 6,069 | 3,796 | 32,440 |
| 85,929 | 137 | 22,430 | 6,081 | 3,799 | 32,447 |
| 85,930 | 137 | 22,549 | 6,082 | 3,815 | 32,583 |
| 85,931 | 139 | 22,610 | 6,075 | 3,797 | 32,621 |
| 85,932 | 138 | 22,642 | 6,073 | 3,796 | 32,649 |
| 85,933 | 139 | 22,845 | 6,108 | 3,810 | 32,902 |
| 85,934 | 138 | 22,712 | 6,085 | 3,789 | 32,724 |
| 85,935 | 138 | 22,843 | 6,065 | 3,781 | 32,827 |
| 85,936 | 134 | 22,872 | 6,051 | 3,771 | 32,828 |
| 85,937 | 134 | 22,752 | 6,043 | 3,775 | 32,704 |
| 85,938 | 132 | 22,715 | 6,039 | 3,781 | 32,667 |
| 85,939 | 131 | 22,946 | 6,121 | 3,816 | 33,014 |
| 85,940 | 126 | 23,065 | 6,140 | 3,826 | 33,157 |
| 85,941 | 128 | 23,266 | 6,155 | 3,826 | 33,375 |
| 85,942 | 130 | 23,315 | 6,177 | 3,835 | 33,457 |
| 85,943 | 129 | 23,055 | 6,117 | 3,792 | 33,093 |

|        |     |        |       |       |        |
|--------|-----|--------|-------|-------|--------|
| 85,944 | 130 | 23,147 | 6,145 | 3,796 | 33,218 |
| 85,945 | 131 | 23,394 | 6,202 | 3,846 | 33,573 |
| 85,946 | 130 | 23,491 | 6,187 | 3,835 | 33,643 |
| 85,947 | 128 | 23,552 | 6,190 | 3,822 | 33,692 |
| 85,948 | 129 | 23,591 | 6,181 | 3,822 | 33,723 |
| 85,949 | 130 | 23,854 | 6,243 | 3,843 | 34,070 |
| 85,950 | 135 | 23,678 | 6,218 | 3,807 | 33,838 |
| 85,951 | 134 | 23,498 | 6,185 | 3,774 | 33,591 |
| 85,952 | 133 | 23,684 | 6,220 | 3,821 | 33,858 |
| 85,953 | 134 | 23,689 | 6,209 | 3,838 | 33,870 |
| 85,954 | 137 | 23,967 | 6,230 | 3,871 | 34,205 |
| 85,955 | 133 | 23,876 | 6,203 | 3,817 | 34,029 |
| 85,956 | 133 | 23,824 | 6,196 | 3,801 | 33,954 |
| 85,957 | 132 | 23,831 | 6,197 | 3,789 | 33,949 |
| 85,958 | 127 | 23,841 | 6,211 | 3,800 | 33,979 |
| 85,959 | 125 | 23,776 | 6,208 | 3,816 | 33,925 |
| 85,960 | 123 | 23,632 | 6,212 | 3,814 | 33,781 |
| 85,961 | 124 | 23,930 | 6,297 | 3,858 | 34,209 |
| 85,962 | 125 | 24,126 | 6,350 | 3,868 | 34,469 |
| 85,963 | 132 | 24,265 | 6,353 | 3,870 | 34,620 |
| 85,964 | 135 | 24,359 | 6,347 | 3,860 | 34,701 |
| 85,965 | 134 | 24,223 | 6,349 | 3,823 | 34,529 |
| 85,966 | 137 | 24,045 | 6,364 | 3,809 | 34,355 |
| 85,967 | 138 | 23,981 | 6,394 | 3,842 | 34,355 |
| 85,968 | 145 | 23,945 | 6,384 | 3,840 | 34,314 |
| 85,969 | 143 | 23,680 | 6,345 | 3,818 | 33,986 |
| 85,970 | 146 | 23,947 | 6,407 | 3,855 | 34,355 |
| 85,971 | 145 | 23,999 | 6,441 | 3,883 | 34,468 |
| 85,972 | 148 | 23,829 | 6,420 | 3,883 | 34,280 |
| 85,973 | 137 | 23,816 | 6,425 | 3,857 | 34,235 |
| 85,974 | 136 | 23,050 | 6,231 | 3,744 | 33,161 |
| 85,975 | 133 | 22,940 | 6,258 | 3,762 | 33,093 |

|        |     |        |       |       |        |
|--------|-----|--------|-------|-------|--------|
| 85,976 | 133 | 23,057 | 6,289 | 3,792 | 33,271 |
| 85,977 | 124 | 22,952 | 6,292 | 3,756 | 33,124 |
| 85,978 | 133 | 22,705 | 6,236 | 3,705 | 32,779 |
| 85,979 | 132 | 22,542 | 6,176 | 3,695 | 32,545 |
| 85,980 | 126 | 22,513 | 6,222 | 3,712 | 32,573 |
| 85,981 | 125 | 22,460 | 6,254 | 3,715 | 32,554 |
| 85,982 | 125 | 22,487 | 6,276 | 3,710 | 32,598 |
| 85,983 | 124 | 22,373 | 6,232 | 3,711 | 32,440 |
| 85,984 | 126 | 22,361 | 6,250 | 3,713 | 32,450 |
| 85,985 | 125 | 22,076 | 6,175 | 3,692 | 32,068 |
| 85,986 | 126 | 22,133 | 6,259 | 3,753 | 32,271 |
| 85,987 | 133 | 22,264 | 6,310 | 3,786 | 32,493 |
| 85,988 | 134 | 22,255 | 6,345 | 3,772 | 32,506 |
| 85,989 | 124 | 22,306 | 6,308 | 3,740 | 32,478 |
| 85,990 | 132 | 22,136 | 6,280 | 3,740 | 32,288 |
| 85,991 | 140 | 21,870 | 6,253 | 3,715 | 31,978 |
| 85,992 | 143 | 21,391 | 6,182 | 3,662 | 31,378 |
| 85,993 | 141 | 21,106 | 6,123 | 3,607 | 30,977 |
| 85,994 | 139 | 21,118 | 6,162 | 3,608 | 31,027 |
| 85,995 | 140 | 21,298 | 6,200 | 3,648 | 31,286 |
| 85,996 | 141 | 21,042 | 6,133 | 3,587 | 30,903 |
| 85,997 | 141 | 20,630 | 6,055 | 3,544 | 30,370 |
| 85,998 | 141 | 20,760 | 6,103 | 3,563 | 30,567 |
| 85,999 | 140 | 20,943 | 6,205 | 3,626 | 30,914 |
| 86,000 | 139 | 20,562 | 6,147 | 3,600 | 30,448 |
| 86,001 | 136 | 20,635 | 6,244 | 3,634 | 30,649 |
| 86,002 | 136 | 20,296 | 6,220 | 3,624 | 30,276 |
| 86,003 | 137 | 20,397 | 6,273 | 3,635 | 30,442 |
| 86,004 | 133 | 20,101 | 6,236 | 3,603 | 30,073 |
| 86,005 | 131 | 19,895 | 6,187 | 3,588 | 29,801 |
| 86,006 | 133 | 20,048 | 6,243 | 3,626 | 30,050 |
| 86,007 | 134 | 20,003 | 6,237 | 3,626 | 30,000 |



|        |     |        |       |       |        |
|--------|-----|--------|-------|-------|--------|
| 86,008 | 136 | 19,805 | 6,203 | 3,594 | 29,738 |
| 86,009 | 136 | 19,783 | 6,228 | 3,581 | 29,728 |
| 86,010 | 141 | 19,570 | 6,110 | 3,499 | 29,320 |
| 86,011 | 142 | 19,769 | 6,143 | 3,532 | 29,586 |
| 86,012 | 136 | 20,016 | 6,198 | 3,589 | 29,939 |
| 86,013 | 126 | 19,622 | 6,065 | 3,538 | 29,351 |
| 86,014 | 127 | 19,831 | 6,139 | 3,573 | 29,670 |
| 86,015 | 129 | 19,797 | 6,166 | 3,591 | 29,683 |
| 86,016 | 126 | 19,625 | 6,082 | 3,570 | 29,403 |
| 86,017 | 132 | 19,780 | 6,162 | 3,607 | 29,681 |
| 86,018 | 131 | 19,490 | 6,084 | 3,558 | 29,263 |
| 86,019 | 127 | 19,580 | 6,131 | 3,593 | 29,431 |
| 86,020 | 124 | 19,658 | 6,182 | 3,605 | 29,569 |
| 86,021 | 126 | 19,740 | 6,220 | 3,611 | 29,697 |
| 86,022 | 124 | 19,779 | 6,240 | 3,622 | 29,765 |
| 86,023 | 123 | 19,915 | 6,267 | 3,646 | 29,951 |
| 86,024 | 126 | 19,912 | 6,255 | 3,652 | 29,945 |
| 86,025 | 126 | 19,661 | 6,165 | 3,610 | 29,562 |
| 86,026 | 128 | 20,097 | 6,220 | 3,648 | 30,093 |
| 86,027 | 125 | 20,150 | 6,226 | 3,654 | 30,155 |
| 86,028 | 116 | 19,870 | 6,118 | 3,613 | 29,717 |
| 86,029 | 121 | 20,158 | 6,179 | 3,662 | 30,120 |
| 86,030 | 122 | 19,875 | 6,106 | 3,598 | 29,701 |
| 86,031 | 124 | 19,984 | 6,147 | 3,632 | 29,887 |
| 86,032 | 124 | 19,918 | 6,111 | 3,649 | 29,802 |
| 86,033 | 122 | 19,615 | 6,006 | 3,593 | 29,336 |
| 86,034 | 123 | 19,827 | 6,087 | 3,609 | 29,646 |
| 86,035 | 119 | 20,058 | 6,136 | 3,637 | 29,950 |
| 86,036 | 116 | 20,139 | 6,111 | 3,629 | 29,995 |
| 86,037 | 121 | 20,341 | 6,153 | 3,657 | 30,272 |
| 86,038 | 121 | 20,505 | 6,120 | 3,681 | 30,427 |
| 86,039 | 124 | 20,589 | 6,071 | 3,671 | 30,455 |

|        |     |        |       |       |        |
|--------|-----|--------|-------|-------|--------|
| 86,040 | 118 | 20,378 | 5,978 | 3,623 | 30,097 |
| 86,041 | 125 | 20,585 | 6,062 | 3,658 | 30,430 |
| 86,042 | 120 | 20,619 | 6,060 | 3,658 | 30,457 |
| 86,043 | 118 | 21,164 | 6,134 | 3,727 | 31,143 |
| 86,044 | 122 | 21,186 | 6,133 | 3,733 | 31,174 |
| 86,045 | 125 | 21,018 | 6,126 | 3,740 | 31,009 |
| 86,046 | 122 | 20,795 | 6,071 | 3,712 | 30,700 |
| 86,047 | 122 | 20,735 | 6,056 | 3,713 | 30,626 |
| 86,048 | 127 | 20,710 | 6,063 | 3,727 | 30,627 |
| 86,049 | 128 | 20,833 | 6,096 | 3,750 | 30,807 |
| 86,050 | 126 | 20,800 | 6,064 | 3,730 | 30,720 |
| 86,051 | 127 | 20,907 | 6,057 | 3,715 | 30,806 |
| 86,052 | 123 | 21,105 | 6,042 | 3,732 | 31,002 |
| 86,053 | 126 | 21,222 | 6,045 | 3,730 | 31,123 |
| 86,054 | 123 | 21,021 | 6,004 | 3,707 | 30,855 |
| 86,055 | 126 | 21,286 | 6,068 | 3,753 | 31,233 |
| 86,056 | 125 | 21,342 | 6,088 | 3,763 | 31,318 |
| 86,057 | 125 | 21,219 | 6,026 | 3,712 | 31,082 |
| 86,058 | 125 | 21,365 | 6,042 | 3,719 | 31,251 |
| 86,059 | 123 | 21,256 | 5,996 | 3,696 | 31,071 |
| 86,060 | 126 | 21,417 | 6,060 | 3,738 | 31,341 |
| 86,061 | 118 | 21,131 | 5,998 | 3,719 | 30,966 |
| 86,062 | 119 | 21,350 | 6,083 | 3,743 | 31,295 |
| 86,063 | 120 | 21,044 | 6,038 | 3,691 | 30,893 |
| 86,064 | 118 | 20,744 | 5,962 | 3,637 | 30,461 |
| 86,065 | 117 | 20,855 | 6,010 | 3,675 | 30,657 |
| 86,066 | 113 | 21,067 | 6,068 | 3,711 | 30,959 |
| 86,067 | 113 | 21,125 | 6,077 | 3,700 | 31,015 |
| 86,068 | 110 | 21,262 | 6,084 | 3,678 | 31,134 |
| 86,069 | 110 | 21,187 | 6,033 | 3,642 | 30,972 |
| 86,070 | 111 | 21,055 | 5,995 | 3,622 | 30,783 |
| 86,071 | 113 | 21,542 | 6,144 | 3,681 | 31,480 |

|        |     |        |       |       |        |
|--------|-----|--------|-------|-------|--------|
| 86,072 | 115 | 21,436 | 6,099 | 3,661 | 31,311 |
| 86,073 | 117 | 21,503 | 6,121 | 3,647 | 31,388 |
| 86,074 | 116 | 21,283 | 6,069 | 3,586 | 31,054 |
| 86,075 | 116 | 21,255 | 6,059 | 3,580 | 31,010 |
| 86,076 | 113 | 21,126 | 6,080 | 3,600 | 30,919 |
| 86,077 | 114 | 21,049 | 6,102 | 3,607 | 30,872 |
| 86,078 | 119 | 21,154 | 6,133 | 3,618 | 31,024 |
| 86,079 | 119 | 21,308 | 6,169 | 3,649 | 31,245 |
| 86,080 | 117 | 21,428 | 6,209 | 3,652 | 31,406 |
| 86,081 | 117 | 21,361 | 6,156 | 3,631 | 31,265 |
| 86,082 | 122 | 21,376 | 6,158 | 3,610 | 31,266 |
| 86,083 | 124 | 21,481 | 6,142 | 3,597 | 31,344 |
| 86,084 | 124 | 21,555 | 6,182 | 3,613 | 31,474 |
| 86,085 | 123 | 21,551 | 6,176 | 3,627 | 31,477 |
| 86,086 | 123 | 21,628 | 6,238 | 3,645 | 31,634 |
| 86,087 | 123 | 21,537 | 6,258 | 3,631 | 31,549 |
| 86,088 | 121 | 21,488 | 6,263 | 3,625 | 31,497 |
| 86,089 | 114 | 21,227 | 6,257 | 3,586 | 31,184 |
| 86,090 | 114 | 21,900 | 6,488 | 3,734 | 32,236 |
| 86,091 | 109 | 21,920 | 6,481 | 3,755 | 32,265 |
| 86,092 | 105 | 22,051 | 6,513 | 3,771 | 32,440 |
| 86,093 | 106 | 22,087 | 6,560 | 3,783 | 32,536 |
| 86,094 | 104 | 22,177 | 6,594 | 3,791 | 32,666 |
| 86,095 | 98  | 22,111 | 6,543 | 3,772 | 32,524 |
| 86,096 | 103 | 22,284 | 6,559 | 3,778 | 32,724 |
| 86,097 | 104 | 22,142 | 6,532 | 3,755 | 32,533 |
| 86,098 | 105 | 22,308 | 6,594 | 3,795 | 32,802 |
| 86,099 | 105 | 22,295 | 6,593 | 3,809 | 32,802 |
| 86,100 | 108 | 22,438 | 6,635 | 3,825 | 33,006 |
| 86,101 | 112 | 22,320 | 6,642 | 3,836 | 32,910 |
| 86,102 | 117 | 22,126 | 6,636 | 3,830 | 32,709 |
| 86,103 | 113 | 21,718 | 6,538 | 3,754 | 32,123 |

|        |     |        |       |       |        |
|--------|-----|--------|-------|-------|--------|
| 86,104 | 118 | 21,968 | 6,567 | 3,759 | 32,412 |
| 86,105 | 123 | 22,049 | 6,527 | 3,730 | 32,429 |
| 86,106 | 123 | 22,095 | 6,539 | 3,733 | 32,490 |
| 86,107 | 132 | 22,078 | 6,529 | 3,720 | 32,459 |
| 86,108 | 131 | 21,812 | 6,438 | 3,699 | 32,080 |
| 86,109 | 132 | 21,840 | 6,424 | 3,709 | 32,105 |
| 86,110 | 132 | 21,668 | 6,369 | 3,679 | 31,848 |
| 86,111 | 132 | 22,364 | 6,513 | 3,790 | 32,799 |
| 86,112 | 132 | 22,080 | 6,442 | 3,747 | 32,401 |
| 86,113 | 134 | 22,307 | 6,531 | 3,809 | 32,781 |
| 86,114 | 136 | 22,357 | 6,564 | 3,814 | 32,871 |
| 86,115 | 137 | 22,495 | 6,626 | 3,832 | 33,090 |
| 86,116 | 144 | 22,554 | 6,623 | 3,840 | 33,161 |
| 86,117 | 143 | 22,231 | 6,526 | 3,786 | 32,686 |
| 86,118 | 142 | 22,028 | 6,494 | 3,801 | 32,465 |
| 86,119 | 142 | 22,243 | 6,533 | 3,842 | 32,760 |
| 86,120 | 139 | 22,347 | 6,502 | 3,852 | 32,840 |
| 86,121 | 135 | 22,317 | 6,468 | 3,857 | 32,777 |
| 86,122 | 134 | 22,194 | 6,443 | 3,865 | 32,636 |
| 86,123 | 131 | 21,970 | 6,351 | 3,825 | 32,277 |
| 86,124 | 129 | 21,931 | 6,314 | 3,832 | 32,206 |
| 86,125 | 131 | 21,877 | 6,308 | 3,831 | 32,147 |
| 86,126 | 131 | 21,940 | 6,278 | 3,826 | 32,175 |
| 86,127 | 136 | 21,766 | 6,204 | 3,761 | 31,867 |
| 86,128 | 136 | 21,912 | 6,264 | 3,791 | 32,103 |
| 86,129 | 131 | 22,103 | 6,310 | 3,846 | 32,390 |
| 86,130 | 141 | 22,022 | 6,299 | 3,853 | 32,315 |
| 86,131 | 140 | 21,894 | 6,292 | 3,859 | 32,185 |
| 86,132 | 137 | 21,703 | 6,235 | 3,832 | 31,907 |
| 86,133 | 142 | 21,789 | 6,273 | 3,842 | 32,046 |
| 86,134 | 148 | 21,524 | 6,220 | 3,816 | 31,708 |
| 86,135 | 147 | 21,311 | 6,147 | 3,777 | 31,382 |

|        |     |        |       |       |        |
|--------|-----|--------|-------|-------|--------|
| 86,136 | 157 | 21,848 | 6,288 | 3,870 | 32,163 |
| 86,137 | 158 | 21,819 | 6,249 | 3,871 | 32,097 |
| 86,138 | 163 | 21,972 | 6,310 | 3,884 | 32,329 |
| 86,139 | 163 | 21,861 | 6,266 | 3,873 | 32,163 |
| 86,140 | 163 | 21,782 | 6,218 | 3,850 | 32,013 |
| 86,141 | 173 | 21,492 | 6,101 | 3,768 | 31,534 |
| 86,142 | 172 | 21,176 | 6,031 | 3,688 | 31,067 |
| 86,143 | 173 | 21,127 | 6,010 | 3,703 | 31,013 |
| 86,144 | 172 | 20,980 | 5,984 | 3,686 | 30,822 |
| 86,145 | 174 | 20,794 | 5,977 | 3,703 | 30,648 |
| 86,146 | 170 | 20,840 | 6,011 | 3,692 | 30,713 |
| 86,147 | 166 | 20,575 | 5,953 | 3,672 | 30,366 |
| 86,148 | 165 | 20,501 | 5,914 | 3,641 | 30,221 |
| 86,149 | 168 | 20,671 | 5,945 | 3,656 | 30,440 |
| 86,150 | 164 | 20,593 | 5,945 | 3,649 | 30,351 |
| 86,151 | 164 | 20,505 | 5,895 | 3,646 | 30,210 |
| 86,152 | 164 | 20,754 | 5,919 | 3,645 | 30,482 |
| 86,153 | 156 | 20,681 | 5,834 | 3,614 | 30,285 |
| 86,154 | 156 | 20,663 | 5,833 | 3,612 | 30,264 |
| 86,155 | 156 | 20,783 | 5,854 | 3,650 | 30,443 |
| 86,156 | 150 | 20,482 | 5,808 | 3,635 | 30,075 |
| 86,157 | 151 | 20,680 | 5,830 | 3,662 | 30,323 |
| 86,158 | 151 | 20,734 | 5,873 | 3,655 | 30,413 |
| 86,159 | 152 | 20,573 | 5,842 | 3,638 | 30,205 |
| 86,160 | 150 | 20,408 | 5,837 | 3,615 | 30,010 |
| 86,161 | 153 | 20,369 | 5,788 | 3,593 | 29,903 |
| 86,162 | 152 | 20,467 | 5,807 | 3,605 | 30,031 |
| 86,163 | 152 | 20,580 | 5,767 | 3,599 | 30,098 |
| 86,164 | 153 | 20,843 | 5,806 | 3,596 | 30,398 |
| 86,165 | 150 | 20,835 | 5,770 | 3,591 | 30,346 |
| 86,166 | 152 | 20,959 | 5,788 | 3,620 | 30,519 |
| 86,167 | 145 | 20,922 | 5,730 | 3,575 | 30,372 |

|        |     |        |       |       |        |
|--------|-----|--------|-------|-------|--------|
| 86,168 | 152 | 21,199 | 5,774 | 3,611 | 30,736 |
| 86,169 | 153 | 21,305 | 5,747 | 3,614 | 30,819 |
| 86,170 | 161 | 21,348 | 5,785 | 3,641 | 30,935 |
| 86,171 | 166 | 21,168 | 5,742 | 3,582 | 30,658 |
| 86,172 | 167 | 21,213 | 5,704 | 3,565 | 30,649 |
| 86,173 | 178 | 21,353 | 5,740 | 3,567 | 30,838 |
| 86,174 | 178 | 21,348 | 5,739 | 3,546 | 30,811 |
| 86,175 | 176 | 21,413 | 5,718 | 3,546 | 30,853 |
| 86,176 | 187 | 21,352 | 5,686 | 3,526 | 30,751 |
| 86,177 | 185 | 21,236 | 5,659 | 3,506 | 30,586 |
| 86,178 | 185 | 21,418 | 5,703 | 3,549 | 30,855 |
| 86,179 | 190 | 21,563 | 5,706 | 3,534 | 30,993 |
| 86,180 | 190 | 21,706 | 5,664 | 3,536 | 31,096 |
| 86,181 | 190 | 21,284 | 5,528 | 3,449 | 30,451 |
| 86,182 | 192 | 21,545 | 5,576 | 3,473 | 30,786 |
| 86,183 | 184 | 21,715 | 5,634 | 3,497 | 31,030 |
| 86,184 | 183 | 21,830 | 5,643 | 3,502 | 31,158 |
| 86,185 | 174 | 21,767 | 5,578 | 3,480 | 30,999 |
| 86,186 | 169 | 22,024 | 5,623 | 3,505 | 31,321 |
| 86,187 | 168 | 21,698 | 5,530 | 3,438 | 30,834 |
| 86,188 | 173 | 21,912 | 5,602 | 3,466 | 31,153 |
| 86,189 | 171 | 22,252 | 5,634 | 3,517 | 31,574 |
| 86,190 | 168 | 21,987 | 5,589 | 3,458 | 31,202 |
| 86,191 | 160 | 22,015 | 5,576 | 3,448 | 31,199 |
| 86,192 | 160 | 21,967 | 5,504 | 3,453 | 31,084 |
| 86,193 | 164 | 22,287 | 5,554 | 3,498 | 31,503 |
| 86,194 | 159 | 22,392 | 5,543 | 3,479 | 31,573 |
| 86,195 | 160 | 22,504 | 5,542 | 3,514 | 31,720 |
| 86,196 | 161 | 22,759 | 5,625 | 3,529 | 32,074 |
| 86,197 | 163 | 22,627 | 5,601 | 3,535 | 31,926 |
| 86,198 | 162 | 22,560 | 5,596 | 3,513 | 31,831 |
| 86,199 | 158 | 22,667 | 5,624 | 3,518 | 31,967 |

|        |     |        |       |       |        |
|--------|-----|--------|-------|-------|--------|
| 86,200 | 157 | 22,790 | 5,634 | 3,512 | 32,093 |
| 86,201 | 157 | 22,941 | 5,664 | 3,526 | 32,288 |
| 86,202 | 154 | 22,889 | 5,694 | 3,540 | 32,277 |
| 86,203 | 154 | 22,821 | 5,725 | 3,545 | 32,245 |
| 86,204 | 157 | 23,001 | 5,770 | 3,571 | 32,499 |
| 86,205 | 156 | 22,809 | 5,790 | 3,561 | 32,316 |
| 86,206 | 158 | 22,791 | 5,797 | 3,561 | 32,307 |
| 86,207 | 167 | 23,051 | 5,845 | 3,607 | 32,670 |
| 86,208 | 161 | 22,553 | 5,752 | 3,526 | 31,992 |
| 86,209 | 158 | 22,630 | 5,794 | 3,552 | 32,134 |
| 86,210 | 160 | 22,818 | 5,858 | 3,561 | 32,397 |
| 86,211 | 165 | 22,525 | 5,749 | 3,510 | 31,949 |
| 86,212 | 163 | 22,470 | 5,741 | 3,505 | 31,879 |
| 86,213 | 165 | 22,396 | 5,775 | 3,516 | 31,852 |
| 86,214 | 165 | 22,547 | 5,866 | 3,570 | 32,148 |
| 86,215 | 166 | 22,561 | 5,915 | 3,589 | 32,231 |
| 86,216 | 172 | 22,562 | 5,935 | 3,594 | 32,263 |
| 86,217 | 171 | 22,552 | 5,918 | 3,590 | 32,231 |
| 86,218 | 170 | 22,208 | 5,872 | 3,568 | 31,818 |
| 86,219 | 168 | 22,479 | 5,944 | 3,591 | 32,182 |
| 86,220 | 159 | 22,067 | 5,872 | 3,547 | 31,645 |
| 86,221 | 159 | 22,048 | 5,860 | 3,541 | 31,608 |
| 86,222 | 154 | 21,946 | 5,865 | 3,552 | 31,517 |
| 86,223 | 154 | 22,113 | 5,968 | 3,591 | 31,826 |
| 86,224 | 144 | 22,105 | 5,966 | 3,604 | 31,819 |
| 86,225 | 144 | 22,057 | 5,982 | 3,637 | 31,820 |
| 86,226 | 130 | 21,828 | 5,944 | 3,636 | 31,538 |
| 86,227 | 130 | 21,933 | 5,973 | 3,638 | 31,674 |
| 86,228 | 132 | 22,028 | 6,016 | 3,662 | 31,838 |
| 86,229 | 128 | 21,929 | 6,003 | 3,652 | 31,712 |
| 86,230 | 127 | 21,810 | 5,973 | 3,636 | 31,546 |
| 86,231 | 118 | 21,393 | 5,950 | 3,592 | 31,053 |

|        |     |        |       |       |        |
|--------|-----|--------|-------|-------|--------|
| 86,232 | 120 | 21,600 | 5,998 | 3,618 | 31,336 |
| 86,233 | 117 | 21,221 | 5,893 | 3,583 | 30,814 |
| 86,234 | 117 | 20,950 | 5,816 | 3,535 | 30,418 |
| 86,235 | 118 | 20,993 | 5,825 | 3,529 | 30,465 |
| 86,236 | 118 | 20,639 | 5,774 | 3,480 | 30,011 |
| 86,237 | 118 | 20,299 | 5,702 | 3,434 | 29,553 |
| 86,238 | 115 | 20,674 | 5,812 | 3,529 | 30,130 |
| 86,239 | 117 | 20,765 | 5,812 | 3,540 | 30,234 |
| 86,240 | 116 | 20,378 | 5,751 | 3,481 | 29,726 |
| 86,241 | 116 | 20,349 | 5,741 | 3,486 | 29,692 |
| 86,242 | 114 | 20,512 | 5,799 | 3,539 | 29,964 |
| 86,243 | 114 | 20,536 | 5,824 | 3,527 | 30,001 |
| 86,244 | 112 | 20,082 | 5,748 | 3,427 | 29,369 |
| 86,245 | 112 | 20,144 | 5,785 | 3,440 | 29,481 |
| 86,246 | 113 | 20,367 | 5,827 | 3,475 | 29,782 |
| 86,247 | 113 | 20,541 | 5,820 | 3,503 | 29,977 |
| 86,248 | 111 | 20,532 | 5,809 | 3,494 | 29,946 |
| 86,249 | 108 | 20,214 | 5,706 | 3,452 | 29,480 |
| 86,250 | 110 | 20,335 | 5,750 | 3,469 | 29,664 |
| 86,251 | 109 | 20,246 | 5,770 | 3,468 | 29,593 |
| 86,252 | 110 | 19,963 | 5,647 | 3,391 | 29,111 |
| 86,253 | 111 | 20,305 | 5,693 | 3,429 | 29,538 |
| 86,254 | 113 | 20,556 | 5,744 | 3,478 | 29,891 |
| 86,255 | 108 | 20,132 | 5,625 | 3,429 | 29,294 |
| 86,256 | 109 | 20,305 | 5,634 | 3,467 | 29,515 |
| 86,257 | 102 | 20,420 | 5,690 | 3,490 | 29,702 |
| 86,258 | 99  | 20,163 | 5,635 | 3,444 | 29,341 |
| 86,259 | 101 | 19,949 | 5,529 | 3,407 | 28,986 |
| 86,260 | 101 | 19,931 | 5,529 | 3,392 | 28,953 |
| 86,261 | 97  | 19,670 | 5,440 | 3,358 | 28,565 |
| 86,262 | 91  | 19,343 | 5,385 | 3,309 | 28,128 |
| 86,263 | 94  | 20,232 | 5,567 | 3,454 | 29,347 |



|        |     |        |       |       |        |
|--------|-----|--------|-------|-------|--------|
| 86,264 | 93  | 20,144 | 5,504 | 3,397 | 29,138 |
| 86,265 | 97  | 20,477 | 5,573 | 3,432 | 29,579 |
| 86,266 | 102 | 20,384 | 5,549 | 3,440 | 29,475 |
| 86,267 | 93  | 20,130 | 5,463 | 3,384 | 29,070 |
| 86,268 | 93  | 20,059 | 5,444 | 3,374 | 28,970 |
| 86,269 | 92  | 20,134 | 5,437 | 3,380 | 29,043 |
| 86,270 | 91  | 20,444 | 5,501 | 3,414 | 29,450 |
| 86,271 | 91  | 20,159 | 5,448 | 3,356 | 29,054 |
| 86,272 | 93  | 20,500 | 5,547 | 3,414 | 29,554 |
| 86,273 | 93  | 20,641 | 5,579 | 3,430 | 29,743 |
| 86,274 | 94  | 20,444 | 5,504 | 3,384 | 29,426 |
| 86,275 | 96  | 20,478 | 5,482 | 3,351 | 29,407 |
| 86,276 | 96  | 20,497 | 5,443 | 3,336 | 29,372 |
| 86,277 | 97  | 20,799 | 5,530 | 3,381 | 29,807 |
| 86,278 | 97  | 20,825 | 5,511 | 3,355 | 29,788 |
| 86,279 | 94  | 20,915 | 5,551 | 3,356 | 29,916 |
| 86,280 | 95  | 20,739 | 5,504 | 3,322 | 29,660 |
| 86,281 | 104 | 20,735 | 5,503 | 3,315 | 29,657 |
| 86,282 | 106 | 21,018 | 5,550 | 3,344 | 30,018 |
| 86,283 | 104 | 20,939 | 5,550 | 3,324 | 29,917 |
| 86,284 | 105 | 21,008 | 5,556 | 3,324 | 29,993 |
| 86,285 | 109 | 21,252 | 5,628 | 3,355 | 30,344 |
| 86,286 | 109 | 21,448 | 5,672 | 3,391 | 30,620 |
| 86,287 | 112 | 21,370 | 5,617 | 3,349 | 30,448 |
| 86,288 | 112 | 21,622 | 5,671 | 3,371 | 30,776 |
| 86,289 | 116 | 21,652 | 5,666 | 3,368 | 30,802 |
| 86,290 | 111 | 21,424 | 5,653 | 3,358 | 30,546 |
| 86,291 | 115 | 21,722 | 5,731 | 3,395 | 30,963 |
| 86,292 | 117 | 21,894 | 5,747 | 3,441 | 31,199 |
| 86,293 | 114 | 21,691 | 5,701 | 3,402 | 30,908 |
| 86,294 | 115 | 21,614 | 5,678 | 3,403 | 30,810 |
| 86,295 | 112 | 21,815 | 5,687 | 3,408 | 31,022 |

|        |     |        |       |       |        |
|--------|-----|--------|-------|-------|--------|
| 86,296 | 117 | 21,992 | 5,751 | 3,438 | 31,298 |
| 86,297 | 115 | 21,979 | 5,758 | 3,432 | 31,284 |
| 86,298 | 113 | 21,597 | 5,684 | 3,381 | 30,775 |
| 86,299 | 114 | 21,804 | 5,724 | 3,389 | 31,031 |
| 86,300 | 113 | 21,892 | 5,766 | 3,414 | 31,185 |
| 86,301 | 113 | 21,950 | 5,744 | 3,398 | 31,205 |
| 86,302 | 113 | 21,974 | 5,742 | 3,423 | 31,252 |
| 86,303 | 112 | 22,198 | 5,803 | 3,462 | 31,575 |
| 86,304 | 118 | 22,298 | 5,828 | 3,474 | 31,718 |
| 86,305 | 117 | 22,325 | 5,821 | 3,473 | 31,736 |
| 86,306 | 112 | 21,831 | 5,717 | 3,384 | 31,044 |
| 86,307 | 122 | 22,047 | 5,783 | 3,415 | 31,367 |
| 86,308 | 120 | 22,300 | 5,837 | 3,441 | 31,698 |
| 86,309 | 117 | 22,409 | 5,836 | 3,445 | 31,807 |
| 86,310 | 120 | 22,532 | 5,828 | 3,444 | 31,924 |
| 86,311 | 126 | 22,673 | 5,872 | 3,466 | 32,137 |
| 86,312 | 126 | 22,745 | 5,924 | 3,487 | 32,282 |
| 86,313 | 128 | 22,748 | 5,962 | 3,466 | 32,304 |
| 86,314 | 126 | 22,497 | 5,908 | 3,426 | 31,957 |
| 86,315 | 129 | 22,435 | 5,899 | 3,421 | 31,884 |
| 86,316 | 133 | 22,588 | 5,965 | 3,438 | 32,124 |
| 86,317 | 130 | 22,400 | 5,901 | 3,395 | 31,826 |
| 86,318 | 130 | 22,165 | 5,869 | 3,384 | 31,548 |
| 86,319 | 133 | 22,435 | 5,939 | 3,423 | 31,930 |
| 86,320 | 136 | 22,435 | 5,957 | 3,421 | 31,949 |
| 86,321 | 138 | 22,548 | 6,003 | 3,459 | 32,148 |
| 86,322 | 140 | 22,479 | 5,927 | 3,452 | 31,998 |
| 86,323 | 143 | 22,291 | 5,903 | 3,427 | 31,764 |
| 86,324 | 153 | 22,231 | 5,881 | 3,417 | 31,682 |
| 86,325 | 151 | 21,853 | 5,797 | 3,378 | 31,179 |
| 86,326 | 152 | 22,292 | 5,946 | 3,480 | 31,870 |
| 86,327 | 155 | 21,582 | 5,793 | 3,389 | 30,919 |

|        |     |        |       |       |        |
|--------|-----|--------|-------|-------|--------|
| 86,328 | 154 | 21,732 | 5,796 | 3,382 | 31,064 |
| 86,329 | 154 | 21,664 | 5,756 | 3,377 | 30,951 |
| 86,330 | 155 | 21,701 | 5,768 | 3,401 | 31,025 |
| 86,331 | 147 | 21,649 | 5,771 | 3,408 | 30,975 |
| 86,332 | 143 | 21,601 | 5,737 | 3,396 | 30,877 |
| 86,333 | 143 | 21,366 | 5,671 | 3,362 | 30,542 |
| 86,334 | 143 | 21,060 | 5,589 | 3,307 | 30,099 |
| 86,335 | 148 | 21,418 | 5,699 | 3,377 | 30,642 |
| 86,336 | 147 | 21,414 | 5,699 | 3,375 | 30,635 |
| 86,337 | 149 | 21,435 | 5,694 | 3,373 | 30,651 |
| 86,338 | 144 | 21,250 | 5,630 | 3,343 | 30,367 |
| 86,339 | 135 | 20,859 | 5,488 | 3,279 | 29,761 |
| 86,340 | 136 | 20,957 | 5,532 | 3,277 | 29,902 |
| 86,341 | 136 | 21,203 | 5,586 | 3,316 | 30,241 |
| 86,342 | 140 | 21,152 | 5,590 | 3,293 | 30,175 |
| 86,343 | 138 | 20,954 | 5,554 | 3,256 | 29,902 |
| 86,344 | 138 | 21,155 | 5,627 | 3,308 | 30,228 |
| 86,345 | 139 | 21,162 | 5,641 | 3,299 | 30,241 |
| 86,346 | 140 | 21,046 | 5,637 | 3,323 | 30,146 |
| 86,347 | 141 | 20,749 | 5,558 | 3,284 | 29,732 |
| 86,348 | 143 | 20,754 | 5,560 | 3,274 | 29,731 |
| 86,349 | 142 | 20,608 | 5,519 | 3,246 | 29,515 |
| 86,350 | 142 | 20,594 | 5,542 | 3,263 | 29,541 |
| 86,351 | 146 | 20,629 | 5,521 | 3,234 | 29,530 |
| 86,352 | 146 | 20,365 | 5,472 | 3,221 | 29,204 |
| 86,353 | 149 | 20,032 | 5,392 | 3,160 | 28,733 |
| 86,354 | 151 | 20,025 | 5,388 | 3,150 | 28,714 |
| 86,355 | 147 | 20,106 | 5,440 | 3,138 | 28,831 |
| 86,356 | 145 | 19,424 | 5,241 | 3,025 | 27,835 |
| 86,357 | 147 | 19,538 | 5,238 | 3,008 | 27,931 |
| 86,358 | 141 | 19,864 | 5,282 | 3,043 | 28,330 |
| 86,359 | 149 | 19,855 | 5,269 | 3,037 | 28,310 |

|        |     |        |       |       |        |
|--------|-----|--------|-------|-------|--------|
| 86,360 | 149 | 19,807 | 5,259 | 3,042 | 28,257 |
| 86,361 | 148 | 19,891 | 5,313 | 3,074 | 28,426 |
| 86,362 | 142 | 19,777 | 5,271 | 3,053 | 28,243 |
| 86,363 | 140 | 19,653 | 5,174 | 3,035 | 28,002 |
| 86,364 | 140 | 19,725 | 5,178 | 3,049 | 28,092 |
| 86,365 | 138 | 19,852 | 5,226 | 3,072 | 28,288 |
| 86,366 | 129 | 19,287 | 5,019 | 2,957 | 27,392 |
| 86,367 | 128 | 19,509 | 5,046 | 2,994 | 27,677 |
| 86,368 | 124 | 19,608 | 5,049 | 3,020 | 27,801 |
| 86,369 | 125 | 19,845 | 5,089 | 3,041 | 28,100 |
| 86,370 | 123 | 20,022 | 5,119 | 3,061 | 28,325 |
| 86,371 | 122 | 19,708 | 5,053 | 3,029 | 27,912 |
| 86,372 | 124 | 19,785 | 5,106 | 3,031 | 28,046 |
| 86,373 | 121 | 19,615 | 5,089 | 3,004 | 27,829 |
| 86,374 | 124 | 19,728 | 5,095 | 3,004 | 27,951 |
| 86,375 | 124 | 19,707 | 5,106 | 2,997 | 27,934 |
| 86,376 | 124 | 19,562 | 5,077 | 2,954 | 27,717 |
| 86,377 | 117 | 19,238 | 4,937 | 2,902 | 27,194 |
| 86,378 | 117 | 19,327 | 4,950 | 2,919 | 27,313 |
| 86,379 | 117 | 19,128 | 4,986 | 2,938 | 27,169 |
| 86,380 | 121 | 19,184 | 5,006 | 2,938 | 27,249 |
| 86,381 | 125 | 19,209 | 4,980 | 2,927 | 27,241 |
| 86,382 | 125 | 19,197 | 4,996 | 2,924 | 27,242 |
| 86,383 | 122 | 19,509 | 5,058 | 2,971 | 27,660 |
| 86,384 | 122 | 19,602 | 5,068 | 2,949 | 27,741 |
| 86,385 | 122 | 19,514 | 5,009 | 2,914 | 27,559 |
| 86,386 | 124 | 19,674 | 5,037 | 2,936 | 27,771 |
| 86,387 | 119 | 19,432 | 4,959 | 2,911 | 27,421 |
| 86,388 | 121 | 19,513 | 4,993 | 2,929 | 27,556 |
| 86,389 | 120 | 19,244 | 4,952 | 2,913 | 27,229 |
| 86,390 | 121 | 19,141 | 4,934 | 2,912 | 27,108 |
| 86,391 | 121 | 19,194 | 4,961 | 2,944 | 27,220 |

|        |     |        |       |       |        |
|--------|-----|--------|-------|-------|--------|
| 86,392 | 118 | 19,174 | 4,968 | 2,952 | 27,212 |
| 86,393 | 114 | 19,045 | 4,952 | 2,951 | 27,062 |
| 86,394 | 115 | 18,884 | 4,960 | 2,941 | 26,900 |
| 86,395 | 118 | 18,908 | 4,939 | 2,945 | 26,910 |
| 86,396 | 120 | 19,085 | 4,951 | 2,952 | 27,108 |
| 86,397 | 122 | 19,141 | 4,953 | 2,958 | 27,174 |
| 86,398 | 116 | 19,203 | 4,944 | 2,952 | 27,215 |
| 86,399 | 115 | 19,010 | 4,886 | 2,930 | 26,941 |
| 86,400 | 119 | 19,233 | 4,933 | 2,958 | 27,243 |
| 86,401 | 120 | 19,388 | 4,911 | 2,956 | 27,375 |
| 86,402 | 112 | 19,034 | 4,820 | 2,901 | 26,867 |
| 86,403 | 112 | 19,366 | 4,889 | 2,941 | 27,308 |
| 86,404 | 110 | 19,447 | 4,901 | 2,937 | 27,395 |
| 86,405 | 111 | 19,565 | 4,949 | 2,967 | 27,592 |
| 86,406 | 110 | 19,289 | 4,888 | 2,948 | 27,235 |
| 86,407 | 110 | 19,262 | 4,873 | 2,960 | 27,205 |
| 86,408 | 120 | 19,694 | 4,998 | 3,047 | 27,859 |
| 86,409 | 117 | 19,763 | 5,012 | 3,073 | 27,965 |
| 86,410 | 114 | 19,636 | 5,018 | 3,081 | 27,849 |
| 86,411 | 114 | 19,745 | 5,029 | 3,089 | 27,977 |
| 86,412 | 112 | 19,892 | 5,097 | 3,160 | 28,261 |
| 86,413 | 110 | 19,720 | 5,069 | 3,127 | 28,026 |
| 86,414 | 110 | 19,553 | 5,085 | 3,142 | 27,890 |
| 86,415 | 110 | 19,435 | 5,086 | 3,122 | 27,753 |
| 86,416 | 115 | 19,720 | 5,138 | 3,147 | 28,120 |
| 86,417 | 112 | 19,324 | 5,049 | 3,104 | 27,589 |
| 86,418 | 115 | 19,493 | 5,066 | 3,121 | 27,795 |
| 86,419 | 117 | 19,412 | 5,045 | 3,095 | 27,669 |
| 86,420 | 118 | 19,126 | 5,024 | 3,064 | 27,332 |
| 86,421 | 119 | 19,204 | 5,023 | 3,068 | 27,414 |
| 86,422 | 120 | 19,343 | 5,021 | 3,089 | 27,573 |
| 86,423 | 120 | 19,349 | 5,006 | 3,085 | 27,560 |

|        |     |        |       |       |        |
|--------|-----|--------|-------|-------|--------|
| 86,424 | 125 | 19,589 | 5,055 | 3,112 | 27,881 |
| 86,425 | 120 | 19,704 | 5,045 | 3,124 | 27,993 |
| 86,426 | 108 | 19,514 | 4,957 | 3,109 | 27,688 |
| 86,427 | 109 | 19,588 | 4,995 | 3,122 | 27,814 |
| 86,428 | 108 | 19,629 | 4,995 | 3,111 | 27,843 |
| 86,429 | 109 | 19,663 | 4,975 | 3,086 | 27,833 |
| 86,430 | 111 | 19,918 | 5,026 | 3,121 | 28,176 |
| 86,431 | 107 | 19,763 | 4,987 | 3,115 | 27,972 |
| 86,432 | 103 | 19,496 | 4,983 | 3,089 | 27,671 |
| 86,433 | 106 | 19,627 | 5,030 | 3,127 | 27,890 |
| 86,434 | 109 | 19,837 | 5,095 | 3,140 | 28,181 |
| 86,435 | 106 | 19,905 | 5,081 | 3,184 | 28,276 |
| 86,436 | 105 | 19,964 | 5,106 | 3,228 | 28,403 |
| 86,437 | 108 | 20,004 | 5,124 | 3,229 | 28,465 |
| 86,438 | 104 | 19,765 | 5,098 | 3,209 | 28,176 |
| 86,439 | 104 | 19,746 | 5,077 | 3,199 | 28,126 |
| 86,440 | 106 | 19,469 | 4,944 | 3,134 | 27,653 |
| 86,441 | 105 | 19,717 | 4,990 | 3,169 | 27,981 |
| 86,442 | 106 | 19,869 | 4,988 | 3,146 | 28,109 |
| 86,443 | 106 | 20,074 | 5,038 | 3,178 | 28,396 |
| 86,444 | 110 | 20,098 | 5,034 | 3,175 | 28,417 |
| 86,445 | 109 | 20,135 | 4,991 | 3,147 | 28,382 |
| 86,446 | 111 | 20,488 | 5,080 | 3,217 | 28,896 |
| 86,447 | 112 | 20,435 | 5,101 | 3,217 | 28,865 |
| 86,448 | 115 | 20,449 | 5,113 | 3,204 | 28,881 |
| 86,449 | 116 | 20,256 | 5,086 | 3,178 | 28,636 |
| 86,450 | 115 | 20,212 | 5,084 | 3,177 | 28,588 |
| 86,451 | 112 | 20,189 | 5,094 | 3,180 | 28,575 |
| 86,452 | 117 | 20,228 | 5,152 | 3,210 | 28,707 |
| 86,453 | 120 | 20,214 | 5,149 | 3,209 | 28,692 |
| 86,454 | 120 | 20,058 | 5,097 | 3,190 | 28,465 |
| 86,455 | 116 | 20,058 | 5,075 | 3,191 | 28,440 |

|        |     |        |       |       |        |
|--------|-----|--------|-------|-------|--------|
| 86,456 | 119 | 20,102 | 5,108 | 3,202 | 28,531 |
| 86,457 | 119 | 20,016 | 5,109 | 3,203 | 28,447 |
| 86,458 | 122 | 20,097 | 5,160 | 3,211 | 28,590 |
| 86,459 | 124 | 19,975 | 5,176 | 3,217 | 28,492 |
| 86,460 | 125 | 19,876 | 5,166 | 3,190 | 28,357 |
| 86,461 | 127 | 19,884 | 5,149 | 3,168 | 28,328 |
| 86,462 | 128 | 19,748 | 5,140 | 3,135 | 28,151 |
| 86,463 | 128 | 19,844 | 5,140 | 3,126 | 28,238 |
| 86,464 | 129 | 19,955 | 5,153 | 3,117 | 28,354 |
| 86,465 | 134 | 20,042 | 5,180 | 3,108 | 28,464 |
| 86,466 | 135 | 20,093 | 5,179 | 3,117 | 28,524 |
| 86,467 | 136 | 20,296 | 5,232 | 3,162 | 28,826 |
| 86,468 | 136 | 20,118 | 5,204 | 3,136 | 28,594 |
| 86,469 | 134 | 20,151 | 5,207 | 3,150 | 28,642 |
| 86,470 | 140 | 20,046 | 5,192 | 3,131 | 28,509 |
| 86,471 | 141 | 20,078 | 5,194 | 3,129 | 28,542 |
| 86,472 | 141 | 20,052 | 5,236 | 3,134 | 28,563 |
| 86,473 | 144 | 20,298 | 5,271 | 3,168 | 28,881 |
| 86,474 | 147 | 20,346 | 5,296 | 3,174 | 28,963 |
| 86,475 | 146 | 20,250 | 5,273 | 3,152 | 28,821 |
| 86,476 | 151 | 20,090 | 5,249 | 3,110 | 28,600 |
| 86,477 | 156 | 20,448 | 5,320 | 3,165 | 29,089 |
| 86,478 | 162 | 20,375 | 5,312 | 3,130 | 28,979 |
| 86,479 | 162 | 20,470 | 5,327 | 3,146 | 29,105 |
| 86,480 | 161 | 20,768 | 5,380 | 3,181 | 29,490 |
| 86,481 | 161 | 20,785 | 5,364 | 3,164 | 29,474 |
| 86,482 | 164 | 20,898 | 5,357 | 3,169 | 29,588 |
| 86,483 | 166 | 21,115 | 5,400 | 3,208 | 29,889 |
| 86,484 | 169 | 21,301 | 5,437 | 3,224 | 30,131 |
| 86,485 | 172 | 21,110 | 5,416 | 3,223 | 29,921 |
| 86,486 | 171 | 20,833 | 5,365 | 3,179 | 29,548 |
| 86,487 | 175 | 21,178 | 5,390 | 3,177 | 29,920 |

|        |     |        |       |       |        |
|--------|-----|--------|-------|-------|--------|
| 86,488 | 177 | 21,043 | 5,337 | 3,152 | 29,709 |
| 86,489 | 178 | 21,177 | 5,347 | 3,161 | 29,863 |
| 86,490 | 181 | 21,293 | 5,387 | 3,171 | 30,032 |
| 86,491 | 183 | 21,388 | 5,398 | 3,157 | 30,126 |
| 86,492 | 185 | 21,447 | 5,410 | 3,171 | 30,213 |
| 86,493 | 191 | 21,693 | 5,471 | 3,205 | 30,560 |
| 86,494 | 194 | 21,850 | 5,557 | 3,231 | 30,832 |
| 86,495 | 184 | 21,878 | 5,531 | 3,217 | 30,810 |
| 86,496 | 188 | 21,960 | 5,559 | 3,232 | 30,939 |
| 86,497 | 195 | 21,810 | 5,527 | 3,200 | 30,732 |
| 86,498 | 191 | 21,792 | 5,501 | 3,185 | 30,669 |
| 86,499 | 193 | 22,615 | 5,581 | 3,295 | 31,684 |
| 86,500 | 200 | 22,788 | 5,598 | 3,310 | 31,896 |
| 86,501 | 201 | 22,861 | 5,608 | 3,314 | 31,984 |
| 86,502 | 204 | 23,079 | 5,647 | 3,347 | 32,277 |
| 86,503 | 203 | 23,144 | 5,648 | 3,362 | 32,357 |
| 86,504 | 208 | 23,144 | 5,647 | 3,358 | 32,357 |
| 86,505 | 211 | 23,150 | 5,643 | 3,364 | 32,368 |
| 86,506 | 209 | 23,127 | 5,622 | 3,337 | 32,295 |
| 86,507 | 212 | 23,428 | 5,669 | 3,380 | 32,689 |
| 86,508 | 211 | 23,423 | 5,617 | 3,345 | 32,596 |
| 86,509 | 209 | 23,456 | 5,616 | 3,356 | 32,637 |
| 86,510 | 204 | 23,847 | 5,650 | 3,377 | 33,078 |
| 86,511 | 201 | 23,677 | 5,583 | 3,328 | 32,789 |
| 86,512 | 196 | 23,664 | 5,579 | 3,323 | 32,762 |
| 86,513 | 205 | 23,746 | 5,550 | 3,303 | 32,804 |
| 86,514 | 205 | 23,809 | 5,593 | 3,306 | 32,913 |
| 86,515 | 209 | 24,116 | 5,642 | 3,356 | 33,323 |
| 86,516 | 204 | 24,060 | 5,611 | 3,332 | 33,207 |
| 86,517 | 202 | 24,089 | 5,636 | 3,335 | 33,262 |
| 86,518 | 200 | 24,342 | 5,694 | 3,364 | 33,600 |
| 86,519 | 200 | 24,382 | 5,705 | 3,357 | 33,644 |



|        |     |        |       |       |        |
|--------|-----|--------|-------|-------|--------|
| 86,520 | 195 | 24,208 | 5,662 | 3,339 | 33,404 |
| 86,521 | 195 | 24,330 | 5,659 | 3,353 | 33,537 |
| 86,522 | 193 | 24,597 | 5,697 | 3,409 | 33,896 |
| 86,523 | 191 | 24,643 | 5,649 | 3,405 | 33,888 |
| 86,524 | 185 | 24,386 | 5,607 | 3,364 | 33,542 |
| 86,525 | 180 | 24,357 | 5,588 | 3,355 | 33,480 |
| 86,526 | 168 | 24,038 | 5,532 | 3,334 | 33,072 |
| 86,527 | 171 | 24,042 | 5,556 | 3,330 | 33,099 |
| 86,528 | 168 | 23,873 | 5,547 | 3,303 | 32,891 |
| 86,529 | 165 | 24,050 | 5,593 | 3,354 | 33,162 |
| 86,530 | 163 | 23,857 | 5,557 | 3,304 | 32,881 |
| 86,531 | 165 | 23,945 | 5,552 | 3,309 | 32,971 |
| 86,532 | 161 | 23,640 | 5,483 | 3,261 | 32,545 |
| 86,533 | 163 | 23,658 | 5,453 | 3,239 | 32,513 |
| 86,534 | 164 | 23,610 | 5,454 | 3,239 | 32,467 |
| 86,535 | 164 | 23,719 | 5,460 | 3,260 | 32,603 |
| 86,536 | 160 | 23,398 | 5,401 | 3,218 | 32,177 |
| 86,537 | 160 | 23,248 | 5,403 | 3,206 | 32,017 |
| 86,538 | 158 | 23,037 | 5,430 | 3,208 | 31,833 |
| 86,539 | 151 | 23,125 | 5,476 | 3,228 | 31,980 |
| 86,540 | 151 | 22,859 | 5,439 | 3,187 | 31,636 |
| 86,541 | 148 | 22,710 | 5,468 | 3,174 | 31,500 |
| 86,542 | 148 | 22,601 | 5,460 | 3,181 | 31,390 |
| 86,543 | 144 | 22,569 | 5,481 | 3,162 | 31,356 |
| 86,544 | 139 | 22,459 | 5,371 | 3,140 | 31,109 |
| 86,545 | 139 | 22,356 | 5,371 | 3,134 | 31,000 |
| 86,546 | 136 | 22,004 | 5,353 | 3,117 | 30,610 |
| 86,547 | 141 | 22,137 | 5,389 | 3,121 | 30,788 |
| 86,548 | 136 | 21,818 | 5,379 | 3,084 | 30,417 |
| 86,549 | 135 | 21,416 | 5,335 | 3,056 | 29,942 |
| 86,550 | 134 | 21,540 | 5,407 | 3,100 | 30,181 |
| 86,551 | 129 | 21,744 | 5,435 | 3,138 | 30,446 |

|        |     |        |       |       |        |
|--------|-----|--------|-------|-------|--------|
| 86,552 | 129 | 21,694 | 5,448 | 3,142 | 30,413 |
| 86,553 | 121 | 21,646 | 5,445 | 3,128 | 30,340 |
| 86,554 | 120 | 21,553 | 5,433 | 3,113 | 30,219 |
| 86,555 | 121 | 21,523 | 5,432 | 3,116 | 30,192 |
| 86,556 | 118 | 21,354 | 5,407 | 3,096 | 29,975 |
| 86,557 | 115 | 21,353 | 5,442 | 3,108 | 30,018 |
| 86,558 | 112 | 21,343 | 5,444 | 3,096 | 29,995 |
| 86,559 | 112 | 21,423 | 5,462 | 3,095 | 30,092 |
| 86,560 | 115 | 21,678 | 5,527 | 3,133 | 30,453 |
| 86,561 | 109 | 21,310 | 5,423 | 3,081 | 29,923 |
| 86,562 | 107 | 20,899 | 5,329 | 3,045 | 29,380 |
| 86,563 | 108 | 21,016 | 5,381 | 3,067 | 29,572 |
| 86,564 | 103 | 21,042 | 5,398 | 3,079 | 29,622 |
| 86,565 | 98  | 20,838 | 5,340 | 3,055 | 29,331 |
| 86,566 | 104 | 20,952 | 5,394 | 3,078 | 29,528 |
| 86,567 | 106 | 20,619 | 5,309 | 3,049 | 29,083 |
| 86,568 | 108 | 20,579 | 5,283 | 3,035 | 29,005 |
| 86,569 | 108 | 20,905 | 5,379 | 3,073 | 29,465 |
| 86,570 | 108 | 20,835 | 5,409 | 3,087 | 29,439 |
| 86,571 | 104 | 20,814 | 5,459 | 3,091 | 29,468 |
| 86,572 | 102 | 20,434 | 5,416 | 3,039 | 28,991 |
| 86,573 | 102 | 20,517 | 5,473 | 3,067 | 29,159 |
| 86,574 | 103 | 20,572 | 5,503 | 3,071 | 29,249 |
| 86,575 | 104 | 20,455 | 5,458 | 3,039 | 29,056 |
| 86,576 | 104 | 20,201 | 5,416 | 3,025 | 28,746 |
| 86,577 | 101 | 20,741 | 5,535 | 3,124 | 29,501 |
| 86,578 | 104 | 20,740 | 5,525 | 3,130 | 29,499 |
| 86,579 | 104 | 20,541 | 5,468 | 3,095 | 29,208 |
| 86,580 | 100 | 20,922 | 5,549 | 3,142 | 29,713 |
| 86,581 | 100 | 20,868 | 5,567 | 3,139 | 29,674 |
| 86,582 | 101 | 20,740 | 5,567 | 3,141 | 29,549 |
| 86,583 | 96  | 20,525 | 5,537 | 3,123 | 29,281 |

|        |     |        |       |       |        |
|--------|-----|--------|-------|-------|--------|
| 86,584 | 98  | 20,646 | 5,565 | 3,146 | 29,455 |
| 86,585 | 105 | 20,721 | 5,588 | 3,155 | 29,569 |
| 86,586 | 103 | 20,706 | 5,576 | 3,128 | 29,513 |
| 86,587 | 102 | 20,633 | 5,516 | 3,101 | 29,352 |
| 86,588 | 108 | 20,627 | 5,489 | 3,108 | 29,332 |
| 86,589 | 110 | 20,485 | 5,450 | 3,086 | 29,131 |
| 86,590 | 113 | 20,951 | 5,553 | 3,140 | 29,757 |
| 86,591 | 111 | 20,721 | 5,458 | 3,109 | 29,399 |
| 86,592 | 118 | 20,707 | 5,441 | 3,114 | 29,380 |
| 86,593 | 120 | 20,710 | 5,434 | 3,124 | 29,388 |
| 86,594 | 121 | 20,723 | 5,456 | 3,129 | 29,429 |
| 86,595 | 119 | 20,551 | 5,362 | 3,082 | 29,114 |
| 86,596 | 119 | 20,538 | 5,372 | 3,082 | 29,111 |
| 86,597 | 122 | 20,671 | 5,402 | 3,087 | 29,282 |
| 86,598 | 120 | 20,585 | 5,384 | 3,110 | 29,199 |
| 86,599 | 117 | 20,289 | 5,263 | 3,052 | 28,721 |
| 86,600 | 117 | 20,147 | 5,185 | 2,999 | 28,448 |
| 86,601 | 127 | 20,407 | 5,299 | 3,027 | 28,860 |
| 86,602 | 128 | 20,390 | 5,303 | 3,021 | 28,842 |
| 86,603 | 127 | 20,136 | 5,211 | 2,989 | 28,463 |
| 86,604 | 138 | 20,091 | 5,195 | 2,995 | 28,419 |
| 86,605 | 138 | 20,161 | 5,212 | 2,996 | 28,507 |
| 86,606 | 136 | 20,085 | 5,187 | 2,971 | 28,379 |
| 86,607 | 137 | 20,004 | 5,161 | 2,979 | 28,281 |
| 86,608 | 141 | 20,242 | 5,203 | 3,022 | 28,608 |
| 86,609 | 147 | 19,608 | 5,071 | 2,964 | 27,790 |
| 86,610 | 148 | 19,739 | 5,102 | 2,983 | 27,972 |
| 86,611 | 149 | 19,700 | 5,102 | 2,974 | 27,925 |
| 86,612 | 150 | 19,428 | 5,069 | 2,948 | 27,595 |
| 86,613 | 151 | 19,789 | 5,159 | 3,008 | 28,107 |
| 86,614 | 155 | 19,503 | 5,108 | 2,980 | 27,746 |
| 86,615 | 155 | 19,441 | 5,110 | 2,977 | 27,683 |

|        |     |        |       |       |        |
|--------|-----|--------|-------|-------|--------|
| 86,616 | 161 | 19,619 | 5,149 | 3,009 | 27,938 |
| 86,617 | 159 | 19,410 | 5,089 | 2,976 | 27,634 |
| 86,618 | 155 | 19,042 | 5,012 | 2,941 | 27,150 |
| 86,619 | 155 | 19,507 | 5,129 | 3,041 | 27,832 |
| 86,620 | 157 | 19,384 | 5,096 | 3,030 | 27,667 |
| 86,621 | 155 | 19,435 | 5,080 | 3,038 | 27,708 |
| 86,622 | 160 | 19,513 | 5,078 | 3,036 | 27,787 |
| 86,623 | 164 | 19,480 | 5,087 | 3,032 | 27,763 |
| 86,624 | 164 | 19,309 | 5,028 | 2,995 | 27,496 |
| 86,625 | 176 | 19,465 | 5,073 | 3,033 | 27,747 |
| 86,626 | 187 | 19,431 | 5,075 | 3,040 | 27,733 |
| 86,627 | 197 | 19,294 | 5,046 | 3,008 | 27,545 |
| 86,628 | 197 | 19,048 | 4,993 | 2,963 | 27,201 |
| 86,629 | 196 | 19,226 | 5,036 | 2,978 | 27,436 |
| 86,630 | 196 | 19,282 | 5,055 | 3,004 | 27,537 |
| 86,631 | 197 | 19,413 | 5,130 | 3,027 | 27,767 |
| 86,632 | 199 | 19,312 | 5,079 | 3,001 | 27,591 |
| 86,633 | 199 | 19,324 | 5,071 | 3,002 | 27,596 |
| 86,634 | 199 | 19,507 | 5,117 | 3,043 | 27,866 |
| 86,635 | 201 | 19,511 | 5,119 | 3,040 | 27,871 |
| 86,636 | 200 | 19,809 | 5,200 | 3,082 | 28,291 |
| 86,637 | 197 | 19,548 | 5,147 | 3,069 | 27,961 |
| 86,638 | 197 | 19,643 | 5,198 | 3,088 | 28,126 |
| 86,639 | 201 | 19,946 | 5,321 | 3,146 | 28,614 |
| 86,640 | 198 | 19,709 | 5,276 | 3,113 | 28,296 |
| 86,641 | 205 | 19,843 | 5,325 | 3,157 | 28,530 |
| 86,642 | 197 | 19,808 | 5,344 | 3,168 | 28,517 |
| 86,643 | 202 | 19,866 | 5,445 | 3,200 | 28,713 |
| 86,644 | 204 | 19,727 | 5,453 | 3,190 | 28,574 |
| 86,645 | 203 | 19,663 | 5,434 | 3,192 | 28,492 |
| 86,646 | 202 | 19,621 | 5,484 | 3,218 | 28,525 |
| 86,647 | 207 | 19,706 | 5,505 | 3,240 | 28,658 |

|        |     |        |       |       |        |
|--------|-----|--------|-------|-------|--------|
| 86,648 | 203 | 19,792 | 5,499 | 3,260 | 28,754 |
| 86,649 | 204 | 20,039 | 5,568 | 3,296 | 29,107 |
| 86,650 | 200 | 19,974 | 5,566 | 3,280 | 29,020 |
| 86,651 | 200 | 20,038 | 5,549 | 3,297 | 29,084 |
| 86,652 | 193 | 19,722 | 5,456 | 3,263 | 28,634 |
| 86,653 | 203 | 19,990 | 5,535 | 3,303 | 29,031 |
| 86,654 | 195 | 20,250 | 5,599 | 3,357 | 29,401 |
| 86,655 | 202 | 20,524 | 5,689 | 3,387 | 29,802 |
| 86,656 | 200 | 20,701 | 5,769 | 3,434 | 30,104 |
| 86,657 | 199 | 20,533 | 5,736 | 3,415 | 29,883 |
| 86,658 | 204 | 20,634 | 5,775 | 3,424 | 30,037 |
| 86,659 | 207 | 20,827 | 5,839 | 3,457 | 30,330 |
| 86,660 | 200 | 21,123 | 5,903 | 3,495 | 30,721 |
| 86,661 | 204 | 21,222 | 5,943 | 3,506 | 30,875 |
| 86,662 | 201 | 21,241 | 5,958 | 3,519 | 30,919 |
| 86,663 | 199 | 21,053 | 5,875 | 3,500 | 30,627 |
| 86,664 | 199 | 21,237 | 5,930 | 3,514 | 30,880 |
| 86,665 | 202 | 21,389 | 5,963 | 3,540 | 31,094 |
| 86,666 | 205 | 21,586 | 5,985 | 3,563 | 31,339 |
| 86,667 | 205 | 21,402 | 5,950 | 3,549 | 31,106 |
| 86,668 | 201 | 21,190 | 5,921 | 3,547 | 30,859 |
| 86,669 | 202 | 21,739 | 6,020 | 3,607 | 31,568 |
| 86,670 | 201 | 22,294 | 6,145 | 3,684 | 32,324 |
| 86,671 | 200 | 22,130 | 6,112 | 3,656 | 32,098 |
| 86,672 | 208 | 22,453 | 6,248 | 3,705 | 32,614 |
| 86,673 | 202 | 22,238 | 6,192 | 3,684 | 32,316 |
| 86,674 | 202 | 22,281 | 6,189 | 3,681 | 32,353 |
| 86,675 | 209 | 22,748 | 6,284 | 3,747 | 32,988 |
| 86,676 | 204 | 22,857 | 6,278 | 3,760 | 33,099 |
| 86,677 | 193 | 22,909 | 6,305 | 3,761 | 33,168 |
| 86,678 | 184 | 22,653 | 6,222 | 3,736 | 32,795 |
| 86,679 | 184 | 22,779 | 6,261 | 3,753 | 32,977 |

|        |     |        |       |       |        |
|--------|-----|--------|-------|-------|--------|
| 86,680 | 189 | 22,810 | 6,247 | 3,742 | 32,988 |
| 86,681 | 190 | 22,786 | 6,230 | 3,736 | 32,942 |
| 86,682 | 190 | 22,866 | 6,245 | 3,757 | 33,058 |
| 86,683 | 186 | 22,920 | 6,256 | 3,783 | 33,145 |
| 86,684 | 183 | 22,963 | 6,287 | 3,823 | 33,256 |
| 86,685 | 180 | 22,697 | 6,236 | 3,804 | 32,917 |
| 86,686 | 177 | 22,604 | 6,286 | 3,811 | 32,878 |
| 86,687 | 171 | 22,604 | 6,292 | 3,825 | 32,892 |
| 86,688 | 174 | 22,740 | 6,305 | 3,841 | 33,060 |
| 86,689 | 167 | 22,706 | 6,277 | 3,834 | 32,984 |
| 86,690 | 168 | 22,496 | 6,262 | 3,821 | 32,747 |
| 86,691 | 163 | 22,524 | 6,280 | 3,832 | 32,799 |
| 86,692 | 156 | 22,225 | 6,142 | 3,722 | 32,245 |
| 86,693 | 156 | 22,518 | 6,179 | 3,752 | 32,605 |
| 86,694 | 150 | 22,677 | 6,205 | 3,790 | 32,822 |
| 86,695 | 155 | 22,685 | 6,219 | 3,773 | 32,832 |
| 86,696 | 154 | 22,669 | 6,204 | 3,771 | 32,798 |
| 86,697 | 149 | 22,730 | 6,220 | 3,794 | 32,893 |
| 86,698 | 149 | 22,683 | 6,224 | 3,798 | 32,854 |
| 86,699 | 156 | 22,460 | 6,207 | 3,756 | 32,579 |
| 86,700 | 154 | 22,307 | 6,156 | 3,705 | 32,322 |
| 86,701 | 154 | 22,518 | 6,245 | 3,745 | 32,662 |
| 86,702 | 154 | 22,504 | 6,249 | 3,739 | 32,646 |
| 86,703 | 148 | 22,574 | 6,265 | 3,765 | 32,752 |
| 86,704 | 139 | 22,192 | 6,192 | 3,730 | 32,253 |
| 86,705 | 142 | 22,275 | 6,253 | 3,716 | 32,386 |
| 86,706 | 140 | 22,236 | 6,245 | 3,739 | 32,360 |
| 86,707 | 135 | 21,746 | 6,086 | 3,637 | 31,604 |
| 86,708 | 136 | 21,852 | 6,129 | 3,656 | 31,773 |
| 86,709 | 139 | 21,953 | 6,167 | 3,674 | 31,933 |
| 86,710 | 136 | 21,729 | 6,106 | 3,646 | 31,617 |
| 86,711 | 138 | 21,686 | 6,097 | 3,640 | 31,561 |

|        |     |        |       |       |        |
|--------|-----|--------|-------|-------|--------|
| 86,712 | 132 | 21,449 | 6,074 | 3,634 | 31,289 |
| 86,713 | 131 | 21,288 | 6,074 | 3,634 | 31,127 |
| 86,714 | 126 | 21,258 | 6,065 | 3,620 | 31,069 |
| 86,715 | 133 | 21,199 | 6,064 | 3,623 | 31,019 |
| 86,716 | 131 | 20,972 | 6,034 | 3,609 | 30,746 |
| 86,717 | 126 | 21,006 | 6,108 | 3,631 | 30,871 |
| 86,718 | 125 | 20,757 | 6,087 | 3,625 | 30,594 |
| 86,719 | 123 | 20,579 | 6,056 | 3,594 | 30,352 |
| 86,720 | 127 | 20,693 | 6,120 | 3,613 | 30,553 |
| 86,721 | 132 | 20,703 | 6,129 | 3,604 | 30,568 |
| 86,722 | 123 | 20,587 | 6,072 | 3,584 | 30,366 |
| 86,723 | 127 | 20,352 | 6,032 | 3,565 | 30,076 |
| 86,724 | 128 | 20,447 | 6,026 | 3,575 | 30,176 |
| 86,725 | 126 | 20,705 | 6,074 | 3,583 | 30,488 |
| 86,726 | 123 | 20,439 | 6,045 | 3,567 | 30,174 |
| 86,727 | 123 | 20,483 | 6,093 | 3,590 | 30,289 |
| 86,728 | 123 | 20,301 | 6,102 | 3,581 | 30,107 |
| 86,729 | 124 | 20,237 | 6,152 | 3,603 | 30,116 |
| 86,730 | 127 | 20,310 | 6,165 | 3,622 | 30,224 |
| 86,731 | 124 | 20,404 | 6,217 | 3,654 | 30,399 |
| 86,732 | 124 | 20,471 | 6,238 | 3,671 | 30,504 |
| 86,733 | 127 | 20,665 | 6,308 | 3,703 | 30,803 |
| 86,734 | 129 | 20,453 | 6,302 | 3,658 | 30,542 |
| 86,735 | 129 | 20,673 | 6,315 | 3,662 | 30,779 |
| 86,736 | 130 | 21,051 | 6,387 | 3,715 | 31,283 |
| 86,737 | 134 | 21,122 | 6,424 | 3,758 | 31,438 |
| 86,738 | 137 | 20,916 | 6,385 | 3,741 | 31,179 |
| 86,739 | 134 | 20,823 | 6,367 | 3,733 | 31,057 |
| 86,740 | 135 | 20,591 | 6,323 | 3,686 | 30,735 |
| 86,741 | 130 | 20,403 | 6,259 | 3,649 | 30,441 |
| 86,742 | 131 | 20,700 | 6,310 | 3,673 | 30,814 |
| 86,743 | 130 | 20,704 | 6,303 | 3,683 | 30,820 |

|        |     |        |       |       |        |
|--------|-----|--------|-------|-------|--------|
| 86,744 | 133 | 20,718 | 6,289 | 3,660 | 30,800 |
| 86,745 | 132 | 20,790 | 6,296 | 3,651 | 30,869 |
| 86,746 | 132 | 20,686 | 6,246 | 3,637 | 30,701 |
| 86,747 | 135 | 20,667 | 6,241 | 3,606 | 30,649 |
| 86,748 | 140 | 20,730 | 6,243 | 3,600 | 30,713 |
| 86,749 | 142 | 20,531 | 6,204 | 3,561 | 30,438 |
| 86,750 | 143 | 20,502 | 6,167 | 3,536 | 30,348 |
| 86,751 | 142 | 20,202 | 6,124 | 3,527 | 29,995 |
| 86,752 | 143 | 20,675 | 6,244 | 3,609 | 30,671 |
| 86,753 | 150 | 20,494 | 6,211 | 3,570 | 30,425 |
| 86,754 | 145 | 20,181 | 6,137 | 3,539 | 30,002 |
| 86,755 | 146 | 20,699 | 6,228 | 3,614 | 30,687 |
| 86,756 | 140 | 20,471 | 6,148 | 3,578 | 30,337 |
| 86,757 | 139 | 20,539 | 6,191 | 3,596 | 30,465 |
| 86,758 | 137 | 20,518 | 6,123 | 3,577 | 30,355 |
| 86,759 | 137 | 20,482 | 6,087 | 3,568 | 30,274 |
| 86,760 | 132 | 20,427 | 6,086 | 3,565 | 30,210 |
| 86,761 | 127 | 20,207 | 6,011 | 3,514 | 29,859 |
| 86,762 | 127 | 20,510 | 6,047 | 3,548 | 30,232 |
| 86,763 | 133 | 20,596 | 6,028 | 3,532 | 30,289 |
| 86,764 | 139 | 20,661 | 5,998 | 3,523 | 30,321 |
| 86,765 | 139 | 20,518 | 5,952 | 3,510 | 30,119 |
| 86,766 | 131 | 20,290 | 5,805 | 3,411 | 29,637 |
| 86,767 | 135 | 20,449 | 5,858 | 3,435 | 29,877 |
| 86,768 | 136 | 20,681 | 5,930 | 3,469 | 30,216 |
| 86,769 | 138 | 20,688 | 5,937 | 3,457 | 30,220 |
| 86,770 | 142 | 20,843 | 5,983 | 3,514 | 30,482 |
| 86,771 | 140 | 20,749 | 5,945 | 3,486 | 30,320 |
| 86,772 | 142 | 20,616 | 5,928 | 3,486 | 30,172 |
| 86,773 | 135 | 20,124 | 5,792 | 3,409 | 29,460 |
| 86,774 | 140 | 20,154 | 5,789 | 3,403 | 29,486 |
| 86,775 | 139 | 19,781 | 5,741 | 3,357 | 29,018 |



|        |     |        |       |       |        |
|--------|-----|--------|-------|-------|--------|
| 86,776 | 137 | 19,913 | 5,776 | 3,419 | 29,245 |
| 86,777 | 136 | 19,737 | 5,749 | 3,387 | 29,009 |
| 86,778 | 131 | 19,618 | 5,680 | 3,387 | 28,816 |
| 86,779 | 131 | 19,602 | 5,624 | 3,377 | 28,734 |
| 86,780 | 130 | 19,599 | 5,588 | 3,347 | 28,664 |
| 86,781 | 128 | 19,491 | 5,544 | 3,323 | 28,486 |
| 86,782 | 132 | 19,059 | 5,424 | 3,263 | 27,878 |
| 86,783 | 129 | 18,728 | 5,351 | 3,215 | 27,423 |
| 86,784 | 134 | 19,026 | 5,473 | 3,254 | 27,887 |
| 86,785 | 132 | 18,746 | 5,382 | 3,211 | 27,471 |
| 86,786 | 134 | 18,819 | 5,411 | 3,237 | 27,601 |
| 86,787 | 133 | 18,741 | 5,388 | 3,211 | 27,473 |
| 86,788 | 131 | 18,635 | 5,344 | 3,151 | 27,261 |
| 86,789 | 132 | 18,790 | 5,383 | 3,159 | 27,464 |
| 86,790 | 139 | 18,823 | 5,432 | 3,162 | 27,556 |
| 86,791 | 141 | 18,812 | 5,371 | 3,138 | 27,462 |
| 86,792 | 141 | 18,819 | 5,390 | 3,138 | 27,488 |
| 86,793 | 144 | 18,834 | 5,403 | 3,160 | 27,541 |
| 86,794 | 147 | 19,020 | 5,482 | 3,195 | 27,844 |
| 86,795 | 147 | 18,882 | 5,462 | 3,180 | 27,671 |
| 86,796 | 148 | 19,049 | 5,514 | 3,216 | 27,927 |
| 86,797 | 145 | 18,979 | 5,484 | 3,181 | 27,789 |
| 86,798 | 146 | 19,035 | 5,483 | 3,185 | 27,849 |
| 86,799 | 134 | 19,139 | 5,511 | 3,187 | 27,971 |
| 86,800 | 134 | 19,067 | 5,504 | 3,173 | 27,878 |
| 86,801 | 132 | 19,072 | 5,575 | 3,246 | 28,025 |
| 86,802 | 138 | 19,186 | 5,591 | 3,259 | 28,174 |
| 86,803 | 131 | 19,023 | 5,569 | 3,243 | 27,966 |
| 86,804 | 134 | 19,245 | 5,647 | 3,266 | 28,292 |
| 86,805 | 133 | 19,399 | 5,673 | 3,271 | 28,476 |
| 86,806 | 135 | 19,337 | 5,673 | 3,261 | 28,406 |
| 86,807 | 136 | 19,281 | 5,646 | 3,241 | 28,304 |

|        |     |        |       |       |        |
|--------|-----|--------|-------|-------|--------|
| 86,808 | 136 | 19,331 | 5,674 | 3,248 | 28,389 |
| 86,809 | 141 | 19,473 | 5,735 | 3,294 | 28,643 |
| 86,810 | 143 | 19,402 | 5,674 | 3,268 | 28,487 |
| 86,811 | 144 | 19,133 | 5,606 | 3,217 | 28,100 |
| 86,812 | 145 | 19,189 | 5,635 | 3,231 | 28,200 |
| 86,813 | 147 | 18,996 | 5,623 | 3,216 | 27,982 |
| 86,814 | 142 | 18,847 | 5,582 | 3,211 | 27,782 |
| 86,815 | 138 | 19,808 | 5,850 | 3,375 | 29,171 |
| 86,816 | 132 | 19,200 | 5,703 | 3,313 | 28,348 |
| 86,817 | 134 | 19,438 | 5,772 | 3,353 | 28,697 |
| 86,818 | 130 | 19,746 | 5,860 | 3,388 | 29,124 |
| 86,819 | 131 | 19,712 | 5,859 | 3,398 | 29,100 |
| 86,820 | 132 | 19,856 | 5,908 | 3,435 | 29,331 |
| 86,821 | 128 | 20,137 | 5,991 | 3,455 | 29,711 |
| 86,822 | 125 | 20,174 | 6,009 | 3,433 | 29,741 |
| 86,823 | 123 | 20,165 | 6,016 | 3,426 | 29,730 |
| 86,824 | 129 | 20,424 | 6,090 | 3,463 | 30,106 |
| 86,825 | 128 | 20,388 | 6,069 | 3,439 | 30,024 |
| 86,826 | 128 | 20,402 | 6,089 | 3,447 | 30,066 |
| 86,827 | 130 | 20,510 | 6,155 | 3,445 | 30,240 |
| 86,828 | 127 | 20,235 | 6,096 | 3,366 | 29,824 |
| 86,829 | 129 | 20,398 | 6,208 | 3,395 | 30,130 |
| 86,830 | 128 | 20,256 | 6,185 | 3,376 | 29,945 |
| 86,831 | 131 | 20,253 | 6,209 | 3,370 | 29,963 |
| 86,832 | 132 | 20,583 | 6,283 | 3,397 | 30,395 |
| 86,833 | 131 | 20,629 | 6,310 | 3,409 | 30,479 |
| 86,834 | 128 | 20,798 | 6,330 | 3,408 | 30,664 |
| 86,835 | 127 | 20,706 | 6,325 | 3,400 | 30,558 |
| 86,836 | 128 | 20,645 | 6,360 | 3,372 | 30,505 |
| 86,837 | 129 | 20,687 | 6,355 | 3,388 | 30,559 |
| 86,838 | 129 | 20,710 | 6,356 | 3,385 | 30,580 |
| 86,839 | 129 | 20,885 | 6,406 | 3,420 | 30,840 |

|        |     |        |       |       |        |
|--------|-----|--------|-------|-------|--------|
| 86,840 | 128 | 20,651 | 6,349 | 3,411 | 30,539 |
| 86,841 | 127 | 20,916 | 6,425 | 3,434 | 30,902 |
| 86,842 | 130 | 21,064 | 6,484 | 3,470 | 31,148 |
| 86,843 | 128 | 21,152 | 6,496 | 3,484 | 31,260 |
| 86,844 | 129 | 21,118 | 6,547 | 3,492 | 31,286 |
| 86,845 | 126 | 21,269 | 6,591 | 3,526 | 31,512 |
| 86,846 | 120 | 20,970 | 6,507 | 3,512 | 31,109 |
| 86,847 | 123 | 21,202 | 6,542 | 3,527 | 31,394 |
| 86,848 | 123 | 21,192 | 6,570 | 3,560 | 31,445 |
| 86,849 | 124 | 21,181 | 6,581 | 3,565 | 31,451 |
| 86,850 | 125 | 21,203 | 6,577 | 3,574 | 31,479 |
| 86,851 | 126 | 21,032 | 6,482 | 3,500 | 31,140 |
| 86,852 | 127 | 21,423 | 6,537 | 3,538 | 31,625 |
| 86,853 | 133 | 21,679 | 6,617 | 3,570 | 31,999 |
| 86,854 | 136 | 21,728 | 6,623 | 3,571 | 32,058 |
| 86,855 | 136 | 21,542 | 6,556 | 3,531 | 31,765 |
| 86,856 | 135 | 21,295 | 6,502 | 3,498 | 31,430 |
| 86,857 | 136 | 21,504 | 6,565 | 3,521 | 31,726 |
| 86,858 | 137 | 21,574 | 6,587 | 3,543 | 31,841 |
| 86,859 | 136 | 21,337 | 6,524 | 3,509 | 31,506 |
| 86,860 | 131 | 21,188 | 6,515 | 3,496 | 31,330 |
| 86,861 | 131 | 21,254 | 6,574 | 3,506 | 31,465 |
| 86,862 | 132 | 21,262 | 6,582 | 3,497 | 31,473 |
| 86,863 | 132 | 21,179 | 6,583 | 3,498 | 31,392 |
| 86,864 | 136 | 21,141 | 6,597 | 3,504 | 31,378 |
| 86,865 | 137 | 21,059 | 6,591 | 3,497 | 31,284 |
| 86,866 | 143 | 20,613 | 6,465 | 3,394 | 30,615 |
| 86,867 | 146 | 20,821 | 6,518 | 3,406 | 30,891 |
| 86,868 | 144 | 20,796 | 6,499 | 3,397 | 30,836 |
| 86,869 | 147 | 20,751 | 6,480 | 3,407 | 30,785 |
| 86,870 | 147 | 20,977 | 6,506 | 3,433 | 31,063 |
| 86,871 | 144 | 20,839 | 6,434 | 3,383 | 30,800 |

|        |     |        |       |       |        |
|--------|-----|--------|-------|-------|--------|
| 86,872 | 145 | 21,030 | 6,434 | 3,438 | 31,047 |
| 86,873 | 144 | 20,837 | 6,374 | 3,439 | 30,794 |
| 86,874 | 143 | 20,858 | 6,399 | 3,431 | 30,831 |
| 86,875 | 132 | 20,710 | 6,317 | 3,421 | 30,580 |
| 86,876 | 136 | 20,765 | 6,305 | 3,417 | 30,623 |
| 86,877 | 136 | 20,793 | 6,277 | 3,410 | 30,616 |
| 86,878 | 136 | 20,749 | 6,283 | 3,422 | 30,590 |
| 86,879 | 141 | 20,797 | 6,255 | 3,465 | 30,658 |
| 86,880 | 144 | 20,755 | 6,196 | 3,440 | 30,535 |
| 86,881 | 144 | 20,957 | 6,210 | 3,464 | 30,775 |
| 86,882 | 140 | 20,942 | 6,223 | 3,487 | 30,792 |
| 86,883 | 140 | 20,833 | 6,211 | 3,501 | 30,685 |
| 86,884 | 133 | 20,570 | 6,126 | 3,440 | 30,269 |
| 86,885 | 133 | 20,641 | 6,173 | 3,493 | 30,440 |
| 86,886 | 129 | 20,563 | 6,169 | 3,485 | 30,346 |
| 86,887 | 129 | 19,864 | 5,927 | 3,370 | 29,290 |
| 86,888 | 132 | 19,920 | 5,971 | 3,375 | 29,398 |
| 86,889 | 127 | 19,907 | 5,989 | 3,388 | 29,411 |
| 86,890 | 127 | 19,854 | 5,984 | 3,378 | 29,343 |
| 86,891 | 124 | 19,998 | 6,030 | 3,391 | 29,543 |
| 86,892 | 124 | 20,071 | 6,041 | 3,443 | 29,679 |
| 86,893 | 120 | 19,655 | 5,904 | 3,409 | 29,088 |
| 86,894 | 120 | 19,579 | 5,866 | 3,368 | 28,933 |
| 86,895 | 119 | 19,700 | 5,880 | 3,386 | 29,085 |
| 86,896 | 122 | 19,451 | 5,820 | 3,346 | 28,739 |
| 86,897 | 120 | 19,252 | 5,760 | 3,318 | 28,450 |
| 86,898 | 121 | 18,974 | 5,737 | 3,298 | 28,130 |
| 86,899 | 121 | 19,062 | 5,741 | 3,291 | 28,215 |
| 86,900 | 120 | 18,787 | 5,719 | 3,269 | 27,895 |
| 86,901 | 119 | 18,720 | 5,710 | 3,251 | 27,800 |
| 86,902 | 109 | 18,395 | 5,646 | 3,209 | 27,359 |
| 86,903 | 109 | 18,466 | 5,685 | 3,221 | 27,481 |

|        |     |        |       |       |        |
|--------|-----|--------|-------|-------|--------|
| 86,904 | 107 | 18,585 | 5,712 | 3,242 | 27,646 |
| 86,905 | 105 | 18,404 | 5,658 | 3,234 | 27,401 |
| 86,906 | 98  | 18,083 | 5,589 | 3,203 | 26,973 |
| 86,907 | 104 | 18,179 | 5,659 | 3,237 | 27,179 |
| 86,908 | 110 | 17,992 | 5,616 | 3,212 | 26,930 |
| 86,909 | 110 | 18,037 | 5,632 | 3,200 | 26,979 |
| 86,910 | 111 | 18,161 | 5,665 | 3,217 | 27,154 |
| 86,911 | 110 | 18,159 | 5,658 | 3,229 | 27,156 |
| 86,912 | 105 | 18,153 | 5,626 | 3,214 | 27,098 |
| 86,913 | 107 | 18,058 | 5,589 | 3,212 | 26,966 |
| 86,914 | 108 | 17,935 | 5,584 | 3,204 | 26,831 |
| 86,915 | 107 | 18,039 | 5,617 | 3,228 | 26,991 |
| 86,916 | 106 | 17,857 | 5,606 | 3,215 | 26,784 |
| 86,917 | 101 | 17,778 | 5,608 | 3,229 | 26,716 |
| 86,918 | 98  | 17,727 | 5,573 | 3,198 | 26,596 |
| 86,919 | 100 | 17,984 | 5,639 | 3,250 | 26,973 |
| 86,920 | 98  | 18,012 | 5,650 | 3,235 | 26,995 |
| 86,921 | 105 | 17,900 | 5,652 | 3,209 | 26,866 |
| 86,922 | 105 | 17,875 | 5,653 | 3,209 | 26,842 |
| 86,923 | 110 | 17,892 | 5,719 | 3,199 | 26,920 |
| 86,924 | 110 | 17,827 | 5,715 | 3,188 | 26,840 |
| 86,925 | 110 | 17,843 | 5,693 | 3,173 | 26,819 |
| 86,926 | 112 | 17,859 | 5,798 | 3,192 | 26,961 |
| 86,927 | 110 | 18,042 | 5,895 | 3,245 | 27,292 |
| 86,928 | 107 | 17,818 | 5,858 | 3,223 | 27,006 |
| 86,929 | 107 | 18,073 | 5,955 | 3,268 | 27,403 |
| 86,930 | 101 | 17,948 | 5,957 | 3,268 | 27,274 |
| 86,931 | 100 | 18,287 | 6,104 | 3,321 | 27,812 |
| 86,932 | 99  | 18,406 | 6,185 | 3,362 | 28,052 |
| 86,933 | 103 | 18,500 | 6,232 | 3,367 | 28,202 |
| 86,934 | 102 | 18,602 | 6,250 | 3,389 | 28,343 |
| 86,935 | 105 | 18,756 | 6,272 | 3,419 | 28,552 |

|        |     |        |       |       |        |
|--------|-----|--------|-------|-------|--------|
| 86,936 | 107 | 18,745 | 6,249 | 3,406 | 28,507 |
| 86,937 | 107 | 18,904 | 6,262 | 3,438 | 28,711 |
| 86,938 | 106 | 19,043 | 6,299 | 3,483 | 28,931 |
| 86,939 | 105 | 19,148 | 6,298 | 3,490 | 29,041 |
| 86,940 | 104 | 19,014 | 6,237 | 3,477 | 28,832 |
| 86,941 | 107 | 19,253 | 6,298 | 3,508 | 29,166 |
| 86,942 | 115 | 19,638 | 6,424 | 3,591 | 29,768 |
| 86,943 | 116 | 19,793 | 6,466 | 3,589 | 29,964 |
| 86,944 | 119 | 19,682 | 6,505 | 3,565 | 29,871 |
| 86,945 | 119 | 19,569 | 6,441 | 3,559 | 29,688 |
| 86,946 | 114 | 19,559 | 6,411 | 3,545 | 29,629 |
| 86,947 | 120 | 19,765 | 6,453 | 3,573 | 29,911 |
| 86,948 | 118 | 19,744 | 6,450 | 3,550 | 29,862 |
| 86,949 | 112 | 19,598 | 6,384 | 3,514 | 29,608 |
| 86,950 | 113 | 19,410 | 6,310 | 3,472 | 29,305 |
| 86,951 | 113 | 19,577 | 6,351 | 3,500 | 29,541 |
| 86,952 | 113 | 19,796 | 6,411 | 3,523 | 29,843 |
| 86,953 | 114 | 19,622 | 6,373 | 3,485 | 29,594 |
| 86,954 | 115 | 19,872 | 6,417 | 3,533 | 29,937 |
| 86,955 | 119 | 19,440 | 6,348 | 3,490 | 29,397 |
| 86,956 | 121 | 19,716 | 6,410 | 3,513 | 29,760 |
| 86,957 | 121 | 19,917 | 6,445 | 3,544 | 30,027 |
| 86,958 | 115 | 19,852 | 6,450 | 3,555 | 29,972 |
| 86,959 | 108 | 19,751 | 6,443 | 3,557 | 29,859 |
| 86,960 | 107 | 19,596 | 6,399 | 3,524 | 29,626 |
| 86,961 | 109 | 19,681 | 6,452 | 3,546 | 29,788 |
| 86,962 | 112 | 19,721 | 6,497 | 3,556 | 29,886 |
| 86,963 | 110 | 19,577 | 6,413 | 3,513 | 29,613 |
| 86,964 | 107 | 19,728 | 6,510 | 3,552 | 29,897 |
| 86,965 | 105 | 19,803 | 6,583 | 3,594 | 30,085 |
| 86,966 | 108 | 19,836 | 6,593 | 3,568 | 30,105 |
| 86,967 | 106 | 19,572 | 6,526 | 3,524 | 29,728 |

|        |     |        |       |       |        |
|--------|-----|--------|-------|-------|--------|
| 86,968 | 106 | 19,563 | 6,523 | 3,502 | 29,694 |
| 86,969 | 115 | 19,783 | 6,648 | 3,546 | 30,092 |
| 86,970 | 116 | 19,773 | 6,671 | 3,533 | 30,093 |
| 86,971 | 117 | 19,668 | 6,696 | 3,540 | 30,021 |
| 86,972 | 111 | 19,217 | 6,563 | 3,476 | 29,367 |
| 86,973 | 112 | 19,448 | 6,652 | 3,515 | 29,727 |
| 86,974 | 111 | 19,702 | 6,711 | 3,546 | 30,070 |
| 86,975 | 114 | 19,762 | 6,697 | 3,562 | 30,135 |
| 86,976 | 112 | 19,538 | 6,628 | 3,569 | 29,847 |
| 86,977 | 113 | 19,867 | 6,674 | 3,600 | 30,254 |
| 86,978 | 116 | 19,800 | 6,618 | 3,567 | 30,101 |
| 86,979 | 119 | 19,878 | 6,595 | 3,554 | 30,146 |
| 86,980 | 123 | 19,708 | 6,537 | 3,507 | 29,875 |
| 86,981 | 130 | 19,900 | 6,633 | 3,541 | 30,204 |
| 86,982 | 134 | 19,751 | 6,556 | 3,516 | 29,957 |
| 86,983 | 137 | 19,614 | 6,497 | 3,467 | 29,715 |
| 86,984 | 144 | 19,755 | 6,481 | 3,482 | 29,862 |
| 86,985 | 145 | 19,635 | 6,475 | 3,459 | 29,714 |
| 86,986 | 142 | 19,642 | 6,510 | 3,456 | 29,750 |
| 86,987 | 148 | 19,839 | 6,570 | 3,473 | 30,030 |
| 86,988 | 148 | 19,727 | 6,558 | 3,450 | 29,883 |
| 86,989 | 151 | 19,912 | 6,644 | 3,456 | 30,163 |
| 86,990 | 154 | 19,962 | 6,665 | 3,441 | 30,222 |
| 86,991 | 154 | 20,087 | 6,727 | 3,464 | 30,432 |
| 86,992 | 155 | 20,059 | 6,719 | 3,470 | 30,403 |
| 86,993 | 153 | 19,925 | 6,684 | 3,444 | 30,206 |
| 86,994 | 158 | 20,041 | 6,724 | 3,476 | 30,399 |
| 86,995 | 154 | 20,031 | 6,640 | 3,447 | 30,272 |
| 86,996 | 158 | 19,979 | 6,667 | 3,438 | 30,242 |
| 86,997 | 160 | 19,969 | 6,678 | 3,444 | 30,251 |
| 86,998 | 160 | 19,993 | 6,718 | 3,446 | 30,317 |
| 86,999 | 160 | 19,996 | 6,738 | 3,448 | 30,342 |

|        |     |        |       |       |        |
|--------|-----|--------|-------|-------|--------|
| 87,000 | 157 | 20,050 | 6,777 | 3,468 | 30,452 |
| 87,001 | 160 | 20,144 | 6,788 | 3,459 | 30,551 |
| 87,002 | 160 | 20,038 | 6,764 | 3,462 | 30,424 |
| 87,003 | 157 | 20,187 | 6,827 | 3,491 | 30,662 |
| 87,004 | 159 | 20,104 | 6,838 | 3,521 | 30,622 |
| 87,005 | 162 | 20,098 | 6,861 | 3,517 | 30,638 |
| 87,006 | 160 | 20,111 | 6,827 | 3,504 | 30,602 |
| 87,007 | 167 | 20,063 | 6,897 | 3,521 | 30,648 |
| 87,008 | 169 | 20,081 | 6,898 | 3,495 | 30,643 |
| 87,009 | 180 | 20,165 | 6,888 | 3,492 | 30,725 |
| 87,010 | 183 | 20,333 | 6,909 | 3,485 | 30,910 |
| 87,011 | 186 | 20,473 | 6,891 | 3,493 | 31,043 |
| 87,012 | 185 | 20,486 | 6,890 | 3,502 | 31,063 |
| 87,013 | 182 | 20,406 | 6,894 | 3,505 | 30,987 |
| 87,014 | 195 | 20,561 | 6,964 | 3,533 | 31,253 |
| 87,015 | 199 | 20,740 | 6,945 | 3,514 | 31,398 |
| 87,016 | 199 | 20,819 | 6,958 | 3,498 | 31,474 |
| 87,017 | 196 | 20,835 | 6,963 | 3,522 | 31,516 |
| 87,018 | 206 | 20,808 | 6,929 | 3,519 | 31,462 |
| 87,019 | 202 | 20,737 | 6,866 | 3,497 | 31,302 |
| 87,020 | 200 | 21,216 | 6,992 | 3,559 | 31,967 |
| 87,021 | 202 | 21,046 | 6,888 | 3,522 | 31,658 |
| 87,022 | 202 | 21,161 | 6,882 | 3,527 | 31,772 |
| 87,023 | 198 | 21,036 | 6,859 | 3,526 | 31,619 |
| 87,024 | 208 | 21,051 | 6,840 | 3,527 | 31,626 |
| 87,025 | 210 | 20,931 | 6,831 | 3,504 | 31,476 |
| 87,026 | 220 | 20,978 | 6,915 | 3,532 | 31,645 |
| 87,027 | 220 | 21,035 | 6,916 | 3,534 | 31,705 |
| 87,028 | 215 | 20,764 | 6,871 | 3,507 | 31,357 |
| 87,029 | 204 | 19,816 | 6,520 | 3,347 | 29,887 |
| 87,030 | 206 | 19,927 | 6,544 | 3,360 | 30,037 |
| 87,031 | 211 | 20,092 | 6,567 | 3,401 | 30,271 |



|        |     |        |       |       |        |
|--------|-----|--------|-------|-------|--------|
| 87,032 | 210 | 20,131 | 6,564 | 3,393 | 30,298 |
| 87,033 | 206 | 20,051 | 6,540 | 3,385 | 30,182 |
| 87,034 | 205 | 20,103 | 6,529 | 3,378 | 30,215 |
| 87,035 | 196 | 19,923 | 6,465 | 3,350 | 29,934 |
| 87,036 | 197 | 20,077 | 6,502 | 3,389 | 30,165 |
| 87,037 | 195 | 19,695 | 6,366 | 3,325 | 29,581 |
| 87,038 | 188 | 19,552 | 6,339 | 3,293 | 29,372 |
| 87,039 | 187 | 19,580 | 6,323 | 3,299 | 29,389 |
| 87,040 | 184 | 19,366 | 6,219 | 3,268 | 29,037 |
| 87,041 | 184 | 19,632 | 6,265 | 3,314 | 29,395 |
| 87,042 | 179 | 19,250 | 6,154 | 3,242 | 28,825 |
| 87,043 | 181 | 19,550 | 6,167 | 3,267 | 29,165 |
| 87,044 | 171 | 19,164 | 6,032 | 3,200 | 28,567 |
| 87,045 | 170 | 19,048 | 6,005 | 3,184 | 28,407 |
| 87,046 | 172 | 19,091 | 6,037 | 3,185 | 28,485 |
| 87,047 | 174 | 19,163 | 6,036 | 3,187 | 28,560 |
| 87,048 | 172 | 19,028 | 5,982 | 3,176 | 28,358 |
| 87,049 | 172 | 18,971 | 5,969 | 3,191 | 28,303 |
| 87,050 | 177 | 18,942 | 5,956 | 3,196 | 28,271 |
| 87,051 | 179 | 18,821 | 5,940 | 3,177 | 28,117 |
| 87,052 | 185 | 18,953 | 5,975 | 3,201 | 28,314 |
| 87,053 | 189 | 18,895 | 5,943 | 3,204 | 28,231 |
| 87,054 | 191 | 18,905 | 5,917 | 3,186 | 28,199 |
| 87,055 | 193 | 18,957 | 5,922 | 3,179 | 28,251 |
| 87,056 | 191 | 19,137 | 5,959 | 3,199 | 28,486 |
| 87,057 | 186 | 19,057 | 5,922 | 3,171 | 28,336 |
| 87,058 | 178 | 18,582 | 5,716 | 3,099 | 27,575 |
| 87,059 | 179 | 18,804 | 5,749 | 3,143 | 27,875 |
| 87,060 | 171 | 18,997 | 5,797 | 3,181 | 28,146 |
| 87,061 | 170 | 19,233 | 5,841 | 3,214 | 28,458 |
| 87,062 | 170 | 19,249 | 5,839 | 3,207 | 28,465 |
| 87,063 | 169 | 19,244 | 5,838 | 3,205 | 28,456 |

|        |     |        |       |       |        |
|--------|-----|--------|-------|-------|--------|
| 87,064 | 167 | 19,556 | 5,928 | 3,229 | 28,880 |
| 87,065 | 161 | 19,523 | 5,900 | 3,265 | 28,849 |
| 87,066 | 159 | 19,373 | 5,906 | 3,282 | 28,720 |
| 87,067 | 165 | 19,387 | 5,897 | 3,291 | 28,740 |
| 87,068 | 152 | 19,003 | 5,779 | 3,239 | 28,173 |
| 87,069 | 154 | 19,260 | 5,841 | 3,266 | 28,521 |
| 87,070 | 155 | 19,228 | 5,816 | 3,258 | 28,457 |
| 87,071 | 157 | 19,288 | 5,821 | 3,261 | 28,527 |
| 87,072 | 151 | 18,938 | 5,739 | 3,226 | 28,054 |
| 87,073 | 154 | 19,200 | 5,849 | 3,270 | 28,473 |
| 87,074 | 142 | 18,950 | 5,775 | 3,214 | 28,081 |
| 87,075 | 143 | 19,158 | 5,828 | 3,238 | 28,367 |
| 87,076 | 141 | 19,084 | 5,766 | 3,238 | 28,229 |
| 87,077 | 129 | 19,020 | 5,734 | 3,205 | 28,088 |
| 87,078 | 129 | 18,748 | 5,648 | 3,156 | 27,681 |
| 87,079 | 129 | 18,737 | 5,636 | 3,157 | 27,659 |
| 87,080 | 128 | 18,892 | 5,722 | 3,176 | 27,918 |
| 87,081 | 123 | 18,690 | 5,643 | 3,134 | 27,590 |
| 87,082 | 123 | 18,871 | 5,699 | 3,149 | 27,842 |
| 87,083 | 124 | 18,859 | 5,681 | 3,143 | 27,807 |
| 87,084 | 126 | 18,710 | 5,648 | 3,136 | 27,620 |
| 87,085 | 129 | 18,878 | 5,719 | 3,163 | 27,889 |
| 87,086 | 131 | 18,356 | 5,550 | 3,046 | 27,083 |
| 87,087 | 135 | 18,502 | 5,606 | 3,073 | 27,316 |
| 87,088 | 134 | 18,444 | 5,622 | 3,081 | 27,281 |
| 87,089 | 142 | 18,636 | 5,680 | 3,114 | 27,572 |
| 87,090 | 142 | 18,705 | 5,726 | 3,111 | 27,684 |
| 87,091 | 150 | 18,604 | 5,705 | 3,084 | 27,543 |
| 87,092 | 155 | 18,481 | 5,704 | 3,081 | 27,421 |
| 87,093 | 153 | 18,288 | 5,646 | 3,059 | 27,146 |
| 87,094 | 157 | 18,214 | 5,658 | 3,048 | 27,077 |
| 87,095 | 157 | 18,276 | 5,667 | 3,047 | 27,147 |

|        |     |        |       |       |        |
|--------|-----|--------|-------|-------|--------|
| 87,096 | 167 | 18,416 | 5,715 | 3,072 | 27,370 |
| 87,097 | 161 | 18,296 | 5,644 | 3,066 | 27,167 |
| 87,098 | 148 | 17,603 | 5,365 | 2,904 | 26,020 |
| 87,099 | 152 | 17,767 | 5,395 | 2,918 | 26,232 |
| 87,100 | 155 | 17,913 | 5,408 | 2,934 | 26,410 |
| 87,101 | 155 | 17,919 | 5,408 | 2,924 | 26,406 |
| 87,102 | 156 | 18,220 | 5,514 | 2,974 | 26,864 |
| 87,103 | 155 | 17,971 | 5,403 | 2,927 | 26,456 |
| 87,104 | 154 | 17,961 | 5,400 | 2,935 | 26,450 |
| 87,105 | 148 | 17,817 | 5,373 | 2,931 | 26,269 |
| 87,106 | 151 | 17,880 | 5,431 | 2,947 | 26,409 |
| 87,107 | 152 | 17,830 | 5,439 | 2,941 | 26,362 |
| 87,108 | 146 | 17,686 | 5,452 | 2,952 | 26,236 |
| 87,109 | 148 | 17,710 | 5,476 | 2,953 | 26,287 |
| 87,110 | 147 | 17,521 | 5,450 | 2,910 | 26,028 |
| 87,111 | 150 | 17,643 | 5,502 | 2,948 | 26,243 |
| 87,112 | 149 | 17,558 | 5,496 | 2,936 | 26,139 |
| 87,113 | 147 | 17,280 | 5,414 | 2,896 | 25,737 |
| 87,114 | 149 | 17,327 | 5,489 | 2,941 | 25,906 |
| 87,115 | 145 | 17,023 | 5,344 | 2,865 | 25,377 |
| 87,116 | 139 | 16,905 | 5,268 | 2,807 | 25,119 |
| 87,117 | 140 | 17,035 | 5,273 | 2,818 | 25,266 |
| 87,118 | 136 | 17,042 | 5,269 | 2,833 | 25,280 |
| 87,119 | 138 | 17,089 | 5,243 | 2,836 | 25,306 |
| 87,120 | 140 | 17,184 | 5,274 | 2,867 | 25,465 |
| 87,121 | 139 | 17,116 | 5,277 | 2,851 | 25,383 |
| 87,122 | 140 | 16,793 | 5,186 | 2,789 | 24,908 |
| 87,123 | 141 | 16,875 | 5,188 | 2,792 | 24,996 |
| 87,124 | 145 | 17,055 | 5,186 | 2,806 | 25,192 |
| 87,125 | 148 | 16,886 | 5,095 | 2,776 | 24,905 |
| 87,126 | 150 | 16,962 | 5,098 | 2,792 | 25,002 |
| 87,127 | 148 | 16,887 | 5,104 | 2,800 | 24,939 |

|        |     |        |       |       |        |
|--------|-----|--------|-------|-------|--------|
| 87,128 | 151 | 16,880 | 5,077 | 2,804 | 24,912 |
| 87,129 | 153 | 16,901 | 5,074 | 2,796 | 24,924 |
| 87,130 | 154 | 16,978 | 5,080 | 2,801 | 25,013 |
| 87,131 | 157 | 17,143 | 5,121 | 2,821 | 25,242 |
| 87,132 | 152 | 17,053 | 5,143 | 2,827 | 25,175 |
| 87,133 | 151 | 17,133 | 5,145 | 2,817 | 25,246 |
| 87,134 | 156 | 17,302 | 5,178 | 2,818 | 25,454 |
| 87,135 | 158 | 17,571 | 5,274 | 2,865 | 25,868 |
| 87,136 | 158 | 17,591 | 5,254 | 2,879 | 25,882 |
| 87,137 | 160 | 17,680 | 5,271 | 2,898 | 26,009 |
| 87,138 | 162 | 17,886 | 5,282 | 2,898 | 26,228 |
| 87,139 | 163 | 17,955 | 5,305 | 2,915 | 26,338 |
| 87,140 | 157 | 17,665 | 5,203 | 2,879 | 25,904 |
| 87,141 | 161 | 17,755 | 5,223 | 2,895 | 26,034 |
| 87,142 | 156 | 18,074 | 5,287 | 2,963 | 26,480 |
| 87,143 | 152 | 17,836 | 5,237 | 2,926 | 26,151 |
| 87,144 | 153 | 17,912 | 5,265 | 2,942 | 26,272 |
| 87,145 | 153 | 17,920 | 5,257 | 2,940 | 26,270 |
| 87,146 | 151 | 18,121 | 5,295 | 2,968 | 26,535 |
| 87,147 | 148 | 18,057 | 5,250 | 2,956 | 26,411 |
| 87,148 | 149 | 18,171 | 5,267 | 2,989 | 26,576 |
| 87,149 | 147 | 18,565 | 5,390 | 3,060 | 27,162 |
| 87,150 | 145 | 18,511 | 5,399 | 3,084 | 27,139 |
| 87,151 | 143 | 18,753 | 5,597 | 3,164 | 27,657 |
| 87,152 | 142 | 18,904 | 5,715 | 3,199 | 27,960 |
| 87,153 | 138 | 19,105 | 5,771 | 3,256 | 28,270 |
| 87,154 | 140 | 19,390 | 5,891 | 3,308 | 28,729 |
| 87,155 | 148 | 19,757 | 5,939 | 3,338 | 29,182 |
| 87,156 | 148 | 19,797 | 5,955 | 3,355 | 29,255 |
| 87,157 | 154 | 20,169 | 6,127 | 3,448 | 29,898 |
| 87,158 | 151 | 19,924 | 6,045 | 3,421 | 29,541 |
| 87,159 | 149 | 19,848 | 5,997 | 3,416 | 29,410 |

|        |     |        |       |       |        |
|--------|-----|--------|-------|-------|--------|
| 87,160 | 153 | 20,096 | 6,037 | 3,461 | 29,747 |
| 87,161 | 152 | 20,047 | 6,012 | 3,462 | 29,673 |
| 87,162 | 149 | 20,196 | 6,058 | 3,472 | 29,875 |
| 87,163 | 147 | 19,853 | 5,913 | 3,413 | 29,326 |
| 87,164 | 148 | 20,082 | 5,961 | 3,454 | 29,645 |
| 87,165 | 155 | 20,370 | 6,029 | 3,492 | 30,046 |
| 87,166 | 164 | 20,348 | 6,069 | 3,483 | 30,064 |
| 87,167 | 167 | 20,111 | 6,038 | 3,489 | 29,805 |
| 87,168 | 168 | 20,097 | 6,052 | 3,498 | 29,815 |
| 87,169 | 172 | 20,233 | 6,131 | 3,542 | 30,078 |
| 87,170 | 176 | 19,965 | 6,092 | 3,495 | 29,728 |
| 87,171 | 173 | 19,873 | 6,040 | 3,493 | 29,579 |
| 87,172 | 175 | 19,862 | 6,027 | 3,509 | 29,573 |
| 87,173 | 175 | 19,929 | 6,018 | 3,515 | 29,637 |
| 87,174 | 173 | 19,888 | 6,036 | 3,512 | 29,609 |
| 87,175 | 168 | 20,097 | 6,138 | 3,571 | 29,974 |
| 87,176 | 162 | 19,797 | 6,081 | 3,516 | 29,556 |
| 87,177 | 170 | 20,170 | 6,142 | 3,539 | 30,021 |
| 87,178 | 174 | 20,227 | 6,149 | 3,535 | 30,085 |
| 87,179 | 173 | 20,114 | 6,130 | 3,501 | 29,918 |
| 87,180 | 173 | 20,231 | 6,150 | 3,507 | 30,061 |
| 87,181 | 175 | 20,481 | 6,204 | 3,542 | 30,402 |
| 87,182 | 168 | 20,264 | 6,151 | 3,552 | 30,135 |
| 87,183 | 170 | 20,359 | 6,149 | 3,557 | 30,235 |
| 87,184 | 168 | 20,050 | 6,118 | 3,565 | 29,901 |
| 87,185 | 162 | 20,119 | 6,224 | 3,607 | 30,112 |
| 87,186 | 164 | 19,891 | 6,169 | 3,591 | 29,815 |
| 87,187 | 162 | 19,731 | 6,170 | 3,575 | 29,638 |
| 87,188 | 154 | 19,752 | 6,195 | 3,603 | 29,704 |
| 87,189 | 155 | 19,711 | 6,220 | 3,631 | 29,717 |
| 87,190 | 156 | 19,751 | 6,237 | 3,639 | 29,783 |
| 87,191 | 156 | 19,749 | 6,259 | 3,630 | 29,794 |

|        |     |        |       |       |        |
|--------|-----|--------|-------|-------|--------|
| 87,192 | 151 | 19,659 | 6,209 | 3,602 | 29,621 |
| 87,193 | 146 | 19,198 | 6,117 | 3,527 | 28,988 |
| 87,194 | 150 | 19,613 | 6,223 | 3,594 | 29,580 |
| 87,195 | 146 | 19,749 | 6,283 | 3,623 | 29,801 |
| 87,196 | 148 | 19,686 | 6,286 | 3,622 | 29,742 |
| 87,197 | 148 | 19,632 | 6,295 | 3,623 | 29,698 |
| 87,198 | 146 | 19,639 | 6,289 | 3,607 | 29,681 |
| 87,199 | 148 | 19,576 | 6,284 | 3,594 | 29,602 |
| 87,200 | 146 | 19,343 | 6,244 | 3,568 | 29,301 |
| 87,201 | 146 | 19,438 | 6,219 | 3,553 | 29,356 |
| 87,202 | 147 | 19,396 | 6,094 | 3,496 | 29,133 |
| 87,203 | 148 | 19,116 | 5,926 | 3,424 | 28,614 |
| 87,204 | 147 | 19,413 | 5,947 | 3,453 | 28,960 |
| 87,205 | 148 | 19,697 | 5,960 | 3,490 | 29,295 |
| 87,206 | 143 | 19,727 | 5,932 | 3,428 | 29,230 |
| 87,207 | 150 | 19,781 | 5,914 | 3,423 | 29,268 |
| 87,208 | 153 | 19,706 | 5,786 | 3,351 | 28,996 |
| 87,209 | 156 | 19,945 | 5,804 | 3,352 | 29,257 |
| 87,210 | 160 | 20,189 | 5,857 | 3,351 | 29,557 |
| 87,211 | 159 | 20,202 | 5,860 | 3,360 | 29,581 |
| 87,212 | 163 | 20,247 | 5,877 | 3,350 | 29,637 |
| 87,213 | 160 | 20,208 | 5,839 | 3,337 | 29,544 |
| 87,214 | 164 | 20,353 | 5,835 | 3,342 | 29,694 |
| 87,215 | 158 | 20,435 | 5,846 | 3,333 | 29,772 |
| 87,216 | 148 | 20,153 | 5,728 | 3,273 | 29,302 |
| 87,217 | 147 | 20,401 | 5,734 | 3,292 | 29,574 |
| 87,218 | 145 | 20,737 | 5,762 | 3,317 | 29,961 |
| 87,219 | 146 | 20,877 | 5,780 | 3,324 | 30,127 |
| 87,220 | 142 | 21,116 | 5,827 | 3,340 | 30,425 |
| 87,221 | 140 | 21,075 | 5,776 | 3,342 | 30,333 |
| 87,222 | 140 | 21,038 | 5,774 | 3,336 | 30,288 |
| 87,223 | 137 | 21,147 | 5,816 | 3,348 | 30,448 |

|        |     |        |       |       |        |
|--------|-----|--------|-------|-------|--------|
| 87,224 | 137 | 20,980 | 5,779 | 3,350 | 30,246 |
| 87,225 | 142 | 21,831 | 6,037 | 3,507 | 31,517 |
| 87,226 | 145 | 21,690 | 5,967 | 3,459 | 31,261 |
| 87,227 | 145 | 21,526 | 5,928 | 3,446 | 31,045 |
| 87,228 | 139 | 21,816 | 6,055 | 3,536 | 31,546 |
| 87,229 | 134 | 21,458 | 5,962 | 3,494 | 31,048 |
| 87,230 | 137 | 21,714 | 6,048 | 3,541 | 31,440 |
| 87,231 | 137 | 21,774 | 6,037 | 3,533 | 31,481 |
| 87,232 | 135 | 21,527 | 5,986 | 3,499 | 31,147 |
| 87,233 | 135 | 21,512 | 5,964 | 3,479 | 31,090 |
| 87,234 | 136 | 21,640 | 5,911 | 3,459 | 31,146 |
| 87,235 | 138 | 21,631 | 5,881 | 3,448 | 31,098 |
| 87,236 | 139 | 21,642 | 5,883 | 3,453 | 31,117 |
| 87,237 | 134 | 21,613 | 5,870 | 3,454 | 31,071 |
| 87,238 | 133 | 21,532 | 5,871 | 3,455 | 30,991 |
| 87,239 | 136 | 21,740 | 5,924 | 3,501 | 31,301 |
| 87,240 | 138 | 21,630 | 5,914 | 3,473 | 31,155 |
| 87,241 | 136 | 21,848 | 5,872 | 3,483 | 31,339 |
| 87,242 | 140 | 21,775 | 5,822 | 3,455 | 31,192 |
| 87,243 | 147 | 21,915 | 5,891 | 3,499 | 31,452 |
| 87,244 | 145 | 21,845 | 5,882 | 3,520 | 31,392 |
| 87,245 | 146 | 21,821 | 5,840 | 3,502 | 31,309 |
| 87,246 | 153 | 21,712 | 5,793 | 3,499 | 31,157 |
| 87,247 | 149 | 21,642 | 5,753 | 3,481 | 31,025 |
| 87,248 | 146 | 21,895 | 5,808 | 3,542 | 31,391 |
| 87,249 | 147 | 21,865 | 5,804 | 3,542 | 31,358 |
| 87,250 | 145 | 21,933 | 5,771 | 3,537 | 31,386 |
| 87,251 | 151 | 21,831 | 5,717 | 3,499 | 31,198 |
| 87,252 | 151 | 21,817 | 5,696 | 3,506 | 31,170 |
| 87,253 | 157 | 21,921 | 5,720 | 3,537 | 31,335 |
| 87,254 | 151 | 21,605 | 5,673 | 3,500 | 30,929 |
| 87,255 | 153 | 21,436 | 5,675 | 3,482 | 30,746 |

|        |     |        |       |       |        |
|--------|-----|--------|-------|-------|--------|
| 87,256 | 163 | 21,546 | 5,718 | 3,495 | 30,922 |
| 87,257 | 162 | 21,491 | 5,740 | 3,530 | 30,923 |
| 87,258 | 155 | 21,096 | 5,641 | 3,493 | 30,385 |
| 87,259 | 143 | 21,073 | 5,629 | 3,508 | 30,353 |
| 87,260 | 143 | 20,979 | 5,630 | 3,520 | 30,272 |
| 87,261 | 141 | 21,198 | 5,691 | 3,581 | 30,611 |
| 87,262 | 145 | 21,193 | 5,703 | 3,590 | 30,631 |
| 87,263 | 142 | 20,839 | 5,628 | 3,562 | 30,171 |
| 87,264 | 145 | 20,763 | 5,695 | 3,611 | 30,214 |
| 87,265 | 142 | 20,579 | 5,717 | 3,621 | 30,059 |
| 87,266 | 142 | 20,213 | 5,650 | 3,573 | 29,578 |
| 87,267 | 143 | 20,248 | 5,670 | 3,588 | 29,649 |
| 87,268 | 143 | 20,236 | 5,681 | 3,592 | 29,652 |
| 87,269 | 147 | 20,061 | 5,685 | 3,583 | 29,476 |
| 87,270 | 147 | 20,209 | 5,700 | 3,593 | 29,649 |
| 87,271 | 150 | 19,948 | 5,636 | 3,579 | 29,313 |
| 87,272 | 148 | 20,014 | 5,688 | 3,588 | 29,438 |
| 87,273 | 147 | 19,905 | 5,696 | 3,590 | 29,338 |
| 87,274 | 143 | 19,763 | 5,657 | 3,586 | 29,149 |
| 87,275 | 143 | 19,742 | 5,655 | 3,584 | 29,124 |
| 87,276 | 148 | 19,809 | 5,630 | 3,598 | 29,185 |
| 87,277 | 143 | 19,753 | 5,583 | 3,592 | 29,071 |
| 87,278 | 145 | 20,051 | 5,630 | 3,630 | 29,456 |
| 87,279 | 150 | 20,068 | 5,657 | 3,629 | 29,504 |
| 87,280 | 152 | 20,103 | 5,620 | 3,617 | 29,492 |
| 87,281 | 161 | 20,316 | 5,693 | 3,676 | 29,846 |
| 87,282 | 170 | 20,298 | 5,728 | 3,668 | 29,864 |
| 87,283 | 172 | 20,429 | 5,758 | 3,700 | 30,059 |
| 87,284 | 172 | 20,620 | 5,818 | 3,714 | 30,324 |
| 87,285 | 178 | 20,799 | 5,838 | 3,732 | 30,547 |
| 87,286 | 181 | 21,047 | 5,868 | 3,748 | 30,844 |
| 87,287 | 180 | 21,165 | 5,867 | 3,748 | 30,960 |



|        |     |        |       |       |        |
|--------|-----|--------|-------|-------|--------|
| 87,288 | 185 | 21,471 | 5,892 | 3,771 | 31,319 |
| 87,289 | 188 | 21,760 | 5,950 | 3,814 | 31,712 |
| 87,290 | 192 | 21,902 | 5,944 | 3,806 | 31,844 |
| 87,291 | 187 | 21,906 | 5,889 | 3,780 | 31,762 |
| 87,292 | 187 | 21,719 | 5,869 | 3,762 | 31,537 |
| 87,293 | 185 | 21,984 | 5,923 | 3,817 | 31,909 |
| 87,294 | 178 | 22,013 | 5,871 | 3,800 | 31,862 |
| 87,295 | 180 | 22,157 | 5,901 | 3,803 | 32,041 |
| 87,296 | 168 | 22,104 | 5,863 | 3,775 | 31,910 |
| 87,297 | 174 | 21,956 | 5,811 | 3,744 | 31,685 |
| 87,298 | 175 | 22,002 | 5,817 | 3,741 | 31,735 |
| 87,299 | 178 | 21,954 | 5,840 | 3,717 | 31,689 |
| 87,300 | 178 | 21,965 | 5,846 | 3,739 | 31,728 |
| 87,301 | 170 | 22,182 | 5,903 | 3,785 | 32,040 |
| 87,302 | 171 | 22,359 | 5,965 | 3,810 | 32,305 |
| 87,303 | 177 | 22,567 | 6,019 | 3,848 | 32,611 |
| 87,304 | 171 | 22,613 | 6,016 | 3,841 | 32,641 |
| 87,305 | 170 | 22,762 | 6,034 | 3,852 | 32,818 |
| 87,306 | 164 | 22,590 | 6,019 | 3,829 | 32,602 |
| 87,307 | 161 | 22,986 | 6,093 | 3,899 | 33,139 |
| 87,308 | 159 | 23,247 | 6,152 | 3,957 | 33,515 |
| 87,309 | 157 | 22,962 | 6,097 | 3,920 | 33,136 |
| 87,310 | 164 | 23,210 | 6,215 | 3,960 | 33,549 |
| 87,311 | 165 | 23,309 | 6,226 | 3,969 | 33,669 |
| 87,312 | 165 | 23,390 | 6,239 | 4,012 | 33,806 |
| 87,313 | 159 | 23,317 | 6,176 | 3,972 | 33,624 |
| 87,314 | 165 | 23,509 | 6,152 | 3,970 | 33,796 |
| 87,315 | 164 | 23,669 | 6,141 | 3,935 | 33,909 |
| 87,316 | 160 | 23,768 | 6,122 | 3,929 | 33,979 |
| 87,317 | 160 | 23,730 | 6,111 | 3,927 | 33,928 |
| 87,318 | 164 | 23,878 | 6,193 | 3,963 | 34,198 |
| 87,319 | 159 | 23,838 | 6,141 | 3,940 | 34,078 |

|        |     |        |       |       |        |
|--------|-----|--------|-------|-------|--------|
| 87,320 | 166 | 24,167 | 6,205 | 4,015 | 34,553 |
| 87,321 | 166 | 24,266 | 6,258 | 4,020 | 34,710 |
| 87,322 | 169 | 24,421 | 6,252 | 4,018 | 34,860 |
| 87,323 | 173 | 23,706 | 6,041 | 3,849 | 33,769 |
| 87,324 | 173 | 23,967 | 6,104 | 3,873 | 34,117 |
| 87,325 | 176 | 24,278 | 6,205 | 3,935 | 34,594 |
| 87,326 | 178 | 24,377 | 6,202 | 3,938 | 34,695 |
| 87,327 | 183 | 24,607 | 6,285 | 3,964 | 35,039 |
| 87,328 | 183 | 24,617 | 6,285 | 3,961 | 35,046 |
| 87,329 | 176 | 24,569 | 6,286 | 3,955 | 34,986 |
| 87,330 | 172 | 24,453 | 6,265 | 3,954 | 34,844 |
| 87,331 | 167 | 24,466 | 6,265 | 3,960 | 34,858 |
| 87,332 | 160 | 24,752 | 6,329 | 3,976 | 35,217 |
| 87,333 | 150 | 24,543 | 6,213 | 3,944 | 34,850 |
| 87,334 | 142 | 24,140 | 6,203 | 3,921 | 34,406 |
| 87,335 | 144 | 24,358 | 6,231 | 3,954 | 34,687 |
| 87,336 | 139 | 24,678 | 6,301 | 4,018 | 35,136 |
| 87,337 | 138 | 24,363 | 6,255 | 4,015 | 34,771 |
| 87,338 | 138 | 24,571 | 6,261 | 4,027 | 34,997 |
| 87,339 | 133 | 24,740 | 6,309 | 4,072 | 35,254 |
| 87,340 | 129 | 24,827 | 6,329 | 4,064 | 35,349 |
| 87,341 | 126 | 24,495 | 6,244 | 4,033 | 34,898 |
| 87,342 | 127 | 24,587 | 6,335 | 4,074 | 35,123 |
| 87,343 | 128 | 24,552 | 6,350 | 4,081 | 35,111 |
| 87,344 | 128 | 24,405 | 6,368 | 4,088 | 34,989 |
| 87,345 | 134 | 24,460 | 6,373 | 4,088 | 35,055 |
| 87,346 | 131 | 24,341 | 6,355 | 4,088 | 34,915 |
| 87,347 | 128 | 24,166 | 6,335 | 4,065 | 34,694 |
| 87,348 | 128 | 24,277 | 6,346 | 4,074 | 34,825 |
| 87,349 | 126 | 24,174 | 6,339 | 4,083 | 34,722 |
| 87,350 | 126 | 24,085 | 6,315 | 4,082 | 34,608 |
| 87,351 | 131 | 24,110 | 6,350 | 4,087 | 34,678 |

|        |     |        |       |       |        |
|--------|-----|--------|-------|-------|--------|
| 87,352 | 134 | 23,830 | 6,278 | 4,030 | 34,272 |
| 87,353 | 135 | 23,660 | 6,263 | 4,021 | 34,079 |
| 87,354 | 133 | 23,788 | 6,284 | 4,041 | 34,246 |
| 87,355 | 138 | 23,874 | 6,298 | 4,038 | 34,348 |
| 87,356 | 135 | 23,583 | 6,243 | 3,995 | 33,956 |
| 87,357 | 135 | 23,629 | 6,200 | 3,981 | 33,945 |
| 87,358 | 137 | 23,369 | 6,124 | 3,904 | 33,534 |
| 87,359 | 139 | 23,388 | 6,101 | 3,924 | 33,552 |
| 87,360 | 144 | 23,376 | 6,096 | 3,933 | 33,549 |
| 87,361 | 143 | 23,338 | 6,056 | 3,894 | 33,431 |
| 87,362 | 138 | 23,006 | 6,010 | 3,817 | 32,971 |
| 87,363 | 141 | 22,753 | 5,940 | 3,768 | 32,602 |
| 87,364 | 144 | 22,779 | 5,948 | 3,777 | 32,648 |
| 87,365 | 144 | 22,571 | 5,944 | 3,758 | 32,417 |
| 87,366 | 146 | 22,429 | 5,928 | 3,777 | 32,280 |
| 87,367 | 147 | 22,441 | 5,930 | 3,779 | 32,297 |
| 87,368 | 148 | 22,477 | 5,920 | 3,777 | 32,322 |
| 87,369 | 150 | 22,444 | 5,895 | 3,752 | 32,241 |
| 87,370 | 153 | 22,651 | 5,959 | 3,787 | 32,550 |
| 87,371 | 145 | 22,382 | 5,862 | 3,715 | 32,104 |
| 87,372 | 147 | 22,546 | 5,922 | 3,743 | 32,358 |
| 87,373 | 139 | 22,258 | 5,833 | 3,705 | 31,935 |
| 87,374 | 137 | 22,183 | 5,803 | 3,681 | 31,804 |
| 87,375 | 142 | 22,333 | 5,835 | 3,683 | 31,993 |
| 87,376 | 138 | 22,365 | 5,800 | 3,667 | 31,970 |
| 87,377 | 132 | 22,334 | 5,764 | 3,683 | 31,913 |
| 87,378 | 136 | 22,265 | 5,733 | 3,680 | 31,814 |
| 87,379 | 142 | 22,297 | 5,692 | 3,674 | 31,805 |
| 87,380 | 142 | 22,186 | 5,658 | 3,650 | 31,636 |
| 87,381 | 141 | 22,206 | 5,655 | 3,647 | 31,649 |
| 87,382 | 142 | 22,150 | 5,624 | 3,634 | 31,550 |
| 87,383 | 142 | 21,740 | 5,513 | 3,579 | 30,974 |

|        |     |        |       |       |        |
|--------|-----|--------|-------|-------|--------|
| 87,384 | 143 | 21,579 | 5,448 | 3,543 | 30,713 |
| 87,385 | 143 | 21,532 | 5,452 | 3,545 | 30,672 |
| 87,386 | 146 | 21,217 | 5,422 | 3,485 | 30,270 |
| 87,387 | 144 | 20,946 | 5,349 | 3,425 | 29,864 |
| 87,388 | 147 | 21,190 | 5,357 | 3,448 | 30,142 |
| 87,389 | 152 | 21,277 | 5,391 | 3,475 | 30,295 |
| 87,390 | 156 | 21,127 | 5,335 | 3,418 | 30,036 |
| 87,391 | 163 | 21,349 | 5,386 | 3,474 | 30,372 |
| 87,392 | 161 | 21,200 | 5,331 | 3,429 | 30,121 |
| 87,393 | 159 | 21,085 | 5,294 | 3,402 | 29,940 |
| 87,394 | 159 | 21,150 | 5,304 | 3,404 | 30,017 |
| 87,395 | 156 | 21,397 | 5,342 | 3,416 | 30,311 |
| 87,396 | 151 | 21,135 | 5,256 | 3,332 | 29,874 |
| 87,397 | 156 | 21,461 | 5,332 | 3,362 | 30,311 |
| 87,398 | 154 | 21,465 | 5,309 | 3,341 | 30,269 |
| 87,399 | 156 | 21,590 | 5,303 | 3,364 | 30,413 |
| 87,400 | 153 | 21,647 | 5,300 | 3,366 | 30,466 |
| 87,401 | 149 | 21,028 | 5,140 | 3,275 | 29,592 |
| 87,402 | 148 | 21,267 | 5,165 | 3,303 | 29,883 |
| 87,403 | 148 | 21,509 | 5,222 | 3,338 | 30,217 |
| 87,404 | 154 | 21,798 | 5,298 | 3,389 | 30,639 |
| 87,405 | 149 | 21,843 | 5,340 | 3,428 | 30,760 |
| 87,406 | 150 | 21,757 | 5,358 | 3,456 | 30,721 |
| 87,407 | 155 | 21,679 | 5,385 | 3,451 | 30,670 |
| 87,408 | 154 | 21,440 | 5,379 | 3,444 | 30,417 |
| 87,409 | 153 | 21,658 | 5,451 | 3,450 | 30,712 |
| 87,410 | 145 | 21,668 | 5,446 | 3,444 | 30,703 |
| 87,411 | 144 | 21,576 | 5,408 | 3,423 | 30,551 |
| 87,412 | 144 | 21,757 | 5,431 | 3,449 | 30,781 |
| 87,413 | 139 | 21,539 | 5,384 | 3,435 | 30,497 |
| 87,414 | 139 | 22,027 | 5,498 | 3,486 | 31,150 |
| 87,415 | 137 | 22,146 | 5,524 | 3,503 | 31,310 |

|        |     |        |       |       |        |
|--------|-----|--------|-------|-------|--------|
| 87,416 | 133 | 22,502 | 5,592 | 3,570 | 31,797 |
| 87,417 | 130 | 22,442 | 5,560 | 3,536 | 31,668 |
| 87,418 | 129 | 22,617 | 5,609 | 3,563 | 31,918 |
| 87,419 | 130 | 22,718 | 5,699 | 3,615 | 32,162 |
| 87,420 | 128 | 22,633 | 5,688 | 3,606 | 32,055 |
| 87,421 | 135 | 22,834 | 5,722 | 3,643 | 32,334 |
| 87,422 | 133 | 22,897 | 5,733 | 3,661 | 32,424 |
| 87,423 | 131 | 22,797 | 5,696 | 3,657 | 32,281 |
| 87,424 | 129 | 22,305 | 5,617 | 3,591 | 31,642 |
| 87,425 | 129 | 22,366 | 5,613 | 3,601 | 31,709 |
| 87,426 | 131 | 22,238 | 5,573 | 3,587 | 31,529 |
| 87,427 | 130 | 21,973 | 5,519 | 3,542 | 31,164 |
| 87,428 | 124 | 22,874 | 5,763 | 3,664 | 32,425 |
| 87,429 | 126 | 23,128 | 5,828 | 3,728 | 32,810 |
| 87,430 | 122 | 22,850 | 5,764 | 3,686 | 32,422 |
| 87,431 | 126 | 22,847 | 5,773 | 3,689 | 32,435 |
| 87,432 | 131 | 22,881 | 5,783 | 3,698 | 32,493 |
| 87,433 | 129 | 22,681 | 5,776 | 3,679 | 32,265 |
| 87,434 | 138 | 23,198 | 5,902 | 3,759 | 32,997 |
| 87,435 | 140 | 23,315 | 5,900 | 3,765 | 33,120 |
| 87,436 | 141 | 23,595 | 5,940 | 3,791 | 33,467 |
| 87,437 | 138 | 23,609 | 5,955 | 3,801 | 33,503 |
| 87,438 | 136 | 23,325 | 5,928 | 3,778 | 33,167 |
| 87,439 | 137 | 23,289 | 5,937 | 3,782 | 33,145 |
| 87,440 | 132 | 23,336 | 5,979 | 3,820 | 33,267 |
| 87,441 | 128 | 23,329 | 5,965 | 3,821 | 33,243 |
| 87,442 | 123 | 23,054 | 5,916 | 3,787 | 32,880 |
| 87,443 | 123 | 23,236 | 5,933 | 3,788 | 33,080 |
| 87,444 | 126 | 23,499 | 6,013 | 3,847 | 33,485 |
| 87,445 | 125 | 23,395 | 5,960 | 3,860 | 33,340 |
| 87,446 | 129 | 23,567 | 6,060 | 3,930 | 33,686 |
| 87,447 | 130 | 23,510 | 6,092 | 3,949 | 33,681 |

|        |     |        |       |       |        |
|--------|-----|--------|-------|-------|--------|
| 87,448 | 126 | 23,564 | 6,126 | 3,993 | 33,809 |
| 87,449 | 124 | 23,629 | 6,189 | 4,013 | 33,955 |
| 87,450 | 122 | 22,980 | 6,057 | 3,929 | 33,088 |
| 87,451 | 125 | 23,345 | 6,110 | 3,973 | 33,553 |
| 87,452 | 125 | 23,388 | 6,120 | 3,970 | 33,603 |
| 87,453 | 124 | 23,105 | 6,083 | 3,944 | 33,256 |
| 87,454 | 122 | 23,018 | 6,111 | 3,956 | 33,207 |
| 87,455 | 117 | 22,876 | 6,076 | 3,931 | 33,000 |
| 87,456 | 116 | 23,017 | 6,096 | 3,941 | 33,170 |
| 87,457 | 116 | 23,020 | 6,072 | 3,923 | 33,131 |
| 87,458 | 113 | 23,115 | 6,059 | 3,923 | 33,210 |
| 87,459 | 112 | 23,052 | 6,022 | 3,900 | 33,086 |
| 87,460 | 112 | 22,879 | 5,946 | 3,875 | 32,812 |
| 87,461 | 109 | 22,652 | 5,879 | 3,864 | 32,504 |
| 87,462 | 113 | 23,006 | 5,931 | 3,894 | 32,944 |
| 87,463 | 111 | 22,798 | 5,895 | 3,849 | 32,653 |
| 87,464 | 119 | 23,152 | 5,961 | 3,868 | 33,100 |
| 87,465 | 125 | 23,156 | 5,970 | 3,861 | 33,112 |
| 87,466 | 125 | 22,784 | 5,904 | 3,809 | 32,622 |
| 87,467 | 126 | 22,784 | 5,930 | 3,819 | 32,659 |
| 87,468 | 127 | 23,136 | 5,993 | 3,886 | 33,142 |
| 87,469 | 124 | 22,934 | 5,878 | 3,813 | 32,749 |
| 87,470 | 124 | 22,968 | 5,876 | 3,789 | 32,757 |
| 87,471 | 120 | 22,850 | 5,858 | 3,803 | 32,631 |
| 87,472 | 115 | 22,654 | 5,837 | 3,772 | 32,378 |
| 87,473 | 115 | 22,501 | 5,823 | 3,778 | 32,217 |
| 87,474 | 116 | 22,414 | 5,832 | 3,760 | 32,122 |
| 87,475 | 113 | 22,603 | 5,880 | 3,793 | 32,389 |
| 87,476 | 114 | 22,608 | 5,876 | 3,800 | 32,398 |
| 87,477 | 107 | 22,412 | 5,815 | 3,767 | 32,101 |
| 87,478 | 109 | 22,280 | 5,803 | 3,764 | 31,956 |
| 87,479 | 109 | 22,184 | 5,752 | 3,754 | 31,799 |

|        |     |        |       |       |        |
|--------|-----|--------|-------|-------|--------|
| 87,480 | 109 | 21,861 | 5,703 | 3,700 | 31,373 |
| 87,481 | 106 | 21,490 | 5,650 | 3,658 | 30,904 |
| 87,482 | 105 | 22,406 | 5,902 | 3,819 | 32,232 |
| 87,483 | 102 | 22,509 | 5,950 | 3,839 | 32,400 |
| 87,484 | 99  | 22,472 | 5,921 | 3,844 | 32,336 |
| 87,485 | 92  | 22,236 | 5,853 | 3,781 | 31,962 |
| 87,486 | 91  | 22,412 | 5,920 | 3,836 | 32,259 |
| 87,487 | 89  | 22,237 | 5,880 | 3,817 | 32,023 |
| 87,488 | 89  | 22,312 | 5,886 | 3,809 | 32,096 |
| 87,489 | 87  | 22,341 | 5,917 | 3,799 | 32,144 |
| 87,490 | 90  | 22,682 | 5,976 | 3,813 | 32,561 |
| 87,491 | 93  | 22,783 | 6,014 | 3,830 | 32,720 |
| 87,492 | 92  | 22,623 | 6,006 | 3,817 | 32,538 |
| 87,493 | 96  | 22,729 | 6,078 | 3,848 | 32,751 |
| 87,494 | 98  | 22,648 | 6,133 | 3,866 | 32,745 |
| 87,495 | 97  | 22,650 | 6,159 | 3,884 | 32,790 |
| 87,496 | 100 | 22,837 | 6,209 | 3,884 | 33,030 |
| 87,497 | 103 | 23,077 | 6,194 | 3,856 | 33,230 |
| 87,498 | 102 | 23,205 | 6,181 | 3,851 | 33,339 |
| 87,499 | 105 | 23,202 | 6,161 | 3,843 | 33,311 |
| 87,500 | 107 | 23,056 | 6,112 | 3,841 | 33,116 |
| 87,501 | 105 | 23,025 | 6,100 | 3,835 | 33,065 |
| 87,502 | 110 | 23,261 | 6,192 | 3,874 | 33,437 |
| 87,503 | 113 | 23,155 | 6,140 | 3,842 | 33,250 |
| 87,504 | 113 | 23,212 | 6,124 | 3,843 | 33,292 |
| 87,505 | 114 | 23,582 | 6,228 | 3,904 | 33,828 |
| 87,506 | 121 | 23,418 | 6,140 | 3,847 | 33,526 |
| 87,507 | 134 | 23,673 | 6,184 | 3,863 | 33,854 |
| 87,508 | 133 | 23,720 | 6,192 | 3,862 | 33,907 |
| 87,509 | 134 | 23,991 | 6,234 | 3,936 | 34,295 |
| 87,510 | 134 | 23,695 | 6,168 | 3,900 | 33,897 |
| 87,511 | 136 | 23,757 | 6,198 | 3,899 | 33,990 |

|        |     |        |       |       |        |
|--------|-----|--------|-------|-------|--------|
| 87,512 | 134 | 23,786 | 6,212 | 3,900 | 34,032 |
| 87,513 | 130 | 23,669 | 6,211 | 3,909 | 33,919 |
| 87,514 | 129 | 23,616 | 6,219 | 3,928 | 33,892 |
| 87,515 | 121 | 23,756 | 6,237 | 3,953 | 34,067 |
| 87,516 | 119 | 23,808 | 6,263 | 3,997 | 34,187 |
| 87,517 | 117 | 23,944 | 6,316 | 4,028 | 34,405 |
| 87,518 | 117 | 24,010 | 6,352 | 4,032 | 34,511 |
| 87,519 | 122 | 24,052 | 6,324 | 4,033 | 34,531 |
| 87,520 | 124 | 24,154 | 6,354 | 4,038 | 34,670 |
| 87,521 | 125 | 24,217 | 6,336 | 4,017 | 34,695 |
| 87,522 | 125 | 24,222 | 6,345 | 4,020 | 34,712 |
| 87,523 | 127 | 24,678 | 6,405 | 4,042 | 35,252 |
| 87,524 | 124 | 24,724 | 6,392 | 4,030 | 35,270 |
| 87,525 | 131 | 24,982 | 6,373 | 4,044 | 35,530 |
| 87,526 | 133 | 25,160 | 6,411 | 4,068 | 35,772 |
| 87,527 | 136 | 25,014 | 6,363 | 4,016 | 35,529 |
| 87,528 | 136 | 24,918 | 6,364 | 4,007 | 35,425 |
| 87,529 | 137 | 24,863 | 6,390 | 4,006 | 35,396 |
| 87,530 | 138 | 25,054 | 6,435 | 4,035 | 35,662 |
| 87,531 | 136 | 25,039 | 6,415 | 4,028 | 35,618 |
| 87,532 | 137 | 25,016 | 6,407 | 4,012 | 35,572 |
| 87,533 | 140 | 24,870 | 6,341 | 3,970 | 35,321 |
| 87,534 | 138 | 24,509 | 6,239 | 3,913 | 34,799 |
| 87,535 | 137 | 24,328 | 6,243 | 3,905 | 34,613 |
| 87,536 | 141 | 24,198 | 6,233 | 3,918 | 34,490 |
| 87,537 | 144 | 24,223 | 6,236 | 3,914 | 34,517 |
| 87,538 | 146 | 24,162 | 6,169 | 3,888 | 34,365 |
| 87,539 | 151 | 24,323 | 6,211 | 3,916 | 34,601 |
| 87,540 | 154 | 24,433 | 6,256 | 3,965 | 34,808 |
| 87,541 | 157 | 24,344 | 6,246 | 3,965 | 34,712 |
| 87,542 | 158 | 24,221 | 6,247 | 3,941 | 34,567 |
| 87,543 | 158 | 24,193 | 6,211 | 3,900 | 34,462 |



|        |     |        |       |       |        |
|--------|-----|--------|-------|-------|--------|
| 87,544 | 165 | 24,363 | 6,262 | 3,936 | 34,726 |
| 87,545 | 162 | 24,104 | 6,160 | 3,880 | 34,306 |
| 87,546 | 158 | 23,491 | 5,991 | 3,777 | 33,417 |
| 87,547 | 159 | 23,633 | 6,018 | 3,803 | 33,613 |
| 87,548 | 154 | 23,554 | 6,024 | 3,811 | 33,543 |
| 87,549 | 153 | 23,392 | 5,988 | 3,779 | 33,312 |
| 87,550 | 150 | 23,005 | 5,900 | 3,695 | 32,750 |
| 87,551 | 151 | 23,218 | 5,938 | 3,711 | 33,018 |
| 87,552 | 146 | 23,205 | 5,949 | 3,713 | 33,013 |
| 87,553 | 139 | 23,160 | 5,947 | 3,698 | 32,944 |
| 87,554 | 139 | 23,245 | 5,977 | 3,696 | 33,057 |
| 87,555 | 140 | 23,288 | 5,958 | 3,688 | 33,074 |
| 87,556 | 139 | 23,245 | 5,962 | 3,686 | 33,032 |
| 87,557 | 134 | 23,408 | 6,010 | 3,709 | 33,261 |
| 87,558 | 123 | 23,363 | 6,008 | 3,738 | 33,232 |
| 87,559 | 122 | 23,374 | 6,017 | 3,723 | 33,236 |
| 87,560 | 118 | 23,098 | 5,960 | 3,676 | 32,852 |
| 87,561 | 120 | 23,232 | 6,017 | 3,700 | 33,069 |
| 87,562 | 120 | 22,996 | 5,969 | 3,651 | 32,736 |
| 87,563 | 120 | 23,054 | 5,981 | 3,654 | 32,809 |
| 87,564 | 130 | 23,277 | 6,042 | 3,682 | 33,131 |
| 87,565 | 131 | 23,251 | 6,045 | 3,670 | 33,097 |
| 87,566 | 134 | 22,970 | 5,980 | 3,621 | 32,705 |
| 87,567 | 135 | 22,887 | 5,961 | 3,588 | 32,571 |
| 87,568 | 143 | 22,773 | 5,916 | 3,595 | 32,427 |
| 87,569 | 144 | 22,736 | 5,906 | 3,578 | 32,364 |
| 87,570 | 138 | 22,741 | 5,953 | 3,601 | 32,433 |
| 87,571 | 136 | 22,367 | 5,872 | 3,567 | 31,942 |
| 87,572 | 135 | 22,324 | 5,870 | 3,607 | 31,936 |
| 87,573 | 135 | 22,193 | 5,870 | 3,618 | 31,816 |
| 87,574 | 133 | 21,872 | 5,836 | 3,579 | 31,420 |
| 87,575 | 135 | 21,813 | 5,849 | 3,578 | 31,375 |

|        |     |        |       |       |        |
|--------|-----|--------|-------|-------|--------|
| 87,576 | 135 | 21,788 | 5,902 | 3,608 | 31,433 |
| 87,577 | 133 | 21,545 | 5,882 | 3,584 | 31,144 |
| 87,578 | 132 | 21,306 | 5,836 | 3,570 | 30,844 |
| 87,579 | 131 | 21,443 | 5,837 | 3,568 | 30,979 |
| 87,580 | 134 | 21,422 | 5,847 | 3,581 | 30,984 |
| 87,581 | 131 | 21,380 | 5,818 | 3,554 | 30,883 |
| 87,582 | 133 | 21,317 | 5,793 | 3,542 | 30,785 |
| 87,583 | 136 | 21,431 | 5,858 | 3,561 | 30,986 |
| 87,584 | 132 | 21,150 | 5,830 | 3,516 | 30,628 |
| 87,585 | 133 | 21,260 | 5,827 | 3,500 | 30,720 |
| 87,586 | 133 | 21,323 | 5,867 | 3,513 | 30,836 |
| 87,587 | 132 | 21,410 | 5,888 | 3,513 | 30,943 |
| 87,588 | 132 | 21,589 | 5,957 | 3,549 | 31,227 |
| 87,589 | 132 | 21,617 | 5,986 | 3,567 | 31,302 |
| 87,590 | 130 | 21,585 | 6,006 | 3,591 | 31,312 |
| 87,591 | 130 | 21,640 | 6,062 | 3,595 | 31,427 |
| 87,592 | 122 | 21,821 | 6,120 | 3,615 | 31,678 |
| 87,593 | 118 | 21,726 | 6,124 | 3,611 | 31,579 |
| 87,594 | 107 | 21,680 | 6,108 | 3,619 | 31,514 |
| 87,595 | 105 | 21,703 | 6,133 | 3,625 | 31,566 |
| 87,596 | 110 | 21,532 | 6,067 | 3,598 | 31,307 |
| 87,597 | 111 | 21,438 | 6,036 | 3,572 | 31,157 |
| 87,598 | 110 | 21,627 | 6,155 | 3,637 | 31,529 |
| 87,599 | 110 | 21,316 | 6,086 | 3,590 | 31,102 |
| 87,600 | 110 | 21,249 | 6,075 | 3,597 | 31,031 |
| 87,601 | 110 | 21,180 | 6,077 | 3,583 | 30,950 |
| 87,602 | 110 | 21,225 | 6,133 | 3,611 | 31,079 |
| 87,603 | 115 | 21,173 | 6,104 | 3,589 | 30,981 |
| 87,604 | 113 | 20,975 | 6,040 | 3,558 | 30,686 |
| 87,605 | 120 | 21,054 | 6,081 | 3,590 | 30,845 |
| 87,606 | 119 | 20,803 | 6,050 | 3,549 | 30,521 |
| 87,607 | 119 | 20,645 | 6,009 | 3,518 | 30,291 |

|        |     |        |       |       |        |
|--------|-----|--------|-------|-------|--------|
| 87,608 | 121 | 20,525 | 5,975 | 3,512 | 30,133 |
| 87,609 | 120 | 20,255 | 5,916 | 3,441 | 29,732 |
| 87,610 | 124 | 20,498 | 5,982 | 3,484 | 30,088 |
| 87,611 | 125 | 20,376 | 5,981 | 3,469 | 29,951 |
| 87,612 | 124 | 20,321 | 5,969 | 3,474 | 29,888 |
| 87,613 | 121 | 19,994 | 5,910 | 3,468 | 29,493 |
| 87,614 | 129 | 20,141 | 5,965 | 3,500 | 29,735 |
| 87,615 | 120 | 20,145 | 5,962 | 3,511 | 29,738 |
| 87,616 | 120 | 20,207 | 5,966 | 3,521 | 29,814 |
| 87,617 | 114 | 20,182 | 5,944 | 3,525 | 29,765 |
| 87,618 | 107 | 19,986 | 5,875 | 3,486 | 29,454 |
| 87,619 | 108 | 20,328 | 5,974 | 3,519 | 29,929 |
| 87,620 | 112 | 20,301 | 6,014 | 3,527 | 29,954 |
| 87,621 | 113 | 20,177 | 5,974 | 3,527 | 29,791 |
| 87,622 | 113 | 20,206 | 5,973 | 3,520 | 29,812 |
| 87,623 | 112 | 20,224 | 6,018 | 3,514 | 29,868 |
| 87,624 | 111 | 20,256 | 6,055 | 3,513 | 29,935 |
| 87,625 | 110 | 20,286 | 6,065 | 3,552 | 30,013 |
| 87,626 | 109 | 20,227 | 6,062 | 3,532 | 29,930 |
| 87,627 | 105 | 20,192 | 6,072 | 3,506 | 29,875 |
| 87,628 | 106 | 20,192 | 6,028 | 3,485 | 29,811 |
| 87,629 | 106 | 20,047 | 6,004 | 3,487 | 29,644 |
| 87,630 | 110 | 19,991 | 5,974 | 3,496 | 29,571 |
| 87,631 | 108 | 19,651 | 5,874 | 3,425 | 29,058 |
| 87,632 | 108 | 19,620 | 5,857 | 3,408 | 28,993 |
| 87,633 | 105 | 19,402 | 5,809 | 3,364 | 28,680 |
| 87,634 | 103 | 19,362 | 5,743 | 3,345 | 28,553 |
| 87,635 | 114 | 19,706 | 5,862 | 3,430 | 29,112 |
| 87,636 | 114 | 19,773 | 5,893 | 3,442 | 29,222 |
| 87,637 | 119 | 19,983 | 5,894 | 3,450 | 29,446 |
| 87,638 | 115 | 19,909 | 5,857 | 3,423 | 29,304 |
| 87,639 | 113 | 19,783 | 5,801 | 3,382 | 29,079 |

|        |     |        |       |       |        |
|--------|-----|--------|-------|-------|--------|
| 87,640 | 110 | 20,040 | 5,828 | 3,410 | 29,388 |
| 87,641 | 107 | 20,075 | 5,800 | 3,415 | 29,397 |
| 87,642 | 105 | 20,064 | 5,729 | 3,384 | 29,282 |
| 87,643 | 107 | 19,928 | 5,680 | 3,360 | 29,075 |
| 87,644 | 108 | 19,815 | 5,616 | 3,338 | 28,877 |
| 87,645 | 109 | 19,907 | 5,636 | 3,332 | 28,984 |
| 87,646 | 103 | 19,871 | 5,578 | 3,282 | 28,834 |
| 87,647 | 105 | 19,900 | 5,543 | 3,246 | 28,794 |
| 87,648 | 108 | 20,009 | 5,559 | 3,232 | 28,908 |
| 87,649 | 108 | 19,987 | 5,556 | 3,232 | 28,883 |
| 87,650 | 106 | 20,140 | 5,595 | 3,234 | 29,075 |
| 87,651 | 113 | 20,048 | 5,593 | 3,225 | 28,979 |
| 87,652 | 117 | 20,030 | 5,603 | 3,227 | 28,977 |
| 87,653 | 117 | 19,991 | 5,551 | 3,202 | 28,861 |
| 87,654 | 122 | 20,369 | 5,681 | 3,323 | 29,495 |
| 87,655 | 116 | 20,189 | 5,629 | 3,296 | 29,230 |
| 87,656 | 116 | 20,246 | 5,622 | 3,292 | 29,276 |
| 87,657 | 123 | 20,230 | 5,652 | 3,324 | 29,329 |
| 87,658 | 122 | 20,267 | 5,656 | 3,330 | 29,375 |
| 87,659 | 122 | 20,202 | 5,636 | 3,319 | 29,279 |
| 87,660 | 123 | 20,277 | 5,789 | 3,404 | 29,593 |
| 87,661 | 121 | 20,309 | 5,761 | 3,387 | 29,578 |
| 87,662 | 120 | 20,274 | 5,785 | 3,382 | 29,561 |
| 87,663 | 120 | 20,372 | 5,826 | 3,410 | 29,728 |
| 87,664 | 116 | 20,314 | 5,807 | 3,373 | 29,610 |
| 87,665 | 116 | 20,330 | 5,832 | 3,389 | 29,667 |
| 87,666 | 116 | 20,530 | 5,889 | 3,409 | 29,944 |
| 87,667 | 117 | 20,402 | 5,868 | 3,404 | 29,791 |
| 87,668 | 118 | 20,345 | 5,881 | 3,409 | 29,753 |
| 87,669 | 118 | 20,333 | 5,911 | 3,400 | 29,762 |
| 87,670 | 117 | 20,091 | 5,824 | 3,348 | 29,380 |
| 87,671 | 114 | 20,351 | 5,835 | 3,367 | 29,667 |

|        |     |        |       |       |        |
|--------|-----|--------|-------|-------|--------|
| 87,672 | 120 | 20,488 | 5,881 | 3,366 | 29,855 |
| 87,673 | 124 | 20,353 | 5,824 | 3,334 | 29,635 |
| 87,674 | 125 | 20,406 | 5,841 | 3,345 | 29,717 |
| 87,675 | 126 | 20,614 | 5,837 | 3,357 | 29,934 |
| 87,676 | 130 | 20,657 | 5,839 | 3,353 | 29,979 |
| 87,677 | 133 | 20,753 | 5,840 | 3,348 | 30,074 |
| 87,678 | 133 | 20,738 | 5,841 | 3,362 | 30,074 |
| 87,679 | 135 | 20,690 | 5,868 | 3,355 | 30,048 |
| 87,680 | 136 | 20,940 | 5,960 | 3,379 | 30,415 |
| 87,681 | 130 | 20,664 | 5,949 | 3,350 | 30,093 |
| 87,682 | 133 | 20,658 | 5,911 | 3,320 | 30,022 |
| 87,683 | 133 | 20,944 | 5,963 | 3,341 | 30,381 |
| 87,684 | 129 | 21,260 | 6,034 | 3,380 | 30,803 |
| 87,685 | 123 | 21,273 | 6,068 | 3,382 | 30,846 |
| 87,686 | 126 | 21,136 | 6,019 | 3,376 | 30,657 |
| 87,687 | 126 | 21,084 | 6,023 | 3,389 | 30,622 |
| 87,688 | 123 | 21,129 | 6,119 | 3,431 | 30,802 |
| 87,689 | 124 | 20,979 | 6,147 | 3,452 | 30,702 |
| 87,690 | 124 | 21,017 | 6,161 | 3,483 | 30,785 |
| 87,691 | 125 | 20,943 | 6,151 | 3,467 | 30,686 |
| 87,692 | 127 | 20,938 | 6,146 | 3,431 | 30,642 |
| 87,693 | 127 | 20,713 | 6,078 | 3,395 | 30,313 |
| 87,694 | 126 | 20,507 | 6,044 | 3,369 | 30,046 |
| 87,695 | 126 | 20,558 | 6,050 | 3,367 | 30,101 |
| 87,696 | 127 | 20,263 | 5,999 | 3,357 | 29,746 |
| 87,697 | 128 | 20,211 | 6,005 | 3,366 | 29,710 |
| 87,698 | 126 | 20,177 | 6,019 | 3,386 | 29,708 |
| 87,699 | 125 | 20,228 | 6,069 | 3,465 | 29,887 |
| 87,700 | 122 | 19,628 | 5,889 | 3,389 | 29,028 |
| 87,701 | 123 | 19,807 | 5,959 | 3,435 | 29,324 |
| 87,702 | 117 | 20,070 | 6,032 | 3,467 | 29,686 |
| 87,703 | 115 | 19,682 | 5,932 | 3,394 | 29,123 |

|        |     |        |       |       |        |
|--------|-----|--------|-------|-------|--------|
| 87,704 | 115 | 19,884 | 5,983 | 3,409 | 29,391 |
| 87,705 | 116 | 19,909 | 6,000 | 3,410 | 29,435 |
| 87,706 | 119 | 20,177 | 6,061 | 3,436 | 29,793 |
| 87,707 | 117 | 20,379 | 6,123 | 3,456 | 30,075 |
| 87,708 | 114 | 20,509 | 6,153 | 3,485 | 30,261 |
| 87,709 | 111 | 20,660 | 6,180 | 3,510 | 30,461 |
| 87,710 | 108 | 20,753 | 6,190 | 3,498 | 30,549 |
| 87,711 | 107 | 20,981 | 6,168 | 3,487 | 30,743 |
| 87,712 | 111 | 20,828 | 6,112 | 3,477 | 30,528 |
| 87,713 | 113 | 20,848 | 6,097 | 3,466 | 30,524 |
| 87,714 | 113 | 20,951 | 6,109 | 3,470 | 30,643 |
| 87,715 | 111 | 20,829 | 6,108 | 3,489 | 30,537 |
| 87,716 | 111 | 20,836 | 6,091 | 3,501 | 30,539 |
| 87,717 | 113 | 20,751 | 6,071 | 3,472 | 30,407 |
| 87,718 | 113 | 21,058 | 6,159 | 3,507 | 30,837 |
| 87,719 | 114 | 21,145 | 6,160 | 3,515 | 30,934 |
| 87,720 | 112 | 20,903 | 6,067 | 3,493 | 30,575 |
| 87,721 | 109 | 20,640 | 5,995 | 3,475 | 30,219 |
| 87,722 | 110 | 20,779 | 6,028 | 3,522 | 30,439 |
| 87,723 | 106 | 21,000 | 6,066 | 3,545 | 30,717 |
| 87,724 | 103 | 21,034 | 6,114 | 3,561 | 30,812 |
| 87,725 | 103 | 20,763 | 6,041 | 3,496 | 30,403 |
| 87,726 | 104 | 21,022 | 6,116 | 3,517 | 30,759 |
| 87,727 | 101 | 21,227 | 6,214 | 3,547 | 31,089 |
| 87,728 | 96  | 20,804 | 6,129 | 3,511 | 30,540 |
| 87,729 | 97  | 21,062 | 6,168 | 3,539 | 30,866 |
| 87,730 | 95  | 21,292 | 6,208 | 3,563 | 31,158 |
| 87,731 | 96  | 20,947 | 6,088 | 3,537 | 30,668 |
| 87,732 | 96  | 20,980 | 6,085 | 3,545 | 30,706 |
| 87,733 | 94  | 20,946 | 6,086 | 3,559 | 30,685 |
| 87,734 | 96  | 20,995 | 6,094 | 3,571 | 30,756 |
| 87,735 | 98  | 21,203 | 6,178 | 3,618 | 31,097 |

|        |     |        |       |       |        |
|--------|-----|--------|-------|-------|--------|
| 87,736 | 107 | 21,117 | 6,170 | 3,619 | 31,013 |
| 87,737 | 102 | 21,176 | 6,201 | 3,632 | 31,111 |
| 87,738 | 108 | 21,105 | 6,184 | 3,640 | 31,037 |
| 87,739 | 109 | 21,170 | 6,145 | 3,638 | 31,062 |
| 87,740 | 110 | 21,415 | 6,202 | 3,674 | 31,401 |
| 87,741 | 111 | 21,370 | 6,173 | 3,656 | 31,310 |
| 87,742 | 111 | 21,335 | 6,165 | 3,673 | 31,284 |
| 87,743 | 109 | 21,128 | 6,168 | 3,666 | 31,071 |
| 87,744 | 107 | 21,172 | 6,164 | 3,669 | 31,112 |
| 87,745 | 108 | 21,122 | 6,113 | 3,637 | 30,980 |
| 87,746 | 111 | 21,398 | 6,174 | 3,662 | 31,345 |
| 87,747 | 107 | 21,473 | 6,171 | 3,678 | 31,429 |
| 87,748 | 109 | 21,824 | 6,254 | 3,708 | 31,895 |
| 87,749 | 108 | 21,598 | 6,219 | 3,660 | 31,585 |
| 87,750 | 108 | 21,708 | 6,204 | 3,658 | 31,678 |
| 87,751 | 108 | 21,867 | 6,237 | 3,666 | 31,878 |
| 87,752 | 111 | 21,601 | 6,149 | 3,612 | 31,473 |
| 87,753 | 111 | 21,660 | 6,147 | 3,614 | 31,532 |
| 87,754 | 110 | 21,859 | 6,190 | 3,651 | 31,810 |
| 87,755 | 109 | 21,681 | 6,132 | 3,615 | 31,537 |
| 87,756 | 108 | 21,573 | 6,124 | 3,614 | 31,419 |
| 87,757 | 108 | 21,867 | 6,231 | 3,680 | 31,886 |
| 87,758 | 110 | 21,762 | 6,194 | 3,675 | 31,741 |
| 87,759 | 115 | 21,961 | 6,258 | 3,697 | 32,031 |
| 87,760 | 118 | 21,583 | 6,217 | 3,658 | 31,576 |
| 87,761 | 122 | 21,441 | 6,167 | 3,641 | 31,371 |
| 87,762 | 124 | 21,930 | 6,270 | 3,716 | 32,040 |
| 87,763 | 120 | 21,647 | 6,200 | 3,660 | 31,627 |
| 87,764 | 124 | 21,762 | 6,198 | 3,662 | 31,746 |
| 87,765 | 124 | 21,796 | 6,215 | 3,672 | 31,807 |
| 87,766 | 123 | 21,878 | 6,229 | 3,680 | 31,910 |
| 87,767 | 124 | 21,864 | 6,209 | 3,683 | 31,880 |

|        |     |        |       |       |        |
|--------|-----|--------|-------|-------|--------|
| 87,768 | 122 | 21,859 | 6,216 | 3,671 | 31,868 |
| 87,769 | 123 | 22,017 | 6,284 | 3,702 | 32,126 |
| 87,770 | 122 | 21,793 | 6,309 | 3,693 | 31,917 |
| 87,771 | 126 | 21,548 | 6,229 | 3,637 | 31,540 |
| 87,772 | 123 | 21,460 | 6,225 | 3,628 | 31,436 |
| 87,773 | 123 | 21,468 | 6,249 | 3,613 | 31,453 |
| 87,774 | 123 | 21,406 | 6,247 | 3,625 | 31,401 |
| 87,775 | 123 | 21,047 | 6,184 | 3,593 | 30,947 |
| 87,776 | 123 | 21,079 | 6,168 | 3,642 | 31,012 |
| 87,777 | 126 | 21,094 | 6,190 | 3,659 | 31,069 |
| 87,778 | 129 | 21,167 | 6,167 | 3,683 | 31,146 |
| 87,779 | 136 | 21,338 | 6,192 | 3,691 | 31,357 |
| 87,780 | 135 | 21,058 | 6,141 | 3,685 | 31,019 |
| 87,781 | 138 | 21,118 | 6,121 | 3,662 | 31,039 |
| 87,782 | 137 | 21,179 | 6,135 | 3,665 | 31,116 |
| 87,783 | 139 | 21,276 | 6,154 | 3,666 | 31,235 |
| 87,784 | 139 | 21,424 | 6,185 | 3,687 | 31,435 |
| 87,785 | 141 | 21,265 | 6,113 | 3,626 | 31,145 |
| 87,786 | 139 | 21,488 | 6,147 | 3,663 | 31,437 |
| 87,787 | 132 | 21,712 | 6,213 | 3,702 | 31,759 |
| 87,788 | 141 | 21,847 | 6,261 | 3,728 | 31,977 |
| 87,789 | 137 | 21,861 | 6,244 | 3,685 | 31,927 |
| 87,790 | 143 | 21,983 | 6,259 | 3,700 | 32,085 |
| 87,791 | 144 | 21,981 | 6,262 | 3,699 | 32,086 |
| 87,792 | 148 | 22,173 | 6,390 | 3,763 | 32,474 |
| 87,793 | 151 | 21,984 | 6,402 | 3,747 | 32,284 |
| 87,794 | 158 | 21,691 | 6,299 | 3,719 | 31,867 |
| 87,795 | 158 | 21,636 | 6,302 | 3,721 | 31,817 |
| 87,796 | 157 | 21,487 | 6,331 | 3,728 | 31,703 |
| 87,797 | 157 | 21,528 | 6,360 | 3,753 | 31,798 |
| 87,798 | 155 | 21,634 | 6,396 | 3,750 | 31,935 |
| 87,799 | 153 | 21,491 | 6,336 | 3,736 | 31,716 |



|        |     |        |       |       |        |
|--------|-----|--------|-------|-------|--------|
| 87,800 | 154 | 21,609 | 6,326 | 3,752 | 31,841 |
| 87,801 | 153 | 21,667 | 6,390 | 3,737 | 31,947 |
| 87,802 | 148 | 21,385 | 6,321 | 3,714 | 31,568 |
| 87,803 | 149 | 21,438 | 6,325 | 3,718 | 31,630 |
| 87,804 | 153 | 21,284 | 6,308 | 3,708 | 31,453 |
| 87,805 | 149 | 21,159 | 6,305 | 3,692 | 31,305 |
| 87,806 | 147 | 22,155 | 6,634 | 3,845 | 32,781 |
| 87,807 | 145 | 22,183 | 6,632 | 3,869 | 32,829 |
| 87,808 | 148 | 22,265 | 6,688 | 3,909 | 33,010 |
| 87,809 | 145 | 22,285 | 6,713 | 3,941 | 33,084 |
| 87,810 | 143 | 21,981 | 6,650 | 3,916 | 32,690 |
| 87,811 | 139 | 21,820 | 6,585 | 3,874 | 32,418 |
| 87,812 | 140 | 21,774 | 6,659 | 3,907 | 32,480 |
| 87,813 | 138 | 21,751 | 6,714 | 3,916 | 32,519 |
| 87,814 | 136 | 21,711 | 6,729 | 3,937 | 32,513 |
| 87,815 | 133 | 21,535 | 6,677 | 3,892 | 32,237 |
| 87,816 | 136 | 21,752 | 6,756 | 3,914 | 32,558 |
| 87,817 | 137 | 21,516 | 6,723 | 3,887 | 32,263 |
| 87,818 | 134 | 21,211 | 6,674 | 3,854 | 31,873 |
| 87,819 | 136 | 21,662 | 6,810 | 3,931 | 32,539 |
| 87,820 | 136 | 21,726 | 6,780 | 3,932 | 32,574 |
| 87,821 | 133 | 21,864 | 6,742 | 3,918 | 32,657 |
| 87,822 | 130 | 21,863 | 6,762 | 3,919 | 32,674 |
| 87,823 | 130 | 21,600 | 6,719 | 3,880 | 32,329 |
| 87,824 | 131 | 21,723 | 6,746 | 3,921 | 32,521 |
| 87,825 | 130 | 21,611 | 6,679 | 3,894 | 32,314 |
| 87,826 | 134 | 21,886 | 6,724 | 3,902 | 32,646 |
| 87,827 | 131 | 21,946 | 6,738 | 3,889 | 32,704 |
| 87,828 | 127 | 21,652 | 6,666 | 3,837 | 32,282 |
| 87,829 | 123 | 21,801 | 6,699 | 3,854 | 32,477 |
| 87,830 | 114 | 21,667 | 6,659 | 3,858 | 32,298 |
| 87,831 | 115 | 21,445 | 6,597 | 3,812 | 31,969 |

|        |     |        |       |       |        |
|--------|-----|--------|-------|-------|--------|
| 87,832 | 112 | 21,672 | 6,675 | 3,862 | 32,321 |
| 87,833 | 110 | 21,398 | 6,595 | 3,817 | 31,920 |
| 87,834 | 111 | 21,614 | 6,657 | 3,842 | 32,224 |
| 87,835 | 112 | 21,480 | 6,622 | 3,826 | 32,040 |
| 87,836 | 111 | 21,266 | 6,561 | 3,801 | 31,739 |
| 87,837 | 109 | 21,099 | 6,546 | 3,777 | 31,531 |
| 87,838 | 110 | 21,336 | 6,604 | 3,820 | 31,870 |
| 87,839 | 102 | 21,219 | 6,577 | 3,790 | 31,688 |
| 87,840 | 99  | 21,139 | 6,564 | 3,763 | 31,565 |
| 87,841 | 92  | 20,914 | 6,583 | 3,752 | 31,341 |
| 87,842 | 94  | 20,910 | 6,592 | 3,745 | 31,341 |
| 87,843 | 79  | 20,286 | 6,338 | 3,598 | 30,301 |
| 87,844 | 79  | 20,572 | 6,378 | 3,623 | 30,652 |
| 87,845 | 78  | 20,867 | 6,460 | 3,647 | 31,052 |
| 87,846 | 82  | 20,900 | 6,473 | 3,653 | 31,108 |
| 87,847 | 81  | 20,649 | 6,415 | 3,626 | 30,771 |
| 87,848 | 82  | 20,722 | 6,466 | 3,678 | 30,948 |
| 87,849 | 83  | 20,626 | 6,473 | 3,682 | 30,864 |
| 87,850 | 85  | 20,474 | 6,491 | 3,670 | 30,720 |
| 87,851 | 83  | 20,199 | 6,474 | 3,652 | 30,408 |
| 87,852 | 86  | 20,185 | 6,518 | 3,701 | 30,490 |
| 87,853 | 83  | 19,365 | 6,273 | 3,567 | 29,288 |
| 87,854 | 82  | 19,658 | 6,325 | 3,608 | 29,673 |
| 87,855 | 84  | 19,936 | 6,390 | 3,677 | 30,087 |
| 87,856 | 85  | 19,815 | 6,348 | 3,689 | 29,937 |
| 87,857 | 87  | 20,005 | 6,382 | 3,726 | 30,200 |
| 87,858 | 91  | 19,931 | 6,359 | 3,707 | 30,088 |
| 87,859 | 87  | 19,961 | 6,368 | 3,693 | 30,109 |
| 87,860 | 88  | 20,059 | 6,355 | 3,666 | 30,168 |
| 87,861 | 85  | 20,086 | 6,342 | 3,645 | 30,158 |
| 87,862 | 88  | 19,975 | 6,310 | 3,616 | 29,989 |
| 87,863 | 100 | 20,152 | 6,325 | 3,648 | 30,225 |

|        |     |        |       |       |        |
|--------|-----|--------|-------|-------|--------|
| 87,864 | 101 | 20,095 | 6,303 | 3,645 | 30,144 |
| 87,865 | 108 | 19,875 | 6,245 | 3,590 | 29,818 |
| 87,866 | 107 | 19,609 | 6,169 | 3,574 | 29,459 |
| 87,867 | 104 | 19,807 | 6,244 | 3,627 | 29,782 |
| 87,868 | 107 | 19,581 | 6,158 | 3,583 | 29,429 |
| 87,869 | 106 | 19,422 | 6,097 | 3,572 | 29,197 |
| 87,870 | 108 | 19,953 | 6,260 | 3,667 | 29,988 |
| 87,871 | 115 | 19,874 | 6,269 | 3,655 | 29,913 |
| 87,872 | 115 | 19,908 | 6,298 | 3,665 | 29,986 |
| 87,873 | 115 | 20,039 | 6,355 | 3,682 | 30,191 |
| 87,874 | 117 | 20,017 | 6,307 | 3,642 | 30,083 |
| 87,875 | 117 | 20,342 | 6,355 | 3,670 | 30,484 |
| 87,876 | 114 | 20,301 | 6,386 | 3,690 | 30,491 |
| 87,877 | 115 | 20,365 | 6,418 | 3,719 | 30,617 |
| 87,878 | 117 | 20,544 | 6,487 | 3,771 | 30,919 |
| 87,879 | 118 | 20,599 | 6,493 | 3,791 | 31,001 |
| 87,880 | 118 | 20,656 | 6,518 | 3,769 | 31,061 |
| 87,881 | 118 | 20,527 | 6,487 | 3,740 | 30,872 |
| 87,882 | 118 | 20,513 | 6,485 | 3,727 | 30,843 |
| 87,883 | 116 | 20,735 | 6,533 | 3,779 | 31,163 |
| 87,884 | 115 | 20,579 | 6,515 | 3,749 | 30,958 |
| 87,885 | 121 | 20,286 | 6,453 | 3,724 | 30,584 |
| 87,886 | 120 | 19,993 | 6,415 | 3,708 | 30,236 |
| 87,887 | 125 | 20,658 | 6,609 | 3,815 | 31,207 |
| 87,888 | 130 | 20,695 | 6,624 | 3,822 | 31,271 |
| 87,889 | 130 | 20,678 | 6,623 | 3,823 | 31,254 |
| 87,890 | 129 | 20,507 | 6,602 | 3,838 | 31,076 |
| 87,891 | 127 | 20,174 | 6,471 | 3,793 | 30,565 |
| 87,892 | 128 | 20,317 | 6,551 | 3,826 | 30,822 |
| 87,893 | 125 | 20,007 | 6,471 | 3,806 | 30,409 |
| 87,894 | 125 | 20,143 | 6,601 | 3,874 | 30,743 |
| 87,895 | 126 | 20,451 | 6,675 | 3,910 | 31,162 |

|        |     |        |       |       |        |
|--------|-----|--------|-------|-------|--------|
| 87,896 | 123 | 20,336 | 6,654 | 3,918 | 31,031 |
| 87,897 | 117 | 20,448 | 6,634 | 3,938 | 31,137 |
| 87,898 | 117 | 20,531 | 6,628 | 3,946 | 31,222 |
| 87,899 | 117 | 20,633 | 6,650 | 3,941 | 31,341 |
| 87,900 | 114 | 20,185 | 6,445 | 3,816 | 30,560 |
| 87,901 | 114 | 20,524 | 6,478 | 3,864 | 30,980 |
| 87,902 | 119 | 20,584 | 6,482 | 3,858 | 31,043 |
| 87,903 | 125 | 20,867 | 6,502 | 3,876 | 31,370 |
| 87,904 | 124 | 21,044 | 6,597 | 3,907 | 31,672 |
| 87,905 | 122 | 20,802 | 6,517 | 3,874 | 31,315 |
| 87,906 | 135 | 20,830 | 6,523 | 3,856 | 31,344 |
| 87,907 | 136 | 20,966 | 6,586 | 3,894 | 31,582 |
| 87,908 | 137 | 20,953 | 6,603 | 3,908 | 31,601 |
| 87,909 | 141 | 20,795 | 6,598 | 3,886 | 31,420 |
| 87,910 | 144 | 20,598 | 6,559 | 3,894 | 31,195 |
| 87,911 | 147 | 20,344 | 6,524 | 3,854 | 30,869 |
| 87,912 | 142 | 20,312 | 6,517 | 3,865 | 30,836 |
| 87,913 | 138 | 20,456 | 6,536 | 3,881 | 31,011 |
| 87,914 | 129 | 20,367 | 6,525 | 3,850 | 30,871 |
| 87,915 | 128 | 20,292 | 6,476 | 3,824 | 30,720 |
| 87,916 | 124 | 20,160 | 6,401 | 3,793 | 30,478 |
| 87,917 | 124 | 20,025 | 6,328 | 3,750 | 30,227 |
| 87,918 | 119 | 20,421 | 6,449 | 3,776 | 30,765 |
| 87,919 | 119 | 20,327 | 6,415 | 3,786 | 30,647 |
| 87,920 | 118 | 20,567 | 6,499 | 3,823 | 31,007 |
| 87,921 | 115 | 20,536 | 6,512 | 3,837 | 31,000 |
| 87,922 | 116 | 20,611 | 6,508 | 3,863 | 31,098 |
| 87,923 | 115 | 20,390 | 6,424 | 3,832 | 30,761 |
| 87,924 | 117 | 20,468 | 6,496 | 3,857 | 30,938 |
| 87,925 | 116 | 20,396 | 6,482 | 3,826 | 30,820 |
| 87,926 | 115 | 19,951 | 6,331 | 3,721 | 30,118 |
| 87,927 | 116 | 20,110 | 6,384 | 3,736 | 30,346 |

|        |     |        |       |       |        |
|--------|-----|--------|-------|-------|--------|
| 87,928 | 113 | 20,109 | 6,374 | 3,748 | 30,344 |
| 87,929 | 112 | 19,858 | 6,346 | 3,700 | 30,016 |
| 87,930 | 113 | 20,022 | 6,376 | 3,731 | 30,242 |
| 87,931 | 114 | 19,644 | 6,266 | 3,685 | 29,709 |
| 87,932 | 116 | 19,850 | 6,293 | 3,708 | 29,967 |
| 87,933 | 116 | 19,450 | 6,193 | 3,651 | 29,410 |
| 87,934 | 119 | 19,660 | 6,250 | 3,688 | 29,717 |
| 87,935 | 117 | 19,563 | 6,235 | 3,681 | 29,596 |
| 87,936 | 111 | 19,367 | 6,176 | 3,640 | 29,294 |
| 87,937 | 112 | 19,714 | 6,258 | 3,691 | 29,775 |
| 87,938 | 109 | 19,554 | 6,261 | 3,691 | 29,615 |
| 87,939 | 105 | 19,456 | 6,238 | 3,693 | 29,492 |
| 87,940 | 104 | 19,454 | 6,249 | 3,690 | 29,497 |
| 87,941 | 105 | 19,458 | 6,238 | 3,674 | 29,475 |
| 87,942 | 104 | 19,490 | 6,252 | 3,667 | 29,513 |
| 87,943 | 104 | 19,609 | 6,224 | 3,664 | 29,601 |
| 87,944 | 104 | 19,423 | 6,175 | 3,630 | 29,332 |
| 87,945 | 107 | 19,408 | 6,109 | 3,601 | 29,225 |
| 87,946 | 107 | 19,228 | 6,053 | 3,563 | 28,951 |
| 87,947 | 109 | 19,114 | 6,009 | 3,515 | 28,747 |
| 87,948 | 109 | 19,095 | 6,010 | 3,519 | 28,733 |
| 87,949 | 113 | 19,253 | 6,032 | 3,521 | 28,919 |
| 87,950 | 113 | 19,239 | 6,000 | 3,518 | 28,870 |
| 87,951 | 111 | 19,286 | 6,018 | 3,546 | 28,961 |
| 87,952 | 111 | 19,335 | 6,017 | 3,539 | 29,002 |
| 87,953 | 112 | 19,663 | 6,103 | 3,595 | 29,473 |
| 87,954 | 106 | 19,783 | 6,163 | 3,640 | 29,692 |
| 87,955 | 105 | 19,410 | 6,063 | 3,561 | 29,139 |
| 87,956 | 106 | 19,611 | 6,097 | 3,594 | 29,408 |
| 87,957 | 97  | 19,875 | 6,143 | 3,638 | 29,753 |
| 87,958 | 95  | 20,093 | 6,180 | 3,644 | 30,012 |
| 87,959 | 95  | 19,970 | 6,116 | 3,587 | 29,768 |

|        |     |        |       |       |        |
|--------|-----|--------|-------|-------|--------|
| 87,960 | 88  | 19,836 | 6,006 | 3,506 | 29,436 |
| 87,961 | 88  | 19,946 | 6,018 | 3,501 | 29,553 |
| 87,962 | 87  | 19,734 | 5,943 | 3,476 | 29,240 |
| 87,963 | 87  | 19,601 | 5,878 | 3,430 | 28,996 |
| 87,964 | 93  | 20,694 | 6,215 | 3,718 | 30,720 |
| 87,965 | 98  | 20,766 | 6,234 | 3,723 | 30,821 |
| 87,966 | 96  | 20,470 | 6,166 | 3,685 | 30,417 |
| 87,967 | 96  | 20,412 | 6,177 | 3,732 | 30,417 |
| 87,968 | 95  | 20,260 | 6,169 | 3,732 | 30,256 |
| 87,969 | 103 | 20,537 | 6,229 | 3,766 | 30,635 |
| 87,970 | 103 | 20,677 | 6,243 | 3,769 | 30,792 |
| 87,971 | 103 | 20,611 | 6,182 | 3,757 | 30,653 |
| 87,972 | 107 | 21,101 | 6,252 | 3,810 | 31,270 |
| 87,973 | 104 | 21,134 | 6,246 | 3,803 | 31,287 |
| 87,974 | 108 | 21,262 | 6,237 | 3,797 | 31,404 |
| 87,975 | 108 | 21,330 | 6,259 | 3,813 | 31,510 |
| 87,976 | 109 | 21,467 | 6,307 | 3,837 | 31,720 |
| 87,977 | 108 | 21,699 | 6,418 | 3,915 | 32,140 |
| 87,978 | 111 | 21,762 | 6,462 | 3,912 | 32,247 |
| 87,979 | 112 | 21,846 | 6,480 | 3,916 | 32,354 |
| 87,980 | 113 | 22,204 | 6,553 | 3,971 | 32,841 |
| 87,981 | 113 | 22,125 | 6,557 | 3,977 | 32,772 |
| 87,982 | 111 | 22,388 | 6,619 | 3,993 | 33,111 |
| 87,983 | 109 | 22,262 | 6,598 | 4,004 | 32,973 |
| 87,984 | 112 | 22,476 | 6,689 | 4,036 | 33,313 |
| 87,985 | 114 | 22,400 | 6,720 | 4,065 | 33,299 |
| 87,986 | 113 | 22,416 | 6,755 | 4,095 | 33,379 |
| 87,987 | 113 | 22,556 | 6,761 | 4,118 | 33,548 |
| 87,988 | 119 | 22,745 | 6,831 | 4,148 | 33,843 |
| 87,989 | 124 | 22,866 | 6,838 | 4,162 | 33,990 |
| 87,990 | 127 | 23,094 | 6,883 | 4,186 | 34,290 |
| 87,991 | 128 | 23,245 | 6,887 | 4,202 | 34,462 |

|        |     |        |       |       |        |
|--------|-----|--------|-------|-------|--------|
| 87,992 | 130 | 23,423 | 6,902 | 4,222 | 34,677 |
| 87,993 | 135 | 23,575 | 6,923 | 4,236 | 34,869 |
| 87,994 | 137 | 23,435 | 6,895 | 4,217 | 34,684 |
| 87,995 | 137 | 23,603 | 6,889 | 4,218 | 34,847 |
| 87,996 | 137 | 23,693 | 6,893 | 4,215 | 34,938 |
| 87,997 | 136 | 23,609 | 6,931 | 4,233 | 34,909 |
| 87,998 | 139 | 23,456 | 6,869 | 4,188 | 34,652 |
| 87,999 | 140 | 23,658 | 6,906 | 4,226 | 34,930 |
| 88,000 | 138 | 23,897 | 6,961 | 4,247 | 35,243 |
| 88,001 | 140 | 23,808 | 6,909 | 4,226 | 35,083 |
| 88,002 | 140 | 23,689 | 6,885 | 4,202 | 34,916 |
| 88,003 | 142 | 24,147 | 7,001 | 4,261 | 35,551 |
| 88,004 | 136 | 24,066 | 7,016 | 4,243 | 35,461 |
| 88,005 | 136 | 23,697 | 6,933 | 4,189 | 34,955 |
| 88,006 | 139 | 23,705 | 6,932 | 4,179 | 34,955 |
| 88,007 | 143 | 23,748 | 6,932 | 4,172 | 34,995 |
| 88,008 | 140 | 23,479 | 6,869 | 4,128 | 34,616 |
| 88,009 | 142 | 23,912 | 7,024 | 4,233 | 35,311 |
| 88,010 | 143 | 23,859 | 6,975 | 4,223 | 35,200 |
| 88,011 | 140 | 23,734 | 6,936 | 4,177 | 34,987 |
| 88,012 | 140 | 23,895 | 6,924 | 4,168 | 35,127 |
| 88,013 | 140 | 23,945 | 6,914 | 4,141 | 35,140 |
| 88,014 | 139 | 23,985 | 6,897 | 4,138 | 35,159 |
| 88,015 | 135 | 24,045 | 6,905 | 4,123 | 35,208 |
| 88,016 | 127 | 23,950 | 6,855 | 4,101 | 35,033 |
| 88,017 | 124 | 23,898 | 6,782 | 4,046 | 34,850 |
| 88,018 | 124 | 23,884 | 6,754 | 4,050 | 34,812 |
| 88,019 | 123 | 24,078 | 6,800 | 4,076 | 35,077 |
| 88,020 | 120 | 23,789 | 6,734 | 4,044 | 34,687 |
| 88,021 | 121 | 23,631 | 6,710 | 4,025 | 34,487 |
| 88,022 | 121 | 23,632 | 6,707 | 4,047 | 34,507 |
| 88,023 | 122 | 23,523 | 6,698 | 4,025 | 34,368 |

|        |     |        |       |       |        |
|--------|-----|--------|-------|-------|--------|
| 88,024 | 122 | 22,979 | 6,529 | 3,930 | 33,560 |
| 88,025 | 121 | 23,082 | 6,554 | 3,925 | 33,682 |
| 88,026 | 117 | 23,089 | 6,527 | 3,915 | 33,648 |
| 88,027 | 120 | 23,088 | 6,496 | 3,899 | 33,603 |
| 88,028 | 117 | 23,076 | 6,449 | 3,902 | 33,544 |
| 88,029 | 121 | 23,094 | 6,403 | 3,901 | 33,519 |
| 88,030 | 121 | 23,092 | 6,352 | 3,865 | 33,430 |
| 88,031 | 130 | 23,140 | 6,339 | 3,847 | 33,456 |
| 88,032 | 129 | 22,994 | 6,265 | 3,808 | 33,196 |
| 88,033 | 129 | 23,115 | 6,241 | 3,833 | 33,318 |
| 88,034 | 127 | 23,229 | 6,220 | 3,827 | 33,403 |
| 88,035 | 127 | 23,275 | 6,207 | 3,825 | 33,434 |
| 88,036 | 121 | 23,490 | 6,169 | 3,785 | 33,565 |
| 88,037 | 122 | 23,468 | 6,132 | 3,767 | 33,489 |
| 88,038 | 116 | 23,638 | 6,139 | 3,766 | 33,659 |
| 88,039 | 119 | 23,723 | 6,132 | 3,764 | 33,738 |
| 88,040 | 120 | 23,995 | 6,198 | 3,820 | 34,133 |
| 88,041 | 120 | 23,786 | 6,145 | 3,784 | 33,835 |
| 88,042 | 121 | 23,601 | 6,094 | 3,735 | 33,551 |
| 88,043 | 122 | 24,144 | 6,213 | 3,802 | 34,281 |
| 88,044 | 120 | 24,280 | 6,219 | 3,837 | 34,456 |
| 88,045 | 117 | 24,314 | 6,177 | 3,833 | 34,441 |
| 88,046 | 116 | 24,573 | 6,264 | 3,895 | 34,848 |
| 88,047 | 116 | 24,622 | 6,266 | 3,893 | 34,897 |
| 88,048 | 123 | 24,785 | 6,314 | 3,932 | 35,154 |
| 88,049 | 116 | 24,526 | 6,273 | 3,907 | 34,822 |
| 88,050 | 122 | 24,591 | 6,321 | 3,921 | 34,955 |
| 88,051 | 121 | 24,316 | 6,260 | 3,875 | 34,572 |
| 88,052 | 121 | 24,359 | 6,291 | 3,885 | 34,656 |
| 88,053 | 121 | 24,035 | 6,251 | 3,859 | 34,266 |
| 88,054 | 120 | 24,077 | 6,238 | 3,849 | 34,284 |
| 88,055 | 120 | 24,045 | 6,230 | 3,855 | 34,250 |



|        |     |        |       |       |        |
|--------|-----|--------|-------|-------|--------|
| 88,056 | 123 | 24,036 | 6,241 | 3,856 | 34,256 |
| 88,057 | 120 | 23,692 | 6,190 | 3,842 | 33,844 |
| 88,058 | 124 | 23,917 | 6,264 | 3,900 | 34,205 |
| 88,059 | 122 | 24,063 | 6,295 | 3,926 | 34,406 |
| 88,060 | 130 | 24,125 | 6,312 | 3,917 | 34,484 |
| 88,061 | 130 | 24,162 | 6,359 | 3,929 | 34,580 |
| 88,062 | 129 | 24,133 | 6,362 | 3,930 | 34,554 |
| 88,063 | 129 | 24,113 | 6,352 | 3,930 | 34,524 |
| 88,064 | 130 | 24,149 | 6,369 | 3,930 | 34,578 |
| 88,065 | 129 | 23,885 | 6,318 | 3,889 | 34,221 |
| 88,066 | 132 | 23,691 | 6,314 | 3,883 | 34,020 |
| 88,067 | 135 | 23,565 | 6,298 | 3,860 | 33,858 |
| 88,068 | 136 | 23,889 | 6,338 | 3,895 | 34,258 |
| 88,069 | 139 | 23,942 | 6,381 | 3,911 | 34,373 |
| 88,070 | 135 | 23,911 | 6,382 | 3,921 | 34,349 |
| 88,071 | 134 | 23,678 | 6,309 | 3,879 | 34,000 |
| 88,072 | 135 | 23,827 | 6,355 | 3,890 | 34,207 |
| 88,073 | 132 | 23,814 | 6,352 | 3,905 | 34,203 |
| 88,074 | 128 | 23,525 | 6,290 | 3,851 | 33,794 |
| 88,075 | 122 | 23,400 | 6,273 | 3,851 | 33,646 |
| 88,076 | 122 | 23,499 | 6,320 | 3,878 | 33,819 |
| 88,077 | 122 | 23,358 | 6,296 | 3,882 | 33,658 |
| 88,078 | 120 | 22,910 | 6,223 | 3,825 | 33,078 |
| 88,079 | 122 | 23,186 | 6,302 | 3,888 | 33,498 |
| 88,080 | 125 | 23,224 | 6,361 | 3,911 | 33,621 |
| 88,081 | 124 | 23,352 | 6,417 | 3,948 | 33,841 |
| 88,082 | 117 | 23,254 | 6,466 | 3,963 | 33,800 |
| 88,083 | 120 | 22,875 | 6,407 | 3,912 | 33,314 |
| 88,084 | 118 | 22,692 | 6,384 | 3,903 | 33,097 |
| 88,085 | 120 | 23,014 | 6,465 | 3,953 | 33,552 |
| 88,086 | 120 | 22,996 | 6,459 | 3,954 | 33,529 |
| 88,087 | 122 | 23,368 | 6,555 | 4,036 | 34,081 |

|        |     |        |       |       |        |
|--------|-----|--------|-------|-------|--------|
| 88,088 | 121 | 23,470 | 6,589 | 4,028 | 34,208 |
| 88,089 | 123 | 23,505 | 6,577 | 4,023 | 34,228 |
| 88,090 | 119 | 23,194 | 6,527 | 3,971 | 33,811 |
| 88,091 | 116 | 22,898 | 6,435 | 3,918 | 33,367 |
| 88,092 | 114 | 22,859 | 6,406 | 3,892 | 33,271 |
| 88,093 | 112 | 22,577 | 6,336 | 3,856 | 32,881 |
| 88,094 | 113 | 22,864 | 6,485 | 3,925 | 33,387 |
| 88,095 | 112 | 22,642 | 6,419 | 3,881 | 33,054 |
| 88,096 | 111 | 22,228 | 6,311 | 3,806 | 32,456 |
| 88,097 | 112 | 22,152 | 6,265 | 3,776 | 32,305 |
| 88,098 | 110 | 22,268 | 6,287 | 3,769 | 32,434 |
| 88,099 | 115 | 22,492 | 6,309 | 3,765 | 32,681 |
| 88,100 | 109 | 22,646 | 6,297 | 3,798 | 32,850 |
| 88,101 | 115 | 22,957 | 6,369 | 3,836 | 33,277 |
| 88,102 | 111 | 22,742 | 6,278 | 3,819 | 32,950 |
| 88,103 | 110 | 22,730 | 6,250 | 3,826 | 32,916 |
| 88,104 | 110 | 23,013 | 6,293 | 3,855 | 33,271 |
| 88,105 | 116 | 22,714 | 6,162 | 3,788 | 32,780 |
| 88,106 | 116 | 23,122 | 6,221 | 3,834 | 33,293 |
| 88,107 | 111 | 23,454 | 6,274 | 3,868 | 33,707 |
| 88,108 | 115 | 23,373 | 6,214 | 3,825 | 33,527 |
| 88,109 | 114 | 23,276 | 6,183 | 3,813 | 33,386 |
| 88,110 | 115 | 23,393 | 6,179 | 3,793 | 33,480 |
| 88,111 | 109 | 23,524 | 6,193 | 3,798 | 33,624 |
| 88,112 | 106 | 23,244 | 6,098 | 3,737 | 33,185 |
| 88,113 | 105 | 22,914 | 6,002 | 3,697 | 32,718 |
| 88,114 | 101 | 23,126 | 6,039 | 3,710 | 32,976 |
| 88,115 | 101 | 23,372 | 6,074 | 3,738 | 33,285 |
| 88,116 | 101 | 23,133 | 5,989 | 3,686 | 32,909 |
| 88,117 | 102 | 23,383 | 6,005 | 3,717 | 33,207 |
| 88,118 | 99  | 23,380 | 5,998 | 3,726 | 33,203 |
| 88,119 | 98  | 23,809 | 6,082 | 3,758 | 33,747 |

|        |     |        |       |       |        |
|--------|-----|--------|-------|-------|--------|
| 88,120 | 98  | 23,899 | 6,061 | 3,749 | 33,807 |
| 88,121 | 99  | 23,660 | 5,999 | 3,695 | 33,453 |
| 88,122 | 100 | 23,594 | 5,995 | 3,674 | 33,363 |
| 88,123 | 100 | 23,763 | 6,067 | 3,719 | 33,649 |
| 88,124 | 102 | 23,870 | 6,072 | 3,721 | 33,765 |
| 88,125 | 103 | 23,805 | 6,025 | 3,722 | 33,655 |
| 88,126 | 107 | 23,840 | 6,015 | 3,725 | 33,687 |
| 88,127 | 108 | 24,079 | 6,053 | 3,759 | 33,999 |
| 88,128 | 107 | 24,043 | 6,003 | 3,732 | 33,885 |
| 88,129 | 108 | 24,230 | 6,041 | 3,760 | 34,139 |
| 88,130 | 108 | 24,201 | 6,036 | 3,750 | 34,095 |
| 88,131 | 104 | 24,261 | 6,018 | 3,744 | 34,127 |
| 88,132 | 107 | 24,257 | 6,018 | 3,749 | 34,131 |
| 88,133 | 106 | 24,141 | 5,934 | 3,727 | 33,908 |
| 88,134 | 104 | 24,213 | 5,940 | 3,702 | 33,959 |
| 88,135 | 104 | 24,293 | 5,958 | 3,683 | 34,038 |
| 88,136 | 106 | 24,259 | 5,953 | 3,686 | 34,004 |
| 88,137 | 106 | 23,891 | 5,879 | 3,642 | 33,518 |
| 88,138 | 107 | 24,141 | 5,938 | 3,683 | 33,869 |
| 88,139 | 106 | 24,170 | 5,953 | 3,718 | 33,947 |
| 88,140 | 105 | 24,090 | 5,920 | 3,719 | 33,834 |
| 88,141 | 100 | 23,064 | 5,633 | 3,571 | 32,368 |
| 88,142 | 102 | 23,230 | 5,655 | 3,581 | 32,568 |
| 88,143 | 103 | 23,439 | 5,665 | 3,608 | 32,815 |
| 88,144 | 103 | 23,480 | 5,635 | 3,617 | 32,835 |
| 88,145 | 105 | 23,510 | 5,630 | 3,625 | 32,870 |
| 88,146 | 105 | 23,410 | 5,635 | 3,626 | 32,776 |
| 88,147 | 106 | 23,303 | 5,603 | 3,616 | 32,628 |
| 88,148 | 102 | 23,000 | 5,555 | 3,596 | 32,253 |
| 88,149 | 102 | 23,104 | 5,559 | 3,626 | 32,391 |
| 88,150 | 104 | 23,281 | 5,604 | 3,647 | 32,636 |
| 88,151 | 105 | 23,282 | 5,614 | 3,637 | 32,638 |

|        |     |        |       |       |        |
|--------|-----|--------|-------|-------|--------|
| 88,152 | 101 | 23,085 | 5,557 | 3,619 | 32,362 |
| 88,153 | 102 | 23,022 | 5,551 | 3,597 | 32,272 |
| 88,154 | 103 | 22,972 | 5,533 | 3,572 | 32,180 |
| 88,155 | 103 | 22,823 | 5,477 | 3,543 | 31,946 |
| 88,156 | 96  | 23,213 | 5,629 | 3,610 | 32,548 |
| 88,157 | 94  | 23,135 | 5,616 | 3,597 | 32,442 |
| 88,158 | 92  | 22,731 | 5,556 | 3,549 | 31,928 |
| 88,159 | 90  | 22,653 | 5,535 | 3,527 | 31,805 |
| 88,160 | 91  | 22,793 | 5,573 | 3,541 | 31,998 |
| 88,161 | 90  | 22,714 | 5,509 | 3,519 | 31,832 |
| 88,162 | 94  | 22,399 | 5,438 | 3,481 | 31,412 |
| 88,163 | 93  | 22,055 | 5,396 | 3,451 | 30,995 |
| 88,164 | 102 | 22,791 | 5,568 | 3,528 | 31,989 |
| 88,165 | 105 | 22,602 | 5,543 | 3,531 | 31,781 |
| 88,166 | 105 | 22,506 | 5,527 | 3,512 | 31,650 |
| 88,167 | 104 | 22,617 | 5,555 | 3,530 | 31,806 |
| 88,168 | 102 | 22,251 | 5,528 | 3,495 | 31,376 |
| 88,169 | 102 | 22,332 | 5,597 | 3,505 | 31,536 |
| 88,170 | 106 | 22,296 | 5,608 | 3,541 | 31,551 |
| 88,171 | 105 | 22,358 | 5,617 | 3,547 | 31,627 |
| 88,172 | 102 | 22,694 | 5,637 | 3,577 | 32,010 |
| 88,173 | 106 | 22,773 | 5,632 | 3,596 | 32,107 |
| 88,174 | 106 | 22,717 | 5,610 | 3,570 | 32,003 |
| 88,175 | 104 | 22,392 | 5,609 | 3,551 | 31,656 |
| 88,176 | 103 | 22,613 | 5,648 | 3,559 | 31,923 |
| 88,177 | 101 | 22,624 | 5,637 | 3,547 | 31,909 |
| 88,178 | 101 | 22,390 | 5,595 | 3,535 | 31,621 |
| 88,179 | 101 | 22,773 | 5,693 | 3,599 | 32,166 |
| 88,180 | 99  | 22,668 | 5,699 | 3,579 | 32,045 |
| 88,181 | 98  | 22,486 | 5,640 | 3,575 | 31,799 |
| 88,182 | 102 | 22,579 | 5,710 | 3,603 | 31,994 |
| 88,183 | 101 | 22,534 | 5,655 | 3,595 | 31,885 |

|        |     |        |       |       |        |
|--------|-----|--------|-------|-------|--------|
| 88,184 | 104 | 22,490 | 5,656 | 3,577 | 31,827 |
| 88,185 | 100 | 21,702 | 5,490 | 3,455 | 30,747 |
| 88,186 | 100 | 21,797 | 5,495 | 3,471 | 30,863 |
| 88,187 | 100 | 22,007 | 5,558 | 3,500 | 31,165 |
| 88,188 | 103 | 22,285 | 5,602 | 3,520 | 31,510 |
| 88,189 | 108 | 22,246 | 5,575 | 3,495 | 31,424 |
| 88,190 | 107 | 21,955 | 5,503 | 3,444 | 31,009 |
| 88,191 | 105 | 21,931 | 5,544 | 3,434 | 31,014 |
| 88,192 | 104 | 21,871 | 5,589 | 3,463 | 31,027 |
| 88,193 | 102 | 21,736 | 5,573 | 3,452 | 30,863 |
| 88,194 | 103 | 21,708 | 5,570 | 3,441 | 30,822 |
| 88,195 | 102 | 21,715 | 5,593 | 3,448 | 30,858 |
| 88,196 | 112 | 22,067 | 5,710 | 3,484 | 31,373 |
| 88,197 | 112 | 22,033 | 5,732 | 3,477 | 31,354 |
| 88,198 | 110 | 21,869 | 5,706 | 3,461 | 31,146 |
| 88,199 | 120 | 22,160 | 5,773 | 3,514 | 31,567 |
| 88,200 | 120 | 22,074 | 5,777 | 3,502 | 31,473 |
| 88,201 | 116 | 21,992 | 5,762 | 3,485 | 31,355 |
| 88,202 | 115 | 21,647 | 5,701 | 3,425 | 30,888 |
| 88,203 | 113 | 21,565 | 5,702 | 3,422 | 30,802 |
| 88,204 | 112 | 21,453 | 5,713 | 3,425 | 30,703 |
| 88,205 | 116 | 21,378 | 5,659 | 3,420 | 30,573 |
| 88,206 | 116 | 21,267 | 5,628 | 3,409 | 30,420 |
| 88,207 | 123 | 21,390 | 5,660 | 3,436 | 30,609 |
| 88,208 | 125 | 21,384 | 5,664 | 3,437 | 30,610 |
| 88,209 | 122 | 21,252 | 5,612 | 3,442 | 30,428 |
| 88,210 | 122 | 21,229 | 5,608 | 3,443 | 30,402 |
| 88,211 | 125 | 21,415 | 5,703 | 3,516 | 30,759 |
| 88,212 | 129 | 21,572 | 5,735 | 3,535 | 30,971 |
| 88,213 | 125 | 21,460 | 5,674 | 3,501 | 30,760 |
| 88,214 | 127 | 21,696 | 5,704 | 3,525 | 31,052 |
| 88,215 | 129 | 21,904 | 5,747 | 3,537 | 31,317 |

|        |     |        |       |       |        |
|--------|-----|--------|-------|-------|--------|
| 88,216 | 125 | 21,859 | 5,772 | 3,517 | 31,273 |
| 88,217 | 126 | 21,697 | 5,739 | 3,495 | 31,057 |
| 88,218 | 124 | 21,426 | 5,679 | 3,492 | 30,721 |
| 88,219 | 127 | 21,474 | 5,680 | 3,505 | 30,786 |
| 88,220 | 126 | 21,305 | 5,636 | 3,475 | 30,542 |
| 88,221 | 127 | 22,120 | 5,876 | 3,616 | 31,739 |
| 88,222 | 128 | 22,054 | 5,909 | 3,621 | 31,712 |
| 88,223 | 129 | 21,999 | 5,907 | 3,605 | 31,640 |
| 88,224 | 124 | 22,043 | 5,880 | 3,588 | 31,635 |
| 88,225 | 129 | 21,974 | 5,852 | 3,598 | 31,553 |
| 88,226 | 131 | 22,076 | 5,863 | 3,592 | 31,662 |
| 88,227 | 138 | 22,114 | 5,912 | 3,635 | 31,799 |
| 88,228 | 145 | 22,330 | 6,014 | 3,679 | 32,168 |
| 88,229 | 145 | 22,381 | 5,994 | 3,637 | 32,157 |
| 88,230 | 145 | 22,453 | 5,969 | 3,614 | 32,181 |
| 88,231 | 149 | 22,834 | 6,061 | 3,648 | 32,692 |
| 88,232 | 146 | 23,027 | 6,089 | 3,638 | 32,900 |
| 88,233 | 151 | 23,342 | 6,115 | 3,663 | 33,271 |
| 88,234 | 156 | 23,068 | 6,094 | 3,624 | 32,942 |
| 88,235 | 153 | 23,044 | 6,085 | 3,625 | 32,907 |
| 88,236 | 153 | 22,990 | 6,065 | 3,625 | 32,833 |
| 88,237 | 152 | 22,939 | 6,078 | 3,635 | 32,804 |
| 88,238 | 151 | 22,987 | 6,071 | 3,642 | 32,851 |
| 88,239 | 148 | 23,075 | 6,119 | 3,666 | 33,008 |
| 88,240 | 143 | 23,154 | 6,169 | 3,702 | 33,168 |
| 88,241 | 142 | 23,020 | 6,118 | 3,682 | 32,962 |
| 88,242 | 143 | 23,373 | 6,200 | 3,739 | 33,455 |
| 88,243 | 152 | 23,298 | 6,173 | 3,701 | 33,324 |
| 88,244 | 151 | 23,249 | 6,170 | 3,685 | 33,255 |
| 88,245 | 152 | 23,488 | 6,230 | 3,740 | 33,610 |
| 88,246 | 161 | 23,580 | 6,276 | 3,768 | 33,785 |
| 88,247 | 155 | 23,790 | 6,299 | 3,794 | 34,038 |

|        |     |        |       |       |        |
|--------|-----|--------|-------|-------|--------|
| 88,248 | 160 | 23,230 | 6,089 | 3,686 | 33,165 |
| 88,249 | 167 | 23,466 | 6,163 | 3,707 | 33,503 |
| 88,250 | 160 | 23,724 | 6,213 | 3,751 | 33,848 |
| 88,251 | 164 | 24,095 | 6,289 | 3,808 | 34,356 |
| 88,252 | 171 | 23,936 | 6,247 | 3,788 | 34,142 |
| 88,253 | 173 | 24,017 | 6,253 | 3,777 | 34,220 |
| 88,254 | 179 | 23,968 | 6,253 | 3,783 | 34,183 |
| 88,255 | 179 | 23,966 | 6,253 | 3,785 | 34,183 |
| 88,256 | 176 | 23,824 | 6,264 | 3,763 | 34,027 |
| 88,257 | 175 | 23,812 | 6,261 | 3,753 | 34,001 |
| 88,258 | 168 | 23,886 | 6,276 | 3,762 | 34,092 |
| 88,259 | 170 | 23,759 | 6,257 | 3,741 | 33,927 |
| 88,260 | 170 | 23,761 | 6,258 | 3,719 | 33,908 |
| 88,261 | 169 | 24,133 | 6,316 | 3,775 | 34,393 |
| 88,262 | 166 | 24,277 | 6,322 | 3,800 | 34,565 |
| 88,263 | 169 | 24,088 | 6,324 | 3,799 | 34,380 |
| 88,264 | 162 | 23,763 | 6,274 | 3,760 | 33,959 |
| 88,265 | 163 | 23,583 | 6,271 | 3,770 | 33,787 |
| 88,266 | 161 | 23,504 | 6,288 | 3,810 | 33,763 |
| 88,267 | 164 | 23,498 | 6,264 | 3,825 | 33,751 |
| 88,268 | 167 | 23,611 | 6,288 | 3,825 | 33,891 |
| 88,269 | 169 | 23,711 | 6,299 | 3,835 | 34,014 |
| 88,270 | 171 | 23,796 | 6,261 | 3,826 | 34,054 |
| 88,271 | 177 | 23,944 | 6,309 | 3,853 | 34,283 |
| 88,272 | 182 | 24,056 | 6,312 | 3,833 | 34,383 |
| 88,273 | 180 | 23,908 | 6,255 | 3,800 | 34,143 |
| 88,274 | 178 | 23,613 | 6,236 | 3,803 | 33,830 |
| 88,275 | 181 | 23,555 | 6,260 | 3,805 | 33,801 |
| 88,276 | 177 | 23,724 | 6,326 | 3,824 | 34,051 |
| 88,277 | 170 | 23,600 | 6,251 | 3,781 | 33,802 |
| 88,278 | 172 | 23,621 | 6,253 | 3,787 | 33,833 |
| 88,279 | 166 | 23,699 | 6,271 | 3,790 | 33,926 |

|        |     |        |       |       |        |
|--------|-----|--------|-------|-------|--------|
| 88,280 | 172 | 24,096 | 6,397 | 3,894 | 34,559 |
| 88,281 | 168 | 23,687 | 6,314 | 3,860 | 34,029 |
| 88,282 | 169 | 23,762 | 6,324 | 3,896 | 34,151 |
| 88,283 | 170 | 23,858 | 6,439 | 3,955 | 34,422 |
| 88,284 | 160 | 23,718 | 6,448 | 3,953 | 34,279 |
| 88,285 | 162 | 23,766 | 6,443 | 3,951 | 34,322 |
| 88,286 | 166 | 23,866 | 6,450 | 3,966 | 34,448 |
| 88,287 | 164 | 23,662 | 6,408 | 3,961 | 34,195 |
| 88,288 | 166 | 23,915 | 6,455 | 3,978 | 34,514 |
| 88,289 | 170 | 24,113 | 6,451 | 3,978 | 34,712 |
| 88,290 | 169 | 23,868 | 6,379 | 3,951 | 34,367 |
| 88,291 | 171 | 23,929 | 6,391 | 3,958 | 34,449 |
| 88,292 | 170 | 23,753 | 6,307 | 3,915 | 34,145 |
| 88,293 | 173 | 23,972 | 6,351 | 3,915 | 34,411 |
| 88,294 | 173 | 24,329 | 6,425 | 3,956 | 34,883 |
| 88,295 | 176 | 24,273 | 6,374 | 3,931 | 34,754 |
| 88,296 | 172 | 24,177 | 6,350 | 3,912 | 34,611 |
| 88,297 | 165 | 24,134 | 6,347 | 3,922 | 34,568 |
| 88,298 | 167 | 24,314 | 6,389 | 3,951 | 34,821 |
| 88,299 | 161 | 23,917 | 6,343 | 3,911 | 34,332 |
| 88,300 | 159 | 24,006 | 6,387 | 3,944 | 34,496 |
| 88,301 | 167 | 23,915 | 6,364 | 3,931 | 34,377 |
| 88,302 | 168 | 23,868 | 6,333 | 3,912 | 34,281 |
| 88,303 | 158 | 23,804 | 6,286 | 3,910 | 34,158 |
| 88,304 | 155 | 23,865 | 6,295 | 3,904 | 34,219 |
| 88,305 | 149 | 23,783 | 6,245 | 3,886 | 34,063 |
| 88,306 | 146 | 23,774 | 6,281 | 3,874 | 34,075 |
| 88,307 | 146 | 23,872 | 6,266 | 3,873 | 34,157 |
| 88,308 | 145 | 24,131 | 6,298 | 3,927 | 34,501 |
| 88,309 | 147 | 24,175 | 6,297 | 3,915 | 34,534 |
| 88,310 | 145 | 23,771 | 6,182 | 3,841 | 33,939 |
| 88,311 | 149 | 23,924 | 6,227 | 3,856 | 34,156 |



|        |     |        |       |       |        |
|--------|-----|--------|-------|-------|--------|
| 88,312 | 154 | 24,232 | 6,284 | 3,880 | 34,550 |
| 88,313 | 155 | 24,194 | 6,265 | 3,854 | 34,468 |
| 88,314 | 144 | 23,894 | 6,144 | 3,800 | 33,982 |
| 88,315 | 146 | 23,733 | 6,071 | 3,725 | 33,675 |
| 88,316 | 148 | 24,103 | 6,124 | 3,754 | 34,129 |
| 88,317 | 151 | 24,146 | 6,112 | 3,763 | 34,172 |
| 88,318 | 152 | 24,030 | 6,073 | 3,717 | 33,972 |
| 88,319 | 149 | 24,286 | 6,068 | 3,758 | 34,261 |
| 88,320 | 149 | 24,234 | 6,055 | 3,744 | 34,182 |
| 88,321 | 149 | 24,255 | 6,094 | 3,757 | 34,255 |
| 88,322 | 141 | 24,160 | 6,070 | 3,736 | 34,107 |
| 88,323 | 135 | 23,618 | 5,911 | 3,667 | 33,331 |
| 88,324 | 135 | 23,945 | 5,948 | 3,698 | 33,726 |
| 88,325 | 133 | 23,292 | 5,754 | 3,573 | 32,752 |
| 88,326 | 134 | 23,490 | 5,751 | 3,595 | 32,970 |
| 88,327 | 133 | 23,528 | 5,759 | 3,607 | 33,027 |
| 88,328 | 132 | 23,277 | 5,677 | 3,558 | 32,644 |
| 88,329 | 131 | 23,344 | 5,626 | 3,551 | 32,652 |
| 88,330 | 134 | 23,431 | 5,646 | 3,569 | 32,780 |
| 88,331 | 128 | 23,188 | 5,566 | 3,501 | 32,383 |
| 88,332 | 127 | 22,897 | 5,449 | 3,437 | 31,910 |
| 88,333 | 129 | 23,273 | 5,523 | 3,453 | 32,378 |
| 88,334 | 129 | 23,144 | 5,382 | 3,401 | 32,056 |
| 88,335 | 126 | 22,813 | 5,268 | 3,351 | 31,558 |
| 88,336 | 122 | 22,622 | 5,230 | 3,321 | 31,295 |
| 88,337 | 122 | 22,609 | 5,228 | 3,325 | 31,284 |
| 88,338 | 121 | 22,482 | 5,224 | 3,303 | 31,130 |
| 88,339 | 117 | 22,240 | 5,176 | 3,301 | 30,834 |
| 88,340 | 120 | 22,111 | 5,117 | 3,274 | 30,622 |
| 88,341 | 120 | 22,118 | 5,109 | 3,272 | 30,619 |
| 88,342 | 126 | 21,902 | 5,062 | 3,251 | 30,341 |
| 88,343 | 125 | 21,897 | 5,051 | 3,244 | 30,317 |

|        |     |        |       |       |        |
|--------|-----|--------|-------|-------|--------|
| 88,344 | 122 | 21,693 | 4,996 | 3,202 | 30,013 |
| 88,345 | 124 | 21,909 | 5,059 | 3,234 | 30,326 |
| 88,346 | 119 | 21,703 | 5,029 | 3,205 | 30,056 |
| 88,347 | 118 | 21,343 | 4,925 | 3,142 | 29,528 |
| 88,348 | 118 | 21,362 | 4,912 | 3,135 | 29,527 |
| 88,349 | 116 | 21,551 | 4,946 | 3,145 | 29,758 |
| 88,350 | 105 | 21,315 | 4,815 | 3,078 | 29,313 |
| 88,351 | 109 | 21,557 | 4,854 | 3,121 | 29,641 |
| 88,352 | 104 | 21,792 | 4,961 | 3,156 | 30,013 |
| 88,353 | 99  | 21,518 | 4,930 | 3,137 | 29,684 |
| 88,354 | 100 | 21,461 | 4,943 | 3,124 | 29,628 |
| 88,355 | 101 | 21,286 | 4,935 | 3,113 | 29,435 |
| 88,356 | 101 | 21,300 | 4,931 | 3,102 | 29,434 |
| 88,357 | 107 | 21,341 | 4,967 | 3,147 | 29,562 |
| 88,358 | 107 | 21,096 | 4,946 | 3,138 | 29,287 |
| 88,359 | 111 | 21,428 | 5,046 | 3,181 | 29,766 |
| 88,360 | 107 | 21,072 | 4,971 | 3,146 | 29,296 |
| 88,361 | 108 | 21,278 | 5,000 | 3,183 | 29,569 |
| 88,362 | 103 | 21,288 | 4,997 | 3,184 | 29,572 |
| 88,363 | 111 | 21,807 | 5,133 | 3,263 | 30,314 |
| 88,364 | 112 | 21,641 | 5,132 | 3,238 | 30,123 |
| 88,365 | 113 | 21,705 | 5,128 | 3,249 | 30,195 |
| 88,366 | 110 | 21,921 | 5,182 | 3,301 | 30,514 |
| 88,367 | 109 | 22,433 | 5,287 | 3,360 | 31,189 |
| 88,368 | 102 | 22,423 | 5,302 | 3,347 | 31,174 |
| 88,369 | 105 | 22,179 | 5,266 | 3,312 | 30,862 |
| 88,370 | 109 | 22,466 | 5,341 | 3,357 | 31,273 |
| 88,371 | 111 | 22,467 | 5,314 | 3,332 | 31,224 |
| 88,372 | 113 | 22,483 | 5,299 | 3,329 | 31,224 |
| 88,373 | 113 | 22,575 | 5,317 | 3,345 | 31,350 |
| 88,374 | 119 | 22,637 | 5,344 | 3,352 | 31,452 |
| 88,375 | 135 | 22,708 | 5,397 | 3,362 | 31,602 |

|        |     |        |       |       |        |
|--------|-----|--------|-------|-------|--------|
| 88,376 | 134 | 22,648 | 5,396 | 3,358 | 31,536 |
| 88,377 | 132 | 22,703 | 5,444 | 3,341 | 31,620 |
| 88,378 | 135 | 22,604 | 5,451 | 3,345 | 31,535 |
| 88,379 | 136 | 22,220 | 5,406 | 3,337 | 31,099 |
| 88,380 | 141 | 22,722 | 5,559 | 3,401 | 31,823 |
| 88,381 | 141 | 22,868 | 5,601 | 3,410 | 32,020 |
| 88,382 | 144 | 22,755 | 5,609 | 3,429 | 31,937 |
| 88,383 | 145 | 22,748 | 5,650 | 3,432 | 31,975 |
| 88,384 | 150 | 22,728 | 5,650 | 3,443 | 31,971 |
| 88,385 | 156 | 22,512 | 5,608 | 3,418 | 31,694 |
| 88,386 | 164 | 22,890 | 5,685 | 3,451 | 32,190 |
| 88,387 | 166 | 22,861 | 5,686 | 3,417 | 32,130 |
| 88,388 | 165 | 22,954 | 5,712 | 3,427 | 32,258 |
| 88,389 | 165 | 23,054 | 5,698 | 3,422 | 32,339 |
| 88,390 | 168 | 23,527 | 5,819 | 3,472 | 32,986 |
| 88,391 | 161 | 22,983 | 5,729 | 3,384 | 32,257 |
| 88,392 | 163 | 23,349 | 5,794 | 3,423 | 32,729 |
| 88,393 | 156 | 23,591 | 5,829 | 3,446 | 33,022 |
| 88,394 | 158 | 23,852 | 5,903 | 3,483 | 33,396 |
| 88,395 | 159 | 23,859 | 5,879 | 3,505 | 33,402 |
| 88,396 | 156 | 23,615 | 5,840 | 3,476 | 33,087 |
| 88,397 | 157 | 23,366 | 5,820 | 3,438 | 32,781 |
| 88,398 | 155 | 23,035 | 5,761 | 3,406 | 32,357 |
| 88,399 | 154 | 23,396 | 5,892 | 3,482 | 32,924 |
| 88,400 | 155 | 23,168 | 5,879 | 3,489 | 32,691 |
| 88,401 | 158 | 23,278 | 5,927 | 3,552 | 32,915 |
| 88,402 | 154 | 23,203 | 5,950 | 3,541 | 32,848 |
| 88,403 | 153 | 23,188 | 5,922 | 3,544 | 32,807 |
| 88,404 | 165 | 23,204 | 5,918 | 3,544 | 32,831 |
| 88,405 | 165 | 23,394 | 5,906 | 3,590 | 33,055 |
| 88,406 | 168 | 23,434 | 5,931 | 3,609 | 33,142 |
| 88,407 | 169 | 23,347 | 5,892 | 3,606 | 33,014 |

|        |     |        |       |       |        |
|--------|-----|--------|-------|-------|--------|
| 88,408 | 163 | 23,341 | 5,867 | 3,620 | 32,991 |
| 88,409 | 165 | 23,539 | 5,870 | 3,602 | 33,176 |
| 88,410 | 166 | 23,378 | 5,818 | 3,560 | 32,922 |
| 88,411 | 166 | 23,345 | 5,805 | 3,559 | 32,875 |
| 88,412 | 166 | 23,154 | 5,795 | 3,547 | 32,662 |
| 88,413 | 168 | 23,271 | 5,809 | 3,557 | 32,805 |
| 88,414 | 158 | 23,396 | 5,825 | 3,582 | 32,961 |
| 88,415 | 170 | 23,095 | 5,731 | 3,535 | 32,531 |
| 88,416 | 169 | 22,888 | 5,685 | 3,509 | 32,251 |
| 88,417 | 187 | 23,176 | 5,729 | 3,571 | 32,663 |
| 88,418 | 187 | 23,111 | 5,729 | 3,553 | 32,580 |
| 88,419 | 186 | 23,168 | 5,750 | 3,581 | 32,685 |
| 88,420 | 187 | 23,146 | 5,770 | 3,572 | 32,675 |
| 88,421 | 193 | 23,067 | 5,730 | 3,561 | 32,551 |
| 88,422 | 193 | 23,096 | 5,783 | 3,590 | 32,662 |
| 88,423 | 193 | 22,982 | 5,778 | 3,574 | 32,527 |
| 88,424 | 192 | 23,126 | 5,835 | 3,608 | 32,761 |
| 88,425 | 192 | 23,135 | 5,815 | 3,632 | 32,774 |
| 88,426 | 177 | 22,907 | 5,793 | 3,615 | 32,492 |
| 88,427 | 188 | 22,616 | 5,745 | 3,598 | 32,147 |
| 88,428 | 186 | 22,424 | 5,713 | 3,584 | 31,907 |
| 88,429 | 183 | 23,190 | 5,941 | 3,695 | 33,009 |
| 88,430 | 181 | 23,079 | 5,953 | 3,703 | 32,916 |
| 88,431 | 183 | 23,122 | 5,971 | 3,723 | 32,999 |
| 88,432 | 179 | 23,099 | 5,957 | 3,722 | 32,957 |
| 88,433 | 176 | 23,116 | 5,971 | 3,695 | 32,958 |
| 88,434 | 171 | 23,036 | 5,958 | 3,681 | 32,846 |
| 88,435 | 172 | 22,929 | 5,946 | 3,689 | 32,736 |
| 88,436 | 174 | 23,022 | 5,991 | 3,716 | 32,903 |
| 88,437 | 169 | 22,990 | 5,987 | 3,737 | 32,883 |
| 88,438 | 167 | 22,779 | 5,947 | 3,733 | 32,626 |
| 88,439 | 168 | 22,604 | 5,923 | 3,728 | 32,423 |

|        |     |        |       |       |        |
|--------|-----|--------|-------|-------|--------|
| 88,440 | 171 | 22,959 | 6,018 | 3,806 | 32,954 |
| 88,441 | 170 | 22,618 | 5,962 | 3,770 | 32,520 |
| 88,442 | 169 | 22,685 | 5,988 | 3,795 | 32,637 |
| 88,443 | 173 | 22,391 | 5,929 | 3,765 | 32,258 |
| 88,444 | 173 | 22,084 | 5,911 | 3,756 | 31,924 |
| 88,445 | 181 | 23,040 | 6,101 | 3,891 | 33,213 |
| 88,446 | 187 | 22,966 | 6,067 | 3,868 | 33,088 |
| 88,447 | 189 | 23,154 | 6,071 | 3,889 | 33,303 |
| 88,448 | 191 | 23,432 | 6,067 | 3,899 | 33,589 |
| 88,449 | 191 | 23,443 | 6,092 | 3,892 | 33,618 |
| 88,450 | 195 | 23,715 | 6,149 | 3,924 | 33,983 |
| 88,451 | 197 | 23,898 | 6,140 | 3,916 | 34,151 |
| 88,452 | 196 | 23,719 | 6,123 | 3,895 | 33,933 |
| 88,453 | 197 | 24,039 | 6,193 | 3,952 | 34,381 |
| 88,454 | 199 | 24,053 | 6,215 | 3,984 | 34,451 |
| 88,455 | 190 | 24,105 | 6,221 | 3,977 | 34,493 |
| 88,456 | 190 | 23,977 | 6,232 | 3,975 | 34,374 |
| 88,457 | 188 | 23,982 | 6,168 | 3,911 | 34,249 |
| 88,458 | 188 | 24,130 | 6,198 | 3,911 | 34,427 |
| 88,459 | 189 | 24,158 | 6,289 | 3,970 | 34,606 |
| 88,460 | 187 | 24,143 | 6,326 | 3,995 | 34,651 |
| 88,461 | 188 | 23,894 | 6,271 | 3,972 | 34,325 |
| 88,462 | 188 | 23,858 | 6,262 | 3,970 | 34,278 |
| 88,463 | 187 | 23,924 | 6,250 | 3,983 | 34,344 |
| 88,464 | 188 | 23,630 | 6,198 | 3,967 | 33,983 |
| 88,465 | 186 | 23,369 | 6,137 | 3,936 | 33,628 |
| 88,466 | 165 | 23,148 | 6,112 | 3,915 | 33,340 |
| 88,467 | 166 | 23,278 | 6,167 | 3,925 | 33,536 |
| 88,468 | 155 | 22,526 | 6,008 | 3,828 | 32,517 |
| 88,469 | 158 | 22,636 | 6,019 | 3,839 | 32,652 |
| 88,470 | 149 | 22,647 | 5,992 | 3,866 | 32,654 |
| 88,471 | 146 | 22,585 | 5,984 | 3,863 | 32,578 |

|        |     |        |       |       |        |
|--------|-----|--------|-------|-------|--------|
| 88,472 | 140 | 22,626 | 5,976 | 3,864 | 32,606 |
| 88,473 | 146 | 22,719 | 5,954 | 3,860 | 32,679 |
| 88,474 | 151 | 22,685 | 5,973 | 3,844 | 32,653 |
| 88,475 | 145 | 22,427 | 5,906 | 3,811 | 32,289 |
| 88,476 | 156 | 22,755 | 6,020 | 3,901 | 32,832 |
| 88,477 | 156 | 22,602 | 5,933 | 3,884 | 32,575 |
| 88,478 | 146 | 22,746 | 5,896 | 3,871 | 32,659 |
| 88,479 | 154 | 22,317 | 5,737 | 3,759 | 31,967 |
| 88,480 | 158 | 22,633 | 5,774 | 3,783 | 32,348 |
| 88,481 | 156 | 22,665 | 5,766 | 3,782 | 32,369 |
| 88,482 | 157 | 22,698 | 5,783 | 3,777 | 32,415 |
| 88,483 | 160 | 22,736 | 5,765 | 3,770 | 32,431 |
| 88,484 | 158 | 22,741 | 5,730 | 3,793 | 32,422 |
| 88,485 | 159 | 22,632 | 5,705 | 3,793 | 32,289 |
| 88,486 | 157 | 22,744 | 5,699 | 3,779 | 32,379 |
| 88,487 | 150 | 22,986 | 5,737 | 3,782 | 32,655 |
| 88,488 | 148 | 22,599 | 5,610 | 3,694 | 32,051 |
| 88,489 | 149 | 22,567 | 5,614 | 3,694 | 32,024 |
| 88,490 | 145 | 22,580 | 5,598 | 3,661 | 31,984 |
| 88,491 | 143 | 22,612 | 5,589 | 3,661 | 32,005 |
| 88,492 | 143 | 22,820 | 5,608 | 3,685 | 32,256 |
| 88,493 | 142 | 22,564 | 5,565 | 3,651 | 31,922 |
| 88,494 | 142 | 22,461 | 5,563 | 3,649 | 31,815 |
| 88,495 | 145 | 22,247 | 5,536 | 3,631 | 31,559 |
| 88,496 | 145 | 21,990 | 5,508 | 3,588 | 31,231 |
| 88,497 | 143 | 22,847 | 5,746 | 3,792 | 32,528 |
| 88,498 | 143 | 22,703 | 5,755 | 3,803 | 32,404 |
| 88,499 | 143 | 22,743 | 5,804 | 3,818 | 32,508 |
| 88,500 | 144 | 22,610 | 5,771 | 3,806 | 32,331 |
| 88,501 | 142 | 22,312 | 5,719 | 3,755 | 31,928 |
| 88,502 | 142 | 22,293 | 5,708 | 3,747 | 31,890 |
| 88,503 | 141 | 22,335 | 5,732 | 3,728 | 31,936 |

|        |     |        |       |       |        |
|--------|-----|--------|-------|-------|--------|
| 88,504 | 142 | 22,512 | 5,806 | 3,756 | 32,216 |
| 88,505 | 139 | 22,428 | 5,767 | 3,718 | 32,052 |
| 88,506 | 137 | 22,439 | 5,755 | 3,721 | 32,052 |
| 88,507 | 136 | 22,209 | 5,693 | 3,653 | 31,691 |
| 88,508 | 134 | 22,373 | 5,711 | 3,676 | 31,894 |
| 88,509 | 131 | 22,481 | 5,701 | 3,687 | 32,000 |
| 88,510 | 133 | 21,803 | 5,503 | 3,547 | 30,986 |
| 88,511 | 135 | 22,113 | 5,522 | 3,577 | 31,347 |
| 88,512 | 138 | 22,391 | 5,583 | 3,603 | 31,715 |
| 88,513 | 141 | 22,419 | 5,595 | 3,613 | 31,768 |
| 88,514 | 140 | 22,732 | 5,731 | 3,686 | 32,289 |
| 88,515 | 136 | 22,402 | 5,693 | 3,616 | 31,847 |
| 88,516 | 138 | 22,335 | 5,702 | 3,618 | 31,793 |
| 88,517 | 139 | 22,209 | 5,676 | 3,617 | 31,641 |
| 88,518 | 138 | 22,174 | 5,679 | 3,628 | 31,619 |
| 88,519 | 140 | 22,395 | 5,723 | 3,642 | 31,900 |
| 88,520 | 145 | 22,159 | 5,663 | 3,577 | 31,544 |
| 88,521 | 142 | 22,261 | 5,673 | 3,585 | 31,661 |
| 88,522 | 140 | 22,213 | 5,685 | 3,604 | 31,642 |
| 88,523 | 146 | 22,481 | 5,736 | 3,635 | 31,998 |
| 88,524 | 138 | 22,258 | 5,654 | 3,610 | 31,660 |
| 88,525 | 139 | 22,485 | 5,730 | 3,641 | 31,995 |
| 88,526 | 131 | 22,438 | 5,651 | 3,584 | 31,804 |
| 88,527 | 135 | 22,509 | 5,672 | 3,607 | 31,923 |
| 88,528 | 135 | 22,130 | 5,555 | 3,544 | 31,364 |
| 88,529 | 126 | 22,037 | 5,527 | 3,525 | 31,215 |
| 88,530 | 126 | 22,025 | 5,527 | 3,544 | 31,222 |
| 88,531 | 124 | 22,051 | 5,517 | 3,536 | 31,228 |
| 88,532 | 128 | 22,372 | 5,572 | 3,584 | 31,656 |
| 88,533 | 127 | 22,097 | 5,495 | 3,544 | 31,263 |
| 88,534 | 131 | 22,198 | 5,545 | 3,595 | 31,469 |
| 88,535 | 130 | 22,042 | 5,504 | 3,577 | 31,253 |

|        |     |        |       |       |        |
|--------|-----|--------|-------|-------|--------|
| 88,536 | 130 | 22,242 | 5,567 | 3,608 | 31,547 |
| 88,537 | 127 | 22,063 | 5,538 | 3,595 | 31,323 |
| 88,538 | 124 | 21,897 | 5,522 | 3,585 | 31,128 |
| 88,539 | 125 | 22,051 | 5,618 | 3,631 | 31,425 |
| 88,540 | 128 | 22,024 | 5,600 | 3,636 | 31,388 |
| 88,541 | 128 | 21,886 | 5,610 | 3,633 | 31,257 |
| 88,542 | 139 | 21,810 | 5,595 | 3,646 | 31,190 |
| 88,543 | 141 | 21,809 | 5,644 | 3,657 | 31,251 |
| 88,544 | 132 | 21,806 | 5,619 | 3,684 | 31,241 |
| 88,545 | 129 | 21,776 | 5,624 | 3,665 | 31,194 |
| 88,546 | 121 | 21,945 | 5,640 | 3,663 | 31,369 |
| 88,547 | 119 | 22,040 | 5,639 | 3,668 | 31,466 |
| 88,548 | 120 | 22,085 | 5,628 | 3,638 | 31,471 |
| 88,549 | 114 | 21,262 | 5,391 | 3,517 | 30,284 |
| 88,550 | 114 | 21,455 | 5,415 | 3,554 | 30,538 |
| 88,551 | 111 | 21,503 | 5,416 | 3,556 | 30,586 |
| 88,552 | 108 | 21,482 | 5,405 | 3,581 | 30,576 |
| 88,553 | 112 | 21,954 | 5,454 | 3,616 | 31,136 |
| 88,554 | 112 | 21,961 | 5,427 | 3,596 | 31,096 |
| 88,555 | 111 | 22,017 | 5,400 | 3,603 | 31,131 |
| 88,556 | 110 | 21,728 | 5,338 | 3,568 | 30,744 |
| 88,557 | 111 | 21,612 | 5,347 | 3,603 | 30,673 |
| 88,558 | 113 | 21,338 | 5,293 | 3,572 | 30,316 |
| 88,559 | 114 | 21,026 | 5,245 | 3,546 | 29,931 |
| 88,560 | 122 | 21,938 | 5,478 | 3,690 | 31,228 |
| 88,561 | 124 | 21,985 | 5,520 | 3,674 | 31,303 |
| 88,562 | 125 | 21,939 | 5,552 | 3,679 | 31,295 |
| 88,563 | 122 | 21,925 | 5,555 | 3,700 | 31,302 |
| 88,564 | 120 | 21,879 | 5,510 | 3,668 | 31,177 |
| 88,565 | 121 | 21,640 | 5,406 | 3,606 | 30,773 |
| 88,566 | 121 | 21,942 | 5,446 | 3,639 | 31,148 |
| 88,567 | 118 | 22,272 | 5,476 | 3,668 | 31,534 |



|        |     |        |       |       |        |
|--------|-----|--------|-------|-------|--------|
| 88,568 | 119 | 22,337 | 5,470 | 3,664 | 31,590 |
| 88,569 | 120 | 22,373 | 5,449 | 3,667 | 31,609 |
| 88,570 | 118 | 22,213 | 5,424 | 3,671 | 31,426 |
| 88,571 | 112 | 22,402 | 5,506 | 3,726 | 31,746 |
| 88,572 | 118 | 22,622 | 5,570 | 3,758 | 32,068 |
| 88,573 | 120 | 22,608 | 5,626 | 3,752 | 32,106 |
| 88,574 | 112 | 22,292 | 5,568 | 3,730 | 31,702 |
| 88,575 | 117 | 22,636 | 5,636 | 3,749 | 32,138 |
| 88,576 | 115 | 22,671 | 5,612 | 3,739 | 32,137 |
| 88,577 | 113 | 22,428 | 5,565 | 3,698 | 31,804 |
| 88,578 | 113 | 22,535 | 5,580 | 3,710 | 31,938 |
| 88,579 | 109 | 22,802 | 5,640 | 3,746 | 32,297 |
| 88,580 | 111 | 22,593 | 5,606 | 3,737 | 32,047 |
| 88,581 | 110 | 22,338 | 5,577 | 3,715 | 31,740 |
| 88,582 | 114 | 22,625 | 5,669 | 3,783 | 32,191 |
| 88,583 | 113 | 22,428 | 5,675 | 3,765 | 31,981 |
| 88,584 | 116 | 22,471 | 5,697 | 3,780 | 32,064 |
| 88,585 | 109 | 22,313 | 5,677 | 3,746 | 31,845 |
| 88,586 | 112 | 22,440 | 5,727 | 3,783 | 32,062 |
| 88,587 | 119 | 22,219 | 5,666 | 3,744 | 31,748 |
| 88,588 | 119 | 22,324 | 5,659 | 3,751 | 31,853 |
| 88,589 | 122 | 22,219 | 5,649 | 3,737 | 31,727 |
| 88,590 | 122 | 22,243 | 5,626 | 3,748 | 31,739 |
| 88,591 | 120 | 22,152 | 5,619 | 3,734 | 31,625 |
| 88,592 | 121 | 22,249 | 5,600 | 3,738 | 31,708 |
| 88,593 | 114 | 22,190 | 5,569 | 3,693 | 31,566 |
| 88,594 | 114 | 22,291 | 5,530 | 3,684 | 31,619 |
| 88,595 | 116 | 21,839 | 5,423 | 3,577 | 30,955 |
| 88,596 | 116 | 21,831 | 5,403 | 3,576 | 30,926 |
| 88,597 | 120 | 21,861 | 5,360 | 3,590 | 30,931 |
| 88,598 | 122 | 21,919 | 5,321 | 3,578 | 30,940 |
| 88,599 | 119 | 21,777 | 5,273 | 3,538 | 30,707 |

|        |     |        |       |       |        |
|--------|-----|--------|-------|-------|--------|
| 88,600 | 123 | 22,074 | 5,355 | 3,564 | 31,116 |
| 88,601 | 123 | 22,088 | 5,315 | 3,527 | 31,053 |
| 88,602 | 125 | 22,216 | 5,340 | 3,547 | 31,228 |
| 88,603 | 127 | 22,233 | 5,358 | 3,545 | 31,263 |
| 88,604 | 124 | 21,955 | 5,296 | 3,524 | 30,899 |
| 88,605 | 125 | 21,840 | 5,236 | 3,501 | 30,702 |
| 88,606 | 126 | 21,966 | 5,285 | 3,510 | 30,887 |
| 88,607 | 124 | 22,261 | 5,321 | 3,521 | 31,227 |
| 88,608 | 123 | 22,133 | 5,264 | 3,468 | 30,988 |
| 88,609 | 118 | 22,289 | 5,268 | 3,494 | 31,169 |
| 88,610 | 123 | 22,323 | 5,239 | 3,499 | 31,184 |
| 88,611 | 124 | 22,294 | 5,233 | 3,490 | 31,141 |
| 88,612 | 120 | 21,599 | 5,091 | 3,416 | 30,226 |
| 88,613 | 121 | 21,860 | 5,131 | 3,442 | 30,554 |
| 88,614 | 118 | 21,964 | 5,122 | 3,432 | 30,636 |
| 88,615 | 121 | 22,208 | 5,164 | 3,457 | 30,950 |
| 88,616 | 121 | 21,946 | 5,116 | 3,419 | 30,602 |
| 88,617 | 122 | 21,994 | 5,102 | 3,418 | 30,636 |
| 88,618 | 127 | 21,986 | 5,135 | 3,433 | 30,681 |
| 88,619 | 129 | 21,874 | 5,161 | 3,445 | 30,609 |
| 88,620 | 129 | 21,841 | 5,129 | 3,418 | 30,517 |
| 88,621 | 127 | 21,885 | 5,117 | 3,402 | 30,531 |
| 88,622 | 128 | 21,881 | 5,099 | 3,374 | 30,482 |
| 88,623 | 125 | 21,691 | 5,035 | 3,350 | 30,201 |
| 88,624 | 124 | 21,249 | 4,891 | 3,246 | 29,510 |
| 88,625 | 124 | 21,294 | 4,883 | 3,260 | 29,561 |
| 88,626 | 127 | 20,952 | 4,831 | 3,235 | 29,145 |
| 88,627 | 125 | 20,684 | 4,773 | 3,217 | 28,799 |
| 88,628 | 136 | 21,883 | 5,073 | 3,412 | 30,504 |
| 88,629 | 141 | 21,768 | 5,061 | 3,413 | 30,383 |
| 88,630 | 141 | 21,673 | 5,075 | 3,407 | 30,296 |
| 88,631 | 140 | 21,948 | 5,087 | 3,457 | 30,632 |

|        |     |        |       |       |        |
|--------|-----|--------|-------|-------|--------|
| 88,632 | 135 | 21,867 | 5,031 | 3,406 | 30,439 |
| 88,633 | 135 | 21,887 | 5,003 | 3,396 | 30,421 |
| 88,634 | 136 | 22,167 | 5,060 | 3,436 | 30,799 |
| 88,635 | 131 | 21,873 | 4,936 | 3,358 | 30,298 |
| 88,636 | 132 | 22,190 | 4,977 | 3,382 | 30,681 |
| 88,637 | 130 | 22,387 | 5,012 | 3,407 | 30,936 |
| 88,638 | 128 | 22,152 | 4,958 | 3,358 | 30,596 |
| 88,639 | 130 | 22,453 | 5,032 | 3,387 | 31,002 |
| 88,640 | 128 | 22,763 | 5,084 | 3,424 | 31,399 |
| 88,641 | 130 | 22,551 | 5,044 | 3,362 | 31,087 |
| 88,642 | 130 | 22,617 | 5,025 | 3,363 | 31,135 |
| 88,643 | 129 | 22,700 | 5,055 | 3,393 | 31,277 |
| 88,644 | 129 | 22,469 | 5,013 | 3,368 | 30,979 |
| 88,645 | 126 | 22,417 | 5,007 | 3,370 | 30,920 |
| 88,646 | 126 | 22,496 | 5,025 | 3,394 | 31,041 |
| 88,647 | 127 | 22,609 | 5,041 | 3,406 | 31,183 |
| 88,648 | 126 | 22,413 | 5,000 | 3,380 | 30,919 |
| 88,649 | 127 | 22,324 | 5,042 | 3,389 | 30,882 |
| 88,650 | 130 | 22,633 | 5,094 | 3,430 | 31,287 |
| 88,651 | 128 | 22,644 | 5,064 | 3,431 | 31,267 |
| 88,652 | 126 | 22,506 | 5,074 | 3,411 | 31,117 |
| 88,653 | 126 | 22,551 | 5,077 | 3,405 | 31,159 |
| 88,654 | 131 | 22,531 | 5,077 | 3,405 | 31,144 |
| 88,655 | 134 | 22,876 | 5,135 | 3,451 | 31,596 |
| 88,656 | 141 | 22,826 | 5,128 | 3,430 | 31,525 |
| 88,657 | 147 | 23,115 | 5,188 | 3,476 | 31,926 |
| 88,658 | 153 | 23,167 | 5,261 | 3,492 | 32,073 |
| 88,659 | 155 | 23,131 | 5,277 | 3,467 | 32,030 |
| 88,660 | 146 | 22,939 | 5,260 | 3,450 | 31,795 |
| 88,661 | 148 | 23,003 | 5,268 | 3,451 | 31,870 |
| 88,662 | 147 | 22,665 | 5,201 | 3,425 | 31,438 |
| 88,663 | 145 | 22,918 | 5,239 | 3,486 | 31,788 |

|        |     |        |       |       |        |
|--------|-----|--------|-------|-------|--------|
| 88,664 | 147 | 23,212 | 5,285 | 3,526 | 32,170 |
| 88,665 | 150 | 23,098 | 5,232 | 3,500 | 31,980 |
| 88,666 | 148 | 22,978 | 5,192 | 3,480 | 31,798 |
| 88,667 | 148 | 23,266 | 5,270 | 3,517 | 32,201 |
| 88,668 | 147 | 23,325 | 5,266 | 3,498 | 32,236 |
| 88,669 | 147 | 23,252 | 5,194 | 3,458 | 32,051 |
| 88,670 | 150 | 23,313 | 5,202 | 3,438 | 32,103 |
| 88,671 | 152 | 23,437 | 5,255 | 3,459 | 32,303 |
| 88,672 | 157 | 23,224 | 5,208 | 3,449 | 32,038 |
| 88,673 | 155 | 23,175 | 5,177 | 3,432 | 31,939 |
| 88,674 | 153 | 23,107 | 5,154 | 3,432 | 31,846 |
| 88,675 | 150 | 23,045 | 5,140 | 3,457 | 31,792 |
| 88,676 | 148 | 23,051 | 5,145 | 3,425 | 31,769 |
| 88,677 | 139 | 23,037 | 5,145 | 3,431 | 31,752 |
| 88,678 | 137 | 23,079 | 5,162 | 3,452 | 31,830 |
| 88,679 | 136 | 23,227 | 5,211 | 3,471 | 32,045 |
| 88,680 | 132 | 23,014 | 5,141 | 3,429 | 31,716 |
| 88,681 | 134 | 23,373 | 5,191 | 3,452 | 32,150 |
| 88,682 | 135 | 23,401 | 5,205 | 3,459 | 32,200 |
| 88,683 | 133 | 23,188 | 5,193 | 3,428 | 31,942 |
| 88,684 | 133 | 23,347 | 5,191 | 3,440 | 32,111 |
| 88,685 | 135 | 23,337 | 5,174 | 3,441 | 32,087 |
| 88,686 | 135 | 23,181 | 5,150 | 3,423 | 31,889 |
| 88,687 | 136 | 23,082 | 5,138 | 3,419 | 31,775 |
| 88,688 | 136 | 23,128 | 5,138 | 3,429 | 31,831 |
| 88,689 | 133 | 23,340 | 5,176 | 3,458 | 32,107 |
| 88,690 | 132 | 23,258 | 5,120 | 3,449 | 31,959 |
| 88,691 | 136 | 23,224 | 5,103 | 3,442 | 31,905 |
| 88,692 | 132 | 23,022 | 5,054 | 3,428 | 31,636 |
| 88,693 | 135 | 23,396 | 5,129 | 3,475 | 32,135 |
| 88,694 | 138 | 23,611 | 5,174 | 3,476 | 32,399 |
| 88,695 | 140 | 23,784 | 5,184 | 3,478 | 32,586 |

|        |     |        |       |       |        |
|--------|-----|--------|-------|-------|--------|
| 88,696 | 143 | 23,728 | 5,176 | 3,438 | 32,485 |
| 88,697 | 143 | 23,806 | 5,181 | 3,444 | 32,574 |
| 88,698 | 142 | 23,754 | 5,191 | 3,444 | 32,531 |
| 88,699 | 142 | 23,601 | 5,194 | 3,438 | 32,375 |
| 88,700 | 146 | 23,727 | 5,225 | 3,451 | 32,549 |
| 88,701 | 142 | 23,465 | 5,173 | 3,430 | 32,210 |
| 88,702 | 141 | 23,438 | 5,154 | 3,421 | 32,154 |
| 88,703 | 141 | 23,360 | 5,137 | 3,422 | 32,060 |
| 88,704 | 137 | 23,550 | 5,199 | 3,459 | 32,345 |
| 88,705 | 134 | 23,400 | 5,162 | 3,428 | 32,124 |
| 88,706 | 131 | 23,653 | 5,230 | 3,457 | 32,471 |
| 88,707 | 122 | 23,633 | 5,219 | 3,471 | 32,445 |
| 88,708 | 121 | 23,642 | 5,189 | 3,461 | 32,413 |
| 88,709 | 120 | 23,644 | 5,143 | 3,434 | 32,341 |
| 88,710 | 122 | 23,446 | 5,087 | 3,418 | 32,073 |
| 88,711 | 122 | 23,648 | 5,091 | 3,423 | 32,284 |
| 88,712 | 123 | 23,755 | 5,126 | 3,408 | 32,412 |
| 88,713 | 122 | 23,769 | 5,122 | 3,398 | 32,411 |
| 88,714 | 124 | 24,036 | 5,183 | 3,417 | 32,760 |
| 88,715 | 125 | 23,485 | 5,076 | 3,343 | 32,029 |
| 88,716 | 125 | 23,462 | 5,084 | 3,348 | 32,019 |
| 88,717 | 131 | 23,080 | 4,991 | 3,299 | 31,501 |
| 88,718 | 134 | 22,818 | 4,929 | 3,264 | 31,145 |
| 88,719 | 142 | 24,005 | 5,266 | 3,485 | 32,898 |
| 88,720 | 140 | 23,786 | 5,217 | 3,453 | 32,596 |
| 88,721 | 137 | 23,900 | 5,269 | 3,489 | 32,795 |
| 88,722 | 136 | 23,860 | 5,256 | 3,480 | 32,732 |
| 88,723 | 132 | 23,901 | 5,264 | 3,494 | 32,791 |
| 88,724 | 132 | 23,875 | 5,282 | 3,495 | 32,784 |
| 88,725 | 131 | 23,987 | 5,297 | 3,492 | 32,907 |
| 88,726 | 134 | 24,155 | 5,331 | 3,508 | 33,128 |
| 88,727 | 133 | 24,143 | 5,347 | 3,515 | 33,138 |

|        |     |        |       |       |        |
|--------|-----|--------|-------|-------|--------|
| 88,728 | 135 | 24,546 | 5,426 | 3,543 | 33,650 |
| 88,729 | 139 | 24,308 | 5,386 | 3,523 | 33,356 |
| 88,730 | 135 | 24,312 | 5,379 | 3,537 | 33,363 |
| 88,731 | 146 | 24,489 | 5,449 | 3,571 | 33,655 |
| 88,732 | 143 | 24,181 | 5,438 | 3,536 | 33,298 |
| 88,733 | 143 | 24,097 | 5,413 | 3,501 | 33,154 |
| 88,734 | 150 | 24,149 | 5,425 | 3,506 | 33,230 |
| 88,735 | 152 | 23,963 | 5,391 | 3,491 | 32,997 |
| 88,736 | 153 | 24,299 | 5,444 | 3,525 | 33,421 |
| 88,737 | 155 | 24,195 | 5,452 | 3,511 | 33,313 |
| 88,738 | 160 | 24,135 | 5,459 | 3,495 | 33,249 |
| 88,739 | 160 | 24,085 | 5,450 | 3,498 | 33,193 |
| 88,740 | 164 | 24,185 | 5,481 | 3,503 | 33,333 |
| 88,741 | 165 | 24,214 | 5,518 | 3,529 | 33,426 |
| 88,742 | 158 | 23,899 | 5,475 | 3,508 | 33,040 |
| 88,743 | 154 | 23,895 | 5,531 | 3,512 | 33,092 |
| 88,744 | 154 | 23,862 | 5,543 | 3,526 | 33,085 |
| 88,745 | 154 | 23,794 | 5,535 | 3,534 | 33,017 |
| 88,746 | 158 | 23,907 | 5,558 | 3,561 | 33,184 |
| 88,747 | 154 | 24,110 | 5,591 | 3,593 | 33,448 |
| 88,748 | 149 | 24,298 | 5,628 | 3,619 | 33,694 |
| 88,749 | 151 | 24,047 | 5,556 | 3,594 | 33,348 |
| 88,750 | 151 | 24,358 | 5,611 | 3,621 | 33,741 |
| 88,751 | 147 | 24,431 | 5,611 | 3,623 | 33,812 |
| 88,752 | 148 | 24,238 | 5,594 | 3,599 | 33,579 |
| 88,753 | 157 | 24,448 | 5,606 | 3,595 | 33,806 |
| 88,754 | 158 | 24,658 | 5,638 | 3,602 | 34,056 |
| 88,755 | 157 | 24,606 | 5,640 | 3,595 | 33,998 |
| 88,756 | 158 | 24,424 | 5,632 | 3,619 | 33,833 |
| 88,757 | 162 | 24,460 | 5,642 | 3,639 | 33,903 |
| 88,758 | 169 | 24,094 | 5,594 | 3,586 | 33,443 |
| 88,759 | 164 | 23,693 | 5,561 | 3,558 | 32,976 |

|        |     |        |       |       |        |
|--------|-----|--------|-------|-------|--------|
| 88,760 | 159 | 23,970 | 5,613 | 3,650 | 33,392 |
| 88,761 | 156 | 23,233 | 5,461 | 3,541 | 32,391 |
| 88,762 | 157 | 23,379 | 5,478 | 3,547 | 32,561 |
| 88,763 | 156 | 23,311 | 5,476 | 3,551 | 32,494 |
| 88,764 | 155 | 23,234 | 5,487 | 3,552 | 32,428 |
| 88,765 | 153 | 23,162 | 5,468 | 3,554 | 32,337 |
| 88,766 | 149 | 23,084 | 5,449 | 3,546 | 32,228 |
| 88,767 | 152 | 23,257 | 5,495 | 3,567 | 32,471 |
| 88,768 | 148 | 22,941 | 5,429 | 3,533 | 32,051 |
| 88,769 | 147 | 23,103 | 5,465 | 3,525 | 32,240 |
| 88,770 | 141 | 23,019 | 5,452 | 3,510 | 32,122 |
| 88,771 | 137 | 22,701 | 5,377 | 3,502 | 31,717 |
| 88,772 | 142 | 22,808 | 5,363 | 3,481 | 31,794 |
| 88,773 | 143 | 22,854 | 5,373 | 3,483 | 31,853 |
| 88,774 | 146 | 22,865 | 5,385 | 3,453 | 31,849 |
| 88,775 | 146 | 22,804 | 5,387 | 3,462 | 31,799 |
| 88,776 | 143 | 22,802 | 5,406 | 3,478 | 31,829 |
| 88,777 | 142 | 22,863 | 5,417 | 3,472 | 31,894 |
| 88,778 | 145 | 22,878 | 5,409 | 3,482 | 31,914 |
| 88,779 | 148 | 23,003 | 5,451 | 3,510 | 32,112 |
| 88,780 | 142 | 22,311 | 5,224 | 3,383 | 31,060 |
| 88,781 | 141 | 22,527 | 5,273 | 3,403 | 31,344 |
| 88,782 | 136 | 22,807 | 5,308 | 3,421 | 31,672 |
| 88,783 | 143 | 22,773 | 5,278 | 3,402 | 31,596 |
| 88,784 | 144 | 22,559 | 5,243 | 3,403 | 31,349 |
| 88,785 | 145 | 22,491 | 5,200 | 3,383 | 31,219 |
| 88,786 | 142 | 22,277 | 5,162 | 3,345 | 30,926 |
| 88,787 | 149 | 22,559 | 5,205 | 3,392 | 31,305 |
| 88,788 | 156 | 22,497 | 5,218 | 3,387 | 31,258 |
| 88,789 | 150 | 22,505 | 5,222 | 3,397 | 31,274 |
| 88,790 | 151 | 22,355 | 5,218 | 3,374 | 31,098 |
| 88,791 | 145 | 22,248 | 5,172 | 3,348 | 30,913 |

|        |     |        |       |       |        |
|--------|-----|--------|-------|-------|--------|
| 88,792 | 149 | 22,452 | 5,163 | 3,374 | 31,138 |
| 88,793 | 157 | 22,687 | 5,137 | 3,372 | 31,353 |
| 88,794 | 157 | 22,662 | 5,132 | 3,374 | 31,325 |
| 88,795 | 154 | 22,917 | 5,158 | 3,408 | 31,637 |
| 88,796 | 161 | 23,041 | 5,205 | 3,440 | 31,847 |
| 88,797 | 155 | 23,030 | 5,235 | 3,441 | 31,861 |
| 88,798 | 155 | 22,678 | 5,225 | 3,420 | 31,478 |
| 88,799 | 156 | 22,696 | 5,246 | 3,405 | 31,503 |
| 88,800 | 157 | 22,777 | 5,268 | 3,407 | 31,609 |
| 88,801 | 165 | 22,935 | 5,292 | 3,424 | 31,816 |
| 88,802 | 159 | 22,679 | 5,258 | 3,421 | 31,517 |
| 88,803 | 159 | 23,212 | 5,326 | 3,496 | 32,193 |
| 88,804 | 160 | 23,208 | 5,334 | 3,515 | 32,217 |
| 88,805 | 165 | 23,267 | 5,307 | 3,540 | 32,279 |
| 88,806 | 169 | 23,299 | 5,310 | 3,545 | 32,323 |
| 88,807 | 168 | 23,127 | 5,259 | 3,520 | 32,074 |
| 88,808 | 167 | 23,472 | 5,347 | 3,578 | 32,564 |
| 88,809 | 163 | 23,643 | 5,359 | 3,577 | 32,742 |
| 88,810 | 168 | 23,697 | 5,345 | 3,553 | 32,763 |
| 88,811 | 179 | 23,796 | 5,342 | 3,535 | 32,852 |
| 88,812 | 174 | 23,831 | 5,345 | 3,549 | 32,899 |
| 88,813 | 175 | 23,819 | 5,368 | 3,564 | 32,926 |
| 88,814 | 184 | 23,649 | 5,326 | 3,533 | 32,692 |
| 88,815 | 185 | 23,482 | 5,293 | 3,497 | 32,457 |
| 88,816 | 189 | 23,627 | 5,281 | 3,505 | 32,602 |
| 88,817 | 190 | 23,601 | 5,264 | 3,498 | 32,553 |
| 88,818 | 189 | 23,634 | 5,283 | 3,517 | 32,623 |
| 88,819 | 182 | 23,551 | 5,228 | 3,496 | 32,457 |
| 88,820 | 180 | 23,416 | 5,160 | 3,474 | 32,230 |
| 88,821 | 180 | 23,216 | 5,111 | 3,424 | 31,931 |
| 88,822 | 180 | 23,226 | 5,106 | 3,419 | 31,931 |
| 88,823 | 176 | 23,498 | 5,164 | 3,471 | 32,309 |



|        |     |        |       |       |        |
|--------|-----|--------|-------|-------|--------|
| 88,824 | 172 | 23,376 | 5,113 | 3,453 | 32,114 |
| 88,825 | 171 | 23,270 | 5,085 | 3,446 | 31,972 |
| 88,826 | 171 | 23,373 | 5,085 | 3,452 | 32,081 |
| 88,827 | 171 | 23,273 | 5,083 | 3,453 | 31,980 |
| 88,828 | 174 | 23,511 | 5,127 | 3,469 | 32,281 |
| 88,829 | 169 | 23,531 | 5,130 | 3,484 | 32,314 |
| 88,830 | 167 | 23,284 | 5,077 | 3,439 | 31,967 |
| 88,831 | 172 | 23,432 | 5,054 | 3,407 | 32,065 |
| 88,832 | 174 | 23,461 | 5,056 | 3,415 | 32,106 |
| 88,833 | 176 | 23,497 | 5,093 | 3,451 | 32,217 |
| 88,834 | 167 | 23,446 | 5,108 | 3,474 | 32,195 |
| 88,835 | 157 | 23,117 | 5,069 | 3,411 | 31,754 |
| 88,836 | 161 | 23,057 | 5,021 | 3,391 | 31,630 |
| 88,837 | 158 | 23,015 | 5,011 | 3,380 | 31,564 |
| 88,838 | 159 | 23,236 | 5,053 | 3,423 | 31,871 |
| 88,839 | 164 | 23,029 | 4,995 | 3,403 | 31,591 |
| 88,840 | 163 | 22,996 | 5,001 | 3,408 | 31,568 |
| 88,841 | 159 | 22,882 | 4,991 | 3,422 | 31,454 |
| 88,842 | 156 | 22,681 | 5,000 | 3,426 | 31,263 |
| 88,843 | 155 | 22,495 | 5,012 | 3,416 | 31,078 |
| 88,844 | 156 | 22,721 | 5,084 | 3,461 | 31,422 |
| 88,845 | 156 | 22,683 | 5,143 | 3,465 | 31,447 |
| 88,846 | 151 | 22,814 | 5,150 | 3,472 | 31,587 |
| 88,847 | 152 | 23,013 | 5,166 | 3,485 | 31,816 |
| 88,848 | 151 | 22,919 | 5,110 | 3,461 | 31,641 |
| 88,849 | 152 | 23,087 | 5,138 | 3,513 | 31,890 |
| 88,850 | 146 | 22,747 | 5,052 | 3,487 | 31,432 |
| 88,851 | 145 | 22,657 | 5,024 | 3,469 | 31,295 |
| 88,852 | 141 | 22,727 | 5,049 | 3,471 | 31,388 |
| 88,853 | 146 | 22,804 | 5,041 | 3,453 | 31,444 |
| 88,854 | 144 | 22,533 | 4,995 | 3,412 | 31,084 |
| 88,855 | 143 | 22,634 | 5,022 | 3,422 | 31,221 |

|        |     |        |       |       |        |
|--------|-----|--------|-------|-------|--------|
| 88,856 | 138 | 22,344 | 4,996 | 3,367 | 30,845 |
| 88,857 | 138 | 22,632 | 5,026 | 3,368 | 31,164 |
| 88,858 | 145 | 22,904 | 5,104 | 3,405 | 31,558 |
| 88,859 | 144 | 22,647 | 5,039 | 3,382 | 31,212 |
| 88,860 | 144 | 22,602 | 5,049 | 3,384 | 31,179 |
| 88,861 | 138 | 22,370 | 5,007 | 3,352 | 30,867 |
| 88,862 | 130 | 22,523 | 5,065 | 3,362 | 31,080 |
| 88,863 | 131 | 22,668 | 5,096 | 3,400 | 31,295 |
| 88,864 | 132 | 22,642 | 5,114 | 3,391 | 31,279 |
| 88,865 | 124 | 22,724 | 5,157 | 3,408 | 31,413 |
| 88,866 | 123 | 22,396 | 5,090 | 3,389 | 30,998 |
| 88,867 | 130 | 22,743 | 5,201 | 3,438 | 31,512 |
| 88,868 | 132 | 22,803 | 5,229 | 3,443 | 31,607 |
| 88,869 | 131 | 22,611 | 5,188 | 3,424 | 31,354 |
| 88,870 | 134 | 22,934 | 5,301 | 3,498 | 31,867 |
| 88,871 | 133 | 22,789 | 5,298 | 3,478 | 31,698 |
| 88,872 | 134 | 23,070 | 5,393 | 3,500 | 32,097 |
| 88,873 | 143 | 23,187 | 5,445 | 3,512 | 32,287 |
| 88,874 | 143 | 23,101 | 5,443 | 3,505 | 32,192 |
| 88,875 | 143 | 22,782 | 5,408 | 3,472 | 31,805 |
| 88,876 | 142 | 22,955 | 5,457 | 3,501 | 32,055 |
| 88,877 | 145 | 23,155 | 5,549 | 3,554 | 32,403 |
| 88,878 | 148 | 23,260 | 5,563 | 3,582 | 32,553 |
| 88,879 | 146 | 22,955 | 5,510 | 3,555 | 32,166 |
| 88,880 | 146 | 22,834 | 5,514 | 3,559 | 32,053 |
| 88,881 | 145 | 22,775 | 5,516 | 3,551 | 31,987 |
| 88,882 | 146 | 22,859 | 5,580 | 3,608 | 32,193 |
| 88,883 | 144 | 22,311 | 5,497 | 3,527 | 31,479 |
| 88,884 | 145 | 22,608 | 5,547 | 3,565 | 31,865 |
| 88,885 | 141 | 22,614 | 5,538 | 3,557 | 31,850 |
| 88,886 | 139 | 22,640 | 5,556 | 3,546 | 31,881 |
| 88,887 | 137 | 22,592 | 5,578 | 3,567 | 31,874 |

|        |     |        |       |       |        |
|--------|-----|--------|-------|-------|--------|
| 88,888 | 140 | 22,723 | 5,606 | 3,570 | 32,039 |
| 88,889 | 150 | 23,066 | 5,689 | 3,601 | 32,506 |
| 88,890 | 145 | 23,018 | 5,641 | 3,587 | 32,391 |
| 88,891 | 153 | 23,449 | 5,730 | 3,636 | 32,968 |
| 88,892 | 162 | 23,560 | 5,702 | 3,612 | 33,036 |
| 88,893 | 162 | 23,565 | 5,718 | 3,620 | 33,065 |
| 88,894 | 168 | 24,017 | 5,827 | 3,649 | 33,661 |
| 88,895 | 162 | 23,925 | 5,817 | 3,647 | 33,551 |
| 88,896 | 164 | 23,604 | 5,719 | 3,592 | 33,079 |
| 88,897 | 161 | 23,238 | 5,658 | 3,546 | 32,603 |
| 88,898 | 168 | 23,041 | 5,679 | 3,573 | 32,461 |
| 88,899 | 168 | 22,634 | 5,600 | 3,483 | 31,885 |
| 88,900 | 168 | 22,674 | 5,596 | 3,481 | 31,919 |
| 88,901 | 169 | 22,713 | 5,600 | 3,495 | 31,977 |
| 88,902 | 172 | 22,620 | 5,589 | 3,478 | 31,859 |
| 88,903 | 173 | 22,510 | 5,590 | 3,477 | 31,750 |
| 88,904 | 169 | 22,523 | 5,611 | 3,506 | 31,809 |
| 88,905 | 176 | 22,273 | 5,558 | 3,480 | 31,487 |
| 88,906 | 176 | 22,321 | 5,567 | 3,501 | 31,565 |
| 88,907 | 174 | 22,269 | 5,559 | 3,493 | 31,495 |
| 88,908 | 174 | 22,340 | 5,602 | 3,509 | 31,625 |
| 88,909 | 167 | 22,575 | 5,668 | 3,540 | 31,950 |
| 88,910 | 168 | 22,482 | 5,632 | 3,498 | 31,780 |
| 88,911 | 167 | 22,444 | 5,635 | 3,503 | 31,749 |
| 88,912 | 168 | 22,741 | 5,724 | 3,559 | 32,192 |
| 88,913 | 168 | 22,494 | 5,691 | 3,544 | 31,897 |
| 88,914 | 168 | 22,562 | 5,708 | 3,545 | 31,983 |
| 88,915 | 167 | 22,545 | 5,690 | 3,550 | 31,952 |
| 88,916 | 164 | 22,691 | 5,749 | 3,580 | 32,184 |
| 88,917 | 166 | 22,606 | 5,698 | 3,542 | 32,012 |
| 88,918 | 163 | 22,515 | 5,676 | 3,542 | 31,896 |
| 88,919 | 158 | 22,752 | 5,737 | 3,566 | 32,213 |

|        |     |        |       |       |        |
|--------|-----|--------|-------|-------|--------|
| 88,920 | 154 | 22,709 | 5,726 | 3,567 | 32,156 |
| 88,921 | 158 | 22,958 | 5,778 | 3,564 | 32,458 |
| 88,922 | 158 | 22,974 | 5,732 | 3,583 | 32,447 |
| 88,923 | 157 | 23,016 | 5,724 | 3,588 | 32,485 |
| 88,924 | 169 | 23,254 | 5,789 | 3,616 | 32,828 |
| 88,925 | 174 | 23,481 | 5,806 | 3,640 | 33,101 |
| 88,926 | 178 | 23,434 | 5,796 | 3,643 | 33,051 |
| 88,927 | 188 | 23,544 | 5,843 | 3,659 | 33,234 |
| 88,928 | 185 | 23,893 | 5,943 | 3,730 | 33,751 |
| 88,929 | 189 | 23,913 | 5,983 | 3,739 | 33,824 |
| 88,930 | 189 | 23,898 | 5,941 | 3,703 | 33,731 |
| 88,931 | 192 | 24,050 | 5,951 | 3,718 | 33,911 |
| 88,932 | 193 | 24,091 | 5,950 | 3,712 | 33,946 |
| 88,933 | 194 | 24,560 | 6,040 | 3,752 | 34,546 |
| 88,934 | 188 | 24,319 | 5,981 | 3,726 | 34,214 |
| 88,935 | 188 | 24,584 | 6,058 | 3,753 | 34,583 |
| 88,936 | 189 | 24,419 | 6,022 | 3,759 | 34,389 |
| 88,937 | 187 | 24,460 | 6,021 | 3,755 | 34,423 |
| 88,938 | 193 | 24,513 | 6,043 | 3,796 | 34,545 |
| 88,939 | 192 | 24,480 | 6,039 | 3,810 | 34,521 |
| 88,940 | 190 | 24,932 | 6,131 | 3,876 | 35,129 |
| 88,941 | 184 | 25,000 | 6,162 | 3,897 | 35,243 |
| 88,942 | 175 | 24,907 | 6,135 | 3,907 | 35,124 |
| 88,943 | 166 | 24,808 | 6,146 | 3,922 | 35,042 |
| 88,944 | 170 | 24,839 | 6,148 | 3,919 | 35,076 |
| 88,945 | 168 | 24,792 | 6,086 | 3,914 | 34,960 |
| 88,946 | 168 | 24,865 | 6,086 | 3,893 | 35,012 |
| 88,947 | 169 | 24,751 | 6,014 | 3,870 | 34,804 |
| 88,948 | 169 | 24,872 | 6,017 | 3,870 | 34,928 |
| 88,949 | 163 | 24,855 | 6,028 | 3,854 | 34,900 |
| 88,950 | 163 | 24,841 | 6,011 | 3,836 | 34,851 |
| 88,951 | 170 | 25,026 | 6,066 | 3,854 | 35,116 |

|        |     |        |       |       |        |
|--------|-----|--------|-------|-------|--------|
| 88,952 | 168 | 25,114 | 6,091 | 3,876 | 35,249 |
| 88,953 | 163 | 24,926 | 6,034 | 3,859 | 34,982 |
| 88,954 | 164 | 24,960 | 6,051 | 3,836 | 35,011 |
| 88,955 | 164 | 24,864 | 6,051 | 3,821 | 34,900 |
| 88,956 | 159 | 25,073 | 6,072 | 3,836 | 35,140 |
| 88,957 | 161 | 25,088 | 6,080 | 3,858 | 35,187 |
| 88,958 | 158 | 24,993 | 6,065 | 3,863 | 35,079 |
| 88,959 | 160 | 24,779 | 5,987 | 3,839 | 34,765 |
| 88,960 | 162 | 24,418 | 5,886 | 3,802 | 34,268 |
| 88,961 | 160 | 24,135 | 5,827 | 3,765 | 33,887 |
| 88,962 | 165 | 24,738 | 5,896 | 3,859 | 34,658 |
| 88,963 | 168 | 25,007 | 5,948 | 3,888 | 35,011 |
| 88,964 | 168 | 25,144 | 5,945 | 3,894 | 35,151 |
| 88,965 | 169 | 24,916 | 5,845 | 3,818 | 34,748 |
| 88,966 | 172 | 25,050 | 5,851 | 3,844 | 34,917 |
| 88,967 | 172 | 25,003 | 5,842 | 3,834 | 34,851 |
| 88,968 | 167 | 25,032 | 5,866 | 3,876 | 34,941 |
| 88,969 | 172 | 24,436 | 5,746 | 3,791 | 34,145 |
| 88,970 | 172 | 24,434 | 5,740 | 3,774 | 34,120 |
| 88,971 | 171 | 24,385 | 5,727 | 3,763 | 34,046 |
| 88,972 | 170 | 23,951 | 5,668 | 3,730 | 33,519 |
| 88,973 | 170 | 24,033 | 5,670 | 3,736 | 33,609 |
| 88,974 | 158 | 24,203 | 5,697 | 3,768 | 33,826 |
| 88,975 | 148 | 23,979 | 5,643 | 3,749 | 33,519 |
| 88,976 | 146 | 23,757 | 5,604 | 3,714 | 33,221 |
| 88,977 | 143 | 23,553 | 5,531 | 3,675 | 32,902 |
| 88,978 | 134 | 23,443 | 5,471 | 3,643 | 32,691 |
| 88,979 | 142 | 23,467 | 5,448 | 3,614 | 32,671 |
| 88,980 | 136 | 23,140 | 5,331 | 3,566 | 32,173 |
| 88,981 | 136 | 22,920 | 5,294 | 3,556 | 31,906 |
| 88,982 | 136 | 22,959 | 5,308 | 3,567 | 31,970 |
| 88,983 | 138 | 22,848 | 5,291 | 3,572 | 31,849 |

|        |     |        |       |       |        |
|--------|-----|--------|-------|-------|--------|
| 88,984 | 131 | 22,542 | 5,257 | 3,543 | 31,473 |
| 88,985 | 132 | 22,570 | 5,257 | 3,536 | 31,495 |
| 88,986 | 130 | 22,425 | 5,242 | 3,539 | 31,336 |
| 88,987 | 138 | 22,413 | 5,240 | 3,512 | 31,303 |
| 88,988 | 138 | 22,368 | 5,228 | 3,501 | 31,235 |
| 88,989 | 128 | 22,250 | 5,220 | 3,482 | 31,080 |
| 88,990 | 130 | 22,244 | 5,232 | 3,496 | 31,102 |
| 88,991 | 135 | 21,879 | 5,182 | 3,448 | 30,644 |
| 88,992 | 134 | 21,631 | 5,135 | 3,400 | 30,300 |
| 88,993 | 138 | 21,765 | 5,146 | 3,404 | 30,453 |
| 88,994 | 141 | 21,780 | 5,150 | 3,387 | 30,458 |
| 88,995 | 137 | 21,470 | 5,070 | 3,357 | 30,034 |
| 88,996 | 135 | 21,595 | 5,135 | 3,405 | 30,270 |
| 88,997 | 134 | 21,632 | 5,123 | 3,434 | 30,323 |
| 88,998 | 134 | 21,590 | 5,114 | 3,431 | 30,269 |
| 88,999 | 139 | 21,551 | 5,100 | 3,433 | 30,223 |
| 89,000 | 137 | 21,753 | 5,166 | 3,458 | 30,514 |
| 89,001 | 131 | 21,681 | 5,146 | 3,475 | 30,433 |
| 89,002 | 132 | 21,615 | 5,112 | 3,458 | 30,317 |
| 89,003 | 133 | 21,834 | 5,163 | 3,492 | 30,622 |
| 89,004 | 130 | 21,793 | 5,163 | 3,493 | 30,579 |
| 89,005 | 131 | 21,822 | 5,190 | 3,518 | 30,661 |
| 89,006 | 127 | 21,969 | 5,232 | 3,569 | 30,897 |
| 89,007 | 127 | 22,068 | 5,271 | 3,603 | 31,069 |
| 89,008 | 126 | 22,183 | 5,332 | 3,605 | 31,246 |
| 89,009 | 129 | 22,153 | 5,353 | 3,562 | 31,197 |
| 89,010 | 130 | 22,220 | 5,349 | 3,546 | 31,245 |
| 89,011 | 127 | 22,627 | 5,456 | 3,606 | 31,816 |
| 89,012 | 126 | 22,419 | 5,417 | 3,573 | 31,535 |
| 89,013 | 124 | 22,667 | 5,533 | 3,622 | 31,946 |
| 89,014 | 126 | 22,776 | 5,546 | 3,635 | 32,083 |
| 89,015 | 125 | 22,863 | 5,588 | 3,675 | 32,251 |

|        |     |        |       |       |        |
|--------|-----|--------|-------|-------|--------|
| 89,016 | 122 | 22,454 | 5,527 | 3,642 | 31,745 |
| 89,017 | 122 | 22,747 | 5,656 | 3,718 | 32,243 |
| 89,018 | 124 | 22,924 | 5,679 | 3,748 | 32,475 |
| 89,019 | 116 | 22,856 | 5,621 | 3,703 | 32,296 |
| 89,020 | 116 | 22,967 | 5,636 | 3,714 | 32,433 |
| 89,021 | 119 | 23,417 | 5,722 | 3,781 | 33,039 |
| 89,022 | 115 | 23,426 | 5,724 | 3,808 | 33,073 |
| 89,023 | 117 | 23,207 | 5,674 | 3,785 | 32,783 |
| 89,024 | 117 | 23,005 | 5,667 | 3,769 | 32,558 |
| 89,025 | 126 | 23,406 | 5,753 | 3,839 | 33,124 |
| 89,026 | 129 | 23,275 | 5,707 | 3,809 | 32,920 |
| 89,027 | 126 | 23,014 | 5,632 | 3,762 | 32,534 |
| 89,028 | 128 | 23,462 | 5,734 | 3,817 | 33,141 |
| 89,029 | 124 | 23,696 | 5,786 | 3,874 | 33,480 |
| 89,030 | 118 | 23,317 | 5,724 | 3,818 | 32,977 |
| 89,031 | 119 | 23,459 | 5,770 | 3,860 | 33,208 |
| 89,032 | 115 | 23,379 | 5,760 | 3,847 | 33,101 |
| 89,033 | 112 | 22,478 | 5,542 | 3,682 | 31,814 |
| 89,034 | 113 | 22,594 | 5,594 | 3,717 | 32,018 |
| 89,035 | 114 | 22,810 | 5,657 | 3,750 | 32,331 |
| 89,036 | 114 | 22,752 | 5,642 | 3,760 | 32,268 |
| 89,037 | 119 | 22,911 | 5,708 | 3,821 | 32,559 |
| 89,038 | 116 | 22,952 | 5,709 | 3,816 | 32,593 |
| 89,039 | 117 | 23,141 | 5,703 | 3,826 | 32,787 |
| 89,040 | 115 | 23,240 | 5,700 | 3,829 | 32,884 |
| 89,041 | 102 | 22,850 | 5,647 | 3,769 | 32,368 |
| 89,042 | 103 | 22,976 | 5,713 | 3,790 | 32,582 |
| 89,043 | 107 | 22,911 | 5,708 | 3,769 | 32,495 |
| 89,044 | 116 | 22,967 | 5,711 | 3,770 | 32,564 |
| 89,045 | 113 | 22,669 | 5,626 | 3,737 | 32,145 |
| 89,046 | 113 | 22,373 | 5,573 | 3,678 | 31,737 |
| 89,047 | 119 | 22,716 | 5,663 | 3,706 | 32,204 |

|        |     |        |       |       |        |
|--------|-----|--------|-------|-------|--------|
| 89,048 | 117 | 22,453 | 5,616 | 3,689 | 31,875 |
| 89,049 | 118 | 22,432 | 5,608 | 3,683 | 31,841 |
| 89,050 | 116 | 22,237 | 5,552 | 3,652 | 31,557 |
| 89,051 | 115 | 21,886 | 5,487 | 3,619 | 31,107 |
| 89,052 | 120 | 22,465 | 5,683 | 3,721 | 31,989 |
| 89,053 | 125 | 22,360 | 5,662 | 3,685 | 31,832 |
| 89,054 | 128 | 22,411 | 5,677 | 3,679 | 31,895 |
| 89,055 | 139 | 22,571 | 5,690 | 3,670 | 32,070 |
| 89,056 | 140 | 22,419 | 5,610 | 3,615 | 31,784 |
| 89,057 | 144 | 22,290 | 5,605 | 3,589 | 31,628 |
| 89,058 | 148 | 22,487 | 5,617 | 3,586 | 31,838 |
| 89,059 | 149 | 22,593 | 5,614 | 3,593 | 31,949 |
| 89,060 | 144 | 22,238 | 5,518 | 3,560 | 31,460 |
| 89,061 | 142 | 22,295 | 5,520 | 3,572 | 31,529 |
| 89,062 | 141 | 22,126 | 5,480 | 3,561 | 31,308 |
| 89,063 | 147 | 22,068 | 5,437 | 3,534 | 31,186 |
| 89,064 | 144 | 21,830 | 5,366 | 3,513 | 30,853 |
| 89,065 | 146 | 21,789 | 5,414 | 3,513 | 30,862 |
| 89,066 | 146 | 21,966 | 5,419 | 3,505 | 31,036 |
| 89,067 | 146 | 21,890 | 5,398 | 3,480 | 30,914 |
| 89,068 | 158 | 21,923 | 5,383 | 3,475 | 30,939 |
| 89,069 | 156 | 21,550 | 5,322 | 3,427 | 30,455 |
| 89,070 | 156 | 21,746 | 5,376 | 3,465 | 30,743 |
| 89,071 | 156 | 21,819 | 5,384 | 3,462 | 30,821 |
| 89,072 | 158 | 21,697 | 5,354 | 3,433 | 30,642 |
| 89,073 | 165 | 21,987 | 5,398 | 3,447 | 30,997 |
| 89,074 | 159 | 22,001 | 5,390 | 3,421 | 30,971 |
| 89,075 | 161 | 21,917 | 5,328 | 3,386 | 30,792 |
| 89,076 | 160 | 21,850 | 5,346 | 3,387 | 30,743 |
| 89,077 | 158 | 21,974 | 5,387 | 3,414 | 30,933 |
| 89,078 | 162 | 22,048 | 5,391 | 3,438 | 31,039 |
| 89,079 | 170 | 22,103 | 5,372 | 3,445 | 31,090 |



|        |     |        |       |       |        |
|--------|-----|--------|-------|-------|--------|
| 89,080 | 187 | 22,027 | 5,347 | 3,425 | 30,986 |
| 89,081 | 187 | 22,174 | 5,317 | 3,399 | 31,077 |
| 89,082 | 192 | 22,292 | 5,333 | 3,381 | 31,198 |
| 89,083 | 192 | 22,320 | 5,337 | 3,388 | 31,237 |
| 89,084 | 191 | 22,541 | 5,357 | 3,407 | 31,496 |
| 89,085 | 193 | 22,631 | 5,357 | 3,405 | 31,586 |
| 89,086 | 197 | 22,751 | 5,350 | 3,386 | 31,684 |
| 89,087 | 196 | 22,825 | 5,358 | 3,387 | 31,766 |
| 89,088 | 189 | 22,891 | 5,351 | 3,367 | 31,798 |
| 89,089 | 187 | 22,855 | 5,375 | 3,389 | 31,806 |
| 89,090 | 192 | 23,122 | 5,456 | 3,430 | 32,200 |
| 89,091 | 196 | 23,126 | 5,435 | 3,432 | 32,189 |
| 89,092 | 208 | 23,458 | 5,449 | 3,467 | 32,582 |
| 89,093 | 209 | 23,564 | 5,460 | 3,483 | 32,716 |
| 89,094 | 212 | 24,002 | 5,527 | 3,557 | 33,298 |
| 89,095 | 201 | 23,977 | 5,582 | 3,573 | 33,333 |
| 89,096 | 191 | 23,669 | 5,546 | 3,535 | 32,941 |
| 89,097 | 192 | 23,624 | 5,592 | 3,543 | 32,951 |
| 89,098 | 193 | 23,726 | 5,603 | 3,559 | 33,081 |
| 89,099 | 194 | 23,888 | 5,646 | 3,567 | 33,295 |
| 89,100 | 203 | 23,806 | 5,618 | 3,535 | 33,162 |
| 89,101 | 200 | 23,761 | 5,575 | 3,515 | 33,051 |
| 89,102 | 203 | 24,341 | 5,644 | 3,526 | 33,714 |
| 89,103 | 207 | 24,671 | 5,711 | 3,548 | 34,137 |
| 89,104 | 199 | 24,417 | 5,634 | 3,527 | 33,777 |
| 89,105 | 199 | 24,646 | 5,668 | 3,567 | 34,080 |
| 89,106 | 186 | 24,133 | 5,585 | 3,513 | 33,417 |
| 89,107 | 189 | 24,214 | 5,611 | 3,521 | 33,535 |
| 89,108 | 182 | 23,958 | 5,552 | 3,487 | 33,179 |
| 89,109 | 187 | 24,190 | 5,624 | 3,531 | 33,532 |
| 89,110 | 187 | 24,136 | 5,657 | 3,534 | 33,514 |
| 89,111 | 189 | 23,979 | 5,665 | 3,509 | 33,342 |

|        |     |        |       |       |        |
|--------|-----|--------|-------|-------|--------|
| 89,112 | 192 | 23,657 | 5,585 | 3,446 | 32,880 |
| 89,113 | 187 | 23,529 | 5,531 | 3,422 | 32,669 |
| 89,114 | 193 | 23,486 | 5,523 | 3,399 | 32,601 |
| 89,115 | 193 | 23,553 | 5,540 | 3,398 | 32,684 |
| 89,116 | 191 | 23,402 | 5,512 | 3,399 | 32,504 |
| 89,117 | 193 | 23,380 | 5,487 | 3,394 | 32,454 |
| 89,118 | 195 | 23,415 | 5,464 | 3,399 | 32,473 |
| 89,119 | 183 | 23,262 | 5,424 | 3,365 | 32,234 |
| 89,120 | 189 | 23,539 | 5,481 | 3,413 | 32,622 |
| 89,121 | 190 | 23,531 | 5,472 | 3,400 | 32,593 |
| 89,122 | 197 | 23,829 | 5,520 | 3,442 | 32,988 |
| 89,123 | 188 | 23,477 | 5,457 | 3,422 | 32,544 |
| 89,124 | 184 | 23,299 | 5,439 | 3,406 | 32,328 |
| 89,125 | 182 | 23,107 | 5,397 | 3,392 | 32,078 |
| 89,126 | 186 | 23,149 | 5,416 | 3,398 | 32,149 |
| 89,127 | 187 | 23,025 | 5,354 | 3,380 | 31,946 |
| 89,128 | 185 | 23,355 | 5,464 | 3,437 | 32,441 |
| 89,129 | 180 | 22,932 | 5,428 | 3,375 | 31,915 |
| 89,130 | 171 | 23,020 | 5,459 | 3,423 | 32,073 |
| 89,131 | 159 | 22,758 | 5,411 | 3,382 | 31,710 |
| 89,132 | 158 | 22,610 | 5,391 | 3,373 | 31,532 |
| 89,133 | 154 | 23,035 | 5,470 | 3,420 | 32,079 |
| 89,134 | 153 | 22,777 | 5,418 | 3,402 | 31,750 |
| 89,135 | 156 | 23,007 | 5,453 | 3,430 | 32,046 |
| 89,136 | 161 | 23,111 | 5,459 | 3,451 | 32,182 |
| 89,137 | 158 | 23,125 | 5,447 | 3,441 | 32,171 |
| 89,138 | 157 | 23,147 | 5,457 | 3,445 | 32,206 |
| 89,139 | 157 | 23,155 | 5,453 | 3,457 | 32,222 |
| 89,140 | 159 | 23,306 | 5,456 | 3,456 | 32,377 |
| 89,141 | 148 | 23,030 | 5,394 | 3,428 | 32,000 |
| 89,142 | 148 | 23,178 | 5,436 | 3,452 | 32,214 |
| 89,143 | 137 | 23,562 | 5,504 | 3,521 | 32,724 |

|        |     |        |       |       |        |
|--------|-----|--------|-------|-------|--------|
| 89,144 | 139 | 23,436 | 5,492 | 3,490 | 32,557 |
| 89,145 | 142 | 23,129 | 5,395 | 3,425 | 32,091 |
| 89,146 | 143 | 23,300 | 5,357 | 3,427 | 32,227 |
| 89,147 | 146 | 23,673 | 5,407 | 3,462 | 32,688 |
| 89,148 | 143 | 23,659 | 5,390 | 3,470 | 32,662 |
| 89,149 | 144 | 23,258 | 5,320 | 3,439 | 32,161 |
| 89,150 | 145 | 23,382 | 5,321 | 3,442 | 32,290 |
| 89,151 | 140 | 23,343 | 5,304 | 3,467 | 32,254 |
| 89,152 | 136 | 23,007 | 5,245 | 3,445 | 31,833 |
| 89,153 | 141 | 23,112 | 5,255 | 3,483 | 31,991 |
| 89,154 | 142 | 23,064 | 5,262 | 3,500 | 31,968 |
| 89,155 | 145 | 22,872 | 5,248 | 3,470 | 31,735 |
| 89,156 | 147 | 22,772 | 5,257 | 3,460 | 31,636 |
| 89,157 | 148 | 22,893 | 5,262 | 3,482 | 31,785 |
| 89,158 | 149 | 22,859 | 5,254 | 3,483 | 31,745 |
| 89,159 | 149 | 23,111 | 5,311 | 3,522 | 32,093 |
| 89,160 | 148 | 23,207 | 5,296 | 3,535 | 32,186 |
| 89,161 | 153 | 22,986 | 5,205 | 3,487 | 31,831 |
| 89,162 | 152 | 23,081 | 5,204 | 3,482 | 31,919 |
| 89,163 | 149 | 23,056 | 5,240 | 3,485 | 31,930 |
| 89,164 | 147 | 23,150 | 5,281 | 3,516 | 32,094 |
| 89,165 | 143 | 23,385 | 5,323 | 3,549 | 32,400 |
| 89,166 | 145 | 23,471 | 5,361 | 3,576 | 32,553 |
| 89,167 | 140 | 23,181 | 5,348 | 3,557 | 32,226 |
| 89,168 | 143 | 23,252 | 5,400 | 3,583 | 32,378 |
| 89,169 | 139 | 23,185 | 5,382 | 3,597 | 32,303 |
| 89,170 | 140 | 22,900 | 5,321 | 3,556 | 31,917 |
| 89,171 | 137 | 22,678 | 5,297 | 3,521 | 31,633 |
| 89,172 | 143 | 22,889 | 5,353 | 3,564 | 31,949 |
| 89,173 | 137 | 22,928 | 5,357 | 3,545 | 31,967 |
| 89,174 | 135 | 22,631 | 5,297 | 3,502 | 31,565 |
| 89,175 | 134 | 22,662 | 5,314 | 3,498 | 31,608 |

|        |     |        |       |       |        |
|--------|-----|--------|-------|-------|--------|
| 89,176 | 137 | 22,945 | 5,361 | 3,531 | 31,974 |
| 89,177 | 134 | 22,747 | 5,288 | 3,474 | 31,643 |
| 89,178 | 134 | 23,039 | 5,320 | 3,480 | 31,973 |
| 89,179 | 138 | 22,955 | 5,309 | 3,482 | 31,884 |
| 89,180 | 142 | 23,007 | 5,304 | 3,467 | 31,920 |
| 89,181 | 137 | 22,450 | 5,172 | 3,363 | 31,122 |
| 89,182 | 139 | 22,443 | 5,164 | 3,377 | 31,123 |
| 89,183 | 143 | 22,137 | 5,111 | 3,337 | 30,728 |
| 89,184 | 142 | 21,861 | 5,069 | 3,322 | 30,394 |
| 89,185 | 151 | 22,386 | 5,183 | 3,394 | 31,114 |
| 89,186 | 150 | 22,082 | 5,145 | 3,367 | 30,744 |
| 89,187 | 148 | 22,265 | 5,259 | 3,415 | 31,087 |
| 89,188 | 149 | 21,930 | 5,194 | 3,368 | 30,641 |
| 89,189 | 148 | 21,722 | 5,184 | 3,345 | 30,399 |
| 89,190 | 158 | 22,551 | 5,407 | 3,466 | 31,582 |
| 89,191 | 159 | 22,426 | 5,369 | 3,446 | 31,400 |
| 89,192 | 153 | 21,488 | 5,154 | 3,281 | 30,076 |
| 89,193 | 154 | 21,792 | 5,227 | 3,315 | 30,488 |
| 89,194 | 156 | 21,896 | 5,261 | 3,350 | 30,663 |
| 89,195 | 156 | 21,946 | 5,275 | 3,352 | 30,729 |
| 89,196 | 155 | 22,274 | 5,344 | 3,434 | 31,207 |
| 89,197 | 153 | 22,434 | 5,425 | 3,461 | 31,473 |
| 89,198 | 165 | 22,687 | 5,485 | 3,514 | 31,851 |
| 89,199 | 163 | 22,706 | 5,484 | 3,530 | 31,883 |
| 89,200 | 166 | 22,897 | 5,517 | 3,536 | 32,116 |
| 89,201 | 167 | 22,964 | 5,517 | 3,539 | 32,187 |
| 89,202 | 167 | 23,088 | 5,569 | 3,546 | 32,370 |
| 89,203 | 169 | 23,334 | 5,638 | 3,572 | 32,713 |
| 89,204 | 166 | 23,062 | 5,586 | 3,519 | 32,333 |
| 89,205 | 162 | 22,964 | 5,544 | 3,497 | 32,167 |
| 89,206 | 174 | 23,060 | 5,544 | 3,505 | 32,283 |
| 89,207 | 183 | 23,280 | 5,553 | 3,519 | 32,535 |

|        |     |        |       |       |        |
|--------|-----|--------|-------|-------|--------|
| 89,208 | 185 | 23,273 | 5,540 | 3,498 | 32,496 |
| 89,209 | 187 | 23,535 | 5,592 | 3,550 | 32,864 |
| 89,210 | 188 | 23,318 | 5,561 | 3,526 | 32,593 |
| 89,211 | 184 | 22,930 | 5,511 | 3,486 | 32,111 |
| 89,212 | 178 | 23,113 | 5,589 | 3,559 | 32,439 |
| 89,213 | 180 | 23,037 | 5,578 | 3,573 | 32,368 |
| 89,214 | 180 | 22,920 | 5,550 | 3,593 | 32,243 |
| 89,215 | 180 | 23,142 | 5,620 | 3,614 | 32,556 |
| 89,216 | 180 | 23,223 | 5,636 | 3,626 | 32,665 |
| 89,217 | 181 | 22,591 | 5,422 | 3,463 | 31,657 |
| 89,218 | 189 | 22,992 | 5,478 | 3,486 | 32,145 |
| 89,219 | 187 | 22,653 | 5,425 | 3,409 | 31,674 |
| 89,220 | 187 | 22,967 | 5,488 | 3,424 | 32,066 |
| 89,221 | 198 | 23,336 | 5,577 | 3,490 | 32,601 |
| 89,222 | 198 | 23,277 | 5,584 | 3,503 | 32,562 |
| 89,223 | 212 | 23,824 | 5,732 | 3,598 | 33,366 |
| 89,224 | 221 | 23,525 | 5,672 | 3,569 | 32,987 |
| 89,225 | 223 | 23,392 | 5,647 | 3,555 | 32,817 |
| 89,226 | 224 | 23,456 | 5,646 | 3,588 | 32,914 |
| 89,227 | 221 | 23,219 | 5,614 | 3,573 | 32,627 |
| 89,228 | 225 | 23,418 | 5,678 | 3,611 | 32,932 |
| 89,229 | 225 | 23,149 | 5,642 | 3,606 | 32,622 |
| 89,230 | 222 | 23,552 | 5,731 | 3,671 | 33,176 |
| 89,231 | 221 | 23,540 | 5,732 | 3,664 | 33,157 |
| 89,232 | 224 | 23,783 | 5,791 | 3,692 | 33,490 |
| 89,233 | 217 | 23,776 | 5,775 | 3,705 | 33,473 |
| 89,234 | 208 | 23,272 | 5,690 | 3,657 | 32,827 |
| 89,235 | 208 | 23,404 | 5,696 | 3,670 | 32,978 |
| 89,236 | 204 | 23,395 | 5,694 | 3,672 | 32,965 |
| 89,237 | 205 | 23,383 | 5,665 | 3,663 | 32,916 |
| 89,238 | 203 | 23,262 | 5,611 | 3,653 | 32,729 |
| 89,239 | 197 | 22,979 | 5,521 | 3,598 | 32,295 |

|        |     |        |       |       |        |
|--------|-----|--------|-------|-------|--------|
| 89,240 | 197 | 23,018 | 5,521 | 3,600 | 32,336 |
| 89,241 | 194 | 23,077 | 5,595 | 3,651 | 32,517 |
| 89,242 | 197 | 22,964 | 5,604 | 3,636 | 32,401 |
| 89,243 | 197 | 22,889 | 5,599 | 3,621 | 32,306 |
| 89,244 | 198 | 22,578 | 5,545 | 3,579 | 31,900 |
| 89,245 | 198 | 22,750 | 5,568 | 3,571 | 32,087 |
| 89,246 | 196 | 22,394 | 5,478 | 3,482 | 31,550 |
| 89,247 | 201 | 22,530 | 5,467 | 3,496 | 31,694 |
| 89,248 | 199 | 22,634 | 5,523 | 3,489 | 31,845 |
| 89,249 | 212 | 22,343 | 5,456 | 3,434 | 31,445 |
| 89,250 | 211 | 22,422 | 5,462 | 3,428 | 31,523 |
| 89,251 | 212 | 22,433 | 5,474 | 3,441 | 31,560 |
| 89,252 | 210 | 22,342 | 5,470 | 3,454 | 31,476 |
| 89,253 | 211 | 22,286 | 5,449 | 3,460 | 31,406 |
| 89,254 | 212 | 22,312 | 5,449 | 3,457 | 31,430 |
| 89,255 | 208 | 22,017 | 5,418 | 3,419 | 31,062 |
| 89,256 | 208 | 22,054 | 5,424 | 3,430 | 31,116 |
| 89,257 | 201 | 21,826 | 5,387 | 3,414 | 30,828 |
| 89,258 | 190 | 21,683 | 5,370 | 3,420 | 30,663 |
| 89,259 | 188 | 22,228 | 5,507 | 3,504 | 31,427 |
| 89,260 | 191 | 22,154 | 5,467 | 3,482 | 31,294 |
| 89,261 | 199 | 22,322 | 5,523 | 3,511 | 31,555 |
| 89,262 | 197 | 22,362 | 5,478 | 3,459 | 31,496 |
| 89,263 | 201 | 22,534 | 5,472 | 3,459 | 31,666 |
| 89,264 | 207 | 22,574 | 5,506 | 3,439 | 31,726 |
| 89,265 | 212 | 22,579 | 5,521 | 3,430 | 31,742 |
| 89,266 | 210 | 22,257 | 5,462 | 3,413 | 31,342 |
| 89,267 | 214 | 21,955 | 5,412 | 3,384 | 30,965 |
| 89,268 | 210 | 21,660 | 5,360 | 3,378 | 30,608 |
| 89,269 | 204 | 22,041 | 5,481 | 3,497 | 31,223 |
| 89,270 | 199 | 21,979 | 5,453 | 3,522 | 31,153 |
| 89,271 | 198 | 21,962 | 5,487 | 3,566 | 31,213 |

|        |     |        |       |       |        |
|--------|-----|--------|-------|-------|--------|
| 89,272 | 186 | 22,075 | 5,525 | 3,599 | 31,385 |
| 89,273 | 182 | 22,297 | 5,540 | 3,622 | 31,641 |
| 89,274 | 175 | 22,241 | 5,573 | 3,631 | 31,620 |
| 89,275 | 183 | 22,152 | 5,576 | 3,620 | 31,531 |
| 89,276 | 180 | 21,995 | 5,558 | 3,613 | 31,346 |
| 89,277 | 188 | 22,024 | 5,590 | 3,594 | 31,396 |
| 89,278 | 190 | 21,914 | 5,580 | 3,567 | 31,251 |
| 89,279 | 192 | 22,744 | 5,694 | 3,635 | 32,265 |
| 89,280 | 193 | 22,908 | 5,691 | 3,638 | 32,430 |
| 89,281 | 195 | 23,140 | 5,769 | 3,692 | 32,796 |
| 89,282 | 194 | 23,248 | 5,805 | 3,719 | 32,966 |
| 89,283 | 191 | 23,132 | 5,813 | 3,706 | 32,842 |
| 89,284 | 192 | 23,186 | 5,838 | 3,696 | 32,912 |
| 89,285 | 196 | 23,440 | 5,867 | 3,741 | 33,244 |
| 89,286 | 196 | 23,430 | 5,882 | 3,745 | 33,253 |
| 89,287 | 195 | 23,524 | 5,896 | 3,773 | 33,388 |
| 89,288 | 195 | 23,488 | 5,928 | 3,797 | 33,408 |
| 89,289 | 195 | 23,452 | 5,963 | 3,790 | 33,400 |
| 89,290 | 201 | 23,608 | 5,947 | 3,803 | 33,559 |
| 89,291 | 209 | 23,861 | 5,947 | 3,835 | 33,852 |
| 89,292 | 205 | 23,722 | 5,876 | 3,782 | 33,585 |
| 89,293 | 202 | 23,634 | 5,867 | 3,809 | 33,512 |
| 89,294 | 206 | 23,746 | 5,921 | 3,858 | 33,731 |
| 89,295 | 203 | 23,513 | 5,873 | 3,826 | 33,415 |
| 89,296 | 207 | 23,434 | 5,866 | 3,839 | 33,346 |
| 89,297 | 206 | 23,388 | 5,882 | 3,844 | 33,320 |
| 89,298 | 201 | 23,300 | 5,905 | 3,854 | 33,260 |
| 89,299 | 190 | 23,543 | 5,942 | 3,890 | 33,565 |
| 89,300 | 176 | 23,501 | 5,935 | 3,902 | 33,514 |
| 89,301 | 172 | 23,190 | 5,835 | 3,843 | 33,040 |
| 89,302 | 172 | 23,221 | 5,838 | 3,838 | 33,069 |
| 89,303 | 178 | 23,604 | 5,917 | 3,895 | 33,594 |

|        |     |        |       |       |        |
|--------|-----|--------|-------|-------|--------|
| 89,304 | 176 | 23,636 | 5,907 | 3,896 | 33,615 |
| 89,305 | 178 | 23,762 | 5,935 | 3,932 | 33,807 |
| 89,306 | 179 | 23,724 | 5,938 | 3,908 | 33,749 |
| 89,307 | 180 | 23,749 | 5,939 | 3,908 | 33,776 |
| 89,308 | 177 | 23,836 | 5,997 | 3,945 | 33,955 |
| 89,309 | 181 | 23,805 | 5,986 | 3,935 | 33,907 |
| 89,310 | 176 | 23,720 | 5,966 | 3,901 | 33,763 |
| 89,311 | 173 | 23,401 | 5,901 | 3,849 | 33,324 |
| 89,312 | 170 | 23,728 | 5,939 | 3,899 | 33,736 |
| 89,313 | 176 | 23,609 | 5,908 | 3,897 | 33,590 |
| 89,314 | 169 | 23,323 | 5,835 | 3,846 | 33,173 |
| 89,315 | 166 | 23,304 | 5,805 | 3,857 | 33,132 |
| 89,316 | 167 | 23,310 | 5,832 | 3,864 | 33,173 |
| 89,317 | 165 | 23,312 | 5,822 | 3,833 | 33,132 |
| 89,318 | 166 | 23,291 | 5,840 | 3,795 | 33,092 |
| 89,319 | 169 | 23,630 | 5,909 | 3,824 | 33,532 |
| 89,320 | 175 | 23,722 | 5,926 | 3,800 | 33,623 |
| 89,321 | 177 | 23,894 | 5,973 | 3,796 | 33,840 |
| 89,322 | 179 | 23,683 | 5,877 | 3,731 | 33,470 |
| 89,323 | 181 | 23,902 | 5,923 | 3,775 | 33,781 |
| 89,324 | 180 | 23,812 | 5,885 | 3,752 | 33,629 |
| 89,325 | 177 | 23,529 | 5,802 | 3,697 | 33,205 |
| 89,326 | 158 | 23,357 | 5,820 | 3,684 | 33,019 |
| 89,327 | 157 | 23,136 | 5,794 | 3,657 | 32,744 |
| 89,328 | 154 | 23,360 | 5,814 | 3,674 | 33,002 |
| 89,329 | 163 | 23,341 | 5,806 | 3,656 | 32,966 |
| 89,330 | 158 | 23,292 | 5,846 | 3,676 | 32,972 |
| 89,331 | 162 | 23,215 | 5,858 | 3,690 | 32,925 |
| 89,332 | 168 | 22,871 | 5,706 | 3,587 | 32,332 |
| 89,333 | 173 | 23,020 | 5,748 | 3,635 | 32,576 |
| 89,334 | 175 | 22,911 | 5,751 | 3,632 | 32,469 |
| 89,335 | 177 | 22,717 | 5,779 | 3,648 | 32,321 |



|        |     |        |       |       |        |
|--------|-----|--------|-------|-------|--------|
| 89,336 | 174 | 22,786 | 5,860 | 3,648 | 32,468 |
| 89,337 | 174 | 22,834 | 5,822 | 3,626 | 32,456 |
| 89,338 | 174 | 23,067 | 5,829 | 3,621 | 32,691 |
| 89,339 | 175 | 23,089 | 5,854 | 3,624 | 32,742 |
| 89,340 | 171 | 23,121 | 5,846 | 3,643 | 32,781 |
| 89,341 | 171 | 23,174 | 5,873 | 3,664 | 32,882 |
| 89,342 | 163 | 23,030 | 5,908 | 3,650 | 32,751 |
| 89,343 | 166 | 23,156 | 5,918 | 3,666 | 32,906 |
| 89,344 | 167 | 22,971 | 5,860 | 3,613 | 32,611 |
| 89,345 | 168 | 23,126 | 5,939 | 3,657 | 32,890 |
| 89,346 | 166 | 23,277 | 5,963 | 3,653 | 33,059 |
| 89,347 | 170 | 23,033 | 5,916 | 3,627 | 32,746 |
| 89,348 | 170 | 23,120 | 5,914 | 3,640 | 32,844 |
| 89,349 | 169 | 23,071 | 5,917 | 3,602 | 32,759 |
| 89,350 | 168 | 23,030 | 5,892 | 3,608 | 32,698 |
| 89,351 | 170 | 22,917 | 5,883 | 3,594 | 32,564 |
| 89,352 | 171 | 22,923 | 5,904 | 3,605 | 32,603 |
| 89,353 | 160 | 22,954 | 5,937 | 3,592 | 32,643 |
| 89,354 | 163 | 23,130 | 6,010 | 3,636 | 32,939 |
| 89,355 | 156 | 23,039 | 5,961 | 3,602 | 32,758 |
| 89,356 | 154 | 23,033 | 5,972 | 3,592 | 32,751 |
| 89,357 | 151 | 22,844 | 5,930 | 3,575 | 32,500 |
| 89,358 | 152 | 22,502 | 5,858 | 3,513 | 32,025 |
| 89,359 | 151 | 22,610 | 5,880 | 3,499 | 32,140 |
| 89,360 | 158 | 22,387 | 5,849 | 3,464 | 31,858 |
| 89,361 | 157 | 22,149 | 5,826 | 3,465 | 31,597 |
| 89,362 | 168 | 23,408 | 6,177 | 3,627 | 33,380 |
| 89,363 | 164 | 22,882 | 6,094 | 3,532 | 32,672 |
| 89,364 | 168 | 23,025 | 6,155 | 3,565 | 32,913 |
| 89,365 | 164 | 23,201 | 6,184 | 3,603 | 33,152 |
| 89,366 | 168 | 23,426 | 6,241 | 3,630 | 33,465 |
| 89,367 | 166 | 23,311 | 6,183 | 3,627 | 33,287 |

|        |     |        |       |       |        |
|--------|-----|--------|-------|-------|--------|
| 89,368 | 167 | 23,386 | 6,189 | 3,632 | 33,374 |
| 89,369 | 165 | 23,130 | 6,067 | 3,596 | 32,958 |
| 89,370 | 163 | 23,256 | 6,100 | 3,630 | 33,149 |
| 89,371 | 160 | 23,438 | 6,157 | 3,689 | 33,444 |
| 89,372 | 162 | 23,468 | 6,151 | 3,716 | 33,497 |
| 89,373 | 162 | 23,289 | 6,127 | 3,684 | 33,262 |
| 89,374 | 160 | 23,208 | 6,099 | 3,676 | 33,143 |
| 89,375 | 160 | 23,563 | 6,197 | 3,716 | 33,636 |
| 89,376 | 162 | 23,604 | 6,154 | 3,713 | 33,633 |
| 89,377 | 164 | 23,810 | 6,237 | 3,761 | 33,972 |
| 89,378 | 162 | 23,880 | 6,277 | 3,771 | 34,090 |
| 89,379 | 158 | 23,829 | 6,291 | 3,781 | 34,059 |
| 89,380 | 152 | 23,881 | 6,291 | 3,796 | 34,120 |
| 89,381 | 152 | 23,839 | 6,234 | 3,784 | 34,009 |
| 89,382 | 147 | 23,565 | 6,172 | 3,749 | 33,633 |
| 89,383 | 129 | 23,095 | 6,058 | 3,680 | 32,962 |
| 89,384 | 131 | 23,158 | 6,111 | 3,683 | 33,083 |
| 89,385 | 131 | 23,123 | 6,129 | 3,678 | 33,061 |
| 89,386 | 132 | 22,983 | 6,088 | 3,647 | 32,850 |
| 89,387 | 134 | 23,144 | 6,085 | 3,647 | 33,010 |
| 89,388 | 133 | 23,147 | 6,185 | 3,701 | 33,166 |
| 89,389 | 139 | 22,854 | 6,126 | 3,665 | 32,784 |
| 89,390 | 138 | 22,689 | 6,060 | 3,651 | 32,538 |
| 89,391 | 142 | 23,087 | 6,214 | 3,717 | 33,160 |
| 89,392 | 142 | 22,835 | 6,168 | 3,674 | 32,819 |
| 89,393 | 139 | 22,816 | 6,164 | 3,664 | 32,783 |
| 89,394 | 138 | 22,744 | 6,162 | 3,664 | 32,708 |
| 89,395 | 130 | 22,998 | 6,199 | 3,696 | 33,023 |
| 89,396 | 131 | 22,973 | 6,200 | 3,696 | 33,000 |
| 89,397 | 137 | 22,872 | 6,184 | 3,700 | 32,893 |
| 89,398 | 131 | 22,654 | 6,123 | 3,662 | 32,570 |
| 89,399 | 132 | 22,568 | 6,153 | 3,685 | 32,538 |

|        |     |        |       |       |        |
|--------|-----|--------|-------|-------|--------|
| 89,400 | 138 | 22,293 | 6,084 | 3,655 | 32,170 |
| 89,401 | 138 | 22,066 | 6,029 | 3,621 | 31,854 |
| 89,402 | 138 | 22,106 | 6,088 | 3,628 | 31,960 |
| 89,403 | 137 | 21,832 | 5,996 | 3,603 | 31,568 |
| 89,404 | 138 | 22,080 | 6,087 | 3,680 | 31,985 |
| 89,405 | 140 | 21,298 | 5,885 | 3,580 | 30,903 |
| 89,406 | 145 | 21,526 | 5,943 | 3,620 | 31,234 |
| 89,407 | 137 | 21,773 | 6,005 | 3,671 | 31,586 |
| 89,408 | 138 | 22,085 | 6,085 | 3,723 | 32,031 |
| 89,409 | 118 | 21,548 | 5,965 | 3,661 | 31,292 |
| 89,410 | 118 | 21,676 | 6,007 | 3,704 | 31,505 |
| 89,411 | 117 | 21,926 | 6,056 | 3,739 | 31,838 |
| 89,412 | 117 | 21,627 | 5,972 | 3,702 | 31,418 |
| 89,413 | 121 | 21,853 | 6,036 | 3,740 | 31,750 |
| 89,414 | 116 | 21,362 | 5,905 | 3,673 | 31,056 |
| 89,415 | 115 | 21,318 | 5,898 | 3,672 | 31,003 |
| 89,416 | 114 | 21,338 | 5,890 | 3,667 | 31,009 |
| 89,417 | 117 | 21,508 | 5,937 | 3,686 | 31,248 |
| 89,418 | 114 | 21,272 | 5,897 | 3,638 | 30,921 |
| 89,419 | 117 | 21,567 | 6,003 | 3,676 | 31,363 |
| 89,420 | 119 | 21,128 | 5,880 | 3,600 | 30,727 |
| 89,421 | 120 | 21,444 | 5,992 | 3,646 | 31,202 |
| 89,422 | 122 | 21,431 | 5,992 | 3,632 | 31,177 |
| 89,423 | 121 | 21,030 | 5,903 | 3,576 | 30,630 |
| 89,424 | 118 | 21,333 | 6,000 | 3,657 | 31,108 |
| 89,425 | 118 | 21,016 | 5,902 | 3,602 | 30,638 |
| 89,426 | 118 | 20,736 | 5,818 | 3,588 | 30,260 |
| 89,427 | 118 | 20,984 | 5,909 | 3,654 | 30,665 |
| 89,428 | 127 | 21,370 | 5,968 | 3,693 | 31,158 |
| 89,429 | 129 | 21,069 | 5,871 | 3,653 | 30,722 |
| 89,430 | 140 | 21,290 | 5,950 | 3,694 | 31,074 |
| 89,431 | 137 | 21,135 | 5,955 | 3,684 | 30,911 |

|        |     |        |       |       |        |
|--------|-----|--------|-------|-------|--------|
| 89,432 | 135 | 21,116 | 5,952 | 3,692 | 30,895 |
| 89,433 | 137 | 20,864 | 5,886 | 3,632 | 30,519 |
| 89,434 | 137 | 20,831 | 5,867 | 3,615 | 30,450 |
| 89,435 | 135 | 20,793 | 5,846 | 3,637 | 30,411 |
| 89,436 | 134 | 20,772 | 5,829 | 3,639 | 30,374 |
| 89,437 | 137 | 20,699 | 5,796 | 3,638 | 30,270 |
| 89,438 | 143 | 20,955 | 5,777 | 3,669 | 30,544 |
| 89,439 | 148 | 21,041 | 5,755 | 3,650 | 30,594 |
| 89,440 | 144 | 20,994 | 5,726 | 3,625 | 30,489 |
| 89,441 | 146 | 21,047 | 5,730 | 3,626 | 30,549 |
| 89,442 | 146 | 20,722 | 5,658 | 3,584 | 30,110 |
| 89,443 | 146 | 20,440 | 5,621 | 3,564 | 29,771 |
| 89,444 | 157 | 20,596 | 5,671 | 3,612 | 30,036 |
| 89,445 | 178 | 20,914 | 5,747 | 3,666 | 30,505 |
| 89,446 | 179 | 20,954 | 5,776 | 3,672 | 30,581 |
| 89,447 | 179 | 21,011 | 5,743 | 3,649 | 30,582 |
| 89,448 | 171 | 21,020 | 5,734 | 3,643 | 30,568 |
| 89,449 | 171 | 20,944 | 5,664 | 3,601 | 30,380 |
| 89,450 | 171 | 20,995 | 5,652 | 3,602 | 30,420 |
| 89,451 | 165 | 20,941 | 5,620 | 3,626 | 30,352 |
| 89,452 | 164 | 20,793 | 5,585 | 3,611 | 30,153 |
| 89,453 | 165 | 20,845 | 5,560 | 3,571 | 30,141 |
| 89,454 | 165 | 20,856 | 5,558 | 3,560 | 30,139 |
| 89,455 | 163 | 21,168 | 5,625 | 3,600 | 30,556 |
| 89,456 | 169 | 21,165 | 5,629 | 3,598 | 30,561 |
| 89,457 | 169 | 21,254 | 5,640 | 3,601 | 30,664 |
| 89,458 | 181 | 21,432 | 5,674 | 3,612 | 30,899 |
| 89,459 | 186 | 21,559 | 5,714 | 3,599 | 31,058 |
| 89,460 | 191 | 21,466 | 5,651 | 3,583 | 30,891 |
| 89,461 | 192 | 21,602 | 5,658 | 3,576 | 31,028 |
| 89,462 | 189 | 21,572 | 5,686 | 3,606 | 31,053 |
| 89,463 | 196 | 21,704 | 5,686 | 3,628 | 31,214 |

|        |     |        |       |       |        |
|--------|-----|--------|-------|-------|--------|
| 89,464 | 197 | 21,923 | 5,754 | 3,675 | 31,549 |
| 89,465 | 193 | 21,881 | 5,732 | 3,676 | 31,482 |
| 89,466 | 193 | 21,820 | 5,739 | 3,667 | 31,419 |
| 89,467 | 191 | 21,961 | 5,757 | 3,675 | 31,584 |
| 89,468 | 191 | 21,957 | 5,826 | 3,725 | 31,699 |
| 89,469 | 190 | 21,966 | 5,856 | 3,767 | 31,779 |
| 89,470 | 195 | 21,905 | 5,860 | 3,780 | 31,740 |
| 89,471 | 192 | 21,787 | 5,879 | 3,801 | 31,659 |
| 89,472 | 195 | 21,705 | 5,838 | 3,813 | 31,551 |
| 89,473 | 194 | 21,789 | 5,835 | 3,824 | 31,642 |
| 89,474 | 189 | 21,694 | 5,808 | 3,785 | 31,476 |
| 89,475 | 190 | 21,760 | 5,871 | 3,782 | 31,603 |
| 89,476 | 192 | 21,878 | 5,865 | 3,781 | 31,716 |
| 89,477 | 195 | 22,012 | 5,872 | 3,751 | 31,830 |
| 89,478 | 195 | 22,017 | 5,884 | 3,749 | 31,845 |
| 89,479 | 190 | 22,337 | 5,931 | 3,785 | 32,243 |
| 89,480 | 193 | 22,579 | 5,981 | 3,832 | 32,585 |
| 89,481 | 184 | 22,757 | 6,013 | 3,851 | 32,805 |
| 89,482 | 187 | 22,924 | 6,077 | 3,883 | 33,071 |
| 89,483 | 187 | 23,162 | 6,135 | 3,924 | 33,408 |
| 89,484 | 202 | 23,412 | 6,173 | 3,946 | 33,733 |
| 89,485 | 205 | 23,841 | 6,253 | 3,989 | 34,288 |
| 89,486 | 202 | 23,869 | 6,244 | 3,989 | 34,304 |
| 89,487 | 201 | 23,983 | 6,250 | 4,000 | 34,434 |
| 89,488 | 200 | 23,979 | 6,261 | 3,990 | 34,430 |
| 89,489 | 199 | 23,747 | 6,252 | 3,968 | 34,166 |
| 89,490 | 195 | 23,559 | 6,187 | 3,941 | 33,882 |
| 89,491 | 201 | 24,735 | 6,514 | 4,136 | 35,586 |
| 89,492 | 194 | 24,787 | 6,531 | 4,168 | 35,680 |
| 89,493 | 194 | 24,832 | 6,551 | 4,176 | 35,753 |
| 89,494 | 185 | 25,185 | 6,604 | 4,202 | 36,176 |
| 89,495 | 179 | 25,366 | 6,647 | 4,216 | 36,408 |

|        |     |        |       |       |        |
|--------|-----|--------|-------|-------|--------|
| 89,496 | 169 | 25,155 | 6,544 | 4,154 | 36,022 |
| 89,497 | 171 | 25,348 | 6,560 | 4,169 | 36,248 |
| 89,498 | 169 | 25,316 | 6,577 | 4,195 | 36,257 |
| 89,499 | 171 | 25,516 | 6,631 | 4,226 | 36,544 |
| 89,500 | 173 | 25,397 | 6,627 | 4,199 | 36,396 |
| 89,501 | 179 | 25,518 | 6,657 | 4,194 | 36,548 |
| 89,502 | 180 | 25,622 | 6,674 | 4,197 | 36,673 |
| 89,503 | 184 | 25,702 | 6,714 | 4,235 | 36,835 |
| 89,504 | 184 | 25,644 | 6,697 | 4,245 | 36,770 |
| 89,505 | 184 | 25,479 | 6,652 | 4,242 | 36,557 |
| 89,506 | 183 | 25,493 | 6,687 | 4,248 | 36,611 |
| 89,507 | 181 | 25,371 | 6,717 | 4,262 | 36,531 |
| 89,508 | 181 | 25,570 | 6,782 | 4,320 | 36,853 |
| 89,509 | 175 | 25,484 | 6,763 | 4,325 | 36,747 |
| 89,510 | 170 | 25,459 | 6,741 | 4,356 | 36,726 |
| 89,511 | 166 | 25,300 | 6,705 | 4,361 | 36,532 |
| 89,512 | 169 | 24,961 | 6,648 | 4,314 | 36,092 |
| 89,513 | 169 | 25,272 | 6,675 | 4,337 | 36,453 |
| 89,514 | 158 | 25,471 | 6,699 | 4,364 | 36,692 |
| 89,515 | 162 | 25,564 | 6,717 | 4,348 | 36,791 |
| 89,516 | 161 | 25,757 | 6,765 | 4,370 | 37,053 |
| 89,517 | 165 | 25,732 | 6,720 | 4,369 | 36,986 |
| 89,518 | 165 | 25,724 | 6,668 | 4,360 | 36,917 |
| 89,519 | 167 | 25,846 | 6,651 | 4,321 | 36,985 |
| 89,520 | 167 | 25,885 | 6,648 | 4,323 | 37,023 |
| 89,521 | 159 | 25,818 | 6,649 | 4,317 | 36,943 |
| 89,522 | 155 | 25,659 | 6,599 | 4,263 | 36,676 |
| 89,523 | 153 | 25,581 | 6,579 | 4,243 | 36,556 |
| 89,524 | 158 | 25,302 | 6,493 | 4,170 | 36,123 |
| 89,525 | 165 | 25,582 | 6,559 | 4,220 | 36,526 |
| 89,526 | 162 | 25,666 | 6,602 | 4,244 | 36,674 |
| 89,527 | 162 | 25,617 | 6,644 | 4,252 | 36,675 |

|        |     |        |       |       |        |
|--------|-----|--------|-------|-------|--------|
| 89,528 | 160 | 25,669 | 6,654 | 4,267 | 36,750 |
| 89,529 | 161 | 25,518 | 6,668 | 4,267 | 36,614 |
| 89,530 | 159 | 25,380 | 6,693 | 4,292 | 36,524 |
| 89,531 | 153 | 25,060 | 6,566 | 4,273 | 36,052 |
| 89,532 | 153 | 25,104 | 6,595 | 4,273 | 36,125 |
| 89,533 | 153 | 24,911 | 6,556 | 4,229 | 35,849 |
| 89,534 | 156 | 25,162 | 6,603 | 4,270 | 36,191 |
| 89,535 | 151 | 25,489 | 6,669 | 4,332 | 36,641 |
| 89,536 | 158 | 25,594 | 6,743 | 4,354 | 36,849 |
| 89,537 | 157 | 25,435 | 6,717 | 4,337 | 36,646 |
| 89,538 | 149 | 25,331 | 6,705 | 4,340 | 36,525 |
| 89,539 | 151 | 25,487 | 6,800 | 4,387 | 36,825 |
| 89,540 | 147 | 25,504 | 6,819 | 4,423 | 36,893 |
| 89,541 | 144 | 25,489 | 6,806 | 4,410 | 36,849 |
| 89,542 | 145 | 25,258 | 6,734 | 4,347 | 36,484 |
| 89,543 | 146 | 25,253 | 6,751 | 4,337 | 36,487 |
| 89,544 | 145 | 25,346 | 6,743 | 4,355 | 36,589 |
| 89,545 | 147 | 25,038 | 6,674 | 4,328 | 36,187 |
| 89,546 | 148 | 25,197 | 6,712 | 4,365 | 36,422 |
| 89,547 | 153 | 25,150 | 6,706 | 4,366 | 36,375 |
| 89,548 | 156 | 24,836 | 6,623 | 4,304 | 35,919 |
| 89,549 | 155 | 24,601 | 6,606 | 4,280 | 35,642 |
| 89,550 | 155 | 24,701 | 6,624 | 4,296 | 35,776 |
| 89,551 | 149 | 24,036 | 6,480 | 4,204 | 34,869 |
| 89,552 | 149 | 24,199 | 6,523 | 4,233 | 35,104 |
| 89,553 | 147 | 24,485 | 6,594 | 4,276 | 35,502 |
| 89,554 | 146 | 24,458 | 6,599 | 4,256 | 35,459 |
| 89,555 | 145 | 24,687 | 6,635 | 4,284 | 35,751 |
| 89,556 | 145 | 24,203 | 6,481 | 4,172 | 35,001 |
| 89,557 | 141 | 24,313 | 6,497 | 4,214 | 35,165 |
| 89,558 | 139 | 24,576 | 6,569 | 4,248 | 35,532 |
| 89,559 | 139 | 24,255 | 6,505 | 4,184 | 35,083 |

|        |     |        |       |       |        |
|--------|-----|--------|-------|-------|--------|
| 89,560 | 133 | 23,904 | 6,420 | 4,139 | 34,596 |
| 89,561 | 128 | 23,065 | 6,288 | 4,011 | 33,492 |
| 89,562 | 129 | 23,209 | 6,297 | 4,028 | 33,663 |
| 89,563 | 130 | 23,525 | 6,345 | 4,059 | 34,059 |
| 89,564 | 134 | 23,553 | 6,352 | 4,060 | 34,099 |
| 89,565 | 134 | 23,245 | 6,308 | 3,999 | 33,686 |
| 89,566 | 128 | 22,963 | 6,244 | 3,986 | 33,321 |
| 89,567 | 128 | 23,232 | 6,334 | 4,024 | 33,718 |
| 89,568 | 126 | 23,210 | 6,330 | 4,003 | 33,669 |
| 89,569 | 126 | 23,578 | 6,441 | 4,090 | 34,235 |
| 89,570 | 125 | 23,251 | 6,380 | 4,028 | 33,784 |
| 89,571 | 128 | 23,363 | 6,337 | 4,012 | 33,840 |
| 89,572 | 128 | 23,435 | 6,346 | 4,009 | 33,918 |
| 89,573 | 130 | 23,467 | 6,350 | 4,002 | 33,949 |
| 89,574 | 138 | 23,717 | 6,431 | 4,076 | 34,362 |
| 89,575 | 135 | 23,669 | 6,452 | 4,096 | 34,352 |
| 89,576 | 129 | 23,808 | 6,469 | 4,104 | 34,510 |
| 89,577 | 132 | 23,705 | 6,443 | 4,088 | 34,368 |
| 89,578 | 130 | 23,545 | 6,360 | 4,041 | 34,076 |
| 89,579 | 128 | 23,638 | 6,331 | 4,027 | 34,124 |
| 89,580 | 128 | 23,750 | 6,330 | 4,030 | 34,238 |
| 89,581 | 129 | 23,606 | 6,278 | 3,961 | 33,974 |
| 89,582 | 129 | 23,506 | 6,268 | 3,958 | 33,861 |
| 89,583 | 130 | 23,378 | 6,170 | 3,941 | 33,619 |
| 89,584 | 127 | 23,464 | 6,187 | 3,947 | 33,725 |
| 89,585 | 123 | 23,158 | 6,130 | 3,914 | 33,325 |
| 89,586 | 114 | 22,864 | 6,068 | 3,874 | 32,920 |
| 89,587 | 105 | 22,610 | 5,992 | 3,842 | 32,549 |
| 89,588 | 105 | 22,362 | 5,937 | 3,828 | 32,232 |
| 89,589 | 103 | 22,297 | 5,891 | 3,808 | 32,099 |
| 89,590 | 111 | 22,305 | 5,858 | 3,766 | 32,040 |
| 89,591 | 110 | 22,204 | 5,806 | 3,722 | 31,842 |



|        |     |        |       |       |        |
|--------|-----|--------|-------|-------|--------|
| 89,592 | 118 | 22,451 | 5,857 | 3,744 | 32,170 |
| 89,593 | 117 | 22,123 | 5,791 | 3,693 | 31,724 |
| 89,594 | 125 | 22,494 | 5,838 | 3,752 | 32,209 |
| 89,595 | 125 | 22,470 | 5,849 | 3,746 | 32,190 |
| 89,596 | 132 | 22,777 | 5,882 | 3,765 | 32,556 |
| 89,597 | 139 | 23,181 | 5,981 | 3,821 | 33,122 |
| 89,598 | 129 | 23,340 | 6,016 | 3,828 | 33,313 |
| 89,599 | 121 | 23,150 | 5,987 | 3,837 | 33,095 |
| 89,600 | 122 | 23,261 | 5,973 | 3,816 | 33,172 |
| 89,601 | 122 | 23,297 | 5,978 | 3,823 | 33,220 |
| 89,602 | 119 | 23,546 | 5,998 | 3,837 | 33,500 |
| 89,603 | 124 | 23,917 | 6,087 | 3,885 | 34,013 |
| 89,604 | 123 | 23,614 | 6,028 | 3,849 | 33,614 |
| 89,605 | 126 | 23,527 | 6,006 | 3,836 | 33,495 |
| 89,606 | 132 | 24,064 | 6,097 | 3,926 | 34,219 |
| 89,607 | 131 | 23,905 | 6,039 | 3,889 | 33,964 |
| 89,608 | 125 | 23,807 | 5,943 | 3,824 | 33,699 |
| 89,609 | 126 | 24,070 | 5,977 | 3,841 | 34,014 |
| 89,610 | 125 | 24,347 | 6,027 | 3,899 | 34,398 |
| 89,611 | 125 | 24,297 | 5,990 | 3,866 | 34,278 |
| 89,612 | 124 | 24,170 | 5,961 | 3,842 | 34,097 |
| 89,613 | 126 | 24,251 | 5,994 | 3,833 | 34,204 |
| 89,614 | 127 | 24,352 | 6,057 | 3,866 | 34,402 |
| 89,615 | 125 | 24,280 | 6,053 | 3,847 | 34,305 |
| 89,616 | 128 | 24,094 | 5,964 | 3,826 | 34,012 |
| 89,617 | 130 | 23,920 | 5,894 | 3,792 | 33,736 |
| 89,618 | 132 | 24,098 | 5,888 | 3,800 | 33,918 |
| 89,619 | 134 | 24,279 | 5,939 | 3,830 | 34,182 |
| 89,620 | 135 | 24,195 | 5,895 | 3,796 | 34,021 |
| 89,621 | 135 | 24,355 | 5,910 | 3,801 | 34,201 |
| 89,622 | 133 | 24,475 | 5,938 | 3,833 | 34,379 |
| 89,623 | 136 | 24,470 | 5,965 | 3,857 | 34,428 |

|        |     |        |       |       |        |
|--------|-----|--------|-------|-------|--------|
| 89,624 | 135 | 24,680 | 6,008 | 3,882 | 34,705 |
| 89,625 | 126 | 24,477 | 5,926 | 3,816 | 34,345 |
| 89,626 | 132 | 24,939 | 5,991 | 3,847 | 34,909 |
| 89,627 | 136 | 24,997 | 5,998 | 3,836 | 34,967 |
| 89,628 | 133 | 24,830 | 5,937 | 3,796 | 34,696 |
| 89,629 | 136 | 24,873 | 5,954 | 3,811 | 34,774 |
| 89,630 | 136 | 24,780 | 5,960 | 3,822 | 34,698 |
| 89,631 | 132 | 24,828 | 5,983 | 3,849 | 34,792 |
| 89,632 | 132 | 24,580 | 6,002 | 3,879 | 34,593 |
| 89,633 | 137 | 24,556 | 6,073 | 3,891 | 34,657 |
| 89,634 | 135 | 24,265 | 6,031 | 3,871 | 34,302 |
| 89,635 | 137 | 24,384 | 6,033 | 3,877 | 34,431 |
| 89,636 | 142 | 24,525 | 6,087 | 3,899 | 34,653 |
| 89,637 | 145 | 24,566 | 6,115 | 3,900 | 34,726 |
| 89,638 | 146 | 24,579 | 6,116 | 3,898 | 34,739 |
| 89,639 | 147 | 24,538 | 6,133 | 3,877 | 34,695 |
| 89,640 | 149 | 24,632 | 6,150 | 3,883 | 34,814 |
| 89,641 | 151 | 24,311 | 6,121 | 3,897 | 34,480 |
| 89,642 | 151 | 24,362 | 6,140 | 3,898 | 34,551 |
| 89,643 | 146 | 24,274 | 6,144 | 3,923 | 34,487 |
| 89,644 | 149 | 24,531 | 6,207 | 3,951 | 34,838 |
| 89,645 | 145 | 24,481 | 6,190 | 3,920 | 34,736 |
| 89,646 | 145 | 24,677 | 6,289 | 3,999 | 35,110 |
| 89,647 | 141 | 24,828 | 6,360 | 4,031 | 35,360 |
| 89,648 | 140 | 24,983 | 6,389 | 4,052 | 35,564 |
| 89,649 | 144 | 24,733 | 6,343 | 4,011 | 35,231 |
| 89,650 | 146 | 24,873 | 6,361 | 4,009 | 35,389 |
| 89,651 | 145 | 24,805 | 6,364 | 4,007 | 35,321 |
| 89,652 | 149 | 25,504 | 6,504 | 4,106 | 36,263 |
| 89,653 | 150 | 25,615 | 6,587 | 4,146 | 36,498 |
| 89,654 | 147 | 25,684 | 6,611 | 4,179 | 36,621 |
| 89,655 | 145 | 25,376 | 6,555 | 4,136 | 36,212 |

|        |     |        |       |       |        |
|--------|-----|--------|-------|-------|--------|
| 89,656 | 141 | 25,153 | 6,530 | 4,118 | 35,942 |
| 89,657 | 139 | 25,116 | 6,613 | 4,155 | 36,023 |
| 89,658 | 142 | 25,211 | 6,691 | 4,202 | 36,246 |
| 89,659 | 144 | 25,218 | 6,730 | 4,229 | 36,321 |
| 89,660 | 148 | 25,326 | 6,779 | 4,244 | 36,497 |
| 89,661 | 150 | 25,282 | 6,788 | 4,219 | 36,439 |
| 89,662 | 150 | 24,934 | 6,722 | 4,188 | 35,994 |
| 89,663 | 154 | 24,918 | 6,714 | 4,213 | 35,999 |
| 89,664 | 155 | 25,092 | 6,748 | 4,251 | 36,246 |
| 89,665 | 155 | 25,191 | 6,750 | 4,240 | 36,336 |
| 89,666 | 153 | 24,905 | 6,664 | 4,216 | 35,938 |
| 89,667 | 150 | 24,901 | 6,694 | 4,218 | 35,963 |
| 89,668 | 150 | 24,920 | 6,733 | 4,242 | 36,045 |
| 89,669 | 148 | 25,190 | 6,816 | 4,300 | 36,454 |
| 89,670 | 143 | 25,277 | 6,823 | 4,314 | 36,557 |
| 89,671 | 145 | 25,049 | 6,809 | 4,292 | 36,295 |
| 89,672 | 146 | 24,937 | 6,789 | 4,299 | 36,171 |
| 89,673 | 146 | 24,671 | 6,737 | 4,255 | 35,809 |
| 89,674 | 142 | 24,720 | 6,761 | 4,273 | 35,896 |
| 89,675 | 143 | 24,439 | 6,691 | 4,230 | 35,503 |
| 89,676 | 142 | 24,147 | 6,625 | 4,193 | 35,107 |
| 89,677 | 139 | 24,407 | 6,694 | 4,233 | 35,473 |
| 89,678 | 135 | 24,065 | 6,649 | 4,228 | 35,077 |
| 89,679 | 129 | 23,542 | 6,529 | 4,179 | 34,379 |
| 89,680 | 133 | 23,698 | 6,592 | 4,202 | 34,625 |
| 89,681 | 136 | 23,512 | 6,552 | 4,138 | 34,338 |
| 89,682 | 135 | 23,756 | 6,569 | 4,115 | 34,575 |
| 89,683 | 131 | 23,917 | 6,541 | 4,108 | 34,697 |
| 89,684 | 130 | 23,804 | 6,526 | 4,086 | 34,546 |
| 89,685 | 130 | 24,042 | 6,565 | 4,113 | 34,850 |
| 89,686 | 133 | 23,941 | 6,563 | 4,103 | 34,740 |
| 89,687 | 134 | 23,876 | 6,520 | 4,094 | 34,624 |

|        |     |        |       |       |        |
|--------|-----|--------|-------|-------|--------|
| 89,688 | 132 | 24,015 | 6,493 | 4,102 | 34,742 |
| 89,689 | 136 | 24,142 | 6,507 | 4,114 | 34,899 |
| 89,690 | 132 | 24,171 | 6,449 | 4,123 | 34,875 |
| 89,691 | 128 | 23,853 | 6,354 | 4,042 | 34,377 |
| 89,692 | 128 | 23,933 | 6,315 | 4,020 | 34,396 |
| 89,693 | 127 | 23,974 | 6,313 | 4,014 | 34,428 |
| 89,694 | 132 | 23,724 | 6,288 | 3,987 | 34,131 |
| 89,695 | 128 | 23,526 | 6,253 | 3,960 | 33,867 |
| 89,696 | 123 | 22,712 | 6,036 | 3,811 | 32,682 |
| 89,697 | 124 | 22,813 | 6,034 | 3,795 | 32,766 |
| 89,698 | 120 | 23,083 | 6,075 | 3,809 | 33,087 |
| 89,699 | 116 | 22,444 | 5,915 | 3,720 | 32,195 |
| 89,700 | 114 | 22,335 | 5,887 | 3,713 | 32,049 |
| 89,701 | 117 | 22,337 | 5,965 | 3,773 | 32,192 |
| 89,702 | 116 | 22,009 | 5,947 | 3,779 | 31,851 |
| 89,703 | 114 | 21,950 | 5,951 | 3,791 | 31,806 |
| 89,704 | 114 | 22,062 | 5,924 | 3,787 | 31,887 |
| 89,705 | 109 | 21,748 | 5,798 | 3,708 | 31,363 |
| 89,706 | 121 | 21,892 | 5,815 | 3,710 | 31,538 |
| 89,707 | 121 | 21,800 | 5,734 | 3,663 | 31,318 |
| 89,708 | 124 | 22,437 | 5,862 | 3,748 | 32,171 |
| 89,709 | 123 | 22,515 | 5,842 | 3,756 | 32,236 |
| 89,710 | 118 | 22,697 | 5,890 | 3,794 | 32,499 |
| 89,711 | 117 | 22,734 | 5,878 | 3,793 | 32,522 |
| 89,712 | 117 | 22,707 | 5,864 | 3,800 | 32,488 |
| 89,713 | 113 | 22,676 | 5,849 | 3,771 | 32,409 |
| 89,714 | 110 | 23,335 | 5,979 | 3,864 | 33,288 |
| 89,715 | 110 | 23,458 | 6,056 | 3,905 | 33,529 |
| 89,716 | 114 | 23,439 | 6,074 | 3,921 | 33,548 |
| 89,717 | 111 | 23,548 | 6,121 | 3,916 | 33,696 |
| 89,718 | 118 | 23,759 | 6,166 | 3,938 | 33,981 |
| 89,719 | 126 | 23,909 | 6,197 | 3,964 | 34,196 |

|        |     |        |       |       |        |
|--------|-----|--------|-------|-------|--------|
| 89,720 | 133 | 23,682 | 6,228 | 3,966 | 34,009 |
| 89,721 | 135 | 23,541 | 6,232 | 3,974 | 33,882 |
| 89,722 | 129 | 23,397 | 6,190 | 3,960 | 33,676 |
| 89,723 | 134 | 23,378 | 6,175 | 3,958 | 33,645 |
| 89,724 | 136 | 23,405 | 6,173 | 3,971 | 33,685 |
| 89,725 | 136 | 23,473 | 6,172 | 3,966 | 33,747 |
| 89,726 | 133 | 23,461 | 6,170 | 3,980 | 33,744 |
| 89,727 | 134 | 23,320 | 6,184 | 3,994 | 33,632 |
| 89,728 | 143 | 23,396 | 6,186 | 4,018 | 33,743 |
| 89,729 | 144 | 23,583 | 6,194 | 4,028 | 33,949 |
| 89,730 | 148 | 23,995 | 6,277 | 4,055 | 34,475 |
| 89,731 | 144 | 24,103 | 6,298 | 4,075 | 34,620 |
| 89,732 | 143 | 23,958 | 6,225 | 4,034 | 34,360 |
| 89,733 | 144 | 24,202 | 6,272 | 4,073 | 34,691 |
| 89,734 | 146 | 24,197 | 6,252 | 4,065 | 34,660 |
| 89,735 | 150 | 24,379 | 6,293 | 4,086 | 34,908 |
| 89,736 | 146 | 24,229 | 6,238 | 4,058 | 34,671 |
| 89,737 | 145 | 24,205 | 6,206 | 4,054 | 34,610 |
| 89,738 | 140 | 24,150 | 6,177 | 4,040 | 34,507 |
| 89,739 | 139 | 24,270 | 6,199 | 4,062 | 34,670 |
| 89,740 | 134 | 24,319 | 6,192 | 4,047 | 34,692 |
| 89,741 | 134 | 24,258 | 6,219 | 4,016 | 34,627 |
| 89,742 | 128 | 23,864 | 6,094 | 3,960 | 34,046 |
| 89,743 | 128 | 24,005 | 6,104 | 3,981 | 34,218 |
| 89,744 | 123 | 23,992 | 6,073 | 3,954 | 34,142 |
| 89,745 | 121 | 23,886 | 6,045 | 3,944 | 33,996 |
| 89,746 | 124 | 24,185 | 6,137 | 3,973 | 34,419 |
| 89,747 | 123 | 23,854 | 6,059 | 3,936 | 33,972 |
| 89,748 | 122 | 23,787 | 6,078 | 3,959 | 33,946 |
| 89,749 | 121 | 23,434 | 6,035 | 3,941 | 33,531 |
| 89,750 | 117 | 23,140 | 6,073 | 3,966 | 33,296 |
| 89,751 | 121 | 23,206 | 6,086 | 3,949 | 33,362 |

|        |     |        |       |       |        |
|--------|-----|--------|-------|-------|--------|
| 89,752 | 116 | 23,297 | 6,065 | 3,947 | 33,425 |
| 89,753 | 118 | 23,376 | 6,050 | 3,940 | 33,484 |
| 89,754 | 123 | 23,340 | 6,039 | 3,926 | 33,428 |
| 89,755 | 122 | 22,956 | 5,966 | 3,877 | 32,921 |
| 89,756 | 124 | 23,011 | 5,988 | 3,871 | 32,994 |
| 89,757 | 116 | 23,152 | 6,020 | 3,910 | 33,198 |
| 89,758 | 115 | 22,811 | 5,933 | 3,850 | 32,709 |
| 89,759 | 114 | 22,958 | 6,026 | 3,878 | 32,976 |
| 89,760 | 122 | 22,918 | 6,019 | 3,889 | 32,948 |
| 89,761 | 133 | 22,702 | 5,963 | 3,860 | 32,658 |
| 89,762 | 132 | 22,538 | 5,937 | 3,850 | 32,457 |
| 89,763 | 135 | 22,637 | 5,951 | 3,848 | 32,571 |
| 89,764 | 134 | 22,659 | 5,957 | 3,835 | 32,585 |
| 89,765 | 136 | 22,619 | 5,938 | 3,851 | 32,544 |
| 89,766 | 136 | 22,519 | 5,912 | 3,831 | 32,398 |
| 89,767 | 138 | 22,429 | 5,887 | 3,819 | 32,273 |
| 89,768 | 140 | 22,496 | 5,909 | 3,849 | 32,394 |
| 89,769 | 136 | 22,317 | 5,849 | 3,860 | 32,162 |
| 89,770 | 126 | 22,293 | 5,778 | 3,821 | 32,018 |
| 89,771 | 125 | 22,451 | 5,772 | 3,821 | 32,169 |
| 89,772 | 133 | 22,347 | 5,772 | 3,804 | 32,056 |
| 89,773 | 132 | 22,412 | 5,783 | 3,789 | 32,116 |
| 89,774 | 138 | 22,568 | 5,792 | 3,807 | 32,305 |
| 89,775 | 139 | 22,918 | 5,848 | 3,831 | 32,736 |
| 89,776 | 142 | 22,875 | 5,876 | 3,832 | 32,725 |
| 89,777 | 146 | 23,014 | 5,874 | 3,831 | 32,865 |
| 89,778 | 143 | 22,750 | 5,845 | 3,800 | 32,538 |
| 89,779 | 139 | 23,343 | 5,997 | 3,893 | 33,372 |
| 89,780 | 136 | 23,183 | 5,955 | 3,888 | 33,162 |
| 89,781 | 136 | 22,700 | 5,865 | 3,863 | 32,564 |
| 89,782 | 137 | 23,042 | 5,920 | 3,877 | 32,976 |
| 89,783 | 137 | 23,046 | 5,932 | 3,885 | 33,000 |

|        |     |        |       |       |        |
|--------|-----|--------|-------|-------|--------|
| 89,784 | 138 | 23,353 | 6,039 | 3,957 | 33,487 |
| 89,785 | 137 | 23,344 | 6,043 | 3,959 | 33,483 |
| 89,786 | 139 | 23,084 | 5,971 | 3,929 | 33,123 |
| 89,787 | 145 | 23,194 | 5,990 | 3,923 | 33,252 |
| 89,788 | 145 | 23,130 | 5,981 | 3,917 | 33,173 |
| 89,789 | 153 | 23,298 | 6,018 | 3,942 | 33,411 |
| 89,790 | 158 | 23,218 | 6,040 | 3,945 | 33,361 |
| 89,791 | 162 | 23,134 | 6,023 | 3,947 | 33,266 |
| 89,792 | 160 | 22,918 | 5,942 | 3,904 | 32,924 |
| 89,793 | 161 | 23,160 | 6,036 | 3,956 | 33,313 |
| 89,794 | 168 | 23,267 | 6,092 | 3,977 | 33,504 |
| 89,795 | 167 | 23,195 | 6,058 | 3,962 | 33,382 |
| 89,796 | 171 | 23,451 | 6,089 | 4,006 | 33,717 |
| 89,797 | 173 | 23,410 | 6,131 | 4,039 | 33,753 |
| 89,798 | 181 | 23,654 | 6,153 | 4,053 | 34,041 |
| 89,799 | 182 | 23,923 | 6,144 | 4,066 | 34,315 |
| 89,800 | 181 | 23,961 | 6,097 | 4,066 | 34,305 |
| 89,801 | 182 | 24,194 | 6,150 | 4,103 | 34,629 |
| 89,802 | 178 | 24,500 | 6,167 | 4,119 | 34,964 |
| 89,803 | 176 | 24,329 | 6,114 | 4,081 | 34,700 |
| 89,804 | 175 | 24,107 | 6,046 | 4,033 | 34,361 |
| 89,805 | 173 | 24,499 | 6,112 | 4,097 | 34,881 |
| 89,806 | 172 | 24,311 | 6,032 | 4,050 | 34,565 |
| 89,807 | 175 | 24,268 | 6,019 | 4,051 | 34,513 |
| 89,808 | 171 | 24,103 | 5,956 | 4,015 | 34,245 |
| 89,809 | 170 | 23,805 | 5,881 | 3,961 | 33,817 |
| 89,810 | 166 | 23,599 | 5,826 | 3,906 | 33,497 |
| 89,811 | 176 | 23,713 | 5,841 | 3,909 | 33,639 |
| 89,812 | 166 | 23,332 | 5,755 | 3,828 | 33,081 |
| 89,813 | 166 | 23,421 | 5,790 | 3,834 | 33,211 |
| 89,814 | 162 | 22,920 | 5,678 | 3,781 | 32,541 |
| 89,815 | 160 | 22,809 | 5,646 | 3,742 | 32,357 |

|        |     |        |       |       |        |
|--------|-----|--------|-------|-------|--------|
| 89,816 | 165 | 23,101 | 5,708 | 3,763 | 32,737 |
| 89,817 | 159 | 23,052 | 5,692 | 3,747 | 32,650 |
| 89,818 | 160 | 23,168 | 5,683 | 3,764 | 32,775 |
| 89,819 | 159 | 23,087 | 5,676 | 3,768 | 32,690 |
| 89,820 | 156 | 23,172 | 5,664 | 3,737 | 32,729 |
| 89,821 | 154 | 23,262 | 5,733 | 3,760 | 32,909 |
| 89,822 | 153 | 23,253 | 5,724 | 3,758 | 32,888 |
| 89,823 | 148 | 23,110 | 5,682 | 3,734 | 32,674 |
| 89,824 | 145 | 23,095 | 5,673 | 3,729 | 32,642 |
| 89,825 | 140 | 23,003 | 5,697 | 3,737 | 32,577 |
| 89,826 | 143 | 23,165 | 5,760 | 3,765 | 32,833 |
| 89,827 | 141 | 23,113 | 5,686 | 3,725 | 32,665 |
| 89,828 | 137 | 23,011 | 5,677 | 3,705 | 32,530 |
| 89,829 | 139 | 22,714 | 5,576 | 3,634 | 32,063 |
| 89,830 | 146 | 22,833 | 5,602 | 3,637 | 32,218 |
| 89,831 | 146 | 22,414 | 5,522 | 3,569 | 31,651 |
| 89,832 | 146 | 22,491 | 5,534 | 3,564 | 31,735 |
| 89,833 | 150 | 22,424 | 5,534 | 3,574 | 31,682 |
| 89,834 | 158 | 22,098 | 5,461 | 3,540 | 31,257 |
| 89,835 | 164 | 21,975 | 5,441 | 3,498 | 31,078 |
| 89,836 | 166 | 21,972 | 5,445 | 3,492 | 31,075 |
| 89,837 | 159 | 21,987 | 5,460 | 3,486 | 31,092 |
| 89,838 | 159 | 22,063 | 5,497 | 3,522 | 31,241 |
| 89,839 | 152 | 22,011 | 5,480 | 3,522 | 31,165 |
| 89,840 | 161 | 21,980 | 5,466 | 3,518 | 31,125 |
| 89,841 | 156 | 21,742 | 5,412 | 3,472 | 30,782 |
| 89,842 | 153 | 22,086 | 5,507 | 3,523 | 31,269 |
| 89,843 | 157 | 22,077 | 5,537 | 3,554 | 31,325 |
| 89,844 | 156 | 22,094 | 5,535 | 3,565 | 31,350 |
| 89,845 | 153 | 22,389 | 5,618 | 3,618 | 31,778 |
| 89,846 | 151 | 22,295 | 5,579 | 3,594 | 31,619 |
| 89,847 | 153 | 22,382 | 5,567 | 3,580 | 31,682 |



|        |     |        |       |       |        |
|--------|-----|--------|-------|-------|--------|
| 89,848 | 153 | 22,370 | 5,540 | 3,564 | 31,627 |
| 89,849 | 150 | 22,658 | 5,625 | 3,626 | 32,059 |
| 89,850 | 151 | 22,649 | 5,636 | 3,615 | 32,051 |
| 89,851 | 150 | 22,527 | 5,614 | 3,585 | 31,876 |
| 89,852 | 150 | 22,835 | 5,646 | 3,617 | 32,248 |
| 89,853 | 152 | 22,673 | 5,620 | 3,591 | 32,036 |
| 89,854 | 153 | 22,921 | 5,665 | 3,627 | 32,366 |
| 89,855 | 153 | 23,058 | 5,685 | 3,635 | 32,531 |
| 89,856 | 151 | 23,152 | 5,721 | 3,648 | 32,672 |
| 89,857 | 156 | 23,209 | 5,748 | 3,672 | 32,785 |
| 89,858 | 155 | 23,439 | 5,799 | 3,699 | 33,092 |
| 89,859 | 157 | 23,404 | 5,779 | 3,686 | 33,026 |
| 89,860 | 157 | 23,404 | 5,789 | 3,685 | 33,035 |
| 89,861 | 153 | 23,394 | 5,803 | 3,709 | 33,059 |
| 89,862 | 144 | 23,814 | 5,918 | 3,781 | 33,657 |
| 89,863 | 144 | 23,748 | 5,903 | 3,801 | 33,596 |
| 89,864 | 145 | 23,577 | 5,859 | 3,791 | 33,372 |
| 89,865 | 144 | 23,506 | 5,825 | 3,768 | 33,243 |
| 89,866 | 154 | 23,949 | 5,917 | 3,830 | 33,850 |
| 89,867 | 149 | 23,940 | 5,874 | 3,827 | 33,790 |
| 89,868 | 153 | 23,832 | 5,842 | 3,797 | 33,624 |
| 89,869 | 152 | 23,664 | 5,816 | 3,771 | 33,403 |
| 89,870 | 159 | 23,989 | 5,933 | 3,792 | 33,873 |
| 89,871 | 164 | 23,752 | 5,868 | 3,762 | 33,546 |
| 89,872 | 169 | 23,680 | 5,813 | 3,718 | 33,380 |
| 89,873 | 180 | 23,800 | 5,828 | 3,721 | 33,529 |
| 89,874 | 176 | 23,586 | 5,774 | 3,686 | 33,222 |
| 89,875 | 173 | 23,988 | 5,831 | 3,733 | 33,725 |
| 89,876 | 179 | 24,056 | 5,832 | 3,717 | 33,784 |
| 89,877 | 179 | 24,074 | 5,816 | 3,717 | 33,786 |
| 89,878 | 185 | 24,183 | 5,865 | 3,744 | 33,977 |
| 89,879 | 184 | 24,128 | 5,856 | 3,736 | 33,904 |

|        |     |        |       |       |        |
|--------|-----|--------|-------|-------|--------|
| 89,880 | 178 | 24,068 | 5,860 | 3,755 | 33,861 |
| 89,881 | 172 | 24,122 | 5,892 | 3,771 | 33,957 |
| 89,882 | 171 | 24,423 | 5,967 | 3,818 | 34,379 |
| 89,883 | 164 | 24,067 | 5,839 | 3,744 | 33,814 |
| 89,884 | 165 | 24,388 | 5,871 | 3,749 | 34,173 |
| 89,885 | 159 | 24,677 | 5,922 | 3,781 | 34,539 |
| 89,886 | 150 | 24,496 | 5,879 | 3,779 | 34,304 |
| 89,887 | 143 | 24,560 | 5,914 | 3,780 | 34,397 |
| 89,888 | 142 | 24,545 | 5,937 | 3,780 | 34,404 |
| 89,889 | 142 | 24,470 | 5,934 | 3,785 | 34,331 |
| 89,890 | 142 | 24,552 | 5,984 | 3,801 | 34,479 |
| 89,891 | 135 | 24,281 | 5,976 | 3,790 | 34,182 |
| 89,892 | 135 | 24,192 | 5,925 | 3,780 | 34,032 |
| 89,893 | 136 | 24,012 | 5,880 | 3,748 | 33,776 |
| 89,894 | 138 | 24,008 | 5,825 | 3,717 | 33,688 |
| 89,895 | 137 | 24,192 | 5,893 | 3,733 | 33,955 |
| 89,896 | 134 | 23,790 | 5,801 | 3,700 | 33,425 |
| 89,897 | 131 | 23,656 | 5,799 | 3,708 | 33,294 |
| 89,898 | 132 | 23,643 | 5,798 | 3,687 | 33,260 |
| 89,899 | 133 | 23,790 | 5,863 | 3,693 | 33,479 |
| 89,900 | 130 | 23,419 | 5,815 | 3,645 | 33,009 |
| 89,901 | 129 | 22,927 | 5,719 | 3,584 | 32,359 |
| 89,902 | 130 | 22,867 | 5,704 | 3,567 | 32,268 |
| 89,903 | 131 | 22,585 | 5,650 | 3,514 | 31,880 |
| 89,904 | 131 | 22,559 | 5,655 | 3,512 | 31,857 |
| 89,905 | 128 | 22,274 | 5,608 | 3,465 | 31,475 |
| 89,906 | 129 | 22,456 | 5,643 | 3,492 | 31,720 |
| 89,907 | 126 | 22,135 | 5,553 | 3,425 | 31,239 |
| 89,908 | 129 | 22,371 | 5,610 | 3,439 | 31,549 |
| 89,909 | 134 | 22,281 | 5,617 | 3,426 | 31,458 |
| 89,910 | 142 | 22,073 | 5,591 | 3,399 | 31,205 |
| 89,911 | 143 | 22,113 | 5,587 | 3,390 | 31,233 |

|        |     |        |       |       |        |
|--------|-----|--------|-------|-------|--------|
| 89,912 | 146 | 22,518 | 5,616 | 3,430 | 31,710 |
| 89,913 | 153 | 21,763 | 5,471 | 3,311 | 30,698 |
| 89,914 | 156 | 21,999 | 5,515 | 3,324 | 30,994 |
| 89,915 | 157 | 22,177 | 5,569 | 3,341 | 31,244 |
| 89,916 | 157 | 22,164 | 5,584 | 3,334 | 31,239 |
| 89,917 | 153 | 22,440 | 5,624 | 3,376 | 31,593 |
| 89,918 | 148 | 22,235 | 5,584 | 3,336 | 31,303 |
| 89,919 | 150 | 22,222 | 5,582 | 3,333 | 31,287 |
| 89,920 | 146 | 22,061 | 5,491 | 3,290 | 30,988 |
| 89,921 | 144 | 22,025 | 5,481 | 3,289 | 30,939 |
| 89,922 | 139 | 21,885 | 5,477 | 3,294 | 30,795 |
| 89,923 | 130 | 21,827 | 5,459 | 3,275 | 30,691 |
| 89,924 | 131 | 21,572 | 5,429 | 3,254 | 30,386 |
| 89,925 | 132 | 21,530 | 5,429 | 3,256 | 30,347 |
| 89,926 | 132 | 21,689 | 5,523 | 3,282 | 30,626 |
| 89,927 | 125 | 21,426 | 5,503 | 3,280 | 30,334 |
| 89,928 | 125 | 21,509 | 5,539 | 3,283 | 30,456 |
| 89,929 | 123 | 21,414 | 5,544 | 3,304 | 30,385 |
| 89,930 | 126 | 21,462 | 5,589 | 3,339 | 30,516 |
| 89,931 | 131 | 21,634 | 5,617 | 3,325 | 30,707 |
| 89,932 | 134 | 21,704 | 5,600 | 3,334 | 30,772 |
| 89,933 | 132 | 21,645 | 5,596 | 3,330 | 30,703 |
| 89,934 | 131 | 21,256 | 5,530 | 3,286 | 30,203 |
| 89,935 | 130 | 21,188 | 5,540 | 3,305 | 30,163 |
| 89,936 | 129 | 21,090 | 5,531 | 3,291 | 30,041 |
| 89,937 | 130 | 21,142 | 5,541 | 3,311 | 30,124 |
| 89,938 | 132 | 21,041 | 5,514 | 3,307 | 29,994 |
| 89,939 | 131 | 21,186 | 5,520 | 3,314 | 30,151 |
| 89,940 | 130 | 21,462 | 5,531 | 3,321 | 30,444 |
| 89,941 | 126 | 21,514 | 5,514 | 3,289 | 30,443 |
| 89,942 | 128 | 21,619 | 5,548 | 3,281 | 30,576 |
| 89,943 | 132 | 22,017 | 5,639 | 3,330 | 31,118 |

|        |     |        |       |       |        |
|--------|-----|--------|-------|-------|--------|
| 89,944 | 126 | 21,821 | 5,598 | 3,295 | 30,840 |
| 89,945 | 130 | 21,930 | 5,589 | 3,307 | 30,956 |
| 89,946 | 130 | 22,117 | 5,654 | 3,341 | 31,242 |
| 89,947 | 135 | 22,159 | 5,682 | 3,350 | 31,326 |
| 89,948 | 130 | 22,052 | 5,685 | 3,368 | 31,235 |
| 89,949 | 130 | 22,199 | 5,744 | 3,381 | 31,454 |
| 89,950 | 134 | 21,948 | 5,689 | 3,361 | 31,132 |
| 89,951 | 135 | 22,003 | 5,697 | 3,356 | 31,191 |
| 89,952 | 134 | 22,162 | 5,725 | 3,370 | 31,391 |
| 89,953 | 134 | 21,909 | 5,686 | 3,327 | 31,056 |
| 89,954 | 132 | 21,625 | 5,621 | 3,298 | 30,676 |
| 89,955 | 135 | 21,970 | 5,773 | 3,383 | 31,261 |
| 89,956 | 138 | 21,128 | 5,562 | 3,284 | 30,112 |
| 89,957 | 143 | 21,268 | 5,610 | 3,299 | 30,320 |
| 89,958 | 140 | 21,510 | 5,645 | 3,330 | 30,625 |
| 89,959 | 142 | 21,478 | 5,649 | 3,326 | 30,595 |
| 89,960 | 139 | 21,881 | 5,750 | 3,403 | 31,173 |
| 89,961 | 129 | 21,675 | 5,705 | 3,381 | 30,890 |
| 89,962 | 126 | 21,259 | 5,574 | 3,320 | 30,279 |
| 89,963 | 126 | 21,188 | 5,577 | 3,314 | 30,205 |
| 89,964 | 125 | 21,544 | 5,667 | 3,354 | 30,690 |
| 89,965 | 124 | 21,573 | 5,678 | 3,361 | 30,736 |
| 89,966 | 123 | 21,597 | 5,670 | 3,374 | 30,764 |
| 89,967 | 124 | 21,330 | 5,639 | 3,335 | 30,428 |
| 89,968 | 126 | 21,342 | 5,661 | 3,328 | 30,457 |
| 89,969 | 124 | 21,438 | 5,726 | 3,357 | 30,645 |
| 89,970 | 128 | 21,451 | 5,725 | 3,349 | 30,653 |
| 89,971 | 128 | 21,374 | 5,728 | 3,351 | 30,581 |
| 89,972 | 131 | 21,764 | 5,828 | 3,400 | 31,123 |
| 89,973 | 128 | 21,608 | 5,768 | 3,368 | 30,872 |
| 89,974 | 130 | 21,411 | 5,727 | 3,361 | 30,629 |
| 89,975 | 130 | 21,392 | 5,743 | 3,357 | 30,622 |

|        |     |        |       |       |        |
|--------|-----|--------|-------|-------|--------|
| 89,976 | 132 | 21,637 | 5,816 | 3,405 | 30,990 |
| 89,977 | 133 | 21,402 | 5,708 | 3,362 | 30,605 |
| 89,978 | 131 | 21,282 | 5,664 | 3,332 | 30,409 |
| 89,979 | 132 | 21,274 | 5,674 | 3,349 | 30,429 |
| 89,980 | 131 | 21,451 | 5,692 | 3,336 | 30,610 |
| 89,981 | 132 | 21,394 | 5,631 | 3,296 | 30,453 |
| 89,982 | 132 | 21,350 | 5,639 | 3,313 | 30,434 |
| 89,983 | 129 | 20,936 | 5,554 | 3,265 | 29,884 |
| 89,984 | 144 | 21,144 | 5,667 | 3,313 | 30,268 |
| 89,985 | 149 | 21,223 | 5,705 | 3,324 | 30,401 |
| 89,986 | 150 | 21,149 | 5,649 | 3,294 | 30,242 |
| 89,987 | 152 | 21,041 | 5,661 | 3,306 | 30,160 |
| 89,988 | 152 | 21,043 | 5,671 | 3,284 | 30,150 |
| 89,989 | 153 | 21,308 | 5,737 | 3,342 | 30,540 |
| 89,990 | 155 | 21,165 | 5,737 | 3,347 | 30,404 |
| 89,991 | 155 | 20,814 | 5,666 | 3,298 | 29,933 |
| 89,992 | 154 | 20,542 | 5,603 | 3,250 | 29,549 |
| 89,993 | 157 | 20,966 | 5,665 | 3,295 | 30,083 |
| 89,994 | 166 | 21,120 | 5,696 | 3,336 | 30,318 |
| 89,995 | 165 | 21,024 | 5,680 | 3,331 | 30,200 |
| 89,996 | 168 | 21,240 | 5,695 | 3,350 | 30,453 |
| 89,997 | 169 | 21,418 | 5,706 | 3,364 | 30,657 |
| 89,998 | 175 | 21,427 | 5,706 | 3,372 | 30,680 |
| 89,999 | 182 | 21,790 | 5,755 | 3,419 | 31,146 |
| 90,000 | 182 | 21,620 | 5,739 | 3,429 | 30,970 |
| 90,001 | 179 | 21,841 | 5,742 | 3,461 | 31,223 |
| 90,002 | 178 | 21,869 | 5,700 | 3,443 | 31,190 |
| 90,003 | 174 | 21,834 | 5,621 | 3,433 | 31,062 |
| 90,004 | 177 | 21,906 | 5,633 | 3,429 | 31,145 |
| 90,005 | 177 | 21,967 | 5,628 | 3,421 | 31,193 |
| 90,006 | 173 | 21,844 | 5,609 | 3,418 | 31,044 |
| 90,007 | 169 | 21,836 | 5,601 | 3,414 | 31,020 |

|        |     |        |       |       |        |
|--------|-----|--------|-------|-------|--------|
| 90,008 | 167 | 21,703 | 5,601 | 3,425 | 30,896 |
| 90,009 | 166 | 21,569 | 5,633 | 3,452 | 30,820 |
| 90,010 | 169 | 21,688 | 5,664 | 3,463 | 30,984 |
| 90,011 | 173 | 21,414 | 5,641 | 3,422 | 30,650 |
| 90,012 | 170 | 21,369 | 5,652 | 3,420 | 30,611 |
| 90,013 | 169 | 21,106 | 5,651 | 3,409 | 30,335 |
| 90,014 | 167 | 21,204 | 5,716 | 3,451 | 30,538 |
| 90,015 | 164 | 20,955 | 5,644 | 3,418 | 30,181 |
| 90,016 | 162 | 20,734 | 5,614 | 3,407 | 29,917 |
| 90,017 | 159 | 20,589 | 5,605 | 3,400 | 29,753 |
| 90,018 | 157 | 20,399 | 5,565 | 3,379 | 29,500 |
| 90,019 | 164 | 20,573 | 5,587 | 3,430 | 29,754 |
| 90,020 | 164 | 20,443 | 5,585 | 3,418 | 29,610 |
| 90,021 | 159 | 20,430 | 5,624 | 3,441 | 29,654 |
| 90,022 | 160 | 20,402 | 5,620 | 3,452 | 29,634 |
| 90,023 | 159 | 20,349 | 5,644 | 3,454 | 29,606 |
| 90,024 | 160 | 20,229 | 5,620 | 3,454 | 29,463 |
| 90,025 | 155 | 20,065 | 5,619 | 3,445 | 29,284 |
| 90,026 | 156 | 20,056 | 5,619 | 3,436 | 29,267 |
| 90,027 | 153 | 19,878 | 5,606 | 3,426 | 29,063 |
| 90,028 | 147 | 19,821 | 5,584 | 3,424 | 28,976 |
| 90,029 | 148 | 19,880 | 5,583 | 3,412 | 29,023 |
| 90,030 | 146 | 19,777 | 5,586 | 3,412 | 28,921 |
| 90,031 | 145 | 19,748 | 5,585 | 3,416 | 28,894 |
| 90,032 | 143 | 19,837 | 5,618 | 3,434 | 29,032 |
| 90,033 | 138 | 19,850 | 5,642 | 3,475 | 29,105 |
| 90,034 | 140 | 19,800 | 5,643 | 3,456 | 29,039 |
| 90,035 | 129 | 19,751 | 5,622 | 3,433 | 28,935 |
| 90,036 | 124 | 19,447 | 5,558 | 3,404 | 28,533 |
| 90,037 | 124 | 19,380 | 5,579 | 3,395 | 28,478 |
| 90,038 | 126 | 19,606 | 5,619 | 3,401 | 28,752 |
| 90,039 | 124 | 19,443 | 5,575 | 3,367 | 28,509 |

|        |     |        |       |       |        |
|--------|-----|--------|-------|-------|--------|
| 90,040 | 123 | 19,384 | 5,526 | 3,336 | 28,369 |
| 90,041 | 123 | 19,403 | 5,548 | 3,323 | 28,397 |
| 90,042 | 123 | 19,303 | 5,550 | 3,341 | 28,317 |
| 90,043 | 122 | 19,341 | 5,552 | 3,379 | 28,394 |
| 90,044 | 122 | 19,221 | 5,546 | 3,352 | 28,241 |
| 90,045 | 114 | 19,110 | 5,571 | 3,357 | 28,152 |
| 90,046 | 118 | 19,224 | 5,656 | 3,364 | 28,362 |
| 90,047 | 113 | 19,355 | 5,757 | 3,380 | 28,605 |
| 90,048 | 107 | 19,228 | 5,794 | 3,397 | 28,526 |
| 90,049 | 104 | 19,057 | 5,813 | 3,388 | 28,362 |
| 90,050 | 98  | 19,088 | 5,878 | 3,387 | 28,451 |
| 90,051 | 98  | 18,980 | 5,870 | 3,380 | 28,328 |
| 90,052 | 98  | 18,969 | 5,938 | 3,391 | 28,396 |
| 90,053 | 99  | 18,931 | 5,997 | 3,449 | 28,476 |
| 90,054 | 105 | 18,966 | 6,043 | 3,458 | 28,572 |
| 90,055 | 103 | 19,049 | 6,061 | 3,446 | 28,659 |
| 90,056 | 102 | 19,226 | 6,120 | 3,476 | 28,924 |
| 90,057 | 101 | 19,164 | 6,098 | 3,459 | 28,822 |
| 90,058 | 99  | 19,158 | 6,170 | 3,508 | 28,935 |
| 90,059 | 97  | 19,229 | 6,192 | 3,522 | 29,040 |
| 90,060 | 101 | 19,225 | 6,182 | 3,510 | 29,018 |
| 90,061 | 97  | 19,049 | 6,165 | 3,494 | 28,805 |
| 90,062 | 95  | 19,194 | 6,238 | 3,544 | 29,071 |
| 90,063 | 95  | 19,356 | 6,204 | 3,532 | 29,187 |
| 90,064 | 94  | 19,332 | 6,137 | 3,517 | 29,080 |
| 90,065 | 90  | 18,937 | 5,988 | 3,414 | 28,429 |
| 90,066 | 97  | 19,019 | 6,046 | 3,431 | 28,593 |
| 90,067 | 91  | 19,041 | 6,046 | 3,428 | 28,606 |
| 90,068 | 99  | 18,891 | 6,008 | 3,416 | 28,414 |
| 90,069 | 105 | 19,101 | 6,049 | 3,441 | 28,696 |
| 90,070 | 108 | 19,176 | 6,059 | 3,451 | 28,794 |
| 90,071 | 111 | 19,348 | 6,085 | 3,455 | 28,999 |

|        |     |        |       |       |        |
|--------|-----|--------|-------|-------|--------|
| 90,072 | 110 | 18,955 | 5,914 | 3,356 | 28,335 |
| 90,073 | 111 | 19,173 | 5,976 | 3,372 | 28,632 |
| 90,074 | 109 | 19,470 | 6,056 | 3,410 | 29,045 |
| 90,075 | 109 | 19,737 | 6,166 | 3,447 | 29,459 |
| 90,076 | 108 | 19,541 | 6,091 | 3,400 | 29,140 |
| 90,077 | 108 | 19,308 | 6,032 | 3,378 | 28,826 |
| 90,078 | 109 | 19,511 | 6,046 | 3,393 | 29,059 |
| 90,079 | 108 | 19,489 | 6,067 | 3,392 | 29,056 |
| 90,080 | 111 | 19,786 | 6,160 | 3,466 | 29,523 |
| 90,081 | 116 | 19,883 | 6,179 | 3,468 | 29,646 |
| 90,082 | 124 | 19,867 | 6,177 | 3,457 | 29,625 |
| 90,083 | 127 | 19,900 | 6,192 | 3,441 | 29,660 |
| 90,084 | 133 | 19,948 | 6,185 | 3,440 | 29,706 |
| 90,085 | 129 | 19,708 | 6,082 | 3,416 | 29,335 |
| 90,086 | 134 | 19,543 | 6,010 | 3,371 | 29,058 |
| 90,087 | 135 | 19,876 | 6,050 | 3,395 | 29,456 |
| 90,088 | 136 | 19,917 | 6,050 | 3,404 | 29,507 |
| 90,089 | 136 | 19,976 | 6,031 | 3,418 | 29,561 |
| 90,090 | 136 | 19,930 | 6,020 | 3,419 | 29,505 |
| 90,091 | 134 | 19,687 | 5,998 | 3,395 | 29,214 |
| 90,092 | 139 | 20,012 | 6,148 | 3,472 | 29,771 |
| 90,093 | 136 | 19,933 | 6,149 | 3,458 | 29,676 |
| 90,094 | 132 | 19,664 | 6,096 | 3,402 | 29,294 |
| 90,095 | 139 | 19,890 | 6,139 | 3,414 | 29,582 |
| 90,096 | 137 | 19,711 | 6,089 | 3,370 | 29,307 |
| 90,097 | 140 | 19,740 | 6,061 | 3,401 | 29,342 |
| 90,098 | 140 | 19,431 | 5,967 | 3,344 | 28,882 |
| 90,099 | 140 | 19,457 | 5,930 | 3,339 | 28,866 |
| 90,100 | 142 | 19,363 | 5,870 | 3,308 | 28,683 |
| 90,101 | 146 | 19,435 | 5,827 | 3,301 | 28,709 |
| 90,102 | 148 | 19,513 | 5,781 | 3,287 | 28,729 |
| 90,103 | 150 | 19,728 | 5,839 | 3,317 | 29,034 |



|        |     |        |       |       |        |
|--------|-----|--------|-------|-------|--------|
| 90,104 | 154 | 19,607 | 5,783 | 3,275 | 28,819 |
| 90,105 | 149 | 19,430 | 5,745 | 3,267 | 28,591 |
| 90,106 | 148 | 18,720 | 5,650 | 3,155 | 27,673 |
| 90,107 | 154 | 19,493 | 5,759 | 3,269 | 28,675 |
| 90,108 | 156 | 19,760 | 5,776 | 3,291 | 28,983 |
| 90,109 | 155 | 19,747 | 5,758 | 3,294 | 28,954 |
| 90,110 | 152 | 19,796 | 5,746 | 3,274 | 28,968 |
| 90,111 | 154 | 19,885 | 5,743 | 3,274 | 29,056 |
| 90,112 | 157 | 19,982 | 5,731 | 3,275 | 29,145 |
| 90,113 | 159 | 20,004 | 5,712 | 3,274 | 29,149 |
| 90,114 | 159 | 20,142 | 5,752 | 3,292 | 29,345 |
| 90,115 | 158 | 19,631 | 5,625 | 3,251 | 28,665 |
| 90,116 | 157 | 19,722 | 5,654 | 3,283 | 28,816 |
| 90,117 | 153 | 19,915 | 5,685 | 3,287 | 29,040 |
| 90,118 | 151 | 20,069 | 5,708 | 3,307 | 29,235 |
| 90,119 | 157 | 20,140 | 5,735 | 3,322 | 29,354 |
| 90,120 | 153 | 20,214 | 5,756 | 3,334 | 29,457 |
| 90,121 | 152 | 20,541 | 5,876 | 3,424 | 29,993 |
| 90,122 | 154 | 20,804 | 5,962 | 3,468 | 30,388 |
| 90,123 | 152 | 21,238 | 6,054 | 3,536 | 30,980 |
| 90,124 | 152 | 21,350 | 6,054 | 3,546 | 31,102 |
| 90,125 | 156 | 21,322 | 6,055 | 3,562 | 31,095 |
| 90,126 | 163 | 21,363 | 6,068 | 3,564 | 31,158 |
| 90,127 | 161 | 21,285 | 6,023 | 3,561 | 31,030 |
| 90,128 | 163 | 21,631 | 6,089 | 3,627 | 31,510 |
| 90,129 | 163 | 21,637 | 6,112 | 3,650 | 31,562 |
| 90,130 | 162 | 21,831 | 6,119 | 3,640 | 31,752 |
| 90,131 | 173 | 21,890 | 6,107 | 3,614 | 31,784 |
| 90,132 | 169 | 21,658 | 6,086 | 3,609 | 31,522 |
| 90,133 | 168 | 21,962 | 6,169 | 3,670 | 31,969 |
| 90,134 | 173 | 22,037 | 6,166 | 3,659 | 32,035 |
| 90,135 | 168 | 21,923 | 6,120 | 3,616 | 31,827 |

|        |     |        |       |       |        |
|--------|-----|--------|-------|-------|--------|
| 90,136 | 167 | 21,943 | 6,115 | 3,615 | 31,840 |
| 90,137 | 163 | 22,018 | 6,157 | 3,652 | 31,990 |
| 90,138 | 166 | 22,237 | 6,263 | 3,718 | 32,384 |
| 90,139 | 170 | 22,228 | 6,269 | 3,704 | 32,371 |
| 90,140 | 170 | 22,298 | 6,269 | 3,714 | 32,451 |
| 90,141 | 170 | 22,333 | 6,277 | 3,715 | 32,495 |
| 90,142 | 168 | 22,340 | 6,267 | 3,721 | 32,496 |
| 90,143 | 169 | 22,425 | 6,280 | 3,738 | 32,612 |
| 90,144 | 169 | 22,355 | 6,244 | 3,739 | 32,507 |
| 90,145 | 168 | 22,603 | 6,302 | 3,775 | 32,848 |
| 90,146 | 164 | 22,690 | 6,305 | 3,792 | 32,951 |
| 90,147 | 162 | 22,481 | 6,228 | 3,763 | 32,634 |
| 90,148 | 170 | 22,697 | 6,273 | 3,784 | 32,924 |
| 90,149 | 168 | 22,623 | 6,251 | 3,780 | 32,822 |
| 90,150 | 165 | 22,304 | 6,136 | 3,713 | 32,318 |
| 90,151 | 163 | 22,215 | 6,127 | 3,713 | 32,218 |
| 90,152 | 159 | 22,181 | 6,181 | 3,713 | 32,234 |
| 90,153 | 161 | 22,243 | 6,245 | 3,724 | 32,373 |
| 90,154 | 157 | 21,912 | 6,157 | 3,684 | 31,910 |
| 90,155 | 153 | 21,816 | 6,156 | 3,664 | 31,789 |
| 90,156 | 154 | 21,470 | 6,078 | 3,613 | 31,315 |
| 90,157 | 152 | 21,199 | 5,988 | 3,585 | 30,924 |
| 90,158 | 148 | 21,564 | 6,103 | 3,651 | 31,466 |
| 90,159 | 150 | 21,416 | 6,092 | 3,637 | 31,295 |
| 90,160 | 155 | 21,320 | 6,043 | 3,579 | 31,097 |
| 90,161 | 155 | 21,273 | 6,048 | 3,595 | 31,071 |
| 90,162 | 153 | 21,323 | 6,055 | 3,602 | 31,133 |
| 90,163 | 149 | 20,991 | 6,023 | 3,559 | 30,722 |
| 90,164 | 148 | 21,163 | 6,085 | 3,585 | 30,981 |
| 90,165 | 152 | 21,105 | 6,110 | 3,572 | 30,939 |
| 90,166 | 152 | 20,941 | 6,072 | 3,546 | 30,711 |
| 90,167 | 148 | 20,800 | 6,050 | 3,537 | 30,535 |

|        |     |        |       |       |        |
|--------|-----|--------|-------|-------|--------|
| 90,168 | 151 | 21,077 | 6,136 | 3,584 | 30,948 |
| 90,169 | 151 | 20,827 | 6,092 | 3,538 | 30,608 |
| 90,170 | 137 | 20,547 | 6,062 | 3,512 | 30,258 |
| 90,171 | 132 | 20,644 | 6,071 | 3,514 | 30,361 |
| 90,172 | 133 | 20,834 | 6,153 | 3,548 | 30,668 |
| 90,173 | 136 | 20,650 | 6,163 | 3,546 | 30,495 |
| 90,174 | 136 | 20,529 | 6,149 | 3,523 | 30,337 |
| 90,175 | 141 | 20,327 | 6,171 | 3,536 | 30,175 |
| 90,176 | 139 | 20,484 | 6,194 | 3,546 | 30,363 |
| 90,177 | 132 | 20,032 | 6,068 | 3,415 | 29,647 |
| 90,178 | 131 | 20,218 | 6,153 | 3,446 | 29,948 |
| 90,179 | 131 | 20,269 | 6,174 | 3,453 | 30,027 |
| 90,180 | 133 | 20,255 | 6,183 | 3,442 | 30,013 |
| 90,181 | 136 | 20,267 | 6,197 | 3,478 | 30,078 |
| 90,182 | 119 | 19,921 | 6,113 | 3,447 | 29,600 |
| 90,183 | 118 | 19,710 | 6,037 | 3,407 | 29,272 |
| 90,184 | 117 | 19,642 | 6,048 | 3,415 | 29,222 |
| 90,185 | 114 | 19,564 | 6,047 | 3,427 | 29,152 |
| 90,186 | 115 | 19,526 | 6,054 | 3,443 | 29,138 |
| 90,187 | 120 | 19,694 | 6,137 | 3,488 | 29,439 |
| 90,188 | 125 | 19,417 | 6,081 | 3,441 | 29,064 |
| 90,189 | 120 | 19,108 | 6,021 | 3,406 | 28,655 |
| 90,190 | 125 | 19,618 | 6,219 | 3,489 | 29,451 |
| 90,191 | 137 | 19,388 | 6,179 | 3,456 | 29,160 |
| 90,192 | 139 | 19,290 | 6,163 | 3,442 | 29,034 |
| 90,193 | 137 | 19,660 | 6,206 | 3,462 | 29,465 |
| 90,194 | 137 | 19,605 | 6,177 | 3,455 | 29,374 |
| 90,195 | 137 | 19,566 | 6,167 | 3,443 | 29,313 |
| 90,196 | 136 | 19,588 | 6,199 | 3,446 | 29,369 |
| 90,197 | 133 | 18,998 | 6,052 | 3,358 | 28,541 |
| 90,198 | 136 | 19,111 | 6,126 | 3,411 | 28,784 |
| 90,199 | 131 | 19,304 | 6,201 | 3,462 | 29,098 |

|        |     |        |       |       |        |
|--------|-----|--------|-------|-------|--------|
| 90,200 | 133 | 19,336 | 6,214 | 3,462 | 29,145 |
| 90,201 | 135 | 19,344 | 6,209 | 3,444 | 29,132 |
| 90,202 | 135 | 19,272 | 6,193 | 3,441 | 29,041 |
| 90,203 | 131 | 19,335 | 6,226 | 3,483 | 29,175 |
| 90,204 | 128 | 19,344 | 6,209 | 3,477 | 29,158 |
| 90,205 | 132 | 19,392 | 6,214 | 3,494 | 29,232 |
| 90,206 | 134 | 19,432 | 6,218 | 3,493 | 29,277 |
| 90,207 | 134 | 19,368 | 6,199 | 3,480 | 29,181 |
| 90,208 | 134 | 19,312 | 6,213 | 3,479 | 29,138 |
| 90,209 | 133 | 19,344 | 6,244 | 3,497 | 29,218 |
| 90,210 | 132 | 19,699 | 6,338 | 3,549 | 29,718 |
| 90,211 | 129 | 19,652 | 6,333 | 3,549 | 29,663 |
| 90,212 | 128 | 19,562 | 6,304 | 3,531 | 29,525 |
| 90,213 | 131 | 19,638 | 6,351 | 3,547 | 29,667 |
| 90,214 | 135 | 19,512 | 6,293 | 3,515 | 29,455 |
| 90,215 | 134 | 19,331 | 6,251 | 3,498 | 29,214 |
| 90,216 | 146 | 19,514 | 6,298 | 3,516 | 29,474 |
| 90,217 | 146 | 19,297 | 6,260 | 3,481 | 29,184 |
| 90,218 | 154 | 19,973 | 6,389 | 3,563 | 30,079 |
| 90,219 | 150 | 19,836 | 6,327 | 3,534 | 29,847 |
| 90,220 | 152 | 19,822 | 6,314 | 3,524 | 29,812 |
| 90,221 | 152 | 19,973 | 6,377 | 3,560 | 30,062 |
| 90,222 | 161 | 19,818 | 6,289 | 3,511 | 29,779 |
| 90,223 | 162 | 19,925 | 6,345 | 3,542 | 29,974 |
| 90,224 | 162 | 20,138 | 6,417 | 3,571 | 30,288 |
| 90,225 | 162 | 20,140 | 6,430 | 3,574 | 30,306 |
| 90,226 | 156 | 20,024 | 6,364 | 3,544 | 30,088 |
| 90,227 | 155 | 19,781 | 6,344 | 3,518 | 29,798 |
| 90,228 | 157 | 19,766 | 6,320 | 3,545 | 29,788 |
| 90,229 | 159 | 19,872 | 6,378 | 3,583 | 29,992 |
| 90,230 | 157 | 19,678 | 6,309 | 3,534 | 29,678 |
| 90,231 | 155 | 19,699 | 6,352 | 3,537 | 29,743 |

|        |     |        |       |       |        |
|--------|-----|--------|-------|-------|--------|
| 90,232 | 160 | 19,893 | 6,359 | 3,568 | 29,980 |
| 90,233 | 167 | 20,013 | 6,378 | 3,551 | 30,109 |
| 90,234 | 166 | 20,023 | 6,391 | 3,562 | 30,142 |
| 90,235 | 164 | 20,247 | 6,456 | 3,599 | 30,466 |
| 90,236 | 166 | 20,244 | 6,483 | 3,591 | 30,484 |
| 90,237 | 168 | 20,318 | 6,497 | 3,585 | 30,568 |
| 90,238 | 162 | 20,044 | 6,454 | 3,550 | 30,210 |
| 90,239 | 158 | 20,759 | 6,657 | 3,655 | 31,229 |
| 90,240 | 164 | 20,586 | 6,667 | 3,656 | 31,073 |
| 90,241 | 162 | 20,674 | 6,673 | 3,657 | 31,166 |
| 90,242 | 150 | 20,610 | 6,700 | 3,650 | 31,110 |
| 90,243 | 149 | 20,467 | 6,708 | 3,627 | 30,951 |
| 90,244 | 154 | 20,372 | 6,729 | 3,619 | 30,874 |
| 90,245 | 152 | 20,342 | 6,722 | 3,627 | 30,843 |
| 90,246 | 151 | 20,191 | 6,673 | 3,607 | 30,622 |
| 90,247 | 151 | 20,051 | 6,634 | 3,609 | 30,445 |
| 90,248 | 150 | 20,023 | 6,682 | 3,621 | 30,476 |
| 90,249 | 148 | 20,193 | 6,713 | 3,628 | 30,682 |
| 90,250 | 144 | 20,117 | 6,659 | 3,600 | 30,520 |
| 90,251 | 144 | 20,109 | 6,651 | 3,596 | 30,500 |
| 90,252 | 141 | 20,029 | 6,646 | 3,600 | 30,416 |
| 90,253 | 139 | 19,898 | 6,592 | 3,583 | 30,212 |
| 90,254 | 141 | 20,161 | 6,655 | 3,623 | 30,580 |
| 90,255 | 147 | 19,962 | 6,630 | 3,594 | 30,333 |
| 90,256 | 146 | 19,947 | 6,628 | 3,586 | 30,307 |
| 90,257 | 147 | 20,049 | 6,658 | 3,596 | 30,450 |
| 90,258 | 146 | 19,871 | 6,594 | 3,568 | 30,179 |
| 90,259 | 155 | 20,064 | 6,656 | 3,586 | 30,461 |
| 90,260 | 163 | 20,105 | 6,647 | 3,573 | 30,488 |
| 90,261 | 161 | 19,923 | 6,591 | 3,542 | 30,217 |
| 90,262 | 161 | 20,134 | 6,660 | 3,566 | 30,521 |
| 90,263 | 161 | 19,988 | 6,598 | 3,537 | 30,284 |

|        |     |        |       |       |        |
|--------|-----|--------|-------|-------|--------|
| 90,264 | 156 | 20,029 | 6,586 | 3,543 | 30,314 |
| 90,265 | 154 | 19,932 | 6,583 | 3,542 | 30,211 |
| 90,266 | 152 | 19,891 | 6,607 | 3,547 | 30,197 |
| 90,267 | 137 | 19,775 | 6,602 | 3,562 | 30,076 |
| 90,268 | 142 | 19,702 | 6,603 | 3,569 | 30,016 |
| 90,269 | 143 | 19,918 | 6,750 | 3,617 | 30,428 |
| 90,270 | 149 | 19,767 | 6,706 | 3,607 | 30,229 |
| 90,271 | 145 | 19,576 | 6,627 | 3,595 | 29,943 |
| 90,272 | 150 | 19,864 | 6,725 | 3,628 | 30,367 |
| 90,273 | 149 | 20,021 | 6,774 | 3,651 | 30,595 |
| 90,274 | 146 | 19,711 | 6,674 | 3,603 | 30,134 |
| 90,275 | 146 | 19,958 | 6,720 | 3,626 | 30,450 |
| 90,276 | 149 | 19,647 | 6,580 | 3,551 | 29,927 |
| 90,277 | 149 | 19,586 | 6,590 | 3,551 | 29,876 |
| 90,278 | 147 | 19,731 | 6,607 | 3,565 | 30,050 |
| 90,279 | 150 | 19,570 | 6,556 | 3,511 | 29,787 |
| 90,280 | 152 | 19,395 | 6,503 | 3,482 | 29,532 |
| 90,281 | 154 | 19,348 | 6,471 | 3,473 | 29,446 |
| 90,282 | 155 | 19,253 | 6,442 | 3,473 | 29,323 |
| 90,283 | 152 | 19,286 | 6,491 | 3,477 | 29,406 |
| 90,284 | 152 | 19,218 | 6,520 | 3,509 | 29,399 |
| 90,285 | 151 | 19,053 | 6,426 | 3,458 | 29,088 |
| 90,286 | 150 | 19,129 | 6,421 | 3,472 | 29,172 |
| 90,287 | 149 | 18,880 | 6,362 | 3,442 | 28,833 |
| 90,288 | 147 | 18,996 | 6,363 | 3,470 | 28,976 |
| 90,289 | 149 | 19,156 | 6,393 | 3,462 | 29,160 |
| 90,290 | 147 | 18,864 | 6,332 | 3,422 | 28,765 |
| 90,291 | 142 | 18,858 | 6,263 | 3,381 | 28,644 |
| 90,292 | 140 | 18,570 | 6,233 | 3,355 | 28,298 |
| 90,293 | 136 | 18,431 | 6,193 | 3,341 | 28,101 |
| 90,294 | 140 | 18,318 | 6,152 | 3,319 | 27,929 |
| 90,295 | 135 | 18,340 | 6,118 | 3,317 | 27,910 |

|        |     |        |       |       |        |
|--------|-----|--------|-------|-------|--------|
| 90,296 | 137 | 18,163 | 6,098 | 3,280 | 27,678 |
| 90,297 | 139 | 18,062 | 6,053 | 3,239 | 27,493 |
| 90,298 | 139 | 18,067 | 6,032 | 3,221 | 27,459 |
| 90,299 | 145 | 18,080 | 6,127 | 3,270 | 27,622 |
| 90,300 | 146 | 18,097 | 6,123 | 3,282 | 27,648 |
| 90,301 | 150 | 18,317 | 6,235 | 3,315 | 28,017 |
| 90,302 | 147 | 18,292 | 6,267 | 3,330 | 28,036 |
| 90,303 | 148 | 18,180 | 6,233 | 3,301 | 27,862 |
| 90,304 | 150 | 17,942 | 6,224 | 3,283 | 27,599 |
| 90,305 | 150 | 18,120 | 6,273 | 3,321 | 27,864 |
| 90,306 | 150 | 18,262 | 6,305 | 3,351 | 28,068 |
| 90,307 | 153 | 18,341 | 6,303 | 3,355 | 28,152 |
| 90,308 | 150 | 17,935 | 6,192 | 3,298 | 27,575 |
| 90,309 | 153 | 17,945 | 6,187 | 3,292 | 27,577 |
| 90,310 | 146 | 18,056 | 6,232 | 3,369 | 27,803 |
| 90,311 | 147 | 17,711 | 6,169 | 3,315 | 27,342 |
| 90,312 | 146 | 17,454 | 6,100 | 3,278 | 26,978 |
| 90,313 | 153 | 17,680 | 6,257 | 3,339 | 27,429 |
| 90,314 | 167 | 17,909 | 6,390 | 3,419 | 27,885 |
| 90,315 | 176 | 17,785 | 6,401 | 3,395 | 27,757 |
| 90,316 | 180 | 17,981 | 6,457 | 3,427 | 28,045 |
| 90,317 | 180 | 17,921 | 6,426 | 3,428 | 27,955 |
| 90,318 | 181 | 17,949 | 6,483 | 3,484 | 28,097 |
| 90,319 | 178 | 17,821 | 6,537 | 3,522 | 28,058 |
| 90,320 | 178 | 18,030 | 6,603 | 3,553 | 28,364 |
| 90,321 | 173 | 18,155 | 6,719 | 3,617 | 28,664 |
| 90,322 | 171 | 18,206 | 6,771 | 3,634 | 28,782 |
| 90,323 | 172 | 18,021 | 6,683 | 3,607 | 28,483 |
| 90,324 | 167 | 17,839 | 6,610 | 3,578 | 28,194 |
| 90,325 | 167 | 18,320 | 6,793 | 3,658 | 28,938 |
| 90,326 | 167 | 18,221 | 6,783 | 3,646 | 28,817 |
| 90,327 | 167 | 18,272 | 6,944 | 3,712 | 29,095 |

|        |     |        |       |       |        |
|--------|-----|--------|-------|-------|--------|
| 90,328 | 167 | 18,285 | 6,963 | 3,726 | 29,141 |
| 90,329 | 166 | 18,219 | 6,976 | 3,721 | 29,082 |
| 90,330 | 160 | 17,971 | 6,933 | 3,695 | 28,759 |
| 90,331 | 168 | 17,953 | 6,945 | 3,706 | 28,772 |
| 90,332 | 168 | 17,988 | 6,920 | 3,699 | 28,775 |
| 90,333 | 165 | 17,827 | 6,878 | 3,665 | 28,535 |
| 90,334 | 166 | 18,129 | 6,978 | 3,723 | 28,996 |
| 90,335 | 156 | 17,814 | 6,867 | 3,664 | 28,501 |
| 90,336 | 163 | 17,875 | 6,928 | 3,675 | 28,641 |
| 90,337 | 163 | 17,880 | 6,965 | 3,671 | 28,679 |
| 90,338 | 163 | 17,945 | 6,990 | 3,681 | 28,779 |
| 90,339 | 165 | 18,049 | 7,001 | 3,714 | 28,929 |
| 90,340 | 168 | 18,169 | 6,999 | 3,739 | 29,075 |
| 90,341 | 168 | 18,323 | 7,019 | 3,763 | 29,273 |
| 90,342 | 166 | 18,412 | 7,036 | 3,792 | 29,406 |
| 90,343 | 166 | 18,361 | 6,905 | 3,767 | 29,199 |
| 90,344 | 166 | 18,367 | 6,895 | 3,756 | 29,184 |
| 90,345 | 161 | 18,686 | 7,009 | 3,815 | 29,671 |
| 90,346 | 161 | 18,693 | 7,011 | 3,821 | 29,686 |
| 90,347 | 159 | 18,503 | 6,953 | 3,794 | 29,409 |
| 90,348 | 162 | 18,874 | 7,035 | 3,838 | 29,909 |
| 90,349 | 162 | 19,000 | 7,026 | 3,854 | 30,042 |
| 90,350 | 160 | 19,062 | 7,009 | 3,856 | 30,087 |
| 90,351 | 161 | 19,107 | 7,039 | 3,870 | 30,177 |
| 90,352 | 160 | 18,967 | 6,978 | 3,842 | 29,947 |
| 90,353 | 163 | 19,031 | 7,002 | 3,842 | 30,038 |
| 90,354 | 172 | 19,098 | 7,008 | 3,829 | 30,107 |
| 90,355 | 169 | 19,216 | 6,986 | 3,830 | 30,201 |
| 90,356 | 174 | 19,178 | 6,962 | 3,792 | 30,106 |
| 90,357 | 174 | 19,220 | 6,957 | 3,793 | 30,144 |
| 90,358 | 175 | 19,234 | 6,962 | 3,787 | 30,158 |
| 90,359 | 173 | 19,316 | 6,978 | 3,777 | 30,244 |



|        |     |        |       |       |        |
|--------|-----|--------|-------|-------|--------|
| 90,360 | 175 | 19,292 | 6,996 | 3,746 | 30,209 |
| 90,361 | 175 | 19,411 | 7,063 | 3,770 | 30,419 |
| 90,362 | 163 | 19,422 | 6,998 | 3,758 | 30,341 |
| 90,363 | 159 | 19,386 | 6,962 | 3,744 | 30,251 |
| 90,364 | 156 | 19,422 | 6,941 | 3,725 | 30,244 |
| 90,365 | 143 | 19,410 | 6,884 | 3,691 | 30,128 |
| 90,366 | 141 | 19,540 | 6,850 | 3,693 | 30,224 |
| 90,367 | 140 | 19,564 | 6,832 | 3,669 | 30,205 |
| 90,368 | 143 | 19,761 | 6,842 | 3,628 | 30,374 |
| 90,369 | 142 | 19,571 | 6,758 | 3,583 | 30,054 |
| 90,370 | 148 | 19,684 | 6,770 | 3,599 | 30,201 |
| 90,371 | 151 | 19,620 | 6,740 | 3,587 | 30,098 |
| 90,372 | 159 | 19,499 | 6,714 | 3,555 | 29,927 |
| 90,373 | 159 | 19,385 | 6,680 | 3,534 | 29,758 |
| 90,374 | 155 | 19,250 | 6,654 | 3,549 | 29,608 |
| 90,375 | 157 | 18,982 | 6,625 | 3,528 | 29,292 |
| 90,376 | 161 | 18,884 | 6,596 | 3,493 | 29,134 |
| 90,377 | 163 | 19,093 | 6,684 | 3,525 | 29,465 |
| 90,378 | 162 | 19,079 | 6,584 | 3,472 | 29,297 |
| 90,379 | 163 | 19,253 | 6,599 | 3,501 | 29,516 |
| 90,380 | 165 | 19,235 | 6,559 | 3,497 | 29,456 |
| 90,381 | 168 | 19,342 | 6,588 | 3,522 | 29,620 |
| 90,382 | 159 | 19,333 | 6,586 | 3,515 | 29,593 |
| 90,383 | 155 | 19,410 | 6,608 | 3,518 | 29,691 |
| 90,384 | 158 | 19,437 | 6,617 | 3,497 | 29,709 |
| 90,385 | 160 | 19,583 | 6,632 | 3,486 | 29,861 |
| 90,386 | 163 | 19,516 | 6,634 | 3,476 | 29,789 |
| 90,387 | 160 | 19,594 | 6,607 | 3,498 | 29,859 |
| 90,388 | 159 | 19,575 | 6,617 | 3,505 | 29,856 |
| 90,389 | 161 | 19,720 | 6,704 | 3,528 | 30,113 |
| 90,390 | 174 | 19,688 | 6,742 | 3,506 | 30,110 |
| 90,391 | 171 | 19,604 | 6,745 | 3,486 | 30,006 |

|        |     |        |       |       |        |
|--------|-----|--------|-------|-------|--------|
| 90,392 | 176 | 19,560 | 6,714 | 3,498 | 29,948 |
| 90,393 | 176 | 19,359 | 6,678 | 3,467 | 29,680 |
| 90,394 | 175 | 19,475 | 6,712 | 3,489 | 29,851 |
| 90,395 | 178 | 19,631 | 6,733 | 3,518 | 30,060 |
| 90,396 | 184 | 19,663 | 6,691 | 3,488 | 30,026 |
| 90,397 | 184 | 19,674 | 6,695 | 3,489 | 30,042 |
| 90,398 | 183 | 19,752 | 6,728 | 3,514 | 30,177 |
| 90,399 | 186 | 19,773 | 6,763 | 3,534 | 30,256 |
| 90,400 | 188 | 19,744 | 6,773 | 3,517 | 30,222 |
| 90,401 | 189 | 19,647 | 6,742 | 3,474 | 30,052 |
| 90,402 | 187 | 19,592 | 6,708 | 3,474 | 29,961 |
| 90,403 | 186 | 19,464 | 6,666 | 3,476 | 29,792 |
| 90,404 | 185 | 19,442 | 6,668 | 3,472 | 29,767 |
| 90,405 | 175 | 19,301 | 6,651 | 3,461 | 29,588 |
| 90,406 | 174 | 19,278 | 6,650 | 3,450 | 29,552 |
| 90,407 | 165 | 19,284 | 6,662 | 3,448 | 29,559 |
| 90,408 | 167 | 19,223 | 6,671 | 3,439 | 29,500 |
| 90,409 | 168 | 19,072 | 6,587 | 3,418 | 29,245 |
| 90,410 | 175 | 19,168 | 6,618 | 3,436 | 29,397 |
| 90,411 | 177 | 19,044 | 6,577 | 3,415 | 29,213 |
| 90,412 | 178 | 19,055 | 6,568 | 3,414 | 29,215 |
| 90,413 | 179 | 19,126 | 6,602 | 3,428 | 29,335 |
| 90,414 | 181 | 19,088 | 6,593 | 3,407 | 29,269 |
| 90,415 | 185 | 18,857 | 6,536 | 3,376 | 28,954 |
| 90,416 | 185 | 18,806 | 6,526 | 3,377 | 28,894 |
| 90,417 | 172 | 18,223 | 6,344 | 3,318 | 28,057 |
| 90,418 | 172 | 18,266 | 6,342 | 3,324 | 28,104 |
| 90,419 | 166 | 18,486 | 6,452 | 3,350 | 28,454 |
| 90,420 | 165 | 18,402 | 6,353 | 3,297 | 28,217 |
| 90,421 | 161 | 18,257 | 6,304 | 3,252 | 27,974 |
| 90,422 | 160 | 18,161 | 6,241 | 3,240 | 27,802 |
| 90,423 | 154 | 18,174 | 6,174 | 3,216 | 27,718 |

|        |     |        |       |       |        |
|--------|-----|--------|-------|-------|--------|
| 90,424 | 150 | 18,058 | 6,144 | 3,180 | 27,532 |
| 90,425 | 149 | 17,993 | 6,060 | 3,132 | 27,334 |
| 90,426 | 150 | 18,056 | 6,113 | 3,116 | 27,435 |
| 90,427 | 146 | 17,957 | 5,997 | 3,098 | 27,198 |
| 90,428 | 149 | 18,053 | 6,014 | 3,114 | 27,330 |
| 90,429 | 150 | 17,685 | 5,928 | 3,063 | 26,826 |
| 90,430 | 151 | 17,684 | 5,930 | 3,048 | 26,813 |
| 90,431 | 145 | 17,714 | 5,905 | 3,045 | 26,809 |
| 90,432 | 147 | 17,675 | 5,871 | 3,033 | 26,726 |
| 90,433 | 150 | 17,607 | 5,830 | 3,033 | 26,620 |
| 90,434 | 150 | 17,662 | 5,838 | 3,034 | 26,684 |
| 90,435 | 147 | 17,599 | 5,823 | 3,025 | 26,594 |
| 90,436 | 149 | 17,600 | 5,852 | 3,041 | 26,642 |
| 90,437 | 143 | 17,518 | 5,819 | 2,993 | 26,473 |
| 90,438 | 146 | 17,588 | 5,842 | 3,035 | 26,611 |
| 90,439 | 137 | 17,340 | 5,737 | 3,004 | 26,218 |
| 90,440 | 138 | 17,448 | 5,756 | 3,029 | 26,371 |
| 90,441 | 127 | 17,629 | 5,816 | 3,076 | 26,648 |
| 90,442 | 130 | 17,369 | 5,742 | 3,054 | 26,295 |
| 90,443 | 125 | 17,113 | 5,674 | 2,994 | 25,906 |
| 90,444 | 135 | 17,050 | 5,635 | 2,984 | 25,804 |
| 90,445 | 139 | 16,834 | 5,567 | 2,928 | 25,468 |
| 90,446 | 144 | 17,316 | 5,719 | 2,986 | 26,165 |
| 90,447 | 138 | 17,105 | 5,674 | 2,969 | 25,886 |
| 90,448 | 140 | 17,129 | 5,681 | 2,946 | 25,896 |
| 90,449 | 143 | 17,276 | 5,751 | 2,983 | 26,153 |
| 90,450 | 135 | 17,026 | 5,660 | 2,939 | 25,760 |
| 90,451 | 131 | 16,953 | 5,635 | 2,938 | 25,657 |
| 90,452 | 136 | 17,075 | 5,679 | 2,981 | 25,871 |
| 90,453 | 133 | 16,951 | 5,639 | 2,926 | 25,649 |
| 90,454 | 141 | 17,253 | 5,711 | 2,953 | 26,058 |
| 90,455 | 140 | 17,048 | 5,633 | 2,947 | 25,768 |

|        |     |        |       |       |        |
|--------|-----|--------|-------|-------|--------|
| 90,456 | 140 | 17,075 | 5,641 | 2,946 | 25,802 |
| 90,457 | 138 | 16,944 | 5,596 | 2,937 | 25,615 |
| 90,458 | 138 | 17,106 | 5,618 | 2,962 | 25,824 |
| 90,459 | 140 | 17,378 | 5,685 | 2,995 | 26,198 |
| 90,460 | 134 | 17,324 | 5,666 | 2,976 | 26,100 |
| 90,461 | 127 | 17,345 | 5,673 | 2,981 | 26,126 |
| 90,462 | 129 | 17,157 | 5,599 | 2,939 | 25,824 |
| 90,463 | 130 | 17,089 | 5,566 | 2,925 | 25,710 |
| 90,464 | 131 | 17,145 | 5,562 | 2,930 | 25,768 |
| 90,465 | 129 | 17,021 | 5,514 | 2,908 | 25,572 |
| 90,466 | 130 | 17,422 | 5,587 | 2,969 | 26,108 |
| 90,467 | 133 | 17,416 | 5,595 | 2,940 | 26,084 |
| 90,468 | 137 | 17,647 | 5,671 | 2,971 | 26,426 |
| 90,469 | 139 | 17,516 | 5,627 | 2,943 | 26,225 |
| 90,470 | 139 | 17,473 | 5,640 | 2,953 | 26,205 |
| 90,471 | 142 | 17,670 | 5,706 | 2,980 | 26,498 |
| 90,472 | 140 | 17,727 | 5,707 | 2,997 | 26,571 |
| 90,473 | 144 | 17,770 | 5,722 | 2,974 | 26,610 |
| 90,474 | 143 | 17,627 | 5,667 | 2,972 | 26,409 |
| 90,475 | 146 | 17,694 | 5,662 | 2,973 | 26,475 |
| 90,476 | 143 | 17,521 | 5,610 | 2,960 | 26,234 |
| 90,477 | 145 | 17,871 | 5,775 | 3,051 | 26,842 |
| 90,478 | 139 | 17,861 | 5,761 | 3,021 | 26,782 |
| 90,479 | 138 | 17,865 | 5,759 | 3,013 | 26,775 |
| 90,480 | 140 | 18,032 | 5,848 | 3,054 | 27,074 |
| 90,481 | 141 | 17,986 | 5,871 | 3,062 | 27,060 |
| 90,482 | 138 | 17,977 | 5,845 | 3,045 | 27,005 |
| 90,483 | 139 | 18,020 | 5,906 | 3,086 | 27,151 |
| 90,484 | 137 | 17,930 | 5,880 | 3,072 | 27,019 |
| 90,485 | 138 | 17,937 | 5,862 | 3,067 | 27,004 |
| 90,486 | 146 | 18,169 | 5,907 | 3,108 | 27,330 |
| 90,487 | 147 | 18,138 | 5,871 | 3,107 | 27,263 |

|        |     |        |       |       |        |
|--------|-----|--------|-------|-------|--------|
| 90,488 | 144 | 18,048 | 5,816 | 3,079 | 27,087 |
| 90,489 | 143 | 17,875 | 5,744 | 3,026 | 26,788 |
| 90,490 | 145 | 18,207 | 5,810 | 3,070 | 27,232 |
| 90,491 | 151 | 18,268 | 5,829 | 3,075 | 27,323 |
| 90,492 | 148 | 18,144 | 5,758 | 3,049 | 27,099 |
| 90,493 | 149 | 18,571 | 5,835 | 3,067 | 27,622 |
| 90,494 | 149 | 18,586 | 5,839 | 3,069 | 27,643 |
| 90,495 | 143 | 18,807 | 5,896 | 3,114 | 27,960 |
| 90,496 | 137 | 18,703 | 5,903 | 3,123 | 27,866 |
| 90,497 | 132 | 18,428 | 5,835 | 3,101 | 27,496 |
| 90,498 | 135 | 18,669 | 5,885 | 3,153 | 27,842 |
| 90,499 | 133 | 18,758 | 5,899 | 3,150 | 27,940 |
| 90,500 | 133 | 18,669 | 5,892 | 3,155 | 27,849 |
| 90,501 | 133 | 18,696 | 5,881 | 3,138 | 27,848 |
| 90,502 | 128 | 18,791 | 5,856 | 3,137 | 27,912 |
| 90,503 | 133 | 19,021 | 5,912 | 3,150 | 28,216 |
| 90,504 | 136 | 19,006 | 5,902 | 3,142 | 28,186 |
| 90,505 | 128 | 19,010 | 5,905 | 3,155 | 28,198 |
| 90,506 | 123 | 18,148 | 5,647 | 2,980 | 26,898 |
| 90,507 | 124 | 18,407 | 5,702 | 3,008 | 27,241 |
| 90,508 | 125 | 18,616 | 5,731 | 3,037 | 27,509 |
| 90,509 | 126 | 18,639 | 5,736 | 3,044 | 27,545 |
| 90,510 | 129 | 18,851 | 5,823 | 3,086 | 27,889 |
| 90,511 | 132 | 18,857 | 5,821 | 3,068 | 27,878 |
| 90,512 | 136 | 19,089 | 5,897 | 3,110 | 28,232 |
| 90,513 | 133 | 18,946 | 5,839 | 3,100 | 28,018 |
| 90,514 | 130 | 18,715 | 5,809 | 3,073 | 27,727 |
| 90,515 | 127 | 18,972 | 5,875 | 3,111 | 28,085 |
| 90,516 | 126 | 19,071 | 5,888 | 3,115 | 28,200 |
| 90,517 | 122 | 19,058 | 5,889 | 3,132 | 28,201 |
| 90,518 | 119 | 18,926 | 5,847 | 3,102 | 27,994 |
| 90,519 | 115 | 18,997 | 5,834 | 3,121 | 28,067 |

|        |     |        |       |       |        |
|--------|-----|--------|-------|-------|--------|
| 90,520 | 113 | 18,692 | 5,744 | 3,070 | 27,619 |
| 90,521 | 114 | 18,939 | 5,761 | 3,096 | 27,910 |
| 90,522 | 112 | 18,783 | 5,742 | 3,081 | 27,718 |
| 90,523 | 113 | 19,109 | 5,834 | 3,131 | 28,187 |
| 90,524 | 111 | 19,415 | 5,902 | 3,181 | 28,609 |
| 90,525 | 108 | 19,512 | 5,927 | 3,201 | 28,748 |
| 90,526 | 107 | 19,296 | 5,835 | 3,156 | 28,394 |
| 90,527 | 107 | 19,412 | 5,893 | 3,183 | 28,595 |
| 90,528 | 102 | 19,622 | 5,944 | 3,228 | 28,896 |
| 90,529 | 103 | 19,613 | 5,942 | 3,218 | 28,876 |
| 90,530 | 102 | 19,710 | 5,946 | 3,221 | 28,979 |
| 90,531 | 99  | 19,626 | 5,833 | 3,171 | 28,729 |
| 90,532 | 99  | 19,844 | 5,886 | 3,183 | 29,012 |
| 90,533 | 99  | 19,671 | 5,843 | 3,144 | 28,757 |
| 90,534 | 110 | 19,903 | 5,909 | 3,173 | 29,095 |
| 90,535 | 116 | 19,736 | 5,906 | 3,148 | 28,906 |
| 90,536 | 115 | 19,735 | 5,907 | 3,162 | 28,919 |
| 90,537 | 109 | 19,664 | 5,910 | 3,168 | 28,851 |
| 90,538 | 102 | 19,666 | 5,928 | 3,156 | 28,852 |
| 90,539 | 108 | 19,747 | 5,984 | 3,174 | 29,013 |
| 90,540 | 107 | 19,530 | 5,950 | 3,144 | 28,731 |
| 90,541 | 109 | 19,720 | 6,040 | 3,175 | 29,044 |
| 90,542 | 104 | 19,686 | 6,051 | 3,181 | 29,022 |
| 90,543 | 106 | 19,557 | 6,027 | 3,158 | 28,848 |
| 90,544 | 105 | 19,540 | 6,024 | 3,186 | 28,855 |
| 90,545 | 103 | 19,574 | 6,024 | 3,189 | 28,890 |
| 90,546 | 106 | 19,540 | 6,017 | 3,178 | 28,841 |
| 90,547 | 102 | 19,518 | 5,987 | 3,150 | 28,757 |
| 90,548 | 102 | 19,868 | 6,029 | 3,156 | 29,155 |
| 90,549 | 105 | 20,162 | 6,093 | 3,171 | 29,531 |
| 90,550 | 113 | 20,099 | 6,052 | 3,137 | 29,401 |
| 90,551 | 112 | 20,234 | 6,077 | 3,125 | 29,548 |

|        |     |        |       |       |        |
|--------|-----|--------|-------|-------|--------|
| 90,552 | 113 | 20,211 | 6,143 | 3,139 | 29,606 |
| 90,553 | 113 | 20,224 | 6,155 | 3,149 | 29,641 |
| 90,554 | 111 | 20,268 | 6,192 | 3,160 | 29,731 |
| 90,555 | 111 | 20,528 | 6,233 | 3,206 | 30,078 |
| 90,556 | 111 | 20,347 | 6,193 | 3,187 | 29,838 |
| 90,557 | 113 | 20,550 | 6,260 | 3,228 | 30,151 |
| 90,558 | 113 | 20,546 | 6,257 | 3,214 | 30,130 |
| 90,559 | 112 | 20,528 | 6,255 | 3,215 | 30,110 |
| 90,560 | 117 | 20,872 | 6,334 | 3,259 | 30,582 |
| 90,561 | 117 | 20,749 | 6,288 | 3,235 | 30,389 |
| 90,562 | 112 | 20,686 | 6,257 | 3,229 | 30,284 |
| 90,563 | 110 | 21,275 | 6,398 | 3,287 | 31,070 |
| 90,564 | 107 | 21,196 | 6,357 | 3,288 | 30,948 |
| 90,565 | 106 | 21,007 | 6,300 | 3,231 | 30,644 |
| 90,566 | 107 | 21,258 | 6,331 | 3,266 | 30,962 |
| 90,567 | 107 | 20,935 | 6,278 | 3,211 | 30,531 |
| 90,568 | 108 | 21,245 | 6,340 | 3,240 | 30,933 |
| 90,569 | 112 | 20,811 | 6,227 | 3,181 | 30,331 |
| 90,570 | 121 | 21,114 | 6,304 | 3,214 | 30,753 |
| 90,571 | 119 | 21,038 | 6,292 | 3,209 | 30,658 |
| 90,572 | 121 | 21,209 | 6,404 | 3,252 | 30,986 |
| 90,573 | 115 | 21,140 | 6,377 | 3,260 | 30,892 |
| 90,574 | 115 | 21,075 | 6,362 | 3,252 | 30,804 |
| 90,575 | 114 | 20,965 | 6,305 | 3,239 | 30,623 |
| 90,576 | 117 | 20,730 | 6,238 | 3,197 | 30,282 |
| 90,577 | 122 | 21,032 | 6,291 | 3,234 | 30,679 |
| 90,578 | 123 | 20,907 | 6,200 | 3,166 | 30,396 |
| 90,579 | 128 | 20,830 | 6,156 | 3,169 | 30,283 |
| 90,580 | 128 | 20,904 | 6,156 | 3,184 | 30,372 |
| 90,581 | 128 | 20,879 | 6,148 | 3,203 | 30,358 |
| 90,582 | 139 | 21,032 | 6,192 | 3,228 | 30,591 |
| 90,583 | 144 | 21,108 | 6,225 | 3,242 | 30,719 |

|        |     |        |       |       |        |
|--------|-----|--------|-------|-------|--------|
| 90,584 | 155 | 21,338 | 6,263 | 3,271 | 31,027 |
| 90,585 | 143 | 21,228 | 6,174 | 3,235 | 30,780 |
| 90,586 | 143 | 21,417 | 6,207 | 3,260 | 31,027 |
| 90,587 | 141 | 20,993 | 6,078 | 3,178 | 30,390 |
| 90,588 | 141 | 21,108 | 6,124 | 3,223 | 30,596 |
| 90,589 | 135 | 21,214 | 6,171 | 3,250 | 30,770 |
| 90,590 | 141 | 21,196 | 6,128 | 3,250 | 30,715 |
| 90,591 | 141 | 21,459 | 6,167 | 3,274 | 31,041 |
| 90,592 | 147 | 21,553 | 6,188 | 3,299 | 31,187 |
| 90,593 | 149 | 21,551 | 6,147 | 3,275 | 31,122 |
| 90,594 | 147 | 21,330 | 6,096 | 3,262 | 30,835 |
| 90,595 | 148 | 21,002 | 6,043 | 3,207 | 30,400 |
| 90,596 | 148 | 20,660 | 5,964 | 3,172 | 29,944 |
| 90,597 | 154 | 21,027 | 6,084 | 3,234 | 30,499 |
| 90,598 | 156 | 20,927 | 6,064 | 3,230 | 30,377 |
| 90,599 | 159 | 21,189 | 6,141 | 3,303 | 30,792 |
| 90,600 | 157 | 21,062 | 6,152 | 3,307 | 30,678 |
| 90,601 | 150 | 20,960 | 6,099 | 3,306 | 30,515 |
| 90,602 | 149 | 20,791 | 6,029 | 3,287 | 30,256 |
| 90,603 | 154 | 20,950 | 6,086 | 3,329 | 30,519 |
| 90,604 | 152 | 20,831 | 6,015 | 3,310 | 30,308 |
| 90,605 | 153 | 21,030 | 6,072 | 3,345 | 30,600 |
| 90,606 | 153 | 21,046 | 6,121 | 3,385 | 30,705 |
| 90,607 | 152 | 21,068 | 6,109 | 3,384 | 30,713 |
| 90,608 | 151 | 21,166 | 6,151 | 3,402 | 30,870 |
| 90,609 | 153 | 21,048 | 6,134 | 3,412 | 30,747 |
| 90,610 | 152 | 20,954 | 6,083 | 3,421 | 30,610 |
| 90,611 | 144 | 20,831 | 6,112 | 3,445 | 30,532 |
| 90,612 | 148 | 20,778 | 6,105 | 3,440 | 30,471 |
| 90,613 | 148 | 20,559 | 6,039 | 3,415 | 30,161 |
| 90,614 | 149 | 20,764 | 6,103 | 3,452 | 30,468 |
| 90,615 | 151 | 20,799 | 6,167 | 3,470 | 30,587 |



|        |     |        |       |       |        |
|--------|-----|--------|-------|-------|--------|
| 90,616 | 151 | 20,813 | 6,182 | 3,483 | 30,629 |
| 90,617 | 152 | 20,952 | 6,248 | 3,523 | 30,875 |
| 90,618 | 159 | 21,087 | 6,279 | 3,559 | 31,084 |
| 90,619 | 158 | 20,942 | 6,264 | 3,560 | 30,924 |
| 90,620 | 155 | 21,077 | 6,326 | 3,592 | 31,150 |
| 90,621 | 151 | 21,077 | 6,372 | 3,631 | 31,231 |
| 90,622 | 152 | 21,072 | 6,330 | 3,625 | 31,179 |
| 90,623 | 152 | 21,176 | 6,287 | 3,648 | 31,263 |
| 90,624 | 152 | 21,248 | 6,294 | 3,634 | 31,328 |
| 90,625 | 151 | 21,288 | 6,312 | 3,624 | 31,375 |
| 90,626 | 155 | 21,326 | 6,336 | 3,629 | 31,446 |
| 90,627 | 158 | 21,401 | 6,366 | 3,646 | 31,571 |
| 90,628 | 153 | 21,220 | 6,328 | 3,644 | 31,345 |
| 90,629 | 174 | 21,575 | 6,467 | 3,728 | 31,944 |
| 90,630 | 169 | 21,500 | 6,496 | 3,731 | 31,896 |
| 90,631 | 167 | 21,529 | 6,521 | 3,742 | 31,959 |
| 90,632 | 167 | 21,752 | 6,561 | 3,742 | 32,222 |
| 90,633 | 163 | 21,694 | 6,544 | 3,728 | 32,129 |
| 90,634 | 160 | 21,920 | 6,581 | 3,774 | 32,435 |
| 90,635 | 153 | 22,099 | 6,598 | 3,809 | 32,659 |
| 90,636 | 153 | 22,201 | 6,628 | 3,838 | 32,820 |
| 90,637 | 152 | 22,153 | 6,622 | 3,813 | 32,740 |
| 90,638 | 153 | 22,311 | 6,611 | 3,819 | 32,894 |
| 90,639 | 160 | 22,452 | 6,618 | 3,816 | 33,046 |
| 90,640 | 159 | 22,557 | 6,632 | 3,813 | 33,161 |
| 90,641 | 153 | 22,639 | 6,631 | 3,826 | 33,249 |
| 90,642 | 152 | 22,821 | 6,712 | 3,859 | 33,544 |
| 90,643 | 147 | 22,721 | 6,658 | 3,836 | 33,362 |
| 90,644 | 141 | 22,501 | 6,631 | 3,822 | 33,095 |
| 90,645 | 148 | 22,740 | 6,691 | 3,852 | 33,431 |
| 90,646 | 151 | 22,825 | 6,693 | 3,885 | 33,554 |
| 90,647 | 148 | 22,718 | 6,661 | 3,861 | 33,388 |

|        |     |        |       |       |        |
|--------|-----|--------|-------|-------|--------|
| 90,648 | 144 | 22,596 | 6,631 | 3,858 | 33,229 |
| 90,649 | 143 | 22,940 | 6,748 | 3,889 | 33,720 |
| 90,650 | 143 | 22,577 | 6,639 | 3,830 | 33,189 |
| 90,651 | 143 | 22,701 | 6,677 | 3,872 | 33,393 |
| 90,652 | 140 | 22,665 | 6,689 | 3,880 | 33,374 |
| 90,653 | 135 | 22,553 | 6,669 | 3,883 | 33,240 |
| 90,654 | 134 | 22,454 | 6,669 | 3,876 | 33,133 |
| 90,655 | 137 | 22,561 | 6,734 | 3,907 | 33,339 |
| 90,656 | 137 | 22,468 | 6,736 | 3,906 | 33,247 |
| 90,657 | 139 | 22,365 | 6,759 | 3,899 | 33,162 |
| 90,658 | 141 | 22,307 | 6,797 | 3,920 | 33,165 |
| 90,659 | 139 | 22,064 | 6,755 | 3,876 | 32,834 |
| 90,660 | 142 | 22,041 | 6,735 | 3,840 | 32,758 |
| 90,661 | 142 | 22,043 | 6,740 | 3,812 | 32,737 |
| 90,662 | 142 | 22,113 | 6,756 | 3,814 | 32,825 |
| 90,663 | 141 | 22,018 | 6,763 | 3,834 | 32,756 |
| 90,664 | 141 | 21,863 | 6,700 | 3,794 | 32,498 |
| 90,665 | 142 | 22,156 | 6,764 | 3,839 | 32,901 |
| 90,666 | 139 | 22,173 | 6,755 | 3,835 | 32,902 |
| 90,667 | 142 | 22,178 | 6,765 | 3,810 | 32,895 |
| 90,668 | 138 | 21,993 | 6,701 | 3,785 | 32,617 |
| 90,669 | 138 | 22,231 | 6,737 | 3,785 | 32,891 |
| 90,670 | 143 | 22,485 | 6,850 | 3,837 | 33,315 |
| 90,671 | 138 | 22,274 | 6,755 | 3,790 | 32,957 |
| 90,672 | 139 | 22,150 | 6,737 | 3,762 | 32,788 |
| 90,673 | 141 | 22,312 | 6,848 | 3,782 | 33,083 |
| 90,674 | 139 | 21,941 | 6,815 | 3,728 | 32,623 |
| 90,675 | 136 | 21,533 | 6,659 | 3,633 | 31,961 |
| 90,676 | 137 | 21,776 | 6,706 | 3,681 | 32,300 |
| 90,677 | 137 | 21,783 | 6,726 | 3,671 | 32,317 |
| 90,678 | 138 | 22,005 | 6,789 | 3,711 | 32,643 |
| 90,679 | 128 | 22,287 | 6,876 | 3,751 | 33,042 |

|        |     |        |       |       |        |
|--------|-----|--------|-------|-------|--------|
| 90,680 | 125 | 21,942 | 6,783 | 3,698 | 32,548 |
| 90,681 | 125 | 21,982 | 6,791 | 3,701 | 32,599 |
| 90,682 | 119 | 22,078 | 6,821 | 3,702 | 32,720 |
| 90,683 | 117 | 21,919 | 6,822 | 3,710 | 32,568 |
| 90,684 | 117 | 21,687 | 6,811 | 3,679 | 32,294 |
| 90,685 | 117 | 21,678 | 6,829 | 3,680 | 32,304 |
| 90,686 | 117 | 21,830 | 6,893 | 3,694 | 32,534 |
| 90,687 | 113 | 21,403 | 6,821 | 3,652 | 31,989 |
| 90,688 | 111 | 21,625 | 6,855 | 3,692 | 32,283 |
| 90,689 | 113 | 21,698 | 6,907 | 3,710 | 32,428 |
| 90,690 | 107 | 21,473 | 6,895 | 3,699 | 32,174 |
| 90,691 | 107 | 21,352 | 6,900 | 3,703 | 32,062 |
| 90,692 | 110 | 21,623 | 7,024 | 3,740 | 32,497 |
| 90,693 | 117 | 21,604 | 7,019 | 3,737 | 32,477 |
| 90,694 | 115 | 21,293 | 6,981 | 3,708 | 32,097 |
| 90,695 | 120 | 21,749 | 7,089 | 3,791 | 32,749 |
| 90,696 | 113 | 21,844 | 7,104 | 3,780 | 32,841 |
| 90,697 | 106 | 21,203 | 6,880 | 3,650 | 31,839 |
| 90,698 | 106 | 21,244 | 6,903 | 3,672 | 31,925 |
| 90,699 | 107 | 21,351 | 6,936 | 3,709 | 32,103 |
| 90,700 | 107 | 21,161 | 6,912 | 3,687 | 31,867 |
| 90,701 | 108 | 20,937 | 6,853 | 3,661 | 31,559 |
| 90,702 | 108 | 21,036 | 6,873 | 3,660 | 31,677 |
| 90,703 | 108 | 21,173 | 6,858 | 3,647 | 31,786 |
| 90,704 | 107 | 21,235 | 6,822 | 3,631 | 31,795 |
| 90,705 | 107 | 21,384 | 6,811 | 3,617 | 31,919 |
| 90,706 | 107 | 21,369 | 6,807 | 3,574 | 31,857 |
| 90,707 | 104 | 21,330 | 6,757 | 3,545 | 31,736 |
| 90,708 | 100 | 21,341 | 6,699 | 3,520 | 31,660 |
| 90,709 | 99  | 20,905 | 6,517 | 3,426 | 30,947 |
| 90,710 | 101 | 21,113 | 6,546 | 3,458 | 31,218 |
| 90,711 | 101 | 21,103 | 6,565 | 3,454 | 31,223 |

|        |     |        |       |       |        |
|--------|-----|--------|-------|-------|--------|
| 90,712 | 100 | 21,234 | 6,601 | 3,487 | 31,422 |
| 90,713 | 97  | 21,035 | 6,568 | 3,462 | 31,162 |
| 90,714 | 96  | 21,065 | 6,552 | 3,451 | 31,164 |
| 90,715 | 96  | 20,998 | 6,568 | 3,457 | 31,119 |
| 90,716 | 95  | 20,669 | 6,494 | 3,406 | 30,664 |
| 90,717 | 95  | 20,280 | 6,403 | 3,366 | 30,144 |
| 90,718 | 94  | 20,664 | 6,537 | 3,449 | 30,744 |
| 90,719 | 93  | 20,511 | 6,524 | 3,460 | 30,588 |
| 90,720 | 95  | 20,521 | 6,504 | 3,438 | 30,558 |
| 90,721 | 92  | 20,522 | 6,471 | 3,421 | 30,506 |
| 90,722 | 97  | 20,416 | 6,459 | 3,420 | 30,392 |
| 90,723 | 95  | 20,289 | 6,391 | 3,368 | 30,143 |
| 90,724 | 94  | 20,229 | 6,355 | 3,352 | 30,030 |
| 90,725 | 99  | 20,457 | 6,428 | 3,393 | 30,377 |
| 90,726 | 95  | 20,352 | 6,433 | 3,408 | 30,288 |
| 90,727 | 94  | 20,066 | 6,368 | 3,366 | 29,894 |
| 90,728 | 92  | 19,942 | 6,330 | 3,369 | 29,733 |
| 90,729 | 91  | 19,854 | 6,333 | 3,349 | 29,627 |
| 90,730 | 96  | 20,018 | 6,377 | 3,381 | 29,872 |
| 90,731 | 96  | 19,969 | 6,377 | 3,396 | 29,838 |
| 90,732 | 98  | 19,891 | 6,362 | 3,383 | 29,734 |
| 90,733 | 97  | 19,829 | 6,290 | 3,371 | 29,587 |
| 90,734 | 99  | 19,650 | 6,212 | 3,318 | 29,279 |
| 90,735 | 99  | 19,471 | 6,146 | 3,316 | 29,032 |
| 90,736 | 96  | 19,582 | 6,201 | 3,361 | 29,240 |
| 90,737 | 96  | 19,440 | 6,187 | 3,350 | 29,073 |
| 90,738 | 97  | 19,283 | 6,140 | 3,310 | 28,830 |
| 90,739 | 96  | 18,987 | 6,083 | 3,267 | 28,433 |
| 90,740 | 101 | 19,544 | 6,266 | 3,357 | 29,268 |
| 90,741 | 103 | 19,418 | 6,222 | 3,338 | 29,081 |
| 90,742 | 96  | 19,111 | 6,057 | 3,271 | 28,535 |
| 90,743 | 92  | 19,351 | 6,127 | 3,311 | 28,881 |

|        |    |        |       |       |        |
|--------|----|--------|-------|-------|--------|
| 90,744 | 89 | 19,484 | 6,195 | 3,335 | 29,103 |
| 90,745 | 88 | 19,405 | 6,146 | 3,333 | 28,972 |
| 90,746 | 87 | 19,382 | 6,136 | 3,329 | 28,934 |
| 90,747 | 87 | 19,315 | 6,130 | 3,326 | 28,858 |
| 90,748 | 87 | 19,185 | 6,125 | 3,312 | 28,709 |
| 90,749 | 88 | 19,107 | 6,133 | 3,313 | 28,641 |
| 90,750 | 87 | 19,055 | 6,108 | 3,302 | 28,552 |
| 90,751 | 85 | 18,857 | 6,048 | 3,260 | 28,250 |
| 90,752 | 82 | 18,859 | 6,072 | 3,277 | 28,290 |
| 90,753 | 84 | 18,640 | 6,012 | 3,266 | 28,002 |
| 90,754 | 85 | 18,349 | 5,978 | 3,248 | 27,660 |
| 90,755 | 85 | 18,657 | 6,068 | 3,303 | 28,113 |
| 90,756 | 85 | 18,502 | 6,053 | 3,297 | 27,937 |
| 90,757 | 84 | 18,404 | 6,027 | 3,324 | 27,839 |
| 90,758 | 85 | 18,154 | 5,957 | 3,288 | 27,484 |
| 90,759 | 85 | 17,878 | 5,930 | 3,263 | 27,156 |
| 90,760 | 82 | 18,051 | 6,002 | 3,332 | 27,467 |
| 90,761 | 81 | 18,187 | 6,024 | 3,320 | 27,612 |
| 90,762 | 80 | 18,233 | 6,021 | 3,341 | 27,675 |
| 90,763 | 80 | 18,076 | 5,968 | 3,316 | 27,440 |
| 90,764 | 82 | 18,151 | 5,927 | 3,319 | 27,479 |
| 90,765 | 81 | 17,975 | 5,799 | 3,254 | 27,109 |
| 90,766 | 82 | 18,179 | 5,828 | 3,285 | 27,374 |
| 90,767 | 79 | 18,331 | 5,867 | 3,302 | 27,579 |
| 90,768 | 79 | 18,413 | 5,927 | 3,328 | 27,747 |
| 90,769 | 78 | 18,442 | 5,932 | 3,329 | 27,781 |
| 90,770 | 81 | 18,409 | 5,939 | 3,308 | 27,737 |
| 90,771 | 78 | 18,064 | 5,865 | 3,269 | 27,276 |
| 90,772 | 76 | 17,753 | 5,769 | 3,230 | 26,828 |
| 90,773 | 70 | 18,000 | 5,832 | 3,297 | 27,199 |
| 90,774 | 69 | 17,764 | 5,755 | 3,279 | 26,867 |
| 90,775 | 73 | 17,766 | 5,744 | 3,282 | 26,865 |

|        |    |        |       |       |        |
|--------|----|--------|-------|-------|--------|
| 90,776 | 73 | 17,823 | 5,760 | 3,274 | 26,930 |
| 90,777 | 75 | 17,734 | 5,745 | 3,266 | 26,820 |
| 90,778 | 78 | 17,527 | 5,686 | 3,217 | 26,508 |
| 90,779 | 78 | 17,347 | 5,586 | 3,162 | 26,173 |
| 90,780 | 76 | 17,509 | 5,643 | 3,197 | 26,425 |
| 90,781 | 76 | 17,791 | 5,721 | 3,253 | 26,841 |
| 90,782 | 66 | 17,449 | 5,631 | 3,175 | 26,321 |
| 90,783 | 67 | 17,449 | 5,631 | 3,174 | 26,321 |
| 90,784 | 67 | 17,606 | 5,707 | 3,191 | 26,571 |
| 90,785 | 64 | 17,581 | 5,697 | 3,203 | 26,545 |
| 90,786 | 65 | 17,284 | 5,630 | 3,164 | 26,143 |
| 90,787 | 64 | 17,252 | 5,625 | 3,159 | 26,100 |
| 90,788 | 64 | 17,112 | 5,592 | 3,131 | 25,899 |
| 90,789 | 66 | 17,615 | 5,762 | 3,226 | 26,669 |
| 90,790 | 65 | 17,582 | 5,758 | 3,213 | 26,618 |
| 90,791 | 62 | 17,632 | 5,792 | 3,230 | 26,716 |
| 90,792 | 58 | 17,302 | 5,690 | 3,172 | 26,222 |
| 90,793 | 64 | 17,291 | 5,730 | 3,176 | 26,261 |
| 90,794 | 64 | 17,357 | 5,750 | 3,198 | 26,369 |
| 90,795 | 70 | 17,476 | 5,840 | 3,244 | 26,630 |
| 90,796 | 69 | 17,499 | 5,898 | 3,248 | 26,714 |
| 90,797 | 70 | 17,474 | 5,961 | 3,256 | 26,761 |
| 90,798 | 71 | 17,092 | 5,843 | 3,191 | 26,197 |
| 90,799 | 70 | 17,338 | 5,933 | 3,244 | 26,585 |
| 90,800 | 71 | 17,751 | 6,049 | 3,299 | 27,170 |
| 90,801 | 73 | 18,037 | 6,114 | 3,333 | 27,557 |
| 90,802 | 74 | 18,259 | 6,179 | 3,362 | 27,874 |
| 90,803 | 81 | 18,680 | 6,305 | 3,422 | 28,488 |
| 90,804 | 81 | 18,536 | 6,270 | 3,394 | 28,281 |
| 90,805 | 80 | 18,437 | 6,242 | 3,358 | 28,117 |
| 90,806 | 91 | 19,284 | 6,577 | 3,525 | 29,477 |
| 90,807 | 92 | 19,308 | 6,595 | 3,525 | 29,520 |

|        |     |        |       |       |        |
|--------|-----|--------|-------|-------|--------|
| 90,808 | 96  | 19,383 | 6,610 | 3,518 | 29,607 |
| 90,809 | 97  | 19,358 | 6,609 | 3,509 | 29,573 |
| 90,810 | 96  | 19,275 | 6,525 | 3,472 | 29,368 |
| 90,811 | 97  | 19,281 | 6,552 | 3,485 | 29,415 |
| 90,812 | 104 | 19,363 | 6,602 | 3,535 | 29,604 |
| 90,813 | 103 | 19,052 | 6,500 | 3,473 | 29,128 |
| 90,814 | 104 | 18,821 | 6,462 | 3,439 | 28,826 |
| 90,815 | 104 | 18,582 | 6,407 | 3,403 | 28,496 |
| 90,816 | 120 | 19,314 | 6,674 | 3,535 | 29,643 |
| 90,817 | 120 | 19,405 | 6,736 | 3,525 | 29,786 |
| 90,818 | 121 | 19,473 | 6,705 | 3,530 | 29,829 |
| 90,819 | 121 | 19,432 | 6,664 | 3,521 | 29,738 |
| 90,820 | 131 | 19,874 | 6,763 | 3,584 | 30,352 |
| 90,821 | 127 | 19,975 | 6,720 | 3,575 | 30,397 |
| 90,822 | 132 | 20,256 | 6,784 | 3,597 | 30,769 |
| 90,823 | 138 | 20,398 | 6,848 | 3,586 | 30,970 |
| 90,824 | 138 | 20,378 | 6,835 | 3,574 | 30,925 |
| 90,825 | 136 | 20,153 | 6,802 | 3,561 | 30,652 |
| 90,826 | 132 | 20,996 | 7,002 | 3,698 | 31,828 |
| 90,827 | 132 | 21,065 | 6,996 | 3,753 | 31,946 |
| 90,828 | 129 | 21,251 | 7,006 | 3,758 | 32,144 |
| 90,829 | 127 | 21,029 | 6,967 | 3,736 | 31,859 |
| 90,830 | 127 | 20,878 | 6,922 | 3,708 | 31,635 |
| 90,831 | 126 | 21,330 | 7,019 | 3,809 | 32,284 |
| 90,832 | 126 | 21,276 | 6,992 | 3,787 | 32,181 |
| 90,833 | 133 | 21,340 | 6,996 | 3,794 | 32,263 |
| 90,834 | 133 | 21,378 | 7,006 | 3,794 | 32,311 |
| 90,835 | 136 | 21,386 | 6,981 | 3,799 | 32,302 |
| 90,836 | 135 | 21,409 | 6,967 | 3,778 | 32,289 |
| 90,837 | 133 | 21,205 | 6,884 | 3,728 | 31,950 |
| 90,838 | 135 | 21,286 | 6,941 | 3,780 | 32,142 |
| 90,839 | 136 | 21,233 | 6,904 | 3,776 | 32,049 |

|        |     |        |       |       |        |
|--------|-----|--------|-------|-------|--------|
| 90,840 | 134 | 21,173 | 6,892 | 3,782 | 31,981 |
| 90,841 | 136 | 21,415 | 6,958 | 3,793 | 32,302 |
| 90,842 | 136 | 21,382 | 6,926 | 3,788 | 32,232 |
| 90,843 | 135 | 21,278 | 6,900 | 3,793 | 32,106 |
| 90,844 | 131 | 21,116 | 6,826 | 3,765 | 31,838 |
| 90,845 | 131 | 21,065 | 6,784 | 3,745 | 31,725 |
| 90,846 | 127 | 21,317 | 6,776 | 3,743 | 31,963 |
| 90,847 | 131 | 21,396 | 6,732 | 3,736 | 31,995 |
| 90,848 | 130 | 21,344 | 6,632 | 3,693 | 31,799 |
| 90,849 | 131 | 21,241 | 6,631 | 3,700 | 31,703 |
| 90,850 | 131 | 21,148 | 6,564 | 3,675 | 31,518 |
| 90,851 | 133 | 21,095 | 6,541 | 3,657 | 31,426 |
| 90,852 | 133 | 21,038 | 6,548 | 3,671 | 31,390 |
| 90,853 | 135 | 21,064 | 6,525 | 3,665 | 31,389 |
| 90,854 | 136 | 21,143 | 6,553 | 3,673 | 31,505 |
| 90,855 | 133 | 20,993 | 6,484 | 3,641 | 31,251 |
| 90,856 | 128 | 20,707 | 6,341 | 3,581 | 30,757 |
| 90,857 | 128 | 20,659 | 6,324 | 3,567 | 30,678 |
| 90,858 | 125 | 20,661 | 6,286 | 3,566 | 30,638 |
| 90,859 | 131 | 20,832 | 6,270 | 3,589 | 30,822 |
| 90,860 | 133 | 20,891 | 6,238 | 3,567 | 30,829 |
| 90,861 | 137 | 20,978 | 6,218 | 3,546 | 30,879 |
| 90,862 | 136 | 20,833 | 6,201 | 3,516 | 30,686 |
| 90,863 | 134 | 21,106 | 6,292 | 3,579 | 31,111 |
| 90,864 | 132 | 21,162 | 6,292 | 3,597 | 31,183 |
| 90,865 | 121 | 20,978 | 6,210 | 3,556 | 30,865 |
| 90,866 | 119 | 20,973 | 6,205 | 3,546 | 30,843 |
| 90,867 | 116 | 20,942 | 6,193 | 3,558 | 30,809 |
| 90,868 | 116 | 20,838 | 6,142 | 3,548 | 30,644 |
| 90,869 | 115 | 20,803 | 6,178 | 3,571 | 30,667 |
| 90,870 | 112 | 20,568 | 6,138 | 3,563 | 30,381 |
| 90,871 | 108 | 20,347 | 6,158 | 3,546 | 30,159 |



|        |     |        |       |       |        |
|--------|-----|--------|-------|-------|--------|
| 90,872 | 108 | 20,385 | 6,235 | 3,616 | 30,344 |
| 90,873 | 107 | 20,362 | 6,213 | 3,611 | 30,293 |
| 90,874 | 105 | 20,420 | 6,220 | 3,631 | 30,376 |
| 90,875 | 111 | 20,685 | 6,248 | 3,672 | 30,716 |
| 90,876 | 116 | 20,501 | 6,154 | 3,591 | 30,362 |
| 90,877 | 120 | 20,727 | 6,216 | 3,618 | 30,681 |
| 90,878 | 117 | 20,880 | 6,220 | 3,594 | 30,811 |
| 90,879 | 119 | 20,796 | 6,235 | 3,612 | 30,762 |
| 90,880 | 121 | 20,880 | 6,218 | 3,615 | 30,834 |
| 90,881 | 123 | 21,003 | 6,254 | 3,612 | 30,992 |
| 90,882 | 123 | 20,868 | 6,223 | 3,585 | 30,799 |
| 90,883 | 123 | 20,748 | 6,222 | 3,569 | 30,662 |
| 90,884 | 115 | 20,668 | 6,215 | 3,569 | 30,567 |
| 90,885 | 117 | 20,804 | 6,241 | 3,591 | 30,753 |
| 90,886 | 114 | 20,890 | 6,261 | 3,608 | 30,873 |
| 90,887 | 113 | 20,571 | 6,154 | 3,544 | 30,382 |
| 90,888 | 114 | 20,904 | 6,215 | 3,566 | 30,799 |
| 90,889 | 117 | 21,063 | 6,246 | 3,572 | 30,998 |
| 90,890 | 117 | 21,071 | 6,237 | 3,564 | 30,989 |
| 90,891 | 119 | 21,009 | 6,230 | 3,570 | 30,928 |
| 90,892 | 118 | 21,258 | 6,286 | 3,649 | 31,311 |
| 90,893 | 119 | 21,068 | 6,228 | 3,608 | 31,023 |
| 90,894 | 119 | 21,060 | 6,216 | 3,589 | 30,984 |
| 90,895 | 117 | 21,004 | 6,199 | 3,587 | 30,907 |
| 90,896 | 123 | 21,106 | 6,237 | 3,611 | 31,077 |
| 90,897 | 126 | 21,036 | 6,201 | 3,590 | 30,953 |
| 90,898 | 122 | 20,661 | 6,104 | 3,538 | 30,425 |
| 90,899 | 121 | 20,674 | 6,093 | 3,520 | 30,408 |
| 90,900 | 123 | 20,724 | 6,087 | 3,508 | 30,442 |
| 90,901 | 123 | 20,589 | 6,032 | 3,484 | 30,228 |
| 90,902 | 124 | 20,765 | 6,072 | 3,508 | 30,469 |
| 90,903 | 124 | 20,235 | 5,890 | 3,427 | 29,676 |

|        |     |        |       |       |        |
|--------|-----|--------|-------|-------|--------|
| 90,904 | 123 | 20,365 | 5,917 | 3,437 | 29,842 |
| 90,905 | 117 | 20,498 | 5,950 | 3,464 | 30,029 |
| 90,906 | 112 | 20,270 | 5,906 | 3,416 | 29,704 |
| 90,907 | 116 | 20,056 | 5,818 | 3,378 | 29,368 |
| 90,908 | 116 | 19,898 | 5,768 | 3,353 | 29,135 |
| 90,909 | 114 | 20,311 | 5,911 | 3,441 | 29,777 |
| 90,910 | 109 | 20,051 | 5,865 | 3,401 | 29,426 |
| 90,911 | 107 | 19,986 | 5,827 | 3,390 | 29,310 |
| 90,912 | 103 | 20,513 | 5,980 | 3,478 | 30,074 |
| 90,913 | 102 | 20,419 | 5,920 | 3,455 | 29,896 |
| 90,914 | 102 | 20,527 | 5,923 | 3,443 | 29,995 |
| 90,915 | 100 | 20,663 | 5,914 | 3,437 | 30,114 |
| 90,916 | 104 | 20,769 | 5,901 | 3,448 | 30,222 |
| 90,917 | 106 | 20,842 | 5,901 | 3,429 | 30,278 |
| 90,918 | 110 | 20,836 | 5,898 | 3,453 | 30,297 |
| 90,919 | 112 | 20,730 | 5,872 | 3,436 | 30,150 |
| 90,920 | 116 | 20,911 | 5,899 | 3,464 | 30,390 |
| 90,921 | 115 | 20,973 | 5,820 | 3,446 | 30,354 |
| 90,922 | 118 | 20,953 | 5,779 | 3,408 | 30,258 |
| 90,923 | 118 | 20,929 | 5,786 | 3,412 | 30,245 |
| 90,924 | 121 | 20,974 | 5,804 | 3,422 | 30,321 |
| 90,925 | 122 | 20,843 | 5,754 | 3,402 | 30,121 |
| 90,926 | 119 | 20,577 | 5,712 | 3,388 | 29,796 |
| 90,927 | 121 | 20,598 | 5,738 | 3,396 | 29,853 |
| 90,928 | 120 | 20,722 | 5,780 | 3,403 | 30,025 |
| 90,929 | 125 | 20,406 | 5,684 | 3,366 | 29,581 |
| 90,930 | 126 | 20,500 | 5,682 | 3,357 | 29,665 |
| 90,931 | 127 | 20,730 | 5,746 | 3,393 | 29,996 |
| 90,932 | 123 | 20,530 | 5,693 | 3,381 | 29,727 |
| 90,933 | 123 | 20,589 | 5,676 | 3,385 | 29,773 |
| 90,934 | 124 | 20,761 | 5,711 | 3,413 | 30,009 |
| 90,935 | 126 | 20,688 | 5,631 | 3,385 | 29,830 |

|        |     |        |       |       |        |
|--------|-----|--------|-------|-------|--------|
| 90,936 | 125 | 20,845 | 5,702 | 3,425 | 30,097 |
| 90,937 | 124 | 20,724 | 5,633 | 3,414 | 29,895 |
| 90,938 | 127 | 20,792 | 5,618 | 3,443 | 29,980 |
| 90,939 | 128 | 20,908 | 5,622 | 3,458 | 30,116 |
| 90,940 | 122 | 20,693 | 5,578 | 3,441 | 29,834 |
| 90,941 | 130 | 20,969 | 5,610 | 3,464 | 30,173 |
| 90,942 | 129 | 21,203 | 5,651 | 3,471 | 30,454 |
| 90,943 | 129 | 21,100 | 5,621 | 3,458 | 30,308 |
| 90,944 | 135 | 21,196 | 5,639 | 3,476 | 30,446 |
| 90,945 | 136 | 21,262 | 5,667 | 3,481 | 30,546 |
| 90,946 | 132 | 21,516 | 5,703 | 3,497 | 30,848 |
| 90,947 | 130 | 21,430 | 5,670 | 3,514 | 30,744 |
| 90,948 | 128 | 21,447 | 5,676 | 3,521 | 30,772 |
| 90,949 | 130 | 21,796 | 5,737 | 3,553 | 31,216 |
| 90,950 | 127 | 21,753 | 5,743 | 3,546 | 31,169 |
| 90,951 | 131 | 21,943 | 5,792 | 3,584 | 31,450 |
| 90,952 | 130 | 21,883 | 5,779 | 3,555 | 31,347 |
| 90,953 | 131 | 21,941 | 5,758 | 3,538 | 31,368 |
| 90,954 | 133 | 22,115 | 5,810 | 3,558 | 31,616 |
| 90,955 | 133 | 21,976 | 5,776 | 3,530 | 31,415 |
| 90,956 | 134 | 22,179 | 5,812 | 3,559 | 31,684 |
| 90,957 | 137 | 22,342 | 5,859 | 3,585 | 31,923 |
| 90,958 | 135 | 22,424 | 5,937 | 3,604 | 32,100 |
| 90,959 | 144 | 22,532 | 5,967 | 3,601 | 32,244 |
| 90,960 | 142 | 22,180 | 5,872 | 3,536 | 31,730 |
| 90,961 | 142 | 22,185 | 5,861 | 3,541 | 31,729 |
| 90,962 | 142 | 21,866 | 5,808 | 3,526 | 31,342 |
| 90,963 | 142 | 21,669 | 5,772 | 3,513 | 31,096 |
| 90,964 | 145 | 22,283 | 5,934 | 3,615 | 31,977 |
| 90,965 | 145 | 22,451 | 6,007 | 3,655 | 32,258 |
| 90,966 | 147 | 22,416 | 6,005 | 3,664 | 32,232 |
| 90,967 | 144 | 22,478 | 6,089 | 3,670 | 32,381 |

|        |     |        |       |       |        |
|--------|-----|--------|-------|-------|--------|
| 90,968 | 144 | 22,447 | 6,111 | 3,675 | 32,377 |
| 90,969 | 141 | 22,033 | 6,023 | 3,596 | 31,793 |
| 90,970 | 143 | 22,227 | 6,097 | 3,620 | 32,087 |
| 90,971 | 140 | 22,331 | 6,131 | 3,631 | 32,233 |
| 90,972 | 138 | 22,292 | 6,140 | 3,617 | 32,187 |
| 90,973 | 138 | 22,258 | 6,147 | 3,623 | 32,166 |
| 90,974 | 135 | 22,400 | 6,184 | 3,612 | 32,331 |
| 90,975 | 132 | 22,631 | 6,254 | 3,663 | 32,680 |
| 90,976 | 122 | 22,104 | 6,088 | 3,558 | 31,872 |
| 90,977 | 122 | 22,377 | 6,167 | 3,590 | 32,256 |
| 90,978 | 121 | 22,685 | 6,220 | 3,626 | 32,652 |
| 90,979 | 123 | 22,526 | 6,208 | 3,629 | 32,486 |
| 90,980 | 121 | 22,210 | 6,160 | 3,577 | 32,068 |
| 90,981 | 119 | 22,034 | 6,121 | 3,542 | 31,816 |
| 90,982 | 120 | 22,314 | 6,172 | 3,584 | 32,190 |
| 90,983 | 126 | 22,271 | 6,181 | 3,570 | 32,148 |
| 90,984 | 126 | 22,260 | 6,180 | 3,566 | 32,132 |
| 90,985 | 125 | 22,377 | 6,244 | 3,604 | 32,350 |
| 90,986 | 122 | 22,300 | 6,265 | 3,610 | 32,297 |
| 90,987 | 122 | 22,201 | 6,246 | 3,616 | 32,185 |
| 90,988 | 124 | 22,152 | 6,317 | 3,653 | 32,246 |
| 90,989 | 123 | 22,075 | 6,320 | 3,661 | 32,179 |
| 90,990 | 125 | 21,878 | 6,330 | 3,638 | 31,971 |
| 90,991 | 122 | 21,863 | 6,320 | 3,620 | 31,925 |
| 90,992 | 118 | 21,635 | 6,257 | 3,602 | 31,612 |
| 90,993 | 122 | 21,895 | 6,354 | 3,659 | 32,030 |
| 90,994 | 121 | 21,964 | 6,387 | 3,652 | 32,124 |
| 90,995 | 116 | 22,102 | 6,463 | 3,664 | 32,345 |
| 90,996 | 125 | 22,208 | 6,484 | 3,684 | 32,501 |
| 90,997 | 128 | 21,923 | 6,449 | 3,668 | 32,168 |
| 90,998 | 129 | 21,931 | 6,467 | 3,659 | 32,186 |
| 90,999 | 133 | 21,888 | 6,476 | 3,662 | 32,159 |

|        |     |        |       |       |        |
|--------|-----|--------|-------|-------|--------|
| 91,000 | 135 | 22,064 | 6,553 | 3,697 | 32,449 |
| 91,001 | 129 | 21,831 | 6,499 | 3,658 | 32,117 |
| 91,002 | 129 | 21,809 | 6,498 | 3,662 | 32,098 |
| 91,003 | 128 | 21,968 | 6,553 | 3,704 | 32,353 |
| 91,004 | 123 | 21,667 | 6,505 | 3,679 | 31,974 |
| 91,005 | 122 | 21,808 | 6,553 | 3,705 | 32,188 |
| 91,006 | 120 | 21,710 | 6,551 | 3,725 | 32,106 |
| 91,007 | 122 | 22,012 | 6,628 | 3,778 | 32,540 |
| 91,008 | 115 | 21,355 | 6,406 | 3,684 | 31,560 |
| 91,009 | 114 | 21,436 | 6,451 | 3,708 | 31,709 |
| 91,010 | 108 | 21,770 | 6,521 | 3,787 | 32,186 |
| 91,011 | 107 | 21,687 | 6,467 | 3,763 | 32,024 |
| 91,012 | 108 | 21,791 | 6,480 | 3,777 | 32,156 |
| 91,013 | 104 | 21,605 | 6,445 | 3,755 | 31,909 |
| 91,014 | 104 | 22,062 | 6,553 | 3,831 | 32,550 |
| 91,015 | 100 | 21,807 | 6,474 | 3,795 | 32,176 |
| 91,016 | 100 | 21,906 | 6,532 | 3,833 | 32,371 |
| 91,017 | 105 | 22,158 | 6,605 | 3,878 | 32,746 |
| 91,018 | 104 | 22,315 | 6,597 | 3,906 | 32,922 |
| 91,019 | 103 | 22,473 | 6,629 | 3,936 | 33,141 |
| 91,020 | 98  | 22,366 | 6,559 | 3,941 | 32,964 |
| 91,021 | 98  | 22,501 | 6,586 | 3,950 | 33,135 |
| 91,022 | 97  | 22,608 | 6,642 | 4,009 | 33,356 |
| 91,023 | 94  | 22,387 | 6,606 | 3,991 | 33,078 |
| 91,024 | 95  | 22,563 | 6,631 | 4,000 | 33,289 |
| 91,025 | 95  | 22,438 | 6,613 | 3,992 | 33,138 |
| 91,026 | 95  | 22,467 | 6,665 | 4,023 | 33,250 |
| 91,027 | 94  | 22,374 | 6,681 | 4,030 | 33,179 |
| 91,028 | 108 | 22,358 | 6,674 | 4,024 | 33,164 |
| 91,029 | 107 | 22,256 | 6,664 | 4,016 | 33,043 |
| 91,030 | 112 | 22,156 | 6,617 | 3,992 | 32,877 |
| 91,031 | 104 | 21,929 | 6,539 | 3,943 | 32,515 |

|        |     |        |       |       |        |
|--------|-----|--------|-------|-------|--------|
| 91,032 | 105 | 22,074 | 6,592 | 3,973 | 32,744 |
| 91,033 | 103 | 21,896 | 6,583 | 3,941 | 32,523 |
| 91,034 | 108 | 22,072 | 6,664 | 4,000 | 32,844 |
| 91,035 | 108 | 22,033 | 6,700 | 3,995 | 32,836 |
| 91,036 | 110 | 22,051 | 6,691 | 3,984 | 32,836 |
| 91,037 | 109 | 22,229 | 6,672 | 3,970 | 32,980 |
| 91,038 | 108 | 21,973 | 6,601 | 3,857 | 32,539 |
| 91,039 | 108 | 22,219 | 6,622 | 3,885 | 32,834 |
| 91,040 | 105 | 22,484 | 6,700 | 3,899 | 33,188 |
| 91,041 | 101 | 22,308 | 6,610 | 3,861 | 32,880 |
| 91,042 | 99  | 22,071 | 6,537 | 3,824 | 32,531 |
| 91,043 | 98  | 22,258 | 6,551 | 3,848 | 32,755 |
| 91,044 | 98  | 22,237 | 6,568 | 3,879 | 32,782 |
| 91,045 | 96  | 21,808 | 6,469 | 3,841 | 32,214 |
| 91,046 | 99  | 21,940 | 6,473 | 3,874 | 32,386 |
| 91,047 | 89  | 21,803 | 6,471 | 3,874 | 32,237 |
| 91,048 | 83  | 21,674 | 6,414 | 3,828 | 31,999 |
| 91,049 | 82  | 21,636 | 6,399 | 3,815 | 31,932 |
| 91,050 | 72  | 21,407 | 6,358 | 3,819 | 31,656 |
| 91,051 | 72  | 21,463 | 6,416 | 3,841 | 31,792 |
| 91,052 | 76  | 21,605 | 6,449 | 3,884 | 32,014 |
| 91,053 | 76  | 21,565 | 6,377 | 3,856 | 31,874 |
| 91,054 | 77  | 21,353 | 6,336 | 3,840 | 31,606 |
| 91,055 | 80  | 21,577 | 6,346 | 3,859 | 31,862 |
| 91,056 | 82  | 21,613 | 6,379 | 3,870 | 31,944 |
| 91,057 | 80  | 21,698 | 6,365 | 3,845 | 31,988 |
| 91,058 | 78  | 21,682 | 6,383 | 3,840 | 31,983 |
| 91,059 | 80  | 21,549 | 6,396 | 3,819 | 31,844 |
| 91,060 | 82  | 21,550 | 6,384 | 3,822 | 31,838 |
| 91,061 | 89  | 21,455 | 6,362 | 3,788 | 31,694 |
| 91,062 | 91  | 21,343 | 6,352 | 3,750 | 31,536 |
| 91,063 | 92  | 21,192 | 6,311 | 3,711 | 31,306 |

|        |     |        |       |       |        |
|--------|-----|--------|-------|-------|--------|
| 91,064 | 92  | 21,026 | 6,268 | 3,662 | 31,048 |
| 91,065 | 99  | 21,257 | 6,353 | 3,705 | 31,414 |
| 91,066 | 101 | 20,998 | 6,268 | 3,640 | 31,007 |
| 91,067 | 104 | 21,274 | 6,320 | 3,673 | 31,371 |
| 91,068 | 100 | 21,274 | 6,311 | 3,656 | 31,341 |
| 91,069 | 108 | 21,116 | 6,256 | 3,641 | 31,121 |
| 91,070 | 115 | 20,960 | 6,217 | 3,625 | 30,917 |
| 91,071 | 121 | 20,800 | 6,142 | 3,598 | 30,661 |
| 91,072 | 124 | 20,976 | 6,135 | 3,601 | 30,836 |
| 91,073 | 124 | 20,652 | 6,080 | 3,536 | 30,392 |
| 91,074 | 125 | 20,748 | 6,093 | 3,566 | 30,532 |
| 91,075 | 128 | 20,671 | 6,063 | 3,550 | 30,412 |
| 91,076 | 129 | 20,813 | 6,075 | 3,563 | 30,580 |
| 91,077 | 133 | 20,515 | 5,958 | 3,501 | 30,107 |
| 91,078 | 133 | 20,549 | 5,942 | 3,496 | 30,120 |
| 91,079 | 119 | 20,308 | 5,877 | 3,466 | 29,770 |
| 91,080 | 118 | 20,041 | 5,809 | 3,448 | 29,416 |
| 91,081 | 112 | 20,739 | 5,940 | 3,564 | 30,355 |
| 91,082 | 113 | 20,685 | 5,930 | 3,560 | 30,288 |
| 91,083 | 113 | 20,886 | 5,996 | 3,603 | 30,598 |
| 91,084 | 114 | 21,112 | 6,017 | 3,630 | 30,873 |
| 91,085 | 114 | 21,280 | 6,010 | 3,635 | 31,039 |
| 91,086 | 114 | 21,127 | 5,916 | 3,600 | 30,757 |
| 91,087 | 112 | 21,406 | 5,967 | 3,632 | 31,117 |
| 91,088 | 116 | 21,090 | 5,853 | 3,603 | 30,662 |
| 91,089 | 117 | 21,382 | 5,938 | 3,651 | 31,088 |
| 91,090 | 118 | 21,328 | 5,937 | 3,634 | 31,017 |
| 91,091 | 125 | 21,533 | 5,983 | 3,671 | 31,312 |
| 91,092 | 130 | 21,576 | 6,031 | 3,695 | 31,432 |
| 91,093 | 130 | 21,736 | 6,081 | 3,705 | 31,652 |
| 91,094 | 132 | 21,629 | 6,029 | 3,652 | 31,442 |
| 91,095 | 134 | 21,810 | 6,059 | 3,676 | 31,679 |

|        |     |        |       |       |        |
|--------|-----|--------|-------|-------|--------|
| 91,096 | 132 | 22,157 | 6,140 | 3,710 | 32,139 |
| 91,097 | 133 | 22,099 | 6,080 | 3,677 | 31,989 |
| 91,098 | 138 | 22,082 | 6,073 | 3,683 | 31,976 |
| 91,099 | 139 | 22,406 | 6,165 | 3,718 | 32,428 |
| 91,100 | 139 | 22,209 | 6,104 | 3,671 | 32,123 |
| 91,101 | 140 | 22,166 | 6,071 | 3,657 | 32,034 |
| 91,102 | 138 | 22,113 | 6,062 | 3,639 | 31,952 |
| 91,103 | 140 | 22,295 | 6,121 | 3,675 | 32,231 |
| 91,104 | 141 | 22,051 | 6,059 | 3,632 | 31,883 |
| 91,105 | 148 | 22,307 | 6,132 | 3,671 | 32,258 |
| 91,106 | 150 | 22,082 | 6,097 | 3,641 | 31,970 |
| 91,107 | 149 | 22,042 | 6,046 | 3,635 | 31,872 |
| 91,108 | 151 | 22,275 | 6,130 | 3,670 | 32,226 |
| 91,109 | 155 | 22,317 | 6,100 | 3,660 | 32,232 |
| 91,110 | 153 | 22,132 | 5,990 | 3,595 | 31,870 |
| 91,111 | 155 | 22,311 | 6,045 | 3,601 | 32,112 |
| 91,112 | 146 | 22,601 | 6,090 | 3,633 | 32,470 |
| 91,113 | 147 | 22,919 | 6,171 | 3,683 | 32,920 |
| 91,114 | 148 | 23,063 | 6,182 | 3,692 | 33,085 |
| 91,115 | 145 | 22,998 | 6,105 | 3,668 | 32,916 |
| 91,116 | 145 | 23,240 | 6,148 | 3,703 | 33,236 |
| 91,117 | 144 | 23,233 | 6,155 | 3,692 | 33,224 |
| 91,118 | 140 | 22,860 | 6,041 | 3,621 | 32,662 |
| 91,119 | 140 | 23,099 | 6,102 | 3,668 | 33,009 |
| 91,120 | 136 | 23,334 | 6,165 | 3,702 | 33,337 |
| 91,121 | 128 | 23,162 | 6,113 | 3,668 | 33,071 |
| 91,122 | 125 | 23,019 | 6,089 | 3,638 | 32,871 |
| 91,123 | 126 | 23,087 | 6,057 | 3,633 | 32,903 |
| 91,124 | 126 | 23,128 | 6,054 | 3,634 | 32,942 |
| 91,125 | 123 | 23,163 | 6,085 | 3,642 | 33,013 |
| 91,126 | 121 | 23,217 | 6,125 | 3,637 | 33,100 |
| 91,127 | 121 | 23,408 | 6,179 | 3,652 | 33,360 |



|        |     |        |       |       |        |
|--------|-----|--------|-------|-------|--------|
| 91,128 | 117 | 23,240 | 6,165 | 3,644 | 33,166 |
| 91,129 | 116 | 23,466 | 6,213 | 3,699 | 33,494 |
| 91,130 | 122 | 23,478 | 6,225 | 3,686 | 33,511 |
| 91,131 | 119 | 23,329 | 6,192 | 3,635 | 33,275 |
| 91,132 | 127 | 23,328 | 6,213 | 3,640 | 33,308 |
| 91,133 | 128 | 22,963 | 6,130 | 3,589 | 32,810 |
| 91,134 | 130 | 23,087 | 6,185 | 3,591 | 32,993 |
| 91,135 | 126 | 23,196 | 6,217 | 3,627 | 33,166 |
| 91,136 | 126 | 23,052 | 6,204 | 3,619 | 33,001 |
| 91,137 | 133 | 22,889 | 6,149 | 3,589 | 32,760 |
| 91,138 | 133 | 22,776 | 6,118 | 3,567 | 32,594 |
| 91,139 | 140 | 22,805 | 6,209 | 3,580 | 32,734 |
| 91,140 | 139 | 22,945 | 6,245 | 3,599 | 32,928 |
| 91,141 | 134 | 22,679 | 6,195 | 3,576 | 32,584 |
| 91,142 | 131 | 22,687 | 6,187 | 3,570 | 32,575 |
| 91,143 | 128 | 22,542 | 6,160 | 3,539 | 32,369 |
| 91,144 | 128 | 22,621 | 6,207 | 3,556 | 32,512 |
| 91,145 | 124 | 22,476 | 6,187 | 3,532 | 32,319 |
| 91,146 | 122 | 22,158 | 6,151 | 3,498 | 31,929 |
| 91,147 | 121 | 22,274 | 6,204 | 3,546 | 32,145 |
| 91,148 | 119 | 22,175 | 6,160 | 3,524 | 31,978 |
| 91,149 | 114 | 22,381 | 6,190 | 3,532 | 32,217 |
| 91,150 | 119 | 22,445 | 6,161 | 3,551 | 32,276 |
| 91,151 | 121 | 22,481 | 6,197 | 3,564 | 32,363 |
| 91,152 | 123 | 22,573 | 6,188 | 3,560 | 32,444 |
| 91,153 | 123 | 22,695 | 6,176 | 3,555 | 32,549 |
| 91,154 | 122 | 22,790 | 6,190 | 3,561 | 32,663 |
| 91,155 | 121 | 22,784 | 6,208 | 3,559 | 32,672 |
| 91,156 | 110 | 22,802 | 6,216 | 3,542 | 32,670 |
| 91,157 | 108 | 22,572 | 6,156 | 3,499 | 32,335 |
| 91,158 | 111 | 22,706 | 6,208 | 3,523 | 32,548 |
| 91,159 | 108 | 22,759 | 6,219 | 3,524 | 32,610 |

|        |     |        |       |       |        |
|--------|-----|--------|-------|-------|--------|
| 91,160 | 114 | 22,497 | 6,199 | 3,502 | 32,312 |
| 91,161 | 114 | 22,265 | 6,162 | 3,487 | 32,028 |
| 91,162 | 116 | 22,690 | 6,288 | 3,602 | 32,696 |
| 91,163 | 121 | 22,726 | 6,327 | 3,623 | 32,797 |
| 91,164 | 123 | 22,749 | 6,320 | 3,628 | 32,820 |
| 91,165 | 117 | 22,254 | 6,223 | 3,571 | 32,165 |
| 91,166 | 116 | 22,250 | 6,294 | 3,596 | 32,256 |
| 91,167 | 117 | 22,113 | 6,312 | 3,611 | 32,153 |
| 91,168 | 116 | 21,949 | 6,339 | 3,642 | 32,046 |
| 91,169 | 120 | 21,906 | 6,359 | 3,655 | 32,040 |
| 91,170 | 122 | 21,899 | 6,393 | 3,689 | 32,103 |
| 91,171 | 120 | 21,778 | 6,424 | 3,692 | 32,014 |
| 91,172 | 121 | 21,902 | 6,448 | 3,693 | 32,164 |
| 91,173 | 119 | 21,898 | 6,505 | 3,712 | 32,234 |
| 91,174 | 124 | 21,995 | 6,526 | 3,735 | 32,380 |
| 91,175 | 126 | 21,887 | 6,488 | 3,697 | 32,198 |
| 91,176 | 127 | 21,775 | 6,445 | 3,682 | 32,029 |
| 91,177 | 127 | 21,991 | 6,482 | 3,730 | 32,330 |
| 91,178 | 127 | 22,049 | 6,473 | 3,729 | 32,378 |
| 91,179 | 125 | 21,565 | 6,335 | 3,658 | 31,683 |
| 91,180 | 125 | 21,778 | 6,409 | 3,685 | 31,997 |
| 91,181 | 123 | 21,814 | 6,394 | 3,697 | 32,028 |
| 91,182 | 123 | 21,933 | 6,414 | 3,730 | 32,200 |
| 91,183 | 115 | 22,219 | 6,496 | 3,748 | 32,578 |
| 91,184 | 116 | 22,303 | 6,488 | 3,769 | 32,676 |
| 91,185 | 114 | 22,444 | 6,460 | 3,789 | 32,807 |
| 91,186 | 113 | 22,457 | 6,450 | 3,773 | 32,793 |
| 91,187 | 100 | 22,209 | 6,392 | 3,734 | 32,435 |
| 91,188 | 99  | 21,966 | 6,318 | 3,674 | 32,057 |
| 91,189 | 100 | 22,328 | 6,350 | 3,709 | 32,487 |
| 91,190 | 96  | 22,611 | 6,416 | 3,745 | 32,868 |
| 91,191 | 96  | 22,644 | 6,443 | 3,755 | 32,938 |

|        |     |        |       |       |        |
|--------|-----|--------|-------|-------|--------|
| 91,192 | 97  | 22,687 | 6,466 | 3,746 | 32,996 |
| 91,193 | 97  | 22,468 | 6,405 | 3,731 | 32,701 |
| 91,194 | 98  | 22,386 | 6,360 | 3,724 | 32,568 |
| 91,195 | 99  | 22,270 | 6,306 | 3,724 | 32,399 |
| 91,196 | 99  | 22,639 | 6,376 | 3,778 | 32,892 |
| 91,197 | 107 | 22,476 | 6,268 | 3,731 | 32,582 |
| 91,198 | 109 | 22,102 | 6,195 | 3,672 | 32,078 |
| 91,199 | 115 | 22,258 | 6,367 | 3,767 | 32,507 |
| 91,200 | 119 | 22,105 | 6,359 | 3,774 | 32,357 |
| 91,201 | 114 | 21,768 | 6,297 | 3,732 | 31,911 |
| 91,202 | 110 | 21,494 | 6,200 | 3,713 | 31,517 |
| 91,203 | 110 | 21,604 | 6,209 | 3,723 | 31,646 |
| 91,204 | 111 | 21,509 | 6,189 | 3,725 | 31,534 |
| 91,205 | 113 | 21,439 | 6,181 | 3,728 | 31,461 |
| 91,206 | 117 | 21,738 | 6,230 | 3,768 | 31,853 |
| 91,207 | 116 | 21,539 | 6,155 | 3,732 | 31,542 |
| 91,208 | 120 | 21,593 | 6,174 | 3,740 | 31,627 |
| 91,209 | 118 | 21,497 | 6,161 | 3,733 | 31,509 |
| 91,210 | 110 | 21,564 | 6,116 | 3,744 | 31,534 |
| 91,211 | 111 | 21,410 | 6,095 | 3,734 | 31,350 |
| 91,212 | 117 | 21,690 | 6,173 | 3,776 | 31,756 |
| 91,213 | 123 | 21,492 | 6,118 | 3,736 | 31,469 |
| 91,214 | 118 | 21,358 | 6,074 | 3,706 | 31,256 |
| 91,215 | 122 | 21,568 | 6,141 | 3,748 | 31,579 |
| 91,216 | 126 | 21,809 | 6,180 | 3,800 | 31,915 |
| 91,217 | 125 | 21,744 | 6,089 | 3,731 | 31,689 |
| 91,218 | 123 | 21,427 | 5,870 | 3,587 | 31,007 |
| 91,219 | 123 | 21,664 | 5,940 | 3,622 | 31,349 |
| 91,220 | 123 | 22,008 | 5,993 | 3,670 | 31,794 |
| 91,221 | 122 | 22,135 | 5,937 | 3,670 | 31,864 |
| 91,222 | 123 | 22,358 | 6,010 | 3,691 | 32,182 |
| 91,223 | 125 | 22,478 | 6,022 | 3,722 | 32,347 |

|        |     |        |       |       |        |
|--------|-----|--------|-------|-------|--------|
| 91,224 | 124 | 22,505 | 6,022 | 3,712 | 32,363 |
| 91,225 | 124 | 22,434 | 6,069 | 3,709 | 32,336 |
| 91,226 | 121 | 22,489 | 6,039 | 3,727 | 32,376 |
| 91,227 | 121 | 22,199 | 5,941 | 3,684 | 31,945 |
| 91,228 | 121 | 21,924 | 5,918 | 3,644 | 31,607 |
| 91,229 | 121 | 22,092 | 5,997 | 3,682 | 31,892 |
| 91,230 | 124 | 22,151 | 6,022 | 3,676 | 31,973 |
| 91,231 | 125 | 22,106 | 5,972 | 3,667 | 31,870 |
| 91,232 | 123 | 21,760 | 5,919 | 3,626 | 31,428 |
| 91,233 | 123 | 21,797 | 5,921 | 3,615 | 31,456 |
| 91,234 | 127 | 21,477 | 5,829 | 3,590 | 31,023 |
| 91,235 | 124 | 21,142 | 5,761 | 3,534 | 30,561 |
| 91,236 | 131 | 21,541 | 5,928 | 3,618 | 31,218 |
| 91,237 | 131 | 21,356 | 5,873 | 3,576 | 30,936 |
| 91,238 | 132 | 21,628 | 5,924 | 3,590 | 31,274 |
| 91,239 | 128 | 21,637 | 5,908 | 3,598 | 31,271 |
| 91,240 | 128 | 21,871 | 5,976 | 3,614 | 31,589 |
| 91,241 | 127 | 21,817 | 5,947 | 3,603 | 31,494 |
| 91,242 | 126 | 21,849 | 5,934 | 3,596 | 31,505 |
| 91,243 | 125 | 21,589 | 5,811 | 3,545 | 31,070 |
| 91,244 | 122 | 21,604 | 5,815 | 3,549 | 31,090 |
| 91,245 | 122 | 21,600 | 5,814 | 3,543 | 31,079 |
| 91,246 | 121 | 21,818 | 5,901 | 3,574 | 31,414 |
| 91,247 | 123 | 21,766 | 5,907 | 3,581 | 31,377 |
| 91,248 | 115 | 21,818 | 5,921 | 3,572 | 31,426 |
| 91,249 | 117 | 21,923 | 5,913 | 3,585 | 31,538 |
| 91,250 | 119 | 22,076 | 5,910 | 3,589 | 31,694 |
| 91,251 | 115 | 21,760 | 5,834 | 3,513 | 31,222 |
| 91,252 | 117 | 21,833 | 5,831 | 3,502 | 31,283 |
| 91,253 | 117 | 21,811 | 5,857 | 3,490 | 31,275 |
| 91,254 | 118 | 21,776 | 5,876 | 3,483 | 31,253 |
| 91,255 | 118 | 22,048 | 5,909 | 3,520 | 31,595 |

|        |     |        |       |       |        |
|--------|-----|--------|-------|-------|--------|
| 91,256 | 112 | 21,893 | 5,844 | 3,488 | 31,337 |
| 91,257 | 114 | 22,115 | 5,917 | 3,515 | 31,661 |
| 91,258 | 110 | 22,265 | 5,936 | 3,538 | 31,849 |
| 91,259 | 108 | 22,028 | 5,875 | 3,512 | 31,523 |
| 91,260 | 105 | 22,154 | 5,860 | 3,529 | 31,648 |
| 91,261 | 104 | 21,924 | 5,831 | 3,499 | 31,358 |
| 91,262 | 105 | 22,153 | 5,862 | 3,531 | 31,651 |
| 91,263 | 100 | 22,367 | 5,878 | 3,530 | 31,875 |
| 91,264 | 89  | 22,297 | 5,845 | 3,507 | 31,738 |
| 91,265 | 89  | 22,106 | 5,774 | 3,476 | 31,445 |
| 91,266 | 86  | 22,048 | 5,740 | 3,452 | 31,326 |
| 91,267 | 96  | 22,071 | 5,739 | 3,430 | 31,336 |
| 91,268 | 95  | 21,861 | 5,670 | 3,393 | 31,019 |
| 91,269 | 96  | 21,811 | 5,686 | 3,406 | 30,999 |
| 91,270 | 96  | 21,561 | 5,634 | 3,375 | 30,666 |
| 91,271 | 99  | 22,306 | 5,790 | 3,503 | 31,698 |
| 91,272 | 104 | 22,615 | 5,803 | 3,517 | 32,039 |
| 91,273 | 109 | 22,894 | 5,855 | 3,564 | 32,422 |
| 91,274 | 109 | 22,702 | 5,864 | 3,533 | 32,208 |
| 91,275 | 116 | 22,837 | 5,869 | 3,547 | 32,369 |
| 91,276 | 114 | 22,678 | 5,770 | 3,514 | 32,076 |
| 91,277 | 117 | 22,776 | 5,806 | 3,541 | 32,240 |
| 91,278 | 116 | 22,583 | 5,743 | 3,509 | 31,951 |
| 91,279 | 120 | 22,666 | 5,715 | 3,497 | 31,998 |
| 91,280 | 121 | 22,708 | 5,731 | 3,522 | 32,082 |
| 91,281 | 121 | 22,652 | 5,739 | 3,526 | 32,038 |
| 91,282 | 124 | 22,676 | 5,787 | 3,533 | 32,120 |
| 91,283 | 122 | 22,835 | 5,831 | 3,577 | 32,365 |
| 91,284 | 134 | 22,945 | 5,875 | 3,601 | 32,555 |
| 91,285 | 131 | 23,245 | 5,910 | 3,642 | 32,928 |
| 91,286 | 129 | 23,142 | 5,878 | 3,608 | 32,757 |
| 91,287 | 131 | 23,169 | 5,870 | 3,614 | 32,784 |

|        |     |        |       |       |        |
|--------|-----|--------|-------|-------|--------|
| 91,288 | 130 | 22,961 | 5,838 | 3,587 | 32,516 |
| 91,289 | 137 | 23,348 | 5,949 | 3,661 | 33,095 |
| 91,290 | 136 | 23,044 | 5,895 | 3,642 | 32,717 |
| 91,291 | 137 | 23,164 | 5,928 | 3,663 | 32,892 |
| 91,292 | 144 | 23,256 | 5,948 | 3,688 | 33,036 |
| 91,293 | 158 | 23,438 | 5,956 | 3,727 | 33,279 |
| 91,294 | 160 | 23,540 | 5,982 | 3,759 | 33,441 |
| 91,295 | 170 | 23,737 | 6,058 | 3,793 | 33,758 |
| 91,296 | 177 | 23,955 | 6,070 | 3,788 | 33,990 |
| 91,297 | 178 | 23,999 | 6,075 | 3,782 | 34,034 |
| 91,298 | 180 | 24,194 | 6,144 | 3,799 | 34,317 |
| 91,299 | 181 | 24,369 | 6,194 | 3,827 | 34,571 |
| 91,300 | 180 | 24,365 | 6,172 | 3,830 | 34,547 |
| 91,301 | 176 | 24,189 | 6,067 | 3,765 | 34,197 |
| 91,302 | 176 | 24,212 | 6,058 | 3,771 | 34,217 |
| 91,303 | 172 | 24,256 | 6,077 | 3,785 | 34,290 |
| 91,304 | 175 | 24,599 | 6,155 | 3,847 | 34,776 |
| 91,305 | 178 | 24,560 | 6,154 | 3,843 | 34,735 |
| 91,306 | 178 | 24,262 | 6,147 | 3,805 | 34,392 |
| 91,307 | 181 | 24,277 | 6,178 | 3,840 | 34,476 |
| 91,308 | 181 | 24,285 | 6,185 | 3,855 | 34,506 |
| 91,309 | 183 | 24,038 | 6,156 | 3,865 | 34,242 |
| 91,310 | 182 | 23,845 | 6,138 | 3,821 | 33,986 |
| 91,311 | 183 | 23,698 | 6,155 | 3,826 | 33,862 |
| 91,312 | 184 | 23,611 | 6,153 | 3,825 | 33,773 |
| 91,313 | 187 | 23,793 | 6,174 | 3,840 | 33,994 |
| 91,314 | 190 | 23,261 | 6,086 | 3,789 | 33,326 |
| 91,315 | 190 | 23,199 | 6,100 | 3,794 | 33,283 |
| 91,316 | 196 | 22,856 | 6,053 | 3,761 | 32,866 |
| 91,317 | 196 | 22,585 | 6,000 | 3,720 | 32,501 |
| 91,318 | 190 | 23,191 | 6,144 | 3,827 | 33,352 |
| 91,319 | 193 | 23,125 | 6,156 | 3,813 | 33,287 |

|        |     |        |       |       |        |
|--------|-----|--------|-------|-------|--------|
| 91,320 | 193 | 22,990 | 6,169 | 3,827 | 33,179 |
| 91,321 | 194 | 22,615 | 6,091 | 3,780 | 32,680 |
| 91,322 | 191 | 22,306 | 6,089 | 3,743 | 32,329 |
| 91,323 | 192 | 22,194 | 6,142 | 3,781 | 32,309 |
| 91,324 | 188 | 22,007 | 6,163 | 3,771 | 32,129 |
| 91,325 | 187 | 22,249 | 6,202 | 3,840 | 32,478 |
| 91,326 | 179 | 21,760 | 6,076 | 3,775 | 31,790 |
| 91,327 | 188 | 21,572 | 6,067 | 3,778 | 31,605 |
| 91,328 | 188 | 21,653 | 6,081 | 3,791 | 31,713 |
| 91,329 | 187 | 21,494 | 6,078 | 3,776 | 31,535 |
| 91,330 | 186 | 21,433 | 6,091 | 3,763 | 31,473 |
| 91,331 | 182 | 21,560 | 6,083 | 3,795 | 31,620 |
| 91,332 | 182 | 21,422 | 5,995 | 3,768 | 31,367 |
| 91,333 | 182 | 21,580 | 6,037 | 3,787 | 31,586 |
| 91,334 | 180 | 21,926 | 6,150 | 3,848 | 32,104 |
| 91,335 | 176 | 21,764 | 6,099 | 3,817 | 31,856 |
| 91,336 | 174 | 21,836 | 6,096 | 3,825 | 31,931 |
| 91,337 | 177 | 22,246 | 6,175 | 3,867 | 32,465 |
| 91,338 | 178 | 22,125 | 6,109 | 3,872 | 32,284 |
| 91,339 | 179 | 22,174 | 6,115 | 3,880 | 32,348 |
| 91,340 | 176 | 22,177 | 6,112 | 3,866 | 32,331 |
| 91,341 | 174 | 22,187 | 6,117 | 3,874 | 32,352 |
| 91,342 | 168 | 21,721 | 6,007 | 3,805 | 31,701 |
| 91,343 | 170 | 21,926 | 6,080 | 3,851 | 32,027 |
| 91,344 | 157 | 22,225 | 6,172 | 3,888 | 32,442 |
| 91,345 | 158 | 22,268 | 6,187 | 3,895 | 32,508 |
| 91,346 | 148 | 22,192 | 6,158 | 3,883 | 32,381 |
| 91,347 | 149 | 22,782 | 6,321 | 4,009 | 33,261 |
| 91,348 | 147 | 22,637 | 6,296 | 4,000 | 33,080 |
| 91,349 | 148 | 22,820 | 6,318 | 4,044 | 33,330 |
| 91,350 | 142 | 22,717 | 6,308 | 4,040 | 33,207 |
| 91,351 | 139 | 22,397 | 6,253 | 3,988 | 32,777 |

|        |     |        |       |       |        |
|--------|-----|--------|-------|-------|--------|
| 91,352 | 139 | 22,364 | 6,264 | 4,018 | 32,785 |
| 91,353 | 140 | 22,542 | 6,348 | 4,084 | 33,114 |
| 91,354 | 139 | 22,604 | 6,397 | 4,126 | 33,266 |
| 91,355 | 144 | 22,706 | 6,444 | 4,146 | 33,440 |
| 91,356 | 142 | 23,015 | 6,499 | 4,182 | 33,838 |
| 91,357 | 142 | 23,053 | 6,474 | 4,189 | 33,858 |
| 91,358 | 140 | 23,196 | 6,506 | 4,194 | 34,036 |
| 91,359 | 138 | 23,304 | 6,514 | 4,205 | 34,161 |
| 91,360 | 136 | 23,283 | 6,505 | 4,183 | 34,107 |
| 91,361 | 135 | 23,337 | 6,499 | 4,193 | 34,164 |
| 91,362 | 137 | 23,170 | 6,463 | 4,189 | 33,959 |
| 91,363 | 135 | 23,037 | 6,426 | 4,157 | 33,755 |
| 91,364 | 132 | 23,004 | 6,450 | 4,184 | 33,770 |
| 91,365 | 126 | 23,005 | 6,423 | 4,173 | 33,727 |
| 91,366 | 126 | 23,181 | 6,453 | 4,195 | 33,955 |
| 91,367 | 116 | 23,212 | 6,450 | 4,200 | 33,978 |
| 91,368 | 112 | 22,972 | 6,404 | 4,160 | 33,648 |
| 91,369 | 109 | 23,033 | 6,408 | 4,169 | 33,719 |
| 91,370 | 108 | 22,940 | 6,396 | 4,151 | 33,595 |
| 91,371 | 107 | 23,087 | 6,394 | 4,149 | 33,737 |
| 91,372 | 109 | 23,313 | 6,478 | 4,211 | 34,111 |
| 91,373 | 105 | 23,124 | 6,468 | 4,208 | 33,905 |
| 91,374 | 103 | 23,127 | 6,454 | 4,194 | 33,878 |
| 91,375 | 112 | 23,222 | 6,436 | 4,183 | 33,953 |
| 91,376 | 117 | 23,161 | 6,442 | 4,168 | 33,888 |
| 91,377 | 116 | 23,159 | 6,471 | 4,154 | 33,900 |
| 91,378 | 107 | 23,288 | 6,477 | 4,128 | 34,000 |
| 91,379 | 104 | 23,065 | 6,431 | 4,095 | 33,695 |
| 91,380 | 110 | 23,024 | 6,427 | 4,095 | 33,656 |
| 91,381 | 109 | 23,141 | 6,461 | 4,129 | 33,840 |
| 91,382 | 109 | 22,908 | 6,402 | 4,076 | 33,495 |
| 91,383 | 112 | 23,074 | 6,471 | 4,082 | 33,739 |



|        |     |        |       |       |        |
|--------|-----|--------|-------|-------|--------|
| 91,384 | 115 | 23,030 | 6,470 | 4,067 | 33,682 |
| 91,385 | 108 | 22,795 | 6,439 | 4,050 | 33,392 |
| 91,386 | 107 | 22,441 | 6,389 | 4,008 | 32,945 |
| 91,387 | 117 | 22,657 | 6,464 | 4,060 | 33,298 |
| 91,388 | 123 | 22,640 | 6,451 | 4,069 | 33,283 |
| 91,389 | 115 | 22,326 | 6,385 | 4,006 | 32,832 |
| 91,390 | 122 | 22,021 | 6,321 | 3,970 | 32,434 |
| 91,391 | 123 | 22,053 | 6,339 | 3,977 | 32,492 |
| 91,392 | 129 | 21,732 | 6,293 | 3,917 | 32,071 |
| 91,393 | 128 | 21,394 | 6,220 | 3,885 | 31,627 |
| 91,394 | 138 | 21,901 | 6,329 | 3,972 | 32,340 |
| 91,395 | 140 | 21,593 | 6,265 | 3,935 | 31,933 |
| 91,396 | 140 | 21,676 | 6,285 | 3,960 | 32,061 |
| 91,397 | 136 | 21,592 | 6,250 | 3,980 | 31,958 |
| 91,398 | 143 | 21,539 | 6,241 | 3,949 | 31,872 |
| 91,399 | 139 | 21,263 | 6,155 | 3,890 | 31,447 |
| 91,400 | 141 | 21,136 | 6,124 | 3,894 | 31,295 |
| 91,401 | 141 | 21,224 | 6,117 | 3,897 | 31,379 |
| 91,402 | 143 | 21,269 | 6,111 | 3,886 | 31,409 |
| 91,403 | 147 | 21,416 | 6,125 | 3,867 | 31,555 |
| 91,404 | 148 | 21,593 | 6,047 | 3,818 | 31,606 |
| 91,405 | 150 | 21,834 | 6,126 | 3,846 | 31,956 |
| 91,406 | 140 | 22,154 | 6,230 | 3,920 | 32,444 |
| 91,407 | 143 | 21,909 | 6,229 | 3,912 | 32,193 |
| 91,408 | 143 | 21,944 | 6,278 | 3,908 | 32,273 |
| 91,409 | 146 | 22,033 | 6,293 | 3,905 | 32,377 |
| 91,410 | 145 | 22,006 | 6,297 | 3,893 | 32,341 |
| 91,411 | 145 | 22,157 | 6,313 | 3,911 | 32,526 |
| 91,412 | 143 | 21,968 | 6,236 | 3,862 | 32,209 |
| 91,413 | 146 | 22,190 | 6,248 | 3,857 | 32,441 |
| 91,414 | 150 | 22,212 | 6,264 | 3,843 | 32,469 |
| 91,415 | 150 | 21,959 | 6,217 | 3,795 | 32,121 |

|        |     |        |       |       |        |
|--------|-----|--------|-------|-------|--------|
| 91,416 | 155 | 22,416 | 6,336 | 3,888 | 32,795 |
| 91,417 | 157 | 22,109 | 6,280 | 3,846 | 32,392 |
| 91,418 | 161 | 22,163 | 6,262 | 3,856 | 32,442 |
| 91,419 | 161 | 22,113 | 6,264 | 3,856 | 32,394 |
| 91,420 | 166 | 22,216 | 6,331 | 3,904 | 32,617 |
| 91,421 | 166 | 22,218 | 6,332 | 3,920 | 32,636 |
| 91,422 | 164 | 22,244 | 6,362 | 3,908 | 32,678 |
| 91,423 | 161 | 22,219 | 6,269 | 3,865 | 32,514 |
| 91,424 | 162 | 21,949 | 6,216 | 3,799 | 32,126 |
| 91,425 | 162 | 22,197 | 6,245 | 3,816 | 32,420 |
| 91,426 | 153 | 22,481 | 6,286 | 3,846 | 32,766 |
| 91,427 | 148 | 22,511 | 6,265 | 3,830 | 32,754 |
| 91,428 | 146 | 22,385 | 6,211 | 3,813 | 32,555 |
| 91,429 | 145 | 22,634 | 6,263 | 3,871 | 32,913 |
| 91,430 | 139 | 22,792 | 6,291 | 3,885 | 33,107 |
| 91,431 | 145 | 22,693 | 6,224 | 3,835 | 32,897 |
| 91,432 | 148 | 22,835 | 6,274 | 3,858 | 33,115 |
| 91,433 | 145 | 23,013 | 6,320 | 3,907 | 33,385 |
| 91,434 | 146 | 23,279 | 6,405 | 3,962 | 33,792 |
| 91,435 | 136 | 22,556 | 6,176 | 3,838 | 32,706 |
| 91,436 | 136 | 22,813 | 6,213 | 3,851 | 33,013 |
| 91,437 | 134 | 22,432 | 6,139 | 3,818 | 32,523 |
| 91,438 | 135 | 22,530 | 6,186 | 3,860 | 32,711 |
| 91,439 | 129 | 22,708 | 6,222 | 3,897 | 32,956 |
| 91,440 | 138 | 22,668 | 6,229 | 3,922 | 32,957 |
| 91,441 | 125 | 22,383 | 6,196 | 3,902 | 32,606 |
| 91,442 | 123 | 22,583 | 6,247 | 3,933 | 32,886 |
| 91,443 | 129 | 22,559 | 6,261 | 3,944 | 32,893 |
| 91,444 | 130 | 22,363 | 6,231 | 3,900 | 32,624 |
| 91,445 | 130 | 22,749 | 6,326 | 3,928 | 33,133 |
| 91,446 | 131 | 22,782 | 6,338 | 3,934 | 33,185 |
| 91,447 | 129 | 22,778 | 6,353 | 3,945 | 33,205 |

|        |     |        |       |       |        |
|--------|-----|--------|-------|-------|--------|
| 91,448 | 128 | 23,068 | 6,433 | 3,964 | 33,593 |
| 91,449 | 122 | 22,836 | 6,376 | 3,938 | 33,272 |
| 91,450 | 120 | 22,865 | 6,380 | 3,943 | 33,308 |
| 91,451 | 124 | 22,826 | 6,407 | 3,943 | 33,300 |
| 91,452 | 122 | 22,526 | 6,392 | 3,930 | 32,970 |
| 91,453 | 122 | 22,661 | 6,549 | 3,994 | 33,326 |
| 91,454 | 119 | 22,225 | 6,471 | 3,959 | 32,774 |
| 91,455 | 123 | 22,161 | 6,482 | 3,957 | 32,723 |
| 91,456 | 125 | 22,181 | 6,454 | 3,949 | 32,709 |
| 91,457 | 125 | 21,977 | 6,381 | 3,892 | 32,375 |
| 91,458 | 124 | 21,665 | 6,241 | 3,818 | 31,848 |
| 91,459 | 124 | 21,637 | 6,223 | 3,821 | 31,805 |
| 91,460 | 121 | 21,407 | 6,196 | 3,820 | 31,544 |
| 91,461 | 123 | 21,293 | 6,194 | 3,817 | 31,427 |
| 91,462 | 127 | 21,381 | 6,277 | 3,851 | 31,636 |
| 91,463 | 129 | 21,282 | 6,294 | 3,864 | 31,569 |
| 91,464 | 129 | 21,436 | 6,348 | 3,912 | 31,825 |
| 91,465 | 125 | 21,581 | 6,381 | 3,949 | 32,036 |
| 91,466 | 125 | 21,735 | 6,409 | 3,960 | 32,229 |
| 91,467 | 117 | 21,630 | 6,380 | 3,930 | 32,057 |
| 91,468 | 117 | 21,752 | 6,393 | 3,925 | 32,187 |
| 91,469 | 115 | 22,045 | 6,504 | 3,971 | 32,635 |
| 91,470 | 115 | 22,392 | 6,531 | 4,015 | 33,053 |
| 91,471 | 113 | 22,268 | 6,468 | 3,952 | 32,801 |
| 91,472 | 113 | 22,561 | 6,536 | 3,987 | 33,197 |
| 91,473 | 114 | 22,506 | 6,496 | 3,998 | 33,114 |
| 91,474 | 115 | 22,155 | 6,403 | 3,953 | 32,626 |
| 91,475 | 118 | 22,159 | 6,407 | 3,952 | 32,636 |
| 91,476 | 118 | 21,913 | 6,376 | 3,948 | 32,355 |
| 91,477 | 120 | 21,721 | 6,367 | 3,943 | 32,151 |
| 91,478 | 116 | 21,379 | 6,317 | 3,908 | 31,720 |
| 91,479 | 119 | 21,638 | 6,389 | 3,958 | 32,104 |

|        |     |        |       |       |        |
|--------|-----|--------|-------|-------|--------|
| 91,480 | 120 | 21,851 | 6,452 | 3,973 | 32,396 |
| 91,481 | 123 | 21,673 | 6,375 | 3,932 | 32,103 |
| 91,482 | 117 | 21,620 | 6,354 | 3,936 | 32,027 |
| 91,483 | 117 | 21,426 | 6,318 | 3,905 | 31,766 |
| 91,484 | 126 | 21,698 | 6,400 | 3,947 | 32,171 |
| 91,485 | 125 | 21,334 | 6,319 | 3,882 | 31,660 |
| 91,486 | 124 | 21,603 | 6,388 | 3,937 | 32,052 |
| 91,487 | 122 | 21,294 | 6,330 | 3,911 | 31,657 |
| 91,488 | 121 | 21,342 | 6,370 | 3,922 | 31,755 |
| 91,489 | 124 | 21,300 | 6,378 | 3,900 | 31,702 |
| 91,490 | 127 | 21,298 | 6,383 | 3,907 | 31,715 |
| 91,491 | 111 | 21,151 | 6,340 | 3,858 | 31,460 |
| 91,492 | 115 | 21,423 | 6,459 | 3,934 | 31,931 |
| 91,493 | 116 | 21,354 | 6,433 | 3,917 | 31,820 |
| 91,494 | 118 | 21,076 | 6,334 | 3,869 | 31,397 |
| 91,495 | 124 | 21,254 | 6,369 | 3,902 | 31,649 |
| 91,496 | 120 | 21,392 | 6,411 | 3,932 | 31,855 |
| 91,497 | 126 | 21,404 | 6,439 | 3,949 | 31,918 |
| 91,498 | 129 | 21,301 | 6,400 | 3,926 | 31,756 |
| 91,499 | 126 | 20,928 | 6,312 | 3,889 | 31,255 |
| 91,500 | 128 | 21,168 | 6,353 | 3,919 | 31,568 |
| 91,501 | 129 | 21,202 | 6,338 | 3,910 | 31,579 |
| 91,502 | 124 | 21,121 | 6,213 | 3,843 | 31,301 |
| 91,503 | 129 | 20,960 | 6,104 | 3,805 | 30,998 |
| 91,504 | 129 | 21,000 | 6,103 | 3,801 | 31,033 |
| 91,505 | 135 | 20,837 | 6,050 | 3,754 | 30,776 |
| 91,506 | 132 | 20,596 | 5,977 | 3,714 | 30,419 |
| 91,507 | 138 | 21,085 | 6,137 | 3,843 | 31,203 |
| 91,508 | 137 | 20,992 | 6,124 | 3,839 | 31,092 |
| 91,509 | 135 | 20,946 | 6,130 | 3,848 | 31,059 |
| 91,510 | 137 | 21,367 | 6,263 | 3,897 | 31,664 |
| 91,511 | 134 | 21,500 | 6,261 | 3,924 | 31,819 |

|        |     |        |       |       |        |
|--------|-----|--------|-------|-------|--------|
| 91,512 | 132 | 21,573 | 6,270 | 3,926 | 31,901 |
| 91,513 | 130 | 21,441 | 6,217 | 3,893 | 31,681 |
| 91,514 | 130 | 21,650 | 6,294 | 3,942 | 32,016 |
| 91,515 | 129 | 21,583 | 6,279 | 3,934 | 31,925 |
| 91,516 | 128 | 21,388 | 6,256 | 3,909 | 31,681 |
| 91,517 | 130 | 21,103 | 6,165 | 3,881 | 31,279 |
| 91,518 | 130 | 20,895 | 6,129 | 3,880 | 31,034 |
| 91,519 | 135 | 21,301 | 6,218 | 3,953 | 31,607 |
| 91,520 | 142 | 21,624 | 6,324 | 3,989 | 32,079 |
| 91,521 | 140 | 21,665 | 6,359 | 3,977 | 32,141 |
| 91,522 | 139 | 21,752 | 6,393 | 4,001 | 32,285 |
| 91,523 | 135 | 21,013 | 6,220 | 3,866 | 31,234 |
| 91,524 | 136 | 21,298 | 6,288 | 3,902 | 31,624 |
| 91,525 | 138 | 21,635 | 6,323 | 3,936 | 32,032 |
| 91,526 | 137 | 21,704 | 6,331 | 3,929 | 32,101 |
| 91,527 | 140 | 22,176 | 6,445 | 4,014 | 32,775 |
| 91,528 | 137 | 21,940 | 6,396 | 3,979 | 32,452 |
| 91,529 | 139 | 22,214 | 6,411 | 4,023 | 32,787 |
| 91,530 | 141 | 22,446 | 6,483 | 4,071 | 33,141 |
| 91,531 | 140 | 22,234 | 6,418 | 4,039 | 32,831 |
| 91,532 | 140 | 22,254 | 6,425 | 4,045 | 32,864 |
| 91,533 | 145 | 22,629 | 6,523 | 4,094 | 33,391 |
| 91,534 | 144 | 22,784 | 6,566 | 4,124 | 33,618 |
| 91,535 | 142 | 22,740 | 6,524 | 4,110 | 33,516 |
| 91,536 | 143 | 22,822 | 6,519 | 4,106 | 33,590 |
| 91,537 | 142 | 22,896 | 6,523 | 4,096 | 33,657 |
| 91,538 | 143 | 23,248 | 6,606 | 4,132 | 34,129 |
| 91,539 | 145 | 23,456 | 6,645 | 4,128 | 34,374 |
| 91,540 | 140 | 23,532 | 6,651 | 4,131 | 34,454 |
| 91,541 | 137 | 23,526 | 6,597 | 4,103 | 34,363 |
| 91,542 | 137 | 23,570 | 6,600 | 4,106 | 34,413 |
| 91,543 | 132 | 23,749 | 6,652 | 4,152 | 34,685 |

|        |     |        |       |       |        |
|--------|-----|--------|-------|-------|--------|
| 91,544 | 133 | 23,782 | 6,661 | 4,168 | 34,744 |
| 91,545 | 123 | 23,692 | 6,636 | 4,130 | 34,581 |
| 91,546 | 118 | 23,413 | 6,541 | 4,090 | 34,162 |
| 91,547 | 118 | 23,261 | 6,525 | 4,090 | 33,994 |
| 91,548 | 112 | 23,323 | 6,541 | 4,117 | 34,093 |
| 91,549 | 109 | 23,005 | 6,441 | 4,056 | 33,611 |
| 91,550 | 110 | 23,256 | 6,493 | 4,075 | 33,934 |
| 91,551 | 108 | 23,072 | 6,510 | 4,069 | 33,759 |
| 91,552 | 109 | 22,961 | 6,533 | 4,057 | 33,660 |
| 91,553 | 110 | 23,007 | 6,560 | 4,080 | 33,757 |
| 91,554 | 99  | 22,661 | 6,444 | 3,986 | 33,190 |
| 91,555 | 99  | 22,855 | 6,522 | 4,021 | 33,497 |
| 91,556 | 97  | 22,784 | 6,518 | 4,020 | 33,419 |
| 91,557 | 91  | 22,922 | 6,593 | 4,044 | 33,650 |
| 91,558 | 90  | 22,983 | 6,572 | 4,046 | 33,691 |
| 91,559 | 91  | 23,162 | 6,623 | 4,075 | 33,951 |
| 91,560 | 90  | 23,254 | 6,663 | 4,090 | 34,097 |
| 91,561 | 90  | 23,211 | 6,617 | 4,083 | 34,001 |
| 91,562 | 94  | 23,125 | 6,588 | 4,063 | 33,870 |
| 91,563 | 94  | 22,936 | 6,492 | 4,022 | 33,544 |
| 91,564 | 99  | 22,979 | 6,459 | 3,976 | 33,513 |
| 91,565 | 99  | 22,942 | 6,451 | 3,962 | 33,454 |
| 91,566 | 97  | 22,688 | 6,415 | 3,935 | 33,135 |
| 91,567 | 102 | 23,010 | 6,506 | 3,981 | 33,599 |
| 91,568 | 98  | 22,535 | 6,398 | 3,914 | 32,945 |
| 91,569 | 100 | 22,546 | 6,465 | 3,950 | 33,061 |
| 91,570 | 95  | 22,677 | 6,523 | 3,985 | 33,280 |
| 91,571 | 94  | 22,535 | 6,519 | 3,971 | 33,119 |
| 91,572 | 103 | 22,169 | 6,428 | 3,934 | 32,634 |
| 91,573 | 103 | 21,885 | 6,369 | 3,907 | 32,264 |
| 91,574 | 103 | 22,042 | 6,527 | 3,977 | 32,649 |
| 91,575 | 107 | 22,005 | 6,594 | 4,013 | 32,719 |

|        |     |        |       |       |        |
|--------|-----|--------|-------|-------|--------|
| 91,576 | 107 | 22,129 | 6,697 | 4,088 | 33,021 |
| 91,577 | 105 | 21,994 | 6,687 | 4,074 | 32,860 |
| 91,578 | 102 | 21,945 | 6,702 | 4,079 | 32,828 |
| 91,579 | 103 | 21,984 | 6,724 | 4,063 | 32,874 |
| 91,580 | 111 | 21,851 | 6,725 | 4,051 | 32,738 |
| 91,581 | 109 | 21,815 | 6,718 | 4,042 | 32,684 |
| 91,582 | 107 | 21,547 | 6,679 | 4,031 | 32,364 |
| 91,583 | 103 | 21,419 | 6,642 | 3,990 | 32,154 |
| 91,584 | 106 | 21,786 | 6,829 | 4,113 | 32,834 |
| 91,585 | 105 | 21,953 | 6,892 | 4,127 | 33,077 |
| 91,586 | 110 | 22,018 | 6,996 | 4,172 | 33,296 |
| 91,587 | 117 | 22,124 | 7,094 | 4,222 | 33,557 |
| 91,588 | 125 | 22,158 | 7,168 | 4,274 | 33,725 |
| 91,589 | 124 | 22,152 | 7,188 | 4,288 | 33,752 |
| 91,590 | 122 | 21,768 | 7,104 | 4,260 | 33,254 |
| 91,591 | 122 | 21,668 | 7,058 | 4,223 | 33,071 |
| 91,592 | 125 | 21,751 | 7,153 | 4,278 | 33,307 |
| 91,593 | 127 | 21,757 | 7,151 | 4,268 | 33,303 |
| 91,594 | 127 | 21,807 | 7,150 | 4,257 | 33,341 |
| 91,595 | 126 | 21,823 | 7,163 | 4,240 | 33,352 |
| 91,596 | 123 | 21,733 | 7,125 | 4,231 | 33,212 |
| 91,597 | 125 | 22,077 | 7,201 | 4,256 | 33,659 |
| 91,598 | 126 | 21,889 | 7,127 | 4,205 | 33,347 |
| 91,599 | 129 | 22,129 | 7,189 | 4,233 | 33,680 |
| 91,600 | 131 | 22,274 | 7,233 | 4,298 | 33,936 |
| 91,601 | 133 | 22,092 | 7,208 | 4,258 | 33,691 |
| 91,602 | 135 | 22,099 | 7,213 | 4,258 | 33,705 |
| 91,603 | 136 | 22,184 | 7,234 | 4,268 | 33,822 |
| 91,604 | 139 | 22,156 | 7,240 | 4,265 | 33,800 |
| 91,605 | 138 | 22,060 | 7,266 | 4,290 | 33,754 |
| 91,606 | 146 | 22,060 | 7,236 | 4,300 | 33,742 |
| 91,607 | 146 | 22,227 | 7,231 | 4,306 | 33,910 |

|        |     |        |       |       |        |
|--------|-----|--------|-------|-------|--------|
| 91,608 | 152 | 21,981 | 7,131 | 4,251 | 33,515 |
| 91,609 | 152 | 21,755 | 7,094 | 4,225 | 33,226 |
| 91,610 | 152 | 21,899 | 7,171 | 4,282 | 33,504 |
| 91,611 | 151 | 21,715 | 7,147 | 4,264 | 33,277 |
| 91,612 | 151 | 21,912 | 7,228 | 4,306 | 33,597 |
| 91,613 | 148 | 21,696 | 7,187 | 4,251 | 33,282 |
| 91,614 | 147 | 21,341 | 7,123 | 4,214 | 32,825 |
| 91,615 | 142 | 21,679 | 7,241 | 4,303 | 33,365 |
| 91,616 | 151 | 21,631 | 7,246 | 4,304 | 33,332 |
| 91,617 | 150 | 21,549 | 7,207 | 4,293 | 33,199 |
| 91,618 | 149 | 21,635 | 7,210 | 4,297 | 33,291 |
| 91,619 | 150 | 21,786 | 7,194 | 4,262 | 33,392 |
| 91,620 | 148 | 21,861 | 7,167 | 4,263 | 33,439 |
| 91,621 | 150 | 21,853 | 7,146 | 4,265 | 33,414 |
| 91,622 | 145 | 21,626 | 7,046 | 4,230 | 33,047 |
| 91,623 | 138 | 21,652 | 7,033 | 4,221 | 33,044 |
| 91,624 | 139 | 21,842 | 7,002 | 4,199 | 33,182 |
| 91,625 | 137 | 21,554 | 6,827 | 4,116 | 32,634 |
| 91,626 | 141 | 21,843 | 6,866 | 4,143 | 32,993 |
| 91,627 | 143 | 21,849 | 6,851 | 4,103 | 32,946 |
| 91,628 | 150 | 21,431 | 6,692 | 4,008 | 32,281 |
| 91,629 | 152 | 21,481 | 6,688 | 4,016 | 32,337 |
| 91,630 | 150 | 21,178 | 6,590 | 3,977 | 31,895 |
| 91,631 | 144 | 20,966 | 6,524 | 3,938 | 31,572 |
| 91,632 | 149 | 21,968 | 6,786 | 4,063 | 32,966 |
| 91,633 | 153 | 21,990 | 6,753 | 4,049 | 32,945 |
| 91,634 | 153 | 21,926 | 6,731 | 4,042 | 32,852 |
| 91,635 | 150 | 21,772 | 6,678 | 4,020 | 32,620 |
| 91,636 | 152 | 22,050 | 6,733 | 4,075 | 33,010 |
| 91,637 | 143 | 22,104 | 6,696 | 4,074 | 33,017 |
| 91,638 | 136 | 21,959 | 6,621 | 4,027 | 32,743 |
| 91,639 | 128 | 21,851 | 6,563 | 3,991 | 32,533 |



|        |     |        |       |       |        |
|--------|-----|--------|-------|-------|--------|
| 91,640 | 129 | 21,622 | 6,476 | 3,938 | 32,165 |
| 91,641 | 131 | 21,573 | 6,451 | 3,943 | 32,098 |
| 91,642 | 130 | 21,664 | 6,466 | 3,946 | 32,206 |
| 91,643 | 130 | 21,743 | 6,486 | 3,936 | 32,295 |
| 91,644 | 130 | 21,908 | 6,590 | 3,990 | 32,618 |
| 91,645 | 133 | 21,882 | 6,590 | 4,008 | 32,613 |
| 91,646 | 134 | 21,653 | 6,537 | 3,987 | 32,311 |
| 91,647 | 134 | 21,445 | 6,498 | 3,941 | 32,018 |
| 91,648 | 134 | 21,633 | 6,614 | 4,015 | 32,396 |
| 91,649 | 133 | 21,446 | 6,557 | 3,974 | 32,110 |
| 91,650 | 126 | 20,943 | 6,339 | 3,869 | 31,277 |
| 91,651 | 129 | 21,253 | 6,381 | 3,882 | 31,645 |
| 91,652 | 128 | 21,549 | 6,450 | 3,914 | 32,041 |
| 91,653 | 128 | 21,588 | 6,461 | 3,925 | 32,102 |
| 91,654 | 125 | 22,083 | 6,553 | 3,973 | 32,734 |
| 91,655 | 128 | 22,043 | 6,530 | 3,973 | 32,674 |
| 91,656 | 126 | 21,941 | 6,467 | 3,940 | 32,474 |
| 91,657 | 119 | 22,445 | 6,590 | 4,015 | 33,169 |
| 91,658 | 119 | 22,426 | 6,555 | 4,009 | 33,109 |
| 91,659 | 112 | 22,257 | 6,530 | 3,959 | 32,858 |
| 91,660 | 115 | 22,595 | 6,584 | 3,985 | 33,279 |
| 91,661 | 117 | 22,433 | 6,478 | 3,949 | 32,977 |
| 91,662 | 117 | 22,466 | 6,472 | 3,947 | 33,002 |
| 91,663 | 117 | 22,674 | 6,521 | 3,983 | 33,295 |
| 91,664 | 119 | 22,662 | 6,525 | 4,001 | 33,307 |
| 91,665 | 118 | 22,181 | 6,301 | 3,859 | 32,459 |
| 91,666 | 122 | 22,320 | 6,376 | 3,898 | 32,716 |
| 91,667 | 116 | 22,545 | 6,400 | 3,920 | 32,981 |
| 91,668 | 117 | 22,511 | 6,384 | 3,918 | 32,930 |
| 91,669 | 115 | 22,862 | 6,483 | 3,948 | 33,408 |
| 91,670 | 116 | 22,719 | 6,516 | 3,948 | 33,299 |
| 91,671 | 117 | 22,504 | 6,448 | 3,905 | 32,974 |

|        |     |        |       |       |        |
|--------|-----|--------|-------|-------|--------|
| 91,672 | 115 | 22,535 | 6,414 | 3,877 | 32,941 |
| 91,673 | 116 | 22,554 | 6,416 | 3,859 | 32,945 |
| 91,674 | 114 | 22,268 | 6,343 | 3,824 | 32,549 |
| 91,675 | 112 | 22,428 | 6,392 | 3,855 | 32,787 |
| 91,676 | 106 | 21,984 | 6,298 | 3,784 | 32,172 |
| 91,677 | 107 | 22,077 | 6,300 | 3,793 | 32,277 |
| 91,678 | 93  | 21,708 | 6,237 | 3,775 | 31,813 |
| 91,679 | 91  | 21,640 | 6,214 | 3,756 | 31,701 |
| 91,680 | 91  | 21,566 | 6,191 | 3,746 | 31,594 |
| 91,681 | 85  | 21,430 | 6,207 | 3,738 | 31,460 |
| 91,682 | 88  | 21,503 | 6,190 | 3,741 | 31,522 |
| 91,683 | 89  | 21,339 | 6,161 | 3,721 | 31,310 |
| 91,684 | 88  | 21,233 | 6,160 | 3,732 | 31,213 |
| 91,685 | 89  | 21,105 | 6,099 | 3,687 | 30,980 |
| 91,686 | 92  | 21,138 | 6,136 | 3,702 | 31,068 |
| 91,687 | 88  | 20,879 | 6,096 | 3,696 | 30,759 |
| 91,688 | 86  | 20,846 | 6,050 | 3,662 | 30,644 |
| 91,689 | 94  | 20,947 | 6,073 | 3,672 | 30,786 |
| 91,690 | 95  | 20,937 | 6,050 | 3,664 | 30,746 |
| 91,691 | 94  | 20,810 | 6,008 | 3,650 | 30,562 |
| 91,692 | 93  | 20,957 | 6,043 | 3,652 | 30,745 |
| 91,693 | 91  | 21,097 | 6,068 | 3,672 | 30,928 |
| 91,694 | 96  | 21,294 | 6,071 | 3,686 | 31,147 |
| 91,695 | 94  | 21,487 | 6,067 | 3,689 | 31,337 |
| 91,696 | 93  | 21,303 | 6,004 | 3,649 | 31,049 |
| 91,697 | 93  | 21,421 | 6,016 | 3,643 | 31,173 |
| 91,698 | 91  | 21,122 | 5,919 | 3,607 | 30,739 |
| 91,699 | 91  | 21,182 | 5,917 | 3,606 | 30,796 |
| 91,700 | 91  | 20,842 | 5,868 | 3,555 | 30,356 |
| 91,701 | 89  | 20,589 | 5,814 | 3,522 | 30,014 |
| 91,702 | 88  | 21,383 | 6,040 | 3,673 | 31,184 |
| 91,703 | 91  | 21,584 | 6,094 | 3,720 | 31,489 |

|        |     |        |       |       |        |
|--------|-----|--------|-------|-------|--------|
| 91,704 | 92  | 21,380 | 6,104 | 3,704 | 31,280 |
| 91,705 | 96  | 21,336 | 6,082 | 3,680 | 31,194 |
| 91,706 | 92  | 21,082 | 6,038 | 3,643 | 30,855 |
| 91,707 | 93  | 20,869 | 5,988 | 3,589 | 30,539 |
| 91,708 | 93  | 20,635 | 5,927 | 3,550 | 30,205 |
| 91,709 | 102 | 21,093 | 6,039 | 3,615 | 30,849 |
| 91,710 | 106 | 21,495 | 6,156 | 3,677 | 31,434 |
| 91,711 | 103 | 21,421 | 6,153 | 3,660 | 31,337 |
| 91,712 | 105 | 21,562 | 6,226 | 3,689 | 31,582 |
| 91,713 | 105 | 21,619 | 6,231 | 3,694 | 31,649 |
| 91,714 | 105 | 21,825 | 6,287 | 3,727 | 31,944 |
| 91,715 | 100 | 21,463 | 6,189 | 3,649 | 31,401 |
| 91,716 | 101 | 21,720 | 6,249 | 3,709 | 31,779 |
| 91,717 | 103 | 22,065 | 6,293 | 3,748 | 32,209 |
| 91,718 | 109 | 21,887 | 6,261 | 3,737 | 31,994 |
| 91,719 | 108 | 21,800 | 6,251 | 3,716 | 31,875 |
| 91,720 | 116 | 22,337 | 6,427 | 3,853 | 32,733 |
| 91,721 | 113 | 22,128 | 6,336 | 3,798 | 32,375 |
| 91,722 | 111 | 22,287 | 6,392 | 3,807 | 32,597 |
| 91,723 | 113 | 22,508 | 6,475 | 3,836 | 32,932 |
| 91,724 | 116 | 22,465 | 6,443 | 3,835 | 32,859 |
| 91,725 | 116 | 22,547 | 6,465 | 3,858 | 32,986 |
| 91,726 | 124 | 22,598 | 6,457 | 3,857 | 33,036 |
| 91,727 | 125 | 22,554 | 6,432 | 3,847 | 32,958 |
| 91,728 | 123 | 22,627 | 6,507 | 3,883 | 33,140 |
| 91,729 | 125 | 22,820 | 6,563 | 3,920 | 33,428 |
| 91,730 | 126 | 22,780 | 6,559 | 3,923 | 33,388 |
| 91,731 | 123 | 21,721 | 6,215 | 3,704 | 31,763 |
| 91,732 | 125 | 21,883 | 6,258 | 3,724 | 31,990 |
| 91,733 | 127 | 22,147 | 6,332 | 3,753 | 32,359 |
| 91,734 | 126 | 22,093 | 6,334 | 3,740 | 32,293 |
| 91,735 | 126 | 22,697 | 6,507 | 3,838 | 33,168 |

|        |     |        |       |       |        |
|--------|-----|--------|-------|-------|--------|
| 91,736 | 128 | 22,772 | 6,582 | 3,889 | 33,371 |
| 91,737 | 125 | 22,754 | 6,594 | 3,893 | 33,366 |
| 91,738 | 125 | 22,809 | 6,609 | 3,859 | 33,402 |
| 91,739 | 125 | 23,030 | 6,706 | 3,883 | 33,744 |
| 91,740 | 119 | 22,970 | 6,678 | 3,885 | 33,652 |
| 91,741 | 123 | 22,832 | 6,619 | 3,849 | 33,423 |
| 91,742 | 123 | 22,803 | 6,627 | 3,839 | 33,392 |
| 91,743 | 122 | 22,979 | 6,659 | 3,843 | 33,603 |
| 91,744 | 123 | 22,852 | 6,650 | 3,848 | 33,473 |
| 91,745 | 122 | 22,789 | 6,657 | 3,855 | 33,423 |
| 91,746 | 121 | 22,655 | 6,637 | 3,869 | 33,282 |
| 91,747 | 120 | 22,864 | 6,649 | 3,882 | 33,515 |
| 91,748 | 128 | 22,772 | 6,606 | 3,845 | 33,351 |
| 91,749 | 133 | 23,072 | 6,700 | 3,883 | 33,788 |
| 91,750 | 130 | 23,003 | 6,698 | 3,888 | 33,719 |
| 91,751 | 131 | 23,151 | 6,747 | 3,890 | 33,919 |
| 91,752 | 132 | 23,161 | 6,765 | 3,897 | 33,955 |
| 91,753 | 137 | 23,276 | 6,819 | 3,942 | 34,174 |
| 91,754 | 137 | 23,192 | 6,747 | 3,898 | 33,974 |
| 91,755 | 137 | 23,240 | 6,716 | 3,888 | 33,981 |
| 91,756 | 132 | 23,214 | 6,737 | 3,907 | 33,990 |
| 91,757 | 133 | 23,110 | 6,760 | 3,930 | 33,933 |
| 91,758 | 130 | 23,214 | 6,838 | 3,988 | 34,170 |
| 91,759 | 133 | 22,795 | 6,755 | 3,901 | 33,584 |
| 91,760 | 147 | 22,897 | 6,774 | 3,928 | 33,746 |
| 91,761 | 162 | 22,899 | 6,796 | 3,929 | 33,786 |
| 91,762 | 164 | 22,779 | 6,823 | 3,949 | 33,715 |
| 91,763 | 166 | 22,811 | 6,822 | 3,962 | 33,761 |
| 91,764 | 172 | 22,567 | 6,795 | 3,925 | 33,459 |
| 91,765 | 174 | 22,261 | 6,732 | 3,869 | 33,036 |
| 91,766 | 179 | 22,477 | 6,828 | 3,922 | 33,406 |
| 91,767 | 178 | 22,316 | 6,820 | 3,898 | 33,212 |

|        |     |        |       |       |        |
|--------|-----|--------|-------|-------|--------|
| 91,768 | 173 | 22,053 | 6,804 | 3,872 | 32,902 |
| 91,769 | 168 | 21,833 | 6,781 | 3,833 | 32,615 |
| 91,770 | 164 | 21,718 | 6,744 | 3,813 | 32,439 |
| 91,771 | 172 | 21,954 | 6,815 | 3,876 | 32,817 |
| 91,772 | 176 | 21,771 | 6,829 | 3,879 | 32,655 |
| 91,773 | 180 | 21,759 | 6,841 | 3,889 | 32,669 |
| 91,774 | 175 | 21,713 | 6,830 | 3,896 | 32,614 |
| 91,775 | 182 | 21,886 | 6,867 | 3,928 | 32,863 |
| 91,776 | 187 | 21,953 | 6,876 | 3,929 | 32,945 |
| 91,777 | 183 | 21,935 | 6,872 | 3,910 | 32,900 |
| 91,778 | 184 | 22,077 | 6,905 | 3,923 | 33,089 |
| 91,779 | 182 | 22,120 | 6,918 | 3,907 | 33,127 |
| 91,780 | 182 | 22,172 | 6,915 | 3,914 | 33,183 |
| 91,781 | 180 | 22,198 | 6,954 | 3,908 | 33,240 |
| 91,782 | 181 | 22,182 | 6,934 | 3,908 | 33,205 |
| 91,783 | 181 | 21,921 | 6,924 | 3,894 | 32,920 |
| 91,784 | 176 | 22,188 | 7,057 | 3,985 | 33,406 |
| 91,785 | 186 | 22,299 | 7,075 | 4,011 | 33,571 |
| 91,786 | 190 | 22,354 | 7,113 | 4,016 | 33,673 |
| 91,787 | 191 | 22,284 | 7,029 | 3,985 | 33,489 |
| 91,788 | 194 | 22,298 | 6,986 | 3,966 | 33,444 |
| 91,789 | 199 | 22,388 | 6,990 | 4,015 | 33,592 |
| 91,790 | 201 | 22,359 | 6,972 | 4,015 | 33,547 |
| 91,791 | 199 | 22,485 | 7,031 | 4,034 | 33,749 |
| 91,792 | 194 | 22,194 | 6,973 | 3,998 | 33,359 |
| 91,793 | 194 | 22,008 | 6,962 | 4,002 | 33,166 |
| 91,794 | 202 | 22,117 | 7,003 | 4,029 | 33,351 |
| 91,795 | 206 | 22,032 | 6,966 | 4,011 | 33,215 |
| 91,796 | 207 | 21,882 | 6,939 | 3,974 | 33,002 |
| 91,797 | 213 | 21,607 | 6,887 | 3,894 | 32,601 |
| 91,798 | 212 | 21,251 | 6,782 | 3,831 | 32,076 |
| 91,799 | 213 | 21,116 | 6,765 | 3,822 | 31,916 |

|        |     |        |       |       |        |
|--------|-----|--------|-------|-------|--------|
| 91,800 | 213 | 21,172 | 6,765 | 3,846 | 31,996 |
| 91,801 | 216 | 21,000 | 6,714 | 3,826 | 31,756 |
| 91,802 | 221 | 20,882 | 6,666 | 3,780 | 31,549 |
| 91,803 | 221 | 20,941 | 6,683 | 3,773 | 31,618 |
| 91,804 | 219 | 20,780 | 6,687 | 3,774 | 31,460 |
| 91,805 | 215 | 20,666 | 6,690 | 3,781 | 31,352 |
| 91,806 | 215 | 20,654 | 6,641 | 3,769 | 31,279 |
| 91,807 | 201 | 19,949 | 6,402 | 3,601 | 30,153 |
| 91,808 | 203 | 20,095 | 6,429 | 3,611 | 30,338 |
| 91,809 | 205 | 20,229 | 6,469 | 3,631 | 30,534 |
| 91,810 | 205 | 20,216 | 6,466 | 3,646 | 30,533 |
| 91,811 | 194 | 20,404 | 6,531 | 3,701 | 30,830 |
| 91,812 | 181 | 20,156 | 6,388 | 3,671 | 30,396 |
| 91,813 | 183 | 20,364 | 6,436 | 3,705 | 30,688 |
| 91,814 | 179 | 20,453 | 6,524 | 3,744 | 30,900 |
| 91,815 | 171 | 20,389 | 6,499 | 3,756 | 30,815 |
| 91,816 | 170 | 20,179 | 6,413 | 3,734 | 30,496 |
| 91,817 | 172 | 20,314 | 6,421 | 3,725 | 30,632 |
| 91,818 | 171 | 20,451 | 6,416 | 3,720 | 30,758 |
| 91,819 | 174 | 20,633 | 6,432 | 3,712 | 30,951 |
| 91,820 | 175 | 20,551 | 6,433 | 3,728 | 30,887 |
| 91,821 | 174 | 20,606 | 6,487 | 3,752 | 31,019 |
| 91,822 | 167 | 20,610 | 6,450 | 3,741 | 30,968 |
| 91,823 | 162 | 20,447 | 6,366 | 3,705 | 30,680 |
| 91,824 | 160 | 20,595 | 6,381 | 3,731 | 30,867 |
| 91,825 | 161 | 20,199 | 6,276 | 3,686 | 30,322 |
| 91,826 | 154 | 19,958 | 6,249 | 3,641 | 30,002 |
| 91,827 | 149 | 20,207 | 6,346 | 3,692 | 30,394 |
| 91,828 | 143 | 20,105 | 6,304 | 3,675 | 30,227 |
| 91,829 | 146 | 19,947 | 6,241 | 3,649 | 29,983 |
| 91,830 | 145 | 19,804 | 6,200 | 3,649 | 29,798 |
| 91,831 | 143 | 19,698 | 6,090 | 3,611 | 29,542 |

|        |     |        |       |       |        |
|--------|-----|--------|-------|-------|--------|
| 91,832 | 145 | 19,836 | 6,155 | 3,639 | 29,775 |
| 91,833 | 149 | 20,020 | 6,198 | 3,668 | 30,035 |
| 91,834 | 154 | 20,018 | 6,201 | 3,669 | 30,042 |
| 91,835 | 154 | 19,962 | 6,191 | 3,662 | 29,969 |
| 91,836 | 150 | 19,915 | 6,216 | 3,660 | 29,941 |
| 91,837 | 148 | 19,712 | 6,193 | 3,619 | 29,672 |
| 91,838 | 145 | 19,614 | 6,174 | 3,591 | 29,524 |
| 91,839 | 141 | 19,279 | 6,081 | 3,535 | 29,036 |
| 91,840 | 138 | 19,353 | 6,150 | 3,551 | 29,192 |
| 91,841 | 136 | 19,399 | 6,164 | 3,545 | 29,244 |
| 91,842 | 142 | 19,203 | 6,051 | 3,461 | 28,857 |
| 91,843 | 143 | 19,468 | 6,117 | 3,494 | 29,222 |
| 91,844 | 141 | 19,639 | 6,170 | 3,521 | 29,471 |
| 91,845 | 132 | 19,272 | 6,062 | 3,460 | 28,926 |
| 91,846 | 128 | 19,181 | 6,033 | 3,432 | 28,774 |
| 91,847 | 127 | 19,188 | 6,016 | 3,442 | 28,773 |
| 91,848 | 121 | 19,311 | 6,058 | 3,456 | 28,946 |
| 91,849 | 114 | 19,220 | 6,070 | 3,451 | 28,855 |
| 91,850 | 110 | 19,287 | 6,048 | 3,447 | 28,892 |
| 91,851 | 111 | 19,274 | 6,031 | 3,433 | 28,849 |
| 91,852 | 107 | 19,005 | 5,926 | 3,397 | 28,435 |
| 91,853 | 102 | 19,279 | 6,001 | 3,462 | 28,844 |
| 91,854 | 103 | 19,578 | 6,036 | 3,478 | 29,195 |
| 91,855 | 107 | 19,464 | 5,955 | 3,417 | 28,943 |
| 91,856 | 107 | 19,262 | 5,919 | 3,407 | 28,695 |
| 91,857 | 108 | 19,636 | 6,106 | 3,564 | 29,414 |
| 91,858 | 107 | 19,747 | 6,131 | 3,587 | 29,572 |
| 91,859 | 103 | 19,796 | 6,179 | 3,607 | 29,685 |
| 91,860 | 105 | 19,901 | 6,209 | 3,633 | 29,848 |
| 91,861 | 108 | 20,181 | 6,286 | 3,672 | 30,247 |
| 91,862 | 110 | 20,123 | 6,281 | 3,667 | 30,181 |
| 91,863 | 105 | 20,149 | 6,291 | 3,667 | 30,212 |

|        |     |        |       |       |        |
|--------|-----|--------|-------|-------|--------|
| 91,864 | 107 | 20,115 | 6,262 | 3,642 | 30,126 |
| 91,865 | 111 | 20,223 | 6,229 | 3,644 | 30,207 |
| 91,866 | 110 | 20,327 | 6,238 | 3,632 | 30,307 |
| 91,867 | 109 | 20,125 | 6,165 | 3,588 | 29,987 |
| 91,868 | 107 | 20,260 | 6,205 | 3,621 | 30,193 |
| 91,869 | 121 | 20,557 | 6,302 | 3,701 | 30,681 |
| 91,870 | 128 | 20,531 | 6,288 | 3,694 | 30,641 |
| 91,871 | 129 | 20,353 | 6,230 | 3,646 | 30,358 |
| 91,872 | 135 | 20,516 | 6,265 | 3,668 | 30,584 |
| 91,873 | 133 | 20,137 | 6,194 | 3,608 | 30,072 |
| 91,874 | 136 | 19,869 | 6,110 | 3,553 | 29,668 |
| 91,875 | 135 | 19,471 | 6,037 | 3,491 | 29,134 |
| 91,876 | 140 | 19,917 | 6,136 | 3,544 | 29,737 |
| 91,877 | 140 | 19,780 | 6,077 | 3,524 | 29,521 |
| 91,878 | 140 | 19,678 | 6,076 | 3,513 | 29,407 |
| 91,879 | 140 | 19,603 | 6,074 | 3,508 | 29,325 |
| 91,880 | 136 | 19,532 | 6,047 | 3,508 | 29,223 |
| 91,881 | 135 | 19,414 | 6,057 | 3,511 | 29,117 |
| 91,882 | 135 | 19,803 | 6,207 | 3,555 | 29,700 |
| 91,883 | 152 | 20,085 | 6,264 | 3,583 | 30,084 |
| 91,884 | 149 | 20,345 | 6,322 | 3,607 | 30,423 |
| 91,885 | 145 | 20,477 | 6,323 | 3,610 | 30,555 |
| 91,886 | 145 | 20,643 | 6,345 | 3,614 | 30,747 |
| 91,887 | 145 | 20,706 | 6,335 | 3,620 | 30,806 |
| 91,888 | 142 | 20,494 | 6,242 | 3,606 | 30,484 |
| 91,889 | 140 | 20,454 | 6,236 | 3,600 | 30,430 |
| 91,890 | 142 | 20,659 | 6,267 | 3,619 | 30,687 |
| 91,891 | 143 | 20,876 | 6,352 | 3,661 | 31,032 |
| 91,892 | 143 | 20,836 | 6,327 | 3,655 | 30,961 |
| 91,893 | 140 | 20,840 | 6,340 | 3,661 | 30,981 |
| 91,894 | 144 | 20,958 | 6,351 | 3,669 | 31,122 |
| 91,895 | 141 | 20,942 | 6,372 | 3,672 | 31,127 |



|        |     |        |       |       |        |
|--------|-----|--------|-------|-------|--------|
| 91,896 | 154 | 21,276 | 6,474 | 3,715 | 31,619 |
| 91,897 | 158 | 21,249 | 6,490 | 3,728 | 31,625 |
| 91,898 | 158 | 21,215 | 6,510 | 3,729 | 31,612 |
| 91,899 | 164 | 21,346 | 6,546 | 3,767 | 31,823 |
| 91,900 | 169 | 21,240 | 6,526 | 3,772 | 31,707 |
| 91,901 | 169 | 21,024 | 6,491 | 3,733 | 31,417 |
| 91,902 | 171 | 21,493 | 6,671 | 3,811 | 32,146 |
| 91,903 | 172 | 21,501 | 6,710 | 3,804 | 32,187 |
| 91,904 | 177 | 21,375 | 6,704 | 3,786 | 32,042 |
| 91,905 | 174 | 21,180 | 6,640 | 3,792 | 31,786 |
| 91,906 | 168 | 20,663 | 6,481 | 3,706 | 31,018 |
| 91,907 | 171 | 20,832 | 6,509 | 3,704 | 31,216 |
| 91,908 | 170 | 20,933 | 6,491 | 3,698 | 31,292 |
| 91,909 | 171 | 20,722 | 6,479 | 3,685 | 31,057 |
| 91,910 | 171 | 20,829 | 6,428 | 3,674 | 31,102 |
| 91,911 | 171 | 20,819 | 6,412 | 3,628 | 31,030 |
| 91,912 | 176 | 20,818 | 6,409 | 3,617 | 31,020 |
| 91,913 | 171 | 20,866 | 6,422 | 3,605 | 31,064 |
| 91,914 | 181 | 21,001 | 6,488 | 3,642 | 31,312 |
| 91,915 | 175 | 20,829 | 6,470 | 3,607 | 31,081 |
| 91,916 | 182 | 20,814 | 6,486 | 3,622 | 31,104 |
| 91,917 | 183 | 20,564 | 6,411 | 3,580 | 30,738 |
| 91,918 | 187 | 20,641 | 6,429 | 3,602 | 30,859 |
| 91,919 | 182 | 20,666 | 6,427 | 3,576 | 30,851 |
| 91,920 | 182 | 20,517 | 6,412 | 3,571 | 30,682 |
| 91,921 | 179 | 20,806 | 6,492 | 3,605 | 31,082 |
| 91,922 | 181 | 20,757 | 6,486 | 3,611 | 31,035 |
| 91,923 | 177 | 20,758 | 6,519 | 3,654 | 31,108 |
| 91,924 | 175 | 20,882 | 6,532 | 3,665 | 31,254 |
| 91,925 | 174 | 20,776 | 6,526 | 3,650 | 31,126 |
| 91,926 | 173 | 20,826 | 6,532 | 3,683 | 31,214 |
| 91,927 | 174 | 20,926 | 6,582 | 3,729 | 31,411 |

|        |     |        |       |       |        |
|--------|-----|--------|-------|-------|--------|
| 91,928 | 174 | 21,043 | 6,648 | 3,742 | 31,607 |
| 91,929 | 176 | 21,181 | 6,687 | 3,773 | 31,817 |
| 91,930 | 184 | 21,518 | 6,748 | 3,792 | 32,242 |
| 91,931 | 184 | 21,599 | 6,747 | 3,797 | 32,327 |
| 91,932 | 189 | 21,468 | 6,692 | 3,775 | 32,124 |
| 91,933 | 187 | 21,856 | 6,808 | 3,856 | 32,707 |
| 91,934 | 183 | 22,273 | 6,940 | 3,948 | 33,344 |
| 91,935 | 190 | 22,389 | 6,981 | 3,962 | 33,522 |
| 91,936 | 192 | 22,320 | 7,001 | 3,967 | 33,480 |
| 91,937 | 195 | 22,416 | 7,028 | 3,979 | 33,618 |
| 91,938 | 195 | 22,463 | 7,035 | 3,980 | 33,673 |
| 91,939 | 197 | 22,828 | 7,152 | 4,062 | 34,239 |
| 91,940 | 198 | 22,811 | 7,161 | 4,052 | 34,222 |
| 91,941 | 198 | 22,944 | 7,172 | 4,059 | 34,373 |
| 91,942 | 206 | 22,973 | 7,171 | 4,068 | 34,418 |
| 91,943 | 207 | 22,996 | 7,182 | 4,076 | 34,461 |
| 91,944 | 203 | 23,168 | 7,276 | 4,143 | 34,790 |
| 91,945 | 209 | 23,036 | 7,278 | 4,165 | 34,688 |
| 91,946 | 212 | 23,271 | 7,326 | 4,201 | 35,010 |
| 91,947 | 205 | 23,574 | 7,423 | 4,250 | 35,452 |
| 91,948 | 210 | 23,441 | 7,371 | 4,211 | 35,233 |
| 91,949 | 209 | 23,336 | 7,317 | 4,193 | 35,055 |
| 91,950 | 203 | 23,375 | 7,362 | 4,244 | 35,184 |
| 91,951 | 205 | 23,381 | 7,425 | 4,237 | 35,248 |
| 91,952 | 206 | 23,572 | 7,483 | 4,283 | 35,544 |
| 91,953 | 208 | 23,624 | 7,472 | 4,298 | 35,602 |
| 91,954 | 207 | 23,670 | 7,452 | 4,320 | 35,649 |
| 91,955 | 201 | 23,404 | 7,373 | 4,291 | 35,269 |
| 91,956 | 211 | 23,448 | 7,468 | 4,325 | 35,452 |
| 91,957 | 220 | 23,411 | 7,466 | 4,340 | 35,437 |
| 91,958 | 224 | 23,080 | 7,362 | 4,275 | 34,941 |
| 91,959 | 227 | 23,138 | 7,364 | 4,253 | 34,982 |

|        |     |        |       |       |        |
|--------|-----|--------|-------|-------|--------|
| 91,960 | 228 | 23,378 | 7,434 | 4,294 | 35,334 |
| 91,961 | 231 | 23,008 | 7,370 | 4,236 | 34,845 |
| 91,962 | 227 | 22,921 | 7,349 | 4,235 | 34,732 |
| 91,963 | 231 | 22,881 | 7,336 | 4,228 | 34,676 |
| 91,964 | 232 | 23,137 | 7,415 | 4,270 | 35,054 |
| 91,965 | 231 | 23,048 | 7,406 | 4,279 | 34,964 |
| 91,966 | 230 | 22,949 | 7,372 | 4,296 | 34,847 |
| 91,967 | 224 | 22,831 | 7,332 | 4,257 | 34,644 |
| 91,968 | 225 | 22,612 | 7,247 | 4,220 | 34,304 |
| 91,969 | 221 | 22,361 | 7,180 | 4,169 | 33,931 |
| 91,970 | 218 | 22,436 | 7,210 | 4,209 | 34,073 |
| 91,971 | 217 | 22,378 | 7,180 | 4,206 | 33,981 |
| 91,972 | 208 | 22,331 | 7,153 | 4,198 | 33,890 |
| 91,973 | 204 | 22,206 | 7,051 | 4,118 | 33,579 |
| 91,974 | 200 | 22,271 | 7,037 | 4,124 | 33,632 |
| 91,975 | 200 | 22,533 | 7,077 | 4,155 | 33,965 |
| 91,976 | 199 | 22,253 | 6,937 | 4,071 | 33,460 |
| 91,977 | 200 | 22,489 | 6,984 | 4,115 | 33,788 |
| 91,978 | 201 | 22,785 | 7,008 | 4,146 | 34,140 |
| 91,979 | 199 | 22,647 | 6,956 | 4,118 | 33,920 |
| 91,980 | 202 | 22,269 | 6,873 | 4,069 | 33,413 |
| 91,981 | 199 | 21,957 | 6,808 | 4,047 | 33,011 |
| 91,982 | 194 | 21,865 | 6,788 | 4,055 | 32,902 |
| 91,983 | 195 | 21,573 | 6,733 | 3,995 | 32,496 |
| 91,984 | 197 | 21,462 | 6,665 | 3,967 | 32,291 |
| 91,985 | 194 | 20,975 | 6,527 | 3,879 | 31,575 |
| 91,986 | 186 | 20,575 | 6,397 | 3,825 | 30,983 |
| 91,987 | 185 | 20,460 | 6,326 | 3,794 | 30,765 |
| 91,988 | 186 | 20,443 | 6,305 | 3,787 | 30,721 |
| 91,989 | 186 | 20,580 | 6,318 | 3,771 | 30,855 |
| 91,990 | 188 | 20,519 | 6,290 | 3,745 | 30,742 |
| 91,991 | 186 | 20,651 | 6,309 | 3,784 | 30,930 |

|        |     |        |       |       |        |
|--------|-----|--------|-------|-------|--------|
| 91,992 | 185 | 20,365 | 6,244 | 3,757 | 30,551 |
| 91,993 | 179 | 20,205 | 6,231 | 3,750 | 30,365 |
| 91,994 | 186 | 20,109 | 6,179 | 3,715 | 30,189 |
| 91,995 | 184 | 19,831 | 6,057 | 3,653 | 29,725 |
| 91,996 | 174 | 19,783 | 6,068 | 3,647 | 29,672 |
| 91,997 | 177 | 19,535 | 5,935 | 3,580 | 29,227 |
| 91,998 | 176 | 19,502 | 5,923 | 3,569 | 29,170 |
| 91,999 | 171 | 19,291 | 5,873 | 3,533 | 28,868 |
| 92,000 | 172 | 19,297 | 5,873 | 3,526 | 28,868 |
| 92,001 | 176 | 19,452 | 5,809 | 3,488 | 28,925 |
| 92,002 | 176 | 19,442 | 5,782 | 3,466 | 28,866 |
| 92,003 | 172 | 19,470 | 5,751 | 3,450 | 28,843 |
| 92,004 | 177 | 18,911 | 5,528 | 3,304 | 27,920 |
| 92,005 | 180 | 19,214 | 5,584 | 3,328 | 28,306 |
| 92,006 | 176 | 19,484 | 5,637 | 3,371 | 28,668 |
| 92,007 | 176 | 19,526 | 5,633 | 3,364 | 28,699 |
| 92,008 | 172 | 19,944 | 5,768 | 3,419 | 29,303 |
| 92,009 | 164 | 20,054 | 5,817 | 3,437 | 29,472 |
| 92,010 | 161 | 20,024 | 5,776 | 3,450 | 29,411 |
| 92,011 | 160 | 19,944 | 5,775 | 3,449 | 29,328 |
| 92,012 | 156 | 19,913 | 5,770 | 3,472 | 29,311 |
| 92,013 | 157 | 19,982 | 5,806 | 3,488 | 29,433 |
| 92,014 | 153 | 20,082 | 5,838 | 3,511 | 29,584 |
| 92,015 | 154 | 20,385 | 5,913 | 3,539 | 29,991 |
| 92,016 | 146 | 20,397 | 5,872 | 3,497 | 29,912 |
| 92,017 | 148 | 20,450 | 5,855 | 3,489 | 29,942 |
| 92,018 | 147 | 20,599 | 5,866 | 3,495 | 30,107 |
| 92,019 | 143 | 20,429 | 5,791 | 3,446 | 29,809 |
| 92,020 | 144 | 20,324 | 5,763 | 3,401 | 29,632 |
| 92,021 | 144 | 20,397 | 5,749 | 3,398 | 29,688 |
| 92,022 | 146 | 20,292 | 5,737 | 3,369 | 29,544 |
| 92,023 | 146 | 20,134 | 5,702 | 3,339 | 29,321 |

|        |     |        |       |       |        |
|--------|-----|--------|-------|-------|--------|
| 92,024 | 149 | 20,917 | 5,898 | 3,446 | 30,410 |
| 92,025 | 156 | 21,194 | 5,998 | 3,483 | 30,831 |
| 92,026 | 157 | 21,146 | 5,978 | 3,456 | 30,737 |
| 92,027 | 157 | 21,345 | 6,065 | 3,478 | 31,045 |
| 92,028 | 158 | 21,381 | 6,088 | 3,491 | 31,118 |
| 92,029 | 156 | 21,352 | 6,086 | 3,495 | 31,089 |
| 92,030 | 149 | 21,169 | 6,009 | 3,459 | 30,786 |
| 92,031 | 149 | 21,280 | 6,026 | 3,465 | 30,920 |
| 92,032 | 148 | 21,355 | 6,014 | 3,451 | 30,968 |
| 92,033 | 153 | 21,421 | 6,023 | 3,441 | 31,038 |
| 92,034 | 150 | 21,625 | 6,010 | 3,447 | 31,232 |
| 92,035 | 153 | 21,849 | 6,105 | 3,490 | 31,597 |
| 92,036 | 146 | 21,536 | 6,028 | 3,453 | 31,163 |
| 92,037 | 146 | 21,456 | 6,026 | 3,452 | 31,080 |
| 92,038 | 143 | 21,398 | 6,033 | 3,474 | 31,048 |
| 92,039 | 146 | 21,416 | 6,066 | 3,511 | 31,139 |
| 92,040 | 143 | 21,268 | 6,067 | 3,518 | 30,996 |
| 92,041 | 146 | 21,164 | 6,084 | 3,534 | 30,928 |
| 92,042 | 146 | 21,124 | 6,103 | 3,533 | 30,906 |
| 92,043 | 148 | 21,147 | 6,097 | 3,512 | 30,904 |
| 92,044 | 143 | 21,016 | 6,016 | 3,468 | 30,643 |
| 92,045 | 146 | 21,125 | 6,012 | 3,466 | 30,749 |
| 92,046 | 146 | 21,182 | 6,020 | 3,462 | 30,810 |
| 92,047 | 147 | 21,335 | 6,095 | 3,509 | 31,086 |
| 92,048 | 139 | 21,182 | 6,038 | 3,480 | 30,839 |
| 92,049 | 136 | 20,988 | 6,034 | 3,487 | 30,645 |
| 92,050 | 136 | 20,948 | 6,031 | 3,485 | 30,600 |
| 92,051 | 131 | 20,921 | 6,081 | 3,512 | 30,645 |
| 92,052 | 126 | 20,730 | 6,033 | 3,494 | 30,383 |
| 92,053 | 129 | 20,569 | 6,065 | 3,489 | 30,252 |
| 92,054 | 136 | 20,759 | 6,164 | 3,525 | 30,584 |
| 92,055 | 125 | 19,584 | 5,864 | 3,319 | 28,892 |

|        |     |        |       |       |        |
|--------|-----|--------|-------|-------|--------|
| 92,056 | 127 | 19,685 | 5,929 | 3,337 | 29,078 |
| 92,057 | 133 | 19,875 | 5,983 | 3,357 | 29,348 |
| 92,058 | 133 | 19,785 | 5,989 | 3,347 | 29,254 |
| 92,059 | 129 | 20,085 | 6,098 | 3,402 | 29,714 |
| 92,060 | 127 | 19,882 | 6,025 | 3,368 | 29,402 |
| 92,061 | 130 | 20,115 | 6,073 | 3,397 | 29,715 |
| 92,062 | 127 | 20,413 | 6,172 | 3,444 | 30,156 |
| 92,063 | 130 | 20,531 | 6,230 | 3,464 | 30,355 |
| 92,064 | 133 | 20,329 | 6,178 | 3,415 | 30,055 |
| 92,065 | 135 | 20,690 | 6,277 | 3,467 | 30,569 |
| 92,066 | 138 | 20,576 | 6,273 | 3,471 | 30,458 |
| 92,067 | 136 | 20,275 | 6,228 | 3,428 | 30,067 |
| 92,068 | 133 | 20,268 | 6,294 | 3,425 | 30,120 |
| 92,069 | 133 | 20,273 | 6,344 | 3,458 | 30,208 |
| 92,070 | 131 | 20,004 | 6,292 | 3,425 | 29,852 |
| 92,071 | 135 | 19,927 | 6,307 | 3,407 | 29,776 |
| 92,072 | 139 | 20,259 | 6,447 | 3,472 | 30,317 |
| 92,073 | 138 | 20,108 | 6,465 | 3,471 | 30,182 |
| 92,074 | 137 | 19,953 | 6,454 | 3,466 | 30,010 |
| 92,075 | 143 | 19,991 | 6,466 | 3,483 | 30,083 |
| 92,076 | 141 | 19,805 | 6,429 | 3,457 | 29,832 |
| 92,077 | 140 | 19,393 | 6,393 | 3,444 | 29,370 |
| 92,078 | 141 | 19,526 | 6,424 | 3,484 | 29,575 |
| 92,079 | 142 | 19,438 | 6,433 | 3,480 | 29,493 |
| 92,080 | 141 | 19,428 | 6,440 | 3,464 | 29,473 |
| 92,081 | 145 | 19,462 | 6,453 | 3,459 | 29,519 |
| 92,082 | 144 | 19,416 | 6,473 | 3,457 | 29,490 |
| 92,083 | 142 | 19,405 | 6,484 | 3,464 | 29,495 |
| 92,084 | 142 | 19,391 | 6,530 | 3,499 | 29,562 |
| 92,085 | 145 | 19,391 | 6,551 | 3,515 | 29,602 |
| 92,086 | 147 | 19,620 | 6,645 | 3,567 | 29,979 |
| 92,087 | 144 | 19,892 | 6,717 | 3,609 | 30,362 |

|        |     |        |       |       |        |
|--------|-----|--------|-------|-------|--------|
| 92,088 | 141 | 20,209 | 6,803 | 3,630 | 30,783 |
| 92,089 | 139 | 20,368 | 6,815 | 3,636 | 30,958 |
| 92,090 | 136 | 20,477 | 6,842 | 3,637 | 31,092 |
| 92,091 | 140 | 20,489 | 6,843 | 3,638 | 31,110 |
| 92,092 | 138 | 20,341 | 6,749 | 3,570 | 30,798 |
| 92,093 | 139 | 20,573 | 6,818 | 3,585 | 31,115 |
| 92,094 | 135 | 20,321 | 6,739 | 3,549 | 30,744 |
| 92,095 | 133 | 19,986 | 6,679 | 3,519 | 30,317 |
| 92,096 | 132 | 20,518 | 6,793 | 3,618 | 31,061 |
| 92,097 | 138 | 20,582 | 6,791 | 3,649 | 31,160 |
| 92,098 | 142 | 20,749 | 6,831 | 3,671 | 31,393 |
| 92,099 | 144 | 20,772 | 6,798 | 3,655 | 31,369 |
| 92,100 | 145 | 21,115 | 6,807 | 3,678 | 31,745 |
| 92,101 | 146 | 21,044 | 6,727 | 3,651 | 31,568 |
| 92,102 | 145 | 21,370 | 6,788 | 3,699 | 32,002 |
| 92,103 | 142 | 21,439 | 6,774 | 3,711 | 32,066 |
| 92,104 | 143 | 21,568 | 6,793 | 3,724 | 32,228 |
| 92,105 | 135 | 21,832 | 6,848 | 3,757 | 32,572 |
| 92,106 | 130 | 21,433 | 6,756 | 3,704 | 32,023 |
| 92,107 | 130 | 21,677 | 6,778 | 3,725 | 32,310 |
| 92,108 | 125 | 21,622 | 6,775 | 3,734 | 32,256 |
| 92,109 | 131 | 21,931 | 6,831 | 3,777 | 32,670 |
| 92,110 | 130 | 21,633 | 6,730 | 3,739 | 32,232 |
| 92,111 | 137 | 21,867 | 6,790 | 3,782 | 32,576 |
| 92,112 | 135 | 21,911 | 6,808 | 3,774 | 32,628 |
| 92,113 | 136 | 21,878 | 6,789 | 3,760 | 32,563 |
| 92,114 | 135 | 21,711 | 6,763 | 3,734 | 32,343 |
| 92,115 | 139 | 21,456 | 6,671 | 3,701 | 31,967 |
| 92,116 | 135 | 21,292 | 6,646 | 3,664 | 31,737 |
| 92,117 | 132 | 21,441 | 6,674 | 3,697 | 31,944 |
| 92,118 | 146 | 21,452 | 6,587 | 3,679 | 31,864 |
| 92,119 | 146 | 21,404 | 6,592 | 3,677 | 31,819 |

|        |     |        |       |       |        |
|--------|-----|--------|-------|-------|--------|
| 92,120 | 145 | 21,364 | 6,588 | 3,691 | 31,788 |
| 92,121 | 142 | 21,667 | 6,627 | 3,735 | 32,171 |
| 92,122 | 143 | 21,760 | 6,670 | 3,763 | 32,336 |
| 92,123 | 143 | 21,700 | 6,634 | 3,759 | 32,236 |
| 92,124 | 139 | 21,443 | 6,513 | 3,727 | 31,822 |
| 92,125 | 141 | 21,515 | 6,521 | 3,759 | 31,936 |
| 92,126 | 141 | 21,584 | 6,520 | 3,762 | 32,007 |
| 92,127 | 135 | 21,320 | 6,495 | 3,761 | 31,711 |
| 92,128 | 142 | 21,427 | 6,565 | 3,800 | 31,934 |
| 92,129 | 144 | 21,305 | 6,493 | 3,742 | 31,684 |
| 92,130 | 149 | 21,334 | 6,479 | 3,767 | 31,729 |
| 92,131 | 149 | 21,368 | 6,485 | 3,778 | 31,780 |
| 92,132 | 145 | 21,194 | 6,447 | 3,751 | 31,537 |
| 92,133 | 146 | 21,310 | 6,436 | 3,761 | 31,653 |
| 92,134 | 147 | 21,465 | 6,469 | 3,789 | 31,870 |
| 92,135 | 155 | 21,646 | 6,497 | 3,817 | 32,115 |
| 92,136 | 155 | 21,301 | 6,414 | 3,751 | 31,621 |
| 92,137 | 160 | 21,042 | 6,314 | 3,677 | 31,193 |
| 92,138 | 159 | 20,785 | 6,258 | 3,627 | 30,829 |
| 92,139 | 163 | 20,929 | 6,304 | 3,668 | 31,064 |
| 92,140 | 166 | 20,914 | 6,288 | 3,653 | 31,021 |
| 92,141 | 167 | 20,885 | 6,262 | 3,633 | 30,947 |
| 92,142 | 167 | 20,865 | 6,263 | 3,646 | 30,941 |
| 92,143 | 162 | 20,599 | 6,201 | 3,620 | 30,582 |
| 92,144 | 163 | 20,978 | 6,289 | 3,697 | 31,127 |
| 92,145 | 164 | 20,985 | 6,344 | 3,735 | 31,228 |
| 92,146 | 165 | 20,919 | 6,379 | 3,734 | 31,197 |
| 92,147 | 169 | 20,996 | 6,444 | 3,778 | 31,387 |
| 92,148 | 163 | 20,744 | 6,419 | 3,731 | 31,057 |
| 92,149 | 163 | 20,934 | 6,498 | 3,767 | 31,362 |
| 92,150 | 161 | 20,834 | 6,532 | 3,803 | 31,330 |
| 92,151 | 163 | 20,718 | 6,576 | 3,794 | 31,251 |



|        |     |        |       |       |        |
|--------|-----|--------|-------|-------|--------|
| 92,152 | 161 | 20,714 | 6,579 | 3,827 | 31,281 |
| 92,153 | 166 | 20,807 | 6,626 | 3,821 | 31,420 |
| 92,154 | 169 | 21,018 | 6,677 | 3,861 | 31,725 |
| 92,155 | 172 | 20,838 | 6,643 | 3,856 | 31,509 |
| 92,156 | 172 | 20,811 | 6,645 | 3,854 | 31,482 |
| 92,157 | 173 | 20,948 | 6,677 | 3,884 | 31,682 |
| 92,158 | 172 | 20,916 | 6,696 | 3,892 | 31,676 |
| 92,159 | 168 | 20,900 | 6,636 | 3,861 | 31,565 |
| 92,160 | 172 | 20,865 | 6,612 | 3,855 | 31,504 |
| 92,161 | 174 | 21,067 | 6,654 | 3,870 | 31,765 |
| 92,162 | 168 | 21,134 | 6,657 | 3,848 | 31,807 |
| 92,163 | 167 | 21,070 | 6,639 | 3,862 | 31,738 |
| 92,164 | 168 | 20,977 | 6,612 | 3,846 | 31,603 |
| 92,165 | 164 | 20,775 | 6,539 | 3,817 | 31,295 |
| 92,166 | 159 | 20,614 | 6,439 | 3,774 | 30,986 |
| 92,167 | 163 | 20,562 | 6,445 | 3,765 | 30,935 |
| 92,168 | 159 | 20,263 | 6,359 | 3,744 | 30,525 |
| 92,169 | 155 | 20,251 | 6,486 | 3,790 | 30,682 |
| 92,170 | 155 | 20,385 | 6,480 | 3,786 | 30,806 |
| 92,171 | 159 | 20,450 | 6,481 | 3,772 | 30,862 |
| 92,172 | 161 | 20,478 | 6,526 | 3,790 | 30,955 |
| 92,173 | 162 | 20,503 | 6,513 | 3,793 | 30,971 |
| 92,174 | 158 | 20,184 | 6,411 | 3,742 | 30,495 |
| 92,175 | 156 | 20,584 | 6,534 | 3,790 | 31,064 |
| 92,176 | 151 | 20,627 | 6,556 | 3,770 | 31,104 |
| 92,177 | 149 | 20,723 | 6,475 | 3,704 | 31,051 |
| 92,178 | 152 | 21,225 | 6,548 | 3,747 | 31,672 |
| 92,179 | 145 | 21,448 | 6,591 | 3,789 | 31,973 |
| 92,180 | 141 | 21,389 | 6,591 | 3,786 | 31,907 |
| 92,181 | 135 | 21,197 | 6,552 | 3,730 | 31,614 |
| 92,182 | 136 | 21,374 | 6,589 | 3,761 | 31,860 |
| 92,183 | 137 | 21,215 | 6,510 | 3,739 | 31,601 |

|        |     |        |       |       |        |
|--------|-----|--------|-------|-------|--------|
| 92,184 | 137 | 21,358 | 6,535 | 3,764 | 31,794 |
| 92,185 | 136 | 21,113 | 6,457 | 3,719 | 31,425 |
| 92,186 | 124 | 21,055 | 6,447 | 3,757 | 31,383 |
| 92,187 | 124 | 21,188 | 6,515 | 3,781 | 31,608 |
| 92,188 | 114 | 20,893 | 6,406 | 3,735 | 31,148 |
| 92,189 | 117 | 20,825 | 6,410 | 3,726 | 31,078 |
| 92,190 | 117 | 20,587 | 6,315 | 3,698 | 30,717 |
| 92,191 | 118 | 20,880 | 6,401 | 3,755 | 31,154 |
| 92,192 | 113 | 20,620 | 6,341 | 3,712 | 30,786 |
| 92,193 | 117 | 20,701 | 6,396 | 3,742 | 30,956 |
| 92,194 | 120 | 20,685 | 6,398 | 3,722 | 30,925 |
| 92,195 | 126 | 20,665 | 6,393 | 3,714 | 30,898 |
| 92,196 | 126 | 20,529 | 6,311 | 3,659 | 30,625 |
| 92,197 | 126 | 20,556 | 6,302 | 3,659 | 30,643 |
| 92,198 | 124 | 20,546 | 6,310 | 3,658 | 30,638 |
| 92,199 | 123 | 20,378 | 6,242 | 3,660 | 30,403 |
| 92,200 | 122 | 20,471 | 6,154 | 3,626 | 30,373 |
| 92,201 | 121 | 20,650 | 6,229 | 3,636 | 30,636 |
| 92,202 | 119 | 20,457 | 6,141 | 3,611 | 30,328 |
| 92,203 | 119 | 20,184 | 6,070 | 3,539 | 29,912 |
| 92,204 | 115 | 20,600 | 6,173 | 3,621 | 30,509 |
| 92,205 | 111 | 20,297 | 6,115 | 3,583 | 30,106 |
| 92,206 | 107 | 20,094 | 6,060 | 3,527 | 29,788 |
| 92,207 | 109 | 20,296 | 6,094 | 3,568 | 30,067 |
| 92,208 | 106 | 20,103 | 6,029 | 3,543 | 29,781 |
| 92,209 | 106 | 20,135 | 6,024 | 3,554 | 29,819 |
| 92,210 | 108 | 20,210 | 6,084 | 3,601 | 30,003 |
| 92,211 | 105 | 20,176 | 6,129 | 3,607 | 30,017 |
| 92,212 | 103 | 20,030 | 6,092 | 3,607 | 29,832 |
| 92,213 | 110 | 20,249 | 6,168 | 3,658 | 30,185 |
| 92,214 | 112 | 20,313 | 6,201 | 3,677 | 30,303 |
| 92,215 | 111 | 20,454 | 6,203 | 3,694 | 30,462 |

|        |     |        |       |       |        |
|--------|-----|--------|-------|-------|--------|
| 92,216 | 112 | 20,454 | 6,205 | 3,696 | 30,467 |
| 92,217 | 106 | 20,456 | 6,153 | 3,691 | 30,406 |
| 92,218 | 107 | 20,546 | 6,143 | 3,669 | 30,465 |
| 92,219 | 107 | 20,773 | 6,189 | 3,689 | 30,758 |
| 92,220 | 105 | 20,744 | 6,183 | 3,703 | 30,735 |
| 92,221 | 105 | 20,558 | 6,148 | 3,670 | 30,481 |
| 92,222 | 102 | 20,877 | 6,181 | 3,734 | 30,894 |
| 92,223 | 97  | 20,877 | 6,134 | 3,721 | 30,829 |
| 92,224 | 104 | 20,719 | 6,122 | 3,688 | 30,633 |
| 92,225 | 104 | 20,612 | 6,081 | 3,687 | 30,484 |
| 92,226 | 109 | 20,952 | 6,200 | 3,760 | 31,021 |
| 92,227 | 108 | 20,687 | 6,113 | 3,716 | 30,624 |
| 92,228 | 108 | 20,524 | 6,121 | 3,753 | 30,506 |
| 92,229 | 108 | 20,376 | 6,135 | 3,731 | 30,350 |
| 92,230 | 108 | 20,073 | 6,082 | 3,676 | 29,939 |
| 92,231 | 111 | 20,066 | 6,062 | 3,673 | 29,912 |
| 92,232 | 111 | 20,055 | 6,062 | 3,660 | 29,888 |
| 92,233 | 108 | 19,959 | 6,066 | 3,692 | 29,825 |
| 92,234 | 107 | 20,006 | 6,102 | 3,672 | 29,887 |
| 92,235 | 110 | 20,257 | 6,172 | 3,710 | 30,249 |
| 92,236 | 115 | 20,422 | 6,251 | 3,739 | 30,527 |
| 92,237 | 112 | 20,166 | 6,240 | 3,727 | 30,245 |
| 92,238 | 110 | 20,402 | 6,287 | 3,779 | 30,578 |
| 92,239 | 108 | 20,428 | 6,344 | 3,813 | 30,693 |
| 92,240 | 108 | 20,721 | 6,462 | 3,882 | 31,173 |
| 92,241 | 105 | 20,659 | 6,422 | 3,867 | 31,053 |
| 92,242 | 108 | 20,561 | 6,421 | 3,864 | 30,954 |
| 92,243 | 104 | 20,675 | 6,445 | 3,884 | 31,108 |
| 92,244 | 105 | 20,869 | 6,507 | 3,924 | 31,405 |
| 92,245 | 100 | 20,689 | 6,407 | 3,916 | 31,112 |
| 92,246 | 98  | 20,764 | 6,501 | 3,947 | 31,310 |
| 92,247 | 95  | 20,793 | 6,554 | 3,963 | 31,405 |

|        |     |        |       |       |        |
|--------|-----|--------|-------|-------|--------|
| 92,248 | 98  | 20,833 | 6,570 | 3,997 | 31,498 |
| 92,249 | 104 | 20,716 | 6,547 | 3,955 | 31,322 |
| 92,250 | 103 | 20,494 | 6,526 | 3,927 | 31,050 |
| 92,251 | 109 | 20,888 | 6,745 | 4,022 | 31,764 |
| 92,252 | 114 | 20,899 | 6,768 | 4,053 | 31,834 |
| 92,253 | 117 | 20,893 | 6,804 | 4,058 | 31,872 |
| 92,254 | 124 | 20,806 | 6,791 | 4,035 | 31,756 |
| 92,255 | 130 | 20,671 | 6,750 | 3,993 | 31,544 |
| 92,256 | 130 | 20,723 | 6,760 | 3,990 | 31,603 |
| 92,257 | 131 | 20,644 | 6,758 | 3,983 | 31,516 |
| 92,258 | 130 | 20,614 | 6,767 | 3,991 | 31,502 |
| 92,259 | 132 | 20,524 | 6,719 | 3,951 | 31,326 |
| 92,260 | 134 | 20,823 | 6,801 | 3,992 | 31,750 |
| 92,261 | 133 | 20,724 | 6,798 | 3,984 | 31,639 |
| 92,262 | 131 | 20,847 | 6,782 | 3,992 | 31,752 |
| 92,263 | 135 | 21,060 | 6,861 | 4,012 | 32,068 |
| 92,264 | 130 | 21,021 | 6,888 | 4,024 | 32,063 |
| 92,265 | 130 | 20,890 | 6,885 | 3,988 | 31,893 |
| 92,266 | 130 | 20,852 | 6,898 | 3,993 | 31,873 |
| 92,267 | 128 | 20,688 | 6,851 | 3,964 | 31,631 |
| 92,268 | 134 | 20,853 | 6,947 | 4,001 | 31,935 |
| 92,269 | 134 | 20,877 | 6,963 | 4,015 | 31,989 |
| 92,270 | 134 | 21,096 | 6,992 | 4,042 | 32,264 |
| 92,271 | 134 | 21,022 | 7,009 | 4,027 | 32,192 |
| 92,272 | 134 | 20,983 | 7,021 | 4,012 | 32,150 |
| 92,273 | 138 | 21,231 | 7,081 | 4,046 | 32,496 |
| 92,274 | 140 | 21,117 | 7,085 | 4,032 | 32,374 |
| 92,275 | 128 | 20,977 | 7,057 | 4,038 | 32,200 |
| 92,276 | 128 | 21,040 | 7,081 | 4,046 | 32,295 |
| 92,277 | 126 | 20,877 | 6,994 | 4,002 | 31,999 |
| 92,278 | 127 | 20,822 | 6,928 | 3,955 | 31,832 |
| 92,279 | 129 | 21,165 | 7,013 | 3,976 | 32,283 |

|        |     |        |       |       |        |
|--------|-----|--------|-------|-------|--------|
| 92,280 | 126 | 21,082 | 7,019 | 3,967 | 32,194 |
| 92,281 | 125 | 21,089 | 7,060 | 4,035 | 32,309 |
| 92,282 | 122 | 20,650 | 6,959 | 3,965 | 31,696 |
| 92,283 | 122 | 20,883 | 6,975 | 3,975 | 31,955 |
| 92,284 | 119 | 20,844 | 7,000 | 4,018 | 31,981 |
| 92,285 | 118 | 20,687 | 6,945 | 3,991 | 31,741 |
| 92,286 | 118 | 20,496 | 6,894 | 3,953 | 31,461 |
| 92,287 | 113 | 20,443 | 6,862 | 3,950 | 31,368 |
| 92,288 | 120 | 20,289 | 6,853 | 3,940 | 31,202 |
| 92,289 | 122 | 20,163 | 6,824 | 3,907 | 31,016 |
| 92,290 | 127 | 20,225 | 6,771 | 3,880 | 31,003 |
| 92,291 | 128 | 20,357 | 6,757 | 3,860 | 31,102 |
| 92,292 | 124 | 19,425 | 6,523 | 3,686 | 29,758 |
| 92,293 | 128 | 19,612 | 6,564 | 3,697 | 30,001 |
| 92,294 | 141 | 19,805 | 6,605 | 3,727 | 30,278 |
| 92,295 | 141 | 19,834 | 6,588 | 3,728 | 30,291 |
| 92,296 | 139 | 19,951 | 6,676 | 3,764 | 30,530 |
| 92,297 | 137 | 20,030 | 6,634 | 3,784 | 30,585 |
| 92,298 | 136 | 20,028 | 6,564 | 3,770 | 30,498 |
| 92,299 | 131 | 20,035 | 6,551 | 3,764 | 30,481 |
| 92,300 | 133 | 19,936 | 6,463 | 3,715 | 30,247 |
| 92,301 | 135 | 20,137 | 6,518 | 3,748 | 30,538 |
| 92,302 | 134 | 20,415 | 6,614 | 3,790 | 30,953 |
| 92,303 | 127 | 20,071 | 6,431 | 3,717 | 30,346 |
| 92,304 | 127 | 20,248 | 6,449 | 3,739 | 30,563 |
| 92,305 | 120 | 20,439 | 6,496 | 3,775 | 30,830 |
| 92,306 | 116 | 20,469 | 6,513 | 3,777 | 30,875 |
| 92,307 | 113 | 20,364 | 6,450 | 3,768 | 30,695 |
| 92,308 | 118 | 20,173 | 6,399 | 3,717 | 30,407 |
| 92,309 | 117 | 20,020 | 6,347 | 3,702 | 30,186 |
| 92,310 | 114 | 20,167 | 6,434 | 3,767 | 30,482 |
| 92,311 | 117 | 19,962 | 6,405 | 3,754 | 30,238 |

|        |     |        |       |       |        |
|--------|-----|--------|-------|-------|--------|
| 92,312 | 121 | 20,338 | 6,483 | 3,800 | 30,742 |
| 92,313 | 127 | 19,946 | 6,390 | 3,717 | 30,180 |
| 92,314 | 124 | 20,137 | 6,442 | 3,758 | 30,461 |
| 92,315 | 123 | 20,279 | 6,471 | 3,790 | 30,663 |
| 92,316 | 127 | 20,073 | 6,356 | 3,761 | 30,317 |
| 92,317 | 132 | 20,096 | 6,351 | 3,752 | 30,331 |
| 92,318 | 129 | 19,941 | 6,296 | 3,732 | 30,098 |
| 92,319 | 137 | 20,587 | 6,413 | 3,817 | 30,954 |
| 92,320 | 139 | 20,430 | 6,330 | 3,768 | 30,667 |
| 92,321 | 139 | 20,187 | 6,281 | 3,730 | 30,337 |
| 92,322 | 142 | 20,559 | 6,364 | 3,782 | 30,847 |
| 92,323 | 143 | 20,539 | 6,358 | 3,780 | 30,820 |
| 92,324 | 145 | 20,743 | 6,408 | 3,825 | 31,121 |
| 92,325 | 143 | 20,652 | 6,353 | 3,802 | 30,950 |
| 92,326 | 146 | 20,675 | 6,295 | 3,758 | 30,874 |
| 92,327 | 147 | 20,828 | 6,325 | 3,785 | 31,085 |
| 92,328 | 149 | 20,827 | 6,314 | 3,789 | 31,079 |
| 92,329 | 149 | 20,808 | 6,314 | 3,801 | 31,072 |
| 92,330 | 153 | 20,832 | 6,316 | 3,823 | 31,124 |
| 92,331 | 157 | 20,960 | 6,307 | 3,797 | 31,221 |
| 92,332 | 157 | 21,071 | 6,295 | 3,781 | 31,304 |
| 92,333 | 161 | 21,299 | 6,347 | 3,801 | 31,608 |
| 92,334 | 162 | 21,252 | 6,338 | 3,779 | 31,531 |
| 92,335 | 163 | 21,335 | 6,365 | 3,786 | 31,649 |
| 92,336 | 163 | 21,409 | 6,381 | 3,779 | 31,732 |
| 92,337 | 163 | 21,344 | 6,354 | 3,754 | 31,615 |
| 92,338 | 162 | 21,400 | 6,321 | 3,724 | 31,607 |
| 92,339 | 161 | 21,414 | 6,291 | 3,720 | 31,586 |
| 92,340 | 159 | 21,122 | 6,229 | 3,712 | 31,222 |
| 92,341 | 155 | 21,259 | 6,279 | 3,725 | 31,418 |
| 92,342 | 160 | 21,200 | 6,253 | 3,729 | 31,342 |
| 92,343 | 151 | 20,688 | 6,082 | 3,630 | 30,551 |

|        |     |        |       |       |        |
|--------|-----|--------|-------|-------|--------|
| 92,344 | 154 | 21,101 | 6,165 | 3,681 | 31,101 |
| 92,345 | 155 | 21,366 | 6,244 | 3,722 | 31,487 |
| 92,346 | 154 | 21,406 | 6,210 | 3,723 | 31,493 |
| 92,347 | 153 | 21,679 | 6,289 | 3,753 | 31,874 |
| 92,348 | 156 | 21,558 | 6,309 | 3,717 | 31,740 |
| 92,349 | 154 | 21,520 | 6,287 | 3,692 | 31,653 |
| 92,350 | 150 | 21,107 | 6,177 | 3,621 | 31,055 |
| 92,351 | 150 | 21,178 | 6,161 | 3,613 | 31,102 |
| 92,352 | 149 | 20,899 | 6,083 | 3,574 | 30,705 |
| 92,353 | 155 | 20,953 | 6,114 | 3,602 | 30,824 |
| 92,354 | 156 | 20,500 | 5,980 | 3,529 | 30,165 |
| 92,355 | 155 | 20,573 | 6,000 | 3,540 | 30,268 |
| 92,356 | 156 | 20,748 | 6,049 | 3,569 | 30,522 |
| 92,357 | 158 | 20,364 | 5,943 | 3,516 | 29,981 |
| 92,358 | 154 | 20,448 | 5,926 | 3,523 | 30,051 |
| 92,359 | 160 | 20,456 | 5,926 | 3,508 | 30,050 |
| 92,360 | 165 | 20,473 | 5,912 | 3,495 | 30,045 |
| 92,361 | 160 | 20,491 | 5,913 | 3,500 | 30,064 |
| 92,362 | 157 | 20,495 | 5,920 | 3,497 | 30,069 |
| 92,363 | 162 | 20,755 | 6,007 | 3,564 | 30,488 |
| 92,364 | 158 | 20,812 | 5,995 | 3,563 | 30,528 |
| 92,365 | 163 | 20,798 | 5,995 | 3,559 | 30,515 |
| 92,366 | 163 | 20,983 | 6,023 | 3,566 | 30,735 |
| 92,367 | 153 | 21,171 | 6,160 | 3,627 | 31,111 |
| 92,368 | 154 | 21,156 | 6,142 | 3,639 | 31,091 |
| 92,369 | 148 | 21,713 | 6,286 | 3,707 | 31,854 |
| 92,370 | 143 | 21,834 | 6,324 | 3,709 | 32,010 |
| 92,371 | 136 | 21,764 | 6,282 | 3,715 | 31,897 |
| 92,372 | 133 | 21,456 | 6,193 | 3,672 | 31,454 |
| 92,373 | 139 | 21,610 | 6,264 | 3,712 | 31,725 |
| 92,374 | 137 | 21,565 | 6,276 | 3,706 | 31,684 |
| 92,375 | 138 | 21,312 | 6,222 | 3,683 | 31,355 |

|        |     |        |       |       |        |
|--------|-----|--------|-------|-------|--------|
| 92,376 | 139 | 21,253 | 6,221 | 3,680 | 31,293 |
| 92,377 | 141 | 21,306 | 6,317 | 3,721 | 31,485 |
| 92,378 | 140 | 21,138 | 6,249 | 3,687 | 31,214 |
| 92,379 | 138 | 21,447 | 6,368 | 3,735 | 31,688 |
| 92,380 | 151 | 21,191 | 6,295 | 3,697 | 31,334 |
| 92,381 | 145 | 21,014 | 6,235 | 3,653 | 31,047 |
| 92,382 | 156 | 21,343 | 6,338 | 3,769 | 31,606 |
| 92,383 | 156 | 21,272 | 6,345 | 3,757 | 31,530 |
| 92,384 | 154 | 21,406 | 6,409 | 3,800 | 31,769 |
| 92,385 | 156 | 21,475 | 6,442 | 3,815 | 31,888 |
| 92,386 | 156 | 21,538 | 6,448 | 3,832 | 31,974 |
| 92,387 | 157 | 21,461 | 6,434 | 3,836 | 31,888 |
| 92,388 | 162 | 21,809 | 6,505 | 3,870 | 32,346 |
| 92,389 | 162 | 21,786 | 6,482 | 3,834 | 32,264 |
| 92,390 | 163 | 21,878 | 6,484 | 3,837 | 32,362 |
| 92,391 | 162 | 22,057 | 6,476 | 3,831 | 32,526 |
| 92,392 | 161 | 22,012 | 6,463 | 3,820 | 32,456 |
| 92,393 | 156 | 22,095 | 6,539 | 3,864 | 32,654 |
| 92,394 | 150 | 21,933 | 6,540 | 3,868 | 32,491 |
| 92,395 | 147 | 21,768 | 6,531 | 3,851 | 32,297 |
| 92,396 | 139 | 21,792 | 6,498 | 3,822 | 32,251 |
| 92,397 | 140 | 21,824 | 6,504 | 3,819 | 32,287 |
| 92,398 | 141 | 21,913 | 6,469 | 3,808 | 32,331 |
| 92,399 | 137 | 21,951 | 6,431 | 3,779 | 32,298 |
| 92,400 | 134 | 21,792 | 6,370 | 3,749 | 32,045 |
| 92,401 | 135 | 22,098 | 6,423 | 3,770 | 32,426 |
| 92,402 | 134 | 21,965 | 6,368 | 3,731 | 32,198 |
| 92,403 | 131 | 21,904 | 6,289 | 3,686 | 32,010 |
| 92,404 | 131 | 22,320 | 6,361 | 3,743 | 32,555 |
| 92,405 | 129 | 22,269 | 6,362 | 3,752 | 32,512 |
| 92,406 | 132 | 22,305 | 6,406 | 3,758 | 32,601 |
| 92,407 | 136 | 22,507 | 6,513 | 3,804 | 32,960 |



|        |     |        |       |       |        |
|--------|-----|--------|-------|-------|--------|
| 92,408 | 130 | 22,348 | 6,459 | 3,761 | 32,698 |
| 92,409 | 135 | 22,874 | 6,564 | 3,817 | 33,390 |
| 92,410 | 129 | 22,969 | 6,585 | 3,830 | 33,513 |
| 92,411 | 124 | 22,848 | 6,490 | 3,792 | 33,254 |
| 92,412 | 124 | 23,075 | 6,527 | 3,819 | 33,545 |
| 92,413 | 119 | 23,165 | 6,556 | 3,826 | 33,666 |
| 92,414 | 119 | 22,845 | 6,477 | 3,767 | 33,208 |
| 92,415 | 117 | 22,554 | 6,389 | 3,725 | 32,785 |
| 92,416 | 113 | 22,711 | 6,443 | 3,765 | 33,032 |
| 92,417 | 116 | 22,707 | 6,400 | 3,742 | 32,965 |
| 92,418 | 118 | 22,670 | 6,343 | 3,714 | 32,845 |
| 92,419 | 121 | 21,555 | 6,103 | 3,531 | 31,310 |
| 92,420 | 123 | 21,623 | 6,097 | 3,554 | 31,397 |
| 92,421 | 125 | 21,976 | 6,167 | 3,622 | 31,890 |
| 92,422 | 127 | 21,989 | 6,186 | 3,645 | 31,947 |
| 92,423 | 122 | 22,137 | 6,151 | 3,635 | 32,045 |
| 92,424 | 118 | 22,177 | 6,120 | 3,612 | 32,027 |
| 92,425 | 116 | 22,163 | 6,114 | 3,590 | 31,983 |
| 92,426 | 117 | 22,466 | 6,139 | 3,601 | 32,323 |
| 92,427 | 113 | 22,395 | 6,059 | 3,549 | 32,116 |
| 92,428 | 112 | 22,537 | 6,046 | 3,530 | 32,225 |
| 92,429 | 114 | 22,446 | 5,981 | 3,488 | 32,029 |
| 92,430 | 120 | 22,578 | 6,013 | 3,515 | 32,226 |
| 92,431 | 103 | 22,364 | 5,951 | 3,474 | 31,892 |
| 92,432 | 98  | 21,897 | 5,842 | 3,405 | 31,242 |
| 92,433 | 98  | 21,838 | 5,868 | 3,417 | 31,221 |
| 92,434 | 98  | 21,800 | 5,827 | 3,406 | 31,131 |
| 92,435 | 96  | 21,775 | 5,756 | 3,367 | 30,994 |
| 92,436 | 96  | 21,791 | 5,733 | 3,359 | 30,979 |
| 92,437 | 95  | 21,686 | 5,709 | 3,330 | 30,820 |
| 92,438 | 94  | 21,705 | 5,681 | 3,325 | 30,805 |
| 92,439 | 90  | 21,686 | 5,690 | 3,330 | 30,796 |

|        |     |        |       |       |        |
|--------|-----|--------|-------|-------|--------|
| 92,440 | 86  | 21,762 | 5,702 | 3,351 | 30,901 |
| 92,441 | 89  | 21,791 | 5,767 | 3,371 | 31,018 |
| 92,442 | 96  | 21,878 | 5,752 | 3,382 | 31,108 |
| 92,443 | 106 | 22,187 | 5,826 | 3,435 | 31,554 |
| 92,444 | 108 | 22,099 | 5,754 | 3,366 | 31,327 |
| 92,445 | 109 | 22,206 | 5,742 | 3,371 | 31,428 |
| 92,446 | 118 | 22,399 | 5,770 | 3,391 | 31,678 |
| 92,447 | 119 | 22,077 | 5,726 | 3,375 | 31,297 |
| 92,448 | 121 | 22,002 | 5,715 | 3,364 | 31,202 |
| 92,449 | 126 | 22,060 | 5,746 | 3,395 | 31,327 |
| 92,450 | 124 | 21,769 | 5,698 | 3,387 | 30,978 |
| 92,451 | 126 | 21,861 | 5,706 | 3,394 | 31,087 |
| 92,452 | 126 | 21,967 | 5,730 | 3,445 | 31,268 |
| 92,453 | 124 | 21,900 | 5,762 | 3,458 | 31,244 |
| 92,454 | 124 | 21,816 | 5,777 | 3,469 | 31,186 |
| 92,455 | 125 | 21,844 | 5,842 | 3,515 | 31,326 |
| 92,456 | 122 | 21,842 | 5,829 | 3,507 | 31,300 |
| 92,457 | 122 | 21,738 | 5,808 | 3,496 | 31,164 |
| 92,458 | 120 | 21,796 | 5,856 | 3,535 | 31,307 |
| 92,459 | 119 | 21,808 | 5,897 | 3,578 | 31,402 |
| 92,460 | 114 | 21,808 | 5,938 | 3,608 | 31,468 |
| 92,461 | 124 | 21,913 | 5,985 | 3,645 | 31,667 |
| 92,462 | 129 | 21,980 | 6,049 | 3,672 | 31,830 |
| 92,463 | 129 | 21,797 | 6,011 | 3,658 | 31,595 |
| 92,464 | 130 | 21,873 | 6,034 | 3,657 | 31,694 |
| 92,465 | 131 | 21,652 | 6,028 | 3,630 | 31,441 |
| 92,466 | 133 | 21,686 | 6,023 | 3,627 | 31,469 |
| 92,467 | 134 | 21,620 | 5,999 | 3,625 | 31,378 |
| 92,468 | 137 | 21,545 | 5,980 | 3,626 | 31,288 |
| 92,469 | 132 | 21,073 | 5,894 | 3,561 | 30,660 |
| 92,470 | 136 | 21,642 | 6,097 | 3,666 | 31,541 |
| 92,471 | 134 | 21,773 | 6,122 | 3,675 | 31,704 |

|        |     |        |       |       |        |
|--------|-----|--------|-------|-------|--------|
| 92,472 | 133 | 21,633 | 6,097 | 3,652 | 31,515 |
| 92,473 | 132 | 21,434 | 6,038 | 3,616 | 31,220 |
| 92,474 | 131 | 21,089 | 6,002 | 3,580 | 30,802 |
| 92,475 | 134 | 20,942 | 5,996 | 3,560 | 30,632 |
| 92,476 | 134 | 20,953 | 5,989 | 3,560 | 30,636 |
| 92,477 | 131 | 20,912 | 6,031 | 3,570 | 30,644 |
| 92,478 | 134 | 20,913 | 6,022 | 3,554 | 30,623 |
| 92,479 | 134 | 20,675 | 5,983 | 3,526 | 30,318 |
| 92,480 | 137 | 21,051 | 6,073 | 3,593 | 30,854 |
| 92,481 | 136 | 21,060 | 6,039 | 3,565 | 30,800 |
| 92,482 | 131 | 20,900 | 5,907 | 3,499 | 30,437 |
| 92,483 | 133 | 21,096 | 5,956 | 3,526 | 30,711 |
| 92,484 | 132 | 21,042 | 5,956 | 3,519 | 30,649 |
| 92,485 | 133 | 20,741 | 5,870 | 3,471 | 30,215 |
| 92,486 | 131 | 20,451 | 5,809 | 3,435 | 29,826 |
| 92,487 | 132 | 20,847 | 5,945 | 3,496 | 30,420 |
| 92,488 | 133 | 21,122 | 6,014 | 3,549 | 30,818 |
| 92,489 | 133 | 20,729 | 5,907 | 3,479 | 30,248 |
| 92,490 | 133 | 20,822 | 5,952 | 3,500 | 30,407 |
| 92,491 | 130 | 20,832 | 5,977 | 3,505 | 30,444 |
| 92,492 | 123 | 20,352 | 5,876 | 3,425 | 29,776 |
| 92,493 | 124 | 20,359 | 5,890 | 3,431 | 29,804 |
| 92,494 | 115 | 20,500 | 5,943 | 3,448 | 30,006 |
| 92,495 | 111 | 20,202 | 5,888 | 3,448 | 29,649 |
| 92,496 | 105 | 20,424 | 5,933 | 3,458 | 29,920 |
| 92,497 | 109 | 20,570 | 5,945 | 3,451 | 30,075 |
| 92,498 | 108 | 20,793 | 5,936 | 3,452 | 30,289 |
| 92,499 | 108 | 20,731 | 5,918 | 3,441 | 30,198 |
| 92,500 | 103 | 20,616 | 5,919 | 3,429 | 30,067 |
| 92,501 | 107 | 20,909 | 6,003 | 3,462 | 30,481 |
| 92,502 | 107 | 20,871 | 5,960 | 3,443 | 30,381 |
| 92,503 | 113 | 21,009 | 5,963 | 3,428 | 30,513 |

|        |     |        |       |       |        |
|--------|-----|--------|-------|-------|--------|
| 92,504 | 109 | 20,874 | 5,905 | 3,395 | 30,283 |
| 92,505 | 109 | 20,934 | 5,934 | 3,390 | 30,367 |
| 92,506 | 112 | 21,006 | 5,900 | 3,368 | 30,386 |
| 92,507 | 118 | 21,315 | 5,943 | 3,404 | 30,780 |
| 92,508 | 116 | 21,336 | 5,878 | 3,374 | 30,704 |
| 92,509 | 118 | 21,212 | 5,804 | 3,323 | 30,457 |
| 92,510 | 118 | 21,176 | 5,720 | 3,273 | 30,287 |
| 92,511 | 115 | 20,707 | 5,606 | 3,166 | 29,594 |
| 92,512 | 115 | 20,876 | 5,612 | 3,161 | 29,764 |
| 92,513 | 115 | 21,161 | 5,661 | 3,169 | 30,106 |
| 92,514 | 118 | 20,900 | 5,545 | 3,121 | 29,684 |
| 92,515 | 115 | 20,991 | 5,521 | 3,115 | 29,742 |
| 92,516 | 115 | 21,021 | 5,513 | 3,120 | 29,769 |
| 92,517 | 115 | 21,094 | 5,521 | 3,167 | 29,897 |
| 92,518 | 114 | 21,257 | 5,558 | 3,183 | 30,112 |
| 92,519 | 105 | 21,295 | 5,573 | 3,181 | 30,154 |
| 92,520 | 111 | 21,442 | 5,561 | 3,180 | 30,294 |
| 92,521 | 111 | 21,418 | 5,503 | 3,172 | 30,204 |
| 92,522 | 120 | 21,238 | 5,472 | 3,154 | 29,984 |
| 92,523 | 124 | 20,814 | 5,366 | 3,063 | 29,367 |
| 92,524 | 123 | 20,904 | 5,368 | 3,063 | 29,458 |
| 92,525 | 123 | 20,688 | 5,294 | 3,044 | 29,149 |
| 92,526 | 121 | 20,537 | 5,222 | 3,025 | 28,905 |
| 92,527 | 131 | 21,099 | 5,356 | 3,132 | 29,718 |
| 92,528 | 130 | 20,862 | 5,308 | 3,110 | 29,410 |
| 92,529 | 130 | 20,799 | 5,294 | 3,100 | 29,323 |
| 92,530 | 126 | 20,543 | 5,220 | 3,074 | 28,963 |
| 92,531 | 126 | 20,263 | 5,208 | 3,046 | 28,643 |
| 92,532 | 130 | 21,198 | 5,488 | 3,190 | 30,006 |
| 92,533 | 131 | 21,118 | 5,469 | 3,173 | 29,891 |
| 92,534 | 132 | 21,353 | 5,514 | 3,198 | 30,197 |
| 92,535 | 136 | 21,455 | 5,534 | 3,225 | 30,350 |

|        |     |        |       |       |        |
|--------|-----|--------|-------|-------|--------|
| 92,536 | 132 | 21,243 | 5,490 | 3,218 | 30,083 |
| 92,537 | 138 | 21,587 | 5,554 | 3,235 | 30,514 |
| 92,538 | 142 | 21,749 | 5,588 | 3,256 | 30,735 |
| 92,539 | 140 | 21,702 | 5,584 | 3,254 | 30,680 |
| 92,540 | 139 | 21,633 | 5,569 | 3,239 | 30,580 |
| 92,541 | 140 | 21,435 | 5,479 | 3,213 | 30,267 |
| 92,542 | 150 | 21,687 | 5,515 | 3,236 | 30,588 |
| 92,543 | 149 | 21,561 | 5,453 | 3,248 | 30,411 |
| 92,544 | 155 | 21,870 | 5,488 | 3,253 | 30,766 |
| 92,545 | 156 | 21,736 | 5,400 | 3,221 | 30,513 |
| 92,546 | 158 | 21,624 | 5,380 | 3,211 | 30,373 |
| 92,547 | 156 | 21,611 | 5,382 | 3,229 | 30,378 |
| 92,548 | 153 | 21,572 | 5,381 | 3,223 | 30,329 |
| 92,549 | 152 | 21,587 | 5,400 | 3,229 | 30,368 |
| 92,550 | 150 | 21,003 | 5,250 | 3,155 | 29,558 |
| 92,551 | 150 | 21,126 | 5,274 | 3,151 | 29,701 |
| 92,552 | 153 | 21,280 | 5,275 | 3,180 | 29,888 |
| 92,553 | 153 | 21,298 | 5,309 | 3,169 | 29,929 |
| 92,554 | 152 | 21,377 | 5,360 | 3,209 | 30,098 |
| 92,555 | 154 | 21,206 | 5,307 | 3,181 | 29,848 |
| 92,556 | 156 | 21,334 | 5,340 | 3,182 | 30,012 |
| 92,557 | 153 | 21,437 | 5,372 | 3,198 | 30,160 |
| 92,558 | 148 | 21,181 | 5,289 | 3,143 | 29,761 |
| 92,559 | 148 | 21,170 | 5,301 | 3,134 | 29,753 |
| 92,560 | 147 | 21,156 | 5,283 | 3,145 | 29,731 |
| 92,561 | 144 | 21,224 | 5,321 | 3,198 | 29,887 |
| 92,562 | 144 | 21,161 | 5,318 | 3,193 | 29,816 |
| 92,563 | 143 | 21,252 | 5,354 | 3,244 | 29,993 |
| 92,564 | 142 | 21,273 | 5,380 | 3,256 | 30,051 |
| 92,565 | 137 | 21,358 | 5,394 | 3,278 | 30,167 |
| 92,566 | 139 | 21,718 | 5,466 | 3,298 | 30,621 |
| 92,567 | 141 | 21,874 | 5,505 | 3,282 | 30,802 |

|        |     |        |       |       |        |
|--------|-----|--------|-------|-------|--------|
| 92,568 | 137 | 21,782 | 5,453 | 3,266 | 30,638 |
| 92,569 | 137 | 21,270 | 5,391 | 3,189 | 29,987 |
| 92,570 | 139 | 21,468 | 5,416 | 3,219 | 30,242 |
| 92,571 | 135 | 21,753 | 5,459 | 3,247 | 30,594 |
| 92,572 | 141 | 21,953 | 5,525 | 3,288 | 30,907 |
| 92,573 | 128 | 21,221 | 5,341 | 3,187 | 29,877 |
| 92,574 | 128 | 21,452 | 5,391 | 3,220 | 30,191 |
| 92,575 | 131 | 21,721 | 5,444 | 3,253 | 30,549 |
| 92,576 | 130 | 21,748 | 5,443 | 3,252 | 30,573 |
| 92,577 | 124 | 22,059 | 5,527 | 3,296 | 31,006 |
| 92,578 | 128 | 22,075 | 5,521 | 3,300 | 31,024 |
| 92,579 | 128 | 22,111 | 5,494 | 3,308 | 31,041 |
| 92,580 | 130 | 22,163 | 5,505 | 3,327 | 31,125 |
| 92,581 | 128 | 22,090 | 5,504 | 3,356 | 31,078 |
| 92,582 | 128 | 22,080 | 5,495 | 3,333 | 31,036 |
| 92,583 | 130 | 22,327 | 5,535 | 3,384 | 31,376 |
| 92,584 | 132 | 22,449 | 5,580 | 3,390 | 31,551 |
| 92,585 | 131 | 22,205 | 5,539 | 3,362 | 31,237 |
| 92,586 | 127 | 22,124 | 5,518 | 3,360 | 31,129 |
| 92,587 | 124 | 22,394 | 5,565 | 3,385 | 31,468 |
| 92,588 | 125 | 22,475 | 5,568 | 3,407 | 31,575 |
| 92,589 | 121 | 22,317 | 5,532 | 3,379 | 31,349 |
| 92,590 | 125 | 22,307 | 5,550 | 3,375 | 31,357 |
| 92,591 | 128 | 22,339 | 5,565 | 3,394 | 31,426 |
| 92,592 | 127 | 22,354 | 5,571 | 3,389 | 31,441 |
| 92,593 | 117 | 22,693 | 5,676 | 3,454 | 31,940 |
| 92,594 | 116 | 22,740 | 5,707 | 3,460 | 32,023 |
| 92,595 | 114 | 22,640 | 5,758 | 3,501 | 32,013 |
| 92,596 | 110 | 22,539 | 5,750 | 3,481 | 31,880 |
| 92,597 | 113 | 22,562 | 5,769 | 3,491 | 31,935 |
| 92,598 | 117 | 22,883 | 5,825 | 3,515 | 32,340 |
| 92,599 | 116 | 22,773 | 5,803 | 3,495 | 32,187 |

|        |     |        |       |       |        |
|--------|-----|--------|-------|-------|--------|
| 92,600 | 116 | 22,677 | 5,797 | 3,475 | 32,065 |
| 92,601 | 114 | 22,495 | 5,752 | 3,464 | 31,825 |
| 92,602 | 116 | 22,699 | 5,792 | 3,497 | 32,104 |
| 92,603 | 108 | 22,375 | 5,730 | 3,462 | 31,675 |
| 92,604 | 107 | 22,425 | 5,738 | 3,466 | 31,736 |
| 92,605 | 104 | 22,547 | 5,714 | 3,473 | 31,838 |
| 92,606 | 100 | 22,501 | 5,685 | 3,456 | 31,742 |
| 92,607 | 99  | 22,258 | 5,603 | 3,428 | 31,388 |
| 92,608 | 103 | 22,458 | 5,673 | 3,461 | 31,695 |
| 92,609 | 105 | 22,218 | 5,634 | 3,429 | 31,386 |
| 92,610 | 105 | 22,007 | 5,590 | 3,395 | 31,097 |
| 92,611 | 109 | 22,491 | 5,709 | 3,485 | 31,794 |
| 92,612 | 116 | 22,245 | 5,612 | 3,439 | 31,412 |
| 92,613 | 117 | 22,032 | 5,553 | 3,415 | 31,117 |
| 92,614 | 112 | 22,116 | 5,569 | 3,399 | 31,196 |
| 92,615 | 118 | 22,051 | 5,557 | 3,394 | 31,120 |
| 92,616 | 119 | 21,759 | 5,525 | 3,371 | 30,774 |
| 92,617 | 126 | 21,950 | 5,617 | 3,430 | 31,123 |
| 92,618 | 122 | 21,579 | 5,586 | 3,401 | 30,688 |
| 92,619 | 123 | 21,442 | 5,588 | 3,366 | 30,519 |
| 92,620 | 120 | 21,533 | 5,622 | 3,400 | 30,675 |
| 92,621 | 117 | 21,301 | 5,576 | 3,372 | 30,366 |
| 92,622 | 116 | 20,987 | 5,572 | 3,364 | 30,039 |
| 92,623 | 110 | 20,837 | 5,529 | 3,343 | 29,819 |
| 92,624 | 108 | 20,838 | 5,506 | 3,350 | 29,802 |
| 92,625 | 113 | 20,770 | 5,509 | 3,348 | 29,740 |
| 92,626 | 109 | 20,578 | 5,459 | 3,323 | 29,469 |
| 92,627 | 111 | 20,783 | 5,546 | 3,370 | 29,810 |
| 92,628 | 109 | 20,723 | 5,564 | 3,354 | 29,750 |
| 92,629 | 106 | 20,691 | 5,556 | 3,349 | 29,702 |
| 92,630 | 101 | 20,414 | 5,514 | 3,287 | 29,316 |
| 92,631 | 103 | 20,403 | 5,517 | 3,248 | 29,271 |

|        |     |        |       |       |        |
|--------|-----|--------|-------|-------|--------|
| 92,632 | 103 | 20,412 | 5,504 | 3,242 | 29,261 |
| 92,633 | 99  | 20,322 | 5,506 | 3,235 | 29,162 |
| 92,634 | 100 | 20,358 | 5,543 | 3,250 | 29,251 |
| 92,635 | 95  | 19,993 | 5,448 | 3,193 | 28,729 |
| 92,636 | 95  | 19,900 | 5,393 | 3,144 | 28,532 |
| 92,637 | 99  | 20,006 | 5,453 | 3,179 | 28,737 |
| 92,638 | 103 | 20,254 | 5,517 | 3,212 | 29,086 |
| 92,639 | 106 | 20,089 | 5,485 | 3,178 | 28,858 |
| 92,640 | 104 | 19,849 | 5,443 | 3,169 | 28,565 |
| 92,641 | 105 | 19,788 | 5,434 | 3,161 | 28,488 |
| 92,642 | 104 | 19,935 | 5,537 | 3,177 | 28,753 |
| 92,643 | 107 | 19,965 | 5,514 | 3,158 | 28,744 |
| 92,644 | 107 | 19,740 | 5,453 | 3,122 | 28,422 |
| 92,645 | 110 | 19,842 | 5,478 | 3,129 | 28,559 |
| 92,646 | 108 | 19,645 | 5,395 | 3,077 | 28,225 |
| 92,647 | 111 | 19,694 | 5,403 | 3,086 | 28,294 |
| 92,648 | 111 | 19,762 | 5,425 | 3,090 | 28,388 |
| 92,649 | 110 | 19,571 | 5,399 | 3,071 | 28,151 |
| 92,650 | 109 | 19,455 | 5,354 | 3,052 | 27,970 |
| 92,651 | 112 | 19,841 | 5,430 | 3,107 | 28,490 |
| 92,652 | 112 | 19,625 | 5,379 | 3,069 | 28,185 |
| 92,653 | 111 | 19,682 | 5,387 | 3,062 | 28,242 |
| 92,654 | 111 | 19,609 | 5,382 | 3,052 | 28,154 |
| 92,655 | 111 | 19,563 | 5,407 | 3,061 | 28,142 |
| 92,656 | 116 | 19,754 | 5,473 | 3,098 | 28,441 |
| 92,657 | 117 | 19,789 | 5,497 | 3,113 | 28,516 |
| 92,658 | 119 | 19,871 | 5,499 | 3,127 | 28,616 |
| 92,659 | 117 | 19,997 | 5,531 | 3,133 | 28,778 |
| 92,660 | 116 | 20,017 | 5,558 | 3,135 | 28,826 |
| 92,661 | 114 | 20,018 | 5,556 | 3,133 | 28,821 |
| 92,662 | 104 | 19,852 | 5,518 | 3,085 | 28,559 |
| 92,663 | 104 | 19,921 | 5,541 | 3,092 | 28,658 |



|        |     |        |       |       |        |
|--------|-----|--------|-------|-------|--------|
| 92,664 | 102 | 19,472 | 5,430 | 2,991 | 27,995 |
| 92,665 | 103 | 19,619 | 5,448 | 3,018 | 28,188 |
| 92,666 | 103 | 19,819 | 5,498 | 3,041 | 28,461 |
| 92,667 | 103 | 19,829 | 5,507 | 3,040 | 28,479 |
| 92,668 | 97  | 19,567 | 5,442 | 3,012 | 28,118 |
| 92,669 | 103 | 19,983 | 5,511 | 3,060 | 28,657 |
| 92,670 | 107 | 19,968 | 5,520 | 3,037 | 28,632 |
| 92,671 | 110 | 20,057 | 5,535 | 3,036 | 28,738 |
| 92,672 | 114 | 19,975 | 5,477 | 3,005 | 28,571 |
| 92,673 | 114 | 19,977 | 5,431 | 2,975 | 28,497 |
| 92,674 | 117 | 20,355 | 5,498 | 2,995 | 28,965 |
| 92,675 | 119 | 20,154 | 5,439 | 2,959 | 28,671 |
| 92,676 | 113 | 20,093 | 5,414 | 2,921 | 28,541 |
| 92,677 | 117 | 20,573 | 5,530 | 2,980 | 29,200 |
| 92,678 | 119 | 20,151 | 5,360 | 2,898 | 28,528 |
| 92,679 | 119 | 20,146 | 5,343 | 2,895 | 28,503 |
| 92,680 | 118 | 19,948 | 5,288 | 2,862 | 28,216 |
| 92,681 | 118 | 19,771 | 5,234 | 2,838 | 27,961 |
| 92,682 | 131 | 20,764 | 5,485 | 2,983 | 29,363 |
| 92,683 | 133 | 20,826 | 5,445 | 2,969 | 29,373 |
| 92,684 | 129 | 20,631 | 5,355 | 2,929 | 29,044 |
| 92,685 | 129 | 20,832 | 5,366 | 2,954 | 29,281 |
| 92,686 | 130 | 21,005 | 5,394 | 2,976 | 29,505 |
| 92,687 | 142 | 20,994 | 5,383 | 2,965 | 29,484 |
| 92,688 | 143 | 21,014 | 5,373 | 2,947 | 29,477 |
| 92,689 | 142 | 20,803 | 5,297 | 2,904 | 29,146 |
| 92,690 | 137 | 20,684 | 5,244 | 2,892 | 28,957 |
| 92,691 | 140 | 20,801 | 5,227 | 2,892 | 29,060 |
| 92,692 | 143 | 20,781 | 5,142 | 2,889 | 28,955 |
| 92,693 | 143 | 20,844 | 5,119 | 2,884 | 28,990 |
| 92,694 | 144 | 20,691 | 5,074 | 2,863 | 28,772 |
| 92,695 | 150 | 20,838 | 5,083 | 2,878 | 28,949 |

|        |     |        |       |       |        |
|--------|-----|--------|-------|-------|--------|
| 92,696 | 149 | 20,820 | 5,043 | 2,850 | 28,862 |
| 92,697 | 151 | 21,025 | 5,090 | 2,884 | 29,150 |
| 92,698 | 147 | 20,799 | 5,031 | 2,841 | 28,818 |
| 92,699 | 150 | 20,934 | 5,063 | 2,863 | 29,010 |
| 92,700 | 152 | 20,866 | 5,023 | 2,849 | 28,890 |
| 92,701 | 149 | 20,667 | 4,956 | 2,836 | 28,608 |
| 92,702 | 150 | 20,745 | 4,977 | 2,851 | 28,723 |
| 92,703 | 150 | 20,784 | 4,971 | 2,859 | 28,764 |
| 92,704 | 153 | 21,067 | 5,018 | 2,871 | 29,109 |
| 92,705 | 152 | 20,915 | 4,953 | 2,846 | 28,866 |
| 92,706 | 157 | 21,128 | 4,982 | 2,854 | 29,121 |
| 92,707 | 157 | 20,966 | 4,904 | 2,799 | 28,826 |
| 92,708 | 162 | 21,018 | 4,887 | 2,799 | 28,866 |
| 92,709 | 162 | 20,798 | 4,824 | 2,760 | 28,544 |
| 92,710 | 159 | 20,720 | 4,772 | 2,757 | 28,408 |
| 92,711 | 161 | 20,809 | 4,767 | 2,756 | 28,493 |
| 92,712 | 161 | 20,669 | 4,751 | 2,747 | 28,328 |
| 92,713 | 164 | 20,435 | 4,687 | 2,738 | 28,024 |
| 92,714 | 164 | 20,408 | 4,680 | 2,728 | 27,980 |
| 92,715 | 165 | 20,360 | 4,648 | 2,735 | 27,908 |
| 92,716 | 164 | 20,362 | 4,659 | 2,726 | 27,911 |
| 92,717 | 164 | 20,373 | 4,621 | 2,731 | 27,889 |
| 92,718 | 174 | 20,568 | 4,654 | 2,764 | 28,160 |
| 92,719 | 176 | 20,669 | 4,642 | 2,745 | 28,232 |
| 92,720 | 178 | 20,416 | 4,519 | 2,693 | 27,806 |
| 92,721 | 176 | 20,366 | 4,494 | 2,706 | 27,742 |
| 92,722 | 176 | 20,083 | 4,414 | 2,676 | 27,349 |
| 92,723 | 172 | 19,992 | 4,377 | 2,663 | 27,204 |
| 92,724 | 179 | 20,530 | 4,526 | 2,747 | 27,982 |
| 92,725 | 184 | 20,359 | 4,449 | 2,732 | 27,724 |
| 92,726 | 180 | 20,282 | 4,416 | 2,715 | 27,593 |
| 92,727 | 179 | 19,965 | 4,321 | 2,702 | 27,167 |

|        |     |        |       |       |        |
|--------|-----|--------|-------|-------|--------|
| 92,728 | 182 | 20,161 | 4,332 | 2,716 | 27,391 |
| 92,729 | 179 | 20,346 | 4,359 | 2,741 | 27,625 |
| 92,730 | 179 | 20,339 | 4,352 | 2,740 | 27,610 |
| 92,731 | 180 | 20,914 | 4,517 | 2,802 | 28,413 |
| 92,732 | 180 | 20,762 | 4,466 | 2,789 | 28,197 |
| 92,733 | 177 | 20,703 | 4,427 | 2,777 | 28,084 |
| 92,734 | 183 | 21,264 | 4,599 | 2,861 | 28,907 |
| 92,735 | 192 | 21,267 | 4,618 | 2,865 | 28,942 |
| 92,736 | 196 | 21,321 | 4,622 | 2,863 | 29,002 |
| 92,737 | 181 | 21,436 | 4,623 | 2,876 | 29,116 |
| 92,738 | 180 | 21,379 | 4,606 | 2,871 | 29,036 |
| 92,739 | 182 | 21,352 | 4,563 | 2,870 | 28,967 |
| 92,740 | 179 | 21,468 | 4,596 | 2,922 | 29,165 |
| 92,741 | 186 | 21,149 | 4,572 | 2,881 | 28,788 |
| 92,742 | 186 | 21,166 | 4,567 | 2,868 | 28,787 |
| 92,743 | 184 | 21,168 | 4,582 | 2,878 | 28,812 |
| 92,744 | 185 | 21,129 | 4,581 | 2,898 | 28,793 |
| 92,745 | 186 | 21,133 | 4,575 | 2,888 | 28,782 |
| 92,746 | 180 | 21,118 | 4,604 | 2,906 | 28,808 |
| 92,747 | 178 | 21,251 | 4,632 | 2,929 | 28,990 |
| 92,748 | 176 | 21,107 | 4,631 | 2,900 | 28,814 |
| 92,749 | 181 | 20,900 | 4,568 | 2,852 | 28,501 |
| 92,750 | 191 | 21,153 | 4,579 | 2,875 | 28,798 |
| 92,751 | 185 | 21,234 | 4,569 | 2,885 | 28,873 |
| 92,752 | 189 | 21,364 | 4,621 | 2,899 | 29,073 |
| 92,753 | 190 | 21,406 | 4,609 | 2,885 | 29,090 |
| 92,754 | 191 | 21,096 | 4,573 | 2,869 | 28,729 |
| 92,755 | 191 | 21,120 | 4,569 | 2,858 | 28,738 |
| 92,756 | 205 | 21,354 | 4,608 | 2,880 | 29,047 |
| 92,757 | 205 | 21,111 | 4,577 | 2,877 | 28,770 |
| 92,758 | 200 | 21,043 | 4,562 | 2,870 | 28,675 |
| 92,759 | 195 | 20,961 | 4,576 | 2,860 | 28,592 |

|        |     |        |       |       |        |
|--------|-----|--------|-------|-------|--------|
| 92,760 | 194 | 21,032 | 4,594 | 2,879 | 28,699 |
| 92,761 | 196 | 20,772 | 4,539 | 2,852 | 28,359 |
| 92,762 | 195 | 20,793 | 4,507 | 2,834 | 28,329 |
| 92,763 | 193 | 20,783 | 4,509 | 2,829 | 28,314 |
| 92,764 | 192 | 20,804 | 4,514 | 2,823 | 28,333 |
| 92,765 | 185 | 20,755 | 4,481 | 2,816 | 28,237 |
| 92,766 | 185 | 20,729 | 4,493 | 2,816 | 28,223 |
| 92,767 | 185 | 20,604 | 4,475 | 2,818 | 28,082 |
| 92,768 | 186 | 20,621 | 4,476 | 2,814 | 28,097 |
| 92,769 | 177 | 20,418 | 4,446 | 2,795 | 27,836 |
| 92,770 | 180 | 20,688 | 4,511 | 2,862 | 28,241 |
| 92,771 | 169 | 20,455 | 4,450 | 2,814 | 27,888 |
| 92,772 | 167 | 20,682 | 4,493 | 2,828 | 28,170 |
| 92,773 | 163 | 20,738 | 4,486 | 2,832 | 28,219 |
| 92,774 | 165 | 20,358 | 4,422 | 2,789 | 27,734 |
| 92,775 | 166 | 20,371 | 4,423 | 2,788 | 27,748 |
| 92,776 | 161 | 20,249 | 4,478 | 2,805 | 27,693 |
| 92,777 | 165 | 20,094 | 4,462 | 2,785 | 27,506 |
| 92,778 | 165 | 20,095 | 4,471 | 2,776 | 27,507 |
| 92,779 | 164 | 19,871 | 4,442 | 2,752 | 27,229 |
| 92,780 | 162 | 19,583 | 4,391 | 2,721 | 26,857 |
| 92,781 | 162 | 19,632 | 4,399 | 2,759 | 26,952 |
| 92,782 | 160 | 19,730 | 4,385 | 2,770 | 27,045 |
| 92,783 | 160 | 19,399 | 4,276 | 2,728 | 26,563 |
| 92,784 | 160 | 19,227 | 4,238 | 2,689 | 26,314 |
| 92,785 | 162 | 19,569 | 4,334 | 2,757 | 26,822 |
| 92,786 | 159 | 19,972 | 4,408 | 2,804 | 27,343 |
| 92,787 | 172 | 19,937 | 4,427 | 2,801 | 27,337 |
| 92,788 | 174 | 20,002 | 4,426 | 2,787 | 27,389 |
| 92,789 | 173 | 20,336 | 4,566 | 2,872 | 27,947 |
| 92,790 | 171 | 20,334 | 4,555 | 2,866 | 27,926 |
| 92,791 | 165 | 20,592 | 4,629 | 2,903 | 28,289 |

|        |     |        |       |       |        |
|--------|-----|--------|-------|-------|--------|
| 92,792 | 166 | 20,624 | 4,633 | 2,905 | 28,328 |
| 92,793 | 171 | 20,583 | 4,626 | 2,896 | 28,276 |
| 92,794 | 169 | 20,496 | 4,627 | 2,874 | 28,166 |
| 92,795 | 172 | 20,723 | 4,699 | 2,925 | 28,519 |
| 92,796 | 172 | 20,503 | 4,659 | 2,896 | 28,230 |
| 92,797 | 172 | 20,328 | 4,611 | 2,873 | 27,984 |
| 92,798 | 174 | 20,513 | 4,730 | 2,923 | 28,340 |
| 92,799 | 195 | 20,494 | 4,732 | 2,919 | 28,340 |
| 92,800 | 186 | 20,235 | 4,676 | 2,900 | 27,997 |
| 92,801 | 182 | 20,232 | 4,704 | 2,884 | 28,002 |
| 92,802 | 184 | 20,166 | 4,691 | 2,881 | 27,922 |
| 92,803 | 182 | 20,132 | 4,675 | 2,870 | 27,859 |
| 92,804 | 182 | 20,118 | 4,678 | 2,886 | 27,864 |
| 92,805 | 188 | 20,164 | 4,673 | 2,888 | 27,913 |
| 92,806 | 189 | 20,231 | 4,685 | 2,887 | 27,992 |
| 92,807 | 177 | 20,739 | 4,752 | 2,942 | 28,610 |
| 92,808 | 174 | 20,786 | 4,748 | 2,930 | 28,638 |
| 92,809 | 180 | 21,005 | 4,798 | 2,978 | 28,961 |
| 92,810 | 179 | 21,105 | 4,817 | 2,994 | 29,095 |
| 92,811 | 176 | 21,409 | 4,857 | 3,016 | 29,458 |
| 92,812 | 177 | 21,680 | 4,919 | 3,068 | 29,844 |
| 92,813 | 178 | 21,801 | 4,958 | 3,086 | 30,023 |
| 92,814 | 183 | 21,983 | 4,986 | 3,101 | 30,253 |
| 92,815 | 184 | 22,164 | 5,016 | 3,126 | 30,490 |
| 92,816 | 184 | 22,253 | 5,026 | 3,143 | 30,606 |
| 92,817 | 189 | 22,548 | 5,114 | 3,205 | 31,056 |
| 92,818 | 185 | 22,519 | 5,120 | 3,210 | 31,034 |
| 92,819 | 184 | 22,812 | 5,188 | 3,239 | 31,423 |
| 92,820 | 183 | 22,954 | 5,195 | 3,259 | 31,591 |
| 92,821 | 176 | 22,988 | 5,215 | 3,273 | 31,652 |
| 92,822 | 186 | 22,912 | 5,229 | 3,301 | 31,628 |
| 92,823 | 191 | 22,995 | 5,249 | 3,323 | 31,758 |

|        |     |        |       |       |        |
|--------|-----|--------|-------|-------|--------|
| 92,824 | 195 | 22,973 | 5,246 | 3,333 | 31,747 |
| 92,825 | 192 | 22,982 | 5,267 | 3,349 | 31,790 |
| 92,826 | 185 | 23,055 | 5,264 | 3,334 | 31,838 |
| 92,827 | 194 | 23,260 | 5,294 | 3,361 | 32,109 |
| 92,828 | 192 | 23,037 | 5,273 | 3,342 | 31,844 |
| 92,829 | 190 | 22,970 | 5,253 | 3,336 | 31,749 |
| 92,830 | 190 | 23,225 | 5,302 | 3,343 | 32,060 |
| 92,831 | 191 | 23,301 | 5,307 | 3,344 | 32,143 |
| 92,832 | 193 | 23,239 | 5,314 | 3,330 | 32,076 |
| 92,833 | 197 | 22,864 | 5,243 | 3,276 | 31,580 |
| 92,834 | 195 | 22,817 | 5,225 | 3,267 | 31,504 |
| 92,835 | 200 | 22,883 | 5,239 | 3,304 | 31,626 |
| 92,836 | 212 | 22,561 | 5,184 | 3,257 | 31,214 |
| 92,837 | 206 | 22,323 | 5,149 | 3,240 | 30,918 |
| 92,838 | 191 | 22,369 | 5,182 | 3,269 | 31,011 |
| 92,839 | 192 | 22,360 | 5,190 | 3,235 | 30,977 |
| 92,840 | 194 | 22,372 | 5,165 | 3,228 | 30,959 |
| 92,841 | 196 | 22,361 | 5,122 | 3,216 | 30,895 |
| 92,842 | 211 | 22,392 | 5,106 | 3,192 | 30,901 |
| 92,843 | 212 | 22,459 | 5,138 | 3,196 | 31,005 |
| 92,844 | 203 | 22,532 | 5,123 | 3,179 | 31,037 |
| 92,845 | 205 | 22,668 | 5,170 | 3,189 | 31,232 |
| 92,846 | 205 | 22,721 | 5,175 | 3,193 | 31,294 |
| 92,847 | 206 | 22,741 | 5,134 | 3,165 | 31,246 |
| 92,848 | 206 | 23,025 | 5,156 | 3,183 | 31,570 |
| 92,849 | 198 | 23,346 | 5,210 | 3,228 | 31,982 |
| 92,850 | 191 | 23,206 | 5,189 | 3,221 | 31,807 |
| 92,851 | 185 | 23,133 | 5,219 | 3,242 | 31,779 |
| 92,852 | 186 | 23,079 | 5,216 | 3,256 | 31,737 |
| 92,853 | 198 | 23,005 | 5,180 | 3,258 | 31,641 |
| 92,854 | 198 | 22,957 | 5,204 | 3,266 | 31,625 |
| 92,855 | 198 | 22,839 | 5,200 | 3,288 | 31,525 |

|        |     |        |       |       |        |
|--------|-----|--------|-------|-------|--------|
| 92,856 | 195 | 22,835 | 5,224 | 3,306 | 31,560 |
| 92,857 | 198 | 22,793 | 5,231 | 3,314 | 31,536 |
| 92,858 | 210 | 22,756 | 5,260 | 3,313 | 31,539 |
| 92,859 | 207 | 22,551 | 5,241 | 3,292 | 31,291 |
| 92,860 | 205 | 23,012 | 5,330 | 3,360 | 31,907 |
| 92,861 | 211 | 22,930 | 5,344 | 3,375 | 31,860 |
| 92,862 | 209 | 22,729 | 5,334 | 3,391 | 31,663 |
| 92,863 | 217 | 22,836 | 5,398 | 3,403 | 31,854 |
| 92,864 | 215 | 22,677 | 5,368 | 3,387 | 31,647 |
| 92,865 | 213 | 22,742 | 5,371 | 3,394 | 31,720 |
| 92,866 | 214 | 22,965 | 5,429 | 3,424 | 32,032 |
| 92,867 | 215 | 22,990 | 5,432 | 3,421 | 32,058 |
| 92,868 | 212 | 22,968 | 5,401 | 3,387 | 31,968 |
| 92,869 | 213 | 22,915 | 5,373 | 3,366 | 31,867 |
| 92,870 | 212 | 22,789 | 5,342 | 3,343 | 31,686 |
| 92,871 | 218 | 22,952 | 5,349 | 3,343 | 31,862 |
| 92,872 | 226 | 22,898 | 5,357 | 3,333 | 31,814 |
| 92,873 | 216 | 22,668 | 5,313 | 3,294 | 31,491 |
| 92,874 | 220 | 22,960 | 5,385 | 3,329 | 31,894 |
| 92,875 | 215 | 22,715 | 5,368 | 3,282 | 31,580 |
| 92,876 | 219 | 22,720 | 5,358 | 3,282 | 31,579 |
| 92,877 | 219 | 22,664 | 5,364 | 3,295 | 31,542 |
| 92,878 | 211 | 22,677 | 5,384 | 3,301 | 31,573 |
| 92,879 | 210 | 22,641 | 5,365 | 3,300 | 31,516 |
| 92,880 | 208 | 22,633 | 5,377 | 3,294 | 31,512 |
| 92,881 | 209 | 22,646 | 5,390 | 3,315 | 31,560 |
| 92,882 | 210 | 22,566 | 5,379 | 3,321 | 31,476 |
| 92,883 | 210 | 22,606 | 5,392 | 3,332 | 31,540 |
| 92,884 | 206 | 22,703 | 5,397 | 3,315 | 31,621 |
| 92,885 | 214 | 22,965 | 5,449 | 3,355 | 31,983 |
| 92,886 | 216 | 22,961 | 5,421 | 3,351 | 31,949 |
| 92,887 | 202 | 22,607 | 5,380 | 3,319 | 31,508 |

|        |     |        |       |       |        |
|--------|-----|--------|-------|-------|--------|
| 92,888 | 207 | 22,466 | 5,357 | 3,300 | 31,330 |
| 92,889 | 207 | 22,336 | 5,360 | 3,283 | 31,186 |
| 92,890 | 207 | 22,232 | 5,352 | 3,300 | 31,091 |
| 92,891 | 202 | 21,734 | 5,303 | 3,250 | 30,489 |
| 92,892 | 184 | 21,490 | 5,305 | 3,248 | 30,227 |
| 92,893 | 189 | 21,457 | 5,293 | 3,244 | 30,183 |
| 92,894 | 189 | 21,491 | 5,305 | 3,247 | 30,232 |
| 92,895 | 192 | 21,301 | 5,261 | 3,235 | 29,989 |
| 92,896 | 194 | 21,283 | 5,247 | 3,246 | 29,970 |
| 92,897 | 200 | 21,197 | 5,267 | 3,244 | 29,908 |
| 92,898 | 205 | 21,037 | 5,238 | 3,222 | 29,702 |
| 92,899 | 224 | 21,671 | 5,382 | 3,326 | 30,603 |
| 92,900 | 221 | 21,476 | 5,311 | 3,267 | 30,275 |
| 92,901 | 223 | 21,629 | 5,293 | 3,238 | 30,383 |
| 92,902 | 223 | 21,861 | 5,357 | 3,258 | 30,699 |
| 92,903 | 217 | 21,838 | 5,369 | 3,236 | 30,660 |
| 92,904 | 214 | 21,793 | 5,374 | 3,232 | 30,613 |
| 92,905 | 209 | 21,736 | 5,393 | 3,228 | 30,566 |
| 92,906 | 211 | 21,702 | 5,379 | 3,223 | 30,515 |
| 92,907 | 210 | 21,597 | 5,393 | 3,197 | 30,397 |
| 92,908 | 206 | 21,365 | 5,390 | 3,199 | 30,160 |
| 92,909 | 198 | 21,342 | 5,398 | 3,210 | 30,148 |
| 92,910 | 201 | 21,278 | 5,385 | 3,183 | 30,047 |
| 92,911 | 194 | 21,293 | 5,374 | 3,155 | 30,016 |
| 92,912 | 192 | 21,064 | 5,334 | 3,105 | 29,695 |
| 92,913 | 197 | 21,347 | 5,363 | 3,132 | 30,039 |
| 92,914 | 189 | 21,086 | 5,313 | 3,096 | 29,684 |
| 92,915 | 189 | 21,012 | 5,314 | 3,101 | 29,616 |
| 92,916 | 188 | 20,693 | 5,263 | 3,069 | 29,213 |
| 92,917 | 194 | 20,872 | 5,309 | 3,094 | 29,469 |
| 92,918 | 196 | 20,837 | 5,316 | 3,081 | 29,430 |
| 92,919 | 194 | 20,568 | 5,277 | 3,048 | 29,087 |



|        |     |        |       |       |        |
|--------|-----|--------|-------|-------|--------|
| 92,920 | 194 | 20,523 | 5,294 | 3,047 | 29,058 |
| 92,921 | 199 | 20,736 | 5,315 | 3,063 | 29,313 |
| 92,922 | 195 | 20,710 | 5,352 | 3,068 | 29,325 |
| 92,923 | 187 | 20,422 | 5,287 | 3,044 | 28,940 |
| 92,924 | 185 | 20,522 | 5,361 | 3,062 | 29,130 |
| 92,925 | 183 | 20,460 | 5,347 | 3,053 | 29,043 |
| 92,926 | 189 | 20,501 | 5,358 | 3,067 | 29,115 |
| 92,927 | 190 | 20,540 | 5,326 | 3,047 | 29,103 |
| 92,928 | 191 | 20,573 | 5,351 | 3,068 | 29,183 |
| 92,929 | 190 | 20,566 | 5,364 | 3,064 | 29,184 |
| 92,930 | 191 | 20,690 | 5,412 | 3,071 | 29,364 |
| 92,931 | 192 | 20,818 | 5,437 | 3,065 | 29,512 |
| 92,932 | 188 | 20,821 | 5,443 | 3,069 | 29,521 |
| 92,933 | 192 | 21,010 | 5,501 | 3,102 | 29,805 |
| 92,934 | 195 | 21,021 | 5,525 | 3,104 | 29,845 |
| 92,935 | 188 | 20,810 | 5,494 | 3,091 | 29,583 |
| 92,936 | 196 | 20,783 | 5,558 | 3,118 | 29,655 |
| 92,937 | 186 | 20,559 | 5,570 | 3,094 | 29,409 |
| 92,938 | 178 | 20,283 | 5,526 | 3,059 | 29,046 |
| 92,939 | 180 | 20,270 | 5,485 | 3,041 | 28,976 |
| 92,940 | 183 | 20,288 | 5,479 | 3,027 | 28,977 |
| 92,941 | 183 | 20,302 | 5,484 | 3,021 | 28,990 |
| 92,942 | 189 | 20,433 | 5,476 | 3,029 | 29,127 |
| 92,943 | 189 | 20,438 | 5,481 | 3,022 | 29,130 |
| 92,944 | 186 | 20,539 | 5,473 | 3,028 | 29,226 |
| 92,945 | 186 | 20,537 | 5,481 | 3,035 | 29,239 |
| 92,946 | 180 | 20,442 | 5,475 | 3,030 | 29,127 |
| 92,947 | 191 | 20,414 | 5,556 | 3,023 | 29,184 |
| 92,948 | 176 | 20,206 | 5,579 | 3,006 | 28,967 |
| 92,949 | 174 | 19,921 | 5,543 | 2,976 | 28,614 |
| 92,950 | 174 | 19,690 | 5,523 | 2,958 | 28,345 |
| 92,951 | 183 | 19,539 | 5,553 | 2,969 | 28,244 |

|        |     |        |       |       |        |
|--------|-----|--------|-------|-------|--------|
| 92,952 | 182 | 19,286 | 5,525 | 2,952 | 27,945 |
| 92,953 | 181 | 19,467 | 5,587 | 2,984 | 28,219 |
| 92,954 | 176 | 19,089 | 5,535 | 2,953 | 27,753 |
| 92,955 | 179 | 18,937 | 5,507 | 2,926 | 27,549 |
| 92,956 | 174 | 19,400 | 5,632 | 2,990 | 28,196 |
| 92,957 | 176 | 19,274 | 5,573 | 2,951 | 27,974 |
| 92,958 | 178 | 19,268 | 5,576 | 2,948 | 27,970 |
| 92,959 | 175 | 19,171 | 5,529 | 2,904 | 27,779 |
| 92,960 | 175 | 19,037 | 5,554 | 2,893 | 27,659 |
| 92,961 | 170 | 18,721 | 5,528 | 2,881 | 27,300 |
| 92,962 | 171 | 18,657 | 5,561 | 2,902 | 27,291 |
| 92,963 | 171 | 18,494 | 5,524 | 2,871 | 27,060 |
| 92,964 | 169 | 18,318 | 5,532 | 2,843 | 26,862 |
| 92,965 | 169 | 18,069 | 5,415 | 2,784 | 26,437 |
| 92,966 | 166 | 17,892 | 5,371 | 2,752 | 26,181 |
| 92,967 | 167 | 17,904 | 5,392 | 2,755 | 26,218 |
| 92,968 | 165 | 17,577 | 5,353 | 2,718 | 25,813 |
| 92,969 | 162 | 17,253 | 5,277 | 2,681 | 25,373 |
| 92,970 | 171 | 17,839 | 5,466 | 2,784 | 26,260 |
| 92,971 | 178 | 17,716 | 5,465 | 2,769 | 26,128 |
| 92,972 | 172 | 17,460 | 5,457 | 2,750 | 25,839 |
| 92,973 | 175 | 17,294 | 5,461 | 2,727 | 25,657 |
| 92,974 | 176 | 17,264 | 5,450 | 2,741 | 25,631 |
| 92,975 | 173 | 16,960 | 5,376 | 2,686 | 25,195 |
| 92,976 | 182 | 17,041 | 5,421 | 2,706 | 25,350 |
| 92,977 | 186 | 17,035 | 5,477 | 2,711 | 25,409 |
| 92,978 | 181 | 16,789 | 5,442 | 2,667 | 25,079 |
| 92,979 | 188 | 16,745 | 5,495 | 2,659 | 25,087 |
| 92,980 | 194 | 16,568 | 5,468 | 2,650 | 24,880 |
| 92,981 | 194 | 16,213 | 5,369 | 2,596 | 24,372 |
| 92,982 | 194 | 16,123 | 5,385 | 2,597 | 24,299 |
| 92,983 | 193 | 15,999 | 5,383 | 2,591 | 24,166 |

|        |     |        |       |       |        |
|--------|-----|--------|-------|-------|--------|
| 92,984 | 189 | 15,875 | 5,379 | 2,564 | 24,007 |
| 92,985 | 183 | 15,688 | 5,336 | 2,556 | 23,763 |
| 92,986 | 173 | 15,617 | 5,297 | 2,533 | 23,620 |
| 92,987 | 173 | 15,646 | 5,381 | 2,561 | 23,761 |
| 92,988 | 175 | 15,358 | 5,294 | 2,521 | 23,348 |
| 92,989 | 178 | 15,237 | 5,293 | 2,522 | 23,230 |
| 92,990 | 176 | 15,131 | 5,310 | 2,513 | 23,130 |
| 92,991 | 171 | 15,098 | 5,415 | 2,555 | 23,239 |
| 92,992 | 172 | 14,879 | 5,449 | 2,575 | 23,075 |
| 92,993 | 166 | 14,738 | 5,476 | 2,586 | 22,966 |
| 92,994 | 167 | 14,723 | 5,499 | 2,602 | 22,991 |
| 92,995 | 165 | 14,673 | 5,531 | 2,618 | 22,987 |
| 92,996 | 161 | 14,667 | 5,538 | 2,598 | 22,964 |
| 92,997 | 161 | 14,547 | 5,513 | 2,598 | 22,819 |
| 92,998 | 151 | 14,492 | 5,451 | 2,588 | 22,682 |
| 92,999 | 147 | 14,272 | 5,355 | 2,555 | 22,329 |
| 93,000 | 133 | 14,051 | 5,267 | 2,518 | 21,969 |
| 93,001 | 135 | 14,028 | 5,274 | 2,512 | 21,949 |
| 93,002 | 121 | 13,815 | 5,213 | 2,492 | 21,641 |
| 93,003 | 122 | 13,817 | 5,267 | 2,508 | 21,714 |
| 93,004 | 122 | 13,759 | 5,275 | 2,516 | 21,672 |
| 93,005 | 122 | 13,694 | 5,251 | 2,528 | 21,595 |
| 93,006 | 121 | 13,434 | 5,229 | 2,501 | 21,285 |
| 93,007 | 127 | 13,594 | 5,248 | 2,518 | 21,487 |
| 93,008 | 126 | 13,557 | 5,228 | 2,528 | 21,439 |
| 93,009 | 122 | 13,410 | 5,181 | 2,506 | 21,219 |
| 93,010 | 125 | 13,519 | 5,251 | 2,521 | 21,416 |
| 93,011 | 127 | 13,518 | 5,233 | 2,509 | 21,387 |
| 93,012 | 128 | 13,683 | 5,286 | 2,544 | 21,641 |
| 93,013 | 129 | 13,799 | 5,293 | 2,565 | 21,786 |
| 93,014 | 128 | 13,360 | 5,188 | 2,510 | 21,186 |
| 93,015 | 127 | 13,283 | 5,177 | 2,507 | 21,094 |

|        |     |        |       |       |        |
|--------|-----|--------|-------|-------|--------|
| 93,016 | 127 | 13,068 | 5,145 | 2,475 | 20,815 |
| 93,017 | 125 | 12,903 | 5,100 | 2,454 | 20,582 |
| 93,018 | 127 | 13,943 | 5,546 | 2,703 | 22,319 |
| 93,019 | 125 | 14,024 | 5,595 | 2,713 | 22,457 |
| 93,020 | 117 | 13,976 | 5,568 | 2,703 | 22,364 |
| 93,021 | 118 | 14,121 | 5,636 | 2,736 | 22,611 |
| 93,022 | 110 | 13,819 | 5,531 | 2,695 | 22,155 |
| 93,023 | 108 | 13,747 | 5,518 | 2,654 | 22,027 |
| 93,024 | 111 | 14,201 | 5,651 | 2,751 | 22,714 |
| 93,025 | 112 | 14,193 | 5,660 | 2,744 | 22,709 |
| 93,026 | 111 | 14,210 | 5,646 | 2,745 | 22,712 |
| 93,027 | 104 | 14,240 | 5,653 | 2,746 | 22,743 |
| 93,028 | 110 | 14,294 | 5,658 | 2,757 | 22,819 |
| 93,029 | 113 | 14,329 | 5,678 | 2,769 | 22,889 |
| 93,030 | 110 | 14,384 | 5,664 | 2,789 | 22,947 |
| 93,031 | 103 | 14,199 | 5,603 | 2,773 | 22,678 |
| 93,032 | 100 | 14,191 | 5,607 | 2,778 | 22,676 |
| 93,033 | 101 | 14,402 | 5,649 | 2,834 | 22,986 |
| 93,034 | 101 | 14,464 | 5,643 | 2,847 | 23,055 |
| 93,035 | 105 | 14,552 | 5,679 | 2,845 | 23,181 |
| 93,036 | 103 | 14,490 | 5,626 | 2,826 | 23,045 |
| 93,037 | 105 | 14,905 | 5,729 | 2,879 | 23,618 |
| 93,038 | 111 | 15,054 | 5,739 | 2,878 | 23,782 |
| 93,039 | 108 | 15,215 | 5,736 | 2,890 | 23,949 |
| 93,040 | 114 | 15,297 | 5,730 | 2,913 | 24,054 |
| 93,041 | 124 | 15,558 | 5,762 | 2,927 | 24,371 |
| 93,042 | 132 | 15,527 | 5,619 | 2,865 | 24,143 |
| 93,043 | 138 | 15,869 | 5,707 | 2,913 | 24,627 |
| 93,044 | 142 | 16,108 | 5,781 | 2,943 | 24,974 |
| 93,045 | 140 | 15,805 | 5,728 | 2,902 | 24,575 |
| 93,046 | 163 | 15,913 | 5,805 | 2,937 | 24,818 |
| 93,047 | 162 | 15,838 | 5,783 | 2,946 | 24,729 |

|        |     |        |       |       |        |
|--------|-----|--------|-------|-------|--------|
| 93,048 | 163 | 15,934 | 5,795 | 2,965 | 24,857 |
| 93,049 | 163 | 16,103 | 5,799 | 2,969 | 25,034 |
| 93,050 | 165 | 16,062 | 5,796 | 2,980 | 25,003 |
| 93,051 | 165 | 16,199 | 5,832 | 2,995 | 25,191 |
| 93,052 | 162 | 16,208 | 5,811 | 3,013 | 25,194 |
| 93,053 | 162 | 16,198 | 5,786 | 2,998 | 25,144 |
| 93,054 | 162 | 16,196 | 5,768 | 3,001 | 25,127 |
| 93,055 | 164 | 16,417 | 5,850 | 3,038 | 25,469 |
| 93,056 | 162 | 16,263 | 5,784 | 2,985 | 25,194 |
| 93,057 | 164 | 16,406 | 5,818 | 2,997 | 25,385 |
| 93,058 | 158 | 16,398 | 5,884 | 3,005 | 25,445 |
| 93,059 | 161 | 16,341 | 5,894 | 3,006 | 25,402 |
| 93,060 | 156 | 16,219 | 5,890 | 3,007 | 25,272 |
| 93,061 | 164 | 16,389 | 5,939 | 3,042 | 25,534 |
| 93,062 | 166 | 16,493 | 5,988 | 3,058 | 25,705 |
| 93,063 | 171 | 16,577 | 6,009 | 3,052 | 25,809 |
| 93,064 | 175 | 16,598 | 6,012 | 3,049 | 25,834 |
| 93,065 | 179 | 16,607 | 5,945 | 3,042 | 25,773 |
| 93,066 | 188 | 16,820 | 6,004 | 3,079 | 26,091 |
| 93,067 | 190 | 16,919 | 5,989 | 3,092 | 26,190 |
| 93,068 | 193 | 17,000 | 5,975 | 3,074 | 26,242 |
| 93,069 | 197 | 17,259 | 6,080 | 3,101 | 26,637 |
| 93,070 | 195 | 17,219 | 6,066 | 3,107 | 26,587 |
| 93,071 | 200 | 17,349 | 6,090 | 3,130 | 26,769 |
| 93,072 | 201 | 17,456 | 6,084 | 3,119 | 26,860 |
| 93,073 | 209 | 17,517 | 6,101 | 3,127 | 26,954 |
| 93,074 | 208 | 17,601 | 6,098 | 3,124 | 27,031 |
| 93,075 | 206 | 17,754 | 6,157 | 3,162 | 27,279 |
| 93,076 | 205 | 17,757 | 6,136 | 3,167 | 27,265 |
| 93,077 | 206 | 17,773 | 6,138 | 3,177 | 27,294 |
| 93,078 | 208 | 17,972 | 6,177 | 3,195 | 27,552 |
| 93,079 | 202 | 18,166 | 6,244 | 3,237 | 27,849 |

|        |     |        |       |       |        |
|--------|-----|--------|-------|-------|--------|
| 93,080 | 203 | 18,082 | 6,184 | 3,229 | 27,698 |
| 93,081 | 201 | 17,949 | 6,175 | 3,205 | 27,530 |
| 93,082 | 207 | 18,228 | 6,260 | 3,277 | 27,972 |
| 93,083 | 209 | 18,241 | 6,262 | 3,269 | 27,981 |
| 93,084 | 214 | 18,356 | 6,267 | 3,272 | 28,109 |
| 93,085 | 216 | 18,395 | 6,286 | 3,287 | 28,184 |
| 93,086 | 220 | 18,323 | 6,302 | 3,284 | 28,129 |
| 93,087 | 222 | 18,349 | 6,319 | 3,285 | 28,175 |
| 93,088 | 223 | 18,397 | 6,315 | 3,299 | 28,234 |
| 93,089 | 230 | 18,505 | 6,361 | 3,342 | 28,438 |
| 93,090 | 229 | 18,486 | 6,368 | 3,344 | 28,427 |
| 93,091 | 222 | 18,714 | 6,443 | 3,377 | 28,756 |
| 93,092 | 215 | 18,996 | 6,511 | 3,446 | 29,168 |
| 93,093 | 204 | 19,012 | 6,535 | 3,479 | 29,230 |
| 93,094 | 198 | 19,073 | 6,553 | 3,459 | 29,283 |
| 93,095 | 192 | 19,050 | 6,522 | 3,463 | 29,227 |
| 93,096 | 186 | 19,136 | 6,470 | 3,442 | 29,234 |
| 93,097 | 171 | 19,174 | 6,492 | 3,459 | 29,296 |
| 93,098 | 171 | 19,136 | 6,484 | 3,459 | 29,250 |
| 93,099 | 174 | 19,261 | 6,523 | 3,461 | 29,419 |
| 93,100 | 174 | 19,055 | 6,474 | 3,431 | 29,134 |
| 93,101 | 171 | 19,172 | 6,483 | 3,439 | 29,265 |
| 93,102 | 172 | 19,268 | 6,567 | 3,510 | 29,517 |
| 93,103 | 174 | 19,228 | 6,582 | 3,518 | 29,502 |
| 93,104 | 176 | 19,045 | 6,471 | 3,461 | 29,153 |
| 93,105 | 179 | 19,182 | 6,513 | 3,487 | 29,361 |
| 93,106 | 181 | 19,379 | 6,565 | 3,520 | 29,645 |
| 93,107 | 182 | 19,219 | 6,495 | 3,502 | 29,398 |
| 93,108 | 180 | 19,166 | 6,456 | 3,483 | 29,285 |
| 93,109 | 182 | 19,555 | 6,509 | 3,545 | 29,791 |
| 93,110 | 178 | 19,313 | 6,368 | 3,491 | 29,350 |
| 93,111 | 179 | 19,569 | 6,412 | 3,517 | 29,677 |

|        |     |        |       |       |        |
|--------|-----|--------|-------|-------|--------|
| 93,112 | 176 | 19,807 | 6,454 | 3,557 | 29,994 |
| 93,113 | 172 | 19,803 | 6,384 | 3,561 | 29,920 |
| 93,114 | 166 | 19,568 | 6,299 | 3,547 | 29,580 |
| 93,115 | 166 | 19,519 | 6,281 | 3,553 | 29,519 |
| 93,116 | 173 | 19,624 | 6,349 | 3,590 | 29,736 |
| 93,117 | 171 | 18,946 | 6,137 | 3,443 | 28,697 |
| 93,118 | 172 | 19,138 | 6,125 | 3,452 | 28,887 |
| 93,119 | 168 | 19,243 | 6,120 | 3,466 | 28,997 |
| 93,120 | 168 | 19,053 | 6,060 | 3,419 | 28,700 |
| 93,121 | 163 | 18,999 | 5,954 | 3,383 | 28,499 |
| 93,122 | 172 | 19,089 | 5,934 | 3,374 | 28,569 |
| 93,123 | 170 | 18,983 | 5,863 | 3,358 | 28,374 |
| 93,124 | 165 | 19,228 | 5,882 | 3,384 | 28,659 |
| 93,125 | 171 | 19,268 | 5,854 | 3,371 | 28,664 |
| 93,126 | 176 | 19,381 | 5,827 | 3,385 | 28,769 |
| 93,127 | 180 | 19,645 | 5,857 | 3,417 | 29,099 |
| 93,128 | 177 | 19,686 | 5,859 | 3,414 | 29,136 |
| 93,129 | 173 | 19,735 | 5,848 | 3,419 | 29,175 |
| 93,130 | 167 | 19,714 | 5,798 | 3,408 | 29,087 |
| 93,131 | 173 | 19,997 | 5,821 | 3,416 | 29,407 |
| 93,132 | 173 | 19,793 | 5,751 | 3,377 | 29,094 |
| 93,133 | 172 | 19,902 | 5,761 | 3,380 | 29,215 |
| 93,134 | 167 | 20,023 | 5,756 | 3,387 | 29,333 |
| 93,135 | 167 | 20,057 | 5,768 | 3,393 | 29,385 |
| 93,136 | 162 | 20,149 | 5,753 | 3,387 | 29,451 |
| 93,137 | 165 | 20,165 | 5,702 | 3,383 | 29,415 |
| 93,138 | 163 | 20,082 | 5,693 | 3,389 | 29,327 |
| 93,139 | 159 | 20,374 | 5,758 | 3,403 | 29,694 |
| 93,140 | 161 | 20,437 | 5,744 | 3,397 | 29,739 |
| 93,141 | 159 | 20,547 | 5,711 | 3,404 | 29,821 |
| 93,142 | 165 | 20,538 | 5,629 | 3,376 | 29,708 |
| 93,143 | 167 | 20,440 | 5,628 | 3,366 | 29,601 |

|        |     |        |       |       |        |
|--------|-----|--------|-------|-------|--------|
| 93,144 | 169 | 19,968 | 5,477 | 3,273 | 28,887 |
| 93,145 | 170 | 20,008 | 5,457 | 3,239 | 28,874 |
| 93,146 | 170 | 20,067 | 5,455 | 3,246 | 28,938 |
| 93,147 | 169 | 20,236 | 5,430 | 3,235 | 29,070 |
| 93,148 | 172 | 20,382 | 5,476 | 3,267 | 29,297 |
| 93,149 | 171 | 20,517 | 5,481 | 3,275 | 29,444 |
| 93,150 | 167 | 20,507 | 5,434 | 3,272 | 29,380 |
| 93,151 | 167 | 20,763 | 5,462 | 3,284 | 29,676 |
| 93,152 | 167 | 20,960 | 5,489 | 3,296 | 29,912 |
| 93,153 | 168 | 21,190 | 5,515 | 3,303 | 30,176 |
| 93,154 | 166 | 21,089 | 5,458 | 3,267 | 29,980 |
| 93,155 | 162 | 21,070 | 5,484 | 3,267 | 29,983 |
| 93,156 | 159 | 21,202 | 5,484 | 3,278 | 30,123 |
| 93,157 | 159 | 21,331 | 5,461 | 3,280 | 30,231 |
| 93,158 | 155 | 21,460 | 5,499 | 3,294 | 30,408 |
| 93,159 | 155 | 21,684 | 5,565 | 3,322 | 30,726 |
| 93,160 | 153 | 21,670 | 5,546 | 3,327 | 30,696 |
| 93,161 | 153 | 21,763 | 5,581 | 3,319 | 30,816 |
| 93,162 | 157 | 21,850 | 5,597 | 3,328 | 30,932 |
| 93,163 | 156 | 21,844 | 5,557 | 3,263 | 30,820 |
| 93,164 | 158 | 22,154 | 5,619 | 3,296 | 31,227 |
| 93,165 | 153 | 22,452 | 5,658 | 3,332 | 31,595 |
| 93,166 | 152 | 22,609 | 5,670 | 3,308 | 31,739 |
| 93,167 | 145 | 22,725 | 5,641 | 3,301 | 31,812 |
| 93,168 | 132 | 22,490 | 5,611 | 3,285 | 31,518 |
| 93,169 | 132 | 22,515 | 5,624 | 3,291 | 31,562 |
| 93,170 | 135 | 22,634 | 5,632 | 3,297 | 31,698 |
| 93,171 | 133 | 22,413 | 5,562 | 3,278 | 31,386 |
| 93,172 | 134 | 22,428 | 5,567 | 3,272 | 31,401 |
| 93,173 | 129 | 22,259 | 5,558 | 3,235 | 31,181 |
| 93,174 | 128 | 22,235 | 5,567 | 3,236 | 31,166 |
| 93,175 | 124 | 22,187 | 5,619 | 3,252 | 31,182 |



|        |     |        |       |       |        |
|--------|-----|--------|-------|-------|--------|
| 93,176 | 118 | 21,859 | 5,570 | 3,220 | 30,767 |
| 93,177 | 114 | 21,765 | 5,567 | 3,174 | 30,620 |
| 93,178 | 121 | 22,042 | 5,633 | 3,198 | 30,994 |
| 93,179 | 118 | 21,907 | 5,576 | 3,185 | 30,786 |
| 93,180 | 114 | 21,575 | 5,536 | 3,160 | 30,385 |
| 93,181 | 127 | 21,960 | 5,593 | 3,188 | 30,868 |
| 93,182 | 122 | 21,754 | 5,582 | 3,149 | 30,607 |
| 93,183 | 120 | 21,849 | 5,579 | 3,151 | 30,699 |
| 93,184 | 117 | 21,822 | 5,591 | 3,165 | 30,695 |
| 93,185 | 121 | 21,962 | 5,614 | 3,154 | 30,851 |
| 93,186 | 119 | 21,752 | 5,534 | 3,108 | 30,513 |
| 93,187 | 119 | 21,734 | 5,538 | 3,104 | 30,495 |
| 93,188 | 116 | 21,753 | 5,562 | 3,084 | 30,515 |
| 93,189 | 122 | 21,252 | 5,398 | 2,980 | 29,752 |
| 93,190 | 120 | 21,440 | 5,438 | 3,010 | 30,008 |
| 93,191 | 112 | 21,406 | 5,434 | 2,993 | 29,945 |
| 93,192 | 115 | 21,564 | 5,450 | 3,000 | 30,129 |
| 93,193 | 109 | 21,485 | 5,460 | 3,004 | 30,058 |
| 93,194 | 105 | 21,572 | 5,493 | 3,040 | 30,210 |
| 93,195 | 104 | 21,351 | 5,431 | 3,007 | 29,893 |
| 93,196 | 105 | 21,313 | 5,442 | 3,023 | 29,883 |
| 93,197 | 105 | 21,466 | 5,491 | 3,020 | 30,082 |
| 93,198 | 108 | 21,591 | 5,505 | 3,026 | 30,230 |
| 93,199 | 108 | 21,554 | 5,475 | 3,000 | 30,137 |
| 93,200 | 110 | 21,736 | 5,525 | 3,010 | 30,381 |
| 93,201 | 110 | 21,543 | 5,482 | 2,987 | 30,122 |
| 93,202 | 111 | 21,470 | 5,462 | 2,952 | 29,995 |
| 93,203 | 117 | 21,618 | 5,507 | 2,964 | 30,206 |
| 93,204 | 119 | 21,572 | 5,488 | 2,940 | 30,119 |
| 93,205 | 124 | 21,572 | 5,456 | 2,918 | 30,070 |
| 93,206 | 124 | 21,556 | 5,484 | 2,909 | 30,073 |
| 93,207 | 125 | 21,455 | 5,496 | 2,914 | 29,990 |

|        |     |        |       |       |        |
|--------|-----|--------|-------|-------|--------|
| 93,208 | 125 | 21,380 | 5,498 | 2,895 | 29,898 |
| 93,209 | 129 | 21,340 | 5,463 | 2,875 | 29,807 |
| 93,210 | 130 | 21,193 | 5,421 | 2,822 | 29,566 |
| 93,211 | 136 | 21,136 | 5,432 | 2,829 | 29,533 |
| 93,212 | 134 | 20,949 | 5,398 | 2,812 | 29,293 |
| 93,213 | 135 | 21,262 | 5,482 | 2,872 | 29,751 |
| 93,214 | 133 | 21,161 | 5,502 | 2,871 | 29,667 |
| 93,215 | 141 | 20,959 | 5,456 | 2,840 | 29,396 |
| 93,216 | 146 | 20,757 | 5,429 | 2,805 | 29,137 |
| 93,217 | 151 | 21,319 | 5,578 | 2,895 | 29,943 |
| 93,218 | 163 | 21,013 | 5,514 | 2,866 | 29,556 |
| 93,219 | 163 | 21,035 | 5,525 | 2,869 | 29,592 |
| 93,220 | 164 | 21,118 | 5,533 | 2,882 | 29,697 |
| 93,221 | 164 | 21,170 | 5,538 | 2,880 | 29,752 |
| 93,222 | 164 | 21,298 | 5,584 | 2,907 | 29,953 |
| 93,223 | 165 | 21,393 | 5,614 | 2,932 | 30,104 |
| 93,224 | 170 | 21,519 | 5,625 | 2,952 | 30,266 |
| 93,225 | 170 | 21,645 | 5,629 | 2,940 | 30,384 |
| 93,226 | 176 | 21,605 | 5,608 | 2,944 | 30,333 |
| 93,227 | 178 | 21,859 | 5,671 | 2,980 | 30,688 |
| 93,228 | 190 | 21,915 | 5,695 | 3,017 | 30,817 |
| 93,229 | 184 | 21,979 | 5,704 | 3,031 | 30,898 |
| 93,230 | 182 | 21,749 | 5,652 | 2,992 | 30,575 |
| 93,231 | 187 | 21,956 | 5,703 | 3,012 | 30,858 |
| 93,232 | 178 | 21,941 | 5,734 | 3,029 | 30,882 |
| 93,233 | 175 | 21,905 | 5,720 | 3,047 | 30,847 |
| 93,234 | 180 | 21,782 | 5,687 | 3,029 | 30,678 |
| 93,235 | 180 | 21,704 | 5,687 | 3,036 | 30,607 |
| 93,236 | 176 | 21,625 | 5,712 | 3,050 | 30,563 |
| 93,237 | 173 | 21,441 | 5,718 | 3,070 | 30,402 |
| 93,238 | 173 | 21,350 | 5,709 | 3,092 | 30,324 |
| 93,239 | 174 | 21,282 | 5,715 | 3,110 | 30,281 |

|        |     |        |       |       |        |
|--------|-----|--------|-------|-------|--------|
| 93,240 | 174 | 21,243 | 5,733 | 3,133 | 30,283 |
| 93,241 | 180 | 21,426 | 5,807 | 3,160 | 30,573 |
| 93,242 | 184 | 21,487 | 5,811 | 3,167 | 30,649 |
| 93,243 | 181 | 21,443 | 5,800 | 3,160 | 30,584 |
| 93,244 | 180 | 21,546 | 5,806 | 3,169 | 30,701 |
| 93,245 | 180 | 21,445 | 5,737 | 3,125 | 30,487 |
| 93,246 | 179 | 21,724 | 5,786 | 3,161 | 30,850 |
| 93,247 | 182 | 21,989 | 5,860 | 3,225 | 31,256 |
| 93,248 | 181 | 21,801 | 5,821 | 3,196 | 30,999 |
| 93,249 | 185 | 22,147 | 5,883 | 3,237 | 31,452 |
| 93,250 | 194 | 21,998 | 5,864 | 3,232 | 31,288 |
| 93,251 | 192 | 21,831 | 5,830 | 3,223 | 31,076 |
| 93,252 | 198 | 21,811 | 5,855 | 3,268 | 31,132 |
| 93,253 | 198 | 21,758 | 5,849 | 3,263 | 31,068 |
| 93,254 | 195 | 21,710 | 5,820 | 3,267 | 30,992 |
| 93,255 | 193 | 21,673 | 5,802 | 3,283 | 30,951 |
| 93,256 | 195 | 21,705 | 5,783 | 3,303 | 30,986 |
| 93,257 | 192 | 21,464 | 5,698 | 3,287 | 30,641 |
| 93,258 | 197 | 21,750 | 5,788 | 3,301 | 31,036 |
| 93,259 | 198 | 21,623 | 5,732 | 3,292 | 30,845 |
| 93,260 | 197 | 21,598 | 5,739 | 3,289 | 30,823 |
| 93,261 | 196 | 21,412 | 5,703 | 3,285 | 30,596 |
| 93,262 | 193 | 21,818 | 5,747 | 3,321 | 31,079 |
| 93,263 | 188 | 21,618 | 5,689 | 3,274 | 30,769 |
| 93,264 | 188 | 21,408 | 5,643 | 3,264 | 30,503 |
| 93,265 | 190 | 21,467 | 5,679 | 3,287 | 30,623 |
| 93,266 | 179 | 21,072 | 5,634 | 3,237 | 30,122 |
| 93,267 | 173 | 20,844 | 5,624 | 3,220 | 29,861 |
| 93,268 | 173 | 20,675 | 5,604 | 3,245 | 29,697 |
| 93,269 | 162 | 20,524 | 5,567 | 3,218 | 29,471 |
| 93,270 | 172 | 20,291 | 5,535 | 3,196 | 29,194 |
| 93,271 | 168 | 20,014 | 5,531 | 3,188 | 28,901 |

|        |     |        |       |       |        |
|--------|-----|--------|-------|-------|--------|
| 93,272 | 167 | 20,360 | 5,600 | 3,259 | 29,386 |
| 93,273 | 162 | 19,651 | 5,378 | 3,139 | 28,330 |
| 93,274 | 164 | 19,672 | 5,404 | 3,159 | 28,399 |
| 93,275 | 168 | 20,014 | 5,502 | 3,209 | 28,893 |
| 93,276 | 169 | 19,986 | 5,511 | 3,224 | 28,890 |
| 93,277 | 166 | 20,374 | 5,599 | 3,260 | 29,399 |
| 93,278 | 165 | 20,347 | 5,606 | 3,251 | 29,369 |
| 93,279 | 154 | 20,414 | 5,596 | 3,240 | 29,404 |
| 93,280 | 162 | 20,818 | 5,688 | 3,291 | 29,959 |
| 93,281 | 158 | 20,404 | 5,543 | 3,187 | 29,292 |
| 93,282 | 159 | 20,700 | 5,629 | 3,236 | 29,724 |
| 93,283 | 159 | 21,147 | 5,732 | 3,308 | 30,346 |
| 93,284 | 167 | 21,518 | 5,854 | 3,369 | 30,908 |
| 93,285 | 163 | 21,307 | 5,818 | 3,335 | 30,623 |
| 93,286 | 166 | 21,524 | 5,880 | 3,362 | 30,932 |
| 93,287 | 166 | 21,547 | 5,904 | 3,361 | 30,978 |
| 93,288 | 169 | 21,842 | 5,959 | 3,381 | 31,351 |
| 93,289 | 169 | 22,255 | 6,069 | 3,451 | 31,944 |
| 93,290 | 164 | 22,037 | 6,007 | 3,400 | 31,608 |
| 93,291 | 170 | 22,022 | 5,995 | 3,388 | 31,575 |
| 93,292 | 170 | 22,280 | 6,065 | 3,432 | 31,947 |
| 93,293 | 163 | 21,844 | 5,990 | 3,396 | 31,393 |
| 93,294 | 162 | 21,715 | 5,958 | 3,394 | 31,229 |
| 93,295 | 161 | 21,589 | 5,964 | 3,403 | 31,117 |
| 93,296 | 164 | 21,782 | 6,050 | 3,438 | 31,434 |
| 93,297 | 163 | 21,265 | 5,944 | 3,364 | 30,736 |
| 93,298 | 163 | 21,388 | 6,020 | 3,409 | 30,980 |
| 93,299 | 164 | 21,564 | 6,126 | 3,434 | 31,288 |
| 93,300 | 165 | 21,600 | 6,200 | 3,490 | 31,455 |
| 93,301 | 158 | 21,354 | 6,092 | 3,440 | 31,044 |
| 93,302 | 159 | 21,394 | 6,111 | 3,431 | 31,095 |
| 93,303 | 159 | 21,622 | 6,158 | 3,469 | 31,408 |

|        |     |        |       |       |        |
|--------|-----|--------|-------|-------|--------|
| 93,304 | 158 | 21,747 | 6,197 | 3,484 | 31,586 |
| 93,305 | 156 | 21,108 | 6,027 | 3,387 | 30,678 |
| 93,306 | 160 | 21,382 | 6,072 | 3,423 | 31,037 |
| 93,307 | 160 | 21,631 | 6,153 | 3,452 | 31,396 |
| 93,308 | 160 | 21,536 | 6,163 | 3,459 | 31,318 |
| 93,309 | 160 | 21,822 | 6,276 | 3,530 | 31,788 |
| 93,310 | 160 | 21,713 | 6,311 | 3,540 | 31,724 |
| 93,311 | 159 | 21,742 | 6,346 | 3,577 | 31,824 |
| 93,312 | 159 | 21,775 | 6,389 | 3,587 | 31,910 |
| 93,313 | 162 | 21,859 | 6,420 | 3,623 | 32,064 |
| 93,314 | 164 | 21,811 | 6,421 | 3,618 | 32,014 |
| 93,315 | 165 | 21,947 | 6,434 | 3,618 | 32,164 |
| 93,316 | 161 | 21,769 | 6,296 | 3,573 | 31,799 |
| 93,317 | 172 | 22,107 | 6,383 | 3,615 | 32,277 |
| 93,318 | 179 | 22,348 | 6,445 | 3,639 | 32,611 |
| 93,319 | 178 | 22,330 | 6,427 | 3,596 | 32,531 |
| 93,320 | 181 | 22,359 | 6,419 | 3,582 | 32,541 |
| 93,321 | 175 | 22,181 | 6,417 | 3,570 | 32,343 |
| 93,322 | 176 | 22,187 | 6,380 | 3,537 | 32,280 |
| 93,323 | 174 | 21,920 | 6,340 | 3,482 | 31,916 |
| 93,324 | 177 | 21,954 | 6,330 | 3,481 | 31,942 |
| 93,325 | 177 | 21,915 | 6,331 | 3,482 | 31,905 |
| 93,326 | 169 | 21,987 | 6,369 | 3,506 | 32,031 |
| 93,327 | 169 | 21,994 | 6,365 | 3,520 | 32,048 |
| 93,328 | 174 | 21,725 | 6,317 | 3,491 | 31,707 |
| 93,329 | 174 | 21,525 | 6,302 | 3,471 | 31,472 |
| 93,330 | 170 | 21,791 | 6,399 | 3,539 | 31,899 |
| 93,331 | 168 | 21,940 | 6,477 | 3,592 | 32,177 |
| 93,332 | 163 | 21,751 | 6,418 | 3,579 | 31,911 |
| 93,333 | 165 | 20,952 | 6,209 | 3,437 | 30,763 |
| 93,334 | 165 | 20,871 | 6,178 | 3,444 | 30,658 |
| 93,335 | 159 | 20,897 | 6,170 | 3,432 | 30,658 |

|        |     |        |       |       |        |
|--------|-----|--------|-------|-------|--------|
| 93,336 | 161 | 20,987 | 6,163 | 3,435 | 30,746 |
| 93,337 | 159 | 21,201 | 6,218 | 3,461 | 31,039 |
| 93,338 | 168 | 21,233 | 6,217 | 3,475 | 31,093 |
| 93,339 | 168 | 21,055 | 6,152 | 3,456 | 30,831 |
| 93,340 | 168 | 21,006 | 6,140 | 3,452 | 30,766 |
| 93,341 | 168 | 20,956 | 6,128 | 3,460 | 30,712 |
| 93,342 | 169 | 20,936 | 6,105 | 3,459 | 30,669 |
| 93,343 | 170 | 20,838 | 6,084 | 3,433 | 30,525 |
| 93,344 | 173 | 20,819 | 6,069 | 3,400 | 30,461 |
| 93,345 | 176 | 20,912 | 6,061 | 3,400 | 30,549 |
| 93,346 | 175 | 20,901 | 6,054 | 3,390 | 30,520 |
| 93,347 | 180 | 20,952 | 6,027 | 3,374 | 30,533 |
| 93,348 | 175 | 20,852 | 5,997 | 3,349 | 30,373 |
| 93,349 | 177 | 21,086 | 6,036 | 3,370 | 30,669 |
| 93,350 | 172 | 20,758 | 5,857 | 3,303 | 30,090 |
| 93,351 | 180 | 21,020 | 5,924 | 3,336 | 30,460 |
| 93,352 | 174 | 20,836 | 5,891 | 3,325 | 30,226 |
| 93,353 | 174 | 20,855 | 5,898 | 3,334 | 30,261 |
| 93,354 | 172 | 20,810 | 5,906 | 3,310 | 30,198 |
| 93,355 | 170 | 20,668 | 5,892 | 3,301 | 30,031 |
| 93,356 | 169 | 20,799 | 5,904 | 3,321 | 30,193 |
| 93,357 | 168 | 20,999 | 5,975 | 3,367 | 30,509 |
| 93,358 | 165 | 20,736 | 5,947 | 3,352 | 30,200 |
| 93,359 | 179 | 21,123 | 6,009 | 3,402 | 30,713 |
| 93,360 | 181 | 21,336 | 6,021 | 3,414 | 30,952 |
| 93,361 | 178 | 21,552 | 6,023 | 3,420 | 31,173 |
| 93,362 | 178 | 21,424 | 5,953 | 3,393 | 30,948 |
| 93,363 | 179 | 21,430 | 5,947 | 3,395 | 30,951 |
| 93,364 | 175 | 21,228 | 5,913 | 3,360 | 30,676 |
| 93,365 | 172 | 21,153 | 5,880 | 3,361 | 30,566 |
| 93,366 | 180 | 21,273 | 6,025 | 3,445 | 30,923 |
| 93,367 | 183 | 21,462 | 6,059 | 3,468 | 31,172 |

|        |     |        |       |       |        |
|--------|-----|--------|-------|-------|--------|
| 93,368 | 175 | 21,620 | 6,106 | 3,505 | 31,406 |
| 93,369 | 167 | 21,494 | 6,058 | 3,494 | 31,213 |
| 93,370 | 169 | 21,599 | 6,067 | 3,510 | 31,345 |
| 93,371 | 161 | 21,378 | 5,966 | 3,480 | 30,985 |
| 93,372 | 161 | 21,484 | 5,971 | 3,489 | 31,105 |
| 93,373 | 159 | 21,369 | 6,002 | 3,501 | 31,031 |
| 93,374 | 158 | 21,347 | 6,027 | 3,512 | 31,044 |
| 93,375 | 155 | 21,151 | 6,019 | 3,514 | 30,839 |
| 93,376 | 156 | 21,403 | 6,104 | 3,579 | 31,242 |
| 93,377 | 157 | 21,418 | 6,153 | 3,584 | 31,312 |
| 93,378 | 154 | 21,612 | 6,184 | 3,626 | 31,576 |
| 93,379 | 148 | 21,540 | 6,099 | 3,618 | 31,405 |
| 93,380 | 148 | 21,355 | 6,034 | 3,586 | 31,123 |
| 93,381 | 148 | 21,160 | 6,019 | 3,566 | 30,893 |
| 93,382 | 148 | 21,067 | 6,009 | 3,546 | 30,770 |
| 93,383 | 150 | 21,062 | 6,008 | 3,563 | 30,783 |
| 93,384 | 142 | 20,738 | 5,937 | 3,510 | 30,327 |
| 93,385 | 142 | 20,730 | 5,950 | 3,534 | 30,356 |
| 93,386 | 142 | 20,737 | 5,959 | 3,528 | 30,366 |
| 93,387 | 138 | 20,117 | 5,786 | 3,451 | 29,492 |
| 93,388 | 139 | 20,287 | 5,821 | 3,481 | 29,728 |
| 93,389 | 136 | 20,350 | 5,831 | 3,473 | 29,790 |
| 93,390 | 136 | 20,456 | 5,870 | 3,493 | 29,955 |
| 93,391 | 128 | 20,452 | 5,862 | 3,496 | 29,938 |
| 93,392 | 131 | 20,637 | 5,910 | 3,501 | 30,179 |
| 93,393 | 128 | 20,335 | 5,846 | 3,446 | 29,755 |
| 93,394 | 128 | 20,258 | 5,820 | 3,447 | 29,653 |
| 93,395 | 125 | 20,528 | 5,890 | 3,496 | 30,039 |
| 93,396 | 124 | 20,530 | 5,916 | 3,519 | 30,089 |
| 93,397 | 125 | 20,403 | 5,886 | 3,533 | 29,947 |
| 93,398 | 120 | 20,264 | 5,823 | 3,509 | 29,716 |
| 93,399 | 120 | 20,360 | 5,836 | 3,515 | 29,831 |

|        |     |        |       |       |        |
|--------|-----|--------|-------|-------|--------|
| 93,400 | 113 | 19,898 | 5,744 | 3,440 | 29,195 |
| 93,401 | 114 | 19,979 | 5,796 | 3,474 | 29,363 |
| 93,402 | 108 | 20,008 | 5,848 | 3,511 | 29,475 |
| 93,403 | 108 | 19,988 | 5,828 | 3,500 | 29,424 |
| 93,404 | 113 | 20,208 | 5,942 | 3,547 | 29,810 |
| 93,405 | 111 | 20,194 | 5,955 | 3,555 | 29,815 |
| 93,406 | 108 | 20,153 | 5,977 | 3,583 | 29,821 |
| 93,407 | 108 | 20,377 | 6,053 | 3,618 | 30,156 |
| 93,408 | 105 | 20,049 | 5,931 | 3,538 | 29,623 |
| 93,409 | 106 | 20,303 | 5,999 | 3,565 | 29,973 |
| 93,410 | 98  | 20,390 | 6,034 | 3,592 | 30,114 |
| 93,411 | 101 | 20,258 | 6,034 | 3,595 | 29,988 |
| 93,412 | 102 | 20,250 | 6,033 | 3,614 | 29,999 |
| 93,413 | 101 | 20,229 | 6,051 | 3,642 | 30,023 |
| 93,414 | 100 | 20,284 | 6,073 | 3,643 | 30,100 |
| 93,415 | 95  | 20,180 | 6,029 | 3,658 | 29,962 |
| 93,416 | 91  | 19,589 | 5,889 | 3,563 | 29,132 |
| 93,417 | 91  | 19,776 | 5,922 | 3,575 | 29,364 |
| 93,418 | 88  | 19,855 | 5,967 | 3,619 | 29,529 |
| 93,419 | 87  | 19,835 | 5,955 | 3,611 | 29,488 |
| 93,420 | 84  | 19,608 | 5,949 | 3,611 | 29,252 |
| 93,421 | 86  | 19,841 | 6,055 | 3,657 | 29,639 |
| 93,422 | 88  | 19,887 | 6,098 | 3,668 | 29,741 |
| 93,423 | 99  | 20,010 | 6,110 | 3,695 | 29,914 |
| 93,424 | 99  | 20,049 | 6,128 | 3,718 | 29,994 |
| 93,425 | 106 | 20,133 | 6,162 | 3,730 | 30,131 |
| 93,426 | 110 | 20,310 | 6,206 | 3,735 | 30,361 |
| 93,427 | 109 | 20,696 | 6,311 | 3,773 | 30,889 |
| 93,428 | 112 | 20,721 | 6,279 | 3,753 | 30,865 |
| 93,429 | 117 | 20,543 | 6,272 | 3,723 | 30,655 |
| 93,430 | 116 | 20,416 | 6,244 | 3,695 | 30,471 |
| 93,431 | 113 | 20,435 | 6,272 | 3,710 | 30,530 |



|        |     |        |       |       |        |
|--------|-----|--------|-------|-------|--------|
| 93,432 | 114 | 20,541 | 6,276 | 3,720 | 30,651 |
| 93,433 | 112 | 20,596 | 6,309 | 3,742 | 30,759 |
| 93,434 | 115 | 20,617 | 6,344 | 3,742 | 30,818 |
| 93,435 | 115 | 20,554 | 6,327 | 3,764 | 30,760 |
| 93,436 | 118 | 20,846 | 6,390 | 3,812 | 31,166 |
| 93,437 | 119 | 20,937 | 6,417 | 3,837 | 31,310 |
| 93,438 | 124 | 20,772 | 6,373 | 3,792 | 31,061 |
| 93,439 | 124 | 20,631 | 6,323 | 3,783 | 30,861 |
| 93,440 | 126 | 20,699 | 6,347 | 3,793 | 30,965 |
| 93,441 | 127 | 20,709 | 6,333 | 3,792 | 30,961 |
| 93,442 | 126 | 20,523 | 6,302 | 3,750 | 30,701 |
| 93,443 | 124 | 20,384 | 6,246 | 3,746 | 30,500 |
| 93,444 | 123 | 20,846 | 6,423 | 3,851 | 31,243 |
| 93,445 | 125 | 21,002 | 6,480 | 3,888 | 31,495 |
| 93,446 | 127 | 20,892 | 6,454 | 3,859 | 31,332 |
| 93,447 | 122 | 20,856 | 6,435 | 3,856 | 31,269 |
| 93,448 | 125 | 21,199 | 6,514 | 3,884 | 31,722 |
| 93,449 | 129 | 21,052 | 6,517 | 3,886 | 31,584 |
| 93,450 | 132 | 20,916 | 6,482 | 3,882 | 31,412 |
| 93,451 | 135 | 21,043 | 6,462 | 3,876 | 31,516 |
| 93,452 | 139 | 20,992 | 6,407 | 3,837 | 31,375 |
| 93,453 | 144 | 21,385 | 6,430 | 3,869 | 31,828 |
| 93,454 | 140 | 21,423 | 6,386 | 3,863 | 31,812 |
| 93,455 | 140 | 21,489 | 6,368 | 3,860 | 31,857 |
| 93,456 | 144 | 21,462 | 6,372 | 3,834 | 31,812 |
| 93,457 | 145 | 21,557 | 6,343 | 3,815 | 31,860 |
| 93,458 | 145 | 21,529 | 6,342 | 3,809 | 31,825 |
| 93,459 | 149 | 21,515 | 6,275 | 3,804 | 31,743 |
| 93,460 | 150 | 21,667 | 6,328 | 3,841 | 31,986 |
| 93,461 | 149 | 21,783 | 6,330 | 3,844 | 32,106 |
| 93,462 | 142 | 21,843 | 6,320 | 3,830 | 32,135 |
| 93,463 | 143 | 21,666 | 6,276 | 3,758 | 31,843 |

|        |     |        |       |       |        |
|--------|-----|--------|-------|-------|--------|
| 93,464 | 147 | 21,681 | 6,244 | 3,778 | 31,850 |
| 93,465 | 147 | 21,728 | 6,252 | 3,768 | 31,895 |
| 93,466 | 152 | 21,838 | 6,233 | 3,745 | 31,968 |
| 93,467 | 151 | 21,989 | 6,242 | 3,763 | 32,145 |
| 93,468 | 154 | 22,140 | 6,265 | 3,762 | 32,321 |
| 93,469 | 154 | 22,165 | 6,267 | 3,760 | 32,346 |
| 93,470 | 155 | 22,192 | 6,287 | 3,774 | 32,408 |
| 93,471 | 161 | 22,349 | 6,288 | 3,780 | 32,578 |
| 93,472 | 164 | 22,487 | 6,281 | 3,780 | 32,712 |
| 93,473 | 162 | 22,384 | 6,300 | 3,796 | 32,642 |
| 93,474 | 150 | 22,528 | 6,370 | 3,856 | 32,904 |
| 93,475 | 151 | 22,440 | 6,388 | 3,859 | 32,838 |
| 93,476 | 142 | 22,459 | 6,370 | 3,857 | 32,828 |
| 93,477 | 138 | 22,551 | 6,336 | 3,851 | 32,876 |
| 93,478 | 140 | 22,718 | 6,325 | 3,857 | 33,040 |
| 93,479 | 136 | 22,845 | 6,366 | 3,890 | 33,237 |
| 93,480 | 134 | 22,621 | 6,291 | 3,834 | 32,880 |
| 93,481 | 135 | 22,740 | 6,278 | 3,820 | 32,973 |
| 93,482 | 135 | 22,944 | 6,324 | 3,850 | 33,253 |
| 93,483 | 136 | 23,090 | 6,325 | 3,861 | 33,412 |
| 93,484 | 135 | 22,873 | 6,252 | 3,834 | 33,094 |
| 93,485 | 132 | 22,928 | 6,230 | 3,812 | 33,102 |
| 93,486 | 132 | 23,096 | 6,318 | 3,821 | 33,367 |
| 93,487 | 132 | 23,031 | 6,265 | 3,791 | 33,219 |
| 93,488 | 126 | 22,741 | 6,177 | 3,744 | 32,788 |
| 93,489 | 122 | 22,709 | 6,154 | 3,747 | 32,732 |
| 93,490 | 122 | 22,810 | 6,185 | 3,739 | 32,856 |
| 93,491 | 115 | 22,406 | 6,045 | 3,658 | 32,224 |
| 93,492 | 116 | 22,665 | 6,082 | 3,666 | 32,529 |
| 93,493 | 115 | 22,699 | 6,104 | 3,669 | 32,587 |
| 93,494 | 119 | 22,705 | 6,104 | 3,635 | 32,563 |
| 93,495 | 117 | 22,790 | 6,074 | 3,589 | 32,570 |

|        |     |        |       |       |        |
|--------|-----|--------|-------|-------|--------|
| 93,496 | 117 | 22,991 | 6,108 | 3,632 | 32,848 |
| 93,497 | 113 | 22,662 | 6,032 | 3,571 | 32,378 |
| 93,498 | 116 | 22,795 | 6,063 | 3,589 | 32,563 |
| 93,499 | 116 | 22,558 | 5,958 | 3,529 | 32,161 |
| 93,500 | 117 | 22,557 | 5,958 | 3,522 | 32,154 |
| 93,501 | 112 | 22,256 | 5,889 | 3,464 | 31,721 |
| 93,502 | 115 | 22,505 | 5,985 | 3,513 | 32,118 |
| 93,503 | 115 | 22,393 | 5,950 | 3,501 | 31,959 |
| 93,504 | 113 | 22,017 | 5,898 | 3,440 | 31,468 |
| 93,505 | 114 | 22,030 | 5,883 | 3,444 | 31,471 |
| 93,506 | 111 | 21,987 | 5,898 | 3,479 | 31,475 |
| 93,507 | 109 | 21,804 | 5,826 | 3,452 | 31,191 |
| 93,508 | 111 | 21,342 | 5,737 | 3,393 | 30,583 |
| 93,509 | 114 | 21,507 | 5,803 | 3,418 | 30,842 |
| 93,510 | 109 | 21,528 | 5,830 | 3,407 | 30,874 |
| 93,511 | 105 | 21,232 | 5,790 | 3,372 | 30,499 |
| 93,512 | 104 | 21,157 | 5,772 | 3,349 | 30,382 |
| 93,513 | 106 | 21,343 | 5,827 | 3,368 | 30,644 |
| 93,514 | 105 | 21,271 | 5,775 | 3,356 | 30,507 |
| 93,515 | 101 | 20,933 | 5,676 | 3,283 | 29,993 |
| 93,516 | 101 | 20,966 | 5,673 | 3,283 | 30,023 |
| 93,517 | 102 | 21,183 | 5,752 | 3,311 | 30,348 |
| 93,518 | 100 | 21,039 | 5,724 | 3,277 | 30,140 |
| 93,519 | 104 | 21,174 | 5,746 | 3,308 | 30,332 |
| 93,520 | 102 | 20,733 | 5,594 | 3,220 | 29,649 |
| 93,521 | 104 | 20,926 | 5,601 | 3,233 | 29,864 |
| 93,522 | 96  | 21,096 | 5,642 | 3,260 | 30,094 |
| 93,523 | 91  | 20,876 | 5,503 | 3,172 | 29,642 |
| 93,524 | 92  | 21,133 | 5,548 | 3,192 | 29,965 |
| 93,525 | 92  | 20,866 | 5,404 | 3,075 | 29,437 |
| 93,526 | 94  | 21,205 | 5,441 | 3,112 | 29,852 |
| 93,527 | 97  | 20,892 | 5,352 | 3,060 | 29,401 |

|        |     |        |       |       |        |
|--------|-----|--------|-------|-------|--------|
| 93,528 | 98  | 20,288 | 5,219 | 3,000 | 28,605 |
| 93,529 | 100 | 20,218 | 5,237 | 3,006 | 28,561 |
| 93,530 | 98  | 19,687 | 5,084 | 2,932 | 27,801 |
| 93,531 | 102 | 19,720 | 5,079 | 2,926 | 27,827 |
| 93,532 | 100 | 19,399 | 5,018 | 2,899 | 27,416 |
| 93,533 | 100 | 19,641 | 5,096 | 2,929 | 27,766 |
| 93,534 | 101 | 19,829 | 5,135 | 2,916 | 27,981 |
| 93,535 | 98  | 19,636 | 5,055 | 2,873 | 27,662 |
| 93,536 | 101 | 19,617 | 5,064 | 2,878 | 27,660 |
| 93,537 | 101 | 19,635 | 5,060 | 2,886 | 27,682 |
| 93,538 | 99  | 19,642 | 5,151 | 2,951 | 27,843 |
| 93,539 | 99  | 19,546 | 5,128 | 2,934 | 27,707 |
| 93,540 | 99  | 19,808 | 5,195 | 2,976 | 28,078 |
| 93,541 | 103 | 19,877 | 5,179 | 2,976 | 28,135 |
| 93,542 | 103 | 19,643 | 5,154 | 2,980 | 27,880 |
| 93,543 | 102 | 19,636 | 5,146 | 2,989 | 27,873 |
| 93,544 | 98  | 19,658 | 5,120 | 2,995 | 27,871 |
| 93,545 | 103 | 19,949 | 5,161 | 3,043 | 28,256 |
| 93,546 | 105 | 19,832 | 5,179 | 3,040 | 28,156 |
| 93,547 | 105 | 19,815 | 5,177 | 3,053 | 28,150 |
| 93,548 | 109 | 20,142 | 5,241 | 3,086 | 28,578 |
| 93,549 | 106 | 20,107 | 5,250 | 3,094 | 28,557 |
| 93,550 | 105 | 20,144 | 5,259 | 3,107 | 28,615 |
| 93,551 | 101 | 20,090 | 5,234 | 3,092 | 28,517 |
| 93,552 | 103 | 20,323 | 5,275 | 3,120 | 28,821 |
| 93,553 | 108 | 20,298 | 5,268 | 3,126 | 28,800 |
| 93,554 | 103 | 20,122 | 5,246 | 3,110 | 28,581 |
| 93,555 | 107 | 20,572 | 5,351 | 3,170 | 29,200 |
| 93,556 | 108 | 20,713 | 5,391 | 3,170 | 29,382 |
| 93,557 | 109 | 20,879 | 5,431 | 3,174 | 29,593 |
| 93,558 | 106 | 20,956 | 5,447 | 3,174 | 29,683 |
| 93,559 | 108 | 21,257 | 5,496 | 3,214 | 30,075 |

|        |     |        |       |       |        |
|--------|-----|--------|-------|-------|--------|
| 93,560 | 109 | 21,299 | 5,495 | 3,235 | 30,138 |
| 93,561 | 109 | 21,370 | 5,492 | 3,267 | 30,238 |
| 93,562 | 108 | 21,189 | 5,434 | 3,238 | 29,969 |
| 93,563 | 112 | 20,951 | 5,415 | 3,205 | 29,683 |
| 93,564 | 110 | 20,836 | 5,372 | 3,189 | 29,507 |
| 93,565 | 109 | 20,919 | 5,447 | 3,243 | 29,718 |
| 93,566 | 107 | 20,780 | 5,461 | 3,234 | 29,582 |
| 93,567 | 110 | 21,351 | 5,639 | 3,323 | 30,423 |
| 93,568 | 112 | 21,608 | 5,704 | 3,378 | 30,802 |
| 93,569 | 115 | 21,611 | 5,718 | 3,408 | 30,852 |
| 93,570 | 112 | 21,405 | 5,700 | 3,379 | 30,596 |
| 93,571 | 115 | 21,589 | 5,725 | 3,385 | 30,814 |
| 93,572 | 112 | 21,337 | 5,733 | 3,374 | 30,556 |
| 93,573 | 113 | 21,340 | 5,765 | 3,402 | 30,620 |
| 93,574 | 113 | 21,487 | 5,855 | 3,441 | 30,896 |
| 93,575 | 112 | 21,468 | 5,897 | 3,468 | 30,945 |
| 93,576 | 112 | 21,492 | 5,896 | 3,486 | 30,986 |
| 93,577 | 111 | 21,560 | 5,907 | 3,503 | 31,081 |
| 93,578 | 108 | 21,434 | 5,868 | 3,489 | 30,899 |
| 93,579 | 106 | 21,591 | 5,902 | 3,494 | 31,093 |
| 93,580 | 105 | 21,679 | 5,929 | 3,533 | 31,246 |
| 93,581 | 104 | 21,473 | 5,931 | 3,528 | 31,036 |
| 93,582 | 100 | 21,576 | 5,909 | 3,552 | 31,137 |
| 93,583 | 101 | 21,630 | 5,975 | 3,599 | 31,305 |
| 93,584 | 102 | 21,434 | 5,957 | 3,593 | 31,086 |
| 93,585 | 101 | 21,293 | 5,955 | 3,601 | 30,950 |
| 93,586 | 104 | 21,336 | 5,965 | 3,606 | 31,011 |
| 93,587 | 102 | 21,509 | 5,963 | 3,592 | 31,166 |
| 93,588 | 101 | 21,327 | 5,873 | 3,504 | 30,805 |
| 93,589 | 102 | 21,749 | 5,925 | 3,550 | 31,326 |
| 93,590 | 100 | 21,815 | 5,951 | 3,562 | 31,428 |
| 93,591 | 101 | 21,981 | 6,022 | 3,588 | 31,692 |

|        |     |        |       |       |        |
|--------|-----|--------|-------|-------|--------|
| 93,592 | 99  | 21,591 | 5,970 | 3,562 | 31,222 |
| 93,593 | 100 | 21,710 | 5,987 | 3,561 | 31,358 |
| 93,594 | 100 | 21,570 | 6,001 | 3,561 | 31,232 |
| 93,595 | 103 | 21,819 | 6,057 | 3,608 | 31,587 |
| 93,596 | 98  | 21,858 | 6,080 | 3,602 | 31,638 |
| 93,597 | 100 | 21,982 | 6,113 | 3,613 | 31,808 |
| 93,598 | 102 | 22,193 | 6,171 | 3,659 | 32,125 |
| 93,599 | 94  | 21,333 | 6,008 | 3,566 | 31,001 |
| 93,600 | 94  | 21,538 | 6,047 | 3,600 | 31,279 |
| 93,601 | 97  | 21,630 | 6,107 | 3,604 | 31,438 |
| 93,602 | 99  | 22,013 | 6,184 | 3,669 | 31,965 |
| 93,603 | 95  | 21,952 | 6,192 | 3,678 | 31,917 |
| 93,604 | 85  | 21,818 | 6,209 | 3,671 | 31,783 |
| 93,605 | 83  | 21,583 | 6,177 | 3,663 | 31,506 |
| 93,606 | 87  | 21,587 | 6,199 | 3,680 | 31,553 |
| 93,607 | 89  | 21,491 | 6,204 | 3,695 | 31,479 |
| 93,608 | 103 | 21,493 | 6,206 | 3,703 | 31,505 |
| 93,609 | 103 | 21,473 | 6,197 | 3,722 | 31,495 |
| 93,610 | 99  | 21,449 | 6,231 | 3,747 | 31,526 |
| 93,611 | 101 | 21,552 | 6,266 | 3,725 | 31,644 |
| 93,612 | 102 | 21,637 | 6,264 | 3,732 | 31,735 |
| 93,613 | 100 | 21,589 | 6,219 | 3,713 | 31,621 |
| 93,614 | 103 | 21,816 | 6,267 | 3,739 | 31,925 |
| 93,615 | 106 | 22,190 | 6,367 | 3,777 | 32,440 |
| 93,616 | 117 | 22,367 | 6,417 | 3,820 | 32,721 |
| 93,617 | 116 | 22,266 | 6,329 | 3,793 | 32,504 |
| 93,618 | 117 | 22,398 | 6,363 | 3,809 | 32,687 |
| 93,619 | 111 | 22,503 | 6,402 | 3,845 | 32,861 |
| 93,620 | 111 | 22,262 | 6,332 | 3,797 | 32,502 |
| 93,621 | 110 | 22,134 | 6,295 | 3,782 | 32,321 |
| 93,622 | 112 | 22,324 | 6,375 | 3,825 | 32,636 |
| 93,623 | 114 | 22,516 | 6,416 | 3,862 | 32,908 |

|        |     |        |       |       |        |
|--------|-----|--------|-------|-------|--------|
| 93,624 | 118 | 22,542 | 6,359 | 3,830 | 32,849 |
| 93,625 | 122 | 22,592 | 6,351 | 3,820 | 32,885 |
| 93,626 | 125 | 22,608 | 6,346 | 3,830 | 32,909 |
| 93,627 | 126 | 22,781 | 6,422 | 3,862 | 33,191 |
| 93,628 | 125 | 22,759 | 6,437 | 3,854 | 33,175 |
| 93,629 | 127 | 22,828 | 6,445 | 3,869 | 33,269 |
| 93,630 | 126 | 22,852 | 6,426 | 3,860 | 33,264 |
| 93,631 | 125 | 22,668 | 6,372 | 3,820 | 32,985 |
| 93,632 | 133 | 22,796 | 6,393 | 3,821 | 33,143 |
| 93,633 | 134 | 22,888 | 6,367 | 3,797 | 33,186 |
| 93,634 | 134 | 23,249 | 6,434 | 3,851 | 33,668 |
| 93,635 | 134 | 23,008 | 6,383 | 3,813 | 33,338 |
| 93,636 | 133 | 22,836 | 6,315 | 3,781 | 33,065 |
| 93,637 | 142 | 23,048 | 6,399 | 3,854 | 33,443 |
| 93,638 | 146 | 22,931 | 6,385 | 3,879 | 33,341 |
| 93,639 | 145 | 22,755 | 6,396 | 3,908 | 33,204 |
| 93,640 | 144 | 22,626 | 6,375 | 3,896 | 33,041 |
| 93,641 | 148 | 22,534 | 6,348 | 3,893 | 32,923 |
| 93,642 | 148 | 22,467 | 6,319 | 3,869 | 32,803 |
| 93,643 | 147 | 22,561 | 6,325 | 3,874 | 32,907 |
| 93,644 | 147 | 22,479 | 6,300 | 3,858 | 32,784 |
| 93,645 | 146 | 22,273 | 6,241 | 3,839 | 32,499 |
| 93,646 | 144 | 22,448 | 6,377 | 3,896 | 32,865 |
| 93,647 | 143 | 22,233 | 6,327 | 3,885 | 32,588 |
| 93,648 | 145 | 22,164 | 6,297 | 3,880 | 32,486 |
| 93,649 | 149 | 21,997 | 6,241 | 3,830 | 32,217 |
| 93,650 | 149 | 22,104 | 6,274 | 3,839 | 32,366 |
| 93,651 | 147 | 22,007 | 6,266 | 3,836 | 32,256 |
| 93,652 | 148 | 22,130 | 6,300 | 3,852 | 32,430 |
| 93,653 | 145 | 22,037 | 6,276 | 3,830 | 32,288 |
| 93,654 | 145 | 22,066 | 6,213 | 3,774 | 32,198 |
| 93,655 | 149 | 21,993 | 6,196 | 3,744 | 32,082 |

|        |     |        |       |       |        |
|--------|-----|--------|-------|-------|--------|
| 93,656 | 149 | 21,990 | 6,216 | 3,744 | 32,099 |
| 93,657 | 149 | 21,765 | 6,154 | 3,683 | 31,751 |
| 93,658 | 145 | 21,536 | 6,058 | 3,635 | 31,374 |
| 93,659 | 132 | 21,878 | 6,154 | 3,714 | 31,878 |
| 93,660 | 136 | 21,821 | 6,150 | 3,678 | 31,785 |
| 93,661 | 141 | 21,663 | 6,122 | 3,638 | 31,564 |
| 93,662 | 138 | 21,438 | 6,047 | 3,601 | 31,224 |
| 93,663 | 138 | 21,280 | 5,988 | 3,583 | 30,989 |
| 93,664 | 137 | 21,161 | 5,978 | 3,571 | 30,847 |
| 93,665 | 139 | 21,008 | 5,952 | 3,564 | 30,663 |
| 93,666 | 138 | 21,166 | 5,976 | 3,612 | 30,892 |
| 93,667 | 130 | 20,755 | 5,889 | 3,532 | 30,306 |
| 93,668 | 129 | 20,567 | 5,837 | 3,500 | 30,033 |
| 93,669 | 129 | 20,615 | 5,892 | 3,526 | 30,162 |
| 93,670 | 129 | 20,759 | 5,959 | 3,568 | 30,415 |
| 93,671 | 122 | 20,540 | 5,917 | 3,531 | 30,110 |
| 93,672 | 122 | 20,427 | 5,892 | 3,525 | 29,966 |
| 93,673 | 122 | 20,435 | 5,889 | 3,522 | 29,968 |
| 93,674 | 119 | 20,421 | 5,884 | 3,500 | 29,924 |
| 93,675 | 125 | 20,232 | 5,840 | 3,484 | 29,681 |
| 93,676 | 121 | 20,003 | 5,771 | 3,460 | 29,355 |
| 93,677 | 122 | 20,351 | 5,888 | 3,512 | 29,873 |
| 93,678 | 125 | 19,316 | 5,651 | 3,341 | 28,433 |
| 93,679 | 125 | 19,313 | 5,633 | 3,330 | 28,401 |
| 93,680 | 124 | 19,289 | 5,626 | 3,319 | 28,358 |
| 93,681 | 125 | 19,245 | 5,644 | 3,313 | 28,327 |
| 93,682 | 122 | 19,275 | 5,650 | 3,309 | 28,356 |
| 93,683 | 122 | 19,193 | 5,661 | 3,317 | 28,293 |
| 93,684 | 124 | 19,713 | 5,866 | 3,424 | 29,127 |
| 93,685 | 129 | 19,802 | 5,883 | 3,416 | 29,230 |
| 93,686 | 126 | 19,958 | 5,944 | 3,425 | 29,453 |
| 93,687 | 118 | 19,806 | 5,878 | 3,374 | 29,176 |



|        |     |        |       |       |        |
|--------|-----|--------|-------|-------|--------|
| 93,688 | 118 | 19,754 | 5,871 | 3,373 | 29,116 |
| 93,689 | 114 | 19,886 | 5,932 | 3,408 | 29,340 |
| 93,690 | 117 | 19,925 | 5,894 | 3,374 | 29,310 |
| 93,691 | 118 | 20,060 | 5,942 | 3,408 | 29,528 |
| 93,692 | 114 | 20,118 | 5,956 | 3,405 | 29,593 |
| 93,693 | 113 | 19,836 | 5,900 | 3,384 | 29,233 |
| 93,694 | 113 | 20,077 | 5,960 | 3,438 | 29,588 |
| 93,695 | 116 | 20,174 | 5,953 | 3,437 | 29,680 |
| 93,696 | 122 | 20,110 | 5,909 | 3,396 | 29,537 |
| 93,697 | 122 | 20,015 | 5,877 | 3,370 | 29,384 |
| 93,698 | 126 | 20,448 | 5,984 | 3,457 | 30,015 |
| 93,699 | 116 | 20,102 | 5,891 | 3,413 | 29,522 |
| 93,700 | 119 | 20,299 | 5,936 | 3,465 | 29,819 |
| 93,701 | 118 | 20,001 | 5,859 | 3,415 | 29,393 |
| 93,702 | 119 | 20,000 | 5,851 | 3,421 | 29,391 |
| 93,703 | 117 | 20,287 | 5,896 | 3,474 | 29,774 |
| 93,704 | 121 | 20,208 | 5,919 | 3,468 | 29,716 |
| 93,705 | 118 | 20,068 | 5,844 | 3,462 | 29,492 |
| 93,706 | 120 | 20,171 | 5,851 | 3,461 | 29,603 |
| 93,707 | 123 | 20,348 | 5,932 | 3,487 | 29,890 |
| 93,708 | 124 | 20,379 | 5,943 | 3,510 | 29,956 |
| 93,709 | 125 | 20,346 | 5,959 | 3,508 | 29,938 |
| 93,710 | 134 | 20,082 | 5,895 | 3,480 | 29,591 |
| 93,711 | 129 | 19,801 | 5,833 | 3,450 | 29,213 |
| 93,712 | 125 | 19,834 | 5,828 | 3,446 | 29,233 |
| 93,713 | 123 | 19,541 | 5,763 | 3,403 | 28,830 |
| 93,714 | 126 | 19,907 | 5,895 | 3,458 | 29,386 |
| 93,715 | 134 | 20,307 | 6,002 | 3,487 | 29,930 |
| 93,716 | 133 | 20,317 | 6,007 | 3,506 | 29,963 |
| 93,717 | 133 | 20,237 | 5,960 | 3,490 | 29,820 |
| 93,718 | 131 | 19,993 | 5,877 | 3,442 | 29,443 |
| 93,719 | 131 | 19,718 | 5,792 | 3,407 | 29,048 |

|        |     |        |       |       |        |
|--------|-----|--------|-------|-------|--------|
| 93,720 | 132 | 20,064 | 5,891 | 3,467 | 29,554 |
| 93,721 | 136 | 20,068 | 5,890 | 3,429 | 29,523 |
| 93,722 | 138 | 19,911 | 5,842 | 3,388 | 29,279 |
| 93,723 | 142 | 20,210 | 5,910 | 3,401 | 29,663 |
| 93,724 | 142 | 19,987 | 5,850 | 3,381 | 29,360 |
| 93,725 | 143 | 20,099 | 5,895 | 3,385 | 29,522 |
| 93,726 | 142 | 19,993 | 5,830 | 3,357 | 29,322 |
| 93,727 | 148 | 20,324 | 5,892 | 3,380 | 29,744 |
| 93,728 | 147 | 20,309 | 5,906 | 3,388 | 29,750 |
| 93,729 | 143 | 20,528 | 5,970 | 3,452 | 30,093 |
| 93,730 | 140 | 20,510 | 5,927 | 3,444 | 30,021 |
| 93,731 | 142 | 20,659 | 6,007 | 3,471 | 30,279 |
| 93,732 | 140 | 20,616 | 6,007 | 3,485 | 30,248 |
| 93,733 | 136 | 20,639 | 6,008 | 3,518 | 30,301 |
| 93,734 | 136 | 20,891 | 6,076 | 3,550 | 30,653 |
| 93,735 | 133 | 20,787 | 6,023 | 3,536 | 30,479 |
| 93,736 | 138 | 21,004 | 6,080 | 3,560 | 30,782 |
| 93,737 | 141 | 20,939 | 6,043 | 3,552 | 30,675 |
| 93,738 | 138 | 20,983 | 6,033 | 3,528 | 30,682 |
| 93,739 | 138 | 20,965 | 6,030 | 3,519 | 30,652 |
| 93,740 | 140 | 21,235 | 6,081 | 3,554 | 31,010 |
| 93,741 | 140 | 21,195 | 6,078 | 3,556 | 30,969 |
| 93,742 | 140 | 20,947 | 6,047 | 3,525 | 30,659 |
| 93,743 | 140 | 20,731 | 6,025 | 3,543 | 30,439 |
| 93,744 | 139 | 20,743 | 6,006 | 3,527 | 30,415 |
| 93,745 | 142 | 20,731 | 6,062 | 3,527 | 30,462 |
| 93,746 | 139 | 20,531 | 6,014 | 3,504 | 30,188 |
| 93,747 | 132 | 20,404 | 5,980 | 3,480 | 29,996 |
| 93,748 | 133 | 20,279 | 5,952 | 3,446 | 29,810 |
| 93,749 | 132 | 20,380 | 6,012 | 3,485 | 30,009 |
| 93,750 | 135 | 20,279 | 6,020 | 3,470 | 29,904 |
| 93,751 | 132 | 20,246 | 6,002 | 3,452 | 29,832 |

|        |     |        |       |       |        |
|--------|-----|--------|-------|-------|--------|
| 93,752 | 135 | 20,368 | 6,028 | 3,455 | 29,986 |
| 93,753 | 147 | 20,510 | 6,108 | 3,498 | 30,263 |
| 93,754 | 147 | 20,327 | 6,096 | 3,473 | 30,043 |
| 93,755 | 144 | 20,166 | 6,043 | 3,462 | 29,815 |
| 93,756 | 142 | 20,269 | 6,123 | 3,488 | 30,022 |
| 93,757 | 140 | 20,358 | 6,107 | 3,496 | 30,101 |
| 93,758 | 136 | 20,639 | 6,144 | 3,527 | 30,446 |
| 93,759 | 136 | 20,793 | 6,189 | 3,560 | 30,678 |
| 93,760 | 138 | 20,747 | 6,185 | 3,557 | 30,627 |
| 93,761 | 126 | 20,997 | 6,266 | 3,598 | 30,987 |
| 93,762 | 126 | 20,941 | 6,227 | 3,573 | 30,867 |
| 93,763 | 126 | 20,899 | 6,206 | 3,573 | 30,804 |
| 93,764 | 127 | 21,558 | 6,449 | 3,669 | 31,803 |
| 93,765 | 127 | 21,699 | 6,455 | 3,711 | 31,992 |
| 93,766 | 132 | 21,785 | 6,475 | 3,713 | 32,105 |
| 93,767 | 129 | 21,623 | 6,455 | 3,681 | 31,888 |
| 93,768 | 132 | 21,812 | 6,499 | 3,716 | 32,159 |
| 93,769 | 135 | 21,866 | 6,508 | 3,720 | 32,229 |
| 93,770 | 133 | 21,715 | 6,494 | 3,705 | 32,047 |
| 93,771 | 133 | 21,673 | 6,494 | 3,707 | 32,007 |
| 93,772 | 129 | 21,583 | 6,516 | 3,699 | 31,927 |
| 93,773 | 127 | 21,508 | 6,458 | 3,716 | 31,809 |
| 93,774 | 129 | 21,513 | 6,431 | 3,721 | 31,794 |
| 93,775 | 128 | 21,374 | 6,414 | 3,732 | 31,648 |
| 93,776 | 123 | 21,096 | 6,437 | 3,730 | 31,386 |
| 93,777 | 128 | 21,368 | 6,566 | 3,774 | 31,836 |
| 93,778 | 123 | 21,487 | 6,600 | 3,793 | 32,003 |
| 93,779 | 125 | 21,712 | 6,644 | 3,787 | 32,268 |
| 93,780 | 126 | 21,796 | 6,651 | 3,790 | 32,363 |
| 93,781 | 125 | 21,673 | 6,608 | 3,761 | 32,167 |
| 93,782 | 130 | 22,016 | 6,678 | 3,793 | 32,617 |
| 93,783 | 137 | 22,015 | 6,665 | 3,742 | 32,559 |

|        |     |        |       |       |        |
|--------|-----|--------|-------|-------|--------|
| 93,784 | 137 | 22,115 | 6,686 | 3,747 | 32,685 |
| 93,785 | 142 | 22,289 | 6,761 | 3,792 | 32,984 |
| 93,786 | 145 | 22,435 | 6,792 | 3,826 | 33,198 |
| 93,787 | 141 | 22,546 | 6,825 | 3,855 | 33,367 |
| 93,788 | 142 | 22,241 | 6,779 | 3,834 | 32,996 |
| 93,789 | 142 | 22,079 | 6,740 | 3,810 | 32,771 |
| 93,790 | 140 | 22,120 | 6,790 | 3,830 | 32,880 |
| 93,791 | 140 | 22,181 | 6,820 | 3,827 | 32,968 |
| 93,792 | 138 | 22,077 | 6,790 | 3,807 | 32,812 |
| 93,793 | 136 | 22,252 | 6,827 | 3,803 | 33,018 |
| 93,794 | 139 | 22,324 | 6,851 | 3,798 | 33,112 |
| 93,795 | 137 | 22,166 | 6,786 | 3,765 | 32,854 |
| 93,796 | 137 | 22,139 | 6,788 | 3,763 | 32,827 |
| 93,797 | 138 | 22,305 | 6,852 | 3,791 | 33,086 |
| 93,798 | 138 | 22,103 | 6,806 | 3,775 | 32,822 |
| 93,799 | 137 | 22,008 | 6,766 | 3,762 | 32,673 |
| 93,800 | 139 | 21,962 | 6,750 | 3,756 | 32,607 |
| 93,801 | 136 | 21,838 | 6,699 | 3,740 | 32,413 |
| 93,802 | 138 | 21,613 | 6,649 | 3,716 | 32,116 |
| 93,803 | 134 | 21,511 | 6,636 | 3,691 | 31,972 |
| 93,804 | 127 | 21,510 | 6,614 | 3,678 | 31,929 |
| 93,805 | 130 | 21,265 | 6,538 | 3,644 | 31,577 |
| 93,806 | 129 | 21,009 | 6,457 | 3,595 | 31,190 |
| 93,807 | 132 | 21,166 | 6,508 | 3,624 | 31,430 |
| 93,808 | 132 | 21,044 | 6,516 | 3,628 | 31,320 |
| 93,809 | 132 | 20,899 | 6,469 | 3,592 | 31,092 |
| 93,810 | 137 | 20,802 | 6,440 | 3,557 | 30,936 |
| 93,811 | 135 | 20,613 | 6,371 | 3,530 | 30,649 |
| 93,812 | 136 | 20,558 | 6,367 | 3,524 | 30,585 |
| 93,813 | 134 | 20,376 | 6,344 | 3,515 | 30,369 |
| 93,814 | 136 | 20,351 | 6,316 | 3,513 | 30,316 |
| 93,815 | 139 | 20,011 | 6,218 | 3,485 | 29,853 |

|        |     |        |       |       |        |
|--------|-----|--------|-------|-------|--------|
| 93,816 | 135 | 19,617 | 6,160 | 3,437 | 29,349 |
| 93,817 | 132 | 19,730 | 6,209 | 3,488 | 29,559 |
| 93,818 | 129 | 19,524 | 6,123 | 3,449 | 29,225 |
| 93,819 | 120 | 19,170 | 6,043 | 3,398 | 28,731 |
| 93,820 | 121 | 19,252 | 6,030 | 3,384 | 28,787 |
| 93,821 | 122 | 19,294 | 6,022 | 3,386 | 28,824 |
| 93,822 | 122 | 19,201 | 5,990 | 3,368 | 28,681 |
| 93,823 | 120 | 19,172 | 5,979 | 3,357 | 28,628 |
| 93,824 | 118 | 19,046 | 5,969 | 3,325 | 28,458 |
| 93,825 | 120 | 18,933 | 5,901 | 3,259 | 28,213 |
| 93,826 | 120 | 18,950 | 5,897 | 3,255 | 28,222 |
| 93,827 | 127 | 19,095 | 5,916 | 3,266 | 28,404 |
| 93,828 | 125 | 18,914 | 5,840 | 3,233 | 28,112 |
| 93,829 | 123 | 17,800 | 5,590 | 3,091 | 26,604 |
| 93,830 | 129 | 17,886 | 5,624 | 3,121 | 26,760 |
| 93,831 | 128 | 17,858 | 5,617 | 3,120 | 26,723 |
| 93,832 | 127 | 17,466 | 5,590 | 3,125 | 26,308 |
| 93,833 | 121 | 17,124 | 5,493 | 3,089 | 25,827 |
| 93,834 | 124 | 17,316 | 5,533 | 3,122 | 26,095 |
| 93,835 | 123 | 17,540 | 5,577 | 3,146 | 26,386 |
| 93,836 | 117 | 17,175 | 5,478 | 3,109 | 25,879 |
| 93,837 | 115 | 17,301 | 5,487 | 3,099 | 26,002 |
| 93,838 | 115 | 17,322 | 5,498 | 3,097 | 26,032 |
| 93,839 | 115 | 17,246 | 5,464 | 3,069 | 25,894 |
| 93,840 | 117 | 17,399 | 5,470 | 3,077 | 26,063 |
| 93,841 | 117 | 17,387 | 5,462 | 3,077 | 26,043 |
| 93,842 | 119 | 17,496 | 5,506 | 3,113 | 26,234 |
| 93,843 | 123 | 17,507 | 5,518 | 3,128 | 26,276 |
| 93,844 | 125 | 17,528 | 5,510 | 3,140 | 26,303 |
| 93,845 | 129 | 17,347 | 5,402 | 3,099 | 25,977 |
| 93,846 | 127 | 17,157 | 5,337 | 3,081 | 25,702 |
| 93,847 | 130 | 17,719 | 5,526 | 3,178 | 26,553 |

|        |     |        |       |       |        |
|--------|-----|--------|-------|-------|--------|
| 93,848 | 136 | 17,823 | 5,550 | 3,181 | 26,690 |
| 93,849 | 142 | 17,822 | 5,566 | 3,160 | 26,690 |
| 93,850 | 142 | 17,883 | 5,567 | 3,167 | 26,759 |
| 93,851 | 145 | 17,878 | 5,607 | 3,181 | 26,811 |
| 93,852 | 150 | 17,878 | 5,672 | 3,201 | 26,901 |
| 93,853 | 154 | 17,983 | 5,670 | 3,212 | 27,019 |
| 93,854 | 154 | 18,238 | 5,731 | 3,255 | 27,378 |
| 93,855 | 152 | 18,139 | 5,692 | 3,224 | 27,207 |
| 93,856 | 145 | 17,951 | 5,623 | 3,193 | 26,912 |
| 93,857 | 147 | 18,370 | 5,725 | 3,268 | 27,510 |
| 93,858 | 150 | 18,563 | 5,771 | 3,319 | 27,803 |
| 93,859 | 148 | 18,369 | 5,692 | 3,267 | 27,476 |
| 93,860 | 148 | 18,479 | 5,763 | 3,321 | 27,711 |
| 93,861 | 141 | 18,180 | 5,697 | 3,290 | 27,308 |
| 93,862 | 143 | 18,130 | 5,697 | 3,286 | 27,256 |
| 93,863 | 149 | 18,285 | 5,733 | 3,306 | 27,473 |
| 93,864 | 149 | 18,428 | 5,746 | 3,315 | 27,638 |
| 93,865 | 153 | 18,471 | 5,747 | 3,312 | 27,683 |
| 93,866 | 154 | 18,626 | 5,770 | 3,305 | 27,855 |
| 93,867 | 154 | 18,481 | 5,709 | 3,261 | 27,605 |
| 93,868 | 154 | 18,647 | 5,755 | 3,266 | 27,822 |
| 93,869 | 156 | 18,668 | 5,766 | 3,286 | 27,876 |
| 93,870 | 156 | 18,944 | 5,832 | 3,316 | 28,248 |
| 93,871 | 154 | 18,756 | 5,804 | 3,286 | 28,000 |
| 93,872 | 153 | 18,653 | 5,755 | 3,268 | 27,829 |
| 93,873 | 154 | 18,740 | 5,793 | 3,300 | 27,987 |
| 93,874 | 155 | 18,524 | 5,752 | 3,301 | 27,732 |
| 93,875 | 158 | 19,469 | 6,054 | 3,470 | 29,151 |
| 93,876 | 157 | 19,434 | 5,991 | 3,454 | 29,036 |
| 93,877 | 158 | 19,687 | 6,055 | 3,502 | 29,402 |
| 93,878 | 149 | 20,022 | 6,133 | 3,547 | 29,851 |
| 93,879 | 146 | 20,085 | 6,173 | 3,550 | 29,954 |

|        |     |        |       |       |        |
|--------|-----|--------|-------|-------|--------|
| 93,880 | 150 | 20,196 | 6,182 | 3,560 | 30,088 |
| 93,881 | 145 | 20,306 | 6,205 | 3,568 | 30,224 |
| 93,882 | 150 | 20,597 | 6,250 | 3,554 | 30,551 |
| 93,883 | 154 | 20,391 | 6,170 | 3,500 | 30,215 |
| 93,884 | 161 | 20,582 | 6,229 | 3,508 | 30,480 |
| 93,885 | 156 | 20,379 | 6,174 | 3,476 | 30,185 |
| 93,886 | 160 | 20,619 | 6,259 | 3,532 | 30,570 |
| 93,887 | 170 | 20,503 | 6,217 | 3,492 | 30,382 |
| 93,888 | 169 | 20,345 | 6,178 | 3,462 | 30,154 |
| 93,889 | 168 | 20,504 | 6,229 | 3,481 | 30,382 |
| 93,890 | 164 | 20,568 | 6,214 | 3,488 | 30,434 |
| 93,891 | 172 | 20,965 | 6,307 | 3,550 | 30,994 |
| 93,892 | 174 | 21,049 | 6,283 | 3,536 | 31,042 |
| 93,893 | 172 | 21,006 | 6,292 | 3,534 | 31,004 |
| 93,894 | 172 | 21,485 | 6,405 | 3,571 | 31,633 |
| 93,895 | 166 | 21,630 | 6,460 | 3,603 | 31,859 |
| 93,896 | 177 | 21,858 | 6,526 | 3,617 | 32,178 |
| 93,897 | 183 | 22,036 | 6,521 | 3,605 | 32,345 |
| 93,898 | 182 | 22,076 | 6,499 | 3,592 | 32,349 |
| 93,899 | 195 | 22,699 | 6,686 | 3,691 | 33,271 |
| 93,900 | 196 | 22,905 | 6,687 | 3,705 | 33,493 |
| 93,901 | 195 | 23,090 | 6,669 | 3,711 | 33,665 |
| 93,902 | 192 | 23,256 | 6,597 | 3,685 | 33,730 |
| 93,903 | 191 | 23,265 | 6,586 | 3,671 | 33,713 |
| 93,904 | 186 | 23,306 | 6,566 | 3,675 | 33,733 |
| 93,905 | 186 | 23,461 | 6,609 | 3,715 | 33,971 |
| 93,906 | 190 | 23,606 | 6,654 | 3,735 | 34,185 |
| 93,907 | 188 | 23,335 | 6,587 | 3,677 | 33,787 |
| 93,908 | 189 | 23,296 | 6,601 | 3,684 | 33,770 |
| 93,909 | 188 | 23,184 | 6,608 | 3,657 | 33,637 |
| 93,910 | 190 | 23,162 | 6,585 | 3,645 | 33,582 |
| 93,911 | 190 | 23,161 | 6,567 | 3,626 | 33,544 |

|        |     |        |       |       |        |
|--------|-----|--------|-------|-------|--------|
| 93,912 | 190 | 23,249 | 6,557 | 3,612 | 33,608 |
| 93,913 | 192 | 23,210 | 6,555 | 3,609 | 33,566 |
| 93,914 | 194 | 23,307 | 6,543 | 3,620 | 33,664 |
| 93,915 | 194 | 23,250 | 6,540 | 3,623 | 33,607 |
| 93,916 | 193 | 23,491 | 6,635 | 3,656 | 33,975 |
| 93,917 | 191 | 23,393 | 6,607 | 3,653 | 33,844 |
| 93,918 | 187 | 23,398 | 6,590 | 3,640 | 33,815 |
| 93,919 | 187 | 23,357 | 6,571 | 3,643 | 33,758 |
| 93,920 | 188 | 23,625 | 6,602 | 3,646 | 34,061 |
| 93,921 | 193 | 23,541 | 6,504 | 3,628 | 33,866 |
| 93,922 | 192 | 23,483 | 6,482 | 3,611 | 33,768 |
| 93,923 | 187 | 23,723 | 6,504 | 3,645 | 34,059 |
| 93,924 | 190 | 23,712 | 6,470 | 3,631 | 34,003 |
| 93,925 | 204 | 23,705 | 6,450 | 3,602 | 33,961 |
| 93,926 | 204 | 23,731 | 6,432 | 3,599 | 33,966 |
| 93,927 | 204 | 23,760 | 6,454 | 3,605 | 34,023 |
| 93,928 | 203 | 23,541 | 6,371 | 3,564 | 33,679 |
| 93,929 | 206 | 23,524 | 6,321 | 3,567 | 33,618 |
| 93,930 | 206 | 23,389 | 6,266 | 3,554 | 33,415 |
| 93,931 | 202 | 23,286 | 6,276 | 3,570 | 33,334 |
| 93,932 | 202 | 23,350 | 6,269 | 3,575 | 33,396 |
| 93,933 | 196 | 23,131 | 6,212 | 3,562 | 33,101 |
| 93,934 | 193 | 22,937 | 6,148 | 3,534 | 32,812 |
| 93,935 | 190 | 22,829 | 6,144 | 3,540 | 32,703 |
| 93,936 | 191 | 22,671 | 6,113 | 3,505 | 32,480 |
| 93,937 | 191 | 22,578 | 6,093 | 3,489 | 32,351 |
| 93,938 | 182 | 22,396 | 6,053 | 3,489 | 32,120 |
| 93,939 | 183 | 22,101 | 6,014 | 3,487 | 31,785 |
| 93,940 | 187 | 21,685 | 5,933 | 3,439 | 31,244 |
| 93,941 | 186 | 21,555 | 5,927 | 3,427 | 31,095 |
| 93,942 | 178 | 21,308 | 5,892 | 3,393 | 30,771 |
| 93,943 | 175 | 21,159 | 5,881 | 3,405 | 30,620 |



|        |     |        |       |       |        |
|--------|-----|--------|-------|-------|--------|
| 93,944 | 171 | 21,059 | 5,892 | 3,384 | 30,506 |
| 93,945 | 172 | 20,721 | 5,802 | 3,324 | 30,019 |
| 93,946 | 170 | 20,646 | 5,806 | 3,305 | 29,927 |
| 93,947 | 162 | 20,510 | 5,762 | 3,309 | 29,743 |
| 93,948 | 157 | 20,493 | 5,811 | 3,336 | 29,797 |
| 93,949 | 151 | 20,261 | 5,796 | 3,346 | 29,554 |
| 93,950 | 145 | 20,006 | 5,745 | 3,319 | 29,215 |
| 93,951 | 136 | 19,556 | 5,664 | 3,280 | 28,636 |
| 93,952 | 133 | 19,271 | 5,660 | 3,284 | 28,348 |
| 93,953 | 133 | 19,205 | 5,683 | 3,303 | 28,324 |
| 93,954 | 137 | 19,196 | 5,710 | 3,313 | 28,356 |
| 93,955 | 133 | 19,159 | 5,710 | 3,303 | 28,305 |
| 93,956 | 139 | 19,091 | 5,709 | 3,278 | 28,217 |
| 93,957 | 137 | 18,938 | 5,699 | 3,267 | 28,041 |
| 93,958 | 137 | 18,814 | 5,615 | 3,226 | 27,792 |
| 93,959 | 138 | 18,822 | 5,576 | 3,229 | 27,765 |
| 93,960 | 141 | 18,748 | 5,578 | 3,210 | 27,677 |
| 93,961 | 143 | 18,521 | 5,538 | 3,188 | 27,390 |
| 93,962 | 143 | 18,262 | 5,491 | 3,171 | 27,067 |
| 93,963 | 141 | 18,475 | 5,531 | 3,218 | 27,365 |
| 93,964 | 141 | 18,386 | 5,498 | 3,193 | 27,218 |
| 93,965 | 135 | 18,515 | 5,540 | 3,207 | 27,397 |
| 93,966 | 138 | 18,406 | 5,496 | 3,191 | 27,231 |
| 93,967 | 134 | 18,177 | 5,436 | 3,161 | 26,908 |
| 93,968 | 132 | 18,266 | 5,509 | 3,190 | 27,097 |
| 93,969 | 132 | 17,676 | 5,353 | 3,103 | 26,264 |
| 93,970 | 131 | 17,622 | 5,346 | 3,100 | 26,199 |
| 93,971 | 130 | 17,327 | 5,281 | 3,072 | 25,810 |
| 93,972 | 123 | 16,999 | 5,239 | 3,046 | 25,407 |
| 93,973 | 128 | 17,517 | 5,460 | 3,171 | 26,276 |
| 93,974 | 129 | 17,149 | 5,392 | 3,107 | 25,777 |
| 93,975 | 124 | 16,823 | 5,309 | 3,059 | 25,315 |

|        |     |        |       |       |        |
|--------|-----|--------|-------|-------|--------|
| 93,976 | 109 | 17,624 | 5,485 | 3,186 | 26,404 |
| 93,977 | 109 | 17,366 | 5,413 | 3,142 | 26,030 |
| 93,978 | 104 | 17,203 | 5,397 | 3,134 | 25,838 |
| 93,979 | 105 | 17,313 | 5,434 | 3,160 | 26,012 |
| 93,980 | 104 | 17,416 | 5,473 | 3,171 | 26,164 |
| 93,981 | 108 | 17,386 | 5,456 | 3,170 | 26,120 |
| 93,982 | 107 | 17,093 | 5,379 | 3,122 | 25,701 |
| 93,983 | 111 | 17,330 | 5,441 | 3,171 | 26,053 |
| 93,984 | 104 | 17,042 | 5,351 | 3,117 | 25,614 |
| 93,985 | 104 | 17,242 | 5,361 | 3,125 | 25,832 |
| 93,986 | 105 | 17,493 | 5,425 | 3,166 | 26,189 |
| 93,987 | 101 | 17,504 | 5,425 | 3,189 | 26,219 |
| 93,988 | 100 | 17,565 | 5,396 | 3,179 | 26,240 |
| 93,989 | 100 | 17,763 | 5,415 | 3,188 | 26,466 |
| 93,990 | 96  | 17,935 | 5,456 | 3,212 | 26,699 |
| 93,991 | 103 | 18,152 | 5,526 | 3,243 | 27,024 |
| 93,992 | 102 | 18,145 | 5,505 | 3,263 | 27,015 |
| 93,993 | 103 | 18,063 | 5,480 | 3,273 | 26,919 |
| 93,994 | 103 | 17,859 | 5,414 | 3,238 | 26,614 |
| 93,995 | 101 | 17,113 | 5,188 | 3,141 | 25,543 |
| 93,996 | 102 | 17,330 | 5,209 | 3,178 | 25,819 |
| 93,997 | 102 | 17,564 | 5,266 | 3,215 | 26,147 |
| 93,998 | 98  | 17,317 | 5,200 | 3,185 | 25,800 |
| 93,999 | 97  | 17,110 | 5,095 | 3,116 | 25,418 |
| 94,000 | 98  | 17,448 | 5,164 | 3,150 | 25,860 |
| 94,001 | 95  | 17,664 | 5,223 | 3,193 | 26,175 |
| 94,002 | 95  | 17,737 | 5,153 | 3,135 | 26,120 |
| 94,003 | 96  | 17,748 | 5,144 | 3,126 | 26,114 |
| 94,004 | 94  | 17,537 | 5,085 | 3,085 | 25,801 |
| 94,005 | 92  | 17,822 | 5,124 | 3,126 | 26,164 |
| 94,006 | 95  | 17,934 | 5,174 | 3,173 | 26,376 |
| 94,007 | 93  | 17,971 | 5,149 | 3,181 | 26,394 |

|        |     |        |       |       |        |
|--------|-----|--------|-------|-------|--------|
| 94,008 | 89  | 17,761 | 5,075 | 3,150 | 26,075 |
| 94,009 | 100 | 17,970 | 5,115 | 3,170 | 26,355 |
| 94,010 | 95  | 17,799 | 5,065 | 3,141 | 26,100 |
| 94,011 | 93  | 17,799 | 5,095 | 3,160 | 26,147 |
| 94,012 | 92  | 17,568 | 5,033 | 3,113 | 25,806 |
| 94,013 | 92  | 17,417 | 4,983 | 3,086 | 25,578 |
| 94,014 | 98  | 18,069 | 5,152 | 3,198 | 26,517 |
| 94,015 | 102 | 18,160 | 5,178 | 3,204 | 26,644 |
| 94,016 | 99  | 18,263 | 5,197 | 3,218 | 26,777 |
| 94,017 | 96  | 18,028 | 5,119 | 3,178 | 26,421 |
| 94,018 | 101 | 18,184 | 5,168 | 3,219 | 26,672 |
| 94,019 | 99  | 18,247 | 5,142 | 3,217 | 26,705 |
| 94,020 | 101 | 18,440 | 5,132 | 3,207 | 26,880 |
| 94,021 | 103 | 18,534 | 5,159 | 3,199 | 26,995 |
| 94,022 | 104 | 18,632 | 5,201 | 3,234 | 27,171 |
| 94,023 | 105 | 18,725 | 5,243 | 3,258 | 27,331 |
| 94,024 | 110 | 18,639 | 5,249 | 3,265 | 27,263 |
| 94,025 | 125 | 18,706 | 5,255 | 3,268 | 27,354 |
| 94,026 | 125 | 18,599 | 5,232 | 3,251 | 27,207 |
| 94,027 | 126 | 18,636 | 5,253 | 3,256 | 27,271 |
| 94,028 | 131 | 18,661 | 5,248 | 3,263 | 27,303 |
| 94,029 | 129 | 18,666 | 5,228 | 3,261 | 27,284 |
| 94,030 | 132 | 18,775 | 5,244 | 3,263 | 27,414 |
| 94,031 | 131 | 18,721 | 5,237 | 3,272 | 27,361 |
| 94,032 | 131 | 18,837 | 5,259 | 3,277 | 27,504 |
| 94,033 | 138 | 19,197 | 5,368 | 3,316 | 28,019 |
| 94,034 | 144 | 19,326 | 5,415 | 3,347 | 28,232 |
| 94,035 | 149 | 19,238 | 5,338 | 3,338 | 28,063 |
| 94,036 | 149 | 19,041 | 5,332 | 3,343 | 27,865 |
| 94,037 | 148 | 19,048 | 5,317 | 3,344 | 27,857 |
| 94,038 | 148 | 18,804 | 5,289 | 3,312 | 27,553 |
| 94,039 | 157 | 19,363 | 5,461 | 3,400 | 28,381 |

|        |     |        |       |       |        |
|--------|-----|--------|-------|-------|--------|
| 94,040 | 159 | 19,364 | 5,458 | 3,408 | 28,389 |
| 94,041 | 162 | 19,417 | 5,479 | 3,419 | 28,477 |
| 94,042 | 161 | 19,590 | 5,479 | 3,460 | 28,690 |
| 94,043 | 161 | 19,764 | 5,515 | 3,454 | 28,894 |
| 94,044 | 162 | 19,980 | 5,539 | 3,442 | 29,123 |
| 94,045 | 164 | 20,470 | 5,645 | 3,502 | 29,781 |
| 94,046 | 171 | 21,055 | 5,722 | 3,557 | 30,505 |
| 94,047 | 176 | 20,925 | 5,702 | 3,538 | 30,341 |
| 94,048 | 175 | 20,740 | 5,677 | 3,512 | 30,104 |
| 94,049 | 174 | 21,537 | 5,834 | 3,636 | 31,181 |
| 94,050 | 180 | 21,540 | 5,874 | 3,628 | 31,222 |
| 94,051 | 189 | 21,611 | 5,835 | 3,605 | 31,240 |
| 94,052 | 190 | 21,682 | 5,827 | 3,599 | 31,298 |
| 94,053 | 190 | 21,782 | 5,860 | 3,604 | 31,436 |
| 94,054 | 187 | 21,888 | 5,895 | 3,619 | 31,589 |
| 94,055 | 192 | 22,065 | 5,950 | 3,663 | 31,870 |
| 94,056 | 206 | 21,975 | 5,938 | 3,634 | 31,753 |
| 94,057 | 204 | 22,035 | 5,922 | 3,642 | 31,803 |
| 94,058 | 203 | 22,275 | 5,990 | 3,689 | 32,157 |
| 94,059 | 201 | 22,304 | 6,000 | 3,691 | 32,196 |
| 94,060 | 197 | 22,752 | 6,172 | 3,765 | 32,886 |
| 94,061 | 208 | 22,953 | 6,227 | 3,773 | 33,161 |
| 94,062 | 209 | 22,938 | 6,217 | 3,772 | 33,136 |
| 94,063 | 220 | 23,465 | 6,298 | 3,841 | 33,824 |
| 94,064 | 219 | 23,371 | 6,314 | 3,838 | 33,742 |
| 94,065 | 222 | 23,435 | 6,369 | 3,851 | 33,877 |
| 94,066 | 223 | 23,853 | 6,489 | 3,940 | 34,505 |
| 94,067 | 229 | 24,019 | 6,479 | 3,964 | 34,691 |
| 94,068 | 226 | 24,183 | 6,478 | 3,978 | 34,865 |
| 94,069 | 228 | 24,242 | 6,465 | 3,961 | 34,896 |
| 94,070 | 229 | 24,227 | 6,471 | 3,973 | 34,900 |
| 94,071 | 224 | 24,178 | 6,476 | 4,019 | 34,897 |

|        |     |        |       |       |        |
|--------|-----|--------|-------|-------|--------|
| 94,072 | 219 | 24,327 | 6,485 | 4,052 | 35,083 |
| 94,073 | 224 | 24,556 | 6,491 | 4,061 | 35,332 |
| 94,074 | 226 | 24,649 | 6,462 | 4,039 | 35,376 |
| 94,075 | 224 | 24,816 | 6,474 | 4,038 | 35,552 |
| 94,076 | 212 | 24,523 | 6,372 | 4,001 | 35,108 |
| 94,077 | 212 | 24,555 | 6,383 | 4,005 | 35,155 |
| 94,078 | 210 | 24,620 | 6,396 | 4,003 | 35,229 |
| 94,079 | 222 | 24,641 | 6,393 | 3,994 | 35,250 |
| 94,080 | 219 | 24,698 | 6,422 | 4,003 | 35,342 |
| 94,081 | 221 | 24,696 | 6,426 | 3,991 | 35,334 |
| 94,082 | 216 | 24,660 | 6,455 | 3,965 | 35,296 |
| 94,083 | 214 | 24,744 | 6,484 | 3,985 | 35,427 |
| 94,084 | 211 | 24,975 | 6,516 | 4,023 | 35,725 |
| 94,085 | 199 | 24,622 | 6,415 | 3,968 | 35,204 |
| 94,086 | 201 | 24,630 | 6,433 | 3,961 | 35,225 |
| 94,087 | 199 | 24,560 | 6,384 | 3,924 | 35,067 |
| 94,088 | 198 | 24,533 | 6,394 | 3,920 | 35,045 |
| 94,089 | 198 | 24,440 | 6,336 | 3,885 | 34,859 |
| 94,090 | 196 | 24,813 | 6,449 | 3,941 | 35,399 |
| 94,091 | 193 | 24,561 | 6,401 | 3,903 | 35,058 |
| 94,092 | 191 | 24,497 | 6,356 | 3,877 | 34,921 |
| 94,093 | 189 | 24,185 | 6,299 | 3,828 | 34,501 |
| 94,094 | 189 | 23,806 | 6,224 | 3,795 | 34,014 |
| 94,095 | 195 | 24,176 | 6,381 | 3,898 | 34,650 |
| 94,096 | 194 | 23,931 | 6,316 | 3,886 | 34,327 |
| 94,097 | 191 | 23,766 | 6,315 | 3,882 | 34,154 |
| 94,098 | 192 | 23,445 | 6,265 | 3,844 | 33,746 |
| 94,099 | 192 | 23,172 | 6,189 | 3,792 | 33,345 |
| 94,100 | 193 | 23,265 | 6,228 | 3,815 | 33,501 |
| 94,101 | 187 | 23,170 | 6,179 | 3,822 | 33,358 |
| 94,102 | 177 | 22,877 | 6,178 | 3,828 | 33,060 |
| 94,103 | 176 | 22,683 | 6,129 | 3,845 | 32,833 |

|        |     |        |       |       |        |
|--------|-----|--------|-------|-------|--------|
| 94,104 | 180 | 22,458 | 6,070 | 3,816 | 32,524 |
| 94,105 | 177 | 22,457 | 6,053 | 3,803 | 32,490 |
| 94,106 | 164 | 22,452 | 6,035 | 3,796 | 32,447 |
| 94,107 | 165 | 22,460 | 6,019 | 3,800 | 32,444 |
| 94,108 | 165 | 22,448 | 5,987 | 3,773 | 32,373 |
| 94,109 | 165 | 22,514 | 5,969 | 3,774 | 32,422 |
| 94,110 | 161 | 22,200 | 5,882 | 3,742 | 31,985 |
| 94,111 | 163 | 22,363 | 5,906 | 3,747 | 32,179 |
| 94,112 | 160 | 22,623 | 5,910 | 3,781 | 32,474 |
| 94,113 | 156 | 22,498 | 5,862 | 3,745 | 32,261 |
| 94,114 | 148 | 22,386 | 5,807 | 3,729 | 32,070 |
| 94,115 | 147 | 22,756 | 5,836 | 3,777 | 32,516 |
| 94,116 | 143 | 22,774 | 5,801 | 3,753 | 32,471 |
| 94,117 | 150 | 22,833 | 5,769 | 3,726 | 32,478 |
| 94,118 | 150 | 22,362 | 5,721 | 3,673 | 31,906 |
| 94,119 | 153 | 22,414 | 5,715 | 3,680 | 31,962 |
| 94,120 | 150 | 22,266 | 5,676 | 3,647 | 31,739 |
| 94,121 | 157 | 22,320 | 5,651 | 3,607 | 31,735 |
| 94,122 | 166 | 22,298 | 5,639 | 3,599 | 31,702 |
| 94,123 | 165 | 22,107 | 5,566 | 3,539 | 31,377 |
| 94,124 | 165 | 21,947 | 5,575 | 3,524 | 31,211 |
| 94,125 | 162 | 21,660 | 5,518 | 3,502 | 30,842 |
| 94,126 | 161 | 21,889 | 5,574 | 3,578 | 31,202 |
| 94,127 | 166 | 21,948 | 5,672 | 3,608 | 31,394 |
| 94,128 | 173 | 21,777 | 5,608 | 3,563 | 31,121 |
| 94,129 | 170 | 21,564 | 5,539 | 3,530 | 30,803 |
| 94,130 | 162 | 21,579 | 5,563 | 3,562 | 30,866 |
| 94,131 | 162 | 21,312 | 5,526 | 3,526 | 30,526 |
| 94,132 | 163 | 22,402 | 5,813 | 3,740 | 32,118 |
| 94,133 | 162 | 22,121 | 5,753 | 3,739 | 31,775 |
| 94,134 | 162 | 22,402 | 5,847 | 3,789 | 32,200 |
| 94,135 | 161 | 22,228 | 5,800 | 3,744 | 31,933 |

|        |     |        |       |       |        |
|--------|-----|--------|-------|-------|--------|
| 94,136 | 158 | 22,106 | 5,761 | 3,689 | 31,714 |
| 94,137 | 162 | 22,486 | 5,798 | 3,745 | 32,191 |
| 94,138 | 162 | 22,509 | 5,780 | 3,752 | 32,203 |
| 94,139 | 159 | 22,837 | 5,859 | 3,810 | 32,665 |
| 94,140 | 158 | 22,713 | 5,806 | 3,766 | 32,443 |
| 94,141 | 170 | 22,805 | 5,807 | 3,762 | 32,544 |
| 94,142 | 177 | 23,005 | 5,824 | 3,810 | 32,816 |
| 94,143 | 176 | 22,824 | 5,785 | 3,786 | 32,571 |
| 94,144 | 171 | 22,547 | 5,745 | 3,765 | 32,228 |
| 94,145 | 176 | 22,878 | 5,820 | 3,824 | 32,698 |
| 94,146 | 172 | 22,900 | 5,753 | 3,801 | 32,626 |
| 94,147 | 172 | 22,712 | 5,682 | 3,744 | 32,310 |
| 94,148 | 168 | 22,467 | 5,611 | 3,705 | 31,951 |
| 94,149 | 163 | 22,493 | 5,651 | 3,717 | 32,024 |
| 94,150 | 166 | 22,490 | 5,636 | 3,706 | 31,998 |
| 94,151 | 169 | 22,695 | 5,689 | 3,737 | 32,290 |
| 94,152 | 172 | 22,400 | 5,554 | 3,642 | 31,768 |
| 94,153 | 175 | 22,747 | 5,614 | 3,681 | 32,217 |
| 94,154 | 169 | 22,710 | 5,613 | 3,682 | 32,174 |
| 94,155 | 176 | 22,650 | 5,616 | 3,684 | 32,126 |
| 94,156 | 173 | 22,407 | 5,622 | 3,692 | 31,894 |
| 94,157 | 177 | 22,514 | 5,668 | 3,727 | 32,086 |
| 94,158 | 180 | 22,459 | 5,659 | 3,690 | 31,988 |
| 94,159 | 181 | 22,209 | 5,649 | 3,672 | 31,711 |
| 94,160 | 171 | 21,318 | 5,471 | 3,549 | 30,509 |
| 94,161 | 175 | 21,584 | 5,517 | 3,591 | 30,867 |
| 94,162 | 177 | 21,815 | 5,527 | 3,622 | 31,141 |
| 94,163 | 177 | 21,678 | 5,511 | 3,600 | 30,966 |
| 94,164 | 177 | 21,716 | 5,491 | 3,604 | 30,988 |
| 94,165 | 175 | 21,638 | 5,510 | 3,630 | 30,953 |
| 94,166 | 175 | 21,362 | 5,466 | 3,600 | 30,603 |
| 94,167 | 173 | 21,163 | 5,419 | 3,579 | 30,334 |

|        |     |        |       |       |        |
|--------|-----|--------|-------|-------|--------|
| 94,168 | 170 | 21,058 | 5,414 | 3,589 | 30,231 |
| 94,169 | 168 | 21,001 | 5,373 | 3,562 | 30,104 |
| 94,170 | 167 | 20,906 | 5,363 | 3,557 | 29,993 |
| 94,171 | 174 | 21,055 | 5,390 | 3,576 | 30,195 |
| 94,172 | 169 | 21,082 | 5,413 | 3,587 | 30,251 |
| 94,173 | 161 | 21,044 | 5,431 | 3,592 | 30,228 |
| 94,174 | 163 | 21,041 | 5,440 | 3,579 | 30,223 |
| 94,175 | 158 | 20,878 | 5,386 | 3,560 | 29,982 |
| 94,176 | 161 | 21,040 | 5,421 | 3,566 | 30,188 |
| 94,177 | 158 | 21,055 | 5,381 | 3,561 | 30,155 |
| 94,178 | 156 | 20,973 | 5,346 | 3,543 | 30,018 |
| 94,179 | 152 | 20,941 | 5,317 | 3,528 | 29,938 |
| 94,180 | 157 | 20,919 | 5,320 | 3,526 | 29,922 |
| 94,181 | 153 | 20,785 | 5,273 | 3,511 | 29,722 |
| 94,182 | 152 | 20,703 | 5,193 | 3,472 | 29,520 |
| 94,183 | 155 | 20,536 | 5,143 | 3,440 | 29,274 |
| 94,184 | 166 | 20,556 | 5,075 | 3,403 | 29,200 |
| 94,185 | 166 | 20,650 | 5,046 | 3,385 | 29,247 |
| 94,186 | 170 | 20,500 | 5,031 | 3,385 | 29,086 |
| 94,187 | 172 | 20,515 | 4,995 | 3,377 | 29,059 |
| 94,188 | 172 | 20,632 | 5,045 | 3,409 | 29,258 |
| 94,189 | 177 | 20,444 | 4,998 | 3,352 | 28,971 |
| 94,190 | 180 | 20,423 | 4,946 | 3,367 | 28,916 |
| 94,191 | 177 | 20,350 | 4,934 | 3,356 | 28,817 |
| 94,192 | 170 | 20,541 | 4,990 | 3,396 | 29,097 |
| 94,193 | 167 | 20,481 | 4,998 | 3,351 | 28,997 |
| 94,194 | 167 | 20,650 | 4,976 | 3,328 | 29,121 |
| 94,195 | 165 | 20,767 | 4,980 | 3,331 | 29,243 |
| 94,196 | 162 | 20,615 | 4,987 | 3,299 | 29,063 |
| 94,197 | 165 | 20,575 | 4,995 | 3,288 | 29,023 |
| 94,198 | 164 | 20,640 | 4,981 | 3,298 | 29,083 |
| 94,199 | 166 | 20,662 | 4,961 | 3,284 | 29,073 |



|        |     |        |       |       |        |
|--------|-----|--------|-------|-------|--------|
| 94,200 | 164 | 20,890 | 5,023 | 3,304 | 29,381 |
| 94,201 | 162 | 21,024 | 4,991 | 3,304 | 29,481 |
| 94,202 | 164 | 21,116 | 5,005 | 3,319 | 29,604 |
| 94,203 | 166 | 21,173 | 5,032 | 3,342 | 29,713 |
| 94,204 | 165 | 21,393 | 5,081 | 3,362 | 30,001 |
| 94,205 | 160 | 21,650 | 5,115 | 3,374 | 30,299 |
| 94,206 | 160 | 21,723 | 5,088 | 3,358 | 30,329 |
| 94,207 | 157 | 21,832 | 5,072 | 3,336 | 30,397 |
| 94,208 | 160 | 21,961 | 5,055 | 3,324 | 30,500 |
| 94,209 | 158 | 21,790 | 4,999 | 3,293 | 30,240 |
| 94,210 | 157 | 21,788 | 5,032 | 3,297 | 30,274 |
| 94,211 | 165 | 21,938 | 5,036 | 3,309 | 30,448 |
| 94,212 | 162 | 21,967 | 5,020 | 3,313 | 30,462 |
| 94,213 | 154 | 21,962 | 5,058 | 3,336 | 30,510 |
| 94,214 | 160 | 22,015 | 5,069 | 3,307 | 30,551 |
| 94,215 | 160 | 22,062 | 5,053 | 3,288 | 30,563 |
| 94,216 | 158 | 22,377 | 5,115 | 3,309 | 30,959 |
| 94,217 | 157 | 21,726 | 4,977 | 3,169 | 30,029 |
| 94,218 | 164 | 21,946 | 4,999 | 3,182 | 30,291 |
| 94,219 | 161 | 22,218 | 5,055 | 3,197 | 30,631 |
| 94,220 | 160 | 22,137 | 5,069 | 3,203 | 30,569 |
| 94,221 | 157 | 22,442 | 5,137 | 3,244 | 30,980 |
| 94,222 | 166 | 22,765 | 5,213 | 3,291 | 31,435 |
| 94,223 | 166 | 22,636 | 5,164 | 3,253 | 31,219 |
| 94,224 | 167 | 22,912 | 5,224 | 3,297 | 31,600 |
| 94,225 | 165 | 22,998 | 5,230 | 3,325 | 31,718 |
| 94,226 | 170 | 23,108 | 5,269 | 3,323 | 31,870 |
| 94,227 | 179 | 23,016 | 5,251 | 3,294 | 31,740 |
| 94,228 | 179 | 23,107 | 5,259 | 3,302 | 31,847 |
| 94,229 | 176 | 22,961 | 5,263 | 3,307 | 31,707 |
| 94,230 | 173 | 22,868 | 5,273 | 3,308 | 31,622 |
| 94,231 | 175 | 23,105 | 5,325 | 3,332 | 31,937 |

|        |     |        |       |       |        |
|--------|-----|--------|-------|-------|--------|
| 94,232 | 174 | 22,639 | 5,215 | 3,229 | 31,257 |
| 94,233 | 177 | 22,708 | 5,201 | 3,215 | 31,301 |
| 94,234 | 176 | 22,810 | 5,201 | 3,216 | 31,403 |
| 94,235 | 169 | 22,777 | 5,233 | 3,218 | 31,397 |
| 94,236 | 169 | 22,889 | 5,238 | 3,212 | 31,508 |
| 94,237 | 165 | 23,001 | 5,275 | 3,281 | 31,722 |
| 94,238 | 162 | 22,731 | 5,226 | 3,231 | 31,350 |
| 94,239 | 161 | 22,816 | 5,237 | 3,243 | 31,457 |
| 94,240 | 167 | 22,837 | 5,286 | 3,270 | 31,560 |
| 94,241 | 170 | 23,147 | 5,359 | 3,325 | 32,001 |
| 94,242 | 181 | 22,461 | 5,213 | 3,236 | 31,091 |
| 94,243 | 181 | 22,582 | 5,243 | 3,286 | 31,292 |
| 94,244 | 177 | 22,799 | 5,286 | 3,318 | 31,580 |
| 94,245 | 176 | 22,814 | 5,278 | 3,309 | 31,577 |
| 94,246 | 182 | 22,784 | 5,271 | 3,317 | 31,554 |
| 94,247 | 182 | 22,755 | 5,263 | 3,326 | 31,526 |
| 94,248 | 178 | 22,690 | 5,230 | 3,362 | 31,460 |
| 94,249 | 178 | 22,585 | 5,208 | 3,336 | 31,307 |
| 94,250 | 185 | 22,846 | 5,252 | 3,346 | 31,629 |
| 94,251 | 191 | 22,598 | 5,175 | 3,309 | 31,273 |
| 94,252 | 188 | 22,158 | 5,122 | 3,274 | 30,742 |
| 94,253 | 192 | 22,694 | 5,191 | 3,338 | 31,415 |
| 94,254 | 191 | 22,642 | 5,167 | 3,303 | 31,303 |
| 94,255 | 195 | 22,449 | 5,115 | 3,275 | 31,034 |
| 94,256 | 202 | 22,258 | 5,059 | 3,234 | 30,753 |
| 94,257 | 201 | 21,799 | 4,982 | 3,188 | 30,170 |
| 94,258 | 207 | 22,033 | 5,017 | 3,217 | 30,474 |
| 94,259 | 208 | 22,187 | 5,079 | 3,245 | 30,719 |
| 94,260 | 209 | 21,926 | 5,014 | 3,209 | 30,358 |
| 94,261 | 212 | 22,048 | 5,004 | 3,218 | 30,482 |
| 94,262 | 204 | 22,168 | 5,042 | 3,244 | 30,658 |
| 94,263 | 213 | 22,317 | 5,097 | 3,250 | 30,877 |

|        |     |        |       |       |        |
|--------|-----|--------|-------|-------|--------|
| 94,264 | 213 | 22,253 | 5,059 | 3,252 | 30,777 |
| 94,265 | 208 | 22,229 | 5,047 | 3,277 | 30,761 |
| 94,266 | 213 | 22,568 | 5,106 | 3,334 | 31,221 |
| 94,267 | 211 | 22,242 | 5,026 | 3,302 | 30,781 |
| 94,268 | 210 | 22,246 | 5,065 | 3,349 | 30,870 |
| 94,269 | 207 | 22,224 | 5,134 | 3,381 | 30,946 |
| 94,270 | 206 | 22,424 | 5,166 | 3,438 | 31,234 |
| 94,271 | 206 | 22,528 | 5,234 | 3,467 | 31,435 |
| 94,272 | 198 | 22,469 | 5,237 | 3,495 | 31,399 |
| 94,273 | 196 | 22,534 | 5,254 | 3,515 | 31,499 |
| 94,274 | 197 | 22,606 | 5,240 | 3,529 | 31,572 |
| 94,275 | 196 | 22,585 | 5,202 | 3,505 | 31,488 |
| 94,276 | 197 | 22,301 | 5,150 | 3,440 | 31,088 |
| 94,277 | 193 | 22,434 | 5,147 | 3,443 | 31,217 |
| 94,278 | 185 | 22,212 | 5,067 | 3,400 | 30,864 |
| 94,279 | 190 | 22,187 | 5,014 | 3,367 | 30,758 |
| 94,280 | 191 | 22,384 | 5,041 | 3,389 | 31,005 |
| 94,281 | 190 | 22,341 | 5,016 | 3,384 | 30,931 |
| 94,282 | 188 | 22,132 | 4,964 | 3,352 | 30,636 |
| 94,283 | 192 | 22,267 | 4,988 | 3,408 | 30,855 |
| 94,284 | 194 | 22,115 | 4,958 | 3,403 | 30,670 |
| 94,285 | 197 | 22,145 | 4,944 | 3,403 | 30,689 |
| 94,286 | 203 | 22,218 | 4,917 | 3,393 | 30,731 |
| 94,287 | 201 | 22,205 | 4,892 | 3,375 | 30,673 |
| 94,288 | 211 | 22,556 | 4,933 | 3,380 | 31,080 |
| 94,289 | 211 | 22,167 | 4,839 | 3,349 | 30,566 |
| 94,290 | 207 | 22,434 | 4,877 | 3,367 | 30,885 |
| 94,291 | 203 | 22,703 | 4,932 | 3,378 | 31,216 |
| 94,292 | 203 | 22,801 | 4,920 | 3,375 | 31,299 |
| 94,293 | 193 | 22,714 | 4,871 | 3,311 | 31,089 |
| 94,294 | 192 | 22,790 | 4,855 | 3,298 | 31,135 |
| 94,295 | 196 | 23,120 | 4,903 | 3,340 | 31,559 |

|        |     |        |       |       |        |
|--------|-----|--------|-------|-------|--------|
| 94,296 | 191 | 22,961 | 4,893 | 3,342 | 31,387 |
| 94,297 | 192 | 23,019 | 4,850 | 3,294 | 31,355 |
| 94,298 | 200 | 23,137 | 4,882 | 3,291 | 31,510 |
| 94,299 | 198 | 23,096 | 4,881 | 3,285 | 31,460 |
| 94,300 | 200 | 23,104 | 4,894 | 3,305 | 31,503 |
| 94,301 | 201 | 23,065 | 4,913 | 3,306 | 31,485 |
| 94,302 | 197 | 22,675 | 4,834 | 3,239 | 30,945 |
| 94,303 | 197 | 22,426 | 4,791 | 3,194 | 30,608 |
| 94,304 | 201 | 22,566 | 4,846 | 3,214 | 30,827 |
| 94,305 | 196 | 22,229 | 4,747 | 3,166 | 30,338 |
| 94,306 | 191 | 22,154 | 4,734 | 3,186 | 30,265 |
| 94,307 | 178 | 22,076 | 4,738 | 3,182 | 30,174 |
| 94,308 | 184 | 22,477 | 4,802 | 3,232 | 30,695 |
| 94,309 | 183 | 22,396 | 4,780 | 3,224 | 30,583 |
| 94,310 | 179 | 22,170 | 4,752 | 3,201 | 30,302 |
| 94,311 | 177 | 22,185 | 4,749 | 3,202 | 30,313 |
| 94,312 | 178 | 21,971 | 4,711 | 3,152 | 30,012 |
| 94,313 | 179 | 22,129 | 4,701 | 3,151 | 30,160 |
| 94,314 | 178 | 22,121 | 4,682 | 3,142 | 30,123 |
| 94,315 | 178 | 22,046 | 4,651 | 3,117 | 29,992 |
| 94,316 | 177 | 22,474 | 4,781 | 3,190 | 30,622 |
| 94,317 | 178 | 22,043 | 4,658 | 3,062 | 29,941 |
| 94,318 | 175 | 22,188 | 4,655 | 3,055 | 30,073 |
| 94,319 | 175 | 22,407 | 4,678 | 3,072 | 30,332 |
| 94,320 | 187 | 22,664 | 4,701 | 3,088 | 30,640 |
| 94,321 | 188 | 22,416 | 4,620 | 3,027 | 30,251 |
| 94,322 | 189 | 22,464 | 4,565 | 2,992 | 30,210 |
| 94,323 | 192 | 22,441 | 4,547 | 2,975 | 30,155 |
| 94,324 | 205 | 22,705 | 4,589 | 2,991 | 30,490 |
| 94,325 | 202 | 22,583 | 4,597 | 2,998 | 30,380 |
| 94,326 | 202 | 22,361 | 4,566 | 2,975 | 30,104 |
| 94,327 | 201 | 22,384 | 4,535 | 2,986 | 30,106 |

|        |     |        |       |       |        |
|--------|-----|--------|-------|-------|--------|
| 94,328 | 199 | 22,377 | 4,538 | 2,995 | 30,109 |
| 94,329 | 198 | 22,234 | 4,536 | 2,987 | 29,955 |
| 94,330 | 199 | 22,294 | 4,509 | 2,978 | 29,980 |
| 94,331 | 198 | 22,291 | 4,499 | 2,965 | 29,953 |
| 94,332 | 197 | 22,336 | 4,500 | 2,952 | 29,985 |
| 94,333 | 196 | 22,327 | 4,510 | 2,951 | 29,984 |
| 94,334 | 203 | 22,747 | 4,613 | 2,996 | 30,559 |
| 94,335 | 198 | 22,401 | 4,543 | 2,936 | 30,078 |
| 94,336 | 195 | 22,270 | 4,528 | 2,937 | 29,930 |
| 94,337 | 192 | 22,001 | 4,507 | 2,922 | 29,622 |
| 94,338 | 194 | 21,834 | 4,492 | 2,902 | 29,422 |
| 94,339 | 198 | 22,722 | 4,699 | 3,043 | 30,662 |
| 94,340 | 200 | 22,754 | 4,708 | 3,027 | 30,689 |
| 94,341 | 197 | 22,614 | 4,654 | 3,000 | 30,465 |
| 94,342 | 197 | 22,596 | 4,658 | 3,008 | 30,459 |
| 94,343 | 196 | 22,664 | 4,704 | 3,041 | 30,605 |
| 94,344 | 196 | 22,525 | 4,657 | 3,033 | 30,411 |
| 94,345 | 198 | 22,758 | 4,708 | 3,053 | 30,717 |
| 94,346 | 194 | 22,946 | 4,752 | 3,079 | 30,971 |
| 94,347 | 196 | 22,892 | 4,755 | 3,061 | 30,904 |
| 94,348 | 194 | 22,979 | 4,796 | 3,064 | 31,033 |
| 94,349 | 186 | 23,163 | 4,811 | 3,069 | 31,229 |
| 94,350 | 181 | 23,346 | 4,839 | 3,071 | 31,437 |
| 94,351 | 179 | 23,277 | 4,794 | 3,061 | 31,311 |
| 94,352 | 179 | 23,365 | 4,799 | 3,060 | 31,403 |
| 94,353 | 172 | 23,577 | 4,812 | 3,091 | 31,652 |
| 94,354 | 171 | 23,589 | 4,823 | 3,088 | 31,671 |
| 94,355 | 167 | 23,734 | 4,875 | 3,118 | 31,894 |
| 94,356 | 167 | 23,755 | 4,871 | 3,087 | 31,880 |
| 94,357 | 168 | 23,898 | 4,924 | 3,125 | 32,115 |
| 94,358 | 167 | 23,859 | 4,919 | 3,112 | 32,057 |
| 94,359 | 166 | 22,901 | 4,727 | 3,005 | 30,799 |

|        |     |        |       |       |        |
|--------|-----|--------|-------|-------|--------|
| 94,360 | 171 | 23,215 | 4,770 | 3,031 | 31,187 |
| 94,361 | 172 | 23,514 | 4,793 | 3,052 | 31,531 |
| 94,362 | 172 | 23,489 | 4,816 | 3,054 | 31,531 |
| 94,363 | 170 | 23,574 | 4,857 | 3,085 | 31,686 |
| 94,364 | 170 | 23,709 | 4,906 | 3,106 | 31,891 |
| 94,365 | 163 | 23,404 | 4,853 | 3,072 | 31,492 |
| 94,366 | 165 | 23,494 | 4,866 | 3,077 | 31,602 |
| 94,367 | 165 | 23,491 | 4,873 | 3,085 | 31,614 |
| 94,368 | 164 | 23,461 | 4,868 | 3,094 | 31,587 |
| 94,369 | 169 | 23,548 | 4,898 | 3,091 | 31,706 |
| 94,370 | 166 | 23,357 | 4,856 | 3,086 | 31,465 |
| 94,371 | 153 | 23,674 | 4,947 | 3,132 | 31,906 |
| 94,372 | 153 | 23,603 | 4,953 | 3,127 | 31,836 |
| 94,373 | 156 | 23,532 | 4,969 | 3,125 | 31,782 |
| 94,374 | 159 | 23,692 | 5,023 | 3,194 | 32,068 |
| 94,375 | 145 | 23,599 | 5,024 | 3,205 | 31,973 |
| 94,376 | 149 | 23,574 | 4,990 | 3,183 | 31,896 |
| 94,377 | 146 | 23,408 | 4,970 | 3,151 | 31,675 |
| 94,378 | 150 | 23,411 | 4,984 | 3,147 | 31,692 |
| 94,379 | 150 | 23,531 | 4,988 | 3,140 | 31,809 |
| 94,380 | 143 | 23,511 | 5,000 | 3,162 | 31,816 |
| 94,381 | 143 | 23,493 | 4,997 | 3,159 | 31,792 |
| 94,382 | 147 | 23,491 | 5,003 | 3,178 | 31,819 |
| 94,383 | 147 | 23,355 | 5,009 | 3,182 | 31,693 |
| 94,384 | 149 | 23,646 | 5,063 | 3,211 | 32,069 |
| 94,385 | 144 | 23,691 | 5,087 | 3,228 | 32,150 |
| 94,386 | 147 | 23,555 | 5,075 | 3,207 | 31,984 |
| 94,387 | 147 | 23,613 | 5,079 | 3,211 | 32,050 |
| 94,388 | 141 | 23,520 | 5,124 | 3,224 | 32,009 |
| 94,389 | 138 | 23,221 | 5,093 | 3,185 | 31,637 |
| 94,390 | 137 | 23,085 | 5,091 | 3,190 | 31,503 |
| 94,391 | 136 | 23,138 | 5,130 | 3,220 | 31,624 |

|        |     |        |       |       |        |
|--------|-----|--------|-------|-------|--------|
| 94,392 | 142 | 23,034 | 5,129 | 3,212 | 31,517 |
| 94,393 | 139 | 23,015 | 5,130 | 3,223 | 31,507 |
| 94,394 | 145 | 22,671 | 5,076 | 3,179 | 31,071 |
| 94,395 | 145 | 22,515 | 5,055 | 3,146 | 30,861 |
| 94,396 | 149 | 22,509 | 5,072 | 3,131 | 30,861 |
| 94,397 | 150 | 22,508 | 5,076 | 3,136 | 30,870 |
| 94,398 | 150 | 22,513 | 5,062 | 3,151 | 30,876 |
| 94,399 | 153 | 22,377 | 5,052 | 3,158 | 30,740 |
| 94,400 | 153 | 22,228 | 5,048 | 3,160 | 30,589 |
| 94,401 | 153 | 22,490 | 5,076 | 3,212 | 30,931 |
| 94,402 | 155 | 22,584 | 5,099 | 3,235 | 31,073 |
| 94,403 | 158 | 22,783 | 5,155 | 3,270 | 31,366 |
| 94,404 | 158 | 22,859 | 5,170 | 3,294 | 31,481 |
| 94,405 | 161 | 22,936 | 5,189 | 3,299 | 31,585 |
| 94,406 | 159 | 22,704 | 5,132 | 3,260 | 31,255 |
| 94,407 | 159 | 22,785 | 5,152 | 3,291 | 31,387 |
| 94,408 | 150 | 21,755 | 4,932 | 3,172 | 30,009 |
| 94,409 | 150 | 21,825 | 4,915 | 3,164 | 30,054 |
| 94,410 | 147 | 21,822 | 4,934 | 3,176 | 30,079 |
| 94,411 | 145 | 21,826 | 4,934 | 3,173 | 30,078 |
| 94,412 | 146 | 21,869 | 4,940 | 3,179 | 30,134 |
| 94,413 | 146 | 21,935 | 4,958 | 3,186 | 30,225 |
| 94,414 | 145 | 22,873 | 5,115 | 3,312 | 31,445 |
| 94,415 | 145 | 22,836 | 5,137 | 3,321 | 31,439 |
| 94,416 | 150 | 22,731 | 5,119 | 3,305 | 31,305 |
| 94,417 | 147 | 22,632 | 5,113 | 3,289 | 31,181 |
| 94,418 | 157 | 22,883 | 5,152 | 3,317 | 31,509 |
| 94,419 | 162 | 22,674 | 5,124 | 3,303 | 31,263 |
| 94,420 | 155 | 22,410 | 5,076 | 3,270 | 30,911 |
| 94,421 | 162 | 22,795 | 5,191 | 3,327 | 31,475 |
| 94,422 | 160 | 22,773 | 5,171 | 3,308 | 31,412 |
| 94,423 | 159 | 22,676 | 5,155 | 3,273 | 31,263 |

|        |     |        |       |       |        |
|--------|-----|--------|-------|-------|--------|
| 94,424 | 162 | 22,893 | 5,193 | 3,313 | 31,561 |
| 94,425 | 161 | 22,711 | 5,149 | 3,232 | 31,253 |
| 94,426 | 161 | 22,811 | 5,162 | 3,231 | 31,365 |
| 94,427 | 156 | 22,769 | 5,179 | 3,241 | 31,345 |
| 94,428 | 164 | 22,782 | 5,174 | 3,253 | 31,373 |
| 94,429 | 168 | 22,852 | 5,175 | 3,245 | 31,440 |
| 94,430 | 171 | 22,961 | 5,200 | 3,246 | 31,578 |
| 94,431 | 172 | 23,112 | 5,244 | 3,268 | 31,796 |
| 94,432 | 171 | 22,993 | 5,251 | 3,261 | 31,676 |
| 94,433 | 160 | 23,345 | 5,284 | 3,296 | 32,085 |
| 94,434 | 163 | 23,477 | 5,288 | 3,280 | 32,208 |
| 94,435 | 154 | 23,535 | 5,282 | 3,281 | 32,252 |
| 94,436 | 160 | 23,527 | 5,272 | 3,270 | 32,229 |
| 94,437 | 157 | 23,377 | 5,213 | 3,225 | 31,972 |
| 94,438 | 163 | 23,489 | 5,179 | 3,216 | 32,047 |
| 94,439 | 163 | 23,581 | 5,196 | 3,225 | 32,165 |
| 94,440 | 160 | 23,897 | 5,185 | 3,248 | 32,490 |
| 94,441 | 167 | 24,241 | 5,282 | 3,282 | 32,972 |
| 94,442 | 168 | 24,427 | 5,297 | 3,315 | 33,207 |
| 94,443 | 161 | 24,127 | 5,254 | 3,292 | 32,834 |
| 94,444 | 172 | 24,580 | 5,307 | 3,320 | 33,379 |
| 94,445 | 162 | 24,255 | 5,237 | 3,282 | 32,936 |
| 94,446 | 164 | 24,272 | 5,250 | 3,272 | 32,958 |
| 94,447 | 160 | 24,431 | 5,255 | 3,287 | 33,133 |
| 94,448 | 161 | 24,224 | 5,216 | 3,254 | 32,855 |
| 94,449 | 161 | 23,971 | 5,177 | 3,220 | 32,529 |
| 94,450 | 160 | 24,552 | 5,292 | 3,287 | 33,291 |
| 94,451 | 160 | 24,383 | 5,244 | 3,250 | 33,037 |
| 94,452 | 159 | 24,148 | 5,213 | 3,217 | 32,737 |
| 94,453 | 164 | 24,913 | 5,350 | 3,280 | 33,707 |
| 94,454 | 162 | 24,819 | 5,346 | 3,283 | 33,610 |
| 94,455 | 166 | 24,797 | 5,355 | 3,264 | 33,582 |



|        |     |        |       |       |        |
|--------|-----|--------|-------|-------|--------|
| 94,456 | 166 | 24,510 | 5,274 | 3,224 | 33,174 |
| 94,457 | 168 | 24,493 | 5,289 | 3,222 | 33,172 |
| 94,458 | 167 | 24,302 | 5,262 | 3,195 | 32,926 |
| 94,459 | 168 | 24,281 | 5,295 | 3,197 | 32,941 |
| 94,460 | 167 | 24,095 | 5,278 | 3,174 | 32,714 |
| 94,461 | 173 | 24,050 | 5,277 | 3,157 | 32,657 |
| 94,462 | 173 | 23,887 | 5,249 | 3,143 | 32,452 |
| 94,463 | 173 | 23,884 | 5,264 | 3,141 | 32,462 |
| 94,464 | 172 | 23,778 | 5,240 | 3,125 | 32,315 |
| 94,465 | 171 | 23,737 | 5,253 | 3,132 | 32,293 |
| 94,466 | 165 | 24,020 | 5,313 | 3,123 | 32,621 |
| 94,467 | 164 | 23,723 | 5,278 | 3,113 | 32,278 |
| 94,468 | 164 | 23,805 | 5,315 | 3,119 | 32,403 |
| 94,469 | 152 | 23,569 | 5,234 | 3,072 | 32,027 |
| 94,470 | 153 | 23,686 | 5,281 | 3,108 | 32,228 |
| 94,471 | 151 | 23,679 | 5,283 | 3,123 | 32,236 |
| 94,472 | 152 | 23,464 | 5,226 | 3,091 | 31,933 |
| 94,473 | 152 | 23,152 | 5,171 | 3,067 | 31,542 |
| 94,474 | 148 | 23,292 | 5,180 | 3,094 | 31,714 |
| 94,475 | 150 | 23,232 | 5,169 | 3,082 | 31,633 |
| 94,476 | 142 | 22,536 | 5,013 | 2,986 | 30,677 |
| 94,477 | 142 | 22,614 | 5,039 | 2,989 | 30,784 |
| 94,478 | 140 | 22,785 | 5,109 | 3,012 | 31,046 |
| 94,479 | 140 | 22,766 | 5,123 | 3,021 | 31,050 |
| 94,480 | 140 | 23,052 | 5,205 | 3,065 | 31,462 |
| 94,481 | 145 | 22,883 | 5,223 | 3,072 | 31,323 |
| 94,482 | 152 | 22,610 | 5,169 | 3,035 | 30,966 |
| 94,483 | 155 | 22,482 | 5,178 | 3,038 | 30,853 |
| 94,484 | 158 | 22,461 | 5,182 | 3,053 | 30,854 |
| 94,485 | 155 | 22,230 | 5,153 | 3,067 | 30,605 |
| 94,486 | 151 | 21,887 | 5,112 | 3,036 | 30,186 |
| 94,487 | 151 | 21,822 | 5,110 | 3,022 | 30,105 |

|        |     |        |       |       |        |
|--------|-----|--------|-------|-------|--------|
| 94,488 | 151 | 21,638 | 5,106 | 3,040 | 29,935 |
| 94,489 | 149 | 21,575 | 5,115 | 3,053 | 29,892 |
| 94,490 | 147 | 21,515 | 5,124 | 3,058 | 29,844 |
| 94,491 | 146 | 21,342 | 5,150 | 3,041 | 29,679 |
| 94,492 | 136 | 21,174 | 5,130 | 3,006 | 29,446 |
| 94,493 | 138 | 21,347 | 5,197 | 3,026 | 29,708 |
| 94,494 | 141 | 21,476 | 5,247 | 3,040 | 29,904 |
| 94,495 | 149 | 21,226 | 5,267 | 3,023 | 29,665 |
| 94,496 | 150 | 21,095 | 5,245 | 3,034 | 29,524 |
| 94,497 | 157 | 21,042 | 5,256 | 3,029 | 29,484 |
| 94,498 | 156 | 20,874 | 5,233 | 3,021 | 29,284 |
| 94,499 | 153 | 20,891 | 5,264 | 3,033 | 29,341 |
| 94,500 | 153 | 20,608 | 5,240 | 3,018 | 29,019 |
| 94,501 | 156 | 20,766 | 5,302 | 3,090 | 29,314 |
| 94,502 | 160 | 20,798 | 5,349 | 3,103 | 29,410 |
| 94,503 | 166 | 20,943 | 5,383 | 3,132 | 29,624 |
| 94,504 | 164 | 20,882 | 5,375 | 3,109 | 29,530 |
| 94,505 | 162 | 20,698 | 5,370 | 3,084 | 29,314 |
| 94,506 | 160 | 20,295 | 5,341 | 3,061 | 28,857 |
| 94,507 | 156 | 20,287 | 5,329 | 3,070 | 28,842 |
| 94,508 | 157 | 20,319 | 5,312 | 3,058 | 28,846 |
| 94,509 | 164 | 20,585 | 5,368 | 3,091 | 29,208 |
| 94,510 | 166 | 20,526 | 5,338 | 3,098 | 29,128 |
| 94,511 | 162 | 20,438 | 5,327 | 3,088 | 29,015 |
| 94,512 | 160 | 20,221 | 5,279 | 3,076 | 28,736 |
| 94,513 | 156 | 20,260 | 5,280 | 3,075 | 28,771 |
| 94,514 | 154 | 20,120 | 5,268 | 3,068 | 28,610 |
| 94,515 | 155 | 20,327 | 5,362 | 3,105 | 28,949 |
| 94,516 | 160 | 19,953 | 5,243 | 3,029 | 28,385 |
| 94,517 | 159 | 20,078 | 5,261 | 3,076 | 28,574 |
| 94,518 | 162 | 20,134 | 5,291 | 3,079 | 28,666 |
| 94,519 | 162 | 19,911 | 5,270 | 3,076 | 28,419 |

|        |     |        |       |       |        |
|--------|-----|--------|-------|-------|--------|
| 94,520 | 164 | 19,915 | 5,280 | 3,074 | 28,433 |
| 94,521 | 163 | 19,807 | 5,223 | 3,043 | 28,236 |
| 94,522 | 168 | 20,239 | 5,350 | 3,122 | 28,879 |
| 94,523 | 169 | 19,878 | 5,298 | 3,107 | 28,452 |
| 94,524 | 170 | 19,638 | 5,260 | 3,087 | 28,155 |
| 94,525 | 167 | 19,958 | 5,328 | 3,148 | 28,601 |
| 94,526 | 170 | 19,725 | 5,285 | 3,107 | 28,287 |
| 94,527 | 171 | 19,492 | 5,257 | 3,093 | 28,013 |
| 94,528 | 176 | 19,981 | 5,460 | 3,175 | 28,792 |
| 94,529 | 170 | 19,984 | 5,470 | 3,197 | 28,821 |
| 94,530 | 175 | 20,223 | 5,549 | 3,243 | 29,190 |
| 94,531 | 167 | 20,155 | 5,510 | 3,246 | 29,078 |
| 94,532 | 170 | 20,342 | 5,513 | 3,264 | 29,289 |
| 94,533 | 173 | 20,368 | 5,513 | 3,278 | 29,332 |
| 94,534 | 167 | 20,245 | 5,479 | 3,237 | 29,128 |
| 94,535 | 171 | 21,117 | 5,690 | 3,367 | 30,345 |
| 94,536 | 173 | 21,233 | 5,735 | 3,386 | 30,527 |
| 94,537 | 171 | 20,931 | 5,655 | 3,329 | 30,086 |
| 94,538 | 170 | 20,985 | 5,726 | 3,350 | 30,231 |
| 94,539 | 165 | 21,184 | 5,819 | 3,400 | 30,568 |
| 94,540 | 165 | 20,947 | 5,797 | 3,378 | 30,287 |
| 94,541 | 165 | 20,694 | 5,741 | 3,357 | 29,957 |
| 94,542 | 173 | 20,692 | 5,747 | 3,368 | 29,980 |
| 94,543 | 171 | 20,507 | 5,687 | 3,361 | 29,726 |
| 94,544 | 171 | 20,502 | 5,690 | 3,383 | 29,746 |
| 94,545 | 161 | 20,289 | 5,615 | 3,346 | 29,411 |
| 94,546 | 148 | 20,142 | 5,560 | 3,345 | 29,195 |
| 94,547 | 144 | 19,794 | 5,476 | 3,287 | 28,701 |
| 94,548 | 152 | 20,065 | 5,527 | 3,326 | 29,070 |
| 94,549 | 145 | 18,930 | 5,124 | 3,109 | 27,308 |
| 94,550 | 154 | 19,294 | 5,222 | 3,143 | 27,813 |
| 94,551 | 162 | 19,559 | 5,308 | 3,182 | 28,211 |

|        |     |        |       |       |        |
|--------|-----|--------|-------|-------|--------|
| 94,552 | 162 | 19,533 | 5,320 | 3,189 | 28,204 |
| 94,553 | 168 | 20,129 | 5,459 | 3,268 | 29,024 |
| 94,554 | 163 | 20,463 | 5,512 | 3,315 | 29,453 |
| 94,555 | 162 | 20,490 | 5,528 | 3,322 | 29,502 |
| 94,556 | 167 | 20,381 | 5,475 | 3,298 | 29,321 |
| 94,557 | 166 | 21,101 | 5,609 | 3,403 | 30,279 |
| 94,558 | 166 | 20,891 | 5,554 | 3,380 | 29,991 |
| 94,559 | 166 | 20,973 | 5,611 | 3,404 | 30,154 |
| 94,560 | 166 | 21,412 | 5,724 | 3,460 | 30,762 |
| 94,561 | 163 | 21,239 | 5,696 | 3,416 | 30,514 |
| 94,562 | 164 | 21,279 | 5,750 | 3,450 | 30,643 |
| 94,563 | 169 | 21,132 | 5,732 | 3,429 | 30,462 |
| 94,564 | 169 | 21,110 | 5,744 | 3,438 | 30,461 |
| 94,565 | 169 | 21,238 | 5,829 | 3,460 | 30,696 |
| 94,566 | 173 | 21,075 | 5,742 | 3,429 | 30,419 |
| 94,567 | 168 | 20,877 | 5,708 | 3,425 | 30,178 |
| 94,568 | 171 | 21,157 | 5,802 | 3,465 | 30,595 |
| 94,569 | 168 | 21,386 | 5,847 | 3,490 | 30,891 |
| 94,570 | 159 | 20,970 | 5,714 | 3,412 | 30,255 |
| 94,571 | 159 | 21,176 | 5,727 | 3,422 | 30,484 |
| 94,572 | 156 | 21,418 | 5,816 | 3,467 | 30,857 |
| 94,573 | 158 | 21,507 | 5,872 | 3,491 | 31,028 |
| 94,574 | 152 | 21,527 | 5,871 | 3,480 | 31,030 |
| 94,575 | 155 | 21,282 | 5,811 | 3,432 | 30,680 |
| 94,576 | 154 | 21,109 | 5,793 | 3,411 | 30,467 |
| 94,577 | 154 | 21,512 | 5,817 | 3,454 | 30,937 |
| 94,578 | 156 | 21,473 | 5,760 | 3,429 | 30,818 |
| 94,579 | 158 | 21,519 | 5,750 | 3,429 | 30,856 |
| 94,580 | 158 | 21,589 | 5,742 | 3,436 | 30,925 |
| 94,581 | 154 | 21,835 | 5,807 | 3,479 | 31,275 |
| 94,582 | 149 | 21,895 | 5,814 | 3,485 | 31,343 |
| 94,583 | 142 | 21,656 | 5,765 | 3,452 | 31,015 |

|        |     |        |       |       |        |
|--------|-----|--------|-------|-------|--------|
| 94,584 | 138 | 21,692 | 5,780 | 3,472 | 31,082 |
| 94,585 | 142 | 21,600 | 5,779 | 3,471 | 30,992 |
| 94,586 | 144 | 21,630 | 5,755 | 3,451 | 30,980 |
| 94,587 | 148 | 21,934 | 5,816 | 3,504 | 31,402 |
| 94,588 | 150 | 21,974 | 5,774 | 3,493 | 31,391 |
| 94,589 | 157 | 22,137 | 5,738 | 3,464 | 31,496 |
| 94,590 | 156 | 22,125 | 5,722 | 3,463 | 31,466 |
| 94,591 | 156 | 22,116 | 5,710 | 3,452 | 31,434 |
| 94,592 | 161 | 22,199 | 5,703 | 3,461 | 31,524 |
| 94,593 | 162 | 22,254 | 5,710 | 3,454 | 31,580 |
| 94,594 | 163 | 22,340 | 5,733 | 3,458 | 31,694 |
| 94,595 | 162 | 22,446 | 5,749 | 3,472 | 31,829 |
| 94,596 | 161 | 22,409 | 5,767 | 3,469 | 31,806 |
| 94,597 | 160 | 22,476 | 5,754 | 3,472 | 31,862 |
| 94,598 | 154 | 22,520 | 5,790 | 3,463 | 31,927 |
| 94,599 | 148 | 22,728 | 5,870 | 3,542 | 32,288 |
| 94,600 | 150 | 22,595 | 5,898 | 3,553 | 32,196 |
| 94,601 | 157 | 22,862 | 5,955 | 3,578 | 32,552 |
| 94,602 | 153 | 22,894 | 5,926 | 3,566 | 32,539 |
| 94,603 | 151 | 22,870 | 5,926 | 3,580 | 32,527 |
| 94,604 | 150 | 22,759 | 5,929 | 3,584 | 32,422 |
| 94,605 | 153 | 22,606 | 5,904 | 3,563 | 32,226 |
| 94,606 | 158 | 22,771 | 5,947 | 3,588 | 32,464 |
| 94,607 | 154 | 22,971 | 5,987 | 3,581 | 32,693 |
| 94,608 | 157 | 22,794 | 5,958 | 3,566 | 32,475 |
| 94,609 | 155 | 22,470 | 5,907 | 3,529 | 32,061 |
| 94,610 | 160 | 22,816 | 5,992 | 3,618 | 32,586 |
| 94,611 | 161 | 23,018 | 6,007 | 3,664 | 32,850 |
| 94,612 | 161 | 22,777 | 5,890 | 3,630 | 32,458 |
| 94,613 | 161 | 23,034 | 5,915 | 3,662 | 32,772 |
| 94,614 | 160 | 23,374 | 5,978 | 3,685 | 33,197 |
| 94,615 | 163 | 23,431 | 5,915 | 3,670 | 33,179 |

|        |     |        |       |       |        |
|--------|-----|--------|-------|-------|--------|
| 94,616 | 164 | 23,446 | 5,912 | 3,673 | 33,195 |
| 94,617 | 169 | 23,609 | 5,948 | 3,702 | 33,428 |
| 94,618 | 169 | 23,721 | 5,946 | 3,708 | 33,544 |
| 94,619 | 174 | 23,814 | 5,937 | 3,691 | 33,616 |
| 94,620 | 173 | 23,871 | 5,954 | 3,690 | 33,688 |
| 94,621 | 173 | 23,598 | 5,896 | 3,652 | 33,319 |
| 94,622 | 173 | 23,784 | 5,939 | 3,659 | 33,555 |
| 94,623 | 174 | 24,054 | 5,952 | 3,674 | 33,854 |
| 94,624 | 174 | 23,967 | 5,906 | 3,631 | 33,678 |
| 94,625 | 174 | 24,038 | 5,894 | 3,627 | 33,733 |
| 94,626 | 170 | 23,914 | 5,849 | 3,614 | 33,547 |
| 94,627 | 170 | 23,927 | 5,836 | 3,610 | 33,543 |
| 94,628 | 168 | 23,745 | 5,775 | 3,580 | 33,268 |
| 94,629 | 167 | 23,912 | 5,844 | 3,648 | 33,571 |
| 94,630 | 166 | 23,613 | 5,777 | 3,595 | 33,151 |
| 94,631 | 168 | 23,640 | 5,779 | 3,603 | 33,190 |
| 94,632 | 170 | 23,401 | 5,735 | 3,548 | 32,854 |
| 94,633 | 166 | 23,254 | 5,668 | 3,523 | 32,611 |
| 94,634 | 169 | 23,436 | 5,704 | 3,566 | 32,875 |
| 94,635 | 170 | 23,308 | 5,665 | 3,557 | 32,700 |
| 94,636 | 163 | 22,942 | 5,571 | 3,501 | 32,177 |
| 94,637 | 169 | 23,113 | 5,629 | 3,534 | 32,445 |
| 94,638 | 172 | 23,188 | 5,668 | 3,527 | 32,555 |
| 94,639 | 170 | 23,191 | 5,688 | 3,543 | 32,592 |
| 94,640 | 162 | 23,038 | 5,628 | 3,524 | 32,352 |
| 94,641 | 161 | 22,933 | 5,598 | 3,495 | 32,187 |
| 94,642 | 162 | 23,154 | 5,664 | 3,538 | 32,518 |
| 94,643 | 155 | 23,264 | 5,669 | 3,536 | 32,624 |
| 94,644 | 155 | 23,301 | 5,709 | 3,570 | 32,735 |
| 94,645 | 154 | 23,279 | 5,716 | 3,576 | 32,725 |
| 94,646 | 158 | 23,259 | 5,719 | 3,578 | 32,714 |
| 94,647 | 162 | 23,059 | 5,678 | 3,572 | 32,471 |

|        |     |        |       |       |        |
|--------|-----|--------|-------|-------|--------|
| 94,648 | 162 | 23,034 | 5,627 | 3,558 | 32,381 |
| 94,649 | 163 | 22,933 | 5,578 | 3,499 | 32,173 |
| 94,650 | 167 | 23,161 | 5,658 | 3,538 | 32,524 |
| 94,651 | 163 | 23,110 | 5,635 | 3,507 | 32,415 |
| 94,652 | 157 | 23,027 | 5,590 | 3,502 | 32,276 |
| 94,653 | 155 | 22,749 | 5,514 | 3,462 | 31,880 |
| 94,654 | 160 | 22,847 | 5,538 | 3,464 | 32,009 |
| 94,655 | 158 | 22,582 | 5,472 | 3,426 | 31,638 |
| 94,656 | 159 | 22,765 | 5,491 | 3,474 | 31,889 |
| 94,657 | 154 | 22,696 | 5,476 | 3,456 | 31,782 |
| 94,658 | 154 | 22,618 | 5,417 | 3,450 | 31,639 |
| 94,659 | 144 | 22,557 | 5,360 | 3,387 | 31,448 |
| 94,660 | 145 | 22,549 | 5,336 | 3,373 | 31,403 |
| 94,661 | 145 | 22,737 | 5,395 | 3,411 | 31,688 |
| 94,662 | 144 | 22,564 | 5,394 | 3,357 | 31,459 |
| 94,663 | 141 | 22,320 | 5,378 | 3,321 | 31,160 |
| 94,664 | 140 | 22,358 | 5,396 | 3,319 | 31,213 |
| 94,665 | 143 | 22,207 | 5,389 | 3,327 | 31,066 |
| 94,666 | 142 | 22,223 | 5,433 | 3,358 | 31,156 |
| 94,667 | 133 | 22,018 | 5,384 | 3,338 | 30,873 |
| 94,668 | 130 | 21,929 | 5,407 | 3,346 | 30,812 |
| 94,669 | 130 | 22,308 | 5,496 | 3,423 | 31,357 |
| 94,670 | 125 | 21,889 | 5,451 | 3,401 | 30,866 |
| 94,671 | 124 | 21,668 | 5,450 | 3,407 | 30,649 |
| 94,672 | 127 | 21,757 | 5,540 | 3,466 | 30,890 |
| 94,673 | 128 | 21,822 | 5,550 | 3,475 | 30,975 |
| 94,674 | 131 | 21,789 | 5,572 | 3,498 | 30,990 |
| 94,675 | 129 | 21,742 | 5,549 | 3,490 | 30,910 |
| 94,676 | 131 | 21,559 | 5,517 | 3,476 | 30,683 |
| 94,677 | 132 | 21,735 | 5,549 | 3,513 | 30,929 |
| 94,678 | 137 | 21,410 | 5,495 | 3,478 | 30,520 |
| 94,679 | 137 | 21,431 | 5,482 | 3,477 | 30,527 |

|        |     |        |       |       |        |
|--------|-----|--------|-------|-------|--------|
| 94,680 | 142 | 21,343 | 5,495 | 3,473 | 30,453 |
| 94,681 | 143 | 21,517 | 5,529 | 3,502 | 30,691 |
| 94,682 | 136 | 21,415 | 5,530 | 3,497 | 30,578 |
| 94,683 | 140 | 21,461 | 5,539 | 3,501 | 30,641 |
| 94,684 | 140 | 21,431 | 5,555 | 3,507 | 30,633 |
| 94,685 | 140 | 21,484 | 5,572 | 3,501 | 30,697 |
| 94,686 | 141 | 21,533 | 5,598 | 3,483 | 30,755 |
| 94,687 | 142 | 21,531 | 5,608 | 3,464 | 30,745 |
| 94,688 | 138 | 21,560 | 5,610 | 3,437 | 30,745 |
| 94,689 | 130 | 21,258 | 5,547 | 3,422 | 30,357 |
| 94,690 | 128 | 20,993 | 5,472 | 3,379 | 29,972 |
| 94,691 | 127 | 21,023 | 5,472 | 3,384 | 30,006 |
| 94,692 | 124 | 21,049 | 5,442 | 3,387 | 30,002 |
| 94,693 | 124 | 21,156 | 5,408 | 3,384 | 30,072 |
| 94,694 | 123 | 20,983 | 5,330 | 3,335 | 29,771 |
| 94,695 | 123 | 21,247 | 5,368 | 3,355 | 30,093 |
| 94,696 | 121 | 21,559 | 5,427 | 3,390 | 30,497 |
| 94,697 | 120 | 21,464 | 5,380 | 3,357 | 30,321 |
| 94,698 | 118 | 21,433 | 5,377 | 3,364 | 30,292 |
| 94,699 | 118 | 21,508 | 5,407 | 3,375 | 30,408 |
| 94,700 | 123 | 21,871 | 5,539 | 3,445 | 30,978 |
| 94,701 | 120 | 22,047 | 5,531 | 3,459 | 31,157 |
| 94,702 | 117 | 21,679 | 5,445 | 3,416 | 30,657 |
| 94,703 | 108 | 21,687 | 5,472 | 3,446 | 30,713 |
| 94,704 | 110 | 21,880 | 5,555 | 3,480 | 31,025 |
| 94,705 | 99  | 21,825 | 5,548 | 3,477 | 30,949 |
| 94,706 | 97  | 21,711 | 5,553 | 3,456 | 30,817 |
| 94,707 | 98  | 21,509 | 5,512 | 3,423 | 30,542 |
| 94,708 | 98  | 21,164 | 5,473 | 3,393 | 30,128 |
| 94,709 | 101 | 21,230 | 5,515 | 3,439 | 30,285 |
| 94,710 | 103 | 21,224 | 5,487 | 3,442 | 30,256 |
| 94,711 | 102 | 21,171 | 5,478 | 3,436 | 30,187 |



|        |     |        |       |       |        |
|--------|-----|--------|-------|-------|--------|
| 94,712 | 108 | 21,208 | 5,469 | 3,423 | 30,208 |
| 94,713 | 108 | 20,974 | 5,358 | 3,413 | 29,853 |
| 94,714 | 113 | 21,028 | 5,373 | 3,414 | 29,928 |
| 94,715 | 109 | 21,112 | 5,377 | 3,410 | 30,008 |
| 94,716 | 111 | 21,323 | 5,398 | 3,418 | 30,250 |
| 94,717 | 111 | 21,352 | 5,423 | 3,424 | 30,310 |
| 94,718 | 114 | 21,412 | 5,443 | 3,412 | 30,381 |
| 94,719 | 112 | 21,421 | 5,409 | 3,386 | 30,328 |
| 94,720 | 113 | 21,251 | 5,364 | 3,354 | 30,082 |
| 94,721 | 117 | 21,351 | 5,348 | 3,349 | 30,165 |
| 94,722 | 115 | 21,262 | 5,272 | 3,317 | 29,966 |
| 94,723 | 114 | 21,262 | 5,218 | 3,300 | 29,894 |
| 94,724 | 114 | 21,364 | 5,251 | 3,324 | 30,053 |
| 94,725 | 111 | 21,126 | 5,165 | 3,269 | 29,671 |
| 94,726 | 117 | 21,281 | 5,192 | 3,305 | 29,895 |
| 94,727 | 113 | 21,224 | 5,152 | 3,265 | 29,754 |
| 94,728 | 113 | 21,236 | 5,149 | 3,252 | 29,750 |
| 94,729 | 113 | 21,471 | 5,224 | 3,295 | 30,103 |
| 94,730 | 106 | 21,335 | 5,171 | 3,262 | 29,874 |
| 94,731 | 117 | 21,704 | 5,233 | 3,294 | 30,348 |
| 94,732 | 114 | 21,483 | 5,191 | 3,251 | 30,039 |
| 94,733 | 122 | 21,661 | 5,247 | 3,262 | 30,292 |
| 94,734 | 122 | 21,622 | 5,264 | 3,257 | 30,265 |
| 94,735 | 119 | 21,437 | 5,233 | 3,233 | 30,022 |
| 94,736 | 124 | 21,595 | 5,297 | 3,276 | 30,292 |
| 94,737 | 121 | 21,492 | 5,281 | 3,278 | 30,172 |
| 94,738 | 121 | 21,398 | 5,267 | 3,279 | 30,065 |
| 94,739 | 120 | 21,068 | 5,168 | 3,245 | 29,601 |
| 94,740 | 120 | 21,172 | 5,179 | 3,242 | 29,713 |
| 94,741 | 125 | 21,337 | 5,274 | 3,258 | 29,994 |
| 94,742 | 127 | 21,191 | 5,287 | 3,246 | 29,851 |
| 94,743 | 128 | 20,832 | 5,224 | 3,204 | 29,388 |

|        |     |        |       |       |        |
|--------|-----|--------|-------|-------|--------|
| 94,744 | 128 | 20,767 | 5,218 | 3,189 | 29,302 |
| 94,745 | 129 | 20,488 | 5,171 | 3,145 | 28,933 |
| 94,746 | 129 | 20,685 | 5,248 | 3,185 | 29,247 |
| 94,747 | 130 | 20,891 | 5,357 | 3,247 | 29,625 |
| 94,748 | 130 | 20,562 | 5,296 | 3,213 | 29,201 |
| 94,749 | 130 | 20,344 | 5,258 | 3,171 | 28,903 |
| 94,750 | 127 | 20,478 | 5,325 | 3,204 | 29,134 |
| 94,751 | 127 | 20,462 | 5,352 | 3,235 | 29,176 |
| 94,752 | 127 | 20,340 | 5,338 | 3,213 | 29,018 |
| 94,753 | 127 | 19,612 | 5,132 | 3,073 | 27,944 |
| 94,754 | 132 | 19,741 | 5,150 | 3,088 | 28,111 |
| 94,755 | 129 | 19,909 | 5,159 | 3,116 | 28,313 |
| 94,756 | 133 | 19,968 | 5,171 | 3,116 | 28,388 |
| 94,757 | 133 | 19,971 | 5,158 | 3,104 | 28,366 |
| 94,758 | 135 | 20,346 | 5,228 | 3,129 | 28,838 |
| 94,759 | 133 | 20,279 | 5,182 | 3,099 | 28,693 |
| 94,760 | 132 | 20,574 | 5,251 | 3,130 | 29,087 |
| 94,761 | 130 | 20,417 | 5,236 | 3,096 | 28,879 |
| 94,762 | 128 | 20,366 | 5,230 | 3,094 | 28,818 |
| 94,763 | 121 | 20,254 | 5,239 | 3,092 | 28,706 |
| 94,764 | 118 | 20,612 | 5,380 | 3,168 | 29,278 |
| 94,765 | 122 | 20,664 | 5,395 | 3,180 | 29,361 |
| 94,766 | 124 | 20,662 | 5,416 | 3,193 | 29,395 |
| 94,767 | 130 | 20,787 | 5,480 | 3,210 | 29,607 |
| 94,768 | 134 | 20,834 | 5,495 | 3,228 | 29,691 |
| 94,769 | 131 | 20,584 | 5,439 | 3,198 | 29,352 |
| 94,770 | 132 | 20,584 | 5,446 | 3,206 | 29,368 |
| 94,771 | 133 | 20,500 | 5,471 | 3,192 | 29,296 |
| 94,772 | 135 | 20,229 | 5,410 | 3,146 | 28,920 |
| 94,773 | 134 | 20,022 | 5,379 | 3,110 | 28,645 |
| 94,774 | 140 | 20,627 | 5,517 | 3,215 | 29,499 |
| 94,775 | 140 | 20,314 | 5,444 | 3,165 | 29,063 |

|        |     |        |       |       |        |
|--------|-----|--------|-------|-------|--------|
| 94,776 | 142 | 20,110 | 5,435 | 3,143 | 28,830 |
| 94,777 | 138 | 20,249 | 5,545 | 3,188 | 29,120 |
| 94,778 | 139 | 20,330 | 5,579 | 3,211 | 29,259 |
| 94,779 | 130 | 20,506 | 5,595 | 3,229 | 29,460 |
| 94,780 | 130 | 20,487 | 5,608 | 3,232 | 29,457 |
| 94,781 | 132 | 20,536 | 5,624 | 3,236 | 29,528 |
| 94,782 | 132 | 20,689 | 5,675 | 3,266 | 29,762 |
| 94,783 | 127 | 20,856 | 5,706 | 3,300 | 29,989 |
| 94,784 | 122 | 20,714 | 5,659 | 3,299 | 29,794 |
| 94,785 | 124 | 20,627 | 5,628 | 3,293 | 29,672 |
| 94,786 | 128 | 20,799 | 5,620 | 3,299 | 29,846 |
| 94,787 | 126 | 20,880 | 5,622 | 3,308 | 29,936 |
| 94,788 | 124 | 20,648 | 5,568 | 3,267 | 29,607 |
| 94,789 | 129 | 20,685 | 5,575 | 3,278 | 29,667 |
| 94,790 | 129 | 20,969 | 5,636 | 3,310 | 30,044 |
| 94,791 | 139 | 21,067 | 5,636 | 3,333 | 30,175 |
| 94,792 | 140 | 21,125 | 5,642 | 3,341 | 30,248 |
| 94,793 | 139 | 20,827 | 5,570 | 3,314 | 29,850 |
| 94,794 | 141 | 20,775 | 5,625 | 3,309 | 29,850 |
| 94,795 | 142 | 20,749 | 5,647 | 3,314 | 29,852 |
| 94,796 | 146 | 21,099 | 5,693 | 3,364 | 30,302 |
| 94,797 | 149 | 21,031 | 5,692 | 3,337 | 30,209 |
| 94,798 | 147 | 21,153 | 5,680 | 3,328 | 30,308 |
| 94,799 | 144 | 20,978 | 5,642 | 3,290 | 30,054 |
| 94,800 | 152 | 21,143 | 5,655 | 3,283 | 30,233 |
| 94,801 | 152 | 21,158 | 5,648 | 3,260 | 30,218 |
| 94,802 | 153 | 21,179 | 5,642 | 3,243 | 30,217 |
| 94,803 | 152 | 20,862 | 5,590 | 3,188 | 29,792 |
| 94,804 | 151 | 20,763 | 5,587 | 3,168 | 29,669 |
| 94,805 | 148 | 20,522 | 5,542 | 3,140 | 29,352 |
| 94,806 | 147 | 20,267 | 5,503 | 3,100 | 29,017 |
| 94,807 | 151 | 21,293 | 5,813 | 3,249 | 30,506 |

|        |     |        |       |       |        |
|--------|-----|--------|-------|-------|--------|
| 94,808 | 153 | 21,326 | 5,832 | 3,270 | 30,581 |
| 94,809 | 152 | 21,011 | 5,786 | 3,247 | 30,196 |
| 94,810 | 151 | 20,903 | 5,773 | 3,241 | 30,068 |
| 94,811 | 152 | 20,970 | 5,811 | 3,244 | 30,177 |
| 94,812 | 154 | 20,844 | 5,773 | 3,209 | 29,980 |
| 94,813 | 155 | 20,790 | 5,764 | 3,199 | 29,908 |
| 94,814 | 156 | 20,831 | 5,784 | 3,217 | 29,988 |
| 94,815 | 157 | 20,519 | 5,696 | 3,152 | 29,524 |
| 94,816 | 155 | 20,159 | 5,626 | 3,108 | 29,048 |
| 94,817 | 156 | 19,943 | 5,571 | 3,067 | 28,737 |
| 94,818 | 153 | 20,196 | 5,631 | 3,109 | 29,089 |
| 94,819 | 157 | 20,055 | 5,575 | 3,089 | 28,876 |
| 94,820 | 161 | 19,920 | 5,549 | 3,092 | 28,722 |
| 94,821 | 161 | 20,036 | 5,622 | 3,099 | 28,918 |
| 94,822 | 161 | 19,788 | 5,542 | 3,064 | 28,555 |
| 94,823 | 153 | 19,772 | 5,568 | 3,102 | 28,595 |
| 94,824 | 154 | 19,870 | 5,624 | 3,108 | 28,756 |
| 94,825 | 153 | 19,723 | 5,617 | 3,111 | 28,604 |
| 94,826 | 152 | 19,671 | 5,624 | 3,129 | 28,576 |
| 94,827 | 150 | 19,550 | 5,596 | 3,099 | 28,395 |
| 94,828 | 149 | 19,512 | 5,577 | 3,107 | 28,345 |
| 94,829 | 150 | 19,335 | 5,526 | 3,072 | 28,083 |
| 94,830 | 151 | 19,454 | 5,562 | 3,088 | 28,255 |
| 94,831 | 148 | 19,406 | 5,582 | 3,091 | 28,227 |
| 94,832 | 141 | 19,373 | 5,601 | 3,087 | 28,202 |
| 94,833 | 142 | 19,339 | 5,606 | 3,083 | 28,170 |
| 94,834 | 148 | 19,352 | 5,594 | 3,066 | 28,160 |
| 94,835 | 151 | 19,302 | 5,616 | 3,060 | 28,129 |
| 94,836 | 148 | 19,218 | 5,612 | 3,027 | 28,005 |
| 94,837 | 143 | 19,315 | 5,668 | 3,053 | 28,179 |
| 94,838 | 143 | 19,275 | 5,672 | 3,047 | 28,137 |
| 94,839 | 141 | 19,337 | 5,721 | 3,065 | 28,264 |

|        |     |        |       |       |        |
|--------|-----|--------|-------|-------|--------|
| 94,840 | 138 | 19,320 | 5,723 | 3,087 | 28,268 |
| 94,841 | 139 | 19,420 | 5,790 | 3,114 | 28,463 |
| 94,842 | 134 | 19,394 | 5,810 | 3,110 | 28,448 |
| 94,843 | 130 | 19,276 | 5,781 | 3,090 | 28,277 |
| 94,844 | 124 | 19,658 | 5,897 | 3,165 | 28,844 |
| 94,845 | 121 | 19,724 | 5,874 | 3,170 | 28,889 |
| 94,846 | 116 | 19,685 | 5,920 | 3,194 | 28,915 |
| 94,847 | 117 | 19,792 | 5,977 | 3,236 | 29,122 |
| 94,848 | 114 | 19,626 | 5,927 | 3,227 | 28,894 |
| 94,849 | 114 | 19,465 | 5,852 | 3,196 | 28,627 |
| 94,850 | 114 | 19,624 | 5,890 | 3,235 | 28,863 |
| 94,851 | 107 | 19,579 | 5,886 | 3,231 | 28,803 |
| 94,852 | 108 | 19,394 | 5,843 | 3,227 | 28,572 |
| 94,853 | 108 | 19,312 | 5,836 | 3,224 | 28,480 |
| 94,854 | 112 | 19,307 | 5,815 | 3,267 | 28,501 |
| 94,855 | 113 | 19,384 | 5,853 | 3,298 | 28,648 |
| 94,856 | 110 | 19,402 | 5,866 | 3,329 | 28,707 |
| 94,857 | 108 | 19,388 | 5,891 | 3,347 | 28,734 |
| 94,858 | 105 | 19,372 | 5,916 | 3,347 | 28,740 |
| 94,859 | 105 | 19,210 | 5,904 | 3,362 | 28,581 |
| 94,860 | 104 | 19,239 | 5,948 | 3,380 | 28,671 |
| 94,861 | 104 | 19,083 | 5,938 | 3,366 | 28,491 |
| 94,862 | 103 | 19,099 | 5,937 | 3,388 | 28,527 |
| 94,863 | 100 | 18,937 | 5,904 | 3,389 | 28,330 |
| 94,864 | 100 | 18,896 | 5,888 | 3,383 | 28,267 |
| 94,865 | 98  | 18,731 | 5,836 | 3,342 | 28,007 |
| 94,866 | 98  | 18,790 | 5,842 | 3,340 | 28,070 |
| 94,867 | 92  | 18,958 | 5,853 | 3,367 | 28,270 |
| 94,868 | 88  | 18,915 | 5,847 | 3,366 | 28,216 |
| 94,869 | 70  | 18,574 | 5,757 | 3,295 | 27,696 |
| 94,870 | 71  | 18,613 | 5,775 | 3,296 | 27,755 |
| 94,871 | 72  | 18,775 | 5,826 | 3,330 | 28,003 |

|        |    |        |       |       |        |
|--------|----|--------|-------|-------|--------|
| 94,872 | 70 | 18,753 | 5,804 | 3,327 | 27,954 |
| 94,873 | 68 | 18,660 | 5,764 | 3,303 | 27,795 |
| 94,874 | 66 | 18,536 | 5,707 | 3,256 | 27,565 |
| 94,875 | 67 | 18,407 | 5,644 | 3,227 | 27,345 |
| 94,876 | 74 | 18,518 | 5,643 | 3,230 | 27,465 |
| 94,877 | 74 | 18,347 | 5,601 | 3,208 | 27,230 |
| 94,878 | 74 | 18,323 | 5,598 | 3,195 | 27,190 |
| 94,879 | 76 | 18,347 | 5,606 | 3,195 | 27,224 |
| 94,880 | 76 | 18,134 | 5,562 | 3,156 | 26,928 |
| 94,881 | 74 | 18,036 | 5,474 | 3,130 | 26,714 |
| 94,882 | 75 | 17,938 | 5,466 | 3,133 | 26,612 |
| 94,883 | 77 | 17,975 | 5,488 | 3,148 | 26,688 |
| 94,884 | 75 | 17,940 | 5,456 | 3,151 | 26,622 |
| 94,885 | 70 | 17,698 | 5,391 | 3,125 | 26,284 |
| 94,886 | 67 | 17,587 | 5,334 | 3,117 | 26,105 |
| 94,887 | 68 | 17,256 | 5,245 | 3,079 | 25,648 |
| 94,888 | 66 | 17,002 | 5,210 | 3,037 | 25,315 |
| 94,889 | 68 | 17,385 | 5,308 | 3,094 | 25,855 |
| 94,890 | 74 | 17,258 | 5,248 | 3,078 | 25,658 |
| 94,891 | 78 | 17,230 | 5,232 | 3,051 | 25,591 |
| 94,892 | 79 | 17,290 | 5,180 | 3,064 | 25,613 |
| 94,893 | 77 | 17,238 | 5,146 | 3,039 | 25,500 |
| 94,894 | 80 | 16,845 | 5,031 | 2,989 | 24,945 |
| 94,895 | 81 | 16,890 | 5,056 | 2,990 | 25,017 |
| 94,896 | 83 | 16,888 | 5,066 | 2,984 | 25,021 |
| 94,897 | 85 | 16,564 | 4,999 | 2,942 | 24,590 |
| 94,898 | 85 | 16,507 | 4,986 | 2,931 | 24,509 |
| 94,899 | 83 | 16,357 | 4,945 | 2,900 | 24,285 |
| 94,900 | 85 | 16,522 | 5,002 | 2,920 | 24,529 |
| 94,901 | 87 | 16,463 | 4,980 | 2,903 | 24,433 |
| 94,902 | 83 | 16,190 | 4,884 | 2,853 | 24,010 |
| 94,903 | 83 | 16,180 | 4,903 | 2,850 | 24,016 |

|        |     |        |       |       |        |
|--------|-----|--------|-------|-------|--------|
| 94,904 | 81  | 16,198 | 4,961 | 2,869 | 24,109 |
| 94,905 | 79  | 15,963 | 4,891 | 2,813 | 23,746 |
| 94,906 | 79  | 15,954 | 4,880 | 2,798 | 23,711 |
| 94,907 | 81  | 16,223 | 4,950 | 2,816 | 24,070 |
| 94,908 | 88  | 16,349 | 4,985 | 2,810 | 24,232 |
| 94,909 | 92  | 16,280 | 4,941 | 2,792 | 24,105 |
| 94,910 | 91  | 16,355 | 4,939 | 2,767 | 24,152 |
| 94,911 | 94  | 16,184 | 4,860 | 2,745 | 23,883 |
| 94,912 | 94  | 16,412 | 4,918 | 2,772 | 24,196 |
| 94,913 | 93  | 16,410 | 4,927 | 2,781 | 24,211 |
| 94,914 | 93  | 16,328 | 4,898 | 2,755 | 24,074 |
| 94,915 | 92  | 16,350 | 4,921 | 2,786 | 24,149 |
| 94,916 | 92  | 16,211 | 4,881 | 2,779 | 23,963 |
| 94,917 | 97  | 16,504 | 4,977 | 2,836 | 24,414 |
| 94,918 | 100 | 16,420 | 4,981 | 2,824 | 24,325 |
| 94,919 | 100 | 16,310 | 4,964 | 2,806 | 24,180 |
| 94,920 | 118 | 16,797 | 5,135 | 2,907 | 24,957 |
| 94,921 | 117 | 16,657 | 5,104 | 2,886 | 24,764 |
| 94,922 | 121 | 16,987 | 5,169 | 2,924 | 25,201 |
| 94,923 | 117 | 16,264 | 4,894 | 2,793 | 24,068 |
| 94,924 | 117 | 16,303 | 4,897 | 2,783 | 24,100 |
| 94,925 | 120 | 16,270 | 4,890 | 2,791 | 24,071 |
| 94,926 | 120 | 16,270 | 4,899 | 2,781 | 24,070 |
| 94,927 | 119 | 16,286 | 4,926 | 2,774 | 24,105 |
| 94,928 | 120 | 16,298 | 4,928 | 2,776 | 24,122 |
| 94,929 | 122 | 17,088 | 5,180 | 2,917 | 25,307 |
| 94,930 | 122 | 17,119 | 5,187 | 2,918 | 25,346 |
| 94,931 | 121 | 17,286 | 5,270 | 2,966 | 25,643 |
| 94,932 | 127 | 17,084 | 5,235 | 2,916 | 25,362 |
| 94,933 | 126 | 17,069 | 5,243 | 2,919 | 25,357 |
| 94,934 | 125 | 16,952 | 5,207 | 2,887 | 25,171 |
| 94,935 | 126 | 16,723 | 5,185 | 2,865 | 24,899 |

|        |     |        |       |       |        |
|--------|-----|--------|-------|-------|--------|
| 94,936 | 140 | 17,473 | 5,416 | 2,989 | 26,018 |
| 94,937 | 150 | 17,750 | 5,521 | 3,031 | 26,452 |
| 94,938 | 152 | 17,731 | 5,510 | 3,014 | 26,407 |
| 94,939 | 152 | 17,637 | 5,525 | 3,011 | 26,325 |
| 94,940 | 156 | 17,633 | 5,536 | 3,020 | 26,345 |
| 94,941 | 151 | 17,764 | 5,597 | 3,052 | 26,564 |
| 94,942 | 146 | 17,741 | 5,659 | 3,070 | 26,616 |
| 94,943 | 144 | 17,693 | 5,716 | 3,060 | 26,613 |
| 94,944 | 143 | 17,455 | 5,685 | 3,053 | 26,336 |
| 94,945 | 142 | 17,233 | 5,685 | 3,037 | 26,097 |
| 94,946 | 146 | 17,237 | 5,689 | 3,041 | 26,113 |
| 94,947 | 141 | 17,217 | 5,629 | 3,014 | 26,001 |
| 94,948 | 143 | 17,430 | 5,701 | 3,026 | 26,300 |
| 94,949 | 156 | 17,328 | 5,664 | 2,999 | 26,147 |
| 94,950 | 157 | 17,186 | 5,635 | 2,985 | 25,963 |
| 94,951 | 168 | 17,239 | 5,684 | 3,023 | 26,114 |
| 94,952 | 170 | 17,207 | 5,709 | 3,021 | 26,107 |
| 94,953 | 168 | 17,289 | 5,728 | 3,038 | 26,223 |
| 94,954 | 167 | 17,518 | 5,710 | 3,044 | 26,439 |
| 94,955 | 169 | 17,604 | 5,716 | 3,058 | 26,547 |
| 94,956 | 172 | 17,755 | 5,793 | 3,099 | 26,819 |
| 94,957 | 171 | 17,648 | 5,748 | 3,077 | 26,644 |
| 94,958 | 170 | 17,738 | 5,810 | 3,099 | 26,817 |
| 94,959 | 163 | 17,666 | 5,783 | 3,112 | 26,724 |
| 94,960 | 159 | 17,632 | 5,810 | 3,107 | 26,708 |
| 94,961 | 165 | 17,776 | 5,819 | 3,131 | 26,891 |
| 94,962 | 163 | 17,851 | 5,866 | 3,135 | 27,015 |
| 94,963 | 163 | 17,731 | 5,841 | 3,099 | 26,834 |
| 94,964 | 164 | 18,001 | 5,865 | 3,114 | 27,144 |
| 94,965 | 167 | 18,098 | 5,874 | 3,081 | 27,220 |
| 94,966 | 169 | 18,370 | 5,960 | 3,102 | 27,601 |
| 94,967 | 167 | 18,625 | 6,041 | 3,135 | 27,968 |



|        |     |        |       |       |        |
|--------|-----|--------|-------|-------|--------|
| 94,968 | 169 | 18,702 | 6,094 | 3,130 | 28,095 |
| 94,969 | 168 | 18,740 | 6,117 | 3,137 | 28,162 |
| 94,970 | 171 | 18,647 | 6,070 | 3,111 | 27,999 |
| 94,971 | 169 | 18,541 | 6,017 | 3,093 | 27,820 |
| 94,972 | 171 | 18,923 | 6,156 | 3,164 | 28,414 |
| 94,973 | 172 | 18,825 | 6,124 | 3,126 | 28,247 |
| 94,974 | 176 | 18,760 | 6,143 | 3,135 | 28,214 |
| 94,975 | 176 | 18,717 | 6,154 | 3,135 | 28,182 |
| 94,976 | 168 | 18,725 | 6,169 | 3,148 | 28,210 |
| 94,977 | 168 | 18,753 | 6,225 | 3,149 | 28,295 |
| 94,978 | 167 | 18,711 | 6,186 | 3,162 | 28,226 |
| 94,979 | 166 | 18,758 | 6,206 | 3,172 | 28,302 |
| 94,980 | 165 | 18,873 | 6,224 | 3,177 | 28,439 |
| 94,981 | 165 | 18,993 | 6,229 | 3,177 | 28,564 |
| 94,982 | 167 | 19,054 | 6,251 | 3,192 | 28,664 |
| 94,983 | 157 | 18,865 | 6,194 | 3,189 | 28,405 |
| 94,984 | 153 | 19,189 | 6,293 | 3,231 | 28,866 |
| 94,985 | 151 | 19,386 | 6,327 | 3,247 | 29,111 |
| 94,986 | 144 | 19,389 | 6,313 | 3,234 | 29,080 |
| 94,987 | 141 | 19,493 | 6,331 | 3,247 | 29,212 |
| 94,988 | 135 | 19,243 | 6,168 | 3,184 | 28,730 |
| 94,989 | 135 | 19,411 | 6,224 | 3,211 | 28,981 |
| 94,990 | 130 | 19,593 | 6,274 | 3,242 | 29,239 |
| 94,991 | 131 | 19,748 | 6,361 | 3,267 | 29,507 |
| 94,992 | 132 | 19,768 | 6,368 | 3,288 | 29,556 |
| 94,993 | 131 | 19,728 | 6,320 | 3,265 | 29,444 |
| 94,994 | 131 | 19,762 | 6,317 | 3,282 | 29,492 |
| 94,995 | 129 | 19,475 | 6,152 | 3,187 | 28,943 |
| 94,996 | 129 | 19,756 | 6,225 | 3,209 | 29,319 |
| 94,997 | 127 | 20,020 | 6,297 | 3,246 | 29,690 |
| 94,998 | 127 | 19,811 | 6,228 | 3,246 | 29,412 |
| 94,999 | 127 | 19,877 | 6,240 | 3,263 | 29,507 |

|        |     |        |       |       |        |
|--------|-----|--------|-------|-------|--------|
| 95,000 | 119 | 20,021 | 6,304 | 3,274 | 29,718 |
| 95,001 | 115 | 19,812 | 6,209 | 3,236 | 29,372 |
| 95,002 | 111 | 19,784 | 6,241 | 3,235 | 29,371 |
| 95,003 | 113 | 19,933 | 6,280 | 3,266 | 29,592 |
| 95,004 | 113 | 19,634 | 6,224 | 3,234 | 29,205 |
| 95,005 | 119 | 19,785 | 6,255 | 3,258 | 29,417 |
| 95,006 | 119 | 19,760 | 6,230 | 3,252 | 29,361 |
| 95,007 | 117 | 19,723 | 6,176 | 3,237 | 29,253 |
| 95,008 | 119 | 19,803 | 6,189 | 3,256 | 29,367 |
| 95,009 | 121 | 19,729 | 6,180 | 3,250 | 29,280 |
| 95,010 | 122 | 19,765 | 6,198 | 3,259 | 29,344 |
| 95,011 | 123 | 19,851 | 6,200 | 3,278 | 29,452 |
| 95,012 | 119 | 19,760 | 6,192 | 3,264 | 29,335 |
| 95,013 | 121 | 19,487 | 6,056 | 3,206 | 28,870 |
| 95,014 | 122 | 19,595 | 6,085 | 3,216 | 29,018 |
| 95,015 | 121 | 19,464 | 6,060 | 3,218 | 28,863 |
| 95,016 | 119 | 19,398 | 6,031 | 3,226 | 28,774 |
| 95,017 | 120 | 19,530 | 6,088 | 3,255 | 28,993 |
| 95,018 | 112 | 19,068 | 5,901 | 3,175 | 28,256 |
| 95,019 | 112 | 19,258 | 5,938 | 3,207 | 28,515 |
| 95,020 | 106 | 19,461 | 5,978 | 3,227 | 28,772 |
| 95,021 | 100 | 19,387 | 5,930 | 3,234 | 28,651 |
| 95,022 | 99  | 19,338 | 5,919 | 3,211 | 28,567 |
| 95,023 | 95  | 19,018 | 5,864 | 3,181 | 28,158 |
| 95,024 | 90  | 18,975 | 5,855 | 3,176 | 28,096 |
| 95,025 | 92  | 19,187 | 5,903 | 3,202 | 28,384 |
| 95,026 | 93  | 19,085 | 5,850 | 3,163 | 28,191 |
| 95,027 | 93  | 19,211 | 5,883 | 3,177 | 28,364 |
| 95,028 | 99  | 18,986 | 5,836 | 3,156 | 28,077 |
| 95,029 | 98  | 18,730 | 5,808 | 3,139 | 27,775 |
| 95,030 | 99  | 18,832 | 5,842 | 3,158 | 27,931 |
| 95,031 | 103 | 18,700 | 5,804 | 3,146 | 27,753 |

|        |     |        |       |       |        |
|--------|-----|--------|-------|-------|--------|
| 95,032 | 102 | 18,571 | 5,810 | 3,138 | 27,621 |
| 95,033 | 102 | 18,507 | 5,786 | 3,127 | 27,522 |
| 95,034 | 101 | 17,551 | 5,503 | 2,985 | 26,140 |
| 95,035 | 104 | 17,617 | 5,542 | 3,009 | 26,272 |
| 95,036 | 108 | 17,821 | 5,594 | 3,029 | 26,552 |
| 95,037 | 107 | 17,728 | 5,571 | 3,019 | 26,425 |
| 95,038 | 107 | 17,378 | 5,489 | 2,961 | 25,935 |
| 95,039 | 109 | 17,463 | 5,518 | 2,969 | 26,059 |
| 95,040 | 107 | 17,589 | 5,570 | 3,008 | 26,274 |
| 95,041 | 110 | 17,504 | 5,576 | 2,980 | 26,170 |
| 95,042 | 109 | 17,543 | 5,549 | 2,974 | 26,175 |
| 95,043 | 109 | 17,342 | 5,475 | 2,912 | 25,838 |
| 95,044 | 108 | 17,201 | 5,406 | 2,888 | 25,603 |
| 95,045 | 109 | 17,175 | 5,475 | 2,885 | 25,644 |
| 95,046 | 106 | 16,933 | 5,390 | 2,858 | 25,287 |
| 95,047 | 104 | 16,886 | 5,379 | 2,850 | 25,219 |
| 95,048 | 104 | 16,605 | 5,295 | 2,810 | 24,814 |
| 95,049 | 104 | 16,799 | 5,370 | 2,830 | 25,103 |
| 95,050 | 98  | 16,978 | 5,369 | 2,836 | 25,281 |
| 95,051 | 92  | 16,925 | 5,322 | 2,834 | 25,173 |
| 95,052 | 89  | 16,826 | 5,284 | 2,825 | 25,024 |
| 95,053 | 88  | 16,891 | 5,300 | 2,835 | 25,114 |
| 95,054 | 83  | 16,504 | 5,192 | 2,770 | 24,549 |
| 95,055 | 82  | 16,621 | 5,235 | 2,783 | 24,721 |
| 95,056 | 78  | 16,543 | 5,257 | 2,774 | 24,652 |
| 95,057 | 77  | 16,565 | 5,269 | 2,773 | 24,684 |
| 95,058 | 73  | 16,274 | 5,163 | 2,718 | 24,228 |
| 95,059 | 72  | 16,258 | 5,125 | 2,686 | 24,141 |
| 95,060 | 71  | 16,351 | 5,120 | 2,675 | 24,217 |
| 95,061 | 71  | 16,386 | 5,131 | 2,675 | 24,263 |
| 95,062 | 68  | 16,365 | 5,070 | 2,639 | 24,142 |
| 95,063 | 70  | 16,366 | 5,081 | 2,642 | 24,159 |

|        |    |        |       |       |        |
|--------|----|--------|-------|-------|--------|
| 95,064 | 68 | 16,163 | 5,013 | 2,613 | 23,857 |
| 95,065 | 67 | 16,251 | 5,015 | 2,644 | 23,977 |
| 95,066 | 68 | 16,343 | 5,065 | 2,674 | 24,150 |
| 95,067 | 66 | 16,195 | 5,026 | 2,620 | 23,907 |
| 95,068 | 71 | 16,383 | 5,065 | 2,652 | 24,171 |
| 95,069 | 72 | 16,218 | 5,058 | 2,664 | 24,012 |
| 95,070 | 74 | 15,934 | 4,994 | 2,623 | 23,625 |
| 95,071 | 73 | 15,623 | 4,916 | 2,594 | 23,206 |
| 95,072 | 70 | 15,975 | 5,027 | 2,627 | 23,699 |
| 95,073 | 72 | 15,875 | 4,984 | 2,615 | 23,546 |
| 95,074 | 75 | 15,794 | 4,948 | 2,609 | 23,426 |
| 95,075 | 74 | 15,765 | 4,969 | 2,609 | 23,417 |
| 95,076 | 71 | 15,616 | 4,938 | 2,582 | 23,207 |
| 95,077 | 73 | 15,775 | 4,976 | 2,600 | 23,424 |
| 95,078 | 71 | 15,703 | 4,915 | 2,575 | 23,264 |
| 95,079 | 71 | 15,778 | 4,937 | 2,581 | 23,367 |
| 95,080 | 70 | 15,922 | 4,970 | 2,589 | 23,551 |
| 95,081 | 72 | 16,122 | 5,032 | 2,638 | 23,864 |
| 95,082 | 72 | 16,056 | 4,996 | 2,624 | 23,748 |
| 95,083 | 72 | 16,057 | 4,996 | 2,621 | 23,746 |
| 95,084 | 77 | 16,344 | 5,056 | 2,659 | 24,136 |
| 95,085 | 77 | 16,549 | 5,107 | 2,712 | 24,445 |
| 95,086 | 74 | 16,891 | 5,185 | 2,770 | 24,920 |
| 95,087 | 76 | 17,022 | 5,247 | 2,801 | 25,146 |
| 95,088 | 76 | 17,238 | 5,273 | 2,830 | 25,417 |
| 95,089 | 79 | 17,435 | 5,314 | 2,841 | 25,669 |
| 95,090 | 77 | 17,666 | 5,331 | 2,862 | 25,936 |
| 95,091 | 77 | 17,846 | 5,361 | 2,860 | 26,144 |
| 95,092 | 79 | 18,068 | 5,410 | 2,911 | 26,468 |
| 95,093 | 78 | 17,890 | 5,361 | 2,895 | 26,224 |
| 95,094 | 81 | 18,175 | 5,409 | 2,916 | 26,581 |
| 95,095 | 81 | 18,008 | 5,338 | 2,884 | 26,311 |

|        |     |        |       |       |        |
|--------|-----|--------|-------|-------|--------|
| 95,096 | 81  | 18,267 | 5,408 | 2,933 | 26,689 |
| 95,097 | 81  | 18,281 | 5,445 | 2,944 | 26,751 |
| 95,098 | 82  | 18,145 | 5,382 | 2,918 | 26,527 |
| 95,099 | 85  | 18,371 | 5,460 | 2,951 | 26,867 |
| 95,100 | 94  | 18,400 | 5,443 | 2,936 | 26,873 |
| 95,101 | 95  | 18,275 | 5,473 | 2,944 | 26,787 |
| 95,102 | 95  | 18,400 | 5,514 | 2,936 | 26,945 |
| 95,103 | 105 | 18,510 | 5,559 | 2,956 | 27,130 |
| 95,104 | 111 | 18,745 | 5,639 | 2,995 | 27,490 |
| 95,105 | 112 | 18,704 | 5,602 | 3,003 | 27,421 |
| 95,106 | 115 | 18,727 | 5,609 | 2,998 | 27,449 |
| 95,107 | 115 | 18,647 | 5,564 | 2,994 | 27,320 |
| 95,108 | 118 | 18,602 | 5,570 | 2,984 | 27,274 |
| 95,109 | 118 | 18,329 | 5,525 | 2,960 | 26,932 |
| 95,110 | 118 | 18,886 | 5,773 | 3,057 | 27,834 |
| 95,111 | 121 | 18,890 | 5,757 | 3,066 | 27,834 |
| 95,112 | 127 | 18,726 | 5,706 | 3,053 | 27,612 |
| 95,113 | 126 | 18,526 | 5,695 | 3,054 | 27,401 |
| 95,114 | 125 | 18,725 | 5,786 | 3,072 | 27,708 |
| 95,115 | 131 | 18,942 | 5,921 | 3,100 | 28,094 |
| 95,116 | 137 | 18,944 | 5,905 | 3,069 | 28,055 |
| 95,117 | 138 | 18,833 | 5,909 | 3,069 | 27,949 |
| 95,118 | 142 | 19,091 | 5,956 | 3,127 | 28,316 |
| 95,119 | 143 | 19,170 | 5,996 | 3,152 | 28,461 |
| 95,120 | 143 | 19,259 | 6,031 | 3,176 | 28,609 |
| 95,121 | 150 | 19,445 | 6,115 | 3,196 | 28,906 |
| 95,122 | 154 | 19,589 | 6,188 | 3,213 | 29,144 |
| 95,123 | 151 | 19,428 | 6,142 | 3,190 | 28,911 |
| 95,124 | 156 | 19,581 | 6,193 | 3,211 | 29,141 |
| 95,125 | 158 | 19,760 | 6,285 | 3,258 | 29,461 |
| 95,126 | 164 | 19,988 | 6,354 | 3,284 | 29,790 |
| 95,127 | 165 | 19,893 | 6,337 | 3,272 | 29,667 |

|        |     |        |       |       |        |
|--------|-----|--------|-------|-------|--------|
| 95,128 | 165 | 19,909 | 6,335 | 3,278 | 29,687 |
| 95,129 | 165 | 20,173 | 6,419 | 3,305 | 30,062 |
| 95,130 | 170 | 20,073 | 6,412 | 3,290 | 29,945 |
| 95,131 | 171 | 20,070 | 6,400 | 3,296 | 29,937 |
| 95,132 | 172 | 20,340 | 6,503 | 3,317 | 30,332 |
| 95,133 | 171 | 20,171 | 6,465 | 3,295 | 30,102 |
| 95,134 | 170 | 19,991 | 6,425 | 3,294 | 29,880 |
| 95,135 | 165 | 20,060 | 6,471 | 3,312 | 30,008 |
| 95,136 | 167 | 19,896 | 6,462 | 3,283 | 29,808 |
| 95,137 | 175 | 19,868 | 6,480 | 3,285 | 29,808 |
| 95,138 | 182 | 19,995 | 6,488 | 3,285 | 29,950 |
| 95,139 | 184 | 20,045 | 6,522 | 3,284 | 30,035 |
| 95,140 | 193 | 19,898 | 6,533 | 3,276 | 29,900 |
| 95,141 | 193 | 19,930 | 6,543 | 3,277 | 29,943 |
| 95,142 | 199 | 19,963 | 6,530 | 3,309 | 30,001 |
| 95,143 | 202 | 19,857 | 6,507 | 3,291 | 29,857 |
| 95,144 | 202 | 19,877 | 6,528 | 3,287 | 29,894 |
| 95,145 | 201 | 20,003 | 6,577 | 3,306 | 30,087 |
| 95,146 | 202 | 20,217 | 6,660 | 3,342 | 30,421 |
| 95,147 | 206 | 20,063 | 6,605 | 3,311 | 30,185 |
| 95,148 | 206 | 20,091 | 6,608 | 3,291 | 30,196 |
| 95,149 | 207 | 19,948 | 6,565 | 3,284 | 30,004 |
| 95,150 | 204 | 19,805 | 6,531 | 3,275 | 29,815 |
| 95,151 | 199 | 20,210 | 6,749 | 3,373 | 30,531 |
| 95,152 | 205 | 20,354 | 6,813 | 3,374 | 30,746 |
| 95,153 | 213 | 20,333 | 6,809 | 3,373 | 30,728 |
| 95,154 | 207 | 20,320 | 6,788 | 3,378 | 30,693 |
| 95,155 | 202 | 20,273 | 6,754 | 3,365 | 30,594 |
| 95,156 | 202 | 20,342 | 6,800 | 3,342 | 30,686 |
| 95,157 | 207 | 20,479 | 6,831 | 3,369 | 30,886 |
| 95,158 | 208 | 20,514 | 6,815 | 3,377 | 30,914 |
| 95,159 | 207 | 20,539 | 6,834 | 3,384 | 30,964 |

|        |     |        |       |       |        |
|--------|-----|--------|-------|-------|--------|
| 95,160 | 209 | 20,548 | 6,843 | 3,383 | 30,983 |
| 95,161 | 209 | 20,574 | 6,841 | 3,389 | 31,013 |
| 95,162 | 206 | 20,617 | 6,869 | 3,401 | 31,093 |
| 95,163 | 203 | 20,633 | 6,874 | 3,414 | 31,124 |
| 95,164 | 203 | 20,653 | 6,878 | 3,418 | 31,152 |
| 95,165 | 202 | 20,656 | 6,842 | 3,406 | 31,106 |
| 95,166 | 202 | 20,716 | 6,818 | 3,404 | 31,140 |
| 95,167 | 200 | 20,749 | 6,834 | 3,418 | 31,201 |
| 95,168 | 197 | 20,928 | 6,878 | 3,420 | 31,423 |
| 95,169 | 190 | 21,075 | 6,900 | 3,425 | 31,590 |
| 95,170 | 189 | 20,734 | 6,745 | 3,346 | 31,014 |
| 95,171 | 191 | 20,979 | 6,795 | 3,366 | 31,331 |
| 95,172 | 189 | 21,239 | 6,837 | 3,406 | 31,671 |
| 95,173 | 193 | 21,323 | 6,855 | 3,438 | 31,809 |
| 95,174 | 183 | 21,274 | 6,847 | 3,434 | 31,738 |
| 95,175 | 181 | 21,143 | 6,817 | 3,428 | 31,569 |
| 95,176 | 187 | 21,181 | 6,830 | 3,436 | 31,634 |
| 95,177 | 182 | 21,088 | 6,776 | 3,422 | 31,468 |
| 95,178 | 185 | 21,166 | 6,783 | 3,432 | 31,566 |
| 95,179 | 186 | 21,057 | 6,741 | 3,411 | 31,395 |
| 95,180 | 184 | 20,927 | 6,696 | 3,401 | 31,208 |
| 95,181 | 184 | 20,855 | 6,623 | 3,384 | 31,046 |
| 95,182 | 184 | 20,855 | 6,605 | 3,386 | 31,030 |
| 95,183 | 183 | 20,829 | 6,611 | 3,402 | 31,025 |
| 95,184 | 181 | 20,601 | 6,521 | 3,338 | 30,641 |
| 95,185 | 180 | 20,594 | 6,502 | 3,340 | 30,616 |
| 95,186 | 181 | 20,574 | 6,461 | 3,301 | 30,517 |
| 95,187 | 178 | 20,434 | 6,412 | 3,273 | 30,297 |
| 95,188 | 177 | 20,450 | 6,406 | 3,258 | 30,291 |
| 95,189 | 165 | 20,375 | 6,359 | 3,249 | 30,148 |
| 95,190 | 165 | 20,122 | 6,275 | 3,210 | 29,772 |
| 95,191 | 154 | 19,644 | 6,124 | 3,157 | 29,079 |

|        |     |        |       |       |        |
|--------|-----|--------|-------|-------|--------|
| 95,192 | 154 | 19,734 | 6,134 | 3,168 | 29,190 |
| 95,193 | 142 | 19,486 | 6,072 | 3,113 | 28,813 |
| 95,194 | 141 | 19,412 | 6,023 | 3,089 | 28,665 |
| 95,195 | 140 | 19,430 | 6,009 | 3,086 | 28,665 |
| 95,196 | 139 | 18,934 | 5,824 | 3,021 | 27,918 |
| 95,197 | 141 | 19,122 | 5,863 | 3,059 | 28,185 |
| 95,198 | 140 | 19,242 | 5,908 | 3,110 | 28,400 |
| 95,199 | 135 | 19,066 | 5,838 | 3,082 | 28,121 |
| 95,200 | 135 | 19,119 | 5,812 | 3,061 | 28,127 |
| 95,201 | 139 | 19,269 | 5,852 | 3,080 | 28,340 |
| 95,202 | 137 | 18,948 | 5,695 | 3,037 | 27,817 |
| 95,203 | 134 | 18,930 | 5,696 | 3,050 | 27,810 |
| 95,204 | 126 | 18,863 | 5,689 | 3,064 | 27,742 |
| 95,205 | 122 | 18,775 | 5,680 | 3,045 | 27,622 |
| 95,206 | 121 | 18,574 | 5,654 | 3,030 | 27,379 |
| 95,207 | 122 | 18,685 | 5,694 | 3,077 | 27,578 |
| 95,208 | 121 | 18,913 | 5,712 | 3,082 | 27,828 |
| 95,209 | 122 | 18,764 | 5,684 | 3,045 | 27,615 |
| 95,210 | 121 | 18,994 | 5,699 | 3,057 | 27,871 |
| 95,211 | 120 | 19,123 | 5,716 | 3,110 | 28,069 |
| 95,212 | 126 | 19,378 | 5,791 | 3,135 | 28,430 |
| 95,213 | 125 | 19,269 | 5,762 | 3,142 | 28,298 |
| 95,214 | 131 | 19,326 | 5,771 | 3,135 | 28,363 |
| 95,215 | 131 | 19,087 | 5,717 | 3,114 | 28,049 |
| 95,216 | 133 | 19,269 | 5,874 | 3,206 | 28,482 |
| 95,217 | 126 | 18,915 | 5,773 | 3,159 | 27,973 |
| 95,218 | 130 | 18,742 | 5,741 | 3,142 | 27,755 |
| 95,219 | 132 | 18,872 | 5,756 | 3,156 | 27,916 |
| 95,220 | 130 | 18,573 | 5,696 | 3,113 | 27,512 |
| 95,221 | 123 | 18,066 | 5,628 | 3,047 | 26,864 |
| 95,222 | 126 | 18,250 | 5,672 | 3,079 | 27,127 |
| 95,223 | 121 | 18,391 | 5,743 | 3,115 | 27,370 |



|        |     |        |       |       |        |
|--------|-----|--------|-------|-------|--------|
| 95,224 | 119 | 18,223 | 5,673 | 3,064 | 27,079 |
| 95,225 | 119 | 17,977 | 5,593 | 3,026 | 26,715 |
| 95,226 | 120 | 18,156 | 5,591 | 3,033 | 26,900 |
| 95,227 | 123 | 18,179 | 5,576 | 3,017 | 26,895 |
| 95,228 | 120 | 17,932 | 5,529 | 2,976 | 26,557 |
| 95,229 | 129 | 18,124 | 5,598 | 3,003 | 26,854 |
| 95,230 | 125 | 17,822 | 5,532 | 2,976 | 26,455 |
| 95,231 | 130 | 18,005 | 5,593 | 3,008 | 26,736 |
| 95,232 | 124 | 17,875 | 5,592 | 3,002 | 26,593 |
| 95,233 | 122 | 17,846 | 5,587 | 2,997 | 26,552 |
| 95,234 | 123 | 17,934 | 5,627 | 3,011 | 26,695 |
| 95,235 | 124 | 17,841 | 5,597 | 3,007 | 26,569 |
| 95,236 | 123 | 17,863 | 5,596 | 3,004 | 26,586 |
| 95,237 | 120 | 17,818 | 5,591 | 3,001 | 26,530 |
| 95,238 | 118 | 17,818 | 5,577 | 3,004 | 26,517 |
| 95,239 | 123 | 17,936 | 5,615 | 3,019 | 26,693 |
| 95,240 | 123 | 17,709 | 5,567 | 2,983 | 26,382 |
| 95,241 | 120 | 17,525 | 5,534 | 2,970 | 26,149 |
| 95,242 | 121 | 17,931 | 5,632 | 3,024 | 26,708 |
| 95,243 | 123 | 17,744 | 5,577 | 2,988 | 26,432 |
| 95,244 | 123 | 17,532 | 5,526 | 2,957 | 26,138 |
| 95,245 | 122 | 17,569 | 5,511 | 2,969 | 26,171 |
| 95,246 | 122 | 17,386 | 5,465 | 2,945 | 25,918 |
| 95,247 | 117 | 17,976 | 5,722 | 3,060 | 26,875 |
| 95,248 | 115 | 17,951 | 5,730 | 3,044 | 26,840 |
| 95,249 | 114 | 18,028 | 5,694 | 3,044 | 26,880 |
| 95,250 | 117 | 17,988 | 5,721 | 3,063 | 26,889 |
| 95,251 | 115 | 17,979 | 5,713 | 3,054 | 26,861 |
| 95,252 | 112 | 18,010 | 5,733 | 3,071 | 26,926 |
| 95,253 | 116 | 18,367 | 5,812 | 3,088 | 27,383 |
| 95,254 | 116 | 18,429 | 5,831 | 3,097 | 27,473 |
| 95,255 | 115 | 18,308 | 5,784 | 3,081 | 27,288 |

|        |     |        |       |       |        |
|--------|-----|--------|-------|-------|--------|
| 95,256 | 115 | 18,423 | 5,795 | 3,069 | 27,402 |
| 95,257 | 117 | 18,716 | 5,862 | 3,092 | 27,787 |
| 95,258 | 122 | 18,808 | 5,851 | 3,090 | 27,871 |
| 95,259 | 114 | 18,408 | 5,712 | 3,042 | 27,276 |
| 95,260 | 116 | 18,355 | 5,703 | 3,050 | 27,224 |
| 95,261 | 123 | 18,386 | 5,730 | 3,063 | 27,302 |
| 95,262 | 123 | 18,290 | 5,685 | 3,006 | 27,104 |
| 95,263 | 118 | 18,310 | 5,664 | 3,006 | 27,098 |
| 95,264 | 116 | 18,171 | 5,650 | 2,989 | 26,926 |
| 95,265 | 110 | 18,024 | 5,566 | 2,954 | 26,654 |
| 95,266 | 110 | 18,208 | 5,530 | 2,951 | 26,799 |
| 95,267 | 111 | 18,300 | 5,516 | 2,947 | 26,874 |
| 95,268 | 113 | 18,078 | 5,446 | 2,913 | 26,550 |
| 95,269 | 132 | 18,368 | 5,490 | 2,963 | 26,953 |
| 95,270 | 134 | 18,401 | 5,483 | 2,976 | 26,994 |
| 95,271 | 143 | 18,407 | 5,448 | 2,969 | 26,967 |
| 95,272 | 143 | 18,357 | 5,443 | 2,954 | 26,897 |
| 95,273 | 143 | 18,405 | 5,437 | 2,937 | 26,922 |
| 95,274 | 148 | 18,649 | 5,515 | 2,963 | 27,275 |
| 95,275 | 141 | 18,405 | 5,402 | 2,910 | 26,858 |
| 95,276 | 140 | 18,345 | 5,388 | 2,911 | 26,784 |
| 95,277 | 134 | 18,185 | 5,355 | 2,880 | 26,554 |
| 95,278 | 132 | 18,137 | 5,326 | 2,861 | 26,456 |
| 95,279 | 142 | 19,067 | 5,556 | 2,966 | 27,731 |
| 95,280 | 137 | 19,163 | 5,571 | 2,985 | 27,856 |
| 95,281 | 141 | 19,272 | 5,586 | 2,975 | 27,974 |
| 95,282 | 140 | 19,174 | 5,498 | 2,928 | 27,740 |
| 95,283 | 143 | 19,371 | 5,537 | 2,941 | 27,992 |
| 95,284 | 141 | 19,279 | 5,448 | 2,913 | 27,781 |
| 95,285 | 144 | 19,493 | 5,499 | 2,934 | 28,070 |
| 95,286 | 144 | 19,490 | 5,506 | 2,949 | 28,089 |
| 95,287 | 144 | 19,424 | 5,502 | 2,955 | 28,025 |

|        |     |        |       |       |        |
|--------|-----|--------|-------|-------|--------|
| 95,288 | 144 | 19,242 | 5,479 | 2,943 | 27,808 |
| 95,289 | 145 | 19,098 | 5,469 | 2,925 | 27,637 |
| 95,290 | 145 | 19,549 | 5,621 | 2,982 | 28,297 |
| 95,291 | 141 | 19,526 | 5,640 | 3,011 | 28,318 |
| 95,292 | 143 | 19,489 | 5,666 | 3,001 | 28,299 |
| 95,293 | 146 | 19,541 | 5,679 | 3,006 | 28,372 |
| 95,294 | 144 | 19,361 | 5,634 | 2,964 | 28,103 |
| 95,295 | 144 | 19,282 | 5,580 | 2,970 | 27,976 |
| 95,296 | 149 | 19,568 | 5,644 | 3,013 | 28,374 |
| 95,297 | 148 | 19,667 | 5,675 | 3,026 | 28,516 |
| 95,298 | 149 | 19,585 | 5,633 | 3,016 | 28,383 |
| 95,299 | 152 | 19,779 | 5,646 | 3,021 | 28,598 |
| 95,300 | 160 | 19,826 | 5,689 | 3,003 | 28,678 |
| 95,301 | 161 | 19,918 | 5,651 | 2,979 | 28,709 |
| 95,302 | 165 | 19,732 | 5,593 | 2,943 | 28,433 |
| 95,303 | 165 | 19,769 | 5,586 | 2,936 | 28,456 |
| 95,304 | 179 | 19,726 | 5,576 | 2,955 | 28,436 |
| 95,305 | 179 | 19,670 | 5,554 | 2,920 | 28,323 |
| 95,306 | 184 | 19,677 | 5,575 | 2,932 | 28,368 |
| 95,307 | 186 | 19,767 | 5,631 | 2,942 | 28,526 |
| 95,308 | 190 | 19,696 | 5,589 | 2,956 | 28,431 |
| 95,309 | 182 | 19,513 | 5,519 | 2,928 | 28,142 |
| 95,310 | 182 | 19,530 | 5,549 | 2,909 | 28,170 |
| 95,311 | 183 | 19,506 | 5,571 | 2,911 | 28,171 |
| 95,312 | 178 | 19,458 | 5,570 | 2,908 | 28,114 |
| 95,313 | 178 | 19,378 | 5,568 | 2,923 | 28,047 |
| 95,314 | 177 | 19,233 | 5,515 | 2,886 | 27,811 |
| 95,315 | 178 | 19,046 | 5,487 | 2,867 | 27,578 |
| 95,316 | 178 | 19,047 | 5,501 | 2,851 | 27,577 |
| 95,317 | 176 | 19,059 | 5,565 | 2,882 | 27,682 |
| 95,318 | 163 | 19,005 | 5,571 | 2,872 | 27,611 |
| 95,319 | 149 | 18,754 | 5,548 | 2,850 | 27,301 |

|        |     |        |       |       |        |
|--------|-----|--------|-------|-------|--------|
| 95,320 | 149 | 18,816 | 5,576 | 2,846 | 27,387 |
| 95,321 | 142 | 18,863 | 5,610 | 2,840 | 27,455 |
| 95,322 | 142 | 18,555 | 5,537 | 2,836 | 27,070 |
| 95,323 | 143 | 18,757 | 5,566 | 2,851 | 27,317 |
| 95,324 | 142 | 18,928 | 5,596 | 2,868 | 27,534 |
| 95,325 | 140 | 18,899 | 5,564 | 2,862 | 27,465 |
| 95,326 | 135 | 18,792 | 5,552 | 2,872 | 27,351 |
| 95,327 | 133 | 18,675 | 5,512 | 2,860 | 27,180 |
| 95,328 | 133 | 18,624 | 5,470 | 2,874 | 27,101 |
| 95,329 | 132 | 18,613 | 5,530 | 2,881 | 27,156 |
| 95,330 | 139 | 18,469 | 5,500 | 2,877 | 26,985 |
| 95,331 | 135 | 18,103 | 5,407 | 2,812 | 26,457 |
| 95,332 | 137 | 18,093 | 5,378 | 2,821 | 26,429 |
| 95,333 | 134 | 18,058 | 5,405 | 2,839 | 26,436 |
| 95,334 | 136 | 17,890 | 5,354 | 2,842 | 26,222 |
| 95,335 | 136 | 17,638 | 5,308 | 2,812 | 25,894 |
| 95,336 | 142 | 18,166 | 5,456 | 2,884 | 26,648 |
| 95,337 | 142 | 18,068 | 5,412 | 2,852 | 26,474 |
| 95,338 | 142 | 18,157 | 5,402 | 2,876 | 26,577 |
| 95,339 | 140 | 18,094 | 5,339 | 2,854 | 26,427 |
| 95,340 | 137 | 18,008 | 5,284 | 2,844 | 26,273 |
| 95,341 | 138 | 18,514 | 5,423 | 2,909 | 26,984 |
| 95,342 | 136 | 18,433 | 5,365 | 2,860 | 26,794 |
| 95,343 | 136 | 18,441 | 5,352 | 2,857 | 26,786 |
| 95,344 | 133 | 18,647 | 5,450 | 2,908 | 27,138 |
| 95,345 | 132 | 18,594 | 5,453 | 2,922 | 27,101 |
| 95,346 | 129 | 18,468 | 5,414 | 2,892 | 26,903 |
| 95,347 | 134 | 18,420 | 5,394 | 2,893 | 26,841 |
| 95,348 | 139 | 18,639 | 5,456 | 2,929 | 27,163 |
| 95,349 | 139 | 18,365 | 5,425 | 2,895 | 26,824 |
| 95,350 | 136 | 18,108 | 5,385 | 2,883 | 26,512 |
| 95,351 | 134 | 18,254 | 5,456 | 2,928 | 26,772 |

|        |     |        |       |       |        |
|--------|-----|--------|-------|-------|--------|
| 95,352 | 134 | 18,123 | 5,461 | 2,929 | 26,647 |
| 95,353 | 133 | 17,880 | 5,374 | 2,899 | 26,286 |
| 95,354 | 133 | 17,664 | 5,318 | 2,872 | 25,987 |
| 95,355 | 119 | 17,823 | 5,405 | 2,939 | 26,286 |
| 95,356 | 115 | 17,682 | 5,346 | 2,927 | 26,070 |
| 95,357 | 116 | 17,868 | 5,416 | 2,952 | 26,352 |
| 95,358 | 109 | 17,794 | 5,392 | 2,971 | 26,266 |
| 95,359 | 109 | 17,737 | 5,390 | 2,967 | 26,203 |
| 95,360 | 109 | 17,838 | 5,443 | 2,998 | 26,388 |
| 95,361 | 108 | 17,948 | 5,459 | 3,030 | 26,545 |
| 95,362 | 105 | 18,073 | 5,458 | 3,034 | 26,670 |
| 95,363 | 105 | 18,176 | 5,445 | 3,036 | 26,762 |
| 95,364 | 109 | 18,285 | 5,481 | 3,035 | 26,910 |
| 95,365 | 109 | 18,222 | 5,469 | 3,047 | 26,847 |
| 95,366 | 110 | 18,614 | 5,544 | 3,100 | 27,368 |
| 95,367 | 114 | 18,463 | 5,491 | 3,060 | 27,128 |
| 95,368 | 115 | 18,374 | 5,464 | 3,046 | 26,999 |
| 95,369 | 115 | 18,442 | 5,490 | 3,068 | 27,115 |
| 95,370 | 120 | 18,501 | 5,441 | 3,056 | 27,118 |
| 95,371 | 119 | 18,659 | 5,484 | 3,097 | 27,359 |
| 95,372 | 119 | 18,423 | 5,414 | 3,056 | 27,012 |
| 95,373 | 118 | 18,174 | 5,342 | 3,015 | 26,649 |
| 95,374 | 115 | 18,211 | 5,397 | 3,047 | 26,770 |
| 95,375 | 118 | 18,405 | 5,435 | 3,084 | 27,042 |
| 95,376 | 118 | 18,200 | 5,384 | 3,047 | 26,749 |
| 95,377 | 121 | 18,450 | 5,453 | 3,088 | 27,112 |
| 95,378 | 120 | 18,170 | 5,377 | 3,055 | 26,722 |
| 95,379 | 124 | 18,414 | 5,397 | 3,069 | 27,004 |
| 95,380 | 121 | 18,701 | 5,444 | 3,133 | 27,399 |
| 95,381 | 116 | 18,526 | 5,402 | 3,109 | 27,153 |
| 95,382 | 114 | 18,445 | 5,373 | 3,116 | 27,048 |
| 95,383 | 119 | 18,532 | 5,440 | 3,156 | 27,247 |

|        |     |        |       |       |        |
|--------|-----|--------|-------|-------|--------|
| 95,384 | 118 | 18,555 | 5,433 | 3,157 | 27,263 |
| 95,385 | 116 | 18,754 | 5,485 | 3,191 | 27,546 |
| 95,386 | 122 | 18,844 | 5,499 | 3,193 | 27,658 |
| 95,387 | 118 | 18,480 | 5,403 | 3,138 | 27,139 |
| 95,388 | 126 | 18,548 | 5,457 | 3,162 | 27,293 |
| 95,389 | 123 | 18,531 | 5,464 | 3,166 | 27,284 |
| 95,390 | 128 | 18,529 | 5,512 | 3,174 | 27,343 |
| 95,391 | 128 | 18,447 | 5,512 | 3,160 | 27,247 |
| 95,392 | 129 | 18,170 | 5,452 | 3,139 | 26,890 |
| 95,393 | 130 | 18,346 | 5,503 | 3,153 | 27,132 |
| 95,394 | 133 | 18,504 | 5,497 | 3,172 | 27,306 |
| 95,395 | 134 | 18,310 | 5,445 | 3,138 | 27,027 |
| 95,396 | 136 | 18,224 | 5,458 | 3,105 | 26,923 |
| 95,397 | 136 | 18,237 | 5,452 | 3,083 | 26,908 |
| 95,398 | 132 | 18,150 | 5,429 | 3,083 | 26,794 |
| 95,399 | 129 | 18,203 | 5,408 | 3,093 | 26,833 |
| 95,400 | 127 | 18,244 | 5,399 | 3,086 | 26,856 |
| 95,401 | 125 | 18,233 | 5,355 | 3,068 | 26,781 |
| 95,402 | 124 | 18,294 | 5,317 | 3,068 | 26,803 |
| 95,403 | 119 | 18,189 | 5,325 | 3,039 | 26,672 |
| 95,404 | 119 | 18,329 | 5,315 | 3,040 | 26,803 |
| 95,405 | 122 | 18,535 | 5,325 | 3,046 | 27,028 |
| 95,406 | 124 | 18,649 | 5,332 | 3,068 | 27,173 |
| 95,407 | 124 | 18,860 | 5,409 | 3,112 | 27,505 |
| 95,408 | 123 | 18,757 | 5,396 | 3,134 | 27,410 |
| 95,409 | 124 | 18,687 | 5,402 | 3,106 | 27,319 |
| 95,410 | 123 | 18,464 | 5,334 | 3,050 | 26,971 |
| 95,411 | 123 | 18,743 | 5,387 | 3,094 | 27,347 |
| 95,412 | 124 | 18,575 | 5,374 | 3,069 | 27,142 |
| 95,413 | 126 | 18,337 | 5,334 | 3,037 | 26,834 |
| 95,414 | 126 | 18,180 | 5,298 | 3,020 | 26,624 |
| 95,415 | 126 | 18,299 | 5,317 | 3,053 | 26,795 |

|        |     |        |       |       |        |
|--------|-----|--------|-------|-------|--------|
| 95,416 | 135 | 18,336 | 5,369 | 3,051 | 26,891 |
| 95,417 | 135 | 18,262 | 5,389 | 3,056 | 26,842 |
| 95,418 | 137 | 18,169 | 5,309 | 3,037 | 26,652 |
| 95,419 | 137 | 18,211 | 5,318 | 3,031 | 26,697 |
| 95,420 | 137 | 18,314 | 5,313 | 3,025 | 26,789 |
| 95,421 | 137 | 18,360 | 5,332 | 3,058 | 26,887 |
| 95,422 | 135 | 18,449 | 5,341 | 3,078 | 27,003 |
| 95,423 | 139 | 18,563 | 5,346 | 3,065 | 27,113 |
| 95,424 | 142 | 18,568 | 5,315 | 3,052 | 27,077 |
| 95,425 | 149 | 18,775 | 5,377 | 3,096 | 27,397 |
| 95,426 | 156 | 18,872 | 5,411 | 3,103 | 27,542 |
| 95,427 | 150 | 18,731 | 5,391 | 3,082 | 27,354 |
| 95,428 | 148 | 18,791 | 5,399 | 3,083 | 27,421 |
| 95,429 | 146 | 18,667 | 5,356 | 3,058 | 27,227 |
| 95,430 | 147 | 19,047 | 5,496 | 3,129 | 27,819 |
| 95,431 | 151 | 19,027 | 5,485 | 3,111 | 27,774 |
| 95,432 | 146 | 18,968 | 5,441 | 3,079 | 27,634 |
| 95,433 | 142 | 18,860 | 5,406 | 3,040 | 27,448 |
| 95,434 | 143 | 18,928 | 5,428 | 3,042 | 27,541 |
| 95,435 | 147 | 18,603 | 5,313 | 2,967 | 27,030 |
| 95,436 | 148 | 18,799 | 5,336 | 2,990 | 27,273 |
| 95,437 | 143 | 18,783 | 5,261 | 2,965 | 27,152 |
| 95,438 | 142 | 19,048 | 5,314 | 2,986 | 27,490 |
| 95,439 | 141 | 19,341 | 5,370 | 3,016 | 27,868 |
| 95,440 | 145 | 19,437 | 5,442 | 3,048 | 28,072 |
| 95,441 | 144 | 19,547 | 5,421 | 3,052 | 28,164 |
| 95,442 | 145 | 19,579 | 5,436 | 3,059 | 28,219 |
| 95,443 | 147 | 19,792 | 5,481 | 3,088 | 28,508 |
| 95,444 | 147 | 19,947 | 5,506 | 3,115 | 28,715 |
| 95,445 | 149 | 19,900 | 5,491 | 3,104 | 28,644 |
| 95,446 | 149 | 19,910 | 5,483 | 3,116 | 28,658 |
| 95,447 | 146 | 19,765 | 5,422 | 3,095 | 28,428 |

|        |     |        |       |       |        |
|--------|-----|--------|-------|-------|--------|
| 95,448 | 149 | 19,948 | 5,443 | 3,111 | 28,651 |
| 95,449 | 153 | 19,989 | 5,434 | 3,095 | 28,671 |
| 95,450 | 155 | 20,060 | 5,456 | 3,095 | 28,766 |
| 95,451 | 154 | 20,105 | 5,474 | 3,104 | 28,837 |
| 95,452 | 153 | 20,205 | 5,534 | 3,135 | 29,027 |
| 95,453 | 152 | 20,142 | 5,527 | 3,138 | 28,959 |
| 95,454 | 151 | 19,838 | 5,450 | 3,111 | 28,550 |
| 95,455 | 153 | 19,928 | 5,481 | 3,156 | 28,718 |
| 95,456 | 150 | 19,867 | 5,486 | 3,167 | 28,670 |
| 95,457 | 149 | 19,972 | 5,534 | 3,178 | 28,833 |
| 95,458 | 151 | 19,460 | 5,355 | 3,074 | 28,040 |
| 95,459 | 153 | 19,785 | 5,425 | 3,112 | 28,475 |
| 95,460 | 152 | 20,156 | 5,473 | 3,142 | 28,923 |
| 95,461 | 152 | 20,172 | 5,462 | 3,130 | 28,916 |
| 95,462 | 153 | 20,209 | 5,451 | 3,121 | 28,934 |
| 95,463 | 157 | 20,275 | 5,455 | 3,112 | 28,999 |
| 95,464 | 152 | 20,091 | 5,403 | 3,096 | 28,742 |
| 95,465 | 160 | 20,632 | 5,489 | 3,156 | 29,437 |
| 95,466 | 149 | 20,481 | 5,427 | 3,129 | 29,186 |
| 95,467 | 149 | 20,232 | 5,325 | 3,100 | 28,806 |
| 95,468 | 149 | 20,553 | 5,354 | 3,118 | 29,174 |
| 95,469 | 142 | 20,548 | 5,384 | 3,134 | 29,208 |
| 95,470 | 143 | 20,621 | 5,404 | 3,167 | 29,335 |
| 95,471 | 140 | 20,716 | 5,408 | 3,146 | 29,410 |
| 95,472 | 145 | 20,916 | 5,449 | 3,150 | 29,660 |
| 95,473 | 142 | 20,916 | 5,454 | 3,154 | 29,666 |
| 95,474 | 137 | 20,652 | 5,417 | 3,155 | 29,361 |
| 95,475 | 138 | 20,727 | 5,452 | 3,176 | 29,493 |
| 95,476 | 131 | 21,063 | 5,513 | 3,193 | 29,900 |
| 95,477 | 123 | 20,778 | 5,443 | 3,151 | 29,495 |
| 95,478 | 127 | 20,781 | 5,437 | 3,152 | 29,497 |
| 95,479 | 128 | 20,578 | 5,388 | 3,135 | 29,229 |



|        |     |        |       |       |        |
|--------|-----|--------|-------|-------|--------|
| 95,480 | 129 | 20,977 | 5,493 | 3,191 | 29,790 |
| 95,481 | 128 | 20,792 | 5,442 | 3,172 | 29,534 |
| 95,482 | 124 | 20,801 | 5,464 | 3,157 | 29,546 |
| 95,483 | 128 | 20,889 | 5,494 | 3,177 | 29,688 |
| 95,484 | 128 | 20,869 | 5,506 | 3,186 | 29,689 |
| 95,485 | 124 | 20,921 | 5,533 | 3,192 | 29,770 |
| 95,486 | 119 | 20,713 | 5,507 | 3,175 | 29,514 |
| 95,487 | 121 | 20,608 | 5,507 | 3,177 | 29,413 |
| 95,488 | 116 | 20,502 | 5,543 | 3,185 | 29,346 |
| 95,489 | 120 | 20,656 | 5,598 | 3,240 | 29,614 |
| 95,490 | 113 | 20,458 | 5,528 | 3,216 | 29,315 |
| 95,491 | 115 | 20,712 | 5,602 | 3,278 | 29,707 |
| 95,492 | 113 | 20,742 | 5,620 | 3,298 | 29,773 |
| 95,493 | 115 | 20,726 | 5,662 | 3,320 | 29,823 |
| 95,494 | 113 | 20,926 | 5,741 | 3,360 | 30,140 |
| 95,495 | 107 | 20,502 | 5,636 | 3,294 | 29,539 |
| 95,496 | 114 | 20,743 | 5,679 | 3,326 | 29,862 |
| 95,497 | 113 | 20,979 | 5,751 | 3,369 | 30,212 |
| 95,498 | 113 | 20,757 | 5,706 | 3,352 | 29,928 |
| 95,499 | 113 | 20,783 | 5,744 | 3,380 | 30,020 |
| 95,500 | 107 | 20,735 | 5,770 | 3,398 | 30,010 |
| 95,501 | 109 | 20,778 | 5,814 | 3,434 | 30,135 |
| 95,502 | 107 | 20,713 | 5,783 | 3,405 | 30,008 |
| 95,503 | 106 | 20,801 | 5,796 | 3,404 | 30,107 |
| 95,504 | 108 | 20,876 | 5,800 | 3,415 | 30,199 |
| 95,505 | 110 | 20,920 | 5,839 | 3,411 | 30,280 |
| 95,506 | 110 | 20,828 | 5,828 | 3,383 | 30,149 |
| 95,507 | 113 | 21,130 | 5,907 | 3,422 | 30,572 |
| 95,508 | 113 | 20,820 | 5,860 | 3,383 | 30,176 |
| 95,509 | 110 | 20,597 | 5,821 | 3,351 | 29,879 |
| 95,510 | 112 | 21,099 | 5,929 | 3,440 | 30,580 |
| 95,511 | 112 | 20,788 | 5,885 | 3,440 | 30,225 |

|        |     |        |       |       |        |
|--------|-----|--------|-------|-------|--------|
| 95,512 | 112 | 20,879 | 5,911 | 3,454 | 30,356 |
| 95,513 | 108 | 21,144 | 6,016 | 3,513 | 30,781 |
| 95,514 | 99  | 20,942 | 5,998 | 3,516 | 30,555 |
| 95,515 | 99  | 21,149 | 6,066 | 3,547 | 30,861 |
| 95,516 | 97  | 21,091 | 6,118 | 3,566 | 30,872 |
| 95,517 | 96  | 21,021 | 6,135 | 3,563 | 30,815 |
| 95,518 | 95  | 20,757 | 6,085 | 3,522 | 30,459 |
| 95,519 | 97  | 20,911 | 6,129 | 3,553 | 30,690 |
| 95,520 | 95  | 21,246 | 6,204 | 3,600 | 31,145 |
| 95,521 | 97  | 21,278 | 6,249 | 3,607 | 31,231 |
| 95,522 | 97  | 21,270 | 6,291 | 3,635 | 31,293 |
| 95,523 | 92  | 21,081 | 6,229 | 3,621 | 31,023 |
| 95,524 | 90  | 20,849 | 6,249 | 3,611 | 30,799 |
| 95,525 | 92  | 21,095 | 6,299 | 3,654 | 31,140 |
| 95,526 | 92  | 21,207 | 6,306 | 3,635 | 31,240 |
| 95,527 | 92  | 21,202 | 6,320 | 3,651 | 31,265 |
| 95,528 | 95  | 20,974 | 6,266 | 3,625 | 30,960 |
| 95,529 | 91  | 20,826 | 6,224 | 3,600 | 30,741 |
| 95,530 | 94  | 21,077 | 6,320 | 3,648 | 31,139 |
| 95,531 | 96  | 20,732 | 6,244 | 3,605 | 30,677 |
| 95,532 | 96  | 20,453 | 6,164 | 3,551 | 30,264 |
| 95,533 | 104 | 20,849 | 6,328 | 3,644 | 30,925 |
| 95,534 | 103 | 20,663 | 6,266 | 3,608 | 30,640 |
| 95,535 | 104 | 20,664 | 6,278 | 3,622 | 30,668 |
| 95,536 | 104 | 20,566 | 6,277 | 3,633 | 30,580 |
| 95,537 | 102 | 20,379 | 6,233 | 3,604 | 30,318 |
| 95,538 | 101 | 20,251 | 6,181 | 3,570 | 30,103 |
| 95,539 | 110 | 20,842 | 6,314 | 3,631 | 30,897 |
| 95,540 | 111 | 20,915 | 6,334 | 3,622 | 30,982 |
| 95,541 | 111 | 20,861 | 6,285 | 3,579 | 30,836 |
| 95,542 | 115 | 21,031 | 6,331 | 3,607 | 31,084 |
| 95,543 | 109 | 20,644 | 6,176 | 3,515 | 30,444 |

|        |     |        |       |       |        |
|--------|-----|--------|-------|-------|--------|
| 95,544 | 109 | 20,638 | 6,170 | 3,527 | 30,444 |
| 95,545 | 110 | 20,283 | 6,015 | 3,436 | 29,844 |
| 95,546 | 115 | 20,502 | 6,083 | 3,471 | 30,171 |
| 95,547 | 110 | 20,689 | 6,145 | 3,537 | 30,481 |
| 95,548 | 118 | 20,690 | 6,136 | 3,517 | 30,461 |
| 95,549 | 119 | 20,649 | 6,135 | 3,475 | 30,378 |
| 95,550 | 124 | 20,639 | 6,055 | 3,422 | 30,240 |
| 95,551 | 124 | 20,647 | 6,069 | 3,428 | 30,268 |
| 95,552 | 123 | 20,692 | 6,042 | 3,432 | 30,289 |
| 95,553 | 123 | 20,669 | 6,032 | 3,429 | 30,253 |
| 95,554 | 127 | 20,898 | 6,099 | 3,466 | 30,590 |
| 95,555 | 125 | 20,982 | 6,132 | 3,486 | 30,725 |
| 95,556 | 119 | 20,737 | 6,076 | 3,456 | 30,388 |
| 95,557 | 118 | 20,693 | 6,066 | 3,473 | 30,350 |
| 95,558 | 119 | 20,764 | 6,096 | 3,494 | 30,473 |
| 95,559 | 119 | 20,808 | 6,060 | 3,492 | 30,479 |
| 95,560 | 117 | 20,929 | 6,087 | 3,514 | 30,647 |
| 95,561 | 117 | 20,734 | 6,041 | 3,464 | 30,356 |
| 95,562 | 116 | 20,718 | 6,016 | 3,422 | 30,272 |
| 95,563 | 120 | 20,591 | 5,927 | 3,398 | 30,036 |
| 95,564 | 121 | 20,802 | 5,970 | 3,437 | 30,330 |
| 95,565 | 123 | 20,859 | 5,907 | 3,423 | 30,312 |
| 95,566 | 127 | 21,018 | 5,944 | 3,437 | 30,526 |
| 95,567 | 128 | 21,199 | 6,004 | 3,493 | 30,824 |
| 95,568 | 126 | 21,051 | 5,956 | 3,485 | 30,618 |
| 95,569 | 127 | 21,081 | 5,976 | 3,495 | 30,679 |
| 95,570 | 125 | 21,130 | 5,969 | 3,506 | 30,730 |
| 95,571 | 125 | 21,057 | 5,939 | 3,496 | 30,617 |
| 95,572 | 122 | 20,938 | 5,881 | 3,479 | 30,420 |
| 95,573 | 125 | 20,939 | 5,849 | 3,477 | 30,390 |
| 95,574 | 128 | 20,926 | 5,793 | 3,445 | 30,292 |
| 95,575 | 128 | 21,014 | 5,814 | 3,443 | 30,399 |

|        |     |        |       |       |        |
|--------|-----|--------|-------|-------|--------|
| 95,576 | 130 | 21,199 | 5,861 | 3,477 | 30,667 |
| 95,577 | 129 | 21,170 | 5,881 | 3,493 | 30,673 |
| 95,578 | 133 | 20,891 | 5,781 | 3,432 | 30,237 |
| 95,579 | 139 | 21,170 | 5,807 | 3,462 | 30,578 |
| 95,580 | 138 | 21,347 | 5,843 | 3,483 | 30,811 |
| 95,581 | 133 | 21,179 | 5,790 | 3,451 | 30,553 |
| 95,582 | 128 | 21,170 | 5,775 | 3,458 | 30,531 |
| 95,583 | 131 | 21,019 | 5,767 | 3,444 | 30,361 |
| 95,584 | 135 | 21,332 | 5,823 | 3,487 | 30,777 |
| 95,585 | 134 | 21,215 | 5,801 | 3,453 | 30,603 |
| 95,586 | 134 | 21,185 | 5,805 | 3,464 | 30,588 |
| 95,587 | 127 | 21,280 | 5,814 | 3,476 | 30,697 |
| 95,588 | 128 | 21,505 | 5,870 | 3,513 | 31,016 |
| 95,589 | 126 | 21,320 | 5,824 | 3,495 | 30,765 |
| 95,590 | 126 | 21,360 | 5,824 | 3,506 | 30,816 |
| 95,591 | 126 | 21,566 | 5,873 | 3,540 | 31,105 |
| 95,592 | 122 | 21,541 | 5,863 | 3,516 | 31,042 |
| 95,593 | 119 | 21,462 | 5,856 | 3,501 | 30,938 |
| 95,594 | 119 | 21,467 | 5,853 | 3,528 | 30,967 |
| 95,595 | 117 | 21,839 | 5,975 | 3,606 | 31,537 |
| 95,596 | 117 | 21,636 | 5,921 | 3,578 | 31,252 |
| 95,597 | 112 | 21,660 | 5,950 | 3,611 | 31,333 |
| 95,598 | 111 | 21,722 | 5,961 | 3,587 | 31,381 |
| 95,599 | 104 | 21,417 | 5,893 | 3,560 | 30,974 |
| 95,600 | 99  | 21,574 | 5,938 | 3,614 | 31,225 |
| 95,601 | 96  | 21,189 | 5,886 | 3,592 | 30,763 |
| 95,602 | 98  | 21,294 | 5,887 | 3,606 | 30,885 |
| 95,603 | 97  | 21,364 | 5,923 | 3,615 | 30,999 |
| 95,604 | 98  | 21,314 | 5,941 | 3,617 | 30,970 |
| 95,605 | 97  | 21,301 | 5,936 | 3,627 | 30,961 |
| 95,606 | 99  | 21,060 | 5,855 | 3,563 | 30,577 |
| 95,607 | 100 | 20,996 | 5,806 | 3,521 | 30,423 |

|        |     |        |       |       |        |
|--------|-----|--------|-------|-------|--------|
| 95,608 | 99  | 21,023 | 5,793 | 3,524 | 30,439 |
| 95,609 | 98  | 20,816 | 5,729 | 3,486 | 30,129 |
| 95,610 | 96  | 20,606 | 5,658 | 3,464 | 29,824 |
| 95,611 | 101 | 21,080 | 5,849 | 3,565 | 30,595 |
| 95,612 | 97  | 20,759 | 5,781 | 3,534 | 30,171 |
| 95,613 | 98  | 20,473 | 5,742 | 3,497 | 29,810 |
| 95,614 | 101 | 20,757 | 5,839 | 3,532 | 30,229 |
| 95,615 | 105 | 20,593 | 5,807 | 3,492 | 29,997 |
| 95,616 | 100 | 20,468 | 5,783 | 3,483 | 29,834 |
| 95,617 | 95  | 20,559 | 5,783 | 3,475 | 29,912 |
| 95,618 | 96  | 20,639 | 5,805 | 3,506 | 30,046 |
| 95,619 | 100 | 20,785 | 5,846 | 3,511 | 30,242 |
| 95,620 | 99  | 20,569 | 5,754 | 3,477 | 29,899 |
| 95,621 | 101 | 20,846 | 5,859 | 3,514 | 30,320 |
| 95,622 | 106 | 20,624 | 5,808 | 3,471 | 30,009 |
| 95,623 | 107 | 20,386 | 5,758 | 3,433 | 29,684 |
| 95,624 | 109 | 20,900 | 5,931 | 3,525 | 30,465 |
| 95,625 | 109 | 20,562 | 5,822 | 3,486 | 29,979 |
| 95,626 | 109 | 20,590 | 5,818 | 3,484 | 30,001 |
| 95,627 | 106 | 20,200 | 5,746 | 3,454 | 29,506 |
| 95,628 | 107 | 20,277 | 5,785 | 3,470 | 29,639 |
| 95,629 | 100 | 20,046 | 5,749 | 3,441 | 29,336 |
| 95,630 | 95  | 20,072 | 5,773 | 3,463 | 29,403 |
| 95,631 | 95  | 19,646 | 5,632 | 3,398 | 28,771 |
| 95,632 | 97  | 20,028 | 5,714 | 3,425 | 29,264 |
| 95,633 | 92  | 20,100 | 5,708 | 3,434 | 29,334 |
| 95,634 | 101 | 20,089 | 5,714 | 3,462 | 29,366 |
| 95,635 | 100 | 20,271 | 5,751 | 3,482 | 29,604 |
| 95,636 | 100 | 20,431 | 5,773 | 3,501 | 29,805 |
| 95,637 | 99  | 20,524 | 5,745 | 3,455 | 29,823 |
| 95,638 | 99  | 20,572 | 5,753 | 3,456 | 29,880 |
| 95,639 | 98  | 20,856 | 5,819 | 3,493 | 30,266 |

|        |     |        |       |       |        |
|--------|-----|--------|-------|-------|--------|
| 95,640 | 99  | 20,928 | 5,811 | 3,493 | 30,331 |
| 95,641 | 100 | 20,658 | 5,774 | 3,467 | 29,999 |
| 95,642 | 102 | 20,589 | 5,780 | 3,472 | 29,943 |
| 95,643 | 107 | 20,699 | 5,833 | 3,518 | 30,157 |
| 95,644 | 107 | 20,672 | 5,789 | 3,506 | 30,074 |
| 95,645 | 113 | 20,783 | 5,799 | 3,509 | 30,204 |
| 95,646 | 117 | 20,871 | 5,794 | 3,514 | 30,296 |
| 95,647 | 117 | 20,773 | 5,759 | 3,472 | 30,121 |
| 95,648 | 117 | 20,832 | 5,760 | 3,475 | 30,184 |
| 95,649 | 121 | 20,928 | 5,783 | 3,500 | 30,332 |
| 95,650 | 125 | 20,833 | 5,731 | 3,459 | 30,148 |
| 95,651 | 125 | 20,765 | 5,731 | 3,467 | 30,088 |
| 95,652 | 121 | 21,212 | 5,840 | 3,505 | 30,678 |
| 95,653 | 122 | 21,086 | 5,821 | 3,484 | 30,513 |
| 95,654 | 121 | 21,110 | 5,816 | 3,503 | 30,550 |
| 95,655 | 119 | 21,193 | 5,822 | 3,519 | 30,653 |
| 95,656 | 115 | 21,186 | 5,810 | 3,516 | 30,627 |
| 95,657 | 115 | 21,481 | 5,841 | 3,536 | 30,973 |
| 95,658 | 113 | 21,568 | 5,843 | 3,561 | 31,085 |
| 95,659 | 113 | 21,737 | 5,861 | 3,564 | 31,275 |
| 95,660 | 112 | 21,573 | 5,817 | 3,549 | 31,051 |
| 95,661 | 112 | 21,536 | 5,859 | 3,553 | 31,060 |
| 95,662 | 116 | 21,817 | 5,944 | 3,598 | 31,475 |
| 95,663 | 113 | 22,008 | 5,906 | 3,611 | 31,638 |
| 95,664 | 113 | 21,782 | 5,814 | 3,591 | 31,300 |
| 95,665 | 112 | 21,537 | 5,774 | 3,563 | 30,986 |
| 95,666 | 110 | 22,012 | 5,876 | 3,646 | 31,644 |
| 95,667 | 110 | 21,748 | 5,815 | 3,592 | 31,265 |
| 95,668 | 112 | 21,833 | 5,841 | 3,600 | 31,386 |
| 95,669 | 114 | 21,904 | 5,849 | 3,603 | 31,470 |
| 95,670 | 110 | 21,664 | 5,786 | 3,588 | 31,148 |
| 95,671 | 111 | 21,980 | 5,874 | 3,612 | 31,577 |

|        |     |        |       |       |        |
|--------|-----|--------|-------|-------|--------|
| 95,672 | 110 | 22,195 | 5,934 | 3,625 | 31,864 |
| 95,673 | 106 | 22,234 | 5,914 | 3,652 | 31,906 |
| 95,674 | 110 | 22,316 | 5,930 | 3,659 | 32,015 |
| 95,675 | 110 | 22,336 | 5,956 | 3,674 | 32,076 |
| 95,676 | 110 | 22,214 | 5,920 | 3,651 | 31,895 |
| 95,677 | 113 | 22,272 | 5,908 | 3,635 | 31,928 |
| 95,678 | 113 | 22,369 | 5,919 | 3,656 | 32,057 |
| 95,679 | 115 | 22,421 | 5,928 | 3,660 | 32,124 |
| 95,680 | 116 | 22,414 | 5,878 | 3,650 | 32,058 |
| 95,681 | 115 | 22,575 | 5,907 | 3,669 | 32,266 |
| 95,682 | 111 | 22,196 | 5,830 | 3,623 | 31,760 |
| 95,683 | 113 | 22,373 | 5,861 | 3,649 | 31,996 |
| 95,684 | 105 | 22,278 | 5,855 | 3,638 | 31,876 |
| 95,685 | 104 | 22,180 | 5,864 | 3,637 | 31,785 |
| 95,686 | 102 | 22,093 | 5,882 | 3,637 | 31,714 |
| 95,687 | 108 | 22,165 | 5,880 | 3,656 | 31,809 |
| 95,688 | 114 | 22,062 | 5,877 | 3,677 | 31,730 |
| 95,689 | 114 | 22,023 | 5,887 | 3,715 | 31,739 |
| 95,690 | 114 | 21,912 | 5,844 | 3,695 | 31,565 |
| 95,691 | 108 | 21,757 | 5,797 | 3,635 | 31,297 |
| 95,692 | 112 | 22,131 | 5,870 | 3,668 | 31,781 |
| 95,693 | 112 | 22,392 | 5,953 | 3,710 | 32,167 |
| 95,694 | 112 | 22,609 | 6,012 | 3,747 | 32,480 |
| 95,695 | 112 | 22,672 | 6,057 | 3,768 | 32,609 |
| 95,696 | 106 | 22,673 | 6,059 | 3,769 | 32,607 |
| 95,697 | 104 | 22,406 | 5,979 | 3,708 | 32,197 |
| 95,698 | 106 | 22,521 | 6,069 | 3,739 | 32,435 |
| 95,699 | 104 | 22,781 | 6,115 | 3,780 | 32,780 |
| 95,700 | 96  | 22,505 | 6,047 | 3,766 | 32,414 |
| 95,701 | 99  | 22,642 | 6,089 | 3,790 | 32,620 |
| 95,702 | 103 | 22,791 | 6,157 | 3,850 | 32,901 |
| 95,703 | 102 | 22,834 | 6,151 | 3,861 | 32,948 |

|        |     |        |       |       |        |
|--------|-----|--------|-------|-------|--------|
| 95,704 | 112 | 22,720 | 6,087 | 3,837 | 32,756 |
| 95,705 | 114 | 22,701 | 6,058 | 3,809 | 32,682 |
| 95,706 | 124 | 23,008 | 6,170 | 3,894 | 33,196 |
| 95,707 | 124 | 23,097 | 6,171 | 3,888 | 33,280 |
| 95,708 | 127 | 22,746 | 6,168 | 3,870 | 32,911 |
| 95,709 | 127 | 22,770 | 6,166 | 3,869 | 32,932 |
| 95,710 | 127 | 22,791 | 6,185 | 3,873 | 32,976 |
| 95,711 | 127 | 22,716 | 6,183 | 3,876 | 32,902 |
| 95,712 | 125 | 22,970 | 6,213 | 3,878 | 33,186 |
| 95,713 | 126 | 22,977 | 6,226 | 3,878 | 33,207 |
| 95,714 | 129 | 22,737 | 6,187 | 3,843 | 32,896 |
| 95,715 | 124 | 22,468 | 6,126 | 3,818 | 32,536 |
| 95,716 | 125 | 22,678 | 6,190 | 3,863 | 32,856 |
| 95,717 | 129 | 22,917 | 6,194 | 3,881 | 33,121 |
| 95,718 | 128 | 22,764 | 6,148 | 3,842 | 32,882 |
| 95,719 | 131 | 23,084 | 6,211 | 3,877 | 33,303 |
| 95,720 | 132 | 23,248 | 6,272 | 3,913 | 33,565 |
| 95,721 | 141 | 23,126 | 6,257 | 3,910 | 33,434 |
| 95,722 | 141 | 23,067 | 6,223 | 3,913 | 33,344 |
| 95,723 | 144 | 23,226 | 6,300 | 3,944 | 33,614 |
| 95,724 | 142 | 23,327 | 6,288 | 3,933 | 33,690 |
| 95,725 | 136 | 23,295 | 6,217 | 3,918 | 33,566 |
| 95,726 | 133 | 22,975 | 6,122 | 3,858 | 33,088 |
| 95,727 | 132 | 22,862 | 6,122 | 3,868 | 32,984 |
| 95,728 | 132 | 22,902 | 6,125 | 3,876 | 33,035 |
| 95,729 | 136 | 23,112 | 6,170 | 3,902 | 33,320 |
| 95,730 | 137 | 23,110 | 6,189 | 3,916 | 33,352 |
| 95,731 | 139 | 23,379 | 6,306 | 3,958 | 33,782 |
| 95,732 | 146 | 23,464 | 6,324 | 3,979 | 33,913 |
| 95,733 | 142 | 23,273 | 6,288 | 3,967 | 33,670 |
| 95,734 | 142 | 23,394 | 6,260 | 3,966 | 33,762 |
| 95,735 | 141 | 23,423 | 6,170 | 3,926 | 33,660 |



|        |     |        |       |       |        |
|--------|-----|--------|-------|-------|--------|
| 95,736 | 143 | 23,600 | 6,179 | 3,942 | 33,864 |
| 95,737 | 136 | 23,552 | 6,185 | 3,943 | 33,816 |
| 95,738 | 134 | 23,667 | 6,197 | 3,990 | 33,988 |
| 95,739 | 127 | 23,323 | 6,096 | 3,912 | 33,458 |
| 95,740 | 127 | 23,568 | 6,126 | 3,937 | 33,758 |
| 95,741 | 128 | 23,578 | 6,130 | 3,921 | 33,757 |
| 95,742 | 131 | 23,543 | 6,091 | 3,942 | 33,707 |
| 95,743 | 130 | 23,541 | 6,084 | 3,949 | 33,704 |
| 95,744 | 135 | 23,371 | 6,006 | 3,928 | 33,440 |
| 95,745 | 135 | 23,263 | 5,960 | 3,902 | 33,260 |
| 95,746 | 135 | 23,185 | 5,929 | 3,895 | 33,144 |
| 95,747 | 140 | 23,424 | 5,955 | 3,908 | 33,427 |
| 95,748 | 142 | 23,644 | 5,932 | 3,939 | 33,657 |
| 95,749 | 141 | 23,367 | 5,830 | 3,870 | 33,208 |
| 95,750 | 142 | 23,400 | 5,820 | 3,863 | 33,225 |
| 95,751 | 143 | 23,227 | 5,784 | 3,859 | 33,013 |
| 95,752 | 140 | 23,165 | 5,741 | 3,848 | 32,894 |
| 95,753 | 138 | 23,162 | 5,681 | 3,802 | 32,783 |
| 95,754 | 139 | 23,003 | 5,653 | 3,797 | 32,592 |
| 95,755 | 132 | 23,123 | 5,674 | 3,812 | 32,741 |
| 95,756 | 132 | 22,992 | 5,627 | 3,781 | 32,532 |
| 95,757 | 125 | 22,946 | 5,582 | 3,759 | 32,412 |
| 95,758 | 126 | 23,345 | 5,597 | 3,797 | 32,865 |
| 95,759 | 128 | 23,617 | 5,630 | 3,814 | 33,189 |
| 95,760 | 133 | 23,923 | 5,684 | 3,860 | 33,600 |
| 95,761 | 130 | 23,718 | 5,609 | 3,818 | 33,275 |
| 95,762 | 130 | 23,553 | 5,590 | 3,814 | 33,087 |
| 95,763 | 129 | 23,705 | 5,616 | 3,843 | 33,293 |
| 95,764 | 129 | 23,337 | 5,491 | 3,778 | 32,735 |
| 95,765 | 128 | 23,368 | 5,495 | 3,762 | 32,753 |
| 95,766 | 131 | 23,317 | 5,449 | 3,739 | 32,636 |
| 95,767 | 136 | 23,326 | 5,453 | 3,740 | 32,655 |

|        |     |        |       |       |        |
|--------|-----|--------|-------|-------|--------|
| 95,768 | 132 | 22,965 | 5,428 | 3,710 | 32,235 |
| 95,769 | 135 | 23,132 | 5,455 | 3,755 | 32,477 |
| 95,770 | 131 | 22,910 | 5,428 | 3,747 | 32,216 |
| 95,771 | 127 | 22,859 | 5,434 | 3,753 | 32,173 |
| 95,772 | 119 | 22,896 | 5,392 | 3,749 | 32,156 |
| 95,773 | 120 | 23,127 | 5,423 | 3,765 | 32,435 |
| 95,774 | 117 | 23,007 | 5,361 | 3,729 | 32,214 |
| 95,775 | 119 | 23,226 | 5,432 | 3,736 | 32,513 |
| 95,776 | 120 | 23,261 | 5,454 | 3,734 | 32,569 |
| 95,777 | 118 | 22,984 | 5,423 | 3,699 | 32,224 |
| 95,778 | 114 | 23,045 | 5,447 | 3,711 | 32,317 |
| 95,779 | 116 | 23,259 | 5,448 | 3,705 | 32,528 |
| 95,780 | 114 | 23,333 | 5,443 | 3,690 | 32,580 |
| 95,781 | 116 | 23,360 | 5,396 | 3,664 | 32,536 |
| 95,782 | 111 | 23,217 | 5,330 | 3,638 | 32,296 |
| 95,783 | 111 | 23,497 | 5,375 | 3,656 | 32,639 |
| 95,784 | 110 | 23,270 | 5,323 | 3,605 | 32,308 |
| 95,785 | 119 | 23,160 | 5,333 | 3,609 | 32,221 |
| 95,786 | 119 | 23,181 | 5,346 | 3,623 | 32,269 |
| 95,787 | 122 | 23,220 | 5,415 | 3,634 | 32,391 |
| 95,788 | 121 | 23,348 | 5,476 | 3,649 | 32,594 |
| 95,789 | 121 | 23,182 | 5,479 | 3,642 | 32,424 |
| 95,790 | 123 | 23,389 | 5,518 | 3,689 | 32,719 |
| 95,791 | 126 | 23,246 | 5,461 | 3,656 | 32,489 |
| 95,792 | 124 | 23,181 | 5,463 | 3,663 | 32,431 |
| 95,793 | 123 | 23,213 | 5,478 | 3,687 | 32,501 |
| 95,794 | 122 | 23,148 | 5,458 | 3,685 | 32,413 |
| 95,795 | 118 | 22,548 | 5,333 | 3,579 | 31,578 |
| 95,796 | 120 | 22,759 | 5,387 | 3,583 | 31,849 |
| 95,797 | 122 | 23,049 | 5,438 | 3,624 | 32,233 |
| 95,798 | 119 | 23,134 | 5,431 | 3,620 | 32,304 |
| 95,799 | 125 | 22,601 | 5,339 | 3,533 | 31,598 |

|        |     |        |       |       |        |
|--------|-----|--------|-------|-------|--------|
| 95,800 | 125 | 22,618 | 5,339 | 3,532 | 31,614 |
| 95,801 | 126 | 22,351 | 5,280 | 3,489 | 31,246 |
| 95,802 | 126 | 22,216 | 5,242 | 3,461 | 31,045 |
| 95,803 | 125 | 23,121 | 5,468 | 3,618 | 32,332 |
| 95,804 | 127 | 23,198 | 5,525 | 3,626 | 32,476 |
| 95,805 | 126 | 23,030 | 5,487 | 3,603 | 32,246 |
| 95,806 | 122 | 22,690 | 5,431 | 3,565 | 31,808 |
| 95,807 | 130 | 22,988 | 5,514 | 3,629 | 32,261 |
| 95,808 | 130 | 22,875 | 5,508 | 3,645 | 32,158 |
| 95,809 | 133 | 22,721 | 5,510 | 3,606 | 31,970 |
| 95,810 | 130 | 22,587 | 5,474 | 3,596 | 31,787 |
| 95,811 | 125 | 22,265 | 5,425 | 3,547 | 31,362 |
| 95,812 | 127 | 22,409 | 5,414 | 3,544 | 31,494 |
| 95,813 | 132 | 22,428 | 5,402 | 3,551 | 31,513 |
| 95,814 | 133 | 22,570 | 5,408 | 3,540 | 31,651 |
| 95,815 | 132 | 22,853 | 5,460 | 3,551 | 31,996 |
| 95,816 | 133 | 22,702 | 5,420 | 3,517 | 31,772 |
| 95,817 | 125 | 22,754 | 5,407 | 3,508 | 31,794 |
| 95,818 | 128 | 22,919 | 5,447 | 3,532 | 32,026 |
| 95,819 | 130 | 22,932 | 5,400 | 3,500 | 31,962 |
| 95,820 | 130 | 23,157 | 5,450 | 3,518 | 32,255 |
| 95,821 | 134 | 23,220 | 5,461 | 3,503 | 32,318 |
| 95,822 | 135 | 23,172 | 5,420 | 3,476 | 32,203 |
| 95,823 | 137 | 23,470 | 5,464 | 3,501 | 32,572 |
| 95,824 | 141 | 23,397 | 5,423 | 3,485 | 32,446 |
| 95,825 | 146 | 23,060 | 5,356 | 3,452 | 32,014 |
| 95,826 | 146 | 22,863 | 5,291 | 3,430 | 31,730 |
| 95,827 | 147 | 23,268 | 5,318 | 3,482 | 32,215 |
| 95,828 | 148 | 23,218 | 5,309 | 3,479 | 32,154 |
| 95,829 | 154 | 23,226 | 5,293 | 3,498 | 32,171 |
| 95,830 | 154 | 23,091 | 5,273 | 3,499 | 32,017 |
| 95,831 | 153 | 23,105 | 5,301 | 3,529 | 32,088 |

|        |     |        |       |       |        |
|--------|-----|--------|-------|-------|--------|
| 95,832 | 151 | 23,192 | 5,289 | 3,549 | 32,181 |
| 95,833 | 154 | 23,227 | 5,303 | 3,556 | 32,240 |
| 95,834 | 150 | 23,295 | 5,302 | 3,567 | 32,314 |
| 95,835 | 150 | 23,322 | 5,275 | 3,566 | 32,313 |
| 95,836 | 144 | 23,341 | 5,256 | 3,559 | 32,300 |
| 95,837 | 140 | 23,362 | 5,214 | 3,538 | 32,254 |
| 95,838 | 144 | 23,443 | 5,174 | 3,515 | 32,276 |
| 95,839 | 144 | 23,384 | 5,104 | 3,486 | 32,118 |
| 95,840 | 147 | 23,311 | 5,096 | 3,466 | 32,020 |
| 95,841 | 154 | 23,311 | 5,093 | 3,436 | 31,994 |
| 95,842 | 150 | 23,013 | 5,022 | 3,385 | 31,570 |
| 95,843 | 155 | 23,431 | 5,096 | 3,442 | 32,124 |
| 95,844 | 156 | 23,138 | 5,036 | 3,373 | 31,703 |
| 95,845 | 154 | 23,143 | 5,023 | 3,366 | 31,686 |
| 95,846 | 148 | 22,990 | 4,994 | 3,340 | 31,472 |
| 95,847 | 156 | 23,067 | 5,003 | 3,380 | 31,606 |
| 95,848 | 156 | 23,013 | 4,966 | 3,348 | 31,483 |
| 95,849 | 148 | 22,423 | 4,871 | 3,295 | 30,737 |
| 95,850 | 155 | 22,402 | 4,882 | 3,282 | 30,721 |
| 95,851 | 155 | 22,421 | 4,860 | 3,276 | 30,712 |
| 95,852 | 157 | 22,534 | 4,839 | 3,241 | 30,771 |
| 95,853 | 159 | 22,508 | 4,835 | 3,233 | 30,735 |
| 95,854 | 159 | 22,658 | 4,845 | 3,232 | 30,894 |
| 95,855 | 159 | 22,692 | 4,829 | 3,234 | 30,914 |
| 95,856 | 159 | 23,016 | 4,819 | 3,226 | 31,220 |
| 95,857 | 160 | 22,872 | 4,806 | 3,208 | 31,046 |
| 95,858 | 160 | 23,163 | 4,855 | 3,245 | 31,423 |
| 95,859 | 160 | 23,198 | 4,842 | 3,228 | 31,428 |
| 95,860 | 156 | 22,709 | 4,775 | 3,207 | 30,847 |
| 95,861 | 157 | 22,617 | 4,758 | 3,183 | 30,715 |
| 95,862 | 166 | 22,957 | 4,777 | 3,197 | 31,097 |
| 95,863 | 164 | 22,781 | 4,731 | 3,165 | 30,841 |

|        |     |        |       |       |        |
|--------|-----|--------|-------|-------|--------|
| 95,864 | 163 | 22,790 | 4,729 | 3,164 | 30,846 |
| 95,865 | 167 | 22,989 | 4,834 | 3,216 | 31,206 |
| 95,866 | 167 | 22,692 | 4,799 | 3,198 | 30,856 |
| 95,867 | 169 | 22,701 | 4,805 | 3,222 | 30,897 |
| 95,868 | 172 | 22,406 | 4,775 | 3,181 | 30,534 |
| 95,869 | 168 | 22,181 | 4,738 | 3,154 | 30,241 |
| 95,870 | 172 | 22,529 | 4,852 | 3,189 | 30,742 |
| 95,871 | 179 | 22,572 | 4,892 | 3,214 | 30,857 |
| 95,872 | 175 | 22,431 | 4,836 | 3,193 | 30,635 |
| 95,873 | 175 | 22,407 | 4,834 | 3,203 | 30,619 |
| 95,874 | 175 | 22,350 | 4,835 | 3,197 | 30,557 |
| 95,875 | 172 | 22,259 | 4,817 | 3,163 | 30,411 |
| 95,876 | 169 | 22,654 | 4,963 | 3,223 | 31,009 |
| 95,877 | 168 | 22,613 | 4,957 | 3,221 | 30,959 |
| 95,878 | 167 | 22,282 | 4,915 | 3,191 | 30,555 |
| 95,879 | 165 | 22,597 | 4,968 | 3,228 | 30,958 |
| 95,880 | 163 | 22,567 | 4,950 | 3,206 | 30,886 |
| 95,881 | 162 | 22,584 | 4,941 | 3,199 | 30,886 |
| 95,882 | 160 | 22,637 | 4,939 | 3,221 | 30,957 |
| 95,883 | 160 | 22,543 | 4,936 | 3,218 | 30,857 |
| 95,884 | 157 | 22,660 | 4,966 | 3,239 | 31,022 |
| 95,885 | 155 | 22,594 | 4,960 | 3,215 | 30,924 |
| 95,886 | 155 | 22,579 | 4,953 | 3,200 | 30,887 |
| 95,887 | 157 | 22,321 | 4,933 | 3,169 | 30,580 |
| 95,888 | 158 | 22,350 | 4,989 | 3,186 | 30,683 |
| 95,889 | 159 | 22,213 | 4,972 | 3,185 | 30,529 |
| 95,890 | 166 | 22,259 | 4,958 | 3,172 | 30,555 |
| 95,891 | 162 | 22,111 | 4,934 | 3,159 | 30,366 |
| 95,892 | 157 | 22,493 | 5,002 | 3,244 | 30,896 |
| 95,893 | 161 | 22,757 | 5,108 | 3,286 | 31,312 |
| 95,894 | 162 | 22,772 | 5,103 | 3,286 | 31,323 |
| 95,895 | 164 | 22,629 | 5,061 | 3,260 | 31,114 |

|        |     |        |       |       |        |
|--------|-----|--------|-------|-------|--------|
| 95,896 | 164 | 22,595 | 5,038 | 3,265 | 31,062 |
| 95,897 | 162 | 22,646 | 5,053 | 3,275 | 31,136 |
| 95,898 | 160 | 23,002 | 5,147 | 3,337 | 31,646 |
| 95,899 | 154 | 22,872 | 5,094 | 3,343 | 31,463 |
| 95,900 | 148 | 22,609 | 5,085 | 3,351 | 31,193 |
| 95,901 | 147 | 22,776 | 5,110 | 3,383 | 31,416 |
| 95,902 | 148 | 22,953 | 5,160 | 3,462 | 31,723 |
| 95,903 | 147 | 23,015 | 5,183 | 3,473 | 31,818 |
| 95,904 | 145 | 22,805 | 5,117 | 3,434 | 31,501 |
| 95,905 | 145 | 22,646 | 5,072 | 3,392 | 31,255 |
| 95,906 | 145 | 23,227 | 5,190 | 3,480 | 32,042 |
| 95,907 | 143 | 23,192 | 5,164 | 3,478 | 31,977 |
| 95,908 | 138 | 23,089 | 5,127 | 3,446 | 31,800 |
| 95,909 | 146 | 23,323 | 5,167 | 3,475 | 32,111 |
| 95,910 | 145 | 22,909 | 5,086 | 3,405 | 31,545 |
| 95,911 | 145 | 23,031 | 5,068 | 3,405 | 31,649 |
| 95,912 | 145 | 23,169 | 5,070 | 3,410 | 31,794 |
| 95,913 | 137 | 22,879 | 5,002 | 3,382 | 31,400 |
| 95,914 | 135 | 23,062 | 5,033 | 3,393 | 31,623 |
| 95,915 | 135 | 23,273 | 5,064 | 3,437 | 31,909 |
| 95,916 | 137 | 23,332 | 5,042 | 3,433 | 31,944 |
| 95,917 | 134 | 23,358 | 5,033 | 3,418 | 31,943 |
| 95,918 | 142 | 23,636 | 5,093 | 3,442 | 32,313 |
| 95,919 | 134 | 22,998 | 4,905 | 3,377 | 31,414 |
| 95,920 | 136 | 23,335 | 4,938 | 3,425 | 31,834 |
| 95,921 | 141 | 23,691 | 4,959 | 3,470 | 32,261 |
| 95,922 | 143 | 23,606 | 4,922 | 3,443 | 32,114 |
| 95,923 | 144 | 23,600 | 4,913 | 3,425 | 32,082 |
| 95,924 | 144 | 23,409 | 4,870 | 3,399 | 31,822 |
| 95,925 | 144 | 23,645 | 4,914 | 3,453 | 32,156 |
| 95,926 | 149 | 23,724 | 4,927 | 3,458 | 32,258 |
| 95,927 | 150 | 23,495 | 4,821 | 3,386 | 31,852 |

|        |     |        |       |       |        |
|--------|-----|--------|-------|-------|--------|
| 95,928 | 156 | 23,175 | 4,768 | 3,328 | 31,427 |
| 95,929 | 161 | 23,673 | 4,898 | 3,375 | 32,107 |
| 95,930 | 162 | 23,613 | 4,886 | 3,361 | 32,022 |
| 95,931 | 162 | 23,757 | 4,920 | 3,420 | 32,259 |
| 95,932 | 164 | 23,480 | 4,894 | 3,368 | 31,906 |
| 95,933 | 163 | 23,278 | 4,863 | 3,342 | 31,646 |
| 95,934 | 163 | 23,477 | 4,911 | 3,394 | 31,945 |
| 95,935 | 162 | 23,421 | 4,897 | 3,366 | 31,846 |
| 95,936 | 162 | 23,309 | 4,893 | 3,373 | 31,737 |
| 95,937 | 160 | 23,245 | 4,919 | 3,391 | 31,715 |
| 95,938 | 155 | 23,251 | 4,910 | 3,393 | 31,709 |
| 95,939 | 160 | 23,066 | 4,837 | 3,357 | 31,420 |
| 95,940 | 157 | 22,885 | 4,808 | 3,342 | 31,192 |
| 95,941 | 147 | 23,253 | 4,933 | 3,432 | 31,765 |
| 95,942 | 147 | 23,483 | 4,963 | 3,438 | 32,031 |
| 95,943 | 144 | 23,399 | 4,910 | 3,421 | 31,874 |
| 95,944 | 145 | 23,348 | 4,889 | 3,438 | 31,820 |
| 95,945 | 140 | 23,203 | 4,857 | 3,399 | 31,599 |
| 95,946 | 140 | 23,500 | 4,964 | 3,488 | 32,092 |
| 95,947 | 144 | 23,766 | 5,009 | 3,538 | 32,457 |
| 95,948 | 144 | 23,883 | 5,046 | 3,548 | 32,621 |
| 95,949 | 143 | 23,911 | 5,028 | 3,542 | 32,624 |
| 95,950 | 147 | 23,882 | 5,051 | 3,545 | 32,625 |
| 95,951 | 147 | 23,711 | 4,989 | 3,485 | 32,332 |
| 95,952 | 146 | 23,779 | 4,993 | 3,457 | 32,375 |
| 95,953 | 150 | 23,884 | 4,991 | 3,446 | 32,471 |
| 95,954 | 149 | 23,669 | 4,944 | 3,417 | 32,179 |
| 95,955 | 158 | 23,783 | 4,978 | 3,440 | 32,359 |
| 95,956 | 158 | 23,539 | 4,931 | 3,405 | 32,033 |
| 95,957 | 162 | 23,491 | 4,911 | 3,398 | 31,962 |
| 95,958 | 166 | 23,308 | 4,887 | 3,370 | 31,731 |
| 95,959 | 166 | 23,230 | 4,893 | 3,353 | 31,642 |

|        |     |        |       |       |        |
|--------|-----|--------|-------|-------|--------|
| 95,960 | 161 | 23,150 | 4,887 | 3,356 | 31,554 |
| 95,961 | 164 | 23,222 | 4,919 | 3,371 | 31,676 |
| 95,962 | 164 | 23,170 | 4,881 | 3,374 | 31,589 |
| 95,963 | 163 | 23,115 | 4,889 | 3,390 | 31,557 |
| 95,964 | 164 | 23,142 | 4,862 | 3,391 | 31,559 |
| 95,965 | 161 | 22,558 | 4,751 | 3,336 | 30,806 |
| 95,966 | 158 | 22,890 | 4,798 | 3,365 | 31,211 |
| 95,967 | 163 | 22,621 | 4,749 | 3,289 | 30,822 |
| 95,968 | 165 | 22,858 | 4,784 | 3,314 | 31,121 |
| 95,969 | 158 | 23,207 | 4,829 | 3,362 | 31,556 |
| 95,970 | 159 | 23,455 | 4,866 | 3,390 | 31,870 |
| 95,971 | 162 | 23,420 | 4,882 | 3,387 | 31,851 |
| 95,972 | 151 | 23,155 | 4,865 | 3,344 | 31,515 |
| 95,973 | 152 | 23,167 | 4,882 | 3,357 | 31,558 |
| 95,974 | 151 | 23,173 | 4,903 | 3,360 | 31,587 |
| 95,975 | 150 | 23,128 | 4,882 | 3,361 | 31,521 |
| 95,976 | 152 | 23,056 | 4,885 | 3,360 | 31,453 |
| 95,977 | 150 | 22,957 | 4,886 | 3,408 | 31,401 |
| 95,978 | 148 | 23,233 | 4,957 | 3,478 | 31,816 |
| 95,979 | 144 | 23,301 | 4,979 | 3,483 | 31,907 |
| 95,980 | 137 | 23,535 | 4,982 | 3,489 | 32,143 |
| 95,981 | 142 | 23,747 | 4,995 | 3,500 | 32,384 |
| 95,982 | 143 | 23,927 | 5,041 | 3,497 | 32,608 |
| 95,983 | 148 | 23,739 | 4,969 | 3,474 | 32,330 |
| 95,984 | 149 | 23,783 | 4,970 | 3,465 | 32,367 |
| 95,985 | 149 | 23,637 | 4,956 | 3,453 | 32,195 |
| 95,986 | 151 | 23,718 | 4,993 | 3,513 | 32,375 |
| 95,987 | 155 | 23,608 | 4,941 | 3,493 | 32,197 |
| 95,988 | 158 | 23,533 | 4,930 | 3,483 | 32,104 |
| 95,989 | 151 | 23,518 | 4,901 | 3,457 | 32,027 |
| 95,990 | 150 | 23,501 | 4,894 | 3,430 | 31,975 |
| 95,991 | 157 | 23,659 | 4,934 | 3,456 | 32,206 |



|        |     |        |       |       |        |
|--------|-----|--------|-------|-------|--------|
| 95,992 | 163 | 23,694 | 4,951 | 3,449 | 32,257 |
| 95,993 | 171 | 23,407 | 4,904 | 3,410 | 31,892 |
| 95,994 | 174 | 23,710 | 4,963 | 3,430 | 32,277 |
| 95,995 | 171 | 23,759 | 4,933 | 3,399 | 32,262 |
| 95,996 | 175 | 23,497 | 4,897 | 3,345 | 31,914 |
| 95,997 | 175 | 23,617 | 4,914 | 3,350 | 32,056 |
| 95,998 | 175 | 23,906 | 4,943 | 3,360 | 32,384 |
| 95,999 | 172 | 23,543 | 4,852 | 3,304 | 31,871 |
| 96,000 | 175 | 23,521 | 4,840 | 3,279 | 31,815 |
| 96,001 | 172 | 23,386 | 4,846 | 3,293 | 31,697 |
| 96,002 | 171 | 22,283 | 4,597 | 3,132 | 30,183 |
| 96,003 | 171 | 22,477 | 4,643 | 3,161 | 30,452 |
| 96,004 | 167 | 22,726 | 4,669 | 3,190 | 30,752 |
| 96,005 | 166 | 22,711 | 4,672 | 3,199 | 30,748 |
| 96,006 | 165 | 22,921 | 4,791 | 3,264 | 31,141 |
| 96,007 | 162 | 22,904 | 4,791 | 3,269 | 31,126 |
| 96,008 | 161 | 22,877 | 4,805 | 3,279 | 31,122 |
| 96,009 | 161 | 22,897 | 4,813 | 3,276 | 31,147 |
| 96,010 | 159 | 22,869 | 4,836 | 3,279 | 31,143 |
| 96,011 | 152 | 22,766 | 4,822 | 3,270 | 31,010 |
| 96,012 | 156 | 22,450 | 4,761 | 3,234 | 30,601 |
| 96,013 | 155 | 22,215 | 4,743 | 3,201 | 30,314 |
| 96,014 | 158 | 22,800 | 4,892 | 3,302 | 31,152 |
| 96,015 | 157 | 22,545 | 4,859 | 3,269 | 30,830 |
| 96,016 | 149 | 21,813 | 4,799 | 3,189 | 29,950 |
| 96,017 | 150 | 22,086 | 4,855 | 3,231 | 30,322 |
| 96,018 | 147 | 22,239 | 4,911 | 3,275 | 30,572 |
| 96,019 | 148 | 22,315 | 4,957 | 3,300 | 30,720 |
| 96,020 | 151 | 21,693 | 4,845 | 3,200 | 29,889 |
| 96,021 | 159 | 21,919 | 4,883 | 3,239 | 30,200 |
| 96,022 | 156 | 22,001 | 4,900 | 3,251 | 30,308 |
| 96,023 | 156 | 22,054 | 4,882 | 3,244 | 30,336 |

|        |     |        |       |       |        |
|--------|-----|--------|-------|-------|--------|
| 96,024 | 158 | 21,723 | 4,822 | 3,198 | 29,901 |
| 96,025 | 153 | 21,452 | 4,770 | 3,172 | 29,547 |
| 96,026 | 153 | 21,928 | 4,919 | 3,274 | 30,274 |
| 96,027 | 165 | 22,203 | 4,965 | 3,293 | 30,626 |
| 96,028 | 164 | 22,077 | 4,892 | 3,242 | 30,375 |
| 96,029 | 165 | 22,180 | 4,913 | 3,263 | 30,521 |
| 96,030 | 167 | 22,010 | 4,859 | 3,260 | 30,296 |
| 96,031 | 169 | 21,794 | 4,858 | 3,265 | 30,086 |
| 96,032 | 171 | 21,327 | 4,742 | 3,212 | 29,452 |
| 96,033 | 174 | 21,296 | 4,723 | 3,178 | 29,371 |
| 96,034 | 174 | 21,407 | 4,730 | 3,158 | 29,469 |
| 96,035 | 174 | 21,530 | 4,764 | 3,166 | 29,634 |
| 96,036 | 174 | 21,522 | 4,766 | 3,124 | 29,586 |
| 96,037 | 175 | 21,717 | 4,838 | 3,142 | 29,872 |
| 96,038 | 185 | 21,761 | 4,834 | 3,138 | 29,918 |
| 96,039 | 182 | 21,620 | 4,807 | 3,120 | 29,729 |
| 96,040 | 187 | 21,613 | 4,828 | 3,106 | 29,734 |
| 96,041 | 189 | 21,687 | 4,831 | 3,132 | 29,839 |
| 96,042 | 182 | 21,741 | 4,856 | 3,154 | 29,933 |
| 96,043 | 178 | 21,735 | 4,863 | 3,162 | 29,938 |
| 96,044 | 171 | 21,747 | 4,870 | 3,184 | 29,972 |
| 96,045 | 175 | 21,803 | 4,928 | 3,186 | 30,092 |
| 96,046 | 175 | 21,810 | 4,959 | 3,201 | 30,145 |
| 96,047 | 172 | 22,222 | 5,016 | 3,273 | 30,683 |
| 96,048 | 172 | 22,336 | 5,041 | 3,301 | 30,850 |
| 96,049 | 173 | 21,885 | 4,957 | 3,244 | 30,259 |
| 96,050 | 181 | 22,197 | 5,040 | 3,286 | 30,704 |
| 96,051 | 175 | 22,194 | 5,059 | 3,303 | 30,731 |
| 96,052 | 177 | 22,377 | 5,098 | 3,324 | 30,976 |
| 96,053 | 171 | 22,584 | 5,150 | 3,364 | 31,269 |
| 96,054 | 173 | 22,791 | 5,194 | 3,380 | 31,538 |
| 96,055 | 182 | 22,975 | 5,245 | 3,428 | 31,830 |

|        |     |        |       |       |        |
|--------|-----|--------|-------|-------|--------|
| 96,056 | 186 | 23,139 | 5,269 | 3,431 | 32,025 |
| 96,057 | 192 | 23,267 | 5,264 | 3,427 | 32,150 |
| 96,058 | 202 | 23,249 | 5,273 | 3,414 | 32,138 |
| 96,059 | 203 | 23,154 | 5,223 | 3,393 | 31,973 |
| 96,060 | 204 | 23,235 | 5,194 | 3,382 | 32,015 |
| 96,061 | 204 | 23,249 | 5,238 | 3,375 | 32,066 |
| 96,062 | 203 | 23,387 | 5,260 | 3,386 | 32,236 |
| 96,063 | 194 | 23,364 | 5,237 | 3,372 | 32,167 |
| 96,064 | 198 | 23,143 | 5,173 | 3,327 | 31,841 |
| 96,065 | 198 | 23,164 | 5,181 | 3,322 | 31,865 |
| 96,066 | 199 | 23,062 | 5,179 | 3,316 | 31,756 |
| 96,067 | 198 | 23,051 | 5,160 | 3,338 | 31,747 |
| 96,068 | 199 | 23,178 | 5,162 | 3,340 | 31,879 |
| 96,069 | 199 | 23,001 | 5,053 | 3,284 | 31,537 |
| 96,070 | 199 | 23,117 | 5,069 | 3,288 | 31,673 |
| 96,071 | 191 | 23,279 | 5,095 | 3,298 | 31,863 |
| 96,072 | 184 | 23,056 | 5,051 | 3,268 | 31,559 |
| 96,073 | 184 | 23,286 | 5,114 | 3,305 | 31,889 |
| 96,074 | 179 | 22,942 | 5,038 | 3,252 | 31,411 |
| 96,075 | 183 | 23,197 | 5,094 | 3,287 | 31,761 |
| 96,076 | 181 | 23,158 | 5,095 | 3,290 | 31,724 |
| 96,077 | 180 | 23,426 | 5,167 | 3,294 | 32,067 |
| 96,078 | 170 | 23,267 | 5,136 | 3,270 | 31,843 |
| 96,079 | 176 | 23,009 | 5,108 | 3,234 | 31,527 |
| 96,080 | 177 | 22,927 | 5,122 | 3,236 | 31,462 |
| 96,081 | 175 | 22,887 | 5,079 | 3,195 | 31,336 |
| 96,082 | 174 | 22,810 | 5,083 | 3,191 | 31,258 |
| 96,083 | 163 | 22,556 | 5,109 | 3,182 | 31,010 |
| 96,084 | 154 | 22,410 | 5,128 | 3,176 | 30,868 |
| 96,085 | 157 | 22,253 | 5,115 | 3,185 | 30,710 |
| 96,086 | 160 | 22,142 | 5,114 | 3,180 | 30,596 |
| 96,087 | 163 | 22,216 | 5,101 | 3,169 | 30,649 |

|        |     |        |       |       |        |
|--------|-----|--------|-------|-------|--------|
| 96,088 | 165 | 22,264 | 5,111 | 3,177 | 30,717 |
| 96,089 | 151 | 22,108 | 5,094 | 3,151 | 30,504 |
| 96,090 | 149 | 22,242 | 5,175 | 3,220 | 30,786 |
| 96,091 | 153 | 22,496 | 5,289 | 3,295 | 31,233 |
| 96,092 | 156 | 22,630 | 5,283 | 3,285 | 31,354 |
| 96,093 | 159 | 23,024 | 5,391 | 3,350 | 31,924 |
| 96,094 | 165 | 22,870 | 5,364 | 3,337 | 31,736 |
| 96,095 | 160 | 22,726 | 5,353 | 3,324 | 31,563 |
| 96,096 | 163 | 22,616 | 5,353 | 3,360 | 31,492 |
| 96,097 | 163 | 22,349 | 5,317 | 3,344 | 31,173 |
| 96,098 | 161 | 22,182 | 5,358 | 3,350 | 31,051 |
| 96,099 | 159 | 22,147 | 5,377 | 3,350 | 31,033 |
| 96,100 | 159 | 22,345 | 5,416 | 3,365 | 31,285 |
| 96,101 | 163 | 22,236 | 5,394 | 3,350 | 31,143 |
| 96,102 | 162 | 21,939 | 5,348 | 3,301 | 30,750 |
| 96,103 | 160 | 22,028 | 5,363 | 3,317 | 30,868 |
| 96,104 | 161 | 21,889 | 5,288 | 3,240 | 30,578 |
| 96,105 | 162 | 22,041 | 5,380 | 3,280 | 30,863 |
| 96,106 | 158 | 22,251 | 5,470 | 3,304 | 31,183 |
| 96,107 | 149 | 22,117 | 5,434 | 3,265 | 30,965 |
| 96,108 | 149 | 22,125 | 5,444 | 3,289 | 31,007 |
| 96,109 | 137 | 22,047 | 5,448 | 3,310 | 30,942 |
| 96,110 | 133 | 22,032 | 5,504 | 3,332 | 31,001 |
| 96,111 | 132 | 21,896 | 5,475 | 3,341 | 30,844 |
| 96,112 | 135 | 21,803 | 5,473 | 3,345 | 30,756 |
| 96,113 | 138 | 21,982 | 5,542 | 3,367 | 31,029 |
| 96,114 | 143 | 21,746 | 5,530 | 3,342 | 30,761 |
| 96,115 | 138 | 21,566 | 5,512 | 3,319 | 30,535 |
| 96,116 | 144 | 21,813 | 5,551 | 3,340 | 30,848 |
| 96,117 | 144 | 21,746 | 5,560 | 3,330 | 30,780 |
| 96,118 | 149 | 21,788 | 5,601 | 3,334 | 30,872 |
| 96,119 | 151 | 21,629 | 5,578 | 3,323 | 30,681 |

|        |     |        |       |       |        |
|--------|-----|--------|-------|-------|--------|
| 96,120 | 148 | 21,427 | 5,576 | 3,301 | 30,452 |
| 96,121 | 155 | 21,385 | 5,582 | 3,304 | 30,426 |
| 96,122 | 152 | 21,037 | 5,557 | 3,294 | 30,040 |
| 96,123 | 160 | 21,879 | 5,720 | 3,409 | 31,168 |
| 96,124 | 159 | 21,561 | 5,692 | 3,388 | 30,800 |
| 96,125 | 159 | 21,625 | 5,743 | 3,430 | 30,957 |
| 96,126 | 157 | 21,625 | 5,737 | 3,417 | 30,936 |
| 96,127 | 159 | 21,715 | 5,720 | 3,441 | 31,035 |
| 96,128 | 162 | 21,378 | 5,657 | 3,419 | 30,616 |
| 96,129 | 162 | 21,408 | 5,672 | 3,432 | 30,674 |
| 96,130 | 153 | 21,372 | 5,691 | 3,437 | 30,653 |
| 96,131 | 157 | 21,610 | 5,742 | 3,458 | 30,967 |
| 96,132 | 153 | 21,684 | 5,790 | 3,482 | 31,109 |
| 96,133 | 156 | 21,386 | 5,639 | 3,410 | 30,591 |
| 96,134 | 156 | 21,738 | 5,687 | 3,472 | 31,053 |
| 96,135 | 155 | 22,013 | 5,744 | 3,501 | 31,413 |
| 96,136 | 152 | 22,105 | 5,737 | 3,512 | 31,506 |
| 96,137 | 155 | 22,177 | 5,725 | 3,519 | 31,576 |
| 96,138 | 151 | 21,878 | 5,674 | 3,512 | 31,215 |
| 96,139 | 151 | 22,039 | 5,731 | 3,567 | 31,488 |
| 96,140 | 150 | 22,049 | 5,711 | 3,567 | 31,477 |
| 96,141 | 149 | 22,170 | 5,712 | 3,551 | 31,582 |
| 96,142 | 155 | 22,002 | 5,684 | 3,547 | 31,388 |
| 96,143 | 160 | 21,757 | 5,632 | 3,515 | 31,064 |
| 96,144 | 158 | 21,556 | 5,580 | 3,478 | 30,772 |
| 96,145 | 152 | 21,185 | 5,439 | 3,365 | 30,141 |
| 96,146 | 150 | 21,173 | 5,385 | 3,346 | 30,054 |
| 96,147 | 150 | 21,255 | 5,404 | 3,348 | 30,157 |
| 96,148 | 151 | 21,218 | 5,398 | 3,330 | 30,097 |
| 96,149 | 155 | 21,328 | 5,350 | 3,301 | 30,134 |
| 96,150 | 157 | 21,503 | 5,424 | 3,329 | 30,413 |
| 96,151 | 154 | 21,225 | 5,395 | 3,314 | 30,088 |

|        |     |        |       |       |        |
|--------|-----|--------|-------|-------|--------|
| 96,152 | 140 | 20,743 | 5,283 | 3,276 | 29,442 |
| 96,153 | 140 | 20,728 | 5,285 | 3,288 | 29,441 |
| 96,154 | 138 | 20,589 | 5,282 | 3,293 | 29,302 |
| 96,155 | 146 | 20,859 | 5,342 | 3,328 | 29,675 |
| 96,156 | 147 | 20,757 | 5,314 | 3,314 | 29,532 |
| 96,157 | 142 | 20,470 | 5,224 | 3,274 | 29,110 |
| 96,158 | 144 | 20,494 | 5,220 | 3,276 | 29,134 |
| 96,159 | 148 | 20,552 | 5,236 | 3,285 | 29,221 |
| 96,160 | 147 | 20,305 | 5,126 | 3,248 | 28,826 |
| 96,161 | 148 | 20,434 | 5,175 | 3,294 | 29,051 |
| 96,162 | 148 | 20,710 | 5,223 | 3,323 | 29,404 |
| 96,163 | 146 | 20,750 | 5,197 | 3,318 | 29,411 |
| 96,164 | 146 | 20,999 | 5,259 | 3,359 | 29,763 |
| 96,165 | 138 | 21,090 | 5,268 | 3,391 | 29,887 |
| 96,166 | 134 | 20,898 | 5,237 | 3,371 | 29,640 |
| 96,167 | 132 | 21,269 | 5,324 | 3,407 | 30,132 |
| 96,168 | 129 | 21,153 | 5,279 | 3,393 | 29,954 |
| 96,169 | 128 | 21,073 | 5,274 | 3,405 | 29,880 |
| 96,170 | 121 | 21,021 | 5,325 | 3,431 | 29,898 |
| 96,171 | 121 | 20,816 | 5,322 | 3,433 | 29,692 |
| 96,172 | 111 | 20,758 | 5,337 | 3,446 | 29,652 |
| 96,173 | 113 | 20,840 | 5,362 | 3,438 | 29,753 |
| 96,174 | 117 | 20,916 | 5,378 | 3,454 | 29,865 |
| 96,175 | 120 | 20,862 | 5,328 | 3,443 | 29,753 |
| 96,176 | 119 | 20,698 | 5,271 | 3,412 | 29,500 |
| 96,177 | 121 | 20,610 | 5,294 | 3,414 | 29,439 |
| 96,178 | 125 | 20,662 | 5,349 | 3,411 | 29,547 |
| 96,179 | 123 | 20,547 | 5,295 | 3,382 | 29,347 |
| 96,180 | 129 | 20,647 | 5,319 | 3,427 | 29,522 |
| 96,181 | 127 | 20,464 | 5,285 | 3,405 | 29,281 |
| 96,182 | 126 | 20,423 | 5,296 | 3,393 | 29,238 |
| 96,183 | 133 | 20,363 | 5,321 | 3,388 | 29,205 |

|        |     |        |       |       |        |
|--------|-----|--------|-------|-------|--------|
| 96,184 | 132 | 20,233 | 5,317 | 3,396 | 29,078 |
| 96,185 | 133 | 20,015 | 5,266 | 3,356 | 28,770 |
| 96,186 | 136 | 19,869 | 5,267 | 3,361 | 28,633 |
| 96,187 | 137 | 19,799 | 5,279 | 3,359 | 28,574 |
| 96,188 | 132 | 19,969 | 5,311 | 3,326 | 28,738 |
| 96,189 | 131 | 20,137 | 5,321 | 3,316 | 28,905 |
| 96,190 | 134 | 20,309 | 5,325 | 3,345 | 29,113 |
| 96,191 | 135 | 20,608 | 5,414 | 3,395 | 29,552 |
| 96,192 | 126 | 20,355 | 5,307 | 3,329 | 29,117 |
| 96,193 | 126 | 20,743 | 5,397 | 3,371 | 29,637 |
| 96,194 | 118 | 20,744 | 5,420 | 3,384 | 29,666 |
| 96,195 | 114 | 20,756 | 5,457 | 3,407 | 29,734 |
| 96,196 | 110 | 21,248 | 5,610 | 3,504 | 30,472 |
| 96,197 | 113 | 21,218 | 5,602 | 3,503 | 30,436 |
| 96,198 | 112 | 20,927 | 5,568 | 3,478 | 30,085 |
| 96,199 | 108 | 21,886 | 5,824 | 3,641 | 31,459 |
| 96,200 | 108 | 22,073 | 5,919 | 3,685 | 31,785 |
| 96,201 | 107 | 21,878 | 5,873 | 3,670 | 31,528 |
| 96,202 | 108 | 21,961 | 5,896 | 3,675 | 31,640 |
| 96,203 | 109 | 22,059 | 5,935 | 3,687 | 31,790 |
| 96,204 | 108 | 21,854 | 5,918 | 3,680 | 31,560 |
| 96,205 | 108 | 22,315 | 6,024 | 3,774 | 32,221 |
| 96,206 | 102 | 22,286 | 6,041 | 3,777 | 32,206 |
| 96,207 | 98  | 22,105 | 6,036 | 3,770 | 32,009 |
| 96,208 | 103 | 21,925 | 5,974 | 3,759 | 31,761 |
| 96,209 | 109 | 22,115 | 6,023 | 3,771 | 32,018 |
| 96,210 | 112 | 22,402 | 6,146 | 3,820 | 32,480 |
| 96,211 | 119 | 22,550 | 6,225 | 3,853 | 32,747 |
| 96,212 | 122 | 22,749 | 6,279 | 3,865 | 33,015 |
| 96,213 | 128 | 22,554 | 6,255 | 3,822 | 32,759 |
| 96,214 | 127 | 22,335 | 6,230 | 3,815 | 32,507 |
| 96,215 | 135 | 22,763 | 6,399 | 3,881 | 33,178 |

|        |     |        |       |       |        |
|--------|-----|--------|-------|-------|--------|
| 96,216 | 139 | 22,406 | 6,343 | 3,816 | 32,704 |
| 96,217 | 140 | 22,179 | 6,264 | 3,781 | 32,364 |
| 96,218 | 146 | 22,456 | 6,370 | 3,912 | 32,884 |
| 96,219 | 148 | 22,566 | 6,397 | 3,891 | 33,002 |
| 96,220 | 151 | 22,848 | 6,398 | 3,901 | 33,298 |
| 96,221 | 153 | 23,089 | 6,407 | 3,899 | 33,548 |
| 96,222 | 155 | 23,078 | 6,431 | 3,903 | 33,567 |
| 96,223 | 161 | 23,314 | 6,497 | 3,958 | 33,930 |
| 96,224 | 160 | 23,320 | 6,500 | 3,955 | 33,935 |
| 96,225 | 152 | 22,752 | 6,386 | 3,830 | 33,120 |
| 96,226 | 151 | 23,027 | 6,457 | 3,906 | 33,541 |
| 96,227 | 151 | 23,154 | 6,497 | 3,932 | 33,734 |
| 96,228 | 151 | 23,396 | 6,566 | 3,962 | 34,075 |
| 96,229 | 145 | 23,622 | 6,614 | 3,985 | 34,366 |
| 96,230 | 134 | 23,351 | 6,571 | 3,941 | 33,997 |
| 96,231 | 140 | 23,374 | 6,586 | 3,938 | 34,038 |
| 96,232 | 140 | 23,390 | 6,585 | 3,940 | 34,055 |
| 96,233 | 134 | 23,429 | 6,610 | 3,985 | 34,158 |
| 96,234 | 131 | 22,912 | 6,503 | 3,922 | 33,468 |
| 96,235 | 134 | 23,044 | 6,562 | 3,933 | 33,673 |
| 96,236 | 131 | 23,081 | 6,553 | 3,933 | 33,698 |
| 96,237 | 130 | 22,923 | 6,531 | 3,923 | 33,507 |
| 96,238 | 135 | 23,158 | 6,669 | 3,983 | 33,945 |
| 96,239 | 139 | 23,087 | 6,675 | 3,985 | 33,886 |
| 96,240 | 144 | 23,037 | 6,691 | 4,013 | 33,885 |
| 96,241 | 146 | 22,745 | 6,640 | 3,958 | 33,489 |
| 96,242 | 146 | 22,522 | 6,590 | 3,926 | 33,184 |
| 96,243 | 147 | 22,463 | 6,625 | 3,927 | 33,162 |
| 96,244 | 160 | 22,081 | 6,563 | 3,883 | 32,687 |
| 96,245 | 160 | 21,801 | 6,495 | 3,845 | 32,301 |
| 96,246 | 174 | 22,270 | 6,634 | 3,891 | 32,969 |
| 96,247 | 184 | 22,030 | 6,591 | 3,849 | 32,654 |



|        |     |        |       |       |        |
|--------|-----|--------|-------|-------|--------|
| 96,248 | 185 | 21,830 | 6,566 | 3,854 | 32,435 |
| 96,249 | 184 | 21,636 | 6,504 | 3,801 | 32,125 |
| 96,250 | 189 | 21,663 | 6,496 | 3,808 | 32,156 |
| 96,251 | 190 | 21,449 | 6,469 | 3,785 | 31,893 |
| 96,252 | 193 | 21,288 | 6,476 | 3,800 | 31,757 |
| 96,253 | 193 | 21,324 | 6,489 | 3,802 | 31,808 |
| 96,254 | 189 | 21,281 | 6,470 | 3,800 | 31,740 |
| 96,255 | 190 | 21,379 | 6,488 | 3,805 | 31,862 |
| 96,256 | 193 | 21,315 | 6,483 | 3,779 | 31,770 |
| 96,257 | 197 | 21,281 | 6,420 | 3,758 | 31,656 |
| 96,258 | 197 | 21,208 | 6,409 | 3,764 | 31,578 |
| 96,259 | 192 | 21,259 | 6,421 | 3,784 | 31,656 |
| 96,260 | 183 | 21,128 | 6,346 | 3,783 | 31,440 |
| 96,261 | 188 | 21,180 | 6,414 | 3,826 | 31,608 |
| 96,262 | 186 | 21,387 | 6,476 | 3,858 | 31,907 |
| 96,263 | 188 | 21,545 | 6,491 | 3,865 | 32,089 |
| 96,264 | 177 | 21,530 | 6,443 | 3,905 | 32,055 |
| 96,265 | 177 | 21,509 | 6,391 | 3,874 | 31,951 |
| 96,266 | 173 | 21,770 | 6,383 | 3,888 | 32,214 |
| 96,267 | 177 | 21,802 | 6,402 | 3,878 | 32,259 |
| 96,268 | 178 | 21,798 | 6,420 | 3,890 | 32,286 |
| 96,269 | 175 | 21,872 | 6,459 | 3,906 | 32,412 |
| 96,270 | 172 | 21,840 | 6,446 | 3,928 | 32,386 |
| 96,271 | 173 | 21,837 | 6,470 | 3,969 | 32,449 |
| 96,272 | 173 | 21,878 | 6,503 | 4,011 | 32,565 |
| 96,273 | 167 | 21,754 | 6,501 | 3,987 | 32,409 |
| 96,274 | 166 | 21,514 | 6,471 | 3,937 | 32,088 |
| 96,275 | 164 | 21,161 | 6,383 | 3,897 | 31,605 |
| 96,276 | 169 | 21,405 | 6,406 | 3,941 | 31,921 |
| 96,277 | 174 | 21,380 | 6,406 | 3,911 | 31,871 |
| 96,278 | 174 | 21,322 | 6,383 | 3,892 | 31,771 |
| 96,279 | 176 | 21,400 | 6,392 | 3,892 | 31,860 |

|        |     |        |       |       |        |
|--------|-----|--------|-------|-------|--------|
| 96,280 | 183 | 21,181 | 6,337 | 3,882 | 31,583 |
| 96,281 | 180 | 21,397 | 6,384 | 3,877 | 31,838 |
| 96,282 | 180 | 21,615 | 6,380 | 3,872 | 32,047 |
| 96,283 | 183 | 21,675 | 6,377 | 3,879 | 32,114 |
| 96,284 | 182 | 21,500 | 6,306 | 3,838 | 31,826 |
| 96,285 | 186 | 21,740 | 6,330 | 3,878 | 32,134 |
| 96,286 | 185 | 21,971 | 6,377 | 3,918 | 32,451 |
| 96,287 | 181 | 21,916 | 6,327 | 3,866 | 32,290 |
| 96,288 | 184 | 22,217 | 6,394 | 3,906 | 32,701 |
| 96,289 | 181 | 22,247 | 6,338 | 3,903 | 32,669 |
| 96,290 | 176 | 22,097 | 6,280 | 3,898 | 32,451 |
| 96,291 | 171 | 22,266 | 6,296 | 3,890 | 32,623 |
| 96,292 | 162 | 22,031 | 6,274 | 3,858 | 32,325 |
| 96,293 | 166 | 21,945 | 6,219 | 3,820 | 32,150 |
| 96,294 | 166 | 21,878 | 6,218 | 3,819 | 32,081 |
| 96,295 | 153 | 21,957 | 6,221 | 3,845 | 32,176 |
| 96,296 | 154 | 22,020 | 6,220 | 3,849 | 32,243 |
| 96,297 | 139 | 21,665 | 6,110 | 3,832 | 31,746 |
| 96,298 | 135 | 21,454 | 6,047 | 3,806 | 31,442 |
| 96,299 | 137 | 21,422 | 5,987 | 3,796 | 31,342 |
| 96,300 | 144 | 21,723 | 6,047 | 3,843 | 31,757 |
| 96,301 | 140 | 21,620 | 5,971 | 3,812 | 31,543 |
| 96,302 | 141 | 21,462 | 5,886 | 3,775 | 31,264 |
| 96,303 | 139 | 21,320 | 5,840 | 3,741 | 31,040 |
| 96,304 | 139 | 21,687 | 5,910 | 3,793 | 31,529 |
| 96,305 | 138 | 21,592 | 5,934 | 3,809 | 31,473 |
| 96,306 | 137 | 21,432 | 5,905 | 3,815 | 31,289 |
| 96,307 | 138 | 21,529 | 5,936 | 3,836 | 31,439 |
| 96,308 | 140 | 21,511 | 5,932 | 3,839 | 31,422 |
| 96,309 | 138 | 21,320 | 5,869 | 3,776 | 31,103 |
| 96,310 | 138 | 20,980 | 5,752 | 3,712 | 30,582 |
| 96,311 | 138 | 21,161 | 5,812 | 3,729 | 30,840 |

|        |     |        |       |       |        |
|--------|-----|--------|-------|-------|--------|
| 96,312 | 143 | 21,240 | 5,808 | 3,715 | 30,906 |
| 96,313 | 137 | 20,944 | 5,752 | 3,665 | 30,498 |
| 96,314 | 136 | 20,967 | 5,801 | 3,642 | 30,546 |
| 96,315 | 136 | 20,862 | 5,789 | 3,636 | 30,423 |
| 96,316 | 140 | 20,995 | 5,886 | 3,679 | 30,700 |
| 96,317 | 144 | 20,941 | 5,904 | 3,704 | 30,693 |
| 96,318 | 142 | 20,919 | 5,834 | 3,653 | 30,548 |
| 96,319 | 142 | 20,961 | 5,852 | 3,651 | 30,606 |
| 96,320 | 142 | 20,805 | 5,831 | 3,637 | 30,415 |
| 96,321 | 151 | 20,909 | 5,825 | 3,640 | 30,525 |
| 96,322 | 157 | 20,874 | 5,797 | 3,589 | 30,417 |
| 96,323 | 161 | 20,463 | 5,654 | 3,549 | 29,827 |
| 96,324 | 160 | 20,598 | 5,662 | 3,564 | 29,984 |
| 96,325 | 162 | 20,745 | 5,645 | 3,543 | 30,095 |
| 96,326 | 163 | 20,931 | 5,684 | 3,557 | 30,335 |
| 96,327 | 160 | 20,831 | 5,680 | 3,554 | 30,225 |
| 96,328 | 155 | 20,866 | 5,697 | 3,558 | 30,276 |
| 96,329 | 158 | 20,916 | 5,715 | 3,606 | 30,395 |
| 96,330 | 160 | 21,013 | 5,777 | 3,663 | 30,613 |
| 96,331 | 155 | 21,044 | 5,791 | 3,654 | 30,644 |
| 96,332 | 153 | 21,162 | 5,792 | 3,699 | 30,806 |
| 96,333 | 155 | 21,166 | 5,834 | 3,733 | 30,888 |
| 96,334 | 152 | 21,000 | 5,801 | 3,707 | 30,660 |
| 96,335 | 152 | 21,028 | 5,809 | 3,711 | 30,700 |
| 96,336 | 153 | 21,302 | 5,894 | 3,752 | 31,101 |
| 96,337 | 151 | 21,433 | 5,891 | 3,768 | 31,243 |
| 96,338 | 150 | 21,174 | 5,872 | 3,768 | 30,964 |
| 96,339 | 151 | 21,285 | 5,901 | 3,778 | 31,115 |
| 96,340 | 150 | 21,231 | 5,943 | 3,776 | 31,100 |
| 96,341 | 154 | 20,841 | 5,850 | 3,711 | 30,556 |
| 96,342 | 158 | 21,141 | 5,932 | 3,766 | 30,997 |
| 96,343 | 157 | 21,323 | 5,992 | 3,810 | 31,282 |

|        |     |        |       |       |        |
|--------|-----|--------|-------|-------|--------|
| 96,344 | 154 | 21,326 | 5,968 | 3,802 | 31,250 |
| 96,345 | 154 | 21,186 | 5,935 | 3,776 | 31,051 |
| 96,346 | 150 | 21,308 | 5,958 | 3,774 | 31,190 |
| 96,347 | 151 | 21,781 | 6,074 | 3,855 | 31,861 |
| 96,348 | 150 | 21,531 | 6,006 | 3,812 | 31,499 |
| 96,349 | 147 | 21,235 | 6,005 | 3,779 | 31,166 |
| 96,350 | 144 | 21,601 | 6,172 | 3,844 | 31,761 |
| 96,351 | 145 | 21,650 | 6,209 | 3,840 | 31,844 |
| 96,352 | 153 | 21,552 | 6,229 | 3,840 | 31,774 |
| 96,353 | 155 | 21,408 | 6,216 | 3,816 | 31,595 |
| 96,354 | 160 | 21,279 | 6,149 | 3,768 | 31,356 |
| 96,355 | 161 | 21,363 | 6,110 | 3,746 | 31,380 |
| 96,356 | 166 | 21,489 | 6,135 | 3,704 | 31,494 |
| 96,357 | 165 | 21,555 | 6,156 | 3,703 | 31,579 |
| 96,358 | 166 | 21,602 | 6,145 | 3,708 | 31,621 |
| 96,359 | 166 | 21,734 | 6,177 | 3,718 | 31,795 |
| 96,360 | 165 | 21,535 | 6,107 | 3,678 | 31,485 |
| 96,361 | 171 | 21,583 | 6,104 | 3,676 | 31,534 |
| 96,362 | 175 | 21,884 | 6,148 | 3,720 | 31,927 |
| 96,363 | 160 | 21,638 | 6,089 | 3,699 | 31,586 |
| 96,364 | 162 | 21,608 | 6,077 | 3,695 | 31,542 |
| 96,365 | 162 | 21,858 | 6,118 | 3,744 | 31,882 |
| 96,366 | 166 | 21,787 | 6,066 | 3,707 | 31,726 |
| 96,367 | 162 | 21,722 | 6,049 | 3,680 | 31,613 |
| 96,368 | 156 | 21,871 | 6,107 | 3,700 | 31,834 |
| 96,369 | 159 | 21,782 | 6,031 | 3,640 | 31,612 |
| 96,370 | 162 | 22,018 | 6,078 | 3,659 | 31,917 |
| 96,371 | 157 | 22,027 | 6,089 | 3,662 | 31,935 |
| 96,372 | 157 | 22,141 | 6,109 | 3,657 | 32,064 |
| 96,373 | 152 | 22,061 | 6,121 | 3,660 | 31,994 |
| 96,374 | 152 | 22,067 | 6,121 | 3,642 | 31,982 |
| 96,375 | 152 | 22,152 | 6,173 | 3,679 | 32,156 |

|        |     |        |       |       |        |
|--------|-----|--------|-------|-------|--------|
| 96,376 | 151 | 22,087 | 6,115 | 3,664 | 32,017 |
| 96,377 | 151 | 22,173 | 6,118 | 3,686 | 32,128 |
| 96,378 | 154 | 22,425 | 6,233 | 3,739 | 32,551 |
| 96,379 | 158 | 22,586 | 6,298 | 3,741 | 32,783 |
| 96,380 | 152 | 22,564 | 6,276 | 3,722 | 32,714 |
| 96,381 | 153 | 22,391 | 6,212 | 3,667 | 32,423 |
| 96,382 | 151 | 22,183 | 6,147 | 3,641 | 32,122 |
| 96,383 | 152 | 22,109 | 6,155 | 3,667 | 32,083 |
| 96,384 | 152 | 21,838 | 6,115 | 3,653 | 31,758 |
| 96,385 | 152 | 21,734 | 6,099 | 3,631 | 31,616 |
| 96,386 | 156 | 21,724 | 6,131 | 3,643 | 31,654 |
| 96,387 | 153 | 21,797 | 6,122 | 3,640 | 31,712 |
| 96,388 | 152 | 21,736 | 6,121 | 3,622 | 31,631 |
| 96,389 | 150 | 21,353 | 5,977 | 3,544 | 31,024 |
| 96,390 | 150 | 21,500 | 6,008 | 3,563 | 31,221 |
| 96,391 | 149 | 21,403 | 5,991 | 3,567 | 31,110 |
| 96,392 | 152 | 21,460 | 6,011 | 3,592 | 31,215 |
| 96,393 | 150 | 21,448 | 5,997 | 3,580 | 31,175 |
| 96,394 | 149 | 21,244 | 5,943 | 3,552 | 30,888 |
| 96,395 | 156 | 21,558 | 6,029 | 3,648 | 31,391 |
| 96,396 | 173 | 21,620 | 6,036 | 3,643 | 31,472 |
| 96,397 | 173 | 21,376 | 5,951 | 3,583 | 31,083 |
| 96,398 | 174 | 21,312 | 5,882 | 3,533 | 30,901 |
| 96,399 | 175 | 21,460 | 5,901 | 3,528 | 31,064 |
| 96,400 | 175 | 21,511 | 5,865 | 3,523 | 31,074 |
| 96,401 | 171 | 21,393 | 5,802 | 3,529 | 30,895 |
| 96,402 | 162 | 21,271 | 5,742 | 3,490 | 30,665 |
| 96,403 | 168 | 21,413 | 5,765 | 3,506 | 30,852 |
| 96,404 | 164 | 21,100 | 5,666 | 3,445 | 30,375 |
| 96,405 | 168 | 21,246 | 5,685 | 3,474 | 30,573 |
| 96,406 | 166 | 20,914 | 5,614 | 3,432 | 30,126 |
| 96,407 | 166 | 20,699 | 5,561 | 3,400 | 29,826 |

|        |     |        |       |       |        |
|--------|-----|--------|-------|-------|--------|
| 96,408 | 166 | 20,688 | 5,574 | 3,376 | 29,804 |
| 96,409 | 163 | 20,505 | 5,544 | 3,354 | 29,566 |
| 96,410 | 160 | 20,286 | 5,496 | 3,324 | 29,266 |
| 96,411 | 161 | 20,791 | 5,710 | 3,433 | 30,095 |
| 96,412 | 160 | 20,805 | 5,731 | 3,435 | 30,131 |
| 96,413 | 160 | 21,029 | 5,805 | 3,481 | 30,475 |
| 96,414 | 164 | 20,892 | 5,773 | 3,457 | 30,286 |
| 96,415 | 164 | 20,798 | 5,776 | 3,441 | 30,179 |
| 96,416 | 161 | 20,821 | 5,798 | 3,469 | 30,249 |
| 96,417 | 156 | 20,323 | 5,635 | 3,409 | 29,523 |
| 96,418 | 159 | 20,197 | 5,605 | 3,392 | 29,353 |
| 96,419 | 160 | 20,153 | 5,589 | 3,387 | 29,289 |
| 96,420 | 156 | 20,030 | 5,593 | 3,378 | 29,157 |
| 96,421 | 152 | 20,012 | 5,594 | 3,409 | 29,167 |
| 96,422 | 150 | 20,153 | 5,615 | 3,431 | 29,349 |
| 96,423 | 151 | 20,211 | 5,624 | 3,423 | 29,409 |
| 96,424 | 143 | 19,944 | 5,554 | 3,381 | 29,022 |
| 96,425 | 142 | 20,027 | 5,585 | 3,393 | 29,147 |
| 96,426 | 141 | 19,836 | 5,558 | 3,408 | 28,943 |
| 96,427 | 140 | 19,531 | 5,527 | 3,401 | 28,599 |
| 96,428 | 141 | 19,526 | 5,561 | 3,416 | 28,644 |
| 96,429 | 138 | 19,490 | 5,504 | 3,413 | 28,545 |
| 96,430 | 136 | 19,380 | 5,474 | 3,431 | 28,421 |
| 96,431 | 141 | 19,388 | 5,499 | 3,437 | 28,465 |
| 96,432 | 138 | 19,311 | 5,442 | 3,422 | 28,313 |
| 96,433 | 142 | 19,083 | 5,382 | 3,351 | 27,958 |
| 96,434 | 138 | 19,122 | 5,380 | 3,324 | 27,964 |
| 96,435 | 140 | 19,186 | 5,356 | 3,304 | 27,986 |
| 96,436 | 141 | 19,235 | 5,355 | 3,305 | 28,036 |
| 96,437 | 136 | 19,425 | 5,408 | 3,327 | 28,296 |
| 96,438 | 136 | 19,158 | 5,352 | 3,289 | 27,935 |
| 96,439 | 138 | 19,357 | 5,422 | 3,320 | 28,237 |

|        |     |        |       |       |        |
|--------|-----|--------|-------|-------|--------|
| 96,440 | 136 | 19,194 | 5,413 | 3,301 | 28,044 |
| 96,441 | 136 | 19,197 | 5,421 | 3,291 | 28,045 |
| 96,442 | 135 | 19,335 | 5,425 | 3,312 | 28,207 |
| 96,443 | 133 | 19,648 | 5,498 | 3,354 | 28,633 |
| 96,444 | 129 | 19,183 | 5,406 | 3,262 | 27,980 |
| 96,445 | 129 | 19,327 | 5,462 | 3,282 | 28,200 |
| 96,446 | 126 | 19,503 | 5,498 | 3,289 | 28,416 |
| 96,447 | 112 | 19,172 | 5,441 | 3,258 | 27,983 |
| 96,448 | 109 | 18,815 | 5,389 | 3,237 | 27,550 |
| 96,449 | 116 | 19,024 | 5,513 | 3,330 | 27,983 |
| 96,450 | 113 | 18,658 | 5,391 | 3,287 | 27,449 |
| 96,451 | 113 | 18,801 | 5,417 | 3,298 | 27,629 |
| 96,452 | 112 | 18,795 | 5,418 | 3,278 | 27,603 |
| 96,453 | 113 | 18,638 | 5,388 | 3,259 | 27,398 |
| 96,454 | 116 | 19,349 | 5,576 | 3,347 | 28,388 |
| 96,455 | 115 | 19,410 | 5,645 | 3,380 | 28,550 |
| 96,456 | 107 | 19,438 | 5,677 | 3,390 | 28,612 |
| 96,457 | 105 | 19,367 | 5,692 | 3,412 | 28,576 |
| 96,458 | 104 | 19,354 | 5,719 | 3,433 | 28,610 |
| 96,459 | 105 | 19,212 | 5,666 | 3,446 | 28,429 |
| 96,460 | 103 | 19,051 | 5,605 | 3,411 | 28,170 |
| 96,461 | 103 | 19,062 | 5,645 | 3,426 | 28,236 |
| 96,462 | 99  | 18,964 | 5,605 | 3,428 | 28,096 |
| 96,463 | 109 | 19,039 | 5,656 | 3,463 | 28,267 |
| 96,464 | 109 | 18,858 | 5,636 | 3,454 | 28,057 |
| 96,465 | 119 | 18,682 | 5,597 | 3,429 | 27,827 |
| 96,466 | 121 | 18,481 | 5,520 | 3,383 | 27,505 |
| 96,467 | 121 | 18,537 | 5,510 | 3,378 | 27,546 |
| 96,468 | 122 | 18,482 | 5,513 | 3,366 | 27,483 |
| 96,469 | 122 | 18,455 | 5,508 | 3,368 | 27,453 |
| 96,470 | 130 | 18,526 | 5,497 | 3,380 | 27,533 |
| 96,471 | 138 | 18,549 | 5,503 | 3,364 | 27,554 |

|        |     |        |       |       |        |
|--------|-----|--------|-------|-------|--------|
| 96,472 | 136 | 18,466 | 5,508 | 3,366 | 27,476 |
| 96,473 | 135 | 18,302 | 5,459 | 3,341 | 27,237 |
| 96,474 | 144 | 18,650 | 5,588 | 3,420 | 27,802 |
| 96,475 | 144 | 18,767 | 5,607 | 3,412 | 27,930 |
| 96,476 | 147 | 18,789 | 5,555 | 3,351 | 27,842 |
| 96,477 | 149 | 18,782 | 5,550 | 3,332 | 27,813 |
| 96,478 | 149 | 18,731 | 5,520 | 3,304 | 27,704 |
| 96,479 | 149 | 18,967 | 5,608 | 3,339 | 28,063 |
| 96,480 | 157 | 19,122 | 5,649 | 3,368 | 28,296 |
| 96,481 | 156 | 19,241 | 5,640 | 3,359 | 28,396 |
| 96,482 | 149 | 18,938 | 5,588 | 3,311 | 27,986 |
| 96,483 | 152 | 19,103 | 5,692 | 3,348 | 28,295 |
| 96,484 | 151 | 19,085 | 5,716 | 3,377 | 28,329 |
| 96,485 | 156 | 19,027 | 5,768 | 3,400 | 28,351 |
| 96,486 | 161 | 19,009 | 5,818 | 3,415 | 28,403 |
| 96,487 | 164 | 19,078 | 5,804 | 3,411 | 28,457 |
| 96,488 | 170 | 19,050 | 5,807 | 3,406 | 28,433 |
| 96,489 | 173 | 18,821 | 5,732 | 3,369 | 28,095 |
| 96,490 | 171 | 18,620 | 5,674 | 3,335 | 27,800 |
| 96,491 | 173 | 18,830 | 5,737 | 3,398 | 28,138 |
| 96,492 | 175 | 18,621 | 5,674 | 3,354 | 27,824 |
| 96,493 | 177 | 18,529 | 5,629 | 3,330 | 27,665 |
| 96,494 | 184 | 18,850 | 5,699 | 3,364 | 28,097 |
| 96,495 | 184 | 18,839 | 5,677 | 3,360 | 28,060 |
| 96,496 | 194 | 18,895 | 5,708 | 3,355 | 28,152 |
| 96,497 | 199 | 19,085 | 5,759 | 3,379 | 28,422 |
| 96,498 | 196 | 18,825 | 5,602 | 3,302 | 27,925 |
| 96,499 | 201 | 19,052 | 5,638 | 3,324 | 28,215 |
| 96,500 | 197 | 19,305 | 5,698 | 3,338 | 28,538 |
| 96,501 | 195 | 19,113 | 5,677 | 3,305 | 28,290 |
| 96,502 | 203 | 19,414 | 5,729 | 3,358 | 28,704 |
| 96,503 | 201 | 19,275 | 5,666 | 3,338 | 28,480 |



|        |     |        |       |       |        |
|--------|-----|--------|-------|-------|--------|
| 96,504 | 199 | 18,925 | 5,573 | 3,300 | 27,997 |
| 96,505 | 200 | 19,214 | 5,710 | 3,392 | 28,516 |
| 96,506 | 203 | 19,182 | 5,714 | 3,405 | 28,504 |
| 96,507 | 205 | 19,289 | 5,751 | 3,426 | 28,671 |
| 96,508 | 206 | 19,360 | 5,764 | 3,432 | 28,762 |
| 96,509 | 206 | 19,339 | 5,801 | 3,435 | 28,781 |
| 96,510 | 216 | 19,545 | 5,844 | 3,455 | 29,060 |
| 96,511 | 219 | 19,786 | 5,860 | 3,467 | 29,332 |
| 96,512 | 229 | 19,570 | 5,813 | 3,385 | 28,997 |
| 96,513 | 230 | 19,867 | 5,855 | 3,400 | 29,352 |
| 96,514 | 218 | 19,608 | 5,733 | 3,318 | 28,877 |
| 96,515 | 218 | 19,968 | 5,791 | 3,357 | 29,334 |
| 96,516 | 209 | 20,278 | 5,839 | 3,397 | 29,723 |
| 96,517 | 207 | 20,337 | 5,848 | 3,390 | 29,782 |
| 96,518 | 205 | 20,636 | 5,938 | 3,441 | 30,220 |
| 96,519 | 200 | 20,635 | 5,945 | 3,448 | 30,228 |
| 96,520 | 193 | 20,831 | 5,997 | 3,467 | 30,488 |
| 96,521 | 203 | 21,235 | 6,079 | 3,522 | 31,039 |
| 96,522 | 195 | 21,080 | 6,045 | 3,494 | 30,814 |
| 96,523 | 210 | 21,141 | 6,063 | 3,493 | 30,907 |
| 96,524 | 210 | 21,180 | 6,044 | 3,505 | 30,939 |
| 96,525 | 208 | 21,104 | 6,042 | 3,476 | 30,830 |
| 96,526 | 210 | 21,085 | 6,038 | 3,469 | 30,802 |
| 96,527 | 207 | 21,016 | 6,004 | 3,448 | 30,675 |
| 96,528 | 207 | 21,081 | 6,032 | 3,457 | 30,777 |
| 96,529 | 212 | 21,102 | 6,022 | 3,460 | 30,796 |
| 96,530 | 212 | 21,091 | 5,982 | 3,445 | 30,730 |
| 96,531 | 207 | 21,351 | 6,022 | 3,491 | 31,071 |
| 96,532 | 211 | 21,122 | 5,981 | 3,458 | 30,772 |
| 96,533 | 210 | 21,163 | 5,948 | 3,439 | 30,760 |
| 96,534 | 203 | 21,248 | 5,889 | 3,423 | 30,763 |
| 96,535 | 202 | 21,167 | 5,836 | 3,389 | 30,594 |

|        |     |        |       |       |        |
|--------|-----|--------|-------|-------|--------|
| 96,536 | 205 | 21,383 | 5,860 | 3,423 | 30,871 |
| 96,537 | 200 | 21,437 | 5,830 | 3,444 | 30,911 |
| 96,538 | 197 | 21,384 | 5,891 | 3,476 | 30,948 |
| 96,539 | 192 | 21,459 | 5,880 | 3,494 | 31,025 |
| 96,540 | 189 | 21,400 | 5,898 | 3,509 | 30,996 |
| 96,541 | 204 | 21,526 | 5,900 | 3,524 | 31,154 |
| 96,542 | 198 | 21,549 | 5,889 | 3,520 | 31,156 |
| 96,543 | 197 | 21,543 | 5,881 | 3,539 | 31,160 |
| 96,544 | 191 | 21,506 | 5,913 | 3,552 | 31,162 |
| 96,545 | 196 | 21,636 | 5,957 | 3,608 | 31,397 |
| 96,546 | 189 | 21,489 | 5,884 | 3,593 | 31,155 |
| 96,547 | 189 | 21,586 | 5,888 | 3,600 | 31,263 |
| 96,548 | 192 | 21,726 | 5,928 | 3,607 | 31,453 |
| 96,549 | 190 | 21,812 | 5,940 | 3,624 | 31,566 |
| 96,550 | 187 | 21,759 | 5,932 | 3,636 | 31,514 |
| 96,551 | 185 | 21,712 | 5,906 | 3,654 | 31,457 |
| 96,552 | 189 | 21,911 | 5,960 | 3,673 | 31,733 |
| 96,553 | 181 | 21,672 | 5,915 | 3,607 | 31,375 |
| 96,554 | 182 | 21,771 | 5,902 | 3,604 | 31,459 |
| 96,555 | 183 | 21,829 | 5,909 | 3,611 | 31,532 |
| 96,556 | 177 | 21,774 | 5,838 | 3,606 | 31,395 |
| 96,557 | 181 | 22,025 | 5,888 | 3,620 | 31,714 |
| 96,558 | 179 | 21,902 | 5,842 | 3,590 | 31,513 |
| 96,559 | 178 | 21,455 | 5,658 | 3,485 | 30,776 |
| 96,560 | 178 | 21,854 | 5,702 | 3,499 | 31,233 |
| 96,561 | 169 | 21,899 | 5,706 | 3,499 | 31,273 |
| 96,562 | 170 | 21,944 | 5,726 | 3,527 | 31,367 |
| 96,563 | 159 | 21,686 | 5,656 | 3,508 | 31,009 |
| 96,564 | 159 | 21,598 | 5,672 | 3,526 | 30,955 |
| 96,565 | 157 | 21,453 | 5,700 | 3,557 | 30,867 |
| 96,566 | 160 | 21,556 | 5,785 | 3,595 | 31,096 |
| 96,567 | 164 | 21,489 | 5,774 | 3,604 | 31,031 |

|        |     |        |       |       |        |
|--------|-----|--------|-------|-------|--------|
| 96,568 | 162 | 21,508 | 5,782 | 3,625 | 31,077 |
| 96,569 | 163 | 21,494 | 5,768 | 3,631 | 31,056 |
| 96,570 | 164 | 21,571 | 5,770 | 3,639 | 31,144 |
| 96,571 | 156 | 21,683 | 5,778 | 3,653 | 31,270 |
| 96,572 | 151 | 21,801 | 5,847 | 3,677 | 31,476 |
| 96,573 | 145 | 21,774 | 5,788 | 3,663 | 31,370 |
| 96,574 | 138 | 21,718 | 5,790 | 3,664 | 31,310 |
| 96,575 | 137 | 21,682 | 5,784 | 3,681 | 31,284 |
| 96,576 | 130 | 21,481 | 5,737 | 3,669 | 31,017 |
| 96,577 | 132 | 21,626 | 5,757 | 3,679 | 31,194 |
| 96,578 | 129 | 21,674 | 5,778 | 3,694 | 31,275 |
| 96,579 | 124 | 21,457 | 5,710 | 3,643 | 30,934 |
| 96,580 | 126 | 21,799 | 5,801 | 3,679 | 31,405 |
| 96,581 | 128 | 21,846 | 5,830 | 3,696 | 31,500 |
| 96,582 | 129 | 21,779 | 5,834 | 3,686 | 31,428 |
| 96,583 | 125 | 21,411 | 5,756 | 3,646 | 30,938 |
| 96,584 | 127 | 21,516 | 5,778 | 3,683 | 31,104 |
| 96,585 | 127 | 21,362 | 5,738 | 3,662 | 30,889 |
| 96,586 | 120 | 21,472 | 5,751 | 3,685 | 31,028 |
| 96,587 | 124 | 21,596 | 5,735 | 3,671 | 31,126 |
| 96,588 | 125 | 21,793 | 5,705 | 3,660 | 31,283 |
| 96,589 | 127 | 21,467 | 5,608 | 3,587 | 30,789 |
| 96,590 | 128 | 21,823 | 5,651 | 3,592 | 31,194 |
| 96,591 | 122 | 21,966 | 5,669 | 3,605 | 31,362 |
| 96,592 | 116 | 21,999 | 5,634 | 3,597 | 31,346 |
| 96,593 | 118 | 22,123 | 5,632 | 3,575 | 31,448 |
| 96,594 | 124 | 22,484 | 5,692 | 3,594 | 31,894 |
| 96,595 | 124 | 22,413 | 5,663 | 3,576 | 31,776 |
| 96,596 | 123 | 22,446 | 5,649 | 3,572 | 31,790 |
| 96,597 | 127 | 22,676 | 5,707 | 3,594 | 32,104 |
| 96,598 | 129 | 22,524 | 5,695 | 3,585 | 31,933 |
| 96,599 | 120 | 22,199 | 5,589 | 3,545 | 31,453 |

|        |     |        |       |       |        |
|--------|-----|--------|-------|-------|--------|
| 96,600 | 126 | 22,522 | 5,648 | 3,581 | 31,877 |
| 96,601 | 125 | 22,229 | 5,579 | 3,519 | 31,452 |
| 96,602 | 124 | 22,260 | 5,618 | 3,516 | 31,518 |
| 96,603 | 120 | 22,142 | 5,595 | 3,517 | 31,374 |
| 96,604 | 117 | 21,941 | 5,547 | 3,497 | 31,102 |
| 96,605 | 116 | 21,711 | 5,513 | 3,450 | 30,790 |
| 96,606 | 115 | 21,644 | 5,493 | 3,421 | 30,673 |
| 96,607 | 111 | 21,563 | 5,472 | 3,391 | 30,537 |
| 96,608 | 110 | 21,411 | 5,452 | 3,350 | 30,323 |
| 96,609 | 110 | 21,679 | 5,500 | 3,378 | 30,667 |
| 96,610 | 105 | 21,545 | 5,469 | 3,387 | 30,506 |
| 96,611 | 107 | 21,298 | 5,428 | 3,357 | 30,190 |
| 96,612 | 106 | 21,061 | 5,361 | 3,325 | 29,853 |
| 96,613 | 104 | 21,226 | 5,431 | 3,368 | 30,129 |
| 96,614 | 103 | 21,136 | 5,384 | 3,345 | 29,968 |
| 96,615 | 104 | 21,494 | 5,465 | 3,363 | 30,426 |
| 96,616 | 101 | 21,663 | 5,441 | 3,372 | 30,577 |
| 96,617 | 100 | 21,583 | 5,386 | 3,323 | 30,392 |
| 96,618 | 95  | 21,454 | 5,342 | 3,299 | 30,190 |
| 96,619 | 99  | 21,221 | 5,252 | 3,223 | 29,795 |
| 96,620 | 102 | 21,238 | 5,241 | 3,205 | 29,786 |
| 96,621 | 103 | 21,304 | 5,249 | 3,210 | 29,866 |
| 96,622 | 104 | 21,176 | 5,238 | 3,194 | 29,712 |
| 96,623 | 110 | 21,283 | 5,201 | 3,166 | 29,760 |
| 96,624 | 109 | 21,065 | 5,177 | 3,118 | 29,469 |
| 96,625 | 110 | 21,039 | 5,139 | 3,114 | 29,402 |
| 96,626 | 113 | 21,176 | 5,188 | 3,132 | 29,609 |
| 96,627 | 111 | 21,260 | 5,198 | 3,171 | 29,740 |
| 96,628 | 108 | 21,246 | 5,171 | 3,168 | 29,693 |
| 96,629 | 109 | 21,149 | 5,143 | 3,162 | 29,563 |
| 96,630 | 110 | 21,183 | 5,155 | 3,164 | 29,612 |
| 96,631 | 108 | 21,406 | 5,204 | 3,194 | 29,912 |

|        |     |        |       |       |        |
|--------|-----|--------|-------|-------|--------|
| 96,632 | 114 | 21,110 | 5,144 | 3,147 | 29,515 |
| 96,633 | 111 | 21,049 | 5,138 | 3,155 | 29,453 |
| 96,634 | 110 | 21,492 | 5,223 | 3,203 | 30,028 |
| 96,635 | 114 | 21,612 | 5,221 | 3,190 | 30,137 |
| 96,636 | 115 | 21,537 | 5,198 | 3,165 | 30,015 |
| 96,637 | 115 | 21,531 | 5,206 | 3,160 | 30,012 |
| 96,638 | 109 | 21,447 | 5,226 | 3,163 | 29,945 |
| 96,639 | 104 | 21,390 | 5,220 | 3,165 | 29,879 |
| 96,640 | 107 | 21,501 | 5,248 | 3,168 | 30,024 |
| 96,641 | 115 | 21,796 | 5,338 | 3,222 | 30,471 |
| 96,642 | 116 | 21,584 | 5,348 | 3,189 | 30,237 |
| 96,643 | 116 | 21,259 | 5,300 | 3,152 | 29,827 |
| 96,644 | 110 | 21,493 | 5,355 | 3,212 | 30,170 |
| 96,645 | 109 | 21,679 | 5,420 | 3,247 | 30,455 |
| 96,646 | 105 | 21,679 | 5,461 | 3,259 | 30,504 |
| 96,647 | 105 | 21,722 | 5,454 | 3,267 | 30,548 |
| 96,648 | 100 | 21,775 | 5,479 | 3,282 | 30,636 |
| 96,649 | 103 | 21,519 | 5,436 | 3,248 | 30,306 |
| 96,650 | 102 | 21,316 | 5,413 | 3,214 | 30,045 |
| 96,651 | 107 | 21,868 | 5,565 | 3,284 | 30,824 |
| 96,652 | 106 | 21,775 | 5,498 | 3,287 | 30,666 |
| 96,653 | 106 | 21,781 | 5,498 | 3,287 | 30,672 |
| 96,654 | 106 | 21,720 | 5,511 | 3,289 | 30,626 |
| 96,655 | 109 | 21,887 | 5,638 | 3,341 | 30,975 |
| 96,656 | 108 | 21,628 | 5,579 | 3,307 | 30,622 |
| 96,657 | 107 | 21,847 | 5,676 | 3,395 | 31,025 |
| 96,658 | 107 | 21,834 | 5,703 | 3,419 | 31,063 |
| 96,659 | 108 | 22,088 | 5,745 | 3,460 | 31,401 |
| 96,660 | 107 | 22,115 | 5,763 | 3,452 | 31,437 |
| 96,661 | 106 | 21,894 | 5,701 | 3,419 | 31,120 |
| 96,662 | 107 | 22,046 | 5,726 | 3,427 | 31,306 |
| 96,663 | 107 | 22,131 | 5,766 | 3,459 | 31,463 |

|        |     |        |       |       |        |
|--------|-----|--------|-------|-------|--------|
| 96,664 | 108 | 22,031 | 5,765 | 3,439 | 31,343 |
| 96,665 | 109 | 21,906 | 5,713 | 3,434 | 31,162 |
| 96,666 | 111 | 21,908 | 5,714 | 3,434 | 31,167 |
| 96,667 | 115 | 21,931 | 5,708 | 3,427 | 31,181 |
| 96,668 | 114 | 21,807 | 5,665 | 3,429 | 31,015 |
| 96,669 | 115 | 21,767 | 5,671 | 3,421 | 30,974 |
| 96,670 | 110 | 21,706 | 5,633 | 3,421 | 30,870 |
| 96,671 | 109 | 21,808 | 5,607 | 3,416 | 30,940 |
| 96,672 | 109 | 21,736 | 5,594 | 3,420 | 30,859 |
| 96,673 | 112 | 21,827 | 5,633 | 3,484 | 31,056 |
| 96,674 | 118 | 21,879 | 5,672 | 3,515 | 31,184 |
| 96,675 | 118 | 21,898 | 5,699 | 3,533 | 31,248 |
| 96,676 | 118 | 21,889 | 5,699 | 3,521 | 31,227 |
| 96,677 | 119 | 21,888 | 5,702 | 3,508 | 31,217 |
| 96,678 | 129 | 22,093 | 5,733 | 3,506 | 31,461 |
| 96,679 | 129 | 22,116 | 5,739 | 3,508 | 31,492 |
| 96,680 | 131 | 22,141 | 5,807 | 3,515 | 31,594 |
| 96,681 | 141 | 22,190 | 5,805 | 3,511 | 31,647 |
| 96,682 | 141 | 21,830 | 5,737 | 3,469 | 31,177 |
| 96,683 | 135 | 21,777 | 5,745 | 3,479 | 31,136 |
| 96,684 | 143 | 21,871 | 5,769 | 3,469 | 31,252 |
| 96,685 | 143 | 21,886 | 5,749 | 3,463 | 31,241 |
| 96,686 | 151 | 21,608 | 5,727 | 3,441 | 30,927 |
| 96,687 | 150 | 21,307 | 5,692 | 3,428 | 30,577 |
| 96,688 | 150 | 21,469 | 5,746 | 3,452 | 30,817 |
| 96,689 | 152 | 21,603 | 5,788 | 3,483 | 31,026 |
| 96,690 | 157 | 21,593 | 5,795 | 3,473 | 31,018 |
| 96,691 | 154 | 21,523 | 5,782 | 3,457 | 30,916 |
| 96,692 | 148 | 21,476 | 5,729 | 3,443 | 30,796 |
| 96,693 | 144 | 21,111 | 5,622 | 3,402 | 30,279 |
| 96,694 | 144 | 20,905 | 5,582 | 3,365 | 29,996 |
| 96,695 | 145 | 20,971 | 5,637 | 3,394 | 30,147 |

|        |     |        |       |       |        |
|--------|-----|--------|-------|-------|--------|
| 96,696 | 145 | 20,769 | 5,607 | 3,395 | 29,916 |
| 96,697 | 143 | 20,442 | 5,547 | 3,365 | 29,497 |
| 96,698 | 143 | 20,234 | 5,523 | 3,335 | 29,235 |
| 96,699 | 146 | 20,323 | 5,558 | 3,369 | 29,396 |
| 96,700 | 142 | 20,211 | 5,543 | 3,348 | 29,244 |
| 96,701 | 141 | 20,189 | 5,537 | 3,334 | 29,201 |
| 96,702 | 135 | 20,099 | 5,497 | 3,325 | 29,056 |
| 96,703 | 137 | 20,040 | 5,498 | 3,299 | 28,974 |
| 96,704 | 137 | 19,925 | 5,418 | 3,250 | 28,730 |
| 96,705 | 139 | 20,264 | 5,444 | 3,284 | 29,131 |
| 96,706 | 145 | 20,531 | 5,532 | 3,318 | 29,526 |
| 96,707 | 151 | 20,606 | 5,508 | 3,306 | 29,571 |
| 96,708 | 151 | 20,751 | 5,490 | 3,306 | 29,698 |
| 96,709 | 155 | 21,075 | 5,566 | 3,342 | 30,138 |
| 96,710 | 159 | 21,058 | 5,569 | 3,361 | 30,147 |
| 96,711 | 158 | 20,848 | 5,526 | 3,329 | 29,861 |
| 96,712 | 159 | 20,810 | 5,517 | 3,335 | 29,821 |
| 96,713 | 160 | 20,933 | 5,552 | 3,347 | 29,992 |
| 96,714 | 160 | 20,949 | 5,559 | 3,341 | 30,009 |
| 96,715 | 163 | 20,941 | 5,565 | 3,344 | 30,013 |
| 96,716 | 164 | 21,034 | 5,633 | 3,353 | 30,184 |
| 96,717 | 160 | 20,811 | 5,561 | 3,320 | 29,852 |
| 96,718 | 156 | 20,741 | 5,573 | 3,321 | 29,791 |
| 96,719 | 158 | 20,834 | 5,575 | 3,305 | 29,872 |
| 96,720 | 158 | 20,708 | 5,580 | 3,302 | 29,748 |
| 96,721 | 161 | 20,725 | 5,620 | 3,310 | 29,816 |
| 96,722 | 161 | 20,948 | 5,699 | 3,362 | 30,170 |
| 96,723 | 152 | 21,006 | 5,674 | 3,315 | 30,147 |
| 96,724 | 152 | 20,998 | 5,695 | 3,309 | 30,154 |
| 96,725 | 152 | 21,236 | 5,761 | 3,363 | 30,512 |
| 96,726 | 149 | 20,988 | 5,717 | 3,332 | 30,186 |
| 96,727 | 148 | 21,039 | 5,718 | 3,327 | 30,232 |

|        |     |        |       |       |        |
|--------|-----|--------|-------|-------|--------|
| 96,728 | 147 | 21,152 | 5,771 | 3,362 | 30,432 |
| 96,729 | 140 | 21,419 | 5,878 | 3,399 | 30,836 |
| 96,730 | 135 | 21,131 | 5,801 | 3,326 | 30,393 |
| 96,731 | 135 | 21,368 | 5,826 | 3,383 | 30,712 |
| 96,732 | 128 | 21,644 | 5,886 | 3,428 | 31,086 |
| 96,733 | 127 | 21,603 | 5,815 | 3,407 | 30,952 |
| 96,734 | 126 | 21,492 | 5,807 | 3,416 | 30,841 |
| 96,735 | 126 | 21,494 | 5,807 | 3,447 | 30,874 |
| 96,736 | 125 | 21,641 | 5,868 | 3,474 | 31,108 |
| 96,737 | 114 | 21,503 | 5,814 | 3,450 | 30,881 |
| 96,738 | 114 | 21,454 | 5,771 | 3,439 | 30,778 |
| 96,739 | 124 | 21,991 | 5,821 | 3,482 | 31,418 |
| 96,740 | 126 | 22,129 | 5,860 | 3,496 | 31,611 |
| 96,741 | 124 | 22,332 | 5,923 | 3,521 | 31,900 |
| 96,742 | 128 | 22,203 | 5,920 | 3,524 | 31,775 |
| 96,743 | 131 | 22,146 | 5,943 | 3,524 | 31,744 |
| 96,744 | 132 | 22,078 | 5,901 | 3,494 | 31,605 |
| 96,745 | 131 | 22,020 | 5,850 | 3,458 | 31,459 |
| 96,746 | 140 | 22,369 | 5,913 | 3,479 | 31,901 |
| 96,747 | 146 | 22,434 | 5,865 | 3,446 | 31,891 |
| 96,748 | 144 | 22,432 | 5,879 | 3,440 | 31,895 |
| 96,749 | 152 | 22,560 | 5,893 | 3,479 | 32,084 |
| 96,750 | 151 | 22,486 | 5,888 | 3,459 | 31,984 |
| 96,751 | 151 | 22,539 | 5,917 | 3,482 | 32,089 |
| 96,752 | 154 | 22,321 | 5,874 | 3,461 | 31,810 |
| 96,753 | 154 | 21,976 | 5,831 | 3,431 | 31,392 |
| 96,754 | 160 | 22,729 | 6,045 | 3,552 | 32,486 |
| 96,755 | 165 | 22,541 | 6,009 | 3,530 | 32,245 |
| 96,756 | 166 | 22,651 | 6,059 | 3,558 | 32,434 |
| 96,757 | 155 | 22,677 | 6,035 | 3,575 | 32,442 |
| 96,758 | 150 | 22,473 | 6,017 | 3,558 | 32,198 |
| 96,759 | 153 | 22,382 | 6,019 | 3,545 | 32,099 |



|        |     |        |       |       |        |
|--------|-----|--------|-------|-------|--------|
| 96,760 | 157 | 22,402 | 6,031 | 3,534 | 32,124 |
| 96,761 | 154 | 22,272 | 6,009 | 3,491 | 31,926 |
| 96,762 | 154 | 22,055 | 5,949 | 3,472 | 31,630 |
| 96,763 | 152 | 21,933 | 5,953 | 3,473 | 31,511 |
| 96,764 | 152 | 22,110 | 5,975 | 3,503 | 31,740 |
| 96,765 | 148 | 21,988 | 5,915 | 3,469 | 31,520 |
| 96,766 | 147 | 21,952 | 5,943 | 3,476 | 31,518 |
| 96,767 | 146 | 21,913 | 5,917 | 3,489 | 31,465 |
| 96,768 | 153 | 21,802 | 5,919 | 3,488 | 31,362 |
| 96,769 | 159 | 21,682 | 5,913 | 3,484 | 31,238 |
| 96,770 | 154 | 21,456 | 5,861 | 3,465 | 30,936 |
| 96,771 | 155 | 21,964 | 5,975 | 3,547 | 31,641 |
| 96,772 | 153 | 21,593 | 5,908 | 3,520 | 31,174 |
| 96,773 | 153 | 21,495 | 5,920 | 3,515 | 31,083 |
| 96,774 | 153 | 21,386 | 5,939 | 3,546 | 31,024 |
| 96,775 | 155 | 21,261 | 5,907 | 3,533 | 30,856 |
| 96,776 | 153 | 20,994 | 5,835 | 3,482 | 30,464 |
| 96,777 | 152 | 21,051 | 5,830 | 3,487 | 30,520 |
| 96,778 | 151 | 20,945 | 5,804 | 3,498 | 30,398 |
| 96,779 | 159 | 20,691 | 5,723 | 3,450 | 30,023 |
| 96,780 | 158 | 20,417 | 5,642 | 3,420 | 29,637 |
| 96,781 | 159 | 20,308 | 5,629 | 3,464 | 29,560 |
| 96,782 | 157 | 20,192 | 5,630 | 3,454 | 29,433 |
| 96,783 | 160 | 20,163 | 5,630 | 3,443 | 29,396 |
| 96,784 | 160 | 20,193 | 5,698 | 3,474 | 29,525 |
| 96,785 | 153 | 20,108 | 5,656 | 3,420 | 29,337 |
| 96,786 | 154 | 20,056 | 5,656 | 3,397 | 29,263 |
| 96,787 | 154 | 19,981 | 5,642 | 3,391 | 29,168 |
| 96,788 | 149 | 20,099 | 5,678 | 3,403 | 29,329 |
| 96,789 | 149 | 19,775 | 5,613 | 3,361 | 28,898 |
| 96,790 | 148 | 19,558 | 5,577 | 3,347 | 28,630 |
| 96,791 | 155 | 19,888 | 5,641 | 3,423 | 29,107 |

|        |     |        |       |       |        |
|--------|-----|--------|-------|-------|--------|
| 96,792 | 155 | 19,830 | 5,624 | 3,428 | 29,037 |
| 96,793 | 147 | 19,762 | 5,589 | 3,388 | 28,886 |
| 96,794 | 147 | 19,707 | 5,593 | 3,391 | 28,838 |
| 96,795 | 144 | 19,543 | 5,541 | 3,370 | 28,598 |
| 96,796 | 144 | 19,457 | 5,539 | 3,372 | 28,512 |
| 96,797 | 137 | 19,472 | 5,568 | 3,400 | 28,577 |
| 96,798 | 131 | 19,298 | 5,527 | 3,383 | 28,339 |
| 96,799 | 121 | 19,414 | 5,548 | 3,402 | 28,485 |
| 96,800 | 126 | 19,294 | 5,494 | 3,378 | 28,292 |
| 96,801 | 121 | 19,437 | 5,503 | 3,371 | 28,432 |
| 96,802 | 114 | 19,563 | 5,522 | 3,385 | 28,584 |
| 96,803 | 113 | 19,609 | 5,540 | 3,421 | 28,683 |
| 96,804 | 122 | 19,442 | 5,490 | 3,397 | 28,451 |
| 96,805 | 124 | 19,192 | 5,430 | 3,372 | 28,118 |
| 96,806 | 120 | 19,514 | 5,500 | 3,466 | 28,600 |
| 96,807 | 117 | 19,115 | 5,350 | 3,380 | 27,962 |
| 96,808 | 119 | 19,290 | 5,375 | 3,391 | 28,175 |
| 96,809 | 119 | 19,330 | 5,375 | 3,386 | 28,210 |
| 96,810 | 111 | 19,077 | 5,317 | 3,376 | 27,881 |
| 96,811 | 113 | 19,172 | 5,356 | 3,399 | 28,040 |
| 96,812 | 122 | 18,982 | 5,267 | 3,366 | 27,737 |
| 96,813 | 121 | 18,988 | 5,266 | 3,353 | 27,728 |
| 96,814 | 122 | 18,891 | 5,254 | 3,350 | 27,617 |
| 96,815 | 122 | 18,857 | 5,237 | 3,362 | 27,578 |
| 96,816 | 124 | 18,874 | 5,199 | 3,362 | 27,559 |
| 96,817 | 125 | 19,138 | 5,277 | 3,423 | 27,963 |
| 96,818 | 122 | 19,226 | 5,314 | 3,428 | 28,090 |
| 96,819 | 117 | 19,299 | 5,284 | 3,420 | 28,120 |
| 96,820 | 111 | 19,140 | 5,238 | 3,374 | 27,863 |
| 96,821 | 111 | 19,340 | 5,298 | 3,385 | 28,134 |
| 96,822 | 115 | 19,268 | 5,320 | 3,394 | 28,097 |
| 96,823 | 113 | 19,256 | 5,263 | 3,364 | 27,996 |

|        |     |        |       |       |        |
|--------|-----|--------|-------|-------|--------|
| 96,824 | 112 | 19,244 | 5,257 | 3,353 | 27,966 |
| 96,825 | 109 | 19,201 | 5,241 | 3,345 | 27,896 |
| 96,826 | 108 | 19,167 | 5,240 | 3,328 | 27,843 |
| 96,827 | 109 | 19,342 | 5,272 | 3,353 | 28,076 |
| 96,828 | 113 | 19,329 | 5,271 | 3,352 | 28,065 |
| 96,829 | 113 | 19,267 | 5,268 | 3,313 | 27,961 |
| 96,830 | 106 | 19,236 | 5,224 | 3,288 | 27,854 |
| 96,831 | 106 | 19,020 | 5,155 | 3,256 | 27,537 |
| 96,832 | 110 | 19,130 | 5,193 | 3,230 | 27,663 |
| 96,833 | 110 | 19,016 | 5,164 | 3,203 | 27,493 |
| 96,834 | 110 | 19,106 | 5,158 | 3,183 | 27,557 |
| 96,835 | 112 | 18,835 | 5,099 | 3,138 | 27,184 |
| 96,836 | 112 | 18,929 | 5,129 | 3,160 | 27,330 |
| 96,837 | 111 | 18,932 | 5,137 | 3,163 | 27,343 |
| 96,838 | 114 | 18,918 | 5,111 | 3,154 | 27,297 |
| 96,839 | 114 | 18,836 | 5,098 | 3,154 | 27,202 |
| 96,840 | 108 | 18,876 | 5,117 | 3,150 | 27,251 |
| 96,841 | 105 | 18,694 | 5,076 | 3,126 | 27,001 |
| 96,842 | 105 | 18,711 | 5,095 | 3,113 | 27,024 |
| 96,843 | 105 | 18,432 | 5,039 | 3,079 | 26,655 |
| 96,844 | 106 | 18,673 | 5,092 | 3,124 | 26,995 |
| 96,845 | 108 | 18,708 | 5,091 | 3,116 | 27,023 |
| 96,846 | 108 | 18,751 | 5,103 | 3,117 | 27,079 |
| 96,847 | 108 | 18,589 | 5,038 | 3,079 | 26,814 |
| 96,848 | 106 | 18,478 | 5,032 | 3,077 | 26,693 |
| 96,849 | 111 | 18,555 | 5,080 | 3,088 | 26,834 |
| 96,850 | 114 | 18,368 | 5,048 | 3,061 | 26,591 |
| 96,851 | 112 | 18,343 | 5,025 | 3,035 | 26,515 |
| 96,852 | 115 | 18,287 | 5,033 | 3,047 | 26,482 |
| 96,853 | 115 | 18,217 | 4,998 | 3,032 | 26,362 |
| 96,854 | 105 | 17,897 | 4,877 | 2,977 | 25,856 |
| 96,855 | 112 | 18,068 | 4,925 | 2,982 | 26,087 |

|        |     |        |       |       |        |
|--------|-----|--------|-------|-------|--------|
| 96,856 | 109 | 18,046 | 4,927 | 2,950 | 26,032 |
| 96,857 | 109 | 18,041 | 4,964 | 2,965 | 26,079 |
| 96,858 | 109 | 17,800 | 4,938 | 2,937 | 25,784 |
| 96,859 | 109 | 17,744 | 4,921 | 2,955 | 25,729 |
| 96,860 | 109 | 17,780 | 4,931 | 2,949 | 25,769 |
| 96,861 | 110 | 17,834 | 4,915 | 2,931 | 25,790 |
| 96,862 | 106 | 17,719 | 4,852 | 2,916 | 25,593 |
| 96,863 | 103 | 18,046 | 4,925 | 2,957 | 26,031 |
| 96,864 | 101 | 17,966 | 4,893 | 2,916 | 25,876 |
| 96,865 | 105 | 18,018 | 4,890 | 2,911 | 25,924 |
| 96,866 | 104 | 17,816 | 4,823 | 2,883 | 25,626 |
| 96,867 | 117 | 18,587 | 5,014 | 2,994 | 26,712 |
| 96,868 | 126 | 18,689 | 5,019 | 2,962 | 26,796 |
| 96,869 | 126 | 18,443 | 4,930 | 2,916 | 26,415 |
| 96,870 | 126 | 18,596 | 4,984 | 2,937 | 26,643 |
| 96,871 | 125 | 18,268 | 4,895 | 2,915 | 26,203 |
| 96,872 | 127 | 18,407 | 4,911 | 2,947 | 26,392 |
| 96,873 | 124 | 18,611 | 4,946 | 2,962 | 26,643 |
| 96,874 | 125 | 18,384 | 4,894 | 2,919 | 26,322 |
| 96,875 | 125 | 18,404 | 4,892 | 2,912 | 26,333 |
| 96,876 | 134 | 18,216 | 4,834 | 2,898 | 26,082 |
| 96,877 | 133 | 18,095 | 4,787 | 2,876 | 25,891 |
| 96,878 | 141 | 18,768 | 4,969 | 2,985 | 26,863 |
| 96,879 | 140 | 18,414 | 4,896 | 2,939 | 26,389 |
| 96,880 | 141 | 18,385 | 4,882 | 2,934 | 26,342 |
| 96,881 | 138 | 18,380 | 4,896 | 2,928 | 26,342 |
| 96,882 | 138 | 18,440 | 4,909 | 2,928 | 26,415 |
| 96,883 | 137 | 18,518 | 4,902 | 2,949 | 26,506 |
| 96,884 | 138 | 18,767 | 4,922 | 2,963 | 26,790 |
| 96,885 | 137 | 18,614 | 4,862 | 2,972 | 26,585 |
| 96,886 | 135 | 18,557 | 4,844 | 2,961 | 26,497 |
| 96,887 | 138 | 18,875 | 4,910 | 2,977 | 26,900 |

|        |     |        |       |       |        |
|--------|-----|--------|-------|-------|--------|
| 96,888 | 137 | 18,689 | 4,884 | 2,945 | 26,655 |
| 96,889 | 137 | 18,751 | 4,879 | 2,945 | 26,712 |
| 96,890 | 137 | 18,987 | 4,945 | 2,988 | 27,057 |
| 96,891 | 135 | 18,878 | 4,881 | 2,952 | 26,846 |
| 96,892 | 136 | 19,196 | 4,929 | 2,976 | 27,237 |
| 96,893 | 133 | 19,127 | 4,883 | 2,943 | 27,086 |
| 96,894 | 132 | 19,116 | 4,872 | 2,933 | 27,053 |
| 96,895 | 135 | 19,402 | 4,940 | 2,984 | 27,461 |
| 96,896 | 134 | 19,369 | 4,950 | 2,993 | 27,446 |
| 96,897 | 133 | 19,366 | 4,943 | 2,984 | 27,426 |
| 96,898 | 133 | 19,479 | 4,969 | 3,003 | 27,584 |
| 96,899 | 132 | 19,648 | 5,024 | 3,013 | 27,817 |
| 96,900 | 131 | 19,809 | 5,030 | 3,025 | 27,995 |
| 96,901 | 128 | 19,631 | 4,971 | 2,991 | 27,721 |
| 96,902 | 128 | 19,696 | 4,982 | 3,004 | 27,810 |
| 96,903 | 127 | 19,873 | 5,031 | 3,028 | 28,059 |
| 96,904 | 128 | 19,737 | 4,998 | 3,011 | 27,874 |
| 96,905 | 131 | 19,875 | 5,013 | 3,017 | 28,036 |
| 96,906 | 124 | 19,788 | 4,959 | 3,011 | 27,882 |
| 96,907 | 130 | 20,084 | 5,027 | 3,044 | 28,285 |
| 96,908 | 133 | 20,152 | 5,028 | 3,015 | 28,328 |
| 96,909 | 131 | 19,913 | 4,974 | 2,977 | 27,995 |
| 96,910 | 131 | 19,934 | 5,014 | 2,956 | 28,035 |
| 96,911 | 130 | 20,020 | 5,039 | 2,964 | 28,153 |
| 96,912 | 134 | 20,107 | 5,028 | 2,955 | 28,224 |
| 96,913 | 133 | 19,934 | 4,980 | 2,938 | 27,985 |
| 96,914 | 130 | 20,074 | 5,061 | 2,997 | 28,262 |
| 96,915 | 135 | 19,929 | 5,014 | 2,965 | 28,043 |
| 96,916 | 129 | 19,846 | 4,968 | 2,954 | 27,897 |
| 96,917 | 122 | 19,807 | 4,948 | 2,943 | 27,820 |
| 96,918 | 124 | 19,928 | 4,984 | 2,950 | 27,986 |
| 96,919 | 116 | 19,841 | 4,971 | 2,956 | 27,884 |

|        |     |        |       |       |        |
|--------|-----|--------|-------|-------|--------|
| 96,920 | 121 | 19,867 | 4,994 | 2,974 | 27,956 |
| 96,921 | 119 | 19,610 | 4,933 | 2,945 | 27,607 |
| 96,922 | 120 | 19,703 | 4,924 | 2,929 | 27,676 |
| 96,923 | 120 | 19,747 | 4,942 | 2,905 | 27,714 |
| 96,924 | 120 | 19,813 | 4,921 | 2,902 | 27,756 |
| 96,925 | 120 | 19,905 | 4,918 | 2,897 | 27,840 |
| 96,926 | 123 | 19,956 | 4,925 | 2,898 | 27,902 |
| 96,927 | 122 | 20,031 | 4,911 | 2,894 | 27,958 |
| 96,928 | 123 | 20,120 | 4,915 | 2,906 | 28,064 |
| 96,929 | 123 | 20,133 | 4,892 | 2,895 | 28,043 |
| 96,930 | 118 | 19,877 | 4,841 | 2,882 | 27,718 |
| 96,931 | 118 | 20,344 | 4,927 | 2,952 | 28,341 |
| 96,932 | 122 | 20,287 | 4,881 | 2,942 | 28,232 |
| 96,933 | 120 | 20,451 | 4,920 | 2,977 | 28,468 |
| 96,934 | 126 | 20,512 | 4,946 | 2,987 | 28,571 |
| 96,935 | 125 | 20,355 | 4,901 | 2,962 | 28,343 |
| 96,936 | 134 | 20,312 | 4,928 | 2,955 | 28,329 |
| 96,937 | 136 | 20,351 | 4,911 | 2,954 | 28,352 |
| 96,938 | 137 | 20,380 | 4,936 | 2,973 | 28,426 |
| 96,939 | 137 | 20,399 | 4,943 | 2,979 | 28,458 |
| 96,940 | 144 | 20,440 | 5,004 | 2,986 | 28,574 |
| 96,941 | 143 | 20,254 | 4,922 | 2,954 | 28,273 |
| 96,942 | 143 | 20,228 | 4,924 | 2,956 | 28,251 |
| 96,943 | 143 | 20,048 | 4,883 | 2,929 | 28,003 |
| 96,944 | 144 | 19,702 | 4,846 | 2,886 | 27,578 |
| 96,945 | 142 | 20,190 | 5,025 | 3,001 | 28,358 |
| 96,946 | 145 | 20,233 | 5,041 | 2,989 | 28,408 |
| 96,947 | 147 | 19,985 | 4,961 | 2,931 | 28,024 |
| 96,948 | 150 | 20,022 | 4,954 | 2,913 | 28,039 |
| 96,949 | 150 | 19,982 | 4,952 | 2,910 | 27,994 |
| 96,950 | 151 | 20,117 | 4,978 | 2,934 | 28,180 |
| 96,951 | 151 | 19,914 | 4,923 | 2,908 | 27,896 |

|        |     |        |       |       |        |
|--------|-----|--------|-------|-------|--------|
| 96,952 | 149 | 19,907 | 4,920 | 2,894 | 27,870 |
| 96,953 | 151 | 19,911 | 4,913 | 2,880 | 27,855 |
| 96,954 | 158 | 19,943 | 4,891 | 2,873 | 27,865 |
| 96,955 | 154 | 19,766 | 4,849 | 2,843 | 27,612 |
| 96,956 | 152 | 19,740 | 4,894 | 2,843 | 27,629 |
| 96,957 | 152 | 19,569 | 4,881 | 2,813 | 27,415 |
| 96,958 | 152 | 20,025 | 4,989 | 2,890 | 28,056 |
| 96,959 | 151 | 19,985 | 4,968 | 2,897 | 28,001 |
| 96,960 | 159 | 20,009 | 4,930 | 2,900 | 27,998 |
| 96,961 | 159 | 19,821 | 4,899 | 2,887 | 27,766 |
| 96,962 | 165 | 19,868 | 4,914 | 2,905 | 27,852 |
| 96,963 | 162 | 19,633 | 4,846 | 2,836 | 27,477 |
| 96,964 | 163 | 19,554 | 4,847 | 2,811 | 27,375 |
| 96,965 | 163 | 19,644 | 4,856 | 2,826 | 27,489 |
| 96,966 | 162 | 19,434 | 4,799 | 2,799 | 27,194 |
| 96,967 | 164 | 19,413 | 4,803 | 2,782 | 27,162 |
| 96,968 | 158 | 19,217 | 4,782 | 2,759 | 26,916 |
| 96,969 | 159 | 19,178 | 4,771 | 2,751 | 26,859 |
| 96,970 | 156 | 19,015 | 4,733 | 2,717 | 26,621 |
| 96,971 | 162 | 19,040 | 4,726 | 2,695 | 26,623 |
| 96,972 | 163 | 18,957 | 4,689 | 2,694 | 26,503 |
| 96,973 | 163 | 19,132 | 4,721 | 2,712 | 26,728 |
| 96,974 | 163 | 18,670 | 4,634 | 2,678 | 26,145 |
| 96,975 | 163 | 18,709 | 4,642 | 2,671 | 26,185 |
| 96,976 | 160 | 18,502 | 4,598 | 2,650 | 25,910 |
| 96,977 | 150 | 18,299 | 4,576 | 2,625 | 25,650 |
| 96,978 | 158 | 18,942 | 4,752 | 2,722 | 26,574 |
| 96,979 | 156 | 18,735 | 4,759 | 2,689 | 26,339 |
| 96,980 | 159 | 19,040 | 4,811 | 2,736 | 26,746 |
| 96,981 | 159 | 18,885 | 4,762 | 2,717 | 26,523 |
| 96,982 | 159 | 18,930 | 4,794 | 2,727 | 26,610 |
| 96,983 | 156 | 18,847 | 4,795 | 2,694 | 26,492 |

|        |     |        |       |       |        |
|--------|-----|--------|-------|-------|--------|
| 96,984 | 149 | 18,698 | 4,786 | 2,663 | 26,296 |
| 96,985 | 154 | 18,652 | 4,777 | 2,671 | 26,254 |
| 96,986 | 151 | 18,460 | 4,731 | 2,659 | 26,001 |
| 96,987 | 150 | 18,779 | 4,804 | 2,705 | 26,438 |
| 96,988 | 152 | 18,727 | 4,781 | 2,689 | 26,349 |
| 96,989 | 146 | 18,763 | 4,751 | 2,689 | 26,349 |
| 96,990 | 150 | 18,769 | 4,742 | 2,665 | 26,326 |
| 96,991 | 157 | 18,531 | 4,668 | 2,625 | 25,981 |
| 96,992 | 164 | 18,416 | 4,602 | 2,577 | 25,759 |
| 96,993 | 164 | 18,519 | 4,611 | 2,579 | 25,873 |
| 96,994 | 164 | 18,238 | 4,583 | 2,559 | 25,544 |
| 96,995 | 162 | 18,086 | 4,548 | 2,548 | 25,344 |
| 96,996 | 162 | 18,903 | 4,708 | 2,633 | 26,406 |
| 96,997 | 161 | 18,870 | 4,657 | 2,633 | 26,321 |
| 96,998 | 165 | 18,920 | 4,677 | 2,671 | 26,433 |
| 96,999 | 165 | 18,923 | 4,700 | 2,683 | 26,471 |
| 97,000 | 165 | 19,070 | 4,694 | 2,690 | 26,619 |
| 97,001 | 163 | 19,224 | 4,697 | 2,683 | 26,767 |
| 97,002 | 170 | 19,220 | 4,700 | 2,687 | 26,777 |
| 97,003 | 170 | 19,273 | 4,705 | 2,687 | 26,835 |
| 97,004 | 168 | 19,406 | 4,720 | 2,719 | 27,013 |
| 97,005 | 168 | 19,467 | 4,745 | 2,721 | 27,101 |
| 97,006 | 172 | 19,690 | 4,833 | 2,771 | 27,466 |
| 97,007 | 173 | 19,693 | 4,776 | 2,744 | 27,386 |
| 97,008 | 174 | 19,709 | 4,788 | 2,758 | 27,429 |
| 97,009 | 173 | 19,714 | 4,794 | 2,733 | 27,414 |
| 97,010 | 179 | 19,925 | 4,834 | 2,763 | 27,701 |
| 97,011 | 173 | 19,909 | 4,841 | 2,756 | 27,679 |
| 97,012 | 166 | 19,864 | 4,788 | 2,742 | 27,560 |
| 97,013 | 167 | 19,947 | 4,806 | 2,751 | 27,671 |
| 97,014 | 165 | 20,166 | 4,869 | 2,778 | 27,978 |
| 97,015 | 162 | 19,993 | 4,837 | 2,777 | 27,769 |



|        |     |        |       |       |        |
|--------|-----|--------|-------|-------|--------|
| 97,016 | 163 | 20,235 | 4,899 | 2,813 | 28,110 |
| 97,017 | 158 | 20,121 | 4,886 | 2,811 | 27,976 |
| 97,018 | 156 | 19,757 | 4,747 | 2,759 | 27,419 |
| 97,019 | 156 | 19,947 | 4,800 | 2,791 | 27,694 |
| 97,020 | 155 | 19,981 | 4,808 | 2,798 | 27,742 |
| 97,021 | 158 | 20,131 | 4,846 | 2,834 | 27,969 |
| 97,022 | 155 | 20,386 | 4,901 | 2,871 | 28,313 |
| 97,023 | 152 | 20,271 | 4,882 | 2,854 | 28,159 |
| 97,024 | 153 | 20,351 | 4,929 | 2,894 | 28,327 |
| 97,025 | 149 | 20,262 | 4,929 | 2,902 | 28,242 |
| 97,026 | 158 | 20,195 | 4,865 | 2,896 | 28,114 |
| 97,027 | 158 | 20,256 | 4,881 | 2,894 | 28,189 |
| 97,028 | 156 | 20,261 | 4,876 | 2,893 | 28,186 |
| 97,029 | 150 | 20,197 | 4,898 | 2,917 | 28,162 |
| 97,030 | 148 | 20,131 | 4,874 | 2,914 | 28,067 |
| 97,031 | 152 | 20,219 | 4,896 | 2,907 | 28,174 |
| 97,032 | 153 | 20,274 | 4,933 | 2,911 | 28,271 |
| 97,033 | 159 | 20,167 | 4,891 | 2,889 | 28,106 |
| 97,034 | 163 | 20,153 | 4,885 | 2,902 | 28,103 |
| 97,035 | 158 | 20,042 | 4,829 | 2,875 | 27,904 |
| 97,036 | 158 | 20,094 | 4,846 | 2,878 | 27,976 |
| 97,037 | 157 | 19,805 | 4,794 | 2,849 | 27,605 |
| 97,038 | 153 | 19,552 | 4,735 | 2,838 | 27,278 |
| 97,039 | 151 | 20,016 | 4,870 | 2,968 | 28,005 |
| 97,040 | 155 | 20,078 | 4,894 | 2,989 | 28,116 |
| 97,041 | 143 | 20,073 | 4,897 | 3,010 | 28,123 |
| 97,042 | 127 | 20,200 | 4,952 | 3,024 | 28,303 |
| 97,043 | 128 | 20,477 | 5,009 | 3,052 | 28,666 |
| 97,044 | 128 | 20,534 | 5,001 | 3,065 | 28,728 |
| 97,045 | 128 | 20,489 | 5,023 | 3,070 | 28,710 |
| 97,046 | 128 | 20,492 | 5,025 | 3,093 | 28,738 |
| 97,047 | 131 | 20,545 | 5,108 | 3,118 | 28,902 |

|        |     |        |       |       |        |
|--------|-----|--------|-------|-------|--------|
| 97,048 | 130 | 20,585 | 5,149 | 3,151 | 29,015 |
| 97,049 | 130 | 20,646 | 5,171 | 3,146 | 29,093 |
| 97,050 | 129 | 20,486 | 5,158 | 3,149 | 28,922 |
| 97,051 | 134 | 20,656 | 5,218 | 3,169 | 29,177 |
| 97,052 | 136 | 20,794 | 5,291 | 3,238 | 29,459 |
| 97,053 | 129 | 20,433 | 5,244 | 3,207 | 29,013 |
| 97,054 | 134 | 20,662 | 5,287 | 3,236 | 29,319 |
| 97,055 | 126 | 20,599 | 5,320 | 3,245 | 29,290 |
| 97,056 | 125 | 20,563 | 5,253 | 3,244 | 29,185 |
| 97,057 | 124 | 20,699 | 5,319 | 3,277 | 29,419 |
| 97,058 | 122 | 20,744 | 5,381 | 3,283 | 29,530 |
| 97,059 | 122 | 20,803 | 5,366 | 3,270 | 29,561 |
| 97,060 | 122 | 20,767 | 5,337 | 3,278 | 29,504 |
| 97,061 | 121 | 20,503 | 5,306 | 3,258 | 29,188 |
| 97,062 | 120 | 20,303 | 5,269 | 3,229 | 28,921 |
| 97,063 | 122 | 20,672 | 5,371 | 3,265 | 29,430 |
| 97,064 | 129 | 20,769 | 5,410 | 3,291 | 29,599 |
| 97,065 | 132 | 20,576 | 5,385 | 3,271 | 29,364 |
| 97,066 | 133 | 20,500 | 5,368 | 3,243 | 29,244 |
| 97,067 | 134 | 20,728 | 5,423 | 3,281 | 29,566 |
| 97,068 | 134 | 20,677 | 5,427 | 3,286 | 29,524 |
| 97,069 | 132 | 20,761 | 5,470 | 3,322 | 29,685 |
| 97,070 | 132 | 20,854 | 5,486 | 3,328 | 29,800 |
| 97,071 | 132 | 20,974 | 5,535 | 3,372 | 30,013 |
| 97,072 | 137 | 20,968 | 5,541 | 3,380 | 30,026 |
| 97,073 | 135 | 20,990 | 5,555 | 3,393 | 30,073 |
| 97,074 | 133 | 20,909 | 5,502 | 3,346 | 29,890 |
| 97,075 | 134 | 20,601 | 5,438 | 3,307 | 29,480 |
| 97,076 | 136 | 20,844 | 5,468 | 3,326 | 29,774 |
| 97,077 | 130 | 21,057 | 5,531 | 3,363 | 30,081 |
| 97,078 | 130 | 20,929 | 5,505 | 3,353 | 29,917 |
| 97,079 | 132 | 21,123 | 5,547 | 3,364 | 30,166 |

|        |     |        |       |       |        |
|--------|-----|--------|-------|-------|--------|
| 97,080 | 135 | 21,064 | 5,490 | 3,321 | 30,010 |
| 97,081 | 134 | 20,963 | 5,497 | 3,328 | 29,922 |
| 97,082 | 130 | 21,208 | 5,556 | 3,363 | 30,257 |
| 97,083 | 130 | 21,180 | 5,545 | 3,363 | 30,218 |
| 97,084 | 123 | 20,999 | 5,509 | 3,362 | 29,993 |
| 97,085 | 122 | 21,084 | 5,538 | 3,358 | 30,102 |
| 97,086 | 122 | 21,146 | 5,555 | 3,353 | 30,176 |
| 97,087 | 121 | 20,996 | 5,517 | 3,333 | 29,967 |
| 97,088 | 119 | 20,867 | 5,481 | 3,303 | 29,770 |
| 97,089 | 119 | 20,778 | 5,464 | 3,272 | 29,633 |
| 97,090 | 117 | 21,195 | 5,552 | 3,294 | 30,158 |
| 97,091 | 117 | 21,234 | 5,531 | 3,271 | 30,153 |
| 97,092 | 116 | 20,948 | 5,447 | 3,244 | 29,755 |
| 97,093 | 127 | 21,195 | 5,499 | 3,269 | 30,090 |
| 97,094 | 127 | 21,016 | 5,453 | 3,252 | 29,848 |
| 97,095 | 132 | 20,685 | 5,371 | 3,192 | 29,380 |
| 97,096 | 132 | 20,817 | 5,392 | 3,206 | 29,547 |
| 97,097 | 128 | 20,500 | 5,301 | 3,144 | 29,073 |
| 97,098 | 132 | 20,651 | 5,345 | 3,162 | 29,290 |
| 97,099 | 127 | 19,948 | 5,159 | 3,063 | 28,297 |
| 97,100 | 126 | 19,891 | 5,166 | 3,063 | 28,246 |
| 97,101 | 123 | 19,763 | 5,115 | 3,029 | 28,030 |
| 97,102 | 123 | 19,610 | 5,075 | 3,002 | 27,810 |
| 97,103 | 128 | 19,707 | 5,095 | 3,013 | 27,943 |
| 97,104 | 125 | 19,449 | 5,000 | 2,975 | 27,549 |
| 97,105 | 120 | 19,370 | 5,011 | 2,973 | 27,474 |
| 97,106 | 120 | 19,466 | 5,010 | 2,967 | 27,563 |
| 97,107 | 118 | 19,263 | 4,971 | 2,939 | 27,291 |
| 97,108 | 118 | 19,115 | 4,875 | 2,903 | 27,011 |
| 97,109 | 119 | 19,270 | 4,872 | 2,929 | 27,190 |
| 97,110 | 117 | 19,017 | 4,828 | 2,928 | 26,890 |
| 97,111 | 115 | 18,770 | 4,788 | 2,904 | 26,577 |

|        |     |        |       |       |        |
|--------|-----|--------|-------|-------|--------|
| 97,112 | 114 | 18,919 | 4,821 | 2,905 | 26,759 |
| 97,113 | 119 | 18,652 | 4,744 | 2,862 | 26,377 |
| 97,114 | 118 | 18,522 | 4,671 | 2,840 | 26,151 |
| 97,115 | 118 | 18,560 | 4,673 | 2,837 | 26,188 |
| 97,116 | 116 | 18,652 | 4,680 | 2,856 | 26,304 |
| 97,117 | 118 | 18,439 | 4,598 | 2,833 | 25,988 |
| 97,118 | 114 | 18,247 | 4,533 | 2,811 | 25,705 |
| 97,119 | 125 | 18,302 | 4,584 | 2,821 | 25,832 |
| 97,120 | 125 | 18,239 | 4,581 | 2,825 | 25,770 |
| 97,121 | 126 | 18,129 | 4,543 | 2,808 | 25,606 |
| 97,122 | 126 | 18,092 | 4,563 | 2,807 | 25,588 |
| 97,123 | 118 | 18,089 | 4,573 | 2,809 | 25,589 |
| 97,124 | 122 | 17,913 | 4,541 | 2,791 | 25,367 |
| 97,125 | 123 | 17,884 | 4,530 | 2,778 | 25,315 |
| 97,126 | 123 | 18,082 | 4,571 | 2,808 | 25,584 |
| 97,127 | 125 | 17,880 | 4,562 | 2,779 | 25,346 |
| 97,128 | 135 | 17,794 | 4,563 | 2,767 | 25,259 |
| 97,129 | 135 | 17,815 | 4,568 | 2,766 | 25,284 |
| 97,130 | 138 | 18,016 | 4,631 | 2,826 | 25,611 |
| 97,131 | 142 | 17,821 | 4,612 | 2,820 | 25,395 |
| 97,132 | 142 | 17,809 | 4,602 | 2,822 | 25,375 |
| 97,133 | 145 | 18,224 | 4,744 | 2,919 | 26,032 |
| 97,134 | 146 | 18,104 | 4,705 | 2,906 | 25,861 |
| 97,135 | 149 | 18,125 | 4,693 | 2,907 | 25,874 |
| 97,136 | 156 | 18,187 | 4,790 | 2,966 | 26,099 |
| 97,137 | 160 | 18,029 | 4,733 | 2,915 | 25,837 |
| 97,138 | 160 | 18,016 | 4,734 | 2,920 | 25,830 |
| 97,139 | 158 | 17,786 | 4,703 | 2,888 | 25,535 |
| 97,140 | 158 | 17,453 | 4,665 | 2,875 | 25,151 |
| 97,141 | 166 | 17,869 | 4,840 | 3,006 | 25,881 |
| 97,142 | 175 | 18,052 | 4,955 | 3,044 | 26,226 |
| 97,143 | 173 | 18,135 | 4,961 | 3,084 | 26,353 |

|        |     |        |       |       |        |
|--------|-----|--------|-------|-------|--------|
| 97,144 | 171 | 18,223 | 4,990 | 3,098 | 26,482 |
| 97,145 | 171 | 18,269 | 5,008 | 3,109 | 26,557 |
| 97,146 | 165 | 18,239 | 5,025 | 3,117 | 26,546 |
| 97,147 | 164 | 18,137 | 5,006 | 3,113 | 26,420 |
| 97,148 | 164 | 18,235 | 5,015 | 3,112 | 26,526 |
| 97,149 | 166 | 18,504 | 5,077 | 3,165 | 26,912 |
| 97,150 | 163 | 18,595 | 5,094 | 3,181 | 27,033 |
| 97,151 | 164 | 18,544 | 5,094 | 3,195 | 26,997 |
| 97,152 | 164 | 18,740 | 5,129 | 3,235 | 27,268 |
| 97,153 | 161 | 18,829 | 5,150 | 3,253 | 27,393 |
| 97,154 | 161 | 18,976 | 5,203 | 3,274 | 27,614 |
| 97,155 | 166 | 19,170 | 5,237 | 3,286 | 27,859 |
| 97,156 | 166 | 19,096 | 5,192 | 3,261 | 27,715 |
| 97,157 | 172 | 18,913 | 5,165 | 3,248 | 27,498 |
| 97,158 | 172 | 18,713 | 5,116 | 3,210 | 27,211 |
| 97,159 | 170 | 19,375 | 5,359 | 3,348 | 28,252 |
| 97,160 | 168 | 19,182 | 5,330 | 3,326 | 28,006 |
| 97,161 | 170 | 19,349 | 5,362 | 3,327 | 28,208 |
| 97,162 | 170 | 19,311 | 5,368 | 3,327 | 28,176 |
| 97,163 | 168 | 19,292 | 5,384 | 3,338 | 28,182 |
| 97,164 | 165 | 19,478 | 5,491 | 3,397 | 28,531 |
| 97,165 | 158 | 19,485 | 5,503 | 3,410 | 28,556 |
| 97,166 | 157 | 19,262 | 5,456 | 3,393 | 28,268 |
| 97,167 | 161 | 19,436 | 5,505 | 3,423 | 28,525 |
| 97,168 | 158 | 19,389 | 5,528 | 3,401 | 28,476 |
| 97,169 | 157 | 19,431 | 5,532 | 3,391 | 28,511 |
| 97,170 | 158 | 19,481 | 5,554 | 3,376 | 28,569 |
| 97,171 | 158 | 19,542 | 5,576 | 3,380 | 28,656 |
| 97,172 | 160 | 19,783 | 5,608 | 3,390 | 28,941 |
| 97,173 | 160 | 19,562 | 5,601 | 3,354 | 28,677 |
| 97,174 | 160 | 19,682 | 5,657 | 3,384 | 28,883 |
| 97,175 | 157 | 19,809 | 5,721 | 3,411 | 29,098 |

|        |     |        |       |       |        |
|--------|-----|--------|-------|-------|--------|
| 97,176 | 155 | 19,395 | 5,644 | 3,367 | 28,561 |
| 97,177 | 154 | 19,585 | 5,674 | 3,389 | 28,802 |
| 97,178 | 148 | 19,880 | 5,725 | 3,427 | 29,180 |
| 97,179 | 136 | 19,727 | 5,665 | 3,399 | 28,927 |
| 97,180 | 139 | 19,917 | 5,720 | 3,440 | 29,216 |
| 97,181 | 134 | 19,439 | 5,569 | 3,347 | 28,489 |
| 97,182 | 135 | 19,685 | 5,612 | 3,373 | 28,805 |
| 97,183 | 134 | 19,872 | 5,677 | 3,397 | 29,080 |
| 97,184 | 137 | 19,791 | 5,651 | 3,367 | 28,946 |
| 97,185 | 129 | 19,840 | 5,624 | 3,335 | 28,928 |
| 97,186 | 130 | 19,773 | 5,595 | 3,311 | 28,809 |
| 97,187 | 124 | 19,784 | 5,550 | 3,304 | 28,762 |
| 97,188 | 129 | 20,107 | 5,612 | 3,344 | 29,192 |
| 97,189 | 129 | 20,213 | 5,610 | 3,357 | 29,309 |
| 97,190 | 124 | 20,423 | 5,620 | 3,338 | 29,505 |
| 97,191 | 126 | 20,436 | 5,619 | 3,326 | 29,507 |
| 97,192 | 125 | 20,872 | 5,681 | 3,359 | 30,037 |
| 97,193 | 127 | 20,474 | 5,529 | 3,274 | 29,404 |
| 97,194 | 128 | 20,720 | 5,606 | 3,300 | 29,754 |
| 97,195 | 125 | 20,687 | 5,612 | 3,336 | 29,760 |
| 97,196 | 124 | 20,788 | 5,680 | 3,357 | 29,949 |
| 97,197 | 133 | 20,731 | 5,627 | 3,342 | 29,833 |
| 97,198 | 133 | 21,049 | 5,668 | 3,369 | 30,219 |
| 97,199 | 128 | 21,109 | 5,694 | 3,386 | 30,317 |
| 97,200 | 128 | 21,051 | 5,691 | 3,382 | 30,252 |
| 97,201 | 129 | 21,238 | 5,771 | 3,404 | 30,542 |
| 97,202 | 128 | 21,438 | 5,820 | 3,453 | 30,839 |
| 97,203 | 128 | 21,351 | 5,813 | 3,441 | 30,733 |
| 97,204 | 133 | 21,535 | 5,860 | 3,462 | 30,990 |
| 97,205 | 129 | 21,584 | 5,847 | 3,461 | 31,021 |
| 97,206 | 125 | 21,345 | 5,843 | 3,459 | 30,772 |
| 97,207 | 126 | 21,391 | 5,843 | 3,479 | 30,839 |

|        |     |        |       |       |        |
|--------|-----|--------|-------|-------|--------|
| 97,208 | 122 | 21,518 | 5,814 | 3,452 | 30,906 |
| 97,209 | 137 | 21,464 | 5,812 | 3,440 | 30,853 |
| 97,210 | 137 | 21,620 | 5,797 | 3,469 | 31,023 |
| 97,211 | 136 | 21,550 | 5,812 | 3,487 | 30,985 |
| 97,212 | 135 | 21,565 | 5,846 | 3,495 | 31,041 |
| 97,213 | 138 | 21,754 | 5,862 | 3,510 | 31,264 |
| 97,214 | 137 | 21,932 | 5,861 | 3,518 | 31,448 |
| 97,215 | 136 | 21,970 | 5,851 | 3,502 | 31,459 |
| 97,216 | 138 | 22,087 | 5,859 | 3,500 | 31,584 |
| 97,217 | 149 | 22,169 | 5,872 | 3,518 | 31,708 |
| 97,218 | 146 | 22,131 | 5,849 | 3,512 | 31,638 |
| 97,219 | 151 | 22,320 | 5,863 | 3,551 | 31,885 |
| 97,220 | 151 | 22,229 | 5,850 | 3,558 | 31,788 |
| 97,221 | 152 | 22,348 | 5,890 | 3,585 | 31,975 |
| 97,222 | 153 | 22,512 | 5,925 | 3,633 | 32,223 |
| 97,223 | 150 | 22,368 | 5,875 | 3,612 | 32,005 |
| 97,224 | 153 | 22,514 | 5,881 | 3,645 | 32,193 |
| 97,225 | 156 | 22,722 | 5,894 | 3,668 | 32,440 |
| 97,226 | 156 | 22,804 | 5,890 | 3,664 | 32,514 |
| 97,227 | 159 | 22,877 | 5,910 | 3,674 | 32,620 |
| 97,228 | 161 | 22,842 | 5,917 | 3,688 | 32,608 |
| 97,229 | 168 | 23,233 | 5,995 | 3,721 | 33,117 |
| 97,230 | 166 | 23,176 | 5,993 | 3,721 | 33,056 |
| 97,231 | 173 | 23,436 | 6,058 | 3,758 | 33,425 |
| 97,232 | 177 | 23,359 | 6,105 | 3,789 | 33,430 |
| 97,233 | 179 | 23,339 | 6,058 | 3,760 | 33,336 |
| 97,234 | 179 | 23,295 | 6,063 | 3,760 | 33,297 |
| 97,235 | 175 | 23,177 | 6,073 | 3,780 | 33,205 |
| 97,236 | 174 | 23,140 | 6,080 | 3,807 | 33,201 |
| 97,237 | 171 | 23,006 | 6,077 | 3,813 | 33,067 |
| 97,238 | 172 | 22,825 | 6,089 | 3,790 | 32,876 |
| 97,239 | 168 | 22,633 | 6,017 | 3,765 | 32,583 |

|        |     |        |       |       |        |
|--------|-----|--------|-------|-------|--------|
| 97,240 | 167 | 22,488 | 5,967 | 3,736 | 32,358 |
| 97,241 | 165 | 23,030 | 6,070 | 3,840 | 33,105 |
| 97,242 | 165 | 22,844 | 6,042 | 3,828 | 32,879 |
| 97,243 | 167 | 22,962 | 6,044 | 3,853 | 33,026 |
| 97,244 | 159 | 22,706 | 5,990 | 3,819 | 32,674 |
| 97,245 | 162 | 22,634 | 5,983 | 3,825 | 32,604 |
| 97,246 | 162 | 22,627 | 5,970 | 3,819 | 32,578 |
| 97,247 | 162 | 22,787 | 5,940 | 3,838 | 32,727 |
| 97,248 | 154 | 22,740 | 5,936 | 3,856 | 32,686 |
| 97,249 | 160 | 22,590 | 5,896 | 3,838 | 32,484 |
| 97,250 | 159 | 22,384 | 5,862 | 3,824 | 32,229 |
| 97,251 | 158 | 22,369 | 5,860 | 3,849 | 32,236 |
| 97,252 | 162 | 22,313 | 5,783 | 3,838 | 32,096 |
| 97,253 | 166 | 22,510 | 5,843 | 3,867 | 32,386 |
| 97,254 | 169 | 22,329 | 5,811 | 3,866 | 32,175 |
| 97,255 | 169 | 22,460 | 5,828 | 3,869 | 32,326 |
| 97,256 | 176 | 22,089 | 5,697 | 3,794 | 31,756 |
| 97,257 | 179 | 22,216 | 5,703 | 3,795 | 31,893 |
| 97,258 | 178 | 21,900 | 5,627 | 3,742 | 31,447 |
| 97,259 | 180 | 21,878 | 5,670 | 3,747 | 31,475 |
| 97,260 | 172 | 21,534 | 5,587 | 3,681 | 30,974 |
| 97,261 | 171 | 21,519 | 5,587 | 3,672 | 30,949 |
| 97,262 | 172 | 21,338 | 5,499 | 3,626 | 30,635 |
| 97,263 | 176 | 21,536 | 5,514 | 3,638 | 30,864 |
| 97,264 | 175 | 21,223 | 5,433 | 3,593 | 30,424 |
| 97,265 | 175 | 21,212 | 5,414 | 3,600 | 30,401 |
| 97,266 | 174 | 21,248 | 5,411 | 3,627 | 30,460 |
| 97,267 | 173 | 21,336 | 5,448 | 3,674 | 30,631 |
| 97,268 | 163 | 20,886 | 5,379 | 3,587 | 30,015 |
| 97,269 | 162 | 20,799 | 5,370 | 3,599 | 29,930 |
| 97,270 | 162 | 20,853 | 5,395 | 3,614 | 30,024 |
| 97,271 | 161 | 21,058 | 5,418 | 3,616 | 30,253 |



|        |     |        |       |       |        |
|--------|-----|--------|-------|-------|--------|
| 97,272 | 156 | 21,186 | 5,381 | 3,611 | 30,334 |
| 97,273 | 156 | 21,026 | 5,306 | 3,577 | 30,065 |
| 97,274 | 157 | 20,760 | 5,223 | 3,522 | 29,662 |
| 97,275 | 154 | 20,542 | 5,188 | 3,477 | 29,361 |
| 97,276 | 155 | 20,707 | 5,225 | 3,486 | 29,573 |
| 97,277 | 156 | 20,718 | 5,203 | 3,481 | 29,558 |
| 97,278 | 159 | 21,060 | 5,244 | 3,512 | 29,975 |
| 97,279 | 157 | 21,036 | 5,236 | 3,514 | 29,943 |
| 97,280 | 152 | 20,944 | 5,210 | 3,513 | 29,819 |
| 97,281 | 156 | 20,899 | 5,186 | 3,492 | 29,733 |
| 97,282 | 150 | 20,724 | 5,092 | 3,422 | 29,388 |
| 97,283 | 146 | 20,833 | 5,081 | 3,419 | 29,479 |
| 97,284 | 142 | 20,746 | 5,042 | 3,427 | 29,357 |
| 97,285 | 146 | 20,849 | 5,053 | 3,421 | 29,469 |
| 97,286 | 151 | 21,103 | 5,043 | 3,434 | 29,731 |
| 97,287 | 153 | 20,919 | 4,931 | 3,368 | 29,371 |
| 97,288 | 154 | 21,034 | 4,934 | 3,366 | 29,488 |
| 97,289 | 160 | 21,192 | 4,979 | 3,382 | 29,713 |
| 97,290 | 155 | 20,930 | 4,920 | 3,316 | 29,321 |
| 97,291 | 157 | 20,822 | 4,881 | 3,296 | 29,156 |
| 97,292 | 157 | 20,839 | 4,884 | 3,313 | 29,193 |
| 97,293 | 160 | 20,908 | 4,873 | 3,308 | 29,249 |
| 97,294 | 159 | 21,038 | 4,919 | 3,363 | 29,479 |
| 97,295 | 160 | 20,792 | 4,913 | 3,336 | 29,201 |
| 97,296 | 157 | 20,717 | 4,886 | 3,325 | 29,085 |
| 97,297 | 158 | 20,576 | 4,840 | 3,319 | 28,893 |
| 97,298 | 158 | 20,144 | 4,771 | 3,254 | 28,327 |
| 97,299 | 152 | 20,129 | 4,742 | 3,233 | 28,256 |
| 97,300 | 155 | 20,218 | 4,708 | 3,232 | 28,313 |
| 97,301 | 155 | 20,285 | 4,720 | 3,231 | 28,391 |
| 97,302 | 154 | 20,438 | 4,772 | 3,243 | 28,607 |
| 97,303 | 149 | 20,472 | 4,793 | 3,271 | 28,685 |

|        |     |        |       |       |        |
|--------|-----|--------|-------|-------|--------|
| 97,304 | 146 | 20,581 | 4,805 | 3,255 | 28,787 |
| 97,305 | 146 | 21,139 | 4,897 | 3,323 | 29,505 |
| 97,306 | 142 | 21,038 | 4,903 | 3,338 | 29,421 |
| 97,307 | 137 | 21,103 | 4,919 | 3,346 | 29,505 |
| 97,308 | 131 | 21,329 | 4,932 | 3,365 | 29,757 |
| 97,309 | 129 | 21,276 | 4,911 | 3,367 | 29,683 |
| 97,310 | 134 | 21,625 | 5,011 | 3,420 | 30,190 |
| 97,311 | 131 | 21,724 | 5,023 | 3,441 | 30,319 |
| 97,312 | 131 | 21,724 | 5,051 | 3,461 | 30,367 |
| 97,313 | 135 | 21,999 | 5,098 | 3,509 | 30,741 |
| 97,314 | 132 | 22,043 | 5,149 | 3,542 | 30,866 |
| 97,315 | 131 | 21,989 | 5,153 | 3,540 | 30,813 |
| 97,316 | 135 | 21,983 | 5,188 | 3,526 | 30,832 |
| 97,317 | 135 | 21,911 | 5,177 | 3,508 | 30,731 |
| 97,318 | 132 | 21,828 | 5,132 | 3,480 | 30,572 |
| 97,319 | 134 | 21,915 | 5,138 | 3,485 | 30,672 |
| 97,320 | 130 | 21,851 | 5,112 | 3,455 | 30,548 |
| 97,321 | 127 | 22,102 | 5,144 | 3,459 | 30,832 |
| 97,322 | 131 | 22,068 | 5,137 | 3,461 | 30,797 |
| 97,323 | 134 | 21,711 | 5,093 | 3,413 | 30,351 |
| 97,324 | 133 | 21,478 | 5,060 | 3,373 | 30,044 |
| 97,325 | 136 | 22,151 | 5,236 | 3,511 | 31,034 |
| 97,326 | 132 | 21,871 | 5,155 | 3,470 | 30,628 |
| 97,327 | 131 | 21,895 | 5,175 | 3,493 | 30,694 |
| 97,328 | 137 | 22,225 | 5,233 | 3,530 | 31,125 |
| 97,329 | 136 | 22,061 | 5,207 | 3,513 | 30,917 |
| 97,330 | 135 | 21,999 | 5,187 | 3,492 | 30,813 |
| 97,331 | 136 | 22,154 | 5,254 | 3,521 | 31,065 |
| 97,332 | 124 | 21,823 | 5,178 | 3,462 | 30,587 |
| 97,333 | 125 | 21,806 | 5,164 | 3,459 | 30,554 |
| 97,334 | 124 | 21,722 | 5,157 | 3,450 | 30,453 |
| 97,335 | 127 | 21,948 | 5,191 | 3,470 | 30,736 |

|        |     |        |       |       |        |
|--------|-----|--------|-------|-------|--------|
| 97,336 | 120 | 21,913 | 5,148 | 3,464 | 30,645 |
| 97,337 | 120 | 21,721 | 5,153 | 3,437 | 30,431 |
| 97,338 | 119 | 21,646 | 5,129 | 3,428 | 30,322 |
| 97,339 | 114 | 21,619 | 5,105 | 3,428 | 30,266 |
| 97,340 | 115 | 21,888 | 5,168 | 3,439 | 30,610 |
| 97,341 | 112 | 21,991 | 5,203 | 3,467 | 30,773 |
| 97,342 | 113 | 22,088 | 5,236 | 3,474 | 30,911 |
| 97,343 | 112 | 22,131 | 5,251 | 3,480 | 30,974 |
| 97,344 | 109 | 22,206 | 5,245 | 3,483 | 31,043 |
| 97,345 | 112 | 22,239 | 5,230 | 3,447 | 31,028 |
| 97,346 | 112 | 22,352 | 5,222 | 3,481 | 31,167 |
| 97,347 | 111 | 22,369 | 5,207 | 3,448 | 31,135 |
| 97,348 | 116 | 22,465 | 5,206 | 3,445 | 31,232 |
| 97,349 | 115 | 22,090 | 5,154 | 3,398 | 30,757 |
| 97,350 | 116 | 22,522 | 5,337 | 3,476 | 31,451 |
| 97,351 | 117 | 22,563 | 5,336 | 3,465 | 31,481 |
| 97,352 | 116 | 22,567 | 5,329 | 3,452 | 31,464 |
| 97,353 | 117 | 22,651 | 5,316 | 3,432 | 31,516 |
| 97,354 | 116 | 22,391 | 5,247 | 3,376 | 31,130 |
| 97,355 | 119 | 22,529 | 5,305 | 3,415 | 31,368 |
| 97,356 | 126 | 22,395 | 5,289 | 3,391 | 31,201 |
| 97,357 | 125 | 22,152 | 5,210 | 3,351 | 30,838 |
| 97,358 | 124 | 22,279 | 5,210 | 3,365 | 30,978 |
| 97,359 | 130 | 22,140 | 5,207 | 3,355 | 30,832 |
| 97,360 | 134 | 22,210 | 5,266 | 3,361 | 30,971 |
| 97,361 | 140 | 22,189 | 5,242 | 3,359 | 30,930 |
| 97,362 | 139 | 21,898 | 5,198 | 3,312 | 30,547 |
| 97,363 | 141 | 22,244 | 5,243 | 3,349 | 30,977 |
| 97,364 | 137 | 22,056 | 5,183 | 3,291 | 30,667 |
| 97,365 | 136 | 22,059 | 5,135 | 3,270 | 30,600 |
| 97,366 | 137 | 22,099 | 5,131 | 3,270 | 30,637 |
| 97,367 | 133 | 22,031 | 5,116 | 3,270 | 30,550 |

|        |     |        |       |       |        |
|--------|-----|--------|-------|-------|--------|
| 97,368 | 140 | 22,028 | 5,119 | 3,265 | 30,552 |
| 97,369 | 140 | 21,933 | 5,106 | 3,256 | 30,435 |
| 97,370 | 134 | 22,034 | 5,127 | 3,268 | 30,563 |
| 97,371 | 138 | 22,129 | 5,194 | 3,331 | 30,792 |
| 97,372 | 138 | 22,162 | 5,179 | 3,347 | 30,826 |
| 97,373 | 139 | 22,234 | 5,215 | 3,353 | 30,941 |
| 97,374 | 137 | 22,275 | 5,199 | 3,377 | 30,988 |
| 97,375 | 140 | 22,380 | 5,194 | 3,403 | 31,117 |
| 97,376 | 141 | 22,258 | 5,169 | 3,388 | 30,956 |
| 97,377 | 142 | 22,391 | 5,191 | 3,401 | 31,125 |
| 97,378 | 134 | 22,491 | 5,252 | 3,442 | 31,319 |
| 97,379 | 136 | 22,424 | 5,278 | 3,444 | 31,282 |
| 97,380 | 135 | 22,454 | 5,268 | 3,411 | 31,268 |
| 97,381 | 133 | 21,461 | 5,051 | 3,282 | 29,927 |
| 97,382 | 133 | 21,752 | 5,067 | 3,283 | 30,235 |
| 97,383 | 135 | 21,960 | 5,093 | 3,312 | 30,500 |
| 97,384 | 135 | 22,013 | 5,088 | 3,314 | 30,550 |
| 97,385 | 135 | 22,507 | 5,157 | 3,364 | 31,163 |
| 97,386 | 141 | 22,471 | 5,156 | 3,379 | 31,147 |
| 97,387 | 139 | 22,473 | 5,160 | 3,377 | 31,149 |
| 97,388 | 139 | 22,843 | 5,205 | 3,425 | 31,612 |
| 97,389 | 146 | 22,859 | 5,212 | 3,410 | 31,627 |
| 97,390 | 148 | 23,143 | 5,252 | 3,435 | 31,978 |
| 97,391 | 149 | 22,841 | 5,203 | 3,425 | 31,618 |
| 97,392 | 149 | 22,884 | 5,197 | 3,427 | 31,657 |
| 97,393 | 147 | 23,189 | 5,265 | 3,478 | 32,079 |
| 97,394 | 146 | 23,194 | 5,276 | 3,447 | 32,063 |
| 97,395 | 141 | 23,055 | 5,278 | 3,423 | 31,897 |
| 97,396 | 139 | 22,858 | 5,242 | 3,415 | 31,654 |
| 97,397 | 141 | 22,878 | 5,249 | 3,393 | 31,661 |
| 97,398 | 146 | 23,210 | 5,289 | 3,445 | 32,090 |
| 97,399 | 143 | 22,981 | 5,193 | 3,387 | 31,704 |

|        |     |        |       |       |        |
|--------|-----|--------|-------|-------|--------|
| 97,400 | 147 | 23,239 | 5,205 | 3,432 | 32,023 |
| 97,401 | 147 | 23,260 | 5,188 | 3,451 | 32,046 |
| 97,402 | 142 | 23,250 | 5,214 | 3,449 | 32,055 |
| 97,403 | 145 | 23,138 | 5,193 | 3,431 | 31,907 |
| 97,404 | 145 | 23,209 | 5,181 | 3,424 | 31,959 |
| 97,405 | 145 | 23,297 | 5,153 | 3,419 | 32,014 |
| 97,406 | 145 | 23,291 | 5,132 | 3,410 | 31,978 |
| 97,407 | 140 | 23,244 | 5,109 | 3,383 | 31,876 |
| 97,408 | 150 | 23,418 | 5,153 | 3,432 | 32,153 |
| 97,409 | 147 | 23,631 | 5,177 | 3,452 | 32,407 |
| 97,410 | 150 | 23,490 | 5,117 | 3,440 | 32,197 |
| 97,411 | 143 | 23,662 | 5,136 | 3,436 | 32,377 |
| 97,412 | 141 | 23,626 | 5,133 | 3,442 | 32,342 |
| 97,413 | 146 | 23,973 | 5,194 | 3,480 | 32,793 |
| 97,414 | 149 | 23,755 | 5,157 | 3,465 | 32,526 |
| 97,415 | 150 | 24,047 | 5,204 | 3,504 | 32,905 |
| 97,416 | 148 | 23,881 | 5,228 | 3,487 | 32,744 |
| 97,417 | 147 | 23,897 | 5,218 | 3,481 | 32,743 |
| 97,418 | 143 | 23,794 | 5,218 | 3,494 | 32,649 |
| 97,419 | 141 | 24,120 | 5,310 | 3,552 | 33,123 |
| 97,420 | 148 | 24,077 | 5,297 | 3,556 | 33,078 |
| 97,421 | 145 | 24,144 | 5,291 | 3,519 | 33,099 |
| 97,422 | 141 | 24,102 | 5,253 | 3,485 | 32,981 |
| 97,423 | 141 | 24,012 | 5,236 | 3,482 | 32,871 |
| 97,424 | 136 | 24,215 | 5,285 | 3,527 | 33,163 |
| 97,425 | 135 | 24,073 | 5,277 | 3,490 | 32,975 |
| 97,426 | 137 | 23,907 | 5,275 | 3,485 | 32,804 |
| 97,427 | 139 | 24,051 | 5,324 | 3,471 | 32,985 |
| 97,428 | 141 | 23,907 | 5,266 | 3,431 | 32,745 |
| 97,429 | 148 | 24,023 | 5,245 | 3,431 | 32,847 |
| 97,430 | 144 | 23,826 | 5,208 | 3,416 | 32,594 |
| 97,431 | 143 | 23,977 | 5,248 | 3,483 | 32,851 |

|        |     |        |       |       |        |
|--------|-----|--------|-------|-------|--------|
| 97,432 | 143 | 23,932 | 5,278 | 3,515 | 32,868 |
| 97,433 | 144 | 23,973 | 5,283 | 3,529 | 32,929 |
| 97,434 | 143 | 24,026 | 5,293 | 3,530 | 32,992 |
| 97,435 | 145 | 24,113 | 5,344 | 3,552 | 33,154 |
| 97,436 | 147 | 24,357 | 5,398 | 3,615 | 33,517 |
| 97,437 | 142 | 24,219 | 5,383 | 3,604 | 33,348 |
| 97,438 | 143 | 24,064 | 5,386 | 3,632 | 33,225 |
| 97,439 | 143 | 24,256 | 5,417 | 3,678 | 33,494 |
| 97,440 | 136 | 24,478 | 5,488 | 3,712 | 33,814 |
| 97,441 | 136 | 24,552 | 5,527 | 3,725 | 33,940 |
| 97,442 | 136 | 24,468 | 5,500 | 3,729 | 33,833 |
| 97,443 | 139 | 24,439 | 5,507 | 3,715 | 33,800 |
| 97,444 | 138 | 24,224 | 5,480 | 3,676 | 33,518 |
| 97,445 | 139 | 24,288 | 5,459 | 3,690 | 33,576 |
| 97,446 | 143 | 24,741 | 5,540 | 3,771 | 34,195 |
| 97,447 | 133 | 23,824 | 5,378 | 3,625 | 32,960 |
| 97,448 | 135 | 24,051 | 5,416 | 3,654 | 33,256 |
| 97,449 | 133 | 24,230 | 5,446 | 3,694 | 33,503 |
| 97,450 | 138 | 24,405 | 5,495 | 3,727 | 33,765 |
| 97,451 | 140 | 24,211 | 5,438 | 3,648 | 33,437 |
| 97,452 | 140 | 24,160 | 5,437 | 3,653 | 33,390 |
| 97,453 | 140 | 24,309 | 5,479 | 3,693 | 33,621 |
| 97,454 | 141 | 24,055 | 5,421 | 3,662 | 33,279 |
| 97,455 | 142 | 24,024 | 5,410 | 3,656 | 33,232 |
| 97,456 | 138 | 23,703 | 5,369 | 3,625 | 32,835 |
| 97,457 | 143 | 23,853 | 5,415 | 3,673 | 33,084 |
| 97,458 | 134 | 23,651 | 5,395 | 3,645 | 32,825 |
| 97,459 | 134 | 23,884 | 5,428 | 3,657 | 33,103 |
| 97,460 | 130 | 23,697 | 5,406 | 3,654 | 32,887 |
| 97,461 | 124 | 23,373 | 5,376 | 3,604 | 32,477 |
| 97,462 | 135 | 23,591 | 5,430 | 3,648 | 32,804 |
| 97,463 | 136 | 23,318 | 5,372 | 3,605 | 32,431 |

|        |     |        |       |       |        |
|--------|-----|--------|-------|-------|--------|
| 97,464 | 132 | 23,209 | 5,346 | 3,578 | 32,265 |
| 97,465 | 131 | 23,409 | 5,383 | 3,595 | 32,518 |
| 97,466 | 134 | 23,341 | 5,359 | 3,573 | 32,407 |
| 97,467 | 134 | 23,439 | 5,371 | 3,578 | 32,522 |
| 97,468 | 134 | 23,465 | 5,365 | 3,577 | 32,541 |
| 97,469 | 137 | 23,348 | 5,290 | 3,518 | 32,293 |
| 97,470 | 140 | 23,615 | 5,343 | 3,559 | 32,657 |
| 97,471 | 134 | 23,574 | 5,328 | 3,563 | 32,599 |
| 97,472 | 138 | 23,298 | 5,266 | 3,539 | 32,241 |
| 97,473 | 138 | 23,065 | 5,242 | 3,524 | 31,969 |
| 97,474 | 145 | 23,956 | 5,434 | 3,626 | 33,161 |
| 97,475 | 146 | 24,050 | 5,426 | 3,614 | 33,236 |
| 97,476 | 144 | 23,710 | 5,362 | 3,575 | 32,791 |
| 97,477 | 140 | 23,373 | 5,242 | 3,509 | 32,264 |
| 97,478 | 143 | 23,684 | 5,267 | 3,536 | 32,630 |
| 97,479 | 140 | 23,672 | 5,250 | 3,529 | 32,591 |
| 97,480 | 133 | 23,833 | 5,270 | 3,544 | 32,780 |
| 97,481 | 135 | 23,930 | 5,275 | 3,565 | 32,905 |
| 97,482 | 135 | 23,712 | 5,249 | 3,531 | 32,627 |
| 97,483 | 133 | 23,924 | 5,274 | 3,532 | 32,863 |
| 97,484 | 138 | 23,913 | 5,272 | 3,537 | 32,860 |
| 97,485 | 139 | 24,189 | 5,325 | 3,576 | 33,229 |
| 97,486 | 137 | 24,251 | 5,321 | 3,572 | 33,281 |
| 97,487 | 138 | 24,141 | 5,295 | 3,512 | 33,086 |
| 97,488 | 146 | 24,591 | 5,371 | 3,575 | 33,683 |
| 97,489 | 148 | 24,323 | 5,312 | 3,503 | 33,286 |
| 97,490 | 149 | 23,535 | 5,155 | 3,392 | 32,231 |
| 97,491 | 147 | 23,711 | 5,170 | 3,431 | 32,459 |
| 97,492 | 150 | 23,931 | 5,204 | 3,471 | 32,756 |
| 97,493 | 150 | 23,972 | 5,200 | 3,465 | 32,787 |
| 97,494 | 147 | 23,689 | 5,127 | 3,429 | 32,392 |
| 97,495 | 153 | 23,814 | 5,141 | 3,465 | 32,573 |

|        |     |        |       |       |        |
|--------|-----|--------|-------|-------|--------|
| 97,496 | 158 | 24,032 | 5,163 | 3,480 | 32,833 |
| 97,497 | 160 | 24,026 | 5,123 | 3,441 | 32,750 |
| 97,498 | 158 | 23,778 | 5,072 | 3,427 | 32,435 |
| 97,499 | 159 | 24,009 | 5,118 | 3,439 | 32,725 |
| 97,500 | 154 | 23,922 | 5,075 | 3,425 | 32,576 |
| 97,501 | 154 | 24,223 | 5,105 | 3,444 | 32,926 |
| 97,502 | 154 | 24,169 | 5,094 | 3,446 | 32,863 |
| 97,503 | 154 | 24,388 | 5,099 | 3,448 | 33,089 |
| 97,504 | 151 | 24,054 | 5,029 | 3,422 | 32,656 |
| 97,505 | 153 | 24,363 | 5,064 | 3,452 | 33,032 |
| 97,506 | 149 | 24,410 | 5,082 | 3,449 | 33,090 |
| 97,507 | 150 | 24,528 | 5,064 | 3,445 | 33,187 |
| 97,508 | 152 | 24,452 | 5,043 | 3,421 | 33,068 |
| 97,509 | 150 | 24,429 | 5,041 | 3,425 | 33,045 |
| 97,510 | 152 | 24,393 | 5,062 | 3,433 | 33,040 |
| 97,511 | 154 | 24,519 | 5,067 | 3,441 | 33,181 |
| 97,512 | 149 | 24,513 | 5,022 | 3,441 | 33,125 |
| 97,513 | 139 | 24,290 | 4,938 | 3,386 | 32,753 |
| 97,514 | 141 | 24,255 | 4,942 | 3,402 | 32,740 |
| 97,515 | 139 | 24,127 | 4,916 | 3,395 | 32,577 |
| 97,516 | 141 | 24,245 | 4,927 | 3,418 | 32,731 |
| 97,517 | 142 | 23,930 | 4,840 | 3,376 | 32,288 |
| 97,518 | 143 | 24,078 | 4,856 | 3,404 | 32,481 |
| 97,519 | 138 | 24,189 | 4,861 | 3,414 | 32,602 |
| 97,520 | 147 | 24,386 | 4,882 | 3,437 | 32,852 |
| 97,521 | 153 | 24,394 | 4,854 | 3,412 | 32,813 |
| 97,522 | 152 | 24,288 | 4,833 | 3,388 | 32,661 |
| 97,523 | 152 | 24,347 | 4,810 | 3,382 | 32,691 |
| 97,524 | 156 | 24,558 | 4,839 | 3,385 | 32,938 |
| 97,525 | 152 | 24,094 | 4,737 | 3,353 | 32,336 |
| 97,526 | 151 | 24,095 | 4,736 | 3,348 | 32,330 |
| 97,527 | 150 | 23,989 | 4,727 | 3,336 | 32,202 |



|        |     |        |       |       |        |
|--------|-----|--------|-------|-------|--------|
| 97,528 | 150 | 23,791 | 4,722 | 3,325 | 31,988 |
| 97,529 | 150 | 23,818 | 4,766 | 3,348 | 32,082 |
| 97,530 | 154 | 23,467 | 4,706 | 3,277 | 31,604 |
| 97,531 | 152 | 23,390 | 4,698 | 3,262 | 31,502 |
| 97,532 | 152 | 23,349 | 4,706 | 3,257 | 31,464 |
| 97,533 | 154 | 23,410 | 4,721 | 3,271 | 31,556 |
| 97,534 | 154 | 23,363 | 4,736 | 3,265 | 31,518 |
| 97,535 | 148 | 23,113 | 4,693 | 3,243 | 31,197 |
| 97,536 | 147 | 23,044 | 4,688 | 3,230 | 31,109 |
| 97,537 | 147 | 22,902 | 4,665 | 3,220 | 30,934 |
| 97,538 | 145 | 23,099 | 4,673 | 3,249 | 31,166 |
| 97,539 | 147 | 23,005 | 4,673 | 3,230 | 31,055 |
| 97,540 | 141 | 22,804 | 4,633 | 3,207 | 30,785 |
| 97,541 | 141 | 23,116 | 4,673 | 3,195 | 31,125 |
| 97,542 | 141 | 22,954 | 4,635 | 3,156 | 30,886 |
| 97,543 | 140 | 23,061 | 4,668 | 3,203 | 31,072 |
| 97,544 | 138 | 23,202 | 4,712 | 3,237 | 31,289 |
| 97,545 | 135 | 22,946 | 4,660 | 3,207 | 30,948 |
| 97,546 | 135 | 22,829 | 4,659 | 3,205 | 30,828 |
| 97,547 | 134 | 22,672 | 4,661 | 3,214 | 30,681 |
| 97,548 | 139 | 22,531 | 4,689 | 3,220 | 30,579 |
| 97,549 | 137 | 22,373 | 4,674 | 3,207 | 30,391 |
| 97,550 | 139 | 22,616 | 4,722 | 3,233 | 30,710 |
| 97,551 | 135 | 22,661 | 4,764 | 3,236 | 30,796 |
| 97,552 | 132 | 22,471 | 4,776 | 3,207 | 30,586 |
| 97,553 | 132 | 22,769 | 4,850 | 3,273 | 31,024 |
| 97,554 | 130 | 22,614 | 4,818 | 3,250 | 30,812 |
| 97,555 | 135 | 22,930 | 4,870 | 3,297 | 31,232 |
| 97,556 | 134 | 22,943 | 4,889 | 3,311 | 31,277 |
| 97,557 | 135 | 22,581 | 4,834 | 3,258 | 30,808 |
| 97,558 | 138 | 22,648 | 4,844 | 3,263 | 30,893 |
| 97,559 | 136 | 22,418 | 4,822 | 3,256 | 30,632 |

|        |     |        |       |       |        |
|--------|-----|--------|-------|-------|--------|
| 97,560 | 133 | 22,798 | 4,888 | 3,337 | 31,156 |
| 97,561 | 137 | 22,591 | 4,857 | 3,311 | 30,896 |
| 97,562 | 136 | 22,314 | 4,805 | 3,285 | 30,540 |
| 97,563 | 136 | 22,443 | 4,867 | 3,332 | 30,778 |
| 97,564 | 134 | 22,351 | 4,880 | 3,329 | 30,694 |
| 97,565 | 133 | 22,516 | 4,911 | 3,343 | 30,903 |
| 97,566 | 127 | 22,372 | 4,874 | 3,319 | 30,692 |
| 97,567 | 125 | 22,438 | 4,924 | 3,348 | 30,835 |
| 97,568 | 119 | 22,173 | 4,874 | 3,332 | 30,498 |
| 97,569 | 117 | 21,874 | 4,826 | 3,293 | 30,110 |
| 97,570 | 120 | 22,031 | 4,860 | 3,320 | 30,331 |
| 97,571 | 115 | 22,140 | 4,909 | 3,375 | 30,539 |
| 97,572 | 110 | 21,778 | 4,868 | 3,356 | 30,112 |
| 97,573 | 106 | 21,399 | 4,806 | 3,319 | 29,630 |
| 97,574 | 107 | 21,650 | 4,875 | 3,360 | 29,992 |
| 97,575 | 106 | 21,635 | 4,880 | 3,367 | 29,988 |
| 97,576 | 105 | 21,271 | 4,790 | 3,314 | 29,480 |
| 97,577 | 108 | 21,608 | 4,833 | 3,341 | 29,890 |
| 97,578 | 112 | 21,950 | 4,887 | 3,383 | 30,332 |
| 97,579 | 120 | 21,390 | 4,775 | 3,318 | 29,603 |
| 97,580 | 122 | 21,689 | 4,829 | 3,382 | 30,022 |
| 97,581 | 132 | 21,775 | 4,822 | 3,376 | 30,105 |
| 97,582 | 138 | 22,156 | 4,901 | 3,420 | 30,615 |
| 97,583 | 136 | 22,433 | 4,951 | 3,480 | 31,000 |
| 97,584 | 136 | 22,801 | 5,048 | 3,523 | 31,508 |
| 97,585 | 136 | 22,773 | 5,008 | 3,524 | 31,441 |
| 97,586 | 136 | 22,813 | 5,012 | 3,533 | 31,494 |
| 97,587 | 141 | 23,175 | 5,157 | 3,594 | 32,067 |
| 97,588 | 145 | 23,258 | 5,181 | 3,587 | 32,171 |
| 97,589 | 139 | 22,809 | 5,089 | 3,531 | 31,568 |
| 97,590 | 138 | 22,678 | 5,080 | 3,525 | 31,421 |
| 97,591 | 136 | 22,986 | 5,155 | 3,599 | 31,876 |

|        |     |        |       |       |        |
|--------|-----|--------|-------|-------|--------|
| 97,592 | 139 | 22,866 | 5,126 | 3,610 | 31,741 |
| 97,593 | 138 | 22,688 | 5,100 | 3,557 | 31,483 |
| 97,594 | 137 | 22,876 | 5,130 | 3,585 | 31,728 |
| 97,595 | 137 | 22,973 | 5,121 | 3,585 | 31,816 |
| 97,596 | 139 | 23,324 | 5,136 | 3,643 | 32,242 |
| 97,597 | 137 | 23,296 | 5,144 | 3,651 | 32,228 |
| 97,598 | 131 | 23,716 | 5,200 | 3,717 | 32,764 |
| 97,599 | 134 | 23,557 | 5,167 | 3,696 | 32,554 |
| 97,600 | 135 | 23,243 | 5,151 | 3,673 | 32,202 |
| 97,601 | 136 | 23,409 | 5,205 | 3,768 | 32,518 |
| 97,602 | 141 | 23,348 | 5,145 | 3,770 | 32,404 |
| 97,603 | 140 | 23,558 | 5,217 | 3,817 | 32,732 |
| 97,604 | 140 | 23,503 | 5,250 | 3,831 | 32,724 |
| 97,605 | 141 | 23,491 | 5,260 | 3,840 | 32,732 |
| 97,606 | 140 | 23,592 | 5,277 | 3,841 | 32,850 |
| 97,607 | 139 | 23,216 | 5,202 | 3,790 | 32,347 |
| 97,608 | 136 | 23,092 | 5,214 | 3,814 | 32,256 |
| 97,609 | 135 | 23,136 | 5,255 | 3,838 | 32,364 |
| 97,610 | 137 | 22,914 | 5,181 | 3,776 | 32,008 |
| 97,611 | 137 | 22,763 | 5,144 | 3,748 | 31,792 |
| 97,612 | 138 | 23,573 | 5,328 | 3,879 | 32,918 |
| 97,613 | 135 | 23,262 | 5,280 | 3,835 | 32,512 |
| 97,614 | 145 | 23,665 | 5,328 | 3,886 | 33,024 |
| 97,615 | 144 | 23,633 | 5,330 | 3,874 | 32,981 |
| 97,616 | 145 | 23,771 | 5,356 | 3,885 | 33,157 |
| 97,617 | 147 | 23,945 | 5,385 | 3,908 | 33,385 |
| 97,618 | 153 | 24,228 | 5,474 | 3,974 | 33,829 |
| 97,619 | 163 | 23,904 | 5,439 | 3,936 | 33,442 |
| 97,620 | 162 | 23,674 | 5,418 | 3,914 | 33,168 |
| 97,621 | 171 | 24,390 | 5,601 | 4,007 | 34,169 |
| 97,622 | 169 | 24,201 | 5,545 | 3,960 | 33,875 |
| 97,623 | 169 | 24,186 | 5,578 | 3,948 | 33,881 |

|        |     |        |       |       |        |
|--------|-----|--------|-------|-------|--------|
| 97,624 | 169 | 24,048 | 5,553 | 3,938 | 33,708 |
| 97,625 | 167 | 23,754 | 5,506 | 3,925 | 33,352 |
| 97,626 | 181 | 24,850 | 5,783 | 4,109 | 34,923 |
| 97,627 | 183 | 24,990 | 5,837 | 4,122 | 35,132 |
| 97,628 | 183 | 25,395 | 5,961 | 4,180 | 35,719 |
| 97,629 | 182 | 25,446 | 6,001 | 4,190 | 35,819 |
| 97,630 | 167 | 24,952 | 5,928 | 4,155 | 35,202 |
| 97,631 | 165 | 25,108 | 5,986 | 4,169 | 35,428 |
| 97,632 | 160 | 25,293 | 6,053 | 4,191 | 35,697 |
| 97,633 | 159 | 25,061 | 6,006 | 4,152 | 35,378 |
| 97,634 | 158 | 24,876 | 5,985 | 4,135 | 35,154 |
| 97,635 | 168 | 25,066 | 6,028 | 4,205 | 35,467 |
| 97,636 | 178 | 25,070 | 6,086 | 4,200 | 35,534 |
| 97,637 | 173 | 24,708 | 6,023 | 4,164 | 35,068 |
| 97,638 | 173 | 24,732 | 6,028 | 4,156 | 35,089 |
| 97,639 | 172 | 24,623 | 6,065 | 4,175 | 35,035 |
| 97,640 | 174 | 24,812 | 6,116 | 4,187 | 35,289 |
| 97,641 | 176 | 24,739 | 6,080 | 4,165 | 35,160 |
| 97,642 | 180 | 24,707 | 6,104 | 4,147 | 35,138 |
| 97,643 | 178 | 24,520 | 6,089 | 4,141 | 34,928 |
| 97,644 | 175 | 24,796 | 6,211 | 4,239 | 35,421 |
| 97,645 | 187 | 24,913 | 6,318 | 4,279 | 35,697 |
| 97,646 | 187 | 24,707 | 6,320 | 4,270 | 35,484 |
| 97,647 | 186 | 24,625 | 6,364 | 4,245 | 35,420 |
| 97,648 | 185 | 24,710 | 6,435 | 4,266 | 35,596 |
| 97,649 | 181 | 24,381 | 6,381 | 4,217 | 35,160 |
| 97,650 | 179 | 24,417 | 6,352 | 4,193 | 35,141 |
| 97,651 | 180 | 24,345 | 6,355 | 4,155 | 35,035 |
| 97,652 | 175 | 24,268 | 6,350 | 4,145 | 34,938 |
| 97,653 | 174 | 24,152 | 6,349 | 4,147 | 34,822 |
| 97,654 | 177 | 24,142 | 6,343 | 4,112 | 34,774 |
| 97,655 | 182 | 24,075 | 6,337 | 4,069 | 34,663 |

|        |     |        |       |       |        |
|--------|-----|--------|-------|-------|--------|
| 97,656 | 183 | 23,911 | 6,332 | 4,046 | 34,472 |
| 97,657 | 180 | 24,028 | 6,361 | 4,044 | 34,613 |
| 97,658 | 181 | 24,017 | 6,346 | 4,008 | 34,552 |
| 97,659 | 179 | 24,161 | 6,369 | 4,025 | 34,734 |
| 97,660 | 183 | 24,243 | 6,391 | 4,013 | 34,830 |
| 97,661 | 187 | 24,264 | 6,371 | 4,005 | 34,827 |
| 97,662 | 192 | 24,373 | 6,381 | 3,993 | 34,939 |
| 97,663 | 190 | 24,316 | 6,387 | 4,009 | 34,902 |
| 97,664 | 183 | 24,432 | 6,376 | 4,003 | 34,994 |
| 97,665 | 181 | 24,397 | 6,389 | 4,023 | 34,990 |
| 97,666 | 180 | 24,460 | 6,414 | 4,049 | 35,103 |
| 97,667 | 180 | 24,471 | 6,444 | 4,071 | 35,166 |
| 97,668 | 179 | 24,510 | 6,434 | 4,050 | 35,173 |
| 97,669 | 183 | 24,920 | 6,548 | 4,110 | 35,761 |
| 97,670 | 176 | 24,843 | 6,495 | 4,071 | 35,585 |
| 97,671 | 172 | 24,730 | 6,456 | 4,043 | 35,401 |
| 97,672 | 171 | 25,256 | 6,524 | 4,088 | 36,039 |
| 97,673 | 176 | 25,497 | 6,596 | 4,124 | 36,393 |
| 97,674 | 177 | 25,471 | 6,526 | 4,095 | 36,269 |
| 97,675 | 174 | 25,374 | 6,512 | 4,096 | 36,156 |
| 97,676 | 175 | 25,593 | 6,574 | 4,131 | 36,473 |
| 97,677 | 174 | 25,591 | 6,588 | 4,134 | 36,487 |
| 97,678 | 177 | 25,578 | 6,569 | 4,125 | 36,449 |
| 97,679 | 177 | 25,565 | 6,550 | 4,141 | 36,433 |
| 97,680 | 173 | 25,168 | 6,449 | 4,094 | 35,884 |
| 97,681 | 173 | 25,256 | 6,479 | 4,098 | 36,006 |
| 97,682 | 173 | 25,230 | 6,462 | 4,085 | 35,950 |
| 97,683 | 170 | 24,860 | 6,345 | 3,995 | 35,370 |
| 97,684 | 171 | 25,022 | 6,382 | 4,001 | 35,576 |
| 97,685 | 163 | 25,300 | 6,415 | 4,027 | 35,905 |
| 97,686 | 159 | 24,989 | 6,357 | 3,963 | 35,468 |
| 97,687 | 159 | 24,949 | 6,272 | 3,939 | 35,319 |

|        |     |        |       |       |        |
|--------|-----|--------|-------|-------|--------|
| 97,688 | 158 | 24,893 | 6,268 | 3,934 | 35,253 |
| 97,689 | 157 | 24,958 | 6,258 | 3,963 | 35,336 |
| 97,690 | 156 | 24,904 | 6,215 | 3,971 | 35,246 |
| 97,691 | 153 | 24,540 | 6,138 | 3,924 | 34,755 |
| 97,692 | 150 | 24,363 | 6,132 | 3,903 | 34,548 |
| 97,693 | 146 | 23,765 | 5,938 | 3,797 | 33,646 |
| 97,694 | 147 | 23,912 | 5,959 | 3,834 | 33,852 |
| 97,695 | 143 | 23,911 | 5,976 | 3,850 | 33,880 |
| 97,696 | 137 | 23,717 | 5,894 | 3,783 | 33,531 |
| 97,697 | 136 | 23,776 | 5,882 | 3,780 | 33,574 |
| 97,698 | 143 | 23,865 | 5,852 | 3,799 | 33,659 |
| 97,699 | 147 | 24,094 | 5,917 | 3,827 | 33,985 |
| 97,700 | 143 | 23,864 | 5,839 | 3,782 | 33,628 |
| 97,701 | 143 | 24,011 | 5,843 | 3,796 | 33,793 |
| 97,702 | 143 | 24,046 | 5,829 | 3,793 | 33,811 |
| 97,703 | 143 | 24,292 | 5,868 | 3,828 | 34,131 |
| 97,704 | 145 | 24,325 | 5,863 | 3,830 | 34,163 |
| 97,705 | 141 | 24,370 | 5,843 | 3,844 | 34,198 |
| 97,706 | 139 | 24,156 | 5,776 | 3,826 | 33,897 |
| 97,707 | 136 | 24,067 | 5,794 | 3,828 | 33,825 |
| 97,708 | 134 | 23,595 | 5,680 | 3,768 | 33,177 |
| 97,709 | 136 | 23,816 | 5,689 | 3,796 | 33,437 |
| 97,710 | 131 | 23,732 | 5,708 | 3,801 | 33,372 |
| 97,711 | 128 | 23,478 | 5,658 | 3,793 | 33,057 |
| 97,712 | 125 | 23,531 | 5,707 | 3,811 | 33,174 |
| 97,713 | 125 | 23,345 | 5,715 | 3,815 | 33,000 |
| 97,714 | 130 | 23,121 | 5,663 | 3,757 | 32,671 |
| 97,715 | 129 | 22,820 | 5,620 | 3,723 | 32,292 |
| 97,716 | 130 | 22,822 | 5,668 | 3,740 | 32,360 |
| 97,717 | 133 | 22,484 | 5,613 | 3,694 | 31,924 |
| 97,718 | 133 | 22,305 | 5,567 | 3,670 | 31,675 |
| 97,719 | 133 | 22,419 | 5,628 | 3,709 | 31,889 |

|        |     |        |       |       |        |
|--------|-----|--------|-------|-------|--------|
| 97,720 | 127 | 22,126 | 5,545 | 3,650 | 31,448 |
| 97,721 | 120 | 21,583 | 5,438 | 3,586 | 30,727 |
| 97,722 | 123 | 21,093 | 5,378 | 3,531 | 30,125 |
| 97,723 | 122 | 21,207 | 5,432 | 3,567 | 30,328 |
| 97,724 | 117 | 20,953 | 5,371 | 3,544 | 29,985 |
| 97,725 | 110 | 20,357 | 5,206 | 3,422 | 29,095 |
| 97,726 | 113 | 20,521 | 5,255 | 3,441 | 29,330 |
| 97,727 | 111 | 20,557 | 5,281 | 3,440 | 29,389 |
| 97,728 | 120 | 20,533 | 5,250 | 3,438 | 29,341 |
| 97,729 | 118 | 20,260 | 5,174 | 3,390 | 28,942 |
| 97,730 | 118 | 20,187 | 5,176 | 3,379 | 28,860 |
| 97,731 | 121 | 19,985 | 5,147 | 3,364 | 28,617 |
| 97,732 | 124 | 20,012 | 5,160 | 3,392 | 28,688 |
| 97,733 | 120 | 19,727 | 5,076 | 3,360 | 28,283 |
| 97,734 | 119 | 19,508 | 5,031 | 3,348 | 28,006 |
| 97,735 | 118 | 19,406 | 5,012 | 3,339 | 27,875 |
| 97,736 | 115 | 19,950 | 5,211 | 3,437 | 28,713 |
| 97,737 | 113 | 19,967 | 5,195 | 3,452 | 28,727 |
| 97,738 | 107 | 19,964 | 5,199 | 3,445 | 28,715 |
| 97,739 | 106 | 19,960 | 5,255 | 3,471 | 28,792 |
| 97,740 | 107 | 20,130 | 5,299 | 3,494 | 29,030 |
| 97,741 | 105 | 19,970 | 5,246 | 3,449 | 28,770 |
| 97,742 | 109 | 20,110 | 5,253 | 3,460 | 28,932 |
| 97,743 | 110 | 20,157 | 5,273 | 3,467 | 29,007 |
| 97,744 | 110 | 20,352 | 5,347 | 3,502 | 29,311 |
| 97,745 | 106 | 20,122 | 5,255 | 3,415 | 28,898 |
| 97,746 | 108 | 20,144 | 5,296 | 3,399 | 28,947 |
| 97,747 | 111 | 20,011 | 5,215 | 3,345 | 28,682 |
| 97,748 | 111 | 20,239 | 5,292 | 3,378 | 29,020 |
| 97,749 | 111 | 20,386 | 5,397 | 3,412 | 29,306 |
| 97,750 | 113 | 20,316 | 5,403 | 3,428 | 29,260 |
| 97,751 | 119 | 20,267 | 5,400 | 3,422 | 29,208 |

|        |     |        |       |       |        |
|--------|-----|--------|-------|-------|--------|
| 97,752 | 122 | 20,297 | 5,419 | 3,429 | 29,267 |
| 97,753 | 126 | 20,120 | 5,404 | 3,390 | 29,040 |
| 97,754 | 127 | 19,907 | 5,384 | 3,361 | 28,779 |
| 97,755 | 129 | 20,200 | 5,481 | 3,405 | 29,215 |
| 97,756 | 130 | 20,288 | 5,526 | 3,401 | 29,345 |
| 97,757 | 131 | 20,564 | 5,610 | 3,446 | 29,751 |
| 97,758 | 133 | 20,459 | 5,552 | 3,421 | 29,565 |
| 97,759 | 135 | 20,741 | 5,631 | 3,477 | 29,984 |
| 97,760 | 135 | 20,842 | 5,676 | 3,491 | 30,144 |
| 97,761 | 135 | 20,864 | 5,634 | 3,478 | 30,111 |
| 97,762 | 129 | 20,759 | 5,599 | 3,453 | 29,940 |
| 97,763 | 132 | 21,050 | 5,654 | 3,488 | 30,324 |
| 97,764 | 133 | 21,407 | 5,754 | 3,528 | 30,822 |
| 97,765 | 131 | 21,199 | 5,660 | 3,476 | 30,466 |
| 97,766 | 131 | 21,521 | 5,750 | 3,507 | 30,909 |
| 97,767 | 130 | 21,957 | 5,842 | 3,554 | 31,483 |
| 97,768 | 130 | 22,075 | 5,875 | 3,562 | 31,642 |
| 97,769 | 131 | 22,215 | 5,907 | 3,569 | 31,822 |
| 97,770 | 129 | 22,049 | 5,857 | 3,526 | 31,561 |
| 97,771 | 130 | 22,101 | 5,880 | 3,543 | 31,654 |
| 97,772 | 125 | 22,001 | 5,884 | 3,544 | 31,554 |
| 97,773 | 124 | 22,059 | 5,873 | 3,559 | 31,615 |
| 97,774 | 124 | 22,026 | 5,887 | 3,564 | 31,601 |
| 97,775 | 124 | 22,479 | 5,994 | 3,638 | 32,235 |
| 97,776 | 119 | 22,540 | 6,059 | 3,684 | 32,402 |
| 97,777 | 116 | 22,678 | 6,063 | 3,723 | 32,580 |
| 97,778 | 111 | 22,519 | 6,056 | 3,724 | 32,410 |
| 97,779 | 108 | 22,531 | 6,059 | 3,717 | 32,415 |
| 97,780 | 106 | 22,656 | 6,112 | 3,760 | 32,634 |
| 97,781 | 101 | 22,936 | 6,135 | 3,785 | 32,957 |
| 97,782 | 106 | 23,189 | 6,144 | 3,785 | 33,224 |
| 97,783 | 103 | 22,927 | 6,115 | 3,734 | 32,879 |



|        |     |        |       |       |        |
|--------|-----|--------|-------|-------|--------|
| 97,784 | 109 | 23,203 | 6,182 | 3,781 | 33,275 |
| 97,785 | 113 | 23,306 | 6,194 | 3,763 | 33,376 |
| 97,786 | 113 | 23,373 | 6,202 | 3,770 | 33,458 |
| 97,787 | 115 | 23,458 | 6,231 | 3,790 | 33,594 |
| 97,788 | 117 | 23,457 | 6,243 | 3,794 | 33,611 |
| 97,789 | 116 | 23,423 | 6,248 | 3,792 | 33,579 |
| 97,790 | 122 | 23,247 | 6,168 | 3,749 | 33,286 |
| 97,791 | 122 | 23,286 | 6,178 | 3,750 | 33,336 |
| 97,792 | 123 | 23,268 | 6,201 | 3,755 | 33,347 |
| 97,793 | 121 | 23,415 | 6,264 | 3,801 | 33,601 |
| 97,794 | 119 | 23,221 | 6,233 | 3,775 | 33,348 |
| 97,795 | 120 | 23,269 | 6,232 | 3,770 | 33,391 |
| 97,796 | 119 | 23,037 | 6,170 | 3,750 | 33,076 |
| 97,797 | 118 | 23,430 | 6,234 | 3,811 | 33,593 |
| 97,798 | 114 | 23,219 | 6,197 | 3,802 | 33,332 |
| 97,799 | 115 | 23,502 | 6,278 | 3,838 | 33,733 |
| 97,800 | 104 | 23,339 | 6,159 | 3,791 | 33,393 |
| 97,801 | 104 | 23,367 | 6,165 | 3,787 | 33,423 |
| 97,802 | 99  | 23,330 | 6,221 | 3,819 | 33,469 |
| 97,803 | 99  | 23,290 | 6,220 | 3,798 | 33,407 |
| 97,804 | 92  | 23,016 | 6,154 | 3,769 | 33,031 |
| 97,805 | 88  | 23,139 | 6,187 | 3,790 | 33,204 |
| 97,806 | 88  | 23,225 | 6,208 | 3,790 | 33,311 |
| 97,807 | 90  | 22,906 | 6,129 | 3,739 | 32,864 |
| 97,808 | 91  | 23,077 | 6,171 | 3,746 | 33,085 |
| 97,809 | 91  | 22,988 | 6,181 | 3,737 | 32,997 |
| 97,810 | 89  | 22,828 | 6,139 | 3,705 | 32,761 |
| 97,811 | 93  | 22,783 | 6,178 | 3,708 | 32,762 |
| 97,812 | 102 | 22,741 | 6,165 | 3,710 | 32,718 |
| 97,813 | 101 | 22,523 | 6,105 | 3,703 | 32,432 |
| 97,814 | 101 | 22,645 | 6,174 | 3,741 | 32,661 |
| 97,815 | 103 | 22,270 | 6,081 | 3,701 | 32,155 |

|        |     |        |       |       |        |
|--------|-----|--------|-------|-------|--------|
| 97,816 | 100 | 21,868 | 6,002 | 3,649 | 31,619 |
| 97,817 | 113 | 22,417 | 6,157 | 3,757 | 32,444 |
| 97,818 | 115 | 22,379 | 6,138 | 3,755 | 32,387 |
| 97,819 | 116 | 22,332 | 6,125 | 3,771 | 32,344 |
| 97,820 | 122 | 22,348 | 6,115 | 3,779 | 32,364 |
| 97,821 | 132 | 22,191 | 6,061 | 3,759 | 32,143 |
| 97,822 | 132 | 22,375 | 6,084 | 3,763 | 32,354 |
| 97,823 | 134 | 22,387 | 6,094 | 3,798 | 32,413 |
| 97,824 | 134 | 22,444 | 6,104 | 3,767 | 32,449 |
| 97,825 | 138 | 22,087 | 6,009 | 3,706 | 31,940 |
| 97,826 | 139 | 22,300 | 6,083 | 3,725 | 32,247 |
| 97,827 | 137 | 22,473 | 6,141 | 3,744 | 32,495 |
| 97,828 | 141 | 22,223 | 6,119 | 3,686 | 32,169 |
| 97,829 | 138 | 22,158 | 6,096 | 3,655 | 32,047 |
| 97,830 | 136 | 22,060 | 6,117 | 3,683 | 31,996 |
| 97,831 | 141 | 21,697 | 6,038 | 3,645 | 31,521 |
| 97,832 | 142 | 21,406 | 6,006 | 3,624 | 31,178 |
| 97,833 | 145 | 21,940 | 6,236 | 3,718 | 32,039 |
| 97,834 | 145 | 21,811 | 6,177 | 3,703 | 31,836 |
| 97,835 | 145 | 21,712 | 6,165 | 3,676 | 31,698 |
| 97,836 | 143 | 22,283 | 6,331 | 3,783 | 32,540 |
| 97,837 | 145 | 22,204 | 6,363 | 3,797 | 32,509 |
| 97,838 | 143 | 22,024 | 6,378 | 3,818 | 32,363 |
| 97,839 | 147 | 22,177 | 6,483 | 3,854 | 32,661 |
| 97,840 | 150 | 22,101 | 6,483 | 3,863 | 32,597 |
| 97,841 | 146 | 22,080 | 6,521 | 3,852 | 32,599 |
| 97,842 | 145 | 22,155 | 6,522 | 3,842 | 32,664 |
| 97,843 | 144 | 21,926 | 6,475 | 3,816 | 32,361 |
| 97,844 | 143 | 22,150 | 6,552 | 3,847 | 32,692 |
| 97,845 | 144 | 22,162 | 6,587 | 3,866 | 32,759 |
| 97,846 | 151 | 22,192 | 6,619 | 3,879 | 32,841 |
| 97,847 | 155 | 22,243 | 6,631 | 3,874 | 32,903 |

|        |     |        |       |       |        |
|--------|-----|--------|-------|-------|--------|
| 97,848 | 156 | 22,155 | 6,662 | 3,894 | 32,867 |
| 97,849 | 158 | 22,088 | 6,672 | 3,907 | 32,825 |
| 97,850 | 156 | 21,997 | 6,662 | 3,908 | 32,723 |
| 97,851 | 155 | 21,542 | 6,612 | 3,835 | 32,144 |
| 97,852 | 155 | 21,911 | 6,704 | 3,892 | 32,662 |
| 97,853 | 154 | 21,953 | 6,675 | 3,887 | 32,669 |
| 97,854 | 160 | 22,110 | 6,776 | 3,973 | 33,019 |
| 97,855 | 165 | 22,142 | 6,806 | 3,999 | 33,112 |
| 97,856 | 166 | 21,744 | 6,711 | 3,970 | 32,591 |
| 97,857 | 165 | 21,703 | 6,654 | 3,969 | 32,491 |
| 97,858 | 168 | 21,439 | 6,557 | 3,908 | 32,072 |
| 97,859 | 168 | 21,676 | 6,599 | 3,960 | 32,403 |
| 97,860 | 165 | 21,606 | 6,606 | 3,951 | 32,328 |
| 97,861 | 164 | 21,587 | 6,598 | 3,975 | 32,324 |
| 97,862 | 156 | 21,665 | 6,582 | 3,947 | 32,350 |
| 97,863 | 161 | 21,909 | 6,647 | 3,990 | 32,707 |
| 97,864 | 158 | 21,928 | 6,658 | 3,993 | 32,737 |
| 97,865 | 150 | 21,983 | 6,664 | 4,001 | 32,798 |
| 97,866 | 153 | 22,061 | 6,632 | 4,018 | 32,864 |
| 97,867 | 157 | 21,969 | 6,582 | 3,982 | 32,690 |
| 97,868 | 154 | 21,797 | 6,551 | 3,934 | 32,436 |
| 97,869 | 159 | 21,989 | 6,658 | 3,982 | 32,788 |
| 97,870 | 158 | 21,876 | 6,621 | 3,936 | 32,591 |
| 97,871 | 143 | 21,481 | 6,550 | 3,880 | 32,054 |
| 97,872 | 142 | 21,391 | 6,537 | 3,871 | 31,941 |
| 97,873 | 139 | 21,198 | 6,496 | 3,825 | 31,658 |
| 97,874 | 139 | 21,401 | 6,524 | 3,839 | 31,903 |
| 97,875 | 142 | 21,335 | 6,492 | 3,842 | 31,811 |
| 97,876 | 144 | 21,299 | 6,472 | 3,841 | 31,756 |
| 97,877 | 145 | 21,204 | 6,421 | 3,827 | 31,597 |
| 97,878 | 139 | 20,994 | 6,280 | 3,783 | 31,196 |
| 97,879 | 133 | 20,805 | 6,175 | 3,694 | 30,807 |

|        |     |        |       |       |        |
|--------|-----|--------|-------|-------|--------|
| 97,880 | 135 | 21,175 | 6,245 | 3,743 | 31,298 |
| 97,881 | 133 | 21,360 | 6,293 | 3,781 | 31,567 |
| 97,882 | 135 | 21,612 | 6,322 | 3,813 | 31,882 |
| 97,883 | 129 | 21,731 | 6,285 | 3,809 | 31,954 |
| 97,884 | 136 | 21,744 | 6,278 | 3,819 | 31,977 |
| 97,885 | 135 | 21,563 | 6,193 | 3,779 | 31,670 |
| 97,886 | 136 | 21,497 | 6,112 | 3,732 | 31,477 |
| 97,887 | 135 | 21,509 | 5,969 | 3,694 | 31,307 |
| 97,888 | 140 | 21,679 | 5,950 | 3,690 | 31,459 |
| 97,889 | 140 | 21,936 | 5,983 | 3,721 | 31,780 |
| 97,890 | 140 | 21,756 | 5,861 | 3,660 | 31,417 |
| 97,891 | 141 | 21,745 | 5,867 | 3,656 | 31,409 |
| 97,892 | 142 | 21,947 | 5,871 | 3,691 | 31,651 |
| 97,893 | 142 | 21,595 | 5,779 | 3,648 | 31,164 |
| 97,894 | 143 | 21,645 | 5,786 | 3,643 | 31,217 |
| 97,895 | 143 | 21,841 | 5,760 | 3,653 | 31,397 |
| 97,896 | 143 | 21,808 | 5,745 | 3,650 | 31,346 |
| 97,897 | 135 | 21,794 | 5,725 | 3,644 | 31,298 |
| 97,898 | 131 | 21,598 | 5,680 | 3,639 | 31,048 |
| 97,899 | 130 | 21,431 | 5,645 | 3,615 | 30,821 |
| 97,900 | 130 | 21,355 | 5,613 | 3,603 | 30,701 |
| 97,901 | 130 | 21,223 | 5,569 | 3,562 | 30,484 |
| 97,902 | 130 | 21,609 | 5,626 | 3,594 | 30,959 |
| 97,903 | 129 | 21,754 | 5,612 | 3,578 | 31,073 |
| 97,904 | 127 | 21,950 | 5,607 | 3,561 | 31,245 |
| 97,905 | 125 | 21,971 | 5,561 | 3,561 | 31,218 |
| 97,906 | 121 | 21,798 | 5,473 | 3,512 | 30,904 |
| 97,907 | 126 | 21,935 | 5,459 | 3,501 | 31,021 |
| 97,908 | 124 | 21,738 | 5,444 | 3,483 | 30,789 |
| 97,909 | 122 | 21,966 | 5,522 | 3,547 | 31,157 |
| 97,910 | 120 | 22,170 | 5,546 | 3,558 | 31,394 |
| 97,911 | 120 | 22,084 | 5,547 | 3,518 | 31,269 |

|        |     |        |       |       |        |
|--------|-----|--------|-------|-------|--------|
| 97,912 | 120 | 22,124 | 5,573 | 3,545 | 31,362 |
| 97,913 | 119 | 22,145 | 5,562 | 3,554 | 31,380 |
| 97,914 | 118 | 21,883 | 5,460 | 3,484 | 30,945 |
| 97,915 | 121 | 22,054 | 5,502 | 3,515 | 31,192 |
| 97,916 | 120 | 22,073 | 5,493 | 3,518 | 31,204 |
| 97,917 | 110 | 21,655 | 5,385 | 3,429 | 30,579 |
| 97,918 | 111 | 21,953 | 5,419 | 3,436 | 30,919 |
| 97,919 | 119 | 22,089 | 5,463 | 3,471 | 31,142 |
| 97,920 | 113 | 21,945 | 5,412 | 3,451 | 30,921 |
| 97,921 | 112 | 21,958 | 5,422 | 3,466 | 30,958 |
| 97,922 | 114 | 21,937 | 5,405 | 3,460 | 30,916 |
| 97,923 | 114 | 21,916 | 5,387 | 3,458 | 30,875 |
| 97,924 | 119 | 21,762 | 5,389 | 3,453 | 30,723 |
| 97,925 | 128 | 21,910 | 5,457 | 3,478 | 30,973 |
| 97,926 | 124 | 21,639 | 5,406 | 3,434 | 30,603 |
| 97,927 | 125 | 21,626 | 5,422 | 3,421 | 30,594 |
| 97,928 | 122 | 21,375 | 5,389 | 3,402 | 30,288 |
| 97,929 | 126 | 21,508 | 5,450 | 3,434 | 30,518 |
| 97,930 | 127 | 21,586 | 5,505 | 3,437 | 30,655 |
| 97,931 | 127 | 21,682 | 5,520 | 3,445 | 30,774 |
| 97,932 | 127 | 21,613 | 5,462 | 3,421 | 30,623 |
| 97,933 | 129 | 21,625 | 5,474 | 3,398 | 30,626 |
| 97,934 | 129 | 21,617 | 5,469 | 3,399 | 30,614 |
| 97,935 | 119 | 21,382 | 5,480 | 3,365 | 30,346 |
| 97,936 | 119 | 21,303 | 5,507 | 3,358 | 30,287 |
| 97,937 | 117 | 20,991 | 5,463 | 3,318 | 29,889 |
| 97,938 | 125 | 21,247 | 5,612 | 3,408 | 30,392 |
| 97,939 | 120 | 21,154 | 5,614 | 3,411 | 30,299 |
| 97,940 | 121 | 21,264 | 5,647 | 3,432 | 30,464 |
| 97,941 | 112 | 20,823 | 5,497 | 3,348 | 29,780 |
| 97,942 | 115 | 21,000 | 5,553 | 3,357 | 30,025 |
| 97,943 | 112 | 20,941 | 5,560 | 3,345 | 29,958 |

|        |     |        |       |       |        |
|--------|-----|--------|-------|-------|--------|
| 97,944 | 113 | 20,928 | 5,545 | 3,367 | 29,953 |
| 97,945 | 113 | 21,070 | 5,567 | 3,381 | 30,131 |
| 97,946 | 110 | 21,099 | 5,582 | 3,383 | 30,174 |
| 97,947 | 110 | 20,925 | 5,549 | 3,367 | 29,951 |
| 97,948 | 116 | 21,015 | 5,558 | 3,357 | 30,046 |
| 97,949 | 116 | 21,037 | 5,532 | 3,351 | 30,036 |
| 97,950 | 115 | 21,070 | 5,538 | 3,335 | 30,058 |
| 97,951 | 116 | 21,098 | 5,532 | 3,336 | 30,082 |
| 97,952 | 118 | 21,085 | 5,545 | 3,341 | 30,089 |
| 97,953 | 132 | 21,289 | 5,618 | 3,404 | 30,443 |
| 97,954 | 135 | 20,920 | 5,565 | 3,372 | 29,992 |
| 97,955 | 132 | 20,660 | 5,522 | 3,349 | 29,663 |
| 97,956 | 137 | 20,670 | 5,569 | 3,340 | 29,716 |
| 97,957 | 138 | 20,635 | 5,560 | 3,354 | 29,687 |
| 97,958 | 131 | 20,764 | 5,632 | 3,368 | 29,895 |
| 97,959 | 136 | 20,712 | 5,657 | 3,357 | 29,862 |
| 97,960 | 139 | 20,813 | 5,668 | 3,340 | 29,960 |
| 97,961 | 142 | 20,716 | 5,671 | 3,316 | 29,845 |
| 97,962 | 143 | 20,780 | 5,673 | 3,312 | 29,908 |
| 97,963 | 145 | 20,577 | 5,632 | 3,279 | 29,633 |
| 97,964 | 146 | 20,622 | 5,642 | 3,276 | 29,686 |
| 97,965 | 150 | 20,817 | 5,704 | 3,317 | 29,988 |
| 97,966 | 151 | 20,530 | 5,638 | 3,253 | 29,572 |
| 97,967 | 153 | 20,553 | 5,632 | 3,257 | 29,595 |
| 97,968 | 156 | 20,766 | 5,678 | 3,298 | 29,898 |
| 97,969 | 162 | 20,766 | 5,696 | 3,328 | 29,952 |
| 97,970 | 151 | 20,508 | 5,629 | 3,276 | 29,564 |
| 97,971 | 151 | 20,492 | 5,630 | 3,275 | 29,548 |
| 97,972 | 152 | 20,488 | 5,624 | 3,278 | 29,542 |
| 97,973 | 150 | 20,786 | 5,674 | 3,310 | 29,920 |
| 97,974 | 149 | 20,685 | 5,617 | 3,275 | 29,726 |
| 97,975 | 150 | 20,945 | 5,665 | 3,309 | 30,069 |

|        |     |        |       |       |        |
|--------|-----|--------|-------|-------|--------|
| 97,976 | 144 | 21,201 | 5,703 | 3,347 | 30,395 |
| 97,977 | 140 | 20,981 | 5,663 | 3,321 | 30,105 |
| 97,978 | 140 | 21,279 | 5,690 | 3,350 | 30,459 |
| 97,979 | 142 | 21,376 | 5,669 | 3,338 | 30,525 |
| 97,980 | 145 | 21,166 | 5,586 | 3,299 | 30,196 |
| 97,981 | 145 | 21,083 | 5,582 | 3,308 | 30,118 |
| 97,982 | 144 | 21,262 | 5,612 | 3,315 | 30,333 |
| 97,983 | 152 | 20,942 | 5,570 | 3,292 | 29,956 |
| 97,984 | 149 | 20,690 | 5,535 | 3,290 | 29,664 |
| 97,985 | 157 | 21,166 | 5,652 | 3,365 | 30,340 |
| 97,986 | 163 | 20,768 | 5,484 | 3,309 | 29,724 |
| 97,987 | 166 | 20,906 | 5,530 | 3,318 | 29,920 |
| 97,988 | 160 | 20,896 | 5,535 | 3,302 | 29,893 |
| 97,989 | 161 | 20,895 | 5,530 | 3,307 | 29,893 |
| 97,990 | 162 | 20,787 | 5,507 | 3,273 | 29,729 |
| 97,991 | 168 | 20,380 | 5,428 | 3,201 | 29,177 |
| 97,992 | 167 | 20,164 | 5,352 | 3,168 | 28,851 |
| 97,993 | 172 | 20,766 | 5,477 | 3,246 | 29,661 |
| 97,994 | 172 | 20,656 | 5,412 | 3,224 | 29,464 |
| 97,995 | 174 | 20,737 | 5,439 | 3,241 | 29,591 |
| 97,996 | 175 | 20,652 | 5,430 | 3,195 | 29,452 |
| 97,997 | 176 | 20,596 | 5,401 | 3,206 | 29,379 |
| 97,998 | 176 | 20,589 | 5,392 | 3,192 | 29,349 |
| 97,999 | 179 | 20,853 | 5,505 | 3,243 | 29,780 |
| 98,000 | 181 | 20,898 | 5,537 | 3,248 | 29,864 |
| 98,001 | 180 | 20,863 | 5,560 | 3,259 | 29,862 |
| 98,002 | 176 | 20,695 | 5,479 | 3,231 | 29,581 |
| 98,003 | 177 | 20,863 | 5,518 | 3,242 | 29,800 |
| 98,004 | 172 | 20,876 | 5,507 | 3,248 | 29,803 |
| 98,005 | 169 | 20,724 | 5,459 | 3,229 | 29,581 |
| 98,006 | 164 | 20,948 | 5,503 | 3,273 | 29,888 |
| 98,007 | 164 | 20,900 | 5,494 | 3,271 | 29,829 |

|        |     |        |       |       |        |
|--------|-----|--------|-------|-------|--------|
| 98,008 | 162 | 20,885 | 5,509 | 3,257 | 29,813 |
| 98,009 | 164 | 20,854 | 5,502 | 3,261 | 29,781 |
| 98,010 | 156 | 20,800 | 5,453 | 3,268 | 29,677 |
| 98,011 | 159 | 21,006 | 5,511 | 3,282 | 29,958 |
| 98,012 | 156 | 21,010 | 5,470 | 3,292 | 29,928 |
| 98,013 | 154 | 20,874 | 5,475 | 3,295 | 29,798 |
| 98,014 | 153 | 20,929 | 5,490 | 3,305 | 29,877 |
| 98,015 | 150 | 21,153 | 5,571 | 3,334 | 30,208 |
| 98,016 | 144 | 21,201 | 5,585 | 3,328 | 30,258 |
| 98,017 | 140 | 20,880 | 5,517 | 3,303 | 29,840 |
| 98,018 | 137 | 21,197 | 5,589 | 3,360 | 30,283 |
| 98,019 | 135 | 21,280 | 5,616 | 3,375 | 30,406 |
| 98,020 | 130 | 21,060 | 5,540 | 3,342 | 30,072 |
| 98,021 | 131 | 21,193 | 5,546 | 3,344 | 30,214 |
| 98,022 | 134 | 21,397 | 5,612 | 3,383 | 30,526 |
| 98,023 | 133 | 21,310 | 5,611 | 3,389 | 30,443 |
| 98,024 | 138 | 21,672 | 5,736 | 3,450 | 30,996 |
| 98,025 | 137 | 21,726 | 5,752 | 3,471 | 31,086 |
| 98,026 | 139 | 21,881 | 5,835 | 3,523 | 31,378 |
| 98,027 | 140 | 21,595 | 5,827 | 3,503 | 31,065 |
| 98,028 | 140 | 21,580 | 5,835 | 3,518 | 31,073 |
| 98,029 | 135 | 21,486 | 5,872 | 3,539 | 31,032 |
| 98,030 | 135 | 21,416 | 5,905 | 3,539 | 30,995 |
| 98,031 | 137 | 21,541 | 5,951 | 3,563 | 31,192 |
| 98,032 | 133 | 21,649 | 5,904 | 3,540 | 31,226 |
| 98,033 | 134 | 21,954 | 5,994 | 3,599 | 31,681 |
| 98,034 | 128 | 22,193 | 6,074 | 3,655 | 32,050 |
| 98,035 | 128 | 21,520 | 5,931 | 3,577 | 31,156 |
| 98,036 | 132 | 21,711 | 5,972 | 3,637 | 31,452 |
| 98,037 | 127 | 21,792 | 5,977 | 3,633 | 31,529 |
| 98,038 | 127 | 21,928 | 5,994 | 3,652 | 31,701 |
| 98,039 | 130 | 21,922 | 6,004 | 3,654 | 31,710 |



|        |     |        |       |       |        |
|--------|-----|--------|-------|-------|--------|
| 98,040 | 127 | 21,640 | 5,971 | 3,615 | 31,353 |
| 98,041 | 126 | 21,753 | 6,002 | 3,641 | 31,522 |
| 98,042 | 119 | 21,671 | 5,974 | 3,633 | 31,397 |
| 98,043 | 122 | 21,502 | 5,993 | 3,638 | 31,255 |
| 98,044 | 121 | 21,622 | 6,024 | 3,687 | 31,454 |
| 98,045 | 125 | 21,560 | 6,029 | 3,666 | 31,380 |
| 98,046 | 125 | 21,340 | 5,965 | 3,638 | 31,068 |
| 98,047 | 127 | 21,534 | 5,997 | 3,645 | 31,303 |
| 98,048 | 131 | 21,382 | 5,947 | 3,620 | 31,080 |
| 98,049 | 131 | 21,669 | 6,001 | 3,631 | 31,432 |
| 98,050 | 124 | 21,916 | 6,050 | 3,686 | 31,776 |
| 98,051 | 126 | 21,615 | 5,940 | 3,632 | 31,313 |
| 98,052 | 132 | 21,913 | 5,990 | 3,663 | 31,698 |
| 98,053 | 139 | 21,927 | 6,002 | 3,661 | 31,729 |
| 98,054 | 139 | 21,703 | 5,951 | 3,627 | 31,420 |
| 98,055 | 130 | 21,762 | 6,005 | 3,649 | 31,546 |
| 98,056 | 128 | 21,580 | 6,009 | 3,630 | 31,347 |
| 98,057 | 130 | 21,572 | 5,988 | 3,622 | 31,312 |
| 98,058 | 134 | 21,573 | 6,014 | 3,656 | 31,377 |
| 98,059 | 132 | 21,445 | 5,982 | 3,623 | 31,182 |
| 98,060 | 131 | 21,362 | 5,954 | 3,601 | 31,048 |
| 98,061 | 131 | 21,418 | 5,986 | 3,629 | 31,164 |
| 98,062 | 133 | 21,183 | 5,948 | 3,614 | 30,878 |
| 98,063 | 136 | 21,081 | 5,960 | 3,588 | 30,765 |
| 98,064 | 138 | 20,969 | 5,917 | 3,569 | 30,593 |
| 98,065 | 142 | 20,995 | 5,939 | 3,579 | 30,655 |
| 98,066 | 146 | 20,842 | 5,923 | 3,578 | 30,489 |
| 98,067 | 148 | 20,724 | 5,896 | 3,590 | 30,358 |
| 98,068 | 149 | 20,560 | 5,829 | 3,549 | 30,087 |
| 98,069 | 147 | 20,335 | 5,784 | 3,510 | 29,776 |
| 98,070 | 150 | 20,323 | 5,795 | 3,516 | 29,784 |
| 98,071 | 149 | 20,313 | 5,805 | 3,515 | 29,782 |

|        |     |        |       |       |        |
|--------|-----|--------|-------|-------|--------|
| 98,072 | 146 | 20,186 | 5,748 | 3,481 | 29,561 |
| 98,073 | 146 | 20,155 | 5,764 | 3,492 | 29,557 |
| 98,074 | 142 | 20,113 | 5,782 | 3,521 | 29,558 |
| 98,075 | 140 | 20,040 | 5,756 | 3,516 | 29,452 |
| 98,076 | 140 | 19,999 | 5,726 | 3,486 | 29,351 |
| 98,077 | 140 | 19,962 | 5,666 | 3,455 | 29,223 |
| 98,078 | 135 | 19,930 | 5,610 | 3,409 | 29,084 |
| 98,079 | 136 | 19,975 | 5,573 | 3,373 | 29,057 |
| 98,080 | 136 | 20,001 | 5,575 | 3,367 | 29,079 |
| 98,081 | 134 | 20,089 | 5,577 | 3,393 | 29,193 |
| 98,082 | 132 | 19,757 | 5,509 | 3,356 | 28,754 |
| 98,083 | 131 | 19,855 | 5,577 | 3,396 | 28,959 |
| 98,084 | 134 | 19,605 | 5,530 | 3,349 | 28,618 |
| 98,085 | 128 | 19,247 | 5,431 | 3,279 | 28,085 |
| 98,086 | 129 | 19,389 | 5,453 | 3,281 | 28,252 |
| 98,087 | 141 | 19,311 | 5,478 | 3,271 | 28,201 |
| 98,088 | 144 | 19,351 | 5,487 | 3,280 | 28,262 |
| 98,089 | 145 | 19,349 | 5,479 | 3,273 | 28,246 |
| 98,090 | 141 | 19,515 | 5,584 | 3,296 | 28,536 |
| 98,091 | 140 | 19,355 | 5,545 | 3,262 | 28,302 |
| 98,092 | 139 | 19,393 | 5,549 | 3,263 | 28,344 |
| 98,093 | 134 | 19,513 | 5,556 | 3,267 | 28,470 |
| 98,094 | 146 | 19,499 | 5,564 | 3,249 | 28,458 |
| 98,095 | 146 | 19,465 | 5,575 | 3,241 | 28,427 |
| 98,096 | 143 | 19,370 | 5,568 | 3,239 | 28,320 |
| 98,097 | 145 | 19,221 | 5,557 | 3,245 | 28,168 |
| 98,098 | 144 | 19,448 | 5,656 | 3,299 | 28,547 |
| 98,099 | 147 | 19,389 | 5,672 | 3,307 | 28,515 |
| 98,100 | 153 | 19,405 | 5,704 | 3,318 | 28,580 |
| 98,101 | 155 | 19,730 | 5,800 | 3,356 | 29,041 |
| 98,102 | 151 | 19,737 | 5,805 | 3,350 | 29,043 |
| 98,103 | 145 | 19,745 | 5,813 | 3,340 | 29,043 |

|        |     |        |       |       |        |
|--------|-----|--------|-------|-------|--------|
| 98,104 | 136 | 19,633 | 5,741 | 3,312 | 28,822 |
| 98,105 | 139 | 19,573 | 5,696 | 3,292 | 28,700 |
| 98,106 | 139 | 19,780 | 5,707 | 3,317 | 28,943 |
| 98,107 | 141 | 20,003 | 5,772 | 3,358 | 29,274 |
| 98,108 | 142 | 20,175 | 5,816 | 3,371 | 29,504 |
| 98,109 | 137 | 19,959 | 5,732 | 3,339 | 29,167 |
| 98,110 | 143 | 20,152 | 5,757 | 3,368 | 29,420 |
| 98,111 | 146 | 20,130 | 5,757 | 3,365 | 29,398 |
| 98,112 | 146 | 20,045 | 5,722 | 3,350 | 29,263 |
| 98,113 | 147 | 20,189 | 5,804 | 3,384 | 29,524 |
| 98,114 | 145 | 20,039 | 5,781 | 3,372 | 29,337 |
| 98,115 | 147 | 20,036 | 5,778 | 3,370 | 29,331 |
| 98,116 | 147 | 20,329 | 5,830 | 3,399 | 29,705 |
| 98,117 | 143 | 20,265 | 5,769 | 3,381 | 29,558 |
| 98,118 | 143 | 20,208 | 5,767 | 3,364 | 29,482 |
| 98,119 | 141 | 20,434 | 5,827 | 3,396 | 29,798 |
| 98,120 | 147 | 20,439 | 5,836 | 3,388 | 29,810 |
| 98,121 | 147 | 20,551 | 5,868 | 3,404 | 29,970 |
| 98,122 | 153 | 20,663 | 5,880 | 3,393 | 30,089 |
| 98,123 | 152 | 20,682 | 5,870 | 3,363 | 30,067 |
| 98,124 | 153 | 20,841 | 5,877 | 3,356 | 30,227 |
| 98,125 | 154 | 20,832 | 5,876 | 3,358 | 30,220 |
| 98,126 | 154 | 21,058 | 5,930 | 3,373 | 30,515 |
| 98,127 | 150 | 20,635 | 5,843 | 3,331 | 29,959 |
| 98,128 | 148 | 20,726 | 5,922 | 3,356 | 30,152 |
| 98,129 | 157 | 20,660 | 5,913 | 3,381 | 30,111 |
| 98,130 | 159 | 20,589 | 5,948 | 3,397 | 30,093 |
| 98,131 | 161 | 20,856 | 5,983 | 3,425 | 30,425 |
| 98,132 | 163 | 20,844 | 5,980 | 3,441 | 30,428 |
| 98,133 | 159 | 20,904 | 5,992 | 3,437 | 30,492 |
| 98,134 | 159 | 20,771 | 5,953 | 3,394 | 30,277 |
| 98,135 | 155 | 20,820 | 5,940 | 3,394 | 30,309 |

|        |     |        |       |       |        |
|--------|-----|--------|-------|-------|--------|
| 98,136 | 150 | 20,827 | 5,938 | 3,389 | 30,304 |
| 98,137 | 142 | 20,844 | 5,857 | 3,354 | 30,197 |
| 98,138 | 141 | 20,756 | 5,842 | 3,346 | 30,085 |
| 98,139 | 144 | 20,616 | 5,814 | 3,316 | 29,890 |
| 98,140 | 152 | 21,132 | 5,939 | 3,383 | 30,606 |
| 98,141 | 152 | 21,136 | 5,879 | 3,364 | 30,531 |
| 98,142 | 152 | 21,293 | 5,923 | 3,403 | 30,771 |
| 98,143 | 159 | 21,270 | 5,920 | 3,407 | 30,756 |
| 98,144 | 162 | 21,229 | 5,910 | 3,417 | 30,718 |
| 98,145 | 154 | 21,050 | 5,862 | 3,388 | 30,454 |
| 98,146 | 152 | 20,926 | 5,812 | 3,368 | 30,258 |
| 98,147 | 148 | 21,511 | 5,980 | 3,466 | 31,105 |
| 98,148 | 148 | 21,640 | 6,016 | 3,464 | 31,268 |
| 98,149 | 146 | 21,722 | 6,041 | 3,463 | 31,372 |
| 98,150 | 141 | 21,548 | 5,997 | 3,452 | 31,138 |
| 98,151 | 139 | 21,485 | 5,941 | 3,422 | 30,987 |
| 98,152 | 138 | 20,999 | 5,790 | 3,340 | 30,267 |
| 98,153 | 138 | 21,083 | 5,791 | 3,352 | 30,364 |
| 98,154 | 138 | 21,108 | 5,797 | 3,342 | 30,385 |
| 98,155 | 137 | 20,954 | 5,771 | 3,319 | 30,181 |
| 98,156 | 143 | 21,077 | 5,802 | 3,357 | 30,379 |
| 98,157 | 143 | 21,015 | 5,772 | 3,315 | 30,245 |
| 98,158 | 145 | 20,921 | 5,724 | 3,291 | 30,081 |
| 98,159 | 146 | 20,991 | 5,730 | 3,285 | 30,152 |
| 98,160 | 150 | 21,268 | 5,779 | 3,315 | 30,512 |
| 98,161 | 144 | 20,911 | 5,623 | 3,209 | 29,887 |
| 98,162 | 145 | 21,202 | 5,648 | 3,230 | 30,225 |
| 98,163 | 150 | 21,448 | 5,686 | 3,262 | 30,546 |
| 98,164 | 149 | 21,452 | 5,681 | 3,264 | 30,546 |
| 98,165 | 148 | 21,743 | 5,736 | 3,301 | 30,928 |
| 98,166 | 152 | 21,860 | 5,787 | 3,327 | 31,126 |
| 98,167 | 153 | 21,848 | 5,804 | 3,332 | 31,137 |

|        |     |        |       |       |        |
|--------|-----|--------|-------|-------|--------|
| 98,168 | 154 | 21,672 | 5,778 | 3,282 | 30,886 |
| 98,169 | 159 | 21,739 | 5,787 | 3,277 | 30,962 |
| 98,170 | 160 | 21,715 | 5,790 | 3,274 | 30,939 |
| 98,171 | 157 | 21,703 | 5,759 | 3,274 | 30,893 |
| 98,172 | 162 | 21,696 | 5,805 | 3,302 | 30,965 |
| 98,173 | 161 | 21,596 | 5,799 | 3,299 | 30,855 |
| 98,174 | 166 | 21,232 | 5,720 | 3,287 | 30,405 |
| 98,175 | 164 | 20,941 | 5,686 | 3,258 | 30,049 |
| 98,176 | 165 | 21,299 | 5,744 | 3,309 | 30,517 |
| 98,177 | 166 | 21,205 | 5,758 | 3,321 | 30,450 |
| 98,178 | 166 | 21,215 | 5,750 | 3,317 | 30,448 |
| 98,179 | 166 | 21,267 | 5,746 | 3,356 | 30,535 |
| 98,180 | 156 | 21,206 | 5,719 | 3,352 | 30,433 |
| 98,181 | 155 | 21,164 | 5,669 | 3,328 | 30,316 |
| 98,182 | 156 | 21,116 | 5,715 | 3,339 | 30,326 |
| 98,183 | 154 | 20,999 | 5,690 | 3,294 | 30,137 |
| 98,184 | 163 | 21,001 | 5,679 | 3,303 | 30,146 |
| 98,185 | 163 | 20,990 | 5,695 | 3,316 | 30,164 |
| 98,186 | 169 | 20,868 | 5,720 | 3,325 | 30,082 |
| 98,187 | 174 | 20,803 | 5,707 | 3,313 | 29,997 |
| 98,188 | 174 | 20,510 | 5,672 | 3,297 | 29,653 |
| 98,189 | 167 | 20,649 | 5,724 | 3,330 | 29,870 |
| 98,190 | 166 | 20,552 | 5,720 | 3,337 | 29,775 |
| 98,191 | 159 | 20,465 | 5,728 | 3,350 | 29,702 |
| 98,192 | 159 | 20,557 | 5,802 | 3,389 | 29,907 |
| 98,193 | 157 | 20,373 | 5,806 | 3,389 | 29,725 |
| 98,194 | 152 | 20,181 | 5,758 | 3,364 | 29,455 |
| 98,195 | 157 | 20,342 | 5,821 | 3,401 | 29,721 |
| 98,196 | 153 | 20,380 | 5,846 | 3,427 | 29,806 |
| 98,197 | 153 | 20,414 | 5,870 | 3,425 | 29,862 |
| 98,198 | 157 | 20,528 | 5,867 | 3,425 | 29,977 |
| 98,199 | 157 | 20,281 | 5,788 | 3,400 | 29,626 |

|        |     |        |       |       |        |
|--------|-----|--------|-------|-------|--------|
| 98,200 | 161 | 20,564 | 5,875 | 3,465 | 30,065 |
| 98,201 | 162 | 20,690 | 5,866 | 3,450 | 30,168 |
| 98,202 | 158 | 20,730 | 5,870 | 3,476 | 30,234 |
| 98,203 | 159 | 20,156 | 5,773 | 3,430 | 29,518 |
| 98,204 | 162 | 20,164 | 5,789 | 3,459 | 29,574 |
| 98,205 | 165 | 20,133 | 5,778 | 3,457 | 29,533 |
| 98,206 | 166 | 19,897 | 5,726 | 3,423 | 29,212 |
| 98,207 | 160 | 19,666 | 5,685 | 3,372 | 28,883 |
| 98,208 | 158 | 19,808 | 5,778 | 3,423 | 29,167 |
| 98,209 | 156 | 19,716 | 5,763 | 3,431 | 29,066 |
| 98,210 | 157 | 19,823 | 5,851 | 3,461 | 29,292 |
| 98,211 | 153 | 19,698 | 5,820 | 3,450 | 29,121 |
| 98,212 | 145 | 19,244 | 5,726 | 3,400 | 28,515 |
| 98,213 | 155 | 19,565 | 5,806 | 3,459 | 28,985 |
| 98,214 | 158 | 19,706 | 5,816 | 3,472 | 29,152 |
| 98,215 | 159 | 19,934 | 5,873 | 3,522 | 29,488 |
| 98,216 | 157 | 20,255 | 5,949 | 3,570 | 29,931 |
| 98,217 | 149 | 20,042 | 5,863 | 3,543 | 29,597 |
| 98,218 | 147 | 20,151 | 5,841 | 3,531 | 29,670 |
| 98,219 | 146 | 20,137 | 5,848 | 3,528 | 29,659 |
| 98,220 | 141 | 19,916 | 5,807 | 3,501 | 29,365 |
| 98,221 | 141 | 20,384 | 5,950 | 3,621 | 30,096 |
| 98,222 | 131 | 20,222 | 5,883 | 3,589 | 29,825 |
| 98,223 | 131 | 20,477 | 5,931 | 3,608 | 30,147 |
| 98,224 | 125 | 20,431 | 5,914 | 3,610 | 30,080 |
| 98,225 | 121 | 20,339 | 5,922 | 3,591 | 29,973 |
| 98,226 | 124 | 20,378 | 5,903 | 3,583 | 29,988 |
| 98,227 | 123 | 20,312 | 5,829 | 3,541 | 29,805 |
| 98,228 | 124 | 20,479 | 5,867 | 3,551 | 30,021 |
| 98,229 | 124 | 20,570 | 5,872 | 3,535 | 30,101 |
| 98,230 | 127 | 20,552 | 5,868 | 3,532 | 30,079 |
| 98,231 | 125 | 20,576 | 5,887 | 3,533 | 30,121 |

|        |     |        |       |       |        |
|--------|-----|--------|-------|-------|--------|
| 98,232 | 120 | 20,230 | 5,777 | 3,484 | 29,611 |
| 98,233 | 121 | 20,595 | 5,793 | 3,505 | 30,014 |
| 98,234 | 119 | 20,723 | 5,801 | 3,494 | 30,137 |
| 98,235 | 115 | 20,623 | 5,758 | 3,501 | 29,997 |
| 98,236 | 122 | 21,068 | 5,823 | 3,558 | 30,571 |
| 98,237 | 116 | 20,973 | 5,763 | 3,524 | 30,376 |
| 98,238 | 108 | 21,046 | 5,741 | 3,517 | 30,412 |
| 98,239 | 109 | 21,207 | 5,797 | 3,573 | 30,686 |
| 98,240 | 109 | 21,150 | 5,814 | 3,566 | 30,639 |
| 98,241 | 109 | 21,157 | 5,792 | 3,578 | 30,636 |
| 98,242 | 109 | 21,252 | 5,784 | 3,563 | 30,708 |
| 98,243 | 112 | 21,333 | 5,811 | 3,563 | 30,819 |
| 98,244 | 110 | 21,219 | 5,670 | 3,507 | 30,506 |
| 98,245 | 105 | 21,323 | 5,664 | 3,490 | 30,582 |
| 98,246 | 105 | 21,338 | 5,634 | 3,470 | 30,547 |
| 98,247 | 107 | 21,383 | 5,649 | 3,468 | 30,607 |
| 98,248 | 108 | 21,213 | 5,611 | 3,456 | 30,388 |
| 98,249 | 102 | 21,292 | 5,632 | 3,475 | 30,501 |
| 98,250 | 103 | 21,428 | 5,658 | 3,505 | 30,694 |
| 98,251 | 105 | 21,323 | 5,657 | 3,503 | 30,588 |
| 98,252 | 108 | 21,389 | 5,682 | 3,525 | 30,704 |
| 98,253 | 111 | 21,254 | 5,687 | 3,490 | 30,542 |
| 98,254 | 110 | 21,454 | 5,706 | 3,494 | 30,764 |
| 98,255 | 118 | 21,698 | 5,730 | 3,495 | 31,041 |
| 98,256 | 122 | 21,780 | 5,716 | 3,488 | 31,106 |
| 98,257 | 125 | 22,029 | 5,762 | 3,504 | 31,420 |
| 98,258 | 123 | 21,939 | 5,732 | 3,499 | 31,293 |
| 98,259 | 124 | 22,102 | 5,762 | 3,516 | 31,504 |
| 98,260 | 130 | 22,168 | 5,759 | 3,512 | 31,569 |
| 98,261 | 128 | 22,207 | 5,745 | 3,515 | 31,595 |
| 98,262 | 132 | 22,214 | 5,732 | 3,523 | 31,601 |
| 98,263 | 132 | 22,065 | 5,742 | 3,518 | 31,457 |

|        |     |        |       |       |        |
|--------|-----|--------|-------|-------|--------|
| 98,264 | 125 | 22,307 | 5,809 | 3,554 | 31,795 |
| 98,265 | 123 | 22,166 | 5,802 | 3,549 | 31,640 |
| 98,266 | 122 | 22,117 | 5,794 | 3,537 | 31,570 |
| 98,267 | 125 | 22,126 | 5,808 | 3,546 | 31,605 |
| 98,268 | 125 | 22,061 | 5,792 | 3,537 | 31,515 |
| 98,269 | 127 | 22,691 | 5,950 | 3,660 | 32,428 |
| 98,270 | 129 | 22,849 | 5,989 | 3,699 | 32,666 |
| 98,271 | 129 | 22,715 | 5,921 | 3,682 | 32,447 |
| 98,272 | 130 | 22,907 | 5,994 | 3,716 | 32,747 |
| 98,273 | 133 | 23,141 | 6,064 | 3,731 | 33,069 |
| 98,274 | 133 | 23,028 | 6,014 | 3,709 | 32,884 |
| 98,275 | 135 | 23,029 | 6,007 | 3,726 | 32,897 |
| 98,276 | 147 | 23,292 | 6,059 | 3,779 | 33,277 |
| 98,277 | 146 | 23,029 | 6,023 | 3,749 | 32,947 |
| 98,278 | 147 | 22,771 | 5,970 | 3,725 | 32,613 |
| 98,279 | 153 | 22,714 | 5,967 | 3,728 | 32,562 |
| 98,280 | 152 | 22,552 | 5,912 | 3,700 | 32,316 |
| 98,281 | 156 | 23,016 | 6,069 | 3,805 | 33,046 |
| 98,282 | 157 | 22,944 | 6,082 | 3,778 | 32,961 |
| 98,283 | 158 | 22,995 | 6,081 | 3,783 | 33,017 |
| 98,284 | 163 | 23,186 | 6,116 | 3,837 | 33,302 |
| 98,285 | 158 | 23,170 | 6,119 | 3,847 | 33,294 |
| 98,286 | 157 | 22,929 | 6,090 | 3,800 | 32,976 |
| 98,287 | 158 | 22,760 | 6,051 | 3,774 | 32,743 |
| 98,288 | 158 | 22,520 | 6,009 | 3,751 | 32,438 |
| 98,289 | 161 | 22,844 | 6,105 | 3,816 | 32,926 |
| 98,290 | 163 | 22,901 | 6,040 | 3,759 | 32,863 |
| 98,291 | 163 | 23,183 | 6,087 | 3,805 | 33,238 |
| 98,292 | 161 | 22,604 | 5,952 | 3,694 | 32,411 |
| 98,293 | 164 | 22,833 | 5,976 | 3,715 | 32,688 |
| 98,294 | 162 | 23,099 | 6,028 | 3,755 | 33,044 |
| 98,295 | 170 | 22,754 | 5,966 | 3,696 | 32,586 |



|        |     |        |       |       |        |
|--------|-----|--------|-------|-------|--------|
| 98,296 | 170 | 22,785 | 5,958 | 3,701 | 32,614 |
| 98,297 | 174 | 22,840 | 6,010 | 3,740 | 32,764 |
| 98,298 | 174 | 22,652 | 5,902 | 3,709 | 32,437 |
| 98,299 | 176 | 22,557 | 5,901 | 3,692 | 32,326 |
| 98,300 | 181 | 22,864 | 5,955 | 3,714 | 32,714 |
| 98,301 | 175 | 22,725 | 5,883 | 3,648 | 32,431 |
| 98,302 | 175 | 22,693 | 5,875 | 3,643 | 32,386 |
| 98,303 | 173 | 22,797 | 5,893 | 3,657 | 32,520 |
| 98,304 | 173 | 22,715 | 5,846 | 3,646 | 32,380 |
| 98,305 | 173 | 22,727 | 5,856 | 3,671 | 32,427 |
| 98,306 | 162 | 22,461 | 5,818 | 3,640 | 32,081 |
| 98,307 | 161 | 22,443 | 5,856 | 3,656 | 32,116 |
| 98,308 | 161 | 22,381 | 5,826 | 3,648 | 32,016 |
| 98,309 | 166 | 22,432 | 5,844 | 3,662 | 32,104 |
| 98,310 | 164 | 22,216 | 5,793 | 3,631 | 31,804 |
| 98,311 | 163 | 22,405 | 5,815 | 3,647 | 32,030 |
| 98,312 | 163 | 22,234 | 5,792 | 3,611 | 31,800 |
| 98,313 | 168 | 22,277 | 5,808 | 3,622 | 31,875 |
| 98,314 | 169 | 22,335 | 5,787 | 3,613 | 31,904 |
| 98,315 | 164 | 21,756 | 5,677 | 3,522 | 31,119 |
| 98,316 | 165 | 21,689 | 5,641 | 3,511 | 31,006 |
| 98,317 | 166 | 21,811 | 5,638 | 3,484 | 31,099 |
| 98,318 | 163 | 21,805 | 5,645 | 3,498 | 31,111 |
| 98,319 | 160 | 21,458 | 5,568 | 3,435 | 30,621 |
| 98,320 | 161 | 21,427 | 5,605 | 3,444 | 30,637 |
| 98,321 | 162 | 21,435 | 5,613 | 3,413 | 30,623 |
| 98,322 | 160 | 21,378 | 5,593 | 3,404 | 30,535 |
| 98,323 | 165 | 21,620 | 5,646 | 3,440 | 30,871 |
| 98,324 | 171 | 21,598 | 5,625 | 3,411 | 30,805 |
| 98,325 | 183 | 21,544 | 5,618 | 3,402 | 30,747 |
| 98,326 | 181 | 21,335 | 5,613 | 3,382 | 30,511 |
| 98,327 | 172 | 21,619 | 5,662 | 3,428 | 30,881 |

|        |     |        |       |       |        |
|--------|-----|--------|-------|-------|--------|
| 98,328 | 171 | 21,689 | 5,647 | 3,408 | 30,915 |
| 98,329 | 172 | 21,925 | 5,688 | 3,432 | 31,217 |
| 98,330 | 166 | 21,959 | 5,704 | 3,418 | 31,247 |
| 98,331 | 164 | 21,746 | 5,669 | 3,397 | 30,976 |
| 98,332 | 168 | 21,895 | 5,654 | 3,394 | 31,111 |
| 98,333 | 169 | 21,860 | 5,671 | 3,402 | 31,102 |
| 98,334 | 165 | 21,943 | 5,717 | 3,432 | 31,257 |
| 98,335 | 162 | 21,670 | 5,700 | 3,390 | 30,922 |
| 98,336 | 162 | 21,814 | 5,740 | 3,418 | 31,134 |
| 98,337 | 155 | 21,529 | 5,697 | 3,387 | 30,768 |
| 98,338 | 156 | 21,536 | 5,668 | 3,380 | 30,740 |
| 98,339 | 155 | 21,528 | 5,672 | 3,378 | 30,733 |
| 98,340 | 152 | 21,485 | 5,714 | 3,368 | 30,719 |
| 98,341 | 148 | 21,482 | 5,759 | 3,380 | 30,769 |
| 98,342 | 149 | 21,442 | 5,763 | 3,374 | 30,728 |
| 98,343 | 153 | 21,652 | 5,856 | 3,429 | 31,090 |
| 98,344 | 153 | 21,780 | 5,935 | 3,463 | 31,331 |
| 98,345 | 153 | 21,926 | 5,989 | 3,482 | 31,550 |
| 98,346 | 140 | 21,735 | 5,969 | 3,467 | 31,311 |
| 98,347 | 142 | 22,080 | 6,031 | 3,519 | 31,772 |
| 98,348 | 143 | 22,204 | 6,040 | 3,525 | 31,912 |
| 98,349 | 145 | 22,016 | 6,026 | 3,494 | 31,681 |
| 98,350 | 143 | 21,911 | 6,022 | 3,484 | 31,560 |
| 98,351 | 145 | 22,531 | 6,213 | 3,603 | 32,492 |
| 98,352 | 148 | 22,549 | 6,236 | 3,611 | 32,544 |
| 98,353 | 145 | 22,220 | 6,153 | 3,558 | 32,076 |
| 98,354 | 146 | 22,469 | 6,238 | 3,579 | 32,432 |
| 98,355 | 141 | 22,616 | 6,279 | 3,577 | 32,613 |
| 98,356 | 143 | 22,841 | 6,306 | 3,621 | 32,911 |
| 98,357 | 136 | 23,027 | 6,398 | 3,674 | 33,235 |
| 98,358 | 137 | 22,990 | 6,379 | 3,667 | 33,173 |
| 98,359 | 139 | 22,995 | 6,401 | 3,667 | 33,202 |

|        |     |        |       |       |        |
|--------|-----|--------|-------|-------|--------|
| 98,360 | 135 | 23,248 | 6,492 | 3,720 | 33,595 |
| 98,361 | 137 | 23,437 | 6,554 | 3,762 | 33,890 |
| 98,362 | 130 | 22,872 | 6,461 | 3,690 | 33,153 |
| 98,363 | 131 | 23,207 | 6,516 | 3,724 | 33,578 |
| 98,364 | 128 | 23,511 | 6,611 | 3,771 | 34,021 |
| 98,365 | 125 | 23,545 | 6,628 | 3,774 | 34,072 |
| 98,366 | 125 | 23,539 | 6,613 | 3,775 | 34,052 |
| 98,367 | 126 | 23,631 | 6,661 | 3,812 | 34,230 |
| 98,368 | 126 | 23,836 | 6,724 | 3,861 | 34,547 |
| 98,369 | 124 | 23,769 | 6,705 | 3,839 | 34,437 |
| 98,370 | 124 | 23,808 | 6,683 | 3,828 | 34,443 |
| 98,371 | 124 | 23,589 | 6,656 | 3,789 | 34,158 |
| 98,372 | 125 | 23,789 | 6,672 | 3,804 | 34,390 |
| 98,373 | 125 | 23,850 | 6,689 | 3,797 | 34,461 |
| 98,374 | 121 | 24,160 | 6,755 | 3,830 | 34,866 |
| 98,375 | 113 | 23,857 | 6,747 | 3,817 | 34,534 |
| 98,376 | 97  | 23,701 | 6,696 | 3,789 | 34,283 |
| 98,377 | 99  | 23,733 | 6,662 | 3,753 | 34,247 |
| 98,378 | 98  | 23,458 | 6,565 | 3,686 | 33,807 |
| 98,379 | 98  | 23,555 | 6,616 | 3,716 | 33,985 |
| 98,380 | 98  | 23,487 | 6,641 | 3,733 | 33,959 |
| 98,381 | 93  | 23,052 | 6,542 | 3,675 | 33,362 |
| 98,382 | 94  | 23,204 | 6,591 | 3,717 | 33,606 |
| 98,383 | 91  | 23,140 | 6,605 | 3,726 | 33,562 |
| 98,384 | 95  | 23,248 | 6,598 | 3,721 | 33,662 |
| 98,385 | 94  | 23,030 | 6,565 | 3,705 | 33,394 |
| 98,386 | 96  | 23,258 | 6,594 | 3,737 | 33,685 |
| 98,387 | 95  | 23,254 | 6,589 | 3,728 | 33,666 |
| 98,388 | 94  | 23,128 | 6,538 | 3,721 | 33,481 |
| 98,389 | 96  | 23,125 | 6,548 | 3,713 | 33,482 |
| 98,390 | 96  | 22,965 | 6,515 | 3,687 | 33,263 |
| 98,391 | 100 | 23,312 | 6,519 | 3,724 | 33,655 |

|        |     |        |       |       |        |
|--------|-----|--------|-------|-------|--------|
| 98,392 | 102 | 23,321 | 6,502 | 3,724 | 33,649 |
| 98,393 | 112 | 23,430 | 6,521 | 3,735 | 33,798 |
| 98,394 | 107 | 23,523 | 6,485 | 3,730 | 33,845 |
| 98,395 | 106 | 23,367 | 6,450 | 3,720 | 33,643 |
| 98,396 | 115 | 22,957 | 6,359 | 3,667 | 33,098 |
| 98,397 | 113 | 22,631 | 6,286 | 3,615 | 32,645 |
| 98,398 | 116 | 22,870 | 6,374 | 3,645 | 33,005 |
| 98,399 | 123 | 22,467 | 6,215 | 3,577 | 32,382 |
| 98,400 | 124 | 22,596 | 6,236 | 3,603 | 32,559 |
| 98,401 | 119 | 22,556 | 6,222 | 3,601 | 32,498 |
| 98,402 | 116 | 22,473 | 6,238 | 3,601 | 32,428 |
| 98,403 | 114 | 22,180 | 6,161 | 3,546 | 32,001 |
| 98,404 | 111 | 21,859 | 6,110 | 3,507 | 31,587 |
| 98,405 | 127 | 22,225 | 6,229 | 3,595 | 32,176 |
| 98,406 | 134 | 22,248 | 6,228 | 3,594 | 32,204 |
| 98,407 | 135 | 22,303 | 6,221 | 3,591 | 32,250 |
| 98,408 | 136 | 22,307 | 6,209 | 3,581 | 32,233 |
| 98,409 | 131 | 22,037 | 6,147 | 3,545 | 31,860 |
| 98,410 | 131 | 22,219 | 6,150 | 3,588 | 32,088 |
| 98,411 | 134 | 22,422 | 6,199 | 3,584 | 32,339 |
| 98,412 | 136 | 22,707 | 6,256 | 3,603 | 32,702 |
| 98,413 | 136 | 22,680 | 6,219 | 3,608 | 32,643 |
| 98,414 | 135 | 22,419 | 6,155 | 3,575 | 32,284 |
| 98,415 | 135 | 22,388 | 6,137 | 3,572 | 32,232 |
| 98,416 | 135 | 22,641 | 6,174 | 3,589 | 32,539 |
| 98,417 | 134 | 22,549 | 6,159 | 3,567 | 32,409 |
| 98,418 | 140 | 22,781 | 6,224 | 3,620 | 32,765 |
| 98,419 | 140 | 22,554 | 6,126 | 3,561 | 32,381 |
| 98,420 | 142 | 22,482 | 6,122 | 3,576 | 32,322 |
| 98,421 | 142 | 22,484 | 6,129 | 3,566 | 32,321 |
| 98,422 | 144 | 22,459 | 6,113 | 3,571 | 32,287 |
| 98,423 | 145 | 22,504 | 6,179 | 3,611 | 32,439 |

|        |     |        |       |       |        |
|--------|-----|--------|-------|-------|--------|
| 98,424 | 145 | 22,326 | 6,155 | 3,603 | 32,229 |
| 98,425 | 146 | 21,920 | 6,114 | 3,595 | 31,775 |
| 98,426 | 147 | 22,135 | 6,149 | 3,624 | 32,055 |
| 98,427 | 146 | 22,135 | 6,160 | 3,619 | 32,060 |
| 98,428 | 144 | 21,844 | 6,103 | 3,584 | 31,675 |
| 98,429 | 144 | 21,574 | 6,067 | 3,562 | 31,347 |
| 98,430 | 145 | 21,963 | 6,153 | 3,640 | 31,901 |
| 98,431 | 149 | 21,852 | 6,078 | 3,587 | 31,666 |
| 98,432 | 155 | 22,151 | 6,161 | 3,628 | 32,095 |
| 98,433 | 148 | 21,870 | 6,103 | 3,589 | 31,710 |
| 98,434 | 156 | 21,990 | 6,180 | 3,619 | 31,945 |
| 98,435 | 154 | 22,170 | 6,257 | 3,660 | 32,241 |
| 98,436 | 155 | 22,257 | 6,251 | 3,616 | 32,279 |
| 98,437 | 155 | 22,014 | 6,211 | 3,578 | 31,958 |
| 98,438 | 159 | 21,732 | 6,150 | 3,565 | 31,606 |
| 98,439 | 160 | 21,498 | 6,092 | 3,526 | 31,276 |
| 98,440 | 155 | 22,212 | 6,316 | 3,692 | 32,375 |
| 98,441 | 154 | 21,881 | 6,221 | 3,630 | 31,886 |
| 98,442 | 155 | 22,214 | 6,281 | 3,671 | 32,321 |
| 98,443 | 146 | 22,167 | 6,259 | 3,672 | 32,244 |
| 98,444 | 153 | 22,143 | 6,281 | 3,685 | 32,262 |
| 98,445 | 154 | 22,144 | 6,290 | 3,692 | 32,280 |
| 98,446 | 154 | 21,773 | 6,127 | 3,582 | 31,636 |
| 98,447 | 160 | 21,941 | 6,196 | 3,604 | 31,901 |
| 98,448 | 155 | 21,863 | 6,161 | 3,598 | 31,777 |
| 98,449 | 155 | 22,096 | 6,234 | 3,624 | 32,109 |
| 98,450 | 148 | 22,386 | 6,290 | 3,665 | 32,489 |
| 98,451 | 149 | 22,306 | 6,263 | 3,605 | 32,323 |
| 98,452 | 150 | 22,674 | 6,297 | 3,645 | 32,766 |
| 98,453 | 141 | 23,034 | 6,393 | 3,708 | 33,276 |
| 98,454 | 137 | 22,874 | 6,324 | 3,692 | 33,027 |
| 98,455 | 139 | 22,786 | 6,260 | 3,680 | 32,865 |

|        |     |        |       |       |        |
|--------|-----|--------|-------|-------|--------|
| 98,456 | 141 | 22,994 | 6,295 | 3,716 | 33,146 |
| 98,457 | 145 | 23,047 | 6,330 | 3,716 | 33,238 |
| 98,458 | 147 | 22,912 | 6,326 | 3,672 | 33,057 |
| 98,459 | 157 | 22,861 | 6,257 | 3,630 | 32,905 |
| 98,460 | 157 | 22,830 | 6,248 | 3,633 | 32,868 |
| 98,461 | 157 | 22,447 | 6,196 | 3,578 | 32,378 |
| 98,462 | 154 | 22,141 | 6,129 | 3,566 | 31,990 |
| 98,463 | 156 | 23,027 | 6,358 | 3,744 | 33,285 |
| 98,464 | 153 | 22,706 | 6,283 | 3,691 | 32,833 |
| 98,465 | 152 | 22,455 | 6,258 | 3,683 | 32,548 |
| 98,466 | 152 | 22,325 | 6,249 | 3,702 | 32,428 |
| 98,467 | 151 | 22,125 | 6,253 | 3,701 | 32,230 |
| 98,468 | 152 | 22,081 | 6,249 | 3,709 | 32,191 |
| 98,469 | 148 | 22,197 | 6,288 | 3,726 | 32,359 |
| 98,470 | 147 | 22,151 | 6,305 | 3,717 | 32,320 |
| 98,471 | 144 | 22,089 | 6,284 | 3,702 | 32,219 |
| 98,472 | 144 | 22,159 | 6,274 | 3,715 | 32,292 |
| 98,473 | 144 | 22,292 | 6,262 | 3,730 | 32,428 |
| 98,474 | 143 | 22,537 | 6,273 | 3,742 | 32,695 |
| 98,475 | 146 | 22,584 | 6,224 | 3,710 | 32,664 |
| 98,476 | 146 | 22,663 | 6,231 | 3,700 | 32,740 |
| 98,477 | 146 | 23,017 | 6,267 | 3,744 | 33,174 |
| 98,478 | 144 | 23,254 | 6,313 | 3,773 | 33,484 |
| 98,479 | 151 | 23,442 | 6,316 | 3,804 | 33,713 |
| 98,480 | 152 | 23,462 | 6,312 | 3,801 | 33,727 |
| 98,481 | 150 | 23,246 | 6,290 | 3,776 | 33,462 |
| 98,482 | 147 | 24,018 | 6,493 | 3,882 | 34,540 |
| 98,483 | 144 | 23,971 | 6,532 | 3,903 | 34,550 |
| 98,484 | 146 | 24,080 | 6,511 | 3,894 | 34,631 |
| 98,485 | 139 | 24,345 | 6,538 | 3,913 | 34,935 |
| 98,486 | 145 | 24,196 | 6,485 | 3,885 | 34,711 |
| 98,487 | 142 | 23,968 | 6,448 | 3,881 | 34,439 |

|        |     |        |       |       |        |
|--------|-----|--------|-------|-------|--------|
| 98,488 | 139 | 24,255 | 6,530 | 3,903 | 34,827 |
| 98,489 | 142 | 24,237 | 6,489 | 3,892 | 34,760 |
| 98,490 | 143 | 24,240 | 6,486 | 3,890 | 34,759 |
| 98,491 | 143 | 24,253 | 6,485 | 3,881 | 34,762 |
| 98,492 | 142 | 24,044 | 6,447 | 3,868 | 34,501 |
| 98,493 | 146 | 24,075 | 6,516 | 3,911 | 34,648 |
| 98,494 | 137 | 24,087 | 6,519 | 3,901 | 34,644 |
| 98,495 | 146 | 24,244 | 6,559 | 3,933 | 34,882 |
| 98,496 | 138 | 24,076 | 6,530 | 3,896 | 34,640 |
| 98,497 | 142 | 24,230 | 6,525 | 3,924 | 34,821 |
| 98,498 | 137 | 24,110 | 6,464 | 3,898 | 34,609 |
| 98,499 | 138 | 24,055 | 6,461 | 3,900 | 34,554 |
| 98,500 | 138 | 23,984 | 6,458 | 3,906 | 34,486 |
| 98,501 | 142 | 24,210 | 6,525 | 3,943 | 34,820 |
| 98,502 | 140 | 23,832 | 6,454 | 3,922 | 34,348 |
| 98,503 | 140 | 23,773 | 6,497 | 3,935 | 34,345 |
| 98,504 | 143 | 23,920 | 6,529 | 3,958 | 34,550 |
| 98,505 | 141 | 23,857 | 6,575 | 3,960 | 34,533 |
| 98,506 | 144 | 23,941 | 6,596 | 3,972 | 34,653 |
| 98,507 | 132 | 23,721 | 6,563 | 3,960 | 34,376 |
| 98,508 | 133 | 23,657 | 6,538 | 3,970 | 34,298 |
| 98,509 | 134 | 23,872 | 6,609 | 4,023 | 34,638 |
| 98,510 | 119 | 23,432 | 6,537 | 3,985 | 34,073 |
| 98,511 | 123 | 23,545 | 6,611 | 4,011 | 34,290 |
| 98,512 | 122 | 23,418 | 6,615 | 4,015 | 34,170 |
| 98,513 | 125 | 23,351 | 6,614 | 3,992 | 34,082 |
| 98,514 | 124 | 23,586 | 6,675 | 3,996 | 34,381 |
| 98,515 | 123 | 23,424 | 6,647 | 3,957 | 34,151 |
| 98,516 | 122 | 23,357 | 6,679 | 3,967 | 34,125 |
| 98,517 | 125 | 23,628 | 6,718 | 3,996 | 34,467 |
| 98,518 | 129 | 23,625 | 6,698 | 3,987 | 34,439 |
| 98,519 | 131 | 23,588 | 6,665 | 3,957 | 34,341 |

|        |     |        |       |       |        |
|--------|-----|--------|-------|-------|--------|
| 98,520 | 131 | 23,320 | 6,584 | 3,909 | 33,944 |
| 98,521 | 132 | 22,941 | 6,494 | 3,868 | 33,435 |
| 98,522 | 131 | 22,629 | 6,437 | 3,831 | 33,028 |
| 98,523 | 131 | 22,858 | 6,557 | 3,874 | 33,420 |
| 98,524 | 138 | 22,515 | 6,499 | 3,822 | 32,974 |
| 98,525 | 140 | 22,195 | 6,457 | 3,779 | 32,571 |
| 98,526 | 147 | 22,052 | 6,410 | 3,763 | 32,372 |
| 98,527 | 147 | 21,830 | 6,321 | 3,726 | 32,024 |
| 98,528 | 158 | 21,958 | 6,405 | 3,753 | 32,274 |
| 98,529 | 161 | 21,974 | 6,420 | 3,765 | 32,320 |
| 98,530 | 156 | 22,058 | 6,410 | 3,769 | 32,393 |
| 98,531 | 159 | 21,763 | 6,348 | 3,741 | 32,011 |
| 98,532 | 160 | 21,723 | 6,371 | 3,727 | 31,981 |
| 98,533 | 165 | 21,408 | 6,288 | 3,691 | 31,552 |
| 98,534 | 163 | 21,208 | 6,166 | 3,657 | 31,194 |
| 98,535 | 162 | 21,178 | 6,260 | 3,716 | 31,316 |
| 98,536 | 157 | 21,020 | 6,198 | 3,686 | 31,061 |
| 98,537 | 161 | 21,041 | 6,167 | 3,679 | 31,048 |
| 98,538 | 165 | 21,063 | 6,182 | 3,683 | 31,093 |
| 98,539 | 166 | 21,124 | 6,219 | 3,711 | 31,220 |
| 98,540 | 169 | 21,153 | 6,248 | 3,709 | 31,279 |
| 98,541 | 168 | 21,237 | 6,253 | 3,703 | 31,361 |
| 98,542 | 174 | 21,273 | 6,307 | 3,710 | 31,464 |
| 98,543 | 175 | 21,154 | 6,227 | 3,668 | 31,224 |
| 98,544 | 174 | 20,977 | 6,149 | 3,633 | 30,933 |
| 98,545 | 175 | 21,069 | 6,166 | 3,623 | 31,033 |
| 98,546 | 173 | 20,834 | 6,118 | 3,585 | 30,710 |
| 98,547 | 171 | 20,622 | 6,070 | 3,562 | 30,425 |
| 98,548 | 172 | 21,096 | 6,206 | 3,646 | 31,120 |
| 98,549 | 170 | 21,149 | 6,211 | 3,635 | 31,165 |
| 98,550 | 171 | 21,142 | 6,204 | 3,617 | 31,134 |
| 98,551 | 172 | 21,327 | 6,253 | 3,652 | 31,404 |



|        |     |        |       |       |        |
|--------|-----|--------|-------|-------|--------|
| 98,552 | 170 | 21,431 | 6,299 | 3,668 | 31,568 |
| 98,553 | 171 | 21,398 | 6,209 | 3,627 | 31,405 |
| 98,554 | 170 | 21,203 | 6,154 | 3,591 | 31,118 |
| 98,555 | 176 | 21,097 | 6,146 | 3,572 | 30,991 |
| 98,556 | 173 | 20,744 | 6,028 | 3,520 | 30,465 |
| 98,557 | 168 | 20,873 | 6,056 | 3,566 | 30,663 |
| 98,558 | 168 | 21,060 | 6,085 | 3,580 | 30,893 |
| 98,559 | 169 | 21,045 | 6,065 | 3,584 | 30,863 |
| 98,560 | 166 | 21,036 | 6,032 | 3,613 | 30,847 |
| 98,561 | 168 | 21,151 | 6,039 | 3,624 | 30,982 |
| 98,562 | 167 | 21,110 | 5,974 | 3,579 | 30,830 |
| 98,563 | 165 | 21,191 | 5,945 | 3,569 | 30,870 |
| 98,564 | 171 | 21,481 | 5,969 | 3,606 | 31,227 |
| 98,565 | 169 | 21,296 | 5,882 | 3,576 | 30,923 |
| 98,566 | 176 | 21,186 | 5,795 | 3,532 | 30,689 |
| 98,567 | 177 | 21,346 | 5,807 | 3,537 | 30,867 |
| 98,568 | 175 | 21,300 | 5,805 | 3,539 | 30,819 |
| 98,569 | 172 | 21,259 | 5,809 | 3,550 | 30,790 |
| 98,570 | 168 | 21,544 | 5,846 | 3,606 | 31,164 |
| 98,571 | 166 | 21,575 | 5,828 | 3,626 | 31,195 |
| 98,572 | 167 | 21,625 | 5,835 | 3,629 | 31,256 |
| 98,573 | 165 | 21,867 | 5,875 | 3,667 | 31,574 |
| 98,574 | 159 | 21,930 | 5,864 | 3,676 | 31,629 |
| 98,575 | 159 | 21,954 | 5,843 | 3,666 | 31,622 |
| 98,576 | 159 | 21,943 | 5,828 | 3,673 | 31,603 |
| 98,577 | 139 | 22,053 | 5,887 | 3,701 | 31,780 |
| 98,578 | 140 | 21,856 | 5,894 | 3,720 | 31,610 |
| 98,579 | 139 | 22,012 | 5,916 | 3,725 | 31,792 |
| 98,580 | 140 | 22,142 | 5,930 | 3,732 | 31,944 |
| 98,581 | 129 | 21,467 | 5,722 | 3,591 | 30,909 |
| 98,582 | 130 | 21,954 | 5,793 | 3,647 | 31,524 |
| 98,583 | 134 | 22,251 | 5,880 | 3,691 | 31,956 |

|        |     |        |       |       |        |
|--------|-----|--------|-------|-------|--------|
| 98,584 | 134 | 22,446 | 5,908 | 3,681 | 32,169 |
| 98,585 | 139 | 22,590 | 5,900 | 3,668 | 32,297 |
| 98,586 | 139 | 22,622 | 5,902 | 3,667 | 32,330 |
| 98,587 | 137 | 22,600 | 5,907 | 3,668 | 32,312 |
| 98,588 | 135 | 22,444 | 5,886 | 3,633 | 32,098 |
| 98,589 | 134 | 22,621 | 5,889 | 3,663 | 32,307 |
| 98,590 | 132 | 23,007 | 5,955 | 3,697 | 32,791 |
| 98,591 | 134 | 23,088 | 5,959 | 3,714 | 32,895 |
| 98,592 | 142 | 22,945 | 5,889 | 3,707 | 32,683 |
| 98,593 | 142 | 23,003 | 5,890 | 3,723 | 32,758 |
| 98,594 | 150 | 23,308 | 5,972 | 3,770 | 33,200 |
| 98,595 | 150 | 23,044 | 5,892 | 3,747 | 32,833 |
| 98,596 | 152 | 23,274 | 5,942 | 3,778 | 33,146 |
| 98,597 | 154 | 22,972 | 5,842 | 3,708 | 32,676 |
| 98,598 | 154 | 22,964 | 5,845 | 3,720 | 32,683 |
| 98,599 | 156 | 22,961 | 5,852 | 3,712 | 32,681 |
| 98,600 | 160 | 22,716 | 5,811 | 3,692 | 32,379 |
| 98,601 | 158 | 22,350 | 5,737 | 3,656 | 31,901 |
| 98,602 | 162 | 22,713 | 5,848 | 3,697 | 32,420 |
| 98,603 | 160 | 22,800 | 5,840 | 3,729 | 32,529 |
| 98,604 | 153 | 22,704 | 5,825 | 3,743 | 32,425 |
| 98,605 | 156 | 22,658 | 5,855 | 3,741 | 32,410 |
| 98,606 | 150 | 22,701 | 5,869 | 3,750 | 32,470 |
| 98,607 | 155 | 22,560 | 5,796 | 3,706 | 32,217 |
| 98,608 | 159 | 22,461 | 5,772 | 3,676 | 32,068 |
| 98,609 | 164 | 22,428 | 5,755 | 3,692 | 32,039 |
| 98,610 | 161 | 22,152 | 5,680 | 3,642 | 31,635 |
| 98,611 | 167 | 22,654 | 5,835 | 3,691 | 32,347 |
| 98,612 | 172 | 22,746 | 5,886 | 3,713 | 32,517 |
| 98,613 | 173 | 22,736 | 5,898 | 3,706 | 32,513 |
| 98,614 | 171 | 22,503 | 5,847 | 3,682 | 32,203 |
| 98,615 | 168 | 22,779 | 5,880 | 3,716 | 32,543 |

|        |     |        |       |       |        |
|--------|-----|--------|-------|-------|--------|
| 98,616 | 162 | 22,402 | 5,820 | 3,662 | 32,046 |
| 98,617 | 162 | 22,498 | 5,811 | 3,655 | 32,126 |
| 98,618 | 163 | 22,727 | 5,874 | 3,688 | 32,452 |
| 98,619 | 161 | 22,670 | 5,851 | 3,675 | 32,357 |
| 98,620 | 162 | 22,561 | 5,846 | 3,672 | 32,241 |
| 98,621 | 161 | 22,443 | 5,879 | 3,653 | 32,136 |
| 98,622 | 160 | 22,412 | 5,882 | 3,629 | 32,083 |
| 98,623 | 162 | 22,675 | 5,910 | 3,652 | 32,399 |
| 98,624 | 164 | 22,645 | 5,915 | 3,623 | 32,347 |
| 98,625 | 164 | 22,471 | 5,872 | 3,594 | 32,101 |
| 98,626 | 161 | 22,637 | 5,893 | 3,592 | 32,283 |
| 98,627 | 161 | 22,931 | 5,952 | 3,612 | 32,656 |
| 98,628 | 157 | 22,843 | 5,867 | 3,587 | 32,454 |
| 98,629 | 162 | 23,013 | 5,920 | 3,597 | 32,692 |
| 98,630 | 163 | 22,855 | 5,883 | 3,596 | 32,497 |
| 98,631 | 160 | 22,565 | 5,826 | 3,546 | 32,097 |
| 98,632 | 159 | 22,443 | 5,829 | 3,537 | 31,968 |
| 98,633 | 164 | 22,556 | 5,864 | 3,547 | 32,131 |
| 98,634 | 163 | 22,385 | 5,782 | 3,496 | 31,826 |
| 98,635 | 166 | 22,565 | 5,840 | 3,533 | 32,104 |
| 98,636 | 162 | 22,344 | 5,774 | 3,504 | 31,784 |
| 98,637 | 166 | 22,400 | 5,781 | 3,516 | 31,863 |
| 98,638 | 164 | 22,337 | 5,793 | 3,523 | 31,817 |
| 98,639 | 169 | 22,369 | 5,789 | 3,541 | 31,868 |
| 98,640 | 175 | 22,287 | 5,785 | 3,522 | 31,769 |
| 98,641 | 171 | 22,180 | 5,776 | 3,507 | 31,634 |
| 98,642 | 165 | 22,046 | 5,727 | 3,442 | 31,380 |
| 98,643 | 162 | 22,371 | 5,787 | 3,463 | 31,783 |
| 98,644 | 166 | 22,470 | 5,834 | 3,491 | 31,961 |
| 98,645 | 163 | 22,365 | 5,800 | 3,469 | 31,797 |
| 98,646 | 160 | 22,446 | 5,823 | 3,469 | 31,898 |
| 98,647 | 160 | 22,462 | 5,816 | 3,475 | 31,913 |

|        |     |        |       |       |        |
|--------|-----|--------|-------|-------|--------|
| 98,648 | 152 | 22,711 | 5,887 | 3,527 | 32,277 |
| 98,649 | 146 | 22,512 | 5,835 | 3,479 | 31,972 |
| 98,650 | 142 | 22,537 | 5,810 | 3,486 | 31,975 |
| 98,651 | 142 | 22,534 | 5,813 | 3,503 | 31,992 |
| 98,652 | 141 | 22,739 | 5,785 | 3,509 | 32,174 |
| 98,653 | 144 | 22,753 | 5,822 | 3,509 | 32,228 |
| 98,654 | 145 | 22,815 | 5,807 | 3,482 | 32,249 |
| 98,655 | 145 | 22,941 | 5,796 | 3,490 | 32,372 |
| 98,656 | 150 | 22,917 | 5,762 | 3,488 | 32,317 |
| 98,657 | 153 | 23,239 | 5,862 | 3,537 | 32,791 |
| 98,658 | 149 | 23,251 | 5,854 | 3,478 | 32,732 |
| 98,659 | 151 | 23,508 | 5,921 | 3,521 | 33,101 |
| 98,660 | 144 | 23,560 | 5,935 | 3,534 | 33,173 |
| 98,661 | 141 | 23,632 | 5,975 | 3,546 | 33,294 |
| 98,662 | 138 | 23,571 | 5,953 | 3,541 | 33,203 |
| 98,663 | 135 | 23,549 | 5,941 | 3,539 | 33,164 |
| 98,664 | 133 | 23,628 | 5,912 | 3,565 | 33,238 |
| 98,665 | 131 | 23,599 | 5,933 | 3,573 | 33,236 |
| 98,666 | 134 | 23,648 | 6,002 | 3,587 | 33,371 |
| 98,667 | 133 | 23,668 | 6,008 | 3,593 | 33,402 |
| 98,668 | 134 | 23,539 | 6,000 | 3,582 | 33,255 |
| 98,669 | 136 | 23,356 | 5,943 | 3,544 | 32,979 |
| 98,670 | 136 | 23,168 | 5,900 | 3,521 | 32,725 |
| 98,671 | 135 | 23,354 | 5,900 | 3,519 | 32,908 |
| 98,672 | 139 | 23,267 | 5,822 | 3,486 | 32,714 |
| 98,673 | 140 | 23,061 | 5,790 | 3,451 | 32,442 |
| 98,674 | 138 | 22,826 | 5,764 | 3,419 | 32,147 |
| 98,675 | 147 | 23,017 | 5,841 | 3,482 | 32,487 |
| 98,676 | 145 | 22,721 | 5,786 | 3,442 | 32,094 |
| 98,677 | 146 | 22,593 | 5,746 | 3,444 | 31,929 |
| 98,678 | 151 | 22,290 | 5,691 | 3,402 | 31,534 |
| 98,679 | 151 | 21,933 | 5,636 | 3,362 | 31,082 |

|        |     |        |       |       |        |
|--------|-----|--------|-------|-------|--------|
| 98,680 | 148 | 22,588 | 5,796 | 3,474 | 32,006 |
| 98,681 | 143 | 22,380 | 5,673 | 3,438 | 31,634 |
| 98,682 | 143 | 22,323 | 5,659 | 3,433 | 31,558 |
| 98,683 | 140 | 22,439 | 5,696 | 3,452 | 31,727 |
| 98,684 | 143 | 22,282 | 5,697 | 3,473 | 31,595 |
| 98,685 | 145 | 21,896 | 5,622 | 3,429 | 31,092 |
| 98,686 | 143 | 21,661 | 5,571 | 3,393 | 30,768 |
| 98,687 | 145 | 22,201 | 5,791 | 3,576 | 31,713 |
| 98,688 | 151 | 22,339 | 5,868 | 3,605 | 31,963 |
| 98,689 | 146 | 22,532 | 5,906 | 3,667 | 32,251 |
| 98,690 | 141 | 22,236 | 5,846 | 3,618 | 31,841 |
| 98,691 | 137 | 22,199 | 5,838 | 3,629 | 31,803 |
| 98,692 | 137 | 22,044 | 5,829 | 3,613 | 31,623 |
| 98,693 | 135 | 21,937 | 5,816 | 3,591 | 31,479 |
| 98,694 | 140 | 21,886 | 5,818 | 3,597 | 31,441 |
| 98,695 | 133 | 21,681 | 5,740 | 3,568 | 31,122 |
| 98,696 | 128 | 21,325 | 5,669 | 3,520 | 30,642 |
| 98,697 | 127 | 21,062 | 5,621 | 3,488 | 30,298 |
| 98,698 | 129 | 21,361 | 5,759 | 3,546 | 30,795 |
| 98,699 | 129 | 21,289 | 5,739 | 3,573 | 30,730 |
| 98,700 | 140 | 21,251 | 5,729 | 3,582 | 30,702 |
| 98,701 | 142 | 21,361 | 5,756 | 3,603 | 30,862 |
| 98,702 | 142 | 21,295 | 5,761 | 3,598 | 30,796 |
| 98,703 | 152 | 21,553 | 5,802 | 3,620 | 31,127 |
| 98,704 | 153 | 21,651 | 5,883 | 3,638 | 31,325 |
| 98,705 | 155 | 21,528 | 5,877 | 3,653 | 31,213 |
| 98,706 | 154 | 21,570 | 5,957 | 3,690 | 31,371 |
| 98,707 | 148 | 21,454 | 5,999 | 3,693 | 31,294 |
| 98,708 | 147 | 21,407 | 5,966 | 3,703 | 31,223 |
| 98,709 | 144 | 21,363 | 5,955 | 3,710 | 31,172 |
| 98,710 | 149 | 21,458 | 5,970 | 3,716 | 31,293 |
| 98,711 | 151 | 21,382 | 5,995 | 3,685 | 31,213 |

|        |     |        |       |       |        |
|--------|-----|--------|-------|-------|--------|
| 98,712 | 154 | 21,032 | 5,871 | 3,627 | 30,684 |
| 98,713 | 154 | 21,011 | 5,881 | 3,625 | 30,671 |
| 98,714 | 157 | 21,252 | 5,969 | 3,655 | 31,033 |
| 98,715 | 158 | 20,747 | 5,820 | 3,538 | 30,263 |
| 98,716 | 160 | 20,875 | 5,876 | 3,570 | 30,481 |
| 98,717 | 161 | 21,101 | 5,920 | 3,606 | 30,788 |
| 98,718 | 162 | 20,731 | 5,813 | 3,548 | 30,254 |
| 98,719 | 161 | 20,722 | 5,810 | 3,541 | 30,234 |
| 98,720 | 161 | 20,520 | 5,771 | 3,516 | 29,968 |
| 98,721 | 162 | 20,327 | 5,730 | 3,493 | 29,712 |
| 98,722 | 164 | 20,754 | 5,888 | 3,591 | 30,397 |
| 98,723 | 164 | 20,556 | 5,858 | 3,574 | 30,152 |
| 98,724 | 165 | 20,970 | 5,961 | 3,653 | 30,749 |
| 98,725 | 168 | 20,937 | 5,916 | 3,651 | 30,672 |
| 98,726 | 158 | 20,722 | 5,834 | 3,614 | 30,328 |
| 98,727 | 158 | 20,876 | 5,870 | 3,629 | 30,533 |
| 98,728 | 161 | 20,973 | 5,882 | 3,638 | 30,654 |
| 98,729 | 157 | 21,016 | 5,844 | 3,652 | 30,669 |
| 98,730 | 159 | 21,031 | 5,873 | 3,646 | 30,709 |
| 98,731 | 160 | 21,055 | 5,897 | 3,653 | 30,765 |
| 98,732 | 160 | 20,876 | 5,887 | 3,618 | 30,541 |
| 98,733 | 161 | 20,714 | 5,852 | 3,593 | 30,320 |
| 98,734 | 165 | 20,828 | 5,895 | 3,589 | 30,477 |
| 98,735 | 161 | 20,669 | 5,824 | 3,546 | 30,200 |
| 98,736 | 153 | 20,538 | 5,734 | 3,494 | 29,919 |
| 98,737 | 158 | 20,821 | 5,795 | 3,511 | 30,285 |
| 98,738 | 157 | 20,751 | 5,776 | 3,481 | 30,165 |
| 98,739 | 152 | 20,554 | 5,686 | 3,446 | 29,838 |
| 98,740 | 150 | 20,448 | 5,705 | 3,415 | 29,718 |
| 98,741 | 151 | 20,387 | 5,679 | 3,431 | 29,648 |
| 98,742 | 157 | 20,670 | 5,702 | 3,466 | 29,995 |
| 98,743 | 157 | 20,596 | 5,678 | 3,478 | 29,909 |

|        |     |        |       |       |        |
|--------|-----|--------|-------|-------|--------|
| 98,744 | 151 | 20,578 | 5,697 | 3,501 | 29,927 |
| 98,745 | 150 | 20,525 | 5,682 | 3,506 | 29,863 |
| 98,746 | 151 | 20,517 | 5,700 | 3,502 | 29,870 |
| 98,747 | 151 | 20,556 | 5,678 | 3,481 | 29,866 |
| 98,748 | 149 | 20,579 | 5,666 | 3,464 | 29,858 |
| 98,749 | 146 | 20,511 | 5,675 | 3,442 | 29,774 |
| 98,750 | 148 | 20,512 | 5,674 | 3,430 | 29,764 |
| 98,751 | 139 | 20,439 | 5,651 | 3,410 | 29,639 |
| 98,752 | 141 | 20,573 | 5,694 | 3,415 | 29,823 |
| 98,753 | 135 | 20,698 | 5,732 | 3,449 | 30,014 |
| 98,754 | 129 | 20,400 | 5,667 | 3,414 | 29,610 |
| 98,755 | 125 | 20,425 | 5,658 | 3,423 | 29,631 |
| 98,756 | 123 | 20,284 | 5,565 | 3,384 | 29,356 |
| 98,757 | 124 | 20,559 | 5,636 | 3,399 | 29,718 |
| 98,758 | 121 | 20,459 | 5,586 | 3,356 | 29,522 |
| 98,759 | 121 | 20,441 | 5,567 | 3,337 | 29,466 |
| 98,760 | 121 | 20,537 | 5,606 | 3,358 | 29,622 |
| 98,761 | 118 | 20,519 | 5,603 | 3,363 | 29,603 |
| 98,762 | 117 | 20,578 | 5,609 | 3,397 | 29,701 |
| 98,763 | 114 | 20,586 | 5,621 | 3,373 | 29,694 |
| 98,764 | 111 | 20,356 | 5,569 | 3,346 | 29,382 |
| 98,765 | 113 | 20,533 | 5,620 | 3,352 | 29,618 |
| 98,766 | 108 | 20,423 | 5,604 | 3,375 | 29,510 |
| 98,767 | 108 | 20,687 | 5,640 | 3,385 | 29,820 |
| 98,768 | 105 | 20,797 | 5,675 | 3,401 | 29,978 |
| 98,769 | 102 | 20,846 | 5,683 | 3,406 | 30,037 |
| 98,770 | 104 | 20,980 | 5,714 | 3,408 | 30,206 |
| 98,771 | 101 | 21,166 | 5,752 | 3,424 | 30,443 |
| 98,772 | 105 | 21,311 | 5,768 | 3,430 | 30,614 |
| 98,773 | 102 | 21,160 | 5,728 | 3,400 | 30,390 |
| 98,774 | 103 | 21,240 | 5,765 | 3,415 | 30,523 |
| 98,775 | 103 | 21,068 | 5,729 | 3,376 | 30,276 |

|        |     |        |       |       |        |
|--------|-----|--------|-------|-------|--------|
| 98,776 | 100 | 20,893 | 5,678 | 3,337 | 30,008 |
| 98,777 | 109 | 21,290 | 5,792 | 3,440 | 30,631 |
| 98,778 | 117 | 21,492 | 5,874 | 3,494 | 30,977 |
| 98,779 | 114 | 21,280 | 5,844 | 3,441 | 30,679 |
| 98,780 | 114 | 21,249 | 5,839 | 3,435 | 30,637 |
| 98,781 | 112 | 21,046 | 5,772 | 3,401 | 30,331 |
| 98,782 | 111 | 21,272 | 5,864 | 3,430 | 30,677 |
| 98,783 | 113 | 21,139 | 5,826 | 3,403 | 30,481 |
| 98,784 | 108 | 20,913 | 5,726 | 3,364 | 30,111 |
| 98,785 | 108 | 20,923 | 5,730 | 3,370 | 30,131 |
| 98,786 | 106 | 20,603 | 5,649 | 3,324 | 29,682 |
| 98,787 | 107 | 20,582 | 5,674 | 3,314 | 29,677 |
| 98,788 | 102 | 20,579 | 5,663 | 3,314 | 29,658 |
| 98,789 | 101 | 20,365 | 5,588 | 3,251 | 29,305 |
| 98,790 | 106 | 20,674 | 5,632 | 3,284 | 29,696 |
| 98,791 | 114 | 20,619 | 5,648 | 3,274 | 29,655 |
| 98,792 | 109 | 20,651 | 5,679 | 3,264 | 29,703 |
| 98,793 | 107 | 20,543 | 5,646 | 3,241 | 29,537 |
| 98,794 | 108 | 20,412 | 5,617 | 3,192 | 29,329 |
| 98,795 | 108 | 20,493 | 5,627 | 3,184 | 29,412 |
| 98,796 | 108 | 20,662 | 5,671 | 3,202 | 29,643 |
| 98,797 | 109 | 20,351 | 5,611 | 3,188 | 29,259 |
| 98,798 | 110 | 20,350 | 5,603 | 3,184 | 29,247 |
| 98,799 | 115 | 20,524 | 5,640 | 3,216 | 29,495 |
| 98,800 | 112 | 20,337 | 5,576 | 3,198 | 29,223 |
| 98,801 | 111 | 20,243 | 5,555 | 3,190 | 29,099 |
| 98,802 | 113 | 20,395 | 5,619 | 3,223 | 29,350 |
| 98,803 | 109 | 20,086 | 5,522 | 3,191 | 28,908 |
| 98,804 | 110 | 20,005 | 5,492 | 3,159 | 28,766 |
| 98,805 | 114 | 20,161 | 5,486 | 3,174 | 28,935 |
| 98,806 | 118 | 20,265 | 5,530 | 3,192 | 29,105 |
| 98,807 | 115 | 19,923 | 5,467 | 3,149 | 28,654 |



|        |     |        |       |       |        |
|--------|-----|--------|-------|-------|--------|
| 98,808 | 115 | 19,935 | 5,451 | 3,128 | 28,629 |
| 98,809 | 115 | 19,583 | 5,374 | 3,079 | 28,151 |
| 98,810 | 118 | 19,497 | 5,373 | 3,085 | 28,073 |
| 98,811 | 119 | 19,254 | 5,303 | 3,063 | 27,739 |
| 98,812 | 119 | 19,668 | 5,405 | 3,128 | 28,320 |
| 98,813 | 121 | 19,674 | 5,392 | 3,136 | 28,323 |
| 98,814 | 121 | 19,663 | 5,391 | 3,168 | 28,343 |
| 98,815 | 126 | 19,629 | 5,371 | 3,172 | 28,298 |
| 98,816 | 125 | 19,373 | 5,295 | 3,122 | 27,915 |
| 98,817 | 125 | 19,394 | 5,313 | 3,128 | 27,960 |
| 98,818 | 129 | 19,262 | 5,308 | 3,120 | 27,819 |
| 98,819 | 134 | 19,208 | 5,328 | 3,116 | 27,786 |
| 98,820 | 130 | 19,109 | 5,285 | 3,099 | 27,623 |
| 98,821 | 130 | 19,227 | 5,339 | 3,128 | 27,824 |
| 98,822 | 130 | 19,335 | 5,354 | 3,149 | 27,968 |
| 98,823 | 129 | 19,360 | 5,320 | 3,151 | 27,960 |
| 98,824 | 128 | 19,387 | 5,345 | 3,161 | 28,021 |
| 98,825 | 121 | 19,301 | 5,310 | 3,128 | 27,860 |
| 98,826 | 133 | 19,523 | 5,390 | 3,171 | 28,217 |
| 98,827 | 134 | 19,608 | 5,412 | 3,164 | 28,318 |
| 98,828 | 133 | 19,715 | 5,409 | 3,150 | 28,407 |
| 98,829 | 127 | 19,492 | 5,371 | 3,129 | 28,119 |
| 98,830 | 131 | 19,680 | 5,437 | 3,195 | 28,443 |
| 98,831 | 134 | 19,404 | 5,388 | 3,177 | 28,103 |
| 98,832 | 133 | 18,757 | 5,220 | 3,071 | 27,181 |
| 98,833 | 134 | 18,989 | 5,256 | 3,090 | 27,469 |
| 98,834 | 135 | 19,151 | 5,309 | 3,114 | 27,709 |
| 98,835 | 135 | 19,114 | 5,296 | 3,107 | 27,652 |
| 98,836 | 132 | 19,353 | 5,373 | 3,146 | 28,004 |
| 98,837 | 132 | 19,465 | 5,384 | 3,144 | 28,125 |
| 98,838 | 135 | 19,509 | 5,368 | 3,128 | 28,140 |
| 98,839 | 135 | 19,527 | 5,375 | 3,136 | 28,173 |

|        |     |        |       |       |        |
|--------|-----|--------|-------|-------|--------|
| 98,840 | 139 | 19,687 | 5,434 | 3,172 | 28,432 |
| 98,841 | 133 | 19,633 | 5,429 | 3,181 | 28,376 |
| 98,842 | 124 | 19,654 | 5,391 | 3,173 | 28,342 |
| 98,843 | 125 | 19,648 | 5,374 | 3,162 | 28,309 |
| 98,844 | 125 | 19,795 | 5,386 | 3,168 | 28,474 |
| 98,845 | 122 | 19,621 | 5,329 | 3,133 | 28,205 |
| 98,846 | 121 | 19,820 | 5,396 | 3,190 | 28,527 |
| 98,847 | 117 | 19,559 | 5,341 | 3,154 | 28,171 |
| 98,848 | 115 | 19,207 | 5,266 | 3,118 | 27,706 |
| 98,849 | 115 | 19,342 | 5,308 | 3,139 | 27,904 |
| 98,850 | 112 | 19,539 | 5,362 | 3,158 | 28,171 |
| 98,851 | 113 | 19,702 | 5,398 | 3,177 | 28,390 |
| 98,852 | 114 | 19,782 | 5,403 | 3,184 | 28,483 |
| 98,853 | 111 | 19,865 | 5,372 | 3,183 | 28,531 |
| 98,854 | 107 | 19,637 | 5,329 | 3,167 | 28,240 |
| 98,855 | 108 | 19,685 | 5,364 | 3,188 | 28,345 |
| 98,856 | 104 | 19,587 | 5,367 | 3,167 | 28,225 |
| 98,857 | 103 | 19,490 | 5,333 | 3,151 | 28,077 |
| 98,858 | 102 | 19,160 | 5,259 | 3,117 | 27,638 |
| 98,859 | 105 | 19,500 | 5,352 | 3,173 | 28,130 |
| 98,860 | 107 | 19,356 | 5,300 | 3,140 | 27,903 |
| 98,861 | 100 | 19,072 | 5,222 | 3,078 | 27,472 |
| 98,862 | 102 | 19,117 | 5,232 | 3,077 | 27,528 |
| 98,863 | 104 | 19,150 | 5,246 | 3,074 | 27,574 |
| 98,864 | 102 | 19,061 | 5,207 | 3,036 | 27,406 |
| 98,865 | 101 | 19,107 | 5,196 | 3,034 | 27,438 |
| 98,866 | 94  | 18,802 | 5,083 | 2,978 | 26,957 |
| 98,867 | 97  | 18,826 | 5,068 | 2,985 | 26,976 |
| 98,868 | 97  | 19,079 | 5,097 | 3,004 | 27,277 |
| 98,869 | 92  | 19,203 | 5,138 | 3,018 | 27,451 |
| 98,870 | 94  | 19,166 | 5,133 | 2,976 | 27,369 |
| 98,871 | 94  | 19,224 | 5,133 | 2,974 | 27,425 |

|        |     |        |       |       |        |
|--------|-----|--------|-------|-------|--------|
| 98,872 | 94  | 19,198 | 5,137 | 2,965 | 27,394 |
| 98,873 | 91  | 19,178 | 5,148 | 2,979 | 27,396 |
| 98,874 | 87  | 18,766 | 5,041 | 2,905 | 26,799 |
| 98,875 | 86  | 18,888 | 5,064 | 2,914 | 26,952 |
| 98,876 | 75  | 19,186 | 5,117 | 2,953 | 27,331 |
| 98,877 | 76  | 19,299 | 5,159 | 2,975 | 27,509 |
| 98,878 | 79  | 19,330 | 5,187 | 2,986 | 27,582 |
| 98,879 | 77  | 19,210 | 5,143 | 2,945 | 27,375 |
| 98,880 | 84  | 19,445 | 5,175 | 2,957 | 27,661 |
| 98,881 | 81  | 19,477 | 5,195 | 2,946 | 27,699 |
| 98,882 | 77  | 19,337 | 5,110 | 2,914 | 27,438 |
| 98,883 | 78  | 19,416 | 5,117 | 2,927 | 27,538 |
| 98,884 | 78  | 19,399 | 5,115 | 2,924 | 27,516 |
| 98,885 | 81  | 19,621 | 5,159 | 2,947 | 27,808 |
| 98,886 | 82  | 19,676 | 5,136 | 2,934 | 27,828 |
| 98,887 | 83  | 19,620 | 5,142 | 2,932 | 27,777 |
| 98,888 | 91  | 19,821 | 5,223 | 3,000 | 28,135 |
| 98,889 | 94  | 19,899 | 5,277 | 3,015 | 28,285 |
| 98,890 | 89  | 19,793 | 5,284 | 3,007 | 28,173 |
| 98,891 | 93  | 19,985 | 5,329 | 3,059 | 28,466 |
| 98,892 | 99  | 19,822 | 5,291 | 3,019 | 28,231 |
| 98,893 | 99  | 19,591 | 5,265 | 2,978 | 27,933 |
| 98,894 | 100 | 19,627 | 5,262 | 2,988 | 27,977 |
| 98,895 | 103 | 19,827 | 5,315 | 3,009 | 28,254 |
| 98,896 | 106 | 19,808 | 5,269 | 2,991 | 28,174 |
| 98,897 | 106 | 19,876 | 5,304 | 2,971 | 28,257 |
| 98,898 | 107 | 20,119 | 5,350 | 3,005 | 28,581 |
| 98,899 | 108 | 20,121 | 5,345 | 2,997 | 28,571 |
| 98,900 | 108 | 20,272 | 5,390 | 3,036 | 28,806 |
| 98,901 | 109 | 20,208 | 5,407 | 3,025 | 28,749 |
| 98,902 | 112 | 20,436 | 5,461 | 3,063 | 29,072 |
| 98,903 | 114 | 20,507 | 5,469 | 3,072 | 29,162 |

|        |     |        |       |       |        |
|--------|-----|--------|-------|-------|--------|
| 98,904 | 117 | 20,612 | 5,510 | 3,079 | 29,318 |
| 98,905 | 117 | 20,664 | 5,543 | 3,062 | 29,386 |
| 98,906 | 117 | 20,704 | 5,552 | 3,074 | 29,447 |
| 98,907 | 113 | 20,603 | 5,506 | 3,078 | 29,300 |
| 98,908 | 114 | 20,802 | 5,558 | 3,103 | 29,577 |
| 98,909 | 110 | 20,478 | 5,459 | 3,032 | 29,079 |
| 98,910 | 110 | 20,746 | 5,510 | 3,062 | 29,428 |
| 98,911 | 110 | 20,686 | 5,529 | 3,070 | 29,395 |
| 98,912 | 111 | 20,902 | 5,599 | 3,112 | 29,724 |
| 98,913 | 110 | 20,760 | 5,586 | 3,073 | 29,529 |
| 98,914 | 112 | 20,990 | 5,644 | 3,123 | 29,869 |
| 98,915 | 116 | 20,967 | 5,693 | 3,119 | 29,895 |
| 98,916 | 121 | 20,816 | 5,659 | 3,090 | 29,686 |
| 98,917 | 120 | 20,674 | 5,629 | 3,076 | 29,499 |
| 98,918 | 117 | 21,063 | 5,755 | 3,121 | 30,056 |
| 98,919 | 115 | 20,917 | 5,718 | 3,086 | 29,836 |
| 98,920 | 115 | 20,848 | 5,715 | 3,086 | 29,764 |
| 98,921 | 115 | 20,859 | 5,752 | 3,120 | 29,846 |
| 98,922 | 117 | 20,812 | 5,713 | 3,110 | 29,752 |
| 98,923 | 120 | 21,019 | 5,771 | 3,136 | 30,046 |
| 98,924 | 123 | 20,994 | 5,783 | 3,124 | 30,024 |
| 98,925 | 126 | 20,906 | 5,749 | 3,114 | 29,895 |
| 98,926 | 126 | 20,924 | 5,738 | 3,114 | 29,902 |
| 98,927 | 128 | 20,413 | 5,581 | 3,030 | 29,152 |
| 98,928 | 130 | 20,531 | 5,620 | 3,040 | 29,321 |
| 98,929 | 127 | 20,666 | 5,665 | 3,059 | 29,517 |
| 98,930 | 128 | 20,660 | 5,672 | 3,057 | 29,517 |
| 98,931 | 125 | 20,405 | 5,660 | 3,056 | 29,246 |
| 98,932 | 123 | 20,803 | 5,752 | 3,122 | 29,800 |
| 98,933 | 123 | 20,605 | 5,731 | 3,095 | 29,554 |
| 98,934 | 122 | 20,698 | 5,760 | 3,106 | 29,686 |
| 98,935 | 122 | 20,559 | 5,713 | 3,103 | 29,497 |

|        |     |        |       |       |        |
|--------|-----|--------|-------|-------|--------|
| 98,936 | 119 | 20,457 | 5,694 | 3,087 | 29,357 |
| 98,937 | 125 | 20,873 | 5,799 | 3,165 | 29,962 |
| 98,938 | 127 | 20,797 | 5,781 | 3,139 | 29,844 |
| 98,939 | 119 | 20,560 | 5,765 | 3,110 | 29,554 |
| 98,940 | 119 | 20,635 | 5,826 | 3,163 | 29,743 |
| 98,941 | 115 | 20,361 | 5,724 | 3,118 | 29,318 |
| 98,942 | 123 | 20,399 | 5,748 | 3,111 | 29,381 |
| 98,943 | 116 | 20,186 | 5,693 | 3,086 | 29,081 |
| 98,944 | 118 | 20,369 | 5,762 | 3,127 | 29,376 |
| 98,945 | 119 | 20,362 | 5,787 | 3,150 | 29,418 |
| 98,946 | 114 | 20,257 | 5,782 | 3,168 | 29,321 |
| 98,947 | 116 | 20,405 | 5,873 | 3,209 | 29,603 |
| 98,948 | 118 | 20,106 | 5,772 | 3,198 | 29,194 |
| 98,949 | 117 | 20,144 | 5,782 | 3,202 | 29,245 |
| 98,950 | 116 | 20,070 | 5,818 | 3,215 | 29,219 |
| 98,951 | 117 | 19,934 | 5,728 | 3,179 | 28,958 |
| 98,952 | 117 | 19,913 | 5,724 | 3,176 | 28,930 |
| 98,953 | 111 | 19,805 | 5,690 | 3,161 | 28,767 |
| 98,954 | 117 | 19,894 | 5,761 | 3,165 | 28,937 |
| 98,955 | 119 | 19,979 | 5,821 | 3,197 | 29,116 |
| 98,956 | 125 | 19,931 | 5,818 | 3,202 | 29,076 |
| 98,957 | 131 | 19,902 | 5,802 | 3,162 | 28,997 |
| 98,958 | 131 | 19,968 | 5,830 | 3,147 | 29,076 |
| 98,959 | 134 | 19,886 | 5,851 | 3,156 | 29,027 |
| 98,960 | 131 | 19,743 | 5,809 | 3,181 | 28,864 |
| 98,961 | 136 | 19,883 | 5,825 | 3,203 | 29,047 |
| 98,962 | 136 | 20,056 | 5,889 | 3,242 | 29,323 |
| 98,963 | 134 | 20,089 | 5,934 | 3,263 | 29,420 |
| 98,964 | 131 | 20,156 | 5,945 | 3,283 | 29,515 |
| 98,965 | 126 | 20,004 | 5,915 | 3,263 | 29,308 |
| 98,966 | 124 | 20,224 | 5,955 | 3,307 | 29,610 |
| 98,967 | 121 | 20,264 | 5,983 | 3,319 | 29,687 |

|        |     |        |       |       |        |
|--------|-----|--------|-------|-------|--------|
| 98,968 | 121 | 20,294 | 6,010 | 3,334 | 29,759 |
| 98,969 | 125 | 20,381 | 6,013 | 3,334 | 29,853 |
| 98,970 | 125 | 20,413 | 5,989 | 3,331 | 29,858 |
| 98,971 | 124 | 20,165 | 5,894 | 3,278 | 29,461 |
| 98,972 | 124 | 20,203 | 5,911 | 3,278 | 29,516 |
| 98,973 | 122 | 20,303 | 5,936 | 3,282 | 29,643 |
| 98,974 | 120 | 20,334 | 5,957 | 3,278 | 29,689 |
| 98,975 | 122 | 20,493 | 5,988 | 3,318 | 29,921 |
| 98,976 | 122 | 20,395 | 5,988 | 3,331 | 29,836 |
| 98,977 | 121 | 20,120 | 5,927 | 3,294 | 29,462 |
| 98,978 | 124 | 20,153 | 5,942 | 3,296 | 29,515 |
| 98,979 | 121 | 20,000 | 5,904 | 3,285 | 29,310 |
| 98,980 | 123 | 20,239 | 5,981 | 3,339 | 29,682 |
| 98,981 | 119 | 20,129 | 5,941 | 3,295 | 29,484 |
| 98,982 | 121 | 20,335 | 5,973 | 3,337 | 29,766 |
| 98,983 | 123 | 19,918 | 5,842 | 3,278 | 29,161 |
| 98,984 | 123 | 20,103 | 5,881 | 3,308 | 29,415 |
| 98,985 | 120 | 20,350 | 5,937 | 3,348 | 29,755 |
| 98,986 | 112 | 20,101 | 5,896 | 3,300 | 29,409 |
| 98,987 | 113 | 20,256 | 5,942 | 3,315 | 29,626 |
| 98,988 | 111 | 20,115 | 5,921 | 3,308 | 29,455 |
| 98,989 | 109 | 20,287 | 5,883 | 3,318 | 29,597 |
| 98,990 | 106 | 20,306 | 5,870 | 3,324 | 29,606 |
| 98,991 | 108 | 20,536 | 5,932 | 3,356 | 29,932 |
| 98,992 | 106 | 20,472 | 5,930 | 3,334 | 29,842 |
| 98,993 | 99  | 20,474 | 5,918 | 3,328 | 29,819 |
| 98,994 | 99  | 20,380 | 5,877 | 3,333 | 29,689 |
| 98,995 | 100 | 20,226 | 5,786 | 3,287 | 29,399 |
| 98,996 | 101 | 20,328 | 5,824 | 3,298 | 29,551 |
| 98,997 | 103 | 20,304 | 5,815 | 3,289 | 29,511 |
| 98,998 | 103 | 20,395 | 5,809 | 3,282 | 29,589 |
| 98,999 | 104 | 20,334 | 5,793 | 3,277 | 29,508 |

|        |     |        |       |       |        |
|--------|-----|--------|-------|-------|--------|
| 99,000 | 108 | 20,413 | 5,781 | 3,291 | 29,593 |
| 99,001 | 111 | 20,704 | 5,833 | 3,332 | 29,980 |
| 99,002 | 110 | 20,497 | 5,798 | 3,308 | 29,713 |
| 99,003 | 109 | 20,437 | 5,805 | 3,296 | 29,647 |
| 99,004 | 109 | 20,304 | 5,800 | 3,289 | 29,502 |
| 99,005 | 103 | 20,291 | 5,754 | 3,296 | 29,444 |
| 99,006 | 97  | 20,226 | 5,750 | 3,288 | 29,361 |
| 99,007 | 90  | 20,255 | 5,722 | 3,278 | 29,345 |
| 99,008 | 87  | 20,128 | 5,691 | 3,262 | 29,168 |
| 99,009 | 85  | 20,074 | 5,615 | 3,249 | 29,023 |
| 99,010 | 85  | 20,101 | 5,649 | 3,250 | 29,085 |
| 99,011 | 86  | 20,164 | 5,709 | 3,252 | 29,211 |
| 99,012 | 85  | 20,076 | 5,696 | 3,260 | 29,117 |
| 99,013 | 85  | 20,084 | 5,680 | 3,254 | 29,103 |
| 99,014 | 88  | 20,112 | 5,656 | 3,221 | 29,077 |
| 99,015 | 88  | 19,860 | 5,600 | 3,188 | 28,736 |
| 99,016 | 95  | 19,870 | 5,571 | 3,176 | 28,712 |
| 99,017 | 98  | 19,902 | 5,605 | 3,169 | 28,774 |
| 99,018 | 104 | 19,765 | 5,592 | 3,151 | 28,612 |
| 99,019 | 104 | 19,662 | 5,584 | 3,153 | 28,503 |
| 99,020 | 105 | 19,680 | 5,633 | 3,187 | 28,605 |
| 99,021 | 103 | 19,431 | 5,600 | 3,183 | 28,317 |
| 99,022 | 107 | 19,587 | 5,682 | 3,242 | 28,618 |
| 99,023 | 109 | 19,400 | 5,639 | 3,226 | 28,374 |
| 99,024 | 109 | 19,259 | 5,603 | 3,212 | 28,183 |
| 99,025 | 111 | 19,604 | 5,686 | 3,272 | 28,673 |
| 99,026 | 107 | 19,665 | 5,703 | 3,253 | 28,728 |
| 99,027 | 106 | 19,626 | 5,679 | 3,231 | 28,642 |
| 99,028 | 100 | 19,277 | 5,628 | 3,206 | 28,211 |
| 99,029 | 96  | 19,375 | 5,637 | 3,229 | 28,337 |
| 99,030 | 97  | 19,453 | 5,651 | 3,238 | 28,439 |
| 99,031 | 99  | 19,507 | 5,644 | 3,233 | 28,483 |

|        |     |        |       |       |        |
|--------|-----|--------|-------|-------|--------|
| 99,032 | 98  | 19,316 | 5,609 | 3,209 | 28,232 |
| 99,033 | 96  | 19,248 | 5,637 | 3,197 | 28,178 |
| 99,034 | 94  | 18,890 | 5,555 | 3,158 | 27,697 |
| 99,035 | 94  | 18,596 | 5,505 | 3,126 | 27,321 |
| 99,036 | 98  | 18,916 | 5,655 | 3,198 | 27,867 |
| 99,037 | 97  | 18,760 | 5,594 | 3,191 | 27,642 |
| 99,038 | 101 | 19,059 | 5,682 | 3,211 | 28,053 |
| 99,039 | 106 | 19,079 | 5,672 | 3,197 | 28,054 |
| 99,040 | 107 | 19,044 | 5,705 | 3,192 | 28,048 |
| 99,041 | 106 | 18,822 | 5,659 | 3,163 | 27,750 |
| 99,042 | 107 | 18,657 | 5,628 | 3,165 | 27,557 |
| 99,043 | 113 | 18,854 | 5,676 | 3,189 | 27,832 |
| 99,044 | 110 | 18,489 | 5,584 | 3,128 | 27,311 |
| 99,045 | 110 | 18,422 | 5,581 | 3,114 | 27,227 |
| 99,046 | 115 | 18,190 | 5,514 | 3,080 | 26,899 |
| 99,047 | 114 | 17,982 | 5,463 | 3,061 | 26,620 |
| 99,048 | 124 | 18,584 | 5,660 | 3,144 | 27,512 |
| 99,049 | 121 | 18,036 | 5,535 | 3,046 | 26,738 |
| 99,050 | 121 | 18,220 | 5,561 | 3,075 | 26,977 |
| 99,051 | 118 | 18,273 | 5,587 | 3,080 | 27,058 |
| 99,052 | 115 | 18,160 | 5,557 | 3,049 | 26,881 |
| 99,053 | 119 | 18,593 | 5,651 | 3,109 | 27,472 |
| 99,054 | 119 | 18,487 | 5,607 | 3,080 | 27,293 |
| 99,055 | 123 | 18,727 | 5,642 | 3,111 | 27,603 |
| 99,056 | 123 | 18,978 | 5,695 | 3,144 | 27,940 |
| 99,057 | 125 | 18,465 | 5,519 | 3,059 | 27,168 |
| 99,058 | 128 | 18,728 | 5,589 | 3,090 | 27,535 |
| 99,059 | 126 | 18,763 | 5,606 | 3,101 | 27,596 |
| 99,060 | 126 | 18,861 | 5,594 | 3,118 | 27,699 |
| 99,061 | 127 | 18,839 | 5,592 | 3,109 | 27,667 |
| 99,062 | 127 | 18,812 | 5,562 | 3,109 | 27,610 |
| 99,063 | 124 | 19,154 | 5,599 | 3,130 | 28,007 |



|        |     |        |       |       |        |
|--------|-----|--------|-------|-------|--------|
| 99,064 | 124 | 19,105 | 5,577 | 3,122 | 27,928 |
| 99,065 | 121 | 19,069 | 5,591 | 3,127 | 27,908 |
| 99,066 | 116 | 19,470 | 5,657 | 3,210 | 28,453 |
| 99,067 | 112 | 19,481 | 5,639 | 3,209 | 28,441 |
| 99,068 | 106 | 19,496 | 5,620 | 3,206 | 28,428 |
| 99,069 | 107 | 19,552 | 5,594 | 3,200 | 28,453 |
| 99,070 | 108 | 19,841 | 5,594 | 3,218 | 28,761 |
| 99,071 | 106 | 19,912 | 5,580 | 3,208 | 28,806 |
| 99,072 | 105 | 20,024 | 5,579 | 3,171 | 28,879 |
| 99,073 | 101 | 19,848 | 5,498 | 3,133 | 28,580 |
| 99,074 | 103 | 19,846 | 5,458 | 3,111 | 28,518 |
| 99,075 | 113 | 19,905 | 5,460 | 3,113 | 28,591 |
| 99,076 | 111 | 19,711 | 5,417 | 3,083 | 28,322 |
| 99,077 | 123 | 20,113 | 5,505 | 3,100 | 28,841 |
| 99,078 | 123 | 20,128 | 5,526 | 3,114 | 28,891 |
| 99,079 | 129 | 20,762 | 5,644 | 3,167 | 29,702 |
| 99,080 | 136 | 20,889 | 5,671 | 3,193 | 29,889 |
| 99,081 | 135 | 20,927 | 5,642 | 3,184 | 29,888 |
| 99,082 | 133 | 20,874 | 5,590 | 3,172 | 29,769 |
| 99,083 | 136 | 21,223 | 5,640 | 3,189 | 30,188 |
| 99,084 | 136 | 21,520 | 5,690 | 3,233 | 30,579 |
| 99,085 | 137 | 21,622 | 5,682 | 3,242 | 30,683 |
| 99,086 | 137 | 22,041 | 5,754 | 3,273 | 31,205 |
| 99,087 | 137 | 22,180 | 5,767 | 3,292 | 31,376 |
| 99,088 | 142 | 22,440 | 5,815 | 3,304 | 31,701 |
| 99,089 | 140 | 22,569 | 5,843 | 3,347 | 31,899 |
| 99,090 | 132 | 22,538 | 5,858 | 3,365 | 31,893 |
| 99,091 | 130 | 22,423 | 5,800 | 3,345 | 31,698 |
| 99,092 | 131 | 22,123 | 5,691 | 3,284 | 31,229 |
| 99,093 | 131 | 22,441 | 5,716 | 3,311 | 31,599 |
| 99,094 | 125 | 22,769 | 5,795 | 3,356 | 32,045 |
| 99,095 | 128 | 22,723 | 5,802 | 3,363 | 32,016 |

|        |     |        |       |       |        |
|--------|-----|--------|-------|-------|--------|
| 99,096 | 136 | 23,204 | 5,939 | 3,443 | 32,722 |
| 99,097 | 131 | 23,228 | 5,952 | 3,451 | 32,762 |
| 99,098 | 133 | 23,452 | 5,973 | 3,477 | 33,035 |
| 99,099 | 139 | 23,294 | 5,948 | 3,457 | 32,838 |
| 99,100 | 136 | 23,180 | 5,905 | 3,440 | 32,661 |
| 99,101 | 138 | 23,217 | 5,951 | 3,470 | 32,776 |
| 99,102 | 138 | 23,202 | 5,962 | 3,467 | 32,769 |
| 99,103 | 144 | 23,351 | 6,016 | 3,528 | 33,039 |
| 99,104 | 150 | 23,258 | 6,026 | 3,515 | 32,949 |
| 99,105 | 157 | 23,051 | 5,993 | 3,492 | 32,693 |
| 99,106 | 161 | 23,078 | 5,987 | 3,483 | 32,709 |
| 99,107 | 160 | 23,263 | 6,015 | 3,494 | 32,932 |
| 99,108 | 158 | 23,109 | 5,955 | 3,476 | 32,698 |
| 99,109 | 158 | 23,153 | 5,952 | 3,497 | 32,760 |
| 99,110 | 158 | 23,019 | 5,914 | 3,462 | 32,553 |
| 99,111 | 166 | 22,826 | 5,843 | 3,422 | 32,257 |
| 99,112 | 167 | 22,865 | 5,837 | 3,417 | 32,286 |
| 99,113 | 173 | 22,697 | 5,809 | 3,396 | 32,075 |
| 99,114 | 173 | 22,424 | 5,777 | 3,362 | 31,736 |
| 99,115 | 177 | 23,157 | 5,948 | 3,513 | 32,795 |
| 99,116 | 178 | 22,764 | 5,830 | 3,445 | 32,217 |
| 99,117 | 182 | 22,682 | 5,818 | 3,413 | 32,095 |
| 99,118 | 182 | 22,629 | 5,821 | 3,423 | 32,055 |
| 99,119 | 182 | 22,449 | 5,790 | 3,427 | 31,848 |
| 99,120 | 186 | 22,575 | 5,837 | 3,454 | 32,052 |
| 99,121 | 183 | 22,369 | 5,801 | 3,432 | 31,785 |
| 99,122 | 184 | 22,352 | 5,804 | 3,457 | 31,797 |
| 99,123 | 187 | 22,205 | 5,791 | 3,454 | 31,637 |
| 99,124 | 185 | 22,229 | 5,785 | 3,462 | 31,661 |
| 99,125 | 179 | 22,121 | 5,789 | 3,446 | 31,535 |
| 99,126 | 177 | 22,048 | 5,795 | 3,471 | 31,491 |
| 99,127 | 168 | 22,021 | 5,773 | 3,496 | 31,458 |

|        |     |        |       |       |        |
|--------|-----|--------|-------|-------|--------|
| 99,128 | 168 | 22,285 | 5,839 | 3,560 | 31,852 |
| 99,129 | 165 | 22,458 | 5,919 | 3,578 | 32,120 |
| 99,130 | 163 | 22,356 | 5,903 | 3,591 | 32,013 |
| 99,131 | 156 | 22,075 | 5,880 | 3,567 | 31,678 |
| 99,132 | 154 | 21,750 | 5,868 | 3,574 | 31,346 |
| 99,133 | 152 | 21,614 | 5,880 | 3,580 | 31,226 |
| 99,134 | 150 | 21,542 | 5,894 | 3,588 | 31,174 |
| 99,135 | 151 | 21,693 | 5,959 | 3,640 | 31,443 |
| 99,136 | 151 | 21,748 | 6,002 | 3,666 | 31,567 |
| 99,137 | 147 | 21,721 | 5,968 | 3,664 | 31,500 |
| 99,138 | 152 | 21,625 | 5,969 | 3,674 | 31,420 |
| 99,139 | 147 | 21,434 | 5,918 | 3,682 | 31,181 |
| 99,140 | 147 | 21,274 | 5,859 | 3,639 | 30,919 |
| 99,141 | 152 | 21,275 | 5,833 | 3,634 | 30,894 |
| 99,142 | 151 | 21,344 | 5,842 | 3,626 | 30,963 |
| 99,143 | 151 | 21,640 | 5,918 | 3,682 | 31,391 |
| 99,144 | 154 | 21,222 | 5,811 | 3,596 | 30,783 |
| 99,145 | 155 | 21,443 | 5,856 | 3,635 | 31,089 |
| 99,146 | 147 | 21,629 | 5,908 | 3,672 | 31,356 |
| 99,147 | 146 | 21,762 | 5,970 | 3,713 | 31,591 |
| 99,148 | 147 | 21,572 | 5,911 | 3,688 | 31,318 |
| 99,149 | 144 | 21,327 | 5,898 | 3,686 | 31,055 |
| 99,150 | 142 | 21,724 | 6,005 | 3,777 | 31,648 |
| 99,151 | 138 | 21,478 | 5,955 | 3,732 | 31,303 |
| 99,152 | 144 | 21,750 | 6,031 | 3,774 | 31,699 |
| 99,153 | 142 | 21,745 | 6,048 | 3,774 | 31,709 |
| 99,154 | 141 | 21,513 | 5,974 | 3,728 | 31,356 |
| 99,155 | 139 | 21,567 | 5,986 | 3,745 | 31,437 |
| 99,156 | 128 | 21,637 | 6,077 | 3,802 | 31,644 |
| 99,157 | 124 | 20,987 | 5,984 | 3,733 | 30,828 |
| 99,158 | 123 | 21,255 | 6,056 | 3,767 | 31,201 |
| 99,159 | 125 | 21,615 | 6,145 | 3,810 | 31,695 |

|        |     |        |       |       |        |
|--------|-----|--------|-------|-------|--------|
| 99,160 | 126 | 21,906 | 6,228 | 3,869 | 32,129 |
| 99,161 | 125 | 21,832 | 6,217 | 3,873 | 32,047 |
| 99,162 | 116 | 21,689 | 6,202 | 3,876 | 31,883 |
| 99,163 | 117 | 21,947 | 6,279 | 3,909 | 32,252 |
| 99,164 | 114 | 21,892 | 6,240 | 3,887 | 32,133 |
| 99,165 | 119 | 22,186 | 6,313 | 3,924 | 32,542 |
| 99,166 | 120 | 22,106 | 6,343 | 3,917 | 32,486 |
| 99,167 | 115 | 21,860 | 6,313 | 3,885 | 32,173 |
| 99,168 | 115 | 21,978 | 6,287 | 3,876 | 32,256 |
| 99,169 | 120 | 22,296 | 6,337 | 3,908 | 32,661 |
| 99,170 | 115 | 22,181 | 6,318 | 3,871 | 32,485 |
| 99,171 | 115 | 22,411 | 6,416 | 3,912 | 32,854 |
| 99,172 | 114 | 22,366 | 6,421 | 3,922 | 32,823 |
| 99,173 | 110 | 22,250 | 6,379 | 3,888 | 32,627 |
| 99,174 | 113 | 22,307 | 6,381 | 3,908 | 32,709 |
| 99,175 | 116 | 22,643 | 6,460 | 3,976 | 33,195 |
| 99,176 | 111 | 22,698 | 6,471 | 3,990 | 33,270 |
| 99,177 | 115 | 22,804 | 6,491 | 3,974 | 33,384 |
| 99,178 | 120 | 22,801 | 6,513 | 3,974 | 33,408 |
| 99,179 | 119 | 22,699 | 6,506 | 3,953 | 33,277 |
| 99,180 | 124 | 22,681 | 6,443 | 3,945 | 33,193 |
| 99,181 | 130 | 22,533 | 6,360 | 3,894 | 32,917 |
| 99,182 | 130 | 22,964 | 6,425 | 3,930 | 33,449 |
| 99,183 | 134 | 23,145 | 6,439 | 3,932 | 33,650 |
| 99,184 | 135 | 22,739 | 6,255 | 3,800 | 32,929 |
| 99,185 | 141 | 22,980 | 6,295 | 3,842 | 33,258 |
| 99,186 | 142 | 23,134 | 6,315 | 3,851 | 33,442 |
| 99,187 | 145 | 22,816 | 6,236 | 3,790 | 32,987 |
| 99,188 | 147 | 22,894 | 6,251 | 3,809 | 33,101 |
| 99,189 | 142 | 22,893 | 6,272 | 3,795 | 33,102 |
| 99,190 | 147 | 23,133 | 6,331 | 3,844 | 33,455 |
| 99,191 | 144 | 22,993 | 6,295 | 3,813 | 33,245 |

|        |     |        |       |       |        |
|--------|-----|--------|-------|-------|--------|
| 99,192 | 144 | 22,897 | 6,284 | 3,816 | 33,141 |
| 99,193 | 145 | 23,130 | 6,377 | 3,874 | 33,526 |
| 99,194 | 144 | 23,217 | 6,415 | 3,904 | 33,680 |
| 99,195 | 140 | 23,177 | 6,409 | 3,918 | 33,644 |
| 99,196 | 141 | 23,068 | 6,379 | 3,891 | 33,479 |
| 99,197 | 139 | 23,252 | 6,383 | 3,909 | 33,683 |
| 99,198 | 136 | 23,200 | 6,317 | 3,844 | 33,497 |
| 99,199 | 137 | 23,441 | 6,378 | 3,886 | 33,842 |
| 99,200 | 133 | 23,549 | 6,411 | 3,903 | 33,996 |
| 99,201 | 130 | 23,519 | 6,433 | 3,893 | 33,975 |
| 99,202 | 130 | 23,605 | 6,423 | 3,904 | 34,062 |
| 99,203 | 125 | 23,587 | 6,386 | 3,883 | 33,981 |
| 99,204 | 122 | 23,574 | 6,358 | 3,869 | 33,923 |
| 99,205 | 121 | 23,363 | 6,249 | 3,782 | 33,515 |
| 99,206 | 121 | 23,553 | 6,274 | 3,803 | 33,751 |
| 99,207 | 124 | 23,973 | 6,369 | 3,825 | 34,291 |
| 99,208 | 123 | 23,703 | 6,301 | 3,766 | 33,893 |
| 99,209 | 124 | 23,472 | 6,256 | 3,742 | 33,594 |
| 99,210 | 125 | 23,684 | 6,347 | 3,810 | 33,966 |
| 99,211 | 124 | 23,328 | 6,240 | 3,757 | 33,449 |
| 99,212 | 124 | 23,271 | 6,211 | 3,724 | 33,330 |
| 99,213 | 131 | 23,343 | 6,210 | 3,729 | 33,413 |
| 99,214 | 133 | 23,450 | 6,260 | 3,742 | 33,585 |
| 99,215 | 137 | 23,395 | 6,225 | 3,719 | 33,476 |
| 99,216 | 130 | 23,199 | 6,147 | 3,662 | 33,138 |
| 99,217 | 127 | 23,169 | 6,113 | 3,645 | 33,054 |
| 99,218 | 128 | 23,195 | 6,100 | 3,661 | 33,084 |
| 99,219 | 131 | 22,923 | 6,072 | 3,634 | 32,760 |
| 99,220 | 138 | 23,462 | 6,198 | 3,705 | 33,503 |
| 99,221 | 136 | 23,201 | 6,126 | 3,653 | 33,116 |
| 99,222 | 144 | 23,627 | 6,186 | 3,705 | 33,662 |
| 99,223 | 150 | 23,381 | 6,108 | 3,652 | 33,291 |

|        |     |        |       |       |        |
|--------|-----|--------|-------|-------|--------|
| 99,224 | 150 | 23,127 | 6,057 | 3,616 | 32,950 |
| 99,225 | 149 | 23,286 | 6,103 | 3,628 | 33,166 |
| 99,226 | 149 | 23,013 | 6,023 | 3,575 | 32,760 |
| 99,227 | 146 | 22,792 | 5,953 | 3,542 | 32,433 |
| 99,228 | 141 | 22,964 | 6,019 | 3,597 | 32,721 |
| 99,229 | 148 | 23,159 | 6,004 | 3,597 | 32,908 |
| 99,230 | 143 | 22,812 | 5,885 | 3,527 | 32,367 |
| 99,231 | 145 | 23,129 | 5,979 | 3,572 | 32,825 |
| 99,232 | 141 | 23,095 | 5,957 | 3,552 | 32,745 |
| 99,233 | 144 | 22,646 | 5,860 | 3,492 | 32,142 |
| 99,234 | 146 | 22,824 | 5,903 | 3,519 | 32,392 |
| 99,235 | 145 | 22,468 | 5,864 | 3,491 | 31,968 |
| 99,236 | 142 | 22,328 | 5,825 | 3,455 | 31,750 |
| 99,237 | 146 | 22,622 | 5,896 | 3,480 | 32,144 |
| 99,238 | 145 | 22,468 | 5,889 | 3,484 | 31,986 |
| 99,239 | 144 | 22,265 | 5,846 | 3,449 | 31,704 |
| 99,240 | 144 | 22,331 | 5,810 | 3,439 | 31,724 |
| 99,241 | 141 | 22,304 | 5,827 | 3,420 | 31,692 |
| 99,242 | 146 | 21,927 | 5,759 | 3,388 | 31,220 |
| 99,243 | 146 | 21,728 | 5,719 | 3,344 | 30,937 |
| 99,244 | 142 | 21,745 | 5,732 | 3,342 | 30,961 |
| 99,245 | 142 | 21,436 | 5,652 | 3,285 | 30,515 |
| 99,246 | 139 | 21,262 | 5,583 | 3,240 | 30,224 |
| 99,247 | 140 | 21,116 | 5,548 | 3,228 | 30,032 |
| 99,248 | 146 | 21,274 | 5,595 | 3,234 | 30,249 |
| 99,249 | 142 | 20,832 | 5,492 | 3,204 | 29,670 |
| 99,250 | 142 | 21,128 | 5,552 | 3,232 | 30,054 |
| 99,251 | 142 | 20,853 | 5,468 | 3,179 | 29,642 |
| 99,252 | 142 | 20,883 | 5,442 | 3,177 | 29,644 |
| 99,253 | 140 | 21,020 | 5,505 | 3,230 | 29,895 |
| 99,254 | 141 | 20,614 | 5,363 | 3,170 | 29,288 |
| 99,255 | 140 | 20,821 | 5,413 | 3,205 | 29,579 |

|        |     |        |       |       |        |
|--------|-----|--------|-------|-------|--------|
| 99,256 | 144 | 21,057 | 5,461 | 3,239 | 29,901 |
| 99,257 | 148 | 21,216 | 5,529 | 3,248 | 30,141 |
| 99,258 | 147 | 21,293 | 5,532 | 3,268 | 30,240 |
| 99,259 | 139 | 21,087 | 5,423 | 3,213 | 29,862 |
| 99,260 | 149 | 21,340 | 5,493 | 3,252 | 30,234 |
| 99,261 | 151 | 21,392 | 5,485 | 3,262 | 30,290 |
| 99,262 | 150 | 21,321 | 5,476 | 3,256 | 30,203 |
| 99,263 | 153 | 21,614 | 5,559 | 3,297 | 30,623 |
| 99,264 | 153 | 21,488 | 5,564 | 3,291 | 30,496 |
| 99,265 | 151 | 21,352 | 5,508 | 3,281 | 30,292 |
| 99,266 | 153 | 21,432 | 5,534 | 3,285 | 30,404 |
| 99,267 | 153 | 21,108 | 5,458 | 3,248 | 29,967 |
| 99,268 | 153 | 20,856 | 5,418 | 3,229 | 29,656 |
| 99,269 | 156 | 21,447 | 5,558 | 3,314 | 30,475 |
| 99,270 | 150 | 21,368 | 5,526 | 3,315 | 30,359 |
| 99,271 | 152 | 21,476 | 5,541 | 3,339 | 30,508 |
| 99,272 | 152 | 21,345 | 5,488 | 3,330 | 30,315 |
| 99,273 | 144 | 21,084 | 5,438 | 3,300 | 29,966 |
| 99,274 | 142 | 21,126 | 5,424 | 3,290 | 29,982 |
| 99,275 | 143 | 21,015 | 5,408 | 3,259 | 29,825 |
| 99,276 | 142 | 20,983 | 5,391 | 3,262 | 29,778 |
| 99,277 | 142 | 21,021 | 5,390 | 3,257 | 29,810 |
| 99,278 | 146 | 21,232 | 5,420 | 3,269 | 30,067 |
| 99,279 | 144 | 21,116 | 5,428 | 3,284 | 29,972 |
| 99,280 | 136 | 21,150 | 5,450 | 3,295 | 30,031 |
| 99,281 | 132 | 21,237 | 5,462 | 3,344 | 30,175 |
| 99,282 | 131 | 21,458 | 5,504 | 3,379 | 30,472 |
| 99,283 | 131 | 21,588 | 5,506 | 3,394 | 30,619 |
| 99,284 | 125 | 21,744 | 5,520 | 3,383 | 30,772 |
| 99,285 | 125 | 21,829 | 5,534 | 3,396 | 30,884 |
| 99,286 | 120 | 21,419 | 5,453 | 3,362 | 30,354 |
| 99,287 | 122 | 21,582 | 5,478 | 3,405 | 30,587 |

|        |     |        |       |       |        |
|--------|-----|--------|-------|-------|--------|
| 99,288 | 119 | 21,642 | 5,472 | 3,420 | 30,653 |
| 99,289 | 116 | 21,825 | 5,474 | 3,424 | 30,839 |
| 99,290 | 116 | 21,768 | 5,470 | 3,416 | 30,770 |
| 99,291 | 117 | 21,627 | 5,453 | 3,397 | 30,594 |
| 99,292 | 122 | 21,599 | 5,410 | 3,401 | 30,532 |
| 99,293 | 116 | 21,541 | 5,352 | 3,359 | 30,368 |
| 99,294 | 116 | 21,675 | 5,324 | 3,359 | 30,474 |
| 99,295 | 116 | 21,780 | 5,338 | 3,361 | 30,595 |
| 99,296 | 118 | 21,921 | 5,385 | 3,385 | 30,809 |
| 99,297 | 119 | 21,850 | 5,364 | 3,375 | 30,708 |
| 99,298 | 116 | 22,135 | 5,381 | 3,381 | 31,013 |
| 99,299 | 119 | 22,251 | 5,426 | 3,400 | 31,196 |
| 99,300 | 120 | 22,181 | 5,381 | 3,349 | 31,031 |
| 99,301 | 122 | 22,444 | 5,494 | 3,398 | 31,458 |
| 99,302 | 124 | 22,542 | 5,546 | 3,412 | 31,624 |
| 99,303 | 125 | 21,822 | 5,402 | 3,347 | 30,696 |
| 99,304 | 127 | 21,952 | 5,443 | 3,360 | 30,882 |
| 99,305 | 127 | 22,247 | 5,530 | 3,403 | 31,307 |
| 99,306 | 130 | 22,552 | 5,607 | 3,457 | 31,746 |
| 99,307 | 124 | 21,853 | 5,425 | 3,358 | 30,760 |
| 99,308 | 124 | 22,130 | 5,447 | 3,409 | 31,110 |
| 99,309 | 130 | 22,575 | 5,536 | 3,461 | 31,702 |
| 99,310 | 130 | 22,582 | 5,513 | 3,466 | 31,691 |
| 99,311 | 129 | 22,887 | 5,593 | 3,531 | 32,140 |
| 99,312 | 133 | 23,079 | 5,701 | 3,606 | 32,519 |
| 99,313 | 138 | 23,001 | 5,720 | 3,602 | 32,461 |
| 99,314 | 128 | 22,620 | 5,602 | 3,527 | 31,877 |
| 99,315 | 130 | 23,160 | 5,693 | 3,577 | 32,560 |
| 99,316 | 125 | 23,406 | 5,791 | 3,625 | 32,947 |
| 99,317 | 129 | 23,371 | 5,779 | 3,624 | 32,903 |
| 99,318 | 126 | 23,158 | 5,761 | 3,593 | 32,638 |
| 99,319 | 130 | 23,712 | 5,943 | 3,688 | 33,473 |



|        |     |        |       |       |        |
|--------|-----|--------|-------|-------|--------|
| 99,320 | 132 | 23,798 | 5,963 | 3,702 | 33,595 |
| 99,321 | 137 | 24,018 | 6,020 | 3,751 | 33,926 |
| 99,322 | 130 | 23,810 | 6,001 | 3,745 | 33,686 |
| 99,323 | 130 | 23,784 | 5,995 | 3,742 | 33,651 |
| 99,324 | 126 | 23,759 | 6,012 | 3,755 | 33,652 |
| 99,325 | 125 | 23,593 | 5,996 | 3,754 | 33,468 |
| 99,326 | 130 | 23,588 | 6,024 | 3,780 | 33,522 |
| 99,327 | 130 | 23,592 | 6,037 | 3,765 | 33,524 |
| 99,328 | 137 | 23,787 | 6,116 | 3,810 | 33,850 |
| 99,329 | 148 | 23,901 | 6,156 | 3,812 | 34,017 |
| 99,330 | 151 | 24,113 | 6,191 | 3,863 | 34,318 |
| 99,331 | 153 | 24,013 | 6,197 | 3,861 | 34,224 |
| 99,332 | 154 | 23,995 | 6,231 | 3,868 | 34,248 |
| 99,333 | 159 | 23,972 | 6,219 | 3,860 | 34,210 |
| 99,334 | 160 | 23,576 | 6,166 | 3,814 | 33,716 |
| 99,335 | 170 | 24,368 | 6,420 | 4,027 | 34,985 |
| 99,336 | 171 | 24,311 | 6,408 | 4,014 | 34,904 |
| 99,337 | 171 | 24,421 | 6,429 | 4,020 | 35,041 |
| 99,338 | 170 | 24,747 | 6,488 | 4,045 | 35,450 |
| 99,339 | 172 | 24,983 | 6,593 | 4,089 | 35,837 |
| 99,340 | 174 | 25,315 | 6,657 | 4,165 | 36,311 |
| 99,341 | 174 | 25,323 | 6,676 | 4,167 | 36,340 |
| 99,342 | 174 | 25,356 | 6,673 | 4,170 | 36,373 |
| 99,343 | 172 | 25,440 | 6,707 | 4,189 | 36,508 |
| 99,344 | 173 | 25,548 | 6,729 | 4,199 | 36,649 |
| 99,345 | 181 | 26,117 | 6,895 | 4,293 | 37,486 |
| 99,346 | 184 | 26,091 | 6,887 | 4,323 | 37,485 |
| 99,347 | 183 | 26,131 | 6,895 | 4,311 | 37,520 |
| 99,348 | 190 | 26,334 | 6,961 | 4,376 | 37,861 |
| 99,349 | 192 | 26,471 | 7,033 | 4,430 | 38,126 |
| 99,350 | 189 | 26,374 | 7,016 | 4,422 | 38,001 |
| 99,351 | 190 | 26,351 | 7,007 | 4,460 | 38,008 |

|        |     |        |       |       |        |
|--------|-----|--------|-------|-------|--------|
| 99,352 | 195 | 26,317 | 6,963 | 4,468 | 37,943 |
| 99,353 | 192 | 26,173 | 6,885 | 4,449 | 37,699 |
| 99,354 | 199 | 26,371 | 6,915 | 4,442 | 37,927 |
| 99,355 | 199 | 26,451 | 6,914 | 4,445 | 38,009 |
| 99,356 | 196 | 26,424 | 6,936 | 4,455 | 38,011 |
| 99,357 | 192 | 26,371 | 6,909 | 4,470 | 37,942 |
| 99,358 | 193 | 26,222 | 6,864 | 4,450 | 37,729 |
| 99,359 | 197 | 26,516 | 6,945 | 4,486 | 38,144 |
| 99,360 | 191 | 26,382 | 6,923 | 4,473 | 37,969 |
| 99,361 | 185 | 26,209 | 6,911 | 4,443 | 37,748 |
| 99,362 | 189 | 26,496 | 6,974 | 4,440 | 38,099 |
| 99,363 | 182 | 26,092 | 6,879 | 4,383 | 37,536 |
| 99,364 | 184 | 26,129 | 6,883 | 4,407 | 37,603 |
| 99,365 | 183 | 25,892 | 6,841 | 4,425 | 37,341 |
| 99,366 | 180 | 25,637 | 6,785 | 4,420 | 37,022 |
| 99,367 | 174 | 25,557 | 6,734 | 4,379 | 36,844 |
| 99,368 | 177 | 25,493 | 6,675 | 4,351 | 36,696 |
| 99,369 | 174 | 25,319 | 6,634 | 4,319 | 36,446 |
| 99,370 | 178 | 25,277 | 6,627 | 4,310 | 36,392 |
| 99,371 | 177 | 25,333 | 6,603 | 4,306 | 36,419 |
| 99,372 | 180 | 25,328 | 6,593 | 4,289 | 36,390 |
| 99,373 | 179 | 25,303 | 6,581 | 4,255 | 36,318 |
| 99,374 | 190 | 25,402 | 6,569 | 4,245 | 36,406 |
| 99,375 | 190 | 25,559 | 6,564 | 4,255 | 36,568 |
| 99,376 | 185 | 25,488 | 6,515 | 4,252 | 36,440 |
| 99,377 | 182 | 25,512 | 6,526 | 4,251 | 36,471 |
| 99,378 | 173 | 25,493 | 6,493 | 4,251 | 36,410 |
| 99,379 | 172 | 25,462 | 6,503 | 4,288 | 36,425 |
| 99,380 | 159 | 25,234 | 6,454 | 4,263 | 36,110 |
| 99,381 | 162 | 25,013 | 6,401 | 4,211 | 35,787 |
| 99,382 | 166 | 25,166 | 6,422 | 4,223 | 35,977 |
| 99,383 | 169 | 25,085 | 6,386 | 4,212 | 35,852 |

|        |     |        |       |       |        |
|--------|-----|--------|-------|-------|--------|
| 99,384 | 159 | 25,013 | 6,353 | 4,162 | 35,687 |
| 99,385 | 176 | 24,620 | 6,271 | 4,097 | 35,164 |
| 99,386 | 176 | 24,466 | 6,217 | 4,071 | 34,930 |
| 99,387 | 179 | 24,476 | 6,243 | 4,081 | 34,979 |
| 99,388 | 178 | 24,227 | 6,209 | 4,057 | 34,671 |
| 99,389 | 182 | 24,136 | 6,180 | 4,047 | 34,545 |
| 99,390 | 181 | 23,990 | 6,161 | 4,024 | 34,356 |
| 99,391 | 181 | 23,812 | 6,153 | 3,992 | 34,138 |
| 99,392 | 181 | 23,757 | 6,124 | 4,003 | 34,065 |
| 99,393 | 176 | 23,820 | 6,124 | 4,027 | 34,147 |
| 99,394 | 174 | 23,902 | 6,135 | 4,043 | 34,254 |
| 99,395 | 176 | 23,897 | 6,189 | 4,091 | 34,353 |
| 99,396 | 169 | 23,598 | 6,166 | 4,046 | 33,979 |
| 99,397 | 168 | 23,463 | 6,052 | 3,961 | 33,644 |
| 99,398 | 168 | 23,733 | 6,102 | 3,975 | 33,978 |
| 99,399 | 158 | 24,013 | 6,169 | 4,007 | 34,347 |
| 99,400 | 158 | 24,272 | 6,235 | 4,059 | 34,724 |
| 99,401 | 154 | 24,082 | 6,179 | 4,041 | 34,456 |
| 99,402 | 156 | 24,536 | 6,259 | 4,087 | 35,038 |
| 99,403 | 156 | 24,258 | 6,206 | 4,021 | 34,641 |
| 99,404 | 157 | 24,011 | 6,154 | 3,986 | 34,308 |
| 99,405 | 156 | 24,352 | 6,227 | 4,059 | 34,794 |
| 99,406 | 155 | 24,280 | 6,217 | 4,041 | 34,693 |
| 99,407 | 155 | 24,264 | 6,222 | 4,054 | 34,695 |
| 99,408 | 163 | 23,973 | 6,170 | 3,976 | 34,282 |
| 99,409 | 162 | 23,801 | 6,136 | 3,946 | 34,045 |
| 99,410 | 160 | 23,608 | 6,101 | 3,917 | 33,786 |
| 99,411 | 158 | 23,310 | 6,037 | 3,883 | 33,388 |
| 99,412 | 159 | 23,477 | 6,061 | 3,918 | 33,615 |
| 99,413 | 156 | 23,315 | 5,995 | 3,893 | 33,359 |
| 99,414 | 150 | 23,323 | 5,954 | 3,877 | 33,304 |
| 99,415 | 153 | 23,571 | 6,023 | 3,903 | 33,650 |

|        |     |        |       |       |        |
|--------|-----|--------|-------|-------|--------|
| 99,416 | 154 | 23,549 | 6,006 | 3,876 | 33,585 |
| 99,417 | 150 | 23,228 | 5,945 | 3,828 | 33,151 |
| 99,418 | 153 | 23,226 | 5,937 | 3,843 | 33,159 |
| 99,419 | 152 | 23,345 | 5,970 | 3,854 | 33,321 |
| 99,420 | 146 | 22,935 | 5,886 | 3,819 | 32,786 |
| 99,421 | 146 | 22,933 | 5,877 | 3,823 | 32,779 |
| 99,422 | 142 | 23,147 | 5,952 | 3,841 | 33,082 |
| 99,423 | 138 | 22,685 | 5,829 | 3,790 | 32,442 |
| 99,424 | 137 | 22,860 | 5,869 | 3,819 | 32,685 |
| 99,425 | 129 | 23,070 | 5,938 | 3,877 | 33,014 |
| 99,426 | 133 | 22,844 | 5,924 | 3,846 | 32,747 |
| 99,427 | 132 | 22,663 | 5,893 | 3,826 | 32,514 |
| 99,428 | 137 | 22,903 | 5,925 | 3,849 | 32,814 |
| 99,429 | 136 | 23,010 | 5,948 | 3,858 | 32,952 |
| 99,430 | 135 | 22,987 | 5,914 | 3,818 | 32,854 |
| 99,431 | 133 | 22,475 | 5,749 | 3,689 | 32,046 |
| 99,432 | 131 | 22,772 | 5,813 | 3,738 | 32,454 |
| 99,433 | 127 | 22,984 | 5,898 | 3,785 | 32,794 |
| 99,434 | 123 | 22,586 | 5,820 | 3,720 | 32,249 |
| 99,435 | 123 | 22,508 | 5,768 | 3,724 | 32,123 |
| 99,436 | 103 | 22,658 | 5,771 | 3,739 | 32,271 |
| 99,437 | 99  | 22,554 | 5,734 | 3,734 | 32,121 |
| 99,438 | 100 | 22,356 | 5,730 | 3,723 | 31,909 |
| 99,439 | 96  | 22,110 | 5,666 | 3,686 | 31,558 |
| 99,440 | 94  | 21,987 | 5,642 | 3,691 | 31,414 |
| 99,441 | 94  | 21,957 | 5,626 | 3,677 | 31,354 |
| 99,442 | 93  | 21,892 | 5,614 | 3,657 | 31,256 |
| 99,443 | 94  | 21,803 | 5,609 | 3,633 | 31,139 |
| 99,444 | 94  | 21,574 | 5,572 | 3,606 | 30,846 |
| 99,445 | 93  | 21,512 | 5,536 | 3,561 | 30,702 |
| 99,446 | 90  | 21,274 | 5,436 | 3,498 | 30,298 |
| 99,447 | 89  | 21,025 | 5,355 | 3,448 | 29,917 |

|        |     |        |       |       |        |
|--------|-----|--------|-------|-------|--------|
| 99,448 | 89  | 20,921 | 5,361 | 3,447 | 29,818 |
| 99,449 | 93  | 20,906 | 5,340 | 3,458 | 29,797 |
| 99,450 | 90  | 20,462 | 5,239 | 3,394 | 29,185 |
| 99,451 | 91  | 20,672 | 5,276 | 3,422 | 29,461 |
| 99,452 | 91  | 20,550 | 5,249 | 3,392 | 29,282 |
| 99,453 | 94  | 20,474 | 5,197 | 3,364 | 29,129 |
| 99,454 | 84  | 20,469 | 5,182 | 3,344 | 29,079 |
| 99,455 | 81  | 20,314 | 5,136 | 3,281 | 28,812 |
| 99,456 | 87  | 20,353 | 5,141 | 3,308 | 28,889 |
| 99,457 | 87  | 20,434 | 5,151 | 3,301 | 28,973 |
| 99,458 | 86  | 20,477 | 5,157 | 3,306 | 29,026 |
| 99,459 | 83  | 20,433 | 5,179 | 3,309 | 29,004 |
| 99,460 | 84  | 20,454 | 5,182 | 3,304 | 29,024 |
| 99,461 | 86  | 20,495 | 5,137 | 3,300 | 29,018 |
| 99,462 | 86  | 20,732 | 5,198 | 3,320 | 29,336 |
| 99,463 | 87  | 20,670 | 5,139 | 3,311 | 29,207 |
| 99,464 | 86  | 20,636 | 5,144 | 3,318 | 29,184 |
| 99,465 | 93  | 20,848 | 5,184 | 3,324 | 29,449 |
| 99,466 | 91  | 20,839 | 5,173 | 3,321 | 29,424 |
| 99,467 | 90  | 20,993 | 5,252 | 3,348 | 29,683 |
| 99,468 | 94  | 21,023 | 5,249 | 3,331 | 29,697 |
| 99,469 | 94  | 21,220 | 5,258 | 3,342 | 29,914 |
| 99,470 | 95  | 21,224 | 5,221 | 3,332 | 29,872 |
| 99,471 | 95  | 21,351 | 5,232 | 3,346 | 30,024 |
| 99,472 | 95  | 21,501 | 5,259 | 3,390 | 30,245 |
| 99,473 | 97  | 21,485 | 5,287 | 3,403 | 30,272 |
| 99,474 | 102 | 21,626 | 5,310 | 3,432 | 30,470 |
| 99,475 | 102 | 21,701 | 5,361 | 3,452 | 30,616 |
| 99,476 | 104 | 21,726 | 5,345 | 3,446 | 30,621 |
| 99,477 | 102 | 21,898 | 5,361 | 3,472 | 30,833 |
| 99,478 | 101 | 21,677 | 5,334 | 3,456 | 30,568 |
| 99,479 | 102 | 21,924 | 5,376 | 3,493 | 30,895 |

|        |     |        |       |       |        |
|--------|-----|--------|-------|-------|--------|
| 99,480 | 102 | 21,851 | 5,332 | 3,470 | 30,755 |
| 99,481 | 102 | 21,892 | 5,329 | 3,488 | 30,811 |
| 99,482 | 102 | 21,950 | 5,341 | 3,497 | 30,890 |
| 99,483 | 105 | 22,183 | 5,334 | 3,507 | 31,129 |
| 99,484 | 107 | 22,471 | 5,348 | 3,530 | 31,456 |
| 99,485 | 107 | 22,728 | 5,386 | 3,536 | 31,757 |
| 99,486 | 105 | 22,901 | 5,400 | 3,544 | 31,950 |
| 99,487 | 109 | 23,245 | 5,463 | 3,574 | 32,391 |
| 99,488 | 110 | 23,300 | 5,413 | 3,527 | 32,350 |
| 99,489 | 110 | 23,508 | 5,437 | 3,557 | 32,612 |
| 99,490 | 110 | 23,591 | 5,424 | 3,555 | 32,680 |
| 99,491 | 115 | 23,451 | 5,413 | 3,523 | 32,502 |
| 99,492 | 115 | 23,235 | 5,392 | 3,502 | 32,244 |
| 99,493 | 115 | 23,905 | 5,550 | 3,647 | 33,217 |
| 99,494 | 112 | 23,688 | 5,504 | 3,609 | 32,913 |
| 99,495 | 116 | 23,952 | 5,539 | 3,633 | 33,240 |
| 99,496 | 120 | 23,921 | 5,543 | 3,622 | 33,206 |
| 99,497 | 119 | 23,628 | 5,487 | 3,587 | 32,821 |
| 99,498 | 119 | 23,608 | 5,492 | 3,591 | 32,810 |
| 99,499 | 118 | 23,618 | 5,499 | 3,606 | 32,841 |
| 99,500 | 121 | 23,659 | 5,514 | 3,615 | 32,909 |
| 99,501 | 131 | 23,765 | 5,532 | 3,604 | 33,032 |
| 99,502 | 133 | 24,077 | 5,620 | 3,646 | 33,476 |
| 99,503 | 131 | 24,059 | 5,631 | 3,643 | 33,464 |
| 99,504 | 133 | 23,276 | 5,517 | 3,556 | 32,482 |
| 99,505 | 137 | 23,435 | 5,529 | 3,586 | 32,687 |
| 99,506 | 133 | 23,488 | 5,522 | 3,577 | 32,720 |
| 99,507 | 130 | 23,656 | 5,562 | 3,603 | 32,951 |
| 99,508 | 129 | 23,480 | 5,507 | 3,567 | 32,683 |
| 99,509 | 127 | 23,435 | 5,480 | 3,564 | 32,606 |
| 99,510 | 129 | 23,391 | 5,461 | 3,560 | 32,541 |
| 99,511 | 129 | 23,507 | 5,508 | 3,587 | 32,731 |

|        |     |        |       |       |        |
|--------|-----|--------|-------|-------|--------|
| 99,512 | 126 | 23,308 | 5,474 | 3,557 | 32,465 |
| 99,513 | 127 | 23,061 | 5,409 | 3,523 | 32,120 |
| 99,514 | 125 | 22,858 | 5,369 | 3,482 | 31,834 |
| 99,515 | 127 | 23,679 | 5,505 | 3,594 | 32,905 |
| 99,516 | 122 | 23,439 | 5,442 | 3,571 | 32,574 |
| 99,517 | 125 | 23,368 | 5,428 | 3,589 | 32,510 |
| 99,518 | 128 | 23,425 | 5,392 | 3,584 | 32,529 |
| 99,519 | 128 | 23,442 | 5,399 | 3,581 | 32,550 |
| 99,520 | 132 | 23,340 | 5,401 | 3,586 | 32,459 |
| 99,521 | 130 | 23,503 | 5,470 | 3,633 | 32,736 |
| 99,522 | 132 | 23,697 | 5,496 | 3,624 | 32,949 |
| 99,523 | 132 | 23,705 | 5,447 | 3,592 | 32,876 |
| 99,524 | 133 | 23,997 | 5,524 | 3,637 | 33,291 |
| 99,525 | 128 | 23,978 | 5,523 | 3,620 | 33,249 |
| 99,526 | 128 | 23,775 | 5,458 | 3,583 | 32,944 |
| 99,527 | 128 | 23,770 | 5,480 | 3,582 | 32,960 |
| 99,528 | 127 | 23,787 | 5,532 | 3,586 | 33,032 |
| 99,529 | 124 | 23,638 | 5,482 | 3,534 | 32,778 |
| 99,530 | 124 | 23,577 | 5,501 | 3,528 | 32,730 |
| 99,531 | 123 | 23,528 | 5,515 | 3,546 | 32,712 |
| 99,532 | 122 | 23,326 | 5,467 | 3,504 | 32,419 |
| 99,533 | 123 | 23,347 | 5,525 | 3,521 | 32,516 |
| 99,534 | 119 | 22,997 | 5,491 | 3,496 | 32,103 |
| 99,535 | 119 | 23,134 | 5,581 | 3,531 | 32,365 |
| 99,536 | 119 | 22,786 | 5,566 | 3,534 | 32,005 |
| 99,537 | 120 | 22,719 | 5,602 | 3,561 | 32,002 |
| 99,538 | 118 | 22,490 | 5,592 | 3,537 | 31,737 |
| 99,539 | 113 | 22,036 | 5,519 | 3,499 | 31,167 |
| 99,540 | 117 | 22,474 | 5,590 | 3,558 | 31,739 |
| 99,541 | 117 | 22,379 | 5,565 | 3,534 | 31,595 |
| 99,542 | 122 | 22,521 | 5,567 | 3,549 | 31,759 |
| 99,543 | 123 | 22,697 | 5,597 | 3,543 | 31,960 |

|        |     |        |       |       |        |
|--------|-----|--------|-------|-------|--------|
| 99,544 | 127 | 22,615 | 5,596 | 3,546 | 31,884 |
| 99,545 | 127 | 22,656 | 5,591 | 3,555 | 31,929 |
| 99,546 | 123 | 22,705 | 5,608 | 3,561 | 31,997 |
| 99,547 | 119 | 22,690 | 5,589 | 3,568 | 31,966 |
| 99,548 | 119 | 22,835 | 5,583 | 3,579 | 32,116 |
| 99,549 | 126 | 22,839 | 5,582 | 3,572 | 32,119 |
| 99,550 | 120 | 22,600 | 5,522 | 3,526 | 31,768 |
| 99,551 | 117 | 22,897 | 5,668 | 3,619 | 32,301 |
| 99,552 | 112 | 22,648 | 5,640 | 3,618 | 32,018 |
| 99,553 | 114 | 22,536 | 5,607 | 3,607 | 31,864 |
| 99,554 | 117 | 22,430 | 5,615 | 3,603 | 31,765 |
| 99,555 | 109 | 22,152 | 5,543 | 3,568 | 31,372 |
| 99,556 | 105 | 21,948 | 5,561 | 3,557 | 31,171 |
| 99,557 | 109 | 22,072 | 5,608 | 3,585 | 31,374 |
| 99,558 | 109 | 21,833 | 5,568 | 3,554 | 31,064 |
| 99,559 | 109 | 21,887 | 5,597 | 3,559 | 31,152 |
| 99,560 | 110 | 21,967 | 5,642 | 3,580 | 31,299 |
| 99,561 | 113 | 21,929 | 5,638 | 3,582 | 31,262 |
| 99,562 | 108 | 21,850 | 5,649 | 3,586 | 31,193 |
| 99,563 | 109 | 21,756 | 5,663 | 3,579 | 31,107 |
| 99,564 | 108 | 21,417 | 5,613 | 3,547 | 30,685 |
| 99,565 | 109 | 21,321 | 5,562 | 3,524 | 30,516 |
| 99,566 | 112 | 21,925 | 5,743 | 3,622 | 31,402 |
| 99,567 | 111 | 21,684 | 5,715 | 3,585 | 31,095 |
| 99,568 | 111 | 21,762 | 5,727 | 3,581 | 31,181 |
| 99,569 | 104 | 21,900 | 5,789 | 3,642 | 31,435 |
| 99,570 | 99  | 21,595 | 5,746 | 3,607 | 31,047 |
| 99,571 | 96  | 21,529 | 5,758 | 3,623 | 31,006 |
| 99,572 | 100 | 21,536 | 5,793 | 3,637 | 31,066 |
| 99,573 | 99  | 21,238 | 5,809 | 3,644 | 30,790 |
| 99,574 | 96  | 21,202 | 5,815 | 3,654 | 30,767 |
| 99,575 | 96  | 21,130 | 5,814 | 3,653 | 30,693 |



|        |     |        |       |       |        |
|--------|-----|--------|-------|-------|--------|
| 99,576 | 98  | 21,113 | 5,842 | 3,662 | 30,715 |
| 99,577 | 99  | 21,340 | 5,918 | 3,707 | 31,064 |
| 99,578 | 97  | 21,280 | 5,874 | 3,716 | 30,967 |
| 99,579 | 103 | 21,443 | 5,879 | 3,740 | 31,165 |
| 99,580 | 103 | 21,884 | 5,925 | 3,792 | 31,704 |
| 99,581 | 103 | 21,737 | 5,888 | 3,753 | 31,481 |
| 99,582 | 103 | 22,190 | 6,029 | 3,843 | 32,165 |
| 99,583 | 106 | 22,336 | 6,063 | 3,881 | 32,386 |
| 99,584 | 105 | 22,447 | 6,070 | 3,896 | 32,518 |
| 99,585 | 103 | 22,451 | 6,023 | 3,872 | 32,449 |
| 99,586 | 103 | 22,354 | 6,004 | 3,859 | 32,320 |
| 99,587 | 103 | 22,715 | 6,064 | 3,889 | 32,771 |
| 99,588 | 104 | 22,757 | 6,021 | 3,852 | 32,734 |
| 99,589 | 106 | 22,461 | 5,933 | 3,826 | 32,326 |
| 99,590 | 107 | 22,328 | 5,913 | 3,788 | 32,136 |
| 99,591 | 111 | 22,541 | 5,999 | 3,828 | 32,479 |
| 99,592 | 105 | 22,396 | 5,943 | 3,816 | 32,260 |
| 99,593 | 103 | 22,281 | 5,932 | 3,775 | 32,091 |
| 99,594 | 105 | 22,009 | 5,891 | 3,746 | 31,751 |
| 99,595 | 103 | 22,028 | 5,900 | 3,743 | 31,774 |
| 99,596 | 104 | 21,991 | 5,924 | 3,743 | 31,762 |
| 99,597 | 104 | 21,959 | 5,915 | 3,758 | 31,736 |
| 99,598 | 114 | 22,064 | 5,931 | 3,792 | 31,901 |
| 99,599 | 120 | 22,081 | 5,953 | 3,786 | 31,940 |
| 99,600 | 125 | 22,086 | 5,911 | 3,782 | 31,904 |
| 99,601 | 130 | 22,139 | 5,884 | 3,781 | 31,934 |
| 99,602 | 137 | 22,197 | 5,892 | 3,785 | 32,011 |
| 99,603 | 141 | 22,567 | 5,965 | 3,800 | 32,473 |
| 99,604 | 142 | 22,222 | 5,888 | 3,762 | 32,014 |
| 99,605 | 148 | 22,528 | 5,935 | 3,775 | 32,386 |
| 99,606 | 152 | 22,435 | 5,877 | 3,742 | 32,206 |
| 99,607 | 153 | 22,412 | 5,890 | 3,745 | 32,200 |

|        |     |        |       |       |        |
|--------|-----|--------|-------|-------|--------|
| 99,608 | 149 | 22,617 | 5,929 | 3,755 | 32,450 |
| 99,609 | 148 | 22,550 | 5,939 | 3,787 | 32,424 |
| 99,610 | 150 | 22,687 | 5,990 | 3,821 | 32,648 |
| 99,611 | 148 | 22,785 | 5,985 | 3,811 | 32,729 |
| 99,612 | 145 | 22,632 | 5,948 | 3,770 | 32,495 |
| 99,613 | 145 | 22,518 | 5,979 | 3,774 | 32,416 |
| 99,614 | 146 | 22,310 | 5,901 | 3,730 | 32,087 |
| 99,615 | 138 | 22,089 | 5,869 | 3,692 | 31,788 |
| 99,616 | 142 | 22,542 | 6,001 | 3,814 | 32,499 |
| 99,617 | 143 | 22,494 | 6,008 | 3,801 | 32,446 |
| 99,618 | 142 | 22,205 | 5,927 | 3,756 | 32,030 |
| 99,619 | 141 | 22,101 | 5,915 | 3,709 | 31,866 |
| 99,620 | 144 | 22,233 | 5,952 | 3,741 | 32,070 |
| 99,621 | 148 | 22,387 | 5,973 | 3,735 | 32,243 |
| 99,622 | 150 | 22,248 | 5,897 | 3,686 | 31,981 |
| 99,623 | 153 | 22,668 | 5,999 | 3,718 | 32,538 |
| 99,624 | 155 | 22,751 | 5,975 | 3,687 | 32,568 |
| 99,625 | 155 | 22,610 | 5,908 | 3,633 | 32,306 |
| 99,626 | 155 | 22,496 | 5,895 | 3,631 | 32,177 |
| 99,627 | 157 | 22,830 | 5,934 | 3,653 | 32,574 |
| 99,628 | 165 | 22,562 | 5,847 | 3,595 | 32,169 |
| 99,629 | 171 | 22,701 | 5,924 | 3,627 | 32,423 |
| 99,630 | 166 | 22,658 | 5,960 | 3,631 | 32,415 |
| 99,631 | 170 | 22,447 | 5,948 | 3,620 | 32,185 |
| 99,632 | 185 | 22,207 | 5,890 | 3,587 | 31,869 |
| 99,633 | 186 | 22,097 | 5,867 | 3,583 | 31,733 |
| 99,634 | 196 | 22,336 | 5,964 | 3,619 | 32,115 |
| 99,635 | 196 | 22,198 | 5,930 | 3,608 | 31,932 |
| 99,636 | 201 | 22,012 | 5,950 | 3,610 | 31,773 |
| 99,637 | 200 | 21,969 | 5,943 | 3,622 | 31,734 |
| 99,638 | 206 | 21,917 | 5,962 | 3,632 | 31,717 |
| 99,639 | 210 | 22,007 | 6,011 | 3,672 | 31,900 |

|        |     |        |       |       |        |
|--------|-----|--------|-------|-------|--------|
| 99,640 | 206 | 21,385 | 5,864 | 3,554 | 31,009 |
| 99,641 | 207 | 21,488 | 5,886 | 3,567 | 31,148 |
| 99,642 | 207 | 21,598 | 5,888 | 3,570 | 31,263 |
| 99,643 | 207 | 21,484 | 5,869 | 3,546 | 31,106 |
| 99,644 | 208 | 21,433 | 5,840 | 3,540 | 31,021 |
| 99,645 | 202 | 21,386 | 5,821 | 3,529 | 30,938 |
| 99,646 | 202 | 21,380 | 5,800 | 3,531 | 30,913 |
| 99,647 | 205 | 21,447 | 5,819 | 3,543 | 31,014 |
| 99,648 | 205 | 21,370 | 5,820 | 3,532 | 30,927 |
| 99,649 | 200 | 21,471 | 5,858 | 3,556 | 31,085 |
| 99,650 | 198 | 21,793 | 5,932 | 3,610 | 31,533 |
| 99,651 | 185 | 21,792 | 5,936 | 3,593 | 31,506 |
| 99,652 | 179 | 21,560 | 5,890 | 3,556 | 31,185 |
| 99,653 | 172 | 21,621 | 5,919 | 3,559 | 31,271 |
| 99,654 | 169 | 21,699 | 5,963 | 3,590 | 31,421 |
| 99,655 | 162 | 21,696 | 5,950 | 3,573 | 31,381 |
| 99,656 | 154 | 21,409 | 5,885 | 3,545 | 30,993 |
| 99,657 | 156 | 21,580 | 5,946 | 3,582 | 31,264 |
| 99,658 | 156 | 21,642 | 5,944 | 3,575 | 31,317 |
| 99,659 | 157 | 21,634 | 5,909 | 3,570 | 31,270 |
| 99,660 | 158 | 21,407 | 5,896 | 3,539 | 31,000 |
| 99,661 | 167 | 21,599 | 5,915 | 3,560 | 31,241 |
| 99,662 | 173 | 21,386 | 5,838 | 3,519 | 30,916 |
| 99,663 | 180 | 21,530 | 5,812 | 3,504 | 31,026 |
| 99,664 | 178 | 21,398 | 5,736 | 3,464 | 30,776 |
| 99,665 | 182 | 21,579 | 5,787 | 3,481 | 31,029 |
| 99,666 | 178 | 21,500 | 5,763 | 3,471 | 30,912 |
| 99,667 | 179 | 21,253 | 5,702 | 3,420 | 30,554 |
| 99,668 | 180 | 21,153 | 5,705 | 3,408 | 30,446 |
| 99,669 | 180 | 21,109 | 5,715 | 3,424 | 30,428 |
| 99,670 | 181 | 20,989 | 5,722 | 3,426 | 30,318 |
| 99,671 | 181 | 20,989 | 5,713 | 3,408 | 30,291 |

|        |     |        |       |       |        |
|--------|-----|--------|-------|-------|--------|
| 99,672 | 186 | 21,177 | 5,757 | 3,429 | 30,549 |
| 99,673 | 191 | 20,968 | 5,696 | 3,402 | 30,257 |
| 99,674 | 189 | 20,800 | 5,628 | 3,375 | 29,992 |
| 99,675 | 191 | 20,985 | 5,673 | 3,426 | 30,275 |
| 99,676 | 194 | 20,974 | 5,671 | 3,414 | 30,253 |
| 99,677 | 194 | 20,871 | 5,666 | 3,397 | 30,128 |
| 99,678 | 190 | 21,002 | 5,704 | 3,418 | 30,314 |
| 99,679 | 181 | 20,884 | 5,663 | 3,396 | 30,124 |
| 99,680 | 174 | 20,890 | 5,607 | 3,385 | 30,056 |
| 99,681 | 172 | 20,771 | 5,559 | 3,350 | 29,852 |
| 99,682 | 156 | 20,597 | 5,543 | 3,315 | 29,611 |
| 99,683 | 150 | 20,140 | 5,407 | 3,228 | 28,925 |
| 99,684 | 152 | 20,401 | 5,488 | 3,255 | 29,296 |
| 99,685 | 146 | 20,643 | 5,522 | 3,283 | 29,594 |
| 99,686 | 141 | 20,560 | 5,471 | 3,238 | 29,410 |
| 99,687 | 144 | 20,604 | 5,518 | 3,262 | 29,528 |
| 99,688 | 139 | 20,422 | 5,458 | 3,214 | 29,233 |
| 99,689 | 135 | 20,449 | 5,468 | 3,212 | 29,264 |
| 99,690 | 132 | 20,241 | 5,423 | 3,188 | 28,984 |
| 99,691 | 130 | 19,907 | 5,341 | 3,148 | 28,526 |
| 99,692 | 130 | 20,015 | 5,377 | 3,156 | 28,678 |
| 99,693 | 137 | 19,789 | 5,324 | 3,138 | 28,388 |
| 99,694 | 135 | 19,675 | 5,311 | 3,110 | 28,231 |
| 99,695 | 137 | 20,521 | 5,510 | 3,244 | 29,412 |
| 99,696 | 137 | 20,539 | 5,530 | 3,238 | 29,444 |
| 99,697 | 138 | 20,443 | 5,459 | 3,203 | 29,243 |
| 99,698 | 137 | 20,626 | 5,515 | 3,223 | 29,501 |
| 99,699 | 132 | 20,851 | 5,570 | 3,248 | 29,801 |
| 99,700 | 135 | 20,763 | 5,567 | 3,236 | 29,701 |
| 99,701 | 132 | 20,710 | 5,562 | 3,225 | 29,629 |
| 99,702 | 133 | 20,433 | 5,516 | 3,187 | 29,269 |
| 99,703 | 135 | 20,316 | 5,518 | 3,183 | 29,152 |

|        |     |        |       |       |        |
|--------|-----|--------|-------|-------|--------|
| 99,704 | 138 | 20,302 | 5,506 | 3,197 | 29,143 |
| 99,705 | 140 | 20,395 | 5,494 | 3,198 | 29,227 |
| 99,706 | 147 | 20,429 | 5,509 | 3,191 | 29,276 |
| 99,707 | 143 | 20,277 | 5,479 | 3,160 | 29,059 |
| 99,708 | 143 | 20,526 | 5,600 | 3,232 | 29,501 |
| 99,709 | 144 | 20,261 | 5,523 | 3,191 | 29,119 |
| 99,710 | 145 | 20,345 | 5,517 | 3,196 | 29,203 |
| 99,711 | 136 | 20,306 | 5,466 | 3,175 | 29,083 |
| 99,712 | 138 | 20,483 | 5,507 | 3,213 | 29,341 |
| 99,713 | 124 | 20,188 | 5,426 | 3,199 | 28,937 |
| 99,714 | 124 | 20,402 | 5,484 | 3,233 | 29,243 |
| 99,715 | 119 | 20,330 | 5,461 | 3,227 | 29,137 |
| 99,716 | 122 | 20,412 | 5,502 | 3,232 | 29,268 |
| 99,717 | 122 | 20,578 | 5,531 | 3,258 | 29,489 |
| 99,718 | 132 | 20,908 | 5,634 | 3,304 | 29,978 |
| 99,719 | 131 | 20,937 | 5,597 | 3,290 | 29,955 |
| 99,720 | 131 | 21,003 | 5,596 | 3,302 | 30,032 |
| 99,721 | 131 | 20,965 | 5,559 | 3,280 | 29,935 |
| 99,722 | 129 | 21,251 | 5,679 | 3,354 | 30,413 |
| 99,723 | 127 | 21,219 | 5,678 | 3,367 | 30,391 |
| 99,724 | 113 | 20,973 | 5,620 | 3,335 | 30,041 |
| 99,725 | 117 | 20,753 | 5,561 | 3,292 | 29,723 |
| 99,726 | 119 | 20,950 | 5,618 | 3,321 | 30,008 |
| 99,727 | 121 | 20,966 | 5,621 | 3,327 | 30,035 |
| 99,728 | 120 | 20,808 | 5,610 | 3,310 | 29,848 |
| 99,729 | 120 | 20,650 | 5,545 | 3,289 | 29,604 |
| 99,730 | 123 | 20,874 | 5,607 | 3,318 | 29,922 |
| 99,731 | 125 | 21,050 | 5,651 | 3,351 | 30,177 |
| 99,732 | 125 | 21,037 | 5,669 | 3,370 | 30,201 |
| 99,733 | 125 | 20,739 | 5,586 | 3,323 | 29,773 |
| 99,734 | 128 | 20,916 | 5,633 | 3,364 | 30,041 |
| 99,735 | 128 | 20,891 | 5,629 | 3,394 | 30,042 |

|        |     |        |       |       |        |
|--------|-----|--------|-------|-------|--------|
| 99,736 | 133 | 20,731 | 5,634 | 3,399 | 29,897 |
| 99,737 | 134 | 20,675 | 5,607 | 3,396 | 29,812 |
| 99,738 | 132 | 20,411 | 5,510 | 3,363 | 29,416 |
| 99,739 | 132 | 20,483 | 5,526 | 3,366 | 29,507 |
| 99,740 | 135 | 20,484 | 5,531 | 3,360 | 29,510 |
| 99,741 | 136 | 20,336 | 5,521 | 3,353 | 29,346 |
| 99,742 | 133 | 20,216 | 5,512 | 3,355 | 29,216 |
| 99,743 | 134 | 20,351 | 5,523 | 3,376 | 29,384 |
| 99,744 | 128 | 20,336 | 5,544 | 3,371 | 29,379 |
| 99,745 | 129 | 20,319 | 5,557 | 3,394 | 29,399 |
| 99,746 | 128 | 20,066 | 5,511 | 3,367 | 29,072 |
| 99,747 | 131 | 20,225 | 5,553 | 3,416 | 29,325 |
| 99,748 | 129 | 20,257 | 5,564 | 3,402 | 29,352 |
| 99,749 | 129 | 20,283 | 5,553 | 3,375 | 29,340 |
| 99,750 | 129 | 19,953 | 5,460 | 3,330 | 28,872 |
| 99,751 | 129 | 19,883 | 5,466 | 3,324 | 28,802 |
| 99,752 | 135 | 19,920 | 5,492 | 3,341 | 28,888 |
| 99,753 | 132 | 19,479 | 5,340 | 3,278 | 28,229 |
| 99,754 | 132 | 19,629 | 5,358 | 3,294 | 28,413 |
| 99,755 | 131 | 19,801 | 5,416 | 3,298 | 28,646 |
| 99,756 | 130 | 19,832 | 5,407 | 3,305 | 28,674 |
| 99,757 | 125 | 19,927 | 5,377 | 3,323 | 28,752 |
| 99,758 | 125 | 19,916 | 5,354 | 3,316 | 28,711 |
| 99,759 | 124 | 19,761 | 5,320 | 3,271 | 28,476 |
| 99,760 | 124 | 19,911 | 5,360 | 3,301 | 28,696 |
| 99,761 | 118 | 19,775 | 5,332 | 3,274 | 28,499 |
| 99,762 | 117 | 19,733 | 5,343 | 3,268 | 28,461 |
| 99,763 | 118 | 19,717 | 5,351 | 3,253 | 28,439 |
| 99,764 | 120 | 19,726 | 5,347 | 3,243 | 28,436 |
| 99,765 | 121 | 19,754 | 5,338 | 3,252 | 28,465 |
| 99,766 | 121 | 19,597 | 5,328 | 3,246 | 28,292 |
| 99,767 | 119 | 19,725 | 5,385 | 3,298 | 28,527 |

|        |     |        |       |       |        |
|--------|-----|--------|-------|-------|--------|
| 99,768 | 117 | 19,907 | 5,430 | 3,309 | 28,763 |
| 99,769 | 109 | 19,836 | 5,413 | 3,305 | 28,663 |
| 99,770 | 112 | 19,852 | 5,453 | 3,294 | 28,711 |
| 99,771 | 114 | 19,955 | 5,477 | 3,302 | 28,848 |
| 99,772 | 114 | 19,523 | 5,367 | 3,226 | 28,230 |
| 99,773 | 115 | 19,815 | 5,426 | 3,251 | 28,607 |
| 99,774 | 113 | 20,089 | 5,482 | 3,294 | 28,978 |
| 99,775 | 109 | 19,854 | 5,421 | 3,254 | 28,638 |
| 99,776 | 115 | 19,659 | 5,382 | 3,229 | 28,385 |
| 99,777 | 113 | 19,422 | 5,339 | 3,213 | 28,087 |
| 99,778 | 114 | 20,010 | 5,511 | 3,291 | 28,926 |
| 99,779 | 117 | 19,731 | 5,427 | 3,247 | 28,522 |
| 99,780 | 117 | 19,548 | 5,411 | 3,213 | 28,289 |
| 99,781 | 115 | 20,012 | 5,523 | 3,284 | 28,934 |
| 99,782 | 112 | 20,031 | 5,536 | 3,272 | 28,951 |
| 99,783 | 109 | 20,099 | 5,554 | 3,274 | 29,036 |
| 99,784 | 112 | 20,109 | 5,532 | 3,272 | 29,025 |
| 99,785 | 113 | 20,277 | 5,592 | 3,308 | 29,290 |
| 99,786 | 111 | 20,308 | 5,556 | 3,275 | 29,250 |
| 99,787 | 103 | 20,171 | 5,486 | 3,232 | 28,992 |
| 99,788 | 104 | 20,311 | 5,479 | 3,222 | 29,116 |
| 99,789 | 104 | 20,352 | 5,490 | 3,216 | 29,162 |
| 99,790 | 100 | 20,515 | 5,505 | 3,239 | 29,359 |
| 99,791 | 103 | 20,486 | 5,508 | 3,234 | 29,331 |
| 99,792 | 97  | 20,389 | 5,484 | 3,221 | 29,191 |
| 99,793 | 97  | 20,502 | 5,519 | 3,217 | 29,335 |
| 99,794 | 97  | 20,331 | 5,471 | 3,182 | 29,081 |
| 99,795 | 100 | 21,016 | 5,612 | 3,285 | 30,013 |
| 99,796 | 99  | 20,865 | 5,570 | 3,254 | 29,788 |
| 99,797 | 98  | 20,723 | 5,532 | 3,234 | 29,587 |
| 99,798 | 95  | 20,652 | 5,507 | 3,216 | 29,470 |
| 99,799 | 97  | 20,884 | 5,563 | 3,243 | 29,787 |

|        |     |        |       |       |        |
|--------|-----|--------|-------|-------|--------|
| 99,800 | 98  | 20,548 | 5,461 | 3,198 | 29,305 |
| 99,801 | 102 | 20,898 | 5,524 | 3,232 | 29,756 |
| 99,802 | 97  | 20,961 | 5,527 | 3,226 | 29,811 |
| 99,803 | 102 | 20,967 | 5,532 | 3,215 | 29,816 |
| 99,804 | 104 | 21,034 | 5,563 | 3,234 | 29,935 |
| 99,805 | 106 | 21,269 | 5,616 | 3,275 | 30,266 |
| 99,806 | 103 | 20,978 | 5,543 | 3,247 | 29,871 |
| 99,807 | 104 | 20,830 | 5,565 | 3,243 | 29,742 |
| 99,808 | 103 | 20,729 | 5,554 | 3,228 | 29,614 |
| 99,809 | 101 | 20,494 | 5,477 | 3,187 | 29,259 |
| 99,810 | 100 | 20,293 | 5,418 | 3,154 | 28,965 |
| 99,811 | 100 | 20,824 | 5,549 | 3,227 | 29,700 |
| 99,812 | 99  | 20,590 | 5,492 | 3,184 | 29,365 |
| 99,813 | 104 | 20,836 | 5,552 | 3,210 | 29,702 |
| 99,814 | 103 | 20,669 | 5,532 | 3,205 | 29,509 |
| 99,815 | 103 | 20,849 | 5,573 | 3,237 | 29,762 |
| 99,816 | 102 | 20,822 | 5,583 | 3,229 | 29,736 |
| 99,817 | 103 | 21,071 | 5,611 | 3,243 | 30,028 |
| 99,818 | 103 | 21,184 | 5,598 | 3,226 | 30,111 |
| 99,819 | 103 | 20,902 | 5,564 | 3,216 | 29,785 |
| 99,820 | 103 | 20,610 | 5,481 | 3,164 | 29,358 |
| 99,821 | 103 | 20,790 | 5,541 | 3,224 | 29,658 |
| 99,822 | 101 | 20,736 | 5,503 | 3,223 | 29,563 |
| 99,823 | 108 | 20,690 | 5,507 | 3,223 | 29,528 |
| 99,824 | 108 | 20,694 | 5,499 | 3,225 | 29,526 |
| 99,825 | 111 | 20,958 | 5,570 | 3,258 | 29,897 |
| 99,826 | 111 | 20,992 | 5,569 | 3,247 | 29,919 |
| 99,827 | 105 | 20,975 | 5,571 | 3,252 | 29,903 |
| 99,828 | 101 | 20,708 | 5,480 | 3,206 | 29,495 |
| 99,829 | 101 | 20,643 | 5,480 | 3,208 | 29,432 |
| 99,830 | 100 | 20,526 | 5,482 | 3,221 | 29,329 |
| 99,831 | 103 | 20,481 | 5,464 | 3,212 | 29,260 |



|        |     |        |       |       |        |
|--------|-----|--------|-------|-------|--------|
| 99,832 | 105 | 20,412 | 5,423 | 3,200 | 29,140 |
| 99,833 | 107 | 20,424 | 5,422 | 3,210 | 29,163 |
| 99,834 | 110 | 20,504 | 5,409 | 3,216 | 29,239 |
| 99,835 | 106 | 20,235 | 5,339 | 3,152 | 28,832 |
| 99,836 | 118 | 20,579 | 5,376 | 3,198 | 29,271 |
| 99,837 | 121 | 20,467 | 5,378 | 3,176 | 29,142 |
| 99,838 | 121 | 20,855 | 5,444 | 3,227 | 29,647 |
| 99,839 | 118 | 20,879 | 5,458 | 3,221 | 29,676 |
| 99,840 | 129 | 20,973 | 5,481 | 3,227 | 29,810 |
| 99,841 | 136 | 21,298 | 5,543 | 3,260 | 30,237 |
| 99,842 | 143 | 21,278 | 5,508 | 3,249 | 30,178 |
| 99,843 | 144 | 21,579 | 5,582 | 3,299 | 30,604 |
| 99,844 | 150 | 21,591 | 5,595 | 3,294 | 30,630 |
| 99,845 | 157 | 21,681 | 5,640 | 3,319 | 30,797 |
| 99,846 | 160 | 21,659 | 5,648 | 3,298 | 30,765 |
| 99,847 | 161 | 21,883 | 5,693 | 3,323 | 31,060 |
| 99,848 | 160 | 21,770 | 5,648 | 3,278 | 30,856 |
| 99,849 | 160 | 21,746 | 5,638 | 3,271 | 30,815 |
| 99,850 | 159 | 21,553 | 5,648 | 3,267 | 30,627 |
| 99,851 | 156 | 21,431 | 5,672 | 3,289 | 30,548 |
| 99,852 | 153 | 21,462 | 5,706 | 3,319 | 30,640 |
| 99,853 | 152 | 21,312 | 5,708 | 3,326 | 30,498 |
| 99,854 | 152 | 21,206 | 5,687 | 3,311 | 30,356 |
| 99,855 | 151 | 21,377 | 5,720 | 3,329 | 30,577 |
| 99,856 | 150 | 21,394 | 5,734 | 3,337 | 30,615 |
| 99,857 | 156 | 21,293 | 5,703 | 3,307 | 30,459 |
| 99,858 | 155 | 21,195 | 5,673 | 3,281 | 30,304 |
| 99,859 | 159 | 21,263 | 5,684 | 3,293 | 30,399 |
| 99,860 | 159 | 21,141 | 5,647 | 3,275 | 30,222 |
| 99,861 | 168 | 21,531 | 5,726 | 3,336 | 30,761 |
| 99,862 | 168 | 21,513 | 5,739 | 3,327 | 30,747 |
| 99,863 | 168 | 21,435 | 5,717 | 3,312 | 30,632 |

|        |     |        |       |       |        |
|--------|-----|--------|-------|-------|--------|
| 99,864 | 165 | 21,566 | 5,745 | 3,338 | 30,814 |
| 99,865 | 163 | 21,316 | 5,671 | 3,300 | 30,450 |
| 99,866 | 165 | 21,251 | 5,663 | 3,305 | 30,384 |
| 99,867 | 163 | 21,079 | 5,613 | 3,279 | 30,134 |
| 99,868 | 163 | 21,439 | 5,716 | 3,314 | 30,632 |
| 99,869 | 165 | 21,413 | 5,693 | 3,314 | 30,585 |
| 99,870 | 163 | 21,370 | 5,641 | 3,293 | 30,467 |
| 99,871 | 162 | 21,436 | 5,638 | 3,278 | 30,514 |
| 99,872 | 163 | 21,620 | 5,630 | 3,282 | 30,695 |
| 99,873 | 164 | 21,688 | 5,648 | 3,292 | 30,792 |
| 99,874 | 160 | 21,420 | 5,557 | 3,250 | 30,387 |
| 99,875 | 160 | 21,335 | 5,559 | 3,247 | 30,301 |
| 99,876 | 160 | 21,095 | 5,523 | 3,255 | 30,033 |
| 99,877 | 166 | 21,376 | 5,592 | 3,305 | 30,439 |
| 99,878 | 164 | 21,118 | 5,499 | 3,245 | 30,026 |
| 99,879 | 167 | 21,205 | 5,497 | 3,241 | 30,110 |
| 99,880 | 166 | 21,175 | 5,484 | 3,229 | 30,054 |
| 99,881 | 163 | 21,039 | 5,473 | 3,228 | 29,903 |
| 99,882 | 161 | 21,033 | 5,493 | 3,218 | 29,905 |
| 99,883 | 162 | 20,851 | 5,476 | 3,217 | 29,706 |
| 99,884 | 162 | 20,821 | 5,480 | 3,215 | 29,678 |
| 99,885 | 166 | 20,688 | 5,504 | 3,220 | 29,578 |
| 99,886 | 167 | 20,589 | 5,494 | 3,252 | 29,502 |
| 99,887 | 156 | 20,392 | 5,506 | 3,234 | 29,288 |
| 99,888 | 155 | 20,363 | 5,544 | 3,264 | 29,326 |
| 99,889 | 151 | 19,575 | 5,421 | 3,185 | 28,332 |
| 99,890 | 153 | 19,780 | 5,455 | 3,239 | 28,627 |
| 99,891 | 145 | 20,101 | 5,544 | 3,287 | 29,077 |
| 99,892 | 144 | 20,083 | 5,542 | 3,304 | 29,073 |
| 99,893 | 133 | 20,125 | 5,524 | 3,311 | 29,093 |
| 99,894 | 132 | 20,222 | 5,556 | 3,329 | 29,239 |
| 99,895 | 130 | 20,465 | 5,624 | 3,341 | 29,560 |

|        |     |        |       |       |        |
|--------|-----|--------|-------|-------|--------|
| 99,896 | 124 | 20,497 | 5,587 | 3,346 | 29,554 |
| 99,897 | 119 | 20,238 | 5,545 | 3,333 | 29,235 |
| 99,898 | 120 | 20,471 | 5,600 | 3,388 | 29,579 |
| 99,899 | 120 | 20,336 | 5,547 | 3,388 | 29,391 |
| 99,900 | 121 | 20,541 | 5,581 | 3,411 | 29,654 |
| 99,901 | 122 | 20,667 | 5,606 | 3,421 | 29,816 |
| 99,902 | 122 | 20,491 | 5,525 | 3,369 | 29,507 |
| 99,903 | 124 | 20,861 | 5,611 | 3,420 | 30,016 |
| 99,904 | 120 | 20,631 | 5,514 | 3,376 | 29,641 |
| 99,905 | 120 | 20,577 | 5,502 | 3,367 | 29,566 |
| 99,906 | 119 | 20,522 | 5,506 | 3,372 | 29,519 |
| 99,907 | 117 | 20,300 | 5,490 | 3,364 | 29,271 |
| 99,908 | 115 | 20,268 | 5,483 | 3,375 | 29,241 |
| 99,909 | 114 | 20,523 | 5,606 | 3,436 | 29,679 |
| 99,910 | 106 | 20,311 | 5,542 | 3,410 | 29,369 |
| 99,911 | 103 | 20,576 | 5,599 | 3,477 | 29,755 |
| 99,912 | 104 | 20,653 | 5,619 | 3,487 | 29,863 |
| 99,913 | 104 | 20,537 | 5,579 | 3,470 | 29,690 |
| 99,914 | 110 | 20,717 | 5,601 | 3,485 | 29,913 |
| 99,915 | 110 | 20,554 | 5,567 | 3,451 | 29,682 |
| 99,916 | 114 | 20,844 | 5,602 | 3,474 | 30,034 |
| 99,917 | 116 | 20,620 | 5,579 | 3,461 | 29,776 |
| 99,918 | 120 | 20,790 | 5,611 | 3,493 | 30,014 |
| 99,919 | 117 | 20,745 | 5,636 | 3,510 | 30,008 |
| 99,920 | 125 | 20,750 | 5,644 | 3,514 | 30,033 |
| 99,921 | 124 | 20,524 | 5,606 | 3,480 | 29,734 |
| 99,922 | 124 | 20,138 | 5,543 | 3,445 | 29,250 |
| 99,923 | 122 | 20,398 | 5,682 | 3,530 | 29,732 |
| 99,924 | 120 | 20,300 | 5,650 | 3,504 | 29,574 |
| 99,925 | 113 | 20,178 | 5,599 | 3,463 | 29,353 |
| 99,926 | 113 | 20,564 | 5,661 | 3,486 | 29,824 |
| 99,927 | 108 | 20,561 | 5,669 | 3,464 | 29,802 |

|        |    |        |       |       |        |
|--------|----|--------|-------|-------|--------|
| 99,928 | 95 | 19,967 | 5,512 | 3,355 | 28,929 |
| 99,929 | 95 | 20,228 | 5,567 | 3,389 | 29,279 |
| 99,930 | 95 | 20,487 | 5,633 | 3,426 | 29,641 |
| 99,931 | 97 | 20,693 | 5,655 | 3,425 | 29,870 |
| 99,932 | 98 | 20,771 | 5,662 | 3,461 | 29,992 |
| 99,933 | 94 | 20,759 | 5,632 | 3,431 | 29,916 |
| 99,934 | 95 | 21,009 | 5,694 | 3,475 | 30,273 |
| 99,935 | 92 | 21,313 | 5,747 | 3,499 | 30,651 |
| 99,936 | 89 | 21,114 | 5,696 | 3,455 | 30,354 |
| 99,937 | 88 | 20,889 | 5,667 | 3,420 | 30,064 |
| 99,938 | 94 | 21,305 | 5,729 | 3,481 | 30,609 |
| 99,939 | 93 | 21,230 | 5,699 | 3,454 | 30,476 |
| 99,940 | 92 | 21,101 | 5,678 | 3,450 | 30,321 |
| 99,941 | 91 | 20,966 | 5,650 | 3,428 | 30,135 |
| 99,942 | 88 | 20,477 | 5,534 | 3,360 | 29,459 |
| 99,943 | 90 | 20,357 | 5,513 | 3,351 | 29,311 |
| 99,944 | 87 | 20,002 | 5,475 | 3,325 | 28,889 |
| 99,945 | 88 | 19,739 | 5,444 | 3,317 | 28,588 |
| 99,946 | 86 | 19,772 | 5,454 | 3,340 | 28,652 |
| 99,947 | 87 | 19,716 | 5,468 | 3,337 | 28,608 |
| 99,948 | 85 | 19,619 | 5,388 | 3,291 | 28,383 |
| 99,949 | 86 | 19,613 | 5,397 | 3,294 | 28,390 |
| 99,950 | 89 | 19,829 | 5,456 | 3,306 | 28,680 |
| 99,951 | 86 | 19,632 | 5,390 | 3,267 | 28,375 |
| 99,952 | 87 | 19,909 | 5,460 | 3,324 | 28,780 |
| 99,953 | 85 | 19,957 | 5,458 | 3,347 | 28,847 |
| 99,954 | 85 | 19,907 | 5,467 | 3,323 | 28,782 |
| 99,955 | 87 | 20,047 | 5,462 | 3,318 | 28,914 |
| 99,956 | 89 | 20,040 | 5,433 | 3,304 | 28,866 |
| 99,957 | 94 | 20,312 | 5,499 | 3,342 | 29,247 |
| 99,958 | 96 | 20,440 | 5,525 | 3,338 | 29,399 |
| 99,959 | 94 | 20,406 | 5,467 | 3,310 | 29,277 |

|        |     |        |       |       |        |
|--------|-----|--------|-------|-------|--------|
| 99,960 | 93  | 20,195 | 5,408 | 3,256 | 28,952 |
| 99,961 | 94  | 20,403 | 5,443 | 3,266 | 29,206 |
| 99,962 | 94  | 20,313 | 5,428 | 3,220 | 29,055 |
| 99,963 | 94  | 20,301 | 5,407 | 3,206 | 29,008 |
| 99,964 | 92  | 20,317 | 5,391 | 3,205 | 29,005 |
| 99,965 | 92  | 20,364 | 5,412 | 3,233 | 29,101 |
| 99,966 | 97  | 20,808 | 5,504 | 3,274 | 29,683 |
| 99,967 | 95  | 20,757 | 5,493 | 3,268 | 29,613 |
| 99,968 | 91  | 20,991 | 5,547 | 3,304 | 29,933 |
| 99,969 | 80  | 20,691 | 5,444 | 3,243 | 29,458 |
| 99,970 | 81  | 21,008 | 5,529 | 3,286 | 29,904 |
| 99,971 | 78  | 21,178 | 5,580 | 3,352 | 30,188 |
| 99,972 | 79  | 21,092 | 5,569 | 3,369 | 30,109 |
| 99,973 | 82  | 21,132 | 5,544 | 3,375 | 30,133 |
| 99,974 | 82  | 21,154 | 5,499 | 3,337 | 30,072 |
| 99,975 | 83  | 21,072 | 5,469 | 3,340 | 29,964 |
| 99,976 | 86  | 21,353 | 5,534 | 3,381 | 30,354 |
| 99,977 | 88  | 20,967 | 5,477 | 3,349 | 29,881 |
| 99,978 | 89  | 20,879 | 5,457 | 3,354 | 29,779 |
| 99,979 | 88  | 20,892 | 5,470 | 3,365 | 29,815 |
| 99,980 | 91  | 20,809 | 5,451 | 3,377 | 29,728 |
| 99,981 | 94  | 20,903 | 5,497 | 3,391 | 29,885 |
| 99,982 | 93  | 20,923 | 5,499 | 3,405 | 29,920 |
| 99,983 | 92  | 20,838 | 5,484 | 3,376 | 29,790 |
| 99,984 | 100 | 20,617 | 5,413 | 3,346 | 29,476 |
| 99,985 | 100 | 20,878 | 5,460 | 3,367 | 29,805 |
| 99,986 | 97  | 20,801 | 5,456 | 3,367 | 29,721 |
| 99,987 | 95  | 20,579 | 5,400 | 3,340 | 29,414 |
| 99,988 | 98  | 20,931 | 5,474 | 3,393 | 29,896 |
| 99,989 | 95  | 20,901 | 5,471 | 3,371 | 29,838 |
| 99,990 | 95  | 20,983 | 5,469 | 3,372 | 29,919 |
| 99,991 | 95  | 20,984 | 5,435 | 3,356 | 29,870 |

|         |     |        |       |       |        |
|---------|-----|--------|-------|-------|--------|
| 99,992  | 96  | 21,012 | 5,455 | 3,338 | 29,901 |
| 99,993  | 96  | 21,157 | 5,453 | 3,333 | 30,039 |
| 99,994  | 98  | 21,392 | 5,475 | 3,329 | 30,294 |
| 99,995  | 97  | 21,492 | 5,446 | 3,307 | 30,342 |
| 99,996  | 97  | 21,583 | 5,434 | 3,308 | 30,422 |
| 99,997  | 97  | 21,630 | 5,473 | 3,325 | 30,525 |
| 99,998  | 100 | 21,548 | 5,427 | 3,307 | 30,382 |
| 99,999  | 100 | 21,345 | 5,357 | 3,282 | 30,084 |
| 100,000 | 99  | 21,409 | 5,411 | 3,291 | 30,210 |
| 100,001 | 95  | 21,154 | 5,371 | 3,265 | 29,885 |
| 100,002 | 101 | 21,398 | 5,402 | 3,308 | 30,209 |
| 100,003 | 102 | 21,418 | 5,380 | 3,286 | 30,186 |
| 100,004 | 102 | 21,345 | 5,326 | 3,257 | 30,030 |
| 100,005 | 102 | 21,162 | 5,259 | 3,240 | 29,763 |
| 100,006 | 102 | 21,031 | 5,257 | 3,229 | 29,619 |
| 100,007 | 100 | 20,940 | 5,218 | 3,192 | 29,450 |
| 100,008 | 96  | 20,851 | 5,178 | 3,185 | 29,310 |
| 100,009 | 96  | 20,808 | 5,162 | 3,178 | 29,244 |
| 100,010 | 93  | 20,695 | 5,151 | 3,169 | 29,108 |
| 100,011 | 98  | 20,971 | 5,206 | 3,204 | 29,479 |
| 100,012 | 97  | 20,623 | 5,150 | 3,163 | 29,033 |
| 100,013 | 98  | 20,375 | 5,093 | 3,139 | 28,705 |
| 100,014 | 97  | 20,131 | 5,073 | 3,138 | 28,439 |
| 100,015 | 99  | 20,670 | 5,223 | 3,220 | 29,212 |
| 100,016 | 102 | 20,529 | 5,205 | 3,236 | 29,072 |
| 100,017 | 101 | 20,487 | 5,200 | 3,245 | 29,033 |
| 100,018 | 101 | 20,479 | 5,228 | 3,239 | 29,047 |
| 100,019 | 113 | 20,473 | 5,230 | 3,216 | 29,032 |
| 100,020 | 117 | 20,392 | 5,211 | 3,215 | 28,935 |
| 100,021 | 116 | 20,281 | 5,144 | 3,179 | 28,720 |
| 100,022 | 113 | 19,925 | 5,059 | 3,097 | 28,194 |
| 100,023 | 113 | 20,173 | 5,094 | 3,109 | 28,489 |

|         |     |        |       |       |        |
|---------|-----|--------|-------|-------|--------|
| 100,024 | 113 | 20,195 | 5,084 | 3,097 | 28,489 |
| 100,025 | 112 | 20,094 | 5,096 | 3,099 | 28,401 |
| 100,026 | 111 | 20,426 | 5,132 | 3,134 | 28,803 |
| 100,027 | 111 | 20,403 | 5,089 | 3,127 | 28,730 |
| 100,028 | 107 | 20,224 | 5,016 | 3,090 | 28,437 |
| 100,029 | 116 | 20,527 | 5,076 | 3,120 | 28,839 |
| 100,030 | 114 | 20,262 | 5,029 | 3,093 | 28,498 |
| 100,031 | 113 | 20,329 | 4,981 | 3,094 | 28,517 |
| 100,032 | 113 | 20,385 | 4,971 | 3,101 | 28,570 |
| 100,033 | 113 | 19,728 | 4,770 | 2,981 | 27,592 |
| 100,034 | 115 | 19,813 | 4,781 | 3,001 | 27,710 |
| 100,035 | 111 | 20,014 | 4,820 | 3,028 | 27,973 |
| 100,036 | 111 | 20,017 | 4,806 | 3,012 | 27,946 |
| 100,037 | 110 | 20,418 | 4,915 | 3,062 | 28,505 |
| 100,038 | 107 | 20,338 | 4,870 | 3,045 | 28,360 |
| 100,039 | 107 | 20,373 | 4,880 | 3,029 | 28,389 |
| 100,040 | 113 | 20,395 | 4,872 | 3,029 | 28,409 |
| 100,041 | 113 | 20,655 | 4,923 | 3,066 | 28,757 |
| 100,042 | 117 | 20,726 | 4,929 | 3,093 | 28,865 |
| 100,043 | 116 | 20,465 | 4,857 | 3,081 | 28,519 |
| 100,044 | 116 | 20,459 | 4,858 | 3,071 | 28,504 |
| 100,045 | 113 | 20,565 | 4,889 | 3,087 | 28,654 |
| 100,046 | 115 | 20,455 | 4,873 | 3,060 | 28,503 |
| 100,047 | 114 | 20,354 | 4,867 | 3,048 | 28,383 |
| 100,048 | 117 | 20,465 | 4,916 | 3,070 | 28,568 |
| 100,049 | 112 | 20,224 | 4,918 | 3,028 | 28,282 |
| 100,050 | 115 | 20,224 | 4,913 | 3,028 | 28,280 |
| 100,051 | 118 | 20,365 | 4,957 | 3,050 | 28,490 |
| 100,052 | 122 | 20,405 | 4,975 | 3,044 | 28,546 |
| 100,053 | 119 | 20,248 | 4,937 | 3,012 | 28,316 |
| 100,054 | 118 | 20,221 | 4,956 | 3,017 | 28,312 |
| 100,055 | 118 | 20,141 | 4,941 | 3,012 | 28,212 |

|         |     |        |       |       |        |
|---------|-----|--------|-------|-------|--------|
| 100,056 | 119 | 20,342 | 5,023 | 3,072 | 28,556 |
| 100,057 | 119 | 20,303 | 5,020 | 3,075 | 28,517 |
| 100,058 | 118 | 20,594 | 5,114 | 3,103 | 28,929 |
| 100,059 | 123 | 20,760 | 5,165 | 3,125 | 29,173 |
| 100,060 | 123 | 20,711 | 5,150 | 3,120 | 29,104 |
| 100,061 | 122 | 20,824 | 5,211 | 3,190 | 29,347 |
| 100,062 | 121 | 20,733 | 5,258 | 3,210 | 29,322 |
| 100,063 | 120 | 20,605 | 5,225 | 3,186 | 29,136 |
| 100,064 | 122 | 20,573 | 5,220 | 3,198 | 29,113 |
| 100,065 | 123 | 20,744 | 5,276 | 3,222 | 29,365 |
| 100,066 | 120 | 20,735 | 5,246 | 3,194 | 29,295 |
| 100,067 | 119 | 20,714 | 5,253 | 3,193 | 29,279 |
| 100,068 | 113 | 20,283 | 5,110 | 3,120 | 28,626 |
| 100,069 | 113 | 20,364 | 5,133 | 3,136 | 28,746 |
| 100,070 | 104 | 20,318 | 5,134 | 3,137 | 28,693 |
| 100,071 | 105 | 20,264 | 5,182 | 3,171 | 28,722 |
| 100,072 | 108 | 20,119 | 5,161 | 3,140 | 28,528 |
| 100,073 | 105 | 19,928 | 5,122 | 3,121 | 28,276 |
| 100,074 | 107 | 19,722 | 5,104 | 3,105 | 28,038 |
| 100,075 | 107 | 19,467 | 5,078 | 3,082 | 27,734 |
| 100,076 | 111 | 20,041 | 5,240 | 3,177 | 28,569 |
| 100,077 | 111 | 19,856 | 5,242 | 3,173 | 28,382 |
| 100,078 | 114 | 19,938 | 5,314 | 3,203 | 28,569 |
| 100,079 | 113 | 20,021 | 5,322 | 3,222 | 28,678 |
| 100,080 | 105 | 19,703 | 5,280 | 3,200 | 28,288 |
| 100,081 | 105 | 19,613 | 5,315 | 3,202 | 28,235 |
| 100,082 | 103 | 19,567 | 5,369 | 3,226 | 28,265 |
| 100,083 | 111 | 19,665 | 5,436 | 3,232 | 28,444 |
| 100,084 | 112 | 19,407 | 5,381 | 3,212 | 28,112 |
| 100,085 | 110 | 19,190 | 5,352 | 3,189 | 27,841 |
| 100,086 | 116 | 19,809 | 5,565 | 3,301 | 28,791 |
| 100,087 | 118 | 19,541 | 5,527 | 3,289 | 28,475 |



|         |     |        |       |       |        |
|---------|-----|--------|-------|-------|--------|
| 100,088 | 119 | 19,523 | 5,496 | 3,288 | 28,426 |
| 100,089 | 119 | 19,570 | 5,501 | 3,284 | 28,474 |
| 100,090 | 113 | 19,704 | 5,496 | 3,310 | 28,623 |
| 100,091 | 115 | 19,864 | 5,545 | 3,343 | 28,867 |
| 100,092 | 115 | 19,396 | 5,486 | 3,307 | 28,304 |
| 100,093 | 116 | 19,560 | 5,513 | 3,322 | 28,511 |
| 100,094 | 117 | 19,694 | 5,585 | 3,360 | 28,756 |
| 100,095 | 117 | 19,617 | 5,631 | 3,389 | 28,754 |
| 100,096 | 120 | 19,581 | 5,659 | 3,405 | 28,765 |
| 100,097 | 118 | 19,482 | 5,642 | 3,421 | 28,663 |
| 100,098 | 121 | 19,558 | 5,646 | 3,446 | 28,771 |
| 100,099 | 119 | 19,784 | 5,689 | 3,484 | 29,076 |
| 100,100 | 120 | 19,555 | 5,638 | 3,454 | 28,767 |
| 100,101 | 120 | 19,719 | 5,692 | 3,509 | 29,040 |
| 100,102 | 121 | 19,939 | 5,707 | 3,533 | 29,300 |
| 100,103 | 116 | 19,961 | 5,704 | 3,545 | 29,326 |
| 100,104 | 118 | 20,040 | 5,737 | 3,569 | 29,464 |
| 100,105 | 124 | 20,011 | 5,697 | 3,533 | 29,365 |
| 100,106 | 121 | 19,941 | 5,678 | 3,524 | 29,264 |
| 100,107 | 122 | 19,890 | 5,695 | 3,528 | 29,235 |
| 100,108 | 123 | 19,920 | 5,743 | 3,563 | 29,349 |
| 100,109 | 122 | 19,674 | 5,695 | 3,566 | 29,057 |
| 100,110 | 118 | 19,648 | 5,703 | 3,574 | 29,043 |
| 100,111 | 119 | 19,572 | 5,682 | 3,529 | 28,902 |
| 100,112 | 117 | 19,667 | 5,659 | 3,527 | 28,970 |
| 100,113 | 120 | 19,690 | 5,609 | 3,505 | 28,924 |
| 100,114 | 122 | 19,755 | 5,630 | 3,505 | 29,012 |
| 100,115 | 120 | 19,742 | 5,635 | 3,494 | 28,991 |
| 100,116 | 119 | 19,702 | 5,637 | 3,519 | 28,977 |
| 100,117 | 121 | 19,671 | 5,638 | 3,503 | 28,933 |
| 100,118 | 125 | 19,669 | 5,657 | 3,508 | 28,959 |
| 100,119 | 128 | 19,855 | 5,699 | 3,552 | 29,234 |

|         |     |        |       |       |        |
|---------|-----|--------|-------|-------|--------|
| 100,120 | 130 | 19,871 | 5,676 | 3,534 | 29,211 |
| 100,121 | 129 | 19,949 | 5,685 | 3,533 | 29,296 |
| 100,122 | 125 | 20,067 | 5,684 | 3,536 | 29,412 |
| 100,123 | 124 | 20,033 | 5,712 | 3,534 | 29,403 |
| 100,124 | 122 | 20,319 | 5,789 | 3,564 | 29,794 |
| 100,125 | 123 | 20,416 | 5,767 | 3,565 | 29,871 |
| 100,126 | 127 | 20,474 | 5,731 | 3,542 | 29,874 |
| 100,127 | 127 | 20,507 | 5,759 | 3,537 | 29,930 |
| 100,128 | 128 | 20,884 | 5,823 | 3,590 | 30,425 |
| 100,129 | 131 | 20,836 | 5,786 | 3,563 | 30,316 |
| 100,130 | 131 | 20,854 | 5,774 | 3,555 | 30,314 |
| 100,131 | 135 | 21,018 | 5,827 | 3,589 | 30,569 |
| 100,132 | 136 | 21,051 | 5,819 | 3,567 | 30,573 |
| 100,133 | 137 | 20,876 | 5,764 | 3,519 | 30,296 |
| 100,134 | 136 | 20,724 | 5,723 | 3,501 | 30,084 |
| 100,135 | 133 | 20,853 | 5,762 | 3,518 | 30,266 |
| 100,136 | 133 | 20,792 | 5,742 | 3,517 | 30,184 |
| 100,137 | 128 | 20,685 | 5,727 | 3,515 | 30,055 |
| 100,138 | 130 | 20,665 | 5,751 | 3,532 | 30,078 |
| 100,139 | 134 | 20,701 | 5,770 | 3,542 | 30,147 |
| 100,140 | 136 | 20,405 | 5,711 | 3,502 | 29,754 |
| 100,141 | 140 | 20,130 | 5,665 | 3,470 | 29,405 |
| 100,142 | 151 | 20,660 | 5,870 | 3,593 | 30,274 |
| 100,143 | 146 | 20,367 | 5,789 | 3,537 | 29,839 |
| 100,144 | 146 | 20,455 | 5,823 | 3,513 | 29,937 |
| 100,145 | 147 | 20,557 | 5,794 | 3,519 | 30,017 |
| 100,146 | 146 | 20,653 | 5,757 | 3,501 | 30,057 |
| 100,147 | 150 | 20,623 | 5,743 | 3,492 | 30,008 |
| 100,148 | 150 | 20,467 | 5,719 | 3,485 | 29,821 |
| 100,149 | 151 | 20,655 | 5,780 | 3,507 | 30,093 |
| 100,150 | 156 | 20,644 | 5,800 | 3,514 | 30,114 |
| 100,151 | 151 | 20,567 | 5,773 | 3,485 | 29,976 |

|         |     |        |       |       |        |
|---------|-----|--------|-------|-------|--------|
| 100,152 | 153 | 20,589 | 5,767 | 3,497 | 30,006 |
| 100,153 | 152 | 20,445 | 5,755 | 3,493 | 29,845 |
| 100,154 | 152 | 20,321 | 5,739 | 3,470 | 29,682 |
| 100,155 | 150 | 20,620 | 5,826 | 3,530 | 30,126 |
| 100,156 | 150 | 20,291 | 5,763 | 3,486 | 29,690 |
| 100,157 | 150 | 20,427 | 5,748 | 3,473 | 29,798 |
| 100,158 | 157 | 20,626 | 5,822 | 3,483 | 30,088 |
| 100,159 | 154 | 20,320 | 5,701 | 3,410 | 29,585 |
| 100,160 | 155 | 20,322 | 5,708 | 3,392 | 29,577 |
| 100,161 | 154 | 20,065 | 5,640 | 3,344 | 29,203 |
| 100,162 | 157 | 20,251 | 5,655 | 3,345 | 29,408 |
| 100,163 | 156 | 19,949 | 5,610 | 3,304 | 29,019 |
| 100,164 | 152 | 19,960 | 5,614 | 3,311 | 29,037 |
| 100,165 | 147 | 19,678 | 5,550 | 3,274 | 28,649 |
| 100,166 | 149 | 19,565 | 5,528 | 3,248 | 28,490 |
| 100,167 | 147 | 19,623 | 5,549 | 3,244 | 28,563 |
| 100,168 | 146 | 19,608 | 5,516 | 3,233 | 28,503 |
| 100,169 | 147 | 19,404 | 5,477 | 3,200 | 28,228 |
| 100,170 | 140 | 19,277 | 5,445 | 3,186 | 28,048 |
| 100,171 | 143 | 19,473 | 5,494 | 3,232 | 28,342 |
| 100,172 | 143 | 19,321 | 5,468 | 3,203 | 28,135 |
| 100,173 | 149 | 19,133 | 5,375 | 3,167 | 27,824 |
| 100,174 | 149 | 18,924 | 5,319 | 3,148 | 27,540 |
| 100,175 | 144 | 18,905 | 5,334 | 3,168 | 27,551 |
| 100,176 | 147 | 19,015 | 5,366 | 3,178 | 27,706 |
| 100,177 | 147 | 18,665 | 5,281 | 3,135 | 27,228 |
| 100,178 | 150 | 18,331 | 5,211 | 3,086 | 26,778 |
| 100,179 | 148 | 18,499 | 5,239 | 3,109 | 26,995 |
| 100,180 | 142 | 18,052 | 5,171 | 3,069 | 26,434 |
| 100,181 | 145 | 17,942 | 5,176 | 3,061 | 26,324 |
| 100,182 | 141 | 17,794 | 5,152 | 3,038 | 26,125 |
| 100,183 | 136 | 17,538 | 5,052 | 3,029 | 25,755 |

|         |     |        |       |       |        |
|---------|-----|--------|-------|-------|--------|
| 100,184 | 136 | 17,472 | 5,011 | 3,027 | 25,646 |
| 100,185 | 134 | 17,391 | 4,992 | 3,033 | 25,550 |
| 100,186 | 134 | 17,366 | 4,964 | 3,020 | 25,484 |
| 100,187 | 133 | 17,285 | 4,979 | 3,008 | 25,405 |
| 100,188 | 129 | 17,249 | 4,987 | 2,996 | 25,361 |
| 100,189 | 131 | 17,243 | 4,987 | 2,966 | 25,327 |
| 100,190 | 130 | 17,459 | 5,041 | 2,988 | 25,618 |
| 100,191 | 129 | 17,599 | 5,034 | 2,963 | 25,725 |
| 100,192 | 122 | 17,721 | 5,010 | 2,947 | 25,800 |
| 100,193 | 114 | 17,588 | 4,950 | 2,895 | 25,547 |
| 100,194 | 114 | 17,546 | 4,939 | 2,903 | 25,502 |
| 100,195 | 110 | 17,403 | 4,926 | 2,923 | 25,362 |
| 100,196 | 109 | 17,435 | 4,953 | 2,934 | 25,431 |
| 100,197 | 102 | 17,212 | 4,916 | 2,907 | 25,137 |
| 100,198 | 102 | 17,379 | 4,943 | 2,890 | 25,314 |
| 100,199 | 105 | 17,497 | 4,978 | 2,907 | 25,487 |
| 100,200 | 100 | 17,128 | 4,889 | 2,853 | 24,970 |
| 100,201 | 96  | 17,207 | 4,901 | 2,880 | 25,084 |
| 100,202 | 94  | 17,175 | 4,899 | 2,865 | 25,033 |
| 100,203 | 100 | 17,097 | 4,898 | 2,847 | 24,942 |
| 100,204 | 97  | 16,803 | 4,823 | 2,793 | 24,516 |
| 100,205 | 102 | 16,766 | 4,907 | 2,809 | 24,584 |
| 100,206 | 114 | 16,650 | 4,918 | 2,810 | 24,492 |
| 100,207 | 109 | 16,366 | 4,890 | 2,789 | 24,154 |
| 100,208 | 114 | 16,612 | 4,974 | 2,815 | 24,515 |
| 100,209 | 110 | 16,609 | 4,996 | 2,825 | 24,540 |
| 100,210 | 109 | 16,347 | 4,949 | 2,813 | 24,218 |
| 100,211 | 109 | 16,347 | 4,952 | 2,814 | 24,222 |
| 100,212 | 109 | 16,578 | 5,000 | 2,847 | 24,534 |
| 100,213 | 107 | 16,677 | 5,045 | 2,872 | 24,701 |
| 100,214 | 109 | 16,810 | 5,105 | 2,881 | 24,905 |
| 100,215 | 112 | 16,933 | 5,176 | 2,907 | 25,128 |

|         |     |        |       |       |        |
|---------|-----|--------|-------|-------|--------|
| 100,216 | 110 | 16,912 | 5,179 | 2,912 | 25,113 |
| 100,217 | 109 | 17,021 | 5,231 | 2,951 | 25,312 |
| 100,218 | 113 | 16,955 | 5,226 | 2,967 | 25,261 |
| 100,219 | 112 | 16,863 | 5,232 | 2,988 | 25,195 |
| 100,220 | 110 | 16,797 | 5,238 | 2,986 | 25,131 |
| 100,221 | 111 | 16,502 | 5,179 | 2,936 | 24,728 |
| 100,222 | 116 | 16,481 | 5,184 | 2,913 | 24,694 |
| 100,223 | 119 | 16,727 | 5,247 | 2,937 | 25,030 |
| 100,224 | 116 | 16,781 | 5,299 | 2,945 | 25,141 |
| 100,225 | 126 | 16,746 | 5,314 | 2,944 | 25,130 |
| 100,226 | 140 | 16,768 | 5,299 | 2,936 | 25,143 |
| 100,227 | 143 | 16,662 | 5,270 | 2,912 | 24,987 |
| 100,228 | 144 | 16,600 | 5,286 | 2,897 | 24,927 |
| 100,229 | 142 | 16,684 | 5,324 | 2,919 | 25,069 |
| 100,230 | 141 | 17,164 | 5,442 | 2,991 | 25,738 |
| 100,231 | 142 | 17,190 | 5,404 | 2,987 | 25,723 |
| 100,232 | 144 | 17,212 | 5,375 | 2,975 | 25,706 |
| 100,233 | 143 | 17,366 | 5,418 | 3,007 | 25,934 |
| 100,234 | 141 | 17,440 | 5,480 | 3,047 | 26,108 |
| 100,235 | 144 | 17,323 | 5,453 | 3,037 | 25,957 |
| 100,236 | 143 | 17,327 | 5,496 | 3,022 | 25,988 |
| 100,237 | 143 | 17,289 | 5,481 | 3,029 | 25,942 |
| 100,238 | 149 | 17,522 | 5,523 | 3,071 | 26,265 |
| 100,239 | 145 | 17,511 | 5,537 | 3,100 | 26,293 |
| 100,240 | 148 | 17,495 | 5,517 | 3,100 | 26,260 |
| 100,241 | 155 | 17,487 | 5,523 | 3,105 | 26,270 |
| 100,242 | 153 | 17,073 | 5,452 | 3,085 | 25,763 |
| 100,243 | 153 | 17,032 | 5,504 | 3,107 | 25,796 |
| 100,244 | 154 | 17,068 | 5,494 | 3,113 | 25,829 |
| 100,245 | 158 | 17,322 | 5,541 | 3,119 | 26,140 |
| 100,246 | 156 | 17,144 | 5,501 | 3,085 | 25,886 |
| 100,247 | 162 | 17,065 | 5,498 | 3,082 | 25,807 |

|         |     |        |       |       |        |
|---------|-----|--------|-------|-------|--------|
| 100,248 | 162 | 17,238 | 5,552 | 3,128 | 26,080 |
| 100,249 | 168 | 17,381 | 5,593 | 3,135 | 26,277 |
| 100,250 | 168 | 17,580 | 5,620 | 3,133 | 26,501 |
| 100,251 | 171 | 17,472 | 5,567 | 3,091 | 26,301 |
| 100,252 | 168 | 17,299 | 5,501 | 3,038 | 26,006 |
| 100,253 | 170 | 17,539 | 5,526 | 3,060 | 26,295 |
| 100,254 | 167 | 17,755 | 5,566 | 3,093 | 26,581 |
| 100,255 | 162 | 17,551 | 5,442 | 3,028 | 26,183 |
| 100,256 | 162 | 17,711 | 5,456 | 3,038 | 26,367 |
| 100,257 | 157 | 17,864 | 5,472 | 3,057 | 26,550 |
| 100,258 | 155 | 17,836 | 5,446 | 3,052 | 26,489 |
| 100,259 | 151 | 17,721 | 5,422 | 3,051 | 26,345 |
| 100,260 | 151 | 17,795 | 5,389 | 3,074 | 26,409 |
| 100,261 | 154 | 17,857 | 5,364 | 3,063 | 26,438 |
| 100,262 | 154 | 17,710 | 5,313 | 3,045 | 26,222 |
| 100,263 | 160 | 18,113 | 5,463 | 3,092 | 26,828 |
| 100,264 | 161 | 18,105 | 5,462 | 3,098 | 26,826 |
| 100,265 | 162 | 18,000 | 5,367 | 3,080 | 26,609 |
| 100,266 | 163 | 18,039 | 5,297 | 3,057 | 26,556 |
| 100,267 | 164 | 18,096 | 5,299 | 3,055 | 26,614 |
| 100,268 | 164 | 18,220 | 5,305 | 3,031 | 26,720 |
| 100,269 | 162 | 18,294 | 5,287 | 3,021 | 26,764 |
| 100,270 | 169 | 18,473 | 5,328 | 3,010 | 26,980 |
| 100,271 | 163 | 18,233 | 5,244 | 2,961 | 26,601 |
| 100,272 | 163 | 18,266 | 5,254 | 2,961 | 26,644 |
| 100,273 | 159 | 18,221 | 5,251 | 2,976 | 26,607 |
| 100,274 | 163 | 18,163 | 5,216 | 2,956 | 26,498 |
| 100,275 | 160 | 18,093 | 5,208 | 2,938 | 26,399 |
| 100,276 | 151 | 18,176 | 5,213 | 2,927 | 26,467 |
| 100,277 | 135 | 18,149 | 5,246 | 2,928 | 26,458 |
| 100,278 | 127 | 17,866 | 5,180 | 2,895 | 26,068 |
| 100,279 | 129 | 17,798 | 5,132 | 2,861 | 25,920 |

|         |     |        |       |       |        |
|---------|-----|--------|-------|-------|--------|
| 100,280 | 128 | 17,734 | 5,142 | 2,855 | 25,859 |
| 100,281 | 129 | 17,760 | 5,193 | 2,868 | 25,950 |
| 100,282 | 125 | 17,707 | 5,206 | 2,851 | 25,889 |
| 100,283 | 123 | 17,674 | 5,211 | 2,820 | 25,828 |
| 100,284 | 122 | 17,363 | 5,117 | 2,723 | 25,325 |
| 100,285 | 122 | 17,564 | 5,155 | 2,732 | 25,573 |
| 100,286 | 119 | 17,736 | 5,178 | 2,755 | 25,788 |
| 100,287 | 120 | 17,878 | 5,212 | 2,776 | 25,986 |
| 100,288 | 121 | 18,065 | 5,292 | 2,800 | 26,278 |
| 100,289 | 117 | 18,096 | 5,334 | 2,796 | 26,343 |
| 100,290 | 114 | 17,869 | 5,247 | 2,745 | 25,975 |
| 100,291 | 118 | 18,122 | 5,357 | 2,782 | 26,379 |
| 100,292 | 112 | 17,941 | 5,379 | 2,758 | 26,190 |
| 100,293 | 112 | 17,971 | 5,332 | 2,739 | 26,154 |
| 100,294 | 112 | 18,024 | 5,332 | 2,736 | 26,204 |
| 100,295 | 109 | 17,930 | 5,327 | 2,720 | 26,086 |
| 100,296 | 105 | 17,930 | 5,347 | 2,749 | 26,131 |
| 100,297 | 101 | 17,973 | 5,312 | 2,768 | 26,154 |
| 100,298 | 107 | 17,650 | 5,217 | 2,699 | 25,673 |
| 100,299 | 109 | 17,854 | 5,260 | 2,717 | 25,940 |
| 100,300 | 103 | 17,830 | 5,231 | 2,725 | 25,889 |
| 100,301 | 104 | 17,863 | 5,263 | 2,758 | 25,988 |
| 100,302 | 101 | 17,763 | 5,221 | 2,750 | 25,835 |
| 100,303 | 101 | 17,811 | 5,232 | 2,771 | 25,915 |
| 100,304 | 108 | 17,838 | 5,254 | 2,780 | 25,980 |
| 100,305 | 108 | 17,841 | 5,249 | 2,775 | 25,973 |
| 100,306 | 115 | 18,008 | 5,311 | 2,795 | 26,229 |
| 100,307 | 115 | 18,021 | 5,330 | 2,787 | 26,253 |
| 100,308 | 111 | 18,131 | 5,348 | 2,775 | 26,365 |
| 100,309 | 113 | 18,047 | 5,371 | 2,769 | 26,300 |
| 100,310 | 113 | 18,211 | 5,426 | 2,787 | 26,537 |
| 100,311 | 109 | 18,109 | 5,417 | 2,751 | 26,386 |

|         |     |        |       |       |        |
|---------|-----|--------|-------|-------|--------|
| 100,312 | 112 | 18,187 | 5,413 | 2,766 | 26,478 |
| 100,313 | 109 | 18,060 | 5,378 | 2,760 | 26,307 |
| 100,314 | 113 | 18,457 | 5,487 | 2,867 | 26,924 |
| 100,315 | 118 | 18,423 | 5,490 | 2,876 | 26,907 |
| 100,316 | 114 | 18,147 | 5,461 | 2,845 | 26,567 |
| 100,317 | 115 | 18,053 | 5,432 | 2,848 | 26,448 |
| 100,318 | 115 | 18,022 | 5,429 | 2,849 | 26,415 |
| 100,319 | 110 | 17,929 | 5,451 | 2,876 | 26,366 |
| 100,320 | 110 | 17,994 | 5,483 | 2,890 | 26,477 |
| 100,321 | 106 | 17,815 | 5,419 | 2,885 | 26,225 |
| 100,322 | 106 | 17,879 | 5,423 | 2,893 | 26,301 |
| 100,323 | 105 | 17,810 | 5,386 | 2,886 | 26,187 |
| 100,324 | 102 | 17,688 | 5,361 | 2,895 | 26,046 |
| 100,325 | 108 | 18,607 | 5,667 | 3,066 | 27,448 |
| 100,326 | 109 | 18,682 | 5,681 | 3,111 | 27,583 |
| 100,327 | 108 | 18,690 | 5,694 | 3,130 | 27,622 |
| 100,328 | 109 | 18,649 | 5,661 | 3,128 | 27,547 |
| 100,329 | 105 | 18,514 | 5,626 | 3,108 | 27,353 |
| 100,330 | 104 | 18,511 | 5,609 | 3,124 | 27,348 |
| 100,331 | 106 | 18,791 | 5,665 | 3,185 | 27,747 |
| 100,332 | 107 | 18,680 | 5,625 | 3,182 | 27,594 |
| 100,333 | 108 | 18,738 | 5,601 | 3,188 | 27,635 |
| 100,334 | 119 | 18,647 | 5,546 | 3,181 | 27,493 |
| 100,335 | 119 | 18,603 | 5,493 | 3,193 | 27,408 |
| 100,336 | 120 | 18,688 | 5,590 | 3,251 | 27,649 |
| 100,337 | 122 | 18,735 | 5,597 | 3,253 | 27,707 |
| 100,338 | 125 | 18,804 | 5,636 | 3,291 | 27,856 |
| 100,339 | 124 | 18,959 | 5,671 | 3,322 | 28,076 |
| 100,340 | 124 | 19,052 | 5,668 | 3,366 | 28,210 |
| 100,341 | 124 | 19,227 | 5,723 | 3,396 | 28,470 |
| 100,342 | 124 | 19,388 | 5,704 | 3,418 | 28,634 |
| 100,343 | 123 | 19,331 | 5,633 | 3,429 | 28,516 |



|         |     |        |       |       |        |
|---------|-----|--------|-------|-------|--------|
| 100,344 | 126 | 19,537 | 5,701 | 3,461 | 28,825 |
| 100,345 | 129 | 19,671 | 5,726 | 3,501 | 29,027 |
| 100,346 | 131 | 19,669 | 5,715 | 3,489 | 29,004 |
| 100,347 | 138 | 19,606 | 5,700 | 3,466 | 28,910 |
| 100,348 | 138 | 19,690 | 5,718 | 3,466 | 29,012 |
| 100,349 | 129 | 19,531 | 5,716 | 3,456 | 28,832 |
| 100,350 | 134 | 19,601 | 5,735 | 3,468 | 28,938 |
| 100,351 | 133 | 19,438 | 5,728 | 3,453 | 28,752 |
| 100,352 | 133 | 19,808 | 5,824 | 3,515 | 29,280 |
| 100,353 | 135 | 19,619 | 5,783 | 3,472 | 29,009 |
| 100,354 | 132 | 19,614 | 5,802 | 3,494 | 29,042 |
| 100,355 | 129 | 19,776 | 5,829 | 3,530 | 29,264 |
| 100,356 | 132 | 19,860 | 5,882 | 3,566 | 29,440 |
| 100,357 | 124 | 19,959 | 5,877 | 3,573 | 29,533 |
| 100,358 | 123 | 19,909 | 5,818 | 3,561 | 29,411 |
| 100,359 | 124 | 19,792 | 5,812 | 3,584 | 29,312 |
| 100,360 | 126 | 19,945 | 5,838 | 3,622 | 29,531 |
| 100,361 | 127 | 20,154 | 5,878 | 3,657 | 29,816 |
| 100,362 | 123 | 19,857 | 5,784 | 3,618 | 29,382 |
| 100,363 | 123 | 20,036 | 5,811 | 3,601 | 29,571 |
| 100,364 | 126 | 20,181 | 5,861 | 3,624 | 29,792 |
| 100,365 | 119 | 20,253 | 5,883 | 3,654 | 29,909 |
| 100,366 | 111 | 19,901 | 5,793 | 3,620 | 29,425 |
| 100,367 | 109 | 20,014 | 5,824 | 3,643 | 29,590 |
| 100,368 | 110 | 20,128 | 5,835 | 3,627 | 29,700 |
| 100,369 | 111 | 20,174 | 5,851 | 3,643 | 29,779 |
| 100,370 | 108 | 20,349 | 5,850 | 3,657 | 29,964 |
| 100,371 | 105 | 19,946 | 5,773 | 3,618 | 29,442 |
| 100,372 | 105 | 20,135 | 5,826 | 3,651 | 29,717 |
| 100,373 | 105 | 20,422 | 5,871 | 3,694 | 30,092 |
| 100,374 | 106 | 20,406 | 5,831 | 3,645 | 29,988 |
| 100,375 | 107 | 20,684 | 5,914 | 3,698 | 30,403 |

|         |     |        |       |       |        |
|---------|-----|--------|-------|-------|--------|
| 100,376 | 104 | 20,413 | 5,834 | 3,641 | 29,992 |
| 100,377 | 106 | 20,577 | 5,843 | 3,632 | 30,158 |
| 100,378 | 107 | 20,598 | 5,862 | 3,645 | 30,212 |
| 100,379 | 107 | 20,591 | 5,867 | 3,655 | 30,220 |
| 100,380 | 108 | 20,795 | 5,940 | 3,719 | 30,562 |
| 100,381 | 107 | 20,851 | 5,971 | 3,725 | 30,654 |
| 100,382 | 111 | 21,087 | 5,996 | 3,753 | 30,947 |
| 100,383 | 109 | 20,796 | 5,931 | 3,705 | 30,541 |
| 100,384 | 98  | 20,740 | 5,926 | 3,689 | 30,453 |
| 100,385 | 100 | 20,808 | 5,907 | 3,672 | 30,487 |
| 100,386 | 100 | 20,962 | 5,918 | 3,678 | 30,658 |
| 100,387 | 97  | 21,135 | 5,911 | 3,695 | 30,838 |
| 100,388 | 96  | 21,283 | 5,899 | 3,687 | 30,965 |
| 100,389 | 96  | 21,208 | 5,830 | 3,633 | 30,767 |
| 100,390 | 96  | 21,181 | 5,797 | 3,605 | 30,679 |
| 100,391 | 97  | 21,348 | 5,854 | 3,643 | 30,942 |
| 100,392 | 93  | 20,900 | 5,744 | 3,573 | 30,310 |
| 100,393 | 92  | 21,165 | 5,793 | 3,607 | 30,657 |
| 100,394 | 93  | 21,299 | 5,766 | 3,596 | 30,754 |
| 100,395 | 92  | 21,283 | 5,713 | 3,570 | 30,658 |
| 100,396 | 92  | 21,359 | 5,699 | 3,546 | 30,696 |
| 100,397 | 84  | 21,239 | 5,670 | 3,552 | 30,545 |
| 100,398 | 89  | 21,512 | 5,738 | 3,588 | 30,927 |
| 100,399 | 90  | 21,424 | 5,706 | 3,598 | 30,818 |
| 100,400 | 86  | 21,546 | 5,690 | 3,599 | 30,921 |
| 100,401 | 86  | 21,660 | 5,696 | 3,605 | 31,047 |
| 100,402 | 90  | 21,833 | 5,738 | 3,635 | 31,296 |
| 100,403 | 88  | 21,712 | 5,721 | 3,626 | 31,147 |
| 100,404 | 86  | 21,516 | 5,695 | 3,631 | 30,928 |
| 100,405 | 83  | 21,701 | 5,737 | 3,668 | 31,189 |
| 100,406 | 80  | 21,284 | 5,596 | 3,581 | 30,541 |
| 100,407 | 82  | 21,563 | 5,662 | 3,624 | 30,931 |

|         |    |        |       |       |        |
|---------|----|--------|-------|-------|--------|
| 100,408 | 81 | 21,518 | 5,618 | 3,617 | 30,834 |
| 100,409 | 77 | 21,385 | 5,562 | 3,590 | 30,614 |
| 100,410 | 71 | 21,197 | 5,472 | 3,525 | 30,265 |
| 100,411 | 72 | 21,139 | 5,463 | 3,535 | 30,209 |
| 100,412 | 72 | 21,275 | 5,456 | 3,540 | 30,343 |
| 100,413 | 72 | 21,186 | 5,460 | 3,537 | 30,255 |
| 100,414 | 73 | 21,223 | 5,462 | 3,549 | 30,307 |
| 100,415 | 74 | 21,434 | 5,503 | 3,567 | 30,578 |
| 100,416 | 74 | 21,411 | 5,453 | 3,538 | 30,476 |
| 100,417 | 73 | 21,249 | 5,409 | 3,505 | 30,236 |
| 100,418 | 72 | 21,563 | 5,471 | 3,529 | 30,635 |
| 100,419 | 74 | 21,486 | 5,451 | 3,528 | 30,539 |
| 100,420 | 76 | 21,907 | 5,535 | 3,576 | 31,094 |
| 100,421 | 75 | 21,705 | 5,489 | 3,560 | 30,829 |
| 100,422 | 74 | 21,863 | 5,502 | 3,577 | 31,016 |
| 100,423 | 72 | 21,432 | 5,403 | 3,516 | 30,423 |
| 100,424 | 74 | 21,736 | 5,492 | 3,557 | 30,859 |
| 100,425 | 74 | 22,151 | 5,578 | 3,630 | 31,433 |
| 100,426 | 75 | 22,107 | 5,556 | 3,586 | 31,324 |
| 100,427 | 78 | 22,488 | 5,639 | 3,652 | 31,857 |
| 100,428 | 78 | 22,605 | 5,680 | 3,693 | 32,056 |
| 100,429 | 80 | 21,981 | 5,426 | 3,528 | 31,015 |
| 100,430 | 81 | 22,215 | 5,495 | 3,578 | 31,369 |
| 100,431 | 88 | 22,672 | 5,590 | 3,623 | 31,973 |
| 100,432 | 88 | 22,757 | 5,610 | 3,628 | 32,083 |
| 100,433 | 84 | 23,233 | 5,764 | 3,708 | 32,789 |
| 100,434 | 83 | 23,062 | 5,677 | 3,645 | 32,467 |
| 100,435 | 83 | 23,352 | 5,753 | 3,686 | 32,874 |
| 100,436 | 85 | 22,952 | 5,686 | 3,638 | 32,361 |
| 100,437 | 85 | 22,993 | 5,703 | 3,645 | 32,426 |
| 100,438 | 86 | 22,680 | 5,643 | 3,624 | 32,033 |
| 100,439 | 85 | 22,340 | 5,590 | 3,598 | 31,613 |

|         |    |        |       |       |        |
|---------|----|--------|-------|-------|--------|
| 100,440 | 82 | 22,796 | 5,762 | 3,705 | 32,345 |
| 100,441 | 86 | 22,975 | 5,813 | 3,720 | 32,594 |
| 100,442 | 85 | 22,774 | 5,743 | 3,648 | 32,250 |
| 100,443 | 86 | 22,816 | 5,735 | 3,661 | 32,298 |
| 100,444 | 86 | 22,779 | 5,759 | 3,671 | 32,295 |
| 100,445 | 85 | 22,529 | 5,757 | 3,656 | 32,027 |
| 100,446 | 88 | 22,776 | 5,864 | 3,672 | 32,400 |
| 100,447 | 89 | 22,906 | 5,910 | 3,701 | 32,606 |
| 100,448 | 88 | 22,999 | 5,932 | 3,689 | 32,708 |
| 100,449 | 83 | 22,774 | 5,883 | 3,669 | 32,409 |
| 100,450 | 83 | 22,743 | 5,901 | 3,669 | 32,396 |
| 100,451 | 81 | 23,069 | 5,994 | 3,718 | 32,862 |
| 100,452 | 84 | 23,214 | 6,041 | 3,723 | 33,062 |
| 100,453 | 85 | 23,166 | 6,029 | 3,720 | 33,000 |
| 100,454 | 84 | 23,040 | 5,988 | 3,686 | 32,798 |
| 100,455 | 86 | 23,085 | 5,990 | 3,682 | 32,843 |
| 100,456 | 89 | 23,107 | 6,026 | 3,652 | 32,874 |
| 100,457 | 89 | 22,961 | 6,015 | 3,640 | 32,705 |
| 100,458 | 88 | 22,805 | 5,966 | 3,637 | 32,496 |
| 100,459 | 87 | 22,526 | 5,938 | 3,625 | 32,176 |
| 100,460 | 90 | 23,237 | 6,117 | 3,736 | 33,180 |
| 100,461 | 93 | 22,994 | 6,071 | 3,703 | 32,861 |
| 100,462 | 93 | 22,924 | 6,078 | 3,680 | 32,775 |
| 100,463 | 92 | 23,461 | 6,247 | 3,773 | 33,573 |
| 100,464 | 90 | 23,262 | 6,209 | 3,738 | 33,299 |
| 100,465 | 91 | 23,422 | 6,244 | 3,768 | 33,525 |
| 100,466 | 86 | 23,340 | 6,204 | 3,776 | 33,406 |
| 100,467 | 86 | 23,138 | 6,158 | 3,741 | 33,123 |
| 100,468 | 86 | 23,103 | 6,167 | 3,754 | 33,110 |
| 100,469 | 87 | 23,197 | 6,210 | 3,774 | 33,268 |
| 100,470 | 87 | 23,139 | 6,218 | 3,758 | 33,202 |
| 100,471 | 85 | 23,140 | 6,231 | 3,767 | 33,223 |

|         |    |        |       |       |        |
|---------|----|--------|-------|-------|--------|
| 100,472 | 85 | 23,307 | 6,256 | 3,788 | 33,436 |
| 100,473 | 89 | 23,101 | 6,220 | 3,773 | 33,183 |
| 100,474 | 90 | 23,496 | 6,311 | 3,822 | 33,719 |
| 100,475 | 91 | 23,441 | 6,291 | 3,803 | 33,626 |
| 100,476 | 92 | 23,381 | 6,326 | 3,776 | 33,575 |
| 100,477 | 92 | 23,247 | 6,290 | 3,793 | 33,422 |
| 100,478 | 87 | 22,904 | 6,211 | 3,732 | 32,934 |
| 100,479 | 88 | 23,066 | 6,277 | 3,762 | 33,193 |
| 100,480 | 80 | 22,532 | 6,171 | 3,685 | 32,468 |
| 100,481 | 80 | 22,798 | 6,218 | 3,696 | 32,792 |
| 100,482 | 80 | 22,983 | 6,280 | 3,723 | 33,066 |
| 100,483 | 86 | 22,740 | 6,194 | 3,708 | 32,728 |
| 100,484 | 87 | 22,818 | 6,198 | 3,736 | 32,839 |
| 100,485 | 90 | 22,830 | 6,222 | 3,760 | 32,902 |
| 100,486 | 86 | 22,783 | 6,200 | 3,743 | 32,812 |
| 100,487 | 90 | 22,920 | 6,205 | 3,730 | 32,945 |
| 100,488 | 89 | 22,987 | 6,209 | 3,722 | 33,007 |
| 100,489 | 93 | 23,012 | 6,223 | 3,697 | 33,025 |
| 100,490 | 99 | 23,133 | 6,228 | 3,710 | 33,170 |
| 100,491 | 94 | 22,980 | 6,202 | 3,693 | 32,969 |
| 100,492 | 97 | 23,109 | 6,268 | 3,738 | 33,212 |
| 100,493 | 96 | 23,121 | 6,263 | 3,755 | 33,235 |
| 100,494 | 95 | 23,456 | 6,352 | 3,812 | 33,715 |
| 100,495 | 94 | 23,704 | 6,393 | 3,848 | 34,039 |
| 100,496 | 95 | 23,636 | 6,384 | 3,842 | 33,957 |
| 100,497 | 94 | 23,471 | 6,355 | 3,834 | 33,754 |
| 100,498 | 92 | 24,043 | 6,531 | 3,938 | 34,604 |
| 100,499 | 92 | 23,664 | 6,497 | 3,917 | 34,170 |
| 100,500 | 93 | 24,005 | 6,573 | 3,954 | 34,625 |
| 100,501 | 96 | 24,489 | 6,706 | 4,034 | 35,325 |
| 100,502 | 96 | 24,523 | 6,719 | 4,032 | 35,370 |
| 100,503 | 94 | 24,429 | 6,716 | 4,052 | 35,291 |

|         |     |        |       |       |        |
|---------|-----|--------|-------|-------|--------|
| 100,504 | 91  | 24,136 | 6,659 | 4,014 | 34,900 |
| 100,505 | 92  | 24,134 | 6,678 | 4,031 | 34,935 |
| 100,506 | 93  | 23,979 | 6,596 | 4,009 | 34,677 |
| 100,507 | 91  | 23,771 | 6,552 | 3,998 | 34,412 |
| 100,508 | 90  | 24,368 | 6,728 | 4,113 | 35,299 |
| 100,509 | 91  | 24,390 | 6,734 | 4,107 | 35,322 |
| 100,510 | 93  | 24,470 | 6,747 | 4,107 | 35,417 |
| 100,511 | 101 | 24,524 | 6,768 | 4,092 | 35,485 |
| 100,512 | 101 | 24,546 | 6,798 | 4,123 | 35,568 |
| 100,513 | 105 | 24,907 | 6,837 | 4,156 | 36,005 |
| 100,514 | 108 | 24,984 | 6,833 | 4,169 | 36,094 |
| 100,515 | 111 | 25,079 | 6,933 | 4,217 | 36,340 |
| 100,516 | 114 | 24,813 | 6,873 | 4,166 | 35,966 |
| 100,517 | 114 | 24,577 | 6,840 | 4,120 | 35,651 |
| 100,518 | 117 | 24,464 | 6,846 | 4,113 | 35,540 |
| 100,519 | 117 | 24,314 | 6,814 | 4,089 | 35,334 |
| 100,520 | 121 | 25,132 | 7,001 | 4,200 | 36,454 |
| 100,521 | 117 | 24,967 | 6,962 | 4,194 | 36,240 |
| 100,522 | 114 | 24,493 | 6,849 | 4,092 | 35,548 |
| 100,523 | 114 | 24,500 | 6,891 | 4,130 | 35,635 |
| 100,524 | 113 | 24,598 | 6,944 | 4,165 | 35,820 |
| 100,525 | 109 | 24,228 | 6,853 | 4,104 | 35,294 |
| 100,526 | 111 | 24,336 | 6,906 | 4,129 | 35,482 |
| 100,527 | 109 | 24,252 | 6,880 | 4,145 | 35,386 |
| 100,528 | 111 | 24,192 | 6,879 | 4,115 | 35,297 |
| 100,529 | 110 | 24,171 | 6,894 | 4,119 | 35,294 |
| 100,530 | 109 | 23,839 | 6,801 | 4,065 | 34,814 |
| 100,531 | 106 | 23,549 | 6,788 | 4,070 | 34,513 |
| 100,532 | 108 | 23,464 | 6,858 | 4,103 | 34,533 |
| 100,533 | 106 | 23,292 | 6,825 | 4,086 | 34,309 |
| 100,534 | 98  | 22,823 | 6,736 | 3,993 | 33,650 |
| 100,535 | 99  | 22,968 | 6,775 | 4,031 | 33,873 |

|         |     |        |       |       |        |
|---------|-----|--------|-------|-------|--------|
| 100,536 | 98  | 22,810 | 6,773 | 3,995 | 33,676 |
| 100,537 | 93  | 22,396 | 6,632 | 3,945 | 33,066 |
| 100,538 | 92  | 22,486 | 6,698 | 3,978 | 33,254 |
| 100,539 | 93  | 22,637 | 6,769 | 4,016 | 33,515 |
| 100,540 | 89  | 22,540 | 6,753 | 4,006 | 33,388 |
| 100,541 | 84  | 22,380 | 6,748 | 4,035 | 33,247 |
| 100,542 | 98  | 22,413 | 6,775 | 4,029 | 33,315 |
| 100,543 | 101 | 22,620 | 6,853 | 4,044 | 33,618 |
| 100,544 | 104 | 22,532 | 6,893 | 4,034 | 33,563 |
| 100,545 | 104 | 22,513 | 6,902 | 4,024 | 33,543 |
| 100,546 | 106 | 22,345 | 6,922 | 4,029 | 33,402 |
| 100,547 | 110 | 21,686 | 6,720 | 3,935 | 32,451 |
| 100,548 | 113 | 21,783 | 6,755 | 3,935 | 32,586 |
| 100,549 | 113 | 22,062 | 6,829 | 3,987 | 32,991 |
| 100,550 | 118 | 21,869 | 6,747 | 3,934 | 32,668 |
| 100,551 | 116 | 21,668 | 6,688 | 3,898 | 32,370 |
| 100,552 | 119 | 21,683 | 6,675 | 3,908 | 32,385 |
| 100,553 | 119 | 21,598 | 6,612 | 3,867 | 32,196 |
| 100,554 | 127 | 21,945 | 6,698 | 3,909 | 32,679 |
| 100,555 | 125 | 21,934 | 6,693 | 3,902 | 32,654 |
| 100,556 | 124 | 22,065 | 6,688 | 3,901 | 32,778 |
| 100,557 | 123 | 22,103 | 6,678 | 3,895 | 32,799 |
| 100,558 | 124 | 22,224 | 6,657 | 3,901 | 32,906 |
| 100,559 | 126 | 22,465 | 6,731 | 3,945 | 33,267 |
| 100,560 | 125 | 22,179 | 6,663 | 3,907 | 32,874 |
| 100,561 | 123 | 22,064 | 6,675 | 3,905 | 32,767 |
| 100,562 | 115 | 22,172 | 6,707 | 3,946 | 32,940 |
| 100,563 | 117 | 22,060 | 6,716 | 3,933 | 32,826 |
| 100,564 | 116 | 22,168 | 6,770 | 3,962 | 33,016 |
| 100,565 | 111 | 22,116 | 6,719 | 3,922 | 32,868 |
| 100,566 | 115 | 22,403 | 6,780 | 3,957 | 33,255 |
| 100,567 | 110 | 22,424 | 6,766 | 3,977 | 33,277 |

|         |     |        |       |       |        |
|---------|-----|--------|-------|-------|--------|
| 100,568 | 111 | 22,522 | 6,774 | 3,982 | 33,389 |
| 100,569 | 112 | 22,563 | 6,801 | 3,999 | 33,475 |
| 100,570 | 111 | 22,564 | 6,797 | 4,006 | 33,478 |
| 100,571 | 109 | 22,533 | 6,743 | 3,984 | 33,369 |
| 100,572 | 115 | 22,064 | 6,609 | 3,896 | 32,684 |
| 100,573 | 115 | 22,435 | 6,662 | 3,938 | 33,150 |
| 100,574 | 115 | 22,478 | 6,654 | 3,937 | 33,184 |
| 100,575 | 114 | 22,564 | 6,719 | 3,970 | 33,367 |
| 100,576 | 114 | 22,427 | 6,675 | 3,964 | 33,180 |
| 100,577 | 112 | 22,476 | 6,645 | 3,976 | 33,209 |
| 100,578 | 111 | 22,379 | 6,578 | 3,933 | 33,001 |
| 100,579 | 109 | 22,187 | 6,533 | 3,916 | 32,745 |
| 100,580 | 109 | 22,117 | 6,503 | 3,902 | 32,631 |
| 100,581 | 110 | 22,195 | 6,425 | 3,881 | 32,611 |
| 100,582 | 109 | 22,506 | 6,509 | 3,901 | 33,025 |
| 100,583 | 109 | 22,563 | 6,482 | 3,887 | 33,041 |
| 100,584 | 108 | 22,387 | 6,400 | 3,850 | 32,745 |
| 100,585 | 106 | 22,567 | 6,398 | 3,843 | 32,914 |
| 100,586 | 108 | 22,828 | 6,478 | 3,870 | 33,284 |
| 100,587 | 109 | 22,874 | 6,485 | 3,882 | 33,350 |
| 100,588 | 111 | 22,742 | 6,469 | 3,869 | 33,191 |
| 100,589 | 111 | 22,631 | 6,414 | 3,849 | 33,005 |
| 100,590 | 111 | 22,711 | 6,445 | 3,848 | 33,115 |
| 100,591 | 109 | 22,606 | 6,395 | 3,808 | 32,918 |
| 100,592 | 110 | 22,703 | 6,404 | 3,783 | 33,000 |
| 100,593 | 99  | 22,852 | 6,455 | 3,818 | 33,224 |
| 100,594 | 94  | 22,710 | 6,401 | 3,818 | 33,023 |
| 100,595 | 90  | 22,670 | 6,321 | 3,810 | 32,891 |
| 100,596 | 94  | 22,719 | 6,297 | 3,830 | 32,940 |
| 100,597 | 94  | 22,590 | 6,225 | 3,805 | 32,714 |
| 100,598 | 85  | 22,360 | 6,115 | 3,741 | 32,301 |
| 100,599 | 85  | 22,169 | 6,050 | 3,723 | 32,027 |



|         |     |        |       |       |        |
|---------|-----|--------|-------|-------|--------|
| 100,600 | 85  | 22,083 | 6,032 | 3,722 | 31,922 |
| 100,601 | 81  | 21,845 | 6,015 | 3,702 | 31,643 |
| 100,602 | 86  | 21,857 | 6,054 | 3,730 | 31,727 |
| 100,603 | 76  | 21,407 | 5,943 | 3,675 | 31,101 |
| 100,604 | 78  | 21,418 | 6,002 | 3,693 | 31,191 |
| 100,605 | 77  | 21,638 | 6,065 | 3,742 | 31,522 |
| 100,606 | 79  | 21,262 | 6,034 | 3,717 | 31,092 |
| 100,607 | 83  | 21,393 | 6,049 | 3,718 | 31,243 |
| 100,608 | 83  | 21,470 | 6,067 | 3,725 | 31,345 |
| 100,609 | 80  | 21,508 | 6,114 | 3,744 | 31,446 |
| 100,610 | 80  | 21,342 | 6,098 | 3,725 | 31,245 |
| 100,611 | 80  | 21,384 | 6,131 | 3,740 | 31,335 |
| 100,612 | 79  | 21,230 | 6,062 | 3,697 | 31,068 |
| 100,613 | 83  | 21,293 | 6,127 | 3,728 | 31,231 |
| 100,614 | 79  | 21,323 | 6,105 | 3,737 | 31,244 |
| 100,615 | 87  | 21,163 | 6,046 | 3,713 | 31,009 |
| 100,616 | 91  | 21,127 | 6,046 | 3,744 | 31,008 |
| 100,617 | 89  | 20,841 | 5,982 | 3,702 | 30,614 |
| 100,618 | 86  | 20,522 | 5,930 | 3,645 | 30,183 |
| 100,619 | 90  | 20,751 | 6,065 | 3,707 | 30,613 |
| 100,620 | 90  | 20,658 | 6,061 | 3,706 | 30,515 |
| 100,621 | 91  | 20,399 | 6,030 | 3,683 | 30,203 |
| 100,622 | 91  | 20,131 | 5,999 | 3,684 | 29,905 |
| 100,623 | 92  | 20,191 | 6,068 | 3,718 | 30,069 |
| 100,624 | 93  | 20,281 | 6,118 | 3,737 | 30,229 |
| 100,625 | 97  | 20,385 | 6,122 | 3,741 | 30,345 |
| 100,626 | 102 | 20,569 | 6,156 | 3,750 | 30,577 |
| 100,627 | 104 | 20,695 | 6,200 | 3,766 | 30,765 |
| 100,628 | 104 | 20,624 | 6,188 | 3,751 | 30,667 |
| 100,629 | 104 | 20,749 | 6,226 | 3,772 | 30,851 |
| 100,630 | 106 | 20,795 | 6,239 | 3,785 | 30,925 |
| 100,631 | 106 | 20,482 | 6,173 | 3,738 | 30,499 |

|         |     |        |       |       |        |
|---------|-----|--------|-------|-------|--------|
| 100,632 | 108 | 20,546 | 6,229 | 3,741 | 30,624 |
| 100,633 | 108 | 20,313 | 6,163 | 3,735 | 30,319 |
| 100,634 | 118 | 21,220 | 6,513 | 3,920 | 31,771 |
| 100,635 | 119 | 21,346 | 6,557 | 3,973 | 31,995 |
| 100,636 | 115 | 21,216 | 6,550 | 3,962 | 31,843 |
| 100,637 | 118 | 21,545 | 6,660 | 4,029 | 32,352 |
| 100,638 | 118 | 21,765 | 6,753 | 4,085 | 32,721 |
| 100,639 | 118 | 21,649 | 6,801 | 4,097 | 32,665 |
| 100,640 | 118 | 21,407 | 6,746 | 4,081 | 32,352 |
| 100,641 | 118 | 21,423 | 6,725 | 4,080 | 32,346 |
| 100,642 | 118 | 21,525 | 6,847 | 4,159 | 32,649 |
| 100,643 | 117 | 21,502 | 6,849 | 4,176 | 32,644 |
| 100,644 | 116 | 21,496 | 6,819 | 4,186 | 32,617 |
| 100,645 | 116 | 21,228 | 6,726 | 4,132 | 32,202 |
| 100,646 | 124 | 21,287 | 6,766 | 4,144 | 32,321 |
| 100,647 | 119 | 20,823 | 6,680 | 4,039 | 31,661 |
| 100,648 | 118 | 21,112 | 6,759 | 4,088 | 32,077 |
| 100,649 | 116 | 21,118 | 6,784 | 4,102 | 32,120 |
| 100,650 | 124 | 21,451 | 6,902 | 4,150 | 32,627 |
| 100,651 | 126 | 21,546 | 6,911 | 4,140 | 32,723 |
| 100,652 | 124 | 21,588 | 6,928 | 4,181 | 32,821 |
| 100,653 | 139 | 21,689 | 6,966 | 4,205 | 32,999 |
| 100,654 | 144 | 21,799 | 7,057 | 4,198 | 33,198 |
| 100,655 | 143 | 22,049 | 7,037 | 4,223 | 33,452 |
| 100,656 | 144 | 21,585 | 6,897 | 4,128 | 32,754 |
| 100,657 | 145 | 21,928 | 6,962 | 4,181 | 33,216 |
| 100,658 | 142 | 21,871 | 6,957 | 4,167 | 33,137 |
| 100,659 | 145 | 22,170 | 7,043 | 4,231 | 33,589 |
| 100,660 | 150 | 21,975 | 7,000 | 4,185 | 33,310 |
| 100,661 | 150 | 21,975 | 6,992 | 4,191 | 33,308 |
| 100,662 | 155 | 21,922 | 6,963 | 4,182 | 33,222 |
| 100,663 | 155 | 21,873 | 6,961 | 4,169 | 33,158 |

|         |     |        |       |       |        |
|---------|-----|--------|-------|-------|--------|
| 100,664 | 153 | 21,822 | 6,939 | 4,154 | 33,068 |
| 100,665 | 151 | 21,691 | 6,932 | 4,139 | 32,913 |
| 100,666 | 144 | 21,787 | 6,982 | 4,182 | 33,095 |
| 100,667 | 143 | 21,712 | 6,952 | 4,166 | 32,973 |
| 100,668 | 139 | 21,830 | 6,901 | 4,147 | 33,017 |
| 100,669 | 138 | 21,719 | 6,844 | 4,107 | 32,808 |
| 100,670 | 137 | 21,642 | 6,794 | 4,071 | 32,644 |
| 100,671 | 137 | 21,663 | 6,789 | 4,067 | 32,656 |
| 100,672 | 140 | 21,862 | 6,823 | 4,082 | 32,907 |
| 100,673 | 138 | 21,941 | 6,773 | 4,026 | 32,878 |
| 100,674 | 139 | 21,918 | 6,771 | 4,028 | 32,856 |
| 100,675 | 139 | 21,988 | 6,760 | 4,037 | 32,924 |
| 100,676 | 137 | 22,409 | 6,855 | 4,073 | 33,474 |
| 100,677 | 137 | 22,391 | 6,836 | 4,054 | 33,418 |
| 100,678 | 137 | 22,177 | 6,762 | 4,017 | 33,093 |
| 100,679 | 137 | 22,191 | 6,766 | 4,018 | 33,112 |
| 100,680 | 136 | 22,381 | 6,819 | 4,064 | 33,400 |
| 100,681 | 132 | 22,238 | 6,732 | 4,025 | 33,127 |
| 100,682 | 134 | 22,439 | 6,747 | 4,065 | 33,385 |
| 100,683 | 136 | 22,679 | 6,771 | 4,091 | 33,677 |
| 100,684 | 131 | 22,726 | 6,763 | 4,074 | 33,694 |
| 100,685 | 131 | 22,808 | 6,757 | 4,087 | 33,783 |
| 100,686 | 135 | 22,696 | 6,741 | 4,063 | 33,635 |
| 100,687 | 136 | 22,527 | 6,685 | 4,052 | 33,400 |
| 100,688 | 149 | 22,434 | 6,688 | 4,051 | 33,322 |
| 100,689 | 151 | 22,423 | 6,652 | 4,056 | 33,282 |
| 100,690 | 154 | 22,580 | 6,657 | 4,078 | 33,469 |
| 100,691 | 160 | 22,893 | 6,696 | 4,120 | 33,869 |
| 100,692 | 161 | 22,971 | 6,667 | 4,102 | 33,901 |
| 100,693 | 170 | 23,154 | 6,682 | 4,108 | 34,114 |
| 100,694 | 170 | 23,238 | 6,684 | 4,120 | 34,212 |
| 100,695 | 185 | 23,381 | 6,741 | 4,120 | 34,427 |

|         |     |        |       |       |        |
|---------|-----|--------|-------|-------|--------|
| 100,696 | 186 | 23,370 | 6,715 | 4,112 | 34,383 |
| 100,697 | 179 | 23,463 | 6,737 | 4,125 | 34,504 |
| 100,698 | 181 | 23,557 | 6,783 | 4,165 | 34,686 |
| 100,699 | 181 | 23,737 | 6,823 | 4,179 | 34,920 |
| 100,700 | 179 | 23,812 | 6,817 | 4,175 | 34,983 |
| 100,701 | 175 | 23,890 | 6,837 | 4,182 | 35,084 |
| 100,702 | 172 | 23,730 | 6,689 | 4,110 | 34,701 |
| 100,703 | 174 | 24,158 | 6,723 | 4,108 | 35,163 |
| 100,704 | 158 | 24,499 | 6,738 | 4,147 | 35,542 |
| 100,705 | 164 | 24,475 | 6,708 | 4,152 | 35,499 |
| 100,706 | 162 | 24,398 | 6,719 | 4,133 | 35,412 |
| 100,707 | 155 | 24,287 | 6,683 | 4,122 | 35,247 |
| 100,708 | 156 | 24,493 | 6,734 | 4,135 | 35,518 |
| 100,709 | 153 | 24,764 | 6,774 | 4,166 | 35,857 |
| 100,710 | 157 | 25,016 | 6,814 | 4,160 | 36,147 |
| 100,711 | 157 | 25,143 | 6,834 | 4,162 | 36,296 |
| 100,712 | 157 | 25,268 | 6,864 | 4,157 | 36,446 |
| 100,713 | 155 | 25,156 | 6,832 | 4,146 | 36,289 |
| 100,714 | 152 | 25,285 | 6,878 | 4,178 | 36,493 |
| 100,715 | 152 | 25,386 | 6,884 | 4,166 | 36,588 |
| 100,716 | 153 | 25,269 | 6,821 | 4,116 | 36,359 |
| 100,717 | 154 | 25,394 | 6,861 | 4,133 | 36,542 |
| 100,718 | 150 | 25,168 | 6,798 | 4,075 | 36,191 |
| 100,719 | 149 | 25,100 | 6,810 | 4,066 | 36,125 |
| 100,720 | 151 | 25,145 | 6,837 | 4,101 | 36,234 |
| 100,721 | 151 | 25,140 | 6,827 | 4,103 | 36,221 |
| 100,722 | 149 | 25,288 | 6,898 | 4,112 | 36,447 |
| 100,723 | 149 | 25,272 | 6,907 | 4,132 | 36,460 |
| 100,724 | 154 | 25,305 | 6,930 | 4,180 | 36,569 |
| 100,725 | 153 | 25,271 | 6,911 | 4,159 | 36,494 |
| 100,726 | 157 | 25,332 | 6,984 | 4,202 | 36,675 |
| 100,727 | 158 | 25,237 | 6,946 | 4,203 | 36,544 |

|         |     |        |       |       |        |
|---------|-----|--------|-------|-------|--------|
| 100,728 | 153 | 25,059 | 6,890 | 4,198 | 36,300 |
| 100,729 | 152 | 24,997 | 6,877 | 4,221 | 36,247 |
| 100,730 | 152 | 25,002 | 6,883 | 4,231 | 36,268 |
| 100,731 | 154 | 25,045 | 6,884 | 4,209 | 36,292 |
| 100,732 | 158 | 24,974 | 6,865 | 4,208 | 36,205 |
| 100,733 | 158 | 25,222 | 6,916 | 4,244 | 36,540 |
| 100,734 | 158 | 24,926 | 6,835 | 4,205 | 36,124 |
| 100,735 | 162 | 24,912 | 6,801 | 4,196 | 36,071 |
| 100,736 | 160 | 24,609 | 6,744 | 4,144 | 35,657 |
| 100,737 | 153 | 24,676 | 6,712 | 4,120 | 35,661 |
| 100,738 | 137 | 24,634 | 6,682 | 4,088 | 35,541 |
| 100,739 | 135 | 24,457 | 6,621 | 4,063 | 35,276 |
| 100,740 | 143 | 24,656 | 6,650 | 4,078 | 35,527 |
| 100,741 | 139 | 24,535 | 6,589 | 4,052 | 35,315 |
| 100,742 | 135 | 24,247 | 6,529 | 3,993 | 34,904 |
| 100,743 | 134 | 24,056 | 6,485 | 3,974 | 34,649 |
| 100,744 | 122 | 23,993 | 6,501 | 3,982 | 34,598 |
| 100,745 | 124 | 24,161 | 6,513 | 4,032 | 34,830 |
| 100,746 | 120 | 24,488 | 6,582 | 4,090 | 35,280 |
| 100,747 | 124 | 24,557 | 6,608 | 4,100 | 35,389 |
| 100,748 | 128 | 24,537 | 6,612 | 4,107 | 35,384 |
| 100,749 | 130 | 24,168 | 6,493 | 4,044 | 34,835 |
| 100,750 | 132 | 24,141 | 6,492 | 4,048 | 34,813 |
| 100,751 | 131 | 23,958 | 6,497 | 4,068 | 34,654 |
| 100,752 | 128 | 23,561 | 6,410 | 4,034 | 34,133 |
| 100,753 | 128 | 23,526 | 6,438 | 4,024 | 34,116 |
| 100,754 | 126 | 23,307 | 6,397 | 4,014 | 33,844 |
| 100,755 | 117 | 22,671 | 6,243 | 3,923 | 32,954 |
| 100,756 | 117 | 22,629 | 6,246 | 3,923 | 32,915 |
| 100,757 | 118 | 22,442 | 6,191 | 3,897 | 32,648 |
| 100,758 | 113 | 22,010 | 6,073 | 3,830 | 32,026 |
| 100,759 | 119 | 21,970 | 6,103 | 3,847 | 32,039 |

|         |     |        |       |       |        |
|---------|-----|--------|-------|-------|--------|
| 100,760 | 122 | 21,729 | 6,061 | 3,845 | 31,757 |
| 100,761 | 118 | 21,457 | 6,029 | 3,836 | 31,440 |
| 100,762 | 112 | 21,107 | 5,936 | 3,803 | 30,958 |
| 100,763 | 110 | 21,065 | 5,881 | 3,796 | 30,852 |
| 100,764 | 110 | 21,251 | 5,874 | 3,805 | 31,040 |
| 100,765 | 109 | 21,345 | 5,886 | 3,809 | 31,149 |
| 100,766 | 108 | 21,201 | 5,828 | 3,783 | 30,920 |
| 100,767 | 104 | 20,860 | 5,767 | 3,751 | 30,482 |
| 100,768 | 104 | 20,948 | 5,768 | 3,764 | 30,584 |
| 100,769 | 103 | 21,085 | 5,804 | 3,795 | 30,787 |
| 100,770 | 107 | 20,921 | 5,759 | 3,776 | 30,563 |
| 100,771 | 106 | 20,674 | 5,699 | 3,736 | 30,215 |
| 100,772 | 107 | 20,820 | 5,698 | 3,744 | 30,369 |
| 100,773 | 108 | 20,877 | 5,693 | 3,747 | 30,425 |
| 100,774 | 104 | 21,135 | 5,799 | 3,790 | 30,828 |
| 100,775 | 98  | 20,903 | 5,732 | 3,733 | 30,466 |
| 100,776 | 100 | 20,475 | 5,580 | 3,644 | 29,799 |
| 100,777 | 100 | 20,490 | 5,566 | 3,652 | 29,808 |
| 100,778 | 100 | 20,219 | 5,502 | 3,616 | 29,437 |
| 100,779 | 99  | 19,943 | 5,453 | 3,555 | 29,050 |
| 100,780 | 101 | 20,653 | 5,721 | 3,690 | 30,165 |
| 100,781 | 104 | 21,123 | 5,795 | 3,757 | 30,779 |
| 100,782 | 102 | 20,935 | 5,740 | 3,710 | 30,487 |
| 100,783 | 107 | 21,115 | 5,796 | 3,759 | 30,777 |
| 100,784 | 108 | 21,045 | 5,796 | 3,751 | 30,700 |
| 100,785 | 100 | 20,649 | 5,713 | 3,712 | 30,174 |
| 100,786 | 107 | 20,570 | 5,699 | 3,706 | 30,082 |
| 100,787 | 108 | 20,643 | 5,709 | 3,725 | 30,185 |
| 100,788 | 112 | 20,402 | 5,651 | 3,705 | 29,870 |
| 100,789 | 114 | 20,363 | 5,616 | 3,699 | 29,792 |
| 100,790 | 112 | 20,389 | 5,635 | 3,691 | 29,827 |
| 100,791 | 108 | 20,411 | 5,641 | 3,685 | 29,845 |

|         |     |        |       |       |        |
|---------|-----|--------|-------|-------|--------|
| 100,792 | 113 | 20,368 | 5,619 | 3,674 | 29,774 |
| 100,793 | 113 | 20,643 | 5,678 | 3,726 | 30,160 |
| 100,794 | 114 | 20,408 | 5,587 | 3,667 | 29,776 |
| 100,795 | 115 | 20,501 | 5,597 | 3,682 | 29,895 |
| 100,796 | 114 | 20,690 | 5,683 | 3,698 | 30,185 |
| 100,797 | 109 | 20,686 | 5,689 | 3,683 | 30,167 |
| 100,798 | 103 | 20,685 | 5,698 | 3,678 | 30,164 |
| 100,799 | 106 | 20,886 | 5,741 | 3,702 | 30,435 |
| 100,800 | 103 | 20,807 | 5,687 | 3,671 | 30,268 |
| 100,801 | 107 | 21,005 | 5,706 | 3,690 | 30,508 |
| 100,802 | 107 | 20,997 | 5,707 | 3,693 | 30,504 |
| 100,803 | 112 | 21,359 | 5,755 | 3,719 | 30,945 |
| 100,804 | 116 | 21,145 | 5,700 | 3,701 | 30,662 |
| 100,805 | 115 | 20,846 | 5,673 | 3,676 | 30,310 |
| 100,806 | 114 | 20,807 | 5,712 | 3,695 | 30,328 |
| 100,807 | 114 | 20,781 | 5,691 | 3,684 | 30,270 |
| 100,808 | 114 | 21,409 | 5,893 | 3,834 | 31,250 |
| 100,809 | 112 | 21,430 | 5,886 | 3,819 | 31,247 |
| 100,810 | 111 | 21,554 | 5,859 | 3,807 | 31,331 |
| 100,811 | 112 | 21,696 | 5,860 | 3,803 | 31,471 |
| 100,812 | 112 | 21,520 | 5,806 | 3,779 | 31,217 |
| 100,813 | 116 | 21,843 | 5,872 | 3,808 | 31,639 |
| 100,814 | 119 | 21,877 | 5,899 | 3,814 | 31,709 |
| 100,815 | 118 | 21,854 | 5,906 | 3,808 | 31,686 |
| 100,816 | 122 | 21,937 | 5,945 | 3,829 | 31,833 |
| 100,817 | 126 | 22,025 | 5,927 | 3,842 | 31,920 |
| 100,818 | 128 | 22,259 | 5,975 | 3,863 | 32,225 |
| 100,819 | 130 | 22,595 | 6,025 | 3,905 | 32,655 |
| 100,820 | 128 | 22,905 | 6,100 | 3,950 | 33,083 |
| 100,821 | 129 | 22,821 | 6,100 | 3,955 | 33,005 |
| 100,822 | 127 | 22,971 | 6,217 | 4,063 | 33,378 |
| 100,823 | 130 | 22,982 | 6,239 | 4,090 | 33,441 |

|         |     |        |       |       |        |
|---------|-----|--------|-------|-------|--------|
| 100,824 | 135 | 23,199 | 6,258 | 4,109 | 33,701 |
| 100,825 | 145 | 23,339 | 6,226 | 4,116 | 33,826 |
| 100,826 | 146 | 23,244 | 6,190 | 4,084 | 33,664 |
| 100,827 | 141 | 23,470 | 6,317 | 4,165 | 34,093 |
| 100,828 | 139 | 23,557 | 6,343 | 4,167 | 34,206 |
| 100,829 | 138 | 23,410 | 6,291 | 4,149 | 33,988 |
| 100,830 | 136 | 23,295 | 6,275 | 4,149 | 33,855 |
| 100,831 | 144 | 23,441 | 6,363 | 4,222 | 34,170 |
| 100,832 | 143 | 23,294 | 6,387 | 4,223 | 34,047 |
| 100,833 | 137 | 23,089 | 6,400 | 4,181 | 33,807 |
| 100,834 | 135 | 23,024 | 6,391 | 4,173 | 33,723 |
| 100,835 | 139 | 23,150 | 6,404 | 4,173 | 33,866 |
| 100,836 | 136 | 23,208 | 6,360 | 4,130 | 33,834 |
| 100,837 | 138 | 23,327 | 6,373 | 4,131 | 33,969 |
| 100,838 | 138 | 23,368 | 6,381 | 4,144 | 34,031 |
| 100,839 | 138 | 23,542 | 6,415 | 4,151 | 34,246 |
| 100,840 | 137 | 23,452 | 6,402 | 4,141 | 34,132 |
| 100,841 | 137 | 23,687 | 6,489 | 4,189 | 34,502 |
| 100,842 | 137 | 23,801 | 6,496 | 4,181 | 34,615 |
| 100,843 | 142 | 23,972 | 6,529 | 4,189 | 34,832 |
| 100,844 | 146 | 23,790 | 6,486 | 4,149 | 34,571 |
| 100,845 | 143 | 23,657 | 6,413 | 4,120 | 34,333 |
| 100,846 | 141 | 24,200 | 6,577 | 4,222 | 35,140 |
| 100,847 | 140 | 24,056 | 6,514 | 4,184 | 34,894 |
| 100,848 | 147 | 22,765 | 6,194 | 3,995 | 33,101 |
| 100,849 | 149 | 22,937 | 6,244 | 4,047 | 33,377 |
| 100,850 | 147 | 23,109 | 6,300 | 4,064 | 33,620 |
| 100,851 | 146 | 23,077 | 6,264 | 4,056 | 33,543 |
| 100,852 | 148 | 23,674 | 6,460 | 4,174 | 34,456 |
| 100,853 | 159 | 24,021 | 6,543 | 4,228 | 34,951 |
| 100,854 | 152 | 23,982 | 6,544 | 4,204 | 34,882 |
| 100,855 | 165 | 24,223 | 6,542 | 4,191 | 35,121 |



|         |     |        |       |       |        |
|---------|-----|--------|-------|-------|--------|
| 100,856 | 173 | 24,648 | 6,594 | 4,226 | 35,641 |
| 100,857 | 174 | 24,668 | 6,603 | 4,224 | 35,669 |
| 100,858 | 181 | 25,383 | 6,762 | 4,311 | 36,637 |
| 100,859 | 182 | 25,392 | 6,763 | 4,307 | 36,644 |
| 100,860 | 184 | 25,578 | 6,839 | 4,350 | 36,951 |
| 100,861 | 183 | 25,701 | 6,905 | 4,386 | 37,175 |
| 100,862 | 180 | 25,449 | 6,867 | 4,343 | 36,839 |
| 100,863 | 180 | 25,300 | 6,826 | 4,321 | 36,627 |
| 100,864 | 178 | 25,677 | 7,008 | 4,446 | 37,309 |
| 100,865 | 186 | 25,924 | 7,108 | 4,515 | 37,733 |
| 100,866 | 194 | 25,870 | 7,142 | 4,547 | 37,753 |
| 100,867 | 197 | 25,885 | 7,128 | 4,540 | 37,750 |
| 100,868 | 207 | 25,429 | 7,068 | 4,476 | 37,180 |
| 100,869 | 207 | 25,153 | 7,004 | 4,451 | 36,815 |
| 100,870 | 209 | 25,490 | 7,112 | 4,519 | 37,330 |
| 100,871 | 207 | 25,365 | 7,043 | 4,463 | 37,078 |
| 100,872 | 212 | 25,564 | 7,051 | 4,442 | 37,269 |
| 100,873 | 212 | 25,567 | 7,024 | 4,431 | 37,234 |
| 100,874 | 210 | 25,541 | 6,983 | 4,416 | 37,150 |
| 100,875 | 205 | 25,494 | 6,984 | 4,414 | 37,097 |
| 100,876 | 200 | 25,311 | 6,922 | 4,358 | 36,791 |
| 100,877 | 200 | 25,382 | 6,908 | 4,333 | 36,823 |
| 100,878 | 205 | 25,421 | 6,921 | 4,319 | 36,866 |
| 100,879 | 208 | 25,037 | 6,828 | 4,212 | 36,285 |
| 100,880 | 209 | 25,263 | 6,833 | 4,225 | 36,530 |
| 100,881 | 203 | 25,534 | 6,894 | 4,220 | 36,851 |
| 100,882 | 201 | 25,805 | 6,954 | 4,245 | 37,205 |
| 100,883 | 201 | 25,781 | 6,876 | 4,211 | 37,069 |
| 100,884 | 197 | 25,388 | 6,732 | 4,143 | 36,460 |
| 100,885 | 197 | 25,437 | 6,728 | 4,145 | 36,507 |
| 100,886 | 192 | 25,272 | 6,715 | 4,130 | 36,309 |
| 100,887 | 187 | 25,274 | 6,780 | 4,166 | 36,407 |

|         |     |        |       |       |        |
|---------|-----|--------|-------|-------|--------|
| 100,888 | 184 | 25,061 | 6,726 | 4,126 | 36,097 |
| 100,889 | 184 | 24,930 | 6,710 | 4,144 | 35,968 |
| 100,890 | 184 | 24,904 | 6,711 | 4,143 | 35,942 |
| 100,891 | 181 | 25,020 | 6,712 | 4,171 | 36,084 |
| 100,892 | 186 | 24,804 | 6,642 | 4,147 | 35,779 |
| 100,893 | 186 | 24,413 | 6,596 | 4,109 | 35,304 |
| 100,894 | 175 | 24,249 | 6,625 | 4,137 | 35,186 |
| 100,895 | 178 | 24,140 | 6,603 | 4,115 | 35,036 |
| 100,896 | 180 | 24,159 | 6,603 | 4,101 | 35,043 |
| 100,897 | 182 | 24,198 | 6,554 | 4,110 | 35,044 |
| 100,898 | 176 | 24,203 | 6,539 | 4,101 | 35,019 |
| 100,899 | 179 | 24,257 | 6,532 | 4,078 | 35,046 |
| 100,900 | 179 | 24,346 | 6,519 | 4,055 | 35,099 |
| 100,901 | 183 | 24,494 | 6,536 | 4,065 | 35,278 |
| 100,902 | 179 | 24,403 | 6,530 | 4,059 | 35,171 |
| 100,903 | 184 | 24,826 | 6,595 | 4,129 | 35,734 |
| 100,904 | 177 | 24,412 | 6,519 | 4,085 | 35,193 |
| 100,905 | 173 | 24,105 | 6,458 | 4,057 | 34,793 |
| 100,906 | 164 | 24,204 | 6,580 | 4,147 | 35,095 |
| 100,907 | 160 | 23,995 | 6,587 | 4,178 | 34,920 |
| 100,908 | 159 | 23,882 | 6,658 | 4,235 | 34,934 |
| 100,909 | 154 | 23,676 | 6,655 | 4,238 | 34,723 |
| 100,910 | 161 | 23,654 | 6,656 | 4,241 | 34,712 |
| 100,911 | 162 | 23,822 | 6,660 | 4,236 | 34,880 |
| 100,912 | 162 | 23,748 | 6,620 | 4,207 | 34,737 |
| 100,913 | 167 | 23,821 | 6,605 | 4,195 | 34,788 |
| 100,914 | 168 | 24,075 | 6,663 | 4,209 | 35,115 |
| 100,915 | 167 | 24,189 | 6,622 | 4,204 | 35,182 |
| 100,916 | 160 | 24,259 | 6,583 | 4,167 | 35,169 |
| 100,917 | 159 | 23,958 | 6,506 | 4,095 | 34,718 |
| 100,918 | 152 | 23,658 | 6,437 | 4,051 | 34,298 |
| 100,919 | 143 | 23,591 | 6,406 | 4,035 | 34,175 |

|         |     |        |       |       |        |
|---------|-----|--------|-------|-------|--------|
| 100,920 | 141 | 23,315 | 6,332 | 3,984 | 33,772 |
| 100,921 | 148 | 23,681 | 6,430 | 4,048 | 34,307 |
| 100,922 | 145 | 23,656 | 6,429 | 4,055 | 34,285 |
| 100,923 | 145 | 23,538 | 6,392 | 4,019 | 34,094 |
| 100,924 | 149 | 23,065 | 6,259 | 3,943 | 33,416 |
| 100,925 | 149 | 23,131 | 6,281 | 3,960 | 33,521 |
| 100,926 | 145 | 23,060 | 6,278 | 3,968 | 33,451 |
| 100,927 | 143 | 22,822 | 6,275 | 3,968 | 33,208 |
| 100,928 | 143 | 22,704 | 6,286 | 4,001 | 33,134 |
| 100,929 | 139 | 22,640 | 6,257 | 3,984 | 33,020 |
| 100,930 | 134 | 22,328 | 6,143 | 3,953 | 32,558 |
| 100,931 | 134 | 22,565 | 6,187 | 3,987 | 32,873 |
| 100,932 | 134 | 22,515 | 6,143 | 3,996 | 32,788 |
| 100,933 | 137 | 22,487 | 6,129 | 4,016 | 32,769 |
| 100,934 | 136 | 22,128 | 6,085 | 3,992 | 32,341 |
| 100,935 | 144 | 22,501 | 6,146 | 4,033 | 32,824 |
| 100,936 | 145 | 22,494 | 6,152 | 4,005 | 32,796 |
| 100,937 | 149 | 22,537 | 6,138 | 3,995 | 32,819 |
| 100,938 | 151 | 22,728 | 6,169 | 4,017 | 33,065 |
| 100,939 | 149 | 22,192 | 6,041 | 3,933 | 32,315 |
| 100,940 | 152 | 22,443 | 6,046 | 3,952 | 32,593 |
| 100,941 | 155 | 22,675 | 6,085 | 3,961 | 32,876 |
| 100,942 | 152 | 22,400 | 6,029 | 3,909 | 32,490 |
| 100,943 | 148 | 22,616 | 6,092 | 3,932 | 32,788 |
| 100,944 | 151 | 22,432 | 5,967 | 3,856 | 32,406 |
| 100,945 | 150 | 22,518 | 5,958 | 3,854 | 32,480 |
| 100,946 | 146 | 22,441 | 5,933 | 3,810 | 32,330 |
| 100,947 | 147 | 22,557 | 6,002 | 3,859 | 32,565 |
| 100,948 | 144 | 22,369 | 5,981 | 3,842 | 32,336 |
| 100,949 | 135 | 21,839 | 5,918 | 3,793 | 31,685 |
| 100,950 | 138 | 21,781 | 5,914 | 3,782 | 31,615 |
| 100,951 | 135 | 21,364 | 5,825 | 3,751 | 31,075 |

|         |     |        |       |       |        |
|---------|-----|--------|-------|-------|--------|
| 100,952 | 134 | 21,404 | 5,872 | 3,783 | 31,193 |
| 100,953 | 125 | 20,499 | 5,602 | 3,616 | 29,842 |
| 100,954 | 128 | 20,634 | 5,617 | 3,612 | 29,991 |
| 100,955 | 130 | 20,835 | 5,631 | 3,620 | 30,216 |
| 100,956 | 139 | 20,679 | 5,528 | 3,563 | 29,909 |
| 100,957 | 137 | 20,662 | 5,495 | 3,544 | 29,838 |
| 100,958 | 140 | 20,546 | 5,380 | 3,459 | 29,525 |
| 100,959 | 141 | 20,563 | 5,306 | 3,407 | 29,417 |
| 100,960 | 136 | 20,417 | 5,252 | 3,367 | 29,172 |
| 100,961 | 137 | 20,464 | 5,236 | 3,353 | 29,190 |
| 100,962 | 137 | 20,401 | 5,242 | 3,356 | 29,136 |
| 100,963 | 133 | 20,086 | 5,162 | 3,330 | 28,711 |
| 100,964 | 132 | 19,903 | 5,149 | 3,321 | 28,505 |
| 100,965 | 128 | 19,575 | 5,121 | 3,297 | 28,121 |
| 100,966 | 128 | 19,633 | 5,129 | 3,307 | 28,197 |
| 100,967 | 125 | 19,503 | 5,093 | 3,282 | 28,003 |
| 100,968 | 128 | 19,498 | 5,082 | 3,276 | 27,984 |
| 100,969 | 127 | 19,187 | 5,008 | 3,239 | 27,561 |
| 100,970 | 115 | 19,300 | 5,031 | 3,246 | 27,692 |
| 100,971 | 116 | 19,492 | 5,096 | 3,289 | 27,993 |
| 100,972 | 127 | 19,237 | 5,069 | 3,245 | 27,678 |
| 100,973 | 130 | 19,026 | 5,024 | 3,205 | 27,385 |
| 100,974 | 134 | 19,868 | 5,240 | 3,328 | 28,570 |
| 100,975 | 128 | 19,776 | 5,237 | 3,320 | 28,461 |
| 100,976 | 130 | 20,081 | 5,296 | 3,341 | 28,848 |
| 100,977 | 131 | 20,471 | 5,310 | 3,366 | 29,278 |
| 100,978 | 137 | 20,692 | 5,325 | 3,372 | 29,526 |
| 100,979 | 141 | 20,742 | 5,311 | 3,374 | 29,568 |
| 100,980 | 140 | 20,417 | 5,253 | 3,354 | 29,164 |
| 100,981 | 140 | 20,765 | 5,350 | 3,423 | 29,678 |
| 100,982 | 139 | 20,894 | 5,430 | 3,474 | 29,937 |
| 100,983 | 146 | 20,752 | 5,394 | 3,450 | 29,742 |

|         |     |        |       |       |        |
|---------|-----|--------|-------|-------|--------|
| 100,984 | 144 | 20,781 | 5,389 | 3,432 | 29,746 |
| 100,985 | 148 | 21,011 | 5,448 | 3,441 | 30,048 |
| 100,986 | 146 | 20,996 | 5,461 | 3,453 | 30,056 |
| 100,987 | 145 | 21,118 | 5,462 | 3,479 | 30,204 |
| 100,988 | 144 | 21,040 | 5,428 | 3,485 | 30,097 |
| 100,989 | 150 | 21,103 | 5,450 | 3,484 | 30,187 |
| 100,990 | 150 | 21,114 | 5,448 | 3,479 | 30,191 |
| 100,991 | 153 | 21,370 | 5,531 | 3,516 | 30,570 |
| 100,992 | 153 | 21,365 | 5,558 | 3,532 | 30,608 |
| 100,993 | 149 | 21,264 | 5,517 | 3,499 | 30,429 |
| 100,994 | 150 | 21,407 | 5,541 | 3,510 | 30,608 |
| 100,995 | 149 | 21,227 | 5,536 | 3,496 | 30,408 |
| 100,996 | 149 | 21,174 | 5,565 | 3,507 | 30,395 |
| 100,997 | 152 | 21,307 | 5,628 | 3,546 | 30,633 |
| 100,998 | 153 | 21,458 | 5,616 | 3,537 | 30,764 |
| 100,999 | 158 | 21,641 | 5,652 | 3,535 | 30,986 |
| 101,000 | 158 | 21,641 | 5,618 | 3,529 | 30,946 |
| 101,001 | 155 | 21,439 | 5,512 | 3,448 | 30,554 |
| 101,002 | 157 | 21,705 | 5,549 | 3,469 | 30,880 |
| 101,003 | 153 | 21,464 | 5,499 | 3,434 | 30,550 |
| 101,004 | 154 | 21,880 | 5,582 | 3,479 | 31,095 |
| 101,005 | 155 | 22,130 | 5,644 | 3,507 | 31,436 |
| 101,006 | 153 | 22,328 | 5,705 | 3,545 | 31,731 |
| 101,007 | 143 | 22,350 | 5,736 | 3,587 | 31,816 |
| 101,008 | 150 | 22,440 | 5,706 | 3,563 | 31,859 |
| 101,009 | 149 | 22,412 | 5,665 | 3,542 | 31,768 |
| 101,010 | 150 | 22,377 | 5,653 | 3,526 | 31,706 |
| 101,011 | 149 | 22,456 | 5,659 | 3,530 | 31,794 |
| 101,012 | 147 | 22,302 | 5,625 | 3,523 | 31,597 |
| 101,013 | 152 | 22,393 | 5,678 | 3,552 | 31,775 |
| 101,014 | 156 | 22,326 | 5,628 | 3,505 | 31,615 |
| 101,015 | 157 | 22,410 | 5,591 | 3,492 | 31,650 |

|         |     |        |       |       |        |
|---------|-----|--------|-------|-------|--------|
| 101,016 | 157 | 22,502 | 5,637 | 3,512 | 31,808 |
| 101,017 | 163 | 22,348 | 5,634 | 3,486 | 31,631 |
| 101,018 | 159 | 22,084 | 5,575 | 3,456 | 31,274 |
| 101,019 | 156 | 22,023 | 5,587 | 3,451 | 31,217 |
| 101,020 | 157 | 21,993 | 5,567 | 3,435 | 31,152 |
| 101,021 | 159 | 22,232 | 5,583 | 3,466 | 31,440 |
| 101,022 | 160 | 22,209 | 5,557 | 3,437 | 31,363 |
| 101,023 | 146 | 21,932 | 5,481 | 3,380 | 30,939 |
| 101,024 | 142 | 21,625 | 5,401 | 3,334 | 30,502 |
| 101,025 | 145 | 21,753 | 5,452 | 3,352 | 30,702 |
| 101,026 | 143 | 21,380 | 5,376 | 3,308 | 30,207 |
| 101,027 | 146 | 21,437 | 5,404 | 3,312 | 30,299 |
| 101,028 | 151 | 21,239 | 5,380 | 3,300 | 30,070 |
| 101,029 | 145 | 21,050 | 5,322 | 3,273 | 29,790 |
| 101,030 | 148 | 21,138 | 5,322 | 3,245 | 29,853 |
| 101,031 | 148 | 21,167 | 5,323 | 3,242 | 29,880 |
| 101,032 | 150 | 21,214 | 5,323 | 3,232 | 29,919 |
| 101,033 | 152 | 21,416 | 5,374 | 3,258 | 30,200 |
| 101,034 | 145 | 21,030 | 5,280 | 3,199 | 29,654 |
| 101,035 | 144 | 21,008 | 5,273 | 3,214 | 29,639 |
| 101,036 | 145 | 21,144 | 5,322 | 3,261 | 29,872 |
| 101,037 | 141 | 20,906 | 5,278 | 3,204 | 29,529 |
| 101,038 | 144 | 20,787 | 5,292 | 3,200 | 29,423 |
| 101,039 | 135 | 20,398 | 5,272 | 3,165 | 28,970 |
| 101,040 | 145 | 20,515 | 5,292 | 3,188 | 29,140 |
| 101,041 | 143 | 20,435 | 5,243 | 3,160 | 28,981 |
| 101,042 | 141 | 20,385 | 5,248 | 3,156 | 28,930 |
| 101,043 | 141 | 20,640 | 5,293 | 3,191 | 29,265 |
| 101,044 | 141 | 20,335 | 5,237 | 3,155 | 28,868 |
| 101,045 | 142 | 20,319 | 5,254 | 3,151 | 28,866 |
| 101,046 | 143 | 20,232 | 5,240 | 3,136 | 28,751 |
| 101,047 | 143 | 20,162 | 5,220 | 3,130 | 28,655 |

|         |     |        |       |       |        |
|---------|-----|--------|-------|-------|--------|
| 101,048 | 139 | 19,997 | 5,223 | 3,128 | 28,487 |
| 101,049 | 137 | 19,793 | 5,236 | 3,138 | 28,304 |
| 101,050 | 135 | 19,659 | 5,206 | 3,147 | 28,147 |
| 101,051 | 133 | 19,806 | 5,285 | 3,166 | 28,390 |
| 101,052 | 135 | 19,744 | 5,312 | 3,163 | 28,354 |
| 101,053 | 133 | 19,521 | 5,300 | 3,160 | 28,114 |
| 101,054 | 132 | 19,605 | 5,387 | 3,232 | 28,356 |
| 101,055 | 132 | 20,053 | 5,563 | 3,323 | 29,071 |
| 101,056 | 128 | 20,091 | 5,600 | 3,330 | 29,149 |
| 101,057 | 130 | 20,070 | 5,585 | 3,321 | 29,106 |
| 101,058 | 132 | 20,234 | 5,651 | 3,365 | 29,382 |
| 101,059 | 125 | 20,538 | 5,751 | 3,444 | 29,858 |
| 101,060 | 120 | 20,185 | 5,739 | 3,428 | 29,472 |
| 101,061 | 118 | 20,230 | 5,812 | 3,487 | 29,647 |
| 101,062 | 114 | 20,327 | 5,894 | 3,552 | 29,887 |
| 101,063 | 111 | 20,475 | 5,909 | 3,545 | 30,040 |
| 101,064 | 106 | 20,489 | 5,892 | 3,560 | 30,047 |
| 101,065 | 102 | 20,499 | 5,868 | 3,564 | 30,033 |
| 101,066 | 102 | 20,537 | 5,926 | 3,579 | 30,144 |
| 101,067 | 104 | 20,661 | 5,954 | 3,607 | 30,326 |
| 101,068 | 97  | 20,485 | 5,884 | 3,582 | 30,048 |
| 101,069 | 99  | 20,417 | 5,857 | 3,574 | 29,947 |
| 101,070 | 96  | 20,335 | 5,834 | 3,558 | 29,823 |
| 101,071 | 96  | 20,559 | 6,015 | 3,643 | 30,313 |
| 101,072 | 97  | 20,594 | 6,072 | 3,658 | 30,421 |
| 101,073 | 99  | 20,547 | 6,063 | 3,662 | 30,371 |
| 101,074 | 95  | 20,377 | 6,015 | 3,655 | 30,142 |
| 101,075 | 94  | 20,677 | 6,076 | 3,726 | 30,573 |
| 101,076 | 94  | 20,667 | 6,087 | 3,733 | 30,581 |
| 101,077 | 89  | 20,569 | 6,073 | 3,738 | 30,469 |
| 101,078 | 93  | 20,760 | 6,143 | 3,786 | 30,782 |
| 101,079 | 90  | 20,654 | 6,187 | 3,782 | 30,713 |

|         |     |        |       |       |        |
|---------|-----|--------|-------|-------|--------|
| 101,080 | 93  | 20,637 | 6,219 | 3,816 | 30,765 |
| 101,081 | 99  | 20,618 | 6,266 | 3,848 | 30,831 |
| 101,082 | 102 | 20,673 | 6,332 | 3,858 | 30,965 |
| 101,083 | 99  | 20,673 | 6,329 | 3,869 | 30,970 |
| 101,084 | 96  | 20,668 | 6,381 | 3,899 | 31,044 |
| 101,085 | 95  | 20,537 | 6,367 | 3,883 | 30,882 |
| 101,086 | 96  | 20,784 | 6,427 | 3,933 | 31,240 |
| 101,087 | 92  | 20,859 | 6,463 | 3,952 | 31,366 |
| 101,088 | 91  | 20,827 | 6,429 | 3,964 | 31,311 |
| 101,089 | 81  | 20,427 | 6,363 | 3,939 | 30,810 |
| 101,090 | 83  | 20,643 | 6,422 | 3,947 | 31,095 |
| 101,091 | 84  | 20,821 | 6,470 | 3,961 | 31,336 |
| 101,092 | 83  | 20,702 | 6,474 | 3,985 | 31,244 |
| 101,093 | 84  | 20,561 | 6,490 | 4,002 | 31,137 |
| 101,094 | 85  | 20,426 | 6,449 | 4,000 | 30,960 |
| 101,095 | 90  | 20,365 | 6,452 | 4,015 | 30,922 |
| 101,096 | 93  | 20,585 | 6,472 | 4,038 | 31,188 |
| 101,097 | 92  | 20,808 | 6,485 | 4,051 | 31,436 |
| 101,098 | 95  | 20,949 | 6,488 | 4,051 | 31,583 |
| 101,099 | 98  | 21,118 | 6,485 | 4,044 | 31,745 |
| 101,100 | 96  | 20,912 | 6,426 | 3,997 | 31,431 |
| 101,101 | 103 | 21,130 | 6,545 | 4,047 | 31,825 |
| 101,102 | 105 | 21,002 | 6,489 | 4,021 | 31,617 |
| 101,103 | 109 | 20,866 | 6,406 | 3,986 | 31,367 |
| 101,104 | 110 | 20,737 | 6,364 | 3,937 | 31,148 |
| 101,105 | 109 | 20,730 | 6,383 | 3,955 | 31,177 |
| 101,106 | 111 | 20,731 | 6,360 | 3,966 | 31,168 |
| 101,107 | 117 | 20,627 | 6,308 | 3,978 | 31,030 |
| 101,108 | 117 | 20,435 | 6,284 | 3,958 | 30,794 |
| 101,109 | 116 | 20,347 | 6,275 | 3,935 | 30,673 |
| 101,110 | 115 | 20,154 | 6,223 | 3,904 | 30,396 |
| 101,111 | 115 | 19,959 | 6,134 | 3,836 | 30,044 |



|         |     |        |       |       |        |
|---------|-----|--------|-------|-------|--------|
| 101,112 | 116 | 19,988 | 6,128 | 3,842 | 30,074 |
| 101,113 | 123 | 19,859 | 6,116 | 3,807 | 29,905 |
| 101,114 | 125 | 19,717 | 6,081 | 3,800 | 29,723 |
| 101,115 | 126 | 19,635 | 6,066 | 3,782 | 29,609 |
| 101,116 | 125 | 19,584 | 6,101 | 3,795 | 29,605 |
| 101,117 | 126 | 19,635 | 6,083 | 3,802 | 29,646 |
| 101,118 | 125 | 19,888 | 6,112 | 3,806 | 29,931 |
| 101,119 | 127 | 20,058 | 6,124 | 3,822 | 30,131 |
| 101,120 | 121 | 19,887 | 6,098 | 3,789 | 29,895 |
| 101,121 | 125 | 20,080 | 6,120 | 3,830 | 30,155 |
| 101,122 | 124 | 20,101 | 6,070 | 3,825 | 30,120 |
| 101,123 | 126 | 20,367 | 6,120 | 3,873 | 30,486 |
| 101,124 | 122 | 20,504 | 6,157 | 3,864 | 30,647 |
| 101,125 | 126 | 20,621 | 6,190 | 3,844 | 30,781 |
| 101,126 | 128 | 20,692 | 6,177 | 3,872 | 30,869 |
| 101,127 | 128 | 20,646 | 6,133 | 3,832 | 30,739 |
| 101,128 | 128 | 20,759 | 6,143 | 3,840 | 30,870 |
| 101,129 | 125 | 21,026 | 6,177 | 3,869 | 31,197 |
| 101,130 | 122 | 21,198 | 6,139 | 3,890 | 31,349 |
| 101,131 | 117 | 21,272 | 6,115 | 3,873 | 31,377 |
| 101,132 | 111 | 21,203 | 6,088 | 3,836 | 31,238 |
| 101,133 | 116 | 21,201 | 6,078 | 3,825 | 31,220 |
| 101,134 | 117 | 20,822 | 5,999 | 3,768 | 30,706 |
| 101,135 | 117 | 20,841 | 6,006 | 3,744 | 30,708 |
| 101,136 | 117 | 21,022 | 5,982 | 3,762 | 30,883 |
| 101,137 | 123 | 21,125 | 5,980 | 3,768 | 30,996 |
| 101,138 | 127 | 21,382 | 6,041 | 3,782 | 31,332 |
| 101,139 | 129 | 21,282 | 6,001 | 3,739 | 31,151 |
| 101,140 | 129 | 21,407 | 6,015 | 3,735 | 31,286 |
| 101,141 | 123 | 21,567 | 6,012 | 3,761 | 31,463 |
| 101,142 | 125 | 21,572 | 6,016 | 3,749 | 31,462 |
| 101,143 | 125 | 21,604 | 6,005 | 3,747 | 31,481 |

|         |     |        |       |       |        |
|---------|-----|--------|-------|-------|--------|
| 101,144 | 125 | 21,582 | 6,015 | 3,745 | 31,467 |
| 101,145 | 123 | 21,868 | 6,081 | 3,788 | 31,860 |
| 101,146 | 116 | 21,771 | 6,044 | 3,775 | 31,706 |
| 101,147 | 126 | 21,890 | 6,079 | 3,800 | 31,895 |
| 101,148 | 132 | 21,728 | 6,046 | 3,779 | 31,685 |
| 101,149 | 129 | 21,664 | 6,023 | 3,773 | 31,589 |
| 101,150 | 127 | 21,874 | 6,107 | 3,833 | 31,941 |
| 101,151 | 129 | 21,876 | 6,111 | 3,817 | 31,933 |
| 101,152 | 124 | 22,117 | 6,099 | 3,830 | 32,170 |
| 101,153 | 116 | 21,903 | 6,026 | 3,775 | 31,820 |
| 101,154 | 116 | 21,985 | 6,004 | 3,769 | 31,874 |
| 101,155 | 115 | 21,893 | 5,992 | 3,760 | 31,760 |
| 101,156 | 114 | 22,233 | 6,046 | 3,809 | 32,202 |
| 101,157 | 120 | 22,245 | 5,995 | 3,774 | 32,134 |
| 101,158 | 116 | 22,434 | 5,975 | 3,756 | 32,281 |
| 101,159 | 116 | 22,242 | 5,916 | 3,699 | 31,973 |
| 101,160 | 116 | 22,294 | 5,931 | 3,712 | 32,053 |
| 101,161 | 121 | 22,146 | 5,854 | 3,647 | 31,768 |
| 101,162 | 123 | 22,218 | 5,892 | 3,680 | 31,913 |
| 101,163 | 116 | 22,221 | 5,905 | 3,700 | 31,942 |
| 101,164 | 115 | 22,393 | 5,929 | 3,710 | 32,147 |
| 101,165 | 116 | 22,414 | 5,949 | 3,728 | 32,207 |
| 101,166 | 121 | 22,806 | 5,990 | 3,776 | 32,693 |
| 101,167 | 122 | 22,662 | 5,939 | 3,719 | 32,442 |
| 101,168 | 121 | 22,689 | 5,940 | 3,745 | 32,495 |
| 101,169 | 122 | 22,634 | 5,938 | 3,764 | 32,458 |
| 101,170 | 124 | 22,524 | 5,932 | 3,761 | 32,341 |
| 101,171 | 126 | 22,780 | 5,942 | 3,782 | 32,630 |
| 101,172 | 126 | 22,618 | 5,918 | 3,733 | 32,395 |
| 101,173 | 127 | 22,619 | 5,927 | 3,743 | 32,416 |
| 101,174 | 125 | 22,718 | 5,953 | 3,778 | 32,574 |
| 101,175 | 126 | 22,990 | 5,977 | 3,878 | 32,971 |

|         |     |        |       |       |        |
|---------|-----|--------|-------|-------|--------|
| 101,176 | 125 | 22,918 | 5,975 | 3,902 | 32,920 |
| 101,177 | 122 | 22,900 | 5,991 | 3,906 | 32,919 |
| 101,178 | 131 | 22,649 | 5,946 | 3,899 | 32,625 |
| 101,179 | 131 | 22,640 | 5,964 | 3,915 | 32,650 |
| 101,180 | 134 | 22,488 | 5,993 | 3,886 | 32,501 |
| 101,181 | 137 | 22,533 | 6,046 | 3,913 | 32,629 |
| 101,182 | 139 | 22,401 | 6,057 | 3,897 | 32,494 |
| 101,183 | 136 | 22,565 | 6,065 | 3,931 | 32,697 |
| 101,184 | 132 | 22,653 | 6,063 | 3,920 | 32,768 |
| 101,185 | 131 | 22,337 | 5,970 | 3,869 | 32,307 |
| 101,186 | 131 | 22,366 | 5,982 | 3,883 | 32,362 |
| 101,187 | 134 | 22,452 | 6,066 | 3,905 | 32,557 |
| 101,188 | 129 | 22,505 | 6,075 | 3,887 | 32,596 |
| 101,189 | 119 | 22,248 | 6,014 | 3,870 | 32,251 |
| 101,190 | 129 | 22,178 | 5,973 | 3,888 | 32,168 |
| 101,191 | 129 | 22,375 | 6,015 | 3,928 | 32,447 |
| 101,192 | 130 | 22,220 | 5,989 | 3,925 | 32,264 |
| 101,193 | 130 | 22,300 | 5,982 | 3,922 | 32,334 |
| 101,194 | 132 | 22,471 | 5,975 | 3,917 | 32,495 |
| 101,195 | 132 | 22,728 | 6,026 | 3,952 | 32,838 |
| 101,196 | 132 | 22,891 | 6,077 | 3,962 | 33,062 |
| 101,197 | 127 | 22,923 | 6,077 | 3,964 | 33,091 |
| 101,198 | 118 | 22,574 | 6,019 | 3,918 | 32,629 |
| 101,199 | 115 | 22,688 | 6,095 | 3,964 | 32,862 |
| 101,200 | 114 | 22,664 | 6,081 | 3,950 | 32,809 |
| 101,201 | 112 | 22,746 | 6,069 | 3,933 | 32,860 |
| 101,202 | 115 | 22,521 | 6,015 | 3,911 | 32,562 |
| 101,203 | 117 | 22,211 | 5,988 | 3,883 | 32,199 |
| 101,204 | 117 | 22,481 | 6,064 | 3,951 | 32,613 |
| 101,205 | 117 | 22,549 | 6,078 | 3,941 | 32,685 |
| 101,206 | 119 | 22,641 | 6,114 | 3,955 | 32,829 |
| 101,207 | 121 | 22,728 | 6,133 | 3,974 | 32,956 |

|         |     |        |       |       |        |
|---------|-----|--------|-------|-------|--------|
| 101,208 | 118 | 21,999 | 5,997 | 3,872 | 31,986 |
| 101,209 | 118 | 22,123 | 6,015 | 3,895 | 32,151 |
| 101,210 | 118 | 22,443 | 6,045 | 3,941 | 32,547 |
| 101,211 | 119 | 22,827 | 6,122 | 3,992 | 33,060 |
| 101,212 | 113 | 22,696 | 6,073 | 3,961 | 32,843 |
| 101,213 | 117 | 22,987 | 6,102 | 3,968 | 33,174 |
| 101,214 | 122 | 22,840 | 6,028 | 3,940 | 32,930 |
| 101,215 | 123 | 22,841 | 6,056 | 3,960 | 32,980 |
| 101,216 | 123 | 23,073 | 6,140 | 3,997 | 33,333 |
| 101,217 | 121 | 22,997 | 6,150 | 4,015 | 33,283 |
| 101,218 | 120 | 22,719 | 6,091 | 3,966 | 32,896 |
| 101,219 | 120 | 22,677 | 6,105 | 3,974 | 32,876 |
| 101,220 | 116 | 22,450 | 6,084 | 3,951 | 32,601 |
| 101,221 | 113 | 22,282 | 6,081 | 3,938 | 32,414 |
| 101,222 | 116 | 22,027 | 6,075 | 3,925 | 32,143 |
| 101,223 | 123 | 22,059 | 6,146 | 3,974 | 32,302 |
| 101,224 | 132 | 22,154 | 6,158 | 3,954 | 32,398 |
| 101,225 | 132 | 21,951 | 6,126 | 3,923 | 32,132 |
| 101,226 | 132 | 21,875 | 6,146 | 3,868 | 32,021 |
| 101,227 | 129 | 21,867 | 6,069 | 3,819 | 31,884 |
| 101,228 | 127 | 21,580 | 5,979 | 3,721 | 31,407 |
| 101,229 | 128 | 21,722 | 5,992 | 3,728 | 31,570 |
| 101,230 | 127 | 21,750 | 5,956 | 3,704 | 31,537 |
| 101,231 | 127 | 21,723 | 5,946 | 3,717 | 31,513 |
| 101,232 | 124 | 21,786 | 5,936 | 3,717 | 31,563 |
| 101,233 | 121 | 21,742 | 5,922 | 3,700 | 31,485 |
| 101,234 | 121 | 21,770 | 5,978 | 3,696 | 31,565 |
| 101,235 | 117 | 21,487 | 5,891 | 3,673 | 31,168 |
| 101,236 | 123 | 21,822 | 5,971 | 3,719 | 31,635 |
| 101,237 | 125 | 21,830 | 5,942 | 3,713 | 31,610 |
| 101,238 | 125 | 21,823 | 5,944 | 3,693 | 31,585 |
| 101,239 | 124 | 21,330 | 5,781 | 3,586 | 30,821 |

|         |     |        |       |       |        |
|---------|-----|--------|-------|-------|--------|
| 101,240 | 129 | 21,669 | 5,841 | 3,614 | 31,253 |
| 101,241 | 120 | 22,093 | 5,906 | 3,645 | 31,764 |
| 101,242 | 120 | 22,169 | 5,925 | 3,648 | 31,862 |
| 101,243 | 120 | 22,594 | 6,058 | 3,720 | 32,492 |
| 101,244 | 119 | 22,608 | 6,075 | 3,726 | 32,528 |
| 101,245 | 118 | 22,068 | 5,957 | 3,630 | 31,773 |
| 101,246 | 119 | 22,266 | 6,003 | 3,649 | 32,037 |
| 101,247 | 117 | 22,343 | 6,012 | 3,663 | 32,135 |
| 101,248 | 119 | 22,021 | 5,861 | 3,585 | 31,586 |
| 101,249 | 119 | 22,309 | 5,881 | 3,623 | 31,932 |
| 101,250 | 119 | 22,432 | 5,896 | 3,651 | 32,098 |
| 101,251 | 118 | 22,878 | 6,042 | 3,727 | 32,765 |
| 101,252 | 115 | 22,895 | 6,029 | 3,737 | 32,776 |
| 101,253 | 112 | 22,694 | 5,981 | 3,691 | 32,478 |
| 101,254 | 112 | 22,587 | 5,915 | 3,685 | 32,299 |
| 101,255 | 110 | 23,184 | 6,079 | 3,794 | 33,167 |
| 101,256 | 111 | 23,405 | 6,144 | 3,852 | 33,512 |
| 101,257 | 112 | 23,425 | 6,164 | 3,862 | 33,563 |
| 101,258 | 111 | 23,329 | 6,155 | 3,837 | 33,432 |
| 101,259 | 110 | 23,000 | 6,071 | 3,802 | 32,983 |
| 101,260 | 110 | 23,040 | 6,076 | 3,799 | 33,025 |
| 101,261 | 112 | 22,798 | 6,068 | 3,759 | 32,737 |
| 101,262 | 114 | 22,978 | 6,095 | 3,778 | 32,965 |
| 101,263 | 106 | 22,681 | 6,059 | 3,743 | 32,589 |
| 101,264 | 110 | 22,918 | 6,122 | 3,797 | 32,947 |
| 101,265 | 107 | 22,947 | 6,115 | 3,785 | 32,954 |
| 101,266 | 107 | 23,069 | 6,124 | 3,782 | 33,082 |
| 101,267 | 104 | 23,203 | 6,133 | 3,781 | 33,221 |
| 101,268 | 103 | 22,941 | 6,068 | 3,726 | 32,838 |
| 101,269 | 105 | 23,219 | 6,099 | 3,743 | 33,166 |
| 101,270 | 105 | 23,407 | 6,060 | 3,738 | 33,310 |
| 101,271 | 106 | 23,661 | 6,091 | 3,772 | 33,630 |

|         |     |        |       |       |        |
|---------|-----|--------|-------|-------|--------|
| 101,272 | 100 | 23,944 | 6,110 | 3,800 | 33,954 |
| 101,273 | 98  | 24,100 | 6,076 | 3,798 | 34,072 |
| 101,274 | 94  | 24,107 | 6,060 | 3,767 | 34,028 |
| 101,275 | 84  | 23,712 | 5,974 | 3,684 | 33,454 |
| 101,276 | 84  | 23,821 | 5,970 | 3,705 | 33,580 |
| 101,277 | 89  | 24,035 | 6,006 | 3,719 | 33,849 |
| 101,278 | 95  | 23,978 | 6,036 | 3,724 | 33,833 |
| 101,279 | 90  | 23,765 | 5,967 | 3,707 | 33,529 |
| 101,280 | 91  | 23,751 | 5,951 | 3,698 | 33,491 |
| 101,281 | 92  | 23,992 | 6,022 | 3,726 | 33,832 |
| 101,282 | 94  | 23,936 | 5,989 | 3,684 | 33,703 |
| 101,283 | 94  | 24,049 | 6,010 | 3,696 | 33,849 |
| 101,284 | 98  | 23,692 | 5,931 | 3,659 | 33,380 |
| 101,285 | 98  | 23,937 | 5,971 | 3,682 | 33,688 |
| 101,286 | 95  | 24,242 | 5,992 | 3,727 | 34,056 |
| 101,287 | 92  | 23,887 | 5,950 | 3,686 | 33,615 |
| 101,288 | 91  | 23,837 | 5,922 | 3,691 | 33,541 |
| 101,289 | 94  | 23,796 | 5,917 | 3,706 | 33,513 |
| 101,290 | 92  | 23,732 | 5,922 | 3,724 | 33,470 |
| 101,291 | 87  | 23,613 | 5,927 | 3,733 | 33,360 |
| 101,292 | 92  | 23,542 | 5,913 | 3,732 | 33,279 |
| 101,293 | 91  | 23,441 | 5,837 | 3,703 | 33,072 |
| 101,294 | 97  | 23,266 | 5,839 | 3,709 | 32,911 |
| 101,295 | 97  | 23,249 | 5,845 | 3,709 | 32,900 |
| 101,296 | 96  | 23,437 | 5,893 | 3,744 | 33,170 |
| 101,297 | 95  | 23,073 | 5,826 | 3,717 | 32,711 |
| 101,298 | 98  | 23,091 | 5,871 | 3,752 | 32,812 |
| 101,299 | 105 | 22,998 | 5,914 | 3,739 | 32,756 |
| 101,300 | 111 | 22,941 | 5,948 | 3,727 | 32,727 |
| 101,301 | 110 | 22,792 | 5,947 | 3,704 | 32,553 |
| 101,302 | 112 | 22,581 | 5,882 | 3,675 | 32,250 |
| 101,303 | 117 | 22,306 | 5,836 | 3,648 | 31,907 |

|         |     |        |       |       |        |
|---------|-----|--------|-------|-------|--------|
| 101,304 | 119 | 22,399 | 5,816 | 3,640 | 31,974 |
| 101,305 | 124 | 22,641 | 5,874 | 3,649 | 32,288 |
| 101,306 | 127 | 22,649 | 5,883 | 3,679 | 32,338 |
| 101,307 | 126 | 22,591 | 5,881 | 3,646 | 32,244 |
| 101,308 | 126 | 22,442 | 5,785 | 3,605 | 31,958 |
| 101,309 | 126 | 22,446 | 5,763 | 3,603 | 31,938 |
| 101,310 | 123 | 22,526 | 5,824 | 3,621 | 32,094 |
| 101,311 | 121 | 22,304 | 5,788 | 3,596 | 31,809 |
| 101,312 | 122 | 22,289 | 5,815 | 3,594 | 31,820 |
| 101,313 | 124 | 22,193 | 5,788 | 3,590 | 31,695 |
| 101,314 | 124 | 21,955 | 5,723 | 3,560 | 31,362 |
| 101,315 | 120 | 22,498 | 5,857 | 3,630 | 32,105 |
| 101,316 | 123 | 22,716 | 5,905 | 3,667 | 32,411 |
| 101,317 | 123 | 22,504 | 5,871 | 3,641 | 32,139 |
| 101,318 | 130 | 22,887 | 5,976 | 3,724 | 32,717 |
| 101,319 | 137 | 22,948 | 6,004 | 3,748 | 32,837 |
| 101,320 | 135 | 22,702 | 5,969 | 3,722 | 32,528 |
| 101,321 | 135 | 22,840 | 5,999 | 3,728 | 32,702 |
| 101,322 | 136 | 23,111 | 6,079 | 3,766 | 33,092 |
| 101,323 | 136 | 22,230 | 5,868 | 3,647 | 31,881 |
| 101,324 | 140 | 22,523 | 5,936 | 3,678 | 32,277 |
| 101,325 | 141 | 22,865 | 6,011 | 3,733 | 32,750 |
| 101,326 | 141 | 22,822 | 6,021 | 3,727 | 32,711 |
| 101,327 | 141 | 23,017 | 6,104 | 3,792 | 33,054 |
| 101,328 | 139 | 23,415 | 6,219 | 3,864 | 33,637 |
| 101,329 | 133 | 23,071 | 6,143 | 3,836 | 33,183 |
| 101,330 | 140 | 23,441 | 6,246 | 3,879 | 33,706 |
| 101,331 | 138 | 23,523 | 6,310 | 3,907 | 33,878 |
| 101,332 | 137 | 23,620 | 6,333 | 3,924 | 34,014 |
| 101,333 | 133 | 23,208 | 6,220 | 3,848 | 33,409 |
| 101,334 | 134 | 23,411 | 6,276 | 3,895 | 33,716 |
| 101,335 | 138 | 23,703 | 6,343 | 3,946 | 34,130 |

|         |     |        |       |       |        |
|---------|-----|--------|-------|-------|--------|
| 101,336 | 142 | 23,839 | 6,362 | 3,978 | 34,321 |
| 101,337 | 144 | 23,905 | 6,426 | 3,990 | 34,465 |
| 101,338 | 149 | 23,536 | 6,339 | 3,927 | 33,951 |
| 101,339 | 147 | 23,492 | 6,301 | 3,911 | 33,851 |
| 101,340 | 144 | 24,000 | 6,408 | 3,979 | 34,531 |
| 101,341 | 146 | 23,998 | 6,410 | 3,985 | 34,539 |
| 101,342 | 142 | 23,995 | 6,412 | 4,000 | 34,549 |
| 101,343 | 141 | 23,789 | 6,359 | 3,992 | 34,281 |
| 101,344 | 146 | 24,061 | 6,414 | 4,021 | 34,642 |
| 101,345 | 139 | 24,292 | 6,453 | 4,054 | 34,938 |
| 101,346 | 139 | 24,087 | 6,427 | 4,036 | 34,689 |
| 101,347 | 142 | 24,281 | 6,443 | 4,065 | 34,931 |
| 101,348 | 139 | 24,322 | 6,413 | 4,044 | 34,918 |
| 101,349 | 145 | 24,662 | 6,461 | 4,076 | 35,344 |
| 101,350 | 146 | 24,782 | 6,450 | 4,081 | 35,459 |
| 101,351 | 140 | 24,597 | 6,364 | 4,058 | 35,159 |
| 101,352 | 138 | 24,773 | 6,357 | 4,036 | 35,304 |
| 101,353 | 137 | 24,738 | 6,342 | 4,041 | 35,258 |
| 101,354 | 137 | 25,148 | 6,388 | 4,091 | 35,764 |
| 101,355 | 136 | 25,048 | 6,386 | 4,068 | 35,638 |
| 101,356 | 136 | 24,691 | 6,309 | 3,973 | 35,109 |
| 101,357 | 136 | 24,635 | 6,297 | 3,983 | 35,051 |
| 101,358 | 132 | 24,594 | 6,322 | 4,013 | 35,061 |
| 101,359 | 132 | 24,503 | 6,345 | 4,010 | 34,990 |
| 101,360 | 132 | 24,879 | 6,426 | 4,059 | 35,496 |
| 101,361 | 131 | 24,666 | 6,376 | 4,031 | 35,204 |
| 101,362 | 130 | 24,971 | 6,459 | 4,096 | 35,656 |
| 101,363 | 131 | 24,950 | 6,468 | 4,079 | 35,628 |
| 101,364 | 130 | 24,583 | 6,308 | 3,979 | 35,000 |
| 101,365 | 130 | 24,551 | 6,352 | 3,988 | 35,021 |
| 101,366 | 126 | 24,491 | 6,347 | 3,974 | 34,938 |
| 101,367 | 124 | 24,347 | 6,303 | 3,948 | 34,722 |



|         |     |        |       |       |        |
|---------|-----|--------|-------|-------|--------|
| 101,368 | 131 | 24,432 | 6,345 | 3,964 | 34,872 |
| 101,369 | 124 | 24,393 | 6,325 | 3,945 | 34,787 |
| 101,370 | 121 | 24,254 | 6,322 | 3,945 | 34,642 |
| 101,371 | 125 | 24,371 | 6,338 | 3,940 | 34,774 |
| 101,372 | 127 | 24,002 | 6,268 | 3,908 | 34,305 |
| 101,373 | 127 | 23,998 | 6,268 | 3,893 | 34,286 |
| 101,374 | 126 | 23,890 | 6,299 | 3,877 | 34,192 |
| 101,375 | 123 | 23,881 | 6,321 | 3,891 | 34,216 |
| 101,376 | 131 | 24,157 | 6,393 | 3,930 | 34,611 |
| 101,377 | 128 | 23,983 | 6,316 | 3,900 | 34,327 |
| 101,378 | 131 | 24,023 | 6,334 | 3,911 | 34,399 |
| 101,379 | 131 | 23,961 | 6,313 | 3,894 | 34,299 |
| 101,380 | 132 | 24,265 | 6,404 | 3,949 | 34,750 |
| 101,381 | 128 | 24,026 | 6,318 | 3,898 | 34,370 |
| 101,382 | 135 | 23,792 | 6,223 | 3,848 | 33,998 |
| 101,383 | 135 | 23,519 | 6,168 | 3,811 | 33,633 |
| 101,384 | 136 | 23,748 | 6,258 | 3,886 | 34,028 |
| 101,385 | 139 | 23,742 | 6,253 | 3,881 | 34,015 |
| 101,386 | 136 | 23,829 | 6,278 | 3,882 | 34,125 |
| 101,387 | 135 | 23,797 | 6,230 | 3,860 | 34,022 |
| 101,388 | 131 | 23,676 | 6,191 | 3,854 | 33,852 |
| 101,389 | 139 | 23,718 | 6,224 | 3,865 | 33,946 |
| 101,390 | 141 | 23,594 | 6,243 | 3,826 | 33,804 |
| 101,391 | 141 | 23,549 | 6,242 | 3,785 | 33,717 |
| 101,392 | 147 | 23,499 | 6,248 | 3,770 | 33,664 |
| 101,393 | 151 | 23,328 | 6,215 | 3,739 | 33,433 |
| 101,394 | 156 | 23,443 | 6,250 | 3,740 | 33,589 |
| 101,395 | 151 | 23,434 | 6,242 | 3,733 | 33,560 |
| 101,396 | 156 | 23,362 | 6,202 | 3,697 | 33,417 |
| 101,397 | 156 | 23,365 | 6,223 | 3,708 | 33,452 |
| 101,398 | 153 | 23,623 | 6,299 | 3,726 | 33,801 |
| 101,399 | 154 | 23,610 | 6,329 | 3,726 | 33,819 |

|         |     |        |       |       |        |
|---------|-----|--------|-------|-------|--------|
| 101,400 | 156 | 23,449 | 6,339 | 3,715 | 33,659 |
| 101,401 | 147 | 23,026 | 6,273 | 3,681 | 33,127 |
| 101,402 | 146 | 23,149 | 6,362 | 3,748 | 33,405 |
| 101,403 | 150 | 23,107 | 6,400 | 3,793 | 33,450 |
| 101,404 | 159 | 23,200 | 6,434 | 3,784 | 33,577 |
| 101,405 | 155 | 23,251 | 6,411 | 3,791 | 33,608 |
| 101,406 | 153 | 23,221 | 6,384 | 3,788 | 33,546 |
| 101,407 | 148 | 23,045 | 6,367 | 3,791 | 33,351 |
| 101,408 | 151 | 23,266 | 6,370 | 3,788 | 33,575 |
| 101,409 | 158 | 23,257 | 6,373 | 3,781 | 33,569 |
| 101,410 | 159 | 23,188 | 6,358 | 3,744 | 33,449 |
| 101,411 | 165 | 23,432 | 6,464 | 3,804 | 33,865 |
| 101,412 | 164 | 23,521 | 6,476 | 3,797 | 33,958 |
| 101,413 | 163 | 23,300 | 6,400 | 3,774 | 33,637 |
| 101,414 | 169 | 23,529 | 6,452 | 3,804 | 33,954 |
| 101,415 | 169 | 23,352 | 6,450 | 3,801 | 33,772 |
| 101,416 | 170 | 23,396 | 6,458 | 3,814 | 33,838 |
| 101,417 | 171 | 23,379 | 6,474 | 3,809 | 33,833 |
| 101,418 | 173 | 23,194 | 6,464 | 3,808 | 33,639 |
| 101,419 | 168 | 23,119 | 6,471 | 3,811 | 33,569 |
| 101,420 | 174 | 22,965 | 6,493 | 3,827 | 33,459 |
| 101,421 | 169 | 22,809 | 6,421 | 3,763 | 33,162 |
| 101,422 | 168 | 22,450 | 6,327 | 3,709 | 32,654 |
| 101,423 | 164 | 22,259 | 6,294 | 3,665 | 32,382 |
| 101,424 | 165 | 22,488 | 6,351 | 3,724 | 32,728 |
| 101,425 | 166 | 22,535 | 6,364 | 3,738 | 32,803 |
| 101,426 | 162 | 22,328 | 6,357 | 3,727 | 32,574 |
| 101,427 | 167 | 22,504 | 6,422 | 3,760 | 32,853 |
| 101,428 | 167 | 22,517 | 6,442 | 3,782 | 32,908 |
| 101,429 | 171 | 22,337 | 6,390 | 3,741 | 32,639 |
| 101,430 | 175 | 22,432 | 6,417 | 3,755 | 32,779 |
| 101,431 | 170 | 22,568 | 6,465 | 3,792 | 32,995 |

|         |     |        |       |       |        |
|---------|-----|--------|-------|-------|--------|
| 101,432 | 157 | 22,245 | 6,415 | 3,741 | 32,558 |
| 101,433 | 157 | 22,207 | 6,411 | 3,742 | 32,517 |
| 101,434 | 157 | 22,132 | 6,396 | 3,741 | 32,426 |
| 101,435 | 157 | 22,498 | 6,479 | 3,821 | 32,955 |
| 101,436 | 158 | 22,451 | 6,483 | 3,847 | 32,939 |
| 101,437 | 154 | 22,367 | 6,483 | 3,863 | 32,867 |
| 101,438 | 153 | 22,434 | 6,573 | 3,872 | 33,032 |
| 101,439 | 144 | 22,244 | 6,491 | 3,856 | 32,735 |
| 101,440 | 144 | 22,340 | 6,495 | 3,866 | 32,845 |
| 101,441 | 136 | 21,910 | 6,365 | 3,809 | 32,220 |
| 101,442 | 136 | 21,948 | 6,399 | 3,842 | 32,325 |
| 101,443 | 134 | 22,094 | 6,450 | 3,863 | 32,541 |
| 101,444 | 134 | 22,018 | 6,464 | 3,847 | 32,463 |
| 101,445 | 131 | 22,120 | 6,483 | 3,860 | 32,594 |
| 101,446 | 133 | 21,888 | 6,429 | 3,830 | 32,280 |
| 101,447 | 128 | 21,574 | 6,364 | 3,796 | 31,862 |
| 101,448 | 134 | 22,061 | 6,465 | 3,874 | 32,534 |
| 101,449 | 133 | 21,750 | 6,410 | 3,849 | 32,142 |
| 101,450 | 135 | 21,497 | 6,332 | 3,828 | 31,792 |
| 101,451 | 130 | 21,451 | 6,283 | 3,810 | 31,674 |
| 101,452 | 139 | 21,758 | 6,378 | 3,861 | 32,136 |
| 101,453 | 138 | 21,335 | 6,218 | 3,752 | 31,443 |
| 101,454 | 139 | 21,614 | 6,254 | 3,779 | 31,786 |
| 101,455 | 130 | 21,873 | 6,309 | 3,826 | 32,138 |
| 101,456 | 126 | 21,393 | 6,254 | 3,774 | 31,547 |
| 101,457 | 127 | 21,292 | 6,237 | 3,770 | 31,426 |
| 101,458 | 127 | 21,175 | 6,184 | 3,735 | 31,221 |
| 101,459 | 124 | 21,290 | 6,222 | 3,753 | 31,389 |
| 101,460 | 119 | 20,970 | 6,129 | 3,716 | 30,934 |
| 101,461 | 119 | 20,959 | 6,149 | 3,712 | 30,939 |
| 101,462 | 114 | 20,853 | 6,131 | 3,724 | 30,822 |
| 101,463 | 115 | 20,947 | 6,196 | 3,750 | 31,008 |

|         |     |        |       |       |        |
|---------|-----|--------|-------|-------|--------|
| 101,464 | 114 | 20,968 | 6,223 | 3,758 | 31,063 |
| 101,465 | 107 | 21,322 | 6,290 | 3,813 | 31,532 |
| 101,466 | 106 | 21,262 | 6,270 | 3,813 | 31,451 |
| 101,467 | 104 | 21,274 | 6,251 | 3,813 | 31,442 |
| 101,468 | 101 | 21,399 | 6,243 | 3,822 | 31,565 |
| 101,469 | 99  | 21,451 | 6,220 | 3,816 | 31,586 |
| 101,470 | 94  | 21,258 | 6,159 | 3,776 | 31,287 |
| 101,471 | 94  | 21,431 | 6,197 | 3,781 | 31,503 |
| 101,472 | 92  | 21,405 | 6,138 | 3,780 | 31,415 |
| 101,473 | 95  | 21,354 | 6,122 | 3,766 | 31,337 |
| 101,474 | 95  | 21,296 | 6,118 | 3,764 | 31,273 |
| 101,475 | 100 | 21,272 | 6,071 | 3,719 | 31,162 |
| 101,476 | 98  | 20,980 | 5,952 | 3,669 | 30,699 |
| 101,477 | 98  | 21,021 | 5,959 | 3,664 | 30,742 |
| 101,478 | 90  | 20,602 | 5,797 | 3,577 | 30,066 |
| 101,479 | 95  | 20,698 | 5,809 | 3,581 | 30,183 |
| 101,480 | 89  | 20,680 | 5,795 | 3,570 | 30,134 |
| 101,481 | 85  | 20,848 | 5,819 | 3,604 | 30,356 |
| 101,482 | 89  | 20,589 | 5,760 | 3,550 | 29,988 |
| 101,483 | 91  | 20,551 | 5,715 | 3,538 | 29,895 |
| 101,484 | 95  | 20,576 | 5,663 | 3,514 | 29,848 |
| 101,485 | 97  | 20,679 | 5,677 | 3,526 | 29,979 |
| 101,486 | 100 | 20,640 | 5,649 | 3,491 | 29,880 |
| 101,487 | 106 | 20,591 | 5,644 | 3,454 | 29,795 |
| 101,488 | 108 | 20,442 | 5,567 | 3,389 | 29,506 |
| 101,489 | 108 | 20,090 | 5,436 | 3,362 | 28,996 |
| 101,490 | 111 | 20,344 | 5,529 | 3,386 | 29,370 |
| 101,491 | 121 | 20,134 | 5,463 | 3,325 | 29,043 |
| 101,492 | 124 | 20,146 | 5,449 | 3,333 | 29,052 |
| 101,493 | 125 | 20,220 | 5,442 | 3,326 | 29,113 |
| 101,494 | 125 | 20,159 | 5,427 | 3,303 | 29,014 |
| 101,495 | 119 | 20,042 | 5,371 | 3,270 | 28,802 |

|         |     |        |       |       |        |
|---------|-----|--------|-------|-------|--------|
| 101,496 | 120 | 20,147 | 5,409 | 3,276 | 28,952 |
| 101,497 | 117 | 20,207 | 5,446 | 3,281 | 29,051 |
| 101,498 | 119 | 20,301 | 5,489 | 3,291 | 29,200 |
| 101,499 | 121 | 20,104 | 5,407 | 3,237 | 28,869 |
| 101,500 | 121 | 20,213 | 5,409 | 3,244 | 28,987 |
| 101,501 | 115 | 20,394 | 5,414 | 3,246 | 29,169 |
| 101,502 | 110 | 20,249 | 5,314 | 3,174 | 28,847 |
| 101,503 | 110 | 20,477 | 5,364 | 3,207 | 29,158 |
| 101,504 | 107 | 20,256 | 5,337 | 3,167 | 28,867 |
| 101,505 | 106 | 20,300 | 5,363 | 3,182 | 28,951 |
| 101,506 | 106 | 20,165 | 5,349 | 3,170 | 28,790 |
| 101,507 | 104 | 20,108 | 5,330 | 3,156 | 28,698 |
| 101,508 | 104 | 19,982 | 5,300 | 3,134 | 28,520 |
| 101,509 | 105 | 20,100 | 5,363 | 3,172 | 28,740 |
| 101,510 | 105 | 20,031 | 5,381 | 3,149 | 28,666 |
| 101,511 | 105 | 19,958 | 5,338 | 3,141 | 28,542 |
| 101,512 | 104 | 19,773 | 5,272 | 3,135 | 28,284 |
| 101,513 | 104 | 19,583 | 5,268 | 3,129 | 28,084 |
| 101,514 | 115 | 19,785 | 5,315 | 3,180 | 28,395 |
| 101,515 | 121 | 19,634 | 5,282 | 3,169 | 28,206 |
| 101,516 | 123 | 19,197 | 5,203 | 3,141 | 27,664 |
| 101,517 | 121 | 19,013 | 5,133 | 3,106 | 27,373 |
| 101,518 | 128 | 19,018 | 5,141 | 3,106 | 27,393 |
| 101,519 | 140 | 19,014 | 5,184 | 3,105 | 27,443 |
| 101,520 | 140 | 19,040 | 5,176 | 3,084 | 27,440 |
| 101,521 | 141 | 19,198 | 5,158 | 3,075 | 27,572 |
| 101,522 | 144 | 19,144 | 5,137 | 3,056 | 27,481 |
| 101,523 | 145 | 19,115 | 5,144 | 3,049 | 27,453 |
| 101,524 | 143 | 19,268 | 5,188 | 3,111 | 27,710 |
| 101,525 | 140 | 19,129 | 5,149 | 3,114 | 27,532 |
| 101,526 | 135 | 19,103 | 5,163 | 3,132 | 27,533 |
| 101,527 | 140 | 19,297 | 5,174 | 3,122 | 27,733 |

|         |     |        |       |       |        |
|---------|-----|--------|-------|-------|--------|
| 101,528 | 144 | 19,315 | 5,174 | 3,117 | 27,750 |
| 101,529 | 144 | 19,112 | 5,134 | 3,111 | 27,501 |
| 101,530 | 152 | 19,539 | 5,316 | 3,175 | 28,182 |
| 101,531 | 155 | 19,221 | 5,296 | 3,158 | 27,830 |
| 101,532 | 167 | 19,389 | 5,337 | 3,181 | 28,074 |
| 101,533 | 167 | 19,302 | 5,331 | 3,165 | 27,965 |
| 101,534 | 166 | 19,256 | 5,341 | 3,171 | 27,934 |
| 101,535 | 164 | 19,341 | 5,393 | 3,218 | 28,116 |
| 101,536 | 169 | 19,410 | 5,441 | 3,237 | 28,257 |
| 101,537 | 164 | 19,464 | 5,482 | 3,235 | 28,345 |
| 101,538 | 156 | 19,198 | 5,403 | 3,187 | 27,944 |
| 101,539 | 156 | 19,233 | 5,391 | 3,190 | 27,970 |
| 101,540 | 154 | 18,817 | 5,376 | 3,154 | 27,501 |
| 101,541 | 153 | 18,873 | 5,448 | 3,172 | 27,646 |
| 101,542 | 148 | 19,046 | 5,539 | 3,218 | 27,951 |
| 101,543 | 156 | 19,213 | 5,622 | 3,240 | 28,231 |
| 101,544 | 159 | 19,372 | 5,668 | 3,282 | 28,481 |
| 101,545 | 159 | 19,197 | 5,609 | 3,266 | 28,231 |
| 101,546 | 159 | 19,335 | 5,673 | 3,324 | 28,491 |
| 101,547 | 161 | 19,302 | 5,681 | 3,344 | 28,488 |
| 101,548 | 159 | 19,317 | 5,729 | 3,383 | 28,588 |
| 101,549 | 160 | 19,414 | 5,754 | 3,376 | 28,704 |
| 101,550 | 164 | 19,243 | 5,705 | 3,330 | 28,442 |
| 101,551 | 164 | 19,029 | 5,672 | 3,309 | 28,174 |
| 101,552 | 165 | 19,698 | 5,936 | 3,413 | 29,212 |
| 101,553 | 172 | 19,674 | 5,996 | 3,441 | 29,283 |
| 101,554 | 177 | 19,607 | 5,944 | 3,414 | 29,142 |
| 101,555 | 179 | 19,871 | 5,998 | 3,452 | 29,500 |
| 101,556 | 196 | 20,123 | 6,032 | 3,475 | 29,826 |
| 101,557 | 197 | 20,307 | 6,067 | 3,501 | 30,072 |
| 101,558 | 199 | 20,441 | 6,081 | 3,499 | 30,220 |
| 101,559 | 201 | 20,684 | 6,118 | 3,511 | 30,514 |

|         |     |        |       |       |        |
|---------|-----|--------|-------|-------|--------|
| 101,560 | 203 | 21,050 | 6,186 | 3,578 | 31,017 |
| 101,561 | 205 | 20,808 | 6,153 | 3,576 | 30,742 |
| 101,562 | 206 | 20,873 | 6,165 | 3,546 | 30,790 |
| 101,563 | 211 | 21,172 | 6,215 | 3,573 | 31,171 |
| 101,564 | 208 | 21,337 | 6,268 | 3,562 | 31,375 |
| 101,565 | 199 | 21,400 | 6,270 | 3,559 | 31,428 |
| 101,566 | 193 | 20,915 | 6,145 | 3,460 | 30,713 |
| 101,567 | 193 | 21,180 | 6,188 | 3,481 | 31,042 |
| 101,568 | 187 | 21,132 | 6,194 | 3,479 | 30,992 |
| 101,569 | 190 | 21,285 | 6,234 | 3,526 | 31,235 |
| 101,570 | 180 | 20,991 | 6,164 | 3,494 | 30,829 |
| 101,571 | 185 | 21,084 | 6,195 | 3,540 | 31,004 |
| 101,572 | 190 | 21,240 | 6,228 | 3,577 | 31,235 |
| 101,573 | 186 | 21,021 | 6,176 | 3,558 | 30,941 |
| 101,574 | 189 | 20,859 | 6,130 | 3,530 | 30,708 |
| 101,575 | 185 | 20,680 | 6,066 | 3,489 | 30,420 |
| 101,576 | 201 | 21,282 | 6,237 | 3,542 | 31,262 |
| 101,577 | 202 | 21,558 | 6,301 | 3,577 | 31,638 |
| 101,578 | 200 | 21,630 | 6,316 | 3,602 | 31,748 |
| 101,579 | 186 | 21,010 | 6,103 | 3,485 | 30,784 |
| 101,580 | 187 | 21,267 | 6,146 | 3,510 | 31,110 |
| 101,581 | 182 | 21,519 | 6,189 | 3,542 | 31,432 |
| 101,582 | 182 | 21,658 | 6,172 | 3,536 | 31,548 |
| 101,583 | 176 | 22,197 | 6,319 | 3,620 | 32,312 |
| 101,584 | 169 | 22,013 | 6,254 | 3,589 | 32,025 |
| 101,585 | 172 | 21,474 | 6,102 | 3,504 | 31,252 |
| 101,586 | 174 | 21,616 | 6,128 | 3,500 | 31,418 |
| 101,587 | 174 | 21,878 | 6,156 | 3,522 | 31,730 |
| 101,588 | 178 | 22,063 | 6,168 | 3,542 | 31,951 |
| 101,589 | 175 | 21,996 | 6,122 | 3,532 | 31,825 |
| 101,590 | 175 | 22,117 | 6,089 | 3,521 | 31,902 |
| 101,591 | 175 | 22,089 | 6,071 | 3,527 | 31,862 |

|         |     |        |       |       |        |
|---------|-----|--------|-------|-------|--------|
| 101,592 | 174 | 22,257 | 6,021 | 3,529 | 31,981 |
| 101,593 | 174 | 22,240 | 6,051 | 3,554 | 32,019 |
| 101,594 | 168 | 22,123 | 6,000 | 3,505 | 31,796 |
| 101,595 | 168 | 22,191 | 6,002 | 3,508 | 31,869 |
| 101,596 | 169 | 22,293 | 5,978 | 3,497 | 31,937 |
| 101,597 | 174 | 22,342 | 5,946 | 3,465 | 31,927 |
| 101,598 | 174 | 22,514 | 5,945 | 3,461 | 32,094 |
| 101,599 | 172 | 22,552 | 5,949 | 3,467 | 32,140 |
| 101,600 | 172 | 22,646 | 5,931 | 3,477 | 32,226 |
| 101,601 | 167 | 22,497 | 5,854 | 3,446 | 31,964 |
| 101,602 | 170 | 22,695 | 5,882 | 3,457 | 32,204 |
| 101,603 | 166 | 22,610 | 5,773 | 3,438 | 31,987 |
| 101,604 | 165 | 22,597 | 5,737 | 3,425 | 31,924 |
| 101,605 | 158 | 22,268 | 5,684 | 3,388 | 31,498 |
| 101,606 | 162 | 22,372 | 5,685 | 3,410 | 31,629 |
| 101,607 | 148 | 22,318 | 5,669 | 3,407 | 31,542 |
| 101,608 | 149 | 22,306 | 5,670 | 3,385 | 31,510 |
| 101,609 | 147 | 22,273 | 5,657 | 3,399 | 31,476 |
| 101,610 | 149 | 22,228 | 5,646 | 3,379 | 31,402 |
| 101,611 | 147 | 22,202 | 5,659 | 3,341 | 31,349 |
| 101,612 | 143 | 22,296 | 5,638 | 3,318 | 31,395 |
| 101,613 | 141 | 22,417 | 5,618 | 3,331 | 31,507 |
| 101,614 | 142 | 22,450 | 5,587 | 3,330 | 31,509 |
| 101,615 | 144 | 22,568 | 5,547 | 3,350 | 31,609 |
| 101,616 | 142 | 22,621 | 5,557 | 3,354 | 31,674 |
| 101,617 | 147 | 22,803 | 5,567 | 3,344 | 31,861 |
| 101,618 | 147 | 22,985 | 5,554 | 3,344 | 32,030 |
| 101,619 | 159 | 23,111 | 5,550 | 3,345 | 32,165 |
| 101,620 | 154 | 23,047 | 5,518 | 3,325 | 32,044 |
| 101,621 | 159 | 23,321 | 5,571 | 3,352 | 32,403 |
| 101,622 | 159 | 23,417 | 5,565 | 3,351 | 32,492 |
| 101,623 | 152 | 23,264 | 5,534 | 3,319 | 32,269 |



|         |     |        |       |       |        |
|---------|-----|--------|-------|-------|--------|
| 101,624 | 150 | 23,184 | 5,526 | 3,306 | 32,166 |
| 101,625 | 142 | 23,905 | 5,701 | 3,413 | 33,161 |
| 101,626 | 136 | 23,897 | 5,688 | 3,418 | 33,139 |
| 101,627 | 138 | 23,625 | 5,584 | 3,379 | 32,726 |
| 101,628 | 141 | 23,745 | 5,616 | 3,397 | 32,899 |
| 101,629 | 141 | 23,763 | 5,634 | 3,403 | 32,941 |
| 101,630 | 139 | 23,741 | 5,674 | 3,400 | 32,954 |
| 101,631 | 143 | 23,576 | 5,627 | 3,399 | 32,745 |
| 101,632 | 150 | 23,720 | 5,659 | 3,431 | 32,960 |
| 101,633 | 157 | 23,811 | 5,667 | 3,447 | 33,082 |
| 101,634 | 160 | 23,539 | 5,584 | 3,397 | 32,680 |
| 101,635 | 160 | 23,515 | 5,559 | 3,402 | 32,636 |
| 101,636 | 153 | 23,612 | 5,576 | 3,417 | 32,758 |
| 101,637 | 153 | 23,627 | 5,575 | 3,441 | 32,796 |
| 101,638 | 148 | 23,634 | 5,579 | 3,447 | 32,808 |
| 101,639 | 148 | 23,699 | 5,597 | 3,456 | 32,900 |
| 101,640 | 148 | 23,940 | 5,671 | 3,483 | 33,242 |
| 101,641 | 145 | 23,811 | 5,630 | 3,458 | 33,044 |
| 101,642 | 146 | 24,127 | 5,699 | 3,492 | 33,464 |
| 101,643 | 150 | 24,045 | 5,674 | 3,451 | 33,320 |
| 101,644 | 150 | 24,089 | 5,674 | 3,458 | 33,371 |
| 101,645 | 145 | 24,125 | 5,680 | 3,484 | 33,434 |
| 101,646 | 139 | 24,011 | 5,638 | 3,451 | 33,239 |
| 101,647 | 142 | 23,816 | 5,586 | 3,424 | 32,968 |
| 101,648 | 135 | 23,438 | 5,507 | 3,400 | 32,480 |
| 101,649 | 135 | 23,471 | 5,491 | 3,407 | 32,504 |
| 101,650 | 139 | 23,449 | 5,483 | 3,406 | 32,477 |
| 101,651 | 132 | 23,053 | 5,380 | 3,367 | 31,932 |
| 101,652 | 135 | 23,140 | 5,392 | 3,408 | 32,075 |
| 101,653 | 131 | 22,909 | 5,388 | 3,425 | 31,853 |
| 101,654 | 138 | 22,645 | 5,342 | 3,372 | 31,497 |
| 101,655 | 138 | 22,479 | 5,293 | 3,355 | 31,265 |

|         |     |        |       |       |        |
|---------|-----|--------|-------|-------|--------|
| 101,656 | 141 | 22,659 | 5,316 | 3,368 | 31,484 |
| 101,657 | 135 | 22,728 | 5,323 | 3,367 | 31,553 |
| 101,658 | 133 | 22,332 | 5,231 | 3,327 | 31,023 |
| 101,659 | 131 | 22,295 | 5,249 | 3,324 | 30,999 |
| 101,660 | 130 | 21,920 | 5,173 | 3,288 | 30,511 |
| 101,661 | 129 | 21,773 | 5,147 | 3,314 | 30,363 |
| 101,662 | 128 | 21,603 | 5,094 | 3,304 | 30,129 |
| 101,663 | 125 | 21,311 | 5,038 | 3,301 | 29,775 |
| 101,664 | 127 | 21,368 | 5,070 | 3,285 | 29,850 |
| 101,665 | 129 | 21,228 | 5,043 | 3,278 | 29,678 |
| 101,666 | 132 | 20,946 | 5,022 | 3,231 | 29,331 |
| 101,667 | 132 | 20,723 | 4,970 | 3,214 | 29,039 |
| 101,668 | 127 | 20,657 | 5,019 | 3,257 | 29,060 |
| 101,669 | 128 | 20,768 | 5,061 | 3,277 | 29,234 |
| 101,670 | 116 | 20,293 | 4,966 | 3,194 | 28,569 |
| 101,671 | 116 | 20,285 | 4,946 | 3,193 | 28,540 |
| 101,672 | 109 | 20,079 | 4,897 | 3,164 | 28,249 |
| 101,673 | 113 | 20,196 | 4,943 | 3,177 | 28,429 |
| 101,674 | 116 | 20,349 | 4,990 | 3,220 | 28,675 |
| 101,675 | 118 | 20,385 | 5,004 | 3,220 | 28,727 |
| 101,676 | 118 | 19,774 | 4,892 | 3,157 | 27,941 |
| 101,677 | 119 | 20,026 | 4,980 | 3,192 | 28,317 |
| 101,678 | 119 | 19,959 | 4,978 | 3,207 | 28,263 |
| 101,679 | 116 | 19,703 | 4,901 | 3,166 | 27,886 |
| 101,680 | 118 | 19,700 | 4,882 | 3,167 | 27,867 |
| 101,681 | 119 | 19,864 | 4,917 | 3,198 | 28,098 |
| 101,682 | 113 | 19,668 | 4,871 | 3,170 | 27,822 |
| 101,683 | 113 | 20,008 | 4,923 | 3,186 | 28,230 |
| 101,684 | 109 | 19,934 | 4,889 | 3,176 | 28,108 |
| 101,685 | 104 | 19,721 | 4,850 | 3,139 | 27,814 |
| 101,686 | 107 | 19,768 | 4,829 | 3,103 | 27,807 |
| 101,687 | 108 | 19,763 | 4,813 | 3,095 | 27,779 |

|         |     |        |       |       |        |
|---------|-----|--------|-------|-------|--------|
| 101,688 | 111 | 19,933 | 4,848 | 3,108 | 28,000 |
| 101,689 | 114 | 19,732 | 4,825 | 3,095 | 27,766 |
| 101,690 | 116 | 19,398 | 4,752 | 3,073 | 27,339 |
| 101,691 | 119 | 19,480 | 4,766 | 3,097 | 27,462 |
| 101,692 | 125 | 19,366 | 4,727 | 3,102 | 27,320 |
| 101,693 | 128 | 19,529 | 4,752 | 3,132 | 27,541 |
| 101,694 | 131 | 19,447 | 4,671 | 3,105 | 27,354 |
| 101,695 | 132 | 19,514 | 4,690 | 3,109 | 27,445 |
| 101,696 | 132 | 19,562 | 4,670 | 3,104 | 27,468 |
| 101,697 | 132 | 19,597 | 4,698 | 3,114 | 27,541 |
| 101,698 | 140 | 19,662 | 4,714 | 3,121 | 27,637 |
| 101,699 | 142 | 19,752 | 4,705 | 3,119 | 27,718 |
| 101,700 | 140 | 19,569 | 4,680 | 3,090 | 27,479 |
| 101,701 | 142 | 19,976 | 4,783 | 3,140 | 28,041 |
| 101,702 | 149 | 20,272 | 4,887 | 3,213 | 28,521 |
| 101,703 | 147 | 20,242 | 4,853 | 3,173 | 28,415 |
| 101,704 | 150 | 20,615 | 4,902 | 3,206 | 28,873 |
| 101,705 | 141 | 20,621 | 4,908 | 3,209 | 28,879 |
| 101,706 | 141 | 20,487 | 4,865 | 3,184 | 28,677 |
| 101,707 | 144 | 20,508 | 4,870 | 3,181 | 28,703 |
| 101,708 | 144 | 20,318 | 4,860 | 3,175 | 28,497 |
| 101,709 | 145 | 20,482 | 4,891 | 3,187 | 28,705 |
| 101,710 | 146 | 20,430 | 4,873 | 3,169 | 28,618 |
| 101,711 | 152 | 21,119 | 4,973 | 3,232 | 29,476 |
| 101,712 | 154 | 21,242 | 5,002 | 3,231 | 29,629 |
| 101,713 | 154 | 21,311 | 5,016 | 3,231 | 29,712 |
| 101,714 | 155 | 21,733 | 5,099 | 3,295 | 30,282 |
| 101,715 | 154 | 21,766 | 5,088 | 3,320 | 30,328 |
| 101,716 | 150 | 21,571 | 5,041 | 3,282 | 30,044 |
| 101,717 | 153 | 21,469 | 4,962 | 3,229 | 29,813 |
| 101,718 | 153 | 21,696 | 5,004 | 3,240 | 30,093 |
| 101,719 | 152 | 22,072 | 5,063 | 3,293 | 30,580 |

|         |     |        |       |       |        |
|---------|-----|--------|-------|-------|--------|
| 101,720 | 156 | 22,034 | 5,046 | 3,275 | 30,511 |
| 101,721 | 156 | 22,158 | 5,049 | 3,291 | 30,654 |
| 101,722 | 164 | 22,468 | 5,111 | 3,326 | 31,069 |
| 101,723 | 168 | 22,510 | 5,123 | 3,315 | 31,116 |
| 101,724 | 167 | 22,456 | 5,098 | 3,277 | 30,998 |
| 101,725 | 167 | 22,781 | 5,155 | 3,295 | 31,398 |
| 101,726 | 161 | 22,638 | 5,074 | 3,275 | 31,148 |
| 101,727 | 164 | 22,567 | 5,021 | 3,223 | 30,975 |
| 101,728 | 167 | 22,832 | 5,027 | 3,255 | 31,281 |
| 101,729 | 164 | 22,819 | 5,026 | 3,247 | 31,256 |
| 101,730 | 164 | 23,091 | 5,041 | 3,236 | 31,532 |
| 101,731 | 163 | 23,057 | 5,040 | 3,230 | 31,490 |
| 101,732 | 165 | 23,330 | 5,066 | 3,256 | 31,817 |
| 101,733 | 163 | 22,998 | 5,009 | 3,205 | 31,375 |
| 101,734 | 170 | 23,155 | 5,036 | 3,212 | 31,573 |
| 101,735 | 168 | 23,075 | 5,033 | 3,200 | 31,476 |
| 101,736 | 168 | 23,037 | 5,019 | 3,194 | 31,418 |
| 101,737 | 167 | 23,071 | 5,037 | 3,206 | 31,481 |
| 101,738 | 165 | 23,208 | 5,061 | 3,219 | 31,653 |
| 101,739 | 162 | 23,358 | 5,038 | 3,210 | 31,768 |
| 101,740 | 162 | 23,369 | 5,047 | 3,223 | 31,801 |
| 101,741 | 159 | 23,497 | 5,066 | 3,211 | 31,933 |
| 101,742 | 156 | 23,564 | 5,078 | 3,207 | 32,005 |
| 101,743 | 155 | 23,564 | 5,104 | 3,203 | 32,026 |
| 101,744 | 154 | 23,536 | 5,106 | 3,209 | 32,005 |
| 101,745 | 147 | 23,495 | 5,154 | 3,238 | 32,034 |
| 101,746 | 156 | 23,738 | 5,227 | 3,277 | 32,398 |
| 101,747 | 156 | 23,557 | 5,195 | 3,221 | 32,129 |
| 101,748 | 161 | 23,760 | 5,234 | 3,241 | 32,396 |
| 101,749 | 155 | 23,693 | 5,226 | 3,231 | 32,305 |
| 101,750 | 155 | 23,752 | 5,279 | 3,267 | 32,453 |
| 101,751 | 158 | 23,764 | 5,326 | 3,297 | 32,545 |

|         |     |        |       |       |        |
|---------|-----|--------|-------|-------|--------|
| 101,752 | 156 | 23,812 | 5,296 | 3,272 | 32,536 |
| 101,753 | 163 | 23,853 | 5,298 | 3,268 | 32,582 |
| 101,754 | 169 | 23,696 | 5,280 | 3,235 | 32,380 |
| 101,755 | 168 | 23,500 | 5,254 | 3,200 | 32,122 |
| 101,756 | 167 | 23,719 | 5,302 | 3,210 | 32,398 |
| 101,757 | 165 | 23,673 | 5,326 | 3,203 | 32,367 |
| 101,758 | 166 | 23,427 | 5,243 | 3,166 | 32,002 |
| 101,759 | 167 | 23,557 | 5,280 | 3,171 | 32,175 |
| 101,760 | 164 | 23,489 | 5,303 | 3,178 | 32,134 |
| 101,761 | 163 | 23,454 | 5,296 | 3,180 | 32,093 |
| 101,762 | 162 | 23,488 | 5,309 | 3,172 | 32,131 |
| 101,763 | 165 | 23,496 | 5,274 | 3,164 | 32,099 |
| 101,764 | 167 | 23,409 | 5,244 | 3,140 | 31,960 |
| 101,765 | 170 | 23,353 | 5,243 | 3,131 | 31,897 |
| 101,766 | 167 | 23,129 | 5,212 | 3,090 | 31,598 |
| 101,767 | 167 | 23,055 | 5,201 | 3,089 | 31,512 |
| 101,768 | 164 | 22,779 | 5,178 | 3,064 | 31,185 |
| 101,769 | 172 | 23,202 | 5,283 | 3,132 | 31,789 |
| 101,770 | 173 | 23,349 | 5,324 | 3,136 | 31,982 |
| 101,771 | 170 | 23,101 | 5,305 | 3,113 | 31,689 |
| 101,772 | 162 | 22,919 | 5,265 | 3,097 | 31,443 |
| 101,773 | 163 | 23,164 | 5,292 | 3,131 | 31,750 |
| 101,774 | 158 | 22,868 | 5,229 | 3,115 | 31,370 |
| 101,775 | 163 | 23,029 | 5,261 | 3,142 | 31,595 |
| 101,776 | 162 | 22,484 | 5,155 | 3,084 | 30,885 |
| 101,777 | 164 | 22,466 | 5,167 | 3,071 | 30,868 |
| 101,778 | 169 | 22,175 | 5,103 | 3,050 | 30,497 |
| 101,779 | 169 | 22,099 | 5,107 | 3,047 | 30,422 |
| 101,780 | 179 | 21,714 | 5,057 | 3,025 | 29,975 |
| 101,781 | 176 | 21,398 | 5,011 | 2,994 | 29,579 |
| 101,782 | 176 | 22,018 | 5,135 | 3,070 | 30,399 |
| 101,783 | 171 | 21,701 | 5,103 | 3,066 | 30,041 |

|         |     |        |       |       |        |
|---------|-----|--------|-------|-------|--------|
| 101,784 | 171 | 21,651 | 5,084 | 3,071 | 29,977 |
| 101,785 | 165 | 21,517 | 5,112 | 3,091 | 29,885 |
| 101,786 | 162 | 21,435 | 5,154 | 3,114 | 29,865 |
| 101,787 | 160 | 21,392 | 5,156 | 3,149 | 29,857 |
| 101,788 | 171 | 21,717 | 5,248 | 3,185 | 30,321 |
| 101,789 | 174 | 21,468 | 5,224 | 3,161 | 30,027 |
| 101,790 | 171 | 21,302 | 5,199 | 3,146 | 29,818 |
| 101,791 | 173 | 21,237 | 5,269 | 3,177 | 29,856 |
| 101,792 | 179 | 21,255 | 5,260 | 3,184 | 29,878 |
| 101,793 | 178 | 21,308 | 5,237 | 3,177 | 29,900 |
| 101,794 | 178 | 21,382 | 5,262 | 3,197 | 30,019 |
| 101,795 | 181 | 21,045 | 5,168 | 3,140 | 29,534 |
| 101,796 | 181 | 21,345 | 5,214 | 3,172 | 29,912 |
| 101,797 | 172 | 21,678 | 5,249 | 3,223 | 30,322 |
| 101,798 | 174 | 21,644 | 5,268 | 3,253 | 30,339 |
| 101,799 | 170 | 21,464 | 5,230 | 3,221 | 30,085 |
| 101,800 | 171 | 21,263 | 5,172 | 3,185 | 29,791 |
| 101,801 | 171 | 20,902 | 5,054 | 3,093 | 29,220 |
| 101,802 | 171 | 21,025 | 5,055 | 3,095 | 29,346 |
| 101,803 | 173 | 20,715 | 5,007 | 3,053 | 28,948 |
| 101,804 | 166 | 20,432 | 4,944 | 3,028 | 28,570 |
| 101,805 | 170 | 21,418 | 5,217 | 3,229 | 30,034 |
| 101,806 | 178 | 21,338 | 5,153 | 3,225 | 29,894 |
| 101,807 | 183 | 21,409 | 5,158 | 3,249 | 29,999 |
| 101,808 | 182 | 21,381 | 5,158 | 3,248 | 29,969 |
| 101,809 | 188 | 21,486 | 5,182 | 3,262 | 30,118 |
| 101,810 | 189 | 21,487 | 5,191 | 3,265 | 30,132 |
| 101,811 | 193 | 21,724 | 5,246 | 3,315 | 30,478 |
| 101,812 | 193 | 21,531 | 5,233 | 3,291 | 30,248 |
| 101,813 | 197 | 21,908 | 5,319 | 3,355 | 30,779 |
| 101,814 | 196 | 21,939 | 5,356 | 3,374 | 30,865 |
| 101,815 | 194 | 22,093 | 5,385 | 3,387 | 31,059 |

|         |     |        |       |       |        |
|---------|-----|--------|-------|-------|--------|
| 101,816 | 193 | 22,124 | 5,365 | 3,395 | 31,077 |
| 101,817 | 194 | 22,407 | 5,427 | 3,439 | 31,467 |
| 101,818 | 191 | 22,492 | 5,421 | 3,455 | 31,559 |
| 101,819 | 189 | 22,288 | 5,385 | 3,435 | 31,297 |
| 101,820 | 194 | 22,492 | 5,448 | 3,495 | 31,629 |
| 101,821 | 193 | 22,268 | 5,389 | 3,477 | 31,327 |
| 101,822 | 197 | 22,554 | 5,433 | 3,520 | 31,704 |
| 101,823 | 196 | 22,718 | 5,499 | 3,526 | 31,939 |
| 101,824 | 196 | 22,555 | 5,490 | 3,526 | 31,767 |
| 101,825 | 196 | 22,591 | 5,486 | 3,537 | 31,810 |
| 101,826 | 190 | 22,619 | 5,543 | 3,557 | 31,909 |
| 101,827 | 189 | 22,364 | 5,503 | 3,528 | 31,584 |
| 101,828 | 190 | 22,733 | 5,568 | 3,572 | 32,063 |
| 101,829 | 178 | 22,818 | 5,587 | 3,592 | 32,175 |
| 101,830 | 178 | 22,821 | 5,590 | 3,591 | 32,180 |
| 101,831 | 166 | 22,872 | 5,628 | 3,581 | 32,247 |
| 101,832 | 165 | 22,721 | 5,554 | 3,580 | 32,020 |
| 101,833 | 167 | 23,088 | 5,612 | 3,621 | 32,488 |
| 101,834 | 168 | 22,926 | 5,564 | 3,570 | 32,228 |
| 101,835 | 168 | 22,974 | 5,523 | 3,543 | 32,208 |
| 101,836 | 175 | 22,914 | 5,465 | 3,495 | 32,049 |
| 101,837 | 179 | 22,982 | 5,483 | 3,500 | 32,144 |
| 101,838 | 178 | 23,153 | 5,535 | 3,542 | 32,408 |
| 101,839 | 173 | 23,077 | 5,499 | 3,532 | 32,281 |
| 101,840 | 164 | 22,830 | 5,423 | 3,494 | 31,911 |
| 101,841 | 168 | 22,913 | 5,422 | 3,475 | 31,978 |
| 101,842 | 166 | 22,937 | 5,411 | 3,473 | 31,987 |
| 101,843 | 162 | 22,850 | 5,404 | 3,467 | 31,883 |
| 101,844 | 161 | 22,778 | 5,381 | 3,455 | 31,775 |
| 101,845 | 161 | 22,831 | 5,394 | 3,431 | 31,817 |
| 101,846 | 158 | 22,751 | 5,373 | 3,421 | 31,703 |
| 101,847 | 160 | 22,392 | 5,313 | 3,378 | 31,243 |

|         |     |        |       |       |        |
|---------|-----|--------|-------|-------|--------|
| 101,848 | 161 | 22,293 | 5,292 | 3,366 | 31,112 |
| 101,849 | 161 | 22,413 | 5,307 | 3,366 | 31,247 |
| 101,850 | 153 | 22,194 | 5,247 | 3,374 | 30,968 |
| 101,851 | 144 | 21,923 | 5,159 | 3,343 | 30,569 |
| 101,852 | 134 | 21,384 | 4,997 | 3,221 | 29,736 |
| 101,853 | 134 | 21,647 | 5,017 | 3,236 | 30,034 |
| 101,854 | 135 | 21,847 | 5,049 | 3,264 | 30,295 |
| 101,855 | 135 | 21,831 | 5,029 | 3,267 | 30,262 |
| 101,856 | 127 | 22,025 | 5,081 | 3,286 | 30,519 |
| 101,857 | 127 | 22,064 | 5,086 | 3,308 | 30,585 |
| 101,858 | 127 | 22,181 | 5,118 | 3,297 | 30,723 |
| 101,859 | 126 | 22,195 | 5,084 | 3,283 | 30,688 |
| 101,860 | 117 | 22,098 | 5,036 | 3,247 | 30,498 |
| 101,861 | 117 | 22,106 | 5,032 | 3,241 | 30,496 |
| 101,862 | 113 | 22,342 | 5,041 | 3,257 | 30,753 |
| 101,863 | 109 | 22,093 | 4,961 | 3,210 | 30,373 |
| 101,864 | 112 | 21,868 | 4,880 | 3,154 | 30,014 |
| 101,865 | 115 | 22,008 | 4,899 | 3,171 | 30,193 |
| 101,866 | 113 | 21,987 | 4,896 | 3,170 | 30,166 |
| 101,867 | 116 | 22,000 | 4,923 | 3,182 | 30,221 |
| 101,868 | 116 | 21,971 | 4,921 | 3,178 | 30,186 |
| 101,869 | 118 | 21,858 | 4,945 | 3,190 | 30,111 |
| 101,870 | 116 | 22,093 | 4,941 | 3,194 | 30,344 |
| 101,871 | 121 | 22,170 | 4,939 | 3,186 | 30,416 |
| 101,872 | 122 | 22,152 | 4,926 | 3,188 | 30,388 |
| 101,873 | 120 | 21,936 | 4,888 | 3,174 | 30,118 |
| 101,874 | 127 | 22,080 | 4,920 | 3,202 | 30,329 |
| 101,875 | 130 | 22,053 | 4,891 | 3,175 | 30,249 |
| 101,876 | 131 | 22,239 | 4,931 | 3,184 | 30,485 |
| 101,877 | 140 | 22,186 | 4,916 | 3,185 | 30,427 |
| 101,878 | 146 | 22,237 | 4,926 | 3,194 | 30,503 |
| 101,879 | 146 | 22,067 | 4,901 | 3,133 | 30,247 |



|         |     |        |       |       |        |
|---------|-----|--------|-------|-------|--------|
| 101,880 | 147 | 21,978 | 4,879 | 3,123 | 30,127 |
| 101,881 | 147 | 22,032 | 4,884 | 3,111 | 30,174 |
| 101,882 | 153 | 22,182 | 4,928 | 3,142 | 30,405 |
| 101,883 | 152 | 21,922 | 4,884 | 3,096 | 30,054 |
| 101,884 | 153 | 22,174 | 4,911 | 3,129 | 30,367 |
| 101,885 | 152 | 22,054 | 4,884 | 3,118 | 30,208 |
| 101,886 | 152 | 22,153 | 4,874 | 3,128 | 30,307 |
| 101,887 | 146 | 22,401 | 4,918 | 3,148 | 30,613 |
| 101,888 | 142 | 22,166 | 4,867 | 3,104 | 30,279 |
| 101,889 | 143 | 22,489 | 4,900 | 3,122 | 30,654 |
| 101,890 | 141 | 22,190 | 4,837 | 3,099 | 30,267 |
| 101,891 | 145 | 22,364 | 4,876 | 3,114 | 30,499 |
| 101,892 | 149 | 22,446 | 4,878 | 3,123 | 30,596 |
| 101,893 | 149 | 22,358 | 4,855 | 3,111 | 30,473 |
| 101,894 | 154 | 22,466 | 4,898 | 3,126 | 30,644 |
| 101,895 | 155 | 22,471 | 4,900 | 3,137 | 30,663 |
| 101,896 | 155 | 22,489 | 4,894 | 3,150 | 30,688 |
| 101,897 | 153 | 22,494 | 4,907 | 3,158 | 30,712 |
| 101,898 | 152 | 22,381 | 4,861 | 3,117 | 30,511 |
| 101,899 | 156 | 22,679 | 4,916 | 3,160 | 30,911 |
| 101,900 | 156 | 22,698 | 4,921 | 3,176 | 30,951 |
| 101,901 | 159 | 22,585 | 4,897 | 3,134 | 30,775 |
| 101,902 | 161 | 22,782 | 4,976 | 3,154 | 31,073 |
| 101,903 | 162 | 22,781 | 5,000 | 3,162 | 31,105 |
| 101,904 | 159 | 22,513 | 5,074 | 3,189 | 30,935 |
| 101,905 | 157 | 22,734 | 5,117 | 3,224 | 31,232 |
| 101,906 | 159 | 22,332 | 5,069 | 3,159 | 30,719 |
| 101,907 | 160 | 22,542 | 5,102 | 3,197 | 31,001 |
| 101,908 | 156 | 22,463 | 5,103 | 3,194 | 30,916 |
| 101,909 | 163 | 22,582 | 5,184 | 3,250 | 31,179 |
| 101,910 | 165 | 22,503 | 5,201 | 3,252 | 31,121 |
| 101,911 | 170 | 22,419 | 5,223 | 3,260 | 31,072 |

|         |     |        |       |       |        |
|---------|-----|--------|-------|-------|--------|
| 101,912 | 171 | 22,451 | 5,228 | 3,262 | 31,112 |
| 101,913 | 181 | 22,412 | 5,223 | 3,262 | 31,078 |
| 101,914 | 178 | 22,257 | 5,186 | 3,249 | 30,870 |
| 101,915 | 174 | 22,140 | 5,153 | 3,235 | 30,702 |
| 101,916 | 170 | 22,237 | 5,176 | 3,256 | 30,839 |
| 101,917 | 169 | 21,986 | 5,106 | 3,212 | 30,473 |
| 101,918 | 168 | 21,979 | 5,086 | 3,203 | 30,436 |
| 101,919 | 166 | 21,759 | 5,035 | 3,168 | 30,128 |
| 101,920 | 165 | 21,596 | 5,014 | 3,128 | 29,903 |
| 101,921 | 174 | 22,468 | 5,202 | 3,209 | 31,053 |
| 101,922 | 184 | 22,332 | 5,175 | 3,189 | 30,880 |
| 101,923 | 185 | 22,442 | 5,182 | 3,188 | 30,997 |
| 101,924 | 186 | 22,595 | 5,220 | 3,197 | 31,198 |
| 101,925 | 184 | 22,597 | 5,198 | 3,203 | 31,182 |
| 101,926 | 184 | 22,601 | 5,195 | 3,189 | 31,169 |
| 101,927 | 181 | 22,530 | 5,159 | 3,180 | 31,050 |
| 101,928 | 183 | 22,417 | 5,145 | 3,183 | 30,928 |
| 101,929 | 185 | 22,737 | 5,178 | 3,214 | 31,314 |
| 101,930 | 187 | 22,627 | 5,163 | 3,213 | 31,190 |
| 101,931 | 190 | 22,556 | 5,165 | 3,203 | 31,114 |
| 101,932 | 190 | 22,371 | 5,134 | 3,215 | 30,910 |
| 101,933 | 188 | 22,471 | 5,235 | 3,257 | 31,151 |
| 101,934 | 187 | 22,411 | 5,266 | 3,257 | 31,121 |
| 101,935 | 187 | 22,399 | 5,309 | 3,271 | 31,166 |
| 101,936 | 189 | 22,111 | 5,239 | 3,229 | 30,768 |
| 101,937 | 189 | 21,911 | 5,232 | 3,221 | 30,553 |
| 101,938 | 189 | 22,160 | 5,350 | 3,280 | 30,979 |
| 101,939 | 185 | 22,336 | 5,398 | 3,286 | 31,205 |
| 101,940 | 187 | 22,301 | 5,418 | 3,287 | 31,193 |
| 101,941 | 194 | 22,636 | 5,500 | 3,315 | 31,645 |
| 101,942 | 187 | 22,451 | 5,490 | 3,316 | 31,444 |
| 101,943 | 184 | 22,660 | 5,553 | 3,356 | 31,753 |

|         |     |        |       |       |        |
|---------|-----|--------|-------|-------|--------|
| 101,944 | 183 | 22,687 | 5,577 | 3,364 | 31,811 |
| 101,945 | 179 | 22,461 | 5,548 | 3,342 | 31,530 |
| 101,946 | 181 | 22,484 | 5,598 | 3,388 | 31,651 |
| 101,947 | 180 | 22,203 | 5,588 | 3,350 | 31,321 |
| 101,948 | 178 | 22,180 | 5,587 | 3,357 | 31,302 |
| 101,949 | 184 | 22,430 | 5,638 | 3,395 | 31,647 |
| 101,950 | 180 | 22,368 | 5,651 | 3,397 | 31,596 |
| 101,951 | 174 | 22,268 | 5,623 | 3,385 | 31,450 |
| 101,952 | 171 | 22,300 | 5,587 | 3,389 | 31,447 |
| 101,953 | 170 | 22,169 | 5,568 | 3,382 | 31,289 |
| 101,954 | 181 | 22,334 | 5,567 | 3,381 | 31,463 |
| 101,955 | 183 | 22,471 | 5,557 | 3,381 | 31,592 |
| 101,956 | 182 | 22,480 | 5,544 | 3,381 | 31,587 |
| 101,957 | 186 | 22,902 | 5,630 | 3,414 | 32,132 |
| 101,958 | 178 | 22,206 | 5,402 | 3,297 | 31,083 |
| 101,959 | 178 | 22,471 | 5,481 | 3,341 | 31,471 |
| 101,960 | 186 | 22,772 | 5,541 | 3,392 | 31,891 |
| 101,961 | 187 | 22,752 | 5,551 | 3,391 | 31,881 |
| 101,962 | 186 | 23,261 | 5,668 | 3,467 | 32,582 |
| 101,963 | 185 | 22,997 | 5,622 | 3,448 | 32,252 |
| 101,964 | 178 | 23,069 | 5,654 | 3,460 | 32,361 |
| 101,965 | 177 | 23,002 | 5,670 | 3,469 | 32,318 |
| 101,966 | 186 | 22,809 | 5,658 | 3,476 | 32,129 |
| 101,967 | 186 | 22,817 | 5,663 | 3,470 | 32,136 |
| 101,968 | 186 | 22,792 | 5,685 | 3,493 | 32,156 |
| 101,969 | 185 | 22,826 | 5,715 | 3,520 | 32,246 |
| 101,970 | 174 | 22,810 | 5,716 | 3,554 | 32,254 |
| 101,971 | 182 | 22,657 | 5,694 | 3,543 | 32,076 |
| 101,972 | 180 | 22,768 | 5,709 | 3,571 | 32,228 |
| 101,973 | 166 | 22,821 | 5,679 | 3,559 | 32,225 |
| 101,974 | 175 | 22,967 | 5,745 | 3,604 | 32,491 |
| 101,975 | 171 | 22,753 | 5,737 | 3,602 | 32,263 |

|         |     |        |       |       |        |
|---------|-----|--------|-------|-------|--------|
| 101,976 | 167 | 22,547 | 5,738 | 3,566 | 32,018 |
| 101,977 | 164 | 22,451 | 5,757 | 3,602 | 31,974 |
| 101,978 | 158 | 22,089 | 5,697 | 3,589 | 31,533 |
| 101,979 | 157 | 22,583 | 5,885 | 3,704 | 32,329 |
| 101,980 | 154 | 22,590 | 5,934 | 3,730 | 32,408 |
| 101,981 | 153 | 22,618 | 5,950 | 3,739 | 32,460 |
| 101,982 | 151 | 22,804 | 5,961 | 3,778 | 32,694 |
| 101,983 | 152 | 22,896 | 5,940 | 3,749 | 32,737 |
| 101,984 | 150 | 22,732 | 5,899 | 3,725 | 32,506 |
| 101,985 | 152 | 22,804 | 5,917 | 3,768 | 32,641 |
| 101,986 | 157 | 22,648 | 5,854 | 3,732 | 32,391 |
| 101,987 | 156 | 22,738 | 5,843 | 3,754 | 32,491 |
| 101,988 | 157 | 22,699 | 5,850 | 3,758 | 32,464 |
| 101,989 | 163 | 22,663 | 5,856 | 3,773 | 32,455 |
| 101,990 | 161 | 22,594 | 5,798 | 3,770 | 32,323 |
| 101,991 | 164 | 22,816 | 5,848 | 3,794 | 32,622 |
| 101,992 | 159 | 22,768 | 5,838 | 3,803 | 32,568 |
| 101,993 | 158 | 22,776 | 5,825 | 3,795 | 32,554 |
| 101,994 | 163 | 22,825 | 5,844 | 3,814 | 32,646 |
| 101,995 | 164 | 22,736 | 5,791 | 3,784 | 32,475 |
| 101,996 | 169 | 22,873 | 5,824 | 3,771 | 32,637 |
| 101,997 | 170 | 22,855 | 5,822 | 3,753 | 32,600 |
| 101,998 | 170 | 22,936 | 5,814 | 3,769 | 32,689 |
| 101,999 | 170 | 22,899 | 5,793 | 3,775 | 32,637 |
| 102,000 | 173 | 22,911 | 5,795 | 3,777 | 32,656 |
| 102,001 | 173 | 22,625 | 5,733 | 3,737 | 32,268 |
| 102,002 | 173 | 22,793 | 5,761 | 3,768 | 32,495 |
| 102,003 | 173 | 22,243 | 5,603 | 3,666 | 31,685 |
| 102,004 | 173 | 22,342 | 5,624 | 3,697 | 31,836 |
| 102,005 | 166 | 22,642 | 5,702 | 3,738 | 32,248 |
| 102,006 | 165 | 22,852 | 5,780 | 3,790 | 32,587 |
| 102,007 | 163 | 22,718 | 5,801 | 3,807 | 32,489 |

|         |     |        |       |       |        |
|---------|-----|--------|-------|-------|--------|
| 102,008 | 164 | 22,585 | 5,796 | 3,829 | 32,374 |
| 102,009 | 162 | 22,301 | 5,765 | 3,818 | 32,046 |
| 102,010 | 162 | 22,342 | 5,774 | 3,849 | 32,127 |
| 102,011 | 154 | 22,282 | 5,780 | 3,847 | 32,063 |
| 102,012 | 156 | 22,206 | 5,826 | 3,870 | 32,058 |
| 102,013 | 153 | 22,531 | 5,936 | 3,930 | 32,550 |
| 102,014 | 147 | 22,324 | 5,890 | 3,911 | 32,272 |
| 102,015 | 148 | 22,164 | 5,846 | 3,856 | 32,014 |
| 102,016 | 148 | 22,330 | 5,870 | 3,881 | 32,229 |
| 102,017 | 140 | 22,557 | 5,934 | 3,947 | 32,578 |
| 102,018 | 141 | 22,685 | 5,967 | 3,977 | 32,770 |
| 102,019 | 139 | 22,855 | 5,972 | 3,998 | 32,964 |
| 102,020 | 142 | 22,675 | 5,919 | 3,959 | 32,695 |
| 102,021 | 144 | 22,767 | 5,936 | 3,977 | 32,824 |
| 102,022 | 133 | 22,531 | 5,905 | 3,966 | 32,535 |
| 102,023 | 137 | 22,907 | 6,037 | 4,049 | 33,130 |
| 102,024 | 132 | 22,719 | 6,050 | 4,039 | 32,940 |
| 102,025 | 133 | 22,804 | 6,051 | 4,033 | 33,021 |
| 102,026 | 133 | 22,766 | 6,065 | 4,065 | 33,029 |
| 102,027 | 130 | 22,853 | 6,042 | 4,040 | 33,065 |
| 102,028 | 134 | 23,052 | 6,106 | 4,084 | 33,376 |
| 102,029 | 136 | 23,240 | 6,128 | 4,099 | 33,603 |
| 102,030 | 132 | 23,164 | 6,062 | 4,052 | 33,410 |
| 102,031 | 132 | 22,804 | 5,970 | 4,010 | 32,916 |
| 102,032 | 135 | 23,031 | 6,101 | 4,054 | 33,321 |
| 102,033 | 132 | 22,701 | 6,045 | 4,006 | 32,884 |
| 102,034 | 139 | 22,768 | 6,040 | 4,004 | 32,951 |
| 102,035 | 141 | 22,792 | 6,031 | 3,987 | 32,951 |
| 102,036 | 141 | 22,794 | 6,050 | 3,999 | 32,984 |
| 102,037 | 132 | 22,596 | 6,075 | 3,997 | 32,800 |
| 102,038 | 131 | 22,692 | 6,121 | 4,021 | 32,965 |
| 102,039 | 129 | 22,822 | 6,151 | 4,052 | 33,154 |

|         |     |        |       |       |        |
|---------|-----|--------|-------|-------|--------|
| 102,040 | 133 | 22,631 | 6,137 | 4,043 | 32,944 |
| 102,041 | 134 | 22,440 | 6,129 | 4,066 | 32,769 |
| 102,042 | 144 | 22,889 | 6,269 | 4,191 | 33,493 |
| 102,043 | 142 | 22,989 | 6,309 | 4,251 | 33,691 |
| 102,044 | 142 | 23,205 | 6,371 | 4,295 | 34,013 |
| 102,045 | 137 | 23,645 | 6,452 | 4,350 | 34,584 |
| 102,046 | 133 | 23,872 | 6,529 | 4,391 | 34,925 |
| 102,047 | 125 | 23,706 | 6,483 | 4,387 | 34,701 |
| 102,048 | 127 | 24,259 | 6,609 | 4,463 | 35,458 |
| 102,049 | 124 | 24,712 | 6,719 | 4,546 | 36,101 |
| 102,050 | 124 | 24,993 | 6,821 | 4,596 | 36,534 |
| 102,051 | 123 | 24,889 | 6,833 | 4,600 | 36,445 |
| 102,052 | 122 | 24,713 | 6,841 | 4,599 | 36,275 |
| 102,053 | 132 | 25,635 | 7,143 | 4,777 | 37,687 |
| 102,054 | 143 | 25,871 | 7,240 | 4,832 | 38,086 |
| 102,055 | 144 | 26,335 | 7,304 | 4,882 | 38,665 |
| 102,056 | 145 | 26,475 | 7,373 | 4,923 | 38,916 |
| 102,057 | 144 | 26,551 | 7,335 | 4,919 | 38,949 |
| 102,058 | 143 | 26,543 | 7,322 | 4,907 | 38,915 |
| 102,059 | 146 | 26,897 | 7,379 | 4,953 | 39,375 |
| 102,060 | 150 | 27,049 | 7,357 | 4,949 | 39,505 |
| 102,061 | 150 | 27,057 | 7,349 | 4,946 | 39,502 |
| 102,062 | 155 | 27,374 | 7,379 | 4,955 | 39,863 |
| 102,063 | 162 | 27,522 | 7,378 | 4,956 | 40,018 |
| 102,064 | 176 | 27,212 | 7,285 | 4,893 | 39,566 |
| 102,065 | 176 | 27,315 | 7,320 | 4,890 | 39,701 |
| 102,066 | 175 | 27,414 | 7,351 | 4,892 | 39,832 |
| 102,067 | 178 | 27,498 | 7,353 | 4,866 | 39,895 |
| 102,068 | 178 | 27,424 | 7,368 | 4,864 | 39,834 |
| 102,069 | 183 | 27,422 | 7,398 | 4,856 | 39,859 |
| 102,070 | 187 | 27,456 | 7,410 | 4,850 | 39,903 |
| 102,071 | 186 | 27,206 | 7,344 | 4,812 | 39,548 |

|         |     |        |       |       |        |
|---------|-----|--------|-------|-------|--------|
| 102,072 | 183 | 26,995 | 7,284 | 4,773 | 39,235 |
| 102,073 | 188 | 27,290 | 7,347 | 4,807 | 39,632 |
| 102,074 | 189 | 27,105 | 7,325 | 4,786 | 39,405 |
| 102,075 | 184 | 26,824 | 7,223 | 4,742 | 38,973 |
| 102,076 | 180 | 26,358 | 7,071 | 4,643 | 38,252 |
| 102,077 | 182 | 26,400 | 7,083 | 4,634 | 38,299 |
| 102,078 | 187 | 26,176 | 7,038 | 4,606 | 38,007 |
| 102,079 | 185 | 26,069 | 7,008 | 4,571 | 37,833 |
| 102,080 | 187 | 27,141 | 7,286 | 4,760 | 39,374 |
| 102,081 | 190 | 26,523 | 7,051 | 4,604 | 38,368 |
| 102,082 | 193 | 26,631 | 7,084 | 4,625 | 38,533 |
| 102,083 | 191 | 26,838 | 7,110 | 4,653 | 38,792 |
| 102,084 | 191 | 26,707 | 7,071 | 4,655 | 38,624 |
| 102,085 | 186 | 26,920 | 7,141 | 4,697 | 38,944 |
| 102,086 | 182 | 27,015 | 7,211 | 4,728 | 39,136 |
| 102,087 | 181 | 26,981 | 7,140 | 4,675 | 38,977 |
| 102,088 | 181 | 26,954 | 7,138 | 4,681 | 38,954 |
| 102,089 | 180 | 26,791 | 7,110 | 4,670 | 38,751 |
| 102,090 | 176 | 26,646 | 7,092 | 4,661 | 38,575 |
| 102,091 | 174 | 26,706 | 7,132 | 4,662 | 38,674 |
| 102,092 | 165 | 26,584 | 7,083 | 4,588 | 38,420 |
| 102,093 | 166 | 26,621 | 7,047 | 4,536 | 38,370 |
| 102,094 | 169 | 26,517 | 6,998 | 4,481 | 38,165 |
| 102,095 | 169 | 25,946 | 6,866 | 4,398 | 37,379 |
| 102,096 | 167 | 25,314 | 6,742 | 4,320 | 36,543 |
| 102,097 | 167 | 24,872 | 6,641 | 4,268 | 35,948 |
| 102,098 | 172 | 25,003 | 6,668 | 4,264 | 36,107 |
| 102,099 | 172 | 24,835 | 6,633 | 4,245 | 35,885 |
| 102,100 | 170 | 24,308 | 6,538 | 4,162 | 35,178 |
| 102,101 | 171 | 24,091 | 6,475 | 4,109 | 34,846 |
| 102,102 | 168 | 23,889 | 6,415 | 4,067 | 34,539 |
| 102,103 | 172 | 23,987 | 6,357 | 4,016 | 34,532 |

|         |     |        |       |       |        |
|---------|-----|--------|-------|-------|--------|
| 102,104 | 168 | 23,894 | 6,260 | 3,975 | 34,297 |
| 102,105 | 162 | 23,706 | 6,202 | 3,924 | 33,994 |
| 102,106 | 159 | 23,195 | 6,133 | 3,817 | 33,304 |
| 102,107 | 167 | 22,836 | 6,043 | 3,753 | 32,799 |
| 102,108 | 167 | 22,716 | 6,046 | 3,703 | 32,632 |
| 102,109 | 171 | 22,898 | 6,121 | 3,744 | 32,934 |
| 102,110 | 174 | 22,679 | 6,092 | 3,708 | 32,653 |
| 102,111 | 170 | 22,255 | 6,018 | 3,641 | 32,084 |
| 102,112 | 170 | 22,403 | 6,048 | 3,651 | 32,272 |
| 102,113 | 174 | 22,348 | 6,044 | 3,638 | 32,204 |
| 102,114 | 167 | 22,018 | 6,001 | 3,589 | 31,775 |
| 102,115 | 152 | 22,128 | 6,062 | 3,616 | 31,958 |
| 102,116 | 154 | 21,961 | 6,021 | 3,637 | 31,773 |
| 102,117 | 152 | 21,839 | 5,974 | 3,610 | 31,575 |
| 102,118 | 154 | 21,926 | 5,957 | 3,620 | 31,657 |
| 102,119 | 149 | 21,921 | 5,932 | 3,617 | 31,619 |
| 102,120 | 143 | 21,748 | 5,926 | 3,607 | 31,424 |
| 102,121 | 140 | 21,666 | 5,919 | 3,587 | 31,312 |
| 102,122 | 141 | 21,928 | 5,972 | 3,632 | 31,673 |
| 102,123 | 140 | 21,914 | 5,991 | 3,630 | 31,675 |
| 102,124 | 136 | 21,773 | 5,937 | 3,586 | 31,432 |
| 102,125 | 136 | 21,835 | 5,975 | 3,639 | 31,585 |
| 102,126 | 142 | 22,066 | 6,027 | 3,676 | 31,911 |
| 102,127 | 145 | 22,003 | 6,040 | 3,666 | 31,854 |
| 102,128 | 145 | 21,973 | 6,046 | 3,679 | 31,843 |
| 102,129 | 139 | 21,924 | 6,043 | 3,661 | 31,767 |
| 102,130 | 141 | 21,688 | 5,989 | 3,632 | 31,450 |
| 102,131 | 137 | 21,732 | 6,008 | 3,657 | 31,534 |
| 102,132 | 134 | 21,909 | 6,030 | 3,675 | 31,748 |
| 102,133 | 139 | 22,074 | 6,058 | 3,676 | 31,947 |
| 102,134 | 137 | 21,903 | 6,022 | 3,650 | 31,712 |
| 102,135 | 146 | 22,367 | 6,116 | 3,713 | 32,342 |



|         |     |        |       |       |        |
|---------|-----|--------|-------|-------|--------|
| 102,136 | 148 | 22,470 | 6,119 | 3,742 | 32,479 |
| 102,137 | 150 | 22,595 | 6,147 | 3,780 | 32,672 |
| 102,138 | 150 | 22,743 | 6,177 | 3,801 | 32,871 |
| 102,139 | 153 | 22,977 | 6,214 | 3,814 | 33,158 |
| 102,140 | 158 | 23,130 | 6,255 | 3,835 | 33,378 |
| 102,141 | 158 | 23,326 | 6,289 | 3,824 | 33,597 |
| 102,142 | 171 | 23,421 | 6,288 | 3,835 | 33,715 |
| 102,143 | 168 | 23,090 | 6,255 | 3,824 | 33,337 |
| 102,144 | 173 | 23,300 | 6,354 | 3,904 | 33,731 |
| 102,145 | 174 | 23,159 | 6,293 | 3,869 | 33,495 |
| 102,146 | 179 | 23,209 | 6,296 | 3,846 | 33,530 |
| 102,147 | 186 | 23,256 | 6,284 | 3,850 | 33,576 |
| 102,148 | 187 | 23,227 | 6,296 | 3,855 | 33,565 |
| 102,149 | 182 | 23,225 | 6,310 | 3,875 | 33,592 |
| 102,150 | 183 | 23,255 | 6,348 | 3,910 | 33,696 |
| 102,151 | 183 | 23,349 | 6,357 | 3,953 | 33,842 |
| 102,152 | 189 | 23,242 | 6,351 | 3,952 | 33,734 |
| 102,153 | 188 | 22,934 | 6,298 | 3,926 | 33,346 |
| 102,154 | 188 | 23,144 | 6,366 | 3,998 | 33,696 |
| 102,155 | 184 | 22,926 | 6,323 | 3,985 | 33,418 |
| 102,156 | 182 | 22,737 | 6,304 | 3,982 | 33,205 |
| 102,157 | 186 | 22,766 | 6,289 | 3,997 | 33,238 |
| 102,158 | 177 | 22,614 | 6,265 | 3,988 | 33,044 |
| 102,159 | 167 | 21,884 | 6,069 | 3,872 | 31,992 |
| 102,160 | 167 | 21,943 | 6,075 | 3,867 | 32,052 |
| 102,161 | 162 | 21,988 | 6,066 | 3,865 | 32,081 |
| 102,162 | 159 | 21,821 | 5,993 | 3,823 | 31,796 |
| 102,163 | 160 | 21,529 | 5,913 | 3,773 | 31,375 |
| 102,164 | 153 | 21,105 | 5,824 | 3,722 | 30,804 |
| 102,165 | 157 | 21,054 | 5,766 | 3,710 | 30,687 |
| 102,166 | 156 | 20,830 | 5,671 | 3,673 | 30,330 |
| 102,167 | 154 | 20,704 | 5,612 | 3,617 | 30,087 |

|         |     |        |       |       |        |
|---------|-----|--------|-------|-------|--------|
| 102,168 | 156 | 20,460 | 5,580 | 3,591 | 29,787 |
| 102,169 | 153 | 19,997 | 5,470 | 3,517 | 29,137 |
| 102,170 | 153 | 19,783 | 5,434 | 3,502 | 28,872 |
| 102,171 | 153 | 20,096 | 5,518 | 3,561 | 29,328 |
| 102,172 | 156 | 20,187 | 5,552 | 3,562 | 29,457 |
| 102,173 | 156 | 20,241 | 5,550 | 3,563 | 29,510 |
| 102,174 | 154 | 20,331 | 5,566 | 3,577 | 29,628 |
| 102,175 | 158 | 20,623 | 5,631 | 3,583 | 29,995 |
| 102,176 | 154 | 20,363 | 5,592 | 3,559 | 29,668 |
| 102,177 | 154 | 20,433 | 5,595 | 3,541 | 29,723 |
| 102,178 | 147 | 20,448 | 5,592 | 3,552 | 29,739 |
| 102,179 | 149 | 20,317 | 5,595 | 3,556 | 29,617 |
| 102,180 | 149 | 20,252 | 5,579 | 3,543 | 29,523 |
| 102,181 | 150 | 20,552 | 5,629 | 3,599 | 29,930 |
| 102,182 | 151 | 20,612 | 5,650 | 3,611 | 30,024 |
| 102,183 | 153 | 20,326 | 5,570 | 3,572 | 29,621 |
| 102,184 | 144 | 20,012 | 5,491 | 3,543 | 29,190 |
| 102,185 | 149 | 20,287 | 5,602 | 3,614 | 29,652 |
| 102,186 | 151 | 20,595 | 5,682 | 3,669 | 30,097 |
| 102,187 | 146 | 20,252 | 5,587 | 3,608 | 29,593 |
| 102,188 | 145 | 19,753 | 5,449 | 3,498 | 28,845 |
| 102,189 | 145 | 19,777 | 5,432 | 3,492 | 28,846 |
| 102,190 | 142 | 19,477 | 5,377 | 3,445 | 28,441 |
| 102,191 | 137 | 19,328 | 5,316 | 3,425 | 28,206 |
| 102,192 | 139 | 20,165 | 5,514 | 3,579 | 29,397 |
| 102,193 | 139 | 19,171 | 5,154 | 3,356 | 27,820 |
| 102,194 | 145 | 19,436 | 5,186 | 3,380 | 28,147 |
| 102,195 | 146 | 19,661 | 5,241 | 3,412 | 28,460 |
| 102,196 | 146 | 19,553 | 5,221 | 3,397 | 28,317 |
| 102,197 | 145 | 19,770 | 5,279 | 3,456 | 28,650 |
| 102,198 | 146 | 20,103 | 5,373 | 3,507 | 29,129 |
| 102,199 | 148 | 20,189 | 5,363 | 3,477 | 29,177 |

|         |     |        |       |       |        |
|---------|-----|--------|-------|-------|--------|
| 102,200 | 148 | 20,104 | 5,349 | 3,461 | 29,062 |
| 102,201 | 155 | 20,056 | 5,340 | 3,461 | 29,012 |
| 102,202 | 153 | 19,963 | 5,307 | 3,430 | 28,853 |
| 102,203 | 148 | 20,023 | 5,302 | 3,435 | 28,908 |
| 102,204 | 145 | 20,183 | 5,332 | 3,437 | 29,097 |
| 102,205 | 146 | 20,417 | 5,366 | 3,444 | 29,373 |
| 102,206 | 150 | 20,604 | 5,373 | 3,452 | 29,579 |
| 102,207 | 146 | 20,377 | 5,321 | 3,430 | 29,274 |
| 102,208 | 147 | 20,714 | 5,391 | 3,475 | 29,727 |
| 102,209 | 151 | 20,839 | 5,435 | 3,487 | 29,912 |
| 102,210 | 154 | 21,115 | 5,509 | 3,560 | 30,338 |
| 102,211 | 160 | 21,428 | 5,582 | 3,597 | 30,767 |
| 102,212 | 158 | 21,295 | 5,579 | 3,586 | 30,618 |
| 102,213 | 158 | 21,362 | 5,634 | 3,629 | 30,783 |
| 102,214 | 157 | 21,436 | 5,678 | 3,659 | 30,930 |
| 102,215 | 156 | 21,747 | 5,742 | 3,721 | 31,366 |
| 102,216 | 155 | 21,815 | 5,788 | 3,767 | 31,525 |
| 102,217 | 155 | 21,987 | 5,849 | 3,792 | 31,783 |
| 102,218 | 152 | 22,164 | 5,877 | 3,815 | 32,008 |
| 102,219 | 152 | 22,347 | 5,941 | 3,855 | 32,295 |
| 102,220 | 158 | 22,513 | 6,020 | 3,883 | 32,574 |
| 102,221 | 159 | 22,744 | 6,072 | 3,893 | 32,868 |
| 102,222 | 165 | 22,694 | 6,075 | 3,896 | 32,830 |
| 102,223 | 164 | 22,566 | 6,057 | 3,892 | 32,679 |
| 102,224 | 162 | 22,412 | 6,018 | 3,893 | 32,485 |
| 102,225 | 165 | 22,476 | 6,049 | 3,900 | 32,590 |
| 102,226 | 160 | 22,351 | 6,010 | 3,895 | 32,416 |
| 102,227 | 167 | 22,449 | 6,004 | 3,893 | 32,513 |
| 102,228 | 169 | 22,322 | 5,979 | 3,869 | 32,339 |
| 102,229 | 169 | 22,465 | 5,955 | 3,862 | 32,451 |
| 102,230 | 164 | 22,440 | 5,944 | 3,862 | 32,410 |
| 102,231 | 164 | 22,572 | 6,031 | 3,892 | 32,659 |

|         |     |        |       |       |        |
|---------|-----|--------|-------|-------|--------|
| 102,232 | 162 | 22,817 | 6,115 | 3,941 | 33,035 |
| 102,233 | 158 | 22,402 | 6,014 | 3,837 | 32,411 |
| 102,234 | 156 | 22,607 | 6,071 | 3,854 | 32,688 |
| 102,235 | 154 | 22,570 | 6,041 | 3,853 | 32,618 |
| 102,236 | 160 | 22,471 | 6,039 | 3,850 | 32,520 |
| 102,237 | 161 | 22,436 | 6,034 | 3,840 | 32,471 |
| 102,238 | 165 | 22,438 | 6,018 | 3,844 | 32,465 |
| 102,239 | 167 | 22,458 | 6,032 | 3,826 | 32,483 |
| 102,240 | 171 | 22,508 | 6,015 | 3,832 | 32,526 |
| 102,241 | 169 | 22,523 | 6,015 | 3,823 | 32,530 |
| 102,242 | 171 | 22,621 | 6,093 | 3,841 | 32,726 |
| 102,243 | 172 | 22,555 | 6,089 | 3,833 | 32,649 |
| 102,244 | 156 | 22,615 | 6,132 | 3,877 | 32,780 |
| 102,245 | 151 | 22,639 | 6,174 | 3,900 | 32,864 |
| 102,246 | 155 | 22,469 | 6,182 | 3,875 | 32,681 |
| 102,247 | 153 | 22,455 | 6,167 | 3,845 | 32,620 |
| 102,248 | 149 | 23,088 | 6,302 | 3,932 | 33,471 |
| 102,249 | 149 | 23,068 | 6,267 | 3,928 | 33,412 |
| 102,250 | 149 | 23,314 | 6,295 | 3,943 | 33,701 |
| 102,251 | 145 | 23,543 | 6,348 | 3,970 | 34,006 |
| 102,252 | 146 | 23,646 | 6,346 | 3,945 | 34,083 |
| 102,253 | 146 | 23,650 | 6,349 | 3,945 | 34,090 |
| 102,254 | 147 | 23,738 | 6,383 | 3,945 | 34,213 |
| 102,255 | 154 | 23,457 | 6,309 | 3,895 | 33,815 |
| 102,256 | 153 | 23,108 | 6,262 | 3,866 | 33,389 |
| 102,257 | 158 | 23,695 | 6,406 | 3,943 | 34,202 |
| 102,258 | 156 | 23,584 | 6,395 | 3,946 | 34,081 |
| 102,259 | 158 | 23,746 | 6,431 | 3,968 | 34,303 |
| 102,260 | 155 | 23,657 | 6,406 | 3,983 | 34,201 |
| 102,261 | 155 | 23,997 | 6,482 | 4,002 | 34,636 |
| 102,262 | 150 | 23,805 | 6,467 | 4,005 | 34,427 |
| 102,263 | 152 | 23,887 | 6,484 | 4,019 | 34,542 |

|         |     |        |       |       |        |
|---------|-----|--------|-------|-------|--------|
| 102,264 | 150 | 23,840 | 6,450 | 3,990 | 34,430 |
| 102,265 | 152 | 23,897 | 6,440 | 3,979 | 34,468 |
| 102,266 | 152 | 23,886 | 6,442 | 3,961 | 34,441 |
| 102,267 | 148 | 23,669 | 6,377 | 3,919 | 34,113 |
| 102,268 | 150 | 23,786 | 6,412 | 3,957 | 34,305 |
| 102,269 | 154 | 23,860 | 6,465 | 4,001 | 34,480 |
| 102,270 | 154 | 23,745 | 6,449 | 3,997 | 34,345 |
| 102,271 | 149 | 23,839 | 6,440 | 3,997 | 34,425 |
| 102,272 | 139 | 23,480 | 6,352 | 3,944 | 33,915 |
| 102,273 | 143 | 23,657 | 6,375 | 3,953 | 34,128 |
| 102,274 | 146 | 23,864 | 6,383 | 3,959 | 34,352 |
| 102,275 | 148 | 23,833 | 6,362 | 3,956 | 34,299 |
| 102,276 | 146 | 23,601 | 6,295 | 3,916 | 33,958 |
| 102,277 | 150 | 23,644 | 6,300 | 3,898 | 33,992 |
| 102,278 | 150 | 23,213 | 6,203 | 3,832 | 33,398 |
| 102,279 | 147 | 22,788 | 6,104 | 3,783 | 32,822 |
| 102,280 | 148 | 22,906 | 6,181 | 3,788 | 33,023 |
| 102,281 | 145 | 22,871 | 6,118 | 3,800 | 32,934 |
| 102,282 | 145 | 22,625 | 6,081 | 3,775 | 32,626 |
| 102,283 | 143 | 22,634 | 6,094 | 3,776 | 32,647 |
| 102,284 | 149 | 22,596 | 6,073 | 3,740 | 32,558 |
| 102,285 | 150 | 22,580 | 6,072 | 3,721 | 32,523 |
| 102,286 | 144 | 22,662 | 6,033 | 3,699 | 32,538 |
| 102,287 | 141 | 22,586 | 6,036 | 3,700 | 32,463 |
| 102,288 | 144 | 22,679 | 6,080 | 3,713 | 32,616 |
| 102,289 | 146 | 22,469 | 6,063 | 3,696 | 32,374 |
| 102,290 | 141 | 22,360 | 6,049 | 3,708 | 32,258 |
| 102,291 | 144 | 22,525 | 6,090 | 3,723 | 32,482 |
| 102,292 | 146 | 22,438 | 6,100 | 3,726 | 32,410 |
| 102,293 | 151 | 22,192 | 6,041 | 3,693 | 32,077 |
| 102,294 | 154 | 22,075 | 6,039 | 3,664 | 31,932 |
| 102,295 | 153 | 22,050 | 6,023 | 3,664 | 31,890 |

|         |     |        |       |       |        |
|---------|-----|--------|-------|-------|--------|
| 102,296 | 146 | 21,995 | 5,951 | 3,642 | 31,734 |
| 102,297 | 146 | 21,888 | 5,952 | 3,634 | 31,620 |
| 102,298 | 151 | 21,946 | 5,967 | 3,655 | 31,719 |
| 102,299 | 154 | 21,776 | 5,949 | 3,618 | 31,497 |
| 102,300 | 154 | 21,378 | 5,891 | 3,561 | 30,984 |
| 102,301 | 155 | 21,317 | 5,882 | 3,556 | 30,910 |
| 102,302 | 150 | 21,193 | 5,869 | 3,549 | 30,761 |
| 102,303 | 152 | 21,044 | 5,810 | 3,535 | 30,541 |
| 102,304 | 151 | 20,938 | 5,825 | 3,528 | 30,442 |
| 102,305 | 141 | 20,910 | 5,864 | 3,542 | 30,457 |
| 102,306 | 141 | 20,565 | 5,803 | 3,501 | 30,010 |
| 102,307 | 142 | 20,389 | 5,768 | 3,467 | 29,766 |
| 102,308 | 149 | 20,391 | 5,802 | 3,481 | 29,823 |
| 102,309 | 151 | 20,446 | 5,858 | 3,491 | 29,946 |
| 102,310 | 149 | 20,136 | 5,765 | 3,430 | 29,480 |
| 102,311 | 154 | 20,250 | 5,803 | 3,445 | 29,652 |
| 102,312 | 162 | 20,280 | 5,792 | 3,430 | 29,664 |
| 102,313 | 161 | 20,005 | 5,735 | 3,382 | 29,283 |
| 102,314 | 163 | 19,911 | 5,720 | 3,355 | 29,149 |
| 102,315 | 164 | 19,885 | 5,711 | 3,342 | 29,102 |
| 102,316 | 173 | 20,038 | 5,763 | 3,365 | 29,339 |
| 102,317 | 179 | 19,884 | 5,723 | 3,343 | 29,129 |
| 102,318 | 179 | 19,823 | 5,696 | 3,323 | 29,021 |
| 102,319 | 182 | 20,057 | 5,767 | 3,325 | 29,331 |
| 102,320 | 187 | 19,847 | 5,710 | 3,269 | 29,013 |
| 102,321 | 189 | 19,698 | 5,669 | 3,235 | 28,791 |
| 102,322 | 194 | 20,022 | 5,750 | 3,281 | 29,247 |
| 102,323 | 194 | 19,927 | 5,746 | 3,274 | 29,141 |
| 102,324 | 191 | 19,942 | 5,775 | 3,298 | 29,206 |
| 102,325 | 196 | 19,842 | 5,786 | 3,296 | 29,120 |
| 102,326 | 198 | 19,602 | 5,757 | 3,245 | 28,802 |
| 102,327 | 198 | 19,447 | 5,695 | 3,203 | 28,543 |

|         |     |        |       |       |        |
|---------|-----|--------|-------|-------|--------|
| 102,328 | 196 | 19,338 | 5,722 | 3,212 | 28,468 |
| 102,329 | 186 | 19,191 | 5,715 | 3,199 | 28,291 |
| 102,330 | 188 | 19,334 | 5,721 | 3,224 | 28,467 |
| 102,331 | 190 | 19,077 | 5,592 | 3,120 | 27,979 |
| 102,332 | 196 | 18,989 | 5,589 | 3,092 | 27,866 |
| 102,333 | 196 | 19,109 | 5,601 | 3,080 | 27,986 |
| 102,334 | 195 | 19,125 | 5,642 | 3,085 | 28,047 |
| 102,335 | 198 | 19,086 | 5,663 | 3,085 | 28,032 |
| 102,336 | 199 | 18,817 | 5,587 | 3,066 | 27,669 |
| 102,337 | 200 | 18,758 | 5,586 | 3,054 | 27,598 |
| 102,338 | 198 | 18,793 | 5,606 | 3,058 | 27,655 |
| 102,339 | 191 | 18,864 | 5,589 | 3,046 | 27,690 |
| 102,340 | 190 | 18,807 | 5,584 | 3,021 | 27,602 |
| 102,341 | 185 | 18,704 | 5,563 | 3,010 | 27,462 |
| 102,342 | 182 | 18,490 | 5,467 | 2,937 | 27,076 |
| 102,343 | 187 | 18,663 | 5,504 | 2,941 | 27,295 |
| 102,344 | 182 | 18,746 | 5,504 | 2,936 | 27,368 |
| 102,345 | 180 | 18,953 | 5,545 | 2,955 | 27,633 |
| 102,346 | 186 | 18,950 | 5,567 | 2,948 | 27,651 |
| 102,347 | 189 | 18,829 | 5,526 | 2,915 | 27,459 |
| 102,348 | 189 | 18,858 | 5,540 | 2,924 | 27,511 |
| 102,349 | 185 | 18,878 | 5,541 | 2,910 | 27,514 |
| 102,350 | 184 | 18,865 | 5,560 | 2,921 | 27,530 |
| 102,351 | 185 | 18,838 | 5,505 | 2,911 | 27,439 |
| 102,352 | 189 | 18,918 | 5,543 | 2,934 | 27,584 |
| 102,353 | 187 | 18,866 | 5,496 | 2,910 | 27,459 |
| 102,354 | 183 | 18,902 | 5,469 | 2,894 | 27,448 |
| 102,355 | 183 | 18,857 | 5,430 | 2,883 | 27,353 |
| 102,356 | 172 | 18,743 | 5,409 | 2,866 | 27,190 |
| 102,357 | 174 | 18,663 | 5,365 | 2,837 | 27,039 |
| 102,358 | 175 | 18,743 | 5,360 | 2,845 | 27,123 |
| 102,359 | 171 | 18,896 | 5,365 | 2,863 | 27,295 |

|         |     |        |       |       |        |
|---------|-----|--------|-------|-------|--------|
| 102,360 | 170 | 18,829 | 5,298 | 2,842 | 27,139 |
| 102,361 | 169 | 18,857 | 5,318 | 2,845 | 27,189 |
| 102,362 | 164 | 19,140 | 5,371 | 2,887 | 27,562 |
| 102,363 | 159 | 19,154 | 5,388 | 2,900 | 27,601 |
| 102,364 | 165 | 19,195 | 5,332 | 2,896 | 27,588 |
| 102,365 | 164 | 19,208 | 5,348 | 2,886 | 27,606 |
| 102,366 | 161 | 19,588 | 5,430 | 2,938 | 28,117 |
| 102,367 | 153 | 19,526 | 5,399 | 2,915 | 27,993 |
| 102,368 | 150 | 19,532 | 5,408 | 2,921 | 28,011 |
| 102,369 | 147 | 19,524 | 5,428 | 2,944 | 28,043 |
| 102,370 | 154 | 19,681 | 5,480 | 2,981 | 28,296 |
| 102,371 | 149 | 19,510 | 5,449 | 2,976 | 28,084 |
| 102,372 | 144 | 19,449 | 5,435 | 2,956 | 27,984 |
| 102,373 | 145 | 19,573 | 5,458 | 2,990 | 28,166 |
| 102,374 | 145 | 19,621 | 5,447 | 2,996 | 28,209 |
| 102,375 | 145 | 19,669 | 5,452 | 2,992 | 28,258 |
| 102,376 | 138 | 19,688 | 5,460 | 2,999 | 28,285 |
| 102,377 | 141 | 19,877 | 5,495 | 3,020 | 28,533 |
| 102,378 | 138 | 19,718 | 5,430 | 3,006 | 28,292 |
| 102,379 | 140 | 19,954 | 5,515 | 3,037 | 28,646 |
| 102,380 | 143 | 19,836 | 5,483 | 3,018 | 28,480 |
| 102,381 | 142 | 19,691 | 5,445 | 2,991 | 28,269 |
| 102,382 | 134 | 19,883 | 5,505 | 3,044 | 28,566 |
| 102,383 | 134 | 19,870 | 5,545 | 3,071 | 28,620 |
| 102,384 | 133 | 19,908 | 5,557 | 3,070 | 28,668 |
| 102,385 | 126 | 19,800 | 5,518 | 3,105 | 28,549 |
| 102,386 | 120 | 19,712 | 5,493 | 3,090 | 28,415 |
| 102,387 | 120 | 20,005 | 5,511 | 3,112 | 28,748 |
| 102,388 | 121 | 19,837 | 5,480 | 3,094 | 28,532 |
| 102,389 | 119 | 19,683 | 5,409 | 3,085 | 28,296 |
| 102,390 | 120 | 20,039 | 5,511 | 3,133 | 28,803 |
| 102,391 | 120 | 19,825 | 5,499 | 3,122 | 28,566 |



|         |     |        |       |       |        |
|---------|-----|--------|-------|-------|--------|
| 102,392 | 124 | 19,977 | 5,513 | 3,125 | 28,739 |
| 102,393 | 122 | 19,842 | 5,499 | 3,137 | 28,600 |
| 102,394 | 126 | 20,229 | 5,670 | 3,235 | 29,260 |
| 102,395 | 131 | 19,977 | 5,602 | 3,212 | 28,922 |
| 102,396 | 131 | 19,940 | 5,610 | 3,222 | 28,903 |
| 102,397 | 124 | 19,815 | 5,605 | 3,226 | 28,770 |
| 102,398 | 118 | 19,870 | 5,648 | 3,252 | 28,888 |
| 102,399 | 117 | 19,806 | 5,662 | 3,260 | 28,845 |
| 102,400 | 119 | 19,442 | 5,564 | 3,195 | 28,320 |
| 102,401 | 115 | 19,596 | 5,613 | 3,224 | 28,548 |
| 102,402 | 112 | 19,701 | 5,680 | 3,257 | 28,750 |
| 102,403 | 112 | 19,780 | 5,720 | 3,264 | 28,876 |
| 102,404 | 110 | 19,596 | 5,719 | 3,243 | 28,668 |
| 102,405 | 112 | 19,484 | 5,713 | 3,239 | 28,548 |
| 102,406 | 111 | 19,504 | 5,700 | 3,243 | 28,558 |
| 102,407 | 110 | 19,295 | 5,647 | 3,218 | 28,270 |
| 102,408 | 107 | 19,320 | 5,669 | 3,226 | 28,322 |
| 102,409 | 105 | 19,261 | 5,704 | 3,219 | 28,289 |
| 102,410 | 103 | 19,202 | 5,776 | 3,247 | 28,328 |
| 102,411 | 104 | 18,920 | 5,718 | 3,225 | 27,967 |
| 102,412 | 103 | 18,767 | 5,682 | 3,198 | 27,750 |
| 102,413 | 107 | 19,015 | 5,790 | 3,237 | 28,149 |
| 102,414 | 104 | 18,765 | 5,711 | 3,200 | 27,780 |
| 102,415 | 94  | 18,449 | 5,673 | 3,162 | 27,378 |
| 102,416 | 97  | 18,319 | 5,694 | 3,197 | 27,307 |
| 102,417 | 98  | 18,130 | 5,701 | 3,189 | 27,118 |
| 102,418 | 96  | 18,106 | 5,700 | 3,202 | 27,104 |
| 102,419 | 92  | 17,376 | 5,493 | 3,082 | 26,043 |
| 102,420 | 93  | 17,597 | 5,515 | 3,108 | 26,313 |
| 102,421 | 88  | 17,855 | 5,615 | 3,142 | 26,700 |
| 102,422 | 96  | 17,937 | 5,600 | 3,151 | 26,784 |
| 102,423 | 97  | 17,718 | 5,563 | 3,124 | 26,502 |

|         |     |        |       |       |        |
|---------|-----|--------|-------|-------|--------|
| 102,424 | 102 | 17,900 | 5,653 | 3,131 | 26,786 |
| 102,425 | 102 | 17,892 | 5,653 | 3,141 | 26,788 |
| 102,426 | 101 | 18,098 | 5,800 | 3,188 | 27,187 |
| 102,427 | 102 | 18,227 | 5,799 | 3,191 | 27,319 |
| 102,428 | 98  | 17,852 | 5,669 | 3,104 | 26,723 |
| 102,429 | 99  | 18,059 | 5,740 | 3,139 | 27,037 |
| 102,430 | 99  | 18,069 | 5,749 | 3,153 | 27,070 |
| 102,431 | 94  | 18,120 | 5,763 | 3,143 | 27,120 |
| 102,432 | 97  | 18,256 | 5,853 | 3,177 | 27,383 |
| 102,433 | 102 | 18,344 | 5,855 | 3,176 | 27,477 |
| 102,434 | 105 | 18,516 | 5,850 | 3,202 | 27,673 |
| 102,435 | 108 | 18,471 | 5,834 | 3,186 | 27,599 |
| 102,436 | 109 | 18,572 | 5,855 | 3,184 | 27,720 |
| 102,437 | 108 | 18,694 | 5,932 | 3,240 | 27,974 |
| 102,438 | 108 | 18,676 | 5,991 | 3,270 | 28,045 |
| 102,439 | 117 | 18,814 | 6,051 | 3,269 | 28,251 |
| 102,440 | 119 | 19,016 | 6,097 | 3,321 | 28,553 |
| 102,441 | 121 | 19,159 | 6,137 | 3,340 | 28,757 |
| 102,442 | 119 | 19,410 | 6,165 | 3,344 | 29,038 |
| 102,443 | 121 | 19,829 | 6,272 | 3,394 | 29,616 |
| 102,444 | 116 | 20,118 | 6,300 | 3,432 | 29,966 |
| 102,445 | 113 | 20,306 | 6,307 | 3,469 | 30,195 |
| 102,446 | 108 | 20,405 | 6,325 | 3,491 | 30,329 |
| 102,447 | 107 | 20,211 | 6,263 | 3,463 | 30,044 |
| 102,448 | 111 | 20,463 | 6,328 | 3,517 | 30,419 |
| 102,449 | 112 | 20,499 | 6,339 | 3,519 | 30,469 |
| 102,450 | 112 | 20,586 | 6,369 | 3,538 | 30,605 |
| 102,451 | 108 | 20,495 | 6,333 | 3,517 | 30,453 |
| 102,452 | 108 | 20,298 | 6,268 | 3,493 | 30,167 |
| 102,453 | 108 | 20,149 | 6,238 | 3,469 | 29,964 |
| 102,454 | 115 | 20,557 | 6,305 | 3,491 | 30,468 |
| 102,455 | 116 | 20,531 | 6,270 | 3,491 | 30,408 |

|         |     |        |       |       |        |
|---------|-----|--------|-------|-------|--------|
| 102,456 | 114 | 20,464 | 6,228 | 3,459 | 30,265 |
| 102,457 | 114 | 20,286 | 6,195 | 3,439 | 30,034 |
| 102,458 | 131 | 20,524 | 6,258 | 3,476 | 30,389 |
| 102,459 | 136 | 20,641 | 6,213 | 3,479 | 30,469 |
| 102,460 | 144 | 20,901 | 6,224 | 3,486 | 30,755 |
| 102,461 | 152 | 21,271 | 6,312 | 3,543 | 31,278 |
| 102,462 | 151 | 21,349 | 6,331 | 3,540 | 31,371 |
| 102,463 | 157 | 21,431 | 6,330 | 3,560 | 31,478 |
| 102,464 | 157 | 21,409 | 6,306 | 3,551 | 31,423 |
| 102,465 | 161 | 21,624 | 6,319 | 3,569 | 31,673 |
| 102,466 | 158 | 21,833 | 6,311 | 3,589 | 31,891 |
| 102,467 | 157 | 21,870 | 6,282 | 3,596 | 31,905 |
| 102,468 | 158 | 22,108 | 6,330 | 3,643 | 32,239 |
| 102,469 | 159 | 21,748 | 6,238 | 3,572 | 31,717 |
| 102,470 | 163 | 22,017 | 6,298 | 3,599 | 32,077 |
| 102,471 | 163 | 22,092 | 6,322 | 3,612 | 32,189 |
| 102,472 | 167 | 22,116 | 6,314 | 3,608 | 32,205 |
| 102,473 | 157 | 21,883 | 6,275 | 3,589 | 31,904 |
| 102,474 | 157 | 21,895 | 6,299 | 3,612 | 31,963 |
| 102,475 | 156 | 22,055 | 6,348 | 3,678 | 32,237 |
| 102,476 | 161 | 22,171 | 6,331 | 3,685 | 32,348 |
| 102,477 | 164 | 22,004 | 6,267 | 3,675 | 32,110 |
| 102,478 | 163 | 21,799 | 6,241 | 3,665 | 31,868 |
| 102,479 | 165 | 22,025 | 6,327 | 3,744 | 32,261 |
| 102,480 | 165 | 22,035 | 6,341 | 3,746 | 32,287 |
| 102,481 | 167 | 22,128 | 6,329 | 3,752 | 32,376 |
| 102,482 | 174 | 22,160 | 6,305 | 3,763 | 32,402 |
| 102,483 | 169 | 22,056 | 6,249 | 3,744 | 32,218 |
| 102,484 | 179 | 22,620 | 6,423 | 3,840 | 33,062 |
| 102,485 | 176 | 22,385 | 6,383 | 3,798 | 32,742 |
| 102,486 | 178 | 22,687 | 6,413 | 3,838 | 33,116 |
| 102,487 | 181 | 22,633 | 6,354 | 3,781 | 32,949 |

|         |     |        |       |       |        |
|---------|-----|--------|-------|-------|--------|
| 102,488 | 189 | 22,933 | 6,433 | 3,835 | 33,390 |
| 102,489 | 178 | 22,939 | 6,417 | 3,847 | 33,381 |
| 102,490 | 180 | 23,235 | 6,505 | 3,882 | 33,802 |
| 102,491 | 186 | 23,428 | 6,577 | 3,908 | 34,099 |
| 102,492 | 186 | 23,362 | 6,534 | 3,896 | 33,978 |
| 102,493 | 191 | 23,259 | 6,538 | 3,915 | 33,903 |
| 102,494 | 191 | 23,051 | 6,485 | 3,879 | 33,606 |
| 102,495 | 194 | 22,904 | 6,483 | 3,849 | 33,430 |
| 102,496 | 201 | 22,892 | 6,504 | 3,828 | 33,425 |
| 102,497 | 198 | 22,532 | 6,457 | 3,797 | 32,984 |
| 102,498 | 195 | 23,045 | 6,596 | 3,877 | 33,713 |
| 102,499 | 198 | 23,197 | 6,643 | 3,897 | 33,935 |
| 102,500 | 202 | 23,134 | 6,659 | 3,883 | 33,878 |
| 102,501 | 202 | 23,027 | 6,619 | 3,874 | 33,722 |
| 102,502 | 202 | 22,993 | 6,616 | 3,892 | 33,703 |
| 102,503 | 197 | 22,912 | 6,677 | 3,906 | 33,692 |
| 102,504 | 195 | 22,844 | 6,647 | 3,901 | 33,587 |
| 102,505 | 198 | 22,660 | 6,645 | 3,896 | 33,399 |
| 102,506 | 198 | 22,753 | 6,678 | 3,915 | 33,544 |
| 102,507 | 194 | 22,697 | 6,674 | 3,910 | 33,475 |
| 102,508 | 194 | 22,690 | 6,697 | 3,926 | 33,507 |
| 102,509 | 185 | 22,638 | 6,754 | 3,934 | 33,511 |
| 102,510 | 182 | 22,484 | 6,775 | 3,936 | 33,377 |
| 102,511 | 175 | 22,532 | 6,818 | 3,963 | 33,488 |
| 102,512 | 169 | 22,464 | 6,841 | 3,959 | 33,433 |
| 102,513 | 171 | 22,521 | 6,880 | 3,988 | 33,560 |
| 102,514 | 164 | 22,150 | 6,817 | 3,942 | 33,073 |
| 102,515 | 164 | 22,157 | 6,819 | 3,948 | 33,088 |
| 102,516 | 162 | 22,046 | 6,833 | 3,948 | 32,989 |
| 102,517 | 167 | 22,106 | 6,872 | 3,934 | 33,079 |
| 102,518 | 166 | 21,987 | 6,860 | 3,917 | 32,930 |
| 102,519 | 167 | 21,974 | 6,884 | 3,942 | 32,967 |

|         |     |        |       |       |        |
|---------|-----|--------|-------|-------|--------|
| 102,520 | 167 | 21,976 | 6,909 | 3,944 | 32,996 |
| 102,521 | 162 | 21,894 | 6,897 | 3,952 | 32,905 |
| 102,522 | 161 | 21,727 | 6,887 | 3,932 | 32,707 |
| 102,523 | 160 | 21,531 | 6,831 | 3,919 | 32,441 |
| 102,524 | 160 | 21,617 | 6,825 | 3,913 | 32,515 |
| 102,525 | 155 | 21,527 | 6,750 | 3,878 | 32,310 |
| 102,526 | 153 | 21,259 | 6,716 | 3,817 | 31,945 |
| 102,527 | 150 | 21,173 | 6,670 | 3,779 | 31,772 |
| 102,528 | 152 | 21,275 | 6,678 | 3,784 | 31,889 |
| 102,529 | 149 | 20,974 | 6,568 | 3,705 | 31,396 |
| 102,530 | 148 | 20,960 | 6,582 | 3,708 | 31,398 |
| 102,531 | 149 | 20,728 | 6,497 | 3,642 | 31,016 |
| 102,532 | 146 | 20,669 | 6,522 | 3,642 | 30,979 |
| 102,533 | 142 | 20,388 | 6,489 | 3,610 | 30,629 |
| 102,534 | 143 | 20,217 | 6,475 | 3,606 | 30,441 |
| 102,535 | 131 | 20,120 | 6,505 | 3,623 | 30,379 |
| 102,536 | 129 | 19,879 | 6,501 | 3,597 | 30,106 |
| 102,537 | 143 | 19,442 | 6,429 | 3,552 | 29,566 |
| 102,538 | 141 | 19,126 | 6,388 | 3,521 | 29,176 |
| 102,539 | 133 | 19,129 | 6,418 | 3,528 | 29,208 |
| 102,540 | 132 | 18,868 | 6,369 | 3,506 | 28,875 |
| 102,541 | 133 | 18,717 | 6,346 | 3,482 | 28,678 |
| 102,542 | 126 | 18,501 | 6,307 | 3,471 | 28,405 |
| 102,543 | 126 | 18,356 | 6,336 | 3,460 | 28,278 |
| 102,544 | 124 | 18,785 | 6,558 | 3,541 | 29,008 |
| 102,545 | 132 | 18,889 | 6,697 | 3,598 | 29,316 |
| 102,546 | 132 | 19,041 | 6,761 | 3,652 | 29,586 |
| 102,547 | 125 | 19,034 | 6,794 | 3,677 | 29,630 |
| 102,548 | 126 | 19,121 | 6,861 | 3,708 | 29,816 |
| 102,549 | 131 | 19,156 | 6,882 | 3,715 | 29,884 |
| 102,550 | 129 | 19,196 | 6,864 | 3,761 | 29,950 |
| 102,551 | 127 | 19,262 | 6,888 | 3,774 | 30,051 |

|         |     |        |       |       |        |
|---------|-----|--------|-------|-------|--------|
| 102,552 | 125 | 19,218 | 6,878 | 3,761 | 29,982 |
| 102,553 | 124 | 19,093 | 6,795 | 3,727 | 29,739 |
| 102,554 | 125 | 19,283 | 6,877 | 3,764 | 30,049 |
| 102,555 | 120 | 19,308 | 6,893 | 3,768 | 30,089 |
| 102,556 | 118 | 19,225 | 6,893 | 3,767 | 30,003 |
| 102,557 | 119 | 19,109 | 6,879 | 3,751 | 29,858 |
| 102,558 | 117 | 19,155 | 6,924 | 3,767 | 29,963 |
| 102,559 | 123 | 19,062 | 6,821 | 3,732 | 29,738 |
| 102,560 | 123 | 18,964 | 6,788 | 3,713 | 29,588 |
| 102,561 | 126 | 19,121 | 6,832 | 3,731 | 29,810 |
| 102,562 | 126 | 19,049 | 6,840 | 3,720 | 29,735 |
| 102,563 | 121 | 18,856 | 6,802 | 3,690 | 29,469 |
| 102,564 | 132 | 19,029 | 6,872 | 3,744 | 29,777 |
| 102,565 | 137 | 19,294 | 6,900 | 3,755 | 30,086 |
| 102,566 | 137 | 19,117 | 6,862 | 3,738 | 29,854 |
| 102,567 | 135 | 18,898 | 6,780 | 3,703 | 29,516 |
| 102,568 | 143 | 19,392 | 6,968 | 3,777 | 30,280 |
| 102,569 | 144 | 19,548 | 6,972 | 3,795 | 30,459 |
| 102,570 | 147 | 19,654 | 6,961 | 3,776 | 30,538 |
| 102,571 | 151 | 19,618 | 6,904 | 3,740 | 30,413 |
| 102,572 | 150 | 19,489 | 6,859 | 3,705 | 30,203 |
| 102,573 | 152 | 19,854 | 6,945 | 3,772 | 30,723 |
| 102,574 | 152 | 20,169 | 7,019 | 3,806 | 31,146 |
| 102,575 | 154 | 19,985 | 6,966 | 3,759 | 30,864 |
| 102,576 | 158 | 20,082 | 7,022 | 3,773 | 31,035 |
| 102,577 | 163 | 20,043 | 7,025 | 3,777 | 31,008 |
| 102,578 | 160 | 19,855 | 6,989 | 3,759 | 30,763 |
| 102,579 | 162 | 19,951 | 7,052 | 3,781 | 30,946 |
| 102,580 | 161 | 19,979 | 7,042 | 3,777 | 30,959 |
| 102,581 | 163 | 19,953 | 7,036 | 3,796 | 30,948 |
| 102,582 | 163 | 19,877 | 7,048 | 3,804 | 30,892 |
| 102,583 | 163 | 19,793 | 7,009 | 3,805 | 30,770 |

|         |     |        |       |       |        |
|---------|-----|--------|-------|-------|--------|
| 102,584 | 158 | 19,657 | 6,988 | 3,780 | 30,583 |
| 102,585 | 157 | 19,695 | 6,986 | 3,774 | 30,612 |
| 102,586 | 159 | 19,814 | 6,969 | 3,774 | 30,716 |
| 102,587 | 142 | 19,510 | 6,815 | 3,710 | 30,177 |
| 102,588 | 145 | 19,680 | 6,890 | 3,759 | 30,474 |
| 102,589 | 152 | 19,477 | 6,797 | 3,713 | 30,139 |
| 102,590 | 152 | 19,158 | 6,713 | 3,683 | 29,706 |
| 102,591 | 148 | 19,020 | 6,705 | 3,683 | 29,556 |
| 102,592 | 146 | 18,835 | 6,716 | 3,692 | 29,389 |
| 102,593 | 145 | 18,784 | 6,700 | 3,674 | 29,303 |
| 102,594 | 148 | 18,756 | 6,612 | 3,627 | 29,143 |
| 102,595 | 147 | 18,725 | 6,504 | 3,581 | 28,957 |
| 102,596 | 149 | 18,650 | 6,431 | 3,560 | 28,790 |
| 102,597 | 155 | 18,617 | 6,432 | 3,515 | 28,719 |
| 102,598 | 160 | 18,453 | 6,311 | 3,453 | 28,377 |
| 102,599 | 160 | 18,704 | 6,304 | 3,452 | 28,620 |
| 102,600 | 156 | 18,761 | 6,267 | 3,451 | 28,635 |
| 102,601 | 158 | 18,802 | 6,301 | 3,417 | 28,678 |
| 102,602 | 158 | 19,017 | 6,296 | 3,443 | 28,914 |
| 102,603 | 163 | 19,102 | 6,296 | 3,443 | 29,004 |
| 102,604 | 166 | 19,287 | 6,257 | 3,444 | 29,154 |
| 102,605 | 169 | 19,323 | 6,253 | 3,448 | 29,193 |
| 102,606 | 171 | 19,536 | 6,255 | 3,478 | 29,440 |
| 102,607 | 171 | 19,624 | 6,248 | 3,479 | 29,522 |
| 102,608 | 177 | 19,684 | 6,233 | 3,478 | 29,572 |
| 102,609 | 177 | 19,596 | 6,191 | 3,467 | 29,431 |
| 102,610 | 166 | 19,622 | 6,268 | 3,486 | 29,542 |
| 102,611 | 166 | 19,652 | 6,262 | 3,511 | 29,591 |
| 102,612 | 170 | 19,699 | 6,245 | 3,510 | 29,624 |
| 102,613 | 180 | 19,759 | 6,222 | 3,496 | 29,657 |
| 102,614 | 181 | 19,750 | 6,207 | 3,506 | 29,644 |
| 102,615 | 172 | 19,846 | 6,208 | 3,497 | 29,723 |

|         |     |        |       |       |        |
|---------|-----|--------|-------|-------|--------|
| 102,616 | 170 | 20,058 | 6,260 | 3,545 | 30,033 |
| 102,617 | 182 | 20,027 | 6,259 | 3,531 | 29,999 |
| 102,618 | 182 | 20,132 | 6,237 | 3,528 | 30,079 |
| 102,619 | 185 | 20,508 | 6,323 | 3,579 | 30,595 |
| 102,620 | 184 | 20,553 | 6,349 | 3,605 | 30,691 |
| 102,621 | 174 | 20,685 | 6,414 | 3,634 | 30,907 |
| 102,622 | 177 | 20,547 | 6,372 | 3,613 | 30,709 |
| 102,623 | 179 | 20,869 | 6,422 | 3,654 | 31,124 |
| 102,624 | 179 | 21,292 | 6,518 | 3,714 | 31,703 |
| 102,625 | 181 | 21,602 | 6,612 | 3,756 | 32,151 |
| 102,626 | 182 | 21,774 | 6,649 | 3,783 | 32,388 |
| 102,627 | 179 | 21,865 | 6,658 | 3,786 | 32,488 |
| 102,628 | 175 | 22,193 | 6,723 | 3,819 | 32,910 |
| 102,629 | 177 | 22,491 | 6,793 | 3,856 | 33,317 |
| 102,630 | 177 | 22,617 | 6,834 | 3,892 | 33,520 |
| 102,631 | 178 | 22,765 | 6,906 | 3,913 | 33,762 |
| 102,632 | 174 | 22,830 | 6,878 | 3,915 | 33,797 |
| 102,633 | 175 | 22,958 | 6,896 | 3,942 | 33,971 |
| 102,634 | 176 | 22,972 | 6,875 | 3,946 | 33,969 |
| 102,635 | 180 | 23,219 | 6,923 | 3,977 | 34,299 |
| 102,636 | 183 | 23,368 | 6,946 | 3,992 | 34,489 |
| 102,637 | 185 | 23,441 | 6,964 | 3,983 | 34,573 |
| 102,638 | 183 | 23,455 | 6,982 | 3,990 | 34,610 |
| 102,639 | 177 | 23,220 | 6,940 | 3,941 | 34,278 |
| 102,640 | 177 | 23,252 | 6,957 | 3,953 | 34,339 |
| 102,641 | 178 | 23,390 | 7,004 | 3,967 | 34,539 |
| 102,642 | 179 | 23,357 | 6,907 | 3,898 | 34,341 |
| 102,643 | 178 | 23,375 | 6,885 | 3,890 | 34,328 |
| 102,644 | 178 | 23,352 | 6,856 | 3,924 | 34,310 |
| 102,645 | 173 | 23,143 | 6,859 | 3,920 | 34,095 |
| 102,646 | 171 | 22,812 | 6,783 | 3,912 | 33,678 |
| 102,647 | 161 | 22,598 | 6,685 | 3,877 | 33,321 |



|         |     |        |       |       |        |
|---------|-----|--------|-------|-------|--------|
| 102,648 | 158 | 22,557 | 6,685 | 3,934 | 33,334 |
| 102,649 | 150 | 22,316 | 6,643 | 3,909 | 33,018 |
| 102,650 | 151 | 21,939 | 6,573 | 3,868 | 32,531 |
| 102,651 | 151 | 21,810 | 6,501 | 3,847 | 32,309 |
| 102,652 | 151 | 21,465 | 6,390 | 3,793 | 31,799 |
| 102,653 | 148 | 21,202 | 6,338 | 3,747 | 31,435 |
| 102,654 | 144 | 21,574 | 6,436 | 3,826 | 31,980 |
| 102,655 | 141 | 21,555 | 6,481 | 3,822 | 31,999 |
| 102,656 | 139 | 21,488 | 6,460 | 3,787 | 31,874 |
| 102,657 | 136 | 21,446 | 6,473 | 3,791 | 31,846 |
| 102,658 | 138 | 21,502 | 6,489 | 3,806 | 31,935 |
| 102,659 | 140 | 21,635 | 6,463 | 3,797 | 32,035 |
| 102,660 | 140 | 21,707 | 6,430 | 3,784 | 32,061 |
| 102,661 | 144 | 21,977 | 6,493 | 3,806 | 32,420 |
| 102,662 | 141 | 21,557 | 6,346 | 3,770 | 31,814 |
| 102,663 | 142 | 21,847 | 6,414 | 3,826 | 32,229 |
| 102,664 | 140 | 21,925 | 6,420 | 3,830 | 32,315 |
| 102,665 | 142 | 21,767 | 6,359 | 3,792 | 32,060 |
| 102,666 | 141 | 21,822 | 6,396 | 3,824 | 32,183 |
| 102,667 | 144 | 21,482 | 6,327 | 3,770 | 31,723 |
| 102,668 | 126 | 20,948 | 6,181 | 3,711 | 30,966 |
| 102,669 | 124 | 21,007 | 6,247 | 3,717 | 31,095 |
| 102,670 | 129 | 20,843 | 6,180 | 3,673 | 30,825 |
| 102,671 | 128 | 20,762 | 6,159 | 3,672 | 30,721 |
| 102,672 | 126 | 20,588 | 6,118 | 3,658 | 30,490 |
| 102,673 | 124 | 20,455 | 6,116 | 3,659 | 30,354 |
| 102,674 | 127 | 20,266 | 6,132 | 3,654 | 30,179 |
| 102,675 | 129 | 20,233 | 6,155 | 3,644 | 30,161 |
| 102,676 | 129 | 20,172 | 6,144 | 3,673 | 30,118 |
| 102,677 | 128 | 20,103 | 6,101 | 3,653 | 29,985 |
| 102,678 | 129 | 20,312 | 6,147 | 3,683 | 30,271 |
| 102,679 | 127 | 20,130 | 6,072 | 3,653 | 29,982 |

|         |     |        |       |       |        |
|---------|-----|--------|-------|-------|--------|
| 102,680 | 134 | 19,889 | 6,009 | 3,627 | 29,659 |
| 102,681 | 132 | 19,672 | 5,928 | 3,587 | 29,319 |
| 102,682 | 133 | 20,147 | 6,096 | 3,722 | 30,098 |
| 102,683 | 134 | 19,960 | 6,041 | 3,674 | 29,809 |
| 102,684 | 145 | 20,083 | 6,062 | 3,674 | 29,964 |
| 102,685 | 145 | 20,118 | 6,073 | 3,675 | 30,011 |
| 102,686 | 141 | 19,910 | 6,018 | 3,648 | 29,717 |
| 102,687 | 153 | 20,247 | 6,117 | 3,727 | 30,244 |
| 102,688 | 153 | 20,300 | 6,135 | 3,745 | 30,333 |
| 102,689 | 155 | 20,311 | 6,120 | 3,723 | 30,309 |
| 102,690 | 152 | 20,449 | 6,090 | 3,712 | 30,403 |
| 102,691 | 156 | 20,415 | 6,051 | 3,675 | 30,297 |
| 102,692 | 154 | 20,264 | 5,979 | 3,654 | 30,051 |
| 102,693 | 155 | 20,416 | 6,058 | 3,698 | 30,327 |
| 102,694 | 156 | 20,589 | 6,084 | 3,706 | 30,535 |
| 102,695 | 158 | 20,757 | 6,101 | 3,723 | 30,739 |
| 102,696 | 159 | 20,651 | 6,046 | 3,713 | 30,569 |
| 102,697 | 161 | 20,855 | 6,083 | 3,708 | 30,807 |
| 102,698 | 161 | 21,024 | 6,103 | 3,734 | 31,022 |
| 102,699 | 156 | 21,160 | 6,111 | 3,723 | 31,150 |
| 102,700 | 156 | 20,894 | 5,975 | 3,638 | 30,663 |
| 102,701 | 155 | 20,908 | 5,955 | 3,642 | 30,660 |
| 102,702 | 158 | 20,605 | 5,881 | 3,589 | 30,233 |
| 102,703 | 156 | 20,314 | 5,835 | 3,544 | 29,849 |
| 102,704 | 177 | 20,896 | 6,076 | 3,673 | 30,822 |
| 102,705 | 180 | 20,855 | 6,068 | 3,658 | 30,761 |
| 102,706 | 180 | 20,644 | 5,961 | 3,630 | 30,415 |
| 102,707 | 181 | 20,414 | 5,878 | 3,589 | 30,062 |
| 102,708 | 182 | 20,612 | 5,932 | 3,614 | 30,340 |
| 102,709 | 173 | 20,636 | 5,923 | 3,606 | 30,338 |
| 102,710 | 184 | 20,636 | 5,963 | 3,607 | 30,390 |
| 102,711 | 185 | 20,678 | 5,950 | 3,619 | 30,432 |

|         |     |        |       |       |        |
|---------|-----|--------|-------|-------|--------|
| 102,712 | 184 | 20,650 | 5,938 | 3,606 | 30,378 |
| 102,713 | 191 | 20,818 | 6,023 | 3,640 | 30,672 |
| 102,714 | 191 | 20,645 | 5,957 | 3,576 | 30,369 |
| 102,715 | 185 | 20,435 | 5,896 | 3,549 | 30,065 |
| 102,716 | 187 | 20,690 | 5,992 | 3,606 | 30,475 |
| 102,717 | 202 | 20,759 | 6,000 | 3,600 | 30,561 |
| 102,718 | 198 | 20,743 | 5,987 | 3,612 | 30,540 |
| 102,719 | 197 | 21,044 | 6,025 | 3,657 | 30,923 |
| 102,720 | 195 | 21,025 | 6,016 | 3,656 | 30,892 |
| 102,721 | 190 | 20,976 | 6,073 | 3,669 | 30,908 |
| 102,722 | 191 | 20,975 | 6,067 | 3,684 | 30,917 |
| 102,723 | 192 | 21,315 | 6,124 | 3,716 | 31,347 |
| 102,724 | 191 | 21,125 | 6,029 | 3,663 | 31,008 |
| 102,725 | 190 | 20,954 | 5,991 | 3,649 | 30,784 |
| 102,726 | 192 | 21,519 | 6,133 | 3,753 | 31,597 |
| 102,727 | 191 | 21,441 | 6,106 | 3,715 | 31,453 |
| 102,728 | 190 | 21,355 | 6,107 | 3,743 | 31,395 |
| 102,729 | 190 | 21,159 | 6,051 | 3,719 | 31,119 |
| 102,730 | 190 | 20,897 | 5,962 | 3,678 | 30,727 |
| 102,731 | 183 | 20,551 | 5,830 | 3,589 | 30,153 |
| 102,732 | 184 | 20,797 | 5,877 | 3,615 | 30,473 |
| 102,733 | 188 | 20,953 | 5,886 | 3,639 | 30,666 |
| 102,734 | 190 | 21,151 | 5,939 | 3,669 | 30,949 |
| 102,735 | 179 | 21,309 | 5,963 | 3,716 | 31,167 |
| 102,736 | 177 | 21,235 | 5,946 | 3,695 | 31,053 |
| 102,737 | 176 | 21,483 | 6,032 | 3,739 | 31,430 |
| 102,738 | 170 | 21,340 | 5,999 | 3,704 | 31,213 |
| 102,739 | 173 | 21,356 | 5,989 | 3,696 | 31,214 |
| 102,740 | 172 | 21,371 | 5,979 | 3,707 | 31,229 |
| 102,741 | 168 | 21,752 | 6,086 | 3,791 | 31,797 |
| 102,742 | 181 | 21,968 | 6,125 | 3,818 | 32,092 |
| 102,743 | 190 | 22,229 | 6,158 | 3,862 | 32,439 |

|         |     |        |       |       |        |
|---------|-----|--------|-------|-------|--------|
| 102,744 | 190 | 22,227 | 6,148 | 3,865 | 32,430 |
| 102,745 | 199 | 22,445 | 6,230 | 3,902 | 32,776 |
| 102,746 | 206 | 22,522 | 6,285 | 3,914 | 32,927 |
| 102,747 | 204 | 22,303 | 6,236 | 3,897 | 32,640 |
| 102,748 | 204 | 22,318 | 6,226 | 3,899 | 32,647 |
| 102,749 | 205 | 22,342 | 6,240 | 3,899 | 32,686 |
| 102,750 | 205 | 22,614 | 6,306 | 3,939 | 33,064 |
| 102,751 | 203 | 22,614 | 6,279 | 3,945 | 33,041 |
| 102,752 | 201 | 22,737 | 6,273 | 3,956 | 33,167 |
| 102,753 | 196 | 22,627 | 6,232 | 3,939 | 32,994 |
| 102,754 | 197 | 22,803 | 6,278 | 3,963 | 33,241 |
| 102,755 | 180 | 22,573 | 6,238 | 3,927 | 32,918 |
| 102,756 | 183 | 22,936 | 6,292 | 3,977 | 33,388 |
| 102,757 | 182 | 22,723 | 6,292 | 3,947 | 33,144 |
| 102,758 | 183 | 22,392 | 6,216 | 3,927 | 32,718 |
| 102,759 | 188 | 22,627 | 6,247 | 3,950 | 33,012 |
| 102,760 | 182 | 22,657 | 6,246 | 3,952 | 33,037 |
| 102,761 | 177 | 22,570 | 6,235 | 3,973 | 32,955 |
| 102,762 | 177 | 22,520 | 6,237 | 3,968 | 32,902 |
| 102,763 | 172 | 22,495 | 6,233 | 3,997 | 32,897 |
| 102,764 | 166 | 22,601 | 6,253 | 4,010 | 33,030 |
| 102,765 | 158 | 22,136 | 6,130 | 3,918 | 32,342 |
| 102,766 | 160 | 22,358 | 6,179 | 3,951 | 32,648 |
| 102,767 | 153 | 22,581 | 6,230 | 3,986 | 32,950 |
| 102,768 | 153 | 22,641 | 6,203 | 3,979 | 32,976 |
| 102,769 | 149 | 22,624 | 6,191 | 3,958 | 32,922 |
| 102,770 | 149 | 22,634 | 6,188 | 3,941 | 32,912 |
| 102,771 | 153 | 22,513 | 6,100 | 3,895 | 32,661 |
| 102,772 | 157 | 22,471 | 6,103 | 3,895 | 32,626 |
| 102,773 | 156 | 22,263 | 6,067 | 3,877 | 32,363 |
| 102,774 | 156 | 21,803 | 5,995 | 3,819 | 31,773 |
| 102,775 | 156 | 22,712 | 6,280 | 4,018 | 33,166 |

|         |     |        |       |       |        |
|---------|-----|--------|-------|-------|--------|
| 102,776 | 159 | 22,647 | 6,226 | 3,970 | 33,002 |
| 102,777 | 160 | 22,805 | 6,225 | 4,013 | 33,203 |
| 102,778 | 174 | 22,913 | 6,250 | 4,007 | 33,344 |
| 102,779 | 174 | 22,877 | 6,243 | 3,985 | 33,279 |
| 102,780 | 174 | 22,847 | 6,275 | 4,002 | 33,298 |
| 102,781 | 176 | 22,870 | 6,318 | 4,009 | 33,373 |
| 102,782 | 177 | 22,853 | 6,361 | 4,027 | 33,418 |
| 102,783 | 180 | 22,924 | 6,388 | 4,036 | 33,528 |
| 102,784 | 175 | 23,176 | 6,446 | 4,076 | 33,873 |
| 102,785 | 174 | 23,053 | 6,421 | 4,050 | 33,698 |
| 102,786 | 176 | 23,041 | 6,425 | 4,021 | 33,663 |
| 102,787 | 181 | 23,132 | 6,426 | 4,014 | 33,753 |
| 102,788 | 182 | 23,199 | 6,433 | 4,016 | 33,830 |
| 102,789 | 178 | 23,121 | 6,427 | 4,037 | 33,763 |
| 102,790 | 171 | 23,287 | 6,518 | 4,067 | 34,043 |
| 102,791 | 170 | 23,249 | 6,520 | 4,071 | 34,010 |
| 102,792 | 173 | 23,575 | 6,584 | 4,108 | 34,440 |
| 102,793 | 165 | 23,949 | 6,638 | 4,141 | 34,893 |
| 102,794 | 163 | 23,853 | 6,613 | 4,119 | 34,748 |
| 102,795 | 160 | 24,062 | 6,667 | 4,131 | 35,020 |
| 102,796 | 158 | 24,338 | 6,732 | 4,176 | 35,404 |
| 102,797 | 155 | 24,563 | 6,725 | 4,183 | 35,626 |
| 102,798 | 153 | 24,134 | 6,619 | 4,096 | 35,002 |
| 102,799 | 155 | 24,536 | 6,716 | 4,158 | 35,565 |
| 102,800 | 163 | 24,820 | 6,797 | 4,234 | 36,014 |
| 102,801 | 164 | 24,938 | 6,792 | 4,231 | 36,125 |
| 102,802 | 169 | 24,672 | 6,719 | 4,183 | 35,743 |
| 102,803 | 168 | 24,388 | 6,704 | 4,162 | 35,422 |
| 102,804 | 172 | 24,760 | 6,796 | 4,207 | 35,935 |
| 102,805 | 177 | 24,873 | 6,803 | 4,229 | 36,082 |
| 102,806 | 178 | 25,085 | 6,837 | 4,261 | 36,361 |
| 102,807 | 177 | 24,979 | 6,859 | 4,248 | 36,263 |

|         |     |        |       |       |        |
|---------|-----|--------|-------|-------|--------|
| 102,808 | 175 | 24,798 | 6,767 | 4,204 | 35,944 |
| 102,809 | 178 | 25,105 | 6,834 | 4,263 | 36,380 |
| 102,810 | 172 | 24,774 | 6,744 | 4,216 | 35,906 |
| 102,811 | 177 | 25,073 | 6,788 | 4,231 | 36,269 |
| 102,812 | 183 | 25,306 | 6,845 | 4,252 | 36,586 |
| 102,813 | 185 | 25,253 | 6,793 | 4,225 | 36,456 |
| 102,814 | 185 | 25,566 | 6,833 | 4,259 | 36,843 |
| 102,815 | 183 | 25,355 | 6,774 | 4,227 | 36,539 |
| 102,816 | 182 | 25,304 | 6,778 | 4,232 | 36,496 |
| 102,817 | 179 | 25,569 | 6,809 | 4,258 | 36,815 |
| 102,818 | 174 | 25,447 | 6,776 | 4,266 | 36,663 |
| 102,819 | 175 | 25,250 | 6,732 | 4,235 | 36,392 |
| 102,820 | 175 | 25,073 | 6,668 | 4,196 | 36,112 |
| 102,821 | 173 | 24,892 | 6,697 | 4,230 | 35,992 |
| 102,822 | 175 | 24,910 | 6,682 | 4,216 | 35,983 |
| 102,823 | 166 | 24,777 | 6,633 | 4,181 | 35,757 |
| 102,824 | 163 | 25,178 | 6,686 | 4,213 | 36,240 |
| 102,825 | 161 | 25,116 | 6,656 | 4,164 | 36,097 |
| 102,826 | 163 | 25,375 | 6,659 | 4,177 | 36,374 |
| 102,827 | 156 | 24,861 | 6,499 | 4,087 | 35,603 |
| 102,828 | 161 | 24,895 | 6,548 | 4,084 | 35,688 |
| 102,829 | 153 | 24,986 | 6,604 | 4,106 | 35,849 |
| 102,830 | 162 | 24,991 | 6,603 | 4,101 | 35,857 |
| 102,831 | 161 | 24,875 | 6,510 | 4,062 | 35,608 |
| 102,832 | 164 | 25,349 | 6,564 | 4,120 | 36,197 |
| 102,833 | 166 | 25,168 | 6,506 | 4,079 | 35,919 |
| 102,834 | 165 | 25,288 | 6,488 | 4,083 | 36,024 |
| 102,835 | 172 | 25,071 | 6,453 | 4,059 | 35,755 |
| 102,836 | 175 | 25,073 | 6,458 | 4,052 | 35,758 |
| 102,837 | 175 | 25,284 | 6,498 | 4,104 | 36,061 |
| 102,838 | 168 | 25,001 | 6,433 | 4,079 | 35,681 |
| 102,839 | 168 | 25,009 | 6,444 | 4,083 | 35,704 |

|         |     |        |       |       |        |
|---------|-----|--------|-------|-------|--------|
| 102,840 | 171 | 25,006 | 6,442 | 4,069 | 35,688 |
| 102,841 | 178 | 24,500 | 6,285 | 4,014 | 34,977 |
| 102,842 | 178 | 24,510 | 6,291 | 4,016 | 34,995 |
| 102,843 | 176 | 24,305 | 6,245 | 3,985 | 34,711 |
| 102,844 | 178 | 24,121 | 6,248 | 4,003 | 34,550 |
| 102,845 | 171 | 23,973 | 6,216 | 3,961 | 34,321 |
| 102,846 | 171 | 23,532 | 6,116 | 3,912 | 33,731 |
| 102,847 | 171 | 23,468 | 6,126 | 3,939 | 33,704 |
| 102,848 | 165 | 23,517 | 6,169 | 3,978 | 33,829 |
| 102,849 | 167 | 23,492 | 6,209 | 4,013 | 33,881 |
| 102,850 | 165 | 23,519 | 6,238 | 4,050 | 33,972 |
| 102,851 | 155 | 23,799 | 6,265 | 4,051 | 34,270 |
| 102,852 | 154 | 23,503 | 6,169 | 4,006 | 33,832 |
| 102,853 | 154 | 23,851 | 6,263 | 4,055 | 34,323 |
| 102,854 | 149 | 24,014 | 6,294 | 4,077 | 34,534 |
| 102,855 | 150 | 24,193 | 6,355 | 4,112 | 34,810 |
| 102,856 | 146 | 24,483 | 6,461 | 4,160 | 35,250 |
| 102,857 | 146 | 24,323 | 6,410 | 4,150 | 35,029 |
| 102,858 | 152 | 24,782 | 6,501 | 4,174 | 35,609 |
| 102,859 | 150 | 25,094 | 6,550 | 4,207 | 36,001 |
| 102,860 | 145 | 24,870 | 6,468 | 4,160 | 35,643 |
| 102,861 | 145 | 24,763 | 6,500 | 4,155 | 35,563 |
| 102,862 | 141 | 24,889 | 6,543 | 4,191 | 35,764 |
| 102,863 | 138 | 24,962 | 6,568 | 4,201 | 35,869 |
| 102,864 | 142 | 24,935 | 6,599 | 4,212 | 35,888 |
| 102,865 | 141 | 24,925 | 6,633 | 4,238 | 35,937 |
| 102,866 | 142 | 24,967 | 6,641 | 4,258 | 36,008 |
| 102,867 | 142 | 25,054 | 6,641 | 4,245 | 36,082 |
| 102,868 | 141 | 25,095 | 6,639 | 4,247 | 36,122 |
| 102,869 | 138 | 24,865 | 6,561 | 4,199 | 35,763 |
| 102,870 | 136 | 24,827 | 6,597 | 4,208 | 35,768 |
| 102,871 | 141 | 24,844 | 6,547 | 4,164 | 35,696 |

|         |     |        |       |       |        |
|---------|-----|--------|-------|-------|--------|
| 102,872 | 143 | 24,915 | 6,556 | 4,165 | 35,779 |
| 102,873 | 141 | 24,628 | 6,513 | 4,131 | 35,413 |
| 102,874 | 149 | 25,017 | 6,704 | 4,234 | 36,104 |
| 102,875 | 149 | 24,899 | 6,722 | 4,262 | 36,032 |
| 102,876 | 146 | 24,808 | 6,694 | 4,257 | 35,905 |
| 102,877 | 138 | 23,866 | 6,446 | 4,126 | 34,576 |
| 102,878 | 139 | 24,157 | 6,493 | 4,145 | 34,934 |
| 102,879 | 139 | 24,468 | 6,534 | 4,173 | 35,314 |
| 102,880 | 139 | 24,718 | 6,577 | 4,203 | 35,637 |
| 102,881 | 129 | 24,696 | 6,585 | 4,208 | 35,618 |
| 102,882 | 124 | 24,561 | 6,584 | 4,208 | 35,477 |
| 102,883 | 120 | 24,515 | 6,560 | 4,202 | 35,397 |
| 102,884 | 116 | 24,056 | 6,465 | 4,123 | 34,760 |
| 102,885 | 116 | 24,044 | 6,444 | 4,109 | 34,713 |
| 102,886 | 108 | 23,814 | 6,430 | 4,103 | 34,455 |
| 102,887 | 107 | 23,977 | 6,464 | 4,129 | 34,677 |
| 102,888 | 104 | 24,074 | 6,483 | 4,142 | 34,803 |
| 102,889 | 107 | 24,088 | 6,478 | 4,149 | 34,822 |
| 102,890 | 112 | 24,124 | 6,451 | 4,140 | 34,827 |
| 102,891 | 119 | 24,029 | 6,422 | 4,126 | 34,696 |
| 102,892 | 113 | 24,039 | 6,386 | 4,111 | 34,649 |
| 102,893 | 115 | 23,762 | 6,307 | 4,082 | 34,266 |
| 102,894 | 115 | 23,837 | 6,316 | 4,089 | 34,357 |
| 102,895 | 109 | 23,685 | 6,280 | 4,048 | 34,122 |
| 102,896 | 107 | 23,651 | 6,251 | 4,062 | 34,071 |
| 102,897 | 111 | 23,554 | 6,211 | 4,030 | 33,906 |
| 102,898 | 111 | 23,384 | 6,164 | 3,966 | 33,625 |
| 102,899 | 109 | 23,037 | 6,004 | 3,845 | 32,995 |
| 102,900 | 110 | 22,927 | 5,935 | 3,807 | 32,779 |
| 102,901 | 109 | 22,903 | 5,936 | 3,809 | 32,757 |
| 102,902 | 113 | 22,676 | 5,906 | 3,773 | 32,468 |
| 102,903 | 110 | 22,256 | 5,764 | 3,674 | 31,804 |



|         |     |        |       |       |        |
|---------|-----|--------|-------|-------|--------|
| 102,904 | 109 | 21,828 | 5,644 | 3,613 | 31,194 |
| 102,905 | 110 | 21,762 | 5,636 | 3,609 | 31,117 |
| 102,906 | 109 | 21,410 | 5,552 | 3,548 | 30,619 |
| 102,907 | 106 | 20,811 | 5,416 | 3,489 | 29,822 |
| 102,908 | 108 | 20,989 | 5,467 | 3,533 | 30,097 |
| 102,909 | 104 | 20,904 | 5,402 | 3,515 | 29,925 |
| 102,910 | 104 | 20,834 | 5,409 | 3,512 | 29,859 |
| 102,911 | 105 | 20,693 | 5,347 | 3,465 | 29,610 |
| 102,912 | 111 | 20,737 | 5,349 | 3,466 | 29,663 |
| 102,913 | 109 | 20,439 | 5,296 | 3,433 | 29,277 |
| 102,914 | 108 | 20,602 | 5,332 | 3,489 | 29,531 |
| 102,915 | 104 | 20,506 | 5,312 | 3,480 | 29,402 |
| 102,916 | 104 | 20,690 | 5,364 | 3,521 | 29,679 |
| 102,917 | 106 | 20,672 | 5,333 | 3,524 | 29,635 |
| 102,918 | 106 | 20,353 | 5,266 | 3,481 | 29,206 |
| 102,919 | 105 | 20,425 | 5,312 | 3,493 | 29,335 |
| 102,920 | 107 | 20,624 | 5,348 | 3,508 | 29,587 |
| 102,921 | 104 | 20,789 | 5,350 | 3,536 | 29,779 |
| 102,922 | 106 | 20,878 | 5,346 | 3,547 | 29,877 |
| 102,923 | 102 | 21,067 | 5,362 | 3,574 | 30,105 |
| 102,924 | 97  | 21,301 | 5,353 | 3,587 | 30,338 |
| 102,925 | 99  | 20,854 | 5,252 | 3,505 | 29,710 |
| 102,926 | 101 | 21,288 | 5,327 | 3,543 | 30,259 |
| 102,927 | 101 | 21,328 | 5,328 | 3,558 | 30,315 |
| 102,928 | 109 | 21,738 | 5,422 | 3,624 | 30,893 |
| 102,929 | 109 | 21,746 | 5,413 | 3,626 | 30,894 |
| 102,930 | 106 | 22,028 | 5,473 | 3,665 | 31,272 |
| 102,931 | 106 | 22,321 | 5,526 | 3,694 | 31,647 |
| 102,932 | 117 | 22,898 | 5,720 | 3,759 | 32,494 |
| 102,933 | 129 | 23,461 | 5,874 | 3,829 | 33,293 |
| 102,934 | 132 | 23,602 | 5,915 | 3,852 | 33,501 |
| 102,935 | 133 | 24,171 | 6,066 | 3,926 | 34,296 |

|         |     |        |       |       |        |
|---------|-----|--------|-------|-------|--------|
| 102,936 | 136 | 24,159 | 6,044 | 3,918 | 34,257 |
| 102,937 | 135 | 24,110 | 5,992 | 3,905 | 34,142 |
| 102,938 | 136 | 24,988 | 6,200 | 4,027 | 35,351 |
| 102,939 | 141 | 25,426 | 6,307 | 4,091 | 35,965 |
| 102,940 | 136 | 25,461 | 6,337 | 4,100 | 36,034 |
| 102,941 | 132 | 25,555 | 6,358 | 4,116 | 36,161 |
| 102,942 | 124 | 25,343 | 6,311 | 4,081 | 35,859 |
| 102,943 | 121 | 25,323 | 6,328 | 4,083 | 35,855 |
| 102,944 | 120 | 25,478 | 6,427 | 4,122 | 36,147 |
| 102,945 | 126 | 25,702 | 6,465 | 4,149 | 36,442 |
| 102,946 | 126 | 25,231 | 6,303 | 4,056 | 35,716 |
| 102,947 | 127 | 25,437 | 6,342 | 4,092 | 35,998 |
| 102,948 | 124 | 25,609 | 6,402 | 4,120 | 36,255 |
| 102,949 | 124 | 25,660 | 6,401 | 4,121 | 36,306 |
| 102,950 | 130 | 25,965 | 6,519 | 4,179 | 36,793 |
| 102,951 | 130 | 26,005 | 6,533 | 4,171 | 36,839 |
| 102,952 | 126 | 26,269 | 6,578 | 4,198 | 37,171 |
| 102,953 | 129 | 26,505 | 6,637 | 4,254 | 37,525 |
| 102,954 | 130 | 26,435 | 6,680 | 4,275 | 37,520 |
| 102,955 | 131 | 26,402 | 6,641 | 4,268 | 37,442 |
| 102,956 | 134 | 26,467 | 6,626 | 4,265 | 37,492 |
| 102,957 | 144 | 26,750 | 6,695 | 4,295 | 37,884 |
| 102,958 | 144 | 26,880 | 6,696 | 4,305 | 38,025 |
| 102,959 | 144 | 26,671 | 6,649 | 4,266 | 37,730 |
| 102,960 | 141 | 26,331 | 6,612 | 4,243 | 37,327 |
| 102,961 | 150 | 26,553 | 6,685 | 4,273 | 37,661 |
| 102,962 | 147 | 26,769 | 6,742 | 4,297 | 37,955 |
| 102,963 | 149 | 27,044 | 6,823 | 4,335 | 38,351 |
| 102,964 | 147 | 27,334 | 6,836 | 4,358 | 38,675 |
| 102,965 | 154 | 27,231 | 6,819 | 4,296 | 38,500 |
| 102,966 | 156 | 27,620 | 6,880 | 4,329 | 38,985 |
| 102,967 | 161 | 27,876 | 6,918 | 4,353 | 39,308 |

|         |     |        |       |       |        |
|---------|-----|--------|-------|-------|--------|
| 102,968 | 158 | 27,597 | 6,933 | 4,321 | 39,009 |
| 102,969 | 161 | 27,786 | 6,979 | 4,339 | 39,265 |
| 102,970 | 161 | 27,871 | 6,968 | 4,329 | 39,329 |
| 102,971 | 169 | 27,729 | 7,012 | 4,351 | 39,261 |
| 102,972 | 168 | 27,937 | 7,056 | 4,403 | 39,564 |
| 102,973 | 165 | 28,217 | 7,112 | 4,440 | 39,934 |
| 102,974 | 163 | 28,060 | 7,087 | 4,386 | 39,696 |
| 102,975 | 171 | 28,133 | 7,121 | 4,400 | 39,825 |
| 102,976 | 173 | 28,528 | 7,164 | 4,422 | 40,287 |
| 102,977 | 172 | 28,378 | 7,143 | 4,382 | 40,075 |
| 102,978 | 177 | 28,304 | 7,110 | 4,365 | 39,956 |
| 102,979 | 172 | 27,915 | 7,093 | 4,339 | 39,519 |
| 102,980 | 176 | 28,332 | 7,263 | 4,429 | 40,200 |
| 102,981 | 180 | 27,991 | 7,153 | 4,377 | 39,701 |
| 102,982 | 183 | 27,951 | 7,146 | 4,377 | 39,657 |
| 102,983 | 178 | 28,132 | 7,121 | 4,397 | 39,828 |
| 102,984 | 166 | 27,832 | 7,006 | 4,360 | 39,364 |
| 102,985 | 171 | 27,672 | 7,019 | 4,366 | 39,228 |
| 102,986 | 172 | 27,515 | 6,995 | 4,388 | 39,070 |
| 102,987 | 168 | 27,437 | 7,002 | 4,396 | 39,003 |
| 102,988 | 172 | 27,279 | 6,997 | 4,390 | 38,838 |
| 102,989 | 167 | 27,182 | 6,976 | 4,382 | 38,707 |
| 102,990 | 169 | 27,004 | 7,033 | 4,384 | 38,590 |
| 102,991 | 171 | 26,871 | 7,020 | 4,386 | 38,448 |
| 102,992 | 173 | 26,990 | 7,022 | 4,361 | 38,546 |
| 102,993 | 177 | 27,123 | 7,015 | 4,351 | 38,666 |
| 102,994 | 178 | 27,194 | 7,013 | 4,338 | 38,723 |
| 102,995 | 178 | 27,147 | 6,971 | 4,334 | 38,630 |
| 102,996 | 174 | 27,214 | 7,017 | 4,346 | 38,751 |
| 102,997 | 175 | 27,164 | 7,046 | 4,366 | 38,751 |
| 102,998 | 178 | 26,972 | 7,057 | 4,342 | 38,549 |
| 102,999 | 188 | 27,180 | 7,102 | 4,377 | 38,847 |

|         |     |        |       |       |        |
|---------|-----|--------|-------|-------|--------|
| 103,000 | 191 | 27,171 | 7,113 | 4,384 | 38,859 |
| 103,001 | 186 | 27,001 | 7,038 | 4,341 | 38,566 |
| 103,002 | 186 | 26,994 | 7,035 | 4,339 | 38,554 |
| 103,003 | 187 | 27,007 | 7,038 | 4,339 | 38,571 |
| 103,004 | 181 | 27,085 | 6,991 | 4,310 | 38,567 |
| 103,005 | 181 | 27,088 | 6,998 | 4,323 | 38,590 |
| 103,006 | 182 | 27,046 | 7,012 | 4,311 | 38,551 |
| 103,007 | 192 | 27,412 | 7,069 | 4,362 | 39,035 |
| 103,008 | 188 | 27,158 | 7,018 | 4,337 | 38,701 |
| 103,009 | 187 | 27,133 | 7,029 | 4,320 | 38,669 |
| 103,010 | 180 | 27,206 | 7,048 | 4,362 | 38,796 |
| 103,011 | 183 | 27,151 | 7,001 | 4,354 | 38,689 |
| 103,012 | 184 | 27,066 | 6,994 | 4,372 | 38,616 |
| 103,013 | 182 | 27,283 | 7,009 | 4,392 | 38,866 |
| 103,014 | 186 | 27,165 | 6,992 | 4,369 | 38,712 |
| 103,015 | 188 | 27,137 | 6,971 | 4,378 | 38,674 |
| 103,016 | 182 | 27,173 | 6,987 | 4,414 | 38,756 |
| 103,017 | 182 | 27,287 | 7,045 | 4,446 | 38,960 |
| 103,018 | 179 | 27,179 | 7,009 | 4,419 | 38,786 |
| 103,019 | 186 | 27,522 | 7,020 | 4,436 | 39,164 |
| 103,020 | 186 | 27,271 | 6,932 | 4,412 | 38,801 |
| 103,021 | 183 | 27,388 | 6,957 | 4,427 | 38,955 |
| 103,022 | 175 | 27,404 | 6,962 | 4,406 | 38,947 |
| 103,023 | 175 | 27,659 | 7,023 | 4,438 | 39,295 |
| 103,024 | 177 | 26,866 | 6,881 | 4,350 | 38,274 |
| 103,025 | 179 | 27,091 | 6,924 | 4,397 | 38,591 |
| 103,026 | 170 | 27,019 | 6,917 | 4,395 | 38,501 |
| 103,027 | 166 | 26,979 | 6,921 | 4,419 | 38,485 |
| 103,028 | 168 | 26,858 | 6,869 | 4,401 | 38,296 |
| 103,029 | 158 | 26,666 | 6,841 | 4,375 | 38,040 |
| 103,030 | 158 | 26,530 | 6,732 | 4,329 | 37,749 |
| 103,031 | 157 | 25,732 | 6,593 | 4,271 | 36,753 |

|         |     |        |       |       |        |
|---------|-----|--------|-------|-------|--------|
| 103,032 | 157 | 25,472 | 6,577 | 4,247 | 36,453 |
| 103,033 | 157 | 25,509 | 6,575 | 4,258 | 36,499 |
| 103,034 | 153 | 24,877 | 6,475 | 4,166 | 35,671 |
| 103,035 | 146 | 24,626 | 6,417 | 4,128 | 35,317 |
| 103,036 | 141 | 23,979 | 6,220 | 3,959 | 34,299 |
| 103,037 | 141 | 24,138 | 6,216 | 3,980 | 34,475 |
| 103,038 | 141 | 24,381 | 6,269 | 4,017 | 34,808 |
| 103,039 | 140 | 23,190 | 5,984 | 3,822 | 33,136 |
| 103,040 | 143 | 23,485 | 6,002 | 3,847 | 33,477 |
| 103,041 | 141 | 23,736 | 6,040 | 3,875 | 33,792 |
| 103,042 | 146 | 23,781 | 6,046 | 3,873 | 33,846 |
| 103,043 | 142 | 23,469 | 5,968 | 3,853 | 33,432 |
| 103,044 | 143 | 23,810 | 6,055 | 3,915 | 33,923 |
| 103,045 | 140 | 23,569 | 6,001 | 3,880 | 33,590 |
| 103,046 | 152 | 23,749 | 6,042 | 3,895 | 33,838 |
| 103,047 | 150 | 23,756 | 6,018 | 3,901 | 33,825 |
| 103,048 | 145 | 23,359 | 5,922 | 3,832 | 33,258 |
| 103,049 | 146 | 23,348 | 5,911 | 3,834 | 33,239 |
| 103,050 | 139 | 23,678 | 5,973 | 3,866 | 33,656 |
| 103,051 | 136 | 23,420 | 5,898 | 3,822 | 33,276 |
| 103,052 | 134 | 23,472 | 5,900 | 3,822 | 33,328 |
| 103,053 | 133 | 23,443 | 5,896 | 3,834 | 33,306 |
| 103,054 | 135 | 23,515 | 5,942 | 3,845 | 33,437 |
| 103,055 | 134 | 23,226 | 5,880 | 3,812 | 33,052 |
| 103,056 | 135 | 23,373 | 5,919 | 3,816 | 33,243 |
| 103,057 | 129 | 23,551 | 5,993 | 3,857 | 33,530 |
| 103,058 | 127 | 23,453 | 6,010 | 3,850 | 33,440 |
| 103,059 | 125 | 23,269 | 5,944 | 3,805 | 33,143 |
| 103,060 | 126 | 23,307 | 5,948 | 3,800 | 33,181 |
| 103,061 | 124 | 23,296 | 5,944 | 3,783 | 33,147 |
| 103,062 | 120 | 23,183 | 5,906 | 3,761 | 32,970 |
| 103,063 | 122 | 23,313 | 5,928 | 3,743 | 33,106 |

|         |     |        |       |       |        |
|---------|-----|--------|-------|-------|--------|
| 103,064 | 124 | 22,985 | 5,869 | 3,690 | 32,668 |
| 103,065 | 118 | 22,597 | 5,804 | 3,650 | 32,169 |
| 103,066 | 114 | 22,748 | 5,857 | 3,676 | 32,395 |
| 103,067 | 118 | 22,831 | 5,834 | 3,676 | 32,459 |
| 103,068 | 118 | 22,817 | 5,807 | 3,644 | 32,386 |
| 103,069 | 116 | 22,783 | 5,825 | 3,666 | 32,390 |
| 103,070 | 110 | 22,581 | 5,785 | 3,658 | 32,134 |
| 103,071 | 111 | 22,136 | 5,723 | 3,615 | 31,585 |
| 103,072 | 111 | 21,800 | 5,661 | 3,561 | 31,133 |
| 103,073 | 113 | 22,186 | 5,716 | 3,603 | 31,618 |
| 103,074 | 116 | 22,103 | 5,657 | 3,584 | 31,460 |
| 103,075 | 114 | 22,066 | 5,594 | 3,560 | 31,334 |
| 103,076 | 113 | 21,951 | 5,507 | 3,478 | 31,049 |
| 103,077 | 113 | 21,971 | 5,520 | 3,460 | 31,064 |
| 103,078 | 115 | 22,342 | 5,622 | 3,515 | 31,594 |
| 103,079 | 109 | 22,064 | 5,573 | 3,511 | 31,257 |
| 103,080 | 108 | 22,023 | 5,560 | 3,482 | 31,173 |
| 103,081 | 106 | 22,102 | 5,578 | 3,465 | 31,251 |
| 103,082 | 109 | 22,139 | 5,585 | 3,474 | 31,307 |
| 103,083 | 106 | 21,984 | 5,534 | 3,457 | 31,081 |
| 103,084 | 115 | 22,357 | 5,579 | 3,508 | 31,559 |
| 103,085 | 121 | 22,614 | 5,633 | 3,543 | 31,911 |
| 103,086 | 120 | 22,951 | 5,686 | 3,592 | 32,349 |
| 103,087 | 120 | 22,818 | 5,617 | 3,569 | 32,124 |
| 103,088 | 125 | 22,729 | 5,639 | 3,562 | 32,055 |
| 103,089 | 120 | 22,494 | 5,567 | 3,524 | 31,705 |
| 103,090 | 119 | 22,854 | 5,622 | 3,546 | 32,141 |
| 103,091 | 121 | 22,661 | 5,572 | 3,517 | 31,871 |
| 103,092 | 120 | 22,464 | 5,536 | 3,488 | 31,608 |
| 103,093 | 124 | 23,207 | 5,709 | 3,630 | 32,670 |
| 103,094 | 129 | 23,505 | 5,797 | 3,649 | 33,080 |
| 103,095 | 129 | 23,036 | 5,683 | 3,578 | 32,426 |

|         |     |        |       |       |        |
|---------|-----|--------|-------|-------|--------|
| 103,096 | 127 | 23,023 | 5,682 | 3,572 | 32,404 |
| 103,097 | 122 | 22,815 | 5,622 | 3,549 | 32,108 |
| 103,098 | 122 | 22,559 | 5,570 | 3,511 | 31,762 |
| 103,099 | 124 | 23,377 | 5,752 | 3,635 | 32,888 |
| 103,100 | 131 | 23,664 | 5,806 | 3,653 | 33,254 |
| 103,101 | 128 | 23,419 | 5,762 | 3,635 | 32,944 |
| 103,102 | 132 | 23,419 | 5,768 | 3,648 | 32,967 |
| 103,103 | 134 | 23,485 | 5,767 | 3,653 | 33,039 |
| 103,104 | 138 | 23,856 | 5,835 | 3,678 | 33,507 |
| 103,105 | 137 | 23,945 | 5,859 | 3,680 | 33,621 |
| 103,106 | 140 | 23,754 | 5,794 | 3,661 | 33,349 |
| 103,107 | 145 | 23,841 | 5,756 | 3,642 | 33,384 |
| 103,108 | 146 | 23,818 | 5,730 | 3,639 | 33,333 |
| 103,109 | 141 | 23,807 | 5,724 | 3,644 | 33,316 |
| 103,110 | 142 | 23,985 | 5,786 | 3,700 | 33,613 |
| 103,111 | 141 | 23,858 | 5,781 | 3,678 | 33,458 |
| 103,112 | 141 | 23,675 | 5,752 | 3,635 | 33,203 |
| 103,113 | 142 | 23,914 | 5,805 | 3,675 | 33,536 |
| 103,114 | 140 | 23,862 | 5,799 | 3,678 | 33,479 |
| 103,115 | 137 | 23,760 | 5,745 | 3,671 | 33,313 |
| 103,116 | 141 | 23,839 | 5,794 | 3,697 | 33,471 |
| 103,117 | 146 | 23,806 | 5,817 | 3,708 | 33,477 |
| 103,118 | 148 | 23,816 | 5,825 | 3,722 | 33,511 |
| 103,119 | 149 | 23,814 | 5,840 | 3,731 | 33,534 |
| 103,120 | 150 | 23,564 | 5,787 | 3,690 | 33,191 |
| 103,121 | 149 | 23,399 | 5,768 | 3,654 | 32,970 |
| 103,122 | 146 | 23,589 | 5,814 | 3,686 | 33,235 |
| 103,123 | 151 | 23,566 | 5,822 | 3,700 | 33,239 |
| 103,124 | 151 | 23,646 | 5,811 | 3,685 | 33,293 |
| 103,125 | 152 | 23,838 | 5,870 | 3,710 | 33,570 |
| 103,126 | 152 | 23,756 | 5,858 | 3,713 | 33,479 |
| 103,127 | 151 | 23,535 | 5,827 | 3,705 | 33,218 |

|         |     |        |       |       |        |
|---------|-----|--------|-------|-------|--------|
| 103,128 | 156 | 23,367 | 5,781 | 3,683 | 32,987 |
| 103,129 | 162 | 23,345 | 5,786 | 3,678 | 32,971 |
| 103,130 | 163 | 22,782 | 5,631 | 3,555 | 32,131 |
| 103,131 | 168 | 23,020 | 5,672 | 3,569 | 32,429 |
| 103,132 | 170 | 23,042 | 5,670 | 3,584 | 32,466 |
| 103,133 | 171 | 23,185 | 5,715 | 3,605 | 32,676 |
| 103,134 | 168 | 22,992 | 5,709 | 3,604 | 32,473 |
| 103,135 | 164 | 22,645 | 5,642 | 3,536 | 31,987 |
| 103,136 | 164 | 22,834 | 5,760 | 3,585 | 32,343 |
| 103,137 | 166 | 22,644 | 5,766 | 3,572 | 32,148 |
| 103,138 | 172 | 22,594 | 5,774 | 3,582 | 32,122 |
| 103,139 | 169 | 22,484 | 5,780 | 3,612 | 32,045 |
| 103,140 | 168 | 22,389 | 5,756 | 3,605 | 31,918 |
| 103,141 | 167 | 22,375 | 5,753 | 3,616 | 31,911 |
| 103,142 | 167 | 22,571 | 5,788 | 3,595 | 32,121 |
| 103,143 | 163 | 22,779 | 5,800 | 3,605 | 32,347 |
| 103,144 | 159 | 22,679 | 5,769 | 3,598 | 32,205 |
| 103,145 | 158 | 22,772 | 5,772 | 3,621 | 32,323 |
| 103,146 | 156 | 22,512 | 5,749 | 3,600 | 32,017 |
| 103,147 | 160 | 22,707 | 5,774 | 3,602 | 32,243 |
| 103,148 | 160 | 22,893 | 5,838 | 3,652 | 32,543 |
| 103,149 | 158 | 22,706 | 5,796 | 3,613 | 32,273 |
| 103,150 | 158 | 23,010 | 5,837 | 3,658 | 32,663 |
| 103,151 | 152 | 22,713 | 5,773 | 3,645 | 32,283 |
| 103,152 | 151 | 22,807 | 5,818 | 3,675 | 32,451 |
| 103,153 | 148 | 22,742 | 5,826 | 3,666 | 32,382 |
| 103,154 | 146 | 23,057 | 5,940 | 3,748 | 32,891 |
| 103,155 | 142 | 22,574 | 5,824 | 3,697 | 32,237 |
| 103,156 | 146 | 22,754 | 5,882 | 3,733 | 32,515 |
| 103,157 | 142 | 22,758 | 5,880 | 3,723 | 32,503 |
| 103,158 | 138 | 22,930 | 6,024 | 3,795 | 32,887 |
| 103,159 | 139 | 22,798 | 6,037 | 3,773 | 32,747 |



|         |     |        |       |       |        |
|---------|-----|--------|-------|-------|--------|
| 103,160 | 142 | 22,794 | 6,031 | 3,765 | 32,732 |
| 103,161 | 158 | 23,044 | 6,146 | 3,798 | 33,146 |
| 103,162 | 156 | 22,702 | 6,070 | 3,776 | 32,704 |
| 103,163 | 157 | 22,499 | 6,051 | 3,747 | 32,454 |
| 103,164 | 160 | 23,179 | 6,238 | 3,884 | 33,461 |
| 103,165 | 163 | 22,898 | 6,222 | 3,835 | 33,118 |
| 103,166 | 163 | 22,980 | 6,227 | 3,839 | 33,209 |
| 103,167 | 165 | 23,240 | 6,293 | 3,876 | 33,574 |
| 103,168 | 160 | 22,927 | 6,196 | 3,813 | 33,096 |
| 103,169 | 154 | 22,975 | 6,215 | 3,804 | 33,148 |
| 103,170 | 158 | 23,245 | 6,325 | 3,899 | 33,627 |
| 103,171 | 156 | 23,056 | 6,276 | 3,858 | 33,346 |
| 103,172 | 156 | 22,893 | 6,278 | 3,854 | 33,181 |
| 103,173 | 154 | 23,019 | 6,397 | 3,920 | 33,490 |
| 103,174 | 159 | 22,974 | 6,451 | 3,948 | 33,532 |
| 103,175 | 157 | 23,025 | 6,528 | 3,977 | 33,687 |
| 103,176 | 155 | 22,969 | 6,537 | 4,007 | 33,668 |
| 103,177 | 155 | 22,460 | 6,417 | 3,951 | 32,983 |
| 103,178 | 157 | 22,798 | 6,489 | 4,007 | 33,451 |
| 103,179 | 154 | 23,067 | 6,570 | 4,058 | 33,849 |
| 103,180 | 146 | 22,800 | 6,481 | 4,018 | 33,445 |
| 103,181 | 145 | 22,921 | 6,553 | 4,081 | 33,700 |
| 103,182 | 140 | 23,041 | 6,568 | 4,109 | 33,858 |
| 103,183 | 135 | 22,849 | 6,463 | 4,054 | 33,501 |
| 103,184 | 138 | 23,112 | 6,537 | 4,095 | 33,882 |
| 103,185 | 137 | 23,403 | 6,599 | 4,153 | 34,292 |
| 103,186 | 138 | 23,515 | 6,595 | 4,153 | 34,401 |
| 103,187 | 134 | 23,548 | 6,586 | 4,179 | 34,447 |
| 103,188 | 133 | 23,665 | 6,599 | 4,174 | 34,571 |
| 103,189 | 130 | 23,611 | 6,539 | 4,135 | 34,415 |
| 103,190 | 130 | 23,635 | 6,563 | 4,136 | 34,464 |
| 103,191 | 130 | 23,630 | 6,562 | 4,112 | 34,434 |

|         |     |        |       |       |        |
|---------|-----|--------|-------|-------|--------|
| 103,192 | 130 | 23,649 | 6,616 | 4,143 | 34,538 |
| 103,193 | 130 | 23,889 | 6,699 | 4,220 | 34,938 |
| 103,194 | 131 | 23,811 | 6,711 | 4,170 | 34,823 |
| 103,195 | 130 | 23,364 | 6,582 | 4,114 | 34,190 |
| 103,196 | 133 | 23,283 | 6,583 | 4,109 | 34,108 |
| 103,197 | 129 | 22,981 | 6,525 | 4,073 | 33,708 |
| 103,198 | 128 | 23,017 | 6,631 | 4,172 | 33,948 |
| 103,199 | 126 | 22,911 | 6,633 | 4,153 | 33,823 |
| 103,200 | 125 | 22,921 | 6,636 | 4,152 | 33,834 |
| 103,201 | 126 | 22,817 | 6,637 | 4,146 | 33,726 |
| 103,202 | 126 | 22,543 | 6,577 | 4,097 | 33,343 |
| 103,203 | 126 | 22,367 | 6,497 | 4,049 | 33,039 |
| 103,204 | 129 | 22,663 | 6,598 | 4,096 | 33,486 |
| 103,205 | 130 | 22,424 | 6,509 | 4,053 | 33,116 |
| 103,206 | 131 | 22,549 | 6,551 | 4,073 | 33,304 |
| 103,207 | 129 | 22,445 | 6,551 | 4,073 | 33,198 |
| 103,208 | 126 | 21,772 | 6,336 | 3,949 | 32,183 |
| 103,209 | 133 | 22,013 | 6,380 | 3,975 | 32,501 |
| 103,210 | 128 | 21,993 | 6,380 | 3,981 | 32,482 |
| 103,211 | 127 | 22,238 | 6,397 | 3,993 | 32,755 |
| 103,212 | 114 | 22,427 | 6,421 | 4,016 | 32,978 |
| 103,213 | 119 | 22,296 | 6,410 | 4,002 | 32,827 |
| 103,214 | 120 | 22,092 | 6,375 | 3,992 | 32,579 |
| 103,215 | 123 | 22,149 | 6,360 | 3,986 | 32,618 |
| 103,216 | 125 | 22,281 | 6,331 | 3,978 | 32,715 |
| 103,217 | 124 | 22,017 | 6,281 | 3,945 | 32,367 |
| 103,218 | 120 | 22,191 | 6,372 | 4,018 | 32,701 |
| 103,219 | 123 | 22,158 | 6,408 | 4,009 | 32,698 |
| 103,220 | 125 | 22,232 | 6,412 | 4,034 | 32,803 |
| 103,221 | 122 | 22,309 | 6,400 | 4,006 | 32,837 |
| 103,222 | 126 | 22,364 | 6,379 | 3,992 | 32,861 |
| 103,223 | 126 | 22,698 | 6,378 | 3,999 | 33,201 |

|         |     |        |       |       |        |
|---------|-----|--------|-------|-------|--------|
| 103,224 | 128 | 22,798 | 6,343 | 3,980 | 33,249 |
| 103,225 | 120 | 22,656 | 6,229 | 3,914 | 32,919 |
| 103,226 | 120 | 22,580 | 6,176 | 3,904 | 32,780 |
| 103,227 | 121 | 22,637 | 6,207 | 3,922 | 32,887 |
| 103,228 | 127 | 22,624 | 6,224 | 3,922 | 32,897 |
| 103,229 | 127 | 22,562 | 6,254 | 3,918 | 32,861 |
| 103,230 | 127 | 22,482 | 6,241 | 3,898 | 32,748 |
| 103,231 | 126 | 22,232 | 6,218 | 3,880 | 32,456 |
| 103,232 | 128 | 22,490 | 6,302 | 3,922 | 32,842 |
| 103,233 | 130 | 22,654 | 6,358 | 3,960 | 33,102 |
| 103,234 | 134 | 22,610 | 6,373 | 3,941 | 33,058 |
| 103,235 | 136 | 22,428 | 6,314 | 3,907 | 32,785 |
| 103,236 | 136 | 22,276 | 6,255 | 3,875 | 32,542 |
| 103,237 | 130 | 22,537 | 6,332 | 3,916 | 32,915 |
| 103,238 | 131 | 22,694 | 6,351 | 3,906 | 33,082 |
| 103,239 | 133 | 22,946 | 6,375 | 3,923 | 33,377 |
| 103,240 | 133 | 22,843 | 6,302 | 3,891 | 33,169 |
| 103,241 | 134 | 22,758 | 6,299 | 3,882 | 33,073 |
| 103,242 | 133 | 22,949 | 6,328 | 3,906 | 33,316 |
| 103,243 | 132 | 22,819 | 6,307 | 3,906 | 33,164 |
| 103,244 | 135 | 22,927 | 6,323 | 3,920 | 33,305 |
| 103,245 | 133 | 22,942 | 6,326 | 3,949 | 33,350 |
| 103,246 | 127 | 22,888 | 6,298 | 3,909 | 33,222 |
| 103,247 | 130 | 23,239 | 6,322 | 3,905 | 33,596 |
| 103,248 | 130 | 23,278 | 6,310 | 3,899 | 33,617 |
| 103,249 | 128 | 23,664 | 6,392 | 3,941 | 34,125 |
| 103,250 | 127 | 23,171 | 6,214 | 3,843 | 33,355 |
| 103,251 | 127 | 23,225 | 6,223 | 3,877 | 33,452 |
| 103,252 | 128 | 23,545 | 6,277 | 3,910 | 33,860 |
| 103,253 | 133 | 23,549 | 6,237 | 3,901 | 33,820 |
| 103,254 | 130 | 23,297 | 6,186 | 3,880 | 33,493 |
| 103,255 | 130 | 23,689 | 6,293 | 3,944 | 34,056 |

|         |     |        |       |       |        |
|---------|-----|--------|-------|-------|--------|
| 103,256 | 126 | 22,601 | 6,028 | 3,795 | 32,550 |
| 103,257 | 126 | 22,772 | 6,046 | 3,813 | 32,757 |
| 103,258 | 128 | 23,019 | 6,085 | 3,826 | 33,058 |
| 103,259 | 128 | 23,060 | 6,086 | 3,820 | 33,094 |
| 103,260 | 122 | 23,491 | 6,209 | 3,904 | 33,726 |
| 103,261 | 119 | 23,123 | 6,133 | 3,871 | 33,246 |
| 103,262 | 127 | 23,437 | 6,228 | 3,936 | 33,728 |
| 103,263 | 125 | 22,940 | 6,066 | 3,860 | 32,991 |
| 103,264 | 124 | 23,231 | 6,110 | 3,894 | 33,359 |
| 103,265 | 123 | 23,343 | 6,168 | 3,932 | 33,566 |
| 103,266 | 116 | 23,061 | 6,092 | 3,897 | 33,166 |
| 103,267 | 122 | 22,798 | 6,018 | 3,837 | 32,775 |
| 103,268 | 123 | 22,703 | 5,954 | 3,799 | 32,579 |
| 103,269 | 127 | 23,443 | 6,048 | 3,857 | 33,475 |
| 103,270 | 127 | 23,373 | 6,037 | 3,834 | 33,371 |
| 103,271 | 131 | 23,416 | 6,018 | 3,829 | 33,394 |
| 103,272 | 133 | 23,556 | 6,011 | 3,841 | 33,541 |
| 103,273 | 129 | 23,154 | 5,930 | 3,794 | 33,007 |
| 103,274 | 127 | 23,108 | 5,896 | 3,790 | 32,921 |
| 103,275 | 128 | 23,029 | 5,865 | 3,768 | 32,790 |
| 103,276 | 128 | 22,738 | 5,752 | 3,678 | 32,296 |
| 103,277 | 129 | 22,891 | 5,759 | 3,685 | 32,464 |
| 103,278 | 122 | 23,111 | 5,837 | 3,724 | 32,794 |
| 103,279 | 125 | 22,895 | 5,793 | 3,682 | 32,495 |
| 103,280 | 125 | 22,855 | 5,775 | 3,695 | 32,450 |
| 103,281 | 123 | 22,980 | 5,795 | 3,738 | 32,636 |
| 103,282 | 123 | 22,992 | 5,769 | 3,706 | 32,590 |
| 103,283 | 122 | 22,819 | 5,685 | 3,679 | 32,305 |
| 103,284 | 125 | 22,798 | 5,688 | 3,666 | 32,277 |
| 103,285 | 122 | 22,687 | 5,668 | 3,666 | 32,143 |
| 103,286 | 118 | 22,410 | 5,599 | 3,629 | 31,756 |
| 103,287 | 118 | 22,425 | 5,564 | 3,616 | 31,723 |

|         |     |        |       |       |        |
|---------|-----|--------|-------|-------|--------|
| 103,288 | 120 | 22,574 | 5,605 | 3,661 | 31,960 |
| 103,289 | 120 | 22,515 | 5,630 | 3,673 | 31,938 |
| 103,290 | 116 | 22,166 | 5,583 | 3,635 | 31,500 |
| 103,291 | 118 | 21,855 | 5,528 | 3,603 | 31,104 |
| 103,292 | 118 | 21,683 | 5,499 | 3,572 | 30,872 |
| 103,293 | 117 | 21,691 | 5,541 | 3,591 | 30,940 |
| 103,294 | 116 | 21,486 | 5,516 | 3,566 | 30,684 |
| 103,295 | 110 | 21,740 | 5,639 | 3,641 | 31,130 |
| 103,296 | 110 | 21,616 | 5,608 | 3,622 | 30,956 |
| 103,297 | 113 | 21,690 | 5,632 | 3,658 | 31,093 |
| 103,298 | 111 | 21,655 | 5,611 | 3,667 | 31,044 |
| 103,299 | 112 | 21,928 | 5,675 | 3,677 | 31,392 |
| 103,300 | 113 | 21,820 | 5,627 | 3,649 | 31,209 |
| 103,301 | 116 | 21,925 | 5,698 | 3,692 | 31,431 |
| 103,302 | 116 | 21,958 | 5,716 | 3,674 | 31,464 |
| 103,303 | 113 | 22,241 | 5,800 | 3,768 | 31,922 |
| 103,304 | 109 | 22,028 | 5,782 | 3,757 | 31,676 |
| 103,305 | 110 | 22,099 | 5,810 | 3,779 | 31,798 |
| 103,306 | 109 | 22,152 | 5,811 | 3,784 | 31,856 |
| 103,307 | 109 | 22,175 | 5,814 | 3,798 | 31,896 |
| 103,308 | 108 | 22,327 | 5,880 | 3,829 | 32,144 |
| 103,309 | 110 | 22,456 | 5,897 | 3,872 | 32,335 |
| 103,310 | 110 | 22,454 | 5,906 | 3,845 | 32,315 |
| 103,311 | 110 | 22,624 | 5,984 | 3,886 | 32,604 |
| 103,312 | 114 | 22,810 | 6,019 | 3,897 | 32,840 |
| 103,313 | 107 | 22,682 | 6,042 | 3,915 | 32,746 |
| 103,314 | 103 | 22,620 | 6,097 | 3,901 | 32,721 |
| 103,315 | 103 | 22,630 | 6,153 | 3,941 | 32,827 |
| 103,316 | 111 | 22,598 | 6,102 | 3,917 | 32,728 |
| 103,317 | 111 | 22,431 | 6,084 | 3,887 | 32,513 |
| 103,318 | 107 | 22,638 | 6,183 | 3,972 | 32,900 |
| 103,319 | 106 | 22,315 | 6,152 | 3,951 | 32,524 |

|         |     |        |       |       |        |
|---------|-----|--------|-------|-------|--------|
| 103,320 | 112 | 22,453 | 6,213 | 3,975 | 32,753 |
| 103,321 | 108 | 22,541 | 6,277 | 4,025 | 32,951 |
| 103,322 | 110 | 22,353 | 6,289 | 4,008 | 32,760 |
| 103,323 | 112 | 22,535 | 6,366 | 4,030 | 33,043 |
| 103,324 | 115 | 22,511 | 6,388 | 4,042 | 33,056 |
| 103,325 | 118 | 22,562 | 6,419 | 4,050 | 33,149 |
| 103,326 | 114 | 22,271 | 6,361 | 4,020 | 32,766 |
| 103,327 | 113 | 22,033 | 6,332 | 4,013 | 32,491 |
| 103,328 | 114 | 22,370 | 6,439 | 4,051 | 32,974 |
| 103,329 | 119 | 22,474 | 6,482 | 4,107 | 33,182 |
| 103,330 | 118 | 22,422 | 6,462 | 4,106 | 33,108 |
| 103,331 | 118 | 22,572 | 6,491 | 4,117 | 33,298 |
| 103,332 | 121 | 22,526 | 6,455 | 4,087 | 33,189 |
| 103,333 | 119 | 22,202 | 6,389 | 4,065 | 32,775 |
| 103,334 | 120 | 22,355 | 6,469 | 4,119 | 33,063 |
| 103,335 | 120 | 22,393 | 6,511 | 4,141 | 33,165 |
| 103,336 | 123 | 22,523 | 6,525 | 4,137 | 33,308 |
| 103,337 | 123 | 22,527 | 6,542 | 4,154 | 33,346 |
| 103,338 | 128 | 22,523 | 6,591 | 4,170 | 33,412 |
| 103,339 | 125 | 22,674 | 6,625 | 4,166 | 33,590 |
| 103,340 | 123 | 22,401 | 6,547 | 4,121 | 33,192 |
| 103,341 | 123 | 22,593 | 6,588 | 4,131 | 33,435 |
| 103,342 | 125 | 22,671 | 6,653 | 4,144 | 33,593 |
| 103,343 | 124 | 22,980 | 6,627 | 4,161 | 33,892 |
| 103,344 | 133 | 23,164 | 6,601 | 4,142 | 34,040 |
| 103,345 | 133 | 23,069 | 6,618 | 4,133 | 33,953 |
| 103,346 | 136 | 23,434 | 6,739 | 4,173 | 34,482 |
| 103,347 | 140 | 23,332 | 6,737 | 4,184 | 34,393 |
| 103,348 | 139 | 23,205 | 6,722 | 4,177 | 34,243 |
| 103,349 | 138 | 23,214 | 6,742 | 4,195 | 34,289 |
| 103,350 | 136 | 22,907 | 6,702 | 4,178 | 33,923 |
| 103,351 | 137 | 22,817 | 6,685 | 4,163 | 33,802 |

|         |     |        |       |       |        |
|---------|-----|--------|-------|-------|--------|
| 103,352 | 133 | 22,639 | 6,631 | 4,134 | 33,537 |
| 103,353 | 135 | 22,726 | 6,606 | 4,118 | 33,585 |
| 103,354 | 134 | 22,726 | 6,585 | 4,079 | 33,524 |
| 103,355 | 146 | 23,069 | 6,634 | 4,104 | 33,953 |
| 103,356 | 146 | 22,959 | 6,579 | 4,097 | 33,781 |
| 103,357 | 148 | 23,191 | 6,657 | 4,129 | 34,125 |
| 103,358 | 153 | 22,587 | 6,494 | 4,030 | 33,264 |
| 103,359 | 153 | 22,742 | 6,555 | 4,059 | 33,509 |
| 103,360 | 154 | 23,055 | 6,627 | 4,089 | 33,925 |
| 103,361 | 159 | 23,138 | 6,591 | 4,060 | 33,948 |
| 103,362 | 156 | 23,057 | 6,551 | 4,046 | 33,810 |
| 103,363 | 155 | 23,086 | 6,520 | 4,022 | 33,783 |
| 103,364 | 153 | 23,244 | 6,466 | 4,003 | 33,866 |
| 103,365 | 142 | 22,837 | 6,353 | 3,902 | 33,234 |
| 103,366 | 143 | 23,131 | 6,366 | 3,919 | 33,559 |
| 103,367 | 145 | 23,410 | 6,442 | 3,958 | 33,955 |
| 103,368 | 151 | 23,102 | 6,387 | 3,898 | 33,538 |
| 103,369 | 152 | 22,757 | 6,302 | 3,833 | 33,044 |
| 103,370 | 148 | 22,827 | 6,335 | 3,865 | 33,175 |
| 103,371 | 144 | 22,586 | 6,267 | 3,810 | 32,807 |
| 103,372 | 149 | 22,567 | 6,257 | 3,800 | 32,773 |
| 103,373 | 144 | 22,203 | 6,160 | 3,770 | 32,277 |
| 103,374 | 145 | 22,220 | 6,167 | 3,802 | 32,334 |
| 103,375 | 142 | 22,057 | 6,156 | 3,790 | 32,145 |
| 103,376 | 140 | 21,837 | 6,129 | 3,765 | 31,871 |
| 103,377 | 139 | 21,752 | 6,137 | 3,763 | 31,791 |
| 103,378 | 139 | 21,890 | 6,163 | 3,765 | 31,957 |
| 103,379 | 136 | 22,210 | 6,201 | 3,780 | 32,327 |
| 103,380 | 136 | 22,438 | 6,240 | 3,798 | 32,612 |
| 103,381 | 131 | 22,422 | 6,235 | 3,794 | 32,582 |
| 103,382 | 132 | 22,127 | 6,176 | 3,742 | 32,177 |
| 103,383 | 136 | 22,335 | 6,197 | 3,752 | 32,420 |

|         |     |        |       |       |        |
|---------|-----|--------|-------|-------|--------|
| 103,384 | 136 | 22,318 | 6,154 | 3,703 | 32,311 |
| 103,385 | 135 | 22,329 | 6,144 | 3,679 | 32,287 |
| 103,386 | 135 | 22,328 | 6,130 | 3,697 | 32,290 |
| 103,387 | 132 | 22,264 | 6,140 | 3,693 | 32,229 |
| 103,388 | 133 | 22,289 | 6,144 | 3,682 | 32,248 |
| 103,389 | 130 | 22,224 | 6,092 | 3,669 | 32,115 |
| 103,390 | 131 | 22,300 | 6,170 | 3,697 | 32,298 |
| 103,391 | 132 | 22,311 | 6,153 | 3,697 | 32,293 |
| 103,392 | 129 | 22,117 | 6,079 | 3,661 | 31,986 |
| 103,393 | 132 | 22,123 | 6,111 | 3,663 | 32,029 |
| 103,394 | 132 | 21,985 | 6,085 | 3,661 | 31,863 |
| 103,395 | 127 | 22,321 | 6,190 | 3,707 | 32,345 |
| 103,396 | 130 | 22,610 | 6,190 | 3,733 | 32,663 |
| 103,397 | 132 | 22,752 | 6,175 | 3,748 | 32,807 |
| 103,398 | 132 | 22,899 | 6,171 | 3,758 | 32,960 |
| 103,399 | 131 | 22,707 | 6,109 | 3,711 | 32,658 |
| 103,400 | 137 | 22,602 | 6,085 | 3,681 | 32,505 |
| 103,401 | 137 | 22,603 | 6,066 | 3,665 | 32,471 |
| 103,402 | 139 | 22,797 | 6,116 | 3,689 | 32,741 |
| 103,403 | 144 | 22,723 | 6,104 | 3,658 | 32,629 |
| 103,404 | 145 | 22,434 | 6,055 | 3,606 | 32,240 |
| 103,405 | 143 | 22,123 | 6,008 | 3,580 | 31,854 |
| 103,406 | 132 | 22,321 | 6,054 | 3,603 | 32,110 |
| 103,407 | 130 | 22,188 | 6,067 | 3,571 | 31,956 |
| 103,408 | 129 | 22,413 | 6,114 | 3,602 | 32,258 |
| 103,409 | 131 | 22,075 | 6,048 | 3,584 | 31,838 |
| 103,410 | 131 | 21,944 | 6,023 | 3,576 | 31,674 |
| 103,411 | 131 | 21,998 | 6,088 | 3,608 | 31,825 |
| 103,412 | 128 | 22,001 | 6,099 | 3,639 | 31,867 |
| 103,413 | 130 | 21,951 | 6,115 | 3,640 | 31,836 |
| 103,414 | 132 | 21,995 | 6,131 | 3,639 | 31,897 |
| 103,415 | 131 | 21,716 | 6,084 | 3,590 | 31,521 |



|         |     |        |       |       |        |
|---------|-----|--------|-------|-------|--------|
| 103,416 | 131 | 21,872 | 6,146 | 3,602 | 31,751 |
| 103,417 | 130 | 21,898 | 6,171 | 3,619 | 31,818 |
| 103,418 | 112 | 21,420 | 5,920 | 3,514 | 30,966 |
| 103,419 | 113 | 21,772 | 5,998 | 3,549 | 31,432 |
| 103,420 | 113 | 21,899 | 6,013 | 3,566 | 31,591 |
| 103,421 | 119 | 22,178 | 6,091 | 3,616 | 32,004 |
| 103,422 | 116 | 22,410 | 6,149 | 3,647 | 32,322 |
| 103,423 | 108 | 22,207 | 6,094 | 3,617 | 32,026 |
| 103,424 | 109 | 22,073 | 6,070 | 3,571 | 31,823 |
| 103,425 | 109 | 21,880 | 6,002 | 3,551 | 31,542 |
| 103,426 | 131 | 22,595 | 6,189 | 3,678 | 32,593 |
| 103,427 | 135 | 22,706 | 6,193 | 3,679 | 32,713 |
| 103,428 | 140 | 22,762 | 6,179 | 3,694 | 32,775 |
| 103,429 | 141 | 22,750 | 6,170 | 3,698 | 32,759 |
| 103,430 | 144 | 22,578 | 6,136 | 3,668 | 32,526 |
| 103,431 | 143 | 22,497 | 6,091 | 3,637 | 32,368 |
| 103,432 | 142 | 22,232 | 6,031 | 3,595 | 32,000 |
| 103,433 | 141 | 22,213 | 6,027 | 3,580 | 31,961 |
| 103,434 | 132 | 22,260 | 6,038 | 3,594 | 32,024 |
| 103,435 | 137 | 21,918 | 5,893 | 3,520 | 31,468 |
| 103,436 | 138 | 22,141 | 5,921 | 3,550 | 31,750 |
| 103,437 | 137 | 22,369 | 5,975 | 3,585 | 32,066 |
| 103,438 | 135 | 22,206 | 5,901 | 3,566 | 31,808 |
| 103,439 | 136 | 22,460 | 5,981 | 3,603 | 32,180 |
| 103,440 | 132 | 22,441 | 5,964 | 3,599 | 32,136 |
| 103,441 | 131 | 22,171 | 5,858 | 3,554 | 31,714 |
| 103,442 | 132 | 22,039 | 5,822 | 3,547 | 31,540 |
| 103,443 | 131 | 21,942 | 5,807 | 3,543 | 31,423 |
| 103,444 | 133 | 21,539 | 5,710 | 3,495 | 30,877 |
| 103,445 | 133 | 21,464 | 5,649 | 3,460 | 30,706 |
| 103,446 | 136 | 22,007 | 5,785 | 3,547 | 31,475 |
| 103,447 | 140 | 21,816 | 5,764 | 3,511 | 31,231 |

|         |     |        |       |       |        |
|---------|-----|--------|-------|-------|--------|
| 103,448 | 137 | 21,485 | 5,704 | 3,457 | 30,783 |
| 103,449 | 142 | 21,213 | 5,637 | 3,396 | 30,388 |
| 103,450 | 140 | 20,994 | 5,568 | 3,374 | 30,076 |
| 103,451 | 140 | 21,375 | 5,717 | 3,454 | 30,686 |
| 103,452 | 143 | 21,452 | 5,727 | 3,452 | 30,774 |
| 103,453 | 144 | 21,671 | 5,787 | 3,481 | 31,083 |
| 103,454 | 139 | 21,426 | 5,713 | 3,451 | 30,729 |
| 103,455 | 141 | 21,435 | 5,690 | 3,442 | 30,708 |
| 103,456 | 140 | 21,379 | 5,684 | 3,429 | 30,632 |
| 103,457 | 141 | 21,264 | 5,690 | 3,437 | 30,532 |
| 103,458 | 144 | 21,517 | 5,753 | 3,481 | 30,895 |
| 103,459 | 144 | 21,591 | 5,750 | 3,485 | 30,970 |
| 103,460 | 138 | 21,649 | 5,707 | 3,436 | 30,930 |
| 103,461 | 147 | 21,954 | 5,768 | 3,470 | 31,339 |
| 103,462 | 152 | 21,787 | 5,691 | 3,435 | 31,065 |
| 103,463 | 152 | 21,459 | 5,636 | 3,373 | 30,620 |
| 103,464 | 159 | 22,064 | 5,806 | 3,488 | 31,517 |
| 103,465 | 160 | 21,866 | 5,733 | 3,441 | 31,200 |
| 103,466 | 161 | 21,863 | 5,732 | 3,469 | 31,225 |
| 103,467 | 164 | 21,660 | 5,678 | 3,469 | 30,971 |
| 103,468 | 164 | 21,582 | 5,681 | 3,458 | 30,885 |
| 103,469 | 164 | 21,545 | 5,706 | 3,490 | 30,905 |
| 103,470 | 166 | 21,435 | 5,691 | 3,487 | 30,779 |
| 103,471 | 167 | 21,525 | 5,744 | 3,510 | 30,946 |
| 103,472 | 161 | 21,480 | 5,738 | 3,501 | 30,880 |
| 103,473 | 161 | 21,588 | 5,750 | 3,536 | 31,035 |
| 103,474 | 159 | 21,863 | 5,822 | 3,566 | 31,410 |
| 103,475 | 149 | 22,114 | 5,838 | 3,576 | 31,677 |
| 103,476 | 140 | 22,197 | 5,870 | 3,558 | 31,765 |
| 103,477 | 139 | 22,257 | 5,864 | 3,563 | 31,823 |
| 103,478 | 137 | 22,524 | 5,985 | 3,598 | 32,244 |
| 103,479 | 131 | 22,545 | 6,030 | 3,594 | 32,300 |

|         |     |        |       |       |        |
|---------|-----|--------|-------|-------|--------|
| 103,480 | 135 | 22,339 | 5,961 | 3,553 | 31,988 |
| 103,481 | 134 | 22,120 | 5,898 | 3,537 | 31,689 |
| 103,482 | 139 | 22,563 | 6,064 | 3,589 | 32,355 |
| 103,483 | 139 | 22,405 | 5,998 | 3,558 | 32,100 |
| 103,484 | 146 | 22,494 | 6,003 | 3,552 | 32,195 |
| 103,485 | 146 | 22,483 | 6,003 | 3,543 | 32,175 |
| 103,486 | 143 | 22,137 | 5,975 | 3,509 | 31,764 |
| 103,487 | 141 | 21,862 | 5,952 | 3,465 | 31,420 |
| 103,488 | 148 | 22,639 | 6,206 | 3,602 | 32,595 |
| 103,489 | 150 | 22,715 | 6,208 | 3,591 | 32,664 |
| 103,490 | 152 | 22,922 | 6,294 | 3,645 | 33,013 |
| 103,491 | 152 | 22,962 | 6,303 | 3,652 | 33,069 |
| 103,492 | 150 | 22,829 | 6,282 | 3,612 | 32,873 |
| 103,493 | 151 | 22,941 | 6,328 | 3,636 | 33,056 |
| 103,494 | 149 | 23,178 | 6,413 | 3,699 | 33,439 |
| 103,495 | 144 | 22,951 | 6,371 | 3,670 | 33,136 |
| 103,496 | 150 | 22,990 | 6,437 | 3,705 | 33,282 |
| 103,497 | 154 | 22,956 | 6,426 | 3,675 | 33,211 |
| 103,498 | 136 | 22,367 | 6,284 | 3,603 | 32,390 |
| 103,499 | 137 | 22,516 | 6,325 | 3,632 | 32,610 |
| 103,500 | 139 | 22,644 | 6,341 | 3,655 | 32,779 |
| 103,501 | 137 | 22,277 | 6,245 | 3,596 | 32,255 |
| 103,502 | 139 | 22,195 | 6,238 | 3,575 | 32,147 |
| 103,503 | 142 | 22,082 | 6,239 | 3,584 | 32,047 |
| 103,504 | 144 | 22,203 | 6,255 | 3,592 | 32,194 |
| 103,505 | 143 | 22,134 | 6,257 | 3,577 | 32,111 |
| 103,506 | 144 | 22,070 | 6,225 | 3,554 | 31,993 |
| 103,507 | 143 | 22,150 | 6,218 | 3,549 | 32,060 |
| 103,508 | 148 | 22,415 | 6,255 | 3,583 | 32,401 |
| 103,509 | 148 | 22,423 | 6,256 | 3,588 | 32,415 |
| 103,510 | 147 | 21,982 | 6,173 | 3,532 | 31,834 |
| 103,511 | 147 | 21,990 | 6,199 | 3,553 | 31,889 |

|         |     |        |       |       |        |
|---------|-----|--------|-------|-------|--------|
| 103,512 | 130 | 21,711 | 6,141 | 3,520 | 31,502 |
| 103,513 | 130 | 21,933 | 6,161 | 3,540 | 31,764 |
| 103,514 | 128 | 21,982 | 6,180 | 3,569 | 31,859 |
| 103,515 | 123 | 21,938 | 6,167 | 3,559 | 31,787 |
| 103,516 | 124 | 21,991 | 6,196 | 3,553 | 31,864 |
| 103,517 | 125 | 21,943 | 6,180 | 3,554 | 31,802 |
| 103,518 | 123 | 22,058 | 6,168 | 3,540 | 31,889 |
| 103,519 | 122 | 21,871 | 6,104 | 3,493 | 31,590 |
| 103,520 | 124 | 21,934 | 6,116 | 3,479 | 31,653 |
| 103,521 | 125 | 22,173 | 6,139 | 3,498 | 31,935 |
| 103,522 | 124 | 22,180 | 6,114 | 3,474 | 31,892 |
| 103,523 | 124 | 21,861 | 6,015 | 3,396 | 31,396 |
| 103,524 | 125 | 21,772 | 5,997 | 3,373 | 31,267 |
| 103,525 | 131 | 21,994 | 6,055 | 3,382 | 31,562 |
| 103,526 | 132 | 21,829 | 6,009 | 3,362 | 31,332 |
| 103,527 | 132 | 21,702 | 5,921 | 3,339 | 31,094 |
| 103,528 | 132 | 21,610 | 5,826 | 3,317 | 30,885 |
| 103,529 | 133 | 21,443 | 5,751 | 3,298 | 30,625 |
| 103,530 | 138 | 21,649 | 5,766 | 3,338 | 30,891 |
| 103,531 | 131 | 21,342 | 5,676 | 3,298 | 30,447 |
| 103,532 | 131 | 21,223 | 5,647 | 3,287 | 30,288 |
| 103,533 | 133 | 21,513 | 5,701 | 3,332 | 30,679 |
| 103,534 | 131 | 21,284 | 5,685 | 3,299 | 30,399 |
| 103,535 | 124 | 21,128 | 5,618 | 3,300 | 30,170 |
| 103,536 | 124 | 21,260 | 5,622 | 3,310 | 30,316 |
| 103,537 | 121 | 21,406 | 5,632 | 3,334 | 30,493 |
| 103,538 | 130 | 21,459 | 5,598 | 3,344 | 30,531 |
| 103,539 | 129 | 21,217 | 5,539 | 3,303 | 30,188 |
| 103,540 | 136 | 21,193 | 5,502 | 3,285 | 30,116 |
| 103,541 | 135 | 21,444 | 5,571 | 3,319 | 30,469 |
| 103,542 | 138 | 21,222 | 5,536 | 3,297 | 30,193 |
| 103,543 | 139 | 20,838 | 5,406 | 3,238 | 29,621 |

|         |     |        |       |       |        |
|---------|-----|--------|-------|-------|--------|
| 103,544 | 144 | 21,094 | 5,445 | 3,257 | 29,940 |
| 103,545 | 140 | 21,295 | 5,466 | 3,276 | 30,177 |
| 103,546 | 139 | 21,377 | 5,461 | 3,297 | 30,274 |
| 103,547 | 140 | 21,412 | 5,451 | 3,296 | 30,299 |
| 103,548 | 142 | 21,481 | 5,424 | 3,323 | 30,370 |
| 103,549 | 146 | 21,638 | 5,439 | 3,332 | 30,555 |
| 103,550 | 146 | 21,779 | 5,463 | 3,352 | 30,740 |
| 103,551 | 148 | 21,730 | 5,435 | 3,345 | 30,658 |
| 103,552 | 143 | 21,698 | 5,426 | 3,340 | 30,607 |
| 103,553 | 142 | 21,867 | 5,446 | 3,346 | 30,801 |
| 103,554 | 142 | 21,725 | 5,414 | 3,336 | 30,617 |
| 103,555 | 141 | 21,630 | 5,382 | 3,326 | 30,479 |
| 103,556 | 140 | 21,663 | 5,366 | 3,324 | 30,493 |
| 103,557 | 139 | 21,859 | 5,393 | 3,357 | 30,748 |
| 103,558 | 137 | 21,645 | 5,330 | 3,338 | 30,450 |
| 103,559 | 135 | 21,609 | 5,321 | 3,333 | 30,398 |
| 103,560 | 137 | 21,700 | 5,310 | 3,337 | 30,484 |
| 103,561 | 136 | 21,942 | 5,351 | 3,349 | 30,778 |
| 103,562 | 136 | 21,823 | 5,297 | 3,335 | 30,591 |
| 103,563 | 136 | 21,881 | 5,308 | 3,351 | 30,676 |
| 103,564 | 137 | 21,981 | 5,322 | 3,353 | 30,793 |
| 103,565 | 137 | 22,118 | 5,382 | 3,387 | 31,024 |
| 103,566 | 138 | 22,131 | 5,377 | 3,394 | 31,040 |
| 103,567 | 138 | 22,026 | 5,343 | 3,408 | 30,915 |
| 103,568 | 137 | 21,826 | 5,289 | 3,398 | 30,650 |
| 103,569 | 139 | 21,947 | 5,338 | 3,420 | 30,844 |
| 103,570 | 140 | 21,795 | 5,310 | 3,410 | 30,655 |
| 103,571 | 141 | 21,626 | 5,264 | 3,404 | 30,435 |
| 103,572 | 141 | 21,990 | 5,352 | 3,472 | 30,955 |
| 103,573 | 141 | 21,685 | 5,301 | 3,451 | 30,578 |
| 103,574 | 143 | 21,808 | 5,318 | 3,475 | 30,744 |
| 103,575 | 141 | 22,110 | 5,392 | 3,554 | 31,197 |

|         |     |        |       |       |        |
|---------|-----|--------|-------|-------|--------|
| 103,576 | 137 | 21,878 | 5,364 | 3,556 | 30,935 |
| 103,577 | 137 | 22,123 | 5,441 | 3,598 | 31,299 |
| 103,578 | 137 | 22,082 | 5,447 | 3,599 | 31,265 |
| 103,579 | 135 | 22,338 | 5,536 | 3,633 | 31,642 |
| 103,580 | 130 | 22,094 | 5,559 | 3,637 | 31,420 |
| 103,581 | 130 | 21,962 | 5,545 | 3,613 | 31,250 |
| 103,582 | 127 | 22,099 | 5,624 | 3,694 | 31,544 |
| 103,583 | 125 | 22,270 | 5,637 | 3,722 | 31,754 |
| 103,584 | 124 | 22,188 | 5,644 | 3,731 | 31,687 |
| 103,585 | 130 | 22,387 | 5,693 | 3,765 | 31,975 |
| 103,586 | 132 | 22,560 | 5,725 | 3,758 | 32,175 |
| 103,587 | 128 | 22,035 | 5,613 | 3,696 | 31,472 |
| 103,588 | 128 | 22,335 | 5,667 | 3,734 | 31,864 |
| 103,589 | 130 | 22,645 | 5,739 | 3,746 | 32,260 |
| 103,590 | 131 | 22,953 | 5,809 | 3,815 | 32,708 |
| 103,591 | 127 | 22,693 | 5,762 | 3,786 | 32,368 |
| 103,592 | 125 | 22,618 | 5,733 | 3,780 | 32,256 |
| 103,593 | 133 | 22,891 | 5,804 | 3,816 | 32,644 |
| 103,594 | 129 | 22,767 | 5,819 | 3,810 | 32,525 |
| 103,595 | 129 | 22,869 | 5,830 | 3,834 | 32,662 |
| 103,596 | 125 | 22,560 | 5,759 | 3,756 | 32,200 |
| 103,597 | 123 | 22,733 | 5,821 | 3,762 | 32,439 |
| 103,598 | 124 | 22,938 | 5,889 | 3,795 | 32,746 |
| 103,599 | 126 | 22,898 | 5,911 | 3,789 | 32,724 |
| 103,600 | 124 | 22,687 | 5,869 | 3,757 | 32,437 |
| 103,601 | 125 | 22,627 | 5,871 | 3,751 | 32,374 |
| 103,602 | 127 | 22,803 | 5,892 | 3,781 | 32,603 |
| 103,603 | 125 | 22,635 | 5,867 | 3,782 | 32,409 |
| 103,604 | 125 | 22,725 | 5,898 | 3,805 | 32,553 |
| 103,605 | 123 | 22,718 | 5,932 | 3,837 | 32,610 |
| 103,606 | 125 | 22,851 | 5,947 | 3,847 | 32,770 |
| 103,607 | 125 | 22,799 | 5,957 | 3,851 | 32,732 |

|         |     |        |       |       |        |
|---------|-----|--------|-------|-------|--------|
| 103,608 | 131 | 22,793 | 5,980 | 3,846 | 32,750 |
| 103,609 | 135 | 22,956 | 6,023 | 3,846 | 32,960 |
| 103,610 | 135 | 22,930 | 6,029 | 3,845 | 32,939 |
| 103,611 | 134 | 23,378 | 6,176 | 3,925 | 33,613 |
| 103,612 | 137 | 23,149 | 6,216 | 3,953 | 33,455 |
| 103,613 | 140 | 23,047 | 6,231 | 3,955 | 33,373 |
| 103,614 | 139 | 23,056 | 6,291 | 3,972 | 33,458 |
| 103,615 | 145 | 23,175 | 6,309 | 3,982 | 33,611 |
| 103,616 | 156 | 23,056 | 6,269 | 3,939 | 33,420 |
| 103,617 | 154 | 22,785 | 6,208 | 3,895 | 33,042 |
| 103,618 | 160 | 23,353 | 6,343 | 3,936 | 33,792 |
| 103,619 | 159 | 23,237 | 6,281 | 3,872 | 33,549 |
| 103,620 | 159 | 23,193 | 6,270 | 3,869 | 33,491 |
| 103,621 | 166 | 23,461 | 6,328 | 3,901 | 33,856 |
| 103,622 | 166 | 23,213 | 6,277 | 3,843 | 33,499 |
| 103,623 | 164 | 23,199 | 6,318 | 3,861 | 33,542 |
| 103,624 | 163 | 23,196 | 6,309 | 3,843 | 33,511 |
| 103,625 | 165 | 23,103 | 6,309 | 3,824 | 33,401 |
| 103,626 | 166 | 23,196 | 6,332 | 3,816 | 33,510 |
| 103,627 | 166 | 23,266 | 6,363 | 3,801 | 33,596 |
| 103,628 | 169 | 23,208 | 6,334 | 3,807 | 33,518 |
| 103,629 | 171 | 23,154 | 6,319 | 3,770 | 33,414 |
| 103,630 | 169 | 23,130 | 6,366 | 3,803 | 33,468 |
| 103,631 | 174 | 23,229 | 6,376 | 3,807 | 33,586 |
| 103,632 | 177 | 23,274 | 6,357 | 3,780 | 33,588 |
| 103,633 | 178 | 23,297 | 6,365 | 3,752 | 33,592 |
| 103,634 | 177 | 23,068 | 6,346 | 3,725 | 33,316 |
| 103,635 | 180 | 23,118 | 6,375 | 3,727 | 33,400 |
| 103,636 | 187 | 22,899 | 6,323 | 3,689 | 33,098 |
| 103,637 | 186 | 22,639 | 6,290 | 3,662 | 32,777 |
| 103,638 | 191 | 22,852 | 6,324 | 3,670 | 33,037 |
| 103,639 | 192 | 22,827 | 6,353 | 3,669 | 33,041 |

|         |     |        |       |       |        |
|---------|-----|--------|-------|-------|--------|
| 103,640 | 190 | 22,861 | 6,357 | 3,681 | 33,089 |
| 103,641 | 190 | 22,813 | 6,364 | 3,665 | 33,032 |
| 103,642 | 185 | 22,573 | 6,251 | 3,597 | 32,606 |
| 103,643 | 188 | 22,787 | 6,290 | 3,612 | 32,877 |
| 103,644 | 183 | 22,753 | 6,289 | 3,614 | 32,839 |
| 103,645 | 183 | 22,867 | 6,313 | 3,628 | 32,991 |
| 103,646 | 179 | 22,889 | 6,310 | 3,640 | 33,018 |
| 103,647 | 178 | 22,621 | 6,248 | 3,650 | 32,697 |
| 103,648 | 179 | 22,592 | 6,223 | 3,623 | 32,617 |
| 103,649 | 181 | 22,715 | 6,213 | 3,623 | 32,732 |
| 103,650 | 183 | 22,545 | 6,159 | 3,625 | 32,512 |
| 103,651 | 182 | 22,531 | 6,191 | 3,636 | 32,540 |
| 103,652 | 181 | 22,711 | 6,264 | 3,671 | 32,827 |
| 103,653 | 182 | 22,570 | 6,260 | 3,614 | 32,626 |
| 103,654 | 183 | 22,559 | 6,248 | 3,588 | 32,578 |
| 103,655 | 188 | 22,680 | 6,315 | 3,601 | 32,784 |
| 103,656 | 190 | 22,585 | 6,286 | 3,560 | 32,621 |
| 103,657 | 188 | 22,497 | 6,321 | 3,575 | 32,581 |
| 103,658 | 183 | 22,458 | 6,361 | 3,589 | 32,591 |
| 103,659 | 183 | 22,399 | 6,383 | 3,602 | 32,567 |
| 103,660 | 177 | 22,369 | 6,393 | 3,621 | 32,560 |
| 103,661 | 176 | 22,413 | 6,417 | 3,628 | 32,634 |
| 103,662 | 182 | 22,578 | 6,435 | 3,648 | 32,843 |
| 103,663 | 178 | 22,716 | 6,393 | 3,629 | 32,916 |
| 103,664 | 175 | 22,449 | 6,295 | 3,563 | 32,482 |
| 103,665 | 177 | 22,734 | 6,346 | 3,588 | 32,845 |
| 103,666 | 171 | 22,992 | 6,405 | 3,626 | 33,194 |
| 103,667 | 161 | 22,765 | 6,365 | 3,607 | 32,898 |
| 103,668 | 162 | 22,658 | 6,333 | 3,584 | 32,737 |
| 103,669 | 167 | 22,776 | 6,364 | 3,607 | 32,914 |
| 103,670 | 165 | 22,627 | 6,366 | 3,606 | 32,764 |
| 103,671 | 159 | 23,061 | 6,468 | 3,703 | 33,391 |



|         |     |        |       |       |        |
|---------|-----|--------|-------|-------|--------|
| 103,672 | 158 | 23,090 | 6,547 | 3,743 | 33,538 |
| 103,673 | 156 | 23,066 | 6,497 | 3,723 | 33,442 |
| 103,674 | 155 | 22,993 | 6,481 | 3,698 | 33,327 |
| 103,675 | 155 | 22,929 | 6,488 | 3,696 | 33,268 |
| 103,676 | 150 | 22,876 | 6,476 | 3,716 | 33,218 |
| 103,677 | 154 | 22,619 | 6,440 | 3,686 | 32,899 |
| 103,678 | 157 | 22,722 | 6,472 | 3,725 | 33,076 |
| 103,679 | 159 | 22,631 | 6,464 | 3,719 | 32,973 |
| 103,680 | 157 | 22,680 | 6,421 | 3,708 | 32,966 |
| 103,681 | 159 | 22,531 | 6,351 | 3,683 | 32,724 |
| 103,682 | 154 | 22,294 | 6,283 | 3,646 | 32,377 |
| 103,683 | 152 | 22,305 | 6,294 | 3,646 | 32,397 |
| 103,684 | 155 | 22,549 | 6,320 | 3,657 | 32,681 |
| 103,685 | 149 | 22,199 | 6,189 | 3,580 | 32,117 |
| 103,686 | 149 | 22,267 | 6,192 | 3,593 | 32,201 |
| 103,687 | 137 | 22,013 | 6,138 | 3,547 | 31,835 |
| 103,688 | 138 | 22,239 | 6,202 | 3,594 | 32,173 |
| 103,689 | 129 | 21,646 | 6,007 | 3,500 | 31,282 |
| 103,690 | 131 | 21,782 | 6,076 | 3,546 | 31,535 |
| 103,691 | 130 | 21,727 | 6,090 | 3,551 | 31,498 |
| 103,692 | 132 | 21,644 | 6,090 | 3,559 | 31,425 |
| 103,693 | 139 | 21,723 | 6,132 | 3,593 | 31,587 |
| 103,694 | 139 | 21,452 | 6,118 | 3,594 | 31,303 |
| 103,695 | 140 | 21,278 | 6,081 | 3,579 | 31,078 |
| 103,696 | 143 | 21,171 | 6,065 | 3,531 | 30,910 |
| 103,697 | 144 | 21,017 | 6,049 | 3,508 | 30,718 |
| 103,698 | 143 | 20,941 | 6,017 | 3,476 | 30,577 |
| 103,699 | 148 | 21,215 | 6,085 | 3,521 | 30,969 |
| 103,700 | 146 | 21,211 | 6,105 | 3,521 | 30,983 |
| 103,701 | 138 | 21,279 | 6,137 | 3,549 | 31,103 |
| 103,702 | 138 | 21,352 | 6,122 | 3,560 | 31,172 |
| 103,703 | 131 | 21,152 | 6,011 | 3,522 | 30,816 |

|         |     |        |       |       |        |
|---------|-----|--------|-------|-------|--------|
| 103,704 | 131 | 21,190 | 6,018 | 3,525 | 30,864 |
| 103,705 | 128 | 21,322 | 6,060 | 3,548 | 31,058 |
| 103,706 | 120 | 21,112 | 5,944 | 3,500 | 30,676 |
| 103,707 | 120 | 21,030 | 5,953 | 3,501 | 30,604 |
| 103,708 | 123 | 21,301 | 5,993 | 3,542 | 30,959 |
| 103,709 | 120 | 21,183 | 5,868 | 3,490 | 30,661 |
| 103,710 | 120 | 20,789 | 5,741 | 3,393 | 30,043 |
| 103,711 | 121 | 20,958 | 5,781 | 3,425 | 30,285 |
| 103,712 | 120 | 21,137 | 5,858 | 3,472 | 30,587 |
| 103,713 | 122 | 21,028 | 5,832 | 3,446 | 30,428 |
| 103,714 | 118 | 20,479 | 5,671 | 3,353 | 29,621 |
| 103,715 | 118 | 20,426 | 5,664 | 3,361 | 29,569 |
| 103,716 | 121 | 20,508 | 5,682 | 3,371 | 29,682 |
| 103,717 | 121 | 20,405 | 5,670 | 3,349 | 29,545 |
| 103,718 | 112 | 20,263 | 5,611 | 3,310 | 29,296 |
| 103,719 | 105 | 19,598 | 5,414 | 3,202 | 28,319 |
| 103,720 | 112 | 19,895 | 5,498 | 3,236 | 28,741 |
| 103,721 | 113 | 19,933 | 5,517 | 3,246 | 28,809 |
| 103,722 | 114 | 20,155 | 5,505 | 3,243 | 29,017 |
| 103,723 | 114 | 20,210 | 5,508 | 3,236 | 29,068 |
| 103,724 | 113 | 20,237 | 5,479 | 3,240 | 29,069 |
| 103,725 | 116 | 20,492 | 5,559 | 3,279 | 29,446 |
| 103,726 | 123 | 20,613 | 5,642 | 3,341 | 29,719 |
| 103,727 | 118 | 20,509 | 5,602 | 3,329 | 29,558 |
| 103,728 | 117 | 20,654 | 5,633 | 3,349 | 29,753 |
| 103,729 | 113 | 20,889 | 5,689 | 3,381 | 30,072 |
| 103,730 | 110 | 20,883 | 5,717 | 3,372 | 30,082 |
| 103,731 | 109 | 20,497 | 5,657 | 3,356 | 29,619 |
| 103,732 | 109 | 20,589 | 5,663 | 3,372 | 29,733 |
| 103,733 | 110 | 20,709 | 5,690 | 3,391 | 29,900 |
| 103,734 | 107 | 20,486 | 5,650 | 3,377 | 29,620 |
| 103,735 | 110 | 20,517 | 5,699 | 3,440 | 29,766 |

|         |     |        |       |       |        |
|---------|-----|--------|-------|-------|--------|
| 103,736 | 113 | 20,527 | 5,721 | 3,450 | 29,811 |
| 103,737 | 114 | 20,685 | 5,771 | 3,499 | 30,069 |
| 103,738 | 115 | 20,480 | 5,740 | 3,491 | 29,826 |
| 103,739 | 122 | 20,590 | 5,794 | 3,506 | 30,012 |
| 103,740 | 124 | 20,640 | 5,820 | 3,529 | 30,113 |
| 103,741 | 122 | 20,746 | 5,859 | 3,537 | 30,264 |
| 103,742 | 121 | 20,852 | 5,839 | 3,549 | 30,361 |
| 103,743 | 113 | 20,805 | 5,839 | 3,496 | 30,253 |
| 103,744 | 113 | 20,708 | 5,788 | 3,457 | 30,066 |
| 103,745 | 113 | 20,763 | 5,778 | 3,468 | 30,122 |
| 103,746 | 117 | 20,480 | 5,720 | 3,427 | 29,744 |
| 103,747 | 114 | 20,175 | 5,656 | 3,412 | 29,357 |
| 103,748 | 120 | 20,966 | 5,824 | 3,511 | 30,421 |
| 103,749 | 115 | 20,923 | 5,839 | 3,542 | 30,419 |
| 103,750 | 115 | 20,964 | 5,881 | 3,556 | 30,516 |
| 103,751 | 117 | 21,074 | 5,888 | 3,537 | 30,616 |
| 103,752 | 117 | 20,983 | 5,846 | 3,518 | 30,464 |
| 103,753 | 118 | 21,002 | 5,902 | 3,555 | 30,577 |
| 103,754 | 118 | 21,152 | 5,978 | 3,573 | 30,821 |
| 103,755 | 129 | 21,421 | 6,017 | 3,635 | 31,202 |
| 103,756 | 131 | 21,578 | 6,100 | 3,671 | 31,480 |
| 103,757 | 138 | 21,400 | 6,054 | 3,673 | 31,265 |
| 103,758 | 137 | 21,327 | 6,033 | 3,665 | 31,162 |
| 103,759 | 140 | 21,344 | 6,066 | 3,674 | 31,224 |
| 103,760 | 141 | 21,084 | 6,025 | 3,618 | 30,868 |
| 103,761 | 154 | 21,919 | 6,279 | 3,762 | 32,114 |
| 103,762 | 152 | 21,713 | 6,246 | 3,734 | 31,845 |
| 103,763 | 151 | 21,757 | 6,295 | 3,750 | 31,953 |
| 103,764 | 150 | 21,951 | 6,366 | 3,803 | 32,270 |
| 103,765 | 153 | 21,739 | 6,319 | 3,777 | 31,988 |
| 103,766 | 152 | 21,659 | 6,298 | 3,749 | 31,858 |
| 103,767 | 158 | 21,668 | 6,298 | 3,737 | 31,861 |

|         |     |        |       |       |        |
|---------|-----|--------|-------|-------|--------|
| 103,768 | 158 | 21,401 | 6,250 | 3,716 | 31,525 |
| 103,769 | 165 | 21,753 | 6,385 | 3,790 | 32,093 |
| 103,770 | 165 | 21,665 | 6,368 | 3,787 | 31,985 |
| 103,771 | 162 | 21,964 | 6,471 | 3,830 | 32,427 |
| 103,772 | 162 | 22,097 | 6,502 | 3,830 | 32,591 |
| 103,773 | 163 | 22,083 | 6,476 | 3,829 | 32,551 |
| 103,774 | 164 | 21,865 | 6,427 | 3,799 | 32,255 |
| 103,775 | 167 | 22,132 | 6,528 | 3,849 | 32,676 |
| 103,776 | 165 | 22,140 | 6,529 | 3,841 | 32,675 |
| 103,777 | 159 | 22,018 | 6,451 | 3,784 | 32,412 |
| 103,778 | 159 | 21,798 | 6,420 | 3,752 | 32,129 |
| 103,779 | 169 | 22,253 | 6,554 | 3,842 | 32,818 |
| 103,780 | 171 | 22,445 | 6,603 | 3,859 | 33,078 |
| 103,781 | 174 | 22,184 | 6,483 | 3,795 | 32,636 |
| 103,782 | 176 | 22,368 | 6,526 | 3,771 | 32,841 |
| 103,783 | 176 | 22,569 | 6,564 | 3,783 | 33,092 |
| 103,784 | 177 | 22,454 | 6,548 | 3,765 | 32,944 |
| 103,785 | 178 | 22,682 | 6,598 | 3,783 | 33,241 |
| 103,786 | 177 | 22,966 | 6,689 | 3,817 | 33,649 |
| 103,787 | 175 | 22,970 | 6,739 | 3,818 | 33,702 |
| 103,788 | 175 | 22,374 | 6,595 | 3,710 | 32,854 |
| 103,789 | 177 | 22,660 | 6,641 | 3,737 | 33,215 |
| 103,790 | 171 | 22,730 | 6,654 | 3,742 | 33,297 |
| 103,791 | 166 | 22,362 | 6,568 | 3,685 | 32,781 |
| 103,792 | 166 | 22,056 | 6,488 | 3,632 | 32,342 |
| 103,793 | 168 | 22,798 | 6,722 | 3,723 | 33,411 |
| 103,794 | 167 | 22,578 | 6,645 | 3,698 | 33,088 |
| 103,795 | 174 | 22,864 | 6,692 | 3,758 | 33,488 |
| 103,796 | 177 | 22,968 | 6,725 | 3,758 | 33,628 |
| 103,797 | 173 | 22,912 | 6,698 | 3,723 | 33,506 |
| 103,798 | 170 | 22,895 | 6,696 | 3,716 | 33,477 |
| 103,799 | 170 | 23,151 | 6,707 | 3,748 | 33,776 |

|         |     |        |       |       |        |
|---------|-----|--------|-------|-------|--------|
| 103,800 | 169 | 23,085 | 6,685 | 3,724 | 33,663 |
| 103,801 | 164 | 22,728 | 6,584 | 3,674 | 33,150 |
| 103,802 | 164 | 22,611 | 6,581 | 3,677 | 33,033 |
| 103,803 | 164 | 22,683 | 6,625 | 3,709 | 33,181 |
| 103,804 | 162 | 22,702 | 6,589 | 3,688 | 33,141 |
| 103,805 | 158 | 22,542 | 6,538 | 3,661 | 32,899 |
| 103,806 | 151 | 22,664 | 6,611 | 3,692 | 33,118 |
| 103,807 | 148 | 22,575 | 6,539 | 3,683 | 32,945 |
| 103,808 | 142 | 22,550 | 6,555 | 3,669 | 32,916 |
| 103,809 | 139 | 22,298 | 6,470 | 3,633 | 32,540 |
| 103,810 | 143 | 22,047 | 6,417 | 3,583 | 32,190 |
| 103,811 | 139 | 21,736 | 6,315 | 3,548 | 31,738 |
| 103,812 | 136 | 21,957 | 6,396 | 3,576 | 32,065 |
| 103,813 | 136 | 22,116 | 6,413 | 3,603 | 32,268 |
| 103,814 | 133 | 21,943 | 6,335 | 3,547 | 31,958 |
| 103,815 | 133 | 21,932 | 6,324 | 3,551 | 31,940 |
| 103,816 | 127 | 21,928 | 6,366 | 3,584 | 32,005 |
| 103,817 | 128 | 21,886 | 6,385 | 3,627 | 32,026 |
| 103,818 | 128 | 21,846 | 6,349 | 3,608 | 31,931 |
| 103,819 | 128 | 21,767 | 6,323 | 3,606 | 31,824 |
| 103,820 | 120 | 21,863 | 6,389 | 3,642 | 32,014 |
| 103,821 | 122 | 22,062 | 6,463 | 3,721 | 32,368 |
| 103,822 | 123 | 22,123 | 6,475 | 3,719 | 32,440 |
| 103,823 | 123 | 22,098 | 6,507 | 3,722 | 32,450 |
| 103,824 | 120 | 21,883 | 6,503 | 3,693 | 32,199 |
| 103,825 | 125 | 22,149 | 6,572 | 3,723 | 32,569 |
| 103,826 | 117 | 21,313 | 6,326 | 3,599 | 31,355 |
| 103,827 | 118 | 21,497 | 6,379 | 3,635 | 31,629 |
| 103,828 | 118 | 21,653 | 6,441 | 3,664 | 31,876 |
| 103,829 | 119 | 21,697 | 6,446 | 3,670 | 31,932 |
| 103,830 | 119 | 21,675 | 6,449 | 3,684 | 31,927 |
| 103,831 | 123 | 21,589 | 6,417 | 3,654 | 31,783 |

|         |     |        |       |       |        |
|---------|-----|--------|-------|-------|--------|
| 103,832 | 116 | 21,420 | 6,386 | 3,617 | 31,539 |
| 103,833 | 116 | 21,772 | 6,489 | 3,706 | 32,083 |
| 103,834 | 115 | 21,617 | 6,473 | 3,688 | 31,893 |
| 103,835 | 116 | 21,358 | 6,399 | 3,647 | 31,520 |
| 103,836 | 116 | 21,645 | 6,439 | 3,674 | 31,874 |
| 103,837 | 121 | 21,664 | 6,418 | 3,667 | 31,870 |
| 103,838 | 116 | 21,299 | 6,278 | 3,641 | 31,334 |
| 103,839 | 116 | 21,268 | 6,281 | 3,644 | 31,309 |
| 103,840 | 116 | 21,375 | 6,393 | 3,697 | 31,581 |
| 103,841 | 114 | 21,223 | 6,325 | 3,673 | 31,335 |
| 103,842 | 114 | 21,282 | 6,361 | 3,722 | 31,479 |
| 103,843 | 115 | 21,312 | 6,356 | 3,734 | 31,517 |
| 103,844 | 114 | 21,350 | 6,346 | 3,738 | 31,548 |
| 103,845 | 114 | 21,120 | 6,303 | 3,692 | 31,229 |
| 103,846 | 100 | 20,679 | 6,246 | 3,682 | 30,707 |
| 103,847 | 106 | 20,863 | 6,301 | 3,723 | 30,993 |
| 103,848 | 103 | 20,817 | 6,287 | 3,729 | 30,936 |
| 103,849 | 103 | 21,075 | 6,315 | 3,771 | 31,264 |
| 103,850 | 101 | 20,791 | 6,287 | 3,743 | 30,922 |
| 103,851 | 102 | 20,480 | 6,255 | 3,702 | 30,539 |
| 103,852 | 106 | 20,880 | 6,370 | 3,750 | 31,106 |
| 103,853 | 106 | 20,802 | 6,389 | 3,750 | 31,047 |
| 103,854 | 110 | 20,753 | 6,445 | 3,752 | 31,060 |
| 103,855 | 113 | 20,581 | 6,451 | 3,727 | 30,872 |
| 103,856 | 120 | 20,476 | 6,423 | 3,713 | 30,732 |
| 103,857 | 120 | 20,493 | 6,436 | 3,714 | 30,763 |
| 103,858 | 119 | 20,278 | 6,416 | 3,691 | 30,504 |
| 103,859 | 116 | 20,129 | 6,377 | 3,669 | 30,291 |
| 103,860 | 115 | 20,227 | 6,368 | 3,668 | 30,378 |
| 103,861 | 109 | 19,933 | 6,284 | 3,640 | 29,966 |
| 103,862 | 109 | 19,884 | 6,334 | 3,659 | 29,986 |
| 103,863 | 108 | 19,854 | 6,326 | 3,671 | 29,959 |

|         |     |        |       |       |        |
|---------|-----|--------|-------|-------|--------|
| 103,864 | 107 | 19,919 | 6,354 | 3,680 | 30,060 |
| 103,865 | 110 | 19,913 | 6,343 | 3,686 | 30,052 |
| 103,866 | 110 | 19,898 | 6,333 | 3,664 | 30,005 |
| 103,867 | 109 | 19,746 | 6,268 | 3,650 | 29,773 |
| 103,868 | 103 | 19,496 | 6,214 | 3,593 | 29,406 |
| 103,869 | 105 | 19,472 | 6,243 | 3,607 | 29,427 |
| 103,870 | 113 | 19,635 | 6,316 | 3,657 | 29,721 |
| 103,871 | 114 | 19,519 | 6,229 | 3,620 | 29,482 |
| 103,872 | 114 | 19,281 | 6,175 | 3,579 | 29,149 |
| 103,873 | 125 | 19,736 | 6,370 | 3,672 | 29,903 |
| 103,874 | 122 | 19,392 | 6,247 | 3,619 | 29,380 |
| 103,875 | 127 | 19,567 | 6,298 | 3,683 | 29,675 |
| 103,876 | 124 | 19,560 | 6,349 | 3,700 | 29,733 |
| 103,877 | 127 | 18,656 | 6,142 | 3,565 | 28,490 |
| 103,878 | 128 | 18,951 | 6,242 | 3,618 | 28,939 |
| 103,879 | 129 | 19,411 | 6,351 | 3,661 | 29,552 |
| 103,880 | 129 | 19,362 | 6,352 | 3,648 | 29,491 |
| 103,881 | 129 | 19,704 | 6,417 | 3,709 | 29,959 |
| 103,882 | 127 | 20,288 | 6,564 | 3,781 | 30,760 |
| 103,883 | 130 | 19,971 | 6,514 | 3,750 | 30,365 |
| 103,884 | 133 | 19,993 | 6,497 | 3,760 | 30,383 |
| 103,885 | 133 | 19,946 | 6,486 | 3,754 | 30,319 |
| 103,886 | 131 | 20,122 | 6,590 | 3,808 | 30,651 |
| 103,887 | 129 | 20,145 | 6,602 | 3,831 | 30,707 |
| 103,888 | 121 | 19,715 | 6,498 | 3,767 | 30,101 |
| 103,889 | 121 | 19,932 | 6,561 | 3,785 | 30,399 |
| 103,890 | 132 | 20,204 | 6,608 | 3,810 | 30,754 |
| 103,891 | 131 | 20,278 | 6,637 | 3,818 | 30,864 |
| 103,892 | 140 | 20,117 | 6,598 | 3,775 | 30,630 |
| 103,893 | 140 | 20,074 | 6,598 | 3,757 | 30,569 |
| 103,894 | 144 | 20,024 | 6,553 | 3,740 | 30,461 |
| 103,895 | 144 | 20,326 | 6,637 | 3,780 | 30,887 |

|         |     |        |       |       |        |
|---------|-----|--------|-------|-------|--------|
| 103,896 | 145 | 20,236 | 6,614 | 3,750 | 30,745 |
| 103,897 | 149 | 20,460 | 6,669 | 3,781 | 31,059 |
| 103,898 | 145 | 20,498 | 6,688 | 3,799 | 31,130 |
| 103,899 | 146 | 20,390 | 6,671 | 3,746 | 30,953 |
| 103,900 | 147 | 20,403 | 6,720 | 3,766 | 31,036 |
| 103,901 | 146 | 20,227 | 6,659 | 3,719 | 30,751 |
| 103,902 | 143 | 20,311 | 6,680 | 3,725 | 30,859 |
| 103,903 | 141 | 20,340 | 6,646 | 3,735 | 30,862 |
| 103,904 | 141 | 20,325 | 6,614 | 3,742 | 30,822 |
| 103,905 | 138 | 20,492 | 6,574 | 3,732 | 30,936 |
| 103,906 | 135 | 20,229 | 6,478 | 3,695 | 30,537 |
| 103,907 | 133 | 20,351 | 6,539 | 3,753 | 30,776 |
| 103,908 | 138 | 20,403 | 6,517 | 3,752 | 30,810 |
| 103,909 | 144 | 20,664 | 6,554 | 3,759 | 31,121 |
| 103,910 | 148 | 20,881 | 6,588 | 3,781 | 31,398 |
| 103,911 | 158 | 20,797 | 6,598 | 3,782 | 31,335 |
| 103,912 | 159 | 20,788 | 6,498 | 3,751 | 31,196 |
| 103,913 | 159 | 20,843 | 6,507 | 3,746 | 31,255 |
| 103,914 | 161 | 20,986 | 6,544 | 3,761 | 31,452 |
| 103,915 | 161 | 20,766 | 6,480 | 3,731 | 31,138 |
| 103,916 | 157 | 20,558 | 6,432 | 3,695 | 30,842 |
| 103,917 | 157 | 20,593 | 6,440 | 3,701 | 30,891 |
| 103,918 | 157 | 20,903 | 6,495 | 3,724 | 31,279 |
| 103,919 | 155 | 20,501 | 6,361 | 3,645 | 30,662 |
| 103,920 | 152 | 20,602 | 6,337 | 3,651 | 30,742 |
| 103,921 | 146 | 20,737 | 6,389 | 3,647 | 30,919 |
| 103,922 | 141 | 20,341 | 6,280 | 3,558 | 30,320 |
| 103,923 | 137 | 20,409 | 6,248 | 3,578 | 30,372 |
| 103,924 | 132 | 20,543 | 6,252 | 3,596 | 30,523 |
| 103,925 | 130 | 20,398 | 6,223 | 3,576 | 30,327 |
| 103,926 | 129 | 20,384 | 6,214 | 3,538 | 30,265 |
| 103,927 | 131 | 20,337 | 6,172 | 3,521 | 30,161 |



|         |     |        |       |       |        |
|---------|-----|--------|-------|-------|--------|
| 103,928 | 125 | 20,404 | 6,110 | 3,491 | 30,130 |
| 103,929 | 124 | 20,207 | 6,059 | 3,451 | 29,841 |
| 103,930 | 133 | 19,936 | 5,996 | 3,434 | 29,499 |
| 103,931 | 132 | 19,684 | 5,941 | 3,410 | 29,167 |
| 103,932 | 133 | 19,997 | 6,062 | 3,475 | 29,667 |
| 103,933 | 135 | 19,814 | 6,049 | 3,481 | 29,479 |
| 103,934 | 129 | 19,770 | 6,031 | 3,487 | 29,417 |
| 103,935 | 129 | 19,842 | 6,060 | 3,466 | 29,497 |
| 103,936 | 130 | 19,834 | 6,036 | 3,453 | 29,453 |
| 103,937 | 135 | 19,786 | 6,019 | 3,424 | 29,364 |
| 103,938 | 135 | 19,681 | 6,000 | 3,402 | 29,218 |
| 103,939 | 141 | 19,643 | 5,946 | 3,368 | 29,098 |
| 103,940 | 141 | 19,717 | 5,953 | 3,372 | 29,183 |
| 103,941 | 128 | 19,481 | 5,894 | 3,350 | 28,853 |
| 103,942 | 131 | 19,554 | 5,916 | 3,363 | 28,964 |
| 103,943 | 125 | 19,301 | 5,870 | 3,346 | 28,642 |
| 103,944 | 122 | 19,080 | 5,857 | 3,342 | 28,401 |
| 103,945 | 122 | 18,988 | 5,869 | 3,371 | 28,350 |
| 103,946 | 122 | 18,867 | 5,865 | 3,374 | 28,228 |
| 103,947 | 120 | 18,702 | 5,838 | 3,372 | 28,032 |
| 103,948 | 119 | 18,785 | 5,836 | 3,380 | 28,120 |
| 103,949 | 117 | 18,552 | 5,795 | 3,332 | 27,796 |
| 103,950 | 114 | 18,587 | 5,843 | 3,359 | 27,903 |
| 103,951 | 115 | 18,734 | 5,830 | 3,369 | 28,048 |
| 103,952 | 115 | 18,643 | 5,797 | 3,360 | 27,915 |
| 103,953 | 115 | 18,728 | 5,813 | 3,362 | 28,018 |
| 103,954 | 117 | 18,693 | 5,790 | 3,343 | 27,943 |
| 103,955 | 117 | 18,825 | 5,824 | 3,349 | 28,115 |
| 103,956 | 114 | 18,836 | 5,850 | 3,375 | 28,175 |
| 103,957 | 109 | 18,938 | 5,859 | 3,357 | 28,263 |
| 103,958 | 109 | 18,899 | 5,858 | 3,362 | 28,228 |
| 103,959 | 104 | 18,782 | 5,866 | 3,379 | 28,131 |

|         |     |        |       |       |        |
|---------|-----|--------|-------|-------|--------|
| 103,960 | 99  | 18,803 | 5,892 | 3,399 | 28,193 |
| 103,961 | 96  | 18,681 | 5,838 | 3,392 | 28,007 |
| 103,962 | 87  | 18,614 | 5,816 | 3,376 | 27,893 |
| 103,963 | 85  | 18,529 | 5,813 | 3,362 | 27,789 |
| 103,964 | 85  | 18,051 | 5,639 | 3,260 | 27,035 |
| 103,965 | 86  | 18,223 | 5,662 | 3,297 | 27,268 |
| 103,966 | 99  | 18,200 | 5,668 | 3,280 | 27,247 |
| 103,967 | 101 | 18,336 | 5,712 | 3,307 | 27,456 |
| 103,968 | 101 | 18,492 | 5,753 | 3,324 | 27,670 |
| 103,969 | 106 | 18,238 | 5,684 | 3,281 | 27,309 |
| 103,970 | 105 | 18,277 | 5,712 | 3,293 | 27,387 |
| 103,971 | 110 | 18,355 | 5,748 | 3,318 | 27,531 |
| 103,972 | 109 | 18,102 | 5,670 | 3,287 | 27,168 |
| 103,973 | 112 | 17,939 | 5,624 | 3,263 | 26,938 |
| 103,974 | 112 | 17,842 | 5,607 | 3,241 | 26,802 |
| 103,975 | 109 | 17,742 | 5,587 | 3,225 | 26,663 |
| 103,976 | 113 | 17,800 | 5,596 | 3,225 | 26,734 |
| 103,977 | 110 | 17,786 | 5,582 | 3,253 | 26,731 |
| 103,978 | 109 | 17,661 | 5,564 | 3,238 | 26,572 |
| 103,979 | 108 | 17,502 | 5,558 | 3,248 | 26,416 |
| 103,980 | 97  | 17,068 | 5,429 | 3,153 | 25,747 |
| 103,981 | 98  | 17,244 | 5,494 | 3,181 | 26,017 |
| 103,982 | 96  | 16,973 | 5,398 | 3,107 | 25,574 |
| 103,983 | 98  | 17,145 | 5,476 | 3,154 | 25,873 |
| 103,984 | 94  | 17,173 | 5,435 | 3,127 | 25,829 |
| 103,985 | 93  | 16,517 | 5,263 | 3,032 | 24,905 |
| 103,986 | 94  | 16,743 | 5,320 | 3,058 | 25,215 |
| 103,987 | 93  | 16,987 | 5,372 | 3,104 | 25,556 |
| 103,988 | 89  | 16,886 | 5,325 | 3,087 | 25,387 |
| 103,989 | 96  | 16,703 | 5,279 | 3,068 | 25,146 |
| 103,990 | 90  | 16,496 | 5,269 | 3,058 | 24,913 |
| 103,991 | 94  | 16,651 | 5,316 | 3,084 | 25,145 |

|         |    |        |       |       |        |
|---------|----|--------|-------|-------|--------|
| 103,992 | 92 | 16,611 | 5,260 | 3,066 | 25,029 |
| 103,993 | 83 | 16,213 | 5,041 | 2,949 | 24,286 |
| 103,994 | 83 | 16,417 | 5,081 | 2,970 | 24,551 |
| 103,995 | 82 | 16,406 | 5,081 | 2,968 | 24,537 |
| 103,996 | 80 | 16,283 | 5,028 | 2,915 | 24,306 |
| 103,997 | 80 | 15,988 | 4,957 | 2,870 | 23,895 |
| 103,998 | 83 | 16,439 | 5,041 | 2,899 | 24,462 |
| 103,999 | 81 | 16,303 | 5,002 | 2,857 | 24,243 |
| 104,000 | 81 | 16,312 | 4,958 | 2,843 | 24,194 |
| 104,001 | 85 | 16,228 | 4,929 | 2,818 | 24,060 |
| 104,002 | 84 | 15,987 | 4,895 | 2,791 | 23,757 |
| 104,003 | 85 | 16,089 | 4,935 | 2,794 | 23,903 |
| 104,004 | 85 | 16,084 | 4,940 | 2,788 | 23,897 |
| 104,005 | 83 | 16,111 | 4,971 | 2,791 | 23,956 |
| 104,006 | 82 | 16,029 | 4,945 | 2,776 | 23,832 |
| 104,007 | 83 | 16,253 | 5,010 | 2,798 | 24,144 |
| 104,008 | 84 | 16,193 | 4,962 | 2,777 | 24,016 |
| 104,009 | 84 | 16,216 | 4,926 | 2,738 | 23,964 |
| 104,010 | 87 | 16,326 | 4,929 | 2,719 | 24,061 |
| 104,011 | 88 | 16,432 | 4,970 | 2,734 | 24,224 |
| 104,012 | 86 | 16,234 | 4,929 | 2,682 | 23,931 |
| 104,013 | 89 | 16,196 | 4,906 | 2,667 | 23,858 |
| 104,014 | 89 | 16,265 | 4,930 | 2,674 | 23,958 |
| 104,015 | 76 | 15,662 | 4,793 | 2,579 | 23,110 |
| 104,016 | 76 | 15,902 | 4,862 | 2,625 | 23,465 |
| 104,017 | 75 | 16,069 | 4,876 | 2,653 | 23,673 |
| 104,018 | 75 | 15,939 | 4,849 | 2,632 | 23,495 |
| 104,019 | 75 | 15,968 | 4,886 | 2,642 | 23,571 |
| 104,020 | 72 | 16,041 | 4,895 | 2,643 | 23,651 |
| 104,021 | 71 | 15,989 | 4,863 | 2,614 | 23,537 |
| 104,022 | 68 | 15,947 | 4,832 | 2,595 | 23,442 |
| 104,023 | 71 | 16,291 | 4,948 | 2,646 | 23,956 |

|         |     |        |       |       |        |
|---------|-----|--------|-------|-------|--------|
| 104,024 | 67  | 16,203 | 4,907 | 2,640 | 23,817 |
| 104,025 | 71  | 16,318 | 4,931 | 2,657 | 23,977 |
| 104,026 | 71  | 16,445 | 4,998 | 2,667 | 24,181 |
| 104,027 | 73  | 15,698 | 4,747 | 2,523 | 23,041 |
| 104,028 | 72  | 15,953 | 4,788 | 2,549 | 23,362 |
| 104,029 | 74  | 16,037 | 4,797 | 2,559 | 23,467 |
| 104,030 | 75  | 16,287 | 4,855 | 2,613 | 23,830 |
| 104,031 | 73  | 16,276 | 4,863 | 2,632 | 23,844 |
| 104,032 | 73  | 16,516 | 4,930 | 2,665 | 24,184 |
| 104,033 | 76  | 16,453 | 4,869 | 2,638 | 24,036 |
| 104,034 | 79  | 16,489 | 4,871 | 2,652 | 24,091 |
| 104,035 | 79  | 16,185 | 4,823 | 2,625 | 23,712 |
| 104,036 | 85  | 16,384 | 4,883 | 2,649 | 24,001 |
| 104,037 | 87  | 16,624 | 4,911 | 2,693 | 24,315 |
| 104,038 | 88  | 16,697 | 4,906 | 2,700 | 24,391 |
| 104,039 | 88  | 16,545 | 4,884 | 2,686 | 24,203 |
| 104,040 | 84  | 16,813 | 4,952 | 2,720 | 24,569 |
| 104,041 | 84  | 16,800 | 4,881 | 2,691 | 24,456 |
| 104,042 | 88  | 16,919 | 4,912 | 2,700 | 24,619 |
| 104,043 | 89  | 16,804 | 4,907 | 2,699 | 24,499 |
| 104,044 | 89  | 16,719 | 4,935 | 2,708 | 24,451 |
| 104,045 | 90  | 16,608 | 4,939 | 2,713 | 24,350 |
| 104,046 | 99  | 17,276 | 5,108 | 2,804 | 25,287 |
| 104,047 | 98  | 17,208 | 5,073 | 2,798 | 25,177 |
| 104,048 | 99  | 17,228 | 5,100 | 2,806 | 25,233 |
| 104,049 | 103 | 17,715 | 5,209 | 2,878 | 25,905 |
| 104,050 | 102 | 17,578 | 5,207 | 2,881 | 25,768 |
| 104,051 | 113 | 17,835 | 5,260 | 2,912 | 26,120 |
| 104,052 | 112 | 17,841 | 5,263 | 2,924 | 26,140 |
| 104,053 | 113 | 17,969 | 5,259 | 2,940 | 26,281 |
| 104,054 | 116 | 17,767 | 5,222 | 2,924 | 26,029 |
| 104,055 | 116 | 17,589 | 5,189 | 2,910 | 25,804 |

|         |     |        |       |       |        |
|---------|-----|--------|-------|-------|--------|
| 104,056 | 123 | 17,589 | 5,152 | 2,916 | 25,780 |
| 104,057 | 123 | 17,330 | 5,095 | 2,874 | 25,422 |
| 104,058 | 122 | 17,592 | 5,107 | 2,917 | 25,738 |
| 104,059 | 121 | 17,386 | 5,070 | 2,905 | 25,482 |
| 104,060 | 119 | 17,502 | 5,128 | 2,919 | 25,668 |
| 104,061 | 119 | 17,704 | 5,177 | 2,942 | 25,942 |
| 104,062 | 122 | 17,902 | 5,268 | 2,987 | 26,279 |
| 104,063 | 123 | 17,700 | 5,276 | 3,011 | 26,110 |
| 104,064 | 121 | 17,695 | 5,251 | 3,022 | 26,089 |
| 104,065 | 122 | 17,565 | 5,188 | 2,994 | 25,869 |
| 104,066 | 124 | 17,845 | 5,274 | 3,037 | 26,280 |
| 104,067 | 125 | 17,972 | 5,323 | 3,053 | 26,473 |
| 104,068 | 122 | 17,888 | 5,297 | 3,031 | 26,338 |
| 104,069 | 122 | 17,934 | 5,322 | 3,045 | 26,423 |
| 104,070 | 122 | 18,022 | 5,319 | 3,060 | 26,523 |
| 104,071 | 124 | 18,225 | 5,357 | 3,089 | 26,795 |
| 104,072 | 124 | 18,143 | 5,292 | 3,066 | 26,625 |
| 104,073 | 125 | 18,079 | 5,243 | 3,020 | 26,467 |
| 104,074 | 124 | 18,380 | 5,297 | 3,076 | 26,877 |
| 104,075 | 122 | 18,627 | 5,397 | 3,109 | 27,255 |
| 104,076 | 120 | 18,649 | 5,406 | 3,109 | 27,284 |
| 104,077 | 120 | 18,680 | 5,399 | 3,122 | 27,321 |
| 104,078 | 119 | 18,667 | 5,432 | 3,128 | 27,346 |
| 104,079 | 122 | 18,721 | 5,470 | 3,127 | 27,440 |
| 104,080 | 119 | 18,803 | 5,485 | 3,134 | 27,541 |
| 104,081 | 120 | 18,704 | 5,431 | 3,071 | 27,326 |
| 104,082 | 120 | 18,856 | 5,490 | 3,089 | 27,555 |
| 104,083 | 122 | 19,048 | 5,529 | 3,112 | 27,811 |
| 104,084 | 122 | 19,006 | 5,497 | 3,104 | 27,729 |
| 104,085 | 115 | 18,775 | 5,444 | 3,061 | 27,395 |
| 104,086 | 115 | 18,858 | 5,447 | 3,061 | 27,481 |
| 104,087 | 113 | 18,861 | 5,462 | 3,059 | 27,495 |

|         |     |        |       |       |        |
|---------|-----|--------|-------|-------|--------|
| 104,088 | 115 | 18,920 | 5,495 | 3,074 | 27,604 |
| 104,089 | 117 | 18,865 | 5,512 | 3,071 | 27,565 |
| 104,090 | 118 | 18,753 | 5,474 | 3,042 | 27,387 |
| 104,091 | 121 | 18,973 | 5,525 | 3,073 | 27,692 |
| 104,092 | 116 | 18,878 | 5,478 | 3,053 | 27,525 |
| 104,093 | 116 | 18,893 | 5,496 | 3,037 | 27,542 |
| 104,094 | 113 | 18,946 | 5,524 | 3,046 | 27,629 |
| 104,095 | 113 | 19,046 | 5,550 | 3,063 | 27,772 |
| 104,096 | 108 | 18,906 | 5,483 | 3,001 | 27,498 |
| 104,097 | 106 | 18,944 | 5,471 | 3,002 | 27,523 |
| 104,098 | 106 | 18,981 | 5,480 | 3,015 | 27,582 |
| 104,099 | 104 | 19,208 | 5,558 | 3,036 | 27,906 |
| 104,100 | 101 | 19,214 | 5,557 | 3,032 | 27,904 |
| 104,101 | 94  | 19,204 | 5,560 | 3,019 | 27,877 |
| 104,102 | 93  | 18,917 | 5,527 | 2,987 | 27,524 |
| 104,103 | 90  | 18,774 | 5,506 | 2,968 | 27,338 |
| 104,104 | 90  | 19,299 | 5,633 | 3,029 | 28,051 |
| 104,105 | 87  | 19,347 | 5,663 | 3,040 | 28,137 |
| 104,106 | 92  | 19,317 | 5,660 | 3,052 | 28,121 |
| 104,107 | 85  | 19,215 | 5,680 | 3,015 | 27,995 |
| 104,108 | 85  | 19,103 | 5,649 | 3,002 | 27,839 |
| 104,109 | 92  | 19,147 | 5,668 | 3,012 | 27,919 |
| 104,110 | 92  | 18,883 | 5,617 | 2,995 | 27,587 |
| 104,111 | 93  | 19,163 | 5,747 | 3,058 | 28,061 |
| 104,112 | 100 | 18,968 | 5,685 | 3,034 | 27,787 |
| 104,113 | 99  | 18,706 | 5,505 | 2,943 | 27,253 |
| 104,114 | 99  | 18,821 | 5,531 | 2,960 | 27,411 |
| 104,115 | 102 | 18,584 | 5,507 | 2,908 | 27,101 |
| 104,116 | 101 | 18,324 | 5,473 | 2,887 | 26,785 |
| 104,117 | 110 | 19,627 | 5,875 | 3,129 | 28,741 |
| 104,118 | 111 | 19,639 | 5,898 | 3,154 | 28,802 |
| 104,119 | 108 | 19,568 | 5,882 | 3,152 | 28,710 |

|         |     |        |       |       |        |
|---------|-----|--------|-------|-------|--------|
| 104,120 | 108 | 19,562 | 5,886 | 3,150 | 28,706 |
| 104,121 | 111 | 19,684 | 5,974 | 3,176 | 28,945 |
| 104,122 | 107 | 19,422 | 5,907 | 3,146 | 28,582 |
| 104,123 | 105 | 19,350 | 5,940 | 3,154 | 28,549 |
| 104,124 | 110 | 19,506 | 5,985 | 3,203 | 28,804 |
| 104,125 | 109 | 19,500 | 6,000 | 3,187 | 28,796 |
| 104,126 | 108 | 19,257 | 5,952 | 3,157 | 28,474 |
| 104,127 | 108 | 19,094 | 5,906 | 3,143 | 28,251 |
| 104,128 | 111 | 19,547 | 6,016 | 3,206 | 28,880 |
| 104,129 | 107 | 19,352 | 5,938 | 3,170 | 28,567 |
| 104,130 | 107 | 19,373 | 5,941 | 3,177 | 28,598 |
| 104,131 | 108 | 19,497 | 5,983 | 3,215 | 28,803 |
| 104,132 | 106 | 19,385 | 5,953 | 3,203 | 28,647 |
| 104,133 | 110 | 19,162 | 5,886 | 3,188 | 28,346 |
| 104,134 | 110 | 19,131 | 5,874 | 3,197 | 28,312 |
| 104,135 | 111 | 19,394 | 5,942 | 3,241 | 28,688 |
| 104,136 | 110 | 19,509 | 5,954 | 3,270 | 28,843 |
| 104,137 | 110 | 19,306 | 5,917 | 3,242 | 28,575 |
| 104,138 | 110 | 19,227 | 5,916 | 3,233 | 28,486 |
| 104,139 | 107 | 19,041 | 5,899 | 3,235 | 28,282 |
| 104,140 | 107 | 19,315 | 6,006 | 3,290 | 28,718 |
| 104,141 | 104 | 19,150 | 6,031 | 3,292 | 28,577 |
| 104,142 | 102 | 19,049 | 6,038 | 3,303 | 28,492 |
| 104,143 | 102 | 18,974 | 6,050 | 3,316 | 28,442 |
| 104,144 | 104 | 18,837 | 5,994 | 3,300 | 28,235 |
| 104,145 | 106 | 18,834 | 5,987 | 3,299 | 28,226 |
| 104,146 | 105 | 18,540 | 5,947 | 3,294 | 27,886 |
| 104,147 | 106 | 18,878 | 6,068 | 3,362 | 28,414 |
| 104,148 | 106 | 18,823 | 6,117 | 3,363 | 28,409 |
| 104,149 | 105 | 18,732 | 6,086 | 3,351 | 28,274 |
| 104,150 | 105 | 18,438 | 5,972 | 3,319 | 27,834 |
| 104,151 | 109 | 18,710 | 6,057 | 3,382 | 28,258 |

|         |     |        |       |       |        |
|---------|-----|--------|-------|-------|--------|
| 104,152 | 109 | 18,448 | 5,982 | 3,365 | 27,904 |
| 104,153 | 106 | 18,348 | 5,939 | 3,330 | 27,723 |
| 104,154 | 107 | 18,691 | 5,989 | 3,389 | 28,176 |
| 104,155 | 109 | 18,670 | 5,965 | 3,385 | 28,129 |
| 104,156 | 109 | 18,677 | 5,931 | 3,372 | 28,089 |
| 104,157 | 108 | 18,512 | 5,884 | 3,321 | 27,825 |
| 104,158 | 108 | 18,270 | 5,820 | 3,308 | 27,506 |
| 104,159 | 108 | 18,526 | 5,832 | 3,330 | 27,796 |
| 104,160 | 103 | 18,646 | 5,859 | 3,342 | 27,950 |
| 104,161 | 103 | 18,693 | 5,834 | 3,344 | 27,974 |
| 104,162 | 100 | 18,557 | 5,786 | 3,306 | 27,749 |
| 104,163 | 92  | 18,599 | 5,807 | 3,327 | 27,825 |
| 104,164 | 89  | 18,492 | 5,819 | 3,317 | 27,717 |
| 104,165 | 85  | 18,627 | 5,820 | 3,297 | 27,829 |
| 104,166 | 89  | 18,185 | 5,684 | 3,228 | 27,186 |
| 104,167 | 91  | 18,438 | 5,741 | 3,240 | 27,510 |
| 104,168 | 91  | 18,822 | 5,828 | 3,297 | 28,038 |
| 104,169 | 91  | 18,320 | 5,656 | 3,226 | 27,293 |
| 104,170 | 92  | 18,304 | 5,636 | 3,215 | 27,247 |
| 104,171 | 92  | 18,320 | 5,622 | 3,219 | 27,253 |
| 104,172 | 92  | 18,371 | 5,602 | 3,229 | 27,294 |
| 104,173 | 96  | 18,391 | 5,593 | 3,223 | 27,303 |
| 104,174 | 96  | 18,422 | 5,598 | 3,244 | 27,360 |
| 104,175 | 95  | 19,087 | 5,857 | 3,357 | 28,396 |
| 104,176 | 95  | 19,047 | 5,856 | 3,374 | 28,372 |
| 104,177 | 91  | 19,082 | 5,871 | 3,409 | 28,453 |
| 104,178 | 92  | 18,832 | 5,746 | 3,373 | 28,043 |
| 104,179 | 99  | 18,980 | 5,836 | 3,412 | 28,327 |
| 104,180 | 98  | 18,692 | 5,712 | 3,351 | 27,853 |
| 104,181 | 98  | 18,632 | 5,700 | 3,346 | 27,776 |
| 104,182 | 102 | 18,273 | 5,648 | 3,319 | 27,342 |
| 104,183 | 102 | 18,010 | 5,619 | 3,303 | 27,034 |



|         |     |        |       |       |        |
|---------|-----|--------|-------|-------|--------|
| 104,184 | 112 | 18,792 | 5,877 | 3,443 | 28,224 |
| 104,185 | 112 | 18,810 | 5,925 | 3,452 | 28,299 |
| 104,186 | 107 | 18,826 | 5,960 | 3,493 | 28,386 |
| 104,187 | 109 | 18,796 | 5,949 | 3,466 | 28,320 |
| 104,188 | 106 | 18,867 | 5,939 | 3,474 | 28,386 |
| 104,189 | 106 | 18,849 | 5,883 | 3,468 | 28,306 |
| 104,190 | 108 | 18,856 | 5,881 | 3,447 | 28,292 |
| 104,191 | 110 | 19,024 | 5,915 | 3,457 | 28,506 |
| 104,192 | 110 | 19,205 | 5,941 | 3,474 | 28,730 |
| 104,193 | 107 | 19,072 | 5,861 | 3,444 | 28,484 |
| 104,194 | 106 | 19,072 | 5,863 | 3,430 | 28,471 |
| 104,195 | 105 | 19,352 | 5,924 | 3,491 | 28,872 |
| 104,196 | 103 | 19,195 | 5,890 | 3,474 | 28,662 |
| 104,197 | 105 | 19,621 | 5,989 | 3,523 | 29,238 |
| 104,198 | 105 | 19,756 | 5,963 | 3,550 | 29,374 |
| 104,199 | 105 | 19,627 | 5,903 | 3,547 | 29,182 |
| 104,200 | 106 | 19,707 | 5,917 | 3,552 | 29,282 |
| 104,201 | 106 | 19,967 | 6,025 | 3,579 | 29,677 |
| 104,202 | 103 | 19,994 | 6,010 | 3,575 | 29,682 |
| 104,203 | 105 | 19,927 | 5,975 | 3,562 | 29,569 |
| 104,204 | 115 | 19,652 | 5,922 | 3,526 | 29,215 |
| 104,205 | 116 | 19,644 | 5,912 | 3,524 | 29,196 |
| 104,206 | 116 | 19,403 | 5,871 | 3,500 | 28,890 |
| 104,207 | 115 | 19,208 | 5,832 | 3,484 | 28,639 |
| 104,208 | 112 | 19,792 | 6,026 | 3,592 | 29,522 |
| 104,209 | 115 | 20,003 | 6,065 | 3,613 | 29,796 |
| 104,210 | 115 | 19,889 | 6,040 | 3,599 | 29,643 |
| 104,211 | 114 | 19,959 | 6,040 | 3,600 | 29,713 |
| 104,212 | 116 | 19,983 | 6,005 | 3,581 | 29,685 |
| 104,213 | 117 | 19,930 | 6,013 | 3,570 | 29,630 |
| 104,214 | 119 | 20,221 | 6,128 | 3,647 | 30,115 |
| 104,215 | 114 | 19,941 | 6,009 | 3,609 | 29,673 |

|         |     |        |       |       |        |
|---------|-----|--------|-------|-------|--------|
| 104,216 | 114 | 20,145 | 6,063 | 3,649 | 29,971 |
| 104,217 | 105 | 20,087 | 6,038 | 3,647 | 29,877 |
| 104,218 | 103 | 20,072 | 6,038 | 3,649 | 29,862 |
| 104,219 | 105 | 19,763 | 5,976 | 3,581 | 29,425 |
| 104,220 | 105 | 19,513 | 5,930 | 3,545 | 29,093 |
| 104,221 | 103 | 19,971 | 6,112 | 3,618 | 29,804 |
| 104,222 | 98  | 19,405 | 5,961 | 3,511 | 28,975 |
| 104,223 | 99  | 19,550 | 6,001 | 3,546 | 29,196 |
| 104,224 | 108 | 19,766 | 6,064 | 3,582 | 29,520 |
| 104,225 | 109 | 19,817 | 6,056 | 3,580 | 29,562 |
| 104,226 | 109 | 19,941 | 6,077 | 3,572 | 29,699 |
| 104,227 | 112 | 19,993 | 6,080 | 3,547 | 29,732 |
| 104,228 | 110 | 20,032 | 6,065 | 3,541 | 29,748 |
| 104,229 | 111 | 20,339 | 6,157 | 3,566 | 30,173 |
| 104,230 | 106 | 20,326 | 6,149 | 3,564 | 30,145 |
| 104,231 | 110 | 20,277 | 6,150 | 3,561 | 30,098 |
| 104,232 | 109 | 20,221 | 6,143 | 3,556 | 30,029 |
| 104,233 | 102 | 20,337 | 6,198 | 3,585 | 30,222 |
| 104,234 | 100 | 20,473 | 6,199 | 3,574 | 30,346 |
| 104,235 | 96  | 20,176 | 6,134 | 3,538 | 29,944 |
| 104,236 | 98  | 20,237 | 6,143 | 3,532 | 30,010 |
| 104,237 | 99  | 20,235 | 6,142 | 3,502 | 29,978 |
| 104,238 | 97  | 19,875 | 6,061 | 3,484 | 29,517 |
| 104,239 | 98  | 20,136 | 6,148 | 3,544 | 29,926 |
| 104,240 | 100 | 20,253 | 6,149 | 3,524 | 30,026 |
| 104,241 | 98  | 20,323 | 6,168 | 3,532 | 30,121 |
| 104,242 | 99  | 20,171 | 6,153 | 3,526 | 29,949 |
| 104,243 | 99  | 20,245 | 6,178 | 3,543 | 30,065 |
| 104,244 | 99  | 20,492 | 6,254 | 3,579 | 30,424 |
| 104,245 | 97  | 20,526 | 6,259 | 3,572 | 30,454 |
| 104,246 | 98  | 20,476 | 6,260 | 3,549 | 30,383 |
| 104,247 | 101 | 20,385 | 6,235 | 3,523 | 30,244 |

|         |     |        |       |       |        |
|---------|-----|--------|-------|-------|--------|
| 104,248 | 101 | 20,400 | 6,248 | 3,528 | 30,277 |
| 104,249 | 105 | 20,281 | 6,260 | 3,503 | 30,149 |
| 104,250 | 112 | 20,096 | 6,195 | 3,456 | 29,859 |
| 104,251 | 119 | 20,173 | 6,177 | 3,443 | 29,912 |
| 104,252 | 122 | 19,963 | 6,150 | 3,445 | 29,680 |
| 104,253 | 124 | 20,213 | 6,244 | 3,496 | 30,077 |
| 104,254 | 124 | 20,245 | 6,300 | 3,536 | 30,205 |
| 104,255 | 120 | 20,159 | 6,272 | 3,492 | 30,043 |
| 104,256 | 121 | 20,178 | 6,269 | 3,510 | 30,078 |
| 104,257 | 123 | 20,238 | 6,256 | 3,500 | 30,117 |
| 104,258 | 123 | 20,161 | 6,242 | 3,494 | 30,020 |
| 104,259 | 121 | 20,203 | 6,247 | 3,503 | 30,074 |
| 104,260 | 128 | 20,336 | 6,290 | 3,540 | 30,294 |
| 104,261 | 135 | 20,119 | 6,262 | 3,516 | 30,032 |
| 104,262 | 135 | 19,944 | 6,220 | 3,494 | 29,793 |
| 104,263 | 133 | 20,049 | 6,290 | 3,547 | 30,019 |
| 104,264 | 134 | 20,332 | 6,331 | 3,579 | 30,376 |
| 104,265 | 132 | 20,097 | 6,290 | 3,549 | 30,068 |
| 104,266 | 132 | 20,161 | 6,312 | 3,533 | 30,138 |
| 104,267 | 132 | 19,931 | 6,271 | 3,522 | 29,856 |
| 104,268 | 135 | 19,991 | 6,289 | 3,524 | 29,939 |
| 104,269 | 135 | 19,771 | 6,220 | 3,503 | 29,629 |
| 104,270 | 132 | 19,780 | 6,213 | 3,540 | 29,665 |
| 104,271 | 134 | 19,929 | 6,222 | 3,531 | 29,816 |
| 104,272 | 135 | 19,780 | 6,157 | 3,492 | 29,564 |
| 104,273 | 141 | 19,661 | 6,135 | 3,494 | 29,431 |
| 104,274 | 140 | 19,619 | 6,153 | 3,490 | 29,402 |
| 104,275 | 138 | 19,688 | 6,208 | 3,518 | 29,552 |
| 104,276 | 136 | 19,485 | 6,174 | 3,498 | 29,293 |
| 104,277 | 141 | 19,438 | 6,151 | 3,483 | 29,213 |
| 104,278 | 138 | 19,255 | 6,146 | 3,486 | 29,025 |
| 104,279 | 142 | 19,300 | 6,216 | 3,497 | 29,155 |

|         |     |        |       |       |        |
|---------|-----|--------|-------|-------|--------|
| 104,280 | 140 | 19,339 | 6,199 | 3,526 | 29,204 |
| 104,281 | 141 | 19,375 | 6,187 | 3,515 | 29,218 |
| 104,282 | 138 | 19,183 | 6,119 | 3,476 | 28,916 |
| 104,283 | 137 | 19,048 | 6,054 | 3,412 | 28,651 |
| 104,284 | 137 | 19,135 | 6,068 | 3,413 | 28,753 |
| 104,285 | 140 | 18,831 | 5,970 | 3,375 | 28,316 |
| 104,286 | 139 | 18,833 | 5,946 | 3,368 | 28,286 |
| 104,287 | 142 | 19,870 | 6,279 | 3,538 | 29,829 |
| 104,288 | 142 | 19,900 | 6,264 | 3,519 | 29,825 |
| 104,289 | 143 | 19,861 | 6,263 | 3,506 | 29,773 |
| 104,290 | 144 | 19,884 | 6,274 | 3,513 | 29,815 |
| 104,291 | 140 | 19,763 | 6,271 | 3,548 | 29,722 |
| 104,292 | 138 | 19,508 | 6,161 | 3,466 | 29,273 |
| 104,293 | 145 | 19,731 | 6,223 | 3,487 | 29,586 |
| 104,294 | 145 | 19,944 | 6,288 | 3,529 | 29,906 |
| 104,295 | 146 | 19,790 | 6,231 | 3,499 | 29,666 |
| 104,296 | 146 | 19,863 | 6,250 | 3,502 | 29,761 |
| 104,297 | 144 | 20,070 | 6,294 | 3,546 | 30,054 |
| 104,298 | 142 | 20,324 | 6,310 | 3,575 | 30,351 |
| 104,299 | 139 | 20,163 | 6,251 | 3,539 | 30,092 |
| 104,300 | 140 | 20,135 | 6,269 | 3,544 | 30,088 |
| 104,301 | 131 | 20,063 | 6,276 | 3,560 | 30,030 |
| 104,302 | 125 | 20,561 | 6,433 | 3,657 | 30,776 |
| 104,303 | 123 | 20,589 | 6,419 | 3,664 | 30,795 |
| 104,304 | 121 | 20,391 | 6,363 | 3,616 | 30,491 |
| 104,305 | 124 | 20,533 | 6,388 | 3,619 | 30,664 |
| 104,306 | 117 | 20,416 | 6,361 | 3,608 | 30,502 |
| 104,307 | 118 | 20,716 | 6,474 | 3,707 | 31,015 |
| 104,308 | 114 | 20,819 | 6,480 | 3,703 | 31,116 |
| 104,309 | 114 | 20,723 | 6,421 | 3,672 | 30,930 |
| 104,310 | 113 | 20,928 | 6,509 | 3,714 | 31,264 |
| 104,311 | 99  | 20,741 | 6,430 | 3,665 | 30,935 |

|         |     |        |       |       |        |
|---------|-----|--------|-------|-------|--------|
| 104,312 | 100 | 20,957 | 6,529 | 3,704 | 31,290 |
| 104,313 | 103 | 20,930 | 6,529 | 3,697 | 31,259 |
| 104,314 | 103 | 20,933 | 6,506 | 3,683 | 31,225 |
| 104,315 | 102 | 20,848 | 6,519 | 3,691 | 31,160 |
| 104,316 | 109 | 20,989 | 6,550 | 3,678 | 31,326 |
| 104,317 | 109 | 20,413 | 6,386 | 3,586 | 30,494 |
| 104,318 | 110 | 20,664 | 6,407 | 3,617 | 30,798 |
| 104,319 | 115 | 20,470 | 6,352 | 3,612 | 30,549 |
| 104,320 | 117 | 20,727 | 6,423 | 3,660 | 30,927 |
| 104,321 | 120 | 20,768 | 6,437 | 3,667 | 30,992 |
| 104,322 | 123 | 20,965 | 6,483 | 3,690 | 31,261 |
| 104,323 | 118 | 21,229 | 6,551 | 3,726 | 31,624 |
| 104,324 | 118 | 21,223 | 6,483 | 3,709 | 31,533 |
| 104,325 | 119 | 21,442 | 6,525 | 3,737 | 31,823 |
| 104,326 | 113 | 21,361 | 6,471 | 3,688 | 31,633 |
| 104,327 | 116 | 21,478 | 6,494 | 3,688 | 31,776 |
| 104,328 | 114 | 21,326 | 6,466 | 3,689 | 31,595 |
| 104,329 | 117 | 21,745 | 6,585 | 3,763 | 32,210 |
| 104,330 | 114 | 21,795 | 6,541 | 3,741 | 32,191 |
| 104,331 | 112 | 21,457 | 6,466 | 3,683 | 31,718 |
| 104,332 | 111 | 21,600 | 6,540 | 3,705 | 31,956 |
| 104,333 | 103 | 21,454 | 6,530 | 3,725 | 31,812 |
| 104,334 | 102 | 21,275 | 6,421 | 3,703 | 31,501 |
| 104,335 | 102 | 21,238 | 6,386 | 3,688 | 31,414 |
| 104,336 | 99  | 21,724 | 6,554 | 3,750 | 32,127 |
| 104,337 | 101 | 21,823 | 6,543 | 3,739 | 32,206 |
| 104,338 | 102 | 21,645 | 6,485 | 3,698 | 31,930 |
| 104,339 | 104 | 21,717 | 6,534 | 3,718 | 32,073 |
| 104,340 | 103 | 21,826 | 6,534 | 3,733 | 32,196 |
| 104,341 | 105 | 21,160 | 6,301 | 3,562 | 31,128 |
| 104,342 | 105 | 21,412 | 6,355 | 3,588 | 31,460 |
| 104,343 | 108 | 21,632 | 6,405 | 3,629 | 31,774 |

|         |     |        |       |       |        |
|---------|-----|--------|-------|-------|--------|
| 104,344 | 100 | 21,453 | 6,349 | 3,610 | 31,512 |
| 104,345 | 103 | 21,639 | 6,430 | 3,653 | 31,825 |
| 104,346 | 103 | 21,672 | 6,426 | 3,656 | 31,857 |
| 104,347 | 103 | 21,495 | 6,376 | 3,621 | 31,595 |
| 104,348 | 103 | 21,392 | 6,398 | 3,621 | 31,514 |
| 104,349 | 101 | 21,601 | 6,471 | 3,675 | 31,848 |
| 104,350 | 103 | 21,534 | 6,462 | 3,681 | 31,780 |
| 104,351 | 106 | 21,575 | 6,505 | 3,687 | 31,873 |
| 104,352 | 108 | 21,632 | 6,507 | 3,693 | 31,940 |
| 104,353 | 116 | 21,564 | 6,441 | 3,663 | 31,784 |
| 104,354 | 115 | 21,221 | 6,312 | 3,589 | 31,237 |
| 104,355 | 117 | 21,329 | 6,283 | 3,574 | 31,303 |
| 104,356 | 117 | 21,504 | 6,306 | 3,580 | 31,507 |
| 104,357 | 113 | 21,368 | 6,271 | 3,560 | 31,312 |
| 104,358 | 115 | 21,646 | 6,348 | 3,585 | 31,694 |
| 104,359 | 118 | 21,300 | 6,301 | 3,570 | 31,289 |
| 104,360 | 122 | 21,471 | 6,335 | 3,578 | 31,506 |
| 104,361 | 123 | 21,419 | 6,308 | 3,577 | 31,427 |
| 104,362 | 124 | 21,592 | 6,357 | 3,618 | 31,691 |
| 104,363 | 122 | 21,565 | 6,319 | 3,608 | 31,614 |
| 104,364 | 127 | 21,566 | 6,306 | 3,627 | 31,626 |
| 104,365 | 126 | 21,471 | 6,213 | 3,624 | 31,434 |
| 104,366 | 130 | 21,781 | 6,244 | 3,670 | 31,825 |
| 104,367 | 126 | 22,122 | 6,319 | 3,720 | 32,287 |
| 104,368 | 127 | 21,469 | 6,159 | 3,594 | 31,349 |
| 104,369 | 130 | 21,885 | 6,268 | 3,651 | 31,934 |
| 104,370 | 126 | 22,323 | 6,374 | 3,698 | 32,521 |
| 104,371 | 129 | 22,213 | 6,325 | 3,658 | 32,325 |
| 104,372 | 127 | 22,372 | 6,341 | 3,692 | 32,532 |
| 104,373 | 124 | 22,296 | 6,326 | 3,701 | 32,447 |
| 104,374 | 125 | 22,573 | 6,404 | 3,746 | 32,848 |
| 104,375 | 124 | 22,727 | 6,458 | 3,757 | 33,066 |

|         |     |        |       |       |        |
|---------|-----|--------|-------|-------|--------|
| 104,376 | 123 | 22,571 | 6,421 | 3,729 | 32,844 |
| 104,377 | 129 | 22,834 | 6,479 | 3,772 | 33,214 |
| 104,378 | 128 | 23,032 | 6,458 | 3,790 | 33,408 |
| 104,379 | 127 | 22,921 | 6,435 | 3,754 | 33,237 |
| 104,380 | 129 | 23,034 | 6,447 | 3,764 | 33,374 |
| 104,381 | 129 | 23,034 | 6,446 | 3,797 | 33,406 |
| 104,382 | 132 | 23,446 | 6,549 | 3,856 | 33,983 |
| 104,383 | 139 | 23,389 | 6,514 | 3,827 | 33,869 |
| 104,384 | 140 | 23,725 | 6,564 | 3,875 | 34,304 |
| 104,385 | 138 | 23,780 | 6,548 | 3,870 | 34,336 |
| 104,386 | 141 | 23,856 | 6,536 | 3,872 | 34,405 |
| 104,387 | 148 | 23,912 | 6,564 | 3,877 | 34,501 |
| 104,388 | 149 | 23,815 | 6,564 | 3,880 | 34,408 |
| 104,389 | 149 | 23,899 | 6,576 | 3,881 | 34,505 |
| 104,390 | 154 | 24,331 | 6,656 | 3,955 | 35,096 |
| 104,391 | 157 | 24,462 | 6,695 | 3,975 | 35,289 |
| 104,392 | 153 | 24,161 | 6,651 | 3,960 | 34,925 |
| 104,393 | 157 | 24,237 | 6,694 | 3,992 | 35,080 |
| 104,394 | 153 | 24,111 | 6,715 | 4,008 | 34,987 |
| 104,395 | 153 | 24,078 | 6,743 | 4,001 | 34,975 |
| 104,396 | 158 | 24,061 | 6,719 | 4,031 | 34,969 |
| 104,397 | 159 | 24,343 | 6,847 | 4,081 | 35,430 |
| 104,398 | 159 | 24,393 | 6,866 | 4,102 | 35,520 |
| 104,399 | 160 | 24,635 | 6,867 | 4,109 | 35,771 |
| 104,400 | 148 | 21,474 | 6,115 | 3,612 | 31,349 |
| 104,401 | 146 | 21,696 | 6,184 | 3,650 | 31,676 |
| 104,402 | 146 | 21,920 | 6,245 | 3,695 | 32,006 |
| 104,403 | 146 | 21,918 | 6,249 | 3,691 | 32,004 |
| 104,404 | 146 | 22,240 | 6,341 | 3,759 | 32,486 |
| 104,405 | 149 | 22,593 | 6,446 | 3,811 | 32,999 |
| 104,406 | 150 | 22,826 | 6,522 | 3,845 | 33,343 |
| 104,407 | 151 | 23,091 | 6,568 | 3,879 | 33,689 |

|         |     |        |       |       |        |
|---------|-----|--------|-------|-------|--------|
| 104,408 | 151 | 23,433 | 6,607 | 3,912 | 34,103 |
| 104,409 | 154 | 23,705 | 6,667 | 3,934 | 34,460 |
| 104,410 | 155 | 23,927 | 6,706 | 3,964 | 34,752 |
| 104,411 | 154 | 24,183 | 6,734 | 3,998 | 35,069 |
| 104,412 | 153 | 24,107 | 6,752 | 3,986 | 34,998 |
| 104,413 | 151 | 23,915 | 6,678 | 3,928 | 34,672 |
| 104,414 | 154 | 24,187 | 6,681 | 3,932 | 34,954 |
| 104,415 | 154 | 23,951 | 6,631 | 3,887 | 34,623 |
| 104,416 | 152 | 23,720 | 6,598 | 3,842 | 34,312 |
| 104,417 | 152 | 24,150 | 6,778 | 3,919 | 34,999 |
| 104,418 | 147 | 24,026 | 6,764 | 3,910 | 34,847 |
| 104,419 | 147 | 23,971 | 6,750 | 3,913 | 34,781 |
| 104,420 | 143 | 24,230 | 6,874 | 3,970 | 35,217 |
| 104,421 | 145 | 24,351 | 6,904 | 3,983 | 35,383 |
| 104,422 | 142 | 24,305 | 6,909 | 4,018 | 35,374 |
| 104,423 | 142 | 24,391 | 6,902 | 4,019 | 35,454 |
| 104,424 | 142 | 24,443 | 6,934 | 4,028 | 35,547 |
| 104,425 | 142 | 24,454 | 6,936 | 4,028 | 35,560 |
| 104,426 | 148 | 24,630 | 6,979 | 4,035 | 35,792 |
| 104,427 | 150 | 24,782 | 7,015 | 4,052 | 35,999 |
| 104,428 | 148 | 24,430 | 6,934 | 4,023 | 35,535 |
| 104,429 | 150 | 24,436 | 7,009 | 4,034 | 35,629 |
| 104,430 | 148 | 24,324 | 6,989 | 4,038 | 35,499 |
| 104,431 | 147 | 24,020 | 6,885 | 3,982 | 35,034 |
| 104,432 | 149 | 24,311 | 6,931 | 3,987 | 35,378 |
| 104,433 | 153 | 24,506 | 6,987 | 4,006 | 35,652 |
| 104,434 | 147 | 24,289 | 6,875 | 3,953 | 35,264 |
| 104,435 | 147 | 24,161 | 6,863 | 3,929 | 35,100 |
| 104,436 | 146 | 24,131 | 6,861 | 3,945 | 35,083 |
| 104,437 | 144 | 24,063 | 6,829 | 3,949 | 34,985 |
| 104,438 | 136 | 24,002 | 6,780 | 3,943 | 34,861 |
| 104,439 | 136 | 23,854 | 6,728 | 3,931 | 34,649 |



|         |     |        |       |       |        |
|---------|-----|--------|-------|-------|--------|
| 104,440 | 131 | 24,011 | 6,788 | 3,993 | 34,923 |
| 104,441 | 131 | 24,048 | 6,805 | 4,006 | 34,990 |
| 104,442 | 128 | 24,187 | 6,800 | 4,012 | 35,127 |
| 104,443 | 126 | 24,111 | 6,750 | 4,000 | 34,987 |
| 104,444 | 131 | 24,254 | 6,692 | 3,963 | 35,040 |
| 104,445 | 132 | 24,499 | 6,719 | 3,997 | 35,347 |
| 104,446 | 126 | 24,720 | 6,819 | 4,032 | 35,697 |
| 104,447 | 128 | 24,931 | 6,860 | 4,078 | 35,997 |
| 104,448 | 125 | 24,589 | 6,748 | 4,042 | 35,504 |
| 104,449 | 127 | 24,859 | 6,791 | 4,076 | 35,853 |
| 104,450 | 126 | 24,828 | 6,838 | 4,094 | 35,886 |
| 104,451 | 116 | 24,804 | 6,812 | 4,094 | 35,826 |
| 104,452 | 114 | 24,517 | 6,683 | 4,040 | 35,354 |
| 104,453 | 117 | 24,723 | 6,697 | 4,057 | 35,594 |
| 104,454 | 116 | 25,001 | 6,732 | 4,082 | 35,931 |
| 104,455 | 112 | 24,713 | 6,673 | 4,045 | 35,543 |
| 104,456 | 109 | 24,751 | 6,663 | 4,056 | 35,579 |
| 104,457 | 108 | 24,759 | 6,658 | 4,068 | 35,593 |
| 104,458 | 109 | 24,675 | 6,646 | 4,067 | 35,497 |
| 104,459 | 111 | 24,708 | 6,646 | 4,066 | 35,531 |
| 104,460 | 109 | 24,451 | 6,581 | 4,035 | 35,176 |
| 104,461 | 107 | 24,376 | 6,543 | 4,003 | 35,029 |
| 104,462 | 108 | 24,620 | 6,568 | 4,025 | 35,321 |
| 104,463 | 108 | 24,885 | 6,620 | 4,050 | 35,663 |
| 104,464 | 109 | 24,880 | 6,668 | 4,057 | 35,714 |
| 104,465 | 106 | 24,725 | 6,664 | 4,068 | 35,563 |
| 104,466 | 100 | 24,552 | 6,675 | 4,079 | 35,406 |
| 104,467 | 100 | 24,531 | 6,687 | 4,057 | 35,375 |
| 104,468 | 101 | 24,315 | 6,614 | 4,038 | 35,068 |
| 104,469 | 103 | 24,083 | 6,495 | 3,971 | 34,652 |
| 104,470 | 112 | 24,059 | 6,421 | 3,955 | 34,547 |
| 104,471 | 114 | 24,053 | 6,366 | 3,944 | 34,477 |

|         |     |        |       |       |        |
|---------|-----|--------|-------|-------|--------|
| 104,472 | 104 | 24,027 | 6,331 | 3,940 | 34,402 |
| 104,473 | 106 | 23,931 | 6,314 | 3,899 | 34,250 |
| 104,474 | 105 | 24,055 | 6,315 | 3,897 | 34,372 |
| 104,475 | 104 | 23,896 | 6,277 | 3,880 | 34,157 |
| 104,476 | 105 | 23,877 | 6,260 | 3,877 | 34,119 |
| 104,477 | 102 | 24,008 | 6,323 | 3,912 | 34,345 |
| 104,478 | 97  | 23,886 | 6,265 | 3,900 | 34,148 |
| 104,479 | 94  | 23,771 | 6,205 | 3,885 | 33,955 |
| 104,480 | 89  | 23,865 | 6,190 | 3,898 | 34,042 |
| 104,481 | 89  | 23,844 | 6,179 | 3,891 | 34,003 |
| 104,482 | 97  | 23,868 | 6,233 | 3,945 | 34,143 |
| 104,483 | 102 | 23,892 | 6,260 | 3,967 | 34,221 |
| 104,484 | 97  | 23,568 | 6,170 | 3,937 | 33,772 |
| 104,485 | 97  | 23,568 | 6,164 | 3,923 | 33,752 |
| 104,486 | 95  | 23,698 | 6,194 | 3,964 | 33,951 |
| 104,487 | 93  | 23,635 | 6,172 | 3,950 | 33,850 |
| 104,488 | 92  | 23,587 | 6,118 | 3,929 | 33,726 |
| 104,489 | 95  | 23,749 | 6,164 | 3,932 | 33,940 |
| 104,490 | 94  | 23,704 | 6,123 | 3,911 | 33,832 |
| 104,491 | 95  | 23,921 | 6,171 | 3,933 | 34,120 |
| 104,492 | 93  | 23,420 | 6,050 | 3,874 | 33,437 |
| 104,493 | 95  | 23,416 | 6,042 | 3,850 | 33,403 |
| 104,494 | 96  | 23,438 | 6,025 | 3,830 | 33,389 |
| 104,495 | 90  | 23,138 | 5,966 | 3,792 | 32,986 |
| 104,496 | 100 | 23,835 | 6,156 | 3,912 | 34,003 |
| 104,497 | 101 | 23,753 | 6,084 | 3,894 | 33,832 |
| 104,498 | 106 | 23,351 | 5,984 | 3,802 | 33,243 |
| 104,499 | 105 | 23,272 | 5,938 | 3,778 | 33,093 |
| 104,500 | 108 | 23,787 | 6,052 | 3,869 | 33,816 |
| 104,501 | 110 | 23,396 | 5,913 | 3,819 | 33,238 |
| 104,502 | 111 | 23,349 | 5,927 | 3,813 | 33,200 |
| 104,503 | 111 | 23,320 | 5,905 | 3,805 | 33,141 |

|         |     |        |       |       |        |
|---------|-----|--------|-------|-------|--------|
| 104,504 | 110 | 23,349 | 5,923 | 3,826 | 33,208 |
| 104,505 | 113 | 23,125 | 5,881 | 3,799 | 32,918 |
| 104,506 | 112 | 23,047 | 5,831 | 3,770 | 32,760 |
| 104,507 | 115 | 23,555 | 6,004 | 3,851 | 33,525 |
| 104,508 | 115 | 23,562 | 5,970 | 3,847 | 33,494 |
| 104,509 | 115 | 23,417 | 5,972 | 3,847 | 33,351 |
| 104,510 | 123 | 23,559 | 6,067 | 3,910 | 33,659 |
| 104,511 | 120 | 23,237 | 6,004 | 3,889 | 33,250 |
| 104,512 | 125 | 23,470 | 6,087 | 3,926 | 33,608 |
| 104,513 | 126 | 23,533 | 6,111 | 3,962 | 33,732 |
| 104,514 | 126 | 23,756 | 6,164 | 3,977 | 34,023 |
| 104,515 | 131 | 23,972 | 6,169 | 4,016 | 34,288 |
| 104,516 | 133 | 24,040 | 6,187 | 4,022 | 34,382 |
| 104,517 | 136 | 24,362 | 6,207 | 4,029 | 34,734 |
| 104,518 | 135 | 24,236 | 6,154 | 3,998 | 34,523 |
| 104,519 | 135 | 24,344 | 6,160 | 4,009 | 34,648 |
| 104,520 | 135 | 24,258 | 6,243 | 4,071 | 34,707 |
| 104,521 | 127 | 24,212 | 6,247 | 4,068 | 34,654 |
| 104,522 | 126 | 23,657 | 6,128 | 4,004 | 33,915 |
| 104,523 | 125 | 23,685 | 6,109 | 4,010 | 33,929 |
| 104,524 | 125 | 23,646 | 6,092 | 4,017 | 33,880 |
| 104,525 | 128 | 23,964 | 6,164 | 4,042 | 34,298 |
| 104,526 | 127 | 23,684 | 6,070 | 4,013 | 33,894 |
| 104,527 | 133 | 23,983 | 6,121 | 4,032 | 34,269 |
| 104,528 | 130 | 24,025 | 6,128 | 4,032 | 34,315 |
| 104,529 | 128 | 23,776 | 6,069 | 4,000 | 33,973 |
| 104,530 | 127 | 23,506 | 6,030 | 3,971 | 33,634 |
| 104,531 | 131 | 23,741 | 6,061 | 3,999 | 33,932 |
| 104,532 | 123 | 24,135 | 6,106 | 4,025 | 34,389 |
| 104,533 | 118 | 23,552 | 5,996 | 3,924 | 33,590 |
| 104,534 | 119 | 23,825 | 6,008 | 3,951 | 33,903 |
| 104,535 | 121 | 24,277 | 6,105 | 4,005 | 34,508 |

|         |     |        |       |       |        |
|---------|-----|--------|-------|-------|--------|
| 104,536 | 123 | 24,546 | 6,156 | 4,039 | 34,864 |
| 104,537 | 123 | 24,513 | 6,147 | 4,045 | 34,828 |
| 104,538 | 123 | 24,283 | 6,131 | 4,014 | 34,551 |
| 104,539 | 125 | 24,770 | 6,313 | 4,134 | 35,342 |
| 104,540 | 129 | 24,839 | 6,289 | 4,137 | 35,394 |
| 104,541 | 131 | 24,938 | 6,324 | 4,147 | 35,540 |
| 104,542 | 131 | 24,777 | 6,286 | 4,102 | 35,296 |
| 104,543 | 131 | 24,635 | 6,245 | 4,090 | 35,101 |
| 104,544 | 130 | 24,736 | 6,315 | 4,151 | 35,332 |
| 104,545 | 130 | 24,560 | 6,306 | 4,141 | 35,137 |
| 104,546 | 131 | 24,290 | 6,271 | 4,119 | 34,811 |
| 104,547 | 122 | 24,067 | 6,185 | 4,083 | 34,457 |
| 104,548 | 121 | 23,930 | 6,202 | 4,078 | 34,331 |
| 104,549 | 118 | 23,540 | 6,106 | 4,031 | 33,795 |
| 104,550 | 118 | 23,215 | 6,039 | 3,985 | 33,357 |
| 104,551 | 117 | 23,427 | 6,152 | 3,990 | 33,686 |
| 104,552 | 120 | 23,391 | 6,115 | 3,982 | 33,608 |
| 104,553 | 123 | 23,457 | 6,118 | 3,982 | 33,680 |
| 104,554 | 121 | 23,398 | 6,119 | 3,964 | 33,602 |
| 104,555 | 122 | 23,380 | 6,111 | 3,963 | 33,576 |
| 104,556 | 116 | 23,664 | 6,151 | 4,010 | 33,941 |
| 104,557 | 115 | 23,452 | 6,105 | 3,975 | 33,647 |
| 104,558 | 117 | 23,658 | 6,123 | 4,021 | 33,919 |
| 104,559 | 116 | 23,292 | 5,999 | 3,921 | 33,328 |
| 104,560 | 119 | 23,522 | 6,040 | 3,929 | 33,610 |
| 104,561 | 110 | 23,420 | 6,020 | 3,916 | 33,466 |
| 104,562 | 106 | 23,554 | 6,020 | 3,920 | 33,600 |
| 104,563 | 106 | 23,648 | 6,020 | 3,947 | 33,721 |
| 104,564 | 105 | 23,407 | 5,958 | 3,883 | 33,353 |
| 104,565 | 109 | 23,440 | 5,948 | 3,904 | 33,401 |
| 104,566 | 104 | 23,426 | 5,951 | 3,876 | 33,357 |
| 104,567 | 104 | 23,408 | 5,934 | 3,857 | 33,303 |

|         |     |        |       |       |        |
|---------|-----|--------|-------|-------|--------|
| 104,568 | 100 | 23,400 | 5,926 | 3,844 | 33,270 |
| 104,569 | 102 | 23,141 | 5,792 | 3,771 | 32,806 |
| 104,570 | 114 | 23,677 | 5,842 | 3,805 | 33,438 |
| 104,571 | 114 | 23,670 | 5,806 | 3,791 | 33,381 |
| 104,572 | 116 | 23,739 | 5,840 | 3,755 | 33,450 |
| 104,573 | 125 | 23,879 | 5,876 | 3,775 | 33,655 |
| 104,574 | 128 | 23,641 | 5,859 | 3,726 | 33,354 |
| 104,575 | 128 | 23,573 | 5,865 | 3,728 | 33,294 |
| 104,576 | 126 | 23,545 | 5,841 | 3,741 | 33,253 |
| 104,577 | 127 | 23,608 | 5,872 | 3,743 | 33,350 |
| 104,578 | 123 | 23,587 | 5,867 | 3,754 | 33,331 |
| 104,579 | 124 | 23,513 | 5,851 | 3,773 | 33,261 |
| 104,580 | 126 | 23,524 | 5,834 | 3,731 | 33,215 |
| 104,581 | 127 | 23,607 | 5,831 | 3,738 | 33,303 |
| 104,582 | 127 | 23,586 | 5,833 | 3,740 | 33,286 |
| 104,583 | 129 | 23,592 | 5,822 | 3,748 | 33,291 |
| 104,584 | 127 | 23,488 | 5,813 | 3,753 | 33,181 |
| 104,585 | 129 | 23,609 | 5,854 | 3,788 | 33,380 |
| 104,586 | 130 | 23,969 | 5,892 | 3,817 | 33,808 |
| 104,587 | 130 | 24,135 | 5,921 | 3,832 | 34,018 |
| 104,588 | 127 | 24,202 | 5,903 | 3,787 | 34,019 |
| 104,589 | 128 | 24,366 | 5,897 | 3,768 | 34,159 |
| 104,590 | 134 | 24,676 | 5,943 | 3,807 | 34,560 |
| 104,591 | 132 | 24,649 | 5,986 | 3,819 | 34,586 |
| 104,592 | 130 | 24,643 | 5,992 | 3,787 | 34,552 |
| 104,593 | 130 | 24,832 | 6,024 | 3,803 | 34,789 |
| 104,594 | 134 | 25,213 | 6,051 | 3,835 | 35,233 |
| 104,595 | 134 | 25,536 | 6,119 | 3,861 | 35,650 |
| 104,596 | 128 | 25,381 | 6,034 | 3,808 | 35,351 |
| 104,597 | 125 | 25,049 | 5,909 | 3,718 | 34,801 |
| 104,598 | 126 | 25,284 | 5,942 | 3,730 | 35,082 |
| 104,599 | 125 | 25,594 | 5,968 | 3,772 | 35,459 |

|         |     |        |       |       |        |
|---------|-----|--------|-------|-------|--------|
| 104,600 | 130 | 25,910 | 6,029 | 3,801 | 35,870 |
| 104,601 | 132 | 25,602 | 5,971 | 3,769 | 35,474 |
| 104,602 | 140 | 25,911 | 6,033 | 3,805 | 35,889 |
| 104,603 | 134 | 25,773 | 6,019 | 3,793 | 35,719 |
| 104,604 | 145 | 25,882 | 6,098 | 3,840 | 35,965 |
| 104,605 | 152 | 25,957 | 6,133 | 3,872 | 36,114 |
| 104,606 | 158 | 26,061 | 6,162 | 3,872 | 36,253 |
| 104,607 | 167 | 25,807 | 6,090 | 3,827 | 35,891 |
| 104,608 | 166 | 25,645 | 6,043 | 3,797 | 35,651 |
| 104,609 | 167 | 25,838 | 6,089 | 3,795 | 35,889 |
| 104,610 | 167 | 25,917 | 6,096 | 3,802 | 35,982 |
| 104,611 | 168 | 26,019 | 6,112 | 3,817 | 36,116 |
| 104,612 | 168 | 26,044 | 6,096 | 3,826 | 36,134 |
| 104,613 | 181 | 26,248 | 6,131 | 3,860 | 36,420 |
| 104,614 | 187 | 26,236 | 6,129 | 3,876 | 36,428 |
| 104,615 | 185 | 25,995 | 6,094 | 3,832 | 36,106 |
| 104,616 | 185 | 25,801 | 6,043 | 3,808 | 35,837 |
| 104,617 | 194 | 26,204 | 6,193 | 3,883 | 36,474 |
| 104,618 | 194 | 26,181 | 6,174 | 3,853 | 36,402 |
| 104,619 | 194 | 25,883 | 6,091 | 3,811 | 35,979 |
| 104,620 | 204 | 26,155 | 6,131 | 3,820 | 36,310 |
| 104,621 | 204 | 26,126 | 6,185 | 3,838 | 36,353 |
| 104,622 | 210 | 26,204 | 6,173 | 3,839 | 36,426 |
| 104,623 | 209 | 26,038 | 6,118 | 3,821 | 36,186 |
| 104,624 | 210 | 25,993 | 6,129 | 3,827 | 36,159 |
| 104,625 | 210 | 25,988 | 6,119 | 3,837 | 36,154 |
| 104,626 | 212 | 26,022 | 6,108 | 3,819 | 36,161 |
| 104,627 | 216 | 25,730 | 6,044 | 3,760 | 35,750 |
| 104,628 | 215 | 25,572 | 5,982 | 3,740 | 35,509 |
| 104,629 | 213 | 25,943 | 6,063 | 3,810 | 36,029 |
| 104,630 | 214 | 25,889 | 6,058 | 3,820 | 35,981 |
| 104,631 | 212 | 25,774 | 6,047 | 3,833 | 35,866 |

|         |     |        |       |       |        |
|---------|-----|--------|-------|-------|--------|
| 104,632 | 209 | 25,415 | 6,008 | 3,810 | 35,442 |
| 104,633 | 206 | 25,134 | 5,936 | 3,747 | 35,023 |
| 104,634 | 205 | 25,245 | 5,984 | 3,781 | 35,215 |
| 104,635 | 202 | 25,308 | 5,980 | 3,801 | 35,291 |
| 104,636 | 206 | 25,314 | 5,970 | 3,779 | 35,269 |
| 104,637 | 208 | 25,015 | 5,947 | 3,785 | 34,955 |
| 104,638 | 207 | 24,691 | 5,883 | 3,749 | 34,530 |
| 104,639 | 206 | 24,160 | 5,782 | 3,707 | 33,855 |
| 104,640 | 210 | 24,354 | 5,864 | 3,753 | 34,181 |
| 104,641 | 210 | 24,038 | 5,829 | 3,730 | 33,807 |
| 104,642 | 210 | 24,011 | 5,803 | 3,704 | 33,728 |
| 104,643 | 215 | 23,368 | 5,653 | 3,645 | 32,881 |
| 104,644 | 221 | 23,342 | 5,636 | 3,634 | 32,833 |
| 104,645 | 217 | 23,091 | 5,601 | 3,603 | 32,512 |
| 104,646 | 215 | 22,736 | 5,526 | 3,592 | 32,069 |
| 104,647 | 218 | 22,719 | 5,535 | 3,615 | 32,087 |
| 104,648 | 221 | 22,761 | 5,570 | 3,646 | 32,198 |
| 104,649 | 221 | 22,770 | 5,575 | 3,647 | 32,213 |
| 104,650 | 226 | 22,957 | 5,634 | 3,693 | 32,510 |
| 104,651 | 223 | 22,898 | 5,621 | 3,708 | 32,450 |
| 104,652 | 218 | 22,779 | 5,575 | 3,679 | 32,251 |
| 104,653 | 212 | 22,901 | 5,626 | 3,723 | 32,462 |
| 104,654 | 213 | 22,849 | 5,607 | 3,689 | 32,358 |
| 104,655 | 207 | 23,004 | 5,566 | 3,663 | 32,440 |
| 104,656 | 199 | 22,821 | 5,499 | 3,618 | 32,137 |
| 104,657 | 189 | 22,614 | 5,454 | 3,619 | 31,876 |
| 104,658 | 189 | 22,629 | 5,461 | 3,632 | 31,911 |
| 104,659 | 189 | 22,484 | 5,455 | 3,613 | 31,741 |
| 104,660 | 195 | 22,515 | 5,431 | 3,606 | 31,747 |
| 104,661 | 195 | 22,533 | 5,407 | 3,608 | 31,743 |
| 104,662 | 198 | 22,524 | 5,418 | 3,602 | 31,742 |
| 104,663 | 198 | 22,591 | 5,427 | 3,608 | 31,824 |

|         |     |        |       |       |        |
|---------|-----|--------|-------|-------|--------|
| 104,664 | 191 | 22,702 | 5,469 | 3,628 | 31,990 |
| 104,665 | 185 | 22,510 | 5,444 | 3,591 | 31,730 |
| 104,666 | 183 | 22,663 | 5,473 | 3,639 | 31,958 |
| 104,667 | 180 | 22,553 | 5,413 | 3,613 | 31,759 |
| 104,668 | 180 | 22,618 | 5,369 | 3,606 | 31,773 |
| 104,669 | 179 | 22,469 | 5,367 | 3,607 | 31,622 |
| 104,670 | 172 | 22,420 | 5,391 | 3,618 | 31,601 |
| 104,671 | 165 | 22,807 | 5,511 | 3,727 | 32,210 |
| 104,672 | 163 | 22,910 | 5,525 | 3,737 | 32,335 |
| 104,673 | 162 | 22,890 | 5,527 | 3,741 | 32,320 |
| 104,674 | 149 | 22,868 | 5,517 | 3,737 | 32,271 |
| 104,675 | 144 | 22,726 | 5,460 | 3,717 | 32,047 |
| 104,676 | 138 | 22,749 | 5,471 | 3,728 | 32,086 |
| 104,677 | 138 | 22,987 | 5,525 | 3,766 | 32,416 |
| 104,678 | 136 | 23,163 | 5,563 | 3,810 | 32,672 |
| 104,679 | 136 | 23,240 | 5,580 | 3,807 | 32,763 |
| 104,680 | 137 | 23,188 | 5,592 | 3,815 | 32,732 |
| 104,681 | 136 | 23,294 | 5,582 | 3,800 | 32,812 |
| 104,682 | 135 | 23,136 | 5,499 | 3,732 | 32,502 |
| 104,683 | 135 | 23,509 | 5,542 | 3,758 | 32,944 |
| 104,684 | 132 | 23,076 | 5,429 | 3,673 | 32,310 |
| 104,685 | 138 | 23,517 | 5,522 | 3,712 | 32,889 |
| 104,686 | 137 | 23,509 | 5,518 | 3,711 | 32,875 |
| 104,687 | 138 | 23,902 | 5,621 | 3,791 | 33,452 |
| 104,688 | 134 | 24,066 | 5,653 | 3,803 | 33,656 |
| 104,689 | 135 | 24,162 | 5,699 | 3,822 | 33,818 |
| 104,690 | 136 | 24,037 | 5,633 | 3,776 | 33,582 |
| 104,691 | 131 | 24,242 | 5,625 | 3,788 | 33,786 |
| 104,692 | 134 | 24,649 | 5,729 | 3,861 | 34,373 |
| 104,693 | 127 | 24,305 | 5,667 | 3,829 | 33,928 |
| 104,694 | 123 | 24,382 | 5,653 | 3,805 | 33,963 |
| 104,695 | 123 | 24,439 | 5,638 | 3,771 | 33,971 |



|         |     |        |       |       |        |
|---------|-----|--------|-------|-------|--------|
| 104,696 | 124 | 24,812 | 5,683 | 3,801 | 34,420 |
| 104,697 | 122 | 24,501 | 5,617 | 3,740 | 33,980 |
| 104,698 | 125 | 24,880 | 5,673 | 3,770 | 34,448 |
| 104,699 | 122 | 25,287 | 5,731 | 3,816 | 34,956 |
| 104,700 | 122 | 25,433 | 5,786 | 3,853 | 35,194 |
| 104,701 | 123 | 25,317 | 5,753 | 3,813 | 35,006 |
| 104,702 | 123 | 25,005 | 5,664 | 3,760 | 34,552 |
| 104,703 | 130 | 25,408 | 5,699 | 3,791 | 35,028 |
| 104,704 | 129 | 25,344 | 5,692 | 3,788 | 34,953 |
| 104,705 | 132 | 25,402 | 5,699 | 3,800 | 35,033 |
| 104,706 | 131 | 25,799 | 5,778 | 3,880 | 35,588 |
| 104,707 | 130 | 25,636 | 5,729 | 3,831 | 35,326 |
| 104,708 | 130 | 25,566 | 5,734 | 3,836 | 35,266 |
| 104,709 | 133 | 25,793 | 5,767 | 3,858 | 35,551 |
| 104,710 | 132 | 26,198 | 5,798 | 3,901 | 36,029 |
| 104,711 | 132 | 26,299 | 5,832 | 3,922 | 36,185 |
| 104,712 | 128 | 26,093 | 5,804 | 3,874 | 35,899 |
| 104,713 | 127 | 26,301 | 5,861 | 3,885 | 36,174 |
| 104,714 | 129 | 26,201 | 5,851 | 3,879 | 36,060 |
| 104,715 | 129 | 26,418 | 5,853 | 3,866 | 36,266 |
| 104,716 | 127 | 26,415 | 5,878 | 3,867 | 36,287 |
| 104,717 | 130 | 26,793 | 5,943 | 3,923 | 36,789 |
| 104,718 | 129 | 26,458 | 5,919 | 3,894 | 36,400 |
| 104,719 | 127 | 26,063 | 5,841 | 3,849 | 35,880 |
| 104,720 | 144 | 26,532 | 5,924 | 3,924 | 36,524 |
| 104,721 | 150 | 26,790 | 5,943 | 3,947 | 36,830 |
| 104,722 | 149 | 26,634 | 5,944 | 3,922 | 36,649 |
| 104,723 | 140 | 26,467 | 5,889 | 3,894 | 36,390 |
| 104,724 | 141 | 26,304 | 5,907 | 3,898 | 36,250 |
| 104,725 | 141 | 26,428 | 5,942 | 3,920 | 36,431 |
| 104,726 | 154 | 26,459 | 5,943 | 3,914 | 36,470 |
| 104,727 | 152 | 26,494 | 5,922 | 3,937 | 36,505 |

|         |     |        |       |       |        |
|---------|-----|--------|-------|-------|--------|
| 104,728 | 159 | 26,408 | 5,926 | 3,930 | 36,423 |
| 104,729 | 160 | 26,298 | 5,880 | 3,891 | 36,229 |
| 104,730 | 169 | 26,095 | 5,856 | 3,868 | 35,988 |
| 104,731 | 168 | 26,185 | 5,852 | 3,847 | 36,052 |
| 104,732 | 168 | 26,414 | 5,903 | 3,869 | 36,354 |
| 104,733 | 172 | 26,650 | 5,969 | 3,896 | 36,687 |
| 104,734 | 171 | 26,178 | 5,895 | 3,851 | 36,095 |
| 104,735 | 173 | 26,253 | 5,938 | 3,882 | 36,246 |
| 104,736 | 178 | 26,167 | 5,878 | 3,860 | 36,083 |
| 104,737 | 179 | 26,036 | 5,865 | 3,828 | 35,908 |
| 104,738 | 183 | 26,113 | 5,870 | 3,840 | 36,006 |
| 104,739 | 187 | 25,513 | 5,773 | 3,777 | 35,250 |
| 104,740 | 193 | 25,644 | 5,773 | 3,765 | 35,375 |
| 104,741 | 189 | 25,526 | 5,752 | 3,752 | 35,219 |
| 104,742 | 191 | 25,530 | 5,754 | 3,724 | 35,199 |
| 104,743 | 186 | 25,229 | 5,690 | 3,671 | 34,776 |
| 104,744 | 192 | 25,471 | 5,708 | 3,684 | 35,055 |
| 104,745 | 205 | 25,282 | 5,698 | 3,657 | 34,842 |
| 104,746 | 206 | 25,197 | 5,692 | 3,665 | 34,760 |
| 104,747 | 209 | 25,150 | 5,724 | 3,659 | 34,742 |
| 104,748 | 206 | 25,082 | 5,711 | 3,642 | 34,641 |
| 104,749 | 203 | 24,975 | 5,686 | 3,626 | 34,490 |
| 104,750 | 203 | 24,280 | 5,526 | 3,524 | 33,533 |
| 104,751 | 202 | 24,553 | 5,534 | 3,532 | 33,821 |
| 104,752 | 198 | 24,834 | 5,593 | 3,556 | 34,181 |
| 104,753 | 199 | 24,844 | 5,598 | 3,541 | 34,182 |
| 104,754 | 192 | 25,041 | 5,657 | 3,567 | 34,457 |
| 104,755 | 193 | 24,835 | 5,623 | 3,554 | 34,205 |
| 104,756 | 191 | 24,555 | 5,601 | 3,528 | 33,875 |
| 104,757 | 194 | 25,422 | 5,800 | 3,654 | 35,070 |
| 104,758 | 191 | 25,164 | 5,759 | 3,625 | 34,739 |
| 104,759 | 192 | 24,947 | 5,705 | 3,570 | 34,414 |

|         |     |        |       |       |        |
|---------|-----|--------|-------|-------|--------|
| 104,760 | 191 | 24,680 | 5,681 | 3,552 | 34,104 |
| 104,761 | 192 | 25,179 | 5,839 | 3,664 | 34,874 |
| 104,762 | 188 | 25,188 | 5,877 | 3,641 | 34,894 |
| 104,763 | 190 | 25,413 | 5,898 | 3,695 | 35,196 |
| 104,764 | 191 | 25,347 | 5,894 | 3,684 | 35,116 |
| 104,765 | 183 | 25,507 | 5,982 | 3,715 | 35,387 |
| 104,766 | 183 | 25,480 | 6,035 | 3,761 | 35,459 |
| 104,767 | 177 | 24,644 | 5,881 | 3,660 | 34,362 |
| 104,768 | 179 | 24,736 | 5,906 | 3,666 | 34,487 |
| 104,769 | 172 | 24,952 | 5,947 | 3,690 | 34,761 |
| 104,770 | 171 | 25,040 | 5,980 | 3,700 | 34,891 |
| 104,771 | 164 | 25,361 | 6,073 | 3,764 | 35,362 |
| 104,772 | 162 | 25,376 | 6,086 | 3,756 | 35,380 |
| 104,773 | 170 | 25,094 | 5,963 | 3,683 | 34,910 |
| 104,774 | 174 | 25,356 | 6,036 | 3,717 | 35,283 |
| 104,775 | 173 | 25,328 | 6,045 | 3,720 | 35,266 |
| 104,776 | 175 | 25,331 | 6,085 | 3,734 | 35,325 |
| 104,777 | 166 | 25,556 | 6,160 | 3,764 | 35,646 |
| 104,778 | 176 | 25,586 | 6,154 | 3,751 | 35,667 |
| 104,779 | 171 | 25,524 | 6,110 | 3,734 | 35,539 |
| 104,780 | 171 | 25,540 | 6,134 | 3,732 | 35,577 |
| 104,781 | 164 | 25,663 | 6,160 | 3,776 | 35,763 |
| 104,782 | 168 | 25,888 | 6,196 | 3,807 | 36,059 |
| 104,783 | 171 | 25,943 | 6,255 | 3,819 | 36,188 |
| 104,784 | 169 | 25,721 | 6,252 | 3,808 | 35,950 |
| 104,785 | 161 | 25,073 | 6,160 | 3,729 | 35,123 |
| 104,786 | 162 | 25,193 | 6,187 | 3,743 | 35,285 |
| 104,787 | 158 | 25,449 | 6,251 | 3,762 | 35,620 |
| 104,788 | 161 | 25,572 | 6,301 | 3,789 | 35,823 |
| 104,789 | 154 | 25,112 | 6,246 | 3,750 | 35,262 |
| 104,790 | 153 | 25,104 | 6,236 | 3,739 | 35,232 |
| 104,791 | 148 | 25,015 | 6,256 | 3,757 | 35,176 |

|         |     |        |       |       |        |
|---------|-----|--------|-------|-------|--------|
| 104,792 | 145 | 24,931 | 6,275 | 3,777 | 35,128 |
| 104,793 | 145 | 24,628 | 6,239 | 3,743 | 34,755 |
| 104,794 | 145 | 24,282 | 6,177 | 3,688 | 34,292 |
| 104,795 | 149 | 24,785 | 6,369 | 3,810 | 35,113 |
| 104,796 | 140 | 24,681 | 6,325 | 3,811 | 34,957 |
| 104,797 | 137 | 24,456 | 6,280 | 3,794 | 34,667 |
| 104,798 | 138 | 24,555 | 6,347 | 3,816 | 34,856 |
| 104,799 | 144 | 24,496 | 6,385 | 3,843 | 34,868 |
| 104,800 | 146 | 24,487 | 6,396 | 3,859 | 34,888 |
| 104,801 | 152 | 24,453 | 6,416 | 3,871 | 34,892 |
| 104,802 | 158 | 24,420 | 6,445 | 3,877 | 34,900 |
| 104,803 | 162 | 24,089 | 6,398 | 3,839 | 34,488 |
| 104,804 | 161 | 23,836 | 6,366 | 3,811 | 34,174 |
| 104,805 | 169 | 24,353 | 6,459 | 3,875 | 34,856 |
| 104,806 | 165 | 24,082 | 6,409 | 3,840 | 34,496 |
| 104,807 | 159 | 24,093 | 6,369 | 3,820 | 34,441 |
| 104,808 | 161 | 23,960 | 6,364 | 3,782 | 34,267 |
| 104,809 | 160 | 23,916 | 6,349 | 3,780 | 34,205 |
| 104,810 | 163 | 23,957 | 6,360 | 3,773 | 34,253 |
| 104,811 | 168 | 23,952 | 6,414 | 3,802 | 34,336 |
| 104,812 | 167 | 23,895 | 6,395 | 3,799 | 34,256 |
| 104,813 | 170 | 23,794 | 6,380 | 3,799 | 34,143 |
| 104,814 | 167 | 23,728 | 6,383 | 3,782 | 34,060 |
| 104,815 | 165 | 23,472 | 6,321 | 3,755 | 33,713 |
| 104,816 | 167 | 23,326 | 6,260 | 3,710 | 33,463 |
| 104,817 | 168 | 23,310 | 6,219 | 3,672 | 33,369 |
| 104,818 | 170 | 23,312 | 6,170 | 3,665 | 33,317 |
| 104,819 | 170 | 23,347 | 6,185 | 3,663 | 33,365 |
| 104,820 | 167 | 23,198 | 6,150 | 3,643 | 33,158 |
| 104,821 | 169 | 23,138 | 6,144 | 3,615 | 33,066 |
| 104,822 | 170 | 22,668 | 6,063 | 3,541 | 32,442 |
| 104,823 | 173 | 22,866 | 6,089 | 3,574 | 32,702 |

|         |     |        |       |       |        |
|---------|-----|--------|-------|-------|--------|
| 104,824 | 170 | 23,100 | 6,147 | 3,610 | 33,027 |
| 104,825 | 166 | 22,756 | 6,089 | 3,567 | 32,578 |
| 104,826 | 161 | 22,580 | 6,042 | 3,531 | 32,314 |
| 104,827 | 156 | 22,094 | 5,928 | 3,461 | 31,639 |
| 104,828 | 158 | 22,335 | 5,954 | 3,477 | 31,924 |
| 104,829 | 149 | 22,328 | 5,983 | 3,493 | 31,953 |
| 104,830 | 150 | 22,554 | 6,033 | 3,517 | 32,254 |
| 104,831 | 153 | 22,592 | 6,035 | 3,500 | 32,280 |
| 104,832 | 149 | 22,407 | 5,992 | 3,460 | 32,008 |
| 104,833 | 152 | 22,605 | 6,030 | 3,477 | 32,264 |
| 104,834 | 148 | 22,220 | 5,911 | 3,428 | 31,707 |
| 104,835 | 145 | 22,240 | 5,870 | 3,429 | 31,684 |
| 104,836 | 145 | 22,289 | 5,866 | 3,419 | 31,719 |
| 104,837 | 147 | 22,585 | 5,944 | 3,460 | 32,136 |
| 104,838 | 151 | 22,484 | 5,906 | 3,473 | 32,014 |
| 104,839 | 148 | 22,594 | 5,907 | 3,468 | 32,117 |
| 104,840 | 163 | 22,839 | 5,948 | 3,503 | 32,453 |
| 104,841 | 166 | 22,866 | 5,897 | 3,474 | 32,403 |
| 104,842 | 169 | 23,186 | 5,960 | 3,524 | 32,839 |
| 104,843 | 172 | 23,316 | 6,019 | 3,552 | 33,059 |
| 104,844 | 169 | 23,214 | 5,967 | 3,529 | 32,879 |
| 104,845 | 169 | 23,278 | 5,980 | 3,519 | 32,946 |
| 104,846 | 169 | 23,174 | 5,942 | 3,494 | 32,779 |
| 104,847 | 167 | 23,693 | 6,067 | 3,557 | 33,484 |
| 104,848 | 165 | 23,447 | 6,000 | 3,517 | 33,129 |
| 104,849 | 167 | 23,538 | 5,947 | 3,486 | 33,138 |
| 104,850 | 167 | 23,488 | 5,956 | 3,484 | 33,095 |
| 104,851 | 160 | 23,381 | 5,918 | 3,474 | 32,933 |
| 104,852 | 159 | 23,340 | 5,926 | 3,463 | 32,888 |
| 104,853 | 148 | 22,968 | 5,798 | 3,387 | 32,301 |
| 104,854 | 150 | 23,144 | 5,846 | 3,414 | 32,554 |
| 104,855 | 147 | 23,301 | 5,948 | 3,456 | 32,852 |

|         |     |        |       |       |        |
|---------|-----|--------|-------|-------|--------|
| 104,856 | 144 | 23,086 | 5,877 | 3,430 | 32,537 |
| 104,857 | 150 | 22,991 | 5,823 | 3,403 | 32,367 |
| 104,858 | 153 | 23,159 | 5,880 | 3,441 | 32,633 |
| 104,859 | 149 | 23,110 | 5,882 | 3,434 | 32,575 |
| 104,860 | 153 | 23,294 | 5,969 | 3,474 | 32,890 |
| 104,861 | 152 | 23,237 | 5,974 | 3,481 | 32,844 |
| 104,862 | 152 | 23,368 | 5,962 | 3,462 | 32,944 |
| 104,863 | 153 | 23,350 | 5,943 | 3,448 | 32,894 |
| 104,864 | 150 | 23,032 | 5,889 | 3,410 | 32,481 |
| 104,865 | 157 | 23,177 | 5,888 | 3,446 | 32,668 |
| 104,866 | 158 | 22,944 | 5,809 | 3,400 | 32,311 |
| 104,867 | 157 | 22,822 | 5,786 | 3,437 | 32,202 |
| 104,868 | 157 | 22,727 | 5,798 | 3,431 | 32,113 |
| 104,869 | 154 | 22,682 | 5,812 | 3,444 | 32,092 |
| 104,870 | 154 | 23,017 | 5,888 | 3,458 | 32,517 |
| 104,871 | 150 | 22,970 | 5,884 | 3,441 | 32,445 |
| 104,872 | 150 | 22,873 | 5,852 | 3,444 | 32,319 |
| 104,873 | 146 | 22,668 | 5,802 | 3,434 | 32,050 |
| 104,874 | 154 | 22,826 | 5,883 | 3,454 | 32,317 |
| 104,875 | 156 | 22,246 | 5,707 | 3,365 | 31,474 |
| 104,876 | 155 | 22,478 | 5,754 | 3,387 | 31,774 |
| 104,877 | 154 | 22,446 | 5,766 | 3,399 | 31,765 |
| 104,878 | 157 | 22,397 | 5,775 | 3,396 | 31,725 |
| 104,879 | 155 | 22,296 | 5,754 | 3,370 | 31,575 |
| 104,880 | 158 | 22,181 | 5,763 | 3,353 | 31,455 |
| 104,881 | 156 | 21,838 | 5,689 | 3,317 | 31,000 |
| 104,882 | 158 | 22,152 | 5,776 | 3,382 | 31,468 |
| 104,883 | 159 | 21,961 | 5,745 | 3,367 | 31,232 |
| 104,884 | 157 | 21,391 | 5,652 | 3,316 | 30,516 |
| 104,885 | 157 | 21,294 | 5,652 | 3,306 | 30,409 |
| 104,886 | 157 | 21,224 | 5,690 | 3,310 | 30,381 |
| 104,887 | 158 | 20,656 | 5,571 | 3,231 | 29,616 |

|         |     |        |       |       |        |
|---------|-----|--------|-------|-------|--------|
| 104,888 | 159 | 20,659 | 5,598 | 3,242 | 29,658 |
| 104,889 | 154 | 20,645 | 5,603 | 3,237 | 29,639 |
| 104,890 | 155 | 20,658 | 5,657 | 3,271 | 29,741 |
| 104,891 | 141 | 20,594 | 5,686 | 3,284 | 29,705 |
| 104,892 | 137 | 20,479 | 5,689 | 3,285 | 29,590 |
| 104,893 | 134 | 20,320 | 5,673 | 3,258 | 29,385 |
| 104,894 | 124 | 20,144 | 5,599 | 3,222 | 29,089 |
| 104,895 | 121 | 20,002 | 5,594 | 3,204 | 28,921 |
| 104,896 | 121 | 19,968 | 5,624 | 3,230 | 28,943 |
| 104,897 | 116 | 19,130 | 5,436 | 3,143 | 27,825 |
| 104,898 | 115 | 19,063 | 5,471 | 3,137 | 27,786 |
| 104,899 | 112 | 19,025 | 5,547 | 3,145 | 27,829 |
| 104,900 | 113 | 19,168 | 5,605 | 3,167 | 28,053 |
| 104,901 | 116 | 18,803 | 5,571 | 3,114 | 27,604 |
| 104,902 | 116 | 18,723 | 5,567 | 3,110 | 27,516 |
| 104,903 | 116 | 18,698 | 5,578 | 3,112 | 27,504 |
| 104,904 | 116 | 18,382 | 5,547 | 3,109 | 27,154 |
| 104,905 | 114 | 18,235 | 5,558 | 3,109 | 27,016 |
| 104,906 | 112 | 17,918 | 5,478 | 3,055 | 26,563 |
| 104,907 | 114 | 17,946 | 5,586 | 3,106 | 26,752 |
| 104,908 | 110 | 17,774 | 5,620 | 3,115 | 26,619 |
| 104,909 | 107 | 17,611 | 5,628 | 3,104 | 26,450 |
| 104,910 | 105 | 17,524 | 5,609 | 3,078 | 26,316 |
| 104,911 | 104 | 17,475 | 5,640 | 3,079 | 26,298 |
| 104,912 | 102 | 17,189 | 5,609 | 3,059 | 25,959 |
| 104,913 | 101 | 17,363 | 5,702 | 3,098 | 26,264 |
| 104,914 | 103 | 17,450 | 5,784 | 3,117 | 26,454 |
| 104,915 | 104 | 17,560 | 5,819 | 3,133 | 26,616 |
| 104,916 | 100 | 17,326 | 5,824 | 3,101 | 26,351 |
| 104,917 | 99  | 17,594 | 5,904 | 3,134 | 26,731 |
| 104,918 | 103 | 18,032 | 6,028 | 3,153 | 27,316 |
| 104,919 | 102 | 17,975 | 6,031 | 3,135 | 27,243 |

|         |     |        |       |       |        |
|---------|-----|--------|-------|-------|--------|
| 104,920 | 108 | 18,141 | 6,204 | 3,232 | 27,685 |
| 104,921 | 108 | 18,220 | 6,278 | 3,258 | 27,864 |
| 104,922 | 109 | 18,049 | 6,303 | 3,255 | 27,716 |
| 104,923 | 108 | 17,918 | 6,265 | 3,210 | 27,501 |
| 104,924 | 114 | 18,036 | 6,330 | 3,227 | 27,707 |
| 104,925 | 109 | 17,949 | 6,410 | 3,236 | 27,704 |
| 104,926 | 106 | 18,115 | 6,602 | 3,303 | 28,126 |
| 104,927 | 114 | 18,311 | 6,755 | 3,343 | 28,523 |
| 104,928 | 114 | 18,373 | 6,912 | 3,373 | 28,772 |
| 104,929 | 114 | 18,494 | 7,071 | 3,408 | 29,087 |
| 104,930 | 120 | 18,573 | 7,219 | 3,436 | 29,348 |
| 104,931 | 118 | 18,631 | 7,366 | 3,469 | 29,584 |
| 104,932 | 119 | 18,700 | 7,460 | 3,473 | 29,752 |
| 104,933 | 118 | 18,849 | 7,564 | 3,484 | 30,015 |
| 104,934 | 118 | 18,869 | 7,609 | 3,481 | 30,077 |
| 104,935 | 118 | 18,920 | 7,637 | 3,474 | 30,149 |
| 104,936 | 118 | 19,493 | 7,889 | 3,538 | 31,038 |
| 104,937 | 114 | 19,634 | 7,944 | 3,541 | 31,233 |
| 104,938 | 112 | 19,360 | 7,898 | 3,505 | 30,875 |
| 104,939 | 113 | 19,641 | 8,122 | 3,577 | 31,453 |
| 104,940 | 112 | 19,543 | 8,201 | 3,581 | 31,437 |
| 104,941 | 116 | 19,524 | 8,231 | 3,576 | 31,447 |
| 104,942 | 117 | 19,472 | 8,261 | 3,572 | 31,422 |
| 104,943 | 123 | 19,360 | 8,257 | 3,560 | 31,300 |
| 104,944 | 124 | 19,083 | 8,245 | 3,536 | 30,988 |
| 104,945 | 124 | 18,879 | 8,247 | 3,520 | 30,770 |
| 104,946 | 124 | 18,722 | 8,239 | 3,492 | 30,577 |
| 104,947 | 121 | 18,551 | 8,199 | 3,440 | 30,311 |
| 104,948 | 122 | 18,523 | 8,217 | 3,440 | 30,302 |
| 104,949 | 122 | 18,428 | 8,190 | 3,424 | 30,164 |
| 104,950 | 123 | 18,398 | 8,214 | 3,436 | 30,171 |
| 104,951 | 122 | 18,125 | 8,186 | 3,424 | 29,857 |



|         |     |        |       |       |        |
|---------|-----|--------|-------|-------|--------|
| 104,952 | 117 | 18,009 | 8,165 | 3,408 | 29,699 |
| 104,953 | 119 | 17,782 | 8,142 | 3,378 | 29,421 |
| 104,954 | 118 | 17,796 | 8,153 | 3,356 | 29,423 |
| 104,955 | 122 | 17,719 | 8,203 | 3,346 | 29,390 |
| 104,956 | 122 | 17,738 | 8,199 | 3,316 | 29,375 |
| 104,957 | 126 | 17,649 | 8,194 | 3,297 | 29,266 |
| 104,958 | 124 | 17,634 | 8,206 | 3,275 | 29,239 |
| 104,959 | 122 | 17,207 | 8,069 | 3,204 | 28,602 |
| 104,960 | 124 | 17,336 | 8,123 | 3,220 | 28,803 |
| 104,961 | 120 | 17,391 | 8,187 | 3,248 | 28,946 |
| 104,962 | 118 | 17,294 | 8,223 | 3,251 | 28,886 |
| 104,963 | 115 | 17,897 | 8,945 | 3,484 | 30,441 |
| 104,964 | 111 | 17,981 | 9,020 | 3,477 | 30,589 |
| 104,965 | 112 | 18,182 | 9,140 | 3,501 | 30,935 |
| 104,966 | 113 | 18,150 | 9,253 | 3,502 | 31,018 |
| 104,967 | 110 | 17,883 | 9,299 | 3,502 | 30,794 |
| 104,968 | 121 | 17,949 | 9,493 | 3,565 | 31,128 |
| 104,969 | 121 | 17,795 | 9,552 | 3,566 | 31,034 |
| 104,970 | 144 | 17,677 | 9,592 | 3,556 | 30,969 |
| 104,971 | 141 | 16,974 | 9,309 | 3,395 | 29,819 |
| 104,972 | 142 | 17,795 | 9,607 | 3,556 | 31,100 |
| 104,973 | 141 | 17,814 | 9,643 | 3,579 | 31,177 |
| 104,974 | 138 | 17,710 | 9,701 | 3,581 | 31,130 |
| 104,975 | 133 | 17,520 | 9,750 | 3,581 | 30,984 |
| 104,976 | 132 | 17,387 | 9,709 | 3,539 | 30,767 |
| 104,977 | 131 | 17,236 | 9,652 | 3,522 | 30,541 |
| 104,978 | 124 | 17,012 | 9,611 | 3,497 | 30,244 |
| 104,979 | 124 | 16,900 | 9,550 | 3,490 | 30,064 |
| 104,980 | 122 | 16,944 | 9,520 | 3,470 | 30,056 |
| 104,981 | 126 | 16,551 | 9,354 | 3,427 | 29,458 |
| 104,982 | 123 | 16,778 | 9,381 | 3,442 | 29,724 |
| 104,983 | 130 | 16,817 | 9,567 | 3,491 | 30,005 |

|         |     |        |        |       |        |
|---------|-----|--------|--------|-------|--------|
| 104,984 | 130 | 16,627 | 9,557  | 3,498 | 29,812 |
| 104,985 | 133 | 16,759 | 9,796  | 3,573 | 30,261 |
| 104,986 | 136 | 16,488 | 9,772  | 3,585 | 29,981 |
| 104,987 | 137 | 16,437 | 9,912  | 3,641 | 30,127 |
| 104,988 | 138 | 16,597 | 10,068 | 3,683 | 30,486 |
| 104,989 | 138 | 16,396 | 9,912  | 3,610 | 30,056 |
| 104,990 | 138 | 16,624 | 10,007 | 3,649 | 30,418 |
| 104,991 | 138 | 16,754 | 10,143 | 3,697 | 30,732 |
| 104,992 | 134 | 16,773 | 10,152 | 3,697 | 30,756 |
| 104,993 | 134 | 16,926 | 10,235 | 3,723 | 31,018 |
| 104,994 | 129 | 16,946 | 10,302 | 3,720 | 31,097 |
| 104,995 | 129 | 17,082 | 10,405 | 3,764 | 31,380 |
| 104,996 | 131 | 17,153 | 10,530 | 3,808 | 31,622 |
| 104,997 | 132 | 17,281 | 10,636 | 3,837 | 31,886 |
| 104,998 | 134 | 17,418 | 10,739 | 3,875 | 32,166 |
| 104,999 | 134 | 17,636 | 10,860 | 3,912 | 32,542 |
| 105,000 | 136 | 17,626 | 10,765 | 3,899 | 32,426 |
| 105,001 | 138 | 17,880 | 10,972 | 3,959 | 32,949 |
| 105,002 | 137 | 18,097 | 11,095 | 4,013 | 33,342 |
| 105,003 | 139 | 18,334 | 11,226 | 4,057 | 33,756 |
| 105,004 | 137 | 18,584 | 11,362 | 4,107 | 34,190 |
| 105,005 | 137 | 18,601 | 11,371 | 4,126 | 34,235 |
| 105,006 | 133 | 18,607 | 11,341 | 4,144 | 34,225 |
| 105,007 | 133 | 18,652 | 11,387 | 4,154 | 34,326 |
| 105,008 | 134 | 18,969 | 11,594 | 4,216 | 34,913 |
| 105,009 | 132 | 18,966 | 11,619 | 4,230 | 34,947 |
| 105,010 | 128 | 18,328 | 11,259 | 4,077 | 33,792 |
| 105,011 | 133 | 18,435 | 11,341 | 4,087 | 33,996 |
| 105,012 | 96  | 13,972 | 8,525  | 3,089 | 25,682 |
| 105,013 | 145 | 18,278 | 10,973 | 3,985 | 33,381 |
| 105,014 | 144 | 17,524 | 10,711 | 3,883 | 32,262 |
| 105,015 | 133 | 15,061 | 9,292  | 3,391 | 27,877 |

|         |     |        |        |       |        |
|---------|-----|--------|--------|-------|--------|
| 105,016 | 144 | 16,874 | 10,463 | 3,811 | 31,292 |
| 105,017 | 138 | 16,573 | 10,233 | 3,750 | 30,694 |
| 105,018 | 134 | 16,378 | 10,233 | 3,742 | 30,487 |
| 105,019 | 128 | 16,172 | 10,137 | 3,692 | 30,129 |
| 105,020 | 123 | 15,872 | 9,964  | 3,613 | 29,572 |
| 105,021 | 117 | 15,539 | 9,792  | 3,541 | 28,989 |
| 105,022 | 105 | 15,183 | 9,607  | 3,478 | 28,373 |
| 105,023 | 100 | 14,674 | 9,430  | 3,403 | 27,607 |
| 105,024 | 100 | 14,343 | 9,270  | 3,330 | 27,043 |
| 105,025 | 98  | 14,141 | 9,189  | 3,307 | 26,735 |
| 105,026 | 97  | 13,952 | 9,077  | 3,283 | 26,409 |
| 105,027 | 97  | 13,737 | 8,952  | 3,238 | 26,024 |
| 105,028 | 97  | 13,502 | 8,837  | 3,197 | 25,633 |
| 105,029 | 96  | 13,334 | 8,692  | 3,146 | 25,268 |
| 105,030 | 93  | 13,083 | 8,560  | 3,105 | 24,841 |
| 105,031 | 88  | 12,774 | 8,380  | 3,043 | 24,285 |
| 105,032 | 79  | 12,412 | 8,181  | 2,968 | 23,640 |
| 105,033 | 74  | 12,093 | 7,960  | 2,897 | 23,024 |
| 105,034 | 72  | 11,785 | 7,773  | 2,818 | 22,448 |
| 105,035 | 66  | 11,478 | 7,573  | 2,744 | 21,861 |
| 105,036 | 66  | 11,341 | 7,426  | 2,703 | 21,536 |
| 105,037 | 64  | 11,175 | 7,296  | 2,644 | 21,179 |
| 105,038 | 64  | 10,932 | 7,082  | 2,591 | 20,669 |
| 105,039 | 62  | 9,909  | 6,536  | 2,386 | 18,893 |
| 105,040 | 61  | 9,882  | 6,510  | 2,378 | 18,831 |
| 105,041 | 59  | 9,890  | 6,457  | 2,376 | 18,782 |
| 105,042 | 59  | 9,736  | 6,344  | 2,318 | 18,457 |
| 105,043 | 58  | 9,560  | 6,228  | 2,269 | 18,115 |
| 105,044 | 58  | 9,528  | 6,176  | 2,251 | 18,013 |
| 105,045 | 59  | 9,393  | 6,081  | 2,221 | 17,754 |
| 105,046 | 19  | 3,774  | 2,573  | 906   | 7,272  |
| 105,047 | 54  | 8,958  | 5,748  | 2,106 | 16,866 |

|         |    |       |       |       |        |
|---------|----|-------|-------|-------|--------|
| 105,048 | 55 | 9,094 | 5,759 | 2,141 | 17,049 |
| 105,049 | 54 | 8,961 | 5,671 | 2,088 | 16,774 |
| 105,050 | 50 | 8,798 | 5,572 | 2,042 | 16,462 |
| 105,051 | 49 | 8,665 | 5,437 | 2,006 | 16,157 |
| 105,052 | 47 | 8,527 | 5,348 | 1,960 | 15,882 |
| 105,053 | 46 | 8,418 | 5,281 | 1,934 | 15,679 |
| 105,054 | 49 | 8,274 | 5,221 | 1,931 | 15,475 |
| 105,055 | 50 | 8,041 | 5,094 | 1,886 | 15,071 |
| 105,056 | 50 | 7,821 | 5,063 | 1,833 | 14,767 |
| 105,057 | 52 | 8,001 | 5,228 | 1,887 | 15,168 |
| 105,058 | 52 | 7,990 | 5,204 | 1,889 | 15,135 |
| 105,059 | 54 | 7,828 | 5,176 | 1,879 | 14,937 |
| 105,060 | 50 | 7,640 | 5,193 | 1,867 | 14,750 |
| 105,061 | 50 | 7,470 | 5,175 | 1,839 | 14,534 |
| 105,062 | 51 | 7,419 | 5,154 | 1,838 | 14,462 |
| 105,063 | 46 | 6,993 | 4,939 | 1,745 | 13,723 |
| 105,064 | 40 | 7,364 | 5,013 | 1,793 | 14,210 |
| 105,065 | 38 | 7,438 | 5,030 | 1,792 | 14,298 |
| 105,066 | 38 | 7,517 | 4,984 | 1,783 | 14,322 |
| 105,067 | 39 | 7,576 | 4,947 | 1,784 | 14,346 |
| 105,068 | 37 | 7,729 | 4,955 | 1,782 | 14,503 |
| 105,069 | 36 | 7,856 | 4,975 | 1,780 | 14,647 |
| 105,070 | 37 | 7,989 | 5,016 | 1,803 | 14,845 |
| 105,071 | 38 | 8,090 | 5,069 | 1,822 | 15,019 |
| 105,072 | 38 | 8,052 | 5,050 | 1,810 | 14,950 |
| 105,073 | 39 | 8,190 | 5,147 | 1,846 | 15,222 |
| 105,074 | 38 | 8,197 | 5,192 | 1,848 | 15,275 |
| 105,075 | 41 | 8,327 | 5,238 | 1,862 | 15,468 |
| 105,076 | 41 | 8,392 | 5,203 | 1,844 | 15,480 |
| 105,077 | 41 | 8,551 | 5,305 | 1,873 | 15,770 |
| 105,078 | 42 | 8,707 | 5,317 | 1,876 | 15,942 |
| 105,079 | 42 | 8,627 | 5,279 | 1,849 | 15,797 |

|         |    |        |       |       |        |
|---------|----|--------|-------|-------|--------|
| 105,080 | 43 | 8,754  | 5,360 | 1,873 | 16,030 |
| 105,081 | 44 | 8,906  | 5,453 | 1,908 | 16,311 |
| 105,082 | 46 | 9,011  | 5,486 | 1,925 | 16,468 |
| 105,083 | 49 | 9,028  | 5,508 | 1,939 | 16,524 |
| 105,084 | 51 | 9,127  | 5,532 | 1,953 | 16,663 |
| 105,085 | 53 | 9,265  | 5,553 | 1,972 | 16,843 |
| 105,086 | 53 | 9,417  | 5,591 | 1,983 | 17,044 |
| 105,087 | 55 | 9,551  | 5,603 | 1,985 | 17,194 |
| 105,088 | 54 | 9,665  | 5,578 | 1,981 | 17,278 |
| 105,089 | 53 | 9,498  | 5,514 | 1,956 | 17,021 |
| 105,090 | 52 | 9,518  | 5,566 | 1,959 | 17,095 |
| 105,091 | 51 | 9,544  | 5,558 | 1,961 | 17,114 |
| 105,092 | 51 | 9,648  | 5,583 | 1,968 | 17,250 |
| 105,093 | 50 | 9,661  | 5,632 | 1,982 | 17,325 |
| 105,094 | 51 | 9,640  | 5,625 | 1,990 | 17,306 |
| 105,095 | 51 | 9,703  | 5,621 | 1,996 | 17,371 |
| 105,096 | 49 | 9,804  | 5,621 | 2,008 | 17,482 |
| 105,097 | 52 | 9,955  | 5,658 | 2,013 | 17,678 |
| 105,098 | 53 | 10,061 | 5,687 | 2,024 | 17,825 |
| 105,099 | 54 | 10,149 | 5,650 | 2,031 | 17,884 |
| 105,100 | 55 | 10,338 | 5,649 | 2,053 | 18,095 |
| 105,101 | 55 | 10,477 | 5,659 | 2,038 | 18,229 |
| 105,102 | 59 | 10,804 | 5,761 | 2,074 | 18,698 |
| 105,103 | 57 | 10,732 | 5,616 | 2,054 | 18,459 |
| 105,104 | 57 | 10,998 | 5,648 | 2,077 | 18,780 |
| 105,105 | 57 | 11,307 | 5,735 | 2,111 | 19,210 |
| 105,106 | 62 | 11,629 | 5,803 | 2,149 | 19,643 |
| 105,107 | 66 | 11,661 | 5,707 | 2,094 | 19,528 |
| 105,108 | 75 | 11,871 | 5,733 | 2,107 | 19,786 |
| 105,109 | 72 | 12,180 | 5,774 | 2,150 | 20,176 |
| 105,110 | 77 | 12,447 | 5,821 | 2,178 | 20,523 |
| 105,111 | 81 | 12,425 | 5,627 | 2,122 | 20,255 |

|         |    |        |       |       |        |
|---------|----|--------|-------|-------|--------|
| 105,112 | 83 | 12,610 | 5,688 | 2,147 | 20,528 |
| 105,113 | 82 | 12,836 | 5,733 | 2,168 | 20,819 |
| 105,114 | 83 | 12,920 | 5,777 | 2,182 | 20,962 |
| 105,115 | 83 | 12,746 | 5,683 | 2,135 | 20,647 |
| 105,116 | 84 | 12,764 | 5,665 | 2,133 | 20,646 |
| 105,117 | 81 | 12,602 | 5,634 | 2,115 | 20,432 |
| 105,118 | 81 | 12,561 | 5,656 | 2,116 | 20,414 |
| 105,119 | 82 | 12,516 | 5,621 | 2,128 | 20,347 |
| 105,120 | 82 | 12,551 | 5,589 | 2,141 | 20,363 |
| 105,121 | 81 | 12,527 | 5,584 | 2,124 | 20,316 |
| 105,122 | 80 | 12,550 | 5,574 | 2,129 | 20,333 |
| 105,123 | 82 | 12,699 | 5,629 | 2,145 | 20,555 |
| 105,124 | 83 | 12,836 | 5,611 | 2,137 | 20,667 |
| 105,125 | 83 | 12,914 | 5,612 | 2,154 | 20,763 |
| 105,126 | 80 | 12,859 | 5,616 | 2,176 | 20,731 |
| 105,127 | 81 | 12,979 | 5,620 | 2,181 | 20,861 |
| 105,128 | 82 | 13,053 | 5,642 | 2,204 | 20,981 |
| 105,129 | 82 | 13,110 | 5,665 | 2,217 | 21,074 |
| 105,130 | 82 | 13,278 | 5,684 | 2,249 | 21,293 |
| 105,131 | 82 | 13,427 | 5,736 | 2,287 | 21,532 |
| 105,132 | 84 | 13,472 | 5,772 | 2,287 | 21,615 |
| 105,133 | 87 | 13,520 | 5,810 | 2,298 | 21,715 |
| 105,134 | 84 | 13,497 | 5,801 | 2,290 | 21,672 |
| 105,135 | 82 | 13,420 | 5,838 | 2,303 | 21,643 |
| 105,136 | 81 | 13,519 | 5,949 | 2,354 | 21,903 |
| 105,137 | 81 | 13,489 | 5,992 | 2,371 | 21,933 |
| 105,138 | 79 | 13,497 | 6,038 | 2,392 | 22,006 |
| 105,139 | 82 | 13,352 | 6,034 | 2,377 | 21,845 |
| 105,140 | 81 | 13,399 | 6,039 | 2,385 | 21,904 |
| 105,141 | 87 | 13,559 | 6,122 | 2,426 | 22,194 |
| 105,142 | 93 | 13,558 | 6,141 | 2,430 | 22,222 |
| 105,143 | 95 | 13,556 | 6,159 | 2,439 | 22,249 |

|         |     |        |       |       |        |
|---------|-----|--------|-------|-------|--------|
| 105,144 | 101 | 13,642 | 6,170 | 2,426 | 22,339 |
| 105,145 | 100 | 13,661 | 6,181 | 2,430 | 22,372 |
| 105,146 | 99  | 13,617 | 6,179 | 2,429 | 22,324 |
| 105,147 | 99  | 13,559 | 6,179 | 2,402 | 22,239 |
| 105,148 | 96  | 13,563 | 6,155 | 2,412 | 22,226 |
| 105,149 | 98  | 13,727 | 6,224 | 2,448 | 22,497 |
| 105,150 | 99  | 13,444 | 6,131 | 2,397 | 22,071 |
| 105,151 | 98  | 13,268 | 6,076 | 2,380 | 21,822 |
| 105,152 | 102 | 13,431 | 6,140 | 2,412 | 22,085 |
| 105,153 | 96  | 13,091 | 6,058 | 2,354 | 21,599 |
| 105,154 | 97  | 12,964 | 6,064 | 2,329 | 21,454 |
| 105,155 | 98  | 12,827 | 6,032 | 2,326 | 21,283 |
| 105,156 | 97  | 12,946 | 6,059 | 2,342 | 21,444 |
| 105,157 | 91  | 12,442 | 5,936 | 2,292 | 20,761 |
| 105,158 | 89  | 12,626 | 6,032 | 2,321 | 21,068 |
| 105,159 | 79  | 12,548 | 6,036 | 2,324 | 20,987 |
| 105,160 | 80  | 12,491 | 6,119 | 2,345 | 21,035 |
| 105,161 | 76  | 12,286 | 6,099 | 2,327 | 20,788 |
| 105,162 | 72  | 12,073 | 6,086 | 2,324 | 20,555 |
| 105,163 | 71  | 11,948 | 6,083 | 2,318 | 20,420 |
| 105,164 | 70  | 11,894 | 6,093 | 2,316 | 20,373 |
| 105,165 | 70  | 11,919 | 6,132 | 2,317 | 20,438 |
| 105,166 | 69  | 11,870 | 6,093 | 2,332 | 20,364 |
| 105,167 | 69  | 11,894 | 6,125 | 2,343 | 20,431 |
| 105,168 | 69  | 11,953 | 6,127 | 2,342 | 20,491 |
| 105,169 | 68  | 11,670 | 6,046 | 2,290 | 20,074 |
| 105,170 | 70  | 11,753 | 6,102 | 2,300 | 20,225 |
| 105,171 | 69  | 11,736 | 6,120 | 2,306 | 20,231 |
| 105,172 | 74  | 11,770 | 6,154 | 2,335 | 20,333 |
| 105,173 | 74  | 11,682 | 6,131 | 2,329 | 20,216 |
| 105,174 | 71  | 11,621 | 6,143 | 2,330 | 20,165 |
| 105,175 | 69  | 11,490 | 6,125 | 2,329 | 20,013 |

|         |    |        |       |       |        |
|---------|----|--------|-------|-------|--------|
| 105,176 | 70 | 11,318 | 6,074 | 2,292 | 19,754 |
| 105,177 | 70 | 11,130 | 6,023 | 2,253 | 19,476 |
| 105,178 | 72 | 11,325 | 6,145 | 2,272 | 19,814 |
| 105,179 | 70 | 11,085 | 6,040 | 2,238 | 19,433 |
| 105,180 | 71 | 11,185 | 6,092 | 2,231 | 19,579 |
| 105,181 | 70 | 11,083 | 6,058 | 2,210 | 19,421 |
| 105,182 | 65 | 10,621 | 5,852 | 2,107 | 18,645 |
| 105,183 | 65 | 10,807 | 5,918 | 2,132 | 18,922 |
| 105,184 | 65 | 10,894 | 5,978 | 2,146 | 19,083 |
| 105,185 | 65 | 10,897 | 5,963 | 2,153 | 19,078 |
| 105,186 | 64 | 10,838 | 5,939 | 2,129 | 18,970 |
| 105,187 | 65 | 10,592 | 5,823 | 2,088 | 18,568 |
| 105,188 | 67 | 10,669 | 5,868 | 2,097 | 18,701 |
| 105,189 | 67 | 10,727 | 5,918 | 2,122 | 18,834 |
| 105,190 | 59 | 10,381 | 5,753 | 2,047 | 18,240 |
| 105,191 | 57 | 10,520 | 5,802 | 2,063 | 18,442 |
| 105,192 | 50 | 10,666 | 5,855 | 2,092 | 18,663 |
| 105,193 | 48 | 10,697 | 5,853 | 2,075 | 18,673 |
| 105,194 | 47 | 10,688 | 5,852 | 2,090 | 18,677 |
| 105,195 | 42 | 10,561 | 5,794 | 2,060 | 18,457 |
| 105,196 | 43 | 10,537 | 5,793 | 2,044 | 18,417 |
| 105,197 | 42 | 10,341 | 5,718 | 2,030 | 18,131 |
| 105,198 | 43 | 10,460 | 5,832 | 2,077 | 18,412 |
| 105,199 | 43 | 10,327 | 5,824 | 2,073 | 18,267 |
| 105,200 | 41 | 10,208 | 5,767 | 2,055 | 18,071 |
| 105,201 | 39 | 9,984  | 5,698 | 2,023 | 17,744 |
| 105,202 | 40 | 10,029 | 5,759 | 2,047 | 17,875 |
| 105,203 | 35 | 9,802  | 5,654 | 2,020 | 17,511 |
| 105,204 | 35 | 9,864  | 5,710 | 2,022 | 17,631 |
| 105,205 | 35 | 9,821  | 5,685 | 2,026 | 17,567 |
| 105,206 | 33 | 9,814  | 5,709 | 2,001 | 17,557 |
| 105,207 | 33 | 9,768  | 5,723 | 1,998 | 17,522 |



|         |    |       |       |       |        |
|---------|----|-------|-------|-------|--------|
| 105,208 | 31 | 9,621 | 5,676 | 1,986 | 17,314 |
| 105,209 | 32 | 9,484 | 5,592 | 1,978 | 17,086 |
| 105,210 | 32 | 9,343 | 5,461 | 1,949 | 16,785 |
| 105,211 | 32 | 9,366 | 5,440 | 1,939 | 16,777 |
| 105,212 | 31 | 9,243 | 5,338 | 1,914 | 16,526 |
| 105,213 | 31 | 9,211 | 5,302 | 1,893 | 16,437 |
| 105,214 | 30 | 9,071 | 5,201 | 1,860 | 16,162 |
| 105,215 | 32 | 9,358 | 5,321 | 1,918 | 16,629 |
| 105,216 | 31 | 9,276 | 5,261 | 1,910 | 16,478 |
| 105,217 | 35 | 9,248 | 5,258 | 1,889 | 16,430 |
| 105,218 | 34 | 9,200 | 5,241 | 1,870 | 16,345 |
| 105,219 | 34 | 9,103 | 5,230 | 1,857 | 16,224 |
| 105,220 | 33 | 9,118 | 5,219 | 1,872 | 16,242 |
| 105,221 | 33 | 9,036 | 5,203 | 1,874 | 16,146 |
| 105,222 | 32 | 9,017 | 5,162 | 1,850 | 16,061 |
| 105,223 | 31 | 8,897 | 5,099 | 1,808 | 15,835 |
| 105,224 | 31 | 8,776 | 5,047 | 1,776 | 15,630 |
| 105,225 | 34 | 8,921 | 5,137 | 1,812 | 15,904 |
| 105,226 | 35 | 8,746 | 5,074 | 1,778 | 15,633 |
| 105,227 | 34 | 8,595 | 5,003 | 1,759 | 15,391 |
| 105,228 | 39 | 8,718 | 5,070 | 1,794 | 15,621 |
| 105,229 | 41 | 8,671 | 5,061 | 1,795 | 15,568 |
| 105,230 | 43 | 8,603 | 5,039 | 1,784 | 15,469 |
| 105,231 | 44 | 8,508 | 5,040 | 1,782 | 15,374 |
| 105,232 | 44 | 8,449 | 5,048 | 1,774 | 15,315 |
| 105,233 | 42 | 8,369 | 5,022 | 1,765 | 15,198 |
| 105,234 | 43 | 8,239 | 5,007 | 1,761 | 15,050 |
| 105,235 | 43 | 8,165 | 4,965 | 1,756 | 14,929 |
| 105,236 | 47 | 8,208 | 4,966 | 1,741 | 14,962 |
| 105,237 | 49 | 8,261 | 4,972 | 1,745 | 15,027 |
| 105,238 | 51 | 8,356 | 4,967 | 1,740 | 15,114 |
| 105,239 | 50 | 8,270 | 4,909 | 1,723 | 14,952 |

|         |    |       |       |       |        |
|---------|----|-------|-------|-------|--------|
| 105,240 | 50 | 8,134 | 4,844 | 1,697 | 14,725 |
| 105,241 | 51 | 8,327 | 4,951 | 1,715 | 15,044 |
| 105,242 | 53 | 8,337 | 4,978 | 1,733 | 15,101 |
| 105,243 | 54 | 8,288 | 5,008 | 1,731 | 15,081 |
| 105,244 | 54 | 8,243 | 4,991 | 1,725 | 15,013 |
| 105,245 | 55 | 8,186 | 4,935 | 1,706 | 14,882 |
| 105,246 | 57 | 8,258 | 4,994 | 1,728 | 15,037 |
| 105,247 | 56 | 8,237 | 4,987 | 1,716 | 14,996 |
| 105,248 | 56 | 8,299 | 5,030 | 1,724 | 15,109 |
| 105,249 | 60 | 8,226 | 4,953 | 1,711 | 14,950 |
| 105,250 | 60 | 8,180 | 4,940 | 1,690 | 14,870 |
| 105,251 | 61 | 8,241 | 5,007 | 1,700 | 15,009 |
| 105,252 | 61 | 8,258 | 5,019 | 1,705 | 15,043 |
| 105,253 | 60 | 8,180 | 4,969 | 1,685 | 14,894 |
| 105,254 | 60 | 8,234 | 5,007 | 1,713 | 15,014 |
| 105,255 | 60 | 8,198 | 4,961 | 1,705 | 14,924 |
| 105,256 | 59 | 8,091 | 4,923 | 1,713 | 14,786 |
| 105,257 | 62 | 8,151 | 5,040 | 1,764 | 15,017 |
| 105,258 | 63 | 8,145 | 5,075 | 1,763 | 15,046 |
| 105,259 | 64 | 8,086 | 5,027 | 1,760 | 14,937 |
| 105,260 | 64 | 8,096 | 5,114 | 1,778 | 15,052 |
| 105,261 | 64 | 7,998 | 5,093 | 1,758 | 14,913 |
| 105,262 | 63 | 7,892 | 5,066 | 1,757 | 14,778 |
| 105,263 | 63 | 8,051 | 5,184 | 1,795 | 15,093 |
| 105,264 | 64 | 8,120 | 5,206 | 1,814 | 15,204 |
| 105,265 | 65 | 8,213 | 5,220 | 1,832 | 15,330 |
| 105,266 | 64 | 8,155 | 5,140 | 1,812 | 15,171 |
| 105,267 | 66 | 8,289 | 5,198 | 1,850 | 15,403 |
| 105,268 | 63 | 8,430 | 5,252 | 1,874 | 15,619 |
| 105,269 | 63 | 8,505 | 5,247 | 1,894 | 15,709 |
| 105,270 | 63 | 8,614 | 5,305 | 1,917 | 15,899 |
| 105,271 | 64 | 8,651 | 5,338 | 1,924 | 15,977 |

|         |    |       |       |       |        |
|---------|----|-------|-------|-------|--------|
| 105,272 | 59 | 8,685 | 5,318 | 1,931 | 15,993 |
| 105,273 | 59 | 8,786 | 5,386 | 1,964 | 16,195 |
| 105,274 | 58 | 8,829 | 5,432 | 1,980 | 16,299 |
| 105,275 | 58 | 8,845 | 5,415 | 1,982 | 16,300 |
| 105,276 | 57 | 8,970 | 5,476 | 1,994 | 16,497 |
| 105,277 | 54 | 9,032 | 5,518 | 2,006 | 16,610 |
| 105,278 | 48 | 9,109 | 5,492 | 2,028 | 16,677 |
| 105,279 | 50 | 9,260 | 5,567 | 2,047 | 16,924 |
| 105,280 | 49 | 9,359 | 5,623 | 2,065 | 17,096 |
| 105,281 | 45 | 9,383 | 5,602 | 2,073 | 17,103 |
| 105,282 | 47 | 9,485 | 5,703 | 2,111 | 17,346 |
| 105,283 | 47 | 9,522 | 5,687 | 2,126 | 17,382 |
| 105,284 | 46 | 9,616 | 5,693 | 2,128 | 17,483 |
| 105,285 | 46 | 9,759 | 5,753 | 2,146 | 17,704 |
| 105,286 | 48 | 9,694 | 5,702 | 2,119 | 17,563 |
| 105,287 | 45 | 9,809 | 5,755 | 2,151 | 17,760 |
| 105,288 | 43 | 9,839 | 5,765 | 2,157 | 17,804 |
| 105,289 | 40 | 9,793 | 5,741 | 2,156 | 17,730 |
| 105,290 | 40 | 9,901 | 5,872 | 2,183 | 17,996 |
| 105,291 | 42 | 9,883 | 5,916 | 2,186 | 18,027 |
| 105,292 | 40 | 9,777 | 5,837 | 2,177 | 17,831 |
| 105,293 | 40 | 9,858 | 5,890 | 2,215 | 18,003 |
| 105,294 | 41 | 9,824 | 5,842 | 2,204 | 17,911 |
| 105,295 | 41 | 9,709 | 5,797 | 2,205 | 17,752 |
| 105,296 | 40 | 9,687 | 5,890 | 2,219 | 17,836 |
| 105,297 | 38 | 9,742 | 5,931 | 2,246 | 17,957 |
| 105,298 | 38 | 9,702 | 5,894 | 2,254 | 17,888 |
| 105,299 | 38 | 9,752 | 5,971 | 2,279 | 18,040 |
| 105,300 | 34 | 9,720 | 6,028 | 2,304 | 18,086 |
| 105,301 | 34 | 9,763 | 6,086 | 2,332 | 18,215 |
| 105,302 | 33 | 9,823 | 6,104 | 2,347 | 18,307 |
| 105,303 | 33 | 9,846 | 6,102 | 2,357 | 18,338 |

|         |    |        |       |       |        |
|---------|----|--------|-------|-------|--------|
| 105,304 | 35 | 9,982  | 6,140 | 2,378 | 18,535 |
| 105,305 | 35 | 10,014 | 6,131 | 2,384 | 18,564 |
| 105,306 | 36 | 10,026 | 6,103 | 2,399 | 18,564 |
| 105,307 | 38 | 10,068 | 6,082 | 2,398 | 18,586 |
| 105,308 | 38 | 10,184 | 6,095 | 2,406 | 18,723 |
| 105,309 | 37 | 10,191 | 6,054 | 2,413 | 18,695 |
| 105,310 | 39 | 10,248 | 5,996 | 2,404 | 18,687 |
| 105,311 | 38 | 10,422 | 6,015 | 2,415 | 18,890 |
| 105,312 | 38 | 10,549 | 6,067 | 2,425 | 19,079 |
| 105,313 | 42 | 10,749 | 6,156 | 2,452 | 19,399 |
| 105,314 | 41 | 10,751 | 6,189 | 2,471 | 19,452 |
| 105,315 | 43 | 10,657 | 6,204 | 2,463 | 19,367 |
| 105,316 | 42 | 10,593 | 6,193 | 2,459 | 19,287 |
| 105,317 | 42 | 10,670 | 6,277 | 2,512 | 19,501 |
| 105,318 | 40 | 10,638 | 6,306 | 2,502 | 19,486 |
| 105,319 | 40 | 10,637 | 6,332 | 2,513 | 19,522 |
| 105,320 | 42 | 10,651 | 6,316 | 2,515 | 19,524 |
| 105,321 | 43 | 10,662 | 6,311 | 2,525 | 19,541 |
| 105,322 | 44 | 10,661 | 6,289 | 2,518 | 19,512 |
| 105,323 | 48 | 10,760 | 6,290 | 2,526 | 19,624 |
| 105,324 | 48 | 10,823 | 6,302 | 2,530 | 19,703 |
| 105,325 | 49 | 10,769 | 6,241 | 2,523 | 19,582 |
| 105,326 | 48 | 10,687 | 6,204 | 2,524 | 19,463 |
| 105,327 | 48 | 10,557 | 6,158 | 2,525 | 19,288 |
| 105,328 | 55 | 10,858 | 6,323 | 2,575 | 19,811 |
| 105,329 | 57 | 10,846 | 6,321 | 2,567 | 19,791 |
| 105,330 | 55 | 10,897 | 6,353 | 2,586 | 19,891 |
| 105,331 | 55 | 10,700 | 6,188 | 2,539 | 19,482 |
| 105,332 | 55 | 10,776 | 6,244 | 2,571 | 19,646 |
| 105,333 | 54 | 10,897 | 6,283 | 2,593 | 19,827 |
| 105,334 | 54 | 10,673 | 6,208 | 2,562 | 19,497 |
| 105,335 | 54 | 10,736 | 6,257 | 2,592 | 19,639 |

|         |    |        |       |       |        |
|---------|----|--------|-------|-------|--------|
| 105,336 | 51 | 10,588 | 6,193 | 2,583 | 19,415 |
| 105,337 | 52 | 10,719 | 6,238 | 2,620 | 19,629 |
| 105,338 | 51 | 10,700 | 6,234 | 2,614 | 19,599 |
| 105,339 | 51 | 10,732 | 6,242 | 2,630 | 19,655 |
| 105,340 | 51 | 10,731 | 6,234 | 2,631 | 19,647 |
| 105,341 | 50 | 10,797 | 6,195 | 2,641 | 19,683 |
| 105,342 | 48 | 10,850 | 6,165 | 2,642 | 19,705 |
| 105,343 | 52 | 10,829 | 6,161 | 2,635 | 19,677 |
| 105,344 | 53 | 10,804 | 6,175 | 2,620 | 19,652 |
| 105,345 | 52 | 10,823 | 6,162 | 2,642 | 19,679 |
| 105,346 | 53 | 10,840 | 6,067 | 2,611 | 19,571 |
| 105,347 | 53 | 10,973 | 6,102 | 2,637 | 19,765 |
| 105,348 | 56 | 11,011 | 6,118 | 2,642 | 19,827 |
| 105,349 | 55 | 11,028 | 6,075 | 2,633 | 19,791 |
| 105,350 | 55 | 11,020 | 6,005 | 2,596 | 19,676 |
| 105,351 | 55 | 11,168 | 6,059 | 2,630 | 19,912 |
| 105,352 | 55 | 11,032 | 5,974 | 2,583 | 19,644 |
| 105,353 | 55 | 11,215 | 6,019 | 2,606 | 19,895 |
| 105,354 | 55 | 11,252 | 6,031 | 2,600 | 19,938 |
| 105,355 | 53 | 11,027 | 5,951 | 2,559 | 19,590 |
| 105,356 | 53 | 11,075 | 5,968 | 2,572 | 19,668 |
| 105,357 | 52 | 11,188 | 6,009 | 2,593 | 19,842 |
| 105,358 | 50 | 11,126 | 5,967 | 2,556 | 19,699 |
| 105,359 | 50 | 10,924 | 5,900 | 2,539 | 19,413 |
| 105,360 | 51 | 11,057 | 5,987 | 2,565 | 19,660 |
| 105,361 | 47 | 10,739 | 5,871 | 2,514 | 19,171 |
| 105,362 | 47 | 10,793 | 5,910 | 2,529 | 19,279 |
| 105,363 | 50 | 10,727 | 5,860 | 2,528 | 19,165 |
| 105,364 | 47 | 10,660 | 5,837 | 2,520 | 19,064 |
| 105,365 | 49 | 10,660 | 5,793 | 2,515 | 19,017 |
| 105,366 | 46 | 10,526 | 5,709 | 2,470 | 18,751 |
| 105,367 | 46 | 10,548 | 5,685 | 2,460 | 18,739 |

|         |    |        |       |       |        |
|---------|----|--------|-------|-------|--------|
| 105,368 | 48 | 10,439 | 5,567 | 2,416 | 18,470 |
| 105,369 | 49 | 10,628 | 5,610 | 2,448 | 18,735 |
| 105,370 | 48 | 10,773 | 5,646 | 2,464 | 18,931 |
| 105,371 | 45 | 10,529 | 5,553 | 2,414 | 18,541 |
| 105,372 | 45 | 10,509 | 5,556 | 2,407 | 18,517 |
| 105,373 | 44 | 10,527 | 5,599 | 2,416 | 18,586 |
| 105,374 | 40 | 10,280 | 5,505 | 2,375 | 18,200 |
| 105,375 | 40 | 10,339 | 5,556 | 2,410 | 18,345 |
| 105,376 | 41 | 10,361 | 5,537 | 2,405 | 18,344 |
| 105,377 | 40 | 10,343 | 5,520 | 2,412 | 18,315 |
| 105,378 | 39 | 10,380 | 5,489 | 2,400 | 18,308 |
| 105,379 | 37 | 10,418 | 5,447 | 2,381 | 18,283 |
| 105,380 | 35 | 10,375 | 5,412 | 2,372 | 18,194 |
| 105,381 | 36 | 10,221 | 5,374 | 2,339 | 17,970 |
| 105,382 | 36 | 10,164 | 5,404 | 2,334 | 17,938 |
| 105,383 | 36 | 10,205 | 5,412 | 2,313 | 17,966 |
| 105,384 | 38 | 10,237 | 5,429 | 2,318 | 18,022 |
| 105,385 | 36 | 10,088 | 5,364 | 2,288 | 17,776 |
| 105,386 | 37 | 10,232 | 5,404 | 2,294 | 17,967 |
| 105,387 | 37 | 10,195 | 5,405 | 2,282 | 17,919 |
| 105,388 | 36 | 10,199 | 5,397 | 2,273 | 17,905 |
| 105,389 | 38 | 10,185 | 5,397 | 2,271 | 17,891 |
| 105,390 | 38 | 10,119 | 5,374 | 2,243 | 17,774 |
| 105,391 | 38 | 9,908  | 5,310 | 2,210 | 17,466 |
| 105,392 | 38 | 9,880  | 5,312 | 2,196 | 17,426 |
| 105,393 | 39 | 9,776  | 5,271 | 2,186 | 17,272 |
| 105,394 | 33 | 9,606  | 5,186 | 2,158 | 16,983 |
| 105,395 | 33 | 9,582  | 5,141 | 2,144 | 16,900 |
| 105,396 | 32 | 9,474  | 5,077 | 2,109 | 16,692 |
| 105,397 | 32 | 9,304  | 5,032 | 2,089 | 16,457 |
| 105,398 | 32 | 9,224  | 5,021 | 2,070 | 16,347 |
| 105,399 | 29 | 9,115  | 4,983 | 2,044 | 16,171 |

|         |    |        |       |       |        |
|---------|----|--------|-------|-------|--------|
| 105,400 | 31 | 9,006  | 4,976 | 2,014 | 16,027 |
| 105,401 | 32 | 8,979  | 4,920 | 1,998 | 15,929 |
| 105,402 | 34 | 8,986  | 4,901 | 1,984 | 15,905 |
| 105,403 | 35 | 8,957  | 4,860 | 1,979 | 15,831 |
| 105,404 | 37 | 8,913  | 4,852 | 1,983 | 15,785 |
| 105,405 | 41 | 8,842  | 4,800 | 1,976 | 15,659 |
| 105,406 | 42 | 8,725  | 4,742 | 1,962 | 15,471 |
| 105,407 | 45 | 9,074  | 4,874 | 1,989 | 15,982 |
| 105,408 | 46 | 8,978  | 4,860 | 1,977 | 15,861 |
| 105,409 | 44 | 8,839  | 4,801 | 1,974 | 15,658 |
| 105,410 | 46 | 8,992  | 4,982 | 2,028 | 16,048 |
| 105,411 | 46 | 9,134  | 4,978 | 2,033 | 16,191 |
| 105,412 | 49 | 9,136  | 5,004 | 2,042 | 16,231 |
| 105,413 | 51 | 9,235  | 5,021 | 2,069 | 16,376 |
| 105,414 | 51 | 9,315  | 5,053 | 2,069 | 16,488 |
| 105,415 | 50 | 9,300  | 5,030 | 2,080 | 16,460 |
| 105,416 | 53 | 9,462  | 5,101 | 2,100 | 16,716 |
| 105,417 | 55 | 9,492  | 5,091 | 2,117 | 16,755 |
| 105,418 | 55 | 9,536  | 5,094 | 2,117 | 16,802 |
| 105,419 | 55 | 9,582  | 5,093 | 2,099 | 16,829 |
| 105,420 | 57 | 9,715  | 5,144 | 2,146 | 17,062 |
| 105,421 | 57 | 9,818  | 5,181 | 2,173 | 17,229 |
| 105,422 | 62 | 9,940  | 5,256 | 2,205 | 17,463 |
| 105,423 | 63 | 10,206 | 5,311 | 2,228 | 17,808 |
| 105,424 | 62 | 10,207 | 5,303 | 2,224 | 17,796 |
| 105,425 | 63 | 10,175 | 5,271 | 2,218 | 17,727 |
| 105,426 | 62 | 10,236 | 5,228 | 2,201 | 17,727 |
| 105,427 | 63 | 10,641 | 5,373 | 2,283 | 18,360 |
| 105,428 | 64 | 11,042 | 5,474 | 2,318 | 18,898 |
| 105,429 | 63 | 11,020 | 5,468 | 2,328 | 18,879 |
| 105,430 | 64 | 11,119 | 5,548 | 2,369 | 19,100 |
| 105,431 | 63 | 11,264 | 5,579 | 2,376 | 19,282 |

|         |    |        |       |       |        |
|---------|----|--------|-------|-------|--------|
| 105,432 | 64 | 11,497 | 5,640 | 2,429 | 19,630 |
| 105,433 | 66 | 11,690 | 5,686 | 2,467 | 19,909 |
| 105,434 | 70 | 11,845 | 5,722 | 2,507 | 20,144 |
| 105,435 | 75 | 11,955 | 5,751 | 2,509 | 20,290 |
| 105,436 | 75 | 12,069 | 5,752 | 2,533 | 20,429 |
| 105,437 | 77 | 12,298 | 5,815 | 2,570 | 20,760 |
| 105,438 | 78 | 12,293 | 5,803 | 2,578 | 20,752 |
| 105,439 | 78 | 12,309 | 5,778 | 2,586 | 20,751 |
| 105,440 | 79 | 12,627 | 5,904 | 2,658 | 21,268 |
| 105,441 | 81 | 12,768 | 5,950 | 2,703 | 21,502 |
| 105,442 | 84 | 12,993 | 6,036 | 2,743 | 21,856 |
| 105,443 | 85 | 13,226 | 6,071 | 2,772 | 22,154 |
| 105,444 | 89 | 13,399 | 6,128 | 2,798 | 22,414 |
| 105,445 | 89 | 13,411 | 6,154 | 2,822 | 22,476 |
| 105,446 | 89 | 13,666 | 6,262 | 2,901 | 22,918 |
| 105,447 | 91 | 13,884 | 6,340 | 2,953 | 23,268 |
| 105,448 | 90 | 13,981 | 6,369 | 2,966 | 23,406 |
| 105,449 | 90 | 14,430 | 6,532 | 3,060 | 24,112 |
| 105,450 | 90 | 14,506 | 6,587 | 3,104 | 24,287 |
| 105,451 | 87 | 14,546 | 6,581 | 3,131 | 24,345 |
| 105,452 | 87 | 14,912 | 6,714 | 3,197 | 24,910 |
| 105,453 | 88 | 15,051 | 6,775 | 3,229 | 25,143 |
| 105,454 | 89 | 15,089 | 6,788 | 3,257 | 25,223 |
| 105,455 | 89 | 15,439 | 7,000 | 3,339 | 25,867 |
| 105,456 | 89 | 15,543 | 7,034 | 3,362 | 26,028 |
| 105,457 | 85 | 15,500 | 7,013 | 3,348 | 25,946 |
| 105,458 | 86 | 15,630 | 7,056 | 3,358 | 26,130 |
| 105,459 | 88 | 15,774 | 7,012 | 3,338 | 26,212 |
| 105,460 | 88 | 15,992 | 7,073 | 3,369 | 26,522 |
| 105,461 | 86 | 16,223 | 7,165 | 3,423 | 26,897 |
| 105,462 | 87 | 16,207 | 7,201 | 3,435 | 26,930 |
| 105,463 | 84 | 16,138 | 7,166 | 3,405 | 26,793 |



|         |    |        |       |       |        |
|---------|----|--------|-------|-------|--------|
| 105,464 | 86 | 16,369 | 7,253 | 3,428 | 27,136 |
| 105,465 | 84 | 16,222 | 7,203 | 3,422 | 26,931 |
| 105,466 | 84 | 16,212 | 7,198 | 3,439 | 26,933 |
| 105,467 | 80 | 16,046 | 7,125 | 3,421 | 26,672 |
| 105,468 | 79 | 15,950 | 7,075 | 3,386 | 26,490 |
| 105,469 | 79 | 15,664 | 6,940 | 3,331 | 26,014 |
| 105,470 | 77 | 15,330 | 6,813 | 3,275 | 25,495 |
| 105,471 | 74 | 15,039 | 6,707 | 3,202 | 25,022 |
| 105,472 | 74 | 14,702 | 6,569 | 3,139 | 24,484 |
| 105,473 | 69 | 14,408 | 6,410 | 3,072 | 23,959 |
| 105,474 | 69 | 14,083 | 6,297 | 3,048 | 23,497 |
| 105,475 | 69 | 13,760 | 6,141 | 2,986 | 22,956 |
| 105,476 | 69 | 13,551 | 6,077 | 2,979 | 22,676 |
| 105,477 | 68 | 13,289 | 6,075 | 2,961 | 22,393 |
| 105,478 | 69 | 13,473 | 6,250 | 3,005 | 22,797 |
| 105,479 | 69 | 13,351 | 6,246 | 3,009 | 22,675 |
| 105,480 | 69 | 13,531 | 6,286 | 3,020 | 22,906 |
| 105,481 | 67 | 13,609 | 6,288 | 3,038 | 23,002 |
| 105,482 | 67 | 13,344 | 6,196 | 3,010 | 22,617 |
| 105,483 | 66 | 13,302 | 6,258 | 3,009 | 22,635 |
| 105,484 | 63 | 13,102 | 6,263 | 2,997 | 22,425 |
| 105,485 | 61 | 13,159 | 6,295 | 3,016 | 22,531 |
| 105,486 | 54 | 13,086 | 6,273 | 3,031 | 22,444 |
| 105,487 | 56 | 12,978 | 6,266 | 3,005 | 22,305 |
| 105,488 | 54 | 13,018 | 6,287 | 3,019 | 22,378 |
| 105,489 | 52 | 12,988 | 6,253 | 3,007 | 22,300 |
| 105,490 | 51 | 13,047 | 6,285 | 3,022 | 22,405 |
| 105,491 | 51 | 13,013 | 6,258 | 2,999 | 22,321 |
| 105,492 | 50 | 12,765 | 6,170 | 2,955 | 21,940 |
| 105,493 | 47 | 12,724 | 6,174 | 2,961 | 21,906 |
| 105,494 | 45 | 12,599 | 6,182 | 2,974 | 21,800 |
| 105,495 | 43 | 12,689 | 6,189 | 2,987 | 21,908 |

|         |    |        |       |       |        |
|---------|----|--------|-------|-------|--------|
| 105,496 | 44 | 12,817 | 6,212 | 2,994 | 22,067 |
| 105,497 | 44 | 12,717 | 6,198 | 2,998 | 21,957 |
| 105,498 | 43 | 12,511 | 6,157 | 2,980 | 21,691 |
| 105,499 | 44 | 12,393 | 6,123 | 2,979 | 21,539 |
| 105,500 | 46 | 12,447 | 6,126 | 2,996 | 21,615 |
| 105,501 | 49 | 12,599 | 6,160 | 3,011 | 21,819 |
| 105,502 | 51 | 12,609 | 6,163 | 3,009 | 21,832 |
| 105,503 | 51 | 12,519 | 6,125 | 3,001 | 21,696 |
| 105,504 | 50 | 12,511 | 6,073 | 3,004 | 21,638 |
| 105,505 | 50 | 12,520 | 6,060 | 3,017 | 21,647 |
| 105,506 | 48 | 12,399 | 5,975 | 2,990 | 21,412 |
| 105,507 | 44 | 12,312 | 5,957 | 2,988 | 21,301 |
| 105,508 | 45 | 12,239 | 5,913 | 2,988 | 21,185 |
| 105,509 | 43 | 11,975 | 5,831 | 2,945 | 20,794 |
| 105,510 | 40 | 11,771 | 5,748 | 2,920 | 20,479 |
| 105,511 | 40 | 12,240 | 5,982 | 3,048 | 21,310 |
| 105,512 | 40 | 11,959 | 5,832 | 2,992 | 20,823 |
| 105,513 | 42 | 12,132 | 5,906 | 3,029 | 21,109 |
| 105,514 | 42 | 12,303 | 5,897 | 3,053 | 21,295 |
| 105,515 | 42 | 12,311 | 5,892 | 3,062 | 21,307 |
| 105,516 | 44 | 12,374 | 5,902 | 3,064 | 21,384 |
| 105,517 | 47 | 12,524 | 5,939 | 3,069 | 21,579 |
| 105,518 | 46 | 12,751 | 6,029 | 3,106 | 21,932 |
| 105,519 | 45 | 12,678 | 6,012 | 3,107 | 21,842 |
| 105,520 | 45 | 12,911 | 6,136 | 3,172 | 22,264 |
| 105,521 | 46 | 13,368 | 6,337 | 3,271 | 23,022 |
| 105,522 | 46 | 13,576 | 6,448 | 3,334 | 23,404 |
| 105,523 | 47 | 13,899 | 6,565 | 3,388 | 23,899 |
| 105,524 | 49 | 14,157 | 6,684 | 3,441 | 24,331 |
| 105,525 | 49 | 14,301 | 6,743 | 3,468 | 24,561 |
| 105,526 | 52 | 14,437 | 6,813 | 3,508 | 24,810 |
| 105,527 | 55 | 14,450 | 6,798 | 3,483 | 24,786 |

|         |    |        |       |       |        |
|---------|----|--------|-------|-------|--------|
| 105,528 | 55 | 14,469 | 6,737 | 3,483 | 24,744 |
| 105,529 | 56 | 14,467 | 6,699 | 3,460 | 24,682 |
| 105,530 | 60 | 14,443 | 6,674 | 3,443 | 24,620 |
| 105,531 | 60 | 14,153 | 6,596 | 3,407 | 24,216 |
| 105,532 | 60 | 13,938 | 6,493 | 3,354 | 23,845 |
| 105,533 | 61 | 14,028 | 6,499 | 3,343 | 23,931 |
| 105,534 | 61 | 14,046 | 6,449 | 3,333 | 23,889 |
| 105,535 | 61 | 13,954 | 6,325 | 3,291 | 23,631 |
| 105,536 | 59 | 13,810 | 6,290 | 3,245 | 23,404 |
| 105,537 | 59 | 13,622 | 6,204 | 3,205 | 23,090 |
| 105,538 | 57 | 13,713 | 6,227 | 3,214 | 23,211 |
| 105,539 | 57 | 13,583 | 6,174 | 3,187 | 23,001 |
| 105,540 | 57 | 13,568 | 6,120 | 3,170 | 22,915 |
| 105,541 | 56 | 13,286 | 5,991 | 3,107 | 22,440 |
| 105,542 | 56 | 13,288 | 5,955 | 3,089 | 22,388 |
| 105,543 | 56 | 13,401 | 5,970 | 3,110 | 22,537 |
| 105,544 | 56 | 13,165 | 5,830 | 3,056 | 22,107 |
| 105,545 | 56 | 13,281 | 5,872 | 3,058 | 22,267 |
| 105,546 | 56 | 13,232 | 5,883 | 3,048 | 22,219 |
| 105,547 | 57 | 13,118 | 5,840 | 3,000 | 22,015 |
| 105,548 | 58 | 13,215 | 5,862 | 3,026 | 22,161 |
| 105,549 | 61 | 13,330 | 5,953 | 3,068 | 22,412 |
| 105,550 | 62 | 13,256 | 6,010 | 3,091 | 22,419 |
| 105,551 | 62 | 13,184 | 5,957 | 3,079 | 22,282 |
| 105,552 | 60 | 13,062 | 5,967 | 3,058 | 22,147 |
| 105,553 | 59 | 13,106 | 5,993 | 3,071 | 22,229 |
| 105,554 | 59 | 12,846 | 5,910 | 3,047 | 21,862 |
| 105,555 | 60 | 12,839 | 5,916 | 3,039 | 21,854 |
| 105,556 | 58 | 12,894 | 5,989 | 3,047 | 21,988 |
| 105,557 | 58 | 12,935 | 5,968 | 3,032 | 21,993 |
| 105,558 | 57 | 12,996 | 5,971 | 3,037 | 22,061 |
| 105,559 | 57 | 12,810 | 5,897 | 3,016 | 21,780 |

|         |     |        |       |       |        |
|---------|-----|--------|-------|-------|--------|
| 105,560 | 58  | 12,972 | 5,986 | 3,055 | 22,071 |
| 105,561 | 59  | 12,958 | 5,991 | 3,052 | 22,060 |
| 105,562 | 60  | 12,835 | 5,891 | 3,007 | 21,793 |
| 105,563 | 60  | 12,672 | 5,870 | 2,985 | 21,587 |
| 105,564 | 70  | 13,053 | 6,032 | 3,058 | 22,213 |
| 105,565 | 78  | 13,007 | 6,057 | 3,070 | 22,212 |
| 105,566 | 79  | 13,024 | 6,059 | 3,088 | 22,250 |
| 105,567 | 78  | 12,909 | 6,012 | 3,044 | 22,043 |
| 105,568 | 75  | 12,835 | 5,993 | 3,029 | 21,932 |
| 105,569 | 87  | 13,070 | 6,180 | 3,119 | 22,456 |
| 105,570 | 88  | 13,259 | 6,221 | 3,139 | 22,707 |
| 105,571 | 90  | 13,294 | 6,212 | 3,138 | 22,734 |
| 105,572 | 93  | 13,359 | 6,238 | 3,133 | 22,823 |
| 105,573 | 93  | 13,528 | 6,340 | 3,188 | 23,149 |
| 105,574 | 94  | 13,464 | 6,377 | 3,192 | 23,127 |
| 105,575 | 98  | 13,598 | 6,445 | 3,221 | 23,362 |
| 105,576 | 100 | 13,629 | 6,479 | 3,225 | 23,433 |
| 105,577 | 96  | 13,729 | 6,514 | 3,240 | 23,579 |
| 105,578 | 92  | 13,565 | 6,449 | 3,220 | 23,326 |
| 105,579 | 93  | 13,488 | 6,410 | 3,184 | 23,175 |
| 105,580 | 93  | 13,325 | 6,381 | 3,174 | 22,973 |
| 105,581 | 101 | 13,743 | 6,636 | 3,287 | 23,767 |
| 105,582 | 101 | 13,836 | 6,686 | 3,327 | 23,950 |
| 105,583 | 102 | 13,772 | 6,729 | 3,346 | 23,949 |
| 105,584 | 104 | 13,846 | 6,772 | 3,393 | 24,115 |
| 105,585 | 106 | 14,035 | 6,856 | 3,437 | 24,434 |
| 105,586 | 108 | 14,229 | 6,936 | 3,474 | 24,747 |
| 105,587 | 111 | 14,467 | 6,978 | 3,525 | 25,081 |
| 105,588 | 115 | 14,712 | 7,082 | 3,563 | 25,472 |
| 105,589 | 117 | 14,780 | 7,148 | 3,609 | 25,654 |
| 105,590 | 121 | 14,792 | 7,236 | 3,652 | 25,801 |
| 105,591 | 121 | 14,788 | 7,291 | 3,682 | 25,882 |

|         |     |        |       |       |        |
|---------|-----|--------|-------|-------|--------|
| 105,592 | 120 | 14,997 | 7,385 | 3,735 | 26,237 |
| 105,593 | 121 | 15,203 | 7,493 | 3,771 | 26,588 |
| 105,594 | 122 | 15,416 | 7,562 | 3,801 | 26,901 |
| 105,595 | 122 | 15,707 | 7,687 | 3,870 | 27,386 |
| 105,596 | 122 | 15,842 | 7,768 | 3,903 | 27,635 |
| 105,597 | 120 | 15,932 | 7,811 | 3,920 | 27,783 |
| 105,598 | 119 | 16,128 | 7,872 | 3,958 | 28,077 |
| 105,599 | 118 | 16,119 | 7,874 | 3,960 | 28,071 |
| 105,600 | 114 | 16,166 | 7,880 | 3,980 | 28,140 |
| 105,601 | 114 | 16,330 | 7,865 | 3,971 | 28,280 |
| 105,602 | 114 | 16,404 | 7,901 | 3,957 | 28,376 |
| 105,603 | 117 | 16,348 | 7,865 | 3,971 | 28,301 |
| 105,604 | 116 | 16,296 | 7,893 | 3,967 | 28,272 |
| 105,605 | 115 | 16,187 | 7,873 | 3,932 | 28,107 |
| 105,606 | 116 | 16,336 | 7,919 | 3,973 | 28,344 |
| 105,607 | 117 | 16,118 | 7,824 | 3,910 | 27,969 |
| 105,608 | 117 | 16,144 | 7,843 | 3,927 | 28,031 |
| 105,609 | 117 | 16,127 | 7,906 | 3,940 | 28,090 |
| 105,610 | 118 | 16,288 | 7,956 | 3,942 | 28,304 |
| 105,611 | 117 | 16,313 | 7,980 | 3,956 | 28,366 |
| 105,612 | 116 | 16,110 | 7,910 | 3,915 | 28,051 |
| 105,613 | 115 | 16,090 | 7,965 | 3,935 | 28,105 |
| 105,614 | 112 | 16,050 | 7,922 | 3,902 | 27,986 |
| 105,615 | 110 | 16,498 | 8,153 | 4,022 | 28,783 |
| 105,616 | 101 | 16,512 | 8,167 | 4,031 | 28,811 |
| 105,617 | 99  | 16,517 | 8,181 | 4,027 | 28,824 |
| 105,618 | 87  | 16,290 | 8,034 | 4,005 | 28,416 |
| 105,619 | 87  | 16,308 | 8,032 | 3,983 | 28,410 |
| 105,620 | 86  | 16,254 | 8,017 | 3,963 | 28,320 |
| 105,621 | 85  | 16,159 | 8,047 | 3,979 | 28,270 |
| 105,622 | 83  | 16,129 | 8,063 | 3,974 | 28,249 |
| 105,623 | 82  | 16,196 | 8,069 | 3,991 | 28,338 |

|         |    |        |       |       |        |
|---------|----|--------|-------|-------|--------|
| 105,624 | 83 | 16,280 | 8,095 | 3,966 | 28,424 |
| 105,625 | 81 | 16,189 | 8,036 | 3,953 | 28,259 |
| 105,626 | 76 | 16,172 | 8,029 | 3,953 | 28,230 |
| 105,627 | 74 | 16,287 | 8,044 | 3,980 | 28,385 |
| 105,628 | 70 | 16,006 | 7,918 | 3,910 | 27,904 |
| 105,629 | 71 | 16,223 | 7,970 | 3,941 | 28,205 |
| 105,630 | 67 | 16,364 | 8,005 | 3,980 | 28,416 |
| 105,631 | 63 | 16,479 | 8,020 | 4,008 | 28,570 |
| 105,632 | 66 | 16,479 | 8,017 | 4,033 | 28,595 |
| 105,633 | 66 | 16,435 | 8,019 | 3,993 | 28,513 |
| 105,634 | 66 | 16,484 | 8,026 | 4,012 | 28,588 |
| 105,635 | 64 | 16,451 | 8,024 | 4,029 | 28,568 |
| 105,636 | 63 | 16,533 | 8,071 | 4,057 | 28,724 |
| 105,637 | 61 | 16,573 | 8,054 | 4,055 | 28,743 |
| 105,638 | 59 | 16,480 | 8,077 | 4,030 | 28,646 |
| 105,639 | 51 | 16,093 | 7,844 | 3,933 | 27,921 |
| 105,640 | 52 | 16,307 | 7,946 | 3,969 | 28,274 |
| 105,641 | 49 | 16,509 | 8,064 | 4,009 | 28,631 |
| 105,642 | 52 | 16,257 | 8,006 | 3,959 | 28,274 |
| 105,643 | 52 | 15,973 | 7,894 | 3,919 | 27,838 |
| 105,644 | 58 | 16,109 | 7,988 | 3,994 | 28,149 |
| 105,645 | 58 | 16,122 | 8,019 | 4,002 | 28,201 |
| 105,646 | 58 | 15,875 | 7,943 | 3,958 | 27,834 |
| 105,647 | 60 | 15,890 | 7,965 | 4,000 | 27,915 |
| 105,648 | 62 | 15,712 | 7,950 | 4,014 | 27,738 |
| 105,649 | 61 | 15,701 | 7,926 | 3,998 | 27,686 |
| 105,650 | 62 | 15,688 | 7,964 | 3,996 | 27,710 |
| 105,651 | 63 | 15,698 | 7,995 | 4,013 | 27,769 |
| 105,652 | 61 | 15,563 | 7,968 | 3,998 | 27,590 |
| 105,653 | 56 | 15,410 | 7,885 | 3,955 | 27,306 |
| 105,654 | 57 | 15,644 | 7,964 | 4,004 | 27,669 |
| 105,655 | 57 | 15,669 | 7,960 | 4,005 | 27,691 |

|         |    |        |       |       |        |
|---------|----|--------|-------|-------|--------|
| 105,656 | 56 | 15,681 | 7,954 | 4,011 | 27,702 |
| 105,657 | 55 | 15,616 | 7,966 | 4,006 | 27,643 |
| 105,658 | 55 | 15,654 | 7,959 | 4,017 | 27,685 |
| 105,659 | 58 | 15,616 | 8,022 | 4,077 | 27,773 |
| 105,660 | 58 | 15,615 | 8,006 | 4,075 | 27,754 |
| 105,661 | 57 | 15,343 | 7,797 | 3,999 | 27,196 |
| 105,662 | 56 | 15,394 | 7,866 | 4,040 | 27,356 |
| 105,663 | 52 | 15,542 | 7,934 | 4,075 | 27,603 |
| 105,664 | 51 | 15,571 | 7,929 | 4,084 | 27,635 |
| 105,665 | 52 | 15,518 | 7,902 | 4,071 | 27,543 |
| 105,666 | 53 | 15,560 | 7,933 | 4,084 | 27,630 |
| 105,667 | 52 | 15,260 | 7,838 | 4,015 | 27,165 |
| 105,668 | 51 | 15,379 | 7,949 | 4,050 | 27,429 |
| 105,669 | 52 | 15,273 | 7,943 | 4,044 | 27,312 |
| 105,670 | 51 | 15,240 | 7,955 | 4,057 | 27,303 |
| 105,671 | 53 | 15,223 | 7,908 | 4,025 | 27,209 |
| 105,672 | 54 | 15,448 | 7,985 | 4,071 | 27,558 |
| 105,673 | 54 | 15,292 | 7,913 | 4,052 | 27,311 |
| 105,674 | 53 | 15,311 | 7,944 | 4,059 | 27,367 |
| 105,675 | 51 | 15,142 | 7,838 | 4,038 | 27,069 |
| 105,676 | 51 | 15,168 | 7,858 | 4,044 | 27,121 |
| 105,677 | 51 | 15,132 | 7,850 | 4,064 | 27,097 |
| 105,678 | 50 | 14,905 | 7,762 | 4,005 | 26,722 |
| 105,679 | 53 | 14,926 | 7,773 | 3,997 | 26,749 |
| 105,680 | 52 | 14,897 | 7,833 | 4,017 | 26,799 |
| 105,681 | 53 | 14,995 | 7,914 | 4,032 | 26,994 |
| 105,682 | 47 | 14,676 | 7,796 | 3,959 | 26,478 |
| 105,683 | 47 | 14,940 | 7,900 | 4,000 | 26,887 |
| 105,684 | 46 | 14,961 | 7,839 | 4,009 | 26,855 |
| 105,685 | 48 | 15,099 | 7,891 | 4,006 | 27,044 |
| 105,686 | 50 | 15,214 | 7,885 | 4,001 | 27,150 |
| 105,687 | 49 | 15,105 | 7,816 | 3,970 | 26,940 |

|         |    |        |       |       |        |
|---------|----|--------|-------|-------|--------|
| 105,688 | 52 | 15,280 | 7,969 | 4,025 | 27,326 |
| 105,689 | 52 | 15,301 | 7,995 | 4,057 | 27,405 |
| 105,690 | 53 | 15,144 | 7,934 | 4,042 | 27,173 |
| 105,691 | 49 | 14,894 | 7,740 | 3,974 | 26,657 |
| 105,692 | 49 | 15,042 | 7,838 | 4,014 | 26,943 |
| 105,693 | 46 | 15,166 | 7,935 | 4,065 | 27,212 |
| 105,694 | 48 | 15,218 | 7,904 | 4,030 | 27,200 |
| 105,695 | 48 | 15,424 | 7,997 | 4,080 | 27,549 |
| 105,696 | 47 | 15,416 | 7,990 | 4,096 | 27,549 |
| 105,697 | 45 | 15,436 | 7,847 | 3,994 | 27,322 |
| 105,698 | 47 | 15,611 | 7,928 | 4,040 | 27,626 |
| 105,699 | 46 | 15,815 | 8,035 | 4,091 | 27,987 |
| 105,700 | 47 | 15,940 | 8,092 | 4,111 | 28,190 |
| 105,701 | 47 | 16,069 | 8,095 | 4,110 | 28,321 |
| 105,702 | 46 | 15,921 | 7,986 | 4,040 | 27,993 |
| 105,703 | 46 | 15,810 | 7,977 | 4,055 | 27,888 |
| 105,704 | 48 | 16,011 | 8,038 | 4,080 | 28,177 |
| 105,705 | 48 | 15,974 | 8,050 | 4,073 | 28,145 |
| 105,706 | 48 | 15,885 | 7,977 | 4,065 | 27,975 |
| 105,707 | 47 | 15,957 | 7,995 | 4,068 | 28,067 |
| 105,708 | 49 | 16,080 | 7,974 | 4,064 | 28,167 |
| 105,709 | 48 | 16,129 | 7,988 | 4,053 | 28,218 |
| 105,710 | 48 | 16,204 | 7,972 | 4,062 | 28,286 |
| 105,711 | 47 | 15,936 | 7,817 | 3,997 | 27,797 |
| 105,712 | 47 | 16,161 | 7,907 | 4,032 | 28,147 |
| 105,713 | 48 | 16,457 | 8,004 | 4,060 | 28,569 |
| 105,714 | 48 | 16,456 | 7,972 | 4,065 | 28,541 |
| 105,715 | 48 | 16,150 | 7,866 | 4,001 | 28,065 |
| 105,716 | 48 | 16,330 | 7,916 | 4,052 | 28,346 |
| 105,717 | 47 | 16,419 | 7,929 | 4,041 | 28,436 |
| 105,718 | 47 | 16,414 | 7,923 | 4,039 | 28,423 |
| 105,719 | 48 | 16,422 | 7,888 | 4,046 | 28,404 |



|         |    |        |       |       |        |
|---------|----|--------|-------|-------|--------|
| 105,720 | 47 | 16,328 | 7,817 | 4,005 | 28,197 |
| 105,721 | 48 | 16,345 | 7,801 | 4,013 | 28,207 |
| 105,722 | 50 | 16,413 | 7,856 | 4,057 | 28,376 |
| 105,723 | 49 | 16,448 | 7,879 | 4,055 | 28,431 |
| 105,724 | 50 | 16,153 | 7,731 | 3,976 | 27,910 |
| 105,725 | 49 | 16,275 | 7,776 | 4,002 | 28,102 |
| 105,726 | 51 | 16,483 | 7,874 | 4,050 | 28,458 |
| 105,727 | 51 | 16,674 | 7,921 | 4,065 | 28,711 |
| 105,728 | 51 | 16,908 | 8,016 | 4,097 | 29,072 |
| 105,729 | 52 | 17,133 | 8,092 | 4,143 | 29,420 |
| 105,730 | 49 | 17,057 | 8,059 | 4,150 | 29,315 |
| 105,731 | 51 | 17,160 | 8,050 | 4,139 | 29,400 |
| 105,732 | 51 | 17,178 | 8,011 | 4,144 | 29,384 |
| 105,733 | 49 | 17,133 | 7,983 | 4,128 | 29,293 |
| 105,734 | 49 | 17,280 | 8,043 | 4,168 | 29,540 |
| 105,735 | 48 | 17,162 | 8,045 | 4,164 | 29,419 |
| 105,736 | 48 | 17,115 | 8,035 | 4,169 | 29,367 |
| 105,737 | 48 | 16,981 | 7,995 | 4,156 | 29,180 |
| 105,738 | 46 | 16,843 | 7,941 | 4,137 | 28,967 |
| 105,739 | 50 | 16,887 | 7,960 | 4,132 | 29,029 |
| 105,740 | 50 | 16,741 | 7,885 | 4,080 | 28,756 |
| 105,741 | 50 | 16,913 | 7,910 | 4,106 | 28,979 |
| 105,742 | 50 | 17,154 | 7,952 | 4,129 | 29,285 |
| 105,743 | 48 | 17,243 | 7,936 | 4,123 | 29,350 |
| 105,744 | 49 | 17,344 | 8,044 | 4,162 | 29,599 |
| 105,745 | 45 | 17,113 | 8,002 | 4,114 | 29,274 |
| 105,746 | 48 | 17,272 | 8,065 | 4,149 | 29,534 |
| 105,747 | 51 | 17,239 | 8,060 | 4,136 | 29,486 |
| 105,748 | 53 | 16,980 | 7,992 | 4,107 | 29,132 |
| 105,749 | 51 | 16,706 | 7,924 | 4,061 | 28,742 |
| 105,750 | 52 | 16,961 | 8,066 | 4,134 | 29,213 |
| 105,751 | 51 | 16,823 | 8,013 | 4,116 | 29,003 |

|         |    |        |       |       |        |
|---------|----|--------|-------|-------|--------|
| 105,752 | 56 | 16,855 | 8,038 | 4,134 | 29,083 |
| 105,753 | 57 | 16,934 | 8,093 | 4,162 | 29,246 |
| 105,754 | 56 | 17,094 | 8,153 | 4,160 | 29,463 |
| 105,755 | 55 | 17,016 | 8,085 | 4,114 | 29,270 |
| 105,756 | 54 | 17,294 | 8,177 | 4,159 | 29,684 |
| 105,757 | 54 | 17,477 | 8,290 | 4,188 | 30,009 |
| 105,758 | 54 | 17,269 | 8,204 | 4,149 | 29,676 |
| 105,759 | 56 | 17,219 | 8,309 | 4,198 | 29,782 |
| 105,760 | 55 | 17,091 | 8,302 | 4,211 | 29,659 |
| 105,761 | 54 | 17,019 | 8,310 | 4,187 | 29,570 |
| 105,762 | 54 | 16,777 | 8,204 | 4,117 | 29,152 |
| 105,763 | 57 | 16,614 | 8,198 | 4,113 | 28,982 |
| 105,764 | 56 | 16,723 | 8,263 | 4,141 | 29,183 |
| 105,765 | 57 | 16,700 | 8,324 | 4,148 | 29,229 |
| 105,766 | 56 | 16,497 | 8,221 | 4,098 | 28,872 |
| 105,767 | 62 | 16,582 | 8,315 | 4,119 | 29,078 |
| 105,768 | 66 | 16,523 | 8,328 | 4,136 | 29,053 |
| 105,769 | 67 | 16,508 | 8,327 | 4,141 | 29,043 |
| 105,770 | 69 | 16,518 | 8,368 | 4,153 | 29,108 |
| 105,771 | 69 | 16,556 | 8,371 | 4,157 | 29,153 |
| 105,772 | 68 | 16,576 | 8,382 | 4,152 | 29,178 |
| 105,773 | 66 | 16,655 | 8,378 | 4,117 | 29,216 |
| 105,774 | 69 | 16,463 | 8,311 | 4,084 | 28,927 |
| 105,775 | 67 | 16,214 | 8,226 | 4,045 | 28,552 |
| 105,776 | 67 | 16,275 | 8,416 | 4,107 | 28,865 |
| 105,777 | 67 | 16,170 | 8,373 | 4,109 | 28,719 |
| 105,778 | 68 | 16,082 | 8,355 | 4,112 | 28,617 |
| 105,779 | 68 | 15,972 | 8,322 | 4,105 | 28,467 |
| 105,780 | 67 | 15,851 | 8,285 | 4,119 | 28,322 |
| 105,781 | 68 | 15,849 | 8,305 | 4,106 | 28,328 |
| 105,782 | 67 | 15,767 | 8,300 | 4,103 | 28,237 |
| 105,783 | 66 | 15,660 | 8,263 | 4,094 | 28,083 |

|         |    |        |       |       |        |
|---------|----|--------|-------|-------|--------|
| 105,784 | 66 | 15,524 | 8,217 | 4,068 | 27,875 |
| 105,785 | 66 | 15,476 | 8,170 | 4,054 | 27,766 |
| 105,786 | 66 | 15,493 | 8,179 | 4,039 | 27,777 |
| 105,787 | 64 | 15,453 | 8,153 | 4,026 | 27,696 |
| 105,788 | 64 | 15,451 | 8,192 | 4,018 | 27,725 |
| 105,789 | 65 | 15,516 | 8,256 | 4,039 | 27,876 |
| 105,790 | 60 | 15,456 | 8,192 | 4,030 | 27,738 |
| 105,791 | 62 | 15,387 | 8,172 | 4,040 | 27,661 |
| 105,792 | 61 | 15,319 | 8,156 | 4,026 | 27,562 |
| 105,793 | 61 | 15,248 | 8,147 | 4,001 | 27,457 |
| 105,794 | 61 | 15,214 | 8,157 | 3,983 | 27,415 |
| 105,795 | 60 | 15,079 | 8,043 | 3,937 | 27,119 |
| 105,796 | 63 | 14,845 | 7,925 | 3,884 | 26,717 |
| 105,797 | 60 | 14,627 | 7,827 | 3,833 | 26,347 |
| 105,798 | 59 | 15,162 | 8,072 | 3,948 | 27,241 |
| 105,799 | 57 | 15,119 | 8,044 | 3,944 | 27,164 |
| 105,800 | 57 | 15,206 | 8,029 | 3,916 | 27,208 |
| 105,801 | 55 | 15,091 | 7,919 | 3,863 | 26,928 |
| 105,802 | 56 | 15,207 | 8,037 | 3,920 | 27,220 |
| 105,803 | 52 | 15,179 | 8,040 | 3,903 | 27,174 |
| 105,804 | 51 | 14,925 | 7,900 | 3,821 | 26,697 |
| 105,805 | 51 | 14,561 | 7,763 | 3,765 | 26,140 |
| 105,806 | 52 | 14,831 | 7,897 | 3,851 | 26,631 |
| 105,807 | 52 | 14,799 | 7,857 | 3,858 | 26,566 |
| 105,808 | 52 | 14,770 | 7,849 | 3,871 | 26,542 |
| 105,809 | 51 | 14,659 | 7,773 | 3,843 | 26,326 |
| 105,810 | 47 | 14,505 | 7,686 | 3,811 | 26,049 |
| 105,811 | 49 | 14,404 | 7,608 | 3,773 | 25,834 |
| 105,812 | 49 | 14,680 | 7,675 | 3,795 | 26,199 |
| 105,813 | 51 | 14,876 | 7,705 | 3,830 | 26,462 |
| 105,814 | 50 | 14,768 | 7,683 | 3,812 | 26,313 |
| 105,815 | 49 | 14,661 | 7,542 | 3,762 | 26,014 |

|         |    |        |       |       |        |
|---------|----|--------|-------|-------|--------|
| 105,816 | 48 | 14,927 | 7,622 | 3,800 | 26,397 |
| 105,817 | 41 | 15,093 | 7,694 | 3,868 | 26,696 |
| 105,818 | 41 | 15,266 | 7,740 | 3,918 | 26,965 |
| 105,819 | 38 | 15,248 | 7,694 | 3,908 | 26,888 |
| 105,820 | 37 | 15,367 | 7,678 | 3,922 | 27,004 |
| 105,821 | 35 | 15,407 | 7,617 | 3,903 | 26,962 |
| 105,822 | 35 | 15,068 | 7,509 | 3,849 | 26,461 |
| 105,823 | 36 | 15,303 | 7,569 | 3,898 | 26,806 |
| 105,824 | 34 | 15,399 | 7,599 | 3,927 | 26,959 |
| 105,825 | 31 | 15,354 | 7,510 | 3,893 | 26,788 |
| 105,826 | 30 | 15,433 | 7,463 | 3,879 | 26,805 |
| 105,827 | 30 | 15,542 | 7,529 | 3,905 | 27,006 |
| 105,828 | 29 | 15,694 | 7,600 | 3,936 | 27,259 |
| 105,829 | 28 | 15,634 | 7,582 | 3,933 | 27,177 |
| 105,830 | 28 | 15,720 | 7,579 | 3,950 | 27,277 |
| 105,831 | 28 | 15,874 | 7,595 | 3,915 | 27,412 |
| 105,832 | 28 | 15,945 | 7,563 | 3,927 | 27,463 |
| 105,833 | 27 | 15,957 | 7,528 | 3,946 | 27,458 |
| 105,834 | 27 | 15,904 | 7,555 | 3,935 | 27,421 |
| 105,835 | 30 | 16,011 | 7,603 | 3,961 | 27,605 |
| 105,836 | 31 | 15,988 | 7,623 | 3,970 | 27,612 |
| 105,837 | 31 | 15,989 | 7,629 | 3,980 | 27,629 |
| 105,838 | 30 | 15,849 | 7,529 | 3,950 | 27,358 |
| 105,839 | 30 | 16,001 | 7,574 | 3,984 | 27,589 |
| 105,840 | 29 | 16,193 | 7,601 | 4,033 | 27,856 |
| 105,841 | 36 | 16,164 | 7,654 | 4,060 | 27,914 |
| 105,842 | 38 | 16,158 | 7,668 | 4,051 | 27,915 |
| 105,843 | 40 | 16,188 | 7,681 | 4,064 | 27,973 |
| 105,844 | 44 | 16,239 | 7,691 | 4,084 | 28,058 |
| 105,845 | 47 | 16,045 | 7,618 | 4,060 | 27,770 |
| 105,846 | 48 | 15,886 | 7,592 | 4,069 | 27,595 |
| 105,847 | 44 | 15,934 | 7,614 | 4,114 | 27,706 |

|         |    |        |       |       |        |
|---------|----|--------|-------|-------|--------|
| 105,848 | 46 | 15,982 | 7,593 | 4,128 | 27,749 |
| 105,849 | 45 | 16,041 | 7,589 | 4,137 | 27,812 |
| 105,850 | 45 | 15,899 | 7,511 | 4,100 | 27,555 |
| 105,851 | 45 | 15,794 | 7,527 | 4,111 | 27,477 |
| 105,852 | 45 | 15,661 | 7,475 | 4,090 | 27,271 |
| 105,853 | 44 | 15,776 | 7,510 | 4,092 | 27,422 |
| 105,854 | 43 | 15,639 | 7,432 | 4,061 | 27,175 |
| 105,855 | 43 | 15,450 | 7,369 | 4,023 | 26,885 |
| 105,856 | 43 | 15,733 | 7,483 | 4,066 | 27,325 |
| 105,857 | 44 | 15,610 | 7,483 | 4,055 | 27,192 |
| 105,858 | 45 | 15,486 | 7,488 | 4,050 | 27,069 |
| 105,859 | 45 | 15,360 | 7,472 | 4,018 | 26,895 |
| 105,860 | 46 | 15,458 | 7,511 | 4,040 | 27,055 |
| 105,861 | 47 | 15,523 | 7,502 | 4,016 | 27,088 |
| 105,862 | 45 | 15,360 | 7,410 | 3,975 | 26,790 |
| 105,863 | 48 | 15,482 | 7,528 | 4,014 | 27,072 |
| 105,864 | 45 | 15,371 | 7,559 | 4,013 | 26,988 |
| 105,865 | 48 | 15,317 | 7,463 | 3,972 | 26,800 |
| 105,866 | 50 | 15,151 | 7,419 | 3,938 | 26,558 |
| 105,867 | 53 | 15,022 | 7,417 | 3,936 | 26,428 |
| 105,868 | 54 | 14,941 | 7,378 | 3,911 | 26,284 |
| 105,869 | 56 | 14,996 | 7,426 | 3,911 | 26,389 |
| 105,870 | 55 | 14,741 | 7,334 | 3,867 | 25,997 |
| 105,871 | 55 | 14,794 | 7,388 | 3,880 | 26,117 |
| 105,872 | 55 | 14,710 | 7,430 | 3,891 | 26,086 |
| 105,873 | 56 | 14,746 | 7,480 | 3,894 | 26,176 |
| 105,874 | 56 | 14,688 | 7,482 | 3,906 | 26,132 |
| 105,875 | 56 | 14,515 | 7,459 | 3,906 | 25,936 |
| 105,876 | 61 | 14,393 | 7,379 | 3,866 | 25,699 |
| 105,877 | 61 | 14,136 | 7,300 | 3,826 | 25,323 |
| 105,878 | 62 | 14,201 | 7,404 | 3,887 | 25,554 |
| 105,879 | 64 | 14,085 | 7,399 | 3,861 | 25,409 |

|         |    |        |       |       |        |
|---------|----|--------|-------|-------|--------|
| 105,880 | 64 | 13,949 | 7,315 | 3,818 | 25,146 |
| 105,881 | 66 | 14,019 | 7,396 | 3,843 | 25,324 |
| 105,882 | 71 | 13,927 | 7,425 | 3,855 | 25,278 |
| 105,883 | 71 | 13,846 | 7,386 | 3,827 | 25,130 |
| 105,884 | 74 | 13,931 | 7,462 | 3,865 | 25,332 |
| 105,885 | 72 | 13,886 | 7,400 | 3,837 | 25,195 |
| 105,886 | 73 | 13,978 | 7,493 | 3,841 | 25,385 |
| 105,887 | 73 | 13,855 | 7,424 | 3,819 | 25,171 |
| 105,888 | 73 | 13,967 | 7,475 | 3,865 | 25,380 |
| 105,889 | 72 | 13,893 | 7,441 | 3,844 | 25,250 |
| 105,890 | 73 | 13,918 | 7,526 | 3,860 | 25,377 |
| 105,891 | 75 | 14,065 | 7,594 | 3,869 | 25,603 |
| 105,892 | 69 | 14,066 | 7,537 | 3,860 | 25,532 |
| 105,893 | 64 | 13,959 | 7,483 | 3,856 | 25,362 |
| 105,894 | 63 | 13,846 | 7,495 | 3,843 | 25,247 |
| 105,895 | 59 | 13,673 | 7,500 | 3,836 | 25,068 |
| 105,896 | 57 | 13,582 | 7,474 | 3,828 | 24,941 |
| 105,897 | 58 | 13,815 | 7,520 | 3,851 | 25,244 |
| 105,898 | 58 | 13,800 | 7,560 | 3,859 | 25,277 |
| 105,899 | 59 | 13,758 | 7,560 | 3,838 | 25,215 |
| 105,900 | 60 | 13,763 | 7,553 | 3,842 | 25,218 |
| 105,901 | 61 | 13,620 | 7,413 | 3,756 | 24,850 |
| 105,902 | 62 | 13,824 | 7,514 | 3,794 | 25,194 |
| 105,903 | 61 | 13,983 | 7,601 | 3,850 | 25,495 |
| 105,904 | 63 | 13,961 | 7,616 | 3,856 | 25,496 |
| 105,905 | 63 | 13,819 | 7,556 | 3,839 | 25,277 |
| 105,906 | 64 | 13,814 | 7,536 | 3,865 | 25,279 |
| 105,907 | 62 | 13,519 | 7,301 | 3,770 | 24,652 |
| 105,908 | 62 | 13,587 | 7,335 | 3,798 | 24,782 |
| 105,909 | 63 | 13,805 | 7,418 | 3,833 | 25,119 |
| 105,910 | 65 | 14,032 | 7,482 | 3,882 | 25,461 |
| 105,911 | 68 | 13,982 | 7,459 | 3,858 | 25,367 |

|         |    |        |       |       |        |
|---------|----|--------|-------|-------|--------|
| 105,912 | 68 | 13,984 | 7,457 | 3,885 | 25,394 |
| 105,913 | 69 | 14,062 | 7,437 | 3,895 | 25,463 |
| 105,914 | 70 | 14,147 | 7,404 | 3,914 | 25,535 |
| 105,915 | 70 | 13,815 | 7,141 | 3,817 | 24,843 |
| 105,916 | 73 | 14,055 | 7,217 | 3,859 | 25,204 |
| 105,917 | 71 | 14,330 | 7,286 | 3,893 | 25,580 |
| 105,918 | 70 | 14,394 | 7,294 | 3,902 | 25,660 |
| 105,919 | 69 | 14,352 | 7,269 | 3,867 | 25,557 |
| 105,920 | 68 | 14,642 | 7,415 | 3,945 | 26,070 |
| 105,921 | 68 | 14,460 | 7,326 | 3,905 | 25,759 |
| 105,922 | 69 | 14,453 | 7,396 | 3,902 | 25,820 |
| 105,923 | 68 | 14,484 | 7,391 | 3,897 | 25,840 |
| 105,924 | 67 | 14,502 | 7,385 | 3,898 | 25,852 |
| 105,925 | 67 | 14,548 | 7,400 | 3,910 | 25,925 |
| 105,926 | 68 | 14,676 | 7,397 | 3,904 | 26,045 |
| 105,927 | 65 | 14,852 | 7,415 | 3,921 | 26,253 |
| 105,928 | 63 | 14,848 | 7,325 | 3,888 | 26,124 |
| 105,929 | 66 | 15,087 | 7,390 | 3,915 | 26,458 |
| 105,930 | 72 | 15,346 | 7,438 | 3,952 | 26,808 |
| 105,931 | 71 | 15,160 | 7,356 | 3,935 | 26,522 |
| 105,932 | 71 | 15,306 | 7,426 | 3,967 | 26,770 |
| 105,933 | 67 | 15,217 | 7,350 | 3,948 | 26,582 |
| 105,934 | 66 | 15,045 | 7,280 | 3,921 | 26,312 |
| 105,935 | 65 | 15,083 | 7,287 | 3,909 | 26,344 |
| 105,936 | 66 | 15,180 | 7,295 | 3,922 | 26,463 |
| 105,937 | 65 | 15,236 | 7,226 | 3,927 | 26,454 |
| 105,938 | 70 | 15,181 | 7,159 | 3,895 | 26,305 |
| 105,939 | 71 | 15,321 | 7,151 | 3,880 | 26,423 |
| 105,940 | 72 | 15,476 | 7,217 | 3,923 | 26,688 |
| 105,941 | 75 | 15,522 | 7,178 | 3,931 | 26,706 |
| 105,942 | 73 | 15,372 | 7,112 | 3,893 | 26,450 |
| 105,943 | 72 | 15,241 | 7,045 | 3,833 | 26,191 |

|         |    |        |       |       |        |
|---------|----|--------|-------|-------|--------|
| 105,944 | 76 | 15,413 | 7,104 | 3,855 | 26,448 |
| 105,945 | 76 | 15,307 | 6,998 | 3,805 | 26,186 |
| 105,946 | 76 | 15,444 | 6,983 | 3,819 | 26,322 |
| 105,947 | 76 | 15,521 | 6,946 | 3,814 | 26,357 |
| 105,948 | 76 | 15,549 | 6,906 | 3,797 | 26,328 |
| 105,949 | 76 | 15,691 | 6,936 | 3,828 | 26,531 |
| 105,950 | 74 | 15,853 | 6,976 | 3,854 | 26,757 |
| 105,951 | 74 | 15,956 | 7,010 | 3,863 | 26,903 |
| 105,952 | 77 | 16,082 | 7,039 | 3,894 | 27,092 |
| 105,953 | 79 | 16,227 | 7,051 | 3,910 | 27,267 |
| 105,954 | 82 | 16,342 | 7,057 | 3,908 | 27,389 |
| 105,955 | 82 | 16,182 | 6,916 | 3,832 | 27,012 |
| 105,956 | 82 | 16,357 | 6,934 | 3,843 | 27,216 |
| 105,957 | 81 | 16,568 | 6,995 | 3,850 | 27,494 |
| 105,958 | 79 | 16,472 | 6,936 | 3,838 | 27,325 |
| 105,959 | 80 | 16,695 | 6,997 | 3,865 | 27,637 |
| 105,960 | 81 | 16,707 | 6,985 | 3,883 | 27,656 |
| 105,961 | 80 | 16,624 | 6,924 | 3,854 | 27,482 |
| 105,962 | 76 | 16,627 | 6,933 | 3,833 | 27,469 |
| 105,963 | 77 | 16,521 | 6,920 | 3,827 | 27,345 |
| 105,964 | 75 | 16,284 | 6,874 | 3,793 | 27,026 |
| 105,965 | 73 | 16,283 | 7,000 | 3,836 | 27,192 |
| 105,966 | 67 | 16,231 | 6,998 | 3,833 | 27,129 |
| 105,967 | 65 | 16,234 | 7,017 | 3,849 | 27,165 |
| 105,968 | 67 | 16,221 | 7,008 | 3,840 | 27,136 |
| 105,969 | 70 | 16,254 | 7,005 | 3,825 | 27,154 |
| 105,970 | 70 | 16,142 | 6,907 | 3,799 | 26,918 |
| 105,971 | 71 | 16,275 | 6,934 | 3,815 | 27,095 |
| 105,972 | 72 | 16,279 | 6,920 | 3,825 | 27,096 |
| 105,973 | 72 | 16,319 | 6,920 | 3,846 | 27,157 |
| 105,974 | 72 | 16,414 | 7,017 | 3,895 | 27,398 |
| 105,975 | 71 | 16,318 | 6,910 | 3,859 | 27,158 |



|         |    |        |       |       |        |
|---------|----|--------|-------|-------|--------|
| 105,976 | 75 | 16,411 | 6,923 | 3,880 | 27,289 |
| 105,977 | 74 | 16,464 | 6,911 | 3,872 | 27,321 |
| 105,978 | 72 | 16,470 | 6,911 | 3,850 | 27,303 |
| 105,979 | 72 | 16,482 | 6,904 | 3,843 | 27,301 |
| 105,980 | 73 | 16,456 | 6,885 | 3,846 | 27,260 |
| 105,981 | 68 | 16,429 | 6,887 | 3,843 | 27,227 |
| 105,982 | 69 | 16,560 | 6,877 | 3,838 | 27,344 |
| 105,983 | 67 | 16,289 | 6,771 | 3,779 | 26,906 |
| 105,984 | 68 | 16,547 | 6,859 | 3,821 | 27,295 |
| 105,985 | 72 | 16,308 | 6,764 | 3,739 | 26,883 |
| 105,986 | 73 | 16,385 | 6,787 | 3,763 | 27,008 |
| 105,987 | 72 | 16,590 | 6,850 | 3,791 | 27,303 |
| 105,988 | 70 | 16,462 | 6,798 | 3,756 | 27,086 |
| 105,989 | 66 | 16,382 | 6,742 | 3,713 | 26,903 |
| 105,990 | 65 | 16,307 | 6,718 | 3,699 | 26,789 |
| 105,991 | 60 | 16,052 | 6,616 | 3,629 | 26,357 |
| 105,992 | 62 | 16,153 | 6,651 | 3,663 | 26,529 |
| 105,993 | 63 | 16,185 | 6,643 | 3,658 | 26,549 |
| 105,994 | 61 | 16,249 | 6,657 | 3,662 | 26,629 |
| 105,995 | 61 | 16,318 | 6,687 | 3,662 | 26,728 |
| 105,996 | 60 | 16,243 | 6,689 | 3,654 | 26,646 |
| 105,997 | 61 | 16,198 | 6,720 | 3,663 | 26,642 |
| 105,998 | 59 | 16,000 | 6,656 | 3,616 | 26,331 |
| 105,999 | 60 | 15,826 | 6,584 | 3,573 | 26,043 |
| 106,000 | 60 | 15,681 | 6,519 | 3,530 | 25,790 |
| 106,001 | 59 | 15,769 | 6,620 | 3,584 | 26,032 |
| 106,002 | 58 | 15,728 | 6,632 | 3,582 | 26,000 |
| 106,003 | 55 | 15,577 | 6,603 | 3,559 | 25,794 |
| 106,004 | 52 | 15,474 | 6,582 | 3,543 | 25,651 |
| 106,005 | 49 | 15,362 | 6,533 | 3,528 | 25,472 |
| 106,006 | 47 | 15,186 | 6,534 | 3,541 | 25,308 |
| 106,007 | 48 | 15,176 | 6,557 | 3,557 | 25,338 |

|         |    |        |       |       |        |
|---------|----|--------|-------|-------|--------|
| 106,008 | 52 | 15,096 | 6,529 | 3,564 | 25,241 |
| 106,009 | 53 | 14,975 | 6,529 | 3,559 | 25,116 |
| 106,010 | 53 | 14,881 | 6,521 | 3,555 | 25,010 |
| 106,011 | 53 | 14,806 | 6,475 | 3,527 | 24,861 |
| 106,012 | 53 | 14,903 | 6,465 | 3,524 | 24,945 |
| 106,013 | 53 | 14,975 | 6,473 | 3,550 | 25,051 |
| 106,014 | 52 | 15,180 | 6,498 | 3,554 | 25,284 |
| 106,015 | 53 | 15,291 | 6,440 | 3,554 | 25,338 |
| 106,016 | 53 | 15,233 | 6,351 | 3,514 | 25,151 |
| 106,017 | 53 | 15,204 | 6,308 | 3,462 | 25,027 |
| 106,018 | 56 | 15,505 | 6,366 | 3,511 | 25,438 |
| 106,019 | 52 | 15,246 | 6,315 | 3,483 | 25,096 |
| 106,020 | 54 | 15,397 | 6,352 | 3,512 | 25,315 |
| 106,021 | 52 | 15,336 | 6,286 | 3,509 | 25,183 |
| 106,022 | 52 | 15,556 | 6,362 | 3,563 | 25,533 |
| 106,023 | 50 | 15,689 | 6,381 | 3,579 | 25,699 |
| 106,024 | 50 | 15,856 | 6,374 | 3,588 | 25,868 |
| 106,025 | 50 | 15,756 | 6,252 | 3,537 | 25,595 |
| 106,026 | 50 | 15,950 | 6,341 | 3,563 | 25,904 |
| 106,027 | 46 | 15,759 | 6,295 | 3,524 | 25,624 |
| 106,028 | 46 | 15,607 | 6,301 | 3,538 | 25,492 |
| 106,029 | 47 | 15,656 | 6,335 | 3,566 | 25,604 |
| 106,030 | 51 | 15,766 | 6,341 | 3,577 | 25,735 |
| 106,031 | 50 | 15,780 | 6,348 | 3,592 | 25,770 |
| 106,032 | 50 | 16,045 | 6,384 | 3,629 | 26,108 |
| 106,033 | 50 | 15,804 | 6,351 | 3,590 | 25,795 |
| 106,034 | 53 | 16,055 | 6,448 | 3,646 | 26,202 |
| 106,035 | 53 | 16,172 | 6,445 | 3,668 | 26,338 |
| 106,036 | 47 | 15,926 | 6,346 | 3,636 | 25,955 |
| 106,037 | 46 | 15,938 | 6,414 | 3,651 | 26,049 |
| 106,038 | 47 | 15,979 | 6,460 | 3,683 | 26,169 |
| 106,039 | 48 | 16,102 | 6,537 | 3,704 | 26,391 |

|         |    |        |       |       |        |
|---------|----|--------|-------|-------|--------|
| 106,040 | 48 | 16,111 | 6,572 | 3,739 | 26,470 |
| 106,041 | 50 | 16,054 | 6,560 | 3,727 | 26,391 |
| 106,042 | 52 | 16,128 | 6,631 | 3,786 | 26,597 |
| 106,043 | 51 | 16,149 | 6,679 | 3,800 | 26,679 |
| 106,044 | 50 | 16,071 | 6,649 | 3,805 | 26,575 |
| 106,045 | 49 | 16,159 | 6,633 | 3,810 | 26,651 |
| 106,046 | 49 | 16,254 | 6,613 | 3,825 | 26,741 |
| 106,047 | 50 | 16,488 | 6,626 | 3,862 | 27,026 |
| 106,048 | 50 | 16,701 | 6,588 | 3,859 | 27,198 |
| 106,049 | 49 | 16,625 | 6,542 | 3,844 | 27,060 |
| 106,050 | 51 | 16,965 | 6,589 | 3,895 | 27,500 |
| 106,051 | 51 | 17,017 | 6,542 | 3,885 | 27,495 |
| 106,052 | 52 | 17,136 | 6,559 | 3,895 | 27,642 |
| 106,053 | 52 | 17,297 | 6,546 | 3,906 | 27,801 |
| 106,054 | 56 | 17,477 | 6,597 | 3,943 | 28,073 |
| 106,055 | 59 | 17,506 | 6,560 | 3,909 | 28,034 |
| 106,056 | 60 | 17,811 | 6,658 | 3,976 | 28,505 |
| 106,057 | 59 | 17,787 | 6,572 | 3,921 | 28,339 |
| 106,058 | 58 | 18,000 | 6,660 | 3,977 | 28,695 |
| 106,059 | 54 | 18,216 | 6,714 | 4,026 | 29,010 |
| 106,060 | 53 | 18,356 | 6,694 | 4,011 | 29,114 |
| 106,061 | 52 | 18,463 | 6,685 | 4,024 | 29,224 |
| 106,062 | 50 | 18,298 | 6,652 | 4,005 | 29,005 |
| 106,063 | 54 | 18,484 | 6,736 | 4,071 | 29,345 |
| 106,064 | 55 | 18,526 | 6,779 | 4,088 | 29,448 |
| 106,065 | 54 | 18,271 | 6,705 | 4,042 | 29,072 |
| 106,066 | 53 | 18,151 | 6,721 | 4,047 | 28,972 |
| 106,067 | 54 | 18,373 | 6,794 | 4,105 | 29,326 |
| 106,068 | 55 | 18,424 | 6,849 | 4,165 | 29,493 |
| 106,069 | 52 | 18,480 | 6,911 | 4,179 | 29,622 |
| 106,070 | 51 | 18,599 | 6,952 | 4,215 | 29,817 |
| 106,071 | 49 | 18,797 | 7,004 | 4,256 | 30,106 |

|         |    |        |       |       |        |
|---------|----|--------|-------|-------|--------|
| 106,072 | 51 | 18,901 | 7,039 | 4,275 | 30,266 |
| 106,073 | 51 | 18,895 | 6,990 | 4,276 | 30,212 |
| 106,074 | 51 | 18,894 | 6,974 | 4,292 | 30,211 |
| 106,075 | 51 | 18,805 | 6,930 | 4,240 | 30,026 |
| 106,076 | 59 | 18,977 | 6,982 | 4,303 | 30,321 |
| 106,077 | 59 | 19,402 | 7,104 | 4,382 | 30,947 |
| 106,078 | 61 | 19,210 | 6,971 | 4,326 | 30,568 |
| 106,079 | 63 | 19,585 | 7,084 | 4,391 | 31,123 |
| 106,080 | 64 | 19,812 | 7,180 | 4,441 | 31,497 |
| 106,081 | 61 | 19,587 | 7,105 | 4,407 | 31,160 |
| 106,082 | 58 | 19,819 | 7,167 | 4,440 | 31,484 |
| 106,083 | 59 | 19,619 | 7,184 | 4,449 | 31,311 |
| 106,084 | 59 | 19,835 | 7,193 | 4,483 | 31,570 |
| 106,085 | 62 | 20,011 | 7,209 | 4,513 | 31,795 |
| 106,086 | 62 | 19,828 | 7,177 | 4,498 | 31,565 |
| 106,087 | 62 | 20,047 | 7,187 | 4,533 | 31,829 |
| 106,088 | 62 | 20,161 | 7,186 | 4,530 | 31,939 |
| 106,089 | 63 | 20,390 | 7,268 | 4,597 | 32,318 |
| 106,090 | 64 | 20,523 | 7,255 | 4,637 | 32,479 |
| 106,091 | 63 | 20,615 | 7,283 | 4,642 | 32,603 |
| 106,092 | 63 | 20,515 | 7,178 | 4,580 | 32,336 |
| 106,093 | 62 | 20,842 | 7,237 | 4,615 | 32,756 |
| 106,094 | 61 | 20,887 | 7,235 | 4,626 | 32,809 |
| 106,095 | 65 | 20,760 | 7,211 | 4,612 | 32,648 |
| 106,096 | 65 | 20,415 | 7,135 | 4,586 | 32,201 |
| 106,097 | 71 | 21,175 | 7,454 | 4,772 | 33,472 |
| 106,098 | 70 | 21,184 | 7,385 | 4,729 | 33,368 |
| 106,099 | 72 | 20,894 | 7,349 | 4,700 | 33,015 |
| 106,100 | 72 | 20,936 | 7,368 | 4,712 | 33,088 |
| 106,101 | 72 | 20,910 | 7,368 | 4,701 | 33,051 |
| 106,102 | 73 | 21,016 | 7,441 | 4,741 | 33,271 |
| 106,103 | 72 | 20,979 | 7,482 | 4,764 | 33,297 |

|         |    |        |       |       |        |
|---------|----|--------|-------|-------|--------|
| 106,104 | 70 | 20,615 | 7,403 | 4,704 | 32,792 |
| 106,105 | 70 | 20,719 | 7,434 | 4,729 | 32,952 |
| 106,106 | 67 | 20,747 | 7,485 | 4,779 | 33,078 |
| 106,107 | 66 | 20,402 | 7,383 | 4,725 | 32,576 |
| 106,108 | 69 | 20,434 | 7,363 | 4,722 | 32,588 |
| 106,109 | 69 | 20,442 | 7,374 | 4,714 | 32,599 |
| 106,110 | 69 | 20,441 | 7,376 | 4,717 | 32,603 |
| 106,111 | 72 | 20,379 | 7,405 | 4,724 | 32,580 |
| 106,112 | 72 | 20,118 | 7,360 | 4,684 | 32,234 |
| 106,113 | 72 | 20,559 | 7,511 | 4,754 | 32,896 |
| 106,114 | 71 | 20,704 | 7,539 | 4,753 | 33,067 |
| 106,115 | 71 | 20,439 | 7,432 | 4,717 | 32,659 |
| 106,116 | 71 | 20,430 | 7,401 | 4,704 | 32,606 |
| 106,117 | 72 | 20,849 | 7,551 | 4,770 | 33,242 |
| 106,118 | 71 | 20,853 | 7,564 | 4,772 | 33,260 |
| 106,119 | 71 | 20,803 | 7,544 | 4,730 | 33,148 |
| 106,120 | 73 | 20,834 | 7,539 | 4,760 | 33,206 |
| 106,121 | 76 | 20,815 | 7,556 | 4,736 | 33,183 |
| 106,122 | 77 | 20,501 | 7,486 | 4,666 | 32,730 |
| 106,123 | 76 | 20,498 | 7,516 | 4,659 | 32,749 |
| 106,124 | 76 | 20,237 | 7,486 | 4,597 | 32,396 |
| 106,125 | 76 | 20,368 | 7,520 | 4,624 | 32,588 |
| 106,126 | 71 | 20,438 | 7,589 | 4,649 | 32,747 |
| 106,127 | 68 | 20,064 | 7,511 | 4,588 | 32,231 |
| 106,128 | 69 | 19,988 | 7,492 | 4,577 | 32,126 |
| 106,129 | 67 | 19,950 | 7,505 | 4,594 | 32,116 |
| 106,130 | 67 | 19,824 | 7,498 | 4,590 | 31,979 |
| 106,131 | 66 | 19,785 | 7,521 | 4,607 | 31,979 |
| 106,132 | 66 | 19,917 | 7,535 | 4,588 | 32,106 |
| 106,133 | 66 | 19,773 | 7,495 | 4,526 | 31,860 |
| 106,134 | 67 | 20,035 | 7,566 | 4,592 | 32,260 |
| 106,135 | 66 | 19,963 | 7,541 | 4,560 | 32,130 |

|         |    |        |       |       |        |
|---------|----|--------|-------|-------|--------|
| 106,136 | 59 | 19,573 | 7,448 | 4,459 | 31,539 |
| 106,137 | 59 | 19,646 | 7,490 | 4,467 | 31,662 |
| 106,138 | 61 | 19,689 | 7,525 | 4,474 | 31,749 |
| 106,139 | 60 | 19,635 | 7,521 | 4,497 | 31,713 |
| 106,140 | 57 | 19,460 | 7,438 | 4,410 | 31,365 |
| 106,141 | 57 | 19,299 | 7,412 | 4,380 | 31,148 |
| 106,142 | 57 | 19,092 | 7,366 | 4,373 | 30,888 |
| 106,143 | 57 | 19,321 | 7,455 | 4,405 | 31,238 |
| 106,144 | 57 | 19,076 | 7,392 | 4,366 | 30,891 |
| 106,145 | 54 | 19,199 | 7,481 | 4,406 | 31,140 |
| 106,146 | 50 | 19,184 | 7,470 | 4,388 | 31,092 |
| 106,147 | 48 | 19,267 | 7,472 | 4,405 | 31,192 |
| 106,148 | 48 | 19,154 | 7,448 | 4,419 | 31,069 |
| 106,149 | 48 | 19,160 | 7,508 | 4,452 | 31,168 |
| 106,150 | 45 | 19,042 | 7,532 | 4,440 | 31,059 |
| 106,151 | 46 | 19,147 | 7,587 | 4,439 | 31,219 |
| 106,152 | 44 | 19,148 | 7,582 | 4,434 | 31,208 |
| 106,153 | 43 | 19,007 | 7,521 | 4,423 | 30,994 |
| 106,154 | 43 | 18,932 | 7,460 | 4,394 | 30,829 |
| 106,155 | 40 | 18,859 | 7,442 | 4,399 | 30,740 |
| 106,156 | 43 | 18,565 | 7,296 | 4,293 | 30,197 |
| 106,157 | 44 | 18,858 | 7,374 | 4,313 | 30,589 |
| 106,158 | 44 | 18,906 | 7,387 | 4,316 | 30,653 |
| 106,159 | 42 | 19,144 | 7,472 | 4,332 | 30,990 |
| 106,160 | 43 | 18,889 | 7,384 | 4,302 | 30,618 |
| 106,161 | 43 | 18,635 | 7,341 | 4,266 | 30,285 |
| 106,162 | 41 | 18,818 | 7,402 | 4,308 | 30,569 |
| 106,163 | 41 | 18,919 | 7,469 | 4,353 | 30,782 |
| 106,164 | 42 | 18,834 | 7,435 | 4,332 | 30,643 |
| 106,165 | 39 | 18,703 | 7,366 | 4,320 | 30,428 |
| 106,166 | 37 | 18,454 | 7,309 | 4,281 | 30,081 |
| 106,167 | 37 | 18,493 | 7,387 | 4,297 | 30,214 |

|         |    |        |       |       |        |
|---------|----|--------|-------|-------|--------|
| 106,168 | 40 | 18,239 | 7,291 | 4,256 | 29,826 |
| 106,169 | 42 | 18,362 | 7,352 | 4,299 | 30,055 |
| 106,170 | 42 | 18,222 | 7,361 | 4,301 | 29,926 |
| 106,171 | 40 | 18,258 | 7,348 | 4,278 | 29,924 |
| 106,172 | 37 | 18,311 | 7,335 | 4,330 | 30,013 |
| 106,173 | 35 | 18,327 | 7,354 | 4,349 | 30,065 |
| 106,174 | 35 | 18,258 | 7,341 | 4,349 | 29,983 |
| 106,175 | 36 | 17,685 | 7,150 | 4,252 | 29,123 |
| 106,176 | 37 | 18,225 | 7,308 | 4,329 | 29,899 |
| 106,177 | 37 | 18,214 | 7,316 | 4,328 | 29,895 |
| 106,178 | 39 | 18,082 | 7,264 | 4,293 | 29,678 |
| 106,179 | 38 | 18,059 | 7,189 | 4,260 | 29,546 |
| 106,180 | 39 | 18,493 | 7,311 | 4,321 | 30,164 |
| 106,181 | 38 | 18,537 | 7,279 | 4,314 | 30,168 |
| 106,182 | 43 | 18,660 | 7,240 | 4,313 | 30,256 |
| 106,183 | 43 | 18,535 | 7,199 | 4,301 | 30,078 |
| 106,184 | 41 | 18,319 | 7,087 | 4,245 | 29,692 |
| 106,185 | 41 | 18,318 | 7,099 | 4,237 | 29,695 |
| 106,186 | 45 | 18,322 | 7,133 | 4,278 | 29,778 |
| 106,187 | 45 | 18,366 | 7,120 | 4,265 | 29,796 |
| 106,188 | 44 | 18,521 | 7,097 | 4,284 | 29,946 |
| 106,189 | 46 | 18,345 | 6,999 | 4,228 | 29,618 |
| 106,190 | 51 | 18,549 | 7,061 | 4,266 | 29,927 |
| 106,191 | 51 | 18,590 | 7,101 | 4,267 | 30,009 |
| 106,192 | 49 | 18,433 | 7,031 | 4,229 | 29,742 |
| 106,193 | 53 | 18,648 | 7,110 | 4,280 | 30,091 |
| 106,194 | 53 | 18,750 | 7,134 | 4,326 | 30,263 |
| 106,195 | 53 | 18,824 | 7,143 | 4,331 | 30,351 |
| 106,196 | 56 | 18,910 | 7,098 | 4,313 | 30,377 |
| 106,197 | 55 | 18,655 | 7,023 | 4,251 | 29,984 |
| 106,198 | 55 | 18,490 | 6,954 | 4,188 | 29,687 |
| 106,199 | 58 | 19,022 | 7,104 | 4,268 | 30,452 |

|         |    |        |       |       |        |
|---------|----|--------|-------|-------|--------|
| 106,200 | 59 | 19,021 | 7,065 | 4,249 | 30,394 |
| 106,201 | 61 | 18,940 | 7,009 | 4,249 | 30,259 |
| 106,202 | 62 | 18,758 | 6,987 | 4,238 | 30,045 |
| 106,203 | 63 | 18,692 | 6,989 | 4,246 | 29,990 |
| 106,204 | 63 | 18,552 | 6,945 | 4,202 | 29,762 |
| 106,205 | 65 | 18,782 | 7,025 | 4,266 | 30,138 |
| 106,206 | 67 | 18,736 | 7,005 | 4,242 | 30,050 |
| 106,207 | 65 | 18,724 | 7,000 | 4,265 | 30,054 |
| 106,208 | 65 | 18,696 | 6,988 | 4,272 | 30,021 |
| 106,209 | 65 | 18,369 | 6,901 | 4,231 | 29,566 |
| 106,210 | 65 | 18,472 | 6,938 | 4,270 | 29,745 |
| 106,211 | 65 | 18,386 | 6,947 | 4,263 | 29,661 |
| 106,212 | 64 | 18,513 | 6,939 | 4,253 | 29,769 |
| 106,213 | 64 | 18,681 | 6,958 | 4,283 | 29,986 |
| 106,214 | 64 | 18,736 | 6,951 | 4,290 | 30,041 |
| 106,215 | 65 | 18,747 | 6,982 | 4,302 | 30,096 |
| 106,216 | 65 | 18,750 | 7,039 | 4,298 | 30,152 |
| 106,217 | 67 | 18,763 | 6,989 | 4,301 | 30,120 |
| 106,218 | 67 | 18,752 | 6,979 | 4,293 | 30,091 |
| 106,219 | 64 | 18,747 | 6,952 | 4,258 | 30,021 |
| 106,220 | 63 | 18,842 | 6,961 | 4,266 | 30,132 |
| 106,221 | 61 | 19,042 | 6,954 | 4,268 | 30,325 |
| 106,222 | 61 | 18,969 | 6,950 | 4,262 | 30,242 |
| 106,223 | 61 | 19,002 | 6,956 | 4,198 | 30,217 |
| 106,224 | 62 | 18,854 | 6,875 | 4,147 | 29,938 |
| 106,225 | 65 | 18,551 | 6,751 | 4,069 | 29,436 |
| 106,226 | 64 | 18,524 | 6,707 | 4,036 | 29,331 |
| 106,227 | 63 | 17,947 | 6,520 | 3,932 | 28,462 |
| 106,228 | 63 | 17,775 | 6,385 | 3,859 | 28,082 |
| 106,229 | 60 | 17,259 | 6,240 | 3,763 | 27,322 |
| 106,230 | 60 | 17,146 | 6,183 | 3,736 | 27,125 |
| 106,231 | 58 | 16,567 | 6,007 | 3,623 | 26,255 |



|         |    |        |       |       |        |
|---------|----|--------|-------|-------|--------|
| 106,232 | 58 | 16,377 | 5,944 | 3,594 | 25,973 |
| 106,233 | 52 | 15,945 | 5,806 | 3,493 | 25,296 |
| 106,234 | 51 | 15,560 | 5,678 | 3,417 | 24,706 |
| 106,235 | 52 | 15,623 | 5,731 | 3,433 | 24,839 |
| 106,236 | 50 | 15,533 | 5,687 | 3,412 | 24,682 |
| 106,237 | 49 | 15,631 | 5,711 | 3,421 | 24,812 |
| 106,238 | 49 | 15,346 | 5,699 | 3,407 | 24,501 |
| 106,239 | 52 | 15,291 | 5,691 | 3,406 | 24,440 |
| 106,240 | 50 | 15,130 | 5,681 | 3,374 | 24,235 |
| 106,241 | 45 | 15,686 | 5,882 | 3,517 | 25,130 |
| 106,242 | 46 | 15,033 | 5,622 | 3,396 | 24,097 |
| 106,243 | 46 | 15,230 | 5,693 | 3,421 | 24,390 |
| 106,244 | 42 | 15,444 | 5,757 | 3,451 | 24,694 |
| 106,245 | 43 | 15,686 | 5,821 | 3,503 | 25,053 |
| 106,246 | 41 | 15,250 | 5,627 | 3,394 | 24,312 |
| 106,247 | 41 | 15,500 | 5,700 | 3,463 | 24,704 |
| 106,248 | 44 | 15,525 | 5,702 | 3,462 | 24,733 |
| 106,249 | 44 | 15,602 | 5,758 | 3,498 | 24,902 |
| 106,250 | 44 | 15,760 | 5,840 | 3,582 | 25,226 |
| 106,251 | 44 | 15,709 | 5,898 | 3,620 | 25,271 |
| 106,252 | 41 | 15,872 | 5,920 | 3,619 | 25,452 |
| 106,253 | 42 | 16,082 | 5,905 | 3,631 | 25,660 |
| 106,254 | 41 | 15,932 | 5,834 | 3,575 | 25,382 |
| 106,255 | 42 | 16,303 | 5,978 | 3,653 | 25,976 |
| 106,256 | 43 | 16,374 | 5,976 | 3,662 | 26,055 |
| 106,257 | 41 | 16,068 | 5,934 | 3,633 | 25,676 |
| 106,258 | 41 | 15,951 | 5,933 | 3,632 | 25,557 |
| 106,259 | 41 | 16,175 | 6,041 | 3,700 | 25,957 |
| 106,260 | 42 | 16,304 | 6,109 | 3,728 | 26,183 |
| 106,261 | 41 | 16,346 | 6,123 | 3,754 | 26,264 |
| 106,262 | 42 | 16,541 | 6,150 | 3,781 | 26,514 |
| 106,263 | 42 | 16,660 | 6,178 | 3,805 | 26,685 |

|         |    |        |       |       |        |
|---------|----|--------|-------|-------|--------|
| 106,264 | 42 | 16,520 | 6,163 | 3,792 | 26,517 |
| 106,265 | 42 | 16,564 | 6,154 | 3,776 | 26,536 |
| 106,266 | 41 | 16,527 | 6,172 | 3,818 | 26,558 |
| 106,267 | 45 | 16,598 | 6,147 | 3,819 | 26,609 |
| 106,268 | 48 | 16,570 | 6,096 | 3,791 | 26,505 |
| 106,269 | 52 | 16,884 | 6,188 | 3,844 | 26,968 |
| 106,270 | 53 | 16,669 | 6,156 | 3,820 | 26,698 |
| 106,271 | 52 | 16,499 | 6,084 | 3,774 | 26,409 |
| 106,272 | 56 | 16,381 | 6,076 | 3,797 | 26,310 |
| 106,273 | 57 | 16,092 | 5,968 | 3,730 | 25,847 |
| 106,274 | 61 | 16,547 | 6,175 | 3,895 | 26,678 |
| 106,275 | 61 | 16,735 | 6,258 | 3,939 | 26,993 |
| 106,276 | 59 | 16,811 | 6,297 | 3,985 | 27,152 |
| 106,277 | 62 | 17,098 | 6,432 | 4,059 | 27,651 |
| 106,278 | 62 | 17,391 | 6,558 | 4,157 | 28,168 |
| 106,279 | 62 | 17,657 | 6,679 | 4,241 | 28,639 |
| 106,280 | 63 | 17,979 | 6,841 | 4,335 | 29,218 |
| 106,281 | 63 | 18,354 | 6,978 | 4,409 | 29,804 |
| 106,282 | 66 | 18,722 | 7,122 | 4,505 | 30,415 |
| 106,283 | 66 | 19,037 | 7,286 | 4,588 | 30,977 |
| 106,284 | 66 | 19,331 | 7,434 | 4,670 | 31,501 |
| 106,285 | 65 | 19,296 | 7,457 | 4,709 | 31,527 |
| 106,286 | 66 | 19,468 | 7,526 | 4,767 | 31,827 |
| 106,287 | 65 | 19,530 | 7,552 | 4,764 | 31,911 |
| 106,288 | 67 | 19,537 | 7,535 | 4,745 | 31,884 |
| 106,289 | 67 | 19,820 | 7,617 | 4,797 | 32,301 |
| 106,290 | 65 | 19,897 | 7,651 | 4,797 | 32,410 |
| 106,291 | 67 | 19,671 | 7,575 | 4,747 | 32,060 |
| 106,292 | 69 | 19,590 | 7,567 | 4,735 | 31,961 |
| 106,293 | 71 | 19,919 | 7,679 | 4,782 | 32,451 |
| 106,294 | 72 | 19,733 | 7,649 | 4,771 | 32,225 |
| 106,295 | 75 | 19,913 | 7,748 | 4,818 | 32,554 |

|         |    |        |       |       |        |
|---------|----|--------|-------|-------|--------|
| 106,296 | 74 | 19,880 | 7,756 | 4,800 | 32,510 |
| 106,297 | 73 | 19,240 | 7,546 | 4,684 | 31,543 |
| 106,298 | 73 | 19,388 | 7,623 | 4,723 | 31,807 |
| 106,299 | 70 | 19,596 | 7,716 | 4,769 | 32,151 |
| 106,300 | 69 | 19,492 | 7,669 | 4,719 | 31,949 |
| 106,301 | 68 | 19,341 | 7,638 | 4,684 | 31,731 |
| 106,302 | 68 | 19,570 | 7,687 | 4,749 | 32,074 |
| 106,303 | 68 | 19,451 | 7,717 | 4,756 | 31,992 |
| 106,304 | 65 | 19,360 | 7,760 | 4,756 | 31,941 |
| 106,305 | 65 | 19,111 | 7,740 | 4,737 | 31,653 |
| 106,306 | 64 | 18,982 | 7,751 | 4,728 | 31,525 |
| 106,307 | 63 | 18,921 | 7,799 | 4,752 | 31,535 |
| 106,308 | 62 | 18,985 | 7,792 | 4,746 | 31,585 |
| 106,309 | 62 | 19,223 | 7,818 | 4,772 | 31,875 |
| 106,310 | 62 | 19,263 | 7,833 | 4,781 | 31,939 |
| 106,311 | 62 | 19,311 | 7,806 | 4,799 | 31,978 |
| 106,312 | 63 | 19,388 | 7,821 | 4,777 | 32,049 |
| 106,313 | 61 | 19,376 | 7,793 | 4,777 | 32,007 |
| 106,314 | 64 | 18,842 | 7,588 | 4,635 | 31,129 |
| 106,315 | 66 | 19,198 | 7,670 | 4,676 | 31,610 |
| 106,316 | 64 | 19,483 | 7,764 | 4,701 | 32,012 |
| 106,317 | 65 | 19,819 | 7,834 | 4,753 | 32,471 |
| 106,318 | 63 | 20,028 | 7,983 | 4,820 | 32,894 |
| 106,319 | 60 | 20,082 | 8,054 | 4,850 | 33,046 |
| 106,320 | 56 | 20,003 | 8,091 | 4,867 | 33,017 |
| 106,321 | 59 | 20,140 | 8,145 | 4,878 | 33,222 |
| 106,322 | 58 | 20,180 | 8,162 | 4,897 | 33,297 |
| 106,323 | 58 | 20,268 | 8,253 | 4,953 | 33,532 |
| 106,324 | 58 | 20,313 | 8,335 | 4,976 | 33,682 |
| 106,325 | 58 | 20,293 | 8,352 | 4,986 | 33,689 |
| 106,326 | 58 | 20,264 | 8,351 | 4,989 | 33,662 |
| 106,327 | 57 | 20,375 | 8,385 | 4,993 | 33,810 |

|         |    |        |       |       |        |
|---------|----|--------|-------|-------|--------|
| 106,328 | 55 | 20,151 | 8,288 | 4,955 | 33,449 |
| 106,329 | 56 | 20,462 | 8,385 | 4,988 | 33,891 |
| 106,330 | 62 | 20,816 | 8,441 | 5,029 | 34,348 |
| 106,331 | 65 | 20,725 | 8,359 | 4,990 | 34,139 |
| 106,332 | 65 | 20,621 | 8,327 | 4,966 | 33,979 |
| 106,333 | 66 | 20,534 | 8,241 | 4,867 | 33,708 |
| 106,334 | 68 | 20,765 | 8,297 | 4,900 | 34,030 |
| 106,335 | 71 | 21,071 | 8,387 | 4,946 | 34,475 |
| 106,336 | 71 | 21,082 | 8,394 | 4,941 | 34,488 |
| 106,337 | 71 | 21,189 | 8,542 | 4,988 | 34,790 |
| 106,338 | 75 | 21,192 | 8,535 | 4,989 | 34,791 |
| 106,339 | 73 | 20,881 | 8,430 | 4,920 | 34,304 |
| 106,340 | 79 | 21,282 | 8,615 | 5,009 | 34,985 |
| 106,341 | 78 | 21,378 | 8,635 | 5,014 | 35,105 |
| 106,342 | 74 | 21,020 | 8,522 | 4,961 | 34,577 |
| 106,343 | 75 | 21,261 | 8,622 | 5,008 | 34,966 |
| 106,344 | 74 | 21,431 | 8,667 | 5,014 | 35,186 |
| 106,345 | 74 | 21,264 | 8,624 | 4,998 | 34,960 |
| 106,346 | 71 | 21,173 | 8,588 | 5,000 | 34,832 |
| 106,347 | 73 | 21,208 | 8,607 | 5,042 | 34,930 |
| 106,348 | 71 | 21,214 | 8,621 | 5,036 | 34,942 |
| 106,349 | 72 | 21,284 | 8,609 | 5,052 | 35,017 |
| 106,350 | 72 | 21,353 | 8,562 | 5,056 | 35,043 |
| 106,351 | 70 | 21,223 | 8,502 | 5,033 | 34,828 |
| 106,352 | 73 | 21,299 | 8,530 | 5,016 | 34,918 |
| 106,353 | 73 | 21,267 | 8,455 | 4,963 | 34,758 |
| 106,354 | 73 | 21,196 | 8,423 | 4,956 | 34,648 |
| 106,355 | 73 | 21,298 | 8,362 | 4,926 | 34,659 |
| 106,356 | 74 | 21,503 | 8,390 | 4,968 | 34,935 |
| 106,357 | 74 | 21,716 | 8,441 | 5,000 | 35,231 |
| 106,358 | 74 | 21,587 | 8,380 | 4,963 | 35,004 |
| 106,359 | 74 | 21,719 | 8,381 | 4,997 | 35,171 |

|         |    |        |       |       |        |
|---------|----|--------|-------|-------|--------|
| 106,360 | 74 | 21,171 | 8,225 | 4,862 | 34,332 |
| 106,361 | 74 | 21,373 | 8,259 | 4,868 | 34,574 |
| 106,362 | 73 | 21,535 | 8,286 | 4,888 | 34,782 |
| 106,363 | 72 | 21,233 | 8,170 | 4,851 | 34,326 |
| 106,364 | 73 | 20,950 | 8,113 | 4,798 | 33,934 |
| 106,365 | 69 | 20,507 | 8,006 | 4,727 | 33,309 |
| 106,366 | 68 | 21,000 | 8,211 | 4,848 | 34,127 |
| 106,367 | 70 | 20,697 | 8,130 | 4,790 | 33,687 |
| 106,368 | 69 | 20,581 | 8,130 | 4,794 | 33,574 |
| 106,369 | 72 | 20,508 | 8,063 | 4,789 | 33,432 |
| 106,370 | 69 | 20,221 | 7,949 | 4,739 | 32,978 |
| 106,371 | 70 | 20,546 | 8,008 | 4,795 | 33,419 |
| 106,372 | 66 | 20,499 | 7,933 | 4,734 | 33,232 |
| 106,373 | 63 | 20,417 | 7,853 | 4,663 | 32,996 |
| 106,374 | 64 | 20,829 | 7,938 | 4,700 | 33,531 |
| 106,375 | 63 | 20,546 | 7,724 | 4,577 | 32,910 |
| 106,376 | 65 | 20,782 | 7,744 | 4,636 | 33,227 |
| 106,377 | 64 | 20,894 | 7,749 | 4,646 | 33,353 |
| 106,378 | 63 | 20,681 | 7,661 | 4,616 | 33,021 |
| 106,379 | 64 | 20,684 | 7,658 | 4,567 | 32,973 |
| 106,380 | 67 | 20,745 | 7,653 | 4,573 | 33,038 |
| 106,381 | 59 | 20,572 | 7,634 | 4,527 | 32,792 |
| 106,382 | 61 | 20,508 | 7,604 | 4,519 | 32,692 |
| 106,383 | 58 | 20,618 | 7,607 | 4,530 | 32,813 |
| 106,384 | 58 | 20,663 | 7,604 | 4,544 | 32,869 |
| 106,385 | 58 | 20,696 | 7,653 | 4,605 | 33,012 |
| 106,386 | 56 | 20,700 | 7,676 | 4,628 | 33,060 |
| 106,387 | 58 | 20,886 | 7,701 | 4,693 | 33,338 |
| 106,388 | 57 | 20,912 | 7,721 | 4,717 | 33,407 |
| 106,389 | 57 | 21,045 | 7,732 | 4,765 | 33,599 |
| 106,390 | 54 | 21,265 | 7,774 | 4,791 | 33,884 |
| 106,391 | 54 | 21,498 | 7,806 | 4,830 | 34,188 |

|         |    |        |       |       |        |
|---------|----|--------|-------|-------|--------|
| 106,392 | 54 | 21,436 | 7,762 | 4,819 | 34,071 |
| 106,393 | 54 | 21,374 | 7,741 | 4,835 | 34,004 |
| 106,394 | 53 | 21,468 | 7,721 | 4,847 | 34,089 |
| 106,395 | 58 | 21,310 | 7,683 | 4,850 | 33,901 |
| 106,396 | 57 | 21,276 | 7,624 | 4,819 | 33,776 |
| 106,397 | 57 | 21,307 | 7,664 | 4,828 | 33,856 |
| 106,398 | 59 | 21,491 | 7,753 | 4,826 | 34,129 |
| 106,399 | 61 | 21,330 | 7,706 | 4,770 | 33,867 |
| 106,400 | 61 | 21,292 | 7,745 | 4,770 | 33,868 |
| 106,401 | 63 | 21,120 | 7,684 | 4,728 | 33,595 |
| 106,402 | 63 | 21,368 | 7,753 | 4,768 | 33,952 |
| 106,403 | 65 | 21,668 | 7,831 | 4,811 | 34,375 |
| 106,404 | 68 | 21,739 | 7,879 | 4,817 | 34,503 |
| 106,405 | 68 | 21,750 | 7,824 | 4,807 | 34,449 |
| 106,406 | 67 | 21,539 | 7,752 | 4,748 | 34,106 |
| 106,407 | 69 | 21,740 | 7,849 | 4,803 | 34,461 |
| 106,408 | 67 | 21,635 | 7,809 | 4,784 | 34,295 |
| 106,409 | 69 | 21,817 | 7,901 | 4,837 | 34,624 |
| 106,410 | 69 | 21,732 | 7,927 | 4,833 | 34,561 |
| 106,411 | 69 | 21,453 | 7,855 | 4,810 | 34,187 |
| 106,412 | 68 | 21,592 | 7,960 | 4,881 | 34,501 |
| 106,413 | 68 | 21,588 | 8,001 | 4,895 | 34,552 |
| 106,414 | 69 | 21,779 | 8,019 | 4,919 | 34,786 |
| 106,415 | 68 | 21,814 | 8,010 | 4,898 | 34,790 |
| 106,416 | 68 | 21,963 | 8,033 | 4,926 | 34,990 |
| 106,417 | 68 | 22,028 | 8,048 | 4,955 | 35,099 |
| 106,418 | 66 | 22,101 | 8,048 | 4,991 | 35,206 |
| 106,419 | 66 | 22,180 | 8,033 | 4,971 | 35,250 |
| 106,420 | 63 | 22,105 | 8,031 | 4,962 | 35,161 |
| 106,421 | 64 | 22,136 | 8,035 | 4,959 | 35,194 |
| 106,422 | 64 | 22,120 | 7,997 | 4,928 | 35,109 |
| 106,423 | 64 | 21,965 | 7,962 | 4,929 | 34,920 |

|         |    |        |       |       |        |
|---------|----|--------|-------|-------|--------|
| 106,424 | 64 | 21,697 | 7,857 | 4,884 | 34,502 |
| 106,425 | 67 | 21,860 | 7,961 | 4,937 | 34,825 |
| 106,426 | 67 | 21,789 | 7,987 | 4,949 | 34,792 |
| 106,427 | 66 | 21,208 | 7,806 | 4,808 | 33,888 |
| 106,428 | 66 | 21,403 | 7,870 | 4,844 | 34,183 |
| 106,429 | 66 | 21,322 | 7,880 | 4,826 | 34,094 |
| 106,430 | 64 | 21,259 | 7,871 | 4,854 | 34,048 |
| 106,431 | 61 | 21,258 | 7,889 | 4,871 | 34,079 |
| 106,432 | 60 | 21,199 | 7,867 | 4,880 | 34,006 |
| 106,433 | 58 | 21,079 | 7,845 | 4,875 | 33,857 |
| 106,434 | 59 | 20,927 | 7,839 | 4,873 | 33,698 |
| 106,435 | 58 | 20,837 | 7,813 | 4,863 | 33,571 |
| 106,436 | 58 | 20,838 | 7,795 | 4,837 | 33,528 |
| 106,437 | 57 | 20,755 | 7,752 | 4,818 | 33,382 |
| 106,438 | 56 | 20,761 | 7,675 | 4,761 | 33,253 |
| 106,439 | 51 | 20,115 | 7,417 | 4,612 | 32,195 |
| 106,440 | 54 | 20,261 | 7,442 | 4,629 | 32,386 |
| 106,441 | 55 | 20,430 | 7,507 | 4,660 | 32,652 |
| 106,442 | 60 | 20,290 | 7,479 | 4,638 | 32,467 |
| 106,443 | 61 | 20,067 | 7,419 | 4,575 | 32,122 |
| 106,444 | 61 | 20,161 | 7,425 | 4,571 | 32,218 |
| 106,445 | 61 | 20,308 | 7,461 | 4,586 | 32,416 |
| 106,446 | 56 | 19,851 | 7,273 | 4,461 | 31,641 |
| 106,447 | 56 | 20,076 | 7,296 | 4,503 | 31,931 |
| 106,448 | 53 | 19,956 | 7,271 | 4,513 | 31,793 |
| 106,449 | 54 | 20,067 | 7,300 | 4,536 | 31,957 |
| 106,450 | 51 | 19,697 | 7,190 | 4,488 | 31,426 |
| 106,451 | 51 | 19,350 | 7,099 | 4,452 | 30,952 |
| 106,452 | 47 | 19,693 | 7,237 | 4,511 | 31,488 |
| 106,453 | 50 | 19,751 | 7,262 | 4,510 | 31,573 |
| 106,454 | 47 | 19,675 | 7,243 | 4,534 | 31,499 |
| 106,455 | 44 | 19,483 | 7,218 | 4,495 | 31,240 |

|         |    |        |       |       |        |
|---------|----|--------|-------|-------|--------|
| 106,456 | 43 | 19,106 | 7,105 | 4,405 | 30,659 |
| 106,457 | 43 | 19,151 | 7,105 | 4,398 | 30,697 |
| 106,458 | 42 | 19,126 | 7,078 | 4,375 | 30,621 |
| 106,459 | 42 | 18,885 | 6,990 | 4,300 | 30,217 |
| 106,460 | 40 | 18,548 | 6,803 | 4,177 | 29,568 |
| 106,461 | 40 | 18,549 | 6,786 | 4,168 | 29,543 |
| 106,462 | 40 | 18,329 | 6,654 | 4,076 | 29,099 |
| 106,463 | 40 | 18,127 | 6,554 | 4,007 | 28,728 |
| 106,464 | 41 | 18,096 | 6,531 | 4,001 | 28,669 |
| 106,465 | 39 | 17,813 | 6,463 | 3,937 | 28,252 |
| 106,466 | 39 | 17,647 | 6,398 | 3,904 | 27,988 |
| 106,467 | 39 | 17,419 | 6,299 | 3,857 | 27,614 |
| 106,468 | 40 | 17,051 | 6,170 | 3,774 | 27,035 |
| 106,469 | 40 | 16,804 | 6,084 | 3,719 | 26,647 |
| 106,470 | 39 | 16,711 | 6,061 | 3,681 | 26,492 |
| 106,471 | 42 | 16,789 | 6,022 | 3,665 | 26,518 |
| 106,472 | 41 | 16,541 | 5,952 | 3,616 | 26,150 |
| 106,473 | 41 | 16,863 | 6,085 | 3,701 | 26,690 |
| 106,474 | 39 | 16,621 | 5,962 | 3,621 | 26,243 |
| 106,475 | 40 | 16,787 | 5,993 | 3,649 | 26,469 |
| 106,476 | 39 | 17,084 | 6,062 | 3,689 | 26,874 |
| 106,477 | 38 | 17,048 | 6,079 | 3,701 | 26,866 |
| 106,478 | 36 | 16,951 | 6,101 | 3,696 | 26,784 |
| 106,479 | 39 | 16,884 | 6,104 | 3,717 | 26,744 |
| 106,480 | 39 | 16,898 | 6,084 | 3,741 | 26,762 |
| 106,481 | 39 | 17,036 | 6,125 | 3,753 | 26,953 |
| 106,482 | 39 | 17,225 | 6,181 | 3,792 | 27,237 |
| 106,483 | 40 | 17,032 | 6,044 | 3,694 | 26,810 |
| 106,484 | 41 | 17,243 | 6,101 | 3,729 | 27,114 |
| 106,485 | 41 | 17,522 | 6,160 | 3,771 | 27,494 |
| 106,486 | 40 | 17,492 | 6,072 | 3,723 | 27,327 |
| 106,487 | 40 | 17,828 | 6,168 | 3,773 | 27,809 |



|         |    |        |       |       |        |
|---------|----|--------|-------|-------|--------|
| 106,488 | 40 | 17,856 | 6,176 | 3,780 | 27,852 |
| 106,489 | 37 | 17,408 | 6,072 | 3,726 | 27,243 |
| 106,490 | 40 | 17,517 | 6,127 | 3,770 | 27,454 |
| 106,491 | 32 | 16,714 | 5,912 | 3,635 | 26,293 |
| 106,492 | 33 | 17,005 | 5,963 | 3,678 | 26,679 |
| 106,493 | 32 | 17,094 | 6,011 | 3,725 | 26,862 |
| 106,494 | 33 | 17,319 | 6,084 | 3,779 | 27,215 |
| 106,495 | 34 | 16,927 | 5,975 | 3,703 | 26,639 |
| 106,496 | 34 | 17,163 | 6,034 | 3,747 | 26,978 |
| 106,497 | 33 | 17,292 | 6,059 | 3,762 | 27,146 |
| 106,498 | 34 | 17,276 | 6,110 | 3,780 | 27,200 |
| 106,499 | 33 | 17,490 | 6,142 | 3,813 | 27,478 |
| 106,500 | 34 | 17,574 | 6,138 | 3,841 | 27,587 |
| 106,501 | 34 | 17,632 | 6,159 | 3,846 | 27,671 |
| 106,502 | 34 | 17,494 | 6,105 | 3,813 | 27,446 |
| 106,503 | 34 | 17,154 | 6,029 | 3,764 | 26,981 |
| 106,504 | 37 | 17,466 | 6,213 | 3,874 | 27,590 |
| 106,505 | 37 | 17,512 | 6,196 | 3,872 | 27,617 |
| 106,506 | 37 | 17,690 | 6,231 | 3,902 | 27,860 |
| 106,507 | 42 | 17,737 | 6,280 | 3,925 | 27,984 |
| 106,508 | 44 | 17,931 | 6,371 | 3,984 | 28,330 |
| 106,509 | 44 | 18,074 | 6,391 | 4,010 | 28,519 |
| 106,510 | 45 | 18,663 | 6,584 | 4,140 | 29,432 |
| 106,511 | 46 | 18,889 | 6,643 | 4,202 | 29,780 |
| 106,512 | 47 | 19,141 | 6,690 | 4,247 | 30,125 |
| 106,513 | 49 | 19,253 | 6,715 | 4,265 | 30,282 |
| 106,514 | 49 | 19,326 | 6,749 | 4,302 | 30,426 |
| 106,515 | 53 | 19,963 | 6,937 | 4,432 | 31,385 |
| 106,516 | 54 | 20,192 | 6,996 | 4,468 | 31,710 |
| 106,517 | 56 | 20,388 | 7,040 | 4,494 | 31,978 |
| 106,518 | 56 | 20,482 | 7,115 | 4,522 | 32,175 |
| 106,519 | 58 | 20,987 | 7,246 | 4,601 | 32,892 |

|         |    |        |       |       |        |
|---------|----|--------|-------|-------|--------|
| 106,520 | 58 | 21,018 | 7,279 | 4,634 | 32,989 |
| 106,521 | 58 | 21,239 | 7,381 | 4,669 | 33,347 |
| 106,522 | 57 | 21,349 | 7,426 | 4,683 | 33,515 |
| 106,523 | 58 | 21,441 | 7,445 | 4,680 | 33,624 |
| 106,524 | 58 | 21,163 | 7,355 | 4,657 | 33,233 |
| 106,525 | 59 | 21,452 | 7,460 | 4,729 | 33,700 |
| 106,526 | 58 | 21,424 | 7,499 | 4,742 | 33,723 |
| 106,527 | 57 | 21,348 | 7,518 | 4,750 | 33,673 |
| 106,528 | 56 | 21,357 | 7,532 | 4,754 | 33,699 |
| 106,529 | 56 | 21,258 | 7,452 | 4,729 | 33,495 |
| 106,530 | 54 | 20,806 | 7,295 | 4,606 | 32,761 |
| 106,531 | 54 | 20,881 | 7,295 | 4,598 | 32,828 |
| 106,532 | 54 | 20,584 | 7,194 | 4,529 | 32,361 |
| 106,533 | 55 | 20,325 | 7,087 | 4,457 | 31,924 |
| 106,534 | 56 | 20,988 | 7,443 | 4,697 | 33,184 |
| 106,535 | 55 | 20,607 | 7,359 | 4,637 | 32,658 |
| 106,536 | 57 | 20,798 | 7,461 | 4,734 | 33,050 |
| 106,537 | 63 | 20,749 | 7,505 | 4,751 | 33,068 |
| 106,538 | 63 | 20,695 | 7,493 | 4,758 | 33,009 |
| 106,539 | 63 | 20,694 | 7,533 | 4,786 | 33,076 |
| 106,540 | 60 | 20,400 | 7,426 | 4,720 | 32,606 |
| 106,541 | 59 | 20,741 | 7,477 | 4,773 | 33,050 |
| 106,542 | 62 | 20,987 | 7,524 | 4,789 | 33,362 |
| 106,543 | 63 | 20,957 | 7,554 | 4,808 | 33,382 |
| 106,544 | 65 | 20,752 | 7,476 | 4,754 | 33,047 |
| 106,545 | 67 | 20,905 | 7,553 | 4,774 | 33,299 |
| 106,546 | 69 | 20,688 | 7,481 | 4,743 | 32,981 |
| 106,547 | 69 | 20,396 | 7,402 | 4,696 | 32,563 |
| 106,548 | 73 | 20,360 | 7,405 | 4,686 | 32,524 |
| 106,549 | 72 | 20,141 | 7,300 | 4,635 | 32,148 |
| 106,550 | 72 | 20,786 | 7,550 | 4,801 | 33,209 |
| 106,551 | 72 | 20,858 | 7,583 | 4,810 | 33,323 |

|         |    |        |       |       |        |
|---------|----|--------|-------|-------|--------|
| 106,552 | 73 | 20,766 | 7,440 | 4,747 | 33,026 |
| 106,553 | 73 | 21,041 | 7,490 | 4,777 | 33,381 |
| 106,554 | 72 | 21,361 | 7,532 | 4,830 | 33,795 |
| 106,555 | 69 | 21,386 | 7,529 | 4,818 | 33,802 |
| 106,556 | 69 | 21,343 | 7,529 | 4,836 | 33,777 |
| 106,557 | 70 | 21,247 | 7,479 | 4,827 | 33,623 |
| 106,558 | 67 | 21,259 | 7,482 | 4,846 | 33,654 |
| 106,559 | 71 | 21,285 | 7,471 | 4,846 | 33,673 |
| 106,560 | 75 | 21,254 | 7,468 | 4,816 | 33,613 |
| 106,561 | 76 | 21,034 | 7,406 | 4,798 | 33,314 |
| 106,562 | 76 | 21,087 | 7,416 | 4,796 | 33,375 |
| 106,563 | 77 | 21,301 | 7,471 | 4,842 | 33,691 |
| 106,564 | 77 | 21,187 | 7,423 | 4,796 | 33,483 |
| 106,565 | 78 | 21,145 | 7,441 | 4,803 | 33,467 |
| 106,566 | 78 | 21,355 | 7,551 | 4,879 | 33,863 |
| 106,567 | 77 | 21,091 | 7,511 | 4,855 | 33,534 |
| 106,568 | 76 | 21,178 | 7,615 | 4,902 | 33,771 |
| 106,569 | 76 | 21,001 | 7,512 | 4,885 | 33,474 |
| 106,570 | 75 | 20,661 | 7,463 | 4,881 | 33,080 |
| 106,571 | 77 | 20,561 | 7,450 | 4,867 | 32,955 |
| 106,572 | 77 | 20,247 | 7,347 | 4,858 | 32,529 |
| 106,573 | 80 | 20,803 | 7,512 | 4,984 | 33,379 |
| 106,574 | 79 | 20,782 | 7,508 | 4,980 | 33,349 |
| 106,575 | 79 | 20,858 | 7,500 | 4,974 | 33,411 |
| 106,576 | 77 | 20,854 | 7,487 | 4,968 | 33,386 |
| 106,577 | 77 | 20,927 | 7,492 | 4,966 | 33,462 |
| 106,578 | 81 | 20,909 | 7,486 | 4,959 | 33,435 |
| 106,579 | 81 | 20,811 | 7,376 | 4,921 | 33,189 |
| 106,580 | 81 | 21,080 | 7,396 | 4,960 | 33,517 |
| 106,581 | 81 | 21,471 | 7,495 | 5,025 | 34,072 |
| 106,582 | 82 | 21,471 | 7,502 | 5,034 | 34,089 |
| 106,583 | 82 | 21,444 | 7,485 | 5,047 | 34,058 |

|         |     |        |       |       |        |
|---------|-----|--------|-------|-------|--------|
| 106,584 | 83  | 21,461 | 7,444 | 5,029 | 34,017 |
| 106,585 | 83  | 21,471 | 7,460 | 5,038 | 34,052 |
| 106,586 | 84  | 21,900 | 7,538 | 5,068 | 34,590 |
| 106,587 | 83  | 22,087 | 7,535 | 5,073 | 34,778 |
| 106,588 | 77  | 21,913 | 7,471 | 5,026 | 34,487 |
| 106,589 | 83  | 21,478 | 7,287 | 4,878 | 33,726 |
| 106,590 | 83  | 21,738 | 7,343 | 4,933 | 34,097 |
| 106,591 | 86  | 21,838 | 7,421 | 5,011 | 34,356 |
| 106,592 | 86  | 21,873 | 7,432 | 5,007 | 34,398 |
| 106,593 | 86  | 22,091 | 7,548 | 5,073 | 34,798 |
| 106,594 | 86  | 22,005 | 7,484 | 5,043 | 34,618 |
| 106,595 | 86  | 21,963 | 7,453 | 5,031 | 34,533 |
| 106,596 | 85  | 22,262 | 7,498 | 5,097 | 34,942 |
| 106,597 | 83  | 22,045 | 7,368 | 4,986 | 34,482 |
| 106,598 | 84  | 22,297 | 7,418 | 5,035 | 34,834 |
| 106,599 | 86  | 22,587 | 7,538 | 5,088 | 35,299 |
| 106,600 | 89  | 22,358 | 7,452 | 5,034 | 34,933 |
| 106,601 | 89  | 22,547 | 7,541 | 5,079 | 35,256 |
| 106,602 | 95  | 22,724 | 7,676 | 5,130 | 35,625 |
| 106,603 | 98  | 22,510 | 7,610 | 5,078 | 35,296 |
| 106,604 | 98  | 22,289 | 7,602 | 5,069 | 35,058 |
| 106,605 | 99  | 22,424 | 7,737 | 5,152 | 35,412 |
| 106,606 | 99  | 22,193 | 7,664 | 5,084 | 35,040 |
| 106,607 | 105 | 22,381 | 7,733 | 5,135 | 35,354 |
| 106,608 | 104 | 22,060 | 7,631 | 5,063 | 34,858 |
| 106,609 | 104 | 22,006 | 7,632 | 5,084 | 34,826 |
| 106,610 | 101 | 22,077 | 7,700 | 5,125 | 35,003 |
| 106,611 | 100 | 21,765 | 7,659 | 5,092 | 34,616 |
| 106,612 | 98  | 21,503 | 7,607 | 5,053 | 34,261 |
| 106,613 | 97  | 21,796 | 7,737 | 5,144 | 34,774 |
| 106,614 | 96  | 21,771 | 7,754 | 5,152 | 34,773 |
| 106,615 | 94  | 21,772 | 7,746 | 5,143 | 34,755 |

|         |    |        |       |       |        |
|---------|----|--------|-------|-------|--------|
| 106,616 | 94 | 21,884 | 7,753 | 5,126 | 34,857 |
| 106,617 | 89 | 22,036 | 7,781 | 5,139 | 35,045 |
| 106,618 | 89 | 21,834 | 7,699 | 5,090 | 34,712 |
| 106,619 | 91 | 21,676 | 7,617 | 5,050 | 34,434 |
| 106,620 | 89 | 21,605 | 7,538 | 5,009 | 34,241 |
| 106,621 | 89 | 22,229 | 7,745 | 5,126 | 35,189 |
| 106,622 | 87 | 22,288 | 7,777 | 5,130 | 35,282 |
| 106,623 | 86 | 22,281 | 7,713 | 5,060 | 35,140 |
| 106,624 | 85 | 21,825 | 7,548 | 4,949 | 34,407 |
| 106,625 | 85 | 21,820 | 7,562 | 4,978 | 34,445 |
| 106,626 | 86 | 21,411 | 7,501 | 4,930 | 33,928 |
| 106,627 | 87 | 21,154 | 7,455 | 4,882 | 33,578 |
| 106,628 | 94 | 21,985 | 7,761 | 5,100 | 34,940 |
| 106,629 | 90 | 22,011 | 7,738 | 5,122 | 34,961 |
| 106,630 | 92 | 21,821 | 7,723 | 5,109 | 34,745 |
| 106,631 | 91 | 21,714 | 7,737 | 5,112 | 34,654 |
| 106,632 | 92 | 21,604 | 7,752 | 5,103 | 34,551 |
| 106,633 | 89 | 21,379 | 7,679 | 5,041 | 34,188 |
| 106,634 | 89 | 21,493 | 7,711 | 5,044 | 34,337 |
| 106,635 | 87 | 21,582 | 7,822 | 5,098 | 34,589 |
| 106,636 | 87 | 21,665 | 7,859 | 5,117 | 34,728 |
| 106,637 | 86 | 21,085 | 7,682 | 5,018 | 33,871 |
| 106,638 | 91 | 21,181 | 7,742 | 5,035 | 34,049 |
| 106,639 | 90 | 21,191 | 7,764 | 5,073 | 34,118 |
| 106,640 | 87 | 21,087 | 7,769 | 5,072 | 34,015 |
| 106,641 | 87 | 21,100 | 7,782 | 5,069 | 34,038 |
| 106,642 | 87 | 21,138 | 7,773 | 5,036 | 34,034 |
| 106,643 | 85 | 20,987 | 7,717 | 5,035 | 33,824 |
| 106,644 | 87 | 21,237 | 7,786 | 5,084 | 34,194 |
| 106,645 | 83 | 20,960 | 7,723 | 5,028 | 33,794 |
| 106,646 | 82 | 20,815 | 7,698 | 5,017 | 33,612 |
| 106,647 | 82 | 21,115 | 7,837 | 5,054 | 34,088 |

|         |    |        |       |       |        |
|---------|----|--------|-------|-------|--------|
| 106,648 | 76 | 20,997 | 7,834 | 5,040 | 33,947 |
| 106,649 | 77 | 20,823 | 7,826 | 5,016 | 33,742 |
| 106,650 | 74 | 20,401 | 7,694 | 4,970 | 33,139 |
| 106,651 | 72 | 20,542 | 7,719 | 5,020 | 33,353 |
| 106,652 | 72 | 20,418 | 7,700 | 4,983 | 33,173 |
| 106,653 | 65 | 20,382 | 7,633 | 4,960 | 33,040 |
| 106,654 | 58 | 19,929 | 7,389 | 4,870 | 32,246 |
| 106,655 | 59 | 20,249 | 7,459 | 4,920 | 32,687 |
| 106,656 | 65 | 20,290 | 7,537 | 4,952 | 32,844 |
| 106,657 | 65 | 20,204 | 7,533 | 4,970 | 32,772 |
| 106,658 | 61 | 20,290 | 7,570 | 4,997 | 32,918 |
| 106,659 | 62 | 20,209 | 7,509 | 4,965 | 32,745 |
| 106,660 | 61 | 20,122 | 7,474 | 4,925 | 32,582 |
| 106,661 | 60 | 20,411 | 7,600 | 5,045 | 33,116 |
| 106,662 | 58 | 20,469 | 7,608 | 5,068 | 33,203 |
| 106,663 | 58 | 20,297 | 7,600 | 5,023 | 32,978 |
| 106,664 | 61 | 20,294 | 7,589 | 5,000 | 32,944 |
| 106,665 | 61 | 19,967 | 7,526 | 4,944 | 32,498 |
| 106,666 | 63 | 20,285 | 7,724 | 5,050 | 33,122 |
| 106,667 | 63 | 20,049 | 7,693 | 5,069 | 32,874 |
| 106,668 | 64 | 19,891 | 7,656 | 5,050 | 32,661 |
| 106,669 | 64 | 19,799 | 7,611 | 5,007 | 32,481 |
| 106,670 | 62 | 19,726 | 7,584 | 4,989 | 32,361 |
| 106,671 | 64 | 20,131 | 7,673 | 5,070 | 32,938 |
| 106,672 | 65 | 20,168 | 7,659 | 5,055 | 32,947 |
| 106,673 | 65 | 20,216 | 7,639 | 5,074 | 32,994 |
| 106,674 | 63 | 19,956 | 7,564 | 5,031 | 32,614 |
| 106,675 | 60 | 20,234 | 7,632 | 5,073 | 32,999 |
| 106,676 | 56 | 20,355 | 7,661 | 5,088 | 33,160 |
| 106,677 | 54 | 20,270 | 7,526 | 5,051 | 32,901 |
| 106,678 | 57 | 20,586 | 7,645 | 5,130 | 33,418 |
| 106,679 | 59 | 20,650 | 7,638 | 5,096 | 33,443 |

|         |    |        |       |       |        |
|---------|----|--------|-------|-------|--------|
| 106,680 | 59 | 20,654 | 7,586 | 5,022 | 33,321 |
| 106,681 | 62 | 20,579 | 7,601 | 5,021 | 33,263 |
| 106,682 | 61 | 20,574 | 7,560 | 5,025 | 33,220 |
| 106,683 | 61 | 20,946 | 7,660 | 5,108 | 33,775 |
| 106,684 | 62 | 20,897 | 7,677 | 5,125 | 33,761 |
| 106,685 | 61 | 20,945 | 7,689 | 5,175 | 33,870 |
| 106,686 | 61 | 20,688 | 7,548 | 5,128 | 33,425 |
| 106,687 | 64 | 20,772 | 7,638 | 5,142 | 33,616 |
| 106,688 | 67 | 20,887 | 7,672 | 5,161 | 33,787 |
| 106,689 | 65 | 21,035 | 7,666 | 5,166 | 33,932 |
| 106,690 | 65 | 20,927 | 7,624 | 5,123 | 33,739 |
| 106,691 | 65 | 20,653 | 7,547 | 5,071 | 33,336 |
| 106,692 | 65 | 20,425 | 7,511 | 5,036 | 33,037 |
| 106,693 | 69 | 21,130 | 7,752 | 5,220 | 34,171 |
| 106,694 | 68 | 20,968 | 7,701 | 5,171 | 33,908 |
| 106,695 | 66 | 20,708 | 7,651 | 5,132 | 33,557 |
| 106,696 | 65 | 21,337 | 7,873 | 5,281 | 34,556 |
| 106,697 | 65 | 21,308 | 7,910 | 5,308 | 34,591 |
| 106,698 | 68 | 21,555 | 7,968 | 5,368 | 34,959 |
| 106,699 | 70 | 21,698 | 8,007 | 5,393 | 35,168 |
| 106,700 | 69 | 21,967 | 8,027 | 5,427 | 35,490 |
| 106,701 | 69 | 22,141 | 8,107 | 5,433 | 35,750 |
| 106,702 | 68 | 22,128 | 8,146 | 5,412 | 35,754 |
| 106,703 | 71 | 22,244 | 8,168 | 5,417 | 35,900 |
| 106,704 | 71 | 21,889 | 8,093 | 5,349 | 35,402 |
| 106,705 | 73 | 22,194 | 8,181 | 5,420 | 35,868 |
| 106,706 | 72 | 22,218 | 8,178 | 5,417 | 35,885 |
| 106,707 | 67 | 22,377 | 8,175 | 5,443 | 36,062 |
| 106,708 | 68 | 22,393 | 8,168 | 5,456 | 36,085 |
| 106,709 | 66 | 22,358 | 8,123 | 5,426 | 35,973 |
| 106,710 | 63 | 22,130 | 7,991 | 5,341 | 35,525 |
| 106,711 | 63 | 22,378 | 8,066 | 5,397 | 35,904 |

|         |    |        |       |       |        |
|---------|----|--------|-------|-------|--------|
| 106,712 | 64 | 22,640 | 8,141 | 5,449 | 36,294 |
| 106,713 | 62 | 22,759 | 8,118 | 5,450 | 36,389 |
| 106,714 | 63 | 23,051 | 8,132 | 5,481 | 36,727 |
| 106,715 | 64 | 22,959 | 8,113 | 5,516 | 36,652 |
| 106,716 | 66 | 23,174 | 8,142 | 5,548 | 36,930 |
| 106,717 | 67 | 23,181 | 8,110 | 5,524 | 36,882 |
| 106,718 | 67 | 23,244 | 8,118 | 5,547 | 36,976 |
| 106,719 | 67 | 23,116 | 8,164 | 5,578 | 36,925 |
| 106,720 | 73 | 23,046 | 8,220 | 5,595 | 36,934 |
| 106,721 | 73 | 22,970 | 8,284 | 5,614 | 36,941 |
| 106,722 | 72 | 22,818 | 8,302 | 5,617 | 36,809 |
| 106,723 | 71 | 22,845 | 8,319 | 5,654 | 36,889 |
| 106,724 | 72 | 22,812 | 8,336 | 5,653 | 36,873 |
| 106,725 | 73 | 22,895 | 8,380 | 5,703 | 37,051 |
| 106,726 | 77 | 22,804 | 8,348 | 5,682 | 36,911 |
| 106,727 | 79 | 22,753 | 8,292 | 5,620 | 36,744 |
| 106,728 | 84 | 23,175 | 8,399 | 5,673 | 37,331 |
| 106,729 | 87 | 23,209 | 8,442 | 5,735 | 37,473 |
| 106,730 | 85 | 23,028 | 8,453 | 5,755 | 37,321 |
| 106,731 | 83 | 22,978 | 8,463 | 5,775 | 37,299 |
| 106,732 | 85 | 23,008 | 8,469 | 5,803 | 37,365 |
| 106,733 | 85 | 23,169 | 8,517 | 5,841 | 37,612 |
| 106,734 | 85 | 23,317 | 8,549 | 5,826 | 37,777 |
| 106,735 | 85 | 23,307 | 8,543 | 5,806 | 37,741 |
| 106,736 | 85 | 23,226 | 8,489 | 5,749 | 37,549 |
| 106,737 | 86 | 23,102 | 8,398 | 5,697 | 37,283 |
| 106,738 | 87 | 23,177 | 8,408 | 5,717 | 37,389 |
| 106,739 | 92 | 23,134 | 8,429 | 5,728 | 37,383 |
| 106,740 | 90 | 22,967 | 8,390 | 5,688 | 37,135 |
| 106,741 | 89 | 23,040 | 8,356 | 5,691 | 37,176 |
| 106,742 | 89 | 22,970 | 8,293 | 5,604 | 36,956 |
| 106,743 | 91 | 23,131 | 8,382 | 5,642 | 37,246 |



|         |     |        |       |       |        |
|---------|-----|--------|-------|-------|--------|
| 106,744 | 89  | 23,235 | 8,404 | 5,668 | 37,396 |
| 106,745 | 89  | 22,903 | 8,332 | 5,601 | 36,925 |
| 106,746 | 93  | 23,160 | 8,445 | 5,686 | 37,384 |
| 106,747 | 94  | 23,043 | 8,362 | 5,603 | 37,102 |
| 106,748 | 94  | 22,994 | 8,384 | 5,635 | 37,107 |
| 106,749 | 90  | 23,090 | 8,408 | 5,693 | 37,281 |
| 106,750 | 88  | 23,072 | 8,390 | 5,702 | 37,252 |
| 106,751 | 90  | 23,000 | 8,412 | 5,680 | 37,182 |
| 106,752 | 91  | 22,598 | 8,209 | 5,606 | 36,504 |
| 106,753 | 93  | 22,879 | 8,262 | 5,664 | 36,898 |
| 106,754 | 92  | 23,093 | 8,290 | 5,730 | 37,205 |
| 106,755 | 93  | 23,145 | 8,283 | 5,733 | 37,254 |
| 106,756 | 94  | 23,142 | 8,314 | 5,752 | 37,302 |
| 106,757 | 95  | 23,135 | 8,313 | 5,749 | 37,292 |
| 106,758 | 97  | 23,155 | 8,333 | 5,719 | 37,304 |
| 106,759 | 100 | 23,210 | 8,353 | 5,703 | 37,366 |
| 106,760 | 103 | 22,606 | 8,198 | 5,577 | 36,484 |
| 106,761 | 103 | 22,778 | 8,256 | 5,602 | 36,739 |
| 106,762 | 103 | 22,960 | 8,309 | 5,643 | 37,015 |
| 106,763 | 101 | 22,951 | 8,289 | 5,625 | 36,966 |
| 106,764 | 101 | 22,890 | 8,280 | 5,608 | 36,879 |
| 106,765 | 102 | 22,751 | 8,198 | 5,580 | 36,631 |
| 106,766 | 98  | 22,688 | 8,121 | 5,511 | 36,418 |
| 106,767 | 98  | 22,961 | 8,158 | 5,523 | 36,740 |
| 106,768 | 97  | 23,125 | 8,144 | 5,515 | 36,881 |
| 106,769 | 99  | 23,417 | 8,139 | 5,502 | 37,157 |
| 106,770 | 93  | 23,426 | 8,013 | 5,464 | 36,996 |
| 106,771 | 93  | 23,549 | 7,969 | 5,457 | 37,068 |
| 106,772 | 93  | 23,734 | 7,942 | 5,458 | 37,227 |
| 106,773 | 95  | 24,254 | 8,053 | 5,549 | 37,951 |
| 106,774 | 93  | 23,933 | 7,981 | 5,462 | 37,469 |
| 106,775 | 95  | 23,865 | 7,939 | 5,429 | 37,328 |

|         |    |        |       |       |        |
|---------|----|--------|-------|-------|--------|
| 106,776 | 95 | 23,970 | 7,933 | 5,413 | 37,411 |
| 106,777 | 93 | 23,992 | 7,923 | 5,446 | 37,454 |
| 106,778 | 95 | 23,902 | 7,936 | 5,457 | 37,390 |
| 106,779 | 90 | 23,895 | 7,919 | 5,465 | 37,369 |
| 106,780 | 84 | 23,651 | 7,830 | 5,385 | 36,950 |
| 106,781 | 84 | 23,940 | 7,865 | 5,416 | 37,305 |
| 106,782 | 85 | 23,877 | 7,849 | 5,398 | 37,209 |
| 106,783 | 80 | 23,506 | 7,724 | 5,297 | 36,607 |
| 106,784 | 83 | 23,512 | 7,743 | 5,298 | 36,636 |
| 106,785 | 83 | 23,406 | 7,714 | 5,278 | 36,481 |
| 106,786 | 83 | 23,187 | 7,613 | 5,242 | 36,125 |
| 106,787 | 86 | 23,457 | 7,661 | 5,299 | 36,503 |
| 106,788 | 82 | 23,360 | 7,645 | 5,312 | 36,399 |
| 106,789 | 72 | 22,640 | 7,360 | 5,120 | 35,192 |
| 106,790 | 72 | 22,813 | 7,452 | 5,162 | 35,499 |
| 106,791 | 72 | 23,009 | 7,505 | 5,205 | 35,791 |
| 106,792 | 77 | 23,314 | 7,594 | 5,251 | 36,236 |
| 106,793 | 77 | 23,226 | 7,575 | 5,274 | 36,152 |
| 106,794 | 75 | 23,318 | 7,527 | 5,250 | 36,170 |
| 106,795 | 70 | 23,378 | 7,517 | 5,252 | 36,217 |
| 106,796 | 68 | 23,484 | 7,482 | 5,239 | 36,273 |
| 106,797 | 69 | 23,453 | 7,479 | 5,202 | 36,203 |
| 106,798 | 69 | 23,237 | 7,376 | 5,148 | 35,830 |
| 106,799 | 70 | 23,317 | 7,377 | 5,154 | 35,918 |
| 106,800 | 72 | 23,608 | 7,430 | 5,211 | 36,321 |
| 106,801 | 73 | 23,524 | 7,396 | 5,188 | 36,181 |
| 106,802 | 70 | 23,082 | 7,254 | 5,119 | 35,525 |
| 106,803 | 69 | 22,887 | 7,228 | 5,085 | 35,269 |
| 106,804 | 68 | 22,819 | 7,212 | 5,098 | 35,197 |
| 106,805 | 69 | 23,093 | 7,310 | 5,155 | 35,627 |
| 106,806 | 70 | 23,236 | 7,331 | 5,181 | 35,818 |
| 106,807 | 67 | 23,462 | 7,356 | 5,189 | 36,074 |

|         |    |        |       |       |        |
|---------|----|--------|-------|-------|--------|
| 106,808 | 70 | 23,548 | 7,389 | 5,212 | 36,219 |
| 106,809 | 67 | 23,651 | 7,349 | 5,218 | 36,285 |
| 106,810 | 64 | 23,646 | 7,348 | 5,220 | 36,278 |
| 106,811 | 62 | 23,527 | 7,273 | 5,167 | 36,029 |
| 106,812 | 63 | 23,611 | 7,309 | 5,193 | 36,176 |
| 106,813 | 63 | 24,014 | 7,404 | 5,239 | 36,720 |
| 106,814 | 61 | 23,623 | 7,277 | 5,121 | 36,082 |
| 106,815 | 62 | 23,866 | 7,359 | 5,199 | 36,486 |
| 106,816 | 62 | 23,874 | 7,373 | 5,215 | 36,524 |
| 106,817 | 62 | 23,644 | 7,432 | 5,242 | 36,380 |
| 106,818 | 62 | 23,718 | 7,500 | 5,337 | 36,617 |
| 106,819 | 61 | 23,447 | 7,483 | 5,349 | 36,340 |
| 106,820 | 62 | 23,363 | 7,488 | 5,366 | 36,279 |
| 106,821 | 63 | 23,075 | 7,434 | 5,293 | 35,865 |
| 106,822 | 62 | 22,783 | 7,377 | 5,239 | 35,461 |
| 106,823 | 62 | 22,951 | 7,493 | 5,282 | 35,788 |
| 106,824 | 61 | 23,122 | 7,604 | 5,352 | 36,139 |
| 106,825 | 60 | 23,079 | 7,582 | 5,379 | 36,100 |
| 106,826 | 57 | 23,299 | 7,647 | 5,411 | 36,414 |
| 106,827 | 56 | 22,702 | 7,538 | 5,324 | 35,620 |
| 106,828 | 56 | 22,844 | 7,619 | 5,359 | 35,878 |
| 106,829 | 52 | 22,934 | 7,681 | 5,406 | 36,073 |
| 106,830 | 53 | 22,731 | 7,662 | 5,366 | 35,812 |
| 106,831 | 56 | 22,827 | 7,687 | 5,399 | 35,969 |
| 106,832 | 56 | 22,892 | 7,691 | 5,408 | 36,047 |
| 106,833 | 55 | 22,865 | 7,680 | 5,387 | 35,987 |
| 106,834 | 55 | 22,752 | 7,610 | 5,354 | 35,771 |
| 106,835 | 54 | 23,175 | 7,722 | 5,414 | 36,365 |
| 106,836 | 54 | 23,083 | 7,717 | 5,433 | 36,287 |
| 106,837 | 53 | 23,066 | 7,750 | 5,452 | 36,321 |
| 106,838 | 51 | 22,879 | 7,689 | 5,392 | 36,011 |
| 106,839 | 51 | 23,275 | 7,771 | 5,443 | 36,540 |

|         |    |        |       |       |        |
|---------|----|--------|-------|-------|--------|
| 106,840 | 49 | 23,375 | 7,789 | 5,483 | 36,696 |
| 106,841 | 49 | 23,448 | 7,789 | 5,508 | 36,794 |
| 106,842 | 47 | 23,542 | 7,824 | 5,524 | 36,937 |
| 106,843 | 45 | 23,277 | 7,761 | 5,500 | 36,583 |
| 106,844 | 45 | 23,549 | 7,836 | 5,558 | 36,988 |
| 106,845 | 45 | 23,449 | 7,833 | 5,603 | 36,930 |
| 106,846 | 45 | 23,438 | 7,818 | 5,603 | 36,904 |
| 106,847 | 44 | 23,424 | 7,811 | 5,613 | 36,892 |
| 106,848 | 45 | 23,282 | 7,777 | 5,598 | 36,702 |
| 106,849 | 44 | 23,287 | 7,741 | 5,565 | 36,637 |
| 106,850 | 41 | 23,132 | 7,698 | 5,504 | 36,375 |
| 106,851 | 42 | 23,345 | 7,797 | 5,557 | 36,741 |
| 106,852 | 43 | 23,303 | 7,785 | 5,554 | 36,685 |
| 106,853 | 43 | 23,523 | 7,842 | 5,621 | 37,029 |
| 106,854 | 41 | 23,730 | 7,879 | 5,613 | 37,263 |
| 106,855 | 44 | 23,427 | 7,762 | 5,516 | 36,749 |
| 106,856 | 43 | 23,537 | 7,828 | 5,559 | 36,967 |
| 106,857 | 43 | 23,765 | 7,893 | 5,589 | 37,290 |
| 106,858 | 44 | 23,725 | 7,883 | 5,579 | 37,231 |
| 106,859 | 41 | 23,605 | 7,886 | 5,572 | 37,104 |
| 106,860 | 45 | 23,513 | 7,930 | 5,631 | 37,119 |
| 106,861 | 46 | 23,483 | 7,923 | 5,629 | 37,081 |
| 106,862 | 45 | 23,329 | 7,932 | 5,634 | 36,940 |
| 106,863 | 46 | 23,334 | 7,918 | 5,636 | 36,934 |
| 106,864 | 46 | 23,340 | 7,915 | 5,641 | 36,942 |
| 106,865 | 47 | 23,276 | 7,900 | 5,645 | 36,868 |
| 106,866 | 46 | 23,288 | 7,891 | 5,663 | 36,888 |
| 106,867 | 47 | 23,441 | 7,850 | 5,641 | 36,979 |
| 106,868 | 47 | 23,548 | 7,838 | 5,632 | 37,065 |
| 106,869 | 46 | 23,462 | 7,717 | 5,523 | 36,748 |
| 106,870 | 43 | 23,594 | 7,665 | 5,465 | 36,767 |
| 106,871 | 43 | 23,639 | 7,656 | 5,450 | 36,788 |

|         |    |        |       |       |        |
|---------|----|--------|-------|-------|--------|
| 106,872 | 45 | 24,048 | 7,722 | 5,482 | 37,297 |
| 106,873 | 49 | 24,265 | 7,854 | 5,566 | 37,734 |
| 106,874 | 52 | 24,452 | 7,834 | 5,596 | 37,934 |
| 106,875 | 54 | 24,582 | 7,838 | 5,602 | 38,076 |
| 106,876 | 61 | 24,400 | 7,835 | 5,585 | 37,881 |
| 106,877 | 62 | 24,146 | 7,780 | 5,572 | 37,560 |
| 106,878 | 62 | 23,987 | 7,708 | 5,529 | 37,286 |
| 106,879 | 64 | 24,188 | 7,693 | 5,532 | 37,477 |
| 106,880 | 66 | 24,268 | 7,697 | 5,525 | 37,556 |
| 106,881 | 65 | 24,276 | 7,700 | 5,531 | 37,572 |
| 106,882 | 64 | 24,235 | 7,770 | 5,545 | 37,614 |
| 106,883 | 68 | 24,087 | 7,737 | 5,537 | 37,429 |
| 106,884 | 68 | 23,954 | 7,718 | 5,528 | 37,268 |
| 106,885 | 66 | 23,868 | 7,721 | 5,517 | 37,172 |
| 106,886 | 67 | 23,795 | 7,740 | 5,516 | 37,118 |
| 106,887 | 67 | 23,846 | 7,688 | 5,505 | 37,106 |
| 106,888 | 67 | 23,526 | 7,598 | 5,429 | 36,620 |
| 106,889 | 66 | 23,449 | 7,609 | 5,431 | 36,555 |
| 106,890 | 67 | 23,415 | 7,610 | 5,446 | 36,538 |
| 106,891 | 67 | 23,494 | 7,672 | 5,459 | 36,692 |
| 106,892 | 67 | 23,556 | 7,653 | 5,465 | 36,741 |
| 106,893 | 69 | 23,536 | 7,680 | 5,482 | 36,767 |
| 106,894 | 66 | 23,416 | 7,639 | 5,446 | 36,567 |
| 106,895 | 65 | 23,363 | 7,632 | 5,427 | 36,487 |
| 106,896 | 66 | 23,379 | 7,657 | 5,414 | 36,516 |
| 106,897 | 65 | 23,325 | 7,630 | 5,400 | 36,420 |
| 106,898 | 70 | 23,223 | 7,604 | 5,375 | 36,272 |
| 106,899 | 68 | 22,959 | 7,519 | 5,326 | 35,872 |
| 106,900 | 71 | 22,958 | 7,578 | 5,384 | 35,991 |
| 106,901 | 74 | 22,836 | 7,541 | 5,360 | 35,811 |
| 106,902 | 72 | 22,692 | 7,475 | 5,318 | 35,557 |
| 106,903 | 71 | 22,430 | 7,384 | 5,257 | 35,142 |

|         |    |        |       |       |        |
|---------|----|--------|-------|-------|--------|
| 106,904 | 71 | 22,467 | 7,482 | 5,272 | 35,292 |
| 106,905 | 70 | 22,054 | 7,415 | 5,211 | 34,750 |
| 106,906 | 75 | 21,800 | 7,310 | 5,138 | 34,323 |
| 106,907 | 75 | 21,993 | 7,350 | 5,152 | 34,570 |
| 106,908 | 73 | 21,948 | 7,334 | 5,129 | 34,484 |
| 106,909 | 74 | 22,026 | 7,347 | 5,136 | 34,583 |
| 106,910 | 74 | 21,984 | 7,306 | 5,111 | 34,475 |
| 106,911 | 74 | 22,071 | 7,276 | 5,057 | 34,478 |
| 106,912 | 77 | 21,937 | 7,211 | 4,976 | 34,201 |
| 106,913 | 77 | 21,813 | 7,205 | 4,964 | 34,059 |
| 106,914 | 77 | 21,951 | 7,282 | 4,997 | 34,307 |
| 106,915 | 77 | 21,814 | 7,243 | 4,965 | 34,099 |
| 106,916 | 76 | 21,430 | 7,152 | 4,892 | 33,550 |
| 106,917 | 78 | 21,340 | 7,143 | 4,833 | 33,394 |
| 106,918 | 78 | 21,028 | 7,176 | 4,795 | 33,077 |
| 106,919 | 77 | 20,887 | 7,156 | 4,792 | 32,912 |
| 106,920 | 75 | 20,670 | 7,147 | 4,787 | 32,679 |
| 106,921 | 74 | 20,478 | 7,139 | 4,816 | 32,507 |
| 106,922 | 73 | 20,439 | 7,178 | 4,868 | 32,558 |
| 106,923 | 70 | 20,400 | 7,167 | 4,878 | 32,515 |
| 106,924 | 66 | 20,251 | 7,097 | 4,836 | 32,250 |
| 106,925 | 62 | 20,179 | 7,090 | 4,825 | 32,156 |
| 106,926 | 60 | 20,341 | 7,119 | 4,817 | 32,337 |
| 106,927 | 54 | 20,560 | 7,146 | 4,829 | 32,589 |
| 106,928 | 53 | 20,561 | 7,116 | 4,814 | 32,544 |
| 106,929 | 52 | 20,688 | 7,111 | 4,822 | 32,673 |
| 106,930 | 51 | 20,729 | 7,132 | 4,834 | 32,746 |
| 106,931 | 50 | 20,845 | 7,130 | 4,849 | 32,874 |
| 106,932 | 50 | 21,035 | 7,089 | 4,841 | 33,015 |
| 106,933 | 51 | 21,106 | 7,094 | 4,833 | 33,084 |
| 106,934 | 53 | 21,598 | 7,232 | 4,954 | 33,837 |
| 106,935 | 54 | 21,780 | 7,249 | 4,973 | 34,056 |

|         |    |        |       |       |        |
|---------|----|--------|-------|-------|--------|
| 106,936 | 55 | 21,782 | 7,174 | 4,943 | 33,954 |
| 106,937 | 56 | 21,929 | 7,236 | 4,999 | 34,220 |
| 106,938 | 57 | 21,931 | 7,299 | 5,012 | 34,299 |
| 106,939 | 57 | 21,840 | 7,265 | 4,969 | 34,131 |
| 106,940 | 60 | 22,006 | 7,330 | 5,006 | 34,402 |
| 106,941 | 59 | 21,958 | 7,312 | 4,994 | 34,323 |
| 106,942 | 59 | 22,015 | 7,288 | 4,992 | 34,354 |
| 106,943 | 59 | 21,730 | 7,292 | 4,991 | 34,072 |
| 106,944 | 58 | 21,665 | 7,246 | 4,967 | 33,936 |
| 106,945 | 58 | 21,721 | 7,260 | 4,989 | 34,028 |
| 106,946 | 58 | 21,736 | 7,257 | 4,982 | 34,033 |
| 106,947 | 59 | 21,721 | 7,236 | 4,989 | 34,005 |
| 106,948 | 59 | 21,679 | 7,266 | 4,979 | 33,983 |
| 106,949 | 53 | 21,503 | 7,214 | 4,901 | 33,671 |
| 106,950 | 58 | 21,748 | 7,279 | 4,927 | 34,012 |
| 106,951 | 56 | 21,891 | 7,327 | 4,966 | 34,240 |
| 106,952 | 53 | 21,714 | 7,272 | 4,914 | 33,953 |
| 106,953 | 53 | 21,950 | 7,324 | 4,957 | 34,284 |
| 106,954 | 56 | 21,926 | 7,249 | 4,934 | 34,165 |
| 106,955 | 56 | 21,996 | 7,244 | 4,935 | 34,231 |
| 106,956 | 55 | 22,277 | 7,269 | 4,992 | 34,593 |
| 106,957 | 52 | 22,386 | 7,289 | 5,009 | 34,736 |
| 106,958 | 51 | 22,123 | 7,249 | 4,979 | 34,402 |
| 106,959 | 50 | 22,437 | 7,382 | 5,051 | 34,920 |
| 106,960 | 50 | 22,170 | 7,308 | 5,007 | 34,535 |
| 106,961 | 49 | 22,247 | 7,380 | 5,049 | 34,725 |
| 106,962 | 45 | 22,285 | 7,406 | 5,061 | 34,797 |
| 106,963 | 41 | 22,245 | 7,379 | 5,068 | 34,733 |
| 106,964 | 41 | 22,359 | 7,387 | 5,056 | 34,843 |
| 106,965 | 41 | 22,177 | 7,317 | 5,007 | 34,542 |
| 106,966 | 41 | 21,884 | 7,244 | 4,967 | 34,136 |
| 106,967 | 43 | 22,208 | 7,408 | 5,050 | 34,709 |

|         |    |        |       |       |        |
|---------|----|--------|-------|-------|--------|
| 106,968 | 42 | 22,231 | 7,369 | 5,052 | 34,694 |
| 106,969 | 41 | 22,152 | 7,286 | 5,035 | 34,514 |
| 106,970 | 42 | 22,089 | 7,220 | 4,991 | 34,342 |
| 106,971 | 42 | 22,024 | 7,218 | 4,972 | 34,256 |
| 106,972 | 43 | 22,034 | 7,162 | 4,918 | 34,157 |
| 106,973 | 45 | 22,186 | 7,219 | 4,961 | 34,411 |
| 106,974 | 46 | 21,961 | 7,193 | 4,956 | 34,156 |
| 106,975 | 52 | 21,844 | 7,179 | 4,924 | 33,999 |
| 106,976 | 55 | 21,548 | 7,123 | 4,884 | 33,610 |
| 106,977 | 59 | 21,158 | 7,081 | 4,879 | 33,177 |
| 106,978 | 62 | 20,907 | 7,011 | 4,812 | 32,792 |
| 106,979 | 62 | 20,653 | 6,954 | 4,772 | 32,441 |
| 106,980 | 65 | 20,475 | 6,947 | 4,745 | 32,232 |
| 106,981 | 65 | 20,159 | 6,868 | 4,692 | 31,784 |
| 106,982 | 66 | 20,430 | 7,036 | 4,805 | 32,337 |
| 106,983 | 68 | 20,414 | 7,055 | 4,784 | 32,321 |
| 106,984 | 66 | 20,298 | 7,017 | 4,761 | 32,142 |
| 106,985 | 64 | 20,337 | 7,033 | 4,731 | 32,165 |
| 106,986 | 66 | 20,093 | 6,970 | 4,685 | 31,814 |
| 106,987 | 64 | 19,852 | 6,931 | 4,634 | 31,481 |
| 106,988 | 66 | 20,316 | 7,041 | 4,697 | 32,120 |
| 106,989 | 65 | 20,702 | 7,133 | 4,749 | 32,649 |
| 106,990 | 66 | 20,825 | 7,131 | 4,777 | 32,799 |
| 106,991 | 63 | 20,593 | 7,087 | 4,748 | 32,491 |
| 106,992 | 66 | 20,577 | 7,065 | 4,718 | 32,426 |
| 106,993 | 67 | 20,589 | 7,029 | 4,681 | 32,366 |
| 106,994 | 70 | 20,933 | 7,090 | 4,725 | 32,818 |
| 106,995 | 72 | 21,062 | 7,099 | 4,717 | 32,950 |
| 106,996 | 74 | 20,964 | 7,043 | 4,668 | 32,749 |
| 106,997 | 75 | 21,213 | 7,103 | 4,718 | 33,109 |
| 106,998 | 73 | 21,013 | 7,013 | 4,636 | 32,735 |
| 106,999 | 80 | 21,219 | 7,072 | 4,670 | 33,041 |



|         |    |        |       |       |        |
|---------|----|--------|-------|-------|--------|
| 107,000 | 80 | 21,157 | 6,993 | 4,682 | 32,912 |
| 107,001 | 78 | 21,027 | 6,937 | 4,644 | 32,686 |
| 107,002 | 78 | 20,999 | 6,933 | 4,634 | 32,644 |
| 107,003 | 80 | 21,014 | 7,004 | 4,684 | 32,782 |
| 107,004 | 85 | 21,134 | 7,040 | 4,717 | 32,976 |
| 107,005 | 83 | 20,883 | 6,972 | 4,668 | 32,606 |
| 107,006 | 84 | 20,700 | 6,944 | 4,653 | 32,381 |
| 107,007 | 86 | 20,493 | 6,917 | 4,619 | 32,115 |
| 107,008 | 87 | 20,882 | 7,092 | 4,722 | 32,783 |
| 107,009 | 89 | 20,853 | 7,081 | 4,731 | 32,754 |
| 107,010 | 92 | 20,773 | 7,103 | 4,732 | 32,700 |
| 107,011 | 94 | 20,947 | 7,133 | 4,758 | 32,932 |
| 107,012 | 95 | 21,090 | 7,180 | 4,793 | 33,158 |
| 107,013 | 96 | 21,015 | 7,191 | 4,802 | 33,104 |
| 107,014 | 96 | 21,013 | 7,169 | 4,813 | 33,091 |
| 107,015 | 96 | 21,087 | 7,175 | 4,850 | 33,208 |
| 107,016 | 96 | 21,164 | 7,150 | 4,907 | 33,317 |
| 107,017 | 95 | 21,214 | 7,155 | 4,905 | 33,369 |
| 107,018 | 96 | 21,028 | 7,137 | 4,896 | 33,157 |
| 107,019 | 95 | 21,018 | 7,164 | 4,911 | 33,188 |
| 107,020 | 95 | 20,849 | 7,148 | 4,894 | 32,986 |
| 107,021 | 96 | 21,078 | 7,284 | 4,963 | 33,421 |
| 107,022 | 97 | 21,257 | 7,334 | 5,016 | 33,704 |
| 107,023 | 97 | 21,102 | 7,315 | 4,999 | 33,513 |
| 107,024 | 96 | 21,150 | 7,340 | 5,009 | 33,595 |
| 107,025 | 95 | 21,327 | 7,368 | 4,999 | 33,789 |
| 107,026 | 87 | 21,139 | 7,327 | 4,978 | 33,531 |
| 107,027 | 88 | 21,495 | 7,464 | 5,025 | 34,072 |
| 107,028 | 84 | 21,577 | 7,457 | 5,028 | 34,146 |
| 107,029 | 82 | 21,638 | 7,441 | 5,020 | 34,181 |
| 107,030 | 82 | 21,704 | 7,424 | 4,972 | 34,182 |
| 107,031 | 78 | 21,527 | 7,363 | 4,939 | 33,907 |

|         |    |        |       |       |        |
|---------|----|--------|-------|-------|--------|
| 107,032 | 77 | 21,742 | 7,413 | 4,980 | 34,212 |
| 107,033 | 75 | 21,566 | 7,329 | 4,926 | 33,896 |
| 107,034 | 75 | 21,247 | 7,282 | 4,901 | 33,505 |
| 107,035 | 75 | 20,939 | 7,218 | 4,838 | 33,070 |
| 107,036 | 73 | 21,472 | 7,383 | 4,961 | 33,889 |
| 107,037 | 73 | 21,445 | 7,417 | 4,972 | 33,907 |
| 107,038 | 77 | 21,128 | 7,312 | 4,918 | 33,435 |
| 107,039 | 78 | 20,844 | 7,255 | 4,872 | 33,049 |
| 107,040 | 80 | 20,955 | 7,367 | 4,930 | 33,332 |
| 107,041 | 86 | 20,663 | 7,305 | 4,857 | 32,911 |
| 107,042 | 85 | 20,670 | 7,311 | 4,850 | 32,916 |
| 107,043 | 88 | 20,433 | 7,273 | 4,820 | 32,614 |
| 107,044 | 87 | 20,159 | 7,240 | 4,797 | 32,283 |
| 107,045 | 85 | 20,582 | 7,614 | 5,073 | 33,354 |
| 107,046 | 85 | 20,825 | 7,687 | 5,143 | 33,740 |
| 107,047 | 84 | 20,449 | 7,612 | 5,091 | 33,236 |
| 107,048 | 84 | 20,849 | 7,744 | 5,157 | 33,834 |
| 107,049 | 84 | 20,922 | 7,807 | 5,208 | 34,021 |
| 107,050 | 76 | 20,455 | 7,722 | 5,148 | 33,401 |
| 107,051 | 76 | 20,831 | 7,846 | 5,201 | 33,954 |
| 107,052 | 74 | 21,048 | 7,934 | 5,255 | 34,311 |
| 107,053 | 76 | 20,783 | 7,800 | 5,173 | 33,832 |
| 107,054 | 80 | 21,155 | 7,887 | 5,230 | 34,352 |
| 107,055 | 76 | 21,281 | 7,961 | 5,273 | 34,591 |
| 107,056 | 78 | 21,129 | 7,909 | 5,233 | 34,349 |
| 107,057 | 77 | 20,950 | 7,872 | 5,209 | 34,108 |
| 107,058 | 77 | 21,000 | 7,898 | 5,239 | 34,214 |
| 107,059 | 76 | 20,763 | 7,800 | 5,186 | 33,825 |
| 107,060 | 73 | 20,480 | 7,693 | 5,107 | 33,353 |
| 107,061 | 71 | 20,983 | 7,782 | 5,201 | 34,037 |
| 107,062 | 75 | 20,705 | 7,730 | 5,133 | 33,643 |
| 107,063 | 75 | 20,577 | 7,664 | 5,105 | 33,421 |

|         |     |        |       |       |        |
|---------|-----|--------|-------|-------|--------|
| 107,064 | 77  | 20,698 | 7,653 | 5,093 | 33,521 |
| 107,065 | 76  | 20,356 | 7,602 | 5,042 | 33,076 |
| 107,066 | 78  | 21,046 | 7,811 | 5,208 | 34,143 |
| 107,067 | 78  | 20,989 | 7,823 | 5,181 | 34,071 |
| 107,068 | 77  | 21,031 | 7,771 | 5,138 | 34,017 |
| 107,069 | 80  | 21,089 | 7,779 | 5,155 | 34,103 |
| 107,070 | 80  | 20,829 | 7,693 | 5,114 | 33,716 |
| 107,071 | 83  | 21,432 | 7,838 | 5,192 | 34,545 |
| 107,072 | 82  | 21,589 | 7,832 | 5,171 | 34,674 |
| 107,073 | 82  | 21,419 | 7,770 | 5,106 | 34,377 |
| 107,074 | 81  | 21,384 | 7,785 | 5,106 | 34,356 |
| 107,075 | 84  | 21,928 | 7,917 | 5,189 | 35,118 |
| 107,076 | 85  | 21,945 | 7,889 | 5,196 | 35,115 |
| 107,077 | 84  | 22,024 | 7,885 | 5,186 | 35,179 |
| 107,078 | 85  | 21,829 | 7,796 | 5,181 | 34,891 |
| 107,079 | 88  | 21,794 | 7,782 | 5,154 | 34,818 |
| 107,080 | 86  | 21,519 | 7,732 | 5,121 | 34,458 |
| 107,081 | 89  | 21,617 | 7,839 | 5,227 | 34,772 |
| 107,082 | 98  | 21,879 | 7,923 | 5,284 | 35,184 |
| 107,083 | 106 | 21,847 | 7,962 | 5,306 | 35,221 |
| 107,084 | 106 | 22,018 | 7,984 | 5,325 | 35,433 |
| 107,085 | 103 | 21,885 | 7,905 | 5,302 | 35,195 |
| 107,086 | 103 | 21,722 | 7,832 | 5,275 | 34,932 |
| 107,087 | 104 | 21,801 | 7,948 | 5,347 | 35,200 |
| 107,088 | 105 | 21,906 | 7,993 | 5,376 | 35,380 |
| 107,089 | 104 | 21,760 | 7,970 | 5,341 | 35,175 |
| 107,090 | 103 | 21,645 | 7,957 | 5,326 | 35,031 |
| 107,091 | 104 | 21,744 | 7,955 | 5,333 | 35,136 |
| 107,092 | 99  | 21,809 | 7,971 | 5,308 | 35,187 |
| 107,093 | 102 | 21,855 | 7,864 | 5,262 | 35,083 |
| 107,094 | 99  | 21,586 | 7,714 | 5,154 | 34,553 |
| 107,095 | 100 | 22,015 | 7,816 | 5,203 | 35,134 |

|         |     |        |       |       |        |
|---------|-----|--------|-------|-------|--------|
| 107,096 | 98  | 21,902 | 7,830 | 5,204 | 35,034 |
| 107,097 | 97  | 21,714 | 7,811 | 5,163 | 34,785 |
| 107,098 | 97  | 21,856 | 7,879 | 5,207 | 35,039 |
| 107,099 | 101 | 21,700 | 7,846 | 5,167 | 34,814 |
| 107,100 | 101 | 21,437 | 7,752 | 5,093 | 34,383 |
| 107,101 | 102 | 21,361 | 7,693 | 5,063 | 34,219 |
| 107,102 | 102 | 21,387 | 7,668 | 5,052 | 34,209 |
| 107,103 | 100 | 21,374 | 7,682 | 5,040 | 34,196 |
| 107,104 | 98  | 21,547 | 7,738 | 5,051 | 34,434 |
| 107,105 | 99  | 21,468 | 7,718 | 5,029 | 34,314 |
| 107,106 | 99  | 21,444 | 7,654 | 4,983 | 34,180 |
| 107,107 | 99  | 21,505 | 7,682 | 4,989 | 34,275 |
| 107,108 | 99  | 21,586 | 7,724 | 5,000 | 34,409 |
| 107,109 | 98  | 21,553 | 7,714 | 4,956 | 34,321 |
| 107,110 | 98  | 21,400 | 7,711 | 4,943 | 34,152 |
| 107,111 | 98  | 21,617 | 7,810 | 4,982 | 34,507 |
| 107,112 | 98  | 21,592 | 7,842 | 4,959 | 34,491 |
| 107,113 | 92  | 21,471 | 7,832 | 4,953 | 34,348 |
| 107,114 | 91  | 21,352 | 7,862 | 4,909 | 34,214 |
| 107,115 | 90  | 21,177 | 7,803 | 4,852 | 33,922 |
| 107,116 | 90  | 21,541 | 7,851 | 4,888 | 34,370 |
| 107,117 | 88  | 21,611 | 7,886 | 4,875 | 34,460 |
| 107,118 | 87  | 21,413 | 7,787 | 4,822 | 34,109 |
| 107,119 | 91  | 21,646 | 7,866 | 4,851 | 34,454 |
| 107,120 | 88  | 21,512 | 7,794 | 4,785 | 34,179 |
| 107,121 | 88  | 21,821 | 7,892 | 4,844 | 34,645 |
| 107,122 | 88  | 21,654 | 7,806 | 4,807 | 34,355 |
| 107,123 | 90  | 21,839 | 7,922 | 4,848 | 34,699 |
| 107,124 | 92  | 21,032 | 7,661 | 4,672 | 33,457 |
| 107,125 | 92  | 21,300 | 7,749 | 4,738 | 33,879 |
| 107,126 | 89  | 21,469 | 7,827 | 4,767 | 34,152 |
| 107,127 | 91  | 21,405 | 7,866 | 4,749 | 34,111 |

|         |    |        |       |       |        |
|---------|----|--------|-------|-------|--------|
| 107,128 | 88 | 21,014 | 7,672 | 4,643 | 33,417 |
| 107,129 | 89 | 21,242 | 7,731 | 4,659 | 33,721 |
| 107,130 | 90 | 21,235 | 7,640 | 4,612 | 33,577 |
| 107,131 | 91 | 21,534 | 7,742 | 4,647 | 34,014 |
| 107,132 | 81 | 21,597 | 7,736 | 4,637 | 34,051 |
| 107,133 | 81 | 21,701 | 7,780 | 4,677 | 34,239 |
| 107,134 | 75 | 21,906 | 7,876 | 4,729 | 34,586 |
| 107,135 | 75 | 21,923 | 7,907 | 4,736 | 34,641 |
| 107,136 | 74 | 21,724 | 7,840 | 4,682 | 34,320 |
| 107,137 | 74 | 21,752 | 7,881 | 4,719 | 34,426 |
| 107,138 | 71 | 21,843 | 7,911 | 4,736 | 34,561 |
| 107,139 | 71 | 21,860 | 7,932 | 4,734 | 34,597 |
| 107,140 | 67 | 21,861 | 7,920 | 4,750 | 34,598 |
| 107,141 | 67 | 21,750 | 7,906 | 4,731 | 34,454 |
| 107,142 | 66 | 21,762 | 7,924 | 4,736 | 34,488 |
| 107,143 | 70 | 21,654 | 7,891 | 4,738 | 34,353 |
| 107,144 | 69 | 21,645 | 7,902 | 4,739 | 34,355 |
| 107,145 | 68 | 21,501 | 7,901 | 4,747 | 34,217 |
| 107,146 | 67 | 21,375 | 7,877 | 4,728 | 34,047 |
| 107,147 | 67 | 21,333 | 7,781 | 4,689 | 33,870 |
| 107,148 | 68 | 21,678 | 7,914 | 4,738 | 34,398 |
| 107,149 | 67 | 21,753 | 7,915 | 4,739 | 34,474 |
| 107,150 | 62 | 21,766 | 7,926 | 4,758 | 34,512 |
| 107,151 | 63 | 21,462 | 7,819 | 4,697 | 34,041 |
| 107,152 | 62 | 21,209 | 7,770 | 4,683 | 33,724 |
| 107,153 | 63 | 21,288 | 7,851 | 4,781 | 33,983 |
| 107,154 | 63 | 20,767 | 7,686 | 4,694 | 33,210 |
| 107,155 | 65 | 20,837 | 7,734 | 4,721 | 33,357 |
| 107,156 | 61 | 20,994 | 7,786 | 4,754 | 33,595 |
| 107,157 | 59 | 20,847 | 7,751 | 4,724 | 33,381 |
| 107,158 | 58 | 20,599 | 7,676 | 4,684 | 33,017 |
| 107,159 | 59 | 20,937 | 7,718 | 4,719 | 33,433 |

|         |    |        |       |       |        |
|---------|----|--------|-------|-------|--------|
| 107,160 | 58 | 20,920 | 7,692 | 4,732 | 33,402 |
| 107,161 | 60 | 21,175 | 7,730 | 4,761 | 33,726 |
| 107,162 | 59 | 21,136 | 7,676 | 4,780 | 33,651 |
| 107,163 | 59 | 20,561 | 7,467 | 4,696 | 32,783 |
| 107,164 | 59 | 20,823 | 7,506 | 4,731 | 33,119 |
| 107,165 | 59 | 21,115 | 7,594 | 4,781 | 33,549 |
| 107,166 | 60 | 20,828 | 7,509 | 4,725 | 33,122 |
| 107,167 | 60 | 20,552 | 7,434 | 4,697 | 32,743 |
| 107,168 | 60 | 20,838 | 7,513 | 4,804 | 33,215 |
| 107,169 | 59 | 20,511 | 7,448 | 4,765 | 32,783 |
| 107,170 | 56 | 20,528 | 7,502 | 4,821 | 32,907 |
| 107,171 | 56 | 20,142 | 7,433 | 4,771 | 32,402 |
| 107,172 | 56 | 20,238 | 7,506 | 4,799 | 32,599 |
| 107,173 | 54 | 20,046 | 7,502 | 4,795 | 32,397 |
| 107,174 | 54 | 19,868 | 7,454 | 4,813 | 32,189 |
| 107,175 | 50 | 19,789 | 7,449 | 4,802 | 32,090 |
| 107,176 | 50 | 19,770 | 7,440 | 4,777 | 32,037 |
| 107,177 | 50 | 19,798 | 7,419 | 4,772 | 32,039 |
| 107,178 | 51 | 19,782 | 7,385 | 4,764 | 31,982 |
| 107,179 | 49 | 19,806 | 7,399 | 4,759 | 32,013 |
| 107,180 | 48 | 19,449 | 7,318 | 4,710 | 31,525 |
| 107,181 | 47 | 19,240 | 7,292 | 4,671 | 31,250 |
| 107,182 | 46 | 19,314 | 7,324 | 4,706 | 31,390 |
| 107,183 | 45 | 19,012 | 7,223 | 4,642 | 30,922 |
| 107,184 | 48 | 19,162 | 7,347 | 4,676 | 31,233 |
| 107,185 | 49 | 19,139 | 7,290 | 4,667 | 31,145 |
| 107,186 | 49 | 19,062 | 7,237 | 4,636 | 30,984 |
| 107,187 | 51 | 18,560 | 6,953 | 4,465 | 30,029 |
| 107,188 | 51 | 18,795 | 7,052 | 4,507 | 30,405 |
| 107,189 | 50 | 18,991 | 7,152 | 4,572 | 30,765 |
| 107,190 | 52 | 18,980 | 7,077 | 4,531 | 30,640 |
| 107,191 | 52 | 19,241 | 7,125 | 4,567 | 30,985 |

|         |    |        |       |       |        |
|---------|----|--------|-------|-------|--------|
| 107,192 | 52 | 19,431 | 7,174 | 4,617 | 31,274 |
| 107,193 | 49 | 19,300 | 7,136 | 4,614 | 31,099 |
| 107,194 | 44 | 18,952 | 7,032 | 4,547 | 30,575 |
| 107,195 | 42 | 19,218 | 7,110 | 4,561 | 30,931 |
| 107,196 | 40 | 19,090 | 6,992 | 4,519 | 30,641 |
| 107,197 | 40 | 19,333 | 7,057 | 4,576 | 31,006 |
| 107,198 | 40 | 19,246 | 7,075 | 4,574 | 30,935 |
| 107,199 | 40 | 19,286 | 7,051 | 4,610 | 30,987 |
| 107,200 | 41 | 19,304 | 7,095 | 4,623 | 31,063 |
| 107,201 | 41 | 19,426 | 7,123 | 4,647 | 31,237 |
| 107,202 | 41 | 19,691 | 7,125 | 4,634 | 31,491 |
| 107,203 | 42 | 19,771 | 7,173 | 4,617 | 31,603 |
| 107,204 | 42 | 19,023 | 6,903 | 4,452 | 30,420 |
| 107,205 | 42 | 19,223 | 6,992 | 4,487 | 30,744 |
| 107,206 | 40 | 19,475 | 7,077 | 4,548 | 31,140 |
| 107,207 | 40 | 19,424 | 7,091 | 4,559 | 31,114 |
| 107,208 | 38 | 19,608 | 7,221 | 4,678 | 31,545 |
| 107,209 | 39 | 19,793 | 7,324 | 4,730 | 31,886 |
| 107,210 | 37 | 19,685 | 7,356 | 4,773 | 31,851 |
| 107,211 | 37 | 19,523 | 7,365 | 4,777 | 31,702 |
| 107,212 | 37 | 19,558 | 7,360 | 4,779 | 31,734 |
| 107,213 | 37 | 19,512 | 7,365 | 4,758 | 31,672 |
| 107,214 | 37 | 19,531 | 7,442 | 4,787 | 31,797 |
| 107,215 | 39 | 19,636 | 7,486 | 4,807 | 31,968 |
| 107,216 | 40 | 19,677 | 7,518 | 4,852 | 32,087 |
| 107,217 | 42 | 19,763 | 7,600 | 4,869 | 32,274 |
| 107,218 | 43 | 19,789 | 7,642 | 4,874 | 32,348 |
| 107,219 | 43 | 19,776 | 7,647 | 4,894 | 32,360 |
| 107,220 | 44 | 19,722 | 7,603 | 4,854 | 32,223 |
| 107,221 | 43 | 19,854 | 7,610 | 4,854 | 32,361 |
| 107,222 | 43 | 19,823 | 7,542 | 4,823 | 32,231 |
| 107,223 | 43 | 20,249 | 7,705 | 4,929 | 32,926 |

|         |    |        |       |       |        |
|---------|----|--------|-------|-------|--------|
| 107,224 | 42 | 20,349 | 7,722 | 4,914 | 33,027 |
| 107,225 | 46 | 20,171 | 7,631 | 4,833 | 32,681 |
| 107,226 | 46 | 20,525 | 7,745 | 4,899 | 33,215 |
| 107,227 | 48 | 20,820 | 7,857 | 4,965 | 33,690 |
| 107,228 | 48 | 20,971 | 7,922 | 4,997 | 33,938 |
| 107,229 | 53 | 21,123 | 8,011 | 5,042 | 34,229 |
| 107,230 | 59 | 21,227 | 8,035 | 5,071 | 34,392 |
| 107,231 | 57 | 21,018 | 7,968 | 5,035 | 34,078 |
| 107,232 | 57 | 21,150 | 8,023 | 5,082 | 34,312 |
| 107,233 | 61 | 21,367 | 8,140 | 5,132 | 34,700 |
| 107,234 | 59 | 21,547 | 8,161 | 5,149 | 34,916 |
| 107,235 | 59 | 21,264 | 8,109 | 5,129 | 34,561 |
| 107,236 | 58 | 20,912 | 8,030 | 5,070 | 34,070 |
| 107,237 | 67 | 21,413 | 8,249 | 5,171 | 34,900 |
| 107,238 | 68 | 21,452 | 8,255 | 5,187 | 34,962 |
| 107,239 | 71 | 21,653 | 8,298 | 5,213 | 35,235 |
| 107,240 | 70 | 21,844 | 8,288 | 5,213 | 35,415 |
| 107,241 | 71 | 22,038 | 8,288 | 5,212 | 35,609 |
| 107,242 | 73 | 21,831 | 8,239 | 5,174 | 35,317 |
| 107,243 | 80 | 22,306 | 8,397 | 5,267 | 36,050 |
| 107,244 | 80 | 22,318 | 8,410 | 5,246 | 36,054 |
| 107,245 | 84 | 22,988 | 8,662 | 5,416 | 37,150 |
| 107,246 | 93 | 23,182 | 8,699 | 5,444 | 37,418 |
| 107,247 | 93 | 23,336 | 8,761 | 5,459 | 37,649 |
| 107,248 | 95 | 23,432 | 8,744 | 5,429 | 37,700 |
| 107,249 | 95 | 23,266 | 8,751 | 5,444 | 37,556 |
| 107,250 | 95 | 23,461 | 8,869 | 5,494 | 37,919 |
| 107,251 | 95 | 23,355 | 8,820 | 5,488 | 37,758 |
| 107,252 | 95 | 23,403 | 8,807 | 5,486 | 37,791 |
| 107,253 | 95 | 23,402 | 8,884 | 5,500 | 37,881 |
| 107,254 | 95 | 23,300 | 8,855 | 5,484 | 37,734 |
| 107,255 | 97 | 23,285 | 8,862 | 5,510 | 37,754 |



|         |     |        |       |       |        |
|---------|-----|--------|-------|-------|--------|
| 107,256 | 99  | 23,183 | 8,799 | 5,482 | 37,563 |
| 107,257 | 100 | 23,483 | 8,827 | 5,504 | 37,914 |
| 107,258 | 102 | 23,587 | 8,756 | 5,454 | 37,899 |
| 107,259 | 103 | 23,841 | 8,820 | 5,485 | 38,249 |
| 107,260 | 101 | 23,851 | 8,866 | 5,522 | 38,340 |
| 107,261 | 106 | 23,707 | 8,776 | 5,443 | 38,032 |
| 107,262 | 106 | 23,529 | 8,716 | 5,395 | 37,746 |
| 107,263 | 106 | 23,431 | 8,743 | 5,370 | 37,650 |
| 107,264 | 106 | 23,221 | 8,681 | 5,340 | 37,348 |
| 107,265 | 105 | 23,702 | 8,867 | 5,458 | 38,132 |
| 107,266 | 106 | 23,677 | 8,871 | 5,452 | 38,106 |
| 107,267 | 105 | 23,697 | 8,835 | 5,411 | 38,048 |
| 107,268 | 103 | 23,761 | 8,781 | 5,399 | 38,044 |
| 107,269 | 106 | 23,055 | 8,568 | 5,237 | 36,966 |
| 107,270 | 111 | 23,288 | 8,620 | 5,243 | 37,262 |
| 107,271 | 112 | 23,490 | 8,656 | 5,303 | 37,561 |
| 107,272 | 114 | 23,548 | 8,667 | 5,299 | 37,628 |
| 107,273 | 113 | 23,268 | 8,589 | 5,251 | 37,221 |
| 107,274 | 116 | 23,193 | 8,603 | 5,241 | 37,153 |
| 107,275 | 119 | 22,978 | 8,538 | 5,211 | 36,846 |
| 107,276 | 114 | 23,476 | 8,702 | 5,358 | 37,650 |
| 107,277 | 114 | 23,214 | 8,625 | 5,304 | 37,257 |
| 107,278 | 115 | 22,947 | 8,542 | 5,220 | 36,824 |
| 107,279 | 118 | 22,917 | 8,560 | 5,234 | 36,829 |
| 107,280 | 112 | 22,994 | 8,549 | 5,245 | 36,900 |
| 107,281 | 112 | 22,740 | 8,450 | 5,166 | 36,468 |
| 107,282 | 112 | 22,687 | 8,436 | 5,159 | 36,394 |
| 107,283 | 108 | 22,537 | 8,401 | 5,153 | 36,199 |
| 107,284 | 112 | 22,572 | 8,416 | 5,133 | 36,233 |
| 107,285 | 111 | 22,407 | 8,293 | 5,051 | 35,862 |
| 107,286 | 111 | 22,532 | 8,328 | 5,113 | 36,084 |
| 107,287 | 106 | 22,383 | 8,302 | 5,110 | 35,901 |

|         |     |        |       |       |        |
|---------|-----|--------|-------|-------|--------|
| 107,288 | 104 | 22,276 | 8,354 | 5,124 | 35,858 |
| 107,289 | 102 | 21,875 | 8,253 | 5,063 | 35,293 |
| 107,290 | 99  | 21,621 | 8,245 | 5,046 | 35,011 |
| 107,291 | 99  | 21,402 | 8,254 | 5,031 | 34,786 |
| 107,292 | 99  | 21,132 | 8,244 | 5,043 | 34,518 |
| 107,293 | 98  | 20,963 | 8,247 | 5,016 | 34,324 |
| 107,294 | 94  | 20,971 | 8,316 | 5,037 | 34,418 |
| 107,295 | 93  | 20,885 | 8,320 | 5,020 | 34,318 |
| 107,296 | 92  | 20,834 | 8,308 | 4,981 | 34,215 |
| 107,297 | 87  | 20,614 | 8,346 | 4,980 | 34,027 |
| 107,298 | 87  | 20,551 | 8,392 | 4,983 | 34,013 |
| 107,299 | 89  | 20,491 | 8,376 | 4,969 | 33,925 |
| 107,300 | 91  | 20,734 | 8,376 | 4,977 | 34,178 |
| 107,301 | 91  | 20,746 | 8,346 | 4,949 | 34,132 |
| 107,302 | 90  | 20,413 | 8,234 | 4,858 | 33,595 |
| 107,303 | 94  | 20,396 | 8,279 | 4,910 | 33,679 |
| 107,304 | 95  | 20,329 | 8,239 | 4,905 | 33,568 |
| 107,305 | 94  | 20,164 | 8,161 | 4,847 | 33,266 |
| 107,306 | 92  | 19,924 | 8,139 | 4,786 | 32,941 |
| 107,307 | 92  | 19,857 | 8,143 | 4,778 | 32,870 |
| 107,308 | 91  | 19,795 | 8,194 | 4,783 | 32,863 |
| 107,309 | 89  | 19,793 | 8,218 | 4,798 | 32,898 |
| 107,310 | 88  | 19,551 | 8,109 | 4,745 | 32,493 |
| 107,311 | 88  | 19,822 | 8,201 | 4,786 | 32,897 |
| 107,312 | 85  | 19,839 | 8,190 | 4,780 | 32,894 |
| 107,313 | 85  | 19,931 | 8,150 | 4,772 | 32,938 |
| 107,314 | 86  | 19,872 | 8,066 | 4,744 | 32,768 |
| 107,315 | 88  | 19,810 | 8,037 | 4,709 | 32,644 |
| 107,316 | 89  | 20,270 | 8,218 | 4,806 | 33,383 |
| 107,317 | 86  | 19,920 | 8,119 | 4,756 | 32,881 |
| 107,318 | 86  | 19,897 | 8,128 | 4,761 | 32,872 |
| 107,319 | 90  | 19,575 | 8,078 | 4,736 | 32,479 |

|         |    |        |       |       |        |
|---------|----|--------|-------|-------|--------|
| 107,320 | 87 | 19,762 | 8,131 | 4,777 | 32,757 |
| 107,321 | 83 | 19,775 | 8,204 | 4,834 | 32,896 |
| 107,322 | 83 | 19,783 | 8,211 | 4,807 | 32,884 |
| 107,323 | 83 | 19,665 | 8,140 | 4,762 | 32,650 |
| 107,324 | 83 | 19,764 | 8,214 | 4,816 | 32,877 |
| 107,325 | 80 | 19,754 | 8,229 | 4,811 | 32,874 |
| 107,326 | 77 | 19,570 | 8,172 | 4,787 | 32,606 |
| 107,327 | 77 | 19,498 | 8,199 | 4,772 | 32,546 |
| 107,328 | 77 | 19,387 | 8,170 | 4,776 | 32,410 |
| 107,329 | 74 | 19,209 | 8,138 | 4,817 | 32,238 |
| 107,330 | 71 | 19,156 | 8,135 | 4,838 | 32,200 |
| 107,331 | 69 | 19,254 | 8,153 | 4,851 | 32,327 |
| 107,332 | 63 | 19,249 | 8,129 | 4,840 | 32,281 |
| 107,333 | 63 | 19,267 | 8,121 | 4,831 | 32,282 |
| 107,334 | 63 | 19,256 | 8,121 | 4,856 | 32,296 |
| 107,335 | 59 | 19,090 | 8,054 | 4,838 | 32,041 |
| 107,336 | 59 | 19,267 | 8,090 | 4,879 | 32,295 |
| 107,337 | 62 | 19,427 | 8,124 | 4,882 | 32,495 |
| 107,338 | 61 | 19,474 | 8,058 | 4,834 | 32,427 |
| 107,339 | 62 | 19,763 | 8,143 | 4,894 | 32,862 |
| 107,340 | 61 | 19,960 | 8,130 | 4,894 | 33,045 |
| 107,341 | 60 | 20,010 | 8,108 | 4,892 | 33,070 |
| 107,342 | 58 | 20,026 | 8,091 | 4,874 | 33,049 |
| 107,343 | 59 | 20,094 | 8,065 | 4,860 | 33,078 |
| 107,344 | 56 | 18,969 | 7,510 | 4,613 | 31,148 |
| 107,345 | 56 | 19,212 | 7,561 | 4,649 | 31,478 |
| 107,346 | 55 | 19,254 | 7,478 | 4,650 | 31,437 |
| 107,347 | 55 | 19,495 | 7,569 | 4,720 | 31,839 |
| 107,348 | 56 | 19,686 | 7,683 | 4,789 | 32,214 |
| 107,349 | 56 | 19,579 | 7,620 | 4,770 | 32,025 |
| 107,350 | 54 | 19,727 | 7,607 | 4,797 | 32,185 |
| 107,351 | 51 | 19,124 | 7,427 | 4,664 | 31,266 |

|         |    |        |       |       |        |
|---------|----|--------|-------|-------|--------|
| 107,352 | 51 | 19,313 | 7,491 | 4,714 | 31,569 |
| 107,353 | 50 | 19,391 | 7,484 | 4,731 | 31,656 |
| 107,354 | 50 | 19,739 | 7,556 | 4,768 | 32,113 |
| 107,355 | 50 | 20,077 | 7,630 | 4,817 | 32,574 |
| 107,356 | 49 | 20,127 | 7,626 | 4,813 | 32,615 |
| 107,357 | 47 | 20,141 | 7,599 | 4,821 | 32,608 |
| 107,358 | 48 | 20,101 | 7,531 | 4,805 | 32,485 |
| 107,359 | 48 | 20,057 | 7,488 | 4,787 | 32,380 |
| 107,360 | 49 | 20,345 | 7,627 | 4,868 | 32,889 |
| 107,361 | 53 | 20,400 | 7,679 | 4,886 | 33,018 |
| 107,362 | 53 | 20,559 | 7,679 | 4,913 | 33,204 |
| 107,363 | 51 | 20,519 | 7,664 | 4,954 | 33,188 |
| 107,364 | 50 | 20,549 | 7,645 | 4,954 | 33,198 |
| 107,365 | 47 | 20,480 | 7,628 | 4,970 | 33,125 |
| 107,366 | 45 | 20,387 | 7,515 | 4,899 | 32,846 |
| 107,367 | 45 | 20,640 | 7,604 | 4,964 | 33,253 |
| 107,368 | 46 | 20,814 | 7,625 | 4,959 | 33,444 |
| 107,369 | 48 | 21,017 | 7,618 | 4,990 | 33,673 |
| 107,370 | 47 | 21,150 | 7,670 | 4,988 | 33,855 |
| 107,371 | 49 | 20,985 | 7,636 | 4,946 | 33,616 |
| 107,372 | 48 | 21,133 | 7,639 | 4,927 | 33,747 |
| 107,373 | 47 | 21,257 | 7,697 | 4,985 | 33,986 |
| 107,374 | 47 | 21,249 | 7,662 | 4,994 | 33,952 |
| 107,375 | 49 | 21,216 | 7,597 | 4,958 | 33,820 |
| 107,376 | 48 | 20,924 | 7,500 | 4,930 | 33,402 |
| 107,377 | 48 | 21,017 | 7,551 | 4,946 | 33,562 |
| 107,378 | 48 | 21,199 | 7,625 | 4,992 | 33,864 |
| 107,379 | 48 | 21,270 | 7,622 | 4,974 | 33,914 |
| 107,380 | 48 | 21,385 | 7,618 | 4,974 | 34,025 |
| 107,381 | 51 | 21,446 | 7,545 | 4,930 | 33,972 |
| 107,382 | 52 | 21,252 | 7,488 | 4,880 | 33,672 |
| 107,383 | 53 | 21,663 | 7,612 | 4,932 | 34,260 |

|         |    |        |       |       |        |
|---------|----|--------|-------|-------|--------|
| 107,384 | 53 | 21,842 | 7,674 | 4,995 | 34,564 |
| 107,385 | 54 | 21,951 | 7,663 | 4,944 | 34,612 |
| 107,386 | 54 | 21,901 | 7,667 | 4,939 | 34,561 |
| 107,387 | 57 | 22,294 | 7,797 | 4,979 | 35,127 |
| 107,388 | 53 | 22,297 | 7,816 | 4,981 | 35,147 |
| 107,389 | 54 | 22,593 | 7,870 | 5,009 | 35,526 |
| 107,390 | 57 | 22,743 | 7,874 | 5,061 | 35,735 |
| 107,391 | 60 | 22,438 | 7,894 | 5,063 | 35,455 |
| 107,392 | 61 | 22,650 | 7,915 | 5,092 | 35,718 |
| 107,393 | 61 | 23,012 | 8,010 | 5,151 | 36,234 |
| 107,394 | 59 | 23,145 | 8,032 | 5,181 | 36,417 |
| 107,395 | 59 | 23,282 | 8,065 | 5,201 | 36,607 |
| 107,396 | 60 | 23,517 | 8,128 | 5,238 | 36,943 |
| 107,397 | 58 | 22,914 | 7,928 | 5,060 | 35,960 |
| 107,398 | 59 | 23,282 | 7,997 | 5,102 | 36,440 |
| 107,399 | 59 | 23,612 | 8,039 | 5,139 | 36,849 |
| 107,400 | 62 | 23,984 | 8,109 | 5,209 | 37,364 |
| 107,401 | 65 | 24,004 | 8,145 | 5,220 | 37,434 |
| 107,402 | 69 | 23,853 | 8,040 | 5,179 | 37,141 |
| 107,403 | 69 | 23,698 | 7,983 | 5,150 | 36,900 |
| 107,404 | 76 | 23,917 | 8,156 | 5,228 | 37,377 |
| 107,405 | 77 | 24,083 | 8,222 | 5,286 | 37,668 |
| 107,406 | 75 | 24,070 | 8,234 | 5,290 | 37,669 |
| 107,407 | 78 | 23,830 | 8,156 | 5,249 | 37,313 |
| 107,408 | 77 | 23,637 | 8,127 | 5,237 | 37,078 |
| 107,409 | 78 | 24,062 | 8,276 | 5,358 | 37,774 |
| 107,410 | 80 | 24,116 | 8,270 | 5,359 | 37,825 |
| 107,411 | 79 | 24,341 | 8,257 | 5,362 | 38,039 |
| 107,412 | 75 | 24,576 | 8,247 | 5,359 | 38,257 |
| 107,413 | 76 | 24,611 | 8,272 | 5,369 | 38,328 |
| 107,414 | 76 | 24,324 | 8,192 | 5,315 | 37,907 |
| 107,415 | 78 | 24,428 | 8,254 | 5,346 | 38,106 |

|         |    |        |       |       |        |
|---------|----|--------|-------|-------|--------|
| 107,416 | 78 | 24,452 | 8,294 | 5,347 | 38,171 |
| 107,417 | 78 | 24,792 | 8,373 | 5,401 | 38,644 |
| 107,418 | 80 | 24,798 | 8,382 | 5,427 | 38,687 |
| 107,419 | 85 | 24,691 | 8,378 | 5,455 | 38,609 |
| 107,420 | 83 | 24,725 | 8,355 | 5,427 | 38,590 |
| 107,421 | 80 | 24,659 | 8,305 | 5,419 | 38,463 |
| 107,422 | 79 | 24,810 | 8,287 | 5,433 | 38,609 |
| 107,423 | 79 | 24,605 | 8,219 | 5,387 | 38,290 |
| 107,424 | 78 | 24,280 | 8,230 | 5,385 | 37,973 |
| 107,425 | 78 | 24,378 | 8,267 | 5,403 | 38,126 |
| 107,426 | 76 | 24,259 | 8,270 | 5,392 | 37,997 |
| 107,427 | 76 | 24,224 | 8,260 | 5,368 | 37,928 |
| 107,428 | 79 | 24,357 | 8,233 | 5,367 | 38,036 |
| 107,429 | 80 | 24,392 | 8,218 | 5,357 | 38,047 |
| 107,430 | 83 | 24,300 | 8,195 | 5,362 | 37,940 |
| 107,431 | 84 | 24,183 | 8,158 | 5,327 | 37,752 |
| 107,432 | 81 | 23,879 | 8,115 | 5,297 | 37,372 |
| 107,433 | 81 | 23,573 | 8,011 | 5,251 | 36,916 |
| 107,434 | 85 | 23,807 | 8,112 | 5,305 | 37,309 |
| 107,435 | 84 | 23,737 | 8,094 | 5,283 | 37,198 |
| 107,436 | 83 | 23,588 | 8,050 | 5,276 | 36,997 |
| 107,437 | 82 | 23,617 | 8,013 | 5,283 | 36,995 |
| 107,438 | 83 | 23,533 | 8,002 | 5,298 | 36,916 |
| 107,439 | 84 | 23,299 | 7,891 | 5,240 | 36,514 |
| 107,440 | 83 | 23,202 | 7,874 | 5,226 | 36,385 |
| 107,441 | 80 | 23,110 | 7,829 | 5,204 | 36,223 |
| 107,442 | 78 | 23,288 | 7,759 | 5,180 | 36,305 |
| 107,443 | 82 | 22,987 | 7,685 | 5,138 | 35,892 |
| 107,444 | 83 | 22,837 | 7,644 | 5,119 | 35,683 |
| 107,445 | 86 | 23,196 | 7,763 | 5,165 | 36,210 |
| 107,446 | 85 | 22,478 | 7,533 | 5,063 | 35,159 |
| 107,447 | 88 | 22,616 | 7,529 | 5,090 | 35,323 |

|         |    |        |       |       |        |
|---------|----|--------|-------|-------|--------|
| 107,448 | 90 | 22,588 | 7,513 | 5,069 | 35,260 |
| 107,449 | 89 | 22,246 | 7,429 | 5,023 | 34,787 |
| 107,450 | 87 | 22,390 | 7,462 | 5,064 | 35,003 |
| 107,451 | 85 | 22,325 | 7,467 | 5,034 | 34,911 |
| 107,452 | 82 | 22,243 | 7,443 | 5,007 | 34,775 |
| 107,453 | 77 | 22,366 | 7,461 | 5,048 | 34,952 |
| 107,454 | 77 | 22,422 | 7,398 | 5,020 | 34,917 |
| 107,455 | 76 | 22,226 | 7,336 | 4,972 | 34,610 |
| 107,456 | 73 | 22,033 | 7,220 | 4,855 | 34,181 |
| 107,457 | 73 | 22,297 | 7,287 | 4,884 | 34,541 |
| 107,458 | 72 | 22,633 | 7,332 | 4,920 | 34,957 |
| 107,459 | 72 | 22,701 | 7,343 | 4,911 | 35,027 |
| 107,460 | 73 | 22,637 | 7,320 | 4,874 | 34,904 |
| 107,461 | 72 | 22,466 | 7,231 | 4,819 | 34,588 |
| 107,462 | 72 | 22,932 | 7,454 | 4,932 | 35,390 |
| 107,463 | 74 | 22,868 | 7,484 | 4,958 | 35,384 |
| 107,464 | 74 | 22,563 | 7,378 | 4,886 | 34,901 |
| 107,465 | 73 | 22,672 | 7,378 | 4,865 | 34,988 |
| 107,466 | 84 | 22,930 | 7,468 | 4,912 | 35,394 |
| 107,467 | 83 | 22,572 | 7,342 | 4,810 | 34,807 |
| 107,468 | 82 | 22,825 | 7,401 | 4,847 | 35,155 |
| 107,469 | 82 | 23,085 | 7,465 | 4,874 | 35,506 |
| 107,470 | 75 | 23,146 | 7,437 | 4,855 | 35,513 |
| 107,471 | 74 | 23,003 | 7,442 | 4,867 | 35,386 |
| 107,472 | 75 | 23,092 | 7,484 | 4,895 | 35,546 |
| 107,473 | 76 | 23,176 | 7,478 | 4,907 | 35,637 |
| 107,474 | 74 | 23,125 | 7,342 | 4,834 | 35,375 |
| 107,475 | 74 | 23,430 | 7,371 | 4,854 | 35,729 |
| 107,476 | 74 | 23,441 | 7,364 | 4,865 | 35,744 |
| 107,477 | 77 | 23,633 | 7,364 | 4,880 | 35,954 |
| 107,478 | 79 | 24,163 | 7,460 | 4,986 | 36,688 |
| 107,479 | 75 | 23,992 | 7,419 | 4,960 | 36,446 |

|         |    |        |       |       |        |
|---------|----|--------|-------|-------|--------|
| 107,480 | 75 | 24,350 | 7,473 | 5,031 | 36,929 |
| 107,481 | 71 | 24,384 | 7,473 | 5,037 | 36,965 |
| 107,482 | 70 | 24,513 | 7,541 | 5,082 | 37,206 |
| 107,483 | 71 | 24,725 | 7,554 | 5,116 | 37,466 |
| 107,484 | 70 | 24,910 | 7,574 | 5,119 | 37,673 |
| 107,485 | 74 | 25,070 | 7,575 | 5,136 | 37,855 |
| 107,486 | 74 | 24,844 | 7,505 | 5,080 | 37,503 |
| 107,487 | 77 | 25,224 | 7,584 | 5,135 | 38,020 |
| 107,488 | 76 | 24,744 | 7,429 | 5,039 | 37,288 |
| 107,489 | 74 | 25,118 | 7,501 | 5,068 | 37,761 |
| 107,490 | 74 | 25,063 | 7,507 | 5,079 | 37,723 |
| 107,491 | 76 | 24,818 | 7,470 | 5,054 | 37,418 |
| 107,492 | 79 | 25,080 | 7,594 | 5,128 | 37,881 |
| 107,493 | 83 | 25,331 | 7,638 | 5,149 | 38,201 |
| 107,494 | 79 | 25,257 | 7,634 | 5,131 | 38,101 |
| 107,495 | 78 | 25,198 | 7,612 | 5,136 | 38,024 |
| 107,496 | 80 | 25,285 | 7,577 | 5,128 | 38,070 |
| 107,497 | 79 | 25,005 | 7,520 | 5,073 | 37,677 |
| 107,498 | 76 | 25,032 | 7,547 | 5,072 | 37,727 |
| 107,499 | 74 | 24,820 | 7,451 | 5,026 | 37,371 |
| 107,500 | 74 | 24,704 | 7,403 | 4,994 | 37,175 |
| 107,501 | 83 | 25,815 | 7,731 | 5,216 | 38,845 |
| 107,502 | 81 | 25,905 | 7,745 | 5,247 | 38,978 |
| 107,503 | 80 | 25,295 | 7,626 | 5,157 | 38,158 |
| 107,504 | 80 | 25,380 | 7,689 | 5,164 | 38,313 |
| 107,505 | 79 | 25,491 | 7,776 | 5,191 | 38,537 |
| 107,506 | 82 | 25,470 | 7,717 | 5,179 | 38,448 |
| 107,507 | 82 | 25,240 | 7,616 | 5,177 | 38,115 |
| 107,508 | 82 | 25,175 | 7,610 | 5,195 | 38,062 |
| 107,509 | 83 | 25,385 | 7,687 | 5,276 | 38,431 |
| 107,510 | 90 | 25,193 | 7,637 | 5,238 | 38,158 |
| 107,511 | 89 | 25,126 | 7,568 | 5,213 | 37,996 |



|         |    |        |       |       |        |
|---------|----|--------|-------|-------|--------|
| 107,512 | 91 | 25,381 | 7,652 | 5,254 | 38,378 |
| 107,513 | 91 | 25,379 | 7,643 | 5,261 | 38,374 |
| 107,514 | 89 | 25,277 | 7,570 | 5,199 | 38,135 |
| 107,515 | 89 | 25,493 | 7,609 | 5,277 | 38,468 |
| 107,516 | 84 | 25,751 | 7,716 | 5,318 | 38,869 |
| 107,517 | 84 | 25,690 | 7,664 | 5,309 | 38,747 |
| 107,518 | 84 | 25,342 | 7,519 | 5,243 | 38,188 |
| 107,519 | 92 | 25,047 | 7,433 | 5,195 | 37,767 |
| 107,520 | 91 | 24,839 | 7,346 | 5,143 | 37,419 |
| 107,521 | 92 | 25,046 | 7,449 | 5,204 | 37,791 |
| 107,522 | 92 | 24,899 | 7,383 | 5,133 | 37,507 |
| 107,523 | 91 | 25,163 | 7,474 | 5,220 | 37,948 |
| 107,524 | 89 | 24,764 | 7,380 | 5,146 | 37,379 |
| 107,525 | 90 | 24,580 | 7,341 | 5,121 | 37,132 |
| 107,526 | 90 | 24,497 | 7,341 | 5,095 | 37,023 |
| 107,527 | 87 | 25,264 | 7,574 | 5,251 | 38,176 |
| 107,528 | 87 | 25,283 | 7,582 | 5,235 | 38,187 |
| 107,529 | 85 | 25,084 | 7,535 | 5,182 | 37,886 |
| 107,530 | 85 | 25,336 | 7,580 | 5,229 | 38,230 |
| 107,531 | 87 | 24,994 | 7,455 | 5,118 | 37,654 |
| 107,532 | 87 | 25,249 | 7,503 | 5,127 | 37,966 |
| 107,533 | 87 | 25,379 | 7,487 | 5,126 | 38,079 |
| 107,534 | 86 | 24,616 | 7,264 | 4,946 | 36,912 |
| 107,535 | 84 | 24,731 | 7,320 | 4,995 | 37,130 |
| 107,536 | 83 | 24,931 | 7,344 | 5,014 | 37,372 |
| 107,537 | 83 | 24,780 | 7,331 | 5,003 | 37,197 |
| 107,538 | 81 | 25,294 | 7,477 | 5,135 | 37,987 |
| 107,539 | 82 | 25,154 | 7,415 | 5,074 | 37,725 |
| 107,540 | 83 | 25,256 | 7,418 | 5,088 | 37,845 |
| 107,541 | 80 | 25,492 | 7,476 | 5,105 | 38,153 |
| 107,542 | 78 | 25,293 | 7,390 | 5,047 | 37,808 |
| 107,543 | 77 | 25,268 | 7,435 | 5,075 | 37,855 |

|         |    |        |       |       |        |
|---------|----|--------|-------|-------|--------|
| 107,544 | 76 | 25,157 | 7,457 | 5,114 | 37,804 |
| 107,545 | 77 | 25,219 | 7,440 | 5,078 | 37,814 |
| 107,546 | 77 | 25,126 | 7,425 | 5,070 | 37,698 |
| 107,547 | 75 | 25,058 | 7,495 | 5,131 | 37,759 |
| 107,548 | 75 | 24,765 | 7,420 | 5,042 | 37,302 |
| 107,549 | 74 | 24,743 | 7,430 | 5,056 | 37,303 |
| 107,550 | 71 | 24,798 | 7,449 | 5,089 | 37,407 |
| 107,551 | 71 | 24,592 | 7,478 | 5,090 | 37,231 |
| 107,552 | 71 | 24,394 | 7,471 | 5,081 | 37,017 |
| 107,553 | 73 | 24,283 | 7,462 | 5,053 | 36,871 |
| 107,554 | 72 | 24,354 | 7,452 | 5,058 | 36,936 |
| 107,555 | 72 | 24,558 | 7,440 | 5,064 | 37,134 |
| 107,556 | 69 | 24,631 | 7,401 | 5,072 | 37,173 |
| 107,557 | 66 | 24,346 | 7,328 | 5,016 | 36,756 |
| 107,558 | 66 | 24,369 | 7,346 | 4,983 | 36,764 |
| 107,559 | 65 | 24,292 | 7,324 | 4,982 | 36,663 |
| 107,560 | 66 | 24,035 | 7,269 | 4,933 | 36,303 |
| 107,561 | 60 | 24,419 | 7,418 | 5,034 | 36,931 |
| 107,562 | 61 | 24,023 | 7,331 | 4,988 | 36,403 |
| 107,563 | 58 | 23,760 | 7,234 | 4,946 | 35,998 |
| 107,564 | 58 | 23,483 | 7,189 | 4,915 | 35,645 |
| 107,565 | 63 | 23,578 | 7,309 | 4,979 | 35,929 |
| 107,566 | 63 | 23,772 | 7,343 | 5,017 | 36,195 |
| 107,567 | 61 | 24,019 | 7,405 | 5,049 | 36,534 |
| 107,568 | 58 | 24,155 | 7,428 | 5,078 | 36,719 |
| 107,569 | 60 | 24,151 | 7,440 | 5,063 | 36,714 |
| 107,570 | 52 | 23,949 | 7,349 | 5,014 | 36,364 |
| 107,571 | 52 | 23,623 | 7,217 | 4,932 | 35,824 |
| 107,572 | 52 | 23,659 | 7,212 | 4,939 | 35,862 |
| 107,573 | 52 | 23,339 | 7,133 | 4,906 | 35,430 |
| 107,574 | 52 | 23,100 | 7,097 | 4,878 | 35,127 |
| 107,575 | 55 | 24,112 | 7,410 | 5,137 | 36,714 |

|         |    |        |       |       |        |
|---------|----|--------|-------|-------|--------|
| 107,576 | 56 | 24,024 | 7,403 | 5,122 | 36,605 |
| 107,577 | 56 | 23,844 | 7,361 | 5,134 | 36,395 |
| 107,578 | 57 | 23,481 | 7,292 | 5,064 | 35,894 |
| 107,579 | 58 | 23,469 | 7,279 | 5,070 | 35,876 |
| 107,580 | 61 | 23,476 | 7,279 | 5,081 | 35,897 |
| 107,581 | 61 | 23,094 | 7,219 | 5,026 | 35,400 |
| 107,582 | 60 | 23,183 | 7,368 | 5,109 | 35,720 |
| 107,583 | 63 | 23,095 | 7,361 | 5,113 | 35,632 |
| 107,584 | 62 | 23,099 | 7,324 | 5,115 | 35,600 |
| 107,585 | 63 | 23,129 | 7,335 | 5,130 | 35,657 |
| 107,586 | 63 | 22,961 | 7,268 | 5,094 | 35,386 |
| 107,587 | 59 | 22,914 | 7,259 | 5,084 | 35,316 |
| 107,588 | 64 | 23,137 | 7,335 | 5,120 | 35,656 |
| 107,589 | 64 | 23,068 | 7,307 | 5,115 | 35,554 |
| 107,590 | 62 | 22,829 | 7,247 | 5,093 | 35,231 |
| 107,591 | 61 | 22,880 | 7,277 | 5,146 | 35,364 |
| 107,592 | 62 | 22,913 | 7,275 | 5,154 | 35,404 |
| 107,593 | 62 | 22,722 | 7,204 | 5,105 | 35,093 |
| 107,594 | 66 | 22,852 | 7,240 | 5,143 | 35,301 |
| 107,595 | 63 | 23,149 | 7,337 | 5,197 | 35,746 |
| 107,596 | 63 | 23,262 | 7,309 | 5,197 | 35,831 |
| 107,597 | 61 | 23,554 | 7,340 | 5,221 | 36,176 |
| 107,598 | 61 | 23,553 | 7,317 | 5,197 | 36,128 |
| 107,599 | 60 | 23,305 | 7,191 | 5,142 | 35,698 |
| 107,600 | 58 | 23,603 | 7,275 | 5,195 | 36,131 |
| 107,601 | 56 | 23,808 | 7,263 | 5,197 | 36,324 |
| 107,602 | 58 | 23,869 | 7,213 | 5,168 | 36,308 |
| 107,603 | 57 | 24,077 | 7,174 | 5,168 | 36,476 |
| 107,604 | 55 | 23,728 | 7,076 | 5,125 | 35,984 |
| 107,605 | 55 | 23,678 | 7,081 | 5,124 | 35,938 |
| 107,606 | 54 | 23,795 | 7,103 | 5,158 | 36,110 |
| 107,607 | 56 | 23,835 | 7,135 | 5,161 | 36,187 |

|         |    |        |       |       |        |
|---------|----|--------|-------|-------|--------|
| 107,608 | 57 | 23,709 | 7,154 | 5,136 | 36,056 |
| 107,609 | 57 | 23,432 | 7,086 | 5,095 | 35,670 |
| 107,610 | 57 | 23,527 | 7,105 | 5,077 | 35,766 |
| 107,611 | 56 | 23,578 | 7,150 | 5,088 | 35,872 |
| 107,612 | 55 | 23,163 | 6,959 | 4,977 | 35,154 |
| 107,613 | 59 | 23,486 | 7,014 | 5,030 | 35,589 |
| 107,614 | 54 | 23,673 | 7,064 | 5,081 | 35,872 |
| 107,615 | 55 | 23,661 | 7,022 | 5,058 | 35,796 |
| 107,616 | 59 | 23,383 | 6,950 | 4,992 | 35,384 |
| 107,617 | 60 | 23,027 | 6,881 | 4,928 | 34,896 |
| 107,618 | 63 | 23,534 | 6,974 | 5,024 | 35,595 |
| 107,619 | 69 | 23,490 | 6,988 | 4,985 | 35,532 |
| 107,620 | 67 | 23,189 | 6,911 | 4,946 | 35,113 |
| 107,621 | 66 | 23,269 | 6,974 | 4,961 | 35,270 |
| 107,622 | 66 | 23,401 | 6,941 | 4,943 | 35,351 |
| 107,623 | 67 | 23,614 | 6,980 | 4,992 | 35,653 |
| 107,624 | 66 | 23,850 | 7,029 | 5,014 | 35,959 |
| 107,625 | 65 | 23,387 | 6,898 | 4,933 | 35,283 |
| 107,626 | 65 | 23,864 | 6,990 | 4,991 | 35,910 |
| 107,627 | 64 | 24,062 | 7,065 | 5,035 | 36,226 |
| 107,628 | 64 | 24,220 | 7,093 | 5,058 | 36,435 |
| 107,629 | 65 | 24,128 | 7,144 | 5,069 | 36,406 |
| 107,630 | 64 | 23,839 | 7,123 | 5,038 | 36,064 |
| 107,631 | 64 | 23,729 | 7,076 | 5,035 | 35,904 |
| 107,632 | 65 | 24,015 | 7,104 | 5,081 | 36,265 |
| 107,633 | 64 | 24,072 | 7,095 | 5,075 | 36,306 |
| 107,634 | 62 | 23,937 | 7,123 | 5,071 | 36,193 |
| 107,635 | 62 | 23,829 | 7,121 | 5,046 | 36,058 |
| 107,636 | 62 | 23,539 | 7,050 | 5,005 | 35,656 |
| 107,637 | 62 | 23,480 | 6,997 | 4,982 | 35,521 |
| 107,638 | 66 | 23,526 | 7,018 | 4,968 | 35,578 |
| 107,639 | 61 | 23,319 | 6,954 | 4,918 | 35,252 |

|         |     |        |       |       |        |
|---------|-----|--------|-------|-------|--------|
| 107,640 | 62  | 23,747 | 7,098 | 5,023 | 35,930 |
| 107,641 | 61  | 23,473 | 7,008 | 4,936 | 35,478 |
| 107,642 | 64  | 23,737 | 7,125 | 4,981 | 35,907 |
| 107,643 | 72  | 23,323 | 7,031 | 4,913 | 35,339 |
| 107,644 | 72  | 23,413 | 7,033 | 4,932 | 35,450 |
| 107,645 | 70  | 23,436 | 7,085 | 4,953 | 35,544 |
| 107,646 | 75  | 23,124 | 6,991 | 4,897 | 35,087 |
| 107,647 | 75  | 22,737 | 6,958 | 4,853 | 34,623 |
| 107,648 | 77  | 23,214 | 7,083 | 4,939 | 35,313 |
| 107,649 | 82  | 22,957 | 6,997 | 4,900 | 34,936 |
| 107,650 | 82  | 22,904 | 7,017 | 4,893 | 34,896 |
| 107,651 | 84  | 23,116 | 7,123 | 4,962 | 35,285 |
| 107,652 | 90  | 22,751 | 7,057 | 4,895 | 34,793 |
| 107,653 | 88  | 22,489 | 7,012 | 4,862 | 34,451 |
| 107,654 | 92  | 22,969 | 7,186 | 4,957 | 35,204 |
| 107,655 | 94  | 23,095 | 7,216 | 4,960 | 35,365 |
| 107,656 | 95  | 23,269 | 7,253 | 5,002 | 35,619 |
| 107,657 | 97  | 22,931 | 7,150 | 4,902 | 35,080 |
| 107,658 | 98  | 23,139 | 7,221 | 4,946 | 35,404 |
| 107,659 | 98  | 23,159 | 7,220 | 4,947 | 35,424 |
| 107,660 | 101 | 23,470 | 7,278 | 5,007 | 35,856 |
| 107,661 | 103 | 23,172 | 7,183 | 4,949 | 35,407 |
| 107,662 | 109 | 23,480 | 7,251 | 4,992 | 35,832 |
| 107,663 | 107 | 23,456 | 7,262 | 4,999 | 35,824 |
| 107,664 | 106 | 23,135 | 7,201 | 4,942 | 35,384 |
| 107,665 | 106 | 22,910 | 7,143 | 4,890 | 35,049 |
| 107,666 | 112 | 22,851 | 7,148 | 4,907 | 35,018 |
| 107,667 | 107 | 22,581 | 7,067 | 4,857 | 34,612 |
| 107,668 | 108 | 22,893 | 7,153 | 4,890 | 35,044 |
| 107,669 | 107 | 22,622 | 7,065 | 4,848 | 34,642 |
| 107,670 | 102 | 23,240 | 7,184 | 4,987 | 35,513 |
| 107,671 | 105 | 23,257 | 7,143 | 4,989 | 35,494 |

|         |     |        |       |       |        |
|---------|-----|--------|-------|-------|--------|
| 107,672 | 105 | 22,918 | 7,066 | 4,942 | 35,031 |
| 107,673 | 111 | 22,633 | 7,035 | 4,904 | 34,683 |
| 107,674 | 109 | 22,409 | 6,990 | 4,849 | 34,357 |
| 107,675 | 114 | 23,045 | 7,187 | 4,977 | 35,323 |
| 107,676 | 117 | 23,054 | 7,196 | 5,029 | 35,396 |
| 107,677 | 118 | 23,080 | 7,214 | 5,065 | 35,477 |
| 107,678 | 118 | 23,111 | 7,217 | 5,084 | 35,530 |
| 107,679 | 118 | 23,109 | 7,200 | 5,077 | 35,504 |
| 107,680 | 116 | 23,121 | 7,133 | 5,067 | 35,437 |
| 107,681 | 116 | 23,110 | 7,088 | 5,035 | 35,349 |
| 107,682 | 121 | 23,534 | 7,188 | 5,090 | 35,933 |
| 107,683 | 123 | 23,464 | 7,162 | 5,040 | 35,789 |
| 107,684 | 124 | 23,603 | 7,183 | 5,051 | 35,961 |
| 107,685 | 124 | 23,562 | 7,072 | 5,005 | 35,763 |
| 107,686 | 125 | 23,692 | 7,132 | 5,035 | 35,984 |
| 107,687 | 126 | 23,564 | 7,131 | 5,029 | 35,850 |
| 107,688 | 122 | 23,364 | 7,069 | 5,007 | 35,562 |
| 107,689 | 123 | 23,417 | 7,044 | 5,012 | 35,596 |
| 107,690 | 122 | 23,440 | 7,046 | 4,989 | 35,597 |
| 107,691 | 123 | 23,837 | 7,168 | 5,067 | 36,195 |
| 107,692 | 124 | 23,615 | 7,144 | 5,043 | 35,926 |
| 107,693 | 121 | 23,538 | 7,091 | 5,045 | 35,795 |
| 107,694 | 116 | 23,535 | 7,073 | 5,008 | 35,732 |
| 107,695 | 113 | 23,382 | 7,034 | 4,986 | 35,515 |
| 107,696 | 116 | 23,549 | 7,093 | 5,019 | 35,777 |
| 107,697 | 111 | 23,542 | 7,042 | 5,000 | 35,695 |
| 107,698 | 115 | 23,255 | 6,973 | 4,944 | 35,287 |
| 107,699 | 113 | 23,024 | 6,886 | 4,911 | 34,934 |
| 107,700 | 109 | 23,458 | 6,965 | 4,982 | 35,514 |
| 107,701 | 109 | 23,164 | 6,853 | 4,927 | 35,053 |
| 107,702 | 108 | 23,257 | 6,852 | 4,918 | 35,135 |
| 107,703 | 112 | 23,557 | 6,931 | 5,002 | 35,602 |

|         |     |        |       |       |        |
|---------|-----|--------|-------|-------|--------|
| 107,704 | 114 | 23,644 | 6,913 | 4,992 | 35,663 |
| 107,705 | 112 | 23,316 | 6,836 | 4,929 | 35,193 |
| 107,706 | 112 | 23,364 | 6,835 | 4,939 | 35,250 |
| 107,707 | 111 | 23,451 | 6,893 | 4,971 | 35,426 |
| 107,708 | 107 | 23,535 | 6,885 | 5,004 | 35,531 |
| 107,709 | 106 | 23,602 | 6,881 | 5,029 | 35,618 |
| 107,710 | 104 | 23,364 | 6,817 | 4,994 | 35,279 |
| 107,711 | 104 | 23,638 | 6,863 | 5,043 | 35,648 |
| 107,712 | 102 | 23,762 | 6,895 | 5,082 | 35,841 |
| 107,713 | 98  | 23,828 | 6,897 | 5,093 | 35,916 |
| 107,714 | 98  | 23,793 | 6,900 | 5,115 | 35,906 |
| 107,715 | 93  | 23,561 | 6,829 | 5,077 | 35,560 |
| 107,716 | 91  | 23,922 | 6,901 | 5,151 | 36,065 |
| 107,717 | 84  | 23,871 | 6,889 | 5,170 | 36,014 |
| 107,718 | 85  | 23,970 | 6,929 | 5,201 | 36,185 |
| 107,719 | 84  | 23,974 | 7,005 | 5,258 | 36,321 |
| 107,720 | 88  | 23,664 | 6,964 | 5,210 | 35,926 |
| 107,721 | 88  | 23,668 | 6,989 | 5,213 | 35,958 |
| 107,722 | 91  | 23,567 | 7,078 | 5,272 | 36,008 |
| 107,723 | 92  | 23,589 | 7,078 | 5,275 | 36,034 |
| 107,724 | 85  | 23,606 | 7,051 | 5,265 | 36,007 |
| 107,725 | 87  | 23,686 | 7,015 | 5,240 | 36,028 |
| 107,726 | 84  | 23,801 | 6,970 | 5,237 | 36,092 |
| 107,727 | 81  | 23,903 | 6,986 | 5,213 | 36,183 |
| 107,728 | 81  | 23,933 | 6,964 | 5,194 | 36,172 |
| 107,729 | 82  | 23,795 | 6,922 | 5,168 | 35,967 |
| 107,730 | 86  | 23,645 | 6,884 | 5,125 | 35,740 |
| 107,731 | 89  | 24,041 | 7,003 | 5,203 | 36,336 |
| 107,732 | 89  | 24,326 | 7,084 | 5,261 | 36,760 |
| 107,733 | 86  | 24,367 | 7,072 | 5,268 | 36,793 |
| 107,734 | 87  | 24,118 | 7,004 | 5,231 | 36,440 |
| 107,735 | 86  | 23,784 | 6,918 | 5,197 | 35,985 |

|         |     |        |       |       |        |
|---------|-----|--------|-------|-------|--------|
| 107,736 | 85  | 24,049 | 7,015 | 5,232 | 36,381 |
| 107,737 | 85  | 24,347 | 7,126 | 5,323 | 36,881 |
| 107,738 | 85  | 24,329 | 7,112 | 5,331 | 36,857 |
| 107,739 | 85  | 24,209 | 7,075 | 5,312 | 36,681 |
| 107,740 | 84  | 23,863 | 7,002 | 5,269 | 36,218 |
| 107,741 | 87  | 24,318 | 7,120 | 5,357 | 36,882 |
| 107,742 | 85  | 24,365 | 7,132 | 5,353 | 36,935 |
| 107,743 | 83  | 24,584 | 7,135 | 5,384 | 37,186 |
| 107,744 | 85  | 24,664 | 7,184 | 5,416 | 37,349 |
| 107,745 | 83  | 24,822 | 7,224 | 5,455 | 37,584 |
| 107,746 | 82  | 24,726 | 7,173 | 5,426 | 37,407 |
| 107,747 | 81  | 24,902 | 7,185 | 5,452 | 37,620 |
| 107,748 | 82  | 25,117 | 7,359 | 5,570 | 38,128 |
| 107,749 | 81  | 25,201 | 7,353 | 5,559 | 38,194 |
| 107,750 | 80  | 25,169 | 7,331 | 5,556 | 38,136 |
| 107,751 | 80  | 25,571 | 7,522 | 5,655 | 38,828 |
| 107,752 | 79  | 25,120 | 7,419 | 5,598 | 38,216 |
| 107,753 | 79  | 25,187 | 7,465 | 5,619 | 38,350 |
| 107,754 | 72  | 25,279 | 7,507 | 5,678 | 38,536 |
| 107,755 | 73  | 25,486 | 7,538 | 5,720 | 38,817 |
| 107,756 | 71  | 25,469 | 7,524 | 5,722 | 38,786 |
| 107,757 | 74  | 25,418 | 7,546 | 5,722 | 38,760 |
| 107,758 | 78  | 25,398 | 7,539 | 5,715 | 38,730 |
| 107,759 | 83  | 25,259 | 7,491 | 5,661 | 38,494 |
| 107,760 | 87  | 25,340 | 7,488 | 5,666 | 38,581 |
| 107,761 | 85  | 25,328 | 7,445 | 5,654 | 38,512 |
| 107,762 | 93  | 25,249 | 7,421 | 5,609 | 38,372 |
| 107,763 | 96  | 25,848 | 7,558 | 5,718 | 39,220 |
| 107,764 | 95  | 25,931 | 7,522 | 5,692 | 39,240 |
| 107,765 | 96  | 26,264 | 7,587 | 5,748 | 39,695 |
| 107,766 | 98  | 26,612 | 7,632 | 5,797 | 40,139 |
| 107,767 | 100 | 26,699 | 7,638 | 5,773 | 40,210 |



|         |     |        |       |       |        |
|---------|-----|--------|-------|-------|--------|
| 107,768 | 101 | 27,156 | 7,707 | 5,818 | 40,782 |
| 107,769 | 102 | 27,356 | 7,722 | 5,827 | 41,007 |
| 107,770 | 103 | 27,500 | 7,730 | 5,815 | 41,148 |
| 107,771 | 99  | 27,682 | 7,730 | 5,824 | 41,335 |
| 107,772 | 96  | 27,764 | 7,637 | 5,780 | 41,277 |
| 107,773 | 95  | 27,672 | 7,604 | 5,741 | 41,112 |
| 107,774 | 95  | 27,773 | 7,605 | 5,743 | 41,216 |
| 107,775 | 95  | 27,674 | 7,616 | 5,730 | 41,115 |
| 107,776 | 93  | 27,491 | 7,575 | 5,709 | 40,868 |
| 107,777 | 93  | 27,356 | 7,557 | 5,706 | 40,712 |
| 107,778 | 94  | 27,353 | 7,542 | 5,723 | 40,712 |
| 107,779 | 94  | 27,318 | 7,538 | 5,695 | 40,645 |
| 107,780 | 92  | 27,172 | 7,490 | 5,656 | 40,410 |
| 107,781 | 88  | 27,102 | 7,450 | 5,625 | 40,265 |
| 107,782 | 86  | 27,086 | 7,412 | 5,597 | 40,181 |
| 107,783 | 84  | 26,759 | 7,307 | 5,535 | 39,685 |
| 107,784 | 82  | 26,701 | 7,290 | 5,518 | 39,591 |
| 107,785 | 80  | 26,406 | 7,211 | 5,466 | 39,163 |
| 107,786 | 80  | 26,369 | 7,146 | 5,420 | 39,015 |
| 107,787 | 79  | 27,348 | 7,354 | 5,598 | 40,379 |
| 107,788 | 80  | 27,201 | 7,323 | 5,587 | 40,191 |
| 107,789 | 79  | 26,869 | 7,268 | 5,518 | 39,734 |
| 107,790 | 79  | 26,699 | 7,235 | 5,507 | 39,520 |
| 107,791 | 76  | 26,828 | 7,274 | 5,563 | 39,741 |
| 107,792 | 76  | 26,638 | 7,251 | 5,555 | 39,520 |
| 107,793 | 76  | 26,518 | 7,226 | 5,535 | 39,355 |
| 107,794 | 76  | 26,562 | 7,219 | 5,511 | 39,368 |
| 107,795 | 74  | 26,621 | 7,191 | 5,494 | 39,380 |
| 107,796 | 77  | 26,680 | 7,166 | 5,468 | 39,391 |
| 107,797 | 81  | 26,368 | 7,035 | 5,360 | 38,844 |
| 107,798 | 83  | 26,550 | 7,032 | 5,363 | 39,028 |
| 107,799 | 84  | 27,082 | 7,087 | 5,400 | 39,653 |

|         |    |        |       |       |        |
|---------|----|--------|-------|-------|--------|
| 107,800 | 83 | 27,027 | 7,075 | 5,395 | 39,580 |
| 107,801 | 84 | 26,841 | 6,958 | 5,323 | 39,206 |
| 107,802 | 85 | 26,948 | 6,948 | 5,309 | 39,290 |
| 107,803 | 85 | 27,135 | 6,947 | 5,278 | 39,445 |
| 107,804 | 81 | 27,357 | 6,928 | 5,299 | 39,665 |
| 107,805 | 82 | 27,362 | 6,927 | 5,293 | 39,664 |
| 107,806 | 79 | 27,208 | 6,919 | 5,295 | 39,501 |
| 107,807 | 76 | 26,982 | 6,826 | 5,223 | 39,107 |
| 107,808 | 76 | 27,029 | 6,793 | 5,214 | 39,112 |
| 107,809 | 78 | 27,025 | 6,781 | 5,229 | 39,113 |
| 107,810 | 74 | 27,110 | 6,801 | 5,245 | 39,230 |
| 107,811 | 71 | 26,756 | 6,762 | 5,189 | 38,778 |
| 107,812 | 72 | 26,403 | 6,710 | 5,145 | 38,330 |
| 107,813 | 71 | 27,155 | 6,955 | 5,281 | 39,462 |
| 107,814 | 68 | 26,901 | 6,890 | 5,241 | 39,100 |
| 107,815 | 73 | 26,672 | 6,861 | 5,230 | 38,836 |
| 107,816 | 72 | 26,614 | 6,831 | 5,217 | 38,734 |
| 107,817 | 71 | 26,465 | 6,845 | 5,259 | 38,640 |
| 107,818 | 69 | 26,309 | 6,789 | 5,257 | 38,424 |
| 107,819 | 71 | 26,816 | 6,928 | 5,361 | 39,176 |
| 107,820 | 72 | 26,381 | 6,858 | 5,332 | 38,643 |
| 107,821 | 72 | 25,968 | 6,779 | 5,294 | 38,113 |
| 107,822 | 71 | 25,910 | 6,812 | 5,294 | 38,087 |
| 107,823 | 72 | 26,083 | 6,876 | 5,334 | 38,365 |
| 107,824 | 71 | 26,254 | 6,912 | 5,385 | 38,622 |
| 107,825 | 71 | 26,284 | 6,928 | 5,412 | 38,695 |
| 107,826 | 72 | 26,402 | 6,925 | 5,429 | 38,828 |
| 107,827 | 71 | 26,479 | 6,965 | 5,454 | 38,969 |
| 107,828 | 71 | 26,480 | 6,962 | 5,435 | 38,948 |
| 107,829 | 72 | 26,257 | 6,915 | 5,373 | 38,617 |
| 107,830 | 71 | 26,160 | 6,901 | 5,365 | 38,497 |
| 107,831 | 74 | 26,338 | 6,982 | 5,409 | 38,803 |

|         |    |        |       |       |        |
|---------|----|--------|-------|-------|--------|
| 107,832 | 74 | 26,382 | 6,949 | 5,410 | 38,815 |
| 107,833 | 75 | 26,311 | 6,954 | 5,406 | 38,746 |
| 107,834 | 76 | 26,561 | 6,985 | 5,453 | 39,075 |
| 107,835 | 78 | 26,465 | 7,001 | 5,476 | 39,020 |
| 107,836 | 76 | 26,232 | 6,930 | 5,468 | 38,706 |
| 107,837 | 78 | 26,299 | 6,915 | 5,465 | 38,757 |
| 107,838 | 82 | 26,392 | 6,902 | 5,437 | 38,813 |
| 107,839 | 81 | 26,457 | 6,805 | 5,393 | 38,736 |
| 107,840 | 83 | 26,933 | 6,876 | 5,433 | 39,325 |
| 107,841 | 83 | 27,384 | 6,930 | 5,505 | 39,902 |
| 107,842 | 86 | 27,888 | 7,039 | 5,588 | 40,601 |
| 107,843 | 89 | 28,213 | 7,055 | 5,603 | 40,960 |
| 107,844 | 89 | 27,974 | 6,962 | 5,568 | 40,593 |
| 107,845 | 89 | 27,985 | 6,994 | 5,593 | 40,661 |
| 107,846 | 90 | 28,028 | 6,978 | 5,592 | 40,688 |
| 107,847 | 90 | 28,281 | 7,033 | 5,664 | 41,068 |
| 107,848 | 88 | 28,145 | 7,009 | 5,663 | 40,905 |
| 107,849 | 85 | 27,921 | 6,922 | 5,615 | 40,543 |
| 107,850 | 90 | 27,483 | 6,840 | 5,547 | 39,960 |
| 107,851 | 87 | 27,038 | 6,759 | 5,482 | 39,366 |
| 107,852 | 87 | 27,273 | 6,855 | 5,550 | 39,765 |
| 107,853 | 90 | 27,159 | 6,792 | 5,537 | 39,578 |
| 107,854 | 94 | 27,448 | 6,851 | 5,579 | 39,972 |
| 107,855 | 94 | 27,645 | 6,902 | 5,611 | 40,252 |
| 107,856 | 94 | 27,473 | 6,819 | 5,582 | 39,968 |
| 107,857 | 92 | 27,630 | 6,838 | 5,576 | 40,136 |
| 107,858 | 92 | 27,610 | 6,832 | 5,594 | 40,128 |
| 107,859 | 90 | 28,215 | 6,938 | 5,694 | 40,937 |
| 107,860 | 92 | 28,041 | 6,869 | 5,641 | 40,643 |
| 107,861 | 91 | 27,586 | 6,774 | 5,596 | 40,047 |
| 107,862 | 92 | 28,411 | 6,930 | 5,756 | 41,189 |
| 107,863 | 90 | 28,706 | 6,931 | 5,763 | 41,490 |

|         |    |        |       |       |        |
|---------|----|--------|-------|-------|--------|
| 107,864 | 89 | 28,640 | 6,881 | 5,761 | 41,371 |
| 107,865 | 85 | 27,868 | 6,716 | 5,601 | 40,270 |
| 107,866 | 85 | 27,882 | 6,700 | 5,580 | 40,247 |
| 107,867 | 84 | 28,135 | 6,716 | 5,618 | 40,553 |
| 107,868 | 83 | 28,116 | 6,652 | 5,588 | 40,439 |
| 107,869 | 81 | 27,897 | 6,602 | 5,525 | 40,105 |
| 107,870 | 83 | 27,866 | 6,586 | 5,506 | 40,041 |
| 107,871 | 79 | 27,851 | 6,483 | 5,442 | 39,855 |
| 107,872 | 80 | 28,098 | 6,535 | 5,483 | 40,196 |
| 107,873 | 80 | 27,880 | 6,450 | 5,446 | 39,856 |
| 107,874 | 77 | 27,828 | 6,373 | 5,400 | 39,678 |
| 107,875 | 78 | 27,606 | 6,306 | 5,330 | 39,320 |
| 107,876 | 80 | 27,587 | 6,241 | 5,279 | 39,187 |
| 107,877 | 81 | 27,927 | 6,294 | 5,344 | 39,646 |
| 107,878 | 82 | 27,761 | 6,243 | 5,318 | 39,404 |
| 107,879 | 82 | 27,878 | 6,255 | 5,335 | 39,550 |
| 107,880 | 81 | 28,188 | 6,280 | 5,385 | 39,934 |
| 107,881 | 87 | 28,262 | 6,267 | 5,370 | 39,986 |
| 107,882 | 83 | 28,092 | 6,230 | 5,344 | 39,749 |
| 107,883 | 83 | 27,975 | 6,207 | 5,330 | 39,595 |
| 107,884 | 84 | 28,438 | 6,272 | 5,380 | 40,174 |
| 107,885 | 83 | 28,291 | 6,239 | 5,342 | 39,955 |
| 107,886 | 81 | 28,038 | 6,171 | 5,252 | 39,542 |
| 107,887 | 82 | 28,245 | 6,172 | 5,255 | 39,754 |
| 107,888 | 80 | 27,618 | 6,097 | 5,164 | 38,959 |
| 107,889 | 79 | 27,498 | 6,079 | 5,157 | 38,813 |
| 107,890 | 78 | 27,604 | 6,123 | 5,180 | 38,985 |
| 107,891 | 77 | 27,563 | 6,119 | 5,180 | 38,939 |
| 107,892 | 78 | 27,569 | 6,137 | 5,136 | 38,920 |
| 107,893 | 81 | 27,607 | 6,100 | 5,111 | 38,899 |
| 107,894 | 83 | 27,429 | 6,084 | 5,087 | 38,683 |
| 107,895 | 83 | 27,131 | 6,015 | 5,050 | 38,279 |

|         |     |        |       |       |        |
|---------|-----|--------|-------|-------|--------|
| 107,896 | 84  | 27,063 | 6,034 | 5,031 | 38,212 |
| 107,897 | 88  | 26,995 | 6,036 | 5,064 | 38,183 |
| 107,898 | 87  | 27,118 | 6,012 | 5,045 | 38,262 |
| 107,899 | 86  | 26,863 | 5,964 | 4,989 | 37,902 |
| 107,900 | 88  | 26,858 | 5,938 | 4,978 | 37,862 |
| 107,901 | 90  | 26,841 | 5,942 | 5,005 | 37,878 |
| 107,902 | 89  | 26,738 | 5,935 | 4,993 | 37,755 |
| 107,903 | 89  | 26,882 | 5,962 | 5,014 | 37,947 |
| 107,904 | 89  | 26,782 | 5,987 | 5,054 | 37,912 |
| 107,905 | 86  | 26,749 | 5,964 | 5,065 | 37,864 |
| 107,906 | 92  | 26,776 | 5,976 | 5,077 | 37,921 |
| 107,907 | 90  | 26,481 | 5,927 | 5,017 | 37,515 |
| 107,908 | 90  | 26,336 | 5,938 | 5,060 | 37,424 |
| 107,909 | 89  | 26,246 | 5,962 | 5,047 | 37,344 |
| 107,910 | 89  | 26,365 | 5,976 | 5,085 | 37,515 |
| 107,911 | 85  | 26,243 | 5,991 | 5,087 | 37,406 |
| 107,912 | 81  | 25,895 | 5,892 | 5,010 | 36,878 |
| 107,913 | 83  | 26,053 | 5,954 | 5,087 | 37,177 |
| 107,914 | 88  | 25,773 | 5,961 | 5,069 | 36,891 |
| 107,915 | 86  | 25,541 | 5,927 | 4,997 | 36,551 |
| 107,916 | 87  | 25,878 | 5,985 | 5,034 | 36,984 |
| 107,917 | 88  | 25,945 | 6,002 | 5,057 | 37,092 |
| 107,918 | 95  | 25,976 | 6,016 | 5,066 | 37,153 |
| 107,919 | 99  | 25,780 | 5,995 | 5,020 | 36,894 |
| 107,920 | 102 | 25,982 | 6,038 | 5,071 | 37,193 |
| 107,921 | 103 | 26,080 | 6,047 | 5,089 | 37,319 |
| 107,922 | 103 | 25,886 | 6,021 | 5,030 | 37,040 |
| 107,923 | 103 | 25,835 | 6,030 | 5,030 | 36,998 |
| 107,924 | 106 | 26,066 | 6,058 | 5,064 | 37,294 |
| 107,925 | 107 | 25,899 | 6,000 | 5,030 | 37,036 |
| 107,926 | 108 | 25,885 | 5,997 | 5,024 | 37,014 |
| 107,927 | 106 | 25,672 | 6,015 | 5,031 | 36,824 |

|         |     |        |       |       |        |
|---------|-----|--------|-------|-------|--------|
| 107,928 | 107 | 25,695 | 6,043 | 5,031 | 36,876 |
| 107,929 | 106 | 25,829 | 6,113 | 5,065 | 37,113 |
| 107,930 | 103 | 25,298 | 6,002 | 4,991 | 36,394 |
| 107,931 | 107 | 25,775 | 6,084 | 5,065 | 37,031 |
| 107,932 | 103 | 25,716 | 6,079 | 5,073 | 36,971 |
| 107,933 | 103 | 25,965 | 6,127 | 5,125 | 37,320 |
| 107,934 | 105 | 26,336 | 6,183 | 5,176 | 37,800 |
| 107,935 | 106 | 26,444 | 6,232 | 5,210 | 37,992 |
| 107,936 | 108 | 26,164 | 6,174 | 5,160 | 37,606 |
| 107,937 | 109 | 26,257 | 6,151 | 5,164 | 37,681 |
| 107,938 | 109 | 26,283 | 6,137 | 5,179 | 37,708 |
| 107,939 | 107 | 26,812 | 6,265 | 5,285 | 38,469 |
| 107,940 | 109 | 26,762 | 6,220 | 5,260 | 38,351 |
| 107,941 | 110 | 26,654 | 6,223 | 5,270 | 38,257 |
| 107,942 | 112 | 26,872 | 6,290 | 5,343 | 38,617 |
| 107,943 | 112 | 26,713 | 6,300 | 5,345 | 38,470 |
| 107,944 | 107 | 26,624 | 6,302 | 5,355 | 38,388 |
| 107,945 | 103 | 26,414 | 6,210 | 5,266 | 37,993 |
| 107,946 | 103 | 26,452 | 6,163 | 5,258 | 37,976 |
| 107,947 | 103 | 26,515 | 6,167 | 5,254 | 38,039 |
| 107,948 | 98  | 26,366 | 6,158 | 5,243 | 37,865 |
| 107,949 | 97  | 26,203 | 6,160 | 5,246 | 37,706 |
| 107,950 | 96  | 26,464 | 6,228 | 5,298 | 38,086 |
| 107,951 | 87  | 26,408 | 6,194 | 5,279 | 37,968 |
| 107,952 | 86  | 26,778 | 6,255 | 5,336 | 38,455 |
| 107,953 | 84  | 27,021 | 6,337 | 5,374 | 38,816 |
| 107,954 | 83  | 27,245 | 6,394 | 5,399 | 39,121 |
| 107,955 | 83  | 27,494 | 6,419 | 5,419 | 39,415 |
| 107,956 | 80  | 27,588 | 6,437 | 5,404 | 39,509 |
| 107,957 | 78  | 27,516 | 6,394 | 5,382 | 39,370 |
| 107,958 | 78  | 27,386 | 6,331 | 5,299 | 39,094 |
| 107,959 | 78  | 27,472 | 6,349 | 5,331 | 39,230 |

|         |    |        |       |       |        |
|---------|----|--------|-------|-------|--------|
| 107,960 | 78 | 27,665 | 6,412 | 5,388 | 39,543 |
| 107,961 | 79 | 27,728 | 6,430 | 5,392 | 39,629 |
| 107,962 | 82 | 27,600 | 6,374 | 5,383 | 39,439 |
| 107,963 | 81 | 27,748 | 6,402 | 5,390 | 39,621 |
| 107,964 | 81 | 27,697 | 6,407 | 5,347 | 39,532 |
| 107,965 | 76 | 27,206 | 6,270 | 5,285 | 38,837 |
| 107,966 | 76 | 27,406 | 6,310 | 5,356 | 39,148 |
| 107,967 | 73 | 27,017 | 6,224 | 5,300 | 38,614 |
| 107,968 | 73 | 26,844 | 6,220 | 5,273 | 38,410 |
| 107,969 | 67 | 26,832 | 6,316 | 5,326 | 38,541 |
| 107,970 | 65 | 26,515 | 6,310 | 5,320 | 38,210 |
| 107,971 | 62 | 26,317 | 6,317 | 5,300 | 37,996 |
| 107,972 | 61 | 26,327 | 6,339 | 5,294 | 38,021 |
| 107,973 | 59 | 26,026 | 6,283 | 5,268 | 37,636 |
| 107,974 | 59 | 26,255 | 6,331 | 5,337 | 37,982 |
| 107,975 | 61 | 26,295 | 6,380 | 5,345 | 38,081 |
| 107,976 | 59 | 26,268 | 6,393 | 5,364 | 38,084 |
| 107,977 | 62 | 26,415 | 6,389 | 5,348 | 38,214 |
| 107,978 | 60 | 26,323 | 6,334 | 5,311 | 38,028 |
| 107,979 | 62 | 26,716 | 6,387 | 5,351 | 38,516 |
| 107,980 | 62 | 26,376 | 6,327 | 5,304 | 38,069 |
| 107,981 | 62 | 26,066 | 6,261 | 5,253 | 37,642 |
| 107,982 | 63 | 26,693 | 6,391 | 5,335 | 38,482 |
| 107,983 | 65 | 26,351 | 6,327 | 5,267 | 38,010 |
| 107,984 | 65 | 26,091 | 6,312 | 5,221 | 37,689 |
| 107,985 | 63 | 26,528 | 6,418 | 5,301 | 38,310 |
| 107,986 | 61 | 26,388 | 6,374 | 5,265 | 38,088 |
| 107,987 | 63 | 26,235 | 6,344 | 5,268 | 37,910 |
| 107,988 | 62 | 25,960 | 6,335 | 5,238 | 37,595 |
| 107,989 | 63 | 26,789 | 6,499 | 5,359 | 38,710 |
| 107,990 | 62 | 26,486 | 6,425 | 5,326 | 38,299 |
| 107,991 | 60 | 26,404 | 6,364 | 5,257 | 38,085 |

|         |    |        |       |       |        |
|---------|----|--------|-------|-------|--------|
| 107,992 | 61 | 26,602 | 6,380 | 5,304 | 38,347 |
| 107,993 | 59 | 26,513 | 6,378 | 5,287 | 38,237 |
| 107,994 | 58 | 26,510 | 6,351 | 5,313 | 38,232 |
| 107,995 | 57 | 26,229 | 6,351 | 5,306 | 37,943 |
| 107,996 | 57 | 26,252 | 6,365 | 5,345 | 38,019 |
| 107,997 | 57 | 25,936 | 6,319 | 5,291 | 37,603 |
| 107,998 | 59 | 25,868 | 6,288 | 5,290 | 37,505 |
| 107,999 | 58 | 25,682 | 6,276 | 5,271 | 37,287 |
| 108,000 | 60 | 25,938 | 6,337 | 5,292 | 37,627 |
| 108,001 | 62 | 26,102 | 6,392 | 5,317 | 37,873 |
| 108,002 | 62 | 25,975 | 6,423 | 5,306 | 37,766 |
| 108,003 | 62 | 25,874 | 6,401 | 5,286 | 37,623 |
| 108,004 | 61 | 25,335 | 6,272 | 5,181 | 36,849 |
| 108,005 | 61 | 25,380 | 6,290 | 5,203 | 36,934 |
| 108,006 | 62 | 25,075 | 6,235 | 5,172 | 36,544 |
| 108,007 | 63 | 25,050 | 6,257 | 5,184 | 36,554 |
| 108,008 | 64 | 24,613 | 6,173 | 5,123 | 35,973 |
| 108,009 | 64 | 24,597 | 6,154 | 5,093 | 35,908 |
| 108,010 | 68 | 24,618 | 6,138 | 5,066 | 35,890 |
| 108,011 | 71 | 24,781 | 6,194 | 5,115 | 36,161 |
| 108,012 | 69 | 24,495 | 6,166 | 5,127 | 35,857 |
| 108,013 | 66 | 24,432 | 6,190 | 5,116 | 35,804 |
| 108,014 | 67 | 24,460 | 6,195 | 5,115 | 35,837 |
| 108,015 | 66 | 24,446 | 6,193 | 5,142 | 35,847 |
| 108,016 | 69 | 24,715 | 6,227 | 5,124 | 36,135 |
| 108,017 | 76 | 24,741 | 6,226 | 5,129 | 36,172 |
| 108,018 | 76 | 24,791 | 6,211 | 5,126 | 36,204 |
| 108,019 | 80 | 25,054 | 6,178 | 5,126 | 36,438 |
| 108,020 | 81 | 25,122 | 6,133 | 5,104 | 36,440 |
| 108,021 | 79 | 25,083 | 6,065 | 5,064 | 36,291 |
| 108,022 | 81 | 25,289 | 6,072 | 5,076 | 36,518 |
| 108,023 | 87 | 25,475 | 6,119 | 5,107 | 36,788 |



|         |     |        |       |       |        |
|---------|-----|--------|-------|-------|--------|
| 108,024 | 92  | 25,464 | 6,051 | 5,050 | 36,657 |
| 108,025 | 92  | 25,398 | 6,066 | 5,044 | 36,600 |
| 108,026 | 90  | 25,609 | 6,159 | 5,113 | 36,971 |
| 108,027 | 94  | 25,417 | 6,142 | 5,087 | 36,740 |
| 108,028 | 90  | 25,177 | 6,092 | 5,052 | 36,411 |
| 108,029 | 94  | 24,910 | 6,054 | 5,009 | 36,067 |
| 108,030 | 92  | 24,666 | 6,008 | 4,982 | 35,748 |
| 108,031 | 96  | 25,026 | 6,095 | 5,067 | 36,284 |
| 108,032 | 96  | 25,027 | 6,118 | 5,082 | 36,323 |
| 108,033 | 92  | 24,761 | 6,049 | 5,048 | 35,950 |
| 108,034 | 92  | 24,706 | 6,059 | 5,060 | 35,917 |
| 108,035 | 103 | 24,905 | 6,062 | 5,068 | 36,138 |
| 108,036 | 104 | 24,520 | 6,017 | 5,031 | 35,672 |
| 108,037 | 103 | 24,148 | 5,951 | 4,998 | 35,200 |
| 108,038 | 102 | 24,591 | 6,071 | 5,058 | 35,822 |
| 108,039 | 108 | 24,559 | 6,046 | 5,017 | 35,730 |
| 108,040 | 107 | 24,463 | 6,056 | 5,019 | 35,645 |
| 108,041 | 108 | 24,244 | 6,002 | 4,991 | 35,345 |
| 108,042 | 109 | 24,301 | 6,022 | 4,978 | 35,410 |
| 108,043 | 112 | 24,573 | 6,103 | 5,024 | 35,812 |
| 108,044 | 112 | 24,437 | 6,040 | 4,979 | 35,568 |
| 108,045 | 114 | 24,709 | 6,107 | 5,030 | 35,960 |
| 108,046 | 114 | 24,985 | 6,132 | 5,100 | 36,331 |
| 108,047 | 116 | 24,985 | 6,090 | 5,053 | 36,244 |
| 108,048 | 116 | 24,959 | 6,109 | 5,058 | 36,242 |
| 108,049 | 118 | 25,373 | 6,205 | 5,141 | 36,837 |
| 108,050 | 121 | 25,503 | 6,194 | 5,137 | 36,955 |
| 108,051 | 123 | 25,467 | 6,176 | 5,184 | 36,950 |
| 108,052 | 121 | 25,562 | 6,177 | 5,182 | 37,042 |
| 108,053 | 121 | 25,396 | 6,093 | 5,118 | 36,728 |
| 108,054 | 122 | 25,593 | 6,167 | 5,166 | 37,048 |
| 108,055 | 122 | 25,577 | 6,172 | 5,147 | 37,018 |

|         |     |        |       |       |        |
|---------|-----|--------|-------|-------|--------|
| 108,056 | 126 | 25,394 | 6,123 | 5,089 | 36,732 |
| 108,057 | 126 | 25,825 | 6,218 | 5,151 | 37,320 |
| 108,058 | 125 | 25,933 | 6,204 | 5,141 | 37,403 |
| 108,059 | 128 | 25,702 | 6,141 | 5,097 | 37,068 |
| 108,060 | 129 | 26,122 | 6,203 | 5,152 | 37,606 |
| 108,061 | 124 | 26,455 | 6,286 | 5,213 | 38,078 |
| 108,062 | 121 | 26,630 | 6,235 | 5,168 | 38,154 |
| 108,063 | 122 | 26,315 | 6,114 | 5,044 | 37,595 |
| 108,064 | 123 | 26,501 | 6,144 | 5,097 | 37,865 |
| 108,065 | 121 | 26,559 | 6,139 | 5,113 | 37,932 |
| 108,066 | 121 | 26,843 | 6,185 | 5,142 | 38,291 |
| 108,067 | 126 | 27,067 | 6,226 | 5,203 | 38,622 |
| 108,068 | 119 | 26,746 | 6,119 | 5,138 | 38,122 |
| 108,069 | 119 | 26,840 | 6,134 | 5,135 | 38,228 |
| 108,070 | 116 | 26,984 | 6,190 | 5,170 | 38,460 |
| 108,071 | 114 | 26,775 | 6,150 | 5,138 | 38,177 |
| 108,072 | 111 | 26,239 | 6,025 | 5,045 | 37,420 |
| 108,073 | 113 | 26,501 | 6,052 | 5,071 | 37,737 |
| 108,074 | 106 | 26,777 | 6,092 | 5,141 | 38,116 |
| 108,075 | 107 | 26,982 | 6,171 | 5,180 | 38,440 |
| 108,076 | 105 | 27,124 | 6,158 | 5,201 | 38,588 |
| 108,077 | 101 | 26,924 | 6,093 | 5,159 | 38,277 |
| 108,078 | 103 | 26,947 | 6,075 | 5,163 | 38,288 |
| 108,079 | 96  | 26,976 | 6,097 | 5,160 | 38,329 |
| 108,080 | 94  | 27,291 | 6,175 | 5,227 | 38,787 |
| 108,081 | 94  | 27,070 | 6,151 | 5,189 | 38,504 |
| 108,082 | 95  | 27,041 | 6,126 | 5,195 | 38,457 |
| 108,083 | 95  | 27,072 | 6,123 | 5,205 | 38,495 |
| 108,084 | 100 | 27,106 | 6,119 | 5,212 | 38,537 |
| 108,085 | 96  | 26,781 | 6,050 | 5,175 | 38,102 |
| 108,086 | 90  | 27,450 | 6,141 | 5,270 | 38,951 |
| 108,087 | 89  | 27,218 | 6,075 | 5,198 | 38,580 |

|         |     |        |       |       |        |
|---------|-----|--------|-------|-------|--------|
| 108,088 | 93  | 27,560 | 6,152 | 5,239 | 39,044 |
| 108,089 | 100 | 27,505 | 6,151 | 5,228 | 38,984 |
| 108,090 | 94  | 26,975 | 6,050 | 5,179 | 38,298 |
| 108,091 | 100 | 27,043 | 6,083 | 5,189 | 38,415 |
| 108,092 | 96  | 26,787 | 6,038 | 5,144 | 38,065 |
| 108,093 | 95  | 26,696 | 6,034 | 5,144 | 37,969 |
| 108,094 | 95  | 26,445 | 5,986 | 5,107 | 37,633 |
| 108,095 | 97  | 26,800 | 6,118 | 5,204 | 38,219 |
| 108,096 | 97  | 26,845 | 6,146 | 5,228 | 38,316 |
| 108,097 | 97  | 26,847 | 6,144 | 5,197 | 38,285 |
| 108,098 | 95  | 26,731 | 6,155 | 5,191 | 38,172 |
| 108,099 | 89  | 26,558 | 6,124 | 5,148 | 37,919 |
| 108,100 | 89  | 26,311 | 6,095 | 5,117 | 37,612 |
| 108,101 | 88  | 26,545 | 6,178 | 5,168 | 37,979 |
| 108,102 | 87  | 26,530 | 6,173 | 5,142 | 37,932 |
| 108,103 | 87  | 26,350 | 6,167 | 5,171 | 37,775 |
| 108,104 | 88  | 26,445 | 6,209 | 5,182 | 37,924 |
| 108,105 | 88  | 26,336 | 6,158 | 5,169 | 37,751 |
| 108,106 | 90  | 25,952 | 6,086 | 5,130 | 37,258 |
| 108,107 | 88  | 26,705 | 6,372 | 5,353 | 38,518 |
| 108,108 | 89  | 26,772 | 6,398 | 5,406 | 38,665 |
| 108,109 | 89  | 26,563 | 6,375 | 5,414 | 38,441 |
| 108,110 | 87  | 26,565 | 6,352 | 5,409 | 38,413 |
| 108,111 | 86  | 26,479 | 6,350 | 5,387 | 38,302 |
| 108,112 | 91  | 27,538 | 6,639 | 5,581 | 39,849 |
| 108,113 | 91  | 27,558 | 6,679 | 5,598 | 39,926 |
| 108,114 | 90  | 27,431 | 6,685 | 5,632 | 39,838 |
| 108,115 | 89  | 27,201 | 6,658 | 5,566 | 39,514 |
| 108,116 | 89  | 26,960 | 6,600 | 5,514 | 39,163 |
| 108,117 | 92  | 27,241 | 6,721 | 5,623 | 39,677 |
| 108,118 | 85  | 26,974 | 6,665 | 5,565 | 39,289 |
| 108,119 | 89  | 27,078 | 6,780 | 5,638 | 39,585 |

|         |     |        |       |       |        |
|---------|-----|--------|-------|-------|--------|
| 108,120 | 90  | 26,749 | 6,729 | 5,604 | 39,172 |
| 108,121 | 90  | 26,730 | 6,730 | 5,599 | 39,149 |
| 108,122 | 92  | 26,958 | 6,801 | 5,631 | 39,482 |
| 108,123 | 91  | 26,670 | 6,759 | 5,584 | 39,104 |
| 108,124 | 89  | 26,294 | 6,738 | 5,555 | 38,676 |
| 108,125 | 97  | 27,026 | 6,906 | 5,654 | 39,683 |
| 108,126 | 98  | 26,721 | 6,809 | 5,580 | 39,208 |
| 108,127 | 99  | 26,738 | 6,798 | 5,574 | 39,209 |
| 108,128 | 99  | 26,650 | 6,794 | 5,582 | 39,125 |
| 108,129 | 98  | 27,164 | 6,923 | 5,684 | 39,869 |
| 108,130 | 101 | 27,272 | 6,938 | 5,720 | 40,031 |
| 108,131 | 100 | 27,445 | 6,973 | 5,733 | 40,251 |
| 108,132 | 101 | 27,448 | 6,949 | 5,712 | 40,210 |
| 108,133 | 100 | 27,199 | 6,913 | 5,674 | 39,886 |
| 108,134 | 100 | 26,930 | 6,856 | 5,623 | 39,509 |
| 108,135 | 95  | 26,819 | 6,830 | 5,607 | 39,351 |
| 108,136 | 97  | 27,822 | 7,020 | 5,782 | 40,721 |
| 108,137 | 97  | 27,787 | 7,074 | 5,798 | 40,756 |
| 108,138 | 96  | 27,382 | 7,007 | 5,738 | 40,223 |
| 108,139 | 90  | 27,356 | 6,981 | 5,806 | 40,233 |
| 108,140 | 84  | 27,057 | 6,950 | 5,793 | 39,884 |
| 108,141 | 83  | 26,953 | 6,942 | 5,781 | 39,759 |
| 108,142 | 76  | 26,867 | 6,866 | 5,757 | 39,566 |
| 108,143 | 76  | 27,030 | 6,898 | 5,766 | 39,770 |
| 108,144 | 75  | 26,951 | 6,843 | 5,753 | 39,622 |
| 108,145 | 73  | 26,733 | 6,766 | 5,690 | 39,262 |
| 108,146 | 72  | 26,244 | 6,593 | 5,549 | 38,458 |
| 108,147 | 72  | 26,183 | 6,599 | 5,551 | 38,405 |
| 108,148 | 71  | 25,844 | 6,546 | 5,501 | 37,962 |
| 108,149 | 70  | 25,418 | 6,483 | 5,455 | 37,426 |
| 108,150 | 72  | 26,358 | 6,677 | 5,652 | 38,759 |
| 108,151 | 75  | 26,420 | 6,748 | 5,702 | 38,945 |

|         |    |        |       |       |        |
|---------|----|--------|-------|-------|--------|
| 108,152 | 72 | 26,372 | 6,762 | 5,708 | 38,914 |
| 108,153 | 75 | 26,558 | 6,787 | 5,714 | 39,134 |
| 108,154 | 74 | 26,610 | 6,767 | 5,713 | 39,164 |
| 108,155 | 73 | 26,553 | 6,737 | 5,707 | 39,070 |
| 108,156 | 75 | 26,518 | 6,727 | 5,702 | 39,022 |
| 108,157 | 71 | 25,939 | 6,567 | 5,555 | 38,132 |
| 108,158 | 74 | 26,301 | 6,625 | 5,632 | 38,632 |
| 108,159 | 75 | 26,834 | 6,716 | 5,681 | 39,306 |
| 108,160 | 72 | 26,710 | 6,676 | 5,661 | 39,119 |
| 108,161 | 73 | 26,573 | 6,659 | 5,652 | 38,957 |
| 108,162 | 75 | 26,346 | 6,598 | 5,639 | 38,658 |
| 108,163 | 75 | 25,839 | 6,483 | 5,557 | 37,954 |
| 108,164 | 75 | 26,081 | 6,492 | 5,576 | 38,224 |
| 108,165 | 77 | 26,281 | 6,480 | 5,595 | 38,433 |
| 108,166 | 78 | 26,418 | 6,478 | 5,605 | 38,579 |
| 108,167 | 77 | 26,661 | 6,504 | 5,653 | 38,895 |
| 108,168 | 81 | 26,895 | 6,573 | 5,702 | 39,251 |
| 108,169 | 82 | 27,024 | 6,599 | 5,711 | 39,416 |
| 108,170 | 84 | 27,117 | 6,575 | 5,699 | 39,475 |
| 108,171 | 81 | 27,001 | 6,523 | 5,690 | 39,295 |
| 108,172 | 85 | 27,289 | 6,606 | 5,733 | 39,713 |
| 108,173 | 84 | 27,138 | 6,565 | 5,719 | 39,506 |
| 108,174 | 79 | 27,527 | 6,734 | 5,857 | 40,197 |
| 108,175 | 80 | 27,581 | 6,733 | 5,901 | 40,295 |
| 108,176 | 81 | 27,887 | 6,805 | 5,979 | 40,752 |
| 108,177 | 76 | 27,524 | 6,744 | 5,913 | 40,257 |
| 108,178 | 74 | 27,413 | 6,752 | 5,916 | 40,155 |
| 108,179 | 73 | 27,438 | 6,802 | 5,919 | 40,232 |
| 108,180 | 74 | 27,682 | 6,821 | 5,974 | 40,551 |
| 108,181 | 74 | 27,618 | 6,823 | 5,980 | 40,495 |
| 108,182 | 78 | 27,554 | 6,844 | 5,994 | 40,470 |
| 108,183 | 76 | 27,652 | 6,891 | 6,045 | 40,664 |

|         |    |        |       |       |        |
|---------|----|--------|-------|-------|--------|
| 108,184 | 76 | 27,882 | 6,938 | 6,040 | 40,936 |
| 108,185 | 80 | 28,004 | 6,952 | 6,059 | 41,095 |
| 108,186 | 83 | 28,033 | 6,974 | 6,066 | 41,156 |
| 108,187 | 84 | 28,257 | 7,019 | 6,103 | 41,463 |
| 108,188 | 87 | 28,222 | 6,931 | 6,084 | 41,324 |
| 108,189 | 90 | 28,841 | 7,057 | 6,167 | 42,155 |
| 108,190 | 96 | 29,093 | 7,091 | 6,193 | 42,473 |
| 108,191 | 94 | 29,044 | 7,045 | 6,137 | 42,320 |
| 108,192 | 96 | 29,014 | 7,068 | 6,144 | 42,322 |
| 108,193 | 96 | 29,195 | 7,141 | 6,199 | 42,631 |
| 108,194 | 97 | 29,164 | 7,144 | 6,214 | 42,619 |
| 108,195 | 94 | 28,946 | 7,110 | 6,179 | 42,329 |
| 108,196 | 95 | 29,113 | 7,175 | 6,229 | 42,612 |
| 108,197 | 95 | 29,177 | 7,211 | 6,241 | 42,724 |
| 108,198 | 94 | 29,080 | 7,114 | 6,143 | 42,431 |
| 108,199 | 95 | 29,283 | 7,149 | 6,166 | 42,693 |
| 108,200 | 94 | 29,662 | 7,199 | 6,233 | 43,188 |
| 108,201 | 94 | 29,904 | 7,181 | 6,242 | 43,421 |
| 108,202 | 95 | 29,929 | 7,096 | 6,143 | 43,263 |
| 108,203 | 95 | 30,077 | 7,171 | 6,200 | 43,543 |
| 108,204 | 92 | 30,040 | 7,180 | 6,200 | 43,512 |
| 108,205 | 93 | 29,960 | 7,211 | 6,216 | 43,480 |
| 108,206 | 95 | 30,233 | 7,237 | 6,227 | 43,792 |
| 108,207 | 92 | 29,674 | 7,073 | 6,095 | 42,934 |
| 108,208 | 92 | 30,136 | 7,143 | 6,159 | 43,530 |
| 108,209 | 90 | 30,503 | 7,224 | 6,202 | 44,019 |
| 108,210 | 91 | 30,117 | 7,133 | 6,144 | 43,485 |
| 108,211 | 95 | 30,389 | 7,206 | 6,186 | 43,876 |
| 108,212 | 92 | 30,103 | 7,122 | 6,120 | 43,437 |
| 108,213 | 90 | 29,985 | 7,124 | 6,091 | 43,290 |
| 108,214 | 88 | 29,675 | 7,040 | 6,029 | 42,832 |
| 108,215 | 88 | 29,663 | 7,071 | 6,036 | 42,858 |

|         |     |        |       |       |        |
|---------|-----|--------|-------|-------|--------|
| 108,216 | 90  | 29,242 | 7,097 | 6,006 | 42,435 |
| 108,217 | 89  | 29,447 | 7,196 | 6,075 | 42,807 |
| 108,218 | 90  | 29,284 | 7,232 | 6,053 | 42,659 |
| 108,219 | 86  | 29,493 | 7,264 | 6,062 | 42,905 |
| 108,220 | 86  | 29,621 | 7,305 | 6,084 | 43,096 |
| 108,221 | 84  | 29,538 | 7,252 | 6,040 | 42,914 |
| 108,222 | 85  | 29,511 | 7,203 | 5,992 | 42,791 |
| 108,223 | 81  | 29,594 | 7,181 | 5,970 | 42,826 |
| 108,224 | 87  | 29,715 | 7,175 | 5,951 | 42,928 |
| 108,225 | 94  | 29,530 | 7,113 | 5,898 | 42,635 |
| 108,226 | 94  | 29,783 | 7,160 | 5,918 | 42,955 |
| 108,227 | 97  | 30,154 | 7,271 | 5,956 | 43,478 |
| 108,228 | 101 | 30,103 | 7,225 | 5,903 | 43,332 |
| 108,229 | 103 | 30,076 | 7,224 | 5,903 | 43,306 |
| 108,230 | 104 | 30,531 | 7,256 | 5,912 | 43,803 |
| 108,231 | 105 | 30,060 | 7,179 | 5,854 | 43,198 |
| 108,232 | 102 | 29,872 | 7,149 | 5,823 | 42,946 |
| 108,233 | 99  | 29,861 | 7,095 | 5,813 | 42,868 |
| 108,234 | 100 | 30,237 | 7,186 | 5,881 | 43,404 |
| 108,235 | 99  | 29,873 | 7,107 | 5,839 | 42,918 |
| 108,236 | 95  | 29,417 | 7,043 | 5,798 | 42,353 |
| 108,237 | 94  | 29,821 | 7,178 | 5,883 | 42,976 |
| 108,238 | 92  | 30,006 | 7,246 | 5,912 | 43,256 |
| 108,239 | 88  | 29,961 | 7,283 | 5,913 | 43,245 |
| 108,240 | 86  | 29,754 | 7,280 | 5,908 | 43,028 |
| 108,241 | 81  | 29,712 | 7,322 | 5,907 | 43,022 |
| 108,242 | 82  | 29,686 | 7,323 | 5,919 | 43,010 |
| 108,243 | 84  | 30,150 | 7,379 | 5,943 | 43,556 |
| 108,244 | 85  | 30,295 | 7,388 | 5,960 | 43,728 |
| 108,245 | 84  | 30,100 | 7,321 | 5,901 | 43,406 |
| 108,246 | 85  | 30,187 | 7,308 | 5,880 | 43,460 |
| 108,247 | 85  | 30,263 | 7,346 | 5,905 | 43,599 |

|         |     |        |       |       |        |
|---------|-----|--------|-------|-------|--------|
| 108,248 | 89  | 30,588 | 7,420 | 5,941 | 44,038 |
| 108,249 | 97  | 30,393 | 7,393 | 5,919 | 43,802 |
| 108,250 | 97  | 30,325 | 7,389 | 5,924 | 43,735 |
| 108,251 | 96  | 30,607 | 7,496 | 5,974 | 44,173 |
| 108,252 | 96  | 30,570 | 7,534 | 5,999 | 44,199 |
| 108,253 | 96  | 30,451 | 7,533 | 6,021 | 44,101 |
| 108,254 | 97  | 30,476 | 7,468 | 5,969 | 44,010 |
| 108,255 | 100 | 30,208 | 7,412 | 5,901 | 43,621 |
| 108,256 | 98  | 29,902 | 7,325 | 5,825 | 43,150 |
| 108,257 | 105 | 30,359 | 7,480 | 5,997 | 43,941 |
| 108,258 | 106 | 30,103 | 7,459 | 5,952 | 43,620 |
| 108,259 | 106 | 30,083 | 7,469 | 5,947 | 43,605 |
| 108,260 | 104 | 30,144 | 7,440 | 5,956 | 43,644 |
| 108,261 | 106 | 30,574 | 7,544 | 6,037 | 44,261 |
| 108,262 | 106 | 30,559 | 7,570 | 6,052 | 44,287 |
| 108,263 | 106 | 30,648 | 7,541 | 6,043 | 44,338 |
| 108,264 | 107 | 30,829 | 7,551 | 6,057 | 44,544 |
| 108,265 | 109 | 30,475 | 7,376 | 5,943 | 43,903 |
| 108,266 | 109 | 30,977 | 7,426 | 5,986 | 44,498 |
| 108,267 | 108 | 31,390 | 7,486 | 6,049 | 45,033 |
| 108,268 | 108 | 31,044 | 7,407 | 5,981 | 44,540 |
| 108,269 | 110 | 31,437 | 7,425 | 6,024 | 44,996 |
| 108,270 | 111 | 31,344 | 7,405 | 6,046 | 44,906 |
| 108,271 | 110 | 31,211 | 7,335 | 6,004 | 44,660 |
| 108,272 | 108 | 31,178 | 7,329 | 6,019 | 44,634 |
| 108,273 | 107 | 31,015 | 7,296 | 5,972 | 44,390 |
| 108,274 | 106 | 30,650 | 7,212 | 5,931 | 43,899 |
| 108,275 | 103 | 30,795 | 7,294 | 6,005 | 44,197 |
| 108,276 | 94  | 30,458 | 7,275 | 5,968 | 43,795 |
| 108,277 | 97  | 30,848 | 7,339 | 6,040 | 44,324 |
| 108,278 | 98  | 30,848 | 7,346 | 6,075 | 44,367 |
| 108,279 | 95  | 30,838 | 7,357 | 6,116 | 44,406 |



|         |     |        |       |       |        |
|---------|-----|--------|-------|-------|--------|
| 108,280 | 97  | 30,789 | 7,384 | 6,148 | 44,418 |
| 108,281 | 95  | 30,834 | 7,402 | 6,158 | 44,489 |
| 108,282 | 97  | 30,726 | 7,345 | 6,118 | 44,286 |
| 108,283 | 96  | 30,454 | 7,304 | 6,059 | 43,913 |
| 108,284 | 98  | 30,633 | 7,350 | 6,139 | 44,220 |
| 108,285 | 98  | 30,179 | 7,246 | 6,033 | 43,556 |
| 108,286 | 98  | 30,354 | 7,255 | 6,052 | 43,759 |
| 108,287 | 97  | 30,558 | 7,322 | 6,114 | 44,091 |
| 108,288 | 99  | 30,684 | 7,300 | 6,137 | 44,220 |
| 108,289 | 99  | 30,611 | 7,228 | 6,128 | 44,066 |
| 108,290 | 104 | 30,648 | 7,156 | 6,099 | 44,007 |
| 108,291 | 106 | 30,330 | 7,012 | 5,998 | 43,446 |
| 108,292 | 107 | 30,077 | 6,938 | 5,949 | 43,071 |
| 108,293 | 108 | 30,437 | 7,026 | 5,992 | 43,563 |
| 108,294 | 104 | 30,306 | 6,999 | 5,976 | 43,385 |
| 108,295 | 103 | 30,157 | 6,954 | 5,933 | 43,147 |
| 108,296 | 103 | 29,815 | 6,930 | 5,914 | 42,762 |
| 108,297 | 101 | 30,388 | 7,080 | 6,038 | 43,607 |
| 108,298 | 100 | 30,019 | 6,989 | 5,973 | 43,081 |
| 108,299 | 98  | 30,205 | 7,074 | 6,026 | 43,403 |
| 108,300 | 90  | 29,977 | 7,073 | 6,009 | 43,149 |
| 108,301 | 90  | 30,013 | 7,059 | 6,004 | 43,166 |
| 108,302 | 88  | 29,589 | 6,965 | 5,936 | 42,578 |
| 108,303 | 87  | 29,685 | 6,949 | 5,936 | 42,657 |
| 108,304 | 84  | 29,397 | 6,848 | 5,895 | 42,224 |
| 108,305 | 85  | 29,807 | 6,934 | 5,962 | 42,788 |
| 108,306 | 82  | 30,222 | 6,990 | 6,021 | 43,315 |
| 108,307 | 76  | 29,905 | 6,898 | 5,943 | 42,822 |
| 108,308 | 77  | 30,071 | 6,976 | 5,995 | 43,119 |
| 108,309 | 74  | 29,720 | 6,912 | 5,964 | 42,670 |
| 108,310 | 74  | 29,438 | 6,843 | 5,911 | 42,266 |
| 108,311 | 75  | 29,664 | 6,943 | 5,949 | 42,631 |

|         |    |        |       |       |        |
|---------|----|--------|-------|-------|--------|
| 108,312 | 75 | 29,456 | 6,888 | 5,916 | 42,335 |
| 108,313 | 71 | 28,983 | 6,776 | 5,822 | 41,652 |
| 108,314 | 70 | 28,669 | 6,748 | 5,806 | 41,293 |
| 108,315 | 72 | 28,750 | 6,813 | 5,845 | 41,480 |
| 108,316 | 75 | 28,259 | 6,759 | 5,798 | 40,891 |
| 108,317 | 77 | 28,125 | 6,767 | 5,808 | 40,777 |
| 108,318 | 75 | 28,074 | 6,783 | 5,807 | 40,739 |
| 108,319 | 78 | 28,119 | 6,814 | 5,825 | 40,836 |
| 108,320 | 78 | 28,731 | 6,949 | 5,941 | 41,699 |
| 108,321 | 79 | 28,500 | 6,876 | 5,852 | 41,307 |
| 108,322 | 79 | 28,025 | 6,830 | 5,809 | 40,743 |
| 108,323 | 82 | 29,013 | 7,049 | 5,991 | 42,135 |
| 108,324 | 84 | 28,929 | 7,060 | 5,968 | 42,041 |
| 108,325 | 80 | 29,212 | 7,059 | 6,017 | 42,368 |
| 108,326 | 79 | 29,600 | 7,146 | 6,135 | 42,960 |
| 108,327 | 83 | 29,986 | 7,194 | 6,161 | 43,424 |
| 108,328 | 79 | 30,156 | 7,221 | 6,158 | 43,614 |
| 108,329 | 76 | 30,278 | 7,222 | 6,171 | 43,747 |
| 108,330 | 75 | 30,449 | 7,254 | 6,181 | 43,959 |
| 108,331 | 71 | 30,550 | 7,244 | 6,172 | 44,037 |
| 108,332 | 74 | 30,588 | 7,240 | 6,205 | 44,107 |
| 108,333 | 69 | 30,606 | 7,224 | 6,185 | 44,084 |
| 108,334 | 69 | 30,818 | 7,224 | 6,164 | 44,275 |
| 108,335 | 75 | 30,959 | 7,204 | 6,161 | 44,399 |
| 108,336 | 72 | 30,530 | 7,106 | 6,074 | 43,782 |
| 108,337 | 73 | 30,556 | 7,071 | 6,097 | 43,797 |
| 108,338 | 75 | 31,000 | 7,174 | 6,126 | 44,375 |
| 108,339 | 72 | 30,250 | 7,056 | 5,968 | 43,346 |
| 108,340 | 73 | 30,662 | 7,129 | 6,036 | 43,900 |
| 108,341 | 73 | 31,110 | 7,225 | 6,124 | 44,532 |
| 108,342 | 69 | 30,688 | 7,150 | 6,064 | 43,971 |
| 108,343 | 77 | 31,194 | 7,281 | 6,194 | 44,746 |

|         |    |        |       |       |        |
|---------|----|--------|-------|-------|--------|
| 108,344 | 80 | 31,392 | 7,293 | 6,230 | 44,995 |
| 108,345 | 81 | 31,310 | 7,249 | 6,203 | 44,843 |
| 108,346 | 84 | 31,680 | 7,349 | 6,281 | 45,394 |
| 108,347 | 88 | 31,993 | 7,387 | 6,316 | 45,784 |
| 108,348 | 88 | 32,118 | 7,431 | 6,349 | 45,986 |
| 108,349 | 91 | 32,302 | 7,442 | 6,401 | 46,236 |
| 108,350 | 92 | 32,329 | 7,422 | 6,383 | 46,226 |
| 108,351 | 91 | 31,953 | 7,314 | 6,312 | 45,670 |
| 108,352 | 93 | 31,894 | 7,296 | 6,293 | 45,576 |
| 108,353 | 94 | 31,690 | 7,282 | 6,275 | 45,341 |
| 108,354 | 92 | 31,813 | 7,357 | 6,305 | 45,567 |
| 108,355 | 91 | 31,719 | 7,378 | 6,310 | 45,498 |
| 108,356 | 90 | 31,558 | 7,363 | 6,276 | 45,287 |
| 108,357 | 90 | 31,302 | 7,356 | 6,230 | 44,978 |
| 108,358 | 91 | 31,274 | 7,359 | 6,213 | 44,937 |
| 108,359 | 91 | 31,397 | 7,352 | 6,222 | 45,062 |
| 108,360 | 92 | 31,515 | 7,360 | 6,210 | 45,177 |
| 108,361 | 91 | 31,396 | 7,325 | 6,212 | 45,024 |
| 108,362 | 92 | 31,374 | 7,329 | 6,217 | 45,012 |
| 108,363 | 92 | 31,425 | 7,339 | 6,239 | 45,095 |
| 108,364 | 92 | 30,886 | 7,235 | 6,149 | 44,362 |
| 108,365 | 92 | 31,231 | 7,295 | 6,182 | 44,800 |
| 108,366 | 89 | 31,313 | 7,276 | 6,195 | 44,873 |
| 108,367 | 84 | 31,570 | 7,374 | 6,264 | 45,292 |
| 108,368 | 80 | 31,829 | 7,434 | 6,295 | 45,638 |
| 108,369 | 79 | 31,811 | 7,409 | 6,273 | 45,572 |
| 108,370 | 78 | 31,471 | 7,306 | 6,190 | 45,045 |
| 108,371 | 81 | 31,753 | 7,374 | 6,216 | 45,424 |
| 108,372 | 80 | 31,285 | 7,269 | 6,149 | 44,783 |
| 108,373 | 78 | 30,900 | 7,194 | 6,055 | 44,227 |
| 108,374 | 80 | 31,038 | 7,252 | 6,118 | 44,488 |
| 108,375 | 82 | 30,761 | 7,172 | 6,072 | 44,087 |

|         |     |        |       |       |        |
|---------|-----|--------|-------|-------|--------|
| 108,376 | 82  | 30,632 | 7,145 | 5,992 | 43,851 |
| 108,377 | 84  | 30,765 | 7,184 | 5,966 | 43,999 |
| 108,378 | 84  | 30,294 | 7,060 | 5,885 | 43,323 |
| 108,379 | 86  | 29,698 | 6,969 | 5,800 | 42,553 |
| 108,380 | 85  | 29,878 | 7,048 | 5,859 | 42,870 |
| 108,381 | 97  | 30,059 | 7,121 | 5,896 | 43,173 |
| 108,382 | 101 | 29,773 | 7,064 | 5,850 | 42,788 |
| 108,383 | 99  | 29,575 | 7,052 | 5,826 | 42,552 |
| 108,384 | 102 | 29,368 | 6,969 | 5,740 | 42,179 |
| 108,385 | 107 | 29,461 | 7,025 | 5,774 | 42,367 |
| 108,386 | 103 | 29,324 | 7,004 | 5,739 | 42,170 |
| 108,387 | 105 | 28,822 | 6,958 | 5,652 | 41,537 |
| 108,388 | 105 | 28,467 | 6,922 | 5,598 | 41,092 |
| 108,389 | 107 | 28,876 | 7,033 | 5,718 | 41,734 |
| 108,390 | 106 | 28,677 | 7,050 | 5,705 | 41,538 |
| 108,391 | 105 | 28,598 | 7,078 | 5,692 | 41,473 |
| 108,392 | 105 | 28,373 | 7,107 | 5,679 | 41,264 |
| 108,393 | 104 | 27,998 | 7,074 | 5,625 | 40,801 |
| 108,394 | 100 | 27,598 | 7,008 | 5,550 | 40,256 |
| 108,395 | 99  | 28,155 | 7,167 | 5,703 | 41,124 |
| 108,396 | 102 | 28,140 | 7,215 | 5,750 | 41,207 |
| 108,397 | 101 | 28,253 | 7,242 | 5,731 | 41,327 |
| 108,398 | 99  | 28,072 | 7,213 | 5,682 | 41,066 |
| 108,399 | 101 | 27,883 | 7,174 | 5,655 | 40,813 |
| 108,400 | 102 | 27,495 | 7,107 | 5,591 | 40,295 |
| 108,401 | 101 | 27,305 | 7,070 | 5,562 | 40,038 |
| 108,402 | 105 | 27,443 | 7,110 | 5,588 | 40,246 |
| 108,403 | 104 | 27,108 | 7,043 | 5,551 | 39,806 |
| 108,404 | 106 | 27,574 | 7,205 | 5,672 | 40,557 |
| 108,405 | 112 | 27,603 | 7,210 | 5,698 | 40,623 |
| 108,406 | 113 | 27,841 | 7,255 | 5,720 | 40,929 |
| 108,407 | 114 | 28,016 | 7,245 | 5,738 | 41,113 |

|         |     |        |       |       |        |
|---------|-----|--------|-------|-------|--------|
| 108,408 | 115 | 27,806 | 7,198 | 5,697 | 40,816 |
| 108,409 | 115 | 27,461 | 7,128 | 5,650 | 40,354 |
| 108,410 | 116 | 28,067 | 7,310 | 5,769 | 41,262 |
| 108,411 | 115 | 27,453 | 7,173 | 5,678 | 40,419 |
| 108,412 | 115 | 27,497 | 7,205 | 5,674 | 40,491 |
| 108,413 | 117 | 27,732 | 7,276 | 5,703 | 40,828 |
| 108,414 | 115 | 27,743 | 7,279 | 5,685 | 40,822 |
| 108,415 | 115 | 27,772 | 7,302 | 5,720 | 40,909 |
| 108,416 | 115 | 27,728 | 7,271 | 5,689 | 40,803 |
| 108,417 | 117 | 27,742 | 7,260 | 5,670 | 40,789 |
| 108,418 | 119 | 27,673 | 7,249 | 5,668 | 40,709 |
| 108,419 | 121 | 27,520 | 7,206 | 5,656 | 40,503 |
| 108,420 | 120 | 27,097 | 7,132 | 5,590 | 39,939 |
| 108,421 | 117 | 26,943 | 7,143 | 5,600 | 39,803 |
| 108,422 | 113 | 27,105 | 7,191 | 5,665 | 40,074 |
| 108,423 | 107 | 26,306 | 6,997 | 5,519 | 38,929 |
| 108,424 | 107 | 26,427 | 7,025 | 5,545 | 39,104 |
| 108,425 | 104 | 26,248 | 7,019 | 5,529 | 38,900 |
| 108,426 | 104 | 26,019 | 6,996 | 5,510 | 38,629 |
| 108,427 | 104 | 25,829 | 6,965 | 5,503 | 38,401 |
| 108,428 | 103 | 25,570 | 6,944 | 5,482 | 38,099 |
| 108,429 | 100 | 25,031 | 6,856 | 5,399 | 37,386 |
| 108,430 | 100 | 24,625 | 6,750 | 5,332 | 36,807 |
| 108,431 | 103 | 25,551 | 6,947 | 5,526 | 38,127 |
| 108,432 | 93  | 25,553 | 6,902 | 5,512 | 38,060 |
| 108,433 | 82  | 24,861 | 6,779 | 5,413 | 37,135 |
| 108,434 | 86  | 25,144 | 6,876 | 5,467 | 37,573 |
| 108,435 | 83  | 25,420 | 6,958 | 5,530 | 37,991 |
| 108,436 | 84  | 25,417 | 6,938 | 5,521 | 37,960 |
| 108,437 | 86  | 25,441 | 6,946 | 5,531 | 38,004 |
| 108,438 | 82  | 25,279 | 6,872 | 5,493 | 37,726 |
| 108,439 | 82  | 25,681 | 6,957 | 5,588 | 38,308 |

|         |    |        |       |       |        |
|---------|----|--------|-------|-------|--------|
| 108,440 | 84 | 25,501 | 6,954 | 5,555 | 38,094 |
| 108,441 | 84 | 25,247 | 6,869 | 5,523 | 37,723 |
| 108,442 | 86 | 25,756 | 7,000 | 5,652 | 38,494 |
| 108,443 | 89 | 25,732 | 6,978 | 5,627 | 38,426 |
| 108,444 | 81 | 25,507 | 6,906 | 5,592 | 38,086 |
| 108,445 | 81 | 25,305 | 6,828 | 5,510 | 37,724 |
| 108,446 | 86 | 25,602 | 6,916 | 5,564 | 38,168 |
| 108,447 | 85 | 25,360 | 6,898 | 5,540 | 37,883 |
| 108,448 | 89 | 24,933 | 6,836 | 5,526 | 37,384 |
| 108,449 | 87 | 24,691 | 6,799 | 5,516 | 37,093 |
| 108,450 | 89 | 24,608 | 6,803 | 5,514 | 37,014 |
| 108,451 | 86 | 24,495 | 6,808 | 5,491 | 36,880 |
| 108,452 | 81 | 24,199 | 6,688 | 5,431 | 36,399 |
| 108,453 | 81 | 24,243 | 6,694 | 5,425 | 36,443 |
| 108,454 | 82 | 24,421 | 6,745 | 5,447 | 36,695 |
| 108,455 | 81 | 24,560 | 6,733 | 5,435 | 36,809 |
| 108,456 | 78 | 24,362 | 6,713 | 5,414 | 36,567 |
| 108,457 | 78 | 24,240 | 6,691 | 5,412 | 36,421 |
| 108,458 | 83 | 24,068 | 6,733 | 5,437 | 36,321 |
| 108,459 | 81 | 23,961 | 6,704 | 5,420 | 36,166 |
| 108,460 | 82 | 23,947 | 6,685 | 5,407 | 36,121 |
| 108,461 | 83 | 24,068 | 6,680 | 5,401 | 36,232 |
| 108,462 | 84 | 23,994 | 6,624 | 5,356 | 36,058 |
| 108,463 | 84 | 23,978 | 6,616 | 5,348 | 36,026 |
| 108,464 | 80 | 24,143 | 6,670 | 5,393 | 36,286 |
| 108,465 | 84 | 23,936 | 6,623 | 5,354 | 35,997 |
| 108,466 | 86 | 24,106 | 6,649 | 5,385 | 36,226 |
| 108,467 | 87 | 24,069 | 6,664 | 5,394 | 36,214 |
| 108,468 | 85 | 23,945 | 6,655 | 5,390 | 36,075 |
| 108,469 | 84 | 23,902 | 6,669 | 5,385 | 36,040 |
| 108,470 | 91 | 23,589 | 6,603 | 5,332 | 35,615 |
| 108,471 | 95 | 23,499 | 6,541 | 5,279 | 35,414 |

|         |     |        |       |       |        |
|---------|-----|--------|-------|-------|--------|
| 108,472 | 96  | 23,663 | 6,578 | 5,280 | 35,617 |
| 108,473 | 98  | 23,677 | 6,589 | 5,304 | 35,668 |
| 108,474 | 103 | 23,434 | 6,520 | 5,244 | 35,301 |
| 108,475 | 103 | 23,311 | 6,496 | 5,215 | 35,125 |
| 108,476 | 105 | 23,822 | 6,572 | 5,303 | 35,802 |
| 108,477 | 105 | 23,723 | 6,511 | 5,241 | 35,580 |
| 108,478 | 104 | 23,543 | 6,488 | 5,233 | 35,368 |
| 108,479 | 103 | 23,607 | 6,534 | 5,248 | 35,492 |
| 108,480 | 102 | 23,502 | 6,506 | 5,232 | 35,342 |
| 108,481 | 100 | 23,362 | 6,494 | 5,236 | 35,192 |
| 108,482 | 100 | 23,161 | 6,493 | 5,205 | 34,959 |
| 108,483 | 100 | 22,799 | 6,504 | 5,162 | 34,565 |
| 108,484 | 102 | 22,649 | 6,510 | 5,154 | 34,415 |
| 108,485 | 98  | 22,535 | 6,489 | 5,141 | 34,263 |
| 108,486 | 104 | 22,107 | 6,408 | 5,066 | 33,685 |
| 108,487 | 103 | 21,962 | 6,377 | 5,033 | 33,475 |
| 108,488 | 102 | 22,194 | 6,459 | 5,076 | 33,831 |
| 108,489 | 102 | 21,847 | 6,436 | 5,052 | 33,437 |
| 108,490 | 103 | 21,693 | 6,453 | 5,007 | 33,256 |
| 108,491 | 99  | 21,562 | 6,439 | 5,007 | 33,107 |
| 108,492 | 99  | 21,526 | 6,433 | 4,963 | 33,021 |
| 108,493 | 100 | 21,677 | 6,493 | 4,998 | 33,268 |
| 108,494 | 96  | 21,583 | 6,436 | 4,952 | 33,067 |
| 108,495 | 99  | 21,299 | 6,411 | 4,889 | 32,698 |
| 108,496 | 100 | 21,260 | 6,373 | 4,867 | 32,600 |
| 108,497 | 90  | 20,421 | 6,045 | 4,628 | 31,184 |
| 108,498 | 91  | 20,543 | 6,061 | 4,640 | 31,335 |
| 108,499 | 89  | 20,730 | 6,096 | 4,647 | 31,562 |
| 108,500 | 89  | 20,713 | 6,096 | 4,635 | 31,533 |
| 108,501 | 89  | 20,935 | 6,128 | 4,674 | 31,826 |
| 108,502 | 88  | 20,822 | 6,086 | 4,628 | 31,624 |
| 108,503 | 88  | 20,579 | 6,003 | 4,541 | 31,211 |

|         |    |        |       |       |        |
|---------|----|--------|-------|-------|--------|
| 108,504 | 93 | 20,408 | 5,964 | 4,518 | 30,983 |
| 108,505 | 92 | 20,106 | 5,888 | 4,451 | 30,537 |
| 108,506 | 91 | 20,391 | 5,965 | 4,522 | 30,969 |
| 108,507 | 94 | 20,064 | 5,802 | 4,377 | 30,337 |
| 108,508 | 99 | 20,345 | 5,838 | 4,424 | 30,706 |
| 108,509 | 93 | 20,296 | 5,830 | 4,410 | 30,629 |
| 108,510 | 92 | 20,188 | 5,820 | 4,374 | 30,474 |
| 108,511 | 90 | 19,982 | 5,775 | 4,315 | 30,162 |
| 108,512 | 90 | 20,076 | 5,828 | 4,350 | 30,344 |
| 108,513 | 89 | 19,822 | 5,782 | 4,315 | 30,008 |
| 108,514 | 89 | 19,785 | 5,790 | 4,310 | 29,974 |
| 108,515 | 90 | 19,783 | 5,772 | 4,326 | 29,971 |
| 108,516 | 88 | 20,186 | 5,875 | 4,397 | 30,546 |
| 108,517 | 87 | 19,940 | 5,831 | 4,333 | 30,191 |
| 108,518 | 89 | 19,686 | 5,781 | 4,293 | 29,849 |
| 108,519 | 89 | 19,432 | 5,712 | 4,242 | 29,475 |
| 108,520 | 91 | 20,261 | 5,924 | 4,391 | 30,667 |
| 108,521 | 87 | 20,384 | 5,930 | 4,383 | 30,784 |
| 108,522 | 83 | 20,037 | 5,838 | 4,332 | 30,290 |
| 108,523 | 83 | 20,106 | 5,849 | 4,317 | 30,355 |
| 108,524 | 81 | 20,325 | 5,935 | 4,354 | 30,695 |
| 108,525 | 77 | 20,297 | 5,944 | 4,358 | 30,676 |
| 108,526 | 75 | 20,075 | 5,887 | 4,300 | 30,337 |
| 108,527 | 77 | 20,183 | 5,945 | 4,325 | 30,530 |
| 108,528 | 78 | 20,100 | 5,976 | 4,326 | 30,480 |
| 108,529 | 83 | 20,197 | 5,946 | 4,296 | 30,522 |
| 108,530 | 84 | 20,398 | 6,029 | 4,365 | 30,876 |
| 108,531 | 86 | 20,234 | 6,019 | 4,358 | 30,697 |
| 108,532 | 85 | 20,155 | 6,008 | 4,314 | 30,562 |
| 108,533 | 85 | 20,107 | 5,904 | 4,256 | 30,352 |
| 108,534 | 85 | 20,515 | 5,967 | 4,318 | 30,885 |
| 108,535 | 82 | 20,455 | 5,899 | 4,274 | 30,710 |



|         |    |        |       |       |        |
|---------|----|--------|-------|-------|--------|
| 108,536 | 83 | 20,459 | 5,887 | 4,251 | 30,680 |
| 108,537 | 75 | 20,560 | 5,856 | 4,232 | 30,723 |
| 108,538 | 75 | 20,125 | 5,666 | 4,111 | 29,977 |
| 108,539 | 74 | 20,498 | 5,719 | 4,122 | 30,413 |
| 108,540 | 72 | 20,715 | 5,735 | 4,167 | 30,689 |
| 108,541 | 77 | 21,085 | 5,810 | 4,202 | 31,174 |
| 108,542 | 77 | 20,915 | 5,734 | 4,141 | 30,867 |
| 108,543 | 77 | 20,765 | 5,699 | 4,125 | 30,666 |
| 108,544 | 78 | 21,320 | 5,812 | 4,201 | 31,411 |
| 108,545 | 81 | 21,387 | 5,855 | 4,228 | 31,551 |
| 108,546 | 79 | 21,294 | 5,835 | 4,216 | 31,424 |
| 108,547 | 80 | 21,258 | 5,916 | 4,250 | 31,504 |
| 108,548 | 79 | 21,119 | 5,850 | 4,221 | 31,269 |
| 108,549 | 80 | 21,203 | 5,853 | 4,217 | 31,353 |
| 108,550 | 79 | 21,214 | 5,864 | 4,231 | 31,388 |
| 108,551 | 82 | 21,397 | 5,894 | 4,263 | 31,636 |
| 108,552 | 83 | 21,445 | 5,917 | 4,261 | 31,706 |
| 108,553 | 86 | 21,833 | 5,999 | 4,376 | 32,294 |
| 108,554 | 87 | 21,716 | 5,990 | 4,364 | 32,157 |
| 108,555 | 82 | 21,591 | 5,966 | 4,374 | 32,013 |
| 108,556 | 84 | 21,730 | 5,982 | 4,368 | 32,164 |
| 108,557 | 84 | 21,518 | 5,928 | 4,351 | 31,881 |
| 108,558 | 85 | 22,220 | 6,195 | 4,541 | 33,041 |
| 108,559 | 82 | 22,264 | 6,238 | 4,571 | 33,155 |
| 108,560 | 83 | 22,097 | 6,199 | 4,571 | 32,950 |
| 108,561 | 84 | 22,359 | 6,318 | 4,683 | 33,444 |
| 108,562 | 85 | 22,308 | 6,325 | 4,695 | 33,413 |
| 108,563 | 83 | 22,126 | 6,258 | 4,663 | 33,130 |
| 108,564 | 83 | 21,952 | 6,254 | 4,676 | 32,965 |
| 108,565 | 83 | 21,948 | 6,247 | 4,675 | 32,953 |
| 108,566 | 81 | 22,117 | 6,298 | 4,705 | 33,201 |
| 108,567 | 80 | 21,632 | 6,191 | 4,625 | 32,528 |

|         |     |        |       |       |        |
|---------|-----|--------|-------|-------|--------|
| 108,568 | 80  | 21,968 | 6,270 | 4,670 | 32,988 |
| 108,569 | 78  | 22,065 | 6,307 | 4,673 | 33,123 |
| 108,570 | 78  | 22,219 | 6,315 | 4,688 | 33,300 |
| 108,571 | 79  | 22,222 | 6,290 | 4,688 | 33,279 |
| 108,572 | 77  | 22,031 | 6,287 | 4,681 | 33,076 |
| 108,573 | 77  | 21,914 | 6,222 | 4,658 | 32,871 |
| 108,574 | 78  | 21,893 | 6,238 | 4,669 | 32,878 |
| 108,575 | 78  | 21,901 | 6,232 | 4,693 | 32,904 |
| 108,576 | 78  | 21,580 | 6,163 | 4,635 | 32,456 |
| 108,577 | 81  | 21,896 | 6,223 | 4,689 | 32,889 |
| 108,578 | 81  | 22,101 | 6,276 | 4,753 | 33,211 |
| 108,579 | 81  | 22,290 | 6,300 | 4,796 | 33,467 |
| 108,580 | 81  | 22,219 | 6,332 | 4,824 | 33,456 |
| 108,581 | 81  | 22,313 | 6,307 | 4,831 | 33,532 |
| 108,582 | 81  | 22,274 | 6,256 | 4,790 | 33,401 |
| 108,583 | 79  | 22,177 | 6,196 | 4,759 | 33,211 |
| 108,584 | 84  | 22,445 | 6,358 | 4,858 | 33,745 |
| 108,585 | 86  | 22,331 | 6,356 | 4,856 | 33,629 |
| 108,586 | 86  | 22,049 | 6,307 | 4,828 | 33,270 |
| 108,587 | 90  | 21,819 | 6,257 | 4,777 | 32,943 |
| 108,588 | 90  | 21,449 | 6,207 | 4,731 | 32,477 |
| 108,589 | 90  | 21,655 | 6,309 | 4,802 | 32,856 |
| 108,590 | 98  | 21,796 | 6,374 | 4,863 | 33,131 |
| 108,591 | 101 | 21,802 | 6,397 | 4,877 | 33,177 |
| 108,592 | 101 | 21,712 | 6,411 | 4,890 | 33,114 |
| 108,593 | 107 | 21,621 | 6,374 | 4,912 | 33,014 |
| 108,594 | 106 | 21,283 | 6,297 | 4,868 | 32,554 |
| 108,595 | 105 | 21,182 | 6,330 | 4,861 | 32,478 |
| 108,596 | 107 | 21,220 | 6,408 | 4,894 | 32,629 |
| 108,597 | 106 | 21,082 | 6,321 | 4,842 | 32,351 |
| 108,598 | 106 | 21,054 | 6,295 | 4,835 | 32,290 |
| 108,599 | 111 | 21,187 | 6,427 | 4,929 | 32,654 |

|         |     |        |       |       |        |
|---------|-----|--------|-------|-------|--------|
| 108,600 | 112 | 21,396 | 6,469 | 4,968 | 32,945 |
| 108,601 | 109 | 21,181 | 6,427 | 4,936 | 32,653 |
| 108,602 | 112 | 21,046 | 6,470 | 4,942 | 32,570 |
| 108,603 | 113 | 21,350 | 6,599 | 4,997 | 33,059 |
| 108,604 | 109 | 21,265 | 6,622 | 4,996 | 32,992 |
| 108,605 | 107 | 21,051 | 6,622 | 5,004 | 32,784 |
| 108,606 | 106 | 21,174 | 6,643 | 5,012 | 32,935 |
| 108,607 | 104 | 21,018 | 6,654 | 5,020 | 32,796 |
| 108,608 | 104 | 21,037 | 6,658 | 5,029 | 32,828 |
| 108,609 | 103 | 21,121 | 6,697 | 5,044 | 32,965 |
| 108,610 | 106 | 21,136 | 6,681 | 5,024 | 32,947 |
| 108,611 | 108 | 21,278 | 6,732 | 5,027 | 33,145 |
| 108,612 | 113 | 21,327 | 6,726 | 5,015 | 33,181 |
| 108,613 | 112 | 21,120 | 6,679 | 4,980 | 32,891 |
| 108,614 | 116 | 21,059 | 6,654 | 4,953 | 32,782 |
| 108,615 | 116 | 20,908 | 6,620 | 4,898 | 32,542 |
| 108,616 | 124 | 21,519 | 6,860 | 5,061 | 33,564 |
| 108,617 | 126 | 21,448 | 6,869 | 5,045 | 33,488 |
| 108,618 | 129 | 21,352 | 6,833 | 5,025 | 33,339 |
| 108,619 | 129 | 21,247 | 6,807 | 5,012 | 33,195 |
| 108,620 | 128 | 21,431 | 6,865 | 5,053 | 33,477 |
| 108,621 | 124 | 20,789 | 6,716 | 4,942 | 32,571 |
| 108,622 | 123 | 21,020 | 6,760 | 4,968 | 32,871 |
| 108,623 | 123 | 21,306 | 6,829 | 5,005 | 33,263 |
| 108,624 | 123 | 20,533 | 6,606 | 4,825 | 32,087 |
| 108,625 | 125 | 20,765 | 6,684 | 4,856 | 32,430 |
| 108,626 | 122 | 20,894 | 6,713 | 4,884 | 32,613 |
| 108,627 | 123 | 21,153 | 6,826 | 4,925 | 33,027 |
| 108,628 | 120 | 21,035 | 6,858 | 4,930 | 32,943 |
| 108,629 | 118 | 21,007 | 6,877 | 4,939 | 32,941 |
| 108,630 | 120 | 21,167 | 6,928 | 4,974 | 33,189 |
| 108,631 | 115 | 21,332 | 6,920 | 4,965 | 33,332 |

|         |     |        |       |       |        |
|---------|-----|--------|-------|-------|--------|
| 108,632 | 114 | 21,266 | 6,912 | 4,947 | 33,239 |
| 108,633 | 111 | 21,174 | 6,861 | 4,935 | 33,081 |
| 108,634 | 112 | 21,099 | 6,821 | 4,901 | 32,933 |
| 108,635 | 110 | 21,006 | 6,795 | 4,854 | 32,765 |
| 108,636 | 110 | 21,031 | 6,811 | 4,852 | 32,804 |
| 108,637 | 105 | 21,186 | 6,841 | 4,886 | 33,018 |
| 108,638 | 106 | 21,433 | 6,913 | 4,962 | 33,414 |
| 108,639 | 104 | 21,335 | 6,810 | 4,909 | 33,158 |
| 108,640 | 103 | 21,531 | 6,881 | 4,956 | 33,471 |
| 108,641 | 100 | 21,827 | 6,927 | 4,991 | 33,845 |
| 108,642 | 97  | 21,967 | 6,936 | 4,976 | 33,976 |
| 108,643 | 94  | 21,989 | 6,902 | 4,964 | 33,949 |
| 108,644 | 88  | 21,352 | 6,750 | 4,814 | 33,004 |
| 108,645 | 90  | 21,732 | 6,787 | 4,855 | 33,464 |
| 108,646 | 86  | 22,035 | 6,826 | 4,912 | 33,859 |
| 108,647 | 84  | 22,073 | 6,789 | 4,906 | 33,852 |
| 108,648 | 85  | 22,415 | 6,861 | 4,957 | 34,318 |
| 108,649 | 82  | 22,722 | 6,917 | 5,013 | 34,734 |
| 108,650 | 82  | 22,892 | 6,938 | 5,003 | 34,915 |
| 108,651 | 80  | 22,481 | 6,877 | 4,973 | 34,411 |
| 108,652 | 77  | 22,265 | 6,834 | 4,950 | 34,126 |
| 108,653 | 76  | 22,792 | 6,965 | 5,048 | 34,881 |
| 108,654 | 76  | 22,815 | 6,954 | 5,060 | 34,905 |
| 108,655 | 77  | 22,956 | 6,947 | 5,067 | 35,047 |
| 108,656 | 76  | 23,161 | 6,954 | 5,063 | 35,254 |
| 108,657 | 74  | 23,127 | 6,909 | 5,041 | 35,151 |
| 108,658 | 72  | 23,145 | 6,840 | 5,009 | 35,066 |
| 108,659 | 73  | 23,067 | 6,793 | 5,000 | 34,933 |
| 108,660 | 74  | 23,451 | 6,863 | 5,049 | 35,437 |
| 108,661 | 69  | 23,591 | 6,917 | 5,062 | 35,639 |
| 108,662 | 71  | 23,764 | 6,893 | 5,081 | 35,809 |
| 108,663 | 62  | 23,229 | 6,727 | 4,962 | 34,980 |

|         |    |        |       |       |        |
|---------|----|--------|-------|-------|--------|
| 108,664 | 65 | 23,514 | 6,760 | 5,010 | 35,349 |
| 108,665 | 61 | 23,750 | 6,788 | 5,047 | 35,646 |
| 108,666 | 61 | 23,868 | 6,770 | 5,036 | 35,735 |
| 108,667 | 57 | 23,997 | 6,755 | 5,068 | 35,877 |
| 108,668 | 55 | 23,711 | 6,652 | 5,024 | 35,442 |
| 108,669 | 55 | 24,022 | 6,736 | 5,076 | 35,889 |
| 108,670 | 55 | 23,915 | 6,697 | 5,088 | 35,755 |
| 108,671 | 55 | 23,793 | 6,656 | 5,044 | 35,548 |
| 108,672 | 57 | 23,635 | 6,654 | 5,046 | 35,392 |
| 108,673 | 60 | 23,905 | 6,739 | 5,083 | 35,787 |
| 108,674 | 60 | 23,709 | 6,652 | 5,054 | 35,475 |
| 108,675 | 58 | 23,478 | 6,621 | 5,027 | 35,184 |
| 108,676 | 63 | 23,508 | 6,596 | 5,056 | 35,223 |
| 108,677 | 64 | 23,295 | 6,568 | 5,030 | 34,957 |
| 108,678 | 65 | 24,221 | 6,721 | 5,173 | 36,180 |
| 108,679 | 68 | 24,400 | 6,714 | 5,171 | 36,353 |
| 108,680 | 67 | 24,539 | 6,723 | 5,181 | 36,510 |
| 108,681 | 66 | 24,576 | 6,720 | 5,191 | 36,553 |
| 108,682 | 68 | 24,615 | 6,698 | 5,212 | 36,593 |
| 108,683 | 68 | 24,353 | 6,637 | 5,172 | 36,230 |
| 108,684 | 67 | 24,288 | 6,675 | 5,197 | 36,227 |
| 108,685 | 67 | 24,297 | 6,689 | 5,242 | 36,295 |
| 108,686 | 70 | 24,417 | 6,747 | 5,294 | 36,528 |
| 108,687 | 72 | 24,478 | 6,739 | 5,302 | 36,591 |
| 108,688 | 76 | 24,463 | 6,739 | 5,276 | 36,554 |
| 108,689 | 78 | 24,513 | 6,715 | 5,243 | 36,549 |
| 108,690 | 83 | 24,199 | 6,614 | 5,185 | 36,081 |
| 108,691 | 83 | 24,137 | 6,599 | 5,198 | 36,017 |
| 108,692 | 86 | 24,407 | 6,698 | 5,228 | 36,419 |
| 108,693 | 87 | 24,368 | 6,692 | 5,230 | 36,377 |
| 108,694 | 86 | 24,146 | 6,654 | 5,207 | 36,093 |
| 108,695 | 85 | 24,224 | 6,640 | 5,207 | 36,156 |

|         |     |        |       |       |        |
|---------|-----|--------|-------|-------|--------|
| 108,696 | 85  | 24,524 | 6,763 | 5,272 | 36,644 |
| 108,697 | 85  | 24,301 | 6,720 | 5,209 | 36,315 |
| 108,698 | 85  | 24,216 | 6,708 | 5,229 | 36,238 |
| 108,699 | 89  | 24,407 | 6,759 | 5,299 | 36,554 |
| 108,700 | 92  | 24,484 | 6,760 | 5,296 | 36,632 |
| 108,701 | 92  | 24,495 | 6,745 | 5,301 | 36,633 |
| 108,702 | 92  | 24,304 | 6,670 | 5,232 | 36,298 |
| 108,703 | 100 | 24,507 | 6,743 | 5,286 | 36,636 |
| 108,704 | 100 | 24,684 | 6,745 | 5,284 | 36,813 |
| 108,705 | 99  | 24,393 | 6,646 | 5,224 | 36,362 |
| 108,706 | 98  | 24,174 | 6,628 | 5,230 | 36,130 |
| 108,707 | 97  | 23,965 | 6,586 | 5,227 | 35,875 |
| 108,708 | 98  | 23,961 | 6,580 | 5,197 | 35,836 |
| 108,709 | 101 | 24,327 | 6,617 | 5,225 | 36,270 |
| 108,710 | 99  | 24,481 | 6,651 | 5,238 | 36,469 |
| 108,711 | 97  | 23,670 | 6,443 | 5,037 | 35,247 |
| 108,712 | 101 | 24,015 | 6,497 | 5,108 | 35,721 |
| 108,713 | 97  | 24,401 | 6,576 | 5,181 | 36,255 |
| 108,714 | 102 | 24,909 | 6,677 | 5,246 | 36,934 |
| 108,715 | 101 | 24,784 | 6,683 | 5,204 | 36,772 |
| 108,716 | 101 | 24,692 | 6,669 | 5,197 | 36,659 |
| 108,717 | 100 | 24,947 | 6,714 | 5,236 | 36,997 |
| 108,718 | 102 | 25,254 | 6,787 | 5,262 | 37,405 |
| 108,719 | 102 | 25,649 | 6,863 | 5,322 | 37,936 |
| 108,720 | 101 | 25,521 | 6,832 | 5,277 | 37,731 |
| 108,721 | 103 | 25,333 | 6,739 | 5,198 | 37,373 |
| 108,722 | 105 | 25,728 | 6,817 | 5,257 | 37,907 |
| 108,723 | 107 | 25,785 | 6,833 | 5,288 | 38,013 |
| 108,724 | 106 | 25,544 | 6,764 | 5,263 | 37,677 |
| 108,725 | 104 | 25,712 | 6,852 | 5,289 | 37,957 |
| 108,726 | 104 | 26,075 | 6,973 | 5,367 | 38,519 |
| 108,727 | 98  | 26,201 | 6,977 | 5,354 | 38,630 |

|         |    |        |       |       |        |
|---------|----|--------|-------|-------|--------|
| 108,728 | 97 | 26,076 | 6,927 | 5,344 | 38,444 |
| 108,729 | 96 | 25,855 | 6,887 | 5,334 | 38,172 |
| 108,730 | 93 | 25,738 | 6,901 | 5,364 | 38,096 |
| 108,731 | 96 | 25,591 | 6,877 | 5,333 | 37,897 |
| 108,732 | 95 | 25,513 | 6,887 | 5,306 | 37,801 |
| 108,733 | 97 | 24,996 | 6,713 | 5,104 | 36,910 |
| 108,734 | 99 | 25,300 | 6,754 | 5,144 | 37,297 |
| 108,735 | 90 | 25,095 | 6,670 | 5,072 | 36,927 |
| 108,736 | 91 | 25,389 | 6,720 | 5,107 | 37,307 |
| 108,737 | 93 | 25,217 | 6,631 | 5,078 | 37,019 |
| 108,738 | 93 | 25,495 | 6,680 | 5,122 | 37,390 |
| 108,739 | 90 | 25,926 | 6,767 | 5,198 | 37,981 |
| 108,740 | 91 | 25,885 | 6,786 | 5,187 | 37,949 |
| 108,741 | 86 | 25,679 | 6,758 | 5,161 | 37,684 |
| 108,742 | 87 | 26,132 | 6,870 | 5,244 | 38,333 |
| 108,743 | 85 | 25,905 | 6,813 | 5,226 | 38,029 |
| 108,744 | 86 | 25,584 | 6,739 | 5,173 | 37,582 |
| 108,745 | 84 | 25,287 | 6,692 | 5,154 | 37,217 |
| 108,746 | 82 | 25,761 | 6,829 | 5,263 | 37,935 |
| 108,747 | 84 | 25,640 | 6,759 | 5,236 | 37,719 |
| 108,748 | 80 | 25,506 | 6,716 | 5,172 | 37,474 |
| 108,749 | 83 | 25,834 | 6,835 | 5,237 | 37,989 |
| 108,750 | 83 | 26,204 | 6,922 | 5,302 | 38,511 |
| 108,751 | 84 | 26,058 | 6,902 | 5,284 | 38,328 |
| 108,752 | 77 | 25,592 | 6,731 | 5,159 | 37,559 |
| 108,753 | 78 | 25,762 | 6,754 | 5,211 | 37,805 |
| 108,754 | 73 | 26,153 | 6,804 | 5,265 | 38,295 |
| 108,755 | 72 | 26,133 | 6,790 | 5,249 | 38,244 |
| 108,756 | 74 | 26,122 | 6,748 | 5,164 | 38,108 |
| 108,757 | 74 | 26,097 | 6,763 | 5,160 | 38,094 |
| 108,758 | 78 | 26,256 | 6,833 | 5,199 | 38,366 |
| 108,759 | 78 | 26,172 | 6,834 | 5,198 | 38,282 |

|         |    |        |       |       |        |
|---------|----|--------|-------|-------|--------|
| 108,760 | 76 | 25,989 | 6,839 | 5,193 | 38,097 |
| 108,761 | 84 | 25,697 | 6,761 | 5,122 | 37,664 |
| 108,762 | 85 | 25,426 | 6,689 | 5,106 | 37,306 |
| 108,763 | 90 | 25,939 | 6,863 | 5,191 | 38,083 |
| 108,764 | 92 | 25,569 | 6,810 | 5,119 | 37,590 |
| 108,765 | 87 | 25,215 | 6,729 | 5,057 | 37,088 |
| 108,766 | 86 | 25,563 | 6,820 | 5,169 | 37,638 |
| 108,767 | 86 | 25,123 | 6,758 | 5,087 | 37,054 |
| 108,768 | 87 | 25,050 | 6,752 | 5,102 | 36,991 |
| 108,769 | 90 | 25,313 | 6,788 | 5,161 | 37,352 |
| 108,770 | 92 | 25,164 | 6,781 | 5,168 | 37,205 |
| 108,771 | 91 | 24,641 | 6,680 | 5,091 | 36,503 |
| 108,772 | 89 | 24,602 | 6,714 | 5,132 | 36,537 |
| 108,773 | 87 | 24,207 | 6,643 | 5,085 | 36,022 |
| 108,774 | 82 | 23,880 | 6,558 | 5,023 | 35,543 |
| 108,775 | 84 | 24,257 | 6,749 | 5,146 | 36,236 |
| 108,776 | 84 | 24,271 | 6,787 | 5,159 | 36,301 |
| 108,777 | 85 | 24,217 | 6,758 | 5,159 | 36,219 |
| 108,778 | 86 | 24,031 | 6,770 | 5,180 | 36,067 |
| 108,779 | 92 | 24,186 | 6,774 | 5,192 | 36,244 |
| 108,780 | 93 | 24,541 | 6,822 | 5,229 | 36,685 |
| 108,781 | 93 | 24,826 | 6,855 | 5,243 | 37,017 |
| 108,782 | 91 | 24,756 | 6,862 | 5,230 | 36,939 |
| 108,783 | 91 | 24,654 | 6,849 | 5,226 | 36,820 |
| 108,784 | 90 | 24,513 | 6,841 | 5,241 | 36,685 |
| 108,785 | 89 | 24,540 | 6,890 | 5,264 | 36,783 |
| 108,786 | 90 | 24,245 | 6,810 | 5,232 | 36,377 |
| 108,787 | 89 | 23,947 | 6,756 | 5,205 | 35,997 |
| 108,788 | 82 | 24,557 | 6,940 | 5,326 | 36,905 |
| 108,789 | 83 | 24,639 | 6,944 | 5,330 | 36,996 |
| 108,790 | 84 | 24,634 | 6,915 | 5,296 | 36,929 |
| 108,791 | 81 | 23,968 | 6,703 | 5,173 | 35,925 |



|         |    |        |       |       |        |
|---------|----|--------|-------|-------|--------|
| 108,792 | 86 | 24,301 | 6,761 | 5,203 | 36,351 |
| 108,793 | 87 | 24,641 | 6,840 | 5,246 | 36,814 |
| 108,794 | 87 | 24,801 | 6,848 | 5,247 | 36,983 |
| 108,795 | 87 | 24,749 | 6,852 | 5,242 | 36,930 |
| 108,796 | 90 | 25,074 | 6,940 | 5,274 | 37,378 |
| 108,797 | 90 | 25,115 | 6,958 | 5,260 | 37,423 |
| 108,798 | 88 | 25,068 | 6,925 | 5,234 | 37,315 |
| 108,799 | 92 | 25,112 | 6,903 | 5,230 | 37,337 |
| 108,800 | 89 | 24,808 | 6,777 | 5,166 | 36,840 |
| 108,801 | 89 | 25,052 | 6,814 | 5,200 | 37,155 |
| 108,802 | 84 | 24,871 | 6,751 | 5,158 | 36,864 |
| 108,803 | 84 | 25,091 | 6,826 | 5,193 | 37,194 |
| 108,804 | 83 | 25,322 | 6,864 | 5,212 | 37,481 |
| 108,805 | 83 | 25,008 | 6,808 | 5,161 | 37,060 |
| 108,806 | 81 | 24,821 | 6,703 | 5,128 | 36,733 |
| 108,807 | 81 | 25,331 | 6,787 | 5,229 | 37,428 |
| 108,808 | 79 | 25,653 | 6,880 | 5,293 | 37,905 |
| 108,809 | 82 | 25,945 | 6,965 | 5,374 | 38,366 |
| 108,810 | 83 | 25,633 | 6,896 | 5,339 | 37,951 |
| 108,811 | 82 | 25,237 | 6,837 | 5,286 | 37,442 |
| 108,812 | 73 | 25,613 | 6,962 | 5,408 | 38,056 |
| 108,813 | 74 | 25,782 | 6,979 | 5,426 | 38,261 |
| 108,814 | 68 | 25,724 | 6,908 | 5,395 | 38,095 |
| 108,815 | 65 | 25,713 | 6,854 | 5,388 | 38,020 |
| 108,816 | 64 | 25,839 | 6,869 | 5,393 | 38,165 |
| 108,817 | 68 | 25,265 | 6,725 | 5,280 | 37,338 |
| 108,818 | 69 | 25,544 | 6,783 | 5,307 | 37,703 |
| 108,819 | 70 | 26,022 | 6,879 | 5,394 | 38,365 |
| 108,820 | 67 | 26,044 | 6,918 | 5,387 | 38,416 |
| 108,821 | 63 | 26,190 | 6,901 | 5,353 | 38,507 |
| 108,822 | 63 | 26,356 | 6,880 | 5,327 | 38,626 |
| 108,823 | 62 | 26,448 | 6,808 | 5,253 | 38,571 |

|         |    |        |       |       |        |
|---------|----|--------|-------|-------|--------|
| 108,824 | 63 | 26,548 | 6,808 | 5,265 | 38,684 |
| 108,825 | 62 | 26,775 | 6,825 | 5,289 | 38,951 |
| 108,826 | 62 | 27,154 | 6,847 | 5,296 | 39,359 |
| 108,827 | 66 | 27,444 | 6,867 | 5,322 | 39,699 |
| 108,828 | 64 | 27,411 | 6,722 | 5,212 | 39,409 |
| 108,829 | 64 | 27,780 | 6,756 | 5,261 | 39,861 |
| 108,830 | 61 | 28,084 | 6,839 | 5,298 | 40,282 |
| 108,831 | 60 | 28,015 | 6,850 | 5,287 | 40,212 |
| 108,832 | 60 | 28,080 | 6,856 | 5,317 | 40,313 |
| 108,833 | 59 | 27,802 | 6,750 | 5,240 | 39,851 |
| 108,834 | 59 | 28,231 | 6,779 | 5,282 | 40,351 |
| 108,835 | 58 | 28,609 | 6,826 | 5,325 | 40,818 |
| 108,836 | 57 | 28,879 | 6,831 | 5,341 | 41,108 |
| 108,837 | 61 | 29,113 | 6,874 | 5,373 | 41,421 |
| 108,838 | 67 | 29,039 | 6,804 | 5,314 | 41,224 |
| 108,839 | 67 | 29,063 | 6,791 | 5,329 | 41,250 |
| 108,840 | 66 | 29,052 | 6,807 | 5,351 | 41,276 |
| 108,841 | 63 | 28,181 | 6,626 | 5,248 | 40,118 |
| 108,842 | 64 | 28,240 | 6,642 | 5,252 | 40,198 |
| 108,843 | 63 | 28,535 | 6,681 | 5,305 | 40,584 |
| 108,844 | 63 | 28,510 | 6,674 | 5,284 | 40,531 |
| 108,845 | 63 | 29,012 | 6,770 | 5,372 | 41,217 |
| 108,846 | 63 | 29,058 | 6,759 | 5,383 | 41,263 |
| 108,847 | 62 | 28,763 | 6,701 | 5,331 | 40,857 |
| 108,848 | 66 | 29,345 | 6,807 | 5,416 | 41,634 |
| 108,849 | 62 | 29,060 | 6,744 | 5,357 | 41,223 |
| 108,850 | 64 | 29,573 | 6,817 | 5,420 | 41,874 |
| 108,851 | 62 | 29,595 | 6,857 | 5,433 | 41,947 |
| 108,852 | 66 | 29,594 | 6,878 | 5,439 | 41,977 |
| 108,853 | 66 | 29,245 | 6,811 | 5,403 | 41,525 |
| 108,854 | 66 | 29,594 | 6,854 | 5,469 | 41,983 |
| 108,855 | 69 | 29,263 | 6,786 | 5,408 | 41,526 |

|         |     |        |       |       |        |
|---------|-----|--------|-------|-------|--------|
| 108,856 | 69  | 28,877 | 6,704 | 5,350 | 41,000 |
| 108,857 | 70  | 29,418 | 6,877 | 5,463 | 41,828 |
| 108,858 | 71  | 29,357 | 6,866 | 5,439 | 41,733 |
| 108,859 | 71  | 29,494 | 6,872 | 5,450 | 41,887 |
| 108,860 | 71  | 29,495 | 6,836 | 5,368 | 41,770 |
| 108,861 | 71  | 29,627 | 6,841 | 5,368 | 41,907 |
| 108,862 | 71  | 29,828 | 6,816 | 5,345 | 42,060 |
| 108,863 | 74  | 30,160 | 6,897 | 5,386 | 42,517 |
| 108,864 | 73  | 30,085 | 6,863 | 5,362 | 42,383 |
| 108,865 | 71  | 29,930 | 6,837 | 5,344 | 42,182 |
| 108,866 | 73  | 29,620 | 6,720 | 5,256 | 41,669 |
| 108,867 | 74  | 29,759 | 6,777 | 5,311 | 41,921 |
| 108,868 | 73  | 29,737 | 6,759 | 5,327 | 41,896 |
| 108,869 | 73  | 29,873 | 6,794 | 5,396 | 42,136 |
| 108,870 | 76  | 29,751 | 6,761 | 5,360 | 41,948 |
| 108,871 | 76  | 29,363 | 6,666 | 5,303 | 41,408 |
| 108,872 | 81  | 29,048 | 6,598 | 5,267 | 40,994 |
| 108,873 | 81  | 28,762 | 6,544 | 5,243 | 40,630 |
| 108,874 | 83  | 29,323 | 6,672 | 5,340 | 41,418 |
| 108,875 | 83  | 29,681 | 6,783 | 5,401 | 41,948 |
| 108,876 | 83  | 29,466 | 6,698 | 5,340 | 41,587 |
| 108,877 | 84  | 29,539 | 6,728 | 5,405 | 41,756 |
| 108,878 | 80  | 29,236 | 6,680 | 5,377 | 41,373 |
| 108,879 | 78  | 29,157 | 6,693 | 5,375 | 41,303 |
| 108,880 | 79  | 29,136 | 6,698 | 5,378 | 41,291 |
| 108,881 | 78  | 29,289 | 6,761 | 5,444 | 41,572 |
| 108,882 | 81  | 29,269 | 6,743 | 5,419 | 41,512 |
| 108,883 | 81  | 28,878 | 6,664 | 5,341 | 40,964 |
| 108,884 | 81  | 28,820 | 6,673 | 5,340 | 40,914 |
| 108,885 | 81  | 28,456 | 6,646 | 5,306 | 40,489 |
| 108,886 | 98  | 28,729 | 6,837 | 5,471 | 41,135 |
| 108,887 | 102 | 28,596 | 6,877 | 5,500 | 41,075 |

|         |     |        |       |       |        |
|---------|-----|--------|-------|-------|--------|
| 108,888 | 96  | 28,388 | 6,836 | 5,460 | 40,780 |
| 108,889 | 94  | 28,370 | 6,841 | 5,471 | 40,776 |
| 108,890 | 100 | 28,419 | 6,837 | 5,463 | 40,819 |
| 108,891 | 99  | 28,002 | 6,763 | 5,380 | 40,244 |
| 108,892 | 99  | 28,022 | 6,754 | 5,383 | 40,258 |
| 108,893 | 99  | 28,391 | 6,826 | 5,440 | 40,756 |
| 108,894 | 98  | 27,923 | 6,712 | 5,361 | 40,094 |
| 108,895 | 98  | 27,891 | 6,717 | 5,361 | 40,067 |
| 108,896 | 97  | 27,454 | 6,640 | 5,304 | 39,495 |
| 108,897 | 95  | 27,033 | 6,563 | 5,260 | 38,951 |
| 108,898 | 99  | 27,277 | 6,607 | 5,319 | 39,302 |
| 108,899 | 105 | 27,415 | 6,612 | 5,334 | 39,466 |
| 108,900 | 106 | 27,306 | 6,610 | 5,371 | 39,393 |
| 108,901 | 106 | 27,209 | 6,630 | 5,381 | 39,326 |
| 108,902 | 106 | 26,917 | 6,560 | 5,315 | 38,898 |
| 108,903 | 102 | 26,807 | 6,531 | 5,323 | 38,763 |
| 108,904 | 106 | 26,569 | 6,471 | 5,263 | 38,409 |
| 108,905 | 106 | 26,287 | 6,426 | 5,211 | 38,030 |
| 108,906 | 112 | 27,544 | 6,692 | 5,473 | 39,821 |
| 108,907 | 112 | 27,705 | 6,696 | 5,508 | 40,021 |
| 108,908 | 112 | 27,821 | 6,691 | 5,518 | 40,142 |
| 108,909 | 111 | 27,322 | 6,608 | 5,437 | 39,478 |
| 108,910 | 111 | 27,170 | 6,562 | 5,412 | 39,255 |
| 108,911 | 108 | 26,704 | 6,452 | 5,352 | 38,616 |
| 108,912 | 108 | 26,460 | 6,391 | 5,303 | 38,262 |
| 108,913 | 110 | 27,267 | 6,552 | 5,455 | 39,384 |
| 108,914 | 111 | 27,254 | 6,536 | 5,467 | 39,368 |
| 108,915 | 111 | 26,802 | 6,441 | 5,397 | 38,751 |
| 108,916 | 109 | 26,808 | 6,488 | 5,396 | 38,801 |
| 108,917 | 107 | 26,930 | 6,551 | 5,446 | 39,034 |
| 108,918 | 106 | 26,900 | 6,496 | 5,379 | 38,881 |
| 108,919 | 104 | 26,670 | 6,427 | 5,309 | 38,510 |

|         |     |        |       |       |        |
|---------|-----|--------|-------|-------|--------|
| 108,920 | 105 | 26,778 | 6,481 | 5,343 | 38,707 |
| 108,921 | 100 | 26,632 | 6,454 | 5,342 | 38,528 |
| 108,922 | 104 | 26,836 | 6,523 | 5,398 | 38,861 |
| 108,923 | 101 | 26,757 | 6,550 | 5,385 | 38,793 |
| 108,924 | 101 | 26,929 | 6,594 | 5,371 | 38,995 |
| 108,925 | 103 | 26,837 | 6,555 | 5,386 | 38,881 |
| 108,926 | 103 | 26,352 | 6,436 | 5,291 | 38,182 |
| 108,927 | 104 | 26,367 | 6,442 | 5,285 | 38,198 |
| 108,928 | 103 | 26,306 | 6,439 | 5,258 | 38,106 |
| 108,929 | 103 | 26,546 | 6,487 | 5,295 | 38,431 |
| 108,930 | 102 | 26,542 | 6,466 | 5,262 | 38,372 |
| 108,931 | 104 | 26,561 | 6,452 | 5,245 | 38,362 |
| 108,932 | 102 | 26,006 | 6,302 | 5,137 | 37,547 |
| 108,933 | 102 | 26,346 | 6,362 | 5,191 | 38,001 |
| 108,934 | 93  | 26,703 | 6,429 | 5,217 | 38,442 |
| 108,935 | 90  | 26,621 | 6,386 | 5,197 | 38,294 |
| 108,936 | 85  | 26,584 | 6,273 | 5,107 | 38,049 |
| 108,937 | 82  | 26,610 | 6,272 | 5,080 | 38,044 |
| 108,938 | 82  | 26,564 | 6,241 | 5,066 | 37,953 |
| 108,939 | 85  | 26,478 | 6,268 | 5,060 | 37,891 |
| 108,940 | 85  | 26,552 | 6,292 | 5,070 | 37,999 |
| 108,941 | 78  | 26,197 | 6,189 | 5,022 | 37,486 |
| 108,942 | 88  | 26,303 | 6,174 | 5,008 | 37,573 |
| 108,943 | 90  | 26,246 | 6,172 | 4,993 | 37,501 |
| 108,944 | 91  | 26,250 | 6,166 | 4,970 | 37,477 |
| 108,945 | 89  | 25,984 | 6,113 | 4,909 | 37,095 |
| 108,946 | 86  | 25,636 | 6,014 | 4,836 | 36,572 |
| 108,947 | 86  | 25,670 | 6,016 | 4,836 | 36,608 |
| 108,948 | 86  | 25,446 | 5,960 | 4,778 | 36,270 |
| 108,949 | 85  | 25,290 | 5,924 | 4,763 | 36,062 |
| 108,950 | 85  | 27,342 | 6,394 | 5,104 | 38,925 |
| 108,951 | 88  | 27,674 | 6,441 | 5,121 | 39,324 |

|         |    |        |       |       |        |
|---------|----|--------|-------|-------|--------|
| 108,952 | 86 | 27,259 | 6,362 | 5,046 | 38,753 |
| 108,953 | 89 | 27,603 | 6,427 | 5,066 | 39,185 |
| 108,954 | 84 | 27,267 | 6,371 | 5,027 | 38,749 |
| 108,955 | 80 | 27,152 | 6,367 | 5,008 | 38,607 |
| 108,956 | 83 | 27,149 | 6,411 | 5,045 | 38,688 |
| 108,957 | 84 | 26,994 | 6,419 | 5,025 | 38,522 |
| 108,958 | 87 | 26,834 | 6,422 | 5,012 | 38,355 |
| 108,959 | 86 | 26,825 | 6,406 | 5,014 | 38,331 |
| 108,960 | 85 | 26,576 | 6,357 | 4,976 | 37,994 |
| 108,961 | 88 | 26,695 | 6,413 | 5,023 | 38,219 |
| 108,962 | 88 | 26,673 | 6,404 | 5,018 | 38,183 |
| 108,963 | 88 | 26,601 | 6,387 | 4,990 | 38,066 |
| 108,964 | 87 | 26,246 | 6,338 | 4,918 | 37,589 |
| 108,965 | 88 | 26,259 | 6,378 | 4,938 | 37,663 |
| 108,966 | 90 | 26,186 | 6,330 | 4,914 | 37,520 |
| 108,967 | 90 | 25,951 | 6,235 | 4,857 | 37,133 |
| 108,968 | 90 | 25,813 | 6,220 | 4,841 | 36,964 |
| 108,969 | 89 | 25,957 | 6,245 | 4,844 | 37,135 |
| 108,970 | 87 | 25,724 | 6,185 | 4,778 | 36,774 |
| 108,971 | 91 | 26,001 | 6,247 | 4,834 | 37,173 |
| 108,972 | 91 | 26,033 | 6,248 | 4,825 | 37,197 |
| 108,973 | 90 | 25,979 | 6,228 | 4,824 | 37,121 |
| 108,974 | 92 | 25,737 | 6,210 | 4,811 | 36,850 |
| 108,975 | 91 | 25,465 | 6,143 | 4,800 | 36,499 |
| 108,976 | 88 | 25,136 | 6,089 | 4,754 | 36,067 |
| 108,977 | 87 | 25,085 | 6,118 | 4,783 | 36,073 |
| 108,978 | 89 | 24,787 | 6,053 | 4,739 | 35,668 |
| 108,979 | 89 | 24,488 | 6,019 | 4,714 | 35,310 |
| 108,980 | 91 | 24,684 | 6,083 | 4,777 | 35,635 |
| 108,981 | 91 | 24,234 | 5,990 | 4,716 | 35,031 |
| 108,982 | 91 | 24,666 | 6,151 | 4,846 | 35,754 |
| 108,983 | 90 | 24,538 | 6,163 | 4,829 | 35,620 |

|         |     |        |       |       |        |
|---------|-----|--------|-------|-------|--------|
| 108,984 | 93  | 24,297 | 6,121 | 4,763 | 35,274 |
| 108,985 | 97  | 24,362 | 6,117 | 4,756 | 35,332 |
| 108,986 | 100 | 24,399 | 6,139 | 4,776 | 35,414 |
| 108,987 | 100 | 24,420 | 6,137 | 4,777 | 35,434 |
| 108,988 | 100 | 24,275 | 6,095 | 4,778 | 35,248 |
| 108,989 | 99  | 24,376 | 6,122 | 4,812 | 35,409 |
| 108,990 | 96  | 24,353 | 6,111 | 4,825 | 35,385 |
| 108,991 | 90  | 22,957 | 5,806 | 4,626 | 33,479 |
| 108,992 | 90  | 23,034 | 5,860 | 4,652 | 33,636 |
| 108,993 | 81  | 23,131 | 5,910 | 4,682 | 33,804 |
| 108,994 | 78  | 22,991 | 5,897 | 4,674 | 33,640 |
| 108,995 | 80  | 23,122 | 6,015 | 4,764 | 33,981 |
| 108,996 | 81  | 23,377 | 6,127 | 4,825 | 34,410 |
| 108,997 | 81  | 23,214 | 6,129 | 4,822 | 34,246 |
| 108,998 | 83  | 23,233 | 6,205 | 4,866 | 34,387 |
| 108,999 | 78  | 22,738 | 6,115 | 4,783 | 33,714 |
| 109,000 | 78  | 23,117 | 6,204 | 4,870 | 34,269 |
| 109,001 | 77  | 23,274 | 6,268 | 4,943 | 34,562 |
| 109,002 | 76  | 22,664 | 6,183 | 4,867 | 33,790 |
| 109,003 | 77  | 22,549 | 6,147 | 4,835 | 33,608 |
| 109,004 | 74  | 22,779 | 6,286 | 4,942 | 34,081 |
| 109,005 | 74  | 22,822 | 6,229 | 4,894 | 34,019 |
| 109,006 | 77  | 22,915 | 6,246 | 4,912 | 34,150 |
| 109,007 | 76  | 22,511 | 6,165 | 4,845 | 33,597 |
| 109,008 | 77  | 23,105 | 6,297 | 4,962 | 34,441 |
| 109,009 | 76  | 23,230 | 6,305 | 4,952 | 34,563 |
| 109,010 | 75  | 22,735 | 6,218 | 4,811 | 33,839 |
| 109,011 | 76  | 23,141 | 6,295 | 4,866 | 34,378 |
| 109,012 | 76  | 23,349 | 6,363 | 4,910 | 34,698 |
| 109,013 | 74  | 23,052 | 6,303 | 4,872 | 34,301 |
| 109,014 | 74  | 23,431 | 6,382 | 4,938 | 34,825 |
| 109,015 | 70  | 23,159 | 6,296 | 4,893 | 34,418 |

|         |    |        |       |       |        |
|---------|----|--------|-------|-------|--------|
| 109,016 | 72 | 23,423 | 6,362 | 4,931 | 34,788 |
| 109,017 | 70 | 23,315 | 6,375 | 4,945 | 34,705 |
| 109,018 | 71 | 23,184 | 6,352 | 4,915 | 34,522 |
| 109,019 | 72 | 23,321 | 6,416 | 4,962 | 34,771 |
| 109,020 | 72 | 23,243 | 6,431 | 4,973 | 34,719 |
| 109,021 | 73 | 23,203 | 6,416 | 4,981 | 34,673 |
| 109,022 | 71 | 23,200 | 6,399 | 4,958 | 34,628 |
| 109,023 | 69 | 23,264 | 6,381 | 4,948 | 34,662 |
| 109,024 | 71 | 23,329 | 6,381 | 4,947 | 34,728 |
| 109,025 | 68 | 23,474 | 6,384 | 4,965 | 34,891 |
| 109,026 | 68 | 23,415 | 6,403 | 4,976 | 34,862 |
| 109,027 | 72 | 23,277 | 6,346 | 4,914 | 34,609 |
| 109,028 | 72 | 22,932 | 6,274 | 4,851 | 34,129 |
| 109,029 | 75 | 23,369 | 6,382 | 4,931 | 34,757 |
| 109,030 | 75 | 23,080 | 6,305 | 4,873 | 34,333 |
| 109,031 | 75 | 23,332 | 6,357 | 4,907 | 34,671 |
| 109,032 | 74 | 22,968 | 6,296 | 4,845 | 34,183 |
| 109,033 | 75 | 22,914 | 6,256 | 4,825 | 34,070 |
| 109,034 | 80 | 23,251 | 6,303 | 4,878 | 34,512 |
| 109,035 | 81 | 23,168 | 6,318 | 4,891 | 34,458 |
| 109,036 | 78 | 22,943 | 6,312 | 4,893 | 34,226 |
| 109,037 | 75 | 22,733 | 6,294 | 4,878 | 33,980 |
| 109,038 | 76 | 22,851 | 6,347 | 4,887 | 34,161 |
| 109,039 | 73 | 22,832 | 6,315 | 4,863 | 34,083 |
| 109,040 | 73 | 22,752 | 6,322 | 4,858 | 34,005 |
| 109,041 | 74 | 22,651 | 6,313 | 4,837 | 33,875 |
| 109,042 | 73 | 22,616 | 6,311 | 4,839 | 33,839 |
| 109,043 | 73 | 22,455 | 6,303 | 4,803 | 33,634 |
| 109,044 | 73 | 22,485 | 6,300 | 4,815 | 33,673 |
| 109,045 | 73 | 22,516 | 6,306 | 4,826 | 33,721 |
| 109,046 | 69 | 22,424 | 6,275 | 4,829 | 33,597 |
| 109,047 | 69 | 22,166 | 6,187 | 4,780 | 33,202 |



|         |    |        |       |       |        |
|---------|----|--------|-------|-------|--------|
| 109,048 | 64 | 22,239 | 6,136 | 4,778 | 33,217 |
| 109,049 | 64 | 22,256 | 6,120 | 4,769 | 33,209 |
| 109,050 | 67 | 22,045 | 6,101 | 4,748 | 32,961 |
| 109,051 | 68 | 21,719 | 6,046 | 4,672 | 32,505 |
| 109,052 | 74 | 21,719 | 6,030 | 4,623 | 32,446 |
| 109,053 | 74 | 21,775 | 5,993 | 4,595 | 32,437 |
| 109,054 | 73 | 21,602 | 5,934 | 4,529 | 32,138 |
| 109,055 | 81 | 21,911 | 6,022 | 4,601 | 32,615 |
| 109,056 | 84 | 21,941 | 6,023 | 4,589 | 32,637 |
| 109,057 | 82 | 21,941 | 5,989 | 4,532 | 32,544 |
| 109,058 | 84 | 21,987 | 5,969 | 4,506 | 32,546 |
| 109,059 | 83 | 22,389 | 6,045 | 4,549 | 33,066 |
| 109,060 | 85 | 21,847 | 5,896 | 4,440 | 32,268 |
| 109,061 | 84 | 22,111 | 5,949 | 4,494 | 32,638 |
| 109,062 | 87 | 22,244 | 5,995 | 4,538 | 32,864 |
| 109,063 | 87 | 22,055 | 5,954 | 4,516 | 32,612 |
| 109,064 | 88 | 22,368 | 6,010 | 4,552 | 33,018 |
| 109,065 | 88 | 22,345 | 6,005 | 4,547 | 32,985 |
| 109,066 | 87 | 22,241 | 5,969 | 4,539 | 32,836 |
| 109,067 | 87 | 22,286 | 5,958 | 4,541 | 32,872 |
| 109,068 | 87 | 22,328 | 5,982 | 4,539 | 32,936 |
| 109,069 | 85 | 22,556 | 6,001 | 4,563 | 33,205 |
| 109,070 | 87 | 22,639 | 6,037 | 4,570 | 33,333 |
| 109,071 | 88 | 22,679 | 6,034 | 4,575 | 33,376 |
| 109,072 | 88 | 22,543 | 6,024 | 4,556 | 33,211 |
| 109,073 | 88 | 22,955 | 6,236 | 4,713 | 33,992 |
| 109,074 | 93 | 22,833 | 6,298 | 4,737 | 33,961 |
| 109,075 | 90 | 22,851 | 6,319 | 4,780 | 34,040 |
| 109,076 | 89 | 22,730 | 6,308 | 4,787 | 33,914 |
| 109,077 | 86 | 22,590 | 6,237 | 4,736 | 33,649 |
| 109,078 | 89 | 22,863 | 6,275 | 4,788 | 34,015 |
| 109,079 | 84 | 22,928 | 6,269 | 4,775 | 34,056 |

|         |    |        |       |       |        |
|---------|----|--------|-------|-------|--------|
| 109,080 | 82 | 23,050 | 6,261 | 4,765 | 34,158 |
| 109,081 | 82 | 23,007 | 6,252 | 4,758 | 34,099 |
| 109,082 | 80 | 23,299 | 6,364 | 4,815 | 34,558 |
| 109,083 | 78 | 23,386 | 6,321 | 4,783 | 34,568 |
| 109,084 | 77 | 23,725 | 6,402 | 4,839 | 35,043 |
| 109,085 | 75 | 23,973 | 6,450 | 4,890 | 35,388 |
| 109,086 | 70 | 23,701 | 6,410 | 4,869 | 35,050 |
| 109,087 | 70 | 23,949 | 6,462 | 4,891 | 35,372 |
| 109,088 | 68 | 23,642 | 6,352 | 4,829 | 34,891 |
| 109,089 | 70 | 24,065 | 6,427 | 4,900 | 35,462 |
| 109,090 | 72 | 24,215 | 6,470 | 4,925 | 35,682 |
| 109,091 | 72 | 24,378 | 6,488 | 4,959 | 35,897 |
| 109,092 | 76 | 24,425 | 6,522 | 4,989 | 36,012 |
| 109,093 | 77 | 24,462 | 6,575 | 4,991 | 36,105 |
| 109,094 | 78 | 24,673 | 6,622 | 5,044 | 36,417 |
| 109,095 | 79 | 24,686 | 6,664 | 5,045 | 36,474 |
| 109,096 | 80 | 24,801 | 6,677 | 5,060 | 36,618 |
| 109,097 | 80 | 25,071 | 6,699 | 5,050 | 36,900 |
| 109,098 | 79 | 24,835 | 6,656 | 5,027 | 36,597 |
| 109,099 | 82 | 24,965 | 6,678 | 5,021 | 36,746 |
| 109,100 | 84 | 25,377 | 6,732 | 5,067 | 37,260 |
| 109,101 | 82 | 25,477 | 6,744 | 5,090 | 37,393 |
| 109,102 | 83 | 25,613 | 6,738 | 5,102 | 37,536 |
| 109,103 | 77 | 25,687 | 6,737 | 5,103 | 37,604 |
| 109,104 | 75 | 25,386 | 6,648 | 5,024 | 37,133 |
| 109,105 | 79 | 25,690 | 6,708 | 5,084 | 37,561 |
| 109,106 | 74 | 25,464 | 6,635 | 5,022 | 37,195 |
| 109,107 | 70 | 24,594 | 6,473 | 4,941 | 36,078 |
| 109,108 | 71 | 24,883 | 6,511 | 4,981 | 36,446 |
| 109,109 | 67 | 24,887 | 6,477 | 4,971 | 36,402 |
| 109,110 | 67 | 25,106 | 6,540 | 5,025 | 36,738 |
| 109,111 | 64 | 25,305 | 6,568 | 5,095 | 37,032 |

|         |    |        |       |       |        |
|---------|----|--------|-------|-------|--------|
| 109,112 | 64 | 25,254 | 6,555 | 5,123 | 36,996 |
| 109,113 | 64 | 25,097 | 6,495 | 5,063 | 36,719 |
| 109,114 | 63 | 24,895 | 6,440 | 5,007 | 36,405 |
| 109,115 | 66 | 25,141 | 6,538 | 5,090 | 36,835 |
| 109,116 | 67 | 25,135 | 6,520 | 5,082 | 36,804 |
| 109,117 | 68 | 25,086 | 6,501 | 5,078 | 36,733 |
| 109,118 | 68 | 24,971 | 6,484 | 5,063 | 36,586 |
| 109,119 | 68 | 25,284 | 6,559 | 5,117 | 37,028 |
| 109,120 | 69 | 25,242 | 6,555 | 5,135 | 37,001 |
| 109,121 | 67 | 25,063 | 6,506 | 5,130 | 36,766 |
| 109,122 | 67 | 25,062 | 6,514 | 5,137 | 36,780 |
| 109,123 | 67 | 25,183 | 6,514 | 5,146 | 36,910 |
| 109,124 | 67 | 25,224 | 6,479 | 5,120 | 36,890 |
| 109,125 | 63 | 25,292 | 6,432 | 5,123 | 36,910 |
| 109,126 | 67 | 25,177 | 6,397 | 5,065 | 36,706 |
| 109,127 | 67 | 25,124 | 6,331 | 4,995 | 36,517 |
| 109,128 | 69 | 25,136 | 6,358 | 4,984 | 36,547 |
| 109,129 | 68 | 25,185 | 6,359 | 4,984 | 36,596 |
| 109,130 | 70 | 25,489 | 6,460 | 5,061 | 37,080 |
| 109,131 | 73 | 25,500 | 6,457 | 5,072 | 37,102 |
| 109,132 | 73 | 25,205 | 6,335 | 5,006 | 36,619 |
| 109,133 | 73 | 25,099 | 6,320 | 5,009 | 36,501 |
| 109,134 | 75 | 25,024 | 6,351 | 5,053 | 36,503 |
| 109,135 | 75 | 24,899 | 6,348 | 5,053 | 36,375 |
| 109,136 | 78 | 24,913 | 6,354 | 5,041 | 36,386 |
| 109,137 | 77 | 24,616 | 6,216 | 4,965 | 35,874 |
| 109,138 | 77 | 24,726 | 6,218 | 4,981 | 36,002 |
| 109,139 | 78 | 24,550 | 6,160 | 4,928 | 35,716 |
| 109,140 | 77 | 25,102 | 6,284 | 5,051 | 36,514 |
| 109,141 | 75 | 25,190 | 6,278 | 5,063 | 36,606 |
| 109,142 | 77 | 25,299 | 6,272 | 5,050 | 36,698 |
| 109,143 | 78 | 25,454 | 6,277 | 5,048 | 36,857 |

|         |     |        |       |       |        |
|---------|-----|--------|-------|-------|--------|
| 109,144 | 77  | 25,242 | 6,196 | 5,017 | 36,532 |
| 109,145 | 79  | 25,473 | 6,222 | 5,074 | 36,848 |
| 109,146 | 79  | 25,384 | 6,126 | 5,000 | 36,589 |
| 109,147 | 83  | 25,575 | 6,138 | 4,992 | 36,788 |
| 109,148 | 83  | 25,583 | 6,123 | 4,996 | 36,785 |
| 109,149 | 80  | 25,791 | 6,140 | 5,015 | 37,026 |
| 109,150 | 85  | 25,696 | 6,155 | 5,004 | 36,940 |
| 109,151 | 85  | 24,983 | 6,011 | 4,883 | 35,962 |
| 109,152 | 86  | 25,357 | 6,053 | 4,917 | 36,413 |
| 109,153 | 85  | 25,687 | 6,094 | 4,967 | 36,833 |
| 109,154 | 85  | 26,008 | 6,143 | 5,020 | 37,256 |
| 109,155 | 81  | 25,909 | 6,151 | 5,035 | 37,176 |
| 109,156 | 78  | 25,630 | 6,068 | 5,006 | 36,782 |
| 109,157 | 76  | 25,539 | 6,042 | 4,981 | 36,638 |
| 109,158 | 80  | 25,764 | 6,115 | 5,042 | 37,001 |
| 109,159 | 82  | 25,554 | 6,139 | 5,075 | 36,850 |
| 109,160 | 85  | 25,438 | 6,165 | 5,105 | 36,793 |
| 109,161 | 86  | 25,567 | 6,170 | 5,122 | 36,945 |
| 109,162 | 86  | 24,934 | 6,056 | 4,975 | 36,051 |
| 109,163 | 87  | 25,241 | 6,127 | 5,032 | 36,487 |
| 109,164 | 87  | 25,253 | 6,103 | 5,026 | 36,469 |
| 109,165 | 86  | 25,227 | 6,121 | 5,037 | 36,471 |
| 109,166 | 86  | 25,361 | 6,129 | 5,043 | 36,619 |
| 109,167 | 88  | 25,251 | 6,132 | 5,058 | 36,529 |
| 109,168 | 91  | 25,282 | 6,198 | 5,074 | 36,645 |
| 109,169 | 94  | 25,484 | 6,216 | 5,082 | 36,876 |
| 109,170 | 96  | 25,357 | 6,165 | 5,056 | 36,674 |
| 109,171 | 98  | 25,585 | 6,186 | 5,047 | 36,916 |
| 109,172 | 97  | 25,789 | 6,198 | 5,073 | 37,157 |
| 109,173 | 101 | 26,069 | 6,280 | 5,150 | 37,600 |
| 109,174 | 100 | 25,989 | 6,242 | 5,149 | 37,480 |
| 109,175 | 102 | 25,846 | 6,187 | 5,101 | 37,236 |

|         |     |        |       |       |        |
|---------|-----|--------|-------|-------|--------|
| 109,176 | 101 | 25,640 | 6,122 | 5,044 | 36,907 |
| 109,177 | 99  | 25,554 | 6,091 | 5,017 | 36,761 |
| 109,178 | 99  | 25,134 | 6,007 | 4,984 | 36,224 |
| 109,179 | 99  | 25,883 | 6,220 | 5,160 | 37,362 |
| 109,180 | 99  | 25,915 | 6,193 | 5,169 | 37,376 |
| 109,181 | 99  | 25,935 | 6,161 | 5,159 | 37,354 |
| 109,182 | 97  | 25,673 | 6,111 | 5,089 | 36,970 |
| 109,183 | 98  | 25,918 | 6,157 | 5,122 | 37,295 |
| 109,184 | 96  | 26,154 | 6,208 | 5,151 | 37,609 |
| 109,185 | 103 | 26,078 | 6,175 | 5,106 | 37,462 |
| 109,186 | 104 | 25,750 | 6,087 | 5,054 | 36,995 |
| 109,187 | 100 | 25,862 | 6,141 | 5,108 | 37,211 |
| 109,188 | 111 | 25,977 | 6,202 | 5,162 | 37,452 |
| 109,189 | 111 | 25,730 | 6,142 | 5,099 | 37,082 |
| 109,190 | 113 | 25,616 | 6,129 | 5,071 | 36,929 |
| 109,191 | 118 | 25,309 | 6,014 | 5,000 | 36,441 |
| 109,192 | 119 | 25,750 | 6,067 | 5,038 | 36,974 |
| 109,193 | 124 | 26,206 | 6,129 | 5,101 | 37,560 |
| 109,194 | 119 | 26,012 | 6,067 | 5,037 | 37,235 |
| 109,195 | 118 | 25,943 | 6,058 | 5,027 | 37,146 |
| 109,196 | 119 | 25,920 | 6,058 | 5,026 | 37,123 |
| 109,197 | 117 | 26,174 | 6,138 | 5,108 | 37,537 |
| 109,198 | 115 | 26,048 | 6,123 | 5,124 | 37,410 |
| 109,199 | 116 | 26,141 | 6,130 | 5,127 | 37,514 |
| 109,200 | 113 | 25,899 | 6,077 | 5,095 | 37,184 |
| 109,201 | 112 | 25,867 | 6,070 | 5,075 | 37,124 |
| 109,202 | 110 | 25,633 | 6,056 | 5,088 | 36,887 |
| 109,203 | 108 | 25,713 | 6,082 | 5,125 | 37,028 |
| 109,204 | 108 | 25,571 | 6,077 | 5,113 | 36,869 |
| 109,205 | 109 | 25,574 | 6,061 | 5,117 | 36,861 |
| 109,206 | 109 | 25,538 | 6,039 | 5,110 | 36,796 |
| 109,207 | 109 | 25,236 | 5,961 | 5,025 | 36,331 |

|         |     |        |       |       |        |
|---------|-----|--------|-------|-------|--------|
| 109,208 | 108 | 25,151 | 5,965 | 5,008 | 36,232 |
| 109,209 | 104 | 25,185 | 5,966 | 5,013 | 36,268 |
| 109,210 | 102 | 25,350 | 5,958 | 4,995 | 36,405 |
| 109,211 | 100 | 25,096 | 5,903 | 4,932 | 36,031 |
| 109,212 | 100 | 25,159 | 5,964 | 4,950 | 36,173 |
| 109,213 | 97  | 24,664 | 5,877 | 4,875 | 35,513 |
| 109,214 | 96  | 24,846 | 5,901 | 4,864 | 35,707 |
| 109,215 | 93  | 24,978 | 5,910 | 4,886 | 35,867 |
| 109,216 | 93  | 24,816 | 5,862 | 4,868 | 35,639 |
| 109,217 | 90  | 24,174 | 5,704 | 4,730 | 34,698 |
| 109,218 | 90  | 24,266 | 5,721 | 4,752 | 34,829 |
| 109,219 | 85  | 24,289 | 5,686 | 4,753 | 34,813 |
| 109,220 | 81  | 24,128 | 5,638 | 4,732 | 34,579 |
| 109,221 | 83  | 24,156 | 5,634 | 4,733 | 34,606 |
| 109,222 | 81  | 24,041 | 5,607 | 4,729 | 34,458 |
| 109,223 | 78  | 23,807 | 5,499 | 4,641 | 34,025 |
| 109,224 | 79  | 23,521 | 5,438 | 4,580 | 33,618 |
| 109,225 | 80  | 23,786 | 5,493 | 4,614 | 33,973 |
| 109,226 | 75  | 23,286 | 5,343 | 4,508 | 33,212 |
| 109,227 | 75  | 23,442 | 5,360 | 4,517 | 33,394 |
| 109,228 | 73  | 23,405 | 5,333 | 4,494 | 33,305 |
| 109,229 | 71  | 23,438 | 5,344 | 4,476 | 33,329 |
| 109,230 | 76  | 23,345 | 5,300 | 4,458 | 33,179 |
| 109,231 | 76  | 22,935 | 5,217 | 4,381 | 32,609 |
| 109,232 | 76  | 23,168 | 5,300 | 4,418 | 32,962 |
| 109,233 | 77  | 23,027 | 5,292 | 4,382 | 32,778 |
| 109,234 | 78  | 22,926 | 5,276 | 4,359 | 32,639 |
| 109,235 | 70  | 22,852 | 5,244 | 4,336 | 32,502 |
| 109,236 | 69  | 22,890 | 5,229 | 4,305 | 32,493 |
| 109,237 | 69  | 23,112 | 5,266 | 4,349 | 32,796 |
| 109,238 | 70  | 23,269 | 5,276 | 4,352 | 32,967 |
| 109,239 | 59  | 22,993 | 5,193 | 4,289 | 32,534 |

|         |     |        |       |       |        |
|---------|-----|--------|-------|-------|--------|
| 109,240 | 59  | 23,247 | 5,286 | 4,366 | 32,958 |
| 109,241 | 56  | 22,862 | 5,196 | 4,304 | 32,418 |
| 109,242 | 51  | 22,754 | 5,237 | 4,320 | 32,362 |
| 109,243 | 50  | 22,983 | 5,329 | 4,394 | 32,756 |
| 109,244 | 44  | 22,535 | 5,258 | 4,334 | 32,171 |
| 109,245 | 49  | 22,823 | 5,365 | 4,407 | 32,644 |
| 109,246 | 49  | 23,093 | 5,429 | 4,452 | 33,023 |
| 109,247 | 55  | 23,275 | 5,437 | 4,458 | 33,225 |
| 109,248 | 61  | 23,316 | 5,472 | 4,466 | 33,315 |
| 109,249 | 64  | 23,268 | 5,486 | 4,444 | 33,262 |
| 109,250 | 64  | 23,295 | 5,486 | 4,440 | 33,285 |
| 109,251 | 63  | 23,432 | 5,509 | 4,444 | 33,448 |
| 109,252 | 68  | 23,664 | 5,519 | 4,469 | 33,720 |
| 109,253 | 69  | 23,659 | 5,498 | 4,421 | 33,647 |
| 109,254 | 69  | 23,434 | 5,440 | 4,398 | 33,341 |
| 109,255 | 71  | 23,580 | 5,482 | 4,422 | 33,555 |
| 109,256 | 73  | 23,449 | 5,410 | 4,366 | 33,298 |
| 109,257 | 72  | 23,459 | 5,362 | 4,333 | 33,226 |
| 109,258 | 82  | 23,902 | 5,435 | 4,380 | 33,799 |
| 109,259 | 86  | 23,993 | 5,452 | 4,414 | 33,945 |
| 109,260 | 89  | 24,045 | 5,415 | 4,421 | 33,970 |
| 109,261 | 95  | 24,091 | 5,410 | 4,425 | 34,021 |
| 109,262 | 99  | 24,060 | 5,373 | 4,376 | 33,908 |
| 109,263 | 99  | 24,275 | 5,385 | 4,392 | 34,151 |
| 109,264 | 104 | 24,295 | 5,410 | 4,382 | 34,191 |
| 109,265 | 105 | 24,276 | 5,406 | 4,373 | 34,160 |
| 109,266 | 104 | 24,361 | 5,422 | 4,382 | 34,269 |
| 109,267 | 103 | 24,406 | 5,435 | 4,383 | 34,327 |
| 109,268 | 105 | 24,527 | 5,445 | 4,391 | 34,468 |
| 109,269 | 111 | 24,323 | 5,396 | 4,344 | 34,174 |
| 109,270 | 109 | 24,045 | 5,356 | 4,324 | 33,834 |
| 109,271 | 120 | 24,204 | 5,400 | 4,359 | 34,083 |

|         |     |        |       |       |        |
|---------|-----|--------|-------|-------|--------|
| 109,272 | 121 | 24,213 | 5,401 | 4,344 | 34,079 |
| 109,273 | 121 | 24,208 | 5,414 | 4,333 | 34,076 |
| 109,274 | 123 | 24,347 | 5,441 | 4,356 | 34,267 |
| 109,275 | 123 | 24,268 | 5,416 | 4,358 | 34,165 |
| 109,276 | 121 | 24,046 | 5,366 | 4,320 | 33,853 |
| 109,277 | 123 | 24,261 | 5,391 | 4,347 | 34,122 |
| 109,278 | 122 | 23,990 | 5,314 | 4,306 | 33,732 |
| 109,279 | 123 | 23,994 | 5,317 | 4,312 | 33,746 |
| 109,280 | 120 | 23,836 | 5,293 | 4,265 | 33,514 |
| 109,281 | 118 | 23,582 | 5,234 | 4,230 | 33,164 |
| 109,282 | 121 | 23,753 | 5,247 | 4,252 | 33,373 |
| 109,283 | 120 | 23,778 | 5,186 | 4,265 | 33,349 |
| 109,284 | 121 | 24,069 | 5,220 | 4,287 | 33,697 |
| 109,285 | 124 | 23,984 | 5,230 | 4,296 | 33,634 |
| 109,286 | 125 | 23,935 | 5,225 | 4,272 | 33,557 |
| 109,287 | 128 | 23,786 | 5,182 | 4,250 | 33,346 |
| 109,288 | 140 | 24,131 | 5,248 | 4,266 | 33,785 |
| 109,289 | 142 | 24,070 | 5,221 | 4,242 | 33,675 |
| 109,290 | 143 | 24,109 | 5,222 | 4,259 | 33,733 |
| 109,291 | 145 | 24,109 | 5,175 | 4,244 | 33,673 |
| 109,292 | 154 | 24,055 | 5,149 | 4,238 | 33,596 |
| 109,293 | 155 | 24,132 | 5,151 | 4,226 | 33,664 |
| 109,294 | 161 | 24,062 | 5,130 | 4,206 | 33,559 |
| 109,295 | 161 | 24,019 | 5,113 | 4,191 | 33,484 |
| 109,296 | 157 | 24,014 | 5,086 | 4,169 | 33,426 |
| 109,297 | 157 | 23,762 | 4,991 | 4,117 | 33,027 |
| 109,298 | 152 | 23,482 | 4,934 | 4,050 | 32,618 |
| 109,299 | 147 | 23,777 | 4,958 | 4,061 | 32,943 |
| 109,300 | 143 | 23,642 | 4,877 | 4,023 | 32,685 |
| 109,301 | 147 | 23,609 | 4,853 | 4,009 | 32,618 |
| 109,302 | 148 | 23,682 | 4,847 | 4,019 | 32,696 |
| 109,303 | 151 | 23,784 | 4,834 | 4,043 | 32,812 |



|         |     |        |       |       |        |
|---------|-----|--------|-------|-------|--------|
| 109,304 | 156 | 23,684 | 4,761 | 3,995 | 32,596 |
| 109,305 | 156 | 23,837 | 4,779 | 4,004 | 32,776 |
| 109,306 | 152 | 23,804 | 4,755 | 3,985 | 32,696 |
| 109,307 | 148 | 23,078 | 4,574 | 3,870 | 31,670 |
| 109,308 | 151 | 23,332 | 4,610 | 3,907 | 32,000 |
| 109,309 | 149 | 23,679 | 4,633 | 3,963 | 32,424 |
| 109,310 | 150 | 24,023 | 4,680 | 3,992 | 32,845 |
| 109,311 | 150 | 24,198 | 4,696 | 3,981 | 33,025 |
| 109,312 | 141 | 23,843 | 4,583 | 3,951 | 32,518 |
| 109,313 | 143 | 23,974 | 4,604 | 3,959 | 32,680 |
| 109,314 | 145 | 24,137 | 4,653 | 4,014 | 32,949 |
| 109,315 | 140 | 24,032 | 4,622 | 4,010 | 32,804 |
| 109,316 | 140 | 23,991 | 4,586 | 3,993 | 32,710 |
| 109,317 | 141 | 24,368 | 4,643 | 4,073 | 33,225 |
| 109,318 | 141 | 24,525 | 4,677 | 4,100 | 33,443 |
| 109,319 | 142 | 24,835 | 4,747 | 4,147 | 33,871 |
| 109,320 | 136 | 24,841 | 4,722 | 4,117 | 33,816 |
| 109,321 | 137 | 24,912 | 4,718 | 4,140 | 33,907 |
| 109,322 | 128 | 25,109 | 4,761 | 4,180 | 34,178 |
| 109,323 | 136 | 25,345 | 4,799 | 4,218 | 34,498 |
| 109,324 | 134 | 25,331 | 4,790 | 4,222 | 34,477 |
| 109,325 | 136 | 24,851 | 4,724 | 4,146 | 33,857 |
| 109,326 | 136 | 25,215 | 4,756 | 4,181 | 34,288 |
| 109,327 | 138 | 25,436 | 4,764 | 4,192 | 34,530 |
| 109,328 | 139 | 24,917 | 4,685 | 4,096 | 33,837 |
| 109,329 | 139 | 25,351 | 4,748 | 4,145 | 34,383 |
| 109,330 | 139 | 25,752 | 4,822 | 4,226 | 34,939 |
| 109,331 | 141 | 25,918 | 4,843 | 4,250 | 35,152 |
| 109,332 | 140 | 25,734 | 4,814 | 4,226 | 34,914 |
| 109,333 | 140 | 26,286 | 4,910 | 4,341 | 35,677 |
| 109,334 | 139 | 26,230 | 4,929 | 4,330 | 35,628 |
| 109,335 | 135 | 25,543 | 4,815 | 4,228 | 34,721 |

|         |     |        |       |       |        |
|---------|-----|--------|-------|-------|--------|
| 109,336 | 135 | 25,980 | 4,869 | 4,304 | 35,288 |
| 109,337 | 136 | 26,299 | 4,919 | 4,368 | 35,722 |
| 109,338 | 132 | 26,471 | 4,901 | 4,376 | 35,880 |
| 109,339 | 124 | 26,412 | 4,872 | 4,384 | 35,792 |
| 109,340 | 126 | 26,305 | 4,826 | 4,350 | 35,607 |
| 109,341 | 125 | 26,500 | 4,850 | 4,317 | 35,792 |
| 109,342 | 113 | 26,395 | 4,832 | 4,283 | 35,623 |
| 109,343 | 106 | 26,330 | 4,790 | 4,254 | 35,480 |
| 109,344 | 109 | 26,820 | 4,842 | 4,310 | 36,081 |
| 109,345 | 106 | 26,912 | 4,857 | 4,333 | 36,208 |
| 109,346 | 107 | 27,182 | 4,906 | 4,378 | 36,573 |
| 109,347 | 108 | 27,574 | 4,983 | 4,450 | 37,115 |
| 109,348 | 107 | 27,439 | 4,949 | 4,433 | 36,928 |
| 109,349 | 107 | 27,589 | 4,960 | 4,465 | 37,121 |
| 109,350 | 108 | 28,118 | 5,049 | 4,560 | 37,835 |
| 109,351 | 108 | 28,209 | 5,060 | 4,580 | 37,957 |
| 109,352 | 103 | 27,975 | 5,017 | 4,533 | 37,628 |
| 109,353 | 106 | 28,326 | 5,067 | 4,558 | 38,057 |
| 109,354 | 101 | 28,408 | 5,111 | 4,559 | 38,179 |
| 109,355 | 97  | 27,996 | 5,037 | 4,496 | 37,626 |
| 109,356 | 97  | 28,153 | 5,051 | 4,528 | 37,829 |
| 109,357 | 94  | 27,532 | 4,980 | 4,434 | 37,040 |
| 109,358 | 96  | 27,791 | 5,036 | 4,469 | 37,392 |
| 109,359 | 94  | 27,936 | 5,040 | 4,491 | 37,561 |
| 109,360 | 87  | 27,709 | 5,017 | 4,454 | 37,267 |
| 109,361 | 87  | 27,629 | 5,031 | 4,451 | 37,198 |
| 109,362 | 84  | 27,730 | 5,058 | 4,516 | 37,388 |
| 109,363 | 83  | 27,690 | 5,092 | 4,502 | 37,367 |
| 109,364 | 83  | 27,764 | 5,094 | 4,517 | 37,458 |
| 109,365 | 82  | 27,522 | 5,053 | 4,458 | 37,115 |
| 109,366 | 82  | 27,402 | 5,063 | 4,463 | 37,010 |
| 109,367 | 81  | 27,394 | 5,066 | 4,466 | 37,007 |

|         |    |        |       |       |        |
|---------|----|--------|-------|-------|--------|
| 109,368 | 79 | 27,282 | 5,047 | 4,448 | 36,856 |
| 109,369 | 81 | 27,091 | 5,010 | 4,403 | 36,585 |
| 109,370 | 84 | 27,505 | 5,073 | 4,435 | 37,097 |
| 109,371 | 85 | 27,919 | 5,138 | 4,470 | 37,612 |
| 109,372 | 83 | 26,937 | 4,972 | 4,265 | 36,257 |
| 109,373 | 83 | 27,311 | 5,026 | 4,306 | 36,726 |
| 109,374 | 75 | 27,028 | 4,995 | 4,266 | 36,364 |
| 109,375 | 76 | 27,369 | 5,028 | 4,321 | 36,794 |
| 109,376 | 74 | 27,645 | 5,072 | 4,356 | 37,147 |
| 109,377 | 74 | 27,826 | 5,108 | 4,406 | 37,414 |
| 109,378 | 72 | 27,527 | 5,084 | 4,384 | 37,067 |
| 109,379 | 69 | 27,492 | 5,064 | 4,359 | 36,984 |
| 109,380 | 69 | 27,219 | 5,020 | 4,333 | 36,641 |
| 109,381 | 68 | 27,091 | 4,985 | 4,282 | 36,426 |
| 109,382 | 64 | 27,535 | 5,045 | 4,350 | 36,994 |
| 109,383 | 64 | 27,711 | 5,037 | 4,352 | 37,164 |
| 109,384 | 63 | 27,423 | 4,993 | 4,306 | 36,785 |
| 109,385 | 65 | 27,338 | 4,962 | 4,298 | 36,663 |
| 109,386 | 66 | 27,377 | 4,980 | 4,307 | 36,730 |
| 109,387 | 71 | 27,382 | 4,984 | 4,297 | 36,734 |
| 109,388 | 74 | 27,415 | 4,967 | 4,262 | 36,718 |
| 109,389 | 77 | 27,292 | 4,955 | 4,232 | 36,556 |
| 109,390 | 78 | 26,602 | 4,864 | 4,135 | 35,679 |
| 109,391 | 77 | 26,731 | 4,869 | 4,138 | 35,815 |
| 109,392 | 79 | 26,841 | 4,874 | 4,186 | 35,980 |
| 109,393 | 79 | 26,359 | 4,798 | 4,138 | 35,374 |
| 109,394 | 79 | 26,428 | 4,819 | 4,140 | 35,466 |
| 109,395 | 78 | 26,609 | 4,863 | 4,187 | 35,737 |
| 109,396 | 79 | 26,702 | 4,859 | 4,196 | 35,836 |
| 109,397 | 84 | 26,661 | 4,846 | 4,192 | 35,783 |
| 109,398 | 86 | 26,893 | 4,879 | 4,214 | 36,072 |
| 109,399 | 85 | 26,837 | 4,881 | 4,199 | 36,002 |

|         |     |        |       |       |        |
|---------|-----|--------|-------|-------|--------|
| 109,400 | 94  | 28,334 | 5,178 | 4,390 | 37,996 |
| 109,401 | 103 | 30,763 | 5,666 | 4,764 | 41,296 |
| 109,402 | 105 | 31,611 | 5,866 | 4,891 | 42,473 |
| 109,403 | 119 | 32,825 | 6,121 | 5,057 | 44,122 |
| 109,404 | 118 | 33,190 | 6,185 | 5,132 | 44,625 |
| 109,405 | 125 | 33,115 | 6,163 | 5,106 | 44,509 |
| 109,406 | 124 | 33,134 | 6,150 | 5,100 | 44,508 |
| 109,407 | 140 | 35,234 | 6,576 | 5,373 | 47,323 |
| 109,408 | 140 | 35,232 | 6,585 | 5,397 | 47,354 |
| 109,409 | 144 | 35,991 | 6,728 | 5,503 | 48,366 |
| 109,410 | 145 | 36,388 | 6,874 | 5,587 | 48,994 |
| 109,411 | 152 | 37,499 | 7,124 | 5,767 | 50,542 |
| 109,412 | 157 | 38,109 | 7,199 | 5,803 | 51,268 |
| 109,413 | 166 | 38,788 | 7,325 | 5,867 | 52,146 |
| 109,414 | 171 | 39,642 | 7,424 | 5,972 | 53,209 |
| 109,415 | 179 | 40,142 | 7,479 | 6,015 | 53,815 |
| 109,416 | 181 | 40,576 | 7,517 | 6,056 | 54,330 |
| 109,417 | 188 | 41,397 | 7,632 | 6,149 | 55,366 |
| 109,418 | 194 | 42,423 | 7,802 | 6,258 | 56,677 |
| 109,419 | 202 | 42,451 | 7,779 | 6,228 | 56,660 |
| 109,420 | 197 | 42,501 | 7,765 | 6,251 | 56,714 |
| 109,421 | 208 | 43,843 | 7,974 | 6,447 | 58,472 |
| 109,422 | 211 | 44,675 | 8,102 | 6,560 | 59,548 |
| 109,423 | 218 | 45,678 | 8,270 | 6,683 | 60,849 |
| 109,424 | 219 | 46,208 | 8,320 | 6,754 | 61,501 |
| 109,425 | 219 | 46,787 | 8,475 | 6,845 | 62,326 |
| 109,426 | 226 | 47,668 | 8,635 | 6,982 | 63,511 |
| 109,427 | 240 | 48,207 | 8,702 | 7,039 | 64,188 |
| 109,428 | 243 | 48,478 | 8,734 | 7,058 | 64,513 |
| 109,429 | 252 | 50,272 | 9,034 | 7,295 | 66,853 |
| 109,430 | 255 | 50,801 | 9,099 | 7,353 | 67,508 |
| 109,431 | 254 | 51,110 | 9,133 | 7,387 | 67,884 |

|         |     |        |        |       |        |
|---------|-----|--------|--------|-------|--------|
| 109,432 | 260 | 52,274 | 9,425  | 7,556 | 69,515 |
| 109,433 | 263 | 52,977 | 9,536  | 7,671 | 70,447 |
| 109,434 | 268 | 53,835 | 9,695  | 7,810 | 71,608 |
| 109,435 | 266 | 54,719 | 9,806  | 7,909 | 72,700 |
| 109,436 | 264 | 55,092 | 9,897  | 8,020 | 73,273 |
| 109,437 | 271 | 56,134 | 10,039 | 8,124 | 74,568 |
| 109,438 | 267 | 57,119 | 10,175 | 8,232 | 75,793 |
| 109,439 | 264 | 57,590 | 10,276 | 8,324 | 76,454 |
| 109,440 | 257 | 57,876 | 10,342 | 8,401 | 76,876 |
| 109,441 | 257 | 58,209 | 10,402 | 8,456 | 77,324 |
| 109,442 | 266 | 59,377 | 10,597 | 8,576 | 78,816 |
| 109,443 | 268 | 60,313 | 10,756 | 8,731 | 80,068 |
| 109,444 | 273 | 60,843 | 10,868 | 8,787 | 80,771 |
| 109,445 | 268 | 59,953 | 10,706 | 8,639 | 79,566 |
| 109,446 | 274 | 60,301 | 10,741 | 8,662 | 79,978 |
| 109,447 | 274 | 60,933 | 10,841 | 8,734 | 80,782 |
| 109,448 | 282 | 61,594 | 10,891 | 8,755 | 81,522 |
| 109,449 | 296 | 61,090 | 10,832 | 8,701 | 80,919 |
| 109,450 | 295 | 61,149 | 10,791 | 8,677 | 80,912 |
| 109,451 | 296 | 61,901 | 10,884 | 8,809 | 81,890 |
| 109,452 | 289 | 61,150 | 10,766 | 8,712 | 80,917 |
| 109,453 | 297 | 62,391 | 10,981 | 8,858 | 82,527 |
| 109,454 | 287 | 61,845 | 10,872 | 8,807 | 81,811 |
| 109,455 | 291 | 62,280 | 10,920 | 8,852 | 82,343 |
| 109,456 | 294 | 62,220 | 10,889 | 8,834 | 82,237 |
| 109,457 | 293 | 62,227 | 10,923 | 8,881 | 82,324 |
| 109,458 | 288 | 61,725 | 10,948 | 8,948 | 81,909 |
| 109,459 | 295 | 62,503 | 11,075 | 9,075 | 82,948 |
| 109,460 | 295 | 62,421 | 11,003 | 9,008 | 82,727 |
| 109,461 | 297 | 62,445 | 10,986 | 8,984 | 82,712 |
| 109,462 | 293 | 62,559 | 10,982 | 8,981 | 82,815 |
| 109,463 | 295 | 62,644 | 11,034 | 8,997 | 82,970 |

|         |     |        |        |       |        |
|---------|-----|--------|--------|-------|--------|
| 109,464 | 286 | 62,284 | 11,040 | 9,012 | 82,622 |
| 109,465 | 298 | 62,616 | 11,091 | 9,034 | 83,039 |
| 109,466 | 291 | 61,869 | 10,987 | 8,953 | 82,100 |
| 109,467 | 292 | 61,972 | 10,968 | 8,945 | 82,177 |
| 109,468 | 289 | 61,931 | 11,060 | 8,941 | 82,221 |
| 109,469 | 289 | 61,637 | 11,046 | 8,918 | 81,890 |
| 109,470 | 284 | 61,974 | 11,138 | 8,940 | 82,336 |
| 109,471 | 281 | 61,215 | 11,003 | 8,858 | 81,357 |
| 109,472 | 284 | 61,095 | 11,053 | 8,875 | 81,307 |
| 109,473 | 286 | 61,156 | 11,096 | 8,922 | 81,460 |
| 109,474 | 284 | 61,124 | 11,187 | 8,986 | 81,581 |
| 109,475 | 293 | 61,035 | 11,171 | 8,975 | 81,474 |
| 109,476 | 296 | 61,228 | 11,177 | 9,010 | 81,711 |
| 109,477 | 294 | 61,332 | 11,213 | 8,982 | 81,821 |
| 109,478 | 286 | 61,783 | 11,342 | 9,046 | 82,457 |
| 109,479 | 280 | 61,667 | 11,341 | 9,065 | 82,353 |
| 109,480 | 289 | 62,028 | 11,435 | 9,139 | 82,891 |
| 109,481 | 290 | 61,847 | 11,459 | 9,086 | 82,682 |
| 109,482 | 292 | 61,885 | 11,451 | 9,098 | 82,726 |
| 109,483 | 296 | 62,304 | 11,526 | 9,174 | 83,300 |
| 109,484 | 303 | 62,444 | 11,614 | 9,184 | 83,545 |
| 109,485 | 307 | 61,713 | 11,527 | 9,031 | 82,578 |
| 109,486 | 316 | 61,318 | 11,481 | 8,944 | 82,059 |
| 109,487 | 316 | 61,264 | 11,447 | 8,899 | 81,926 |
| 109,488 | 312 | 61,364 | 11,547 | 8,957 | 82,180 |
| 109,489 | 313 | 60,762 | 11,463 | 8,863 | 81,401 |
| 109,490 | 312 | 60,454 | 11,431 | 8,837 | 81,034 |
| 109,491 | 311 | 60,724 | 11,455 | 8,851 | 81,341 |
| 109,492 | 314 | 60,669 | 11,477 | 8,840 | 81,300 |
| 109,493 | 304 | 59,997 | 11,400 | 8,777 | 80,478 |
| 109,494 | 304 | 60,329 | 11,485 | 8,802 | 80,920 |
| 109,495 | 298 | 59,562 | 11,390 | 8,721 | 79,971 |

|         |     |        |        |       |        |
|---------|-----|--------|--------|-------|--------|
| 109,496 | 300 | 60,015 | 11,470 | 8,819 | 80,604 |
| 109,497 | 292 | 59,459 | 11,412 | 8,778 | 79,941 |
| 109,498 | 295 | 58,696 | 11,314 | 8,676 | 78,981 |
| 109,499 | 286 | 58,140 | 11,270 | 8,636 | 78,332 |
| 109,500 | 279 | 58,930 | 11,428 | 8,801 | 79,438 |
| 109,501 | 283 | 59,151 | 11,464 | 8,863 | 79,761 |
| 109,502 | 272 | 56,801 | 11,122 | 8,574 | 76,769 |
| 109,503 | 270 | 56,976 | 11,181 | 8,614 | 77,041 |
| 109,504 | 265 | 57,092 | 11,262 | 8,704 | 77,323 |
| 109,505 | 276 | 57,558 | 11,331 | 8,731 | 77,896 |
| 109,506 | 268 | 57,129 | 11,292 | 8,720 | 77,409 |
| 109,507 | 282 | 56,369 | 11,104 | 8,545 | 76,300 |
| 109,508 | 282 | 56,720 | 11,113 | 8,523 | 76,638 |
| 109,509 | 282 | 56,675 | 11,086 | 8,478 | 76,521 |
| 109,510 | 282 | 56,550 | 11,081 | 8,454 | 76,367 |
| 109,511 | 297 | 56,518 | 11,017 | 8,432 | 76,264 |
| 109,512 | 295 | 56,316 | 11,018 | 8,446 | 76,075 |
| 109,513 | 296 | 56,317 | 10,932 | 8,440 | 75,985 |
| 109,514 | 303 | 56,367 | 10,899 | 8,441 | 76,010 |
| 109,515 | 301 | 56,236 | 10,892 | 8,408 | 75,837 |
| 109,516 | 293 | 56,565 | 10,896 | 8,403 | 76,157 |
| 109,517 | 293 | 56,547 | 10,915 | 8,408 | 76,163 |
| 109,518 | 304 | 56,582 | 10,905 | 8,485 | 76,276 |
| 109,519 | 311 | 57,147 | 10,966 | 8,532 | 76,956 |
| 109,520 | 318 | 56,710 | 10,879 | 8,496 | 76,403 |
| 109,521 | 318 | 56,719 | 10,907 | 8,530 | 76,474 |
| 109,522 | 313 | 56,822 | 10,884 | 8,496 | 76,515 |
| 109,523 | 312 | 56,449 | 10,821 | 8,448 | 76,030 |
| 109,524 | 310 | 56,277 | 10,752 | 8,378 | 75,717 |
| 109,525 | 316 | 56,648 | 10,852 | 8,445 | 76,261 |
| 109,526 | 304 | 56,166 | 10,765 | 8,395 | 75,630 |
| 109,527 | 308 | 56,671 | 10,924 | 8,477 | 76,380 |

|         |     |        |        |       |        |
|---------|-----|--------|--------|-------|--------|
| 109,528 | 311 | 55,886 | 10,732 | 8,352 | 75,281 |
| 109,529 | 304 | 55,683 | 10,716 | 8,328 | 75,031 |
| 109,530 | 304 | 55,538 | 10,754 | 8,334 | 74,930 |
| 109,531 | 296 | 55,382 | 10,727 | 8,317 | 74,722 |
| 109,532 | 292 | 55,445 | 10,733 | 8,331 | 74,801 |
| 109,533 | 288 | 55,276 | 10,719 | 8,331 | 74,614 |
| 109,534 | 282 | 55,196 | 10,717 | 8,268 | 74,463 |
| 109,535 | 275 | 54,746 | 10,585 | 8,213 | 73,819 |
| 109,536 | 267 | 53,853 | 10,490 | 8,159 | 72,769 |
| 109,537 | 259 | 54,162 | 10,539 | 8,203 | 73,163 |
| 109,538 | 261 | 54,742 | 10,672 | 8,323 | 73,998 |
| 109,539 | 260 | 54,453 | 10,598 | 8,257 | 73,568 |
| 109,540 | 263 | 53,725 | 10,519 | 8,184 | 72,691 |
| 109,541 | 263 | 53,417 | 10,502 | 8,145 | 72,327 |
| 109,542 | 267 | 54,811 | 10,843 | 8,385 | 74,306 |
| 109,543 | 266 | 54,352 | 10,721 | 8,321 | 73,660 |
| 109,544 | 266 | 54,988 | 10,880 | 8,422 | 74,556 |
| 109,545 | 272 | 54,691 | 10,759 | 8,322 | 74,044 |
| 109,546 | 270 | 54,420 | 10,783 | 8,306 | 73,779 |
| 109,547 | 272 | 54,636 | 10,850 | 8,305 | 74,063 |
| 109,548 | 276 | 54,297 | 10,841 | 8,338 | 73,752 |
| 109,549 | 269 | 53,613 | 10,727 | 8,218 | 72,827 |
| 109,550 | 276 | 53,693 | 10,701 | 8,185 | 72,855 |
| 109,551 | 272 | 53,646 | 10,671 | 8,139 | 72,728 |
| 109,552 | 271 | 53,408 | 10,626 | 8,109 | 72,414 |
| 109,553 | 277 | 53,826 | 10,715 | 8,156 | 72,974 |
| 109,554 | 286 | 52,427 | 10,410 | 7,915 | 71,038 |
| 109,555 | 289 | 52,535 | 10,447 | 7,929 | 71,200 |
| 109,556 | 283 | 51,676 | 10,348 | 7,843 | 70,150 |
| 109,557 | 279 | 50,993 | 10,230 | 7,711 | 69,213 |
| 109,558 | 274 | 52,787 | 10,590 | 7,972 | 71,623 |
| 109,559 | 274 | 52,419 | 10,620 | 7,992 | 71,305 |



|         |     |        |        |       |        |
|---------|-----|--------|--------|-------|--------|
| 109,560 | 274 | 52,353 | 10,643 | 7,964 | 71,234 |
| 109,561 | 261 | 52,398 | 10,641 | 8,001 | 71,301 |
| 109,562 | 259 | 52,350 | 10,719 | 8,041 | 71,369 |
| 109,563 | 254 | 52,411 | 10,820 | 8,076 | 71,561 |
| 109,564 | 245 | 52,091 | 10,826 | 8,090 | 71,252 |
| 109,565 | 246 | 52,439 | 10,987 | 8,170 | 71,842 |
| 109,566 | 246 | 51,903 | 10,943 | 8,163 | 71,255 |
| 109,567 | 248 | 52,100 | 11,079 | 8,240 | 71,667 |
| 109,568 | 246 | 52,190 | 11,179 | 8,269 | 71,884 |
| 109,569 | 246 | 52,110 | 11,218 | 8,281 | 71,855 |
| 109,570 | 245 | 52,007 | 11,238 | 8,266 | 71,756 |
| 109,571 | 222 | 51,339 | 11,141 | 8,162 | 70,864 |
| 109,572 | 225 | 51,138 | 11,155 | 8,172 | 70,690 |
| 109,573 | 225 | 51,251 | 11,191 | 8,181 | 70,848 |
| 109,574 | 221 | 50,594 | 11,089 | 8,110 | 70,014 |
| 109,575 | 221 | 50,700 | 11,166 | 8,162 | 70,249 |
| 109,576 | 221 | 50,683 | 11,170 | 8,173 | 70,247 |
| 109,577 | 236 | 50,563 | 11,257 | 8,220 | 70,276 |
| 109,578 | 236 | 50,411 | 11,218 | 8,187 | 70,052 |
| 109,579 | 229 | 49,536 | 11,060 | 8,072 | 68,897 |
| 109,580 | 232 | 49,967 | 11,195 | 8,159 | 69,553 |
| 109,581 | 233 | 50,121 | 11,226 | 8,138 | 69,718 |
| 109,582 | 239 | 49,829 | 11,190 | 8,113 | 69,371 |
| 109,583 | 238 | 48,915 | 11,014 | 7,998 | 68,165 |
| 109,584 | 238 | 48,672 | 11,048 | 8,009 | 67,967 |
| 109,585 | 242 | 49,052 | 11,129 | 8,091 | 68,514 |
| 109,586 | 242 | 49,546 | 11,254 | 8,127 | 69,169 |
| 109,587 | 244 | 49,471 | 11,237 | 8,127 | 69,079 |
| 109,588 | 244 | 49,350 | 11,228 | 8,111 | 68,933 |
| 109,589 | 248 | 49,724 | 11,329 | 8,121 | 69,422 |
| 109,590 | 250 | 48,989 | 11,159 | 7,979 | 68,377 |
| 109,591 | 249 | 49,220 | 11,197 | 7,986 | 68,652 |

|         |     |        |        |       |        |
|---------|-----|--------|--------|-------|--------|
| 109,592 | 253 | 48,714 | 11,096 | 7,901 | 67,964 |
| 109,593 | 252 | 48,274 | 11,030 | 7,843 | 67,399 |
| 109,594 | 255 | 48,659 | 11,152 | 7,914 | 67,980 |
| 109,595 | 258 | 48,714 | 11,195 | 7,915 | 68,082 |
| 109,596 | 253 | 48,501 | 11,184 | 7,915 | 67,853 |
| 109,597 | 251 | 48,717 | 11,250 | 7,941 | 68,159 |
| 109,598 | 251 | 48,720 | 11,233 | 7,898 | 68,102 |
| 109,599 | 253 | 48,362 | 11,153 | 7,828 | 67,596 |
| 109,600 | 254 | 48,223 | 11,157 | 7,836 | 67,470 |
| 109,601 | 250 | 48,967 | 11,373 | 7,963 | 68,553 |
| 109,602 | 255 | 48,706 | 11,382 | 7,912 | 68,255 |
| 109,603 | 253 | 48,986 | 11,467 | 7,957 | 68,663 |
| 109,604 | 242 | 48,906 | 11,545 | 7,973 | 68,666 |
| 109,605 | 241 | 48,765 | 11,579 | 7,963 | 68,548 |
| 109,606 | 230 | 48,649 | 11,746 | 8,034 | 68,659 |
| 109,607 | 219 | 48,480 | 11,786 | 8,032 | 68,517 |
| 109,608 | 217 | 47,816 | 11,650 | 7,941 | 67,624 |
| 109,609 | 221 | 48,291 | 11,782 | 7,977 | 68,271 |
| 109,610 | 212 | 48,358 | 11,824 | 7,999 | 68,393 |
| 109,611 | 208 | 47,495 | 11,722 | 7,920 | 67,345 |
| 109,612 | 207 | 47,524 | 11,841 | 7,995 | 67,567 |
| 109,613 | 213 | 47,540 | 11,933 | 7,973 | 67,659 |
| 109,614 | 208 | 46,891 | 11,813 | 7,901 | 66,813 |
| 109,615 | 235 | 47,660 | 11,987 | 7,991 | 67,873 |
| 109,616 | 240 | 47,757 | 12,049 | 8,009 | 68,055 |
| 109,617 | 248 | 47,427 | 11,986 | 7,969 | 67,630 |
| 109,618 | 243 | 46,773 | 11,866 | 7,849 | 66,731 |
| 109,619 | 237 | 46,718 | 11,882 | 7,850 | 66,687 |
| 109,620 | 225 | 46,048 | 11,740 | 7,730 | 65,743 |
| 109,621 | 226 | 46,455 | 11,850 | 7,820 | 66,351 |
| 109,622 | 225 | 45,934 | 11,754 | 7,734 | 65,647 |
| 109,623 | 229 | 45,895 | 11,760 | 7,721 | 65,605 |

|         |     |        |        |       |        |
|---------|-----|--------|--------|-------|--------|
| 109,624 | 229 | 45,984 | 11,794 | 7,722 | 65,729 |
| 109,625 | 231 | 46,517 | 11,958 | 7,752 | 66,458 |
| 109,626 | 228 | 46,499 | 11,966 | 7,769 | 66,462 |
| 109,627 | 219 | 46,658 | 12,016 | 7,737 | 66,630 |
| 109,628 | 211 | 46,390 | 11,930 | 7,652 | 66,183 |
| 109,629 | 210 | 46,692 | 12,041 | 7,720 | 66,663 |
| 109,630 | 211 | 46,560 | 12,041 | 7,702 | 66,514 |
| 109,631 | 218 | 45,988 | 11,967 | 7,624 | 65,797 |
| 109,632 | 216 | 45,321 | 11,862 | 7,549 | 64,948 |
| 109,633 | 215 | 45,234 | 11,842 | 7,518 | 64,809 |
| 109,634 | 214 | 44,648 | 11,745 | 7,442 | 64,049 |
| 109,635 | 216 | 46,131 | 12,141 | 7,667 | 66,155 |
| 109,636 | 213 | 46,085 | 12,206 | 7,691 | 66,195 |
| 109,637 | 216 | 45,779 | 12,177 | 7,701 | 65,873 |
| 109,638 | 213 | 45,042 | 12,092 | 7,601 | 64,948 |
| 109,639 | 220 | 45,208 | 12,239 | 7,668 | 65,335 |
| 109,640 | 216 | 44,950 | 12,206 | 7,633 | 65,005 |
| 109,641 | 202 | 44,417 | 12,113 | 7,547 | 64,279 |
| 109,642 | 212 | 44,255 | 12,187 | 7,539 | 64,193 |
| 109,643 | 208 | 43,334 | 11,937 | 7,402 | 62,881 |
| 109,644 | 209 | 43,316 | 11,960 | 7,390 | 62,875 |
| 109,645 | 204 | 43,098 | 11,971 | 7,383 | 62,656 |
| 109,646 | 208 | 43,064 | 12,013 | 7,381 | 62,666 |
| 109,647 | 215 | 43,117 | 12,069 | 7,409 | 62,810 |
| 109,648 | 215 | 42,872 | 12,075 | 7,388 | 62,550 |
| 109,649 | 204 | 42,196 | 11,980 | 7,340 | 61,720 |
| 109,650 | 205 | 42,053 | 12,023 | 7,329 | 61,610 |
| 109,651 | 223 | 42,757 | 12,259 | 7,403 | 62,642 |
| 109,652 | 226 | 42,519 | 12,246 | 7,397 | 62,388 |
| 109,653 | 230 | 42,321 | 12,320 | 7,416 | 62,287 |
| 109,654 | 233 | 41,947 | 12,370 | 7,402 | 61,952 |
| 109,655 | 235 | 41,832 | 12,362 | 7,421 | 61,850 |

|         |     |        |        |       |        |
|---------|-----|--------|--------|-------|--------|
| 109,656 | 237 | 41,563 | 12,243 | 7,316 | 61,359 |
| 109,657 | 238 | 41,344 | 12,149 | 7,282 | 61,013 |
| 109,658 | 238 | 41,386 | 12,205 | 7,259 | 61,088 |
| 109,659 | 244 | 41,525 | 12,343 | 7,279 | 61,391 |
| 109,660 | 239 | 40,618 | 12,136 | 7,152 | 60,145 |
| 109,661 | 238 | 40,605 | 12,130 | 7,147 | 60,120 |
| 109,662 | 246 | 40,955 | 12,271 | 7,171 | 60,643 |
| 109,663 | 245 | 40,411 | 12,085 | 7,036 | 59,777 |
| 109,664 | 245 | 40,011 | 12,008 | 6,977 | 59,241 |
| 109,665 | 245 | 40,873 | 12,190 | 7,047 | 60,355 |
| 109,666 | 225 | 41,319 | 12,407 | 7,122 | 61,073 |
| 109,667 | 221 | 41,431 | 12,532 | 7,190 | 61,374 |
| 109,668 | 209 | 41,073 | 12,513 | 7,106 | 60,901 |
| 109,669 | 212 | 40,607 | 12,649 | 7,131 | 60,599 |
| 109,670 | 212 | 40,481 | 12,664 | 7,116 | 60,473 |
| 109,671 | 206 | 40,977 | 12,789 | 7,194 | 61,166 |
| 109,672 | 211 | 41,247 | 12,965 | 7,265 | 61,688 |
| 109,673 | 211 | 41,252 | 12,976 | 7,268 | 61,707 |
| 109,674 | 221 | 41,697 | 13,225 | 7,391 | 62,534 |
| 109,675 | 219 | 41,907 | 13,298 | 7,424 | 62,848 |
| 109,676 | 218 | 41,217 | 13,220 | 7,330 | 61,985 |
| 109,677 | 226 | 41,418 | 13,366 | 7,407 | 62,417 |
| 109,678 | 226 | 41,289 | 13,383 | 7,432 | 62,330 |
| 109,679 | 222 | 40,829 | 13,303 | 7,396 | 61,750 |
| 109,680 | 224 | 40,934 | 13,444 | 7,433 | 62,035 |
| 109,681 | 222 | 40,685 | 13,515 | 7,443 | 61,865 |
| 109,682 | 226 | 40,564 | 13,527 | 7,478 | 61,795 |
| 109,683 | 230 | 40,079 | 13,446 | 7,409 | 61,164 |
| 109,684 | 225 | 39,665 | 13,380 | 7,347 | 60,617 |
| 109,685 | 244 | 40,285 | 13,633 | 7,514 | 61,676 |
| 109,686 | 253 | 40,327 | 13,679 | 7,523 | 61,782 |
| 109,687 | 262 | 40,325 | 13,698 | 7,539 | 61,824 |

|         |     |        |        |       |        |
|---------|-----|--------|--------|-------|--------|
| 109,688 | 264 | 40,018 | 13,655 | 7,484 | 61,421 |
| 109,689 | 268 | 40,010 | 13,664 | 7,506 | 61,448 |
| 109,690 | 278 | 40,591 | 13,836 | 7,586 | 62,291 |
| 109,691 | 283 | 40,450 | 13,821 | 7,593 | 62,147 |
| 109,692 | 285 | 40,069 | 13,637 | 7,549 | 61,540 |
| 109,693 | 286 | 40,317 | 13,720 | 7,583 | 61,906 |
| 109,694 | 284 | 40,365 | 13,818 | 7,605 | 62,072 |
| 109,695 | 290 | 40,565 | 13,899 | 7,640 | 62,394 |
| 109,696 | 290 | 40,416 | 13,911 | 7,626 | 62,243 |
| 109,697 | 292 | 40,966 | 14,030 | 7,726 | 63,014 |
| 109,698 | 285 | 40,561 | 13,966 | 7,679 | 62,491 |
| 109,699 | 282 | 40,871 | 14,079 | 7,748 | 62,980 |
| 109,700 | 282 | 40,960 | 13,969 | 7,710 | 62,921 |
| 109,701 | 276 | 41,219 | 14,073 | 7,742 | 63,310 |
| 109,702 | 265 | 41,265 | 14,143 | 7,795 | 63,468 |
| 109,703 | 261 | 41,179 | 14,157 | 7,767 | 63,364 |
| 109,704 | 252 | 41,346 | 14,055 | 7,760 | 63,413 |
| 109,705 | 250 | 41,398 | 13,957 | 7,756 | 63,361 |
| 109,706 | 249 | 41,462 | 13,982 | 7,712 | 63,405 |
| 109,707 | 244 | 41,071 | 13,832 | 7,689 | 62,836 |
| 109,708 | 245 | 41,545 | 13,967 | 7,736 | 63,493 |
| 109,709 | 246 | 41,483 | 13,965 | 7,765 | 63,459 |
| 109,710 | 240 | 41,211 | 13,786 | 7,738 | 62,975 |
| 109,711 | 243 | 41,111 | 13,733 | 7,676 | 62,763 |
| 109,712 | 243 | 41,613 | 13,832 | 7,760 | 63,448 |
| 109,713 | 239 | 41,961 | 13,966 | 7,842 | 64,008 |
| 109,714 | 237 | 41,796 | 13,981 | 7,851 | 63,865 |
| 109,715 | 230 | 41,708 | 14,018 | 7,887 | 63,843 |
| 109,716 | 230 | 41,103 | 13,961 | 7,808 | 63,102 |
| 109,717 | 232 | 40,642 | 13,861 | 7,791 | 62,526 |
| 109,718 | 229 | 40,120 | 13,706 | 7,671 | 61,726 |
| 109,719 | 225 | 39,801 | 13,506 | 7,602 | 61,134 |

|         |     |        |        |       |        |
|---------|-----|--------|--------|-------|--------|
| 109,720 | 225 | 39,900 | 13,582 | 7,593 | 61,300 |
| 109,721 | 228 | 39,535 | 13,539 | 7,568 | 60,870 |
| 109,722 | 229 | 39,115 | 13,492 | 7,506 | 60,342 |
| 109,723 | 240 | 39,334 | 13,634 | 7,566 | 60,774 |
| 109,724 | 249 | 39,050 | 13,654 | 7,539 | 60,492 |
| 109,725 | 248 | 38,766 | 13,562 | 7,475 | 60,051 |
| 109,726 | 252 | 37,823 | 13,414 | 7,357 | 58,846 |
| 109,727 | 253 | 37,487 | 13,416 | 7,327 | 58,483 |
| 109,728 | 261 | 37,321 | 13,381 | 7,318 | 58,281 |
| 109,729 | 265 | 37,116 | 13,364 | 7,278 | 58,023 |
| 109,730 | 268 | 37,026 | 13,334 | 7,248 | 57,876 |
| 109,731 | 280 | 36,869 | 13,316 | 7,196 | 57,661 |
| 109,732 | 279 | 36,748 | 13,299 | 7,157 | 57,483 |
| 109,733 | 263 | 36,662 | 13,326 | 7,113 | 57,364 |
| 109,734 | 260 | 36,725 | 13,444 | 7,161 | 57,590 |
| 109,735 | 249 | 36,081 | 13,304 | 7,055 | 56,689 |
| 109,736 | 250 | 36,239 | 13,441 | 7,084 | 57,014 |
| 109,737 | 235 | 35,730 | 13,237 | 6,988 | 56,190 |
| 109,738 | 230 | 35,902 | 13,403 | 7,031 | 56,566 |
| 109,739 | 225 | 35,540 | 13,420 | 6,972 | 56,157 |
| 109,740 | 214 | 35,331 | 13,437 | 6,917 | 55,899 |
| 109,741 | 208 | 35,165 | 13,506 | 6,919 | 55,798 |
| 109,742 | 200 | 35,095 | 13,580 | 6,932 | 55,807 |
| 109,743 | 188 | 34,554 | 13,487 | 6,837 | 55,066 |
| 109,744 | 189 | 34,422 | 13,517 | 6,829 | 54,957 |
| 109,745 | 188 | 34,429 | 13,717 | 6,967 | 55,301 |
| 109,746 | 186 | 34,036 | 13,592 | 6,882 | 54,696 |
| 109,747 | 184 | 33,834 | 13,807 | 6,969 | 54,794 |
| 109,748 | 180 | 33,554 | 13,865 | 6,949 | 54,548 |
| 109,749 | 179 | 33,075 | 13,742 | 6,840 | 53,836 |
| 109,750 | 184 | 33,283 | 13,948 | 6,921 | 54,336 |
| 109,751 | 180 | 32,382 | 13,751 | 6,769 | 53,082 |

|         |     |        |        |       |        |
|---------|-----|--------|--------|-------|--------|
| 109,752 | 184 | 32,046 | 13,758 | 6,770 | 52,758 |
| 109,753 | 188 | 32,121 | 13,989 | 6,817 | 53,115 |
| 109,754 | 195 | 31,187 | 13,835 | 6,690 | 51,907 |
| 109,755 | 197 | 31,128 | 13,998 | 6,729 | 52,052 |
| 109,756 | 197 | 30,752 | 14,097 | 6,706 | 51,752 |
| 109,757 | 193 | 30,119 | 13,987 | 6,607 | 50,906 |
| 109,758 | 208 | 29,810 | 14,109 | 6,626 | 50,753 |
| 109,759 | 208 | 29,593 | 14,156 | 6,600 | 50,557 |
| 109,760 | 214 | 29,536 | 14,337 | 6,607 | 50,694 |
| 109,761 | 219 | 29,220 | 14,507 | 6,608 | 50,554 |
| 109,762 | 218 | 28,994 | 14,843 | 6,674 | 50,729 |
| 109,763 | 223 | 28,919 | 15,171 | 6,735 | 51,048 |
| 109,764 | 224 | 28,861 | 15,405 | 6,772 | 51,262 |
| 109,765 | 228 | 28,856 | 15,732 | 6,820 | 51,636 |
| 109,766 | 230 | 28,912 | 15,994 | 6,820 | 51,956 |
| 109,767 | 233 | 29,013 | 16,272 | 6,905 | 52,423 |
| 109,768 | 235 | 29,392 | 16,621 | 6,970 | 53,218 |
| 109,769 | 234 | 29,766 | 17,064 | 7,090 | 54,154 |
| 109,770 | 233 | 29,820 | 17,177 | 7,096 | 54,326 |
| 109,771 | 235 | 30,076 | 17,397 | 7,117 | 54,825 |
| 109,772 | 235 | 30,685 | 18,091 | 7,333 | 56,344 |
| 109,773 | 232 | 30,905 | 18,469 | 7,438 | 57,044 |
| 109,774 | 222 | 30,715 | 18,716 | 7,488 | 57,141 |
| 109,775 | 208 | 30,877 | 19,011 | 7,536 | 57,632 |
| 109,776 | 195 | 30,617 | 19,004 | 7,511 | 57,327 |
| 109,777 | 203 | 31,237 | 19,455 | 7,692 | 58,587 |
| 109,778 | 200 | 31,770 | 19,835 | 7,801 | 59,606 |
| 109,779 | 206 | 32,262 | 20,220 | 7,890 | 60,578 |
| 109,780 | 201 | 32,502 | 20,458 | 7,950 | 61,111 |
| 109,781 | 210 | 32,378 | 20,636 | 7,989 | 61,213 |
| 109,782 | 210 | 32,624 | 21,018 | 8,145 | 61,997 |
| 109,783 | 214 | 32,773 | 21,305 | 8,240 | 62,532 |

|         |     |        |        |        |        |
|---------|-----|--------|--------|--------|--------|
| 109,784 | 223 | 33,230 | 21,602 | 8,314  | 63,369 |
| 109,785 | 233 | 33,685 | 21,969 | 8,405  | 64,292 |
| 109,786 | 235 | 34,311 | 22,254 | 8,489  | 65,289 |
| 109,787 | 234 | 34,288 | 22,296 | 8,467  | 65,285 |
| 109,788 | 238 | 34,419 | 22,728 | 8,593  | 65,978 |
| 109,789 | 242 | 34,439 | 23,170 | 8,684  | 66,535 |
| 109,790 | 242 | 34,353 | 23,336 | 8,733  | 66,664 |
| 109,791 | 249 | 34,277 | 23,492 | 8,799  | 66,817 |
| 109,792 | 249 | 34,334 | 23,697 | 8,854  | 67,134 |
| 109,793 | 248 | 34,439 | 23,912 | 8,861  | 67,460 |
| 109,794 | 251 | 34,642 | 24,170 | 8,952  | 68,015 |
| 109,795 | 254 | 35,169 | 24,509 | 8,985  | 68,917 |
| 109,796 | 260 | 35,823 | 24,941 | 9,096  | 70,120 |
| 109,797 | 263 | 36,127 | 25,141 | 9,157  | 70,688 |
| 109,798 | 264 | 36,418 | 25,300 | 9,163  | 71,145 |
| 109,799 | 263 | 37,025 | 25,936 | 9,385  | 72,609 |
| 109,800 | 259 | 37,387 | 26,336 | 9,449  | 73,431 |
| 109,801 | 257 | 37,321 | 26,577 | 9,513  | 73,668 |
| 109,802 | 258 | 37,683 | 26,927 | 9,626  | 74,494 |
| 109,803 | 254 | 38,118 | 27,043 | 9,688  | 75,103 |
| 109,804 | 260 | 38,723 | 27,395 | 9,808  | 76,186 |
| 109,805 | 257 | 39,247 | 27,722 | 9,892  | 77,118 |
| 109,806 | 265 | 39,799 | 28,050 | 10,036 | 78,150 |
| 109,807 | 264 | 40,165 | 28,258 | 10,090 | 78,777 |
| 109,808 | 264 | 40,160 | 28,384 | 10,150 | 78,958 |
| 109,809 | 259 | 40,536 | 28,777 | 10,254 | 79,826 |
| 109,810 | 262 | 40,793 | 29,066 | 10,357 | 80,478 |
| 109,811 | 271 | 41,343 | 29,259 | 10,417 | 81,290 |
| 109,812 | 281 | 41,842 | 29,555 | 10,517 | 82,195 |
| 109,813 | 279 | 42,348 | 29,646 | 10,548 | 82,821 |
| 109,814 | 275 | 42,094 | 29,447 | 10,415 | 82,231 |
| 109,815 | 276 | 42,289 | 29,519 | 10,492 | 82,576 |



|         |     |        |        |        |        |
|---------|-----|--------|--------|--------|--------|
| 109,816 | 283 | 42,247 | 29,752 | 10,550 | 82,832 |
| 109,817 | 283 | 42,104 | 29,748 | 10,562 | 82,697 |
| 109,818 | 281 | 41,931 | 29,708 | 10,547 | 82,467 |
| 109,819 | 278 | 41,622 | 29,644 | 10,557 | 82,101 |
| 109,820 | 279 | 41,310 | 29,426 | 10,504 | 81,519 |
| 109,821 | 283 | 41,202 | 29,371 | 10,481 | 81,337 |
| 109,822 | 289 | 41,462 | 29,382 | 10,466 | 81,599 |
| 109,823 | 286 | 41,699 | 29,491 | 10,515 | 81,991 |
| 109,824 | 287 | 41,313 | 29,156 | 10,379 | 81,135 |
| 109,825 | 289 | 41,592 | 29,204 | 10,359 | 81,444 |
| 109,826 | 289 | 41,906 | 29,534 | 10,520 | 82,249 |
| 109,827 | 288 | 41,897 | 29,620 | 10,542 | 82,347 |
| 109,828 | 276 | 41,381 | 29,476 | 10,472 | 81,605 |
| 109,829 | 270 | 41,584 | 29,581 | 10,550 | 81,985 |
| 109,830 | 268 | 41,221 | 29,274 | 10,467 | 81,230 |
| 109,831 | 273 | 41,518 | 29,423 | 10,552 | 81,766 |
| 109,832 | 271 | 42,053 | 29,666 | 10,639 | 82,629 |
| 109,833 | 269 | 42,416 | 29,694 | 10,614 | 82,993 |
| 109,834 | 267 | 42,389 | 29,649 | 10,592 | 82,897 |
| 109,835 | 273 | 41,824 | 29,490 | 10,554 | 82,141 |
| 109,836 | 270 | 41,769 | 29,634 | 10,632 | 82,305 |
| 109,837 | 269 | 41,501 | 29,664 | 10,651 | 82,085 |
| 109,838 | 276 | 41,774 | 29,673 | 10,661 | 82,384 |
| 109,839 | 282 | 41,907 | 29,654 | 10,682 | 82,525 |
| 109,840 | 281 | 42,379 | 29,689 | 10,711 | 83,060 |
| 109,841 | 279 | 42,189 | 29,513 | 10,640 | 82,621 |
| 109,842 | 271 | 42,370 | 29,609 | 10,694 | 82,944 |
| 109,843 | 277 | 42,324 | 29,865 | 10,776 | 83,242 |
| 109,844 | 285 | 42,095 | 29,861 | 10,767 | 83,008 |
| 109,845 | 281 | 41,935 | 29,775 | 10,744 | 82,735 |
| 109,846 | 276 | 41,663 | 29,694 | 10,732 | 82,365 |
| 109,847 | 271 | 41,283 | 29,482 | 10,687 | 81,723 |

|         |     |        |        |        |        |
|---------|-----|--------|--------|--------|--------|
| 109,848 | 274 | 41,146 | 29,400 | 10,667 | 81,487 |
| 109,849 | 277 | 41,408 | 29,454 | 10,706 | 81,845 |
| 109,850 | 277 | 41,684 | 29,544 | 10,700 | 82,205 |
| 109,851 | 280 | 41,217 | 29,147 | 10,617 | 81,261 |
| 109,852 | 281 | 41,509 | 29,202 | 10,620 | 81,612 |
| 109,853 | 280 | 41,850 | 29,450 | 10,760 | 82,340 |
| 109,854 | 282 | 41,745 | 29,555 | 10,807 | 82,389 |
| 109,855 | 278 | 41,147 | 29,455 | 10,773 | 81,653 |
| 109,856 | 272 | 41,327 | 29,644 | 10,847 | 82,090 |
| 109,857 | 266 | 41,029 | 29,302 | 10,704 | 81,301 |
| 109,858 | 271 | 41,548 | 29,512 | 10,797 | 82,128 |
| 109,859 | 265 | 42,512 | 29,835 | 10,914 | 83,526 |
| 109,860 | 263 | 42,956 | 29,770 | 10,915 | 83,904 |
| 109,861 | 260 | 43,254 | 29,834 | 10,973 | 84,321 |
| 109,862 | 257 | 43,061 | 29,688 | 10,945 | 83,951 |
| 109,863 | 249 | 43,215 | 29,806 | 11,039 | 84,309 |
| 109,864 | 251 | 43,468 | 29,895 | 11,151 | 84,765 |
| 109,865 | 257 | 44,031 | 29,990 | 11,254 | 85,532 |
| 109,866 | 260 | 44,452 | 29,951 | 11,220 | 85,883 |
| 109,867 | 254 | 45,052 | 29,903 | 11,242 | 86,451 |
| 109,868 | 251 | 44,881 | 29,705 | 11,204 | 86,041 |
| 109,869 | 255 | 45,733 | 29,832 | 11,275 | 87,095 |
| 109,870 | 260 | 46,178 | 30,085 | 11,373 | 87,896 |
| 109,871 | 286 | 46,320 | 30,182 | 11,394 | 88,182 |
| 109,872 | 291 | 46,366 | 30,176 | 11,419 | 88,252 |
| 109,873 | 286 | 46,217 | 30,114 | 11,437 | 88,054 |
| 109,874 | 291 | 46,350 | 30,065 | 11,439 | 88,145 |
| 109,875 | 292 | 46,469 | 30,083 | 11,484 | 88,328 |
| 109,876 | 309 | 46,986 | 30,206 | 11,525 | 89,026 |
| 109,877 | 309 | 47,327 | 30,151 | 11,532 | 89,319 |
| 109,878 | 307 | 47,226 | 29,808 | 11,472 | 88,813 |
| 109,879 | 307 | 47,685 | 29,842 | 11,487 | 89,321 |

|         |     |        |        |        |         |
|---------|-----|--------|--------|--------|---------|
| 109,880 | 314 | 48,726 | 30,320 | 11,677 | 91,037  |
| 109,881 | 313 | 49,414 | 30,471 | 11,742 | 91,940  |
| 109,882 | 307 | 49,574 | 30,483 | 11,758 | 92,122  |
| 109,883 | 295 | 50,102 | 30,724 | 11,845 | 92,966  |
| 109,884 | 293 | 50,327 | 30,434 | 11,811 | 92,865  |
| 109,885 | 304 | 50,796 | 30,672 | 11,904 | 93,676  |
| 109,886 | 285 | 51,845 | 30,964 | 12,057 | 95,151  |
| 109,887 | 280 | 52,632 | 30,996 | 12,082 | 95,990  |
| 109,888 | 291 | 53,237 | 31,094 | 12,156 | 96,778  |
| 109,889 | 283 | 53,407 | 31,005 | 12,214 | 96,909  |
| 109,890 | 279 | 53,708 | 31,155 | 12,306 | 97,448  |
| 109,891 | 278 | 53,723 | 31,145 | 12,376 | 97,522  |
| 109,892 | 277 | 54,005 | 31,125 | 12,412 | 97,819  |
| 109,893 | 285 | 54,712 | 31,101 | 12,454 | 98,552  |
| 109,894 | 288 | 55,480 | 31,080 | 12,520 | 99,368  |
| 109,895 | 281 | 55,343 | 30,822 | 12,460 | 98,906  |
| 109,896 | 288 | 56,564 | 31,105 | 12,679 | 100,636 |
| 109,897 | 298 | 56,911 | 31,416 | 12,792 | 101,417 |
| 109,898 | 308 | 57,192 | 31,550 | 12,897 | 101,947 |
| 109,899 | 310 | 57,353 | 31,634 | 12,994 | 102,291 |
| 109,900 | 311 | 57,307 | 31,675 | 13,025 | 102,318 |
| 109,901 | 315 | 57,364 | 31,604 | 13,090 | 102,373 |
| 109,902 | 320 | 57,854 | 31,791 | 13,217 | 103,182 |
| 109,903 | 358 | 58,680 | 31,967 | 13,320 | 104,325 |
| 109,904 | 373 | 59,300 | 32,052 | 13,380 | 105,105 |
| 109,905 | 397 | 59,588 | 31,872 | 13,322 | 105,179 |
| 109,906 | 406 | 60,187 | 32,031 | 13,362 | 105,986 |
| 109,907 | 422 | 60,922 | 32,373 | 13,599 | 107,316 |
| 109,908 | 417 | 60,828 | 32,146 | 13,568 | 106,959 |
| 109,909 | 426 | 61,191 | 32,305 | 13,626 | 107,548 |
| 109,910 | 441 | 61,562 | 32,454 | 13,667 | 108,124 |
| 109,911 | 471 | 62,687 | 32,716 | 13,781 | 109,655 |

|         |     |        |        |        |         |
|---------|-----|--------|--------|--------|---------|
| 109,912 | 470 | 62,690 | 32,648 | 13,779 | 109,587 |
| 109,913 | 467 | 64,380 | 33,146 | 14,050 | 112,043 |
| 109,914 | 476 | 64,767 | 33,270 | 14,060 | 112,573 |
| 109,915 | 494 | 65,667 | 33,640 | 14,207 | 114,008 |
| 109,916 | 502 | 66,062 | 33,706 | 14,303 | 114,573 |
| 109,917 | 511 | 65,736 | 33,780 | 14,347 | 114,374 |
| 109,918 | 510 | 65,858 | 33,795 | 14,355 | 114,518 |
| 109,919 | 529 | 66,447 | 34,035 | 14,415 | 115,426 |
| 109,920 | 540 | 66,889 | 34,170 | 14,500 | 116,099 |
| 109,921 | 540 | 66,713 | 34,146 | 14,493 | 115,892 |
| 109,922 | 524 | 67,323 | 34,263 | 14,580 | 116,690 |
| 109,923 | 537 | 67,087 | 34,002 | 14,485 | 116,111 |
| 109,924 | 536 | 66,875 | 33,730 | 14,403 | 115,544 |
| 109,925 | 559 | 67,023 | 34,111 | 14,638 | 116,331 |
| 109,926 | 557 | 66,762 | 33,800 | 14,514 | 115,633 |
| 109,927 | 571 | 68,311 | 34,568 | 15,025 | 118,475 |
| 109,928 | 573 | 68,265 | 34,497 | 14,994 | 118,329 |
| 109,929 | 575 | 68,223 | 34,368 | 14,930 | 118,096 |
| 109,930 | 576 | 68,974 | 34,712 | 15,086 | 119,348 |
| 109,931 | 576 | 68,892 | 34,674 | 15,074 | 119,216 |
| 109,932 | 575 | 68,568 | 34,568 | 15,050 | 118,761 |
| 109,933 | 572 | 67,959 | 34,331 | 14,909 | 117,771 |
| 109,934 | 583 | 67,978 | 34,318 | 14,955 | 117,834 |
| 109,935 | 589 | 68,433 | 34,592 | 15,041 | 118,655 |
| 109,936 | 578 | 67,996 | 34,355 | 14,911 | 117,840 |
| 109,937 | 601 | 67,816 | 34,141 | 14,767 | 117,325 |
| 109,938 | 599 | 68,131 | 34,330 | 14,868 | 117,928 |
| 109,939 | 588 | 68,481 | 34,567 | 15,002 | 118,638 |
| 109,940 | 610 | 68,857 | 34,606 | 14,981 | 119,054 |
| 109,941 | 626 | 68,970 | 34,587 | 14,953 | 119,136 |
| 109,942 | 632 | 68,943 | 34,347 | 14,858 | 118,780 |
| 109,943 | 632 | 69,131 | 34,348 | 14,830 | 118,941 |

|         |     |        |        |        |         |
|---------|-----|--------|--------|--------|---------|
| 109,944 | 634 | 69,233 | 34,576 | 14,943 | 119,386 |
| 109,945 | 632 | 68,750 | 34,327 | 14,811 | 118,520 |
| 109,946 | 641 | 68,861 | 34,410 | 14,853 | 118,765 |
| 109,947 | 606 | 63,967 | 31,973 | 13,812 | 110,358 |
| 109,948 | 633 | 68,563 | 34,057 | 14,686 | 117,939 |
| 109,949 | 629 | 68,659 | 33,996 | 14,624 | 117,908 |
| 109,950 | 625 | 68,892 | 33,821 | 14,532 | 117,870 |
| 109,951 | 634 | 68,850 | 33,646 | 14,436 | 117,566 |
| 109,952 | 634 | 68,865 | 33,417 | 14,329 | 117,245 |
| 109,953 | 613 | 68,377 | 33,106 | 14,183 | 116,279 |
| 109,954 | 609 | 68,217 | 33,050 | 14,113 | 115,989 |
| 109,955 | 593 | 67,789 | 32,907 | 14,031 | 115,320 |
| 109,956 | 565 | 67,256 | 32,645 | 13,934 | 114,400 |
| 109,957 | 562 | 67,045 | 32,547 | 13,899 | 114,053 |
| 109,958 | 558 | 67,442 | 32,546 | 13,863 | 114,409 |
| 109,959 | 546 | 66,761 | 32,355 | 13,788 | 113,450 |
| 109,960 | 541 | 66,559 | 32,416 | 13,835 | 113,351 |
| 109,961 | 519 | 65,537 | 31,984 | 13,686 | 111,726 |
| 109,962 | 519 | 65,362 | 31,848 | 13,664 | 111,393 |
| 109,963 | 514 | 65,345 | 31,733 | 13,579 | 111,171 |
| 109,964 | 513 | 65,291 | 31,621 | 13,475 | 110,900 |
| 109,965 | 497 | 65,278 | 31,394 | 13,392 | 110,561 |
| 109,966 | 499 | 66,110 | 31,688 | 13,452 | 111,749 |
| 109,967 | 470 | 65,139 | 31,301 | 13,223 | 110,133 |
| 109,968 | 473 | 64,825 | 30,909 | 13,026 | 109,233 |
| 109,969 | 475 | 65,778 | 31,142 | 13,106 | 110,501 |
| 109,970 | 452 | 65,442 | 31,045 | 13,088 | 110,027 |
| 109,971 | 459 | 65,688 | 31,239 | 13,114 | 110,500 |
| 109,972 | 456 | 65,912 | 31,317 | 13,131 | 110,816 |
| 109,973 | 416 | 65,617 | 30,957 | 12,934 | 109,924 |
| 109,974 | 408 | 64,475 | 30,175 | 12,566 | 107,624 |
| 109,975 | 414 | 65,041 | 30,296 | 12,602 | 108,353 |

|         |     |        |        |        |         |
|---------|-----|--------|--------|--------|---------|
| 109,976 | 400 | 65,548 | 30,477 | 12,643 | 109,068 |
| 109,977 | 405 | 65,367 | 30,329 | 12,528 | 108,629 |
| 109,978 | 417 | 65,141 | 30,277 | 12,435 | 108,270 |
| 109,979 | 414 | 64,645 | 30,101 | 12,310 | 107,470 |
| 109,980 | 421 | 64,943 | 30,354 | 12,379 | 108,097 |
| 109,981 | 428 | 65,051 | 30,381 | 12,348 | 108,208 |
| 109,982 | 434 | 63,946 | 29,845 | 12,119 | 106,344 |
| 109,983 | 435 | 63,977 | 29,851 | 12,098 | 106,361 |
| 109,984 | 434 | 63,188 | 29,406 | 11,895 | 104,923 |
| 109,985 | 432 | 63,074 | 29,370 | 11,853 | 104,729 |
| 109,986 | 433 | 62,280 | 29,044 | 11,733 | 103,490 |
| 109,987 | 433 | 61,646 | 28,743 | 11,602 | 102,424 |
| 109,988 | 430 | 63,581 | 29,722 | 12,069 | 105,802 |
| 109,989 | 433 | 61,963 | 29,071 | 11,733 | 103,200 |
| 109,990 | 439 | 62,621 | 29,289 | 11,749 | 104,098 |
| 109,991 | 422 | 63,042 | 29,596 | 11,821 | 104,881 |
| 109,992 | 414 | 62,443 | 29,465 | 11,705 | 104,027 |
| 109,993 | 425 | 61,404 | 29,036 | 11,469 | 102,334 |
| 109,994 | 428 | 61,565 | 29,025 | 11,428 | 102,446 |
| 109,995 | 420 | 60,796 | 28,718 | 11,263 | 101,197 |
| 109,996 | 410 | 59,891 | 28,438 | 11,102 | 99,841  |
| 109,997 | 390 | 58,774 | 27,847 | 10,786 | 97,797  |
| 109,998 | 387 | 58,012 | 27,522 | 10,618 | 96,539  |
| 109,999 | 388 | 57,424 | 27,189 | 10,453 | 95,454  |
| 110,000 | 392 | 57,258 | 27,121 | 10,401 | 95,172  |
| 110,001 | 391 | 56,527 | 26,870 | 10,280 | 94,068  |
| 110,002 | 383 | 55,561 | 26,594 | 10,130 | 92,668  |
| 110,003 | 378 | 54,946 | 26,427 | 10,021 | 91,772  |
| 110,004 | 362 | 54,175 | 26,136 | 9,920  | 90,593  |
| 110,005 | 362 | 53,474 | 25,877 | 9,837  | 89,550  |
| 110,006 | 364 | 52,577 | 25,516 | 9,669  | 88,126  |
| 110,007 | 355 | 51,848 | 25,163 | 9,509  | 86,875  |

|         |     |        |        |       |        |
|---------|-----|--------|--------|-------|--------|
| 110,008 | 349 | 51,301 | 24,891 | 9,355 | 85,896 |
| 110,009 | 351 | 50,271 | 24,246 | 9,059 | 83,927 |
| 110,010 | 358 | 50,259 | 24,247 | 9,038 | 83,902 |
| 110,011 | 347 | 49,252 | 23,759 | 8,847 | 82,205 |
| 110,012 | 339 | 48,109 | 23,380 | 8,670 | 80,498 |
| 110,013 | 337 | 46,916 | 22,937 | 8,434 | 78,624 |
| 110,014 | 332 | 45,662 | 22,457 | 8,237 | 76,688 |
| 110,015 | 324 | 44,448 | 22,069 | 8,055 | 74,896 |
| 110,016 | 320 | 43,244 | 21,643 | 7,878 | 73,085 |
| 110,017 | 320 | 41,966 | 21,141 | 7,665 | 71,092 |
| 110,018 | 316 | 40,944 | 20,559 | 7,464 | 69,283 |
| 110,019 | 306 | 39,846 | 20,187 | 7,317 | 67,656 |
| 110,020 | 304 | 38,777 | 19,811 | 7,132 | 66,024 |
| 110,021 | 304 | 38,122 | 19,434 | 6,949 | 64,809 |
| 110,022 | 287 | 37,307 | 19,022 | 6,784 | 63,400 |
| 110,023 | 281 | 35,146 | 18,054 | 6,385 | 59,866 |
| 110,024 | 268 | 34,464 | 17,798 | 6,261 | 58,791 |
| 110,025 | 268 | 34,431 | 17,858 | 6,224 | 58,781 |
| 110,026 | 264 | 33,813 | 17,685 | 6,121 | 57,883 |
| 110,027 | 257 | 33,195 | 17,541 | 5,997 | 56,990 |
| 110,028 | 250 | 32,674 | 17,315 | 5,874 | 56,113 |
| 110,029 | 231 | 32,129 | 16,983 | 5,761 | 55,104 |
| 110,030 | 226 | 31,322 | 16,655 | 5,620 | 53,823 |
| 110,031 | 222 | 30,974 | 16,501 | 5,541 | 53,238 |
| 110,032 | 218 | 30,651 | 16,330 | 5,458 | 52,657 |
| 110,033 | 207 | 30,414 | 16,203 | 5,376 | 52,200 |
| 110,034 | 208 | 30,038 | 16,104 | 5,270 | 51,620 |
| 110,035 | 199 | 29,363 | 15,820 | 5,184 | 50,566 |
| 110,036 | 203 | 28,920 | 15,712 | 5,099 | 49,934 |
| 110,037 | 189 | 28,830 | 15,570 | 5,022 | 49,611 |
| 110,038 | 190 | 28,644 | 15,347 | 4,912 | 49,093 |
| 110,039 | 186 | 28,166 | 15,196 | 4,831 | 48,379 |

|         |     |        |        |       |        |
|---------|-----|--------|--------|-------|--------|
| 110,040 | 179 | 27,833 | 14,989 | 4,787 | 47,788 |
| 110,041 | 176 | 27,806 | 14,956 | 4,750 | 47,688 |
| 110,042 | 172 | 27,675 | 14,731 | 4,695 | 47,273 |
| 110,043 | 165 | 27,703 | 14,748 | 4,749 | 47,365 |
| 110,044 | 151 | 28,054 | 15,003 | 4,855 | 48,063 |
| 110,045 | 145 | 27,496 | 14,812 | 4,813 | 47,266 |
| 110,046 | 156 | 28,368 | 15,142 | 4,953 | 48,619 |
| 110,047 | 162 | 29,352 | 15,456 | 5,110 | 50,080 |
| 110,048 | 178 | 30,195 | 15,766 | 5,245 | 51,384 |
| 110,049 | 172 | 30,225 | 15,874 | 5,294 | 51,565 |
| 110,050 | 125 | 17,224 | 9,773  | 3,241 | 30,363 |
| 110,051 | 185 | 31,944 | 16,788 | 5,641 | 54,558 |
| 110,052 | 191 | 33,232 | 17,304 | 5,885 | 56,612 |
| 110,053 | 190 | 34,212 | 17,557 | 6,024 | 57,983 |
| 110,054 | 187 | 34,709 | 17,691 | 6,145 | 58,732 |
| 110,055 | 195 | 35,590 | 17,946 | 6,243 | 59,974 |
| 110,056 | 202 | 36,525 | 18,214 | 6,325 | 61,266 |
| 110,057 | 202 | 37,449 | 18,426 | 6,436 | 62,513 |
| 110,058 | 217 | 37,760 | 18,518 | 6,481 | 62,976 |
| 110,059 | 214 | 37,922 | 18,651 | 6,558 | 63,345 |
| 110,060 | 207 | 38,225 | 18,787 | 6,624 | 63,843 |
| 110,061 | 216 | 40,139 | 19,558 | 6,912 | 66,825 |
| 110,062 | 236 | 41,139 | 19,949 | 7,051 | 68,375 |
| 110,063 | 242 | 41,949 | 20,234 | 7,183 | 69,608 |
| 110,064 | 242 | 42,387 | 20,485 | 7,257 | 70,371 |
| 110,065 | 247 | 43,455 | 20,851 | 7,405 | 71,958 |
| 110,066 | 258 | 45,130 | 21,395 | 7,642 | 74,425 |
| 110,067 | 262 | 46,295 | 21,824 | 7,841 | 76,222 |
| 110,068 | 261 | 46,818 | 22,064 | 7,969 | 77,112 |
| 110,069 | 266 | 47,072 | 22,250 | 8,087 | 77,675 |
| 110,070 | 272 | 47,971 | 22,593 | 8,227 | 79,063 |
| 110,071 | 272 | 47,797 | 22,574 | 8,233 | 78,876 |



|         |     |        |        |        |        |
|---------|-----|--------|--------|--------|--------|
| 110,072 | 277 | 49,400 | 23,066 | 8,519  | 81,262 |
| 110,073 | 288 | 49,988 | 23,356 | 8,663  | 82,295 |
| 110,074 | 285 | 50,548 | 23,506 | 8,774  | 83,113 |
| 110,075 | 292 | 50,920 | 23,649 | 8,860  | 83,721 |
| 110,076 | 303 | 51,207 | 23,701 | 8,946  | 84,157 |
| 110,077 | 305 | 51,427 | 23,807 | 9,010  | 84,549 |
| 110,078 | 314 | 52,548 | 24,179 | 9,190  | 86,231 |
| 110,079 | 310 | 52,257 | 24,046 | 9,182  | 85,795 |
| 110,080 | 314 | 52,141 | 23,968 | 9,156  | 85,579 |
| 110,081 | 315 | 51,896 | 23,867 | 9,149  | 85,227 |
| 110,082 | 333 | 55,356 | 25,192 | 9,750  | 90,631 |
| 110,083 | 332 | 55,184 | 25,047 | 9,695  | 90,258 |
| 110,084 | 332 | 56,031 | 25,415 | 9,903  | 91,681 |
| 110,085 | 323 | 56,421 | 25,480 | 9,970  | 92,194 |
| 110,086 | 322 | 56,105 | 25,274 | 9,922  | 91,623 |
| 110,087 | 325 | 56,998 | 25,506 | 10,108 | 92,937 |
| 110,088 | 321 | 56,545 | 25,327 | 10,072 | 92,265 |
| 110,089 | 323 | 57,093 | 25,491 | 10,160 | 93,067 |
| 110,090 | 332 | 57,661 | 25,726 | 10,257 | 93,976 |
| 110,091 | 335 | 57,817 | 25,693 | 10,263 | 94,108 |
| 110,092 | 344 | 57,936 | 25,770 | 10,318 | 94,368 |
| 110,093 | 359 | 58,150 | 25,846 | 10,346 | 94,701 |
| 110,094 | 355 | 57,672 | 25,548 | 10,252 | 93,827 |
| 110,095 | 355 | 57,773 | 25,490 | 10,278 | 93,896 |
| 110,096 | 356 | 57,761 | 25,469 | 10,283 | 93,869 |
| 110,097 | 370 | 58,371 | 25,704 | 10,403 | 94,848 |
| 110,098 | 380 | 58,170 | 25,723 | 10,378 | 94,651 |
| 110,099 | 375 | 58,032 | 25,592 | 10,337 | 94,336 |
| 110,100 | 390 | 57,542 | 25,149 | 10,191 | 93,272 |
| 110,101 | 396 | 57,755 | 25,126 | 10,195 | 93,472 |
| 110,102 | 392 | 57,286 | 24,905 | 10,098 | 92,681 |
| 110,103 | 401 | 57,681 | 25,028 | 10,133 | 93,243 |

|         |     |        |        |        |        |
|---------|-----|--------|--------|--------|--------|
| 110,104 | 410 | 56,788 | 24,731 | 10,014 | 91,943 |
| 110,105 | 424 | 56,630 | 24,637 | 9,986  | 91,677 |
| 110,106 | 419 | 55,915 | 24,424 | 9,919  | 90,677 |
| 110,107 | 437 | 55,457 | 24,402 | 9,898  | 90,194 |
| 110,108 | 434 | 54,721 | 24,170 | 9,826  | 89,151 |
| 110,109 | 436 | 55,539 | 24,528 | 9,967  | 90,470 |
| 110,110 | 441 | 55,414 | 24,390 | 9,906  | 90,151 |
| 110,111 | 441 | 55,308 | 24,278 | 9,917  | 89,944 |
| 110,112 | 443 | 55,171 | 24,287 | 9,891  | 89,792 |
| 110,113 | 437 | 54,003 | 23,761 | 9,696  | 87,897 |
| 110,114 | 434 | 54,026 | 23,710 | 9,692  | 87,862 |
| 110,115 | 440 | 53,469 | 23,442 | 9,617  | 86,968 |
| 110,116 | 437 | 52,550 | 23,157 | 9,543  | 85,687 |
| 110,117 | 457 | 54,219 | 24,150 | 9,958  | 88,784 |
| 110,118 | 462 | 53,584 | 23,905 | 9,876  | 87,827 |
| 110,119 | 474 | 53,334 | 23,614 | 9,755  | 87,177 |
| 110,120 | 472 | 53,083 | 23,562 | 9,721  | 86,838 |
| 110,121 | 466 | 52,443 | 23,371 | 9,665  | 85,945 |
| 110,122 | 471 | 52,818 | 23,488 | 9,691  | 86,468 |
| 110,123 | 467 | 52,637 | 23,485 | 9,646  | 86,235 |
| 110,124 | 463 | 52,457 | 23,373 | 9,634  | 85,927 |
| 110,125 | 455 | 51,936 | 23,125 | 9,561  | 85,077 |
| 110,126 | 462 | 52,018 | 23,100 | 9,546  | 85,126 |
| 110,127 | 454 | 51,165 | 22,828 | 9,435  | 83,882 |
| 110,128 | 455 | 51,667 | 23,261 | 9,544  | 84,927 |
| 110,129 | 459 | 52,316 | 23,666 | 9,731  | 86,172 |
| 110,130 | 470 | 52,168 | 23,698 | 9,696  | 86,032 |
| 110,131 | 467 | 51,787 | 23,669 | 9,702  | 85,625 |
| 110,132 | 463 | 51,673 | 23,652 | 9,712  | 85,500 |
| 110,133 | 453 | 50,830 | 23,323 | 9,588  | 84,194 |
| 110,134 | 454 | 51,359 | 23,733 | 9,763  | 85,309 |
| 110,135 | 461 | 51,719 | 24,022 | 9,859  | 86,061 |

|         |     |        |        |        |         |
|---------|-----|--------|--------|--------|---------|
| 110,136 | 458 | 51,722 | 24,115 | 9,890  | 86,185  |
| 110,137 | 455 | 51,477 | 24,361 | 9,915  | 86,208  |
| 110,138 | 454 | 51,691 | 24,554 | 9,967  | 86,666  |
| 110,139 | 469 | 53,384 | 25,359 | 10,289 | 89,501  |
| 110,140 | 468 | 54,036 | 25,736 | 10,431 | 90,671  |
| 110,141 | 479 | 54,043 | 25,661 | 10,388 | 90,571  |
| 110,142 | 473 | 53,353 | 25,408 | 10,299 | 89,533  |
| 110,143 | 493 | 56,931 | 27,002 | 10,918 | 95,344  |
| 110,144 | 480 | 56,200 | 26,672 | 10,798 | 94,150  |
| 110,145 | 501 | 57,998 | 27,601 | 11,101 | 97,201  |
| 110,146 | 503 | 57,864 | 27,490 | 11,036 | 96,893  |
| 110,147 | 519 | 59,590 | 28,292 | 11,338 | 99,739  |
| 110,148 | 513 | 59,726 | 28,410 | 11,362 | 100,011 |
| 110,149 | 506 | 60,024 | 28,486 | 11,400 | 100,416 |
| 110,150 | 493 | 59,246 | 28,287 | 11,314 | 99,340  |
| 110,151 | 498 | 59,313 | 28,458 | 11,369 | 99,638  |
| 110,152 | 494 | 59,477 | 28,625 | 11,430 | 100,026 |
| 110,153 | 506 | 59,520 | 28,716 | 11,484 | 100,226 |
| 110,154 | 502 | 59,913 | 28,880 | 11,570 | 100,865 |
| 110,155 | 489 | 59,546 | 28,695 | 11,465 | 100,195 |
| 110,156 | 492 | 59,365 | 28,639 | 11,461 | 99,957  |
| 110,157 | 486 | 59,325 | 28,592 | 11,454 | 99,857  |
| 110,158 | 459 | 58,724 | 28,286 | 11,360 | 98,829  |
| 110,159 | 452 | 58,121 | 28,158 | 11,283 | 98,014  |
| 110,160 | 448 | 57,917 | 28,168 | 11,259 | 97,792  |
| 110,161 | 443 | 57,630 | 28,051 | 11,168 | 97,292  |
| 110,162 | 442 | 57,597 | 28,006 | 11,148 | 97,193  |
| 110,163 | 435 | 57,622 | 27,858 | 11,098 | 97,013  |
| 110,164 | 417 | 57,340 | 27,623 | 11,047 | 96,427  |
| 110,165 | 418 | 57,012 | 27,555 | 10,921 | 95,906  |
| 110,166 | 418 | 57,055 | 27,540 | 10,921 | 95,934  |
| 110,167 | 428 | 57,350 | 27,652 | 10,942 | 96,372  |

|         |     |        |        |        |        |
|---------|-----|--------|--------|--------|--------|
| 110,168 | 425 | 56,598 | 27,409 | 10,836 | 95,268 |
| 110,169 | 435 | 56,979 | 27,767 | 10,939 | 96,120 |
| 110,170 | 415 | 56,296 | 27,469 | 10,815 | 94,995 |
| 110,171 | 438 | 57,214 | 28,057 | 11,014 | 96,723 |
| 110,172 | 456 | 57,418 | 28,275 | 11,080 | 97,229 |
| 110,173 | 457 | 57,164 | 28,295 | 11,027 | 96,943 |
| 110,174 | 471 | 57,028 | 28,315 | 11,015 | 96,829 |
| 110,175 | 474 | 57,612 | 28,659 | 11,120 | 97,865 |
| 110,176 | 496 | 57,379 | 28,811 | 11,113 | 97,799 |
| 110,177 | 489 | 57,152 | 28,597 | 11,046 | 97,284 |
| 110,178 | 517 | 57,375 | 28,759 | 11,056 | 97,707 |
| 110,179 | 519 | 57,337 | 28,734 | 11,020 | 97,610 |
| 110,180 | 526 | 57,029 | 28,582 | 10,919 | 97,056 |
| 110,181 | 515 | 56,410 | 28,272 | 10,816 | 96,013 |
| 110,182 | 513 | 56,236 | 28,169 | 10,741 | 95,659 |
| 110,183 | 526 | 55,555 | 27,865 | 10,616 | 94,562 |
| 110,184 | 530 | 54,657 | 27,190 | 10,359 | 92,736 |
| 110,185 | 528 | 53,594 | 26,632 | 10,079 | 90,833 |
| 110,186 | 536 | 52,540 | 26,095 | 9,855  | 89,026 |
| 110,187 | 542 | 52,306 | 25,665 | 9,730  | 88,243 |
| 110,188 | 536 | 51,132 | 25,099 | 9,504  | 86,271 |
| 110,189 | 534 | 49,838 | 24,500 | 9,261  | 84,133 |
| 110,190 | 518 | 48,211 | 23,710 | 8,928  | 81,367 |
| 110,191 | 517 | 46,106 | 22,733 | 8,565  | 77,921 |
| 110,192 | 499 | 44,378 | 22,006 | 8,247  | 75,130 |
| 110,193 | 491 | 42,741 | 21,333 | 7,947  | 72,512 |
| 110,194 | 475 | 40,779 | 20,453 | 7,613  | 69,320 |
| 110,195 | 467 | 38,680 | 19,464 | 7,196  | 65,807 |
| 110,196 | 453 | 37,294 | 18,833 | 6,964  | 63,544 |
| 110,197 | 437 | 35,788 | 18,198 | 6,696  | 61,119 |
| 110,198 | 438 | 35,102 | 17,790 | 6,518  | 59,848 |
| 110,199 | 427 | 33,781 | 17,229 | 6,286  | 57,723 |

|         |     |        |        |       |        |
|---------|-----|--------|--------|-------|--------|
| 110,200 | 430 | 33,191 | 16,967 | 6,187 | 56,775 |
| 110,201 | 423 | 32,722 | 16,748 | 6,080 | 55,973 |
| 110,202 | 425 | 32,751 | 16,810 | 6,042 | 56,028 |
| 110,203 | 428 | 32,883 | 16,796 | 6,033 | 56,140 |
| 110,204 | 430 | 33,030 | 16,813 | 6,017 | 56,290 |
| 110,205 | 432 | 33,149 | 17,011 | 6,033 | 56,625 |
| 110,206 | 429 | 33,169 | 16,990 | 5,999 | 56,587 |
| 110,207 | 429 | 33,301 | 17,104 | 6,023 | 56,857 |
| 110,208 | 431 | 33,283 | 17,105 | 5,968 | 56,787 |
| 110,209 | 438 | 33,275 | 17,021 | 5,970 | 56,704 |
| 110,210 | 446 | 33,250 | 16,946 | 5,955 | 56,597 |
| 110,211 | 444 | 32,989 | 16,788 | 5,921 | 56,142 |
| 110,212 | 441 | 32,912 | 16,697 | 5,888 | 55,938 |
| 110,213 | 437 | 32,479 | 16,559 | 5,861 | 55,336 |
| 110,214 | 439 | 32,308 | 16,454 | 5,815 | 55,016 |
| 110,215 | 426 | 31,851 | 16,345 | 5,749 | 54,371 |
| 110,216 | 421 | 31,669 | 16,157 | 5,696 | 53,943 |
| 110,217 | 410 | 31,300 | 16,080 | 5,673 | 53,463 |
| 110,218 | 404 | 31,010 | 15,846 | 5,595 | 52,855 |
| 110,219 | 393 | 30,462 | 15,479 | 5,484 | 51,818 |
| 110,220 | 389 | 30,093 | 15,210 | 5,386 | 51,078 |
| 110,221 | 363 | 29,377 | 14,674 | 5,229 | 49,643 |
| 110,222 | 361 | 29,014 | 14,375 | 5,109 | 48,859 |
| 110,223 | 348 | 28,965 | 14,145 | 5,065 | 48,523 |
| 110,224 | 348 | 28,673 | 13,879 | 4,991 | 47,891 |
| 110,225 | 330 | 28,296 | 13,560 | 4,932 | 47,118 |
| 110,226 | 332 | 28,180 | 13,367 | 4,908 | 46,787 |
| 110,227 | 313 | 27,883 | 12,906 | 4,854 | 45,956 |
| 110,228 | 310 | 27,979 | 12,844 | 4,855 | 45,988 |
| 110,229 | 299 | 28,847 | 13,069 | 4,930 | 47,145 |
| 110,230 | 301 | 29,390 | 13,215 | 5,027 | 47,933 |
| 110,231 | 290 | 29,797 | 13,207 | 5,114 | 48,408 |

|         |     |        |        |       |        |
|---------|-----|--------|--------|-------|--------|
| 110,232 | 297 | 30,622 | 13,472 | 5,217 | 49,608 |
| 110,233 | 305 | 31,137 | 13,638 | 5,340 | 50,420 |
| 110,234 | 310 | 31,901 | 13,944 | 5,463 | 51,618 |
| 110,235 | 322 | 32,769 | 14,304 | 5,598 | 52,993 |
| 110,236 | 333 | 33,382 | 14,558 | 5,710 | 53,983 |
| 110,237 | 347 | 34,285 | 14,964 | 5,861 | 55,457 |
| 110,238 | 351 | 34,918 | 15,291 | 6,006 | 56,566 |
| 110,239 | 355 | 35,791 | 15,680 | 6,166 | 57,992 |
| 110,240 | 360 | 36,658 | 16,042 | 6,348 | 59,408 |
| 110,241 | 365 | 37,631 | 16,372 | 6,517 | 60,885 |
| 110,242 | 382 | 38,458 | 16,775 | 6,684 | 62,299 |
| 110,243 | 383 | 38,721 | 16,963 | 6,768 | 62,835 |
| 110,244 | 384 | 39,696 | 17,422 | 6,963 | 64,465 |
| 110,245 | 384 | 39,965 | 17,728 | 7,132 | 65,209 |
| 110,246 | 389 | 39,895 | 17,707 | 7,147 | 65,138 |
| 110,247 | 385 | 39,806 | 17,740 | 7,209 | 65,140 |
| 110,248 | 387 | 41,360 | 18,754 | 7,659 | 68,160 |
| 110,249 | 387 | 42,751 | 19,448 | 7,985 | 70,571 |
| 110,250 | 369 | 42,345 | 19,291 | 7,952 | 69,957 |
| 110,251 | 368 | 42,506 | 19,418 | 8,038 | 70,330 |
| 110,252 | 362 | 43,482 | 19,836 | 8,278 | 71,958 |
| 110,253 | 359 | 43,555 | 19,812 | 8,322 | 72,048 |
| 110,254 | 348 | 43,467 | 19,658 | 8,329 | 71,802 |
| 110,255 | 347 | 43,475 | 19,649 | 8,378 | 71,849 |
| 110,256 | 354 | 43,989 | 19,722 | 8,489 | 72,554 |
| 110,257 | 351 | 44,258 | 19,838 | 8,578 | 73,025 |
| 110,258 | 345 | 44,019 | 19,724 | 8,561 | 72,649 |
| 110,259 | 352 | 44,619 | 20,010 | 8,714 | 73,695 |
| 110,260 | 346 | 44,341 | 19,887 | 8,644 | 73,218 |
| 110,261 | 337 | 44,352 | 19,929 | 8,677 | 73,295 |
| 110,262 | 346 | 44,999 | 20,223 | 8,795 | 74,363 |
| 110,263 | 364 | 44,813 | 20,234 | 8,790 | 74,201 |

|         |     |        |        |       |        |
|---------|-----|--------|--------|-------|--------|
| 110,264 | 365 | 45,005 | 20,336 | 8,837 | 74,543 |
| 110,265 | 363 | 44,741 | 20,190 | 8,814 | 74,108 |
| 110,266 | 368 | 45,088 | 20,283 | 8,866 | 74,605 |
| 110,267 | 367 | 44,800 | 20,171 | 8,822 | 74,160 |
| 110,268 | 381 | 45,062 | 20,206 | 8,851 | 74,500 |
| 110,269 | 381 | 45,096 | 20,224 | 8,845 | 74,546 |
| 110,270 | 391 | 46,356 | 20,687 | 9,020 | 76,454 |
| 110,271 | 388 | 45,738 | 20,477 | 8,958 | 75,561 |
| 110,272 | 393 | 46,612 | 20,963 | 9,152 | 77,120 |
| 110,273 | 388 | 46,108 | 20,906 | 9,141 | 76,543 |
| 110,274 | 395 | 46,284 | 20,959 | 9,188 | 76,826 |
| 110,275 | 405 | 46,179 | 20,902 | 9,209 | 76,695 |
| 110,276 | 394 | 46,191 | 20,890 | 9,228 | 76,703 |
| 110,277 | 389 | 45,579 | 20,665 | 9,109 | 75,742 |
| 110,278 | 387 | 45,546 | 20,791 | 9,167 | 75,891 |
| 110,279 | 412 | 45,327 | 20,773 | 9,156 | 75,668 |
| 110,280 | 410 | 45,261 | 20,787 | 9,158 | 75,616 |
| 110,281 | 415 | 44,122 | 20,711 | 9,079 | 74,327 |
| 110,282 | 415 | 44,021 | 20,656 | 9,048 | 74,140 |
| 110,283 | 408 | 44,088 | 20,721 | 9,100 | 74,317 |
| 110,284 | 393 | 43,607 | 20,670 | 9,077 | 73,747 |
| 110,285 | 392 | 43,593 | 20,681 | 9,066 | 73,732 |
| 110,286 | 373 | 43,116 | 20,490 | 9,009 | 72,988 |
| 110,287 | 359 | 42,321 | 20,153 | 8,883 | 71,716 |
| 110,288 | 344 | 42,576 | 20,265 | 8,945 | 72,130 |
| 110,289 | 336 | 41,940 | 19,937 | 8,804 | 71,017 |
| 110,290 | 338 | 42,003 | 19,966 | 8,836 | 71,143 |
| 110,291 | 334 | 41,658 | 19,771 | 8,753 | 70,516 |
| 110,292 | 328 | 41,155 | 19,672 | 8,704 | 69,859 |
| 110,293 | 316 | 40,848 | 19,533 | 8,642 | 69,339 |
| 110,294 | 314 | 40,429 | 19,290 | 8,570 | 68,603 |
| 110,295 | 312 | 40,437 | 19,083 | 8,492 | 68,324 |

|         |     |        |        |       |        |
|---------|-----|--------|--------|-------|--------|
| 110,296 | 324 | 40,318 | 18,858 | 8,401 | 67,901 |
| 110,297 | 311 | 39,579 | 18,393 | 8,219 | 66,502 |
| 110,298 | 310 | 38,653 | 17,967 | 8,017 | 64,947 |
| 110,299 | 319 | 39,070 | 18,064 | 8,064 | 65,517 |
| 110,300 | 317 | 38,379 | 17,762 | 7,949 | 64,407 |
| 110,301 | 322 | 38,288 | 17,622 | 7,882 | 64,114 |
| 110,302 | 374 | 39,047 | 17,652 | 7,862 | 64,935 |
| 110,303 | 390 | 38,939 | 17,493 | 7,791 | 64,613 |
| 110,304 | 382 | 38,631 | 17,559 | 7,831 | 64,403 |
| 110,305 | 382 | 37,864 | 17,107 | 7,599 | 62,952 |
| 110,306 | 394 | 38,298 | 17,220 | 7,676 | 63,588 |
| 110,307 | 377 | 38,446 | 17,289 | 7,661 | 63,773 |
| 110,308 | 399 | 38,694 | 17,242 | 7,608 | 63,943 |
| 110,309 | 399 | 38,427 | 17,029 | 7,536 | 63,391 |
| 110,310 | 393 | 38,701 | 17,125 | 7,560 | 63,779 |
| 110,311 | 392 | 38,382 | 16,984 | 7,499 | 63,257 |
| 110,312 | 393 | 39,603 | 17,364 | 7,669 | 65,029 |
| 110,313 | 392 | 39,379 | 17,284 | 7,617 | 64,672 |
| 110,314 | 376 | 40,395 | 17,638 | 7,780 | 66,189 |
| 110,315 | 376 | 40,175 | 17,530 | 7,741 | 65,822 |
| 110,316 | 381 | 40,824 | 17,954 | 7,930 | 67,089 |
| 110,317 | 380 | 40,691 | 17,931 | 7,943 | 66,945 |
| 110,318 | 380 | 41,282 | 18,234 | 8,105 | 68,001 |
| 110,319 | 371 | 42,278 | 18,472 | 8,242 | 69,363 |
| 110,320 | 367 | 42,363 | 18,414 | 8,250 | 69,394 |
| 110,321 | 365 | 42,375 | 18,306 | 8,229 | 69,275 |
| 110,322 | 365 | 42,415 | 18,258 | 8,217 | 69,255 |
| 110,323 | 384 | 42,363 | 18,212 | 8,163 | 69,122 |
| 110,324 | 383 | 42,237 | 18,088 | 8,131 | 68,839 |
| 110,325 | 391 | 42,462 | 18,280 | 8,141 | 69,274 |
| 110,326 | 397 | 42,311 | 18,221 | 8,054 | 68,983 |
| 110,327 | 396 | 41,884 | 17,924 | 7,878 | 68,082 |



|         |     |        |        |       |        |
|---------|-----|--------|--------|-------|--------|
| 110,328 | 403 | 41,809 | 17,879 | 7,825 | 67,916 |
| 110,329 | 384 | 41,833 | 17,849 | 7,807 | 67,873 |
| 110,330 | 388 | 41,576 | 17,702 | 7,752 | 67,418 |
| 110,331 | 375 | 41,569 | 17,511 | 7,708 | 67,163 |
| 110,332 | 377 | 41,536 | 17,396 | 7,631 | 66,940 |
| 110,333 | 384 | 40,987 | 17,169 | 7,532 | 66,072 |
| 110,334 | 383 | 41,004 | 17,104 | 7,513 | 66,004 |
| 110,335 | 377 | 41,300 | 17,038 | 7,479 | 66,194 |
| 110,336 | 376 | 40,438 | 16,704 | 7,354 | 64,872 |
| 110,337 | 375 | 39,873 | 16,508 | 7,263 | 64,019 |
| 110,338 | 382 | 40,711 | 16,801 | 7,394 | 65,288 |
| 110,339 | 385 | 40,948 | 16,914 | 7,445 | 65,692 |
| 110,340 | 385 | 41,395 | 17,031 | 7,498 | 66,309 |
| 110,341 | 383 | 41,696 | 17,145 | 7,527 | 66,751 |
| 110,342 | 389 | 42,687 | 17,547 | 7,678 | 68,301 |
| 110,343 | 392 | 43,077 | 17,639 | 7,697 | 68,805 |
| 110,344 | 397 | 43,385 | 17,723 | 7,697 | 69,202 |
| 110,345 | 398 | 43,718 | 17,842 | 7,705 | 69,663 |
| 110,346 | 396 | 43,349 | 17,680 | 7,657 | 69,082 |
| 110,347 | 406 | 43,978 | 18,058 | 7,780 | 70,222 |
| 110,348 | 405 | 43,899 | 18,064 | 7,741 | 70,109 |
| 110,349 | 406 | 43,860 | 17,946 | 7,708 | 69,920 |
| 110,350 | 407 | 43,860 | 17,873 | 7,677 | 69,817 |
| 110,351 | 404 | 43,718 | 17,813 | 7,685 | 69,620 |
| 110,352 | 397 | 43,666 | 17,879 | 7,738 | 69,680 |
| 110,353 | 363 | 44,397 | 18,160 | 7,879 | 70,799 |
| 110,354 | 351 | 44,226 | 18,113 | 7,843 | 70,533 |
| 110,355 | 364 | 45,539 | 18,464 | 8,011 | 72,378 |
| 110,356 | 370 | 46,206 | 18,723 | 8,187 | 73,486 |
| 110,357 | 366 | 46,565 | 18,821 | 8,285 | 74,037 |
| 110,358 | 402 | 48,592 | 19,779 | 8,804 | 77,577 |
| 110,359 | 413 | 50,409 | 20,760 | 9,284 | 80,866 |

|         |     |        |        |        |         |
|---------|-----|--------|--------|--------|---------|
| 110,360 | 425 | 52,057 | 21,182 | 9,545  | 83,209  |
| 110,361 | 429 | 52,721 | 21,492 | 9,719  | 84,361  |
| 110,362 | 428 | 53,268 | 21,662 | 9,826  | 85,184  |
| 110,363 | 432 | 53,875 | 21,851 | 9,995  | 86,153  |
| 110,364 | 429 | 54,133 | 22,021 | 10,120 | 86,703  |
| 110,365 | 433 | 54,945 | 22,242 | 10,207 | 87,827  |
| 110,366 | 435 | 55,727 | 22,484 | 10,348 | 88,994  |
| 110,367 | 448 | 56,583 | 22,590 | 10,421 | 90,042  |
| 110,368 | 453 | 57,049 | 22,751 | 10,522 | 90,775  |
| 110,369 | 452 | 57,720 | 22,995 | 10,683 | 91,850  |
| 110,370 | 475 | 57,776 | 23,251 | 10,800 | 92,302  |
| 110,371 | 498 | 58,920 | 23,783 | 11,062 | 94,263  |
| 110,372 | 507 | 59,987 | 24,264 | 11,327 | 96,085  |
| 110,373 | 509 | 60,613 | 24,652 | 11,561 | 97,335  |
| 110,374 | 505 | 61,722 | 24,916 | 11,733 | 98,876  |
| 110,375 | 468 | 61,213 | 24,648 | 11,683 | 98,012  |
| 110,376 | 455 | 61,765 | 24,822 | 11,800 | 98,842  |
| 110,377 | 454 | 62,668 | 25,020 | 11,939 | 100,081 |
| 110,378 | 451 | 63,291 | 25,220 | 12,093 | 101,055 |
| 110,379 | 453 | 62,141 | 24,828 | 11,940 | 99,362  |
| 110,380 | 464 | 64,293 | 25,574 | 12,348 | 102,679 |
| 110,381 | 474 | 64,958 | 25,813 | 12,521 | 103,766 |
| 110,382 | 492 | 65,805 | 26,150 | 12,690 | 105,137 |
| 110,383 | 504 | 66,415 | 26,498 | 12,853 | 106,270 |
| 110,384 | 518 | 66,450 | 26,680 | 13,004 | 106,652 |
| 110,385 | 523 | 66,387 | 26,859 | 13,173 | 106,942 |
| 110,386 | 523 | 65,976 | 26,688 | 13,185 | 106,372 |
| 110,387 | 518 | 65,198 | 26,422 | 13,080 | 105,218 |
| 110,388 | 523 | 66,050 | 26,852 | 13,397 | 106,822 |
| 110,389 | 523 | 66,325 | 27,025 | 13,535 | 107,408 |
| 110,390 | 522 | 66,801 | 27,170 | 13,679 | 108,172 |
| 110,391 | 520 | 67,544 | 27,417 | 13,860 | 109,341 |

|         |     |        |        |        |         |
|---------|-----|--------|--------|--------|---------|
| 110,392 | 514 | 68,343 | 27,683 | 14,063 | 110,603 |
| 110,393 | 505 | 69,397 | 27,951 | 14,251 | 112,104 |
| 110,394 | 508 | 71,009 | 28,481 | 14,515 | 114,513 |
| 110,395 | 512 | 72,702 | 28,908 | 14,780 | 116,902 |
| 110,396 | 494 | 73,398 | 28,912 | 14,850 | 117,654 |
| 110,397 | 503 | 75,737 | 29,749 | 15,306 | 121,295 |
| 110,398 | 496 | 75,924 | 29,790 | 15,364 | 121,574 |
| 110,399 | 498 | 77,094 | 30,107 | 15,526 | 123,225 |
| 110,400 | 507 | 78,161 | 30,404 | 15,712 | 124,784 |
| 110,401 | 506 | 78,340 | 30,419 | 15,742 | 125,007 |
| 110,402 | 495 | 78,878 | 30,558 | 15,887 | 125,818 |
| 110,403 | 482 | 79,051 | 30,524 | 15,952 | 126,009 |
| 110,404 | 472 | 78,095 | 30,217 | 15,816 | 124,600 |
| 110,405 | 467 | 79,028 | 30,411 | 15,967 | 125,873 |
| 110,406 | 436 | 80,002 | 30,677 | 16,190 | 127,305 |
| 110,407 | 429 | 80,050 | 30,671 | 16,234 | 127,384 |
| 110,408 | 423 | 80,265 | 30,587 | 16,159 | 127,434 |
| 110,409 | 419 | 80,589 | 30,664 | 16,221 | 127,893 |
| 110,410 | 444 | 81,624 | 30,932 | 16,350 | 129,350 |
| 110,411 | 451 | 81,874 | 31,046 | 16,458 | 129,829 |
| 110,412 | 456 | 82,308 | 31,176 | 16,543 | 130,483 |
| 110,413 | 470 | 81,734 | 30,985 | 16,382 | 129,571 |
| 110,414 | 478 | 81,974 | 30,977 | 16,388 | 129,817 |
| 110,415 | 478 | 81,901 | 30,893 | 16,409 | 129,681 |
| 110,416 | 485 | 82,904 | 31,212 | 16,692 | 131,293 |
| 110,417 | 478 | 83,588 | 31,324 | 16,773 | 132,163 |
| 110,418 | 459 | 82,196 | 30,833 | 16,578 | 130,066 |
| 110,419 | 460 | 80,921 | 30,099 | 16,205 | 127,685 |
| 110,420 | 467 | 81,998 | 30,351 | 16,330 | 129,146 |
| 110,421 | 442 | 82,945 | 30,582 | 16,460 | 130,429 |
| 110,422 | 424 | 81,738 | 30,069 | 16,235 | 128,466 |
| 110,423 | 433 | 80,591 | 29,624 | 16,051 | 126,699 |

|         |     |        |        |        |         |
|---------|-----|--------|--------|--------|---------|
| 110,424 | 428 | 80,242 | 29,332 | 15,889 | 125,891 |
| 110,425 | 462 | 82,580 | 30,200 | 16,309 | 129,551 |
| 110,426 | 463 | 82,046 | 30,105 | 16,280 | 128,894 |
| 110,427 | 480 | 81,944 | 30,168 | 16,332 | 128,924 |
| 110,428 | 488 | 81,806 | 30,256 | 16,403 | 128,953 |
| 110,429 | 495 | 82,033 | 30,317 | 16,462 | 129,307 |
| 110,430 | 487 | 82,691 | 30,461 | 16,586 | 130,225 |
| 110,431 | 479 | 83,169 | 30,544 | 16,615 | 130,807 |
| 110,432 | 472 | 83,449 | 30,583 | 16,661 | 131,165 |
| 110,433 | 469 | 84,129 | 30,645 | 16,735 | 131,978 |
| 110,434 | 462 | 84,275 | 30,563 | 16,743 | 132,043 |
| 110,435 | 439 | 84,517 | 30,322 | 16,552 | 131,830 |
| 110,436 | 447 | 85,360 | 30,286 | 16,454 | 132,547 |
| 110,437 | 449 | 85,579 | 30,284 | 16,471 | 132,783 |
| 110,438 | 480 | 87,111 | 30,754 | 16,681 | 135,026 |
| 110,439 | 519 | 87,731 | 30,861 | 16,730 | 135,841 |
| 110,440 | 535 | 88,143 | 30,957 | 16,735 | 136,370 |
| 110,441 | 548 | 88,612 | 31,074 | 16,798 | 137,032 |
| 110,442 | 568 | 88,737 | 31,024 | 16,794 | 137,123 |
| 110,443 | 589 | 88,020 | 30,669 | 16,637 | 135,915 |
| 110,444 | 585 | 87,727 | 30,620 | 16,649 | 135,581 |
| 110,445 | 584 | 87,263 | 30,575 | 16,701 | 135,123 |
| 110,446 | 582 | 87,576 | 30,467 | 16,704 | 135,329 |
| 110,447 | 588 | 86,709 | 30,217 | 16,586 | 134,100 |
| 110,448 | 591 | 86,515 | 30,086 | 16,530 | 133,722 |
| 110,449 | 590 | 85,574 | 29,649 | 16,359 | 132,172 |
| 110,450 | 590 | 85,725 | 29,606 | 16,398 | 132,319 |
| 110,451 | 579 | 85,911 | 29,608 | 16,425 | 132,523 |
| 110,452 | 589 | 85,626 | 29,596 | 16,492 | 132,303 |
| 110,453 | 588 | 85,348 | 29,428 | 16,427 | 131,791 |
| 110,454 | 605 | 85,367 | 29,288 | 16,397 | 131,657 |
| 110,455 | 621 | 86,930 | 29,552 | 16,607 | 133,710 |

|         |     |        |        |        |         |
|---------|-----|--------|--------|--------|---------|
| 110,456 | 648 | 86,797 | 29,567 | 16,653 | 133,665 |
| 110,457 | 656 | 86,709 | 29,493 | 16,576 | 133,434 |
| 110,458 | 641 | 85,554 | 28,853 | 16,286 | 131,334 |
| 110,459 | 628 | 84,892 | 28,466 | 16,088 | 130,074 |
| 110,460 | 639 | 86,194 | 28,608 | 16,248 | 131,689 |
| 110,461 | 633 | 86,248 | 28,566 | 16,265 | 131,712 |
| 110,462 | 618 | 84,436 | 28,002 | 15,981 | 129,037 |
| 110,463 | 622 | 85,127 | 28,057 | 16,023 | 129,829 |
| 110,464 | 618 | 86,377 | 28,228 | 16,236 | 131,459 |
| 110,465 | 630 | 85,381 | 27,962 | 16,108 | 130,081 |
| 110,466 | 630 | 85,037 | 27,851 | 15,973 | 129,491 |
| 110,467 | 622 | 85,719 | 27,912 | 16,050 | 130,303 |
| 110,468 | 631 | 85,383 | 27,690 | 15,978 | 129,682 |
| 110,469 | 632 | 85,442 | 27,647 | 15,965 | 129,686 |
| 110,470 | 616 | 85,398 | 27,605 | 16,008 | 129,627 |
| 110,471 | 620 | 85,855 | 27,694 | 16,069 | 130,238 |
| 110,472 | 623 | 85,265 | 27,398 | 15,922 | 129,208 |
| 110,473 | 620 | 85,266 | 27,373 | 15,895 | 129,154 |
| 110,474 | 587 | 84,262 | 26,506 | 15,431 | 126,786 |
| 110,475 | 593 | 84,943 | 26,592 | 15,535 | 127,663 |
| 110,476 | 580 | 85,835 | 26,818 | 15,662 | 128,895 |
| 110,477 | 579 | 85,670 | 26,748 | 15,606 | 128,603 |
| 110,478 | 590 | 87,737 | 27,263 | 15,994 | 131,584 |
| 110,479 | 578 | 87,142 | 26,962 | 15,863 | 130,545 |
| 110,480 | 577 | 87,333 | 26,993 | 15,920 | 130,823 |
| 110,481 | 579 | 86,829 | 26,937 | 15,907 | 130,252 |
| 110,482 | 575 | 86,205 | 26,724 | 15,835 | 129,339 |
| 110,483 | 580 | 86,512 | 26,873 | 15,953 | 129,918 |
| 110,484 | 574 | 86,476 | 26,878 | 15,995 | 129,923 |
| 110,485 | 566 | 85,516 | 26,641 | 15,863 | 128,586 |
| 110,486 | 571 | 85,097 | 26,626 | 15,916 | 128,210 |
| 110,487 | 562 | 85,606 | 26,747 | 16,084 | 128,999 |

|         |     |        |        |        |         |
|---------|-----|--------|--------|--------|---------|
| 110,488 | 559 | 86,490 | 26,827 | 16,247 | 130,123 |
| 110,489 | 528 | 87,665 | 27,020 | 16,415 | 131,628 |
| 110,490 | 499 | 87,604 | 26,995 | 16,488 | 131,586 |
| 110,491 | 488 | 86,797 | 26,676 | 16,342 | 130,303 |
| 110,492 | 504 | 87,342 | 26,853 | 16,514 | 131,213 |
| 110,493 | 483 | 86,293 | 26,537 | 16,358 | 129,671 |
| 110,494 | 478 | 88,200 | 26,934 | 16,701 | 132,313 |
| 110,495 | 481 | 87,418 | 26,653 | 16,554 | 131,106 |
| 110,496 | 497 | 88,745 | 26,981 | 16,815 | 133,038 |
| 110,497 | 491 | 87,436 | 26,712 | 16,656 | 131,295 |
| 110,498 | 478 | 87,596 | 26,591 | 16,658 | 131,323 |
| 110,499 | 473 | 87,540 | 26,552 | 16,687 | 131,252 |
| 110,500 | 471 | 87,461 | 26,620 | 16,696 | 131,248 |
| 110,501 | 480 | 88,467 | 27,014 | 16,945 | 132,906 |
| 110,502 | 467 | 87,678 | 26,765 | 16,806 | 131,716 |
| 110,503 | 465 | 88,257 | 26,905 | 16,874 | 132,501 |
| 110,504 | 497 | 90,338 | 27,519 | 17,195 | 135,549 |
| 110,505 | 484 | 89,207 | 27,269 | 17,030 | 133,990 |
| 110,506 | 484 | 89,718 | 27,631 | 17,208 | 135,041 |
| 110,507 | 464 | 89,795 | 27,681 | 17,253 | 135,193 |
| 110,508 | 461 | 88,468 | 27,368 | 17,070 | 133,367 |
| 110,509 | 459 | 89,451 | 27,611 | 17,260 | 134,781 |
| 110,510 | 486 | 90,575 | 27,979 | 17,433 | 136,473 |
| 110,511 | 490 | 90,370 | 28,045 | 17,482 | 136,387 |
| 110,512 | 484 | 89,361 | 27,741 | 17,319 | 134,905 |
| 110,513 | 476 | 88,894 | 27,710 | 17,340 | 134,420 |
| 110,514 | 504 | 89,271 | 28,119 | 17,568 | 135,462 |
| 110,515 | 508 | 89,301 | 28,201 | 17,594 | 135,604 |
| 110,516 | 484 | 88,390 | 27,920 | 17,417 | 134,211 |
| 110,517 | 508 | 89,247 | 28,228 | 17,577 | 135,560 |
| 110,518 | 526 | 89,556 | 28,354 | 17,648 | 136,084 |
| 110,519 | 524 | 89,811 | 28,511 | 17,705 | 136,551 |

|         |     |        |        |        |         |
|---------|-----|--------|--------|--------|---------|
| 110,520 | 532 | 89,453 | 28,409 | 17,648 | 136,042 |
| 110,521 | 534 | 89,619 | 28,476 | 17,693 | 136,322 |
| 110,522 | 523 | 89,868 | 28,579 | 17,774 | 136,744 |
| 110,523 | 528 | 91,137 | 29,056 | 18,063 | 138,784 |
| 110,524 | 525 | 90,462 | 28,916 | 18,039 | 137,942 |
| 110,525 | 525 | 90,539 | 28,960 | 18,043 | 138,067 |
| 110,526 | 515 | 90,494 | 29,145 | 18,160 | 138,314 |
| 110,527 | 533 | 90,733 | 29,272 | 18,280 | 138,818 |
| 110,528 | 538 | 91,280 | 29,553 | 18,472 | 139,843 |
| 110,529 | 515 | 90,705 | 29,631 | 18,509 | 139,360 |
| 110,530 | 516 | 90,674 | 29,681 | 18,555 | 139,426 |
| 110,531 | 517 | 90,862 | 29,845 | 18,487 | 139,711 |
| 110,532 | 523 | 90,651 | 29,657 | 18,367 | 139,198 |
| 110,533 | 528 | 91,749 | 29,956 | 18,528 | 140,761 |
| 110,534 | 523 | 90,784 | 29,480 | 18,203 | 138,990 |
| 110,535 | 521 | 91,299 | 29,653 | 18,289 | 139,762 |
| 110,536 | 529 | 92,518 | 30,091 | 18,499 | 141,637 |
| 110,537 | 533 | 93,114 | 30,247 | 18,573 | 142,467 |
| 110,538 | 530 | 92,021 | 29,960 | 18,392 | 140,903 |
| 110,539 | 560 | 92,818 | 30,531 | 18,620 | 142,529 |
| 110,540 | 566 | 91,443 | 30,423 | 18,512 | 140,944 |
| 110,541 | 547 | 89,761 | 29,829 | 18,067 | 138,204 |
| 110,542 | 552 | 90,832 | 30,061 | 18,132 | 139,577 |
| 110,543 | 532 | 90,091 | 30,043 | 18,137 | 138,803 |
| 110,544 | 536 | 90,956 | 30,453 | 18,314 | 140,259 |
| 110,545 | 527 | 90,455 | 30,499 | 18,215 | 139,696 |
| 110,546 | 522 | 90,673 | 30,528 | 18,240 | 139,963 |
| 110,547 | 514 | 90,060 | 30,326 | 18,078 | 138,978 |
| 110,548 | 512 | 90,304 | 30,453 | 18,146 | 139,415 |
| 110,549 | 508 | 90,311 | 30,594 | 18,129 | 139,542 |
| 110,550 | 507 | 90,046 | 30,607 | 18,117 | 139,277 |
| 110,551 | 498 | 89,843 | 30,651 | 18,162 | 139,154 |

|         |     |        |        |        |         |
|---------|-----|--------|--------|--------|---------|
| 110,552 | 500 | 89,036 | 30,417 | 17,911 | 137,864 |
| 110,553 | 506 | 89,837 | 30,666 | 18,079 | 139,088 |
| 110,554 | 493 | 90,538 | 30,884 | 18,249 | 140,164 |
| 110,555 | 485 | 89,515 | 30,758 | 18,195 | 138,953 |
| 110,556 | 483 | 88,114 | 30,255 | 17,923 | 136,775 |
| 110,557 | 482 | 87,466 | 30,135 | 17,912 | 135,995 |
| 110,558 | 474 | 86,485 | 29,940 | 17,782 | 134,681 |
| 110,559 | 479 | 84,990 | 29,651 | 17,569 | 132,689 |
| 110,560 | 485 | 85,873 | 30,102 | 17,799 | 134,259 |
| 110,561 | 468 | 86,165 | 30,275 | 17,941 | 134,849 |
| 110,562 | 455 | 85,098 | 30,056 | 17,787 | 133,396 |
| 110,563 | 449 | 84,891 | 30,123 | 17,871 | 133,334 |
| 110,564 | 438 | 85,519 | 30,146 | 17,829 | 133,932 |
| 110,565 | 431 | 85,613 | 30,131 | 17,817 | 133,992 |
| 110,566 | 416 | 84,326 | 29,836 | 17,600 | 132,178 |
| 110,567 | 397 | 86,200 | 30,194 | 17,903 | 134,694 |
| 110,568 | 399 | 86,731 | 30,486 | 18,050 | 135,666 |
| 110,569 | 387 | 86,982 | 30,571 | 18,136 | 136,076 |
| 110,570 | 383 | 86,198 | 30,510 | 18,110 | 135,201 |
| 110,571 | 381 | 85,935 | 30,664 | 18,133 | 135,113 |
| 110,572 | 398 | 85,883 | 30,791 | 18,183 | 135,255 |
| 110,573 | 409 | 85,904 | 30,951 | 18,210 | 135,474 |
| 110,574 | 408 | 86,101 | 31,067 | 18,228 | 135,804 |
| 110,575 | 405 | 85,257 | 30,955 | 18,115 | 134,732 |
| 110,576 | 403 | 84,075 | 30,647 | 17,944 | 133,069 |
| 110,577 | 410 | 85,003 | 30,871 | 18,061 | 134,345 |
| 110,578 | 396 | 85,473 | 31,060 | 18,148 | 135,077 |
| 110,579 | 409 | 85,025 | 30,792 | 17,915 | 134,141 |
| 110,580 | 418 | 86,199 | 31,024 | 18,066 | 135,707 |
| 110,581 | 409 | 85,089 | 30,654 | 17,842 | 133,994 |
| 110,582 | 413 | 85,118 | 30,649 | 17,871 | 134,051 |
| 110,583 | 417 | 85,515 | 31,065 | 18,132 | 135,129 |



|         |     |        |        |        |         |
|---------|-----|--------|--------|--------|---------|
| 110,584 | 413 | 84,644 | 30,795 | 17,982 | 133,834 |
| 110,585 | 418 | 83,998 | 30,832 | 17,984 | 133,232 |
| 110,586 | 435 | 83,667 | 31,013 | 18,091 | 133,206 |
| 110,587 | 422 | 83,132 | 30,990 | 18,071 | 132,615 |
| 110,588 | 421 | 82,735 | 31,068 | 18,088 | 132,312 |
| 110,589 | 414 | 84,165 | 31,254 | 18,186 | 134,019 |
| 110,590 | 411 | 83,802 | 31,158 | 18,082 | 133,453 |
| 110,591 | 418 | 85,021 | 31,518 | 18,273 | 135,230 |
| 110,592 | 421 | 84,129 | 31,361 | 18,158 | 134,069 |
| 110,593 | 417 | 82,945 | 31,293 | 18,131 | 132,786 |
| 110,594 | 443 | 84,889 | 32,110 | 18,584 | 136,026 |
| 110,595 | 438 | 83,890 | 31,763 | 18,412 | 134,503 |
| 110,596 | 444 | 84,477 | 32,081 | 18,525 | 135,527 |
| 110,597 | 443 | 84,171 | 32,074 | 18,488 | 135,176 |
| 110,598 | 449 | 84,582 | 32,230 | 18,592 | 135,853 |
| 110,599 | 451 | 84,279 | 32,105 | 18,486 | 135,321 |
| 110,600 | 461 | 83,598 | 31,819 | 18,324 | 134,202 |
| 110,601 | 462 | 82,632 | 31,644 | 18,174 | 132,912 |
| 110,602 | 474 | 83,686 | 31,930 | 18,348 | 134,438 |
| 110,603 | 489 | 84,383 | 32,184 | 18,490 | 135,546 |
| 110,604 | 492 | 83,596 | 32,044 | 18,453 | 134,585 |
| 110,605 | 483 | 83,213 | 31,987 | 18,382 | 134,065 |
| 110,606 | 475 | 83,036 | 31,988 | 18,328 | 133,827 |
| 110,607 | 464 | 82,853 | 31,963 | 18,313 | 133,593 |
| 110,608 | 484 | 83,039 | 31,892 | 18,223 | 133,638 |
| 110,609 | 474 | 82,904 | 31,740 | 18,153 | 133,271 |
| 110,610 | 495 | 83,048 | 31,784 | 18,147 | 133,474 |
| 110,611 | 509 | 83,254 | 31,594 | 18,007 | 133,364 |
| 110,612 | 508 | 83,069 | 31,255 | 17,811 | 132,643 |
| 110,613 | 521 | 83,350 | 31,307 | 17,793 | 132,971 |
| 110,614 | 517 | 82,030 | 30,967 | 17,600 | 131,114 |
| 110,615 | 548 | 83,220 | 31,464 | 17,884 | 133,116 |

|         |     |        |        |        |         |
|---------|-----|--------|--------|--------|---------|
| 110,616 | 546 | 82,786 | 31,315 | 17,765 | 132,412 |
| 110,617 | 542 | 81,765 | 30,941 | 17,586 | 130,834 |
| 110,618 | 571 | 82,804 | 31,248 | 17,767 | 132,390 |
| 110,619 | 587 | 83,137 | 31,254 | 17,746 | 132,724 |
| 110,620 | 581 | 82,541 | 30,972 | 17,609 | 131,703 |
| 110,621 | 583 | 80,931 | 30,077 | 17,073 | 128,664 |
| 110,622 | 595 | 81,887 | 30,286 | 17,140 | 129,908 |
| 110,623 | 593 | 81,714 | 30,261 | 17,109 | 129,677 |
| 110,624 | 611 | 82,844 | 30,516 | 17,251 | 131,222 |
| 110,625 | 606 | 81,524 | 29,965 | 16,975 | 129,070 |
| 110,626 | 604 | 81,829 | 29,884 | 16,973 | 129,290 |
| 110,627 | 600 | 82,299 | 29,936 | 17,051 | 129,886 |
| 110,628 | 596 | 82,131 | 29,857 | 16,991 | 129,575 |
| 110,629 | 600 | 82,811 | 30,175 | 17,155 | 130,741 |
| 110,630 | 589 | 82,248 | 30,083 | 17,149 | 130,069 |
| 110,631 | 589 | 82,057 | 30,087 | 17,110 | 129,843 |
| 110,632 | 584 | 81,564 | 29,958 | 17,037 | 129,143 |
| 110,633 | 589 | 81,895 | 29,777 | 16,937 | 129,198 |
| 110,634 | 591 | 82,315 | 29,705 | 16,856 | 129,467 |
| 110,635 | 581 | 82,780 | 29,689 | 16,837 | 129,887 |
| 110,636 | 569 | 83,073 | 29,567 | 16,754 | 129,963 |
| 110,637 | 581 | 83,056 | 29,215 | 16,554 | 129,406 |
| 110,638 | 578 | 83,147 | 29,213 | 16,560 | 129,498 |
| 110,639 | 583 | 83,232 | 29,388 | 16,654 | 129,857 |
| 110,640 | 576 | 82,165 | 29,143 | 16,508 | 128,392 |
| 110,641 | 585 | 81,568 | 28,941 | 16,419 | 127,513 |
| 110,642 | 570 | 80,208 | 28,538 | 16,184 | 125,500 |
| 110,643 | 568 | 79,751 | 28,456 | 16,158 | 124,933 |
| 110,644 | 566 | 80,206 | 28,397 | 16,107 | 125,276 |
| 110,645 | 553 | 79,705 | 27,825 | 15,803 | 123,886 |
| 110,646 | 558 | 79,785 | 27,821 | 15,796 | 123,960 |
| 110,647 | 561 | 80,112 | 27,952 | 15,941 | 124,566 |

|         |     |        |        |        |         |
|---------|-----|--------|--------|--------|---------|
| 110,648 | 550 | 78,979 | 27,576 | 15,743 | 122,848 |
| 110,649 | 543 | 77,611 | 27,426 | 15,605 | 121,185 |
| 110,650 | 536 | 77,198 | 27,323 | 15,611 | 120,668 |
| 110,651 | 534 | 77,116 | 27,191 | 15,485 | 120,326 |
| 110,652 | 544 | 77,792 | 27,475 | 15,626 | 121,437 |
| 110,653 | 542 | 77,874 | 27,541 | 15,584 | 121,541 |
| 110,654 | 532 | 78,226 | 27,630 | 15,601 | 121,989 |
| 110,655 | 527 | 78,317 | 27,537 | 15,524 | 121,905 |
| 110,656 | 536 | 77,955 | 27,552 | 15,522 | 121,565 |
| 110,657 | 542 | 76,444 | 26,803 | 15,048 | 118,837 |
| 110,658 | 551 | 77,056 | 27,049 | 15,137 | 119,793 |
| 110,659 | 541 | 77,566 | 27,363 | 15,277 | 120,747 |
| 110,660 | 542 | 77,454 | 27,441 | 15,263 | 120,700 |
| 110,661 | 528 | 78,628 | 28,045 | 15,580 | 122,781 |
| 110,662 | 514 | 78,214 | 28,116 | 15,658 | 122,502 |
| 110,663 | 489 | 77,593 | 27,963 | 15,532 | 121,577 |
| 110,664 | 516 | 77,772 | 28,008 | 15,519 | 121,815 |
| 110,665 | 510 | 77,899 | 28,066 | 15,522 | 121,997 |
| 110,666 | 488 | 78,973 | 28,276 | 15,684 | 123,421 |
| 110,667 | 483 | 78,781 | 28,352 | 15,684 | 123,300 |
| 110,668 | 471 | 80,121 | 29,060 | 16,086 | 125,738 |
| 110,669 | 460 | 79,666 | 28,925 | 15,942 | 124,993 |
| 110,670 | 455 | 77,768 | 28,449 | 15,687 | 122,359 |
| 110,671 | 453 | 77,399 | 28,479 | 15,667 | 121,998 |
| 110,672 | 422 | 76,453 | 28,299 | 15,591 | 120,765 |
| 110,673 | 410 | 75,392 | 28,204 | 15,567 | 119,573 |
| 110,674 | 397 | 78,036 | 30,023 | 16,538 | 124,994 |
| 110,675 | 396 | 78,182 | 30,129 | 16,595 | 125,302 |
| 110,676 | 410 | 77,759 | 30,135 | 16,517 | 124,821 |
| 110,677 | 410 | 78,385 | 30,536 | 16,691 | 126,022 |
| 110,678 | 414 | 78,778 | 30,780 | 16,734 | 126,706 |
| 110,679 | 414 | 78,178 | 30,333 | 16,512 | 125,437 |

|         |     |        |        |        |         |
|---------|-----|--------|--------|--------|---------|
| 110,680 | 420 | 78,655 | 30,545 | 16,580 | 126,200 |
| 110,681 | 415 | 79,386 | 30,875 | 16,717 | 127,393 |
| 110,682 | 405 | 78,424 | 30,594 | 16,567 | 125,990 |
| 110,683 | 417 | 79,295 | 30,998 | 16,761 | 127,471 |
| 110,684 | 412 | 79,427 | 31,285 | 16,889 | 128,013 |
| 110,685 | 412 | 79,146 | 31,445 | 16,933 | 127,936 |
| 110,686 | 423 | 78,505 | 31,252 | 16,795 | 126,975 |
| 110,687 | 414 | 77,877 | 31,007 | 16,681 | 125,979 |
| 110,688 | 404 | 78,593 | 31,516 | 16,991 | 127,504 |
| 110,689 | 397 | 78,022 | 31,250 | 16,868 | 126,537 |
| 110,690 | 391 | 77,879 | 31,125 | 16,788 | 126,183 |
| 110,691 | 389 | 78,186 | 31,401 | 16,906 | 126,882 |
| 110,692 | 386 | 77,959 | 31,439 | 16,931 | 126,715 |
| 110,693 | 379 | 77,805 | 31,291 | 16,912 | 126,387 |
| 110,694 | 378 | 77,573 | 31,223 | 16,872 | 126,046 |
| 110,695 | 380 | 77,733 | 31,359 | 16,964 | 126,436 |
| 110,696 | 372 | 77,630 | 31,324 | 16,931 | 126,257 |
| 110,697 | 372 | 77,803 | 31,323 | 16,899 | 126,397 |
| 110,698 | 369 | 77,733 | 31,194 | 16,853 | 126,149 |
| 110,699 | 372 | 77,320 | 30,686 | 16,591 | 124,969 |
| 110,700 | 371 | 77,658 | 30,712 | 16,580 | 125,321 |
| 110,701 | 364 | 77,440 | 30,638 | 16,595 | 125,037 |
| 110,702 | 363 | 77,461 | 30,797 | 16,704 | 125,325 |
| 110,703 | 355 | 76,769 | 30,662 | 16,691 | 124,477 |
| 110,704 | 342 | 74,982 | 30,143 | 16,457 | 121,924 |
| 110,705 | 339 | 74,658 | 30,412 | 16,619 | 122,028 |
| 110,706 | 336 | 73,791 | 30,343 | 16,571 | 121,041 |
| 110,707 | 327 | 73,944 | 30,338 | 16,558 | 121,167 |
| 110,708 | 317 | 74,233 | 30,414 | 16,636 | 121,600 |
| 110,709 | 309 | 74,467 | 30,430 | 16,662 | 121,868 |
| 110,710 | 297 | 75,064 | 30,613 | 16,718 | 122,692 |
| 110,711 | 294 | 74,989 | 30,565 | 16,706 | 122,554 |

|         |     |        |        |        |         |
|---------|-----|--------|--------|--------|---------|
| 110,712 | 283 | 74,569 | 30,459 | 16,702 | 122,013 |
| 110,713 | 283 | 75,075 | 30,606 | 16,769 | 122,733 |
| 110,714 | 288 | 74,762 | 30,694 | 16,842 | 122,586 |
| 110,715 | 257 | 74,925 | 30,808 | 16,967 | 122,957 |
| 110,716 | 287 | 74,817 | 30,877 | 16,979 | 122,960 |
| 110,717 | 289 | 74,805 | 30,917 | 16,969 | 122,980 |
| 110,718 | 301 | 74,594 | 31,003 | 17,039 | 122,937 |
| 110,719 | 312 | 74,387 | 30,896 | 16,946 | 122,541 |
| 110,720 | 332 | 73,926 | 30,836 | 16,924 | 122,018 |
| 110,721 | 332 | 74,702 | 30,831 | 16,895 | 122,760 |
| 110,722 | 329 | 74,405 | 30,601 | 16,785 | 122,120 |
| 110,723 | 329 | 74,774 | 30,680 | 16,826 | 122,609 |
| 110,724 | 336 | 75,250 | 30,761 | 16,855 | 123,202 |
| 110,725 | 332 | 75,200 | 30,724 | 16,893 | 123,149 |
| 110,726 | 348 | 76,618 | 31,162 | 17,180 | 125,308 |
| 110,727 | 330 | 75,304 | 30,684 | 17,018 | 123,336 |
| 110,728 | 331 | 75,061 | 30,534 | 17,043 | 122,969 |
| 110,729 | 340 | 74,838 | 30,550 | 17,064 | 122,792 |
| 110,730 | 332 | 73,348 | 30,242 | 16,877 | 120,799 |
| 110,731 | 337 | 74,950 | 31,041 | 17,332 | 123,660 |
| 110,732 | 344 | 75,031 | 31,141 | 17,383 | 123,899 |
| 110,733 | 343 | 75,395 | 31,224 | 17,441 | 124,403 |
| 110,734 | 333 | 75,649 | 31,196 | 17,451 | 124,629 |
| 110,735 | 327 | 75,699 | 31,086 | 17,450 | 124,562 |
| 110,736 | 315 | 74,832 | 30,721 | 17,243 | 123,111 |
| 110,737 | 306 | 75,149 | 30,748 | 17,294 | 123,497 |
| 110,738 | 319 | 76,334 | 31,147 | 17,536 | 125,336 |
| 110,739 | 340 | 76,838 | 31,167 | 17,523 | 125,868 |
| 110,740 | 342 | 77,216 | 31,249 | 17,531 | 126,338 |
| 110,741 | 340 | 74,017 | 29,620 | 16,575 | 120,552 |
| 110,742 | 350 | 75,054 | 29,880 | 16,713 | 121,997 |
| 110,743 | 352 | 76,407 | 30,216 | 16,959 | 123,934 |

|         |     |        |        |        |         |
|---------|-----|--------|--------|--------|---------|
| 110,744 | 352 | 76,373 | 30,223 | 16,947 | 123,895 |
| 110,745 | 372 | 78,519 | 31,005 | 17,370 | 127,266 |
| 110,746 | 383 | 79,026 | 31,429 | 17,572 | 128,410 |
| 110,747 | 371 | 78,266 | 31,200 | 17,462 | 127,299 |
| 110,748 | 371 | 79,053 | 31,550 | 17,688 | 128,662 |
| 110,749 | 381 | 79,207 | 31,741 | 17,779 | 129,108 |
| 110,750 | 386 | 79,464 | 31,885 | 17,836 | 129,571 |
| 110,751 | 391 | 79,988 | 32,075 | 17,945 | 130,399 |
| 110,752 | 394 | 80,169 | 32,101 | 17,918 | 130,582 |
| 110,753 | 403 | 80,743 | 32,160 | 17,945 | 131,251 |
| 110,754 | 402 | 81,432 | 32,295 | 18,015 | 132,144 |
| 110,755 | 412 | 80,964 | 31,850 | 17,676 | 130,902 |
| 110,756 | 415 | 81,513 | 31,916 | 17,722 | 131,566 |
| 110,757 | 418 | 82,105 | 32,027 | 17,805 | 132,355 |
| 110,758 | 434 | 81,344 | 31,686 | 17,639 | 131,103 |
| 110,759 | 432 | 79,968 | 31,337 | 17,451 | 129,188 |
| 110,760 | 443 | 80,697 | 31,784 | 17,658 | 130,582 |
| 110,761 | 444 | 80,020 | 31,529 | 17,599 | 129,592 |
| 110,762 | 443 | 79,459 | 31,214 | 17,473 | 128,589 |
| 110,763 | 441 | 79,510 | 31,190 | 17,428 | 128,569 |
| 110,764 | 438 | 79,681 | 31,150 | 17,391 | 128,660 |
| 110,765 | 430 | 78,163 | 30,502 | 16,931 | 126,026 |
| 110,766 | 431 | 79,388 | 30,679 | 17,012 | 127,510 |
| 110,767 | 411 | 80,284 | 30,877 | 17,109 | 128,681 |
| 110,768 | 394 | 79,727 | 30,400 | 16,918 | 127,439 |
| 110,769 | 410 | 80,298 | 30,606 | 17,038 | 128,352 |
| 110,770 | 389 | 78,761 | 29,893 | 16,683 | 125,726 |
| 110,771 | 386 | 79,140 | 29,891 | 16,696 | 126,113 |
| 110,772 | 382 | 78,632 | 29,993 | 16,716 | 125,723 |
| 110,773 | 395 | 77,719 | 29,441 | 16,348 | 123,903 |
| 110,774 | 398 | 77,559 | 29,183 | 16,240 | 123,380 |
| 110,775 | 409 | 78,422 | 29,432 | 16,360 | 124,623 |

|         |     |        |        |        |         |
|---------|-----|--------|--------|--------|---------|
| 110,776 | 422 | 78,188 | 29,434 | 16,318 | 124,362 |
| 110,777 | 432 | 78,033 | 29,385 | 16,261 | 124,111 |
| 110,778 | 433 | 77,025 | 29,058 | 16,110 | 122,626 |
| 110,779 | 446 | 77,483 | 29,317 | 16,220 | 123,466 |
| 110,780 | 431 | 76,800 | 28,907 | 16,024 | 122,162 |
| 110,781 | 435 | 76,732 | 28,962 | 16,037 | 122,166 |
| 110,782 | 451 | 76,573 | 28,942 | 16,069 | 122,035 |
| 110,783 | 445 | 76,111 | 28,780 | 16,046 | 121,382 |
| 110,784 | 454 | 75,603 | 28,668 | 15,960 | 120,685 |
| 110,785 | 465 | 75,779 | 28,694 | 15,959 | 120,897 |
| 110,786 | 477 | 76,119 | 28,815 | 15,947 | 121,358 |
| 110,787 | 497 | 76,147 | 28,985 | 16,007 | 121,636 |
| 110,788 | 501 | 76,303 | 29,019 | 16,000 | 121,823 |
| 110,789 | 502 | 77,557 | 29,542 | 16,311 | 123,912 |
| 110,790 | 482 | 77,384 | 29,481 | 16,285 | 123,632 |
| 110,791 | 485 | 77,438 | 29,688 | 16,475 | 124,086 |
| 110,792 | 483 | 77,197 | 29,712 | 16,487 | 123,879 |
| 110,793 | 482 | 77,464 | 30,039 | 16,738 | 124,723 |
| 110,794 | 472 | 79,059 | 30,611 | 17,063 | 127,205 |
| 110,795 | 483 | 80,000 | 30,960 | 17,246 | 128,689 |
| 110,796 | 485 | 81,007 | 31,149 | 17,363 | 130,004 |
| 110,797 | 486 | 82,784 | 31,594 | 17,670 | 132,534 |
| 110,798 | 488 | 82,732 | 31,387 | 17,623 | 132,230 |
| 110,799 | 490 | 83,973 | 31,728 | 17,786 | 133,977 |
| 110,800 | 479 | 83,146 | 31,606 | 17,741 | 132,972 |
| 110,801 | 479 | 84,949 | 32,496 | 18,231 | 136,155 |
| 110,802 | 477 | 84,769 | 32,673 | 18,383 | 136,302 |
| 110,803 | 473 | 83,702 | 32,389 | 18,228 | 134,792 |
| 110,804 | 479 | 84,948 | 32,827 | 18,482 | 136,736 |
| 110,805 | 481 | 85,699 | 32,901 | 18,532 | 137,613 |
| 110,806 | 475 | 86,441 | 33,007 | 18,590 | 138,513 |
| 110,807 | 476 | 87,182 | 33,242 | 18,707 | 139,607 |

|         |     |        |        |        |         |
|---------|-----|--------|--------|--------|---------|
| 110,808 | 457 | 86,936 | 33,139 | 18,661 | 139,193 |
| 110,809 | 462 | 88,120 | 33,554 | 18,874 | 141,010 |
| 110,810 | 464 | 88,565 | 33,591 | 18,918 | 141,538 |
| 110,811 | 470 | 89,121 | 33,687 | 19,001 | 142,279 |
| 110,812 | 470 | 89,828 | 33,749 | 19,028 | 143,075 |
| 110,813 | 468 | 89,298 | 33,550 | 18,911 | 142,227 |
| 110,814 | 484 | 90,298 | 33,989 | 19,174 | 143,945 |
| 110,815 | 491 | 89,561 | 33,872 | 19,088 | 143,012 |
| 110,816 | 511 | 90,436 | 34,313 | 19,306 | 144,566 |
| 110,817 | 520 | 90,255 | 34,419 | 19,372 | 144,566 |
| 110,818 | 518 | 90,161 | 34,517 | 19,426 | 144,622 |
| 110,819 | 520 | 90,754 | 34,675 | 19,440 | 145,389 |
| 110,820 | 488 | 87,196 | 33,508 | 18,777 | 139,969 |
| 110,821 | 488 | 88,102 | 33,702 | 18,930 | 141,222 |
| 110,822 | 505 | 88,811 | 33,941 | 19,050 | 142,307 |
| 110,823 | 509 | 88,915 | 33,963 | 19,036 | 142,423 |
| 110,824 | 503 | 89,295 | 34,238 | 19,233 | 143,269 |
| 110,825 | 508 | 89,657 | 34,479 | 19,356 | 144,000 |
| 110,826 | 478 | 88,575 | 34,032 | 19,140 | 142,225 |
| 110,827 | 495 | 89,061 | 34,298 | 19,263 | 143,117 |
| 110,828 | 477 | 88,664 | 34,155 | 19,179 | 142,475 |
| 110,829 | 459 | 88,008 | 33,844 | 18,987 | 141,298 |
| 110,830 | 465 | 86,270 | 32,934 | 18,319 | 137,988 |
| 110,831 | 468 | 87,371 | 33,245 | 18,484 | 139,568 |
| 110,832 | 458 | 87,819 | 33,385 | 18,527 | 140,189 |
| 110,833 | 457 | 87,520 | 33,327 | 18,510 | 139,814 |
| 110,834 | 446 | 87,734 | 33,638 | 18,663 | 140,481 |
| 110,835 | 442 | 87,987 | 33,779 | 18,796 | 141,004 |
| 110,836 | 426 | 87,643 | 33,672 | 18,749 | 140,490 |
| 110,837 | 431 | 87,707 | 33,712 | 18,783 | 140,633 |
| 110,838 | 410 | 87,956 | 33,654 | 18,765 | 140,785 |
| 110,839 | 407 | 87,342 | 33,505 | 18,652 | 139,906 |



|         |     |        |        |        |         |
|---------|-----|--------|--------|--------|---------|
| 110,840 | 397 | 86,672 | 33,314 | 18,511 | 138,894 |
| 110,841 | 407 | 86,128 | 33,026 | 18,349 | 137,910 |
| 110,842 | 416 | 85,160 | 32,744 | 18,069 | 136,389 |
| 110,843 | 414 | 85,581 | 32,711 | 18,009 | 136,715 |
| 110,844 | 414 | 84,325 | 32,313 | 17,735 | 134,787 |
| 110,845 | 414 | 84,159 | 32,282 | 17,687 | 134,542 |
| 110,846 | 386 | 84,028 | 32,107 | 17,687 | 134,208 |
| 110,847 | 402 | 82,716 | 31,848 | 17,473 | 132,439 |
| 110,848 | 432 | 81,102 | 31,439 | 17,175 | 130,148 |
| 110,849 | 424 | 78,937 | 30,963 | 16,804 | 127,128 |
| 110,850 | 440 | 79,960 | 31,432 | 17,032 | 128,864 |
| 110,851 | 450 | 80,044 | 31,402 | 16,939 | 128,835 |
| 110,852 | 450 | 78,826 | 30,669 | 16,492 | 126,437 |
| 110,853 | 479 | 79,387 | 30,743 | 16,455 | 127,064 |
| 110,854 | 479 | 79,054 | 30,517 | 16,290 | 126,340 |
| 110,855 | 484 | 79,452 | 30,926 | 16,488 | 127,350 |
| 110,856 | 486 | 78,596 | 30,873 | 16,451 | 126,406 |
| 110,857 | 483 | 77,993 | 30,823 | 16,448 | 125,747 |
| 110,858 | 498 | 77,107 | 30,522 | 16,267 | 124,394 |
| 110,859 | 497 | 76,944 | 30,531 | 16,314 | 124,286 |
| 110,860 | 519 | 76,662 | 30,386 | 16,201 | 123,768 |
| 110,861 | 520 | 76,501 | 30,272 | 16,118 | 123,411 |
| 110,862 | 520 | 78,656 | 31,134 | 16,560 | 126,870 |
| 110,863 | 528 | 79,218 | 31,228 | 16,577 | 127,551 |
| 110,864 | 528 | 79,380 | 31,269 | 16,560 | 127,737 |
| 110,865 | 532 | 81,105 | 31,740 | 16,777 | 130,154 |
| 110,866 | 533 | 81,970 | 31,925 | 16,914 | 131,342 |
| 110,867 | 517 | 82,544 | 31,854 | 16,928 | 131,843 |
| 110,868 | 508 | 81,377 | 31,491 | 16,748 | 130,124 |
| 110,869 | 506 | 81,928 | 31,674 | 16,879 | 130,987 |
| 110,870 | 503 | 81,572 | 31,611 | 16,868 | 130,554 |
| 110,871 | 494 | 82,076 | 31,643 | 16,892 | 131,105 |

|         |     |        |        |        |         |
|---------|-----|--------|--------|--------|---------|
| 110,872 | 481 | 81,999 | 31,546 | 16,821 | 130,847 |
| 110,873 | 496 | 83,219 | 31,876 | 16,988 | 132,579 |
| 110,874 | 495 | 83,777 | 31,998 | 17,060 | 133,330 |
| 110,875 | 463 | 82,498 | 31,236 | 16,665 | 130,862 |
| 110,876 | 465 | 83,433 | 31,482 | 16,784 | 132,164 |
| 110,877 | 465 | 84,419 | 31,695 | 16,926 | 133,505 |
| 110,878 | 468 | 85,456 | 31,980 | 17,087 | 134,991 |
| 110,879 | 464 | 83,960 | 31,344 | 16,789 | 132,557 |
| 110,880 | 463 | 84,604 | 31,507 | 16,882 | 133,456 |
| 110,881 | 464 | 85,065 | 31,779 | 17,038 | 134,346 |
| 110,882 | 466 | 84,909 | 31,772 | 17,043 | 134,190 |
| 110,883 | 460 | 84,576 | 31,610 | 16,985 | 133,631 |
| 110,884 | 482 | 85,822 | 32,133 | 17,244 | 135,681 |
| 110,885 | 495 | 85,643 | 32,049 | 17,246 | 135,433 |
| 110,886 | 503 | 85,548 | 32,081 | 17,211 | 135,343 |
| 110,887 | 504 | 84,016 | 31,588 | 17,001 | 133,109 |
| 110,888 | 516 | 84,865 | 31,800 | 17,112 | 134,293 |
| 110,889 | 528 | 85,143 | 31,780 | 17,107 | 134,558 |
| 110,890 | 521 | 84,245 | 31,410 | 16,919 | 133,095 |
| 110,891 | 518 | 84,036 | 31,350 | 16,898 | 132,802 |
| 110,892 | 492 | 82,965 | 30,972 | 16,772 | 131,201 |
| 110,893 | 492 | 83,815 | 31,141 | 16,918 | 132,366 |
| 110,894 | 499 | 84,919 | 31,571 | 17,122 | 134,111 |
| 110,895 | 505 | 85,007 | 31,643 | 17,140 | 134,295 |
| 110,896 | 499 | 84,144 | 31,378 | 17,018 | 133,039 |
| 110,897 | 501 | 85,065 | 31,910 | 17,250 | 134,726 |
| 110,898 | 481 | 84,348 | 31,474 | 17,057 | 133,360 |
| 110,899 | 446 | 83,947 | 31,137 | 16,936 | 132,466 |
| 110,900 | 451 | 86,275 | 31,937 | 17,408 | 136,071 |
| 110,901 | 440 | 86,639 | 31,775 | 17,373 | 136,227 |
| 110,902 | 436 | 86,619 | 31,599 | 17,289 | 135,943 |
| 110,903 | 400 | 84,875 | 30,924 | 17,043 | 133,242 |

|         |     |        |        |        |         |
|---------|-----|--------|--------|--------|---------|
| 110,904 | 415 | 85,896 | 31,184 | 17,174 | 134,669 |
| 110,905 | 405 | 87,071 | 31,487 | 17,369 | 136,332 |
| 110,906 | 407 | 86,462 | 31,104 | 17,155 | 135,128 |
| 110,907 | 421 | 86,766 | 31,081 | 17,112 | 135,380 |
| 110,908 | 422 | 86,663 | 31,051 | 17,096 | 135,232 |
| 110,909 | 410 | 86,928 | 31,059 | 17,135 | 135,532 |
| 110,910 | 439 | 87,985 | 31,361 | 17,288 | 137,073 |
| 110,911 | 408 | 86,872 | 30,980 | 17,065 | 135,325 |
| 110,912 | 406 | 86,697 | 30,961 | 16,993 | 135,057 |
| 110,913 | 413 | 86,012 | 30,722 | 16,869 | 134,016 |
| 110,914 | 428 | 86,792 | 30,980 | 17,026 | 135,226 |
| 110,915 | 428 | 83,843 | 30,068 | 16,536 | 130,875 |
| 110,916 | 420 | 84,679 | 30,220 | 16,666 | 131,985 |
| 110,917 | 425 | 84,692 | 30,183 | 16,652 | 131,952 |
| 110,918 | 422 | 83,797 | 29,953 | 16,543 | 130,715 |
| 110,919 | 427 | 84,916 | 30,304 | 16,691 | 132,338 |
| 110,920 | 434 | 85,814 | 30,591 | 16,792 | 133,631 |
| 110,921 | 424 | 84,762 | 30,145 | 16,573 | 131,904 |
| 110,922 | 424 | 84,365 | 29,964 | 16,481 | 131,234 |
| 110,923 | 430 | 84,825 | 30,261 | 16,566 | 132,082 |
| 110,924 | 420 | 84,446 | 30,272 | 16,563 | 131,701 |
| 110,925 | 421 | 83,959 | 30,292 | 16,518 | 131,190 |
| 110,926 | 417 | 82,995 | 30,026 | 16,435 | 129,873 |
| 110,927 | 431 | 83,572 | 30,310 | 16,543 | 130,856 |
| 110,928 | 436 | 83,678 | 30,326 | 16,522 | 130,962 |
| 110,929 | 435 | 83,730 | 30,420 | 16,581 | 131,166 |
| 110,930 | 423 | 81,768 | 29,688 | 16,164 | 128,043 |
| 110,931 | 423 | 82,181 | 29,899 | 16,256 | 128,759 |
| 110,932 | 420 | 82,755 | 30,183 | 16,435 | 129,793 |
| 110,933 | 431 | 83,473 | 30,561 | 16,608 | 131,073 |
| 110,934 | 429 | 83,385 | 30,595 | 16,638 | 131,047 |
| 110,935 | 422 | 83,631 | 30,695 | 16,645 | 131,393 |

|         |     |        |        |        |         |
|---------|-----|--------|--------|--------|---------|
| 110,936 | 408 | 82,736 | 30,239 | 16,300 | 129,683 |
| 110,937 | 413 | 83,321 | 30,534 | 16,478 | 130,746 |
| 110,938 | 403 | 83,308 | 30,534 | 16,459 | 130,704 |
| 110,939 | 399 | 83,796 | 30,989 | 16,690 | 131,874 |
| 110,940 | 395 | 82,780 | 30,660 | 16,531 | 130,366 |
| 110,941 | 395 | 82,484 | 30,519 | 16,433 | 129,831 |
| 110,942 | 403 | 83,262 | 30,965 | 16,684 | 131,314 |
| 110,943 | 412 | 83,408 | 31,136 | 16,738 | 131,694 |
| 110,944 | 423 | 83,627 | 31,426 | 16,833 | 132,309 |
| 110,945 | 422 | 83,300 | 31,342 | 16,777 | 131,841 |
| 110,946 | 432 | 83,245 | 31,325 | 16,786 | 131,788 |
| 110,947 | 439 | 83,446 | 31,293 | 16,763 | 131,941 |
| 110,948 | 478 | 82,927 | 31,096 | 16,621 | 131,122 |
| 110,949 | 482 | 82,345 | 30,849 | 16,486 | 130,162 |
| 110,950 | 487 | 82,463 | 30,997 | 16,509 | 130,456 |
| 110,951 | 501 | 82,394 | 31,013 | 16,471 | 130,379 |
| 110,952 | 500 | 81,163 | 30,772 | 16,332 | 128,767 |
| 110,953 | 518 | 81,876 | 31,349 | 16,646 | 130,389 |
| 110,954 | 547 | 81,857 | 31,363 | 16,667 | 130,434 |
| 110,955 | 559 | 82,290 | 31,639 | 16,865 | 131,353 |
| 110,956 | 576 | 82,274 | 31,766 | 16,897 | 131,513 |
| 110,957 | 579 | 82,314 | 31,769 | 16,843 | 131,505 |
| 110,958 | 576 | 83,755 | 32,324 | 17,203 | 133,858 |
| 110,959 | 566 | 84,377 | 32,553 | 17,308 | 134,804 |
| 110,960 | 537 | 83,397 | 32,403 | 17,189 | 133,526 |
| 110,961 | 537 | 82,243 | 32,023 | 17,028 | 131,831 |
| 110,962 | 541 | 83,106 | 32,315 | 17,192 | 133,154 |
| 110,963 | 534 | 83,005 | 32,357 | 17,211 | 133,107 |
| 110,964 | 543 | 83,719 | 32,587 | 17,372 | 134,221 |
| 110,965 | 526 | 82,682 | 32,302 | 17,199 | 132,709 |
| 110,966 | 532 | 83,818 | 32,668 | 17,377 | 134,395 |
| 110,967 | 554 | 83,935 | 32,851 | 17,419 | 134,759 |

|         |     |        |        |        |         |
|---------|-----|--------|--------|--------|---------|
| 110,968 | 569 | 83,933 | 32,927 | 17,469 | 134,898 |
| 110,969 | 571 | 83,587 | 32,666 | 17,335 | 134,159 |
| 110,970 | 571 | 82,912 | 32,540 | 17,303 | 133,326 |
| 110,971 | 594 | 84,394 | 33,164 | 17,650 | 135,802 |
| 110,972 | 599 | 84,940 | 33,444 | 17,790 | 136,773 |
| 110,973 | 589 | 83,913 | 33,115 | 17,684 | 135,301 |
| 110,974 | 606 | 85,130 | 33,536 | 17,885 | 137,157 |
| 110,975 | 625 | 85,778 | 33,633 | 17,966 | 138,002 |
| 110,976 | 658 | 85,908 | 33,701 | 18,032 | 138,299 |
| 110,977 | 666 | 85,754 | 33,748 | 18,010 | 138,178 |
| 110,978 | 656 | 84,585 | 33,442 | 17,844 | 136,527 |
| 110,979 | 650 | 83,136 | 33,131 | 17,709 | 134,626 |
| 110,980 | 689 | 85,278 | 33,964 | 18,114 | 138,045 |
| 110,981 | 695 | 84,597 | 33,910 | 18,134 | 137,336 |
| 110,982 | 697 | 84,793 | 33,920 | 18,175 | 137,585 |
| 110,983 | 702 | 84,785 | 33,985 | 18,128 | 137,600 |
| 110,984 | 697 | 85,261 | 33,960 | 18,113 | 138,031 |
| 110,985 | 698 | 85,330 | 33,894 | 18,063 | 137,985 |
| 110,986 | 688 | 85,644 | 33,834 | 18,043 | 138,209 |
| 110,987 | 675 | 84,946 | 33,706 | 18,017 | 137,344 |
| 110,988 | 671 | 83,891 | 33,205 | 17,680 | 135,447 |
| 110,989 | 671 | 84,355 | 33,257 | 17,749 | 136,032 |
| 110,990 | 675 | 85,201 | 33,491 | 17,848 | 137,215 |
| 110,991 | 683 | 85,801 | 33,681 | 17,949 | 138,114 |
| 110,992 | 677 | 85,764 | 33,575 | 17,907 | 137,923 |
| 110,993 | 686 | 85,995 | 33,494 | 17,848 | 138,023 |
| 110,994 | 681 | 85,705 | 33,386 | 17,820 | 137,592 |
| 110,995 | 670 | 85,165 | 33,039 | 17,685 | 136,559 |
| 110,996 | 670 | 85,186 | 33,076 | 17,704 | 136,636 |
| 110,997 | 670 | 85,599 | 33,206 | 17,782 | 137,257 |
| 110,998 | 626 | 84,091 | 32,556 | 17,472 | 134,745 |
| 110,999 | 625 | 83,747 | 32,431 | 17,437 | 134,240 |

|         |     |        |        |        |         |
|---------|-----|--------|--------|--------|---------|
| 111,000 | 620 | 83,601 | 32,267 | 17,312 | 133,800 |
| 111,001 | 628 | 84,117 | 32,432 | 17,349 | 134,526 |
| 111,002 | 590 | 82,361 | 31,592 | 16,934 | 131,477 |
| 111,003 | 591 | 82,714 | 31,728 | 16,992 | 132,025 |
| 111,004 | 572 | 83,047 | 31,895 | 17,047 | 132,561 |
| 111,005 | 574 | 82,025 | 31,653 | 16,886 | 131,138 |
| 111,006 | 566 | 81,557 | 31,573 | 16,811 | 130,507 |
| 111,007 | 562 | 81,562 | 31,513 | 16,793 | 130,430 |
| 111,008 | 589 | 81,992 | 31,417 | 16,709 | 130,707 |
| 111,009 | 603 | 81,395 | 31,332 | 16,633 | 129,963 |
| 111,010 | 622 | 79,899 | 30,780 | 16,365 | 127,666 |
| 111,011 | 637 | 80,354 | 30,742 | 16,348 | 128,081 |
| 111,012 | 642 | 80,403 | 30,677 | 16,303 | 128,025 |
| 111,013 | 654 | 80,804 | 30,941 | 16,400 | 128,799 |
| 111,014 | 649 | 79,896 | 30,588 | 16,215 | 127,348 |
| 111,015 | 658 | 79,369 | 30,587 | 16,157 | 126,771 |
| 111,016 | 658 | 79,481 | 30,815 | 16,253 | 127,207 |
| 111,017 | 657 | 78,178 | 30,455 | 16,075 | 125,365 |
| 111,018 | 631 | 76,807 | 30,001 | 15,883 | 123,322 |
| 111,019 | 611 | 77,087 | 30,259 | 15,983 | 123,940 |
| 111,020 | 615 | 76,373 | 30,130 | 15,935 | 123,053 |
| 111,021 | 613 | 76,690 | 30,292 | 16,044 | 123,639 |
| 111,022 | 619 | 76,876 | 30,126 | 15,935 | 123,556 |
| 111,023 | 625 | 75,713 | 29,668 | 15,687 | 121,693 |
| 111,024 | 625 | 75,863 | 29,710 | 15,670 | 121,868 |
| 111,025 | 611 | 76,518 | 29,637 | 15,634 | 122,400 |
| 111,026 | 623 | 76,701 | 29,830 | 15,643 | 122,797 |
| 111,027 | 600 | 76,893 | 29,907 | 15,736 | 123,136 |
| 111,028 | 593 | 76,595 | 29,397 | 15,509 | 122,094 |
| 111,029 | 598 | 76,458 | 29,475 | 15,537 | 122,068 |
| 111,030 | 568 | 76,078 | 29,505 | 15,634 | 121,785 |
| 111,031 | 567 | 76,110 | 29,437 | 15,573 | 121,687 |

|         |     |        |        |        |         |
|---------|-----|--------|--------|--------|---------|
| 111,032 | 570 | 76,222 | 29,362 | 15,491 | 121,645 |
| 111,033 | 572 | 75,741 | 29,113 | 15,352 | 120,778 |
| 111,034 | 584 | 76,004 | 29,020 | 15,330 | 120,938 |
| 111,035 | 578 | 75,301 | 28,771 | 15,220 | 119,870 |
| 111,036 | 602 | 76,838 | 29,256 | 15,456 | 122,152 |
| 111,037 | 622 | 76,625 | 29,139 | 15,425 | 121,811 |
| 111,038 | 616 | 75,860 | 28,645 | 15,209 | 120,330 |
| 111,039 | 619 | 76,023 | 28,563 | 15,179 | 120,384 |
| 111,040 | 618 | 76,002 | 28,507 | 15,106 | 120,233 |
| 111,041 | 615 | 76,752 | 28,772 | 15,301 | 121,440 |
| 111,042 | 612 | 75,905 | 28,545 | 15,178 | 120,240 |
| 111,043 | 624 | 77,063 | 28,881 | 15,388 | 121,956 |
| 111,044 | 610 | 76,433 | 28,636 | 15,249 | 120,928 |
| 111,045 | 616 | 77,334 | 28,937 | 15,413 | 122,300 |
| 111,046 | 614 | 77,051 | 28,803 | 15,386 | 121,854 |
| 111,047 | 603 | 76,520 | 28,500 | 15,215 | 120,838 |
| 111,048 | 602 | 76,148 | 28,303 | 15,134 | 120,187 |
| 111,049 | 603 | 75,928 | 28,238 | 15,093 | 119,862 |
| 111,050 | 611 | 75,233 | 28,002 | 14,967 | 118,813 |
| 111,051 | 613 | 74,588 | 27,786 | 14,905 | 117,892 |
| 111,052 | 623 | 78,729 | 29,517 | 15,833 | 124,702 |
| 111,053 | 636 | 77,622 | 29,140 | 15,629 | 123,027 |
| 111,054 | 636 | 77,800 | 29,062 | 15,601 | 123,099 |
| 111,055 | 623 | 78,774 | 29,307 | 15,762 | 124,466 |
| 111,056 | 597 | 78,130 | 28,872 | 15,538 | 123,137 |
| 111,057 | 597 | 78,049 | 28,750 | 15,450 | 122,846 |
| 111,058 | 593 | 78,709 | 28,794 | 15,516 | 123,612 |
| 111,059 | 575 | 78,431 | 28,758 | 15,557 | 123,321 |
| 111,060 | 546 | 77,311 | 28,361 | 15,374 | 121,592 |
| 111,061 | 533 | 77,474 | 28,608 | 15,545 | 122,160 |
| 111,062 | 527 | 77,394 | 28,537 | 15,509 | 121,967 |
| 111,063 | 518 | 76,920 | 28,294 | 15,408 | 121,140 |

|         |     |        |        |        |         |
|---------|-----|--------|--------|--------|---------|
| 111,064 | 527 | 78,078 | 28,640 | 15,605 | 122,850 |
| 111,065 | 507 | 78,368 | 28,575 | 15,643 | 123,093 |
| 111,066 | 509 | 77,501 | 28,100 | 15,397 | 121,507 |
| 111,067 | 512 | 78,222 | 28,375 | 15,527 | 122,636 |
| 111,068 | 517 | 78,742 | 28,629 | 15,691 | 123,579 |
| 111,069 | 521 | 79,137 | 28,797 | 15,798 | 124,253 |
| 111,070 | 531 | 79,443 | 28,776 | 15,773 | 124,523 |
| 111,071 | 525 | 79,199 | 28,444 | 15,552 | 123,720 |
| 111,072 | 525 | 79,289 | 28,447 | 15,558 | 123,819 |
| 111,073 | 490 | 78,597 | 28,131 | 15,450 | 122,668 |
| 111,074 | 489 | 79,060 | 28,312 | 15,592 | 123,453 |
| 111,075 | 461 | 79,137 | 28,575 | 15,798 | 123,971 |
| 111,076 | 465 | 79,474 | 28,667 | 15,834 | 124,440 |
| 111,077 | 453 | 78,864 | 28,420 | 15,732 | 123,469 |
| 111,078 | 458 | 79,744 | 28,689 | 15,910 | 124,801 |
| 111,079 | 454 | 79,477 | 28,731 | 15,911 | 124,573 |
| 111,080 | 453 | 79,180 | 28,516 | 15,780 | 123,929 |
| 111,081 | 453 | 79,603 | 28,552 | 15,781 | 124,389 |
| 111,082 | 451 | 79,467 | 28,587 | 15,860 | 124,365 |
| 111,083 | 436 | 78,391 | 28,107 | 15,692 | 122,626 |
| 111,084 | 436 | 78,345 | 28,036 | 15,686 | 122,503 |
| 111,085 | 416 | 79,000 | 28,196 | 15,786 | 123,398 |
| 111,086 | 417 | 78,984 | 28,141 | 15,846 | 123,388 |
| 111,087 | 416 | 79,130 | 28,180 | 15,888 | 123,614 |
| 111,088 | 395 | 78,282 | 27,891 | 15,749 | 122,317 |
| 111,089 | 397 | 77,555 | 27,680 | 15,662 | 121,294 |
| 111,090 | 395 | 76,802 | 27,483 | 15,546 | 120,226 |
| 111,091 | 420 | 79,046 | 28,533 | 16,138 | 124,137 |
| 111,092 | 429 | 79,149 | 28,827 | 16,276 | 124,681 |
| 111,093 | 427 | 79,486 | 28,929 | 16,347 | 125,189 |
| 111,094 | 434 | 79,737 | 29,171 | 16,430 | 125,772 |
| 111,095 | 458 | 80,206 | 29,449 | 16,548 | 126,661 |



|         |     |        |        |        |         |
|---------|-----|--------|--------|--------|---------|
| 111,096 | 450 | 79,507 | 29,278 | 16,457 | 125,692 |
| 111,097 | 452 | 79,282 | 29,247 | 16,436 | 125,417 |
| 111,098 | 469 | 80,065 | 29,766 | 16,701 | 127,001 |
| 111,099 | 473 | 79,675 | 29,712 | 16,614 | 126,474 |
| 111,100 | 483 | 79,994 | 29,695 | 16,655 | 126,827 |
| 111,101 | 481 | 79,637 | 29,447 | 16,518 | 126,083 |
| 111,102 | 481 | 79,884 | 29,454 | 16,516 | 126,335 |
| 111,103 | 474 | 80,812 | 29,793 | 16,694 | 127,773 |
| 111,104 | 464 | 80,508 | 29,650 | 16,592 | 127,214 |
| 111,105 | 487 | 80,692 | 29,916 | 16,633 | 127,728 |
| 111,106 | 504 | 81,057 | 29,995 | 16,699 | 128,255 |
| 111,107 | 505 | 80,691 | 29,948 | 16,672 | 127,816 |
| 111,108 | 524 | 80,998 | 30,149 | 16,780 | 128,451 |
| 111,109 | 548 | 82,063 | 30,592 | 17,002 | 130,205 |
| 111,110 | 547 | 81,258 | 30,362 | 16,815 | 128,982 |
| 111,111 | 554 | 81,389 | 30,430 | 16,799 | 129,172 |
| 111,112 | 549 | 81,129 | 30,356 | 16,782 | 128,816 |
| 111,113 | 532 | 80,804 | 30,488 | 16,867 | 128,691 |
| 111,114 | 540 | 80,416 | 30,586 | 16,910 | 128,452 |
| 111,115 | 526 | 80,869 | 30,815 | 16,995 | 129,205 |
| 111,116 | 539 | 80,971 | 30,791 | 16,945 | 129,246 |
| 111,117 | 522 | 81,584 | 30,877 | 16,970 | 129,953 |
| 111,118 | 523 | 81,828 | 30,900 | 17,003 | 130,254 |
| 111,119 | 527 | 81,367 | 30,618 | 16,830 | 129,342 |
| 111,120 | 526 | 81,362 | 30,595 | 16,824 | 129,307 |
| 111,121 | 509 | 81,140 | 30,499 | 16,800 | 128,948 |
| 111,122 | 538 | 81,603 | 30,894 | 17,022 | 130,057 |
| 111,123 | 539 | 81,549 | 30,977 | 17,050 | 130,115 |
| 111,124 | 551 | 81,481 | 31,093 | 17,043 | 130,168 |
| 111,125 | 555 | 80,875 | 30,684 | 16,727 | 128,841 |
| 111,126 | 559 | 81,237 | 30,939 | 16,848 | 129,583 |
| 111,127 | 560 | 80,383 | 30,763 | 16,775 | 128,481 |

|         |     |        |        |        |         |
|---------|-----|--------|--------|--------|---------|
| 111,128 | 566 | 80,110 | 30,823 | 16,798 | 128,297 |
| 111,129 | 584 | 80,555 | 30,962 | 16,798 | 128,899 |
| 111,130 | 586 | 80,618 | 30,902 | 16,795 | 128,901 |
| 111,131 | 578 | 79,897 | 30,681 | 16,616 | 127,772 |
| 111,132 | 592 | 80,292 | 30,764 | 16,612 | 128,260 |
| 111,133 | 591 | 80,205 | 30,783 | 16,587 | 128,166 |
| 111,134 | 591 | 81,385 | 31,178 | 16,704 | 129,858 |
| 111,135 | 593 | 80,290 | 30,959 | 16,592 | 128,434 |
| 111,136 | 592 | 80,008 | 30,878 | 16,566 | 128,044 |
| 111,137 | 591 | 80,305 | 31,103 | 16,572 | 128,571 |
| 111,138 | 580 | 80,234 | 31,106 | 16,539 | 128,459 |
| 111,139 | 559 | 80,058 | 31,056 | 16,535 | 128,208 |
| 111,140 | 547 | 79,700 | 30,805 | 16,340 | 127,392 |
| 111,141 | 556 | 80,760 | 31,024 | 16,459 | 128,799 |
| 111,142 | 554 | 80,704 | 30,994 | 16,354 | 128,606 |
| 111,143 | 551 | 81,348 | 30,954 | 16,330 | 129,183 |
| 111,144 | 560 | 81,046 | 30,846 | 16,255 | 128,707 |
| 111,145 | 543 | 80,847 | 30,599 | 16,157 | 128,146 |
| 111,146 | 521 | 79,867 | 30,126 | 15,867 | 126,381 |
| 111,147 | 515 | 78,433 | 29,356 | 15,508 | 123,812 |
| 111,148 | 517 | 79,152 | 29,491 | 15,542 | 124,702 |
| 111,149 | 510 | 80,066 | 29,675 | 15,653 | 125,904 |
| 111,150 | 537 | 80,124 | 29,613 | 15,648 | 125,922 |
| 111,151 | 522 | 79,109 | 29,280 | 15,458 | 124,369 |
| 111,152 | 508 | 79,668 | 29,477 | 15,578 | 125,231 |
| 111,153 | 521 | 79,424 | 29,465 | 15,568 | 124,978 |
| 111,154 | 516 | 78,409 | 29,180 | 15,436 | 123,541 |
| 111,155 | 513 | 78,203 | 29,078 | 15,406 | 123,200 |
| 111,156 | 487 | 76,942 | 28,594 | 15,186 | 121,209 |
| 111,157 | 484 | 77,345 | 28,757 | 15,285 | 121,871 |
| 111,158 | 453 | 77,158 | 28,735 | 15,282 | 121,628 |
| 111,159 | 451 | 77,399 | 28,700 | 15,265 | 121,815 |

|         |     |        |        |        |         |
|---------|-----|--------|--------|--------|---------|
| 111,160 | 430 | 77,379 | 28,728 | 15,262 | 121,799 |
| 111,161 | 415 | 76,577 | 28,413 | 15,118 | 120,523 |
| 111,162 | 427 | 75,803 | 27,849 | 14,749 | 118,828 |
| 111,163 | 425 | 76,341 | 28,018 | 14,863 | 119,647 |
| 111,164 | 418 | 76,764 | 28,181 | 14,996 | 120,359 |
| 111,165 | 414 | 72,875 | 27,091 | 14,360 | 114,740 |
| 111,166 | 414 | 73,383 | 27,228 | 14,444 | 115,469 |
| 111,167 | 403 | 74,068 | 27,404 | 14,513 | 116,388 |
| 111,168 | 412 | 73,325 | 27,173 | 14,414 | 115,324 |
| 111,169 | 409 | 72,941 | 27,073 | 14,379 | 114,802 |
| 111,170 | 393 | 73,081 | 27,174 | 14,460 | 115,108 |
| 111,171 | 399 | 71,163 | 26,340 | 13,918 | 111,820 |
| 111,172 | 403 | 71,610 | 26,488 | 13,986 | 112,487 |
| 111,173 | 390 | 71,388 | 26,232 | 13,853 | 111,863 |
| 111,174 | 397 | 72,058 | 26,398 | 13,932 | 112,785 |
| 111,175 | 384 | 72,420 | 26,516 | 14,084 | 113,404 |
| 111,176 | 375 | 70,022 | 25,493 | 13,579 | 109,469 |
| 111,177 | 373 | 70,364 | 25,576 | 13,615 | 109,928 |
| 111,178 | 364 | 70,006 | 25,401 | 13,546 | 109,317 |
| 111,179 | 371 | 70,548 | 25,510 | 13,629 | 110,058 |
| 111,180 | 363 | 70,736 | 25,668 | 13,700 | 110,467 |
| 111,181 | 371 | 69,846 | 25,461 | 13,560 | 109,238 |
| 111,182 | 380 | 70,216 | 25,591 | 13,643 | 109,830 |
| 111,183 | 371 | 69,534 | 25,467 | 13,631 | 109,003 |
| 111,184 | 379 | 69,322 | 25,454 | 13,595 | 108,750 |
| 111,185 | 380 | 68,418 | 25,155 | 13,469 | 107,422 |
| 111,186 | 380 | 68,466 | 25,167 | 13,442 | 107,455 |
| 111,187 | 374 | 68,584 | 25,196 | 13,451 | 107,605 |
| 111,188 | 380 | 67,780 | 24,936 | 13,348 | 106,444 |
| 111,189 | 379 | 66,520 | 24,577 | 13,173 | 104,649 |
| 111,190 | 389 | 67,581 | 24,938 | 13,338 | 106,246 |
| 111,191 | 388 | 67,312 | 24,900 | 13,396 | 105,996 |

|         |     |        |        |        |         |
|---------|-----|--------|--------|--------|---------|
| 111,192 | 379 | 66,054 | 24,597 | 13,193 | 104,223 |
| 111,193 | 381 | 65,626 | 24,483 | 13,173 | 103,663 |
| 111,194 | 362 | 64,031 | 24,049 | 12,918 | 101,360 |
| 111,195 | 357 | 63,488 | 23,798 | 12,780 | 100,423 |
| 111,196 | 360 | 63,957 | 24,034 | 12,888 | 101,239 |
| 111,197 | 356 | 63,280 | 23,847 | 12,813 | 100,296 |
| 111,198 | 316 | 61,492 | 23,202 | 12,436 | 97,446  |
| 111,199 | 319 | 61,648 | 23,292 | 12,512 | 97,771  |
| 111,200 | 316 | 61,555 | 23,324 | 12,556 | 97,751  |
| 111,201 | 313 | 61,311 | 23,381 | 12,577 | 97,582  |
| 111,202 | 311 | 61,443 | 23,526 | 12,585 | 97,865  |
| 111,203 | 295 | 60,551 | 23,193 | 12,378 | 96,417  |
| 111,204 | 296 | 60,380 | 23,031 | 12,284 | 95,991  |
| 111,205 | 289 | 60,474 | 23,021 | 12,267 | 96,051  |
| 111,206 | 281 | 59,886 | 22,874 | 12,139 | 95,180  |
| 111,207 | 282 | 59,125 | 22,694 | 12,103 | 94,204  |
| 111,208 | 291 | 59,433 | 22,910 | 12,187 | 94,821  |
| 111,209 | 291 | 58,823 | 22,788 | 12,125 | 94,027  |
| 111,210 | 298 | 58,405 | 22,810 | 12,086 | 93,599  |
| 111,211 | 294 | 57,639 | 22,614 | 11,951 | 92,498  |
| 111,212 | 297 | 57,068 | 22,424 | 11,843 | 91,632  |
| 111,213 | 303 | 56,987 | 22,332 | 11,782 | 91,404  |
| 111,214 | 307 | 56,898 | 22,241 | 11,697 | 91,143  |
| 111,215 | 309 | 56,288 | 21,945 | 11,577 | 90,119  |
| 111,216 | 309 | 56,658 | 22,026 | 11,618 | 90,611  |
| 111,217 | 310 | 56,512 | 22,061 | 11,615 | 90,498  |
| 111,218 | 314 | 56,851 | 22,296 | 11,707 | 91,168  |
| 111,219 | 300 | 56,144 | 22,121 | 11,568 | 90,133  |
| 111,220 | 303 | 56,008 | 22,148 | 11,527 | 89,986  |
| 111,221 | 297 | 55,241 | 21,907 | 11,443 | 88,888  |
| 111,222 | 298 | 54,667 | 21,845 | 11,430 | 88,240  |
| 111,223 | 286 | 54,636 | 21,904 | 11,437 | 88,263  |

|         |     |        |        |        |        |
|---------|-----|--------|--------|--------|--------|
| 111,224 | 273 | 54,446 | 21,904 | 11,427 | 88,050 |
| 111,225 | 265 | 52,492 | 21,255 | 11,098 | 85,110 |
| 111,226 | 267 | 53,223 | 21,484 | 11,192 | 86,166 |
| 111,227 | 263 | 53,588 | 21,720 | 11,283 | 86,854 |
| 111,228 | 265 | 53,857 | 21,993 | 11,413 | 87,528 |
| 111,229 | 268 | 54,072 | 22,188 | 11,476 | 88,004 |
| 111,230 | 261 | 54,441 | 22,334 | 11,505 | 88,541 |
| 111,231 | 260 | 54,359 | 22,316 | 11,497 | 88,432 |
| 111,232 | 245 | 53,783 | 22,216 | 11,434 | 87,678 |
| 111,233 | 232 | 53,547 | 21,964 | 11,317 | 87,060 |
| 111,234 | 232 | 53,738 | 22,012 | 11,288 | 87,270 |
| 111,235 | 228 | 54,416 | 22,256 | 11,443 | 88,343 |
| 111,236 | 222 | 54,533 | 22,279 | 11,450 | 88,484 |
| 111,237 | 223 | 54,620 | 22,282 | 11,455 | 88,580 |
| 111,238 | 220 | 54,051 | 22,141 | 11,367 | 87,779 |
| 111,239 | 216 | 54,449 | 22,379 | 11,454 | 88,498 |
| 111,240 | 219 | 54,387 | 22,440 | 11,474 | 88,520 |
| 111,241 | 227 | 54,329 | 22,409 | 11,405 | 88,370 |
| 111,242 | 234 | 54,522 | 22,481 | 11,448 | 88,685 |
| 111,243 | 246 | 55,305 | 22,790 | 11,602 | 89,943 |
| 111,244 | 247 | 54,672 | 22,613 | 11,522 | 89,054 |
| 111,245 | 258 | 55,044 | 22,844 | 11,638 | 89,784 |
| 111,246 | 268 | 55,010 | 22,921 | 11,665 | 89,864 |
| 111,247 | 269 | 54,946 | 22,902 | 11,700 | 89,817 |
| 111,248 | 265 | 54,345 | 22,886 | 11,661 | 89,157 |
| 111,249 | 275 | 53,857 | 22,765 | 11,599 | 88,496 |
| 111,250 | 272 | 53,055 | 22,607 | 11,501 | 87,435 |
| 111,251 | 290 | 54,233 | 23,180 | 11,728 | 89,431 |
| 111,252 | 304 | 54,727 | 23,360 | 11,805 | 90,196 |
| 111,253 | 321 | 53,993 | 23,261 | 11,819 | 89,394 |
| 111,254 | 331 | 53,824 | 23,439 | 11,875 | 89,469 |
| 111,255 | 332 | 53,222 | 23,424 | 11,864 | 88,842 |

|         |     |        |        |        |        |
|---------|-----|--------|--------|--------|--------|
| 111,256 | 335 | 53,531 | 23,512 | 11,887 | 89,265 |
| 111,257 | 336 | 53,414 | 23,229 | 11,751 | 88,730 |
| 111,258 | 336 | 54,373 | 23,456 | 11,841 | 90,006 |
| 111,259 | 334 | 54,265 | 23,201 | 11,765 | 89,565 |
| 111,260 | 337 | 55,239 | 23,492 | 11,892 | 90,960 |
| 111,261 | 338 | 56,076 | 23,766 | 12,038 | 92,218 |
| 111,262 | 353 | 57,135 | 24,099 | 12,176 | 93,763 |
| 111,263 | 381 | 57,611 | 24,354 | 12,229 | 94,575 |
| 111,264 | 365 | 57,890 | 24,483 | 12,294 | 95,032 |
| 111,265 | 365 | 58,171 | 24,600 | 12,341 | 95,477 |
| 111,266 | 351 | 57,799 | 24,308 | 12,173 | 94,631 |
| 111,267 | 350 | 58,073 | 24,500 | 12,270 | 95,193 |
| 111,268 | 358 | 58,523 | 24,775 | 12,422 | 96,078 |
| 111,269 | 353 | 58,308 | 24,789 | 12,450 | 95,900 |
| 111,270 | 352 | 57,913 | 24,593 | 12,388 | 95,246 |
| 111,271 | 356 | 58,227 | 24,879 | 12,543 | 96,005 |
| 111,272 | 365 | 58,492 | 25,032 | 12,573 | 96,462 |
| 111,273 | 377 | 59,379 | 25,293 | 12,658 | 97,707 |
| 111,274 | 382 | 58,555 | 25,094 | 12,545 | 96,576 |
| 111,275 | 382 | 58,297 | 25,118 | 12,549 | 96,346 |
| 111,276 | 388 | 58,533 | 25,228 | 12,596 | 96,745 |
| 111,277 | 387 | 58,636 | 25,279 | 12,607 | 96,909 |
| 111,278 | 378 | 57,156 | 24,593 | 12,308 | 94,435 |
| 111,279 | 382 | 57,910 | 24,790 | 12,412 | 95,494 |
| 111,280 | 379 | 58,745 | 24,980 | 12,493 | 96,597 |
| 111,281 | 380 | 58,689 | 24,898 | 12,427 | 96,394 |
| 111,282 | 377 | 58,505 | 24,726 | 12,350 | 95,958 |
| 111,283 | 377 | 58,492 | 24,754 | 12,374 | 95,997 |
| 111,284 | 373 | 58,222 | 24,713 | 12,374 | 95,682 |
| 111,285 | 376 | 58,470 | 24,917 | 12,454 | 96,217 |
| 111,286 | 376 | 58,280 | 24,956 | 12,458 | 96,070 |
| 111,287 | 370 | 58,278 | 25,087 | 12,494 | 96,229 |

|         |     |        |        |        |        |
|---------|-----|--------|--------|--------|--------|
| 111,288 | 381 | 58,636 | 25,193 | 12,485 | 96,695 |
| 111,289 | 377 | 58,922 | 25,220 | 12,473 | 96,992 |
| 111,290 | 380 | 58,985 | 25,176 | 12,467 | 97,008 |
| 111,291 | 374 | 58,400 | 24,872 | 12,352 | 95,998 |
| 111,292 | 373 | 58,217 | 24,957 | 12,430 | 95,977 |
| 111,293 | 375 | 58,803 | 25,003 | 12,464 | 96,645 |
| 111,294 | 357 | 57,642 | 24,480 | 12,166 | 94,645 |
| 111,295 | 371 | 58,527 | 24,729 | 12,271 | 95,898 |
| 111,296 | 372 | 59,085 | 25,036 | 12,450 | 96,943 |
| 111,297 | 379 | 59,451 | 25,066 | 12,457 | 97,353 |
| 111,298 | 376 | 59,766 | 25,054 | 12,449 | 97,645 |
| 111,299 | 381 | 60,307 | 25,320 | 12,579 | 98,587 |
| 111,300 | 371 | 59,972 | 25,331 | 12,621 | 98,295 |
| 111,301 | 372 | 60,030 | 25,280 | 12,574 | 98,256 |
| 111,302 | 369 | 60,039 | 25,264 | 12,591 | 98,263 |
| 111,303 | 358 | 60,137 | 25,130 | 12,541 | 98,166 |
| 111,304 | 350 | 60,619 | 25,054 | 12,461 | 98,484 |
| 111,305 | 335 | 59,944 | 24,596 | 12,251 | 97,126 |
| 111,306 | 348 | 60,169 | 24,524 | 12,217 | 97,258 |
| 111,307 | 349 | 60,422 | 24,521 | 12,225 | 97,517 |
| 111,308 | 348 | 60,076 | 24,553 | 12,223 | 97,200 |
| 111,309 | 348 | 60,037 | 24,565 | 12,272 | 97,222 |
| 111,310 | 351 | 60,051 | 24,741 | 12,359 | 97,502 |
| 111,311 | 352 | 60,252 | 25,012 | 12,513 | 98,129 |
| 111,312 | 328 | 59,039 | 24,598 | 12,334 | 96,299 |
| 111,313 | 322 | 58,979 | 24,795 | 12,435 | 96,531 |
| 111,314 | 304 | 59,442 | 25,000 | 12,531 | 97,277 |
| 111,315 | 312 | 59,140 | 24,958 | 12,505 | 96,915 |
| 111,316 | 307 | 58,952 | 24,939 | 12,508 | 96,706 |
| 111,317 | 314 | 58,701 | 24,908 | 12,494 | 96,417 |
| 111,318 | 322 | 59,120 | 25,076 | 12,576 | 97,094 |
| 111,319 | 314 | 58,396 | 24,730 | 12,418 | 95,858 |

|         |     |        |        |        |        |
|---------|-----|--------|--------|--------|--------|
| 111,320 | 313 | 59,194 | 24,841 | 12,465 | 96,813 |
| 111,321 | 304 | 58,701 | 24,513 | 12,307 | 95,825 |
| 111,322 | 309 | 59,171 | 24,635 | 12,388 | 96,503 |
| 111,323 | 311 | 59,663 | 24,742 | 12,503 | 97,219 |
| 111,324 | 299 | 59,196 | 24,596 | 12,476 | 96,567 |
| 111,325 | 304 | 58,795 | 24,359 | 12,370 | 95,828 |
| 111,326 | 303 | 58,280 | 24,206 | 12,271 | 95,060 |
| 111,327 | 306 | 59,151 | 24,593 | 12,475 | 96,525 |
| 111,328 | 305 | 58,187 | 24,214 | 12,298 | 95,004 |
| 111,329 | 305 | 58,498 | 24,340 | 12,393 | 95,536 |
| 111,330 | 307 | 58,443 | 24,314 | 12,395 | 95,459 |
| 111,331 | 299 | 58,081 | 24,322 | 12,416 | 95,118 |
| 111,332 | 305 | 57,714 | 24,342 | 12,480 | 94,841 |
| 111,333 | 299 | 57,324 | 24,309 | 12,451 | 94,383 |
| 111,334 | 299 | 56,985 | 24,049 | 12,300 | 93,633 |
| 111,335 | 300 | 56,741 | 24,069 | 12,297 | 93,407 |
| 111,336 | 300 | 57,685 | 24,441 | 12,493 | 94,919 |
| 111,337 | 298 | 57,334 | 24,462 | 12,519 | 94,613 |
| 111,338 | 296 | 56,958 | 24,358 | 12,489 | 94,101 |
| 111,339 | 285 | 55,931 | 24,256 | 12,453 | 92,925 |
| 111,340 | 285 | 55,719 | 24,208 | 12,479 | 92,691 |
| 111,341 | 282 | 54,615 | 23,733 | 12,211 | 90,841 |
| 111,342 | 281 | 55,077 | 23,888 | 12,268 | 91,514 |
| 111,343 | 276 | 55,665 | 24,059 | 12,346 | 92,346 |
| 111,344 | 272 | 55,176 | 23,916 | 12,212 | 91,576 |
| 111,345 | 261 | 54,765 | 23,677 | 12,135 | 90,838 |
| 111,346 | 250 | 54,549 | 23,577 | 12,107 | 90,483 |
| 111,347 | 249 | 54,462 | 23,405 | 12,014 | 90,130 |
| 111,348 | 241 | 53,623 | 23,125 | 11,861 | 88,850 |
| 111,349 | 249 | 54,265 | 23,380 | 11,940 | 89,834 |
| 111,350 | 244 | 53,729 | 23,097 | 11,807 | 88,877 |
| 111,351 | 226 | 50,146 | 21,609 | 11,093 | 83,074 |



|         |     |        |        |        |        |
|---------|-----|--------|--------|--------|--------|
| 111,352 | 226 | 50,546 | 21,776 | 11,128 | 83,676 |
| 111,353 | 223 | 50,959 | 21,934 | 11,213 | 84,329 |
| 111,354 | 222 | 50,806 | 21,952 | 11,207 | 84,187 |
| 111,355 | 216 | 51,386 | 22,160 | 11,304 | 85,066 |
| 111,356 | 220 | 51,928 | 22,374 | 11,424 | 85,946 |
| 111,357 | 205 | 51,862 | 22,349 | 11,395 | 85,811 |
| 111,358 | 199 | 51,365 | 22,162 | 11,301 | 85,027 |
| 111,359 | 202 | 51,612 | 22,201 | 11,283 | 85,298 |
| 111,360 | 203 | 52,039 | 22,409 | 11,383 | 86,034 |
| 111,361 | 191 | 52,778 | 22,808 | 11,596 | 87,373 |
| 111,362 | 197 | 53,168 | 22,898 | 11,604 | 87,867 |
| 111,363 | 189 | 52,380 | 22,539 | 11,468 | 86,576 |
| 111,364 | 201 | 53,063 | 22,871 | 11,591 | 87,726 |
| 111,365 | 199 | 53,185 | 22,936 | 11,625 | 87,945 |
| 111,366 | 188 | 52,271 | 22,526 | 11,443 | 86,428 |
| 111,367 | 215 | 53,267 | 23,029 | 11,648 | 88,159 |
| 111,368 | 213 | 53,647 | 23,008 | 11,661 | 88,529 |
| 111,369 | 204 | 52,929 | 22,631 | 11,448 | 87,212 |
| 111,370 | 211 | 54,031 | 23,004 | 11,608 | 88,854 |
| 111,371 | 208 | 53,618 | 22,938 | 11,526 | 88,290 |
| 111,372 | 212 | 54,431 | 23,198 | 11,666 | 89,507 |
| 111,373 | 211 | 54,850 | 23,343 | 11,688 | 90,092 |
| 111,374 | 214 | 54,139 | 23,093 | 11,457 | 88,903 |
| 111,375 | 210 | 54,232 | 22,913 | 11,360 | 88,715 |
| 111,376 | 212 | 54,605 | 23,139 | 11,446 | 89,402 |
| 111,377 | 210 | 55,172 | 23,331 | 11,542 | 90,255 |
| 111,378 | 215 | 55,012 | 23,369 | 11,559 | 90,155 |
| 111,379 | 215 | 54,816 | 23,430 | 11,588 | 90,049 |
| 111,380 | 217 | 54,704 | 23,539 | 11,608 | 90,068 |
| 111,381 | 215 | 54,435 | 23,587 | 11,605 | 89,842 |
| 111,382 | 226 | 54,225 | 23,553 | 11,568 | 89,572 |
| 111,383 | 224 | 54,451 | 23,603 | 11,564 | 89,842 |

|         |     |        |        |        |        |
|---------|-----|--------|--------|--------|--------|
| 111,384 | 235 | 54,890 | 23,650 | 11,603 | 90,378 |
| 111,385 | 248 | 55,776 | 23,862 | 11,736 | 91,622 |
| 111,386 | 250 | 56,008 | 23,925 | 11,731 | 91,914 |
| 111,387 | 266 | 56,348 | 23,911 | 11,743 | 92,268 |
| 111,388 | 291 | 57,091 | 23,953 | 11,698 | 93,033 |
| 111,389 | 306 | 57,522 | 23,897 | 11,671 | 93,396 |
| 111,390 | 309 | 58,062 | 23,896 | 11,683 | 93,950 |
| 111,391 | 314 | 58,723 | 24,097 | 11,717 | 94,851 |
| 111,392 | 316 | 58,515 | 24,068 | 11,680 | 94,579 |
| 111,393 | 316 | 58,700 | 24,021 | 11,636 | 94,673 |
| 111,394 | 335 | 59,057 | 24,331 | 11,782 | 95,505 |
| 111,395 | 332 | 59,003 | 24,291 | 11,794 | 95,420 |
| 111,396 | 325 | 59,056 | 24,424 | 11,793 | 95,598 |
| 111,397 | 326 | 59,554 | 24,696 | 11,965 | 96,541 |
| 111,398 | 326 | 59,091 | 24,732 | 11,976 | 96,125 |
| 111,399 | 319 | 59,100 | 24,836 | 12,020 | 96,275 |
| 111,400 | 324 | 58,493 | 24,752 | 11,977 | 95,546 |
| 111,401 | 336 | 58,921 | 24,874 | 12,025 | 96,156 |
| 111,402 | 335 | 58,940 | 24,906 | 11,998 | 96,179 |
| 111,403 | 347 | 59,057 | 24,971 | 12,055 | 96,430 |
| 111,404 | 357 | 59,216 | 25,071 | 12,088 | 96,732 |
| 111,405 | 365 | 59,418 | 25,118 | 12,122 | 97,023 |
| 111,406 | 366 | 59,469 | 25,093 | 12,134 | 97,062 |
| 111,407 | 363 | 58,750 | 24,886 | 12,018 | 96,017 |
| 111,408 | 362 | 58,762 | 24,864 | 12,031 | 96,019 |
| 111,409 | 362 | 59,410 | 25,093 | 12,117 | 96,982 |
| 111,410 | 364 | 59,071 | 25,029 | 12,109 | 96,573 |
| 111,411 | 368 | 59,060 | 25,008 | 12,114 | 96,550 |
| 111,412 | 378 | 59,350 | 24,896 | 12,044 | 96,668 |
| 111,413 | 380 | 58,680 | 24,569 | 11,898 | 95,527 |
| 111,414 | 399 | 59,746 | 24,845 | 12,048 | 97,038 |
| 111,415 | 392 | 59,748 | 24,673 | 12,002 | 96,815 |

|         |     |        |        |        |         |
|---------|-----|--------|--------|--------|---------|
| 111,416 | 410 | 59,823 | 24,442 | 11,881 | 96,556  |
| 111,417 | 418 | 60,266 | 24,504 | 11,936 | 97,124  |
| 111,418 | 396 | 60,178 | 24,422 | 11,923 | 96,919  |
| 111,419 | 414 | 59,397 | 24,246 | 11,833 | 95,890  |
| 111,420 | 417 | 58,945 | 24,083 | 11,792 | 95,237  |
| 111,421 | 420 | 60,619 | 24,634 | 12,098 | 97,771  |
| 111,422 | 427 | 60,584 | 24,577 | 12,090 | 97,678  |
| 111,423 | 437 | 60,875 | 24,639 | 12,169 | 98,120  |
| 111,424 | 437 | 60,841 | 24,617 | 12,191 | 98,086  |
| 111,425 | 439 | 61,258 | 24,707 | 12,288 | 98,692  |
| 111,426 | 445 | 61,398 | 24,676 | 12,290 | 98,809  |
| 111,427 | 452 | 61,263 | 24,601 | 12,318 | 98,634  |
| 111,428 | 451 | 61,274 | 24,640 | 12,317 | 98,682  |
| 111,429 | 450 | 61,572 | 24,724 | 12,336 | 99,082  |
| 111,430 | 454 | 61,936 | 24,702 | 12,316 | 99,408  |
| 111,431 | 468 | 62,518 | 24,777 | 12,281 | 100,044 |
| 111,432 | 470 | 62,714 | 24,747 | 12,289 | 100,220 |
| 111,433 | 475 | 63,434 | 24,928 | 12,353 | 101,190 |
| 111,434 | 490 | 64,403 | 25,219 | 12,526 | 102,638 |
| 111,435 | 480 | 64,077 | 25,029 | 12,390 | 101,976 |
| 111,436 | 484 | 64,076 | 25,069 | 12,387 | 102,016 |
| 111,437 | 482 | 64,079 | 25,077 | 12,403 | 102,041 |
| 111,438 | 475 | 64,842 | 25,308 | 12,572 | 103,197 |
| 111,439 | 453 | 65,013 | 25,399 | 12,626 | 103,491 |
| 111,440 | 434 | 64,060 | 25,082 | 12,459 | 102,035 |
| 111,441 | 430 | 63,949 | 25,095 | 12,540 | 102,014 |
| 111,442 | 434 | 64,135 | 25,226 | 12,613 | 102,408 |
| 111,443 | 433 | 64,618 | 25,299 | 12,726 | 103,076 |
| 111,444 | 432 | 64,571 | 25,323 | 12,756 | 103,082 |
| 111,445 | 435 | 64,312 | 25,111 | 12,680 | 102,538 |
| 111,446 | 436 | 63,937 | 25,001 | 12,631 | 102,005 |
| 111,447 | 452 | 65,374 | 25,477 | 12,892 | 104,195 |

|         |     |        |        |        |         |
|---------|-----|--------|--------|--------|---------|
| 111,448 | 467 | 65,787 | 25,502 | 12,925 | 104,681 |
| 111,449 | 462 | 65,334 | 25,256 | 12,796 | 103,848 |
| 111,450 | 478 | 65,996 | 25,472 | 12,931 | 104,877 |
| 111,451 | 469 | 65,566 | 25,256 | 12,832 | 104,123 |
| 111,452 | 467 | 64,828 | 24,978 | 12,715 | 102,988 |
| 111,453 | 464 | 64,118 | 24,791 | 12,641 | 102,014 |
| 111,454 | 492 | 65,495 | 25,338 | 12,978 | 104,303 |
| 111,455 | 484 | 65,280 | 25,309 | 12,982 | 104,055 |
| 111,456 | 476 | 64,904 | 25,253 | 13,010 | 103,643 |
| 111,457 | 479 | 64,687 | 25,276 | 13,000 | 103,442 |
| 111,458 | 475 | 64,458 | 25,247 | 13,006 | 103,186 |
| 111,459 | 490 | 64,370 | 25,251 | 12,976 | 103,087 |
| 111,460 | 501 | 64,455 | 25,389 | 13,056 | 103,401 |
| 111,461 | 503 | 63,948 | 25,099 | 12,860 | 102,410 |
| 111,462 | 506 | 64,142 | 25,132 | 12,861 | 102,641 |
| 111,463 | 501 | 63,946 | 25,260 | 12,919 | 102,626 |
| 111,464 | 483 | 63,164 | 24,987 | 12,769 | 101,403 |
| 111,465 | 483 | 62,072 | 24,729 | 12,602 | 99,886  |
| 111,466 | 479 | 61,090 | 24,493 | 12,478 | 98,540  |
| 111,467 | 472 | 62,301 | 25,093 | 12,823 | 100,689 |
| 111,468 | 464 | 61,387 | 24,827 | 12,685 | 99,363  |
| 111,469 | 466 | 60,391 | 24,506 | 12,525 | 97,888  |
| 111,470 | 442 | 59,369 | 24,216 | 12,409 | 96,436  |
| 111,471 | 440 | 60,030 | 24,800 | 12,648 | 97,918  |
| 111,472 | 431 | 59,157 | 24,440 | 12,466 | 96,494  |
| 111,473 | 430 | 59,377 | 24,594 | 12,529 | 96,930  |
| 111,474 | 422 | 58,914 | 24,437 | 12,464 | 96,237  |
| 111,475 | 419 | 58,661 | 24,299 | 12,416 | 95,795  |
| 111,476 | 407 | 58,465 | 24,230 | 12,402 | 95,504  |
| 111,477 | 397 | 58,350 | 24,204 | 12,412 | 95,363  |
| 111,478 | 387 | 57,439 | 23,649 | 12,166 | 93,641  |
| 111,479 | 387 | 58,105 | 23,782 | 12,237 | 94,511  |

|         |     |        |        |        |        |
|---------|-----|--------|--------|--------|--------|
| 111,480 | 380 | 58,291 | 23,793 | 12,249 | 94,713 |
| 111,481 | 377 | 58,733 | 23,940 | 12,326 | 95,376 |
| 111,482 | 365 | 58,748 | 23,839 | 12,356 | 95,308 |
| 111,483 | 353 | 58,721 | 23,750 | 12,351 | 95,175 |
| 111,484 | 344 | 58,417 | 23,604 | 12,362 | 94,727 |
| 111,485 | 328 | 57,350 | 23,236 | 12,177 | 93,091 |
| 111,486 | 325 | 57,573 | 23,293 | 12,258 | 93,449 |
| 111,487 | 312 | 56,902 | 22,952 | 12,153 | 92,319 |
| 111,488 | 313 | 56,923 | 22,821 | 12,121 | 92,178 |
| 111,489 | 310 | 57,346 | 22,863 | 12,175 | 92,694 |
| 111,490 | 305 | 56,474 | 22,461 | 12,011 | 91,251 |
| 111,491 | 308 | 56,719 | 22,516 | 12,007 | 91,550 |
| 111,492 | 306 | 56,618 | 22,402 | 11,953 | 91,279 |
| 111,493 | 319 | 55,668 | 22,017 | 11,733 | 89,737 |
| 111,494 | 319 | 55,730 | 21,997 | 11,734 | 89,780 |
| 111,495 | 305 | 55,204 | 21,625 | 11,561 | 88,695 |
| 111,496 | 305 | 55,117 | 21,587 | 11,575 | 88,584 |
| 111,497 | 296 | 55,126 | 21,517 | 11,559 | 88,498 |
| 111,498 | 272 | 54,448 | 20,990 | 11,356 | 87,066 |
| 111,499 | 270 | 54,954 | 21,156 | 11,421 | 87,801 |
| 111,500 | 265 | 55,412 | 21,113 | 11,447 | 88,237 |
| 111,501 | 261 | 55,916 | 21,218 | 11,500 | 88,895 |
| 111,502 | 242 | 56,696 | 21,385 | 11,632 | 89,955 |
| 111,503 | 232 | 57,035 | 21,401 | 11,612 | 90,280 |
| 111,504 | 219 | 56,966 | 21,265 | 11,541 | 89,991 |
| 111,505 | 218 | 56,686 | 20,919 | 11,406 | 89,229 |
| 111,506 | 221 | 57,530 | 21,127 | 11,488 | 90,366 |
| 111,507 | 220 | 58,049 | 21,253 | 11,586 | 91,108 |
| 111,508 | 222 | 58,433 | 21,409 | 11,664 | 91,728 |
| 111,509 | 211 | 59,126 | 21,580 | 11,772 | 92,689 |
| 111,510 | 202 | 59,303 | 21,580 | 11,768 | 92,853 |
| 111,511 | 195 | 58,888 | 21,385 | 11,690 | 92,158 |

|         |     |        |        |        |        |
|---------|-----|--------|--------|--------|--------|
| 111,512 | 192 | 59,433 | 21,510 | 11,807 | 92,942 |
| 111,513 | 190 | 59,088 | 21,326 | 11,742 | 92,346 |
| 111,514 | 187 | 58,829 | 21,142 | 11,678 | 91,836 |
| 111,515 | 193 | 59,843 | 21,517 | 11,878 | 93,431 |
| 111,516 | 186 | 59,929 | 21,398 | 11,840 | 93,353 |
| 111,517 | 182 | 59,465 | 21,096 | 11,696 | 92,439 |
| 111,518 | 181 | 59,375 | 21,026 | 11,680 | 92,262 |
| 111,519 | 183 | 59,526 | 20,982 | 11,661 | 92,352 |
| 111,520 | 180 | 59,999 | 21,051 | 11,711 | 92,941 |
| 111,521 | 180 | 59,518 | 20,661 | 11,515 | 91,874 |
| 111,522 | 183 | 59,429 | 20,531 | 11,470 | 91,613 |
| 111,523 | 182 | 59,509 | 20,466 | 11,457 | 91,614 |
| 111,524 | 187 | 58,833 | 20,170 | 11,310 | 90,500 |
| 111,525 | 182 | 58,140 | 19,882 | 11,157 | 89,361 |
| 111,526 | 184 | 57,340 | 19,577 | 10,991 | 88,092 |
| 111,527 | 184 | 56,583 | 19,268 | 10,828 | 86,863 |
| 111,528 | 190 | 56,701 | 19,315 | 10,843 | 87,049 |
| 111,529 | 191 | 55,981 | 19,067 | 10,676 | 85,915 |
| 111,530 | 192 | 54,785 | 18,647 | 10,450 | 84,074 |
| 111,531 | 192 | 54,517 | 18,516 | 10,425 | 83,650 |
| 111,532 | 190 | 53,729 | 18,303 | 10,320 | 82,542 |
| 111,533 | 187 | 52,480 | 17,956 | 10,069 | 80,692 |
| 111,534 | 185 | 51,667 | 17,622 | 9,886  | 79,360 |
| 111,535 | 186 | 51,609 | 17,572 | 9,850  | 79,217 |
| 111,536 | 186 | 50,747 | 17,299 | 9,709  | 77,941 |
| 111,537 | 183 | 49,648 | 17,007 | 9,528  | 76,366 |
| 111,538 | 180 | 48,247 | 16,538 | 9,238  | 74,203 |
| 111,539 | 183 | 48,035 | 16,423 | 9,200  | 73,841 |
| 111,540 | 178 | 47,103 | 16,215 | 9,075  | 72,571 |
| 111,541 | 176 | 46,316 | 15,915 | 8,945  | 71,352 |
| 111,542 | 173 | 45,550 | 15,652 | 8,805  | 70,180 |
| 111,543 | 170 | 44,850 | 15,395 | 8,666  | 69,081 |

|         |     |        |        |       |        |
|---------|-----|--------|--------|-------|--------|
| 111,544 | 149 | 44,022 | 15,121 | 8,516 | 67,808 |
| 111,545 | 150 | 43,648 | 14,934 | 8,436 | 67,168 |
| 111,546 | 143 | 43,174 | 14,774 | 8,368 | 66,459 |
| 111,547 | 144 | 42,747 | 14,559 | 8,235 | 65,685 |
| 111,548 | 145 | 41,912 | 14,341 | 8,111 | 64,509 |
| 111,549 | 140 | 39,951 | 13,792 | 7,788 | 61,671 |
| 111,550 | 140 | 40,106 | 13,797 | 7,834 | 61,877 |
| 111,551 | 138 | 37,998 | 13,213 | 7,525 | 58,874 |
| 111,552 | 137 | 38,019 | 13,214 | 7,534 | 58,904 |
| 111,553 | 134 | 37,099 | 12,919 | 7,365 | 57,517 |
| 111,554 | 129 | 36,419 | 12,604 | 7,226 | 56,378 |
| 111,555 | 126 | 35,493 | 12,274 | 7,058 | 54,951 |
| 111,556 | 122 | 34,758 | 11,969 | 6,887 | 53,736 |
| 111,557 | 123 | 34,006 | 11,716 | 6,766 | 52,611 |
| 111,558 | 119 | 33,125 | 11,343 | 6,567 | 51,154 |
| 111,559 | 119 | 32,453 | 11,040 | 6,417 | 50,029 |
| 111,560 | 129 | 32,178 | 10,883 | 6,346 | 49,536 |
| 111,561 | 128 | 31,193 | 10,509 | 6,189 | 48,019 |
| 111,562 | 127 | 31,012 | 10,315 | 6,107 | 47,561 |
| 111,563 | 128 | 30,337 | 10,039 | 5,989 | 46,493 |
| 111,564 | 121 | 29,584 | 9,655  | 5,789 | 45,149 |
| 111,565 | 120 | 28,378 | 9,239  | 5,557 | 43,294 |
| 111,566 | 118 | 27,964 | 9,082  | 5,482 | 42,646 |
| 111,567 | 112 | 27,607 | 8,836  | 5,400 | 41,955 |
| 111,568 | 111 | 26,925 | 8,572  | 5,218 | 40,826 |
| 111,569 | 112 | 26,096 | 8,181  | 5,016 | 39,405 |
| 111,570 | 107 | 24,895 | 7,683  | 4,793 | 37,478 |
| 111,571 | 104 | 23,994 | 7,363  | 4,622 | 36,083 |
| 111,572 | 102 | 23,145 | 7,036  | 4,467 | 34,750 |
| 111,573 | 104 | 23,897 | 7,239  | 4,580 | 35,820 |
| 111,574 | 103 | 23,639 | 7,192  | 4,550 | 35,484 |
| 111,575 | 101 | 24,606 | 7,439  | 4,721 | 36,867 |

|         |     |        |       |       |        |
|---------|-----|--------|-------|-------|--------|
| 111,576 | 98  | 24,753 | 7,425 | 4,757 | 37,033 |
| 111,577 | 94  | 25,045 | 7,486 | 4,813 | 37,438 |
| 111,578 | 93  | 25,208 | 7,479 | 4,832 | 37,612 |
| 111,579 | 89  | 24,963 | 7,403 | 4,796 | 37,251 |
| 111,580 | 89  | 25,025 | 7,416 | 4,808 | 37,338 |
| 111,581 | 89  | 25,161 | 7,519 | 4,888 | 37,657 |
| 111,582 | 91  | 25,160 | 7,570 | 4,893 | 37,714 |
| 111,583 | 92  | 25,242 | 7,550 | 4,888 | 37,772 |
| 111,584 | 94  | 25,228 | 7,525 | 4,935 | 37,782 |
| 111,585 | 95  | 25,170 | 7,510 | 4,913 | 37,688 |
| 111,586 | 95  | 25,405 | 7,495 | 4,918 | 37,913 |
| 111,587 | 95  | 25,706 | 7,483 | 4,899 | 38,183 |
| 111,588 | 95  | 25,616 | 7,406 | 4,863 | 37,980 |
| 111,589 | 96  | 25,955 | 7,459 | 4,892 | 38,402 |
| 111,590 | 94  | 25,336 | 7,255 | 4,761 | 37,446 |
| 111,591 | 94  | 25,676 | 7,315 | 4,791 | 37,876 |
| 111,592 | 96  | 25,939 | 7,389 | 4,856 | 38,280 |
| 111,593 | 93  | 25,795 | 7,335 | 4,844 | 38,067 |
| 111,594 | 93  | 25,934 | 7,398 | 4,873 | 38,298 |
| 111,595 | 93  | 25,930 | 7,406 | 4,899 | 38,328 |
| 111,596 | 93  | 25,862 | 7,423 | 4,906 | 38,284 |
| 111,597 | 91  | 25,650 | 7,408 | 4,899 | 38,048 |
| 111,598 | 89  | 25,656 | 7,408 | 4,895 | 38,048 |
| 111,599 | 87  | 25,685 | 7,326 | 4,885 | 37,983 |
| 111,600 | 90  | 25,952 | 7,334 | 4,903 | 38,279 |
| 111,601 | 93  | 26,049 | 7,311 | 4,887 | 38,340 |
| 111,602 | 97  | 26,377 | 7,377 | 4,917 | 38,768 |
| 111,603 | 98  | 26,392 | 7,333 | 4,903 | 38,726 |
| 111,604 | 100 | 26,662 | 7,350 | 4,954 | 39,066 |
| 111,605 | 101 | 26,475 | 7,288 | 4,889 | 38,753 |
| 111,606 | 103 | 26,696 | 7,293 | 4,870 | 38,962 |
| 111,607 | 102 | 26,773 | 7,286 | 4,885 | 39,046 |



|         |    |        |       |       |        |
|---------|----|--------|-------|-------|--------|
| 111,608 | 99 | 26,831 | 7,229 | 4,827 | 38,986 |
| 111,609 | 97 | 26,696 | 7,213 | 4,832 | 38,838 |
| 111,610 | 92 | 26,883 | 7,233 | 4,885 | 39,093 |
| 111,611 | 86 | 26,793 | 7,256 | 4,916 | 39,051 |
| 111,612 | 86 | 26,683 | 7,261 | 4,940 | 38,970 |
| 111,613 | 85 | 26,718 | 7,272 | 4,967 | 39,042 |
| 111,614 | 77 | 26,679 | 7,280 | 4,953 | 38,989 |
| 111,615 | 74 | 26,326 | 7,179 | 4,927 | 38,506 |
| 111,616 | 78 | 26,473 | 7,200 | 4,937 | 38,688 |
| 111,617 | 78 | 26,274 | 7,161 | 4,933 | 38,446 |
| 111,618 | 83 | 26,540 | 7,332 | 5,005 | 38,960 |
| 111,619 | 82 | 26,553 | 7,329 | 5,006 | 38,970 |
| 111,620 | 79 | 26,626 | 7,383 | 5,016 | 39,104 |
| 111,621 | 81 | 26,654 | 7,364 | 5,026 | 39,125 |
| 111,622 | 77 | 26,340 | 7,300 | 4,997 | 38,714 |
| 111,623 | 74 | 26,676 | 7,440 | 5,097 | 39,287 |
| 111,624 | 72 | 26,521 | 7,400 | 5,110 | 39,103 |
| 111,625 | 72 | 26,320 | 7,329 | 5,060 | 38,781 |
| 111,626 | 75 | 26,670 | 7,375 | 5,112 | 39,232 |
| 111,627 | 77 | 26,053 | 7,235 | 4,986 | 38,351 |
| 111,628 | 81 | 26,260 | 7,290 | 5,002 | 38,633 |
| 111,629 | 81 | 26,275 | 7,268 | 4,975 | 38,599 |
| 111,630 | 78 | 26,210 | 7,218 | 4,951 | 38,457 |
| 111,631 | 76 | 26,651 | 7,323 | 5,010 | 39,060 |
| 111,632 | 78 | 26,638 | 7,236 | 4,954 | 38,906 |
| 111,633 | 76 | 26,904 | 7,263 | 4,992 | 39,235 |
| 111,634 | 78 | 27,203 | 7,294 | 5,039 | 39,614 |
| 111,635 | 76 | 26,861 | 7,216 | 4,956 | 39,109 |
| 111,636 | 76 | 26,884 | 7,221 | 4,972 | 39,153 |
| 111,637 | 74 | 26,820 | 7,262 | 5,017 | 39,173 |
| 111,638 | 71 | 26,825 | 7,310 | 5,063 | 39,269 |
| 111,639 | 72 | 26,839 | 7,339 | 5,095 | 39,345 |

|         |    |        |       |       |        |
|---------|----|--------|-------|-------|--------|
| 111,640 | 72 | 26,686 | 7,411 | 5,124 | 39,293 |
| 111,641 | 71 | 26,575 | 7,453 | 5,168 | 39,267 |
| 111,642 | 74 | 26,651 | 7,514 | 5,218 | 39,457 |
| 111,643 | 71 | 26,677 | 7,514 | 5,230 | 39,492 |
| 111,644 | 75 | 26,663 | 7,551 | 5,257 | 39,546 |
| 111,645 | 76 | 26,992 | 7,595 | 5,324 | 39,987 |
| 111,646 | 76 | 27,283 | 7,656 | 5,364 | 40,379 |
| 111,647 | 79 | 27,189 | 7,640 | 5,314 | 40,222 |
| 111,648 | 79 | 27,694 | 7,773 | 5,396 | 40,942 |
| 111,649 | 79 | 27,771 | 7,785 | 5,414 | 41,049 |
| 111,650 | 75 | 26,980 | 7,643 | 5,276 | 39,974 |
| 111,651 | 75 | 27,176 | 7,696 | 5,305 | 40,252 |
| 111,652 | 75 | 27,481 | 7,755 | 5,366 | 40,677 |
| 111,653 | 77 | 27,116 | 7,659 | 5,314 | 40,166 |
| 111,654 | 77 | 26,767 | 7,579 | 5,247 | 39,670 |
| 111,655 | 79 | 26,605 | 7,570 | 5,211 | 39,465 |
| 111,656 | 78 | 26,256 | 7,503 | 5,164 | 39,001 |
| 111,657 | 81 | 27,041 | 7,675 | 5,297 | 40,094 |
| 111,658 | 82 | 26,642 | 7,624 | 5,263 | 39,611 |
| 111,659 | 82 | 26,631 | 7,652 | 5,285 | 39,650 |
| 111,660 | 83 | 26,974 | 7,730 | 5,344 | 40,131 |
| 111,661 | 84 | 26,520 | 7,634 | 5,254 | 39,492 |
| 111,662 | 83 | 26,420 | 7,593 | 5,217 | 39,313 |
| 111,663 | 83 | 26,622 | 7,659 | 5,259 | 39,623 |
| 111,664 | 83 | 26,672 | 7,688 | 5,261 | 39,704 |
| 111,665 | 84 | 26,316 | 7,565 | 5,213 | 39,178 |
| 111,666 | 87 | 26,609 | 7,634 | 5,281 | 39,611 |
| 111,667 | 80 | 26,709 | 7,627 | 5,305 | 39,721 |
| 111,668 | 82 | 26,783 | 7,598 | 5,289 | 39,752 |
| 111,669 | 84 | 26,814 | 7,635 | 5,311 | 39,844 |
| 111,670 | 87 | 26,804 | 7,669 | 5,337 | 39,897 |
| 111,671 | 85 | 26,542 | 7,620 | 5,298 | 39,545 |

|         |     |        |       |       |        |
|---------|-----|--------|-------|-------|--------|
| 111,672 | 85  | 26,662 | 7,627 | 5,315 | 39,689 |
| 111,673 | 87  | 27,055 | 7,730 | 5,366 | 40,238 |
| 111,674 | 88  | 27,149 | 7,722 | 5,347 | 40,306 |
| 111,675 | 84  | 27,197 | 7,699 | 5,317 | 40,297 |
| 111,676 | 83  | 26,847 | 7,601 | 5,236 | 39,767 |
| 111,677 | 80  | 26,728 | 7,561 | 5,227 | 39,596 |
| 111,678 | 81  | 26,713 | 7,547 | 5,222 | 39,563 |
| 111,679 | 77  | 26,379 | 7,476 | 5,194 | 39,126 |
| 111,680 | 77  | 26,403 | 7,543 | 5,235 | 39,258 |
| 111,681 | 83  | 26,530 | 7,626 | 5,304 | 39,543 |
| 111,682 | 84  | 26,587 | 7,620 | 5,322 | 39,613 |
| 111,683 | 83  | 26,505 | 7,616 | 5,338 | 39,542 |
| 111,684 | 90  | 26,586 | 7,678 | 5,370 | 39,724 |
| 111,685 | 88  | 26,374 | 7,661 | 5,340 | 39,463 |
| 111,686 | 89  | 26,411 | 7,686 | 5,359 | 39,545 |
| 111,687 | 91  | 26,537 | 7,727 | 5,382 | 39,737 |
| 111,688 | 91  | 26,372 | 7,694 | 5,338 | 39,495 |
| 111,689 | 92  | 26,594 | 7,690 | 5,364 | 39,740 |
| 111,690 | 91  | 26,635 | 7,674 | 5,351 | 39,751 |
| 111,691 | 96  | 26,600 | 7,593 | 5,294 | 39,583 |
| 111,692 | 97  | 26,569 | 7,556 | 5,252 | 39,474 |
| 111,693 | 94  | 26,895 | 7,630 | 5,279 | 39,898 |
| 111,694 | 95  | 26,655 | 7,625 | 5,265 | 39,640 |
| 111,695 | 94  | 26,620 | 7,614 | 5,241 | 39,569 |
| 111,696 | 98  | 26,327 | 7,602 | 5,187 | 39,214 |
| 111,697 | 101 | 26,140 | 7,546 | 5,167 | 38,954 |
| 111,698 | 97  | 26,019 | 7,496 | 5,156 | 38,768 |
| 111,699 | 100 | 26,108 | 7,495 | 5,139 | 38,842 |
| 111,700 | 105 | 25,644 | 7,369 | 5,053 | 38,171 |
| 111,701 | 105 | 25,579 | 7,357 | 5,026 | 38,067 |
| 111,702 | 106 | 25,387 | 7,304 | 5,017 | 37,814 |
| 111,703 | 106 | 25,347 | 7,290 | 4,996 | 37,739 |

|         |     |        |       |       |        |
|---------|-----|--------|-------|-------|--------|
| 111,704 | 100 | 25,012 | 7,235 | 4,942 | 37,289 |
| 111,705 | 98  | 24,717 | 7,211 | 4,897 | 36,923 |
| 111,706 | 98  | 25,310 | 7,527 | 5,134 | 38,069 |
| 111,707 | 100 | 25,323 | 7,555 | 5,162 | 38,140 |
| 111,708 | 101 | 25,117 | 7,570 | 5,159 | 37,947 |
| 111,709 | 99  | 25,139 | 7,591 | 5,168 | 37,997 |
| 111,710 | 97  | 24,600 | 7,423 | 5,077 | 37,197 |
| 111,711 | 100 | 25,000 | 7,507 | 5,097 | 37,704 |
| 111,712 | 100 | 25,301 | 7,584 | 5,144 | 38,129 |
| 111,713 | 102 | 25,441 | 7,627 | 5,154 | 38,324 |
| 111,714 | 110 | 25,300 | 7,582 | 5,106 | 38,098 |
| 111,715 | 110 | 24,830 | 7,475 | 5,032 | 37,447 |
| 111,716 | 112 | 25,298 | 7,604 | 5,084 | 38,098 |
| 111,717 | 117 | 25,494 | 7,674 | 5,111 | 38,396 |
| 111,718 | 121 | 25,223 | 7,633 | 5,043 | 38,020 |
| 111,719 | 110 | 24,450 | 7,417 | 4,899 | 36,876 |
| 111,720 | 114 | 24,641 | 7,475 | 4,937 | 37,167 |
| 111,721 | 112 | 24,942 | 7,535 | 4,985 | 37,574 |
| 111,722 | 118 | 24,688 | 7,462 | 4,935 | 37,203 |
| 111,723 | 119 | 24,440 | 7,398 | 4,898 | 36,855 |
| 111,724 | 122 | 24,714 | 7,523 | 4,961 | 37,320 |
| 111,725 | 122 | 24,475 | 7,553 | 4,972 | 37,122 |
| 111,726 | 122 | 24,357 | 7,573 | 4,983 | 37,035 |
| 111,727 | 125 | 24,261 | 7,566 | 5,008 | 36,960 |
| 111,728 | 123 | 24,294 | 7,579 | 5,008 | 37,004 |
| 111,729 | 124 | 24,283 | 7,584 | 5,042 | 37,033 |
| 111,730 | 128 | 24,546 | 7,673 | 5,109 | 37,456 |
| 111,731 | 127 | 24,504 | 7,606 | 5,066 | 37,303 |
| 111,732 | 123 | 24,653 | 7,659 | 5,114 | 37,549 |
| 111,733 | 123 | 24,314 | 7,529 | 4,987 | 36,953 |
| 111,734 | 124 | 24,481 | 7,594 | 5,029 | 37,228 |
| 111,735 | 118 | 24,698 | 7,662 | 5,092 | 37,570 |

|         |     |        |       |       |        |
|---------|-----|--------|-------|-------|--------|
| 111,736 | 119 | 24,884 | 7,701 | 5,129 | 37,833 |
| 111,737 | 116 | 24,871 | 7,732 | 5,133 | 37,852 |
| 111,738 | 117 | 24,686 | 7,663 | 5,072 | 37,538 |
| 111,739 | 117 | 24,322 | 7,593 | 5,032 | 37,064 |
| 111,740 | 119 | 24,695 | 7,744 | 5,131 | 37,689 |
| 111,741 | 120 | 24,533 | 7,734 | 5,115 | 37,502 |
| 111,742 | 115 | 24,365 | 7,689 | 5,077 | 37,246 |
| 111,743 | 113 | 23,528 | 7,385 | 4,914 | 35,940 |
| 111,744 | 119 | 23,830 | 7,445 | 4,953 | 36,347 |
| 111,745 | 116 | 23,605 | 7,325 | 4,885 | 35,931 |
| 111,746 | 117 | 23,910 | 7,418 | 4,928 | 36,373 |
| 111,747 | 115 | 24,199 | 7,478 | 4,978 | 36,770 |
| 111,748 | 115 | 24,484 | 7,541 | 5,005 | 37,145 |
| 111,749 | 115 | 24,422 | 7,515 | 5,007 | 37,059 |
| 111,750 | 113 | 24,295 | 7,465 | 4,997 | 36,870 |
| 111,751 | 108 | 23,918 | 7,404 | 4,950 | 36,380 |
| 111,752 | 114 | 23,913 | 7,472 | 4,979 | 36,478 |
| 111,753 | 114 | 23,696 | 7,507 | 4,959 | 36,276 |
| 111,754 | 114 | 23,473 | 7,497 | 4,973 | 36,057 |
| 111,755 | 113 | 23,525 | 7,478 | 4,961 | 36,077 |
| 111,756 | 115 | 23,564 | 7,407 | 4,940 | 36,026 |
| 111,757 | 109 | 23,423 | 7,273 | 4,855 | 35,660 |
| 111,758 | 110 | 23,696 | 7,392 | 4,916 | 36,114 |
| 111,759 | 109 | 23,704 | 7,376 | 4,927 | 36,116 |
| 111,760 | 109 | 23,435 | 7,310 | 4,914 | 35,768 |
| 111,761 | 108 | 23,211 | 7,306 | 4,916 | 35,541 |
| 111,762 | 106 | 23,530 | 7,426 | 5,007 | 36,069 |
| 111,763 | 104 | 23,309 | 7,364 | 4,968 | 35,745 |
| 111,764 | 103 | 23,486 | 7,447 | 5,029 | 36,065 |
| 111,765 | 94  | 23,409 | 7,452 | 5,043 | 35,998 |
| 111,766 | 93  | 23,531 | 7,456 | 5,029 | 36,109 |
| 111,767 | 92  | 23,503 | 7,465 | 5,025 | 36,085 |

|         |    |        |       |       |        |
|---------|----|--------|-------|-------|--------|
| 111,768 | 87 | 23,504 | 7,465 | 5,034 | 36,090 |
| 111,769 | 85 | 23,010 | 7,301 | 4,980 | 35,376 |
| 111,770 | 86 | 23,305 | 7,366 | 5,004 | 35,761 |
| 111,771 | 82 | 23,571 | 7,394 | 5,042 | 36,089 |
| 111,772 | 83 | 23,452 | 7,399 | 5,060 | 35,994 |
| 111,773 | 79 | 23,493 | 7,382 | 5,086 | 36,040 |
| 111,774 | 81 | 23,284 | 7,254 | 5,008 | 35,627 |
| 111,775 | 81 | 23,485 | 7,236 | 5,016 | 35,818 |
| 111,776 | 81 | 23,386 | 7,156 | 4,975 | 35,598 |
| 111,777 | 85 | 23,778 | 7,235 | 5,021 | 36,119 |
| 111,778 | 83 | 24,128 | 7,312 | 5,076 | 36,599 |
| 111,779 | 79 | 23,906 | 7,214 | 5,007 | 36,206 |
| 111,780 | 79 | 24,078 | 7,264 | 5,038 | 36,459 |
| 111,781 | 75 | 24,065 | 7,235 | 5,024 | 36,399 |
| 111,782 | 76 | 24,153 | 7,271 | 5,012 | 36,512 |
| 111,783 | 79 | 24,004 | 7,202 | 4,957 | 36,242 |
| 111,784 | 77 | 23,464 | 7,085 | 4,906 | 35,532 |
| 111,785 | 75 | 23,517 | 7,144 | 4,985 | 35,721 |
| 111,786 | 75 | 23,532 | 7,168 | 4,985 | 35,760 |
| 111,787 | 75 | 23,390 | 7,110 | 4,952 | 35,527 |
| 111,788 | 75 | 23,402 | 7,044 | 4,939 | 35,460 |
| 111,789 | 72 | 23,396 | 6,937 | 4,886 | 35,291 |
| 111,790 | 74 | 23,673 | 7,045 | 4,932 | 35,724 |
| 111,791 | 71 | 23,772 | 7,077 | 4,937 | 35,857 |
| 111,792 | 69 | 24,014 | 7,089 | 4,945 | 36,117 |
| 111,793 | 67 | 23,820 | 7,018 | 4,936 | 35,841 |
| 111,794 | 67 | 23,850 | 7,012 | 4,927 | 35,856 |
| 111,795 | 61 | 23,976 | 7,055 | 4,966 | 36,058 |
| 111,796 | 60 | 23,670 | 6,997 | 4,931 | 35,658 |
| 111,797 | 60 | 24,099 | 7,086 | 5,018 | 36,263 |
| 111,798 | 58 | 24,289 | 7,127 | 5,045 | 36,519 |
| 111,799 | 59 | 24,403 | 7,157 | 5,075 | 36,694 |

|         |    |        |       |       |        |
|---------|----|--------|-------|-------|--------|
| 111,800 | 58 | 24,496 | 7,201 | 5,073 | 36,828 |
| 111,801 | 58 | 24,445 | 7,236 | 5,092 | 36,831 |
| 111,802 | 54 | 24,712 | 7,271 | 5,152 | 37,189 |
| 111,803 | 51 | 24,577 | 7,143 | 5,067 | 36,838 |
| 111,804 | 51 | 25,130 | 7,253 | 5,145 | 37,579 |
| 111,805 | 52 | 25,181 | 7,245 | 5,146 | 37,624 |
| 111,806 | 51 | 24,892 | 7,143 | 5,099 | 37,185 |
| 111,807 | 51 | 25,326 | 7,363 | 5,254 | 37,994 |
| 111,808 | 55 | 25,219 | 7,356 | 5,240 | 37,870 |
| 111,809 | 55 | 25,442 | 7,334 | 5,258 | 38,089 |
| 111,810 | 57 | 25,483 | 7,300 | 5,197 | 38,037 |
| 111,811 | 57 | 25,828 | 7,330 | 5,252 | 38,467 |
| 111,812 | 62 | 26,230 | 7,416 | 5,300 | 39,008 |
| 111,813 | 66 | 26,323 | 7,392 | 5,293 | 39,074 |
| 111,814 | 68 | 26,363 | 7,328 | 5,276 | 39,035 |
| 111,815 | 67 | 26,151 | 7,227 | 5,194 | 38,639 |
| 111,816 | 67 | 26,325 | 7,216 | 5,195 | 38,803 |
| 111,817 | 70 | 25,752 | 7,105 | 5,115 | 38,042 |
| 111,818 | 75 | 26,129 | 7,127 | 5,155 | 38,486 |
| 111,819 | 76 | 26,504 | 7,172 | 5,195 | 38,947 |
| 111,820 | 79 | 26,855 | 7,281 | 5,277 | 39,492 |
| 111,821 | 80 | 26,902 | 7,283 | 5,289 | 39,554 |
| 111,822 | 83 | 26,981 | 7,298 | 5,293 | 39,655 |
| 111,823 | 86 | 27,291 | 7,360 | 5,333 | 40,070 |
| 111,824 | 80 | 27,252 | 7,329 | 5,339 | 40,000 |
| 111,825 | 76 | 26,910 | 7,232 | 5,294 | 39,512 |
| 111,826 | 77 | 26,917 | 7,293 | 5,317 | 39,604 |
| 111,827 | 76 | 26,807 | 7,317 | 5,313 | 39,513 |
| 111,828 | 72 | 26,395 | 7,269 | 5,256 | 38,992 |
| 111,829 | 77 | 26,573 | 7,346 | 5,272 | 39,268 |
| 111,830 | 80 | 26,668 | 7,385 | 5,289 | 39,422 |
| 111,831 | 81 | 26,570 | 7,333 | 5,247 | 39,231 |

|         |     |        |       |       |        |
|---------|-----|--------|-------|-------|--------|
| 111,832 | 82  | 26,167 | 7,280 | 5,201 | 38,730 |
| 111,833 | 79  | 26,522 | 7,368 | 5,315 | 39,284 |
| 111,834 | 77  | 26,694 | 7,357 | 5,310 | 39,438 |
| 111,835 | 81  | 26,926 | 7,373 | 5,304 | 39,684 |
| 111,836 | 80  | 26,725 | 7,316 | 5,254 | 39,375 |
| 111,837 | 80  | 26,721 | 7,314 | 5,279 | 39,394 |
| 111,838 | 82  | 26,907 | 7,401 | 5,338 | 39,728 |
| 111,839 | 83  | 26,807 | 7,444 | 5,329 | 39,663 |
| 111,840 | 82  | 26,632 | 7,440 | 5,327 | 39,481 |
| 111,841 | 81  | 26,631 | 7,414 | 5,336 | 39,462 |
| 111,842 | 83  | 26,571 | 7,422 | 5,341 | 39,417 |
| 111,843 | 86  | 26,486 | 7,397 | 5,349 | 39,318 |
| 111,844 | 92  | 26,407 | 7,366 | 5,324 | 39,189 |
| 111,845 | 92  | 26,447 | 7,366 | 5,330 | 39,235 |
| 111,846 | 92  | 26,657 | 7,422 | 5,373 | 39,544 |
| 111,847 | 93  | 26,701 | 7,421 | 5,376 | 39,591 |
| 111,848 | 96  | 26,594 | 7,373 | 5,352 | 39,415 |
| 111,849 | 97  | 26,685 | 7,388 | 5,365 | 39,535 |
| 111,850 | 100 | 25,939 | 7,243 | 5,216 | 38,498 |
| 111,851 | 100 | 26,189 | 7,276 | 5,280 | 38,845 |
| 111,852 | 97  | 26,162 | 7,253 | 5,260 | 38,772 |
| 111,853 | 99  | 26,443 | 7,285 | 5,280 | 39,107 |
| 111,854 | 98  | 26,673 | 7,280 | 5,309 | 39,360 |
| 111,855 | 102 | 26,718 | 7,237 | 5,288 | 39,345 |
| 111,856 | 100 | 26,860 | 7,200 | 5,278 | 39,438 |
| 111,857 | 103 | 26,845 | 7,125 | 5,216 | 39,289 |
| 111,858 | 106 | 27,108 | 7,158 | 5,242 | 39,614 |
| 111,859 | 101 | 26,908 | 7,078 | 5,199 | 39,286 |
| 111,860 | 102 | 26,771 | 7,037 | 5,168 | 39,078 |
| 111,861 | 103 | 26,600 | 7,011 | 5,122 | 38,836 |
| 111,862 | 104 | 26,417 | 7,003 | 5,088 | 38,612 |
| 111,863 | 103 | 26,446 | 7,040 | 5,126 | 38,715 |



|         |     |        |       |       |        |
|---------|-----|--------|-------|-------|--------|
| 111,864 | 103 | 26,312 | 7,026 | 5,120 | 38,561 |
| 111,865 | 100 | 26,015 | 6,981 | 5,087 | 38,183 |
| 111,866 | 99  | 26,054 | 7,006 | 5,109 | 38,268 |
| 111,867 | 94  | 25,652 | 6,982 | 5,092 | 37,820 |
| 111,868 | 94  | 25,645 | 6,956 | 5,080 | 37,775 |
| 111,869 | 92  | 25,407 | 6,988 | 5,093 | 37,580 |
| 111,870 | 88  | 25,555 | 7,081 | 5,162 | 37,886 |
| 111,871 | 88  | 25,629 | 7,163 | 5,227 | 38,107 |
| 111,872 | 86  | 25,559 | 7,162 | 5,237 | 38,044 |
| 111,873 | 86  | 25,756 | 7,255 | 5,270 | 38,367 |
| 111,874 | 82  | 25,972 | 7,353 | 5,305 | 38,712 |
| 111,875 | 84  | 25,334 | 7,224 | 5,151 | 37,793 |
| 111,876 | 84  | 25,702 | 7,292 | 5,210 | 38,288 |
| 111,877 | 88  | 26,126 | 7,357 | 5,242 | 38,813 |
| 111,878 | 89  | 25,941 | 7,252 | 5,199 | 38,481 |
| 111,879 | 86  | 26,099 | 7,226 | 5,225 | 38,636 |
| 111,880 | 86  | 26,056 | 7,218 | 5,226 | 38,586 |
| 111,881 | 87  | 26,211 | 7,249 | 5,256 | 38,803 |
| 111,882 | 89  | 26,293 | 7,274 | 5,244 | 38,900 |
| 111,883 | 92  | 26,373 | 7,238 | 5,204 | 38,907 |
| 111,884 | 92  | 26,331 | 7,232 | 5,200 | 38,855 |
| 111,885 | 97  | 26,439 | 7,314 | 5,256 | 39,106 |
| 111,886 | 95  | 26,371 | 7,343 | 5,243 | 39,052 |
| 111,887 | 96  | 26,548 | 7,343 | 5,255 | 39,242 |
| 111,888 | 94  | 26,739 | 7,348 | 5,243 | 39,424 |
| 111,889 | 94  | 26,811 | 7,316 | 5,238 | 39,459 |
| 111,890 | 99  | 26,611 | 7,219 | 5,169 | 39,098 |
| 111,891 | 99  | 26,743 | 7,214 | 5,159 | 39,215 |
| 111,892 | 107 | 27,158 | 7,297 | 5,190 | 39,752 |
| 111,893 | 107 | 27,179 | 7,269 | 5,170 | 39,725 |
| 111,894 | 102 | 26,979 | 7,260 | 5,125 | 39,466 |
| 111,895 | 102 | 27,202 | 7,307 | 5,158 | 39,769 |

|         |     |        |       |       |        |
|---------|-----|--------|-------|-------|--------|
| 111,896 | 106 | 27,247 | 7,260 | 5,122 | 39,735 |
| 111,897 | 108 | 27,344 | 7,285 | 5,124 | 39,861 |
| 111,898 | 108 | 27,288 | 7,278 | 5,115 | 39,789 |
| 111,899 | 109 | 27,568 | 7,379 | 5,167 | 40,223 |
| 111,900 | 108 | 27,579 | 7,387 | 5,159 | 40,233 |
| 111,901 | 109 | 27,531 | 7,356 | 5,168 | 40,164 |
| 111,902 | 112 | 27,047 | 7,249 | 5,065 | 39,473 |
| 111,903 | 112 | 27,101 | 7,245 | 5,062 | 39,520 |
| 111,904 | 111 | 26,841 | 7,170 | 5,005 | 39,127 |
| 111,905 | 111 | 26,612 | 7,140 | 4,957 | 38,820 |
| 111,906 | 113 | 27,345 | 7,365 | 5,139 | 39,962 |
| 111,907 | 112 | 27,307 | 7,360 | 5,160 | 39,939 |
| 111,908 | 107 | 26,624 | 7,184 | 5,027 | 38,942 |
| 111,909 | 107 | 26,763 | 7,235 | 5,060 | 39,165 |
| 111,910 | 111 | 26,811 | 7,246 | 5,050 | 39,218 |
| 111,911 | 111 | 26,478 | 7,178 | 5,020 | 38,787 |
| 111,912 | 109 | 26,952 | 7,389 | 5,163 | 39,613 |
| 111,913 | 101 | 26,462 | 7,253 | 5,059 | 38,875 |
| 111,914 | 102 | 26,540 | 7,270 | 5,075 | 38,987 |
| 111,915 | 101 | 26,708 | 7,320 | 5,096 | 39,225 |
| 111,916 | 101 | 26,706 | 7,288 | 5,048 | 39,143 |
| 111,917 | 100 | 26,304 | 7,158 | 4,949 | 38,511 |
| 111,918 | 102 | 26,874 | 7,240 | 5,022 | 39,238 |
| 111,919 | 103 | 27,198 | 7,324 | 5,065 | 39,690 |
| 111,920 | 106 | 27,186 | 7,284 | 5,035 | 39,611 |
| 111,921 | 106 | 27,323 | 7,247 | 5,027 | 39,703 |
| 111,922 | 108 | 27,175 | 7,153 | 4,956 | 39,392 |
| 111,923 | 112 | 26,903 | 7,111 | 4,875 | 39,001 |
| 111,924 | 111 | 27,251 | 7,159 | 4,928 | 39,449 |
| 111,925 | 111 | 26,865 | 6,977 | 4,806 | 38,759 |
| 111,926 | 111 | 27,015 | 7,002 | 4,816 | 38,944 |
| 111,927 | 109 | 26,981 | 6,971 | 4,784 | 38,845 |

|         |     |        |       |       |        |
|---------|-----|--------|-------|-------|--------|
| 111,928 | 109 | 26,854 | 6,962 | 4,791 | 38,716 |
| 111,929 | 109 | 26,650 | 6,968 | 4,770 | 38,497 |
| 111,930 | 110 | 26,880 | 6,996 | 4,788 | 38,774 |
| 111,931 | 112 | 26,701 | 6,929 | 4,719 | 38,461 |
| 111,932 | 111 | 26,725 | 6,951 | 4,703 | 38,490 |
| 111,933 | 111 | 27,112 | 7,015 | 4,776 | 39,014 |
| 111,934 | 110 | 27,117 | 7,064 | 4,774 | 39,065 |
| 111,935 | 109 | 27,298 | 7,081 | 4,779 | 39,267 |
| 111,936 | 117 | 27,181 | 7,036 | 4,749 | 39,083 |
| 111,937 | 116 | 27,300 | 7,046 | 4,727 | 39,189 |
| 111,938 | 117 | 27,374 | 7,100 | 4,757 | 39,348 |
| 111,939 | 117 | 27,228 | 7,101 | 4,749 | 39,195 |
| 111,940 | 117 | 27,107 | 7,114 | 4,778 | 39,116 |
| 111,941 | 114 | 27,539 | 7,198 | 4,828 | 39,679 |
| 111,942 | 112 | 27,567 | 7,226 | 4,839 | 39,744 |
| 111,943 | 110 | 27,228 | 7,178 | 4,810 | 39,326 |
| 111,944 | 108 | 27,417 | 7,228 | 4,867 | 39,620 |
| 111,945 | 109 | 26,988 | 7,142 | 4,795 | 39,034 |
| 111,946 | 109 | 26,702 | 7,098 | 4,776 | 38,685 |
| 111,947 | 112 | 27,285 | 7,236 | 4,904 | 39,537 |
| 111,948 | 109 | 26,916 | 7,154 | 4,855 | 39,034 |
| 111,949 | 115 | 27,012 | 7,205 | 4,871 | 39,203 |
| 111,950 | 112 | 27,185 | 7,195 | 4,878 | 39,370 |
| 111,951 | 114 | 27,237 | 7,214 | 4,900 | 39,465 |
| 111,952 | 111 | 27,358 | 7,203 | 4,895 | 39,567 |
| 111,953 | 108 | 27,518 | 7,189 | 4,889 | 39,704 |
| 111,954 | 110 | 27,472 | 7,170 | 4,861 | 39,613 |
| 111,955 | 112 | 27,779 | 7,272 | 4,917 | 40,080 |
| 111,956 | 111 | 27,398 | 7,209 | 4,888 | 39,606 |
| 111,957 | 111 | 27,541 | 7,275 | 4,936 | 39,863 |
| 111,958 | 111 | 27,640 | 7,317 | 4,927 | 39,995 |
| 111,959 | 110 | 27,675 | 7,360 | 4,910 | 40,055 |

|         |     |        |       |       |        |
|---------|-----|--------|-------|-------|--------|
| 111,960 | 111 | 27,684 | 7,393 | 4,923 | 40,111 |
| 111,961 | 105 | 27,565 | 7,362 | 4,882 | 39,914 |
| 111,962 | 106 | 27,730 | 7,334 | 4,860 | 40,030 |
| 111,963 | 106 | 27,302 | 7,174 | 4,778 | 39,360 |
| 111,964 | 110 | 27,301 | 7,178 | 4,766 | 39,355 |
| 111,965 | 109 | 27,117 | 7,131 | 4,723 | 39,080 |
| 111,966 | 108 | 27,122 | 7,122 | 4,723 | 39,075 |
| 111,967 | 112 | 27,290 | 7,201 | 4,766 | 39,369 |
| 111,968 | 121 | 27,224 | 7,212 | 4,760 | 39,317 |
| 111,969 | 124 | 27,224 | 7,196 | 4,715 | 39,259 |
| 111,970 | 124 | 26,941 | 7,082 | 4,666 | 38,813 |
| 111,971 | 136 | 27,035 | 7,092 | 4,633 | 38,896 |
| 111,972 | 136 | 26,788 | 7,031 | 4,563 | 38,518 |
| 111,973 | 129 | 27,524 | 7,103 | 4,663 | 39,419 |
| 111,974 | 129 | 27,454 | 7,097 | 4,645 | 39,325 |
| 111,975 | 129 | 27,354 | 7,095 | 4,649 | 39,227 |
| 111,976 | 127 | 27,668 | 7,157 | 4,698 | 39,650 |
| 111,977 | 126 | 27,602 | 7,104 | 4,683 | 39,515 |
| 111,978 | 126 | 27,374 | 7,046 | 4,634 | 39,180 |
| 111,979 | 127 | 27,331 | 7,021 | 4,619 | 39,098 |
| 111,980 | 128 | 27,349 | 7,074 | 4,622 | 39,173 |
| 111,981 | 131 | 27,511 | 7,164 | 4,690 | 39,496 |
| 111,982 | 127 | 27,046 | 7,084 | 4,657 | 38,914 |
| 111,983 | 126 | 26,846 | 7,112 | 4,677 | 38,761 |
| 111,984 | 124 | 26,683 | 7,105 | 4,677 | 38,589 |
| 111,985 | 127 | 26,562 | 7,026 | 4,668 | 38,383 |
| 111,986 | 126 | 26,556 | 7,001 | 4,667 | 38,350 |
| 111,987 | 118 | 26,329 | 6,938 | 4,624 | 38,009 |
| 111,988 | 120 | 26,130 | 6,865 | 4,599 | 37,714 |
| 111,989 | 123 | 25,988 | 6,791 | 4,520 | 37,422 |
| 111,990 | 123 | 26,131 | 6,798 | 4,496 | 37,548 |
| 111,991 | 125 | 25,979 | 6,741 | 4,479 | 37,324 |

|         |     |        |       |       |        |
|---------|-----|--------|-------|-------|--------|
| 111,992 | 124 | 25,771 | 6,694 | 4,449 | 37,038 |
| 111,993 | 123 | 25,702 | 6,669 | 4,429 | 36,923 |
| 111,994 | 127 | 25,974 | 6,660 | 4,456 | 37,217 |
| 111,995 | 124 | 25,952 | 6,612 | 4,424 | 37,112 |
| 111,996 | 126 | 25,899 | 6,574 | 4,379 | 36,978 |
| 111,997 | 126 | 25,757 | 6,587 | 4,354 | 36,824 |
| 111,998 | 121 | 25,930 | 6,621 | 4,406 | 37,078 |
| 111,999 | 116 | 25,930 | 6,612 | 4,399 | 37,057 |
| 112,000 | 122 | 25,723 | 6,552 | 4,348 | 36,745 |
| 112,001 | 121 | 25,652 | 6,549 | 4,338 | 36,660 |
| 112,002 | 122 | 25,651 | 6,583 | 4,391 | 36,747 |
| 112,003 | 121 | 25,361 | 6,580 | 4,387 | 36,449 |
| 112,004 | 119 | 25,207 | 6,583 | 4,408 | 36,317 |
| 112,005 | 117 | 24,924 | 6,546 | 4,389 | 35,976 |
| 112,006 | 117 | 24,882 | 6,526 | 4,407 | 35,932 |
| 112,007 | 117 | 24,775 | 6,459 | 4,373 | 35,724 |
| 112,008 | 119 | 24,804 | 6,456 | 4,359 | 35,738 |
| 112,009 | 120 | 24,658 | 6,392 | 4,307 | 35,477 |
| 112,010 | 119 | 24,165 | 6,215 | 4,246 | 34,745 |
| 112,011 | 119 | 24,168 | 6,181 | 4,240 | 34,708 |
| 112,012 | 121 | 24,151 | 6,180 | 4,212 | 34,664 |
| 112,013 | 123 | 24,077 | 6,181 | 4,216 | 34,597 |
| 112,014 | 125 | 24,004 | 6,150 | 4,235 | 34,514 |
| 112,015 | 126 | 23,882 | 6,121 | 4,206 | 34,335 |
| 112,016 | 126 | 23,832 | 6,103 | 4,220 | 34,281 |
| 112,017 | 127 | 23,574 | 6,100 | 4,194 | 33,995 |
| 112,018 | 124 | 23,709 | 6,099 | 4,218 | 34,150 |
| 112,019 | 116 | 23,175 | 6,007 | 4,178 | 33,476 |
| 112,020 | 112 | 23,105 | 6,019 | 4,192 | 33,428 |
| 112,021 | 107 | 22,731 | 6,011 | 4,180 | 33,029 |
| 112,022 | 94  | 22,418 | 5,956 | 4,163 | 32,631 |
| 112,023 | 97  | 21,999 | 5,917 | 4,128 | 32,141 |

|         |     |        |       |       |        |
|---------|-----|--------|-------|-------|--------|
| 112,024 | 99  | 21,914 | 5,938 | 4,117 | 32,068 |
| 112,025 | 101 | 21,829 | 5,926 | 4,095 | 31,951 |
| 112,026 | 101 | 21,651 | 5,923 | 4,081 | 31,756 |
| 112,027 | 106 | 21,474 | 5,893 | 4,063 | 31,536 |
| 112,028 | 108 | 21,376 | 5,895 | 4,052 | 31,431 |
| 112,029 | 107 | 21,339 | 5,894 | 4,056 | 31,396 |
| 112,030 | 104 | 21,319 | 5,862 | 4,048 | 31,333 |
| 112,031 | 106 | 21,156 | 5,810 | 4,025 | 31,097 |
| 112,032 | 107 | 21,016 | 5,711 | 3,953 | 30,787 |
| 112,033 | 106 | 21,123 | 5,664 | 3,921 | 30,814 |
| 112,034 | 107 | 21,135 | 5,640 | 3,906 | 30,788 |
| 112,035 | 106 | 20,892 | 5,564 | 3,880 | 30,442 |
| 112,036 | 101 | 20,632 | 5,514 | 3,840 | 30,087 |
| 112,037 | 102 | 20,464 | 5,478 | 3,820 | 29,864 |
| 112,038 | 100 | 20,038 | 5,390 | 3,775 | 29,303 |
| 112,039 | 100 | 19,909 | 5,391 | 3,788 | 29,188 |
| 112,040 | 97  | 19,294 | 5,265 | 3,719 | 28,375 |
| 112,041 | 98  | 19,412 | 5,280 | 3,727 | 28,517 |
| 112,042 | 97  | 18,846 | 5,127 | 3,652 | 27,722 |
| 112,043 | 97  | 18,891 | 5,177 | 3,658 | 27,823 |
| 112,044 | 94  | 18,880 | 5,209 | 3,646 | 27,829 |
| 112,045 | 96  | 18,410 | 5,132 | 3,578 | 27,216 |
| 112,046 | 94  | 18,082 | 5,095 | 3,543 | 26,814 |
| 112,047 | 96  | 18,117 | 5,143 | 3,548 | 26,904 |
| 112,048 | 95  | 17,977 | 5,111 | 3,525 | 26,708 |
| 112,049 | 98  | 17,650 | 5,070 | 3,470 | 26,288 |
| 112,050 | 97  | 17,367 | 5,007 | 3,429 | 25,900 |
| 112,051 | 93  | 17,187 | 4,972 | 3,418 | 25,670 |
| 112,052 | 91  | 17,072 | 4,890 | 3,353 | 25,406 |
| 112,053 | 94  | 17,151 | 4,929 | 3,340 | 25,514 |
| 112,054 | 93  | 17,052 | 4,906 | 3,299 | 25,350 |
| 112,055 | 92  | 16,882 | 4,878 | 3,275 | 25,127 |

|         |     |        |       |       |        |
|---------|-----|--------|-------|-------|--------|
| 112,056 | 90  | 16,986 | 4,867 | 3,267 | 25,210 |
| 112,057 | 88  | 16,601 | 4,788 | 3,176 | 24,653 |
| 112,058 | 85  | 16,574 | 4,753 | 3,161 | 24,573 |
| 112,059 | 87  | 16,758 | 4,814 | 3,192 | 24,851 |
| 112,060 | 87  | 16,364 | 4,733 | 3,146 | 24,330 |
| 112,061 | 87  | 16,123 | 4,707 | 3,120 | 24,037 |
| 112,062 | 87  | 16,864 | 4,850 | 3,247 | 25,048 |
| 112,063 | 84  | 16,945 | 4,880 | 3,291 | 25,200 |
| 112,064 | 80  | 17,146 | 4,904 | 3,325 | 25,455 |
| 112,065 | 76  | 16,869 | 4,878 | 3,292 | 25,115 |
| 112,066 | 75  | 16,593 | 4,829 | 3,266 | 24,763 |
| 112,067 | 77  | 18,381 | 5,341 | 3,577 | 27,376 |
| 112,068 | 76  | 18,888 | 5,404 | 3,662 | 28,030 |
| 112,069 | 78  | 19,429 | 5,583 | 3,774 | 28,864 |
| 112,070 | 77  | 19,936 | 5,720 | 3,878 | 29,611 |
| 112,071 | 81  | 20,388 | 5,838 | 3,940 | 30,247 |
| 112,072 | 79  | 20,212 | 5,742 | 3,877 | 29,910 |
| 112,073 | 92  | 21,342 | 6,079 | 4,150 | 31,663 |
| 112,074 | 91  | 22,075 | 6,259 | 4,289 | 32,714 |
| 112,075 | 89  | 21,873 | 6,167 | 4,237 | 32,366 |
| 112,076 | 87  | 21,669 | 6,082 | 4,202 | 32,040 |
| 112,077 | 99  | 22,784 | 6,437 | 4,419 | 33,739 |
| 112,078 | 117 | 23,931 | 6,851 | 4,658 | 35,557 |
| 112,079 | 116 | 24,067 | 6,971 | 4,726 | 35,880 |
| 112,080 | 115 | 23,913 | 6,924 | 4,715 | 35,667 |
| 112,081 | 115 | 24,045 | 6,988 | 4,771 | 35,919 |
| 112,082 | 110 | 24,000 | 6,980 | 4,751 | 35,841 |
| 112,083 | 109 | 24,198 | 7,123 | 4,824 | 36,254 |
| 112,084 | 111 | 24,123 | 7,159 | 4,844 | 36,237 |
| 112,085 | 110 | 24,107 | 7,167 | 4,829 | 36,213 |
| 112,086 | 109 | 24,051 | 7,112 | 4,797 | 36,069 |
| 112,087 | 104 | 23,743 | 6,979 | 4,700 | 35,526 |

|         |     |        |       |       |        |
|---------|-----|--------|-------|-------|--------|
| 112,088 | 104 | 23,740 | 6,975 | 4,689 | 35,508 |
| 112,089 | 104 | 23,772 | 6,991 | 4,690 | 35,557 |
| 112,090 | 104 | 23,669 | 6,970 | 4,659 | 35,402 |
| 112,091 | 106 | 23,794 | 6,990 | 4,673 | 35,563 |
| 112,092 | 105 | 23,597 | 6,957 | 4,638 | 35,297 |
| 112,093 | 100 | 23,371 | 6,920 | 4,618 | 35,009 |
| 112,094 | 105 | 23,376 | 6,918 | 4,596 | 34,995 |
| 112,095 | 109 | 23,418 | 6,923 | 4,612 | 35,062 |
| 112,096 | 108 | 23,413 | 6,897 | 4,611 | 35,029 |
| 112,097 | 106 | 23,162 | 6,764 | 4,533 | 34,565 |
| 112,098 | 107 | 23,362 | 6,841 | 4,562 | 34,872 |
| 112,099 | 101 | 23,020 | 6,754 | 4,511 | 34,386 |
| 112,100 | 105 | 23,233 | 6,806 | 4,554 | 34,698 |
| 112,101 | 104 | 23,406 | 6,869 | 4,593 | 34,972 |
| 112,102 | 105 | 23,323 | 6,868 | 4,585 | 34,881 |
| 112,103 | 110 | 23,760 | 7,003 | 4,684 | 35,557 |
| 112,104 | 111 | 23,725 | 6,981 | 4,681 | 35,498 |
| 112,105 | 111 | 23,517 | 6,911 | 4,658 | 35,197 |
| 112,106 | 124 | 24,029 | 7,103 | 4,740 | 35,996 |
| 112,107 | 127 | 23,882 | 7,072 | 4,716 | 35,797 |
| 112,108 | 131 | 24,070 | 7,151 | 4,744 | 36,096 |
| 112,109 | 132 | 23,972 | 7,151 | 4,733 | 35,988 |
| 112,110 | 134 | 24,091 | 7,175 | 4,720 | 36,120 |
| 112,111 | 133 | 24,078 | 7,185 | 4,708 | 36,104 |
| 112,112 | 135 | 23,952 | 7,183 | 4,704 | 35,974 |
| 112,113 | 139 | 23,803 | 7,190 | 4,668 | 35,800 |
| 112,114 | 144 | 23,639 | 7,173 | 4,612 | 35,568 |
| 112,115 | 144 | 23,460 | 7,169 | 4,586 | 35,359 |
| 112,116 | 149 | 23,330 | 7,173 | 4,595 | 35,247 |
| 112,117 | 154 | 23,341 | 7,160 | 4,582 | 35,237 |
| 112,118 | 159 | 23,008 | 7,083 | 4,521 | 34,771 |
| 112,119 | 159 | 22,850 | 7,066 | 4,494 | 34,569 |



|         |     |        |       |       |        |
|---------|-----|--------|-------|-------|--------|
| 112,120 | 161 | 22,987 | 7,075 | 4,530 | 34,753 |
| 112,121 | 162 | 23,275 | 7,119 | 4,591 | 35,147 |
| 112,122 | 178 | 23,860 | 7,226 | 4,703 | 35,967 |
| 112,123 | 177 | 23,895 | 7,187 | 4,668 | 35,927 |
| 112,124 | 169 | 24,266 | 7,244 | 4,701 | 36,380 |
| 112,125 | 171 | 24,414 | 7,221 | 4,730 | 36,536 |
| 112,126 | 166 | 24,691 | 7,239 | 4,787 | 36,883 |
| 112,127 | 168 | 25,506 | 7,352 | 4,908 | 37,934 |
| 112,128 | 148 | 25,670 | 7,329 | 4,912 | 38,059 |
| 112,129 | 150 | 25,982 | 7,344 | 4,989 | 38,465 |
| 112,130 | 155 | 26,325 | 7,337 | 5,008 | 38,825 |
| 112,131 | 156 | 26,686 | 7,358 | 5,014 | 39,214 |
| 112,132 | 164 | 27,239 | 7,416 | 5,086 | 39,905 |
| 112,133 | 168 | 27,726 | 7,452 | 5,156 | 40,502 |
| 112,134 | 172 | 28,249 | 7,557 | 5,221 | 41,199 |
| 112,135 | 176 | 28,685 | 7,662 | 5,281 | 41,804 |
| 112,136 | 185 | 28,999 | 7,714 | 5,336 | 42,234 |
| 112,137 | 188 | 29,394 | 7,818 | 5,404 | 42,804 |
| 112,138 | 188 | 29,375 | 7,806 | 5,409 | 42,778 |
| 112,139 | 191 | 30,461 | 8,119 | 5,652 | 44,423 |
| 112,140 | 194 | 31,065 | 8,224 | 5,752 | 45,235 |
| 112,141 | 200 | 31,515 | 8,330 | 5,835 | 45,880 |
| 112,142 | 200 | 31,634 | 8,339 | 5,869 | 46,042 |
| 112,143 | 199 | 32,111 | 8,441 | 6,001 | 46,752 |
| 112,144 | 201 | 32,533 | 8,584 | 6,130 | 47,448 |
| 112,145 | 197 | 33,202 | 8,711 | 6,251 | 48,361 |
| 112,146 | 199 | 33,770 | 8,834 | 6,366 | 49,169 |
| 112,147 | 201 | 34,329 | 8,941 | 6,435 | 49,906 |
| 112,148 | 205 | 34,701 | 8,989 | 6,514 | 50,409 |
| 112,149 | 207 | 35,313 | 9,089 | 6,621 | 51,230 |
| 112,150 | 204 | 35,510 | 9,112 | 6,649 | 51,475 |
| 112,151 | 201 | 35,749 | 9,155 | 6,675 | 51,780 |

|         |     |        |       |       |        |
|---------|-----|--------|-------|-------|--------|
| 112,152 | 199 | 36,207 | 9,212 | 6,751 | 52,369 |
| 112,153 | 207 | 36,416 | 9,298 | 6,787 | 52,708 |
| 112,154 | 196 | 36,569 | 9,301 | 6,808 | 52,874 |
| 112,155 | 195 | 36,921 | 9,317 | 6,882 | 53,315 |
| 112,156 | 192 | 37,129 | 9,312 | 6,922 | 53,555 |
| 112,157 | 191 | 37,339 | 9,308 | 6,932 | 53,770 |
| 112,158 | 191 | 37,445 | 9,276 | 6,938 | 53,850 |
| 112,159 | 187 | 37,294 | 9,196 | 6,948 | 53,625 |
| 112,160 | 188 | 37,441 | 9,203 | 6,989 | 53,821 |
| 112,161 | 183 | 37,339 | 9,144 | 6,982 | 53,648 |
| 112,162 | 184 | 37,356 | 9,107 | 6,977 | 53,624 |
| 112,163 | 181 | 37,322 | 9,047 | 6,962 | 53,512 |
| 112,164 | 180 | 36,895 | 8,865 | 6,851 | 52,791 |
| 112,165 | 180 | 37,020 | 8,872 | 6,868 | 52,940 |
| 112,166 | 185 | 37,198 | 8,904 | 6,890 | 53,177 |
| 112,167 | 186 | 36,857 | 8,765 | 6,823 | 52,631 |
| 112,168 | 180 | 36,470 | 8,622 | 6,758 | 52,030 |
| 112,169 | 176 | 35,491 | 8,339 | 6,529 | 50,535 |
| 112,170 | 184 | 35,435 | 8,335 | 6,528 | 50,482 |
| 112,171 | 181 | 34,639 | 8,169 | 6,395 | 49,384 |
| 112,172 | 170 | 34,695 | 8,124 | 6,387 | 49,376 |
| 112,173 | 164 | 33,868 | 7,950 | 6,288 | 48,270 |
| 112,174 | 164 | 33,416 | 7,835 | 6,189 | 47,604 |
| 112,175 | 165 | 32,949 | 7,702 | 6,134 | 46,950 |
| 112,176 | 162 | 32,320 | 7,559 | 6,044 | 46,085 |
| 112,177 | 162 | 31,729 | 7,443 | 5,933 | 45,267 |
| 112,178 | 161 | 31,122 | 7,304 | 5,821 | 44,408 |
| 112,179 | 160 | 30,026 | 6,997 | 5,613 | 42,796 |
| 112,180 | 159 | 29,996 | 6,985 | 5,610 | 42,750 |
| 112,181 | 153 | 29,408 | 6,885 | 5,535 | 41,981 |
| 112,182 | 154 | 29,011 | 6,797 | 5,519 | 41,481 |
| 112,183 | 142 | 28,479 | 6,659 | 5,448 | 40,728 |

|         |     |        |       |       |        |
|---------|-----|--------|-------|-------|--------|
| 112,184 | 139 | 28,355 | 6,619 | 5,434 | 40,547 |
| 112,185 | 143 | 28,357 | 6,579 | 5,433 | 40,512 |
| 112,186 | 142 | 28,404 | 6,545 | 5,459 | 40,550 |
| 112,187 | 134 | 28,631 | 6,622 | 5,502 | 40,889 |
| 112,188 | 131 | 28,929 | 6,672 | 5,552 | 41,284 |
| 112,189 | 129 | 29,015 | 6,661 | 5,538 | 41,343 |
| 112,190 | 131 | 29,421 | 6,762 | 5,637 | 41,951 |
| 112,191 | 124 | 29,346 | 6,722 | 5,609 | 41,801 |
| 112,192 | 128 | 29,528 | 6,779 | 5,684 | 42,119 |
| 112,193 | 126 | 29,748 | 6,792 | 5,695 | 42,361 |
| 112,194 | 130 | 29,671 | 6,738 | 5,640 | 42,179 |
| 112,195 | 129 | 29,356 | 6,683 | 5,584 | 41,752 |
| 112,196 | 133 | 29,414 | 6,764 | 5,627 | 41,938 |
| 112,197 | 130 | 29,562 | 6,756 | 5,603 | 42,051 |
| 112,198 | 125 | 28,790 | 6,545 | 5,477 | 40,937 |
| 112,199 | 125 | 29,195 | 6,597 | 5,522 | 41,439 |
| 112,200 | 128 | 29,127 | 6,531 | 5,476 | 41,262 |
| 112,201 | 127 | 28,585 | 6,441 | 5,397 | 40,550 |
| 112,202 | 127 | 28,399 | 6,387 | 5,390 | 40,303 |
| 112,203 | 127 | 28,198 | 6,360 | 5,403 | 40,088 |
| 112,204 | 121 | 28,029 | 6,294 | 5,376 | 39,820 |
| 112,205 | 124 | 27,902 | 6,248 | 5,365 | 39,639 |
| 112,206 | 125 | 27,679 | 6,228 | 5,322 | 39,354 |
| 112,207 | 123 | 27,562 | 6,208 | 5,292 | 39,185 |
| 112,208 | 121 | 27,445 | 6,184 | 5,272 | 39,022 |
| 112,209 | 120 | 27,451 | 6,185 | 5,277 | 39,033 |
| 112,210 | 118 | 27,133 | 6,134 | 5,218 | 38,603 |
| 112,211 | 117 | 27,093 | 6,146 | 5,197 | 38,553 |
| 112,212 | 119 | 27,220 | 6,189 | 5,218 | 38,746 |
| 112,213 | 117 | 27,096 | 6,183 | 5,194 | 38,590 |
| 112,214 | 115 | 27,114 | 6,168 | 5,175 | 38,572 |
| 112,215 | 117 | 27,009 | 6,130 | 5,142 | 38,398 |

|         |     |        |       |       |        |
|---------|-----|--------|-------|-------|--------|
| 112,216 | 118 | 27,261 | 6,172 | 5,158 | 38,709 |
| 112,217 | 102 | 26,996 | 6,100 | 5,112 | 38,310 |
| 112,218 | 102 | 27,005 | 6,114 | 5,119 | 38,340 |
| 112,219 | 107 | 27,382 | 6,164 | 5,143 | 38,796 |
| 112,220 | 97  | 27,487 | 6,152 | 5,141 | 38,877 |
| 112,221 | 98  | 27,816 | 6,222 | 5,196 | 39,332 |
| 112,222 | 99  | 28,122 | 6,240 | 5,204 | 39,665 |
| 112,223 | 97  | 28,043 | 6,235 | 5,190 | 39,565 |
| 112,224 | 100 | 28,200 | 6,213 | 5,180 | 39,693 |
| 112,225 | 109 | 28,511 | 6,244 | 5,184 | 40,048 |
| 112,226 | 106 | 28,385 | 6,177 | 5,141 | 39,809 |
| 112,227 | 112 | 28,204 | 6,149 | 5,100 | 39,565 |
| 112,228 | 113 | 28,037 | 6,106 | 5,073 | 39,329 |
| 112,229 | 114 | 28,692 | 6,234 | 5,206 | 40,246 |
| 112,230 | 118 | 28,581 | 6,202 | 5,157 | 40,058 |
| 112,231 | 119 | 28,633 | 6,196 | 5,169 | 40,117 |
| 112,232 | 120 | 28,496 | 6,139 | 5,101 | 39,856 |
| 112,233 | 118 | 28,339 | 6,091 | 5,024 | 39,572 |
| 112,234 | 118 | 29,296 | 6,284 | 5,097 | 40,795 |
| 112,235 | 122 | 29,392 | 6,306 | 5,101 | 40,921 |
| 112,236 | 116 | 28,913 | 6,155 | 4,959 | 40,143 |
| 112,237 | 116 | 28,986 | 6,151 | 4,970 | 40,223 |
| 112,238 | 119 | 28,184 | 5,925 | 4,810 | 39,038 |
| 112,239 | 121 | 28,404 | 5,971 | 4,844 | 39,340 |
| 112,240 | 119 | 27,664 | 5,700 | 4,635 | 38,118 |
| 112,241 | 120 | 27,981 | 5,782 | 4,680 | 38,563 |
| 112,242 | 123 | 27,617 | 5,712 | 4,601 | 38,053 |
| 112,243 | 120 | 27,793 | 5,656 | 4,537 | 38,106 |
| 112,244 | 116 | 27,172 | 5,504 | 4,413 | 37,205 |
| 112,245 | 110 | 27,296 | 5,474 | 4,380 | 37,260 |
| 112,246 | 107 | 27,150 | 5,392 | 4,308 | 36,957 |
| 112,247 | 107 | 26,995 | 5,308 | 4,235 | 36,645 |

|         |     |        |       |       |        |
|---------|-----|--------|-------|-------|--------|
| 112,248 | 107 | 26,942 | 5,296 | 4,211 | 36,556 |
| 112,249 | 111 | 26,967 | 5,291 | 4,211 | 36,580 |
| 112,250 | 111 | 26,627 | 5,236 | 4,178 | 36,152 |
| 112,251 | 114 | 26,905 | 5,334 | 4,239 | 36,592 |
| 112,252 | 116 | 27,403 | 5,430 | 4,273 | 37,222 |
| 112,253 | 115 | 27,506 | 5,389 | 4,218 | 37,228 |
| 112,254 | 116 | 27,722 | 5,399 | 4,210 | 37,447 |
| 112,255 | 116 | 27,983 | 5,453 | 4,254 | 37,806 |
| 112,256 | 120 | 27,993 | 5,504 | 4,243 | 37,860 |
| 112,257 | 120 | 28,068 | 5,502 | 4,247 | 37,937 |
| 112,258 | 123 | 28,175 | 5,501 | 4,251 | 38,050 |
| 112,259 | 125 | 28,294 | 5,538 | 4,257 | 38,214 |
| 112,260 | 126 | 28,450 | 5,544 | 4,237 | 38,357 |
| 112,261 | 126 | 28,428 | 5,516 | 4,222 | 38,292 |
| 112,262 | 130 | 28,987 | 5,604 | 4,309 | 39,030 |
| 112,263 | 129 | 28,919 | 5,627 | 4,316 | 38,991 |
| 112,264 | 131 | 29,022 | 5,625 | 4,322 | 39,100 |
| 112,265 | 131 | 28,829 | 5,614 | 4,307 | 38,881 |
| 112,266 | 136 | 29,320 | 5,743 | 4,395 | 39,594 |
| 112,267 | 142 | 29,568 | 5,782 | 4,452 | 39,944 |
| 112,268 | 142 | 29,425 | 5,751 | 4,403 | 39,721 |
| 112,269 | 142 | 29,325 | 5,732 | 4,402 | 39,601 |
| 112,270 | 141 | 30,249 | 5,952 | 4,555 | 40,897 |
| 112,271 | 145 | 30,131 | 5,958 | 4,533 | 40,767 |
| 112,272 | 150 | 29,801 | 5,921 | 4,491 | 40,363 |
| 112,273 | 154 | 29,574 | 5,908 | 4,474 | 40,110 |
| 112,274 | 154 | 29,483 | 5,899 | 4,482 | 40,018 |
| 112,275 | 160 | 29,857 | 6,028 | 4,526 | 40,571 |
| 112,276 | 149 | 29,558 | 6,012 | 4,512 | 40,231 |
| 112,277 | 148 | 29,695 | 6,058 | 4,503 | 40,404 |
| 112,278 | 142 | 29,937 | 6,086 | 4,496 | 40,661 |
| 112,279 | 140 | 29,775 | 6,035 | 4,477 | 40,427 |

|         |     |        |       |       |        |
|---------|-----|--------|-------|-------|--------|
| 112,280 | 141 | 29,903 | 6,070 | 4,481 | 40,595 |
| 112,281 | 140 | 30,029 | 6,151 | 4,495 | 40,815 |
| 112,282 | 140 | 30,301 | 6,186 | 4,542 | 41,169 |
| 112,283 | 142 | 30,406 | 6,240 | 4,575 | 41,363 |
| 112,284 | 144 | 30,333 | 6,251 | 4,595 | 41,323 |
| 112,285 | 149 | 30,463 | 6,253 | 4,602 | 41,467 |
| 112,286 | 150 | 30,626 | 6,299 | 4,624 | 41,699 |
| 112,287 | 157 | 30,681 | 6,307 | 4,626 | 41,771 |
| 112,288 | 157 | 30,419 | 6,270 | 4,597 | 41,443 |
| 112,289 | 160 | 30,398 | 6,313 | 4,594 | 41,465 |
| 112,290 | 159 | 30,166 | 6,278 | 4,588 | 41,191 |
| 112,291 | 159 | 30,607 | 6,425 | 4,714 | 41,905 |
| 112,292 | 162 | 30,181 | 6,352 | 4,656 | 41,351 |
| 112,293 | 159 | 29,721 | 6,305 | 4,635 | 40,820 |
| 112,294 | 156 | 29,816 | 6,445 | 4,735 | 41,152 |
| 112,295 | 160 | 30,024 | 6,494 | 4,784 | 41,462 |
| 112,296 | 163 | 29,919 | 6,484 | 4,798 | 41,364 |
| 112,297 | 167 | 29,916 | 6,485 | 4,811 | 41,379 |
| 112,298 | 166 | 29,578 | 6,421 | 4,771 | 40,936 |
| 112,299 | 169 | 29,381 | 6,499 | 4,793 | 40,842 |
| 112,300 | 169 | 29,360 | 6,508 | 4,800 | 40,837 |
| 112,301 | 170 | 29,733 | 6,580 | 4,836 | 41,319 |
| 112,302 | 172 | 29,666 | 6,573 | 4,831 | 41,242 |
| 112,303 | 171 | 29,410 | 6,530 | 4,772 | 40,883 |
| 112,304 | 170 | 29,013 | 6,463 | 4,735 | 40,381 |
| 112,305 | 159 | 27,875 | 6,263 | 4,554 | 38,851 |
| 112,306 | 159 | 28,104 | 6,297 | 4,588 | 39,148 |
| 112,307 | 167 | 28,334 | 6,337 | 4,606 | 39,444 |
| 112,308 | 167 | 28,289 | 6,349 | 4,603 | 39,408 |
| 112,309 | 164 | 28,448 | 6,418 | 4,641 | 39,671 |
| 112,310 | 176 | 28,608 | 6,486 | 4,691 | 39,961 |
| 112,311 | 184 | 28,535 | 6,508 | 4,715 | 39,942 |

|         |     |        |       |       |        |
|---------|-----|--------|-------|-------|--------|
| 112,312 | 189 | 28,529 | 6,486 | 4,701 | 39,905 |
| 112,313 | 185 | 28,147 | 6,411 | 4,617 | 39,360 |
| 112,314 | 186 | 28,396 | 6,462 | 4,638 | 39,682 |
| 112,315 | 180 | 28,331 | 6,456 | 4,624 | 39,591 |
| 112,316 | 193 | 28,674 | 6,559 | 4,691 | 40,117 |
| 112,317 | 196 | 28,364 | 6,507 | 4,658 | 39,725 |
| 112,318 | 191 | 27,926 | 6,483 | 4,588 | 39,188 |
| 112,319 | 190 | 27,875 | 6,546 | 4,648 | 39,259 |
| 112,320 | 193 | 27,647 | 6,517 | 4,597 | 38,954 |
| 112,321 | 192 | 27,209 | 6,400 | 4,537 | 38,338 |
| 112,322 | 192 | 27,155 | 6,365 | 4,496 | 38,208 |
| 112,323 | 188 | 27,085 | 6,343 | 4,464 | 38,080 |
| 112,324 | 188 | 27,033 | 6,339 | 4,452 | 38,012 |
| 112,325 | 189 | 27,234 | 6,404 | 4,508 | 38,335 |
| 112,326 | 185 | 27,071 | 6,345 | 4,483 | 38,084 |
| 112,327 | 186 | 26,790 | 6,281 | 4,424 | 37,681 |
| 112,328 | 189 | 26,690 | 6,300 | 4,457 | 37,636 |
| 112,329 | 192 | 26,407 | 6,235 | 4,432 | 37,266 |
| 112,330 | 189 | 26,187 | 6,189 | 4,390 | 36,955 |
| 112,331 | 194 | 26,098 | 6,160 | 4,382 | 36,834 |
| 112,332 | 190 | 25,747 | 6,064 | 4,324 | 36,325 |
| 112,333 | 191 | 26,043 | 6,123 | 4,388 | 36,745 |
| 112,334 | 185 | 25,668 | 6,084 | 4,363 | 36,300 |
| 112,335 | 185 | 25,576 | 6,067 | 4,335 | 36,163 |
| 112,336 | 185 | 26,088 | 6,211 | 4,441 | 36,925 |
| 112,337 | 195 | 26,243 | 6,264 | 4,507 | 37,209 |
| 112,338 | 190 | 26,162 | 6,243 | 4,513 | 37,108 |
| 112,339 | 186 | 26,317 | 6,282 | 4,552 | 37,337 |
| 112,340 | 188 | 26,517 | 6,359 | 4,612 | 37,676 |
| 112,341 | 186 | 26,365 | 6,332 | 4,593 | 37,476 |
| 112,342 | 192 | 26,565 | 6,352 | 4,616 | 37,725 |
| 112,343 | 194 | 26,921 | 6,384 | 4,637 | 38,136 |

|         |     |        |       |       |        |
|---------|-----|--------|-------|-------|--------|
| 112,344 | 195 | 26,922 | 6,365 | 4,637 | 38,119 |
| 112,345 | 197 | 27,022 | 6,416 | 4,665 | 38,300 |
| 112,346 | 197 | 27,540 | 6,575 | 4,786 | 39,098 |
| 112,347 | 192 | 27,120 | 6,523 | 4,733 | 38,568 |
| 112,348 | 202 | 27,498 | 6,661 | 4,828 | 39,189 |
| 112,349 | 197 | 27,421 | 6,607 | 4,837 | 39,062 |
| 112,350 | 199 | 27,789 | 6,663 | 4,878 | 39,529 |
| 112,351 | 201 | 27,923 | 6,705 | 4,905 | 39,734 |
| 112,352 | 198 | 27,574 | 6,609 | 4,861 | 39,242 |
| 112,353 | 192 | 27,606 | 6,663 | 4,886 | 39,347 |
| 112,354 | 199 | 27,546 | 6,647 | 4,883 | 39,275 |
| 112,355 | 199 | 27,594 | 6,631 | 4,872 | 39,296 |
| 112,356 | 204 | 27,954 | 6,726 | 4,947 | 39,831 |
| 112,357 | 204 | 27,879 | 6,723 | 4,947 | 39,753 |
| 112,358 | 208 | 28,507 | 6,822 | 5,069 | 40,606 |
| 112,359 | 208 | 28,508 | 6,825 | 5,086 | 40,627 |
| 112,360 | 231 | 29,354 | 6,978 | 5,256 | 41,819 |
| 112,361 | 234 | 29,558 | 7,033 | 5,307 | 42,132 |
| 112,362 | 227 | 29,662 | 7,051 | 5,331 | 42,271 |
| 112,363 | 220 | 29,510 | 7,021 | 5,349 | 42,100 |
| 112,364 | 218 | 29,458 | 6,997 | 5,359 | 42,032 |
| 112,365 | 220 | 29,692 | 6,999 | 5,387 | 42,298 |
| 112,366 | 214 | 29,988 | 7,022 | 5,438 | 42,662 |
| 112,367 | 218 | 30,000 | 7,006 | 5,422 | 42,646 |
| 112,368 | 213 | 30,097 | 6,995 | 5,405 | 42,710 |
| 112,369 | 215 | 30,451 | 7,021 | 5,458 | 43,145 |
| 112,370 | 212 | 30,238 | 6,945 | 5,428 | 42,823 |
| 112,371 | 213 | 30,523 | 6,985 | 5,480 | 43,201 |
| 112,372 | 213 | 30,760 | 7,041 | 5,544 | 43,558 |
| 112,373 | 209 | 30,790 | 7,054 | 5,585 | 43,638 |
| 112,374 | 213 | 30,769 | 7,085 | 5,607 | 43,674 |
| 112,375 | 225 | 30,938 | 7,090 | 5,639 | 43,892 |



|         |     |        |       |       |        |
|---------|-----|--------|-------|-------|--------|
| 112,376 | 224 | 30,773 | 7,029 | 5,575 | 43,601 |
| 112,377 | 223 | 30,402 | 6,963 | 5,517 | 43,105 |
| 112,378 | 229 | 31,076 | 7,066 | 5,667 | 44,038 |
| 112,379 | 226 | 31,252 | 7,071 | 5,666 | 44,215 |
| 112,380 | 223 | 31,244 | 7,106 | 5,685 | 44,258 |
| 112,381 | 222 | 30,908 | 7,087 | 5,667 | 43,884 |
| 112,382 | 216 | 30,544 | 7,027 | 5,616 | 43,403 |
| 112,383 | 229 | 30,847 | 7,103 | 5,687 | 43,866 |
| 112,384 | 225 | 30,572 | 7,047 | 5,654 | 43,498 |
| 112,385 | 225 | 30,665 | 7,027 | 5,635 | 43,552 |
| 112,386 | 223 | 30,531 | 6,999 | 5,643 | 43,396 |
| 112,387 | 221 | 30,547 | 7,026 | 5,657 | 43,451 |
| 112,388 | 219 | 30,670 | 7,058 | 5,658 | 43,605 |
| 112,389 | 220 | 30,419 | 6,986 | 5,608 | 43,233 |
| 112,390 | 229 | 30,404 | 6,986 | 5,561 | 43,180 |
| 112,391 | 232 | 30,465 | 6,950 | 5,535 | 43,182 |
| 112,392 | 233 | 30,566 | 6,915 | 5,483 | 43,197 |
| 112,393 | 229 | 30,712 | 6,924 | 5,487 | 43,352 |
| 112,394 | 232 | 31,000 | 6,959 | 5,477 | 43,668 |
| 112,395 | 233 | 30,972 | 6,944 | 5,471 | 43,620 |
| 112,396 | 236 | 30,961 | 6,948 | 5,472 | 43,617 |
| 112,397 | 240 | 30,544 | 6,807 | 5,384 | 42,975 |
| 112,398 | 245 | 30,734 | 6,849 | 5,400 | 43,228 |
| 112,399 | 238 | 31,087 | 6,917 | 5,441 | 43,683 |
| 112,400 | 241 | 31,364 | 7,002 | 5,448 | 44,055 |
| 112,401 | 249 | 31,246 | 6,975 | 5,422 | 43,892 |
| 112,402 | 253 | 31,304 | 6,997 | 5,417 | 43,971 |
| 112,403 | 254 | 31,319 | 6,995 | 5,397 | 43,965 |
| 112,404 | 255 | 31,339 | 6,980 | 5,427 | 44,001 |
| 112,405 | 259 | 31,521 | 6,978 | 5,466 | 44,224 |
| 112,406 | 259 | 31,344 | 6,952 | 5,430 | 43,985 |
| 112,407 | 257 | 31,324 | 6,973 | 5,417 | 43,971 |

|         |     |        |       |       |        |
|---------|-----|--------|-------|-------|--------|
| 112,408 | 251 | 31,371 | 6,957 | 5,453 | 44,032 |
| 112,409 | 247 | 31,486 | 6,985 | 5,480 | 44,198 |
| 112,410 | 228 | 31,553 | 7,066 | 5,494 | 44,341 |
| 112,411 | 223 | 31,462 | 7,062 | 5,486 | 44,233 |
| 112,412 | 215 | 31,144 | 6,972 | 5,422 | 43,753 |
| 112,413 | 218 | 30,675 | 6,913 | 5,392 | 43,198 |
| 112,414 | 219 | 30,636 | 6,906 | 5,345 | 43,106 |
| 112,415 | 219 | 30,636 | 6,882 | 5,321 | 43,058 |
| 112,416 | 222 | 30,712 | 6,964 | 5,376 | 43,274 |
| 112,417 | 220 | 30,620 | 6,970 | 5,341 | 43,151 |
| 112,418 | 214 | 30,370 | 6,928 | 5,363 | 42,875 |
| 112,419 | 217 | 30,285 | 6,926 | 5,380 | 42,808 |
| 112,420 | 214 | 30,312 | 6,976 | 5,411 | 42,913 |
| 112,421 | 217 | 29,596 | 6,894 | 5,336 | 42,043 |
| 112,422 | 218 | 29,565 | 6,936 | 5,362 | 42,081 |
| 112,423 | 216 | 29,696 | 6,963 | 5,353 | 42,228 |
| 112,424 | 215 | 29,730 | 6,967 | 5,327 | 42,239 |
| 112,425 | 212 | 29,634 | 6,953 | 5,310 | 42,109 |
| 112,426 | 200 | 29,373 | 6,950 | 5,294 | 41,817 |
| 112,427 | 194 | 29,388 | 6,965 | 5,295 | 41,842 |
| 112,428 | 195 | 29,346 | 6,934 | 5,306 | 41,781 |
| 112,429 | 193 | 29,207 | 6,924 | 5,282 | 41,606 |
| 112,430 | 194 | 28,999 | 6,932 | 5,270 | 41,395 |
| 112,431 | 197 | 28,796 | 6,904 | 5,256 | 41,153 |
| 112,432 | 218 | 29,187 | 6,938 | 5,264 | 41,607 |
| 112,433 | 218 | 29,207 | 6,932 | 5,271 | 41,628 |
| 112,434 | 219 | 28,931 | 6,866 | 5,223 | 41,239 |
| 112,435 | 221 | 28,845 | 6,858 | 5,183 | 41,107 |
| 112,436 | 218 | 29,021 | 6,880 | 5,209 | 41,328 |
| 112,437 | 219 | 28,505 | 6,775 | 5,138 | 40,637 |
| 112,438 | 220 | 28,408 | 6,751 | 5,095 | 40,474 |
| 112,439 | 213 | 27,939 | 6,678 | 5,050 | 39,880 |

|         |     |        |       |       |        |
|---------|-----|--------|-------|-------|--------|
| 112,440 | 213 | 27,772 | 6,693 | 5,036 | 39,714 |
| 112,441 | 202 | 27,531 | 6,633 | 5,045 | 39,411 |
| 112,442 | 202 | 27,427 | 6,641 | 5,028 | 39,298 |
| 112,443 | 195 | 27,273 | 6,636 | 5,001 | 39,105 |
| 112,444 | 193 | 27,070 | 6,588 | 4,976 | 38,827 |
| 112,445 | 191 | 26,863 | 6,544 | 4,965 | 38,563 |
| 112,446 | 190 | 26,597 | 6,491 | 4,923 | 38,201 |
| 112,447 | 189 | 26,636 | 6,493 | 4,887 | 38,205 |
| 112,448 | 193 | 26,652 | 6,565 | 4,914 | 38,324 |
| 112,449 | 188 | 26,183 | 6,508 | 4,859 | 37,738 |
| 112,450 | 181 | 26,038 | 6,491 | 4,821 | 37,531 |
| 112,451 | 177 | 26,077 | 6,479 | 4,846 | 37,579 |
| 112,452 | 168 | 25,602 | 6,354 | 4,788 | 36,912 |
| 112,453 | 170 | 25,518 | 6,320 | 4,748 | 36,756 |
| 112,454 | 168 | 25,587 | 6,321 | 4,716 | 36,792 |
| 112,455 | 166 | 25,389 | 6,326 | 4,694 | 36,575 |
| 112,456 | 166 | 25,306 | 6,368 | 4,695 | 36,535 |
| 112,457 | 164 | 25,364 | 6,373 | 4,709 | 36,610 |
| 112,458 | 170 | 25,254 | 6,343 | 4,670 | 36,437 |
| 112,459 | 171 | 25,094 | 6,382 | 4,655 | 36,302 |
| 112,460 | 173 | 24,951 | 6,364 | 4,597 | 36,085 |
| 112,461 | 170 | 24,467 | 6,159 | 4,470 | 35,266 |
| 112,462 | 177 | 24,338 | 6,150 | 4,418 | 35,083 |
| 112,463 | 178 | 24,338 | 6,147 | 4,392 | 35,055 |
| 112,464 | 175 | 24,196 | 6,165 | 4,392 | 34,928 |
| 112,465 | 179 | 24,345 | 6,179 | 4,431 | 35,134 |
| 112,466 | 183 | 24,340 | 6,167 | 4,384 | 35,074 |
| 112,467 | 180 | 24,202 | 6,084 | 4,336 | 34,802 |
| 112,468 | 185 | 24,475 | 6,121 | 4,349 | 35,130 |
| 112,469 | 186 | 24,560 | 6,159 | 4,327 | 35,232 |
| 112,470 | 183 | 24,508 | 6,134 | 4,313 | 35,138 |
| 112,471 | 181 | 24,407 | 6,050 | 4,257 | 34,895 |

|         |     |        |       |       |        |
|---------|-----|--------|-------|-------|--------|
| 112,472 | 187 | 24,498 | 6,049 | 4,238 | 34,972 |
| 112,473 | 187 | 24,595 | 6,027 | 4,203 | 35,012 |
| 112,474 | 184 | 24,576 | 5,984 | 4,196 | 34,940 |
| 112,475 | 188 | 24,527 | 5,943 | 4,168 | 34,826 |
| 112,476 | 189 | 24,470 | 5,928 | 4,149 | 34,736 |
| 112,477 | 187 | 24,312 | 5,885 | 4,096 | 34,480 |
| 112,478 | 186 | 24,275 | 5,907 | 4,087 | 34,455 |
| 112,479 | 189 | 23,776 | 5,772 | 3,973 | 33,710 |
| 112,480 | 189 | 23,768 | 5,746 | 3,956 | 33,659 |
| 112,481 | 190 | 23,354 | 5,672 | 3,891 | 33,107 |
| 112,482 | 186 | 22,999 | 5,600 | 3,826 | 32,611 |
| 112,483 | 168 | 23,487 | 5,728 | 3,927 | 33,310 |
| 112,484 | 164 | 23,163 | 5,688 | 3,858 | 32,873 |
| 112,485 | 159 | 22,895 | 5,669 | 3,818 | 32,541 |
| 112,486 | 164 | 22,840 | 5,684 | 3,824 | 32,512 |
| 112,487 | 163 | 22,454 | 5,621 | 3,775 | 32,013 |
| 112,488 | 154 | 22,473 | 5,654 | 3,791 | 32,072 |
| 112,489 | 153 | 22,345 | 5,647 | 3,767 | 31,912 |
| 112,490 | 152 | 22,384 | 5,661 | 3,774 | 31,971 |
| 112,491 | 156 | 22,195 | 5,624 | 3,708 | 31,683 |
| 112,492 | 156 | 22,068 | 5,620 | 3,693 | 31,537 |
| 112,493 | 155 | 22,080 | 5,623 | 3,689 | 31,547 |
| 112,494 | 164 | 21,958 | 5,605 | 3,704 | 31,431 |
| 112,495 | 160 | 21,881 | 5,606 | 3,708 | 31,355 |
| 112,496 | 162 | 22,095 | 5,684 | 3,731 | 31,672 |
| 112,497 | 157 | 21,960 | 5,668 | 3,705 | 31,490 |
| 112,498 | 166 | 21,833 | 5,585 | 3,669 | 31,253 |
| 112,499 | 157 | 21,767 | 5,553 | 3,637 | 31,114 |
| 112,500 | 164 | 21,943 | 5,520 | 3,643 | 31,270 |
| 112,501 | 165 | 21,854 | 5,537 | 3,636 | 31,192 |
| 112,502 | 174 | 22,192 | 5,594 | 3,663 | 31,623 |
| 112,503 | 160 | 21,956 | 5,534 | 3,615 | 31,265 |

|         |     |        |       |       |        |
|---------|-----|--------|-------|-------|--------|
| 112,504 | 166 | 21,771 | 5,525 | 3,610 | 31,072 |
| 112,505 | 165 | 21,470 | 5,463 | 3,569 | 30,667 |
| 112,506 | 163 | 21,905 | 5,462 | 3,621 | 31,151 |
| 112,507 | 164 | 21,957 | 5,498 | 3,618 | 31,237 |
| 112,508 | 163 | 21,800 | 5,425 | 3,567 | 30,955 |
| 112,509 | 169 | 21,825 | 5,364 | 3,543 | 30,901 |
| 112,510 | 170 | 21,813 | 5,369 | 3,542 | 30,894 |
| 112,511 | 170 | 21,805 | 5,340 | 3,554 | 30,869 |
| 112,512 | 163 | 21,797 | 5,310 | 3,545 | 30,815 |
| 112,513 | 170 | 22,166 | 5,429 | 3,584 | 31,349 |
| 112,514 | 178 | 22,292 | 5,434 | 3,562 | 31,466 |
| 112,515 | 183 | 22,203 | 5,449 | 3,557 | 31,392 |
| 112,516 | 180 | 21,960 | 5,442 | 3,516 | 31,098 |
| 112,517 | 186 | 22,220 | 5,546 | 3,621 | 31,573 |
| 112,518 | 190 | 22,364 | 5,593 | 3,675 | 31,822 |
| 112,519 | 191 | 22,463 | 5,680 | 3,715 | 32,049 |
| 112,520 | 189 | 22,764 | 5,798 | 3,827 | 32,578 |
| 112,521 | 190 | 22,706 | 5,769 | 3,803 | 32,468 |
| 112,522 | 189 | 22,894 | 5,839 | 3,852 | 32,774 |
| 112,523 | 185 | 23,181 | 5,924 | 3,908 | 33,198 |
| 112,524 | 185 | 23,291 | 6,021 | 3,950 | 33,447 |
| 112,525 | 186 | 23,529 | 6,104 | 4,007 | 33,826 |
| 112,526 | 183 | 23,522 | 6,126 | 4,014 | 33,845 |
| 112,527 | 183 | 23,723 | 6,143 | 4,038 | 34,087 |
| 112,528 | 185 | 23,929 | 6,221 | 4,063 | 34,398 |
| 112,529 | 184 | 24,065 | 6,244 | 4,087 | 34,580 |
| 112,530 | 179 | 24,178 | 6,236 | 4,100 | 34,693 |
| 112,531 | 180 | 24,040 | 6,223 | 4,093 | 34,536 |
| 112,532 | 178 | 23,940 | 6,187 | 4,066 | 34,371 |
| 112,533 | 180 | 24,288 | 6,303 | 4,136 | 34,907 |
| 112,534 | 183 | 24,269 | 6,296 | 4,120 | 34,868 |
| 112,535 | 182 | 24,286 | 6,303 | 4,128 | 34,899 |

|         |     |        |       |       |        |
|---------|-----|--------|-------|-------|--------|
| 112,536 | 178 | 24,089 | 6,236 | 4,106 | 34,609 |
| 112,537 | 172 | 23,948 | 6,208 | 4,091 | 34,419 |
| 112,538 | 175 | 24,226 | 6,291 | 4,093 | 34,785 |
| 112,539 | 174 | 24,075 | 6,199 | 4,047 | 34,495 |
| 112,540 | 173 | 24,105 | 6,187 | 4,041 | 34,506 |
| 112,541 | 173 | 24,057 | 6,189 | 4,043 | 34,462 |
| 112,542 | 167 | 24,279 | 6,241 | 4,097 | 34,784 |
| 112,543 | 168 | 24,331 | 6,271 | 4,085 | 34,855 |
| 112,544 | 163 | 24,050 | 6,192 | 4,035 | 34,440 |
| 112,545 | 163 | 23,897 | 6,183 | 3,990 | 34,233 |
| 112,546 | 168 | 24,192 | 6,266 | 4,025 | 34,651 |
| 112,547 | 168 | 23,970 | 6,187 | 4,000 | 34,325 |
| 112,548 | 168 | 23,871 | 6,146 | 3,990 | 34,175 |
| 112,549 | 162 | 23,340 | 6,066 | 3,931 | 33,499 |
| 112,550 | 162 | 23,229 | 6,030 | 3,916 | 33,337 |
| 112,551 | 164 | 23,329 | 6,080 | 3,940 | 33,513 |
| 112,552 | 177 | 23,296 | 6,068 | 3,937 | 33,478 |
| 112,553 | 171 | 22,986 | 6,030 | 3,912 | 33,099 |
| 112,554 | 174 | 22,794 | 6,019 | 3,892 | 32,879 |
| 112,555 | 171 | 22,813 | 6,059 | 3,887 | 32,930 |
| 112,556 | 173 | 22,531 | 5,992 | 3,838 | 32,534 |
| 112,557 | 174 | 22,272 | 5,945 | 3,830 | 32,221 |
| 112,558 | 175 | 22,154 | 5,923 | 3,842 | 32,094 |
| 112,559 | 170 | 22,066 | 5,963 | 3,858 | 32,057 |
| 112,560 | 162 | 21,930 | 5,971 | 3,845 | 31,908 |
| 112,561 | 161 | 21,766 | 5,961 | 3,824 | 31,712 |
| 112,562 | 155 | 21,613 | 5,969 | 3,812 | 31,549 |
| 112,563 | 153 | 21,534 | 5,995 | 3,836 | 31,518 |
| 112,564 | 146 | 21,665 | 5,997 | 3,862 | 31,670 |
| 112,565 | 138 | 21,649 | 5,968 | 3,886 | 31,641 |
| 112,566 | 127 | 21,406 | 5,888 | 3,833 | 31,254 |
| 112,567 | 123 | 21,186 | 5,884 | 3,837 | 31,030 |

|         |     |        |       |       |        |
|---------|-----|--------|-------|-------|--------|
| 112,568 | 117 | 21,236 | 5,983 | 3,848 | 31,184 |
| 112,569 | 112 | 21,174 | 5,994 | 3,823 | 31,103 |
| 112,570 | 113 | 21,357 | 6,029 | 3,835 | 31,334 |
| 112,571 | 115 | 20,886 | 5,912 | 3,749 | 30,662 |
| 112,572 | 112 | 20,350 | 5,811 | 3,687 | 29,960 |
| 112,573 | 116 | 20,569 | 5,908 | 3,748 | 30,341 |
| 112,574 | 113 | 20,371 | 5,859 | 3,729 | 30,072 |
| 112,575 | 113 | 20,296 | 5,784 | 3,726 | 29,919 |
| 112,576 | 113 | 20,161 | 5,774 | 3,709 | 29,757 |
| 112,577 | 113 | 20,171 | 5,754 | 3,698 | 29,736 |
| 112,578 | 115 | 20,164 | 5,745 | 3,699 | 29,723 |
| 112,579 | 116 | 20,223 | 5,742 | 3,702 | 29,783 |
| 112,580 | 116 | 19,906 | 5,670 | 3,652 | 29,344 |
| 112,581 | 117 | 19,949 | 5,704 | 3,653 | 29,423 |
| 112,582 | 118 | 20,042 | 5,716 | 3,657 | 29,533 |
| 112,583 | 120 | 20,193 | 5,759 | 3,663 | 29,735 |
| 112,584 | 120 | 20,325 | 5,795 | 3,691 | 29,931 |
| 112,585 | 121 | 20,200 | 5,803 | 3,685 | 29,809 |
| 112,586 | 121 | 20,327 | 5,858 | 3,721 | 30,027 |
| 112,587 | 121 | 20,258 | 5,886 | 3,740 | 30,005 |
| 112,588 | 118 | 20,219 | 5,877 | 3,753 | 29,967 |
| 112,589 | 122 | 20,099 | 5,866 | 3,742 | 29,829 |
| 112,590 | 124 | 20,020 | 5,867 | 3,745 | 29,756 |
| 112,591 | 126 | 20,109 | 5,938 | 3,785 | 29,958 |
| 112,592 | 133 | 20,336 | 5,985 | 3,807 | 30,261 |
| 112,593 | 137 | 20,281 | 5,968 | 3,793 | 30,179 |
| 112,594 | 136 | 20,071 | 5,883 | 3,773 | 29,863 |
| 112,595 | 135 | 20,034 | 5,878 | 3,781 | 29,828 |
| 112,596 | 135 | 20,066 | 5,892 | 3,799 | 29,892 |
| 112,597 | 131 | 19,640 | 5,790 | 3,728 | 29,289 |
| 112,598 | 131 | 19,832 | 5,847 | 3,775 | 29,585 |
| 112,599 | 128 | 19,875 | 5,840 | 3,789 | 29,632 |

|         |     |        |       |       |        |
|---------|-----|--------|-------|-------|--------|
| 112,600 | 137 | 20,018 | 5,896 | 3,820 | 29,871 |
| 112,601 | 126 | 19,768 | 5,838 | 3,796 | 29,528 |
| 112,602 | 126 | 20,021 | 5,876 | 3,823 | 29,846 |
| 112,603 | 112 | 20,246 | 5,903 | 3,841 | 30,102 |
| 112,604 | 117 | 20,148 | 5,883 | 3,839 | 29,987 |
| 112,605 | 119 | 20,286 | 5,891 | 3,858 | 30,154 |
| 112,606 | 110 | 20,044 | 5,850 | 3,817 | 29,821 |
| 112,607 | 110 | 20,252 | 5,923 | 3,834 | 30,119 |
| 112,608 | 123 | 20,338 | 5,949 | 3,837 | 30,247 |
| 112,609 | 127 | 20,424 | 5,968 | 3,834 | 30,353 |
| 112,610 | 129 | 20,450 | 5,986 | 3,842 | 30,407 |
| 112,611 | 131 | 20,303 | 5,925 | 3,802 | 30,161 |
| 112,612 | 132 | 20,154 | 5,861 | 3,784 | 29,931 |
| 112,613 | 144 | 20,596 | 6,003 | 3,845 | 30,588 |
| 112,614 | 144 | 20,208 | 5,918 | 3,804 | 30,074 |
| 112,615 | 149 | 20,418 | 6,014 | 3,867 | 30,448 |
| 112,616 | 150 | 20,249 | 6,022 | 3,858 | 30,279 |
| 112,617 | 153 | 20,008 | 5,917 | 3,795 | 29,873 |
| 112,618 | 152 | 19,871 | 5,819 | 3,743 | 29,585 |
| 112,619 | 162 | 20,685 | 6,008 | 3,911 | 30,766 |
| 112,620 | 167 | 20,925 | 6,016 | 3,917 | 31,025 |
| 112,621 | 165 | 20,759 | 5,946 | 3,861 | 30,731 |
| 112,622 | 167 | 20,778 | 5,946 | 3,856 | 30,747 |
| 112,623 | 179 | 21,368 | 6,053 | 3,907 | 31,507 |
| 112,624 | 178 | 21,505 | 6,089 | 3,914 | 31,686 |
| 112,625 | 178 | 21,229 | 6,015 | 3,851 | 31,273 |
| 112,626 | 181 | 21,427 | 6,137 | 3,899 | 31,644 |
| 112,627 | 180 | 21,075 | 6,041 | 3,827 | 31,123 |
| 112,628 | 179 | 21,065 | 6,073 | 3,848 | 31,165 |
| 112,629 | 179 | 21,046 | 6,113 | 3,867 | 31,205 |
| 112,630 | 191 | 20,973 | 6,111 | 3,869 | 31,144 |
| 112,631 | 197 | 21,221 | 6,219 | 3,915 | 31,552 |



|         |     |        |       |       |        |
|---------|-----|--------|-------|-------|--------|
| 112,632 | 193 | 20,929 | 6,148 | 3,877 | 31,147 |
| 112,633 | 197 | 21,089 | 6,212 | 3,883 | 31,381 |
| 112,634 | 197 | 21,257 | 6,228 | 3,909 | 31,591 |
| 112,635 | 197 | 21,380 | 6,240 | 3,914 | 31,731 |
| 112,636 | 195 | 21,371 | 6,245 | 3,909 | 31,720 |
| 112,637 | 205 | 21,517 | 6,263 | 3,901 | 31,886 |
| 112,638 | 213 | 21,814 | 6,288 | 3,909 | 32,224 |
| 112,639 | 219 | 21,652 | 6,203 | 3,856 | 31,930 |
| 112,640 | 219 | 21,758 | 6,195 | 3,851 | 32,023 |
| 112,641 | 223 | 21,478 | 6,093 | 3,789 | 31,583 |
| 112,642 | 224 | 21,755 | 6,169 | 3,813 | 31,961 |
| 112,643 | 223 | 22,088 | 6,243 | 3,867 | 32,421 |
| 112,644 | 220 | 22,202 | 6,282 | 3,891 | 32,595 |
| 112,645 | 225 | 22,381 | 6,270 | 3,881 | 32,757 |
| 112,646 | 224 | 22,422 | 6,246 | 3,877 | 32,769 |
| 112,647 | 230 | 22,780 | 6,326 | 3,964 | 33,300 |
| 112,648 | 233 | 22,869 | 6,356 | 3,986 | 33,444 |
| 112,649 | 238 | 22,121 | 6,135 | 3,798 | 32,292 |
| 112,650 | 246 | 22,356 | 6,202 | 3,843 | 32,647 |
| 112,651 | 234 | 22,549 | 6,248 | 3,863 | 32,894 |
| 112,652 | 234 | 22,596 | 6,242 | 3,859 | 32,931 |
| 112,653 | 239 | 22,838 | 6,292 | 3,891 | 33,260 |
| 112,654 | 247 | 23,095 | 6,377 | 3,946 | 33,665 |
| 112,655 | 238 | 23,041 | 6,330 | 3,913 | 33,522 |
| 112,656 | 241 | 23,136 | 6,327 | 3,911 | 33,615 |
| 112,657 | 236 | 23,084 | 6,282 | 3,890 | 33,492 |
| 112,658 | 241 | 23,339 | 6,324 | 3,899 | 33,803 |
| 112,659 | 234 | 23,679 | 6,349 | 3,919 | 34,181 |
| 112,660 | 233 | 23,699 | 6,324 | 3,908 | 34,164 |
| 112,661 | 234 | 23,926 | 6,328 | 3,910 | 34,398 |
| 112,662 | 230 | 23,807 | 6,252 | 3,864 | 34,153 |
| 112,663 | 233 | 23,970 | 6,265 | 3,871 | 34,339 |

|         |     |        |       |       |        |
|---------|-----|--------|-------|-------|--------|
| 112,664 | 235 | 24,308 | 6,358 | 3,913 | 34,814 |
| 112,665 | 232 | 24,252 | 6,290 | 3,851 | 34,625 |
| 112,666 | 233 | 24,554 | 6,283 | 3,835 | 34,905 |
| 112,667 | 233 | 24,798 | 6,273 | 3,808 | 35,112 |
| 112,668 | 229 | 24,632 | 6,160 | 3,720 | 34,741 |
| 112,669 | 227 | 24,519 | 6,041 | 3,662 | 34,449 |
| 112,670 | 225 | 24,258 | 5,978 | 3,598 | 34,059 |
| 112,671 | 236 | 24,371 | 5,944 | 3,574 | 34,125 |
| 112,672 | 239 | 24,301 | 5,843 | 3,535 | 33,918 |
| 112,673 | 237 | 24,270 | 5,804 | 3,523 | 33,834 |
| 112,674 | 230 | 24,297 | 5,765 | 3,483 | 33,775 |
| 112,675 | 234 | 24,510 | 5,745 | 3,478 | 33,967 |
| 112,676 | 236 | 24,693 | 5,729 | 3,460 | 34,118 |
| 112,677 | 235 | 24,774 | 5,701 | 3,445 | 34,155 |
| 112,678 | 240 | 24,784 | 5,617 | 3,399 | 34,040 |
| 112,679 | 240 | 25,008 | 5,620 | 3,388 | 34,256 |
| 112,680 | 228 | 25,010 | 5,585 | 3,355 | 34,178 |
| 112,681 | 224 | 25,278 | 5,603 | 3,379 | 34,484 |
| 112,682 | 220 | 25,170 | 5,508 | 3,338 | 34,236 |
| 112,683 | 222 | 25,325 | 5,475 | 3,329 | 34,351 |
| 112,684 | 219 | 25,543 | 5,480 | 3,345 | 34,587 |
| 112,685 | 220 | 25,472 | 5,446 | 3,328 | 34,466 |
| 112,686 | 220 | 25,492 | 5,395 | 3,287 | 34,394 |
| 112,687 | 219 | 25,568 | 5,335 | 3,262 | 34,384 |
| 112,688 | 203 | 25,569 | 5,310 | 3,272 | 34,354 |
| 112,689 | 209 | 25,769 | 5,312 | 3,268 | 34,558 |
| 112,690 | 206 | 25,783 | 5,273 | 3,244 | 34,506 |
| 112,691 | 204 | 25,687 | 5,209 | 3,196 | 34,296 |
| 112,692 | 211 | 25,808 | 5,211 | 3,186 | 34,416 |
| 112,693 | 210 | 25,616 | 5,107 | 3,160 | 34,093 |
| 112,694 | 216 | 25,919 | 5,126 | 3,161 | 34,422 |
| 112,695 | 226 | 25,612 | 5,050 | 3,112 | 34,000 |

|         |     |        |       |       |        |
|---------|-----|--------|-------|-------|--------|
| 112,696 | 222 | 25,359 | 4,995 | 3,068 | 33,644 |
| 112,697 | 224 | 25,429 | 4,999 | 3,072 | 33,724 |
| 112,698 | 220 | 25,333 | 4,952 | 3,039 | 33,544 |
| 112,699 | 218 | 25,321 | 4,902 | 2,995 | 33,436 |
| 112,700 | 213 | 25,311 | 4,923 | 3,010 | 33,457 |
| 112,701 | 213 | 25,098 | 4,850 | 2,967 | 33,128 |
| 112,702 | 214 | 25,193 | 4,807 | 2,955 | 33,169 |
| 112,703 | 223 | 25,275 | 4,814 | 2,970 | 33,282 |
| 112,704 | 222 | 25,237 | 4,771 | 2,937 | 33,167 |
| 112,705 | 218 | 25,137 | 4,757 | 2,927 | 33,039 |
| 112,706 | 217 | 25,251 | 4,750 | 2,920 | 33,138 |
| 112,707 | 218 | 24,927 | 4,706 | 2,898 | 32,749 |
| 112,708 | 218 | 24,957 | 4,660 | 2,883 | 32,718 |
| 112,709 | 216 | 24,675 | 4,585 | 2,890 | 32,366 |
| 112,710 | 212 | 24,702 | 4,578 | 2,882 | 32,374 |
| 112,711 | 206 | 24,582 | 4,554 | 2,874 | 32,216 |
| 112,712 | 206 | 24,778 | 4,564 | 2,881 | 32,429 |
| 112,713 | 209 | 24,620 | 4,519 | 2,847 | 32,195 |
| 112,714 | 207 | 24,514 | 4,485 | 2,836 | 32,042 |
| 112,715 | 199 | 24,587 | 4,432 | 2,860 | 32,078 |
| 112,716 | 198 | 24,398 | 4,384 | 2,846 | 31,826 |
| 112,717 | 199 | 24,132 | 4,318 | 2,833 | 31,482 |
| 112,718 | 188 | 22,825 | 4,139 | 2,732 | 29,884 |
| 112,719 | 188 | 22,949 | 4,113 | 2,747 | 29,997 |
| 112,720 | 185 | 23,170 | 4,112 | 2,758 | 30,225 |
| 112,721 | 185 | 23,236 | 4,090 | 2,736 | 30,247 |
| 112,722 | 184 | 23,323 | 4,089 | 2,755 | 30,351 |
| 112,723 | 179 | 22,940 | 4,026 | 2,693 | 29,838 |
| 112,724 | 176 | 22,625 | 3,952 | 2,652 | 29,405 |
| 112,725 | 166 | 21,707 | 3,890 | 2,619 | 28,382 |
| 112,726 | 165 | 21,816 | 3,880 | 2,620 | 28,481 |
| 112,727 | 164 | 21,962 | 3,850 | 2,605 | 28,581 |

|         |     |        |       |       |        |
|---------|-----|--------|-------|-------|--------|
| 112,728 | 164 | 21,971 | 3,803 | 2,594 | 28,532 |
| 112,729 | 162 | 22,166 | 3,802 | 2,605 | 28,735 |
| 112,730 | 160 | 22,037 | 3,772 | 2,601 | 28,570 |
| 112,731 | 162 | 22,077 | 3,740 | 2,592 | 28,571 |
| 112,732 | 165 | 22,025 | 3,721 | 2,610 | 28,521 |
| 112,733 | 166 | 22,193 | 3,769 | 2,637 | 28,765 |
| 112,734 | 169 | 21,713 | 3,670 | 2,603 | 28,155 |
| 112,735 | 167 | 21,688 | 3,636 | 2,591 | 28,082 |
| 112,736 | 168 | 21,720 | 3,654 | 2,618 | 28,160 |
| 112,737 | 169 | 21,276 | 3,575 | 2,589 | 27,609 |
| 112,738 | 172 | 21,151 | 3,524 | 2,572 | 27,419 |
| 112,739 | 172 | 21,192 | 3,504 | 2,557 | 27,425 |
| 112,740 | 155 | 20,606 | 3,436 | 2,535 | 26,732 |
| 112,741 | 153 | 20,773 | 3,462 | 2,536 | 26,924 |
| 112,742 | 151 | 20,972 | 3,447 | 2,539 | 27,109 |
| 112,743 | 142 | 20,665 | 3,385 | 2,512 | 26,704 |
| 112,744 | 146 | 20,731 | 3,419 | 2,539 | 26,835 |
| 112,745 | 139 | 20,597 | 3,380 | 2,535 | 26,651 |
| 112,746 | 125 | 20,519 | 3,309 | 2,499 | 26,452 |
| 112,747 | 124 | 20,529 | 3,317 | 2,504 | 26,474 |
| 112,748 | 128 | 20,561 | 3,325 | 2,490 | 26,504 |
| 112,749 | 133 | 20,551 | 3,364 | 2,543 | 26,591 |
| 112,750 | 136 | 20,553 | 3,366 | 2,537 | 26,592 |
| 112,751 | 134 | 20,340 | 3,324 | 2,522 | 26,320 |
| 112,752 | 134 | 20,548 | 3,357 | 2,528 | 26,567 |
| 112,753 | 130 | 20,618 | 3,381 | 2,540 | 26,669 |
| 112,754 | 122 | 20,661 | 3,377 | 2,541 | 26,701 |
| 112,755 | 128 | 20,714 | 3,359 | 2,536 | 26,737 |
| 112,756 | 133 | 20,724 | 3,318 | 2,515 | 26,690 |
| 112,757 | 131 | 20,597 | 3,264 | 2,479 | 26,471 |
| 112,758 | 130 | 20,736 | 3,261 | 2,500 | 26,627 |
| 112,759 | 132 | 20,796 | 3,294 | 2,509 | 26,731 |

|         |     |        |       |       |        |
|---------|-----|--------|-------|-------|--------|
| 112,760 | 131 | 21,041 | 3,308 | 2,524 | 27,004 |
| 112,761 | 136 | 21,527 | 3,361 | 2,573 | 27,597 |
| 112,762 | 135 | 21,467 | 3,333 | 2,570 | 27,505 |
| 112,763 | 135 | 21,495 | 3,307 | 2,559 | 27,496 |
| 112,764 | 129 | 22,020 | 3,401 | 2,628 | 28,178 |
| 112,765 | 134 | 22,278 | 3,451 | 2,637 | 28,500 |
| 112,766 | 132 | 22,325 | 3,459 | 2,638 | 28,554 |
| 112,767 | 135 | 22,669 | 3,507 | 2,657 | 28,968 |
| 112,768 | 131 | 22,614 | 3,518 | 2,666 | 28,929 |
| 112,769 | 127 | 22,344 | 3,495 | 2,642 | 28,608 |
| 112,770 | 128 | 22,556 | 3,533 | 2,668 | 28,885 |
| 112,771 | 132 | 22,862 | 3,567 | 2,694 | 29,255 |
| 112,772 | 129 | 22,628 | 3,530 | 2,662 | 28,949 |
| 112,773 | 130 | 22,913 | 3,584 | 2,677 | 29,304 |
| 112,774 | 126 | 22,628 | 3,555 | 2,669 | 28,978 |
| 112,775 | 127 | 22,801 | 3,557 | 2,688 | 29,173 |
| 112,776 | 128 | 22,866 | 3,541 | 2,677 | 29,212 |
| 112,777 | 128 | 22,774 | 3,495 | 2,648 | 29,045 |
| 112,778 | 128 | 23,031 | 3,553 | 2,693 | 29,405 |
| 112,779 | 130 | 23,002 | 3,547 | 2,681 | 29,360 |
| 112,780 | 135 | 23,080 | 3,593 | 2,692 | 29,500 |
| 112,781 | 137 | 23,319 | 3,605 | 2,731 | 29,792 |
| 112,782 | 142 | 23,345 | 3,614 | 2,723 | 29,824 |
| 112,783 | 148 | 23,291 | 3,593 | 2,708 | 29,740 |
| 112,784 | 146 | 23,182 | 3,585 | 2,696 | 29,609 |
| 112,785 | 152 | 23,534 | 3,634 | 2,713 | 30,033 |
| 112,786 | 156 | 23,465 | 3,599 | 2,692 | 29,912 |
| 112,787 | 154 | 23,498 | 3,574 | 2,682 | 29,908 |
| 112,788 | 155 | 23,597 | 3,600 | 2,688 | 30,040 |
| 112,789 | 154 | 23,337 | 3,546 | 2,661 | 29,698 |
| 112,790 | 154 | 23,081 | 3,508 | 2,630 | 29,373 |
| 112,791 | 173 | 24,035 | 3,663 | 2,713 | 30,584 |

|         |     |        |       |       |        |
|---------|-----|--------|-------|-------|--------|
| 112,792 | 175 | 23,830 | 3,614 | 2,698 | 30,317 |
| 112,793 | 177 | 24,114 | 3,639 | 2,720 | 30,650 |
| 112,794 | 171 | 24,150 | 3,618 | 2,692 | 30,631 |
| 112,795 | 173 | 24,207 | 3,607 | 2,682 | 30,669 |
| 112,796 | 178 | 23,833 | 3,542 | 2,621 | 30,174 |
| 112,797 | 180 | 24,204 | 3,574 | 2,638 | 30,596 |
| 112,798 | 176 | 24,272 | 3,582 | 2,618 | 30,648 |
| 112,799 | 182 | 24,545 | 3,580 | 2,612 | 30,919 |
| 112,800 | 179 | 24,860 | 3,595 | 2,619 | 31,253 |
| 112,801 | 175 | 24,712 | 3,553 | 2,602 | 31,042 |
| 112,802 | 176 | 24,989 | 3,554 | 2,619 | 31,338 |
| 112,803 | 174 | 25,225 | 3,548 | 2,626 | 31,573 |
| 112,804 | 178 | 25,170 | 3,490 | 2,599 | 31,437 |
| 112,805 | 181 | 25,410 | 3,507 | 2,588 | 31,686 |
| 112,806 | 176 | 25,408 | 3,487 | 2,582 | 31,653 |
| 112,807 | 168 | 25,443 | 3,524 | 2,596 | 31,731 |
| 112,808 | 186 | 25,606 | 3,540 | 2,601 | 31,933 |
| 112,809 | 195 | 25,898 | 3,540 | 2,618 | 32,251 |
| 112,810 | 202 | 25,667 | 3,508 | 2,584 | 31,961 |
| 112,811 | 201 | 25,388 | 3,494 | 2,578 | 31,661 |
| 112,812 | 202 | 25,477 | 3,523 | 2,596 | 31,798 |
| 112,813 | 201 | 25,339 | 3,505 | 2,587 | 31,632 |
| 112,814 | 209 | 25,484 | 3,494 | 2,599 | 31,786 |
| 112,815 | 214 | 25,350 | 3,441 | 2,567 | 31,572 |
| 112,816 | 211 | 25,107 | 3,386 | 2,538 | 31,242 |
| 112,817 | 211 | 25,148 | 3,388 | 2,532 | 31,279 |
| 112,818 | 215 | 24,948 | 3,359 | 2,523 | 31,045 |
| 112,819 | 220 | 25,007 | 3,346 | 2,506 | 31,079 |
| 112,820 | 225 | 25,133 | 3,353 | 2,495 | 31,206 |
| 112,821 | 233 | 25,273 | 3,375 | 2,513 | 31,394 |
| 112,822 | 231 | 25,230 | 3,375 | 2,501 | 31,337 |
| 112,823 | 232 | 25,333 | 3,379 | 2,518 | 31,462 |

|         |     |        |       |       |        |
|---------|-----|--------|-------|-------|--------|
| 112,824 | 235 | 25,339 | 3,398 | 2,542 | 31,514 |
| 112,825 | 242 | 25,376 | 3,383 | 2,510 | 31,511 |
| 112,826 | 246 | 25,436 | 3,385 | 2,514 | 31,581 |
| 112,827 | 245 | 25,403 | 3,391 | 2,512 | 31,551 |
| 112,828 | 246 | 25,523 | 3,434 | 2,547 | 31,750 |
| 112,829 | 247 | 25,705 | 3,436 | 2,553 | 31,941 |
| 112,830 | 243 | 25,818 | 3,438 | 2,552 | 32,051 |
| 112,831 | 243 | 25,907 | 3,439 | 2,551 | 32,140 |
| 112,832 | 249 | 26,221 | 3,470 | 2,562 | 32,502 |
| 112,833 | 242 | 26,063 | 3,451 | 2,540 | 32,296 |
| 112,834 | 238 | 26,189 | 3,475 | 2,535 | 32,437 |
| 112,835 | 237 | 26,409 | 3,486 | 2,545 | 32,677 |
| 112,836 | 230 | 26,322 | 3,494 | 2,562 | 32,608 |
| 112,837 | 235 | 26,129 | 3,517 | 2,527 | 32,408 |
| 112,838 | 233 | 26,280 | 3,516 | 2,534 | 32,563 |
| 112,839 | 223 | 26,521 | 3,520 | 2,569 | 32,833 |
| 112,840 | 228 | 26,629 | 3,550 | 2,584 | 32,991 |
| 112,841 | 230 | 26,535 | 3,528 | 2,574 | 32,867 |
| 112,842 | 231 | 26,543 | 3,548 | 2,568 | 32,890 |
| 112,843 | 230 | 26,559 | 3,570 | 2,578 | 32,937 |
| 112,844 | 234 | 26,503 | 3,544 | 2,587 | 32,868 |
| 112,845 | 234 | 26,461 | 3,540 | 2,591 | 32,826 |
| 112,846 | 231 | 26,510 | 3,556 | 2,597 | 32,894 |
| 112,847 | 226 | 26,426 | 3,526 | 2,581 | 32,759 |
| 112,848 | 227 | 26,296 | 3,513 | 2,567 | 32,603 |
| 112,849 | 226 | 26,360 | 3,525 | 2,582 | 32,693 |
| 112,850 | 217 | 26,322 | 3,526 | 2,592 | 32,657 |
| 112,851 | 218 | 26,307 | 3,509 | 2,577 | 32,611 |
| 112,852 | 217 | 26,310 | 3,522 | 2,573 | 32,622 |
| 112,853 | 214 | 26,496 | 3,577 | 2,592 | 32,879 |
| 112,854 | 217 | 26,221 | 3,563 | 2,579 | 32,580 |
| 112,855 | 212 | 26,077 | 3,573 | 2,583 | 32,445 |

|         |     |        |       |       |        |
|---------|-----|--------|-------|-------|--------|
| 112,856 | 213 | 25,988 | 3,533 | 2,576 | 32,310 |
| 112,857 | 217 | 26,060 | 3,538 | 2,574 | 32,389 |
| 112,858 | 209 | 26,251 | 3,564 | 2,588 | 32,612 |
| 112,859 | 187 | 25,817 | 3,514 | 2,548 | 32,066 |
| 112,860 | 178 | 25,615 | 3,489 | 2,534 | 31,816 |
| 112,861 | 184 | 25,824 | 3,502 | 2,542 | 32,052 |
| 112,862 | 181 | 25,457 | 3,440 | 2,471 | 31,549 |
| 112,863 | 185 | 25,250 | 3,401 | 2,451 | 31,287 |
| 112,864 | 186 | 25,223 | 3,409 | 2,449 | 31,267 |
| 112,865 | 181 | 25,121 | 3,397 | 2,426 | 31,125 |
| 112,866 | 170 | 24,479 | 3,337 | 2,365 | 30,351 |
| 112,867 | 171 | 24,232 | 3,291 | 2,335 | 30,029 |
| 112,868 | 171 | 24,301 | 3,315 | 2,329 | 30,116 |
| 112,869 | 171 | 24,330 | 3,313 | 2,337 | 30,151 |
| 112,870 | 172 | 24,371 | 3,325 | 2,361 | 30,229 |
| 112,871 | 166 | 24,179 | 3,326 | 2,355 | 30,026 |
| 112,872 | 162 | 23,863 | 3,288 | 2,321 | 29,634 |
| 112,873 | 161 | 23,939 | 3,297 | 2,323 | 29,720 |
| 112,874 | 164 | 23,879 | 3,256 | 2,295 | 29,594 |
| 112,875 | 161 | 23,856 | 3,277 | 2,291 | 29,585 |
| 112,876 | 154 | 23,820 | 3,281 | 2,318 | 29,573 |
| 112,877 | 147 | 23,839 | 3,292 | 2,322 | 29,600 |
| 112,878 | 154 | 23,932 | 3,301 | 2,337 | 29,724 |
| 112,879 | 152 | 23,675 | 3,279 | 2,320 | 29,426 |
| 112,880 | 151 | 23,450 | 3,299 | 2,317 | 29,217 |
| 112,881 | 153 | 22,971 | 3,229 | 2,265 | 28,618 |
| 112,882 | 153 | 23,251 | 3,261 | 2,298 | 28,963 |
| 112,883 | 152 | 23,271 | 3,277 | 2,312 | 29,012 |
| 112,884 | 153 | 23,236 | 3,297 | 2,310 | 28,996 |
| 112,885 | 159 | 22,904 | 3,268 | 2,303 | 28,634 |
| 112,886 | 160 | 22,844 | 3,275 | 2,330 | 28,609 |
| 112,887 | 161 | 22,886 | 3,248 | 2,311 | 28,606 |



|         |     |        |       |       |        |
|---------|-----|--------|-------|-------|--------|
| 112,888 | 153 | 22,597 | 3,199 | 2,298 | 28,247 |
| 112,889 | 152 | 22,501 | 3,192 | 2,309 | 28,154 |
| 112,890 | 146 | 22,317 | 3,203 | 2,287 | 27,953 |
| 112,891 | 137 | 22,283 | 3,149 | 2,279 | 27,848 |
| 112,892 | 135 | 22,180 | 3,134 | 2,294 | 27,743 |
| 112,893 | 137 | 22,368 | 3,189 | 2,320 | 28,014 |
| 112,894 | 141 | 22,276 | 3,198 | 2,319 | 27,934 |
| 112,895 | 136 | 22,288 | 3,232 | 2,312 | 27,968 |
| 112,896 | 147 | 21,967 | 3,226 | 2,303 | 27,643 |
| 112,897 | 152 | 21,608 | 3,215 | 2,288 | 27,263 |
| 112,898 | 165 | 21,992 | 3,248 | 2,315 | 27,720 |
| 112,899 | 169 | 21,866 | 3,246 | 2,314 | 27,595 |
| 112,900 | 174 | 21,803 | 3,235 | 2,320 | 27,532 |
| 112,901 | 177 | 21,529 | 3,223 | 2,303 | 27,232 |
| 112,902 | 174 | 21,146 | 3,208 | 2,284 | 26,812 |
| 112,903 | 173 | 21,233 | 3,214 | 2,308 | 26,928 |
| 112,904 | 172 | 21,183 | 3,177 | 2,307 | 26,839 |
| 112,905 | 171 | 21,050 | 3,161 | 2,307 | 26,689 |
| 112,906 | 171 | 20,907 | 3,124 | 2,280 | 26,482 |
| 112,907 | 171 | 21,098 | 3,132 | 2,308 | 26,709 |
| 112,908 | 166 | 20,945 | 3,133 | 2,304 | 26,548 |
| 112,909 | 170 | 21,048 | 3,170 | 2,304 | 26,692 |
| 112,910 | 173 | 20,756 | 3,135 | 2,275 | 26,339 |
| 112,911 | 173 | 20,784 | 3,141 | 2,288 | 26,386 |
| 112,912 | 166 | 20,859 | 3,156 | 2,298 | 26,479 |
| 112,913 | 166 | 20,681 | 3,142 | 2,286 | 26,275 |
| 112,914 | 167 | 20,574 | 3,159 | 2,292 | 26,192 |
| 112,915 | 172 | 20,484 | 3,159 | 2,286 | 26,101 |
| 112,916 | 171 | 20,280 | 3,157 | 2,291 | 25,899 |
| 112,917 | 185 | 21,014 | 3,217 | 2,344 | 26,760 |
| 112,918 | 190 | 20,853 | 3,239 | 2,362 | 26,644 |
| 112,919 | 183 | 20,951 | 3,238 | 2,383 | 26,755 |

|         |     |        |       |       |        |
|---------|-----|--------|-------|-------|--------|
| 112,920 | 185 | 20,948 | 3,242 | 2,382 | 26,757 |
| 112,921 | 186 | 21,035 | 3,260 | 2,384 | 26,865 |
| 112,922 | 195 | 20,855 | 3,242 | 2,370 | 26,662 |
| 112,923 | 190 | 20,663 | 3,222 | 2,366 | 26,441 |
| 112,924 | 195 | 20,667 | 3,222 | 2,381 | 26,465 |
| 112,925 | 192 | 20,486 | 3,226 | 2,383 | 26,287 |
| 112,926 | 200 | 21,052 | 3,230 | 2,443 | 26,925 |
| 112,927 | 201 | 21,091 | 3,233 | 2,411 | 26,936 |
| 112,928 | 201 | 21,093 | 3,258 | 2,438 | 26,990 |
| 112,929 | 197 | 21,289 | 3,233 | 2,410 | 27,129 |
| 112,930 | 200 | 21,331 | 3,205 | 2,408 | 27,144 |
| 112,931 | 199 | 21,243 | 3,218 | 2,404 | 27,064 |
| 112,932 | 199 | 21,620 | 3,279 | 2,457 | 27,555 |
| 112,933 | 201 | 21,567 | 3,291 | 2,458 | 27,517 |
| 112,934 | 191 | 21,477 | 3,287 | 2,446 | 27,401 |
| 112,935 | 191 | 21,356 | 3,226 | 2,408 | 27,181 |
| 112,936 | 191 | 21,354 | 3,241 | 2,407 | 27,193 |
| 112,937 | 194 | 21,653 | 3,318 | 2,417 | 27,582 |
| 112,938 | 190 | 21,519 | 3,291 | 2,396 | 27,396 |
| 112,939 | 194 | 21,484 | 3,313 | 2,401 | 27,392 |
| 112,940 | 194 | 21,309 | 3,321 | 2,379 | 27,203 |
| 112,941 | 198 | 21,564 | 3,357 | 2,405 | 27,524 |
| 112,942 | 199 | 21,514 | 3,376 | 2,409 | 27,498 |
| 112,943 | 203 | 21,658 | 3,385 | 2,404 | 27,650 |
| 112,944 | 203 | 21,647 | 3,414 | 2,416 | 27,680 |
| 112,945 | 204 | 21,653 | 3,422 | 2,427 | 27,706 |
| 112,946 | 189 | 21,590 | 3,369 | 2,400 | 27,548 |
| 112,947 | 189 | 21,889 | 3,428 | 2,438 | 27,944 |
| 112,948 | 182 | 21,946 | 3,467 | 2,454 | 28,049 |
| 112,949 | 178 | 22,241 | 3,547 | 2,507 | 28,473 |
| 112,950 | 170 | 22,055 | 3,531 | 2,494 | 28,250 |
| 112,951 | 166 | 22,270 | 3,580 | 2,499 | 28,515 |

|         |     |        |       |       |        |
|---------|-----|--------|-------|-------|--------|
| 112,952 | 162 | 21,956 | 3,541 | 2,481 | 28,140 |
| 112,953 | 163 | 22,401 | 3,597 | 2,528 | 28,689 |
| 112,954 | 164 | 22,512 | 3,612 | 2,521 | 28,809 |
| 112,955 | 163 | 22,656 | 3,644 | 2,537 | 29,000 |
| 112,956 | 165 | 22,536 | 3,646 | 2,532 | 28,879 |
| 112,957 | 175 | 22,847 | 3,712 | 2,556 | 29,290 |
| 112,958 | 174 | 22,366 | 3,648 | 2,499 | 28,687 |
| 112,959 | 180 | 22,696 | 3,697 | 2,526 | 29,099 |
| 112,960 | 176 | 22,682 | 3,711 | 2,547 | 29,116 |
| 112,961 | 181 | 22,759 | 3,728 | 2,555 | 29,223 |
| 112,962 | 181 | 22,716 | 3,740 | 2,557 | 29,194 |
| 112,963 | 183 | 22,663 | 3,761 | 2,555 | 29,162 |
| 112,964 | 183 | 22,599 | 3,782 | 2,568 | 29,132 |
| 112,965 | 176 | 22,679 | 3,811 | 2,577 | 29,243 |
| 112,966 | 167 | 22,760 | 3,836 | 2,594 | 29,357 |
| 112,967 | 166 | 22,898 | 3,838 | 2,583 | 29,485 |
| 112,968 | 171 | 23,189 | 3,887 | 2,605 | 29,852 |
| 112,969 | 166 | 23,238 | 3,878 | 2,599 | 29,881 |
| 112,970 | 164 | 23,266 | 3,911 | 2,605 | 29,946 |
| 112,971 | 168 | 23,498 | 4,003 | 2,639 | 30,308 |
| 112,972 | 158 | 23,070 | 3,930 | 2,580 | 29,738 |
| 112,973 | 165 | 23,313 | 4,007 | 2,629 | 30,114 |
| 112,974 | 160 | 23,218 | 4,041 | 2,655 | 30,074 |
| 112,975 | 161 | 23,209 | 4,107 | 2,669 | 30,146 |
| 112,976 | 162 | 23,398 | 4,168 | 2,679 | 30,407 |
| 112,977 | 159 | 23,111 | 4,122 | 2,649 | 30,041 |
| 112,978 | 160 | 23,156 | 4,146 | 2,671 | 30,133 |
| 112,979 | 159 | 23,389 | 4,214 | 2,679 | 30,441 |
| 112,980 | 157 | 23,438 | 4,227 | 2,683 | 30,505 |
| 112,981 | 153 | 23,331 | 4,237 | 2,678 | 30,399 |
| 112,982 | 164 | 23,521 | 4,295 | 2,730 | 30,710 |
| 112,983 | 160 | 23,221 | 4,242 | 2,693 | 30,316 |

|         |     |        |       |       |        |
|---------|-----|--------|-------|-------|--------|
| 112,984 | 165 | 23,197 | 4,260 | 2,682 | 30,304 |
| 112,985 | 174 | 23,460 | 4,311 | 2,715 | 30,660 |
| 112,986 | 164 | 23,270 | 4,274 | 2,706 | 30,414 |
| 112,987 | 162 | 23,455 | 4,298 | 2,722 | 30,637 |
| 112,988 | 174 | 23,610 | 4,322 | 2,761 | 30,867 |
| 112,989 | 173 | 23,263 | 4,311 | 2,726 | 30,473 |
| 112,990 | 173 | 23,349 | 4,314 | 2,749 | 30,585 |
| 112,991 | 171 | 23,371 | 4,298 | 2,745 | 30,585 |
| 112,992 | 171 | 23,281 | 4,298 | 2,751 | 30,501 |
| 112,993 | 173 | 23,353 | 4,306 | 2,780 | 30,612 |
| 112,994 | 178 | 23,465 | 4,339 | 2,806 | 30,788 |
| 112,995 | 174 | 23,627 | 4,343 | 2,818 | 30,962 |
| 112,996 | 171 | 23,481 | 4,290 | 2,787 | 30,729 |
| 112,997 | 173 | 23,412 | 4,285 | 2,804 | 30,674 |
| 112,998 | 182 | 23,583 | 4,337 | 2,827 | 30,929 |
| 112,999 | 191 | 23,155 | 4,266 | 2,786 | 30,398 |
| 113,000 | 191 | 23,186 | 4,287 | 2,778 | 30,442 |
| 113,001 | 191 | 23,282 | 4,282 | 2,789 | 30,544 |
| 113,002 | 202 | 23,531 | 4,285 | 2,774 | 30,792 |
| 113,003 | 201 | 23,424 | 4,266 | 2,768 | 30,659 |
| 113,004 | 204 | 23,602 | 4,313 | 2,793 | 30,912 |
| 113,005 | 210 | 23,184 | 4,265 | 2,764 | 30,423 |
| 113,006 | 218 | 23,114 | 4,271 | 2,751 | 30,354 |
| 113,007 | 215 | 22,959 | 4,235 | 2,735 | 30,144 |
| 113,008 | 219 | 23,110 | 4,278 | 2,787 | 30,394 |
| 113,009 | 219 | 23,059 | 4,277 | 2,793 | 30,348 |
| 113,010 | 219 | 23,206 | 4,317 | 2,833 | 30,575 |
| 113,011 | 214 | 22,999 | 4,300 | 2,811 | 30,324 |
| 113,012 | 214 | 23,002 | 4,322 | 2,812 | 30,350 |
| 113,013 | 225 | 23,295 | 4,361 | 2,834 | 30,715 |
| 113,014 | 222 | 23,264 | 4,357 | 2,844 | 30,687 |
| 113,015 | 221 | 23,277 | 4,370 | 2,852 | 30,720 |

|         |     |        |       |       |        |
|---------|-----|--------|-------|-------|--------|
| 113,016 | 221 | 23,473 | 4,402 | 2,894 | 30,990 |
| 113,017 | 231 | 23,207 | 4,404 | 2,876 | 30,718 |
| 113,018 | 233 | 23,382 | 4,448 | 2,918 | 30,981 |
| 113,019 | 226 | 23,195 | 4,459 | 2,917 | 30,797 |
| 113,020 | 241 | 23,486 | 4,513 | 2,953 | 31,193 |
| 113,021 | 241 | 23,507 | 4,523 | 2,964 | 31,235 |
| 113,022 | 239 | 23,629 | 4,523 | 2,980 | 31,371 |
| 113,023 | 236 | 23,586 | 4,516 | 2,991 | 31,329 |
| 113,024 | 229 | 23,502 | 4,517 | 2,968 | 31,216 |
| 113,025 | 225 | 23,409 | 4,485 | 2,928 | 31,047 |
| 113,026 | 234 | 23,279 | 4,480 | 2,902 | 30,895 |
| 113,027 | 234 | 23,310 | 4,483 | 2,910 | 30,937 |
| 113,028 | 238 | 23,277 | 4,506 | 2,918 | 30,939 |
| 113,029 | 240 | 23,387 | 4,557 | 2,965 | 31,149 |
| 113,030 | 242 | 23,073 | 4,527 | 2,948 | 30,790 |
| 113,031 | 246 | 22,711 | 4,452 | 2,894 | 30,303 |
| 113,032 | 252 | 22,913 | 4,482 | 2,925 | 30,572 |
| 113,033 | 245 | 22,924 | 4,499 | 2,914 | 30,582 |
| 113,034 | 244 | 22,975 | 4,487 | 2,918 | 30,624 |
| 113,035 | 242 | 23,019 | 4,520 | 2,936 | 30,717 |
| 113,036 | 240 | 23,060 | 4,530 | 2,935 | 30,765 |
| 113,037 | 243 | 23,120 | 4,542 | 2,944 | 30,849 |
| 113,038 | 243 | 23,101 | 4,560 | 2,957 | 30,861 |
| 113,039 | 230 | 23,374 | 4,643 | 3,011 | 31,258 |
| 113,040 | 227 | 23,458 | 4,639 | 3,016 | 31,340 |
| 113,041 | 227 | 23,495 | 4,657 | 3,040 | 31,419 |
| 113,042 | 226 | 23,491 | 4,697 | 3,080 | 31,494 |
| 113,043 | 224 | 23,774 | 4,786 | 3,094 | 31,878 |
| 113,044 | 215 | 23,498 | 4,790 | 3,073 | 31,576 |
| 113,045 | 215 | 23,797 | 4,843 | 3,099 | 31,954 |
| 113,046 | 221 | 23,800 | 4,875 | 3,104 | 32,000 |
| 113,047 | 217 | 23,495 | 4,850 | 3,087 | 31,649 |

|         |     |        |       |       |        |
|---------|-----|--------|-------|-------|--------|
| 113,048 | 219 | 23,583 | 4,885 | 3,080 | 31,767 |
| 113,049 | 210 | 23,740 | 4,937 | 3,135 | 32,022 |
| 113,050 | 200 | 23,565 | 4,924 | 3,141 | 31,830 |
| 113,051 | 200 | 23,504 | 4,945 | 3,146 | 31,795 |
| 113,052 | 198 | 23,506 | 5,003 | 3,179 | 31,886 |
| 113,053 | 199 | 23,470 | 5,056 | 3,219 | 31,944 |
| 113,054 | 198 | 23,259 | 5,039 | 3,202 | 31,698 |
| 113,055 | 192 | 23,264 | 5,066 | 3,212 | 31,734 |
| 113,056 | 194 | 23,607 | 5,133 | 3,282 | 32,216 |
| 113,057 | 177 | 23,103 | 5,039 | 3,200 | 31,519 |
| 113,058 | 178 | 23,311 | 5,084 | 3,230 | 31,803 |
| 113,059 | 175 | 23,628 | 5,159 | 3,271 | 32,233 |
| 113,060 | 178 | 23,900 | 5,221 | 3,326 | 32,625 |
| 113,061 | 174 | 23,549 | 5,177 | 3,321 | 32,221 |
| 113,062 | 177 | 23,774 | 5,224 | 3,376 | 32,551 |
| 113,063 | 179 | 23,498 | 5,176 | 3,356 | 32,209 |
| 113,064 | 169 | 23,210 | 5,137 | 3,337 | 31,853 |
| 113,065 | 166 | 23,337 | 5,158 | 3,359 | 32,020 |
| 113,066 | 167 | 23,292 | 5,184 | 3,360 | 32,003 |
| 113,067 | 165 | 23,340 | 5,208 | 3,350 | 32,063 |
| 113,068 | 155 | 23,082 | 5,149 | 3,325 | 31,711 |
| 113,069 | 157 | 23,156 | 5,165 | 3,337 | 31,815 |
| 113,070 | 162 | 23,648 | 5,254 | 3,411 | 32,475 |
| 113,071 | 152 | 23,644 | 5,225 | 3,408 | 32,429 |
| 113,072 | 151 | 23,072 | 5,137 | 3,350 | 31,710 |
| 113,073 | 151 | 23,285 | 5,200 | 3,379 | 32,015 |
| 113,074 | 150 | 23,043 | 5,164 | 3,355 | 31,712 |
| 113,075 | 148 | 22,840 | 5,099 | 3,345 | 31,432 |
| 113,076 | 150 | 23,083 | 5,153 | 3,366 | 31,752 |
| 113,077 | 156 | 23,363 | 5,217 | 3,402 | 32,138 |
| 113,078 | 157 | 23,147 | 5,169 | 3,370 | 31,843 |
| 113,079 | 153 | 23,200 | 5,198 | 3,367 | 31,918 |

|         |     |        |       |       |        |
|---------|-----|--------|-------|-------|--------|
| 113,080 | 155 | 22,976 | 5,144 | 3,333 | 31,608 |
| 113,081 | 160 | 23,287 | 5,202 | 3,372 | 32,021 |
| 113,082 | 156 | 23,236 | 5,214 | 3,383 | 31,989 |
| 113,083 | 153 | 23,183 | 5,239 | 3,387 | 31,962 |
| 113,084 | 155 | 23,306 | 5,239 | 3,424 | 32,124 |
| 113,085 | 151 | 23,380 | 5,300 | 3,445 | 32,276 |
| 113,086 | 149 | 23,318 | 5,292 | 3,473 | 32,232 |
| 113,087 | 143 | 23,147 | 5,246 | 3,442 | 31,978 |
| 113,088 | 146 | 23,397 | 5,289 | 3,483 | 32,315 |
| 113,089 | 147 | 23,388 | 5,248 | 3,492 | 32,275 |
| 113,090 | 146 | 23,338 | 5,281 | 3,497 | 32,262 |
| 113,091 | 147 | 23,214 | 5,289 | 3,507 | 32,157 |
| 113,092 | 151 | 23,243 | 5,274 | 3,532 | 32,200 |
| 113,093 | 153 | 23,490 | 5,292 | 3,520 | 32,455 |
| 113,094 | 154 | 22,738 | 5,089 | 3,421 | 31,402 |
| 113,095 | 154 | 22,720 | 5,088 | 3,425 | 31,387 |
| 113,096 | 160 | 22,408 | 5,031 | 3,397 | 30,996 |
| 113,097 | 151 | 22,029 | 4,964 | 3,350 | 30,494 |
| 113,098 | 158 | 22,960 | 5,099 | 3,461 | 31,678 |
| 113,099 | 160 | 22,645 | 5,029 | 3,421 | 31,255 |
| 113,100 | 163 | 22,681 | 5,011 | 3,411 | 31,266 |
| 113,101 | 168 | 23,032 | 5,053 | 3,448 | 31,701 |
| 113,102 | 173 | 22,920 | 4,997 | 3,415 | 31,505 |
| 113,103 | 173 | 22,859 | 4,997 | 3,419 | 31,448 |
| 113,104 | 175 | 23,111 | 5,027 | 3,428 | 31,741 |
| 113,105 | 175 | 22,865 | 4,967 | 3,394 | 31,401 |
| 113,106 | 174 | 23,085 | 5,005 | 3,426 | 31,690 |
| 113,107 | 175 | 23,076 | 5,014 | 3,399 | 31,664 |
| 113,108 | 173 | 22,781 | 5,005 | 3,397 | 31,356 |
| 113,109 | 171 | 22,506 | 4,992 | 3,373 | 31,042 |
| 113,110 | 174 | 22,649 | 5,002 | 3,394 | 31,219 |
| 113,111 | 172 | 22,491 | 4,939 | 3,346 | 30,948 |

|         |     |        |       |       |        |
|---------|-----|--------|-------|-------|--------|
| 113,112 | 178 | 22,818 | 4,973 | 3,361 | 31,330 |
| 113,113 | 185 | 22,741 | 4,953 | 3,328 | 31,207 |
| 113,114 | 186 | 22,767 | 4,969 | 3,322 | 31,244 |
| 113,115 | 195 | 23,015 | 4,998 | 3,316 | 31,524 |
| 113,116 | 195 | 23,016 | 4,992 | 3,326 | 31,529 |
| 113,117 | 194 | 23,114 | 4,995 | 3,334 | 31,637 |
| 113,118 | 198 | 23,231 | 5,010 | 3,333 | 31,772 |
| 113,119 | 196 | 23,084 | 5,008 | 3,317 | 31,605 |
| 113,120 | 188 | 23,227 | 5,075 | 3,334 | 31,824 |
| 113,121 | 185 | 23,161 | 5,092 | 3,332 | 31,770 |
| 113,122 | 183 | 22,846 | 5,063 | 3,299 | 31,391 |
| 113,123 | 184 | 22,935 | 5,040 | 3,303 | 31,462 |
| 113,124 | 184 | 22,792 | 5,011 | 3,271 | 31,258 |
| 113,125 | 184 | 23,020 | 5,059 | 3,314 | 31,577 |
| 113,126 | 176 | 22,768 | 5,020 | 3,291 | 31,255 |
| 113,127 | 175 | 22,793 | 5,031 | 3,304 | 31,303 |
| 113,128 | 169 | 22,840 | 5,066 | 3,313 | 31,388 |
| 113,129 | 165 | 22,650 | 5,020 | 3,292 | 31,127 |
| 113,130 | 168 | 22,840 | 5,014 | 3,307 | 31,329 |
| 113,131 | 162 | 22,847 | 5,066 | 3,333 | 31,408 |
| 113,132 | 157 | 22,824 | 5,088 | 3,345 | 31,414 |
| 113,133 | 156 | 22,736 | 5,047 | 3,327 | 31,266 |
| 113,134 | 161 | 22,883 | 5,081 | 3,342 | 31,467 |
| 113,135 | 164 | 22,947 | 5,110 | 3,335 | 31,556 |
| 113,136 | 174 | 22,654 | 5,047 | 3,286 | 31,161 |
| 113,137 | 175 | 22,675 | 5,051 | 3,270 | 31,171 |
| 113,138 | 170 | 22,494 | 5,035 | 3,275 | 30,974 |
| 113,139 | 177 | 22,716 | 5,105 | 3,301 | 31,299 |
| 113,140 | 176 | 22,615 | 5,061 | 3,247 | 31,099 |
| 113,141 | 175 | 22,527 | 5,015 | 3,219 | 30,936 |
| 113,142 | 178 | 22,829 | 5,109 | 3,265 | 31,381 |
| 113,143 | 171 | 22,043 | 4,944 | 3,117 | 30,275 |



|         |     |        |       |       |        |
|---------|-----|--------|-------|-------|--------|
| 113,144 | 174 | 22,226 | 4,983 | 3,156 | 30,539 |
| 113,145 | 177 | 22,468 | 5,034 | 3,191 | 30,870 |
| 113,146 | 177 | 22,388 | 5,045 | 3,192 | 30,802 |
| 113,147 | 178 | 22,791 | 5,150 | 3,261 | 31,380 |
| 113,148 | 178 | 22,483 | 5,092 | 3,245 | 30,998 |
| 113,149 | 175 | 22,578 | 5,150 | 3,266 | 31,169 |
| 113,150 | 174 | 22,545 | 5,181 | 3,281 | 31,181 |
| 113,151 | 188 | 22,879 | 5,294 | 3,342 | 31,703 |
| 113,152 | 188 | 22,959 | 5,325 | 3,372 | 31,844 |
| 113,153 | 182 | 22,795 | 5,263 | 3,341 | 31,581 |
| 113,154 | 183 | 23,032 | 5,318 | 3,376 | 31,909 |
| 113,155 | 177 | 22,932 | 5,337 | 3,389 | 31,835 |
| 113,156 | 180 | 22,842 | 5,380 | 3,405 | 31,807 |
| 113,157 | 181 | 23,114 | 5,453 | 3,430 | 32,178 |
| 113,158 | 175 | 22,865 | 5,402 | 3,368 | 31,810 |
| 113,159 | 178 | 23,075 | 5,390 | 3,386 | 32,029 |
| 113,160 | 177 | 23,143 | 5,391 | 3,387 | 32,098 |
| 113,161 | 179 | 23,133 | 5,415 | 3,395 | 32,122 |
| 113,162 | 179 | 23,367 | 5,507 | 3,425 | 32,478 |
| 113,163 | 173 | 22,984 | 5,465 | 3,400 | 32,022 |
| 113,164 | 170 | 23,005 | 5,501 | 3,417 | 32,093 |
| 113,165 | 172 | 23,000 | 5,547 | 3,461 | 32,180 |
| 113,166 | 167 | 23,128 | 5,563 | 3,475 | 32,333 |
| 113,167 | 167 | 23,224 | 5,595 | 3,494 | 32,480 |
| 113,168 | 164 | 23,339 | 5,615 | 3,500 | 32,618 |
| 113,169 | 167 | 23,406 | 5,646 | 3,515 | 32,734 |
| 113,170 | 168 | 23,581 | 5,678 | 3,545 | 32,972 |
| 113,171 | 175 | 23,605 | 5,658 | 3,521 | 32,959 |
| 113,172 | 180 | 23,342 | 5,587 | 3,472 | 32,581 |
| 113,173 | 180 | 23,414 | 5,586 | 3,473 | 32,653 |
| 113,174 | 176 | 22,901 | 5,515 | 3,431 | 32,023 |
| 113,175 | 178 | 23,106 | 5,553 | 3,462 | 32,299 |

|         |     |        |       |       |        |
|---------|-----|--------|-------|-------|--------|
| 113,176 | 182 | 23,321 | 5,591 | 3,475 | 32,569 |
| 113,177 | 181 | 23,165 | 5,524 | 3,437 | 32,307 |
| 113,178 | 179 | 23,141 | 5,533 | 3,441 | 32,294 |
| 113,179 | 180 | 22,850 | 5,458 | 3,421 | 31,909 |
| 113,180 | 180 | 22,588 | 5,425 | 3,388 | 31,581 |
| 113,181 | 189 | 23,583 | 5,649 | 3,513 | 32,934 |
| 113,182 | 191 | 23,129 | 5,504 | 3,409 | 32,233 |
| 113,183 | 198 | 23,471 | 5,536 | 3,438 | 32,643 |
| 113,184 | 203 | 23,786 | 5,594 | 3,471 | 33,054 |
| 113,185 | 208 | 23,611 | 5,522 | 3,445 | 32,786 |
| 113,186 | 207 | 23,658 | 5,517 | 3,442 | 32,824 |
| 113,187 | 207 | 23,926 | 5,600 | 3,476 | 33,209 |
| 113,188 | 214 | 23,801 | 5,553 | 3,438 | 33,006 |
| 113,189 | 214 | 23,774 | 5,551 | 3,440 | 32,979 |
| 113,190 | 214 | 24,031 | 5,643 | 3,472 | 33,360 |
| 113,191 | 215 | 23,930 | 5,659 | 3,475 | 33,279 |
| 113,192 | 216 | 23,904 | 5,664 | 3,487 | 33,271 |
| 113,193 | 207 | 23,640 | 5,590 | 3,431 | 32,868 |
| 113,194 | 206 | 23,596 | 5,571 | 3,421 | 32,794 |
| 113,195 | 205 | 23,631 | 5,571 | 3,416 | 32,823 |
| 113,196 | 202 | 23,664 | 5,572 | 3,412 | 32,850 |
| 113,197 | 201 | 23,712 | 5,567 | 3,380 | 32,860 |
| 113,198 | 202 | 23,609 | 5,574 | 3,380 | 32,765 |
| 113,199 | 201 | 23,654 | 5,564 | 3,399 | 32,818 |
| 113,200 | 200 | 23,355 | 5,469 | 3,312 | 32,336 |
| 113,201 | 206 | 23,465 | 5,484 | 3,323 | 32,478 |
| 113,202 | 198 | 23,422 | 5,420 | 3,291 | 32,331 |
| 113,203 | 192 | 23,069 | 5,368 | 3,245 | 31,874 |
| 113,204 | 187 | 22,939 | 5,348 | 3,247 | 31,721 |
| 113,205 | 186 | 22,779 | 5,331 | 3,230 | 31,526 |
| 113,206 | 188 | 22,758 | 5,281 | 3,190 | 31,417 |
| 113,207 | 191 | 22,941 | 5,335 | 3,216 | 31,683 |

|         |     |        |       |       |        |
|---------|-----|--------|-------|-------|--------|
| 113,208 | 187 | 22,638 | 5,261 | 3,180 | 31,266 |
| 113,209 | 191 | 22,611 | 5,266 | 3,191 | 31,259 |
| 113,210 | 188 | 22,522 | 5,283 | 3,172 | 31,165 |
| 113,211 | 184 | 22,382 | 5,272 | 3,162 | 31,000 |
| 113,212 | 182 | 22,062 | 5,185 | 3,118 | 30,547 |
| 113,213 | 183 | 22,028 | 5,185 | 3,105 | 30,501 |
| 113,214 | 175 | 22,165 | 5,195 | 3,089 | 30,624 |
| 113,215 | 176 | 22,089 | 5,213 | 3,080 | 30,558 |
| 113,216 | 168 | 21,865 | 5,110 | 3,048 | 30,191 |
| 113,217 | 173 | 21,976 | 5,152 | 3,088 | 30,389 |
| 113,218 | 177 | 21,319 | 4,988 | 2,981 | 29,465 |
| 113,219 | 180 | 21,370 | 5,015 | 3,006 | 29,571 |
| 113,220 | 177 | 21,307 | 5,010 | 3,029 | 29,523 |
| 113,221 | 184 | 20,977 | 4,938 | 2,980 | 29,079 |
| 113,222 | 177 | 20,702 | 4,898 | 2,979 | 28,756 |
| 113,223 | 174 | 20,932 | 4,959 | 3,007 | 29,072 |
| 113,224 | 176 | 20,817 | 4,976 | 2,990 | 28,959 |
| 113,225 | 177 | 20,751 | 4,947 | 2,962 | 28,837 |
| 113,226 | 176 | 20,688 | 4,966 | 2,951 | 28,781 |
| 113,227 | 180 | 20,675 | 4,984 | 2,960 | 28,799 |
| 113,228 | 180 | 20,686 | 4,970 | 2,968 | 28,804 |
| 113,229 | 176 | 20,797 | 5,008 | 2,971 | 28,952 |
| 113,230 | 177 | 20,782 | 5,008 | 2,979 | 28,946 |
| 113,231 | 175 | 20,660 | 4,981 | 2,970 | 28,786 |
| 113,232 | 173 | 20,597 | 5,006 | 2,996 | 28,772 |
| 113,233 | 165 | 20,384 | 5,026 | 3,018 | 28,593 |
| 113,234 | 164 | 20,415 | 5,108 | 3,046 | 28,733 |
| 113,235 | 154 | 20,494 | 5,185 | 3,108 | 28,941 |
| 113,236 | 149 | 20,482 | 5,204 | 3,137 | 28,972 |
| 113,237 | 151 | 20,751 | 5,217 | 3,164 | 29,283 |
| 113,238 | 143 | 20,921 | 5,323 | 3,235 | 29,622 |
| 113,239 | 136 | 21,172 | 5,367 | 3,314 | 29,989 |

|         |     |        |       |       |        |
|---------|-----|--------|-------|-------|--------|
| 113,240 | 130 | 21,135 | 5,328 | 3,322 | 29,915 |
| 113,241 | 130 | 21,688 | 5,505 | 3,408 | 30,731 |
| 113,242 | 127 | 21,592 | 5,462 | 3,384 | 30,565 |
| 113,243 | 121 | 21,685 | 5,546 | 3,410 | 30,762 |
| 113,244 | 122 | 22,028 | 5,638 | 3,488 | 31,276 |
| 113,245 | 133 | 22,082 | 5,698 | 3,521 | 31,434 |
| 113,246 | 133 | 22,357 | 5,791 | 3,582 | 31,863 |
| 113,247 | 132 | 22,713 | 5,884 | 3,651 | 32,380 |
| 113,248 | 130 | 22,734 | 5,887 | 3,662 | 32,413 |
| 113,249 | 133 | 22,881 | 5,926 | 3,679 | 32,619 |
| 113,250 | 134 | 22,901 | 5,931 | 3,698 | 32,664 |
| 113,251 | 135 | 22,973 | 5,944 | 3,710 | 32,762 |
| 113,252 | 127 | 22,782 | 5,923 | 3,684 | 32,516 |
| 113,253 | 124 | 23,066 | 6,042 | 3,790 | 33,022 |
| 113,254 | 127 | 22,908 | 5,988 | 3,767 | 32,790 |
| 113,255 | 126 | 22,767 | 5,953 | 3,769 | 32,615 |
| 113,256 | 128 | 23,024 | 6,038 | 3,813 | 33,003 |
| 113,257 | 132 | 23,317 | 6,127 | 3,873 | 33,449 |
| 113,258 | 132 | 23,390 | 6,152 | 3,883 | 33,557 |
| 113,259 | 140 | 23,307 | 6,168 | 3,906 | 33,521 |
| 113,260 | 138 | 23,142 | 6,129 | 3,899 | 33,308 |
| 113,261 | 140 | 22,954 | 6,115 | 3,863 | 33,072 |
| 113,262 | 141 | 23,105 | 6,192 | 3,906 | 33,344 |
| 113,263 | 144 | 23,351 | 6,232 | 3,948 | 33,675 |
| 113,264 | 153 | 23,173 | 6,156 | 3,934 | 33,416 |
| 113,265 | 149 | 22,918 | 6,091 | 3,922 | 33,080 |
| 113,266 | 151 | 22,931 | 6,085 | 3,917 | 33,084 |
| 113,267 | 150 | 22,711 | 6,041 | 3,877 | 32,779 |
| 113,268 | 148 | 23,523 | 6,256 | 3,970 | 33,897 |
| 113,269 | 144 | 23,291 | 6,203 | 3,942 | 33,580 |
| 113,270 | 143 | 23,456 | 6,227 | 3,986 | 33,812 |
| 113,271 | 140 | 23,378 | 6,209 | 3,977 | 33,704 |

|         |     |        |       |       |        |
|---------|-----|--------|-------|-------|--------|
| 113,272 | 139 | 23,463 | 6,206 | 3,986 | 33,794 |
| 113,273 | 137 | 23,366 | 6,131 | 3,948 | 33,582 |
| 113,274 | 135 | 23,371 | 6,126 | 3,945 | 33,577 |
| 113,275 | 139 | 23,396 | 6,132 | 3,960 | 33,627 |
| 113,276 | 136 | 23,599 | 6,204 | 4,022 | 33,961 |
| 113,277 | 135 | 23,350 | 6,161 | 4,006 | 33,652 |
| 113,278 | 135 | 23,643 | 6,263 | 4,077 | 34,118 |
| 113,279 | 141 | 23,792 | 6,299 | 4,081 | 34,313 |
| 113,280 | 143 | 23,817 | 6,322 | 4,109 | 34,391 |
| 113,281 | 141 | 23,990 | 6,356 | 4,119 | 34,606 |
| 113,282 | 139 | 23,399 | 6,154 | 3,973 | 33,665 |
| 113,283 | 146 | 23,891 | 6,247 | 4,042 | 34,326 |
| 113,284 | 147 | 24,341 | 6,342 | 4,131 | 34,961 |
| 113,285 | 148 | 23,930 | 6,234 | 4,032 | 34,344 |
| 113,286 | 149 | 24,208 | 6,301 | 4,061 | 34,719 |
| 113,287 | 150 | 24,501 | 6,368 | 4,091 | 35,110 |
| 113,288 | 148 | 24,037 | 6,259 | 4,022 | 34,466 |
| 113,289 | 150 | 24,347 | 6,325 | 4,065 | 34,887 |
| 113,290 | 151 | 24,097 | 6,302 | 4,016 | 34,566 |
| 113,291 | 153 | 23,919 | 6,286 | 3,998 | 34,356 |
| 113,292 | 157 | 23,829 | 6,224 | 3,968 | 34,178 |
| 113,293 | 157 | 23,592 | 6,162 | 3,921 | 33,832 |
| 113,294 | 161 | 23,461 | 6,132 | 3,934 | 33,688 |
| 113,295 | 161 | 23,400 | 6,141 | 3,929 | 33,631 |
| 113,296 | 154 | 23,157 | 6,071 | 3,871 | 33,253 |
| 113,297 | 156 | 22,578 | 5,902 | 3,757 | 32,393 |
| 113,298 | 156 | 22,365 | 5,830 | 3,723 | 32,074 |
| 113,299 | 157 | 22,342 | 5,825 | 3,706 | 32,030 |
| 113,300 | 158 | 22,300 | 5,857 | 3,720 | 32,035 |
| 113,301 | 160 | 22,328 | 5,841 | 3,703 | 32,032 |
| 113,302 | 164 | 22,340 | 5,839 | 3,692 | 32,035 |
| 113,303 | 163 | 22,399 | 5,826 | 3,689 | 32,077 |

|         |     |        |       |       |        |
|---------|-----|--------|-------|-------|--------|
| 113,304 | 161 | 22,571 | 5,840 | 3,685 | 32,257 |
| 113,305 | 163 | 22,605 | 5,861 | 3,677 | 32,306 |
| 113,306 | 164 | 22,640 | 5,795 | 3,673 | 32,272 |
| 113,307 | 163 | 22,688 | 5,821 | 3,690 | 32,362 |
| 113,308 | 158 | 22,831 | 5,843 | 3,724 | 32,556 |
| 113,309 | 155 | 22,921 | 5,835 | 3,734 | 32,645 |
| 113,310 | 152 | 23,155 | 5,850 | 3,749 | 32,906 |
| 113,311 | 157 | 23,267 | 5,864 | 3,740 | 33,028 |
| 113,312 | 155 | 23,376 | 5,839 | 3,738 | 33,108 |
| 113,313 | 158 | 23,357 | 5,814 | 3,723 | 33,052 |
| 113,314 | 156 | 23,362 | 5,844 | 3,732 | 33,094 |
| 113,315 | 146 | 23,337 | 5,870 | 3,750 | 33,103 |
| 113,316 | 150 | 23,626 | 5,910 | 3,786 | 33,472 |
| 113,317 | 152 | 23,449 | 5,859 | 3,760 | 33,220 |
| 113,318 | 153 | 23,571 | 5,854 | 3,779 | 33,357 |
| 113,319 | 166 | 23,647 | 5,848 | 3,784 | 33,445 |
| 113,320 | 167 | 23,695 | 5,844 | 3,760 | 33,466 |
| 113,321 | 169 | 23,944 | 5,917 | 3,781 | 33,811 |
| 113,322 | 169 | 23,888 | 5,891 | 3,779 | 33,727 |
| 113,323 | 161 | 23,927 | 5,902 | 3,789 | 33,779 |
| 113,324 | 165 | 24,003 | 5,978 | 3,825 | 33,971 |
| 113,325 | 166 | 24,124 | 5,986 | 3,818 | 34,094 |
| 113,326 | 169 | 24,257 | 6,024 | 3,813 | 34,263 |
| 113,327 | 172 | 24,501 | 6,018 | 3,823 | 34,514 |
| 113,328 | 173 | 24,638 | 6,017 | 3,827 | 34,655 |
| 113,329 | 176 | 24,815 | 6,062 | 3,865 | 34,918 |
| 113,330 | 174 | 24,878 | 6,068 | 3,891 | 35,011 |
| 113,331 | 169 | 24,852 | 6,023 | 3,860 | 34,904 |
| 113,332 | 173 | 24,765 | 6,030 | 3,893 | 34,861 |
| 113,333 | 174 | 24,798 | 6,027 | 3,905 | 34,904 |
| 113,334 | 173 | 24,867 | 6,003 | 3,893 | 34,936 |
| 113,335 | 174 | 25,100 | 6,042 | 3,893 | 35,209 |

|         |     |        |       |       |        |
|---------|-----|--------|-------|-------|--------|
| 113,336 | 174 | 25,025 | 6,035 | 3,914 | 35,148 |
| 113,337 | 174 | 25,223 | 6,087 | 3,939 | 35,423 |
| 113,338 | 173 | 25,446 | 6,115 | 3,980 | 35,714 |
| 113,339 | 169 | 25,278 | 6,030 | 3,934 | 35,411 |
| 113,340 | 172 | 25,527 | 6,045 | 3,962 | 35,706 |
| 113,341 | 171 | 25,755 | 6,076 | 3,984 | 35,986 |
| 113,342 | 169 | 25,779 | 6,028 | 3,965 | 35,941 |
| 113,343 | 165 | 25,692 | 5,996 | 3,966 | 35,819 |
| 113,344 | 169 | 25,685 | 5,981 | 3,952 | 35,787 |
| 113,345 | 176 | 25,736 | 5,937 | 3,922 | 35,771 |
| 113,346 | 177 | 25,848 | 5,940 | 3,910 | 35,875 |
| 113,347 | 168 | 25,522 | 5,872 | 3,890 | 35,452 |
| 113,348 | 165 | 25,333 | 5,818 | 3,849 | 35,165 |
| 113,349 | 166 | 25,584 | 5,857 | 3,888 | 35,495 |
| 113,350 | 164 | 25,962 | 5,898 | 3,929 | 35,953 |
| 113,351 | 164 | 25,620 | 5,816 | 3,865 | 35,465 |
| 113,352 | 160 | 25,665 | 5,850 | 3,886 | 35,561 |
| 113,353 | 156 | 25,689 | 5,855 | 3,885 | 35,585 |
| 113,354 | 164 | 25,590 | 5,877 | 3,897 | 35,528 |
| 113,355 | 173 | 25,681 | 5,927 | 3,922 | 35,703 |
| 113,356 | 168 | 25,493 | 5,925 | 3,907 | 35,493 |
| 113,357 | 173 | 25,322 | 5,913 | 3,865 | 35,273 |
| 113,358 | 172 | 25,117 | 5,850 | 3,826 | 34,965 |
| 113,359 | 171 | 24,954 | 5,822 | 3,803 | 34,750 |
| 113,360 | 172 | 24,666 | 5,794 | 3,778 | 34,410 |
| 113,361 | 167 | 24,468 | 5,812 | 3,788 | 34,235 |
| 113,362 | 163 | 24,453 | 5,800 | 3,805 | 34,221 |
| 113,363 | 163 | 24,428 | 5,752 | 3,801 | 34,144 |
| 113,364 | 158 | 24,360 | 5,702 | 3,785 | 34,005 |
| 113,365 | 163 | 24,565 | 5,758 | 3,787 | 34,273 |
| 113,366 | 161 | 24,411 | 5,707 | 3,750 | 34,029 |
| 113,367 | 152 | 24,106 | 5,683 | 3,734 | 33,675 |

|         |     |        |       |       |        |
|---------|-----|--------|-------|-------|--------|
| 113,368 | 153 | 24,128 | 5,670 | 3,724 | 33,675 |
| 113,369 | 153 | 24,346 | 5,715 | 3,750 | 33,964 |
| 113,370 | 143 | 24,236 | 5,706 | 3,764 | 33,849 |
| 113,371 | 138 | 23,935 | 5,622 | 3,748 | 33,443 |
| 113,372 | 138 | 24,189 | 5,697 | 3,789 | 33,813 |
| 113,373 | 136 | 23,716 | 5,612 | 3,712 | 33,176 |
| 113,374 | 142 | 23,926 | 5,640 | 3,714 | 33,422 |
| 113,375 | 139 | 23,912 | 5,620 | 3,701 | 33,372 |
| 113,376 | 135 | 23,766 | 5,554 | 3,711 | 33,166 |
| 113,377 | 134 | 23,596 | 5,504 | 3,698 | 32,932 |
| 113,378 | 132 | 23,443 | 5,483 | 3,685 | 32,743 |
| 113,379 | 126 | 23,481 | 5,443 | 3,641 | 32,691 |
| 113,380 | 128 | 23,622 | 5,474 | 3,660 | 32,884 |
| 113,381 | 122 | 22,957 | 5,354 | 3,575 | 32,008 |
| 113,382 | 121 | 22,981 | 5,370 | 3,560 | 32,032 |
| 113,383 | 124 | 22,936 | 5,396 | 3,562 | 32,018 |
| 113,384 | 122 | 22,612 | 5,314 | 3,507 | 31,555 |
| 113,385 | 120 | 22,637 | 5,377 | 3,510 | 31,644 |
| 113,386 | 113 | 21,871 | 5,218 | 3,407 | 30,609 |
| 113,387 | 113 | 21,844 | 5,180 | 3,381 | 30,518 |
| 113,388 | 114 | 22,162 | 5,268 | 3,424 | 30,968 |
| 113,389 | 114 | 21,442 | 5,133 | 3,331 | 30,020 |
| 113,390 | 112 | 21,400 | 5,133 | 3,312 | 29,957 |
| 113,391 | 109 | 21,447 | 5,178 | 3,336 | 30,070 |
| 113,392 | 109 | 21,165 | 5,144 | 3,310 | 29,728 |
| 113,393 | 113 | 21,297 | 5,177 | 3,325 | 29,912 |
| 113,394 | 113 | 21,342 | 5,182 | 3,315 | 29,952 |
| 113,395 | 105 | 21,144 | 5,121 | 3,273 | 29,643 |
| 113,396 | 112 | 21,224 | 5,159 | 3,323 | 29,818 |
| 113,397 | 113 | 21,019 | 5,131 | 3,299 | 29,562 |
| 113,398 | 113 | 21,033 | 5,129 | 3,299 | 29,574 |
| 113,399 | 125 | 21,164 | 5,177 | 3,307 | 29,773 |



|         |     |        |       |       |        |
|---------|-----|--------|-------|-------|--------|
| 113,400 | 128 | 21,162 | 5,209 | 3,339 | 29,838 |
| 113,401 | 127 | 21,123 | 5,216 | 3,353 | 29,819 |
| 113,402 | 130 | 21,104 | 5,183 | 3,331 | 29,748 |
| 113,403 | 130 | 21,111 | 5,217 | 3,353 | 29,811 |
| 113,404 | 125 | 21,309 | 5,289 | 3,391 | 30,114 |
| 113,405 | 123 | 21,466 | 5,310 | 3,404 | 30,303 |
| 113,406 | 117 | 21,582 | 5,299 | 3,414 | 30,412 |
| 113,407 | 118 | 21,695 | 5,273 | 3,411 | 30,497 |
| 113,408 | 113 | 21,427 | 5,221 | 3,369 | 30,130 |
| 113,409 | 112 | 21,589 | 5,299 | 3,433 | 30,433 |
| 113,410 | 112 | 21,710 | 5,274 | 3,410 | 30,506 |
| 113,411 | 112 | 21,766 | 5,253 | 3,394 | 30,525 |
| 113,412 | 114 | 21,981 | 5,288 | 3,406 | 30,789 |
| 113,413 | 115 | 21,930 | 5,284 | 3,385 | 30,714 |
| 113,414 | 112 | 21,547 | 5,253 | 3,345 | 30,257 |
| 113,415 | 114 | 21,897 | 5,319 | 3,377 | 30,707 |
| 113,416 | 112 | 21,706 | 5,290 | 3,346 | 30,454 |
| 113,417 | 113 | 21,533 | 5,245 | 3,304 | 30,195 |
| 113,418 | 113 | 21,873 | 5,308 | 3,346 | 30,640 |
| 113,419 | 118 | 22,002 | 5,359 | 3,400 | 30,879 |
| 113,420 | 117 | 21,779 | 5,313 | 3,382 | 30,591 |
| 113,421 | 115 | 21,741 | 5,341 | 3,352 | 30,549 |
| 113,422 | 116 | 21,938 | 5,378 | 3,366 | 30,798 |
| 113,423 | 118 | 22,070 | 5,400 | 3,368 | 30,956 |
| 113,424 | 119 | 22,153 | 5,404 | 3,380 | 31,056 |
| 113,425 | 113 | 22,095 | 5,393 | 3,385 | 30,986 |
| 113,426 | 113 | 22,211 | 5,418 | 3,373 | 31,115 |
| 113,427 | 110 | 22,013 | 5,391 | 3,353 | 30,867 |
| 113,428 | 110 | 22,185 | 5,439 | 3,400 | 31,134 |
| 113,429 | 105 | 22,227 | 5,448 | 3,406 | 31,186 |
| 113,430 | 105 | 22,221 | 5,475 | 3,437 | 31,238 |
| 113,431 | 112 | 22,051 | 5,425 | 3,405 | 30,993 |

|         |     |        |       |       |        |
|---------|-----|--------|-------|-------|--------|
| 113,432 | 114 | 22,304 | 5,460 | 3,426 | 31,304 |
| 113,433 | 108 | 22,527 | 5,496 | 3,446 | 31,577 |
| 113,434 | 110 | 22,468 | 5,502 | 3,464 | 31,544 |
| 113,435 | 116 | 22,409 | 5,468 | 3,462 | 31,455 |
| 113,436 | 117 | 22,354 | 5,456 | 3,453 | 31,380 |
| 113,437 | 118 | 22,693 | 5,500 | 3,489 | 31,800 |
| 113,438 | 118 | 22,766 | 5,510 | 3,508 | 31,902 |
| 113,439 | 120 | 22,750 | 5,456 | 3,512 | 31,838 |
| 113,440 | 119 | 22,530 | 5,391 | 3,469 | 31,509 |
| 113,441 | 125 | 23,181 | 5,526 | 3,558 | 32,390 |
| 113,442 | 125 | 23,040 | 5,490 | 3,522 | 32,177 |
| 113,443 | 123 | 23,113 | 5,502 | 3,529 | 32,267 |
| 113,444 | 118 | 23,116 | 5,534 | 3,550 | 32,318 |
| 113,445 | 114 | 22,714 | 5,411 | 3,480 | 31,719 |
| 113,446 | 113 | 23,044 | 5,472 | 3,507 | 32,136 |
| 113,447 | 106 | 23,155 | 5,506 | 3,514 | 32,281 |
| 113,448 | 108 | 23,247 | 5,555 | 3,554 | 32,464 |
| 113,449 | 98  | 23,487 | 5,560 | 3,578 | 32,723 |
| 113,450 | 98  | 23,454 | 5,571 | 3,597 | 32,720 |
| 113,451 | 96  | 23,291 | 5,526 | 3,558 | 32,471 |
| 113,452 | 96  | 23,211 | 5,521 | 3,547 | 32,375 |
| 113,453 | 97  | 23,264 | 5,521 | 3,544 | 32,426 |
| 113,454 | 101 | 23,117 | 5,478 | 3,540 | 32,236 |
| 113,455 | 103 | 23,283 | 5,507 | 3,567 | 32,460 |
| 113,456 | 107 | 23,138 | 5,497 | 3,546 | 32,288 |
| 113,457 | 112 | 23,137 | 5,490 | 3,549 | 32,288 |
| 113,458 | 110 | 23,112 | 5,447 | 3,515 | 32,184 |
| 113,459 | 111 | 23,336 | 5,463 | 3,523 | 32,433 |
| 113,460 | 114 | 23,540 | 5,471 | 3,506 | 32,631 |
| 113,461 | 117 | 23,429 | 5,453 | 3,482 | 32,481 |
| 113,462 | 124 | 23,344 | 5,437 | 3,454 | 32,359 |
| 113,463 | 125 | 23,298 | 5,432 | 3,452 | 32,307 |

|         |     |        |       |       |        |
|---------|-----|--------|-------|-------|--------|
| 113,464 | 123 | 23,516 | 5,480 | 3,499 | 32,618 |
| 113,465 | 130 | 23,527 | 5,452 | 3,503 | 32,612 |
| 113,466 | 128 | 23,420 | 5,463 | 3,484 | 32,495 |
| 113,467 | 124 | 23,173 | 5,396 | 3,452 | 32,145 |
| 113,468 | 124 | 23,253 | 5,418 | 3,460 | 32,255 |
| 113,469 | 126 | 23,461 | 5,446 | 3,492 | 32,525 |
| 113,470 | 124 | 23,309 | 5,399 | 3,437 | 32,269 |
| 113,471 | 125 | 23,395 | 5,433 | 3,427 | 32,380 |
| 113,472 | 128 | 23,632 | 5,456 | 3,465 | 32,681 |
| 113,473 | 132 | 23,217 | 5,366 | 3,405 | 32,120 |
| 113,474 | 134 | 23,264 | 5,373 | 3,426 | 32,197 |
| 113,475 | 141 | 23,202 | 5,369 | 3,412 | 32,124 |
| 113,476 | 142 | 23,187 | 5,351 | 3,386 | 32,066 |
| 113,477 | 142 | 23,459 | 5,384 | 3,439 | 32,424 |
| 113,478 | 141 | 23,549 | 5,446 | 3,443 | 32,579 |
| 113,479 | 145 | 23,709 | 5,480 | 3,464 | 32,798 |
| 113,480 | 146 | 23,458 | 5,429 | 3,407 | 32,440 |
| 113,481 | 148 | 23,566 | 5,449 | 3,422 | 32,585 |
| 113,482 | 138 | 23,675 | 5,475 | 3,432 | 32,720 |
| 113,483 | 137 | 23,585 | 5,450 | 3,418 | 32,590 |
| 113,484 | 137 | 23,530 | 5,387 | 3,410 | 32,464 |
| 113,485 | 140 | 23,684 | 5,417 | 3,418 | 32,659 |
| 113,486 | 138 | 23,482 | 5,396 | 3,398 | 32,414 |
| 113,487 | 136 | 23,295 | 5,358 | 3,381 | 32,170 |
| 113,488 | 137 | 23,173 | 5,373 | 3,376 | 32,059 |
| 113,489 | 136 | 23,068 | 5,370 | 3,358 | 31,932 |
| 113,490 | 131 | 22,794 | 5,370 | 3,320 | 31,615 |
| 113,491 | 134 | 22,891 | 5,392 | 3,330 | 31,747 |
| 113,492 | 132 | 22,785 | 5,375 | 3,316 | 31,608 |
| 113,493 | 134 | 22,585 | 5,345 | 3,278 | 31,342 |
| 113,494 | 148 | 22,619 | 5,346 | 3,244 | 31,357 |
| 113,495 | 152 | 22,620 | 5,347 | 3,250 | 31,369 |

|         |     |        |       |       |        |
|---------|-----|--------|-------|-------|--------|
| 113,496 | 156 | 22,670 | 5,385 | 3,260 | 31,471 |
| 113,497 | 157 | 22,611 | 5,383 | 3,246 | 31,397 |
| 113,498 | 162 | 22,760 | 5,417 | 3,265 | 31,604 |
| 113,499 | 162 | 22,640 | 5,394 | 3,242 | 31,438 |
| 113,500 | 168 | 22,564 | 5,400 | 3,217 | 31,349 |
| 113,501 | 176 | 22,698 | 5,415 | 3,210 | 31,499 |
| 113,502 | 177 | 22,928 | 5,433 | 3,224 | 31,762 |
| 113,503 | 181 | 23,004 | 5,415 | 3,223 | 31,823 |
| 113,504 | 184 | 23,236 | 5,481 | 3,243 | 32,144 |
| 113,505 | 180 | 23,223 | 5,489 | 3,212 | 32,104 |
| 113,506 | 190 | 23,611 | 5,541 | 3,230 | 32,572 |
| 113,507 | 188 | 23,432 | 5,484 | 3,207 | 32,311 |
| 113,508 | 184 | 23,388 | 5,502 | 3,190 | 32,264 |
| 113,509 | 186 | 23,395 | 5,554 | 3,226 | 32,361 |
| 113,510 | 186 | 23,196 | 5,535 | 3,219 | 32,136 |
| 113,511 | 190 | 22,941 | 5,495 | 3,198 | 31,824 |
| 113,512 | 188 | 22,840 | 5,478 | 3,198 | 31,704 |
| 113,513 | 184 | 23,271 | 5,586 | 3,294 | 32,335 |
| 113,514 | 183 | 23,176 | 5,559 | 3,305 | 32,223 |
| 113,515 | 185 | 23,171 | 5,548 | 3,299 | 32,203 |
| 113,516 | 181 | 22,946 | 5,516 | 3,298 | 31,941 |
| 113,517 | 181 | 22,846 | 5,502 | 3,296 | 31,825 |
| 113,518 | 182 | 22,888 | 5,510 | 3,305 | 31,885 |
| 113,519 | 183 | 22,906 | 5,510 | 3,315 | 31,914 |
| 113,520 | 185 | 22,996 | 5,559 | 3,354 | 32,094 |
| 113,521 | 187 | 23,067 | 5,576 | 3,366 | 32,196 |
| 113,522 | 183 | 23,069 | 5,564 | 3,381 | 32,197 |
| 113,523 | 184 | 23,425 | 5,606 | 3,428 | 32,643 |
| 113,524 | 181 | 23,474 | 5,618 | 3,472 | 32,745 |
| 113,525 | 179 | 23,262 | 5,599 | 3,448 | 32,488 |
| 113,526 | 170 | 23,406 | 5,632 | 3,469 | 32,677 |
| 113,527 | 171 | 23,191 | 5,633 | 3,473 | 32,468 |

|         |     |        |       |       |        |
|---------|-----|--------|-------|-------|--------|
| 113,528 | 174 | 23,477 | 5,666 | 3,487 | 32,804 |
| 113,529 | 178 | 23,457 | 5,666 | 3,488 | 32,789 |
| 113,530 | 178 | 23,408 | 5,642 | 3,472 | 32,700 |
| 113,531 | 173 | 23,086 | 5,587 | 3,448 | 32,294 |
| 113,532 | 174 | 23,118 | 5,549 | 3,441 | 32,282 |
| 113,533 | 175 | 23,395 | 5,593 | 3,478 | 32,641 |
| 113,534 | 168 | 22,419 | 5,343 | 3,313 | 31,243 |
| 113,535 | 169 | 22,676 | 5,392 | 3,323 | 31,560 |
| 113,536 | 176 | 22,919 | 5,427 | 3,357 | 31,879 |
| 113,537 | 176 | 22,952 | 5,434 | 3,358 | 31,920 |
| 113,538 | 175 | 23,198 | 5,486 | 3,393 | 32,252 |
| 113,539 | 176 | 23,329 | 5,488 | 3,414 | 32,407 |
| 113,540 | 187 | 23,256 | 5,491 | 3,432 | 32,366 |
| 113,541 | 187 | 23,328 | 5,504 | 3,438 | 32,457 |
| 113,542 | 186 | 22,940 | 5,445 | 3,406 | 31,977 |
| 113,543 | 189 | 22,917 | 5,457 | 3,428 | 31,991 |
| 113,544 | 185 | 22,519 | 5,390 | 3,397 | 31,491 |
| 113,545 | 175 | 22,746 | 5,448 | 3,474 | 31,843 |
| 113,546 | 178 | 22,510 | 5,398 | 3,436 | 31,522 |
| 113,547 | 176 | 22,363 | 5,388 | 3,433 | 31,360 |
| 113,548 | 169 | 22,281 | 5,424 | 3,462 | 31,336 |
| 113,549 | 169 | 22,285 | 5,417 | 3,457 | 31,328 |
| 113,550 | 170 | 21,968 | 5,366 | 3,406 | 30,910 |
| 113,551 | 162 | 21,794 | 5,304 | 3,377 | 30,637 |
| 113,552 | 157 | 21,806 | 5,351 | 3,437 | 30,751 |
| 113,553 | 158 | 21,853 | 5,392 | 3,454 | 30,857 |
| 113,554 | 160 | 21,819 | 5,385 | 3,454 | 30,818 |
| 113,555 | 155 | 21,595 | 5,341 | 3,438 | 30,529 |
| 113,556 | 152 | 21,710 | 5,378 | 3,446 | 30,686 |
| 113,557 | 148 | 21,540 | 5,358 | 3,439 | 30,485 |
| 113,558 | 145 | 21,400 | 5,308 | 3,415 | 30,268 |
| 113,559 | 142 | 21,422 | 5,295 | 3,420 | 30,279 |

|         |     |        |       |       |        |
|---------|-----|--------|-------|-------|--------|
| 113,560 | 134 | 21,238 | 5,219 | 3,368 | 29,959 |
| 113,561 | 137 | 21,388 | 5,265 | 3,396 | 30,186 |
| 113,562 | 138 | 21,543 | 5,326 | 3,422 | 30,429 |
| 113,563 | 136 | 21,381 | 5,307 | 3,403 | 30,227 |
| 113,564 | 136 | 21,404 | 5,325 | 3,397 | 30,262 |
| 113,565 | 133 | 21,137 | 5,301 | 3,363 | 29,934 |
| 113,566 | 130 | 21,188 | 5,290 | 3,347 | 29,955 |
| 113,567 | 130 | 21,467 | 5,347 | 3,374 | 30,318 |
| 113,568 | 132 | 21,258 | 5,303 | 3,344 | 30,037 |
| 113,569 | 131 | 20,910 | 5,241 | 3,292 | 29,574 |
| 113,570 | 134 | 21,381 | 5,344 | 3,359 | 30,218 |
| 113,571 | 132 | 21,498 | 5,367 | 3,350 | 30,347 |
| 113,572 | 130 | 21,464 | 5,335 | 3,355 | 30,284 |
| 113,573 | 132 | 21,340 | 5,333 | 3,350 | 30,155 |
| 113,574 | 138 | 21,034 | 5,277 | 3,287 | 29,736 |
| 113,575 | 141 | 21,023 | 5,278 | 3,264 | 29,706 |
| 113,576 | 147 | 21,152 | 5,214 | 3,237 | 29,750 |
| 113,577 | 147 | 21,158 | 5,199 | 3,238 | 29,742 |
| 113,578 | 150 | 21,570 | 5,262 | 3,265 | 30,247 |
| 113,579 | 147 | 21,301 | 5,215 | 3,240 | 29,903 |
| 113,580 | 146 | 21,568 | 5,285 | 3,281 | 30,280 |
| 113,581 | 143 | 21,228 | 5,238 | 3,250 | 29,859 |
| 113,582 | 145 | 21,486 | 5,299 | 3,276 | 30,206 |
| 113,583 | 150 | 21,249 | 5,258 | 3,234 | 29,891 |
| 113,584 | 151 | 21,231 | 5,265 | 3,235 | 29,882 |
| 113,585 | 150 | 21,281 | 5,326 | 3,274 | 30,031 |
| 113,586 | 148 | 21,302 | 5,351 | 3,294 | 30,095 |
| 113,587 | 144 | 21,257 | 5,344 | 3,306 | 30,051 |
| 113,588 | 149 | 21,062 | 5,332 | 3,268 | 29,811 |
| 113,589 | 151 | 21,225 | 5,364 | 3,285 | 30,025 |
| 113,590 | 148 | 21,542 | 5,421 | 3,316 | 30,427 |
| 113,591 | 150 | 21,404 | 5,351 | 3,279 | 30,184 |

|         |     |        |       |       |        |
|---------|-----|--------|-------|-------|--------|
| 113,592 | 155 | 21,450 | 5,345 | 3,282 | 30,232 |
| 113,593 | 153 | 21,510 | 5,345 | 3,283 | 30,291 |
| 113,594 | 149 | 21,407 | 5,345 | 3,267 | 30,168 |
| 113,595 | 155 | 21,679 | 5,357 | 3,268 | 30,459 |
| 113,596 | 146 | 21,073 | 5,155 | 3,134 | 29,508 |
| 113,597 | 147 | 21,249 | 5,214 | 3,161 | 29,771 |
| 113,598 | 149 | 21,272 | 5,211 | 3,151 | 29,783 |
| 113,599 | 151 | 21,104 | 5,170 | 3,109 | 29,534 |
| 113,600 | 147 | 20,655 | 5,068 | 3,036 | 28,906 |
| 113,601 | 148 | 20,746 | 5,086 | 3,032 | 29,012 |
| 113,602 | 148 | 20,425 | 5,038 | 3,001 | 28,612 |
| 113,603 | 147 | 20,231 | 4,973 | 2,967 | 28,318 |
| 113,604 | 155 | 21,795 | 5,265 | 3,192 | 30,407 |
| 113,605 | 150 | 21,553 | 5,230 | 3,165 | 30,098 |
| 113,606 | 155 | 21,691 | 5,218 | 3,182 | 30,246 |
| 113,607 | 155 | 21,677 | 5,206 | 3,183 | 30,221 |
| 113,608 | 152 | 21,688 | 5,229 | 3,196 | 30,265 |
| 113,609 | 153 | 21,744 | 5,240 | 3,207 | 30,344 |
| 113,610 | 155 | 21,807 | 5,306 | 3,234 | 30,502 |
| 113,611 | 166 | 21,873 | 5,349 | 3,261 | 30,649 |
| 113,612 | 165 | 21,956 | 5,382 | 3,261 | 30,764 |
| 113,613 | 165 | 22,042 | 5,402 | 3,281 | 30,890 |
| 113,614 | 168 | 22,193 | 5,439 | 3,318 | 31,118 |
| 113,615 | 165 | 22,187 | 5,447 | 3,319 | 31,118 |
| 113,616 | 164 | 22,098 | 5,420 | 3,303 | 30,985 |
| 113,617 | 167 | 22,178 | 5,498 | 3,344 | 31,187 |
| 113,618 | 167 | 22,280 | 5,553 | 3,377 | 31,377 |
| 113,619 | 173 | 22,494 | 5,644 | 3,413 | 31,724 |
| 113,620 | 174 | 22,240 | 5,583 | 3,379 | 31,376 |
| 113,621 | 177 | 22,466 | 5,607 | 3,412 | 31,662 |
| 113,622 | 182 | 22,471 | 5,599 | 3,421 | 31,673 |
| 113,623 | 186 | 22,251 | 5,598 | 3,343 | 31,378 |

|         |     |        |       |       |        |
|---------|-----|--------|-------|-------|--------|
| 113,624 | 187 | 22,239 | 5,618 | 3,354 | 31,398 |
| 113,625 | 185 | 21,943 | 5,597 | 3,329 | 31,054 |
| 113,626 | 184 | 21,733 | 5,592 | 3,325 | 30,834 |
| 113,627 | 198 | 22,961 | 5,923 | 3,502 | 32,584 |
| 113,628 | 220 | 23,541 | 6,079 | 3,558 | 33,398 |
| 113,629 | 224 | 23,667 | 6,137 | 3,580 | 33,608 |
| 113,630 | 224 | 23,700 | 6,153 | 3,578 | 33,655 |
| 113,631 | 227 | 24,211 | 6,241 | 3,628 | 34,307 |
| 113,632 | 232 | 24,455 | 6,309 | 3,664 | 34,660 |
| 113,633 | 233 | 24,442 | 6,312 | 3,682 | 34,669 |
| 113,634 | 227 | 24,958 | 6,412 | 3,738 | 35,335 |
| 113,635 | 226 | 25,136 | 6,415 | 3,737 | 35,514 |
| 113,636 | 229 | 25,494 | 6,481 | 3,784 | 35,988 |
| 113,637 | 229 | 25,347 | 6,437 | 3,728 | 35,741 |
| 113,638 | 234 | 25,550 | 6,511 | 3,777 | 36,072 |
| 113,639 | 231 | 25,655 | 6,530 | 3,790 | 36,206 |
| 113,640 | 230 | 25,586 | 6,529 | 3,773 | 36,118 |
| 113,641 | 230 | 25,639 | 6,559 | 3,787 | 36,215 |
| 113,642 | 228 | 25,571 | 6,574 | 3,785 | 36,158 |
| 113,643 | 225 | 25,468 | 6,557 | 3,778 | 36,028 |
| 113,644 | 224 | 25,475 | 6,552 | 3,778 | 36,029 |
| 113,645 | 223 | 25,448 | 6,575 | 3,815 | 36,061 |
| 113,646 | 230 | 25,557 | 6,648 | 3,851 | 36,286 |
| 113,647 | 231 | 25,430 | 6,599 | 3,823 | 36,083 |
| 113,648 | 233 | 25,668 | 6,657 | 3,861 | 36,419 |
| 113,649 | 231 | 25,711 | 6,667 | 3,845 | 36,454 |
| 113,650 | 230 | 25,542 | 6,670 | 3,823 | 36,265 |
| 113,651 | 225 | 25,362 | 6,669 | 3,818 | 36,074 |
| 113,652 | 230 | 25,555 | 6,691 | 3,836 | 36,312 |
| 113,653 | 232 | 25,377 | 6,701 | 3,811 | 36,121 |
| 113,654 | 232 | 25,534 | 6,716 | 3,815 | 36,297 |
| 113,655 | 233 | 25,492 | 6,722 | 3,808 | 36,255 |



|         |     |        |       |       |        |
|---------|-----|--------|-------|-------|--------|
| 113,656 | 234 | 25,329 | 6,704 | 3,808 | 36,075 |
| 113,657 | 233 | 25,285 | 6,752 | 3,819 | 36,089 |
| 113,658 | 231 | 25,338 | 6,750 | 3,823 | 36,142 |
| 113,659 | 230 | 25,384 | 6,713 | 3,801 | 36,128 |
| 113,660 | 230 | 25,350 | 6,691 | 3,782 | 36,053 |
| 113,661 | 228 | 25,362 | 6,703 | 3,785 | 36,078 |
| 113,662 | 221 | 25,116 | 6,637 | 3,760 | 35,734 |
| 113,663 | 223 | 24,931 | 6,592 | 3,741 | 35,487 |
| 113,664 | 225 | 25,638 | 6,774 | 3,861 | 36,498 |
| 113,665 | 224 | 25,325 | 6,696 | 3,791 | 36,036 |
| 113,666 | 224 | 25,423 | 6,687 | 3,773 | 36,107 |
| 113,667 | 225 | 25,293 | 6,614 | 3,744 | 35,876 |
| 113,668 | 231 | 25,308 | 6,605 | 3,755 | 35,899 |
| 113,669 | 234 | 25,345 | 6,624 | 3,741 | 35,944 |
| 113,670 | 230 | 25,303 | 6,595 | 3,736 | 35,864 |
| 113,671 | 232 | 25,314 | 6,612 | 3,726 | 35,884 |
| 113,672 | 221 | 25,059 | 6,605 | 3,686 | 35,571 |
| 113,673 | 224 | 25,061 | 6,616 | 3,730 | 35,631 |
| 113,674 | 205 | 25,003 | 6,598 | 3,744 | 35,550 |
| 113,675 | 203 | 25,074 | 6,573 | 3,752 | 35,602 |
| 113,676 | 188 | 24,793 | 6,479 | 3,712 | 35,172 |
| 113,677 | 188 | 24,732 | 6,513 | 3,732 | 35,165 |
| 113,678 | 177 | 24,686 | 6,523 | 3,777 | 35,163 |
| 113,679 | 165 | 24,848 | 6,546 | 3,830 | 35,389 |
| 113,680 | 162 | 24,870 | 6,538 | 3,844 | 35,414 |
| 113,681 | 167 | 24,901 | 6,645 | 3,927 | 35,640 |
| 113,682 | 167 | 24,827 | 6,758 | 3,973 | 35,725 |
| 113,683 | 159 | 24,515 | 6,743 | 3,967 | 35,384 |
| 113,684 | 166 | 24,649 | 6,858 | 4,037 | 35,710 |
| 113,685 | 169 | 24,563 | 6,885 | 4,044 | 35,661 |
| 113,686 | 173 | 24,491 | 6,936 | 4,064 | 35,664 |
| 113,687 | 163 | 23,997 | 6,799 | 3,984 | 34,943 |

|         |     |        |       |       |        |
|---------|-----|--------|-------|-------|--------|
| 113,688 | 165 | 24,092 | 6,826 | 4,002 | 35,085 |
| 113,689 | 170 | 24,374 | 6,891 | 4,030 | 35,465 |
| 113,690 | 170 | 24,071 | 6,824 | 4,003 | 35,068 |
| 113,691 | 172 | 24,269 | 6,904 | 4,055 | 35,400 |
| 113,692 | 177 | 24,099 | 6,828 | 4,018 | 35,122 |
| 113,693 | 179 | 24,144 | 6,842 | 4,027 | 35,192 |
| 113,694 | 177 | 24,384 | 6,947 | 4,068 | 35,576 |
| 113,695 | 175 | 24,122 | 6,890 | 4,052 | 35,239 |
| 113,696 | 174 | 24,240 | 6,908 | 4,045 | 35,367 |
| 113,697 | 165 | 24,235 | 6,881 | 4,058 | 35,339 |
| 113,698 | 162 | 24,414 | 6,945 | 4,094 | 35,615 |
| 113,699 | 159 | 24,037 | 6,863 | 4,052 | 35,111 |
| 113,700 | 159 | 24,207 | 6,942 | 4,089 | 35,397 |
| 113,701 | 157 | 23,984 | 6,866 | 4,041 | 35,048 |
| 113,702 | 160 | 24,091 | 6,898 | 4,055 | 35,204 |
| 113,703 | 161 | 24,061 | 6,881 | 4,064 | 35,167 |
| 113,704 | 155 | 24,043 | 6,842 | 4,075 | 35,115 |
| 113,705 | 148 | 23,450 | 6,647 | 3,958 | 34,203 |
| 113,706 | 161 | 23,689 | 6,690 | 4,009 | 34,549 |
| 113,707 | 169 | 24,019 | 6,764 | 4,040 | 34,992 |
| 113,708 | 170 | 24,021 | 6,783 | 4,057 | 35,031 |
| 113,709 | 169 | 23,727 | 6,715 | 4,009 | 34,620 |
| 113,710 | 174 | 23,848 | 6,777 | 4,022 | 34,821 |
| 113,711 | 175 | 23,767 | 6,763 | 4,001 | 34,706 |
| 113,712 | 175 | 23,858 | 6,821 | 4,042 | 34,896 |
| 113,713 | 171 | 23,851 | 6,813 | 4,012 | 34,847 |
| 113,714 | 168 | 23,326 | 6,584 | 3,903 | 33,981 |
| 113,715 | 168 | 23,470 | 6,629 | 3,940 | 34,207 |
| 113,716 | 167 | 23,626 | 6,703 | 3,958 | 34,454 |
| 113,717 | 159 | 23,100 | 6,619 | 3,873 | 33,751 |
| 113,718 | 158 | 23,317 | 6,657 | 3,904 | 34,036 |
| 113,719 | 159 | 23,456 | 6,692 | 3,916 | 34,223 |

|         |     |        |       |       |        |
|---------|-----|--------|-------|-------|--------|
| 113,720 | 156 | 23,401 | 6,660 | 3,930 | 34,147 |
| 113,721 | 152 | 23,152 | 6,579 | 3,903 | 33,786 |
| 113,722 | 149 | 23,021 | 6,573 | 3,906 | 33,649 |
| 113,723 | 149 | 22,774 | 6,511 | 3,878 | 33,312 |
| 113,724 | 148 | 22,605 | 6,494 | 3,841 | 33,088 |
| 113,725 | 148 | 22,473 | 6,491 | 3,825 | 32,937 |
| 113,726 | 152 | 22,330 | 6,505 | 3,828 | 32,815 |
| 113,727 | 151 | 22,165 | 6,510 | 3,805 | 32,631 |
| 113,728 | 150 | 22,032 | 6,455 | 3,757 | 32,394 |
| 113,729 | 153 | 21,721 | 6,362 | 3,685 | 31,921 |
| 113,730 | 154 | 21,250 | 6,230 | 3,619 | 31,253 |
| 113,731 | 153 | 20,697 | 6,104 | 3,527 | 30,481 |
| 113,732 | 152 | 20,685 | 6,030 | 3,461 | 30,328 |
| 113,733 | 151 | 20,521 | 5,875 | 3,394 | 29,941 |
| 113,734 | 156 | 19,963 | 5,619 | 3,238 | 28,976 |
| 113,735 | 159 | 20,031 | 5,627 | 3,246 | 29,063 |
| 113,736 | 155 | 19,815 | 5,469 | 3,171 | 28,610 |
| 113,737 | 155 | 19,827 | 5,450 | 3,174 | 28,606 |
| 113,738 | 149 | 19,754 | 5,425 | 3,162 | 28,490 |
| 113,739 | 144 | 19,819 | 5,475 | 3,203 | 28,641 |
| 113,740 | 143 | 19,821 | 5,477 | 3,198 | 28,639 |
| 113,741 | 143 | 19,811 | 5,455 | 3,189 | 28,598 |
| 113,742 | 151 | 19,946 | 5,486 | 3,220 | 28,803 |
| 113,743 | 148 | 20,000 | 5,511 | 3,247 | 28,906 |
| 113,744 | 147 | 20,160 | 5,546 | 3,260 | 29,113 |
| 113,745 | 145 | 20,129 | 5,516 | 3,243 | 29,033 |
| 113,746 | 145 | 20,229 | 5,522 | 3,234 | 29,130 |
| 113,747 | 151 | 20,543 | 5,600 | 3,277 | 29,571 |
| 113,748 | 157 | 20,494 | 5,554 | 3,248 | 29,453 |
| 113,749 | 164 | 20,676 | 5,628 | 3,281 | 29,749 |
| 113,750 | 162 | 20,980 | 5,656 | 3,311 | 30,109 |
| 113,751 | 160 | 20,835 | 5,589 | 3,294 | 29,878 |

|         |     |        |       |       |        |
|---------|-----|--------|-------|-------|--------|
| 113,752 | 165 | 20,930 | 5,622 | 3,320 | 30,037 |
| 113,753 | 165 | 20,940 | 5,610 | 3,317 | 30,032 |
| 113,754 | 164 | 20,950 | 5,625 | 3,332 | 30,071 |
| 113,755 | 169 | 21,012 | 5,659 | 3,322 | 30,162 |
| 113,756 | 169 | 20,994 | 5,661 | 3,330 | 30,154 |
| 113,757 | 165 | 21,258 | 5,756 | 3,340 | 30,519 |
| 113,758 | 156 | 21,344 | 5,777 | 3,363 | 30,640 |
| 113,759 | 151 | 21,178 | 5,723 | 3,334 | 30,386 |
| 113,760 | 149 | 21,098 | 5,717 | 3,335 | 30,299 |
| 113,761 | 150 | 21,709 | 5,887 | 3,441 | 31,187 |
| 113,762 | 149 | 21,801 | 5,887 | 3,460 | 31,297 |
| 113,763 | 156 | 21,943 | 5,893 | 3,449 | 31,441 |
| 113,764 | 157 | 21,792 | 5,810 | 3,424 | 31,183 |
| 113,765 | 159 | 21,727 | 5,781 | 3,415 | 31,082 |
| 113,766 | 167 | 22,339 | 5,942 | 3,479 | 31,927 |
| 113,767 | 168 | 22,409 | 5,933 | 3,476 | 31,986 |
| 113,768 | 168 | 22,305 | 5,856 | 3,449 | 31,778 |
| 113,769 | 168 | 22,451 | 5,880 | 3,457 | 31,956 |
| 113,770 | 172 | 22,726 | 5,961 | 3,498 | 32,357 |
| 113,771 | 172 | 22,606 | 5,919 | 3,456 | 32,153 |
| 113,772 | 172 | 22,855 | 5,952 | 3,472 | 32,451 |
| 113,773 | 172 | 22,801 | 5,931 | 3,472 | 32,376 |
| 113,774 | 170 | 23,078 | 6,047 | 3,511 | 32,806 |
| 113,775 | 172 | 23,025 | 6,043 | 3,501 | 32,741 |
| 113,776 | 173 | 23,101 | 6,062 | 3,526 | 32,862 |
| 113,777 | 175 | 23,194 | 6,076 | 3,541 | 32,986 |
| 113,778 | 173 | 23,056 | 6,009 | 3,495 | 32,733 |
| 113,779 | 176 | 23,135 | 6,060 | 3,529 | 32,900 |
| 113,780 | 175 | 22,898 | 6,014 | 3,460 | 32,547 |
| 113,781 | 176 | 22,784 | 5,992 | 3,452 | 32,404 |
| 113,782 | 183 | 22,792 | 5,966 | 3,454 | 32,395 |
| 113,783 | 185 | 22,798 | 5,969 | 3,458 | 32,410 |

|         |     |        |       |       |        |
|---------|-----|--------|-------|-------|--------|
| 113,784 | 181 | 22,540 | 5,916 | 3,421 | 32,058 |
| 113,785 | 174 | 22,475 | 5,921 | 3,429 | 31,999 |
| 113,786 | 172 | 22,203 | 5,872 | 3,401 | 31,648 |
| 113,787 | 201 | 22,985 | 6,129 | 3,537 | 32,852 |
| 113,788 | 206 | 22,717 | 6,077 | 3,511 | 32,511 |
| 113,789 | 207 | 22,447 | 6,022 | 3,475 | 32,151 |
| 113,790 | 210 | 22,973 | 6,190 | 3,553 | 32,926 |
| 113,791 | 213 | 22,740 | 6,134 | 3,504 | 32,591 |
| 113,792 | 214 | 23,113 | 6,237 | 3,550 | 33,114 |
| 113,793 | 201 | 23,125 | 6,238 | 3,568 | 33,132 |
| 113,794 | 202 | 23,127 | 6,310 | 3,579 | 33,218 |
| 113,795 | 206 | 23,028 | 6,310 | 3,586 | 33,130 |
| 113,796 | 206 | 22,926 | 6,285 | 3,570 | 32,987 |
| 113,797 | 207 | 23,033 | 6,340 | 3,601 | 33,181 |
| 113,798 | 209 | 23,340 | 6,413 | 3,645 | 33,607 |
| 113,799 | 203 | 23,258 | 6,394 | 3,630 | 33,485 |
| 113,800 | 197 | 23,094 | 6,336 | 3,616 | 33,243 |
| 113,801 | 196 | 22,938 | 6,314 | 3,583 | 33,031 |
| 113,802 | 202 | 22,646 | 6,265 | 3,540 | 32,653 |
| 113,803 | 205 | 22,829 | 6,293 | 3,574 | 32,901 |
| 113,804 | 204 | 21,930 | 6,069 | 3,425 | 31,628 |
| 113,805 | 205 | 22,172 | 6,129 | 3,462 | 31,968 |
| 113,806 | 213 | 22,449 | 6,173 | 3,513 | 32,348 |
| 113,807 | 214 | 22,432 | 6,165 | 3,515 | 32,326 |
| 113,808 | 210 | 22,807 | 6,322 | 3,635 | 32,974 |
| 113,809 | 209 | 23,072 | 6,392 | 3,674 | 33,347 |
| 113,810 | 220 | 22,839 | 6,311 | 3,620 | 32,990 |
| 113,811 | 223 | 22,825 | 6,315 | 3,605 | 32,968 |
| 113,812 | 233 | 22,945 | 6,370 | 3,632 | 33,180 |
| 113,813 | 234 | 22,879 | 6,342 | 3,630 | 33,085 |
| 113,814 | 234 | 23,201 | 6,394 | 3,691 | 33,520 |
| 113,815 | 227 | 23,293 | 6,430 | 3,699 | 33,649 |

|         |     |        |       |       |        |
|---------|-----|--------|-------|-------|--------|
| 113,816 | 220 | 23,019 | 6,382 | 3,673 | 33,294 |
| 113,817 | 224 | 23,245 | 6,429 | 3,702 | 33,600 |
| 113,818 | 223 | 22,962 | 6,387 | 3,693 | 33,265 |
| 113,819 | 219 | 22,653 | 6,343 | 3,671 | 32,886 |
| 113,820 | 221 | 23,021 | 6,502 | 3,778 | 33,522 |
| 113,821 | 218 | 23,045 | 6,490 | 3,783 | 33,536 |
| 113,822 | 220 | 22,905 | 6,536 | 3,794 | 33,455 |
| 113,823 | 222 | 22,866 | 6,548 | 3,796 | 33,432 |
| 113,824 | 224 | 22,828 | 6,496 | 3,771 | 33,319 |
| 113,825 | 224 | 22,972 | 6,543 | 3,807 | 33,546 |
| 113,826 | 223 | 22,931 | 6,504 | 3,795 | 33,453 |
| 113,827 | 218 | 22,683 | 6,396 | 3,735 | 33,032 |
| 113,828 | 219 | 23,036 | 6,458 | 3,791 | 33,504 |
| 113,829 | 221 | 22,710 | 6,410 | 3,763 | 33,104 |
| 113,830 | 221 | 22,773 | 6,392 | 3,742 | 33,128 |
| 113,831 | 215 | 22,700 | 6,380 | 3,761 | 33,056 |
| 113,832 | 215 | 22,686 | 6,359 | 3,755 | 33,015 |
| 113,833 | 208 | 22,915 | 6,417 | 3,803 | 33,343 |
| 113,834 | 207 | 22,866 | 6,374 | 3,775 | 33,222 |
| 113,835 | 197 | 22,631 | 6,279 | 3,721 | 32,828 |
| 113,836 | 198 | 22,775 | 6,313 | 3,748 | 33,034 |
| 113,837 | 176 | 22,697 | 6,280 | 3,743 | 32,896 |
| 113,838 | 173 | 22,763 | 6,329 | 3,763 | 33,028 |
| 113,839 | 167 | 22,924 | 6,335 | 3,776 | 33,202 |
| 113,840 | 170 | 22,953 | 6,296 | 3,770 | 33,189 |
| 113,841 | 169 | 22,848 | 6,321 | 3,793 | 33,131 |
| 113,842 | 171 | 22,682 | 6,302 | 3,783 | 32,938 |
| 113,843 | 171 | 22,697 | 6,270 | 3,757 | 32,895 |
| 113,844 | 168 | 22,504 | 6,160 | 3,716 | 32,548 |
| 113,845 | 172 | 22,609 | 6,130 | 3,711 | 32,622 |
| 113,846 | 172 | 22,498 | 6,108 | 3,713 | 32,491 |
| 113,847 | 173 | 22,639 | 6,148 | 3,743 | 32,703 |

|         |     |        |       |       |        |
|---------|-----|--------|-------|-------|--------|
| 113,848 | 174 | 22,374 | 6,036 | 3,696 | 32,280 |
| 113,849 | 171 | 22,186 | 6,004 | 3,685 | 32,046 |
| 113,850 | 172 | 22,153 | 6,000 | 3,683 | 32,008 |
| 113,851 | 171 | 22,109 | 5,997 | 3,665 | 31,942 |
| 113,852 | 169 | 21,882 | 5,962 | 3,651 | 31,664 |
| 113,853 | 165 | 21,817 | 5,944 | 3,634 | 31,560 |
| 113,854 | 165 | 21,765 | 5,926 | 3,638 | 31,494 |
| 113,855 | 168 | 21,820 | 5,961 | 3,667 | 31,616 |
| 113,856 | 172 | 22,097 | 6,051 | 3,720 | 32,040 |
| 113,857 | 157 | 21,926 | 6,029 | 3,702 | 31,814 |
| 113,858 | 156 | 21,972 | 6,005 | 3,701 | 31,834 |
| 113,859 | 154 | 21,924 | 5,970 | 3,696 | 31,744 |
| 113,860 | 155 | 21,929 | 5,947 | 3,678 | 31,709 |
| 113,861 | 148 | 22,179 | 5,996 | 3,745 | 32,068 |
| 113,862 | 136 | 22,280 | 5,994 | 3,764 | 32,174 |
| 113,863 | 135 | 22,129 | 5,930 | 3,722 | 31,916 |
| 113,864 | 133 | 22,085 | 5,890 | 3,702 | 31,810 |
| 113,865 | 129 | 22,244 | 5,978 | 3,739 | 32,090 |
| 113,866 | 133 | 22,493 | 6,005 | 3,797 | 32,428 |
| 113,867 | 130 | 22,227 | 5,886 | 3,768 | 32,011 |
| 113,868 | 131 | 22,485 | 5,922 | 3,803 | 32,341 |
| 113,869 | 137 | 22,737 | 5,928 | 3,817 | 32,619 |
| 113,870 | 136 | 22,719 | 5,876 | 3,807 | 32,538 |
| 113,871 | 148 | 23,236 | 5,976 | 3,841 | 33,201 |
| 113,872 | 145 | 22,854 | 5,859 | 3,797 | 32,655 |
| 113,873 | 150 | 23,226 | 5,936 | 3,842 | 33,154 |
| 113,874 | 150 | 23,724 | 6,006 | 3,919 | 33,799 |
| 113,875 | 151 | 23,820 | 6,035 | 3,939 | 33,945 |
| 113,876 | 156 | 23,801 | 5,979 | 3,935 | 33,871 |
| 113,877 | 154 | 23,563 | 5,943 | 3,913 | 33,573 |
| 113,878 | 150 | 24,205 | 6,122 | 4,061 | 34,538 |
| 113,879 | 157 | 24,214 | 6,115 | 4,048 | 34,534 |

|         |     |        |       |       |        |
|---------|-----|--------|-------|-------|--------|
| 113,880 | 152 | 24,098 | 6,040 | 4,021 | 34,311 |
| 113,881 | 153 | 24,196 | 6,060 | 4,043 | 34,452 |
| 113,882 | 155 | 24,157 | 6,085 | 4,035 | 34,432 |
| 113,883 | 156 | 24,092 | 6,053 | 4,010 | 34,311 |
| 113,884 | 153 | 23,965 | 6,058 | 4,025 | 34,201 |
| 113,885 | 152 | 23,993 | 6,077 | 4,045 | 34,267 |
| 113,886 | 163 | 24,247 | 6,111 | 4,089 | 34,610 |
| 113,887 | 164 | 24,238 | 6,075 | 4,088 | 34,565 |
| 113,888 | 168 | 24,356 | 6,032 | 4,077 | 34,633 |
| 113,889 | 170 | 24,650 | 6,050 | 4,109 | 34,979 |
| 113,890 | 170 | 24,836 | 6,026 | 4,109 | 35,141 |
| 113,891 | 174 | 24,068 | 5,866 | 4,023 | 34,131 |
| 113,892 | 176 | 24,563 | 5,911 | 4,061 | 34,711 |
| 113,893 | 178 | 24,935 | 5,963 | 4,111 | 35,187 |
| 113,894 | 179 | 25,236 | 6,028 | 4,146 | 35,589 |
| 113,895 | 177 | 25,344 | 6,039 | 4,145 | 35,705 |
| 113,896 | 174 | 25,411 | 6,054 | 4,134 | 35,773 |
| 113,897 | 172 | 25,254 | 6,013 | 4,092 | 35,531 |
| 113,898 | 170 | 25,186 | 6,000 | 4,104 | 35,460 |
| 113,899 | 164 | 25,005 | 6,011 | 4,090 | 35,270 |
| 113,900 | 167 | 24,520 | 5,834 | 4,003 | 34,524 |
| 113,901 | 173 | 24,725 | 5,861 | 4,012 | 34,771 |
| 113,902 | 170 | 25,002 | 5,907 | 4,050 | 35,129 |
| 113,903 | 169 | 24,992 | 5,904 | 4,049 | 35,114 |
| 113,904 | 166 | 25,318 | 6,014 | 4,109 | 35,607 |
| 113,905 | 160 | 25,286 | 5,986 | 4,103 | 35,535 |
| 113,906 | 159 | 25,230 | 5,953 | 4,073 | 35,415 |
| 113,907 | 158 | 24,840 | 5,856 | 4,021 | 34,875 |
| 113,908 | 156 | 24,845 | 5,816 | 4,006 | 34,823 |
| 113,909 | 156 | 24,854 | 5,803 | 4,004 | 34,817 |
| 113,910 | 155 | 24,752 | 5,766 | 3,976 | 34,649 |
| 113,911 | 159 | 24,955 | 5,790 | 3,996 | 34,900 |



|         |     |        |       |       |        |
|---------|-----|--------|-------|-------|--------|
| 113,912 | 155 | 24,641 | 5,722 | 3,932 | 34,450 |
| 113,913 | 160 | 24,766 | 5,725 | 3,944 | 34,595 |
| 113,914 | 155 | 24,325 | 5,617 | 3,854 | 33,951 |
| 113,915 | 155 | 24,543 | 5,642 | 3,864 | 34,204 |
| 113,916 | 152 | 23,903 | 5,519 | 3,778 | 33,352 |
| 113,917 | 153 | 24,027 | 5,545 | 3,798 | 33,523 |
| 113,918 | 153 | 24,061 | 5,539 | 3,786 | 33,539 |
| 113,919 | 152 | 24,021 | 5,541 | 3,806 | 33,520 |
| 113,920 | 151 | 23,495 | 5,432 | 3,751 | 32,829 |
| 113,921 | 148 | 23,655 | 5,438 | 3,761 | 33,002 |
| 113,922 | 141 | 23,785 | 5,453 | 3,775 | 33,154 |
| 113,923 | 140 | 23,621 | 5,413 | 3,742 | 32,916 |
| 113,924 | 135 | 23,417 | 5,341 | 3,705 | 32,598 |
| 113,925 | 138 | 23,605 | 5,375 | 3,724 | 32,842 |
| 113,926 | 132 | 23,603 | 5,338 | 3,686 | 32,759 |
| 113,927 | 137 | 23,607 | 5,288 | 3,647 | 32,679 |
| 113,928 | 142 | 23,715 | 5,243 | 3,601 | 32,701 |
| 113,929 | 142 | 23,671 | 5,222 | 3,589 | 32,624 |
| 113,930 | 135 | 23,613 | 5,241 | 3,574 | 32,563 |
| 113,931 | 131 | 23,642 | 5,222 | 3,579 | 32,574 |
| 113,932 | 133 | 23,728 | 5,205 | 3,588 | 32,654 |
| 113,933 | 136 | 23,911 | 5,205 | 3,587 | 32,839 |
| 113,934 | 144 | 23,943 | 5,212 | 3,571 | 32,870 |
| 113,935 | 139 | 23,810 | 5,179 | 3,546 | 32,674 |
| 113,936 | 135 | 24,162 | 5,243 | 3,573 | 33,113 |
| 113,937 | 131 | 23,981 | 5,215 | 3,521 | 32,848 |
| 113,938 | 132 | 24,025 | 5,219 | 3,514 | 32,890 |
| 113,939 | 128 | 24,057 | 5,243 | 3,521 | 32,949 |
| 113,940 | 128 | 23,794 | 5,232 | 3,501 | 32,655 |
| 113,941 | 126 | 23,801 | 5,237 | 3,497 | 32,661 |
| 113,942 | 116 | 23,534 | 5,206 | 3,495 | 32,351 |
| 113,943 | 121 | 23,600 | 5,272 | 3,510 | 32,503 |

|         |     |        |       |       |        |
|---------|-----|--------|-------|-------|--------|
| 113,944 | 116 | 23,786 | 5,297 | 3,506 | 32,705 |
| 113,945 | 114 | 23,496 | 5,178 | 3,472 | 32,260 |
| 113,946 | 114 | 23,514 | 5,202 | 3,463 | 32,293 |
| 113,947 | 110 | 23,499 | 5,202 | 3,458 | 32,269 |
| 113,948 | 111 | 23,281 | 5,110 | 3,407 | 31,909 |
| 113,949 | 111 | 23,352 | 5,120 | 3,412 | 31,995 |
| 113,950 | 104 | 23,152 | 5,077 | 3,390 | 31,723 |
| 113,951 | 102 | 23,108 | 5,068 | 3,389 | 31,667 |
| 113,952 | 104 | 24,750 | 5,468 | 3,670 | 33,992 |
| 113,953 | 103 | 24,801 | 5,478 | 3,678 | 34,060 |
| 113,954 | 104 | 24,647 | 5,406 | 3,637 | 33,794 |
| 113,955 | 106 | 24,548 | 5,384 | 3,633 | 33,671 |
| 113,956 | 110 | 24,594 | 5,369 | 3,620 | 33,693 |
| 113,957 | 107 | 24,427 | 5,307 | 3,607 | 33,448 |
| 113,958 | 107 | 24,755 | 5,398 | 3,651 | 33,911 |
| 113,959 | 116 | 24,636 | 5,378 | 3,595 | 33,725 |
| 113,960 | 116 | 24,642 | 5,394 | 3,604 | 33,756 |
| 113,961 | 120 | 24,871 | 5,437 | 3,645 | 34,073 |
| 113,962 | 134 | 24,929 | 5,448 | 3,664 | 34,175 |
| 113,963 | 148 | 24,965 | 5,483 | 3,670 | 34,266 |
| 113,964 | 152 | 24,669 | 5,428 | 3,641 | 33,890 |
| 113,965 | 157 | 24,696 | 5,409 | 3,642 | 33,904 |
| 113,966 | 157 | 24,732 | 5,429 | 3,652 | 33,970 |
| 113,967 | 162 | 25,120 | 5,511 | 3,698 | 34,491 |
| 113,968 | 160 | 24,890 | 5,461 | 3,643 | 34,154 |
| 113,969 | 162 | 24,956 | 5,452 | 3,614 | 34,184 |
| 113,970 | 162 | 24,950 | 5,478 | 3,616 | 34,206 |
| 113,971 | 160 | 24,792 | 5,482 | 3,622 | 34,056 |
| 113,972 | 161 | 24,703 | 5,474 | 3,618 | 33,956 |
| 113,973 | 156 | 24,686 | 5,516 | 3,621 | 33,979 |
| 113,974 | 157 | 24,604 | 5,500 | 3,598 | 33,859 |
| 113,975 | 162 | 24,569 | 5,471 | 3,599 | 33,801 |

|         |     |        |       |       |        |
|---------|-----|--------|-------|-------|--------|
| 113,976 | 162 | 23,931 | 5,366 | 3,521 | 32,980 |
| 113,977 | 162 | 23,897 | 5,374 | 3,502 | 32,935 |
| 113,978 | 159 | 23,806 | 5,407 | 3,523 | 32,895 |
| 113,979 | 159 | 23,726 | 5,396 | 3,519 | 32,800 |
| 113,980 | 159 | 23,733 | 5,362 | 3,519 | 32,773 |
| 113,981 | 161 | 23,986 | 5,420 | 3,541 | 33,108 |
| 113,982 | 164 | 24,064 | 5,435 | 3,568 | 33,231 |
| 113,983 | 172 | 23,895 | 5,398 | 3,562 | 33,027 |
| 113,984 | 169 | 23,773 | 5,388 | 3,556 | 32,886 |
| 113,985 | 164 | 23,941 | 5,404 | 3,595 | 33,104 |
| 113,986 | 167 | 24,039 | 5,429 | 3,628 | 33,263 |
| 113,987 | 166 | 23,723 | 5,390 | 3,594 | 32,873 |
| 113,988 | 166 | 23,622 | 5,380 | 3,598 | 32,766 |
| 113,989 | 165 | 23,642 | 5,408 | 3,612 | 32,827 |
| 113,990 | 165 | 23,289 | 5,315 | 3,567 | 32,336 |
| 113,991 | 165 | 23,188 | 5,283 | 3,552 | 32,188 |
| 113,992 | 167 | 22,928 | 5,194 | 3,477 | 31,766 |
| 113,993 | 168 | 22,962 | 5,203 | 3,485 | 31,818 |
| 113,994 | 164 | 22,586 | 5,096 | 3,450 | 31,296 |
| 113,995 | 162 | 22,005 | 4,992 | 3,399 | 30,558 |
| 113,996 | 167 | 22,052 | 5,103 | 3,432 | 30,754 |
| 113,997 | 166 | 22,054 | 5,099 | 3,437 | 30,756 |
| 113,998 | 166 | 21,779 | 4,981 | 3,404 | 30,330 |
| 113,999 | 160 | 21,359 | 4,907 | 3,366 | 29,792 |
| 114,000 | 168 | 21,712 | 5,016 | 3,416 | 30,312 |
| 114,001 | 174 | 21,686 | 5,024 | 3,411 | 30,295 |
| 114,002 | 176 | 21,392 | 4,958 | 3,330 | 29,856 |
| 114,003 | 178 | 21,635 | 5,034 | 3,364 | 30,211 |
| 114,004 | 177 | 21,288 | 4,967 | 3,308 | 29,740 |
| 114,005 | 181 | 21,452 | 4,990 | 3,329 | 29,952 |
| 114,006 | 181 | 21,507 | 5,027 | 3,327 | 30,042 |
| 114,007 | 180 | 21,676 | 5,051 | 3,323 | 30,230 |

|         |     |        |       |       |        |
|---------|-----|--------|-------|-------|--------|
| 114,008 | 186 | 21,960 | 5,087 | 3,359 | 30,592 |
| 114,009 | 183 | 21,861 | 5,078 | 3,340 | 30,462 |
| 114,010 | 182 | 21,783 | 5,075 | 3,349 | 30,389 |
| 114,011 | 180 | 21,874 | 5,103 | 3,357 | 30,514 |
| 114,012 | 178 | 22,096 | 5,156 | 3,428 | 30,858 |
| 114,013 | 164 | 21,973 | 5,150 | 3,435 | 30,722 |
| 114,014 | 147 | 21,591 | 5,067 | 3,404 | 30,209 |
| 114,015 | 142 | 21,487 | 5,078 | 3,414 | 30,121 |
| 114,016 | 141 | 21,441 | 5,093 | 3,423 | 30,098 |
| 114,017 | 149 | 21,674 | 5,116 | 3,418 | 30,357 |
| 114,018 | 146 | 21,584 | 5,125 | 3,410 | 30,265 |
| 114,019 | 152 | 21,613 | 5,149 | 3,428 | 30,342 |
| 114,020 | 149 | 21,644 | 5,152 | 3,459 | 30,404 |
| 114,021 | 157 | 21,783 | 5,177 | 3,461 | 30,578 |
| 114,022 | 162 | 21,905 | 5,210 | 3,456 | 30,733 |
| 114,023 | 162 | 21,958 | 5,218 | 3,471 | 30,809 |
| 114,024 | 169 | 22,288 | 5,285 | 3,521 | 31,263 |
| 114,025 | 172 | 22,317 | 5,291 | 3,538 | 31,318 |
| 114,026 | 172 | 22,421 | 5,327 | 3,518 | 31,438 |
| 114,027 | 168 | 22,239 | 5,288 | 3,499 | 31,194 |
| 114,028 | 175 | 22,042 | 5,272 | 3,491 | 30,980 |
| 114,029 | 174 | 21,814 | 5,225 | 3,463 | 30,676 |
| 114,030 | 181 | 22,395 | 5,385 | 3,558 | 31,519 |
| 114,031 | 188 | 22,075 | 5,357 | 3,527 | 31,147 |
| 114,032 | 186 | 21,741 | 5,309 | 3,489 | 30,725 |
| 114,033 | 188 | 22,443 | 5,492 | 3,593 | 31,716 |
| 114,034 | 179 | 22,411 | 5,527 | 3,603 | 31,720 |
| 114,035 | 173 | 22,002 | 5,510 | 3,568 | 31,253 |
| 114,036 | 175 | 22,080 | 5,548 | 3,573 | 31,376 |
| 114,037 | 176 | 22,112 | 5,576 | 3,576 | 31,440 |
| 114,038 | 179 | 22,362 | 5,599 | 3,603 | 31,743 |
| 114,039 | 184 | 22,812 | 5,706 | 3,664 | 32,366 |

|         |     |        |       |       |        |
|---------|-----|--------|-------|-------|--------|
| 114,040 | 187 | 22,790 | 5,740 | 3,693 | 32,410 |
| 114,041 | 185 | 22,867 | 5,796 | 3,705 | 32,553 |
| 114,042 | 194 | 23,030 | 5,863 | 3,737 | 32,824 |
| 114,043 | 191 | 23,149 | 5,889 | 3,776 | 33,005 |
| 114,044 | 188 | 23,220 | 5,887 | 3,744 | 33,039 |
| 114,045 | 188 | 23,315 | 5,889 | 3,742 | 33,134 |
| 114,046 | 186 | 23,508 | 5,945 | 3,776 | 33,415 |
| 114,047 | 192 | 23,871 | 5,980 | 3,798 | 33,841 |
| 114,048 | 194 | 23,542 | 5,913 | 3,690 | 33,339 |
| 114,049 | 195 | 23,631 | 5,971 | 3,736 | 33,533 |
| 114,050 | 193 | 23,898 | 5,989 | 3,759 | 33,839 |
| 114,051 | 192 | 24,007 | 6,009 | 3,748 | 33,956 |
| 114,052 | 192 | 23,995 | 5,995 | 3,743 | 33,925 |
| 114,053 | 190 | 23,811 | 5,927 | 3,691 | 33,619 |
| 114,054 | 189 | 23,916 | 5,920 | 3,720 | 33,745 |
| 114,055 | 193 | 24,045 | 5,931 | 3,739 | 33,908 |
| 114,056 | 188 | 24,445 | 6,034 | 3,782 | 34,449 |
| 114,057 | 187 | 24,332 | 5,988 | 3,794 | 34,301 |
| 114,058 | 193 | 24,700 | 6,104 | 3,844 | 34,841 |
| 114,059 | 190 | 24,816 | 6,147 | 3,848 | 35,001 |
| 114,060 | 187 | 24,739 | 6,092 | 3,815 | 34,833 |
| 114,061 | 193 | 24,976 | 6,164 | 3,860 | 35,193 |
| 114,062 | 193 | 24,885 | 6,131 | 3,793 | 35,002 |
| 114,063 | 200 | 25,033 | 6,134 | 3,770 | 35,137 |
| 114,064 | 204 | 25,002 | 6,115 | 3,715 | 35,036 |
| 114,065 | 204 | 25,021 | 6,122 | 3,713 | 35,060 |
| 114,066 | 209 | 24,856 | 6,072 | 3,682 | 34,819 |
| 114,067 | 210 | 24,626 | 6,006 | 3,647 | 34,489 |
| 114,068 | 223 | 25,651 | 6,172 | 3,777 | 35,823 |
| 114,069 | 222 | 25,678 | 6,163 | 3,778 | 35,841 |
| 114,070 | 219 | 25,691 | 6,133 | 3,748 | 35,791 |
| 114,071 | 219 | 25,675 | 6,156 | 3,750 | 35,800 |

|         |     |        |       |       |        |
|---------|-----|--------|-------|-------|--------|
| 114,072 | 209 | 26,087 | 6,233 | 3,807 | 36,336 |
| 114,073 | 205 | 25,804 | 6,141 | 3,755 | 35,905 |
| 114,074 | 205 | 25,989 | 6,163 | 3,789 | 36,146 |
| 114,075 | 198 | 25,891 | 6,178 | 3,789 | 36,056 |
| 114,076 | 192 | 25,732 | 6,207 | 3,785 | 35,916 |
| 114,077 | 186 | 25,901 | 6,223 | 3,823 | 36,133 |
| 114,078 | 181 | 25,922 | 6,216 | 3,817 | 36,136 |
| 114,079 | 184 | 25,915 | 6,196 | 3,808 | 36,103 |
| 114,080 | 194 | 25,741 | 6,129 | 3,742 | 35,806 |
| 114,081 | 190 | 25,763 | 6,072 | 3,726 | 35,751 |
| 114,082 | 190 | 25,658 | 6,030 | 3,711 | 35,589 |
| 114,083 | 189 | 25,803 | 6,032 | 3,712 | 35,736 |
| 114,084 | 190 | 25,765 | 6,028 | 3,709 | 35,692 |
| 114,085 | 189 | 25,414 | 5,877 | 3,640 | 35,120 |
| 114,086 | 189 | 25,411 | 5,868 | 3,616 | 35,084 |
| 114,087 | 184 | 25,411 | 5,855 | 3,623 | 35,073 |
| 114,088 | 184 | 25,453 | 5,840 | 3,626 | 35,103 |
| 114,089 | 183 | 25,774 | 5,865 | 3,653 | 35,475 |
| 114,090 | 182 | 25,851 | 5,851 | 3,637 | 35,521 |
| 114,091 | 179 | 25,371 | 5,673 | 3,528 | 34,751 |
| 114,092 | 183 | 25,534 | 5,692 | 3,546 | 34,955 |
| 114,093 | 177 | 25,489 | 5,698 | 3,541 | 34,905 |
| 114,094 | 182 | 25,220 | 5,692 | 3,529 | 34,623 |
| 114,095 | 181 | 25,158 | 5,681 | 3,531 | 34,551 |
| 114,096 | 181 | 25,150 | 5,679 | 3,537 | 34,547 |
| 114,097 | 184 | 25,301 | 5,689 | 3,542 | 34,716 |
| 114,098 | 182 | 25,332 | 5,714 | 3,573 | 34,801 |
| 114,099 | 187 | 25,072 | 5,664 | 3,543 | 34,466 |
| 114,100 | 187 | 25,222 | 5,658 | 3,543 | 34,610 |
| 114,101 | 186 | 25,104 | 5,648 | 3,538 | 34,476 |
| 114,102 | 186 | 25,037 | 5,640 | 3,528 | 34,391 |
| 114,103 | 184 | 25,291 | 5,698 | 3,554 | 34,727 |

|         |     |        |       |       |        |
|---------|-----|--------|-------|-------|--------|
| 114,104 | 182 | 24,989 | 5,658 | 3,549 | 34,378 |
| 114,105 | 181 | 25,024 | 5,645 | 3,539 | 34,389 |
| 114,106 | 183 | 24,021 | 5,431 | 3,409 | 33,044 |
| 114,107 | 186 | 24,180 | 5,424 | 3,434 | 33,224 |
| 114,108 | 184 | 24,424 | 5,451 | 3,466 | 33,525 |
| 114,109 | 184 | 24,364 | 5,449 | 3,472 | 33,469 |
| 114,110 | 187 | 24,770 | 5,547 | 3,570 | 34,074 |
| 114,111 | 184 | 24,535 | 5,505 | 3,566 | 33,790 |
| 114,112 | 177 | 24,517 | 5,484 | 3,552 | 33,730 |
| 114,113 | 170 | 24,319 | 5,473 | 3,567 | 33,529 |
| 114,114 | 170 | 24,133 | 5,447 | 3,545 | 33,295 |
| 114,115 | 172 | 24,251 | 5,476 | 3,567 | 33,466 |
| 114,116 | 171 | 24,280 | 5,522 | 3,591 | 33,564 |
| 114,117 | 156 | 23,986 | 5,496 | 3,575 | 33,213 |
| 114,118 | 154 | 23,822 | 5,476 | 3,571 | 33,023 |
| 114,119 | 146 | 23,706 | 5,496 | 3,569 | 32,917 |
| 114,120 | 147 | 23,890 | 5,531 | 3,606 | 33,174 |
| 114,121 | 141 | 23,582 | 5,448 | 3,552 | 32,723 |
| 114,122 | 141 | 23,629 | 5,481 | 3,564 | 32,815 |
| 114,123 | 142 | 23,452 | 5,454 | 3,569 | 32,617 |
| 114,124 | 143 | 23,320 | 5,417 | 3,540 | 32,420 |
| 114,125 | 143 | 23,078 | 5,352 | 3,520 | 32,093 |
| 114,126 | 145 | 23,262 | 5,373 | 3,539 | 32,319 |
| 114,127 | 150 | 23,109 | 5,337 | 3,519 | 32,115 |
| 114,128 | 150 | 22,819 | 5,260 | 3,490 | 31,719 |
| 114,129 | 154 | 22,901 | 5,283 | 3,486 | 31,824 |
| 114,130 | 132 | 22,429 | 5,209 | 3,434 | 31,204 |
| 114,131 | 129 | 22,375 | 5,192 | 3,429 | 31,125 |
| 114,132 | 135 | 22,482 | 5,265 | 3,448 | 31,330 |
| 114,133 | 134 | 22,599 | 5,321 | 3,463 | 31,517 |
| 114,134 | 129 | 22,201 | 5,216 | 3,415 | 30,961 |
| 114,135 | 136 | 22,445 | 5,271 | 3,440 | 31,292 |

|         |     |        |       |       |        |
|---------|-----|--------|-------|-------|--------|
| 114,136 | 135 | 22,377 | 5,258 | 3,410 | 31,180 |
| 114,137 | 135 | 22,243 | 5,194 | 3,387 | 30,959 |
| 114,138 | 135 | 22,099 | 5,180 | 3,386 | 30,800 |
| 114,139 | 133 | 22,207 | 5,196 | 3,369 | 30,905 |
| 114,140 | 132 | 22,009 | 5,167 | 3,338 | 30,646 |
| 114,141 | 132 | 21,715 | 5,134 | 3,329 | 30,310 |
| 114,142 | 128 | 21,634 | 5,093 | 3,323 | 30,178 |
| 114,143 | 117 | 21,022 | 4,924 | 3,211 | 29,274 |
| 114,144 | 121 | 21,280 | 4,933 | 3,230 | 29,564 |
| 114,145 | 120 | 21,361 | 4,933 | 3,216 | 29,630 |
| 114,146 | 123 | 21,493 | 4,960 | 3,227 | 29,803 |
| 114,147 | 125 | 21,679 | 5,005 | 3,254 | 30,063 |
| 114,148 | 123 | 21,493 | 4,928 | 3,219 | 29,763 |
| 114,149 | 122 | 21,649 | 4,947 | 3,226 | 29,944 |
| 114,150 | 112 | 21,325 | 4,861 | 3,187 | 29,485 |
| 114,151 | 113 | 21,175 | 4,857 | 3,184 | 29,329 |
| 114,152 | 118 | 21,261 | 4,896 | 3,216 | 29,491 |
| 114,153 | 123 | 20,964 | 4,806 | 3,175 | 29,068 |
| 114,154 | 121 | 20,675 | 4,726 | 3,134 | 28,656 |
| 114,155 | 123 | 20,910 | 4,775 | 3,132 | 28,940 |
| 114,156 | 120 | 20,848 | 4,805 | 3,160 | 28,933 |
| 114,157 | 120 | 20,815 | 4,770 | 3,124 | 28,829 |
| 114,158 | 121 | 21,066 | 4,816 | 3,146 | 29,149 |
| 114,159 | 120 | 21,167 | 4,811 | 3,147 | 29,245 |
| 114,160 | 127 | 21,021 | 4,778 | 3,128 | 29,054 |
| 114,161 | 136 | 20,962 | 4,739 | 3,080 | 28,917 |
| 114,162 | 135 | 20,734 | 4,650 | 3,024 | 28,543 |
| 114,163 | 143 | 20,841 | 4,653 | 3,046 | 28,683 |
| 114,164 | 141 | 20,547 | 4,553 | 2,997 | 28,238 |
| 114,165 | 162 | 21,696 | 4,774 | 3,181 | 29,813 |
| 114,166 | 157 | 21,423 | 4,678 | 3,134 | 29,392 |
| 114,167 | 160 | 21,285 | 4,604 | 3,087 | 29,136 |



|         |     |        |       |       |        |
|---------|-----|--------|-------|-------|--------|
| 114,168 | 160 | 21,297 | 4,605 | 3,099 | 29,161 |
| 114,169 | 157 | 21,389 | 4,595 | 3,089 | 29,230 |
| 114,170 | 160 | 21,654 | 4,613 | 3,106 | 29,533 |
| 114,171 | 173 | 21,603 | 4,584 | 3,091 | 29,451 |
| 114,172 | 176 | 21,554 | 4,514 | 3,063 | 29,307 |
| 114,173 | 178 | 21,499 | 4,458 | 3,028 | 29,163 |
| 114,174 | 177 | 21,370 | 4,414 | 3,006 | 28,967 |
| 114,175 | 181 | 21,438 | 4,393 | 2,993 | 29,005 |
| 114,176 | 181 | 21,191 | 4,326 | 2,933 | 28,631 |
| 114,177 | 188 | 21,256 | 4,330 | 2,942 | 28,716 |
| 114,178 | 184 | 20,965 | 4,260 | 2,897 | 28,306 |
| 114,179 | 189 | 21,749 | 4,435 | 3,004 | 29,377 |
| 114,180 | 206 | 22,384 | 4,549 | 3,094 | 30,233 |
| 114,181 | 206 | 22,473 | 4,528 | 3,105 | 30,312 |
| 114,182 | 205 | 22,772 | 4,554 | 3,118 | 30,649 |
| 114,183 | 204 | 23,100 | 4,576 | 3,147 | 31,027 |
| 114,184 | 211 | 23,025 | 4,554 | 3,141 | 30,931 |
| 114,185 | 211 | 23,130 | 4,549 | 3,139 | 31,029 |
| 114,186 | 210 | 23,653 | 4,628 | 3,205 | 31,696 |
| 114,187 | 209 | 23,732 | 4,625 | 3,213 | 31,779 |
| 114,188 | 211 | 23,648 | 4,585 | 3,156 | 31,600 |
| 114,189 | 210 | 23,651 | 4,562 | 3,159 | 31,582 |
| 114,190 | 212 | 23,682 | 4,612 | 3,191 | 31,697 |
| 114,191 | 213 | 23,696 | 4,599 | 3,186 | 31,694 |
| 114,192 | 213 | 23,850 | 4,665 | 3,213 | 31,941 |
| 114,193 | 215 | 23,768 | 4,659 | 3,198 | 31,840 |
| 114,194 | 211 | 23,521 | 4,612 | 3,173 | 31,517 |
| 114,195 | 216 | 23,522 | 4,622 | 3,168 | 31,528 |
| 114,196 | 219 | 23,569 | 4,620 | 3,168 | 31,576 |
| 114,197 | 221 | 23,593 | 4,586 | 3,159 | 31,559 |
| 114,198 | 233 | 23,823 | 4,653 | 3,200 | 31,909 |
| 114,199 | 234 | 23,771 | 4,642 | 3,209 | 31,856 |

|         |     |        |       |       |        |
|---------|-----|--------|-------|-------|--------|
| 114,200 | 242 | 23,681 | 4,643 | 3,180 | 31,746 |
| 114,201 | 242 | 23,869 | 4,640 | 3,176 | 31,927 |
| 114,202 | 242 | 23,934 | 4,604 | 3,157 | 31,937 |
| 114,203 | 237 | 24,285 | 4,675 | 3,236 | 32,433 |
| 114,204 | 235 | 24,292 | 4,654 | 3,251 | 32,432 |
| 114,205 | 236 | 24,229 | 4,601 | 3,231 | 32,297 |
| 114,206 | 243 | 24,033 | 4,600 | 3,215 | 32,091 |
| 114,207 | 247 | 24,405 | 4,643 | 3,250 | 32,545 |
| 114,208 | 244 | 24,393 | 4,609 | 3,238 | 32,484 |
| 114,209 | 248 | 24,492 | 4,645 | 3,264 | 32,649 |
| 114,210 | 253 | 24,816 | 4,714 | 3,294 | 33,077 |
| 114,211 | 247 | 25,040 | 4,672 | 3,302 | 33,261 |
| 114,212 | 229 | 24,314 | 4,593 | 3,220 | 32,356 |
| 114,213 | 238 | 24,552 | 4,620 | 3,236 | 32,646 |
| 114,214 | 232 | 24,828 | 4,688 | 3,262 | 33,010 |
| 114,215 | 233 | 24,836 | 4,666 | 3,236 | 32,971 |
| 114,216 | 225 | 25,157 | 4,722 | 3,302 | 33,406 |
| 114,217 | 228 | 25,536 | 4,836 | 3,356 | 33,956 |
| 114,218 | 230 | 25,667 | 4,823 | 3,353 | 34,073 |
| 114,219 | 233 | 25,630 | 4,832 | 3,352 | 34,047 |
| 114,220 | 233 | 25,682 | 4,805 | 3,353 | 34,073 |
| 114,221 | 235 | 25,672 | 4,778 | 3,342 | 34,027 |
| 114,222 | 224 | 25,752 | 4,793 | 3,368 | 34,137 |
| 114,223 | 228 | 26,065 | 4,870 | 3,428 | 34,591 |
| 114,224 | 230 | 25,961 | 4,881 | 3,424 | 34,496 |
| 114,225 | 228 | 26,032 | 4,879 | 3,407 | 34,546 |
| 114,226 | 222 | 26,123 | 4,913 | 3,432 | 34,690 |
| 114,227 | 214 | 26,309 | 4,960 | 3,459 | 34,942 |
| 114,228 | 208 | 26,213 | 4,940 | 3,428 | 34,789 |
| 114,229 | 209 | 26,276 | 4,923 | 3,446 | 34,854 |
| 114,230 | 200 | 26,446 | 4,962 | 3,474 | 35,082 |
| 114,231 | 210 | 26,167 | 4,886 | 3,427 | 34,690 |

|         |     |        |       |       |        |
|---------|-----|--------|-------|-------|--------|
| 114,232 | 208 | 26,063 | 4,870 | 3,409 | 34,550 |
| 114,233 | 211 | 26,494 | 4,928 | 3,491 | 35,124 |
| 114,234 | 208 | 26,088 | 4,854 | 3,453 | 34,603 |
| 114,235 | 205 | 25,948 | 4,832 | 3,450 | 34,435 |
| 114,236 | 202 | 25,763 | 4,826 | 3,451 | 34,242 |
| 114,237 | 206 | 25,585 | 4,792 | 3,436 | 34,019 |
| 114,238 | 207 | 25,480 | 4,781 | 3,429 | 33,897 |
| 114,239 | 214 | 25,589 | 4,862 | 3,474 | 34,139 |
| 114,240 | 218 | 25,600 | 4,867 | 3,485 | 34,170 |
| 114,241 | 218 | 25,591 | 4,814 | 3,455 | 34,078 |
| 114,242 | 219 | 25,675 | 4,784 | 3,448 | 34,126 |
| 114,243 | 220 | 25,696 | 4,753 | 3,439 | 34,108 |
| 114,244 | 221 | 25,671 | 4,764 | 3,460 | 34,116 |
| 114,245 | 220 | 25,689 | 4,738 | 3,457 | 34,104 |
| 114,246 | 219 | 25,706 | 4,732 | 3,466 | 34,123 |
| 114,247 | 219 | 25,866 | 4,781 | 3,493 | 34,359 |
| 114,248 | 206 | 25,780 | 4,718 | 3,479 | 34,183 |
| 114,249 | 208 | 25,885 | 4,822 | 3,508 | 34,423 |
| 114,250 | 208 | 25,900 | 4,821 | 3,510 | 34,439 |
| 114,251 | 202 | 25,868 | 4,900 | 3,581 | 34,551 |
| 114,252 | 204 | 25,843 | 4,919 | 3,592 | 34,558 |
| 114,253 | 208 | 25,680 | 4,925 | 3,576 | 34,389 |
| 114,254 | 209 | 25,640 | 4,905 | 3,556 | 34,310 |
| 114,255 | 203 | 25,545 | 4,947 | 3,573 | 34,268 |
| 114,256 | 207 | 25,850 | 5,011 | 3,612 | 34,680 |
| 114,257 | 198 | 25,581 | 4,967 | 3,577 | 34,323 |
| 114,258 | 199 | 25,922 | 5,020 | 3,618 | 34,759 |
| 114,259 | 197 | 25,706 | 5,006 | 3,586 | 34,495 |
| 114,260 | 194 | 25,810 | 5,015 | 3,632 | 34,651 |
| 114,261 | 192 | 25,833 | 5,071 | 3,670 | 34,766 |
| 114,262 | 189 | 25,427 | 5,160 | 3,679 | 34,455 |
| 114,263 | 190 | 25,235 | 5,141 | 3,662 | 34,228 |

|         |     |        |       |       |        |
|---------|-----|--------|-------|-------|--------|
| 114,264 | 178 | 25,122 | 5,194 | 3,684 | 34,178 |
| 114,265 | 181 | 25,068 | 5,142 | 3,673 | 34,064 |
| 114,266 | 183 | 25,384 | 5,180 | 3,674 | 34,421 |
| 114,267 | 186 | 25,413 | 5,194 | 3,672 | 34,465 |
| 114,268 | 186 | 25,118 | 5,126 | 3,634 | 34,064 |
| 114,269 | 182 | 24,987 | 5,123 | 3,631 | 33,923 |
| 114,270 | 181 | 24,988 | 5,130 | 3,646 | 33,945 |
| 114,271 | 181 | 24,857 | 5,159 | 3,668 | 33,865 |
| 114,272 | 179 | 24,827 | 5,163 | 3,647 | 33,816 |
| 114,273 | 185 | 24,918 | 5,191 | 3,661 | 33,955 |
| 114,274 | 180 | 24,838 | 5,197 | 3,671 | 33,886 |
| 114,275 | 181 | 24,905 | 5,225 | 3,682 | 33,993 |
| 114,276 | 182 | 24,859 | 5,225 | 3,666 | 33,932 |
| 114,277 | 180 | 24,575 | 5,173 | 3,637 | 33,565 |
| 114,278 | 186 | 24,455 | 5,167 | 3,648 | 33,456 |
| 114,279 | 188 | 24,360 | 5,181 | 3,654 | 33,383 |
| 114,280 | 173 | 23,977 | 5,065 | 3,572 | 32,787 |
| 114,281 | 177 | 24,168 | 5,085 | 3,593 | 33,023 |
| 114,282 | 176 | 24,332 | 5,130 | 3,630 | 33,268 |
| 114,283 | 177 | 24,212 | 5,098 | 3,635 | 33,122 |
| 114,284 | 178 | 23,936 | 5,100 | 3,577 | 32,791 |
| 114,285 | 179 | 23,906 | 5,084 | 3,541 | 32,710 |
| 114,286 | 179 | 23,970 | 5,073 | 3,530 | 32,752 |
| 114,287 | 179 | 23,972 | 5,096 | 3,531 | 32,778 |
| 114,288 | 171 | 23,793 | 5,032 | 3,489 | 32,485 |
| 114,289 | 172 | 24,006 | 5,071 | 3,505 | 32,754 |
| 114,290 | 166 | 24,241 | 5,086 | 3,515 | 33,008 |
| 114,291 | 171 | 24,216 | 5,077 | 3,485 | 32,949 |
| 114,292 | 169 | 24,004 | 5,076 | 3,470 | 32,719 |
| 114,293 | 164 | 24,050 | 5,056 | 3,472 | 32,742 |
| 114,294 | 163 | 24,337 | 5,068 | 3,485 | 33,053 |
| 114,295 | 166 | 24,132 | 5,031 | 3,446 | 32,775 |

|         |     |        |       |       |        |
|---------|-----|--------|-------|-------|--------|
| 114,296 | 165 | 24,125 | 5,026 | 3,424 | 32,740 |
| 114,297 | 160 | 24,176 | 5,023 | 3,441 | 32,800 |
| 114,298 | 163 | 24,309 | 5,075 | 3,455 | 33,002 |
| 114,299 | 161 | 24,136 | 5,042 | 3,415 | 32,754 |
| 114,300 | 175 | 24,072 | 5,009 | 3,401 | 32,657 |
| 114,301 | 178 | 24,151 | 4,996 | 3,364 | 32,689 |
| 114,302 | 189 | 24,257 | 4,981 | 3,312 | 32,739 |
| 114,303 | 180 | 24,008 | 4,924 | 3,271 | 32,383 |
| 114,304 | 186 | 24,153 | 4,915 | 3,248 | 32,502 |
| 114,305 | 187 | 24,119 | 4,932 | 3,242 | 32,480 |
| 114,306 | 186 | 24,204 | 4,913 | 3,239 | 32,542 |
| 114,307 | 180 | 23,839 | 4,885 | 3,212 | 32,116 |
| 114,308 | 180 | 23,637 | 4,858 | 3,167 | 31,842 |
| 114,309 | 175 | 23,445 | 4,840 | 3,126 | 31,586 |
| 114,310 | 174 | 23,181 | 4,791 | 3,081 | 31,227 |
| 114,311 | 170 | 23,228 | 4,782 | 3,036 | 31,216 |
| 114,312 | 166 | 22,848 | 4,685 | 2,965 | 30,664 |
| 114,313 | 168 | 22,910 | 4,626 | 2,923 | 30,627 |
| 114,314 | 171 | 22,762 | 4,542 | 2,880 | 30,355 |
| 114,315 | 170 | 22,795 | 4,554 | 2,878 | 30,397 |
| 114,316 | 166 | 22,520 | 4,518 | 2,829 | 30,033 |
| 114,317 | 170 | 22,417 | 4,521 | 2,830 | 29,938 |
| 114,318 | 165 | 22,095 | 4,458 | 2,782 | 29,500 |
| 114,319 | 162 | 22,033 | 4,414 | 2,771 | 29,380 |
| 114,320 | 169 | 22,040 | 4,384 | 2,723 | 29,316 |
| 114,321 | 173 | 22,061 | 4,406 | 2,703 | 29,343 |
| 114,322 | 171 | 21,921 | 4,373 | 2,659 | 29,124 |
| 114,323 | 171 | 21,894 | 4,386 | 2,672 | 29,123 |
| 114,324 | 167 | 21,771 | 4,335 | 2,622 | 28,895 |
| 114,325 | 165 | 21,599 | 4,294 | 2,596 | 28,654 |
| 114,326 | 168 | 21,517 | 4,262 | 2,582 | 28,529 |
| 114,327 | 168 | 21,563 | 4,310 | 2,608 | 28,649 |

|         |     |        |       |       |        |
|---------|-----|--------|-------|-------|--------|
| 114,328 | 164 | 21,645 | 4,276 | 2,574 | 28,659 |
| 114,329 | 169 | 21,625 | 4,273 | 2,561 | 28,628 |
| 114,330 | 170 | 21,857 | 4,292 | 2,580 | 28,899 |
| 114,331 | 167 | 21,761 | 4,296 | 2,571 | 28,795 |
| 114,332 | 163 | 21,780 | 4,336 | 2,601 | 28,880 |
| 114,333 | 164 | 21,845 | 4,318 | 2,572 | 28,899 |
| 114,334 | 165 | 21,855 | 4,282 | 2,556 | 28,858 |
| 114,335 | 169 | 22,001 | 4,321 | 2,599 | 29,090 |
| 114,336 | 174 | 22,232 | 4,365 | 2,640 | 29,411 |
| 114,337 | 178 | 22,173 | 4,380 | 2,654 | 29,385 |
| 114,338 | 181 | 22,252 | 4,419 | 2,648 | 29,500 |
| 114,339 | 182 | 22,309 | 4,470 | 2,664 | 29,625 |
| 114,340 | 184 | 22,008 | 4,365 | 2,625 | 29,182 |
| 114,341 | 186 | 22,194 | 4,418 | 2,673 | 29,471 |
| 114,342 | 176 | 22,478 | 4,487 | 2,724 | 29,865 |
| 114,343 | 177 | 22,557 | 4,500 | 2,712 | 29,946 |
| 114,344 | 180 | 22,540 | 4,526 | 2,711 | 29,957 |
| 114,345 | 187 | 22,517 | 4,574 | 2,728 | 30,006 |
| 114,346 | 181 | 22,367 | 4,571 | 2,721 | 29,840 |
| 114,347 | 181 | 22,630 | 4,618 | 2,762 | 30,191 |
| 114,348 | 184 | 22,791 | 4,566 | 2,749 | 30,290 |
| 114,349 | 188 | 22,823 | 4,558 | 2,757 | 30,326 |
| 114,350 | 188 | 22,912 | 4,597 | 2,796 | 30,493 |
| 114,351 | 172 | 23,011 | 4,572 | 2,795 | 30,550 |
| 114,352 | 168 | 23,266 | 4,649 | 2,843 | 30,926 |
| 114,353 | 153 | 22,586 | 4,440 | 2,784 | 29,963 |
| 114,354 | 154 | 22,753 | 4,492 | 2,820 | 30,219 |
| 114,355 | 158 | 22,766 | 4,488 | 2,813 | 30,225 |
| 114,356 | 157 | 22,932 | 4,518 | 2,827 | 30,434 |
| 114,357 | 155 | 22,900 | 4,540 | 2,853 | 30,448 |
| 114,358 | 162 | 23,146 | 4,562 | 2,869 | 30,739 |
| 114,359 | 167 | 22,989 | 4,496 | 2,860 | 30,512 |

|         |     |        |       |       |        |
|---------|-----|--------|-------|-------|--------|
| 114,360 | 184 | 23,161 | 4,547 | 2,878 | 30,770 |
| 114,361 | 184 | 23,135 | 4,537 | 2,876 | 30,732 |
| 114,362 | 188 | 23,145 | 4,533 | 2,871 | 30,737 |
| 114,363 | 197 | 23,150 | 4,498 | 2,873 | 30,718 |
| 114,364 | 197 | 23,274 | 4,506 | 2,916 | 30,893 |
| 114,365 | 195 | 23,347 | 4,522 | 2,934 | 30,998 |
| 114,366 | 193 | 22,951 | 4,436 | 2,908 | 30,488 |
| 114,367 | 193 | 22,920 | 4,447 | 2,915 | 30,475 |
| 114,368 | 188 | 22,895 | 4,454 | 2,898 | 30,435 |
| 114,369 | 188 | 22,716 | 4,422 | 2,880 | 30,206 |
| 114,370 | 188 | 22,940 | 4,505 | 2,927 | 30,560 |
| 114,371 | 177 | 22,690 | 4,469 | 2,910 | 30,246 |
| 114,372 | 174 | 22,765 | 4,479 | 2,937 | 30,355 |
| 114,373 | 181 | 22,993 | 4,578 | 2,979 | 30,731 |
| 114,374 | 181 | 22,960 | 4,573 | 2,959 | 30,673 |
| 114,375 | 185 | 22,708 | 4,535 | 2,933 | 30,361 |
| 114,376 | 185 | 23,015 | 4,603 | 2,961 | 30,764 |
| 114,377 | 183 | 23,219 | 4,680 | 2,987 | 31,069 |
| 114,378 | 186 | 22,893 | 4,619 | 2,941 | 30,639 |
| 114,379 | 186 | 22,885 | 4,633 | 2,953 | 30,657 |
| 114,380 | 179 | 22,633 | 4,573 | 2,927 | 30,312 |
| 114,381 | 176 | 22,550 | 4,545 | 2,905 | 30,176 |
| 114,382 | 176 | 22,438 | 4,529 | 2,893 | 30,036 |
| 114,383 | 172 | 22,278 | 4,519 | 2,866 | 29,835 |
| 114,384 | 170 | 22,462 | 4,587 | 2,916 | 30,135 |
| 114,385 | 162 | 21,945 | 4,532 | 2,849 | 29,488 |
| 114,386 | 161 | 22,299 | 4,644 | 2,905 | 30,009 |
| 114,387 | 154 | 22,124 | 4,654 | 2,903 | 29,835 |
| 114,388 | 155 | 21,974 | 4,608 | 2,884 | 29,621 |
| 114,389 | 153 | 21,713 | 4,585 | 2,878 | 29,329 |
| 114,390 | 153 | 21,327 | 4,469 | 2,834 | 28,783 |
| 114,391 | 153 | 21,329 | 4,489 | 2,845 | 28,816 |

|         |     |        |       |       |        |
|---------|-----|--------|-------|-------|--------|
| 114,392 | 154 | 21,326 | 4,521 | 2,855 | 28,856 |
| 114,393 | 154 | 20,898 | 4,464 | 2,826 | 28,342 |
| 114,394 | 155 | 20,822 | 4,479 | 2,847 | 28,303 |
| 114,395 | 152 | 20,707 | 4,480 | 2,860 | 28,199 |
| 114,396 | 146 | 20,592 | 4,515 | 2,868 | 28,121 |
| 114,397 | 148 | 20,501 | 4,535 | 2,883 | 28,067 |
| 114,398 | 151 | 20,155 | 4,494 | 2,853 | 27,653 |
| 114,399 | 147 | 19,933 | 4,483 | 2,850 | 27,413 |
| 114,400 | 151 | 20,233 | 4,635 | 2,920 | 27,939 |
| 114,401 | 152 | 20,012 | 4,626 | 2,890 | 27,680 |
| 114,402 | 154 | 19,909 | 4,658 | 2,880 | 27,601 |
| 114,403 | 158 | 20,073 | 4,724 | 2,912 | 27,867 |
| 114,404 | 159 | 19,800 | 4,658 | 2,851 | 27,468 |
| 114,405 | 158 | 19,743 | 4,679 | 2,881 | 27,461 |
| 114,406 | 150 | 19,650 | 4,737 | 2,896 | 27,433 |
| 114,407 | 152 | 20,033 | 4,892 | 2,998 | 28,075 |
| 114,408 | 149 | 19,824 | 4,883 | 2,984 | 27,840 |
| 114,409 | 139 | 19,767 | 4,883 | 2,961 | 27,750 |
| 114,410 | 139 | 19,907 | 4,944 | 3,008 | 27,998 |
| 114,411 | 129 | 19,901 | 5,008 | 3,031 | 28,069 |
| 114,412 | 124 | 19,748 | 5,005 | 3,022 | 27,899 |
| 114,413 | 126 | 19,801 | 5,084 | 3,055 | 28,066 |
| 114,414 | 123 | 19,830 | 5,205 | 3,112 | 28,270 |
| 114,415 | 120 | 19,866 | 5,264 | 3,110 | 28,360 |
| 114,416 | 120 | 19,571 | 5,271 | 3,092 | 28,054 |
| 114,417 | 120 | 19,523 | 5,293 | 3,087 | 28,023 |
| 114,418 | 132 | 19,926 | 5,477 | 3,195 | 28,730 |
| 114,419 | 131 | 19,767 | 5,451 | 3,196 | 28,545 |
| 114,420 | 130 | 19,777 | 5,509 | 3,218 | 28,634 |
| 114,421 | 131 | 19,818 | 5,538 | 3,226 | 28,713 |
| 114,422 | 132 | 19,673 | 5,517 | 3,219 | 28,541 |
| 114,423 | 132 | 19,773 | 5,565 | 3,254 | 28,724 |



|         |     |        |       |       |        |
|---------|-----|--------|-------|-------|--------|
| 114,424 | 129 | 19,983 | 5,630 | 3,300 | 29,042 |
| 114,425 | 129 | 20,049 | 5,664 | 3,341 | 29,183 |
| 114,426 | 120 | 19,841 | 5,657 | 3,342 | 28,960 |
| 114,427 | 125 | 20,209 | 5,756 | 3,414 | 29,504 |
| 114,428 | 140 | 20,307 | 5,838 | 3,461 | 29,746 |
| 114,429 | 136 | 20,381 | 5,903 | 3,502 | 29,922 |
| 114,430 | 138 | 20,175 | 5,902 | 3,481 | 29,696 |
| 114,431 | 138 | 19,966 | 5,888 | 3,465 | 29,457 |
| 114,432 | 143 | 20,307 | 6,106 | 3,589 | 30,145 |
| 114,433 | 148 | 20,514 | 6,217 | 3,616 | 30,495 |
| 114,434 | 149 | 20,641 | 6,267 | 3,665 | 30,722 |
| 114,435 | 149 | 20,655 | 6,315 | 3,692 | 30,811 |
| 114,436 | 153 | 20,724 | 6,361 | 3,714 | 30,952 |
| 114,437 | 154 | 20,714 | 6,384 | 3,723 | 30,975 |
| 114,438 | 152 | 20,715 | 6,388 | 3,731 | 30,986 |
| 114,439 | 147 | 20,614 | 6,382 | 3,717 | 30,860 |
| 114,440 | 146 | 20,516 | 6,360 | 3,711 | 30,733 |
| 114,441 | 154 | 21,092 | 6,551 | 3,854 | 31,651 |
| 114,442 | 151 | 21,263 | 6,604 | 3,853 | 31,871 |
| 114,443 | 163 | 21,670 | 6,701 | 3,898 | 32,432 |
| 114,444 | 159 | 21,381 | 6,641 | 3,828 | 32,009 |
| 114,445 | 163 | 21,555 | 6,710 | 3,878 | 32,306 |
| 114,446 | 161 | 21,481 | 6,701 | 3,868 | 32,211 |
| 114,447 | 164 | 21,697 | 6,740 | 3,892 | 32,493 |
| 114,448 | 158 | 21,701 | 6,739 | 3,888 | 32,486 |
| 114,449 | 153 | 21,489 | 6,669 | 3,856 | 32,167 |
| 114,450 | 157 | 21,963 | 6,762 | 3,935 | 32,817 |
| 114,451 | 161 | 21,707 | 6,673 | 3,899 | 32,440 |
| 114,452 | 158 | 21,429 | 6,622 | 3,866 | 32,075 |
| 114,453 | 163 | 21,337 | 6,594 | 3,866 | 31,960 |
| 114,454 | 159 | 21,036 | 6,551 | 3,836 | 31,582 |
| 114,455 | 156 | 21,363 | 6,665 | 3,919 | 32,103 |

|         |     |        |       |       |        |
|---------|-----|--------|-------|-------|--------|
| 114,456 | 160 | 21,597 | 6,727 | 3,956 | 32,440 |
| 114,457 | 165 | 21,603 | 6,688 | 3,946 | 32,402 |
| 114,458 | 165 | 21,604 | 6,661 | 3,925 | 32,355 |
| 114,459 | 164 | 21,405 | 6,584 | 3,863 | 32,016 |
| 114,460 | 164 | 21,749 | 6,659 | 3,913 | 32,485 |
| 114,461 | 159 | 21,446 | 6,590 | 3,879 | 32,074 |
| 114,462 | 163 | 21,257 | 6,468 | 3,835 | 31,723 |
| 114,463 | 163 | 21,423 | 6,501 | 3,860 | 31,947 |
| 114,464 | 161 | 21,294 | 6,491 | 3,860 | 31,806 |
| 114,465 | 156 | 21,421 | 6,451 | 3,869 | 31,897 |
| 114,466 | 161 | 21,630 | 6,502 | 3,920 | 32,213 |
| 114,467 | 158 | 21,550 | 6,439 | 3,895 | 32,042 |
| 114,468 | 157 | 21,476 | 6,399 | 3,839 | 31,871 |
| 114,469 | 151 | 21,252 | 6,333 | 3,803 | 31,539 |
| 114,470 | 161 | 21,285 | 6,332 | 3,785 | 31,563 |
| 114,471 | 162 | 21,323 | 6,319 | 3,777 | 31,581 |
| 114,472 | 164 | 21,494 | 6,341 | 3,790 | 31,789 |
| 114,473 | 164 | 21,420 | 6,315 | 3,775 | 31,674 |
| 114,474 | 163 | 21,302 | 6,269 | 3,733 | 31,467 |
| 114,475 | 161 | 22,111 | 6,418 | 3,834 | 32,524 |
| 114,476 | 159 | 21,832 | 6,386 | 3,800 | 32,177 |
| 114,477 | 156 | 21,584 | 6,320 | 3,743 | 31,803 |
| 114,478 | 154 | 21,624 | 6,357 | 3,767 | 31,902 |
| 114,479 | 146 | 21,447 | 6,296 | 3,747 | 31,636 |
| 114,480 | 151 | 21,400 | 6,270 | 3,713 | 31,534 |
| 114,481 | 152 | 21,584 | 6,231 | 3,693 | 31,660 |
| 114,482 | 165 | 21,589 | 6,189 | 3,648 | 31,591 |
| 114,483 | 164 | 21,450 | 6,154 | 3,638 | 31,406 |
| 114,484 | 169 | 21,808 | 6,185 | 3,665 | 31,827 |
| 114,485 | 173 | 21,827 | 6,146 | 3,626 | 31,772 |
| 114,486 | 173 | 21,786 | 6,123 | 3,610 | 31,692 |
| 114,487 | 169 | 21,770 | 6,099 | 3,610 | 31,648 |

|         |     |        |       |       |        |
|---------|-----|--------|-------|-------|--------|
| 114,488 | 170 | 21,822 | 6,092 | 3,618 | 31,702 |
| 114,489 | 176 | 21,750 | 6,083 | 3,584 | 31,593 |
| 114,490 | 176 | 21,833 | 6,044 | 3,554 | 31,607 |
| 114,491 | 175 | 21,698 | 6,030 | 3,528 | 31,431 |
| 114,492 | 176 | 21,830 | 6,108 | 3,557 | 31,671 |
| 114,493 | 177 | 21,756 | 6,110 | 3,569 | 31,612 |
| 114,494 | 174 | 21,728 | 6,128 | 3,574 | 31,604 |
| 114,495 | 175 | 21,762 | 6,107 | 3,574 | 31,618 |
| 114,496 | 183 | 21,755 | 6,061 | 3,540 | 31,539 |
| 114,497 | 184 | 21,796 | 6,048 | 3,537 | 31,565 |
| 114,498 | 186 | 21,893 | 6,114 | 3,599 | 31,792 |
| 114,499 | 185 | 21,656 | 6,062 | 3,579 | 31,482 |
| 114,500 | 185 | 21,734 | 6,071 | 3,576 | 31,566 |
| 114,501 | 180 | 21,756 | 6,073 | 3,598 | 31,607 |
| 114,502 | 176 | 21,683 | 6,067 | 3,604 | 31,530 |
| 114,503 | 180 | 21,765 | 6,089 | 3,601 | 31,635 |
| 114,504 | 175 | 21,870 | 6,087 | 3,605 | 31,737 |
| 114,505 | 177 | 21,987 | 6,082 | 3,596 | 31,842 |
| 114,506 | 177 | 21,983 | 6,082 | 3,584 | 31,826 |
| 114,507 | 179 | 22,203 | 6,148 | 3,618 | 32,148 |
| 114,508 | 185 | 22,121 | 6,154 | 3,597 | 32,057 |
| 114,509 | 185 | 21,858 | 6,100 | 3,567 | 31,710 |
| 114,510 | 188 | 21,729 | 6,102 | 3,558 | 31,577 |
| 114,511 | 191 | 21,428 | 6,066 | 3,544 | 31,229 |
| 114,512 | 193 | 21,695 | 6,096 | 3,570 | 31,554 |
| 114,513 | 191 | 21,435 | 6,043 | 3,535 | 31,204 |
| 114,514 | 190 | 21,450 | 6,066 | 3,540 | 31,246 |
| 114,515 | 190 | 21,561 | 6,064 | 3,543 | 31,358 |
| 114,516 | 193 | 21,617 | 6,107 | 3,538 | 31,455 |
| 114,517 | 195 | 21,381 | 6,062 | 3,499 | 31,137 |
| 114,518 | 194 | 21,445 | 6,054 | 3,480 | 31,173 |
| 114,519 | 191 | 21,542 | 6,048 | 3,519 | 31,300 |

|         |     |        |       |       |        |
|---------|-----|--------|-------|-------|--------|
| 114,520 | 191 | 21,409 | 6,046 | 3,516 | 31,162 |
| 114,521 | 181 | 21,369 | 6,072 | 3,530 | 31,152 |
| 114,522 | 181 | 21,251 | 6,043 | 3,552 | 31,027 |
| 114,523 | 177 | 21,165 | 6,001 | 3,547 | 30,890 |
| 114,524 | 179 | 21,187 | 5,988 | 3,533 | 30,887 |
| 114,525 | 187 | 21,012 | 5,989 | 3,502 | 30,690 |
| 114,526 | 194 | 20,795 | 5,978 | 3,490 | 30,457 |
| 114,527 | 194 | 20,679 | 5,915 | 3,464 | 30,252 |
| 114,528 | 196 | 20,640 | 5,883 | 3,460 | 30,179 |
| 114,529 | 191 | 20,508 | 5,846 | 3,414 | 29,959 |
| 114,530 | 191 | 20,467 | 5,832 | 3,405 | 29,895 |
| 114,531 | 187 | 20,088 | 5,761 | 3,390 | 29,426 |
| 114,532 | 187 | 20,003 | 5,766 | 3,380 | 29,336 |
| 114,533 | 172 | 19,858 | 5,748 | 3,352 | 29,130 |
| 114,534 | 170 | 19,811 | 5,737 | 3,358 | 29,076 |
| 114,535 | 164 | 19,767 | 5,753 | 3,375 | 29,059 |
| 114,536 | 162 | 19,564 | 5,715 | 3,345 | 28,786 |
| 114,537 | 165 | 19,751 | 5,760 | 3,364 | 29,040 |
| 114,538 | 163 | 19,355 | 5,668 | 3,318 | 28,504 |
| 114,539 | 162 | 19,448 | 5,668 | 3,321 | 28,599 |
| 114,540 | 154 | 19,320 | 5,681 | 3,291 | 28,446 |
| 114,541 | 157 | 19,473 | 5,759 | 3,314 | 28,703 |
| 114,542 | 146 | 19,444 | 5,703 | 3,310 | 28,603 |
| 114,543 | 140 | 18,981 | 5,576 | 3,241 | 27,938 |
| 114,544 | 139 | 19,166 | 5,598 | 3,278 | 28,181 |
| 114,545 | 138 | 19,143 | 5,598 | 3,294 | 28,173 |
| 114,546 | 146 | 19,212 | 5,645 | 3,304 | 28,307 |
| 114,547 | 139 | 18,962 | 5,597 | 3,257 | 27,955 |
| 114,548 | 139 | 19,201 | 5,650 | 3,260 | 28,250 |
| 114,549 | 138 | 19,175 | 5,673 | 3,246 | 28,232 |
| 114,550 | 139 | 18,987 | 5,618 | 3,192 | 27,936 |
| 114,551 | 139 | 18,867 | 5,585 | 3,152 | 27,743 |

|         |     |        |       |       |        |
|---------|-----|--------|-------|-------|--------|
| 114,552 | 142 | 18,977 | 5,639 | 3,168 | 27,926 |
| 114,553 | 140 | 18,960 | 5,630 | 3,170 | 27,900 |
| 114,554 | 145 | 18,762 | 5,551 | 3,125 | 27,583 |
| 114,555 | 144 | 18,619 | 5,509 | 3,112 | 27,384 |
| 114,556 | 142 | 18,733 | 5,572 | 3,166 | 27,613 |
| 114,557 | 142 | 18,666 | 5,552 | 3,156 | 27,516 |
| 114,558 | 139 | 18,550 | 5,501 | 3,131 | 27,321 |
| 114,559 | 127 | 17,970 | 5,347 | 3,049 | 26,493 |
| 114,560 | 126 | 17,970 | 5,350 | 3,065 | 26,511 |
| 114,561 | 123 | 17,756 | 5,297 | 3,026 | 26,202 |
| 114,562 | 120 | 17,600 | 5,219 | 2,991 | 25,930 |
| 114,563 | 120 | 18,319 | 5,471 | 3,116 | 27,026 |
| 114,564 | 123 | 18,507 | 5,515 | 3,149 | 27,294 |
| 114,565 | 123 | 18,329 | 5,507 | 3,115 | 27,074 |
| 114,566 | 116 | 18,154 | 5,448 | 3,093 | 26,811 |
| 114,567 | 118 | 18,416 | 5,499 | 3,114 | 27,147 |
| 114,568 | 115 | 18,619 | 5,534 | 3,134 | 27,402 |
| 114,569 | 115 | 18,609 | 5,555 | 3,124 | 27,403 |
| 114,570 | 117 | 18,576 | 5,574 | 3,141 | 27,408 |
| 114,571 | 116 | 18,832 | 5,612 | 3,172 | 27,732 |
| 114,572 | 115 | 18,733 | 5,583 | 3,120 | 27,551 |
| 114,573 | 121 | 19,116 | 5,707 | 3,168 | 28,112 |
| 114,574 | 125 | 19,246 | 5,769 | 3,175 | 28,315 |
| 114,575 | 113 | 19,005 | 5,683 | 3,143 | 27,944 |
| 114,576 | 115 | 19,171 | 5,753 | 3,192 | 28,231 |
| 114,577 | 109 | 19,117 | 5,746 | 3,183 | 28,155 |
| 114,578 | 110 | 18,994 | 5,699 | 3,142 | 27,945 |
| 114,579 | 107 | 19,124 | 5,764 | 3,172 | 28,167 |
| 114,580 | 111 | 18,948 | 5,664 | 3,152 | 27,875 |
| 114,581 | 112 | 19,210 | 5,743 | 3,179 | 28,244 |
| 114,582 | 108 | 19,264 | 5,743 | 3,185 | 28,300 |
| 114,583 | 107 | 19,158 | 5,685 | 3,191 | 28,141 |

|         |     |        |       |       |        |
|---------|-----|--------|-------|-------|--------|
| 114,584 | 112 | 19,192 | 5,731 | 3,197 | 28,232 |
| 114,585 | 113 | 19,358 | 5,758 | 3,210 | 28,439 |
| 114,586 | 117 | 19,373 | 5,759 | 3,219 | 28,468 |
| 114,587 | 118 | 19,186 | 5,692 | 3,171 | 28,167 |
| 114,588 | 118 | 18,995 | 5,623 | 3,145 | 27,881 |
| 114,589 | 127 | 19,256 | 5,697 | 3,174 | 28,254 |
| 114,590 | 126 | 19,337 | 5,705 | 3,191 | 28,359 |
| 114,591 | 126 | 19,368 | 5,687 | 3,197 | 28,378 |
| 114,592 | 133 | 19,273 | 5,634 | 3,161 | 28,201 |
| 114,593 | 147 | 19,352 | 5,611 | 3,167 | 28,277 |
| 114,594 | 148 | 19,672 | 5,681 | 3,207 | 28,708 |
| 114,595 | 154 | 19,221 | 5,537 | 3,101 | 28,013 |
| 114,596 | 153 | 19,451 | 5,599 | 3,139 | 28,342 |
| 114,597 | 156 | 19,712 | 5,687 | 3,160 | 28,715 |
| 114,598 | 147 | 19,446 | 5,567 | 3,128 | 28,288 |
| 114,599 | 152 | 19,709 | 5,630 | 3,153 | 28,644 |
| 114,600 | 152 | 19,767 | 5,643 | 3,159 | 28,721 |
| 114,601 | 151 | 19,503 | 5,583 | 3,123 | 28,360 |
| 114,602 | 150 | 19,268 | 5,566 | 3,106 | 28,090 |
| 114,603 | 163 | 19,913 | 5,798 | 3,222 | 29,096 |
| 114,604 | 156 | 19,618 | 5,711 | 3,163 | 28,648 |
| 114,605 | 165 | 19,882 | 5,745 | 3,180 | 28,972 |
| 114,606 | 170 | 19,859 | 5,770 | 3,170 | 28,969 |
| 114,607 | 169 | 19,776 | 5,740 | 3,152 | 28,837 |
| 114,608 | 175 | 19,624 | 5,681 | 3,128 | 28,608 |
| 114,609 | 173 | 19,504 | 5,650 | 3,116 | 28,443 |
| 114,610 | 188 | 20,232 | 5,847 | 3,206 | 29,473 |
| 114,611 | 189 | 20,204 | 5,845 | 3,207 | 29,445 |
| 114,612 | 200 | 20,604 | 5,895 | 3,274 | 29,973 |
| 114,613 | 202 | 20,480 | 5,841 | 3,232 | 29,755 |
| 114,614 | 203 | 20,387 | 5,817 | 3,228 | 29,635 |
| 114,615 | 205 | 20,703 | 5,892 | 3,260 | 30,060 |

|         |     |        |       |       |        |
|---------|-----|--------|-------|-------|--------|
| 114,616 | 211 | 20,717 | 5,885 | 3,248 | 30,061 |
| 114,617 | 211 | 20,691 | 5,883 | 3,267 | 30,052 |
| 114,618 | 211 | 20,742 | 5,906 | 3,285 | 30,144 |
| 114,619 | 227 | 21,043 | 6,014 | 3,343 | 30,627 |
| 114,620 | 231 | 21,180 | 6,032 | 3,366 | 30,809 |
| 114,621 | 236 | 21,315 | 6,033 | 3,360 | 30,944 |
| 114,622 | 240 | 21,144 | 5,989 | 3,330 | 30,703 |
| 114,623 | 241 | 21,035 | 5,971 | 3,327 | 30,574 |
| 114,624 | 248 | 21,199 | 5,989 | 3,354 | 30,790 |
| 114,625 | 259 | 21,114 | 5,956 | 3,352 | 30,681 |
| 114,626 | 264 | 21,185 | 5,979 | 3,363 | 30,791 |
| 114,627 | 272 | 21,298 | 6,013 | 3,358 | 30,941 |
| 114,628 | 271 | 21,379 | 5,998 | 3,365 | 31,013 |
| 114,629 | 283 | 21,424 | 6,014 | 3,337 | 31,058 |
| 114,630 | 289 | 21,535 | 6,015 | 3,356 | 31,195 |
| 114,631 | 282 | 21,707 | 6,078 | 3,359 | 31,426 |
| 114,632 | 280 | 21,718 | 6,073 | 3,346 | 31,417 |
| 114,633 | 281 | 21,876 | 6,080 | 3,371 | 31,608 |
| 114,634 | 279 | 21,973 | 6,085 | 3,385 | 31,722 |
| 114,635 | 281 | 22,031 | 6,094 | 3,386 | 31,792 |
| 114,636 | 281 | 22,064 | 6,076 | 3,397 | 31,818 |
| 114,637 | 277 | 22,095 | 6,103 | 3,401 | 31,876 |
| 114,638 | 275 | 22,159 | 6,136 | 3,438 | 32,008 |
| 114,639 | 274 | 22,258 | 6,139 | 3,455 | 32,126 |
| 114,640 | 268 | 22,295 | 6,156 | 3,475 | 32,194 |
| 114,641 | 267 | 22,504 | 6,223 | 3,527 | 32,521 |
| 114,642 | 263 | 22,027 | 6,144 | 3,474 | 31,908 |
| 114,643 | 263 | 22,236 | 6,196 | 3,492 | 32,187 |
| 114,644 | 249 | 21,713 | 6,081 | 3,422 | 31,465 |
| 114,645 | 250 | 21,864 | 6,102 | 3,439 | 31,655 |
| 114,646 | 244 | 22,155 | 6,147 | 3,500 | 32,046 |
| 114,647 | 244 | 22,273 | 6,152 | 3,522 | 32,191 |

|         |     |        |       |       |        |
|---------|-----|--------|-------|-------|--------|
| 114,648 | 236 | 22,419 | 6,209 | 3,566 | 32,430 |
| 114,649 | 235 | 22,531 | 6,217 | 3,593 | 32,576 |
| 114,650 | 239 | 22,719 | 6,255 | 3,632 | 32,845 |
| 114,651 | 256 | 22,781 | 6,232 | 3,653 | 32,922 |
| 114,652 | 257 | 23,170 | 6,303 | 3,703 | 33,433 |
| 114,653 | 256 | 23,487 | 6,352 | 3,761 | 33,856 |
| 114,654 | 249 | 23,450 | 6,329 | 3,742 | 33,770 |
| 114,655 | 250 | 23,686 | 6,437 | 3,778 | 34,151 |
| 114,656 | 240 | 23,270 | 6,359 | 3,717 | 33,586 |
| 114,657 | 239 | 23,525 | 6,393 | 3,752 | 33,909 |
| 114,658 | 241 | 23,602 | 6,417 | 3,777 | 34,037 |
| 114,659 | 235 | 23,408 | 6,402 | 3,764 | 33,809 |
| 114,660 | 235 | 23,513 | 6,468 | 3,797 | 34,013 |
| 114,661 | 240 | 23,637 | 6,451 | 3,814 | 34,142 |
| 114,662 | 235 | 23,465 | 6,411 | 3,779 | 33,890 |
| 114,663 | 232 | 23,244 | 6,381 | 3,730 | 33,587 |
| 114,664 | 228 | 22,964 | 6,328 | 3,714 | 33,234 |
| 114,665 | 226 | 23,198 | 6,441 | 3,772 | 33,637 |
| 114,666 | 226 | 23,145 | 6,399 | 3,755 | 33,525 |
| 114,667 | 224 | 23,072 | 6,387 | 3,750 | 33,433 |
| 114,668 | 223 | 23,016 | 6,376 | 3,758 | 33,373 |
| 114,669 | 216 | 22,983 | 6,368 | 3,752 | 33,319 |
| 114,670 | 209 | 23,238 | 6,385 | 3,779 | 33,611 |
| 114,671 | 208 | 23,288 | 6,361 | 3,777 | 33,634 |
| 114,672 | 198 | 22,511 | 6,114 | 3,628 | 32,451 |
| 114,673 | 197 | 22,882 | 6,176 | 3,692 | 32,947 |
| 114,674 | 186 | 22,979 | 6,174 | 3,689 | 33,028 |
| 114,675 | 185 | 23,270 | 6,214 | 3,735 | 33,404 |
| 114,676 | 179 | 23,476 | 6,268 | 3,778 | 33,701 |
| 114,677 | 167 | 22,845 | 6,109 | 3,758 | 32,879 |
| 114,678 | 165 | 22,691 | 6,081 | 3,760 | 32,697 |
| 114,679 | 173 | 22,694 | 6,083 | 3,747 | 32,697 |



|         |     |        |       |       |        |
|---------|-----|--------|-------|-------|--------|
| 114,680 | 161 | 22,513 | 6,027 | 3,735 | 32,436 |
| 114,681 | 157 | 22,650 | 6,058 | 3,768 | 32,633 |
| 114,682 | 159 | 22,856 | 6,103 | 3,804 | 32,922 |
| 114,683 | 158 | 22,529 | 5,980 | 3,759 | 32,426 |
| 114,684 | 156 | 22,300 | 5,933 | 3,734 | 32,123 |
| 114,685 | 162 | 22,499 | 6,001 | 3,758 | 32,420 |
| 114,686 | 166 | 22,679 | 6,047 | 3,787 | 32,679 |
| 114,687 | 165 | 22,852 | 6,106 | 3,822 | 32,945 |
| 114,688 | 168 | 22,757 | 6,072 | 3,785 | 32,782 |
| 114,689 | 169 | 22,688 | 6,019 | 3,767 | 32,643 |
| 114,690 | 170 | 22,641 | 5,976 | 3,734 | 32,521 |
| 114,691 | 168 | 22,275 | 5,874 | 3,669 | 31,986 |
| 114,692 | 171 | 22,563 | 5,961 | 3,716 | 32,411 |
| 114,693 | 164 | 22,188 | 5,840 | 3,672 | 31,864 |
| 114,694 | 161 | 22,124 | 5,803 | 3,651 | 31,739 |
| 114,695 | 160 | 22,243 | 5,801 | 3,636 | 31,840 |
| 114,696 | 161 | 22,304 | 5,816 | 3,656 | 31,937 |
| 114,697 | 158 | 22,091 | 5,757 | 3,607 | 31,613 |
| 114,698 | 160 | 22,296 | 5,771 | 3,610 | 31,837 |
| 114,699 | 161 | 22,297 | 5,768 | 3,596 | 31,822 |
| 114,700 | 158 | 21,987 | 5,667 | 3,507 | 31,319 |
| 114,701 | 154 | 22,103 | 5,667 | 3,530 | 31,454 |
| 114,702 | 139 | 22,418 | 5,730 | 3,570 | 31,857 |
| 114,703 | 137 | 22,355 | 5,700 | 3,583 | 31,775 |
| 114,704 | 132 | 22,284 | 5,674 | 3,563 | 31,653 |
| 114,705 | 131 | 22,013 | 5,557 | 3,535 | 31,236 |
| 114,706 | 129 | 22,044 | 5,514 | 3,545 | 31,232 |
| 114,707 | 132 | 22,408 | 5,551 | 3,587 | 31,678 |
| 114,708 | 119 | 22,172 | 5,461 | 3,509 | 31,261 |
| 114,709 | 121 | 22,193 | 5,451 | 3,507 | 31,272 |
| 114,710 | 120 | 22,042 | 5,389 | 3,449 | 31,000 |
| 114,711 | 114 | 22,532 | 5,501 | 3,522 | 31,669 |

|         |     |        |       |       |        |
|---------|-----|--------|-------|-------|--------|
| 114,712 | 108 | 22,502 | 5,499 | 3,520 | 31,629 |
| 114,713 | 99  | 22,156 | 5,365 | 3,473 | 31,093 |
| 114,714 | 109 | 22,221 | 5,335 | 3,467 | 31,132 |
| 114,715 | 110 | 22,303 | 5,341 | 3,469 | 31,223 |
| 114,716 | 112 | 22,133 | 5,253 | 3,430 | 30,928 |
| 114,717 | 121 | 22,573 | 5,360 | 3,478 | 31,532 |
| 114,718 | 119 | 22,410 | 5,304 | 3,435 | 31,268 |
| 114,719 | 119 | 22,502 | 5,327 | 3,428 | 31,376 |
| 114,720 | 120 | 22,471 | 5,312 | 3,396 | 31,299 |
| 114,721 | 118 | 22,361 | 5,304 | 3,400 | 31,183 |
| 114,722 | 122 | 22,254 | 5,309 | 3,395 | 31,080 |
| 114,723 | 123 | 22,319 | 5,376 | 3,438 | 31,256 |
| 114,724 | 124 | 22,319 | 5,408 | 3,455 | 31,306 |
| 114,725 | 120 | 22,161 | 5,398 | 3,457 | 31,136 |
| 114,726 | 121 | 22,301 | 5,438 | 3,463 | 31,323 |
| 114,727 | 118 | 22,321 | 5,431 | 3,468 | 31,338 |
| 114,728 | 122 | 22,270 | 5,427 | 3,398 | 31,217 |
| 114,729 | 122 | 22,368 | 5,422 | 3,391 | 31,303 |
| 114,730 | 115 | 22,361 | 5,396 | 3,377 | 31,249 |
| 114,731 | 114 | 22,617 | 5,428 | 3,401 | 31,560 |
| 114,732 | 113 | 22,708 | 5,433 | 3,415 | 31,669 |
| 114,733 | 113 | 22,851 | 5,434 | 3,430 | 31,828 |
| 114,734 | 110 | 22,695 | 5,421 | 3,407 | 31,633 |
| 114,735 | 107 | 23,068 | 5,481 | 3,449 | 32,105 |
| 114,736 | 103 | 23,058 | 5,475 | 3,456 | 32,092 |
| 114,737 | 101 | 22,930 | 5,454 | 3,444 | 31,929 |
| 114,738 | 105 | 22,879 | 5,415 | 3,426 | 31,825 |
| 114,739 | 102 | 22,654 | 5,357 | 3,404 | 31,517 |
| 114,740 | 99  | 22,754 | 5,383 | 3,412 | 31,648 |
| 114,741 | 98  | 22,669 | 5,425 | 3,419 | 31,611 |
| 114,742 | 97  | 22,525 | 5,429 | 3,427 | 31,478 |
| 114,743 | 95  | 22,850 | 5,475 | 3,466 | 31,886 |

|         |     |        |       |       |        |
|---------|-----|--------|-------|-------|--------|
| 114,744 | 96  | 22,489 | 5,412 | 3,420 | 31,417 |
| 114,745 | 104 | 22,524 | 5,445 | 3,448 | 31,521 |
| 114,746 | 108 | 22,298 | 5,455 | 3,443 | 31,304 |
| 114,747 | 112 | 22,447 | 5,555 | 3,501 | 31,615 |
| 114,748 | 112 | 22,713 | 5,611 | 3,509 | 31,945 |
| 114,749 | 110 | 22,752 | 5,654 | 3,531 | 32,047 |
| 114,750 | 110 | 22,844 | 5,674 | 3,565 | 32,193 |
| 114,751 | 108 | 22,517 | 5,624 | 3,524 | 31,773 |
| 114,752 | 109 | 22,987 | 5,721 | 3,578 | 32,395 |
| 114,753 | 112 | 22,357 | 5,594 | 3,486 | 31,549 |
| 114,754 | 113 | 22,697 | 5,638 | 3,514 | 31,962 |
| 114,755 | 112 | 22,777 | 5,638 | 3,508 | 32,035 |
| 114,756 | 119 | 22,814 | 5,642 | 3,511 | 32,086 |
| 114,757 | 124 | 23,011 | 5,693 | 3,537 | 32,365 |
| 114,758 | 122 | 22,873 | 5,691 | 3,513 | 32,199 |
| 114,759 | 122 | 22,741 | 5,636 | 3,508 | 32,007 |
| 114,760 | 126 | 23,014 | 5,692 | 3,534 | 32,366 |
| 114,761 | 126 | 23,033 | 5,708 | 3,556 | 32,423 |
| 114,762 | 129 | 23,104 | 5,725 | 3,548 | 32,506 |
| 114,763 | 136 | 23,219 | 5,720 | 3,574 | 32,649 |
| 114,764 | 138 | 23,279 | 5,729 | 3,567 | 32,713 |
| 114,765 | 133 | 23,569 | 5,816 | 3,599 | 33,117 |
| 114,766 | 133 | 22,984 | 5,684 | 3,524 | 32,325 |
| 114,767 | 134 | 23,219 | 5,716 | 3,536 | 32,605 |
| 114,768 | 125 | 23,536 | 5,770 | 3,585 | 33,016 |
| 114,769 | 125 | 23,527 | 5,759 | 3,581 | 32,992 |
| 114,770 | 125 | 23,772 | 5,802 | 3,635 | 33,334 |
| 114,771 | 126 | 23,832 | 5,852 | 3,663 | 33,473 |
| 114,772 | 122 | 24,044 | 5,899 | 3,701 | 33,766 |
| 114,773 | 117 | 23,919 | 5,809 | 3,666 | 33,511 |
| 114,774 | 118 | 24,080 | 5,843 | 3,684 | 33,725 |
| 114,775 | 122 | 24,186 | 5,833 | 3,642 | 33,783 |

|         |     |        |       |       |        |
|---------|-----|--------|-------|-------|--------|
| 114,776 | 121 | 24,215 | 5,812 | 3,619 | 33,767 |
| 114,777 | 123 | 23,984 | 5,730 | 3,576 | 33,413 |
| 114,778 | 123 | 23,942 | 5,734 | 3,579 | 33,378 |
| 114,779 | 121 | 24,240 | 5,771 | 3,644 | 33,776 |
| 114,780 | 116 | 23,946 | 5,740 | 3,629 | 33,431 |
| 114,781 | 129 | 24,165 | 5,872 | 3,706 | 33,872 |
| 114,782 | 134 | 24,279 | 5,892 | 3,711 | 34,016 |
| 114,783 | 134 | 24,210 | 5,930 | 3,711 | 33,985 |
| 114,784 | 136 | 24,133 | 5,950 | 3,708 | 33,927 |
| 114,785 | 138 | 24,113 | 5,917 | 3,679 | 33,847 |
| 114,786 | 137 | 24,171 | 5,916 | 3,681 | 33,905 |
| 114,787 | 142 | 24,109 | 5,875 | 3,650 | 33,776 |
| 114,788 | 142 | 24,196 | 5,878 | 3,652 | 33,868 |
| 114,789 | 145 | 24,111 | 5,866 | 3,647 | 33,769 |
| 114,790 | 151 | 23,887 | 5,766 | 3,568 | 33,372 |
| 114,791 | 152 | 24,152 | 5,774 | 3,609 | 33,687 |
| 114,792 | 152 | 24,400 | 5,816 | 3,640 | 34,008 |
| 114,793 | 152 | 24,348 | 5,779 | 3,609 | 33,888 |
| 114,794 | 156 | 24,538 | 5,804 | 3,641 | 34,139 |
| 114,795 | 148 | 24,685 | 5,787 | 3,636 | 34,256 |
| 114,796 | 150 | 24,671 | 5,708 | 3,561 | 34,090 |
| 114,797 | 150 | 24,926 | 5,754 | 3,584 | 34,414 |
| 114,798 | 149 | 25,163 | 5,797 | 3,622 | 34,731 |
| 114,799 | 158 | 24,953 | 5,757 | 3,628 | 34,496 |
| 114,800 | 160 | 24,651 | 5,663 | 3,580 | 34,054 |
| 114,801 | 159 | 24,391 | 5,628 | 3,531 | 33,709 |
| 114,802 | 158 | 24,453 | 5,674 | 3,584 | 33,869 |
| 114,803 | 164 | 24,342 | 5,663 | 3,568 | 33,737 |
| 114,804 | 162 | 24,423 | 5,679 | 3,558 | 33,822 |
| 114,805 | 167 | 24,263 | 5,673 | 3,544 | 33,647 |
| 114,806 | 166 | 24,130 | 5,657 | 3,540 | 33,493 |
| 114,807 | 160 | 23,871 | 5,627 | 3,521 | 33,179 |

|         |     |        |       |       |        |
|---------|-----|--------|-------|-------|--------|
| 114,808 | 156 | 23,671 | 5,612 | 3,515 | 32,954 |
| 114,809 | 163 | 23,666 | 5,611 | 3,538 | 32,978 |
| 114,810 | 164 | 23,659 | 5,605 | 3,541 | 32,969 |
| 114,811 | 162 | 23,539 | 5,547 | 3,522 | 32,770 |
| 114,812 | 161 | 23,638 | 5,555 | 3,505 | 32,859 |
| 114,813 | 158 | 23,508 | 5,544 | 3,478 | 32,688 |
| 114,814 | 153 | 23,315 | 5,494 | 3,452 | 32,414 |
| 114,815 | 161 | 23,396 | 5,508 | 3,476 | 32,541 |
| 114,816 | 157 | 23,646 | 5,549 | 3,515 | 32,867 |
| 114,817 | 156 | 23,386 | 5,519 | 3,480 | 32,541 |
| 114,818 | 164 | 23,316 | 5,511 | 3,513 | 32,504 |
| 114,819 | 173 | 23,633 | 5,565 | 3,548 | 32,919 |
| 114,820 | 172 | 23,442 | 5,533 | 3,531 | 32,678 |
| 114,821 | 172 | 23,438 | 5,512 | 3,513 | 32,635 |
| 114,822 | 172 | 23,191 | 5,447 | 3,475 | 32,285 |
| 114,823 | 179 | 23,578 | 5,511 | 3,515 | 32,783 |
| 114,824 | 178 | 23,260 | 5,479 | 3,477 | 32,394 |
| 114,825 | 177 | 23,206 | 5,473 | 3,482 | 32,338 |
| 114,826 | 173 | 22,899 | 5,428 | 3,496 | 31,996 |
| 114,827 | 175 | 23,452 | 5,551 | 3,557 | 32,735 |
| 114,828 | 174 | 23,562 | 5,582 | 3,564 | 32,882 |
| 114,829 | 172 | 23,527 | 5,539 | 3,534 | 32,772 |
| 114,830 | 174 | 23,991 | 5,640 | 3,604 | 33,409 |
| 114,831 | 173 | 24,182 | 5,634 | 3,606 | 33,595 |
| 114,832 | 168 | 24,511 | 5,633 | 3,610 | 33,922 |
| 114,833 | 165 | 24,297 | 5,563 | 3,586 | 33,611 |
| 114,834 | 165 | 24,263 | 5,537 | 3,581 | 33,546 |
| 114,835 | 163 | 24,319 | 5,511 | 3,590 | 33,583 |
| 114,836 | 163 | 24,307 | 5,538 | 3,611 | 33,619 |
| 114,837 | 163 | 24,261 | 5,519 | 3,607 | 33,550 |
| 114,838 | 158 | 24,633 | 5,563 | 3,644 | 33,998 |
| 114,839 | 155 | 24,786 | 5,608 | 3,669 | 34,218 |

|         |     |        |       |       |        |
|---------|-----|--------|-------|-------|--------|
| 114,840 | 150 | 24,566 | 5,542 | 3,647 | 33,905 |
| 114,841 | 149 | 24,508 | 5,579 | 3,664 | 33,900 |
| 114,842 | 149 | 24,372 | 5,567 | 3,663 | 33,751 |
| 114,843 | 150 | 24,387 | 5,553 | 3,663 | 33,753 |
| 114,844 | 150 | 24,181 | 5,538 | 3,642 | 33,511 |
| 114,845 | 152 | 24,738 | 5,687 | 3,728 | 34,305 |
| 114,846 | 146 | 24,577 | 5,683 | 3,743 | 34,149 |
| 114,847 | 147 | 24,559 | 5,651 | 3,746 | 34,103 |
| 114,848 | 148 | 24,940 | 5,723 | 3,811 | 34,622 |
| 114,849 | 145 | 25,107 | 5,764 | 3,839 | 34,855 |
| 114,850 | 138 | 25,044 | 5,746 | 3,849 | 34,777 |
| 114,851 | 136 | 24,885 | 5,676 | 3,812 | 34,509 |
| 114,852 | 136 | 24,871 | 5,670 | 3,806 | 34,483 |
| 114,853 | 133 | 25,266 | 5,750 | 3,875 | 35,024 |
| 114,854 | 137 | 25,226 | 5,743 | 3,880 | 34,986 |
| 114,855 | 133 | 25,181 | 5,749 | 3,886 | 34,949 |
| 114,856 | 132 | 25,035 | 5,722 | 3,860 | 34,749 |
| 114,857 | 133 | 25,125 | 5,726 | 3,876 | 34,860 |
| 114,858 | 132 | 25,151 | 5,735 | 3,871 | 34,889 |
| 114,859 | 132 | 25,137 | 5,747 | 3,879 | 34,895 |
| 114,860 | 126 | 25,261 | 5,809 | 3,928 | 35,124 |
| 114,861 | 123 | 24,844 | 5,727 | 3,871 | 34,565 |
| 114,862 | 125 | 24,766 | 5,689 | 3,883 | 34,463 |
| 114,863 | 133 | 25,070 | 5,748 | 3,919 | 34,870 |
| 114,864 | 128 | 24,078 | 5,556 | 3,823 | 33,585 |
| 114,865 | 131 | 24,412 | 5,602 | 3,846 | 33,991 |
| 114,866 | 126 | 24,578 | 5,583 | 3,850 | 34,137 |
| 114,867 | 127 | 24,759 | 5,643 | 3,871 | 34,400 |
| 114,868 | 128 | 25,068 | 5,694 | 3,915 | 34,805 |
| 114,869 | 128 | 25,181 | 5,739 | 3,946 | 34,994 |
| 114,870 | 122 | 25,189 | 5,747 | 3,961 | 35,019 |
| 114,871 | 123 | 25,180 | 5,749 | 3,953 | 35,005 |

|         |     |        |       |       |        |
|---------|-----|--------|-------|-------|--------|
| 114,872 | 123 | 25,078 | 5,710 | 3,936 | 34,847 |
| 114,873 | 124 | 25,100 | 5,705 | 3,943 | 34,872 |
| 114,874 | 120 | 25,258 | 5,757 | 3,983 | 35,118 |
| 114,875 | 120 | 25,110 | 5,693 | 3,942 | 34,865 |
| 114,876 | 119 | 25,114 | 5,654 | 3,905 | 34,792 |
| 114,877 | 121 | 25,684 | 5,733 | 3,994 | 35,532 |
| 114,878 | 123 | 25,549 | 5,677 | 3,983 | 35,332 |
| 114,879 | 122 | 25,153 | 5,600 | 3,925 | 34,800 |
| 114,880 | 125 | 25,318 | 5,634 | 3,925 | 35,002 |
| 114,881 | 122 | 25,074 | 5,571 | 3,887 | 34,654 |
| 114,882 | 122 | 24,958 | 5,523 | 3,862 | 34,465 |
| 114,883 | 123 | 24,879 | 5,515 | 3,835 | 34,352 |
| 114,884 | 124 | 24,837 | 5,520 | 3,828 | 34,309 |
| 114,885 | 127 | 25,142 | 5,596 | 3,860 | 34,725 |
| 114,886 | 124 | 24,711 | 5,521 | 3,811 | 34,167 |
| 114,887 | 124 | 24,731 | 5,548 | 3,805 | 34,208 |
| 114,888 | 126 | 24,973 | 5,589 | 3,856 | 34,544 |
| 114,889 | 125 | 24,746 | 5,522 | 3,812 | 34,205 |
| 114,890 | 124 | 24,901 | 5,511 | 3,803 | 34,339 |
| 114,891 | 124 | 25,037 | 5,531 | 3,809 | 34,501 |
| 114,892 | 125 | 25,037 | 5,508 | 3,803 | 34,473 |
| 114,893 | 125 | 25,046 | 5,513 | 3,797 | 34,481 |
| 114,894 | 124 | 25,170 | 5,526 | 3,789 | 34,609 |
| 114,895 | 121 | 25,213 | 5,516 | 3,832 | 34,682 |
| 114,896 | 122 | 25,375 | 5,557 | 3,859 | 34,913 |
| 114,897 | 122 | 25,266 | 5,546 | 3,861 | 34,795 |
| 114,898 | 121 | 25,159 | 5,560 | 3,852 | 34,692 |
| 114,899 | 123 | 25,011 | 5,504 | 3,809 | 34,447 |
| 114,900 | 121 | 25,029 | 5,476 | 3,772 | 34,398 |
| 114,901 | 122 | 25,348 | 5,526 | 3,800 | 34,796 |
| 114,902 | 122 | 25,483 | 5,545 | 3,799 | 34,949 |
| 114,903 | 132 | 25,686 | 5,557 | 3,787 | 35,162 |

|         |     |        |       |       |        |
|---------|-----|--------|-------|-------|--------|
| 114,904 | 130 | 25,648 | 5,535 | 3,783 | 35,096 |
| 114,905 | 127 | 25,631 | 5,524 | 3,770 | 35,052 |
| 114,906 | 126 | 25,425 | 5,501 | 3,738 | 34,790 |
| 114,907 | 126 | 25,443 | 5,488 | 3,722 | 34,779 |
| 114,908 | 126 | 25,591 | 5,493 | 3,719 | 34,929 |
| 114,909 | 131 | 25,825 | 5,524 | 3,724 | 35,204 |
| 114,910 | 131 | 25,924 | 5,488 | 3,702 | 35,245 |
| 114,911 | 128 | 25,955 | 5,486 | 3,687 | 35,256 |
| 114,912 | 128 | 25,977 | 5,491 | 3,680 | 35,276 |
| 114,913 | 126 | 26,442 | 5,578 | 3,739 | 35,885 |
| 114,914 | 118 | 26,279 | 5,530 | 3,717 | 35,644 |
| 114,915 | 118 | 26,291 | 5,550 | 3,712 | 35,671 |
| 114,916 | 117 | 26,476 | 5,624 | 3,756 | 35,973 |
| 114,917 | 115 | 26,267 | 5,587 | 3,741 | 35,710 |
| 114,918 | 114 | 26,228 | 5,564 | 3,719 | 35,625 |
| 114,919 | 113 | 26,773 | 5,706 | 3,764 | 36,356 |
| 114,920 | 112 | 26,714 | 5,678 | 3,726 | 36,230 |
| 114,921 | 109 | 26,463 | 5,618 | 3,685 | 35,875 |
| 114,922 | 111 | 26,685 | 5,689 | 3,730 | 36,215 |
| 114,923 | 108 | 26,434 | 5,649 | 3,686 | 35,877 |
| 114,924 | 112 | 26,724 | 5,696 | 3,707 | 36,239 |
| 114,925 | 109 | 26,528 | 5,661 | 3,669 | 35,967 |
| 114,926 | 114 | 26,448 | 5,637 | 3,667 | 35,866 |
| 114,927 | 114 | 26,459 | 5,657 | 3,651 | 35,881 |
| 114,928 | 121 | 26,774 | 5,720 | 3,695 | 36,310 |
| 114,929 | 119 | 26,502 | 5,689 | 3,655 | 35,965 |
| 114,930 | 118 | 26,428 | 5,698 | 3,681 | 35,925 |
| 114,931 | 119 | 26,347 | 5,687 | 3,672 | 35,825 |
| 114,932 | 115 | 26,024 | 5,640 | 3,638 | 35,417 |
| 114,933 | 115 | 26,296 | 5,707 | 3,689 | 35,807 |
| 114,934 | 113 | 25,948 | 5,650 | 3,663 | 35,374 |
| 114,935 | 112 | 25,744 | 5,609 | 3,639 | 35,104 |



|         |     |        |       |       |        |
|---------|-----|--------|-------|-------|--------|
| 114,936 | 109 | 25,997 | 5,704 | 3,715 | 35,525 |
| 114,937 | 116 | 26,248 | 5,744 | 3,759 | 35,867 |
| 114,938 | 116 | 25,923 | 5,652 | 3,725 | 35,416 |
| 114,939 | 114 | 25,706 | 5,638 | 3,715 | 35,173 |
| 114,940 | 113 | 25,820 | 5,704 | 3,747 | 35,384 |
| 114,941 | 117 | 25,800 | 5,719 | 3,742 | 35,378 |
| 114,942 | 115 | 25,757 | 5,689 | 3,723 | 35,284 |
| 114,943 | 114 | 25,487 | 5,665 | 3,699 | 34,965 |
| 114,944 | 117 | 25,609 | 5,679 | 3,700 | 35,105 |
| 114,945 | 115 | 25,113 | 5,520 | 3,610 | 34,358 |
| 114,946 | 116 | 25,502 | 5,577 | 3,659 | 34,854 |
| 114,947 | 121 | 25,856 | 5,649 | 3,703 | 35,329 |
| 114,948 | 123 | 26,270 | 5,711 | 3,751 | 35,855 |
| 114,949 | 129 | 26,084 | 5,664 | 3,732 | 35,609 |
| 114,950 | 128 | 25,733 | 5,639 | 3,724 | 35,224 |
| 114,951 | 128 | 25,764 | 5,662 | 3,733 | 35,287 |
| 114,952 | 123 | 24,970 | 5,545 | 3,669 | 34,307 |
| 114,953 | 123 | 25,067 | 5,574 | 3,711 | 34,475 |
| 114,954 | 115 | 25,409 | 5,663 | 3,771 | 34,958 |
| 114,955 | 111 | 24,127 | 5,393 | 3,589 | 33,220 |
| 114,956 | 110 | 24,272 | 5,427 | 3,624 | 33,433 |
| 114,957 | 108 | 24,471 | 5,441 | 3,662 | 33,682 |
| 114,958 | 108 | 24,538 | 5,444 | 3,673 | 33,763 |
| 114,959 | 110 | 24,830 | 5,537 | 3,725 | 34,202 |
| 114,960 | 110 | 24,966 | 5,589 | 3,740 | 34,405 |
| 114,961 | 111 | 24,742 | 5,561 | 3,719 | 34,133 |
| 114,962 | 111 | 24,840 | 5,593 | 3,734 | 34,278 |
| 114,963 | 113 | 24,756 | 5,583 | 3,741 | 34,193 |
| 114,964 | 114 | 24,598 | 5,574 | 3,707 | 33,993 |
| 114,965 | 115 | 24,284 | 5,506 | 3,660 | 33,565 |
| 114,966 | 115 | 24,396 | 5,532 | 3,658 | 33,701 |
| 114,967 | 118 | 24,420 | 5,524 | 3,652 | 33,714 |

|         |     |        |       |       |        |
|---------|-----|--------|-------|-------|--------|
| 114,968 | 114 | 24,306 | 5,483 | 3,641 | 33,544 |
| 114,969 | 113 | 23,888 | 5,391 | 3,612 | 33,004 |
| 114,970 | 115 | 23,805 | 5,408 | 3,638 | 32,966 |
| 114,971 | 115 | 23,740 | 5,417 | 3,649 | 32,921 |
| 114,972 | 120 | 23,901 | 5,453 | 3,666 | 33,140 |
| 114,973 | 126 | 23,541 | 5,401 | 3,634 | 32,702 |
| 114,974 | 126 | 23,504 | 5,421 | 3,632 | 32,683 |
| 114,975 | 124 | 23,419 | 5,378 | 3,650 | 32,571 |
| 114,976 | 125 | 23,117 | 5,339 | 3,622 | 32,203 |
| 114,977 | 121 | 22,788 | 5,286 | 3,569 | 31,764 |
| 114,978 | 117 | 23,173 | 5,350 | 3,648 | 32,288 |
| 114,979 | 111 | 23,252 | 5,365 | 3,651 | 32,379 |
| 114,980 | 110 | 23,276 | 5,351 | 3,651 | 32,388 |
| 114,981 | 111 | 23,008 | 5,304 | 3,609 | 32,032 |
| 114,982 | 115 | 23,276 | 5,358 | 3,642 | 32,391 |
| 114,983 | 113 | 22,982 | 5,304 | 3,604 | 32,003 |
| 114,984 | 114 | 23,044 | 5,287 | 3,608 | 32,053 |
| 114,985 | 116 | 23,039 | 5,249 | 3,588 | 31,992 |
| 114,986 | 117 | 23,138 | 5,249 | 3,575 | 32,079 |
| 114,987 | 119 | 23,165 | 5,243 | 3,563 | 32,090 |
| 114,988 | 119 | 23,337 | 5,269 | 3,567 | 32,292 |
| 114,989 | 116 | 23,245 | 5,247 | 3,558 | 32,166 |
| 114,990 | 117 | 23,522 | 5,240 | 3,549 | 32,428 |
| 114,991 | 117 | 23,525 | 5,256 | 3,555 | 32,453 |
| 114,992 | 114 | 23,361 | 5,255 | 3,547 | 32,277 |
| 114,993 | 114 | 23,438 | 5,257 | 3,579 | 32,388 |
| 114,994 | 116 | 23,532 | 5,255 | 3,591 | 32,494 |
| 114,995 | 117 | 23,827 | 5,333 | 3,643 | 32,920 |
| 114,996 | 117 | 23,605 | 5,335 | 3,613 | 32,670 |
| 114,997 | 116 | 23,689 | 5,392 | 3,647 | 32,844 |
| 114,998 | 111 | 23,944 | 5,448 | 3,697 | 33,200 |
| 114,999 | 112 | 24,127 | 5,525 | 3,736 | 33,500 |

|         |     |        |       |       |        |
|---------|-----|--------|-------|-------|--------|
| 115,000 | 108 | 24,226 | 5,530 | 3,726 | 33,590 |
| 115,001 | 108 | 24,227 | 5,500 | 3,697 | 33,532 |
| 115,002 | 110 | 24,035 | 5,452 | 3,650 | 33,247 |
| 115,003 | 109 | 23,802 | 5,402 | 3,615 | 32,928 |
| 115,004 | 115 | 24,223 | 5,537 | 3,657 | 33,532 |
| 115,005 | 115 | 24,052 | 5,502 | 3,640 | 33,309 |
| 115,006 | 117 | 23,956 | 5,471 | 3,632 | 33,176 |
| 115,007 | 121 | 23,817 | 5,426 | 3,588 | 32,952 |
| 115,008 | 121 | 23,821 | 5,424 | 3,586 | 32,952 |
| 115,009 | 127 | 23,969 | 5,439 | 3,587 | 33,122 |
| 115,010 | 125 | 23,933 | 5,413 | 3,575 | 33,046 |
| 115,011 | 130 | 24,126 | 5,446 | 3,599 | 33,301 |
| 115,012 | 129 | 24,024 | 5,432 | 3,571 | 33,156 |
| 115,013 | 126 | 24,073 | 5,458 | 3,591 | 33,248 |
| 115,014 | 128 | 24,387 | 5,527 | 3,611 | 33,653 |
| 115,015 | 130 | 24,111 | 5,452 | 3,571 | 33,264 |
| 115,016 | 129 | 24,057 | 5,453 | 3,563 | 33,202 |
| 115,017 | 128 | 24,014 | 5,467 | 3,562 | 33,171 |
| 115,018 | 132 | 24,177 | 5,563 | 3,632 | 33,504 |
| 115,019 | 132 | 23,950 | 5,550 | 3,593 | 33,225 |
| 115,020 | 130 | 24,201 | 5,604 | 3,625 | 33,560 |
| 115,021 | 133 | 24,468 | 5,611 | 3,649 | 33,861 |
| 115,022 | 134 | 24,582 | 5,596 | 3,647 | 33,959 |
| 115,023 | 137 | 24,569 | 5,595 | 3,645 | 33,946 |
| 115,024 | 130 | 24,595 | 5,590 | 3,650 | 33,965 |
| 115,025 | 127 | 24,456 | 5,548 | 3,617 | 33,748 |
| 115,026 | 132 | 24,465 | 5,600 | 3,614 | 33,811 |
| 115,027 | 134 | 24,244 | 5,533 | 3,559 | 33,470 |
| 115,028 | 135 | 24,270 | 5,550 | 3,546 | 33,501 |
| 115,029 | 138 | 23,986 | 5,509 | 3,499 | 33,132 |
| 115,030 | 141 | 23,739 | 5,496 | 3,489 | 32,865 |
| 115,031 | 138 | 24,303 | 5,629 | 3,587 | 33,657 |

|         |     |        |       |       |        |
|---------|-----|--------|-------|-------|--------|
| 115,032 | 144 | 24,521 | 5,680 | 3,608 | 33,953 |
| 115,033 | 140 | 24,267 | 5,644 | 3,583 | 33,634 |
| 115,034 | 146 | 24,215 | 5,652 | 3,574 | 33,587 |
| 115,035 | 143 | 23,949 | 5,590 | 3,546 | 33,228 |
| 115,036 | 145 | 24,141 | 5,648 | 3,601 | 33,535 |
| 115,037 | 145 | 23,822 | 5,599 | 3,581 | 33,147 |
| 115,038 | 144 | 23,626 | 5,581 | 3,563 | 32,914 |
| 115,039 | 142 | 24,348 | 5,798 | 3,687 | 33,975 |
| 115,040 | 147 | 24,308 | 5,798 | 3,673 | 33,926 |
| 115,041 | 151 | 24,231 | 5,818 | 3,694 | 33,894 |
| 115,042 | 151 | 23,953 | 5,756 | 3,661 | 33,521 |
| 115,043 | 155 | 23,719 | 5,722 | 3,625 | 33,221 |
| 115,044 | 155 | 23,482 | 5,683 | 3,573 | 32,893 |
| 115,045 | 160 | 23,534 | 5,732 | 3,597 | 33,023 |
| 115,046 | 159 | 23,217 | 5,651 | 3,535 | 32,562 |
| 115,047 | 161 | 23,274 | 5,636 | 3,514 | 32,585 |
| 115,048 | 163 | 23,444 | 5,670 | 3,537 | 32,814 |
| 115,049 | 161 | 22,394 | 5,407 | 3,350 | 31,312 |
| 115,050 | 161 | 22,637 | 5,457 | 3,382 | 31,637 |
| 115,051 | 163 | 22,927 | 5,552 | 3,414 | 32,056 |
| 115,052 | 168 | 23,027 | 5,552 | 3,418 | 32,165 |
| 115,053 | 167 | 23,159 | 5,548 | 3,409 | 32,283 |
| 115,054 | 167 | 23,592 | 5,624 | 3,473 | 32,856 |
| 115,055 | 167 | 23,752 | 5,625 | 3,491 | 33,035 |
| 115,056 | 164 | 23,524 | 5,569 | 3,463 | 32,720 |
| 115,057 | 165 | 23,553 | 5,578 | 3,451 | 32,747 |
| 115,058 | 163 | 23,318 | 5,605 | 3,459 | 32,545 |
| 115,059 | 163 | 23,304 | 5,600 | 3,467 | 32,534 |
| 115,060 | 156 | 23,317 | 5,627 | 3,480 | 32,580 |
| 115,061 | 160 | 23,133 | 5,601 | 3,457 | 32,351 |
| 115,062 | 156 | 23,016 | 5,592 | 3,448 | 32,212 |
| 115,063 | 156 | 23,507 | 5,643 | 3,519 | 32,825 |

|         |     |        |       |       |        |
|---------|-----|--------|-------|-------|--------|
| 115,064 | 157 | 23,689 | 5,690 | 3,558 | 33,094 |
| 115,065 | 153 | 23,411 | 5,676 | 3,570 | 32,810 |
| 115,066 | 153 | 23,199 | 5,582 | 3,538 | 32,472 |
| 115,067 | 155 | 23,335 | 5,636 | 3,570 | 32,696 |
| 115,068 | 159 | 23,275 | 5,643 | 3,538 | 32,615 |
| 115,069 | 164 | 23,396 | 5,673 | 3,536 | 32,769 |
| 115,070 | 169 | 23,542 | 5,696 | 3,564 | 32,971 |
| 115,071 | 175 | 23,481 | 5,676 | 3,564 | 32,896 |
| 115,072 | 174 | 22,935 | 5,612 | 3,477 | 32,198 |
| 115,073 | 172 | 22,556 | 5,549 | 3,437 | 31,714 |
| 115,074 | 167 | 22,806 | 5,628 | 3,501 | 32,102 |
| 115,075 | 166 | 22,681 | 5,612 | 3,491 | 31,950 |
| 115,076 | 162 | 22,638 | 5,599 | 3,480 | 31,879 |
| 115,077 | 162 | 22,489 | 5,581 | 3,471 | 31,703 |
| 115,078 | 160 | 22,720 | 5,623 | 3,508 | 32,011 |
| 115,079 | 160 | 22,569 | 5,556 | 3,479 | 31,764 |
| 115,080 | 156 | 22,652 | 5,548 | 3,480 | 31,836 |
| 115,081 | 161 | 23,088 | 5,669 | 3,529 | 32,447 |
| 115,082 | 158 | 23,101 | 5,647 | 3,526 | 32,432 |
| 115,083 | 153 | 23,133 | 5,637 | 3,537 | 32,460 |
| 115,084 | 155 | 23,428 | 5,694 | 3,563 | 32,840 |
| 115,085 | 156 | 23,359 | 5,710 | 3,555 | 32,780 |
| 115,086 | 156 | 23,077 | 5,675 | 3,527 | 32,435 |
| 115,087 | 158 | 23,652 | 5,785 | 3,616 | 33,211 |
| 115,088 | 157 | 23,699 | 5,767 | 3,641 | 33,264 |
| 115,089 | 155 | 23,474 | 5,689 | 3,609 | 32,927 |
| 115,090 | 152 | 23,447 | 5,726 | 3,625 | 32,950 |
| 115,091 | 150 | 23,242 | 5,740 | 3,617 | 32,749 |
| 115,092 | 147 | 23,269 | 5,723 | 3,607 | 32,746 |
| 115,093 | 140 | 23,018 | 5,675 | 3,563 | 32,396 |
| 115,094 | 138 | 23,149 | 5,726 | 3,591 | 32,604 |
| 115,095 | 139 | 22,853 | 5,659 | 3,565 | 32,216 |

|         |     |        |       |       |        |
|---------|-----|--------|-------|-------|--------|
| 115,096 | 145 | 23,186 | 5,733 | 3,605 | 32,669 |
| 115,097 | 145 | 22,803 | 5,657 | 3,561 | 32,166 |
| 115,098 | 145 | 22,785 | 5,645 | 3,568 | 32,143 |
| 115,099 | 147 | 22,689 | 5,662 | 3,587 | 32,085 |
| 115,100 | 144 | 22,561 | 5,691 | 3,605 | 32,001 |
| 115,101 | 140 | 22,365 | 5,687 | 3,624 | 31,816 |
| 115,102 | 144 | 22,420 | 5,698 | 3,657 | 31,919 |
| 115,103 | 137 | 22,238 | 5,673 | 3,648 | 31,696 |
| 115,104 | 139 | 22,167 | 5,685 | 3,660 | 31,651 |
| 115,105 | 138 | 22,049 | 5,692 | 3,671 | 31,550 |
| 115,106 | 137 | 22,088 | 5,710 | 3,688 | 31,623 |
| 115,107 | 133 | 22,279 | 5,708 | 3,695 | 31,815 |
| 115,108 | 130 | 22,369 | 5,654 | 3,696 | 31,849 |
| 115,109 | 133 | 22,730 | 5,736 | 3,746 | 32,345 |
| 115,110 | 133 | 22,664 | 5,702 | 3,717 | 32,216 |
| 115,111 | 135 | 22,953 | 5,752 | 3,733 | 32,573 |
| 115,112 | 134 | 22,984 | 5,782 | 3,755 | 32,655 |
| 115,113 | 137 | 22,833 | 5,774 | 3,754 | 32,498 |
| 115,114 | 135 | 22,591 | 5,742 | 3,696 | 32,164 |
| 115,115 | 134 | 22,503 | 5,704 | 3,681 | 32,022 |
| 115,116 | 132 | 22,266 | 5,656 | 3,639 | 31,693 |
| 115,117 | 133 | 22,551 | 5,701 | 3,654 | 32,039 |
| 115,118 | 131 | 22,796 | 5,747 | 3,707 | 32,381 |
| 115,119 | 122 | 22,948 | 5,749 | 3,720 | 32,539 |
| 115,120 | 116 | 22,665 | 5,700 | 3,694 | 32,175 |
| 115,121 | 111 | 22,851 | 5,786 | 3,712 | 32,460 |
| 115,122 | 106 | 22,881 | 5,797 | 3,715 | 32,499 |
| 115,123 | 98  | 22,962 | 5,763 | 3,712 | 32,535 |
| 115,124 | 108 | 22,981 | 5,770 | 3,700 | 32,559 |
| 115,125 | 107 | 22,934 | 5,718 | 3,660 | 32,419 |
| 115,126 | 111 | 23,150 | 5,726 | 3,669 | 32,656 |
| 115,127 | 119 | 23,384 | 5,773 | 3,717 | 32,993 |

|         |     |        |       |       |        |
|---------|-----|--------|-------|-------|--------|
| 115,128 | 127 | 23,121 | 5,737 | 3,677 | 32,662 |
| 115,129 | 124 | 22,875 | 5,687 | 3,647 | 32,333 |
| 115,130 | 131 | 23,100 | 5,793 | 3,718 | 32,742 |
| 115,131 | 136 | 23,092 | 5,796 | 3,719 | 32,743 |
| 115,132 | 137 | 22,751 | 5,687 | 3,682 | 32,257 |
| 115,133 | 136 | 22,442 | 5,620 | 3,629 | 31,827 |
| 115,134 | 138 | 22,792 | 5,679 | 3,656 | 32,265 |
| 115,135 | 136 | 22,504 | 5,608 | 3,608 | 31,856 |
| 115,136 | 131 | 22,513 | 5,599 | 3,609 | 31,852 |
| 115,137 | 130 | 22,653 | 5,591 | 3,610 | 31,984 |
| 115,138 | 138 | 23,002 | 5,711 | 3,656 | 32,507 |
| 115,139 | 138 | 22,806 | 5,660 | 3,580 | 32,184 |
| 115,140 | 141 | 22,911 | 5,640 | 3,558 | 32,250 |
| 115,141 | 146 | 23,238 | 5,699 | 3,595 | 32,678 |
| 115,142 | 148 | 23,120 | 5,633 | 3,559 | 32,460 |
| 115,143 | 147 | 23,187 | 5,641 | 3,569 | 32,544 |
| 115,144 | 145 | 23,329 | 5,594 | 3,579 | 32,647 |
| 115,145 | 145 | 23,179 | 5,578 | 3,554 | 32,456 |
| 115,146 | 142 | 23,499 | 5,649 | 3,574 | 32,864 |
| 115,147 | 146 | 23,250 | 5,594 | 3,543 | 32,533 |
| 115,148 | 142 | 23,064 | 5,578 | 3,518 | 32,302 |
| 115,149 | 153 | 23,442 | 5,654 | 3,566 | 32,815 |
| 115,150 | 152 | 23,411 | 5,627 | 3,545 | 32,735 |
| 115,151 | 156 | 23,019 | 5,480 | 3,433 | 32,088 |
| 115,152 | 156 | 23,065 | 5,468 | 3,428 | 32,117 |
| 115,153 | 153 | 22,916 | 5,414 | 3,388 | 31,871 |
| 115,154 | 152 | 22,756 | 5,354 | 3,365 | 31,627 |
| 115,155 | 168 | 23,309 | 5,577 | 3,459 | 32,513 |
| 115,156 | 170 | 23,408 | 5,592 | 3,435 | 32,605 |
| 115,157 | 169 | 23,365 | 5,592 | 3,430 | 32,556 |
| 115,158 | 169 | 22,854 | 5,555 | 3,388 | 31,966 |
| 115,159 | 171 | 23,163 | 5,615 | 3,412 | 32,361 |

|         |     |        |       |       |        |
|---------|-----|--------|-------|-------|--------|
| 115,160 | 169 | 23,128 | 5,613 | 3,417 | 32,327 |
| 115,161 | 172 | 23,132 | 5,620 | 3,421 | 32,345 |
| 115,162 | 174 | 23,122 | 5,625 | 3,432 | 32,353 |
| 115,163 | 175 | 23,032 | 5,604 | 3,401 | 32,212 |
| 115,164 | 171 | 22,848 | 5,551 | 3,361 | 31,931 |
| 115,165 | 174 | 22,666 | 5,503 | 3,359 | 31,702 |
| 115,166 | 176 | 22,645 | 5,480 | 3,345 | 31,646 |
| 115,167 | 177 | 22,670 | 5,444 | 3,341 | 31,632 |
| 115,168 | 176 | 22,563 | 5,419 | 3,328 | 31,486 |
| 115,169 | 180 | 22,739 | 5,446 | 3,337 | 31,702 |
| 115,170 | 182 | 22,648 | 5,414 | 3,345 | 31,589 |
| 115,171 | 180 | 22,570 | 5,346 | 3,329 | 31,425 |
| 115,172 | 184 | 22,624 | 5,351 | 3,339 | 31,498 |
| 115,173 | 194 | 22,096 | 5,289 | 3,273 | 30,852 |
| 115,174 | 196 | 22,493 | 5,340 | 3,302 | 31,331 |
| 115,175 | 187 | 22,538 | 5,362 | 3,305 | 31,392 |
| 115,176 | 190 | 22,651 | 5,379 | 3,317 | 31,537 |
| 115,177 | 187 | 22,936 | 5,429 | 3,361 | 31,913 |
| 115,178 | 178 | 22,841 | 5,379 | 3,325 | 31,723 |
| 115,179 | 177 | 22,814 | 5,351 | 3,313 | 31,655 |
| 115,180 | 169 | 22,981 | 5,345 | 3,335 | 31,830 |
| 115,181 | 164 | 23,014 | 5,332 | 3,341 | 31,851 |
| 115,182 | 168 | 23,218 | 5,391 | 3,371 | 32,148 |
| 115,183 | 172 | 23,266 | 5,411 | 3,380 | 32,229 |
| 115,184 | 174 | 22,942 | 5,355 | 3,339 | 31,810 |
| 115,185 | 168 | 22,567 | 5,295 | 3,308 | 31,338 |
| 115,186 | 173 | 22,821 | 5,369 | 3,348 | 31,711 |
| 115,187 | 190 | 22,995 | 5,422 | 3,354 | 31,961 |
| 115,188 | 193 | 23,065 | 5,450 | 3,339 | 32,047 |
| 115,189 | 184 | 22,895 | 5,344 | 3,286 | 31,709 |
| 115,190 | 188 | 22,927 | 5,364 | 3,308 | 31,787 |
| 115,191 | 182 | 22,870 | 5,376 | 3,313 | 31,741 |



|         |     |        |       |       |        |
|---------|-----|--------|-------|-------|--------|
| 115,192 | 182 | 23,152 | 5,401 | 3,346 | 32,081 |
| 115,193 | 184 | 23,003 | 5,367 | 3,307 | 31,861 |
| 115,194 | 184 | 23,034 | 5,356 | 3,302 | 31,876 |
| 115,195 | 183 | 23,228 | 5,426 | 3,337 | 32,174 |
| 115,196 | 170 | 22,795 | 5,289 | 3,281 | 31,535 |
| 115,197 | 171 | 22,916 | 5,306 | 3,302 | 31,695 |
| 115,198 | 173 | 23,138 | 5,353 | 3,311 | 31,975 |
| 115,199 | 165 | 22,814 | 5,272 | 3,267 | 31,518 |
| 115,200 | 169 | 23,010 | 5,330 | 3,299 | 31,808 |
| 115,201 | 160 | 23,113 | 5,322 | 3,338 | 31,933 |
| 115,202 | 155 | 22,909 | 5,273 | 3,320 | 31,657 |
| 115,203 | 154 | 22,975 | 5,276 | 3,346 | 31,751 |
| 115,204 | 152 | 23,092 | 5,283 | 3,361 | 31,888 |
| 115,205 | 146 | 22,915 | 5,242 | 3,327 | 31,630 |
| 115,206 | 157 | 23,059 | 5,267 | 3,349 | 31,832 |
| 115,207 | 156 | 22,935 | 5,246 | 3,330 | 31,667 |
| 115,208 | 156 | 23,157 | 5,267 | 3,366 | 31,946 |
| 115,209 | 160 | 23,258 | 5,231 | 3,351 | 32,000 |
| 115,210 | 158 | 23,090 | 5,182 | 3,314 | 31,744 |
| 115,211 | 159 | 23,330 | 5,249 | 3,348 | 32,086 |
| 115,212 | 156 | 22,596 | 5,088 | 3,263 | 31,103 |
| 115,213 | 156 | 22,835 | 5,138 | 3,298 | 31,427 |
| 115,214 | 155 | 23,065 | 5,161 | 3,333 | 31,714 |
| 115,215 | 154 | 22,922 | 5,145 | 3,313 | 31,534 |
| 115,216 | 154 | 22,968 | 5,124 | 3,316 | 31,562 |
| 115,217 | 159 | 22,953 | 5,123 | 3,318 | 31,553 |
| 115,218 | 157 | 22,840 | 5,117 | 3,294 | 31,408 |
| 115,219 | 157 | 23,122 | 5,187 | 3,349 | 31,815 |
| 115,220 | 158 | 22,857 | 5,135 | 3,317 | 31,467 |
| 115,221 | 161 | 23,081 | 5,181 | 3,340 | 31,763 |
| 115,222 | 158 | 23,061 | 5,190 | 3,336 | 31,745 |
| 115,223 | 152 | 23,239 | 5,218 | 3,384 | 31,993 |

|         |     |        |       |       |        |
|---------|-----|--------|-------|-------|--------|
| 115,224 | 151 | 23,141 | 5,206 | 3,391 | 31,889 |
| 115,225 | 152 | 22,995 | 5,183 | 3,382 | 31,712 |
| 115,226 | 150 | 22,606 | 5,091 | 3,347 | 31,194 |
| 115,227 | 148 | 22,601 | 5,106 | 3,337 | 31,192 |
| 115,228 | 151 | 22,671 | 5,163 | 3,355 | 31,340 |
| 115,229 | 142 | 22,397 | 5,098 | 3,320 | 30,957 |
| 115,230 | 143 | 22,466 | 5,125 | 3,328 | 31,062 |
| 115,231 | 144 | 22,574 | 5,176 | 3,325 | 31,219 |
| 115,232 | 136 | 22,296 | 5,146 | 3,288 | 30,866 |
| 115,233 | 136 | 22,345 | 5,149 | 3,311 | 30,941 |
| 115,234 | 131 | 22,398 | 5,177 | 3,330 | 31,036 |
| 115,235 | 124 | 21,815 | 5,052 | 3,240 | 30,231 |
| 115,236 | 122 | 21,856 | 5,041 | 3,250 | 30,269 |
| 115,237 | 116 | 22,041 | 5,082 | 3,285 | 30,524 |
| 115,238 | 113 | 22,024 | 5,042 | 3,277 | 30,456 |
| 115,239 | 110 | 21,925 | 5,011 | 3,266 | 30,312 |
| 115,240 | 116 | 21,571 | 4,926 | 3,211 | 29,824 |
| 115,241 | 117 | 21,659 | 4,922 | 3,216 | 29,914 |
| 115,242 | 122 | 21,124 | 4,852 | 3,178 | 29,276 |
| 115,243 | 122 | 21,291 | 4,888 | 3,190 | 29,491 |
| 115,244 | 114 | 21,545 | 4,942 | 3,237 | 29,838 |
| 115,245 | 117 | 21,506 | 4,921 | 3,241 | 29,785 |
| 115,246 | 124 | 21,402 | 4,905 | 3,224 | 29,655 |
| 115,247 | 126 | 21,382 | 4,868 | 3,213 | 29,589 |
| 115,248 | 126 | 21,328 | 4,860 | 3,200 | 29,514 |
| 115,249 | 121 | 21,463 | 4,903 | 3,221 | 29,708 |
| 115,250 | 120 | 21,383 | 4,875 | 3,189 | 29,567 |
| 115,251 | 123 | 21,674 | 4,917 | 3,215 | 29,929 |
| 115,252 | 127 | 21,677 | 4,920 | 3,205 | 29,929 |
| 115,253 | 127 | 21,673 | 4,902 | 3,208 | 29,910 |
| 115,254 | 128 | 21,902 | 4,956 | 3,207 | 30,193 |
| 115,255 | 129 | 21,952 | 4,948 | 3,193 | 30,222 |

|         |     |        |       |       |        |
|---------|-----|--------|-------|-------|--------|
| 115,256 | 120 | 22,311 | 5,030 | 3,235 | 30,696 |
| 115,257 | 120 | 22,352 | 5,001 | 3,239 | 30,712 |
| 115,258 | 122 | 22,446 | 5,076 | 3,295 | 30,939 |
| 115,259 | 125 | 22,326 | 5,115 | 3,300 | 30,866 |
| 115,260 | 121 | 21,981 | 5,084 | 3,277 | 30,463 |
| 115,261 | 125 | 21,967 | 5,072 | 3,278 | 30,442 |
| 115,262 | 132 | 22,245 | 5,117 | 3,322 | 30,816 |
| 115,263 | 130 | 22,201 | 5,121 | 3,317 | 30,769 |
| 115,264 | 128 | 22,220 | 5,128 | 3,331 | 30,807 |
| 115,265 | 127 | 22,087 | 5,102 | 3,304 | 30,620 |
| 115,266 | 127 | 22,178 | 5,100 | 3,309 | 30,714 |
| 115,267 | 127 | 22,240 | 5,137 | 3,312 | 30,816 |
| 115,268 | 129 | 22,181 | 5,137 | 3,311 | 30,758 |
| 115,269 | 127 | 22,323 | 5,194 | 3,340 | 30,984 |
| 115,270 | 128 | 22,042 | 5,144 | 3,300 | 30,614 |
| 115,271 | 128 | 22,165 | 5,198 | 3,322 | 30,813 |
| 115,272 | 128 | 22,161 | 5,197 | 3,315 | 30,801 |
| 115,273 | 129 | 22,041 | 5,147 | 3,276 | 30,593 |
| 115,274 | 132 | 22,298 | 5,197 | 3,305 | 30,932 |
| 115,275 | 132 | 22,380 | 5,219 | 3,292 | 31,023 |
| 115,276 | 128 | 22,068 | 5,155 | 3,257 | 30,608 |
| 115,277 | 131 | 22,202 | 5,193 | 3,280 | 30,806 |
| 115,278 | 139 | 22,455 | 5,262 | 3,318 | 31,174 |
| 115,279 | 141 | 22,816 | 5,333 | 3,348 | 31,638 |
| 115,280 | 141 | 22,917 | 5,388 | 3,383 | 31,829 |
| 115,281 | 145 | 22,885 | 5,377 | 3,418 | 31,825 |
| 115,282 | 142 | 22,975 | 5,375 | 3,424 | 31,916 |
| 115,283 | 145 | 22,751 | 5,324 | 3,375 | 31,595 |
| 115,284 | 147 | 22,878 | 5,325 | 3,377 | 31,727 |
| 115,285 | 147 | 23,050 | 5,355 | 3,395 | 31,947 |
| 115,286 | 159 | 22,885 | 5,320 | 3,348 | 31,712 |
| 115,287 | 162 | 23,256 | 5,394 | 3,381 | 32,193 |

|         |     |        |       |       |        |
|---------|-----|--------|-------|-------|--------|
| 115,288 | 159 | 23,289 | 5,390 | 3,383 | 32,221 |
| 115,289 | 160 | 23,388 | 5,447 | 3,408 | 32,403 |
| 115,290 | 162 | 23,282 | 5,422 | 3,407 | 32,273 |
| 115,291 | 161 | 22,983 | 5,351 | 3,370 | 31,865 |
| 115,292 | 160 | 22,765 | 5,313 | 3,353 | 31,591 |
| 115,293 | 153 | 22,866 | 5,368 | 3,360 | 31,747 |
| 115,294 | 154 | 22,628 | 5,325 | 3,330 | 31,437 |
| 115,295 | 156 | 22,478 | 5,288 | 3,285 | 31,207 |
| 115,296 | 155 | 22,484 | 5,293 | 3,277 | 31,209 |
| 115,297 | 149 | 22,546 | 5,305 | 3,292 | 31,292 |
| 115,298 | 148 | 22,410 | 5,309 | 3,274 | 31,141 |
| 115,299 | 148 | 22,340 | 5,317 | 3,275 | 31,080 |
| 115,300 | 151 | 22,346 | 5,341 | 3,304 | 31,142 |
| 115,301 | 157 | 22,094 | 5,287 | 3,278 | 30,816 |
| 115,302 | 152 | 21,800 | 5,238 | 3,256 | 30,446 |
| 115,303 | 153 | 21,855 | 5,274 | 3,266 | 30,548 |
| 115,304 | 155 | 21,671 | 5,275 | 3,263 | 30,364 |
| 115,305 | 154 | 20,798 | 5,142 | 3,149 | 29,243 |
| 115,306 | 157 | 21,014 | 5,177 | 3,162 | 29,510 |
| 115,307 | 156 | 21,286 | 5,225 | 3,202 | 29,869 |
| 115,308 | 155 | 21,289 | 5,209 | 3,197 | 29,850 |
| 115,309 | 158 | 21,372 | 5,196 | 3,177 | 29,903 |
| 115,310 | 160 | 21,035 | 5,118 | 3,122 | 29,435 |
| 115,311 | 162 | 21,148 | 5,124 | 3,118 | 29,552 |
| 115,312 | 164 | 20,816 | 5,072 | 3,069 | 29,121 |
| 115,313 | 158 | 20,607 | 5,023 | 3,018 | 28,806 |
| 115,314 | 157 | 21,359 | 5,191 | 3,172 | 29,879 |
| 115,315 | 169 | 21,356 | 5,193 | 3,158 | 29,876 |
| 115,316 | 168 | 21,120 | 5,178 | 3,135 | 29,601 |
| 115,317 | 165 | 21,306 | 5,271 | 3,191 | 29,933 |
| 115,318 | 169 | 21,369 | 5,270 | 3,183 | 29,991 |
| 115,319 | 169 | 21,340 | 5,297 | 3,193 | 29,999 |

|         |     |        |       |       |        |
|---------|-----|--------|-------|-------|--------|
| 115,320 | 168 | 21,365 | 5,251 | 3,193 | 29,977 |
| 115,321 | 174 | 21,396 | 5,228 | 3,191 | 29,989 |
| 115,322 | 175 | 21,341 | 5,222 | 3,190 | 29,928 |
| 115,323 | 175 | 21,328 | 5,238 | 3,192 | 29,933 |
| 115,324 | 179 | 21,199 | 5,242 | 3,169 | 29,789 |
| 115,325 | 182 | 21,109 | 5,240 | 3,165 | 29,696 |
| 115,326 | 180 | 21,066 | 5,253 | 3,177 | 29,676 |
| 115,327 | 188 | 21,307 | 5,338 | 3,246 | 30,079 |
| 115,328 | 197 | 21,187 | 5,320 | 3,224 | 29,928 |
| 115,329 | 193 | 21,055 | 5,286 | 3,226 | 29,760 |
| 115,330 | 195 | 21,162 | 5,308 | 3,238 | 29,903 |
| 115,331 | 194 | 21,093 | 5,327 | 3,238 | 29,852 |
| 115,332 | 199 | 20,845 | 5,304 | 3,209 | 29,557 |
| 115,333 | 200 | 21,099 | 5,366 | 3,244 | 29,909 |
| 115,334 | 197 | 21,066 | 5,388 | 3,251 | 29,902 |
| 115,335 | 203 | 20,901 | 5,383 | 3,258 | 29,745 |
| 115,336 | 204 | 20,989 | 5,421 | 3,284 | 29,898 |
| 115,337 | 196 | 21,143 | 5,469 | 3,335 | 30,143 |
| 115,338 | 194 | 21,219 | 5,521 | 3,378 | 30,312 |
| 115,339 | 192 | 21,055 | 5,488 | 3,342 | 30,077 |
| 115,340 | 189 | 20,807 | 5,450 | 3,317 | 29,763 |
| 115,341 | 187 | 20,597 | 5,445 | 3,292 | 29,521 |
| 115,342 | 192 | 21,312 | 5,632 | 3,402 | 30,538 |
| 115,343 | 193 | 21,059 | 5,590 | 3,359 | 30,201 |
| 115,344 | 200 | 21,607 | 5,652 | 3,404 | 30,863 |
| 115,345 | 199 | 21,555 | 5,644 | 3,420 | 30,818 |
| 115,346 | 198 | 21,528 | 5,645 | 3,429 | 30,800 |
| 115,347 | 200 | 21,968 | 5,785 | 3,492 | 31,445 |
| 115,348 | 203 | 21,936 | 5,748 | 3,491 | 31,378 |
| 115,349 | 204 | 21,937 | 5,734 | 3,492 | 31,367 |
| 115,350 | 215 | 22,562 | 5,831 | 3,536 | 32,144 |
| 115,351 | 213 | 22,404 | 5,782 | 3,511 | 31,910 |

|         |     |        |       |       |        |
|---------|-----|--------|-------|-------|--------|
| 115,352 | 206 | 22,084 | 5,757 | 3,493 | 31,540 |
| 115,353 | 208 | 22,543 | 5,853 | 3,552 | 32,156 |
| 115,354 | 200 | 22,322 | 5,731 | 3,493 | 31,746 |
| 115,355 | 203 | 22,473 | 5,795 | 3,518 | 31,989 |
| 115,356 | 204 | 22,321 | 5,781 | 3,530 | 31,836 |
| 115,357 | 203 | 22,203 | 5,765 | 3,545 | 31,716 |
| 115,358 | 207 | 22,075 | 5,745 | 3,545 | 31,572 |
| 115,359 | 208 | 22,107 | 5,772 | 3,552 | 31,639 |
| 115,360 | 214 | 22,050 | 5,722 | 3,538 | 31,524 |
| 115,361 | 215 | 22,127 | 5,755 | 3,543 | 31,640 |
| 115,362 | 225 | 22,354 | 5,803 | 3,571 | 31,953 |
| 115,363 | 222 | 22,343 | 5,821 | 3,578 | 31,964 |
| 115,364 | 222 | 22,098 | 5,784 | 3,556 | 31,660 |
| 115,365 | 231 | 22,172 | 5,817 | 3,574 | 31,794 |
| 115,366 | 224 | 22,125 | 5,749 | 3,550 | 31,648 |
| 115,367 | 226 | 22,140 | 5,740 | 3,546 | 31,652 |
| 115,368 | 227 | 22,149 | 5,740 | 3,556 | 31,672 |
| 115,369 | 221 | 22,425 | 5,768 | 3,604 | 32,018 |
| 115,370 | 220 | 22,226 | 5,727 | 3,579 | 31,752 |
| 115,371 | 223 | 22,402 | 5,772 | 3,602 | 31,999 |
| 115,372 | 222 | 22,677 | 5,822 | 3,631 | 32,352 |
| 115,373 | 222 | 22,656 | 5,829 | 3,647 | 32,354 |
| 115,374 | 216 | 22,742 | 5,831 | 3,667 | 32,456 |
| 115,375 | 213 | 23,089 | 5,903 | 3,750 | 32,955 |
| 115,376 | 208 | 22,910 | 5,865 | 3,725 | 32,708 |
| 115,377 | 199 | 22,597 | 5,764 | 3,656 | 32,216 |
| 115,378 | 191 | 22,427 | 5,704 | 3,625 | 31,947 |
| 115,379 | 190 | 22,469 | 5,709 | 3,642 | 32,010 |
| 115,380 | 191 | 22,338 | 5,670 | 3,600 | 31,799 |
| 115,381 | 187 | 21,984 | 5,561 | 3,526 | 31,258 |
| 115,382 | 186 | 22,111 | 5,607 | 3,552 | 31,456 |
| 115,383 | 187 | 22,375 | 5,690 | 3,583 | 31,835 |

|         |     |        |       |       |        |
|---------|-----|--------|-------|-------|--------|
| 115,384 | 189 | 22,248 | 5,694 | 3,583 | 31,714 |
| 115,385 | 184 | 22,099 | 5,650 | 3,565 | 31,498 |
| 115,386 | 179 | 21,973 | 5,664 | 3,566 | 31,382 |
| 115,387 | 180 | 21,911 | 5,691 | 3,556 | 31,338 |
| 115,388 | 181 | 21,635 | 5,615 | 3,496 | 30,927 |
| 115,389 | 192 | 21,710 | 5,660 | 3,522 | 31,084 |
| 115,390 | 186 | 21,755 | 5,759 | 3,581 | 31,281 |
| 115,391 | 186 | 21,790 | 5,844 | 3,598 | 31,418 |
| 115,392 | 191 | 21,725 | 5,836 | 3,603 | 31,355 |
| 115,393 | 202 | 22,035 | 5,924 | 3,649 | 31,810 |
| 115,394 | 207 | 22,056 | 5,989 | 3,671 | 31,923 |
| 115,395 | 200 | 21,938 | 5,993 | 3,652 | 31,783 |
| 115,396 | 211 | 21,964 | 6,019 | 3,617 | 31,811 |
| 115,397 | 215 | 21,961 | 6,083 | 3,639 | 31,898 |
| 115,398 | 217 | 22,236 | 6,109 | 3,644 | 32,206 |
| 115,399 | 218 | 22,266 | 6,185 | 3,634 | 32,303 |
| 115,400 | 215 | 22,179 | 6,189 | 3,638 | 32,221 |
| 115,401 | 206 | 22,167 | 6,243 | 3,643 | 32,259 |
| 115,402 | 208 | 22,393 | 6,262 | 3,640 | 32,503 |
| 115,403 | 210 | 22,417 | 6,292 | 3,640 | 32,559 |
| 115,404 | 211 | 22,411 | 6,339 | 3,659 | 32,620 |
| 115,405 | 214 | 22,574 | 6,387 | 3,678 | 32,853 |
| 115,406 | 218 | 22,595 | 6,409 | 3,676 | 32,898 |
| 115,407 | 217 | 22,714 | 6,422 | 3,664 | 33,017 |
| 115,408 | 223 | 22,772 | 6,503 | 3,672 | 33,170 |
| 115,409 | 223 | 22,456 | 6,424 | 3,616 | 32,719 |
| 115,410 | 223 | 22,481 | 6,451 | 3,615 | 32,770 |
| 115,411 | 218 | 22,502 | 6,527 | 3,654 | 32,901 |
| 115,412 | 225 | 22,432 | 6,528 | 3,641 | 32,826 |
| 115,413 | 214 | 22,173 | 6,456 | 3,606 | 32,449 |
| 115,414 | 213 | 22,190 | 6,462 | 3,585 | 32,450 |
| 115,415 | 212 | 22,221 | 6,479 | 3,576 | 32,488 |

|         |     |        |       |       |        |
|---------|-----|--------|-------|-------|--------|
| 115,416 | 203 | 22,248 | 6,505 | 3,606 | 32,562 |
| 115,417 | 198 | 22,259 | 6,538 | 3,628 | 32,623 |
| 115,418 | 197 | 22,204 | 6,554 | 3,632 | 32,587 |
| 115,419 | 198 | 22,084 | 6,569 | 3,627 | 32,478 |
| 115,420 | 204 | 22,210 | 6,677 | 3,655 | 32,746 |
| 115,421 | 203 | 22,228 | 6,686 | 3,642 | 32,759 |
| 115,422 | 202 | 22,194 | 6,713 | 3,645 | 32,754 |
| 115,423 | 209 | 22,252 | 6,757 | 3,682 | 32,900 |
| 115,424 | 216 | 22,262 | 6,805 | 3,676 | 32,959 |
| 115,425 | 219 | 22,226 | 6,760 | 3,619 | 32,824 |
| 115,426 | 223 | 22,183 | 6,724 | 3,589 | 32,719 |
| 115,427 | 227 | 22,156 | 6,718 | 3,574 | 32,675 |
| 115,428 | 228 | 22,255 | 6,762 | 3,580 | 32,825 |
| 115,429 | 229 | 22,269 | 6,703 | 3,555 | 32,756 |
| 115,430 | 236 | 22,407 | 6,745 | 3,598 | 32,986 |
| 115,431 | 230 | 22,263 | 6,678 | 3,572 | 32,743 |
| 115,432 | 232 | 22,483 | 6,673 | 3,572 | 32,960 |
| 115,433 | 232 | 22,456 | 6,630 | 3,558 | 32,876 |
| 115,434 | 232 | 22,470 | 6,622 | 3,565 | 32,889 |
| 115,435 | 230 | 22,605 | 6,605 | 3,539 | 32,979 |
| 115,436 | 236 | 22,912 | 6,679 | 3,539 | 33,366 |
| 115,437 | 235 | 22,790 | 6,610 | 3,513 | 33,148 |
| 115,438 | 236 | 22,750 | 6,468 | 3,430 | 32,884 |
| 115,439 | 236 | 23,019 | 6,559 | 3,467 | 33,281 |
| 115,440 | 229 | 23,366 | 6,652 | 3,520 | 33,767 |
| 115,441 | 226 | 23,099 | 6,481 | 3,459 | 33,265 |
| 115,442 | 227 | 23,327 | 6,521 | 3,487 | 33,562 |
| 115,443 | 221 | 23,635 | 6,607 | 3,522 | 33,985 |
| 115,444 | 210 | 23,731 | 6,579 | 3,510 | 34,030 |
| 115,445 | 208 | 23,680 | 6,538 | 3,509 | 33,935 |
| 115,446 | 201 | 23,541 | 6,480 | 3,504 | 33,726 |
| 115,447 | 199 | 23,161 | 6,385 | 3,483 | 33,228 |



|         |     |        |       |       |        |
|---------|-----|--------|-------|-------|--------|
| 115,448 | 197 | 23,211 | 6,385 | 3,485 | 33,278 |
| 115,449 | 190 | 22,989 | 6,338 | 3,481 | 32,998 |
| 115,450 | 194 | 23,057 | 6,397 | 3,528 | 33,176 |
| 115,451 | 194 | 22,738 | 6,275 | 3,485 | 32,692 |
| 115,452 | 193 | 22,732 | 6,271 | 3,498 | 32,694 |
| 115,453 | 190 | 22,684 | 6,249 | 3,488 | 32,611 |
| 115,454 | 193 | 22,755 | 6,265 | 3,505 | 32,718 |
| 115,455 | 193 | 22,791 | 6,259 | 3,503 | 32,746 |
| 115,456 | 192 | 22,894 | 6,281 | 3,525 | 32,892 |
| 115,457 | 185 | 22,868 | 6,295 | 3,534 | 32,882 |
| 115,458 | 184 | 22,990 | 6,299 | 3,557 | 33,030 |
| 115,459 | 170 | 22,912 | 6,211 | 3,539 | 32,832 |
| 115,460 | 173 | 23,021 | 6,237 | 3,569 | 33,000 |
| 115,461 | 169 | 22,913 | 6,125 | 3,514 | 32,721 |
| 115,462 | 168 | 23,117 | 6,206 | 3,537 | 33,028 |
| 115,463 | 160 | 23,203 | 6,195 | 3,544 | 33,102 |
| 115,464 | 160 | 22,363 | 5,911 | 3,382 | 31,816 |
| 115,465 | 160 | 22,541 | 5,964 | 3,395 | 32,060 |
| 115,466 | 160 | 22,645 | 6,012 | 3,421 | 32,238 |
| 115,467 | 163 | 22,471 | 5,964 | 3,386 | 31,984 |
| 115,468 | 163 | 22,445 | 5,951 | 3,373 | 31,932 |
| 115,469 | 163 | 22,348 | 5,968 | 3,388 | 31,867 |
| 115,470 | 163 | 22,370 | 5,960 | 3,381 | 31,874 |
| 115,471 | 157 | 22,368 | 5,884 | 3,375 | 31,784 |
| 115,472 | 151 | 21,823 | 5,717 | 3,270 | 30,961 |
| 115,473 | 152 | 21,892 | 5,732 | 3,275 | 31,051 |
| 115,474 | 146 | 21,805 | 5,702 | 3,232 | 30,885 |
| 115,475 | 139 | 21,487 | 5,594 | 3,184 | 30,404 |
| 115,476 | 139 | 21,306 | 5,590 | 3,194 | 30,229 |
| 115,477 | 130 | 20,955 | 5,505 | 3,164 | 29,754 |
| 115,478 | 131 | 20,966 | 5,513 | 3,169 | 29,779 |
| 115,479 | 126 | 21,104 | 5,544 | 3,210 | 29,984 |

|         |     |        |       |       |        |
|---------|-----|--------|-------|-------|--------|
| 115,480 | 124 | 20,802 | 5,486 | 3,179 | 29,591 |
| 115,481 | 117 | 20,811 | 5,471 | 3,169 | 29,568 |
| 115,482 | 117 | 20,747 | 5,473 | 3,168 | 29,505 |
| 115,483 | 115 | 20,585 | 5,460 | 3,182 | 29,342 |
| 115,484 | 110 | 19,885 | 5,319 | 3,112 | 28,426 |
| 115,485 | 110 | 20,073 | 5,378 | 3,126 | 28,687 |
| 115,486 | 110 | 20,233 | 5,429 | 3,180 | 28,952 |
| 115,487 | 104 | 20,051 | 5,427 | 3,197 | 28,779 |
| 115,488 | 104 | 19,823 | 5,362 | 3,168 | 28,457 |
| 115,489 | 99  | 19,720 | 5,345 | 3,162 | 28,326 |
| 115,490 | 103 | 19,666 | 5,326 | 3,170 | 28,265 |
| 115,491 | 102 | 19,555 | 5,281 | 3,151 | 28,089 |
| 115,492 | 102 | 19,219 | 5,215 | 3,090 | 27,626 |
| 115,493 | 102 | 19,208 | 5,204 | 3,091 | 27,605 |
| 115,494 | 99  | 19,054 | 5,189 | 3,073 | 27,415 |
| 115,495 | 104 | 19,146 | 5,263 | 3,117 | 27,630 |
| 115,496 | 103 | 19,136 | 5,267 | 3,101 | 27,607 |
| 115,497 | 98  | 18,920 | 5,190 | 3,062 | 27,270 |
| 115,498 | 101 | 19,237 | 5,238 | 3,092 | 27,668 |
| 115,499 | 100 | 19,201 | 5,221 | 3,093 | 27,615 |
| 115,500 | 98  | 19,357 | 5,220 | 3,116 | 27,791 |
| 115,501 | 99  | 19,371 | 5,202 | 3,097 | 27,769 |
| 115,502 | 98  | 19,140 | 5,136 | 3,058 | 27,432 |
| 115,503 | 107 | 19,343 | 5,250 | 3,114 | 27,814 |
| 115,504 | 111 | 19,596 | 5,297 | 3,152 | 28,156 |
| 115,505 | 108 | 19,887 | 5,377 | 3,185 | 28,557 |
| 115,506 | 108 | 19,863 | 5,395 | 3,178 | 28,544 |
| 115,507 | 104 | 19,909 | 5,375 | 3,176 | 28,564 |
| 115,508 | 113 | 20,175 | 5,417 | 3,203 | 28,908 |
| 115,509 | 114 | 20,130 | 5,440 | 3,189 | 28,873 |
| 115,510 | 122 | 20,028 | 5,426 | 3,165 | 28,741 |
| 115,511 | 122 | 20,040 | 5,419 | 3,159 | 28,740 |

|         |     |        |       |       |        |
|---------|-----|--------|-------|-------|--------|
| 115,512 | 118 | 19,985 | 5,438 | 3,187 | 28,728 |
| 115,513 | 126 | 20,233 | 5,501 | 3,244 | 29,104 |
| 115,514 | 131 | 20,131 | 5,458 | 3,227 | 28,947 |
| 115,515 | 133 | 20,090 | 5,442 | 3,232 | 28,897 |
| 115,516 | 133 | 20,082 | 5,450 | 3,232 | 28,897 |
| 115,517 | 132 | 20,004 | 5,383 | 3,200 | 28,719 |
| 115,518 | 136 | 19,843 | 5,306 | 3,155 | 28,440 |
| 115,519 | 140 | 20,193 | 5,372 | 3,176 | 28,881 |
| 115,520 | 144 | 20,560 | 5,474 | 3,226 | 29,404 |
| 115,521 | 147 | 20,629 | 5,480 | 3,216 | 29,472 |
| 115,522 | 147 | 20,617 | 5,477 | 3,216 | 29,457 |
| 115,523 | 148 | 20,885 | 5,560 | 3,248 | 29,841 |
| 115,524 | 152 | 21,188 | 5,589 | 3,306 | 30,235 |
| 115,525 | 151 | 21,296 | 5,681 | 3,340 | 30,468 |
| 115,526 | 153 | 21,296 | 5,726 | 3,353 | 30,528 |
| 115,527 | 155 | 21,540 | 5,779 | 3,361 | 30,835 |
| 115,528 | 158 | 21,708 | 5,826 | 3,379 | 31,071 |
| 115,529 | 160 | 21,894 | 5,868 | 3,400 | 31,322 |
| 115,530 | 159 | 21,881 | 5,879 | 3,392 | 31,311 |
| 115,531 | 163 | 22,041 | 5,961 | 3,415 | 31,580 |
| 115,532 | 164 | 21,788 | 5,944 | 3,378 | 31,274 |
| 115,533 | 165 | 21,790 | 5,942 | 3,387 | 31,284 |
| 115,534 | 165 | 21,698 | 5,944 | 3,381 | 31,188 |
| 115,535 | 171 | 21,843 | 5,982 | 3,397 | 31,393 |
| 115,536 | 173 | 21,875 | 6,038 | 3,424 | 31,510 |
| 115,537 | 174 | 21,957 | 6,044 | 3,433 | 31,608 |
| 115,538 | 174 | 21,925 | 5,979 | 3,412 | 31,490 |
| 115,539 | 177 | 22,047 | 6,017 | 3,413 | 31,654 |
| 115,540 | 185 | 22,251 | 6,072 | 3,443 | 31,951 |
| 115,541 | 181 | 22,154 | 6,029 | 3,415 | 31,779 |
| 115,542 | 183 | 22,255 | 6,122 | 3,438 | 31,998 |
| 115,543 | 187 | 22,328 | 6,152 | 3,428 | 32,095 |

|         |     |        |       |       |        |
|---------|-----|--------|-------|-------|--------|
| 115,544 | 194 | 22,423 | 6,141 | 3,447 | 32,205 |
| 115,545 | 202 | 22,623 | 6,193 | 3,500 | 32,518 |
| 115,546 | 204 | 22,711 | 6,269 | 3,547 | 32,731 |
| 115,547 | 210 | 22,691 | 6,266 | 3,580 | 32,747 |
| 115,548 | 223 | 22,786 | 6,328 | 3,600 | 32,937 |
| 115,549 | 220 | 22,582 | 6,294 | 3,585 | 32,681 |
| 115,550 | 225 | 22,637 | 6,374 | 3,617 | 32,853 |
| 115,551 | 229 | 22,917 | 6,433 | 3,656 | 33,235 |
| 115,552 | 231 | 23,389 | 6,564 | 3,757 | 33,941 |
| 115,553 | 231 | 23,122 | 6,524 | 3,732 | 33,609 |
| 115,554 | 224 | 23,306 | 6,591 | 3,769 | 33,890 |
| 115,555 | 224 | 23,788 | 6,714 | 3,862 | 34,588 |
| 115,556 | 227 | 23,855 | 6,719 | 3,889 | 34,690 |
| 115,557 | 234 | 24,019 | 6,763 | 3,910 | 34,926 |
| 115,558 | 234 | 24,017 | 6,760 | 3,909 | 34,920 |
| 115,559 | 238 | 24,220 | 6,798 | 3,943 | 35,199 |
| 115,560 | 240 | 24,655 | 6,896 | 4,008 | 35,799 |
| 115,561 | 247 | 25,126 | 7,036 | 4,059 | 36,468 |
| 115,562 | 247 | 25,492 | 7,121 | 4,117 | 36,977 |
| 115,563 | 250 | 25,430 | 7,108 | 4,109 | 36,897 |
| 115,564 | 243 | 25,389 | 7,088 | 4,106 | 36,826 |
| 115,565 | 233 | 26,011 | 7,347 | 4,177 | 37,768 |
| 115,566 | 243 | 26,134 | 7,415 | 4,210 | 38,002 |
| 115,567 | 243 | 26,152 | 7,406 | 4,232 | 38,033 |
| 115,568 | 240 | 26,377 | 7,504 | 4,298 | 38,419 |
| 115,569 | 244 | 26,615 | 7,664 | 4,346 | 38,869 |
| 115,570 | 241 | 26,501 | 7,650 | 4,361 | 38,753 |
| 115,571 | 246 | 26,637 | 7,726 | 4,391 | 39,000 |
| 115,572 | 247 | 26,709 | 7,821 | 4,458 | 39,235 |
| 115,573 | 248 | 26,856 | 7,910 | 4,508 | 39,522 |
| 115,574 | 251 | 26,950 | 7,954 | 4,549 | 39,704 |
| 115,575 | 248 | 26,988 | 7,993 | 4,586 | 39,815 |

|         |     |        |       |       |        |
|---------|-----|--------|-------|-------|--------|
| 115,576 | 249 | 26,802 | 7,924 | 4,562 | 39,537 |
| 115,577 | 249 | 26,904 | 7,933 | 4,561 | 39,647 |
| 115,578 | 245 | 26,816 | 7,948 | 4,584 | 39,593 |
| 115,579 | 244 | 26,850 | 7,984 | 4,591 | 39,669 |
| 115,580 | 242 | 26,796 | 7,983 | 4,593 | 39,614 |
| 115,581 | 250 | 26,713 | 7,962 | 4,584 | 39,509 |
| 115,582 | 249 | 26,768 | 7,938 | 4,575 | 39,530 |
| 115,583 | 251 | 26,705 | 7,919 | 4,569 | 39,444 |
| 115,584 | 250 | 26,720 | 7,926 | 4,557 | 39,453 |
| 115,585 | 244 | 26,817 | 7,931 | 4,568 | 39,560 |
| 115,586 | 247 | 26,854 | 7,966 | 4,576 | 39,643 |
| 115,587 | 249 | 26,797 | 7,928 | 4,541 | 39,515 |
| 115,588 | 257 | 26,742 | 7,927 | 4,513 | 39,439 |
| 115,589 | 255 | 26,731 | 7,909 | 4,524 | 39,419 |
| 115,590 | 257 | 26,681 | 7,937 | 4,538 | 39,413 |
| 115,591 | 251 | 26,557 | 7,898 | 4,515 | 39,221 |
| 115,592 | 246 | 26,400 | 7,847 | 4,523 | 39,016 |
| 115,593 | 257 | 26,417 | 7,816 | 4,528 | 39,018 |
| 115,594 | 250 | 26,219 | 7,762 | 4,517 | 38,748 |
| 115,595 | 251 | 26,324 | 7,844 | 4,552 | 38,971 |
| 115,596 | 250 | 26,356 | 7,848 | 4,522 | 38,976 |
| 115,597 | 247 | 26,251 | 7,767 | 4,461 | 38,726 |
| 115,598 | 244 | 26,061 | 7,728 | 4,431 | 38,464 |
| 115,599 | 227 | 25,938 | 7,678 | 4,421 | 38,264 |
| 115,600 | 230 | 25,624 | 7,653 | 4,399 | 37,906 |
| 115,601 | 233 | 25,372 | 7,571 | 4,346 | 37,522 |
| 115,602 | 226 | 25,050 | 7,503 | 4,280 | 37,059 |
| 115,603 | 226 | 24,909 | 7,483 | 4,241 | 36,859 |
| 115,604 | 230 | 24,732 | 7,411 | 4,208 | 36,581 |
| 115,605 | 230 | 24,440 | 7,342 | 4,137 | 36,149 |
| 115,606 | 232 | 24,078 | 7,251 | 4,042 | 35,603 |
| 115,607 | 230 | 24,004 | 7,235 | 4,029 | 35,498 |

|         |     |        |       |       |        |
|---------|-----|--------|-------|-------|--------|
| 115,608 | 223 | 23,875 | 7,217 | 4,013 | 35,328 |
| 115,609 | 221 | 23,711 | 7,194 | 3,990 | 35,116 |
| 115,610 | 213 | 23,173 | 7,054 | 3,918 | 34,358 |
| 115,611 | 212 | 23,048 | 7,041 | 3,915 | 34,216 |
| 115,612 | 205 | 23,007 | 7,070 | 3,927 | 34,209 |
| 115,613 | 211 | 22,865 | 7,002 | 3,860 | 33,938 |
| 115,614 | 206 | 22,578 | 6,906 | 3,813 | 33,503 |
| 115,615 | 205 | 22,332 | 6,864 | 3,775 | 33,176 |
| 115,616 | 204 | 22,068 | 6,813 | 3,769 | 32,854 |
| 115,617 | 195 | 21,901 | 6,763 | 3,750 | 32,609 |
| 115,618 | 203 | 21,941 | 6,754 | 3,750 | 32,648 |
| 115,619 | 198 | 21,492 | 6,570 | 3,675 | 31,935 |
| 115,620 | 199 | 21,530 | 6,559 | 3,670 | 31,958 |
| 115,621 | 194 | 21,530 | 6,531 | 3,666 | 31,921 |
| 115,622 | 185 | 21,483 | 6,430 | 3,609 | 31,707 |
| 115,623 | 187 | 21,499 | 6,427 | 3,605 | 31,718 |
| 115,624 | 186 | 21,363 | 6,384 | 3,582 | 31,515 |
| 115,625 | 189 | 21,257 | 6,356 | 3,548 | 31,350 |
| 115,626 | 185 | 21,223 | 6,312 | 3,507 | 31,227 |
| 115,627 | 180 | 20,944 | 6,241 | 3,464 | 30,829 |
| 115,628 | 180 | 20,882 | 6,150 | 3,443 | 30,655 |
| 115,629 | 177 | 20,955 | 6,122 | 3,434 | 30,688 |
| 115,630 | 177 | 20,666 | 6,040 | 3,390 | 30,273 |
| 115,631 | 175 | 20,769 | 6,000 | 3,366 | 30,310 |
| 115,632 | 167 | 20,485 | 5,896 | 3,322 | 29,870 |
| 115,633 | 167 | 20,485 | 5,894 | 3,325 | 29,871 |
| 115,634 | 164 | 20,413 | 5,850 | 3,286 | 29,713 |
| 115,635 | 164 | 20,382 | 5,846 | 3,274 | 29,666 |
| 115,636 | 165 | 20,581 | 5,886 | 3,275 | 29,907 |
| 115,637 | 153 | 20,071 | 5,760 | 3,223 | 29,207 |
| 115,638 | 156 | 20,234 | 5,789 | 3,256 | 29,435 |
| 115,639 | 154 | 20,506 | 5,818 | 3,305 | 29,783 |

|         |     |        |       |       |        |
|---------|-----|--------|-------|-------|--------|
| 115,640 | 150 | 20,392 | 5,809 | 3,283 | 29,634 |
| 115,641 | 147 | 20,331 | 5,772 | 3,263 | 29,513 |
| 115,642 | 151 | 20,089 | 5,708 | 3,252 | 29,200 |
| 115,643 | 148 | 19,799 | 5,596 | 3,184 | 28,727 |
| 115,644 | 149 | 19,911 | 5,616 | 3,204 | 28,880 |
| 115,645 | 146 | 20,133 | 5,649 | 3,221 | 29,149 |
| 115,646 | 142 | 19,785 | 5,523 | 3,153 | 28,603 |
| 115,647 | 142 | 19,800 | 5,521 | 3,158 | 28,621 |
| 115,648 | 134 | 19,706 | 5,490 | 3,143 | 28,473 |
| 115,649 | 134 | 19,786 | 5,475 | 3,126 | 28,521 |
| 115,650 | 123 | 19,211 | 5,176 | 2,982 | 27,492 |
| 115,651 | 122 | 19,404 | 5,212 | 3,012 | 27,750 |
| 115,652 | 123 | 19,672 | 5,275 | 3,045 | 28,115 |
| 115,653 | 122 | 19,354 | 5,169 | 3,016 | 27,661 |
| 115,654 | 123 | 19,343 | 5,171 | 3,023 | 27,660 |
| 115,655 | 117 | 19,046 | 5,084 | 2,980 | 27,227 |
| 115,656 | 115 | 18,783 | 5,020 | 2,959 | 26,877 |
| 115,657 | 129 | 19,873 | 5,246 | 3,125 | 28,373 |
| 115,658 | 138 | 19,569 | 5,153 | 3,083 | 27,943 |
| 115,659 | 138 | 19,365 | 5,066 | 3,048 | 27,617 |
| 115,660 | 136 | 19,519 | 5,083 | 3,080 | 27,818 |
| 115,661 | 137 | 19,554 | 5,073 | 3,068 | 27,832 |
| 115,662 | 144 | 19,623 | 5,086 | 3,066 | 27,919 |
| 115,663 | 135 | 19,397 | 4,957 | 3,004 | 27,493 |
| 115,664 | 134 | 19,499 | 4,978 | 3,039 | 27,650 |
| 115,665 | 134 | 19,536 | 4,986 | 3,059 | 27,715 |
| 115,666 | 139 | 19,591 | 4,941 | 3,063 | 27,734 |
| 115,667 | 136 | 19,348 | 4,864 | 3,021 | 27,369 |
| 115,668 | 136 | 19,420 | 4,924 | 3,043 | 27,523 |
| 115,669 | 131 | 19,445 | 4,922 | 3,042 | 27,540 |
| 115,670 | 127 | 19,399 | 4,960 | 3,068 | 27,554 |
| 115,671 | 129 | 19,388 | 4,961 | 3,050 | 27,528 |

|         |     |        |       |       |        |
|---------|-----|--------|-------|-------|--------|
| 115,672 | 131 | 19,427 | 4,921 | 3,048 | 27,527 |
| 115,673 | 132 | 19,678 | 4,981 | 3,092 | 27,883 |
| 115,674 | 128 | 19,479 | 4,920 | 3,048 | 27,575 |
| 115,675 | 127 | 19,532 | 4,974 | 3,085 | 27,718 |
| 115,676 | 120 | 19,556 | 4,991 | 3,102 | 27,769 |
| 115,677 | 126 | 19,496 | 4,997 | 3,086 | 27,705 |
| 115,678 | 127 | 19,524 | 5,019 | 3,099 | 27,769 |
| 115,679 | 130 | 19,546 | 5,008 | 3,093 | 27,777 |
| 115,680 | 131 | 19,403 | 4,992 | 3,077 | 27,603 |
| 115,681 | 133 | 19,682 | 5,067 | 3,104 | 27,986 |
| 115,682 | 134 | 19,533 | 5,062 | 3,099 | 27,828 |
| 115,683 | 134 | 19,452 | 5,062 | 3,104 | 27,752 |
| 115,684 | 133 | 19,379 | 5,057 | 3,127 | 27,696 |
| 115,685 | 138 | 19,393 | 5,093 | 3,155 | 27,779 |
| 115,686 | 143 | 19,522 | 5,173 | 3,206 | 28,044 |
| 115,687 | 142 | 19,561 | 5,197 | 3,226 | 28,126 |
| 115,688 | 143 | 19,514 | 5,197 | 3,226 | 28,080 |
| 115,689 | 145 | 19,598 | 5,218 | 3,224 | 28,185 |
| 115,690 | 146 | 19,606 | 5,233 | 3,213 | 28,198 |
| 115,691 | 147 | 19,801 | 5,266 | 3,236 | 28,450 |
| 115,692 | 153 | 19,909 | 5,312 | 3,245 | 28,619 |
| 115,693 | 149 | 19,918 | 5,303 | 3,238 | 28,608 |
| 115,694 | 143 | 19,870 | 5,288 | 3,237 | 28,538 |
| 115,695 | 143 | 19,831 | 5,289 | 3,233 | 28,496 |
| 115,696 | 148 | 20,087 | 5,348 | 3,296 | 28,879 |
| 115,697 | 144 | 19,886 | 5,309 | 3,273 | 28,612 |
| 115,698 | 146 | 19,912 | 5,346 | 3,272 | 28,676 |
| 115,699 | 148 | 19,961 | 5,365 | 3,274 | 28,748 |
| 115,700 | 148 | 20,006 | 5,405 | 3,284 | 28,843 |
| 115,701 | 149 | 20,085 | 5,485 | 3,326 | 29,045 |
| 115,702 | 149 | 20,078 | 5,495 | 3,311 | 29,033 |
| 115,703 | 154 | 20,381 | 5,581 | 3,361 | 29,477 |



|         |     |        |       |       |        |
|---------|-----|--------|-------|-------|--------|
| 115,704 | 154 | 20,407 | 5,602 | 3,347 | 29,510 |
| 115,705 | 159 | 20,236 | 5,550 | 3,291 | 29,236 |
| 115,706 | 157 | 20,420 | 5,618 | 3,349 | 29,544 |
| 115,707 | 157 | 20,740 | 5,738 | 3,414 | 30,049 |
| 115,708 | 159 | 20,559 | 5,705 | 3,375 | 29,798 |
| 115,709 | 150 | 20,364 | 5,697 | 3,365 | 29,576 |
| 115,710 | 152 | 20,631 | 5,856 | 3,430 | 30,069 |
| 115,711 | 157 | 20,841 | 5,905 | 3,484 | 30,387 |
| 115,712 | 155 | 20,662 | 5,896 | 3,499 | 30,212 |
| 115,713 | 151 | 20,310 | 5,843 | 3,447 | 29,751 |
| 115,714 | 152 | 20,377 | 5,902 | 3,475 | 29,906 |
| 115,715 | 153 | 20,541 | 5,956 | 3,501 | 30,151 |
| 115,716 | 156 | 20,669 | 6,009 | 3,514 | 30,348 |
| 115,717 | 160 | 20,747 | 6,079 | 3,544 | 30,530 |
| 115,718 | 159 | 20,974 | 6,126 | 3,584 | 30,843 |
| 115,719 | 162 | 20,695 | 6,046 | 3,516 | 30,419 |
| 115,720 | 163 | 21,026 | 6,146 | 3,556 | 30,891 |
| 115,721 | 163 | 21,054 | 6,147 | 3,556 | 30,920 |
| 115,722 | 161 | 20,942 | 6,096 | 3,521 | 30,720 |
| 115,723 | 170 | 21,458 | 6,297 | 3,637 | 31,562 |
| 115,724 | 170 | 21,468 | 6,307 | 3,645 | 31,590 |
| 115,725 | 169 | 21,285 | 6,203 | 3,590 | 31,247 |
| 115,726 | 171 | 21,342 | 6,199 | 3,568 | 31,280 |
| 115,727 | 171 | 21,302 | 6,194 | 3,571 | 31,238 |
| 115,728 | 166 | 21,313 | 6,223 | 3,614 | 31,316 |
| 115,729 | 172 | 21,556 | 6,301 | 3,670 | 31,699 |
| 115,730 | 171 | 21,421 | 6,280 | 3,663 | 31,535 |
| 115,731 | 178 | 21,626 | 6,324 | 3,705 | 31,833 |
| 115,732 | 181 | 21,603 | 6,373 | 3,747 | 31,904 |
| 115,733 | 178 | 21,408 | 6,286 | 3,679 | 31,551 |
| 115,734 | 180 | 21,711 | 6,352 | 3,706 | 31,949 |
| 115,735 | 173 | 21,744 | 6,325 | 3,702 | 31,944 |

|         |     |        |       |       |        |
|---------|-----|--------|-------|-------|--------|
| 115,736 | 176 | 22,037 | 6,386 | 3,743 | 32,342 |
| 115,737 | 169 | 22,299 | 6,461 | 3,801 | 32,730 |
| 115,738 | 172 | 22,042 | 6,386 | 3,736 | 32,336 |
| 115,739 | 176 | 22,353 | 6,443 | 3,777 | 32,749 |
| 115,740 | 172 | 22,295 | 6,433 | 3,762 | 32,662 |
| 115,741 | 184 | 22,717 | 6,560 | 3,833 | 33,294 |
| 115,742 | 195 | 22,624 | 6,556 | 3,824 | 33,199 |
| 115,743 | 189 | 22,355 | 6,484 | 3,786 | 32,814 |
| 115,744 | 189 | 22,302 | 6,470 | 3,781 | 32,742 |
| 115,745 | 196 | 22,486 | 6,566 | 3,801 | 33,049 |
| 115,746 | 200 | 22,478 | 6,564 | 3,807 | 33,049 |
| 115,747 | 196 | 22,215 | 6,498 | 3,755 | 32,664 |
| 115,748 | 193 | 22,272 | 6,507 | 3,795 | 32,767 |
| 115,749 | 192 | 22,304 | 6,516 | 3,812 | 32,824 |
| 115,750 | 190 | 22,259 | 6,528 | 3,818 | 32,795 |
| 115,751 | 188 | 21,893 | 6,455 | 3,762 | 32,298 |
| 115,752 | 189 | 22,224 | 6,537 | 3,818 | 32,768 |
| 115,753 | 181 | 22,427 | 6,593 | 3,848 | 33,049 |
| 115,754 | 182 | 22,589 | 6,658 | 3,887 | 33,316 |
| 115,755 | 181 | 22,162 | 6,575 | 3,847 | 32,765 |
| 115,756 | 175 | 21,798 | 6,528 | 3,822 | 32,323 |
| 115,757 | 178 | 22,004 | 6,627 | 3,871 | 32,680 |
| 115,758 | 171 | 21,948 | 6,596 | 3,835 | 32,550 |
| 115,759 | 175 | 21,899 | 6,547 | 3,819 | 32,440 |
| 115,760 | 176 | 21,763 | 6,517 | 3,773 | 32,229 |
| 115,761 | 174 | 21,697 | 6,533 | 3,773 | 32,177 |
| 115,762 | 175 | 21,648 | 6,532 | 3,750 | 32,105 |
| 115,763 | 179 | 21,562 | 6,514 | 3,714 | 31,969 |
| 115,764 | 181 | 21,613 | 6,493 | 3,719 | 32,006 |
| 115,765 | 181 | 21,615 | 6,482 | 3,708 | 31,986 |
| 115,766 | 178 | 21,475 | 6,472 | 3,720 | 31,845 |
| 115,767 | 173 | 21,558 | 6,513 | 3,748 | 31,992 |

|         |     |        |       |       |        |
|---------|-----|--------|-------|-------|--------|
| 115,768 | 174 | 21,499 | 6,470 | 3,720 | 31,863 |
| 115,769 | 173 | 21,359 | 6,431 | 3,671 | 31,634 |
| 115,770 | 168 | 21,194 | 6,363 | 3,642 | 31,367 |
| 115,771 | 169 | 21,340 | 6,422 | 3,667 | 31,598 |
| 115,772 | 170 | 21,276 | 6,383 | 3,656 | 31,485 |
| 115,773 | 165 | 21,004 | 6,310 | 3,604 | 31,083 |
| 115,774 | 166 | 20,964 | 6,334 | 3,604 | 31,068 |
| 115,775 | 173 | 20,981 | 6,373 | 3,623 | 31,150 |
| 115,776 | 173 | 20,969 | 6,411 | 3,644 | 31,197 |
| 115,777 | 175 | 21,206 | 6,464 | 3,672 | 31,517 |
| 115,778 | 177 | 21,179 | 6,416 | 3,634 | 31,406 |
| 115,779 | 181 | 21,394 | 6,466 | 3,649 | 31,690 |
| 115,780 | 177 | 21,295 | 6,456 | 3,622 | 31,550 |
| 115,781 | 184 | 21,569 | 6,561 | 3,661 | 31,975 |
| 115,782 | 184 | 21,357 | 6,528 | 3,642 | 31,711 |
| 115,783 | 187 | 21,365 | 6,517 | 3,618 | 31,687 |
| 115,784 | 186 | 21,128 | 6,478 | 3,592 | 31,384 |
| 115,785 | 187 | 21,409 | 6,637 | 3,672 | 31,905 |
| 115,786 | 187 | 21,375 | 6,630 | 3,666 | 31,858 |
| 115,787 | 194 | 21,386 | 6,657 | 3,670 | 31,907 |
| 115,788 | 195 | 21,206 | 6,649 | 3,652 | 31,702 |
| 115,789 | 194 | 20,931 | 6,624 | 3,658 | 31,407 |
| 115,790 | 190 | 21,039 | 6,702 | 3,698 | 31,629 |
| 115,791 | 187 | 20,913 | 6,704 | 3,691 | 31,495 |
| 115,792 | 177 | 20,924 | 6,672 | 3,679 | 31,452 |
| 115,793 | 167 | 20,667 | 6,589 | 3,642 | 31,065 |
| 115,794 | 167 | 20,802 | 6,611 | 3,638 | 31,218 |
| 115,795 | 162 | 21,021 | 6,657 | 3,648 | 31,488 |
| 115,796 | 163 | 21,017 | 6,636 | 3,658 | 31,474 |
| 115,797 | 156 | 20,729 | 6,574 | 3,609 | 31,068 |
| 115,798 | 164 | 20,977 | 6,696 | 3,647 | 31,484 |
| 115,799 | 170 | 20,935 | 6,662 | 3,627 | 31,394 |

|         |     |        |       |       |        |
|---------|-----|--------|-------|-------|--------|
| 115,800 | 174 | 21,041 | 6,656 | 3,626 | 31,497 |
| 115,801 | 181 | 20,927 | 6,628 | 3,599 | 31,335 |
| 115,802 | 182 | 20,638 | 6,548 | 3,580 | 30,948 |
| 115,803 | 185 | 20,976 | 6,674 | 3,630 | 31,465 |
| 115,804 | 185 | 20,701 | 6,602 | 3,592 | 31,080 |
| 115,805 | 184 | 20,691 | 6,568 | 3,577 | 31,020 |
| 115,806 | 190 | 20,691 | 6,522 | 3,566 | 30,969 |
| 115,807 | 190 | 20,655 | 6,517 | 3,560 | 30,922 |
| 115,808 | 189 | 20,554 | 6,493 | 3,546 | 30,782 |
| 115,809 | 188 | 20,484 | 6,460 | 3,546 | 30,678 |
| 115,810 | 177 | 20,566 | 6,470 | 3,549 | 30,762 |
| 115,811 | 175 | 20,529 | 6,451 | 3,538 | 30,693 |
| 115,812 | 171 | 20,535 | 6,390 | 3,517 | 30,613 |
| 115,813 | 175 | 20,430 | 6,341 | 3,507 | 30,453 |
| 115,814 | 166 | 20,216 | 6,276 | 3,502 | 30,160 |
| 115,815 | 168 | 20,460 | 6,296 | 3,532 | 30,456 |
| 115,816 | 178 | 20,248 | 6,183 | 3,456 | 30,065 |
| 115,817 | 177 | 20,355 | 6,207 | 3,484 | 30,223 |
| 115,818 | 176 | 20,319 | 6,204 | 3,474 | 30,173 |
| 115,819 | 170 | 20,183 | 6,182 | 3,470 | 30,005 |
| 115,820 | 177 | 19,933 | 6,174 | 3,480 | 29,764 |
| 115,821 | 177 | 19,817 | 6,113 | 3,468 | 29,575 |
| 115,822 | 176 | 19,807 | 6,104 | 3,471 | 29,558 |
| 115,823 | 174 | 19,830 | 6,102 | 3,513 | 29,619 |
| 115,824 | 172 | 19,919 | 6,115 | 3,518 | 29,724 |
| 115,825 | 166 | 19,871 | 6,092 | 3,484 | 29,613 |
| 115,826 | 169 | 20,076 | 6,139 | 3,500 | 29,884 |
| 115,827 | 165 | 19,836 | 6,033 | 3,462 | 29,496 |
| 115,828 | 165 | 19,521 | 5,981 | 3,417 | 29,084 |
| 115,829 | 163 | 19,932 | 6,082 | 3,493 | 29,670 |
| 115,830 | 159 | 19,688 | 6,024 | 3,457 | 29,328 |
| 115,831 | 160 | 19,956 | 6,078 | 3,511 | 29,705 |

|         |     |        |       |       |        |
|---------|-----|--------|-------|-------|--------|
| 115,832 | 150 | 19,996 | 6,034 | 3,509 | 29,689 |
| 115,833 | 140 | 19,818 | 5,963 | 3,469 | 29,390 |
| 115,834 | 136 | 19,786 | 5,975 | 3,505 | 29,402 |
| 115,835 | 137 | 19,780 | 5,931 | 3,494 | 29,342 |
| 115,836 | 137 | 19,851 | 5,899 | 3,493 | 29,380 |
| 115,837 | 136 | 19,877 | 5,910 | 3,465 | 29,388 |
| 115,838 | 134 | 19,874 | 5,908 | 3,470 | 29,386 |
| 115,839 | 130 | 19,883 | 5,842 | 3,438 | 29,293 |
| 115,840 | 131 | 19,961 | 5,821 | 3,412 | 29,325 |
| 115,841 | 132 | 19,914 | 5,810 | 3,395 | 29,251 |
| 115,842 | 132 | 19,951 | 5,787 | 3,394 | 29,264 |
| 115,843 | 132 | 19,834 | 5,836 | 3,421 | 29,223 |
| 115,844 | 134 | 19,538 | 5,759 | 3,400 | 28,831 |
| 115,845 | 135 | 19,582 | 5,756 | 3,389 | 28,862 |
| 115,846 | 135 | 19,793 | 5,810 | 3,430 | 29,168 |
| 115,847 | 133 | 19,704 | 5,802 | 3,429 | 29,068 |
| 115,848 | 130 | 19,829 | 5,795 | 3,423 | 29,177 |
| 115,849 | 124 | 19,873 | 5,760 | 3,397 | 29,154 |
| 115,850 | 117 | 19,514 | 5,688 | 3,361 | 28,680 |
| 115,851 | 116 | 19,515 | 5,679 | 3,380 | 28,690 |
| 115,852 | 111 | 19,617 | 5,709 | 3,415 | 28,852 |
| 115,853 | 111 | 19,632 | 5,688 | 3,380 | 28,811 |
| 115,854 | 110 | 19,704 | 5,682 | 3,391 | 28,887 |
| 115,855 | 109 | 19,711 | 5,663 | 3,369 | 28,852 |
| 115,856 | 113 | 19,950 | 5,733 | 3,397 | 29,193 |
| 115,857 | 112 | 20,003 | 5,739 | 3,382 | 29,236 |
| 115,858 | 109 | 20,257 | 5,762 | 3,412 | 29,540 |
| 115,859 | 113 | 20,196 | 5,766 | 3,404 | 29,479 |
| 115,860 | 113 | 20,110 | 5,759 | 3,404 | 29,386 |
| 115,861 | 115 | 20,409 | 5,872 | 3,458 | 29,854 |
| 115,862 | 115 | 20,265 | 5,816 | 3,440 | 29,636 |
| 115,863 | 116 | 20,410 | 5,901 | 3,461 | 29,888 |

|         |     |        |       |       |        |
|---------|-----|--------|-------|-------|--------|
| 115,864 | 109 | 20,340 | 5,892 | 3,448 | 29,789 |
| 115,865 | 109 | 20,328 | 5,882 | 3,436 | 29,755 |
| 115,866 | 110 | 20,244 | 5,899 | 3,426 | 29,679 |
| 115,867 | 99  | 20,098 | 5,852 | 3,386 | 29,435 |
| 115,868 | 99  | 20,063 | 5,790 | 3,357 | 29,309 |
| 115,869 | 104 | 20,263 | 5,825 | 3,357 | 29,549 |
| 115,870 | 101 | 20,263 | 5,758 | 3,311 | 29,433 |
| 115,871 | 99  | 20,076 | 5,721 | 3,294 | 29,190 |
| 115,872 | 99  | 20,094 | 5,738 | 3,306 | 29,237 |
| 115,873 | 99  | 20,252 | 5,776 | 3,308 | 29,435 |
| 115,874 | 96  | 20,318 | 5,748 | 3,289 | 29,451 |
| 115,875 | 101 | 20,276 | 5,737 | 3,308 | 29,422 |
| 115,876 | 99  | 20,110 | 5,688 | 3,281 | 29,178 |
| 115,877 | 101 | 20,192 | 5,697 | 3,279 | 29,269 |
| 115,878 | 99  | 20,173 | 5,717 | 3,268 | 29,257 |
| 115,879 | 99  | 19,999 | 5,695 | 3,255 | 29,048 |
| 115,880 | 99  | 19,925 | 5,670 | 3,228 | 28,922 |
| 115,881 | 101 | 20,011 | 5,708 | 3,243 | 29,063 |
| 115,882 | 99  | 19,949 | 5,713 | 3,221 | 28,982 |
| 115,883 | 101 | 19,671 | 5,647 | 3,166 | 28,585 |
| 115,884 | 104 | 19,694 | 5,631 | 3,149 | 28,578 |
| 115,885 | 104 | 19,656 | 5,621 | 3,147 | 28,528 |
| 115,886 | 102 | 19,734 | 5,649 | 3,168 | 28,653 |
| 115,887 | 105 | 19,624 | 5,675 | 3,162 | 28,566 |
| 115,888 | 104 | 19,627 | 5,702 | 3,192 | 28,625 |
| 115,889 | 103 | 19,618 | 5,659 | 3,191 | 28,571 |
| 115,890 | 102 | 19,329 | 5,579 | 3,163 | 28,173 |
| 115,891 | 105 | 19,571 | 5,616 | 3,192 | 28,484 |
| 115,892 | 101 | 19,228 | 5,561 | 3,125 | 28,015 |
| 115,893 | 102 | 19,476 | 5,572 | 3,123 | 28,273 |
| 115,894 | 103 | 19,446 | 5,539 | 3,117 | 28,205 |
| 115,895 | 106 | 19,602 | 5,554 | 3,126 | 28,388 |

|         |     |        |       |       |        |
|---------|-----|--------|-------|-------|--------|
| 115,896 | 102 | 19,731 | 5,605 | 3,158 | 28,596 |
| 115,897 | 106 | 19,495 | 5,551 | 3,123 | 28,275 |
| 115,898 | 107 | 19,547 | 5,552 | 3,120 | 28,326 |
| 115,899 | 107 | 19,682 | 5,582 | 3,151 | 28,522 |
| 115,900 | 108 | 19,624 | 5,590 | 3,166 | 28,488 |
| 115,901 | 108 | 19,603 | 5,566 | 3,144 | 28,421 |
| 115,902 | 106 | 19,490 | 5,532 | 3,094 | 28,222 |
| 115,903 | 110 | 19,243 | 5,449 | 3,067 | 27,869 |
| 115,904 | 108 | 18,924 | 5,382 | 3,036 | 27,450 |
| 115,905 | 108 | 19,401 | 5,527 | 3,106 | 28,142 |
| 115,906 | 106 | 19,399 | 5,554 | 3,112 | 28,171 |
| 115,907 | 104 | 19,334 | 5,537 | 3,094 | 28,069 |
| 115,908 | 106 | 19,237 | 5,508 | 3,062 | 27,913 |
| 115,909 | 107 | 19,190 | 5,484 | 3,041 | 27,822 |
| 115,910 | 106 | 19,301 | 5,503 | 3,042 | 27,952 |
| 115,911 | 108 | 19,518 | 5,514 | 3,049 | 28,189 |
| 115,912 | 116 | 19,696 | 5,536 | 3,079 | 28,427 |
| 115,913 | 117 | 19,700 | 5,503 | 3,070 | 28,390 |
| 115,914 | 117 | 19,519 | 5,434 | 3,047 | 28,117 |
| 115,915 | 120 | 19,546 | 5,425 | 3,054 | 28,145 |
| 115,916 | 124 | 19,684 | 5,505 | 3,079 | 28,392 |
| 115,917 | 124 | 19,530 | 5,475 | 3,047 | 28,176 |
| 115,918 | 124 | 19,509 | 5,474 | 3,046 | 28,153 |
| 115,919 | 123 | 19,604 | 5,476 | 3,065 | 28,268 |
| 115,920 | 119 | 19,698 | 5,488 | 3,085 | 28,390 |
| 115,921 | 120 | 19,578 | 5,490 | 3,085 | 28,273 |
| 115,922 | 121 | 19,925 | 5,563 | 3,112 | 28,721 |
| 115,923 | 120 | 19,856 | 5,537 | 3,079 | 28,592 |
| 115,924 | 122 | 20,038 | 5,584 | 3,114 | 28,858 |
| 115,925 | 115 | 19,772 | 5,534 | 3,073 | 28,494 |
| 115,926 | 118 | 20,033 | 5,574 | 3,085 | 28,810 |
| 115,927 | 123 | 19,992 | 5,551 | 3,087 | 28,753 |

|         |     |        |       |       |        |
|---------|-----|--------|-------|-------|--------|
| 115,928 | 121 | 20,080 | 5,539 | 3,104 | 28,844 |
| 115,929 | 126 | 19,930 | 5,440 | 3,084 | 28,580 |
| 115,930 | 127 | 20,060 | 5,448 | 3,090 | 28,725 |
| 115,931 | 127 | 20,229 | 5,453 | 3,099 | 28,908 |
| 115,932 | 126 | 20,012 | 5,368 | 3,065 | 28,571 |
| 115,933 | 122 | 19,845 | 5,290 | 3,022 | 28,279 |
| 115,934 | 123 | 20,105 | 5,335 | 3,040 | 28,603 |
| 115,935 | 124 | 20,370 | 5,383 | 3,059 | 28,936 |
| 115,936 | 126 | 20,551 | 5,482 | 3,085 | 29,244 |
| 115,937 | 127 | 20,427 | 5,453 | 3,090 | 29,097 |
| 115,938 | 128 | 20,432 | 5,404 | 3,058 | 29,022 |
| 115,939 | 125 | 20,372 | 5,370 | 3,039 | 28,906 |
| 115,940 | 129 | 20,355 | 5,386 | 3,034 | 28,904 |
| 115,941 | 128 | 20,292 | 5,389 | 3,012 | 28,821 |
| 115,942 | 129 | 20,582 | 5,469 | 3,052 | 29,232 |
| 115,943 | 133 | 20,476 | 5,412 | 3,040 | 29,061 |
| 115,944 | 136 | 20,403 | 5,383 | 3,031 | 28,953 |
| 115,945 | 137 | 20,433 | 5,385 | 3,036 | 28,991 |
| 115,946 | 135 | 20,515 | 5,407 | 3,041 | 29,098 |
| 115,947 | 142 | 20,702 | 5,447 | 3,066 | 29,357 |
| 115,948 | 142 | 20,618 | 5,434 | 3,049 | 29,243 |
| 115,949 | 143 | 20,709 | 5,417 | 3,066 | 29,335 |
| 115,950 | 145 | 20,763 | 5,405 | 3,061 | 29,374 |
| 115,951 | 154 | 20,662 | 5,416 | 3,062 | 29,294 |
| 115,952 | 152 | 20,441 | 5,386 | 3,042 | 29,021 |
| 115,953 | 153 | 20,684 | 5,454 | 3,096 | 29,387 |
| 115,954 | 150 | 20,698 | 5,491 | 3,100 | 29,439 |
| 115,955 | 152 | 20,745 | 5,446 | 3,106 | 29,449 |
| 115,956 | 151 | 20,671 | 5,380 | 3,090 | 29,292 |
| 115,957 | 162 | 20,663 | 5,392 | 3,098 | 29,315 |
| 115,958 | 162 | 20,697 | 5,375 | 3,107 | 29,341 |
| 115,959 | 159 | 20,470 | 5,387 | 3,126 | 29,142 |



|         |     |        |       |       |        |
|---------|-----|--------|-------|-------|--------|
| 115,960 | 159 | 20,481 | 5,373 | 3,135 | 29,148 |
| 115,961 | 158 | 20,532 | 5,432 | 3,192 | 29,314 |
| 115,962 | 158 | 19,988 | 5,331 | 3,134 | 28,611 |
| 115,963 | 159 | 20,077 | 5,381 | 3,159 | 28,776 |
| 115,964 | 161 | 20,266 | 5,460 | 3,201 | 29,088 |
| 115,965 | 166 | 20,051 | 5,393 | 3,174 | 28,784 |
| 115,966 | 158 | 19,850 | 5,373 | 3,156 | 28,537 |
| 115,967 | 157 | 20,107 | 5,391 | 3,182 | 28,837 |
| 115,968 | 154 | 20,206 | 5,401 | 3,211 | 28,972 |
| 115,969 | 162 | 20,214 | 5,401 | 3,222 | 28,999 |
| 115,970 | 163 | 20,035 | 5,361 | 3,205 | 28,764 |
| 115,971 | 168 | 20,704 | 5,529 | 3,285 | 29,686 |
| 115,972 | 169 | 20,818 | 5,590 | 3,307 | 29,884 |
| 115,973 | 168 | 20,649 | 5,522 | 3,284 | 29,623 |
| 115,974 | 168 | 20,331 | 5,481 | 3,255 | 29,235 |
| 115,975 | 168 | 20,308 | 5,478 | 3,258 | 29,212 |
| 115,976 | 167 | 20,117 | 5,479 | 3,245 | 29,008 |
| 115,977 | 167 | 20,220 | 5,567 | 3,310 | 29,264 |
| 115,978 | 153 | 19,097 | 5,353 | 3,147 | 27,750 |
| 115,979 | 154 | 19,184 | 5,388 | 3,176 | 27,902 |
| 115,980 | 153 | 19,454 | 5,448 | 3,222 | 28,277 |
| 115,981 | 153 | 19,425 | 5,456 | 3,238 | 28,272 |
| 115,982 | 156 | 20,021 | 5,625 | 3,331 | 29,133 |
| 115,983 | 160 | 20,090 | 5,651 | 3,346 | 29,247 |
| 115,984 | 159 | 19,969 | 5,631 | 3,340 | 29,099 |
| 115,985 | 159 | 20,079 | 5,670 | 3,376 | 29,284 |
| 115,986 | 158 | 20,009 | 5,706 | 3,383 | 29,256 |
| 115,987 | 158 | 20,105 | 5,695 | 3,394 | 29,352 |
| 115,988 | 154 | 20,042 | 5,660 | 3,367 | 29,223 |
| 115,989 | 148 | 19,689 | 5,564 | 3,333 | 28,734 |
| 115,990 | 150 | 19,918 | 5,608 | 3,357 | 29,033 |
| 115,991 | 147 | 19,900 | 5,603 | 3,361 | 29,011 |

|         |     |        |       |       |        |
|---------|-----|--------|-------|-------|--------|
| 115,992 | 150 | 19,629 | 5,500 | 3,330 | 28,609 |
| 115,993 | 149 | 19,327 | 5,445 | 3,295 | 28,216 |
| 115,994 | 146 | 19,586 | 5,537 | 3,318 | 28,587 |
| 115,995 | 144 | 19,770 | 5,656 | 3,366 | 28,936 |
| 115,996 | 145 | 19,611 | 5,604 | 3,337 | 28,697 |
| 115,997 | 143 | 19,634 | 5,588 | 3,332 | 28,697 |
| 115,998 | 140 | 19,906 | 5,620 | 3,357 | 29,023 |
| 115,999 | 135 | 19,846 | 5,580 | 3,352 | 28,913 |
| 116,000 | 137 | 19,794 | 5,590 | 3,340 | 28,861 |
| 116,001 | 133 | 19,587 | 5,557 | 3,302 | 28,579 |
| 116,002 | 126 | 19,617 | 5,562 | 3,273 | 28,578 |
| 116,003 | 125 | 19,699 | 5,562 | 3,267 | 28,653 |
| 116,004 | 128 | 19,736 | 5,522 | 3,260 | 28,646 |
| 116,005 | 128 | 19,593 | 5,506 | 3,253 | 28,480 |
| 116,006 | 134 | 19,864 | 5,591 | 3,281 | 28,870 |
| 116,007 | 134 | 19,906 | 5,622 | 3,295 | 28,957 |
| 116,008 | 121 | 19,962 | 5,619 | 3,274 | 28,976 |
| 116,009 | 121 | 20,132 | 5,632 | 3,265 | 29,150 |
| 116,010 | 120 | 20,281 | 5,668 | 3,276 | 29,345 |
| 116,011 | 112 | 19,622 | 5,474 | 3,122 | 28,330 |
| 116,012 | 113 | 19,896 | 5,527 | 3,135 | 28,671 |
| 116,013 | 106 | 19,812 | 5,491 | 3,133 | 28,542 |
| 116,014 | 106 | 19,945 | 5,513 | 3,143 | 28,707 |
| 116,015 | 105 | 19,882 | 5,501 | 3,142 | 28,630 |
| 116,016 | 101 | 19,615 | 5,438 | 3,091 | 28,245 |
| 116,017 | 102 | 19,356 | 5,372 | 3,054 | 27,884 |
| 116,018 | 105 | 19,525 | 5,436 | 3,068 | 28,134 |
| 116,019 | 114 | 19,551 | 5,428 | 3,051 | 28,144 |
| 116,020 | 105 | 19,413 | 5,413 | 3,023 | 27,954 |
| 116,021 | 110 | 19,332 | 5,415 | 3,010 | 27,867 |
| 116,022 | 116 | 19,284 | 5,418 | 3,018 | 27,836 |
| 116,023 | 115 | 19,142 | 5,359 | 3,000 | 27,616 |

|         |     |        |       |       |        |
|---------|-----|--------|-------|-------|--------|
| 116,024 | 113 | 19,376 | 5,390 | 3,011 | 27,890 |
| 116,025 | 116 | 19,583 | 5,383 | 3,014 | 28,096 |
| 116,026 | 118 | 19,553 | 5,333 | 2,995 | 27,999 |
| 116,027 | 118 | 19,776 | 5,364 | 3,005 | 28,263 |
| 116,028 | 123 | 20,021 | 5,397 | 3,031 | 28,572 |
| 116,029 | 123 | 19,958 | 5,365 | 3,013 | 28,459 |
| 116,030 | 122 | 19,862 | 5,364 | 2,990 | 28,338 |
| 116,031 | 124 | 20,047 | 5,360 | 3,003 | 28,534 |
| 116,032 | 127 | 20,321 | 5,425 | 3,032 | 28,905 |
| 116,033 | 127 | 20,246 | 5,401 | 3,029 | 28,803 |
| 116,034 | 137 | 20,103 | 5,376 | 2,992 | 28,608 |
| 116,035 | 137 | 20,169 | 5,398 | 2,986 | 28,690 |
| 116,036 | 146 | 20,397 | 5,488 | 3,017 | 29,048 |
| 116,037 | 144 | 20,168 | 5,376 | 2,973 | 28,661 |
| 116,038 | 143 | 20,148 | 5,389 | 2,970 | 28,650 |
| 116,039 | 144 | 20,258 | 5,411 | 3,003 | 28,816 |
| 116,040 | 145 | 20,221 | 5,416 | 2,993 | 28,775 |
| 116,041 | 156 | 20,200 | 5,413 | 2,995 | 28,764 |
| 116,042 | 156 | 19,998 | 5,384 | 2,979 | 28,517 |
| 116,043 | 156 | 20,268 | 5,501 | 3,066 | 28,991 |
| 116,044 | 164 | 20,213 | 5,478 | 3,040 | 28,895 |
| 116,045 | 167 | 20,481 | 5,505 | 3,057 | 29,210 |
| 116,046 | 171 | 20,277 | 5,441 | 3,033 | 28,922 |
| 116,047 | 169 | 20,076 | 5,439 | 3,010 | 28,694 |
| 116,048 | 168 | 20,115 | 5,468 | 3,034 | 28,785 |
| 116,049 | 170 | 19,876 | 5,465 | 3,033 | 28,544 |
| 116,050 | 170 | 19,890 | 5,455 | 3,033 | 28,548 |
| 116,051 | 171 | 19,798 | 5,437 | 3,037 | 28,443 |
| 116,052 | 171 | 19,807 | 5,437 | 3,049 | 28,464 |
| 116,053 | 169 | 19,891 | 5,434 | 3,068 | 28,562 |
| 116,054 | 169 | 19,846 | 5,428 | 3,074 | 28,517 |
| 116,055 | 170 | 20,149 | 5,503 | 3,092 | 28,914 |

|         |     |        |       |       |        |
|---------|-----|--------|-------|-------|--------|
| 116,056 | 169 | 20,342 | 5,516 | 3,107 | 29,134 |
| 116,057 | 171 | 20,217 | 5,549 | 3,119 | 29,056 |
| 116,058 | 177 | 20,092 | 5,529 | 3,101 | 28,899 |
| 116,059 | 177 | 19,867 | 5,477 | 3,053 | 28,574 |
| 116,060 | 182 | 19,978 | 5,506 | 3,079 | 28,745 |
| 116,061 | 188 | 19,924 | 5,477 | 3,069 | 28,658 |
| 116,062 | 186 | 19,817 | 5,453 | 3,065 | 28,521 |
| 116,063 | 189 | 19,806 | 5,451 | 3,056 | 28,502 |
| 116,064 | 189 | 19,901 | 5,447 | 3,041 | 28,578 |
| 116,065 | 190 | 19,969 | 5,444 | 3,038 | 28,641 |
| 116,066 | 193 | 20,204 | 5,485 | 3,068 | 28,950 |
| 116,067 | 198 | 20,099 | 5,446 | 3,042 | 28,785 |
| 116,068 | 198 | 20,136 | 5,462 | 3,042 | 28,838 |
| 116,069 | 192 | 20,395 | 5,499 | 3,055 | 29,141 |
| 116,070 | 200 | 20,554 | 5,545 | 3,083 | 29,382 |
| 116,071 | 203 | 20,555 | 5,538 | 3,085 | 29,381 |
| 116,072 | 200 | 20,715 | 5,575 | 3,105 | 29,595 |
| 116,073 | 195 | 20,460 | 5,480 | 3,076 | 29,211 |
| 116,074 | 195 | 20,390 | 5,490 | 3,075 | 29,150 |
| 116,075 | 194 | 20,397 | 5,512 | 3,080 | 29,183 |
| 116,076 | 192 | 20,349 | 5,504 | 3,084 | 29,129 |
| 116,077 | 190 | 20,103 | 5,439 | 3,069 | 28,801 |
| 116,078 | 191 | 20,064 | 5,452 | 3,079 | 28,786 |
| 116,079 | 184 | 19,914 | 5,421 | 3,058 | 28,577 |
| 116,080 | 182 | 19,775 | 5,401 | 3,047 | 28,405 |
| 116,081 | 180 | 19,727 | 5,369 | 3,053 | 28,329 |
| 116,082 | 179 | 19,702 | 5,371 | 3,052 | 28,304 |
| 116,083 | 171 | 19,030 | 5,196 | 2,980 | 27,377 |
| 116,084 | 170 | 19,250 | 5,256 | 3,015 | 27,691 |
| 116,085 | 162 | 19,205 | 5,224 | 3,014 | 27,605 |
| 116,086 | 168 | 19,499 | 5,263 | 3,053 | 27,983 |
| 116,087 | 163 | 19,832 | 5,335 | 3,088 | 28,418 |

|         |     |        |       |       |        |
|---------|-----|--------|-------|-------|--------|
| 116,088 | 167 | 19,782 | 5,342 | 3,097 | 28,388 |
| 116,089 | 168 | 19,992 | 5,391 | 3,131 | 28,682 |
| 116,090 | 167 | 19,962 | 5,427 | 3,153 | 28,709 |
| 116,091 | 168 | 20,085 | 5,444 | 3,179 | 28,876 |
| 116,092 | 157 | 19,944 | 5,426 | 3,146 | 28,673 |
| 116,093 | 159 | 20,173 | 5,505 | 3,162 | 28,999 |
| 116,094 | 149 | 20,206 | 5,451 | 3,149 | 28,955 |
| 116,095 | 150 | 20,476 | 5,521 | 3,182 | 29,329 |
| 116,096 | 147 | 20,523 | 5,531 | 3,187 | 29,388 |
| 116,097 | 141 | 20,387 | 5,421 | 3,172 | 29,121 |
| 116,098 | 144 | 20,423 | 5,449 | 3,187 | 29,203 |
| 116,099 | 147 | 20,676 | 5,513 | 3,230 | 29,566 |
| 116,100 | 145 | 20,534 | 5,473 | 3,194 | 29,346 |
| 116,101 | 150 | 20,863 | 5,531 | 3,222 | 29,766 |
| 116,102 | 155 | 20,950 | 5,565 | 3,231 | 29,901 |
| 116,103 | 155 | 20,844 | 5,528 | 3,203 | 29,730 |
| 116,104 | 155 | 20,803 | 5,521 | 3,196 | 29,675 |
| 116,105 | 155 | 20,964 | 5,588 | 3,238 | 29,945 |
| 116,106 | 149 | 21,000 | 5,587 | 3,247 | 29,983 |
| 116,107 | 150 | 20,990 | 5,579 | 3,252 | 29,971 |
| 116,108 | 147 | 21,131 | 5,564 | 3,249 | 30,091 |
| 116,109 | 140 | 20,881 | 5,469 | 3,210 | 29,700 |
| 116,110 | 137 | 21,082 | 5,528 | 3,266 | 30,013 |
| 116,111 | 135 | 20,901 | 5,472 | 3,243 | 29,751 |
| 116,112 | 130 | 20,727 | 5,429 | 3,206 | 29,492 |
| 116,113 | 130 | 20,743 | 5,438 | 3,213 | 29,524 |
| 116,114 | 128 | 20,572 | 5,424 | 3,219 | 29,343 |
| 116,115 | 129 | 20,501 | 5,415 | 3,228 | 29,273 |
| 116,116 | 127 | 20,369 | 5,415 | 3,233 | 29,144 |
| 116,117 | 128 | 20,629 | 5,465 | 3,270 | 29,492 |
| 116,118 | 118 | 20,368 | 5,365 | 3,256 | 29,107 |
| 116,119 | 121 | 20,530 | 5,409 | 3,283 | 29,343 |

|         |     |        |       |       |        |
|---------|-----|--------|-------|-------|--------|
| 116,120 | 116 | 20,908 | 5,460 | 3,318 | 29,802 |
| 116,121 | 113 | 20,927 | 5,466 | 3,320 | 29,826 |
| 116,122 | 105 | 20,931 | 5,467 | 3,319 | 29,822 |
| 116,123 | 106 | 20,947 | 5,480 | 3,339 | 29,872 |
| 116,124 | 104 | 21,004 | 5,508 | 3,355 | 29,971 |
| 116,125 | 104 | 20,959 | 5,447 | 3,328 | 29,838 |
| 116,126 | 104 | 21,230 | 5,534 | 3,372 | 30,240 |
| 116,127 | 106 | 21,218 | 5,538 | 3,355 | 30,217 |
| 116,128 | 105 | 21,058 | 5,481 | 3,307 | 29,951 |
| 116,129 | 107 | 21,134 | 5,513 | 3,290 | 30,044 |
| 116,130 | 107 | 21,039 | 5,498 | 3,284 | 29,928 |
| 116,131 | 114 | 21,127 | 5,544 | 3,306 | 30,091 |
| 116,132 | 120 | 21,169 | 5,544 | 3,285 | 30,118 |
| 116,133 | 122 | 20,840 | 5,447 | 3,225 | 29,634 |
| 116,134 | 121 | 20,911 | 5,453 | 3,226 | 29,711 |
| 116,135 | 120 | 20,611 | 5,373 | 3,182 | 29,286 |
| 116,136 | 121 | 20,670 | 5,428 | 3,199 | 29,418 |
| 116,137 | 123 | 20,891 | 5,491 | 3,213 | 29,718 |
| 116,138 | 127 | 20,862 | 5,472 | 3,215 | 29,676 |
| 116,139 | 125 | 20,984 | 5,470 | 3,234 | 29,813 |
| 116,140 | 126 | 20,967 | 5,477 | 3,212 | 29,782 |
| 116,141 | 126 | 21,003 | 5,465 | 3,192 | 29,786 |
| 116,142 | 123 | 20,647 | 5,390 | 3,134 | 29,294 |
| 116,143 | 123 | 20,665 | 5,366 | 3,137 | 29,291 |
| 116,144 | 123 | 20,921 | 5,394 | 3,182 | 29,620 |
| 116,145 | 126 | 20,921 | 5,365 | 3,177 | 29,589 |
| 116,146 | 127 | 20,999 | 5,383 | 3,183 | 29,692 |
| 116,147 | 126 | 20,653 | 5,338 | 3,150 | 29,267 |
| 116,148 | 128 | 20,694 | 5,399 | 3,176 | 29,397 |
| 116,149 | 128 | 20,950 | 5,456 | 3,198 | 29,732 |
| 116,150 | 125 | 21,026 | 5,440 | 3,200 | 29,791 |
| 116,151 | 125 | 21,008 | 5,449 | 3,192 | 29,774 |

|         |     |        |       |       |        |
|---------|-----|--------|-------|-------|--------|
| 116,152 | 123 | 21,018 | 5,466 | 3,246 | 29,853 |
| 116,153 | 118 | 21,008 | 5,455 | 3,250 | 29,831 |
| 116,154 | 119 | 20,929 | 5,441 | 3,237 | 29,726 |
| 116,155 | 121 | 21,043 | 5,443 | 3,246 | 29,853 |
| 116,156 | 123 | 21,333 | 5,528 | 3,284 | 30,268 |
| 116,157 | 129 | 21,248 | 5,524 | 3,291 | 30,192 |
| 116,158 | 131 | 21,169 | 5,506 | 3,258 | 30,064 |
| 116,159 | 131 | 20,881 | 5,449 | 3,219 | 29,680 |
| 116,160 | 132 | 20,892 | 5,501 | 3,237 | 29,762 |
| 116,161 | 129 | 20,726 | 5,432 | 3,216 | 29,503 |
| 116,162 | 133 | 20,971 | 5,486 | 3,265 | 29,855 |
| 116,163 | 130 | 20,920 | 5,454 | 3,258 | 29,762 |
| 116,164 | 130 | 21,042 | 5,455 | 3,265 | 29,892 |
| 116,165 | 128 | 21,221 | 5,513 | 3,277 | 30,139 |
| 116,166 | 128 | 21,184 | 5,519 | 3,274 | 30,105 |
| 116,167 | 130 | 21,669 | 5,643 | 3,337 | 30,779 |
| 116,168 | 128 | 21,397 | 5,571 | 3,290 | 30,386 |
| 116,169 | 129 | 21,098 | 5,526 | 3,250 | 30,003 |
| 116,170 | 126 | 20,825 | 5,472 | 3,235 | 29,658 |
| 116,171 | 128 | 21,203 | 5,621 | 3,324 | 30,276 |
| 116,172 | 125 | 21,119 | 5,633 | 3,320 | 30,197 |
| 116,173 | 125 | 20,935 | 5,580 | 3,304 | 29,944 |
| 116,174 | 128 | 21,344 | 5,629 | 3,362 | 30,463 |
| 116,175 | 131 | 20,979 | 5,567 | 3,309 | 29,986 |
| 116,176 | 132 | 21,225 | 5,660 | 3,362 | 30,379 |
| 116,177 | 133 | 21,629 | 5,740 | 3,425 | 30,927 |
| 116,178 | 136 | 21,198 | 5,682 | 3,394 | 30,410 |
| 116,179 | 137 | 21,255 | 5,733 | 3,415 | 30,540 |
| 116,180 | 135 | 21,241 | 5,706 | 3,426 | 30,508 |
| 116,181 | 131 | 21,004 | 5,621 | 3,378 | 30,134 |
| 116,182 | 131 | 20,960 | 5,595 | 3,371 | 30,057 |
| 116,183 | 125 | 20,714 | 5,552 | 3,346 | 29,737 |

|         |     |        |       |       |        |
|---------|-----|--------|-------|-------|--------|
| 116,184 | 119 | 20,471 | 5,521 | 3,329 | 29,440 |
| 116,185 | 127 | 21,758 | 5,845 | 3,503 | 31,233 |
| 116,186 | 130 | 22,111 | 5,935 | 3,526 | 31,702 |
| 116,187 | 130 | 22,301 | 5,954 | 3,528 | 31,913 |
| 116,188 | 123 | 22,256 | 5,947 | 3,542 | 31,868 |
| 116,189 | 120 | 22,198 | 5,933 | 3,515 | 31,766 |
| 116,190 | 116 | 21,853 | 5,878 | 3,455 | 31,302 |
| 116,191 | 117 | 22,169 | 5,930 | 3,497 | 31,713 |
| 116,192 | 114 | 22,135 | 5,907 | 3,493 | 31,649 |
| 116,193 | 113 | 21,925 | 5,816 | 3,467 | 31,321 |
| 116,194 | 113 | 21,928 | 5,827 | 3,467 | 31,335 |
| 116,195 | 116 | 21,818 | 5,831 | 3,450 | 31,215 |
| 116,196 | 117 | 21,954 | 5,896 | 3,473 | 31,440 |
| 116,197 | 113 | 21,997 | 5,877 | 3,496 | 31,483 |
| 116,198 | 113 | 22,009 | 5,837 | 3,495 | 31,454 |
| 116,199 | 115 | 21,888 | 5,794 | 3,445 | 31,242 |
| 116,200 | 114 | 21,846 | 5,771 | 3,451 | 31,182 |
| 116,201 | 126 | 21,770 | 5,742 | 3,434 | 31,072 |
| 116,202 | 125 | 21,877 | 5,749 | 3,439 | 31,190 |
| 116,203 | 131 | 22,118 | 5,821 | 3,463 | 31,533 |
| 116,204 | 132 | 22,167 | 5,832 | 3,462 | 31,593 |
| 116,205 | 129 | 21,832 | 5,747 | 3,419 | 31,127 |
| 116,206 | 132 | 22,048 | 5,814 | 3,443 | 31,437 |
| 116,207 | 132 | 22,032 | 5,776 | 3,433 | 31,373 |
| 116,208 | 125 | 21,832 | 5,706 | 3,403 | 31,066 |
| 116,209 | 119 | 21,911 | 5,707 | 3,404 | 31,141 |
| 116,210 | 120 | 21,800 | 5,689 | 3,400 | 31,009 |
| 116,211 | 120 | 21,871 | 5,657 | 3,395 | 31,043 |
| 116,212 | 122 | 22,110 | 5,730 | 3,406 | 31,368 |
| 116,213 | 119 | 22,141 | 5,728 | 3,403 | 31,391 |
| 116,214 | 124 | 21,860 | 5,708 | 3,376 | 31,068 |
| 116,215 | 123 | 21,682 | 5,673 | 3,373 | 30,851 |



|         |     |        |       |       |        |
|---------|-----|--------|-------|-------|--------|
| 116,216 | 122 | 21,740 | 5,681 | 3,404 | 30,947 |
| 116,217 | 128 | 21,923 | 5,714 | 3,421 | 31,186 |
| 116,218 | 127 | 21,909 | 5,690 | 3,425 | 31,151 |
| 116,219 | 125 | 21,792 | 5,634 | 3,409 | 30,960 |
| 116,220 | 128 | 21,926 | 5,644 | 3,426 | 31,124 |
| 116,221 | 132 | 22,112 | 5,654 | 3,408 | 31,306 |
| 116,222 | 133 | 22,262 | 5,646 | 3,408 | 31,449 |
| 116,223 | 134 | 22,169 | 5,604 | 3,381 | 31,288 |
| 116,224 | 135 | 22,223 | 5,637 | 3,406 | 31,401 |
| 116,225 | 133 | 22,291 | 5,684 | 3,402 | 31,510 |
| 116,226 | 127 | 22,244 | 5,658 | 3,401 | 31,430 |
| 116,227 | 127 | 22,281 | 5,615 | 3,408 | 31,431 |
| 116,228 | 129 | 22,269 | 5,572 | 3,379 | 31,349 |
| 116,229 | 126 | 22,293 | 5,507 | 3,362 | 31,288 |
| 116,230 | 125 | 22,461 | 5,518 | 3,370 | 31,474 |
| 116,231 | 129 | 22,788 | 5,563 | 3,410 | 31,890 |
| 116,232 | 121 | 22,786 | 5,529 | 3,378 | 31,814 |
| 116,233 | 122 | 23,077 | 5,608 | 3,404 | 32,211 |
| 116,234 | 123 | 22,561 | 5,467 | 3,326 | 31,477 |
| 116,235 | 130 | 22,747 | 5,495 | 3,354 | 31,726 |
| 116,236 | 135 | 22,942 | 5,538 | 3,393 | 32,008 |
| 116,237 | 137 | 23,104 | 5,567 | 3,425 | 32,233 |
| 116,238 | 145 | 22,798 | 5,479 | 3,386 | 31,808 |
| 116,239 | 144 | 22,750 | 5,482 | 3,383 | 31,759 |
| 116,240 | 147 | 22,654 | 5,457 | 3,425 | 31,683 |
| 116,241 | 150 | 22,633 | 5,434 | 3,435 | 31,652 |
| 116,242 | 151 | 22,568 | 5,416 | 3,401 | 31,536 |
| 116,243 | 153 | 22,608 | 5,434 | 3,405 | 31,600 |
| 116,244 | 153 | 22,598 | 5,440 | 3,402 | 31,593 |
| 116,245 | 148 | 22,734 | 5,454 | 3,398 | 31,734 |
| 116,246 | 150 | 23,003 | 5,504 | 3,432 | 32,089 |
| 116,247 | 148 | 22,859 | 5,443 | 3,421 | 31,871 |

|         |     |        |       |       |        |
|---------|-----|--------|-------|-------|--------|
| 116,248 | 150 | 22,825 | 5,492 | 3,390 | 31,857 |
| 116,249 | 150 | 22,956 | 5,506 | 3,412 | 32,024 |
| 116,250 | 147 | 22,958 | 5,526 | 3,412 | 32,043 |
| 116,251 | 146 | 22,931 | 5,522 | 3,424 | 32,023 |
| 116,252 | 132 | 23,110 | 5,578 | 3,486 | 32,306 |
| 116,253 | 128 | 22,976 | 5,540 | 3,464 | 32,108 |
| 116,254 | 126 | 23,416 | 5,620 | 3,539 | 32,701 |
| 116,255 | 122 | 23,533 | 5,629 | 3,551 | 32,835 |
| 116,256 | 120 | 23,372 | 5,587 | 3,532 | 32,611 |
| 116,257 | 120 | 23,570 | 5,648 | 3,570 | 32,908 |
| 116,258 | 123 | 23,386 | 5,701 | 3,583 | 32,793 |
| 116,259 | 129 | 23,230 | 5,734 | 3,584 | 32,677 |
| 116,260 | 126 | 23,234 | 5,729 | 3,584 | 32,673 |
| 116,261 | 128 | 23,538 | 5,789 | 3,616 | 33,071 |
| 116,262 | 131 | 23,661 | 5,864 | 3,640 | 33,296 |
| 116,263 | 130 | 23,336 | 5,796 | 3,617 | 32,879 |
| 116,264 | 133 | 23,350 | 5,847 | 3,630 | 32,960 |
| 116,265 | 128 | 23,074 | 5,747 | 3,565 | 32,514 |
| 116,266 | 131 | 23,129 | 5,758 | 3,574 | 32,592 |
| 116,267 | 131 | 23,167 | 5,763 | 3,567 | 32,628 |
| 116,268 | 125 | 22,993 | 5,716 | 3,547 | 32,381 |
| 116,269 | 124 | 23,127 | 5,779 | 3,568 | 32,598 |
| 116,270 | 120 | 22,996 | 5,776 | 3,564 | 32,456 |
| 116,271 | 119 | 22,900 | 5,764 | 3,542 | 32,325 |
| 116,272 | 117 | 22,564 | 5,752 | 3,527 | 31,960 |
| 116,273 | 122 | 22,685 | 5,758 | 3,530 | 32,095 |
| 116,274 | 124 | 22,561 | 5,737 | 3,517 | 31,939 |
| 116,275 | 124 | 22,847 | 5,798 | 3,534 | 32,303 |
| 116,276 | 131 | 22,683 | 5,756 | 3,519 | 32,089 |
| 116,277 | 135 | 22,417 | 5,710 | 3,475 | 31,737 |
| 116,278 | 139 | 22,557 | 5,782 | 3,509 | 31,987 |
| 116,279 | 136 | 22,160 | 5,721 | 3,466 | 31,483 |

|         |     |        |       |       |        |
|---------|-----|--------|-------|-------|--------|
| 116,280 | 134 | 22,026 | 5,724 | 3,460 | 31,344 |
| 116,281 | 132 | 21,901 | 5,716 | 3,449 | 31,198 |
| 116,282 | 129 | 21,814 | 5,725 | 3,480 | 31,148 |
| 116,283 | 132 | 21,775 | 5,738 | 3,498 | 31,143 |
| 116,284 | 132 | 21,537 | 5,680 | 3,469 | 30,818 |
| 116,285 | 133 | 21,825 | 5,725 | 3,493 | 31,176 |
| 116,286 | 130 | 22,011 | 5,836 | 3,557 | 31,534 |
| 116,287 | 114 | 20,894 | 5,566 | 3,379 | 29,953 |
| 116,288 | 117 | 20,837 | 5,553 | 3,356 | 29,863 |
| 116,289 | 114 | 20,815 | 5,560 | 3,358 | 29,847 |
| 116,290 | 113 | 20,842 | 5,574 | 3,363 | 29,892 |
| 116,291 | 114 | 20,849 | 5,595 | 3,352 | 29,910 |
| 116,292 | 111 | 20,827 | 5,608 | 3,365 | 29,911 |
| 116,293 | 113 | 21,603 | 5,853 | 3,529 | 31,098 |
| 116,294 | 110 | 21,568 | 5,865 | 3,507 | 31,050 |
| 116,295 | 113 | 21,567 | 5,884 | 3,517 | 31,081 |
| 116,296 | 113 | 21,532 | 5,896 | 3,521 | 31,062 |
| 116,297 | 124 | 21,676 | 5,965 | 3,584 | 31,349 |
| 116,298 | 126 | 21,754 | 6,021 | 3,613 | 31,514 |
| 116,299 | 124 | 21,623 | 5,969 | 3,609 | 31,325 |
| 116,300 | 121 | 21,610 | 5,967 | 3,609 | 31,307 |
| 116,301 | 122 | 21,683 | 5,974 | 3,605 | 31,384 |
| 116,302 | 122 | 21,627 | 5,976 | 3,564 | 31,289 |
| 116,303 | 123 | 21,922 | 6,032 | 3,607 | 31,684 |
| 116,304 | 125 | 21,966 | 6,060 | 3,617 | 31,768 |
| 116,305 | 127 | 21,888 | 6,077 | 3,595 | 31,687 |
| 116,306 | 128 | 21,764 | 6,100 | 3,585 | 31,577 |
| 116,307 | 126 | 21,595 | 6,058 | 3,570 | 31,349 |
| 116,308 | 120 | 21,433 | 5,938 | 3,540 | 31,031 |
| 116,309 | 122 | 21,764 | 6,021 | 3,596 | 31,503 |
| 116,310 | 118 | 22,120 | 6,095 | 3,641 | 31,974 |
| 116,311 | 124 | 22,281 | 6,153 | 3,668 | 32,226 |

|         |     |        |       |       |        |
|---------|-----|--------|-------|-------|--------|
| 116,312 | 135 | 22,452 | 6,178 | 3,701 | 32,466 |
| 116,313 | 131 | 22,261 | 6,099 | 3,666 | 32,157 |
| 116,314 | 127 | 22,262 | 6,092 | 3,679 | 32,160 |
| 116,315 | 125 | 21,861 | 5,993 | 3,617 | 31,596 |
| 116,316 | 125 | 22,059 | 6,038 | 3,648 | 31,870 |
| 116,317 | 124 | 22,355 | 6,062 | 3,679 | 32,220 |
| 116,318 | 126 | 22,378 | 6,080 | 3,675 | 32,259 |
| 116,319 | 125 | 22,209 | 6,065 | 3,651 | 32,050 |
| 116,320 | 126 | 22,455 | 6,133 | 3,702 | 32,416 |
| 116,321 | 135 | 22,192 | 6,077 | 3,656 | 32,060 |
| 116,322 | 134 | 22,092 | 6,053 | 3,659 | 31,938 |
| 116,323 | 130 | 22,233 | 6,052 | 3,668 | 32,083 |
| 116,324 | 130 | 22,354 | 6,098 | 3,705 | 32,287 |
| 116,325 | 123 | 22,025 | 5,977 | 3,645 | 31,770 |
| 116,326 | 123 | 22,208 | 6,042 | 3,686 | 32,059 |
| 116,327 | 122 | 22,315 | 6,108 | 3,718 | 32,263 |
| 116,328 | 115 | 22,099 | 6,045 | 3,689 | 31,948 |
| 116,329 | 115 | 22,030 | 6,056 | 3,676 | 31,877 |
| 116,330 | 114 | 21,739 | 6,015 | 3,646 | 31,514 |
| 116,331 | 115 | 21,983 | 6,035 | 3,645 | 31,778 |
| 116,332 | 117 | 21,502 | 5,908 | 3,559 | 31,086 |
| 116,333 | 124 | 21,693 | 5,961 | 3,566 | 31,344 |
| 116,334 | 124 | 21,677 | 5,958 | 3,570 | 31,329 |
| 116,335 | 123 | 21,846 | 5,981 | 3,587 | 31,537 |
| 116,336 | 123 | 21,780 | 5,997 | 3,587 | 31,487 |
| 116,337 | 127 | 21,500 | 5,882 | 3,516 | 31,025 |
| 116,338 | 123 | 21,156 | 5,780 | 3,459 | 30,518 |
| 116,339 | 124 | 21,263 | 5,822 | 3,488 | 30,697 |
| 116,340 | 123 | 21,568 | 5,889 | 3,535 | 31,115 |
| 116,341 | 123 | 21,607 | 5,886 | 3,535 | 31,151 |
| 116,342 | 122 | 21,637 | 5,839 | 3,514 | 31,112 |
| 116,343 | 122 | 21,676 | 5,810 | 3,498 | 31,106 |

|         |     |        |       |       |        |
|---------|-----|--------|-------|-------|--------|
| 116,344 | 122 | 21,633 | 5,801 | 3,502 | 31,058 |
| 116,345 | 123 | 21,713 | 5,824 | 3,525 | 31,185 |
| 116,346 | 119 | 21,533 | 5,736 | 3,492 | 30,880 |
| 116,347 | 116 | 21,747 | 5,789 | 3,522 | 31,174 |
| 116,348 | 114 | 21,813 | 5,807 | 3,515 | 31,249 |
| 116,349 | 126 | 21,627 | 5,754 | 3,474 | 30,981 |
| 116,350 | 128 | 21,375 | 5,727 | 3,461 | 30,691 |
| 116,351 | 129 | 21,105 | 5,659 | 3,420 | 30,313 |
| 116,352 | 131 | 20,954 | 5,659 | 3,421 | 30,165 |
| 116,353 | 132 | 20,780 | 5,640 | 3,418 | 29,970 |
| 116,354 | 129 | 20,549 | 5,567 | 3,374 | 29,619 |
| 116,355 | 140 | 20,501 | 5,577 | 3,354 | 29,572 |
| 116,356 | 136 | 20,178 | 5,488 | 3,313 | 29,115 |
| 116,357 | 134 | 20,423 | 5,549 | 3,357 | 29,463 |
| 116,358 | 140 | 20,142 | 5,512 | 3,326 | 29,120 |
| 116,359 | 146 | 20,132 | 5,531 | 3,294 | 29,103 |
| 116,360 | 145 | 20,204 | 5,570 | 3,306 | 29,225 |
| 116,361 | 145 | 19,953 | 5,540 | 3,290 | 28,928 |
| 116,362 | 142 | 19,839 | 5,532 | 3,282 | 28,795 |
| 116,363 | 131 | 19,696 | 5,530 | 3,262 | 28,619 |
| 116,364 | 131 | 19,717 | 5,508 | 3,245 | 28,601 |
| 116,365 | 132 | 19,687 | 5,516 | 3,218 | 28,553 |
| 116,366 | 134 | 19,908 | 5,608 | 3,274 | 28,924 |
| 116,367 | 137 | 19,968 | 5,611 | 3,301 | 29,017 |
| 116,368 | 136 | 20,021 | 5,645 | 3,288 | 29,090 |
| 116,369 | 133 | 19,848 | 5,583 | 3,263 | 28,827 |
| 116,370 | 135 | 19,944 | 5,589 | 3,267 | 28,935 |
| 116,371 | 134 | 19,844 | 5,595 | 3,273 | 28,846 |
| 116,372 | 127 | 19,914 | 5,633 | 3,299 | 28,973 |
| 116,373 | 127 | 19,607 | 5,549 | 3,235 | 28,518 |
| 116,374 | 130 | 19,679 | 5,570 | 3,252 | 28,631 |
| 116,375 | 128 | 19,925 | 5,678 | 3,300 | 29,031 |

|         |     |        |       |       |        |
|---------|-----|--------|-------|-------|--------|
| 116,376 | 132 | 19,876 | 5,678 | 3,297 | 28,983 |
| 116,377 | 133 | 19,941 | 5,671 | 3,288 | 29,033 |
| 116,378 | 128 | 19,882 | 5,614 | 3,254 | 28,878 |
| 116,379 | 128 | 19,929 | 5,611 | 3,245 | 28,913 |
| 116,380 | 128 | 19,990 | 5,622 | 3,260 | 29,000 |
| 116,381 | 127 | 20,116 | 5,641 | 3,276 | 29,160 |
| 116,382 | 126 | 20,156 | 5,642 | 3,275 | 29,199 |
| 116,383 | 126 | 20,160 | 5,640 | 3,275 | 29,201 |
| 116,384 | 120 | 20,415 | 5,704 | 3,340 | 29,579 |
| 116,385 | 117 | 20,400 | 5,718 | 3,340 | 29,575 |
| 116,386 | 116 | 19,793 | 5,592 | 3,268 | 28,769 |
| 116,387 | 116 | 19,861 | 5,638 | 3,282 | 28,897 |
| 116,388 | 111 | 19,770 | 5,616 | 3,289 | 28,786 |
| 116,389 | 110 | 19,725 | 5,655 | 3,317 | 28,807 |
| 116,390 | 113 | 19,766 | 5,662 | 3,308 | 28,849 |
| 116,391 | 113 | 19,619 | 5,610 | 3,286 | 28,628 |
| 116,392 | 111 | 19,481 | 5,566 | 3,265 | 28,423 |
| 116,393 | 111 | 19,298 | 5,533 | 3,244 | 28,186 |
| 116,394 | 113 | 19,239 | 5,561 | 3,235 | 28,148 |
| 116,395 | 114 | 19,455 | 5,622 | 3,264 | 28,455 |
| 116,396 | 115 | 19,189 | 5,567 | 3,257 | 28,128 |
| 116,397 | 117 | 19,251 | 5,621 | 3,292 | 28,281 |
| 116,398 | 114 | 19,227 | 5,605 | 3,271 | 28,217 |
| 116,399 | 110 | 19,338 | 5,623 | 3,295 | 28,366 |
| 116,400 | 94  | 18,781 | 5,450 | 3,183 | 27,508 |
| 116,401 | 95  | 19,086 | 5,514 | 3,242 | 27,937 |
| 116,402 | 92  | 19,420 | 5,605 | 3,291 | 28,408 |
| 116,403 | 92  | 19,474 | 5,612 | 3,300 | 28,478 |
| 116,404 | 91  | 19,288 | 5,568 | 3,283 | 28,230 |
| 116,405 | 91  | 19,761 | 5,681 | 3,349 | 28,882 |
| 116,406 | 82  | 20,197 | 5,797 | 3,390 | 29,466 |
| 116,407 | 82  | 20,539 | 5,855 | 3,429 | 29,905 |

|         |     |        |       |       |        |
|---------|-----|--------|-------|-------|--------|
| 116,408 | 83  | 20,574 | 5,805 | 3,405 | 29,867 |
| 116,409 | 83  | 20,804 | 5,857 | 3,455 | 30,199 |
| 116,410 | 82  | 20,726 | 5,835 | 3,457 | 30,100 |
| 116,411 | 82  | 20,527 | 5,775 | 3,426 | 29,810 |
| 116,412 | 82  | 20,846 | 5,873 | 3,471 | 30,272 |
| 116,413 | 78  | 20,821 | 5,856 | 3,460 | 30,215 |
| 116,414 | 78  | 20,678 | 5,838 | 3,445 | 30,039 |
| 116,415 | 77  | 20,535 | 5,845 | 3,455 | 29,912 |
| 116,416 | 87  | 20,643 | 5,863 | 3,484 | 30,077 |
| 116,417 | 86  | 20,779 | 5,856 | 3,476 | 30,197 |
| 116,418 | 85  | 20,812 | 5,870 | 3,454 | 30,221 |
| 116,419 | 97  | 20,664 | 5,854 | 3,470 | 30,085 |
| 116,420 | 97  | 20,463 | 5,802 | 3,433 | 29,795 |
| 116,421 | 96  | 20,634 | 5,878 | 3,472 | 30,080 |
| 116,422 | 96  | 20,536 | 5,836 | 3,448 | 29,916 |
| 116,423 | 95  | 20,540 | 5,826 | 3,445 | 29,906 |
| 116,424 | 95  | 20,438 | 5,869 | 3,456 | 29,858 |
| 116,425 | 94  | 20,482 | 5,854 | 3,444 | 29,874 |
| 116,426 | 89  | 20,383 | 5,841 | 3,433 | 29,746 |
| 116,427 | 91  | 20,619 | 5,930 | 3,477 | 30,117 |
| 116,428 | 95  | 20,449 | 5,890 | 3,452 | 29,886 |
| 116,429 | 94  | 20,207 | 5,839 | 3,419 | 29,559 |
| 116,430 | 99  | 20,658 | 6,015 | 3,518 | 30,290 |
| 116,431 | 99  | 20,371 | 5,960 | 3,490 | 29,920 |
| 116,432 | 103 | 20,376 | 5,992 | 3,513 | 29,984 |
| 116,433 | 111 | 20,657 | 6,107 | 3,573 | 30,448 |
| 116,434 | 113 | 20,854 | 6,144 | 3,595 | 30,706 |
| 116,435 | 113 | 20,839 | 6,134 | 3,591 | 30,677 |
| 116,436 | 113 | 20,769 | 6,101 | 3,588 | 30,571 |
| 116,437 | 111 | 20,433 | 5,974 | 3,502 | 30,020 |
| 116,438 | 111 | 20,770 | 6,030 | 3,547 | 30,458 |
| 116,439 | 110 | 21,004 | 6,061 | 3,564 | 30,739 |

|         |     |        |       |       |        |
|---------|-----|--------|-------|-------|--------|
| 116,440 | 110 | 21,198 | 6,111 | 3,584 | 31,003 |
| 116,441 | 106 | 21,162 | 6,108 | 3,584 | 30,960 |
| 116,442 | 106 | 21,168 | 6,127 | 3,588 | 30,989 |
| 116,443 | 105 | 20,942 | 6,078 | 3,557 | 30,682 |
| 116,444 | 107 | 21,062 | 6,120 | 3,583 | 30,872 |
| 116,445 | 105 | 21,083 | 6,125 | 3,589 | 30,902 |
| 116,446 | 105 | 21,062 | 6,135 | 3,588 | 30,890 |
| 116,447 | 107 | 20,999 | 6,137 | 3,587 | 30,830 |
| 116,448 | 108 | 20,947 | 6,165 | 3,588 | 30,808 |
| 116,449 | 108 | 20,847 | 6,166 | 3,594 | 30,715 |
| 116,450 | 110 | 20,613 | 6,107 | 3,547 | 30,377 |
| 116,451 | 110 | 20,514 | 6,063 | 3,521 | 30,208 |
| 116,452 | 115 | 20,599 | 6,084 | 3,513 | 30,311 |
| 116,453 | 118 | 20,488 | 6,028 | 3,503 | 30,137 |
| 116,454 | 119 | 20,452 | 6,041 | 3,500 | 30,112 |
| 116,455 | 121 | 20,516 | 6,061 | 3,533 | 30,231 |
| 116,456 | 124 | 20,606 | 6,041 | 3,558 | 30,329 |
| 116,457 | 126 | 20,125 | 5,916 | 3,491 | 29,658 |
| 116,458 | 127 | 20,092 | 5,892 | 3,502 | 29,613 |
| 116,459 | 130 | 20,216 | 5,912 | 3,501 | 29,759 |
| 116,460 | 147 | 20,112 | 5,889 | 3,467 | 29,615 |
| 116,461 | 149 | 20,303 | 5,869 | 3,463 | 29,784 |
| 116,462 | 163 | 20,373 | 5,861 | 3,459 | 29,856 |
| 116,463 | 162 | 20,434 | 5,836 | 3,450 | 29,882 |
| 116,464 | 169 | 20,823 | 5,891 | 3,483 | 30,366 |
| 116,465 | 171 | 20,722 | 5,882 | 3,464 | 30,239 |
| 116,466 | 171 | 21,121 | 6,017 | 3,551 | 30,860 |
| 116,467 | 169 | 20,925 | 5,969 | 3,519 | 30,582 |
| 116,468 | 170 | 20,981 | 6,036 | 3,562 | 30,749 |
| 116,469 | 171 | 20,853 | 6,058 | 3,601 | 30,683 |
| 116,470 | 159 | 20,858 | 6,072 | 3,612 | 30,701 |
| 116,471 | 160 | 20,882 | 6,066 | 3,628 | 30,736 |



|         |     |        |       |       |        |
|---------|-----|--------|-------|-------|--------|
| 116,472 | 161 | 20,897 | 6,068 | 3,645 | 30,771 |
| 116,473 | 162 | 21,000 | 6,070 | 3,677 | 30,909 |
| 116,474 | 167 | 21,248 | 6,113 | 3,707 | 31,235 |
| 116,475 | 172 | 21,235 | 6,046 | 3,696 | 31,149 |
| 116,476 | 170 | 21,338 | 6,051 | 3,696 | 31,255 |
| 116,477 | 169 | 21,411 | 6,041 | 3,695 | 31,316 |
| 116,478 | 171 | 21,709 | 6,089 | 3,743 | 31,712 |
| 116,479 | 163 | 21,592 | 6,065 | 3,750 | 31,570 |
| 116,480 | 163 | 21,623 | 6,075 | 3,738 | 31,599 |
| 116,481 | 168 | 21,900 | 6,116 | 3,774 | 31,958 |
| 116,482 | 170 | 21,852 | 6,085 | 3,754 | 31,861 |
| 116,483 | 167 | 21,814 | 6,059 | 3,749 | 31,789 |
| 116,484 | 170 | 21,932 | 6,091 | 3,790 | 31,983 |
| 116,485 | 179 | 21,512 | 6,032 | 3,739 | 31,462 |
| 116,486 | 178 | 21,314 | 5,990 | 3,721 | 31,203 |
| 116,487 | 186 | 21,501 | 6,077 | 3,760 | 31,524 |
| 116,488 | 183 | 21,456 | 6,080 | 3,748 | 31,467 |
| 116,489 | 191 | 21,682 | 6,170 | 3,805 | 31,848 |
| 116,490 | 191 | 21,750 | 6,175 | 3,815 | 31,931 |
| 116,491 | 190 | 21,409 | 6,114 | 3,797 | 31,510 |
| 116,492 | 198 | 21,685 | 6,186 | 3,858 | 31,927 |
| 116,493 | 202 | 21,877 | 6,238 | 3,898 | 32,215 |
| 116,494 | 202 | 22,043 | 6,293 | 3,945 | 32,483 |
| 116,495 | 203 | 22,390 | 6,401 | 4,004 | 32,998 |
| 116,496 | 203 | 22,428 | 6,384 | 3,995 | 33,010 |
| 116,497 | 204 | 22,452 | 6,424 | 4,040 | 33,120 |
| 116,498 | 199 | 22,448 | 6,424 | 4,037 | 33,108 |
| 116,499 | 196 | 22,408 | 6,362 | 4,008 | 32,974 |
| 116,500 | 198 | 22,546 | 6,396 | 4,023 | 33,163 |
| 116,501 | 195 | 22,538 | 6,392 | 4,031 | 33,156 |
| 116,502 | 192 | 22,332 | 6,334 | 3,988 | 32,846 |
| 116,503 | 187 | 22,276 | 6,349 | 4,005 | 32,817 |

|         |     |        |       |       |        |
|---------|-----|--------|-------|-------|--------|
| 116,504 | 186 | 22,112 | 6,315 | 3,959 | 32,572 |
| 116,505 | 184 | 21,716 | 6,167 | 3,857 | 31,924 |
| 116,506 | 183 | 21,732 | 6,169 | 3,853 | 31,937 |
| 116,507 | 184 | 21,699 | 6,188 | 3,875 | 31,946 |
| 116,508 | 178 | 21,333 | 6,137 | 3,837 | 31,485 |
| 116,509 | 178 | 21,502 | 6,169 | 3,852 | 31,701 |
| 116,510 | 172 | 21,262 | 6,126 | 3,803 | 31,363 |
| 116,511 | 149 | 20,725 | 5,962 | 3,707 | 30,543 |
| 116,512 | 149 | 20,674 | 5,962 | 3,703 | 30,488 |
| 116,513 | 135 | 20,423 | 5,917 | 3,691 | 30,166 |
| 116,514 | 134 | 20,427 | 5,940 | 3,753 | 30,254 |
| 116,515 | 126 | 20,235 | 5,938 | 3,742 | 30,041 |
| 116,516 | 125 | 20,227 | 5,953 | 3,757 | 30,062 |
| 116,517 | 125 | 20,354 | 5,931 | 3,768 | 30,178 |
| 116,518 | 126 | 20,371 | 5,907 | 3,750 | 30,154 |
| 116,519 | 124 | 20,578 | 5,867 | 3,744 | 30,313 |
| 116,520 | 127 | 20,436 | 5,822 | 3,704 | 30,089 |
| 116,521 | 125 | 20,581 | 5,840 | 3,686 | 30,232 |
| 116,522 | 128 | 20,540 | 5,817 | 3,674 | 30,159 |
| 116,523 | 129 | 20,616 | 5,828 | 3,659 | 30,232 |
| 116,524 | 130 | 20,686 | 5,833 | 3,659 | 30,308 |
| 116,525 | 127 | 20,550 | 5,857 | 3,660 | 30,194 |
| 116,526 | 136 | 20,555 | 5,865 | 3,655 | 30,211 |
| 116,527 | 137 | 20,370 | 5,836 | 3,640 | 29,983 |
| 116,528 | 139 | 20,408 | 5,918 | 3,685 | 30,150 |
| 116,529 | 143 | 20,307 | 5,900 | 3,683 | 30,033 |
| 116,530 | 140 | 19,883 | 5,787 | 3,592 | 29,402 |
| 116,531 | 140 | 20,112 | 5,807 | 3,606 | 29,665 |
| 116,532 | 136 | 20,180 | 5,801 | 3,597 | 29,714 |
| 116,533 | 135 | 20,327 | 5,834 | 3,619 | 29,915 |
| 116,534 | 130 | 20,634 | 5,896 | 3,657 | 30,317 |
| 116,535 | 120 | 20,368 | 5,747 | 3,573 | 29,808 |

|         |     |        |       |       |        |
|---------|-----|--------|-------|-------|--------|
| 116,536 | 120 | 20,320 | 5,730 | 3,571 | 29,741 |
| 116,537 | 112 | 20,421 | 5,758 | 3,560 | 29,851 |
| 116,538 | 110 | 20,123 | 5,618 | 3,487 | 29,338 |
| 116,539 | 113 | 20,457 | 5,713 | 3,528 | 29,811 |
| 116,540 | 108 | 20,394 | 5,686 | 3,527 | 29,715 |
| 116,541 | 109 | 20,226 | 5,677 | 3,502 | 29,514 |
| 116,542 | 110 | 20,526 | 5,758 | 3,530 | 29,924 |
| 116,543 | 103 | 20,425 | 5,753 | 3,515 | 29,796 |
| 116,544 | 100 | 20,375 | 5,767 | 3,503 | 29,745 |
| 116,545 | 106 | 20,305 | 5,776 | 3,506 | 29,693 |
| 116,546 | 103 | 20,244 | 5,692 | 3,472 | 29,511 |
| 116,547 | 104 | 20,242 | 5,650 | 3,431 | 29,427 |
| 116,548 | 105 | 20,397 | 5,632 | 3,433 | 29,567 |
| 116,549 | 111 | 20,545 | 5,612 | 3,418 | 29,686 |
| 116,550 | 111 | 20,623 | 5,621 | 3,417 | 29,772 |
| 116,551 | 111 | 20,907 | 5,687 | 3,448 | 30,153 |
| 116,552 | 115 | 20,596 | 5,607 | 3,400 | 29,718 |
| 116,553 | 114 | 20,773 | 5,632 | 3,404 | 29,923 |
| 116,554 | 114 | 20,776 | 5,647 | 3,418 | 29,955 |
| 116,555 | 114 | 20,766 | 5,642 | 3,418 | 29,940 |
| 116,556 | 114 | 20,842 | 5,688 | 3,446 | 30,090 |
| 116,557 | 117 | 21,116 | 5,751 | 3,466 | 30,450 |
| 116,558 | 116 | 21,008 | 5,748 | 3,469 | 30,341 |
| 116,559 | 121 | 20,958 | 5,742 | 3,490 | 30,311 |
| 116,560 | 120 | 20,690 | 5,698 | 3,461 | 29,969 |
| 116,561 | 124 | 20,677 | 5,679 | 3,495 | 29,975 |
| 116,562 | 123 | 20,632 | 5,727 | 3,516 | 29,998 |
| 116,563 | 123 | 20,533 | 5,724 | 3,521 | 29,901 |
| 116,564 | 124 | 20,792 | 5,813 | 3,519 | 30,248 |
| 116,565 | 125 | 20,791 | 5,749 | 3,477 | 30,142 |
| 116,566 | 124 | 20,601 | 5,619 | 3,403 | 29,747 |
| 116,567 | 123 | 20,838 | 5,659 | 3,418 | 30,038 |

|         |     |        |       |       |        |
|---------|-----|--------|-------|-------|--------|
| 116,568 | 120 | 21,035 | 5,721 | 3,444 | 30,320 |
| 116,569 | 117 | 20,768 | 5,639 | 3,395 | 29,919 |
| 116,570 | 114 | 20,687 | 5,652 | 3,358 | 29,811 |
| 116,571 | 118 | 20,271 | 5,534 | 3,295 | 29,218 |
| 116,572 | 118 | 20,456 | 5,580 | 3,321 | 29,475 |
| 116,573 | 118 | 20,770 | 5,661 | 3,349 | 29,898 |
| 116,574 | 125 | 20,609 | 5,606 | 3,312 | 29,652 |
| 116,575 | 125 | 20,906 | 5,650 | 3,331 | 30,012 |
| 116,576 | 121 | 21,159 | 5,701 | 3,358 | 30,339 |
| 116,577 | 112 | 20,899 | 5,576 | 3,310 | 29,897 |
| 116,578 | 114 | 20,651 | 5,506 | 3,244 | 29,515 |
| 116,579 | 112 | 20,829 | 5,532 | 3,265 | 29,738 |
| 116,580 | 108 | 21,043 | 5,601 | 3,306 | 30,058 |
| 116,581 | 105 | 20,915 | 5,556 | 3,286 | 29,862 |
| 116,582 | 106 | 20,776 | 5,520 | 3,290 | 29,692 |
| 116,583 | 106 | 20,419 | 5,416 | 3,234 | 29,175 |
| 116,584 | 107 | 20,656 | 5,457 | 3,262 | 29,482 |
| 116,585 | 108 | 20,608 | 5,471 | 3,258 | 29,445 |
| 116,586 | 104 | 20,507 | 5,464 | 3,247 | 29,322 |
| 116,587 | 103 | 20,482 | 5,438 | 3,242 | 29,265 |
| 116,588 | 105 | 20,783 | 5,490 | 3,274 | 29,652 |
| 116,589 | 109 | 20,710 | 5,500 | 3,265 | 29,584 |
| 116,590 | 105 | 20,611 | 5,437 | 3,253 | 29,406 |
| 116,591 | 104 | 20,558 | 5,411 | 3,228 | 29,301 |
| 116,592 | 105 | 20,840 | 5,463 | 3,259 | 29,667 |
| 116,593 | 106 | 20,835 | 5,432 | 3,242 | 29,615 |
| 116,594 | 106 | 20,767 | 5,362 | 3,213 | 29,448 |
| 116,595 | 106 | 20,757 | 5,344 | 3,210 | 29,417 |
| 116,596 | 101 | 20,763 | 5,314 | 3,177 | 29,355 |
| 116,597 | 103 | 20,570 | 5,331 | 3,191 | 29,195 |
| 116,598 | 100 | 20,302 | 5,269 | 3,149 | 28,820 |
| 116,599 | 99  | 20,142 | 5,255 | 3,139 | 28,635 |

|         |     |        |       |       |        |
|---------|-----|--------|-------|-------|--------|
| 116,600 | 95  | 20,318 | 5,294 | 3,157 | 28,864 |
| 116,601 | 93  | 20,156 | 5,269 | 3,142 | 28,660 |
| 116,602 | 95  | 20,036 | 5,278 | 3,155 | 28,564 |
| 116,603 | 94  | 20,013 | 5,254 | 3,144 | 28,505 |
| 116,604 | 95  | 20,067 | 5,238 | 3,151 | 28,551 |
| 116,605 | 99  | 20,320 | 5,315 | 3,200 | 28,934 |
| 116,606 | 97  | 20,163 | 5,299 | 3,185 | 28,744 |
| 116,607 | 98  | 20,352 | 5,321 | 3,232 | 29,003 |
| 116,608 | 96  | 20,386 | 5,358 | 3,255 | 29,095 |
| 116,609 | 91  | 20,244 | 5,279 | 3,202 | 28,816 |
| 116,610 | 98  | 20,378 | 5,325 | 3,212 | 29,013 |
| 116,611 | 103 | 20,650 | 5,380 | 3,236 | 29,369 |
| 116,612 | 104 | 20,627 | 5,309 | 3,203 | 29,243 |
| 116,613 | 108 | 20,918 | 5,378 | 3,241 | 29,645 |
| 116,614 | 109 | 20,910 | 5,335 | 3,244 | 29,598 |
| 116,615 | 115 | 20,896 | 5,317 | 3,252 | 29,580 |
| 116,616 | 114 | 20,555 | 5,249 | 3,221 | 29,139 |
| 116,617 | 111 | 20,825 | 5,371 | 3,293 | 29,600 |
| 116,618 | 111 | 20,534 | 5,318 | 3,254 | 29,217 |
| 116,619 | 111 | 20,510 | 5,304 | 3,257 | 29,182 |
| 116,620 | 114 | 20,399 | 5,303 | 3,263 | 29,079 |
| 116,621 | 116 | 20,445 | 5,344 | 3,293 | 29,198 |
| 116,622 | 112 | 20,188 | 5,294 | 3,245 | 28,839 |
| 116,623 | 113 | 20,182 | 5,305 | 3,241 | 28,841 |
| 116,624 | 116 | 20,463 | 5,373 | 3,276 | 29,228 |
| 116,625 | 110 | 20,414 | 5,389 | 3,267 | 29,180 |
| 116,626 | 120 | 20,397 | 5,393 | 3,285 | 29,195 |
| 116,627 | 123 | 20,361 | 5,392 | 3,280 | 29,156 |
| 116,628 | 121 | 19,994 | 5,335 | 3,247 | 28,697 |
| 116,629 | 120 | 20,601 | 5,557 | 3,388 | 29,666 |
| 116,630 | 122 | 20,761 | 5,662 | 3,417 | 29,962 |
| 116,631 | 127 | 20,594 | 5,623 | 3,398 | 29,742 |

|         |     |        |       |       |        |
|---------|-----|--------|-------|-------|--------|
| 116,632 | 129 | 20,704 | 5,645 | 3,403 | 29,881 |
| 116,633 | 127 | 20,708 | 5,659 | 3,400 | 29,894 |
| 116,634 | 126 | 20,802 | 5,706 | 3,425 | 30,059 |
| 116,635 | 124 | 20,475 | 5,655 | 3,406 | 29,660 |
| 116,636 | 124 | 20,553 | 5,721 | 3,438 | 29,836 |
| 116,637 | 123 | 20,715 | 5,778 | 3,463 | 30,079 |
| 116,638 | 123 | 20,668 | 5,809 | 3,495 | 30,095 |
| 116,639 | 128 | 20,611 | 5,849 | 3,506 | 30,094 |
| 116,640 | 128 | 20,498 | 5,862 | 3,522 | 30,010 |
| 116,641 | 133 | 20,433 | 5,873 | 3,517 | 29,956 |
| 116,642 | 144 | 20,403 | 5,881 | 3,515 | 29,943 |
| 116,643 | 147 | 20,326 | 5,858 | 3,497 | 29,828 |
| 116,644 | 149 | 20,357 | 5,914 | 3,516 | 29,936 |
| 116,645 | 147 | 20,474 | 5,955 | 3,534 | 30,110 |
| 116,646 | 160 | 19,956 | 5,830 | 3,463 | 29,409 |
| 116,647 | 167 | 20,365 | 5,906 | 3,508 | 29,946 |
| 116,648 | 168 | 20,695 | 5,943 | 3,541 | 30,347 |
| 116,649 | 168 | 20,717 | 5,960 | 3,541 | 30,386 |
| 116,650 | 169 | 20,945 | 6,009 | 3,592 | 30,715 |
| 116,651 | 170 | 21,199 | 6,110 | 3,632 | 31,111 |
| 116,652 | 167 | 21,065 | 6,050 | 3,596 | 30,878 |
| 116,653 | 166 | 21,200 | 6,067 | 3,594 | 31,027 |
| 116,654 | 166 | 21,493 | 6,150 | 3,631 | 31,440 |
| 116,655 | 166 | 21,591 | 6,210 | 3,625 | 31,592 |
| 116,656 | 164 | 21,697 | 6,212 | 3,635 | 31,708 |
| 116,657 | 165 | 21,782 | 6,211 | 3,627 | 31,785 |
| 116,658 | 170 | 21,936 | 6,233 | 3,612 | 31,951 |
| 116,659 | 166 | 21,594 | 6,143 | 3,554 | 31,457 |
| 116,660 | 174 | 21,727 | 6,239 | 3,581 | 31,721 |
| 116,661 | 167 | 21,618 | 6,210 | 3,555 | 31,550 |
| 116,662 | 162 | 21,368 | 6,173 | 3,523 | 31,226 |
| 116,663 | 160 | 21,045 | 6,126 | 3,503 | 30,834 |

|         |     |        |       |       |        |
|---------|-----|--------|-------|-------|--------|
| 116,664 | 160 | 21,555 | 6,258 | 3,561 | 31,534 |
| 116,665 | 158 | 21,882 | 6,394 | 3,593 | 32,027 |
| 116,666 | 156 | 21,889 | 6,386 | 3,570 | 32,001 |
| 116,667 | 156 | 22,101 | 6,390 | 3,596 | 32,243 |
| 116,668 | 161 | 22,040 | 6,347 | 3,575 | 32,123 |
| 116,669 | 163 | 22,227 | 6,386 | 3,602 | 32,378 |
| 116,670 | 159 | 22,287 | 6,394 | 3,600 | 32,440 |
| 116,671 | 160 | 22,205 | 6,408 | 3,611 | 32,384 |
| 116,672 | 162 | 22,219 | 6,388 | 3,610 | 32,379 |
| 116,673 | 158 | 21,918 | 6,359 | 3,606 | 32,041 |
| 116,674 | 153 | 21,997 | 6,396 | 3,646 | 32,192 |
| 116,675 | 155 | 22,181 | 6,430 | 3,669 | 32,435 |
| 116,676 | 154 | 22,021 | 6,371 | 3,647 | 32,193 |
| 116,677 | 144 | 21,985 | 6,382 | 3,642 | 32,153 |
| 116,678 | 143 | 21,919 | 6,324 | 3,590 | 31,976 |
| 116,679 | 146 | 22,145 | 6,372 | 3,608 | 32,271 |
| 116,680 | 147 | 21,484 | 6,138 | 3,487 | 31,256 |
| 116,681 | 147 | 21,744 | 6,175 | 3,514 | 31,580 |
| 116,682 | 149 | 21,951 | 6,205 | 3,546 | 31,851 |
| 116,683 | 151 | 22,107 | 6,218 | 3,556 | 32,032 |
| 116,684 | 153 | 22,089 | 6,215 | 3,548 | 32,005 |
| 116,685 | 156 | 22,021 | 6,186 | 3,512 | 31,875 |
| 116,686 | 155 | 22,046 | 6,135 | 3,491 | 31,827 |
| 116,687 | 160 | 22,313 | 6,203 | 3,511 | 32,187 |
| 116,688 | 159 | 22,261 | 6,169 | 3,471 | 32,060 |
| 116,689 | 155 | 22,412 | 6,179 | 3,456 | 32,202 |
| 116,690 | 155 | 22,461 | 6,198 | 3,482 | 32,296 |
| 116,691 | 151 | 22,655 | 6,163 | 3,462 | 32,431 |
| 116,692 | 149 | 22,583 | 6,182 | 3,473 | 32,387 |
| 116,693 | 138 | 22,311 | 6,118 | 3,444 | 32,011 |
| 116,694 | 135 | 22,717 | 6,220 | 3,528 | 32,600 |
| 116,695 | 133 | 22,917 | 6,286 | 3,584 | 32,920 |

|         |     |        |       |       |        |
|---------|-----|--------|-------|-------|--------|
| 116,696 | 133 | 22,859 | 6,277 | 3,574 | 32,843 |
| 116,697 | 119 | 22,849 | 6,304 | 3,591 | 32,863 |
| 116,698 | 113 | 22,670 | 6,248 | 3,562 | 32,593 |
| 116,699 | 116 | 22,888 | 6,337 | 3,626 | 32,967 |
| 116,700 | 115 | 22,859 | 6,307 | 3,595 | 32,876 |
| 116,701 | 118 | 22,934 | 6,331 | 3,616 | 32,999 |
| 116,702 | 116 | 22,744 | 6,267 | 3,604 | 32,731 |
| 116,703 | 116 | 22,787 | 6,251 | 3,624 | 32,778 |
| 116,704 | 121 | 22,904 | 6,302 | 3,642 | 32,969 |
| 116,705 | 128 | 22,673 | 6,243 | 3,626 | 32,670 |
| 116,706 | 127 | 22,630 | 6,227 | 3,626 | 32,610 |
| 116,707 | 126 | 22,404 | 6,224 | 3,609 | 32,363 |
| 116,708 | 124 | 22,319 | 6,226 | 3,598 | 32,267 |
| 116,709 | 120 | 22,391 | 6,278 | 3,642 | 32,431 |
| 116,710 | 118 | 22,510 | 6,260 | 3,604 | 32,492 |
| 116,711 | 111 | 22,386 | 6,153 | 3,572 | 32,222 |
| 116,712 | 107 | 22,455 | 6,150 | 3,568 | 32,280 |
| 116,713 | 109 | 22,735 | 6,226 | 3,597 | 32,667 |
| 116,714 | 108 | 22,594 | 6,199 | 3,560 | 32,461 |
| 116,715 | 107 | 22,471 | 6,162 | 3,555 | 32,295 |
| 116,716 | 108 | 22,296 | 6,182 | 3,585 | 32,171 |
| 116,717 | 105 | 22,099 | 6,166 | 3,580 | 31,950 |
| 116,718 | 109 | 21,962 | 6,207 | 3,592 | 31,870 |
| 116,719 | 106 | 22,050 | 6,227 | 3,622 | 32,005 |
| 116,720 | 108 | 22,199 | 6,292 | 3,665 | 32,264 |
| 116,721 | 108 | 22,221 | 6,278 | 3,670 | 32,277 |
| 116,722 | 110 | 22,036 | 6,226 | 3,621 | 31,993 |
| 116,723 | 107 | 21,834 | 6,206 | 3,600 | 31,747 |
| 116,724 | 112 | 22,211 | 6,335 | 3,649 | 32,307 |
| 116,725 | 115 | 22,345 | 6,357 | 3,658 | 32,475 |
| 116,726 | 112 | 22,279 | 6,362 | 3,633 | 32,386 |
| 116,727 | 110 | 21,879 | 6,265 | 3,600 | 31,854 |



|         |     |        |       |       |        |
|---------|-----|--------|-------|-------|--------|
| 116,728 | 110 | 21,974 | 6,254 | 3,601 | 31,939 |
| 116,729 | 106 | 21,969 | 6,269 | 3,597 | 31,941 |
| 116,730 | 105 | 21,854 | 6,223 | 3,587 | 31,769 |
| 116,731 | 96  | 21,600 | 6,145 | 3,552 | 31,393 |
| 116,732 | 92  | 21,309 | 6,119 | 3,535 | 31,055 |
| 116,733 | 94  | 21,362 | 6,160 | 3,558 | 31,174 |
| 116,734 | 101 | 21,267 | 6,160 | 3,558 | 31,086 |
| 116,735 | 98  | 21,057 | 6,097 | 3,530 | 30,782 |
| 116,736 | 100 | 20,845 | 6,055 | 3,523 | 30,523 |
| 116,737 | 100 | 20,631 | 6,007 | 3,502 | 30,240 |
| 116,738 | 100 | 21,042 | 6,144 | 3,605 | 30,891 |
| 116,739 | 102 | 21,311 | 6,170 | 3,633 | 31,216 |
| 116,740 | 101 | 21,090 | 6,099 | 3,611 | 30,901 |
| 116,741 | 99  | 20,939 | 6,045 | 3,578 | 30,661 |
| 116,742 | 99  | 21,289 | 6,080 | 3,599 | 31,067 |
| 116,743 | 100 | 21,592 | 6,139 | 3,632 | 31,463 |
| 116,744 | 102 | 21,551 | 6,116 | 3,615 | 31,384 |
| 116,745 | 106 | 21,287 | 6,068 | 3,603 | 31,064 |
| 116,746 | 106 | 21,213 | 6,026 | 3,589 | 30,934 |
| 116,747 | 103 | 20,833 | 5,880 | 3,504 | 30,320 |
| 116,748 | 105 | 20,958 | 5,935 | 3,531 | 30,529 |
| 116,749 | 105 | 20,723 | 5,901 | 3,495 | 30,224 |
| 116,750 | 100 | 20,440 | 5,840 | 3,444 | 29,824 |
| 116,751 | 99  | 20,246 | 5,826 | 3,457 | 29,628 |
| 116,752 | 97  | 20,102 | 5,811 | 3,442 | 29,452 |
| 116,753 | 97  | 20,050 | 5,788 | 3,421 | 29,356 |
| 116,754 | 96  | 19,957 | 5,782 | 3,416 | 29,251 |
| 116,755 | 91  | 19,961 | 5,777 | 3,414 | 29,243 |
| 116,756 | 86  | 19,942 | 5,711 | 3,392 | 29,131 |
| 116,757 | 85  | 19,691 | 5,639 | 3,366 | 28,781 |
| 116,758 | 87  | 19,909 | 5,671 | 3,388 | 29,055 |
| 116,759 | 87  | 19,583 | 5,576 | 3,337 | 28,583 |

|         |     |        |       |       |        |
|---------|-----|--------|-------|-------|--------|
| 116,760 | 86  | 19,794 | 5,637 | 3,354 | 28,871 |
| 116,761 | 89  | 19,470 | 5,583 | 3,335 | 28,477 |
| 116,762 | 89  | 19,278 | 5,539 | 3,316 | 28,222 |
| 116,763 | 90  | 19,532 | 5,607 | 3,370 | 28,599 |
| 116,764 | 90  | 19,439 | 5,577 | 3,361 | 28,467 |
| 116,765 | 89  | 19,286 | 5,489 | 3,324 | 28,188 |
| 116,766 | 90  | 19,332 | 5,476 | 3,318 | 28,216 |
| 116,767 | 90  | 19,003 | 5,353 | 3,229 | 27,675 |
| 116,768 | 90  | 19,301 | 5,421 | 3,267 | 28,079 |
| 116,769 | 90  | 19,587 | 5,457 | 3,289 | 28,423 |
| 116,770 | 92  | 19,572 | 5,449 | 3,274 | 28,387 |
| 116,771 | 91  | 19,433 | 5,432 | 3,247 | 28,203 |
| 116,772 | 88  | 19,372 | 5,399 | 3,227 | 28,086 |
| 116,773 | 89  | 19,442 | 5,371 | 3,236 | 28,138 |
| 116,774 | 90  | 19,761 | 5,453 | 3,296 | 28,600 |
| 116,775 | 87  | 19,700 | 5,413 | 3,283 | 28,483 |
| 116,776 | 88  | 19,626 | 5,397 | 3,293 | 28,404 |
| 116,777 | 92  | 19,684 | 5,391 | 3,309 | 28,476 |
| 116,778 | 96  | 19,776 | 5,399 | 3,311 | 28,582 |
| 116,779 | 97  | 19,818 | 5,421 | 3,346 | 28,682 |
| 116,780 | 95  | 19,945 | 5,440 | 3,352 | 28,832 |
| 116,781 | 99  | 20,232 | 5,503 | 3,402 | 29,236 |
| 116,782 | 101 | 20,178 | 5,480 | 3,387 | 29,146 |
| 116,783 | 98  | 19,955 | 5,382 | 3,307 | 28,742 |
| 116,784 | 98  | 20,349 | 5,455 | 3,345 | 29,247 |
| 116,785 | 93  | 20,740 | 5,513 | 3,377 | 29,723 |
| 116,786 | 92  | 20,906 | 5,501 | 3,365 | 29,864 |
| 116,787 | 93  | 21,066 | 5,491 | 3,353 | 30,003 |
| 116,788 | 94  | 21,465 | 5,571 | 3,388 | 30,518 |
| 116,789 | 95  | 21,623 | 5,603 | 3,429 | 30,750 |
| 116,790 | 96  | 21,537 | 5,603 | 3,420 | 30,656 |
| 116,791 | 93  | 21,338 | 5,576 | 3,415 | 30,422 |

|         |     |        |       |       |        |
|---------|-----|--------|-------|-------|--------|
| 116,792 | 95  | 21,555 | 5,626 | 3,458 | 30,734 |
| 116,793 | 94  | 21,522 | 5,645 | 3,472 | 30,733 |
| 116,794 | 95  | 21,710 | 5,673 | 3,506 | 30,984 |
| 116,795 | 92  | 21,722 | 5,684 | 3,509 | 31,007 |
| 116,796 | 89  | 21,983 | 5,702 | 3,512 | 31,286 |
| 116,797 | 92  | 22,036 | 5,746 | 3,515 | 31,389 |
| 116,798 | 92  | 22,012 | 5,743 | 3,531 | 31,378 |
| 116,799 | 94  | 22,258 | 5,747 | 3,541 | 31,640 |
| 116,800 | 95  | 22,245 | 5,701 | 3,523 | 31,564 |
| 116,801 | 96  | 22,666 | 5,793 | 3,540 | 32,095 |
| 116,802 | 95  | 22,740 | 5,792 | 3,546 | 32,173 |
| 116,803 | 96  | 22,904 | 5,831 | 3,566 | 32,397 |
| 116,804 | 98  | 22,993 | 5,840 | 3,575 | 32,506 |
| 116,805 | 102 | 23,090 | 5,852 | 3,578 | 32,622 |
| 116,806 | 103 | 22,924 | 5,811 | 3,572 | 32,410 |
| 116,807 | 107 | 23,276 | 5,952 | 3,621 | 32,956 |
| 116,808 | 112 | 23,239 | 5,896 | 3,588 | 32,835 |
| 116,809 | 110 | 23,013 | 5,856 | 3,550 | 32,529 |
| 116,810 | 114 | 23,362 | 5,960 | 3,624 | 33,060 |
| 116,811 | 112 | 23,368 | 5,886 | 3,611 | 32,977 |
| 116,812 | 114 | 23,383 | 5,882 | 3,591 | 32,970 |
| 116,813 | 118 | 23,705 | 5,993 | 3,636 | 33,452 |
| 116,814 | 122 | 23,709 | 6,004 | 3,658 | 33,493 |
| 116,815 | 118 | 23,615 | 5,944 | 3,637 | 33,314 |
| 116,816 | 118 | 23,277 | 5,884 | 3,561 | 32,840 |
| 116,817 | 121 | 23,597 | 5,954 | 3,620 | 33,292 |
| 116,818 | 119 | 23,636 | 5,953 | 3,616 | 33,324 |
| 116,819 | 121 | 23,896 | 5,986 | 3,646 | 33,649 |
| 116,820 | 118 | 24,190 | 6,039 | 3,689 | 34,036 |
| 116,821 | 116 | 24,068 | 6,037 | 3,673 | 33,894 |
| 116,822 | 119 | 24,053 | 5,984 | 3,651 | 33,807 |
| 116,823 | 123 | 23,751 | 5,894 | 3,603 | 33,371 |

|         |     |        |       |       |        |
|---------|-----|--------|-------|-------|--------|
| 116,824 | 120 | 23,639 | 5,825 | 3,557 | 33,141 |
| 116,825 | 119 | 24,179 | 5,915 | 3,616 | 33,829 |
| 116,826 | 118 | 23,546 | 5,729 | 3,502 | 32,895 |
| 116,827 | 120 | 23,907 | 5,772 | 3,524 | 33,323 |
| 116,828 | 116 | 23,856 | 5,766 | 3,536 | 33,274 |
| 116,829 | 115 | 23,912 | 5,780 | 3,543 | 33,350 |
| 116,830 | 114 | 24,017 | 5,798 | 3,541 | 33,470 |
| 116,831 | 126 | 24,212 | 5,850 | 3,563 | 33,751 |
| 116,832 | 123 | 23,930 | 5,747 | 3,500 | 33,300 |
| 116,833 | 123 | 23,962 | 5,747 | 3,490 | 33,322 |
| 116,834 | 127 | 24,033 | 5,780 | 3,509 | 33,449 |
| 116,835 | 128 | 23,987 | 5,774 | 3,511 | 33,400 |
| 116,836 | 127 | 24,194 | 5,859 | 3,567 | 33,747 |
| 116,837 | 123 | 23,988 | 5,803 | 3,537 | 33,451 |
| 116,838 | 123 | 24,051 | 5,837 | 3,572 | 33,583 |
| 116,839 | 123 | 24,037 | 5,842 | 3,578 | 33,580 |
| 116,840 | 117 | 23,489 | 5,702 | 3,495 | 32,803 |
| 116,841 | 118 | 23,430 | 5,672 | 3,466 | 32,686 |
| 116,842 | 118 | 23,394 | 5,683 | 3,470 | 32,665 |
| 116,843 | 116 | 23,289 | 5,702 | 3,452 | 32,559 |
| 116,844 | 117 | 23,266 | 5,662 | 3,405 | 32,450 |
| 116,845 | 128 | 23,449 | 5,705 | 3,429 | 32,711 |
| 116,846 | 128 | 23,490 | 5,690 | 3,432 | 32,740 |
| 116,847 | 124 | 23,337 | 5,614 | 3,417 | 32,492 |
| 116,848 | 125 | 23,285 | 5,582 | 3,410 | 32,402 |
| 116,849 | 125 | 22,953 | 5,523 | 3,361 | 31,962 |
| 116,850 | 138 | 23,410 | 5,662 | 3,459 | 32,669 |
| 116,851 | 139 | 23,404 | 5,660 | 3,438 | 32,641 |
| 116,852 | 151 | 23,518 | 5,638 | 3,452 | 32,759 |
| 116,853 | 159 | 23,394 | 5,610 | 3,437 | 32,600 |
| 116,854 | 159 | 23,457 | 5,621 | 3,437 | 32,674 |
| 116,855 | 158 | 23,671 | 5,705 | 3,484 | 33,018 |

|         |     |        |       |       |        |
|---------|-----|--------|-------|-------|--------|
| 116,856 | 152 | 23,462 | 5,683 | 3,457 | 32,754 |
| 116,857 | 156 | 23,498 | 5,682 | 3,460 | 32,796 |
| 116,858 | 156 | 23,448 | 5,687 | 3,460 | 32,751 |
| 116,859 | 150 | 23,450 | 5,698 | 3,467 | 32,765 |
| 116,860 | 151 | 23,439 | 5,694 | 3,452 | 32,736 |
| 116,861 | 150 | 23,374 | 5,665 | 3,447 | 32,636 |
| 116,862 | 156 | 23,579 | 5,738 | 3,485 | 32,958 |
| 116,863 | 148 | 23,103 | 5,614 | 3,427 | 32,292 |
| 116,864 | 150 | 23,393 | 5,687 | 3,471 | 32,701 |
| 116,865 | 146 | 23,440 | 5,694 | 3,484 | 32,764 |
| 116,866 | 151 | 23,457 | 5,701 | 3,499 | 32,808 |
| 116,867 | 154 | 23,734 | 5,792 | 3,577 | 33,257 |
| 116,868 | 154 | 23,830 | 5,821 | 3,575 | 33,380 |
| 116,869 | 156 | 23,633 | 5,783 | 3,547 | 33,119 |
| 116,870 | 155 | 23,874 | 5,835 | 3,560 | 33,424 |
| 116,871 | 157 | 23,637 | 5,751 | 3,507 | 33,052 |
| 116,872 | 157 | 23,699 | 5,730 | 3,506 | 33,092 |
| 116,873 | 145 | 23,747 | 5,756 | 3,510 | 33,158 |
| 116,874 | 150 | 23,853 | 5,795 | 3,524 | 33,322 |
| 116,875 | 154 | 23,767 | 5,786 | 3,531 | 33,238 |
| 116,876 | 152 | 23,481 | 5,761 | 3,513 | 32,907 |
| 116,877 | 153 | 23,387 | 5,795 | 3,523 | 32,858 |
| 116,878 | 154 | 23,321 | 5,785 | 3,522 | 32,782 |
| 116,879 | 155 | 23,240 | 5,760 | 3,483 | 32,638 |
| 116,880 | 155 | 23,367 | 5,801 | 3,513 | 32,836 |
| 116,881 | 146 | 23,352 | 5,793 | 3,524 | 32,815 |
| 116,882 | 146 | 23,136 | 5,793 | 3,510 | 32,585 |
| 116,883 | 148 | 23,480 | 5,886 | 3,559 | 33,073 |
| 116,884 | 151 | 23,695 | 5,906 | 3,587 | 33,339 |
| 116,885 | 146 | 23,693 | 5,928 | 3,614 | 33,381 |
| 116,886 | 154 | 23,774 | 5,920 | 3,626 | 33,474 |
| 116,887 | 155 | 23,616 | 5,862 | 3,599 | 33,232 |

|         |     |        |       |       |        |
|---------|-----|--------|-------|-------|--------|
| 116,888 | 164 | 23,579 | 5,855 | 3,576 | 33,174 |
| 116,889 | 166 | 23,616 | 5,860 | 3,570 | 33,212 |
| 116,890 | 169 | 23,683 | 5,878 | 3,587 | 33,317 |
| 116,891 | 170 | 23,553 | 5,872 | 3,594 | 33,189 |
| 116,892 | 180 | 23,240 | 5,766 | 3,523 | 32,709 |
| 116,893 | 180 | 23,246 | 5,761 | 3,526 | 32,713 |
| 116,894 | 182 | 23,033 | 5,719 | 3,495 | 32,429 |
| 116,895 | 181 | 22,717 | 5,708 | 3,475 | 32,081 |
| 116,896 | 171 | 23,281 | 5,847 | 3,581 | 32,880 |
| 116,897 | 173 | 23,482 | 5,865 | 3,594 | 33,114 |
| 116,898 | 172 | 23,040 | 5,765 | 3,517 | 32,494 |
| 116,899 | 170 | 23,236 | 5,788 | 3,541 | 32,735 |
| 116,900 | 167 | 23,284 | 5,781 | 3,541 | 32,773 |
| 116,901 | 161 | 23,306 | 5,776 | 3,561 | 32,804 |
| 116,902 | 161 | 23,314 | 5,768 | 3,567 | 32,810 |
| 116,903 | 141 | 23,169 | 5,714 | 3,579 | 32,603 |
| 116,904 | 136 | 22,593 | 5,541 | 3,486 | 31,756 |
| 116,905 | 136 | 22,821 | 5,559 | 3,501 | 32,017 |
| 116,906 | 141 | 23,158 | 5,619 | 3,553 | 32,471 |
| 116,907 | 140 | 23,171 | 5,613 | 3,574 | 32,498 |
| 116,908 | 140 | 23,353 | 5,633 | 3,617 | 32,743 |
| 116,909 | 138 | 23,624 | 5,675 | 3,649 | 33,086 |
| 116,910 | 139 | 23,626 | 5,647 | 3,652 | 33,064 |
| 116,911 | 139 | 23,670 | 5,658 | 3,664 | 33,131 |
| 116,912 | 139 | 24,061 | 5,730 | 3,711 | 33,641 |
| 116,913 | 134 | 23,740 | 5,687 | 3,682 | 33,243 |
| 116,914 | 134 | 23,587 | 5,607 | 3,620 | 32,948 |
| 116,915 | 133 | 23,755 | 5,649 | 3,631 | 33,168 |
| 116,916 | 130 | 23,958 | 5,724 | 3,678 | 33,490 |
| 116,917 | 132 | 23,782 | 5,705 | 3,683 | 33,302 |
| 116,918 | 134 | 23,827 | 5,671 | 3,680 | 33,312 |
| 116,919 | 141 | 23,795 | 5,655 | 3,673 | 33,264 |

|         |     |        |       |       |        |
|---------|-----|--------|-------|-------|--------|
| 116,920 | 144 | 23,494 | 5,619 | 3,663 | 32,920 |
| 116,921 | 144 | 23,431 | 5,639 | 3,659 | 32,873 |
| 116,922 | 140 | 23,234 | 5,620 | 3,661 | 32,655 |
| 116,923 | 142 | 23,259 | 5,622 | 3,675 | 32,698 |
| 116,924 | 144 | 23,465 | 5,640 | 3,707 | 32,956 |
| 116,925 | 137 | 23,052 | 5,572 | 3,667 | 32,428 |
| 116,926 | 137 | 23,058 | 5,573 | 3,661 | 32,429 |
| 116,927 | 136 | 23,100 | 5,576 | 3,659 | 32,471 |
| 116,928 | 135 | 23,212 | 5,618 | 3,670 | 32,635 |
| 116,929 | 139 | 23,384 | 5,702 | 3,729 | 32,954 |
| 116,930 | 144 | 23,157 | 5,654 | 3,711 | 32,666 |
| 116,931 | 146 | 23,017 | 5,592 | 3,665 | 32,420 |
| 116,932 | 143 | 23,290 | 5,678 | 3,715 | 32,826 |
| 116,933 | 141 | 22,972 | 5,595 | 3,671 | 32,379 |
| 116,934 | 142 | 22,861 | 5,616 | 3,665 | 32,284 |
| 116,935 | 137 | 22,186 | 5,449 | 3,553 | 31,325 |
| 116,936 | 139 | 22,340 | 5,453 | 3,561 | 31,493 |
| 116,937 | 134 | 22,310 | 5,457 | 3,570 | 31,471 |
| 116,938 | 135 | 22,470 | 5,520 | 3,598 | 31,723 |
| 116,939 | 131 | 22,424 | 5,528 | 3,595 | 31,678 |
| 116,940 | 131 | 22,700 | 5,577 | 3,613 | 32,021 |
| 116,941 | 131 | 22,795 | 5,600 | 3,627 | 32,153 |
| 116,942 | 129 | 22,589 | 5,561 | 3,566 | 31,845 |
| 116,943 | 121 | 22,553 | 5,556 | 3,586 | 31,816 |
| 116,944 | 126 | 22,755 | 5,584 | 3,585 | 32,050 |
| 116,945 | 124 | 22,547 | 5,522 | 3,539 | 31,732 |
| 116,946 | 127 | 22,778 | 5,489 | 3,526 | 31,920 |
| 116,947 | 127 | 22,677 | 5,508 | 3,522 | 31,834 |
| 116,948 | 135 | 23,022 | 5,555 | 3,591 | 32,303 |
| 116,949 | 135 | 22,755 | 5,504 | 3,543 | 31,937 |
| 116,950 | 139 | 22,878 | 5,574 | 3,543 | 32,134 |
| 116,951 | 145 | 22,791 | 5,537 | 3,540 | 32,013 |

|         |     |        |       |       |        |
|---------|-----|--------|-------|-------|--------|
| 116,952 | 143 | 22,709 | 5,520 | 3,523 | 31,895 |
| 116,953 | 145 | 22,717 | 5,547 | 3,513 | 31,922 |
| 116,954 | 145 | 22,508 | 5,522 | 3,490 | 31,665 |
| 116,955 | 145 | 22,398 | 5,504 | 3,475 | 31,522 |
| 116,956 | 149 | 22,681 | 5,561 | 3,501 | 31,892 |
| 116,957 | 146 | 22,653 | 5,553 | 3,462 | 31,814 |
| 116,958 | 149 | 22,487 | 5,505 | 3,427 | 31,568 |
| 116,959 | 150 | 22,619 | 5,525 | 3,433 | 31,727 |
| 116,960 | 151 | 22,738 | 5,593 | 3,475 | 31,957 |
| 116,961 | 155 | 22,483 | 5,541 | 3,423 | 31,602 |
| 116,962 | 155 | 22,287 | 5,504 | 3,384 | 31,330 |
| 116,963 | 156 | 22,139 | 5,490 | 3,398 | 31,183 |
| 116,964 | 159 | 22,299 | 5,513 | 3,412 | 31,383 |
| 116,965 | 159 | 22,005 | 5,427 | 3,366 | 30,957 |
| 116,966 | 159 | 22,003 | 5,411 | 3,375 | 30,948 |
| 116,967 | 158 | 22,163 | 5,426 | 3,363 | 31,110 |
| 116,968 | 157 | 21,838 | 5,340 | 3,303 | 30,638 |
| 116,969 | 153 | 21,812 | 5,381 | 3,329 | 30,675 |
| 116,970 | 139 | 21,615 | 5,312 | 3,280 | 30,346 |
| 116,971 | 142 | 21,644 | 5,272 | 3,278 | 30,336 |
| 116,972 | 143 | 21,854 | 5,334 | 3,302 | 30,633 |
| 116,973 | 148 | 22,015 | 5,360 | 3,322 | 30,845 |
| 116,974 | 148 | 21,887 | 5,315 | 3,297 | 30,647 |
| 116,975 | 144 | 21,938 | 5,329 | 3,284 | 30,695 |
| 116,976 | 145 | 21,945 | 5,345 | 3,278 | 30,713 |
| 116,977 | 144 | 22,252 | 5,400 | 3,317 | 31,113 |
| 116,978 | 145 | 22,318 | 5,424 | 3,343 | 31,230 |
| 116,979 | 150 | 22,445 | 5,389 | 3,346 | 31,330 |
| 116,980 | 153 | 22,541 | 5,372 | 3,348 | 31,414 |
| 116,981 | 145 | 22,334 | 5,278 | 3,305 | 31,062 |
| 116,982 | 145 | 22,268 | 5,257 | 3,315 | 30,985 |
| 116,983 | 153 | 22,202 | 5,219 | 3,286 | 30,860 |



|         |     |        |       |       |        |
|---------|-----|--------|-------|-------|--------|
| 116,984 | 152 | 22,268 | 5,220 | 3,287 | 30,927 |
| 116,985 | 152 | 22,033 | 5,152 | 3,285 | 30,622 |
| 116,986 | 152 | 22,022 | 5,151 | 3,307 | 30,632 |
| 116,987 | 150 | 21,882 | 5,180 | 3,301 | 30,513 |
| 116,988 | 153 | 21,617 | 5,121 | 3,279 | 30,170 |
| 116,989 | 152 | 21,347 | 5,059 | 3,229 | 29,787 |
| 116,990 | 159 | 21,803 | 5,156 | 3,283 | 30,401 |
| 116,991 | 164 | 22,020 | 5,221 | 3,353 | 30,758 |
| 116,992 | 165 | 21,984 | 5,233 | 3,365 | 30,747 |
| 116,993 | 161 | 21,784 | 5,175 | 3,365 | 30,485 |
| 116,994 | 168 | 21,987 | 5,258 | 3,391 | 30,804 |
| 116,995 | 162 | 21,765 | 5,225 | 3,373 | 30,525 |
| 116,996 | 162 | 21,686 | 5,248 | 3,389 | 30,485 |
| 116,997 | 162 | 21,612 | 5,252 | 3,403 | 30,429 |
| 116,998 | 164 | 21,865 | 5,288 | 3,410 | 30,727 |
| 116,999 | 156 | 21,618 | 5,277 | 3,360 | 30,411 |
| 117,000 | 155 | 21,510 | 5,226 | 3,349 | 30,240 |
| 117,001 | 155 | 21,463 | 5,227 | 3,369 | 30,214 |
| 117,002 | 146 | 21,603 | 5,279 | 3,380 | 30,408 |
| 117,003 | 149 | 21,514 | 5,248 | 3,371 | 30,282 |
| 117,004 | 148 | 21,445 | 5,251 | 3,380 | 30,224 |
| 117,005 | 150 | 21,657 | 5,311 | 3,414 | 30,532 |
| 117,006 | 159 | 21,857 | 5,381 | 3,461 | 30,858 |
| 117,007 | 159 | 21,952 | 5,434 | 3,497 | 31,042 |
| 117,008 | 154 | 21,788 | 5,424 | 3,495 | 30,861 |
| 117,009 | 153 | 21,634 | 5,420 | 3,471 | 30,678 |
| 117,010 | 153 | 21,838 | 5,494 | 3,494 | 30,979 |
| 117,011 | 152 | 21,830 | 5,487 | 3,491 | 30,960 |
| 117,012 | 144 | 21,735 | 5,474 | 3,487 | 30,840 |
| 117,013 | 147 | 21,558 | 5,416 | 3,430 | 30,551 |
| 117,014 | 149 | 21,870 | 5,494 | 3,462 | 30,975 |
| 117,015 | 151 | 21,900 | 5,520 | 3,457 | 31,028 |

|         |     |        |       |       |        |
|---------|-----|--------|-------|-------|--------|
| 117,016 | 153 | 21,908 | 5,537 | 3,474 | 31,072 |
| 117,017 | 154 | 21,985 | 5,554 | 3,499 | 31,192 |
| 117,018 | 171 | 21,808 | 5,542 | 3,470 | 30,991 |
| 117,019 | 168 | 21,864 | 5,557 | 3,455 | 31,044 |
| 117,020 | 168 | 21,959 | 5,566 | 3,463 | 31,156 |
| 117,021 | 172 | 22,033 | 5,592 | 3,494 | 31,291 |
| 117,022 | 169 | 22,102 | 5,627 | 3,526 | 31,424 |
| 117,023 | 175 | 21,898 | 5,568 | 3,495 | 31,136 |
| 117,024 | 168 | 21,638 | 5,525 | 3,467 | 30,798 |
| 117,025 | 168 | 21,605 | 5,543 | 3,466 | 30,782 |
| 117,026 | 169 | 21,348 | 5,488 | 3,445 | 30,450 |
| 117,027 | 176 | 21,561 | 5,572 | 3,467 | 30,776 |
| 117,028 | 177 | 21,394 | 5,528 | 3,420 | 30,519 |
| 117,029 | 185 | 21,952 | 5,691 | 3,475 | 31,303 |
| 117,030 | 180 | 21,593 | 5,635 | 3,419 | 30,827 |
| 117,031 | 179 | 21,610 | 5,641 | 3,415 | 30,845 |
| 117,032 | 177 | 21,522 | 5,641 | 3,375 | 30,715 |
| 117,033 | 177 | 21,519 | 5,652 | 3,383 | 30,731 |
| 117,034 | 169 | 21,795 | 5,729 | 3,437 | 31,130 |
| 117,035 | 167 | 21,708 | 5,726 | 3,412 | 31,013 |
| 117,036 | 169 | 21,637 | 5,759 | 3,398 | 30,963 |
| 117,037 | 169 | 21,625 | 5,779 | 3,399 | 30,972 |
| 117,038 | 170 | 21,632 | 5,791 | 3,415 | 31,008 |
| 117,039 | 160 | 22,003 | 5,895 | 3,470 | 31,528 |
| 117,040 | 158 | 22,190 | 5,936 | 3,492 | 31,776 |
| 117,041 | 166 | 22,218 | 5,963 | 3,499 | 31,846 |
| 117,042 | 161 | 22,278 | 5,984 | 3,473 | 31,896 |
| 117,043 | 157 | 22,038 | 5,905 | 3,424 | 31,524 |
| 117,044 | 154 | 22,122 | 5,905 | 3,404 | 31,585 |
| 117,045 | 154 | 22,368 | 5,956 | 3,408 | 31,886 |
| 117,046 | 155 | 22,263 | 5,904 | 3,375 | 31,697 |
| 117,047 | 154 | 22,186 | 5,898 | 3,372 | 31,610 |

|         |     |        |       |       |        |
|---------|-----|--------|-------|-------|--------|
| 117,048 | 159 | 22,335 | 5,955 | 3,412 | 31,861 |
| 117,049 | 154 | 22,007 | 5,904 | 3,365 | 31,430 |
| 117,050 | 153 | 22,024 | 5,907 | 3,372 | 31,456 |
| 117,051 | 153 | 22,082 | 5,921 | 3,382 | 31,538 |
| 117,052 | 155 | 22,221 | 5,958 | 3,388 | 31,722 |
| 117,053 | 152 | 22,072 | 5,957 | 3,378 | 31,559 |
| 117,054 | 155 | 22,239 | 6,009 | 3,420 | 31,823 |
| 117,055 | 159 | 22,002 | 5,966 | 3,378 | 31,505 |
| 117,056 | 153 | 21,563 | 5,898 | 3,340 | 30,954 |
| 117,057 | 153 | 21,725 | 5,973 | 3,391 | 31,242 |
| 117,058 | 154 | 21,647 | 5,950 | 3,371 | 31,122 |
| 117,059 | 165 | 21,604 | 5,955 | 3,386 | 31,110 |
| 117,060 | 175 | 21,871 | 5,982 | 3,448 | 31,476 |
| 117,061 | 177 | 21,806 | 5,920 | 3,421 | 31,324 |
| 117,062 | 181 | 22,009 | 5,980 | 3,462 | 31,632 |
| 117,063 | 183 | 21,841 | 5,915 | 3,450 | 31,389 |
| 117,064 | 183 | 21,831 | 5,923 | 3,464 | 31,401 |
| 117,065 | 181 | 21,722 | 5,894 | 3,479 | 31,276 |
| 117,066 | 181 | 21,668 | 5,894 | 3,497 | 31,240 |
| 117,067 | 177 | 21,456 | 5,895 | 3,500 | 31,028 |
| 117,068 | 178 | 21,719 | 5,945 | 3,527 | 31,369 |
| 117,069 | 176 | 22,054 | 5,994 | 3,587 | 31,811 |
| 117,070 | 176 | 22,109 | 6,004 | 3,621 | 31,910 |
| 117,071 | 176 | 22,244 | 6,024 | 3,642 | 32,086 |
| 117,072 | 167 | 21,904 | 5,896 | 3,584 | 31,551 |
| 117,073 | 168 | 22,157 | 5,936 | 3,592 | 31,853 |
| 117,074 | 167 | 22,502 | 6,037 | 3,633 | 32,339 |
| 117,075 | 167 | 22,649 | 6,035 | 3,637 | 32,488 |
| 117,076 | 166 | 22,503 | 5,972 | 3,607 | 32,248 |
| 117,077 | 165 | 22,502 | 6,002 | 3,631 | 32,300 |
| 117,078 | 157 | 22,286 | 5,907 | 3,600 | 31,950 |
| 117,079 | 160 | 22,195 | 5,907 | 3,592 | 31,854 |

|         |     |        |       |       |        |
|---------|-----|--------|-------|-------|--------|
| 117,080 | 155 | 22,251 | 5,896 | 3,618 | 31,920 |
| 117,081 | 152 | 22,281 | 5,934 | 3,621 | 31,988 |
| 117,082 | 156 | 22,146 | 5,903 | 3,608 | 31,813 |
| 117,083 | 156 | 22,051 | 5,822 | 3,575 | 31,604 |
| 117,084 | 156 | 22,267 | 5,850 | 3,599 | 31,872 |
| 117,085 | 158 | 22,514 | 5,917 | 3,624 | 32,213 |
| 117,086 | 157 | 22,491 | 5,884 | 3,608 | 32,140 |
| 117,087 | 159 | 22,945 | 5,968 | 3,657 | 32,729 |
| 117,088 | 158 | 22,817 | 5,859 | 3,592 | 32,426 |
| 117,089 | 158 | 22,927 | 5,876 | 3,602 | 32,563 |
| 117,090 | 158 | 22,913 | 5,888 | 3,605 | 32,564 |
| 117,091 | 163 | 22,902 | 5,890 | 3,610 | 32,565 |
| 117,092 | 158 | 22,557 | 5,791 | 3,572 | 32,078 |
| 117,093 | 164 | 22,458 | 5,735 | 3,541 | 31,898 |
| 117,094 | 162 | 22,312 | 5,715 | 3,538 | 31,727 |
| 117,095 | 167 | 22,363 | 5,733 | 3,585 | 31,848 |
| 117,096 | 166 | 22,257 | 5,718 | 3,588 | 31,729 |
| 117,097 | 169 | 22,252 | 5,720 | 3,597 | 31,738 |
| 117,098 | 168 | 22,409 | 5,719 | 3,592 | 31,888 |
| 117,099 | 172 | 22,456 | 5,687 | 3,601 | 31,916 |
| 117,100 | 172 | 22,406 | 5,674 | 3,609 | 31,861 |
| 117,101 | 172 | 22,428 | 5,692 | 3,604 | 31,896 |
| 117,102 | 183 | 22,823 | 5,772 | 3,661 | 32,439 |
| 117,103 | 180 | 22,842 | 5,702 | 3,615 | 32,339 |
| 117,104 | 189 | 23,204 | 5,785 | 3,663 | 32,841 |
| 117,105 | 182 | 23,105 | 5,727 | 3,603 | 32,617 |
| 117,106 | 184 | 23,319 | 5,737 | 3,614 | 32,854 |
| 117,107 | 188 | 23,615 | 5,816 | 3,649 | 33,268 |
| 117,108 | 175 | 23,481 | 5,748 | 3,628 | 33,032 |
| 117,109 | 175 | 23,499 | 5,763 | 3,622 | 33,059 |
| 117,110 | 164 | 23,704 | 5,774 | 3,620 | 33,262 |
| 117,111 | 156 | 23,686 | 5,767 | 3,581 | 33,190 |

|         |     |        |       |       |        |
|---------|-----|--------|-------|-------|--------|
| 117,112 | 153 | 23,012 | 5,559 | 3,441 | 32,165 |
| 117,113 | 152 | 23,362 | 5,629 | 3,469 | 32,612 |
| 117,114 | 155 | 23,625 | 5,708 | 3,510 | 32,998 |
| 117,115 | 155 | 23,677 | 5,725 | 3,514 | 33,071 |
| 117,116 | 157 | 23,899 | 5,775 | 3,534 | 33,365 |
| 117,117 | 156 | 23,847 | 5,691 | 3,509 | 33,203 |
| 117,118 | 157 | 23,875 | 5,689 | 3,494 | 33,215 |
| 117,119 | 157 | 23,653 | 5,624 | 3,463 | 32,897 |
| 117,120 | 146 | 23,648 | 5,615 | 3,437 | 32,846 |
| 117,121 | 151 | 23,765 | 5,657 | 3,445 | 33,018 |
| 117,122 | 151 | 23,402 | 5,571 | 3,370 | 32,494 |
| 117,123 | 157 | 23,555 | 5,643 | 3,391 | 32,746 |
| 117,124 | 164 | 23,573 | 5,673 | 3,412 | 32,822 |
| 117,125 | 164 | 23,549 | 5,656 | 3,410 | 32,779 |
| 117,126 | 173 | 23,452 | 5,656 | 3,403 | 32,684 |
| 117,127 | 178 | 23,299 | 5,646 | 3,389 | 32,512 |
| 117,128 | 180 | 23,450 | 5,659 | 3,388 | 32,677 |
| 117,129 | 179 | 23,505 | 5,674 | 3,397 | 32,755 |
| 117,130 | 180 | 23,432 | 5,677 | 3,399 | 32,688 |
| 117,131 | 175 | 23,256 | 5,670 | 3,384 | 32,485 |
| 117,132 | 172 | 23,228 | 5,688 | 3,415 | 32,503 |
| 117,133 | 167 | 22,880 | 5,653 | 3,380 | 32,080 |
| 117,134 | 172 | 22,616 | 5,639 | 3,369 | 31,796 |
| 117,135 | 172 | 22,471 | 5,630 | 3,350 | 31,623 |
| 117,136 | 181 | 22,806 | 5,776 | 3,458 | 32,221 |
| 117,137 | 181 | 22,644 | 5,784 | 3,458 | 32,067 |
| 117,138 | 179 | 22,455 | 5,740 | 3,451 | 31,825 |
| 117,139 | 181 | 22,218 | 5,702 | 3,413 | 31,514 |
| 117,140 | 182 | 22,197 | 5,682 | 3,408 | 31,469 |
| 117,141 | 185 | 22,289 | 5,684 | 3,403 | 31,561 |
| 117,142 | 178 | 22,008 | 5,629 | 3,381 | 31,196 |
| 117,143 | 179 | 21,988 | 5,646 | 3,382 | 31,195 |

|         |     |        |       |       |        |
|---------|-----|--------|-------|-------|--------|
| 117,144 | 175 | 21,764 | 5,617 | 3,356 | 30,912 |
| 117,145 | 174 | 21,696 | 5,607 | 3,349 | 30,826 |
| 117,146 | 173 | 22,671 | 5,882 | 3,525 | 32,251 |
| 117,147 | 172 | 22,248 | 5,808 | 3,480 | 31,708 |
| 117,148 | 170 | 22,332 | 5,822 | 3,488 | 31,812 |
| 117,149 | 165 | 22,308 | 5,865 | 3,485 | 31,823 |
| 117,150 | 167 | 22,345 | 5,902 | 3,483 | 31,897 |
| 117,151 | 164 | 22,622 | 5,962 | 3,519 | 32,267 |
| 117,152 | 162 | 22,714 | 5,976 | 3,535 | 32,387 |
| 117,153 | 155 | 21,936 | 5,850 | 3,454 | 31,395 |
| 117,154 | 155 | 22,103 | 5,879 | 3,488 | 31,625 |
| 117,155 | 155 | 22,309 | 5,948 | 3,529 | 31,941 |
| 117,156 | 159 | 22,082 | 5,896 | 3,501 | 31,638 |
| 117,157 | 157 | 21,913 | 5,851 | 3,471 | 31,392 |
| 117,158 | 161 | 21,683 | 5,777 | 3,437 | 31,058 |
| 117,159 | 162 | 21,873 | 5,794 | 3,454 | 31,283 |
| 117,160 | 165 | 21,881 | 5,787 | 3,460 | 31,293 |
| 117,161 | 163 | 21,569 | 5,757 | 3,434 | 30,923 |
| 117,162 | 163 | 21,644 | 5,795 | 3,450 | 31,052 |
| 117,163 | 160 | 21,561 | 5,803 | 3,443 | 30,967 |
| 117,164 | 161 | 21,774 | 5,864 | 3,502 | 31,301 |
| 117,165 | 155 | 21,792 | 5,858 | 3,499 | 31,304 |
| 117,166 | 150 | 21,621 | 5,783 | 3,457 | 31,011 |
| 117,167 | 154 | 21,367 | 5,739 | 3,439 | 30,699 |
| 117,168 | 155 | 21,210 | 5,718 | 3,408 | 30,491 |
| 117,169 | 160 | 21,189 | 5,788 | 3,462 | 30,599 |
| 117,170 | 163 | 20,935 | 5,733 | 3,428 | 30,259 |
| 117,171 | 163 | 21,007 | 5,730 | 3,426 | 30,326 |
| 117,172 | 160 | 20,818 | 5,677 | 3,397 | 30,052 |
| 117,173 | 158 | 20,563 | 5,635 | 3,393 | 29,749 |
| 117,174 | 160 | 21,293 | 5,786 | 3,510 | 30,749 |
| 117,175 | 154 | 21,426 | 5,805 | 3,525 | 30,910 |

|         |     |        |       |       |        |
|---------|-----|--------|-------|-------|--------|
| 117,176 | 154 | 21,735 | 5,875 | 3,579 | 31,343 |
| 117,177 | 144 | 21,500 | 5,811 | 3,558 | 31,013 |
| 117,178 | 146 | 21,700 | 5,864 | 3,624 | 31,334 |
| 117,179 | 143 | 21,703 | 5,850 | 3,668 | 31,364 |
| 117,180 | 143 | 21,622 | 5,812 | 3,656 | 31,233 |
| 117,181 | 143 | 21,942 | 5,903 | 3,694 | 31,682 |
| 117,182 | 145 | 22,172 | 5,913 | 3,731 | 31,961 |
| 117,183 | 144 | 22,262 | 5,898 | 3,720 | 32,024 |
| 117,184 | 144 | 22,422 | 5,867 | 3,699 | 32,132 |
| 117,185 | 139 | 22,594 | 5,867 | 3,708 | 32,308 |
| 117,186 | 139 | 22,581 | 5,804 | 3,687 | 32,211 |
| 117,187 | 139 | 22,642 | 5,792 | 3,686 | 32,259 |
| 117,188 | 136 | 22,354 | 5,677 | 3,638 | 31,805 |
| 117,189 | 142 | 22,680 | 5,743 | 3,693 | 32,258 |
| 117,190 | 142 | 22,771 | 5,754 | 3,710 | 32,377 |
| 117,191 | 135 | 22,735 | 5,736 | 3,700 | 32,306 |
| 117,192 | 137 | 22,916 | 5,792 | 3,742 | 32,587 |
| 117,193 | 132 | 22,949 | 5,776 | 3,724 | 32,581 |
| 117,194 | 130 | 22,786 | 5,721 | 3,704 | 32,341 |
| 117,195 | 131 | 22,874 | 5,749 | 3,726 | 32,480 |
| 117,196 | 131 | 22,930 | 5,726 | 3,718 | 32,505 |
| 117,197 | 131 | 23,067 | 5,709 | 3,701 | 32,608 |
| 117,198 | 132 | 22,830 | 5,627 | 3,654 | 32,243 |
| 117,199 | 133 | 23,065 | 5,670 | 3,694 | 32,562 |
| 117,200 | 130 | 23,039 | 5,672 | 3,713 | 32,554 |
| 117,201 | 127 | 23,043 | 5,609 | 3,720 | 32,499 |
| 117,202 | 127 | 22,959 | 5,556 | 3,717 | 32,359 |
| 117,203 | 130 | 23,245 | 5,594 | 3,745 | 32,714 |
| 117,204 | 128 | 23,073 | 5,534 | 3,709 | 32,444 |
| 117,205 | 117 | 22,478 | 5,421 | 3,591 | 31,607 |
| 117,206 | 124 | 22,849 | 5,470 | 3,647 | 32,090 |
| 117,207 | 125 | 23,219 | 5,551 | 3,697 | 32,592 |

|         |     |        |       |       |        |
|---------|-----|--------|-------|-------|--------|
| 117,208 | 125 | 23,193 | 5,569 | 3,687 | 32,574 |
| 117,209 | 133 | 23,560 | 5,702 | 3,768 | 33,163 |
| 117,210 | 136 | 23,692 | 5,759 | 3,806 | 33,393 |
| 117,211 | 133 | 23,428 | 5,713 | 3,782 | 33,056 |
| 117,212 | 136 | 23,598 | 5,766 | 3,827 | 33,327 |
| 117,213 | 138 | 23,616 | 5,805 | 3,851 | 33,410 |
| 117,214 | 138 | 23,646 | 5,831 | 3,853 | 33,468 |
| 117,215 | 141 | 23,794 | 5,845 | 3,864 | 33,644 |
| 117,216 | 135 | 23,129 | 5,680 | 3,752 | 32,696 |
| 117,217 | 135 | 23,463 | 5,730 | 3,777 | 33,105 |
| 117,218 | 132 | 23,630 | 5,749 | 3,784 | 33,295 |
| 117,219 | 137 | 23,925 | 5,786 | 3,796 | 33,644 |
| 117,220 | 132 | 23,898 | 5,789 | 3,803 | 33,622 |
| 117,221 | 126 | 23,864 | 5,798 | 3,821 | 33,609 |
| 117,222 | 127 | 23,923 | 5,833 | 3,852 | 33,735 |
| 117,223 | 125 | 24,060 | 5,873 | 3,900 | 33,958 |
| 117,224 | 121 | 23,755 | 5,812 | 3,848 | 33,536 |
| 117,225 | 127 | 24,119 | 5,905 | 3,927 | 34,078 |
| 117,226 | 126 | 24,077 | 5,899 | 3,913 | 34,015 |
| 117,227 | 129 | 24,069 | 5,907 | 3,906 | 34,011 |
| 117,228 | 127 | 24,001 | 5,884 | 3,896 | 33,908 |
| 117,229 | 126 | 23,796 | 5,804 | 3,816 | 33,542 |
| 117,230 | 128 | 23,907 | 5,843 | 3,815 | 33,693 |
| 117,231 | 127 | 23,949 | 5,881 | 3,797 | 33,754 |
| 117,232 | 137 | 23,929 | 5,881 | 3,802 | 33,749 |
| 117,233 | 136 | 23,811 | 5,882 | 3,782 | 33,611 |
| 117,234 | 136 | 24,019 | 5,932 | 3,802 | 33,889 |
| 117,235 | 137 | 24,075 | 5,962 | 3,844 | 34,018 |
| 117,236 | 133 | 24,168 | 5,991 | 3,851 | 34,143 |
| 117,237 | 129 | 23,928 | 5,980 | 3,834 | 33,871 |
| 117,238 | 127 | 23,926 | 6,027 | 3,856 | 33,936 |
| 117,239 | 127 | 23,891 | 6,045 | 3,848 | 33,911 |



|         |     |        |       |       |        |
|---------|-----|--------|-------|-------|--------|
| 117,240 | 121 | 23,938 | 6,050 | 3,842 | 33,951 |
| 117,241 | 122 | 23,784 | 6,020 | 3,843 | 33,769 |
| 117,242 | 124 | 23,948 | 6,074 | 3,854 | 34,000 |
| 117,243 | 122 | 23,788 | 6,032 | 3,838 | 33,780 |
| 117,244 | 125 | 24,089 | 6,107 | 3,883 | 34,204 |
| 117,245 | 123 | 24,173 | 6,123 | 3,893 | 34,312 |
| 117,246 | 123 | 23,907 | 6,042 | 3,845 | 33,917 |
| 117,247 | 129 | 24,308 | 6,109 | 3,919 | 34,465 |
| 117,248 | 127 | 24,035 | 6,082 | 3,903 | 34,147 |
| 117,249 | 137 | 24,196 | 6,159 | 3,928 | 34,420 |
| 117,250 | 137 | 24,123 | 6,151 | 3,922 | 34,333 |
| 117,251 | 136 | 24,184 | 6,182 | 3,937 | 34,439 |
| 117,252 | 139 | 24,222 | 6,239 | 3,952 | 34,552 |
| 117,253 | 137 | 24,157 | 6,281 | 3,952 | 34,527 |
| 117,254 | 138 | 23,969 | 6,336 | 3,970 | 34,413 |
| 117,255 | 137 | 23,975 | 6,300 | 3,964 | 34,376 |
| 117,256 | 137 | 24,213 | 6,357 | 4,013 | 34,720 |
| 117,257 | 129 | 24,503 | 6,437 | 4,034 | 35,103 |
| 117,258 | 126 | 24,475 | 6,444 | 4,041 | 35,086 |
| 117,259 | 124 | 24,576 | 6,470 | 4,042 | 35,212 |
| 117,260 | 120 | 24,619 | 6,468 | 4,031 | 35,238 |
| 117,261 | 123 | 24,495 | 6,432 | 4,023 | 35,073 |
| 117,262 | 123 | 24,617 | 6,439 | 4,034 | 35,213 |
| 117,263 | 126 | 25,008 | 6,543 | 4,092 | 35,769 |
| 117,264 | 122 | 24,706 | 6,461 | 4,042 | 35,331 |
| 117,265 | 125 | 24,697 | 6,463 | 4,043 | 35,328 |
| 117,266 | 122 | 24,677 | 6,507 | 4,065 | 35,371 |
| 117,267 | 119 | 24,394 | 6,490 | 4,043 | 35,046 |
| 117,268 | 121 | 24,231 | 6,489 | 4,034 | 34,875 |
| 117,269 | 121 | 24,393 | 6,543 | 4,034 | 35,091 |
| 117,270 | 121 | 24,617 | 6,630 | 4,084 | 35,452 |
| 117,271 | 123 | 24,669 | 6,658 | 4,118 | 35,568 |

|         |     |        |       |       |        |
|---------|-----|--------|-------|-------|--------|
| 117,272 | 126 | 24,737 | 6,678 | 4,115 | 35,656 |
| 117,273 | 125 | 24,654 | 6,625 | 4,082 | 35,486 |
| 117,274 | 132 | 24,542 | 6,621 | 4,018 | 35,313 |
| 117,275 | 148 | 24,676 | 6,657 | 4,030 | 35,511 |
| 117,276 | 146 | 24,936 | 6,706 | 4,064 | 35,852 |
| 117,277 | 147 | 24,456 | 6,585 | 4,006 | 35,194 |
| 117,278 | 147 | 24,434 | 6,586 | 4,003 | 35,170 |
| 117,279 | 154 | 24,407 | 6,577 | 3,984 | 35,122 |
| 117,280 | 159 | 24,527 | 6,621 | 4,010 | 35,317 |
| 117,281 | 155 | 24,129 | 6,510 | 3,959 | 34,753 |
| 117,282 | 162 | 24,026 | 6,505 | 3,939 | 34,632 |
| 117,283 | 152 | 23,762 | 6,461 | 3,901 | 34,276 |
| 117,284 | 154 | 24,143 | 6,576 | 3,964 | 34,837 |
| 117,285 | 155 | 23,874 | 6,521 | 3,919 | 34,469 |
| 117,286 | 154 | 23,981 | 6,543 | 3,928 | 34,606 |
| 117,287 | 153 | 24,142 | 6,592 | 3,956 | 34,843 |
| 117,288 | 153 | 23,913 | 6,514 | 3,912 | 34,492 |
| 117,289 | 151 | 23,967 | 6,474 | 3,911 | 34,503 |
| 117,290 | 151 | 23,883 | 6,451 | 3,906 | 34,391 |
| 117,291 | 149 | 23,972 | 6,504 | 3,914 | 34,539 |
| 117,292 | 155 | 24,037 | 6,514 | 3,948 | 34,654 |
| 117,293 | 155 | 23,742 | 6,431 | 3,897 | 34,225 |
| 117,294 | 156 | 23,894 | 6,473 | 3,913 | 34,436 |
| 117,295 | 155 | 23,333 | 6,304 | 3,811 | 33,603 |
| 117,296 | 154 | 23,485 | 6,337 | 3,838 | 33,814 |
| 117,297 | 148 | 23,486 | 6,332 | 3,822 | 33,788 |
| 117,298 | 150 | 22,316 | 6,021 | 3,607 | 32,094 |
| 117,299 | 149 | 22,389 | 6,029 | 3,626 | 32,193 |
| 117,300 | 147 | 22,540 | 6,053 | 3,666 | 32,406 |
| 117,301 | 147 | 22,399 | 6,048 | 3,662 | 32,256 |
| 117,302 | 145 | 22,599 | 6,150 | 3,714 | 32,608 |
| 117,303 | 145 | 22,551 | 6,126 | 3,685 | 32,507 |

|         |     |        |       |       |        |
|---------|-----|--------|-------|-------|--------|
| 117,304 | 144 | 22,499 | 6,092 | 3,681 | 32,416 |
| 117,305 | 142 | 22,458 | 6,074 | 3,653 | 32,327 |
| 117,306 | 141 | 22,403 | 6,051 | 3,634 | 32,229 |
| 117,307 | 144 | 22,231 | 6,013 | 3,631 | 32,019 |
| 117,308 | 144 | 22,269 | 6,051 | 3,666 | 32,130 |
| 117,309 | 140 | 22,031 | 6,003 | 3,623 | 31,797 |
| 117,310 | 136 | 21,978 | 6,042 | 3,667 | 31,823 |
| 117,311 | 134 | 21,818 | 6,009 | 3,660 | 31,621 |
| 117,312 | 131 | 21,644 | 5,990 | 3,651 | 31,416 |
| 117,313 | 131 | 21,794 | 6,066 | 3,683 | 31,674 |
| 117,314 | 128 | 21,906 | 6,096 | 3,701 | 31,831 |
| 117,315 | 129 | 22,121 | 6,140 | 3,738 | 32,128 |
| 117,316 | 130 | 22,219 | 6,146 | 3,723 | 32,218 |
| 117,317 | 132 | 22,311 | 6,110 | 3,737 | 32,290 |
| 117,318 | 132 | 22,357 | 6,120 | 3,760 | 32,369 |
| 117,319 | 131 | 22,527 | 6,156 | 3,793 | 32,607 |
| 117,320 | 130 | 22,899 | 6,272 | 3,892 | 33,193 |
| 117,321 | 125 | 22,782 | 6,218 | 3,854 | 32,979 |
| 117,322 | 125 | 22,467 | 6,120 | 3,759 | 32,471 |
| 117,323 | 124 | 22,761 | 6,186 | 3,810 | 32,881 |
| 117,324 | 122 | 22,906 | 6,203 | 3,823 | 33,054 |
| 117,325 | 121 | 23,004 | 6,260 | 3,869 | 33,254 |
| 117,326 | 113 | 23,180 | 6,339 | 3,933 | 33,565 |
| 117,327 | 112 | 23,225 | 6,357 | 3,937 | 33,631 |
| 117,328 | 109 | 23,030 | 6,328 | 3,903 | 33,370 |
| 117,329 | 111 | 22,979 | 6,377 | 3,936 | 33,403 |
| 117,330 | 105 | 22,901 | 6,382 | 3,935 | 33,323 |
| 117,331 | 108 | 22,710 | 6,310 | 3,904 | 33,032 |
| 117,332 | 108 | 22,639 | 6,301 | 3,913 | 32,961 |
| 117,333 | 103 | 22,631 | 6,322 | 3,940 | 32,996 |
| 117,334 | 101 | 22,584 | 6,301 | 3,944 | 32,930 |
| 117,335 | 105 | 22,781 | 6,354 | 3,986 | 33,226 |

|         |     |        |       |       |        |
|---------|-----|--------|-------|-------|--------|
| 117,336 | 105 | 22,801 | 6,419 | 3,996 | 33,321 |
| 117,337 | 106 | 22,927 | 6,467 | 4,015 | 33,515 |
| 117,338 | 107 | 23,006 | 6,503 | 4,047 | 33,663 |
| 117,339 | 109 | 23,022 | 6,548 | 4,051 | 33,730 |
| 117,340 | 109 | 22,894 | 6,554 | 4,016 | 33,573 |
| 117,341 | 109 | 22,775 | 6,555 | 4,021 | 33,460 |
| 117,342 | 109 | 22,923 | 6,634 | 4,057 | 33,723 |
| 117,343 | 102 | 22,968 | 6,664 | 4,038 | 33,772 |
| 117,344 | 100 | 22,869 | 6,654 | 4,052 | 33,675 |
| 117,345 | 99  | 22,786 | 6,660 | 4,059 | 33,604 |
| 117,346 | 93  | 22,800 | 6,677 | 4,086 | 33,656 |
| 117,347 | 93  | 22,813 | 6,700 | 4,070 | 33,676 |
| 117,348 | 92  | 22,708 | 6,705 | 4,058 | 33,563 |
| 117,349 | 86  | 22,426 | 6,640 | 4,040 | 33,192 |
| 117,350 | 87  | 22,423 | 6,694 | 4,086 | 33,290 |
| 117,351 | 82  | 22,054 | 6,580 | 4,023 | 32,739 |
| 117,352 | 84  | 22,329 | 6,649 | 4,063 | 33,125 |
| 117,353 | 84  | 22,409 | 6,694 | 4,102 | 33,289 |
| 117,354 | 83  | 22,338 | 6,691 | 4,126 | 33,238 |
| 117,355 | 84  | 22,230 | 6,607 | 4,080 | 33,001 |
| 117,356 | 86  | 22,233 | 6,663 | 4,120 | 33,102 |
| 117,357 | 86  | 22,321 | 6,728 | 4,120 | 33,255 |
| 117,358 | 85  | 22,326 | 6,713 | 4,095 | 33,219 |
| 117,359 | 85  | 22,240 | 6,663 | 4,099 | 33,087 |
| 117,360 | 88  | 22,129 | 6,630 | 4,073 | 32,920 |
| 117,361 | 91  | 22,072 | 6,584 | 4,035 | 32,782 |
| 117,362 | 89  | 21,928 | 6,533 | 3,981 | 32,531 |
| 117,363 | 96  | 22,173 | 6,551 | 3,973 | 32,793 |
| 117,364 | 97  | 22,138 | 6,507 | 3,959 | 32,701 |
| 117,365 | 95  | 22,069 | 6,410 | 3,941 | 32,515 |
| 117,366 | 97  | 22,071 | 6,405 | 3,942 | 32,515 |
| 117,367 | 96  | 21,598 | 6,294 | 3,884 | 31,872 |

|         |     |        |       |       |        |
|---------|-----|--------|-------|-------|--------|
| 117,368 | 99  | 21,769 | 6,346 | 3,905 | 32,119 |
| 117,369 | 100 | 21,732 | 6,315 | 3,907 | 32,054 |
| 117,370 | 100 | 21,625 | 6,265 | 3,904 | 31,894 |
| 117,371 | 106 | 21,912 | 6,302 | 3,926 | 32,246 |
| 117,372 | 112 | 21,805 | 6,267 | 3,896 | 32,080 |
| 117,373 | 116 | 21,734 | 6,270 | 3,925 | 32,045 |
| 117,374 | 110 | 21,522 | 6,186 | 3,909 | 31,727 |
| 117,375 | 112 | 21,285 | 6,088 | 3,848 | 31,333 |
| 117,376 | 112 | 21,515 | 6,118 | 3,870 | 31,615 |
| 117,377 | 108 | 21,630 | 6,162 | 3,903 | 31,803 |
| 117,378 | 105 | 21,372 | 6,053 | 3,856 | 31,386 |
| 117,379 | 101 | 21,464 | 6,032 | 3,847 | 31,444 |
| 117,380 | 102 | 21,538 | 6,010 | 3,847 | 31,497 |
| 117,381 | 102 | 21,577 | 6,005 | 3,855 | 31,539 |
| 117,382 | 94  | 21,546 | 6,020 | 3,885 | 31,545 |
| 117,383 | 94  | 21,807 | 6,032 | 3,862 | 31,795 |
| 117,384 | 98  | 21,900 | 6,078 | 3,905 | 31,981 |
| 117,385 | 100 | 21,865 | 6,088 | 3,887 | 31,940 |
| 117,386 | 102 | 21,847 | 6,084 | 3,917 | 31,950 |
| 117,387 | 108 | 21,963 | 6,055 | 3,916 | 32,042 |
| 117,388 | 109 | 21,774 | 6,018 | 3,927 | 31,828 |
| 117,389 | 111 | 21,711 | 6,004 | 3,921 | 31,747 |
| 117,390 | 111 | 21,543 | 5,913 | 3,902 | 31,469 |
| 117,391 | 110 | 21,475 | 5,885 | 3,901 | 31,371 |
| 117,392 | 110 | 21,848 | 5,935 | 3,965 | 31,858 |
| 117,393 | 114 | 21,884 | 5,922 | 3,981 | 31,901 |
| 117,394 | 114 | 22,233 | 5,997 | 4,040 | 32,384 |
| 117,395 | 118 | 22,307 | 6,069 | 4,046 | 32,540 |
| 117,396 | 121 | 22,589 | 6,131 | 4,078 | 32,919 |
| 117,397 | 124 | 22,695 | 6,146 | 4,088 | 33,053 |
| 117,398 | 124 | 22,847 | 6,175 | 4,153 | 33,299 |
| 117,399 | 127 | 23,009 | 6,201 | 4,171 | 33,508 |

|         |     |        |       |       |        |
|---------|-----|--------|-------|-------|--------|
| 117,400 | 130 | 23,199 | 6,218 | 4,161 | 33,708 |
| 117,401 | 130 | 23,491 | 6,275 | 4,192 | 34,088 |
| 117,402 | 136 | 23,960 | 6,371 | 4,253 | 34,720 |
| 117,403 | 140 | 24,113 | 6,385 | 4,278 | 34,916 |
| 117,404 | 139 | 23,996 | 6,352 | 4,251 | 34,738 |
| 117,405 | 144 | 24,502 | 6,441 | 4,326 | 35,413 |
| 117,406 | 145 | 24,396 | 6,410 | 4,301 | 35,252 |
| 117,407 | 145 | 24,635 | 6,474 | 4,362 | 35,616 |
| 117,408 | 149 | 24,667 | 6,463 | 4,380 | 35,659 |
| 117,409 | 149 | 24,436 | 6,426 | 4,347 | 35,358 |
| 117,410 | 151 | 24,397 | 6,416 | 4,347 | 35,311 |
| 117,411 | 149 | 24,281 | 6,353 | 4,331 | 35,114 |
| 117,412 | 149 | 24,441 | 6,443 | 4,395 | 35,428 |
| 117,413 | 152 | 24,189 | 6,377 | 4,352 | 35,070 |
| 117,414 | 145 | 23,851 | 6,315 | 4,329 | 34,640 |
| 117,415 | 144 | 24,311 | 6,432 | 4,384 | 35,271 |
| 117,416 | 147 | 24,708 | 6,524 | 4,440 | 35,819 |
| 117,417 | 146 | 24,587 | 6,533 | 4,434 | 35,700 |
| 117,418 | 142 | 24,198 | 6,444 | 4,363 | 35,147 |
| 117,419 | 142 | 24,312 | 6,441 | 4,383 | 35,278 |
| 117,420 | 140 | 24,094 | 6,463 | 4,344 | 35,041 |
| 117,421 | 140 | 24,033 | 6,475 | 4,347 | 34,995 |
| 117,422 | 138 | 24,134 | 6,538 | 4,386 | 35,196 |
| 117,423 | 134 | 24,017 | 6,530 | 4,399 | 35,080 |
| 117,424 | 128 | 23,901 | 6,502 | 4,397 | 34,928 |
| 117,425 | 127 | 23,895 | 6,508 | 4,404 | 34,934 |
| 117,426 | 122 | 23,900 | 6,538 | 4,414 | 34,974 |
| 117,427 | 122 | 23,838 | 6,519 | 4,384 | 34,863 |
| 117,428 | 122 | 23,937 | 6,514 | 4,393 | 34,966 |
| 117,429 | 124 | 24,036 | 6,613 | 4,467 | 35,240 |
| 117,430 | 128 | 24,176 | 6,661 | 4,511 | 35,476 |
| 117,431 | 132 | 24,113 | 6,639 | 4,504 | 35,388 |

|         |     |        |       |       |        |
|---------|-----|--------|-------|-------|--------|
| 117,432 | 138 | 24,444 | 6,689 | 4,530 | 35,801 |
| 117,433 | 139 | 24,695 | 6,716 | 4,582 | 36,132 |
| 117,434 | 141 | 24,866 | 6,719 | 4,622 | 36,348 |
| 117,435 | 140 | 25,095 | 6,753 | 4,630 | 36,618 |
| 117,436 | 133 | 24,760 | 6,641 | 4,538 | 36,072 |
| 117,437 | 133 | 25,202 | 6,757 | 4,605 | 36,697 |
| 117,438 | 129 | 25,557 | 6,820 | 4,643 | 37,149 |
| 117,439 | 129 | 25,589 | 6,786 | 4,621 | 37,125 |
| 117,440 | 129 | 25,355 | 6,695 | 4,590 | 36,769 |
| 117,441 | 126 | 25,051 | 6,638 | 4,559 | 36,374 |
| 117,442 | 128 | 25,307 | 6,676 | 4,617 | 36,728 |
| 117,443 | 128 | 25,267 | 6,688 | 4,634 | 36,717 |
| 117,444 | 124 | 25,397 | 6,723 | 4,624 | 36,868 |
| 117,445 | 122 | 24,917 | 6,542 | 4,535 | 36,116 |
| 117,446 | 122 | 25,015 | 6,547 | 4,572 | 36,256 |
| 117,447 | 124 | 25,146 | 6,580 | 4,633 | 36,483 |
| 117,448 | 129 | 24,533 | 6,446 | 4,505 | 35,613 |
| 117,449 | 135 | 24,763 | 6,446 | 4,505 | 35,849 |
| 117,450 | 133 | 24,892 | 6,450 | 4,513 | 35,988 |
| 117,451 | 138 | 24,675 | 6,402 | 4,456 | 35,671 |
| 117,452 | 145 | 24,806 | 6,429 | 4,469 | 35,849 |
| 117,453 | 140 | 24,716 | 6,407 | 4,487 | 35,750 |
| 117,454 | 141 | 24,694 | 6,372 | 4,458 | 35,665 |
| 117,455 | 149 | 24,595 | 6,360 | 4,445 | 35,549 |
| 117,456 | 147 | 24,341 | 6,323 | 4,405 | 35,216 |
| 117,457 | 146 | 24,597 | 6,381 | 4,465 | 35,589 |
| 117,458 | 146 | 24,682 | 6,389 | 4,482 | 35,699 |
| 117,459 | 140 | 24,708 | 6,377 | 4,470 | 35,695 |
| 117,460 | 141 | 24,825 | 6,384 | 4,459 | 35,809 |
| 117,461 | 142 | 24,923 | 6,364 | 4,469 | 35,898 |
| 117,462 | 148 | 25,173 | 6,364 | 4,487 | 36,172 |
| 117,463 | 146 | 24,991 | 6,278 | 4,480 | 35,895 |

|         |     |        |       |       |        |
|---------|-----|--------|-------|-------|--------|
| 117,464 | 154 | 24,805 | 6,236 | 4,460 | 35,655 |
| 117,465 | 154 | 24,659 | 6,198 | 4,440 | 35,451 |
| 117,466 | 162 | 25,354 | 6,435 | 4,555 | 36,506 |
| 117,467 | 164 | 25,363 | 6,444 | 4,587 | 36,558 |
| 117,468 | 163 | 25,234 | 6,395 | 4,545 | 36,337 |
| 117,469 | 170 | 25,228 | 6,424 | 4,538 | 36,360 |
| 117,470 | 179 | 25,171 | 6,411 | 4,550 | 36,311 |
| 117,471 | 179 | 25,237 | 6,412 | 4,557 | 36,385 |
| 117,472 | 180 | 25,311 | 6,400 | 4,558 | 36,449 |
| 117,473 | 182 | 25,280 | 6,387 | 4,561 | 36,410 |
| 117,474 | 181 | 25,271 | 6,373 | 4,542 | 36,367 |
| 117,475 | 181 | 25,229 | 6,364 | 4,543 | 36,317 |
| 117,476 | 181 | 25,011 | 6,340 | 4,531 | 36,063 |
| 117,477 | 182 | 25,050 | 6,319 | 4,541 | 36,092 |
| 117,478 | 184 | 25,031 | 6,312 | 4,559 | 36,086 |
| 117,479 | 187 | 24,983 | 6,279 | 4,555 | 36,004 |
| 117,480 | 187 | 25,196 | 6,285 | 4,573 | 36,241 |
| 117,481 | 185 | 25,225 | 6,259 | 4,573 | 36,242 |
| 117,482 | 181 | 25,184 | 6,251 | 4,560 | 36,176 |
| 117,483 | 179 | 26,624 | 6,672 | 4,795 | 38,270 |
| 117,484 | 177 | 26,449 | 6,633 | 4,750 | 38,009 |
| 117,485 | 175 | 26,463 | 6,695 | 4,758 | 38,091 |
| 117,486 | 176 | 26,817 | 6,759 | 4,835 | 38,587 |
| 117,487 | 171 | 27,168 | 6,773 | 4,885 | 38,997 |
| 117,488 | 171 | 27,306 | 6,756 | 4,911 | 39,144 |
| 117,489 | 178 | 27,176 | 6,727 | 4,936 | 39,017 |
| 117,490 | 177 | 27,197 | 6,736 | 4,956 | 39,066 |
| 117,491 | 174 | 27,477 | 6,839 | 4,932 | 39,422 |
| 117,492 | 174 | 27,620 | 6,867 | 4,937 | 39,598 |
| 117,493 | 180 | 27,683 | 6,856 | 4,956 | 39,675 |
| 117,494 | 187 | 27,974 | 6,914 | 5,025 | 40,100 |
| 117,495 | 189 | 27,933 | 6,909 | 5,037 | 40,068 |



|         |     |        |       |       |        |
|---------|-----|--------|-------|-------|--------|
| 117,496 | 189 | 27,629 | 6,849 | 4,999 | 39,666 |
| 117,497 | 190 | 27,606 | 6,796 | 4,966 | 39,558 |
| 117,498 | 189 | 27,673 | 6,818 | 4,966 | 39,646 |
| 117,499 | 182 | 27,855 | 6,889 | 5,027 | 39,953 |
| 117,500 | 176 | 27,209 | 6,775 | 4,941 | 39,101 |
| 117,501 | 178 | 27,434 | 6,808 | 4,995 | 39,415 |
| 117,502 | 176 | 27,922 | 6,910 | 5,066 | 40,074 |
| 117,503 | 172 | 28,018 | 6,923 | 5,085 | 40,198 |
| 117,504 | 169 | 27,816 | 6,838 | 5,059 | 39,882 |
| 117,505 | 168 | 27,889 | 6,849 | 5,054 | 39,960 |
| 117,506 | 159 | 27,978 | 6,815 | 5,057 | 40,009 |
| 117,507 | 161 | 28,089 | 6,827 | 5,065 | 40,142 |
| 117,508 | 168 | 27,835 | 6,740 | 5,022 | 39,765 |
| 117,509 | 169 | 28,108 | 6,771 | 5,076 | 40,124 |
| 117,510 | 166 | 28,419 | 6,847 | 5,144 | 40,576 |
| 117,511 | 176 | 28,291 | 6,795 | 5,136 | 40,398 |
| 117,512 | 170 | 28,115 | 6,764 | 5,104 | 40,153 |
| 117,513 | 169 | 28,376 | 6,833 | 5,114 | 40,492 |
| 117,514 | 169 | 28,394 | 6,832 | 5,134 | 40,529 |
| 117,515 | 153 | 28,276 | 6,778 | 5,095 | 40,302 |
| 117,516 | 152 | 28,514 | 6,817 | 5,154 | 40,637 |
| 117,517 | 150 | 28,895 | 6,864 | 5,221 | 41,130 |
| 117,518 | 146 | 28,838 | 6,842 | 5,180 | 41,006 |
| 117,519 | 141 | 28,599 | 6,772 | 5,155 | 40,667 |
| 117,520 | 134 | 28,029 | 6,644 | 5,071 | 39,878 |
| 117,521 | 133 | 28,438 | 6,714 | 5,097 | 40,382 |
| 117,522 | 132 | 28,725 | 6,782 | 5,146 | 40,785 |
| 117,523 | 132 | 28,873 | 6,823 | 5,185 | 41,013 |
| 117,524 | 126 | 28,794 | 6,804 | 5,154 | 40,878 |
| 117,525 | 124 | 28,700 | 6,731 | 5,068 | 40,623 |
| 117,526 | 129 | 29,017 | 6,788 | 5,106 | 41,040 |
| 117,527 | 128 | 28,953 | 6,800 | 5,115 | 40,996 |

|         |     |        |       |       |        |
|---------|-----|--------|-------|-------|--------|
| 117,528 | 133 | 29,065 | 6,853 | 5,145 | 41,196 |
| 117,529 | 133 | 28,995 | 6,834 | 5,134 | 41,096 |
| 117,530 | 135 | 28,909 | 6,808 | 5,112 | 40,964 |
| 117,531 | 137 | 28,855 | 6,782 | 5,103 | 40,877 |
| 117,532 | 135 | 28,362 | 6,675 | 5,041 | 40,213 |
| 117,533 | 134 | 28,020 | 6,577 | 4,975 | 39,706 |
| 117,534 | 136 | 27,790 | 6,505 | 4,908 | 39,339 |
| 117,535 | 136 | 27,944 | 6,534 | 4,926 | 39,540 |
| 117,536 | 135 | 27,691 | 6,471 | 4,863 | 39,160 |
| 117,537 | 141 | 27,160 | 6,400 | 4,798 | 38,499 |
| 117,538 | 147 | 27,390 | 6,463 | 4,841 | 38,841 |
| 117,539 | 157 | 27,235 | 6,468 | 4,825 | 38,685 |
| 117,540 | 151 | 26,651 | 6,345 | 4,692 | 37,839 |
| 117,541 | 151 | 26,702 | 6,311 | 4,692 | 37,856 |
| 117,542 | 156 | 26,578 | 6,241 | 4,650 | 37,625 |
| 117,543 | 156 | 26,942 | 6,312 | 4,693 | 38,103 |
| 117,544 | 157 | 27,439 | 6,394 | 4,737 | 38,727 |
| 117,545 | 153 | 27,161 | 6,349 | 4,675 | 38,338 |
| 117,546 | 152 | 27,318 | 6,352 | 4,688 | 38,510 |
| 117,547 | 153 | 27,561 | 6,426 | 4,719 | 38,859 |
| 117,548 | 152 | 27,416 | 6,407 | 4,685 | 38,660 |
| 117,549 | 156 | 27,559 | 6,395 | 4,687 | 38,797 |
| 117,550 | 156 | 27,490 | 6,396 | 4,706 | 38,748 |
| 117,551 | 148 | 27,544 | 6,435 | 4,753 | 38,880 |
| 117,552 | 147 | 27,619 | 6,455 | 4,782 | 39,003 |
| 117,553 | 149 | 27,742 | 6,504 | 4,844 | 39,239 |
| 117,554 | 148 | 27,782 | 6,555 | 4,901 | 39,386 |
| 117,555 | 148 | 27,699 | 6,550 | 4,859 | 39,256 |
| 117,556 | 147 | 27,661 | 6,555 | 4,850 | 39,213 |
| 117,557 | 153 | 28,097 | 6,711 | 4,945 | 39,906 |
| 117,558 | 157 | 28,013 | 6,692 | 4,931 | 39,793 |
| 117,559 | 152 | 28,031 | 6,687 | 4,946 | 39,816 |

|         |     |        |       |       |        |
|---------|-----|--------|-------|-------|--------|
| 117,560 | 160 | 27,797 | 6,682 | 4,891 | 39,530 |
| 117,561 | 159 | 27,449 | 6,616 | 4,848 | 39,072 |
| 117,562 | 157 | 27,538 | 6,666 | 4,861 | 39,222 |
| 117,563 | 161 | 27,935 | 6,760 | 4,895 | 39,751 |
| 117,564 | 161 | 28,055 | 6,758 | 4,917 | 39,891 |
| 117,565 | 164 | 27,511 | 6,619 | 4,777 | 39,071 |
| 117,566 | 164 | 27,873 | 6,693 | 4,844 | 39,574 |
| 117,567 | 164 | 28,022 | 6,715 | 4,879 | 39,780 |
| 117,568 | 167 | 28,427 | 6,820 | 4,945 | 40,359 |
| 117,569 | 167 | 28,726 | 6,832 | 4,977 | 40,702 |
| 117,570 | 164 | 28,689 | 6,790 | 4,942 | 40,585 |
| 117,571 | 164 | 29,031 | 6,857 | 5,013 | 41,065 |
| 117,572 | 164 | 29,167 | 6,894 | 5,085 | 41,310 |
| 117,573 | 162 | 28,829 | 6,811 | 5,012 | 40,814 |
| 117,574 | 162 | 28,880 | 6,816 | 5,031 | 40,889 |
| 117,575 | 162 | 28,872 | 6,812 | 5,035 | 40,881 |
| 117,576 | 169 | 28,888 | 6,813 | 5,074 | 40,944 |
| 117,577 | 166 | 29,412 | 6,943 | 5,160 | 41,681 |
| 117,578 | 165 | 29,668 | 6,959 | 5,194 | 41,986 |
| 117,579 | 157 | 29,337 | 6,861 | 5,096 | 41,451 |
| 117,580 | 161 | 29,771 | 6,956 | 5,146 | 42,034 |
| 117,581 | 161 | 30,054 | 7,010 | 5,180 | 42,405 |
| 117,582 | 156 | 29,572 | 6,913 | 5,095 | 41,736 |
| 117,583 | 161 | 29,599 | 6,905 | 5,091 | 41,756 |
| 117,584 | 161 | 29,190 | 6,836 | 5,049 | 41,236 |
| 117,585 | 163 | 29,421 | 6,907 | 5,100 | 41,591 |
| 117,586 | 163 | 29,484 | 6,868 | 5,115 | 41,630 |
| 117,587 | 159 | 29,518 | 6,842 | 5,089 | 41,608 |
| 117,588 | 148 | 29,463 | 6,773 | 5,055 | 41,439 |
| 117,589 | 140 | 29,171 | 6,659 | 4,991 | 40,961 |
| 117,590 | 140 | 29,239 | 6,669 | 5,005 | 41,053 |
| 117,591 | 144 | 28,854 | 6,584 | 4,953 | 40,535 |

|         |     |        |       |       |        |
|---------|-----|--------|-------|-------|--------|
| 117,592 | 143 | 28,449 | 6,514 | 4,902 | 40,008 |
| 117,593 | 152 | 29,200 | 6,701 | 5,060 | 41,113 |
| 117,594 | 155 | 29,542 | 6,739 | 5,110 | 41,546 |
| 117,595 | 152 | 29,704 | 6,768 | 5,143 | 41,767 |
| 117,596 | 150 | 29,631 | 6,757 | 5,122 | 41,660 |
| 117,597 | 151 | 29,357 | 6,684 | 5,082 | 41,274 |
| 117,598 | 151 | 29,400 | 6,682 | 5,076 | 41,309 |
| 117,599 | 150 | 29,419 | 6,660 | 5,065 | 41,294 |
| 117,600 | 152 | 29,789 | 6,705 | 5,111 | 41,757 |
| 117,601 | 152 | 29,944 | 6,707 | 5,115 | 41,918 |
| 117,602 | 155 | 30,124 | 6,700 | 5,089 | 42,068 |
| 117,603 | 152 | 30,014 | 6,636 | 4,979 | 41,781 |
| 117,604 | 153 | 29,138 | 6,374 | 4,794 | 40,459 |
| 117,605 | 154 | 29,643 | 6,420 | 4,849 | 41,066 |
| 117,606 | 149 | 30,125 | 6,465 | 4,915 | 41,654 |
| 117,607 | 145 | 29,626 | 6,313 | 4,785 | 40,869 |
| 117,608 | 148 | 29,798 | 6,379 | 4,808 | 41,133 |
| 117,609 | 135 | 29,824 | 6,335 | 4,821 | 41,115 |
| 117,610 | 137 | 30,115 | 6,390 | 4,854 | 41,496 |
| 117,611 | 130 | 30,003 | 6,395 | 4,857 | 41,385 |
| 117,612 | 129 | 30,002 | 6,381 | 4,854 | 41,366 |
| 117,613 | 125 | 30,086 | 6,344 | 4,858 | 41,413 |
| 117,614 | 131 | 30,267 | 6,341 | 4,860 | 41,599 |
| 117,615 | 135 | 30,234 | 6,352 | 4,857 | 41,578 |
| 117,616 | 132 | 29,941 | 6,280 | 4,822 | 41,175 |
| 117,617 | 140 | 29,795 | 6,215 | 4,761 | 40,911 |
| 117,618 | 138 | 29,700 | 6,166 | 4,752 | 40,756 |
| 117,619 | 139 | 29,891 | 6,214 | 4,772 | 41,016 |
| 117,620 | 140 | 29,674 | 6,195 | 4,773 | 40,782 |
| 117,621 | 141 | 29,559 | 6,198 | 4,767 | 40,665 |
| 117,622 | 142 | 29,850 | 6,194 | 4,769 | 40,955 |
| 117,623 | 143 | 29,506 | 6,087 | 4,695 | 40,431 |

|         |     |        |       |       |        |
|---------|-----|--------|-------|-------|--------|
| 117,624 | 143 | 29,583 | 6,098 | 4,698 | 40,522 |
| 117,625 | 146 | 29,784 | 6,129 | 4,710 | 40,769 |
| 117,626 | 141 | 30,048 | 6,168 | 4,737 | 41,094 |
| 117,627 | 142 | 30,152 | 6,148 | 4,718 | 41,160 |
| 117,628 | 140 | 29,266 | 5,919 | 4,554 | 39,879 |
| 117,629 | 142 | 29,347 | 5,942 | 4,556 | 39,987 |
| 117,630 | 143 | 29,543 | 5,950 | 4,572 | 40,208 |
| 117,631 | 140 | 29,287 | 5,898 | 4,524 | 39,849 |
| 117,632 | 130 | 28,785 | 5,758 | 4,425 | 39,098 |
| 117,633 | 129 | 29,000 | 5,791 | 4,439 | 39,359 |
| 117,634 | 125 | 28,925 | 5,780 | 4,441 | 39,271 |
| 117,635 | 130 | 28,940 | 5,780 | 4,472 | 39,322 |
| 117,636 | 130 | 28,409 | 5,656 | 4,380 | 38,575 |
| 117,637 | 131 | 28,424 | 5,670 | 4,404 | 38,629 |
| 117,638 | 131 | 28,265 | 5,668 | 4,407 | 38,471 |
| 117,639 | 129 | 28,092 | 5,627 | 4,368 | 38,216 |
| 117,640 | 127 | 27,965 | 5,604 | 4,370 | 38,066 |
| 117,641 | 122 | 27,925 | 5,590 | 4,352 | 37,989 |
| 117,642 | 117 | 27,915 | 5,555 | 4,312 | 37,899 |
| 117,643 | 116 | 27,658 | 5,504 | 4,267 | 37,545 |
| 117,644 | 115 | 27,412 | 5,520 | 4,256 | 37,303 |
| 117,645 | 114 | 27,360 | 5,585 | 4,317 | 37,376 |
| 117,646 | 110 | 26,848 | 5,511 | 4,263 | 36,732 |
| 117,647 | 106 | 26,583 | 5,397 | 4,212 | 36,298 |
| 117,648 | 107 | 26,942 | 5,430 | 4,239 | 36,718 |
| 117,649 | 102 | 26,966 | 5,427 | 4,242 | 36,737 |
| 117,650 | 100 | 27,006 | 5,440 | 4,238 | 36,784 |
| 117,651 | 101 | 27,091 | 5,516 | 4,298 | 37,006 |
| 117,652 | 101 | 27,231 | 5,604 | 4,356 | 37,292 |
| 117,653 | 110 | 27,186 | 5,586 | 4,407 | 37,289 |
| 117,654 | 114 | 27,800 | 5,703 | 4,523 | 38,140 |
| 117,655 | 114 | 27,688 | 5,752 | 4,566 | 38,120 |

|         |     |        |       |       |        |
|---------|-----|--------|-------|-------|--------|
| 117,656 | 118 | 28,014 | 5,825 | 4,674 | 38,631 |
| 117,657 | 118 | 27,646 | 5,748 | 4,620 | 38,132 |
| 117,658 | 122 | 28,443 | 5,981 | 4,820 | 39,366 |
| 117,659 | 118 | 28,236 | 5,903 | 4,789 | 39,046 |
| 117,660 | 119 | 29,057 | 6,110 | 4,996 | 40,282 |
| 117,661 | 118 | 28,985 | 6,097 | 4,975 | 40,175 |
| 117,662 | 127 | 29,531 | 6,205 | 5,044 | 40,907 |
| 117,663 | 127 | 29,430 | 6,211 | 5,041 | 40,809 |
| 117,664 | 120 | 28,524 | 6,084 | 4,918 | 39,646 |
| 117,665 | 117 | 28,678 | 6,120 | 4,974 | 39,889 |
| 117,666 | 115 | 28,830 | 6,179 | 5,012 | 40,136 |
| 117,667 | 114 | 28,788 | 6,187 | 5,013 | 40,102 |
| 117,668 | 111 | 28,914 | 6,241 | 5,056 | 40,322 |
| 117,669 | 110 | 28,234 | 6,097 | 4,947 | 39,388 |
| 117,670 | 111 | 28,359 | 6,120 | 4,993 | 39,583 |
| 117,671 | 109 | 28,568 | 6,183 | 5,038 | 39,898 |
| 117,672 | 110 | 28,654 | 6,239 | 5,086 | 40,089 |
| 117,673 | 111 | 28,310 | 6,237 | 5,083 | 39,741 |
| 117,674 | 113 | 28,166 | 6,263 | 5,091 | 39,633 |
| 117,675 | 112 | 28,224 | 6,254 | 5,100 | 39,690 |
| 117,676 | 113 | 27,938 | 6,233 | 5,089 | 39,373 |
| 117,677 | 111 | 27,639 | 6,168 | 5,031 | 38,949 |
| 117,678 | 118 | 27,562 | 6,187 | 5,065 | 38,932 |
| 117,679 | 117 | 27,184 | 6,148 | 5,035 | 38,484 |
| 117,680 | 117 | 27,161 | 6,143 | 5,036 | 38,457 |
| 117,681 | 117 | 27,392 | 6,209 | 5,084 | 38,802 |
| 117,682 | 116 | 27,172 | 6,161 | 5,076 | 38,525 |
| 117,683 | 117 | 27,276 | 6,216 | 5,106 | 38,715 |
| 117,684 | 117 | 27,270 | 6,198 | 5,117 | 38,702 |
| 117,685 | 113 | 27,442 | 6,211 | 5,154 | 38,920 |
| 117,686 | 111 | 27,335 | 6,159 | 5,128 | 38,733 |
| 117,687 | 111 | 27,419 | 6,173 | 5,130 | 38,833 |

|         |     |        |       |       |        |
|---------|-----|--------|-------|-------|--------|
| 117,688 | 117 | 27,719 | 6,234 | 5,186 | 39,256 |
| 117,689 | 118 | 27,667 | 6,220 | 5,195 | 39,200 |
| 117,690 | 120 | 27,793 | 6,249 | 5,220 | 39,382 |
| 117,691 | 120 | 27,877 | 6,282 | 5,242 | 39,521 |
| 117,692 | 120 | 28,046 | 6,316 | 5,256 | 39,738 |
| 117,693 | 114 | 28,211 | 6,323 | 5,283 | 39,931 |
| 117,694 | 115 | 28,366 | 6,355 | 5,311 | 40,147 |
| 117,695 | 113 | 28,549 | 6,351 | 5,303 | 40,316 |
| 117,696 | 113 | 28,754 | 6,396 | 5,326 | 40,589 |
| 117,697 | 115 | 29,312 | 6,518 | 5,395 | 41,340 |
| 117,698 | 115 | 29,274 | 6,562 | 5,407 | 41,358 |
| 117,699 | 114 | 28,868 | 6,520 | 5,381 | 40,883 |
| 117,700 | 118 | 29,616 | 6,725 | 5,520 | 41,979 |
| 117,701 | 122 | 29,490 | 6,722 | 5,540 | 41,874 |
| 117,702 | 121 | 29,423 | 6,669 | 5,496 | 41,709 |
| 117,703 | 121 | 29,783 | 6,738 | 5,563 | 42,205 |
| 117,704 | 111 | 29,829 | 6,781 | 5,591 | 42,312 |
| 117,705 | 109 | 29,689 | 6,790 | 5,581 | 42,169 |
| 117,706 | 109 | 29,462 | 6,751 | 5,517 | 41,839 |
| 117,707 | 109 | 29,556 | 6,804 | 5,518 | 41,987 |
| 117,708 | 106 | 29,172 | 6,763 | 5,436 | 41,477 |
| 117,709 | 110 | 29,040 | 6,797 | 5,427 | 41,374 |
| 117,710 | 117 | 28,776 | 6,769 | 5,361 | 41,023 |
| 117,711 | 122 | 28,569 | 6,708 | 5,289 | 40,688 |
| 117,712 | 126 | 28,540 | 6,701 | 5,266 | 40,633 |
| 117,713 | 121 | 28,551 | 6,755 | 5,310 | 40,737 |
| 117,714 | 125 | 28,596 | 6,788 | 5,342 | 40,851 |
| 117,715 | 132 | 29,093 | 6,924 | 5,451 | 41,600 |
| 117,716 | 132 | 29,462 | 7,011 | 5,492 | 42,097 |
| 117,717 | 136 | 30,028 | 7,092 | 5,561 | 42,817 |
| 117,718 | 136 | 30,072 | 7,112 | 5,572 | 42,892 |
| 117,719 | 136 | 31,130 | 7,348 | 5,770 | 44,384 |

|         |     |        |       |       |        |
|---------|-----|--------|-------|-------|--------|
| 117,720 | 139 | 31,762 | 7,500 | 5,884 | 45,285 |
| 117,721 | 141 | 32,242 | 7,625 | 5,990 | 45,998 |
| 117,722 | 144 | 32,842 | 7,749 | 6,068 | 46,803 |
| 117,723 | 146 | 33,345 | 7,836 | 6,152 | 47,479 |
| 117,724 | 147 | 33,833 | 7,948 | 6,235 | 48,163 |
| 117,725 | 153 | 34,638 | 8,109 | 6,310 | 49,210 |
| 117,726 | 158 | 34,504 | 8,143 | 6,305 | 49,110 |
| 117,727 | 162 | 35,357 | 8,360 | 6,453 | 50,332 |
| 117,728 | 160 | 35,390 | 8,374 | 6,446 | 50,370 |
| 117,729 | 162 | 36,352 | 8,671 | 6,658 | 51,843 |
| 117,730 | 167 | 36,764 | 8,818 | 6,771 | 52,520 |
| 117,731 | 168 | 37,142 | 8,951 | 6,855 | 53,116 |
| 117,732 | 167 | 36,998 | 8,940 | 6,830 | 52,935 |
| 117,733 | 167 | 36,826 | 8,934 | 6,801 | 52,728 |
| 117,734 | 180 | 37,272 | 9,052 | 6,928 | 53,432 |
| 117,735 | 185 | 37,285 | 9,112 | 6,953 | 53,535 |
| 117,736 | 189 | 37,213 | 9,154 | 6,937 | 53,493 |
| 117,737 | 192 | 37,316 | 9,209 | 6,961 | 53,678 |
| 117,738 | 193 | 37,140 | 9,214 | 6,950 | 53,497 |
| 117,739 | 190 | 37,287 | 9,287 | 6,971 | 53,735 |
| 117,740 | 190 | 37,181 | 9,303 | 6,960 | 53,634 |
| 117,741 | 191 | 36,969 | 9,303 | 6,962 | 53,425 |
| 117,742 | 193 | 36,801 | 9,294 | 6,947 | 53,235 |
| 117,743 | 193 | 36,514 | 9,259 | 6,902 | 52,868 |
| 117,744 | 200 | 36,364 | 9,261 | 6,886 | 52,711 |
| 117,745 | 198 | 36,214 | 9,221 | 6,838 | 52,471 |
| 117,746 | 203 | 35,826 | 9,162 | 6,784 | 51,975 |
| 117,747 | 207 | 35,581 | 9,143 | 6,743 | 51,674 |
| 117,748 | 210 | 35,416 | 9,103 | 6,716 | 51,445 |
| 117,749 | 207 | 34,855 | 9,011 | 6,631 | 50,704 |
| 117,750 | 208 | 34,461 | 8,975 | 6,550 | 50,194 |
| 117,751 | 208 | 33,894 | 8,871 | 6,455 | 49,428 |



|         |     |        |       |       |        |
|---------|-----|--------|-------|-------|--------|
| 117,752 | 204 | 33,346 | 8,778 | 6,364 | 48,692 |
| 117,753 | 206 | 32,663 | 8,659 | 6,213 | 47,741 |
| 117,754 | 205 | 32,142 | 8,505 | 6,103 | 46,955 |
| 117,755 | 205 | 31,522 | 8,374 | 5,995 | 46,096 |
| 117,756 | 206 | 31,425 | 8,357 | 5,966 | 45,954 |
| 117,757 | 197 | 31,011 | 8,248 | 5,896 | 45,352 |
| 117,758 | 199 | 30,333 | 8,120 | 5,759 | 44,411 |
| 117,759 | 192 | 29,330 | 7,799 | 5,546 | 42,867 |
| 117,760 | 191 | 29,190 | 7,767 | 5,506 | 42,654 |
| 117,761 | 184 | 28,886 | 7,657 | 5,461 | 42,188 |
| 117,762 | 180 | 28,585 | 7,589 | 5,414 | 41,768 |
| 117,763 | 180 | 28,152 | 7,524 | 5,390 | 41,246 |
| 117,764 | 176 | 27,620 | 7,426 | 5,311 | 40,533 |
| 117,765 | 177 | 27,155 | 7,379 | 5,262 | 39,973 |
| 117,766 | 175 | 26,631 | 7,329 | 5,229 | 39,364 |
| 117,767 | 173 | 26,276 | 7,340 | 5,227 | 39,016 |
| 117,768 | 170 | 25,958 | 7,354 | 5,237 | 38,719 |
| 117,769 | 168 | 25,799 | 7,325 | 5,206 | 38,498 |
| 117,770 | 191 | 25,467 | 7,338 | 5,163 | 38,159 |
| 117,771 | 186 | 24,747 | 7,215 | 5,018 | 37,166 |
| 117,772 | 191 | 24,498 | 7,191 | 4,957 | 36,837 |
| 117,773 | 193 | 24,386 | 7,230 | 4,942 | 36,751 |
| 117,774 | 196 | 24,002 | 7,183 | 4,883 | 36,264 |
| 117,775 | 196 | 23,945 | 7,231 | 4,926 | 36,298 |
| 117,776 | 180 | 23,279 | 7,114 | 4,828 | 35,401 |
| 117,777 | 180 | 22,984 | 7,003 | 4,779 | 34,946 |
| 117,778 | 177 | 22,840 | 6,954 | 4,720 | 34,691 |
| 117,779 | 177 | 23,053 | 7,020 | 4,737 | 34,987 |
| 117,780 | 168 | 23,379 | 7,138 | 4,799 | 35,484 |
| 117,781 | 163 | 23,453 | 7,162 | 4,830 | 35,608 |
| 117,782 | 162 | 23,607 | 7,107 | 4,812 | 35,688 |
| 117,783 | 161 | 23,805 | 7,138 | 4,822 | 35,926 |

|         |     |        |       |       |        |
|---------|-----|--------|-------|-------|--------|
| 117,784 | 151 | 23,988 | 7,185 | 4,849 | 36,173 |
| 117,785 | 151 | 24,078 | 7,197 | 4,845 | 36,271 |
| 117,786 | 149 | 24,187 | 7,164 | 4,852 | 36,352 |
| 117,787 | 146 | 24,248 | 7,128 | 4,838 | 36,360 |
| 117,788 | 145 | 24,214 | 7,092 | 4,812 | 36,263 |
| 117,789 | 147 | 24,287 | 7,107 | 4,812 | 36,353 |
| 117,790 | 144 | 24,084 | 7,043 | 4,770 | 36,041 |
| 117,791 | 143 | 24,198 | 7,122 | 4,784 | 36,247 |
| 117,792 | 134 | 23,672 | 6,980 | 4,668 | 35,454 |
| 117,793 | 134 | 23,841 | 7,046 | 4,695 | 35,716 |
| 117,794 | 132 | 23,903 | 7,061 | 4,710 | 35,806 |
| 117,795 | 131 | 23,409 | 6,912 | 4,612 | 35,064 |
| 117,796 | 133 | 23,469 | 6,921 | 4,632 | 35,155 |
| 117,797 | 130 | 23,252 | 6,830 | 4,594 | 34,806 |
| 117,798 | 127 | 22,993 | 6,757 | 4,554 | 34,431 |
| 117,799 | 130 | 23,281 | 6,833 | 4,624 | 34,868 |
| 117,800 | 129 | 23,070 | 6,774 | 4,598 | 34,571 |
| 117,801 | 126 | 23,326 | 6,860 | 4,693 | 35,005 |
| 117,802 | 126 | 23,291 | 6,893 | 4,697 | 35,007 |
| 117,803 | 124 | 23,222 | 6,886 | 4,688 | 34,920 |
| 117,804 | 120 | 23,292 | 6,850 | 4,680 | 34,942 |
| 117,805 | 121 | 23,511 | 6,887 | 4,700 | 35,219 |
| 117,806 | 123 | 23,705 | 6,946 | 4,741 | 35,515 |
| 117,807 | 121 | 23,658 | 6,952 | 4,751 | 35,482 |
| 117,808 | 120 | 23,757 | 6,953 | 4,765 | 35,595 |
| 117,809 | 121 | 23,755 | 6,961 | 4,755 | 35,592 |
| 117,810 | 120 | 23,742 | 6,963 | 4,755 | 35,580 |
| 117,811 | 122 | 24,078 | 7,095 | 4,839 | 36,134 |
| 117,812 | 122 | 24,184 | 7,139 | 4,859 | 36,304 |
| 117,813 | 118 | 24,195 | 7,148 | 4,876 | 36,337 |
| 117,814 | 119 | 24,180 | 7,115 | 4,843 | 36,257 |
| 117,815 | 114 | 23,999 | 6,978 | 4,741 | 35,832 |

|         |     |        |       |       |        |
|---------|-----|--------|-------|-------|--------|
| 117,816 | 118 | 24,097 | 6,996 | 4,765 | 35,976 |
| 117,817 | 113 | 23,988 | 6,888 | 4,695 | 35,684 |
| 117,818 | 116 | 24,180 | 6,851 | 4,672 | 35,819 |
| 117,819 | 117 | 23,986 | 6,740 | 4,585 | 35,428 |
| 117,820 | 93  | 22,828 | 6,372 | 4,316 | 33,609 |
| 117,821 | 82  | 21,794 | 6,034 | 4,119 | 32,029 |
| 117,822 | 85  | 21,956 | 6,094 | 4,149 | 32,284 |
| 117,823 | 83  | 22,190 | 6,184 | 4,218 | 32,675 |
| 117,824 | 79  | 21,419 | 6,007 | 4,095 | 31,600 |
| 117,825 | 67  | 20,384 | 5,666 | 3,848 | 29,965 |
| 117,826 | 71  | 20,515 | 5,735 | 3,900 | 30,221 |
| 117,827 | 70  | 20,114 | 5,604 | 3,827 | 29,615 |
| 117,828 | 69  | 19,555 | 5,475 | 3,741 | 28,840 |
| 117,829 | 65  | 18,982 | 5,348 | 3,636 | 28,031 |
| 117,830 | 65  | 18,400 | 5,227 | 3,561 | 27,253 |
| 117,831 | 64  | 16,643 | 4,744 | 3,208 | 24,659 |
| 117,832 | 65  | 16,913 | 4,802 | 3,231 | 25,011 |
| 117,833 | 70  | 17,178 | 4,884 | 3,263 | 25,395 |
| 117,834 | 72  | 16,975 | 4,838 | 3,242 | 25,127 |
| 117,835 | 73  | 16,931 | 4,807 | 3,239 | 25,050 |
| 117,836 | 74  | 16,291 | 4,689 | 3,136 | 24,190 |
| 117,837 | 75  | 16,522 | 4,747 | 3,154 | 24,498 |
| 117,838 | 75  | 16,907 | 4,817 | 3,202 | 25,001 |
| 117,839 | 73  | 16,741 | 4,767 | 3,164 | 24,745 |
| 117,840 | 79  | 16,753 | 4,860 | 3,205 | 24,897 |
| 117,841 | 82  | 17,134 | 4,929 | 3,257 | 25,402 |
| 117,842 | 85  | 17,078 | 4,930 | 3,265 | 25,358 |
| 117,843 | 87  | 17,169 | 4,939 | 3,316 | 25,511 |
| 117,844 | 93  | 17,283 | 4,969 | 3,350 | 25,695 |
| 117,845 | 90  | 17,166 | 4,953 | 3,348 | 25,557 |
| 117,846 | 88  | 17,286 | 5,021 | 3,403 | 25,798 |
| 117,847 | 86  | 17,428 | 5,065 | 3,417 | 25,996 |

|         |     |        |       |       |        |
|---------|-----|--------|-------|-------|--------|
| 117,848 | 86  | 17,745 | 5,113 | 3,458 | 26,402 |
| 117,849 | 86  | 18,091 | 5,157 | 3,495 | 26,829 |
| 117,850 | 87  | 18,276 | 5,190 | 3,507 | 27,060 |
| 117,851 | 88  | 18,261 | 5,134 | 3,488 | 26,971 |
| 117,852 | 89  | 18,606 | 5,196 | 3,528 | 27,419 |
| 117,853 | 90  | 19,065 | 5,284 | 3,599 | 28,038 |
| 117,854 | 90  | 19,041 | 5,270 | 3,600 | 28,001 |
| 117,855 | 91  | 18,960 | 5,234 | 3,592 | 27,877 |
| 117,856 | 97  | 19,540 | 5,383 | 3,696 | 28,716 |
| 117,857 | 95  | 19,410 | 5,342 | 3,661 | 28,508 |
| 117,858 | 110 | 20,043 | 5,437 | 3,722 | 29,312 |
| 117,859 | 111 | 20,218 | 5,428 | 3,735 | 29,492 |
| 117,860 | 117 | 20,654 | 5,526 | 3,776 | 30,073 |
| 117,861 | 120 | 20,870 | 5,562 | 3,788 | 30,340 |
| 117,862 | 122 | 21,053 | 5,634 | 3,836 | 30,645 |
| 117,863 | 122 | 21,250 | 5,693 | 3,849 | 30,914 |
| 117,864 | 122 | 21,259 | 5,706 | 3,859 | 30,946 |
| 117,865 | 122 | 21,170 | 5,763 | 3,876 | 30,931 |
| 117,866 | 123 | 21,259 | 5,845 | 3,926 | 31,153 |
| 117,867 | 120 | 21,407 | 5,896 | 3,954 | 31,377 |
| 117,868 | 119 | 21,383 | 5,920 | 3,963 | 31,385 |
| 117,869 | 115 | 21,430 | 5,960 | 3,962 | 31,467 |
| 117,870 | 114 | 21,605 | 5,992 | 3,979 | 31,690 |
| 117,871 | 114 | 21,765 | 6,012 | 4,011 | 31,902 |
| 117,872 | 115 | 21,948 | 6,020 | 4,028 | 32,111 |
| 117,873 | 113 | 22,057 | 6,033 | 4,056 | 32,259 |
| 117,874 | 113 | 22,129 | 6,028 | 4,065 | 32,335 |
| 117,875 | 115 | 22,420 | 6,072 | 4,074 | 32,681 |
| 117,876 | 124 | 22,752 | 6,119 | 4,102 | 33,097 |
| 117,877 | 123 | 23,171 | 6,157 | 4,108 | 33,559 |
| 117,878 | 123 | 23,182 | 6,158 | 4,104 | 33,567 |
| 117,879 | 129 | 23,705 | 6,243 | 4,133 | 34,210 |

|         |     |        |       |       |        |
|---------|-----|--------|-------|-------|--------|
| 117,880 | 134 | 23,647 | 6,183 | 4,122 | 34,086 |
| 117,881 | 133 | 23,869 | 6,197 | 4,132 | 34,331 |
| 117,882 | 131 | 23,861 | 6,183 | 4,140 | 34,315 |
| 117,883 | 131 | 23,988 | 6,190 | 4,169 | 34,478 |
| 117,884 | 131 | 24,015 | 6,170 | 4,151 | 34,467 |
| 117,885 | 134 | 24,023 | 6,204 | 4,150 | 34,511 |
| 117,886 | 133 | 24,011 | 6,194 | 4,179 | 34,517 |
| 117,887 | 132 | 23,907 | 6,220 | 4,204 | 34,463 |
| 117,888 | 133 | 24,345 | 6,364 | 4,298 | 35,140 |
| 117,889 | 133 | 24,541 | 6,435 | 4,339 | 35,448 |
| 117,890 | 132 | 24,584 | 6,423 | 4,354 | 35,493 |
| 117,891 | 128 | 24,692 | 6,422 | 4,385 | 35,627 |
| 117,892 | 127 | 24,765 | 6,467 | 4,415 | 35,774 |
| 117,893 | 125 | 25,087 | 6,476 | 4,428 | 36,116 |
| 117,894 | 124 | 25,325 | 6,462 | 4,393 | 36,304 |
| 117,895 | 119 | 25,586 | 6,494 | 4,383 | 36,582 |
| 117,896 | 128 | 25,734 | 6,442 | 4,336 | 36,640 |
| 117,897 | 129 | 25,825 | 6,437 | 4,344 | 36,735 |
| 117,898 | 128 | 26,032 | 6,511 | 4,365 | 37,036 |
| 117,899 | 132 | 25,992 | 6,476 | 4,374 | 36,974 |
| 117,900 | 132 | 25,805 | 6,478 | 4,340 | 36,755 |
| 117,901 | 132 | 25,912 | 6,483 | 4,364 | 36,891 |
| 117,902 | 131 | 25,910 | 6,576 | 4,375 | 36,992 |
| 117,903 | 135 | 25,929 | 6,625 | 4,429 | 37,118 |
| 117,904 | 136 | 25,740 | 6,627 | 4,393 | 36,896 |
| 117,905 | 137 | 25,799 | 6,614 | 4,392 | 36,942 |
| 117,906 | 132 | 25,990 | 6,700 | 4,419 | 37,241 |
| 117,907 | 133 | 26,119 | 6,738 | 4,425 | 37,415 |
| 117,908 | 130 | 25,980 | 6,738 | 4,442 | 37,290 |
| 117,909 | 121 | 26,094 | 6,803 | 4,474 | 37,492 |
| 117,910 | 117 | 26,220 | 6,874 | 4,530 | 37,741 |
| 117,911 | 117 | 26,372 | 6,917 | 4,581 | 37,987 |

|         |     |        |       |       |        |
|---------|-----|--------|-------|-------|--------|
| 117,912 | 113 | 26,324 | 6,951 | 4,594 | 37,982 |
| 117,913 | 114 | 26,492 | 7,029 | 4,635 | 38,270 |
| 117,914 | 117 | 26,737 | 7,047 | 4,652 | 38,553 |
| 117,915 | 113 | 26,919 | 7,005 | 4,637 | 38,674 |
| 117,916 | 113 | 27,346 | 7,084 | 4,693 | 39,236 |
| 117,917 | 110 | 27,251 | 7,026 | 4,629 | 39,016 |
| 117,918 | 113 | 27,295 | 7,014 | 4,612 | 39,034 |
| 117,919 | 113 | 27,334 | 7,039 | 4,612 | 39,098 |
| 117,920 | 118 | 27,596 | 7,078 | 4,634 | 39,426 |
| 117,921 | 121 | 27,644 | 7,092 | 4,655 | 39,512 |
| 117,922 | 125 | 27,336 | 7,027 | 4,581 | 39,069 |
| 117,923 | 126 | 27,404 | 7,060 | 4,580 | 39,170 |
| 117,924 | 126 | 27,474 | 7,076 | 4,607 | 39,283 |
| 117,925 | 128 | 26,761 | 6,930 | 4,466 | 38,285 |
| 117,926 | 127 | 27,040 | 7,010 | 4,547 | 38,724 |
| 117,927 | 120 | 26,959 | 7,002 | 4,571 | 38,652 |
| 117,928 | 122 | 27,201 | 7,107 | 4,653 | 39,083 |
| 117,929 | 125 | 27,277 | 7,087 | 4,651 | 39,140 |
| 117,930 | 119 | 27,307 | 7,112 | 4,672 | 39,210 |
| 117,931 | 115 | 27,145 | 7,091 | 4,646 | 38,997 |
| 117,932 | 118 | 27,156 | 7,103 | 4,647 | 39,024 |
| 117,933 | 118 | 27,345 | 7,161 | 4,701 | 39,325 |
| 117,934 | 112 | 27,314 | 7,167 | 4,700 | 39,293 |
| 117,935 | 111 | 27,780 | 7,298 | 4,796 | 39,985 |
| 117,936 | 108 | 27,652 | 7,306 | 4,840 | 39,906 |
| 117,937 | 114 | 27,844 | 7,328 | 4,830 | 40,116 |
| 117,938 | 111 | 27,914 | 7,297 | 4,809 | 40,131 |
| 117,939 | 112 | 27,909 | 7,265 | 4,803 | 40,089 |
| 117,940 | 112 | 27,806 | 7,243 | 4,796 | 39,957 |
| 117,941 | 109 | 27,635 | 7,172 | 4,748 | 39,664 |
| 117,942 | 111 | 27,989 | 7,223 | 4,762 | 40,085 |
| 117,943 | 110 | 27,637 | 7,118 | 4,701 | 39,566 |

|         |     |        |       |       |        |
|---------|-----|--------|-------|-------|--------|
| 117,944 | 112 | 27,525 | 7,143 | 4,703 | 39,483 |
| 117,945 | 118 | 27,345 | 7,203 | 4,729 | 39,395 |
| 117,946 | 120 | 27,242 | 7,218 | 4,757 | 39,337 |
| 117,947 | 112 | 27,064 | 7,233 | 4,741 | 39,150 |
| 117,948 | 114 | 26,948 | 7,238 | 4,752 | 39,052 |
| 117,949 | 109 | 26,810 | 7,223 | 4,719 | 38,861 |
| 117,950 | 112 | 27,167 | 7,288 | 4,779 | 39,346 |
| 117,951 | 114 | 26,631 | 7,116 | 4,675 | 38,536 |
| 117,952 | 116 | 26,943 | 7,155 | 4,712 | 38,926 |
| 117,953 | 114 | 27,360 | 7,237 | 4,760 | 39,471 |
| 117,954 | 113 | 27,163 | 7,241 | 4,714 | 39,231 |
| 117,955 | 117 | 27,518 | 7,275 | 4,757 | 39,667 |
| 117,956 | 121 | 27,519 | 7,253 | 4,796 | 39,689 |
| 117,957 | 124 | 27,212 | 7,200 | 4,751 | 39,287 |
| 117,958 | 125 | 27,343 | 7,209 | 4,740 | 39,417 |
| 117,959 | 125 | 27,467 | 7,251 | 4,761 | 39,604 |
| 117,960 | 124 | 27,299 | 7,233 | 4,723 | 39,379 |
| 117,961 | 123 | 27,183 | 7,220 | 4,737 | 39,263 |
| 117,962 | 117 | 27,315 | 7,277 | 4,792 | 39,501 |
| 117,963 | 119 | 27,145 | 7,269 | 4,789 | 39,322 |
| 117,964 | 118 | 27,143 | 7,252 | 4,766 | 39,279 |
| 117,965 | 116 | 26,733 | 7,170 | 4,715 | 38,734 |
| 117,966 | 116 | 26,716 | 7,175 | 4,728 | 38,735 |
| 117,967 | 118 | 26,951 | 7,251 | 4,783 | 39,103 |
| 117,968 | 121 | 26,686 | 7,208 | 4,752 | 38,767 |
| 117,969 | 124 | 26,883 | 7,223 | 4,778 | 39,008 |
| 117,970 | 124 | 26,979 | 7,245 | 4,798 | 39,146 |
| 117,971 | 119 | 27,025 | 7,248 | 4,828 | 39,220 |
| 117,972 | 119 | 26,874 | 7,258 | 4,825 | 39,076 |
| 117,973 | 117 | 27,290 | 7,390 | 4,955 | 39,752 |
| 117,974 | 117 | 27,022 | 7,345 | 4,905 | 39,389 |
| 117,975 | 114 | 27,291 | 7,459 | 5,007 | 39,871 |

|         |     |        |       |       |        |
|---------|-----|--------|-------|-------|--------|
| 117,976 | 114 | 27,430 | 7,532 | 5,083 | 40,159 |
| 117,977 | 115 | 27,246 | 7,547 | 5,087 | 39,995 |
| 117,978 | 112 | 27,301 | 7,589 | 5,127 | 40,129 |
| 117,979 | 112 | 26,980 | 7,513 | 5,071 | 39,676 |
| 117,980 | 109 | 26,382 | 7,444 | 5,054 | 38,989 |
| 117,981 | 114 | 26,772 | 7,554 | 5,149 | 39,589 |
| 117,982 | 114 | 26,804 | 7,603 | 5,169 | 39,690 |
| 117,983 | 113 | 26,589 | 7,573 | 5,156 | 39,431 |
| 117,984 | 113 | 26,503 | 7,565 | 5,133 | 39,314 |
| 117,985 | 116 | 27,065 | 7,685 | 5,252 | 40,118 |
| 117,986 | 119 | 26,545 | 7,519 | 5,115 | 39,298 |
| 117,987 | 120 | 26,928 | 7,584 | 5,140 | 39,772 |
| 117,988 | 121 | 26,916 | 7,594 | 5,162 | 39,793 |
| 117,989 | 121 | 26,740 | 7,553 | 5,133 | 39,547 |
| 117,990 | 128 | 27,340 | 7,731 | 5,254 | 40,453 |
| 117,991 | 128 | 27,319 | 7,744 | 5,246 | 40,437 |
| 117,992 | 130 | 26,654 | 7,479 | 5,077 | 39,340 |
| 117,993 | 131 | 26,903 | 7,543 | 5,127 | 39,704 |
| 117,994 | 130 | 27,139 | 7,626 | 5,182 | 40,077 |
| 117,995 | 130 | 27,069 | 7,623 | 5,192 | 40,014 |
| 117,996 | 126 | 27,572 | 7,719 | 5,275 | 40,692 |
| 117,997 | 126 | 27,586 | 7,721 | 5,290 | 40,723 |
| 117,998 | 123 | 27,557 | 7,708 | 5,290 | 40,678 |
| 117,999 | 121 | 27,312 | 7,606 | 5,258 | 40,297 |
| 118,000 | 121 | 27,350 | 7,612 | 5,281 | 40,364 |
| 118,001 | 123 | 27,252 | 7,621 | 5,263 | 40,259 |
| 118,002 | 117 | 27,310 | 7,639 | 5,296 | 40,362 |
| 118,003 | 115 | 27,018 | 7,553 | 5,247 | 39,933 |
| 118,004 | 114 | 27,227 | 7,563 | 5,281 | 40,185 |
| 118,005 | 118 | 27,203 | 7,511 | 5,285 | 40,117 |
| 118,006 | 108 | 26,794 | 7,428 | 5,229 | 39,559 |
| 118,007 | 108 | 26,673 | 7,429 | 5,219 | 39,429 |



|         |     |        |       |       |        |
|---------|-----|--------|-------|-------|--------|
| 118,008 | 105 | 26,777 | 7,461 | 5,252 | 39,595 |
| 118,009 | 103 | 26,617 | 7,469 | 5,279 | 39,468 |
| 118,010 | 107 | 26,570 | 7,447 | 5,269 | 39,393 |
| 118,011 | 105 | 26,407 | 7,403 | 5,274 | 39,189 |
| 118,012 | 106 | 26,549 | 7,359 | 5,236 | 39,250 |
| 118,013 | 105 | 26,409 | 7,264 | 5,171 | 38,949 |
| 118,014 | 109 | 26,469 | 7,280 | 5,170 | 39,028 |
| 118,015 | 109 | 26,429 | 7,296 | 5,198 | 39,032 |
| 118,016 | 116 | 26,326 | 7,277 | 5,192 | 38,911 |
| 118,017 | 120 | 26,162 | 7,214 | 5,147 | 38,643 |
| 118,018 | 120 | 26,148 | 7,214 | 5,175 | 38,657 |
| 118,019 | 117 | 25,966 | 7,194 | 5,181 | 38,458 |
| 118,020 | 115 | 26,135 | 7,312 | 5,258 | 38,820 |
| 118,021 | 115 | 25,764 | 7,270 | 5,211 | 38,360 |
| 118,022 | 115 | 25,338 | 7,209 | 5,165 | 37,827 |
| 118,023 | 120 | 25,988 | 7,407 | 5,306 | 38,821 |
| 118,024 | 123 | 25,741 | 7,373 | 5,244 | 38,481 |
| 118,025 | 121 | 25,513 | 7,292 | 5,193 | 38,119 |
| 118,026 | 122 | 25,613 | 7,282 | 5,159 | 38,176 |
| 118,027 | 121 | 25,541 | 7,227 | 5,110 | 37,999 |
| 118,028 | 124 | 25,474 | 7,147 | 5,014 | 37,759 |
| 118,029 | 128 | 25,658 | 7,128 | 5,020 | 37,934 |
| 118,030 | 127 | 25,691 | 7,131 | 5,029 | 37,978 |
| 118,031 | 126 | 26,054 | 7,167 | 4,992 | 38,339 |
| 118,032 | 125 | 26,064 | 7,130 | 4,981 | 38,300 |
| 118,033 | 130 | 26,342 | 7,209 | 5,024 | 38,705 |
| 118,034 | 130 | 26,529 | 7,213 | 5,031 | 38,903 |
| 118,035 | 131 | 26,450 | 7,157 | 5,022 | 38,760 |
| 118,036 | 131 | 26,588 | 7,180 | 5,037 | 38,936 |
| 118,037 | 129 | 26,752 | 7,233 | 5,074 | 39,188 |
| 118,038 | 121 | 26,868 | 7,288 | 5,095 | 39,372 |
| 118,039 | 121 | 27,131 | 7,358 | 5,136 | 39,746 |

|         |     |        |       |       |        |
|---------|-----|--------|-------|-------|--------|
| 118,040 | 120 | 26,928 | 7,308 | 5,121 | 39,477 |
| 118,041 | 119 | 26,989 | 7,401 | 5,189 | 39,698 |
| 118,042 | 123 | 26,796 | 7,423 | 5,195 | 39,537 |
| 118,043 | 114 | 26,718 | 7,494 | 5,226 | 39,552 |
| 118,044 | 118 | 26,494 | 7,480 | 5,183 | 39,275 |
| 118,045 | 117 | 26,243 | 7,444 | 5,165 | 38,969 |
| 118,046 | 119 | 26,303 | 7,461 | 5,156 | 39,039 |
| 118,047 | 119 | 26,016 | 7,399 | 5,122 | 38,656 |
| 118,048 | 116 | 26,818 | 7,545 | 5,224 | 39,703 |
| 118,049 | 117 | 26,726 | 7,530 | 5,214 | 39,587 |
| 118,050 | 116 | 26,843 | 7,545 | 5,223 | 39,727 |
| 118,051 | 112 | 26,781 | 7,557 | 5,224 | 39,674 |
| 118,052 | 113 | 26,540 | 7,514 | 5,189 | 39,356 |
| 118,053 | 113 | 26,465 | 7,524 | 5,198 | 39,300 |
| 118,054 | 112 | 26,504 | 7,587 | 5,229 | 39,432 |
| 118,055 | 112 | 26,477 | 7,590 | 5,229 | 39,408 |
| 118,056 | 109 | 26,459 | 7,580 | 5,258 | 39,406 |
| 118,057 | 112 | 26,457 | 7,590 | 5,246 | 39,405 |
| 118,058 | 113 | 26,662 | 7,635 | 5,270 | 39,680 |
| 118,059 | 111 | 26,768 | 7,635 | 5,272 | 39,786 |
| 118,060 | 111 | 26,645 | 7,569 | 5,213 | 39,538 |
| 118,061 | 111 | 26,632 | 7,593 | 5,195 | 39,531 |
| 118,062 | 112 | 26,863 | 7,685 | 5,229 | 39,889 |
| 118,063 | 112 | 26,600 | 7,689 | 5,233 | 39,634 |
| 118,064 | 111 | 26,468 | 7,679 | 5,247 | 39,505 |
| 118,065 | 106 | 26,076 | 7,547 | 5,174 | 38,903 |
| 118,066 | 106 | 26,504 | 7,644 | 5,228 | 39,482 |
| 118,067 | 99  | 26,603 | 7,678 | 5,252 | 39,632 |
| 118,068 | 93  | 26,459 | 7,637 | 5,260 | 39,449 |
| 118,069 | 91  | 26,294 | 7,585 | 5,207 | 39,177 |
| 118,070 | 95  | 26,749 | 7,627 | 5,265 | 39,736 |
| 118,071 | 95  | 26,916 | 7,589 | 5,253 | 39,853 |

|         |     |        |       |       |        |
|---------|-----|--------|-------|-------|--------|
| 118,072 | 88  | 26,922 | 7,493 | 5,211 | 39,714 |
| 118,073 | 95  | 27,214 | 7,595 | 5,273 | 40,177 |
| 118,074 | 102 | 27,254 | 7,607 | 5,277 | 40,240 |
| 118,075 | 98  | 26,942 | 7,523 | 5,218 | 39,781 |
| 118,076 | 97  | 26,880 | 7,517 | 5,220 | 39,714 |
| 118,077 | 100 | 26,901 | 7,483 | 5,208 | 39,692 |
| 118,078 | 97  | 26,578 | 7,396 | 5,139 | 39,210 |
| 118,079 | 99  | 26,212 | 7,351 | 5,105 | 38,767 |
| 118,080 | 94  | 25,864 | 7,292 | 5,055 | 38,305 |
| 118,081 | 92  | 26,442 | 7,415 | 5,176 | 39,125 |
| 118,082 | 92  | 26,294 | 7,416 | 5,178 | 38,980 |
| 118,083 | 91  | 26,534 | 7,531 | 5,266 | 39,422 |
| 118,084 | 87  | 26,454 | 7,538 | 5,279 | 39,358 |
| 118,085 | 84  | 26,346 | 7,533 | 5,285 | 39,248 |
| 118,086 | 84  | 25,972 | 7,450 | 5,231 | 38,737 |
| 118,087 | 84  | 25,645 | 7,425 | 5,194 | 38,348 |
| 118,088 | 83  | 25,584 | 7,452 | 5,264 | 38,383 |
| 118,089 | 82  | 25,357 | 7,396 | 5,226 | 38,061 |
| 118,090 | 84  | 25,448 | 7,414 | 5,235 | 38,181 |
| 118,091 | 78  | 24,944 | 7,196 | 5,100 | 37,318 |
| 118,092 | 79  | 25,200 | 7,269 | 5,135 | 37,683 |
| 118,093 | 85  | 25,180 | 7,261 | 5,131 | 37,657 |
| 118,094 | 85  | 24,695 | 7,141 | 5,070 | 36,991 |
| 118,095 | 83  | 24,791 | 7,237 | 5,189 | 37,300 |
| 118,096 | 84  | 24,511 | 7,207 | 5,149 | 36,951 |
| 118,097 | 84  | 24,554 | 7,216 | 5,144 | 36,998 |
| 118,098 | 85  | 24,492 | 7,206 | 5,137 | 36,920 |
| 118,099 | 85  | 24,358 | 7,181 | 5,113 | 36,737 |
| 118,100 | 84  | 24,240 | 7,145 | 5,077 | 36,546 |
| 118,101 | 85  | 23,905 | 7,078 | 5,008 | 36,076 |
| 118,102 | 86  | 24,255 | 7,153 | 5,039 | 36,533 |
| 118,103 | 85  | 24,104 | 7,085 | 4,977 | 36,251 |

|         |     |        |       |       |        |
|---------|-----|--------|-------|-------|--------|
| 118,104 | 86  | 24,097 | 7,087 | 4,974 | 36,244 |
| 118,105 | 90  | 24,328 | 7,142 | 5,005 | 36,565 |
| 118,106 | 94  | 24,165 | 7,169 | 5,009 | 36,437 |
| 118,107 | 95  | 24,103 | 7,191 | 5,001 | 36,390 |
| 118,108 | 91  | 23,797 | 7,108 | 4,942 | 35,938 |
| 118,109 | 94  | 23,812 | 7,192 | 4,992 | 36,090 |
| 118,110 | 95  | 23,799 | 7,230 | 5,030 | 36,154 |
| 118,111 | 94  | 23,926 | 7,269 | 5,069 | 36,358 |
| 118,112 | 95  | 23,867 | 7,228 | 5,065 | 36,255 |
| 118,113 | 96  | 23,812 | 7,171 | 5,031 | 36,110 |
| 118,114 | 100 | 24,341 | 7,257 | 5,080 | 36,778 |
| 118,115 | 100 | 24,577 | 7,338 | 5,107 | 37,122 |
| 118,116 | 100 | 24,514 | 7,342 | 5,104 | 37,060 |
| 118,117 | 104 | 24,494 | 7,308 | 5,098 | 37,004 |
| 118,118 | 106 | 24,367 | 7,291 | 5,062 | 36,826 |
| 118,119 | 110 | 24,605 | 7,405 | 5,079 | 37,199 |
| 118,120 | 114 | 24,322 | 7,339 | 5,012 | 36,787 |
| 118,121 | 110 | 23,862 | 7,266 | 4,959 | 36,197 |
| 118,122 | 110 | 23,930 | 7,345 | 4,983 | 36,368 |
| 118,123 | 110 | 23,690 | 7,334 | 4,973 | 36,107 |
| 118,124 | 105 | 23,993 | 7,430 | 5,043 | 36,571 |
| 118,125 | 98  | 23,923 | 7,412 | 5,022 | 36,455 |
| 118,126 | 99  | 23,987 | 7,449 | 5,039 | 36,574 |
| 118,127 | 96  | 23,658 | 7,390 | 5,005 | 36,149 |
| 118,128 | 95  | 23,349 | 7,355 | 4,979 | 35,778 |
| 118,129 | 100 | 23,846 | 7,469 | 5,071 | 36,486 |
| 118,130 | 105 | 23,897 | 7,456 | 5,066 | 36,524 |
| 118,131 | 107 | 23,920 | 7,462 | 5,040 | 36,529 |
| 118,132 | 110 | 23,750 | 7,477 | 5,053 | 36,390 |
| 118,133 | 113 | 23,809 | 7,480 | 5,019 | 36,421 |
| 118,134 | 114 | 23,639 | 7,364 | 4,953 | 36,070 |
| 118,135 | 119 | 23,875 | 7,421 | 4,999 | 36,414 |

|         |     |        |       |       |        |
|---------|-----|--------|-------|-------|--------|
| 118,136 | 117 | 23,527 | 7,323 | 4,880 | 35,847 |
| 118,137 | 119 | 23,740 | 7,296 | 4,865 | 36,020 |
| 118,138 | 122 | 24,030 | 7,376 | 4,882 | 36,410 |
| 118,139 | 125 | 24,017 | 7,374 | 4,888 | 36,404 |
| 118,140 | 125 | 23,714 | 7,295 | 4,846 | 35,980 |
| 118,141 | 122 | 23,890 | 7,394 | 4,933 | 36,339 |
| 118,142 | 122 | 23,863 | 7,416 | 4,966 | 36,367 |
| 118,143 | 123 | 23,871 | 7,440 | 4,976 | 36,410 |
| 118,144 | 118 | 24,079 | 7,461 | 4,963 | 36,621 |
| 118,145 | 117 | 24,334 | 7,446 | 4,961 | 36,858 |
| 118,146 | 115 | 24,413 | 7,437 | 4,942 | 36,907 |
| 118,147 | 118 | 24,871 | 7,504 | 4,995 | 37,488 |
| 118,148 | 121 | 24,975 | 7,549 | 5,014 | 37,659 |
| 118,149 | 124 | 25,072 | 7,579 | 5,021 | 37,796 |
| 118,150 | 124 | 24,763 | 7,503 | 4,979 | 37,369 |
| 118,151 | 126 | 24,439 | 7,426 | 4,930 | 36,921 |
| 118,152 | 124 | 24,077 | 7,332 | 4,870 | 36,403 |
| 118,153 | 128 | 24,326 | 7,420 | 4,938 | 36,812 |
| 118,154 | 128 | 24,033 | 7,355 | 4,898 | 36,414 |
| 118,155 | 125 | 24,934 | 7,628 | 5,090 | 37,777 |
| 118,156 | 127 | 25,005 | 7,631 | 5,128 | 37,891 |
| 118,157 | 124 | 25,205 | 7,627 | 5,109 | 38,065 |
| 118,158 | 121 | 24,833 | 7,469 | 5,026 | 37,449 |
| 118,159 | 120 | 25,123 | 7,542 | 5,055 | 37,840 |
| 118,160 | 119 | 25,336 | 7,619 | 5,092 | 38,166 |
| 118,161 | 118 | 25,323 | 7,609 | 5,082 | 38,132 |
| 118,162 | 116 | 25,141 | 7,582 | 5,079 | 37,918 |
| 118,163 | 126 | 24,904 | 7,524 | 5,018 | 37,572 |
| 118,164 | 124 | 24,715 | 7,453 | 4,990 | 37,282 |
| 118,165 | 123 | 25,029 | 7,621 | 5,122 | 37,895 |
| 118,166 | 122 | 24,800 | 7,554 | 5,085 | 37,561 |
| 118,167 | 123 | 24,792 | 7,616 | 5,111 | 37,642 |

|         |     |        |       |       |        |
|---------|-----|--------|-------|-------|--------|
| 118,168 | 120 | 24,498 | 7,561 | 5,056 | 37,235 |
| 118,169 | 115 | 24,447 | 7,531 | 5,073 | 37,166 |
| 118,170 | 116 | 24,477 | 7,513 | 5,066 | 37,172 |
| 118,171 | 116 | 24,577 | 7,516 | 5,089 | 37,298 |
| 118,172 | 116 | 24,715 | 7,517 | 5,088 | 37,436 |
| 118,173 | 116 | 24,990 | 7,525 | 5,071 | 37,702 |
| 118,174 | 118 | 24,665 | 7,412 | 4,999 | 37,194 |
| 118,175 | 119 | 24,955 | 7,436 | 5,015 | 37,525 |
| 118,176 | 120 | 25,214 | 7,527 | 5,083 | 37,944 |
| 118,177 | 119 | 25,030 | 7,425 | 5,042 | 37,616 |
| 118,178 | 118 | 24,779 | 7,364 | 4,993 | 37,254 |
| 118,179 | 119 | 25,616 | 7,578 | 5,149 | 38,462 |
| 118,180 | 117 | 25,878 | 7,639 | 5,212 | 38,846 |
| 118,181 | 108 | 25,645 | 7,574 | 5,167 | 38,494 |
| 118,182 | 104 | 25,259 | 7,469 | 5,130 | 37,962 |
| 118,183 | 104 | 25,698 | 7,587 | 5,177 | 38,566 |
| 118,184 | 101 | 25,809 | 7,653 | 5,201 | 38,764 |
| 118,185 | 98  | 25,684 | 7,634 | 5,173 | 38,589 |
| 118,186 | 94  | 25,395 | 7,576 | 5,133 | 38,198 |
| 118,187 | 94  | 25,011 | 7,501 | 5,080 | 37,686 |
| 118,188 | 94  | 25,486 | 7,655 | 5,159 | 38,394 |
| 118,189 | 97  | 25,469 | 7,613 | 5,148 | 38,327 |
| 118,190 | 95  | 25,670 | 7,623 | 5,154 | 38,542 |
| 118,191 | 95  | 25,683 | 7,568 | 5,121 | 38,467 |
| 118,192 | 99  | 24,957 | 7,326 | 4,907 | 37,289 |
| 118,193 | 98  | 25,266 | 7,380 | 4,963 | 37,707 |
| 118,194 | 100 | 25,581 | 7,436 | 5,032 | 38,149 |
| 118,195 | 100 | 25,640 | 7,451 | 5,019 | 38,210 |
| 118,196 | 101 | 25,788 | 7,448 | 5,038 | 38,375 |
| 118,197 | 100 | 25,776 | 7,458 | 5,042 | 38,376 |
| 118,198 | 100 | 26,191 | 7,539 | 5,103 | 38,933 |
| 118,199 | 97  | 26,118 | 7,513 | 5,128 | 38,856 |

|         |     |        |       |       |        |
|---------|-----|--------|-------|-------|--------|
| 118,200 | 96  | 26,200 | 7,558 | 5,154 | 39,008 |
| 118,201 | 99  | 26,362 | 7,585 | 5,186 | 39,232 |
| 118,202 | 98  | 26,624 | 7,614 | 5,205 | 39,541 |
| 118,203 | 98  | 26,615 | 7,599 | 5,219 | 39,531 |
| 118,204 | 98  | 26,844 | 7,598 | 5,231 | 39,771 |
| 118,205 | 96  | 26,523 | 7,549 | 5,192 | 39,360 |
| 118,206 | 95  | 26,594 | 7,600 | 5,234 | 39,523 |
| 118,207 | 98  | 26,613 | 7,697 | 5,278 | 39,686 |
| 118,208 | 99  | 26,497 | 7,722 | 5,310 | 39,628 |
| 118,209 | 102 | 26,285 | 7,743 | 5,305 | 39,435 |
| 118,210 | 103 | 26,475 | 7,766 | 5,325 | 39,669 |
| 118,211 | 102 | 26,351 | 7,707 | 5,314 | 39,474 |
| 118,212 | 103 | 26,288 | 7,655 | 5,293 | 39,339 |
| 118,213 | 106 | 26,421 | 7,637 | 5,265 | 39,429 |
| 118,214 | 93  | 26,377 | 7,571 | 5,218 | 39,259 |
| 118,215 | 96  | 26,464 | 7,599 | 5,220 | 39,379 |
| 118,216 | 95  | 26,401 | 7,618 | 5,203 | 39,317 |
| 118,217 | 92  | 26,237 | 7,571 | 5,172 | 39,072 |
| 118,218 | 91  | 26,222 | 7,487 | 5,119 | 38,919 |
| 118,219 | 91  | 26,576 | 7,579 | 5,151 | 39,397 |
| 118,220 | 91  | 26,606 | 7,566 | 5,168 | 39,431 |
| 118,221 | 89  | 26,685 | 7,570 | 5,213 | 39,557 |
| 118,222 | 88  | 26,999 | 7,633 | 5,255 | 39,975 |
| 118,223 | 90  | 27,001 | 7,665 | 5,295 | 40,051 |
| 118,224 | 92  | 26,887 | 7,643 | 5,303 | 39,925 |
| 118,225 | 87  | 26,528 | 7,561 | 5,258 | 39,434 |
| 118,226 | 86  | 26,305 | 7,570 | 5,268 | 39,229 |
| 118,227 | 85  | 26,633 | 7,599 | 5,327 | 39,644 |
| 118,228 | 85  | 26,542 | 7,589 | 5,308 | 39,524 |
| 118,229 | 86  | 26,521 | 7,563 | 5,283 | 39,453 |
| 118,230 | 86  | 26,437 | 7,569 | 5,284 | 39,376 |
| 118,231 | 92  | 26,299 | 7,510 | 5,247 | 39,148 |

|         |     |        |       |       |        |
|---------|-----|--------|-------|-------|--------|
| 118,232 | 91  | 26,016 | 7,426 | 5,199 | 38,732 |
| 118,233 | 94  | 26,296 | 7,541 | 5,265 | 39,196 |
| 118,234 | 98  | 26,297 | 7,530 | 5,279 | 39,204 |
| 118,235 | 99  | 26,117 | 7,441 | 5,255 | 38,912 |
| 118,236 | 103 | 26,240 | 7,460 | 5,273 | 39,076 |
| 118,237 | 104 | 26,677 | 7,568 | 5,332 | 39,681 |
| 118,238 | 105 | 26,412 | 7,493 | 5,309 | 39,319 |
| 118,239 | 106 | 26,441 | 7,482 | 5,304 | 39,333 |
| 118,240 | 100 | 26,739 | 7,583 | 5,376 | 39,798 |
| 118,241 | 101 | 25,897 | 7,415 | 5,199 | 38,612 |
| 118,242 | 103 | 26,237 | 7,493 | 5,258 | 39,091 |
| 118,243 | 106 | 26,422 | 7,492 | 5,257 | 39,277 |
| 118,244 | 110 | 26,739 | 7,565 | 5,312 | 39,726 |
| 118,245 | 111 | 27,119 | 7,672 | 5,404 | 40,306 |
| 118,246 | 109 | 26,867 | 7,610 | 5,366 | 39,952 |
| 118,247 | 109 | 26,643 | 7,577 | 5,324 | 39,653 |
| 118,248 | 115 | 27,357 | 7,748 | 5,475 | 40,695 |
| 118,249 | 114 | 27,347 | 7,754 | 5,483 | 40,698 |
| 118,250 | 112 | 26,863 | 7,630 | 5,380 | 39,985 |
| 118,251 | 109 | 26,909 | 7,629 | 5,397 | 40,044 |
| 118,252 | 111 | 26,579 | 7,607 | 5,370 | 39,667 |
| 118,253 | 108 | 26,297 | 7,563 | 5,341 | 39,309 |
| 118,254 | 108 | 26,322 | 7,547 | 5,310 | 39,287 |
| 118,255 | 110 | 26,328 | 7,541 | 5,304 | 39,283 |
| 118,256 | 110 | 26,238 | 7,494 | 5,267 | 39,109 |
| 118,257 | 111 | 26,346 | 7,463 | 5,238 | 39,158 |
| 118,258 | 107 | 26,554 | 7,387 | 5,194 | 39,242 |
| 118,259 | 106 | 26,600 | 7,353 | 5,162 | 39,221 |
| 118,260 | 102 | 26,564 | 7,286 | 5,107 | 39,059 |
| 118,261 | 103 | 26,668 | 7,260 | 5,097 | 39,128 |
| 118,262 | 103 | 26,612 | 7,250 | 5,069 | 39,034 |
| 118,263 | 103 | 27,043 | 7,320 | 5,107 | 39,573 |



|         |     |        |       |       |        |
|---------|-----|--------|-------|-------|--------|
| 118,264 | 100 | 26,818 | 7,316 | 5,092 | 39,326 |
| 118,265 | 104 | 26,494 | 7,273 | 5,063 | 38,934 |
| 118,266 | 103 | 26,492 | 7,307 | 5,063 | 38,965 |
| 118,267 | 103 | 26,100 | 7,191 | 5,008 | 38,402 |
| 118,268 | 104 | 26,253 | 7,228 | 5,038 | 38,623 |
| 118,269 | 104 | 26,309 | 7,237 | 5,062 | 38,712 |
| 118,270 | 104 | 26,123 | 7,173 | 5,046 | 38,446 |
| 118,271 | 103 | 26,786 | 7,348 | 5,133 | 39,370 |
| 118,272 | 103 | 26,414 | 7,324 | 5,070 | 38,911 |
| 118,273 | 102 | 26,649 | 7,439 | 5,125 | 39,315 |
| 118,274 | 102 | 26,693 | 7,463 | 5,116 | 39,374 |
| 118,275 | 100 | 26,377 | 7,339 | 5,015 | 38,831 |
| 118,276 | 106 | 26,710 | 7,445 | 5,069 | 39,330 |
| 118,277 | 103 | 26,690 | 7,464 | 5,077 | 39,334 |
| 118,278 | 105 | 26,492 | 7,420 | 5,049 | 39,066 |
| 118,279 | 105 | 26,481 | 7,429 | 5,008 | 39,023 |
| 118,280 | 100 | 26,221 | 7,313 | 4,921 | 38,555 |
| 118,281 | 101 | 26,432 | 7,374 | 4,956 | 38,863 |
| 118,282 | 96  | 26,261 | 7,373 | 4,942 | 38,672 |
| 118,283 | 100 | 26,596 | 7,434 | 4,970 | 39,100 |
| 118,284 | 101 | 26,694 | 7,420 | 4,961 | 39,176 |
| 118,285 | 98  | 26,672 | 7,393 | 4,949 | 39,112 |
| 118,286 | 97  | 26,753 | 7,414 | 4,948 | 39,212 |
| 118,287 | 96  | 26,830 | 7,416 | 4,952 | 39,294 |
| 118,288 | 103 | 26,615 | 7,385 | 4,920 | 39,023 |
| 118,289 | 104 | 26,783 | 7,397 | 4,909 | 39,193 |
| 118,290 | 106 | 26,858 | 7,423 | 4,926 | 39,313 |
| 118,291 | 106 | 26,794 | 7,425 | 4,919 | 39,244 |
| 118,292 | 100 | 26,609 | 7,424 | 4,948 | 39,081 |
| 118,293 | 103 | 26,863 | 7,471 | 4,971 | 39,408 |
| 118,294 | 96  | 26,609 | 7,409 | 4,924 | 39,038 |
| 118,295 | 94  | 26,605 | 7,475 | 4,957 | 39,131 |

|         |     |        |       |       |        |
|---------|-----|--------|-------|-------|--------|
| 118,296 | 90  | 26,277 | 7,401 | 4,893 | 38,661 |
| 118,297 | 86  | 26,118 | 7,392 | 4,886 | 38,482 |
| 118,298 | 86  | 25,929 | 7,399 | 4,889 | 38,303 |
| 118,299 | 90  | 25,943 | 7,474 | 4,892 | 38,399 |
| 118,300 | 91  | 25,849 | 7,485 | 4,854 | 38,279 |
| 118,301 | 94  | 26,036 | 7,535 | 4,867 | 38,532 |
| 118,302 | 95  | 26,164 | 7,524 | 4,844 | 38,627 |
| 118,303 | 89  | 26,180 | 7,502 | 4,823 | 38,594 |
| 118,304 | 90  | 25,984 | 7,449 | 4,768 | 38,291 |
| 118,305 | 88  | 26,070 | 7,498 | 4,776 | 38,432 |
| 118,306 | 90  | 25,799 | 7,435 | 4,704 | 38,028 |
| 118,307 | 90  | 25,501 | 7,388 | 4,657 | 37,636 |
| 118,308 | 91  | 26,176 | 7,605 | 4,772 | 38,644 |
| 118,309 | 91  | 25,870 | 7,566 | 4,754 | 38,281 |
| 118,310 | 91  | 25,968 | 7,640 | 4,779 | 38,478 |
| 118,311 | 91  | 25,682 | 7,640 | 4,783 | 38,196 |
| 118,312 | 91  | 25,453 | 7,650 | 4,773 | 37,967 |
| 118,313 | 92  | 25,521 | 7,706 | 4,796 | 38,115 |
| 118,314 | 94  | 25,502 | 7,731 | 4,806 | 38,133 |
| 118,315 | 94  | 25,431 | 7,732 | 4,789 | 38,046 |
| 118,316 | 90  | 25,484 | 7,697 | 4,780 | 38,051 |
| 118,317 | 88  | 25,342 | 7,622 | 4,726 | 37,778 |
| 118,318 | 88  | 25,231 | 7,611 | 4,706 | 37,636 |
| 118,319 | 95  | 25,448 | 7,666 | 4,749 | 37,958 |
| 118,320 | 95  | 25,245 | 7,701 | 4,733 | 37,774 |
| 118,321 | 104 | 24,930 | 7,607 | 4,664 | 37,305 |
| 118,322 | 106 | 24,785 | 7,596 | 4,640 | 37,127 |
| 118,323 | 109 | 23,761 | 7,347 | 4,465 | 35,682 |
| 118,324 | 110 | 24,020 | 7,385 | 4,468 | 35,983 |
| 118,325 | 111 | 23,332 | 7,150 | 4,311 | 34,904 |
| 118,326 | 114 | 24,195 | 7,464 | 4,468 | 36,241 |
| 118,327 | 112 | 25,078 | 7,748 | 4,641 | 37,579 |

|         |     |        |        |       |        |
|---------|-----|--------|--------|-------|--------|
| 118,328 | 117 | 26,369 | 8,261  | 4,878 | 39,625 |
| 118,329 | 114 | 27,284 | 8,688  | 5,035 | 41,121 |
| 118,330 | 118 | 28,047 | 8,991  | 5,230 | 42,386 |
| 118,331 | 124 | 28,443 | 9,240  | 5,335 | 43,142 |
| 118,332 | 124 | 28,838 | 9,384  | 5,392 | 43,738 |
| 118,333 | 123 | 30,075 | 9,857  | 5,588 | 45,643 |
| 118,334 | 133 | 30,810 | 10,262 | 5,791 | 46,996 |
| 118,335 | 132 | 31,410 | 10,524 | 5,915 | 47,981 |
| 118,336 | 130 | 31,539 | 10,734 | 6,000 | 48,403 |
| 118,337 | 135 | 32,533 | 11,111 | 6,203 | 49,982 |
| 118,338 | 124 | 32,832 | 11,208 | 6,276 | 50,440 |
| 118,339 | 125 | 33,580 | 11,527 | 6,456 | 51,688 |
| 118,340 | 124 | 34,364 | 11,836 | 6,608 | 52,932 |
| 118,341 | 124 | 35,130 | 12,096 | 6,748 | 54,098 |
| 118,342 | 130 | 35,794 | 12,363 | 6,876 | 55,163 |
| 118,343 | 132 | 36,739 | 12,701 | 7,047 | 56,619 |
| 118,344 | 135 | 37,427 | 12,969 | 7,194 | 57,725 |
| 118,345 | 140 | 38,211 | 13,236 | 7,345 | 58,932 |
| 118,346 | 139 | 38,156 | 13,228 | 7,345 | 58,868 |
| 118,347 | 143 | 40,227 | 13,803 | 7,722 | 61,895 |
| 118,348 | 143 | 40,124 | 13,831 | 7,679 | 61,777 |
| 118,349 | 143 | 42,006 | 14,369 | 8,012 | 64,530 |
| 118,350 | 139 | 42,819 | 14,527 | 8,135 | 65,620 |
| 118,351 | 139 | 43,307 | 14,758 | 8,271 | 66,475 |
| 118,352 | 143 | 43,835 | 14,910 | 8,356 | 67,244 |
| 118,353 | 144 | 44,242 | 15,080 | 8,443 | 67,909 |
| 118,354 | 162 | 45,138 | 15,344 | 8,617 | 69,261 |
| 118,355 | 166 | 45,904 | 15,603 | 8,782 | 70,455 |
| 118,356 | 170 | 46,766 | 15,836 | 8,916 | 71,688 |
| 118,357 | 172 | 47,602 | 16,155 | 9,070 | 72,999 |
| 118,358 | 174 | 48,363 | 16,347 | 9,204 | 74,088 |
| 118,359 | 172 | 48,560 | 16,423 | 9,238 | 74,393 |

|         |     |        |        |        |        |
|---------|-----|--------|--------|--------|--------|
| 118,360 | 174 | 49,917 | 16,959 | 9,508  | 76,558 |
| 118,361 | 177 | 50,889 | 17,231 | 9,669  | 77,966 |
| 118,362 | 184 | 51,762 | 17,510 | 9,826  | 79,282 |
| 118,363 | 183 | 51,765 | 17,566 | 9,851  | 79,365 |
| 118,364 | 186 | 52,536 | 17,844 | 9,973  | 80,539 |
| 118,365 | 187 | 53,690 | 18,175 | 10,204 | 82,256 |
| 118,366 | 189 | 54,461 | 18,377 | 10,347 | 83,374 |
| 118,367 | 188 | 54,740 | 18,496 | 10,393 | 83,817 |
| 118,368 | 187 | 55,979 | 18,903 | 10,634 | 85,703 |
| 118,369 | 184 | 56,734 | 19,199 | 10,770 | 86,887 |
| 118,370 | 180 | 56,604 | 19,201 | 10,776 | 86,761 |
| 118,371 | 182 | 57,359 | 19,468 | 10,900 | 87,909 |
| 118,372 | 175 | 58,141 | 19,805 | 11,060 | 89,181 |
| 118,373 | 178 | 58,821 | 20,107 | 11,210 | 90,316 |
| 118,374 | 172 | 59,541 | 20,426 | 11,391 | 91,530 |
| 118,375 | 171 | 59,443 | 20,489 | 11,414 | 91,517 |
| 118,376 | 170 | 59,431 | 20,618 | 11,450 | 91,669 |
| 118,377 | 171 | 59,897 | 20,970 | 11,618 | 92,656 |
| 118,378 | 174 | 59,377 | 20,864 | 11,518 | 91,933 |
| 118,379 | 171 | 59,215 | 20,899 | 11,554 | 91,839 |
| 118,380 | 178 | 59,254 | 20,913 | 11,597 | 91,942 |
| 118,381 | 179 | 59,756 | 21,182 | 11,717 | 92,834 |
| 118,382 | 185 | 59,728 | 21,307 | 11,734 | 92,954 |
| 118,383 | 180 | 58,646 | 20,917 | 11,550 | 91,293 |
| 118,384 | 190 | 58,966 | 21,029 | 11,625 | 91,810 |
| 118,385 | 192 | 59,339 | 21,183 | 11,658 | 92,372 |
| 118,386 | 194 | 58,865 | 21,110 | 11,595 | 91,764 |
| 118,387 | 202 | 59,290 | 21,291 | 11,653 | 92,436 |
| 118,388 | 204 | 59,024 | 21,289 | 11,610 | 92,127 |
| 118,389 | 212 | 58,327 | 21,163 | 11,520 | 91,222 |
| 118,390 | 212 | 57,944 | 20,983 | 11,404 | 90,543 |
| 118,391 | 216 | 57,409 | 20,879 | 11,343 | 89,847 |

|         |     |        |        |        |        |
|---------|-----|--------|--------|--------|--------|
| 118,392 | 217 | 56,576 | 20,738 | 11,217 | 88,748 |
| 118,393 | 216 | 56,856 | 21,142 | 11,378 | 89,592 |
| 118,394 | 228 | 56,864 | 21,284 | 11,437 | 89,813 |
| 118,395 | 243 | 56,551 | 21,375 | 11,476 | 89,645 |
| 118,396 | 255 | 55,936 | 21,251 | 11,369 | 88,811 |
| 118,397 | 256 | 55,434 | 21,124 | 11,286 | 88,100 |
| 118,398 | 267 | 55,093 | 21,143 | 11,238 | 87,741 |
| 118,399 | 269 | 54,645 | 20,950 | 11,176 | 87,040 |
| 118,400 | 319 | 55,311 | 21,431 | 11,357 | 88,418 |
| 118,401 | 321 | 55,273 | 21,510 | 11,388 | 88,492 |
| 118,402 | 321 | 55,334 | 21,511 | 11,401 | 88,567 |
| 118,403 | 337 | 55,836 | 21,891 | 11,547 | 89,611 |
| 118,404 | 339 | 55,743 | 21,874 | 11,538 | 89,494 |
| 118,405 | 324 | 56,605 | 22,307 | 11,716 | 90,952 |
| 118,406 | 323 | 56,743 | 22,441 | 11,772 | 91,279 |
| 118,407 | 319 | 56,482 | 22,408 | 11,791 | 91,000 |
| 118,408 | 322 | 57,323 | 22,769 | 11,950 | 92,364 |
| 118,409 | 327 | 56,933 | 22,735 | 11,912 | 91,907 |
| 118,410 | 325 | 56,978 | 22,792 | 11,978 | 92,073 |
| 118,411 | 336 | 57,677 | 23,083 | 12,117 | 93,213 |
| 118,412 | 335 | 57,567 | 23,068 | 12,083 | 93,053 |
| 118,413 | 359 | 58,542 | 23,460 | 12,206 | 94,567 |
| 118,414 | 366 | 58,789 | 23,634 | 12,287 | 95,076 |
| 118,415 | 369 | 58,882 | 23,766 | 12,353 | 95,370 |
| 118,416 | 378 | 58,989 | 23,930 | 12,378 | 95,675 |
| 118,417 | 380 | 58,530 | 23,830 | 12,289 | 95,029 |
| 118,418 | 384 | 58,270 | 23,844 | 12,245 | 94,743 |
| 118,419 | 383 | 57,581 | 23,700 | 12,185 | 93,849 |
| 118,420 | 403 | 58,475 | 24,180 | 12,403 | 95,461 |
| 118,421 | 404 | 58,531 | 24,172 | 12,417 | 95,524 |
| 118,422 | 411 | 58,704 | 24,279 | 12,462 | 95,856 |
| 118,423 | 412 | 58,876 | 24,381 | 12,506 | 96,175 |

|         |     |        |        |        |         |
|---------|-----|--------|--------|--------|---------|
| 118,424 | 422 | 59,334 | 24,490 | 12,544 | 96,790  |
| 118,425 | 427 | 59,133 | 24,258 | 12,461 | 96,279  |
| 118,426 | 435 | 60,108 | 24,682 | 12,638 | 97,863  |
| 118,427 | 442 | 59,340 | 24,221 | 12,396 | 96,399  |
| 118,428 | 460 | 60,274 | 24,502 | 12,553 | 97,789  |
| 118,429 | 455 | 61,282 | 24,800 | 12,757 | 99,294  |
| 118,430 | 463 | 62,239 | 25,099 | 12,893 | 100,694 |
| 118,431 | 457 | 60,851 | 24,402 | 12,548 | 98,258  |
| 118,432 | 461 | 61,814 | 24,673 | 12,683 | 99,631  |
| 118,433 | 462 | 62,932 | 24,919 | 12,882 | 101,195 |
| 118,434 | 479 | 63,794 | 25,213 | 13,041 | 102,527 |
| 118,435 | 471 | 63,995 | 25,217 | 13,025 | 102,708 |
| 118,436 | 470 | 63,788 | 25,230 | 13,043 | 102,531 |
| 118,437 | 475 | 64,287 | 25,492 | 13,218 | 103,472 |
| 118,438 | 465 | 63,961 | 25,289 | 13,135 | 102,850 |
| 118,439 | 460 | 64,235 | 25,350 | 13,147 | 103,192 |
| 118,440 | 465 | 64,426 | 25,377 | 13,161 | 103,429 |
| 118,441 | 465 | 64,693 | 25,383 | 13,171 | 103,712 |
| 118,442 | 468 | 65,011 | 25,358 | 13,190 | 104,027 |
| 118,443 | 466 | 65,186 | 25,413 | 13,182 | 104,247 |
| 118,444 | 436 | 64,003 | 24,840 | 12,823 | 102,102 |
| 118,445 | 441 | 64,576 | 24,984 | 12,922 | 102,923 |
| 118,446 | 433 | 65,228 | 25,250 | 13,020 | 103,931 |
| 118,447 | 444 | 65,618 | 25,483 | 13,121 | 104,666 |
| 118,448 | 416 | 64,884 | 25,265 | 12,938 | 103,503 |
| 118,449 | 413 | 65,353 | 25,537 | 13,071 | 104,374 |
| 118,450 | 398 | 64,919 | 25,563 | 13,033 | 103,913 |
| 118,451 | 384 | 63,521 | 25,158 | 12,776 | 101,839 |
| 118,452 | 385 | 63,999 | 25,278 | 12,803 | 102,465 |
| 118,453 | 380 | 64,333 | 25,446 | 12,882 | 103,041 |
| 118,454 | 382 | 64,322 | 25,471 | 12,877 | 103,052 |
| 118,455 | 380 | 63,805 | 25,333 | 12,762 | 102,280 |

|         |     |        |        |        |         |
|---------|-----|--------|--------|--------|---------|
| 118,456 | 385 | 63,629 | 25,207 | 12,699 | 101,920 |
| 118,457 | 388 | 63,664 | 25,185 | 12,641 | 101,878 |
| 118,458 | 408 | 64,604 | 25,525 | 12,777 | 103,314 |
| 118,459 | 421 | 64,372 | 25,404 | 12,744 | 102,941 |
| 118,460 | 444 | 63,665 | 25,243 | 12,571 | 101,923 |
| 118,461 | 449 | 63,649 | 25,229 | 12,543 | 101,870 |
| 118,462 | 445 | 63,671 | 25,216 | 12,476 | 101,808 |
| 118,463 | 458 | 63,949 | 25,413 | 12,571 | 102,391 |
| 118,464 | 432 | 63,081 | 25,123 | 12,434 | 101,070 |
| 118,465 | 431 | 62,413 | 24,918 | 12,319 | 100,081 |
| 118,466 | 428 | 62,228 | 24,899 | 12,314 | 99,869  |
| 118,467 | 424 | 61,649 | 24,773 | 12,308 | 99,154  |
| 118,468 | 421 | 61,341 | 24,791 | 12,275 | 98,828  |
| 118,469 | 422 | 61,207 | 24,709 | 12,296 | 98,634  |
| 118,470 | 422 | 61,158 | 24,747 | 12,274 | 98,601  |
| 118,471 | 411 | 61,392 | 24,791 | 12,315 | 98,909  |
| 118,472 | 409 | 61,256 | 24,853 | 12,324 | 98,842  |
| 118,473 | 411 | 60,970 | 24,709 | 12,286 | 98,376  |
| 118,474 | 412 | 61,150 | 24,752 | 12,311 | 98,625  |
| 118,475 | 409 | 60,876 | 24,750 | 12,263 | 98,298  |
| 118,476 | 405 | 60,839 | 24,790 | 12,269 | 98,303  |
| 118,477 | 397 | 59,252 | 24,151 | 11,966 | 95,766  |
| 118,478 | 395 | 59,701 | 24,290 | 12,048 | 96,434  |
| 118,479 | 381 | 60,650 | 24,504 | 12,135 | 97,670  |
| 118,480 | 397 | 60,848 | 24,584 | 12,153 | 97,982  |
| 118,481 | 393 | 60,362 | 24,480 | 12,104 | 97,339  |
| 118,482 | 381 | 60,375 | 24,638 | 12,273 | 97,667  |
| 118,483 | 389 | 60,410 | 24,807 | 12,343 | 97,949  |
| 118,484 | 365 | 59,272 | 24,575 | 12,205 | 96,417  |
| 118,485 | 367 | 59,861 | 24,930 | 12,375 | 97,533  |
| 118,486 | 369 | 59,575 | 24,936 | 12,418 | 97,298  |
| 118,487 | 364 | 59,607 | 24,879 | 12,381 | 97,231  |

|         |     |        |        |        |        |
|---------|-----|--------|--------|--------|--------|
| 118,488 | 362 | 59,926 | 24,890 | 12,373 | 97,551 |
| 118,489 | 351 | 59,337 | 24,697 | 12,247 | 96,632 |
| 118,490 | 352 | 59,407 | 24,705 | 12,239 | 96,703 |
| 118,491 | 354 | 59,920 | 24,873 | 12,331 | 97,478 |
| 118,492 | 348 | 59,956 | 24,887 | 12,383 | 97,574 |
| 118,493 | 342 | 59,771 | 24,874 | 12,333 | 97,320 |
| 118,494 | 341 | 59,685 | 24,763 | 12,302 | 97,091 |
| 118,495 | 335 | 59,534 | 24,701 | 12,310 | 96,880 |
| 118,496 | 335 | 59,479 | 24,709 | 12,292 | 96,815 |
| 118,497 | 327 | 59,319 | 24,656 | 12,300 | 96,602 |
| 118,498 | 319 | 59,727 | 24,715 | 12,315 | 97,076 |
| 118,499 | 320 | 59,730 | 24,605 | 12,279 | 96,934 |
| 118,500 | 332 | 60,107 | 24,544 | 12,270 | 97,253 |
| 118,501 | 334 | 59,672 | 24,310 | 12,151 | 96,467 |
| 118,502 | 341 | 59,609 | 24,221 | 12,143 | 96,314 |
| 118,503 | 341 | 59,596 | 24,237 | 12,148 | 96,322 |
| 118,504 | 323 | 59,220 | 23,913 | 12,028 | 95,484 |
| 118,505 | 323 | 59,091 | 23,943 | 12,022 | 95,379 |
| 118,506 | 322 | 59,271 | 24,057 | 12,091 | 95,741 |
| 118,507 | 312 | 58,676 | 23,847 | 12,013 | 94,848 |
| 118,508 | 310 | 58,155 | 23,793 | 12,020 | 94,278 |
| 118,509 | 294 | 57,822 | 23,841 | 12,087 | 94,044 |
| 118,510 | 274 | 57,169 | 23,870 | 12,107 | 93,420 |
| 118,511 | 248 | 56,869 | 23,788 | 12,108 | 93,013 |
| 118,512 | 241 | 56,483 | 23,684 | 12,127 | 92,535 |
| 118,513 | 233 | 55,632 | 23,451 | 12,062 | 91,378 |
| 118,514 | 220 | 55,228 | 23,348 | 12,025 | 90,821 |
| 118,515 | 222 | 54,980 | 23,309 | 12,060 | 90,571 |
| 118,516 | 210 | 55,166 | 23,305 | 12,069 | 90,750 |
| 118,517 | 212 | 55,455 | 23,342 | 12,033 | 91,042 |
| 118,518 | 209 | 55,471 | 23,281 | 11,954 | 90,915 |
| 118,519 | 213 | 55,572 | 23,236 | 11,941 | 90,962 |



|         |     |        |        |        |        |
|---------|-----|--------|--------|--------|--------|
| 118,520 | 211 | 55,742 | 23,232 | 11,906 | 91,091 |
| 118,521 | 219 | 55,118 | 23,013 | 11,796 | 90,146 |
| 118,522 | 216 | 54,681 | 22,811 | 11,691 | 89,399 |
| 118,523 | 230 | 54,561 | 22,910 | 11,746 | 89,447 |
| 118,524 | 233 | 55,213 | 23,214 | 11,919 | 90,579 |
| 118,525 | 231 | 54,781 | 23,038 | 11,822 | 89,872 |
| 118,526 | 221 | 53,949 | 22,709 | 11,699 | 88,578 |
| 118,527 | 222 | 54,414 | 22,769 | 11,756 | 89,161 |
| 118,528 | 213 | 53,252 | 22,444 | 11,613 | 87,522 |
| 118,529 | 217 | 53,985 | 22,903 | 11,763 | 88,868 |
| 118,530 | 224 | 53,596 | 22,904 | 11,771 | 88,495 |
| 118,531 | 203 | 52,469 | 22,433 | 11,510 | 86,615 |
| 118,532 | 211 | 53,354 | 22,861 | 11,709 | 88,135 |
| 118,533 | 217 | 53,159 | 22,856 | 11,693 | 87,925 |
| 118,534 | 207 | 52,491 | 22,527 | 11,548 | 86,773 |
| 118,535 | 213 | 53,347 | 22,857 | 11,681 | 88,098 |
| 118,536 | 207 | 53,134 | 22,781 | 11,628 | 87,750 |
| 118,537 | 213 | 52,340 | 22,412 | 11,429 | 86,394 |
| 118,538 | 212 | 51,933 | 22,238 | 11,353 | 85,736 |
| 118,539 | 213 | 51,694 | 22,245 | 11,354 | 85,506 |
| 118,540 | 223 | 52,246 | 22,394 | 11,419 | 86,282 |
| 118,541 | 237 | 52,326 | 22,425 | 11,416 | 86,404 |
| 118,542 | 235 | 51,905 | 22,257 | 11,313 | 85,710 |
| 118,543 | 248 | 51,417 | 22,030 | 11,227 | 84,922 |
| 118,544 | 248 | 51,546 | 22,053 | 11,238 | 85,085 |
| 118,545 | 250 | 51,144 | 21,944 | 11,185 | 84,523 |
| 118,546 | 249 | 50,738 | 21,780 | 11,111 | 83,878 |
| 118,547 | 269 | 54,275 | 23,222 | 11,819 | 89,585 |
| 118,548 | 275 | 54,774 | 23,455 | 11,958 | 90,462 |
| 118,549 | 273 | 54,173 | 23,237 | 11,853 | 89,536 |
| 118,550 | 288 | 54,894 | 23,537 | 12,003 | 90,722 |
| 118,551 | 275 | 55,133 | 23,724 | 12,127 | 91,259 |

|         |     |        |        |        |        |
|---------|-----|--------|--------|--------|--------|
| 118,552 | 281 | 55,229 | 23,755 | 12,135 | 91,400 |
| 118,553 | 278 | 55,754 | 23,930 | 12,180 | 92,142 |
| 118,554 | 284 | 56,265 | 24,171 | 12,263 | 92,983 |
| 118,555 | 287 | 55,754 | 24,058 | 12,195 | 92,294 |
| 118,556 | 286 | 55,173 | 23,850 | 12,101 | 91,410 |
| 118,557 | 294 | 56,188 | 24,380 | 12,347 | 93,209 |
| 118,558 | 296 | 56,339 | 24,426 | 12,379 | 93,440 |
| 118,559 | 309 | 57,150 | 24,627 | 12,412 | 94,498 |
| 118,560 | 313 | 57,461 | 24,754 | 12,423 | 94,951 |
| 118,561 | 317 | 57,721 | 24,759 | 12,421 | 95,218 |
| 118,562 | 319 | 56,781 | 24,438 | 12,237 | 93,775 |
| 118,563 | 319 | 57,104 | 24,445 | 12,255 | 94,123 |
| 118,564 | 319 | 57,439 | 24,724 | 12,383 | 94,865 |
| 118,565 | 320 | 57,833 | 24,774 | 12,384 | 95,311 |
| 118,566 | 320 | 58,241 | 24,714 | 12,296 | 95,571 |
| 118,567 | 338 | 58,708 | 24,748 | 12,274 | 96,068 |
| 118,568 | 336 | 58,740 | 24,743 | 12,264 | 96,083 |
| 118,569 | 333 | 58,515 | 24,578 | 12,208 | 95,634 |
| 118,570 | 333 | 59,477 | 24,908 | 12,390 | 97,108 |
| 118,571 | 328 | 58,609 | 24,427 | 12,158 | 95,522 |
| 118,572 | 327 | 59,198 | 24,575 | 12,215 | 96,315 |
| 118,573 | 313 | 59,554 | 24,811 | 12,344 | 97,022 |
| 118,574 | 325 | 60,086 | 24,968 | 12,336 | 97,715 |
| 118,575 | 325 | 59,639 | 24,784 | 12,273 | 97,021 |
| 118,576 | 324 | 59,158 | 24,698 | 12,196 | 96,376 |
| 118,577 | 331 | 59,696 | 25,009 | 12,384 | 97,420 |
| 118,578 | 332 | 58,907 | 24,976 | 12,356 | 96,571 |
| 118,579 | 339 | 59,642 | 25,275 | 12,483 | 97,739 |
| 118,580 | 330 | 59,254 | 25,093 | 12,419 | 97,096 |
| 118,581 | 330 | 59,467 | 25,112 | 12,461 | 97,370 |
| 118,582 | 337 | 59,737 | 25,157 | 12,477 | 97,708 |
| 118,583 | 339 | 60,079 | 25,206 | 12,457 | 98,081 |

|         |     |        |        |        |        |
|---------|-----|--------|--------|--------|--------|
| 118,584 | 356 | 59,647 | 24,975 | 12,313 | 97,291 |
| 118,585 | 361 | 59,659 | 24,853 | 12,241 | 97,114 |
| 118,586 | 391 | 60,759 | 25,243 | 12,407 | 98,800 |
| 118,587 | 392 | 60,471 | 24,933 | 12,261 | 98,057 |
| 118,588 | 389 | 60,320 | 24,797 | 12,197 | 97,703 |
| 118,589 | 390 | 60,300 | 24,785 | 12,179 | 97,654 |
| 118,590 | 390 | 60,602 | 24,795 | 12,202 | 97,989 |
| 118,591 | 389 | 60,401 | 24,802 | 12,219 | 97,811 |
| 118,592 | 376 | 60,044 | 24,846 | 12,242 | 97,508 |
| 118,593 | 394 | 60,660 | 25,223 | 12,456 | 98,733 |
| 118,594 | 392 | 60,144 | 25,312 | 12,460 | 98,308 |
| 118,595 | 402 | 60,034 | 25,401 | 12,529 | 98,366 |
| 118,596 | 403 | 60,042 | 25,371 | 12,518 | 98,334 |
| 118,597 | 407 | 60,113 | 25,400 | 12,518 | 98,438 |
| 118,598 | 407 | 60,562 | 25,411 | 12,536 | 98,916 |
| 118,599 | 400 | 60,104 | 25,202 | 12,442 | 98,148 |
| 118,600 | 400 | 59,775 | 25,207 | 12,470 | 97,852 |
| 118,601 | 387 | 59,436 | 25,131 | 12,414 | 97,368 |
| 118,602 | 390 | 58,954 | 24,781 | 12,250 | 96,375 |
| 118,603 | 379 | 58,097 | 24,544 | 12,123 | 95,143 |
| 118,604 | 387 | 59,166 | 25,185 | 12,505 | 97,243 |
| 118,605 | 393 | 58,519 | 25,151 | 12,498 | 96,561 |
| 118,606 | 398 | 58,773 | 25,089 | 12,485 | 96,745 |
| 118,607 | 406 | 59,338 | 25,326 | 12,602 | 97,672 |
| 118,608 | 402 | 59,271 | 25,318 | 12,612 | 97,603 |
| 118,609 | 406 | 59,087 | 25,290 | 12,591 | 97,374 |
| 118,610 | 392 | 58,905 | 25,127 | 12,551 | 96,975 |
| 118,611 | 396 | 58,896 | 24,955 | 12,490 | 96,737 |
| 118,612 | 392 | 59,187 | 24,875 | 12,437 | 96,891 |
| 118,613 | 388 | 58,977 | 24,642 | 12,315 | 96,322 |
| 118,614 | 397 | 59,289 | 24,663 | 12,274 | 96,623 |
| 118,615 | 398 | 59,322 | 24,638 | 12,275 | 96,633 |

|         |     |        |        |        |        |
|---------|-----|--------|--------|--------|--------|
| 118,616 | 400 | 59,497 | 24,856 | 12,364 | 97,117 |
| 118,617 | 398 | 59,464 | 24,972 | 12,444 | 97,278 |
| 118,618 | 386 | 58,576 | 24,792 | 12,373 | 96,127 |
| 118,619 | 385 | 57,777 | 24,539 | 12,295 | 94,996 |
| 118,620 | 391 | 59,269 | 25,172 | 12,581 | 97,413 |
| 118,621 | 392 | 59,149 | 25,176 | 12,559 | 97,276 |
| 118,622 | 387 | 58,863 | 25,084 | 12,509 | 96,843 |
| 118,623 | 388 | 59,120 | 25,103 | 12,543 | 97,154 |
| 118,624 | 383 | 59,928 | 25,310 | 12,636 | 98,257 |
| 118,625 | 369 | 59,018 | 25,123 | 12,597 | 97,107 |
| 118,626 | 354 | 58,740 | 25,002 | 12,491 | 96,587 |
| 118,627 | 353 | 58,345 | 24,758 | 12,347 | 95,803 |
| 118,628 | 352 | 58,755 | 24,912 | 12,417 | 96,436 |
| 118,629 | 357 | 58,848 | 24,905 | 12,379 | 96,489 |
| 118,630 | 352 | 58,470 | 24,594 | 12,269 | 95,685 |
| 118,631 | 354 | 58,129 | 24,418 | 12,177 | 95,078 |
| 118,632 | 364 | 58,569 | 24,691 | 12,254 | 95,878 |
| 118,633 | 366 | 58,263 | 24,570 | 12,183 | 95,382 |
| 118,634 | 372 | 58,039 | 24,481 | 12,128 | 95,020 |
| 118,635 | 339 | 57,654 | 24,352 | 12,090 | 94,435 |
| 118,636 | 326 | 56,523 | 23,996 | 11,911 | 92,756 |
| 118,637 | 328 | 55,696 | 23,716 | 11,758 | 91,498 |
| 118,638 | 326 | 54,647 | 23,467 | 11,617 | 90,057 |
| 118,639 | 322 | 54,957 | 23,606 | 11,689 | 90,574 |
| 118,640 | 321 | 54,030 | 23,328 | 11,569 | 89,248 |
| 118,641 | 312 | 54,191 | 23,587 | 11,730 | 89,820 |
| 118,642 | 310 | 53,960 | 23,485 | 11,725 | 89,480 |
| 118,643 | 311 | 54,500 | 23,499 | 11,755 | 90,065 |
| 118,644 | 290 | 54,630 | 23,374 | 11,676 | 89,970 |
| 118,645 | 278 | 55,428 | 23,450 | 11,737 | 90,893 |
| 118,646 | 265 | 54,984 | 23,305 | 11,636 | 90,190 |
| 118,647 | 249 | 53,683 | 22,770 | 11,381 | 88,083 |

|         |     |        |        |        |        |
|---------|-----|--------|--------|--------|--------|
| 118,648 | 251 | 54,431 | 22,994 | 11,509 | 89,185 |
| 118,649 | 255 | 54,752 | 23,098 | 11,539 | 89,644 |
| 118,650 | 252 | 55,178 | 23,071 | 11,519 | 90,020 |
| 118,651 | 254 | 55,259 | 23,032 | 11,539 | 90,084 |
| 118,652 | 251 | 55,223 | 22,923 | 11,479 | 89,876 |
| 118,653 | 238 | 54,704 | 22,670 | 11,376 | 88,988 |
| 118,654 | 241 | 55,408 | 22,838 | 11,451 | 89,938 |
| 118,655 | 238 | 54,763 | 22,529 | 11,302 | 88,832 |
| 118,656 | 226 | 54,657 | 22,377 | 11,298 | 88,558 |
| 118,657 | 221 | 54,704 | 22,412 | 11,294 | 88,631 |
| 118,658 | 217 | 54,782 | 22,294 | 11,311 | 88,604 |
| 118,659 | 231 | 54,357 | 22,031 | 11,162 | 87,781 |
| 118,660 | 237 | 54,968 | 22,188 | 11,270 | 88,663 |
| 118,661 | 241 | 54,765 | 22,192 | 11,275 | 88,473 |
| 118,662 | 243 | 54,599 | 22,156 | 11,261 | 88,259 |
| 118,663 | 252 | 53,734 | 21,909 | 11,136 | 87,031 |
| 118,664 | 252 | 53,591 | 21,907 | 11,142 | 86,892 |
| 118,665 | 270 | 53,709 | 22,237 | 11,257 | 87,473 |
| 118,666 | 280 | 54,252 | 22,306 | 11,310 | 88,148 |
| 118,667 | 285 | 54,410 | 22,314 | 11,372 | 88,381 |
| 118,668 | 292 | 54,107 | 22,182 | 11,317 | 87,898 |
| 118,669 | 295 | 53,819 | 21,911 | 11,232 | 87,257 |
| 118,670 | 296 | 53,565 | 21,721 | 11,141 | 86,723 |
| 118,671 | 295 | 53,141 | 21,559 | 11,061 | 86,056 |
| 118,672 | 294 | 52,417 | 21,268 | 10,974 | 84,953 |
| 118,673 | 305 | 54,301 | 21,854 | 11,339 | 87,799 |
| 118,674 | 313 | 54,475 | 21,841 | 11,351 | 87,980 |
| 118,675 | 324 | 54,543 | 21,808 | 11,357 | 88,032 |
| 118,676 | 326 | 55,089 | 21,869 | 11,374 | 88,658 |
| 118,677 | 334 | 55,960 | 22,060 | 11,519 | 89,873 |
| 118,678 | 334 | 56,077 | 22,052 | 11,559 | 90,022 |
| 118,679 | 343 | 56,763 | 22,198 | 11,665 | 90,969 |

|         |     |        |        |        |         |
|---------|-----|--------|--------|--------|---------|
| 118,680 | 341 | 56,499 | 21,973 | 11,565 | 90,378  |
| 118,681 | 343 | 56,663 | 21,949 | 11,579 | 90,534  |
| 118,682 | 343 | 56,274 | 21,847 | 11,557 | 90,021  |
| 118,683 | 337 | 56,751 | 22,145 | 11,774 | 91,007  |
| 118,684 | 332 | 56,929 | 22,297 | 11,864 | 91,422  |
| 118,685 | 334 | 56,954 | 22,298 | 11,952 | 91,538  |
| 118,686 | 332 | 57,505 | 22,479 | 12,045 | 92,361  |
| 118,687 | 335 | 58,442 | 22,646 | 12,188 | 93,611  |
| 118,688 | 320 | 58,838 | 22,593 | 12,202 | 93,953  |
| 118,689 | 321 | 59,607 | 22,674 | 12,267 | 94,869  |
| 118,690 | 313 | 59,155 | 22,509 | 12,162 | 94,139  |
| 118,691 | 321 | 59,859 | 22,654 | 12,209 | 95,043  |
| 118,692 | 327 | 60,399 | 22,856 | 12,303 | 95,885  |
| 118,693 | 326 | 60,305 | 22,912 | 12,295 | 95,838  |
| 118,694 | 328 | 60,414 | 23,043 | 12,388 | 96,173  |
| 118,695 | 340 | 61,210 | 23,393 | 12,614 | 97,557  |
| 118,696 | 339 | 60,973 | 23,300 | 12,583 | 97,195  |
| 118,697 | 343 | 61,223 | 23,258 | 12,587 | 97,411  |
| 118,698 | 350 | 61,301 | 23,275 | 12,595 | 97,521  |
| 118,699 | 348 | 61,161 | 23,141 | 12,500 | 97,150  |
| 118,700 | 376 | 63,059 | 23,806 | 12,847 | 100,088 |
| 118,701 | 379 | 63,905 | 24,065 | 13,002 | 101,351 |
| 118,702 | 375 | 63,459 | 23,914 | 12,888 | 100,636 |
| 118,703 | 376 | 63,946 | 24,158 | 13,062 | 101,542 |
| 118,704 | 404 | 65,461 | 24,581 | 13,287 | 103,733 |
| 118,705 | 406 | 65,829 | 24,604 | 13,337 | 104,176 |
| 118,706 | 408 | 67,049 | 24,959 | 13,475 | 105,891 |
| 118,707 | 411 | 67,270 | 24,951 | 13,490 | 106,122 |
| 118,708 | 395 | 66,242 | 24,686 | 13,307 | 104,630 |
| 118,709 | 397 | 67,543 | 24,992 | 13,497 | 106,429 |
| 118,710 | 390 | 68,381 | 25,291 | 13,638 | 107,700 |
| 118,711 | 392 | 68,324 | 25,291 | 13,642 | 107,649 |

|         |     |        |        |        |         |
|---------|-----|--------|--------|--------|---------|
| 118,712 | 390 | 68,253 | 25,268 | 13,632 | 107,543 |
| 118,713 | 382 | 69,145 | 25,547 | 13,817 | 108,891 |
| 118,714 | 375 | 69,453 | 25,560 | 13,876 | 109,264 |
| 118,715 | 372 | 70,040 | 25,605 | 13,942 | 109,959 |
| 118,716 | 362 | 69,690 | 25,461 | 13,877 | 109,390 |
| 118,717 | 357 | 70,496 | 25,707 | 13,978 | 110,538 |
| 118,718 | 374 | 70,195 | 25,529 | 13,846 | 109,944 |
| 118,719 | 367 | 69,649 | 25,402 | 13,779 | 109,197 |
| 118,720 | 376 | 70,011 | 25,649 | 13,878 | 109,914 |
| 118,721 | 377 | 69,627 | 25,535 | 13,815 | 109,354 |
| 118,722 | 383 | 71,859 | 26,558 | 14,418 | 113,218 |
| 118,723 | 409 | 71,687 | 26,426 | 14,296 | 112,818 |
| 118,724 | 396 | 71,170 | 26,342 | 14,237 | 112,145 |
| 118,725 | 410 | 71,342 | 26,615 | 14,397 | 112,764 |
| 118,726 | 403 | 70,910 | 26,493 | 14,317 | 112,123 |
| 118,727 | 401 | 72,762 | 27,426 | 14,804 | 115,393 |
| 118,728 | 422 | 72,491 | 27,268 | 14,714 | 114,895 |
| 118,729 | 424 | 72,821 | 27,337 | 14,756 | 115,338 |
| 118,730 | 421 | 73,570 | 27,609 | 14,885 | 116,485 |
| 118,731 | 427 | 72,786 | 27,487 | 14,776 | 115,476 |
| 118,732 | 423 | 72,256 | 27,387 | 14,701 | 114,767 |
| 118,733 | 425 | 76,039 | 28,599 | 15,342 | 120,405 |
| 118,734 | 433 | 75,678 | 28,401 | 15,240 | 119,752 |
| 118,735 | 430 | 75,138 | 28,127 | 15,112 | 118,807 |
| 118,736 | 417 | 75,947 | 28,722 | 15,455 | 120,541 |
| 118,737 | 427 | 76,741 | 28,973 | 15,621 | 121,762 |
| 118,738 | 440 | 76,723 | 28,989 | 15,596 | 121,748 |
| 118,739 | 450 | 76,581 | 29,048 | 15,594 | 121,673 |
| 118,740 | 480 | 76,632 | 29,081 | 15,602 | 121,795 |
| 118,741 | 481 | 76,275 | 28,901 | 15,493 | 121,150 |
| 118,742 | 514 | 77,553 | 29,360 | 15,696 | 123,123 |
| 118,743 | 519 | 77,857 | 29,434 | 15,751 | 123,561 |

|         |     |        |        |        |         |
|---------|-----|--------|--------|--------|---------|
| 118,744 | 533 | 79,000 | 29,682 | 15,843 | 125,058 |
| 118,745 | 527 | 79,245 | 29,697 | 15,842 | 125,311 |
| 118,746 | 539 | 78,684 | 29,466 | 15,706 | 124,395 |
| 118,747 | 552 | 79,634 | 29,753 | 15,861 | 125,800 |
| 118,748 | 530 | 79,527 | 29,761 | 15,869 | 125,687 |
| 118,749 | 533 | 78,606 | 29,480 | 15,718 | 124,337 |
| 118,750 | 527 | 77,910 | 29,381 | 15,670 | 123,488 |
| 118,751 | 536 | 79,441 | 30,129 | 16,145 | 126,251 |
| 118,752 | 563 | 80,406 | 30,570 | 16,366 | 127,905 |
| 118,753 | 584 | 80,617 | 30,763 | 16,462 | 128,426 |
| 118,754 | 568 | 81,118 | 30,929 | 16,566 | 129,181 |
| 118,755 | 571 | 80,556 | 31,062 | 16,613 | 128,802 |
| 118,756 | 575 | 80,666 | 31,222 | 16,659 | 129,122 |
| 118,757 | 573 | 79,658 | 30,950 | 16,562 | 127,743 |
| 118,758 | 590 | 79,951 | 31,198 | 16,712 | 128,451 |
| 118,759 | 604 | 80,135 | 31,216 | 16,739 | 128,694 |
| 118,760 | 609 | 80,228 | 31,285 | 16,733 | 128,855 |
| 118,761 | 602 | 79,837 | 31,026 | 16,621 | 128,086 |
| 118,762 | 603 | 80,152 | 31,088 | 16,641 | 128,484 |
| 118,763 | 609 | 81,382 | 31,325 | 16,768 | 130,084 |
| 118,764 | 608 | 80,292 | 30,977 | 16,587 | 128,464 |
| 118,765 | 610 | 80,416 | 31,013 | 16,600 | 128,639 |
| 118,766 | 602 | 80,112 | 30,929 | 16,582 | 128,225 |
| 118,767 | 603 | 80,848 | 31,115 | 16,706 | 129,272 |
| 118,768 | 603 | 80,810 | 31,167 | 16,771 | 129,351 |
| 118,769 | 581 | 80,395 | 31,053 | 16,762 | 128,791 |
| 118,770 | 580 | 80,663 | 30,988 | 16,747 | 128,978 |
| 118,771 | 569 | 81,734 | 31,152 | 16,835 | 130,290 |
| 118,772 | 566 | 81,478 | 30,896 | 16,718 | 129,658 |
| 118,773 | 573 | 82,097 | 31,318 | 17,006 | 130,994 |
| 118,774 | 545 | 82,250 | 31,252 | 16,989 | 131,036 |
| 118,775 | 540 | 82,129 | 31,063 | 16,942 | 130,674 |



|         |     |        |        |        |         |
|---------|-----|--------|--------|--------|---------|
| 118,776 | 520 | 81,648 | 30,583 | 16,700 | 129,451 |
| 118,777 | 531 | 81,955 | 30,650 | 16,718 | 129,854 |
| 118,778 | 532 | 81,942 | 30,653 | 16,731 | 129,858 |
| 118,779 | 517 | 82,460 | 30,954 | 16,866 | 130,797 |
| 118,780 | 511 | 82,247 | 30,892 | 16,906 | 130,556 |
| 118,781 | 530 | 81,634 | 30,752 | 16,870 | 129,786 |
| 118,782 | 523 | 81,615 | 30,738 | 16,903 | 129,779 |
| 118,783 | 530 | 81,296 | 30,402 | 16,741 | 128,969 |
| 118,784 | 524 | 81,705 | 30,322 | 16,673 | 129,224 |
| 118,785 | 539 | 82,079 | 30,214 | 16,648 | 129,480 |
| 118,786 | 541 | 82,294 | 30,304 | 16,652 | 129,791 |
| 118,787 | 536 | 82,132 | 30,244 | 16,639 | 129,551 |
| 118,788 | 551 | 82,981 | 30,544 | 16,843 | 130,919 |
| 118,789 | 533 | 81,688 | 30,072 | 16,647 | 128,940 |
| 118,790 | 507 | 81,307 | 29,909 | 16,552 | 128,275 |
| 118,791 | 506 | 81,710 | 29,962 | 16,566 | 128,744 |
| 118,792 | 490 | 81,277 | 29,869 | 16,538 | 128,174 |
| 118,793 | 463 | 80,965 | 29,690 | 16,491 | 127,609 |
| 118,794 | 467 | 81,294 | 29,861 | 16,570 | 128,192 |
| 118,795 | 461 | 80,385 | 29,462 | 16,392 | 126,700 |
| 118,796 | 461 | 80,175 | 29,507 | 16,409 | 126,552 |
| 118,797 | 454 | 80,541 | 29,831 | 16,558 | 127,384 |
| 118,798 | 451 | 80,381 | 29,862 | 16,561 | 127,255 |
| 118,799 | 450 | 80,868 | 29,991 | 16,647 | 127,956 |
| 118,800 | 435 | 80,063 | 29,429 | 16,371 | 126,298 |
| 118,801 | 434 | 80,267 | 29,410 | 16,374 | 126,485 |
| 118,802 | 445 | 81,061 | 29,578 | 16,475 | 127,559 |
| 118,803 | 421 | 80,499 | 29,255 | 16,382 | 126,557 |
| 118,804 | 407 | 80,306 | 29,055 | 16,238 | 126,006 |
| 118,805 | 409 | 79,834 | 28,943 | 16,172 | 125,358 |
| 118,806 | 398 | 79,602 | 28,584 | 16,033 | 124,617 |
| 118,807 | 360 | 77,283 | 27,534 | 15,434 | 120,611 |

|         |     |        |        |        |         |
|---------|-----|--------|--------|--------|---------|
| 118,808 | 364 | 78,014 | 27,736 | 15,542 | 121,656 |
| 118,809 | 364 | 78,840 | 27,966 | 15,649 | 122,819 |
| 118,810 | 381 | 79,648 | 28,316 | 15,790 | 124,135 |
| 118,811 | 389 | 79,483 | 28,299 | 15,766 | 123,937 |
| 118,812 | 395 | 79,477 | 28,340 | 15,779 | 123,991 |
| 118,813 | 411 | 78,806 | 28,144 | 15,644 | 123,005 |
| 118,814 | 410 | 78,822 | 28,164 | 15,643 | 123,039 |
| 118,815 | 423 | 79,790 | 28,533 | 15,857 | 124,603 |
| 118,816 | 429 | 79,749 | 28,446 | 15,803 | 124,427 |
| 118,817 | 427 | 79,306 | 28,374 | 15,780 | 123,887 |
| 118,818 | 425 | 79,654 | 28,603 | 15,860 | 124,542 |
| 118,819 | 439 | 79,882 | 28,566 | 15,821 | 124,708 |
| 118,820 | 433 | 79,002 | 28,250 | 15,646 | 123,331 |
| 118,821 | 433 | 79,793 | 28,458 | 15,794 | 124,478 |
| 118,822 | 438 | 79,237 | 28,413 | 15,700 | 123,788 |
| 118,823 | 455 | 79,048 | 28,151 | 15,450 | 123,104 |
| 118,824 | 449 | 78,522 | 27,916 | 15,293 | 122,180 |
| 118,825 | 476 | 79,253 | 28,276 | 15,471 | 123,476 |
| 118,826 | 476 | 79,164 | 28,249 | 15,477 | 123,366 |
| 118,827 | 474 | 79,359 | 28,593 | 15,681 | 124,107 |
| 118,828 | 477 | 79,033 | 28,645 | 15,703 | 123,858 |
| 118,829 | 470 | 78,656 | 28,437 | 15,616 | 123,179 |
| 118,830 | 478 | 78,181 | 28,222 | 15,491 | 122,372 |
| 118,831 | 479 | 77,480 | 27,997 | 15,295 | 121,251 |
| 118,832 | 484 | 78,300 | 28,445 | 15,513 | 122,742 |
| 118,833 | 491 | 78,023 | 28,438 | 15,509 | 122,461 |
| 118,834 | 482 | 76,667 | 28,063 | 15,300 | 120,512 |
| 118,835 | 497 | 77,166 | 28,322 | 15,401 | 121,386 |
| 118,836 | 501 | 77,164 | 28,340 | 15,382 | 121,387 |
| 118,837 | 508 | 76,937 | 28,091 | 15,262 | 120,798 |
| 118,838 | 529 | 78,030 | 28,475 | 15,411 | 122,445 |
| 118,839 | 543 | 78,250 | 28,528 | 15,373 | 122,694 |

|         |     |        |        |        |         |
|---------|-----|--------|--------|--------|---------|
| 118,840 | 538 | 77,634 | 28,482 | 15,334 | 121,988 |
| 118,841 | 539 | 77,697 | 28,567 | 15,386 | 122,189 |
| 118,842 | 561 | 78,367 | 29,034 | 15,630 | 123,592 |
| 118,843 | 574 | 77,389 | 28,747 | 15,489 | 122,199 |
| 118,844 | 574 | 77,206 | 28,761 | 15,510 | 122,051 |
| 118,845 | 565 | 78,186 | 29,107 | 15,745 | 123,603 |
| 118,846 | 559 | 73,866 | 27,347 | 14,824 | 116,596 |
| 118,847 | 552 | 74,542 | 27,486 | 14,909 | 117,489 |
| 118,848 | 558 | 75,226 | 27,684 | 15,010 | 118,478 |
| 118,849 | 559 | 75,461 | 27,731 | 15,005 | 118,756 |
| 118,850 | 571 | 75,788 | 27,841 | 15,046 | 119,246 |
| 118,851 | 581 | 76,320 | 28,141 | 15,196 | 120,238 |
| 118,852 | 578 | 76,500 | 28,220 | 15,201 | 120,499 |
| 118,853 | 573 | 75,600 | 27,926 | 15,045 | 119,144 |
| 118,854 | 589 | 76,298 | 28,192 | 15,136 | 120,215 |
| 118,855 | 580 | 75,040 | 27,785 | 14,935 | 118,340 |
| 118,856 | 586 | 75,918 | 28,076 | 15,058 | 119,638 |
| 118,857 | 596 | 75,121 | 27,837 | 14,924 | 118,478 |
| 118,858 | 595 | 75,125 | 27,900 | 14,987 | 118,607 |
| 118,859 | 593 | 75,054 | 27,970 | 14,993 | 118,610 |
| 118,860 | 599 | 75,677 | 28,380 | 15,185 | 119,841 |
| 118,861 | 586 | 75,875 | 28,459 | 15,230 | 120,150 |
| 118,862 | 558 | 74,359 | 27,965 | 14,972 | 117,854 |
| 118,863 | 560 | 75,136 | 28,286 | 15,106 | 119,088 |
| 118,864 | 548 | 74,834 | 28,353 | 15,176 | 118,911 |
| 118,865 | 546 | 75,318 | 28,662 | 15,308 | 119,834 |
| 118,866 | 540 | 75,209 | 28,799 | 15,375 | 119,923 |
| 118,867 | 538 | 75,231 | 28,939 | 15,457 | 120,165 |
| 118,868 | 562 | 75,576 | 28,959 | 15,447 | 120,544 |
| 118,869 | 561 | 75,605 | 28,905 | 15,479 | 120,550 |
| 118,870 | 565 | 75,841 | 29,400 | 15,704 | 121,510 |
| 118,871 | 586 | 75,598 | 29,292 | 15,583 | 121,059 |

|         |     |        |        |        |         |
|---------|-----|--------|--------|--------|---------|
| 118,872 | 580 | 75,343 | 29,125 | 15,519 | 120,567 |
| 118,873 | 581 | 74,848 | 29,225 | 15,620 | 120,274 |
| 118,874 | 583 | 74,687 | 29,279 | 15,596 | 120,145 |
| 118,875 | 582 | 75,808 | 29,773 | 15,846 | 122,009 |
| 118,876 | 588 | 75,648 | 29,816 | 15,899 | 121,951 |
| 118,877 | 598 | 75,316 | 29,656 | 15,848 | 121,418 |
| 118,878 | 594 | 76,044 | 29,804 | 15,878 | 122,320 |
| 118,879 | 600 | 75,881 | 29,519 | 15,723 | 121,723 |
| 118,880 | 622 | 77,264 | 29,945 | 15,960 | 123,791 |
| 118,881 | 621 | 78,537 | 30,313 | 16,189 | 125,660 |
| 118,882 | 615 | 78,406 | 30,100 | 16,055 | 125,176 |
| 118,883 | 608 | 78,822 | 30,193 | 16,086 | 125,709 |
| 118,884 | 616 | 79,754 | 30,571 | 16,254 | 127,195 |
| 118,885 | 611 | 79,367 | 30,362 | 16,123 | 126,463 |
| 118,886 | 600 | 79,324 | 30,364 | 16,163 | 126,451 |
| 118,887 | 588 | 78,915 | 30,399 | 16,186 | 126,088 |
| 118,888 | 583 | 80,367 | 30,982 | 16,465 | 128,397 |
| 118,889 | 571 | 80,861 | 31,078 | 16,559 | 129,069 |
| 118,890 | 536 | 80,512 | 31,085 | 16,664 | 128,797 |
| 118,891 | 553 | 80,621 | 31,163 | 16,710 | 129,047 |
| 118,892 | 555 | 81,017 | 31,286 | 16,768 | 129,626 |
| 118,893 | 543 | 82,027 | 31,448 | 16,916 | 130,934 |
| 118,894 | 554 | 81,803 | 31,339 | 16,828 | 130,524 |
| 118,895 | 554 | 81,587 | 31,235 | 16,762 | 130,138 |
| 118,896 | 592 | 83,476 | 31,964 | 17,128 | 133,160 |
| 118,897 | 586 | 82,972 | 31,921 | 17,110 | 132,589 |
| 118,898 | 595 | 83,287 | 32,130 | 17,206 | 133,218 |
| 118,899 | 595 | 83,579 | 32,275 | 17,240 | 133,689 |
| 118,900 | 633 | 85,118 | 32,850 | 17,582 | 136,183 |
| 118,901 | 633 | 84,698 | 32,764 | 17,558 | 135,653 |
| 118,902 | 632 | 84,713 | 32,797 | 17,519 | 135,661 |
| 118,903 | 643 | 85,167 | 33,155 | 17,687 | 136,652 |

|         |     |        |        |        |         |
|---------|-----|--------|--------|--------|---------|
| 118,904 | 646 | 85,357 | 33,215 | 17,735 | 136,953 |
| 118,905 | 654 | 85,102 | 33,313 | 17,771 | 136,840 |
| 118,906 | 662 | 85,250 | 33,469 | 17,806 | 137,187 |
| 118,907 | 655 | 84,638 | 33,229 | 17,718 | 136,240 |
| 118,908 | 655 | 83,907 | 32,949 | 17,575 | 135,086 |
| 118,909 | 657 | 83,506 | 32,825 | 17,531 | 134,519 |
| 118,910 | 668 | 84,609 | 33,336 | 17,861 | 136,474 |
| 118,911 | 674 | 85,213 | 33,454 | 17,906 | 137,247 |
| 118,912 | 688 | 85,055 | 33,474 | 17,942 | 137,159 |
| 118,913 | 688 | 84,971 | 33,523 | 18,018 | 137,200 |
| 118,914 | 702 | 84,446 | 33,455 | 17,992 | 136,595 |
| 118,915 | 704 | 84,539 | 33,449 | 17,987 | 136,679 |
| 118,916 | 707 | 84,384 | 33,422 | 17,971 | 136,484 |
| 118,917 | 711 | 84,896 | 33,498 | 17,975 | 137,080 |
| 118,918 | 675 | 82,892 | 32,632 | 17,471 | 133,670 |
| 118,919 | 679 | 84,279 | 33,009 | 17,638 | 135,605 |
| 118,920 | 686 | 85,430 | 33,299 | 17,797 | 137,212 |
| 118,921 | 672 | 85,716 | 33,317 | 17,801 | 137,506 |
| 118,922 | 649 | 85,629 | 33,290 | 17,789 | 137,357 |
| 118,923 | 641 | 84,898 | 33,194 | 17,763 | 136,496 |
| 118,924 | 630 | 83,633 | 32,736 | 17,566 | 134,565 |
| 118,925 | 642 | 84,615 | 33,006 | 17,641 | 135,904 |
| 118,926 | 639 | 84,293 | 32,728 | 17,503 | 135,163 |
| 118,927 | 610 | 82,808 | 32,170 | 17,138 | 132,726 |
| 118,928 | 610 | 83,430 | 32,272 | 17,189 | 133,501 |
| 118,929 | 601 | 83,629 | 32,433 | 17,302 | 133,965 |
| 118,930 | 607 | 83,549 | 32,379 | 17,322 | 133,857 |
| 118,931 | 592 | 83,495 | 32,234 | 17,258 | 133,579 |
| 118,932 | 590 | 82,512 | 31,916 | 17,044 | 132,062 |
| 118,933 | 606 | 83,503 | 32,277 | 17,218 | 133,604 |
| 118,934 | 608 | 82,829 | 31,997 | 17,060 | 132,494 |
| 118,935 | 625 | 83,046 | 31,939 | 17,071 | 132,681 |

|         |     |        |        |        |         |
|---------|-----|--------|--------|--------|---------|
| 118,936 | 617 | 82,215 | 31,695 | 16,941 | 131,468 |
| 118,937 | 616 | 83,404 | 32,108 | 17,154 | 133,282 |
| 118,938 | 628 | 84,465 | 32,286 | 17,244 | 134,623 |
| 118,939 | 636 | 84,063 | 32,057 | 17,080 | 133,836 |
| 118,940 | 645 | 82,599 | 31,469 | 16,735 | 131,448 |
| 118,941 | 645 | 82,579 | 31,450 | 16,776 | 131,450 |
| 118,942 | 622 | 82,502 | 31,321 | 16,720 | 131,165 |
| 118,943 | 619 | 82,292 | 31,133 | 16,534 | 130,578 |
| 118,944 | 595 | 82,366 | 31,038 | 16,501 | 130,500 |
| 118,945 | 584 | 81,511 | 30,575 | 16,210 | 128,880 |
| 118,946 | 586 | 82,723 | 30,876 | 16,357 | 130,542 |
| 118,947 | 569 | 82,854 | 30,883 | 16,428 | 130,734 |
| 118,948 | 558 | 82,677 | 30,651 | 16,386 | 130,272 |
| 118,949 | 557 | 83,174 | 30,898 | 16,563 | 131,192 |
| 118,950 | 520 | 83,745 | 31,111 | 16,703 | 132,079 |
| 118,951 | 514 | 83,574 | 31,180 | 16,732 | 132,000 |
| 118,952 | 501 | 83,682 | 31,141 | 16,716 | 132,040 |
| 118,953 | 500 | 83,895 | 31,186 | 16,752 | 132,333 |
| 118,954 | 486 | 83,739 | 30,929 | 16,609 | 131,763 |
| 118,955 | 465 | 83,764 | 30,767 | 16,557 | 131,553 |
| 118,956 | 455 | 83,049 | 30,363 | 16,285 | 130,152 |
| 118,957 | 454 | 83,314 | 30,502 | 16,397 | 130,667 |
| 118,958 | 463 | 84,180 | 30,798 | 16,504 | 131,945 |
| 118,959 | 455 | 83,612 | 30,468 | 16,316 | 130,851 |
| 118,960 | 458 | 83,584 | 30,426 | 16,318 | 130,786 |
| 118,961 | 454 | 82,948 | 30,178 | 16,152 | 129,732 |
| 118,962 | 469 | 83,875 | 30,579 | 16,449 | 131,372 |
| 118,963 | 470 | 83,572 | 30,449 | 16,379 | 130,870 |
| 118,964 | 467 | 83,711 | 30,434 | 16,363 | 130,975 |
| 118,965 | 450 | 83,063 | 30,106 | 16,190 | 129,809 |
| 118,966 | 447 | 82,462 | 29,862 | 16,080 | 128,851 |
| 118,967 | 444 | 82,014 | 29,601 | 15,955 | 128,014 |

|         |     |        |        |        |         |
|---------|-----|--------|--------|--------|---------|
| 118,968 | 450 | 84,019 | 30,342 | 16,421 | 131,232 |
| 118,969 | 453 | 83,903 | 30,239 | 16,370 | 130,965 |
| 118,970 | 449 | 83,857 | 30,150 | 16,398 | 130,854 |
| 118,971 | 440 | 83,214 | 29,867 | 16,298 | 129,819 |
| 118,972 | 452 | 84,190 | 30,076 | 16,401 | 131,119 |
| 118,973 | 450 | 84,677 | 30,093 | 16,436 | 131,656 |
| 118,974 | 454 | 85,092 | 30,014 | 16,394 | 131,954 |
| 118,975 | 443 | 84,637 | 29,790 | 16,290 | 131,160 |
| 118,976 | 441 | 84,921 | 29,892 | 16,369 | 131,623 |
| 118,977 | 445 | 85,766 | 30,327 | 16,603 | 133,141 |
| 118,978 | 444 | 84,849 | 30,060 | 16,496 | 131,849 |
| 118,979 | 433 | 83,863 | 29,812 | 16,339 | 130,447 |
| 118,980 | 434 | 84,791 | 30,043 | 16,473 | 131,741 |
| 118,981 | 427 | 84,775 | 30,053 | 16,439 | 131,694 |
| 118,982 | 430 | 83,819 | 29,857 | 16,323 | 130,429 |
| 118,983 | 433 | 86,644 | 30,895 | 16,902 | 134,874 |
| 118,984 | 421 | 85,944 | 30,531 | 16,731 | 133,627 |
| 118,985 | 400 | 86,528 | 30,711 | 16,799 | 134,438 |
| 118,986 | 402 | 86,706 | 30,777 | 16,822 | 134,707 |
| 118,987 | 428 | 87,757 | 31,202 | 17,055 | 136,442 |
| 118,988 | 419 | 86,576 | 30,858 | 16,828 | 134,681 |
| 118,989 | 426 | 86,215 | 30,818 | 16,835 | 134,294 |
| 118,990 | 428 | 86,249 | 30,842 | 16,827 | 134,346 |
| 118,991 | 419 | 86,049 | 30,904 | 16,855 | 134,227 |
| 118,992 | 422 | 86,674 | 31,347 | 17,030 | 135,473 |
| 118,993 | 433 | 85,610 | 31,025 | 16,845 | 133,913 |
| 118,994 | 424 | 84,396 | 30,775 | 16,723 | 132,318 |
| 118,995 | 478 | 86,034 | 31,472 | 17,061 | 135,045 |
| 118,996 | 481 | 86,160 | 31,579 | 17,152 | 135,372 |
| 118,997 | 492 | 85,688 | 31,700 | 17,221 | 135,101 |
| 118,998 | 486 | 83,252 | 30,942 | 16,766 | 131,446 |
| 118,999 | 529 | 83,641 | 31,270 | 16,916 | 132,356 |

|         |     |        |        |        |         |
|---------|-----|--------|--------|--------|---------|
| 119,000 | 564 | 84,437 | 31,648 | 17,098 | 133,747 |
| 119,001 | 562 | 83,423 | 31,176 | 16,872 | 132,033 |
| 119,002 | 565 | 84,281 | 31,443 | 17,025 | 133,314 |
| 119,003 | 560 | 84,270 | 31,424 | 17,048 | 133,302 |
| 119,004 | 563 | 83,264 | 31,038 | 16,849 | 131,714 |
| 119,005 | 561 | 82,355 | 30,828 | 16,762 | 130,506 |
| 119,006 | 592 | 83,238 | 31,313 | 16,850 | 131,993 |
| 119,007 | 596 | 83,442 | 31,361 | 16,893 | 132,292 |
| 119,008 | 604 | 84,208 | 31,751 | 17,049 | 133,612 |
| 119,009 | 583 | 84,046 | 31,755 | 17,126 | 133,510 |
| 119,010 | 570 | 83,169 | 31,486 | 16,998 | 132,223 |
| 119,011 | 569 | 84,700 | 31,996 | 17,201 | 134,466 |
| 119,012 | 564 | 84,801 | 31,977 | 17,246 | 134,588 |
| 119,013 | 551 | 85,047 | 32,085 | 17,230 | 134,913 |
| 119,014 | 530 | 83,734 | 31,621 | 16,975 | 132,860 |
| 119,015 | 535 | 84,066 | 31,799 | 17,086 | 133,486 |
| 119,016 | 531 | 84,303 | 31,759 | 17,052 | 133,645 |
| 119,017 | 529 | 83,827 | 31,474 | 16,902 | 132,732 |
| 119,018 | 533 | 83,165 | 31,302 | 16,750 | 131,750 |
| 119,019 | 536 | 84,597 | 31,940 | 17,006 | 134,079 |
| 119,020 | 532 | 83,557 | 31,663 | 16,859 | 132,611 |
| 119,021 | 538 | 82,549 | 31,463 | 16,708 | 131,258 |
| 119,022 | 532 | 81,742 | 31,246 | 16,576 | 130,096 |
| 119,023 | 546 | 83,081 | 31,965 | 16,995 | 132,587 |
| 119,024 | 540 | 82,522 | 31,875 | 16,910 | 131,847 |
| 119,025 | 529 | 81,300 | 31,558 | 16,719 | 130,106 |
| 119,026 | 542 | 81,545 | 31,686 | 16,782 | 130,555 |
| 119,027 | 553 | 81,118 | 31,715 | 16,750 | 130,136 |
| 119,028 | 559 | 81,407 | 31,746 | 16,754 | 130,466 |
| 119,029 | 566 | 80,992 | 31,564 | 16,598 | 129,720 |
| 119,030 | 585 | 82,071 | 31,986 | 16,793 | 131,435 |
| 119,031 | 602 | 81,456 | 32,086 | 16,801 | 130,945 |



|         |     |        |        |        |         |
|---------|-----|--------|--------|--------|---------|
| 119,032 | 586 | 80,578 | 31,872 | 16,632 | 129,668 |
| 119,033 | 583 | 78,966 | 31,481 | 16,375 | 127,405 |
| 119,034 | 585 | 78,861 | 31,331 | 16,394 | 127,171 |
| 119,035 | 574 | 78,370 | 31,331 | 16,462 | 126,737 |
| 119,036 | 568 | 76,185 | 30,505 | 16,025 | 123,283 |
| 119,037 | 567 | 76,264 | 30,642 | 16,114 | 123,587 |
| 119,038 | 561 | 76,663 | 30,738 | 16,190 | 124,152 |
| 119,039 | 556 | 76,796 | 30,726 | 16,216 | 124,294 |
| 119,040 | 542 | 77,756 | 31,027 | 16,433 | 125,758 |
| 119,041 | 538 | 78,199 | 31,083 | 16,505 | 126,325 |
| 119,042 | 534 | 78,979 | 31,101 | 16,594 | 127,208 |
| 119,043 | 527 | 78,512 | 30,728 | 16,373 | 126,140 |
| 119,044 | 526 | 78,897 | 30,862 | 16,521 | 126,806 |
| 119,045 | 489 | 78,389 | 30,785 | 16,518 | 126,181 |
| 119,046 | 478 | 79,694 | 31,525 | 16,967 | 128,664 |
| 119,047 | 470 | 79,593 | 31,633 | 17,053 | 128,749 |
| 119,048 | 457 | 78,539 | 31,084 | 16,774 | 126,854 |
| 119,049 | 468 | 80,656 | 31,555 | 17,034 | 129,713 |
| 119,050 | 432 | 82,242 | 32,041 | 17,305 | 132,020 |
| 119,051 | 401 | 83,444 | 32,196 | 17,483 | 133,524 |
| 119,052 | 445 | 83,649 | 32,323 | 17,469 | 133,886 |
| 119,053 | 444 | 83,783 | 32,333 | 17,497 | 134,057 |
| 119,054 | 442 | 84,870 | 32,746 | 17,791 | 135,849 |
| 119,055 | 439 | 84,509 | 32,732 | 17,793 | 135,473 |
| 119,056 | 427 | 85,451 | 33,027 | 18,045 | 136,950 |
| 119,057 | 422 | 85,990 | 33,279 | 18,232 | 137,923 |
| 119,058 | 430 | 86,708 | 33,433 | 18,324 | 138,895 |
| 119,059 | 430 | 87,578 | 33,537 | 18,396 | 139,941 |
| 119,060 | 459 | 87,377 | 33,572 | 18,407 | 139,815 |
| 119,061 | 459 | 87,272 | 33,611 | 18,447 | 139,789 |
| 119,062 | 467 | 87,601 | 33,747 | 18,551 | 140,366 |
| 119,063 | 468 | 87,329 | 33,590 | 18,460 | 139,847 |

|         |     |        |        |        |         |
|---------|-----|--------|--------|--------|---------|
| 119,064 | 481 | 87,054 | 33,335 | 18,337 | 139,207 |
| 119,065 | 483 | 87,378 | 33,407 | 18,374 | 139,642 |
| 119,066 | 484 | 86,884 | 33,263 | 18,294 | 138,925 |
| 119,067 | 483 | 85,711 | 32,973 | 18,189 | 137,356 |
| 119,068 | 486 | 87,535 | 33,886 | 18,787 | 140,694 |
| 119,069 | 502 | 88,280 | 34,134 | 18,940 | 141,856 |
| 119,070 | 507 | 88,661 | 34,318 | 19,004 | 142,490 |
| 119,071 | 496 | 88,259 | 34,093 | 18,906 | 141,754 |
| 119,072 | 530 | 89,267 | 34,550 | 19,118 | 143,465 |
| 119,073 | 535 | 88,742 | 34,372 | 19,022 | 142,671 |
| 119,074 | 543 | 88,346 | 34,052 | 18,848 | 141,789 |
| 119,075 | 542 | 88,254 | 34,033 | 18,829 | 141,658 |
| 119,076 | 526 | 87,486 | 33,838 | 18,721 | 140,571 |
| 119,077 | 526 | 86,627 | 33,600 | 18,586 | 139,339 |
| 119,078 | 544 | 90,352 | 34,734 | 19,217 | 144,847 |
| 119,079 | 540 | 89,823 | 34,625 | 19,187 | 144,175 |
| 119,080 | 535 | 89,764 | 34,463 | 19,118 | 143,880 |
| 119,081 | 521 | 89,936 | 34,289 | 19,054 | 143,800 |
| 119,082 | 500 | 89,099 | 33,839 | 18,798 | 142,236 |
| 119,083 | 495 | 89,957 | 34,021 | 18,984 | 143,457 |
| 119,084 | 476 | 88,724 | 33,566 | 18,717 | 141,483 |
| 119,085 | 478 | 89,255 | 33,804 | 18,838 | 142,375 |
| 119,086 | 477 | 88,514 | 33,628 | 18,811 | 141,430 |
| 119,087 | 467 | 87,945 | 33,570 | 18,766 | 140,748 |
| 119,088 | 468 | 87,574 | 33,502 | 18,741 | 140,285 |
| 119,089 | 453 | 86,375 | 33,178 | 18,549 | 138,555 |
| 119,090 | 480 | 86,747 | 33,299 | 18,576 | 139,102 |
| 119,091 | 480 | 85,928 | 33,085 | 18,471 | 137,964 |
| 119,092 | 488 | 85,305 | 32,953 | 18,341 | 137,087 |
| 119,093 | 486 | 84,638 | 32,843 | 18,241 | 136,208 |
| 119,094 | 477 | 83,372 | 32,466 | 18,007 | 134,322 |
| 119,095 | 480 | 84,422 | 32,764 | 18,190 | 135,856 |

|         |     |        |        |        |         |
|---------|-----|--------|--------|--------|---------|
| 119,096 | 484 | 84,605 | 32,511 | 18,077 | 135,677 |
| 119,097 | 473 | 82,545 | 31,703 | 17,600 | 132,321 |
| 119,098 | 489 | 83,434 | 31,872 | 17,639 | 133,434 |
| 119,099 | 483 | 82,290 | 31,526 | 17,425 | 131,724 |
| 119,100 | 477 | 82,376 | 31,735 | 17,570 | 132,158 |
| 119,101 | 474 | 80,660 | 31,264 | 17,285 | 129,683 |
| 119,102 | 471 | 79,701 | 31,234 | 17,179 | 128,585 |
| 119,103 | 430 | 78,797 | 30,949 | 17,030 | 127,206 |
| 119,104 | 427 | 77,452 | 30,433 | 16,668 | 124,980 |
| 119,105 | 438 | 77,121 | 30,044 | 16,445 | 124,048 |
| 119,106 | 440 | 77,321 | 30,036 | 16,394 | 124,191 |
| 119,107 | 433 | 77,397 | 29,802 | 16,230 | 123,862 |
| 119,108 | 446 | 77,605 | 29,832 | 16,270 | 124,153 |
| 119,109 | 439 | 76,102 | 29,296 | 16,006 | 121,843 |
| 119,110 | 439 | 75,898 | 29,318 | 16,031 | 121,686 |
| 119,111 | 416 | 75,634 | 29,155 | 15,991 | 121,196 |
| 119,112 | 409 | 75,476 | 29,132 | 15,969 | 120,986 |
| 119,113 | 405 | 75,422 | 29,067 | 15,953 | 120,847 |
| 119,114 | 396 | 75,820 | 29,190 | 16,050 | 121,456 |
| 119,115 | 394 | 76,238 | 29,289 | 16,075 | 121,996 |
| 119,116 | 386 | 76,368 | 29,287 | 16,072 | 122,113 |
| 119,117 | 381 | 76,515 | 29,232 | 16,086 | 122,214 |
| 119,118 | 400 | 77,146 | 29,611 | 16,259 | 123,416 |
| 119,119 | 385 | 76,801 | 29,338 | 16,185 | 122,709 |
| 119,120 | 381 | 77,709 | 29,718 | 16,379 | 124,187 |
| 119,121 | 382 | 77,918 | 29,756 | 16,444 | 124,500 |
| 119,122 | 382 | 78,257 | 29,731 | 16,415 | 124,785 |
| 119,123 | 359 | 77,377 | 29,499 | 16,300 | 123,535 |
| 119,124 | 356 | 77,623 | 29,645 | 16,420 | 124,044 |
| 119,125 | 344 | 78,415 | 30,203 | 16,811 | 125,773 |
| 119,126 | 341 | 78,891 | 30,111 | 16,873 | 126,216 |
| 119,127 | 343 | 78,517 | 30,132 | 16,838 | 125,830 |

|         |     |        |        |        |         |
|---------|-----|--------|--------|--------|---------|
| 119,128 | 361 | 80,030 | 30,905 | 17,280 | 128,576 |
| 119,129 | 349 | 79,353 | 30,712 | 17,147 | 127,561 |
| 119,130 | 361 | 79,916 | 31,184 | 17,449 | 128,910 |
| 119,131 | 386 | 79,173 | 30,988 | 17,369 | 127,916 |
| 119,132 | 381 | 77,965 | 30,851 | 17,300 | 126,497 |
| 119,133 | 398 | 79,368 | 31,464 | 17,680 | 128,910 |
| 119,134 | 402 | 79,232 | 31,547 | 17,666 | 128,847 |
| 119,135 | 403 | 79,217 | 31,507 | 17,672 | 128,799 |
| 119,136 | 404 | 79,727 | 31,758 | 17,810 | 129,699 |
| 119,137 | 406 | 80,407 | 32,050 | 17,899 | 130,762 |
| 119,138 | 402 | 79,616 | 31,497 | 17,618 | 129,133 |
| 119,139 | 402 | 80,872 | 31,797 | 17,800 | 130,871 |
| 119,140 | 387 | 81,681 | 32,111 | 17,973 | 132,152 |
| 119,141 | 380 | 80,961 | 32,022 | 17,939 | 131,302 |
| 119,142 | 376 | 80,473 | 31,942 | 17,883 | 130,674 |
| 119,143 | 367 | 80,910 | 32,408 | 18,213 | 131,898 |
| 119,144 | 364 | 80,299 | 32,312 | 18,177 | 131,152 |
| 119,145 | 362 | 79,757 | 32,213 | 18,174 | 130,506 |
| 119,146 | 360 | 79,580 | 32,139 | 18,109 | 130,188 |
| 119,147 | 357 | 78,930 | 32,001 | 18,012 | 129,300 |
| 119,148 | 369 | 78,870 | 31,795 | 17,911 | 128,945 |
| 119,149 | 356 | 78,594 | 31,588 | 17,813 | 128,351 |
| 119,150 | 358 | 77,855 | 31,232 | 17,663 | 127,108 |
| 119,151 | 368 | 78,633 | 31,503 | 17,751 | 128,255 |
| 119,152 | 363 | 78,088 | 31,125 | 17,534 | 127,110 |
| 119,153 | 357 | 75,899 | 30,168 | 17,072 | 123,496 |
| 119,154 | 357 | 75,847 | 30,129 | 17,051 | 123,384 |
| 119,155 | 362 | 74,430 | 29,799 | 16,864 | 121,455 |
| 119,156 | 346 | 73,375 | 29,537 | 16,740 | 119,998 |
| 119,157 | 357 | 76,485 | 31,060 | 17,712 | 125,614 |
| 119,158 | 351 | 76,145 | 31,023 | 17,717 | 125,236 |
| 119,159 | 337 | 75,581 | 31,063 | 17,738 | 124,719 |

|         |     |        |        |        |         |
|---------|-----|--------|--------|--------|---------|
| 119,160 | 326 | 74,333 | 30,716 | 17,490 | 122,865 |
| 119,161 | 333 | 74,062 | 30,635 | 17,378 | 122,408 |
| 119,162 | 345 | 75,012 | 31,024 | 17,567 | 123,948 |
| 119,163 | 357 | 74,998 | 31,064 | 17,571 | 123,990 |
| 119,164 | 372 | 74,593 | 31,071 | 17,523 | 123,559 |
| 119,165 | 368 | 74,311 | 30,934 | 17,393 | 123,006 |
| 119,166 | 368 | 74,239 | 30,903 | 17,361 | 122,871 |
| 119,167 | 360 | 72,662 | 30,196 | 16,885 | 120,103 |
| 119,168 | 369 | 74,120 | 30,600 | 17,057 | 122,146 |
| 119,169 | 356 | 74,301 | 30,569 | 17,040 | 122,266 |
| 119,170 | 370 | 74,391 | 30,711 | 16,992 | 122,464 |
| 119,171 | 377 | 75,794 | 31,205 | 17,257 | 124,633 |
| 119,172 | 365 | 74,336 | 30,683 | 17,014 | 122,398 |
| 119,173 | 363 | 74,363 | 30,715 | 17,045 | 122,486 |
| 119,174 | 351 | 73,946 | 30,712 | 16,970 | 121,979 |
| 119,175 | 354 | 73,631 | 30,625 | 16,899 | 121,509 |
| 119,176 | 357 | 73,900 | 30,862 | 17,021 | 122,140 |
| 119,177 | 371 | 73,254 | 30,903 | 17,020 | 121,548 |
| 119,178 | 354 | 73,722 | 30,945 | 17,070 | 122,091 |
| 119,179 | 351 | 73,895 | 31,092 | 17,081 | 122,419 |
| 119,180 | 345 | 74,229 | 31,025 | 17,067 | 122,666 |
| 119,181 | 343 | 74,362 | 30,940 | 17,003 | 122,648 |
| 119,182 | 307 | 74,409 | 30,983 | 17,007 | 122,706 |
| 119,183 | 323 | 74,407 | 30,852 | 16,917 | 122,499 |
| 119,184 | 320 | 74,762 | 30,789 | 16,823 | 122,694 |
| 119,185 | 319 | 74,201 | 30,601 | 16,792 | 121,913 |
| 119,186 | 331 | 74,557 | 30,674 | 16,781 | 122,343 |
| 119,187 | 337 | 74,671 | 30,721 | 16,786 | 122,515 |
| 119,188 | 339 | 74,115 | 30,552 | 16,719 | 121,725 |
| 119,189 | 348 | 73,898 | 30,596 | 16,722 | 121,564 |
| 119,190 | 357 | 73,597 | 30,511 | 16,687 | 121,152 |
| 119,191 | 368 | 73,439 | 30,555 | 16,717 | 121,079 |

|         |     |        |        |        |         |
|---------|-----|--------|--------|--------|---------|
| 119,192 | 372 | 74,306 | 30,580 | 16,725 | 121,983 |
| 119,193 | 374 | 74,611 | 30,282 | 16,608 | 121,875 |
| 119,194 | 384 | 76,420 | 30,796 | 16,806 | 124,406 |
| 119,195 | 390 | 77,104 | 30,874 | 16,785 | 125,153 |
| 119,196 | 388 | 77,031 | 30,701 | 16,634 | 124,754 |
| 119,197 | 398 | 77,317 | 30,763 | 16,663 | 125,141 |
| 119,198 | 396 | 77,002 | 30,763 | 16,678 | 124,839 |
| 119,199 | 387 | 77,390 | 31,267 | 16,930 | 125,974 |
| 119,200 | 389 | 77,522 | 31,385 | 16,991 | 126,287 |
| 119,201 | 381 | 77,312 | 31,348 | 16,998 | 126,039 |
| 119,202 | 386 | 77,393 | 31,395 | 17,033 | 126,207 |
| 119,203 | 393 | 77,278 | 31,314 | 16,985 | 125,970 |
| 119,204 | 393 | 77,530 | 31,464 | 17,041 | 126,428 |
| 119,205 | 398 | 77,827 | 31,534 | 17,139 | 126,898 |
| 119,206 | 402 | 78,190 | 31,475 | 17,122 | 127,189 |
| 119,207 | 403 | 77,864 | 31,270 | 16,978 | 126,515 |
| 119,208 | 400 | 78,036 | 31,419 | 17,038 | 126,893 |
| 119,209 | 401 | 78,427 | 31,652 | 17,135 | 127,615 |
| 119,210 | 405 | 77,832 | 31,157 | 16,909 | 126,303 |
| 119,211 | 413 | 78,628 | 31,318 | 16,996 | 127,355 |
| 119,212 | 401 | 79,379 | 31,516 | 17,145 | 128,441 |
| 119,213 | 396 | 79,614 | 31,413 | 17,095 | 128,518 |
| 119,214 | 382 | 79,371 | 31,176 | 16,984 | 127,913 |
| 119,215 | 360 | 78,643 | 30,778 | 16,822 | 126,603 |
| 119,216 | 378 | 79,592 | 31,090 | 17,011 | 128,071 |
| 119,217 | 379 | 78,890 | 30,757 | 16,899 | 126,925 |
| 119,218 | 379 | 78,409 | 30,462 | 16,798 | 126,048 |
| 119,219 | 381 | 79,067 | 30,776 | 17,046 | 127,270 |
| 119,220 | 383 | 78,657 | 30,563 | 16,985 | 126,588 |
| 119,221 | 375 | 78,100 | 30,158 | 16,832 | 125,465 |
| 119,222 | 368 | 78,435 | 30,206 | 16,840 | 125,849 |
| 119,223 | 367 | 78,272 | 30,142 | 16,763 | 125,544 |

|         |     |        |        |        |         |
|---------|-----|--------|--------|--------|---------|
| 119,224 | 369 | 75,519 | 28,344 | 15,743 | 119,975 |
| 119,225 | 379 | 76,535 | 28,365 | 15,802 | 121,081 |
| 119,226 | 401 | 77,377 | 28,573 | 15,880 | 122,231 |
| 119,227 | 405 | 77,760 | 28,531 | 15,856 | 122,552 |
| 119,228 | 411 | 79,564 | 29,078 | 16,139 | 125,192 |
| 119,229 | 424 | 80,082 | 29,219 | 16,266 | 125,991 |
| 119,230 | 435 | 78,692 | 28,470 | 15,880 | 123,477 |
| 119,231 | 442 | 78,887 | 28,408 | 15,860 | 123,597 |
| 119,232 | 465 | 77,772 | 28,216 | 15,715 | 122,168 |
| 119,233 | 473 | 77,697 | 28,141 | 15,691 | 122,002 |
| 119,234 | 459 | 77,336 | 28,083 | 15,703 | 121,581 |
| 119,235 | 486 | 77,951 | 28,288 | 15,879 | 122,604 |
| 119,236 | 503 | 78,440 | 28,209 | 15,792 | 122,944 |
| 119,237 | 507 | 77,327 | 27,601 | 15,497 | 120,932 |
| 119,238 | 507 | 77,455 | 27,552 | 15,532 | 121,046 |
| 119,239 | 531 | 76,895 | 27,267 | 15,362 | 120,055 |
| 119,240 | 521 | 76,255 | 26,991 | 15,267 | 119,034 |
| 119,241 | 524 | 77,872 | 27,717 | 15,600 | 121,713 |
| 119,242 | 511 | 78,189 | 27,648 | 15,597 | 121,945 |
| 119,243 | 510 | 77,971 | 27,739 | 15,709 | 121,929 |
| 119,244 | 527 | 77,721 | 27,774 | 15,656 | 121,678 |
| 119,245 | 529 | 77,514 | 27,752 | 15,716 | 121,511 |
| 119,246 | 524 | 76,771 | 27,518 | 15,632 | 120,445 |
| 119,247 | 522 | 76,889 | 27,733 | 15,796 | 120,940 |
| 119,248 | 529 | 77,376 | 27,880 | 15,811 | 121,596 |
| 119,249 | 535 | 78,635 | 28,053 | 15,928 | 123,151 |
| 119,250 | 552 | 79,854 | 28,405 | 16,155 | 124,966 |
| 119,251 | 556 | 79,539 | 28,308 | 16,055 | 124,458 |
| 119,252 | 554 | 79,485 | 28,309 | 16,114 | 124,462 |
| 119,253 | 560 | 79,941 | 28,856 | 16,416 | 125,773 |
| 119,254 | 550 | 79,640 | 28,895 | 16,438 | 125,523 |
| 119,255 | 565 | 80,135 | 28,872 | 16,394 | 125,966 |

|         |     |        |        |        |         |
|---------|-----|--------|--------|--------|---------|
| 119,256 | 573 | 81,432 | 29,350 | 16,575 | 127,930 |
| 119,257 | 568 | 82,031 | 29,545 | 16,659 | 128,803 |
| 119,258 | 588 | 83,268 | 29,816 | 16,810 | 130,482 |
| 119,259 | 589 | 83,210 | 29,685 | 16,710 | 130,194 |
| 119,260 | 588 | 83,128 | 29,685 | 16,752 | 130,153 |
| 119,261 | 580 | 83,194 | 29,973 | 16,939 | 130,686 |
| 119,262 | 591 | 82,729 | 30,057 | 17,046 | 130,423 |
| 119,263 | 601 | 82,266 | 30,147 | 17,075 | 130,089 |
| 119,264 | 600 | 81,929 | 30,198 | 17,135 | 129,862 |
| 119,265 | 601 | 81,719 | 30,338 | 17,203 | 129,861 |
| 119,266 | 613 | 82,098 | 30,489 | 17,286 | 130,486 |
| 119,267 | 607 | 82,239 | 30,510 | 17,306 | 130,662 |
| 119,268 | 631 | 82,771 | 30,588 | 17,264 | 131,254 |
| 119,269 | 622 | 82,083 | 30,348 | 17,131 | 130,184 |
| 119,270 | 622 | 82,356 | 30,507 | 17,198 | 130,683 |
| 119,271 | 621 | 81,932 | 30,443 | 17,157 | 130,153 |
| 119,272 | 620 | 81,718 | 30,473 | 17,149 | 129,960 |
| 119,273 | 638 | 82,932 | 31,004 | 17,407 | 131,981 |
| 119,274 | 626 | 81,844 | 30,676 | 17,245 | 130,391 |
| 119,275 | 631 | 82,041 | 30,682 | 17,281 | 130,635 |
| 119,276 | 621 | 81,181 | 30,475 | 17,176 | 129,453 |
| 119,277 | 629 | 82,993 | 31,253 | 17,635 | 132,510 |
| 119,278 | 635 | 83,594 | 31,455 | 17,790 | 133,474 |
| 119,279 | 609 | 83,280 | 31,438 | 17,802 | 133,129 |
| 119,280 | 577 | 82,197 | 31,059 | 17,591 | 131,424 |
| 119,281 | 581 | 83,342 | 31,444 | 17,777 | 133,144 |
| 119,282 | 576 | 83,568 | 31,579 | 17,917 | 133,640 |
| 119,283 | 546 | 82,392 | 30,928 | 17,685 | 131,551 |
| 119,284 | 547 | 83,732 | 31,306 | 17,880 | 133,465 |
| 119,285 | 535 | 83,412 | 31,225 | 17,847 | 133,019 |
| 119,286 | 523 | 83,676 | 31,551 | 18,010 | 133,760 |
| 119,287 | 505 | 83,478 | 31,688 | 18,164 | 133,835 |



|         |     |        |        |        |         |
|---------|-----|--------|--------|--------|---------|
| 119,288 | 489 | 83,432 | 31,753 | 18,158 | 133,832 |
| 119,289 | 500 | 83,606 | 31,951 | 18,246 | 134,303 |
| 119,290 | 476 | 83,388 | 31,993 | 18,302 | 134,159 |
| 119,291 | 478 | 83,595 | 32,154 | 18,342 | 134,569 |
| 119,292 | 480 | 83,773 | 32,144 | 18,401 | 134,798 |
| 119,293 | 493 | 84,212 | 32,275 | 18,383 | 135,363 |
| 119,294 | 491 | 84,941 | 32,338 | 18,399 | 136,169 |
| 119,295 | 471 | 84,246 | 31,997 | 18,251 | 134,965 |
| 119,296 | 466 | 83,374 | 31,625 | 18,029 | 133,494 |
| 119,297 | 469 | 84,376 | 31,823 | 18,120 | 134,788 |
| 119,298 | 468 | 85,104 | 32,034 | 18,337 | 135,943 |
| 119,299 | 463 | 85,361 | 32,228 | 18,409 | 136,461 |
| 119,300 | 453 | 85,155 | 32,115 | 18,362 | 136,085 |
| 119,301 | 442 | 85,395 | 32,100 | 18,376 | 136,313 |
| 119,302 | 433 | 84,757 | 31,838 | 18,242 | 135,270 |
| 119,303 | 439 | 85,795 | 32,100 | 18,408 | 136,742 |
| 119,304 | 422 | 83,749 | 31,317 | 17,915 | 133,403 |
| 119,305 | 430 | 84,908 | 31,370 | 17,997 | 134,705 |
| 119,306 | 422 | 85,752 | 31,587 | 18,165 | 135,926 |
| 119,307 | 420 | 84,624 | 31,199 | 17,996 | 134,239 |
| 119,308 | 416 | 84,963 | 31,353 | 18,098 | 134,830 |
| 119,309 | 408 | 83,315 | 31,043 | 18,028 | 132,794 |
| 119,310 | 411 | 83,759 | 30,901 | 17,983 | 133,054 |
| 119,311 | 425 | 84,206 | 30,906 | 17,905 | 133,442 |
| 119,312 | 418 | 84,503 | 30,762 | 17,856 | 133,539 |
| 119,313 | 414 | 85,234 | 30,673 | 17,807 | 134,128 |
| 119,314 | 427 | 86,093 | 30,955 | 17,911 | 135,386 |
| 119,315 | 423 | 85,653 | 30,549 | 17,716 | 134,341 |
| 119,316 | 425 | 85,594 | 30,522 | 17,744 | 134,285 |
| 119,317 | 424 | 86,686 | 30,844 | 17,942 | 135,896 |
| 119,318 | 415 | 85,561 | 30,577 | 17,786 | 134,339 |
| 119,319 | 395 | 86,043 | 30,892 | 17,972 | 135,302 |

|         |     |        |        |        |         |
|---------|-----|--------|--------|--------|---------|
| 119,320 | 405 | 85,518 | 30,647 | 17,848 | 134,418 |
| 119,321 | 399 | 84,550 | 30,436 | 17,756 | 133,141 |
| 119,322 | 400 | 85,820 | 30,719 | 17,967 | 134,906 |
| 119,323 | 399 | 86,834 | 30,823 | 18,051 | 136,107 |
| 119,324 | 389 | 86,661 | 30,676 | 17,996 | 135,722 |
| 119,325 | 380 | 86,554 | 30,594 | 17,946 | 135,474 |
| 119,326 | 359 | 86,611 | 30,412 | 17,874 | 135,256 |
| 119,327 | 365 | 86,778 | 30,389 | 17,870 | 135,402 |
| 119,328 | 377 | 87,472 | 30,500 | 17,933 | 136,282 |
| 119,329 | 383 | 87,043 | 30,392 | 17,896 | 135,714 |
| 119,330 | 385 | 86,598 | 30,111 | 17,767 | 134,861 |
| 119,331 | 397 | 84,897 | 29,768 | 17,458 | 132,520 |
| 119,332 | 413 | 86,199 | 30,030 | 17,647 | 134,289 |
| 119,333 | 407 | 86,092 | 30,023 | 17,674 | 134,196 |
| 119,334 | 417 | 85,608 | 30,086 | 17,655 | 133,766 |
| 119,335 | 427 | 85,780 | 30,007 | 17,579 | 133,793 |
| 119,336 | 449 | 86,926 | 30,199 | 17,728 | 135,302 |
| 119,337 | 468 | 86,614 | 29,966 | 17,583 | 134,631 |
| 119,338 | 465 | 85,597 | 29,560 | 17,316 | 132,938 |
| 119,339 | 452 | 87,109 | 29,839 | 17,585 | 134,985 |
| 119,340 | 451 | 87,884 | 30,000 | 17,688 | 136,023 |
| 119,341 | 452 | 88,797 | 30,192 | 17,775 | 137,216 |
| 119,342 | 470 | 90,095 | 30,528 | 18,030 | 139,123 |
| 119,343 | 493 | 90,841 | 30,792 | 18,113 | 140,239 |
| 119,344 | 511 | 90,211 | 30,487 | 18,003 | 139,212 |
| 119,345 | 508 | 89,508 | 30,291 | 17,890 | 138,197 |
| 119,346 | 505 | 90,269 | 30,581 | 18,194 | 139,549 |
| 119,347 | 503 | 90,434 | 30,519 | 18,175 | 139,631 |
| 119,348 | 501 | 90,635 | 30,445 | 18,149 | 139,730 |
| 119,349 | 505 | 90,570 | 30,344 | 18,149 | 139,568 |
| 119,350 | 506 | 90,357 | 30,145 | 18,087 | 139,095 |
| 119,351 | 513 | 90,891 | 30,311 | 18,239 | 139,954 |

|         |     |        |        |        |         |
|---------|-----|--------|--------|--------|---------|
| 119,352 | 524 | 90,544 | 30,260 | 18,170 | 139,498 |
| 119,353 | 522 | 91,119 | 30,140 | 18,148 | 139,929 |
| 119,354 | 527 | 90,125 | 29,742 | 17,933 | 138,327 |
| 119,355 | 551 | 90,848 | 29,769 | 17,963 | 139,131 |
| 119,356 | 544 | 89,822 | 29,578 | 17,861 | 137,805 |
| 119,357 | 565 | 91,450 | 30,089 | 18,198 | 140,302 |
| 119,358 | 564 | 92,800 | 30,191 | 18,329 | 141,884 |
| 119,359 | 542 | 91,918 | 29,711 | 18,068 | 140,239 |
| 119,360 | 551 | 93,091 | 30,068 | 18,227 | 141,937 |
| 119,361 | 545 | 92,578 | 29,948 | 18,168 | 141,239 |
| 119,362 | 538 | 91,449 | 29,555 | 18,021 | 139,563 |
| 119,363 | 531 | 91,006 | 29,421 | 17,936 | 138,894 |
| 119,364 | 539 | 92,054 | 29,887 | 18,215 | 140,695 |
| 119,365 | 526 | 90,936 | 29,522 | 18,098 | 139,082 |
| 119,366 | 530 | 91,193 | 29,690 | 18,147 | 139,560 |
| 119,367 | 524 | 91,123 | 29,568 | 18,095 | 139,310 |
| 119,368 | 529 | 91,218 | 29,540 | 18,095 | 139,382 |
| 119,369 | 545 | 91,890 | 29,442 | 18,073 | 139,950 |
| 119,370 | 542 | 91,293 | 29,159 | 17,923 | 138,917 |
| 119,371 | 529 | 91,160 | 29,022 | 17,833 | 138,544 |
| 119,372 | 543 | 91,078 | 28,773 | 17,628 | 138,022 |
| 119,373 | 545 | 90,926 | 28,715 | 17,613 | 137,799 |
| 119,374 | 557 | 91,458 | 28,812 | 17,658 | 138,485 |
| 119,375 | 561 | 90,247 | 28,348 | 17,395 | 136,551 |
| 119,376 | 568 | 89,878 | 28,237 | 17,331 | 136,014 |
| 119,377 | 568 | 89,668 | 28,233 | 17,318 | 135,787 |
| 119,378 | 558 | 89,890 | 28,379 | 17,400 | 136,227 |
| 119,379 | 560 | 89,566 | 28,267 | 17,331 | 135,724 |
| 119,380 | 548 | 89,372 | 28,159 | 17,264 | 135,343 |
| 119,381 | 529 | 88,481 | 27,827 | 17,094 | 133,931 |
| 119,382 | 553 | 89,403 | 28,125 | 17,216 | 135,297 |
| 119,383 | 543 | 89,343 | 28,055 | 17,203 | 135,144 |

|         |     |        |        |        |         |
|---------|-----|--------|--------|--------|---------|
| 119,384 | 531 | 88,906 | 27,684 | 17,009 | 134,130 |
| 119,385 | 539 | 89,222 | 27,645 | 17,024 | 134,430 |
| 119,386 | 549 | 90,293 | 27,935 | 17,178 | 135,955 |
| 119,387 | 535 | 90,317 | 27,889 | 17,129 | 135,870 |
| 119,388 | 508 | 89,227 | 27,573 | 16,950 | 134,258 |
| 119,389 | 507 | 88,186 | 27,278 | 16,746 | 132,717 |
| 119,390 | 505 | 89,531 | 27,631 | 16,927 | 134,594 |
| 119,391 | 518 | 89,548 | 27,579 | 16,886 | 134,531 |
| 119,392 | 509 | 89,051 | 27,239 | 16,696 | 133,495 |
| 119,393 | 525 | 90,223 | 27,474 | 16,850 | 135,072 |
| 119,394 | 477 | 88,296 | 26,813 | 16,486 | 132,072 |
| 119,395 | 484 | 87,784 | 26,648 | 16,391 | 131,307 |
| 119,396 | 498 | 88,585 | 26,939 | 16,542 | 132,564 |
| 119,397 | 501 | 87,460 | 26,489 | 16,263 | 130,713 |
| 119,398 | 514 | 87,504 | 26,532 | 16,291 | 130,841 |
| 119,399 | 533 | 87,656 | 26,557 | 16,294 | 131,040 |
| 119,400 | 548 | 87,433 | 26,635 | 16,283 | 130,899 |
| 119,401 | 556 | 88,751 | 26,922 | 16,448 | 132,677 |
| 119,402 | 544 | 87,531 | 26,555 | 16,249 | 130,879 |
| 119,403 | 541 | 88,394 | 26,872 | 16,390 | 132,197 |
| 119,404 | 534 | 86,627 | 26,535 | 16,090 | 129,786 |
| 119,405 | 556 | 87,673 | 26,863 | 16,297 | 131,389 |
| 119,406 | 533 | 87,279 | 26,666 | 16,130 | 130,608 |
| 119,407 | 555 | 88,065 | 27,003 | 16,299 | 131,922 |
| 119,408 | 574 | 88,074 | 27,045 | 16,306 | 131,999 |
| 119,409 | 595 | 86,882 | 26,853 | 16,124 | 130,454 |
| 119,410 | 594 | 86,134 | 26,667 | 15,977 | 129,372 |
| 119,411 | 601 | 85,595 | 26,525 | 15,859 | 128,580 |
| 119,412 | 596 | 85,955 | 26,504 | 15,798 | 128,853 |
| 119,413 | 603 | 86,922 | 26,754 | 15,910 | 130,189 |
| 119,414 | 610 | 86,844 | 26,777 | 15,875 | 130,106 |
| 119,415 | 602 | 86,505 | 26,633 | 15,810 | 129,550 |

|         |     |        |        |        |         |
|---------|-----|--------|--------|--------|---------|
| 119,416 | 608 | 87,113 | 26,841 | 15,908 | 130,470 |
| 119,417 | 604 | 87,686 | 26,946 | 15,952 | 131,188 |
| 119,418 | 616 | 87,168 | 26,911 | 15,923 | 130,618 |
| 119,419 | 617 | 87,726 | 27,230 | 16,018 | 131,591 |
| 119,420 | 611 | 85,607 | 26,694 | 15,650 | 128,562 |
| 119,421 | 611 | 85,723 | 26,764 | 15,689 | 128,787 |
| 119,422 | 618 | 84,908 | 26,624 | 15,548 | 127,698 |
| 119,423 | 613 | 84,219 | 26,535 | 15,474 | 126,841 |
| 119,424 | 630 | 85,310 | 27,363 | 15,916 | 129,219 |
| 119,425 | 629 | 85,289 | 27,426 | 15,966 | 129,310 |
| 119,426 | 619 | 85,854 | 27,731 | 16,162 | 130,366 |
| 119,427 | 619 | 85,517 | 27,601 | 16,079 | 129,816 |
| 119,428 | 628 | 85,596 | 27,593 | 16,044 | 129,861 |
| 119,429 | 624 | 85,578 | 27,636 | 16,053 | 129,891 |
| 119,430 | 610 | 86,077 | 27,816 | 16,184 | 130,687 |
| 119,431 | 628 | 85,359 | 27,684 | 16,048 | 129,719 |
| 119,432 | 628 | 85,694 | 27,885 | 16,118 | 130,325 |
| 119,433 | 618 | 86,647 | 28,172 | 16,297 | 131,734 |
| 119,434 | 626 | 85,352 | 27,993 | 16,105 | 130,076 |
| 119,435 | 620 | 84,590 | 27,907 | 16,015 | 129,132 |
| 119,436 | 613 | 86,481 | 28,541 | 16,327 | 131,962 |
| 119,437 | 623 | 86,430 | 28,586 | 16,297 | 131,936 |
| 119,438 | 616 | 85,158 | 28,401 | 16,183 | 130,358 |
| 119,439 | 625 | 85,903 | 28,849 | 16,363 | 131,740 |
| 119,440 | 641 | 87,098 | 29,384 | 16,653 | 133,776 |
| 119,441 | 640 | 87,084 | 29,404 | 16,724 | 133,852 |
| 119,442 | 626 | 87,267 | 29,337 | 16,676 | 133,906 |
| 119,443 | 614 | 85,689 | 29,078 | 16,456 | 131,837 |
| 119,444 | 590 | 85,595 | 29,209 | 16,497 | 131,891 |
| 119,445 | 586 | 85,767 | 29,352 | 16,552 | 132,257 |
| 119,446 | 576 | 86,067 | 29,418 | 16,483 | 132,544 |
| 119,447 | 597 | 85,785 | 29,384 | 16,422 | 132,188 |

|         |     |        |        |        |         |
|---------|-----|--------|--------|--------|---------|
| 119,448 | 595 | 85,692 | 29,428 | 16,378 | 132,093 |
| 119,449 | 584 | 86,819 | 29,771 | 16,541 | 133,715 |
| 119,450 | 572 | 86,906 | 29,858 | 16,554 | 133,890 |
| 119,451 | 568 | 87,660 | 30,166 | 16,692 | 135,086 |
| 119,452 | 562 | 87,244 | 30,226 | 16,694 | 134,726 |
| 119,453 | 565 | 87,557 | 30,243 | 16,691 | 135,056 |
| 119,454 | 564 | 87,850 | 30,290 | 16,668 | 135,372 |
| 119,455 | 562 | 88,500 | 30,694 | 16,889 | 136,645 |
| 119,456 | 543 | 88,503 | 30,717 | 16,856 | 136,619 |
| 119,457 | 529 | 87,917 | 30,572 | 16,814 | 135,832 |
| 119,458 | 501 | 87,555 | 30,526 | 16,787 | 135,369 |
| 119,459 | 471 | 86,973 | 30,488 | 16,717 | 134,649 |
| 119,460 | 441 | 85,355 | 30,041 | 16,511 | 132,348 |
| 119,461 | 441 | 85,131 | 30,051 | 16,471 | 132,094 |
| 119,462 | 451 | 84,210 | 30,029 | 16,515 | 131,205 |
| 119,463 | 467 | 84,096 | 30,300 | 16,676 | 131,539 |
| 119,464 | 470 | 83,823 | 30,325 | 16,651 | 131,269 |
| 119,465 | 477 | 83,158 | 30,252 | 16,561 | 130,448 |
| 119,466 | 491 | 82,745 | 30,255 | 16,500 | 129,991 |
| 119,467 | 503 | 82,259 | 30,142 | 16,441 | 129,345 |
| 119,468 | 502 | 81,688 | 30,023 | 16,350 | 128,563 |
| 119,469 | 490 | 81,477 | 30,005 | 16,282 | 128,254 |
| 119,470 | 497 | 81,603 | 29,940 | 16,261 | 128,301 |
| 119,471 | 480 | 81,729 | 29,864 | 16,181 | 128,254 |
| 119,472 | 477 | 82,280 | 29,981 | 16,214 | 128,952 |
| 119,473 | 455 | 79,951 | 29,174 | 15,768 | 125,348 |
| 119,474 | 455 | 80,360 | 29,349 | 15,925 | 126,089 |
| 119,475 | 455 | 81,444 | 29,775 | 16,145 | 127,819 |
| 119,476 | 467 | 82,635 | 30,214 | 16,356 | 129,672 |
| 119,477 | 480 | 81,754 | 29,965 | 16,194 | 128,393 |
| 119,478 | 470 | 80,628 | 29,742 | 16,033 | 126,873 |
| 119,479 | 475 | 82,024 | 30,348 | 16,439 | 129,286 |

|         |     |        |        |        |         |
|---------|-----|--------|--------|--------|---------|
| 119,480 | 501 | 83,443 | 30,747 | 16,694 | 131,385 |
| 119,481 | 499 | 82,784 | 30,647 | 16,583 | 130,513 |
| 119,482 | 483 | 81,796 | 30,274 | 16,408 | 128,961 |
| 119,483 | 483 | 81,856 | 30,318 | 16,420 | 129,077 |
| 119,484 | 481 | 81,735 | 30,329 | 16,377 | 128,922 |
| 119,485 | 469 | 82,482 | 30,498 | 16,498 | 129,947 |
| 119,486 | 463 | 82,065 | 30,352 | 16,422 | 129,302 |
| 119,487 | 464 | 81,665 | 30,203 | 16,309 | 128,641 |
| 119,488 | 447 | 80,673 | 29,907 | 16,166 | 127,193 |
| 119,489 | 458 | 80,277 | 29,896 | 16,148 | 126,779 |
| 119,490 | 471 | 80,086 | 29,966 | 16,156 | 126,679 |
| 119,491 | 471 | 80,137 | 29,964 | 16,111 | 126,683 |
| 119,492 | 507 | 79,285 | 29,750 | 15,904 | 125,446 |
| 119,493 | 504 | 78,237 | 29,601 | 15,766 | 124,108 |
| 119,494 | 515 | 79,134 | 29,846 | 15,937 | 125,432 |
| 119,495 | 537 | 78,857 | 29,844 | 15,880 | 125,118 |
| 119,496 | 546 | 78,392 | 29,717 | 15,783 | 124,438 |
| 119,497 | 547 | 78,204 | 29,681 | 15,739 | 124,171 |
| 119,498 | 524 | 77,169 | 29,409 | 15,584 | 122,686 |
| 119,499 | 523 | 75,941 | 29,105 | 15,391 | 120,960 |
| 119,500 | 525 | 75,774 | 29,081 | 15,331 | 120,711 |
| 119,501 | 516 | 73,456 | 28,311 | 14,900 | 117,183 |
| 119,502 | 529 | 72,745 | 28,301 | 14,801 | 116,376 |
| 119,503 | 535 | 71,041 | 27,887 | 14,508 | 113,971 |
| 119,504 | 535 | 69,101 | 27,285 | 14,140 | 111,061 |
| 119,505 | 539 | 68,515 | 27,013 | 14,048 | 110,115 |
| 119,506 | 543 | 67,682 | 26,755 | 13,867 | 108,847 |
| 119,507 | 545 | 66,867 | 26,562 | 13,683 | 107,657 |
| 119,508 | 545 | 66,257 | 26,385 | 13,547 | 106,734 |
| 119,509 | 543 | 66,035 | 26,224 | 13,415 | 106,217 |
| 119,510 | 541 | 65,648 | 25,924 | 13,177 | 105,290 |
| 119,511 | 528 | 64,424 | 25,610 | 12,914 | 103,476 |

|         |     |        |        |        |         |
|---------|-----|--------|--------|--------|---------|
| 119,512 | 523 | 66,491 | 26,261 | 13,187 | 106,462 |
| 119,513 | 525 | 66,437 | 26,098 | 13,083 | 106,143 |
| 119,514 | 510 | 66,331 | 25,896 | 12,965 | 105,702 |
| 119,515 | 500 | 65,763 | 25,620 | 12,829 | 104,712 |
| 119,516 | 481 | 64,953 | 25,260 | 12,646 | 103,340 |
| 119,517 | 462 | 64,292 | 24,941 | 12,476 | 102,171 |
| 119,518 | 451 | 63,640 | 24,744 | 12,319 | 101,154 |
| 119,519 | 455 | 63,159 | 24,490 | 12,161 | 100,265 |
| 119,520 | 460 | 62,643 | 24,305 | 12,066 | 99,474  |
| 119,521 | 458 | 61,735 | 24,073 | 11,903 | 98,169  |
| 119,522 | 472 | 61,267 | 23,964 | 11,823 | 97,526  |
| 119,523 | 513 | 61,093 | 23,912 | 11,740 | 97,258  |
| 119,524 | 516 | 60,088 | 23,656 | 11,580 | 95,840  |
| 119,525 | 528 | 60,045 | 23,588 | 11,451 | 95,612  |
| 119,526 | 517 | 59,130 | 23,135 | 11,192 | 93,974  |
| 119,527 | 515 | 58,645 | 22,941 | 11,067 | 93,168  |
| 119,528 | 492 | 57,766 | 22,532 | 10,809 | 91,599  |
| 119,529 | 505 | 57,100 | 22,342 | 10,669 | 90,616  |
| 119,530 | 505 | 56,397 | 22,203 | 10,554 | 89,659  |
| 119,531 | 493 | 55,468 | 22,066 | 10,429 | 88,456  |
| 119,532 | 497 | 54,712 | 21,803 | 10,291 | 87,303  |
| 119,533 | 486 | 54,026 | 21,658 | 10,189 | 86,359  |
| 119,534 | 487 | 53,622 | 21,515 | 10,082 | 85,706  |
| 119,535 | 485 | 52,858 | 21,362 | 9,973  | 84,678  |
| 119,536 | 491 | 52,238 | 21,197 | 9,829  | 83,755  |
| 119,537 | 487 | 51,473 | 20,891 | 9,647  | 82,498  |
| 119,538 | 477 | 49,945 | 20,471 | 9,410  | 80,303  |
| 119,539 | 451 | 48,179 | 19,536 | 8,912  | 77,078  |
| 119,540 | 404 | 45,980 | 18,588 | 8,468  | 73,440  |
| 119,541 | 407 | 45,677 | 18,490 | 8,327  | 72,901  |
| 119,542 | 409 | 44,966 | 18,197 | 8,133  | 71,705  |
| 119,543 | 390 | 43,692 | 17,941 | 8,007  | 70,030  |



|         |     |        |        |       |        |
|---------|-----|--------|--------|-------|--------|
| 119,544 | 408 | 43,895 | 17,966 | 8,017 | 70,286 |
| 119,545 | 431 | 43,167 | 17,753 | 7,887 | 69,238 |
| 119,546 | 442 | 43,235 | 17,727 | 7,832 | 69,236 |
| 119,547 | 445 | 43,481 | 17,772 | 7,835 | 69,533 |
| 119,548 | 444 | 43,429 | 17,864 | 7,887 | 69,624 |
| 119,549 | 440 | 43,659 | 17,986 | 7,960 | 70,045 |
| 119,550 | 452 | 43,751 | 18,046 | 7,999 | 70,248 |
| 119,551 | 443 | 43,156 | 17,670 | 7,883 | 69,152 |
| 119,552 | 443 | 43,535 | 17,832 | 7,919 | 69,729 |
| 119,553 | 436 | 43,223 | 17,753 | 7,902 | 69,314 |
| 119,554 | 429 | 42,959 | 17,691 | 7,890 | 68,969 |
| 119,555 | 423 | 42,628 | 17,622 | 7,869 | 68,542 |
| 119,556 | 422 | 41,648 | 17,254 | 7,723 | 67,047 |
| 119,557 | 421 | 41,468 | 17,160 | 7,649 | 66,698 |
| 119,558 | 420 | 41,055 | 17,018 | 7,582 | 66,075 |
| 119,559 | 422 | 40,724 | 16,924 | 7,550 | 65,620 |
| 119,560 | 425 | 39,793 | 16,636 | 7,400 | 64,254 |
| 119,561 | 425 | 40,309 | 16,864 | 7,473 | 65,071 |
| 119,562 | 427 | 41,125 | 17,206 | 7,586 | 66,344 |
| 119,563 | 431 | 40,855 | 17,281 | 7,582 | 66,149 |
| 119,564 | 431 | 40,919 | 17,295 | 7,623 | 66,268 |
| 119,565 | 427 | 41,395 | 17,536 | 7,715 | 67,073 |
| 119,566 | 431 | 41,482 | 17,708 | 7,798 | 67,419 |
| 119,567 | 438 | 41,425 | 17,858 | 7,848 | 67,569 |
| 119,568 | 430 | 41,752 | 18,025 | 7,896 | 68,103 |
| 119,569 | 447 | 41,758 | 18,085 | 7,891 | 68,181 |
| 119,570 | 441 | 41,754 | 18,128 | 7,921 | 68,244 |
| 119,571 | 430 | 42,161 | 18,506 | 8,098 | 69,195 |
| 119,572 | 428 | 42,245 | 18,628 | 8,147 | 69,448 |
| 119,573 | 409 | 41,937 | 18,511 | 8,114 | 68,971 |
| 119,574 | 411 | 42,051 | 18,630 | 8,186 | 69,278 |
| 119,575 | 400 | 41,965 | 18,608 | 8,246 | 69,219 |

|         |     |        |        |       |        |
|---------|-----|--------|--------|-------|--------|
| 119,576 | 398 | 41,917 | 18,641 | 8,262 | 69,218 |
| 119,577 | 393 | 41,799 | 18,706 | 8,274 | 69,172 |
| 119,578 | 392 | 41,835 | 18,752 | 8,262 | 69,241 |
| 119,579 | 390 | 40,919 | 18,487 | 8,085 | 67,881 |
| 119,580 | 382 | 40,489 | 18,222 | 7,942 | 67,035 |
| 119,581 | 383 | 40,674 | 18,287 | 7,911 | 67,255 |
| 119,582 | 376 | 40,004 | 17,874 | 7,737 | 65,991 |
| 119,583 | 381 | 40,204 | 17,942 | 7,756 | 66,283 |
| 119,584 | 391 | 39,319 | 17,558 | 7,625 | 64,893 |
| 119,585 | 394 | 39,566 | 17,652 | 7,649 | 65,261 |
| 119,586 | 400 | 38,461 | 17,260 | 7,490 | 63,611 |
| 119,587 | 399 | 38,751 | 17,373 | 7,554 | 64,077 |
| 119,588 | 406 | 38,544 | 17,329 | 7,527 | 63,806 |
| 119,589 | 405 | 38,747 | 17,519 | 7,624 | 64,295 |
| 119,590 | 388 | 38,499 | 17,516 | 7,684 | 64,087 |
| 119,591 | 399 | 38,298 | 17,490 | 7,637 | 63,824 |
| 119,592 | 388 | 37,865 | 17,380 | 7,587 | 63,220 |
| 119,593 | 385 | 38,686 | 17,787 | 7,831 | 64,689 |
| 119,594 | 386 | 38,960 | 17,685 | 7,788 | 64,819 |
| 119,595 | 369 | 38,992 | 17,813 | 7,846 | 65,020 |
| 119,596 | 337 | 38,314 | 17,728 | 7,845 | 64,224 |
| 119,597 | 332 | 38,295 | 17,833 | 7,877 | 64,337 |
| 119,598 | 336 | 38,991 | 18,115 | 7,986 | 65,428 |
| 119,599 | 326 | 38,511 | 17,984 | 7,893 | 64,714 |
| 119,600 | 330 | 39,250 | 18,401 | 8,072 | 66,053 |
| 119,601 | 328 | 39,954 | 18,873 | 8,261 | 67,416 |
| 119,602 | 315 | 40,040 | 19,098 | 8,366 | 67,819 |
| 119,603 | 318 | 40,097 | 19,274 | 8,454 | 68,143 |
| 119,604 | 323 | 40,497 | 19,508 | 8,531 | 68,859 |
| 119,605 | 338 | 40,849 | 19,641 | 8,593 | 69,421 |
| 119,606 | 344 | 41,318 | 19,763 | 8,654 | 70,079 |
| 119,607 | 347 | 41,612 | 19,887 | 8,703 | 70,549 |

|         |     |        |        |       |        |
|---------|-----|--------|--------|-------|--------|
| 119,608 | 349 | 41,453 | 19,875 | 8,705 | 70,382 |
| 119,609 | 354 | 42,096 | 20,211 | 8,833 | 71,494 |
| 119,610 | 367 | 41,898 | 20,129 | 8,780 | 71,174 |
| 119,611 | 381 | 42,645 | 20,423 | 8,900 | 72,349 |
| 119,612 | 404 | 43,121 | 20,559 | 8,934 | 73,018 |
| 119,613 | 401 | 43,130 | 20,552 | 8,918 | 73,001 |
| 119,614 | 415 | 43,635 | 20,589 | 8,925 | 73,564 |
| 119,615 | 428 | 43,582 | 20,558 | 8,875 | 73,443 |
| 119,616 | 427 | 43,689 | 20,621 | 8,885 | 73,622 |
| 119,617 | 420 | 44,782 | 20,675 | 8,944 | 74,821 |
| 119,618 | 434 | 44,829 | 20,620 | 8,961 | 74,844 |
| 119,619 | 409 | 45,048 | 20,628 | 9,011 | 75,096 |
| 119,620 | 413 | 45,154 | 20,514 | 8,952 | 75,033 |
| 119,621 | 416 | 45,739 | 20,759 | 9,036 | 75,950 |
| 119,622 | 422 | 45,707 | 20,723 | 9,019 | 75,871 |
| 119,623 | 407 | 45,832 | 20,688 | 9,006 | 75,933 |
| 119,624 | 399 | 45,678 | 20,617 | 8,950 | 75,644 |
| 119,625 | 400 | 46,070 | 20,659 | 8,951 | 76,080 |
| 119,626 | 397 | 45,241 | 20,204 | 8,715 | 74,557 |
| 119,627 | 405 | 45,947 | 20,432 | 8,749 | 75,533 |
| 119,628 | 398 | 44,646 | 19,996 | 8,560 | 73,600 |
| 119,629 | 398 | 44,573 | 19,999 | 8,575 | 73,545 |
| 119,630 | 388 | 44,228 | 19,975 | 8,566 | 73,157 |
| 119,631 | 387 | 44,418 | 20,109 | 8,606 | 73,520 |
| 119,632 | 385 | 44,053 | 20,015 | 8,576 | 73,029 |
| 119,633 | 382 | 44,306 | 20,146 | 8,620 | 73,454 |
| 119,634 | 378 | 44,063 | 20,073 | 8,568 | 73,082 |
| 119,635 | 364 | 44,186 | 20,061 | 8,534 | 73,145 |
| 119,636 | 346 | 43,593 | 19,791 | 8,426 | 72,156 |
| 119,637 | 349 | 43,678 | 19,768 | 8,378 | 72,173 |
| 119,638 | 354 | 43,916 | 19,889 | 8,423 | 72,582 |
| 119,639 | 346 | 43,443 | 19,565 | 8,229 | 71,583 |

|         |     |        |        |       |        |
|---------|-----|--------|--------|-------|--------|
| 119,640 | 362 | 43,651 | 19,705 | 8,260 | 71,978 |
| 119,641 | 364 | 43,458 | 19,607 | 8,173 | 71,602 |
| 119,642 | 361 | 43,048 | 19,574 | 8,067 | 71,050 |
| 119,643 | 361 | 43,070 | 19,609 | 8,031 | 71,071 |
| 119,644 | 375 | 43,205 | 19,708 | 8,016 | 71,304 |
| 119,645 | 372 | 43,066 | 19,722 | 7,949 | 71,109 |
| 119,646 | 356 | 42,175 | 19,280 | 7,728 | 69,539 |
| 119,647 | 357 | 42,088 | 19,215 | 7,657 | 69,317 |
| 119,648 | 379 | 42,513 | 19,373 | 7,685 | 69,950 |
| 119,649 | 375 | 41,136 | 18,729 | 7,355 | 67,595 |
| 119,650 | 380 | 39,753 | 17,695 | 6,874 | 64,702 |
| 119,651 | 378 | 39,768 | 17,698 | 6,830 | 64,674 |
| 119,652 | 383 | 39,810 | 17,704 | 6,820 | 64,717 |
| 119,653 | 384 | 39,492 | 17,427 | 6,680 | 63,983 |
| 119,654 | 379 | 38,509 | 16,950 | 6,475 | 62,313 |
| 119,655 | 376 | 38,250 | 16,802 | 6,384 | 61,812 |
| 119,656 | 358 | 37,390 | 16,417 | 6,215 | 60,380 |
| 119,657 | 350 | 36,415 | 16,048 | 6,048 | 58,861 |
| 119,658 | 344 | 35,600 | 15,681 | 5,905 | 57,530 |
| 119,659 | 338 | 34,721 | 15,245 | 5,721 | 56,025 |
| 119,660 | 335 | 34,085 | 14,910 | 5,573 | 54,903 |
| 119,661 | 317 | 33,226 | 14,485 | 5,438 | 53,466 |
| 119,662 | 307 | 32,636 | 14,258 | 5,332 | 52,533 |
| 119,663 | 294 | 31,844 | 13,956 | 5,225 | 51,319 |
| 119,664 | 294 | 31,082 | 13,692 | 5,117 | 50,185 |
| 119,665 | 292 | 30,590 | 13,574 | 5,065 | 49,521 |
| 119,666 | 278 | 29,411 | 13,083 | 4,876 | 47,648 |
| 119,667 | 300 | 28,913 | 13,167 | 4,821 | 47,201 |
| 119,668 | 296 | 28,373 | 13,026 | 4,748 | 46,443 |
| 119,669 | 305 | 28,216 | 13,175 | 4,736 | 46,432 |
| 119,670 | 303 | 28,091 | 13,265 | 4,716 | 46,375 |
| 119,671 | 326 | 28,258 | 13,478 | 4,748 | 46,810 |

|         |     |        |        |       |        |
|---------|-----|--------|--------|-------|--------|
| 119,672 | 328 | 28,484 | 13,749 | 4,835 | 47,396 |
| 119,673 | 345 | 28,907 | 13,933 | 4,882 | 48,067 |
| 119,674 | 346 | 29,185 | 14,271 | 4,975 | 48,777 |
| 119,675 | 370 | 29,188 | 14,545 | 5,008 | 49,111 |
| 119,676 | 376 | 29,833 | 15,045 | 5,152 | 50,406 |
| 119,677 | 394 | 30,453 | 15,488 | 5,311 | 51,646 |
| 119,678 | 396 | 30,679 | 15,768 | 5,424 | 52,267 |
| 119,679 | 415 | 31,257 | 16,099 | 5,543 | 53,314 |
| 119,680 | 417 | 31,570 | 16,288 | 5,622 | 53,897 |
| 119,681 | 424 | 32,100 | 16,454 | 5,612 | 54,590 |
| 119,682 | 426 | 32,258 | 16,636 | 5,674 | 54,994 |
| 119,683 | 448 | 32,705 | 16,787 | 5,690 | 55,630 |
| 119,684 | 446 | 32,831 | 16,894 | 5,745 | 55,916 |
| 119,685 | 453 | 33,294 | 17,107 | 5,840 | 56,694 |
| 119,686 | 452 | 33,399 | 17,213 | 5,871 | 56,935 |
| 119,687 | 454 | 33,487 | 17,391 | 5,905 | 57,237 |
| 119,688 | 458 | 33,512 | 17,478 | 5,946 | 57,394 |
| 119,689 | 454 | 33,530 | 17,515 | 5,975 | 57,474 |
| 119,690 | 450 | 33,473 | 17,524 | 6,003 | 57,450 |
| 119,691 | 442 | 33,333 | 17,388 | 5,970 | 57,133 |
| 119,692 | 443 | 33,287 | 17,396 | 5,987 | 57,113 |
| 119,693 | 437 | 33,296 | 17,164 | 5,944 | 56,841 |
| 119,694 | 437 | 33,092 | 17,123 | 5,956 | 56,608 |
| 119,695 | 434 | 32,990 | 17,147 | 5,993 | 56,564 |
| 119,696 | 439 | 33,011 | 17,163 | 6,028 | 56,641 |
| 119,697 | 449 | 33,264 | 17,337 | 6,137 | 57,187 |
| 119,698 | 447 | 33,793 | 17,595 | 6,264 | 58,099 |
| 119,699 | 453 | 35,136 | 18,102 | 6,474 | 60,165 |
| 119,700 | 450 | 35,832 | 18,474 | 6,654 | 61,410 |
| 119,701 | 466 | 37,507 | 19,178 | 6,897 | 64,048 |
| 119,702 | 486 | 38,960 | 19,773 | 7,170 | 66,389 |
| 119,703 | 491 | 41,107 | 20,669 | 7,506 | 69,773 |

|         |     |        |        |        |        |
|---------|-----|--------|--------|--------|--------|
| 119,704 | 511 | 43,059 | 21,611 | 7,869  | 73,050 |
| 119,705 | 526 | 44,644 | 22,315 | 8,171  | 75,656 |
| 119,706 | 539 | 46,392 | 23,061 | 8,459  | 78,451 |
| 119,707 | 545 | 48,420 | 24,002 | 8,824  | 81,791 |
| 119,708 | 554 | 49,938 | 24,742 | 9,129  | 84,363 |
| 119,709 | 559 | 51,131 | 25,279 | 9,343  | 86,312 |
| 119,710 | 563 | 52,281 | 25,891 | 9,570  | 88,305 |
| 119,711 | 560 | 52,570 | 26,247 | 9,724  | 89,101 |
| 119,712 | 556 | 53,488 | 26,808 | 9,996  | 90,848 |
| 119,713 | 559 | 54,507 | 27,358 | 10,230 | 92,654 |
| 119,714 | 558 | 55,512 | 28,003 | 10,488 | 94,561 |
| 119,715 | 549 | 56,225 | 28,275 | 10,636 | 95,685 |
| 119,716 | 557 | 56,420 | 28,342 | 10,700 | 96,019 |
| 119,717 | 561 | 57,021 | 28,718 | 10,819 | 97,119 |
| 119,718 | 542 | 57,373 | 28,824 | 10,882 | 97,621 |
| 119,719 | 535 | 57,407 | 28,843 | 10,952 | 97,737 |
| 119,720 | 509 | 57,160 | 28,690 | 10,925 | 97,284 |
| 119,721 | 535 | 57,298 | 28,831 | 10,985 | 97,649 |
| 119,722 | 507 | 57,365 | 28,738 | 10,968 | 97,578 |
| 119,723 | 500 | 56,747 | 28,354 | 10,864 | 96,465 |
| 119,724 | 503 | 56,945 | 28,347 | 10,887 | 96,682 |
| 119,725 | 511 | 57,336 | 28,275 | 10,940 | 97,062 |
| 119,726 | 483 | 57,181 | 27,952 | 10,858 | 96,474 |
| 119,727 | 459 | 56,245 | 27,330 | 10,665 | 94,699 |
| 119,728 | 472 | 56,954 | 27,641 | 10,775 | 95,842 |
| 119,729 | 453 | 56,645 | 27,318 | 10,674 | 95,090 |
| 119,730 | 453 | 57,411 | 27,612 | 10,779 | 96,255 |
| 119,731 | 451 | 57,089 | 27,432 | 10,760 | 95,732 |
| 119,732 | 454 | 57,056 | 27,471 | 10,773 | 95,754 |
| 119,733 | 456 | 57,472 | 27,596 | 10,858 | 96,382 |
| 119,734 | 475 | 57,820 | 27,795 | 10,956 | 97,046 |
| 119,735 | 486 | 57,809 | 27,876 | 10,980 | 97,151 |

|         |     |        |        |        |         |
|---------|-----|--------|--------|--------|---------|
| 119,736 | 485 | 57,722 | 27,833 | 10,979 | 97,019  |
| 119,737 | 482 | 58,056 | 27,933 | 11,077 | 97,548  |
| 119,738 | 484 | 58,243 | 27,896 | 11,103 | 97,726  |
| 119,739 | 494 | 58,799 | 28,038 | 11,190 | 98,521  |
| 119,740 | 525 | 59,441 | 28,305 | 11,299 | 99,570  |
| 119,741 | 527 | 59,509 | 28,329 | 11,290 | 99,655  |
| 119,742 | 529 | 59,687 | 28,378 | 11,314 | 99,908  |
| 119,743 | 555 | 60,067 | 28,557 | 11,374 | 100,553 |
| 119,744 | 565 | 59,577 | 28,438 | 11,356 | 99,936  |
| 119,745 | 555 | 59,502 | 28,391 | 11,338 | 99,786  |
| 119,746 | 552 | 59,273 | 28,228 | 11,251 | 99,304  |
| 119,747 | 543 | 59,299 | 28,113 | 11,196 | 99,151  |
| 119,748 | 550 | 60,056 | 28,309 | 11,301 | 100,216 |
| 119,749 | 566 | 59,953 | 28,213 | 11,262 | 99,994  |
| 119,750 | 570 | 59,791 | 28,157 | 11,257 | 99,775  |
| 119,751 | 553 | 58,051 | 27,337 | 10,988 | 96,929  |
| 119,752 | 551 | 58,162 | 27,446 | 11,049 | 97,208  |
| 119,753 | 529 | 56,306 | 26,588 | 10,720 | 94,143  |
| 119,754 | 539 | 57,122 | 26,927 | 10,849 | 95,437  |
| 119,755 | 513 | 53,604 | 25,228 | 10,194 | 89,539  |
| 119,756 | 514 | 54,253 | 25,488 | 10,298 | 90,553  |
| 119,757 | 506 | 54,231 | 25,606 | 10,352 | 90,695  |
| 119,758 | 504 | 53,703 | 25,241 | 10,269 | 89,717  |
| 119,759 | 492 | 52,068 | 24,451 | 9,982  | 86,993  |
| 119,760 | 494 | 51,851 | 24,248 | 9,922  | 86,515  |
| 119,761 | 493 | 52,076 | 24,053 | 9,859  | 86,481  |
| 119,762 | 496 | 52,106 | 23,958 | 9,798  | 86,358  |
| 119,763 | 487 | 51,892 | 23,694 | 9,689  | 85,762  |
| 119,764 | 481 | 51,284 | 23,180 | 9,516  | 84,461  |
| 119,765 | 482 | 52,099 | 23,465 | 9,617  | 85,663  |
| 119,766 | 477 | 52,282 | 23,370 | 9,584  | 85,713  |
| 119,767 | 477 | 52,658 | 23,413 | 9,616  | 86,164  |

|         |     |        |        |        |        |
|---------|-----|--------|--------|--------|--------|
| 119,768 | 474 | 52,814 | 23,306 | 9,648  | 86,242 |
| 119,769 | 467 | 52,168 | 22,941 | 9,501  | 85,077 |
| 119,770 | 466 | 51,748 | 22,535 | 9,347  | 84,096 |
| 119,771 | 479 | 52,687 | 22,815 | 9,449  | 85,430 |
| 119,772 | 455 | 52,682 | 22,856 | 9,496  | 85,489 |
| 119,773 | 464 | 53,203 | 23,135 | 9,609  | 86,411 |
| 119,774 | 463 | 53,375 | 23,278 | 9,642  | 86,758 |
| 119,775 | 469 | 53,512 | 23,366 | 9,666  | 87,013 |
| 119,776 | 461 | 53,165 | 23,280 | 9,608  | 86,514 |
| 119,777 | 471 | 53,689 | 23,455 | 9,700  | 87,315 |
| 119,778 | 475 | 53,973 | 23,445 | 9,696  | 87,589 |
| 119,779 | 466 | 54,251 | 23,773 | 9,824  | 88,314 |
| 119,780 | 464 | 54,922 | 23,993 | 9,936  | 89,315 |
| 119,781 | 429 | 53,259 | 22,916 | 9,538  | 86,142 |
| 119,782 | 431 | 54,148 | 23,234 | 9,623  | 87,436 |
| 119,783 | 426 | 54,810 | 23,491 | 9,732  | 88,459 |
| 119,784 | 427 | 54,745 | 23,532 | 9,746  | 88,450 |
| 119,785 | 430 | 55,928 | 24,011 | 9,930  | 90,299 |
| 119,786 | 429 | 56,049 | 24,059 | 9,972  | 90,509 |
| 119,787 | 427 | 56,191 | 24,107 | 9,994  | 90,719 |
| 119,788 | 424 | 56,392 | 24,223 | 10,035 | 91,074 |
| 119,789 | 414 | 55,639 | 23,944 | 9,862  | 89,859 |
| 119,790 | 419 | 56,337 | 24,235 | 9,923  | 90,914 |
| 119,791 | 399 | 56,748 | 24,290 | 9,914  | 91,351 |
| 119,792 | 401 | 57,354 | 24,439 | 10,003 | 92,197 |
| 119,793 | 382 | 57,573 | 24,530 | 10,026 | 92,511 |
| 119,794 | 373 | 58,343 | 24,937 | 10,167 | 93,820 |
| 119,795 | 364 | 57,932 | 24,855 | 10,091 | 93,242 |
| 119,796 | 363 | 58,391 | 24,999 | 10,169 | 93,922 |
| 119,797 | 359 | 58,182 | 25,008 | 10,170 | 93,719 |
| 119,798 | 350 | 58,705 | 25,431 | 10,320 | 94,806 |
| 119,799 | 348 | 58,863 | 25,555 | 10,360 | 95,126 |



|         |     |        |        |        |        |
|---------|-----|--------|--------|--------|--------|
| 119,800 | 327 | 58,977 | 25,622 | 10,373 | 95,299 |
| 119,801 | 313 | 58,315 | 25,332 | 10,230 | 94,190 |
| 119,802 | 314 | 58,317 | 25,351 | 10,271 | 94,253 |
| 119,803 | 313 | 58,090 | 25,344 | 10,241 | 93,988 |
| 119,804 | 312 | 58,585 | 25,673 | 10,327 | 94,897 |
| 119,805 | 304 | 58,242 | 25,604 | 10,312 | 94,462 |
| 119,806 | 294 | 58,148 | 25,570 | 10,276 | 94,288 |
| 119,807 | 291 | 58,115 | 25,555 | 10,243 | 94,204 |
| 119,808 | 287 | 57,558 | 25,303 | 10,102 | 93,250 |
| 119,809 | 288 | 57,017 | 25,159 | 9,978  | 92,442 |
| 119,810 | 292 | 57,507 | 25,347 | 10,014 | 93,160 |
| 119,811 | 292 | 56,680 | 25,057 | 9,851  | 91,880 |
| 119,812 | 297 | 56,932 | 25,277 | 9,920  | 92,426 |
| 119,813 | 310 | 56,592 | 25,194 | 9,850  | 91,946 |
| 119,814 | 309 | 55,677 | 24,894 | 9,699  | 90,579 |
| 119,815 | 310 | 55,894 | 25,049 | 9,731  | 90,984 |
| 119,816 | 299 | 52,399 | 23,886 | 9,156  | 85,740 |
| 119,817 | 299 | 52,611 | 23,978 | 9,173  | 86,061 |
| 119,818 | 293 | 52,801 | 24,110 | 9,189  | 86,393 |
| 119,819 | 293 | 53,107 | 24,271 | 9,208  | 86,879 |
| 119,820 | 291 | 51,857 | 23,868 | 8,992  | 85,008 |
| 119,821 | 291 | 51,607 | 23,772 | 8,946  | 84,616 |
| 119,822 | 278 | 51,253 | 23,760 | 8,893  | 84,184 |
| 119,823 | 269 | 50,857 | 23,635 | 8,816  | 83,577 |
| 119,824 | 269 | 50,255 | 23,448 | 8,705  | 82,677 |
| 119,825 | 249 | 49,647 | 23,170 | 8,577  | 81,643 |
| 119,826 | 239 | 48,015 | 22,585 | 8,334  | 79,173 |
| 119,827 | 242 | 48,181 | 22,607 | 8,305  | 79,335 |
| 119,828 | 235 | 47,348 | 22,301 | 8,167  | 78,051 |
| 119,829 | 229 | 47,059 | 22,122 | 8,054  | 77,464 |
| 119,830 | 231 | 46,492 | 21,852 | 7,936  | 76,511 |
| 119,831 | 228 | 45,224 | 21,398 | 7,714  | 74,564 |

|         |     |        |        |       |        |
|---------|-----|--------|--------|-------|--------|
| 119,832 | 220 | 43,470 | 20,838 | 7,501 | 72,029 |
| 119,833 | 211 | 42,356 | 20,432 | 7,347 | 70,346 |
| 119,834 | 211 | 41,852 | 20,217 | 7,249 | 69,529 |
| 119,835 | 207 | 41,067 | 19,919 | 7,094 | 68,287 |
| 119,836 | 192 | 40,085 | 19,641 | 6,959 | 66,877 |
| 119,837 | 190 | 38,156 | 18,847 | 6,604 | 63,797 |
| 119,838 | 203 | 37,932 | 18,850 | 6,567 | 63,552 |
| 119,839 | 162 | 23,756 | 12,055 | 4,206 | 40,179 |
| 119,840 | 204 | 36,909 | 18,420 | 6,394 | 61,927 |
| 119,841 | 203 | 36,634 | 18,413 | 6,381 | 61,631 |
| 119,842 | 196 | 35,707 | 18,168 | 6,295 | 60,366 |
| 119,843 | 189 | 34,869 | 17,974 | 6,177 | 59,209 |
| 119,844 | 193 | 34,279 | 17,763 | 6,075 | 58,310 |
| 119,845 | 191 | 33,404 | 17,430 | 5,954 | 56,979 |
| 119,846 | 188 | 32,743 | 17,080 | 5,815 | 55,826 |
| 119,847 | 182 | 31,383 | 16,495 | 5,570 | 53,630 |
| 119,848 | 178 | 30,379 | 15,948 | 5,361 | 51,866 |
| 119,849 | 183 | 30,389 | 15,935 | 5,328 | 51,835 |
| 119,850 | 185 | 29,572 | 15,650 | 5,176 | 50,583 |
| 119,851 | 181 | 28,564 | 15,262 | 5,020 | 49,027 |
| 119,852 | 172 | 27,768 | 14,963 | 4,906 | 47,809 |
| 119,853 | 173 | 28,204 | 15,176 | 4,902 | 48,455 |
| 119,854 | 178 | 27,850 | 14,958 | 4,795 | 47,781 |
| 119,855 | 186 | 27,625 | 14,820 | 4,724 | 47,355 |
| 119,856 | 193 | 27,903 | 15,122 | 4,817 | 48,035 |
| 119,857 | 196 | 28,002 | 15,179 | 4,856 | 48,233 |
| 119,858 | 206 | 28,353 | 15,314 | 4,881 | 48,754 |
| 119,859 | 209 | 28,807 | 15,501 | 4,999 | 49,516 |
| 119,860 | 207 | 28,938 | 15,756 | 5,125 | 50,026 |
| 119,861 | 213 | 29,163 | 15,892 | 5,211 | 50,479 |
| 119,862 | 207 | 29,292 | 15,968 | 5,240 | 50,707 |
| 119,863 | 214 | 29,897 | 16,174 | 5,322 | 51,607 |

|         |     |        |        |        |        |
|---------|-----|--------|--------|--------|--------|
| 119,864 | 212 | 30,401 | 16,336 | 5,423  | 52,372 |
| 119,865 | 215 | 30,591 | 16,556 | 5,524  | 52,886 |
| 119,866 | 220 | 30,865 | 16,701 | 5,613  | 53,399 |
| 119,867 | 216 | 31,178 | 16,869 | 5,699  | 53,962 |
| 119,868 | 226 | 31,961 | 17,215 | 5,856  | 55,258 |
| 119,869 | 251 | 32,517 | 17,465 | 5,971  | 56,204 |
| 119,870 | 255 | 33,119 | 17,643 | 6,080  | 57,097 |
| 119,871 | 263 | 33,691 | 17,810 | 6,183  | 57,947 |
| 119,872 | 266 | 34,315 | 17,954 | 6,282  | 58,817 |
| 119,873 | 265 | 34,394 | 17,862 | 6,290  | 58,811 |
| 119,874 | 268 | 35,028 | 18,097 | 6,396  | 59,789 |
| 119,875 | 278 | 37,129 | 19,109 | 6,790  | 63,306 |
| 119,876 | 311 | 37,961 | 19,557 | 6,957  | 64,786 |
| 119,877 | 310 | 38,616 | 19,953 | 7,137  | 66,016 |
| 119,878 | 320 | 39,634 | 20,321 | 7,287  | 67,562 |
| 119,879 | 332 | 40,642 | 20,773 | 7,478  | 69,225 |
| 119,880 | 332 | 41,690 | 21,278 | 7,706  | 71,006 |
| 119,881 | 341 | 43,053 | 21,836 | 7,943  | 73,173 |
| 119,882 | 342 | 44,171 | 22,237 | 8,159  | 74,909 |
| 119,883 | 351 | 45,338 | 22,621 | 8,313  | 76,623 |
| 119,884 | 360 | 46,583 | 23,080 | 8,494  | 78,517 |
| 119,885 | 365 | 47,905 | 23,595 | 8,699  | 80,564 |
| 119,886 | 377 | 49,029 | 24,026 | 8,856  | 82,288 |
| 119,887 | 389 | 49,972 | 24,449 | 9,038  | 83,848 |
| 119,888 | 377 | 49,954 | 24,424 | 9,064  | 83,819 |
| 119,889 | 379 | 50,918 | 25,094 | 9,395  | 85,786 |
| 119,890 | 377 | 51,510 | 25,353 | 9,519  | 86,759 |
| 119,891 | 383 | 52,258 | 25,682 | 9,675  | 87,998 |
| 119,892 | 381 | 53,144 | 25,971 | 9,829  | 89,325 |
| 119,893 | 383 | 53,858 | 26,210 | 9,949  | 90,400 |
| 119,894 | 396 | 54,718 | 26,478 | 10,055 | 91,647 |
| 119,895 | 404 | 55,366 | 26,662 | 10,166 | 92,598 |

|         |     |        |        |        |         |
|---------|-----|--------|--------|--------|---------|
| 119,896 | 409 | 56,273 | 26,972 | 10,306 | 93,960  |
| 119,897 | 410 | 56,961 | 27,226 | 10,476 | 95,073  |
| 119,898 | 404 | 57,153 | 27,239 | 10,508 | 95,304  |
| 119,899 | 402 | 57,692 | 27,615 | 10,688 | 96,397  |
| 119,900 | 400 | 58,498 | 27,959 | 10,825 | 97,682  |
| 119,901 | 423 | 59,661 | 28,586 | 11,110 | 99,780  |
| 119,902 | 431 | 60,436 | 28,870 | 11,282 | 101,019 |
| 119,903 | 447 | 61,150 | 29,205 | 11,430 | 102,232 |
| 119,904 | 446 | 61,067 | 29,210 | 11,486 | 102,209 |
| 119,905 | 443 | 62,231 | 29,625 | 11,715 | 104,014 |
| 119,906 | 440 | 62,844 | 29,830 | 11,858 | 104,972 |
| 119,907 | 446 | 62,474 | 29,494 | 11,781 | 104,195 |
| 119,908 | 439 | 61,800 | 29,295 | 11,715 | 103,249 |
| 119,909 | 436 | 63,287 | 29,951 | 12,042 | 105,716 |
| 119,910 | 442 | 61,219 | 28,926 | 11,589 | 102,176 |
| 119,911 | 443 | 61,877 | 29,163 | 11,737 | 103,220 |
| 119,912 | 455 | 62,719 | 29,443 | 11,869 | 104,486 |
| 119,913 | 459 | 62,938 | 29,467 | 11,909 | 104,773 |
| 119,914 | 452 | 63,733 | 29,947 | 12,135 | 106,267 |
| 119,915 | 451 | 63,681 | 29,985 | 12,146 | 106,263 |
| 119,916 | 453 | 64,731 | 30,468 | 12,428 | 108,080 |
| 119,917 | 446 | 64,569 | 30,433 | 12,452 | 107,900 |
| 119,918 | 443 | 64,282 | 30,141 | 12,344 | 107,210 |
| 119,919 | 449 | 64,874 | 30,291 | 12,447 | 108,061 |
| 119,920 | 430 | 65,140 | 30,417 | 12,527 | 108,514 |
| 119,921 | 426 | 65,266 | 30,588 | 12,630 | 108,910 |
| 119,922 | 428 | 64,752 | 30,406 | 12,589 | 108,175 |
| 119,923 | 425 | 64,172 | 30,279 | 12,559 | 107,435 |
| 119,924 | 439 | 65,265 | 31,130 | 12,932 | 109,766 |
| 119,925 | 469 | 65,634 | 31,425 | 13,083 | 110,611 |
| 119,926 | 472 | 65,424 | 31,328 | 13,105 | 110,329 |
| 119,927 | 451 | 65,190 | 31,135 | 13,063 | 109,839 |

|         |     |        |        |        |         |
|---------|-----|--------|--------|--------|---------|
| 119,928 | 467 | 65,431 | 31,201 | 13,119 | 110,218 |
| 119,929 | 458 | 64,494 | 30,967 | 13,072 | 108,991 |
| 119,930 | 453 | 64,862 | 31,346 | 13,239 | 109,900 |
| 119,931 | 483 | 65,874 | 31,773 | 13,402 | 111,532 |
| 119,932 | 473 | 64,935 | 31,457 | 13,363 | 110,228 |
| 119,933 | 504 | 64,940 | 31,619 | 13,444 | 110,507 |
| 119,934 | 503 | 64,992 | 31,724 | 13,542 | 110,761 |
| 119,935 | 500 | 64,997 | 31,791 | 13,652 | 110,940 |
| 119,936 | 505 | 65,044 | 31,912 | 13,703 | 111,164 |
| 119,937 | 516 | 66,189 | 32,297 | 13,882 | 112,884 |
| 119,938 | 513 | 66,509 | 32,202 | 13,864 | 113,088 |
| 119,939 | 530 | 67,119 | 32,343 | 13,918 | 113,910 |
| 119,940 | 527 | 66,763 | 32,350 | 13,902 | 113,542 |
| 119,941 | 537 | 66,795 | 32,492 | 13,965 | 113,789 |
| 119,942 | 552 | 67,227 | 32,723 | 14,093 | 114,595 |
| 119,943 | 562 | 67,696 | 32,919 | 14,197 | 115,374 |
| 119,944 | 534 | 63,511 | 30,876 | 13,297 | 108,218 |
| 119,945 | 585 | 68,337 | 33,271 | 14,328 | 116,521 |
| 119,946 | 577 | 68,267 | 33,539 | 14,414 | 116,797 |
| 119,947 | 572 | 68,341 | 33,712 | 14,482 | 117,107 |
| 119,948 | 575 | 68,111 | 33,827 | 14,503 | 117,016 |
| 119,949 | 578 | 68,085 | 33,923 | 14,551 | 117,137 |
| 119,950 | 578 | 67,873 | 33,947 | 14,598 | 116,996 |
| 119,951 | 575 | 68,312 | 34,208 | 14,735 | 117,830 |
| 119,952 | 563 | 68,210 | 34,132 | 14,668 | 117,573 |
| 119,953 | 559 | 68,769 | 34,430 | 14,741 | 118,499 |
| 119,954 | 553 | 68,565 | 34,192 | 14,665 | 117,975 |
| 119,955 | 554 | 68,426 | 34,229 | 14,689 | 117,898 |
| 119,956 | 549 | 68,406 | 34,458 | 14,782 | 118,195 |
| 119,957 | 541 | 68,257 | 34,496 | 14,796 | 118,090 |
| 119,958 | 526 | 67,919 | 34,417 | 14,786 | 117,648 |
| 119,959 | 533 | 67,441 | 34,151 | 14,714 | 116,839 |

|         |     |        |        |        |         |
|---------|-----|--------|--------|--------|---------|
| 119,960 | 533 | 67,125 | 33,962 | 14,629 | 116,249 |
| 119,961 | 517 | 67,467 | 34,139 | 14,748 | 116,871 |
| 119,962 | 530 | 67,846 | 34,443 | 14,886 | 117,705 |
| 119,963 | 512 | 67,312 | 34,268 | 14,770 | 116,862 |
| 119,964 | 506 | 67,264 | 34,208 | 14,760 | 116,738 |
| 119,965 | 510 | 67,879 | 34,457 | 14,857 | 117,703 |
| 119,966 | 508 | 68,267 | 34,596 | 14,876 | 118,247 |
| 119,967 | 505 | 68,505 | 34,526 | 14,810 | 118,346 |
| 119,968 | 502 | 67,850 | 34,222 | 14,620 | 117,194 |
| 119,969 | 497 | 67,887 | 34,376 | 14,699 | 117,459 |
| 119,970 | 490 | 67,875 | 34,490 | 14,740 | 117,595 |
| 119,971 | 489 | 66,248 | 33,704 | 14,333 | 114,774 |
| 119,972 | 496 | 66,563 | 33,976 | 14,461 | 115,496 |
| 119,973 | 470 | 66,344 | 33,537 | 14,233 | 114,584 |
| 119,974 | 473 | 66,590 | 33,783 | 14,333 | 115,179 |
| 119,975 | 467 | 66,869 | 34,126 | 14,459 | 115,921 |
| 119,976 | 466 | 66,285 | 33,945 | 14,338 | 115,034 |
| 119,977 | 465 | 66,454 | 33,978 | 14,348 | 115,245 |
| 119,978 | 453 | 65,885 | 33,848 | 14,257 | 114,443 |
| 119,979 | 443 | 65,497 | 33,664 | 14,148 | 113,752 |
| 119,980 | 443 | 65,411 | 33,604 | 14,137 | 113,595 |
| 119,981 | 426 | 65,770 | 33,541 | 14,094 | 113,831 |
| 119,982 | 425 | 65,394 | 33,437 | 14,069 | 113,325 |
| 119,983 | 397 | 64,599 | 33,083 | 13,842 | 111,921 |
| 119,984 | 391 | 64,287 | 33,085 | 13,765 | 111,528 |
| 119,985 | 395 | 62,685 | 32,707 | 13,514 | 109,301 |
| 119,986 | 393 | 62,658 | 32,751 | 13,498 | 109,300 |
| 119,987 | 367 | 61,423 | 32,492 | 13,339 | 107,621 |
| 119,988 | 359 | 61,032 | 32,398 | 13,254 | 107,043 |
| 119,989 | 343 | 60,606 | 32,314 | 13,183 | 106,446 |
| 119,990 | 350 | 61,166 | 32,706 | 13,320 | 107,542 |
| 119,991 | 335 | 60,744 | 32,405 | 13,130 | 106,614 |

|         |     |        |        |        |         |
|---------|-----|--------|--------|--------|---------|
| 119,992 | 330 | 60,202 | 32,310 | 13,113 | 105,955 |
| 119,993 | 308 | 59,978 | 32,569 | 13,139 | 105,994 |
| 119,994 | 296 | 59,391 | 32,522 | 13,095 | 105,304 |
| 119,995 | 258 | 58,545 | 32,369 | 13,061 | 104,233 |
| 119,996 | 256 | 58,150 | 32,227 | 12,932 | 103,565 |
| 119,997 | 256 | 58,179 | 32,283 | 12,872 | 103,590 |
| 119,998 | 253 | 58,174 | 32,290 | 12,825 | 103,542 |
| 119,999 | 251 | 58,097 | 32,284 | 12,746 | 103,378 |
| 120,000 | 246 | 57,821 | 32,158 | 12,684 | 102,909 |
| 120,001 | 244 | 57,486 | 31,843 | 12,571 | 102,144 |
| 120,002 | 244 | 56,379 | 31,591 | 12,393 | 100,607 |
| 120,003 | 249 | 56,495 | 31,904 | 12,485 | 101,133 |
| 120,004 | 252 | 55,840 | 31,926 | 12,419 | 100,437 |
| 120,005 | 245 | 55,125 | 31,941 | 12,342 | 99,653  |
| 120,006 | 249 | 54,917 | 32,017 | 12,296 | 99,479  |
| 120,007 | 250 | 54,914 | 32,035 | 12,220 | 99,419  |
| 120,008 | 258 | 54,541 | 31,881 | 12,134 | 98,814  |
| 120,009 | 266 | 54,596 | 32,143 | 12,117 | 99,122  |
| 120,010 | 259 | 54,190 | 32,188 | 12,055 | 98,692  |
| 120,011 | 261 | 53,320 | 32,156 | 11,967 | 97,704  |
| 120,012 | 269 | 52,558 | 31,991 | 11,877 | 96,695  |
| 120,013 | 258 | 51,851 | 31,559 | 11,698 | 95,366  |
| 120,014 | 262 | 52,119 | 32,121 | 11,900 | 96,402  |
| 120,015 | 275 | 52,031 | 32,219 | 11,895 | 96,420  |
| 120,016 | 280 | 51,829 | 32,249 | 11,865 | 96,223  |
| 120,017 | 289 | 51,468 | 32,253 | 11,866 | 95,876  |
| 120,018 | 288 | 50,711 | 31,982 | 11,756 | 94,737  |
| 120,019 | 287 | 50,269 | 31,999 | 11,771 | 94,326  |
| 120,020 | 282 | 50,411 | 32,298 | 11,835 | 94,826  |
| 120,021 | 284 | 50,200 | 32,367 | 11,810 | 94,661  |
| 120,022 | 270 | 49,729 | 32,281 | 11,752 | 94,032  |
| 120,023 | 267 | 49,652 | 32,330 | 11,697 | 93,946  |

|         |     |        |        |        |        |
|---------|-----|--------|--------|--------|--------|
| 120,024 | 264 | 49,552 | 32,460 | 11,728 | 94,004 |
| 120,025 | 269 | 49,621 | 32,531 | 11,745 | 94,166 |
| 120,026 | 260 | 49,579 | 32,521 | 11,724 | 94,084 |
| 120,027 | 253 | 49,518 | 32,525 | 11,714 | 94,010 |
| 120,028 | 248 | 49,137 | 32,223 | 11,631 | 93,239 |
| 120,029 | 245 | 48,439 | 32,154 | 11,555 | 92,393 |
| 120,030 | 250 | 48,614 | 32,401 | 11,606 | 92,871 |
| 120,031 | 251 | 48,043 | 32,361 | 11,581 | 92,236 |
| 120,032 | 250 | 47,482 | 32,347 | 11,556 | 91,635 |
| 120,033 | 240 | 46,837 | 32,278 | 11,498 | 90,853 |
| 120,034 | 237 | 46,534 | 32,118 | 11,406 | 90,295 |
| 120,035 | 242 | 46,337 | 31,940 | 11,355 | 89,874 |
| 120,036 | 247 | 46,790 | 32,227 | 11,392 | 90,656 |
| 120,037 | 251 | 46,620 | 32,252 | 11,406 | 90,529 |
| 120,038 | 257 | 45,778 | 32,169 | 11,363 | 89,567 |
| 120,039 | 267 | 44,845 | 31,843 | 11,277 | 88,232 |
| 120,040 | 266 | 43,994 | 31,503 | 11,135 | 86,898 |
| 120,041 | 269 | 44,677 | 31,985 | 11,295 | 88,226 |
| 120,042 | 279 | 44,945 | 32,029 | 11,343 | 88,596 |
| 120,043 | 284 | 45,474 | 32,187 | 11,336 | 89,281 |
| 120,044 | 294 | 45,953 | 32,318 | 11,385 | 89,950 |
| 120,045 | 303 | 45,890 | 32,114 | 11,214 | 89,521 |
| 120,046 | 304 | 45,642 | 32,085 | 11,253 | 89,284 |
| 120,047 | 305 | 46,146 | 32,418 | 11,402 | 90,271 |
| 120,048 | 305 | 45,964 | 32,416 | 11,410 | 90,095 |
| 120,049 | 303 | 45,759 | 32,364 | 11,403 | 89,829 |
| 120,050 | 303 | 45,906 | 32,424 | 11,433 | 90,066 |
| 120,051 | 301 | 46,348 | 32,624 | 11,490 | 90,763 |
| 120,052 | 306 | 46,556 | 32,719 | 11,541 | 91,122 |
| 120,053 | 306 | 46,691 | 32,790 | 11,557 | 91,344 |
| 120,054 | 297 | 46,953 | 32,788 | 11,579 | 91,617 |
| 120,055 | 293 | 46,990 | 32,540 | 11,532 | 91,355 |



|         |     |        |        |        |        |
|---------|-----|--------|--------|--------|--------|
| 120,056 | 292 | 46,884 | 32,471 | 11,529 | 91,176 |
| 120,057 | 299 | 47,071 | 32,636 | 11,598 | 91,604 |
| 120,058 | 299 | 46,563 | 32,531 | 11,561 | 90,954 |
| 120,059 | 284 | 46,323 | 32,472 | 11,549 | 90,628 |
| 120,060 | 285 | 46,058 | 32,419 | 11,570 | 90,332 |
| 120,061 | 279 | 46,054 | 32,356 | 11,539 | 90,228 |
| 120,062 | 282 | 46,259 | 32,374 | 11,558 | 90,473 |
| 120,063 | 283 | 46,485 | 32,451 | 11,543 | 90,762 |
| 120,064 | 289 | 46,394 | 32,478 | 11,523 | 90,684 |
| 120,065 | 291 | 45,842 | 32,388 | 11,440 | 89,961 |
| 120,066 | 304 | 44,972 | 32,074 | 11,304 | 88,654 |
| 120,067 | 296 | 44,272 | 31,656 | 11,158 | 87,382 |
| 120,068 | 300 | 44,968 | 32,209 | 11,291 | 88,768 |
| 120,069 | 304 | 45,089 | 32,317 | 11,320 | 89,030 |
| 120,070 | 314 | 45,584 | 32,425 | 11,358 | 89,681 |
| 120,071 | 316 | 45,995 | 32,618 | 11,404 | 90,333 |
| 120,072 | 318 | 46,018 | 32,422 | 11,286 | 90,044 |
| 120,073 | 317 | 45,742 | 32,404 | 11,328 | 89,791 |
| 120,074 | 320 | 46,191 | 32,763 | 11,463 | 90,737 |
| 120,075 | 319 | 45,965 | 32,728 | 11,469 | 90,481 |
| 120,076 | 312 | 45,784 | 32,716 | 11,478 | 90,290 |
| 120,077 | 312 | 45,911 | 32,787 | 11,481 | 90,491 |
| 120,078 | 313 | 46,217 | 32,960 | 11,555 | 91,045 |
| 120,079 | 307 | 46,446 | 33,026 | 11,540 | 91,319 |
| 120,080 | 309 | 46,534 | 33,053 | 11,549 | 91,445 |
| 120,081 | 305 | 46,685 | 33,066 | 11,595 | 91,651 |
| 120,082 | 302 | 46,694 | 32,888 | 11,556 | 91,440 |
| 120,083 | 303 | 46,687 | 32,838 | 11,515 | 91,343 |
| 120,084 | 308 | 46,951 | 33,044 | 11,594 | 91,897 |
| 120,085 | 314 | 46,474 | 32,960 | 11,590 | 91,338 |
| 120,086 | 306 | 45,876 | 32,664 | 11,500 | 90,346 |
| 120,087 | 300 | 45,157 | 32,340 | 11,406 | 89,203 |

|         |     |        |        |        |        |
|---------|-----|--------|--------|--------|--------|
| 120,088 | 295 | 44,762 | 31,930 | 11,260 | 88,247 |
| 120,089 | 291 | 44,571 | 31,599 | 11,172 | 87,633 |
| 120,090 | 281 | 44,239 | 31,272 | 11,045 | 86,837 |
| 120,091 | 283 | 43,765 | 30,918 | 10,907 | 85,873 |
| 120,092 | 282 | 42,980 | 30,471 | 10,781 | 84,514 |
| 120,093 | 281 | 41,954 | 29,917 | 10,561 | 82,713 |
| 120,094 | 276 | 41,211 | 29,432 | 10,421 | 81,340 |
| 120,095 | 278 | 40,762 | 29,220 | 10,313 | 80,573 |
| 120,096 | 274 | 40,175 | 28,847 | 10,216 | 79,512 |
| 120,097 | 278 | 40,123 | 28,604 | 10,137 | 79,142 |
| 120,098 | 279 | 39,803 | 28,248 | 10,033 | 78,363 |
| 120,099 | 281 | 39,117 | 27,592 | 9,826  | 76,816 |
| 120,100 | 280 | 38,812 | 27,397 | 9,832  | 76,321 |
| 120,101 | 278 | 38,496 | 27,168 | 9,755  | 75,697 |
| 120,102 | 278 | 37,765 | 26,759 | 9,608  | 74,410 |
| 120,103 | 271 | 37,249 | 26,412 | 9,519  | 73,451 |
| 120,104 | 268 | 36,992 | 26,141 | 9,440  | 72,841 |
| 120,105 | 268 | 36,925 | 25,893 | 9,397  | 72,483 |
| 120,106 | 263 | 36,841 | 25,591 | 9,319  | 72,014 |
| 120,107 | 260 | 36,987 | 25,413 | 9,264  | 71,924 |
| 120,108 | 254 | 37,024 | 25,193 | 9,211  | 71,682 |
| 120,109 | 251 | 36,915 | 24,798 | 9,132  | 71,096 |
| 120,110 | 248 | 36,781 | 24,354 | 8,972  | 70,355 |
| 120,111 | 250 | 36,793 | 24,280 | 8,967  | 70,290 |
| 120,112 | 251 | 36,257 | 23,901 | 8,869  | 69,278 |
| 120,113 | 237 | 35,755 | 23,477 | 8,786  | 68,255 |
| 120,114 | 230 | 35,182 | 23,090 | 8,709  | 67,211 |
| 120,115 | 221 | 34,910 | 22,645 | 8,585  | 66,361 |
| 120,116 | 221 | 34,781 | 22,263 | 8,494  | 65,759 |
| 120,117 | 199 | 34,457 | 21,799 | 8,338  | 64,793 |
| 120,118 | 199 | 34,072 | 21,429 | 8,245  | 63,945 |
| 120,119 | 199 | 33,426 | 20,913 | 8,125  | 62,663 |

|         |     |        |        |       |        |
|---------|-----|--------|--------|-------|--------|
| 120,120 | 205 | 32,381 | 20,278 | 7,905 | 60,769 |
| 120,121 | 196 | 31,629 | 19,741 | 7,752 | 59,318 |
| 120,122 | 209 | 31,655 | 19,696 | 7,756 | 59,316 |
| 120,123 | 216 | 31,324 | 19,333 | 7,693 | 58,566 |
| 120,124 | 225 | 31,440 | 19,084 | 7,635 | 58,384 |
| 120,125 | 222 | 31,316 | 18,632 | 7,529 | 57,699 |
| 120,126 | 223 | 30,775 | 17,825 | 7,210 | 56,033 |
| 120,127 | 222 | 30,429 | 17,609 | 7,180 | 55,440 |
| 120,128 | 226 | 30,416 | 17,399 | 7,183 | 55,224 |
| 120,129 | 226 | 29,929 | 16,956 | 7,068 | 54,179 |
| 120,130 | 231 | 29,545 | 16,617 | 6,997 | 53,390 |
| 120,131 | 226 | 29,421 | 16,326 | 6,938 | 52,911 |
| 120,132 | 224 | 29,248 | 16,016 | 6,878 | 52,366 |
| 120,133 | 223 | 29,304 | 15,696 | 6,831 | 52,054 |
| 120,134 | 222 | 29,300 | 15,431 | 6,803 | 51,756 |
| 120,135 | 212 | 29,339 | 15,102 | 6,754 | 51,407 |
| 120,136 | 206 | 29,520 | 14,754 | 6,696 | 51,176 |
| 120,137 | 205 | 29,854 | 14,578 | 6,724 | 51,361 |
| 120,138 | 202 | 29,877 | 14,389 | 6,706 | 51,174 |
| 120,139 | 200 | 30,091 | 14,318 | 6,755 | 51,364 |
| 120,140 | 193 | 30,349 | 14,190 | 6,783 | 51,515 |
| 120,141 | 194 | 31,007 | 14,328 | 6,865 | 52,394 |
| 120,142 | 190 | 31,356 | 14,257 | 6,911 | 52,714 |
| 120,143 | 182 | 31,428 | 14,092 | 6,866 | 52,568 |
| 120,144 | 172 | 32,409 | 14,217 | 6,958 | 53,756 |
| 120,145 | 165 | 32,237 | 13,985 | 6,891 | 53,278 |
| 120,146 | 162 | 32,626 | 13,970 | 6,929 | 53,687 |
| 120,147 | 165 | 33,511 | 14,203 | 7,054 | 54,933 |
| 120,148 | 156 | 33,314 | 14,014 | 7,009 | 54,493 |
| 120,149 | 159 | 33,811 | 14,118 | 7,113 | 55,201 |
| 120,150 | 159 | 33,987 | 14,050 | 7,123 | 55,319 |
| 120,151 | 158 | 34,166 | 13,839 | 7,046 | 55,209 |

|         |     |        |        |       |        |
|---------|-----|--------|--------|-------|--------|
| 120,152 | 162 | 34,542 | 13,903 | 7,120 | 55,727 |
| 120,153 | 166 | 34,493 | 13,686 | 7,044 | 55,389 |
| 120,154 | 169 | 34,615 | 13,600 | 7,029 | 55,413 |
| 120,155 | 179 | 35,175 | 13,691 | 7,115 | 56,160 |
| 120,156 | 188 | 35,185 | 13,611 | 7,096 | 56,080 |
| 120,157 | 192 | 35,272 | 13,605 | 7,114 | 56,183 |
| 120,158 | 198 | 35,465 | 13,598 | 7,142 | 56,403 |
| 120,159 | 204 | 35,744 | 13,578 | 7,172 | 56,698 |
| 120,160 | 205 | 35,589 | 13,420 | 7,108 | 56,322 |
| 120,161 | 223 | 36,141 | 13,652 | 7,223 | 57,239 |
| 120,162 | 223 | 35,976 | 13,513 | 7,201 | 56,913 |
| 120,163 | 233 | 36,552 | 13,621 | 7,282 | 57,688 |
| 120,164 | 233 | 36,459 | 13,476 | 7,246 | 57,414 |
| 120,165 | 248 | 36,663 | 13,412 | 7,248 | 57,571 |
| 120,166 | 247 | 36,786 | 13,379 | 7,280 | 57,692 |
| 120,167 | 242 | 36,951 | 13,420 | 7,312 | 57,925 |
| 120,168 | 239 | 37,040 | 13,444 | 7,365 | 58,088 |
| 120,169 | 231 | 37,303 | 13,461 | 7,361 | 58,356 |
| 120,170 | 221 | 37,526 | 13,447 | 7,327 | 58,521 |
| 120,171 | 222 | 37,811 | 13,400 | 7,362 | 58,795 |
| 120,172 | 225 | 38,611 | 13,571 | 7,475 | 59,882 |
| 120,173 | 221 | 39,025 | 13,606 | 7,547 | 60,399 |
| 120,174 | 215 | 39,379 | 13,623 | 7,579 | 60,796 |
| 120,175 | 206 | 39,156 | 13,499 | 7,526 | 60,387 |
| 120,176 | 207 | 39,501 | 13,551 | 7,577 | 60,836 |
| 120,177 | 210 | 39,832 | 13,665 | 7,595 | 61,302 |
| 120,178 | 208 | 39,733 | 13,573 | 7,608 | 61,122 |
| 120,179 | 208 | 40,073 | 13,753 | 7,704 | 61,738 |
| 120,180 | 210 | 40,615 | 13,941 | 7,824 | 62,590 |
| 120,181 | 213 | 41,093 | 13,992 | 7,863 | 63,161 |
| 120,182 | 214 | 41,643 | 14,083 | 7,907 | 63,847 |
| 120,183 | 219 | 41,714 | 14,048 | 7,863 | 63,844 |

|         |     |        |        |       |        |
|---------|-----|--------|--------|-------|--------|
| 120,184 | 219 | 41,834 | 14,029 | 7,861 | 63,943 |
| 120,185 | 227 | 41,504 | 13,895 | 7,793 | 63,419 |
| 120,186 | 227 | 41,007 | 13,758 | 7,722 | 62,714 |
| 120,187 | 230 | 41,072 | 13,872 | 7,734 | 62,908 |
| 120,188 | 233 | 41,455 | 13,992 | 7,754 | 63,434 |
| 120,189 | 232 | 41,495 | 13,948 | 7,709 | 63,384 |
| 120,190 | 230 | 41,101 | 13,801 | 7,630 | 62,762 |
| 120,191 | 238 | 41,518 | 13,983 | 7,632 | 63,371 |
| 120,192 | 238 | 41,424 | 14,016 | 7,656 | 63,334 |
| 120,193 | 237 | 41,384 | 14,096 | 7,670 | 63,387 |
| 120,194 | 241 | 41,188 | 14,139 | 7,672 | 63,240 |
| 120,195 | 247 | 41,224 | 14,159 | 7,733 | 63,363 |
| 120,196 | 253 | 41,247 | 14,080 | 7,721 | 63,301 |
| 120,197 | 256 | 40,925 | 13,957 | 7,664 | 62,802 |
| 120,198 | 256 | 40,807 | 14,055 | 7,740 | 62,858 |
| 120,199 | 257 | 40,372 | 13,921 | 7,638 | 62,188 |
| 120,200 | 268 | 40,824 | 14,037 | 7,700 | 62,829 |
| 120,201 | 272 | 40,232 | 13,913 | 7,605 | 62,022 |
| 120,202 | 275 | 40,347 | 13,905 | 7,620 | 62,147 |
| 120,203 | 269 | 40,153 | 13,865 | 7,587 | 61,874 |
| 120,204 | 267 | 40,115 | 13,838 | 7,543 | 61,763 |
| 120,205 | 268 | 39,902 | 13,775 | 7,532 | 61,477 |
| 120,206 | 269 | 40,280 | 13,883 | 7,612 | 62,044 |
| 120,207 | 265 | 40,363 | 13,892 | 7,615 | 62,135 |
| 120,208 | 261 | 39,854 | 13,695 | 7,528 | 61,338 |
| 120,209 | 257 | 39,845 | 13,660 | 7,521 | 61,283 |
| 120,210 | 253 | 40,227 | 13,787 | 7,597 | 61,864 |
| 120,211 | 247 | 40,235 | 13,730 | 7,599 | 61,811 |
| 120,212 | 235 | 40,147 | 13,680 | 7,608 | 61,670 |
| 120,213 | 223 | 39,584 | 13,460 | 7,431 | 60,698 |
| 120,214 | 230 | 40,000 | 13,513 | 7,495 | 61,238 |
| 120,215 | 221 | 40,554 | 13,615 | 7,588 | 61,978 |

|         |     |        |        |       |        |
|---------|-----|--------|--------|-------|--------|
| 120,216 | 223 | 40,611 | 13,587 | 7,595 | 62,016 |
| 120,217 | 223 | 40,979 | 13,582 | 7,616 | 62,400 |
| 120,218 | 221 | 40,863 | 13,472 | 7,557 | 62,113 |
| 120,219 | 225 | 41,315 | 13,540 | 7,607 | 62,687 |
| 120,220 | 230 | 41,451 | 13,485 | 7,635 | 62,801 |
| 120,221 | 223 | 41,236 | 13,347 | 7,599 | 62,405 |
| 120,222 | 222 | 41,802 | 13,454 | 7,728 | 63,206 |
| 120,223 | 223 | 41,629 | 13,379 | 7,711 | 62,942 |
| 120,224 | 219 | 41,166 | 13,152 | 7,594 | 62,131 |
| 120,225 | 219 | 41,013 | 13,107 | 7,614 | 61,953 |
| 120,226 | 217 | 40,721 | 12,936 | 7,569 | 61,443 |
| 120,227 | 225 | 40,306 | 12,762 | 7,472 | 60,765 |
| 120,228 | 227 | 40,409 | 12,702 | 7,497 | 60,835 |
| 120,229 | 228 | 40,781 | 12,622 | 7,446 | 61,077 |
| 120,230 | 234 | 41,152 | 12,726 | 7,524 | 61,636 |
| 120,231 | 237 | 41,090 | 12,534 | 7,419 | 61,280 |
| 120,232 | 244 | 40,625 | 12,336 | 7,354 | 60,559 |
| 120,233 | 243 | 39,835 | 12,138 | 7,256 | 59,472 |
| 120,234 | 241 | 40,160 | 12,224 | 7,323 | 59,948 |
| 120,235 | 246 | 40,698 | 12,408 | 7,445 | 60,797 |
| 120,236 | 231 | 40,343 | 12,248 | 7,396 | 60,218 |
| 120,237 | 236 | 40,405 | 12,267 | 7,442 | 60,350 |
| 120,238 | 240 | 41,293 | 12,487 | 7,572 | 61,592 |
| 120,239 | 233 | 41,115 | 12,392 | 7,545 | 61,285 |
| 120,240 | 233 | 41,101 | 12,360 | 7,563 | 61,257 |
| 120,241 | 231 | 41,309 | 12,424 | 7,633 | 61,597 |
| 120,242 | 230 | 41,576 | 12,535 | 7,731 | 62,072 |
| 120,243 | 233 | 41,691 | 12,503 | 7,755 | 62,182 |
| 120,244 | 232 | 42,025 | 12,447 | 7,772 | 62,476 |
| 120,245 | 237 | 42,277 | 12,440 | 7,794 | 62,748 |
| 120,246 | 237 | 42,519 | 12,411 | 7,797 | 62,964 |
| 120,247 | 226 | 41,912 | 12,150 | 7,658 | 61,946 |

|         |     |        |        |       |        |
|---------|-----|--------|--------|-------|--------|
| 120,248 | 227 | 42,033 | 12,121 | 7,640 | 62,021 |
| 120,249 | 235 | 42,695 | 12,207 | 7,684 | 62,821 |
| 120,250 | 234 | 43,015 | 12,215 | 7,735 | 63,199 |
| 120,251 | 223 | 42,875 | 12,110 | 7,689 | 62,897 |
| 120,252 | 214 | 43,014 | 12,102 | 7,733 | 63,063 |
| 120,253 | 219 | 43,241 | 12,084 | 7,714 | 63,258 |
| 120,254 | 218 | 43,249 | 12,071 | 7,727 | 63,265 |
| 120,255 | 222 | 44,165 | 12,234 | 7,915 | 64,536 |
| 120,256 | 212 | 44,336 | 12,180 | 7,922 | 64,650 |
| 120,257 | 221 | 44,890 | 12,310 | 8,012 | 65,433 |
| 120,258 | 219 | 45,275 | 12,336 | 8,050 | 65,880 |
| 120,259 | 219 | 45,094 | 12,217 | 7,982 | 65,512 |
| 120,260 | 223 | 45,889 | 12,334 | 8,090 | 66,536 |
| 120,261 | 221 | 46,128 | 12,250 | 8,103 | 66,702 |
| 120,262 | 219 | 46,226 | 12,162 | 8,092 | 66,699 |
| 120,263 | 218 | 44,715 | 11,751 | 7,805 | 64,489 |
| 120,264 | 222 | 45,330 | 11,847 | 7,883 | 65,282 |
| 120,265 | 216 | 45,449 | 11,876 | 7,920 | 65,461 |
| 120,266 | 217 | 46,053 | 11,978 | 8,003 | 66,251 |
| 120,267 | 210 | 46,614 | 12,078 | 8,090 | 66,992 |
| 120,268 | 207 | 46,722 | 12,076 | 8,100 | 67,105 |
| 120,269 | 209 | 46,327 | 11,934 | 8,006 | 66,476 |
| 120,270 | 225 | 46,630 | 11,986 | 8,084 | 66,925 |
| 120,271 | 226 | 46,527 | 12,013 | 8,107 | 66,873 |
| 120,272 | 232 | 46,533 | 11,991 | 8,077 | 66,833 |
| 120,273 | 224 | 45,963 | 11,851 | 7,950 | 65,988 |
| 120,274 | 226 | 45,990 | 11,767 | 7,907 | 65,890 |
| 120,275 | 225 | 45,997 | 11,755 | 7,901 | 65,878 |
| 120,276 | 227 | 46,481 | 11,847 | 7,975 | 66,530 |
| 120,277 | 221 | 45,950 | 11,712 | 7,885 | 65,768 |
| 120,278 | 225 | 46,627 | 11,845 | 8,015 | 66,712 |
| 120,279 | 225 | 46,744 | 11,843 | 8,004 | 66,816 |

|         |     |        |        |       |        |
|---------|-----|--------|--------|-------|--------|
| 120,280 | 229 | 47,368 | 11,988 | 8,105 | 67,690 |
| 120,281 | 223 | 47,706 | 11,993 | 8,165 | 68,087 |
| 120,282 | 219 | 47,601 | 11,959 | 8,169 | 67,948 |
| 120,283 | 201 | 46,867 | 11,737 | 8,065 | 66,870 |
| 120,284 | 206 | 47,600 | 11,825 | 8,140 | 67,771 |
| 120,285 | 203 | 47,703 | 11,764 | 8,125 | 67,795 |
| 120,286 | 202 | 47,647 | 11,652 | 8,064 | 67,565 |
| 120,287 | 208 | 48,502 | 11,763 | 8,124 | 68,597 |
| 120,288 | 214 | 48,458 | 11,678 | 8,134 | 68,484 |
| 120,289 | 212 | 48,009 | 11,564 | 8,080 | 67,865 |
| 120,290 | 213 | 48,637 | 11,685 | 8,173 | 68,708 |
| 120,291 | 225 | 48,782 | 11,647 | 8,157 | 68,811 |
| 120,292 | 233 | 48,821 | 11,487 | 8,066 | 68,607 |
| 120,293 | 235 | 48,974 | 11,438 | 8,093 | 68,740 |
| 120,294 | 245 | 49,028 | 11,353 | 8,078 | 68,704 |
| 120,295 | 252 | 48,733 | 11,252 | 8,013 | 68,250 |
| 120,296 | 248 | 48,997 | 11,249 | 8,067 | 68,561 |
| 120,297 | 254 | 48,245 | 11,058 | 7,938 | 67,495 |
| 120,298 | 256 | 48,330 | 11,044 | 7,947 | 67,577 |
| 120,299 | 257 | 48,639 | 11,135 | 8,028 | 68,059 |
| 120,300 | 268 | 48,695 | 11,158 | 8,046 | 68,167 |
| 120,301 | 266 | 48,512 | 11,078 | 8,024 | 67,880 |
| 120,302 | 270 | 48,679 | 11,045 | 7,996 | 67,990 |
| 120,303 | 268 | 48,616 | 10,964 | 7,984 | 67,832 |
| 120,304 | 264 | 48,309 | 10,847 | 7,901 | 67,321 |
| 120,305 | 266 | 48,761 | 10,908 | 7,937 | 67,872 |
| 120,306 | 262 | 49,282 | 10,992 | 8,009 | 68,545 |
| 120,307 | 262 | 49,034 | 10,945 | 7,986 | 68,227 |
| 120,308 | 260 | 49,755 | 11,107 | 8,143 | 69,265 |
| 120,309 | 256 | 49,269 | 11,016 | 8,122 | 68,663 |
| 120,310 | 257 | 49,422 | 11,039 | 8,152 | 68,870 |
| 120,311 | 257 | 49,470 | 11,059 | 8,163 | 68,949 |



|         |     |        |        |       |        |
|---------|-----|--------|--------|-------|--------|
| 120,312 | 255 | 49,029 | 11,005 | 8,113 | 68,402 |
| 120,313 | 259 | 48,630 | 10,906 | 8,045 | 67,840 |
| 120,314 | 259 | 48,944 | 10,897 | 8,057 | 68,157 |
| 120,315 | 257 | 49,699 | 11,074 | 8,152 | 69,182 |
| 120,316 | 254 | 49,960 | 11,104 | 8,177 | 69,495 |
| 120,317 | 254 | 49,850 | 11,099 | 8,179 | 69,382 |
| 120,318 | 255 | 49,439 | 10,955 | 8,093 | 68,742 |
| 120,319 | 259 | 50,264 | 11,124 | 8,184 | 69,831 |
| 120,320 | 260 | 50,500 | 11,146 | 8,230 | 70,136 |
| 120,321 | 244 | 50,600 | 11,054 | 8,193 | 70,091 |
| 120,322 | 244 | 50,762 | 11,021 | 8,174 | 70,201 |
| 120,323 | 245 | 50,875 | 10,987 | 8,168 | 70,275 |
| 120,324 | 252 | 51,504 | 11,071 | 8,246 | 71,073 |
| 120,325 | 256 | 51,327 | 11,014 | 8,250 | 70,847 |
| 120,326 | 257 | 51,602 | 11,022 | 8,277 | 71,158 |
| 120,327 | 270 | 52,412 | 11,140 | 8,352 | 72,174 |
| 120,328 | 271 | 52,605 | 11,128 | 8,352 | 72,356 |
| 120,329 | 271 | 52,711 | 11,083 | 8,325 | 72,390 |
| 120,330 | 270 | 52,550 | 10,951 | 8,266 | 72,037 |
| 120,331 | 265 | 52,331 | 10,807 | 8,184 | 71,587 |
| 120,332 | 271 | 52,752 | 10,847 | 8,229 | 72,099 |
| 120,333 | 271 | 52,381 | 10,705 | 8,137 | 71,494 |
| 120,334 | 277 | 52,675 | 10,713 | 8,116 | 71,781 |
| 120,335 | 291 | 52,504 | 10,680 | 8,058 | 71,533 |
| 120,336 | 293 | 52,526 | 10,616 | 8,042 | 71,477 |
| 120,337 | 298 | 52,619 | 10,633 | 8,003 | 71,553 |
| 120,338 | 297 | 52,656 | 10,604 | 8,010 | 71,567 |
| 120,339 | 303 | 52,949 | 10,581 | 7,979 | 71,812 |
| 120,340 | 294 | 51,174 | 10,273 | 7,670 | 69,411 |
| 120,341 | 298 | 51,948 | 10,383 | 7,763 | 70,392 |
| 120,342 | 300 | 52,803 | 10,482 | 7,869 | 71,454 |
| 120,343 | 300 | 52,745 | 10,437 | 7,858 | 71,340 |

|         |     |        |        |       |        |
|---------|-----|--------|--------|-------|--------|
| 120,344 | 287 | 54,163 | 10,733 | 8,095 | 73,278 |
| 120,345 | 284 | 53,781 | 10,630 | 8,027 | 72,722 |
| 120,346 | 290 | 53,945 | 10,672 | 8,034 | 72,941 |
| 120,347 | 287 | 54,078 | 10,684 | 8,059 | 73,108 |
| 120,348 | 273 | 53,994 | 10,720 | 8,094 | 73,081 |
| 120,349 | 275 | 54,775 | 10,820 | 8,196 | 74,066 |
| 120,350 | 260 | 55,140 | 10,778 | 8,220 | 74,398 |
| 120,351 | 266 | 54,890 | 10,755 | 8,212 | 74,123 |
| 120,352 | 265 | 55,102 | 10,738 | 8,222 | 74,327 |
| 120,353 | 262 | 55,474 | 10,822 | 8,303 | 74,861 |
| 120,354 | 263 | 54,833 | 10,708 | 8,201 | 74,005 |
| 120,355 | 260 | 55,351 | 10,848 | 8,263 | 74,722 |
| 120,356 | 259 | 53,962 | 10,548 | 8,036 | 72,805 |
| 120,357 | 262 | 54,257 | 10,580 | 8,054 | 73,153 |
| 120,358 | 263 | 54,857 | 10,669 | 8,146 | 73,935 |
| 120,359 | 267 | 55,144 | 10,758 | 8,216 | 74,385 |
| 120,360 | 266 | 54,611 | 10,633 | 8,083 | 73,593 |
| 120,361 | 272 | 54,280 | 10,540 | 8,040 | 73,132 |
| 120,362 | 285 | 55,115 | 10,625 | 8,095 | 74,120 |
| 120,363 | 299 | 55,446 | 10,690 | 8,146 | 74,581 |
| 120,364 | 307 | 55,499 | 10,749 | 8,193 | 74,748 |
| 120,365 | 309 | 55,679 | 10,777 | 8,230 | 74,995 |
| 120,366 | 315 | 55,729 | 10,748 | 8,216 | 75,008 |
| 120,367 | 322 | 55,799 | 10,724 | 8,198 | 75,043 |
| 120,368 | 322 | 55,975 | 10,690 | 8,186 | 75,173 |
| 120,369 | 320 | 56,101 | 10,707 | 8,229 | 75,357 |
| 120,370 | 322 | 56,889 | 10,871 | 8,371 | 76,453 |
| 120,371 | 315 | 56,400 | 10,766 | 8,297 | 75,778 |
| 120,372 | 319 | 56,848 | 10,841 | 8,355 | 76,363 |
| 120,373 | 312 | 56,407 | 10,766 | 8,270 | 75,755 |
| 120,374 | 311 | 56,459 | 10,810 | 8,341 | 75,921 |
| 120,375 | 304 | 56,857 | 10,849 | 8,360 | 76,370 |

|         |     |        |        |       |        |
|---------|-----|--------|--------|-------|--------|
| 120,376 | 301 | 56,770 | 10,895 | 8,364 | 76,330 |
| 120,377 | 299 | 56,744 | 10,860 | 8,331 | 76,234 |
| 120,378 | 294 | 57,095 | 10,939 | 8,406 | 76,734 |
| 120,379 | 285 | 56,540 | 10,833 | 8,352 | 76,010 |
| 120,380 | 288 | 56,464 | 10,880 | 8,329 | 75,961 |
| 120,381 | 288 | 56,491 | 10,897 | 8,347 | 76,023 |
| 120,382 | 299 | 56,347 | 10,899 | 8,317 | 75,862 |
| 120,383 | 300 | 56,456 | 10,929 | 8,331 | 76,016 |
| 120,384 | 293 | 56,387 | 10,946 | 8,348 | 75,974 |
| 120,385 | 282 | 56,410 | 11,034 | 8,430 | 76,156 |
| 120,386 | 284 | 56,563 | 11,014 | 8,449 | 76,310 |
| 120,387 | 279 | 56,673 | 11,025 | 8,464 | 76,441 |
| 120,388 | 280 | 56,770 | 11,017 | 8,488 | 76,555 |
| 120,389 | 271 | 56,935 | 11,098 | 8,556 | 76,860 |
| 120,390 | 270 | 56,579 | 11,092 | 8,559 | 76,500 |
| 120,391 | 261 | 57,326 | 11,306 | 8,762 | 77,655 |
| 120,392 | 266 | 57,773 | 11,376 | 8,826 | 78,241 |
| 120,393 | 259 | 57,261 | 11,311 | 8,795 | 77,626 |
| 120,394 | 267 | 57,213 | 11,241 | 8,766 | 77,487 |
| 120,395 | 269 | 57,120 | 11,182 | 8,725 | 77,296 |
| 120,396 | 267 | 59,487 | 11,586 | 8,998 | 80,338 |
| 120,397 | 265 | 59,249 | 11,525 | 8,967 | 80,006 |
| 120,398 | 268 | 58,429 | 11,360 | 8,781 | 78,838 |
| 120,399 | 275 | 59,006 | 11,411 | 8,835 | 79,527 |
| 120,400 | 270 | 59,816 | 11,502 | 8,918 | 80,506 |
| 120,401 | 272 | 60,406 | 11,574 | 8,955 | 81,207 |
| 120,402 | 266 | 60,078 | 11,503 | 8,884 | 80,731 |
| 120,403 | 268 | 60,878 | 11,605 | 8,989 | 81,740 |
| 120,404 | 268 | 60,418 | 11,564 | 8,955 | 81,205 |
| 120,405 | 271 | 61,102 | 11,624 | 9,005 | 82,002 |
| 120,406 | 272 | 61,123 | 11,587 | 9,001 | 81,983 |
| 120,407 | 273 | 60,857 | 11,534 | 8,960 | 81,624 |

|         |     |        |        |       |        |
|---------|-----|--------|--------|-------|--------|
| 120,408 | 274 | 61,178 | 11,554 | 8,980 | 81,986 |
| 120,409 | 270 | 61,903 | 11,640 | 9,040 | 82,853 |
| 120,410 | 271 | 61,792 | 11,526 | 8,984 | 82,573 |
| 120,411 | 271 | 61,830 | 11,526 | 9,006 | 82,633 |
| 120,412 | 261 | 62,278 | 11,606 | 9,039 | 83,184 |
| 120,413 | 254 | 63,128 | 11,737 | 9,196 | 84,315 |
| 120,414 | 246 | 63,111 | 11,679 | 9,174 | 84,210 |
| 120,415 | 235 | 62,686 | 11,582 | 9,102 | 83,605 |
| 120,416 | 236 | 62,682 | 11,542 | 9,102 | 83,562 |
| 120,417 | 235 | 62,865 | 11,539 | 9,131 | 83,770 |
| 120,418 | 227 | 62,603 | 11,472 | 9,103 | 83,405 |
| 120,419 | 231 | 62,695 | 11,453 | 9,063 | 83,442 |
| 120,420 | 243 | 62,246 | 11,314 | 8,911 | 82,714 |
| 120,421 | 243 | 62,156 | 11,300 | 8,914 | 82,613 |
| 120,422 | 246 | 61,989 | 11,256 | 8,895 | 82,386 |
| 120,423 | 242 | 62,037 | 11,249 | 8,920 | 82,448 |
| 120,424 | 241 | 62,014 | 11,156 | 8,889 | 82,300 |
| 120,425 | 242 | 61,947 | 11,106 | 8,877 | 82,172 |
| 120,426 | 239 | 62,089 | 11,060 | 8,869 | 82,257 |
| 120,427 | 243 | 62,766 | 11,136 | 8,985 | 83,130 |
| 120,428 | 255 | 62,338 | 11,060 | 8,928 | 82,581 |
| 120,429 | 254 | 62,627 | 11,075 | 8,962 | 82,918 |
| 120,430 | 260 | 62,695 | 11,045 | 8,952 | 82,952 |
| 120,431 | 262 | 62,670 | 11,027 | 8,977 | 82,936 |
| 120,432 | 264 | 63,429 | 11,051 | 9,058 | 83,802 |
| 120,433 | 254 | 63,170 | 11,021 | 9,069 | 83,514 |
| 120,434 | 258 | 63,541 | 10,977 | 9,061 | 83,837 |
| 120,435 | 256 | 63,503 | 10,931 | 9,031 | 83,721 |
| 120,436 | 258 | 63,426 | 10,899 | 9,033 | 83,616 |
| 120,437 | 259 | 63,314 | 10,940 | 9,067 | 83,580 |
| 120,438 | 250 | 63,402 | 11,066 | 9,133 | 83,851 |
| 120,439 | 242 | 62,469 | 10,932 | 9,028 | 82,671 |

|         |     |        |        |       |        |
|---------|-----|--------|--------|-------|--------|
| 120,440 | 249 | 62,961 | 10,907 | 8,971 | 83,088 |
| 120,441 | 255 | 63,023 | 10,833 | 8,908 | 83,019 |
| 120,442 | 255 | 63,091 | 10,867 | 8,947 | 83,160 |
| 120,443 | 255 | 62,601 | 10,808 | 8,893 | 82,557 |
| 120,444 | 268 | 63,367 | 10,909 | 8,912 | 83,456 |
| 120,445 | 265 | 61,900 | 10,696 | 8,730 | 81,591 |
| 120,446 | 274 | 62,651 | 10,800 | 8,793 | 82,518 |
| 120,447 | 272 | 61,903 | 10,703 | 8,698 | 81,576 |
| 120,448 | 271 | 61,774 | 10,719 | 8,715 | 81,479 |
| 120,449 | 267 | 62,152 | 10,838 | 8,800 | 82,057 |
| 120,450 | 261 | 61,422 | 10,779 | 8,785 | 81,247 |
| 120,451 | 263 | 60,776 | 10,697 | 8,725 | 80,461 |
| 120,452 | 263 | 60,411 | 10,647 | 8,693 | 80,014 |
| 120,453 | 267 | 61,235 | 10,825 | 8,819 | 81,146 |
| 120,454 | 267 | 60,686 | 10,717 | 8,732 | 80,402 |
| 120,455 | 265 | 59,848 | 10,528 | 8,573 | 79,214 |
| 120,456 | 265 | 58,648 | 10,347 | 8,436 | 77,696 |
| 120,457 | 265 | 58,366 | 10,295 | 8,410 | 77,336 |
| 120,458 | 266 | 58,033 | 10,244 | 8,341 | 76,884 |
| 120,459 | 268 | 57,453 | 10,162 | 8,300 | 76,183 |
| 120,460 | 272 | 56,512 | 10,009 | 8,185 | 74,978 |
| 120,461 | 267 | 55,500 | 9,859  | 8,080 | 73,706 |
| 120,462 | 266 | 55,094 | 9,808  | 8,025 | 73,193 |
| 120,463 | 265 | 54,209 | 9,690  | 7,923 | 72,087 |
| 120,464 | 261 | 53,263 | 9,509  | 7,793 | 70,826 |
| 120,465 | 259 | 52,526 | 9,395  | 7,702 | 69,882 |
| 120,466 | 252 | 51,389 | 9,144  | 7,477 | 68,262 |
| 120,467 | 254 | 51,056 | 9,087  | 7,439 | 67,836 |
| 120,468 | 249 | 50,539 | 9,056  | 7,400 | 67,244 |
| 120,469 | 243 | 48,735 | 8,754  | 7,213 | 64,945 |
| 120,470 | 243 | 48,402 | 8,715  | 7,186 | 64,546 |
| 120,471 | 226 | 47,902 | 8,642  | 7,169 | 63,939 |

|         |     |        |       |       |        |
|---------|-----|--------|-------|-------|--------|
| 120,472 | 220 | 46,993 | 8,489 | 7,039 | 62,741 |
| 120,473 | 215 | 46,393 | 8,340 | 6,928 | 61,876 |
| 120,474 | 214 | 45,891 | 8,281 | 6,843 | 61,229 |
| 120,475 | 212 | 44,910 | 8,146 | 6,699 | 59,967 |
| 120,476 | 208 | 44,045 | 8,066 | 6,589 | 58,908 |
| 120,477 | 191 | 42,824 | 7,839 | 6,391 | 57,245 |
| 120,478 | 190 | 42,794 | 7,836 | 6,382 | 57,202 |
| 120,479 | 187 | 42,853 | 7,858 | 6,398 | 57,296 |
| 120,480 | 181 | 41,835 | 7,694 | 6,263 | 55,973 |
| 120,481 | 170 | 40,901 | 7,586 | 6,163 | 54,820 |
| 120,482 | 168 | 40,446 | 7,562 | 6,126 | 54,302 |
| 120,483 | 160 | 39,933 | 7,535 | 6,100 | 53,728 |
| 120,484 | 162 | 38,982 | 7,405 | 5,950 | 52,499 |
| 120,485 | 155 | 38,304 | 7,301 | 5,886 | 51,646 |
| 120,486 | 151 | 37,677 | 7,217 | 5,829 | 50,874 |
| 120,487 | 145 | 36,618 | 6,933 | 5,617 | 49,313 |
| 120,488 | 147 | 36,145 | 6,780 | 5,518 | 48,590 |
| 120,489 | 149 | 35,539 | 6,613 | 5,364 | 47,665 |
| 120,490 | 149 | 35,560 | 6,588 | 5,340 | 47,637 |
| 120,491 | 131 | 33,378 | 6,158 | 5,006 | 44,673 |
| 120,492 | 135 | 33,346 | 6,197 | 5,034 | 44,712 |
| 120,493 | 129 | 33,357 | 6,213 | 5,050 | 44,749 |
| 120,494 | 127 | 32,881 | 6,159 | 5,026 | 44,193 |
| 120,495 | 115 | 31,537 | 5,928 | 4,867 | 42,447 |
| 120,496 | 110 | 30,793 | 5,733 | 4,730 | 41,366 |
| 120,497 | 98  | 28,389 | 5,230 | 4,365 | 38,082 |
| 120,498 | 95  | 26,899 | 4,924 | 4,187 | 36,105 |
| 120,499 | 94  | 27,018 | 4,930 | 4,203 | 36,245 |
| 120,500 | 92  | 26,767 | 4,906 | 4,179 | 35,944 |
| 120,501 | 92  | 26,885 | 4,919 | 4,164 | 36,060 |
| 120,502 | 93  | 26,729 | 4,887 | 4,137 | 35,846 |
| 120,503 | 92  | 26,563 | 4,846 | 4,103 | 35,604 |

|         |    |        |       |       |        |
|---------|----|--------|-------|-------|--------|
| 120,504 | 90 | 26,500 | 4,852 | 4,104 | 35,546 |
| 120,505 | 90 | 26,998 | 4,909 | 4,167 | 36,164 |
| 120,506 | 84 | 26,810 | 4,896 | 4,149 | 35,939 |
| 120,507 | 84 | 26,663 | 4,887 | 4,138 | 35,772 |
| 120,508 | 82 | 27,275 | 4,993 | 4,208 | 36,558 |
| 120,509 | 79 | 27,456 | 5,024 | 4,268 | 36,827 |
| 120,510 | 75 | 27,425 | 5,022 | 4,294 | 36,816 |
| 120,511 | 70 | 27,381 | 5,030 | 4,315 | 36,796 |
| 120,512 | 70 | 27,320 | 5,005 | 4,292 | 36,687 |
| 120,513 | 69 | 27,399 | 4,994 | 4,308 | 36,770 |
| 120,514 | 69 | 27,635 | 5,050 | 4,348 | 37,102 |
| 120,515 | 65 | 27,473 | 5,043 | 4,372 | 36,953 |
| 120,516 | 64 | 27,017 | 5,006 | 4,318 | 36,405 |
| 120,517 | 64 | 27,158 | 5,027 | 4,359 | 36,608 |
| 120,518 | 68 | 27,384 | 5,055 | 4,392 | 36,899 |
| 120,519 | 70 | 27,412 | 5,027 | 4,401 | 36,910 |
| 120,520 | 70 | 27,624 | 5,043 | 4,414 | 37,151 |
| 120,521 | 69 | 27,515 | 5,012 | 4,377 | 36,973 |
| 120,522 | 69 | 27,211 | 4,982 | 4,335 | 36,597 |
| 120,523 | 69 | 26,883 | 4,942 | 4,291 | 36,185 |
| 120,524 | 72 | 27,157 | 4,990 | 4,329 | 36,548 |
| 120,525 | 72 | 26,746 | 4,945 | 4,266 | 36,029 |
| 120,526 | 77 | 27,883 | 5,137 | 4,459 | 37,556 |
| 120,527 | 81 | 27,455 | 5,059 | 4,408 | 37,003 |
| 120,528 | 82 | 27,015 | 5,016 | 4,366 | 36,479 |
| 120,529 | 82 | 27,278 | 5,082 | 4,408 | 36,850 |
| 120,530 | 80 | 27,324 | 5,103 | 4,418 | 36,925 |
| 120,531 | 79 | 27,331 | 5,097 | 4,398 | 36,905 |
| 120,532 | 79 | 27,513 | 5,111 | 4,394 | 37,097 |
| 120,533 | 80 | 27,725 | 5,151 | 4,438 | 37,394 |
| 120,534 | 80 | 27,698 | 5,144 | 4,436 | 37,358 |
| 120,535 | 80 | 27,795 | 5,115 | 4,444 | 37,434 |

|         |     |        |       |       |        |
|---------|-----|--------|-------|-------|--------|
| 120,536 | 79  | 27,637 | 5,085 | 4,402 | 37,203 |
| 120,537 | 79  | 27,734 | 5,094 | 4,411 | 37,318 |
| 120,538 | 79  | 27,991 | 5,174 | 4,452 | 37,696 |
| 120,539 | 80  | 27,841 | 5,142 | 4,435 | 37,498 |
| 120,540 | 76  | 27,523 | 5,111 | 4,417 | 37,127 |
| 120,541 | 80  | 28,215 | 5,198 | 4,521 | 38,014 |
| 120,542 | 80  | 28,065 | 5,184 | 4,506 | 37,835 |
| 120,543 | 78  | 28,412 | 5,228 | 4,564 | 38,282 |
| 120,544 | 78  | 28,383 | 5,220 | 4,550 | 38,231 |
| 120,545 | 74  | 28,029 | 5,142 | 4,491 | 37,736 |
| 120,546 | 78  | 28,269 | 5,189 | 4,528 | 38,064 |
| 120,547 | 80  | 28,181 | 5,156 | 4,513 | 37,930 |
| 120,548 | 78  | 27,659 | 5,033 | 4,452 | 37,222 |
| 120,549 | 78  | 27,523 | 5,030 | 4,430 | 37,061 |
| 120,550 | 88  | 27,669 | 5,059 | 4,447 | 37,263 |
| 120,551 | 85  | 27,275 | 4,958 | 4,368 | 36,686 |
| 120,552 | 85  | 26,969 | 4,936 | 4,343 | 36,333 |
| 120,553 | 86  | 26,834 | 4,919 | 4,332 | 36,171 |
| 120,554 | 85  | 26,347 | 4,865 | 4,277 | 35,574 |
| 120,555 | 91  | 26,419 | 4,868 | 4,314 | 35,692 |
| 120,556 | 95  | 26,545 | 4,927 | 4,323 | 35,890 |
| 120,557 | 97  | 26,429 | 4,931 | 4,337 | 35,794 |
| 120,558 | 98  | 26,562 | 4,990 | 4,354 | 36,004 |
| 120,559 | 98  | 26,651 | 5,014 | 4,367 | 36,130 |
| 120,560 | 99  | 26,566 | 5,021 | 4,320 | 36,006 |
| 120,561 | 103 | 26,261 | 4,958 | 4,235 | 35,557 |
| 120,562 | 101 | 25,878 | 4,882 | 4,156 | 35,017 |
| 120,563 | 107 | 26,590 | 5,002 | 4,272 | 35,971 |
| 120,564 | 107 | 26,582 | 5,031 | 4,259 | 35,979 |
| 120,565 | 109 | 26,122 | 4,914 | 4,153 | 35,298 |
| 120,566 | 112 | 26,287 | 4,970 | 4,168 | 35,537 |
| 120,567 | 110 | 26,130 | 4,949 | 4,165 | 35,354 |



|         |     |        |       |       |        |
|---------|-----|--------|-------|-------|--------|
| 120,568 | 110 | 25,723 | 4,894 | 4,099 | 34,826 |
| 120,569 | 106 | 25,327 | 4,843 | 4,045 | 34,321 |
| 120,570 | 105 | 25,904 | 4,952 | 4,151 | 35,112 |
| 120,571 | 106 | 25,714 | 4,953 | 4,133 | 34,906 |
| 120,572 | 107 | 25,378 | 4,886 | 4,111 | 34,482 |
| 120,573 | 108 | 25,834 | 4,948 | 4,179 | 35,069 |
| 120,574 | 109 | 25,816 | 4,949 | 4,192 | 35,066 |
| 120,575 | 111 | 25,578 | 4,903 | 4,149 | 34,741 |
| 120,576 | 110 | 25,356 | 4,840 | 4,110 | 34,416 |
| 120,577 | 110 | 25,239 | 4,840 | 4,103 | 34,292 |
| 120,578 | 113 | 25,205 | 4,887 | 4,141 | 34,346 |
| 120,579 | 113 | 24,827 | 4,825 | 4,068 | 33,833 |
| 120,580 | 112 | 24,618 | 4,793 | 4,036 | 33,559 |
| 120,581 | 113 | 24,302 | 4,723 | 3,971 | 33,109 |
| 120,582 | 113 | 24,261 | 4,741 | 4,016 | 33,131 |
| 120,583 | 114 | 24,359 | 4,737 | 4,032 | 33,242 |
| 120,584 | 114 | 24,132 | 4,689 | 3,974 | 32,909 |
| 120,585 | 113 | 23,969 | 4,677 | 3,962 | 32,721 |
| 120,586 | 117 | 24,299 | 4,769 | 4,024 | 33,209 |
| 120,587 | 117 | 24,218 | 4,726 | 4,009 | 33,070 |
| 120,588 | 115 | 23,887 | 4,655 | 3,962 | 32,619 |
| 120,589 | 119 | 23,543 | 4,581 | 3,904 | 32,147 |
| 120,590 | 117 | 23,218 | 4,568 | 3,851 | 31,754 |
| 120,591 | 124 | 23,854 | 4,680 | 3,975 | 32,633 |
| 120,592 | 124 | 23,950 | 4,723 | 3,988 | 32,785 |
| 120,593 | 125 | 23,796 | 4,710 | 3,961 | 32,592 |
| 120,594 | 124 | 23,997 | 4,747 | 4,044 | 32,912 |
| 120,595 | 128 | 23,924 | 4,728 | 4,062 | 32,842 |
| 120,596 | 127 | 23,801 | 4,740 | 4,064 | 32,732 |
| 120,597 | 124 | 23,802 | 4,778 | 4,075 | 32,779 |
| 120,598 | 122 | 23,910 | 4,852 | 4,121 | 33,005 |
| 120,599 | 123 | 23,649 | 4,846 | 4,059 | 32,677 |

|         |     |        |       |       |        |
|---------|-----|--------|-------|-------|--------|
| 120,600 | 126 | 23,914 | 4,918 | 4,100 | 33,058 |
| 120,601 | 121 | 24,155 | 4,990 | 4,157 | 33,423 |
| 120,602 | 122 | 24,153 | 5,012 | 4,165 | 33,452 |
| 120,603 | 120 | 24,189 | 5,006 | 4,161 | 33,476 |
| 120,604 | 115 | 24,313 | 5,032 | 4,175 | 33,635 |
| 120,605 | 113 | 24,220 | 5,036 | 4,173 | 33,542 |
| 120,606 | 111 | 24,221 | 5,070 | 4,202 | 33,604 |
| 120,607 | 110 | 24,174 | 5,117 | 4,230 | 33,631 |
| 120,608 | 107 | 24,097 | 5,093 | 4,212 | 33,509 |
| 120,609 | 107 | 24,170 | 5,133 | 4,233 | 33,643 |
| 120,610 | 104 | 23,727 | 5,060 | 4,196 | 33,087 |
| 120,611 | 103 | 23,879 | 5,110 | 4,242 | 33,334 |
| 120,612 | 102 | 23,934 | 5,138 | 4,259 | 33,433 |
| 120,613 | 100 | 23,880 | 5,133 | 4,271 | 33,384 |
| 120,614 | 96  | 23,617 | 5,113 | 4,231 | 33,057 |
| 120,615 | 96  | 23,630 | 5,129 | 4,250 | 33,105 |
| 120,616 | 91  | 23,427 | 5,098 | 4,222 | 32,838 |
| 120,617 | 91  | 23,645 | 5,132 | 4,229 | 33,097 |
| 120,618 | 91  | 23,878 | 5,170 | 4,258 | 33,397 |
| 120,619 | 92  | 23,821 | 5,167 | 4,243 | 33,323 |
| 120,620 | 95  | 24,034 | 5,221 | 4,286 | 33,636 |
| 120,621 | 96  | 23,769 | 5,187 | 4,235 | 33,287 |
| 120,622 | 99  | 24,010 | 5,218 | 4,273 | 33,600 |
| 120,623 | 100 | 24,105 | 5,269 | 4,275 | 33,749 |
| 120,624 | 98  | 24,019 | 5,288 | 4,278 | 33,683 |
| 120,625 | 97  | 24,057 | 5,260 | 4,272 | 33,686 |
| 120,626 | 91  | 24,042 | 5,282 | 4,285 | 33,700 |
| 120,627 | 92  | 23,901 | 5,288 | 4,236 | 33,517 |
| 120,628 | 94  | 24,212 | 5,324 | 4,271 | 33,901 |
| 120,629 | 87  | 24,416 | 5,369 | 4,294 | 34,166 |
| 120,630 | 88  | 24,340 | 5,358 | 4,278 | 34,064 |
| 120,631 | 87  | 24,301 | 5,365 | 4,258 | 34,011 |

|         |    |        |       |       |        |
|---------|----|--------|-------|-------|--------|
| 120,632 | 88 | 24,258 | 5,371 | 4,240 | 33,957 |
| 120,633 | 88 | 24,294 | 5,377 | 4,246 | 34,005 |
| 120,634 | 85 | 24,274 | 5,377 | 4,263 | 33,999 |
| 120,635 | 86 | 24,078 | 5,376 | 4,258 | 33,798 |
| 120,636 | 87 | 24,159 | 5,424 | 4,292 | 33,962 |
| 120,637 | 83 | 24,075 | 5,434 | 4,279 | 33,871 |
| 120,638 | 84 | 23,949 | 5,461 | 4,276 | 33,770 |
| 120,639 | 80 | 23,884 | 5,466 | 4,259 | 33,689 |
| 120,640 | 73 | 23,443 | 5,424 | 4,209 | 33,149 |
| 120,641 | 71 | 23,468 | 5,479 | 4,265 | 33,283 |
| 120,642 | 70 | 23,690 | 5,582 | 4,354 | 33,696 |
| 120,643 | 65 | 23,514 | 5,528 | 4,346 | 33,453 |
| 120,644 | 66 | 23,699 | 5,585 | 4,377 | 33,727 |
| 120,645 | 66 | 23,707 | 5,635 | 4,386 | 33,794 |
| 120,646 | 59 | 23,419 | 5,594 | 4,331 | 33,403 |
| 120,647 | 63 | 23,320 | 5,575 | 4,315 | 33,273 |
| 120,648 | 64 | 23,381 | 5,576 | 4,323 | 33,344 |
| 120,649 | 68 | 23,456 | 5,558 | 4,336 | 33,418 |
| 120,650 | 66 | 23,414 | 5,510 | 4,331 | 33,321 |
| 120,651 | 63 | 23,270 | 5,500 | 4,333 | 33,166 |
| 120,652 | 59 | 23,032 | 5,454 | 4,302 | 32,847 |
| 120,653 | 55 | 22,739 | 5,385 | 4,251 | 32,430 |
| 120,654 | 58 | 23,171 | 5,452 | 4,307 | 32,988 |
| 120,655 | 58 | 22,949 | 5,366 | 4,231 | 32,604 |
| 120,656 | 58 | 23,025 | 5,337 | 4,220 | 32,640 |
| 120,657 | 60 | 23,390 | 5,427 | 4,274 | 33,151 |
| 120,658 | 60 | 23,158 | 5,352 | 4,241 | 32,811 |
| 120,659 | 66 | 23,417 | 5,440 | 4,305 | 33,228 |
| 120,660 | 66 | 23,319 | 5,407 | 4,303 | 33,095 |
| 120,661 | 66 | 23,042 | 5,352 | 4,270 | 32,730 |
| 120,662 | 67 | 23,030 | 5,349 | 4,269 | 32,715 |
| 120,663 | 73 | 23,172 | 5,391 | 4,298 | 32,934 |

|         |     |        |       |       |        |
|---------|-----|--------|-------|-------|--------|
| 120,664 | 73  | 23,345 | 5,414 | 4,332 | 33,164 |
| 120,665 | 75  | 23,467 | 5,446 | 4,367 | 33,355 |
| 120,666 | 75  | 23,263 | 5,378 | 4,348 | 33,064 |
| 120,667 | 77  | 23,647 | 5,452 | 4,408 | 33,584 |
| 120,668 | 75  | 23,709 | 5,474 | 4,449 | 33,707 |
| 120,669 | 76  | 23,737 | 5,505 | 4,491 | 33,809 |
| 120,670 | 75  | 23,778 | 5,524 | 4,498 | 33,875 |
| 120,671 | 72  | 23,602 | 5,492 | 4,475 | 33,641 |
| 120,672 | 78  | 24,042 | 5,663 | 4,596 | 34,379 |
| 120,673 | 78  | 23,733 | 5,596 | 4,557 | 33,964 |
| 120,674 | 77  | 23,956 | 5,647 | 4,617 | 34,297 |
| 120,675 | 77  | 24,258 | 5,735 | 4,685 | 34,755 |
| 120,676 | 79  | 24,409 | 5,761 | 4,691 | 34,940 |
| 120,677 | 75  | 24,361 | 5,755 | 4,688 | 34,879 |
| 120,678 | 77  | 24,432 | 5,761 | 4,724 | 34,994 |
| 120,679 | 79  | 24,434 | 5,764 | 4,723 | 35,000 |
| 120,680 | 78  | 24,412 | 5,760 | 4,743 | 34,993 |
| 120,681 | 83  | 24,962 | 5,892 | 4,890 | 35,827 |
| 120,682 | 84  | 25,099 | 5,951 | 4,921 | 36,055 |
| 120,683 | 86  | 24,959 | 5,940 | 4,892 | 35,877 |
| 120,684 | 84  | 24,751 | 5,918 | 4,891 | 35,644 |
| 120,685 | 90  | 25,350 | 6,036 | 4,977 | 36,453 |
| 120,686 | 91  | 25,331 | 5,998 | 4,945 | 36,365 |
| 120,687 | 93  | 25,609 | 6,064 | 5,016 | 36,782 |
| 120,688 | 93  | 25,459 | 6,066 | 5,035 | 36,653 |
| 120,689 | 94  | 25,389 | 6,033 | 5,015 | 36,531 |
| 120,690 | 95  | 25,352 | 6,047 | 5,015 | 36,509 |
| 120,691 | 95  | 25,612 | 6,090 | 5,077 | 36,874 |
| 120,692 | 96  | 25,618 | 6,077 | 5,101 | 36,892 |
| 120,693 | 99  | 25,570 | 6,065 | 5,090 | 36,824 |
| 120,694 | 100 | 25,666 | 6,078 | 5,089 | 36,933 |
| 120,695 | 100 | 25,647 | 6,038 | 5,052 | 36,837 |

|         |     |        |       |       |        |
|---------|-----|--------|-------|-------|--------|
| 120,696 | 103 | 25,950 | 6,066 | 5,069 | 37,188 |
| 120,697 | 103 | 25,963 | 6,083 | 5,077 | 37,226 |
| 120,698 | 100 | 26,178 | 6,152 | 5,140 | 37,570 |
| 120,699 | 99  | 26,058 | 6,157 | 5,127 | 37,441 |
| 120,700 | 100 | 26,144 | 6,155 | 5,123 | 37,522 |
| 120,701 | 104 | 25,848 | 6,104 | 5,059 | 37,115 |
| 120,702 | 107 | 25,941 | 6,065 | 5,045 | 37,158 |
| 120,703 | 107 | 25,992 | 6,079 | 5,058 | 37,236 |
| 120,704 | 114 | 26,165 | 6,119 | 5,105 | 37,503 |
| 120,705 | 111 | 25,754 | 6,045 | 5,039 | 36,949 |
| 120,706 | 111 | 25,339 | 6,002 | 5,019 | 36,471 |
| 120,707 | 111 | 25,698 | 6,058 | 5,097 | 36,964 |
| 120,708 | 113 | 25,784 | 6,058 | 5,086 | 37,041 |
| 120,709 | 113 | 25,951 | 6,139 | 5,142 | 37,345 |
| 120,710 | 106 | 25,828 | 6,116 | 5,104 | 37,154 |
| 120,711 | 105 | 25,667 | 6,040 | 5,066 | 36,878 |
| 120,712 | 105 | 26,042 | 6,134 | 5,125 | 37,406 |
| 120,713 | 98  | 26,121 | 6,189 | 5,159 | 37,567 |
| 120,714 | 97  | 25,843 | 6,115 | 5,110 | 37,165 |
| 120,715 | 97  | 25,548 | 6,087 | 5,081 | 36,813 |
| 120,716 | 95  | 25,857 | 6,142 | 5,132 | 37,226 |
| 120,717 | 97  | 25,805 | 6,152 | 5,135 | 37,189 |
| 120,718 | 95  | 25,799 | 6,164 | 5,137 | 37,195 |
| 120,719 | 93  | 25,075 | 5,933 | 4,927 | 36,028 |
| 120,720 | 92  | 25,511 | 6,017 | 4,969 | 36,589 |
| 120,721 | 93  | 25,667 | 6,034 | 4,951 | 36,745 |
| 120,722 | 97  | 25,873 | 6,065 | 4,987 | 37,022 |
| 120,723 | 94  | 26,049 | 6,091 | 5,013 | 37,247 |
| 120,724 | 95  | 26,200 | 6,074 | 5,000 | 37,369 |
| 120,725 | 94  | 25,893 | 6,010 | 4,944 | 36,941 |
| 120,726 | 94  | 25,612 | 6,027 | 4,940 | 36,673 |
| 120,727 | 92  | 25,326 | 6,013 | 4,954 | 36,385 |

|         |    |        |       |       |        |
|---------|----|--------|-------|-------|--------|
| 120,728 | 92 | 25,478 | 6,040 | 5,009 | 36,619 |
| 120,729 | 89 | 25,366 | 6,047 | 5,004 | 36,506 |
| 120,730 | 85 | 25,237 | 6,011 | 4,969 | 36,302 |
| 120,731 | 83 | 25,310 | 5,999 | 4,969 | 36,361 |
| 120,732 | 82 | 25,223 | 5,984 | 4,919 | 36,208 |
| 120,733 | 81 | 25,265 | 5,984 | 4,916 | 36,246 |
| 120,734 | 83 | 25,229 | 5,992 | 4,918 | 36,222 |
| 120,735 | 83 | 24,925 | 5,907 | 4,853 | 35,768 |
| 120,736 | 77 | 25,446 | 6,062 | 4,999 | 36,584 |
| 120,737 | 76 | 25,269 | 6,064 | 4,998 | 36,407 |
| 120,738 | 75 | 25,314 | 6,044 | 4,970 | 36,403 |
| 120,739 | 73 | 25,551 | 6,030 | 4,953 | 36,607 |
| 120,740 | 71 | 25,327 | 5,960 | 4,894 | 36,252 |
| 120,741 | 70 | 25,511 | 5,994 | 4,914 | 36,489 |
| 120,742 | 73 | 25,781 | 6,032 | 4,926 | 36,812 |
| 120,743 | 74 | 25,800 | 6,040 | 4,929 | 36,843 |
| 120,744 | 72 | 25,530 | 5,986 | 4,874 | 36,462 |
| 120,745 | 79 | 25,248 | 5,929 | 4,837 | 36,093 |
| 120,746 | 78 | 24,863 | 5,887 | 4,794 | 35,622 |
| 120,747 | 78 | 25,551 | 6,035 | 4,903 | 36,567 |
| 120,748 | 76 | 25,636 | 6,020 | 4,904 | 36,636 |
| 120,749 | 79 | 25,457 | 5,963 | 4,880 | 36,379 |
| 120,750 | 79 | 25,432 | 5,961 | 4,884 | 36,356 |
| 120,751 | 74 | 25,212 | 5,958 | 4,871 | 36,115 |
| 120,752 | 72 | 25,308 | 6,032 | 4,934 | 36,346 |
| 120,753 | 71 | 25,065 | 6,017 | 4,912 | 36,065 |
| 120,754 | 73 | 25,260 | 6,086 | 4,950 | 36,369 |
| 120,755 | 70 | 25,127 | 6,091 | 4,958 | 36,246 |
| 120,756 | 71 | 25,049 | 6,116 | 4,955 | 36,191 |
| 120,757 | 74 | 24,954 | 6,137 | 4,953 | 36,118 |
| 120,758 | 71 | 24,433 | 6,001 | 4,851 | 35,356 |
| 120,759 | 74 | 24,603 | 6,062 | 4,880 | 35,619 |

|         |     |        |       |       |        |
|---------|-----|--------|-------|-------|--------|
| 120,760 | 73  | 24,517 | 6,071 | 4,886 | 35,547 |
| 120,761 | 75  | 24,817 | 6,188 | 4,992 | 36,072 |
| 120,762 | 79  | 24,766 | 6,225 | 5,022 | 36,092 |
| 120,763 | 78  | 24,930 | 6,235 | 5,011 | 36,254 |
| 120,764 | 79  | 25,023 | 6,217 | 4,971 | 36,290 |
| 120,765 | 79  | 25,103 | 6,235 | 4,988 | 36,405 |
| 120,766 | 80  | 25,394 | 6,322 | 5,034 | 36,830 |
| 120,767 | 80  | 25,429 | 6,312 | 5,024 | 36,845 |
| 120,768 | 79  | 25,143 | 6,216 | 4,961 | 36,399 |
| 120,769 | 79  | 25,110 | 6,229 | 4,949 | 36,367 |
| 120,770 | 78  | 25,015 | 6,262 | 4,972 | 36,327 |
| 120,771 | 81  | 25,111 | 6,300 | 5,007 | 36,499 |
| 120,772 | 80  | 25,171 | 6,347 | 5,044 | 36,642 |
| 120,773 | 80  | 25,108 | 6,406 | 5,088 | 36,682 |
| 120,774 | 78  | 25,045 | 6,444 | 5,118 | 36,685 |
| 120,775 | 77  | 24,846 | 6,470 | 5,109 | 36,502 |
| 120,776 | 86  | 24,934 | 6,449 | 5,110 | 36,579 |
| 120,777 | 87  | 25,152 | 6,464 | 5,111 | 36,814 |
| 120,778 | 87  | 25,239 | 6,451 | 5,101 | 36,878 |
| 120,779 | 86  | 24,946 | 6,408 | 5,013 | 36,453 |
| 120,780 | 86  | 25,082 | 6,414 | 5,022 | 36,604 |
| 120,781 | 89  | 25,210 | 6,411 | 5,022 | 36,732 |
| 120,782 | 89  | 25,264 | 6,443 | 5,031 | 36,827 |
| 120,783 | 88  | 25,037 | 6,361 | 4,962 | 36,448 |
| 120,784 | 88  | 25,191 | 6,429 | 4,998 | 36,706 |
| 120,785 | 95  | 25,335 | 6,494 | 5,031 | 36,955 |
| 120,786 | 94  | 25,402 | 6,513 | 5,042 | 37,051 |
| 120,787 | 99  | 25,232 | 6,444 | 4,978 | 36,753 |
| 120,788 | 98  | 25,007 | 6,380 | 4,926 | 36,411 |
| 120,789 | 102 | 25,067 | 6,397 | 4,945 | 36,511 |
| 120,790 | 102 | 24,772 | 6,348 | 4,892 | 36,114 |
| 120,791 | 105 | 25,574 | 6,523 | 5,026 | 37,228 |

|         |     |        |       |       |        |
|---------|-----|--------|-------|-------|--------|
| 120,792 | 109 | 25,793 | 6,609 | 5,086 | 37,597 |
| 120,793 | 106 | 25,557 | 6,591 | 5,061 | 37,315 |
| 120,794 | 108 | 25,882 | 6,687 | 5,113 | 37,790 |
| 120,795 | 114 | 25,827 | 6,692 | 5,115 | 37,748 |
| 120,796 | 108 | 25,682 | 6,696 | 5,112 | 37,598 |
| 120,797 | 110 | 25,536 | 6,672 | 5,098 | 37,416 |
| 120,798 | 106 | 25,126 | 6,618 | 5,052 | 36,902 |
| 120,799 | 103 | 25,026 | 6,588 | 5,047 | 36,764 |
| 120,800 | 102 | 25,238 | 6,634 | 5,090 | 37,064 |
| 120,801 | 101 | 24,970 | 6,614 | 5,070 | 36,755 |
| 120,802 | 100 | 24,861 | 6,618 | 5,044 | 36,623 |
| 120,803 | 99  | 24,886 | 6,635 | 5,040 | 36,660 |
| 120,804 | 97  | 24,605 | 6,581 | 4,972 | 36,255 |
| 120,805 | 95  | 24,608 | 6,549 | 4,965 | 36,217 |
| 120,806 | 90  | 24,572 | 6,510 | 4,951 | 36,123 |
| 120,807 | 90  | 24,354 | 6,480 | 4,921 | 35,845 |
| 120,808 | 85  | 24,274 | 6,415 | 4,902 | 35,676 |
| 120,809 | 84  | 23,852 | 6,334 | 4,844 | 35,114 |
| 120,810 | 84  | 24,157 | 6,443 | 4,951 | 35,635 |
| 120,811 | 83  | 23,971 | 6,402 | 4,922 | 35,378 |
| 120,812 | 85  | 24,293 | 6,409 | 4,897 | 35,684 |
| 120,813 | 90  | 24,093 | 6,351 | 4,828 | 35,362 |
| 120,814 | 92  | 23,703 | 6,267 | 4,788 | 34,850 |
| 120,815 | 91  | 23,624 | 6,287 | 4,812 | 34,814 |
| 120,816 | 90  | 23,326 | 6,226 | 4,730 | 34,372 |
| 120,817 | 90  | 23,362 | 6,238 | 4,733 | 34,423 |
| 120,818 | 89  | 23,240 | 6,253 | 4,741 | 34,323 |
| 120,819 | 91  | 23,171 | 6,257 | 4,719 | 34,238 |
| 120,820 | 91  | 22,880 | 6,198 | 4,681 | 33,850 |
| 120,821 | 94  | 23,042 | 6,259 | 4,712 | 34,107 |
| 120,822 | 92  | 23,134 | 6,268 | 4,719 | 34,213 |
| 120,823 | 94  | 23,142 | 6,256 | 4,710 | 34,202 |



|         |    |        |       |       |        |
|---------|----|--------|-------|-------|--------|
| 120,824 | 93 | 23,250 | 6,232 | 4,673 | 34,248 |
| 120,825 | 92 | 22,846 | 6,023 | 4,515 | 33,476 |
| 120,826 | 93 | 23,006 | 6,057 | 4,531 | 33,687 |
| 120,827 | 85 | 23,001 | 6,060 | 4,527 | 33,673 |
| 120,828 | 85 | 22,897 | 6,050 | 4,522 | 33,554 |
| 120,829 | 87 | 22,603 | 6,024 | 4,478 | 33,192 |
| 120,830 | 89 | 22,498 | 6,016 | 4,479 | 33,082 |
| 120,831 | 89 | 22,446 | 6,013 | 4,471 | 33,019 |
| 120,832 | 89 | 22,594 | 6,066 | 4,503 | 33,252 |
| 120,833 | 87 | 22,546 | 6,076 | 4,489 | 33,198 |
| 120,834 | 84 | 22,296 | 6,012 | 4,464 | 32,856 |
| 120,835 | 85 | 22,478 | 6,053 | 4,497 | 33,113 |
| 120,836 | 78 | 22,317 | 5,997 | 4,451 | 32,843 |
| 120,837 | 78 | 22,104 | 5,939 | 4,395 | 32,516 |
| 120,838 | 73 | 22,573 | 6,052 | 4,490 | 33,188 |
| 120,839 | 73 | 22,189 | 5,964 | 4,433 | 32,659 |
| 120,840 | 70 | 22,060 | 5,982 | 4,460 | 32,572 |
| 120,841 | 74 | 22,071 | 6,018 | 4,519 | 32,682 |
| 120,842 | 73 | 22,070 | 6,005 | 4,512 | 32,660 |
| 120,843 | 67 | 21,784 | 5,930 | 4,423 | 32,204 |
| 120,844 | 68 | 21,995 | 5,988 | 4,468 | 32,519 |
| 120,845 | 67 | 21,969 | 6,034 | 4,540 | 32,610 |
| 120,846 | 60 | 21,947 | 6,063 | 4,562 | 32,632 |
| 120,847 | 60 | 22,323 | 6,102 | 4,610 | 33,095 |
| 120,848 | 58 | 22,444 | 6,133 | 4,634 | 33,269 |
| 120,849 | 58 | 22,460 | 6,168 | 4,608 | 33,294 |
| 120,850 | 61 | 22,389 | 6,202 | 4,628 | 33,280 |
| 120,851 | 63 | 22,677 | 6,291 | 4,666 | 33,697 |
| 120,852 | 64 | 22,839 | 6,316 | 4,671 | 33,890 |
| 120,853 | 64 | 22,772 | 6,287 | 4,676 | 33,799 |
| 120,854 | 65 | 22,757 | 6,251 | 4,677 | 33,750 |
| 120,855 | 65 | 22,941 | 6,259 | 4,711 | 33,976 |

|         |    |        |       |       |        |
|---------|----|--------|-------|-------|--------|
| 120,856 | 66 | 22,961 | 6,279 | 4,699 | 34,005 |
| 120,857 | 66 | 23,058 | 6,294 | 4,704 | 34,122 |
| 120,858 | 66 | 23,161 | 6,302 | 4,713 | 34,242 |
| 120,859 | 68 | 23,131 | 6,325 | 4,707 | 34,231 |
| 120,860 | 69 | 22,970 | 6,317 | 4,664 | 34,020 |
| 120,861 | 66 | 23,232 | 6,324 | 4,691 | 34,313 |
| 120,862 | 69 | 23,428 | 6,334 | 4,673 | 34,504 |
| 120,863 | 69 | 23,418 | 6,328 | 4,678 | 34,493 |
| 120,864 | 61 | 23,115 | 6,236 | 4,625 | 34,037 |
| 120,865 | 65 | 23,159 | 6,273 | 4,653 | 34,150 |
| 120,866 | 70 | 23,501 | 6,359 | 4,712 | 34,642 |
| 120,867 | 72 | 23,270 | 6,284 | 4,685 | 34,311 |
| 120,868 | 72 | 23,581 | 6,365 | 4,713 | 34,731 |
| 120,869 | 72 | 23,162 | 6,269 | 4,646 | 34,149 |
| 120,870 | 71 | 23,468 | 6,332 | 4,711 | 34,582 |
| 120,871 | 68 | 23,625 | 6,382 | 4,796 | 34,871 |
| 120,872 | 69 | 23,756 | 6,374 | 4,796 | 34,995 |
| 120,873 | 70 | 23,609 | 6,375 | 4,795 | 34,849 |
| 120,874 | 72 | 23,505 | 6,379 | 4,792 | 34,748 |
| 120,875 | 71 | 23,449 | 6,386 | 4,807 | 34,713 |
| 120,876 | 71 | 23,373 | 6,402 | 4,830 | 34,676 |
| 120,877 | 71 | 23,425 | 6,413 | 4,860 | 34,769 |
| 120,878 | 72 | 23,465 | 6,414 | 4,846 | 34,797 |
| 120,879 | 72 | 23,282 | 6,343 | 4,783 | 34,480 |
| 120,880 | 70 | 23,418 | 6,365 | 4,827 | 34,680 |
| 120,881 | 69 | 23,557 | 6,346 | 4,830 | 34,802 |
| 120,882 | 68 | 23,280 | 6,294 | 4,791 | 34,433 |
| 120,883 | 73 | 23,484 | 6,341 | 4,851 | 34,749 |
| 120,884 | 76 | 23,163 | 6,244 | 4,797 | 34,280 |
| 120,885 | 83 | 23,422 | 6,293 | 4,852 | 34,650 |
| 120,886 | 85 | 23,198 | 6,218 | 4,807 | 34,308 |
| 120,887 | 84 | 22,830 | 6,143 | 4,767 | 33,824 |

|         |     |        |       |       |        |
|---------|-----|--------|-------|-------|--------|
| 120,888 | 87  | 23,358 | 6,279 | 4,907 | 34,631 |
| 120,889 | 87  | 23,289 | 6,241 | 4,903 | 34,520 |
| 120,890 | 87  | 22,790 | 6,107 | 4,776 | 33,760 |
| 120,891 | 87  | 23,212 | 6,182 | 4,799 | 34,280 |
| 120,892 | 83  | 23,133 | 6,159 | 4,778 | 34,153 |
| 120,893 | 82  | 23,089 | 6,218 | 4,800 | 34,189 |
| 120,894 | 85  | 22,793 | 6,099 | 4,690 | 33,667 |
| 120,895 | 84  | 22,861 | 6,127 | 4,729 | 33,801 |
| 120,896 | 87  | 23,438 | 6,189 | 4,790 | 34,504 |
| 120,897 | 94  | 23,304 | 6,105 | 4,730 | 34,233 |
| 120,898 | 94  | 22,857 | 6,002 | 4,622 | 33,575 |
| 120,899 | 101 | 23,396 | 6,119 | 4,733 | 34,349 |
| 120,900 | 98  | 23,317 | 6,041 | 4,709 | 34,165 |
| 120,901 | 101 | 23,490 | 6,050 | 4,703 | 34,344 |
| 120,902 | 102 | 23,207 | 5,952 | 4,644 | 33,905 |
| 120,903 | 104 | 23,057 | 5,853 | 4,581 | 33,595 |
| 120,904 | 105 | 23,246 | 5,873 | 4,593 | 33,817 |
| 120,905 | 109 | 23,088 | 5,854 | 4,559 | 33,610 |
| 120,906 | 110 | 23,012 | 5,811 | 4,526 | 33,459 |
| 120,907 | 120 | 24,444 | 6,114 | 4,731 | 35,409 |
| 120,908 | 128 | 24,430 | 6,105 | 4,731 | 35,394 |
| 120,909 | 127 | 24,288 | 6,055 | 4,696 | 35,166 |
| 120,910 | 127 | 24,452 | 6,070 | 4,712 | 35,361 |
| 120,911 | 127 | 24,408 | 6,045 | 4,724 | 35,304 |
| 120,912 | 128 | 24,389 | 6,025 | 4,699 | 35,241 |
| 120,913 | 126 | 24,308 | 5,994 | 4,733 | 35,161 |
| 120,914 | 123 | 24,643 | 6,057 | 4,786 | 35,609 |
| 120,915 | 123 | 24,702 | 6,049 | 4,789 | 35,663 |
| 120,916 | 116 | 24,230 | 5,898 | 4,674 | 34,918 |
| 120,917 | 116 | 24,679 | 5,997 | 4,734 | 35,526 |
| 120,918 | 114 | 24,504 | 5,945 | 4,716 | 35,279 |
| 120,919 | 114 | 24,811 | 5,993 | 4,779 | 35,697 |

|         |     |        |       |       |        |
|---------|-----|--------|-------|-------|--------|
| 120,920 | 110 | 25,080 | 6,041 | 4,837 | 36,068 |
| 120,921 | 111 | 25,114 | 6,022 | 4,800 | 36,047 |
| 120,922 | 110 | 25,430 | 6,068 | 4,834 | 36,442 |
| 120,923 | 110 | 25,679 | 6,139 | 4,843 | 36,771 |
| 120,924 | 109 | 25,861 | 6,156 | 4,850 | 36,976 |
| 120,925 | 106 | 25,968 | 6,146 | 4,897 | 37,117 |
| 120,926 | 105 | 26,024 | 6,135 | 4,893 | 37,157 |
| 120,927 | 105 | 25,784 | 6,068 | 4,846 | 36,803 |
| 120,928 | 108 | 26,002 | 6,098 | 4,860 | 37,068 |
| 120,929 | 106 | 25,802 | 6,052 | 4,885 | 36,845 |
| 120,930 | 106 | 25,967 | 6,060 | 4,893 | 37,026 |
| 120,931 | 109 | 26,158 | 6,141 | 4,956 | 37,364 |
| 120,932 | 108 | 26,159 | 6,159 | 4,990 | 37,416 |
| 120,933 | 105 | 26,144 | 6,110 | 4,942 | 37,301 |
| 120,934 | 104 | 26,572 | 6,183 | 5,023 | 37,882 |
| 120,935 | 101 | 26,681 | 6,215 | 5,038 | 38,035 |
| 120,936 | 95  | 26,753 | 6,235 | 5,042 | 38,125 |
| 120,937 | 88  | 26,605 | 6,194 | 4,995 | 37,882 |
| 120,938 | 90  | 26,811 | 6,256 | 5,033 | 38,190 |
| 120,939 | 90  | 26,886 | 6,271 | 5,018 | 38,265 |
| 120,940 | 91  | 26,969 | 6,294 | 5,033 | 38,387 |
| 120,941 | 91  | 27,082 | 6,300 | 5,074 | 38,547 |
| 120,942 | 94  | 27,094 | 6,296 | 5,084 | 38,568 |
| 120,943 | 99  | 27,190 | 6,302 | 5,084 | 38,675 |
| 120,944 | 100 | 27,505 | 6,373 | 5,139 | 39,117 |
| 120,945 | 98  | 27,270 | 6,298 | 5,098 | 38,764 |
| 120,946 | 100 | 27,700 | 6,377 | 5,151 | 39,328 |
| 120,947 | 99  | 27,407 | 6,356 | 5,147 | 39,009 |
| 120,948 | 82  | 25,415 | 5,902 | 4,807 | 36,206 |
| 120,949 | 85  | 25,616 | 5,966 | 4,834 | 36,501 |
| 120,950 | 82  | 25,855 | 5,992 | 4,864 | 36,793 |
| 120,951 | 82  | 25,852 | 5,990 | 4,886 | 36,810 |

|         |     |        |       |       |        |
|---------|-----|--------|-------|-------|--------|
| 120,952 | 85  | 26,161 | 6,097 | 4,975 | 37,318 |
| 120,953 | 90  | 26,413 | 6,150 | 5,051 | 37,704 |
| 120,954 | 90  | 26,422 | 6,164 | 5,063 | 37,739 |
| 120,955 | 90  | 26,436 | 6,173 | 5,048 | 37,747 |
| 120,956 | 83  | 26,374 | 6,157 | 5,076 | 37,690 |
| 120,957 | 85  | 26,667 | 6,253 | 5,128 | 38,133 |
| 120,958 | 80  | 26,589 | 6,228 | 5,099 | 37,996 |
| 120,959 | 82  | 26,691 | 6,231 | 5,125 | 38,129 |
| 120,960 | 82  | 26,730 | 6,249 | 5,140 | 38,201 |
| 120,961 | 83  | 26,670 | 6,294 | 5,202 | 38,249 |
| 120,962 | 84  | 26,779 | 6,374 | 5,273 | 38,510 |
| 120,963 | 89  | 26,812 | 6,428 | 5,271 | 38,600 |
| 120,964 | 95  | 26,438 | 6,368 | 5,243 | 38,144 |
| 120,965 | 95  | 26,123 | 6,318 | 5,200 | 37,736 |
| 120,966 | 96  | 26,648 | 6,466 | 5,319 | 38,529 |
| 120,967 | 95  | 26,684 | 6,507 | 5,354 | 38,640 |
| 120,968 | 95  | 26,747 | 6,504 | 5,376 | 38,722 |
| 120,969 | 95  | 26,469 | 6,457 | 5,336 | 38,357 |
| 120,970 | 97  | 26,498 | 6,445 | 5,361 | 38,401 |
| 120,971 | 97  | 26,499 | 6,440 | 5,367 | 38,403 |
| 120,972 | 100 | 26,990 | 6,533 | 5,458 | 39,081 |
| 120,973 | 100 | 27,071 | 6,564 | 5,476 | 39,211 |
| 120,974 | 99  | 26,932 | 6,530 | 5,479 | 39,040 |
| 120,975 | 101 | 27,092 | 6,550 | 5,493 | 39,236 |
| 120,976 | 100 | 26,816 | 6,501 | 5,442 | 38,859 |
| 120,977 | 100 | 26,933 | 6,505 | 5,445 | 38,983 |
| 120,978 | 98  | 26,822 | 6,475 | 5,430 | 38,825 |
| 120,979 | 99  | 27,012 | 6,552 | 5,504 | 39,167 |
| 120,980 | 101 | 27,112 | 6,649 | 5,539 | 39,401 |
| 120,981 | 104 | 27,026 | 6,621 | 5,487 | 39,238 |
| 120,982 | 102 | 27,056 | 6,607 | 5,477 | 39,242 |
| 120,983 | 102 | 27,524 | 6,687 | 5,554 | 39,867 |

|         |     |        |       |       |        |
|---------|-----|--------|-------|-------|--------|
| 120,984 | 104 | 27,556 | 6,701 | 5,561 | 39,922 |
| 120,985 | 102 | 26,763 | 6,532 | 5,401 | 38,798 |
| 120,986 | 102 | 26,973 | 6,596 | 5,441 | 39,112 |
| 120,987 | 102 | 27,501 | 6,681 | 5,527 | 39,811 |
| 120,988 | 102 | 27,623 | 6,706 | 5,548 | 39,979 |
| 120,989 | 104 | 28,103 | 6,769 | 5,613 | 40,589 |
| 120,990 | 107 | 27,964 | 6,745 | 5,606 | 40,422 |
| 120,991 | 106 | 27,828 | 6,748 | 5,583 | 40,265 |
| 120,992 | 101 | 26,526 | 6,442 | 5,308 | 38,377 |
| 120,993 | 100 | 26,780 | 6,501 | 5,348 | 38,729 |
| 120,994 | 98  | 26,999 | 6,577 | 5,390 | 39,064 |
| 120,995 | 99  | 27,090 | 6,581 | 5,405 | 39,175 |
| 120,996 | 101 | 27,325 | 6,635 | 5,481 | 39,542 |
| 120,997 | 101 | 27,441 | 6,639 | 5,493 | 39,674 |
| 120,998 | 98  | 27,582 | 6,595 | 5,469 | 39,744 |
| 120,999 | 94  | 27,468 | 6,586 | 5,461 | 39,609 |
| 121,000 | 88  | 27,108 | 6,565 | 5,425 | 39,186 |
| 121,001 | 88  | 27,487 | 6,644 | 5,463 | 39,682 |
| 121,002 | 88  | 27,978 | 6,726 | 5,518 | 40,310 |
| 121,003 | 88  | 28,010 | 6,744 | 5,531 | 40,373 |
| 121,004 | 86  | 28,524 | 6,854 | 5,614 | 41,078 |
| 121,005 | 84  | 28,208 | 6,793 | 5,586 | 40,671 |
| 121,006 | 84  | 28,234 | 6,791 | 5,567 | 40,676 |
| 121,007 | 87  | 28,710 | 6,873 | 5,607 | 41,277 |
| 121,008 | 82  | 28,708 | 6,871 | 5,608 | 41,269 |
| 121,009 | 87  | 28,772 | 6,857 | 5,609 | 41,325 |
| 121,010 | 88  | 28,966 | 6,898 | 5,621 | 41,573 |
| 121,011 | 87  | 29,166 | 6,835 | 5,542 | 41,630 |
| 121,012 | 82  | 28,827 | 6,654 | 5,406 | 40,969 |
| 121,013 | 84  | 29,178 | 6,701 | 5,436 | 41,399 |
| 121,014 | 85  | 29,167 | 6,678 | 5,420 | 41,350 |
| 121,015 | 86  | 29,556 | 6,738 | 5,467 | 41,847 |

|         |    |        |       |       |        |
|---------|----|--------|-------|-------|--------|
| 121,016 | 84 | 29,569 | 6,749 | 5,470 | 41,872 |
| 121,017 | 82 | 29,433 | 6,703 | 5,426 | 41,644 |
| 121,018 | 81 | 29,450 | 6,703 | 5,435 | 41,669 |
| 121,019 | 83 | 29,492 | 6,679 | 5,423 | 41,677 |
| 121,020 | 85 | 29,808 | 6,739 | 5,476 | 42,108 |
| 121,021 | 83 | 29,662 | 6,678 | 5,372 | 41,795 |
| 121,022 | 85 | 29,912 | 6,755 | 5,416 | 42,168 |
| 121,023 | 81 | 29,536 | 6,672 | 5,354 | 41,643 |
| 121,024 | 83 | 28,964 | 6,492 | 5,226 | 40,765 |
| 121,025 | 84 | 29,303 | 6,562 | 5,260 | 41,209 |
| 121,026 | 81 | 29,653 | 6,621 | 5,310 | 41,665 |
| 121,027 | 83 | 30,046 | 6,703 | 5,377 | 42,209 |
| 121,028 | 83 | 30,177 | 6,763 | 5,402 | 42,425 |
| 121,029 | 82 | 30,166 | 6,720 | 5,371 | 42,339 |
| 121,030 | 86 | 30,202 | 6,743 | 5,369 | 42,400 |
| 121,031 | 83 | 30,049 | 6,671 | 5,318 | 42,121 |
| 121,032 | 79 | 30,273 | 6,724 | 5,404 | 42,480 |
| 121,033 | 80 | 30,472 | 6,751 | 5,435 | 42,738 |
| 121,034 | 80 | 30,564 | 6,809 | 5,443 | 42,896 |
| 121,035 | 77 | 30,246 | 6,753 | 5,381 | 42,457 |
| 121,036 | 77 | 29,935 | 6,755 | 5,388 | 42,155 |
| 121,037 | 77 | 29,791 | 6,773 | 5,390 | 42,031 |
| 121,038 | 77 | 29,698 | 6,824 | 5,415 | 42,014 |
| 121,039 | 77 | 29,642 | 6,829 | 5,410 | 41,958 |
| 121,040 | 75 | 29,745 | 6,865 | 5,406 | 42,091 |
| 121,041 | 70 | 29,138 | 6,719 | 5,289 | 41,216 |
| 121,042 | 70 | 29,488 | 6,795 | 5,340 | 41,693 |
| 121,043 | 66 | 29,793 | 6,864 | 5,390 | 42,113 |
| 121,044 | 66 | 29,517 | 6,770 | 5,316 | 41,669 |
| 121,045 | 67 | 29,844 | 6,832 | 5,374 | 42,117 |
| 121,046 | 67 | 29,807 | 6,837 | 5,352 | 42,063 |
| 121,047 | 67 | 29,866 | 6,835 | 5,298 | 42,066 |

|         |    |        |       |       |        |
|---------|----|--------|-------|-------|--------|
| 121,048 | 67 | 29,326 | 6,747 | 5,244 | 41,384 |
| 121,049 | 71 | 29,535 | 6,837 | 5,303 | 41,746 |
| 121,050 | 71 | 28,994 | 6,720 | 5,226 | 41,011 |
| 121,051 | 72 | 29,313 | 6,759 | 5,238 | 41,382 |
| 121,052 | 71 | 29,251 | 6,759 | 5,245 | 41,326 |
| 121,053 | 69 | 28,665 | 6,648 | 5,157 | 40,539 |
| 121,054 | 69 | 28,685 | 6,671 | 5,148 | 40,573 |
| 121,055 | 70 | 28,384 | 6,629 | 5,119 | 40,202 |
| 121,056 | 70 | 28,242 | 6,621 | 5,096 | 40,029 |
| 121,057 | 71 | 29,128 | 6,755 | 5,232 | 41,186 |
| 121,058 | 70 | 29,104 | 6,728 | 5,212 | 41,114 |
| 121,059 | 70 | 29,047 | 6,727 | 5,208 | 41,052 |
| 121,060 | 63 | 29,090 | 6,794 | 5,270 | 41,217 |
| 121,061 | 61 | 28,836 | 6,765 | 5,232 | 40,894 |
| 121,062 | 60 | 28,561 | 6,766 | 5,239 | 40,626 |
| 121,063 | 55 | 28,248 | 6,708 | 5,200 | 40,211 |
| 121,064 | 53 | 27,813 | 6,672 | 5,166 | 39,704 |
| 121,065 | 52 | 28,120 | 6,784 | 5,267 | 40,223 |
| 121,066 | 51 | 28,079 | 6,767 | 5,271 | 40,168 |
| 121,067 | 51 | 28,120 | 6,791 | 5,278 | 40,240 |
| 121,068 | 54 | 27,787 | 6,762 | 5,231 | 39,834 |
| 121,069 | 55 | 27,417 | 6,703 | 5,172 | 39,347 |
| 121,070 | 54 | 27,501 | 6,854 | 5,306 | 39,715 |
| 121,071 | 52 | 27,234 | 6,818 | 5,291 | 39,395 |
| 121,072 | 50 | 26,899 | 6,813 | 5,323 | 39,085 |
| 121,073 | 53 | 26,661 | 6,776 | 5,299 | 38,789 |
| 121,074 | 53 | 26,554 | 6,790 | 5,307 | 38,704 |
| 121,075 | 51 | 26,463 | 6,898 | 5,363 | 38,775 |
| 121,076 | 50 | 26,206 | 6,902 | 5,384 | 38,542 |
| 121,077 | 51 | 26,089 | 6,922 | 5,391 | 38,453 |
| 121,078 | 51 | 26,038 | 6,899 | 5,373 | 38,361 |
| 121,079 | 51 | 25,568 | 6,801 | 5,304 | 37,724 |



|         |    |        |       |       |        |
|---------|----|--------|-------|-------|--------|
| 121,080 | 51 | 25,209 | 6,770 | 5,259 | 37,289 |
| 121,081 | 48 | 25,789 | 6,936 | 5,395 | 38,168 |
| 121,082 | 48 | 25,699 | 6,916 | 5,385 | 38,048 |
| 121,083 | 54 | 25,771 | 6,963 | 5,384 | 38,172 |
| 121,084 | 58 | 25,805 | 7,017 | 5,399 | 38,279 |
| 121,085 | 58 | 25,631 | 6,985 | 5,401 | 38,075 |
| 121,086 | 60 | 25,261 | 6,830 | 5,296 | 37,447 |
| 121,087 | 62 | 25,667 | 6,909 | 5,346 | 37,984 |
| 121,088 | 63 | 26,009 | 6,988 | 5,381 | 38,441 |
| 121,089 | 64 | 25,694 | 6,885 | 5,318 | 37,961 |
| 121,090 | 64 | 25,345 | 6,821 | 5,253 | 37,483 |
| 121,091 | 65 | 24,828 | 6,728 | 5,194 | 36,815 |
| 121,092 | 67 | 25,025 | 6,816 | 5,254 | 37,162 |
| 121,093 | 68 | 25,375 | 6,885 | 5,323 | 37,651 |
| 121,094 | 69 | 25,170 | 6,872 | 5,304 | 37,415 |
| 121,095 | 70 | 24,951 | 6,838 | 5,264 | 37,123 |
| 121,096 | 71 | 25,110 | 6,929 | 5,321 | 37,431 |
| 121,097 | 70 | 24,819 | 6,859 | 5,281 | 37,029 |
| 121,098 | 71 | 25,078 | 6,941 | 5,353 | 37,443 |
| 121,099 | 65 | 25,103 | 6,965 | 5,373 | 37,506 |
| 121,100 | 66 | 25,188 | 6,984 | 5,368 | 37,606 |
| 121,101 | 68 | 25,173 | 6,992 | 5,334 | 37,567 |
| 121,102 | 68 | 24,826 | 6,900 | 5,315 | 37,109 |
| 121,103 | 68 | 24,839 | 6,915 | 5,313 | 37,135 |
| 121,104 | 67 | 24,689 | 6,892 | 5,298 | 36,946 |
| 121,105 | 65 | 24,334 | 6,829 | 5,263 | 36,491 |
| 121,106 | 62 | 23,971 | 6,757 | 5,209 | 35,999 |
| 121,107 | 66 | 24,632 | 6,963 | 5,333 | 36,994 |
| 121,108 | 67 | 24,684 | 6,967 | 5,365 | 37,083 |
| 121,109 | 69 | 24,645 | 6,969 | 5,373 | 37,056 |
| 121,110 | 68 | 24,096 | 6,804 | 5,257 | 36,225 |
| 121,111 | 68 | 24,409 | 6,850 | 5,287 | 36,614 |

|         |    |        |       |       |        |
|---------|----|--------|-------|-------|--------|
| 121,112 | 68 | 24,649 | 6,920 | 5,343 | 36,980 |
| 121,113 | 69 | 24,544 | 6,899 | 5,312 | 36,824 |
| 121,114 | 71 | 24,653 | 6,885 | 5,293 | 36,902 |
| 121,115 | 71 | 24,812 | 6,864 | 5,287 | 37,034 |
| 121,116 | 69 | 24,857 | 6,847 | 5,275 | 37,048 |
| 121,117 | 70 | 24,582 | 6,828 | 5,253 | 36,733 |
| 121,118 | 69 | 24,255 | 6,803 | 5,214 | 36,341 |
| 121,119 | 68 | 24,034 | 6,785 | 5,184 | 36,071 |
| 121,120 | 68 | 24,164 | 6,812 | 5,152 | 36,196 |
| 121,121 | 72 | 24,237 | 6,811 | 5,152 | 36,272 |
| 121,122 | 72 | 24,234 | 6,783 | 5,116 | 36,205 |
| 121,123 | 73 | 23,788 | 6,634 | 4,982 | 35,477 |
| 121,124 | 77 | 24,120 | 6,713 | 5,021 | 35,931 |
| 121,125 | 79 | 24,572 | 6,737 | 5,070 | 36,458 |
| 121,126 | 81 | 24,653 | 6,703 | 5,044 | 36,481 |
| 121,127 | 84 | 25,237 | 6,837 | 5,131 | 37,289 |
| 121,128 | 87 | 25,324 | 6,852 | 5,129 | 37,392 |
| 121,129 | 85 | 25,018 | 6,782 | 5,045 | 36,930 |
| 121,130 | 85 | 25,085 | 6,704 | 5,020 | 36,894 |
| 121,131 | 85 | 25,500 | 6,790 | 5,067 | 37,442 |
| 121,132 | 87 | 25,163 | 6,665 | 4,971 | 36,886 |
| 121,133 | 91 | 25,526 | 6,766 | 5,024 | 37,407 |
| 121,134 | 86 | 25,886 | 6,830 | 5,091 | 37,893 |
| 121,135 | 85 | 25,433 | 6,675 | 4,960 | 37,153 |
| 121,136 | 86 | 25,710 | 6,718 | 4,996 | 37,510 |
| 121,137 | 85 | 26,022 | 6,800 | 5,087 | 37,994 |
| 121,138 | 84 | 26,086 | 6,830 | 5,096 | 38,096 |
| 121,139 | 83 | 26,176 | 6,847 | 5,109 | 38,215 |
| 121,140 | 81 | 26,096 | 6,760 | 5,067 | 38,004 |
| 121,141 | 81 | 26,162 | 6,748 | 5,050 | 38,041 |
| 121,142 | 79 | 26,151 | 6,785 | 5,107 | 38,122 |
| 121,143 | 81 | 26,160 | 6,831 | 5,125 | 38,197 |

|         |     |        |       |       |        |
|---------|-----|--------|-------|-------|--------|
| 121,144 | 85  | 25,817 | 6,753 | 5,074 | 37,729 |
| 121,145 | 84  | 25,661 | 6,706 | 5,056 | 37,507 |
| 121,146 | 84  | 26,094 | 6,896 | 5,192 | 38,266 |
| 121,147 | 92  | 26,365 | 6,881 | 5,215 | 38,553 |
| 121,148 | 91  | 26,003 | 6,799 | 5,170 | 38,063 |
| 121,149 | 89  | 25,687 | 6,724 | 5,111 | 37,611 |
| 121,150 | 89  | 25,835 | 6,798 | 5,135 | 37,857 |
| 121,151 | 94  | 25,925 | 6,849 | 5,173 | 38,041 |
| 121,152 | 91  | 25,432 | 6,686 | 5,084 | 37,293 |
| 121,153 | 91  | 25,681 | 6,732 | 5,124 | 37,628 |
| 121,154 | 90  | 25,950 | 6,824 | 5,174 | 38,038 |
| 121,155 | 91  | 26,209 | 6,857 | 5,222 | 38,379 |
| 121,156 | 96  | 25,871 | 6,740 | 5,165 | 37,872 |
| 121,157 | 98  | 26,041 | 6,792 | 5,197 | 38,128 |
| 121,158 | 95  | 26,056 | 6,788 | 5,187 | 38,126 |
| 121,159 | 98  | 25,582 | 6,721 | 5,100 | 37,501 |
| 121,160 | 97  | 25,234 | 6,639 | 5,062 | 37,032 |
| 121,161 | 101 | 25,387 | 6,755 | 5,106 | 37,349 |
| 121,162 | 102 | 25,082 | 6,728 | 5,095 | 37,007 |
| 121,163 | 111 | 25,355 | 6,814 | 5,148 | 37,428 |
| 121,164 | 110 | 25,122 | 6,752 | 5,109 | 37,093 |
| 121,165 | 110 | 25,662 | 6,979 | 5,290 | 38,041 |
| 121,166 | 112 | 25,738 | 7,010 | 5,298 | 38,158 |
| 121,167 | 112 | 25,830 | 7,041 | 5,345 | 38,328 |
| 121,168 | 111 | 25,897 | 7,017 | 5,311 | 38,336 |
| 121,169 | 112 | 26,089 | 6,994 | 5,311 | 38,506 |
| 121,170 | 114 | 26,238 | 7,041 | 5,363 | 38,756 |
| 121,171 | 115 | 26,208 | 6,992 | 5,369 | 38,684 |
| 121,172 | 111 | 25,793 | 6,885 | 5,292 | 38,081 |
| 121,173 | 113 | 25,637 | 6,808 | 5,237 | 37,795 |
| 121,174 | 113 | 25,920 | 6,841 | 5,277 | 38,151 |
| 121,175 | 111 | 25,872 | 6,834 | 5,283 | 38,100 |

|         |     |        |       |       |        |
|---------|-----|--------|-------|-------|--------|
| 121,176 | 109 | 25,464 | 6,783 | 5,234 | 37,590 |
| 121,177 | 107 | 25,702 | 6,916 | 5,283 | 38,008 |
| 121,178 | 107 | 25,818 | 6,903 | 5,302 | 38,130 |
| 121,179 | 105 | 25,438 | 6,827 | 5,240 | 37,610 |
| 121,180 | 104 | 25,194 | 6,790 | 5,195 | 37,283 |
| 121,181 | 103 | 24,939 | 6,760 | 5,183 | 36,985 |
| 121,182 | 103 | 25,070 | 6,772 | 5,214 | 37,159 |
| 121,183 | 102 | 25,196 | 6,816 | 5,235 | 37,349 |
| 121,184 | 99  | 24,683 | 6,706 | 5,172 | 36,660 |
| 121,185 | 100 | 24,291 | 6,635 | 5,099 | 36,125 |
| 121,186 | 96  | 23,973 | 6,582 | 5,063 | 35,714 |
| 121,187 | 100 | 24,768 | 6,808 | 5,220 | 36,896 |
| 121,188 | 99  | 24,562 | 6,768 | 5,186 | 36,615 |
| 121,189 | 102 | 24,228 | 6,708 | 5,113 | 36,151 |
| 121,190 | 102 | 24,254 | 6,718 | 5,119 | 36,193 |
| 121,191 | 101 | 24,384 | 6,726 | 5,125 | 36,336 |
| 121,192 | 100 | 24,644 | 6,760 | 5,137 | 36,641 |
| 121,193 | 106 | 24,897 | 6,831 | 5,161 | 36,995 |
| 121,194 | 106 | 24,653 | 6,811 | 5,167 | 36,737 |
| 121,195 | 101 | 24,382 | 6,728 | 5,105 | 36,316 |
| 121,196 | 101 | 24,641 | 6,792 | 5,157 | 36,691 |
| 121,197 | 105 | 24,583 | 6,738 | 5,159 | 36,585 |
| 121,198 | 96  | 24,444 | 6,758 | 5,153 | 36,451 |
| 121,199 | 97  | 24,199 | 6,705 | 5,104 | 36,105 |
| 121,200 | 97  | 24,252 | 6,708 | 5,101 | 36,158 |
| 121,201 | 97  | 24,466 | 6,767 | 5,134 | 36,464 |
| 121,202 | 94  | 24,166 | 6,675 | 5,096 | 36,031 |
| 121,203 | 98  | 24,144 | 6,679 | 5,085 | 36,006 |
| 121,204 | 99  | 24,362 | 6,752 | 5,126 | 36,339 |
| 121,205 | 99  | 24,412 | 6,764 | 5,146 | 36,421 |
| 121,206 | 94  | 24,085 | 6,710 | 5,084 | 35,973 |
| 121,207 | 94  | 24,125 | 6,713 | 5,081 | 36,013 |

|         |    |        |       |       |        |
|---------|----|--------|-------|-------|--------|
| 121,208 | 91 | 24,495 | 6,776 | 5,149 | 36,511 |
| 121,209 | 90 | 24,500 | 6,795 | 5,157 | 36,542 |
| 121,210 | 84 | 24,514 | 6,798 | 5,168 | 36,564 |
| 121,211 | 78 | 24,551 | 6,807 | 5,150 | 36,586 |
| 121,212 | 75 | 24,430 | 6,686 | 5,114 | 36,305 |
| 121,213 | 72 | 24,381 | 6,652 | 5,089 | 36,194 |
| 121,214 | 73 | 24,493 | 6,601 | 5,054 | 36,221 |
| 121,215 | 73 | 24,707 | 6,663 | 5,090 | 36,533 |
| 121,216 | 70 | 24,629 | 6,651 | 5,080 | 36,430 |
| 121,217 | 69 | 24,574 | 6,664 | 5,112 | 36,419 |
| 121,218 | 68 | 24,475 | 6,690 | 5,079 | 36,312 |
| 121,219 | 68 | 24,337 | 6,696 | 5,097 | 36,198 |
| 121,220 | 65 | 23,394 | 6,515 | 4,943 | 34,917 |
| 121,221 | 65 | 23,670 | 6,562 | 4,977 | 35,274 |
| 121,222 | 62 | 23,654 | 6,564 | 4,981 | 35,261 |
| 121,223 | 64 | 23,938 | 6,591 | 5,016 | 35,609 |
| 121,224 | 60 | 24,133 | 6,646 | 5,055 | 35,894 |
| 121,225 | 60 | 23,858 | 6,619 | 4,995 | 35,532 |
| 121,226 | 57 | 23,986 | 6,590 | 5,028 | 35,661 |
| 121,227 | 58 | 24,089 | 6,605 | 5,080 | 35,832 |
| 121,228 | 59 | 24,165 | 6,668 | 5,093 | 35,985 |
| 121,229 | 55 | 23,868 | 6,581 | 5,047 | 35,551 |
| 121,230 | 56 | 24,199 | 6,654 | 5,105 | 36,014 |
| 121,231 | 61 | 24,030 | 6,674 | 5,106 | 35,871 |
| 121,232 | 64 | 23,864 | 6,668 | 5,113 | 35,709 |
| 121,233 | 70 | 23,566 | 6,644 | 5,074 | 35,354 |
| 121,234 | 69 | 23,246 | 6,588 | 5,039 | 34,942 |
| 121,235 | 70 | 23,710 | 6,747 | 5,182 | 35,709 |
| 121,236 | 68 | 23,515 | 6,750 | 5,194 | 35,527 |
| 121,237 | 69 | 23,334 | 6,711 | 5,172 | 35,286 |
| 121,238 | 67 | 22,991 | 6,646 | 5,130 | 34,834 |
| 121,239 | 67 | 23,103 | 6,693 | 5,134 | 34,997 |

|         |     |        |       |       |        |
|---------|-----|--------|-------|-------|--------|
| 121,240 | 68  | 23,012 | 6,730 | 5,224 | 35,034 |
| 121,241 | 69  | 23,050 | 6,765 | 5,268 | 35,152 |
| 121,242 | 69  | 22,877 | 6,787 | 5,280 | 35,013 |
| 121,243 | 69  | 22,674 | 6,794 | 5,276 | 34,813 |
| 121,244 | 63  | 22,691 | 6,816 | 5,295 | 34,865 |
| 121,245 | 66  | 22,162 | 6,701 | 5,176 | 34,105 |
| 121,246 | 67  | 22,316 | 6,758 | 5,213 | 34,354 |
| 121,247 | 68  | 22,653 | 6,826 | 5,265 | 34,812 |
| 121,248 | 69  | 22,550 | 6,809 | 5,256 | 34,684 |
| 121,249 | 76  | 22,237 | 6,722 | 5,187 | 34,222 |
| 121,250 | 74  | 21,979 | 6,674 | 5,132 | 33,859 |
| 121,251 | 74  | 21,942 | 6,708 | 5,166 | 33,890 |
| 121,252 | 78  | 21,667 | 6,629 | 5,126 | 33,500 |
| 121,253 | 76  | 21,287 | 6,559 | 5,072 | 32,994 |
| 121,254 | 78  | 21,990 | 6,753 | 5,207 | 34,028 |
| 121,255 | 79  | 21,987 | 6,753 | 5,201 | 34,020 |
| 121,256 | 82  | 21,891 | 6,720 | 5,170 | 33,863 |
| 121,257 | 84  | 21,662 | 6,643 | 5,134 | 33,523 |
| 121,258 | 84  | 21,431 | 6,569 | 5,090 | 33,174 |
| 121,259 | 87  | 21,510 | 6,669 | 5,155 | 33,421 |
| 121,260 | 87  | 21,248 | 6,605 | 5,098 | 33,038 |
| 121,261 | 89  | 21,044 | 6,577 | 5,052 | 32,762 |
| 121,262 | 88  | 20,957 | 6,575 | 5,048 | 32,668 |
| 121,263 | 92  | 21,017 | 6,636 | 5,078 | 32,823 |
| 121,264 | 94  | 21,117 | 6,681 | 5,081 | 32,973 |
| 121,265 | 96  | 21,120 | 6,730 | 5,125 | 33,071 |
| 121,266 | 97  | 21,179 | 6,756 | 5,165 | 33,197 |
| 121,267 | 100 | 21,056 | 6,757 | 5,147 | 33,060 |
| 121,268 | 101 | 20,853 | 6,718 | 5,128 | 32,800 |
| 121,269 | 104 | 20,889 | 6,671 | 5,117 | 32,781 |
| 121,270 | 106 | 21,046 | 6,661 | 5,104 | 32,917 |
| 121,271 | 104 | 20,817 | 6,583 | 5,043 | 32,547 |

|         |     |        |       |       |        |
|---------|-----|--------|-------|-------|--------|
| 121,272 | 109 | 20,602 | 6,511 | 5,001 | 32,223 |
| 121,273 | 110 | 20,346 | 6,456 | 4,937 | 31,849 |
| 121,274 | 111 | 21,055 | 6,680 | 5,060 | 32,906 |
| 121,275 | 113 | 20,770 | 6,621 | 5,021 | 32,525 |
| 121,276 | 115 | 20,518 | 6,539 | 4,957 | 32,129 |
| 121,277 | 119 | 21,126 | 6,675 | 5,058 | 32,978 |
| 121,278 | 118 | 20,929 | 6,618 | 5,010 | 32,675 |
| 121,279 | 117 | 20,923 | 6,621 | 4,995 | 32,656 |
| 121,280 | 119 | 20,981 | 6,687 | 5,075 | 32,862 |
| 121,281 | 119 | 21,051 | 6,683 | 5,064 | 32,917 |
| 121,282 | 105 | 20,513 | 6,433 | 4,902 | 31,953 |
| 121,283 | 105 | 20,647 | 6,493 | 4,936 | 32,181 |
| 121,284 | 102 | 20,725 | 6,525 | 4,937 | 32,289 |
| 121,285 | 103 | 20,904 | 6,585 | 4,976 | 32,568 |
| 121,286 | 102 | 20,893 | 6,590 | 4,982 | 32,567 |
| 121,287 | 103 | 20,758 | 6,544 | 4,946 | 32,351 |
| 121,288 | 104 | 20,714 | 6,570 | 4,961 | 32,349 |
| 121,289 | 107 | 20,611 | 6,560 | 4,968 | 32,246 |
| 121,290 | 107 | 20,635 | 6,536 | 4,966 | 32,244 |
| 121,291 | 103 | 20,810 | 6,552 | 4,965 | 32,430 |
| 121,292 | 102 | 20,694 | 6,532 | 4,934 | 32,262 |
| 121,293 | 106 | 20,908 | 6,517 | 4,926 | 32,457 |
| 121,294 | 108 | 20,995 | 6,500 | 4,942 | 32,545 |
| 121,295 | 105 | 20,704 | 6,377 | 4,877 | 32,063 |
| 121,296 | 104 | 20,860 | 6,374 | 4,869 | 32,207 |
| 121,297 | 105 | 21,129 | 6,430 | 4,898 | 32,562 |
| 121,298 | 105 | 21,032 | 6,383 | 4,852 | 32,372 |
| 121,299 | 94  | 20,879 | 6,307 | 4,777 | 32,057 |
| 121,300 | 94  | 20,908 | 6,326 | 4,777 | 32,105 |
| 121,301 | 93  | 21,027 | 6,366 | 4,820 | 32,306 |
| 121,302 | 88  | 21,019 | 6,328 | 4,785 | 32,220 |
| 121,303 | 88  | 21,129 | 6,298 | 4,780 | 32,295 |

|         |    |        |       |       |        |
|---------|----|--------|-------|-------|--------|
| 121,304 | 88 | 21,495 | 6,390 | 4,822 | 32,795 |
| 121,305 | 87 | 21,573 | 6,415 | 4,847 | 32,922 |
| 121,306 | 88 | 21,592 | 6,413 | 4,840 | 32,933 |
| 121,307 | 85 | 21,599 | 6,400 | 4,858 | 32,942 |
| 121,308 | 81 | 21,384 | 6,353 | 4,840 | 32,658 |
| 121,309 | 80 | 21,207 | 6,274 | 4,763 | 32,324 |
| 121,310 | 79 | 21,577 | 6,331 | 4,809 | 32,796 |
| 121,311 | 78 | 21,886 | 6,390 | 4,848 | 33,202 |
| 121,312 | 80 | 22,205 | 6,478 | 4,907 | 33,670 |
| 121,313 | 80 | 22,331 | 6,493 | 4,930 | 33,834 |
| 121,314 | 72 | 22,102 | 6,395 | 4,855 | 33,424 |
| 121,315 | 72 | 22,198 | 6,426 | 4,893 | 33,589 |
| 121,316 | 73 | 22,249 | 6,472 | 4,914 | 33,708 |
| 121,317 | 75 | 22,180 | 6,454 | 4,902 | 33,611 |
| 121,318 | 75 | 22,286 | 6,429 | 4,883 | 33,673 |
| 121,319 | 74 | 22,138 | 6,370 | 4,809 | 33,391 |
| 121,320 | 73 | 21,934 | 6,324 | 4,763 | 33,094 |
| 121,321 | 71 | 21,607 | 6,246 | 4,710 | 32,634 |
| 121,322 | 66 | 21,952 | 6,348 | 4,773 | 33,139 |
| 121,323 | 67 | 21,929 | 6,352 | 4,799 | 33,147 |
| 121,324 | 65 | 21,999 | 6,372 | 4,824 | 33,260 |
| 121,325 | 65 | 22,121 | 6,413 | 4,866 | 33,465 |
| 121,326 | 62 | 22,244 | 6,451 | 4,878 | 33,635 |
| 121,327 | 63 | 22,239 | 6,463 | 4,899 | 33,664 |
| 121,328 | 62 | 22,086 | 6,461 | 4,899 | 33,508 |
| 121,329 | 64 | 22,033 | 6,449 | 4,892 | 33,438 |
| 121,330 | 64 | 21,687 | 6,350 | 4,826 | 32,927 |
| 121,331 | 66 | 22,174 | 6,443 | 4,887 | 33,570 |
| 121,332 | 66 | 21,945 | 6,397 | 4,845 | 33,253 |
| 121,333 | 65 | 22,052 | 6,406 | 4,843 | 33,366 |
| 121,334 | 65 | 22,215 | 6,410 | 4,843 | 33,533 |
| 121,335 | 67 | 22,393 | 6,449 | 4,859 | 33,768 |



|         |    |        |       |       |        |
|---------|----|--------|-------|-------|--------|
| 121,336 | 67 | 22,442 | 6,412 | 4,849 | 33,770 |
| 121,337 | 66 | 22,152 | 6,279 | 4,755 | 33,252 |
| 121,338 | 66 | 22,364 | 6,310 | 4,780 | 33,520 |
| 121,339 | 64 | 22,339 | 6,239 | 4,759 | 33,401 |
| 121,340 | 65 | 21,655 | 5,961 | 4,557 | 32,238 |
| 121,341 | 65 | 21,923 | 6,036 | 4,589 | 32,613 |
| 121,342 | 64 | 21,801 | 6,026 | 4,578 | 32,469 |
| 121,343 | 65 | 21,905 | 6,045 | 4,585 | 32,600 |
| 121,344 | 64 | 21,953 | 6,064 | 4,611 | 32,692 |
| 121,345 | 62 | 21,578 | 5,964 | 4,502 | 32,106 |
| 121,346 | 63 | 21,560 | 5,929 | 4,482 | 32,034 |
| 121,347 | 62 | 21,371 | 5,889 | 4,463 | 31,785 |
| 121,348 | 62 | 21,368 | 5,868 | 4,448 | 31,746 |
| 121,349 | 61 | 21,231 | 5,865 | 4,450 | 31,607 |
| 121,350 | 61 | 21,384 | 5,907 | 4,484 | 31,836 |
| 121,351 | 62 | 21,409 | 5,856 | 4,439 | 31,766 |
| 121,352 | 62 | 21,527 | 5,888 | 4,463 | 31,940 |
| 121,353 | 63 | 21,374 | 5,853 | 4,446 | 31,736 |
| 121,354 | 65 | 20,722 | 5,743 | 4,327 | 30,857 |
| 121,355 | 66 | 20,856 | 5,745 | 4,342 | 31,009 |
| 121,356 | 64 | 21,018 | 5,816 | 4,400 | 31,298 |
| 121,357 | 62 | 20,753 | 5,730 | 4,351 | 30,896 |
| 121,358 | 64 | 20,523 | 5,704 | 4,300 | 30,591 |
| 121,359 | 64 | 20,205 | 5,654 | 4,245 | 30,168 |
| 121,360 | 63 | 20,574 | 5,833 | 4,349 | 30,819 |
| 121,361 | 73 | 20,488 | 5,863 | 4,386 | 30,810 |
| 121,362 | 74 | 20,450 | 5,896 | 4,418 | 30,838 |
| 121,363 | 73 | 20,549 | 5,909 | 4,441 | 30,972 |
| 121,364 | 73 | 20,156 | 5,816 | 4,379 | 30,424 |
| 121,365 | 75 | 20,216 | 5,905 | 4,381 | 30,577 |
| 121,366 | 78 | 20,329 | 5,915 | 4,390 | 30,712 |
| 121,367 | 76 | 20,482 | 5,939 | 4,411 | 30,908 |

|         |    |        |       |       |        |
|---------|----|--------|-------|-------|--------|
| 121,368 | 73 | 20,282 | 5,853 | 4,357 | 30,565 |
| 121,369 | 70 | 20,155 | 5,895 | 4,389 | 30,509 |
| 121,370 | 71 | 20,194 | 5,874 | 4,376 | 30,515 |
| 121,371 | 69 | 20,050 | 5,788 | 4,332 | 30,239 |
| 121,372 | 73 | 20,286 | 5,844 | 4,372 | 30,575 |
| 121,373 | 75 | 20,367 | 5,862 | 4,376 | 30,680 |
| 121,374 | 75 | 20,140 | 5,800 | 4,294 | 30,309 |
| 121,375 | 75 | 20,047 | 5,792 | 4,283 | 30,197 |
| 121,376 | 77 | 20,338 | 5,889 | 4,321 | 30,625 |
| 121,377 | 82 | 20,253 | 5,885 | 4,317 | 30,537 |
| 121,378 | 79 | 19,490 | 5,674 | 4,144 | 29,387 |
| 121,379 | 81 | 19,738 | 5,729 | 4,180 | 29,728 |
| 121,380 | 79 | 19,983 | 5,820 | 4,239 | 30,121 |
| 121,381 | 87 | 20,267 | 5,889 | 4,273 | 30,516 |
| 121,382 | 91 | 19,859 | 5,808 | 4,213 | 29,971 |
| 121,383 | 90 | 19,923 | 5,808 | 4,223 | 30,044 |
| 121,384 | 90 | 19,948 | 5,796 | 4,219 | 30,053 |
| 121,385 | 90 | 20,153 | 5,854 | 4,279 | 30,376 |
| 121,386 | 89 | 20,027 | 5,824 | 4,251 | 30,191 |
| 121,387 | 91 | 20,291 | 5,873 | 4,295 | 30,550 |
| 121,388 | 94 | 20,416 | 5,913 | 4,303 | 30,726 |
| 121,389 | 95 | 20,433 | 5,931 | 4,328 | 30,787 |
| 121,390 | 95 | 20,198 | 5,892 | 4,295 | 30,480 |
| 121,391 | 92 | 20,530 | 6,018 | 4,405 | 31,045 |
| 121,392 | 93 | 20,190 | 5,930 | 4,354 | 30,567 |
| 121,393 | 94 | 20,464 | 6,011 | 4,408 | 30,977 |
| 121,394 | 94 | 20,664 | 6,042 | 4,442 | 31,242 |
| 121,395 | 94 | 20,996 | 6,137 | 4,495 | 31,722 |
| 121,396 | 93 | 21,230 | 6,202 | 4,528 | 32,053 |
| 121,397 | 92 | 20,986 | 6,164 | 4,494 | 31,736 |
| 121,398 | 92 | 20,979 | 6,154 | 4,520 | 31,745 |
| 121,399 | 92 | 20,807 | 6,136 | 4,505 | 31,540 |

|         |    |        |       |       |        |
|---------|----|--------|-------|-------|--------|
| 121,400 | 92 | 20,655 | 6,109 | 4,485 | 31,341 |
| 121,401 | 95 | 21,493 | 6,449 | 4,723 | 32,760 |
| 121,402 | 95 | 21,572 | 6,488 | 4,734 | 32,889 |
| 121,403 | 95 | 21,836 | 6,542 | 4,773 | 33,246 |
| 121,404 | 95 | 21,949 | 6,584 | 4,801 | 33,429 |
| 121,405 | 91 | 21,865 | 6,546 | 4,783 | 33,285 |
| 121,406 | 91 | 21,879 | 6,569 | 4,817 | 33,356 |
| 121,407 | 95 | 22,040 | 6,584 | 4,831 | 33,550 |
| 121,408 | 93 | 22,219 | 6,601 | 4,891 | 33,804 |
| 121,409 | 94 | 22,551 | 6,628 | 4,917 | 34,190 |
| 121,410 | 94 | 22,358 | 6,521 | 4,851 | 33,824 |
| 121,411 | 95 | 22,494 | 6,518 | 4,875 | 33,982 |
| 121,412 | 86 | 22,827 | 6,605 | 4,957 | 34,475 |
| 121,413 | 84 | 22,924 | 6,589 | 4,980 | 34,577 |
| 121,414 | 83 | 23,006 | 6,595 | 4,987 | 34,671 |
| 121,415 | 83 | 23,308 | 6,606 | 5,023 | 35,020 |
| 121,416 | 81 | 23,536 | 6,588 | 5,059 | 35,264 |
| 121,417 | 78 | 23,610 | 6,603 | 5,074 | 35,365 |
| 121,418 | 80 | 23,767 | 6,610 | 5,090 | 35,547 |
| 121,419 | 80 | 23,736 | 6,559 | 5,074 | 35,449 |
| 121,420 | 81 | 23,928 | 6,577 | 5,096 | 35,682 |
| 121,421 | 81 | 24,022 | 6,649 | 5,152 | 35,904 |
| 121,422 | 78 | 23,482 | 6,536 | 5,075 | 35,171 |
| 121,423 | 77 | 23,628 | 6,568 | 5,111 | 35,384 |
| 121,424 | 73 | 23,889 | 6,630 | 5,173 | 35,765 |
| 121,425 | 71 | 23,812 | 6,607 | 5,177 | 35,667 |
| 121,426 | 74 | 23,715 | 6,592 | 5,179 | 35,560 |
| 121,427 | 73 | 23,793 | 6,642 | 5,228 | 35,736 |
| 121,428 | 68 | 24,109 | 6,678 | 5,297 | 36,152 |
| 121,429 | 71 | 24,150 | 6,682 | 5,307 | 36,210 |
| 121,430 | 70 | 24,285 | 6,714 | 5,338 | 36,407 |
| 121,431 | 70 | 24,373 | 6,669 | 5,344 | 36,456 |

|         |    |        |       |       |        |
|---------|----|--------|-------|-------|--------|
| 121,432 | 62 | 24,164 | 6,616 | 5,323 | 36,165 |
| 121,433 | 57 | 24,377 | 6,660 | 5,386 | 36,480 |
| 121,434 | 58 | 24,131 | 6,647 | 5,357 | 36,193 |
| 121,435 | 58 | 24,130 | 6,642 | 5,365 | 36,195 |
| 121,436 | 58 | 24,279 | 6,680 | 5,396 | 36,413 |
| 121,437 | 59 | 24,146 | 6,674 | 5,390 | 36,269 |
| 121,438 | 58 | 24,128 | 6,687 | 5,417 | 36,290 |
| 121,439 | 57 | 24,236 | 6,690 | 5,442 | 36,425 |
| 121,440 | 55 | 24,303 | 6,681 | 5,412 | 36,451 |
| 121,441 | 55 | 24,373 | 6,695 | 5,443 | 36,566 |
| 121,442 | 55 | 24,534 | 6,781 | 5,484 | 36,854 |
| 121,443 | 56 | 24,452 | 6,768 | 5,485 | 36,761 |
| 121,444 | 55 | 24,237 | 6,719 | 5,442 | 36,453 |
| 121,445 | 54 | 24,181 | 6,730 | 5,456 | 36,421 |
| 121,446 | 58 | 24,487 | 6,799 | 5,530 | 36,874 |
| 121,447 | 63 | 24,530 | 6,788 | 5,560 | 36,941 |
| 121,448 | 67 | 24,682 | 6,793 | 5,579 | 37,121 |
| 121,449 | 68 | 24,968 | 6,807 | 5,581 | 37,424 |
| 121,450 | 71 | 25,402 | 6,840 | 5,620 | 37,933 |
| 121,451 | 72 | 25,678 | 6,871 | 5,664 | 38,285 |
| 121,452 | 68 | 25,335 | 6,784 | 5,617 | 37,804 |
| 121,453 | 72 | 25,605 | 6,860 | 5,690 | 38,227 |
| 121,454 | 81 | 25,807 | 6,913 | 5,720 | 38,521 |
| 121,455 | 81 | 25,854 | 6,932 | 5,734 | 38,601 |
| 121,456 | 80 | 25,299 | 6,794 | 5,602 | 37,775 |
| 121,457 | 82 | 25,510 | 6,881 | 5,661 | 38,134 |
| 121,458 | 77 | 25,662 | 6,893 | 5,691 | 38,323 |
| 121,459 | 82 | 25,226 | 6,813 | 5,543 | 37,664 |
| 121,460 | 85 | 25,396 | 6,863 | 5,588 | 37,932 |
| 121,461 | 85 | 25,395 | 6,893 | 5,620 | 37,993 |
| 121,462 | 85 | 25,394 | 6,925 | 5,663 | 38,067 |
| 121,463 | 84 | 25,144 | 6,829 | 5,581 | 37,638 |

|         |     |        |       |       |        |
|---------|-----|--------|-------|-------|--------|
| 121,464 | 84  | 24,848 | 6,749 | 5,513 | 37,194 |
| 121,465 | 91  | 25,530 | 6,915 | 5,618 | 38,154 |
| 121,466 | 96  | 25,653 | 6,967 | 5,623 | 38,339 |
| 121,467 | 99  | 24,692 | 6,793 | 5,431 | 37,015 |
| 121,468 | 99  | 25,104 | 6,881 | 5,510 | 37,594 |
| 121,469 | 101 | 25,623 | 6,972 | 5,584 | 38,280 |
| 121,470 | 102 | 25,858 | 7,011 | 5,603 | 38,574 |
| 121,471 | 104 | 26,005 | 7,007 | 5,608 | 38,724 |
| 121,472 | 104 | 26,230 | 7,023 | 5,622 | 38,979 |
| 121,473 | 108 | 26,458 | 7,053 | 5,644 | 39,263 |
| 121,474 | 108 | 26,291 | 7,010 | 5,625 | 39,034 |
| 121,475 | 113 | 27,005 | 7,232 | 5,793 | 40,143 |
| 121,476 | 115 | 26,915 | 7,165 | 5,721 | 39,916 |
| 121,477 | 112 | 27,085 | 7,150 | 5,740 | 40,087 |
| 121,478 | 113 | 27,545 | 7,208 | 5,798 | 40,664 |
| 121,479 | 111 | 27,697 | 7,238 | 5,846 | 40,892 |
| 121,480 | 106 | 27,790 | 7,243 | 5,856 | 40,995 |
| 121,481 | 108 | 27,742 | 7,264 | 5,852 | 40,966 |
| 121,482 | 109 | 27,754 | 7,271 | 5,843 | 40,977 |
| 121,483 | 111 | 27,759 | 7,285 | 5,845 | 41,000 |
| 121,484 | 110 | 27,758 | 7,313 | 5,821 | 41,002 |
| 121,485 | 115 | 27,568 | 7,254 | 5,765 | 40,702 |
| 121,486 | 117 | 27,546 | 7,234 | 5,762 | 40,659 |
| 121,487 | 119 | 28,150 | 7,371 | 5,842 | 41,482 |
| 121,488 | 114 | 27,626 | 7,263 | 5,734 | 40,737 |
| 121,489 | 114 | 27,923 | 7,348 | 5,767 | 41,152 |
| 121,490 | 113 | 28,125 | 7,395 | 5,840 | 41,473 |
| 121,491 | 114 | 28,029 | 7,375 | 5,826 | 41,344 |
| 121,492 | 114 | 27,836 | 7,293 | 5,762 | 41,005 |
| 121,493 | 110 | 27,806 | 7,241 | 5,730 | 40,887 |
| 121,494 | 109 | 27,325 | 7,098 | 5,598 | 40,130 |
| 121,495 | 109 | 27,655 | 7,156 | 5,630 | 40,550 |

|         |     |        |       |       |        |
|---------|-----|--------|-------|-------|--------|
| 121,496 | 104 | 27,484 | 7,149 | 5,595 | 40,332 |
| 121,497 | 105 | 27,658 | 7,196 | 5,614 | 40,573 |
| 121,498 | 100 | 28,059 | 7,281 | 5,686 | 41,126 |
| 121,499 | 97  | 28,195 | 7,293 | 5,728 | 41,313 |
| 121,500 | 101 | 28,283 | 7,345 | 5,721 | 41,450 |
| 121,501 | 98  | 28,138 | 7,313 | 5,705 | 41,254 |
| 121,502 | 96  | 28,133 | 7,245 | 5,664 | 41,138 |
| 121,503 | 91  | 27,528 | 7,084 | 5,511 | 40,214 |
| 121,504 | 93  | 27,941 | 7,119 | 5,579 | 40,732 |
| 121,505 | 92  | 28,335 | 7,152 | 5,618 | 41,197 |
| 121,506 | 94  | 28,483 | 7,127 | 5,648 | 41,352 |
| 121,507 | 96  | 28,603 | 7,125 | 5,645 | 41,469 |
| 121,508 | 97  | 28,795 | 7,096 | 5,635 | 41,623 |
| 121,509 | 93  | 28,390 | 6,952 | 5,563 | 40,998 |
| 121,510 | 94  | 28,710 | 7,027 | 5,611 | 41,442 |
| 121,511 | 90  | 29,178 | 7,073 | 5,676 | 42,017 |
| 121,512 | 97  | 29,347 | 7,095 | 5,689 | 42,228 |
| 121,513 | 95  | 29,295 | 7,038 | 5,659 | 42,087 |
| 121,514 | 95  | 29,535 | 7,121 | 5,725 | 42,476 |
| 121,515 | 95  | 29,743 | 7,144 | 5,755 | 42,737 |
| 121,516 | 94  | 29,989 | 7,187 | 5,787 | 43,057 |
| 121,517 | 85  | 29,728 | 7,110 | 5,756 | 42,679 |
| 121,518 | 85  | 29,522 | 7,064 | 5,696 | 42,367 |
| 121,519 | 88  | 30,072 | 7,144 | 5,782 | 43,086 |
| 121,520 | 86  | 30,447 | 7,255 | 5,855 | 43,643 |
| 121,521 | 84  | 30,339 | 7,217 | 5,862 | 43,502 |
| 121,522 | 82  | 30,456 | 7,288 | 5,947 | 43,773 |
| 121,523 | 76  | 30,722 | 7,322 | 6,001 | 44,121 |
| 121,524 | 77  | 30,568 | 7,256 | 5,939 | 43,840 |
| 121,525 | 78  | 30,944 | 7,306 | 6,039 | 44,367 |
| 121,526 | 76  | 31,364 | 7,422 | 6,159 | 45,021 |
| 121,527 | 74  | 31,093 | 7,346 | 6,141 | 44,654 |

|         |    |        |       |       |        |
|---------|----|--------|-------|-------|--------|
| 121,528 | 77 | 31,366 | 7,444 | 6,201 | 45,088 |
| 121,529 | 76 | 31,393 | 7,438 | 6,229 | 45,136 |
| 121,530 | 76 | 31,169 | 7,404 | 6,169 | 44,818 |
| 121,531 | 74 | 30,911 | 7,290 | 6,093 | 44,368 |
| 121,532 | 77 | 30,852 | 7,299 | 6,109 | 44,337 |
| 121,533 | 77 | 30,517 | 7,252 | 6,069 | 43,915 |
| 121,534 | 79 | 31,041 | 7,376 | 6,161 | 44,657 |
| 121,535 | 79 | 30,916 | 7,351 | 6,158 | 44,504 |
| 121,536 | 73 | 30,927 | 7,340 | 6,180 | 44,520 |
| 121,537 | 70 | 30,988 | 7,337 | 6,181 | 44,576 |
| 121,538 | 70 | 30,921 | 7,344 | 6,191 | 44,526 |
| 121,539 | 72 | 30,738 | 7,306 | 6,208 | 44,324 |
| 121,540 | 72 | 30,829 | 7,289 | 6,234 | 44,424 |
| 121,541 | 73 | 31,079 | 7,323 | 6,242 | 44,717 |
| 121,542 | 74 | 31,334 | 7,338 | 6,267 | 45,013 |
| 121,543 | 74 | 31,374 | 7,318 | 6,276 | 45,042 |
| 121,544 | 76 | 31,272 | 7,304 | 6,238 | 44,890 |
| 121,545 | 78 | 31,492 | 7,307 | 6,274 | 45,151 |
| 121,546 | 79 | 31,568 | 7,266 | 6,297 | 45,210 |
| 121,547 | 84 | 31,952 | 7,360 | 6,365 | 45,761 |
| 121,548 | 83 | 31,901 | 7,359 | 6,372 | 45,715 |
| 121,549 | 82 | 31,681 | 7,318 | 6,351 | 45,432 |
| 121,550 | 81 | 31,568 | 7,272 | 6,276 | 45,197 |
| 121,551 | 76 | 31,322 | 7,220 | 6,258 | 44,876 |
| 121,552 | 75 | 30,952 | 7,143 | 6,189 | 44,359 |
| 121,553 | 79 | 30,993 | 7,191 | 6,210 | 44,473 |
| 121,554 | 78 | 30,808 | 7,167 | 6,190 | 44,243 |
| 121,555 | 71 | 30,297 | 7,071 | 6,079 | 43,518 |
| 121,556 | 72 | 30,681 | 7,136 | 6,141 | 44,030 |
| 121,557 | 70 | 30,329 | 7,086 | 6,061 | 43,546 |
| 121,558 | 68 | 29,936 | 6,993 | 6,001 | 42,998 |
| 121,559 | 67 | 30,644 | 7,139 | 6,131 | 43,981 |

|         |    |        |       |       |        |
|---------|----|--------|-------|-------|--------|
| 121,560 | 66 | 30,195 | 7,074 | 6,059 | 43,394 |
| 121,561 | 66 | 30,157 | 7,065 | 6,062 | 43,350 |
| 121,562 | 68 | 30,595 | 7,155 | 6,158 | 43,976 |
| 121,563 | 62 | 30,469 | 7,147 | 6,181 | 43,859 |
| 121,564 | 61 | 30,276 | 7,149 | 6,205 | 43,691 |
| 121,565 | 64 | 30,286 | 7,161 | 6,217 | 43,728 |
| 121,566 | 61 | 30,226 | 7,129 | 6,185 | 43,601 |
| 121,567 | 65 | 30,222 | 7,126 | 6,207 | 43,620 |
| 121,568 | 70 | 30,079 | 7,118 | 6,170 | 43,437 |
| 121,569 | 72 | 29,952 | 7,126 | 6,159 | 43,309 |
| 121,570 | 71 | 29,823 | 7,111 | 6,139 | 43,144 |
| 121,571 | 70 | 29,517 | 7,052 | 6,100 | 42,739 |
| 121,572 | 70 | 29,096 | 6,961 | 5,984 | 42,111 |
| 121,573 | 71 | 28,902 | 6,919 | 5,969 | 41,861 |
| 121,574 | 75 | 29,000 | 7,012 | 5,990 | 42,077 |
| 121,575 | 76 | 28,125 | 6,812 | 5,768 | 40,781 |
| 121,576 | 76 | 28,582 | 6,896 | 5,855 | 41,409 |
| 121,577 | 80 | 28,858 | 7,002 | 5,899 | 41,839 |
| 121,578 | 87 | 28,241 | 6,891 | 5,805 | 41,024 |
| 121,579 | 90 | 28,143 | 6,864 | 5,752 | 40,849 |
| 121,580 | 90 | 28,184 | 6,873 | 5,765 | 40,912 |
| 121,581 | 89 | 28,298 | 6,869 | 5,775 | 41,031 |
| 121,582 | 88 | 28,743 | 6,922 | 5,865 | 41,618 |
| 121,583 | 85 | 28,659 | 6,848 | 5,813 | 41,405 |
| 121,584 | 80 | 29,075 | 6,882 | 5,861 | 41,898 |
| 121,585 | 82 | 29,540 | 6,974 | 5,929 | 42,525 |
| 121,586 | 81 | 29,758 | 6,984 | 5,963 | 42,786 |
| 121,587 | 81 | 29,537 | 6,920 | 5,921 | 42,459 |
| 121,588 | 85 | 29,746 | 6,967 | 5,951 | 42,749 |
| 121,589 | 86 | 30,050 | 7,007 | 6,002 | 43,145 |
| 121,590 | 85 | 29,860 | 6,976 | 5,939 | 42,860 |
| 121,591 | 87 | 30,271 | 7,069 | 6,012 | 43,439 |



|         |    |        |       |       |        |
|---------|----|--------|-------|-------|--------|
| 121,592 | 88 | 29,859 | 7,007 | 5,953 | 42,907 |
| 121,593 | 87 | 29,365 | 6,924 | 5,896 | 42,272 |
| 121,594 | 89 | 29,702 | 7,023 | 5,997 | 42,811 |
| 121,595 | 89 | 29,622 | 7,025 | 6,020 | 42,756 |
| 121,596 | 89 | 30,047 | 7,121 | 6,102 | 43,359 |
| 121,597 | 88 | 30,006 | 7,135 | 6,107 | 43,336 |
| 121,598 | 89 | 30,217 | 7,133 | 6,113 | 43,552 |
| 121,599 | 90 | 30,059 | 7,067 | 6,046 | 43,262 |
| 121,600 | 90 | 30,399 | 7,148 | 6,124 | 43,761 |
| 121,601 | 93 | 29,798 | 7,034 | 6,045 | 42,970 |
| 121,602 | 93 | 30,177 | 7,066 | 6,089 | 43,425 |
| 121,603 | 91 | 30,390 | 7,114 | 6,132 | 43,727 |
| 121,604 | 95 | 30,514 | 7,137 | 6,168 | 43,914 |
| 121,605 | 93 | 30,150 | 7,062 | 6,137 | 43,442 |
| 121,606 | 95 | 30,274 | 7,102 | 6,177 | 43,648 |
| 121,607 | 94 | 30,611 | 7,230 | 6,283 | 44,218 |
| 121,608 | 92 | 30,668 | 7,249 | 6,313 | 44,322 |
| 121,609 | 93 | 30,741 | 7,287 | 6,347 | 44,468 |
| 121,610 | 93 | 30,640 | 7,338 | 6,343 | 44,414 |
| 121,611 | 94 | 30,432 | 7,300 | 6,301 | 44,127 |
| 121,612 | 94 | 30,230 | 7,287 | 6,293 | 43,904 |
| 121,613 | 98 | 30,792 | 7,394 | 6,413 | 44,697 |
| 121,614 | 95 | 30,684 | 7,342 | 6,372 | 44,493 |
| 121,615 | 97 | 30,960 | 7,407 | 6,416 | 44,880 |
| 121,616 | 95 | 31,047 | 7,452 | 6,469 | 45,063 |
| 121,617 | 96 | 30,980 | 7,455 | 6,446 | 44,977 |
| 121,618 | 96 | 30,940 | 7,460 | 6,420 | 44,916 |
| 121,619 | 93 | 30,968 | 7,415 | 6,417 | 44,893 |
| 121,620 | 92 | 30,932 | 7,405 | 6,412 | 44,841 |
| 121,621 | 90 | 30,587 | 7,376 | 6,371 | 44,424 |
| 121,622 | 94 | 30,948 | 7,385 | 6,372 | 44,799 |
| 121,623 | 98 | 30,793 | 7,336 | 6,260 | 44,487 |

|         |    |        |       |       |        |
|---------|----|--------|-------|-------|--------|
| 121,624 | 98 | 31,191 | 7,381 | 6,322 | 44,992 |
| 121,625 | 99 | 31,293 | 7,396 | 6,379 | 45,167 |
| 121,626 | 96 | 31,242 | 7,377 | 6,380 | 45,095 |
| 121,627 | 96 | 31,355 | 7,410 | 6,347 | 45,208 |
| 121,628 | 92 | 31,439 | 7,357 | 6,342 | 45,230 |
| 121,629 | 80 | 31,074 | 7,290 | 6,304 | 44,748 |
| 121,630 | 85 | 31,396 | 7,366 | 6,356 | 45,203 |
| 121,631 | 86 | 30,993 | 7,309 | 6,277 | 44,665 |
| 121,632 | 87 | 30,493 | 7,253 | 6,197 | 44,030 |
| 121,633 | 88 | 30,870 | 7,371 | 6,300 | 44,629 |
| 121,634 | 91 | 30,715 | 7,353 | 6,307 | 44,466 |
| 121,635 | 94 | 30,591 | 7,334 | 6,283 | 44,302 |
| 121,636 | 93 | 30,569 | 7,305 | 6,282 | 44,249 |
| 121,637 | 93 | 30,175 | 7,224 | 6,203 | 43,695 |
| 121,638 | 94 | 30,184 | 7,215 | 6,213 | 43,706 |
| 121,639 | 92 | 30,209 | 7,204 | 6,224 | 43,729 |
| 121,640 | 94 | 30,404 | 7,261 | 6,223 | 43,982 |
| 121,641 | 90 | 29,933 | 7,107 | 6,043 | 43,173 |
| 121,642 | 92 | 30,212 | 7,163 | 6,082 | 43,549 |
| 121,643 | 89 | 30,485 | 7,223 | 6,118 | 43,915 |
| 121,644 | 91 | 30,456 | 7,257 | 6,137 | 43,941 |
| 121,645 | 90 | 30,548 | 7,257 | 6,125 | 44,020 |
| 121,646 | 90 | 30,587 | 7,210 | 6,098 | 43,985 |
| 121,647 | 91 | 30,230 | 7,147 | 6,027 | 43,495 |
| 121,648 | 91 | 30,314 | 7,152 | 6,020 | 43,577 |
| 121,649 | 85 | 30,541 | 7,157 | 6,084 | 43,867 |
| 121,650 | 84 | 30,236 | 7,095 | 6,034 | 43,449 |
| 121,651 | 85 | 30,181 | 7,079 | 6,013 | 43,358 |
| 121,652 | 81 | 30,075 | 7,115 | 6,029 | 43,300 |
| 121,653 | 84 | 30,272 | 7,191 | 6,102 | 43,649 |
| 121,654 | 84 | 30,109 | 7,202 | 6,097 | 43,492 |
| 121,655 | 80 | 29,671 | 7,139 | 6,031 | 42,921 |

|         |     |        |       |       |        |
|---------|-----|--------|-------|-------|--------|
| 121,656 | 79  | 29,743 | 7,129 | 6,016 | 42,967 |
| 121,657 | 84  | 29,882 | 7,108 | 6,018 | 43,092 |
| 121,658 | 85  | 30,103 | 7,127 | 6,022 | 43,337 |
| 121,659 | 88  | 30,154 | 7,132 | 6,012 | 43,386 |
| 121,660 | 88  | 29,943 | 7,053 | 5,961 | 43,045 |
| 121,661 | 89  | 29,542 | 6,898 | 5,833 | 42,362 |
| 121,662 | 89  | 29,956 | 6,996 | 5,883 | 42,924 |
| 121,663 | 93  | 30,322 | 7,076 | 5,912 | 43,403 |
| 121,664 | 93  | 29,804 | 7,020 | 5,836 | 42,753 |
| 121,665 | 98  | 29,867 | 7,051 | 5,843 | 42,859 |
| 121,666 | 101 | 30,012 | 7,074 | 5,873 | 43,060 |
| 121,667 | 104 | 30,436 | 7,177 | 5,924 | 43,641 |
| 121,668 | 105 | 30,021 | 7,165 | 5,887 | 43,178 |
| 121,669 | 103 | 30,054 | 7,143 | 5,879 | 43,179 |
| 121,670 | 102 | 30,101 | 7,187 | 5,942 | 43,332 |
| 121,671 | 101 | 29,712 | 7,052 | 5,898 | 42,763 |
| 121,672 | 101 | 29,443 | 7,009 | 5,862 | 42,415 |
| 121,673 | 102 | 29,734 | 7,077 | 5,968 | 42,881 |
| 121,674 | 98  | 29,561 | 7,061 | 6,028 | 42,748 |
| 121,675 | 103 | 29,522 | 7,097 | 6,028 | 42,750 |
| 121,676 | 103 | 29,593 | 7,162 | 6,043 | 42,901 |
| 121,677 | 106 | 29,691 | 7,187 | 6,072 | 43,056 |
| 121,678 | 107 | 29,685 | 7,170 | 6,086 | 43,048 |
| 121,679 | 105 | 29,477 | 7,146 | 6,056 | 42,784 |
| 121,680 | 105 | 29,648 | 7,153 | 6,043 | 42,949 |
| 121,681 | 101 | 29,464 | 7,069 | 5,981 | 42,615 |
| 121,682 | 103 | 29,897 | 7,079 | 6,009 | 43,088 |
| 121,683 | 103 | 29,932 | 7,075 | 5,990 | 43,100 |
| 121,684 | 101 | 30,250 | 7,148 | 6,075 | 43,574 |
| 121,685 | 101 | 30,274 | 7,210 | 6,086 | 43,671 |
| 121,686 | 106 | 30,547 | 7,298 | 6,173 | 44,124 |
| 121,687 | 105 | 30,316 | 7,253 | 6,121 | 43,795 |

|         |     |        |       |       |        |
|---------|-----|--------|-------|-------|--------|
| 121,688 | 105 | 30,727 | 7,327 | 6,172 | 44,331 |
| 121,689 | 108 | 30,350 | 7,254 | 6,109 | 43,821 |
| 121,690 | 107 | 29,871 | 7,170 | 6,056 | 43,204 |
| 121,691 | 110 | 30,501 | 7,337 | 6,208 | 44,156 |
| 121,692 | 108 | 30,216 | 7,295 | 6,201 | 43,820 |
| 121,693 | 108 | 30,198 | 7,294 | 6,214 | 43,814 |
| 121,694 | 109 | 30,214 | 7,320 | 6,235 | 43,878 |
| 121,695 | 107 | 30,059 | 7,263 | 6,177 | 43,606 |
| 121,696 | 110 | 30,107 | 7,288 | 6,228 | 43,733 |
| 121,697 | 112 | 29,840 | 7,310 | 6,215 | 43,477 |
| 121,698 | 112 | 29,551 | 7,240 | 6,159 | 43,062 |
| 121,699 | 112 | 29,315 | 7,216 | 6,117 | 42,760 |
| 121,700 | 112 | 29,413 | 7,353 | 6,197 | 43,075 |
| 121,701 | 113 | 29,342 | 7,318 | 6,197 | 42,970 |
| 121,702 | 112 | 29,202 | 7,249 | 6,114 | 42,677 |
| 121,703 | 113 | 29,396 | 7,279 | 6,136 | 42,924 |
| 121,704 | 110 | 29,432 | 7,272 | 6,112 | 42,926 |
| 121,705 | 109 | 29,239 | 7,181 | 6,054 | 42,583 |
| 121,706 | 108 | 29,258 | 7,162 | 6,037 | 42,565 |
| 121,707 | 109 | 29,337 | 7,224 | 6,118 | 42,788 |
| 121,708 | 104 | 28,984 | 7,194 | 6,081 | 42,363 |
| 121,709 | 104 | 28,382 | 7,072 | 6,001 | 41,559 |
| 121,710 | 101 | 28,301 | 7,075 | 6,048 | 41,525 |
| 121,711 | 100 | 28,076 | 7,004 | 6,011 | 41,191 |
| 121,712 | 98  | 28,130 | 6,991 | 6,023 | 41,242 |
| 121,713 | 98  | 28,002 | 6,971 | 5,994 | 41,065 |
| 121,714 | 94  | 27,819 | 6,944 | 5,979 | 40,836 |
| 121,715 | 92  | 27,751 | 6,864 | 5,912 | 40,619 |
| 121,716 | 85  | 27,800 | 6,836 | 5,928 | 40,649 |
| 121,717 | 82  | 27,857 | 6,883 | 5,944 | 40,766 |
| 121,718 | 78  | 27,627 | 6,787 | 5,938 | 40,430 |
| 121,719 | 76  | 27,630 | 6,761 | 5,909 | 40,376 |

|         |    |        |       |       |        |
|---------|----|--------|-------|-------|--------|
| 121,720 | 80 | 27,766 | 6,763 | 5,905 | 40,514 |
| 121,721 | 84 | 28,154 | 6,832 | 5,979 | 41,049 |
| 121,722 | 84 | 27,885 | 6,772 | 5,901 | 40,642 |
| 121,723 | 84 | 27,825 | 6,746 | 5,872 | 40,527 |
| 121,724 | 79 | 27,310 | 6,577 | 5,688 | 39,654 |
| 121,725 | 80 | 27,490 | 6,601 | 5,710 | 39,881 |
| 121,726 | 75 | 27,226 | 6,537 | 5,664 | 39,502 |
| 121,727 | 81 | 27,312 | 6,561 | 5,678 | 39,632 |
| 121,728 | 81 | 27,246 | 6,588 | 5,726 | 39,641 |
| 121,729 | 81 | 27,015 | 6,562 | 5,697 | 39,355 |
| 121,730 | 81 | 26,653 | 6,494 | 5,639 | 38,867 |
| 121,731 | 84 | 26,564 | 6,500 | 5,640 | 38,788 |
| 121,732 | 82 | 26,421 | 6,507 | 5,676 | 38,686 |
| 121,733 | 81 | 26,203 | 6,517 | 5,652 | 38,453 |
| 121,734 | 81 | 26,184 | 6,510 | 5,651 | 38,426 |
| 121,735 | 81 | 26,557 | 6,574 | 5,735 | 38,947 |
| 121,736 | 79 | 26,822 | 6,594 | 5,774 | 39,269 |
| 121,737 | 75 | 26,937 | 6,619 | 5,812 | 39,443 |
| 121,738 | 75 | 27,046 | 6,672 | 5,840 | 39,633 |
| 121,739 | 74 | 26,462 | 6,609 | 5,791 | 38,936 |
| 121,740 | 69 | 26,116 | 6,552 | 5,731 | 38,468 |
| 121,741 | 76 | 26,757 | 6,738 | 5,915 | 39,486 |
| 121,742 | 76 | 26,757 | 6,742 | 5,897 | 39,472 |
| 121,743 | 77 | 26,867 | 6,755 | 5,897 | 39,596 |
| 121,744 | 79 | 26,882 | 6,782 | 5,907 | 39,650 |
| 121,745 | 79 | 26,725 | 6,721 | 5,874 | 39,399 |
| 121,746 | 82 | 26,818 | 6,739 | 5,871 | 39,510 |
| 121,747 | 74 | 26,656 | 6,742 | 5,841 | 39,313 |
| 121,748 | 79 | 25,655 | 6,518 | 5,659 | 37,911 |
| 121,749 | 79 | 26,078 | 6,566 | 5,709 | 38,432 |
| 121,750 | 82 | 26,369 | 6,599 | 5,765 | 38,815 |
| 121,751 | 82 | 26,453 | 6,595 | 5,752 | 38,882 |

|         |     |        |       |       |        |
|---------|-----|--------|-------|-------|--------|
| 121,752 | 85  | 26,904 | 6,771 | 5,889 | 39,649 |
| 121,753 | 89  | 27,102 | 6,848 | 5,972 | 40,011 |
| 121,754 | 94  | 27,238 | 6,883 | 5,987 | 40,202 |
| 121,755 | 94  | 27,012 | 6,874 | 5,965 | 39,945 |
| 121,756 | 104 | 27,120 | 6,958 | 6,011 | 40,193 |
| 121,757 | 103 | 27,260 | 6,972 | 6,028 | 40,363 |
| 121,758 | 102 | 27,559 | 6,992 | 6,025 | 40,678 |
| 121,759 | 104 | 27,616 | 6,978 | 5,991 | 40,689 |
| 121,760 | 105 | 28,038 | 7,050 | 6,046 | 41,239 |
| 121,761 | 105 | 28,045 | 7,073 | 6,012 | 41,235 |
| 121,762 | 106 | 26,961 | 6,919 | 5,854 | 39,840 |
| 121,763 | 110 | 27,056 | 6,947 | 5,861 | 39,974 |
| 121,764 | 111 | 27,317 | 6,963 | 5,890 | 40,281 |
| 121,765 | 110 | 27,540 | 7,015 | 5,930 | 40,595 |
| 121,766 | 111 | 27,478 | 7,028 | 5,952 | 40,569 |
| 121,767 | 118 | 27,315 | 7,018 | 5,878 | 40,329 |
| 121,768 | 119 | 27,162 | 6,930 | 5,813 | 40,024 |
| 121,769 | 123 | 26,651 | 6,829 | 5,686 | 39,289 |
| 121,770 | 123 | 26,703 | 6,836 | 5,684 | 39,346 |
| 121,771 | 121 | 26,639 | 6,823 | 5,670 | 39,253 |
| 121,772 | 118 | 26,989 | 6,929 | 5,721 | 39,757 |
| 121,773 | 115 | 26,276 | 6,770 | 5,584 | 38,745 |
| 121,774 | 116 | 26,554 | 6,796 | 5,622 | 39,088 |
| 121,775 | 114 | 26,849 | 6,846 | 5,673 | 39,482 |
| 121,776 | 115 | 26,630 | 6,818 | 5,602 | 39,165 |
| 121,777 | 114 | 26,681 | 6,815 | 5,595 | 39,205 |
| 121,778 | 109 | 27,005 | 6,883 | 5,620 | 39,617 |
| 121,779 | 104 | 26,865 | 6,813 | 5,529 | 39,311 |
| 121,780 | 106 | 27,164 | 6,863 | 5,569 | 39,702 |
| 121,781 | 107 | 26,908 | 6,723 | 5,447 | 39,185 |
| 121,782 | 107 | 27,101 | 6,773 | 5,492 | 39,473 |
| 121,783 | 106 | 27,309 | 6,829 | 5,555 | 39,799 |

|         |     |        |       |       |        |
|---------|-----|--------|-------|-------|--------|
| 121,784 | 108 | 27,379 | 6,818 | 5,557 | 39,862 |
| 121,785 | 108 | 27,330 | 6,802 | 5,508 | 39,748 |
| 121,786 | 107 | 26,290 | 6,566 | 5,268 | 38,231 |
| 121,787 | 109 | 26,415 | 6,585 | 5,285 | 38,394 |
| 121,788 | 108 | 26,403 | 6,568 | 5,273 | 38,352 |
| 121,789 | 111 | 26,601 | 6,575 | 5,303 | 38,590 |
| 121,790 | 108 | 26,569 | 6,519 | 5,262 | 38,458 |
| 121,791 | 102 | 25,781 | 6,242 | 5,037 | 37,162 |
| 121,792 | 104 | 26,126 | 6,312 | 5,062 | 37,604 |
| 121,793 | 105 | 26,233 | 6,357 | 5,096 | 37,791 |
| 121,794 | 102 | 26,221 | 6,322 | 5,073 | 37,718 |
| 121,795 | 100 | 26,322 | 6,306 | 5,076 | 37,804 |
| 121,796 | 100 | 26,268 | 6,342 | 5,097 | 37,807 |
| 121,797 | 99  | 26,132 | 6,259 | 5,080 | 37,570 |
| 121,798 | 99  | 26,396 | 6,289 | 5,101 | 37,885 |
| 121,799 | 95  | 26,564 | 6,345 | 5,125 | 38,129 |
| 121,800 | 98  | 26,625 | 6,374 | 5,138 | 38,235 |
| 121,801 | 96  | 26,636 | 6,383 | 5,152 | 38,267 |
| 121,802 | 94  | 26,690 | 6,340 | 5,133 | 38,257 |
| 121,803 | 89  | 26,454 | 6,188 | 5,042 | 37,773 |
| 121,804 | 89  | 26,635 | 6,225 | 5,067 | 38,016 |
| 121,805 | 88  | 26,757 | 6,195 | 5,071 | 38,111 |
| 121,806 | 90  | 27,036 | 6,218 | 5,114 | 38,458 |
| 121,807 | 80  | 26,956 | 6,192 | 5,095 | 38,323 |
| 121,808 | 83  | 27,452 | 6,276 | 5,162 | 38,973 |
| 121,809 | 87  | 27,392 | 6,272 | 5,164 | 38,915 |
| 121,810 | 85  | 27,060 | 6,195 | 5,109 | 38,449 |
| 121,811 | 87  | 27,312 | 6,302 | 5,183 | 38,884 |
| 121,812 | 89  | 26,702 | 6,146 | 5,107 | 38,044 |
| 121,813 | 92  | 27,031 | 6,200 | 5,163 | 38,486 |
| 121,814 | 88  | 27,040 | 6,195 | 5,170 | 38,493 |
| 121,815 | 90  | 26,998 | 6,216 | 5,171 | 38,475 |

|         |     |        |       |       |        |
|---------|-----|--------|-------|-------|--------|
| 121,816 | 92  | 27,037 | 6,225 | 5,161 | 38,515 |
| 121,817 | 90  | 27,255 | 6,258 | 5,192 | 38,795 |
| 121,818 | 83  | 26,960 | 6,178 | 5,159 | 38,380 |
| 121,819 | 85  | 26,886 | 6,162 | 5,171 | 38,304 |
| 121,820 | 80  | 26,841 | 6,153 | 5,211 | 38,285 |
| 121,821 | 83  | 26,989 | 6,253 | 5,289 | 38,614 |
| 121,822 | 91  | 26,781 | 6,229 | 5,290 | 38,391 |
| 121,823 | 89  | 26,560 | 6,158 | 5,268 | 38,075 |
| 121,824 | 92  | 26,288 | 6,090 | 5,239 | 37,709 |
| 121,825 | 92  | 26,102 | 6,055 | 5,209 | 37,458 |
| 121,826 | 94  | 26,666 | 6,163 | 5,308 | 38,231 |
| 121,827 | 95  | 26,850 | 6,210 | 5,370 | 38,525 |
| 121,828 | 100 | 26,741 | 6,160 | 5,340 | 38,341 |
| 121,829 | 100 | 26,659 | 6,146 | 5,345 | 38,250 |
| 121,830 | 105 | 27,031 | 6,241 | 5,424 | 38,801 |
| 121,831 | 114 | 26,783 | 6,206 | 5,384 | 38,487 |
| 121,832 | 109 | 26,546 | 6,160 | 5,345 | 38,160 |
| 121,833 | 109 | 26,455 | 6,145 | 5,344 | 38,053 |
| 121,834 | 111 | 26,243 | 6,086 | 5,279 | 37,719 |
| 121,835 | 109 | 26,524 | 6,219 | 5,400 | 38,252 |
| 121,836 | 112 | 26,308 | 6,249 | 5,443 | 38,112 |
| 121,837 | 117 | 25,963 | 6,169 | 5,362 | 37,611 |
| 121,838 | 115 | 25,547 | 6,099 | 5,311 | 37,072 |
| 121,839 | 113 | 25,627 | 6,167 | 5,359 | 37,266 |
| 121,840 | 113 | 25,605 | 6,203 | 5,353 | 37,274 |
| 121,841 | 113 | 25,139 | 6,117 | 5,280 | 36,649 |
| 121,842 | 116 | 25,304 | 6,173 | 5,317 | 36,910 |
| 121,843 | 116 | 25,344 | 6,146 | 5,335 | 36,941 |
| 121,844 | 113 | 25,200 | 6,075 | 5,281 | 36,669 |
| 121,845 | 115 | 25,360 | 6,146 | 5,356 | 36,977 |
| 121,846 | 118 | 25,378 | 6,163 | 5,332 | 36,991 |
| 121,847 | 119 | 25,454 | 6,132 | 5,303 | 37,008 |



|         |     |        |       |       |        |
|---------|-----|--------|-------|-------|--------|
| 121,848 | 118 | 25,345 | 6,124 | 5,282 | 36,869 |
| 121,849 | 120 | 24,905 | 5,996 | 5,210 | 36,231 |
| 121,850 | 120 | 24,913 | 5,986 | 5,206 | 36,225 |
| 121,851 | 121 | 24,988 | 5,999 | 5,211 | 36,319 |
| 121,852 | 123 | 24,690 | 5,963 | 5,160 | 35,936 |
| 121,853 | 122 | 24,328 | 5,912 | 5,093 | 35,455 |
| 121,854 | 123 | 24,458 | 5,977 | 5,120 | 35,678 |
| 121,855 | 121 | 24,204 | 5,902 | 5,062 | 35,289 |
| 121,856 | 120 | 24,089 | 5,906 | 5,048 | 35,163 |
| 121,857 | 120 | 24,230 | 5,918 | 5,089 | 35,357 |
| 121,858 | 121 | 24,251 | 5,944 | 5,144 | 35,460 |
| 121,859 | 120 | 24,285 | 5,954 | 5,169 | 35,528 |
| 121,860 | 121 | 23,905 | 5,835 | 5,090 | 34,951 |
| 121,861 | 123 | 24,295 | 5,900 | 5,111 | 35,429 |
| 121,862 | 122 | 24,580 | 5,952 | 5,180 | 35,834 |
| 121,863 | 117 | 24,445 | 5,921 | 5,125 | 35,608 |
| 121,864 | 115 | 24,492 | 5,922 | 5,109 | 35,638 |
| 121,865 | 119 | 24,752 | 5,992 | 5,164 | 36,027 |
| 121,866 | 119 | 24,800 | 5,943 | 5,183 | 36,045 |
| 121,867 | 120 | 24,459 | 5,870 | 5,092 | 35,541 |
| 121,868 | 123 | 24,717 | 5,903 | 5,115 | 35,858 |
| 121,869 | 121 | 25,033 | 5,970 | 5,182 | 36,306 |
| 121,870 | 123 | 25,270 | 6,014 | 5,227 | 36,634 |
| 121,871 | 121 | 25,484 | 6,034 | 5,216 | 36,855 |
| 121,872 | 113 | 25,337 | 5,935 | 5,117 | 36,502 |
| 121,873 | 113 | 25,427 | 5,930 | 5,114 | 36,584 |
| 121,874 | 111 | 25,396 | 5,979 | 5,147 | 36,633 |
| 121,875 | 107 | 25,209 | 5,963 | 5,115 | 36,394 |
| 121,876 | 109 | 24,984 | 5,971 | 5,113 | 36,177 |
| 121,877 | 109 | 25,059 | 6,015 | 5,158 | 36,341 |
| 121,878 | 108 | 24,985 | 6,047 | 5,174 | 36,314 |
| 121,879 | 102 | 24,623 | 6,056 | 5,174 | 35,955 |

|         |     |        |       |       |        |
|---------|-----|--------|-------|-------|--------|
| 121,880 | 102 | 24,546 | 6,031 | 5,185 | 35,864 |
| 121,881 | 99  | 24,551 | 5,999 | 5,186 | 35,835 |
| 121,882 | 88  | 24,332 | 5,949 | 5,189 | 35,558 |
| 121,883 | 91  | 24,268 | 5,944 | 5,170 | 35,473 |
| 121,884 | 91  | 24,205 | 5,921 | 5,133 | 35,350 |
| 121,885 | 89  | 24,198 | 5,915 | 5,133 | 35,335 |
| 121,886 | 89  | 24,505 | 5,980 | 5,119 | 35,693 |
| 121,887 | 86  | 24,384 | 5,915 | 5,067 | 35,452 |
| 121,888 | 81  | 24,416 | 5,916 | 5,122 | 35,535 |
| 121,889 | 81  | 24,456 | 5,914 | 5,152 | 35,603 |
| 121,890 | 82  | 24,881 | 6,008 | 5,203 | 36,174 |
| 121,891 | 81  | 24,839 | 5,961 | 5,188 | 36,069 |
| 121,892 | 80  | 25,097 | 6,000 | 5,212 | 36,389 |
| 121,893 | 78  | 25,111 | 5,942 | 5,183 | 36,314 |
| 121,894 | 76  | 25,629 | 6,084 | 5,272 | 37,061 |
| 121,895 | 76  | 25,642 | 6,110 | 5,286 | 37,114 |
| 121,896 | 74  | 25,812 | 6,096 | 5,288 | 37,270 |
| 121,897 | 68  | 25,566 | 6,078 | 5,281 | 36,993 |
| 121,898 | 66  | 25,279 | 6,031 | 5,246 | 36,622 |
| 121,899 | 68  | 25,406 | 6,065 | 5,268 | 36,807 |
| 121,900 | 66  | 25,471 | 6,087 | 5,291 | 36,915 |
| 121,901 | 68  | 25,813 | 6,161 | 5,354 | 37,396 |
| 121,902 | 62  | 25,726 | 6,125 | 5,333 | 37,246 |
| 121,903 | 63  | 26,013 | 6,127 | 5,360 | 37,563 |
| 121,904 | 61  | 25,971 | 6,115 | 5,379 | 37,526 |
| 121,905 | 64  | 26,026 | 6,137 | 5,384 | 37,611 |
| 121,906 | 63  | 25,829 | 6,128 | 5,361 | 37,381 |
| 121,907 | 66  | 26,085 | 6,210 | 5,423 | 37,784 |
| 121,908 | 66  | 26,369 | 6,297 | 5,459 | 38,191 |
| 121,909 | 65  | 25,644 | 6,156 | 5,245 | 37,110 |
| 121,910 | 67  | 25,912 | 6,188 | 5,277 | 37,444 |
| 121,911 | 62  | 26,079 | 6,231 | 5,277 | 37,649 |

|         |    |        |       |       |        |
|---------|----|--------|-------|-------|--------|
| 121,912 | 60 | 26,197 | 6,250 | 5,328 | 37,835 |
| 121,913 | 61 | 25,774 | 6,133 | 5,262 | 37,230 |
| 121,914 | 59 | 26,003 | 6,177 | 5,298 | 37,537 |
| 121,915 | 55 | 26,390 | 6,245 | 5,360 | 38,050 |
| 121,916 | 53 | 25,804 | 6,143 | 5,262 | 37,262 |
| 121,917 | 56 | 26,127 | 6,206 | 5,284 | 37,673 |
| 121,918 | 58 | 26,434 | 6,261 | 5,332 | 38,085 |
| 121,919 | 55 | 25,992 | 6,206 | 5,308 | 37,561 |
| 121,920 | 55 | 26,052 | 6,238 | 5,341 | 37,686 |
| 121,921 | 53 | 25,926 | 6,222 | 5,337 | 37,538 |
| 121,922 | 54 | 25,879 | 6,216 | 5,335 | 37,484 |
| 121,923 | 57 | 25,794 | 6,188 | 5,326 | 37,365 |
| 121,924 | 57 | 25,581 | 6,146 | 5,261 | 37,045 |
| 121,925 | 60 | 25,906 | 6,189 | 5,303 | 37,458 |
| 121,926 | 61 | 25,913 | 6,181 | 5,295 | 37,450 |
| 121,927 | 63 | 26,159 | 6,167 | 5,313 | 37,702 |
| 121,928 | 67 | 26,404 | 6,204 | 5,315 | 37,990 |
| 121,929 | 67 | 26,410 | 6,101 | 5,266 | 37,844 |
| 121,930 | 65 | 26,606 | 6,130 | 5,268 | 38,069 |
| 121,931 | 69 | 26,969 | 6,213 | 5,327 | 38,578 |
| 121,932 | 71 | 26,749 | 6,195 | 5,240 | 38,255 |
| 121,933 | 72 | 27,272 | 6,304 | 5,309 | 38,957 |
| 121,934 | 71 | 27,311 | 6,309 | 5,346 | 39,037 |
| 121,935 | 72 | 27,255 | 6,323 | 5,348 | 38,998 |
| 121,936 | 73 | 27,535 | 6,322 | 5,368 | 39,298 |
| 121,937 | 76 | 27,529 | 6,253 | 5,393 | 39,251 |
| 121,938 | 79 | 27,357 | 6,208 | 5,324 | 38,968 |
| 121,939 | 78 | 27,289 | 6,192 | 5,268 | 38,827 |
| 121,940 | 77 | 27,483 | 6,270 | 5,314 | 39,144 |
| 121,941 | 80 | 27,539 | 6,323 | 5,351 | 39,293 |
| 121,942 | 81 | 27,463 | 6,354 | 5,331 | 39,229 |
| 121,943 | 81 | 27,159 | 6,346 | 5,315 | 38,901 |

|         |     |        |       |       |        |
|---------|-----|--------|-------|-------|--------|
| 121,944 | 82  | 26,913 | 6,314 | 5,278 | 38,587 |
| 121,945 | 83  | 26,634 | 6,257 | 5,244 | 38,218 |
| 121,946 | 82  | 26,314 | 6,175 | 5,190 | 37,761 |
| 121,947 | 95  | 26,291 | 6,233 | 5,227 | 37,846 |
| 121,948 | 96  | 26,064 | 6,166 | 5,170 | 37,496 |
| 121,949 | 96  | 26,273 | 6,153 | 5,162 | 37,684 |
| 121,950 | 97  | 26,474 | 6,157 | 5,148 | 37,876 |
| 121,951 | 97  | 26,370 | 6,162 | 5,140 | 37,769 |
| 121,952 | 95  | 26,378 | 6,202 | 5,146 | 37,821 |
| 121,953 | 102 | 26,615 | 6,286 | 5,218 | 38,221 |
| 121,954 | 103 | 26,726 | 6,311 | 5,214 | 38,354 |
| 121,955 | 104 | 26,938 | 6,344 | 5,202 | 38,588 |
| 121,956 | 99  | 26,705 | 6,234 | 5,121 | 38,159 |
| 121,957 | 99  | 26,797 | 6,232 | 5,114 | 38,242 |
| 121,958 | 97  | 26,813 | 6,268 | 5,136 | 38,314 |
| 121,959 | 101 | 26,320 | 6,145 | 5,047 | 37,613 |
| 121,960 | 101 | 26,312 | 6,139 | 5,044 | 37,596 |
| 121,961 | 99  | 26,227 | 6,130 | 5,045 | 37,501 |
| 121,962 | 99  | 26,550 | 6,199 | 5,111 | 37,959 |
| 121,963 | 102 | 26,487 | 6,170 | 5,070 | 37,829 |
| 121,964 | 101 | 26,164 | 6,121 | 5,015 | 37,401 |
| 121,965 | 104 | 25,871 | 6,047 | 4,940 | 36,962 |
| 121,966 | 107 | 25,900 | 6,055 | 4,938 | 37,000 |
| 121,967 | 103 | 25,372 | 5,976 | 4,867 | 36,318 |
| 121,968 | 103 | 25,814 | 6,064 | 4,954 | 36,935 |
| 121,969 | 101 | 25,805 | 5,992 | 4,895 | 36,793 |
| 121,970 | 101 | 25,794 | 6,005 | 4,864 | 36,764 |
| 121,971 | 103 | 26,024 | 6,004 | 4,852 | 36,983 |
| 121,972 | 104 | 26,076 | 6,022 | 4,842 | 37,044 |
| 121,973 | 105 | 26,281 | 6,087 | 4,886 | 37,359 |
| 121,974 | 103 | 26,067 | 6,027 | 4,859 | 37,056 |
| 121,975 | 103 | 26,071 | 6,040 | 4,859 | 37,073 |

|         |     |        |       |       |        |
|---------|-----|--------|-------|-------|--------|
| 121,976 | 102 | 26,330 | 6,103 | 4,899 | 37,434 |
| 121,977 | 100 | 26,362 | 6,065 | 4,891 | 37,418 |
| 121,978 | 96  | 26,111 | 6,032 | 4,855 | 37,094 |
| 121,979 | 91  | 26,329 | 6,056 | 4,872 | 37,348 |
| 121,980 | 90  | 26,294 | 6,055 | 4,879 | 37,318 |
| 121,981 | 89  | 26,181 | 6,017 | 4,872 | 37,159 |
| 121,982 | 85  | 25,883 | 5,958 | 4,838 | 36,764 |
| 121,983 | 84  | 26,104 | 5,978 | 4,898 | 37,064 |
| 121,984 | 83  | 26,306 | 5,970 | 4,930 | 37,289 |
| 121,985 | 82  | 26,193 | 5,935 | 4,861 | 37,071 |
| 121,986 | 88  | 26,580 | 6,004 | 4,919 | 37,591 |
| 121,987 | 90  | 26,634 | 6,029 | 4,923 | 37,676 |
| 121,988 | 84  | 26,460 | 6,019 | 4,887 | 37,450 |
| 121,989 | 86  | 26,506 | 6,008 | 4,878 | 37,478 |
| 121,990 | 87  | 26,591 | 5,979 | 4,882 | 37,539 |
| 121,991 | 90  | 26,903 | 6,044 | 4,937 | 37,974 |
| 121,992 | 86  | 26,966 | 5,989 | 4,922 | 37,963 |
| 121,993 | 88  | 27,046 | 5,979 | 4,926 | 38,039 |
| 121,994 | 88  | 27,197 | 5,958 | 4,918 | 38,161 |
| 121,995 | 88  | 27,115 | 5,947 | 4,910 | 38,060 |
| 121,996 | 88  | 27,213 | 5,978 | 4,911 | 38,190 |
| 121,997 | 87  | 27,266 | 5,972 | 4,900 | 38,225 |
| 121,998 | 82  | 27,317 | 5,986 | 4,918 | 38,303 |
| 121,999 | 84  | 27,539 | 6,041 | 4,954 | 38,618 |
| 122,000 | 83  | 27,454 | 6,086 | 4,970 | 38,593 |
| 122,001 | 83  | 27,462 | 6,072 | 4,979 | 38,596 |
| 122,002 | 82  | 27,537 | 6,052 | 5,003 | 38,674 |
| 122,003 | 80  | 27,830 | 6,131 | 5,060 | 39,101 |
| 122,004 | 79  | 27,975 | 6,180 | 5,067 | 39,301 |
| 122,005 | 79  | 27,920 | 6,203 | 5,064 | 39,266 |
| 122,006 | 78  | 27,891 | 6,180 | 5,087 | 39,236 |
| 122,007 | 80  | 27,951 | 6,195 | 5,103 | 39,329 |

|         |    |        |       |       |        |
|---------|----|--------|-------|-------|--------|
| 122,008 | 83 | 27,895 | 6,143 | 5,056 | 39,177 |
| 122,009 | 84 | 28,031 | 6,157 | 5,057 | 39,329 |
| 122,010 | 86 | 28,562 | 6,242 | 5,164 | 40,054 |
| 122,011 | 84 | 28,368 | 6,251 | 5,178 | 39,881 |
| 122,012 | 87 | 28,613 | 6,339 | 5,232 | 40,271 |
| 122,013 | 88 | 28,738 | 6,345 | 5,251 | 40,422 |
| 122,014 | 84 | 28,215 | 6,280 | 5,193 | 39,772 |
| 122,015 | 85 | 28,293 | 6,318 | 5,184 | 39,880 |
| 122,016 | 86 | 28,393 | 6,360 | 5,234 | 40,073 |
| 122,017 | 82 | 28,313 | 6,370 | 5,238 | 40,003 |
| 122,018 | 81 | 28,072 | 6,333 | 5,179 | 39,665 |
| 122,019 | 80 | 27,940 | 6,318 | 5,173 | 39,511 |
| 122,020 | 82 | 28,078 | 6,385 | 5,213 | 39,758 |
| 122,021 | 80 | 27,725 | 6,313 | 5,196 | 39,314 |
| 122,022 | 78 | 27,733 | 6,348 | 5,253 | 39,412 |
| 122,023 | 78 | 27,893 | 6,421 | 5,288 | 39,680 |
| 122,024 | 79 | 27,974 | 6,478 | 5,332 | 39,863 |
| 122,025 | 80 | 28,154 | 6,559 | 5,388 | 40,181 |
| 122,026 | 78 | 27,934 | 6,510 | 5,366 | 39,888 |
| 122,027 | 79 | 27,916 | 6,629 | 5,454 | 40,078 |
| 122,028 | 79 | 27,900 | 6,683 | 5,455 | 40,117 |
| 122,029 | 79 | 28,136 | 6,741 | 5,500 | 40,456 |
| 122,030 | 79 | 28,146 | 6,772 | 5,527 | 40,524 |
| 122,031 | 79 | 27,914 | 6,760 | 5,498 | 40,251 |
| 122,032 | 79 | 27,902 | 6,781 | 5,502 | 40,264 |
| 122,033 | 88 | 28,626 | 6,985 | 5,611 | 41,310 |
| 122,034 | 89 | 28,731 | 7,002 | 5,618 | 41,440 |
| 122,035 | 90 | 28,519 | 6,990 | 5,580 | 41,179 |
| 122,036 | 85 | 27,614 | 6,815 | 5,428 | 39,942 |
| 122,037 | 85 | 28,044 | 6,920 | 5,511 | 40,560 |
| 122,038 | 83 | 28,266 | 7,002 | 5,559 | 40,910 |
| 122,039 | 81 | 27,635 | 6,919 | 5,456 | 40,091 |

|         |    |        |       |       |        |
|---------|----|--------|-------|-------|--------|
| 122,040 | 81 | 27,643 | 6,921 | 5,457 | 40,102 |
| 122,041 | 80 | 27,521 | 6,910 | 5,447 | 39,958 |
| 122,042 | 77 | 27,726 | 6,961 | 5,475 | 40,239 |
| 122,043 | 81 | 27,456 | 6,933 | 5,427 | 39,897 |
| 122,044 | 78 | 27,187 | 6,891 | 5,380 | 39,536 |
| 122,045 | 83 | 27,329 | 6,920 | 5,420 | 39,752 |
| 122,046 | 87 | 27,003 | 6,823 | 5,332 | 39,245 |
| 122,047 | 89 | 27,442 | 6,899 | 5,384 | 39,814 |
| 122,048 | 85 | 27,826 | 6,981 | 5,437 | 40,329 |
| 122,049 | 95 | 28,136 | 7,061 | 5,479 | 40,771 |
| 122,050 | 94 | 28,265 | 7,098 | 5,507 | 40,964 |
| 122,051 | 98 | 28,080 | 7,040 | 5,433 | 40,651 |
| 122,052 | 98 | 28,038 | 7,060 | 5,401 | 40,597 |
| 122,053 | 99 | 28,012 | 7,048 | 5,384 | 40,543 |
| 122,054 | 99 | 28,296 | 7,129 | 5,434 | 40,958 |
| 122,055 | 95 | 28,036 | 7,077 | 5,442 | 40,650 |
| 122,056 | 93 | 27,505 | 6,962 | 5,372 | 39,932 |
| 122,057 | 94 | 27,087 | 6,910 | 5,329 | 39,420 |
| 122,058 | 92 | 26,629 | 6,851 | 5,277 | 38,849 |
| 122,059 | 88 | 26,530 | 6,944 | 5,356 | 38,918 |
| 122,060 | 87 | 26,493 | 6,985 | 5,366 | 38,931 |
| 122,061 | 83 | 26,418 | 7,001 | 5,357 | 38,859 |
| 122,062 | 83 | 26,570 | 7,032 | 5,381 | 39,066 |
| 122,063 | 80 | 26,658 | 7,014 | 5,389 | 39,141 |
| 122,064 | 79 | 26,401 | 6,986 | 5,374 | 38,840 |
| 122,065 | 79 | 26,465 | 7,020 | 5,367 | 38,931 |
| 122,066 | 75 | 26,499 | 7,034 | 5,381 | 38,989 |
| 122,067 | 73 | 26,381 | 6,971 | 5,330 | 38,755 |
| 122,068 | 74 | 26,457 | 6,963 | 5,329 | 38,823 |
| 122,069 | 74 | 26,713 | 7,022 | 5,382 | 39,191 |
| 122,070 | 76 | 26,721 | 7,030 | 5,387 | 39,214 |
| 122,071 | 76 | 26,643 | 7,007 | 5,369 | 39,095 |

|         |    |        |       |       |        |
|---------|----|--------|-------|-------|--------|
| 122,072 | 76 | 26,514 | 6,984 | 5,355 | 38,929 |
| 122,073 | 76 | 26,530 | 6,998 | 5,330 | 38,934 |
| 122,074 | 75 | 26,519 | 6,954 | 5,317 | 38,865 |
| 122,075 | 76 | 26,358 | 6,898 | 5,281 | 38,613 |
| 122,076 | 75 | 26,460 | 6,863 | 5,269 | 38,667 |
| 122,077 | 77 | 26,845 | 6,920 | 5,259 | 39,101 |
| 122,078 | 77 | 27,281 | 6,930 | 5,260 | 39,548 |
| 122,079 | 83 | 26,693 | 6,777 | 5,137 | 38,690 |
| 122,080 | 86 | 26,797 | 6,811 | 5,153 | 38,847 |
| 122,081 | 86 | 26,947 | 6,810 | 5,094 | 38,937 |
| 122,082 | 87 | 27,050 | 6,857 | 5,108 | 39,102 |
| 122,083 | 82 | 27,282 | 6,901 | 5,144 | 39,409 |
| 122,084 | 88 | 27,536 | 6,989 | 5,185 | 39,798 |
| 122,085 | 86 | 26,766 | 6,791 | 5,054 | 38,697 |
| 122,086 | 86 | 27,120 | 6,878 | 5,128 | 39,212 |
| 122,087 | 86 | 27,440 | 6,958 | 5,186 | 39,670 |
| 122,088 | 88 | 27,302 | 6,910 | 5,137 | 39,437 |
| 122,089 | 90 | 27,399 | 6,903 | 5,146 | 39,538 |
| 122,090 | 90 | 27,385 | 6,912 | 5,147 | 39,534 |
| 122,091 | 93 | 27,578 | 7,012 | 5,229 | 39,912 |
| 122,092 | 97 | 27,676 | 7,040 | 5,241 | 40,054 |
| 122,093 | 97 | 27,604 | 7,028 | 5,240 | 39,969 |
| 122,094 | 93 | 27,380 | 7,014 | 5,245 | 39,732 |
| 122,095 | 92 | 27,155 | 7,052 | 5,268 | 39,567 |
| 122,096 | 87 | 27,056 | 7,070 | 5,258 | 39,471 |
| 122,097 | 84 | 27,234 | 7,181 | 5,323 | 39,822 |
| 122,098 | 86 | 27,294 | 7,233 | 5,363 | 39,976 |
| 122,099 | 85 | 26,806 | 7,204 | 5,335 | 39,430 |
| 122,100 | 73 | 26,523 | 7,201 | 5,324 | 39,121 |
| 122,101 | 76 | 26,854 | 7,314 | 5,399 | 39,643 |
| 122,102 | 73 | 26,746 | 7,289 | 5,432 | 39,540 |
| 122,103 | 75 | 26,638 | 7,300 | 5,474 | 39,487 |



|         |     |        |       |       |        |
|---------|-----|--------|-------|-------|--------|
| 122,104 | 74  | 26,618 | 7,334 | 5,489 | 39,515 |
| 122,105 | 77  | 26,696 | 7,347 | 5,503 | 39,623 |
| 122,106 | 77  | 26,834 | 7,381 | 5,525 | 39,817 |
| 122,107 | 81  | 26,659 | 7,315 | 5,460 | 39,515 |
| 122,108 | 82  | 26,807 | 7,349 | 5,470 | 39,708 |
| 122,109 | 83  | 27,066 | 7,428 | 5,536 | 40,113 |
| 122,110 | 83  | 27,172 | 7,442 | 5,550 | 40,247 |
| 122,111 | 85  | 26,281 | 7,216 | 5,367 | 38,949 |
| 122,112 | 85  | 26,337 | 7,247 | 5,419 | 39,088 |
| 122,113 | 91  | 26,636 | 7,327 | 5,466 | 39,520 |
| 122,114 | 92  | 26,693 | 7,331 | 5,519 | 39,635 |
| 122,115 | 92  | 26,977 | 7,416 | 5,546 | 40,031 |
| 122,116 | 92  | 27,045 | 7,395 | 5,568 | 40,100 |
| 122,117 | 95  | 27,095 | 7,431 | 5,590 | 40,211 |
| 122,118 | 99  | 27,176 | 7,469 | 5,611 | 40,355 |
| 122,119 | 101 | 27,302 | 7,515 | 5,679 | 40,597 |
| 122,120 | 102 | 27,259 | 7,495 | 5,696 | 40,552 |
| 122,121 | 103 | 27,420 | 7,538 | 5,691 | 40,752 |
| 122,122 | 103 | 27,628 | 7,546 | 5,722 | 40,999 |
| 122,123 | 105 | 27,731 | 7,546 | 5,717 | 41,099 |
| 122,124 | 105 | 27,589 | 7,548 | 5,711 | 40,953 |
| 122,125 | 106 | 27,591 | 7,585 | 5,726 | 41,008 |
| 122,126 | 106 | 27,446 | 7,645 | 5,774 | 40,971 |
| 122,127 | 106 | 27,263 | 7,687 | 5,783 | 40,839 |
| 122,128 | 103 | 27,172 | 7,650 | 5,816 | 40,741 |
| 122,129 | 103 | 26,936 | 7,656 | 5,819 | 40,514 |
| 122,130 | 97  | 26,601 | 7,613 | 5,806 | 40,117 |
| 122,131 | 95  | 26,478 | 7,622 | 5,802 | 39,997 |
| 122,132 | 93  | 26,139 | 7,559 | 5,790 | 39,581 |
| 122,133 | 92  | 25,742 | 7,484 | 5,727 | 39,045 |
| 122,134 | 91  | 25,694 | 7,498 | 5,754 | 39,037 |
| 122,135 | 85  | 25,085 | 7,344 | 5,662 | 38,176 |

|         |    |        |       |       |        |
|---------|----|--------|-------|-------|--------|
| 122,136 | 85 | 25,143 | 7,378 | 5,705 | 38,311 |
| 122,137 | 85 | 25,102 | 7,368 | 5,674 | 38,229 |
| 122,138 | 81 | 25,041 | 7,340 | 5,674 | 38,136 |
| 122,139 | 79 | 25,183 | 7,376 | 5,700 | 38,338 |
| 122,140 | 76 | 25,134 | 7,389 | 5,695 | 38,294 |
| 122,141 | 74 | 25,169 | 7,393 | 5,706 | 38,342 |
| 122,142 | 73 | 25,270 | 7,358 | 5,695 | 38,396 |
| 122,143 | 69 | 25,110 | 7,322 | 5,661 | 38,162 |
| 122,144 | 75 | 25,065 | 7,286 | 5,637 | 38,063 |
| 122,145 | 75 | 25,002 | 7,239 | 5,603 | 37,919 |
| 122,146 | 75 | 25,471 | 7,360 | 5,711 | 38,617 |
| 122,147 | 73 | 25,064 | 7,173 | 5,612 | 37,922 |
| 122,148 | 73 | 25,103 | 7,176 | 5,609 | 37,961 |
| 122,149 | 71 | 25,007 | 7,170 | 5,603 | 37,851 |
| 122,150 | 77 | 24,768 | 7,003 | 5,494 | 37,342 |
| 122,151 | 77 | 24,596 | 6,988 | 5,471 | 37,132 |
| 122,152 | 80 | 24,668 | 7,040 | 5,518 | 37,306 |
| 122,153 | 82 | 24,490 | 7,018 | 5,483 | 37,073 |
| 122,154 | 79 | 24,498 | 7,006 | 5,448 | 37,031 |
| 122,155 | 79 | 24,260 | 6,979 | 5,428 | 36,746 |
| 122,156 | 76 | 24,204 | 6,964 | 5,417 | 36,661 |
| 122,157 | 71 | 23,823 | 6,843 | 5,317 | 36,054 |
| 122,158 | 76 | 24,244 | 6,926 | 5,366 | 36,612 |
| 122,159 | 77 | 24,367 | 6,938 | 5,378 | 36,760 |
| 122,160 | 78 | 24,458 | 6,946 | 5,377 | 36,859 |
| 122,161 | 75 | 24,157 | 6,847 | 5,297 | 36,376 |
| 122,162 | 77 | 23,914 | 6,802 | 5,231 | 36,024 |
| 122,163 | 80 | 24,234 | 6,882 | 5,253 | 36,449 |
| 122,164 | 75 | 24,449 | 6,962 | 5,316 | 36,802 |
| 122,165 | 75 | 24,457 | 6,973 | 5,292 | 36,797 |
| 122,166 | 78 | 24,219 | 6,904 | 5,245 | 36,446 |
| 122,167 | 77 | 23,796 | 6,821 | 5,190 | 35,884 |

|         |     |        |       |       |        |
|---------|-----|--------|-------|-------|--------|
| 122,168 | 74  | 23,974 | 6,857 | 5,239 | 36,144 |
| 122,169 | 71  | 24,164 | 6,936 | 5,286 | 36,457 |
| 122,170 | 69  | 24,045 | 6,941 | 5,268 | 36,323 |
| 122,171 | 68  | 23,895 | 6,968 | 5,252 | 36,183 |
| 122,172 | 70  | 23,752 | 7,022 | 5,259 | 36,103 |
| 122,173 | 69  | 23,583 | 7,057 | 5,280 | 35,989 |
| 122,174 | 74  | 23,559 | 7,082 | 5,300 | 36,015 |
| 122,175 | 74  | 23,549 | 7,104 | 5,309 | 36,036 |
| 122,176 | 73  | 23,643 | 6,994 | 5,247 | 35,957 |
| 122,177 | 73  | 23,652 | 6,990 | 5,222 | 35,937 |
| 122,178 | 71  | 23,975 | 7,048 | 5,244 | 36,338 |
| 122,179 | 74  | 24,008 | 7,017 | 5,185 | 36,284 |
| 122,180 | 74  | 23,885 | 6,979 | 5,160 | 36,098 |
| 122,181 | 81  | 23,978 | 6,955 | 5,150 | 36,164 |
| 122,182 | 80  | 23,654 | 6,845 | 5,084 | 35,663 |
| 122,183 | 86  | 23,911 | 6,917 | 5,112 | 36,026 |
| 122,184 | 88  | 23,975 | 6,930 | 5,108 | 36,101 |
| 122,185 | 92  | 23,926 | 6,932 | 5,104 | 36,054 |
| 122,186 | 93  | 23,831 | 6,902 | 5,064 | 35,890 |
| 122,187 | 91  | 23,534 | 6,853 | 5,006 | 35,484 |
| 122,188 | 98  | 23,761 | 6,948 | 5,081 | 35,888 |
| 122,189 | 98  | 23,682 | 6,947 | 5,073 | 35,800 |
| 122,190 | 99  | 23,631 | 6,960 | 5,066 | 35,756 |
| 122,191 | 104 | 23,582 | 6,894 | 5,013 | 35,593 |
| 122,192 | 105 | 23,554 | 6,919 | 5,013 | 35,591 |
| 122,193 | 110 | 23,892 | 7,043 | 5,084 | 36,129 |
| 122,194 | 111 | 23,807 | 7,039 | 5,061 | 36,018 |
| 122,195 | 113 | 23,454 | 6,945 | 4,950 | 35,462 |
| 122,196 | 115 | 23,434 | 6,929 | 4,921 | 35,399 |
| 122,197 | 115 | 23,665 | 7,013 | 4,955 | 35,748 |
| 122,198 | 115 | 23,298 | 6,952 | 4,875 | 35,240 |
| 122,199 | 116 | 23,476 | 7,030 | 4,905 | 35,527 |

|         |     |        |       |       |        |
|---------|-----|--------|-------|-------|--------|
| 122,200 | 114 | 23,794 | 7,106 | 4,947 | 35,961 |
| 122,201 | 113 | 23,839 | 7,137 | 4,950 | 36,039 |
| 122,202 | 110 | 23,686 | 7,065 | 4,907 | 35,768 |
| 122,203 | 111 | 23,871 | 7,126 | 4,933 | 36,041 |
| 122,204 | 113 | 23,916 | 7,146 | 4,908 | 36,083 |
| 122,205 | 115 | 23,993 | 7,165 | 4,927 | 36,200 |
| 122,206 | 115 | 24,176 | 7,153 | 4,926 | 36,370 |
| 122,207 | 115 | 23,826 | 7,056 | 4,853 | 35,850 |
| 122,208 | 116 | 23,744 | 7,070 | 4,847 | 35,777 |
| 122,209 | 112 | 23,643 | 7,086 | 4,852 | 35,693 |
| 122,210 | 119 | 23,929 | 7,137 | 4,896 | 36,081 |
| 122,211 | 120 | 23,969 | 7,156 | 4,895 | 36,140 |
| 122,212 | 120 | 23,815 | 7,078 | 4,853 | 35,866 |
| 122,213 | 122 | 23,918 | 7,164 | 4,895 | 36,099 |
| 122,214 | 120 | 23,813 | 7,181 | 4,905 | 36,019 |
| 122,215 | 119 | 23,991 | 7,207 | 4,931 | 36,248 |
| 122,216 | 118 | 23,538 | 7,126 | 4,860 | 35,642 |
| 122,217 | 114 | 23,495 | 7,182 | 4,925 | 35,716 |
| 122,218 | 115 | 23,511 | 7,219 | 4,906 | 35,751 |
| 122,219 | 115 | 23,463 | 7,235 | 4,932 | 35,745 |
| 122,220 | 115 | 23,420 | 7,211 | 4,928 | 35,674 |
| 122,221 | 117 | 23,463 | 7,198 | 4,885 | 35,663 |
| 122,222 | 116 | 23,502 | 7,160 | 4,865 | 35,643 |
| 122,223 | 110 | 22,915 | 6,949 | 4,724 | 34,698 |
| 122,224 | 111 | 23,161 | 7,007 | 4,755 | 35,034 |
| 122,225 | 106 | 23,463 | 7,046 | 4,770 | 35,385 |
| 122,226 | 110 | 23,833 | 7,152 | 4,811 | 35,906 |
| 122,227 | 107 | 23,800 | 7,190 | 4,820 | 35,917 |
| 122,228 | 105 | 23,170 | 7,051 | 4,717 | 35,043 |
| 122,229 | 109 | 23,374 | 7,104 | 4,742 | 35,329 |
| 122,230 | 104 | 22,971 | 7,046 | 4,694 | 34,815 |
| 122,231 | 107 | 23,299 | 7,105 | 4,735 | 35,246 |

|         |     |        |       |       |        |
|---------|-----|--------|-------|-------|--------|
| 122,232 | 101 | 23,274 | 7,130 | 4,761 | 35,266 |
| 122,233 | 101 | 23,497 | 7,200 | 4,775 | 35,573 |
| 122,234 | 98  | 23,817 | 7,256 | 4,844 | 36,015 |
| 122,235 | 97  | 23,841 | 7,234 | 4,829 | 36,001 |
| 122,236 | 92  | 23,525 | 7,164 | 4,778 | 35,559 |
| 122,237 | 90  | 23,833 | 7,261 | 4,844 | 36,028 |
| 122,238 | 85  | 23,580 | 7,197 | 4,814 | 35,676 |
| 122,239 | 85  | 23,562 | 7,196 | 4,808 | 35,651 |
| 122,240 | 85  | 23,332 | 7,131 | 4,761 | 35,309 |
| 122,241 | 87  | 23,688 | 7,257 | 4,831 | 35,863 |
| 122,242 | 82  | 23,493 | 7,230 | 4,853 | 35,658 |
| 122,243 | 78  | 23,315 | 7,192 | 4,835 | 35,420 |
| 122,244 | 78  | 22,715 | 7,056 | 4,734 | 34,583 |
| 122,245 | 79  | 22,969 | 7,131 | 4,767 | 34,946 |
| 122,246 | 74  | 23,352 | 7,202 | 4,825 | 35,453 |
| 122,247 | 74  | 23,084 | 7,130 | 4,784 | 35,072 |
| 122,248 | 74  | 23,151 | 7,128 | 4,792 | 35,145 |
| 122,249 | 77  | 23,357 | 7,206 | 4,869 | 35,509 |
| 122,250 | 76  | 22,932 | 7,055 | 4,791 | 34,854 |
| 122,251 | 76  | 23,271 | 7,105 | 4,835 | 35,287 |
| 122,252 | 70  | 23,602 | 7,172 | 4,909 | 35,753 |
| 122,253 | 69  | 23,488 | 7,115 | 4,895 | 35,567 |
| 122,254 | 70  | 23,419 | 7,083 | 4,883 | 35,455 |
| 122,255 | 65  | 23,808 | 7,170 | 5,002 | 36,045 |
| 122,256 | 63  | 23,494 | 7,069 | 4,917 | 35,543 |
| 122,257 | 67  | 23,851 | 7,185 | 4,987 | 36,090 |
| 122,258 | 66  | 23,347 | 7,045 | 4,895 | 35,353 |
| 122,259 | 68  | 23,643 | 7,106 | 4,936 | 35,753 |
| 122,260 | 60  | 23,580 | 7,116 | 4,945 | 35,701 |
| 122,261 | 61  | 23,580 | 7,132 | 4,960 | 35,733 |
| 122,262 | 60  | 23,805 | 7,214 | 4,995 | 36,074 |
| 122,263 | 58  | 23,849 | 7,250 | 5,019 | 36,176 |

|         |    |        |       |       |        |
|---------|----|--------|-------|-------|--------|
| 122,264 | 55 | 23,977 | 7,223 | 5,035 | 36,290 |
| 122,265 | 54 | 23,905 | 7,166 | 5,025 | 36,150 |
| 122,266 | 54 | 23,566 | 7,134 | 4,989 | 35,743 |
| 122,267 | 58 | 23,695 | 7,147 | 4,988 | 35,888 |
| 122,268 | 58 | 23,956 | 7,152 | 5,007 | 36,173 |
| 122,269 | 58 | 24,087 | 7,137 | 5,001 | 36,283 |
| 122,270 | 58 | 23,955 | 7,144 | 4,982 | 36,139 |
| 122,271 | 60 | 23,755 | 7,075 | 4,913 | 35,803 |
| 122,272 | 57 | 23,296 | 6,966 | 4,865 | 35,184 |
| 122,273 | 59 | 23,798 | 7,122 | 4,968 | 35,947 |
| 122,274 | 64 | 23,579 | 7,043 | 4,940 | 35,626 |
| 122,275 | 63 | 23,375 | 7,006 | 4,903 | 35,347 |
| 122,276 | 64 | 23,236 | 6,995 | 4,907 | 35,202 |
| 122,277 | 64 | 23,077 | 6,931 | 4,907 | 34,979 |
| 122,278 | 64 | 23,393 | 7,024 | 4,945 | 35,426 |
| 122,279 | 65 | 23,439 | 7,007 | 4,980 | 35,491 |
| 122,280 | 62 | 22,938 | 6,901 | 4,900 | 34,801 |
| 122,281 | 62 | 23,318 | 6,982 | 4,958 | 35,320 |
| 122,282 | 60 | 23,555 | 7,059 | 5,003 | 35,677 |
| 122,283 | 60 | 23,557 | 7,072 | 5,004 | 35,693 |
| 122,284 | 64 | 23,388 | 7,019 | 4,995 | 35,466 |
| 122,285 | 63 | 23,055 | 6,954 | 4,956 | 35,028 |
| 122,286 | 65 | 23,496 | 7,140 | 5,109 | 35,810 |
| 122,287 | 66 | 23,424 | 7,077 | 5,098 | 35,665 |
| 122,288 | 68 | 23,303 | 7,100 | 5,083 | 35,554 |
| 122,289 | 70 | 23,584 | 7,147 | 5,121 | 35,922 |
| 122,290 | 69 | 23,621 | 7,167 | 5,115 | 35,972 |
| 122,291 | 70 | 23,611 | 7,168 | 5,113 | 35,962 |
| 122,292 | 72 | 23,541 | 7,103 | 5,095 | 35,811 |
| 122,293 | 74 | 23,657 | 7,115 | 5,065 | 35,911 |
| 122,294 | 76 | 24,004 | 7,195 | 5,139 | 36,414 |
| 122,295 | 71 | 23,932 | 7,207 | 5,157 | 36,367 |

|         |    |        |       |       |        |
|---------|----|--------|-------|-------|--------|
| 122,296 | 71 | 23,895 | 7,200 | 5,211 | 36,377 |
| 122,297 | 70 | 23,711 | 7,232 | 5,215 | 36,228 |
| 122,298 | 69 | 23,427 | 7,156 | 5,158 | 35,810 |
| 122,299 | 68 | 23,669 | 7,270 | 5,243 | 36,250 |
| 122,300 | 65 | 23,685 | 7,295 | 5,258 | 36,303 |
| 122,301 | 65 | 23,416 | 7,291 | 5,248 | 36,020 |
| 122,302 | 68 | 23,342 | 7,285 | 5,253 | 35,948 |
| 122,303 | 73 | 23,084 | 7,209 | 5,192 | 35,558 |
| 122,304 | 71 | 23,007 | 7,165 | 5,144 | 35,387 |
| 122,305 | 70 | 23,162 | 7,270 | 5,221 | 35,723 |
| 122,306 | 70 | 23,034 | 7,258 | 5,228 | 35,590 |
| 122,307 | 72 | 22,989 | 7,270 | 5,223 | 35,554 |
| 122,308 | 73 | 23,267 | 7,327 | 5,266 | 35,933 |
| 122,309 | 72 | 23,266 | 7,360 | 5,260 | 35,958 |
| 122,310 | 69 | 22,952 | 7,300 | 5,221 | 35,542 |
| 122,311 | 69 | 23,007 | 7,299 | 5,209 | 35,584 |
| 122,312 | 68 | 23,228 | 7,378 | 5,252 | 35,926 |
| 122,313 | 66 | 23,242 | 7,371 | 5,253 | 35,932 |
| 122,314 | 66 | 23,368 | 7,389 | 5,255 | 36,078 |
| 122,315 | 67 | 23,380 | 7,390 | 5,251 | 36,088 |
| 122,316 | 70 | 23,226 | 7,301 | 5,179 | 35,776 |
| 122,317 | 70 | 23,592 | 7,356 | 5,223 | 36,241 |
| 122,318 | 66 | 23,574 | 7,349 | 5,212 | 36,201 |
| 122,319 | 66 | 23,593 | 7,394 | 5,209 | 36,262 |
| 122,320 | 67 | 23,996 | 7,454 | 5,293 | 36,810 |
| 122,321 | 69 | 24,222 | 7,427 | 5,272 | 36,990 |
| 122,322 | 67 | 24,277 | 7,438 | 5,281 | 37,063 |
| 122,323 | 64 | 23,278 | 7,090 | 5,027 | 35,459 |
| 122,324 | 64 | 23,503 | 7,157 | 5,079 | 35,803 |
| 122,325 | 61 | 23,816 | 7,220 | 5,122 | 36,219 |
| 122,326 | 61 | 23,766 | 7,229 | 5,120 | 36,176 |
| 122,327 | 60 | 24,121 | 7,393 | 5,214 | 36,788 |

|         |    |        |       |       |        |
|---------|----|--------|-------|-------|--------|
| 122,328 | 64 | 24,372 | 7,484 | 5,249 | 37,169 |
| 122,329 | 63 | 24,367 | 7,475 | 5,250 | 37,155 |
| 122,330 | 64 | 24,260 | 7,462 | 5,216 | 37,002 |
| 122,331 | 66 | 24,049 | 7,405 | 5,182 | 36,702 |
| 122,332 | 66 | 23,854 | 7,394 | 5,142 | 36,456 |
| 122,333 | 64 | 23,804 | 7,332 | 5,065 | 36,265 |
| 122,334 | 65 | 24,110 | 7,385 | 5,099 | 36,659 |
| 122,335 | 64 | 24,382 | 7,439 | 5,132 | 37,017 |
| 122,336 | 64 | 24,725 | 7,519 | 5,178 | 37,486 |
| 122,337 | 67 | 24,372 | 7,397 | 5,070 | 36,906 |
| 122,338 | 67 | 24,597 | 7,459 | 5,103 | 37,226 |
| 122,339 | 66 | 24,676 | 7,464 | 5,090 | 37,296 |
| 122,340 | 68 | 24,619 | 7,473 | 5,048 | 37,208 |
| 122,341 | 69 | 24,965 | 7,530 | 5,091 | 37,655 |
| 122,342 | 73 | 24,882 | 7,527 | 5,085 | 37,567 |
| 122,343 | 71 | 24,674 | 7,542 | 5,064 | 37,351 |
| 122,344 | 75 | 24,583 | 7,528 | 5,090 | 37,276 |
| 122,345 | 73 | 24,715 | 7,544 | 5,062 | 37,394 |
| 122,346 | 75 | 24,864 | 7,553 | 5,063 | 37,555 |
| 122,347 | 74 | 25,065 | 7,601 | 5,046 | 37,786 |
| 122,348 | 80 | 25,009 | 7,542 | 5,021 | 37,652 |
| 122,349 | 82 | 25,041 | 7,488 | 4,998 | 37,609 |
| 122,350 | 84 | 25,363 | 7,560 | 5,057 | 38,064 |
| 122,351 | 87 | 25,271 | 7,505 | 4,991 | 37,854 |
| 122,352 | 87 | 25,382 | 7,525 | 4,997 | 37,991 |
| 122,353 | 85 | 25,267 | 7,557 | 5,003 | 37,912 |
| 122,354 | 83 | 25,269 | 7,531 | 4,985 | 37,868 |
| 122,355 | 82 | 25,304 | 7,526 | 4,935 | 37,847 |
| 122,356 | 86 | 25,534 | 7,625 | 4,985 | 38,230 |
| 122,357 | 85 | 25,371 | 7,563 | 4,944 | 37,963 |
| 122,358 | 85 | 25,229 | 7,514 | 4,933 | 37,761 |
| 122,359 | 83 | 25,357 | 7,563 | 4,979 | 37,982 |



|         |     |        |       |       |        |
|---------|-----|--------|-------|-------|--------|
| 122,360 | 91  | 24,925 | 7,374 | 4,882 | 37,272 |
| 122,361 | 91  | 25,072 | 7,392 | 4,913 | 37,468 |
| 122,362 | 94  | 24,891 | 7,359 | 4,887 | 37,231 |
| 122,363 | 94  | 24,758 | 7,313 | 4,851 | 37,016 |
| 122,364 | 96  | 25,457 | 7,529 | 5,031 | 38,113 |
| 122,365 | 97  | 25,314 | 7,532 | 5,041 | 37,984 |
| 122,366 | 96  | 25,077 | 7,507 | 5,008 | 37,688 |
| 122,367 | 99  | 25,440 | 7,616 | 5,111 | 38,266 |
| 122,368 | 99  | 25,209 | 7,581 | 5,065 | 37,954 |
| 122,369 | 102 | 25,342 | 7,642 | 5,093 | 38,179 |
| 122,370 | 102 | 25,282 | 7,646 | 5,089 | 38,119 |
| 122,371 | 99  | 24,370 | 7,454 | 4,946 | 36,869 |
| 122,372 | 98  | 24,488 | 7,484 | 4,967 | 37,037 |
| 122,373 | 98  | 24,668 | 7,549 | 5,006 | 37,321 |
| 122,374 | 98  | 25,013 | 7,646 | 5,063 | 37,820 |
| 122,375 | 99  | 24,802 | 7,548 | 4,983 | 37,432 |
| 122,376 | 99  | 24,940 | 7,608 | 5,034 | 37,681 |
| 122,377 | 97  | 24,670 | 7,525 | 4,997 | 37,289 |
| 122,378 | 97  | 24,878 | 7,585 | 5,039 | 37,599 |
| 122,379 | 95  | 25,150 | 7,674 | 5,109 | 38,028 |
| 122,380 | 99  | 25,515 | 7,781 | 5,187 | 38,582 |
| 122,381 | 101 | 25,555 | 7,815 | 5,212 | 38,683 |
| 122,382 | 107 | 25,237 | 7,746 | 5,147 | 38,237 |
| 122,383 | 107 | 24,964 | 7,647 | 5,094 | 37,812 |
| 122,384 | 104 | 25,056 | 7,717 | 5,162 | 38,039 |
| 122,385 | 104 | 25,081 | 7,738 | 5,156 | 38,079 |
| 122,386 | 105 | 24,799 | 7,665 | 5,116 | 37,685 |
| 122,387 | 106 | 24,894 | 7,718 | 5,162 | 37,880 |
| 122,388 | 105 | 25,034 | 7,804 | 5,167 | 38,110 |
| 122,389 | 104 | 24,893 | 7,722 | 5,128 | 37,847 |
| 122,390 | 101 | 24,967 | 7,718 | 5,153 | 37,939 |
| 122,391 | 102 | 25,215 | 7,798 | 5,225 | 38,340 |

|         |     |        |       |       |        |
|---------|-----|--------|-------|-------|--------|
| 122,392 | 100 | 25,164 | 7,844 | 5,253 | 38,361 |
| 122,393 | 97  | 25,067 | 7,782 | 5,219 | 38,165 |
| 122,394 | 98  | 24,945 | 7,737 | 5,195 | 37,975 |
| 122,395 | 95  | 25,526 | 7,879 | 5,293 | 38,793 |
| 122,396 | 97  | 25,417 | 7,862 | 5,280 | 38,656 |
| 122,397 | 87  | 24,312 | 7,522 | 5,044 | 36,965 |
| 122,398 | 87  | 24,408 | 7,574 | 5,104 | 37,173 |
| 122,399 | 87  | 24,601 | 7,661 | 5,194 | 37,543 |
| 122,400 | 88  | 24,577 | 7,637 | 5,170 | 37,472 |
| 122,401 | 89  | 24,879 | 7,724 | 5,221 | 37,913 |
| 122,402 | 92  | 24,883 | 7,730 | 5,232 | 37,937 |
| 122,403 | 93  | 24,944 | 7,745 | 5,250 | 38,032 |
| 122,404 | 96  | 25,070 | 7,776 | 5,242 | 38,184 |
| 122,405 | 99  | 24,859 | 7,725 | 5,217 | 37,900 |
| 122,406 | 92  | 24,560 | 7,642 | 5,155 | 37,449 |
| 122,407 | 94  | 24,859 | 7,679 | 5,190 | 37,822 |
| 122,408 | 94  | 24,890 | 7,693 | 5,183 | 37,860 |
| 122,409 | 94  | 24,549 | 7,624 | 5,136 | 37,403 |
| 122,410 | 95  | 25,080 | 7,781 | 5,240 | 38,196 |
| 122,411 | 86  | 24,735 | 7,692 | 5,178 | 37,691 |
| 122,412 | 86  | 24,917 | 7,752 | 5,220 | 37,975 |
| 122,413 | 84  | 24,748 | 7,759 | 5,209 | 37,800 |
| 122,414 | 86  | 24,593 | 7,733 | 5,195 | 37,607 |
| 122,415 | 92  | 24,460 | 7,685 | 5,172 | 37,409 |
| 122,416 | 90  | 24,346 | 7,635 | 5,116 | 37,187 |
| 122,417 | 95  | 24,357 | 7,614 | 5,123 | 37,189 |
| 122,418 | 92  | 23,984 | 7,559 | 5,050 | 36,685 |
| 122,419 | 97  | 24,207 | 7,640 | 5,083 | 37,027 |
| 122,420 | 95  | 23,707 | 7,512 | 5,006 | 36,320 |
| 122,421 | 93  | 23,532 | 7,485 | 4,992 | 36,102 |
| 122,422 | 93  | 23,549 | 7,500 | 4,993 | 36,135 |
| 122,423 | 94  | 23,191 | 7,457 | 4,963 | 35,705 |

|         |    |        |       |       |        |
|---------|----|--------|-------|-------|--------|
| 122,424 | 92 | 23,316 | 7,540 | 5,024 | 35,972 |
| 122,425 | 94 | 23,242 | 7,570 | 5,021 | 35,927 |
| 122,426 | 93 | 23,191 | 7,507 | 5,000 | 35,791 |
| 122,427 | 93 | 23,295 | 7,537 | 4,989 | 35,914 |
| 122,428 | 93 | 23,242 | 7,549 | 5,006 | 35,890 |
| 122,429 | 96 | 22,983 | 7,490 | 4,961 | 35,530 |
| 122,430 | 96 | 22,716 | 7,436 | 4,898 | 35,146 |
| 122,431 | 92 | 23,217 | 7,571 | 5,006 | 35,886 |
| 122,432 | 79 | 22,982 | 7,486 | 4,967 | 35,514 |
| 122,433 | 80 | 22,922 | 7,493 | 4,968 | 35,463 |
| 122,434 | 83 | 23,166 | 7,583 | 5,012 | 35,844 |
| 122,435 | 85 | 23,234 | 7,567 | 5,029 | 35,915 |
| 122,436 | 83 | 22,623 | 7,393 | 4,884 | 34,983 |
| 122,437 | 84 | 22,862 | 7,490 | 4,939 | 35,375 |
| 122,438 | 83 | 22,976 | 7,490 | 4,954 | 35,503 |
| 122,439 | 81 | 22,942 | 7,474 | 4,990 | 35,487 |
| 122,440 | 83 | 22,586 | 7,439 | 4,941 | 35,049 |
| 122,441 | 83 | 22,322 | 7,389 | 4,889 | 34,683 |
| 122,442 | 81 | 22,529 | 7,560 | 5,029 | 35,199 |
| 122,443 | 86 | 22,755 | 7,640 | 5,088 | 35,569 |
| 122,444 | 84 | 22,669 | 7,614 | 5,091 | 35,458 |
| 122,445 | 84 | 22,534 | 7,578 | 5,046 | 35,242 |
| 122,446 | 83 | 22,620 | 7,594 | 5,061 | 35,358 |
| 122,447 | 83 | 22,738 | 7,637 | 5,099 | 35,557 |
| 122,448 | 83 | 22,618 | 7,574 | 5,053 | 35,328 |
| 122,449 | 84 | 22,961 | 7,639 | 5,120 | 35,804 |
| 122,450 | 85 | 23,016 | 7,662 | 5,107 | 35,870 |
| 122,451 | 83 | 22,862 | 7,657 | 5,085 | 35,687 |
| 122,452 | 83 | 23,594 | 7,836 | 5,242 | 36,755 |
| 122,453 | 76 | 23,207 | 7,725 | 5,172 | 36,180 |
| 122,454 | 74 | 23,307 | 7,749 | 5,198 | 36,328 |
| 122,455 | 71 | 23,657 | 7,822 | 5,266 | 36,816 |

|         |    |        |       |       |        |
|---------|----|--------|-------|-------|--------|
| 122,456 | 66 | 23,465 | 7,839 | 5,268 | 36,638 |
| 122,457 | 67 | 23,469 | 7,872 | 5,290 | 36,698 |
| 122,458 | 67 | 23,480 | 7,896 | 5,287 | 36,730 |
| 122,459 | 67 | 23,671 | 8,021 | 5,367 | 37,126 |
| 122,460 | 67 | 23,720 | 8,041 | 5,349 | 37,177 |
| 122,461 | 66 | 23,675 | 8,052 | 5,344 | 37,137 |
| 122,462 | 67 | 23,772 | 8,096 | 5,344 | 37,279 |
| 122,463 | 67 | 23,871 | 8,121 | 5,341 | 37,400 |
| 122,464 | 63 | 23,611 | 8,028 | 5,277 | 36,979 |
| 122,465 | 63 | 23,865 | 8,134 | 5,341 | 37,403 |
| 122,466 | 64 | 24,144 | 8,184 | 5,372 | 37,764 |
| 122,467 | 65 | 24,303 | 8,207 | 5,403 | 37,978 |
| 122,468 | 61 | 24,403 | 8,222 | 5,397 | 38,083 |
| 122,469 | 58 | 24,422 | 8,222 | 5,412 | 38,114 |
| 122,470 | 56 | 24,251 | 8,181 | 5,412 | 37,900 |
| 122,471 | 55 | 24,317 | 8,196 | 5,427 | 37,995 |
| 122,472 | 58 | 24,435 | 8,203 | 5,439 | 38,135 |
| 122,473 | 58 | 24,335 | 8,165 | 5,410 | 37,968 |
| 122,474 | 62 | 24,662 | 8,205 | 5,436 | 38,365 |
| 122,475 | 63 | 24,859 | 8,289 | 5,501 | 38,712 |
| 122,476 | 63 | 24,820 | 8,277 | 5,498 | 38,658 |
| 122,477 | 65 | 24,806 | 8,337 | 5,484 | 38,692 |
| 122,478 | 69 | 24,763 | 8,340 | 5,509 | 38,681 |
| 122,479 | 69 | 24,813 | 8,313 | 5,508 | 38,703 |
| 122,480 | 66 | 24,741 | 8,317 | 5,506 | 38,630 |
| 122,481 | 65 | 24,386 | 8,212 | 5,434 | 38,097 |
| 122,482 | 65 | 24,279 | 8,203 | 5,430 | 37,977 |
| 122,483 | 64 | 24,212 | 8,168 | 5,429 | 37,873 |
| 122,484 | 66 | 24,510 | 8,219 | 5,467 | 38,262 |
| 122,485 | 63 | 24,502 | 8,193 | 5,467 | 38,225 |
| 122,486 | 61 | 24,242 | 8,168 | 5,434 | 37,905 |
| 122,487 | 61 | 24,095 | 8,149 | 5,436 | 37,741 |

|         |    |        |       |       |        |
|---------|----|--------|-------|-------|--------|
| 122,488 | 61 | 24,003 | 8,150 | 5,426 | 37,640 |
| 122,489 | 65 | 23,498 | 7,969 | 5,321 | 36,853 |
| 122,490 | 68 | 23,721 | 8,011 | 5,329 | 37,129 |
| 122,491 | 67 | 23,987 | 8,051 | 5,351 | 37,456 |
| 122,492 | 67 | 23,931 | 8,013 | 5,329 | 37,340 |
| 122,493 | 67 | 23,723 | 7,966 | 5,255 | 37,011 |
| 122,494 | 62 | 23,486 | 7,824 | 5,150 | 36,522 |
| 122,495 | 62 | 23,696 | 7,895 | 5,168 | 36,821 |
| 122,496 | 64 | 23,874 | 7,992 | 5,209 | 37,139 |
| 122,497 | 64 | 23,800 | 7,970 | 5,213 | 37,047 |
| 122,498 | 63 | 23,394 | 7,891 | 5,115 | 36,463 |
| 122,499 | 65 | 23,035 | 7,838 | 5,059 | 35,997 |
| 122,500 | 64 | 22,666 | 7,782 | 4,987 | 35,499 |
| 122,501 | 63 | 23,309 | 8,008 | 5,125 | 36,505 |
| 122,502 | 64 | 23,022 | 7,959 | 5,094 | 36,139 |
| 122,503 | 65 | 22,852 | 7,945 | 5,063 | 35,925 |
| 122,504 | 66 | 22,779 | 7,979 | 5,048 | 35,872 |
| 122,505 | 67 | 22,380 | 7,882 | 4,983 | 35,312 |
| 122,506 | 68 | 22,212 | 7,858 | 4,970 | 35,108 |
| 122,507 | 70 | 22,437 | 7,850 | 4,973 | 35,330 |
| 122,508 | 71 | 22,289 | 7,833 | 4,965 | 35,158 |
| 122,509 | 69 | 22,089 | 7,760 | 4,928 | 34,846 |
| 122,510 | 75 | 22,105 | 7,732 | 4,903 | 34,815 |
| 122,511 | 77 | 21,713 | 7,599 | 4,849 | 34,238 |
| 122,512 | 77 | 21,752 | 7,613 | 4,846 | 34,288 |
| 122,513 | 76 | 21,654 | 7,642 | 4,863 | 34,235 |
| 122,514 | 76 | 21,498 | 7,574 | 4,847 | 33,995 |
| 122,515 | 77 | 21,089 | 7,454 | 4,772 | 33,392 |
| 122,516 | 77 | 21,329 | 7,524 | 4,803 | 33,733 |
| 122,517 | 70 | 21,236 | 7,589 | 4,836 | 33,731 |
| 122,518 | 71 | 21,078 | 7,577 | 4,810 | 33,536 |
| 122,519 | 71 | 20,976 | 7,607 | 4,816 | 33,470 |

|         |    |        |       |       |        |
|---------|----|--------|-------|-------|--------|
| 122,520 | 70 | 20,786 | 7,577 | 4,767 | 33,200 |
| 122,521 | 72 | 20,725 | 7,541 | 4,749 | 33,087 |
| 122,522 | 72 | 21,028 | 7,637 | 4,788 | 33,525 |
| 122,523 | 70 | 21,097 | 7,711 | 4,813 | 33,691 |
| 122,524 | 70 | 21,032 | 7,731 | 4,810 | 33,643 |
| 122,525 | 64 | 20,930 | 7,681 | 4,759 | 33,434 |
| 122,526 | 64 | 20,783 | 7,656 | 4,737 | 33,240 |
| 122,527 | 64 | 20,863 | 7,707 | 4,777 | 33,411 |
| 122,528 | 63 | 20,762 | 7,667 | 4,779 | 33,271 |
| 122,529 | 60 | 20,577 | 7,642 | 4,770 | 33,049 |
| 122,530 | 58 | 20,425 | 7,648 | 4,739 | 32,870 |
| 122,531 | 60 | 20,209 | 7,543 | 4,698 | 32,510 |
| 122,532 | 62 | 20,368 | 7,624 | 4,748 | 32,802 |
| 122,533 | 63 | 20,380 | 7,670 | 4,746 | 32,859 |
| 122,534 | 67 | 20,406 | 7,685 | 4,729 | 32,887 |
| 122,535 | 65 | 20,449 | 7,709 | 4,727 | 32,950 |
| 122,536 | 65 | 20,395 | 7,733 | 4,718 | 32,911 |
| 122,537 | 64 | 20,385 | 7,717 | 4,702 | 32,868 |
| 122,538 | 63 | 20,070 | 7,581 | 4,613 | 32,327 |
| 122,539 | 66 | 20,132 | 7,621 | 4,634 | 32,453 |
| 122,540 | 59 | 20,161 | 7,670 | 4,665 | 32,555 |
| 122,541 | 58 | 20,179 | 7,659 | 4,683 | 32,579 |
| 122,542 | 59 | 20,114 | 7,657 | 4,681 | 32,511 |
| 122,543 | 62 | 19,836 | 7,579 | 4,627 | 32,104 |
| 122,544 | 61 | 19,521 | 7,487 | 4,580 | 31,649 |
| 122,545 | 62 | 19,446 | 7,467 | 4,589 | 31,564 |
| 122,546 | 62 | 19,196 | 7,422 | 4,551 | 31,231 |
| 122,547 | 66 | 19,736 | 7,643 | 4,691 | 32,136 |
| 122,548 | 69 | 19,721 | 7,663 | 4,663 | 32,116 |
| 122,549 | 69 | 19,835 | 7,694 | 4,673 | 32,271 |
| 122,550 | 67 | 19,619 | 7,619 | 4,624 | 31,929 |
| 122,551 | 67 | 19,428 | 7,544 | 4,580 | 31,619 |

|         |    |        |       |       |        |
|---------|----|--------|-------|-------|--------|
| 122,552 | 70 | 19,374 | 7,599 | 4,615 | 31,658 |
| 122,553 | 70 | 19,156 | 7,533 | 4,571 | 31,330 |
| 122,554 | 68 | 20,229 | 8,065 | 4,862 | 33,224 |
| 122,555 | 69 | 20,179 | 8,043 | 4,868 | 33,159 |
| 122,556 | 72 | 20,149 | 8,070 | 4,874 | 33,165 |
| 122,557 | 72 | 20,069 | 8,089 | 4,895 | 33,125 |
| 122,558 | 71 | 19,984 | 8,124 | 4,907 | 33,086 |
| 122,559 | 71 | 19,697 | 8,027 | 4,827 | 32,622 |
| 122,560 | 75 | 19,645 | 8,110 | 4,860 | 32,690 |
| 122,561 | 69 | 19,475 | 8,061 | 4,856 | 32,461 |
| 122,562 | 68 | 19,337 | 8,048 | 4,821 | 32,274 |
| 122,563 | 68 | 19,501 | 8,089 | 4,852 | 32,510 |
| 122,564 | 69 | 19,567 | 8,088 | 4,836 | 32,560 |
| 122,565 | 69 | 19,568 | 8,134 | 4,837 | 32,608 |
| 122,566 | 71 | 19,578 | 8,154 | 4,848 | 32,651 |
| 122,567 | 71 | 19,467 | 8,123 | 4,850 | 32,511 |
| 122,568 | 72 | 19,547 | 8,146 | 4,834 | 32,599 |
| 122,569 | 71 | 19,702 | 8,173 | 4,855 | 32,801 |
| 122,570 | 72 | 19,839 | 8,190 | 4,846 | 32,947 |
| 122,571 | 71 | 19,956 | 8,175 | 4,838 | 33,040 |
| 122,572 | 70 | 20,098 | 8,225 | 4,850 | 33,243 |
| 122,573 | 72 | 20,064 | 8,211 | 4,888 | 33,235 |
| 122,574 | 71 | 19,973 | 8,123 | 4,856 | 33,023 |
| 122,575 | 76 | 20,154 | 8,183 | 4,905 | 33,318 |
| 122,576 | 78 | 20,162 | 8,178 | 4,925 | 33,343 |
| 122,577 | 82 | 20,160 | 8,120 | 4,884 | 33,246 |
| 122,578 | 81 | 20,023 | 8,049 | 4,839 | 32,992 |
| 122,579 | 82 | 20,343 | 8,093 | 4,862 | 33,380 |
| 122,580 | 82 | 20,358 | 8,102 | 4,849 | 33,391 |
| 122,581 | 87 | 20,736 | 8,185 | 4,902 | 33,910 |
| 122,582 | 85 | 20,279 | 8,047 | 4,800 | 33,211 |
| 122,583 | 84 | 20,318 | 8,087 | 4,830 | 33,319 |

|         |    |        |       |       |        |
|---------|----|--------|-------|-------|--------|
| 122,584 | 84 | 20,371 | 8,125 | 4,878 | 33,458 |
| 122,585 | 80 | 20,281 | 8,143 | 4,874 | 33,378 |
| 122,586 | 82 | 20,241 | 8,145 | 4,885 | 33,353 |
| 122,587 | 82 | 19,911 | 8,042 | 4,841 | 32,876 |
| 122,588 | 83 | 20,209 | 8,125 | 4,894 | 33,311 |
| 122,589 | 83 | 20,292 | 8,108 | 4,880 | 33,363 |
| 122,590 | 83 | 20,347 | 8,063 | 4,858 | 33,351 |
| 122,591 | 83 | 20,405 | 8,068 | 4,870 | 33,426 |
| 122,592 | 81 | 20,657 | 8,156 | 4,906 | 33,800 |
| 122,593 | 83 | 20,790 | 8,233 | 4,971 | 34,077 |
| 122,594 | 77 | 20,938 | 8,290 | 4,999 | 34,304 |
| 122,595 | 75 | 20,905 | 8,240 | 4,959 | 34,179 |
| 122,596 | 74 | 21,251 | 8,341 | 5,008 | 34,674 |
| 122,597 | 74 | 21,248 | 8,321 | 5,021 | 34,664 |
| 122,598 | 69 | 21,081 | 8,299 | 5,000 | 34,449 |
| 122,599 | 65 | 21,106 | 8,283 | 5,035 | 34,489 |
| 122,600 | 67 | 21,188 | 8,270 | 5,025 | 34,550 |
| 122,601 | 69 | 21,415 | 8,265 | 5,045 | 34,794 |
| 122,602 | 71 | 21,540 | 8,282 | 5,060 | 34,953 |
| 122,603 | 74 | 21,643 | 8,268 | 5,060 | 35,045 |
| 122,604 | 78 | 21,706 | 8,191 | 5,015 | 34,990 |
| 122,605 | 78 | 21,888 | 8,169 | 5,033 | 35,168 |
| 122,606 | 75 | 22,094 | 8,189 | 5,049 | 35,407 |
| 122,607 | 73 | 22,340 | 8,163 | 5,034 | 35,610 |
| 122,608 | 75 | 22,615 | 8,168 | 5,043 | 35,901 |
| 122,609 | 77 | 22,947 | 8,257 | 5,097 | 36,378 |
| 122,610 | 75 | 22,975 | 8,192 | 5,074 | 36,316 |
| 122,611 | 73 | 23,096 | 8,194 | 5,074 | 36,437 |
| 122,612 | 73 | 22,986 | 8,139 | 5,033 | 36,231 |
| 122,613 | 74 | 23,142 | 8,255 | 5,113 | 36,584 |
| 122,614 | 75 | 23,120 | 8,247 | 5,101 | 36,543 |
| 122,615 | 80 | 23,247 | 8,287 | 5,120 | 36,734 |



|         |    |        |       |       |        |
|---------|----|--------|-------|-------|--------|
| 122,616 | 79 | 23,256 | 8,277 | 5,134 | 36,746 |
| 122,617 | 82 | 23,542 | 8,392 | 5,187 | 37,203 |
| 122,618 | 85 | 23,508 | 8,394 | 5,184 | 37,171 |
| 122,619 | 84 | 23,535 | 8,367 | 5,187 | 37,173 |
| 122,620 | 87 | 23,773 | 8,462 | 5,267 | 37,589 |
| 122,621 | 87 | 24,030 | 8,559 | 5,332 | 38,008 |
| 122,622 | 92 | 23,451 | 8,382 | 5,188 | 37,113 |
| 122,623 | 91 | 23,628 | 8,435 | 5,234 | 37,388 |
| 122,624 | 89 | 23,677 | 8,446 | 5,225 | 37,437 |
| 122,625 | 93 | 23,984 | 8,514 | 5,277 | 37,868 |
| 122,626 | 90 | 23,915 | 8,523 | 5,279 | 37,807 |
| 122,627 | 89 | 23,696 | 8,465 | 5,231 | 37,481 |
| 122,628 | 84 | 23,450 | 8,430 | 5,216 | 37,180 |
| 122,629 | 85 | 24,039 | 8,662 | 5,385 | 38,171 |
| 122,630 | 86 | 24,032 | 8,722 | 5,421 | 38,261 |
| 122,631 | 82 | 24,030 | 8,779 | 5,437 | 38,328 |
| 122,632 | 82 | 24,096 | 8,799 | 5,458 | 38,435 |
| 122,633 | 85 | 23,611 | 8,572 | 5,324 | 37,592 |
| 122,634 | 86 | 23,786 | 8,668 | 5,371 | 37,911 |
| 122,635 | 87 | 23,825 | 8,678 | 5,381 | 37,971 |
| 122,636 | 88 | 24,014 | 8,734 | 5,452 | 38,288 |
| 122,637 | 88 | 24,157 | 8,826 | 5,506 | 38,577 |
| 122,638 | 89 | 24,101 | 8,780 | 5,479 | 38,449 |
| 122,639 | 88 | 23,823 | 8,724 | 5,440 | 38,075 |
| 122,640 | 88 | 23,684 | 8,794 | 5,502 | 38,068 |
| 122,641 | 85 | 23,385 | 8,768 | 5,489 | 37,727 |
| 122,642 | 87 | 23,463 | 8,822 | 5,516 | 37,888 |
| 122,643 | 87 | 23,415 | 8,801 | 5,498 | 37,801 |
| 122,644 | 86 | 23,586 | 8,822 | 5,521 | 38,015 |
| 122,645 | 89 | 23,456 | 8,764 | 5,503 | 37,812 |
| 122,646 | 89 | 23,426 | 8,760 | 5,506 | 37,781 |
| 122,647 | 92 | 23,503 | 8,778 | 5,513 | 37,886 |

|         |    |        |       |       |        |
|---------|----|--------|-------|-------|--------|
| 122,648 | 93 | 23,323 | 8,712 | 5,511 | 37,639 |
| 122,649 | 93 | 23,476 | 8,726 | 5,515 | 37,810 |
| 122,650 | 94 | 23,361 | 8,758 | 5,546 | 37,759 |
| 122,651 | 92 | 23,181 | 8,694 | 5,532 | 37,499 |
| 122,652 | 88 | 23,014 | 8,602 | 5,493 | 37,197 |
| 122,653 | 82 | 22,291 | 8,359 | 5,368 | 36,100 |
| 122,654 | 82 | 22,297 | 8,366 | 5,368 | 36,113 |
| 122,655 | 78 | 21,810 | 8,231 | 5,280 | 35,399 |
| 122,656 | 78 | 21,938 | 8,307 | 5,354 | 35,677 |
| 122,657 | 78 | 21,684 | 8,280 | 5,337 | 35,379 |
| 122,658 | 80 | 21,511 | 8,289 | 5,333 | 35,213 |
| 122,659 | 78 | 21,325 | 8,275 | 5,310 | 34,988 |
| 122,660 | 77 | 21,338 | 8,253 | 5,287 | 34,955 |
| 122,661 | 74 | 20,891 | 8,093 | 5,178 | 34,236 |
| 122,662 | 78 | 21,256 | 8,183 | 5,226 | 34,743 |
| 122,663 | 78 | 21,467 | 8,221 | 5,241 | 35,007 |
| 122,664 | 79 | 21,331 | 8,170 | 5,215 | 34,795 |
| 122,665 | 73 | 21,074 | 8,062 | 5,171 | 34,380 |
| 122,666 | 73 | 21,004 | 8,024 | 5,162 | 34,263 |
| 122,667 | 73 | 21,153 | 8,086 | 5,228 | 34,540 |
| 122,668 | 71 | 21,035 | 8,041 | 5,209 | 34,356 |
| 122,669 | 70 | 20,836 | 7,977 | 5,171 | 34,054 |
| 122,670 | 68 | 20,642 | 7,897 | 5,137 | 33,744 |
| 122,671 | 65 | 20,332 | 7,791 | 5,070 | 33,258 |
| 122,672 | 65 | 19,962 | 7,662 | 5,000 | 32,689 |
| 122,673 | 61 | 20,119 | 7,782 | 5,095 | 33,057 |
| 122,674 | 62 | 20,058 | 7,784 | 5,071 | 32,975 |
| 122,675 | 56 | 19,603 | 7,612 | 4,978 | 32,249 |
| 122,676 | 57 | 19,623 | 7,678 | 5,012 | 32,370 |
| 122,677 | 55 | 19,527 | 7,662 | 5,006 | 32,250 |
| 122,678 | 55 | 19,582 | 7,678 | 5,029 | 32,344 |
| 122,679 | 55 | 19,580 | 7,651 | 5,008 | 32,294 |

|         |    |        |       |       |        |
|---------|----|--------|-------|-------|--------|
| 122,680 | 54 | 19,602 | 7,624 | 5,004 | 32,284 |
| 122,681 | 53 | 19,459 | 7,510 | 4,951 | 31,973 |
| 122,682 | 53 | 19,393 | 7,435 | 4,931 | 31,812 |
| 122,683 | 53 | 19,278 | 7,390 | 4,930 | 31,651 |
| 122,684 | 52 | 19,221 | 7,356 | 4,916 | 31,545 |
| 122,685 | 52 | 19,289 | 7,336 | 4,919 | 31,596 |
| 122,686 | 53 | 19,305 | 7,296 | 4,899 | 31,553 |
| 122,687 | 55 | 19,462 | 7,331 | 4,878 | 31,726 |
| 122,688 | 54 | 19,535 | 7,307 | 4,855 | 31,751 |
| 122,689 | 53 | 19,335 | 7,197 | 4,768 | 31,353 |
| 122,690 | 53 | 19,142 | 7,071 | 4,677 | 30,943 |
| 122,691 | 53 | 19,198 | 7,070 | 4,693 | 31,014 |
| 122,692 | 55 | 19,000 | 6,975 | 4,630 | 30,660 |
| 122,693 | 55 | 18,853 | 6,912 | 4,590 | 30,410 |
| 122,694 | 56 | 19,581 | 7,239 | 4,767 | 31,643 |
| 122,695 | 55 | 19,493 | 7,230 | 4,740 | 31,518 |
| 122,696 | 56 | 19,319 | 7,237 | 4,745 | 31,357 |
| 122,697 | 56 | 19,212 | 7,216 | 4,744 | 31,228 |
| 122,698 | 54 | 19,196 | 7,218 | 4,730 | 31,198 |
| 122,699 | 55 | 19,174 | 7,214 | 4,693 | 31,136 |
| 122,700 | 56 | 19,261 | 7,181 | 4,673 | 31,171 |
| 122,701 | 56 | 19,012 | 7,108 | 4,618 | 30,794 |
| 122,702 | 61 | 19,165 | 7,225 | 4,682 | 31,133 |
| 122,703 | 63 | 18,888 | 7,229 | 4,635 | 30,815 |
| 122,704 | 66 | 19,224 | 7,295 | 4,692 | 31,277 |
| 122,705 | 66 | 19,313 | 7,333 | 4,698 | 31,410 |
| 122,706 | 68 | 19,085 | 7,277 | 4,650 | 31,080 |
| 122,707 | 67 | 18,882 | 7,211 | 4,589 | 30,749 |
| 122,708 | 65 | 18,982 | 7,309 | 4,627 | 30,983 |
| 122,709 | 67 | 18,748 | 7,211 | 4,575 | 30,601 |
| 122,710 | 67 | 18,487 | 7,121 | 4,534 | 30,209 |
| 122,711 | 66 | 18,927 | 7,386 | 4,725 | 31,104 |

|         |    |        |       |       |        |
|---------|----|--------|-------|-------|--------|
| 122,712 | 66 | 19,063 | 7,459 | 4,766 | 31,354 |
| 122,713 | 63 | 19,095 | 7,476 | 4,788 | 31,422 |
| 122,714 | 59 | 18,999 | 7,436 | 4,748 | 31,242 |
| 122,715 | 60 | 19,334 | 7,550 | 4,826 | 31,770 |
| 122,716 | 61 | 19,224 | 7,539 | 4,764 | 31,588 |
| 122,717 | 65 | 19,414 | 7,536 | 4,770 | 31,785 |
| 122,718 | 65 | 19,810 | 7,659 | 4,825 | 32,359 |
| 122,719 | 63 | 19,791 | 7,633 | 4,818 | 32,305 |
| 122,720 | 61 | 19,826 | 7,676 | 4,860 | 32,423 |
| 122,721 | 61 | 19,861 | 7,718 | 4,848 | 32,488 |
| 122,722 | 62 | 19,902 | 7,716 | 4,874 | 32,554 |
| 122,723 | 64 | 19,978 | 7,730 | 4,864 | 32,636 |
| 122,724 | 66 | 20,190 | 7,747 | 4,883 | 32,886 |
| 122,725 | 66 | 20,336 | 7,743 | 4,903 | 33,048 |
| 122,726 | 70 | 20,147 | 7,673 | 4,842 | 32,732 |
| 122,727 | 76 | 20,470 | 7,759 | 4,877 | 33,182 |
| 122,728 | 80 | 20,499 | 7,722 | 4,848 | 33,149 |
| 122,729 | 81 | 20,817 | 7,809 | 4,904 | 33,611 |
| 122,730 | 82 | 20,633 | 7,707 | 4,799 | 33,221 |
| 122,731 | 83 | 20,871 | 7,766 | 4,818 | 33,538 |
| 122,732 | 82 | 21,122 | 7,851 | 4,892 | 33,947 |
| 122,733 | 85 | 20,857 | 7,779 | 4,829 | 33,550 |
| 122,734 | 84 | 20,626 | 7,704 | 4,771 | 33,185 |
| 122,735 | 84 | 21,234 | 7,870 | 4,862 | 34,050 |
| 122,736 | 83 | 21,204 | 7,892 | 4,850 | 34,029 |
| 122,737 | 81 | 20,946 | 7,883 | 4,826 | 33,736 |
| 122,738 | 80 | 20,952 | 7,869 | 4,845 | 33,746 |
| 122,739 | 79 | 20,684 | 7,802 | 4,797 | 33,362 |
| 122,740 | 80 | 20,919 | 7,882 | 4,845 | 33,726 |
| 122,741 | 84 | 21,014 | 7,907 | 4,858 | 33,863 |
| 122,742 | 86 | 20,888 | 7,832 | 4,802 | 33,608 |
| 122,743 | 82 | 20,811 | 7,782 | 4,772 | 33,447 |

|         |     |        |       |       |        |
|---------|-----|--------|-------|-------|--------|
| 122,744 | 88  | 21,283 | 7,893 | 4,827 | 34,091 |
| 122,745 | 86  | 21,240 | 7,793 | 4,758 | 33,877 |
| 122,746 | 86  | 21,444 | 7,851 | 4,814 | 34,195 |
| 122,747 | 82  | 21,745 | 7,949 | 4,888 | 34,664 |
| 122,748 | 88  | 21,778 | 7,952 | 4,875 | 34,693 |
| 122,749 | 90  | 21,693 | 7,915 | 4,868 | 34,566 |
| 122,750 | 88  | 21,339 | 7,809 | 4,819 | 34,055 |
| 122,751 | 87  | 21,399 | 7,930 | 4,870 | 34,286 |
| 122,752 | 86  | 21,563 | 7,919 | 4,838 | 34,406 |
| 122,753 | 82  | 21,696 | 7,882 | 4,826 | 34,486 |
| 122,754 | 81  | 21,626 | 7,806 | 4,817 | 34,330 |
| 122,755 | 79  | 21,722 | 7,864 | 4,810 | 34,475 |
| 122,756 | 80  | 21,701 | 7,843 | 4,819 | 34,443 |
| 122,757 | 77  | 21,844 | 7,809 | 4,829 | 34,559 |
| 122,758 | 79  | 21,823 | 7,841 | 4,855 | 34,598 |
| 122,759 | 79  | 21,843 | 7,805 | 4,854 | 34,581 |
| 122,760 | 78  | 21,783 | 7,763 | 4,847 | 34,471 |
| 122,761 | 78  | 21,791 | 7,709 | 4,796 | 34,374 |
| 122,762 | 80  | 21,997 | 7,778 | 4,851 | 34,706 |
| 122,763 | 80  | 21,950 | 7,712 | 4,842 | 34,584 |
| 122,764 | 81  | 21,772 | 7,642 | 4,790 | 34,285 |
| 122,765 | 83  | 21,647 | 7,558 | 4,749 | 34,037 |
| 122,766 | 90  | 21,558 | 7,563 | 4,734 | 33,945 |
| 122,767 | 89  | 21,260 | 7,458 | 4,701 | 33,508 |
| 122,768 | 86  | 21,339 | 7,560 | 4,748 | 33,733 |
| 122,769 | 86  | 21,077 | 7,472 | 4,695 | 33,330 |
| 122,770 | 93  | 21,479 | 7,680 | 4,839 | 34,091 |
| 122,771 | 94  | 21,481 | 7,645 | 4,808 | 34,028 |
| 122,772 | 99  | 21,338 | 7,559 | 4,770 | 33,766 |
| 122,773 | 99  | 21,082 | 7,453 | 4,706 | 33,340 |
| 122,774 | 103 | 21,945 | 7,691 | 4,848 | 34,587 |
| 122,775 | 101 | 21,707 | 7,606 | 4,788 | 34,202 |

|         |     |        |       |       |        |
|---------|-----|--------|-------|-------|--------|
| 122,776 | 103 | 21,938 | 7,691 | 4,842 | 34,574 |
| 122,777 | 99  | 21,724 | 7,629 | 4,799 | 34,251 |
| 122,778 | 93  | 21,944 | 7,694 | 4,862 | 34,593 |
| 122,779 | 88  | 21,744 | 7,605 | 4,824 | 34,261 |
| 122,780 | 94  | 21,890 | 7,696 | 4,890 | 34,570 |
| 122,781 | 95  | 21,758 | 7,703 | 4,885 | 34,441 |
| 122,782 | 94  | 21,458 | 7,660 | 4,862 | 34,074 |
| 122,783 | 96  | 21,646 | 7,704 | 4,913 | 34,359 |
| 122,784 | 96  | 21,706 | 7,739 | 4,938 | 34,479 |
| 122,785 | 101 | 21,778 | 7,751 | 4,934 | 34,564 |
| 122,786 | 97  | 21,805 | 7,706 | 4,939 | 34,547 |
| 122,787 | 101 | 21,689 | 7,619 | 4,908 | 34,317 |
| 122,788 | 102 | 21,862 | 7,603 | 4,918 | 34,485 |
| 122,789 | 103 | 21,924 | 7,639 | 4,934 | 34,600 |
| 122,790 | 103 | 21,861 | 7,580 | 4,929 | 34,473 |
| 122,791 | 103 | 21,790 | 7,542 | 4,924 | 34,359 |
| 122,792 | 104 | 21,890 | 7,587 | 4,981 | 34,562 |
| 122,793 | 100 | 21,955 | 7,624 | 5,044 | 34,723 |
| 122,794 | 96  | 21,769 | 7,561 | 5,031 | 34,457 |
| 122,795 | 96  | 21,744 | 7,558 | 5,093 | 34,491 |
| 122,796 | 97  | 21,667 | 7,550 | 5,089 | 34,403 |
| 122,797 | 99  | 21,716 | 7,582 | 5,090 | 34,487 |
| 122,798 | 103 | 21,950 | 7,667 | 5,142 | 34,862 |
| 122,799 | 98  | 22,092 | 7,708 | 5,199 | 35,097 |
| 122,800 | 95  | 21,933 | 7,653 | 5,171 | 34,852 |
| 122,801 | 96  | 22,106 | 7,656 | 5,171 | 35,029 |
| 122,802 | 99  | 22,161 | 7,648 | 5,185 | 35,093 |
| 122,803 | 99  | 21,731 | 7,570 | 5,161 | 34,561 |
| 122,804 | 100 | 21,956 | 7,768 | 5,273 | 35,097 |
| 122,805 | 98  | 22,008 | 7,860 | 5,334 | 35,300 |
| 122,806 | 98  | 21,962 | 7,859 | 5,344 | 35,263 |
| 122,807 | 100 | 21,872 | 7,865 | 5,321 | 35,158 |

|         |     |        |       |       |        |
|---------|-----|--------|-------|-------|--------|
| 122,808 | 101 | 21,924 | 7,889 | 5,352 | 35,266 |
| 122,809 | 103 | 22,077 | 7,850 | 5,353 | 35,383 |
| 122,810 | 104 | 21,909 | 7,822 | 5,306 | 35,141 |
| 122,811 | 106 | 21,808 | 7,750 | 5,247 | 34,911 |
| 122,812 | 106 | 21,990 | 7,822 | 5,287 | 35,205 |
| 122,813 | 108 | 22,157 | 7,890 | 5,341 | 35,496 |
| 122,814 | 108 | 21,983 | 7,878 | 5,321 | 35,290 |
| 122,815 | 107 | 21,988 | 7,853 | 5,305 | 35,253 |
| 122,816 | 100 | 21,770 | 7,786 | 5,263 | 34,919 |
| 122,817 | 100 | 21,651 | 7,663 | 5,195 | 34,609 |
| 122,818 | 99  | 21,883 | 7,717 | 5,215 | 34,914 |
| 122,819 | 96  | 21,920 | 7,777 | 5,231 | 35,024 |
| 122,820 | 94  | 22,167 | 7,836 | 5,282 | 35,379 |
| 122,821 | 94  | 22,098 | 7,797 | 5,284 | 35,273 |
| 122,822 | 93  | 22,069 | 7,829 | 5,280 | 35,271 |
| 122,823 | 83  | 21,491 | 7,701 | 5,207 | 34,482 |
| 122,824 | 81  | 21,508 | 7,696 | 5,238 | 34,523 |
| 122,825 | 80  | 21,602 | 7,767 | 5,286 | 34,735 |
| 122,826 | 82  | 21,453 | 7,733 | 5,303 | 34,571 |
| 122,827 | 79  | 20,856 | 7,570 | 5,192 | 33,697 |
| 122,828 | 79  | 21,061 | 7,625 | 5,258 | 34,023 |
| 122,829 | 79  | 21,032 | 7,602 | 5,254 | 33,967 |
| 122,830 | 79  | 20,964 | 7,652 | 5,247 | 33,942 |
| 122,831 | 73  | 21,042 | 7,630 | 5,256 | 34,001 |
| 122,832 | 69  | 20,303 | 7,416 | 5,110 | 32,898 |
| 122,833 | 69  | 20,683 | 7,484 | 5,147 | 33,383 |
| 122,834 | 70  | 20,580 | 7,489 | 5,145 | 33,284 |
| 122,835 | 71  | 20,744 | 7,561 | 5,193 | 33,569 |
| 122,836 | 66  | 21,030 | 7,634 | 5,259 | 33,989 |
| 122,837 | 64  | 20,480 | 7,594 | 5,158 | 33,296 |
| 122,838 | 64  | 20,697 | 7,708 | 5,222 | 33,691 |
| 122,839 | 65  | 20,958 | 7,777 | 5,280 | 34,080 |

|         |    |        |       |       |        |
|---------|----|--------|-------|-------|--------|
| 122,840 | 64 | 20,855 | 7,752 | 5,261 | 33,932 |
| 122,841 | 64 | 21,009 | 7,806 | 5,295 | 34,174 |
| 122,842 | 60 | 21,137 | 7,898 | 5,328 | 34,423 |
| 122,843 | 60 | 21,000 | 7,820 | 5,266 | 34,146 |
| 122,844 | 60 | 20,606 | 7,741 | 5,173 | 33,580 |
| 122,845 | 66 | 20,909 | 7,913 | 5,248 | 34,136 |
| 122,846 | 67 | 20,687 | 7,824 | 5,172 | 33,750 |
| 122,847 | 65 | 20,396 | 7,747 | 5,123 | 33,331 |
| 122,848 | 69 | 20,856 | 7,851 | 5,192 | 33,968 |
| 122,849 | 65 | 20,792 | 7,781 | 5,169 | 33,807 |
| 122,850 | 66 | 20,359 | 7,672 | 5,062 | 33,159 |
| 122,851 | 68 | 20,766 | 7,735 | 5,121 | 33,690 |
| 122,852 | 69 | 20,578 | 7,637 | 5,060 | 33,344 |
| 122,853 | 71 | 20,096 | 7,273 | 4,783 | 32,223 |
| 122,854 | 71 | 20,365 | 7,332 | 4,823 | 32,591 |
| 122,855 | 74 | 20,545 | 7,376 | 4,852 | 32,847 |
| 122,856 | 74 | 20,518 | 7,363 | 4,854 | 32,809 |
| 122,857 | 73 | 20,836 | 7,410 | 4,922 | 33,241 |
| 122,858 | 70 | 20,770 | 7,362 | 4,872 | 33,074 |
| 122,859 | 70 | 21,056 | 7,437 | 4,938 | 33,501 |
| 122,860 | 67 | 21,366 | 7,535 | 5,003 | 33,971 |
| 122,861 | 65 | 21,415 | 7,514 | 4,985 | 33,979 |
| 122,862 | 64 | 20,951 | 7,295 | 4,852 | 33,162 |
| 122,863 | 65 | 21,230 | 7,364 | 4,916 | 33,575 |
| 122,864 | 63 | 21,553 | 7,440 | 4,976 | 34,032 |
| 122,865 | 64 | 21,734 | 7,493 | 5,037 | 34,328 |
| 122,866 | 62 | 21,540 | 7,353 | 4,997 | 33,952 |
| 122,867 | 62 | 21,746 | 7,443 | 5,045 | 34,296 |
| 122,868 | 61 | 21,687 | 7,449 | 5,068 | 34,265 |
| 122,869 | 70 | 21,708 | 7,455 | 5,058 | 34,291 |
| 122,870 | 70 | 21,645 | 7,436 | 5,050 | 34,201 |
| 122,871 | 69 | 21,262 | 7,322 | 4,984 | 33,637 |



|         |    |        |       |       |        |
|---------|----|--------|-------|-------|--------|
| 122,872 | 70 | 21,375 | 7,406 | 5,022 | 33,873 |
| 122,873 | 72 | 21,236 | 7,376 | 5,020 | 33,704 |
| 122,874 | 76 | 21,191 | 7,374 | 4,995 | 33,636 |
| 122,875 | 76 | 21,308 | 7,388 | 5,007 | 33,779 |
| 122,876 | 76 | 21,223 | 7,337 | 4,987 | 33,623 |
| 122,877 | 74 | 20,980 | 7,249 | 4,895 | 33,198 |
| 122,878 | 74 | 21,130 | 7,252 | 4,911 | 33,367 |
| 122,879 | 76 | 21,130 | 7,261 | 4,896 | 33,363 |
| 122,880 | 76 | 21,288 | 7,282 | 4,895 | 33,541 |
| 122,881 | 75 | 21,243 | 7,311 | 4,923 | 33,552 |
| 122,882 | 78 | 21,153 | 7,287 | 4,933 | 33,451 |
| 122,883 | 77 | 21,106 | 7,267 | 4,921 | 33,371 |
| 122,884 | 77 | 21,120 | 7,276 | 4,939 | 33,412 |
| 122,885 | 76 | 21,220 | 7,299 | 4,944 | 33,539 |
| 122,886 | 75 | 21,087 | 7,217 | 4,887 | 33,266 |
| 122,887 | 75 | 20,879 | 7,191 | 4,864 | 33,009 |
| 122,888 | 71 | 20,929 | 7,155 | 4,893 | 33,048 |
| 122,889 | 75 | 21,009 | 7,153 | 4,896 | 33,133 |
| 122,890 | 70 | 20,579 | 6,988 | 4,777 | 32,414 |
| 122,891 | 72 | 20,821 | 7,053 | 4,795 | 32,741 |
| 122,892 | 72 | 21,014 | 7,113 | 4,825 | 33,024 |
| 122,893 | 72 | 21,281 | 7,173 | 4,857 | 33,383 |
| 122,894 | 69 | 21,154 | 7,112 | 4,834 | 33,169 |
| 122,895 | 69 | 21,172 | 7,030 | 4,811 | 33,082 |
| 122,896 | 69 | 21,195 | 7,035 | 4,816 | 33,115 |
| 122,897 | 70 | 21,409 | 7,062 | 4,854 | 33,395 |
| 122,898 | 70 | 21,455 | 7,088 | 4,866 | 33,479 |
| 122,899 | 67 | 21,253 | 7,035 | 4,815 | 33,170 |
| 122,900 | 68 | 21,400 | 7,109 | 4,893 | 33,470 |
| 122,901 | 66 | 21,182 | 7,019 | 4,832 | 33,099 |
| 122,902 | 66 | 21,269 | 7,106 | 4,885 | 33,326 |
| 122,903 | 61 | 21,198 | 7,107 | 4,886 | 33,252 |

|         |    |        |       |       |        |
|---------|----|--------|-------|-------|--------|
| 122,904 | 58 | 20,896 | 7,037 | 4,841 | 32,832 |
| 122,905 | 58 | 20,913 | 7,045 | 4,859 | 32,875 |
| 122,906 | 56 | 20,987 | 7,043 | 4,882 | 32,968 |
| 122,907 | 56 | 21,237 | 7,136 | 4,937 | 33,366 |
| 122,908 | 57 | 21,101 | 7,125 | 4,925 | 33,208 |
| 122,909 | 58 | 20,703 | 6,993 | 4,860 | 32,614 |
| 122,910 | 58 | 20,309 | 6,892 | 4,821 | 32,080 |
| 122,911 | 61 | 20,586 | 6,944 | 4,858 | 32,449 |
| 122,912 | 63 | 20,794 | 6,995 | 4,884 | 32,736 |
| 122,913 | 63 | 20,749 | 7,006 | 4,915 | 32,733 |
| 122,914 | 64 | 20,827 | 7,045 | 4,931 | 32,867 |
| 122,915 | 63 | 20,855 | 7,055 | 4,924 | 32,897 |
| 122,916 | 62 | 20,548 | 6,896 | 4,788 | 32,294 |
| 122,917 | 62 | 20,751 | 6,980 | 4,854 | 32,647 |
| 122,918 | 61 | 20,888 | 7,008 | 4,893 | 32,850 |
| 122,919 | 61 | 21,195 | 7,059 | 4,936 | 33,251 |
| 122,920 | 54 | 21,417 | 7,129 | 5,010 | 33,610 |
| 122,921 | 55 | 21,699 | 7,160 | 5,045 | 33,959 |
| 122,922 | 54 | 21,998 | 7,184 | 5,062 | 34,298 |
| 122,923 | 54 | 22,165 | 7,201 | 5,103 | 34,523 |
| 122,924 | 52 | 22,408 | 7,269 | 5,124 | 34,853 |
| 122,925 | 49 | 22,202 | 7,168 | 5,097 | 34,516 |
| 122,926 | 50 | 22,152 | 7,227 | 5,120 | 34,549 |
| 122,927 | 50 | 22,192 | 7,223 | 5,134 | 34,599 |
| 122,928 | 49 | 22,219 | 7,309 | 5,211 | 34,788 |
| 122,929 | 50 | 22,315 | 7,350 | 5,235 | 34,950 |
| 122,930 | 49 | 22,374 | 7,345 | 5,231 | 34,999 |
| 122,931 | 49 | 22,034 | 7,215 | 5,121 | 34,419 |
| 122,932 | 50 | 22,303 | 7,278 | 5,149 | 34,780 |
| 122,933 | 51 | 22,471 | 7,372 | 5,206 | 35,100 |
| 122,934 | 50 | 22,405 | 7,381 | 5,210 | 35,046 |
| 122,935 | 52 | 22,370 | 7,401 | 5,196 | 35,019 |

|         |    |        |       |       |        |
|---------|----|--------|-------|-------|--------|
| 122,936 | 56 | 22,296 | 7,360 | 5,169 | 34,881 |
| 122,937 | 56 | 22,151 | 7,305 | 5,146 | 34,658 |
| 122,938 | 57 | 22,485 | 7,362 | 5,196 | 35,100 |
| 122,939 | 55 | 22,205 | 7,210 | 5,101 | 34,571 |
| 122,940 | 55 | 22,508 | 7,284 | 5,139 | 34,986 |
| 122,941 | 61 | 22,396 | 7,245 | 5,117 | 34,819 |
| 122,942 | 59 | 22,067 | 7,155 | 5,062 | 34,343 |
| 122,943 | 59 | 21,987 | 7,162 | 5,058 | 34,266 |
| 122,944 | 62 | 22,070 | 7,204 | 5,093 | 34,429 |
| 122,945 | 60 | 21,839 | 7,131 | 5,041 | 34,071 |
| 122,946 | 61 | 22,042 | 7,207 | 5,090 | 34,400 |
| 122,947 | 61 | 21,879 | 7,178 | 5,053 | 34,171 |
| 122,948 | 58 | 21,598 | 7,113 | 5,021 | 33,790 |
| 122,949 | 58 | 21,791 | 7,197 | 5,071 | 34,117 |
| 122,950 | 59 | 21,921 | 7,220 | 5,101 | 34,301 |
| 122,951 | 59 | 21,946 | 7,207 | 5,085 | 34,297 |
| 122,952 | 59 | 21,865 | 7,190 | 5,064 | 34,178 |
| 122,953 | 59 | 21,844 | 7,194 | 5,085 | 34,182 |
| 122,954 | 62 | 21,867 | 7,246 | 5,104 | 34,279 |
| 122,955 | 62 | 22,094 | 7,279 | 5,132 | 34,567 |
| 122,956 | 63 | 22,021 | 7,320 | 5,132 | 34,536 |
| 122,957 | 63 | 22,039 | 7,335 | 5,139 | 34,576 |
| 122,958 | 64 | 21,860 | 7,245 | 5,091 | 34,260 |
| 122,959 | 63 | 21,913 | 7,311 | 5,092 | 34,379 |
| 122,960 | 61 | 21,875 | 7,292 | 5,071 | 34,299 |
| 122,961 | 59 | 21,636 | 7,200 | 5,001 | 33,896 |
| 122,962 | 56 | 21,615 | 7,268 | 5,016 | 33,955 |
| 122,963 | 55 | 21,511 | 7,267 | 5,019 | 33,852 |
| 122,964 | 54 | 20,988 | 7,109 | 4,889 | 33,040 |
| 122,965 | 53 | 20,966 | 7,104 | 4,879 | 33,002 |
| 122,966 | 54 | 20,762 | 7,071 | 4,848 | 32,735 |
| 122,967 | 56 | 20,633 | 7,109 | 4,842 | 32,640 |

|         |    |        |       |       |        |
|---------|----|--------|-------|-------|--------|
| 122,968 | 59 | 20,658 | 7,106 | 4,846 | 32,669 |
| 122,969 | 61 | 20,611 | 7,102 | 4,823 | 32,597 |
| 122,970 | 63 | 20,513 | 7,130 | 4,846 | 32,552 |
| 122,971 | 66 | 20,336 | 7,143 | 4,860 | 32,405 |
| 122,972 | 66 | 20,158 | 7,076 | 4,831 | 32,131 |
| 122,973 | 70 | 20,230 | 7,118 | 4,858 | 32,276 |
| 122,974 | 71 | 20,352 | 7,155 | 4,867 | 32,445 |
| 122,975 | 76 | 20,405 | 7,127 | 4,893 | 32,501 |
| 122,976 | 76 | 20,488 | 7,105 | 4,878 | 32,547 |
| 122,977 | 79 | 20,730 | 7,110 | 4,849 | 32,768 |
| 122,978 | 81 | 20,954 | 7,097 | 4,835 | 32,967 |
| 122,979 | 81 | 21,091 | 7,124 | 4,848 | 33,144 |
| 122,980 | 82 | 21,299 | 7,180 | 4,870 | 33,431 |
| 122,981 | 83 | 21,412 | 7,158 | 4,883 | 33,536 |
| 122,982 | 84 | 21,797 | 7,275 | 4,949 | 34,105 |
| 122,983 | 83 | 21,974 | 7,304 | 4,970 | 34,331 |
| 122,984 | 80 | 21,798 | 7,207 | 4,917 | 34,002 |
| 122,985 | 80 | 21,906 | 7,203 | 4,957 | 34,146 |
| 122,986 | 78 | 22,141 | 7,291 | 5,038 | 34,548 |
| 122,987 | 78 | 22,044 | 7,324 | 5,081 | 34,527 |
| 122,988 | 80 | 22,093 | 7,349 | 5,087 | 34,609 |
| 122,989 | 80 | 22,000 | 7,321 | 5,100 | 34,501 |
| 122,990 | 81 | 22,040 | 7,339 | 5,097 | 34,557 |
| 122,991 | 80 | 21,789 | 7,272 | 5,084 | 34,225 |
| 122,992 | 76 | 22,114 | 7,356 | 5,161 | 34,707 |
| 122,993 | 76 | 22,583 | 7,475 | 5,260 | 35,394 |
| 122,994 | 73 | 22,537 | 7,423 | 5,262 | 35,295 |
| 122,995 | 74 | 22,761 | 7,514 | 5,281 | 35,630 |
| 122,996 | 76 | 22,956 | 7,589 | 5,313 | 35,934 |
| 122,997 | 75 | 23,031 | 7,625 | 5,327 | 36,058 |
| 122,998 | 77 | 23,041 | 7,544 | 5,272 | 35,934 |
| 122,999 | 79 | 23,264 | 7,582 | 5,328 | 36,253 |

|         |    |        |       |       |        |
|---------|----|--------|-------|-------|--------|
| 123,000 | 79 | 23,280 | 7,627 | 5,368 | 36,354 |
| 123,001 | 79 | 23,328 | 7,637 | 5,364 | 36,408 |
| 123,002 | 78 | 23,266 | 7,650 | 5,348 | 36,342 |
| 123,003 | 81 | 23,345 | 7,658 | 5,360 | 36,444 |
| 123,004 | 81 | 23,447 | 7,648 | 5,363 | 36,539 |
| 123,005 | 79 | 23,427 | 7,628 | 5,357 | 36,491 |
| 123,006 | 82 | 23,426 | 7,609 | 5,352 | 36,469 |
| 123,007 | 82 | 23,367 | 7,529 | 5,340 | 36,318 |
| 123,008 | 82 | 23,410 | 7,532 | 5,338 | 36,362 |
| 123,009 | 82 | 23,486 | 7,510 | 5,364 | 36,442 |
| 123,010 | 82 | 23,836 | 7,581 | 5,424 | 36,923 |
| 123,011 | 84 | 23,805 | 7,586 | 5,446 | 36,921 |
| 123,012 | 85 | 23,858 | 7,584 | 5,476 | 37,003 |
| 123,013 | 85 | 23,943 | 7,577 | 5,504 | 37,109 |
| 123,014 | 82 | 24,002 | 7,581 | 5,514 | 37,179 |
| 123,015 | 82 | 24,229 | 7,591 | 5,533 | 37,435 |
| 123,016 | 82 | 24,270 | 7,554 | 5,550 | 37,456 |
| 123,017 | 82 | 24,251 | 7,554 | 5,569 | 37,456 |
| 123,018 | 81 | 24,178 | 7,547 | 5,590 | 37,396 |
| 123,019 | 79 | 23,971 | 7,550 | 5,567 | 37,167 |
| 123,020 | 78 | 24,130 | 7,599 | 5,613 | 37,420 |
| 123,021 | 76 | 24,409 | 7,641 | 5,629 | 37,755 |
| 123,022 | 73 | 24,570 | 7,613 | 5,634 | 37,890 |
| 123,023 | 72 | 24,482 | 7,618 | 5,635 | 37,807 |
| 123,024 | 69 | 24,352 | 7,597 | 5,603 | 37,621 |
| 123,025 | 66 | 24,146 | 7,499 | 5,526 | 37,237 |
| 123,026 | 61 | 23,713 | 7,430 | 5,454 | 36,658 |
| 123,027 | 61 | 23,695 | 7,472 | 5,489 | 36,717 |
| 123,028 | 59 | 23,535 | 7,521 | 5,520 | 36,635 |
| 123,029 | 59 | 23,597 | 7,633 | 5,652 | 36,941 |
| 123,030 | 60 | 23,515 | 7,633 | 5,689 | 36,897 |
| 123,031 | 58 | 23,411 | 7,646 | 5,696 | 36,811 |

|         |    |        |       |       |        |
|---------|----|--------|-------|-------|--------|
| 123,032 | 57 | 23,458 | 7,696 | 5,708 | 36,919 |
| 123,033 | 58 | 23,485 | 7,716 | 5,707 | 36,966 |
| 123,034 | 59 | 23,479 | 7,701 | 5,724 | 36,963 |
| 123,035 | 58 | 23,546 | 7,710 | 5,735 | 37,049 |
| 123,036 | 58 | 23,697 | 7,706 | 5,718 | 37,179 |
| 123,037 | 58 | 23,659 | 7,685 | 5,702 | 37,104 |
| 123,038 | 53 | 23,833 | 7,639 | 5,691 | 37,216 |
| 123,039 | 52 | 23,915 | 7,641 | 5,694 | 37,302 |
| 123,040 | 53 | 23,940 | 7,693 | 5,676 | 37,362 |
| 123,041 | 51 | 23,740 | 7,629 | 5,636 | 37,056 |
| 123,042 | 50 | 23,607 | 7,583 | 5,602 | 36,842 |
| 123,043 | 52 | 23,947 | 7,678 | 5,682 | 37,359 |
| 123,044 | 53 | 23,763 | 7,630 | 5,679 | 37,125 |
| 123,045 | 54 | 23,534 | 7,538 | 5,638 | 36,764 |
| 123,046 | 54 | 23,584 | 7,527 | 5,662 | 36,827 |
| 123,047 | 51 | 23,334 | 7,441 | 5,623 | 36,449 |
| 123,048 | 54 | 23,481 | 7,476 | 5,679 | 36,690 |
| 123,049 | 53 | 23,491 | 7,510 | 5,698 | 36,752 |
| 123,050 | 51 | 23,719 | 7,564 | 5,713 | 37,047 |
| 123,051 | 52 | 23,758 | 7,550 | 5,690 | 37,050 |
| 123,052 | 54 | 23,695 | 7,563 | 5,678 | 36,990 |
| 123,053 | 54 | 23,829 | 7,576 | 5,692 | 37,151 |
| 123,054 | 50 | 23,556 | 7,512 | 5,648 | 36,766 |
| 123,055 | 50 | 23,828 | 7,609 | 5,687 | 37,174 |
| 123,056 | 49 | 23,769 | 7,606 | 5,678 | 37,102 |
| 123,057 | 48 | 23,652 | 7,584 | 5,663 | 36,947 |
| 123,058 | 47 | 23,592 | 7,574 | 5,637 | 36,850 |
| 123,059 | 47 | 23,198 | 7,504 | 5,578 | 36,327 |
| 123,060 | 48 | 23,396 | 7,609 | 5,616 | 36,669 |
| 123,061 | 51 | 23,403 | 7,604 | 5,642 | 36,700 |
| 123,062 | 49 | 23,572 | 7,643 | 5,606 | 36,870 |
| 123,063 | 48 | 23,185 | 7,548 | 5,517 | 36,298 |

|         |    |        |       |       |        |
|---------|----|--------|-------|-------|--------|
| 123,064 | 49 | 23,307 | 7,624 | 5,547 | 36,527 |
| 123,065 | 50 | 23,392 | 7,638 | 5,550 | 36,630 |
| 123,066 | 49 | 23,267 | 7,654 | 5,553 | 36,523 |
| 123,067 | 47 | 23,084 | 7,640 | 5,517 | 36,288 |
| 123,068 | 46 | 23,291 | 7,657 | 5,531 | 36,525 |
| 123,069 | 49 | 23,218 | 7,639 | 5,471 | 36,377 |
| 123,070 | 48 | 23,057 | 7,565 | 5,428 | 36,098 |
| 123,071 | 48 | 23,596 | 7,715 | 5,515 | 36,874 |
| 123,072 | 50 | 23,373 | 7,673 | 5,497 | 36,593 |
| 123,073 | 50 | 23,430 | 7,676 | 5,501 | 36,657 |
| 123,074 | 52 | 23,250 | 7,579 | 5,432 | 36,313 |
| 123,075 | 52 | 23,064 | 7,467 | 5,402 | 35,985 |
| 123,076 | 54 | 23,415 | 7,550 | 5,438 | 36,457 |
| 123,077 | 55 | 23,659 | 7,628 | 5,499 | 36,841 |
| 123,078 | 55 | 23,773 | 7,585 | 5,473 | 36,886 |
| 123,079 | 58 | 24,016 | 7,601 | 5,443 | 37,118 |
| 123,080 | 56 | 23,922 | 7,537 | 5,375 | 36,890 |
| 123,081 | 55 | 24,161 | 7,502 | 5,341 | 37,059 |
| 123,082 | 55 | 24,165 | 7,515 | 5,341 | 37,076 |
| 123,083 | 55 | 23,868 | 7,415 | 5,284 | 36,622 |
| 123,084 | 53 | 24,319 | 7,516 | 5,354 | 37,242 |
| 123,085 | 52 | 23,924 | 7,456 | 5,292 | 36,724 |
| 123,086 | 53 | 23,752 | 7,437 | 5,222 | 36,464 |
| 123,087 | 54 | 23,868 | 7,492 | 5,292 | 36,706 |
| 123,088 | 54 | 23,893 | 7,508 | 5,313 | 36,768 |
| 123,089 | 56 | 23,782 | 7,569 | 5,303 | 36,710 |
| 123,090 | 59 | 23,713 | 7,565 | 5,277 | 36,614 |
| 123,091 | 61 | 23,500 | 7,519 | 5,290 | 36,370 |
| 123,092 | 62 | 23,283 | 7,503 | 5,267 | 36,115 |
| 123,093 | 60 | 22,988 | 7,414 | 5,181 | 35,643 |
| 123,094 | 59 | 23,050 | 7,406 | 5,171 | 35,686 |
| 123,095 | 60 | 23,214 | 7,426 | 5,165 | 35,865 |

|         |    |        |       |       |        |
|---------|----|--------|-------|-------|--------|
| 123,096 | 64 | 23,579 | 7,550 | 5,224 | 36,417 |
| 123,097 | 64 | 23,626 | 7,593 | 5,257 | 36,540 |
| 123,098 | 62 | 23,343 | 7,543 | 5,179 | 36,127 |
| 123,099 | 62 | 23,237 | 7,549 | 5,172 | 36,020 |
| 123,100 | 63 | 23,455 | 7,655 | 5,278 | 36,451 |
| 123,101 | 63 | 23,430 | 7,699 | 5,298 | 36,490 |
| 123,102 | 63 | 23,328 | 7,720 | 5,324 | 36,435 |
| 123,103 | 63 | 23,269 | 7,703 | 5,324 | 36,359 |
| 123,104 | 67 | 23,143 | 7,706 | 5,310 | 36,226 |
| 123,105 | 68 | 23,200 | 7,723 | 5,293 | 36,284 |
| 123,106 | 67 | 22,874 | 7,642 | 5,236 | 35,819 |
| 123,107 | 69 | 22,668 | 7,541 | 5,191 | 35,469 |
| 123,108 | 68 | 22,493 | 7,488 | 5,135 | 35,184 |
| 123,109 | 73 | 23,178 | 7,733 | 5,283 | 36,267 |
| 123,110 | 77 | 23,315 | 7,740 | 5,280 | 36,412 |
| 123,111 | 76 | 23,018 | 7,662 | 5,236 | 35,992 |
| 123,112 | 79 | 23,241 | 7,766 | 5,249 | 36,335 |
| 123,113 | 82 | 23,263 | 7,771 | 5,278 | 36,394 |
| 123,114 | 81 | 23,265 | 7,746 | 5,252 | 36,344 |
| 123,115 | 83 | 23,653 | 7,853 | 5,344 | 36,933 |
| 123,116 | 87 | 23,731 | 7,920 | 5,363 | 37,101 |
| 123,117 | 88 | 23,479 | 7,870 | 5,334 | 36,771 |
| 123,118 | 92 | 23,706 | 7,943 | 5,395 | 37,136 |
| 123,119 | 93 | 23,683 | 7,996 | 5,419 | 37,191 |
| 123,120 | 96 | 23,821 | 7,973 | 5,421 | 37,311 |
| 123,121 | 98 | 23,785 | 7,963 | 5,389 | 37,235 |
| 123,122 | 97 | 23,713 | 7,973 | 5,396 | 37,179 |
| 123,123 | 96 | 23,769 | 8,011 | 5,400 | 37,276 |
| 123,124 | 95 | 24,053 | 8,096 | 5,434 | 37,678 |
| 123,125 | 92 | 23,551 | 8,000 | 5,358 | 37,001 |
| 123,126 | 91 | 23,306 | 8,012 | 5,347 | 36,756 |
| 123,127 | 89 | 23,154 | 8,027 | 5,360 | 36,630 |



|         |     |        |       |       |        |
|---------|-----|--------|-------|-------|--------|
| 123,128 | 89  | 23,172 | 8,113 | 5,412 | 36,786 |
| 123,129 | 90  | 22,869 | 8,133 | 5,405 | 36,497 |
| 123,130 | 91  | 22,732 | 8,138 | 5,408 | 36,369 |
| 123,131 | 90  | 22,538 | 8,113 | 5,369 | 36,110 |
| 123,132 | 95  | 22,558 | 8,199 | 5,436 | 36,288 |
| 123,133 | 96  | 22,619 | 8,253 | 5,470 | 36,438 |
| 123,134 | 97  | 22,707 | 8,267 | 5,490 | 36,561 |
| 123,135 | 98  | 22,678 | 8,308 | 5,528 | 36,612 |
| 123,136 | 100 | 22,539 | 8,256 | 5,490 | 36,385 |
| 123,137 | 99  | 22,389 | 8,182 | 5,478 | 36,148 |
| 123,138 | 98  | 22,940 | 8,357 | 5,602 | 36,997 |
| 123,139 | 98  | 22,888 | 8,344 | 5,586 | 36,916 |
| 123,140 | 97  | 22,885 | 8,311 | 5,595 | 36,888 |
| 123,141 | 92  | 22,936 | 8,326 | 5,620 | 36,974 |
| 123,142 | 90  | 22,895 | 8,345 | 5,593 | 36,923 |
| 123,143 | 89  | 22,863 | 8,324 | 5,595 | 36,871 |
| 123,144 | 91  | 22,657 | 8,280 | 5,555 | 36,583 |
| 123,145 | 91  | 22,337 | 8,253 | 5,495 | 36,176 |
| 123,146 | 89  | 22,821 | 8,409 | 5,638 | 36,957 |
| 123,147 | 87  | 22,904 | 8,447 | 5,672 | 37,110 |
| 123,148 | 86  | 22,949 | 8,461 | 5,650 | 37,146 |
| 123,149 | 92  | 22,885 | 8,416 | 5,618 | 37,011 |
| 123,150 | 93  | 22,917 | 8,426 | 5,584 | 37,020 |
| 123,151 | 93  | 23,091 | 8,460 | 5,637 | 37,281 |
| 123,152 | 92  | 22,788 | 8,353 | 5,579 | 36,812 |
| 123,153 | 93  | 23,135 | 8,463 | 5,618 | 37,309 |
| 123,154 | 97  | 23,093 | 8,462 | 5,630 | 37,282 |
| 123,155 | 93  | 22,962 | 8,414 | 5,589 | 37,058 |
| 123,156 | 92  | 23,115 | 8,472 | 5,677 | 37,356 |
| 123,157 | 95  | 23,151 | 8,468 | 5,683 | 37,397 |
| 123,158 | 96  | 23,312 | 8,531 | 5,720 | 37,659 |
| 123,159 | 94  | 23,327 | 8,521 | 5,713 | 37,655 |

|         |    |        |       |       |        |
|---------|----|--------|-------|-------|--------|
| 123,160 | 93 | 23,242 | 8,518 | 5,713 | 37,566 |
| 123,161 | 90 | 23,356 | 8,638 | 5,782 | 37,866 |
| 123,162 | 88 | 23,455 | 8,695 | 5,819 | 38,057 |
| 123,163 | 86 | 23,482 | 8,707 | 5,840 | 38,115 |
| 123,164 | 83 | 23,342 | 8,675 | 5,829 | 37,929 |
| 123,165 | 83 | 23,203 | 8,646 | 5,843 | 37,775 |
| 123,166 | 81 | 23,144 | 8,645 | 5,828 | 37,698 |
| 123,167 | 77 | 23,127 | 8,573 | 5,822 | 37,599 |
| 123,168 | 79 | 23,312 | 8,550 | 5,826 | 37,767 |
| 123,169 | 75 | 23,269 | 8,517 | 5,803 | 37,664 |
| 123,170 | 74 | 22,883 | 8,389 | 5,721 | 37,067 |
| 123,171 | 69 | 22,910 | 8,470 | 5,766 | 37,215 |
| 123,172 | 68 | 23,019 | 8,480 | 5,794 | 37,361 |
| 123,173 | 67 | 22,981 | 8,431 | 5,772 | 37,251 |
| 123,174 | 66 | 23,062 | 8,408 | 5,775 | 37,311 |
| 123,175 | 69 | 22,984 | 8,381 | 5,773 | 37,207 |
| 123,176 | 69 | 23,120 | 8,379 | 5,757 | 37,325 |
| 123,177 | 70 | 23,222 | 8,351 | 5,720 | 37,363 |
| 123,178 | 69 | 23,274 | 8,335 | 5,724 | 37,402 |
| 123,179 | 67 | 23,397 | 8,279 | 5,689 | 37,432 |
| 123,180 | 67 | 23,345 | 8,293 | 5,668 | 37,373 |
| 123,181 | 63 | 23,357 | 8,372 | 5,715 | 37,507 |
| 123,182 | 64 | 23,091 | 8,306 | 5,655 | 37,116 |
| 123,183 | 61 | 23,186 | 8,322 | 5,619 | 37,188 |
| 123,184 | 61 | 22,911 | 8,275 | 5,611 | 36,858 |
| 123,185 | 64 | 22,798 | 8,285 | 5,598 | 36,745 |
| 123,186 | 65 | 22,548 | 8,209 | 5,539 | 36,361 |
| 123,187 | 63 | 22,299 | 8,127 | 5,474 | 35,963 |
| 123,188 | 67 | 22,464 | 8,286 | 5,528 | 36,345 |
| 123,189 | 68 | 22,549 | 8,331 | 5,559 | 36,507 |
| 123,190 | 69 | 22,535 | 8,342 | 5,562 | 36,508 |
| 123,191 | 68 | 22,339 | 8,367 | 5,540 | 36,314 |

|         |    |        |       |       |        |
|---------|----|--------|-------|-------|--------|
| 123,192 | 70 | 22,241 | 8,315 | 5,548 | 36,174 |
| 123,193 | 68 | 21,936 | 8,184 | 5,476 | 35,664 |
| 123,194 | 69 | 22,227 | 8,282 | 5,542 | 36,120 |
| 123,195 | 68 | 22,051 | 8,259 | 5,521 | 35,899 |
| 123,196 | 68 | 22,048 | 8,244 | 5,508 | 35,868 |
| 123,197 | 69 | 21,877 | 8,200 | 5,488 | 35,634 |
| 123,198 | 68 | 21,689 | 8,146 | 5,455 | 35,358 |
| 123,199 | 70 | 21,582 | 8,088 | 5,452 | 35,192 |
| 123,200 | 63 | 21,330 | 8,063 | 5,418 | 34,874 |
| 123,201 | 60 | 21,298 | 8,011 | 5,391 | 34,760 |
| 123,202 | 61 | 20,644 | 7,769 | 5,239 | 33,713 |
| 123,203 | 63 | 20,904 | 7,789 | 5,243 | 33,999 |
| 123,204 | 64 | 21,108 | 7,831 | 5,299 | 34,302 |
| 123,205 | 62 | 20,362 | 7,571 | 5,123 | 33,118 |
| 123,206 | 63 | 20,523 | 7,644 | 5,142 | 33,372 |
| 123,207 | 60 | 20,760 | 7,726 | 5,199 | 33,745 |
| 123,208 | 61 | 20,878 | 7,790 | 5,247 | 33,976 |
| 123,209 | 58 | 20,750 | 7,785 | 5,244 | 33,837 |
| 123,210 | 59 | 20,590 | 7,794 | 5,220 | 33,663 |
| 123,211 | 58 | 20,482 | 7,709 | 5,179 | 33,428 |
| 123,212 | 59 | 20,725 | 7,774 | 5,248 | 33,806 |
| 123,213 | 60 | 20,663 | 7,684 | 5,230 | 33,637 |
| 123,214 | 59 | 20,712 | 7,682 | 5,205 | 33,658 |
| 123,215 | 59 | 20,361 | 7,588 | 5,137 | 33,145 |
| 123,216 | 61 | 20,351 | 7,600 | 5,106 | 33,118 |
| 123,217 | 61 | 20,395 | 7,582 | 5,095 | 33,133 |
| 123,218 | 61 | 20,409 | 7,650 | 5,128 | 33,248 |
| 123,219 | 58 | 20,307 | 7,647 | 5,113 | 33,125 |
| 123,220 | 58 | 19,995 | 7,512 | 5,016 | 32,581 |
| 123,221 | 60 | 20,054 | 7,608 | 5,094 | 32,816 |
| 123,222 | 60 | 19,888 | 7,585 | 5,059 | 32,592 |
| 123,223 | 62 | 19,676 | 7,515 | 4,998 | 32,251 |

|         |    |        |       |       |        |
|---------|----|--------|-------|-------|--------|
| 123,224 | 63 | 19,851 | 7,568 | 5,026 | 32,508 |
| 123,225 | 63 | 19,752 | 7,589 | 4,999 | 32,403 |
| 123,226 | 61 | 19,715 | 7,617 | 4,999 | 32,392 |
| 123,227 | 61 | 19,328 | 7,472 | 4,906 | 31,767 |
| 123,228 | 61 | 19,314 | 7,512 | 4,952 | 31,839 |
| 123,229 | 61 | 19,419 | 7,568 | 4,975 | 32,023 |
| 123,230 | 61 | 19,519 | 7,610 | 5,026 | 32,216 |
| 123,231 | 62 | 19,753 | 7,607 | 5,054 | 32,476 |
| 123,232 | 61 | 19,469 | 7,396 | 4,946 | 31,872 |
| 123,233 | 62 | 19,793 | 7,483 | 4,997 | 32,335 |
| 123,234 | 60 | 19,797 | 7,502 | 5,021 | 32,380 |
| 123,235 | 60 | 19,909 | 7,533 | 5,025 | 32,527 |
| 123,236 | 60 | 19,839 | 7,496 | 5,006 | 32,401 |
| 123,237 | 61 | 19,500 | 7,309 | 4,918 | 31,788 |
| 123,238 | 61 | 19,604 | 7,362 | 4,945 | 31,972 |
| 123,239 | 60 | 19,683 | 7,427 | 4,961 | 32,131 |
| 123,240 | 65 | 19,544 | 7,381 | 4,909 | 31,899 |
| 123,241 | 65 | 19,646 | 7,375 | 4,906 | 31,992 |
| 123,242 | 65 | 19,588 | 7,259 | 4,864 | 31,776 |
| 123,243 | 63 | 19,297 | 7,187 | 4,779 | 31,326 |
| 123,244 | 71 | 19,827 | 7,405 | 4,880 | 32,183 |
| 123,245 | 75 | 19,907 | 7,454 | 4,893 | 32,329 |
| 123,246 | 75 | 20,066 | 7,474 | 4,919 | 32,534 |
| 123,247 | 78 | 19,963 | 7,459 | 4,886 | 32,386 |
| 123,248 | 77 | 20,379 | 7,567 | 4,962 | 32,985 |
| 123,249 | 76 | 20,533 | 7,572 | 4,959 | 33,140 |
| 123,250 | 78 | 20,624 | 7,596 | 4,969 | 33,267 |
| 123,251 | 80 | 20,398 | 7,469 | 4,883 | 32,830 |
| 123,252 | 80 | 20,553 | 7,491 | 4,899 | 33,023 |
| 123,253 | 79 | 20,838 | 7,559 | 4,941 | 33,417 |
| 123,254 | 77 | 20,565 | 7,525 | 4,916 | 33,083 |
| 123,255 | 76 | 20,680 | 7,583 | 4,971 | 33,310 |

|         |    |        |       |       |        |
|---------|----|--------|-------|-------|--------|
| 123,256 | 72 | 20,616 | 7,569 | 4,977 | 33,234 |
| 123,257 | 72 | 20,665 | 7,536 | 4,972 | 33,245 |
| 123,258 | 73 | 20,736 | 7,555 | 4,965 | 33,329 |
| 123,259 | 74 | 20,751 | 7,491 | 4,924 | 33,240 |
| 123,260 | 73 | 20,636 | 7,445 | 4,878 | 33,032 |
| 123,261 | 75 | 21,229 | 7,608 | 5,006 | 33,918 |
| 123,262 | 74 | 21,158 | 7,541 | 4,972 | 33,745 |
| 123,263 | 76 | 21,090 | 7,498 | 4,936 | 33,600 |
| 123,264 | 75 | 20,962 | 7,502 | 4,907 | 33,446 |
| 123,265 | 76 | 21,174 | 7,545 | 4,990 | 33,785 |
| 123,266 | 75 | 21,255 | 7,580 | 5,006 | 33,916 |
| 123,267 | 78 | 21,324 | 7,592 | 4,999 | 33,993 |
| 123,268 | 78 | 21,556 | 7,595 | 5,020 | 34,249 |
| 123,269 | 82 | 21,554 | 7,653 | 5,030 | 34,319 |
| 123,270 | 81 | 20,769 | 7,354 | 4,841 | 33,045 |
| 123,271 | 80 | 21,019 | 7,385 | 4,877 | 33,361 |
| 123,272 | 79 | 21,443 | 7,455 | 4,912 | 33,889 |
| 123,273 | 78 | 21,428 | 7,472 | 4,906 | 33,884 |
| 123,274 | 76 | 21,894 | 7,651 | 5,027 | 34,648 |
| 123,275 | 77 | 21,933 | 7,716 | 5,100 | 34,826 |
| 123,276 | 81 | 21,927 | 7,703 | 5,130 | 34,841 |
| 123,277 | 82 | 21,371 | 7,529 | 5,002 | 33,984 |
| 123,278 | 84 | 21,476 | 7,604 | 5,058 | 34,222 |
| 123,279 | 88 | 21,680 | 7,679 | 5,079 | 34,526 |
| 123,280 | 89 | 21,845 | 7,781 | 5,124 | 34,839 |
| 123,281 | 89 | 21,768 | 7,754 | 5,109 | 34,720 |
| 123,282 | 90 | 21,653 | 7,752 | 5,087 | 34,582 |
| 123,283 | 92 | 21,674 | 7,758 | 5,098 | 34,622 |
| 123,284 | 91 | 21,728 | 7,738 | 5,113 | 34,670 |
| 123,285 | 89 | 21,430 | 7,604 | 5,036 | 34,159 |
| 123,286 | 90 | 21,754 | 7,678 | 5,070 | 34,592 |
| 123,287 | 91 | 22,055 | 7,751 | 5,125 | 35,022 |

|         |    |        |       |       |        |
|---------|----|--------|-------|-------|--------|
| 123,288 | 89 | 22,055 | 7,682 | 5,089 | 34,915 |
| 123,289 | 88 | 22,124 | 7,674 | 5,084 | 34,970 |
| 123,290 | 89 | 22,465 | 7,786 | 5,172 | 35,512 |
| 123,291 | 83 | 22,297 | 7,718 | 5,145 | 35,243 |
| 123,292 | 82 | 22,465 | 7,771 | 5,180 | 35,498 |
| 123,293 | 81 | 22,327 | 7,662 | 5,095 | 35,165 |
| 123,294 | 81 | 22,539 | 7,703 | 5,117 | 35,440 |
| 123,295 | 75 | 22,735 | 7,734 | 5,183 | 35,727 |
| 123,296 | 74 | 22,502 | 7,648 | 5,132 | 35,356 |
| 123,297 | 75 | 22,265 | 7,581 | 5,078 | 34,999 |
| 123,298 | 72 | 22,429 | 7,642 | 5,141 | 35,284 |
| 123,299 | 74 | 22,163 | 7,571 | 5,080 | 34,888 |
| 123,300 | 75 | 21,913 | 7,508 | 5,041 | 34,537 |
| 123,301 | 77 | 22,079 | 7,645 | 5,132 | 34,933 |
| 123,302 | 79 | 21,799 | 7,586 | 5,084 | 34,548 |
| 123,303 | 79 | 21,834 | 7,595 | 5,089 | 34,597 |
| 123,304 | 78 | 21,893 | 7,644 | 5,150 | 34,765 |
| 123,305 | 80 | 21,686 | 7,545 | 5,053 | 34,364 |
| 123,306 | 80 | 21,626 | 7,537 | 5,034 | 34,277 |
| 123,307 | 86 | 21,499 | 7,481 | 4,978 | 34,044 |
| 123,308 | 85 | 21,233 | 7,432 | 4,920 | 33,670 |
| 123,309 | 80 | 21,790 | 7,608 | 5,097 | 34,575 |
| 123,310 | 82 | 21,966 | 7,672 | 5,140 | 34,860 |
| 123,311 | 80 | 21,872 | 7,682 | 5,123 | 34,757 |
| 123,312 | 78 | 21,416 | 7,610 | 5,076 | 34,180 |
| 123,313 | 78 | 21,406 | 7,611 | 5,071 | 34,166 |
| 123,314 | 76 | 21,432 | 7,647 | 5,079 | 34,234 |
| 123,315 | 75 | 21,480 | 7,658 | 5,072 | 34,285 |
| 123,316 | 74 | 21,485 | 7,680 | 5,042 | 34,281 |
| 123,317 | 73 | 21,093 | 7,556 | 4,972 | 33,694 |
| 123,318 | 71 | 20,889 | 7,517 | 4,964 | 33,441 |
| 123,319 | 71 | 20,991 | 7,560 | 5,010 | 33,632 |

|         |    |        |       |       |        |
|---------|----|--------|-------|-------|--------|
| 123,320 | 69 | 20,942 | 7,520 | 5,005 | 33,536 |
| 123,321 | 68 | 20,858 | 7,539 | 4,981 | 33,446 |
| 123,322 | 69 | 20,880 | 7,592 | 4,991 | 33,532 |
| 123,323 | 70 | 20,760 | 7,605 | 4,974 | 33,409 |
| 123,324 | 70 | 20,747 | 7,595 | 4,974 | 33,386 |
| 123,325 | 66 | 20,153 | 7,360 | 4,821 | 32,400 |
| 123,326 | 66 | 20,418 | 7,415 | 4,841 | 32,740 |
| 123,327 | 65 | 20,516 | 7,417 | 4,809 | 32,807 |
| 123,328 | 67 | 20,819 | 7,461 | 4,836 | 33,183 |
| 123,329 | 66 | 21,099 | 7,493 | 4,870 | 33,528 |
| 123,330 | 61 | 21,040 | 7,400 | 4,841 | 33,342 |
| 123,331 | 64 | 21,291 | 7,423 | 4,888 | 33,666 |
| 123,332 | 64 | 21,028 | 7,304 | 4,815 | 33,211 |
| 123,333 | 64 | 21,080 | 7,315 | 4,795 | 33,254 |
| 123,334 | 66 | 21,142 | 7,355 | 4,803 | 33,366 |
| 123,335 | 66 | 20,922 | 7,321 | 4,757 | 33,066 |
| 123,336 | 65 | 20,820 | 7,334 | 4,757 | 32,976 |
| 123,337 | 65 | 21,024 | 7,417 | 4,794 | 33,300 |
| 123,338 | 63 | 21,091 | 7,438 | 4,810 | 33,402 |
| 123,339 | 60 | 21,107 | 7,450 | 4,818 | 33,435 |
| 123,340 | 65 | 21,087 | 7,435 | 4,811 | 33,398 |
| 123,341 | 65 | 21,207 | 7,459 | 4,827 | 33,558 |
| 123,342 | 66 | 21,266 | 7,464 | 4,859 | 33,655 |
| 123,343 | 68 | 21,264 | 7,516 | 4,878 | 33,726 |
| 123,344 | 69 | 21,001 | 7,449 | 4,834 | 33,353 |
| 123,345 | 69 | 20,729 | 7,377 | 4,791 | 32,966 |
| 123,346 | 69 | 20,833 | 7,493 | 4,841 | 33,236 |
| 123,347 | 65 | 20,778 | 7,471 | 4,843 | 33,157 |
| 123,348 | 63 | 20,078 | 7,207 | 4,666 | 32,014 |
| 123,349 | 64 | 20,324 | 7,300 | 4,720 | 32,408 |
| 123,350 | 64 | 20,414 | 7,311 | 4,717 | 32,506 |
| 123,351 | 64 | 20,698 | 7,403 | 4,752 | 32,917 |

|         |    |        |       |       |        |
|---------|----|--------|-------|-------|--------|
| 123,352 | 60 | 20,941 | 7,499 | 4,804 | 33,304 |
| 123,353 | 58 | 20,769 | 7,431 | 4,777 | 33,035 |
| 123,354 | 59 | 21,022 | 7,492 | 4,795 | 33,368 |
| 123,355 | 60 | 21,086 | 7,504 | 4,794 | 33,444 |
| 123,356 | 63 | 20,819 | 7,458 | 4,753 | 33,093 |
| 123,357 | 63 | 20,482 | 7,371 | 4,708 | 32,624 |
| 123,358 | 58 | 20,810 | 7,491 | 4,791 | 33,150 |
| 123,359 | 60 | 20,705 | 7,481 | 4,768 | 33,014 |
| 123,360 | 64 | 20,730 | 7,479 | 4,764 | 33,037 |
| 123,361 | 63 | 20,792 | 7,456 | 4,747 | 33,058 |
| 123,362 | 65 | 20,574 | 7,329 | 4,674 | 32,642 |
| 123,363 | 65 | 20,958 | 7,426 | 4,733 | 33,182 |
| 123,364 | 64 | 20,298 | 7,094 | 4,535 | 31,991 |
| 123,365 | 64 | 20,618 | 7,179 | 4,592 | 32,453 |
| 123,366 | 66 | 20,914 | 7,274 | 4,642 | 32,896 |
| 123,367 | 66 | 20,842 | 7,263 | 4,643 | 32,814 |
| 123,368 | 66 | 21,238 | 7,439 | 4,765 | 33,508 |
| 123,369 | 65 | 21,382 | 7,527 | 4,822 | 33,796 |
| 123,370 | 65 | 21,365 | 7,522 | 4,806 | 33,758 |
| 123,371 | 63 | 21,489 | 7,511 | 4,806 | 33,869 |
| 123,372 | 63 | 21,506 | 7,466 | 4,818 | 33,853 |
| 123,373 | 62 | 21,276 | 7,365 | 4,764 | 33,467 |
| 123,374 | 61 | 21,582 | 7,460 | 4,816 | 33,919 |
| 123,375 | 61 | 21,489 | 7,453 | 4,807 | 33,810 |
| 123,376 | 64 | 21,473 | 7,480 | 4,805 | 33,822 |
| 123,377 | 65 | 21,298 | 7,445 | 4,760 | 33,568 |
| 123,378 | 63 | 21,226 | 7,420 | 4,766 | 33,475 |
| 123,379 | 61 | 20,689 | 7,287 | 4,674 | 32,711 |
| 123,380 | 61 | 20,561 | 7,237 | 4,648 | 32,507 |
| 123,381 | 60 | 20,342 | 7,187 | 4,619 | 32,208 |
| 123,382 | 58 | 20,115 | 7,140 | 4,559 | 31,872 |
| 123,383 | 55 | 19,580 | 6,922 | 4,442 | 30,999 |



|         |    |        |       |       |        |
|---------|----|--------|-------|-------|--------|
| 123,384 | 56 | 19,523 | 6,898 | 4,435 | 30,912 |
| 123,385 | 52 | 19,398 | 6,871 | 4,408 | 30,729 |
| 123,386 | 52 | 19,163 | 6,807 | 4,352 | 30,374 |
| 123,387 | 52 | 18,972 | 6,717 | 4,292 | 30,033 |
| 123,388 | 51 | 18,354 | 6,473 | 4,150 | 29,028 |
| 123,389 | 51 | 18,218 | 6,437 | 4,117 | 28,823 |
| 123,390 | 54 | 18,009 | 6,376 | 4,054 | 28,493 |
| 123,391 | 50 | 17,957 | 6,313 | 4,027 | 28,347 |
| 123,392 | 50 | 17,825 | 6,283 | 4,008 | 28,166 |
| 123,393 | 49 | 17,777 | 6,303 | 3,966 | 28,095 |
| 123,394 | 46 | 17,459 | 6,141 | 3,848 | 27,494 |
| 123,395 | 46 | 17,774 | 6,213 | 3,897 | 27,930 |
| 123,396 | 46 | 17,948 | 6,294 | 3,938 | 28,226 |
| 123,397 | 49 | 17,844 | 6,279 | 3,947 | 28,119 |
| 123,398 | 49 | 17,836 | 6,255 | 3,905 | 28,045 |
| 123,399 | 48 | 17,695 | 6,227 | 3,888 | 27,858 |
| 123,400 | 47 | 17,729 | 6,201 | 3,847 | 27,824 |
| 123,401 | 47 | 17,559 | 6,151 | 3,836 | 27,593 |
| 123,402 | 47 | 17,327 | 6,087 | 3,797 | 27,258 |
| 123,403 | 48 | 17,759 | 6,169 | 3,881 | 27,857 |
| 123,404 | 46 | 17,534 | 6,111 | 3,846 | 27,537 |
| 123,405 | 47 | 17,400 | 6,061 | 3,820 | 27,328 |
| 123,406 | 45 | 17,112 | 5,997 | 3,768 | 26,922 |
| 123,407 | 44 | 17,846 | 6,209 | 3,869 | 27,968 |
| 123,408 | 44 | 17,748 | 6,166 | 3,828 | 27,786 |
| 123,409 | 44 | 18,201 | 6,250 | 3,889 | 28,384 |
| 123,410 | 43 | 18,225 | 6,259 | 3,873 | 28,400 |
| 123,411 | 39 | 17,856 | 6,163 | 3,819 | 27,877 |
| 123,412 | 37 | 17,960 | 6,219 | 3,862 | 28,078 |
| 123,413 | 36 | 17,661 | 6,152 | 3,826 | 27,675 |
| 123,414 | 36 | 17,451 | 6,086 | 3,788 | 27,361 |
| 123,415 | 37 | 17,627 | 6,168 | 3,829 | 27,661 |

|         |    |        |       |       |        |
|---------|----|--------|-------|-------|--------|
| 123,416 | 37 | 17,369 | 6,127 | 3,806 | 27,339 |
| 123,417 | 37 | 17,194 | 6,107 | 3,792 | 27,130 |
| 123,418 | 37 | 17,211 | 6,117 | 3,777 | 27,142 |
| 123,419 | 37 | 17,243 | 6,096 | 3,756 | 27,132 |
| 123,420 | 41 | 17,354 | 6,084 | 3,740 | 27,219 |
| 123,421 | 42 | 17,384 | 6,089 | 3,740 | 27,255 |
| 123,422 | 44 | 17,084 | 6,033 | 3,683 | 26,844 |
| 123,423 | 43 | 16,943 | 5,981 | 3,630 | 26,597 |
| 123,424 | 45 | 17,203 | 6,075 | 3,689 | 27,012 |
| 123,425 | 43 | 16,772 | 5,876 | 3,597 | 26,288 |
| 123,426 | 45 | 17,015 | 5,949 | 3,655 | 26,664 |
| 123,427 | 44 | 16,950 | 5,973 | 3,667 | 26,634 |
| 123,428 | 44 | 17,069 | 6,014 | 3,685 | 26,812 |
| 123,429 | 43 | 17,326 | 6,085 | 3,732 | 27,186 |
| 123,430 | 44 | 17,747 | 6,225 | 3,803 | 27,819 |
| 123,431 | 44 | 17,956 | 6,338 | 3,853 | 28,191 |
| 123,432 | 44 | 18,129 | 6,405 | 3,882 | 28,460 |
| 123,433 | 44 | 18,461 | 6,470 | 3,940 | 28,915 |
| 123,434 | 44 | 18,450 | 6,495 | 3,954 | 28,943 |
| 123,435 | 43 | 18,627 | 6,578 | 4,000 | 29,248 |
| 123,436 | 44 | 18,850 | 6,725 | 4,091 | 29,710 |
| 123,437 | 46 | 18,826 | 6,740 | 4,104 | 29,716 |
| 123,438 | 46 | 19,209 | 6,928 | 4,217 | 30,400 |
| 123,439 | 48 | 19,491 | 7,024 | 4,298 | 30,861 |
| 123,440 | 50 | 19,461 | 7,084 | 4,311 | 30,906 |
| 123,441 | 49 | 19,370 | 7,082 | 4,343 | 30,844 |
| 123,442 | 48 | 19,740 | 7,214 | 4,431 | 31,433 |
| 123,443 | 48 | 19,920 | 7,260 | 4,436 | 31,664 |
| 123,444 | 50 | 20,005 | 7,273 | 4,440 | 31,768 |
| 123,445 | 50 | 19,891 | 7,281 | 4,460 | 31,682 |
| 123,446 | 52 | 19,575 | 7,144 | 4,379 | 31,150 |
| 123,447 | 52 | 19,920 | 7,214 | 4,440 | 31,626 |

|         |    |        |       |       |        |
|---------|----|--------|-------|-------|--------|
| 123,448 | 48 | 20,285 | 7,345 | 4,482 | 32,160 |
| 123,449 | 50 | 20,139 | 7,324 | 4,493 | 32,006 |
| 123,450 | 53 | 20,229 | 7,346 | 4,488 | 32,116 |
| 123,451 | 53 | 19,999 | 7,298 | 4,460 | 31,810 |
| 123,452 | 55 | 20,456 | 7,538 | 4,604 | 32,653 |
| 123,453 | 55 | 20,317 | 7,468 | 4,575 | 32,415 |
| 123,454 | 56 | 20,160 | 7,470 | 4,583 | 32,269 |
| 123,455 | 52 | 20,363 | 7,519 | 4,632 | 32,566 |
| 123,456 | 50 | 20,519 | 7,583 | 4,663 | 32,815 |
| 123,457 | 51 | 20,315 | 7,540 | 4,625 | 32,531 |
| 123,458 | 51 | 20,174 | 7,486 | 4,608 | 32,319 |
| 123,459 | 53 | 20,746 | 7,745 | 4,757 | 33,301 |
| 123,460 | 55 | 20,737 | 7,844 | 4,807 | 33,443 |
| 123,461 | 54 | 20,811 | 7,895 | 4,858 | 33,618 |
| 123,462 | 56 | 20,799 | 7,930 | 4,864 | 33,649 |
| 123,463 | 57 | 20,792 | 7,943 | 4,883 | 33,675 |
| 123,464 | 57 | 20,943 | 7,980 | 4,888 | 33,868 |
| 123,465 | 59 | 21,040 | 7,962 | 4,888 | 33,949 |
| 123,466 | 60 | 21,106 | 8,012 | 4,896 | 34,074 |
| 123,467 | 59 | 21,159 | 7,968 | 4,866 | 34,052 |
| 123,468 | 63 | 21,201 | 7,966 | 4,835 | 34,065 |
| 123,469 | 63 | 21,298 | 7,965 | 4,850 | 34,176 |
| 123,470 | 62 | 21,148 | 7,922 | 4,807 | 33,939 |
| 123,471 | 65 | 21,767 | 8,063 | 4,902 | 34,797 |
| 123,472 | 65 | 21,739 | 8,077 | 4,887 | 34,768 |
| 123,473 | 65 | 21,570 | 8,004 | 4,851 | 34,490 |
| 123,474 | 65 | 21,819 | 8,121 | 4,906 | 34,911 |
| 123,475 | 64 | 21,837 | 8,162 | 4,897 | 34,960 |
| 123,476 | 65 | 21,858 | 8,176 | 4,931 | 35,030 |
| 123,477 | 63 | 21,806 | 8,165 | 4,930 | 34,964 |
| 123,478 | 67 | 21,858 | 8,130 | 4,910 | 34,965 |
| 123,479 | 66 | 21,793 | 8,124 | 4,908 | 34,891 |

|         |    |        |       |       |        |
|---------|----|--------|-------|-------|--------|
| 123,480 | 66 | 21,705 | 8,103 | 4,899 | 34,773 |
| 123,481 | 66 | 21,601 | 8,097 | 4,896 | 34,660 |
| 123,482 | 66 | 21,471 | 8,038 | 4,893 | 34,468 |
| 123,483 | 67 | 21,491 | 8,069 | 4,887 | 34,514 |
| 123,484 | 68 | 21,335 | 8,044 | 4,869 | 34,316 |
| 123,485 | 70 | 21,367 | 8,020 | 4,856 | 34,313 |
| 123,486 | 70 | 21,210 | 7,885 | 4,797 | 33,962 |
| 123,487 | 70 | 21,535 | 7,983 | 4,825 | 34,413 |
| 123,488 | 69 | 21,594 | 7,938 | 4,789 | 34,390 |
| 123,489 | 68 | 21,379 | 7,859 | 4,756 | 34,062 |
| 123,490 | 68 | 21,532 | 7,912 | 4,777 | 34,289 |
| 123,491 | 66 | 21,397 | 7,814 | 4,724 | 34,001 |
| 123,492 | 64 | 21,651 | 7,909 | 4,770 | 34,394 |
| 123,493 | 66 | 21,660 | 7,958 | 4,775 | 34,459 |
| 123,494 | 65 | 21,552 | 7,919 | 4,767 | 34,303 |
| 123,495 | 64 | 21,226 | 7,816 | 4,714 | 33,820 |
| 123,496 | 65 | 21,024 | 7,743 | 4,666 | 33,498 |
| 123,497 | 65 | 21,231 | 7,840 | 4,723 | 33,859 |
| 123,498 | 66 | 21,270 | 7,847 | 4,709 | 33,892 |
| 123,499 | 66 | 21,419 | 7,899 | 4,757 | 34,141 |
| 123,500 | 59 | 21,244 | 7,815 | 4,714 | 33,832 |
| 123,501 | 60 | 21,197 | 7,799 | 4,695 | 33,751 |
| 123,502 | 60 | 21,175 | 7,849 | 4,698 | 33,782 |
| 123,503 | 57 | 21,341 | 7,903 | 4,726 | 34,027 |
| 123,504 | 58 | 21,232 | 7,926 | 4,728 | 33,944 |
| 123,505 | 59 | 21,336 | 7,930 | 4,743 | 34,068 |
| 123,506 | 59 | 21,417 | 7,982 | 4,776 | 34,234 |
| 123,507 | 58 | 21,208 | 7,941 | 4,760 | 33,967 |
| 123,508 | 59 | 21,041 | 7,929 | 4,749 | 33,778 |
| 123,509 | 60 | 20,937 | 7,894 | 4,729 | 33,620 |
| 123,510 | 58 | 20,982 | 7,874 | 4,701 | 33,615 |
| 123,511 | 58 | 20,804 | 7,809 | 4,638 | 33,309 |

|         |    |        |       |       |        |
|---------|----|--------|-------|-------|--------|
| 123,512 | 62 | 20,830 | 7,763 | 4,581 | 33,236 |
| 123,513 | 61 | 20,787 | 7,718 | 4,536 | 33,102 |
| 123,514 | 61 | 20,811 | 7,715 | 4,533 | 33,120 |
| 123,515 | 64 | 20,754 | 7,698 | 4,534 | 33,050 |
| 123,516 | 62 | 20,826 | 7,763 | 4,547 | 33,198 |
| 123,517 | 71 | 20,943 | 7,785 | 4,568 | 33,367 |
| 123,518 | 70 | 20,897 | 7,781 | 4,577 | 33,325 |
| 123,519 | 67 | 20,868 | 7,782 | 4,614 | 33,331 |
| 123,520 | 73 | 21,043 | 7,853 | 4,656 | 33,625 |
| 123,521 | 72 | 20,964 | 7,853 | 4,668 | 33,557 |
| 123,522 | 71 | 20,704 | 7,824 | 4,630 | 33,229 |
| 123,523 | 72 | 21,038 | 8,002 | 4,756 | 33,868 |
| 123,524 | 69 | 20,603 | 7,927 | 4,709 | 33,308 |
| 123,525 | 69 | 20,767 | 8,014 | 4,777 | 33,627 |
| 123,526 | 71 | 20,897 | 8,104 | 4,834 | 33,906 |
| 123,527 | 72 | 20,646 | 8,083 | 4,778 | 33,579 |
| 123,528 | 72 | 20,938 | 8,196 | 4,833 | 34,039 |
| 123,529 | 69 | 21,127 | 8,251 | 4,865 | 34,312 |
| 123,530 | 69 | 21,225 | 8,277 | 4,893 | 34,464 |
| 123,531 | 69 | 21,509 | 8,379 | 4,945 | 34,902 |
| 123,532 | 67 | 20,921 | 8,169 | 4,783 | 33,940 |
| 123,533 | 67 | 21,372 | 8,264 | 4,855 | 34,558 |
| 123,534 | 66 | 21,647 | 8,330 | 4,907 | 34,950 |
| 123,535 | 69 | 21,912 | 8,415 | 4,961 | 35,357 |
| 123,536 | 72 | 21,756 | 8,385 | 4,942 | 35,155 |
| 123,537 | 72 | 21,564 | 8,357 | 4,916 | 34,909 |
| 123,538 | 75 | 22,067 | 8,531 | 5,062 | 35,735 |
| 123,539 | 74 | 21,987 | 8,541 | 5,086 | 35,688 |
| 123,540 | 72 | 22,113 | 8,589 | 5,114 | 35,888 |
| 123,541 | 72 | 21,879 | 8,536 | 5,081 | 35,568 |
| 123,542 | 73 | 21,623 | 8,490 | 5,055 | 35,241 |
| 123,543 | 73 | 21,539 | 8,499 | 5,078 | 35,189 |

|         |    |        |       |       |        |
|---------|----|--------|-------|-------|--------|
| 123,544 | 71 | 21,567 | 8,492 | 5,095 | 35,225 |
| 123,545 | 72 | 21,590 | 8,589 | 5,137 | 35,388 |
| 123,546 | 69 | 21,517 | 8,580 | 5,150 | 35,316 |
| 123,547 | 69 | 21,660 | 8,633 | 5,176 | 35,538 |
| 123,548 | 69 | 21,585 | 8,633 | 5,169 | 35,456 |
| 123,549 | 70 | 21,492 | 8,628 | 5,182 | 35,372 |
| 123,550 | 71 | 21,520 | 8,601 | 5,166 | 35,358 |
| 123,551 | 71 | 21,508 | 8,576 | 5,158 | 35,313 |
| 123,552 | 71 | 21,582 | 8,577 | 5,197 | 35,427 |
| 123,553 | 72 | 21,757 | 8,606 | 5,228 | 35,663 |
| 123,554 | 73 | 21,529 | 8,531 | 5,176 | 35,309 |
| 123,555 | 71 | 21,315 | 8,424 | 5,108 | 34,918 |
| 123,556 | 74 | 21,666 | 8,533 | 5,135 | 35,408 |
| 123,557 | 74 | 21,592 | 8,505 | 5,099 | 35,270 |
| 123,558 | 71 | 21,146 | 8,302 | 4,971 | 34,490 |
| 123,559 | 71 | 21,460 | 8,365 | 5,010 | 34,906 |
| 123,560 | 70 | 21,443 | 8,388 | 5,009 | 34,910 |
| 123,561 | 72 | 21,268 | 8,255 | 4,950 | 34,545 |
| 123,562 | 73 | 21,277 | 8,234 | 4,961 | 34,545 |
| 123,563 | 69 | 20,909 | 8,127 | 4,923 | 34,028 |
| 123,564 | 67 | 20,690 | 8,026 | 4,868 | 33,651 |
| 123,565 | 65 | 20,661 | 8,072 | 4,916 | 33,714 |
| 123,566 | 67 | 20,795 | 8,093 | 4,951 | 33,906 |
| 123,567 | 63 | 20,814 | 8,143 | 4,993 | 34,013 |
| 123,568 | 63 | 20,541 | 8,113 | 4,961 | 33,678 |
| 123,569 | 63 | 20,191 | 8,039 | 4,913 | 33,206 |
| 123,570 | 58 | 20,472 | 8,121 | 4,988 | 33,639 |
| 123,571 | 58 | 20,360 | 8,114 | 4,975 | 33,507 |
| 123,572 | 58 | 20,341 | 8,098 | 4,945 | 33,442 |
| 123,573 | 58 | 20,427 | 8,140 | 4,946 | 33,571 |
| 123,574 | 56 | 20,354 | 8,078 | 4,929 | 33,417 |
| 123,575 | 56 | 20,275 | 7,970 | 4,858 | 33,159 |

|         |    |        |       |       |        |
|---------|----|--------|-------|-------|--------|
| 123,576 | 57 | 20,186 | 7,931 | 4,852 | 33,026 |
| 123,577 | 60 | 20,117 | 7,878 | 4,840 | 32,895 |
| 123,578 | 59 | 20,124 | 7,818 | 4,823 | 32,824 |
| 123,579 | 61 | 20,077 | 7,777 | 4,795 | 32,710 |
| 123,580 | 62 | 19,763 | 7,672 | 4,739 | 32,236 |
| 123,581 | 63 | 19,425 | 7,563 | 4,673 | 31,724 |
| 123,582 | 63 | 19,206 | 7,472 | 4,626 | 31,367 |
| 123,583 | 62 | 18,837 | 7,376 | 4,616 | 30,891 |
| 123,584 | 66 | 19,381 | 7,637 | 4,733 | 31,817 |
| 123,585 | 67 | 19,334 | 7,652 | 4,752 | 31,805 |
| 123,586 | 64 | 19,272 | 7,656 | 4,768 | 31,760 |
| 123,587 | 59 | 19,181 | 7,665 | 4,785 | 31,690 |
| 123,588 | 60 | 19,114 | 7,607 | 4,784 | 31,565 |
| 123,589 | 58 | 18,869 | 7,549 | 4,729 | 31,205 |
| 123,590 | 60 | 18,829 | 7,561 | 4,730 | 31,180 |
| 123,591 | 64 | 18,837 | 7,529 | 4,710 | 31,140 |
| 123,592 | 64 | 18,933 | 7,533 | 4,717 | 31,247 |
| 123,593 | 64 | 19,155 | 7,521 | 4,735 | 31,475 |
| 123,594 | 68 | 19,256 | 7,536 | 4,719 | 31,579 |
| 123,595 | 69 | 19,388 | 7,521 | 4,727 | 31,705 |
| 123,596 | 68 | 19,199 | 7,425 | 4,666 | 31,358 |
| 123,597 | 69 | 19,358 | 7,429 | 4,687 | 31,543 |
| 123,598 | 70 | 19,428 | 7,444 | 4,722 | 31,664 |
| 123,599 | 69 | 19,234 | 7,374 | 4,698 | 31,375 |
| 123,600 | 68 | 19,115 | 7,300 | 4,649 | 31,132 |
| 123,601 | 70 | 19,829 | 7,536 | 4,785 | 32,220 |
| 123,602 | 71 | 19,871 | 7,555 | 4,786 | 32,283 |
| 123,603 | 72 | 19,666 | 7,482 | 4,716 | 31,936 |
| 123,604 | 71 | 19,888 | 7,532 | 4,741 | 32,232 |
| 123,605 | 69 | 19,629 | 7,408 | 4,694 | 31,800 |
| 123,606 | 70 | 19,701 | 7,417 | 4,684 | 31,872 |
| 123,607 | 66 | 19,920 | 7,473 | 4,731 | 32,190 |

|         |    |        |       |       |        |
|---------|----|--------|-------|-------|--------|
| 123,608 | 69 | 19,845 | 7,453 | 4,739 | 32,106 |
| 123,609 | 69 | 19,558 | 7,344 | 4,691 | 31,662 |
| 123,610 | 70 | 19,572 | 7,368 | 4,717 | 31,727 |
| 123,611 | 70 | 19,508 | 7,343 | 4,719 | 31,640 |
| 123,612 | 67 | 19,386 | 7,309 | 4,673 | 31,435 |
| 123,613 | 67 | 19,377 | 7,296 | 4,657 | 31,397 |
| 123,614 | 67 | 19,112 | 7,180 | 4,576 | 30,935 |
| 123,615 | 66 | 18,816 | 7,041 | 4,496 | 30,419 |
| 123,616 | 65 | 18,482 | 6,903 | 4,405 | 29,855 |
| 123,617 | 62 | 18,082 | 6,785 | 4,330 | 29,259 |
| 123,618 | 61 | 17,791 | 6,657 | 4,242 | 28,751 |
| 123,619 | 56 | 17,515 | 6,504 | 4,146 | 28,221 |
| 123,620 | 56 | 17,244 | 6,385 | 4,059 | 27,744 |
| 123,621 | 54 | 16,951 | 6,258 | 3,982 | 27,245 |
| 123,622 | 53 | 16,887 | 6,176 | 3,959 | 27,075 |
| 123,623 | 52 | 16,743 | 6,110 | 3,919 | 26,824 |
| 123,624 | 52 | 16,224 | 5,876 | 3,751 | 25,903 |
| 123,625 | 52 | 16,517 | 5,952 | 3,818 | 26,339 |
| 123,626 | 52 | 16,550 | 5,953 | 3,824 | 26,379 |
| 123,627 | 53 | 16,737 | 6,026 | 3,859 | 26,675 |
| 123,628 | 48 | 16,897 | 6,073 | 3,891 | 26,909 |
| 123,629 | 47 | 16,639 | 5,962 | 3,831 | 26,479 |
| 123,630 | 48 | 16,646 | 5,988 | 3,846 | 26,528 |
| 123,631 | 46 | 16,555 | 5,962 | 3,843 | 26,406 |
| 123,632 | 45 | 16,552 | 5,976 | 3,843 | 26,416 |
| 123,633 | 44 | 16,488 | 5,962 | 3,854 | 26,348 |
| 123,634 | 43 | 16,595 | 5,958 | 3,845 | 26,441 |
| 123,635 | 43 | 16,467 | 5,900 | 3,823 | 26,233 |
| 123,636 | 43 | 16,344 | 5,881 | 3,795 | 26,063 |
| 123,637 | 43 | 16,315 | 5,861 | 3,768 | 25,987 |
| 123,638 | 42 | 16,200 | 5,802 | 3,718 | 25,762 |
| 123,639 | 40 | 16,060 | 5,741 | 3,642 | 25,483 |



|         |    |        |       |       |        |
|---------|----|--------|-------|-------|--------|
| 123,640 | 40 | 16,163 | 5,729 | 3,656 | 25,588 |
| 123,641 | 39 | 16,436 | 5,791 | 3,691 | 25,957 |
| 123,642 | 36 | 16,384 | 5,780 | 3,660 | 25,860 |
| 123,643 | 36 | 15,996 | 5,666 | 3,568 | 25,266 |
| 123,644 | 37 | 16,176 | 5,744 | 3,593 | 25,550 |
| 123,645 | 35 | 15,943 | 5,733 | 3,593 | 25,304 |
| 123,646 | 35 | 15,726 | 5,719 | 3,578 | 25,058 |
| 123,647 | 35 | 15,687 | 5,699 | 3,562 | 24,983 |
| 123,648 | 37 | 15,560 | 5,649 | 3,492 | 24,738 |
| 123,649 | 36 | 15,493 | 5,585 | 3,467 | 24,581 |
| 123,650 | 40 | 15,413 | 5,531 | 3,454 | 24,438 |
| 123,651 | 40 | 15,164 | 5,447 | 3,399 | 24,050 |
| 123,652 | 38 | 15,640 | 5,655 | 3,533 | 24,866 |
| 123,653 | 37 | 15,380 | 5,551 | 3,476 | 24,444 |
| 123,654 | 38 | 15,207 | 5,489 | 3,421 | 24,155 |
| 123,655 | 38 | 14,985 | 5,412 | 3,388 | 23,823 |
| 123,656 | 38 | 15,649 | 5,652 | 3,521 | 24,860 |
| 123,657 | 42 | 15,089 | 5,493 | 3,407 | 24,031 |
| 123,658 | 45 | 15,227 | 5,541 | 3,412 | 24,225 |
| 123,659 | 42 | 15,240 | 5,526 | 3,403 | 24,211 |
| 123,660 | 44 | 15,522 | 5,582 | 3,427 | 24,575 |
| 123,661 | 43 | 15,402 | 5,574 | 3,422 | 24,441 |
| 123,662 | 47 | 15,489 | 5,632 | 3,454 | 24,622 |
| 123,663 | 46 | 15,400 | 5,582 | 3,438 | 24,466 |
| 123,664 | 46 | 15,772 | 5,716 | 3,503 | 25,037 |
| 123,665 | 48 | 16,181 | 5,872 | 3,604 | 25,705 |
| 123,666 | 48 | 16,356 | 5,933 | 3,625 | 25,962 |
| 123,667 | 48 | 16,882 | 6,100 | 3,735 | 26,765 |
| 123,668 | 49 | 17,004 | 6,159 | 3,766 | 26,978 |
| 123,669 | 49 | 17,473 | 6,350 | 3,883 | 27,755 |
| 123,670 | 49 | 17,670 | 6,484 | 3,967 | 28,170 |
| 123,671 | 52 | 18,204 | 6,683 | 4,077 | 29,016 |

|         |    |        |       |       |        |
|---------|----|--------|-------|-------|--------|
| 123,672 | 52 | 18,233 | 6,725 | 4,110 | 29,120 |
| 123,673 | 52 | 18,539 | 6,872 | 4,178 | 29,641 |
| 123,674 | 53 | 18,690 | 6,932 | 4,235 | 29,910 |
| 123,675 | 51 | 18,668 | 6,969 | 4,264 | 29,952 |
| 123,676 | 51 | 18,757 | 7,031 | 4,261 | 30,100 |
| 123,677 | 51 | 18,584 | 7,034 | 4,247 | 29,916 |
| 123,678 | 50 | 18,460 | 7,037 | 4,268 | 29,815 |
| 123,679 | 52 | 18,538 | 7,111 | 4,274 | 29,975 |
| 123,680 | 52 | 18,544 | 7,165 | 4,305 | 30,066 |
| 123,681 | 50 | 18,587 | 7,189 | 4,330 | 30,156 |
| 123,682 | 50 | 18,655 | 7,194 | 4,320 | 30,219 |
| 123,683 | 49 | 18,649 | 7,170 | 4,302 | 30,170 |
| 123,684 | 50 | 18,626 | 7,197 | 4,279 | 30,152 |
| 123,685 | 50 | 18,467 | 7,157 | 4,263 | 29,937 |
| 123,686 | 50 | 18,339 | 7,178 | 4,289 | 29,856 |
| 123,687 | 52 | 18,424 | 7,197 | 4,305 | 29,978 |
| 123,688 | 53 | 18,269 | 7,145 | 4,266 | 29,733 |
| 123,689 | 53 | 18,562 | 7,218 | 4,328 | 30,161 |
| 123,690 | 53 | 18,547 | 7,214 | 4,344 | 30,158 |
| 123,691 | 55 | 18,547 | 7,180 | 4,305 | 30,087 |
| 123,692 | 54 | 18,621 | 7,208 | 4,317 | 30,200 |
| 123,693 | 54 | 18,375 | 7,163 | 4,283 | 29,875 |
| 123,694 | 54 | 18,543 | 7,205 | 4,316 | 30,118 |
| 123,695 | 53 | 18,586 | 7,232 | 4,311 | 30,182 |
| 123,696 | 54 | 18,823 | 7,229 | 4,331 | 30,437 |
| 123,697 | 54 | 18,967 | 7,263 | 4,364 | 30,648 |
| 123,698 | 54 | 18,948 | 7,297 | 4,385 | 30,684 |
| 123,699 | 48 | 18,390 | 7,190 | 4,260 | 29,888 |
| 123,700 | 49 | 18,525 | 7,253 | 4,307 | 30,134 |
| 123,701 | 49 | 18,679 | 7,331 | 4,367 | 30,426 |
| 123,702 | 49 | 18,595 | 7,338 | 4,386 | 30,368 |
| 123,703 | 52 | 18,481 | 7,338 | 4,372 | 30,243 |

|         |    |        |       |       |        |
|---------|----|--------|-------|-------|--------|
| 123,704 | 53 | 18,350 | 7,272 | 4,355 | 30,030 |
| 123,705 | 49 | 18,131 | 7,198 | 4,314 | 29,692 |
| 123,706 | 53 | 18,345 | 7,285 | 4,354 | 30,037 |
| 123,707 | 53 | 18,295 | 7,309 | 4,349 | 30,006 |
| 123,708 | 49 | 18,107 | 7,201 | 4,309 | 29,666 |
| 123,709 | 49 | 18,276 | 7,312 | 4,386 | 30,023 |
| 123,710 | 50 | 18,138 | 7,313 | 4,366 | 29,867 |
| 123,711 | 52 | 18,114 | 7,308 | 4,383 | 29,857 |
| 123,712 | 49 | 18,094 | 7,275 | 4,357 | 29,775 |
| 123,713 | 48 | 18,122 | 7,257 | 4,339 | 29,766 |
| 123,714 | 49 | 18,396 | 7,377 | 4,404 | 30,226 |
| 123,715 | 50 | 18,478 | 7,393 | 4,426 | 30,347 |
| 123,716 | 50 | 18,439 | 7,399 | 4,421 | 30,309 |
| 123,717 | 51 | 18,440 | 7,443 | 4,455 | 30,389 |
| 123,718 | 52 | 18,017 | 7,271 | 4,367 | 29,707 |
| 123,719 | 52 | 18,039 | 7,308 | 4,392 | 29,791 |
| 123,720 | 52 | 18,147 | 7,379 | 4,435 | 30,013 |
| 123,721 | 52 | 18,117 | 7,365 | 4,430 | 29,964 |
| 123,722 | 49 | 17,602 | 7,207 | 4,353 | 29,211 |
| 123,723 | 50 | 18,209 | 7,354 | 4,442 | 30,055 |
| 123,724 | 50 | 18,255 | 7,351 | 4,430 | 30,086 |
| 123,725 | 49 | 18,178 | 7,352 | 4,415 | 29,994 |
| 123,726 | 50 | 18,112 | 7,303 | 4,401 | 29,866 |
| 123,727 | 54 | 18,098 | 7,318 | 4,418 | 29,888 |
| 123,728 | 58 | 18,251 | 7,311 | 4,429 | 30,049 |
| 123,729 | 58 | 18,121 | 7,208 | 4,367 | 29,754 |
| 123,730 | 56 | 18,341 | 7,262 | 4,463 | 30,122 |
| 123,731 | 55 | 18,286 | 7,186 | 4,449 | 29,976 |
| 123,732 | 55 | 18,537 | 7,264 | 4,484 | 30,340 |
| 123,733 | 55 | 18,614 | 7,303 | 4,536 | 30,508 |
| 123,734 | 54 | 18,656 | 7,316 | 4,548 | 30,574 |
| 123,735 | 53 | 18,567 | 7,249 | 4,527 | 30,396 |

|         |    |        |       |       |        |
|---------|----|--------|-------|-------|--------|
| 123,736 | 53 | 18,355 | 7,169 | 4,472 | 30,049 |
| 123,737 | 53 | 18,597 | 7,213 | 4,477 | 30,340 |
| 123,738 | 51 | 18,811 | 7,248 | 4,503 | 30,613 |
| 123,739 | 52 | 18,660 | 7,196 | 4,493 | 30,401 |
| 123,740 | 53 | 18,614 | 7,175 | 4,470 | 30,312 |
| 123,741 | 53 | 18,334 | 7,118 | 4,417 | 29,922 |
| 123,742 | 55 | 18,587 | 7,273 | 4,554 | 30,469 |
| 123,743 | 58 | 18,624 | 7,257 | 4,547 | 30,486 |
| 123,744 | 57 | 18,740 | 7,255 | 4,575 | 30,627 |
| 123,745 | 59 | 18,899 | 7,310 | 4,609 | 30,877 |
| 123,746 | 59 | 18,927 | 7,282 | 4,622 | 30,890 |
| 123,747 | 56 | 18,825 | 7,271 | 4,610 | 30,762 |
| 123,748 | 57 | 18,909 | 7,221 | 4,599 | 30,786 |
| 123,749 | 57 | 18,935 | 7,165 | 4,554 | 30,711 |
| 123,750 | 56 | 19,087 | 7,143 | 4,562 | 30,848 |
| 123,751 | 56 | 19,065 | 7,112 | 4,582 | 30,815 |
| 123,752 | 58 | 19,129 | 7,142 | 4,553 | 30,882 |
| 123,753 | 60 | 18,928 | 7,078 | 4,502 | 30,568 |
| 123,754 | 57 | 19,171 | 7,113 | 4,559 | 30,900 |
| 123,755 | 56 | 19,000 | 7,064 | 4,502 | 30,622 |
| 123,756 | 54 | 19,172 | 7,100 | 4,530 | 30,856 |
| 123,757 | 53 | 19,296 | 7,153 | 4,552 | 31,054 |
| 123,758 | 57 | 19,518 | 7,188 | 4,604 | 31,367 |
| 123,759 | 56 | 19,527 | 7,199 | 4,619 | 31,401 |
| 123,760 | 54 | 19,568 | 7,149 | 4,601 | 31,372 |
| 123,761 | 53 | 19,507 | 7,118 | 4,603 | 31,281 |
| 123,762 | 54 | 19,891 | 7,233 | 4,692 | 31,870 |
| 123,763 | 53 | 19,955 | 7,253 | 4,722 | 31,983 |
| 123,764 | 52 | 19,651 | 7,154 | 4,675 | 31,532 |
| 123,765 | 52 | 19,760 | 7,204 | 4,719 | 31,735 |
| 123,766 | 51 | 19,700 | 7,211 | 4,742 | 31,704 |
| 123,767 | 49 | 19,695 | 7,198 | 4,733 | 31,675 |

|         |    |        |       |       |        |
|---------|----|--------|-------|-------|--------|
| 123,768 | 48 | 19,846 | 7,172 | 4,748 | 31,814 |
| 123,769 | 50 | 19,898 | 7,163 | 4,738 | 31,849 |
| 123,770 | 52 | 20,069 | 7,174 | 4,740 | 32,035 |
| 123,771 | 53 | 20,412 | 7,231 | 4,767 | 32,463 |
| 123,772 | 53 | 20,329 | 7,188 | 4,765 | 32,335 |
| 123,773 | 52 | 20,189 | 7,146 | 4,734 | 32,121 |
| 123,774 | 53 | 20,384 | 7,217 | 4,799 | 32,453 |
| 123,775 | 54 | 20,397 | 7,217 | 4,813 | 32,481 |
| 123,776 | 54 | 20,753 | 7,265 | 4,873 | 32,945 |
| 123,777 | 53 | 20,839 | 7,279 | 4,886 | 33,057 |
| 123,778 | 51 | 20,759 | 7,230 | 4,903 | 32,943 |
| 123,779 | 49 | 20,849 | 7,281 | 4,933 | 33,112 |
| 123,780 | 49 | 20,854 | 7,275 | 4,915 | 33,093 |
| 123,781 | 49 | 20,404 | 7,128 | 4,830 | 32,411 |
| 123,782 | 49 | 20,414 | 7,166 | 4,841 | 32,470 |
| 123,783 | 52 | 20,676 | 7,225 | 4,884 | 32,837 |
| 123,784 | 53 | 20,547 | 7,189 | 4,861 | 32,650 |
| 123,785 | 53 | 20,167 | 7,046 | 4,780 | 32,046 |
| 123,786 | 56 | 20,449 | 7,090 | 4,820 | 32,415 |
| 123,787 | 57 | 20,522 | 7,081 | 4,819 | 32,479 |
| 123,788 | 58 | 20,527 | 7,097 | 4,823 | 32,505 |
| 123,789 | 58 | 20,597 | 7,109 | 4,823 | 32,587 |
| 123,790 | 57 | 20,573 | 7,128 | 4,823 | 32,581 |
| 123,791 | 57 | 20,904 | 7,237 | 4,888 | 33,086 |
| 123,792 | 63 | 20,937 | 7,181 | 4,847 | 33,028 |
| 123,793 | 61 | 20,826 | 7,145 | 4,832 | 32,864 |
| 123,794 | 62 | 21,179 | 7,280 | 4,911 | 33,432 |
| 123,795 | 61 | 21,211 | 7,274 | 4,912 | 33,458 |
| 123,796 | 61 | 21,060 | 7,191 | 4,843 | 33,155 |
| 123,797 | 64 | 21,095 | 7,215 | 4,843 | 33,217 |
| 123,798 | 64 | 21,066 | 7,205 | 4,825 | 33,160 |
| 123,799 | 66 | 21,317 | 7,322 | 4,857 | 33,562 |

|         |    |        |       |       |        |
|---------|----|--------|-------|-------|--------|
| 123,800 | 66 | 21,298 | 7,337 | 4,889 | 33,590 |
| 123,801 | 62 | 20,565 | 7,090 | 4,722 | 32,439 |
| 123,802 | 63 | 20,879 | 7,160 | 4,765 | 32,867 |
| 123,803 | 62 | 20,995 | 7,174 | 4,796 | 33,027 |
| 123,804 | 65 | 20,987 | 7,172 | 4,785 | 33,009 |
| 123,805 | 65 | 20,677 | 7,121 | 4,731 | 32,594 |
| 123,806 | 65 | 20,747 | 7,169 | 4,799 | 32,780 |
| 123,807 | 68 | 20,624 | 7,110 | 4,767 | 32,569 |
| 123,808 | 66 | 20,492 | 7,105 | 4,772 | 32,435 |
| 123,809 | 63 | 20,220 | 7,039 | 4,727 | 32,049 |
| 123,810 | 67 | 20,143 | 7,061 | 4,689 | 31,960 |
| 123,811 | 66 | 19,905 | 7,030 | 4,656 | 31,657 |
| 123,812 | 67 | 20,106 | 7,083 | 4,685 | 31,941 |
| 123,813 | 65 | 19,935 | 7,051 | 4,651 | 31,702 |
| 123,814 | 70 | 19,737 | 7,022 | 4,626 | 31,455 |
| 123,815 | 70 | 19,907 | 7,047 | 4,605 | 31,629 |
| 123,816 | 72 | 19,697 | 6,999 | 4,563 | 31,331 |
| 123,817 | 73 | 19,966 | 7,060 | 4,606 | 31,705 |
| 123,818 | 74 | 19,759 | 6,969 | 4,550 | 31,352 |
| 123,819 | 74 | 19,355 | 6,876 | 4,473 | 30,778 |
| 123,820 | 72 | 19,598 | 6,967 | 4,554 | 31,191 |
| 123,821 | 71 | 19,121 | 6,856 | 4,482 | 30,530 |
| 123,822 | 70 | 18,955 | 6,843 | 4,413 | 30,281 |
| 123,823 | 72 | 19,047 | 6,936 | 4,449 | 30,504 |
| 123,824 | 71 | 19,054 | 6,922 | 4,457 | 30,504 |
| 123,825 | 70 | 19,036 | 6,944 | 4,430 | 30,480 |
| 123,826 | 70 | 18,897 | 6,962 | 4,396 | 30,325 |
| 123,827 | 71 | 18,691 | 6,896 | 4,369 | 30,027 |
| 123,828 | 71 | 18,556 | 6,831 | 4,332 | 29,790 |
| 123,829 | 70 | 18,530 | 6,827 | 4,269 | 29,696 |
| 123,830 | 69 | 18,456 | 6,772 | 4,231 | 29,528 |
| 123,831 | 69 | 18,263 | 6,681 | 4,184 | 29,197 |

|         |    |        |       |       |        |
|---------|----|--------|-------|-------|--------|
| 123,832 | 70 | 18,419 | 6,654 | 4,179 | 29,322 |
| 123,833 | 71 | 18,679 | 6,720 | 4,213 | 29,683 |
| 123,834 | 68 | 18,696 | 6,720 | 4,194 | 29,678 |
| 123,835 | 66 | 18,440 | 6,646 | 4,152 | 29,304 |
| 123,836 | 68 | 18,585 | 6,704 | 4,192 | 29,549 |
| 123,837 | 70 | 18,433 | 6,714 | 4,182 | 29,399 |
| 123,838 | 69 | 18,319 | 6,705 | 4,180 | 29,273 |
| 123,839 | 74 | 18,110 | 6,663 | 4,147 | 28,994 |
| 123,840 | 74 | 17,846 | 6,596 | 4,095 | 28,611 |
| 123,841 | 78 | 17,914 | 6,701 | 4,142 | 28,835 |
| 123,842 | 78 | 17,616 | 6,603 | 4,078 | 28,375 |
| 123,843 | 73 | 17,621 | 6,673 | 4,088 | 28,455 |
| 123,844 | 73 | 17,445 | 6,608 | 4,019 | 28,145 |
| 123,845 | 69 | 17,303 | 6,569 | 4,007 | 27,948 |
| 123,846 | 69 | 17,122 | 6,553 | 3,962 | 27,706 |
| 123,847 | 68 | 17,103 | 6,605 | 3,998 | 27,774 |
| 123,848 | 65 | 16,783 | 6,522 | 3,945 | 27,315 |
| 123,849 | 64 | 16,834 | 6,563 | 3,997 | 27,458 |
| 123,850 | 61 | 16,624 | 6,542 | 3,979 | 27,206 |
| 123,851 | 60 | 16,456 | 6,497 | 3,945 | 26,958 |
| 123,852 | 60 | 16,350 | 6,517 | 3,921 | 26,848 |
| 123,853 | 59 | 16,267 | 6,512 | 3,905 | 26,743 |
| 123,854 | 59 | 16,386 | 6,547 | 3,895 | 26,887 |
| 123,855 | 57 | 16,353 | 6,511 | 3,881 | 26,802 |
| 123,856 | 57 | 16,280 | 6,455 | 3,834 | 26,626 |
| 123,857 | 57 | 16,355 | 6,496 | 3,841 | 26,749 |
| 123,858 | 53 | 16,346 | 6,475 | 3,815 | 26,689 |
| 123,859 | 53 | 16,286 | 6,390 | 3,771 | 26,500 |
| 123,860 | 50 | 16,227 | 6,309 | 3,757 | 26,343 |
| 123,861 | 52 | 16,243 | 6,274 | 3,733 | 26,302 |
| 123,862 | 52 | 16,464 | 6,375 | 3,776 | 26,667 |
| 123,863 | 50 | 16,328 | 6,367 | 3,753 | 26,498 |

|         |    |        |       |       |        |
|---------|----|--------|-------|-------|--------|
| 123,864 | 50 | 16,064 | 6,278 | 3,697 | 26,089 |
| 123,865 | 45 | 16,352 | 6,325 | 3,730 | 26,452 |
| 123,866 | 47 | 16,066 | 6,275 | 3,708 | 26,096 |
| 123,867 | 45 | 16,059 | 6,281 | 3,689 | 26,074 |
| 123,868 | 44 | 15,891 | 6,254 | 3,671 | 25,860 |
| 123,869 | 43 | 15,813 | 6,210 | 3,650 | 25,716 |
| 123,870 | 42 | 15,935 | 6,253 | 3,629 | 25,859 |
| 123,871 | 42 | 16,080 | 6,313 | 3,651 | 26,086 |
| 123,872 | 41 | 15,926 | 6,245 | 3,634 | 25,846 |
| 123,873 | 41 | 16,026 | 6,319 | 3,688 | 26,074 |
| 123,874 | 40 | 15,944 | 6,280 | 3,680 | 25,944 |
| 123,875 | 41 | 15,827 | 6,319 | 3,664 | 25,851 |
| 123,876 | 41 | 15,596 | 6,238 | 3,616 | 25,491 |
| 123,877 | 42 | 15,730 | 6,266 | 3,646 | 25,684 |
| 123,878 | 41 | 15,581 | 6,218 | 3,598 | 25,438 |
| 123,879 | 46 | 15,786 | 6,279 | 3,642 | 25,753 |
| 123,880 | 45 | 15,490 | 6,209 | 3,611 | 25,355 |
| 123,881 | 46 | 15,596 | 6,263 | 3,614 | 25,519 |
| 123,882 | 47 | 15,629 | 6,330 | 3,637 | 25,643 |
| 123,883 | 46 | 15,485 | 6,382 | 3,647 | 25,560 |
| 123,884 | 46 | 15,302 | 6,383 | 3,629 | 25,360 |
| 123,885 | 46 | 15,134 | 6,358 | 3,629 | 25,167 |
| 123,886 | 47 | 15,037 | 6,359 | 3,607 | 25,050 |
| 123,887 | 45 | 15,132 | 6,389 | 3,601 | 25,167 |
| 123,888 | 40 | 15,230 | 6,391 | 3,602 | 25,263 |
| 123,889 | 40 | 15,370 | 6,395 | 3,612 | 25,417 |
| 123,890 | 33 | 15,469 | 6,408 | 3,611 | 25,521 |
| 123,891 | 32 | 15,465 | 6,380 | 3,608 | 25,485 |
| 123,892 | 31 | 15,643 | 6,383 | 3,630 | 25,687 |
| 123,893 | 32 | 15,780 | 6,434 | 3,646 | 25,892 |
| 123,894 | 30 | 15,849 | 6,443 | 3,656 | 25,978 |
| 123,895 | 31 | 16,058 | 6,477 | 3,685 | 26,251 |



|         |    |        |       |       |        |
|---------|----|--------|-------|-------|--------|
| 123,896 | 31 | 16,142 | 6,453 | 3,697 | 26,323 |
| 123,897 | 30 | 15,900 | 6,336 | 3,637 | 25,903 |
| 123,898 | 33 | 16,098 | 6,450 | 3,674 | 26,255 |
| 123,899 | 34 | 16,282 | 6,499 | 3,706 | 26,521 |
| 123,900 | 35 | 16,475 | 6,584 | 3,738 | 26,832 |
| 123,901 | 35 | 16,528 | 6,579 | 3,755 | 26,897 |
| 123,902 | 36 | 16,538 | 6,621 | 3,766 | 26,961 |
| 123,903 | 37 | 16,486 | 6,582 | 3,779 | 26,884 |
| 123,904 | 37 | 16,428 | 6,576 | 3,773 | 26,814 |
| 123,905 | 38 | 16,407 | 6,567 | 3,776 | 26,788 |
| 123,906 | 37 | 16,304 | 6,537 | 3,757 | 26,635 |
| 123,907 | 39 | 16,502 | 6,619 | 3,801 | 26,961 |
| 123,908 | 40 | 16,619 | 6,635 | 3,822 | 27,116 |
| 123,909 | 46 | 16,712 | 6,699 | 3,842 | 27,299 |
| 123,910 | 49 | 16,768 | 6,783 | 3,870 | 27,470 |
| 123,911 | 50 | 16,587 | 6,731 | 3,837 | 27,205 |
| 123,912 | 47 | 16,493 | 6,690 | 3,826 | 27,056 |
| 123,913 | 47 | 16,766 | 6,782 | 3,911 | 27,506 |
| 123,914 | 46 | 16,479 | 6,706 | 3,862 | 27,093 |
| 123,915 | 48 | 16,687 | 6,845 | 3,932 | 27,512 |
| 123,916 | 48 | 16,557 | 6,853 | 3,919 | 27,377 |
| 123,917 | 50 | 16,590 | 6,844 | 3,942 | 27,426 |
| 123,918 | 54 | 16,613 | 6,851 | 3,949 | 27,467 |
| 123,919 | 58 | 16,596 | 6,852 | 3,947 | 27,453 |
| 123,920 | 61 | 16,629 | 6,875 | 3,946 | 27,511 |
| 123,921 | 62 | 16,500 | 6,870 | 3,957 | 27,389 |
| 123,922 | 64 | 16,418 | 6,843 | 3,955 | 27,280 |
| 123,923 | 63 | 16,538 | 6,935 | 3,977 | 27,513 |
| 123,924 | 63 | 16,444 | 6,858 | 3,927 | 27,292 |
| 123,925 | 63 | 16,430 | 6,844 | 3,910 | 27,247 |
| 123,926 | 63 | 16,433 | 6,837 | 3,918 | 27,251 |
| 123,927 | 63 | 16,368 | 6,836 | 3,896 | 27,163 |

|         |    |        |       |       |        |
|---------|----|--------|-------|-------|--------|
| 123,928 | 62 | 16,461 | 6,923 | 3,933 | 27,379 |
| 123,929 | 59 | 16,469 | 6,954 | 3,943 | 27,425 |
| 123,930 | 59 | 16,477 | 6,950 | 3,953 | 27,439 |
| 123,931 | 57 | 16,445 | 6,914 | 3,934 | 27,350 |
| 123,932 | 59 | 16,445 | 6,933 | 3,948 | 27,385 |
| 123,933 | 60 | 16,442 | 6,830 | 3,891 | 27,223 |
| 123,934 | 63 | 16,710 | 6,889 | 3,916 | 27,578 |
| 123,935 | 64 | 16,788 | 6,912 | 3,922 | 27,686 |
| 123,936 | 64 | 16,892 | 6,900 | 3,915 | 27,771 |
| 123,937 | 64 | 16,995 | 6,971 | 3,925 | 27,955 |
| 123,938 | 64 | 16,993 | 6,971 | 3,923 | 27,951 |
| 123,939 | 64 | 16,789 | 6,912 | 3,885 | 27,650 |
| 123,940 | 64 | 16,831 | 6,980 | 3,923 | 27,798 |
| 123,941 | 65 | 16,590 | 6,910 | 3,900 | 27,465 |
| 123,942 | 65 | 16,395 | 6,882 | 3,853 | 27,195 |
| 123,943 | 64 | 16,548 | 7,010 | 3,907 | 27,529 |
| 123,944 | 64 | 16,387 | 6,953 | 3,892 | 27,296 |
| 123,945 | 66 | 16,279 | 6,960 | 3,870 | 27,175 |
| 123,946 | 65 | 16,070 | 6,943 | 3,843 | 26,921 |
| 123,947 | 67 | 15,943 | 6,931 | 3,850 | 26,791 |
| 123,948 | 67 | 15,867 | 6,889 | 3,831 | 26,654 |
| 123,949 | 64 | 15,638 | 6,808 | 3,789 | 26,299 |
| 123,950 | 63 | 15,566 | 6,848 | 3,810 | 26,287 |
| 123,951 | 63 | 15,471 | 6,839 | 3,822 | 26,195 |
| 123,952 | 64 | 15,392 | 6,869 | 3,792 | 26,117 |
| 123,953 | 63 | 15,516 | 6,950 | 3,837 | 26,366 |
| 123,954 | 62 | 15,316 | 6,901 | 3,807 | 26,086 |
| 123,955 | 64 | 15,437 | 6,988 | 3,836 | 26,325 |
| 123,956 | 64 | 15,551 | 7,058 | 3,863 | 26,536 |
| 123,957 | 65 | 15,518 | 7,107 | 3,849 | 26,539 |
| 123,958 | 64 | 15,367 | 7,058 | 3,825 | 26,314 |
| 123,959 | 63 | 15,177 | 7,088 | 3,819 | 26,147 |

|         |    |        |       |       |        |
|---------|----|--------|-------|-------|--------|
| 123,960 | 58 | 15,225 | 7,180 | 3,859 | 26,322 |
| 123,961 | 59 | 15,238 | 7,183 | 3,861 | 26,341 |
| 123,962 | 59 | 15,158 | 7,204 | 3,853 | 26,274 |
| 123,963 | 64 | 15,086 | 7,208 | 3,835 | 26,193 |
| 123,964 | 64 | 15,239 | 7,274 | 3,870 | 26,447 |
| 123,965 | 64 | 15,353 | 7,326 | 3,894 | 26,637 |
| 123,966 | 64 | 15,246 | 7,229 | 3,855 | 26,394 |
| 123,967 | 67 | 15,426 | 7,308 | 3,913 | 26,714 |
| 123,968 | 64 | 15,206 | 7,259 | 3,852 | 26,381 |
| 123,969 | 60 | 14,980 | 7,181 | 3,808 | 26,029 |
| 123,970 | 57 | 14,985 | 7,326 | 3,858 | 26,226 |
| 123,971 | 54 | 14,788 | 7,302 | 3,856 | 26,000 |
| 123,972 | 55 | 14,692 | 7,321 | 3,841 | 25,909 |
| 123,973 | 55 | 14,628 | 7,297 | 3,823 | 25,803 |
| 123,974 | 58 | 14,655 | 7,295 | 3,821 | 25,829 |
| 123,975 | 58 | 14,627 | 7,300 | 3,806 | 25,791 |
| 123,976 | 57 | 14,562 | 7,231 | 3,782 | 25,632 |
| 123,977 | 59 | 14,736 | 7,318 | 3,817 | 25,930 |
| 123,978 | 61 | 14,382 | 7,179 | 3,724 | 25,346 |
| 123,979 | 62 | 14,450 | 7,213 | 3,748 | 25,473 |
| 123,980 | 61 | 14,398 | 7,212 | 3,740 | 25,411 |
| 123,981 | 60 | 14,124 | 7,165 | 3,703 | 25,052 |
| 123,982 | 60 | 13,854 | 7,096 | 3,663 | 24,673 |
| 123,983 | 65 | 14,217 | 7,317 | 3,753 | 25,352 |
| 123,984 | 64 | 14,113 | 7,325 | 3,769 | 25,271 |
| 123,985 | 61 | 14,041 | 7,346 | 3,775 | 25,223 |
| 123,986 | 60 | 14,044 | 7,359 | 3,776 | 25,239 |
| 123,987 | 63 | 14,057 | 7,366 | 3,777 | 25,263 |
| 123,988 | 62 | 13,871 | 7,299 | 3,759 | 24,991 |
| 123,989 | 63 | 13,647 | 7,243 | 3,717 | 24,670 |
| 123,990 | 64 | 13,572 | 7,220 | 3,687 | 24,543 |
| 123,991 | 64 | 13,870 | 7,400 | 3,803 | 25,137 |

|         |    |        |       |       |        |
|---------|----|--------|-------|-------|--------|
| 123,992 | 63 | 13,876 | 7,424 | 3,802 | 25,165 |
| 123,993 | 67 | 14,000 | 7,470 | 3,830 | 25,367 |
| 123,994 | 66 | 14,017 | 7,468 | 3,848 | 25,399 |
| 123,995 | 65 | 13,862 | 7,390 | 3,810 | 25,127 |
| 123,996 | 63 | 13,640 | 7,271 | 3,799 | 24,773 |
| 123,997 | 65 | 13,866 | 7,420 | 3,903 | 25,254 |
| 123,998 | 63 | 13,877 | 7,430 | 3,878 | 25,248 |
| 123,999 | 64 | 13,934 | 7,448 | 3,905 | 25,351 |
| 124,000 | 66 | 13,961 | 7,442 | 3,926 | 25,395 |
| 124,001 | 65 | 13,801 | 7,413 | 3,912 | 25,191 |
| 124,002 | 66 | 13,924 | 7,436 | 3,929 | 25,355 |
| 124,003 | 68 | 14,096 | 7,440 | 3,915 | 25,519 |
| 124,004 | 71 | 14,213 | 7,450 | 3,916 | 25,650 |
| 124,005 | 74 | 14,291 | 7,503 | 3,940 | 25,808 |
| 124,006 | 75 | 14,281 | 7,554 | 3,964 | 25,874 |
| 124,007 | 74 | 14,183 | 7,508 | 3,959 | 25,724 |
| 124,008 | 72 | 14,140 | 7,420 | 3,930 | 25,562 |
| 124,009 | 74 | 14,194 | 7,443 | 3,935 | 25,646 |
| 124,010 | 75 | 14,097 | 7,359 | 3,890 | 25,421 |
| 124,011 | 74 | 14,267 | 7,396 | 3,908 | 25,645 |
| 124,012 | 71 | 14,178 | 7,375 | 3,897 | 25,521 |
| 124,013 | 72 | 14,268 | 7,368 | 3,902 | 25,610 |
| 124,014 | 67 | 14,176 | 7,311 | 3,880 | 25,434 |
| 124,015 | 67 | 14,249 | 7,382 | 3,896 | 25,594 |
| 124,016 | 66 | 14,355 | 7,388 | 3,896 | 25,705 |
| 124,017 | 63 | 14,219 | 7,269 | 3,839 | 25,390 |
| 124,018 | 63 | 14,347 | 7,377 | 3,854 | 25,641 |
| 124,019 | 62 | 14,429 | 7,383 | 3,861 | 25,735 |
| 124,020 | 62 | 14,372 | 7,273 | 3,804 | 25,511 |
| 124,021 | 62 | 14,641 | 7,356 | 3,851 | 25,910 |
| 124,022 | 61 | 14,778 | 7,412 | 3,910 | 26,161 |
| 124,023 | 60 | 14,911 | 7,439 | 3,917 | 26,327 |

|         |    |        |       |       |        |
|---------|----|--------|-------|-------|--------|
| 124,024 | 60 | 15,013 | 7,430 | 3,911 | 26,414 |
| 124,025 | 57 | 14,942 | 7,408 | 3,927 | 26,334 |
| 124,026 | 58 | 15,018 | 7,414 | 3,922 | 26,412 |
| 124,027 | 56 | 14,934 | 7,410 | 3,885 | 26,285 |
| 124,028 | 56 | 15,204 | 7,482 | 3,930 | 26,672 |
| 124,029 | 55 | 15,198 | 7,425 | 3,920 | 26,598 |
| 124,030 | 54 | 15,257 | 7,450 | 3,942 | 26,703 |
| 124,031 | 54 | 15,351 | 7,439 | 3,928 | 26,772 |
| 124,032 | 56 | 15,496 | 7,491 | 3,940 | 26,983 |
| 124,033 | 50 | 15,614 | 7,578 | 3,985 | 27,227 |
| 124,034 | 51 | 15,710 | 7,577 | 3,984 | 27,322 |
| 124,035 | 50 | 15,588 | 7,498 | 3,928 | 27,064 |
| 124,036 | 52 | 15,735 | 7,551 | 3,975 | 27,313 |
| 124,037 | 52 | 15,667 | 7,543 | 3,982 | 27,244 |
| 124,038 | 49 | 15,555 | 7,539 | 3,975 | 27,118 |
| 124,039 | 49 | 15,602 | 7,578 | 3,972 | 27,201 |
| 124,040 | 48 | 15,700 | 7,587 | 3,965 | 27,300 |
| 124,041 | 49 | 15,837 | 7,593 | 3,971 | 27,450 |
| 124,042 | 52 | 15,648 | 7,478 | 3,912 | 27,090 |
| 124,043 | 54 | 15,826 | 7,537 | 3,935 | 27,352 |
| 124,044 | 52 | 15,956 | 7,622 | 3,978 | 27,608 |
| 124,045 | 51 | 15,910 | 7,596 | 3,949 | 27,506 |
| 124,046 | 51 | 16,032 | 7,661 | 3,934 | 27,678 |
| 124,047 | 51 | 16,116 | 7,641 | 3,935 | 27,743 |
| 124,048 | 50 | 16,242 | 7,745 | 3,980 | 28,017 |
| 124,049 | 54 | 16,196 | 7,766 | 3,970 | 27,986 |
| 124,050 | 53 | 16,168 | 7,778 | 3,947 | 27,946 |
| 124,051 | 55 | 16,104 | 7,718 | 3,904 | 27,781 |
| 124,052 | 55 | 16,239 | 7,719 | 3,900 | 27,913 |
| 124,053 | 54 | 16,405 | 7,788 | 3,916 | 28,163 |
| 124,054 | 52 | 16,335 | 7,804 | 3,919 | 28,110 |
| 124,055 | 49 | 16,276 | 7,835 | 3,928 | 28,088 |

|         |    |        |       |       |        |
|---------|----|--------|-------|-------|--------|
| 124,056 | 48 | 16,303 | 7,852 | 3,920 | 28,123 |
| 124,057 | 45 | 16,303 | 7,788 | 3,888 | 28,024 |
| 124,058 | 44 | 16,093 | 7,732 | 3,850 | 27,719 |
| 124,059 | 44 | 15,965 | 7,690 | 3,827 | 27,526 |
| 124,060 | 43 | 16,150 | 7,807 | 3,868 | 27,868 |
| 124,061 | 42 | 16,171 | 7,828 | 3,886 | 27,927 |
| 124,062 | 42 | 16,119 | 7,812 | 3,896 | 27,869 |
| 124,063 | 41 | 15,982 | 7,780 | 3,876 | 27,679 |
| 124,064 | 41 | 15,974 | 7,797 | 3,888 | 27,700 |
| 124,065 | 41 | 15,958 | 7,794 | 3,882 | 27,675 |
| 124,066 | 41 | 15,877 | 7,788 | 3,885 | 27,591 |
| 124,067 | 43 | 15,730 | 7,791 | 3,884 | 27,448 |
| 124,068 | 45 | 15,662 | 7,840 | 3,878 | 27,425 |
| 124,069 | 46 | 15,722 | 7,842 | 3,887 | 27,497 |
| 124,070 | 46 | 15,582 | 7,752 | 3,836 | 27,216 |
| 124,071 | 46 | 15,482 | 7,695 | 3,802 | 27,025 |
| 124,072 | 46 | 15,410 | 7,740 | 3,837 | 27,033 |
| 124,073 | 49 | 15,464 | 7,840 | 3,858 | 27,211 |
| 124,074 | 50 | 15,405 | 7,818 | 3,852 | 27,125 |
| 124,075 | 51 | 15,141 | 7,757 | 3,807 | 26,756 |
| 124,076 | 53 | 15,456 | 7,864 | 3,849 | 27,222 |
| 124,077 | 51 | 15,377 | 7,887 | 3,876 | 27,191 |
| 124,078 | 53 | 15,303 | 7,860 | 3,870 | 27,086 |
| 124,079 | 54 | 15,288 | 7,880 | 3,905 | 27,127 |
| 124,080 | 53 | 15,101 | 7,797 | 3,869 | 26,820 |
| 124,081 | 58 | 14,940 | 7,759 | 3,823 | 26,580 |
| 124,082 | 58 | 14,685 | 7,675 | 3,786 | 26,204 |
| 124,083 | 56 | 14,799 | 7,815 | 3,862 | 26,532 |
| 124,084 | 57 | 14,860 | 7,843 | 3,872 | 26,632 |
| 124,085 | 55 | 14,656 | 7,793 | 3,854 | 26,358 |
| 124,086 | 55 | 14,386 | 7,737 | 3,817 | 25,995 |
| 124,087 | 53 | 14,497 | 7,860 | 3,852 | 26,262 |

|         |    |        |       |       |        |
|---------|----|--------|-------|-------|--------|
| 124,088 | 55 | 14,704 | 7,918 | 3,874 | 26,551 |
| 124,089 | 55 | 14,800 | 7,968 | 3,881 | 26,704 |
| 124,090 | 57 | 14,859 | 7,980 | 3,895 | 26,791 |
| 124,091 | 57 | 14,899 | 8,009 | 3,909 | 26,874 |
| 124,092 | 51 | 14,542 | 7,857 | 3,839 | 26,289 |
| 124,093 | 51 | 14,921 | 7,968 | 3,902 | 26,842 |
| 124,094 | 51 | 15,147 | 8,120 | 3,964 | 27,282 |
| 124,095 | 54 | 15,191 | 8,104 | 3,948 | 27,297 |
| 124,096 | 53 | 14,994 | 7,973 | 3,900 | 26,920 |
| 124,097 | 55 | 15,112 | 8,072 | 3,940 | 27,179 |
| 124,098 | 55 | 15,099 | 8,059 | 3,946 | 27,159 |
| 124,099 | 57 | 15,129 | 8,072 | 3,939 | 27,197 |
| 124,100 | 53 | 14,629 | 7,849 | 3,836 | 26,367 |
| 124,101 | 55 | 14,830 | 7,956 | 3,887 | 26,728 |
| 124,102 | 52 | 15,104 | 8,039 | 3,922 | 27,117 |
| 124,103 | 52 | 15,219 | 8,150 | 3,959 | 27,380 |
| 124,104 | 52 | 15,270 | 8,192 | 3,975 | 27,489 |
| 124,105 | 52 | 15,256 | 8,165 | 3,975 | 27,448 |
| 124,106 | 53 | 15,372 | 8,151 | 3,990 | 27,566 |
| 124,107 | 51 | 15,450 | 8,118 | 3,991 | 27,610 |
| 124,108 | 52 | 15,560 | 8,164 | 4,005 | 27,781 |
| 124,109 | 51 | 15,544 | 8,153 | 3,976 | 27,724 |
| 124,110 | 52 | 15,504 | 8,098 | 3,961 | 27,615 |
| 124,111 | 53 | 15,543 | 8,111 | 3,968 | 27,675 |
| 124,112 | 53 | 15,566 | 8,105 | 3,972 | 27,696 |
| 124,113 | 52 | 15,591 | 8,123 | 3,976 | 27,742 |
| 124,114 | 52 | 15,721 | 8,171 | 3,994 | 27,938 |
| 124,115 | 53 | 15,852 | 8,193 | 3,994 | 28,092 |
| 124,116 | 53 | 15,967 | 8,200 | 3,992 | 28,212 |
| 124,117 | 53 | 16,025 | 8,189 | 3,983 | 28,250 |
| 124,118 | 51 | 16,121 | 8,227 | 3,984 | 28,383 |
| 124,119 | 50 | 16,233 | 8,231 | 4,005 | 28,519 |

|         |    |        |       |       |        |
|---------|----|--------|-------|-------|--------|
| 124,120 | 49 | 16,359 | 8,231 | 4,006 | 28,645 |
| 124,121 | 48 | 16,458 | 8,263 | 4,029 | 28,798 |
| 124,122 | 48 | 16,361 | 8,113 | 3,942 | 28,464 |
| 124,123 | 48 | 16,651 | 8,202 | 3,973 | 28,874 |
| 124,124 | 45 | 16,889 | 8,286 | 4,012 | 29,232 |
| 124,125 | 43 | 16,822 | 8,295 | 4,001 | 29,161 |
| 124,126 | 42 | 16,774 | 8,289 | 4,001 | 29,106 |
| 124,127 | 41 | 16,741 | 8,275 | 4,003 | 29,060 |
| 124,128 | 41 | 16,716 | 8,233 | 3,987 | 28,977 |
| 124,129 | 42 | 16,757 | 8,233 | 3,990 | 29,022 |
| 124,130 | 41 | 16,818 | 8,246 | 3,963 | 29,068 |
| 124,131 | 36 | 16,760 | 8,167 | 3,932 | 28,895 |
| 124,132 | 37 | 16,989 | 8,257 | 3,991 | 29,274 |
| 124,133 | 36 | 17,021 | 8,239 | 3,979 | 29,275 |
| 124,134 | 37 | 16,896 | 8,181 | 3,955 | 29,069 |
| 124,135 | 38 | 17,029 | 8,150 | 3,944 | 29,161 |
| 124,136 | 42 | 17,283 | 8,252 | 3,989 | 29,566 |
| 124,137 | 44 | 17,353 | 8,281 | 4,009 | 29,687 |
| 124,138 | 44 | 17,384 | 8,302 | 3,994 | 29,724 |
| 124,139 | 44 | 17,366 | 8,263 | 3,964 | 29,637 |
| 124,140 | 44 | 17,580 | 8,331 | 4,019 | 29,974 |
| 124,141 | 42 | 17,420 | 8,230 | 3,978 | 29,670 |
| 124,142 | 43 | 17,159 | 8,146 | 3,926 | 29,274 |
| 124,143 | 44 | 17,184 | 8,289 | 4,015 | 29,532 |
| 124,144 | 44 | 17,025 | 8,252 | 4,009 | 29,330 |
| 124,145 | 42 | 16,959 | 8,200 | 3,996 | 29,197 |
| 124,146 | 38 | 16,883 | 8,166 | 4,004 | 29,091 |
| 124,147 | 39 | 17,037 | 8,242 | 3,991 | 29,309 |
| 124,148 | 38 | 16,732 | 8,115 | 3,906 | 28,791 |
| 124,149 | 39 | 17,026 | 8,223 | 3,944 | 29,232 |
| 124,150 | 38 | 17,264 | 8,285 | 3,985 | 29,572 |
| 124,151 | 37 | 17,302 | 8,285 | 3,985 | 29,609 |



|         |    |        |       |       |        |
|---------|----|--------|-------|-------|--------|
| 124,152 | 35 | 17,113 | 8,217 | 3,942 | 29,307 |
| 124,153 | 35 | 17,286 | 8,323 | 3,989 | 29,633 |
| 124,154 | 35 | 17,164 | 8,213 | 3,964 | 29,376 |
| 124,155 | 34 | 17,054 | 8,174 | 3,941 | 29,203 |
| 124,156 | 34 | 16,854 | 8,133 | 3,914 | 28,935 |
| 124,157 | 34 | 16,758 | 8,124 | 3,882 | 28,798 |
| 124,158 | 35 | 16,933 | 8,202 | 3,912 | 29,082 |
| 124,159 | 34 | 16,900 | 8,186 | 3,922 | 29,042 |
| 124,160 | 36 | 17,011 | 8,207 | 3,953 | 29,207 |
| 124,161 | 36 | 17,187 | 8,238 | 3,966 | 29,427 |
| 124,162 | 37 | 17,195 | 8,260 | 3,975 | 29,467 |
| 124,163 | 37 | 17,259 | 8,311 | 3,983 | 29,590 |
| 124,164 | 36 | 17,135 | 8,228 | 3,932 | 29,331 |
| 124,165 | 38 | 17,204 | 8,268 | 3,952 | 29,462 |
| 124,166 | 38 | 17,162 | 8,297 | 3,978 | 29,475 |
| 124,167 | 42 | 17,093 | 8,300 | 4,001 | 29,436 |
| 124,168 | 43 | 17,150 | 8,331 | 4,009 | 29,533 |
| 124,169 | 43 | 16,917 | 8,220 | 3,976 | 29,156 |
| 124,170 | 42 | 16,715 | 8,140 | 3,933 | 28,830 |
| 124,171 | 41 | 16,496 | 8,090 | 3,915 | 28,542 |
| 124,172 | 45 | 16,289 | 7,971 | 3,849 | 28,154 |
| 124,173 | 46 | 16,167 | 7,912 | 3,829 | 27,954 |
| 124,174 | 47 | 16,321 | 8,049 | 3,892 | 28,309 |
| 124,175 | 47 | 16,251 | 8,048 | 3,875 | 28,221 |
| 124,176 | 46 | 16,205 | 7,931 | 3,825 | 28,007 |
| 124,177 | 44 | 16,167 | 7,904 | 3,810 | 27,925 |
| 124,178 | 46 | 16,288 | 7,996 | 3,853 | 28,183 |
| 124,179 | 47 | 16,274 | 8,010 | 3,862 | 28,193 |
| 124,180 | 45 | 16,218 | 7,990 | 3,867 | 28,120 |
| 124,181 | 46 | 16,172 | 7,988 | 3,872 | 28,078 |
| 124,182 | 47 | 15,976 | 7,920 | 3,840 | 27,783 |
| 124,183 | 49 | 16,305 | 8,030 | 3,881 | 28,265 |

|         |    |        |       |       |        |
|---------|----|--------|-------|-------|--------|
| 124,184 | 50 | 16,281 | 8,019 | 3,913 | 28,263 |
| 124,185 | 47 | 16,004 | 7,939 | 3,869 | 27,859 |
| 124,186 | 47 | 15,778 | 7,879 | 3,843 | 27,547 |
| 124,187 | 44 | 16,021 | 7,986 | 3,938 | 27,989 |
| 124,188 | 43 | 15,949 | 7,936 | 3,925 | 27,853 |
| 124,189 | 45 | 15,987 | 7,934 | 3,951 | 27,917 |
| 124,190 | 42 | 15,911 | 7,880 | 3,951 | 27,784 |
| 124,191 | 45 | 15,889 | 7,903 | 3,945 | 27,782 |
| 124,192 | 47 | 15,962 | 7,896 | 3,924 | 27,829 |
| 124,193 | 47 | 15,974 | 7,870 | 3,929 | 27,820 |
| 124,194 | 47 | 15,858 | 7,782 | 3,879 | 27,566 |
| 124,195 | 47 | 15,991 | 7,806 | 3,869 | 27,713 |
| 124,196 | 50 | 16,152 | 7,900 | 3,921 | 28,023 |
| 124,197 | 52 | 16,042 | 7,900 | 3,904 | 27,898 |
| 124,198 | 53 | 15,883 | 7,854 | 3,910 | 27,700 |
| 124,199 | 55 | 15,653 | 7,769 | 3,871 | 27,348 |
| 124,200 | 55 | 15,466 | 7,654 | 3,841 | 27,016 |
| 124,201 | 55 | 15,495 | 7,788 | 3,900 | 27,238 |
| 124,202 | 56 | 15,435 | 7,803 | 3,892 | 27,186 |
| 124,203 | 57 | 15,248 | 7,688 | 3,865 | 26,858 |
| 124,204 | 57 | 15,221 | 7,680 | 3,897 | 26,855 |
| 124,205 | 61 | 15,109 | 7,599 | 3,866 | 26,635 |
| 124,206 | 61 | 14,976 | 7,524 | 3,842 | 26,403 |
| 124,207 | 67 | 15,181 | 7,671 | 3,930 | 26,849 |
| 124,208 | 68 | 15,318 | 7,725 | 3,964 | 27,075 |
| 124,209 | 67 | 15,230 | 7,695 | 3,957 | 26,949 |
| 124,210 | 68 | 15,024 | 7,581 | 3,879 | 26,552 |
| 124,211 | 69 | 15,139 | 7,648 | 3,946 | 26,802 |
| 124,212 | 69 | 14,966 | 7,633 | 3,929 | 26,597 |
| 124,213 | 67 | 14,859 | 7,579 | 3,936 | 26,441 |
| 124,214 | 68 | 14,863 | 7,559 | 3,922 | 26,412 |
| 124,215 | 69 | 14,613 | 7,481 | 3,877 | 26,040 |

|         |    |        |       |       |        |
|---------|----|--------|-------|-------|--------|
| 124,216 | 68 | 14,927 | 7,561 | 3,947 | 26,503 |
| 124,217 | 67 | 14,830 | 7,494 | 3,910 | 26,301 |
| 124,218 | 64 | 14,812 | 7,444 | 3,895 | 26,215 |
| 124,219 | 63 | 14,821 | 7,420 | 3,902 | 26,206 |
| 124,220 | 64 | 15,065 | 7,499 | 3,966 | 26,594 |
| 124,221 | 64 | 15,130 | 7,509 | 3,970 | 26,673 |
| 124,222 | 64 | 15,066 | 7,505 | 3,958 | 26,593 |
| 124,223 | 62 | 15,253 | 7,597 | 4,011 | 26,923 |
| 124,224 | 62 | 15,278 | 7,595 | 4,000 | 26,935 |
| 124,225 | 61 | 15,480 | 7,629 | 4,027 | 27,197 |
| 124,226 | 61 | 15,237 | 7,508 | 3,995 | 26,801 |
| 124,227 | 63 | 15,261 | 7,587 | 4,040 | 26,951 |
| 124,228 | 65 | 15,321 | 7,605 | 4,056 | 27,047 |
| 124,229 | 63 | 15,421 | 7,614 | 4,055 | 27,153 |
| 124,230 | 62 | 15,310 | 7,543 | 4,000 | 26,915 |
| 124,231 | 62 | 15,635 | 7,677 | 4,054 | 27,428 |
| 124,232 | 62 | 15,535 | 7,629 | 4,059 | 27,285 |
| 124,233 | 63 | 15,573 | 7,647 | 4,062 | 27,345 |
| 124,234 | 63 | 15,509 | 7,629 | 4,058 | 27,259 |
| 124,235 | 64 | 15,371 | 7,560 | 3,997 | 26,992 |
| 124,236 | 64 | 15,319 | 7,493 | 3,959 | 26,835 |
| 124,237 | 67 | 15,634 | 7,675 | 4,020 | 27,396 |
| 124,238 | 68 | 15,644 | 7,676 | 4,011 | 27,399 |
| 124,239 | 66 | 15,600 | 7,596 | 3,974 | 27,236 |
| 124,240 | 65 | 15,551 | 7,569 | 3,981 | 27,166 |
| 124,241 | 72 | 15,614 | 7,607 | 3,984 | 27,277 |
| 124,242 | 69 | 15,585 | 7,576 | 3,980 | 27,210 |
| 124,243 | 68 | 15,547 | 7,599 | 3,994 | 27,208 |
| 124,244 | 66 | 15,354 | 7,502 | 3,951 | 26,873 |
| 124,245 | 68 | 15,461 | 7,589 | 3,980 | 27,098 |
| 124,246 | 72 | 15,574 | 7,602 | 3,990 | 27,238 |
| 124,247 | 69 | 15,535 | 7,598 | 3,986 | 27,188 |

|         |    |        |       |       |        |
|---------|----|--------|-------|-------|--------|
| 124,248 | 68 | 15,592 | 7,567 | 4,006 | 27,233 |
| 124,249 | 70 | 15,637 | 7,553 | 3,995 | 27,255 |
| 124,250 | 68 | 15,821 | 7,526 | 3,998 | 27,413 |
| 124,251 | 66 | 15,758 | 7,511 | 3,966 | 27,301 |
| 124,252 | 69 | 16,027 | 7,592 | 4,000 | 27,688 |
| 124,253 | 69 | 16,077 | 7,569 | 3,996 | 27,711 |
| 124,254 | 65 | 15,984 | 7,475 | 3,919 | 27,443 |
| 124,255 | 66 | 16,198 | 7,582 | 3,980 | 27,826 |
| 124,256 | 65 | 16,404 | 7,647 | 4,026 | 28,142 |
| 124,257 | 62 | 16,250 | 7,551 | 3,971 | 27,834 |
| 124,258 | 62 | 16,046 | 7,486 | 3,936 | 27,530 |
| 124,259 | 63 | 16,435 | 7,728 | 4,075 | 28,301 |
| 124,260 | 66 | 16,530 | 7,728 | 4,088 | 28,412 |
| 124,261 | 65 | 16,501 | 7,719 | 4,076 | 28,361 |
| 124,262 | 63 | 16,409 | 7,694 | 4,044 | 28,210 |
| 124,263 | 63 | 16,446 | 7,704 | 4,029 | 28,242 |
| 124,264 | 63 | 16,401 | 7,682 | 4,016 | 28,162 |
| 124,265 | 63 | 16,449 | 7,729 | 4,076 | 28,317 |
| 124,266 | 63 | 16,458 | 7,726 | 4,086 | 28,333 |
| 124,267 | 67 | 16,368 | 7,741 | 4,073 | 28,249 |
| 124,268 | 74 | 16,249 | 7,701 | 4,047 | 28,071 |
| 124,269 | 73 | 16,049 | 7,655 | 4,010 | 27,787 |
| 124,270 | 78 | 16,263 | 7,825 | 4,088 | 28,254 |
| 124,271 | 84 | 16,171 | 7,829 | 4,053 | 28,137 |
| 124,272 | 86 | 16,154 | 7,848 | 4,052 | 28,140 |
| 124,273 | 86 | 16,294 | 7,881 | 4,082 | 28,343 |
| 124,274 | 89 | 16,202 | 7,902 | 4,080 | 28,273 |
| 124,275 | 91 | 16,184 | 7,868 | 4,071 | 28,214 |
| 124,276 | 92 | 16,226 | 7,875 | 4,068 | 28,261 |
| 124,277 | 92 | 16,310 | 7,880 | 4,034 | 28,316 |
| 124,278 | 93 | 16,357 | 7,912 | 4,035 | 28,397 |
| 124,279 | 91 | 16,339 | 7,913 | 4,030 | 28,373 |

|         |     |        |       |       |        |
|---------|-----|--------|-------|-------|--------|
| 124,280 | 96  | 16,548 | 7,995 | 4,088 | 28,727 |
| 124,281 | 97  | 16,576 | 7,976 | 4,092 | 28,741 |
| 124,282 | 103 | 16,586 | 7,972 | 4,095 | 28,756 |
| 124,283 | 101 | 16,185 | 7,756 | 3,969 | 28,011 |
| 124,284 | 101 | 16,219 | 7,817 | 4,006 | 28,143 |
| 124,285 | 109 | 16,272 | 7,766 | 4,001 | 28,148 |
| 124,286 | 112 | 16,512 | 7,819 | 4,045 | 28,488 |
| 124,287 | 110 | 16,524 | 7,799 | 4,024 | 28,457 |
| 124,288 | 113 | 16,358 | 7,762 | 3,995 | 28,228 |
| 124,289 | 113 | 16,383 | 7,765 | 3,967 | 28,228 |
| 124,290 | 114 | 16,383 | 7,750 | 3,957 | 28,204 |
| 124,291 | 112 | 16,618 | 7,855 | 4,002 | 28,587 |
| 124,292 | 110 | 16,482 | 7,797 | 3,980 | 28,369 |
| 124,293 | 110 | 16,629 | 7,877 | 4,012 | 28,628 |
| 124,294 | 110 | 16,663 | 7,876 | 4,017 | 28,666 |
| 124,295 | 110 | 16,679 | 7,886 | 3,997 | 28,672 |
| 124,296 | 109 | 16,615 | 7,885 | 4,029 | 28,638 |
| 124,297 | 107 | 16,462 | 7,903 | 4,046 | 28,518 |
| 124,298 | 112 | 16,423 | 7,895 | 4,041 | 28,471 |
| 124,299 | 111 | 16,410 | 7,913 | 3,994 | 28,428 |
| 124,300 | 107 | 16,205 | 7,859 | 3,983 | 28,154 |
| 124,301 | 107 | 16,160 | 7,850 | 3,987 | 28,104 |
| 124,302 | 109 | 16,051 | 7,759 | 3,944 | 27,863 |
| 124,303 | 106 | 15,759 | 7,645 | 3,882 | 27,392 |
| 124,304 | 105 | 15,518 | 7,564 | 3,841 | 27,028 |
| 124,305 | 106 | 15,296 | 7,474 | 3,795 | 26,671 |
| 124,306 | 105 | 15,186 | 7,397 | 3,735 | 26,423 |
| 124,307 | 105 | 15,177 | 7,374 | 3,716 | 26,372 |
| 124,308 | 103 | 15,126 | 7,282 | 3,660 | 26,171 |
| 124,309 | 102 | 15,070 | 7,216 | 3,602 | 25,990 |
| 124,310 | 100 | 14,838 | 7,103 | 3,541 | 25,582 |
| 124,311 | 97  | 14,613 | 7,024 | 3,527 | 25,261 |

|         |    |        |       |       |        |
|---------|----|--------|-------|-------|--------|
| 124,312 | 96 | 14,391 | 6,966 | 3,508 | 24,961 |
| 124,313 | 96 | 14,197 | 6,872 | 3,464 | 24,629 |
| 124,314 | 96 | 14,136 | 6,836 | 3,451 | 24,519 |
| 124,315 | 97 | 14,194 | 6,816 | 3,406 | 24,513 |
| 124,316 | 96 | 14,107 | 6,740 | 3,362 | 24,305 |
| 124,317 | 83 | 13,635 | 6,478 | 3,219 | 23,415 |
| 124,318 | 84 | 13,784 | 6,498 | 3,216 | 23,582 |
| 124,319 | 84 | 13,842 | 6,557 | 3,233 | 23,716 |
| 124,320 | 85 | 14,019 | 6,644 | 3,251 | 23,999 |
| 124,321 | 84 | 13,913 | 6,603 | 3,243 | 23,843 |
| 124,322 | 77 | 13,917 | 6,565 | 3,230 | 23,789 |
| 124,323 | 76 | 13,790 | 6,489 | 3,209 | 23,564 |
| 124,324 | 77 | 13,827 | 6,502 | 3,209 | 23,615 |
| 124,325 | 73 | 13,691 | 6,380 | 3,177 | 23,321 |
| 124,326 | 70 | 13,625 | 6,363 | 3,150 | 23,208 |
| 124,327 | 72 | 13,606 | 6,372 | 3,171 | 23,221 |
| 124,328 | 70 | 13,469 | 6,297 | 3,175 | 23,011 |
| 124,329 | 66 | 13,254 | 6,120 | 3,092 | 22,532 |
| 124,330 | 66 | 13,316 | 6,175 | 3,121 | 22,678 |
| 124,331 | 66 | 13,424 | 6,200 | 3,150 | 22,840 |
| 124,332 | 65 | 13,399 | 6,176 | 3,132 | 22,772 |
| 124,333 | 58 | 13,399 | 6,164 | 3,122 | 22,743 |
| 124,334 | 50 | 12,992 | 6,077 | 3,022 | 22,141 |
| 124,335 | 51 | 13,181 | 6,107 | 3,036 | 22,375 |
| 124,336 | 45 | 13,288 | 6,177 | 3,069 | 22,579 |
| 124,337 | 41 | 13,267 | 6,171 | 3,071 | 22,550 |
| 124,338 | 38 | 13,108 | 6,075 | 3,048 | 22,269 |
| 124,339 | 39 | 13,283 | 6,139 | 3,087 | 22,548 |
| 124,340 | 39 | 13,260 | 6,109 | 3,074 | 22,482 |
| 124,341 | 36 | 13,248 | 6,117 | 3,077 | 22,478 |
| 124,342 | 37 | 13,101 | 6,058 | 3,041 | 22,237 |
| 124,343 | 37 | 13,038 | 6,027 | 3,047 | 22,149 |

|         |    |        |       |       |        |
|---------|----|--------|-------|-------|--------|
| 124,344 | 42 | 13,296 | 6,102 | 3,081 | 22,521 |
| 124,345 | 42 | 13,287 | 6,087 | 3,077 | 22,493 |
| 124,346 | 42 | 13,380 | 6,093 | 3,077 | 22,592 |
| 124,347 | 44 | 13,467 | 6,121 | 3,080 | 22,712 |
| 124,348 | 42 | 13,545 | 6,105 | 3,042 | 22,734 |
| 124,349 | 38 | 13,464 | 6,011 | 2,988 | 22,501 |
| 124,350 | 38 | 13,388 | 5,970 | 2,991 | 22,387 |
| 124,351 | 38 | 13,560 | 6,042 | 3,036 | 22,676 |
| 124,352 | 41 | 13,572 | 6,047 | 3,031 | 22,691 |
| 124,353 | 38 | 13,454 | 6,030 | 3,026 | 22,548 |
| 124,354 | 38 | 13,679 | 6,161 | 3,080 | 22,958 |
| 124,355 | 36 | 13,572 | 6,119 | 3,071 | 22,798 |
| 124,356 | 36 | 13,538 | 6,157 | 3,086 | 22,817 |
| 124,357 | 36 | 13,764 | 6,263 | 3,144 | 23,207 |
| 124,358 | 36 | 13,833 | 6,296 | 3,161 | 23,326 |
| 124,359 | 36 | 13,970 | 6,322 | 3,182 | 23,510 |
| 124,360 | 38 | 13,891 | 6,302 | 3,178 | 23,409 |
| 124,361 | 38 | 14,082 | 6,405 | 3,214 | 23,739 |
| 124,362 | 37 | 14,269 | 6,452 | 3,213 | 23,971 |
| 124,363 | 37 | 14,394 | 6,536 | 3,247 | 24,214 |
| 124,364 | 38 | 14,417 | 6,571 | 3,263 | 24,289 |
| 124,365 | 37 | 14,340 | 6,541 | 3,266 | 24,184 |
| 124,366 | 38 | 14,514 | 6,650 | 3,336 | 24,538 |
| 124,367 | 38 | 14,740 | 6,730 | 3,383 | 24,891 |
| 124,368 | 38 | 14,770 | 6,747 | 3,394 | 24,949 |
| 124,369 | 38 | 14,800 | 6,799 | 3,417 | 25,054 |
| 124,370 | 35 | 14,782 | 6,812 | 3,428 | 25,057 |
| 124,371 | 34 | 14,797 | 6,792 | 3,422 | 25,045 |
| 124,372 | 36 | 14,648 | 6,706 | 3,387 | 24,777 |
| 124,373 | 37 | 14,468 | 6,644 | 3,364 | 24,513 |
| 124,374 | 36 | 14,215 | 6,527 | 3,305 | 24,083 |
| 124,375 | 34 | 13,884 | 6,395 | 3,232 | 23,545 |

|         |    |        |       |       |        |
|---------|----|--------|-------|-------|--------|
| 124,376 | 34 | 13,641 | 6,289 | 3,174 | 23,138 |
| 124,377 | 32 | 13,131 | 6,082 | 3,078 | 22,323 |
| 124,378 | 31 | 12,835 | 5,952 | 3,007 | 21,825 |
| 124,379 | 32 | 12,908 | 5,937 | 3,005 | 21,882 |
| 124,380 | 31 | 12,660 | 5,875 | 2,981 | 21,547 |
| 124,381 | 31 | 12,521 | 5,817 | 2,941 | 21,310 |
| 124,382 | 31 | 12,456 | 5,852 | 2,936 | 21,275 |
| 124,383 | 36 | 12,387 | 5,895 | 2,934 | 21,252 |
| 124,384 | 37 | 12,276 | 5,863 | 2,917 | 21,093 |
| 124,385 | 38 | 12,102 | 5,781 | 2,904 | 20,825 |
| 124,386 | 41 | 12,358 | 5,908 | 2,962 | 21,269 |
| 124,387 | 41 | 11,882 | 5,752 | 2,850 | 20,525 |
| 124,388 | 43 | 12,094 | 5,792 | 2,868 | 20,797 |
| 124,389 | 45 | 12,322 | 5,856 | 2,910 | 21,133 |
| 124,390 | 45 | 12,346 | 5,898 | 2,936 | 21,225 |
| 124,391 | 46 | 12,405 | 5,940 | 2,951 | 21,342 |
| 124,392 | 49 | 12,537 | 6,049 | 2,970 | 21,605 |
| 124,393 | 47 | 12,578 | 6,052 | 2,970 | 21,647 |
| 124,394 | 49 | 12,590 | 6,087 | 2,975 | 21,701 |
| 124,395 | 44 | 12,638 | 6,133 | 2,976 | 21,791 |
| 124,396 | 44 | 12,605 | 6,109 | 2,942 | 21,700 |
| 124,397 | 43 | 12,499 | 6,060 | 2,934 | 21,536 |
| 124,398 | 41 | 12,451 | 6,036 | 2,905 | 21,433 |
| 124,399 | 41 | 12,481 | 6,042 | 2,910 | 21,474 |
| 124,400 | 40 | 12,643 | 6,100 | 2,928 | 21,711 |
| 124,401 | 41 | 12,707 | 6,137 | 2,925 | 21,810 |
| 124,402 | 41 | 12,535 | 6,087 | 2,888 | 21,551 |
| 124,403 | 41 | 12,464 | 6,065 | 2,894 | 21,464 |
| 124,404 | 42 | 12,608 | 6,067 | 2,891 | 21,608 |
| 124,405 | 44 | 12,634 | 6,034 | 2,876 | 21,588 |
| 124,406 | 48 | 12,927 | 6,114 | 2,901 | 21,990 |
| 124,407 | 50 | 13,004 | 6,140 | 2,912 | 22,106 |



|         |    |        |       |       |        |
|---------|----|--------|-------|-------|--------|
| 124,408 | 50 | 12,944 | 6,115 | 2,896 | 22,005 |
| 124,409 | 54 | 12,900 | 6,106 | 2,898 | 21,958 |
| 124,410 | 55 | 12,864 | 6,100 | 2,887 | 21,906 |
| 124,411 | 53 | 12,916 | 6,105 | 2,902 | 21,976 |
| 124,412 | 56 | 12,979 | 6,081 | 2,904 | 22,020 |
| 124,413 | 58 | 12,867 | 6,066 | 2,893 | 21,884 |
| 124,414 | 62 | 13,058 | 6,090 | 2,923 | 22,133 |
| 124,415 | 64 | 13,081 | 6,071 | 2,892 | 22,108 |
| 124,416 | 64 | 13,319 | 6,142 | 2,928 | 22,453 |
| 124,417 | 66 | 13,233 | 6,127 | 2,902 | 22,328 |
| 124,418 | 66 | 13,078 | 6,101 | 2,885 | 22,130 |
| 124,419 | 70 | 13,225 | 6,117 | 2,897 | 22,309 |
| 124,420 | 68 | 13,040 | 5,968 | 2,839 | 21,915 |
| 124,421 | 69 | 13,253 | 5,975 | 2,844 | 22,141 |
| 124,422 | 72 | 13,429 | 6,057 | 2,889 | 22,447 |
| 124,423 | 74 | 13,711 | 6,213 | 2,962 | 22,960 |
| 124,424 | 73 | 14,033 | 6,334 | 3,017 | 23,457 |
| 124,425 | 74 | 14,292 | 6,465 | 3,085 | 23,916 |
| 124,426 | 78 | 14,625 | 6,612 | 3,152 | 24,467 |
| 124,427 | 81 | 14,922 | 6,767 | 3,209 | 24,979 |
| 124,428 | 82 | 15,241 | 6,908 | 3,264 | 25,495 |
| 124,429 | 85 | 15,547 | 7,029 | 3,313 | 25,974 |
| 124,430 | 84 | 15,677 | 7,125 | 3,352 | 26,238 |
| 124,431 | 84 | 15,821 | 7,182 | 3,358 | 26,445 |
| 124,432 | 85 | 15,844 | 7,201 | 3,340 | 26,470 |
| 124,433 | 87 | 16,006 | 7,244 | 3,361 | 26,698 |
| 124,434 | 83 | 15,811 | 7,151 | 3,329 | 26,374 |
| 124,435 | 85 | 15,855 | 7,216 | 3,356 | 26,512 |
| 124,436 | 81 | 15,843 | 7,199 | 3,339 | 26,462 |
| 124,437 | 82 | 15,613 | 7,116 | 3,286 | 26,097 |
| 124,438 | 80 | 15,393 | 7,033 | 3,251 | 25,757 |
| 124,439 | 80 | 15,263 | 7,075 | 3,298 | 25,716 |

|         |    |        |       |       |        |
|---------|----|--------|-------|-------|--------|
| 124,440 | 84 | 15,141 | 7,072 | 3,270 | 25,567 |
| 124,441 | 88 | 15,155 | 7,118 | 3,280 | 25,641 |
| 124,442 | 90 | 15,091 | 7,067 | 3,267 | 25,515 |
| 124,443 | 87 | 14,746 | 6,821 | 3,183 | 24,837 |
| 124,444 | 88 | 14,678 | 6,800 | 3,179 | 24,745 |
| 124,445 | 88 | 14,520 | 6,747 | 3,137 | 24,492 |
| 124,446 | 88 | 14,216 | 6,592 | 3,081 | 23,977 |
| 124,447 | 88 | 14,183 | 6,598 | 3,093 | 23,962 |
| 124,448 | 88 | 14,120 | 6,555 | 3,062 | 23,825 |
| 124,449 | 88 | 13,740 | 6,390 | 2,984 | 23,202 |
| 124,450 | 88 | 13,653 | 6,365 | 2,971 | 23,077 |
| 124,451 | 88 | 13,443 | 6,282 | 2,934 | 22,747 |
| 124,452 | 89 | 13,190 | 6,159 | 2,860 | 22,298 |
| 124,453 | 89 | 13,179 | 6,138 | 2,847 | 22,253 |
| 124,454 | 86 | 13,004 | 6,077 | 2,799 | 21,966 |
| 124,455 | 87 | 12,773 | 6,025 | 2,770 | 21,655 |
| 124,456 | 85 | 12,547 | 5,982 | 2,730 | 21,344 |
| 124,457 | 81 | 12,400 | 5,953 | 2,703 | 21,137 |
| 124,458 | 80 | 12,134 | 5,875 | 2,642 | 20,731 |
| 124,459 | 80 | 12,141 | 5,892 | 2,652 | 20,765 |
| 124,460 | 76 | 12,159 | 5,896 | 2,643 | 20,774 |
| 124,461 | 75 | 11,948 | 5,842 | 2,612 | 20,477 |
| 124,462 | 77 | 11,851 | 5,853 | 2,585 | 20,366 |
| 124,463 | 76 | 11,768 | 5,854 | 2,572 | 20,270 |
| 124,464 | 76 | 11,641 | 5,822 | 2,537 | 20,076 |
| 124,465 | 72 | 11,424 | 5,747 | 2,490 | 19,733 |
| 124,466 | 69 | 11,168 | 5,679 | 2,455 | 19,371 |
| 124,467 | 70 | 11,065 | 5,656 | 2,449 | 19,240 |
| 124,468 | 67 | 10,951 | 5,578 | 2,403 | 18,999 |
| 124,469 | 70 | 10,962 | 5,596 | 2,388 | 19,016 |
| 124,470 | 64 | 10,563 | 5,473 | 2,332 | 18,432 |
| 124,471 | 61 | 10,167 | 5,323 | 2,250 | 17,801 |

|         |    |        |       |       |        |
|---------|----|--------|-------|-------|--------|
| 124,472 | 62 | 10,154 | 5,368 | 2,264 | 17,848 |
| 124,473 | 59 | 10,191 | 5,394 | 2,255 | 17,899 |
| 124,474 | 60 | 10,212 | 5,438 | 2,244 | 17,954 |
| 124,475 | 61 | 9,958  | 5,380 | 2,196 | 17,595 |
| 124,476 | 60 | 9,878  | 5,340 | 2,157 | 17,435 |
| 124,477 | 56 | 9,795  | 5,316 | 2,130 | 17,297 |
| 124,478 | 53 | 9,640  | 5,213 | 2,091 | 16,997 |
| 124,479 | 54 | 9,606  | 5,181 | 2,096 | 16,937 |
| 124,480 | 52 | 9,530  | 5,201 | 2,093 | 16,876 |
| 124,481 | 52 | 9,487  | 5,178 | 2,075 | 16,792 |
| 124,482 | 54 | 9,302  | 5,106 | 2,068 | 16,530 |
| 124,483 | 54 | 9,301  | 5,110 | 2,080 | 16,545 |
| 124,484 | 53 | 9,266  | 5,100 | 2,062 | 16,481 |
| 124,485 | 51 | 9,181  | 5,062 | 2,038 | 16,332 |
| 124,486 | 49 | 9,161  | 5,015 | 2,016 | 16,241 |
| 124,487 | 49 | 9,061  | 4,977 | 2,000 | 16,087 |
| 124,488 | 45 | 8,877  | 4,851 | 1,933 | 15,706 |
| 124,489 | 47 | 9,044  | 4,895 | 1,929 | 15,915 |
| 124,490 | 41 | 9,111  | 4,919 | 1,932 | 16,003 |
| 124,491 | 39 | 8,779  | 4,773 | 1,896 | 15,487 |
| 124,492 | 39 | 8,872  | 4,813 | 1,903 | 15,627 |
| 124,493 | 36 | 8,966  | 4,859 | 1,902 | 15,763 |
| 124,494 | 36 | 8,994  | 4,885 | 1,904 | 15,819 |
| 124,495 | 36 | 9,030  | 4,940 | 1,900 | 15,906 |
| 124,496 | 35 | 9,080  | 4,960 | 1,895 | 15,970 |
| 124,497 | 35 | 9,121  | 5,006 | 1,895 | 16,057 |
| 124,498 | 35 | 9,187  | 5,033 | 1,899 | 16,154 |
| 124,499 | 36 | 9,262  | 5,111 | 1,920 | 16,329 |
| 124,500 | 36 | 9,322  | 5,143 | 1,938 | 16,439 |
| 124,501 | 37 | 9,491  | 5,196 | 1,962 | 16,686 |
| 124,502 | 37 | 9,599  | 5,241 | 1,985 | 16,862 |
| 124,503 | 36 | 9,640  | 5,310 | 2,013 | 16,999 |

|         |    |        |       |       |        |
|---------|----|--------|-------|-------|--------|
| 124,504 | 37 | 9,824  | 5,395 | 2,037 | 17,293 |
| 124,505 | 34 | 9,896  | 5,447 | 2,059 | 17,436 |
| 124,506 | 34 | 9,924  | 5,429 | 2,070 | 17,457 |
| 124,507 | 34 | 10,115 | 5,518 | 2,083 | 17,750 |
| 124,508 | 34 | 10,175 | 5,560 | 2,098 | 17,867 |
| 124,509 | 33 | 10,173 | 5,535 | 2,105 | 17,846 |
| 124,510 | 34 | 10,144 | 5,556 | 2,118 | 17,852 |
| 124,511 | 34 | 10,179 | 5,577 | 2,134 | 17,924 |
| 124,512 | 33 | 10,030 | 5,507 | 2,133 | 17,703 |
| 124,513 | 34 | 10,170 | 5,587 | 2,160 | 17,951 |
| 124,514 | 32 | 10,091 | 5,561 | 2,152 | 17,836 |
| 124,515 | 32 | 10,089 | 5,548 | 2,162 | 17,831 |
| 124,516 | 32 | 10,126 | 5,545 | 2,154 | 17,857 |
| 124,517 | 33 | 10,231 | 5,590 | 2,176 | 18,030 |
| 124,518 | 34 | 10,301 | 5,614 | 2,185 | 18,134 |
| 124,519 | 35 | 10,314 | 5,650 | 2,194 | 18,193 |
| 124,520 | 32 | 10,248 | 5,643 | 2,198 | 18,121 |
| 124,521 | 35 | 10,240 | 5,650 | 2,205 | 18,130 |
| 124,522 | 36 | 10,258 | 5,643 | 2,196 | 18,133 |
| 124,523 | 36 | 10,173 | 5,613 | 2,170 | 17,992 |
| 124,524 | 39 | 10,446 | 5,698 | 2,210 | 18,393 |
| 124,525 | 40 | 10,426 | 5,656 | 2,212 | 18,334 |
| 124,526 | 40 | 10,428 | 5,664 | 2,208 | 18,340 |
| 124,527 | 42 | 10,621 | 5,767 | 2,273 | 18,703 |
| 124,528 | 43 | 10,450 | 5,693 | 2,250 | 18,436 |
| 124,529 | 42 | 10,278 | 5,642 | 2,234 | 18,196 |
| 124,530 | 41 | 10,390 | 5,767 | 2,301 | 18,499 |
| 124,531 | 42 | 10,364 | 5,753 | 2,316 | 18,475 |
| 124,532 | 44 | 10,573 | 5,859 | 2,368 | 18,844 |
| 124,533 | 44 | 10,628 | 5,892 | 2,374 | 18,938 |
| 124,534 | 45 | 10,711 | 5,912 | 2,378 | 19,046 |
| 124,535 | 44 | 10,693 | 5,926 | 2,400 | 19,063 |

|         |    |        |       |       |        |
|---------|----|--------|-------|-------|--------|
| 124,536 | 44 | 10,629 | 5,901 | 2,382 | 18,956 |
| 124,537 | 44 | 10,970 | 6,006 | 2,441 | 19,461 |
| 124,538 | 45 | 10,833 | 5,931 | 2,423 | 19,232 |
| 124,539 | 45 | 11,036 | 5,999 | 2,462 | 19,542 |
| 124,540 | 47 | 11,078 | 6,056 | 2,482 | 19,663 |
| 124,541 | 51 | 10,988 | 6,018 | 2,476 | 19,533 |
| 124,542 | 52 | 10,932 | 5,995 | 2,441 | 19,420 |
| 124,543 | 53 | 11,149 | 6,059 | 2,491 | 19,752 |
| 124,544 | 53 | 11,123 | 6,094 | 2,508 | 19,778 |
| 124,545 | 54 | 10,968 | 6,039 | 2,492 | 19,553 |
| 124,546 | 53 | 11,089 | 6,133 | 2,546 | 19,821 |
| 124,547 | 51 | 10,922 | 6,074 | 2,528 | 19,575 |
| 124,548 | 53 | 10,921 | 6,169 | 2,576 | 19,719 |
| 124,549 | 54 | 10,957 | 6,184 | 2,588 | 19,783 |
| 124,550 | 53 | 10,916 | 6,152 | 2,581 | 19,702 |
| 124,551 | 53 | 10,789 | 6,113 | 2,567 | 19,522 |
| 124,552 | 52 | 10,769 | 6,193 | 2,599 | 19,613 |
| 124,553 | 52 | 10,750 | 6,201 | 2,584 | 19,587 |
| 124,554 | 55 | 10,772 | 6,177 | 2,594 | 19,598 |
| 124,555 | 58 | 10,819 | 6,203 | 2,609 | 19,689 |
| 124,556 | 60 | 10,784 | 6,217 | 2,607 | 19,668 |
| 124,557 | 61 | 10,719 | 6,233 | 2,617 | 19,630 |
| 124,558 | 61 | 10,684 | 6,239 | 2,622 | 19,606 |
| 124,559 | 64 | 10,647 | 6,221 | 2,622 | 19,554 |
| 124,560 | 64 | 10,624 | 6,210 | 2,609 | 19,507 |
| 124,561 | 63 | 10,496 | 6,135 | 2,569 | 19,263 |
| 124,562 | 65 | 10,620 | 6,162 | 2,580 | 19,427 |
| 124,563 | 65 | 10,557 | 6,107 | 2,545 | 19,274 |
| 124,564 | 64 | 10,746 | 6,165 | 2,558 | 19,533 |
| 124,565 | 64 | 10,649 | 6,132 | 2,532 | 19,377 |
| 124,566 | 62 | 10,531 | 6,095 | 2,497 | 19,185 |
| 124,567 | 63 | 10,751 | 6,206 | 2,547 | 19,567 |

|         |    |        |       |       |        |
|---------|----|--------|-------|-------|--------|
| 124,568 | 65 | 10,702 | 6,180 | 2,528 | 19,475 |
| 124,569 | 65 | 10,705 | 6,197 | 2,531 | 19,498 |
| 124,570 | 63 | 10,474 | 6,053 | 2,474 | 19,064 |
| 124,571 | 64 | 10,592 | 6,110 | 2,485 | 19,251 |
| 124,572 | 62 | 10,685 | 6,139 | 2,489 | 19,375 |
| 124,573 | 62 | 10,752 | 6,173 | 2,526 | 19,513 |
| 124,574 | 61 | 10,638 | 6,162 | 2,510 | 19,371 |
| 124,575 | 58 | 10,556 | 6,155 | 2,507 | 19,276 |
| 124,576 | 56 | 10,543 | 6,145 | 2,496 | 19,240 |
| 124,577 | 55 | 10,561 | 6,160 | 2,486 | 19,262 |
| 124,578 | 55 | 10,572 | 6,162 | 2,478 | 19,267 |
| 124,579 | 54 | 10,559 | 6,165 | 2,462 | 19,240 |
| 124,580 | 56 | 10,612 | 6,144 | 2,435 | 19,247 |
| 124,581 | 54 | 10,546 | 6,082 | 2,388 | 19,070 |
| 124,582 | 55 | 10,590 | 6,094 | 2,396 | 19,135 |
| 124,583 | 53 | 10,620 | 6,080 | 2,397 | 19,150 |
| 124,584 | 50 | 10,619 | 6,046 | 2,373 | 19,088 |
| 124,585 | 48 | 10,419 | 5,970 | 2,331 | 18,768 |
| 124,586 | 48 | 10,317 | 5,935 | 2,311 | 18,611 |
| 124,587 | 48 | 10,134 | 5,929 | 2,308 | 18,419 |
| 124,588 | 51 | 10,101 | 5,958 | 2,329 | 18,439 |
| 124,589 | 53 | 10,052 | 5,989 | 2,330 | 18,424 |
| 124,590 | 54 | 9,938  | 5,990 | 2,306 | 18,288 |
| 124,591 | 52 | 9,910  | 6,000 | 2,312 | 18,274 |
| 124,592 | 50 | 9,871  | 6,012 | 2,295 | 18,228 |
| 124,593 | 50 | 9,839  | 6,024 | 2,302 | 18,215 |
| 124,594 | 48 | 9,743  | 6,010 | 2,280 | 18,081 |
| 124,595 | 49 | 9,723  | 5,981 | 2,263 | 18,016 |
| 124,596 | 50 | 9,665  | 5,972 | 2,246 | 17,933 |
| 124,597 | 51 | 9,623  | 5,953 | 2,222 | 17,849 |
| 124,598 | 51 | 9,673  | 5,885 | 2,219 | 17,828 |
| 124,599 | 52 | 9,611  | 5,829 | 2,187 | 17,679 |

|         |    |       |       |       |        |
|---------|----|-------|-------|-------|--------|
| 124,600 | 53 | 9,637 | 5,852 | 2,201 | 17,743 |
| 124,601 | 54 | 9,601 | 5,794 | 2,173 | 17,622 |
| 124,602 | 55 | 9,612 | 5,701 | 2,145 | 17,513 |
| 124,603 | 56 | 9,682 | 5,745 | 2,151 | 17,634 |
| 124,604 | 56 | 9,753 | 5,790 | 2,166 | 17,765 |
| 124,605 | 52 | 9,655 | 5,720 | 2,135 | 17,562 |
| 124,606 | 50 | 9,758 | 5,771 | 2,150 | 17,729 |
| 124,607 | 49 | 9,748 | 5,733 | 2,152 | 17,682 |
| 124,608 | 51 | 9,661 | 5,642 | 2,109 | 17,463 |
| 124,609 | 52 | 9,682 | 5,677 | 2,108 | 17,519 |
| 124,610 | 50 | 9,615 | 5,650 | 2,099 | 17,414 |
| 124,611 | 51 | 9,542 | 5,613 | 2,086 | 17,292 |
| 124,612 | 50 | 9,620 | 5,716 | 2,115 | 17,501 |
| 124,613 | 51 | 9,493 | 5,671 | 2,101 | 17,316 |
| 124,614 | 50 | 9,424 | 5,669 | 2,093 | 17,236 |
| 124,615 | 53 | 9,400 | 5,707 | 2,096 | 17,256 |
| 124,616 | 53 | 9,258 | 5,635 | 2,068 | 17,014 |
| 124,617 | 55 | 9,271 | 5,629 | 2,095 | 17,050 |
| 124,618 | 57 | 9,220 | 5,567 | 2,082 | 16,926 |
| 124,619 | 54 | 9,090 | 5,497 | 2,053 | 16,694 |
| 124,620 | 54 | 9,000 | 5,504 | 2,034 | 16,592 |
| 124,621 | 57 | 8,950 | 5,483 | 2,016 | 16,506 |
| 124,622 | 56 | 8,832 | 5,418 | 2,004 | 16,310 |
| 124,623 | 57 | 8,829 | 5,448 | 2,001 | 16,335 |
| 124,624 | 61 | 8,798 | 5,417 | 1,969 | 16,245 |
| 124,625 | 61 | 8,711 | 5,333 | 1,958 | 16,063 |
| 124,626 | 62 | 8,672 | 5,363 | 1,946 | 16,043 |
| 124,627 | 62 | 8,682 | 5,345 | 1,940 | 16,029 |
| 124,628 | 62 | 8,592 | 5,256 | 1,915 | 15,825 |
| 124,629 | 62 | 8,547 | 5,272 | 1,911 | 15,792 |
| 124,630 | 63 | 8,429 | 5,214 | 1,897 | 15,603 |
| 124,631 | 61 | 8,270 | 5,156 | 1,875 | 15,362 |

|         |    |       |       |       |        |
|---------|----|-------|-------|-------|--------|
| 124,632 | 62 | 8,273 | 5,249 | 1,888 | 15,472 |
| 124,633 | 62 | 8,188 | 5,265 | 1,874 | 15,389 |
| 124,634 | 63 | 8,149 | 5,242 | 1,859 | 15,313 |
| 124,635 | 64 | 7,961 | 5,130 | 1,828 | 14,983 |
| 124,636 | 66 | 8,082 | 5,169 | 1,830 | 15,147 |
| 124,637 | 66 | 8,194 | 5,174 | 1,835 | 15,269 |
| 124,638 | 67 | 8,156 | 5,103 | 1,806 | 15,132 |
| 124,639 | 67 | 8,259 | 5,152 | 1,821 | 15,299 |
| 124,640 | 63 | 8,298 | 5,133 | 1,819 | 15,313 |
| 124,641 | 61 | 8,247 | 4,985 | 1,769 | 15,062 |
| 124,642 | 64 | 8,373 | 5,030 | 1,796 | 15,263 |
| 124,643 | 61 | 8,441 | 5,061 | 1,817 | 15,380 |
| 124,644 | 60 | 8,389 | 5,008 | 1,797 | 15,254 |
| 124,645 | 62 | 8,464 | 5,070 | 1,819 | 15,415 |
| 124,646 | 61 | 8,434 | 5,048 | 1,827 | 15,370 |
| 124,647 | 59 | 8,361 | 4,938 | 1,812 | 15,170 |
| 124,648 | 59 | 8,396 | 4,951 | 1,805 | 15,211 |
| 124,649 | 58 | 8,438 | 5,002 | 1,808 | 15,306 |
| 124,650 | 56 | 8,380 | 4,963 | 1,802 | 15,201 |
| 124,651 | 56 | 8,440 | 5,011 | 1,820 | 15,327 |
| 124,652 | 55 | 8,378 | 4,950 | 1,810 | 15,193 |
| 124,653 | 55 | 8,449 | 4,979 | 1,819 | 15,302 |
| 124,654 | 54 | 8,567 | 5,002 | 1,826 | 15,449 |
| 124,655 | 54 | 8,581 | 4,986 | 1,831 | 15,452 |
| 124,656 | 54 | 8,573 | 4,994 | 1,819 | 15,440 |
| 124,657 | 50 | 8,370 | 4,848 | 1,782 | 15,050 |
| 124,658 | 49 | 8,525 | 4,922 | 1,805 | 15,301 |
| 124,659 | 48 | 8,631 | 4,986 | 1,827 | 15,492 |
| 124,660 | 47 | 8,586 | 4,967 | 1,827 | 15,427 |
| 124,661 | 47 | 8,544 | 4,961 | 1,831 | 15,383 |
| 124,662 | 46 | 8,516 | 4,941 | 1,823 | 15,326 |
| 124,663 | 45 | 8,588 | 4,938 | 1,827 | 15,398 |



|         |    |        |       |       |        |
|---------|----|--------|-------|-------|--------|
| 124,664 | 45 | 8,689  | 4,948 | 1,829 | 15,511 |
| 124,665 | 45 | 8,833  | 4,942 | 1,848 | 15,668 |
| 124,666 | 43 | 8,842  | 4,935 | 1,864 | 15,684 |
| 124,667 | 44 | 8,917  | 4,953 | 1,866 | 15,780 |
| 124,668 | 42 | 8,968  | 4,997 | 1,862 | 15,869 |
| 124,669 | 40 | 9,010  | 5,036 | 1,864 | 15,950 |
| 124,670 | 38 | 8,881  | 4,973 | 1,846 | 15,738 |
| 124,671 | 39 | 9,050  | 5,021 | 1,874 | 15,984 |
| 124,672 | 38 | 9,227  | 5,065 | 1,914 | 16,244 |
| 124,673 | 34 | 9,047  | 4,980 | 1,884 | 15,945 |
| 124,674 | 36 | 9,154  | 5,016 | 1,908 | 16,114 |
| 124,675 | 35 | 9,281  | 5,083 | 1,921 | 16,320 |
| 124,676 | 37 | 9,316  | 5,109 | 1,931 | 16,393 |
| 124,677 | 39 | 9,374  | 5,118 | 1,960 | 16,491 |
| 124,678 | 38 | 9,296  | 5,109 | 1,954 | 16,397 |
| 124,679 | 38 | 9,375  | 5,136 | 1,973 | 16,522 |
| 124,680 | 38 | 9,407  | 5,165 | 1,983 | 16,593 |
| 124,681 | 37 | 9,471  | 5,165 | 1,996 | 16,669 |
| 124,682 | 38 | 9,540  | 5,234 | 2,008 | 16,820 |
| 124,683 | 34 | 9,253  | 5,139 | 1,967 | 16,393 |
| 124,684 | 34 | 9,403  | 5,227 | 1,989 | 16,653 |
| 124,685 | 33 | 9,423  | 5,255 | 1,995 | 16,706 |
| 124,686 | 33 | 9,538  | 5,352 | 2,032 | 16,955 |
| 124,687 | 32 | 9,521  | 5,367 | 2,036 | 16,956 |
| 124,688 | 32 | 9,614  | 5,493 | 2,081 | 17,220 |
| 124,689 | 30 | 9,726  | 5,574 | 2,101 | 17,431 |
| 124,690 | 30 | 9,864  | 5,623 | 2,121 | 17,638 |
| 124,691 | 32 | 9,886  | 5,623 | 2,117 | 17,658 |
| 124,692 | 31 | 9,915  | 5,600 | 2,110 | 17,656 |
| 124,693 | 29 | 9,954  | 5,609 | 2,101 | 17,693 |
| 124,694 | 29 | 9,853  | 5,570 | 2,087 | 17,539 |
| 124,695 | 31 | 10,097 | 5,660 | 2,109 | 17,897 |

|         |    |        |       |       |        |
|---------|----|--------|-------|-------|--------|
| 124,696 | 29 | 10,039 | 5,605 | 2,082 | 17,755 |
| 124,697 | 29 | 10,241 | 5,684 | 2,107 | 18,061 |
| 124,698 | 32 | 10,399 | 5,756 | 2,133 | 18,320 |
| 124,699 | 32 | 10,533 | 5,787 | 2,161 | 18,513 |
| 124,700 | 31 | 10,358 | 5,685 | 2,122 | 18,196 |
| 124,701 | 32 | 10,541 | 5,741 | 2,140 | 18,454 |
| 124,702 | 32 | 10,559 | 5,759 | 2,139 | 18,489 |
| 124,703 | 33 | 10,646 | 5,831 | 2,152 | 18,662 |
| 124,704 | 36 | 10,662 | 5,872 | 2,162 | 18,732 |
| 124,705 | 36 | 10,601 | 5,863 | 2,154 | 18,654 |
| 124,706 | 44 | 10,445 | 5,810 | 2,123 | 18,422 |
| 124,707 | 45 | 10,334 | 5,762 | 2,109 | 18,250 |
| 124,708 | 49 | 10,661 | 5,942 | 2,185 | 18,837 |
| 124,709 | 52 | 10,561 | 5,881 | 2,156 | 18,650 |
| 124,710 | 52 | 10,493 | 5,821 | 2,139 | 18,505 |
| 124,711 | 54 | 10,726 | 5,922 | 2,187 | 18,889 |
| 124,712 | 54 | 10,769 | 5,952 | 2,196 | 18,971 |
| 124,713 | 55 | 10,767 | 5,989 | 2,204 | 19,015 |
| 124,714 | 58 | 10,659 | 5,942 | 2,186 | 18,845 |
| 124,715 | 57 | 10,492 | 5,876 | 2,176 | 18,601 |
| 124,716 | 62 | 10,929 | 6,147 | 2,273 | 19,411 |
| 124,717 | 62 | 11,025 | 6,175 | 2,287 | 19,549 |
| 124,718 | 62 | 10,940 | 6,149 | 2,280 | 19,431 |
| 124,719 | 62 | 11,148 | 6,225 | 2,315 | 19,750 |
| 124,720 | 58 | 10,920 | 6,126 | 2,275 | 19,379 |
| 124,721 | 58 | 11,106 | 6,157 | 2,307 | 19,628 |
| 124,722 | 60 | 11,260 | 6,236 | 2,332 | 19,888 |
| 124,723 | 63 | 11,367 | 6,291 | 2,337 | 20,058 |
| 124,724 | 64 | 11,425 | 6,304 | 2,345 | 20,138 |
| 124,725 | 63 | 11,524 | 6,329 | 2,350 | 20,266 |
| 124,726 | 61 | 11,518 | 6,300 | 2,344 | 20,223 |
| 124,727 | 61 | 11,515 | 6,290 | 2,341 | 20,207 |

|         |    |        |       |       |        |
|---------|----|--------|-------|-------|--------|
| 124,728 | 59 | 11,453 | 6,234 | 2,314 | 20,060 |
| 124,729 | 60 | 11,762 | 6,341 | 2,384 | 20,547 |
| 124,730 | 61 | 11,708 | 6,326 | 2,386 | 20,481 |
| 124,731 | 61 | 11,668 | 6,292 | 2,385 | 20,406 |
| 124,732 | 62 | 11,697 | 6,294 | 2,384 | 20,437 |
| 124,733 | 63 | 11,663 | 6,256 | 2,373 | 20,355 |
| 124,734 | 64 | 11,700 | 6,207 | 2,350 | 20,321 |
| 124,735 | 68 | 11,824 | 6,215 | 2,358 | 20,465 |
| 124,736 | 71 | 12,055 | 6,243 | 2,372 | 20,741 |
| 124,737 | 72 | 12,328 | 6,252 | 2,391 | 21,043 |
| 124,738 | 74 | 12,413 | 6,209 | 2,369 | 21,065 |
| 124,739 | 84 | 12,515 | 6,211 | 2,372 | 21,182 |
| 124,740 | 83 | 12,338 | 6,110 | 2,332 | 20,863 |
| 124,741 | 89 | 12,848 | 6,264 | 2,393 | 21,594 |
| 124,742 | 87 | 12,740 | 6,205 | 2,383 | 21,415 |
| 124,743 | 92 | 12,872 | 6,256 | 2,403 | 21,623 |
| 124,744 | 91 | 12,977 | 6,255 | 2,408 | 21,731 |
| 124,745 | 93 | 13,331 | 6,342 | 2,468 | 22,234 |
| 124,746 | 92 | 13,166 | 6,266 | 2,438 | 21,962 |
| 124,747 | 94 | 13,320 | 6,321 | 2,458 | 22,193 |
| 124,748 | 97 | 13,635 | 6,399 | 2,498 | 22,629 |
| 124,749 | 93 | 13,451 | 6,305 | 2,464 | 22,313 |
| 124,750 | 94 | 13,479 | 6,316 | 2,477 | 22,366 |
| 124,751 | 93 | 13,500 | 6,332 | 2,489 | 22,414 |
| 124,752 | 94 | 13,580 | 6,312 | 2,487 | 22,473 |
| 124,753 | 94 | 13,590 | 6,310 | 2,491 | 22,485 |
| 124,754 | 89 | 13,544 | 6,285 | 2,486 | 22,404 |
| 124,755 | 89 | 13,519 | 6,271 | 2,481 | 22,360 |
| 124,756 | 81 | 13,550 | 6,228 | 2,486 | 22,345 |
| 124,757 | 78 | 13,358 | 6,121 | 2,444 | 22,001 |
| 124,758 | 78 | 13,306 | 6,120 | 2,445 | 21,949 |
| 124,759 | 78 | 13,394 | 6,137 | 2,450 | 22,059 |

|         |    |        |       |       |        |
|---------|----|--------|-------|-------|--------|
| 124,760 | 73 | 13,370 | 6,113 | 2,432 | 21,988 |
| 124,761 | 73 | 13,370 | 6,091 | 2,426 | 21,960 |
| 124,762 | 72 | 13,338 | 5,969 | 2,372 | 21,751 |
| 124,763 | 71 | 13,426 | 5,927 | 2,360 | 21,784 |
| 124,764 | 72 | 13,410 | 5,960 | 2,362 | 21,804 |
| 124,765 | 68 | 13,360 | 5,930 | 2,372 | 21,730 |
| 124,766 | 66 | 13,334 | 5,928 | 2,376 | 21,704 |
| 124,767 | 64 | 13,155 | 5,826 | 2,339 | 21,384 |
| 124,768 | 65 | 13,024 | 5,775 | 2,312 | 21,176 |
| 124,769 | 65 | 12,946 | 5,726 | 2,297 | 21,034 |
| 124,770 | 65 | 12,913 | 5,705 | 2,264 | 20,947 |
| 124,771 | 66 | 12,802 | 5,691 | 2,257 | 20,816 |
| 124,772 | 64 | 12,829 | 5,698 | 2,228 | 20,819 |
| 124,773 | 64 | 12,774 | 5,689 | 2,226 | 20,753 |
| 124,774 | 62 | 12,647 | 5,697 | 2,233 | 20,639 |
| 124,775 | 59 | 12,464 | 5,620 | 2,212 | 20,355 |
| 124,776 | 60 | 12,448 | 5,621 | 2,205 | 20,334 |
| 124,777 | 60 | 12,461 | 5,644 | 2,210 | 20,375 |
| 124,778 | 60 | 12,421 | 5,648 | 2,183 | 20,312 |
| 124,779 | 59 | 12,439 | 5,683 | 2,186 | 20,367 |
| 124,780 | 64 | 12,476 | 5,668 | 2,166 | 20,374 |
| 124,781 | 64 | 12,609 | 5,725 | 2,190 | 20,588 |
| 124,782 | 66 | 12,594 | 5,738 | 2,174 | 20,572 |
| 124,783 | 69 | 12,790 | 5,861 | 2,219 | 20,939 |
| 124,784 | 67 | 12,742 | 5,818 | 2,213 | 20,840 |
| 124,785 | 66 | 12,537 | 5,761 | 2,187 | 20,551 |
| 124,786 | 63 | 12,354 | 5,708 | 2,166 | 20,291 |
| 124,787 | 60 | 12,371 | 5,890 | 2,245 | 20,566 |
| 124,788 | 59 | 12,026 | 5,855 | 2,214 | 20,154 |
| 124,789 | 60 | 11,708 | 5,797 | 2,175 | 19,740 |
| 124,790 | 51 | 11,505 | 5,741 | 2,163 | 19,460 |
| 124,791 | 48 | 11,445 | 5,844 | 2,196 | 19,533 |

|         |    |        |       |       |        |
|---------|----|--------|-------|-------|--------|
| 124,792 | 43 | 11,081 | 5,759 | 2,159 | 19,042 |
| 124,793 | 44 | 10,750 | 5,685 | 2,120 | 18,599 |
| 124,794 | 39 | 10,460 | 5,650 | 2,092 | 18,241 |
| 124,795 | 41 | 10,636 | 5,833 | 2,137 | 18,647 |
| 124,796 | 38 | 10,300 | 5,763 | 2,085 | 18,186 |
| 124,797 | 39 | 10,165 | 5,771 | 2,070 | 18,045 |
| 124,798 | 36 | 9,956  | 5,759 | 2,058 | 17,809 |
| 124,799 | 34 | 9,872  | 5,789 | 2,053 | 17,748 |
| 124,800 | 34 | 9,753  | 5,775 | 2,035 | 17,597 |
| 124,801 | 33 | 9,572  | 5,722 | 2,000 | 17,327 |
| 124,802 | 32 | 9,499  | 5,716 | 2,000 | 17,247 |
| 124,803 | 31 | 9,422  | 5,739 | 1,994 | 17,186 |
| 124,804 | 32 | 9,426  | 5,745 | 1,989 | 17,192 |
| 124,805 | 33 | 9,381  | 5,717 | 1,986 | 17,117 |
| 124,806 | 33 | 9,316  | 5,703 | 1,983 | 17,035 |
| 124,807 | 34 | 9,255  | 5,710 | 1,983 | 16,982 |
| 124,808 | 36 | 9,247  | 5,673 | 1,972 | 16,928 |
| 124,809 | 36 | 9,401  | 5,752 | 1,995 | 17,184 |
| 124,810 | 35 | 9,353  | 5,757 | 1,991 | 17,136 |
| 124,811 | 35 | 9,252  | 5,741 | 2,001 | 17,029 |
| 124,812 | 35 | 9,106  | 5,698 | 1,990 | 16,829 |
| 124,813 | 35 | 8,944  | 5,688 | 1,979 | 16,646 |
| 124,814 | 35 | 8,844  | 5,639 | 1,961 | 16,479 |
| 124,815 | 34 | 8,886  | 5,597 | 1,956 | 16,473 |
| 124,816 | 35 | 8,778  | 5,538 | 1,922 | 16,273 |
| 124,817 | 34 | 8,626  | 5,436 | 1,870 | 15,966 |
| 124,818 | 34 | 8,515  | 5,375 | 1,839 | 15,763 |
| 124,819 | 32 | 8,558  | 5,432 | 1,864 | 15,886 |
| 124,820 | 32 | 8,401  | 5,406 | 1,877 | 15,716 |
| 124,821 | 32 | 8,242  | 5,320 | 1,846 | 15,440 |
| 124,822 | 33 | 8,189  | 5,363 | 1,872 | 15,457 |
| 124,823 | 31 | 8,077  | 5,306 | 1,874 | 15,288 |

|         |    |       |       |       |        |
|---------|----|-------|-------|-------|--------|
| 124,824 | 32 | 8,072 | 5,248 | 1,856 | 15,208 |
| 124,825 | 33 | 7,947 | 5,153 | 1,821 | 14,954 |
| 124,826 | 30 | 7,697 | 5,026 | 1,758 | 14,511 |
| 124,827 | 33 | 7,897 | 5,129 | 1,812 | 14,871 |
| 124,828 | 34 | 7,769 | 5,068 | 1,798 | 14,669 |
| 124,829 | 35 | 7,631 | 5,047 | 1,793 | 14,506 |
| 124,830 | 44 | 7,504 | 5,012 | 1,776 | 14,336 |
| 124,831 | 40 | 7,425 | 5,059 | 1,790 | 14,314 |
| 124,832 | 43 | 7,317 | 5,065 | 1,791 | 14,216 |
| 124,833 | 44 | 7,219 | 5,093 | 1,783 | 14,139 |
| 124,834 | 40 | 6,954 | 4,940 | 1,732 | 13,666 |
| 124,835 | 40 | 6,653 | 4,783 | 1,668 | 13,144 |
| 124,836 | 39 | 6,392 | 4,578 | 1,610 | 12,619 |
| 124,837 | 39 | 6,255 | 4,418 | 1,563 | 12,275 |
| 124,838 | 39 | 6,158 | 4,263 | 1,505 | 11,965 |
| 124,839 | 37 | 6,051 | 4,114 | 1,458 | 11,660 |
| 124,840 | 37 | 5,995 | 4,056 | 1,438 | 11,526 |
| 124,841 | 35 | 5,711 | 3,857 | 1,352 | 10,955 |
| 124,842 | 36 | 5,654 | 3,777 | 1,335 | 10,802 |
| 124,843 | 7  | 1,971 | 1,450 | 468   | 3,896  |
| 124,844 | 33 | 5,229 | 3,507 | 1,234 | 10,003 |
| 124,845 | 32 | 5,195 | 3,429 | 1,221 | 9,877  |
| 124,846 | 33 | 5,020 | 3,289 | 1,181 | 9,523  |
| 124,847 | 32 | 4,887 | 3,189 | 1,154 | 9,262  |
| 124,848 | 32 | 4,717 | 3,073 | 1,124 | 8,946  |
| 124,849 | 32 | 4,558 | 2,944 | 1,088 | 8,622  |
| 124,850 | 32 | 4,335 | 2,799 | 1,043 | 8,209  |
| 124,851 | 32 | 4,162 | 2,695 | 1,007 | 7,896  |
| 124,852 | 32 | 4,015 | 2,609 | 963   | 7,619  |
| 124,853 | 32 | 3,893 | 2,512 | 931   | 7,368  |
| 124,854 | 32 | 3,839 | 2,449 | 918   | 7,238  |
| 124,855 | 31 | 3,703 | 2,373 | 889   | 6,996  |

|         |    |       |       |     |       |
|---------|----|-------|-------|-----|-------|
| 124,856 | 30 | 3,528 | 2,296 | 856 | 6,710 |
| 124,857 | 30 | 3,373 | 2,213 | 826 | 6,442 |
| 124,858 | 30 | 3,235 | 2,139 | 797 | 6,201 |
| 124,859 | 29 | 3,029 | 2,042 | 764 | 5,864 |
| 124,860 | 27 | 2,822 | 1,954 | 729 | 5,532 |
| 124,861 | 26 | 2,621 | 1,838 | 690 | 5,175 |
| 124,862 | 26 | 2,463 | 1,740 | 655 | 4,884 |
| 124,863 | 26 | 2,316 | 1,673 | 621 | 4,636 |
| 124,864 | 26 | 2,267 | 1,619 | 596 | 4,508 |
| 124,865 | 26 | 2,219 | 1,556 | 578 | 4,379 |
| 124,866 | 26 | 2,086 | 1,519 | 557 | 4,188 |
| 124,867 | 25 | 1,926 | 1,470 | 532 | 3,953 |
| 124,868 | 25 | 1,820 | 1,422 | 511 | 3,778 |
| 124,869 | 25 | 1,705 | 1,357 | 489 | 3,576 |
| 124,870 | 25 | 1,636 | 1,317 | 466 | 3,444 |
| 124,871 | 25 | 1,574 | 1,260 | 446 | 3,305 |
| 124,872 | 25 | 1,518 | 1,186 | 406 | 3,135 |
| 124,873 | 25 | 1,451 | 1,091 | 365 | 2,932 |
| 124,874 | 25 | 1,357 | 1,047 | 348 | 2,777 |
| 124,875 | 23 | 1,234 | 994   | 321 | 2,572 |
| 124,876 | 21 | 1,125 | 947   | 303 | 2,396 |
| 124,877 | 20 | 995   | 883   | 281 | 2,179 |
| 124,878 | 20 | 903   | 827   | 257 | 2,007 |
| 124,879 | 20 | 783   | 747   | 233 | 1,783 |
| 124,880 | 16 | 661   | 635   | 194 | 1,506 |
| 124,881 | 16 | 598   | 564   | 173 | 1,351 |
| 124,882 | 10 | 536   | 501   | 149 | 1,196 |
| 124,883 | 7  | 372   | 352   | 105 | 836   |
| 124,884 | 3  | 214   | 198   | 50  | 465   |

<sup>a</sup> VZV-DEN09 nucleotide location based on VZV strain 32 passage 72.

TABLE S2 Single-nucleotide polymorphism in VZV-DEN09 compared to VZV strain 32 passage 72

| Reference position <sup>a</sup> | DNA change | Gene  | Amino acid change | Impact         | Depth <sup>b</sup> |
|---------------------------------|------------|-------|-------------------|----------------|--------------------|
| 569                             | T>C        |       |                   |                | 19,819             |
| 1,348                           | A>G        | ORF02 | K72R              | Non-synonymous | 29,990             |
| 1,669                           | T>C        | ORF02 | L179S             | Non-synonymous | 27,366             |
| 25,025                          | A>G        | ORF17 | Q297R             | Non-synonymous | 15,866             |
| 35,257                          | T>C        | ORF22 | No change         | Synonymous     | 18,295             |
| 60,089                          | A>G        | ORF32 | No change         | Synonymous     | 14,137             |
| 61,298                          | C>T        | ORF35 | R291H             | Non-synonymous | 17,452             |
| 81,020                          | C>T        | ORF44 | No change         | Synonymous     | 19,544             |
| 81,020                          | C>T        | ORF44 | No change         | Synonymous     | 19,544             |
| 87,924                          | A>G        | ORF51 | N4D               | Non-synonymous | 16,054             |
| 90,505                          | T>C        |       |                   |                | 14,387             |
| 105,536                         | T>C        | ORF62 | Q1211R            | Non-synonymous | 11,504             |
| 105,739                         | T>C        | ORF62 | No change         | Synonymous     | 13,408             |
| 105,928                         | T>C        | ORF62 | No change         | Synonymous     | 10,851             |
| 105,953                         | Y>T        | ORF62 | No change         | Synonymous     | 11,471             |
| 105,998                         | Y>T        | ORF62 | No change         | Synonymous     | 13,260             |
| 106,035                         | C>T        | ORF62 | E1045K            | Non-synonymous | 12,371             |
| 106,097                         | T>C        | ORF62 | Q1024R            | Non-synonymous | 14,910             |
| 106,198                         | T>C        | ORF62 | No change         | Synonymous     | 15,142             |
| 106,513                         | T>C        | ORF62 | No change         | Synonymous     | 14,023             |
| 106,865                         | Y>C        | ORF62 | Q768R             | Non-synonymous | 19,219             |
| 106,975                         | A>G        | ORF62 | No change         | Synonymous     | 17,696             |
| 107,104                         | C>T        | ORF62 | No change         | Synonymous     | 16,436             |
| 107,218                         | T>C        | ORF62 | No change         | Synonymous     | 15,201             |
| 107,962                         | Y>T        | ORF62 | No change         | Synonymous     | 20,850             |
| 109,357                         | T>C        |       |                   |                | 20,648             |
| 120,860                         | A>G        |       |                   |                | 20,478             |
| 122,255                         | R>A        | ORF71 | No change         | Synonymous     | 20,620             |
| 122,999                         | A>G        | ORF71 | No change         | Synonymous     | 15,363             |
| 123,113                         | G>A        | ORF71 | No change         | Synonymous     | 16,464             |
| 123,242                         | T>C        | ORF71 | No change         | synonymous     | 17,739             |
| 123,352                         | R>G        | ORF71 | Q768R             | Non-synonymous | 19,262             |
| 123,704                         | A>G        | ORF71 | No change         | Synonymous     | 14,054             |
| 124,019                         | A>G        | ORF71 | No change         | Synonymous     | 15,706             |
| 124,120                         | A>G        | ORF71 | Q1024R            | Non-synonymous | 14,895             |
| 124,182                         | G>A        | ORF71 | E1045K            | Non-synonymous | 12,429             |
| 124,219                         | R>A        | ORF71 | No change         | Synonymous     | 13,253             |
| 124,264                         | R>A        | ORF71 | No change         | Synonymous     | 11,660             |
| 124,289                         | A>G        | ORF71 | No change         | Synonymous     | 10,882             |
| 124,478                         | A>G        | ORF71 | No change         | Synonymous     | 13,425             |
| 124,681                         | A>G        | ORF71 | Q1211R            | Non-synonymous | 11,294             |

<sup>a</sup> Reference position relative to VZV strain 32 passage 72.

<sup>b</sup> Number of times individual nucleotide was identified.



TABLE S3 VZV-DEN09 cDNA cpn

| Library                        | C         | C         | C          | C          | D         | D         | D          | D          | Sum        |            |
|--------------------------------|-----------|-----------|------------|------------|-----------|-----------|------------|------------|------------|------------|
| Enrichment                     | No        | No        | Yes        | Yes        | No        | No        | Yes        | Yes        |            |            |
| Strand                         | Top       | Bottom    | Top        | Bottom     | Top       | Bottom    | Bop        | Bottom     | Top        | Bottom     |
| Total cpn                      | 3,839,639 | 2,427,934 | 41,520,490 | 26,385,975 | 2,242,370 | 1,457,380 | 26,265,370 | 17,397,313 | 73,867,869 | 47,668,602 |
| Strand usage (top/bottom)      | 1.58      |           | 1.57       |            | 1.54      |           | 1.51       |            | 1.55       |            |
| Total cpn both strands         | 6,267,573 |           | 67,906,465 |            | 3,699,750 |           | 43,662,683 |            |            |            |
| Number of reads mapping to VZV | 122,947   |           | 1,338,040  |            | 72,251    |           | 860,067    |            |            |            |
| Nucleotides per read           | 51.0      |           | 50.8       |            | 51.2      |           | 50.8       |            |            |            |

| Nucleotide <sup>a</sup> | cpn | cpn | cpn | cpn | cpn | cpn | cpn | cpn | cpn | cpn | cpn |
|-------------------------|-----|-----|-----|-----|-----|-----|-----|-----|-----|-----|-----|
| 1                       | 0   | 0   | 4   | 0   | 1   | 0   | 5   | 0   | 10  | 0   |     |
| 2                       | 0   | 0   | 8   | 0   | 1   | 0   | 7   | 0   | 16  | 0   |     |
| 3                       | 0   | 0   | 9   | 0   | 2   | 0   | 10  | 0   | 21  | 0   |     |
| 4                       | 0   | 0   | 9   | 0   | 2   | 0   | 10  | 0   | 21  | 0   |     |
| 5                       | 0   | 0   | 10  | 0   | 2   | 0   | 10  | 0   | 22  | 0   |     |
| 6                       | 0   | 0   | 10  | 0   | 2   | 0   | 10  | 0   | 22  | 0   |     |
| 7                       | 0   | 0   | 11  | 1   | 2   | 0   | 10  | 0   | 23  | 1   |     |
| 8                       | 0   | 0   | 11  | 1   | 2   | 0   | 10  | 0   | 23  | 1   |     |
| 9                       | 1   | 0   | 11  | 1   | 2   | 0   | 10  | 0   | 24  | 1   |     |
| 10                      | 1   | 0   | 11  | 1   | 2   | 0   | 10  | 1   | 24  | 2   |     |
| 11                      | 1   | 0   | 11  | 1   | 2   | 0   | 10  | 1   | 24  | 2   |     |
| 12                      | 2   | 0   | 11  | 1   | 2   | 0   | 10  | 1   | 25  | 2   |     |
| 13                      | 2   | 0   | 11  | 1   | 2   | 0   | 10  | 1   | 25  | 2   |     |
| 14                      | 2   | 0   | 11  | 2   | 2   | 0   | 10  | 1   | 25  | 3   |     |
| 15                      | 2   | 0   | 11  | 3   | 2   | 0   | 10  | 2   | 25  | 5   |     |
| 16                      | 2   | 1   | 11  | 4   | 2   | 0   | 10  | 3   | 25  | 8   |     |
| 17                      | 2   | 1   | 11  | 4   | 2   | 0   | 10  | 3   | 25  | 8   |     |
| 18                      | 2   | 2   | 11  | 10  | 2   | 0   | 10  | 4   | 25  | 16  |     |
| 19                      | 2   | 2   | 11  | 10  | 2   | 0   | 10  | 4   | 25  | 16  |     |
| 20                      | 2   | 2   | 12  | 10  | 2   | 0   | 10  | 4   | 26  | 16  |     |
| 21                      | 2   | 2   | 13  | 10  | 2   | 0   | 10  | 4   | 27  | 16  |     |
| 22                      | 2   | 2   | 13  | 10  | 3   | 0   | 11  | 4   | 29  | 16  |     |
| 23                      | 2   | 2   | 13  | 10  | 3   | 0   | 11  | 6   | 29  | 18  |     |
| 24                      | 2   | 2   | 13  | 10  | 3   | 0   | 11  | 6   | 29  | 18  |     |
| 25                      | 2   | 2   | 13  | 13  | 3   | 0   | 11  | 6   | 29  | 21  |     |
| 26                      | 2   | 2   | 13  | 13  | 3   | 0   | 12  | 6   | 30  | 21  |     |
| 27                      | 2   | 2   | 13  | 13  | 3   | 0   | 12  | 6   | 30  | 21  |     |
| 28                      | 2   | 2   | 13  | 14  | 3   | 0   | 12  | 7   | 30  | 23  |     |
| 29                      | 2   | 2   | 13  | 14  | 3   | 0   | 12  | 7   | 30  | 23  |     |

|    |    |   |    |    |    |   |    |    |    |    |
|----|----|---|----|----|----|---|----|----|----|----|
| 30 | 2  | 2 | 13 | 14 | 3  | 0 | 12 | 7  | 30 | 23 |
| 31 | 2  | 2 | 13 | 14 | 3  | 0 | 12 | 7  | 30 | 23 |
| 32 | 3  | 2 | 13 | 14 | 3  | 0 | 12 | 7  | 31 | 23 |
| 33 | 3  | 2 | 12 | 10 | 3  | 0 | 14 | 7  | 32 | 19 |
| 34 | 3  | 2 | 13 | 14 | 3  | 0 | 14 | 7  | 33 | 23 |
| 35 | 3  | 2 | 13 | 14 | 3  | 0 | 14 | 7  | 33 | 23 |
| 36 | 3  | 2 | 13 | 14 | 3  | 0 | 14 | 7  | 33 | 23 |
| 37 | 3  | 2 | 13 | 14 | 3  | 0 | 14 | 7  | 33 | 23 |
| 38 | 3  | 2 | 13 | 14 | 3  | 0 | 14 | 7  | 33 | 23 |
| 39 | 3  | 2 | 13 | 14 | 3  | 0 | 14 | 7  | 33 | 23 |
| 40 | 3  | 2 | 13 | 14 | 3  | 0 | 14 | 7  | 33 | 23 |
| 41 | 3  | 2 | 13 | 14 | 3  | 0 | 14 | 7  | 33 | 23 |
| 42 | 4  | 2 | 13 | 14 | 3  | 0 | 14 | 7  | 34 | 23 |
| 43 | 4  | 2 | 13 | 14 | 3  | 0 | 14 | 7  | 34 | 23 |
| 44 | 4  | 2 | 13 | 14 | 3  | 0 | 14 | 7  | 34 | 23 |
| 45 | 4  | 2 | 13 | 14 | 3  | 0 | 14 | 7  | 34 | 23 |
| 46 | 4  | 2 | 13 | 14 | 4  | 0 | 13 | 8  | 34 | 24 |
| 47 | 4  | 2 | 13 | 16 | 4  | 0 | 13 | 9  | 34 | 27 |
| 48 | 4  | 2 | 13 | 18 | 4  | 0 | 12 | 9  | 33 | 29 |
| 49 | 4  | 2 | 13 | 18 | 4  | 0 | 12 | 9  | 33 | 29 |
| 50 | 4  | 2 | 12 | 19 | 4  | 0 | 12 | 8  | 32 | 29 |
| 51 | 6  | 2 | 11 | 19 | 3  | 0 | 11 | 8  | 31 | 29 |
| 52 | 6  | 2 | 12 | 20 | 4  | 0 | 8  | 8  | 30 | 30 |
| 53 | 6  | 2 | 9  | 21 | 3  | 0 | 5  | 8  | 23 | 31 |
| 54 | 6  | 3 | 9  | 22 | 3  | 0 | 5  | 8  | 23 | 33 |
| 55 | 7  | 3 | 17 | 22 | 3  | 0 | 16 | 8  | 43 | 33 |
| 56 | 7  | 3 | 16 | 22 | 3  | 0 | 16 | 8  | 42 | 33 |
| 57 | 7  | 3 | 16 | 22 | 3  | 0 | 16 | 8  | 42 | 33 |
| 58 | 7  | 3 | 15 | 23 | 3  | 0 | 16 | 10 | 41 | 36 |
| 59 | 7  | 3 | 16 | 23 | 5  | 0 | 17 | 10 | 45 | 36 |
| 60 | 6  | 3 | 16 | 24 | 6  | 0 | 17 | 10 | 45 | 37 |
| 61 | 7  | 3 | 17 | 24 | 7  | 0 | 17 | 9  | 48 | 36 |
| 62 | 7  | 3 | 21 | 24 | 8  | 0 | 18 | 9  | 54 | 36 |
| 63 | 8  | 3 | 28 | 24 | 9  | 0 | 23 | 9  | 68 | 36 |
| 64 | 8  | 3 | 28 | 24 | 9  | 0 | 23 | 9  | 68 | 36 |
| 65 | 11 | 3 | 28 | 23 | 9  | 0 | 24 | 9  | 72 | 35 |
| 66 | 11 | 3 | 28 | 22 | 9  | 0 | 25 | 9  | 73 | 34 |
| 67 | 12 | 2 | 28 | 23 | 11 | 0 | 25 | 8  | 76 | 33 |
| 68 | 12 | 2 | 28 | 22 | 11 | 2 | 25 | 9  | 76 | 35 |
| 69 | 12 | 1 | 28 | 21 | 11 | 2 | 26 | 10 | 77 | 34 |
| 70 | 13 | 2 | 30 | 20 | 11 | 2 | 26 | 10 | 80 | 34 |

|     |    |   |     |    |    |   |    |    |     |    |
|-----|----|---|-----|----|----|---|----|----|-----|----|
| 71  | 13 | 2 | 30  | 20 | 11 | 2 | 28 | 10 | 82  | 34 |
| 72  | 13 | 2 | 30  | 20 | 11 | 2 | 27 | 10 | 81  | 34 |
| 73  | 13 | 2 | 30  | 20 | 10 | 2 | 27 | 10 | 80  | 34 |
| 74  | 13 | 2 | 30  | 20 | 10 | 2 | 27 | 8  | 80  | 32 |
| 75  | 13 | 2 | 30  | 17 | 10 | 2 | 27 | 8  | 80  | 29 |
| 76  | 13 | 2 | 30  | 17 | 10 | 2 | 27 | 8  | 80  | 29 |
| 77  | 13 | 2 | 30  | 17 | 10 | 2 | 26 | 8  | 79  | 29 |
| 78  | 13 | 2 | 30  | 16 | 10 | 2 | 26 | 7  | 79  | 27 |
| 79  | 13 | 2 | 30  | 16 | 10 | 2 | 26 | 7  | 79  | 27 |
| 80  | 13 | 2 | 30  | 16 | 10 | 2 | 27 | 7  | 80  | 27 |
| 81  | 13 | 2 | 30  | 16 | 10 | 2 | 27 | 7  | 80  | 27 |
| 82  | 13 | 2 | 30  | 16 | 10 | 2 | 27 | 7  | 80  | 27 |
| 83  | 12 | 2 | 30  | 18 | 10 | 2 | 27 | 7  | 79  | 29 |
| 84  | 13 | 2 | 34  | 18 | 10 | 2 | 27 | 8  | 84  | 30 |
| 85  | 13 | 2 | 37  | 18 | 10 | 2 | 33 | 8  | 93  | 30 |
| 86  | 16 | 2 | 37  | 19 | 10 | 2 | 33 | 8  | 96  | 31 |
| 87  | 18 | 2 | 38  | 19 | 10 | 2 | 34 | 8  | 100 | 31 |
| 88  | 18 | 2 | 57  | 19 | 11 | 2 | 40 | 8  | 126 | 31 |
| 89  | 18 | 2 | 57  | 19 | 11 | 2 | 40 | 8  | 126 | 31 |
| 90  | 18 | 2 | 94  | 20 | 12 | 2 | 55 | 8  | 179 | 32 |
| 91  | 18 | 2 | 96  | 20 | 13 | 2 | 56 | 8  | 183 | 32 |
| 92  | 18 | 2 | 96  | 20 | 13 | 2 | 56 | 8  | 183 | 32 |
| 93  | 17 | 2 | 96  | 20 | 13 | 2 | 56 | 9  | 182 | 33 |
| 94  | 17 | 2 | 96  | 20 | 13 | 2 | 56 | 9  | 182 | 33 |
| 95  | 17 | 2 | 97  | 20 | 13 | 2 | 56 | 9  | 183 | 33 |
| 96  | 17 | 2 | 97  | 20 | 13 | 2 | 57 | 9  | 184 | 33 |
| 97  | 17 | 2 | 98  | 20 | 12 | 2 | 57 | 8  | 184 | 32 |
| 98  | 17 | 2 | 100 | 18 | 12 | 2 | 58 | 7  | 187 | 29 |
| 99  | 17 | 2 | 104 | 16 | 13 | 2 | 61 | 7  | 195 | 27 |
| 100 | 17 | 2 | 118 | 16 | 13 | 2 | 64 | 7  | 212 | 27 |
| 101 | 18 | 2 | 128 | 15 | 13 | 2 | 67 | 7  | 226 | 26 |
| 102 | 22 | 2 | 144 | 15 | 13 | 2 | 73 | 7  | 252 | 26 |
| 103 | 22 | 2 | 148 | 14 | 14 | 2 | 79 | 7  | 263 | 25 |
| 104 | 23 | 2 | 161 | 13 | 14 | 2 | 97 | 7  | 295 | 24 |
| 105 | 23 | 1 | 171 | 12 | 15 | 2 | 98 | 7  | 307 | 22 |
| 106 | 22 | 1 | 167 | 12 | 15 | 2 | 93 | 7  | 297 | 22 |
| 107 | 22 | 1 | 171 | 12 | 15 | 2 | 94 | 7  | 302 | 22 |
| 108 | 23 | 1 | 172 | 10 | 15 | 2 | 95 | 5  | 305 | 18 |
| 109 | 19 | 1 | 134 | 9  | 14 | 2 | 73 | 3  | 240 | 15 |
| 110 | 23 | 1 | 176 | 10 | 13 | 2 | 97 | 5  | 309 | 18 |
| 111 | 22 | 1 | 177 | 9  | 12 | 2 | 97 | 6  | 308 | 18 |

|     |    |   |     |   |    |   |     |   |     |    |
|-----|----|---|-----|---|----|---|-----|---|-----|----|
| 112 | 21 | 1 | 176 | 9 | 11 | 2 | 99  | 6 | 307 | 18 |
| 113 | 21 | 1 | 172 | 9 | 10 | 2 | 99  | 6 | 302 | 18 |
| 114 | 21 | 1 | 165 | 9 | 9  | 2 | 94  | 6 | 289 | 18 |
| 115 | 19 | 1 | 165 | 9 | 8  | 2 | 98  | 6 | 290 | 18 |
| 116 | 19 | 1 | 166 | 9 | 8  | 2 | 97  | 6 | 290 | 18 |
| 117 | 18 | 1 | 167 | 9 | 8  | 2 | 97  | 6 | 290 | 18 |
| 118 | 18 | 1 | 167 | 6 | 7  | 2 | 97  | 6 | 289 | 15 |
| 119 | 18 | 1 | 167 | 6 | 7  | 0 | 97  | 7 | 289 | 14 |
| 120 | 18 | 1 | 168 | 6 | 7  | 0 | 96  | 4 | 289 | 11 |
| 121 | 18 | 0 | 168 | 4 | 7  | 0 | 99  | 4 | 292 | 8  |
| 122 | 18 | 0 | 175 | 5 | 8  | 0 | 106 | 4 | 307 | 9  |
| 123 | 18 | 0 | 173 | 5 | 8  | 0 | 104 | 4 | 303 | 9  |
| 124 | 18 | 1 | 173 | 5 | 8  | 1 | 104 | 5 | 303 | 12 |
| 125 | 18 | 1 | 173 | 5 | 8  | 1 | 104 | 5 | 303 | 12 |
| 126 | 18 | 1 | 175 | 5 | 8  | 1 | 109 | 5 | 310 | 12 |
| 127 | 18 | 2 | 175 | 5 | 8  | 1 | 109 | 5 | 310 | 13 |
| 128 | 18 | 2 | 180 | 5 | 10 | 1 | 119 | 5 | 327 | 13 |
| 129 | 18 | 2 | 181 | 5 | 10 | 1 | 120 | 5 | 329 | 13 |
| 130 | 19 | 2 | 185 | 5 | 10 | 1 | 123 | 5 | 337 | 13 |
| 131 | 19 | 2 | 185 | 5 | 10 | 1 | 122 | 5 | 336 | 13 |
| 132 | 19 | 2 | 184 | 5 | 10 | 1 | 122 | 5 | 335 | 13 |
| 133 | 20 | 2 | 185 | 3 | 10 | 1 | 122 | 4 | 337 | 10 |
| 134 | 20 | 2 | 185 | 3 | 10 | 1 | 122 | 4 | 337 | 10 |
| 135 | 20 | 2 | 187 | 4 | 11 | 1 | 122 | 4 | 340 | 11 |
| 136 | 19 | 2 | 181 | 4 | 11 | 1 | 119 | 5 | 330 | 12 |
| 137 | 17 | 2 | 185 | 7 | 12 | 1 | 118 | 6 | 332 | 16 |
| 138 | 14 | 2 | 184 | 8 | 12 | 1 | 117 | 6 | 327 | 17 |
| 139 | 14 | 2 | 177 | 9 | 11 | 1 | 113 | 6 | 315 | 18 |
| 140 | 14 | 2 | 137 | 9 | 10 | 1 | 103 | 6 | 264 | 18 |
| 141 | 14 | 2 | 128 | 8 | 10 | 1 | 96  | 6 | 248 | 17 |
| 142 | 14 | 2 | 128 | 8 | 9  | 1 | 96  | 6 | 247 | 17 |
| 143 | 14 | 2 | 127 | 8 | 9  | 1 | 96  | 6 | 246 | 17 |
| 144 | 14 | 2 | 133 | 8 | 9  | 1 | 98  | 6 | 254 | 17 |
| 145 | 14 | 2 | 138 | 8 | 9  | 1 | 98  | 5 | 259 | 16 |
| 146 | 15 | 2 | 144 | 8 | 9  | 1 | 100 | 5 | 268 | 16 |
| 147 | 15 | 2 | 160 | 8 | 10 | 1 | 104 | 5 | 289 | 16 |
| 148 | 15 | 2 | 163 | 8 | 10 | 1 | 107 | 5 | 295 | 16 |
| 149 | 15 | 2 | 158 | 8 | 9  | 1 | 104 | 5 | 286 | 16 |
| 150 | 15 | 2 | 147 | 8 | 9  | 1 | 100 | 5 | 271 | 16 |
| 151 | 15 | 2 | 146 | 8 | 9  | 1 | 101 | 5 | 271 | 16 |
| 152 | 14 | 2 | 142 | 8 | 9  | 1 | 99  | 5 | 264 | 16 |

|     |   |   |     |    |    |   |    |   |     |    |
|-----|---|---|-----|----|----|---|----|---|-----|----|
| 153 | 9 | 2 | 114 | 8  | 8  | 1 | 92 | 5 | 223 | 16 |
| 154 | 8 | 2 | 111 | 8  | 8  | 1 | 89 | 6 | 216 | 17 |
| 155 | 8 | 2 | 103 | 8  | 7  | 1 | 73 | 6 | 191 | 17 |
| 156 | 7 | 2 | 86  | 8  | 6  | 1 | 66 | 7 | 165 | 18 |
| 157 | 7 | 3 | 85  | 10 | 6  | 1 | 66 | 7 | 164 | 21 |
| 158 | 7 | 3 | 82  | 10 | 6  | 1 | 65 | 7 | 160 | 21 |
| 159 | 7 | 3 | 82  | 10 | 6  | 1 | 67 | 7 | 162 | 21 |
| 160 | 7 | 3 | 81  | 10 | 6  | 1 | 69 | 7 | 163 | 21 |
| 161 | 7 | 3 | 77  | 10 | 6  | 1 | 66 | 7 | 156 | 21 |
| 162 | 7 | 3 | 80  | 10 | 9  | 1 | 68 | 6 | 164 | 20 |
| 163 | 7 | 3 | 86  | 10 | 9  | 1 | 67 | 6 | 169 | 20 |
| 164 | 7 | 3 | 89  | 10 | 9  | 1 | 68 | 6 | 173 | 20 |
| 165 | 6 | 4 | 89  | 10 | 9  | 1 | 68 | 6 | 172 | 21 |
| 166 | 5 | 5 | 89  | 10 | 9  | 1 | 63 | 6 | 166 | 22 |
| 167 | 5 | 5 | 88  | 11 | 9  | 1 | 65 | 6 | 167 | 23 |
| 168 | 5 | 6 | 87  | 12 | 9  | 1 | 66 | 7 | 167 | 26 |
| 169 | 5 | 6 | 87  | 12 | 9  | 1 | 66 | 7 | 167 | 26 |
| 170 | 5 | 6 | 89  | 12 | 9  | 2 | 70 | 6 | 173 | 26 |
| 171 | 5 | 6 | 92  | 12 | 10 | 2 | 70 | 6 | 177 | 26 |
| 172 | 4 | 6 | 90  | 13 | 10 | 3 | 67 | 6 | 171 | 28 |
| 173 | 4 | 6 | 83  | 12 | 9  | 3 | 60 | 6 | 156 | 27 |
| 174 | 4 | 6 | 83  | 12 | 9  | 3 | 60 | 6 | 156 | 27 |
| 175 | 4 | 5 | 91  | 12 | 9  | 2 | 58 | 6 | 162 | 25 |
| 176 | 4 | 5 | 89  | 12 | 9  | 2 | 56 | 6 | 158 | 25 |
| 177 | 4 | 5 | 89  | 12 | 9  | 2 | 58 | 6 | 160 | 25 |
| 178 | 4 | 4 | 90  | 12 | 9  | 2 | 61 | 6 | 164 | 24 |
| 179 | 5 | 4 | 85  | 12 | 7  | 2 | 52 | 6 | 149 | 24 |
| 180 | 5 | 4 | 87  | 12 | 7  | 2 | 51 | 6 | 150 | 24 |
| 181 | 4 | 4 | 88  | 12 | 7  | 2 | 60 | 6 | 159 | 24 |
| 182 | 5 | 4 | 97  | 12 | 7  | 2 | 71 | 6 | 180 | 24 |
| 183 | 5 | 4 | 97  | 12 | 7  | 2 | 72 | 6 | 181 | 24 |
| 184 | 6 | 4 | 103 | 12 | 7  | 2 | 90 | 6 | 206 | 24 |
| 185 | 6 | 4 | 103 | 12 | 7  | 2 | 91 | 6 | 207 | 24 |
| 186 | 6 | 4 | 105 | 11 | 6  | 2 | 96 | 5 | 213 | 22 |
| 187 | 6 | 4 | 105 | 11 | 6  | 3 | 93 | 5 | 210 | 23 |
| 188 | 6 | 5 | 101 | 7  | 5  | 3 | 93 | 4 | 205 | 19 |
| 189 | 6 | 5 | 103 | 6  | 5  | 3 | 94 | 4 | 208 | 18 |
| 190 | 6 | 5 | 103 | 6  | 5  | 3 | 94 | 5 | 208 | 19 |
| 191 | 6 | 5 | 103 | 6  | 5  | 3 | 93 | 5 | 207 | 19 |
| 192 | 8 | 5 | 104 | 6  | 5  | 3 | 95 | 5 | 212 | 19 |
| 193 | 8 | 5 | 101 | 6  | 5  | 3 | 95 | 5 | 209 | 19 |

|     |    |   |     |    |    |   |     |   |     |    |
|-----|----|---|-----|----|----|---|-----|---|-----|----|
| 194 | 8  | 5 | 98  | 7  | 5  | 3 | 94  | 5 | 205 | 20 |
| 195 | 8  | 5 | 93  | 7  | 5  | 3 | 94  | 5 | 200 | 20 |
| 196 | 7  | 5 | 86  | 7  | 5  | 3 | 92  | 5 | 190 | 20 |
| 197 | 7  | 5 | 84  | 7  | 5  | 3 | 90  | 5 | 186 | 20 |
| 198 | 7  | 5 | 72  | 7  | 4  | 3 | 87  | 5 | 170 | 20 |
| 199 | 7  | 5 | 68  | 7  | 4  | 3 | 84  | 5 | 163 | 20 |
| 200 | 7  | 5 | 68  | 8  | 4  | 3 | 84  | 5 | 163 | 21 |
| 201 | 7  | 5 | 68  | 8  | 4  | 3 | 83  | 5 | 162 | 21 |
| 202 | 7  | 5 | 67  | 8  | 4  | 3 | 83  | 5 | 161 | 21 |
| 203 | 7  | 5 | 75  | 8  | 5  | 3 | 89  | 5 | 176 | 21 |
| 204 | 7  | 5 | 76  | 8  | 5  | 3 | 89  | 5 | 177 | 21 |
| 205 | 12 | 5 | 109 | 8  | 11 | 3 | 121 | 4 | 253 | 20 |
| 206 | 12 | 5 | 111 | 8  | 11 | 3 | 120 | 3 | 254 | 19 |
| 207 | 12 | 5 | 115 | 8  | 12 | 3 | 121 | 3 | 260 | 19 |
| 208 | 14 | 4 | 145 | 9  | 13 | 3 | 128 | 3 | 300 | 19 |
| 209 | 15 | 4 | 161 | 9  | 20 | 3 | 138 | 3 | 334 | 19 |
| 210 | 15 | 4 | 167 | 9  | 24 | 3 | 152 | 3 | 358 | 19 |
| 211 | 15 | 4 | 168 | 9  | 24 | 3 | 152 | 3 | 359 | 19 |
| 212 | 15 | 5 | 166 | 9  | 21 | 3 | 151 | 3 | 353 | 20 |
| 213 | 16 | 6 | 163 | 9  | 21 | 3 | 153 | 3 | 353 | 21 |
| 214 | 16 | 6 | 172 | 9  | 21 | 3 | 155 | 3 | 364 | 21 |
| 215 | 16 | 6 | 174 | 9  | 23 | 3 | 154 | 3 | 367 | 21 |
| 216 | 16 | 5 | 174 | 10 | 23 | 3 | 151 | 3 | 364 | 21 |
| 217 | 16 | 4 | 186 | 10 | 24 | 3 | 162 | 3 | 388 | 20 |
| 218 | 17 | 3 | 194 | 8  | 25 | 3 | 178 | 2 | 414 | 16 |
| 219 | 18 | 3 | 197 | 8  | 26 | 3 | 178 | 2 | 419 | 16 |
| 220 | 18 | 3 | 198 | 8  | 26 | 3 | 177 | 2 | 419 | 16 |
| 221 | 18 | 3 | 197 | 10 | 26 | 2 | 177 | 2 | 418 | 17 |
| 222 | 18 | 3 | 193 | 10 | 25 | 2 | 177 | 2 | 413 | 17 |
| 223 | 21 | 3 | 227 | 9  | 27 | 1 | 208 | 2 | 483 | 15 |
| 224 | 22 | 3 | 267 | 9  | 28 | 1 | 220 | 2 | 537 | 15 |
| 225 | 22 | 3 | 275 | 9  | 28 | 1 | 221 | 1 | 546 | 14 |
| 226 | 24 | 3 | 275 | 9  | 28 | 1 | 232 | 0 | 559 | 13 |
| 227 | 24 | 3 | 275 | 9  | 28 | 1 | 232 | 0 | 559 | 13 |
| 228 | 24 | 3 | 277 | 9  | 28 | 1 | 235 | 0 | 564 | 13 |
| 229 | 25 | 3 | 277 | 9  | 28 | 1 | 234 | 0 | 564 | 13 |
| 230 | 24 | 3 | 277 | 11 | 28 | 1 | 233 | 0 | 562 | 15 |
| 231 | 25 | 3 | 276 | 11 | 28 | 1 | 237 | 0 | 566 | 15 |
| 232 | 25 | 3 | 274 | 11 | 28 | 1 | 224 | 0 | 551 | 15 |
| 233 | 26 | 3 | 273 | 11 | 31 | 1 | 218 | 0 | 548 | 15 |
| 234 | 28 | 3 | 277 | 11 | 32 | 1 | 227 | 0 | 564 | 15 |

|     |    |   |     |    |    |   |     |   |       |    |
|-----|----|---|-----|----|----|---|-----|---|-------|----|
| 235 | 26 | 3 | 277 | 11 | 33 | 1 | 222 | 0 | 558   | 15 |
| 236 | 29 | 3 | 300 | 11 | 39 | 0 | 287 | 0 | 655   | 14 |
| 237 | 29 | 3 | 300 | 11 | 42 | 0 | 292 | 0 | 663   | 14 |
| 238 | 30 | 3 | 300 | 13 | 44 | 1 | 296 | 0 | 670   | 17 |
| 239 | 30 | 4 | 298 | 13 | 44 | 1 | 297 | 0 | 669   | 18 |
| 240 | 30 | 4 | 298 | 13 | 44 | 1 | 297 | 0 | 669   | 18 |
| 241 | 32 | 4 | 303 | 13 | 44 | 1 | 300 | 1 | 679   | 19 |
| 242 | 34 | 4 | 307 | 13 | 44 | 1 | 302 | 1 | 687   | 19 |
| 243 | 32 | 4 | 312 | 13 | 46 | 1 | 307 | 1 | 697   | 19 |
| 244 | 32 | 4 | 312 | 13 | 46 | 1 | 307 | 1 | 697   | 19 |
| 245 | 32 | 5 | 322 | 12 | 46 | 1 | 319 | 1 | 719   | 19 |
| 246 | 32 | 5 | 328 | 12 | 47 | 1 | 326 | 1 | 733   | 19 |
| 247 | 32 | 5 | 332 | 12 | 48 | 1 | 327 | 1 | 739   | 19 |
| 248 | 32 | 5 | 336 | 12 | 49 | 1 | 335 | 1 | 752   | 19 |
| 249 | 32 | 5 | 336 | 12 | 49 | 1 | 335 | 1 | 752   | 19 |
| 250 | 32 | 5 | 337 | 12 | 51 | 1 | 337 | 1 | 757   | 19 |
| 251 | 33 | 5 | 378 | 11 | 55 | 1 | 353 | 1 | 819   | 18 |
| 252 | 33 | 5 | 391 | 11 | 57 | 1 | 360 | 1 | 841   | 18 |
| 253 | 37 | 5 | 516 | 11 | 71 | 1 | 440 | 1 | 1,064 | 18 |
| 254 | 42 | 5 | 556 | 11 | 75 | 1 | 473 | 1 | 1,146 | 18 |
| 255 | 42 | 5 | 611 | 12 | 82 | 1 | 489 | 1 | 1,224 | 19 |
| 256 | 46 | 5 | 667 | 12 | 84 | 1 | 493 | 1 | 1,290 | 19 |
| 257 | 47 | 6 | 712 | 12 | 84 | 1 | 513 | 1 | 1,356 | 20 |
| 258 | 48 | 6 | 748 | 12 | 84 | 1 | 526 | 1 | 1,406 | 20 |
| 259 | 46 | 6 | 740 | 9  | 83 | 1 | 522 | 1 | 1,391 | 17 |
| 260 | 44 | 6 | 729 | 9  | 76 | 1 | 517 | 1 | 1,366 | 17 |
| 261 | 44 | 6 | 722 | 9  | 71 | 1 | 503 | 1 | 1,340 | 17 |
| 262 | 44 | 6 | 723 | 9  | 72 | 1 | 502 | 1 | 1,341 | 17 |
| 263 | 44 | 5 | 727 | 9  | 72 | 1 | 505 | 1 | 1,348 | 16 |
| 264 | 43 | 4 | 724 | 9  | 72 | 1 | 505 | 1 | 1,344 | 15 |
| 265 | 43 | 4 | 713 | 9  | 72 | 1 | 502 | 1 | 1,330 | 15 |
| 266 | 43 | 4 | 710 | 9  | 70 | 1 | 502 | 1 | 1,325 | 15 |
| 267 | 46 | 4 | 705 | 8  | 69 | 1 | 497 | 1 | 1,317 | 14 |
| 268 | 49 | 4 | 706 | 8  | 70 | 1 | 504 | 1 | 1,329 | 14 |
| 269 | 48 | 5 | 698 | 9  | 69 | 1 | 487 | 1 | 1,302 | 16 |
| 270 | 47 | 5 | 695 | 10 | 69 | 1 | 486 | 1 | 1,297 | 17 |
| 271 | 55 | 5 | 741 | 8  | 74 | 1 | 518 | 3 | 1,388 | 17 |
| 272 | 57 | 5 | 779 | 10 | 77 | 1 | 555 | 3 | 1,468 | 19 |
| 273 | 61 | 5 | 815 | 10 | 85 | 1 | 587 | 3 | 1,548 | 19 |
| 274 | 59 | 5 | 791 | 10 | 84 | 1 | 575 | 3 | 1,509 | 19 |
| 275 | 58 | 5 | 755 | 10 | 83 | 1 | 586 | 3 | 1,482 | 19 |

|     |    |   |     |    |    |   |     |    |       |    |
|-----|----|---|-----|----|----|---|-----|----|-------|----|
| 276 | 58 | 5 | 748 | 10 | 84 | 1 | 589 | 3  | 1,479 | 19 |
| 277 | 56 | 5 | 742 | 10 | 83 | 1 | 581 | 4  | 1,462 | 20 |
| 278 | 56 | 5 | 742 | 10 | 83 | 1 | 579 | 4  | 1,460 | 20 |
| 279 | 57 | 5 | 741 | 10 | 83 | 1 | 578 | 5  | 1,459 | 21 |
| 280 | 57 | 5 | 740 | 10 | 83 | 1 | 578 | 5  | 1,458 | 21 |
| 281 | 56 | 5 | 740 | 12 | 83 | 1 | 576 | 7  | 1,455 | 25 |
| 282 | 56 | 5 | 741 | 12 | 83 | 1 | 575 | 8  | 1,455 | 26 |
| 283 | 57 | 5 | 738 | 13 | 83 | 1 | 576 | 8  | 1,454 | 27 |
| 284 | 55 | 5 | 732 | 13 | 80 | 1 | 572 | 8  | 1,439 | 27 |
| 285 | 53 | 5 | 723 | 13 | 79 | 2 | 554 | 8  | 1,409 | 28 |
| 286 | 53 | 5 | 721 | 15 | 78 | 2 | 550 | 8  | 1,402 | 30 |
| 287 | 51 | 5 | 705 | 20 | 72 | 2 | 483 | 8  | 1,311 | 35 |
| 288 | 51 | 5 | 706 | 20 | 69 | 2 | 474 | 9  | 1,300 | 36 |
| 289 | 52 | 5 | 713 | 18 | 69 | 1 | 477 | 10 | 1,311 | 34 |
| 290 | 53 | 3 | 738 | 19 | 70 | 1 | 486 | 10 | 1,347 | 33 |
| 291 | 53 | 3 | 738 | 19 | 70 | 1 | 483 | 12 | 1,344 | 35 |
| 292 | 58 | 3 | 835 | 22 | 73 | 2 | 519 | 12 | 1,485 | 39 |
| 293 | 57 | 3 | 848 | 22 | 75 | 2 | 526 | 12 | 1,506 | 39 |
| 294 | 59 | 3 | 873 | 22 | 76 | 2 | 527 | 12 | 1,535 | 39 |
| 295 | 59 | 2 | 891 | 22 | 77 | 2 | 525 | 12 | 1,552 | 38 |
| 296 | 59 | 2 | 896 | 22 | 77 | 2 | 524 | 12 | 1,556 | 38 |
| 297 | 59 | 2 | 891 | 22 | 76 | 2 | 518 | 12 | 1,544 | 38 |
| 298 | 59 | 2 | 887 | 22 | 75 | 2 | 517 | 12 | 1,538 | 38 |
| 299 | 59 | 2 | 883 | 22 | 74 | 2 | 508 | 12 | 1,524 | 38 |
| 300 | 59 | 2 | 881 | 22 | 72 | 2 | 506 | 12 | 1,518 | 38 |
| 301 | 58 | 2 | 874 | 22 | 72 | 2 | 503 | 12 | 1,507 | 38 |
| 302 | 24 | 1 | 504 | 5  | 38 | 0 | 271 | 0  | 837   | 6  |
| 303 | 58 | 2 | 825 | 24 | 65 | 2 | 480 | 12 | 1,428 | 40 |
| 304 | 54 | 2 | 702 | 24 | 51 | 2 | 404 | 12 | 1,211 | 40 |
| 305 | 49 | 2 | 660 | 24 | 46 | 2 | 369 | 13 | 1,124 | 41 |
| 306 | 49 | 3 | 606 | 23 | 39 | 2 | 353 | 14 | 1,047 | 42 |
| 307 | 40 | 3 | 516 | 23 | 31 | 2 | 317 | 15 | 904   | 43 |
| 308 | 39 | 2 | 468 | 23 | 31 | 2 | 293 | 15 | 831   | 42 |
| 309 | 38 | 2 | 433 | 24 | 30 | 2 | 279 | 15 | 780   | 43 |
| 310 | 38 | 2 | 411 | 26 | 30 | 2 | 274 | 15 | 753   | 45 |
| 311 | 38 | 2 | 406 | 26 | 30 | 2 | 269 | 15 | 743   | 45 |
| 312 | 38 | 2 | 404 | 26 | 30 | 2 | 269 | 15 | 741   | 45 |
| 313 | 38 | 2 | 409 | 28 | 30 | 2 | 272 | 15 | 749   | 47 |
| 314 | 38 | 2 | 410 | 28 | 30 | 2 | 271 | 15 | 749   | 47 |
| 315 | 41 | 2 | 413 | 28 | 31 | 2 | 277 | 15 | 762   | 47 |
| 316 | 42 | 3 | 415 | 28 | 31 | 2 | 275 | 15 | 763   | 48 |



|     |    |   |     |    |    |   |     |    |       |    |
|-----|----|---|-----|----|----|---|-----|----|-------|----|
| 317 | 40 | 3 | 415 | 28 | 31 | 2 | 274 | 15 | 760   | 48 |
| 318 | 40 | 3 | 421 | 29 | 32 | 2 | 275 | 16 | 768   | 50 |
| 319 | 40 | 3 | 422 | 31 | 32 | 2 | 274 | 16 | 768   | 52 |
| 320 | 37 | 3 | 438 | 31 | 31 | 2 | 274 | 17 | 780   | 53 |
| 321 | 44 | 3 | 506 | 30 | 33 | 2 | 304 | 22 | 887   | 57 |
| 322 | 42 | 3 | 523 | 29 | 32 | 2 | 318 | 22 | 915   | 56 |
| 323 | 52 | 3 | 728 | 29 | 49 | 2 | 457 | 21 | 1,286 | 55 |
| 324 | 50 | 3 | 712 | 27 | 47 | 2 | 428 | 21 | 1,237 | 53 |
| 325 | 49 | 3 | 692 | 27 | 40 | 2 | 399 | 21 | 1,180 | 53 |
| 326 | 52 | 3 | 738 | 27 | 43 | 2 | 423 | 21 | 1,256 | 53 |
| 327 | 54 | 3 | 804 | 27 | 47 | 2 | 435 | 20 | 1,340 | 52 |
| 328 | 57 | 3 | 867 | 27 | 49 | 2 | 464 | 20 | 1,437 | 52 |
| 329 | 57 | 3 | 866 | 27 | 49 | 2 | 464 | 20 | 1,436 | 52 |
| 330 | 56 | 3 | 866 | 27 | 49 | 2 | 465 | 20 | 1,436 | 52 |
| 331 | 56 | 3 | 866 | 27 | 49 | 2 | 466 | 19 | 1,437 | 51 |
| 332 | 61 | 3 | 950 | 26 | 54 | 2 | 529 | 19 | 1,594 | 50 |
| 333 | 61 | 3 | 952 | 23 | 54 | 2 | 528 | 17 | 1,595 | 45 |
| 334 | 61 | 3 | 950 | 23 | 54 | 2 | 527 | 16 | 1,592 | 44 |
| 335 | 60 | 3 | 949 | 23 | 54 | 2 | 528 | 17 | 1,591 | 45 |
| 336 | 60 | 3 | 947 | 23 | 54 | 2 | 527 | 17 | 1,588 | 45 |
| 337 | 60 | 3 | 947 | 23 | 54 | 1 | 530 | 17 | 1,591 | 44 |
| 338 | 60 | 3 | 947 | 19 | 54 | 1 | 530 | 17 | 1,591 | 40 |
| 339 | 59 | 3 | 940 | 16 | 54 | 1 | 531 | 17 | 1,584 | 37 |
| 340 | 58 | 3 | 937 | 21 | 54 | 1 | 530 | 16 | 1,579 | 41 |
| 341 | 57 | 4 | 931 | 22 | 53 | 1 | 520 | 18 | 1,561 | 45 |
| 342 | 56 | 4 | 904 | 21 | 52 | 1 | 508 | 18 | 1,520 | 44 |
| 343 | 55 | 4 | 882 | 21 | 51 | 1 | 492 | 16 | 1,480 | 42 |
| 344 | 49 | 5 | 790 | 19 | 49 | 0 | 467 | 15 | 1,355 | 39 |
| 345 | 47 | 5 | 781 | 19 | 47 | 0 | 461 | 15 | 1,336 | 39 |
| 346 | 46 | 5 | 750 | 19 | 44 | 0 | 457 | 15 | 1,297 | 39 |
| 347 | 46 | 5 | 725 | 19 | 43 | 0 | 450 | 15 | 1,264 | 39 |
| 348 | 46 | 5 | 732 | 19 | 43 | 0 | 456 | 15 | 1,277 | 39 |
| 349 | 46 | 5 | 729 | 19 | 43 | 0 | 455 | 15 | 1,273 | 39 |
| 350 | 47 | 5 | 744 | 19 | 43 | 0 | 470 | 16 | 1,304 | 40 |
| 351 | 47 | 5 | 744 | 19 | 43 | 0 | 471 | 16 | 1,305 | 40 |
| 352 | 47 | 7 | 746 | 19 | 43 | 0 | 474 | 16 | 1,310 | 42 |
| 353 | 48 | 7 | 747 | 19 | 43 | 0 | 474 | 16 | 1,312 | 42 |
| 354 | 51 | 7 | 753 | 19 | 43 | 0 | 475 | 17 | 1,322 | 43 |
| 355 | 51 | 7 | 752 | 20 | 43 | 0 | 473 | 17 | 1,319 | 44 |
| 356 | 51 | 7 | 748 | 20 | 43 | 0 | 471 | 16 | 1,313 | 43 |
| 357 | 51 | 6 | 781 | 20 | 43 | 0 | 487 | 15 | 1,362 | 41 |

|     |    |   |     |    |    |   |     |    |       |    |
|-----|----|---|-----|----|----|---|-----|----|-------|----|
| 358 | 52 | 6 | 782 | 20 | 43 | 0 | 486 | 15 | 1,363 | 41 |
| 359 | 52 | 6 | 781 | 20 | 43 | 0 | 486 | 15 | 1,362 | 41 |
| 360 | 53 | 6 | 783 | 20 | 44 | 0 | 486 | 15 | 1,366 | 41 |
| 361 | 53 | 6 | 783 | 18 | 44 | 0 | 485 | 16 | 1,365 | 40 |
| 362 | 53 | 6 | 791 | 19 | 44 | 0 | 486 | 16 | 1,374 | 41 |
| 363 | 53 | 6 | 786 | 20 | 45 | 0 | 483 | 16 | 1,367 | 42 |
| 364 | 53 | 5 | 787 | 18 | 45 | 0 | 484 | 16 | 1,369 | 39 |
| 365 | 53 | 5 | 791 | 18 | 46 | 0 | 487 | 16 | 1,377 | 39 |
| 366 | 50 | 5 | 784 | 18 | 46 | 0 | 481 | 16 | 1,361 | 39 |
| 367 | 50 | 5 | 786 | 18 | 46 | 0 | 487 | 16 | 1,369 | 39 |
| 368 | 50 | 5 | 784 | 19 | 46 | 0 | 487 | 16 | 1,367 | 40 |
| 369 | 53 | 5 | 782 | 19 | 46 | 0 | 489 | 15 | 1,370 | 39 |
| 370 | 54 | 5 | 788 | 21 | 46 | 0 | 491 | 15 | 1,379 | 41 |
| 371 | 54 | 5 | 768 | 21 | 46 | 0 | 480 | 14 | 1,348 | 40 |
| 372 | 49 | 4 | 734 | 21 | 45 | 0 | 460 | 10 | 1,288 | 35 |
| 373 | 46 | 4 | 684 | 21 | 44 | 0 | 421 | 10 | 1,195 | 35 |
| 374 | 33 | 4 | 488 | 22 | 28 | 0 | 300 | 9  | 849   | 35 |
| 375 | 31 | 4 | 464 | 22 | 27 | 0 | 288 | 9  | 810   | 35 |
| 376 | 30 | 4 | 445 | 22 | 26 | 0 | 273 | 9  | 774   | 35 |
| 377 | 26 | 5 | 398 | 22 | 23 | 0 | 246 | 9  | 693   | 36 |
| 378 | 24 | 5 | 328 | 22 | 18 | 0 | 213 | 9  | 583   | 36 |
| 379 | 21 | 5 | 264 | 22 | 16 | 0 | 185 | 9  | 486   | 36 |
| 380 | 18 | 5 | 234 | 22 | 15 | 0 | 158 | 9  | 425   | 36 |
| 381 | 24 | 5 | 226 | 22 | 15 | 0 | 170 | 9  | 435   | 36 |
| 382 | 21 | 5 | 207 | 22 | 13 | 0 | 146 | 9  | 387   | 36 |
| 383 | 26 | 5 | 207 | 22 | 12 | 0 | 143 | 9  | 388   | 36 |
| 384 | 26 | 5 | 205 | 22 | 12 | 0 | 144 | 9  | 387   | 36 |
| 385 | 26 | 6 | 205 | 22 | 12 | 0 | 144 | 9  | 387   | 37 |
| 386 | 26 | 6 | 205 | 21 | 13 | 0 | 144 | 8  | 388   | 35 |
| 387 | 26 | 6 | 220 | 21 | 13 | 0 | 156 | 9  | 415   | 36 |
| 388 | 27 | 6 | 223 | 21 | 13 | 0 | 165 | 9  | 428   | 36 |
| 389 | 27 | 6 | 223 | 21 | 13 | 0 | 166 | 9  | 429   | 36 |
| 390 | 27 | 6 | 221 | 21 | 14 | 0 | 165 | 9  | 427   | 36 |
| 391 | 27 | 5 | 220 | 14 | 14 | 0 | 165 | 6  | 426   | 25 |
| 392 | 27 | 5 | 220 | 14 | 14 | 0 | 165 | 6  | 426   | 25 |
| 393 | 27 | 5 | 220 | 14 | 14 | 0 | 165 | 6  | 426   | 25 |
| 394 | 27 | 5 | 220 | 14 | 14 | 0 | 165 | 6  | 426   | 25 |
| 395 | 28 | 4 | 220 | 14 | 14 | 0 | 165 | 6  | 427   | 24 |
| 396 | 28 | 4 | 219 | 16 | 14 | 0 | 165 | 8  | 426   | 28 |
| 397 | 28 | 4 | 208 | 16 | 14 | 0 | 158 | 8  | 408   | 28 |
| 398 | 28 | 4 | 204 | 16 | 14 | 0 | 150 | 7  | 396   | 27 |

|     |    |   |     |    |    |   |     |    |     |    |
|-----|----|---|-----|----|----|---|-----|----|-----|----|
| 399 | 28 | 4 | 203 | 16 | 14 | 0 | 150 | 7  | 395 | 27 |
| 400 | 27 | 4 | 195 | 17 | 14 | 0 | 143 | 7  | 379 | 28 |
| 401 | 27 | 4 | 195 | 18 | 14 | 0 | 142 | 7  | 378 | 29 |
| 402 | 27 | 4 | 194 | 20 | 14 | 0 | 139 | 7  | 374 | 31 |
| 403 | 26 | 2 | 206 | 21 | 14 | 0 | 143 | 8  | 389 | 31 |
| 404 | 26 | 2 | 206 | 22 | 14 | 0 | 143 | 8  | 389 | 32 |
| 405 | 23 | 2 | 200 | 21 | 14 | 0 | 143 | 7  | 380 | 30 |
| 406 | 23 | 2 | 194 | 20 | 14 | 0 | 136 | 7  | 367 | 29 |
| 407 | 23 | 3 | 167 | 20 | 14 | 1 | 129 | 7  | 333 | 31 |
| 408 | 23 | 3 | 165 | 20 | 14 | 1 | 127 | 7  | 329 | 31 |
| 409 | 22 | 3 | 164 | 21 | 14 | 1 | 127 | 6  | 327 | 31 |
| 410 | 22 | 3 | 164 | 21 | 14 | 1 | 127 | 6  | 327 | 31 |
| 411 | 21 | 7 | 165 | 20 | 13 | 1 | 131 | 6  | 330 | 34 |
| 412 | 22 | 7 | 160 | 19 | 13 | 1 | 136 | 5  | 331 | 32 |
| 413 | 22 | 7 | 160 | 19 | 13 | 1 | 136 | 5  | 331 | 32 |
| 414 | 23 | 7 | 163 | 18 | 12 | 1 | 136 | 5  | 334 | 31 |
| 415 | 26 | 7 | 179 | 18 | 12 | 1 | 144 | 5  | 361 | 31 |
| 416 | 27 | 7 | 185 | 18 | 11 | 1 | 146 | 5  | 369 | 31 |
| 417 | 29 | 7 | 212 | 18 | 10 | 1 | 156 | 5  | 407 | 31 |
| 418 | 28 | 7 | 208 | 18 | 10 | 1 | 150 | 5  | 396 | 31 |
| 419 | 26 | 7 | 353 | 17 | 18 | 1 | 211 | 5  | 608 | 30 |
| 420 | 26 | 7 | 386 | 17 | 22 | 1 | 226 | 5  | 660 | 30 |
| 421 | 24 | 7 | 377 | 14 | 22 | 1 | 225 | 5  | 648 | 27 |
| 422 | 24 | 7 | 376 | 14 | 22 | 1 | 224 | 5  | 646 | 27 |
| 423 | 22 | 7 | 337 | 13 | 21 | 1 | 210 | 4  | 590 | 25 |
| 424 | 22 | 7 | 334 | 13 | 20 | 1 | 207 | 4  | 583 | 25 |
| 425 | 22 | 7 | 318 | 13 | 16 | 1 | 173 | 4  | 529 | 25 |
| 426 | 22 | 7 | 317 | 13 | 16 | 1 | 172 | 4  | 527 | 25 |
| 427 | 22 | 7 | 317 | 13 | 15 | 1 | 171 | 4  | 525 | 25 |
| 428 | 22 | 6 | 317 | 13 | 15 | 1 | 171 | 4  | 525 | 24 |
| 429 | 22 | 6 | 318 | 13 | 15 | 1 | 171 | 4  | 526 | 24 |
| 430 | 22 | 6 | 318 | 13 | 15 | 1 | 173 | 5  | 528 | 25 |
| 431 | 22 | 6 | 316 | 14 | 15 | 1 | 172 | 10 | 525 | 31 |
| 432 | 16 | 8 | 308 | 19 | 14 | 1 | 158 | 11 | 496 | 39 |
| 433 | 16 | 9 | 292 | 19 | 14 | 1 | 152 | 11 | 474 | 40 |
| 434 | 11 | 9 | 295 | 26 | 15 | 2 | 153 | 14 | 474 | 51 |
| 435 | 11 | 9 | 296 | 26 | 15 | 2 | 153 | 14 | 475 | 51 |
| 436 | 11 | 8 | 294 | 26 | 15 | 2 | 153 | 14 | 473 | 50 |
| 437 | 11 | 8 | 283 | 26 | 15 | 2 | 141 | 15 | 450 | 51 |
| 438 | 10 | 8 | 284 | 26 | 15 | 2 | 134 | 14 | 443 | 50 |
| 439 | 11 | 8 | 287 | 26 | 15 | 2 | 134 | 14 | 447 | 50 |

|     |    |    |     |    |    |   |     |    |     |    |
|-----|----|----|-----|----|----|---|-----|----|-----|----|
| 440 | 12 | 8  | 290 | 26 | 15 | 2 | 133 | 14 | 450 | 50 |
| 441 | 12 | 8  | 290 | 26 | 14 | 2 | 133 | 14 | 449 | 50 |
| 442 | 12 | 8  | 290 | 27 | 14 | 2 | 133 | 14 | 449 | 51 |
| 443 | 19 | 8  | 311 | 28 | 16 | 2 | 139 | 14 | 485 | 52 |
| 444 | 22 | 8  | 413 | 25 | 20 | 2 | 162 | 12 | 617 | 47 |
| 445 | 22 | 8  | 441 | 25 | 22 | 2 | 168 | 12 | 653 | 47 |
| 446 | 36 | 8  | 498 | 25 | 28 | 2 | 189 | 12 | 751 | 47 |
| 447 | 40 | 9  | 526 | 25 | 29 | 2 | 198 | 12 | 793 | 48 |
| 448 | 40 | 9  | 526 | 25 | 29 | 2 | 198 | 12 | 793 | 48 |
| 449 | 40 | 9  | 535 | 25 | 29 | 2 | 198 | 12 | 802 | 48 |
| 450 | 41 | 10 | 538 | 25 | 29 | 2 | 200 | 12 | 808 | 49 |
| 451 | 41 | 10 | 538 | 24 | 29 | 2 | 200 | 12 | 808 | 48 |
| 452 | 42 | 10 | 543 | 23 | 29 | 3 | 201 | 12 | 815 | 48 |
| 453 | 42 | 10 | 529 | 20 | 29 | 3 | 200 | 11 | 800 | 44 |
| 454 | 42 | 10 | 530 | 19 | 29 | 3 | 197 | 11 | 798 | 43 |
| 455 | 42 | 10 | 531 | 18 | 29 | 3 | 196 | 11 | 798 | 42 |
| 456 | 42 | 10 | 531 | 18 | 29 | 3 | 196 | 12 | 798 | 43 |
| 457 | 42 | 10 | 531 | 18 | 29 | 3 | 196 | 12 | 798 | 43 |
| 458 | 42 | 9  | 531 | 19 | 29 | 2 | 196 | 12 | 798 | 42 |
| 459 | 42 | 9  | 529 | 19 | 29 | 2 | 196 | 12 | 796 | 42 |
| 460 | 42 | 9  | 530 | 19 | 29 | 2 | 201 | 12 | 802 | 42 |
| 461 | 42 | 9  | 526 | 19 | 29 | 2 | 198 | 12 | 795 | 42 |
| 462 | 42 | 5  | 529 | 19 | 30 | 2 | 196 | 12 | 797 | 38 |
| 463 | 41 | 5  | 527 | 21 | 30 | 2 | 190 | 13 | 788 | 41 |
| 464 | 40 | 5  | 526 | 21 | 30 | 2 | 192 | 13 | 788 | 41 |
| 465 | 40 | 7  | 527 | 28 | 30 | 2 | 191 | 20 | 788 | 57 |
| 466 | 37 | 7  | 509 | 28 | 31 | 2 | 182 | 22 | 759 | 59 |
| 467 | 36 | 7  | 509 | 37 | 31 | 3 | 178 | 23 | 754 | 70 |
| 468 | 34 | 8  | 483 | 38 | 31 | 3 | 164 | 23 | 712 | 72 |
| 469 | 33 | 8  | 388 | 38 | 26 | 3 | 127 | 25 | 574 | 74 |
| 470 | 33 | 8  | 332 | 38 | 22 | 3 | 99  | 25 | 486 | 74 |
| 471 | 33 | 8  | 301 | 37 | 18 | 3 | 85  | 25 | 437 | 73 |
| 472 | 33 | 8  | 301 | 36 | 18 | 3 | 84  | 25 | 436 | 72 |
| 473 | 33 | 8  | 301 | 36 | 18 | 3 | 84  | 25 | 436 | 72 |
| 474 | 33 | 8  | 301 | 36 | 18 | 3 | 84  | 25 | 436 | 72 |
| 475 | 33 | 8  | 302 | 36 | 18 | 3 | 84  | 25 | 437 | 72 |
| 476 | 33 | 8  | 301 | 36 | 18 | 3 | 85  | 25 | 437 | 72 |
| 477 | 33 | 8  | 303 | 36 | 19 | 3 | 86  | 25 | 441 | 72 |
| 478 | 33 | 8  | 303 | 36 | 19 | 3 | 86  | 25 | 441 | 72 |
| 479 | 33 | 8  | 304 | 36 | 19 | 3 | 86  | 25 | 442 | 72 |
| 480 | 33 | 8  | 304 | 36 | 19 | 3 | 86  | 25 | 442 | 72 |

|     |    |   |     |    |    |   |     |    |     |    |
|-----|----|---|-----|----|----|---|-----|----|-----|----|
| 481 | 33 | 8 | 304 | 36 | 19 | 3 | 84  | 24 | 440 | 71 |
| 482 | 33 | 8 | 304 | 35 | 19 | 3 | 86  | 19 | 442 | 65 |
| 483 | 33 | 6 | 304 | 30 | 19 | 3 | 86  | 18 | 442 | 57 |
| 484 | 33 | 5 | 306 | 30 | 19 | 3 | 86  | 18 | 444 | 56 |
| 485 | 33 | 5 | 305 | 23 | 18 | 3 | 87  | 15 | 443 | 46 |
| 486 | 36 | 5 | 347 | 23 | 18 | 3 | 103 | 15 | 504 | 46 |
| 487 | 39 | 5 | 348 | 23 | 18 | 3 | 108 | 15 | 513 | 46 |
| 488 | 39 | 5 | 346 | 23 | 18 | 4 | 108 | 14 | 511 | 46 |
| 489 | 43 | 5 | 386 | 23 | 20 | 5 | 158 | 14 | 607 | 47 |
| 490 | 42 | 5 | 385 | 23 | 20 | 5 | 157 | 14 | 604 | 47 |
| 491 | 45 | 5 | 400 | 23 | 26 | 5 | 161 | 15 | 632 | 48 |
| 492 | 43 | 5 | 397 | 24 | 26 | 6 | 162 | 15 | 628 | 50 |
| 493 | 42 | 5 | 392 | 23 | 25 | 6 | 161 | 15 | 620 | 49 |
| 494 | 42 | 5 | 425 | 24 | 26 | 6 | 172 | 15 | 665 | 50 |
| 495 | 40 | 5 | 326 | 24 | 22 | 6 | 148 | 16 | 536 | 51 |
| 496 | 42 | 5 | 319 | 24 | 20 | 6 | 149 | 17 | 530 | 52 |
| 497 | 37 | 5 | 377 | 27 | 20 | 6 | 179 | 17 | 613 | 55 |
| 498 | 34 | 4 | 349 | 27 | 20 | 6 | 172 | 18 | 575 | 55 |
| 499 | 34 | 4 | 344 | 27 | 20 | 6 | 172 | 18 | 570 | 55 |
| 500 | 41 | 4 | 431 | 27 | 27 | 6 | 214 | 18 | 713 | 55 |
| 501 | 42 | 3 | 456 | 28 | 27 | 6 | 221 | 18 | 746 | 55 |
| 502 | 42 | 3 | 457 | 28 | 27 | 6 | 223 | 19 | 749 | 56 |
| 503 | 41 | 3 | 452 | 28 | 27 | 5 | 222 | 19 | 742 | 55 |
| 504 | 41 | 3 | 456 | 28 | 28 | 5 | 223 | 19 | 748 | 55 |
| 505 | 41 | 3 | 454 | 30 | 28 | 5 | 223 | 19 | 746 | 57 |
| 506 | 41 | 3 | 454 | 30 | 28 | 5 | 225 | 19 | 748 | 57 |
| 507 | 45 | 5 | 497 | 33 | 32 | 5 | 246 | 18 | 820 | 61 |
| 508 | 45 | 5 | 497 | 33 | 32 | 5 | 246 | 18 | 820 | 61 |
| 509 | 46 | 5 | 501 | 32 | 32 | 5 | 247 | 18 | 826 | 60 |
| 510 | 46 | 5 | 502 | 33 | 32 | 5 | 247 | 18 | 827 | 61 |
| 511 | 46 | 5 | 504 | 32 | 32 | 5 | 246 | 18 | 828 | 60 |
| 512 | 53 | 5 | 521 | 34 | 35 | 5 | 263 | 18 | 872 | 62 |
| 513 | 53 | 5 | 517 | 38 | 35 | 6 | 266 | 23 | 871 | 72 |
| 514 | 53 | 5 | 517 | 36 | 35 | 6 | 265 | 23 | 870 | 70 |
| 515 | 55 | 5 | 519 | 41 | 35 | 6 | 268 | 25 | 877 | 77 |
| 516 | 60 | 3 | 533 | 37 | 36 | 6 | 282 | 18 | 911 | 64 |
| 517 | 60 | 3 | 534 | 37 | 35 | 6 | 282 | 16 | 911 | 62 |
| 518 | 60 | 3 | 524 | 30 | 35 | 5 | 282 | 16 | 901 | 54 |
| 519 | 61 | 2 | 531 | 30 | 35 | 5 | 288 | 14 | 915 | 51 |
| 520 | 61 | 2 | 531 | 30 | 35 | 5 | 287 | 14 | 914 | 51 |
| 521 | 65 | 2 | 563 | 31 | 37 | 5 | 294 | 14 | 959 | 52 |

|     |    |   |     |    |    |   |     |    |       |     |
|-----|----|---|-----|----|----|---|-----|----|-------|-----|
| 522 | 70 | 2 | 580 | 31 | 37 | 6 | 300 | 14 | 987   | 53  |
| 523 | 70 | 2 | 580 | 32 | 37 | 6 | 300 | 15 | 987   | 55  |
| 524 | 70 | 3 | 584 | 34 | 37 | 6 | 302 | 20 | 993   | 63  |
| 525 | 70 | 4 | 596 | 54 | 38 | 6 | 305 | 25 | 1,009 | 89  |
| 526 | 70 | 4 | 607 | 56 | 39 | 7 | 315 | 26 | 1,031 | 93  |
| 527 | 70 | 4 | 605 | 57 | 39 | 7 | 314 | 26 | 1,028 | 94  |
| 528 | 70 | 4 | 607 | 57 | 38 | 7 | 315 | 26 | 1,030 | 94  |
| 529 | 70 | 4 | 602 | 59 | 38 | 7 | 315 | 26 | 1,025 | 96  |
| 530 | 70 | 4 | 608 | 59 | 40 | 7 | 318 | 26 | 1,036 | 96  |
| 531 | 70 | 4 | 609 | 59 | 40 | 7 | 318 | 26 | 1,037 | 96  |
| 532 | 70 | 4 | 610 | 59 | 40 | 7 | 322 | 27 | 1,042 | 97  |
| 533 | 71 | 4 | 617 | 59 | 40 | 7 | 326 | 27 | 1,054 | 97  |
| 534 | 72 | 4 | 617 | 59 | 40 | 7 | 343 | 27 | 1,072 | 97  |
| 535 | 72 | 4 | 622 | 59 | 40 | 7 | 345 | 27 | 1,079 | 97  |
| 536 | 71 | 5 | 604 | 59 | 40 | 6 | 334 | 27 | 1,049 | 97  |
| 537 | 69 | 5 | 578 | 61 | 40 | 6 | 325 | 27 | 1,012 | 99  |
| 538 | 66 | 5 | 575 | 61 | 40 | 4 | 319 | 27 | 1,000 | 97  |
| 539 | 66 | 5 | 570 | 64 | 40 | 4 | 319 | 27 | 995   | 100 |
| 540 | 61 | 5 | 529 | 64 | 38 | 4 | 269 | 27 | 897   | 100 |
| 541 | 57 | 5 | 513 | 64 | 32 | 4 | 264 | 26 | 866   | 99  |
| 542 | 57 | 5 | 515 | 63 | 32 | 3 | 265 | 26 | 869   | 97  |
| 543 | 57 | 5 | 515 | 64 | 31 | 3 | 266 | 28 | 869   | 100 |
| 544 | 57 | 6 | 494 | 64 | 31 | 3 | 261 | 29 | 843   | 102 |
| 545 | 54 | 6 | 470 | 63 | 30 | 3 | 254 | 28 | 808   | 100 |
| 546 | 55 | 6 | 464 | 65 | 30 | 3 | 256 | 28 | 805   | 102 |
| 547 | 54 | 6 | 456 | 65 | 29 | 3 | 250 | 28 | 789   | 102 |
| 548 | 44 | 6 | 341 | 62 | 21 | 3 | 197 | 29 | 603   | 100 |
| 549 | 37 | 6 | 309 | 62 | 15 | 3 | 170 | 28 | 531   | 99  |
| 550 | 36 | 6 | 288 | 62 | 14 | 3 | 159 | 28 | 497   | 99  |
| 551 | 36 | 6 | 280 | 63 | 14 | 3 | 158 | 28 | 488   | 100 |
| 552 | 35 | 7 | 261 | 62 | 14 | 3 | 152 | 28 | 462   | 100 |
| 553 | 36 | 7 | 303 | 62 | 13 | 3 | 154 | 27 | 506   | 99  |
| 554 | 36 | 7 | 304 | 62 | 13 | 3 | 155 | 27 | 508   | 99  |
| 555 | 40 | 7 | 337 | 60 | 17 | 3 | 187 | 27 | 581   | 97  |
| 556 | 40 | 7 | 335 | 60 | 17 | 3 | 185 | 27 | 577   | 97  |
| 557 | 38 | 7 | 296 | 60 | 13 | 3 | 169 | 27 | 516   | 97  |
| 558 | 37 | 5 | 311 | 57 | 13 | 3 | 168 | 27 | 529   | 92  |
| 559 | 41 | 5 | 316 | 57 | 14 | 3 | 171 | 27 | 542   | 92  |
| 560 | 40 | 5 | 340 | 57 | 14 | 3 | 172 | 27 | 566   | 92  |
| 561 | 40 | 5 | 339 | 57 | 14 | 3 | 171 | 27 | 564   | 92  |
| 562 | 34 | 5 | 329 | 57 | 12 | 3 | 161 | 27 | 536   | 92  |

|     |    |   |     |    |    |   |     |    |     |     |
|-----|----|---|-----|----|----|---|-----|----|-----|-----|
| 563 | 33 | 5 | 332 | 51 | 12 | 2 | 158 | 22 | 535 | 80  |
| 564 | 33 | 5 | 330 | 51 | 12 | 2 | 155 | 21 | 530 | 79  |
| 565 | 32 | 5 | 332 | 47 | 13 | 2 | 152 | 19 | 529 | 73  |
| 566 | 31 | 5 | 332 | 47 | 13 | 2 | 152 | 19 | 528 | 73  |
| 567 | 26 | 5 | 316 | 44 | 12 | 3 | 137 | 19 | 491 | 71  |
| 568 | 26 | 5 | 333 | 42 | 13 | 3 | 141 | 19 | 513 | 69  |
| 569 | 26 | 5 | 335 | 42 | 13 | 3 | 143 | 19 | 517 | 69  |
| 570 | 26 | 5 | 326 | 41 | 13 | 3 | 138 | 19 | 503 | 68  |
| 571 | 24 | 5 | 300 | 41 | 11 | 3 | 133 | 19 | 468 | 68  |
| 572 | 20 | 5 | 287 | 40 | 11 | 3 | 127 | 19 | 445 | 67  |
| 573 | 19 | 6 | 299 | 40 | 11 | 2 | 138 | 19 | 467 | 67  |
| 574 | 19 | 6 | 300 | 40 | 11 | 2 | 141 | 20 | 471 | 68  |
| 575 | 21 | 5 | 315 | 39 | 12 | 2 | 153 | 15 | 501 | 61  |
| 576 | 24 | 4 | 318 | 19 | 11 | 2 | 156 | 9  | 509 | 34  |
| 577 | 24 | 4 | 309 | 16 | 10 | 1 | 148 | 9  | 491 | 30  |
| 578 | 24 | 4 | 311 | 16 | 10 | 1 | 148 | 9  | 493 | 30  |
| 579 | 24 | 4 | 307 | 21 | 10 | 1 | 147 | 10 | 488 | 36  |
| 580 | 24 | 5 | 304 | 24 | 8  | 1 | 142 | 11 | 478 | 41  |
| 581 | 24 | 5 | 304 | 33 | 8  | 1 | 142 | 11 | 478 | 50  |
| 582 | 24 | 5 | 308 | 33 | 8  | 1 | 139 | 12 | 479 | 51  |
| 583 | 23 | 5 | 309 | 34 | 9  | 1 | 143 | 12 | 484 | 52  |
| 584 | 23 | 5 | 310 | 34 | 9  | 1 | 135 | 12 | 477 | 52  |
| 585 | 23 | 5 | 311 | 34 | 9  | 1 | 128 | 12 | 471 | 52  |
| 586 | 23 | 5 | 303 | 34 | 9  | 1 | 124 | 12 | 459 | 52  |
| 587 | 23 | 4 | 303 | 34 | 9  | 1 | 124 | 12 | 459 | 51  |
| 588 | 23 | 5 | 311 | 34 | 11 | 1 | 127 | 13 | 472 | 53  |
| 589 | 23 | 5 | 311 | 34 | 11 | 1 | 127 | 13 | 472 | 53  |
| 590 | 24 | 5 | 317 | 31 | 11 | 1 | 126 | 14 | 478 | 51  |
| 591 | 24 | 5 | 317 | 31 | 11 | 1 | 126 | 14 | 478 | 51  |
| 592 | 25 | 5 | 334 | 35 | 11 | 1 | 129 | 14 | 499 | 55  |
| 593 | 25 | 5 | 331 | 35 | 11 | 2 | 126 | 15 | 493 | 57  |
| 594 | 25 | 6 | 334 | 41 | 11 | 3 | 125 | 19 | 495 | 69  |
| 595 | 25 | 8 | 334 | 73 | 11 | 6 | 125 | 50 | 495 | 137 |
| 596 | 23 | 8 | 334 | 73 | 11 | 6 | 125 | 50 | 493 | 137 |
| 597 | 24 | 8 | 377 | 72 | 11 | 7 | 141 | 50 | 553 | 137 |
| 598 | 23 | 8 | 375 | 75 | 11 | 7 | 141 | 50 | 550 | 140 |
| 599 | 22 | 8 | 373 | 76 | 11 | 7 | 138 | 50 | 544 | 141 |
| 600 | 22 | 8 | 345 | 77 | 11 | 7 | 135 | 50 | 513 | 142 |
| 601 | 22 | 8 | 335 | 77 | 11 | 7 | 130 | 50 | 498 | 142 |
| 602 | 29 | 8 | 346 | 78 | 12 | 7 | 134 | 50 | 521 | 143 |
| 603 | 30 | 7 | 345 | 80 | 12 | 7 | 134 | 51 | 521 | 145 |

|     |    |   |     |    |    |   |     |    |     |     |
|-----|----|---|-----|----|----|---|-----|----|-----|-----|
| 604 | 31 | 7 | 312 | 80 | 12 | 7 | 135 | 52 | 490 | 146 |
| 605 | 31 | 7 | 310 | 81 | 12 | 7 | 134 | 53 | 487 | 148 |
| 606 | 29 | 7 | 295 | 81 | 9  | 7 | 106 | 53 | 439 | 148 |
| 607 | 29 | 7 | 291 | 81 | 9  | 7 | 105 | 53 | 434 | 148 |
| 608 | 31 | 7 | 289 | 81 | 9  | 7 | 105 | 53 | 434 | 148 |
| 609 | 30 | 7 | 280 | 82 | 9  | 7 | 105 | 53 | 424 | 149 |
| 610 | 26 | 7 | 274 | 82 | 8  | 7 | 101 | 53 | 409 | 149 |
| 611 | 26 | 7 | 278 | 82 | 8  | 7 | 100 | 53 | 412 | 149 |
| 612 | 26 | 7 | 297 | 82 | 10 | 7 | 107 | 54 | 440 | 150 |
| 613 | 26 | 7 | 297 | 84 | 10 | 7 | 103 | 55 | 436 | 153 |
| 614 | 27 | 7 | 292 | 84 | 10 | 7 | 105 | 56 | 434 | 154 |
| 615 | 27 | 7 | 292 | 86 | 10 | 7 | 105 | 58 | 434 | 158 |
| 616 | 27 | 7 | 287 | 85 | 9  | 7 | 105 | 59 | 428 | 158 |
| 617 | 27 | 7 | 275 | 85 | 8  | 7 | 101 | 59 | 411 | 158 |
| 618 | 27 | 7 | 272 | 85 | 8  | 6 | 101 | 59 | 408 | 157 |
| 619 | 27 | 7 | 269 | 86 | 8  | 6 | 101 | 58 | 405 | 157 |
| 620 | 28 | 7 | 274 | 86 | 8  | 6 | 103 | 58 | 413 | 157 |
| 621 | 27 | 7 | 274 | 87 | 8  | 6 | 103 | 58 | 412 | 158 |
| 622 | 25 | 7 | 266 | 91 | 8  | 6 | 99  | 58 | 398 | 162 |
| 623 | 25 | 7 | 263 | 91 | 8  | 6 | 95  | 58 | 391 | 162 |
| 624 | 25 | 6 | 252 | 90 | 8  | 6 | 90  | 56 | 375 | 158 |
| 625 | 25 | 6 | 250 | 91 | 8  | 6 | 85  | 56 | 368 | 159 |
| 626 | 25 | 6 | 247 | 91 | 7  | 6 | 73  | 58 | 352 | 161 |
| 627 | 22 | 6 | 237 | 91 | 7  | 6 | 67  | 57 | 333 | 160 |
| 628 | 22 | 7 | 238 | 91 | 7  | 6 | 68  | 58 | 335 | 162 |
| 629 | 22 | 7 | 237 | 84 | 7  | 6 | 68  | 56 | 334 | 153 |
| 630 | 23 | 6 | 247 | 81 | 7  | 6 | 69  | 56 | 346 | 149 |
| 631 | 28 | 6 | 251 | 72 | 7  | 6 | 69  | 56 | 355 | 140 |
| 632 | 28 | 6 | 255 | 71 | 7  | 6 | 69  | 55 | 359 | 138 |
| 633 | 28 | 6 | 256 | 72 | 7  | 6 | 71  | 55 | 362 | 139 |
| 634 | 28 | 6 | 248 | 72 | 6  | 6 | 63  | 54 | 345 | 138 |
| 635 | 27 | 7 | 243 | 72 | 6  | 6 | 63  | 54 | 339 | 139 |
| 636 | 28 | 7 | 243 | 72 | 6  | 6 | 61  | 54 | 338 | 139 |
| 637 | 28 | 7 | 246 | 72 | 6  | 6 | 61  | 54 | 341 | 139 |
| 638 | 28 | 6 | 244 | 70 | 4  | 6 | 60  | 54 | 336 | 136 |
| 639 | 28 | 6 | 241 | 70 | 4  | 6 | 58  | 54 | 331 | 136 |
| 640 | 27 | 6 | 240 | 70 | 4  | 6 | 59  | 53 | 330 | 135 |
| 641 | 27 | 6 | 240 | 70 | 4  | 6 | 59  | 53 | 330 | 135 |
| 642 | 27 | 6 | 237 | 70 | 4  | 6 | 60  | 53 | 328 | 135 |
| 643 | 27 | 6 | 226 | 66 | 4  | 6 | 58  | 53 | 315 | 131 |
| 644 | 27 | 6 | 223 | 66 | 4  | 6 | 58  | 52 | 312 | 130 |



|     |    |   |     |    |   |   |    |    |     |    |
|-----|----|---|-----|----|---|---|----|----|-----|----|
| 645 | 28 | 2 | 198 | 27 | 4 | 2 | 50 | 16 | 280 | 47 |
| 646 | 28 | 2 | 209 | 29 | 4 | 2 | 52 | 17 | 293 | 50 |
| 647 | 27 | 2 | 205 | 28 | 4 | 2 | 41 | 17 | 277 | 49 |
| 648 | 27 | 2 | 206 | 24 | 4 | 1 | 43 | 16 | 280 | 43 |
| 649 | 28 | 2 | 215 | 24 | 4 | 1 | 43 | 17 | 290 | 44 |
| 650 | 32 | 2 | 233 | 24 | 4 | 1 | 51 | 18 | 320 | 45 |
| 651 | 37 | 2 | 259 | 26 | 5 | 1 | 51 | 18 | 352 | 47 |
| 652 | 33 | 2 | 252 | 26 | 4 | 1 | 50 | 18 | 339 | 47 |
| 653 | 30 | 2 | 248 | 24 | 4 | 1 | 49 | 18 | 331 | 45 |
| 654 | 29 | 2 | 245 | 22 | 4 | 1 | 47 | 16 | 325 | 41 |
| 655 | 28 | 2 | 246 | 21 | 4 | 1 | 45 | 15 | 323 | 39 |
| 656 | 28 | 2 | 248 | 21 | 4 | 1 | 47 | 15 | 327 | 39 |
| 657 | 24 | 2 | 227 | 23 | 3 | 1 | 42 | 15 | 296 | 41 |
| 658 | 24 | 2 | 227 | 23 | 3 | 1 | 42 | 16 | 296 | 42 |
| 659 | 24 | 3 | 228 | 26 | 3 | 1 | 43 | 24 | 298 | 54 |
| 660 | 24 | 3 | 228 | 29 | 3 | 1 | 44 | 25 | 299 | 58 |
| 661 | 24 | 3 | 227 | 29 | 3 | 2 | 43 | 25 | 297 | 59 |
| 662 | 24 | 3 | 193 | 28 | 3 | 2 | 42 | 25 | 262 | 58 |
| 663 | 24 | 3 | 173 | 30 | 1 | 2 | 35 | 23 | 233 | 58 |
| 664 | 24 | 3 | 170 | 29 | 1 | 2 | 35 | 23 | 230 | 57 |
| 665 | 23 | 3 | 168 | 32 | 1 | 2 | 33 | 24 | 225 | 61 |
| 666 | 23 | 3 | 168 | 30 | 1 | 2 | 33 | 22 | 225 | 57 |
| 667 | 23 | 3 | 168 | 30 | 1 | 2 | 34 | 21 | 226 | 56 |
| 668 | 23 | 3 | 168 | 30 | 1 | 2 | 34 | 21 | 226 | 56 |
| 669 | 23 | 3 | 170 | 29 | 1 | 2 | 34 | 21 | 228 | 55 |
| 670 | 23 | 3 | 171 | 29 | 1 | 2 | 35 | 21 | 230 | 55 |
| 671 | 22 | 3 | 164 | 29 | 1 | 2 | 30 | 21 | 217 | 55 |
| 672 | 24 | 3 | 181 | 24 | 1 | 2 | 33 | 22 | 239 | 51 |
| 673 | 24 | 3 | 181 | 25 | 1 | 2 | 33 | 22 | 239 | 52 |
| 674 | 24 | 3 | 179 | 25 | 1 | 2 | 32 | 22 | 236 | 52 |
| 675 | 25 | 4 | 189 | 24 | 1 | 2 | 33 | 22 | 248 | 52 |
| 676 | 25 | 4 | 186 | 24 | 1 | 2 | 33 | 22 | 245 | 52 |
| 677 | 23 | 4 | 168 | 25 | 1 | 2 | 33 | 24 | 225 | 55 |
| 678 | 23 | 5 | 169 | 26 | 1 | 2 | 34 | 27 | 227 | 60 |
| 679 | 23 | 4 | 166 | 33 | 1 | 2 | 33 | 30 | 223 | 69 |
| 680 | 23 | 4 | 165 | 34 | 1 | 2 | 33 | 31 | 222 | 71 |
| 681 | 22 | 5 | 156 | 34 | 1 | 2 | 32 | 32 | 211 | 73 |
| 682 | 17 | 5 | 153 | 39 | 1 | 2 | 32 | 32 | 203 | 78 |
| 683 | 17 | 5 | 149 | 39 | 1 | 2 | 32 | 32 | 199 | 78 |
| 684 | 17 | 5 | 149 | 40 | 2 | 2 | 33 | 32 | 201 | 79 |
| 685 | 18 | 5 | 175 | 45 | 2 | 2 | 35 | 35 | 230 | 87 |

|     |    |    |     |     |    |   |     |    |     |     |
|-----|----|----|-----|-----|----|---|-----|----|-----|-----|
| 686 | 21 | 4  | 197 | 46  | 2  | 2 | 41  | 35 | 261 | 87  |
| 687 | 21 | 4  | 195 | 46  | 2  | 2 | 41  | 35 | 259 | 87  |
| 688 | 21 | 4  | 208 | 48  | 2  | 2 | 48  | 35 | 279 | 89  |
| 689 | 25 | 6  | 241 | 51  | 3  | 2 | 61  | 36 | 330 | 95  |
| 690 | 25 | 7  | 241 | 51  | 3  | 2 | 63  | 36 | 332 | 96  |
| 691 | 26 | 7  | 237 | 52  | 3  | 2 | 63  | 38 | 329 | 99  |
| 692 | 26 | 7  | 237 | 52  | 3  | 2 | 63  | 38 | 329 | 99  |
| 693 | 25 | 7  | 235 | 54  | 3  | 2 | 61  | 38 | 324 | 101 |
| 694 | 26 | 7  | 236 | 54  | 3  | 1 | 61  | 38 | 326 | 100 |
| 695 | 27 | 7  | 243 | 56  | 3  | 2 | 64  | 40 | 337 | 105 |
| 696 | 26 | 7  | 242 | 59  | 3  | 2 | 64  | 42 | 335 | 110 |
| 697 | 26 | 7  | 230 | 63  | 3  | 2 | 62  | 44 | 321 | 116 |
| 698 | 26 | 9  | 225 | 68  | 3  | 2 | 65  | 52 | 319 | 131 |
| 699 | 26 | 9  | 223 | 69  | 3  | 2 | 63  | 53 | 315 | 133 |
| 700 | 25 | 9  | 217 | 70  | 3  | 2 | 63  | 52 | 308 | 133 |
| 701 | 21 | 9  | 202 | 70  | 3  | 2 | 57  | 52 | 283 | 133 |
| 702 | 16 | 10 | 176 | 69  | 2  | 2 | 58  | 53 | 252 | 134 |
| 703 | 16 | 10 | 174 | 69  | 2  | 2 | 57  | 56 | 249 | 137 |
| 704 | 16 | 14 | 173 | 76  | 2  | 2 | 57  | 65 | 248 | 157 |
| 705 | 16 | 14 | 173 | 79  | 2  | 2 | 57  | 65 | 248 | 160 |
| 706 | 18 | 15 | 177 | 80  | 3  | 2 | 69  | 65 | 267 | 162 |
| 707 | 18 | 15 | 175 | 80  | 3  | 2 | 68  | 65 | 264 | 162 |
| 708 | 18 | 15 | 175 | 79  | 4  | 2 | 69  | 64 | 266 | 160 |
| 709 | 18 | 15 | 175 | 79  | 4  | 2 | 69  | 65 | 266 | 161 |
| 710 | 18 | 14 | 177 | 76  | 4  | 2 | 72  | 57 | 271 | 149 |
| 711 | 18 | 14 | 195 | 72  | 4  | 2 | 93  | 56 | 310 | 144 |
| 712 | 22 | 14 | 219 | 73  | 5  | 1 | 104 | 56 | 350 | 144 |
| 713 | 23 | 14 | 231 | 73  | 7  | 1 | 122 | 56 | 383 | 144 |
| 714 | 24 | 14 | 242 | 68  | 8  | 1 | 125 | 54 | 399 | 137 |
| 715 | 26 | 14 | 259 | 68  | 8  | 1 | 147 | 54 | 440 | 137 |
| 716 | 26 | 14 | 259 | 69  | 8  | 1 | 147 | 54 | 440 | 138 |
| 717 | 32 | 15 | 291 | 70  | 10 | 2 | 177 | 54 | 510 | 141 |
| 718 | 32 | 15 | 295 | 78  | 10 | 2 | 181 | 58 | 518 | 153 |
| 719 | 32 | 15 | 298 | 81  | 11 | 2 | 181 | 60 | 522 | 158 |
| 720 | 32 | 15 | 296 | 89  | 11 | 2 | 182 | 61 | 521 | 167 |
| 721 | 32 | 15 | 296 | 89  | 11 | 2 | 181 | 62 | 520 | 168 |
| 722 | 31 | 15 | 284 | 91  | 11 | 2 | 182 | 65 | 508 | 173 |
| 723 | 30 | 15 | 291 | 94  | 11 | 2 | 184 | 70 | 516 | 181 |
| 724 | 29 | 17 | 286 | 95  | 12 | 2 | 185 | 72 | 512 | 186 |
| 725 | 32 | 18 | 291 | 103 | 13 | 3 | 195 | 80 | 531 | 204 |
| 726 | 32 | 19 | 296 | 109 | 13 | 3 | 195 | 83 | 536 | 214 |

|     |    |    |     |     |    |   |     |     |     |     |
|-----|----|----|-----|-----|----|---|-----|-----|-----|-----|
| 727 | 32 | 19 | 296 | 112 | 13 | 3 | 197 | 83  | 538 | 217 |
| 728 | 32 | 24 | 296 | 115 | 13 | 3 | 197 | 81  | 538 | 223 |
| 729 | 32 | 23 | 295 | 114 | 13 | 4 | 196 | 77  | 536 | 218 |
| 730 | 38 | 23 | 355 | 107 | 15 | 4 | 230 | 73  | 638 | 207 |
| 731 | 39 | 23 | 376 | 106 | 16 | 4 | 246 | 73  | 677 | 206 |
| 732 | 39 | 23 | 375 | 120 | 16 | 4 | 246 | 83  | 676 | 230 |
| 733 | 39 | 23 | 372 | 115 | 16 | 4 | 246 | 85  | 673 | 227 |
| 734 | 40 | 26 | 384 | 134 | 16 | 4 | 252 | 96  | 692 | 260 |
| 735 | 40 | 27 | 382 | 135 | 16 | 4 | 251 | 100 | 689 | 266 |
| 736 | 38 | 29 | 357 | 133 | 16 | 4 | 249 | 97  | 660 | 263 |
| 737 | 35 | 29 | 335 | 133 | 16 | 4 | 242 | 97  | 628 | 263 |
| 738 | 35 | 29 | 322 | 133 | 16 | 4 | 236 | 97  | 609 | 263 |
| 739 | 31 | 27 | 297 | 128 | 16 | 4 | 223 | 96  | 567 | 255 |
| 740 | 31 | 27 | 288 | 129 | 15 | 4 | 223 | 96  | 557 | 256 |
| 741 | 31 | 28 | 288 | 131 | 15 | 4 | 221 | 97  | 555 | 260 |
| 742 | 33 | 28 | 291 | 133 | 15 | 4 | 221 | 95  | 560 | 260 |
| 743 | 33 | 28 | 290 | 137 | 15 | 4 | 221 | 96  | 559 | 265 |
| 744 | 34 | 28 | 290 | 142 | 16 | 6 | 221 | 96  | 561 | 272 |
| 745 | 33 | 28 | 289 | 145 | 16 | 6 | 222 | 97  | 560 | 276 |
| 746 | 35 | 30 | 311 | 147 | 16 | 6 | 243 | 96  | 605 | 279 |
| 747 | 35 | 32 | 305 | 158 | 16 | 8 | 241 | 101 | 597 | 299 |
| 748 | 35 | 32 | 302 | 158 | 16 | 8 | 240 | 97  | 593 | 295 |
| 749 | 35 | 30 | 302 | 153 | 16 | 8 | 246 | 89  | 599 | 280 |
| 750 | 38 | 33 | 313 | 159 | 17 | 8 | 258 | 89  | 626 | 289 |
| 751 | 38 | 33 | 315 | 157 | 18 | 8 | 258 | 88  | 629 | 286 |
| 752 | 43 | 33 | 322 | 156 | 18 | 8 | 264 | 88  | 647 | 285 |
| 753 | 41 | 32 | 323 | 155 | 17 | 8 | 255 | 84  | 636 | 279 |
| 754 | 42 | 32 | 322 | 155 | 18 | 8 | 260 | 86  | 642 | 281 |
| 755 | 42 | 28 | 324 | 145 | 18 | 8 | 265 | 80  | 649 | 261 |
| 756 | 41 | 28 | 324 | 145 | 18 | 8 | 264 | 81  | 647 | 262 |
| 757 | 46 | 27 | 395 | 144 | 27 | 8 | 306 | 81  | 774 | 260 |
| 758 | 47 | 27 | 398 | 143 | 27 | 8 | 308 | 81  | 780 | 259 |
| 759 | 50 | 27 | 434 | 143 | 31 | 8 | 340 | 81  | 855 | 259 |
| 760 | 51 | 27 | 451 | 143 | 32 | 8 | 362 | 81  | 896 | 259 |
| 761 | 51 | 27 | 444 | 143 | 32 | 8 | 357 | 81  | 884 | 259 |
| 762 | 47 | 27 | 406 | 142 | 31 | 8 | 328 | 82  | 812 | 259 |
| 763 | 47 | 27 | 407 | 143 | 31 | 8 | 324 | 82  | 809 | 260 |
| 764 | 46 | 27 | 395 | 143 | 29 | 8 | 309 | 82  | 779 | 260 |
| 765 | 45 | 27 | 383 | 146 | 28 | 8 | 309 | 82  | 765 | 263 |
| 766 | 43 | 27 | 367 | 146 | 28 | 8 | 287 | 82  | 725 | 263 |
| 767 | 37 | 26 | 335 | 144 | 26 | 7 | 257 | 82  | 655 | 259 |

|     |    |    |     |     |    |    |     |    |     |     |
|-----|----|----|-----|-----|----|----|-----|----|-----|-----|
| 768 | 37 | 26 | 338 | 136 | 26 | 7  | 255 | 80 | 656 | 249 |
| 769 | 37 | 26 | 337 | 136 | 26 | 7  | 254 | 80 | 654 | 249 |
| 770 | 37 | 26 | 337 | 125 | 25 | 7  | 255 | 77 | 654 | 235 |
| 771 | 37 | 26 | 354 | 120 | 25 | 8  | 257 | 67 | 673 | 221 |
| 772 | 37 | 26 | 360 | 120 | 25 | 8  | 261 | 67 | 683 | 221 |
| 773 | 38 | 26 | 373 | 120 | 25 | 8  | 267 | 67 | 703 | 221 |
| 774 | 38 | 24 | 361 | 118 | 25 | 8  | 263 | 65 | 687 | 215 |
| 775 | 38 | 24 | 359 | 119 | 24 | 8  | 263 | 66 | 684 | 217 |
| 776 | 35 | 23 | 362 | 118 | 23 | 8  | 264 | 69 | 684 | 218 |
| 777 | 35 | 21 | 357 | 113 | 23 | 8  | 264 | 70 | 679 | 212 |
| 778 | 35 | 22 | 361 | 115 | 25 | 8  | 269 | 73 | 690 | 218 |
| 779 | 34 | 17 | 348 | 116 | 25 | 9  | 266 | 75 | 673 | 217 |
| 780 | 30 | 18 | 306 | 117 | 23 | 8  | 237 | 74 | 596 | 217 |
| 781 | 29 | 18 | 290 | 120 | 22 | 8  | 222 | 78 | 563 | 224 |
| 782 | 28 | 18 | 283 | 120 | 22 | 8  | 218 | 78 | 551 | 224 |
| 783 | 28 | 17 | 284 | 106 | 23 | 8  | 218 | 67 | 553 | 198 |
| 784 | 28 | 18 | 285 | 111 | 24 | 10 | 218 | 78 | 555 | 217 |
| 785 | 28 | 15 | 283 | 93  | 23 | 10 | 217 | 70 | 551 | 188 |
| 786 | 28 | 15 | 282 | 94  | 23 | 11 | 217 | 76 | 550 | 196 |
| 787 | 28 | 13 | 281 | 91  | 23 | 11 | 217 | 76 | 549 | 191 |
| 788 | 28 | 13 | 297 | 90  | 23 | 12 | 221 | 76 | 569 | 191 |
| 789 | 30 | 15 | 302 | 96  | 23 | 12 | 223 | 77 | 578 | 200 |
| 790 | 30 | 15 | 302 | 96  | 23 | 12 | 223 | 77 | 578 | 200 |
| 791 | 30 | 15 | 302 | 96  | 23 | 12 | 229 | 78 | 584 | 201 |
| 792 | 30 | 14 | 303 | 95  | 23 | 12 | 228 | 77 | 584 | 198 |
| 793 | 27 | 14 | 302 | 93  | 24 | 12 | 229 | 77 | 582 | 196 |
| 794 | 27 | 14 | 302 | 82  | 23 | 10 | 228 | 77 | 580 | 183 |
| 795 | 26 | 14 | 304 | 80  | 23 | 10 | 229 | 77 | 582 | 181 |
| 796 | 26 | 14 | 305 | 80  | 23 | 10 | 229 | 78 | 583 | 182 |
| 797 | 23 | 12 | 279 | 77  | 23 | 9  | 205 | 77 | 530 | 175 |
| 798 | 23 | 10 | 285 | 58  | 23 | 7  | 202 | 69 | 533 | 144 |
| 799 | 23 | 10 | 287 | 58  | 23 | 7  | 204 | 69 | 537 | 144 |
| 800 | 23 | 10 | 286 | 58  | 23 | 7  | 205 | 69 | 537 | 144 |
| 801 | 20 | 7  | 275 | 53  | 22 | 7  | 193 | 69 | 510 | 136 |
| 802 | 23 | 7  | 275 | 55  | 21 | 7  | 201 | 69 | 520 | 138 |
| 803 | 18 | 7  | 265 | 58  | 21 | 7  | 191 | 70 | 495 | 142 |
| 804 | 20 | 7  | 262 | 59  | 21 | 7  | 192 | 71 | 495 | 144 |
| 805 | 19 | 7  | 263 | 71  | 20 | 7  | 188 | 69 | 490 | 154 |
| 806 | 19 | 7  | 261 | 74  | 20 | 7  | 184 | 68 | 484 | 156 |
| 807 | 15 | 8  | 248 | 77  | 20 | 7  | 178 | 68 | 461 | 160 |
| 808 | 14 | 8  | 188 | 81  | 11 | 7  | 142 | 69 | 355 | 165 |

|     |    |    |     |    |    |   |     |    |       |     |
|-----|----|----|-----|----|----|---|-----|----|-------|-----|
| 809 | 13 | 9  | 185 | 83 | 11 | 8 | 139 | 70 | 348   | 170 |
| 810 | 10 | 9  | 148 | 88 | 6  | 8 | 105 | 69 | 269   | 174 |
| 811 | 9  | 9  | 132 | 91 | 5  | 8 | 85  | 71 | 231   | 179 |
| 812 | 9  | 9  | 133 | 91 | 5  | 8 | 83  | 77 | 230   | 185 |
| 813 | 9  | 9  | 133 | 91 | 5  | 8 | 84  | 76 | 231   | 184 |
| 814 | 9  | 9  | 132 | 90 | 5  | 8 | 84  | 76 | 230   | 183 |
| 815 | 9  | 9  | 136 | 92 | 5  | 8 | 84  | 76 | 234   | 185 |
| 816 | 9  | 9  | 136 | 88 | 5  | 8 | 84  | 78 | 234   | 183 |
| 817 | 9  | 9  | 139 | 88 | 5  | 8 | 82  | 78 | 235   | 183 |
| 818 | 9  | 9  | 139 | 89 | 5  | 8 | 82  | 79 | 235   | 185 |
| 819 | 9  | 9  | 134 | 89 | 5  | 8 | 82  | 77 | 230   | 183 |
| 820 | 9  | 10 | 137 | 89 | 7  | 8 | 82  | 77 | 235   | 184 |
| 821 | 9  | 10 | 136 | 89 | 7  | 8 | 80  | 77 | 232   | 184 |
| 822 | 9  | 10 | 119 | 89 | 7  | 8 | 78  | 77 | 213   | 184 |
| 823 | 9  | 10 | 112 | 89 | 7  | 8 | 75  | 77 | 203   | 184 |
| 824 | 9  | 10 | 102 | 89 | 7  | 8 | 69  | 77 | 187   | 184 |
| 825 | 9  | 10 | 116 | 81 | 7  | 7 | 70  | 65 | 202   | 163 |
| 826 | 15 | 10 | 152 | 84 | 10 | 7 | 80  | 65 | 257   | 166 |
| 827 | 15 | 10 | 144 | 84 | 10 | 7 | 70  | 65 | 239   | 166 |
| 828 | 15 | 10 | 142 | 86 | 10 | 7 | 70  | 62 | 237   | 165 |
| 829 | 28 | 9  | 361 | 81 | 20 | 7 | 235 | 59 | 644   | 156 |
| 830 | 28 | 9  | 361 | 75 | 20 | 6 | 234 | 56 | 643   | 146 |
| 831 | 30 | 8  | 432 | 75 | 22 | 6 | 283 | 57 | 767   | 146 |
| 832 | 30 | 8  | 427 | 72 | 22 | 6 | 283 | 52 | 762   | 138 |
| 833 | 30 | 8  | 428 | 72 | 22 | 6 | 284 | 51 | 764   | 137 |
| 834 | 30 | 9  | 428 | 73 | 21 | 6 | 283 | 51 | 762   | 139 |
| 835 | 32 | 8  | 426 | 68 | 21 | 4 | 287 | 38 | 766   | 118 |
| 836 | 32 | 10 | 424 | 67 | 21 | 4 | 288 | 35 | 765   | 116 |
| 837 | 32 | 9  | 420 | 63 | 21 | 3 | 286 | 26 | 759   | 101 |
| 838 | 40 | 9  | 465 | 63 | 22 | 3 | 334 | 26 | 861   | 101 |
| 839 | 38 | 7  | 504 | 57 | 25 | 2 | 374 | 26 | 941   | 92  |
| 840 | 38 | 7  | 502 | 57 | 25 | 2 | 373 | 26 | 938   | 92  |
| 841 | 40 | 7  | 555 | 56 | 27 | 2 | 391 | 25 | 1,013 | 90  |
| 842 | 40 | 7  | 573 | 56 | 27 | 2 | 409 | 25 | 1,049 | 90  |
| 843 | 40 | 6  | 610 | 54 | 27 | 2 | 417 | 25 | 1,094 | 87  |
| 844 | 40 | 6  | 610 | 54 | 27 | 2 | 417 | 25 | 1,094 | 87  |
| 845 | 55 | 6  | 803 | 52 | 34 | 2 | 472 | 24 | 1,364 | 84  |
| 846 | 55 | 6  | 830 | 52 | 37 | 2 | 490 | 24 | 1,412 | 84  |
| 847 | 55 | 6  | 841 | 51 | 38 | 2 | 508 | 24 | 1,442 | 83  |
| 848 | 55 | 6  | 842 | 52 | 38 | 2 | 507 | 24 | 1,442 | 84  |
| 849 | 59 | 6  | 855 | 52 | 41 | 2 | 517 | 24 | 1,472 | 84  |

|     |     |   |       |    |    |   |     |    |       |    |
|-----|-----|---|-------|----|----|---|-----|----|-------|----|
| 850 | 59  | 6 | 854   | 52 | 41 | 2 | 516 | 24 | 1,470 | 84 |
| 851 | 59  | 6 | 856   | 45 | 41 | 2 | 516 | 22 | 1,472 | 75 |
| 852 | 59  | 6 | 889   | 45 | 41 | 2 | 528 | 22 | 1,517 | 75 |
| 853 | 68  | 6 | 982   | 44 | 44 | 2 | 562 | 21 | 1,656 | 73 |
| 854 | 68  | 6 | 993   | 44 | 45 | 2 | 566 | 21 | 1,672 | 73 |
| 855 | 66  | 6 | 992   | 44 | 45 | 2 | 561 | 21 | 1,664 | 73 |
| 856 | 66  | 6 | 991   | 32 | 46 | 2 | 561 | 21 | 1,664 | 61 |
| 857 | 66  | 6 | 991   | 29 | 46 | 2 | 560 | 19 | 1,663 | 56 |
| 858 | 80  | 6 | 1,115 | 26 | 48 | 2 | 616 | 18 | 1,859 | 52 |
| 859 | 80  | 6 | 1,115 | 22 | 48 | 2 | 617 | 17 | 1,860 | 47 |
| 860 | 109 | 6 | 1,300 | 15 | 55 | 1 | 673 | 17 | 2,137 | 39 |
| 861 | 109 | 6 | 1,299 | 15 | 55 | 1 | 673 | 17 | 2,136 | 39 |
| 862 | 132 | 6 | 1,560 | 12 | 68 | 1 | 857 | 15 | 2,617 | 34 |
| 863 | 133 | 6 | 1,584 | 12 | 68 | 1 | 871 | 9  | 2,656 | 28 |
| 864 | 133 | 6 | 1,585 | 12 | 68 | 1 | 871 | 9  | 2,657 | 28 |
| 865 | 133 | 6 | 1,584 | 12 | 68 | 1 | 872 | 10 | 2,657 | 29 |
| 866 | 135 | 7 | 1,606 | 11 | 72 | 1 | 901 | 9  | 2,714 | 28 |
| 867 | 135 | 7 | 1,603 | 11 | 72 | 1 | 901 | 9  | 2,711 | 28 |
| 868 | 135 | 7 | 1,603 | 11 | 73 | 1 | 902 | 9  | 2,713 | 28 |
| 869 | 136 | 6 | 1,616 | 10 | 73 | 0 | 905 | 8  | 2,730 | 24 |
| 870 | 137 | 6 | 1,633 | 10 | 72 | 0 | 910 | 8  | 2,752 | 24 |
| 871 | 141 | 6 | 1,711 | 10 | 71 | 0 | 941 | 9  | 2,864 | 25 |
| 872 | 141 | 6 | 1,710 | 10 | 71 | 0 | 941 | 9  | 2,863 | 25 |
| 873 | 141 | 6 | 1,721 | 10 | 71 | 0 | 948 | 9  | 2,881 | 25 |
| 874 | 145 | 6 | 1,753 | 10 | 72 | 0 | 968 | 9  | 2,938 | 25 |
| 875 | 144 | 6 | 1,761 | 10 | 72 | 0 | 970 | 10 | 2,947 | 26 |
| 876 | 147 | 6 | 1,797 | 10 | 73 | 0 | 983 | 10 | 3,000 | 26 |
| 877 | 145 | 6 | 1,775 | 7  | 70 | 0 | 977 | 10 | 2,967 | 23 |
| 878 | 132 | 6 | 1,559 | 5  | 58 | 0 | 808 | 9  | 2,557 | 20 |
| 879 | 133 | 6 | 1,530 | 5  | 58 | 0 | 794 | 9  | 2,515 | 20 |
| 880 | 133 | 6 | 1,506 | 5  | 58 | 0 | 784 | 9  | 2,481 | 20 |
| 881 | 131 | 6 | 1,487 | 4  | 57 | 0 | 758 | 7  | 2,433 | 17 |
| 882 | 131 | 6 | 1,486 | 4  | 57 | 0 | 758 | 7  | 2,432 | 17 |
| 883 | 131 | 6 | 1,484 | 4  | 57 | 0 | 756 | 7  | 2,428 | 17 |
| 884 | 131 | 6 | 1,483 | 4  | 57 | 0 | 756 | 7  | 2,427 | 17 |
| 885 | 129 | 5 | 1,483 | 3  | 57 | 0 | 751 | 7  | 2,420 | 15 |
| 886 | 129 | 5 | 1,481 | 3  | 56 | 0 | 751 | 7  | 2,417 | 15 |
| 887 | 129 | 3 | 1,481 | 3  | 56 | 0 | 751 | 7  | 2,417 | 13 |
| 888 | 125 | 3 | 1,444 | 3  | 55 | 0 | 728 | 7  | 2,352 | 13 |
| 889 | 121 | 3 | 1,427 | 4  | 55 | 0 | 703 | 7  | 2,306 | 14 |
| 890 | 121 | 3 | 1,382 | 4  | 52 | 0 | 660 | 6  | 2,215 | 13 |

|     |     |   |       |    |    |   |     |    |       |    |
|-----|-----|---|-------|----|----|---|-----|----|-------|----|
| 891 | 119 | 3 | 1,337 | 4  | 50 | 0 | 641 | 6  | 2,147 | 13 |
| 892 | 119 | 3 | 1,329 | 4  | 50 | 0 | 634 | 8  | 2,132 | 15 |
| 893 | 119 | 3 | 1,315 | 5  | 50 | 1 | 619 | 9  | 2,103 | 18 |
| 894 | 119 | 3 | 1,277 | 5  | 49 | 1 | 611 | 9  | 2,056 | 18 |
| 895 | 113 | 3 | 1,186 | 5  | 47 | 1 | 594 | 9  | 1,940 | 18 |
| 896 | 104 | 3 | 1,084 | 5  | 42 | 1 | 556 | 8  | 1,786 | 17 |
| 897 | 104 | 3 | 1,056 | 5  | 39 | 1 | 538 | 8  | 1,737 | 17 |
| 898 | 104 | 3 | 1,047 | 4  | 38 | 1 | 521 | 9  | 1,710 | 17 |
| 899 | 104 | 3 | 1,044 | 4  | 38 | 1 | 520 | 9  | 1,706 | 17 |
| 900 | 100 | 3 | 1,026 | 4  | 35 | 1 | 509 | 9  | 1,670 | 17 |
| 901 | 100 | 3 | 1,025 | 4  | 35 | 1 | 508 | 9  | 1,668 | 17 |
| 902 | 100 | 3 | 1,026 | 4  | 35 | 1 | 508 | 9  | 1,669 | 17 |
| 903 | 100 | 3 | 992   | 4  | 35 | 1 | 497 | 10 | 1,624 | 18 |
| 904 | 88  | 3 | 896   | 4  | 32 | 1 | 454 | 10 | 1,470 | 18 |
| 905 | 88  | 3 | 884   | 4  | 31 | 1 | 449 | 10 | 1,452 | 18 |
| 906 | 79  | 3 | 812   | 4  | 28 | 1 | 405 | 10 | 1,324 | 18 |
| 907 | 79  | 3 | 796   | 7  | 28 | 1 | 400 | 10 | 1,303 | 21 |
| 908 | 78  | 4 | 772   | 8  | 28 | 1 | 393 | 13 | 1,271 | 26 |
| 909 | 78  | 3 | 763   | 9  | 28 | 1 | 392 | 22 | 1,261 | 35 |
| 910 | 74  | 4 | 701   | 11 | 27 | 1 | 380 | 22 | 1,182 | 38 |
| 911 | 48  | 3 | 580   | 11 | 21 | 1 | 332 | 21 | 981   | 36 |
| 912 | 43  | 3 | 548   | 11 | 21 | 1 | 305 | 22 | 917   | 37 |
| 913 | 26  | 3 | 358   | 11 | 8  | 1 | 147 | 22 | 539   | 37 |
| 914 | 28  | 3 | 341   | 11 | 8  | 1 | 137 | 22 | 514   | 37 |
| 915 | 26  | 3 | 319   | 11 | 4  | 1 | 109 | 21 | 458   | 36 |
| 916 | 26  | 3 | 319   | 11 | 4  | 1 | 109 | 21 | 458   | 36 |
| 917 | 29  | 2 | 333   | 11 | 4  | 1 | 111 | 20 | 477   | 34 |
| 918 | 31  | 2 | 340   | 12 | 3  | 1 | 112 | 23 | 486   | 38 |
| 919 | 31  | 2 | 345   | 14 | 3  | 2 | 114 | 23 | 493   | 41 |
| 920 | 30  | 2 | 335   | 14 | 3  | 2 | 113 | 23 | 481   | 41 |
| 921 | 29  | 2 | 318   | 14 | 3  | 2 | 108 | 23 | 458   | 41 |
| 922 | 25  | 2 | 239   | 14 | 3  | 2 | 77  | 22 | 344   | 40 |
| 923 | 25  | 2 | 228   | 15 | 3  | 2 | 70  | 22 | 326   | 41 |
| 924 | 23  | 2 | 207   | 15 | 2  | 2 | 57  | 22 | 289   | 41 |
| 925 | 21  | 2 | 196   | 15 | 2  | 2 | 51  | 22 | 270   | 41 |
| 926 | 21  | 2 | 186   | 16 | 2  | 2 | 47  | 23 | 256   | 43 |
| 927 | 18  | 2 | 138   | 16 | 2  | 2 | 36  | 23 | 194   | 43 |
| 928 | 14  | 2 | 124   | 15 | 2  | 2 | 31  | 23 | 171   | 42 |
| 929 | 14  | 2 | 116   | 16 | 2  | 2 | 28  | 23 | 160   | 43 |
| 930 | 12  | 2 | 115   | 16 | 1  | 4 | 26  | 23 | 154   | 45 |
| 931 | 13  | 2 | 116   | 16 | 1  | 4 | 26  | 23 | 156   | 45 |

|     |    |   |     |    |   |   |    |    |     |    |
|-----|----|---|-----|----|---|---|----|----|-----|----|
| 932 | 13 | 2 | 116 | 16 | 1 | 4 | 26 | 23 | 156 | 45 |
| 933 | 14 | 2 | 122 | 16 | 1 | 4 | 26 | 23 | 163 | 45 |
| 934 | 14 | 2 | 122 | 16 | 1 | 4 | 26 | 23 | 163 | 45 |
| 935 | 15 | 2 | 123 | 16 | 1 | 4 | 31 | 23 | 170 | 45 |
| 936 | 15 | 2 | 124 | 16 | 1 | 4 | 34 | 23 | 174 | 45 |
| 937 | 15 | 2 | 124 | 16 | 1 | 4 | 34 | 23 | 174 | 45 |
| 938 | 17 | 2 | 133 | 17 | 2 | 4 | 42 | 23 | 194 | 46 |
| 939 | 17 | 2 | 133 | 18 | 2 | 4 | 42 | 23 | 194 | 47 |
| 940 | 17 | 2 | 133 | 18 | 2 | 4 | 43 | 23 | 195 | 47 |
| 941 | 20 | 2 | 138 | 19 | 5 | 4 | 51 | 23 | 214 | 48 |
| 942 | 20 | 2 | 137 | 19 | 5 | 4 | 51 | 22 | 213 | 47 |
| 943 | 20 | 2 | 138 | 19 | 5 | 4 | 51 | 22 | 214 | 47 |
| 944 | 20 | 2 | 133 | 19 | 5 | 3 | 48 | 21 | 206 | 45 |
| 945 | 20 | 2 | 134 | 19 | 5 | 3 | 49 | 22 | 208 | 46 |
| 946 | 20 | 2 | 134 | 19 | 5 | 3 | 49 | 22 | 208 | 46 |
| 947 | 20 | 2 | 131 | 19 | 5 | 3 | 47 | 24 | 203 | 48 |
| 948 | 20 | 2 | 129 | 19 | 5 | 3 | 46 | 24 | 200 | 48 |
| 949 | 20 | 2 | 126 | 19 | 5 | 3 | 45 | 23 | 196 | 47 |
| 950 | 20 | 2 | 130 | 21 | 5 | 3 | 45 | 23 | 200 | 49 |
| 951 | 22 | 2 | 138 | 22 | 5 | 3 | 53 | 23 | 218 | 50 |
| 952 | 22 | 2 | 138 | 22 | 5 | 3 | 53 | 24 | 218 | 51 |
| 953 | 22 | 2 | 137 | 22 | 5 | 3 | 53 | 24 | 217 | 51 |
| 954 | 25 | 2 | 140 | 22 | 5 | 3 | 59 | 24 | 229 | 51 |
| 955 | 25 | 2 | 144 | 22 | 6 | 3 | 61 | 24 | 236 | 51 |
| 956 | 25 | 2 | 144 | 22 | 6 | 3 | 61 | 24 | 236 | 51 |
| 957 | 22 | 2 | 146 | 19 | 6 | 3 | 62 | 24 | 236 | 48 |
| 958 | 22 | 2 | 146 | 19 | 6 | 3 | 62 | 25 | 236 | 49 |
| 959 | 21 | 1 | 144 | 18 | 6 | 3 | 61 | 22 | 232 | 44 |
| 960 | 21 | 1 | 146 | 17 | 6 | 3 | 62 | 13 | 235 | 34 |
| 961 | 21 | 0 | 148 | 15 | 6 | 3 | 63 | 13 | 238 | 31 |
| 962 | 21 | 0 | 156 | 15 | 6 | 3 | 65 | 13 | 248 | 31 |
| 963 | 20 | 0 | 154 | 16 | 6 | 3 | 64 | 13 | 244 | 32 |
| 964 | 20 | 0 | 115 | 17 | 6 | 3 | 61 | 13 | 202 | 33 |
| 965 | 18 | 0 | 107 | 17 | 7 | 3 | 57 | 14 | 189 | 34 |
| 966 | 18 | 0 | 104 | 17 | 7 | 3 | 57 | 14 | 186 | 34 |
| 967 | 15 | 1 | 90  | 15 | 7 | 3 | 55 | 12 | 167 | 31 |
| 968 | 15 | 1 | 92  | 15 | 7 | 3 | 55 | 13 | 169 | 32 |
| 969 | 13 | 1 | 85  | 15 | 7 | 3 | 54 | 13 | 159 | 32 |
| 970 | 13 | 1 | 80  | 13 | 7 | 2 | 52 | 13 | 152 | 29 |
| 971 | 13 | 1 | 75  | 13 | 7 | 2 | 51 | 14 | 146 | 30 |
| 972 | 15 | 1 | 77  | 13 | 7 | 2 | 51 | 14 | 150 | 30 |



|       |    |   |     |    |    |   |     |    |     |    |
|-------|----|---|-----|----|----|---|-----|----|-----|----|
| 973   | 15 | 1 | 77  | 13 | 7  | 2 | 51  | 14 | 150 | 30 |
| 974   | 15 | 1 | 77  | 12 | 7  | 2 | 50  | 14 | 149 | 29 |
| 975   | 15 | 1 | 77  | 12 | 7  | 2 | 50  | 14 | 149 | 29 |
| 976   | 15 | 1 | 77  | 11 | 7  | 2 | 50  | 12 | 149 | 26 |
| 977   | 15 | 1 | 96  | 11 | 8  | 2 | 53  | 12 | 172 | 26 |
| 978   | 15 | 1 | 118 | 11 | 7  | 2 | 63  | 12 | 203 | 26 |
| 979   | 15 | 1 | 118 | 11 | 7  | 2 | 63  | 12 | 203 | 26 |
| 980   | 24 | 1 | 150 | 10 | 8  | 2 | 81  | 12 | 263 | 25 |
| 981   | 28 | 1 | 156 | 10 | 8  | 0 | 95  | 13 | 287 | 24 |
| 982   | 27 | 1 | 168 | 11 | 8  | 0 | 97  | 13 | 300 | 25 |
| 983   | 27 | 1 | 168 | 11 | 8  | 0 | 97  | 13 | 300 | 25 |
| 984   | 28 | 1 | 182 | 12 | 8  | 0 | 120 | 15 | 338 | 28 |
| 985   | 28 | 1 | 181 | 12 | 8  | 0 | 116 | 15 | 333 | 28 |
| 986   | 27 | 1 | 185 | 13 | 8  | 0 | 116 | 16 | 336 | 30 |
| 987   | 30 | 1 | 204 | 13 | 9  | 0 | 128 | 16 | 371 | 30 |
| 988   | 31 | 1 | 206 | 14 | 9  | 0 | 130 | 18 | 376 | 33 |
| 989   | 29 | 1 | 203 | 12 | 8  | 0 | 122 | 19 | 362 | 32 |
| 990   | 29 | 1 | 202 | 13 | 8  | 0 | 121 | 19 | 360 | 33 |
| 991   | 27 | 1 | 205 | 11 | 5  | 0 | 118 | 19 | 355 | 31 |
| 992   | 32 | 1 | 221 | 11 | 5  | 0 | 128 | 19 | 386 | 31 |
| 993   | 32 | 1 | 221 | 11 | 5  | 0 | 128 | 19 | 386 | 31 |
| 994   | 32 | 1 | 220 | 11 | 5  | 0 | 128 | 19 | 385 | 31 |
| 995   | 32 | 1 | 220 | 10 | 5  | 0 | 128 | 19 | 385 | 30 |
| 996   | 32 | 1 | 219 | 10 | 5  | 0 | 128 | 18 | 384 | 29 |
| 997   | 35 | 1 | 231 | 10 | 6  | 0 | 144 | 18 | 416 | 29 |
| 998   | 37 | 1 | 242 | 10 | 6  | 0 | 154 | 16 | 439 | 27 |
| 999   | 38 | 1 | 250 | 8  | 7  | 0 | 159 | 17 | 454 | 26 |
| 1,000 | 38 | 1 | 250 | 8  | 7  | 0 | 159 | 17 | 454 | 26 |
| 1,001 | 36 | 1 | 247 | 8  | 7  | 0 | 154 | 17 | 444 | 26 |
| 1,002 | 37 | 1 | 265 | 7  | 8  | 0 | 158 | 20 | 468 | 28 |
| 1,003 | 36 | 1 | 277 | 7  | 8  | 0 | 156 | 19 | 477 | 27 |
| 1,004 | 39 | 1 | 320 | 7  | 13 | 0 | 182 | 20 | 554 | 28 |
| 1,005 | 39 | 1 | 318 | 7  | 13 | 0 | 182 | 20 | 552 | 28 |
| 1,006 | 41 | 1 | 335 | 7  | 13 | 0 | 194 | 21 | 583 | 29 |
| 1,007 | 41 | 1 | 334 | 8  | 14 | 0 | 196 | 21 | 585 | 30 |
| 1,008 | 41 | 1 | 333 | 10 | 14 | 0 | 196 | 24 | 584 | 35 |
| 1,009 | 41 | 1 | 331 | 10 | 14 | 0 | 195 | 23 | 581 | 34 |
| 1,010 | 42 | 1 | 331 | 10 | 14 | 0 | 195 | 23 | 582 | 34 |
| 1,011 | 42 | 1 | 330 | 11 | 14 | 0 | 196 | 23 | 582 | 35 |
| 1,012 | 42 | 1 | 326 | 11 | 14 | 0 | 194 | 24 | 576 | 36 |
| 1,013 | 42 | 1 | 325 | 11 | 14 | 0 | 194 | 24 | 575 | 36 |

|       |    |   |     |    |    |   |     |    |     |    |
|-------|----|---|-----|----|----|---|-----|----|-----|----|
| 1,014 | 42 | 1 | 325 | 11 | 14 | 0 | 194 | 23 | 575 | 35 |
| 1,015 | 42 | 1 | 327 | 10 | 13 | 0 | 194 | 22 | 576 | 33 |
| 1,016 | 42 | 1 | 327 | 10 | 13 | 0 | 194 | 22 | 576 | 33 |
| 1,017 | 42 | 1 | 328 | 10 | 13 | 0 | 195 | 22 | 578 | 33 |
| 1,018 | 42 | 0 | 328 | 10 | 13 | 0 | 195 | 21 | 578 | 31 |
| 1,019 | 42 | 0 | 327 | 10 | 13 | 0 | 195 | 20 | 577 | 30 |
| 1,020 | 43 | 0 | 327 | 10 | 13 | 0 | 195 | 20 | 578 | 30 |
| 1,021 | 43 | 0 | 327 | 10 | 13 | 0 | 195 | 19 | 578 | 29 |
| 1,022 | 43 | 0 | 326 | 10 | 13 | 0 | 195 | 19 | 577 | 29 |
| 1,023 | 41 | 0 | 326 | 10 | 13 | 0 | 195 | 19 | 575 | 29 |
| 1,024 | 41 | 0 | 325 | 10 | 13 | 0 | 195 | 20 | 574 | 30 |
| 1,025 | 41 | 0 | 325 | 13 | 13 | 0 | 195 | 23 | 574 | 36 |
| 1,026 | 41 | 0 | 328 | 14 | 13 | 0 | 196 | 25 | 578 | 39 |
| 1,027 | 41 | 0 | 328 | 14 | 13 | 0 | 196 | 27 | 578 | 41 |
| 1,028 | 41 | 0 | 309 | 14 | 12 | 0 | 193 | 29 | 555 | 43 |
| 1,029 | 41 | 0 | 286 | 15 | 12 | 1 | 183 | 31 | 522 | 47 |
| 1,030 | 32 | 0 | 254 | 19 | 11 | 1 | 165 | 32 | 462 | 52 |
| 1,031 | 28 | 0 | 246 | 19 | 11 | 1 | 150 | 32 | 435 | 52 |
| 1,032 | 28 | 0 | 246 | 19 | 11 | 1 | 150 | 31 | 435 | 51 |
| 1,033 | 28 | 0 | 234 | 18 | 11 | 1 | 148 | 31 | 421 | 50 |
| 1,034 | 28 | 0 | 231 | 18 | 11 | 1 | 143 | 32 | 413 | 51 |
| 1,035 | 26 | 0 | 215 | 20 | 11 | 1 | 125 | 33 | 377 | 54 |
| 1,036 | 26 | 1 | 211 | 22 | 11 | 1 | 125 | 34 | 373 | 58 |
| 1,037 | 26 | 1 | 210 | 25 | 11 | 1 | 124 | 35 | 371 | 62 |
| 1,038 | 23 | 2 | 191 | 23 | 10 | 1 | 108 | 33 | 332 | 59 |
| 1,039 | 22 | 2 | 185 | 23 | 10 | 1 | 106 | 32 | 323 | 58 |
| 1,040 | 22 | 2 | 182 | 22 | 10 | 1 | 106 | 32 | 320 | 57 |
| 1,041 | 21 | 2 | 179 | 22 | 10 | 1 | 106 | 31 | 316 | 56 |
| 1,042 | 21 | 2 | 174 | 22 | 10 | 1 | 103 | 31 | 308 | 56 |
| 1,043 | 16 | 2 | 158 | 22 | 10 | 1 | 91  | 31 | 275 | 56 |
| 1,044 | 16 | 2 | 158 | 23 | 10 | 1 | 91  | 31 | 275 | 57 |
| 1,045 | 15 | 2 | 155 | 23 | 10 | 1 | 83  | 31 | 263 | 57 |
| 1,046 | 13 | 2 | 149 | 23 | 10 | 1 | 80  | 31 | 252 | 57 |
| 1,047 | 13 | 2 | 146 | 23 | 9  | 1 | 74  | 31 | 242 | 57 |
| 1,048 | 13 | 2 | 138 | 23 | 9  | 1 | 69  | 31 | 229 | 57 |
| 1,049 | 11 | 2 | 136 | 23 | 9  | 1 | 64  | 31 | 220 | 57 |
| 1,050 | 10 | 2 | 128 | 23 | 8  | 1 | 59  | 30 | 205 | 56 |
| 1,051 | 10 | 2 | 124 | 23 | 8  | 1 | 59  | 31 | 201 | 57 |
| 1,052 | 10 | 2 | 123 | 23 | 8  | 1 | 59  | 32 | 200 | 58 |
| 1,053 | 9  | 2 | 101 | 24 | 7  | 1 | 52  | 29 | 169 | 56 |
| 1,054 | 7  | 4 | 87  | 24 | 7  | 1 | 52  | 29 | 153 | 58 |

|       |    |   |     |    |    |   |    |    |     |    |
|-------|----|---|-----|----|----|---|----|----|-----|----|
| 1,055 | 4  | 4 | 42  | 24 | 2  | 1 | 24 | 27 | 72  | 56 |
| 1,056 | 2  | 4 | 29  | 23 | 1  | 1 | 13 | 27 | 45  | 55 |
| 1,057 | 2  | 4 | 24  | 23 | 1  | 1 | 11 | 27 | 38  | 55 |
| 1,058 | 3  | 4 | 25  | 21 | 0  | 1 | 9  | 24 | 37  | 50 |
| 1,059 | 3  | 4 | 28  | 21 | 0  | 1 | 11 | 24 | 42  | 50 |
| 1,060 | 3  | 4 | 29  | 20 | 0  | 1 | 12 | 24 | 44  | 49 |
| 1,061 | 2  | 4 | 30  | 20 | 0  | 1 | 13 | 24 | 45  | 49 |
| 1,062 | 2  | 4 | 32  | 20 | 0  | 1 | 14 | 24 | 48  | 49 |
| 1,063 | 2  | 4 | 28  | 20 | 0  | 1 | 14 | 23 | 44  | 48 |
| 1,064 | 6  | 4 | 38  | 20 | 3  | 1 | 23 | 23 | 70  | 48 |
| 1,065 | 6  | 4 | 38  | 19 | 3  | 1 | 23 | 23 | 70  | 47 |
| 1,066 | 6  | 4 | 36  | 19 | 3  | 1 | 23 | 23 | 68  | 47 |
| 1,067 | 15 | 4 | 81  | 19 | 9  | 1 | 47 | 23 | 152 | 47 |
| 1,068 | 18 | 4 | 85  | 19 | 10 | 1 | 52 | 23 | 165 | 47 |
| 1,069 | 21 | 4 | 122 | 19 | 15 | 1 | 66 | 23 | 224 | 47 |
| 1,070 | 20 | 4 | 133 | 20 | 16 | 1 | 73 | 23 | 242 | 48 |
| 1,071 | 21 | 4 | 132 | 20 | 16 | 1 | 73 | 23 | 242 | 48 |
| 1,072 | 22 | 4 | 134 | 20 | 16 | 1 | 73 | 24 | 245 | 49 |
| 1,073 | 22 | 4 | 134 | 20 | 16 | 1 | 74 | 24 | 246 | 49 |
| 1,074 | 22 | 4 | 133 | 20 | 16 | 1 | 75 | 23 | 246 | 48 |
| 1,075 | 22 | 4 | 133 | 20 | 16 | 1 | 75 | 23 | 246 | 48 |
| 1,076 | 22 | 4 | 134 | 17 | 16 | 1 | 75 | 20 | 247 | 42 |
| 1,077 | 22 | 4 | 132 | 16 | 16 | 1 | 75 | 18 | 245 | 39 |
| 1,078 | 22 | 4 | 132 | 16 | 16 | 1 | 75 | 16 | 245 | 37 |
| 1,079 | 22 | 4 | 133 | 16 | 16 | 1 | 76 | 14 | 247 | 35 |
| 1,080 | 22 | 4 | 133 | 15 | 16 | 0 | 76 | 12 | 247 | 31 |
| 1,081 | 22 | 4 | 133 | 11 | 16 | 0 | 75 | 11 | 246 | 26 |
| 1,082 | 22 | 4 | 133 | 11 | 16 | 0 | 75 | 11 | 246 | 26 |
| 1,083 | 22 | 4 | 132 | 13 | 16 | 0 | 75 | 13 | 245 | 30 |
| 1,084 | 22 | 4 | 133 | 13 | 16 | 0 | 75 | 13 | 246 | 30 |
| 1,085 | 22 | 4 | 132 | 13 | 16 | 0 | 75 | 12 | 245 | 29 |
| 1,086 | 22 | 4 | 133 | 11 | 16 | 0 | 76 | 9  | 247 | 24 |
| 1,087 | 22 | 3 | 133 | 9  | 16 | 0 | 76 | 8  | 247 | 20 |
| 1,088 | 23 | 3 | 136 | 8  | 16 | 0 | 77 | 8  | 252 | 19 |
| 1,089 | 23 | 2 | 136 | 8  | 16 | 0 | 77 | 8  | 252 | 18 |
| 1,090 | 23 | 2 | 136 | 10 | 16 | 0 | 78 | 9  | 253 | 21 |
| 1,091 | 23 | 2 | 137 | 10 | 16 | 0 | 77 | 9  | 253 | 21 |
| 1,092 | 23 | 2 | 139 | 10 | 16 | 0 | 78 | 11 | 256 | 23 |
| 1,093 | 23 | 2 | 138 | 10 | 16 | 0 | 78 | 11 | 255 | 23 |
| 1,094 | 23 | 2 | 138 | 10 | 16 | 0 | 78 | 11 | 255 | 23 |
| 1,095 | 23 | 2 | 138 | 9  | 16 | 0 | 78 | 11 | 255 | 22 |

|       |    |   |     |    |    |   |     |    |     |    |
|-------|----|---|-----|----|----|---|-----|----|-----|----|
| 1,096 | 23 | 2 | 138 | 9  | 16 | 0 | 79  | 11 | 256 | 22 |
| 1,097 | 23 | 2 | 138 | 9  | 16 | 0 | 79  | 11 | 256 | 22 |
| 1,098 | 23 | 2 | 138 | 9  | 16 | 0 | 79  | 11 | 256 | 22 |
| 1,099 | 23 | 2 | 138 | 9  | 16 | 0 | 79  | 11 | 256 | 22 |
| 1,100 | 23 | 2 | 144 | 9  | 17 | 0 | 83  | 11 | 267 | 22 |
| 1,101 | 23 | 3 | 144 | 11 | 17 | 0 | 83  | 11 | 267 | 25 |
| 1,102 | 23 | 3 | 144 | 12 | 17 | 0 | 83  | 10 | 267 | 25 |
| 1,103 | 23 | 3 | 157 | 11 | 17 | 0 | 100 | 9  | 297 | 23 |
| 1,104 | 23 | 3 | 157 | 12 | 17 | 0 | 100 | 9  | 297 | 24 |
| 1,105 | 24 | 1 | 157 | 12 | 17 | 0 | 99  | 9  | 297 | 22 |
| 1,106 | 24 | 1 | 157 | 12 | 17 | 0 | 99  | 8  | 297 | 21 |
| 1,107 | 24 | 1 | 156 | 13 | 17 | 0 | 99  | 8  | 296 | 22 |
| 1,108 | 23 | 1 | 156 | 13 | 17 | 0 | 100 | 8  | 296 | 22 |
| 1,109 | 23 | 1 | 154 | 13 | 17 | 0 | 99  | 8  | 293 | 22 |
| 1,110 | 23 | 1 | 151 | 13 | 17 | 0 | 97  | 8  | 288 | 22 |
| 1,111 | 23 | 1 | 151 | 13 | 17 | 0 | 96  | 8  | 287 | 22 |
| 1,112 | 23 | 1 | 150 | 13 | 17 | 0 | 95  | 9  | 285 | 23 |
| 1,113 | 23 | 1 | 147 | 13 | 17 | 0 | 92  | 9  | 279 | 23 |
| 1,114 | 19 | 1 | 137 | 13 | 14 | 0 | 83  | 9  | 253 | 23 |
| 1,115 | 15 | 1 | 110 | 13 | 10 | 0 | 71  | 9  | 206 | 23 |
| 1,116 | 15 | 1 | 106 | 13 | 10 | 0 | 70  | 9  | 201 | 23 |
| 1,117 | 15 | 1 | 108 | 14 | 10 | 0 | 74  | 9  | 207 | 24 |
| 1,118 | 10 | 1 | 96  | 14 | 9  | 0 | 63  | 9  | 178 | 24 |
| 1,119 | 7  | 1 | 92  | 14 | 8  | 0 | 60  | 9  | 167 | 24 |
| 1,120 | 4  | 1 | 56  | 15 | 3  | 0 | 47  | 10 | 110 | 26 |
| 1,121 | 4  | 1 | 46  | 15 | 2  | 0 | 40  | 10 | 92  | 26 |
| 1,122 | 3  | 2 | 46  | 21 | 2  | 1 | 40  | 10 | 91  | 34 |
| 1,123 | 2  | 2 | 44  | 22 | 2  | 1 | 40  | 9  | 88  | 34 |
| 1,124 | 2  | 2 | 43  | 22 | 2  | 1 | 39  | 9  | 86  | 34 |
| 1,125 | 2  | 2 | 44  | 22 | 2  | 1 | 38  | 9  | 86  | 34 |
| 1,126 | 3  | 2 | 43  | 22 | 2  | 1 | 37  | 9  | 85  | 34 |
| 1,127 | 3  | 2 | 48  | 22 | 2  | 1 | 38  | 9  | 91  | 34 |
| 1,128 | 3  | 2 | 48  | 22 | 2  | 1 | 37  | 9  | 90  | 34 |
| 1,129 | 3  | 2 | 60  | 22 | 2  | 1 | 38  | 9  | 103 | 34 |
| 1,130 | 3  | 2 | 61  | 22 | 2  | 1 | 38  | 11 | 104 | 36 |
| 1,131 | 3  | 2 | 61  | 22 | 2  | 1 | 38  | 11 | 104 | 36 |
| 1,132 | 3  | 2 | 60  | 22 | 2  | 1 | 38  | 11 | 103 | 36 |
| 1,133 | 3  | 2 | 60  | 20 | 2  | 1 | 38  | 9  | 103 | 32 |
| 1,134 | 3  | 2 | 61  | 20 | 2  | 1 | 38  | 9  | 104 | 32 |
| 1,135 | 3  | 2 | 64  | 20 | 2  | 1 | 38  | 9  | 107 | 32 |
| 1,136 | 3  | 2 | 64  | 20 | 2  | 1 | 38  | 9  | 107 | 32 |

|       |   |   |    |    |   |   |    |    |     |    |
|-------|---|---|----|----|---|---|----|----|-----|----|
| 1,137 | 3 | 2 | 64 | 19 | 2 | 1 | 37 | 9  | 106 | 31 |
| 1,138 | 2 | 2 | 64 | 19 | 2 | 2 | 36 | 9  | 104 | 32 |
| 1,139 | 2 | 2 | 63 | 17 | 2 | 2 | 36 | 7  | 103 | 28 |
| 1,140 | 2 | 2 | 63 | 17 | 2 | 2 | 35 | 7  | 102 | 28 |
| 1,141 | 2 | 2 | 63 | 18 | 2 | 2 | 36 | 8  | 103 | 30 |
| 1,142 | 2 | 2 | 61 | 19 | 2 | 2 | 36 | 8  | 101 | 31 |
| 1,143 | 2 | 2 | 62 | 21 | 2 | 2 | 35 | 6  | 101 | 31 |
| 1,144 | 2 | 2 | 62 | 23 | 2 | 2 | 37 | 6  | 103 | 33 |
| 1,145 | 2 | 2 | 62 | 23 | 2 | 2 | 37 | 6  | 103 | 33 |
| 1,146 | 2 | 3 | 62 | 24 | 2 | 2 | 37 | 7  | 103 | 36 |
| 1,147 | 2 | 3 | 62 | 24 | 2 | 2 | 37 | 7  | 103 | 36 |
| 1,148 | 2 | 3 | 62 | 25 | 2 | 2 | 37 | 7  | 103 | 37 |
| 1,149 | 2 | 3 | 62 | 26 | 2 | 2 | 37 | 7  | 103 | 38 |
| 1,150 | 2 | 3 | 62 | 26 | 2 | 2 | 37 | 7  | 103 | 38 |
| 1,151 | 2 | 2 | 56 | 23 | 1 | 2 | 33 | 7  | 92  | 34 |
| 1,152 | 2 | 2 | 53 | 23 | 1 | 2 | 32 | 7  | 88  | 34 |
| 1,153 | 2 | 2 | 43 | 23 | 1 | 2 | 17 | 7  | 63  | 34 |
| 1,154 | 2 | 2 | 43 | 23 | 1 | 2 | 17 | 7  | 63  | 34 |
| 1,155 | 1 | 2 | 43 | 22 | 1 | 2 | 17 | 7  | 62  | 33 |
| 1,156 | 1 | 2 | 42 | 22 | 1 | 2 | 17 | 7  | 61  | 33 |
| 1,157 | 1 | 2 | 42 | 22 | 1 | 2 | 17 | 7  | 61  | 33 |
| 1,158 | 1 | 2 | 42 | 21 | 1 | 2 | 16 | 7  | 60  | 32 |
| 1,159 | 1 | 2 | 43 | 21 | 1 | 2 | 16 | 7  | 61  | 32 |
| 1,160 | 1 | 3 | 43 | 21 | 1 | 2 | 17 | 7  | 62  | 33 |
| 1,161 | 1 | 3 | 43 | 21 | 1 | 2 | 19 | 7  | 64  | 33 |
| 1,162 | 1 | 3 | 42 | 21 | 1 | 2 | 19 | 8  | 63  | 34 |
| 1,163 | 1 | 3 | 42 | 22 | 1 | 2 | 19 | 8  | 63  | 35 |
| 1,164 | 1 | 4 | 42 | 23 | 1 | 2 | 19 | 10 | 63  | 39 |
| 1,165 | 1 | 4 | 42 | 25 | 1 | 2 | 19 | 10 | 63  | 41 |
| 1,166 | 1 | 6 | 42 | 29 | 1 | 2 | 19 | 11 | 63  | 48 |
| 1,167 | 1 | 6 | 42 | 31 | 1 | 2 | 19 | 11 | 63  | 50 |
| 1,168 | 2 | 6 | 51 | 30 | 3 | 2 | 21 | 11 | 77  | 49 |
| 1,169 | 2 | 6 | 53 | 30 | 2 | 2 | 20 | 11 | 77  | 49 |
| 1,170 | 2 | 6 | 53 | 31 | 2 | 2 | 18 | 11 | 75  | 50 |
| 1,171 | 3 | 6 | 59 | 30 | 2 | 2 | 17 | 10 | 81  | 48 |
| 1,172 | 3 | 6 | 58 | 29 | 2 | 2 | 17 | 10 | 80  | 47 |
| 1,173 | 3 | 5 | 59 | 24 | 2 | 1 | 17 | 11 | 81  | 41 |
| 1,174 | 6 | 6 | 67 | 27 | 2 | 1 | 27 | 13 | 102 | 47 |
| 1,175 | 6 | 7 | 67 | 29 | 2 | 1 | 27 | 14 | 102 | 51 |
| 1,176 | 6 | 7 | 67 | 29 | 2 | 1 | 27 | 14 | 102 | 51 |
| 1,177 | 5 | 7 | 67 | 31 | 2 | 1 | 28 | 14 | 102 | 53 |

|       |    |    |    |    |   |   |    |    |     |    |
|-------|----|----|----|----|---|---|----|----|-----|----|
| 1,178 | 5  | 7  | 63 | 31 | 3 | 1 | 27 | 14 | 98  | 53 |
| 1,179 | 5  | 7  | 54 | 32 | 3 | 1 | 27 | 14 | 89  | 54 |
| 1,180 | 5  | 7  | 51 | 32 | 3 | 1 | 26 | 14 | 85  | 54 |
| 1,181 | 6  | 7  | 52 | 32 | 4 | 1 | 28 | 12 | 90  | 52 |
| 1,182 | 6  | 8  | 55 | 32 | 4 | 1 | 29 | 12 | 94  | 53 |
| 1,183 | 6  | 8  | 56 | 32 | 5 | 1 | 29 | 12 | 96  | 53 |
| 1,184 | 6  | 8  | 56 | 32 | 5 | 1 | 29 | 12 | 96  | 53 |
| 1,185 | 6  | 8  | 54 | 34 | 5 | 1 | 29 | 12 | 94  | 55 |
| 1,186 | 6  | 8  | 52 | 34 | 5 | 2 | 29 | 13 | 92  | 57 |
| 1,187 | 6  | 8  | 52 | 35 | 5 | 2 | 29 | 13 | 92  | 58 |
| 1,188 | 7  | 8  | 53 | 39 | 5 | 2 | 29 | 13 | 94  | 62 |
| 1,189 | 11 | 8  | 53 | 39 | 5 | 1 | 29 | 13 | 98  | 61 |
| 1,190 | 12 | 8  | 52 | 42 | 5 | 1 | 28 | 13 | 97  | 64 |
| 1,191 | 12 | 11 | 52 | 51 | 5 | 1 | 27 | 16 | 96  | 79 |
| 1,192 | 12 | 11 | 51 | 48 | 5 | 1 | 27 | 14 | 95  | 74 |
| 1,193 | 12 | 11 | 67 | 48 | 5 | 1 | 32 | 14 | 116 | 74 |
| 1,194 | 12 | 11 | 67 | 46 | 5 | 1 | 32 | 14 | 116 | 72 |
| 1,195 | 12 | 11 | 68 | 44 | 5 | 1 | 32 | 14 | 117 | 70 |
| 1,196 | 12 | 11 | 68 | 45 | 5 | 1 | 31 | 14 | 116 | 71 |
| 1,197 | 12 | 10 | 68 | 44 | 5 | 1 | 31 | 13 | 116 | 68 |
| 1,198 | 12 | 10 | 67 | 44 | 5 | 1 | 31 | 13 | 115 | 68 |
| 1,199 | 12 | 10 | 67 | 43 | 5 | 1 | 31 | 13 | 115 | 67 |
| 1,200 | 12 | 10 | 68 | 42 | 5 | 1 | 31 | 13 | 116 | 66 |
| 1,201 | 12 | 10 | 68 | 42 | 5 | 1 | 32 | 13 | 117 | 66 |
| 1,202 | 12 | 10 | 68 | 42 | 5 | 1 | 32 | 13 | 117 | 66 |
| 1,203 | 12 | 10 | 71 | 42 | 5 | 1 | 36 | 13 | 124 | 66 |
| 1,204 | 12 | 10 | 72 | 42 | 5 | 1 | 35 | 13 | 124 | 66 |
| 1,205 | 12 | 10 | 74 | 42 | 5 | 1 | 35 | 13 | 126 | 66 |
| 1,206 | 12 | 10 | 74 | 42 | 5 | 1 | 34 | 14 | 125 | 67 |
| 1,207 | 12 | 10 | 75 | 47 | 5 | 1 | 34 | 15 | 126 | 73 |
| 1,208 | 12 | 10 | 75 | 48 | 5 | 1 | 34 | 15 | 126 | 74 |
| 1,209 | 12 | 10 | 74 | 48 | 5 | 1 | 34 | 15 | 125 | 74 |
| 1,210 | 12 | 9  | 76 | 48 | 5 | 1 | 34 | 15 | 127 | 73 |
| 1,211 | 12 | 9  | 76 | 49 | 5 | 1 | 34 | 15 | 127 | 74 |
| 1,212 | 12 | 9  | 76 | 49 | 5 | 1 | 32 | 15 | 125 | 74 |
| 1,213 | 12 | 9  | 77 | 49 | 5 | 1 | 33 | 14 | 127 | 73 |
| 1,214 | 13 | 9  | 78 | 48 | 5 | 1 | 33 | 13 | 129 | 71 |
| 1,215 | 14 | 8  | 81 | 45 | 5 | 1 | 35 | 11 | 135 | 65 |
| 1,216 | 14 | 6  | 81 | 41 | 6 | 1 | 36 | 10 | 137 | 58 |
| 1,217 | 16 | 6  | 84 | 39 | 7 | 1 | 39 | 10 | 146 | 56 |
| 1,218 | 16 | 6  | 82 | 39 | 7 | 1 | 39 | 11 | 144 | 57 |

|       |    |   |     |    |   |   |    |    |     |    |
|-------|----|---|-----|----|---|---|----|----|-----|----|
| 1,219 | 15 | 6 | 70  | 39 | 5 | 1 | 33 | 11 | 123 | 57 |
| 1,220 | 15 | 6 | 68  | 39 | 5 | 1 | 33 | 11 | 121 | 57 |
| 1,221 | 15 | 7 | 66  | 38 | 5 | 1 | 33 | 11 | 119 | 57 |
| 1,222 | 14 | 7 | 61  | 38 | 5 | 1 | 33 | 11 | 113 | 57 |
| 1,223 | 14 | 8 | 60  | 40 | 5 | 1 | 33 | 11 | 112 | 60 |
| 1,224 | 11 | 8 | 55  | 44 | 5 | 1 | 24 | 11 | 95  | 64 |
| 1,225 | 11 | 7 | 52  | 40 | 5 | 1 | 25 | 9  | 93  | 57 |
| 1,226 | 11 | 6 | 54  | 38 | 5 | 1 | 26 | 8  | 96  | 53 |
| 1,227 | 13 | 6 | 57  | 38 | 5 | 1 | 29 | 8  | 104 | 53 |
| 1,228 | 14 | 6 | 59  | 36 | 5 | 1 | 29 | 8  | 107 | 51 |
| 1,229 | 14 | 6 | 57  | 36 | 4 | 1 | 29 | 8  | 104 | 51 |
| 1,230 | 15 | 6 | 56  | 42 | 4 | 1 | 31 | 9  | 106 | 58 |
| 1,231 | 14 | 6 | 54  | 42 | 3 | 1 | 29 | 9  | 100 | 58 |
| 1,232 | 14 | 5 | 51  | 42 | 3 | 1 | 28 | 9  | 96  | 57 |
| 1,233 | 14 | 5 | 52  | 42 | 3 | 1 | 28 | 9  | 97  | 57 |
| 1,234 | 14 | 5 | 51  | 42 | 2 | 1 | 28 | 9  | 95  | 57 |
| 1,235 | 14 | 5 | 52  | 40 | 2 | 1 | 28 | 9  | 96  | 55 |
| 1,236 | 14 | 5 | 51  | 40 | 2 | 1 | 28 | 9  | 95  | 55 |
| 1,237 | 14 | 5 | 54  | 42 | 3 | 0 | 29 | 9  | 100 | 56 |
| 1,238 | 15 | 5 | 63  | 41 | 3 | 0 | 37 | 9  | 118 | 55 |
| 1,239 | 14 | 5 | 60  | 37 | 3 | 0 | 37 | 9  | 114 | 51 |
| 1,240 | 10 | 6 | 61  | 37 | 3 | 0 | 41 | 9  | 115 | 52 |
| 1,241 | 9  | 6 | 62  | 34 | 3 | 0 | 43 | 9  | 117 | 49 |
| 1,242 | 10 | 3 | 47  | 25 | 3 | 0 | 44 | 6  | 104 | 34 |
| 1,243 | 10 | 3 | 45  | 25 | 3 | 0 | 42 | 6  | 100 | 34 |
| 1,244 | 13 | 3 | 72  | 24 | 4 | 0 | 57 | 6  | 146 | 33 |
| 1,245 | 13 | 3 | 93  | 23 | 6 | 0 | 75 | 6  | 187 | 32 |
| 1,246 | 13 | 3 | 97  | 23 | 7 | 0 | 76 | 6  | 193 | 32 |
| 1,247 | 13 | 3 | 97  | 23 | 7 | 0 | 76 | 6  | 193 | 32 |
| 1,248 | 13 | 3 | 97  | 23 | 7 | 0 | 76 | 6  | 193 | 32 |
| 1,249 | 13 | 3 | 98  | 23 | 7 | 0 | 77 | 6  | 195 | 32 |
| 1,250 | 13 | 3 | 100 | 23 | 8 | 0 | 77 | 6  | 198 | 32 |
| 1,251 | 13 | 3 | 102 | 23 | 8 | 0 | 78 | 6  | 201 | 32 |
| 1,252 | 13 | 3 | 103 | 23 | 8 | 0 | 78 | 6  | 202 | 32 |
| 1,253 | 13 | 3 | 106 | 23 | 8 | 0 | 83 | 6  | 210 | 32 |
| 1,254 | 13 | 3 | 107 | 24 | 8 | 0 | 80 | 6  | 208 | 33 |
| 1,255 | 13 | 3 | 106 | 24 | 8 | 0 | 80 | 6  | 207 | 33 |
| 1,256 | 13 | 3 | 104 | 24 | 8 | 0 | 82 | 6  | 207 | 33 |
| 1,257 | 13 | 3 | 103 | 24 | 8 | 0 | 82 | 6  | 206 | 33 |
| 1,258 | 13 | 3 | 103 | 19 | 8 | 0 | 82 | 5  | 206 | 27 |
| 1,259 | 13 | 3 | 104 | 18 | 8 | 0 | 84 | 5  | 209 | 26 |

|       |    |   |     |    |    |   |     |    |     |    |
|-------|----|---|-----|----|----|---|-----|----|-----|----|
| 1,260 | 13 | 3 | 105 | 18 | 8  | 0 | 84  | 5  | 210 | 26 |
| 1,261 | 13 | 3 | 103 | 18 | 8  | 0 | 84  | 5  | 208 | 26 |
| 1,262 | 13 | 3 | 103 | 17 | 8  | 0 | 83  | 5  | 207 | 25 |
| 1,263 | 13 | 4 | 113 | 17 | 8  | 0 | 87  | 5  | 221 | 26 |
| 1,264 | 14 | 4 | 123 | 17 | 9  | 0 | 92  | 5  | 238 | 26 |
| 1,265 | 13 | 4 | 122 | 18 | 9  | 0 | 90  | 5  | 234 | 27 |
| 1,266 | 13 | 4 | 122 | 18 | 9  | 0 | 90  | 5  | 234 | 27 |
| 1,267 | 13 | 4 | 125 | 18 | 9  | 0 | 90  | 5  | 237 | 27 |
| 1,268 | 11 | 4 | 122 | 18 | 8  | 0 | 87  | 5  | 228 | 27 |
| 1,269 | 14 | 4 | 146 | 19 | 10 | 1 | 103 | 4  | 273 | 28 |
| 1,270 | 14 | 4 | 145 | 19 | 10 | 1 | 103 | 4  | 272 | 28 |
| 1,271 | 14 | 4 | 145 | 19 | 10 | 1 | 103 | 4  | 272 | 28 |
| 1,272 | 18 | 3 | 156 | 19 | 11 | 1 | 111 | 4  | 296 | 27 |
| 1,273 | 20 | 3 | 166 | 21 | 12 | 1 | 126 | 5  | 324 | 30 |
| 1,274 | 20 | 2 | 169 | 20 | 12 | 1 | 127 | 5  | 328 | 28 |
| 1,275 | 20 | 3 | 175 | 22 | 12 | 1 | 132 | 8  | 339 | 34 |
| 1,276 | 21 | 3 | 179 | 22 | 12 | 1 | 132 | 11 | 344 | 37 |
| 1,277 | 21 | 4 | 181 | 27 | 14 | 1 | 130 | 13 | 346 | 45 |
| 1,278 | 19 | 4 | 178 | 27 | 16 | 1 | 130 | 13 | 343 | 45 |
| 1,279 | 18 | 4 | 176 | 20 | 16 | 1 | 130 | 12 | 340 | 37 |
| 1,280 | 18 | 4 | 176 | 20 | 16 | 1 | 131 | 12 | 341 | 37 |
| 1,281 | 17 | 4 | 179 | 20 | 16 | 1 | 133 | 12 | 345 | 37 |
| 1,282 | 17 | 4 | 180 | 20 | 16 | 1 | 134 | 12 | 347 | 37 |
| 1,283 | 17 | 4 | 180 | 20 | 16 | 1 | 134 | 14 | 347 | 39 |
| 1,284 | 17 | 4 | 179 | 20 | 16 | 1 | 134 | 14 | 346 | 39 |
| 1,285 | 17 | 4 | 180 | 20 | 16 | 1 | 135 | 14 | 348 | 39 |
| 1,286 | 17 | 4 | 179 | 20 | 16 | 1 | 135 | 14 | 347 | 39 |
| 1,287 | 17 | 4 | 180 | 18 | 16 | 1 | 135 | 13 | 348 | 36 |
| 1,288 | 17 | 4 | 177 | 18 | 15 | 1 | 134 | 13 | 343 | 36 |
| 1,289 | 16 | 5 | 168 | 18 | 15 | 1 | 127 | 13 | 326 | 37 |
| 1,290 | 16 | 5 | 170 | 18 | 15 | 1 | 127 | 13 | 328 | 37 |
| 1,291 | 16 | 4 | 168 | 18 | 15 | 1 | 123 | 13 | 322 | 36 |
| 1,292 | 16 | 4 | 168 | 18 | 15 | 1 | 120 | 13 | 319 | 36 |
| 1,293 | 16 | 4 | 169 | 23 | 15 | 1 | 118 | 13 | 318 | 41 |
| 1,294 | 15 | 4 | 149 | 23 | 15 | 1 | 103 | 13 | 282 | 41 |
| 1,295 | 15 | 4 | 146 | 23 | 14 | 1 | 103 | 14 | 278 | 42 |
| 1,296 | 15 | 4 | 125 | 24 | 12 | 1 | 87  | 14 | 239 | 43 |
| 1,297 | 15 | 4 | 138 | 27 | 11 | 1 | 101 | 14 | 265 | 46 |
| 1,298 | 15 | 4 | 138 | 29 | 11 | 1 | 101 | 14 | 265 | 48 |
| 1,299 | 16 | 4 | 139 | 30 | 15 | 1 | 116 | 17 | 286 | 52 |
| 1,300 | 16 | 4 | 139 | 30 | 15 | 1 | 117 | 18 | 287 | 53 |



|       |    |   |     |    |    |   |     |    |     |    |
|-------|----|---|-----|----|----|---|-----|----|-----|----|
| 1,301 | 16 | 4 | 138 | 32 | 14 | 1 | 117 | 18 | 285 | 55 |
| 1,302 | 16 | 5 | 136 | 34 | 14 | 1 | 117 | 18 | 283 | 58 |
| 1,303 | 16 | 5 | 135 | 35 | 14 | 2 | 116 | 18 | 281 | 60 |
| 1,304 | 16 | 5 | 130 | 35 | 14 | 2 | 111 | 18 | 271 | 60 |
| 1,305 | 16 | 5 | 128 | 34 | 14 | 2 | 110 | 18 | 268 | 59 |
| 1,306 | 16 | 5 | 135 | 34 | 14 | 2 | 110 | 18 | 275 | 59 |
| 1,307 | 16 | 5 | 135 | 34 | 14 | 2 | 109 | 18 | 274 | 59 |
| 1,308 | 16 | 5 | 135 | 34 | 14 | 2 | 109 | 17 | 274 | 58 |
| 1,309 | 16 | 5 | 134 | 34 | 14 | 2 | 107 | 17 | 271 | 58 |
| 1,310 | 16 | 5 | 134 | 34 | 14 | 2 | 108 | 17 | 272 | 58 |
| 1,311 | 18 | 5 | 134 | 34 | 14 | 2 | 110 | 17 | 276 | 58 |
| 1,312 | 18 | 5 | 135 | 34 | 14 | 2 | 110 | 17 | 277 | 58 |
| 1,313 | 19 | 4 | 137 | 34 | 14 | 2 | 109 | 17 | 279 | 57 |
| 1,314 | 20 | 4 | 145 | 34 | 14 | 2 | 114 | 17 | 293 | 57 |
| 1,315 | 18 | 4 | 181 | 33 | 13 | 2 | 119 | 17 | 331 | 56 |
| 1,316 | 18 | 4 | 180 | 34 | 13 | 2 | 119 | 17 | 330 | 57 |
| 1,317 | 19 | 4 | 190 | 34 | 14 | 2 | 129 | 17 | 352 | 57 |
| 1,318 | 20 | 4 | 188 | 34 | 13 | 2 | 128 | 17 | 349 | 57 |
| 1,319 | 20 | 4 | 187 | 34 | 13 | 2 | 127 | 17 | 347 | 57 |
| 1,320 | 17 | 4 | 164 | 33 | 11 | 1 | 111 | 17 | 303 | 55 |
| 1,321 | 16 | 4 | 162 | 33 | 10 | 1 | 109 | 17 | 297 | 55 |
| 1,322 | 13 | 4 | 154 | 33 | 10 | 1 | 105 | 17 | 282 | 55 |
| 1,323 | 11 | 4 | 144 | 34 | 10 | 1 | 94  | 17 | 259 | 56 |
| 1,324 | 11 | 4 | 144 | 32 | 9  | 1 | 91  | 16 | 255 | 53 |
| 1,325 | 11 | 4 | 142 | 32 | 9  | 1 | 91  | 16 | 253 | 53 |
| 1,326 | 12 | 3 | 141 | 25 | 9  | 1 | 85  | 12 | 247 | 41 |
| 1,327 | 11 | 2 | 138 | 20 | 10 | 1 | 83  | 7  | 242 | 30 |
| 1,328 | 12 | 2 | 135 | 20 | 8  | 1 | 83  | 7  | 238 | 30 |
| 1,329 | 13 | 2 | 134 | 20 | 6  | 1 | 80  | 9  | 233 | 32 |
| 1,330 | 13 | 2 | 134 | 20 | 6  | 1 | 79  | 9  | 232 | 32 |
| 1,331 | 13 | 2 | 137 | 20 | 6  | 1 | 81  | 9  | 237 | 32 |
| 1,332 | 13 | 2 | 134 | 20 | 6  | 1 | 77  | 9  | 230 | 32 |
| 1,333 | 13 | 2 | 133 | 20 | 6  | 1 | 76  | 9  | 228 | 32 |
| 1,334 | 15 | 2 | 172 | 20 | 6  | 1 | 88  | 7  | 281 | 30 |
| 1,335 | 15 | 2 | 172 | 20 | 6  | 1 | 88  | 7  | 281 | 30 |
| 1,336 | 15 | 2 | 178 | 20 | 6  | 1 | 91  | 7  | 290 | 30 |
| 1,337 | 15 | 2 | 178 | 20 | 6  | 1 | 91  | 7  | 290 | 30 |
| 1,338 | 16 | 2 | 182 | 20 | 6  | 1 | 92  | 7  | 296 | 30 |
| 1,339 | 16 | 1 | 182 | 20 | 6  | 1 | 92  | 7  | 296 | 29 |
| 1,340 | 16 | 1 | 182 | 20 | 6  | 1 | 92  | 7  | 296 | 29 |
| 1,341 | 16 | 1 | 180 | 20 | 6  | 1 | 92  | 7  | 294 | 29 |

|       |    |   |     |    |   |   |    |    |     |    |
|-------|----|---|-----|----|---|---|----|----|-----|----|
| 1,342 | 16 | 1 | 180 | 20 | 6 | 1 | 92 | 7  | 294 | 29 |
| 1,343 | 16 | 1 | 178 | 20 | 6 | 2 | 92 | 7  | 292 | 30 |
| 1,344 | 15 | 1 | 178 | 15 | 6 | 2 | 90 | 8  | 289 | 26 |
| 1,345 | 15 | 1 | 177 | 17 | 6 | 2 | 89 | 9  | 287 | 29 |
| 1,346 | 13 | 1 | 173 | 17 | 6 | 2 | 89 | 8  | 281 | 28 |
| 1,347 | 13 | 2 | 173 | 16 | 6 | 2 | 87 | 9  | 279 | 29 |
| 1,348 | 13 | 2 | 156 | 9  | 6 | 2 | 72 | 5  | 247 | 18 |
| 1,349 | 13 | 2 | 156 | 9  | 6 | 2 | 72 | 5  | 247 | 18 |
| 1,350 | 12 | 2 | 155 | 9  | 2 | 2 | 57 | 5  | 226 | 18 |
| 1,351 | 12 | 2 | 153 | 9  | 2 | 2 | 55 | 5  | 222 | 18 |
| 1,352 | 12 | 1 | 152 | 7  | 2 | 2 | 55 | 5  | 221 | 15 |
| 1,353 | 12 | 1 | 152 | 9  | 2 | 2 | 55 | 5  | 221 | 17 |
| 1,354 | 12 | 1 | 152 | 8  | 2 | 1 | 55 | 5  | 221 | 15 |
| 1,355 | 12 | 1 | 152 | 8  | 2 | 1 | 55 | 5  | 221 | 15 |
| 1,356 | 12 | 1 | 152 | 8  | 2 | 1 | 55 | 5  | 221 | 15 |
| 1,357 | 12 | 1 | 145 | 9  | 2 | 1 | 54 | 5  | 213 | 16 |
| 1,358 | 12 | 1 | 145 | 9  | 2 | 1 | 54 | 6  | 213 | 17 |
| 1,359 | 12 | 1 | 146 | 9  | 2 | 1 | 54 | 7  | 214 | 18 |
| 1,360 | 12 | 1 | 147 | 10 | 2 | 1 | 54 | 8  | 215 | 20 |
| 1,361 | 10 | 2 | 147 | 12 | 2 | 1 | 51 | 10 | 210 | 25 |
| 1,362 | 10 | 2 | 146 | 18 | 2 | 1 | 51 | 12 | 209 | 33 |
| 1,363 | 10 | 2 | 145 | 23 | 2 | 1 | 51 | 14 | 208 | 40 |
| 1,364 | 9  | 2 | 134 | 23 | 2 | 1 | 47 | 15 | 192 | 41 |
| 1,365 | 8  | 2 | 124 | 25 | 2 | 2 | 42 | 16 | 176 | 45 |
| 1,366 | 8  | 3 | 77  | 25 | 2 | 2 | 32 | 16 | 119 | 46 |
| 1,367 | 7  | 4 | 66  | 25 | 1 | 2 | 22 | 16 | 96  | 47 |
| 1,368 | 7  | 4 | 65  | 25 | 1 | 2 | 22 | 16 | 95  | 47 |
| 1,369 | 6  | 4 | 65  | 25 | 1 | 2 | 22 | 16 | 94  | 47 |
| 1,370 | 6  | 4 | 65  | 25 | 1 | 2 | 22 | 16 | 94  | 47 |
| 1,371 | 6  | 4 | 65  | 26 | 1 | 2 | 21 | 16 | 93  | 48 |
| 1,372 | 6  | 4 | 65  | 26 | 1 | 2 | 21 | 16 | 93  | 48 |
| 1,373 | 6  | 4 | 64  | 26 | 1 | 2 | 21 | 16 | 92  | 48 |
| 1,374 | 6  | 4 | 66  | 25 | 1 | 2 | 22 | 16 | 95  | 47 |
| 1,375 | 6  | 4 | 66  | 24 | 1 | 2 | 22 | 16 | 95  | 46 |
| 1,376 | 6  | 5 | 65  | 24 | 1 | 2 | 21 | 16 | 93  | 47 |
| 1,377 | 5  | 5 | 60  | 24 | 1 | 2 | 21 | 16 | 87  | 47 |
| 1,378 | 5  | 5 | 59  | 25 | 0 | 2 | 21 | 16 | 85  | 48 |
| 1,379 | 4  | 5 | 58  | 25 | 0 | 2 | 21 | 16 | 83  | 48 |
| 1,380 | 3  | 5 | 58  | 25 | 0 | 2 | 21 | 14 | 82  | 46 |
| 1,381 | 4  | 5 | 58  | 26 | 0 | 2 | 21 | 14 | 83  | 47 |
| 1,382 | 4  | 5 | 55  | 26 | 0 | 2 | 18 | 14 | 77  | 47 |

|       |   |   |    |    |   |   |    |    |    |    |
|-------|---|---|----|----|---|---|----|----|----|----|
| 1,383 | 4 | 5 | 48 | 26 | 0 | 2 | 17 | 15 | 69 | 48 |
| 1,384 | 2 | 5 | 19 | 26 | 0 | 2 | 6  | 15 | 27 | 48 |
| 1,385 | 2 | 5 | 16 | 27 | 0 | 2 | 5  | 16 | 23 | 50 |
| 1,386 | 2 | 5 | 10 | 27 | 0 | 2 | 2  | 16 | 14 | 50 |
| 1,387 | 2 | 5 | 9  | 27 | 0 | 2 | 2  | 16 | 13 | 50 |
| 1,388 | 1 | 5 | 9  | 27 | 0 | 2 | 1  | 16 | 11 | 50 |
| 1,389 | 1 | 5 | 8  | 27 | 0 | 2 | 3  | 16 | 12 | 50 |
| 1,390 | 2 | 5 | 12 | 27 | 0 | 2 | 6  | 16 | 20 | 50 |
| 1,391 | 2 | 5 | 12 | 27 | 0 | 2 | 6  | 16 | 20 | 50 |
| 1,392 | 2 | 5 | 13 | 27 | 0 | 1 | 7  | 16 | 22 | 49 |
| 1,393 | 2 | 5 | 16 | 27 | 0 | 1 | 7  | 16 | 25 | 49 |
| 1,394 | 2 | 5 | 17 | 27 | 0 | 1 | 7  | 16 | 26 | 49 |
| 1,395 | 2 | 5 | 18 | 27 | 0 | 1 | 7  | 15 | 27 | 48 |
| 1,396 | 2 | 5 | 19 | 25 | 0 | 1 | 8  | 14 | 29 | 45 |
| 1,397 | 2 | 5 | 20 | 26 | 1 | 1 | 8  | 14 | 31 | 46 |
| 1,398 | 2 | 4 | 20 | 26 | 1 | 1 | 8  | 13 | 31 | 44 |
| 1,399 | 2 | 4 | 20 | 25 | 1 | 1 | 11 | 13 | 34 | 43 |
| 1,400 | 2 | 4 | 20 | 25 | 1 | 1 | 12 | 13 | 35 | 43 |
| 1,401 | 2 | 4 | 20 | 25 | 1 | 1 | 12 | 13 | 35 | 43 |
| 1,402 | 3 | 4 | 20 | 25 | 1 | 1 | 12 | 13 | 36 | 43 |
| 1,403 | 3 | 4 | 20 | 25 | 1 | 1 | 12 | 13 | 36 | 43 |
| 1,404 | 3 | 4 | 33 | 23 | 1 | 1 | 15 | 13 | 52 | 41 |
| 1,405 | 3 | 4 | 33 | 23 | 1 | 1 | 16 | 13 | 53 | 41 |
| 1,406 | 4 | 4 | 34 | 23 | 1 | 1 | 25 | 13 | 64 | 41 |
| 1,407 | 4 | 4 | 36 | 23 | 1 | 1 | 25 | 13 | 66 | 41 |
| 1,408 | 4 | 4 | 36 | 22 | 1 | 1 | 26 | 13 | 67 | 40 |
| 1,409 | 4 | 4 | 36 | 23 | 1 | 1 | 26 | 12 | 67 | 40 |
| 1,410 | 4 | 4 | 35 | 24 | 1 | 1 | 26 | 11 | 66 | 40 |
| 1,411 | 4 | 4 | 36 | 23 | 1 | 1 | 26 | 10 | 67 | 38 |
| 1,412 | 4 | 3 | 36 | 21 | 2 | 1 | 27 | 8  | 69 | 33 |
| 1,413 | 4 | 3 | 36 | 10 | 2 | 1 | 27 | 3  | 69 | 17 |
| 1,414 | 4 | 3 | 36 | 12 | 2 | 1 | 27 | 3  | 69 | 19 |
| 1,415 | 4 | 3 | 37 | 14 | 2 | 1 | 27 | 3  | 70 | 21 |
| 1,416 | 4 | 3 | 37 | 12 | 2 | 0 | 27 | 2  | 70 | 17 |
| 1,417 | 4 | 2 | 38 | 12 | 2 | 0 | 27 | 3  | 71 | 17 |
| 1,418 | 4 | 1 | 38 | 13 | 2 | 0 | 28 | 4  | 72 | 18 |
| 1,419 | 4 | 1 | 38 | 13 | 2 | 0 | 29 | 4  | 73 | 18 |
| 1,420 | 4 | 1 | 38 | 12 | 2 | 0 | 29 | 5  | 73 | 18 |
| 1,421 | 4 | 2 | 38 | 12 | 2 | 0 | 29 | 5  | 73 | 19 |
| 1,422 | 4 | 2 | 37 | 13 | 2 | 0 | 28 | 6  | 71 | 21 |
| 1,423 | 4 | 2 | 36 | 13 | 2 | 0 | 28 | 7  | 70 | 22 |

|       |   |   |     |    |   |   |    |    |     |    |
|-------|---|---|-----|----|---|---|----|----|-----|----|
| 1,424 | 4 | 2 | 36  | 13 | 2 | 0 | 28 | 7  | 70  | 22 |
| 1,425 | 4 | 2 | 36  | 13 | 2 | 0 | 28 | 7  | 70  | 22 |
| 1,426 | 4 | 2 | 36  | 13 | 2 | 0 | 28 | 7  | 70  | 22 |
| 1,427 | 4 | 1 | 36  | 13 | 2 | 0 | 28 | 7  | 70  | 21 |
| 1,428 | 4 | 1 | 36  | 14 | 2 | 0 | 28 | 7  | 70  | 22 |
| 1,429 | 4 | 1 | 36  | 13 | 2 | 0 | 28 | 7  | 70  | 21 |
| 1,430 | 4 | 1 | 36  | 13 | 2 | 0 | 28 | 7  | 70  | 21 |
| 1,431 | 3 | 1 | 38  | 13 | 5 | 0 | 30 | 7  | 76  | 21 |
| 1,432 | 3 | 1 | 41  | 12 | 5 | 0 | 31 | 7  | 80  | 20 |
| 1,433 | 3 | 1 | 41  | 12 | 5 | 0 | 31 | 7  | 80  | 20 |
| 1,434 | 3 | 1 | 41  | 12 | 5 | 0 | 31 | 7  | 80  | 20 |
| 1,435 | 3 | 1 | 45  | 12 | 5 | 0 | 34 | 7  | 87  | 20 |
| 1,436 | 3 | 1 | 46  | 11 | 5 | 0 | 37 | 6  | 91  | 18 |
| 1,437 | 3 | 1 | 49  | 11 | 5 | 1 | 43 | 6  | 100 | 19 |
| 1,438 | 6 | 1 | 59  | 11 | 7 | 1 | 68 | 6  | 140 | 19 |
| 1,439 | 6 | 1 | 62  | 12 | 7 | 1 | 72 | 9  | 147 | 23 |
| 1,440 | 6 | 1 | 60  | 12 | 7 | 1 | 72 | 10 | 145 | 24 |
| 1,441 | 5 | 1 | 56  | 13 | 7 | 1 | 69 | 11 | 137 | 26 |
| 1,442 | 5 | 1 | 55  | 14 | 7 | 1 | 69 | 11 | 136 | 27 |
| 1,443 | 5 | 1 | 60  | 14 | 7 | 1 | 68 | 11 | 140 | 27 |
| 1,444 | 5 | 1 | 59  | 14 | 7 | 1 | 68 | 11 | 139 | 27 |
| 1,445 | 5 | 1 | 59  | 14 | 7 | 1 | 68 | 11 | 139 | 27 |
| 1,446 | 5 | 2 | 64  | 20 | 7 | 1 | 71 | 11 | 147 | 34 |
| 1,447 | 5 | 2 | 63  | 20 | 7 | 1 | 71 | 11 | 146 | 34 |
| 1,448 | 6 | 2 | 76  | 19 | 7 | 1 | 76 | 11 | 165 | 33 |
| 1,449 | 6 | 2 | 88  | 19 | 7 | 1 | 84 | 11 | 185 | 33 |
| 1,450 | 6 | 2 | 91  | 19 | 7 | 1 | 83 | 11 | 187 | 33 |
| 1,451 | 6 | 2 | 95  | 19 | 7 | 1 | 87 | 11 | 195 | 33 |
| 1,452 | 9 | 2 | 104 | 19 | 7 | 1 | 88 | 11 | 208 | 33 |
| 1,453 | 8 | 2 | 108 | 19 | 7 | 1 | 89 | 11 | 212 | 33 |
| 1,454 | 8 | 2 | 106 | 19 | 7 | 1 | 90 | 11 | 211 | 33 |
| 1,455 | 8 | 2 | 107 | 19 | 8 | 1 | 89 | 11 | 212 | 33 |
| 1,456 | 8 | 2 | 107 | 19 | 8 | 1 | 88 | 11 | 211 | 33 |
| 1,457 | 7 | 2 | 110 | 19 | 8 | 1 | 81 | 11 | 206 | 33 |
| 1,458 | 7 | 2 | 110 | 19 | 8 | 1 | 82 | 11 | 207 | 33 |
| 1,459 | 7 | 2 | 111 | 18 | 8 | 1 | 85 | 11 | 211 | 32 |
| 1,460 | 7 | 2 | 112 | 18 | 8 | 1 | 85 | 11 | 212 | 32 |
| 1,461 | 7 | 2 | 116 | 17 | 8 | 1 | 86 | 11 | 217 | 31 |
| 1,462 | 7 | 2 | 130 | 17 | 9 | 1 | 95 | 11 | 241 | 31 |
| 1,463 | 7 | 2 | 130 | 18 | 8 | 1 | 94 | 11 | 239 | 32 |
| 1,464 | 7 | 2 | 130 | 18 | 8 | 1 | 95 | 12 | 240 | 33 |

|       |    |   |     |    |    |   |     |    |     |    |
|-------|----|---|-----|----|----|---|-----|----|-----|----|
| 1,465 | 7  | 2 | 130 | 16 | 8  | 1 | 95  | 14 | 240 | 33 |
| 1,466 | 7  | 2 | 129 | 16 | 8  | 1 | 95  | 14 | 239 | 33 |
| 1,467 | 7  | 2 | 130 | 16 | 10 | 1 | 96  | 16 | 243 | 35 |
| 1,468 | 7  | 2 | 132 | 16 | 10 | 1 | 96  | 15 | 245 | 34 |
| 1,469 | 7  | 2 | 133 | 14 | 10 | 1 | 95  | 14 | 245 | 31 |
| 1,470 | 7  | 2 | 133 | 16 | 10 | 1 | 94  | 15 | 244 | 34 |
| 1,471 | 7  | 2 | 133 | 17 | 10 | 1 | 94  | 14 | 244 | 34 |
| 1,472 | 7  | 1 | 135 | 17 | 10 | 1 | 95  | 13 | 247 | 32 |
| 1,473 | 7  | 1 | 135 | 17 | 10 | 1 | 95  | 13 | 247 | 32 |
| 1,474 | 7  | 1 | 159 | 17 | 10 | 1 | 108 | 12 | 284 | 31 |
| 1,475 | 12 | 1 | 207 | 17 | 11 | 1 | 125 | 12 | 355 | 31 |
| 1,476 | 13 | 1 | 221 | 17 | 12 | 1 | 143 | 12 | 389 | 31 |
| 1,477 | 13 | 1 | 221 | 17 | 12 | 1 | 143 | 12 | 389 | 31 |
| 1,478 | 13 | 1 | 237 | 17 | 13 | 1 | 145 | 12 | 408 | 31 |
| 1,479 | 13 | 1 | 237 | 16 | 13 | 1 | 145 | 12 | 408 | 30 |
| 1,480 | 13 | 1 | 238 | 17 | 13 | 1 | 152 | 12 | 416 | 31 |
| 1,481 | 13 | 1 | 236 | 20 | 10 | 1 | 149 | 13 | 408 | 35 |
| 1,482 | 13 | 1 | 234 | 20 | 10 | 1 | 148 | 13 | 405 | 35 |
| 1,483 | 14 | 1 | 233 | 22 | 10 | 1 | 148 | 13 | 405 | 37 |
| 1,484 | 14 | 2 | 235 | 24 | 10 | 2 | 149 | 14 | 408 | 42 |
| 1,485 | 14 | 2 | 232 | 24 | 10 | 2 | 146 | 13 | 402 | 41 |
| 1,486 | 14 | 2 | 233 | 25 | 10 | 2 | 143 | 13 | 400 | 42 |
| 1,487 | 14 | 2 | 232 | 27 | 10 | 2 | 140 | 13 | 396 | 44 |
| 1,488 | 14 | 2 | 230 | 33 | 10 | 1 | 136 | 15 | 390 | 51 |
| 1,489 | 11 | 2 | 218 | 33 | 8  | 1 | 109 | 15 | 346 | 51 |
| 1,490 | 11 | 2 | 215 | 33 | 8  | 1 | 105 | 12 | 339 | 48 |
| 1,491 | 11 | 2 | 215 | 33 | 8  | 1 | 102 | 11 | 336 | 47 |
| 1,492 | 11 | 2 | 215 | 32 | 8  | 1 | 103 | 10 | 337 | 45 |
| 1,493 | 11 | 2 | 210 | 31 | 8  | 1 | 104 | 10 | 333 | 44 |
| 1,494 | 11 | 2 | 210 | 31 | 8  | 1 | 104 | 10 | 333 | 44 |
| 1,495 | 11 | 2 | 208 | 31 | 8  | 1 | 104 | 10 | 331 | 44 |
| 1,496 | 11 | 2 | 208 | 31 | 8  | 1 | 104 | 10 | 331 | 44 |
| 1,497 | 12 | 1 | 203 | 26 | 8  | 1 | 104 | 10 | 327 | 38 |
| 1,498 | 12 | 1 | 203 | 27 | 8  | 1 | 103 | 10 | 326 | 39 |
| 1,499 | 11 | 1 | 189 | 29 | 7  | 1 | 97  | 10 | 304 | 41 |
| 1,500 | 12 | 1 | 177 | 29 | 8  | 1 | 89  | 10 | 286 | 41 |
| 1,501 | 12 | 2 | 174 | 30 | 8  | 1 | 89  | 11 | 283 | 44 |
| 1,502 | 12 | 3 | 170 | 31 | 8  | 1 | 84  | 14 | 274 | 49 |
| 1,503 | 9  | 3 | 161 | 32 | 8  | 1 | 83  | 14 | 261 | 50 |
| 1,504 | 9  | 3 | 157 | 32 | 8  | 1 | 82  | 14 | 256 | 50 |
| 1,505 | 9  | 3 | 156 | 32 | 8  | 1 | 81  | 14 | 254 | 50 |

|       |    |   |     |    |   |   |    |    |     |    |
|-------|----|---|-----|----|---|---|----|----|-----|----|
| 1,506 | 9  | 3 | 145 | 34 | 7 | 1 | 80 | 14 | 241 | 52 |
| 1,507 | 9  | 3 | 142 | 35 | 7 | 1 | 79 | 14 | 237 | 53 |
| 1,508 | 9  | 3 | 141 | 35 | 7 | 1 | 79 | 14 | 236 | 53 |
| 1,509 | 9  | 3 | 139 | 36 | 7 | 1 | 78 | 14 | 233 | 54 |
| 1,510 | 10 | 3 | 138 | 36 | 7 | 1 | 74 | 14 | 229 | 54 |
| 1,511 | 10 | 4 | 137 | 36 | 7 | 1 | 74 | 14 | 228 | 55 |
| 1,512 | 10 | 4 | 132 | 36 | 7 | 1 | 75 | 13 | 224 | 54 |
| 1,513 | 10 | 4 | 117 | 37 | 6 | 1 | 66 | 13 | 199 | 55 |
| 1,514 | 10 | 4 | 121 | 36 | 6 | 1 | 69 | 13 | 206 | 54 |
| 1,515 | 10 | 4 | 121 | 36 | 6 | 1 | 68 | 12 | 205 | 53 |
| 1,516 | 10 | 4 | 126 | 34 | 4 | 1 | 69 | 10 | 209 | 49 |
| 1,517 | 11 | 4 | 129 | 35 | 5 | 1 | 73 | 10 | 218 | 50 |
| 1,518 | 11 | 4 | 129 | 35 | 6 | 1 | 76 | 9  | 222 | 49 |
| 1,519 | 11 | 4 | 129 | 35 | 6 | 1 | 76 | 9  | 222 | 49 |
| 1,520 | 11 | 4 | 128 | 35 | 6 | 1 | 76 | 9  | 221 | 49 |
| 1,521 | 11 | 5 | 128 | 33 | 6 | 1 | 76 | 8  | 221 | 47 |
| 1,522 | 11 | 5 | 128 | 33 | 6 | 1 | 75 | 8  | 220 | 47 |
| 1,523 | 11 | 5 | 126 | 32 | 6 | 1 | 75 | 8  | 218 | 46 |
| 1,524 | 11 | 5 | 126 | 32 | 6 | 1 | 75 | 8  | 218 | 46 |
| 1,525 | 11 | 5 | 102 | 32 | 6 | 1 | 62 | 8  | 181 | 46 |
| 1,526 | 6  | 5 | 54  | 32 | 5 | 1 | 45 | 8  | 110 | 46 |
| 1,527 | 5  | 5 | 40  | 32 | 4 | 1 | 27 | 8  | 76  | 46 |
| 1,528 | 5  | 5 | 28  | 32 | 3 | 1 | 27 | 8  | 63  | 46 |
| 1,529 | 6  | 5 | 27  | 32 | 3 | 1 | 25 | 8  | 61  | 46 |
| 1,530 | 6  | 5 | 27  | 31 | 3 | 1 | 24 | 8  | 60  | 45 |
| 1,531 | 6  | 5 | 26  | 31 | 3 | 1 | 18 | 8  | 53  | 45 |
| 1,532 | 6  | 5 | 26  | 29 | 3 | 1 | 18 | 7  | 53  | 42 |
| 1,533 | 5  | 5 | 26  | 29 | 3 | 1 | 18 | 7  | 52  | 42 |
| 1,534 | 5  | 5 | 26  | 28 | 3 | 1 | 18 | 8  | 52  | 42 |
| 1,535 | 5  | 4 | 25  | 26 | 3 | 0 | 19 | 7  | 52  | 37 |
| 1,536 | 5  | 4 | 24  | 26 | 3 | 0 | 19 | 7  | 51  | 37 |
| 1,537 | 5  | 4 | 22  | 25 | 3 | 0 | 18 | 7  | 48  | 36 |
| 1,538 | 5  | 4 | 22  | 23 | 3 | 0 | 18 | 7  | 48  | 34 |
| 1,539 | 5  | 4 | 23  | 17 | 4 | 0 | 20 | 5  | 52  | 26 |
| 1,540 | 5  | 4 | 23  | 16 | 4 | 0 | 20 | 5  | 52  | 25 |
| 1,541 | 5  | 4 | 23  | 16 | 4 | 0 | 20 | 5  | 52  | 25 |
| 1,542 | 5  | 4 | 23  | 16 | 4 | 0 | 20 | 5  | 52  | 25 |
| 1,543 | 5  | 4 | 24  | 16 | 4 | 0 | 19 | 5  | 52  | 25 |
| 1,544 | 5  | 4 | 24  | 16 | 4 | 0 | 21 | 5  | 54  | 25 |
| 1,545 | 5  | 4 | 25  | 16 | 4 | 0 | 21 | 5  | 55  | 25 |
| 1,546 | 5  | 5 | 24  | 14 | 4 | 0 | 21 | 5  | 54  | 24 |

|       |   |   |     |    |   |   |    |    |     |    |
|-------|---|---|-----|----|---|---|----|----|-----|----|
| 1,547 | 5 | 5 | 23  | 14 | 4 | 0 | 21 | 5  | 53  | 24 |
| 1,548 | 4 | 3 | 23  | 10 | 4 | 0 | 21 | 1  | 52  | 14 |
| 1,549 | 4 | 3 | 23  | 10 | 4 | 0 | 21 | 1  | 52  | 14 |
| 1,550 | 3 | 3 | 23  | 10 | 3 | 0 | 20 | 1  | 49  | 14 |
| 1,551 | 3 | 3 | 23  | 10 | 3 | 0 | 20 | 1  | 49  | 14 |
| 1,552 | 3 | 3 | 23  | 10 | 3 | 0 | 20 | 1  | 49  | 14 |
| 1,553 | 3 | 3 | 23  | 10 | 3 | 0 | 20 | 1  | 49  | 14 |
| 1,554 | 3 | 3 | 23  | 9  | 3 | 0 | 20 | 1  | 49  | 13 |
| 1,555 | 3 | 3 | 23  | 9  | 3 | 0 | 20 | 1  | 49  | 13 |
| 1,556 | 3 | 3 | 24  | 9  | 3 | 0 | 21 | 1  | 51  | 13 |
| 1,557 | 3 | 3 | 24  | 7  | 3 | 0 | 21 | 1  | 51  | 11 |
| 1,558 | 3 | 3 | 28  | 6  | 3 | 0 | 22 | 1  | 56  | 10 |
| 1,559 | 2 | 3 | 38  | 6  | 3 | 0 | 26 | 1  | 69  | 10 |
| 1,560 | 3 | 3 | 43  | 5  | 3 | 0 | 29 | 1  | 78  | 9  |
| 1,561 | 3 | 3 | 43  | 5  | 3 | 0 | 29 | 1  | 78  | 9  |
| 1,562 | 5 | 2 | 54  | 8  | 3 | 0 | 40 | 1  | 102 | 11 |
| 1,563 | 5 | 3 | 54  | 18 | 3 | 0 | 38 | 1  | 100 | 22 |
| 1,564 | 5 | 5 | 55  | 23 | 3 | 1 | 38 | 9  | 101 | 38 |
| 1,565 | 5 | 5 | 51  | 26 | 3 | 1 | 35 | 9  | 94  | 41 |
| 1,566 | 5 | 7 | 50  | 32 | 3 | 1 | 35 | 10 | 93  | 50 |
| 1,567 | 5 | 7 | 44  | 35 | 3 | 1 | 33 | 10 | 85  | 53 |
| 1,568 | 4 | 8 | 45  | 36 | 2 | 1 | 29 | 11 | 80  | 56 |
| 1,569 | 4 | 8 | 43  | 37 | 1 | 1 | 27 | 11 | 75  | 57 |
| 1,570 | 4 | 8 | 70  | 37 | 4 | 1 | 36 | 11 | 114 | 57 |
| 1,571 | 5 | 7 | 117 | 37 | 4 | 1 | 44 | 12 | 170 | 57 |
| 1,572 | 5 | 7 | 117 | 37 | 4 | 1 | 44 | 12 | 170 | 57 |
| 1,573 | 5 | 7 | 124 | 37 | 4 | 1 | 47 | 12 | 180 | 57 |
| 1,574 | 5 | 7 | 124 | 37 | 4 | 1 | 47 | 13 | 180 | 58 |
| 1,575 | 5 | 7 | 126 | 38 | 4 | 1 | 48 | 13 | 183 | 59 |
| 1,576 | 5 | 7 | 127 | 38 | 4 | 1 | 49 | 13 | 185 | 59 |
| 1,577 | 5 | 7 | 132 | 38 | 5 | 1 | 53 | 13 | 195 | 59 |
| 1,578 | 5 | 7 | 132 | 38 | 5 | 1 | 53 | 13 | 195 | 59 |
| 1,579 | 5 | 7 | 135 | 38 | 5 | 1 | 54 | 13 | 199 | 59 |
| 1,580 | 4 | 7 | 135 | 38 | 5 | 1 | 55 | 13 | 199 | 59 |
| 1,581 | 4 | 7 | 135 | 38 | 5 | 1 | 55 | 13 | 199 | 59 |
| 1,582 | 7 | 7 | 139 | 37 | 5 | 1 | 60 | 13 | 211 | 58 |
| 1,583 | 7 | 7 | 139 | 37 | 5 | 1 | 60 | 13 | 211 | 58 |
| 1,584 | 7 | 7 | 140 | 37 | 5 | 1 | 62 | 13 | 214 | 58 |
| 1,585 | 7 | 7 | 144 | 36 | 6 | 1 | 63 | 12 | 220 | 56 |
| 1,586 | 7 | 7 | 147 | 36 | 6 | 1 | 61 | 12 | 221 | 56 |
| 1,587 | 7 | 7 | 147 | 36 | 6 | 1 | 62 | 12 | 222 | 56 |

|       |    |    |     |    |   |   |    |    |     |    |
|-------|----|----|-----|----|---|---|----|----|-----|----|
| 1,588 | 8  | 7  | 155 | 37 | 7 | 1 | 67 | 13 | 237 | 58 |
| 1,589 | 8  | 8  | 155 | 37 | 6 | 1 | 66 | 13 | 235 | 59 |
| 1,590 | 8  | 8  | 155 | 37 | 6 | 1 | 67 | 14 | 236 | 60 |
| 1,591 | 9  | 8  | 156 | 37 | 6 | 1 | 68 | 14 | 239 | 60 |
| 1,592 | 9  | 8  | 156 | 37 | 6 | 1 | 70 | 15 | 241 | 61 |
| 1,593 | 9  | 8  | 155 | 37 | 6 | 1 | 70 | 15 | 240 | 61 |
| 1,594 | 9  | 8  | 155 | 37 | 6 | 1 | 70 | 15 | 240 | 61 |
| 1,595 | 9  | 8  | 156 | 37 | 6 | 1 | 68 | 15 | 239 | 61 |
| 1,596 | 9  | 9  | 155 | 37 | 6 | 1 | 68 | 15 | 238 | 62 |
| 1,597 | 9  | 9  | 155 | 38 | 6 | 1 | 68 | 17 | 238 | 65 |
| 1,598 | 9  | 9  | 155 | 38 | 6 | 1 | 68 | 17 | 238 | 65 |
| 1,599 | 9  | 9  | 157 | 38 | 7 | 1 | 68 | 17 | 241 | 65 |
| 1,600 | 10 | 9  | 161 | 38 | 8 | 1 | 68 | 17 | 247 | 65 |
| 1,601 | 10 | 9  | 161 | 39 | 8 | 1 | 68 | 17 | 247 | 66 |
| 1,602 | 10 | 9  | 163 | 39 | 8 | 1 | 70 | 17 | 251 | 66 |
| 1,603 | 10 | 9  | 163 | 39 | 8 | 1 | 71 | 17 | 252 | 66 |
| 1,604 | 10 | 9  | 173 | 39 | 9 | 1 | 73 | 17 | 265 | 66 |
| 1,605 | 10 | 9  | 176 | 42 | 9 | 1 | 73 | 17 | 268 | 69 |
| 1,606 | 10 | 9  | 179 | 43 | 9 | 1 | 79 | 17 | 277 | 70 |
| 1,607 | 10 | 9  | 178 | 43 | 9 | 1 | 78 | 17 | 275 | 70 |
| 1,608 | 10 | 9  | 174 | 46 | 9 | 1 | 77 | 25 | 270 | 81 |
| 1,609 | 10 | 10 | 164 | 49 | 9 | 2 | 73 | 26 | 256 | 87 |
| 1,610 | 9  | 10 | 160 | 47 | 9 | 2 | 70 | 26 | 248 | 85 |
| 1,611 | 10 | 10 | 160 | 47 | 9 | 2 | 72 | 26 | 251 | 85 |
| 1,612 | 10 | 10 | 153 | 48 | 9 | 2 | 62 | 26 | 234 | 86 |
| 1,613 | 8  | 9  | 150 | 39 | 9 | 2 | 61 | 26 | 228 | 76 |
| 1,614 | 8  | 9  | 150 | 39 | 9 | 2 | 61 | 26 | 228 | 76 |
| 1,615 | 8  | 7  | 149 | 30 | 9 | 1 | 61 | 18 | 227 | 56 |
| 1,616 | 8  | 7  | 149 | 31 | 9 | 1 | 61 | 18 | 227 | 57 |
| 1,617 | 8  | 5  | 149 | 25 | 9 | 1 | 61 | 18 | 227 | 49 |
| 1,618 | 8  | 5  | 149 | 25 | 9 | 2 | 62 | 18 | 228 | 50 |
| 1,619 | 8  | 4  | 145 | 24 | 9 | 2 | 61 | 18 | 223 | 48 |
| 1,620 | 8  | 4  | 129 | 23 | 8 | 2 | 58 | 18 | 203 | 47 |
| 1,621 | 8  | 4  | 118 | 23 | 6 | 2 | 52 | 18 | 184 | 47 |
| 1,622 | 7  | 4  | 71  | 23 | 6 | 2 | 44 | 17 | 128 | 46 |
| 1,623 | 7  | 4  | 66  | 22 | 6 | 2 | 43 | 17 | 122 | 45 |
| 1,624 | 7  | 4  | 65  | 22 | 6 | 2 | 41 | 16 | 119 | 44 |
| 1,625 | 7  | 4  | 64  | 21 | 6 | 2 | 42 | 16 | 119 | 43 |
| 1,626 | 7  | 5  | 63  | 21 | 6 | 2 | 41 | 16 | 117 | 44 |
| 1,627 | 7  | 5  | 58  | 21 | 5 | 2 | 38 | 16 | 108 | 44 |
| 1,628 | 7  | 5  | 59  | 21 | 5 | 2 | 40 | 16 | 111 | 44 |



|       |    |   |     |    |    |   |     |    |     |    |
|-------|----|---|-----|----|----|---|-----|----|-----|----|
| 1,629 | 7  | 6 | 55  | 22 | 5  | 2 | 40  | 16 | 107 | 46 |
| 1,630 | 7  | 6 | 54  | 22 | 5  | 2 | 39  | 16 | 105 | 46 |
| 1,631 | 7  | 6 | 53  | 23 | 5  | 2 | 38  | 16 | 103 | 47 |
| 1,632 | 5  | 7 | 49  | 24 | 5  | 2 | 33  | 16 | 92  | 49 |
| 1,633 | 4  | 7 | 50  | 25 | 6  | 2 | 34  | 17 | 94  | 51 |
| 1,634 | 4  | 7 | 50  | 25 | 6  | 2 | 33  | 17 | 93  | 51 |
| 1,635 | 4  | 8 | 54  | 25 | 6  | 2 | 34  | 17 | 98  | 52 |
| 1,636 | 4  | 8 | 52  | 25 | 5  | 2 | 34  | 17 | 95  | 52 |
| 1,637 | 4  | 8 | 51  | 25 | 5  | 2 | 36  | 17 | 96  | 52 |
| 1,638 | 3  | 8 | 43  | 26 | 4  | 2 | 30  | 17 | 80  | 53 |
| 1,639 | 3  | 8 | 43  | 27 | 4  | 2 | 31  | 18 | 81  | 55 |
| 1,640 | 3  | 7 | 43  | 35 | 4  | 2 | 31  | 20 | 81  | 64 |
| 1,641 | 3  | 7 | 42  | 35 | 4  | 2 | 29  | 19 | 78  | 63 |
| 1,642 | 8  | 7 | 56  | 35 | 6  | 2 | 32  | 19 | 102 | 63 |
| 1,643 | 9  | 7 | 67  | 35 | 8  | 2 | 39  | 18 | 123 | 62 |
| 1,644 | 9  | 7 | 67  | 35 | 8  | 2 | 39  | 18 | 123 | 62 |
| 1,645 | 10 | 7 | 111 | 35 | 10 | 2 | 61  | 18 | 192 | 62 |
| 1,646 | 10 | 7 | 110 | 35 | 10 | 2 | 61  | 18 | 191 | 62 |
| 1,647 | 13 | 5 | 115 | 34 | 11 | 2 | 65  | 16 | 204 | 57 |
| 1,648 | 13 | 5 | 114 | 34 | 11 | 2 | 65  | 16 | 203 | 57 |
| 1,649 | 13 | 5 | 117 | 35 | 10 | 2 | 65  | 16 | 205 | 58 |
| 1,650 | 13 | 5 | 118 | 35 | 10 | 2 | 68  | 16 | 209 | 58 |
| 1,651 | 13 | 6 | 116 | 36 | 9  | 2 | 68  | 16 | 206 | 60 |
| 1,652 | 13 | 6 | 120 | 35 | 9  | 2 | 72  | 16 | 214 | 59 |
| 1,653 | 13 | 6 | 123 | 35 | 9  | 2 | 74  | 16 | 219 | 59 |
| 1,654 | 13 | 6 | 114 | 35 | 8  | 2 | 72  | 16 | 207 | 59 |
| 1,655 | 13 | 6 | 112 | 35 | 8  | 2 | 73  | 16 | 206 | 59 |
| 1,656 | 13 | 6 | 111 | 32 | 9  | 2 | 69  | 16 | 202 | 56 |
| 1,657 | 13 | 6 | 111 | 32 | 9  | 2 | 69  | 16 | 202 | 56 |
| 1,658 | 13 | 6 | 116 | 32 | 9  | 2 | 72  | 16 | 210 | 56 |
| 1,659 | 13 | 5 | 132 | 26 | 10 | 1 | 83  | 7  | 238 | 39 |
| 1,660 | 15 | 5 | 141 | 26 | 10 | 1 | 88  | 7  | 254 | 39 |
| 1,661 | 15 | 5 | 154 | 26 | 10 | 1 | 89  | 7  | 268 | 39 |
| 1,662 | 14 | 5 | 156 | 25 | 11 | 1 | 88  | 7  | 269 | 38 |
| 1,663 | 14 | 6 | 155 | 25 | 11 | 1 | 89  | 7  | 269 | 39 |
| 1,664 | 21 | 6 | 218 | 24 | 19 | 1 | 131 | 7  | 389 | 38 |
| 1,665 | 22 | 6 | 228 | 24 | 21 | 1 | 134 | 7  | 405 | 38 |
| 1,666 | 22 | 6 | 231 | 23 | 21 | 1 | 134 | 7  | 408 | 37 |
| 1,667 | 22 | 6 | 232 | 23 | 21 | 1 | 134 | 6  | 409 | 36 |
| 1,668 | 22 | 6 | 232 | 23 | 21 | 1 | 134 | 6  | 409 | 36 |
| 1,669 | 22 | 6 | 232 | 20 | 21 | 0 | 133 | 6  | 408 | 32 |

|       |    |   |     |    |    |   |     |   |     |    |
|-------|----|---|-----|----|----|---|-----|---|-----|----|
| 1,670 | 23 | 6 | 238 | 19 | 21 | 0 | 135 | 6 | 417 | 31 |
| 1,671 | 23 | 6 | 242 | 19 | 21 | 0 | 137 | 6 | 423 | 31 |
| 1,672 | 23 | 7 | 244 | 19 | 21 | 0 | 138 | 6 | 426 | 32 |
| 1,673 | 26 | 7 | 253 | 19 | 21 | 0 | 139 | 6 | 439 | 32 |
| 1,674 | 29 | 6 | 270 | 19 | 21 | 0 | 152 | 6 | 472 | 31 |
| 1,675 | 29 | 6 | 276 | 19 | 21 | 0 | 163 | 6 | 489 | 31 |
| 1,676 | 29 | 6 | 276 | 19 | 21 | 0 | 164 | 6 | 490 | 31 |
| 1,677 | 30 | 5 | 288 | 18 | 21 | 0 | 174 | 6 | 513 | 29 |
| 1,678 | 34 | 5 | 307 | 18 | 22 | 0 | 176 | 6 | 539 | 29 |
| 1,679 | 34 | 5 | 312 | 18 | 22 | 0 | 173 | 6 | 541 | 29 |
| 1,680 | 34 | 5 | 312 | 18 | 22 | 0 | 173 | 6 | 541 | 29 |
| 1,681 | 34 | 5 | 312 | 18 | 22 | 0 | 173 | 6 | 541 | 29 |
| 1,682 | 34 | 5 | 317 | 17 | 22 | 0 | 174 | 6 | 547 | 28 |
| 1,683 | 34 | 4 | 317 | 16 | 22 | 0 | 173 | 7 | 546 | 27 |
| 1,684 | 41 | 4 | 380 | 15 | 28 | 0 | 246 | 6 | 695 | 25 |
| 1,685 | 41 | 4 | 381 | 15 | 29 | 0 | 250 | 6 | 701 | 25 |
| 1,686 | 41 | 3 | 377 | 15 | 29 | 0 | 248 | 6 | 695 | 24 |
| 1,687 | 48 | 3 | 424 | 16 | 39 | 0 | 275 | 6 | 786 | 25 |
| 1,688 | 53 | 3 | 448 | 14 | 41 | 0 | 293 | 5 | 835 | 22 |
| 1,689 | 54 | 3 | 458 | 5  | 41 | 0 | 303 | 2 | 856 | 10 |
| 1,690 | 54 | 3 | 467 | 7  | 41 | 0 | 301 | 2 | 863 | 12 |
| 1,691 | 50 | 4 | 461 | 7  | 40 | 0 | 315 | 2 | 866 | 13 |
| 1,692 | 51 | 4 | 476 | 8  | 42 | 0 | 322 | 2 | 891 | 14 |
| 1,693 | 50 | 4 | 469 | 8  | 40 | 0 | 319 | 2 | 878 | 14 |
| 1,694 | 50 | 4 | 468 | 8  | 40 | 0 | 317 | 2 | 875 | 14 |
| 1,695 | 56 | 4 | 482 | 8  | 40 | 0 | 328 | 2 | 906 | 14 |
| 1,696 | 56 | 4 | 461 | 8  | 39 | 0 | 319 | 2 | 875 | 14 |
| 1,697 | 53 | 4 | 455 | 8  | 38 | 0 | 315 | 2 | 861 | 14 |
| 1,698 | 58 | 4 | 485 | 8  | 42 | 0 | 341 | 2 | 926 | 14 |
| 1,699 | 59 | 4 | 500 | 7  | 44 | 0 | 353 | 3 | 956 | 14 |
| 1,700 | 59 | 4 | 503 | 7  | 44 | 0 | 355 | 3 | 961 | 14 |
| 1,701 | 59 | 4 | 507 | 7  | 44 | 0 | 358 | 3 | 968 | 14 |
| 1,702 | 59 | 3 | 506 | 6  | 44 | 0 | 355 | 3 | 964 | 12 |
| 1,703 | 61 | 3 | 506 | 7  | 44 | 0 | 357 | 3 | 968 | 13 |
| 1,704 | 61 | 3 | 503 | 8  | 44 | 0 | 354 | 3 | 962 | 14 |
| 1,705 | 61 | 3 | 502 | 8  | 44 | 0 | 354 | 3 | 961 | 14 |
| 1,706 | 61 | 3 | 503 | 8  | 44 | 0 | 354 | 3 | 962 | 14 |
| 1,707 | 61 | 3 | 501 | 7  | 43 | 0 | 352 | 3 | 957 | 13 |
| 1,708 | 62 | 3 | 500 | 8  | 43 | 0 | 354 | 3 | 959 | 14 |
| 1,709 | 62 | 3 | 485 | 8  | 42 | 0 | 343 | 3 | 932 | 14 |
| 1,710 | 62 | 3 | 485 | 8  | 42 | 0 | 343 | 3 | 932 | 14 |

|       |    |   |     |    |    |   |     |   |     |    |
|-------|----|---|-----|----|----|---|-----|---|-----|----|
| 1,711 | 60 | 4 | 479 | 7  | 42 | 0 | 342 | 3 | 923 | 14 |
| 1,712 | 60 | 4 | 466 | 7  | 42 | 0 | 341 | 3 | 909 | 14 |
| 1,713 | 60 | 3 | 464 | 7  | 41 | 0 | 340 | 3 | 905 | 13 |
| 1,714 | 60 | 3 | 463 | 8  | 41 | 0 | 339 | 3 | 903 | 14 |
| 1,715 | 53 | 3 | 401 | 9  | 33 | 0 | 298 | 3 | 785 | 15 |
| 1,716 | 52 | 3 | 392 | 10 | 31 | 0 | 298 | 3 | 773 | 16 |
| 1,717 | 52 | 3 | 390 | 10 | 31 | 0 | 298 | 3 | 771 | 16 |
| 1,718 | 52 | 3 | 389 | 10 | 31 | 0 | 298 | 3 | 770 | 16 |
| 1,719 | 52 | 3 | 385 | 10 | 31 | 0 | 298 | 3 | 766 | 16 |
| 1,720 | 51 | 3 | 387 | 10 | 32 | 0 | 299 | 3 | 769 | 16 |
| 1,721 | 51 | 3 | 387 | 10 | 32 | 0 | 299 | 2 | 769 | 15 |
| 1,722 | 52 | 3 | 386 | 10 | 33 | 0 | 298 | 2 | 769 | 15 |
| 1,723 | 52 | 2 | 384 | 10 | 33 | 0 | 298 | 2 | 767 | 14 |
| 1,724 | 49 | 2 | 375 | 10 | 33 | 0 | 297 | 2 | 754 | 14 |
| 1,725 | 46 | 2 | 359 | 10 | 33 | 0 | 281 | 1 | 719 | 13 |
| 1,726 | 46 | 2 | 352 | 10 | 33 | 0 | 272 | 1 | 703 | 13 |
| 1,727 | 46 | 2 | 356 | 10 | 33 | 0 | 272 | 1 | 707 | 13 |
| 1,728 | 46 | 2 | 347 | 11 | 33 | 0 | 262 | 1 | 688 | 14 |
| 1,729 | 42 | 2 | 328 | 11 | 32 | 0 | 260 | 1 | 662 | 14 |
| 1,730 | 42 | 2 | 322 | 11 | 32 | 0 | 260 | 1 | 656 | 14 |
| 1,731 | 44 | 2 | 333 | 11 | 32 | 0 | 269 | 1 | 678 | 14 |
| 1,732 | 43 | 3 | 320 | 11 | 32 | 0 | 267 | 1 | 662 | 15 |
| 1,733 | 44 | 3 | 327 | 11 | 33 | 0 | 268 | 1 | 672 | 15 |
| 1,734 | 43 | 3 | 299 | 11 | 29 | 0 | 217 | 1 | 588 | 15 |
| 1,735 | 44 | 3 | 309 | 11 | 29 | 0 | 207 | 1 | 589 | 15 |
| 1,736 | 48 | 3 | 323 | 11 | 29 | 1 | 209 | 2 | 609 | 17 |
| 1,737 | 50 | 3 | 346 | 11 | 30 | 1 | 221 | 2 | 647 | 17 |
| 1,738 | 56 | 3 | 460 | 11 | 30 | 1 | 263 | 2 | 809 | 17 |
| 1,739 | 53 | 3 | 441 | 11 | 28 | 1 | 245 | 2 | 767 | 17 |
| 1,740 | 53 | 2 | 475 | 9  | 30 | 1 | 248 | 2 | 806 | 14 |
| 1,741 | 53 | 2 | 469 | 9  | 32 | 1 | 250 | 2 | 804 | 14 |
| 1,742 | 52 | 2 | 468 | 9  | 31 | 1 | 235 | 2 | 786 | 14 |
| 1,743 | 50 | 2 | 448 | 8  | 29 | 1 | 227 | 2 | 754 | 13 |
| 1,744 | 50 | 2 | 449 | 9  | 29 | 1 | 224 | 2 | 752 | 14 |
| 1,745 | 51 | 2 | 449 | 9  | 31 | 1 | 225 | 2 | 756 | 14 |
| 1,746 | 44 | 2 | 412 | 9  | 30 | 1 | 201 | 2 | 687 | 14 |
| 1,747 | 43 | 2 | 409 | 9  | 30 | 1 | 200 | 2 | 682 | 14 |
| 1,748 | 39 | 2 | 383 | 9  | 26 | 1 | 175 | 2 | 623 | 14 |
| 1,749 | 38 | 3 | 381 | 10 | 25 | 1 | 172 | 1 | 616 | 15 |
| 1,750 | 38 | 3 | 372 | 10 | 24 | 1 | 167 | 1 | 601 | 15 |
| 1,751 | 39 | 3 | 370 | 10 | 24 | 1 | 166 | 1 | 599 | 15 |

|       |    |   |     |    |    |   |     |   |     |    |
|-------|----|---|-----|----|----|---|-----|---|-----|----|
| 1,752 | 39 | 3 | 368 | 9  | 25 | 1 | 161 | 1 | 593 | 14 |
| 1,753 | 39 | 3 | 363 | 10 | 25 | 1 | 159 | 1 | 586 | 15 |
| 1,754 | 37 | 3 | 363 | 10 | 25 | 1 | 157 | 1 | 582 | 15 |
| 1,755 | 37 | 3 | 363 | 9  | 25 | 1 | 157 | 1 | 582 | 14 |
| 1,756 | 37 | 3 | 364 | 9  | 25 | 1 | 157 | 1 | 583 | 14 |
| 1,757 | 37 | 3 | 366 | 10 | 25 | 1 | 156 | 1 | 584 | 15 |
| 1,758 | 38 | 3 | 368 | 10 | 25 | 1 | 156 | 1 | 587 | 15 |
| 1,759 | 37 | 3 | 371 | 9  | 25 | 1 | 154 | 1 | 587 | 14 |
| 1,760 | 37 | 3 | 372 | 9  | 25 | 1 | 154 | 1 | 588 | 14 |
| 1,761 | 37 | 3 | 377 | 9  | 27 | 2 | 159 | 1 | 600 | 15 |
| 1,762 | 37 | 2 | 375 | 9  | 27 | 2 | 157 | 1 | 596 | 14 |
| 1,763 | 37 | 2 | 374 | 9  | 27 | 2 | 157 | 1 | 595 | 14 |
| 1,764 | 38 | 2 | 379 | 10 | 28 | 2 | 159 | 1 | 604 | 15 |
| 1,765 | 38 | 2 | 379 | 9  | 28 | 2 | 161 | 1 | 606 | 14 |
| 1,766 | 38 | 2 | 379 | 9  | 28 | 2 | 161 | 1 | 606 | 14 |
| 1,767 | 38 | 2 | 378 | 8  | 28 | 2 | 159 | 1 | 603 | 13 |
| 1,768 | 38 | 2 | 377 | 10 | 28 | 2 | 159 | 1 | 602 | 15 |
| 1,769 | 38 | 2 | 373 | 10 | 27 | 2 | 156 | 1 | 594 | 15 |
| 1,770 | 38 | 2 | 370 | 10 | 27 | 2 | 155 | 1 | 590 | 15 |
| 1,771 | 37 | 2 | 370 | 10 | 26 | 2 | 155 | 1 | 588 | 15 |
| 1,772 | 37 | 2 | 370 | 10 | 26 | 2 | 155 | 1 | 588 | 15 |
| 1,773 | 37 | 2 | 373 | 11 | 26 | 2 | 155 | 1 | 591 | 16 |
| 1,774 | 37 | 2 | 373 | 11 | 26 | 2 | 154 | 1 | 590 | 16 |
| 1,775 | 54 | 2 | 459 | 11 | 28 | 2 | 188 | 1 | 729 | 16 |
| 1,776 | 57 | 2 | 482 | 11 | 28 | 2 | 201 | 1 | 768 | 16 |
| 1,777 | 60 | 2 | 488 | 11 | 30 | 2 | 204 | 1 | 782 | 16 |
| 1,778 | 60 | 2 | 496 | 10 | 30 | 2 | 206 | 1 | 792 | 15 |
| 1,779 | 59 | 2 | 499 | 10 | 30 | 2 | 206 | 1 | 794 | 15 |
| 1,780 | 59 | 2 | 496 | 11 | 30 | 2 | 204 | 1 | 789 | 16 |
| 1,781 | 57 | 2 | 488 | 11 | 30 | 2 | 201 | 1 | 776 | 16 |
| 1,782 | 58 | 1 | 498 | 11 | 30 | 2 | 205 | 1 | 791 | 15 |
| 1,783 | 58 | 1 | 498 | 11 | 30 | 2 | 204 | 1 | 790 | 15 |
| 1,784 | 57 | 1 | 512 | 11 | 30 | 2 | 212 | 3 | 811 | 17 |
| 1,785 | 53 | 1 | 502 | 11 | 28 | 2 | 209 | 3 | 792 | 17 |
| 1,786 | 51 | 1 | 512 | 11 | 29 | 2 | 228 | 5 | 820 | 19 |
| 1,787 | 50 | 1 | 502 | 11 | 30 | 1 | 233 | 4 | 815 | 17 |
| 1,788 | 50 | 1 | 471 | 11 | 31 | 1 | 222 | 4 | 774 | 17 |
| 1,789 | 39 | 1 | 362 | 10 | 22 | 1 | 172 | 6 | 595 | 18 |
| 1,790 | 39 | 1 | 371 | 10 | 23 | 1 | 194 | 6 | 627 | 18 |
| 1,791 | 38 | 1 | 327 | 10 | 19 | 1 | 180 | 6 | 564 | 18 |
| 1,792 | 38 | 1 | 333 | 12 | 21 | 1 | 186 | 7 | 578 | 21 |

|       |    |   |     |    |    |   |     |    |     |    |
|-------|----|---|-----|----|----|---|-----|----|-----|----|
| 1,793 | 38 | 1 | 332 | 12 | 21 | 1 | 184 | 7  | 575 | 21 |
| 1,794 | 39 | 1 | 331 | 11 | 21 | 1 | 185 | 7  | 576 | 20 |
| 1,795 | 39 | 1 | 330 | 11 | 21 | 1 | 185 | 7  | 575 | 20 |
| 1,796 | 38 | 1 | 327 | 15 | 19 | 1 | 184 | 9  | 568 | 26 |
| 1,797 | 38 | 1 | 327 | 17 | 19 | 2 | 185 | 10 | 569 | 30 |
| 1,798 | 38 | 1 | 330 | 18 | 19 | 3 | 185 | 11 | 572 | 33 |
| 1,799 | 38 | 1 | 329 | 18 | 19 | 3 | 186 | 11 | 572 | 33 |
| 1,800 | 38 | 0 | 327 | 17 | 19 | 3 | 186 | 12 | 570 | 32 |
| 1,801 | 38 | 0 | 325 | 18 | 19 | 3 | 182 | 13 | 564 | 34 |
| 1,802 | 37 | 0 | 321 | 18 | 19 | 3 | 180 | 13 | 557 | 34 |
| 1,803 | 36 | 0 | 316 | 18 | 18 | 3 | 179 | 14 | 549 | 35 |
| 1,804 | 36 | 0 | 316 | 17 | 18 | 3 | 179 | 14 | 549 | 34 |
| 1,805 | 37 | 0 | 322 | 17 | 19 | 3 | 181 | 14 | 559 | 34 |
| 1,806 | 37 | 0 | 321 | 17 | 19 | 3 | 181 | 14 | 558 | 34 |
| 1,807 | 37 | 0 | 322 | 17 | 19 | 4 | 181 | 14 | 559 | 35 |
| 1,808 | 37 | 0 | 318 | 22 | 19 | 4 | 181 | 14 | 555 | 40 |
| 1,809 | 37 | 0 | 316 | 25 | 19 | 4 | 181 | 14 | 553 | 43 |
| 1,810 | 37 | 0 | 311 | 26 | 19 | 4 | 181 | 15 | 548 | 45 |
| 1,811 | 37 | 0 | 308 | 29 | 19 | 5 | 180 | 15 | 544 | 49 |
| 1,812 | 37 | 0 | 303 | 29 | 17 | 4 | 176 | 16 | 533 | 49 |
| 1,813 | 37 | 1 | 304 | 31 | 17 | 4 | 174 | 18 | 532 | 54 |
| 1,814 | 36 | 1 | 299 | 31 | 16 | 4 | 172 | 18 | 523 | 54 |
| 1,815 | 36 | 1 | 299 | 30 | 16 | 4 | 170 | 18 | 521 | 53 |
| 1,816 | 39 | 1 | 309 | 27 | 17 | 4 | 174 | 18 | 539 | 50 |
| 1,817 | 39 | 1 | 309 | 28 | 17 | 4 | 174 | 18 | 539 | 51 |
| 1,818 | 39 | 1 | 309 | 28 | 17 | 4 | 174 | 18 | 539 | 51 |
| 1,819 | 39 | 1 | 309 | 29 | 17 | 4 | 174 | 18 | 539 | 52 |
| 1,820 | 39 | 1 | 310 | 29 | 18 | 4 | 174 | 18 | 541 | 52 |
| 1,821 | 39 | 1 | 311 | 29 | 18 | 4 | 174 | 19 | 542 | 53 |
| 1,822 | 39 | 1 | 311 | 32 | 18 | 4 | 174 | 19 | 542 | 56 |
| 1,823 | 39 | 2 | 310 | 32 | 18 | 4 | 174 | 19 | 541 | 57 |
| 1,824 | 39 | 2 | 308 | 31 | 18 | 4 | 174 | 19 | 539 | 56 |
| 1,825 | 21 | 2 | 220 | 31 | 16 | 4 | 140 | 19 | 397 | 56 |
| 1,826 | 19 | 2 | 199 | 31 | 16 | 4 | 131 | 19 | 365 | 56 |
| 1,827 | 18 | 2 | 198 | 31 | 16 | 4 | 127 | 19 | 359 | 56 |
| 1,828 | 16 | 2 | 192 | 31 | 14 | 4 | 124 | 21 | 346 | 58 |
| 1,829 | 16 | 2 | 179 | 32 | 14 | 4 | 119 | 21 | 328 | 59 |
| 1,830 | 16 | 2 | 173 | 32 | 14 | 4 | 119 | 21 | 322 | 59 |
| 1,831 | 16 | 2 | 169 | 31 | 14 | 4 | 117 | 21 | 316 | 58 |
| 1,832 | 16 | 2 | 169 | 31 | 14 | 4 | 117 | 21 | 316 | 58 |
| 1,833 | 15 | 2 | 159 | 32 | 14 | 4 | 111 | 22 | 299 | 60 |

|       |    |   |     |    |    |   |    |    |     |    |
|-------|----|---|-----|----|----|---|----|----|-----|----|
| 1,834 | 15 | 3 | 151 | 32 | 14 | 4 | 99 | 22 | 279 | 61 |
| 1,835 | 15 | 3 | 135 | 32 | 13 | 4 | 97 | 18 | 260 | 57 |
| 1,836 | 15 | 3 | 130 | 32 | 13 | 4 | 96 | 18 | 254 | 57 |
| 1,837 | 15 | 3 | 105 | 37 | 11 | 4 | 74 | 19 | 205 | 63 |
| 1,838 | 12 | 3 | 99  | 38 | 9  | 4 | 64 | 19 | 184 | 64 |
| 1,839 | 10 | 3 | 94  | 38 | 7  | 4 | 57 | 19 | 168 | 64 |
| 1,840 | 8  | 3 | 53  | 39 | 6  | 4 | 39 | 17 | 106 | 63 |
| 1,841 | 6  | 3 | 36  | 39 | 5  | 4 | 17 | 17 | 64  | 63 |
| 1,842 | 7  | 3 | 28  | 38 | 3  | 4 | 9  | 16 | 47  | 61 |
| 1,843 | 7  | 3 | 27  | 39 | 3  | 4 | 9  | 16 | 46  | 62 |
| 1,844 | 7  | 3 | 26  | 39 | 3  | 4 | 9  | 17 | 45  | 63 |
| 1,845 | 6  | 4 | 26  | 39 | 3  | 4 | 9  | 17 | 44  | 64 |
| 1,846 | 6  | 4 | 26  | 35 | 3  | 4 | 9  | 15 | 44  | 58 |
| 1,847 | 6  | 4 | 26  | 35 | 3  | 4 | 9  | 15 | 44  | 58 |
| 1,848 | 7  | 5 | 26  | 33 | 3  | 3 | 8  | 14 | 44  | 55 |
| 1,849 | 7  | 6 | 23  | 34 | 3  | 3 | 8  | 13 | 41  | 56 |
| 1,850 | 7  | 6 | 25  | 36 | 3  | 3 | 8  | 12 | 43  | 57 |
| 1,851 | 7  | 6 | 25  | 36 | 3  | 3 | 8  | 11 | 43  | 56 |
| 1,852 | 7  | 6 | 25  | 36 | 3  | 3 | 8  | 11 | 43  | 56 |
| 1,853 | 7  | 7 | 24  | 38 | 2  | 3 | 8  | 11 | 41  | 59 |
| 1,854 | 6  | 7 | 23  | 38 | 2  | 3 | 8  | 10 | 39  | 58 |
| 1,855 | 6  | 7 | 21  | 38 | 2  | 3 | 8  | 10 | 37  | 58 |
| 1,856 | 6  | 7 | 19  | 38 | 2  | 3 | 7  | 10 | 34  | 58 |
| 1,857 | 6  | 7 | 18  | 38 | 2  | 2 | 8  | 10 | 34  | 57 |
| 1,858 | 6  | 7 | 18  | 32 | 2  | 2 | 8  | 10 | 34  | 51 |
| 1,859 | 6  | 7 | 18  | 29 | 2  | 2 | 8  | 10 | 34  | 48 |
| 1,860 | 5  | 7 | 18  | 29 | 2  | 3 | 8  | 10 | 33  | 49 |
| 1,861 | 5  | 7 | 17  | 25 | 2  | 2 | 7  | 9  | 31  | 43 |
| 1,862 | 5  | 7 | 18  | 25 | 2  | 2 | 7  | 8  | 32  | 42 |
| 1,863 | 5  | 6 | 18  | 24 | 2  | 2 | 6  | 6  | 31  | 38 |
| 1,864 | 5  | 6 | 16  | 25 | 2  | 2 | 6  | 6  | 29  | 39 |
| 1,865 | 5  | 6 | 16  | 25 | 2  | 2 | 6  | 6  | 29  | 39 |
| 1,866 | 2  | 6 | 8   | 25 | 1  | 2 | 2  | 6  | 13  | 39 |
| 1,867 | 2  | 6 | 7   | 25 | 2  | 2 | 2  | 6  | 13  | 39 |
| 1,868 | 2  | 7 | 8   | 24 | 2  | 2 | 2  | 6  | 14  | 39 |
| 1,869 | 2  | 7 | 8   | 25 | 2  | 2 | 3  | 6  | 15  | 40 |
| 1,870 | 2  | 8 | 7   | 24 | 1  | 2 | 3  | 6  | 13  | 40 |
| 1,871 | 2  | 8 | 6   | 24 | 1  | 2 | 3  | 6  | 12  | 40 |
| 1,872 | 2  | 8 | 7   | 24 | 1  | 2 | 3  | 5  | 13  | 39 |
| 1,873 | 2  | 8 | 7   | 22 | 1  | 2 | 3  | 5  | 13  | 37 |
| 1,874 | 2  | 7 | 8   | 24 | 1  | 2 | 3  | 6  | 14  | 39 |

|       |   |    |    |     |   |    |    |     |    |     |
|-------|---|----|----|-----|---|----|----|-----|----|-----|
| 1,875 | 2 | 7  | 8  | 25  | 1 | 2  | 3  | 6   | 14 | 40  |
| 1,876 | 2 | 7  | 8  | 26  | 1 | 2  | 3  | 6   | 14 | 41  |
| 1,877 | 2 | 8  | 8  | 29  | 1 | 4  | 3  | 9   | 14 | 50  |
| 1,878 | 2 | 9  | 13 | 31  | 1 | 4  | 4  | 9   | 20 | 53  |
| 1,879 | 2 | 10 | 13 | 31  | 1 | 4  | 4  | 7   | 20 | 52  |
| 1,880 | 2 | 10 | 13 | 33  | 1 | 4  | 4  | 7   | 20 | 54  |
| 1,881 | 2 | 12 | 13 | 36  | 1 | 4  | 4  | 10  | 20 | 62  |
| 1,882 | 2 | 15 | 13 | 36  | 1 | 4  | 4  | 10  | 20 | 65  |
| 1,883 | 2 | 15 | 13 | 37  | 1 | 4  | 4  | 11  | 20 | 67  |
| 1,884 | 2 | 14 | 13 | 39  | 1 | 4  | 4  | 12  | 20 | 69  |
| 1,885 | 2 | 14 | 14 | 40  | 1 | 4  | 4  | 16  | 21 | 74  |
| 1,886 | 2 | 14 | 16 | 43  | 1 | 4  | 4  | 20  | 23 | 81  |
| 1,887 | 2 | 14 | 15 | 43  | 1 | 4  | 4  | 20  | 22 | 81  |
| 1,888 | 2 | 27 | 15 | 54  | 1 | 6  | 4  | 35  | 22 | 122 |
| 1,889 | 2 | 29 | 15 | 81  | 1 | 6  | 4  | 40  | 22 | 156 |
| 1,890 | 2 | 31 | 15 | 97  | 1 | 6  | 5  | 42  | 23 | 176 |
| 1,891 | 2 | 31 | 15 | 100 | 1 | 6  | 6  | 42  | 24 | 179 |
| 1,892 | 2 | 31 | 18 | 100 | 1 | 6  | 6  | 42  | 27 | 179 |
| 1,893 | 3 | 31 | 22 | 100 | 1 | 6  | 9  | 42  | 35 | 179 |
| 1,894 | 5 | 34 | 25 | 102 | 1 | 7  | 12 | 42  | 43 | 185 |
| 1,895 | 5 | 34 | 25 | 102 | 1 | 7  | 12 | 42  | 43 | 185 |
| 1,896 | 5 | 33 | 25 | 102 | 1 | 7  | 13 | 42  | 44 | 184 |
| 1,897 | 5 | 33 | 25 | 102 | 1 | 7  | 13 | 42  | 44 | 184 |
| 1,898 | 4 | 32 | 25 | 102 | 1 | 7  | 13 | 42  | 43 | 183 |
| 1,899 | 5 | 31 | 25 | 101 | 1 | 6  | 13 | 42  | 44 | 180 |
| 1,900 | 5 | 31 | 24 | 99  | 1 | 6  | 13 | 42  | 43 | 178 |
| 1,901 | 5 | 33 | 24 | 105 | 1 | 7  | 13 | 43  | 43 | 188 |
| 1,902 | 5 | 34 | 24 | 115 | 1 | 8  | 13 | 54  | 43 | 211 |
| 1,903 | 5 | 35 | 24 | 119 | 1 | 8  | 13 | 58  | 43 | 220 |
| 1,904 | 5 | 36 | 24 | 127 | 1 | 9  | 12 | 65  | 42 | 237 |
| 1,905 | 5 | 36 | 24 | 128 | 1 | 9  | 12 | 65  | 42 | 238 |
| 1,906 | 5 | 41 | 25 | 142 | 1 | 9  | 12 | 67  | 43 | 259 |
| 1,907 | 5 | 65 | 25 | 253 | 1 | 15 | 12 | 141 | 43 | 474 |
| 1,908 | 5 | 65 | 25 | 260 | 1 | 15 | 11 | 143 | 42 | 483 |
| 1,909 | 6 | 70 | 25 | 301 | 1 | 17 | 11 | 150 | 43 | 538 |
| 1,910 | 6 | 70 | 25 | 321 | 1 | 17 | 11 | 154 | 43 | 562 |
| 1,911 | 6 | 70 | 26 | 332 | 1 | 17 | 11 | 157 | 44 | 576 |
| 1,912 | 6 | 70 | 26 | 332 | 1 | 17 | 11 | 157 | 44 | 576 |
| 1,913 | 7 | 70 | 25 | 339 | 1 | 18 | 12 | 161 | 45 | 588 |
| 1,914 | 7 | 71 | 25 | 370 | 1 | 19 | 12 | 180 | 45 | 640 |
| 1,915 | 7 | 74 | 25 | 392 | 1 | 19 | 12 | 186 | 45 | 671 |

|       |   |    |    |     |   |    |    |     |    |       |
|-------|---|----|----|-----|---|----|----|-----|----|-------|
| 1,916 | 7 | 79 | 26 | 497 | 1 | 25 | 12 | 238 | 46 | 839   |
| 1,917 | 7 | 80 | 25 | 546 | 1 | 26 | 12 | 285 | 45 | 937   |
| 1,918 | 8 | 83 | 26 | 639 | 0 | 29 | 12 | 308 | 46 | 1,059 |
| 1,919 | 8 | 82 | 25 | 646 | 0 | 30 | 14 | 313 | 47 | 1,071 |
| 1,920 | 8 | 82 | 26 | 655 | 0 | 31 | 13 | 317 | 47 | 1,085 |
| 1,921 | 8 | 81 | 26 | 658 | 0 | 31 | 13 | 317 | 47 | 1,087 |
| 1,922 | 8 | 81 | 25 | 658 | 1 | 31 | 13 | 317 | 47 | 1,087 |
| 1,923 | 8 | 81 | 25 | 663 | 1 | 31 | 13 | 318 | 47 | 1,093 |
| 1,924 | 8 | 81 | 24 | 670 | 1 | 31 | 13 | 321 | 46 | 1,103 |
| 1,925 | 8 | 81 | 24 | 678 | 1 | 32 | 13 | 322 | 46 | 1,113 |
| 1,926 | 8 | 82 | 24 | 679 | 1 | 33 | 13 | 323 | 46 | 1,117 |
| 1,927 | 8 | 82 | 25 | 683 | 1 | 34 | 13 | 325 | 47 | 1,124 |
| 1,928 | 8 | 81 | 25 | 680 | 1 | 32 | 13 | 322 | 47 | 1,115 |
| 1,929 | 8 | 80 | 20 | 686 | 1 | 35 | 12 | 338 | 41 | 1,139 |
| 1,930 | 8 | 79 | 20 | 688 | 1 | 35 | 12 | 338 | 41 | 1,140 |
| 1,931 | 8 | 81 | 22 | 697 | 1 | 36 | 14 | 348 | 45 | 1,162 |
| 1,932 | 8 | 79 | 22 | 698 | 1 | 36 | 14 | 347 | 45 | 1,160 |
| 1,933 | 8 | 76 | 22 | 699 | 1 | 36 | 15 | 348 | 46 | 1,159 |
| 1,934 | 8 | 76 | 22 | 699 | 1 | 36 | 15 | 347 | 46 | 1,158 |
| 1,935 | 8 | 77 | 22 | 697 | 1 | 36 | 15 | 345 | 46 | 1,155 |
| 1,936 | 8 | 77 | 21 | 694 | 1 | 36 | 15 | 342 | 45 | 1,149 |
| 1,937 | 8 | 77 | 21 | 693 | 1 | 36 | 16 | 338 | 46 | 1,144 |
| 1,938 | 8 | 77 | 22 | 694 | 1 | 36 | 16 | 338 | 47 | 1,145 |
| 1,939 | 9 | 64 | 22 | 680 | 1 | 34 | 16 | 328 | 48 | 1,106 |
| 1,940 | 9 | 62 | 24 | 659 | 1 | 35 | 16 | 328 | 50 | 1,084 |
| 1,941 | 9 | 60 | 24 | 646 | 1 | 35 | 15 | 328 | 49 | 1,069 |
| 1,942 | 9 | 62 | 23 | 650 | 1 | 37 | 15 | 342 | 48 | 1,091 |
| 1,943 | 7 | 62 | 19 | 652 | 1 | 38 | 12 | 346 | 39 | 1,098 |
| 1,944 | 6 | 62 | 17 | 652 | 1 | 38 | 10 | 346 | 34 | 1,098 |
| 1,945 | 5 | 59 | 17 | 650 | 1 | 37 | 9  | 345 | 32 | 1,091 |
| 1,946 | 5 | 59 | 17 | 650 | 1 | 37 | 8  | 345 | 31 | 1,091 |
| 1,947 | 5 | 60 | 17 | 653 | 1 | 37 | 8  | 345 | 31 | 1,095 |
| 1,948 | 5 | 60 | 17 | 653 | 1 | 37 | 8  | 345 | 31 | 1,095 |
| 1,949 | 5 | 60 | 18 | 652 | 1 | 37 | 8  | 345 | 32 | 1,094 |
| 1,950 | 4 | 60 | 18 | 652 | 1 | 37 | 8  | 346 | 31 | 1,095 |
| 1,951 | 4 | 58 | 17 | 646 | 1 | 36 | 8  | 343 | 30 | 1,083 |
| 1,952 | 4 | 57 | 17 | 635 | 1 | 35 | 8  | 332 | 30 | 1,059 |
| 1,953 | 4 | 57 | 17 | 635 | 1 | 35 | 10 | 333 | 32 | 1,060 |
| 1,954 | 4 | 54 | 17 | 621 | 1 | 34 | 11 | 324 | 33 | 1,033 |
| 1,955 | 4 | 54 | 17 | 622 | 1 | 34 | 11 | 325 | 33 | 1,035 |
| 1,956 | 4 | 54 | 18 | 621 | 1 | 35 | 11 | 325 | 34 | 1,035 |



|       |   |    |    |     |   |    |    |     |    |     |
|-------|---|----|----|-----|---|----|----|-----|----|-----|
| 1,957 | 4 | 26 | 17 | 497 | 1 | 29 | 11 | 251 | 33 | 803 |
| 1,958 | 4 | 25 | 17 | 497 | 1 | 29 | 11 | 251 | 33 | 802 |
| 1,959 | 3 | 25 | 17 | 492 | 1 | 29 | 11 | 252 | 32 | 798 |
| 1,960 | 3 | 20 | 17 | 453 | 1 | 27 | 11 | 247 | 32 | 747 |
| 1,961 | 3 | 20 | 17 | 442 | 1 | 27 | 11 | 247 | 32 | 736 |
| 1,962 | 3 | 20 | 16 | 433 | 1 | 26 | 11 | 246 | 31 | 725 |
| 1,963 | 3 | 20 | 16 | 434 | 1 | 26 | 10 | 247 | 30 | 727 |
| 1,964 | 2 | 20 | 16 | 429 | 1 | 25 | 10 | 245 | 29 | 719 |
| 1,965 | 2 | 19 | 16 | 403 | 1 | 26 | 10 | 233 | 29 | 681 |
| 1,966 | 2 | 33 | 16 | 483 | 1 | 40 | 11 | 332 | 30 | 888 |
| 1,967 | 2 | 28 | 15 | 384 | 1 | 34 | 11 | 281 | 29 | 727 |
| 1,968 | 2 | 27 | 15 | 335 | 1 | 35 | 12 | 236 | 30 | 633 |
| 1,969 | 1 | 24 | 14 | 245 | 1 | 32 | 12 | 214 | 28 | 515 |
| 1,970 | 1 | 24 | 14 | 237 | 1 | 31 | 10 | 209 | 26 | 501 |
| 1,971 | 1 | 26 | 13 | 224 | 1 | 30 | 10 | 205 | 25 | 485 |
| 1,972 | 1 | 26 | 13 | 224 | 1 | 30 | 10 | 206 | 25 | 486 |
| 1,973 | 1 | 26 | 13 | 226 | 0 | 30 | 10 | 207 | 24 | 489 |
| 1,974 | 1 | 32 | 14 | 256 | 0 | 36 | 10 | 270 | 25 | 594 |
| 1,975 | 1 | 32 | 14 | 250 | 0 | 36 | 10 | 275 | 25 | 593 |
| 1,976 | 1 | 32 | 14 | 272 | 0 | 37 | 11 | 284 | 26 | 625 |
| 1,977 | 1 | 32 | 14 | 280 | 0 | 37 | 11 | 292 | 26 | 641 |
| 1,978 | 1 | 32 | 13 | 276 | 0 | 36 | 11 | 290 | 25 | 634 |
| 1,979 | 1 | 34 | 13 | 310 | 0 | 36 | 11 | 323 | 25 | 703 |
| 1,980 | 1 | 34 | 12 | 304 | 0 | 33 | 9  | 314 | 22 | 685 |
| 1,981 | 1 | 37 | 13 | 309 | 0 | 33 | 9  | 320 | 23 | 699 |
| 1,982 | 1 | 37 | 13 | 306 | 0 | 35 | 9  | 316 | 23 | 694 |
| 1,983 | 3 | 37 | 15 | 301 | 0 | 35 | 10 | 315 | 28 | 688 |
| 1,984 | 3 | 37 | 17 | 300 | 0 | 35 | 9  | 315 | 29 | 687 |
| 1,985 | 3 | 37 | 20 | 300 | 0 | 35 | 10 | 315 | 33 | 687 |
| 1,986 | 3 | 36 | 18 | 299 | 0 | 35 | 9  | 315 | 30 | 685 |
| 1,987 | 3 | 36 | 18 | 301 | 0 | 35 | 9  | 324 | 30 | 696 |
| 1,988 | 3 | 37 | 17 | 303 | 0 | 35 | 9  | 324 | 29 | 699 |
| 1,989 | 4 | 37 | 18 | 308 | 0 | 35 | 9  | 330 | 31 | 710 |
| 1,990 | 4 | 37 | 18 | 310 | 0 | 35 | 8  | 325 | 30 | 707 |
| 1,991 | 4 | 38 | 16 | 310 | 0 | 34 | 8  | 325 | 28 | 707 |
| 1,992 | 4 | 38 | 16 | 308 | 0 | 34 | 8  | 325 | 28 | 705 |
| 1,993 | 4 | 37 | 14 | 305 | 0 | 32 | 8  | 315 | 26 | 689 |
| 1,994 | 4 | 37 | 15 | 304 | 0 | 31 | 9  | 311 | 28 | 683 |
| 1,995 | 4 | 36 | 15 | 299 | 0 | 31 | 9  | 311 | 28 | 677 |
| 1,996 | 4 | 36 | 14 | 299 | 0 | 31 | 9  | 311 | 27 | 677 |
| 1,997 | 4 | 36 | 14 | 301 | 0 | 31 | 9  | 311 | 27 | 679 |

|       |   |    |    |     |   |    |    |     |    |       |
|-------|---|----|----|-----|---|----|----|-----|----|-------|
| 1,998 | 4 | 40 | 14 | 307 | 0 | 33 | 11 | 321 | 29 | 701   |
| 1,999 | 4 | 48 | 15 | 369 | 0 | 40 | 11 | 374 | 30 | 831   |
| 2,000 | 4 | 48 | 16 | 388 | 0 | 43 | 11 | 394 | 31 | 873   |
| 2,001 | 4 | 56 | 16 | 463 | 0 | 51 | 12 | 437 | 32 | 1,007 |
| 2,002 | 4 | 56 | 16 | 471 | 0 | 51 | 12 | 442 | 32 | 1,020 |
| 2,003 | 4 | 59 | 16 | 475 | 0 | 52 | 12 | 445 | 32 | 1,031 |
| 2,004 | 4 | 62 | 16 | 497 | 0 | 54 | 10 | 456 | 30 | 1,069 |
| 2,005 | 4 | 62 | 16 | 510 | 0 | 54 | 9  | 456 | 29 | 1,082 |
| 2,006 | 4 | 62 | 16 | 516 | 0 | 54 | 9  | 455 | 29 | 1,087 |
| 2,007 | 4 | 62 | 17 | 517 | 0 | 53 | 9  | 455 | 30 | 1,087 |
| 2,008 | 4 | 62 | 17 | 517 | 0 | 53 | 10 | 453 | 31 | 1,085 |
| 2,009 | 4 | 62 | 17 | 518 | 0 | 53 | 10 | 454 | 31 | 1,087 |
| 2,010 | 4 | 62 | 17 | 514 | 0 | 53 | 10 | 449 | 31 | 1,078 |
| 2,011 | 4 | 63 | 17 | 505 | 0 | 53 | 10 | 445 | 31 | 1,066 |
| 2,012 | 4 | 63 | 17 | 505 | 0 | 53 | 10 | 448 | 31 | 1,069 |
| 2,013 | 4 | 63 | 17 | 504 | 0 | 54 | 10 | 448 | 31 | 1,069 |
| 2,014 | 4 | 63 | 17 | 501 | 0 | 54 | 12 | 443 | 33 | 1,061 |
| 2,015 | 4 | 63 | 17 | 502 | 0 | 54 | 12 | 445 | 33 | 1,064 |
| 2,016 | 4 | 46 | 17 | 389 | 1 | 38 | 12 | 334 | 34 | 807   |
| 2,017 | 5 | 46 | 17 | 393 | 1 | 40 | 12 | 338 | 35 | 817   |
| 2,018 | 5 | 46 | 17 | 393 | 1 | 40 | 11 | 338 | 34 | 817   |
| 2,019 | 5 | 46 | 18 | 392 | 1 | 38 | 11 | 338 | 35 | 814   |
| 2,020 | 5 | 46 | 18 | 390 | 1 | 38 | 11 | 338 | 35 | 812   |
| 2,021 | 5 | 46 | 18 | 391 | 1 | 38 | 11 | 340 | 35 | 815   |
| 2,022 | 5 | 44 | 18 | 398 | 1 | 39 | 11 | 339 | 35 | 820   |
| 2,023 | 5 | 45 | 18 | 400 | 1 | 39 | 11 | 341 | 35 | 825   |
| 2,024 | 5 | 49 | 18 | 407 | 1 | 39 | 11 | 342 | 35 | 837   |
| 2,025 | 5 | 43 | 18 | 373 | 1 | 33 | 11 | 279 | 35 | 728   |
| 2,026 | 5 | 43 | 18 | 340 | 1 | 31 | 11 | 260 | 35 | 674   |
| 2,027 | 5 | 42 | 18 | 331 | 1 | 31 | 10 | 255 | 34 | 659   |
| 2,028 | 5 | 42 | 18 | 333 | 1 | 32 | 10 | 256 | 34 | 663   |
| 2,029 | 6 | 40 | 18 | 326 | 1 | 37 | 10 | 240 | 35 | 643   |
| 2,030 | 6 | 42 | 18 | 382 | 1 | 39 | 10 | 268 | 35 | 731   |
| 2,031 | 6 | 42 | 18 | 401 | 1 | 42 | 10 | 286 | 35 | 771   |
| 2,032 | 6 | 48 | 17 | 474 | 1 | 54 | 10 | 390 | 34 | 966   |
| 2,033 | 6 | 62 | 16 | 662 | 1 | 59 | 10 | 473 | 33 | 1,256 |
| 2,034 | 4 | 62 | 14 | 662 | 1 | 59 | 9  | 472 | 28 | 1,255 |
| 2,035 | 4 | 63 | 11 | 686 | 1 | 59 | 9  | 478 | 25 | 1,286 |
| 2,036 | 4 | 62 | 8  | 680 | 1 | 59 | 8  | 465 | 21 | 1,266 |
| 2,037 | 4 | 62 | 8  | 681 | 1 | 59 | 8  | 467 | 21 | 1,269 |
| 2,038 | 3 | 62 | 8  | 681 | 1 | 59 | 8  | 467 | 20 | 1,269 |

|       |   |    |    |     |   |    |    |     |    |       |
|-------|---|----|----|-----|---|----|----|-----|----|-------|
| 2,039 | 2 | 62 | 7  | 681 | 1 | 60 | 8  | 468 | 18 | 1,271 |
| 2,040 | 2 | 62 | 7  | 682 | 1 | 60 | 8  | 468 | 18 | 1,272 |
| 2,041 | 2 | 62 | 7  | 677 | 1 | 60 | 8  | 467 | 18 | 1,266 |
| 2,042 | 2 | 61 | 7  | 670 | 2 | 60 | 8  | 460 | 19 | 1,251 |
| 2,043 | 2 | 61 | 7  | 670 | 2 | 60 | 8  | 460 | 19 | 1,251 |
| 2,044 | 2 | 60 | 8  | 665 | 2 | 60 | 8  | 456 | 20 | 1,241 |
| 2,045 | 2 | 60 | 7  | 665 | 2 | 60 | 7  | 456 | 18 | 1,241 |
| 2,046 | 2 | 60 | 7  | 665 | 2 | 60 | 7  | 457 | 18 | 1,242 |
| 2,047 | 2 | 60 | 7  | 665 | 2 | 60 | 7  | 457 | 18 | 1,242 |
| 2,048 | 2 | 48 | 7  | 596 | 2 | 51 | 7  | 394 | 18 | 1,089 |
| 2,049 | 2 | 48 | 7  | 596 | 2 | 51 | 5  | 394 | 16 | 1,089 |
| 2,050 | 2 | 48 | 7  | 596 | 2 | 51 | 5  | 394 | 16 | 1,089 |
| 2,051 | 2 | 48 | 5  | 577 | 2 | 48 | 5  | 375 | 14 | 1,048 |
| 2,052 | 2 | 40 | 6  | 502 | 2 | 40 | 4  | 334 | 14 | 916   |
| 2,053 | 2 | 40 | 6  | 495 | 2 | 40 | 3  | 329 | 13 | 904   |
| 2,054 | 2 | 38 | 11 | 502 | 2 | 40 | 5  | 333 | 20 | 913   |
| 2,055 | 2 | 35 | 12 | 481 | 2 | 38 | 5  | 320 | 21 | 874   |
| 2,056 | 2 | 35 | 16 | 468 | 3 | 38 | 8  | 320 | 29 | 861   |
| 2,057 | 2 | 35 | 15 | 461 | 4 | 38 | 8  | 320 | 29 | 854   |
| 2,058 | 2 | 35 | 15 | 459 | 5 | 38 | 7  | 320 | 29 | 852   |
| 2,059 | 2 | 35 | 15 | 459 | 5 | 38 | 7  | 320 | 29 | 852   |
| 2,060 | 2 | 35 | 15 | 458 | 5 | 39 | 7  | 319 | 29 | 851   |
| 2,061 | 2 | 36 | 16 | 458 | 5 | 39 | 10 | 319 | 33 | 852   |
| 2,062 | 2 | 35 | 16 | 458 | 5 | 39 | 10 | 320 | 33 | 852   |
| 2,063 | 2 | 36 | 17 | 456 | 5 | 38 | 10 | 315 | 34 | 845   |
| 2,064 | 3 | 36 | 17 | 456 | 5 | 38 | 10 | 315 | 35 | 845   |
| 2,065 | 3 | 36 | 17 | 456 | 5 | 38 | 9  | 316 | 34 | 846   |
| 2,066 | 3 | 36 | 17 | 455 | 5 | 38 | 9  | 315 | 34 | 844   |
| 2,067 | 3 | 36 | 17 | 455 | 4 | 38 | 9  | 315 | 33 | 844   |
| 2,068 | 2 | 36 | 19 | 452 | 4 | 36 | 9  | 310 | 34 | 834   |
| 2,069 | 2 | 36 | 18 | 452 | 4 | 36 | 9  | 309 | 33 | 833   |
| 2,070 | 2 | 36 | 18 | 452 | 4 | 36 | 9  | 309 | 33 | 833   |
| 2,071 | 2 | 36 | 18 | 461 | 4 | 36 | 9  | 312 | 33 | 845   |
| 2,072 | 2 | 36 | 18 | 460 | 4 | 36 | 9  | 310 | 33 | 842   |
| 2,073 | 2 | 36 | 18 | 454 | 4 | 35 | 9  | 310 | 33 | 835   |
| 2,074 | 2 | 35 | 18 | 457 | 4 | 35 | 9  | 311 | 33 | 838   |
| 2,075 | 2 | 31 | 18 | 448 | 4 | 35 | 9  | 310 | 33 | 824   |
| 2,076 | 2 | 32 | 17 | 449 | 4 | 35 | 9  | 309 | 32 | 825   |
| 2,077 | 2 | 32 | 17 | 446 | 4 | 33 | 9  | 303 | 32 | 814   |
| 2,078 | 2 | 32 | 17 | 446 | 4 | 33 | 9  | 304 | 32 | 815   |
| 2,079 | 2 | 32 | 17 | 446 | 4 | 33 | 9  | 303 | 32 | 814   |

|       |   |    |    |     |   |    |    |     |    |     |
|-------|---|----|----|-----|---|----|----|-----|----|-----|
| 2,080 | 1 | 34 | 17 | 420 | 4 | 28 | 10 | 281 | 32 | 763 |
| 2,081 | 2 | 32 | 18 | 372 | 5 | 26 | 12 | 256 | 37 | 686 |
| 2,082 | 2 | 32 | 18 | 363 | 5 | 23 | 12 | 238 | 37 | 656 |
| 2,083 | 2 | 23 | 18 | 286 | 5 | 11 | 12 | 128 | 37 | 448 |
| 2,084 | 2 | 7  | 18 | 91  | 5 | 3  | 12 | 40  | 37 | 141 |
| 2,085 | 2 | 7  | 18 | 92  | 5 | 3  | 12 | 39  | 37 | 141 |
| 2,086 | 2 | 6  | 18 | 73  | 5 | 3  | 12 | 37  | 37 | 119 |
| 2,087 | 2 | 6  | 18 | 75  | 5 | 3  | 12 | 39  | 37 | 123 |
| 2,088 | 2 | 6  | 18 | 74  | 5 | 3  | 12 | 37  | 37 | 120 |
| 2,089 | 2 | 6  | 18 | 76  | 5 | 3  | 12 | 36  | 37 | 121 |
| 2,090 | 2 | 7  | 18 | 74  | 5 | 2  | 12 | 35  | 37 | 118 |
| 2,091 | 2 | 7  | 18 | 78  | 5 | 2  | 12 | 37  | 37 | 124 |
| 2,092 | 2 | 7  | 18 | 87  | 5 | 2  | 12 | 37  | 37 | 133 |
| 2,093 | 2 | 10 | 18 | 111 | 4 | 3  | 13 | 42  | 37 | 166 |
| 2,094 | 2 | 12 | 19 | 124 | 4 | 3  | 13 | 46  | 38 | 185 |
| 2,095 | 2 | 13 | 18 | 124 | 4 | 3  | 13 | 46  | 37 | 186 |
| 2,096 | 2 | 13 | 18 | 138 | 4 | 4  | 13 | 49  | 37 | 204 |
| 2,097 | 2 | 13 | 18 | 141 | 4 | 4  | 13 | 51  | 37 | 209 |
| 2,098 | 2 | 15 | 18 | 145 | 4 | 5  | 13 | 53  | 37 | 218 |
| 2,099 | 2 | 15 | 18 | 145 | 4 | 5  | 13 | 53  | 37 | 218 |
| 2,100 | 4 | 15 | 20 | 148 | 4 | 5  | 16 | 56  | 44 | 224 |
| 2,101 | 4 | 15 | 25 | 148 | 6 | 5  | 20 | 56  | 55 | 224 |
| 2,102 | 4 | 15 | 26 | 149 | 6 | 6  | 20 | 55  | 56 | 225 |
| 2,103 | 4 | 15 | 26 | 154 | 6 | 7  | 21 | 53  | 57 | 229 |
| 2,104 | 4 | 16 | 26 | 157 | 6 | 7  | 21 | 54  | 57 | 234 |
| 2,105 | 4 | 16 | 22 | 175 | 6 | 6  | 21 | 58  | 53 | 255 |
| 2,106 | 4 | 23 | 21 | 217 | 6 | 10 | 21 | 73  | 52 | 323 |
| 2,107 | 4 | 23 | 16 | 220 | 5 | 10 | 21 | 75  | 46 | 328 |
| 2,108 | 4 | 23 | 17 | 226 | 4 | 11 | 24 | 76  | 49 | 336 |
| 2,109 | 4 | 23 | 17 | 227 | 3 | 11 | 24 | 77  | 48 | 338 |
| 2,110 | 4 | 45 | 19 | 319 | 3 | 22 | 24 | 134 | 50 | 520 |
| 2,111 | 4 | 50 | 18 | 342 | 3 | 22 | 22 | 152 | 47 | 566 |
| 2,112 | 4 | 52 | 18 | 354 | 3 | 22 | 21 | 153 | 46 | 581 |
| 2,113 | 4 | 51 | 18 | 370 | 3 | 22 | 21 | 158 | 46 | 601 |
| 2,114 | 4 | 52 | 17 | 375 | 3 | 23 | 21 | 163 | 45 | 613 |
| 2,115 | 3 | 55 | 17 | 377 | 3 | 23 | 21 | 162 | 44 | 617 |
| 2,116 | 3 | 57 | 17 | 388 | 3 | 23 | 20 | 163 | 43 | 631 |
| 2,117 | 3 | 57 | 17 | 387 | 3 | 23 | 20 | 163 | 43 | 630 |
| 2,118 | 3 | 57 | 17 | 392 | 3 | 24 | 21 | 165 | 44 | 638 |
| 2,119 | 3 | 59 | 15 | 406 | 3 | 24 | 21 | 174 | 42 | 663 |
| 2,120 | 3 | 61 | 15 | 428 | 3 | 24 | 21 | 189 | 42 | 702 |

|       |   |    |    |     |   |    |    |     |    |       |
|-------|---|----|----|-----|---|----|----|-----|----|-------|
| 2,121 | 3 | 61 | 15 | 428 | 3 | 24 | 21 | 189 | 42 | 702   |
| 2,122 | 3 | 61 | 15 | 419 | 3 | 24 | 21 | 185 | 42 | 689   |
| 2,123 | 3 | 62 | 15 | 419 | 3 | 24 | 21 | 187 | 42 | 692   |
| 2,124 | 3 | 62 | 15 | 421 | 3 | 24 | 21 | 188 | 42 | 695   |
| 2,125 | 3 | 64 | 15 | 429 | 3 | 24 | 21 | 194 | 42 | 711   |
| 2,126 | 3 | 65 | 15 | 450 | 3 | 25 | 21 | 206 | 42 | 746   |
| 2,127 | 3 | 66 | 15 | 488 | 3 | 29 | 21 | 231 | 42 | 814   |
| 2,128 | 3 | 67 | 16 | 503 | 4 | 29 | 21 | 237 | 44 | 836   |
| 2,129 | 3 | 71 | 16 | 521 | 4 | 29 | 21 | 241 | 44 | 862   |
| 2,130 | 3 | 71 | 16 | 526 | 4 | 29 | 21 | 242 | 44 | 868   |
| 2,131 | 2 | 69 | 15 | 525 | 4 | 29 | 20 | 242 | 41 | 865   |
| 2,132 | 2 | 69 | 15 | 510 | 3 | 30 | 19 | 240 | 39 | 849   |
| 2,133 | 2 | 69 | 15 | 506 | 3 | 30 | 19 | 240 | 39 | 845   |
| 2,134 | 2 | 69 | 15 | 506 | 3 | 30 | 19 | 240 | 39 | 845   |
| 2,135 | 2 | 69 | 15 | 499 | 3 | 30 | 19 | 239 | 39 | 837   |
| 2,136 | 2 | 69 | 15 | 500 | 3 | 30 | 19 | 240 | 39 | 839   |
| 2,137 | 2 | 70 | 15 | 500 | 3 | 30 | 19 | 240 | 39 | 840   |
| 2,138 | 2 | 70 | 16 | 499 | 3 | 30 | 19 | 238 | 40 | 837   |
| 2,139 | 2 | 73 | 20 | 504 | 3 | 31 | 19 | 254 | 44 | 862   |
| 2,140 | 2 | 73 | 20 | 506 | 3 | 32 | 19 | 257 | 44 | 868   |
| 2,141 | 2 | 72 | 20 | 563 | 3 | 35 | 19 | 287 | 44 | 957   |
| 2,142 | 2 | 79 | 20 | 627 | 4 | 39 | 19 | 310 | 45 | 1,055 |
| 2,143 | 3 | 84 | 20 | 657 | 4 | 39 | 19 | 324 | 46 | 1,104 |
| 2,144 | 3 | 83 | 20 | 647 | 4 | 40 | 18 | 321 | 45 | 1,091 |
| 2,145 | 3 | 80 | 19 | 636 | 4 | 40 | 18 | 318 | 44 | 1,074 |
| 2,146 | 3 | 86 | 19 | 628 | 4 | 39 | 18 | 321 | 44 | 1,074 |
| 2,147 | 3 | 86 | 19 | 628 | 4 | 39 | 18 | 321 | 44 | 1,074 |
| 2,148 | 3 | 86 | 19 | 628 | 4 | 39 | 18 | 318 | 44 | 1,071 |
| 2,149 | 3 | 84 | 19 | 623 | 4 | 38 | 18 | 316 | 44 | 1,061 |
| 2,150 | 2 | 84 | 18 | 624 | 4 | 38 | 16 | 314 | 40 | 1,060 |
| 2,151 | 1 | 89 | 17 | 708 | 4 | 42 | 15 | 331 | 37 | 1,170 |
| 2,152 | 1 | 89 | 12 | 713 | 2 | 42 | 11 | 334 | 26 | 1,178 |
| 2,153 | 1 | 88 | 11 | 719 | 2 | 40 | 11 | 333 | 25 | 1,180 |
| 2,154 | 1 | 88 | 10 | 724 | 2 | 40 | 10 | 334 | 23 | 1,186 |
| 2,155 | 1 | 88 | 9  | 727 | 2 | 42 | 8  | 335 | 20 | 1,192 |
| 2,156 | 1 | 88 | 9  | 700 | 2 | 43 | 8  | 335 | 20 | 1,166 |
| 2,157 | 1 | 81 | 9  | 692 | 2 | 39 | 8  | 330 | 20 | 1,142 |
| 2,158 | 1 | 82 | 9  | 721 | 2 | 39 | 5  | 331 | 17 | 1,173 |
| 2,159 | 1 | 83 | 8  | 723 | 2 | 38 | 2  | 335 | 13 | 1,179 |
| 2,160 | 1 | 61 | 8  | 634 | 2 | 27 | 2  | 277 | 13 | 999   |
| 2,161 | 1 | 56 | 6  | 616 | 2 | 26 | 2  | 259 | 11 | 957   |

|       |   |     |    |       |   |    |    |     |    |       |
|-------|---|-----|----|-------|---|----|----|-----|----|-------|
| 2,162 | 1 | 53  | 6  | 608   | 2 | 26 | 2  | 260 | 11 | 947   |
| 2,163 | 1 | 53  | 6  | 595   | 2 | 26 | 2  | 254 | 11 | 928   |
| 2,164 | 1 | 55  | 7  | 630   | 2 | 28 | 2  | 265 | 12 | 978   |
| 2,165 | 1 | 54  | 7  | 629   | 2 | 28 | 2  | 263 | 12 | 974   |
| 2,166 | 1 | 52  | 7  | 629   | 2 | 29 | 2  | 266 | 12 | 976   |
| 2,167 | 1 | 62  | 7  | 650   | 2 | 34 | 2  | 315 | 12 | 1,061 |
| 2,168 | 1 | 63  | 7  | 695   | 2 | 34 | 1  | 338 | 11 | 1,130 |
| 2,169 | 1 | 67  | 8  | 715   | 2 | 33 | 3  | 344 | 14 | 1,159 |
| 2,170 | 1 | 65  | 8  | 703   | 2 | 33 | 3  | 340 | 14 | 1,141 |
| 2,171 | 1 | 63  | 8  | 693   | 2 | 34 | 5  | 331 | 16 | 1,121 |
| 2,172 | 1 | 81  | 8  | 802   | 2 | 37 | 6  | 381 | 17 | 1,301 |
| 2,173 | 2 | 87  | 9  | 881   | 2 | 40 | 6  | 424 | 19 | 1,432 |
| 2,174 | 2 | 86  | 9  | 885   | 2 | 43 | 6  | 423 | 19 | 1,437 |
| 2,175 | 2 | 87  | 9  | 887   | 2 | 43 | 7  | 426 | 20 | 1,443 |
| 2,176 | 2 | 84  | 9  | 854   | 2 | 42 | 7  | 406 | 20 | 1,386 |
| 2,177 | 2 | 82  | 9  | 814   | 2 | 38 | 7  | 384 | 20 | 1,318 |
| 2,178 | 2 | 83  | 9  | 823   | 2 | 38 | 7  | 384 | 20 | 1,328 |
| 2,179 | 2 | 79  | 8  | 795   | 1 | 38 | 7  | 374 | 18 | 1,286 |
| 2,180 | 2 | 79  | 8  | 796   | 1 | 38 | 7  | 374 | 18 | 1,287 |
| 2,181 | 3 | 79  | 10 | 788   | 1 | 38 | 6  | 372 | 20 | 1,277 |
| 2,182 | 3 | 79  | 10 | 788   | 1 | 38 | 8  | 372 | 22 | 1,277 |
| 2,183 | 3 | 79  | 10 | 789   | 1 | 38 | 12 | 372 | 26 | 1,278 |
| 2,184 | 3 | 81  | 10 | 805   | 1 | 40 | 12 | 380 | 26 | 1,306 |
| 2,185 | 3 | 91  | 10 | 920   | 1 | 49 | 12 | 450 | 26 | 1,510 |
| 2,186 | 3 | 98  | 11 | 1,023 | 2 | 61 | 16 | 486 | 32 | 1,668 |
| 2,187 | 3 | 103 | 11 | 1,082 | 2 | 65 | 16 | 510 | 32 | 1,760 |
| 2,188 | 3 | 109 | 11 | 1,121 | 2 | 70 | 16 | 527 | 32 | 1,827 |
| 2,189 | 3 | 110 | 10 | 1,132 | 2 | 70 | 16 | 529 | 31 | 1,841 |
| 2,190 | 3 | 118 | 6  | 1,176 | 2 | 72 | 16 | 543 | 27 | 1,909 |
| 2,191 | 3 | 118 | 6  | 1,183 | 2 | 73 | 16 | 548 | 27 | 1,922 |
| 2,192 | 3 | 118 | 7  | 1,129 | 1 | 70 | 16 | 518 | 27 | 1,835 |
| 2,193 | 3 | 112 | 7  | 1,069 | 1 | 67 | 16 | 497 | 27 | 1,745 |
| 2,194 | 2 | 107 | 7  | 1,025 | 1 | 65 | 16 | 483 | 26 | 1,680 |
| 2,195 | 2 | 107 | 7  | 1,030 | 1 | 65 | 16 | 487 | 26 | 1,689 |
| 2,196 | 2 | 107 | 7  | 1,031 | 1 | 65 | 16 | 491 | 26 | 1,694 |
| 2,197 | 2 | 107 | 7  | 1,032 | 1 | 65 | 16 | 492 | 26 | 1,696 |
| 2,198 | 2 | 112 | 7  | 1,054 | 1 | 68 | 16 | 504 | 26 | 1,738 |
| 2,199 | 2 | 117 | 7  | 1,092 | 1 | 69 | 16 | 517 | 26 | 1,795 |
| 2,200 | 2 | 117 | 7  | 1,099 | 1 | 69 | 16 | 521 | 26 | 1,806 |
| 2,201 | 2 | 117 | 7  | 1,099 | 1 | 69 | 16 | 521 | 26 | 1,806 |
| 2,202 | 2 | 112 | 8  | 1,015 | 1 | 65 | 17 | 505 | 28 | 1,697 |

|       |   |     |    |       |   |    |    |     |    |       |
|-------|---|-----|----|-------|---|----|----|-----|----|-------|
| 2,203 | 2 | 114 | 10 | 1,004 | 1 | 65 | 17 | 503 | 30 | 1,686 |
| 2,204 | 2 | 114 | 10 | 1,005 | 1 | 65 | 17 | 506 | 30 | 1,690 |
| 2,205 | 2 | 118 | 10 | 1,024 | 1 | 67 | 17 | 519 | 30 | 1,728 |
| 2,206 | 2 | 118 | 10 | 1,031 | 1 | 65 | 17 | 519 | 30 | 1,733 |
| 2,207 | 2 | 121 | 13 | 1,047 | 1 | 66 | 18 | 526 | 34 | 1,760 |
| 2,208 | 2 | 121 | 13 | 1,014 | 1 | 66 | 18 | 515 | 34 | 1,716 |
| 2,209 | 2 | 120 | 13 | 975   | 1 | 66 | 18 | 507 | 34 | 1,668 |
| 2,210 | 2 | 120 | 14 | 985   | 1 | 72 | 18 | 519 | 35 | 1,696 |
| 2,211 | 2 | 121 | 14 | 1,030 | 1 | 74 | 18 | 573 | 35 | 1,798 |
| 2,212 | 2 | 122 | 14 | 1,050 | 1 | 75 | 18 | 587 | 35 | 1,834 |
| 2,213 | 2 | 122 | 14 | 1,053 | 1 | 78 | 18 | 590 | 35 | 1,843 |
| 2,214 | 2 | 122 | 14 | 1,056 | 1 | 78 | 18 | 591 | 35 | 1,847 |
| 2,215 | 2 | 120 | 13 | 1,017 | 1 | 75 | 18 | 576 | 34 | 1,788 |
| 2,216 | 2 | 107 | 13 | 987   | 1 | 69 | 18 | 525 | 34 | 1,688 |
| 2,217 | 2 | 109 | 13 | 999   | 2 | 72 | 18 | 557 | 35 | 1,737 |
| 2,218 | 2 | 109 | 13 | 999   | 2 | 72 | 17 | 556 | 34 | 1,736 |
| 2,219 | 2 | 108 | 12 | 957   | 2 | 72 | 16 | 534 | 32 | 1,671 |
| 2,220 | 2 | 104 | 12 | 934   | 2 | 72 | 16 | 525 | 32 | 1,635 |
| 2,221 | 2 | 104 | 13 | 922   | 2 | 71 | 14 | 514 | 31 | 1,611 |
| 2,222 | 2 | 86  | 13 | 813   | 2 | 68 | 14 | 467 | 31 | 1,434 |
| 2,223 | 2 | 86  | 13 | 813   | 2 | 68 | 13 | 467 | 30 | 1,434 |
| 2,224 | 1 | 80  | 12 | 734   | 2 | 65 | 14 | 430 | 29 | 1,309 |
| 2,225 | 1 | 80  | 12 | 723   | 2 | 62 | 13 | 425 | 28 | 1,290 |
| 2,226 | 1 | 80  | 13 | 723   | 2 | 62 | 13 | 426 | 29 | 1,291 |
| 2,227 | 1 | 80  | 13 | 725   | 2 | 62 | 13 | 425 | 29 | 1,292 |
| 2,228 | 1 | 79  | 14 | 716   | 2 | 62 | 13 | 425 | 30 | 1,282 |
| 2,229 | 1 | 79  | 14 | 712   | 2 | 62 | 13 | 425 | 30 | 1,278 |
| 2,230 | 1 | 79  | 14 | 731   | 2 | 63 | 13 | 439 | 30 | 1,312 |
| 2,231 | 0 | 79  | 15 | 732   | 2 | 64 | 13 | 440 | 30 | 1,315 |
| 2,232 | 0 | 79  | 14 | 734   | 2 | 64 | 13 | 441 | 29 | 1,318 |
| 2,233 | 0 | 84  | 14 | 808   | 2 | 68 | 11 | 508 | 27 | 1,468 |
| 2,234 | 0 | 84  | 14 | 823   | 2 | 67 | 7  | 530 | 23 | 1,504 |
| 2,235 | 0 | 105 | 16 | 982   | 2 | 72 | 9  | 661 | 27 | 1,820 |
| 2,236 | 0 | 95  | 16 | 873   | 1 | 63 | 5  | 597 | 22 | 1,628 |
| 2,237 | 0 | 94  | 15 | 775   | 1 | 47 | 6  | 561 | 22 | 1,477 |
| 2,238 | 0 | 88  | 15 | 741   | 1 | 42 | 6  | 544 | 22 | 1,415 |
| 2,239 | 0 | 89  | 15 | 734   | 1 | 43 | 6  | 542 | 22 | 1,408 |
| 2,240 | 0 | 89  | 15 | 734   | 1 | 43 | 6  | 542 | 22 | 1,408 |
| 2,241 | 0 | 78  | 17 | 689   | 1 | 39 | 6  | 512 | 24 | 1,318 |
| 2,242 | 0 | 82  | 16 | 691   | 1 | 39 | 7  | 512 | 24 | 1,324 |
| 2,243 | 0 | 82  | 16 | 691   | 1 | 39 | 7  | 513 | 24 | 1,325 |

|       |   |    |    |     |   |    |    |     |    |       |
|-------|---|----|----|-----|---|----|----|-----|----|-------|
| 2,244 | 0 | 82 | 16 | 690 | 1 | 38 | 7  | 513 | 24 | 1,323 |
| 2,245 | 0 | 74 | 17 | 674 | 1 | 38 | 7  | 506 | 25 | 1,292 |
| 2,246 | 0 | 76 | 18 | 699 | 1 | 40 | 7  | 522 | 26 | 1,337 |
| 2,247 | 0 | 82 | 18 | 790 | 1 | 46 | 7  | 596 | 26 | 1,514 |
| 2,248 | 0 | 91 | 18 | 893 | 1 | 49 | 7  | 643 | 26 | 1,676 |
| 2,249 | 0 | 86 | 18 | 901 | 1 | 50 | 8  | 663 | 27 | 1,700 |
| 2,250 | 0 | 82 | 25 | 869 | 1 | 49 | 9  | 656 | 35 | 1,656 |
| 2,251 | 0 | 88 | 25 | 974 | 1 | 51 | 9  | 700 | 35 | 1,813 |
| 2,252 | 0 | 90 | 24 | 983 | 1 | 52 | 8  | 712 | 33 | 1,837 |
| 2,253 | 1 | 92 | 22 | 991 | 1 | 52 | 8  | 716 | 32 | 1,851 |
| 2,254 | 2 | 90 | 20 | 990 | 1 | 52 | 7  | 715 | 30 | 1,847 |
| 2,255 | 2 | 90 | 20 | 988 | 1 | 52 | 7  | 712 | 30 | 1,842 |
| 2,256 | 2 | 86 | 20 | 954 | 1 | 50 | 8  | 697 | 31 | 1,787 |
| 2,257 | 2 | 86 | 20 | 954 | 1 | 51 | 8  | 698 | 31 | 1,789 |
| 2,258 | 2 | 82 | 19 | 937 | 1 | 49 | 8  | 679 | 30 | 1,747 |
| 2,259 | 2 | 82 | 19 | 936 | 1 | 49 | 8  | 679 | 30 | 1,746 |
| 2,260 | 2 | 81 | 20 | 939 | 1 | 49 | 8  | 680 | 31 | 1,749 |
| 2,261 | 2 | 81 | 20 | 932 | 1 | 43 | 9  | 670 | 32 | 1,726 |
| 2,262 | 2 | 80 | 20 | 881 | 1 | 42 | 9  | 619 | 32 | 1,622 |
| 2,263 | 2 | 79 | 20 | 858 | 1 | 41 | 9  | 605 | 32 | 1,583 |
| 2,264 | 2 | 79 | 20 | 852 | 1 | 38 | 9  | 602 | 32 | 1,571 |
| 2,265 | 2 | 79 | 20 | 848 | 1 | 38 | 9  | 601 | 32 | 1,566 |
| 2,266 | 2 | 80 | 20 | 844 | 1 | 38 | 9  | 599 | 32 | 1,561 |
| 2,267 | 2 | 78 | 20 | 830 | 1 | 35 | 9  | 564 | 32 | 1,507 |
| 2,268 | 2 | 78 | 20 | 830 | 1 | 35 | 9  | 564 | 32 | 1,507 |
| 2,269 | 2 | 78 | 20 | 829 | 1 | 36 | 9  | 564 | 32 | 1,507 |
| 2,270 | 2 | 78 | 20 | 830 | 1 | 36 | 10 | 564 | 33 | 1,508 |
| 2,271 | 2 | 79 | 20 | 830 | 1 | 36 | 10 | 565 | 33 | 1,510 |
| 2,272 | 2 | 79 | 19 | 827 | 1 | 36 | 10 | 563 | 32 | 1,505 |
| 2,273 | 2 | 79 | 19 | 827 | 1 | 36 | 10 | 563 | 32 | 1,505 |
| 2,274 | 2 | 79 | 21 | 827 | 1 | 36 | 9  | 558 | 33 | 1,500 |
| 2,275 | 2 | 79 | 21 | 827 | 1 | 36 | 9  | 559 | 33 | 1,501 |
| 2,276 | 3 | 78 | 22 | 828 | 1 | 36 | 10 | 562 | 36 | 1,504 |
| 2,277 | 3 | 78 | 21 | 826 | 1 | 36 | 13 | 562 | 38 | 1,502 |
| 2,278 | 3 | 80 | 23 | 830 | 1 | 36 | 13 | 570 | 40 | 1,516 |
| 2,279 | 3 | 86 | 22 | 839 | 1 | 36 | 13 | 591 | 39 | 1,552 |
| 2,280 | 3 | 85 | 22 | 853 | 1 | 36 | 13 | 601 | 39 | 1,575 |
| 2,281 | 3 | 87 | 23 | 854 | 1 | 35 | 13 | 607 | 40 | 1,583 |
| 2,282 | 3 | 87 | 21 | 857 | 1 | 34 | 13 | 609 | 38 | 1,587 |
| 2,283 | 4 | 87 | 24 | 857 | 1 | 34 | 15 | 608 | 44 | 1,586 |
| 2,284 | 4 | 82 | 24 | 765 | 1 | 30 | 15 | 519 | 44 | 1,396 |



|       |   |    |    |       |   |    |    |     |    |       |
|-------|---|----|----|-------|---|----|----|-----|----|-------|
| 2,285 | 4 | 59 | 23 | 602   | 1 | 23 | 13 | 382 | 41 | 1,066 |
| 2,286 | 4 | 61 | 22 | 605   | 1 | 25 | 13 | 389 | 40 | 1,080 |
| 2,287 | 4 | 50 | 22 | 538   | 1 | 25 | 11 | 360 | 38 | 973   |
| 2,288 | 5 | 51 | 22 | 539   | 1 | 25 | 11 | 360 | 39 | 975   |
| 2,289 | 5 | 50 | 22 | 535   | 1 | 25 | 11 | 360 | 39 | 970   |
| 2,290 | 5 | 51 | 22 | 529   | 1 | 25 | 11 | 365 | 39 | 970   |
| 2,291 | 5 | 52 | 22 | 530   | 1 | 25 | 11 | 365 | 39 | 972   |
| 2,292 | 6 | 48 | 20 | 514   | 1 | 25 | 11 | 358 | 38 | 945   |
| 2,293 | 6 | 48 | 21 | 517   | 1 | 25 | 11 | 361 | 39 | 951   |
| 2,294 | 6 | 46 | 21 | 483   | 1 | 24 | 11 | 346 | 39 | 899   |
| 2,295 | 6 | 48 | 21 | 508   | 1 | 25 | 11 | 361 | 39 | 942   |
| 2,296 | 6 | 43 | 20 | 478   | 1 | 19 | 11 | 324 | 38 | 864   |
| 2,297 | 6 | 48 | 19 | 523   | 1 | 21 | 11 | 348 | 37 | 940   |
| 2,298 | 6 | 54 | 19 | 691   | 1 | 30 | 11 | 433 | 37 | 1,208 |
| 2,299 | 6 | 58 | 19 | 711   | 1 | 34 | 11 | 475 | 37 | 1,278 |
| 2,300 | 6 | 59 | 21 | 696   | 1 | 31 | 15 | 447 | 43 | 1,233 |
| 2,301 | 6 | 56 | 15 | 616   | 1 | 30 | 14 | 440 | 36 | 1,142 |
| 2,302 | 6 | 56 | 15 | 626   | 1 | 32 | 14 | 443 | 36 | 1,157 |
| 2,303 | 6 | 57 | 15 | 707   | 1 | 39 | 15 | 468 | 37 | 1,271 |
| 2,304 | 5 | 55 | 15 | 714   | 1 | 39 | 15 | 469 | 36 | 1,277 |
| 2,305 | 4 | 56 | 15 | 760   | 1 | 42 | 18 | 502 | 38 | 1,360 |
| 2,306 | 5 | 64 | 15 | 802   | 1 | 46 | 20 | 544 | 41 | 1,456 |
| 2,307 | 5 | 64 | 15 | 806   | 1 | 46 | 19 | 544 | 40 | 1,460 |
| 2,308 | 5 | 65 | 16 | 827   | 1 | 48 | 19 | 575 | 41 | 1,515 |
| 2,309 | 5 | 68 | 17 | 854   | 1 | 48 | 19 | 592 | 42 | 1,562 |
| 2,310 | 5 | 72 | 16 | 943   | 1 | 57 | 19 | 652 | 41 | 1,724 |
| 2,311 | 5 | 72 | 16 | 942   | 1 | 57 | 18 | 654 | 40 | 1,725 |
| 2,312 | 6 | 72 | 19 | 941   | 1 | 58 | 21 | 654 | 47 | 1,725 |
| 2,313 | 6 | 73 | 19 | 948   | 1 | 58 | 23 | 657 | 49 | 1,736 |
| 2,314 | 6 | 74 | 19 | 955   | 1 | 58 | 23 | 659 | 49 | 1,746 |
| 2,315 | 6 | 74 | 19 | 963   | 1 | 58 | 23 | 662 | 49 | 1,757 |
| 2,316 | 6 | 75 | 19 | 985   | 1 | 58 | 23 | 681 | 49 | 1,799 |
| 2,317 | 6 | 74 | 19 | 989   | 1 | 58 | 23 | 682 | 49 | 1,803 |
| 2,318 | 6 | 74 | 20 | 991   | 1 | 58 | 23 | 682 | 50 | 1,805 |
| 2,319 | 6 | 74 | 20 | 992   | 0 | 57 | 23 | 684 | 49 | 1,807 |
| 2,320 | 6 | 77 | 19 | 1,000 | 0 | 58 | 23 | 692 | 48 | 1,827 |
| 2,321 | 6 | 78 | 20 | 1,000 | 0 | 58 | 22 | 692 | 48 | 1,828 |
| 2,322 | 6 | 77 | 23 | 1,009 | 1 | 58 | 22 | 695 | 52 | 1,839 |
| 2,323 | 6 | 79 | 24 | 1,026 | 1 | 61 | 22 | 704 | 53 | 1,870 |
| 2,324 | 6 | 79 | 24 | 1,037 | 1 | 61 | 22 | 704 | 53 | 1,881 |
| 2,325 | 6 | 80 | 25 | 1,039 | 1 | 61 | 22 | 707 | 54 | 1,887 |

|       |   |    |    |       |   |    |    |     |     |       |
|-------|---|----|----|-------|---|----|----|-----|-----|-------|
| 2,326 | 6 | 80 | 24 | 1,044 | 1 | 61 | 22 | 708 | 53  | 1,893 |
| 2,327 | 5 | 82 | 30 | 1,050 | 2 | 61 | 24 | 711 | 61  | 1,904 |
| 2,328 | 6 | 85 | 33 | 1,090 | 2 | 62 | 23 | 738 | 64  | 1,975 |
| 2,329 | 6 | 83 | 31 | 1,087 | 2 | 62 | 23 | 732 | 62  | 1,964 |
| 2,330 | 6 | 77 | 32 | 1,082 | 2 | 63 | 28 | 713 | 68  | 1,935 |
| 2,331 | 6 | 81 | 32 | 1,065 | 2 | 63 | 31 | 700 | 71  | 1,909 |
| 2,332 | 6 | 80 | 29 | 1,048 | 2 | 63 | 29 | 681 | 66  | 1,872 |
| 2,333 | 6 | 81 | 35 | 1,051 | 2 | 65 | 33 | 690 | 76  | 1,887 |
| 2,334 | 6 | 81 | 35 | 1,052 | 2 | 66 | 33 | 691 | 76  | 1,890 |
| 2,335 | 6 | 82 | 36 | 1,065 | 3 | 68 | 34 | 705 | 79  | 1,920 |
| 2,336 | 6 | 84 | 41 | 1,061 | 3 | 69 | 35 | 706 | 85  | 1,920 |
| 2,337 | 6 | 82 | 44 | 1,055 | 3 | 67 | 36 | 695 | 89  | 1,899 |
| 2,338 | 7 | 82 | 46 | 1,055 | 3 | 67 | 37 | 696 | 93  | 1,900 |
| 2,339 | 7 | 81 | 47 | 1,057 | 4 | 68 | 39 | 710 | 97  | 1,916 |
| 2,340 | 7 | 81 | 47 | 1,055 | 4 | 69 | 39 | 708 | 97  | 1,913 |
| 2,341 | 7 | 78 | 49 | 1,053 | 5 | 68 | 39 | 699 | 100 | 1,898 |
| 2,342 | 6 | 78 | 50 | 1,055 | 5 | 68 | 39 | 701 | 100 | 1,902 |
| 2,343 | 6 | 78 | 51 | 1,053 | 5 | 67 | 39 | 701 | 101 | 1,899 |
| 2,344 | 6 | 78 | 52 | 1,050 | 5 | 67 | 39 | 697 | 102 | 1,892 |
| 2,345 | 6 | 77 | 52 | 1,046 | 5 | 66 | 39 | 680 | 102 | 1,869 |
| 2,346 | 6 | 75 | 52 | 1,021 | 5 | 65 | 39 | 667 | 102 | 1,828 |
| 2,347 | 6 | 74 | 52 | 960   | 5 | 65 | 39 | 631 | 102 | 1,730 |
| 2,348 | 6 | 64 | 52 | 746   | 5 | 54 | 39 | 524 | 102 | 1,388 |
| 2,349 | 6 | 50 | 52 | 622   | 5 | 47 | 39 | 433 | 102 | 1,152 |
| 2,350 | 6 | 50 | 52 | 624   | 5 | 47 | 39 | 435 | 102 | 1,156 |
| 2,351 | 6 | 49 | 50 | 609   | 5 | 46 | 34 | 432 | 95  | 1,136 |
| 2,352 | 6 | 45 | 49 | 570   | 5 | 45 | 34 | 385 | 94  | 1,045 |
| 2,353 | 6 | 45 | 49 | 558   | 5 | 43 | 34 | 383 | 94  | 1,029 |
| 2,354 | 6 | 42 | 51 | 396   | 5 | 32 | 33 | 309 | 95  | 779   |
| 2,355 | 6 | 42 | 51 | 400   | 5 | 33 | 33 | 311 | 95  | 786   |
| 2,356 | 6 | 42 | 51 | 409   | 5 | 34 | 30 | 313 | 92  | 798   |
| 2,357 | 5 | 35 | 56 | 380   | 6 | 31 | 30 | 281 | 97  | 727   |
| 2,358 | 5 | 35 | 55 | 384   | 6 | 31 | 30 | 281 | 96  | 731   |
| 2,359 | 5 | 34 | 55 | 364   | 6 | 29 | 33 | 255 | 99  | 682   |
| 2,360 | 5 | 35 | 56 | 349   | 6 | 30 | 33 | 241 | 100 | 655   |
| 2,361 | 5 | 35 | 56 | 273   | 6 | 23 | 33 | 188 | 100 | 519   |
| 2,362 | 4 | 35 | 54 | 275   | 6 | 23 | 32 | 190 | 96  | 523   |
| 2,363 | 4 | 34 | 52 | 277   | 6 | 21 | 31 | 184 | 93  | 516   |
| 2,364 | 4 | 34 | 52 | 277   | 6 | 21 | 29 | 184 | 91  | 516   |
| 2,365 | 4 | 33 | 53 | 261   | 6 | 21 | 29 | 177 | 92  | 492   |
| 2,366 | 4 | 32 | 53 | 237   | 7 | 21 | 29 | 159 | 93  | 449   |

|       |   |    |    |     |   |    |    |     |    |     |
|-------|---|----|----|-----|---|----|----|-----|----|-----|
| 2,367 | 4 | 34 | 53 | 240 | 7 | 21 | 29 | 165 | 93 | 460 |
| 2,368 | 4 | 34 | 53 | 236 | 7 | 21 | 29 | 163 | 93 | 454 |
| 2,369 | 4 | 34 | 52 | 235 | 7 | 21 | 30 | 163 | 93 | 453 |
| 2,370 | 4 | 34 | 52 | 233 | 7 | 21 | 30 | 162 | 93 | 450 |
| 2,371 | 4 | 31 | 52 | 225 | 7 | 20 | 30 | 155 | 93 | 431 |
| 2,372 | 4 | 30 | 49 | 226 | 6 | 20 | 30 | 156 | 89 | 432 |
| 2,373 | 4 | 30 | 48 | 217 | 6 | 20 | 30 | 152 | 88 | 419 |
| 2,374 | 4 | 28 | 48 | 189 | 6 | 17 | 30 | 143 | 88 | 377 |
| 2,375 | 4 | 27 | 48 | 187 | 6 | 17 | 30 | 140 | 88 | 371 |
| 2,376 | 4 | 27 | 46 | 182 | 6 | 17 | 30 | 133 | 86 | 359 |
| 2,377 | 4 | 28 | 46 | 182 | 6 | 17 | 30 | 133 | 86 | 360 |
| 2,378 | 4 | 26 | 39 | 176 | 5 | 18 | 28 | 131 | 76 | 351 |
| 2,379 | 3 | 23 | 37 | 136 | 5 | 17 | 28 | 106 | 73 | 282 |
| 2,380 | 3 | 23 | 38 | 139 | 5 | 17 | 29 | 111 | 75 | 290 |
| 2,381 | 3 | 23 | 36 | 135 | 5 | 16 | 24 | 109 | 68 | 283 |
| 2,382 | 3 | 19 | 37 | 136 | 5 | 16 | 21 | 111 | 66 | 282 |
| 2,383 | 3 | 18 | 33 | 135 | 5 | 16 | 19 | 116 | 60 | 285 |
| 2,384 | 3 | 18 | 32 | 130 | 5 | 13 | 17 | 104 | 57 | 265 |
| 2,385 | 3 | 17 | 35 | 117 | 4 | 11 | 17 | 91  | 59 | 236 |
| 2,386 | 3 | 18 | 37 | 119 | 4 | 11 | 17 | 94  | 61 | 242 |
| 2,387 | 5 | 16 | 35 | 114 | 4 | 10 | 17 | 92  | 61 | 232 |
| 2,388 | 6 | 16 | 32 | 114 | 4 | 10 | 16 | 92  | 58 | 232 |
| 2,389 | 5 | 24 | 30 | 176 | 4 | 13 | 15 | 145 | 54 | 358 |
| 2,390 | 4 | 24 | 28 | 184 | 3 | 12 | 13 | 131 | 48 | 351 |
| 2,391 | 4 | 24 | 26 | 198 | 2 | 11 | 14 | 136 | 46 | 369 |
| 2,392 | 4 | 23 | 25 | 195 | 2 | 11 | 14 | 134 | 45 | 363 |
| 2,393 | 4 | 23 | 26 | 195 | 2 | 11 | 14 | 134 | 46 | 363 |
| 2,394 | 4 | 24 | 24 | 203 | 2 | 12 | 14 | 143 | 44 | 382 |
| 2,395 | 4 | 24 | 24 | 204 | 2 | 12 | 14 | 144 | 44 | 384 |
| 2,396 | 4 | 25 | 24 | 212 | 2 | 12 | 14 | 144 | 44 | 393 |
| 2,397 | 4 | 25 | 24 | 213 | 2 | 12 | 14 | 142 | 44 | 392 |
| 2,398 | 4 | 25 | 25 | 213 | 2 | 12 | 14 | 141 | 45 | 391 |
| 2,399 | 4 | 25 | 26 | 212 | 2 | 12 | 14 | 138 | 46 | 387 |
| 2,400 | 4 | 25 | 27 | 212 | 2 | 12 | 14 | 138 | 47 | 387 |
| 2,401 | 4 | 27 | 28 | 212 | 2 | 12 | 14 | 138 | 48 | 389 |
| 2,402 | 4 | 27 | 27 | 212 | 2 | 12 | 14 | 138 | 47 | 389 |
| 2,403 | 4 | 27 | 27 | 212 | 2 | 12 | 14 | 138 | 47 | 389 |
| 2,404 | 4 | 27 | 27 | 213 | 2 | 12 | 14 | 139 | 47 | 391 |
| 2,405 | 4 | 27 | 26 | 211 | 2 | 11 | 15 | 140 | 47 | 389 |
| 2,406 | 4 | 28 | 26 | 225 | 2 | 12 | 15 | 153 | 47 | 418 |
| 2,407 | 4 | 27 | 21 | 215 | 1 | 11 | 13 | 150 | 39 | 403 |

|       |   |    |    |     |   |    |    |     |    |     |
|-------|---|----|----|-----|---|----|----|-----|----|-----|
| 2,408 | 4 | 26 | 21 | 204 | 1 | 10 | 14 | 146 | 40 | 386 |
| 2,409 | 4 | 26 | 22 | 202 | 1 | 10 | 14 | 147 | 41 | 385 |
| 2,410 | 4 | 26 | 22 | 204 | 1 | 9  | 12 | 147 | 39 | 386 |
| 2,411 | 4 | 18 | 20 | 181 | 1 | 6  | 13 | 137 | 38 | 342 |
| 2,412 | 4 | 18 | 20 | 186 | 1 | 6  | 13 | 138 | 38 | 348 |
| 2,413 | 4 | 18 | 22 | 191 | 1 | 6  | 12 | 138 | 39 | 353 |
| 2,414 | 4 | 18 | 22 | 184 | 1 | 9  | 12 | 141 | 39 | 352 |
| 2,415 | 4 | 19 | 22 | 196 | 1 | 10 | 12 | 146 | 39 | 371 |
| 2,416 | 4 | 19 | 21 | 197 | 1 | 10 | 12 | 146 | 38 | 372 |
| 2,417 | 4 | 19 | 21 | 200 | 0 | 11 | 12 | 149 | 37 | 379 |
| 2,418 | 4 | 20 | 21 | 202 | 0 | 11 | 11 | 145 | 36 | 378 |
| 2,419 | 4 | 21 | 21 | 202 | 0 | 11 | 11 | 145 | 36 | 379 |
| 2,420 | 4 | 21 | 21 | 210 | 0 | 11 | 11 | 148 | 36 | 390 |
| 2,421 | 4 | 21 | 21 | 213 | 0 | 11 | 11 | 150 | 36 | 395 |
| 2,422 | 4 | 21 | 21 | 222 | 0 | 11 | 11 | 153 | 36 | 407 |
| 2,423 | 4 | 21 | 21 | 222 | 0 | 11 | 11 | 157 | 36 | 411 |
| 2,424 | 4 | 21 | 21 | 225 | 0 | 11 | 11 | 157 | 36 | 414 |
| 2,425 | 4 | 21 | 22 | 225 | 0 | 11 | 11 | 157 | 37 | 414 |
| 2,426 | 4 | 21 | 22 | 225 | 0 | 11 | 11 | 157 | 37 | 414 |
| 2,427 | 4 | 21 | 22 | 224 | 0 | 11 | 11 | 158 | 37 | 414 |
| 2,428 | 4 | 20 | 22 | 229 | 0 | 11 | 11 | 159 | 37 | 419 |
| 2,429 | 4 | 20 | 22 | 229 | 0 | 10 | 10 | 158 | 36 | 417 |
| 2,430 | 4 | 20 | 21 | 226 | 0 | 10 | 8  | 149 | 33 | 405 |
| 2,431 | 4 | 20 | 20 | 225 | 0 | 10 | 7  | 146 | 31 | 401 |
| 2,432 | 4 | 20 | 20 | 225 | 0 | 10 | 7  | 146 | 31 | 401 |
| 2,433 | 3 | 22 | 19 | 231 | 0 | 10 | 7  | 153 | 29 | 416 |
| 2,434 | 3 | 22 | 18 | 238 | 0 | 10 | 7  | 152 | 28 | 422 |
| 2,435 | 3 | 23 | 20 | 240 | 0 | 10 | 7  | 157 | 30 | 430 |
| 2,436 | 3 | 23 | 18 | 239 | 0 | 11 | 6  | 158 | 27 | 431 |
| 2,437 | 3 | 23 | 15 | 237 | 0 | 11 | 6  | 157 | 24 | 428 |
| 2,438 | 2 | 23 | 13 | 239 | 0 | 12 | 5  | 157 | 20 | 431 |
| 2,439 | 1 | 23 | 13 | 239 | 0 | 12 | 5  | 156 | 19 | 430 |
| 2,440 | 1 | 15 | 14 | 176 | 0 | 9  | 5  | 105 | 20 | 305 |
| 2,441 | 2 | 15 | 14 | 166 | 0 | 10 | 4  | 105 | 20 | 296 |
| 2,442 | 2 | 15 | 14 | 152 | 0 | 10 | 4  | 100 | 20 | 277 |
| 2,443 | 2 | 15 | 14 | 150 | 0 | 10 | 4  | 100 | 20 | 275 |
| 2,444 | 2 | 15 | 13 | 150 | 0 | 10 | 4  | 101 | 19 | 276 |
| 2,445 | 2 | 14 | 13 | 142 | 0 | 9  | 6  | 93  | 21 | 258 |
| 2,446 | 2 | 14 | 15 | 142 | 0 | 9  | 6  | 94  | 23 | 259 |
| 2,447 | 3 | 13 | 17 | 132 | 0 | 9  | 8  | 94  | 28 | 248 |
| 2,448 | 3 | 13 | 16 | 132 | 0 | 9  | 8  | 94  | 27 | 248 |

|       |   |    |    |     |   |   |    |    |    |     |
|-------|---|----|----|-----|---|---|----|----|----|-----|
| 2,449 | 3 | 13 | 17 | 132 | 0 | 9 | 9  | 94 | 29 | 248 |
| 2,450 | 3 | 13 | 16 | 131 | 0 | 9 | 10 | 94 | 29 | 247 |
| 2,451 | 4 | 11 | 16 | 131 | 0 | 9 | 12 | 95 | 32 | 246 |
| 2,452 | 4 | 11 | 15 | 131 | 0 | 9 | 12 | 95 | 31 | 246 |
| 2,453 | 4 | 11 | 22 | 131 | 0 | 9 | 13 | 95 | 39 | 246 |
| 2,454 | 5 | 11 | 22 | 133 | 1 | 9 | 18 | 93 | 46 | 246 |
| 2,455 | 5 | 11 | 22 | 131 | 1 | 9 | 18 | 90 | 46 | 241 |
| 2,456 | 5 | 10 | 22 | 117 | 1 | 8 | 17 | 76 | 45 | 211 |
| 2,457 | 5 | 10 | 22 | 117 | 1 | 8 | 17 | 76 | 45 | 211 |
| 2,458 | 5 | 10 | 22 | 117 | 1 | 8 | 16 | 79 | 44 | 214 |
| 2,459 | 5 | 10 | 22 | 115 | 1 | 8 | 16 | 74 | 44 | 207 |
| 2,460 | 5 | 10 | 21 | 109 | 1 | 8 | 16 | 73 | 43 | 200 |
| 2,461 | 5 | 10 | 21 | 106 | 1 | 8 | 15 | 69 | 42 | 193 |
| 2,462 | 5 | 10 | 21 | 104 | 1 | 8 | 14 | 69 | 41 | 191 |
| 2,463 | 5 | 10 | 19 | 99  | 1 | 8 | 14 | 68 | 39 | 185 |
| 2,464 | 5 | 10 | 19 | 90  | 1 | 8 | 14 | 63 | 39 | 171 |
| 2,465 | 5 | 9  | 19 | 73  | 1 | 4 | 14 | 54 | 39 | 140 |
| 2,466 | 5 | 9  | 19 | 73  | 1 | 4 | 14 | 54 | 39 | 140 |
| 2,467 | 5 | 9  | 19 | 68  | 1 | 3 | 14 | 50 | 39 | 130 |
| 2,468 | 5 | 9  | 19 | 68  | 1 | 3 | 14 | 50 | 39 | 130 |
| 2,469 | 5 | 6  | 20 | 64  | 1 | 4 | 14 | 50 | 40 | 124 |
| 2,470 | 5 | 5  | 20 | 64  | 1 | 4 | 14 | 50 | 40 | 123 |
| 2,471 | 5 | 9  | 20 | 62  | 1 | 5 | 14 | 61 | 40 | 137 |
| 2,472 | 5 | 9  | 20 | 59  | 1 | 5 | 14 | 58 | 40 | 131 |
| 2,473 | 5 | 9  | 20 | 50  | 1 | 5 | 14 | 57 | 40 | 121 |
| 2,474 | 5 | 10 | 19 | 52  | 1 | 5 | 14 | 52 | 39 | 119 |
| 2,475 | 5 | 10 | 19 | 49  | 1 | 5 | 14 | 52 | 39 | 116 |
| 2,476 | 5 | 12 | 19 | 51  | 1 | 6 | 14 | 52 | 39 | 121 |
| 2,477 | 5 | 12 | 19 | 51  | 1 | 6 | 14 | 53 | 39 | 122 |
| 2,478 | 5 | 12 | 19 | 51  | 1 | 6 | 14 | 53 | 39 | 122 |
| 2,479 | 5 | 12 | 19 | 51  | 1 | 6 | 14 | 52 | 39 | 121 |
| 2,480 | 5 | 14 | 19 | 50  | 1 | 7 | 15 | 54 | 40 | 125 |
| 2,481 | 5 | 14 | 19 | 49  | 1 | 7 | 15 | 54 | 40 | 124 |
| 2,482 | 5 | 14 | 19 | 49  | 1 | 7 | 15 | 54 | 40 | 124 |
| 2,483 | 5 | 14 | 19 | 49  | 1 | 7 | 15 | 54 | 40 | 124 |
| 2,484 | 5 | 12 | 19 | 43  | 1 | 7 | 15 | 47 | 40 | 109 |
| 2,485 | 6 | 11 | 18 | 30  | 1 | 7 | 15 | 39 | 40 | 87  |
| 2,486 | 6 | 11 | 19 | 30  | 1 | 7 | 15 | 38 | 41 | 86  |
| 2,487 | 6 | 10 | 19 | 29  | 1 | 6 | 18 | 36 | 44 | 81  |
| 2,488 | 6 | 10 | 21 | 29  | 1 | 6 | 18 | 34 | 46 | 79  |
| 2,489 | 5 | 10 | 25 | 26  | 1 | 5 | 19 | 33 | 50 | 74  |

|       |   |    |    |    |   |   |    |    |     |    |
|-------|---|----|----|----|---|---|----|----|-----|----|
| 2,490 | 5 | 10 | 28 | 26 | 1 | 5 | 21 | 33 | 55  | 74 |
| 2,491 | 4 | 10 | 31 | 25 | 2 | 4 | 23 | 33 | 60  | 72 |
| 2,492 | 4 | 10 | 31 | 25 | 2 | 4 | 23 | 33 | 60  | 72 |
| 2,493 | 4 | 10 | 31 | 25 | 2 | 4 | 23 | 33 | 60  | 72 |
| 2,494 | 4 | 10 | 31 | 24 | 2 | 4 | 23 | 30 | 60  | 68 |
| 2,495 | 4 | 10 | 32 | 24 | 2 | 4 | 23 | 30 | 61  | 68 |
| 2,496 | 4 | 10 | 32 | 26 | 2 | 4 | 21 | 29 | 59  | 69 |
| 2,497 | 4 | 10 | 30 | 26 | 3 | 4 | 21 | 30 | 58  | 70 |
| 2,498 | 3 | 10 | 28 | 26 | 3 | 4 | 19 | 30 | 53  | 70 |
| 2,499 | 3 | 10 | 27 | 26 | 3 | 4 | 20 | 30 | 53  | 70 |
| 2,500 | 3 | 10 | 27 | 26 | 3 | 4 | 19 | 30 | 52  | 70 |
| 2,501 | 3 | 10 | 34 | 26 | 3 | 4 | 23 | 30 | 63  | 70 |
| 2,502 | 2 | 10 | 34 | 26 | 3 | 4 | 22 | 29 | 61  | 69 |
| 2,503 | 4 | 10 | 32 | 26 | 3 | 4 | 22 | 29 | 61  | 69 |
| 2,504 | 4 | 10 | 32 | 26 | 2 | 4 | 19 | 29 | 57  | 69 |
| 2,505 | 3 | 10 | 33 | 23 | 2 | 4 | 17 | 29 | 55  | 66 |
| 2,506 | 3 | 10 | 34 | 23 | 2 | 4 | 17 | 29 | 56  | 66 |
| 2,507 | 4 | 10 | 34 | 23 | 2 | 4 | 17 | 30 | 57  | 67 |
| 2,508 | 4 | 10 | 36 | 23 | 2 | 4 | 17 | 27 | 59  | 64 |
| 2,509 | 5 | 10 | 37 | 23 | 2 | 4 | 18 | 27 | 62  | 64 |
| 2,510 | 5 | 10 | 42 | 21 | 2 | 4 | 19 | 27 | 68  | 62 |
| 2,511 | 5 | 10 | 42 | 21 | 2 | 4 | 19 | 27 | 68  | 62 |
| 2,512 | 5 | 10 | 42 | 21 | 2 | 4 | 20 | 27 | 69  | 62 |
| 2,513 | 5 | 10 | 42 | 21 | 2 | 4 | 20 | 27 | 69  | 62 |
| 2,514 | 5 | 10 | 42 | 21 | 2 | 4 | 20 | 31 | 69  | 66 |
| 2,515 | 5 | 10 | 42 | 21 | 2 | 4 | 20 | 31 | 69  | 66 |
| 2,516 | 5 | 10 | 42 | 21 | 2 | 4 | 20 | 31 | 69  | 66 |
| 2,517 | 5 | 10 | 44 | 21 | 2 | 4 | 20 | 31 | 71  | 66 |
| 2,518 | 5 | 10 | 44 | 23 | 2 | 4 | 20 | 31 | 71  | 68 |
| 2,519 | 5 | 10 | 44 | 23 | 2 | 4 | 20 | 31 | 71  | 68 |
| 2,520 | 6 | 10 | 48 | 22 | 2 | 3 | 22 | 29 | 78  | 64 |
| 2,521 | 6 | 10 | 50 | 20 | 2 | 3 | 23 | 29 | 81  | 62 |
| 2,522 | 8 | 6  | 68 | 15 | 2 | 2 | 35 | 15 | 113 | 38 |
| 2,523 | 8 | 6  | 69 | 12 | 3 | 2 | 38 | 13 | 118 | 33 |
| 2,524 | 8 | 5  | 69 | 12 | 3 | 2 | 39 | 13 | 119 | 32 |
| 2,525 | 8 | 3  | 69 | 10 | 3 | 1 | 39 | 12 | 119 | 26 |
| 2,526 | 8 | 3  | 69 | 10 | 4 | 1 | 39 | 12 | 120 | 26 |
| 2,527 | 8 | 3  | 69 | 10 | 4 | 1 | 39 | 12 | 120 | 26 |
| 2,528 | 8 | 3  | 69 | 8  | 4 | 1 | 39 | 11 | 120 | 23 |
| 2,529 | 8 | 3  | 69 | 8  | 5 | 1 | 39 | 11 | 121 | 23 |
| 2,530 | 8 | 3  | 69 | 8  | 5 | 1 | 39 | 11 | 121 | 23 |

|       |   |   |    |    |   |   |    |   |     |    |
|-------|---|---|----|----|---|---|----|---|-----|----|
| 2,531 | 8 | 1 | 69 | 6  | 6 | 0 | 38 | 9 | 121 | 16 |
| 2,532 | 8 | 1 | 69 | 6  | 6 | 0 | 38 | 9 | 121 | 16 |
| 2,533 | 8 | 1 | 69 | 6  | 6 | 0 | 38 | 9 | 121 | 16 |
| 2,534 | 8 | 1 | 69 | 6  | 6 | 0 | 38 | 9 | 121 | 16 |
| 2,535 | 8 | 1 | 69 | 7  | 6 | 0 | 38 | 9 | 121 | 17 |
| 2,536 | 7 | 0 | 68 | 7  | 6 | 0 | 38 | 9 | 119 | 16 |
| 2,537 | 7 | 0 | 67 | 6  | 6 | 2 | 38 | 8 | 118 | 16 |
| 2,538 | 8 | 0 | 66 | 6  | 6 | 2 | 35 | 8 | 115 | 16 |
| 2,539 | 8 | 0 | 64 | 8  | 6 | 2 | 35 | 7 | 113 | 17 |
| 2,540 | 8 | 0 | 59 | 8  | 6 | 2 | 34 | 7 | 107 | 17 |
| 2,541 | 8 | 0 | 55 | 8  | 6 | 2 | 32 | 7 | 101 | 17 |
| 2,542 | 8 | 0 | 52 | 8  | 5 | 2 | 30 | 7 | 95  | 17 |
| 2,543 | 8 | 0 | 52 | 8  | 5 | 2 | 30 | 7 | 95  | 17 |
| 2,544 | 8 | 0 | 52 | 8  | 5 | 2 | 30 | 7 | 95  | 17 |
| 2,545 | 8 | 0 | 52 | 8  | 5 | 2 | 30 | 7 | 95  | 17 |
| 2,546 | 8 | 0 | 51 | 8  | 5 | 2 | 30 | 7 | 94  | 17 |
| 2,547 | 8 | 0 | 51 | 6  | 5 | 2 | 30 | 6 | 94  | 14 |
| 2,548 | 8 | 0 | 51 | 6  | 4 | 2 | 30 | 6 | 93  | 14 |
| 2,549 | 8 | 0 | 51 | 7  | 4 | 2 | 30 | 6 | 93  | 15 |
| 2,550 | 8 | 0 | 51 | 7  | 4 | 2 | 28 | 6 | 91  | 15 |
| 2,551 | 8 | 0 | 51 | 7  | 4 | 2 | 28 | 6 | 91  | 15 |
| 2,552 | 8 | 0 | 45 | 7  | 5 | 2 | 24 | 6 | 82  | 15 |
| 2,553 | 8 | 0 | 44 | 7  | 5 | 2 | 23 | 6 | 80  | 15 |
| 2,554 | 6 | 0 | 39 | 7  | 5 | 2 | 22 | 7 | 72  | 16 |
| 2,555 | 6 | 0 | 38 | 7  | 5 | 2 | 22 | 7 | 71  | 16 |
| 2,556 | 5 | 0 | 37 | 7  | 5 | 2 | 22 | 7 | 69  | 16 |
| 2,557 | 5 | 0 | 37 | 7  | 5 | 2 | 22 | 7 | 69  | 16 |
| 2,558 | 5 | 0 | 37 | 7  | 5 | 2 | 22 | 6 | 69  | 15 |
| 2,559 | 5 | 0 | 35 | 7  | 5 | 2 | 22 | 6 | 67  | 15 |
| 2,560 | 4 | 0 | 34 | 7  | 5 | 2 | 21 | 7 | 64  | 16 |
| 2,561 | 4 | 0 | 29 | 8  | 5 | 2 | 20 | 7 | 58  | 17 |
| 2,562 | 4 | 0 | 29 | 8  | 5 | 2 | 20 | 7 | 58  | 17 |
| 2,563 | 4 | 0 | 29 | 8  | 5 | 2 | 19 | 7 | 57  | 17 |
| 2,564 | 5 | 0 | 29 | 8  | 5 | 2 | 20 | 3 | 59  | 13 |
| 2,565 | 5 | 0 | 29 | 8  | 5 | 2 | 20 | 3 | 59  | 13 |
| 2,566 | 5 | 0 | 29 | 9  | 5 | 2 | 21 | 3 | 60  | 14 |
| 2,567 | 5 | 0 | 28 | 10 | 5 | 2 | 21 | 3 | 59  | 15 |
| 2,568 | 5 | 0 | 27 | 8  | 5 | 2 | 22 | 4 | 59  | 14 |
| 2,569 | 5 | 0 | 27 | 9  | 5 | 2 | 22 | 4 | 59  | 15 |
| 2,570 | 4 | 0 | 22 | 9  | 5 | 2 | 20 | 4 | 51  | 15 |
| 2,571 | 4 | 0 | 20 | 9  | 5 | 2 | 19 | 5 | 48  | 16 |

|       |   |   |    |    |   |   |    |   |    |    |
|-------|---|---|----|----|---|---|----|---|----|----|
| 2,572 | 4 | 0 | 16 | 9  | 5 | 2 | 18 | 5 | 43 | 16 |
| 2,573 | 2 | 0 | 3  | 10 | 5 | 2 | 7  | 5 | 17 | 17 |
| 2,574 | 2 | 0 | 2  | 10 | 4 | 2 | 4  | 5 | 12 | 17 |
| 2,575 | 2 | 0 | 2  | 11 | 4 | 2 | 3  | 5 | 11 | 18 |
| 2,576 | 2 | 0 | 3  | 11 | 4 | 2 | 3  | 5 | 12 | 18 |
| 2,577 | 2 | 0 | 3  | 11 | 3 | 2 | 3  | 5 | 11 | 18 |
| 2,578 | 2 | 0 | 3  | 12 | 3 | 2 | 3  | 5 | 11 | 19 |
| 2,579 | 2 | 0 | 3  | 12 | 3 | 3 | 3  | 6 | 11 | 21 |
| 2,580 | 2 | 0 | 3  | 12 | 2 | 3 | 3  | 6 | 10 | 21 |
| 2,581 | 2 | 0 | 3  | 12 | 1 | 3 | 3  | 7 | 9  | 22 |
| 2,582 | 3 | 0 | 4  | 12 | 1 | 3 | 3  | 7 | 11 | 22 |
| 2,583 | 3 | 0 | 4  | 12 | 1 | 3 | 3  | 7 | 11 | 22 |
| 2,584 | 4 | 0 | 4  | 13 | 1 | 3 | 3  | 7 | 12 | 23 |
| 2,585 | 4 | 0 | 4  | 14 | 1 | 3 | 3  | 7 | 12 | 24 |
| 2,586 | 4 | 0 | 5  | 14 | 1 | 3 | 3  | 7 | 13 | 24 |
| 2,587 | 4 | 0 | 6  | 13 | 1 | 3 | 3  | 6 | 14 | 22 |
| 2,588 | 4 | 0 | 6  | 13 | 1 | 1 | 3  | 6 | 14 | 20 |
| 2,589 | 4 | 0 | 7  | 14 | 1 | 1 | 10 | 6 | 22 | 21 |
| 2,590 | 4 | 0 | 8  | 12 | 1 | 1 | 11 | 6 | 24 | 19 |
| 2,591 | 4 | 1 | 8  | 12 | 1 | 1 | 11 | 6 | 24 | 20 |
| 2,592 | 4 | 1 | 8  | 12 | 1 | 1 | 12 | 6 | 25 | 20 |
| 2,593 | 5 | 1 | 9  | 12 | 2 | 1 | 13 | 6 | 29 | 20 |
| 2,594 | 5 | 1 | 9  | 12 | 3 | 1 | 14 | 6 | 31 | 20 |
| 2,595 | 5 | 1 | 9  | 12 | 3 | 1 | 14 | 6 | 31 | 20 |
| 2,596 | 5 | 3 | 9  | 12 | 3 | 1 | 14 | 7 | 31 | 23 |
| 2,597 | 5 | 3 | 9  | 13 | 3 | 1 | 14 | 7 | 31 | 24 |
| 2,598 | 5 | 3 | 9  | 13 | 3 | 1 | 15 | 7 | 32 | 24 |
| 2,599 | 5 | 3 | 9  | 13 | 3 | 1 | 15 | 7 | 32 | 24 |
| 2,600 | 5 | 3 | 9  | 12 | 3 | 1 | 15 | 7 | 32 | 23 |
| 2,601 | 5 | 3 | 9  | 12 | 3 | 1 | 16 | 7 | 33 | 23 |
| 2,602 | 5 | 3 | 9  | 12 | 3 | 1 | 16 | 7 | 33 | 23 |
| 2,603 | 5 | 3 | 9  | 12 | 2 | 1 | 16 | 7 | 32 | 23 |
| 2,604 | 5 | 3 | 9  | 13 | 2 | 1 | 16 | 6 | 32 | 23 |
| 2,605 | 5 | 3 | 9  | 13 | 2 | 1 | 16 | 6 | 32 | 23 |
| 2,606 | 5 | 3 | 9  | 13 | 2 | 1 | 16 | 6 | 32 | 23 |
| 2,607 | 5 | 3 | 10 | 13 | 2 | 1 | 16 | 6 | 33 | 23 |
| 2,608 | 5 | 3 | 10 | 13 | 2 | 1 | 16 | 6 | 33 | 23 |
| 2,609 | 5 | 3 | 10 | 12 | 2 | 1 | 16 | 5 | 33 | 21 |
| 2,610 | 5 | 3 | 10 | 12 | 2 | 1 | 16 | 5 | 33 | 21 |
| 2,611 | 5 | 3 | 10 | 12 | 2 | 1 | 16 | 5 | 33 | 21 |
| 2,612 | 5 | 3 | 10 | 12 | 2 | 1 | 16 | 5 | 33 | 21 |



|       |   |    |    |     |   |   |    |    |    |     |
|-------|---|----|----|-----|---|---|----|----|----|-----|
| 2,613 | 5 | 3  | 10 | 12  | 2 | 1 | 16 | 5  | 33 | 21  |
| 2,614 | 4 | 3  | 10 | 13  | 2 | 1 | 15 | 5  | 31 | 22  |
| 2,615 | 4 | 3  | 10 | 13  | 2 | 1 | 15 | 5  | 31 | 22  |
| 2,616 | 4 | 3  | 10 | 13  | 2 | 1 | 15 | 5  | 31 | 22  |
| 2,617 | 4 | 3  | 11 | 13  | 2 | 1 | 14 | 5  | 31 | 22  |
| 2,618 | 4 | 3  | 11 | 13  | 2 | 1 | 14 | 5  | 31 | 22  |
| 2,619 | 4 | 3  | 11 | 12  | 2 | 1 | 13 | 4  | 30 | 20  |
| 2,620 | 4 | 3  | 11 | 12  | 2 | 1 | 13 | 4  | 30 | 20  |
| 2,621 | 4 | 3  | 11 | 12  | 2 | 1 | 13 | 3  | 30 | 19  |
| 2,622 | 4 | 3  | 11 | 12  | 2 | 1 | 13 | 3  | 30 | 19  |
| 2,623 | 4 | 3  | 11 | 11  | 2 | 1 | 13 | 3  | 30 | 18  |
| 2,624 | 5 | 3  | 10 | 11  | 2 | 1 | 13 | 3  | 30 | 18  |
| 2,625 | 5 | 3  | 10 | 11  | 2 | 1 | 13 | 3  | 30 | 18  |
| 2,626 | 5 | 3  | 10 | 10  | 2 | 1 | 13 | 3  | 30 | 17  |
| 2,627 | 5 | 3  | 9  | 10  | 2 | 1 | 13 | 3  | 29 | 17  |
| 2,628 | 5 | 3  | 9  | 9   | 2 | 1 | 14 | 3  | 30 | 16  |
| 2,629 | 5 | 3  | 9  | 9   | 2 | 1 | 14 | 3  | 30 | 16  |
| 2,630 | 5 | 3  | 11 | 9   | 2 | 0 | 15 | 2  | 33 | 14  |
| 2,631 | 5 | 3  | 12 | 9   | 3 | 0 | 16 | 1  | 36 | 13  |
| 2,632 | 5 | 3  | 11 | 9   | 3 | 0 | 16 | 1  | 35 | 13  |
| 2,633 | 4 | 3  | 11 | 9   | 3 | 0 | 17 | 1  | 35 | 13  |
| 2,634 | 4 | 3  | 11 | 9   | 3 | 0 | 17 | 2  | 35 | 14  |
| 2,635 | 3 | 3  | 11 | 8   | 3 | 0 | 17 | 2  | 34 | 13  |
| 2,636 | 3 | 4  | 10 | 6   | 3 | 0 | 17 | 2  | 33 | 12  |
| 2,637 | 3 | 4  | 9  | 8   | 3 | 1 | 17 | 2  | 32 | 15  |
| 2,638 | 4 | 10 | 9  | 25  | 3 | 1 | 17 | 6  | 33 | 42  |
| 2,639 | 3 | 13 | 8  | 63  | 3 | 1 | 10 | 9  | 24 | 86  |
| 2,640 | 3 | 13 | 7  | 64  | 3 | 1 | 9  | 9  | 22 | 87  |
| 2,641 | 3 | 15 | 8  | 71  | 3 | 1 | 9  | 11 | 23 | 98  |
| 2,642 | 3 | 14 | 8  | 71  | 3 | 1 | 8  | 11 | 22 | 97  |
| 2,643 | 2 | 16 | 8  | 95  | 3 | 2 | 8  | 11 | 21 | 124 |
| 2,644 | 2 | 22 | 7  | 104 | 2 | 2 | 7  | 12 | 18 | 140 |
| 2,645 | 2 | 22 | 7  | 107 | 1 | 2 | 5  | 13 | 15 | 144 |
| 2,646 | 2 | 30 | 7  | 115 | 1 | 4 | 5  | 17 | 15 | 166 |
| 2,647 | 2 | 28 | 7  | 118 | 1 | 4 | 5  | 16 | 15 | 166 |
| 2,648 | 2 | 64 | 8  | 165 | 1 | 5 | 6  | 24 | 17 | 258 |
| 2,649 | 2 | 70 | 8  | 183 | 1 | 6 | 6  | 27 | 17 | 286 |
| 2,650 | 2 | 72 | 8  | 193 | 1 | 6 | 6  | 27 | 17 | 298 |
| 2,651 | 2 | 72 | 9  | 194 | 1 | 6 | 5  | 28 | 17 | 300 |
| 2,652 | 2 | 74 | 9  | 194 | 1 | 6 | 5  | 28 | 17 | 302 |
| 2,653 | 2 | 76 | 9  | 197 | 1 | 6 | 5  | 28 | 17 | 307 |

|       |   |    |   |     |   |   |   |    |    |     |
|-------|---|----|---|-----|---|---|---|----|----|-----|
| 2,654 | 2 | 81 | 9 | 202 | 1 | 6 | 5 | 28 | 17 | 317 |
| 2,655 | 2 | 81 | 9 | 206 | 1 | 6 | 5 | 28 | 17 | 321 |
| 2,656 | 2 | 81 | 9 | 213 | 1 | 6 | 5 | 28 | 17 | 328 |
| 2,657 | 2 | 83 | 8 | 213 | 1 | 6 | 5 | 28 | 16 | 330 |
| 2,658 | 2 | 83 | 8 | 214 | 1 | 6 | 5 | 28 | 16 | 331 |
| 2,659 | 2 | 83 | 9 | 214 | 1 | 7 | 5 | 28 | 17 | 332 |
| 2,660 | 2 | 83 | 9 | 214 | 1 | 7 | 5 | 28 | 17 | 332 |
| 2,661 | 2 | 83 | 9 | 214 | 1 | 7 | 8 | 28 | 20 | 332 |
| 2,662 | 2 | 83 | 9 | 214 | 1 | 7 | 8 | 28 | 20 | 332 |
| 2,663 | 2 | 83 | 9 | 214 | 1 | 7 | 8 | 28 | 20 | 332 |
| 2,664 | 2 | 83 | 9 | 215 | 1 | 7 | 8 | 28 | 20 | 333 |
| 2,665 | 2 | 83 | 9 | 215 | 1 | 7 | 8 | 28 | 20 | 333 |
| 2,666 | 2 | 83 | 9 | 219 | 1 | 7 | 8 | 28 | 20 | 337 |
| 2,667 | 2 | 83 | 9 | 217 | 1 | 7 | 8 | 28 | 20 | 335 |
| 2,668 | 2 | 83 | 8 | 217 | 1 | 7 | 8 | 28 | 19 | 335 |
| 2,669 | 2 | 83 | 8 | 217 | 1 | 7 | 8 | 28 | 19 | 335 |
| 2,670 | 2 | 83 | 8 | 217 | 1 | 7 | 8 | 28 | 19 | 335 |
| 2,671 | 2 | 83 | 8 | 217 | 1 | 7 | 8 | 28 | 19 | 335 |
| 2,672 | 2 | 83 | 8 | 218 | 1 | 7 | 8 | 28 | 19 | 336 |
| 2,673 | 2 | 83 | 9 | 218 | 1 | 7 | 8 | 29 | 20 | 337 |
| 2,674 | 2 | 83 | 9 | 218 | 1 | 7 | 8 | 29 | 20 | 337 |
| 2,675 | 1 | 83 | 9 | 220 | 1 | 7 | 8 | 33 | 19 | 343 |
| 2,676 | 1 | 83 | 9 | 220 | 1 | 7 | 8 | 33 | 19 | 343 |
| 2,677 | 1 | 83 | 9 | 221 | 1 | 7 | 8 | 33 | 19 | 344 |
| 2,678 | 1 | 83 | 9 | 222 | 1 | 7 | 8 | 33 | 19 | 345 |
| 2,679 | 1 | 83 | 9 | 222 | 1 | 7 | 7 | 34 | 18 | 346 |
| 2,680 | 1 | 83 | 7 | 224 | 1 | 7 | 6 | 34 | 15 | 348 |
| 2,681 | 1 | 83 | 7 | 226 | 1 | 8 | 6 | 34 | 15 | 351 |
| 2,682 | 1 | 83 | 6 | 226 | 0 | 8 | 5 | 35 | 12 | 352 |
| 2,683 | 1 | 83 | 6 | 226 | 0 | 8 | 5 | 35 | 12 | 352 |
| 2,684 | 1 | 83 | 6 | 228 | 0 | 8 | 4 | 37 | 11 | 356 |
| 2,685 | 1 | 85 | 6 | 228 | 0 | 8 | 4 | 41 | 11 | 362 |
| 2,686 | 1 | 84 | 6 | 232 | 0 | 8 | 4 | 42 | 11 | 366 |
| 2,687 | 1 | 84 | 6 | 233 | 0 | 8 | 4 | 42 | 11 | 367 |
| 2,688 | 1 | 84 | 7 | 235 | 0 | 7 | 4 | 42 | 12 | 368 |
| 2,689 | 0 | 75 | 7 | 180 | 0 | 7 | 4 | 35 | 11 | 297 |
| 2,690 | 0 | 75 | 7 | 178 | 0 | 7 | 5 | 35 | 12 | 295 |
| 2,691 | 0 | 73 | 7 | 171 | 0 | 7 | 5 | 34 | 12 | 285 |
| 2,692 | 0 | 73 | 6 | 172 | 0 | 7 | 5 | 36 | 11 | 288 |
| 2,693 | 0 | 65 | 6 | 139 | 0 | 6 | 5 | 37 | 11 | 247 |
| 2,694 | 0 | 65 | 6 | 140 | 0 | 6 | 5 | 37 | 11 | 248 |

|       |   |    |   |     |   |   |    |    |    |     |
|-------|---|----|---|-----|---|---|----|----|----|-----|
| 2,695 | 0 | 65 | 6 | 142 | 0 | 6 | 5  | 40 | 11 | 253 |
| 2,696 | 0 | 65 | 6 | 139 | 0 | 6 | 5  | 39 | 11 | 249 |
| 2,697 | 0 | 59 | 6 | 133 | 0 | 4 | 5  | 37 | 11 | 233 |
| 2,698 | 0 | 59 | 6 | 133 | 0 | 4 | 5  | 37 | 11 | 233 |
| 2,699 | 0 | 23 | 5 | 91  | 0 | 3 | 4  | 30 | 9  | 147 |
| 2,700 | 0 | 17 | 5 | 73  | 0 | 2 | 4  | 27 | 9  | 119 |
| 2,701 | 0 | 15 | 6 | 63  | 0 | 2 | 5  | 26 | 11 | 106 |
| 2,702 | 0 | 16 | 5 | 64  | 0 | 2 | 5  | 26 | 10 | 108 |
| 2,703 | 0 | 14 | 4 | 64  | 0 | 2 | 5  | 26 | 9  | 106 |
| 2,704 | 0 | 7  | 4 | 57  | 0 | 2 | 5  | 27 | 9  | 93  |
| 2,705 | 0 | 7  | 4 | 57  | 0 | 2 | 5  | 27 | 9  | 93  |
| 2,706 | 0 | 7  | 4 | 53  | 0 | 2 | 5  | 27 | 9  | 89  |
| 2,707 | 0 | 7  | 4 | 46  | 0 | 2 | 5  | 27 | 9  | 82  |
| 2,708 | 0 | 5  | 4 | 45  | 0 | 2 | 5  | 27 | 9  | 79  |
| 2,709 | 0 | 5  | 5 | 45  | 0 | 1 | 8  | 27 | 13 | 78  |
| 2,710 | 0 | 5  | 4 | 45  | 0 | 1 | 8  | 27 | 12 | 78  |
| 2,711 | 0 | 5  | 5 | 46  | 0 | 1 | 11 | 28 | 16 | 80  |
| 2,712 | 0 | 5  | 6 | 47  | 0 | 1 | 8  | 28 | 14 | 81  |
| 2,713 | 0 | 7  | 6 | 57  | 0 | 1 | 10 | 32 | 16 | 97  |
| 2,714 | 0 | 7  | 6 | 58  | 0 | 1 | 10 | 33 | 16 | 99  |
| 2,715 | 0 | 7  | 6 | 58  | 0 | 1 | 10 | 33 | 16 | 99  |
| 2,716 | 0 | 7  | 6 | 53  | 0 | 1 | 10 | 33 | 16 | 94  |
| 2,717 | 0 | 7  | 6 | 53  | 0 | 1 | 10 | 33 | 16 | 94  |
| 2,718 | 0 | 7  | 6 | 54  | 0 | 1 | 10 | 33 | 16 | 95  |
| 2,719 | 0 | 7  | 6 | 54  | 0 | 1 | 10 | 33 | 16 | 95  |
| 2,720 | 0 | 7  | 7 | 54  | 0 | 1 | 10 | 33 | 17 | 95  |
| 2,721 | 0 | 7  | 7 | 54  | 0 | 1 | 10 | 33 | 17 | 95  |
| 2,722 | 0 | 7  | 8 | 54  | 0 | 1 | 10 | 34 | 18 | 96  |
| 2,723 | 0 | 8  | 7 | 54  | 0 | 1 | 10 | 36 | 17 | 99  |
| 2,724 | 0 | 8  | 7 | 55  | 0 | 1 | 10 | 35 | 17 | 99  |
| 2,725 | 0 | 8  | 7 | 55  | 0 | 1 | 10 | 35 | 17 | 99  |
| 2,726 | 0 | 8  | 7 | 53  | 0 | 1 | 10 | 31 | 17 | 93  |
| 2,727 | 0 | 8  | 7 | 52  | 0 | 1 | 10 | 31 | 17 | 92  |
| 2,728 | 0 | 8  | 7 | 52  | 0 | 1 | 10 | 31 | 17 | 92  |
| 2,729 | 0 | 8  | 7 | 51  | 0 | 1 | 10 | 31 | 17 | 91  |
| 2,730 | 0 | 8  | 7 | 51  | 0 | 1 | 10 | 30 | 17 | 90  |
| 2,731 | 0 | 8  | 7 | 51  | 0 | 1 | 10 | 30 | 17 | 90  |
| 2,732 | 0 | 8  | 7 | 49  | 0 | 0 | 10 | 30 | 17 | 87  |
| 2,733 | 0 | 8  | 7 | 49  | 0 | 0 | 10 | 28 | 17 | 85  |
| 2,734 | 0 | 8  | 7 | 47  | 0 | 0 | 11 | 26 | 18 | 81  |
| 2,735 | 0 | 6  | 7 | 47  | 0 | 0 | 11 | 23 | 18 | 76  |

|       |   |    |    |    |   |   |    |    |    |     |
|-------|---|----|----|----|---|---|----|----|----|-----|
| 2,736 | 0 | 6  | 9  | 43 | 0 | 0 | 11 | 22 | 20 | 71  |
| 2,737 | 0 | 6  | 9  | 42 | 0 | 0 | 11 | 22 | 20 | 70  |
| 2,738 | 0 | 6  | 9  | 42 | 0 | 0 | 11 | 22 | 20 | 70  |
| 2,739 | 0 | 6  | 8  | 38 | 0 | 0 | 12 | 22 | 20 | 66  |
| 2,740 | 0 | 6  | 8  | 38 | 0 | 0 | 12 | 22 | 20 | 66  |
| 2,741 | 0 | 6  | 8  | 38 | 0 | 0 | 11 | 21 | 19 | 65  |
| 2,742 | 0 | 6  | 8  | 37 | 0 | 0 | 11 | 19 | 19 | 62  |
| 2,743 | 0 | 6  | 8  | 37 | 0 | 0 | 11 | 17 | 19 | 60  |
| 2,744 | 0 | 6  | 8  | 37 | 0 | 0 | 11 | 17 | 19 | 60  |
| 2,745 | 0 | 6  | 8  | 36 | 0 | 0 | 12 | 17 | 20 | 59  |
| 2,746 | 0 | 4  | 10 | 29 | 1 | 0 | 23 | 12 | 34 | 45  |
| 2,747 | 0 | 4  | 10 | 29 | 2 | 0 | 27 | 15 | 39 | 48  |
| 2,748 | 0 | 4  | 10 | 29 | 2 | 0 | 27 | 15 | 39 | 48  |
| 2,749 | 0 | 4  | 10 | 23 | 2 | 0 | 28 | 14 | 40 | 41  |
| 2,750 | 0 | 5  | 10 | 23 | 2 | 0 | 28 | 14 | 40 | 42  |
| 2,751 | 0 | 5  | 11 | 28 | 3 | 0 | 29 | 20 | 43 | 53  |
| 2,752 | 0 | 5  | 11 | 27 | 3 | 0 | 29 | 20 | 43 | 52  |
| 2,753 | 0 | 4  | 11 | 29 | 3 | 0 | 29 | 20 | 43 | 53  |
| 2,754 | 0 | 6  | 11 | 29 | 3 | 0 | 29 | 20 | 43 | 55  |
| 2,755 | 0 | 6  | 11 | 31 | 3 | 0 | 29 | 19 | 43 | 56  |
| 2,756 | 0 | 6  | 11 | 36 | 3 | 0 | 30 | 23 | 44 | 65  |
| 2,757 | 0 | 7  | 11 | 38 | 3 | 0 | 30 | 26 | 44 | 71  |
| 2,758 | 0 | 7  | 11 | 44 | 3 | 0 | 30 | 32 | 44 | 83  |
| 2,759 | 0 | 7  | 10 | 44 | 3 | 0 | 27 | 32 | 40 | 83  |
| 2,760 | 0 | 7  | 10 | 43 | 3 | 1 | 27 | 31 | 40 | 82  |
| 2,761 | 0 | 7  | 10 | 46 | 3 | 1 | 27 | 31 | 40 | 85  |
| 2,762 | 0 | 9  | 9  | 49 | 3 | 1 | 24 | 32 | 36 | 91  |
| 2,763 | 0 | 8  | 8  | 40 | 3 | 1 | 24 | 29 | 35 | 78  |
| 2,764 | 0 | 8  | 8  | 42 | 3 | 1 | 22 | 33 | 33 | 84  |
| 2,765 | 0 | 10 | 8  | 57 | 3 | 1 | 22 | 41 | 33 | 109 |
| 2,766 | 0 | 10 | 8  | 57 | 3 | 1 | 22 | 42 | 33 | 110 |
| 2,767 | 0 | 10 | 8  | 58 | 3 | 1 | 22 | 42 | 33 | 111 |
| 2,768 | 0 | 11 | 8  | 58 | 3 | 1 | 22 | 42 | 33 | 112 |
| 2,769 | 0 | 11 | 8  | 58 | 3 | 1 | 23 | 42 | 34 | 112 |
| 2,770 | 0 | 12 | 9  | 58 | 3 | 1 | 23 | 42 | 35 | 113 |
| 2,771 | 0 | 12 | 8  | 58 | 3 | 1 | 23 | 42 | 34 | 113 |
| 2,772 | 0 | 12 | 7  | 59 | 3 | 1 | 23 | 42 | 33 | 114 |
| 2,773 | 0 | 12 | 7  | 59 | 3 | 1 | 23 | 41 | 33 | 113 |
| 2,774 | 1 | 11 | 7  | 57 | 3 | 1 | 23 | 39 | 34 | 108 |
| 2,775 | 1 | 11 | 7  | 57 | 3 | 1 | 23 | 39 | 34 | 108 |
| 2,776 | 1 | 12 | 7  | 60 | 3 | 1 | 23 | 42 | 34 | 115 |

|       |   |    |    |     |   |    |    |     |    |     |
|-------|---|----|----|-----|---|----|----|-----|----|-----|
| 2,777 | 1 | 13 | 7  | 60  | 3 | 1  | 23 | 42  | 34 | 116 |
| 2,778 | 1 | 13 | 7  | 60  | 3 | 1  | 23 | 42  | 34 | 116 |
| 2,779 | 1 | 13 | 7  | 60  | 3 | 1  | 23 | 42  | 34 | 116 |
| 2,780 | 1 | 13 | 7  | 60  | 3 | 1  | 23 | 42  | 34 | 116 |
| 2,781 | 1 | 13 | 9  | 58  | 4 | 1  | 23 | 42  | 37 | 114 |
| 2,782 | 1 | 13 | 9  | 58  | 4 | 1  | 23 | 42  | 37 | 114 |
| 2,783 | 1 | 13 | 11 | 58  | 4 | 2  | 24 | 42  | 40 | 115 |
| 2,784 | 1 | 13 | 11 | 58  | 4 | 2  | 24 | 43  | 40 | 116 |
| 2,785 | 1 | 13 | 11 | 58  | 4 | 2  | 23 | 43  | 39 | 116 |
| 2,786 | 1 | 14 | 12 | 67  | 4 | 2  | 23 | 43  | 40 | 126 |
| 2,787 | 1 | 14 | 10 | 67  | 4 | 2  | 23 | 43  | 38 | 126 |
| 2,788 | 1 | 14 | 10 | 67  | 4 | 2  | 23 | 43  | 38 | 126 |
| 2,789 | 1 | 16 | 10 | 67  | 4 | 2  | 22 | 43  | 37 | 128 |
| 2,790 | 1 | 16 | 10 | 68  | 4 | 3  | 22 | 50  | 37 | 137 |
| 2,791 | 1 | 17 | 10 | 71  | 4 | 3  | 22 | 50  | 37 | 141 |
| 2,792 | 1 | 17 | 10 | 71  | 4 | 3  | 22 | 50  | 37 | 141 |
| 2,793 | 1 | 17 | 11 | 72  | 4 | 3  | 22 | 52  | 38 | 144 |
| 2,794 | 1 | 19 | 11 | 74  | 4 | 3  | 22 | 52  | 38 | 148 |
| 2,795 | 1 | 20 | 11 | 78  | 4 | 3  | 21 | 62  | 37 | 163 |
| 2,796 | 1 | 20 | 10 | 81  | 4 | 3  | 19 | 62  | 34 | 166 |
| 2,797 | 1 | 20 | 11 | 83  | 3 | 3  | 10 | 63  | 25 | 169 |
| 2,798 | 1 | 20 | 11 | 84  | 2 | 3  | 6  | 61  | 20 | 168 |
| 2,799 | 1 | 20 | 11 | 90  | 2 | 3  | 5  | 69  | 19 | 182 |
| 2,800 | 1 | 32 | 11 | 115 | 2 | 7  | 5  | 115 | 19 | 269 |
| 2,801 | 1 | 31 | 11 | 116 | 2 | 7  | 4  | 117 | 18 | 271 |
| 2,802 | 1 | 31 | 9  | 113 | 1 | 7  | 3  | 111 | 14 | 262 |
| 2,803 | 1 | 31 | 9  | 115 | 1 | 7  | 3  | 111 | 14 | 264 |
| 2,804 | 1 | 29 | 9  | 115 | 1 | 7  | 3  | 112 | 14 | 263 |
| 2,805 | 1 | 30 | 9  | 120 | 1 | 7  | 3  | 114 | 14 | 271 |
| 2,806 | 1 | 30 | 9  | 117 | 1 | 7  | 2  | 114 | 13 | 268 |
| 2,807 | 1 | 30 | 9  | 114 | 1 | 7  | 2  | 111 | 13 | 262 |
| 2,808 | 1 | 30 | 9  | 110 | 1 | 8  | 2  | 106 | 13 | 254 |
| 2,809 | 1 | 30 | 12 | 110 | 1 | 8  | 8  | 106 | 22 | 254 |
| 2,810 | 1 | 30 | 12 | 110 | 1 | 7  | 8  | 106 | 22 | 253 |
| 2,811 | 1 | 30 | 13 | 107 | 1 | 7  | 10 | 107 | 25 | 251 |
| 2,812 | 1 | 30 | 13 | 107 | 1 | 7  | 10 | 107 | 25 | 251 |
| 2,813 | 1 | 27 | 14 | 106 | 1 | 8  | 11 | 105 | 27 | 246 |
| 2,814 | 1 | 27 | 14 | 106 | 1 | 8  | 11 | 106 | 27 | 247 |
| 2,815 | 1 | 27 | 17 | 115 | 1 | 8  | 12 | 106 | 31 | 256 |
| 2,816 | 1 | 27 | 17 | 111 | 1 | 10 | 13 | 106 | 32 | 254 |
| 2,817 | 2 | 27 | 20 | 126 | 1 | 10 | 15 | 111 | 38 | 274 |

|       |   |    |    |     |   |    |    |     |    |     |
|-------|---|----|----|-----|---|----|----|-----|----|-----|
| 2,818 | 3 | 27 | 20 | 126 | 1 | 11 | 15 | 113 | 39 | 277 |
| 2,819 | 3 | 28 | 20 | 127 | 1 | 11 | 15 | 113 | 39 | 279 |
| 2,820 | 3 | 31 | 22 | 142 | 1 | 12 | 14 | 119 | 40 | 304 |
| 2,821 | 3 | 30 | 21 | 146 | 1 | 12 | 14 | 119 | 39 | 307 |
| 2,822 | 3 | 31 | 22 | 157 | 1 | 12 | 14 | 121 | 40 | 321 |
| 2,823 | 3 | 32 | 22 | 163 | 1 | 12 | 14 | 121 | 40 | 328 |
| 2,824 | 2 | 35 | 32 | 184 | 2 | 12 | 18 | 122 | 54 | 353 |
| 2,825 | 3 | 35 | 33 | 189 | 2 | 12 | 18 | 124 | 56 | 360 |
| 2,826 | 4 | 34 | 33 | 191 | 2 | 12 | 19 | 122 | 58 | 359 |
| 2,827 | 4 | 35 | 33 | 215 | 2 | 13 | 19 | 136 | 58 | 399 |
| 2,828 | 4 | 34 | 47 | 227 | 3 | 13 | 31 | 140 | 85 | 414 |
| 2,829 | 4 | 35 | 47 | 249 | 3 | 13 | 31 | 144 | 85 | 441 |
| 2,830 | 4 | 35 | 47 | 252 | 3 | 13 | 31 | 144 | 85 | 444 |
| 2,831 | 4 | 35 | 45 | 255 | 3 | 13 | 32 | 147 | 84 | 450 |
| 2,832 | 4 | 41 | 45 | 306 | 2 | 15 | 32 | 186 | 83 | 548 |
| 2,833 | 4 | 41 | 43 | 306 | 2 | 15 | 31 | 186 | 80 | 548 |
| 2,834 | 4 | 43 | 43 | 332 | 3 | 14 | 31 | 199 | 81 | 588 |
| 2,835 | 4 | 44 | 43 | 327 | 3 | 14 | 31 | 199 | 81 | 584 |
| 2,836 | 4 | 44 | 43 | 333 | 3 | 14 | 31 | 206 | 81 | 597 |
| 2,837 | 4 | 44 | 42 | 335 | 3 | 14 | 31 | 206 | 80 | 599 |
| 2,838 | 4 | 44 | 42 | 336 | 3 | 14 | 31 | 206 | 80 | 600 |
| 2,839 | 4 | 41 | 42 | 332 | 3 | 13 | 31 | 199 | 80 | 585 |
| 2,840 | 4 | 41 | 42 | 332 | 3 | 13 | 31 | 199 | 80 | 585 |
| 2,841 | 4 | 41 | 42 | 332 | 3 | 13 | 31 | 199 | 80 | 585 |
| 2,842 | 4 | 41 | 42 | 333 | 3 | 14 | 31 | 201 | 80 | 589 |
| 2,843 | 4 | 42 | 41 | 358 | 3 | 14 | 31 | 218 | 79 | 632 |
| 2,844 | 4 | 43 | 41 | 376 | 3 | 15 | 31 | 228 | 79 | 662 |
| 2,845 | 4 | 41 | 42 | 381 | 3 | 15 | 31 | 232 | 80 | 669 |
| 2,846 | 4 | 40 | 43 | 388 | 3 | 15 | 31 | 222 | 81 | 665 |
| 2,847 | 4 | 40 | 43 | 386 | 3 | 15 | 31 | 226 | 81 | 667 |
| 2,848 | 4 | 40 | 41 | 391 | 3 | 16 | 31 | 229 | 79 | 676 |
| 2,849 | 4 | 42 | 42 | 398 | 3 | 16 | 31 | 238 | 80 | 694 |
| 2,850 | 4 | 43 | 42 | 396 | 3 | 16 | 31 | 230 | 80 | 685 |
| 2,851 | 4 | 31 | 42 | 373 | 3 | 13 | 31 | 184 | 80 | 601 |
| 2,852 | 4 | 31 | 42 | 371 | 3 | 13 | 31 | 183 | 80 | 598 |
| 2,853 | 4 | 31 | 42 | 366 | 3 | 13 | 31 | 182 | 80 | 592 |
| 2,854 | 4 | 31 | 44 | 366 | 3 | 13 | 31 | 182 | 82 | 592 |
| 2,855 | 4 | 31 | 44 | 366 | 3 | 13 | 31 | 182 | 82 | 592 |
| 2,856 | 4 | 30 | 44 | 365 | 3 | 13 | 32 | 182 | 83 | 590 |
| 2,857 | 4 | 30 | 44 | 368 | 3 | 13 | 34 | 182 | 85 | 593 |
| 2,858 | 4 | 30 | 44 | 372 | 3 | 12 | 34 | 195 | 85 | 609 |

|       |   |     |    |     |   |    |    |     |    |       |
|-------|---|-----|----|-----|---|----|----|-----|----|-------|
| 2,859 | 4 | 30  | 44 | 376 | 3 | 12 | 35 | 197 | 86 | 615   |
| 2,860 | 4 | 32  | 41 | 379 | 3 | 12 | 29 | 197 | 77 | 620   |
| 2,861 | 4 | 33  | 41 | 392 | 3 | 12 | 29 | 203 | 77 | 640   |
| 2,862 | 4 | 71  | 40 | 625 | 3 | 17 | 27 | 299 | 74 | 1,012 |
| 2,863 | 4 | 84  | 39 | 706 | 3 | 21 | 28 | 339 | 74 | 1,150 |
| 2,864 | 4 | 84  | 39 | 707 | 3 | 20 | 27 | 340 | 73 | 1,151 |
| 2,865 | 4 | 84  | 37 | 700 | 3 | 20 | 27 | 337 | 71 | 1,141 |
| 2,866 | 4 | 85  | 37 | 703 | 3 | 20 | 26 | 342 | 70 | 1,150 |
| 2,867 | 3 | 93  | 35 | 716 | 3 | 18 | 24 | 346 | 65 | 1,173 |
| 2,868 | 3 | 93  | 35 | 722 | 3 | 18 | 24 | 350 | 65 | 1,183 |
| 2,869 | 2 | 93  | 37 | 726 | 3 | 17 | 24 | 348 | 66 | 1,184 |
| 2,870 | 2 | 91  | 38 | 725 | 3 | 17 | 24 | 348 | 67 | 1,181 |
| 2,871 | 2 | 88  | 37 | 707 | 3 | 16 | 24 | 343 | 66 | 1,154 |
| 2,872 | 3 | 88  | 36 | 695 | 3 | 16 | 24 | 341 | 66 | 1,140 |
| 2,873 | 3 | 88  | 36 | 696 | 3 | 16 | 24 | 343 | 66 | 1,143 |
| 2,874 | 3 | 84  | 26 | 671 | 2 | 16 | 22 | 342 | 53 | 1,113 |
| 2,875 | 3 | 84  | 26 | 673 | 2 | 16 | 21 | 342 | 52 | 1,115 |
| 2,876 | 2 | 85  | 25 | 668 | 2 | 16 | 21 | 341 | 50 | 1,110 |
| 2,877 | 1 | 84  | 25 | 639 | 2 | 15 | 20 | 328 | 48 | 1,066 |
| 2,878 | 1 | 84  | 25 | 642 | 2 | 15 | 20 | 328 | 48 | 1,069 |
| 2,879 | 1 | 84  | 11 | 630 | 0 | 15 | 8  | 323 | 20 | 1,052 |
| 2,880 | 1 | 83  | 11 | 605 | 1 | 15 | 8  | 319 | 21 | 1,022 |
| 2,881 | 1 | 83  | 11 | 605 | 1 | 15 | 8  | 320 | 21 | 1,023 |
| 2,882 | 1 | 77  | 11 | 551 | 1 | 13 | 7  | 278 | 20 | 919   |
| 2,883 | 1 | 77  | 11 | 554 | 1 | 13 | 7  | 282 | 20 | 926   |
| 2,884 | 1 | 77  | 11 | 554 | 1 | 13 | 7  | 282 | 20 | 926   |
| 2,885 | 2 | 75  | 14 | 529 | 1 | 13 | 8  | 270 | 25 | 887   |
| 2,886 | 3 | 73  | 16 | 530 | 1 | 13 | 9  | 268 | 29 | 884   |
| 2,887 | 3 | 73  | 16 | 527 | 1 | 13 | 9  | 265 | 29 | 878   |
| 2,888 | 3 | 74  | 16 | 527 | 1 | 14 | 9  | 267 | 29 | 882   |
| 2,889 | 3 | 74  | 16 | 530 | 1 | 14 | 9  | 271 | 29 | 889   |
| 2,890 | 3 | 74  | 16 | 537 | 1 | 14 | 9  | 275 | 29 | 900   |
| 2,891 | 3 | 74  | 16 | 537 | 1 | 14 | 9  | 276 | 29 | 901   |
| 2,892 | 3 | 76  | 16 | 552 | 1 | 17 | 9  | 282 | 29 | 927   |
| 2,893 | 3 | 76  | 16 | 557 | 1 | 17 | 9  | 283 | 29 | 933   |
| 2,894 | 4 | 97  | 16 | 688 | 1 | 29 | 10 | 316 | 31 | 1,130 |
| 2,895 | 4 | 99  | 16 | 727 | 1 | 29 | 10 | 329 | 31 | 1,184 |
| 2,896 | 4 | 108 | 15 | 783 | 1 | 38 | 11 | 376 | 31 | 1,305 |
| 2,897 | 4 | 108 | 14 | 778 | 1 | 38 | 11 | 378 | 30 | 1,302 |
| 2,898 | 5 | 109 | 14 | 814 | 1 | 40 | 12 | 382 | 32 | 1,345 |
| 2,899 | 5 | 120 | 14 | 846 | 1 | 41 | 12 | 393 | 32 | 1,400 |

|       |   |     |    |       |   |     |    |     |    |       |
|-------|---|-----|----|-------|---|-----|----|-----|----|-------|
| 2,900 | 5 | 120 | 13 | 852   | 1 | 41  | 12 | 396 | 31 | 1,409 |
| 2,901 | 5 | 122 | 13 | 864   | 1 | 41  | 13 | 405 | 32 | 1,432 |
| 2,902 | 5 | 151 | 14 | 1,009 | 1 | 61  | 14 | 546 | 34 | 1,767 |
| 2,903 | 5 | 155 | 14 | 1,037 | 1 | 62  | 14 | 563 | 34 | 1,817 |
| 2,904 | 5 | 172 | 14 | 1,127 | 1 | 72  | 14 | 616 | 34 | 1,987 |
| 2,905 | 5 | 177 | 12 | 1,140 | 1 | 74  | 14 | 624 | 32 | 2,015 |
| 2,906 | 5 | 177 | 13 | 1,146 | 2 | 74  | 13 | 624 | 33 | 2,021 |
| 2,907 | 5 | 209 | 13 | 1,244 | 2 | 83  | 11 | 709 | 31 | 2,245 |
| 2,908 | 5 | 212 | 13 | 1,268 | 2 | 83  | 11 | 712 | 31 | 2,275 |
| 2,909 | 5 | 222 | 13 | 1,338 | 2 | 87  | 11 | 764 | 31 | 2,411 |
| 2,910 | 5 | 222 | 13 | 1,342 | 2 | 90  | 10 | 767 | 30 | 2,421 |
| 2,911 | 5 | 219 | 14 | 1,340 | 2 | 90  | 10 | 764 | 31 | 2,413 |
| 2,912 | 5 | 181 | 14 | 1,109 | 2 | 85  | 10 | 669 | 31 | 2,044 |
| 2,913 | 5 | 168 | 14 | 1,027 | 2 | 81  | 10 | 629 | 31 | 1,905 |
| 2,914 | 5 | 168 | 14 | 1,022 | 2 | 81  | 9  | 628 | 30 | 1,899 |
| 2,915 | 6 | 168 | 16 | 1,024 | 2 | 81  | 9  | 631 | 33 | 1,904 |
| 2,916 | 6 | 167 | 15 | 1,017 | 2 | 81  | 8  | 625 | 31 | 1,890 |
| 2,917 | 6 | 167 | 15 | 1,019 | 2 | 81  | 8  | 627 | 31 | 1,894 |
| 2,918 | 6 | 157 | 14 | 982   | 2 | 81  | 8  | 610 | 30 | 1,830 |
| 2,919 | 6 | 157 | 13 | 978   | 2 | 81  | 8  | 608 | 29 | 1,824 |
| 2,920 | 6 | 157 | 13 | 980   | 2 | 82  | 8  | 614 | 29 | 1,833 |
| 2,921 | 6 | 157 | 13 | 984   | 2 | 82  | 8  | 614 | 29 | 1,837 |
| 2,922 | 6 | 157 | 13 | 985   | 2 | 82  | 8  | 614 | 29 | 1,838 |
| 2,923 | 6 | 156 | 13 | 980   | 2 | 82  | 8  | 612 | 29 | 1,830 |
| 2,924 | 6 | 156 | 13 | 980   | 2 | 82  | 8  | 612 | 29 | 1,830 |
| 2,925 | 6 | 156 | 13 | 980   | 2 | 82  | 8  | 612 | 29 | 1,830 |
| 2,926 | 6 | 156 | 13 | 980   | 2 | 82  | 7  | 612 | 28 | 1,830 |
| 2,927 | 6 | 155 | 13 | 980   | 2 | 82  | 7  | 609 | 28 | 1,826 |
| 2,928 | 6 | 155 | 13 | 979   | 2 | 82  | 7  | 609 | 28 | 1,825 |
| 2,929 | 6 | 155 | 13 | 977   | 2 | 82  | 7  | 609 | 28 | 1,823 |
| 2,930 | 7 | 155 | 13 | 984   | 2 | 82  | 7  | 611 | 29 | 1,832 |
| 2,931 | 7 | 159 | 14 | 1,039 | 1 | 88  | 7  | 650 | 29 | 1,936 |
| 2,932 | 7 | 163 | 16 | 1,063 | 1 | 92  | 7  | 664 | 31 | 1,982 |
| 2,933 | 7 | 168 | 16 | 1,100 | 1 | 99  | 7  | 690 | 31 | 2,057 |
| 2,934 | 6 | 170 | 16 | 1,101 | 1 | 99  | 7  | 687 | 30 | 2,057 |
| 2,935 | 6 | 172 | 17 | 1,122 | 1 | 103 | 7  | 692 | 31 | 2,089 |
| 2,936 | 6 | 174 | 15 | 1,125 | 1 | 103 | 7  | 694 | 29 | 2,096 |
| 2,937 | 5 | 174 | 13 | 1,121 | 1 | 102 | 4  | 694 | 23 | 2,091 |
| 2,938 | 5 | 177 | 14 | 1,140 | 1 | 103 | 4  | 698 | 24 | 2,118 |
| 2,939 | 5 | 176 | 14 | 1,136 | 1 | 102 | 4  | 697 | 24 | 2,111 |
| 2,940 | 5 | 184 | 15 | 1,141 | 1 | 102 | 4  | 692 | 25 | 2,119 |



|       |   |     |    |       |   |     |    |     |    |       |
|-------|---|-----|----|-------|---|-----|----|-----|----|-------|
| 2,941 | 5 | 184 | 15 | 1,152 | 1 | 102 | 4  | 696 | 25 | 2,134 |
| 2,942 | 6 | 185 | 15 | 1,152 | 1 | 99  | 4  | 693 | 26 | 2,129 |
| 2,943 | 6 | 185 | 15 | 1,155 | 1 | 99  | 4  | 695 | 26 | 2,134 |
| 2,944 | 6 | 186 | 17 | 1,153 | 1 | 98  | 4  | 697 | 28 | 2,134 |
| 2,945 | 5 | 167 | 17 | 1,017 | 1 | 86  | 4  | 654 | 27 | 1,924 |
| 2,946 | 5 | 164 | 17 | 963   | 1 | 85  | 4  | 629 | 27 | 1,841 |
| 2,947 | 5 | 155 | 18 | 904   | 2 | 76  | 4  | 575 | 29 | 1,710 |
| 2,948 | 5 | 160 | 19 | 903   | 2 | 77  | 5  | 577 | 31 | 1,717 |
| 2,949 | 4 | 159 | 19 | 865   | 2 | 75  | 4  | 564 | 29 | 1,663 |
| 2,950 | 4 | 146 | 19 | 813   | 2 | 73  | 4  | 539 | 29 | 1,571 |
| 2,951 | 4 | 143 | 19 | 796   | 2 | 73  | 3  | 528 | 28 | 1,540 |
| 2,952 | 4 | 143 | 30 | 796   | 2 | 73  | 7  | 528 | 43 | 1,540 |
| 2,953 | 4 | 110 | 30 | 623   | 2 | 52  | 7  | 373 | 43 | 1,158 |
| 2,954 | 4 | 110 | 30 | 627   | 2 | 52  | 7  | 373 | 43 | 1,162 |
| 2,955 | 4 | 93  | 30 | 537   | 2 | 43  | 7  | 321 | 43 | 994   |
| 2,956 | 5 | 88  | 31 | 524   | 3 | 41  | 7  | 313 | 46 | 966   |
| 2,957 | 5 | 88  | 30 | 517   | 2 | 41  | 8  | 312 | 45 | 958   |
| 2,958 | 5 | 53  | 30 | 387   | 2 | 32  | 8  | 225 | 45 | 697   |
| 2,959 | 5 | 42  | 30 | 307   | 2 | 28  | 8  | 157 | 45 | 534   |
| 2,960 | 5 | 42  | 29 | 307   | 2 | 28  | 8  | 157 | 44 | 534   |
| 2,961 | 5 | 42  | 29 | 302   | 2 | 25  | 8  | 152 | 44 | 521   |
| 2,962 | 5 | 42  | 29 | 288   | 2 | 25  | 8  | 149 | 44 | 504   |
| 2,963 | 6 | 42  | 29 | 288   | 2 | 25  | 8  | 149 | 45 | 504   |
| 2,964 | 6 | 42  | 30 | 288   | 2 | 25  | 8  | 149 | 46 | 504   |
| 2,965 | 6 | 42  | 30 | 288   | 2 | 25  | 8  | 149 | 46 | 504   |
| 2,966 | 5 | 42  | 28 | 285   | 2 | 25  | 8  | 145 | 43 | 497   |
| 2,967 | 5 | 42  | 29 | 284   | 2 | 25  | 9  | 144 | 45 | 495   |
| 2,968 | 5 | 42  | 29 | 285   | 2 | 25  | 9  | 147 | 45 | 499   |
| 2,969 | 5 | 43  | 29 | 284   | 2 | 25  | 9  | 145 | 45 | 497   |
| 2,970 | 5 | 43  | 29 | 282   | 2 | 25  | 9  | 143 | 45 | 493   |
| 2,971 | 5 | 43  | 30 | 271   | 2 | 24  | 9  | 137 | 46 | 475   |
| 2,972 | 5 | 43  | 30 | 271   | 2 | 24  | 9  | 137 | 46 | 475   |
| 2,973 | 5 | 43  | 30 | 269   | 2 | 24  | 11 | 135 | 48 | 471   |
| 2,974 | 4 | 43  | 30 | 269   | 2 | 25  | 11 | 135 | 47 | 472   |
| 2,975 | 6 | 43  | 35 | 270   | 2 | 25  | 14 | 135 | 57 | 473   |
| 2,976 | 6 | 44  | 37 | 273   | 2 | 25  | 17 | 138 | 62 | 480   |
| 2,977 | 6 | 45  | 37 | 274   | 2 | 25  | 17 | 139 | 62 | 483   |
| 2,978 | 6 | 46  | 37 | 274   | 2 | 25  | 17 | 139 | 62 | 484   |
| 2,979 | 6 | 46  | 37 | 277   | 2 | 25  | 17 | 139 | 62 | 487   |
| 2,980 | 6 | 47  | 37 | 277   | 2 | 25  | 17 | 139 | 62 | 488   |
| 2,981 | 5 | 43  | 37 | 217   | 2 | 19  | 17 | 100 | 61 | 379   |

|       |   |    |    |     |   |    |    |     |    |       |
|-------|---|----|----|-----|---|----|----|-----|----|-------|
| 2,982 | 5 | 43 | 36 | 223 | 2 | 19 | 17 | 102 | 60 | 387   |
| 2,983 | 5 | 40 | 34 | 200 | 2 | 15 | 17 | 88  | 58 | 343   |
| 2,984 | 6 | 35 | 34 | 170 | 2 | 8  | 17 | 67  | 59 | 280   |
| 2,985 | 7 | 33 | 34 | 171 | 2 | 8  | 18 | 73  | 61 | 285   |
| 2,986 | 7 | 29 | 32 | 148 | 2 | 4  | 17 | 65  | 58 | 246   |
| 2,987 | 7 | 30 | 32 | 149 | 2 | 4  | 17 | 65  | 58 | 248   |
| 2,988 | 7 | 27 | 31 | 127 | 2 | 3  | 17 | 57  | 57 | 214   |
| 2,989 | 7 | 27 | 31 | 127 | 2 | 3  | 17 | 56  | 57 | 213   |
| 2,990 | 7 | 19 | 30 | 111 | 2 | 3  | 17 | 53  | 56 | 186   |
| 2,991 | 7 | 20 | 30 | 111 | 2 | 3  | 17 | 53  | 56 | 187   |
| 2,992 | 6 | 20 | 30 | 103 | 2 | 3  | 17 | 49  | 55 | 175   |
| 2,993 | 6 | 17 | 30 | 88  | 2 | 3  | 17 | 44  | 55 | 152   |
| 2,994 | 6 | 14 | 28 | 59  | 2 | 3  | 18 | 32  | 54 | 108   |
| 2,995 | 6 | 14 | 28 | 60  | 2 | 3  | 18 | 33  | 54 | 110   |
| 2,996 | 6 | 14 | 28 | 60  | 1 | 3  | 17 | 37  | 52 | 114   |
| 2,997 | 6 | 17 | 28 | 151 | 1 | 5  | 17 | 81  | 52 | 254   |
| 2,998 | 6 | 25 | 27 | 226 | 1 | 6  | 16 | 141 | 50 | 398   |
| 2,999 | 6 | 25 | 27 | 250 | 1 | 5  | 16 | 157 | 50 | 437   |
| 3,000 | 6 | 25 | 27 | 260 | 1 | 5  | 16 | 160 | 50 | 450   |
| 3,001 | 8 | 28 | 27 | 286 | 1 | 5  | 16 | 182 | 52 | 501   |
| 3,002 | 8 | 31 | 27 | 316 | 1 | 7  | 16 | 188 | 52 | 542   |
| 3,003 | 8 | 32 | 18 | 320 | 1 | 7  | 12 | 188 | 39 | 547   |
| 3,004 | 8 | 32 | 17 | 314 | 1 | 7  | 12 | 188 | 38 | 541   |
| 3,005 | 8 | 32 | 17 | 319 | 1 | 7  | 12 | 193 | 38 | 551   |
| 3,006 | 7 | 32 | 16 | 321 | 0 | 6  | 12 | 194 | 35 | 553   |
| 3,007 | 7 | 32 | 16 | 321 | 0 | 6  | 11 | 194 | 34 | 553   |
| 3,008 | 7 | 33 | 16 | 322 | 0 | 6  | 11 | 195 | 34 | 556   |
| 3,009 | 7 | 33 | 16 | 322 | 0 | 6  | 11 | 195 | 34 | 556   |
| 3,010 | 7 | 33 | 17 | 323 | 0 | 6  | 13 | 195 | 37 | 557   |
| 3,011 | 7 | 33 | 17 | 323 | 0 | 6  | 13 | 194 | 37 | 556   |
| 3,012 | 7 | 33 | 18 | 321 | 0 | 6  | 13 | 195 | 38 | 555   |
| 3,013 | 6 | 33 | 18 | 321 | 0 | 6  | 13 | 195 | 37 | 555   |
| 3,014 | 6 | 33 | 17 | 320 | 0 | 6  | 13 | 195 | 36 | 554   |
| 3,015 | 6 | 34 | 17 | 322 | 0 | 6  | 13 | 195 | 36 | 557   |
| 3,016 | 6 | 34 | 17 | 322 | 0 | 7  | 13 | 195 | 36 | 558   |
| 3,017 | 6 | 34 | 17 | 322 | 1 | 7  | 13 | 195 | 37 | 558   |
| 3,018 | 6 | 34 | 16 | 320 | 1 | 7  | 12 | 192 | 35 | 553   |
| 3,019 | 6 | 35 | 16 | 319 | 1 | 7  | 12 | 194 | 35 | 555   |
| 3,020 | 6 | 37 | 16 | 346 | 1 | 10 | 12 | 202 | 35 | 595   |
| 3,021 | 6 | 40 | 15 | 579 | 1 | 20 | 12 | 256 | 34 | 895   |
| 3,022 | 6 | 76 | 13 | 795 | 1 | 46 | 12 | 427 | 32 | 1,344 |

|       |   |     |    |       |   |    |    |     |    |       |
|-------|---|-----|----|-------|---|----|----|-----|----|-------|
| 3,023 | 6 | 126 | 13 | 1,306 | 1 | 68 | 11 | 528 | 31 | 2,028 |
| 3,024 | 6 | 161 | 12 | 1,597 | 1 | 80 | 10 | 650 | 29 | 2,488 |
| 3,025 | 4 | 164 | 10 | 1,612 | 1 | 79 | 10 | 653 | 25 | 2,508 |
| 3,026 | 4 | 164 | 7  | 1,625 | 1 | 79 | 7  | 656 | 19 | 2,524 |
| 3,027 | 4 | 164 | 5  | 1,630 | 1 | 79 | 5  | 655 | 15 | 2,528 |
| 3,028 | 4 | 171 | 5  | 1,652 | 1 | 81 | 5  | 658 | 15 | 2,562 |
| 3,029 | 4 | 171 | 5  | 1,653 | 1 | 81 | 5  | 658 | 15 | 2,563 |
| 3,030 | 4 | 171 | 5  | 1,651 | 1 | 82 | 5  | 660 | 15 | 2,564 |
| 3,031 | 5 | 172 | 5  | 1,670 | 1 | 82 | 7  | 663 | 18 | 2,587 |
| 3,032 | 5 | 172 | 5  | 1,675 | 1 | 82 | 7  | 664 | 18 | 2,593 |
| 3,033 | 5 | 171 | 6  | 1,672 | 1 | 83 | 9  | 661 | 21 | 2,587 |
| 3,034 | 5 | 171 | 6  | 1,665 | 1 | 83 | 9  | 656 | 21 | 2,575 |
| 3,035 | 4 | 171 | 6  | 1,668 | 1 | 83 | 9  | 658 | 20 | 2,580 |
| 3,036 | 3 | 171 | 6  | 1,659 | 1 | 83 | 8  | 651 | 18 | 2,564 |
| 3,037 | 3 | 170 | 6  | 1,659 | 1 | 83 | 8  | 651 | 18 | 2,563 |
| 3,038 | 3 | 170 | 6  | 1,659 | 1 | 84 | 8  | 651 | 18 | 2,564 |
| 3,039 | 3 | 170 | 6  | 1,659 | 1 | 84 | 8  | 651 | 18 | 2,564 |
| 3,040 | 3 | 170 | 6  | 1,659 | 1 | 84 | 8  | 650 | 18 | 2,563 |
| 3,041 | 3 | 170 | 6  | 1,659 | 1 | 84 | 8  | 650 | 18 | 2,563 |
| 3,042 | 3 | 169 | 9  | 1,659 | 1 | 84 | 8  | 653 | 21 | 2,565 |
| 3,043 | 3 | 169 | 9  | 1,659 | 1 | 84 | 8  | 653 | 21 | 2,565 |
| 3,044 | 3 | 168 | 9  | 1,657 | 1 | 84 | 8  | 649 | 21 | 2,558 |
| 3,045 | 3 | 168 | 10 | 1,657 | 2 | 84 | 8  | 644 | 23 | 2,553 |
| 3,046 | 3 | 168 | 11 | 1,657 | 3 | 84 | 13 | 644 | 30 | 2,553 |
| 3,047 | 3 | 168 | 10 | 1,657 | 3 | 84 | 13 | 644 | 29 | 2,553 |
| 3,048 | 3 | 152 | 10 | 1,464 | 3 | 81 | 17 | 520 | 33 | 2,217 |
| 3,049 | 3 | 152 | 10 | 1,467 | 3 | 81 | 17 | 521 | 33 | 2,221 |
| 3,050 | 3 | 152 | 10 | 1,467 | 3 | 81 | 17 | 521 | 33 | 2,221 |
| 3,051 | 3 | 149 | 10 | 1,429 | 3 | 81 | 17 | 497 | 33 | 2,156 |
| 3,052 | 1 | 146 | 10 | 1,399 | 3 | 79 | 17 | 491 | 31 | 2,115 |
| 3,053 | 1 | 146 | 10 | 1,399 | 3 | 79 | 17 | 491 | 31 | 2,115 |
| 3,054 | 1 | 145 | 8  | 1,396 | 4 | 79 | 17 | 492 | 30 | 2,112 |
| 3,055 | 1 | 146 | 8  | 1,404 | 4 | 79 | 17 | 501 | 30 | 2,130 |
| 3,056 | 1 | 148 | 8  | 1,401 | 4 | 79 | 17 | 497 | 30 | 2,125 |
| 3,057 | 1 | 151 | 9  | 1,412 | 4 | 79 | 17 | 512 | 31 | 2,154 |
| 3,058 | 1 | 154 | 9  | 1,421 | 4 | 79 | 17 | 517 | 31 | 2,171 |
| 3,059 | 1 | 153 | 9  | 1,420 | 4 | 79 | 17 | 516 | 31 | 2,168 |
| 3,060 | 1 | 153 | 9  | 1,425 | 4 | 79 | 17 | 516 | 31 | 2,173 |
| 3,061 | 1 | 154 | 8  | 1,425 | 4 | 79 | 15 | 518 | 28 | 2,176 |
| 3,062 | 1 | 154 | 8  | 1,427 | 4 | 79 | 15 | 520 | 28 | 2,180 |
| 3,063 | 1 | 154 | 7  | 1,427 | 4 | 79 | 15 | 518 | 27 | 2,178 |

|       |   |     |    |       |   |    |    |     |    |       |
|-------|---|-----|----|-------|---|----|----|-----|----|-------|
| 3,064 | 1 | 154 | 7  | 1,427 | 4 | 80 | 15 | 518 | 27 | 2,179 |
| 3,065 | 1 | 155 | 7  | 1,427 | 4 | 80 | 15 | 520 | 27 | 2,182 |
| 3,066 | 1 | 154 | 7  | 1,425 | 4 | 79 | 15 | 520 | 27 | 2,178 |
| 3,067 | 1 | 156 | 7  | 1,430 | 4 | 79 | 15 | 521 | 27 | 2,186 |
| 3,068 | 1 | 157 | 7  | 1,430 | 3 | 79 | 15 | 521 | 26 | 2,187 |
| 3,069 | 1 | 156 | 7  | 1,427 | 3 | 79 | 15 | 519 | 26 | 2,181 |
| 3,070 | 1 | 153 | 7  | 1,401 | 3 | 76 | 15 | 511 | 26 | 2,141 |
| 3,071 | 1 | 150 | 7  | 1,169 | 3 | 66 | 15 | 456 | 26 | 1,841 |
| 3,072 | 1 | 114 | 7  | 953   | 3 | 40 | 15 | 286 | 26 | 1,393 |
| 3,073 | 1 | 114 | 7  | 955   | 3 | 40 | 15 | 288 | 26 | 1,397 |
| 3,074 | 1 | 64  | 7  | 445   | 3 | 17 | 15 | 186 | 26 | 712   |
| 3,075 | 1 | 29  | 7  | 154   | 3 | 6  | 15 | 67  | 26 | 256   |
| 3,076 | 1 | 26  | 7  | 145   | 3 | 6  | 15 | 66  | 26 | 243   |
| 3,077 | 1 | 26  | 7  | 148   | 4 | 6  | 15 | 69  | 27 | 249   |
| 3,078 | 1 | 24  | 7  | 154   | 4 | 7  | 14 | 84  | 26 | 269   |
| 3,079 | 1 | 17  | 7  | 149   | 4 | 5  | 14 | 96  | 26 | 267   |
| 3,080 | 1 | 17  | 9  | 173   | 4 | 5  | 15 | 109 | 29 | 304   |
| 3,081 | 1 | 17  | 9  | 183   | 4 | 5  | 17 | 107 | 31 | 312   |
| 3,082 | 0 | 16  | 9  | 181   | 4 | 5  | 17 | 118 | 30 | 320   |
| 3,083 | 0 | 16  | 9  | 190   | 4 | 5  | 17 | 118 | 30 | 329   |
| 3,084 | 0 | 17  | 11 | 187   | 4 | 4  | 16 | 119 | 31 | 327   |
| 3,085 | 0 | 17  | 12 | 186   | 4 | 4  | 16 | 117 | 32 | 324   |
| 3,086 | 0 | 17  | 12 | 186   | 4 | 4  | 16 | 117 | 32 | 324   |
| 3,087 | 0 | 17  | 12 | 186   | 4 | 4  | 16 | 117 | 32 | 324   |
| 3,088 | 0 | 17  | 12 | 186   | 4 | 3  | 16 | 117 | 32 | 323   |
| 3,089 | 0 | 17  | 13 | 193   | 4 | 3  | 16 | 122 | 33 | 335   |
| 3,090 | 0 | 17  | 13 | 209   | 4 | 4  | 16 | 125 | 33 | 355   |
| 3,091 | 0 | 18  | 13 | 266   | 4 | 5  | 17 | 147 | 34 | 436   |
| 3,092 | 0 | 30  | 12 | 430   | 4 | 19 | 18 | 298 | 34 | 777   |
| 3,093 | 0 | 61  | 10 | 681   | 4 | 29 | 18 | 438 | 32 | 1,209 |
| 3,094 | 0 | 68  | 10 | 760   | 4 | 32 | 18 | 484 | 32 | 1,344 |
| 3,095 | 0 | 91  | 10 | 1,004 | 4 | 41 | 18 | 550 | 32 | 1,686 |
| 3,096 | 0 | 93  | 9  | 1,043 | 3 | 42 | 17 | 580 | 29 | 1,758 |
| 3,097 | 0 | 96  | 8  | 1,071 | 2 | 44 | 13 | 591 | 23 | 1,802 |
| 3,098 | 0 | 99  | 8  | 1,108 | 2 | 44 | 12 | 599 | 22 | 1,850 |
| 3,099 | 0 | 99  | 8  | 1,116 | 2 | 44 | 9  | 599 | 19 | 1,858 |
| 3,100 | 0 | 105 | 8  | 1,192 | 2 | 46 | 9  | 623 | 19 | 1,966 |
| 3,101 | 0 | 105 | 8  | 1,194 | 2 | 46 | 9  | 624 | 19 | 1,969 |
| 3,102 | 0 | 105 | 9  | 1,206 | 2 | 46 | 9  | 624 | 20 | 1,981 |
| 3,103 | 0 | 108 | 14 | 1,220 | 2 | 46 | 13 | 632 | 29 | 2,006 |
| 3,104 | 0 | 108 | 16 | 1,219 | 2 | 46 | 13 | 632 | 31 | 2,005 |

|       |   |     |    |       |   |    |    |     |    |       |
|-------|---|-----|----|-------|---|----|----|-----|----|-------|
| 3,105 | 0 | 102 | 17 | 1,196 | 1 | 46 | 13 | 606 | 31 | 1,950 |
| 3,106 | 0 | 102 | 18 | 1,197 | 1 | 46 | 13 | 606 | 32 | 1,951 |
| 3,107 | 0 | 102 | 17 | 1,198 | 1 | 46 | 13 | 609 | 31 | 1,955 |
| 3,108 | 0 | 102 | 17 | 1,200 | 1 | 46 | 13 | 612 | 31 | 1,960 |
| 3,109 | 1 | 100 | 17 | 1,208 | 1 | 47 | 13 | 618 | 32 | 1,973 |
| 3,110 | 1 | 100 | 17 | 1,220 | 1 | 47 | 13 | 625 | 32 | 1,992 |
| 3,111 | 1 | 101 | 18 | 1,218 | 1 | 47 | 13 | 627 | 33 | 1,993 |
| 3,112 | 1 | 100 | 18 | 1,218 | 1 | 48 | 13 | 624 | 33 | 1,990 |
| 3,113 | 1 | 101 | 18 | 1,219 | 1 | 48 | 13 | 628 | 33 | 1,996 |
| 3,114 | 1 | 101 | 18 | 1,219 | 1 | 47 | 13 | 630 | 33 | 1,997 |
| 3,115 | 1 | 101 | 18 | 1,219 | 1 | 47 | 13 | 630 | 33 | 1,997 |
| 3,116 | 1 | 100 | 18 | 1,221 | 1 | 47 | 13 | 630 | 33 | 1,998 |
| 3,117 | 1 | 100 | 18 | 1,221 | 1 | 47 | 13 | 630 | 33 | 1,998 |
| 3,118 | 1 | 98  | 18 | 1,216 | 1 | 47 | 13 | 630 | 33 | 1,991 |
| 3,119 | 1 | 97  | 18 | 1,222 | 1 | 47 | 13 | 639 | 33 | 2,005 |
| 3,120 | 1 | 97  | 18 | 1,230 | 1 | 48 | 13 | 649 | 33 | 2,024 |
| 3,121 | 1 | 101 | 18 | 1,239 | 1 | 50 | 13 | 671 | 33 | 2,061 |
| 3,122 | 1 | 106 | 18 | 1,261 | 1 | 51 | 13 | 702 | 33 | 2,120 |
| 3,123 | 1 | 111 | 18 | 1,310 | 1 | 56 | 13 | 728 | 33 | 2,205 |
| 3,124 | 1 | 113 | 18 | 1,342 | 1 | 58 | 13 | 747 | 33 | 2,260 |
| 3,125 | 1 | 113 | 18 | 1,345 | 1 | 58 | 13 | 747 | 33 | 2,263 |
| 3,126 | 1 | 130 | 18 | 1,476 | 1 | 65 | 13 | 825 | 33 | 2,496 |
| 3,127 | 1 | 131 | 18 | 1,488 | 0 | 65 | 13 | 826 | 32 | 2,510 |
| 3,128 | 1 | 131 | 18 | 1,491 | 1 | 66 | 13 | 822 | 33 | 2,510 |
| 3,129 | 1 | 132 | 16 | 1,490 | 1 | 65 | 13 | 804 | 31 | 2,491 |
| 3,130 | 1 | 130 | 16 | 1,427 | 1 | 64 | 13 | 765 | 31 | 2,386 |
| 3,131 | 1 | 132 | 16 | 1,433 | 1 | 64 | 12 | 766 | 30 | 2,395 |
| 3,132 | 1 | 134 | 16 | 1,438 | 1 | 64 | 10 | 767 | 28 | 2,403 |
| 3,133 | 1 | 133 | 16 | 1,424 | 1 | 64 | 8  | 767 | 26 | 2,388 |
| 3,134 | 1 | 133 | 16 | 1,426 | 1 | 64 | 7  | 769 | 25 | 2,392 |
| 3,135 | 1 | 133 | 13 | 1,427 | 1 | 64 | 7  | 771 | 22 | 2,395 |
| 3,136 | 1 | 133 | 12 | 1,429 | 1 | 64 | 7  | 771 | 21 | 2,397 |
| 3,137 | 1 | 133 | 12 | 1,430 | 1 | 64 | 7  | 773 | 21 | 2,400 |
| 3,138 | 1 | 133 | 12 | 1,432 | 1 | 64 | 7  | 774 | 21 | 2,403 |
| 3,139 | 1 | 133 | 12 | 1,432 | 1 | 64 | 7  | 774 | 21 | 2,403 |
| 3,140 | 1 | 134 | 11 | 1,407 | 1 | 63 | 7  | 765 | 20 | 2,369 |
| 3,141 | 1 | 134 | 11 | 1,408 | 1 | 63 | 6  | 766 | 19 | 2,371 |
| 3,142 | 1 | 134 | 11 | 1,353 | 1 | 62 | 6  | 744 | 19 | 2,293 |
| 3,143 | 1 | 122 | 11 | 1,196 | 1 | 48 | 5  | 598 | 18 | 1,964 |
| 3,144 | 1 | 91  | 11 | 945   | 1 | 38 | 5  | 458 | 18 | 1,532 |
| 3,145 | 1 | 61  | 11 | 622   | 1 | 26 | 5  | 349 | 18 | 1,058 |

|       |   |     |    |       |   |     |   |       |    |       |
|-------|---|-----|----|-------|---|-----|---|-------|----|-------|
| 3,146 | 1 | 61  | 11 | 623   | 1 | 27  | 5 | 351   | 18 | 1,062 |
| 3,147 | 1 | 56  | 11 | 549   | 1 | 24  | 5 | 309   | 18 | 938   |
| 3,148 | 1 | 53  | 11 | 514   | 1 | 24  | 4 | 301   | 17 | 892   |
| 3,149 | 1 | 53  | 11 | 507   | 1 | 24  | 4 | 304   | 17 | 888   |
| 3,150 | 1 | 47  | 11 | 479   | 1 | 25  | 4 | 302   | 17 | 853   |
| 3,151 | 1 | 48  | 11 | 511   | 1 | 28  | 4 | 318   | 17 | 905   |
| 3,152 | 1 | 51  | 11 | 536   | 1 | 31  | 4 | 327   | 17 | 945   |
| 3,153 | 1 | 55  | 10 | 565   | 1 | 35  | 4 | 380   | 16 | 1,035 |
| 3,154 | 1 | 317 | 6  | 2,017 | 1 | 188 | 1 | 1,422 | 9  | 3,944 |
| 3,155 | 1 | 418 | 4  | 2,566 | 1 | 219 | 1 | 1,714 | 7  | 4,917 |
| 3,156 | 1 | 427 | 3  | 2,635 | 1 | 223 | 1 | 1,734 | 6  | 5,019 |
| 3,157 | 1 | 431 | 3  | 2,654 | 1 | 223 | 1 | 1,739 | 6  | 5,047 |
| 3,158 | 1 | 434 | 3  | 2,702 | 2 | 224 | 1 | 1,741 | 7  | 5,101 |
| 3,159 | 1 | 462 | 3  | 2,776 | 2 | 228 | 1 | 1,769 | 7  | 5,235 |
| 3,160 | 0 | 463 | 3  | 2,802 | 2 | 227 | 1 | 1,763 | 6  | 5,255 |
| 3,161 | 0 | 463 | 3  | 2,793 | 2 | 227 | 1 | 1,759 | 6  | 5,242 |
| 3,162 | 0 | 462 | 2  | 2,792 | 2 | 227 | 1 | 1,758 | 5  | 5,239 |
| 3,163 | 0 | 461 | 2  | 2,788 | 2 | 226 | 1 | 1,753 | 5  | 5,228 |
| 3,164 | 0 | 461 | 2  | 2,790 | 2 | 226 | 1 | 1,751 | 5  | 5,228 |
| 3,165 | 0 | 464 | 2  | 2,794 | 2 | 226 | 1 | 1,751 | 5  | 5,235 |
| 3,166 | 0 | 464 | 2  | 2,797 | 2 | 226 | 1 | 1,752 | 5  | 5,239 |
| 3,167 | 0 | 464 | 2  | 2,796 | 2 | 226 | 1 | 1,751 | 5  | 5,237 |
| 3,168 | 0 | 464 | 2  | 2,796 | 2 | 226 | 1 | 1,751 | 5  | 5,237 |
| 3,169 | 0 | 464 | 4  | 2,792 | 2 | 226 | 1 | 1,742 | 7  | 5,224 |
| 3,170 | 0 | 464 | 4  | 2,785 | 2 | 225 | 1 | 1,731 | 7  | 5,205 |
| 3,171 | 0 | 462 | 4  | 2,781 | 2 | 223 | 1 | 1,714 | 7  | 5,180 |
| 3,172 | 0 | 462 | 4  | 2,785 | 2 | 223 | 1 | 1,715 | 7  | 5,185 |
| 3,173 | 0 | 458 | 5  | 2,771 | 2 | 222 | 1 | 1,688 | 8  | 5,139 |
| 3,174 | 0 | 472 | 5  | 2,844 | 2 | 226 | 1 | 1,793 | 8  | 5,335 |
| 3,175 | 0 | 470 | 5  | 2,829 | 2 | 225 | 1 | 1,785 | 8  | 5,309 |
| 3,176 | 0 | 473 | 8  | 2,926 | 2 | 229 | 4 | 1,862 | 14 | 5,490 |
| 3,177 | 0 | 458 | 8  | 2,804 | 2 | 223 | 4 | 1,791 | 14 | 5,276 |
| 3,178 | 0 | 458 | 8  | 2,769 | 1 | 222 | 4 | 1,788 | 13 | 5,237 |
| 3,179 | 0 | 457 | 8  | 2,760 | 1 | 222 | 4 | 1,788 | 13 | 5,227 |
| 3,180 | 0 | 457 | 8  | 2,752 | 1 | 222 | 4 | 1,787 | 13 | 5,218 |
| 3,181 | 0 | 454 | 8  | 2,753 | 1 | 222 | 4 | 1,795 | 13 | 5,224 |
| 3,182 | 0 | 465 | 9  | 2,865 | 1 | 227 | 6 | 1,878 | 16 | 5,435 |
| 3,183 | 0 | 465 | 9  | 2,877 | 1 | 229 | 6 | 1,886 | 16 | 5,457 |
| 3,184 | 0 | 466 | 9  | 2,880 | 1 | 229 | 6 | 1,887 | 16 | 5,462 |
| 3,185 | 0 | 466 | 9  | 2,877 | 1 | 229 | 6 | 1,883 | 16 | 5,455 |
| 3,186 | 0 | 478 | 9  | 3,039 | 1 | 235 | 6 | 2,134 | 16 | 5,886 |

|       |   |     |    |       |   |     |   |       |    |       |
|-------|---|-----|----|-------|---|-----|---|-------|----|-------|
| 3,187 | 0 | 479 | 9  | 3,115 | 1 | 237 | 6 | 2,186 | 16 | 6,017 |
| 3,188 | 0 | 480 | 9  | 3,170 | 1 | 239 | 6 | 2,228 | 16 | 6,117 |
| 3,189 | 0 | 507 | 9  | 3,442 | 1 | 260 | 6 | 2,520 | 16 | 6,729 |
| 3,190 | 0 | 507 | 9  | 3,447 | 1 | 260 | 6 | 2,524 | 16 | 6,738 |
| 3,191 | 0 | 505 | 9  | 3,446 | 1 | 260 | 6 | 2,525 | 16 | 6,736 |
| 3,192 | 0 | 507 | 9  | 3,511 | 1 | 262 | 6 | 2,551 | 16 | 6,831 |
| 3,193 | 0 | 517 | 9  | 3,580 | 1 | 272 | 6 | 2,645 | 16 | 7,014 |
| 3,194 | 0 | 517 | 9  | 3,590 | 1 | 271 | 6 | 2,644 | 16 | 7,022 |
| 3,195 | 0 | 517 | 9  | 3,615 | 1 | 274 | 6 | 2,694 | 16 | 7,100 |
| 3,196 | 0 | 533 | 9  | 3,887 | 1 | 284 | 6 | 2,807 | 16 | 7,511 |
| 3,197 | 0 | 544 | 9  | 4,034 | 1 | 290 | 6 | 2,949 | 16 | 7,817 |
| 3,198 | 0 | 545 | 11 | 4,044 | 1 | 290 | 6 | 2,951 | 18 | 7,830 |
| 3,199 | 0 | 545 | 11 | 4,044 | 1 | 290 | 6 | 2,950 | 18 | 7,829 |
| 3,200 | 0 | 550 | 11 | 4,064 | 1 | 290 | 6 | 2,963 | 18 | 7,867 |
| 3,201 | 0 | 551 | 11 | 3,990 | 1 | 285 | 6 | 2,927 | 18 | 7,753 |
| 3,202 | 0 | 549 | 11 | 3,970 | 1 | 284 | 6 | 2,923 | 18 | 7,726 |
| 3,203 | 0 | 552 | 11 | 3,981 | 1 | 285 | 6 | 2,928 | 18 | 7,746 |
| 3,204 | 0 | 549 | 11 | 3,960 | 1 | 281 | 6 | 2,880 | 18 | 7,670 |
| 3,205 | 0 | 287 | 10 | 2,517 | 1 | 129 | 5 | 1,849 | 16 | 4,782 |
| 3,206 | 0 | 188 | 10 | 1,977 | 1 | 99  | 5 | 1,561 | 16 | 3,825 |
| 3,207 | 0 | 175 | 10 | 1,885 | 1 | 95  | 5 | 1,530 | 16 | 3,685 |
| 3,208 | 0 | 175 | 9  | 1,887 | 1 | 95  | 5 | 1,530 | 15 | 3,687 |
| 3,209 | 0 | 172 | 9  | 1,842 | 0 | 94  | 5 | 1,529 | 14 | 3,637 |
| 3,210 | 0 | 142 | 9  | 1,727 | 0 | 90  | 5 | 1,497 | 14 | 3,456 |
| 3,211 | 0 | 142 | 9  | 1,732 | 0 | 90  | 5 | 1,497 | 14 | 3,461 |
| 3,212 | 0 | 142 | 9  | 1,731 | 0 | 90  | 5 | 1,496 | 14 | 3,459 |
| 3,213 | 0 | 142 | 9  | 1,728 | 0 | 90  | 5 | 1,495 | 14 | 3,455 |
| 3,214 | 0 | 142 | 10 | 1,736 | 0 | 90  | 5 | 1,497 | 15 | 3,465 |
| 3,215 | 0 | 143 | 10 | 1,736 | 0 | 90  | 5 | 1,499 | 15 | 3,468 |
| 3,216 | 0 | 142 | 10 | 1,734 | 0 | 90  | 5 | 1,500 | 15 | 3,466 |
| 3,217 | 0 | 142 | 10 | 1,737 | 0 | 90  | 5 | 1,501 | 15 | 3,470 |
| 3,218 | 0 | 143 | 10 | 1,738 | 0 | 90  | 6 | 1,516 | 16 | 3,487 |
| 3,219 | 0 | 143 | 8  | 1,741 | 0 | 90  | 6 | 1,519 | 14 | 3,493 |
| 3,220 | 1 | 147 | 13 | 1,750 | 0 | 90  | 6 | 1,529 | 20 | 3,516 |
| 3,221 | 1 | 147 | 13 | 1,763 | 0 | 92  | 6 | 1,547 | 20 | 3,549 |
| 3,222 | 1 | 148 | 15 | 1,765 | 0 | 94  | 6 | 1,550 | 22 | 3,557 |
| 3,223 | 1 | 151 | 16 | 1,813 | 0 | 98  | 6 | 1,593 | 23 | 3,655 |
| 3,224 | 1 | 154 | 16 | 1,833 | 0 | 99  | 8 | 1,614 | 25 | 3,700 |
| 3,225 | 1 | 136 | 15 | 1,731 | 0 | 91  | 7 | 1,495 | 23 | 3,453 |
| 3,226 | 1 | 135 | 15 | 1,621 | 0 | 87  | 5 | 1,410 | 21 | 3,253 |
| 3,227 | 1 | 132 | 14 | 1,609 | 0 | 86  | 3 | 1,400 | 18 | 3,227 |

|       |   |     |    |       |   |    |    |       |    |       |
|-------|---|-----|----|-------|---|----|----|-------|----|-------|
| 3,228 | 1 | 134 | 15 | 1,629 | 0 | 86 | 3  | 1,407 | 19 | 3,256 |
| 3,229 | 1 | 134 | 15 | 1,628 | 0 | 86 | 3  | 1,406 | 19 | 3,254 |
| 3,230 | 1 | 134 | 15 | 1,625 | 0 | 86 | 3  | 1,406 | 19 | 3,251 |
| 3,231 | 1 | 134 | 15 | 1,626 | 0 | 86 | 3  | 1,405 | 19 | 3,251 |
| 3,232 | 1 | 133 | 15 | 1,615 | 0 | 86 | 3  | 1,395 | 19 | 3,229 |
| 3,233 | 1 | 122 | 20 | 1,508 | 0 | 81 | 4  | 1,314 | 25 | 3,025 |
| 3,234 | 1 | 123 | 20 | 1,546 | 0 | 79 | 4  | 1,333 | 25 | 3,081 |
| 3,235 | 1 | 123 | 20 | 1,640 | 0 | 89 | 4  | 1,377 | 25 | 3,229 |
| 3,236 | 1 | 124 | 20 | 1,666 | 0 | 91 | 4  | 1,395 | 25 | 3,276 |
| 3,237 | 1 | 117 | 20 | 1,546 | 1 | 91 | 4  | 1,191 | 26 | 2,945 |
| 3,238 | 1 | 119 | 20 | 1,492 | 1 | 89 | 4  | 1,150 | 26 | 2,850 |
| 3,239 | 1 | 126 | 20 | 1,472 | 1 | 87 | 4  | 1,117 | 26 | 2,802 |
| 3,240 | 1 | 101 | 20 | 1,227 | 1 | 66 | 4  | 839   | 26 | 2,233 |
| 3,241 | 1 | 101 | 20 | 1,219 | 1 | 66 | 4  | 832   | 26 | 2,218 |
| 3,242 | 1 | 100 | 21 | 1,158 | 1 | 64 | 5  | 806   | 28 | 2,128 |
| 3,243 | 1 | 99  | 21 | 1,159 | 1 | 64 | 5  | 806   | 28 | 2,128 |
| 3,244 | 1 | 91  | 21 | 1,094 | 1 | 55 | 5  | 713   | 28 | 1,953 |
| 3,245 | 1 | 91  | 21 | 1,098 | 1 | 55 | 5  | 713   | 28 | 1,957 |
| 3,246 | 1 | 91  | 22 | 1,073 | 1 | 52 | 5  | 660   | 29 | 1,876 |
| 3,247 | 1 | 75  | 22 | 802   | 1 | 42 | 5  | 548   | 29 | 1,467 |
| 3,248 | 1 | 64  | 22 | 654   | 1 | 35 | 5  | 405   | 29 | 1,158 |
| 3,249 | 1 | 64  | 20 | 640   | 1 | 35 | 5  | 400   | 27 | 1,139 |
| 3,250 | 1 | 62  | 20 | 649   | 1 | 35 | 5  | 420   | 27 | 1,166 |
| 3,251 | 1 | 65  | 20 | 675   | 1 | 37 | 5  | 451   | 27 | 1,228 |
| 3,252 | 1 | 69  | 28 | 718   | 1 | 38 | 7  | 552   | 37 | 1,377 |
| 3,253 | 1 | 70  | 28 | 744   | 1 | 38 | 7  | 583   | 37 | 1,435 |
| 3,254 | 1 | 66  | 28 | 716   | 1 | 37 | 8  | 572   | 38 | 1,391 |
| 3,255 | 1 | 69  | 28 | 726   | 1 | 37 | 8  | 579   | 38 | 1,411 |
| 3,256 | 1 | 72  | 28 | 727   | 1 | 41 | 8  | 583   | 38 | 1,423 |
| 3,257 | 1 | 70  | 28 | 717   | 1 | 41 | 8  | 580   | 38 | 1,408 |
| 3,258 | 1 | 70  | 28 | 732   | 1 | 41 | 8  | 584   | 38 | 1,427 |
| 3,259 | 1 | 70  | 28 | 732   | 1 | 41 | 8  | 584   | 38 | 1,427 |
| 3,260 | 1 | 70  | 28 | 731   | 1 | 41 | 8  | 584   | 38 | 1,426 |
| 3,261 | 1 | 70  | 28 | 731   | 1 | 41 | 8  | 584   | 38 | 1,426 |
| 3,262 | 1 | 70  | 28 | 725   | 1 | 41 | 10 | 583   | 40 | 1,419 |
| 3,263 | 1 | 71  | 28 | 726   | 1 | 41 | 10 | 588   | 40 | 1,426 |
| 3,264 | 1 | 71  | 28 | 727   | 1 | 41 | 10 | 589   | 40 | 1,428 |
| 3,265 | 1 | 71  | 27 | 726   | 1 | 41 | 10 | 592   | 39 | 1,430 |
| 3,266 | 1 | 77  | 27 | 747   | 1 | 42 | 10 | 613   | 39 | 1,479 |
| 3,267 | 1 | 75  | 29 | 764   | 1 | 43 | 10 | 620   | 41 | 1,502 |
| 3,268 | 1 | 75  | 29 | 791   | 1 | 44 | 10 | 637   | 41 | 1,547 |



|       |   |    |    |       |   |    |    |     |    |       |
|-------|---|----|----|-------|---|----|----|-----|----|-------|
| 3,269 | 1 | 77 | 32 | 931   | 1 | 54 | 9  | 722 | 43 | 1,784 |
| 3,270 | 1 | 83 | 32 | 1,012 | 1 | 58 | 9  | 777 | 43 | 1,930 |
| 3,271 | 0 | 80 | 27 | 1,101 | 1 | 58 | 9  | 786 | 37 | 2,025 |
| 3,272 | 0 | 81 | 26 | 1,094 | 1 | 57 | 9  | 775 | 36 | 2,007 |
| 3,273 | 0 | 73 | 26 | 994   | 1 | 49 | 9  | 692 | 36 | 1,808 |
| 3,274 | 0 | 73 | 24 | 994   | 1 | 49 | 10 | 692 | 35 | 1,808 |
| 3,275 | 0 | 73 | 23 | 996   | 1 | 49 | 8  | 690 | 32 | 1,808 |
| 3,276 | 0 | 76 | 23 | 1,032 | 1 | 50 | 8  | 736 | 32 | 1,894 |
| 3,277 | 0 | 74 | 23 | 1,028 | 1 | 50 | 8  | 743 | 32 | 1,895 |
| 3,278 | 1 | 79 | 24 | 1,051 | 2 | 52 | 8  | 758 | 35 | 1,940 |
| 3,279 | 1 | 83 | 25 | 1,066 | 2 | 54 | 11 | 791 | 39 | 1,994 |
| 3,280 | 1 | 83 | 32 | 1,071 | 2 | 54 | 12 | 792 | 47 | 2,000 |
| 3,281 | 1 | 83 | 33 | 1,071 | 2 | 54 | 12 | 794 | 48 | 2,002 |
| 3,282 | 1 | 83 | 34 | 1,075 | 2 | 55 | 12 | 801 | 49 | 2,014 |
| 3,283 | 1 | 83 | 28 | 1,092 | 2 | 55 | 11 | 810 | 42 | 2,040 |
| 3,284 | 1 | 95 | 28 | 1,151 | 2 | 60 | 11 | 860 | 42 | 2,166 |
| 3,285 | 1 | 94 | 28 | 1,102 | 2 | 60 | 11 | 836 | 42 | 2,092 |
| 3,286 | 1 | 93 | 28 | 1,003 | 2 | 50 | 11 | 789 | 42 | 1,935 |
| 3,287 | 1 | 92 | 28 | 980   | 2 | 48 | 11 | 768 | 42 | 1,888 |
| 3,288 | 1 | 85 | 28 | 915   | 1 | 42 | 11 | 714 | 41 | 1,756 |
| 3,289 | 1 | 78 | 28 | 881   | 1 | 42 | 11 | 704 | 41 | 1,705 |
| 3,290 | 1 | 78 | 28 | 881   | 1 | 42 | 11 | 704 | 41 | 1,705 |
| 3,291 | 1 | 76 | 28 | 858   | 1 | 42 | 11 | 697 | 41 | 1,673 |
| 3,292 | 1 | 76 | 28 | 851   | 1 | 42 | 11 | 696 | 41 | 1,665 |
| 3,293 | 1 | 76 | 27 | 850   | 1 | 42 | 10 | 696 | 39 | 1,664 |
| 3,294 | 1 | 74 | 27 | 827   | 1 | 41 | 10 | 692 | 39 | 1,634 |
| 3,295 | 1 | 74 | 27 | 827   | 1 | 41 | 10 | 692 | 39 | 1,634 |
| 3,296 | 1 | 74 | 26 | 827   | 1 | 41 | 10 | 692 | 38 | 1,634 |
| 3,297 | 1 | 74 | 26 | 828   | 1 | 41 | 10 | 693 | 38 | 1,636 |
| 3,298 | 1 | 74 | 26 | 835   | 1 | 41 | 10 | 694 | 38 | 1,644 |
| 3,299 | 1 | 79 | 26 | 874   | 1 | 43 | 10 | 733 | 38 | 1,729 |
| 3,300 | 1 | 79 | 26 | 879   | 1 | 43 | 10 | 732 | 38 | 1,733 |
| 3,301 | 1 | 77 | 26 | 865   | 1 | 43 | 10 | 709 | 38 | 1,694 |
| 3,302 | 1 | 74 | 25 | 844   | 1 | 41 | 9  | 682 | 36 | 1,641 |
| 3,303 | 1 | 66 | 18 | 761   | 1 | 37 | 8  | 540 | 28 | 1,404 |
| 3,304 | 1 | 66 | 19 | 766   | 1 | 37 | 8  | 541 | 29 | 1,410 |
| 3,305 | 1 | 66 | 19 | 773   | 1 | 37 | 7  | 544 | 28 | 1,420 |
| 3,306 | 1 | 63 | 19 | 763   | 1 | 37 | 7  | 540 | 28 | 1,403 |
| 3,307 | 1 | 57 | 19 | 742   | 1 | 32 | 7  | 522 | 28 | 1,353 |
| 3,308 | 1 | 57 | 19 | 745   | 1 | 32 | 7  | 522 | 28 | 1,356 |
| 3,309 | 1 | 57 | 19 | 730   | 1 | 32 | 7  | 517 | 28 | 1,336 |

|       |   |    |    |     |   |    |   |     |    |       |
|-------|---|----|----|-----|---|----|---|-----|----|-------|
| 3,310 | 1 | 59 | 19 | 729 | 1 | 32 | 7 | 516 | 28 | 1,336 |
| 3,311 | 1 | 59 | 19 | 730 | 1 | 32 | 7 | 518 | 28 | 1,339 |
| 3,312 | 1 | 59 | 19 | 731 | 1 | 32 | 7 | 518 | 28 | 1,340 |
| 3,313 | 1 | 62 | 19 | 744 | 1 | 32 | 5 | 526 | 26 | 1,364 |
| 3,314 | 1 | 61 | 19 | 748 | 1 | 32 | 5 | 522 | 26 | 1,363 |
| 3,315 | 1 | 61 | 20 | 748 | 1 | 32 | 5 | 525 | 27 | 1,366 |
| 3,316 | 1 | 61 | 20 | 742 | 1 | 32 | 5 | 521 | 27 | 1,356 |
| 3,317 | 1 | 54 | 21 | 725 | 1 | 32 | 5 | 511 | 28 | 1,322 |
| 3,318 | 1 | 54 | 19 | 674 | 1 | 30 | 5 | 484 | 26 | 1,242 |
| 3,319 | 1 | 54 | 19 | 674 | 1 | 30 | 5 | 485 | 26 | 1,243 |
| 3,320 | 1 | 49 | 17 | 524 | 1 | 20 | 5 | 377 | 24 | 970   |
| 3,321 | 1 | 43 | 17 | 440 | 1 | 16 | 5 | 320 | 24 | 819   |
| 3,322 | 2 | 41 | 17 | 336 | 1 | 15 | 5 | 294 | 25 | 686   |
| 3,323 | 2 | 40 | 17 | 335 | 1 | 15 | 5 | 294 | 25 | 684   |
| 3,324 | 2 | 40 | 16 | 346 | 1 | 16 | 5 | 307 | 24 | 709   |
| 3,325 | 2 | 42 | 16 | 372 | 1 | 16 | 4 | 316 | 23 | 746   |
| 3,326 | 2 | 42 | 16 | 392 | 1 | 16 | 4 | 326 | 23 | 776   |
| 3,327 | 1 | 40 | 16 | 470 | 1 | 16 | 4 | 304 | 22 | 830   |
| 3,328 | 1 | 44 | 16 | 507 | 1 | 18 | 4 | 323 | 22 | 892   |
| 3,329 | 1 | 46 | 15 | 558 | 0 | 17 | 4 | 328 | 20 | 949   |
| 3,330 | 1 | 42 | 13 | 555 | 0 | 16 | 1 | 302 | 15 | 915   |
| 3,331 | 1 | 42 | 6  | 557 | 0 | 16 | 0 | 302 | 7  | 917   |
| 3,332 | 1 | 42 | 5  | 558 | 0 | 16 | 0 | 302 | 6  | 918   |
| 3,333 | 1 | 42 | 4  | 537 | 0 | 15 | 0 | 286 | 5  | 880   |
| 3,334 | 1 | 30 | 5  | 474 | 0 | 10 | 0 | 233 | 6  | 747   |
| 3,335 | 1 | 30 | 5  | 474 | 0 | 10 | 0 | 233 | 6  | 747   |
| 3,336 | 1 | 30 | 5  | 472 | 0 | 10 | 0 | 228 | 6  | 740   |
| 3,337 | 1 | 30 | 5  | 472 | 0 | 10 | 0 | 229 | 6  | 741   |
| 3,338 | 1 | 30 | 5  | 468 | 0 | 10 | 0 | 228 | 6  | 736   |
| 3,339 | 1 | 29 | 5  | 468 | 0 | 10 | 0 | 228 | 6  | 735   |
| 3,340 | 1 | 28 | 5  | 466 | 0 | 10 | 0 | 226 | 6  | 730   |
| 3,341 | 1 | 28 | 5  | 462 | 0 | 10 | 0 | 222 | 6  | 722   |
| 3,342 | 1 | 29 | 5  | 466 | 0 | 12 | 0 | 240 | 6  | 747   |
| 3,343 | 1 | 29 | 5  | 466 | 0 | 12 | 0 | 240 | 6  | 747   |
| 3,344 | 1 | 29 | 5  | 467 | 0 | 12 | 1 | 242 | 7  | 750   |
| 3,345 | 1 | 29 | 5  | 467 | 0 | 12 | 1 | 242 | 7  | 750   |
| 3,346 | 1 | 30 | 5  | 482 | 0 | 13 | 1 | 255 | 7  | 780   |
| 3,347 | 1 | 30 | 5  | 483 | 0 | 13 | 1 | 256 | 7  | 782   |
| 3,348 | 1 | 30 | 5  | 482 | 0 | 13 | 1 | 255 | 7  | 780   |
| 3,349 | 1 | 30 | 5  | 475 | 0 | 13 | 1 | 252 | 7  | 770   |
| 3,350 | 1 | 25 | 5  | 436 | 0 | 11 | 1 | 214 | 7  | 686   |

|       |   |    |    |     |   |    |   |     |    |     |
|-------|---|----|----|-----|---|----|---|-----|----|-----|
| 3,351 | 1 | 23 | 7  | 418 | 0 | 11 | 2 | 206 | 10 | 658 |
| 3,352 | 1 | 23 | 7  | 419 | 0 | 11 | 2 | 206 | 10 | 659 |
| 3,353 | 1 | 23 | 12 | 415 | 0 | 11 | 4 | 202 | 17 | 651 |
| 3,354 | 1 | 23 | 12 | 416 | 0 | 11 | 4 | 202 | 17 | 652 |
| 3,355 | 1 | 23 | 11 | 411 | 0 | 11 | 4 | 201 | 16 | 646 |
| 3,356 | 1 | 23 | 11 | 400 | 0 | 11 | 4 | 194 | 16 | 628 |
| 3,357 | 1 | 23 | 11 | 414 | 0 | 12 | 4 | 201 | 16 | 650 |
| 3,358 | 1 | 23 | 11 | 413 | 0 | 12 | 4 | 202 | 16 | 650 |
| 3,359 | 1 | 24 | 11 | 412 | 0 | 12 | 4 | 202 | 16 | 650 |
| 3,360 | 1 | 22 | 11 | 407 | 0 | 12 | 4 | 200 | 16 | 641 |
| 3,361 | 1 | 22 | 11 | 406 | 0 | 12 | 4 | 198 | 16 | 638 |
| 3,362 | 1 | 19 | 11 | 394 | 0 | 12 | 4 | 193 | 16 | 618 |
| 3,363 | 1 | 20 | 11 | 395 | 0 | 12 | 4 | 195 | 16 | 622 |
| 3,364 | 1 | 20 | 10 | 401 | 0 | 12 | 4 | 202 | 15 | 635 |
| 3,365 | 1 | 20 | 10 | 396 | 0 | 12 | 4 | 201 | 15 | 629 |
| 3,366 | 1 | 20 | 10 | 395 | 0 | 12 | 4 | 196 | 15 | 623 |
| 3,367 | 1 | 22 | 10 | 407 | 0 | 13 | 4 | 212 | 15 | 654 |
| 3,368 | 1 | 25 | 9  | 413 | 0 | 14 | 4 | 205 | 14 | 657 |
| 3,369 | 1 | 26 | 9  | 415 | 0 | 14 | 4 | 208 | 14 | 663 |
| 3,370 | 1 | 26 | 9  | 419 | 0 | 14 | 4 | 208 | 14 | 667 |
| 3,371 | 2 | 26 | 9  | 418 | 0 | 14 | 4 | 207 | 15 | 665 |
| 3,372 | 2 | 26 | 9  | 418 | 0 | 14 | 4 | 207 | 15 | 665 |
| 3,373 | 1 | 26 | 9  | 406 | 0 | 13 | 4 | 195 | 14 | 640 |
| 3,374 | 2 | 26 | 9  | 407 | 0 | 13 | 4 | 196 | 15 | 642 |
| 3,375 | 2 | 26 | 9  | 407 | 0 | 13 | 4 | 196 | 15 | 642 |
| 3,376 | 2 | 24 | 9  | 381 | 0 | 13 | 4 | 188 | 15 | 606 |
| 3,377 | 4 | 24 | 11 | 359 | 0 | 13 | 4 | 177 | 19 | 573 |
| 3,378 | 4 | 19 | 16 | 203 | 0 | 9  | 8 | 125 | 28 | 356 |
| 3,379 | 4 | 19 | 16 | 218 | 0 | 13 | 8 | 138 | 28 | 388 |
| 3,380 | 4 | 12 | 16 | 180 | 0 | 14 | 8 | 148 | 28 | 354 |
| 3,381 | 4 | 10 | 16 | 151 | 0 | 13 | 8 | 134 | 28 | 308 |
| 3,382 | 4 | 11 | 16 | 160 | 0 | 13 | 8 | 143 | 28 | 327 |
| 3,383 | 4 | 11 | 16 | 164 | 0 | 13 | 8 | 152 | 28 | 340 |
| 3,384 | 4 | 24 | 16 | 265 | 0 | 19 | 8 | 212 | 28 | 520 |
| 3,385 | 4 | 25 | 15 | 282 | 0 | 20 | 8 | 233 | 27 | 560 |
| 3,386 | 4 | 26 | 15 | 314 | 0 | 21 | 8 | 243 | 27 | 604 |
| 3,387 | 4 | 26 | 16 | 326 | 0 | 21 | 8 | 244 | 28 | 617 |
| 3,388 | 4 | 27 | 16 | 327 | 0 | 21 | 8 | 244 | 28 | 619 |
| 3,389 | 4 | 27 | 16 | 330 | 0 | 21 | 8 | 245 | 28 | 623 |
| 3,390 | 4 | 27 | 18 | 331 | 0 | 21 | 8 | 246 | 30 | 625 |
| 3,391 | 4 | 27 | 18 | 335 | 0 | 21 | 9 | 248 | 31 | 631 |

|       |   |     |    |       |   |     |    |       |    |       |
|-------|---|-----|----|-------|---|-----|----|-------|----|-------|
| 3,392 | 4 | 27  | 18 | 335   | 0 | 21  | 9  | 248   | 31 | 631   |
| 3,393 | 4 | 26  | 19 | 333   | 0 | 19  | 9  | 230   | 32 | 608   |
| 3,394 | 4 | 26  | 19 | 332   | 0 | 19  | 9  | 229   | 32 | 606   |
| 3,395 | 4 | 26  | 19 | 336   | 0 | 19  | 8  | 230   | 31 | 611   |
| 3,396 | 4 | 28  | 19 | 389   | 0 | 22  | 8  | 288   | 31 | 727   |
| 3,397 | 4 | 27  | 19 | 399   | 0 | 21  | 8  | 280   | 31 | 727   |
| 3,398 | 4 | 37  | 20 | 575   | 0 | 24  | 8  | 349   | 32 | 985   |
| 3,399 | 4 | 42  | 20 | 647   | 0 | 30  | 9  | 397   | 33 | 1,116 |
| 3,400 | 4 | 49  | 20 | 724   | 0 | 33  | 11 | 421   | 35 | 1,227 |
| 3,401 | 4 | 56  | 20 | 843   | 0 | 39  | 10 | 475   | 34 | 1,413 |
| 3,402 | 4 | 58  | 19 | 887   | 0 | 39  | 10 | 499   | 33 | 1,483 |
| 3,403 | 4 | 59  | 14 | 889   | 0 | 39  | 9  | 500   | 27 | 1,487 |
| 3,404 | 4 | 59  | 14 | 890   | 0 | 39  | 9  | 500   | 27 | 1,488 |
| 3,405 | 4 | 59  | 14 | 876   | 0 | 38  | 9  | 492   | 27 | 1,465 |
| 3,406 | 4 | 60  | 14 | 878   | 0 | 38  | 9  | 493   | 27 | 1,469 |
| 3,407 | 4 | 60  | 14 | 881   | 0 | 38  | 11 | 494   | 29 | 1,473 |
| 3,408 | 4 | 60  | 14 | 883   | 0 | 39  | 11 | 498   | 29 | 1,480 |
| 3,409 | 4 | 60  | 21 | 886   | 0 | 39  | 13 | 499   | 38 | 1,484 |
| 3,410 | 4 | 59  | 21 | 883   | 0 | 39  | 13 | 499   | 38 | 1,480 |
| 3,411 | 4 | 66  | 21 | 917   | 0 | 42  | 13 | 524   | 38 | 1,549 |
| 3,412 | 4 | 68  | 21 | 926   | 0 | 42  | 13 | 526   | 38 | 1,562 |
| 3,413 | 4 | 69  | 21 | 928   | 0 | 42  | 13 | 528   | 38 | 1,567 |
| 3,414 | 4 | 68  | 21 | 927   | 0 | 42  | 13 | 526   | 38 | 1,563 |
| 3,415 | 4 | 68  | 22 | 921   | 0 | 43  | 13 | 519   | 39 | 1,551 |
| 3,416 | 4 | 68  | 22 | 937   | 0 | 44  | 13 | 529   | 39 | 1,578 |
| 3,417 | 4 | 68  | 22 | 937   | 0 | 44  | 13 | 530   | 39 | 1,579 |
| 3,418 | 4 | 66  | 22 | 928   | 0 | 43  | 13 | 514   | 39 | 1,551 |
| 3,419 | 4 | 65  | 22 | 919   | 0 | 41  | 13 | 510   | 39 | 1,535 |
| 3,420 | 4 | 65  | 22 | 923   | 0 | 41  | 13 | 508   | 39 | 1,537 |
| 3,421 | 3 | 67  | 22 | 933   | 0 | 44  | 14 | 516   | 39 | 1,560 |
| 3,422 | 3 | 67  | 21 | 946   | 0 | 44  | 14 | 526   | 38 | 1,583 |
| 3,423 | 3 | 76  | 22 | 1,119 | 0 | 60  | 14 | 629   | 39 | 1,884 |
| 3,424 | 3 | 82  | 22 | 1,218 | 0 | 69  | 14 | 699   | 39 | 2,068 |
| 3,425 | 2 | 119 | 22 | 1,612 | 0 | 121 | 14 | 1,030 | 38 | 2,882 |
| 3,426 | 2 | 167 | 22 | 2,353 | 0 | 174 | 14 | 1,409 | 38 | 4,103 |
| 3,427 | 2 | 207 | 22 | 2,660 | 0 | 185 | 14 | 1,518 | 38 | 4,570 |
| 3,428 | 0 | 208 | 20 | 2,673 | 0 | 187 | 14 | 1,523 | 34 | 4,591 |
| 3,429 | 0 | 211 | 16 | 2,704 | 0 | 184 | 9  | 1,517 | 25 | 4,616 |
| 3,430 | 0 | 211 | 16 | 2,670 | 0 | 182 | 9  | 1,486 | 25 | 4,549 |
| 3,431 | 0 | 211 | 17 | 2,668 | 0 | 182 | 9  | 1,486 | 26 | 4,547 |
| 3,432 | 0 | 210 | 19 | 2,652 | 0 | 182 | 10 | 1,473 | 29 | 4,517 |

|       |   |     |    |       |   |     |    |       |    |       |
|-------|---|-----|----|-------|---|-----|----|-------|----|-------|
| 3,433 | 0 | 210 | 19 | 2,653 | 0 | 182 | 10 | 1,473 | 29 | 4,518 |
| 3,434 | 0 | 197 | 19 | 2,546 | 0 | 176 | 10 | 1,403 | 29 | 4,322 |
| 3,435 | 0 | 197 | 19 | 2,547 | 0 | 176 | 10 | 1,403 | 29 | 4,323 |
| 3,436 | 0 | 196 | 19 | 2,529 | 0 | 175 | 10 | 1,382 | 29 | 4,282 |
| 3,437 | 0 | 195 | 19 | 2,497 | 0 | 174 | 10 | 1,374 | 29 | 4,240 |
| 3,438 | 0 | 194 | 18 | 2,484 | 0 | 175 | 10 | 1,370 | 28 | 4,223 |
| 3,439 | 0 | 194 | 18 | 2,487 | 0 | 175 | 11 | 1,370 | 29 | 4,226 |
| 3,440 | 0 | 194 | 18 | 2,487 | 0 | 175 | 11 | 1,369 | 29 | 4,225 |
| 3,441 | 0 | 194 | 16 | 2,486 | 0 | 175 | 11 | 1,368 | 27 | 4,223 |
| 3,442 | 0 | 194 | 16 | 2,482 | 0 | 175 | 11 | 1,366 | 27 | 4,217 |
| 3,443 | 0 | 194 | 16 | 2,480 | 0 | 175 | 11 | 1,366 | 27 | 4,215 |
| 3,444 | 0 | 194 | 16 | 2,477 | 0 | 175 | 11 | 1,363 | 27 | 4,209 |
| 3,445 | 0 | 194 | 16 | 2,477 | 0 | 175 | 11 | 1,363 | 27 | 4,209 |
| 3,446 | 1 | 194 | 16 | 2,478 | 0 | 175 | 11 | 1,364 | 28 | 4,211 |
| 3,447 | 1 | 192 | 15 | 2,433 | 0 | 173 | 11 | 1,316 | 27 | 4,114 |
| 3,448 | 1 | 192 | 15 | 2,414 | 0 | 173 | 11 | 1,320 | 27 | 4,099 |
| 3,449 | 1 | 177 | 15 | 2,169 | 0 | 164 | 11 | 1,206 | 27 | 3,716 |
| 3,450 | 1 | 177 | 15 | 2,170 | 0 | 164 | 10 | 1,206 | 26 | 3,717 |
| 3,451 | 1 | 170 | 15 | 2,101 | 0 | 161 | 8  | 1,181 | 24 | 3,613 |
| 3,452 | 1 | 162 | 15 | 1,939 | 0 | 155 | 8  | 1,105 | 24 | 3,361 |
| 3,453 | 1 | 161 | 14 | 1,938 | 0 | 155 | 8  | 1,112 | 23 | 3,366 |
| 3,454 | 1 | 161 | 14 | 1,954 | 0 | 155 | 7  | 1,124 | 22 | 3,394 |
| 3,455 | 1 | 165 | 14 | 2,001 | 0 | 159 | 7  | 1,175 | 22 | 3,500 |
| 3,456 | 1 | 167 | 14 | 2,037 | 1 | 162 | 7  | 1,217 | 23 | 3,583 |
| 3,457 | 1 | 186 | 14 | 2,112 | 1 | 172 | 7  | 1,328 | 23 | 3,798 |
| 3,458 | 1 | 194 | 14 | 2,121 | 1 | 175 | 5  | 1,340 | 21 | 3,830 |
| 3,459 | 1 | 219 | 13 | 2,249 | 1 | 187 | 5  | 1,483 | 20 | 4,138 |
| 3,460 | 1 | 219 | 7  | 2,255 | 1 | 187 | 3  | 1,484 | 12 | 4,145 |
| 3,461 | 1 | 263 | 7  | 2,426 | 1 | 196 | 3  | 1,573 | 12 | 4,458 |
| 3,462 | 1 | 257 | 7  | 2,414 | 1 | 193 | 3  | 1,554 | 12 | 4,418 |
| 3,463 | 1 | 257 | 8  | 2,410 | 1 | 193 | 3  | 1,552 | 13 | 4,412 |
| 3,464 | 1 | 257 | 8  | 2,412 | 1 | 193 | 4  | 1,551 | 14 | 4,413 |
| 3,465 | 1 | 257 | 7  | 2,415 | 1 | 193 | 4  | 1,551 | 13 | 4,416 |
| 3,466 | 1 | 259 | 7  | 2,408 | 1 | 192 | 5  | 1,546 | 14 | 4,405 |
| 3,467 | 1 | 259 | 7  | 2,415 | 1 | 192 | 5  | 1,549 | 14 | 4,415 |
| 3,468 | 1 | 260 | 7  | 2,432 | 1 | 194 | 5  | 1,566 | 14 | 4,452 |
| 3,469 | 1 | 262 | 7  | 2,443 | 1 | 194 | 5  | 1,580 | 14 | 4,479 |
| 3,470 | 1 | 260 | 7  | 2,448 | 1 | 194 | 5  | 1,581 | 14 | 4,483 |
| 3,471 | 1 | 284 | 7  | 2,853 | 1 | 204 | 5  | 1,731 | 14 | 5,072 |
| 3,472 | 1 | 283 | 7  | 2,876 | 1 | 201 | 5  | 1,736 | 14 | 5,096 |
| 3,473 | 1 | 284 | 6  | 2,863 | 1 | 201 | 5  | 1,726 | 13 | 5,074 |

|       |   |     |   |       |   |     |   |       |    |       |
|-------|---|-----|---|-------|---|-----|---|-------|----|-------|
| 3,474 | 1 | 275 | 6 | 2,610 | 1 | 181 | 5 | 1,557 | 13 | 4,623 |
| 3,475 | 1 | 275 | 6 | 2,637 | 1 | 183 | 5 | 1,578 | 13 | 4,673 |
| 3,476 | 1 | 198 | 6 | 1,521 | 1 | 79  | 5 | 894   | 13 | 2,692 |
| 3,477 | 1 | 198 | 6 | 1,529 | 1 | 79  | 5 | 894   | 13 | 2,700 |
| 3,478 | 1 | 163 | 6 | 1,267 | 1 | 70  | 5 | 808   | 13 | 2,308 |
| 3,479 | 1 | 164 | 6 | 1,261 | 1 | 68  | 5 | 805   | 13 | 2,298 |
| 3,480 | 1 | 161 | 5 | 1,213 | 1 | 67  | 5 | 798   | 12 | 2,239 |
| 3,481 | 1 | 162 | 5 | 1,214 | 1 | 67  | 5 | 797   | 12 | 2,240 |
| 3,482 | 1 | 162 | 4 | 1,219 | 1 | 67  | 5 | 801   | 11 | 2,249 |
| 3,483 | 1 | 162 | 2 | 1,223 | 1 | 67  | 4 | 805   | 8  | 2,257 |
| 3,484 | 1 | 166 | 4 | 1,230 | 1 | 67  | 4 | 812   | 10 | 2,275 |
| 3,485 | 1 | 166 | 4 | 1,233 | 1 | 68  | 4 | 816   | 10 | 2,283 |
| 3,486 | 1 | 167 | 4 | 1,244 | 1 | 68  | 4 | 820   | 10 | 2,299 |
| 3,487 | 1 | 168 | 4 | 1,246 | 1 | 67  | 4 | 819   | 10 | 2,300 |
| 3,488 | 1 | 169 | 4 | 1,254 | 1 | 67  | 4 | 825   | 10 | 2,315 |
| 3,489 | 1 | 169 | 4 | 1,258 | 1 | 67  | 4 | 824   | 10 | 2,318 |
| 3,490 | 1 | 170 | 4 | 1,255 | 1 | 67  | 3 | 824   | 9  | 2,316 |
| 3,491 | 1 | 170 | 4 | 1,256 | 1 | 67  | 3 | 825   | 9  | 2,318 |
| 3,492 | 1 | 170 | 4 | 1,257 | 1 | 67  | 3 | 826   | 9  | 2,320 |
| 3,493 | 1 | 170 | 4 | 1,257 | 1 | 67  | 3 | 825   | 9  | 2,319 |
| 3,494 | 1 | 170 | 4 | 1,258 | 1 | 67  | 3 | 826   | 9  | 2,321 |
| 3,495 | 1 | 170 | 4 | 1,257 | 1 | 67  | 3 | 825   | 9  | 2,319 |
| 3,496 | 1 | 170 | 4 | 1,259 | 1 | 67  | 3 | 825   | 9  | 2,321 |
| 3,497 | 0 | 170 | 4 | 1,259 | 1 | 67  | 3 | 825   | 8  | 2,321 |
| 3,498 | 0 | 170 | 4 | 1,252 | 1 | 66  | 3 | 816   | 8  | 2,304 |
| 3,499 | 0 | 171 | 4 | 1,288 | 1 | 68  | 3 | 851   | 8  | 2,378 |
| 3,500 | 0 | 171 | 4 | 1,287 | 1 | 68  | 3 | 850   | 8  | 2,376 |
| 3,501 | 0 | 171 | 4 | 1,294 | 1 | 68  | 3 | 854   | 8  | 2,387 |
| 3,502 | 0 | 171 | 4 | 1,288 | 1 | 68  | 3 | 856   | 8  | 2,383 |
| 3,503 | 0 | 172 | 4 | 1,290 | 1 | 68  | 3 | 855   | 8  | 2,385 |
| 3,504 | 0 | 178 | 4 | 1,298 | 1 | 69  | 3 | 847   | 8  | 2,392 |
| 3,505 | 0 | 178 | 4 | 1,300 | 1 | 69  | 3 | 852   | 8  | 2,399 |
| 3,506 | 0 | 174 | 4 | 1,259 | 1 | 65  | 3 | 808   | 8  | 2,306 |
| 3,507 | 0 | 172 | 4 | 1,229 | 0 | 62  | 3 | 768   | 7  | 2,231 |
| 3,508 | 0 | 146 | 5 | 1,153 | 0 | 49  | 3 | 649   | 8  | 1,997 |
| 3,509 | 0 | 121 | 6 | 1,023 | 0 | 36  | 3 | 503   | 9  | 1,683 |
| 3,510 | 0 | 121 | 6 | 1,019 | 0 | 37  | 4 | 504   | 10 | 1,681 |
| 3,511 | 0 | 121 | 6 | 1,035 | 0 | 37  | 4 | 519   | 10 | 1,712 |
| 3,512 | 0 | 80  | 6 | 1,009 | 0 | 33  | 4 | 514   | 10 | 1,636 |
| 3,513 | 0 | 77  | 5 | 1,000 | 0 | 33  | 4 | 509   | 9  | 1,619 |
| 3,514 | 0 | 77  | 5 | 999   | 0 | 33  | 4 | 516   | 9  | 1,625 |

|       |   |     |    |       |   |     |    |       |    |       |
|-------|---|-----|----|-------|---|-----|----|-------|----|-------|
| 3,515 | 0 | 83  | 5  | 1,039 | 0 | 36  | 3  | 542   | 8  | 1,700 |
| 3,516 | 0 | 83  | 5  | 1,051 | 0 | 36  | 2  | 562   | 7  | 1,732 |
| 3,517 | 0 | 81  | 8  | 1,084 | 0 | 39  | 2  | 590   | 10 | 1,794 |
| 3,518 | 0 | 84  | 11 | 1,112 | 1 | 43  | 5  | 628   | 17 | 1,867 |
| 3,519 | 0 | 91  | 11 | 1,167 | 1 | 45  | 6  | 685   | 18 | 1,988 |
| 3,520 | 0 | 89  | 14 | 1,176 | 1 | 46  | 8  | 682   | 23 | 1,993 |
| 3,521 | 0 | 65  | 18 | 747   | 1 | 36  | 9  | 520   | 28 | 1,368 |
| 3,522 | 0 | 75  | 19 | 816   | 1 | 38  | 9  | 575   | 29 | 1,504 |
| 3,523 | 0 | 75  | 19 | 821   | 1 | 38  | 8  | 577   | 28 | 1,511 |
| 3,524 | 0 | 77  | 20 | 833   | 1 | 39  | 9  | 581   | 30 | 1,530 |
| 3,525 | 0 | 71  | 20 | 788   | 1 | 32  | 9  | 555   | 30 | 1,446 |
| 3,526 | 0 | 63  | 20 | 776   | 1 | 31  | 9  | 542   | 30 | 1,412 |
| 3,527 | 0 | 64  | 20 | 788   | 1 | 31  | 9  | 547   | 30 | 1,430 |
| 3,528 | 0 | 71  | 20 | 828   | 1 | 32  | 9  | 567   | 30 | 1,498 |
| 3,529 | 0 | 79  | 20 | 889   | 2 | 39  | 9  | 643   | 31 | 1,650 |
| 3,530 | 0 | 77  | 20 | 898   | 2 | 39  | 9  | 641   | 31 | 1,655 |
| 3,531 | 0 | 83  | 20 | 958   | 2 | 42  | 9  | 695   | 31 | 1,778 |
| 3,532 | 0 | 84  | 20 | 986   | 2 | 42  | 9  | 697   | 31 | 1,809 |
| 3,533 | 0 | 90  | 21 | 1,053 | 2 | 48  | 9  | 741   | 32 | 1,932 |
| 3,534 | 0 | 96  | 21 | 1,211 | 2 | 50  | 9  | 797   | 32 | 2,154 |
| 3,535 | 0 | 115 | 20 | 1,329 | 2 | 67  | 9  | 928   | 31 | 2,439 |
| 3,536 | 0 | 116 | 20 | 1,381 | 2 | 69  | 9  | 947   | 31 | 2,513 |
| 3,537 | 0 | 116 | 20 | 1,387 | 2 | 70  | 9  | 956   | 31 | 2,529 |
| 3,538 | 0 | 116 | 20 | 1,397 | 2 | 70  | 9  | 957   | 31 | 2,540 |
| 3,539 | 0 | 118 | 20 | 1,428 | 2 | 75  | 9  | 1,033 | 31 | 2,654 |
| 3,540 | 0 | 118 | 20 | 1,437 | 2 | 75  | 9  | 1,042 | 31 | 2,672 |
| 3,541 | 2 | 120 | 23 | 1,558 | 2 | 85  | 12 | 1,156 | 39 | 2,919 |
| 3,542 | 2 | 123 | 23 | 1,726 | 2 | 88  | 12 | 1,261 | 39 | 3,198 |
| 3,543 | 2 | 125 | 24 | 1,836 | 2 | 91  | 12 | 1,312 | 40 | 3,364 |
| 3,544 | 2 | 125 | 23 | 1,960 | 2 | 92  | 12 | 1,332 | 39 | 3,509 |
| 3,545 | 2 | 125 | 23 | 1,969 | 2 | 93  | 12 | 1,344 | 39 | 3,531 |
| 3,546 | 2 | 128 | 23 | 1,987 | 2 | 94  | 12 | 1,347 | 39 | 3,556 |
| 3,547 | 2 | 135 | 23 | 2,042 | 2 | 98  | 12 | 1,384 | 39 | 3,659 |
| 3,548 | 2 | 135 | 23 | 2,048 | 2 | 98  | 12 | 1,386 | 39 | 3,667 |
| 3,549 | 2 | 151 | 23 | 2,195 | 2 | 106 | 12 | 1,433 | 39 | 3,885 |
| 3,550 | 2 | 152 | 23 | 2,177 | 2 | 104 | 12 | 1,402 | 39 | 3,835 |
| 3,551 | 2 | 155 | 23 | 2,192 | 2 | 106 | 12 | 1,422 | 39 | 3,875 |
| 3,552 | 2 | 165 | 23 | 2,349 | 2 | 109 | 12 | 1,510 | 39 | 4,133 |
| 3,553 | 2 | 165 | 23 | 2,353 | 2 | 109 | 12 | 1,514 | 39 | 4,141 |
| 3,554 | 2 | 166 | 23 | 2,376 | 2 | 109 | 12 | 1,535 | 39 | 4,186 |
| 3,555 | 2 | 160 | 22 | 2,359 | 2 | 108 | 12 | 1,529 | 38 | 4,156 |

|       |   |     |    |       |   |     |    |       |    |       |
|-------|---|-----|----|-------|---|-----|----|-------|----|-------|
| 3,556 | 2 | 160 | 22 | 2,350 | 2 | 108 | 12 | 1,519 | 38 | 4,137 |
| 3,557 | 2 | 166 | 22 | 2,363 | 2 | 111 | 12 | 1,533 | 38 | 4,173 |
| 3,558 | 2 | 165 | 22 | 2,359 | 2 | 112 | 12 | 1,533 | 38 | 4,169 |
| 3,559 | 3 | 164 | 22 | 2,348 | 2 | 112 | 12 | 1,528 | 39 | 4,152 |
| 3,560 | 3 | 165 | 21 | 2,349 | 2 | 112 | 12 | 1,527 | 38 | 4,153 |
| 3,561 | 3 | 167 | 21 | 2,331 | 2 | 111 | 11 | 1,508 | 37 | 4,117 |
| 3,562 | 4 | 164 | 21 | 2,191 | 2 | 106 | 12 | 1,423 | 39 | 3,884 |
| 3,563 | 4 | 164 | 21 | 2,193 | 2 | 106 | 12 | 1,423 | 39 | 3,886 |
| 3,564 | 4 | 157 | 21 | 2,133 | 2 | 103 | 12 | 1,385 | 39 | 3,778 |
| 3,565 | 4 | 158 | 21 | 2,146 | 2 | 104 | 12 | 1,393 | 39 | 3,801 |
| 3,566 | 4 | 158 | 21 | 2,168 | 2 | 106 | 12 | 1,432 | 39 | 3,864 |
| 3,567 | 4 | 158 | 20 | 2,146 | 2 | 102 | 12 | 1,388 | 38 | 3,794 |
| 3,568 | 4 | 160 | 18 | 2,185 | 2 | 105 | 12 | 1,441 | 36 | 3,891 |
| 3,569 | 4 | 159 | 15 | 2,174 | 1 | 102 | 9  | 1,414 | 29 | 3,849 |
| 3,570 | 4 | 170 | 16 | 2,328 | 1 | 127 | 9  | 1,533 | 30 | 4,158 |
| 3,571 | 4 | 184 | 13 | 2,415 | 1 | 133 | 6  | 1,649 | 24 | 4,381 |
| 3,572 | 4 | 207 | 9  | 2,550 | 1 | 151 | 7  | 1,767 | 21 | 4,675 |
| 3,573 | 4 | 243 | 8  | 2,809 | 1 | 169 | 7  | 1,962 | 20 | 5,183 |
| 3,574 | 5 | 253 | 7  | 2,910 | 1 | 169 | 7  | 2,008 | 20 | 5,340 |
| 3,575 | 5 | 250 | 7  | 2,898 | 1 | 168 | 6  | 2,000 | 19 | 5,316 |
| 3,576 | 5 | 255 | 7  | 2,910 | 1 | 168 | 8  | 1,997 | 21 | 5,330 |
| 3,577 | 5 | 289 | 7  | 3,062 | 1 | 172 | 8  | 2,046 | 21 | 5,569 |
| 3,578 | 5 | 289 | 7  | 3,064 | 1 | 172 | 8  | 2,049 | 21 | 5,574 |
| 3,579 | 5 | 282 | 7  | 3,016 | 1 | 170 | 8  | 2,028 | 21 | 5,496 |
| 3,580 | 5 | 270 | 7  | 2,923 | 0 | 163 | 8  | 1,931 | 20 | 5,287 |
| 3,581 | 6 | 270 | 7  | 2,917 | 0 | 162 | 8  | 1,934 | 21 | 5,283 |
| 3,582 | 6 | 263 | 7  | 2,828 | 0 | 159 | 8  | 1,874 | 21 | 5,124 |
| 3,583 | 6 | 263 | 7  | 2,830 | 0 | 159 | 8  | 1,876 | 21 | 5,128 |
| 3,584 | 6 | 257 | 6  | 2,770 | 0 | 153 | 8  | 1,838 | 20 | 5,018 |
| 3,585 | 6 | 251 | 5  | 2,621 | 0 | 151 | 8  | 1,790 | 19 | 4,813 |
| 3,586 | 6 | 228 | 5  | 2,463 | 0 | 131 | 8  | 1,651 | 19 | 4,473 |
| 3,587 | 6 | 235 | 5  | 2,583 | 0 | 148 | 8  | 1,821 | 19 | 4,787 |
| 3,588 | 6 | 240 | 5  | 2,612 | 0 | 153 | 8  | 1,848 | 19 | 4,853 |
| 3,589 | 6 | 245 | 5  | 2,657 | 0 | 155 | 8  | 1,878 | 19 | 4,935 |
| 3,590 | 6 | 242 | 4  | 2,624 | 0 | 150 | 8  | 1,800 | 18 | 4,816 |
| 3,591 | 4 | 242 | 3  | 2,611 | 0 | 150 | 7  | 1,791 | 14 | 4,794 |
| 3,592 | 4 | 236 | 2  | 2,321 | 0 | 138 | 5  | 1,574 | 11 | 4,269 |
| 3,593 | 4 | 236 | 2  | 2,322 | 0 | 138 | 5  | 1,575 | 11 | 4,271 |
| 3,594 | 4 | 234 | 1  | 2,090 | 0 | 134 | 6  | 1,504 | 11 | 3,962 |
| 3,595 | 4 | 234 | 1  | 2,091 | 0 | 134 | 6  | 1,505 | 11 | 3,964 |
| 3,596 | 4 | 234 | 1  | 2,082 | 0 | 133 | 9  | 1,492 | 14 | 3,941 |



|       |   |     |   |       |   |     |   |       |    |       |
|-------|---|-----|---|-------|---|-----|---|-------|----|-------|
| 3,597 | 4 | 225 | 1 | 2,012 | 0 | 128 | 9 | 1,454 | 14 | 3,819 |
| 3,598 | 4 | 225 | 1 | 2,014 | 0 | 128 | 9 | 1,454 | 14 | 3,821 |
| 3,599 | 4 | 209 | 1 | 1,861 | 0 | 120 | 9 | 1,405 | 14 | 3,595 |
| 3,600 | 4 | 212 | 1 | 1,867 | 0 | 120 | 9 | 1,412 | 14 | 3,611 |
| 3,601 | 4 | 210 | 1 | 1,841 | 0 | 120 | 9 | 1,401 | 14 | 3,572 |
| 3,602 | 4 | 205 | 1 | 1,813 | 0 | 118 | 9 | 1,378 | 14 | 3,514 |
| 3,603 | 4 | 194 | 1 | 1,657 | 0 | 115 | 9 | 1,289 | 14 | 3,255 |
| 3,604 | 4 | 194 | 1 | 1,655 | 0 | 115 | 9 | 1,286 | 14 | 3,250 |
| 3,605 | 4 | 194 | 2 | 1,632 | 0 | 115 | 9 | 1,265 | 15 | 3,206 |
| 3,606 | 4 | 194 | 2 | 1,623 | 0 | 115 | 9 | 1,259 | 15 | 3,191 |
| 3,607 | 4 | 194 | 2 | 1,620 | 0 | 115 | 9 | 1,259 | 15 | 3,188 |
| 3,608 | 3 | 188 | 2 | 1,608 | 0 | 112 | 9 | 1,244 | 14 | 3,152 |
| 3,609 | 3 | 188 | 2 | 1,604 | 0 | 111 | 9 | 1,240 | 14 | 3,143 |
| 3,610 | 3 | 187 | 3 | 1,603 | 0 | 111 | 9 | 1,240 | 15 | 3,141 |
| 3,611 | 3 | 187 | 3 | 1,605 | 0 | 111 | 9 | 1,242 | 15 | 3,145 |
| 3,612 | 3 | 185 | 3 | 1,606 | 0 | 111 | 9 | 1,246 | 15 | 3,148 |
| 3,613 | 2 | 185 | 3 | 1,608 | 0 | 111 | 8 | 1,252 | 13 | 3,156 |
| 3,614 | 2 | 185 | 3 | 1,608 | 0 | 111 | 8 | 1,252 | 13 | 3,156 |
| 3,615 | 2 | 187 | 3 | 1,624 | 0 | 112 | 8 | 1,278 | 13 | 3,201 |
| 3,616 | 2 | 186 | 3 | 1,619 | 0 | 111 | 8 | 1,273 | 13 | 3,189 |
| 3,617 | 2 | 191 | 3 | 1,622 | 0 | 110 | 8 | 1,275 | 13 | 3,198 |
| 3,618 | 2 | 191 | 3 | 1,579 | 0 | 110 | 8 | 1,263 | 13 | 3,143 |
| 3,619 | 3 | 194 | 3 | 1,601 | 0 | 109 | 8 | 1,238 | 14 | 3,142 |
| 3,620 | 3 | 193 | 3 | 1,649 | 0 | 110 | 8 | 1,240 | 14 | 3,192 |
| 3,621 | 3 | 174 | 2 | 1,625 | 0 | 84  | 7 | 1,070 | 12 | 2,953 |
| 3,622 | 3 | 189 | 2 | 1,792 | 0 | 102 | 7 | 1,179 | 12 | 3,262 |
| 3,623 | 3 | 182 | 2 | 1,769 | 0 | 89  | 6 | 1,116 | 11 | 3,156 |
| 3,624 | 3 | 187 | 2 | 1,989 | 0 | 117 | 6 | 1,166 | 11 | 3,459 |
| 3,625 | 2 | 182 | 3 | 2,011 | 0 | 124 | 6 | 1,167 | 11 | 3,484 |
| 3,626 | 2 | 281 | 3 | 2,444 | 0 | 176 | 4 | 1,569 | 9  | 4,470 |
| 3,627 | 2 | 283 | 3 | 2,491 | 0 | 184 | 4 | 1,678 | 9  | 4,636 |
| 3,628 | 2 | 251 | 3 | 2,357 | 0 | 183 | 4 | 1,643 | 9  | 4,434 |
| 3,629 | 2 | 328 | 3 | 2,692 | 0 | 209 | 4 | 2,072 | 9  | 5,301 |
| 3,630 | 2 | 330 | 3 | 2,707 | 0 | 210 | 4 | 2,077 | 9  | 5,324 |
| 3,631 | 2 | 344 | 3 | 2,782 | 0 | 220 | 5 | 2,173 | 10 | 5,519 |
| 3,632 | 1 | 344 | 3 | 2,789 | 0 | 220 | 5 | 2,173 | 9  | 5,526 |
| 3,633 | 1 | 371 | 3 | 2,909 | 0 | 229 | 5 | 2,269 | 9  | 5,778 |
| 3,634 | 1 | 371 | 3 | 2,969 | 0 | 233 | 5 | 2,291 | 9  | 5,864 |
| 3,635 | 1 | 371 | 4 | 2,999 | 0 | 234 | 6 | 2,301 | 11 | 5,905 |
| 3,636 | 1 | 376 | 6 | 3,095 | 0 | 237 | 6 | 2,323 | 13 | 6,031 |
| 3,637 | 2 | 375 | 6 | 3,096 | 0 | 237 | 7 | 2,306 | 15 | 6,014 |

|       |   |     |   |       |   |     |   |       |    |       |
|-------|---|-----|---|-------|---|-----|---|-------|----|-------|
| 3,638 | 2 | 362 | 6 | 2,931 | 0 | 214 | 8 | 2,104 | 16 | 5,611 |
| 3,639 | 2 | 356 | 7 | 2,876 | 0 | 212 | 8 | 2,071 | 17 | 5,515 |
| 3,640 | 2 | 356 | 7 | 2,870 | 0 | 212 | 8 | 2,069 | 17 | 5,507 |
| 3,641 | 2 | 356 | 7 | 2,873 | 1 | 212 | 8 | 2,069 | 18 | 5,510 |
| 3,642 | 2 | 356 | 7 | 2,875 | 1 | 212 | 8 | 2,070 | 18 | 5,513 |
| 3,643 | 2 | 356 | 7 | 2,877 | 1 | 212 | 8 | 2,068 | 18 | 5,513 |
| 3,644 | 2 | 356 | 7 | 2,876 | 1 | 212 | 8 | 2,070 | 18 | 5,514 |
| 3,645 | 2 | 356 | 7 | 2,873 | 1 | 212 | 7 | 2,069 | 17 | 5,510 |
| 3,646 | 2 | 356 | 7 | 2,871 | 1 | 212 | 7 | 2,069 | 17 | 5,508 |
| 3,647 | 2 | 355 | 7 | 2,865 | 1 | 212 | 4 | 2,066 | 14 | 5,498 |
| 3,648 | 2 | 355 | 7 | 2,865 | 1 | 212 | 4 | 2,065 | 14 | 5,497 |
| 3,649 | 2 | 355 | 7 | 2,866 | 1 | 212 | 4 | 2,067 | 14 | 5,500 |
| 3,650 | 2 | 355 | 7 | 2,866 | 1 | 212 | 4 | 2,069 | 14 | 5,502 |
| 3,651 | 2 | 360 | 9 | 2,879 | 1 | 214 | 6 | 2,089 | 18 | 5,542 |
| 3,652 | 2 | 360 | 9 | 2,882 | 1 | 214 | 6 | 2,092 | 18 | 5,548 |
| 3,653 | 2 | 360 | 9 | 2,883 | 1 | 214 | 7 | 2,088 | 19 | 5,545 |
| 3,654 | 2 | 360 | 9 | 2,889 | 1 | 214 | 7 | 2,091 | 19 | 5,554 |
| 3,655 | 2 | 360 | 8 | 2,889 | 1 | 214 | 8 | 2,093 | 19 | 5,556 |
| 3,656 | 2 | 360 | 8 | 2,891 | 1 | 214 | 8 | 2,101 | 19 | 5,566 |
| 3,657 | 2 | 361 | 8 | 2,912 | 1 | 214 | 8 | 2,112 | 19 | 5,599 |
| 3,658 | 2 | 361 | 8 | 2,936 | 1 | 214 | 8 | 2,123 | 19 | 5,634 |
| 3,659 | 2 | 368 | 8 | 2,972 | 1 | 217 | 8 | 2,158 | 19 | 5,715 |
| 3,660 | 2 | 380 | 8 | 3,033 | 1 | 222 | 8 | 2,237 | 19 | 5,872 |
| 3,661 | 2 | 382 | 7 | 3,037 | 1 | 222 | 8 | 2,241 | 18 | 5,882 |
| 3,662 | 2 | 388 | 7 | 3,090 | 1 | 227 | 8 | 2,282 | 18 | 5,987 |
| 3,663 | 2 | 391 | 7 | 3,104 | 1 | 227 | 8 | 2,284 | 18 | 6,006 |
| 3,664 | 2 | 392 | 7 | 3,149 | 1 | 229 | 8 | 2,309 | 18 | 6,079 |
| 3,665 | 2 | 395 | 7 | 3,191 | 1 | 233 | 8 | 2,338 | 18 | 6,157 |
| 3,666 | 2 | 404 | 7 | 3,253 | 1 | 239 | 8 | 2,367 | 18 | 6,263 |
| 3,667 | 2 | 455 | 7 | 3,599 | 1 | 277 | 8 | 2,747 | 18 | 7,078 |
| 3,668 | 2 | 451 | 7 | 3,590 | 1 | 277 | 8 | 2,722 | 18 | 7,040 |
| 3,669 | 2 | 527 | 7 | 3,850 | 1 | 293 | 8 | 2,958 | 18 | 7,628 |
| 3,670 | 1 | 556 | 7 | 3,947 | 1 | 305 | 9 | 3,051 | 18 | 7,859 |
| 3,671 | 1 | 578 | 7 | 4,139 | 1 | 313 | 9 | 3,171 | 18 | 8,201 |
| 3,672 | 1 | 601 | 7 | 3,842 | 1 | 303 | 9 | 3,084 | 18 | 7,830 |
| 3,673 | 1 | 601 | 7 | 3,849 | 1 | 303 | 9 | 3,087 | 18 | 7,840 |
| 3,674 | 1 | 594 | 7 | 3,771 | 1 | 300 | 9 | 3,058 | 18 | 7,723 |
| 3,675 | 1 | 653 | 7 | 3,567 | 1 | 256 | 9 | 2,847 | 18 | 7,323 |
| 3,676 | 1 | 665 | 6 | 3,648 | 1 | 260 | 9 | 2,884 | 17 | 7,457 |
| 3,677 | 1 | 569 | 7 | 3,261 | 1 | 207 | 9 | 2,496 | 18 | 6,533 |
| 3,678 | 1 | 562 | 8 | 3,197 | 1 | 199 | 9 | 2,386 | 19 | 6,344 |

|       |   |     |    |       |   |     |    |       |    |       |
|-------|---|-----|----|-------|---|-----|----|-------|----|-------|
| 3,679 | 1 | 564 | 8  | 3,197 | 1 | 197 | 8  | 2,372 | 18 | 6,330 |
| 3,680 | 1 | 487 | 8  | 2,863 | 1 | 172 | 8  | 1,944 | 18 | 5,466 |
| 3,681 | 1 | 485 | 9  | 2,846 | 1 | 171 | 8  | 1,938 | 19 | 5,440 |
| 3,682 | 1 | 471 | 9  | 2,771 | 1 | 162 | 8  | 1,853 | 19 | 5,257 |
| 3,683 | 1 | 491 | 9  | 2,906 | 1 | 191 | 8  | 2,055 | 19 | 5,643 |
| 3,684 | 1 | 463 | 8  | 2,787 | 1 | 182 | 8  | 1,966 | 18 | 5,398 |
| 3,685 | 1 | 474 | 14 | 2,875 | 1 | 190 | 10 | 2,096 | 26 | 5,635 |
| 3,686 | 1 | 481 | 14 | 2,908 | 1 | 196 | 11 | 2,116 | 27 | 5,701 |
| 3,687 | 1 | 478 | 13 | 2,867 | 1 | 197 | 11 | 2,134 | 26 | 5,676 |
| 3,688 | 0 | 488 | 13 | 2,884 | 1 | 203 | 10 | 2,169 | 24 | 5,744 |
| 3,689 | 0 | 489 | 13 | 2,894 | 1 | 203 | 9  | 2,173 | 23 | 5,759 |
| 3,690 | 0 | 500 | 12 | 3,057 | 1 | 209 | 9  | 2,229 | 22 | 5,995 |
| 3,691 | 0 | 501 | 12 | 3,073 | 1 | 210 | 9  | 2,264 | 22 | 6,048 |
| 3,692 | 0 | 501 | 12 | 3,072 | 0 | 210 | 9  | 2,264 | 21 | 6,047 |
| 3,693 | 0 | 501 | 13 | 3,085 | 0 | 212 | 9  | 2,271 | 22 | 6,069 |
| 3,694 | 0 | 504 | 13 | 3,111 | 0 | 214 | 9  | 2,280 | 22 | 6,109 |
| 3,695 | 0 | 504 | 13 | 3,119 | 0 | 214 | 9  | 2,280 | 22 | 6,117 |
| 3,696 | 0 | 504 | 13 | 3,126 | 0 | 214 | 9  | 2,288 | 22 | 6,132 |
| 3,697 | 0 | 504 | 14 | 3,153 | 0 | 214 | 10 | 2,296 | 24 | 6,167 |
| 3,698 | 0 | 505 | 14 | 3,159 | 0 | 214 | 10 | 2,298 | 24 | 6,176 |
| 3,699 | 0 | 506 | 14 | 3,166 | 0 | 215 | 10 | 2,303 | 24 | 6,190 |
| 3,700 | 0 | 506 | 14 | 3,175 | 0 | 216 | 10 | 2,308 | 24 | 6,205 |
| 3,701 | 0 | 506 | 14 | 3,193 | 0 | 216 | 9  | 2,317 | 23 | 6,232 |
| 3,702 | 0 | 499 | 12 | 3,176 | 0 | 214 | 8  | 2,294 | 20 | 6,183 |
| 3,703 | 0 | 499 | 12 | 3,190 | 0 | 215 | 8  | 2,304 | 20 | 6,208 |
| 3,704 | 0 | 499 | 12 | 3,197 | 0 | 215 | 7  | 2,309 | 19 | 6,220 |
| 3,705 | 0 | 499 | 12 | 3,197 | 0 | 215 | 9  | 2,322 | 21 | 6,233 |
| 3,706 | 0 | 499 | 12 | 3,214 | 0 | 215 | 8  | 2,327 | 20 | 6,255 |
| 3,707 | 0 | 499 | 12 | 3,218 | 0 | 215 | 8  | 2,320 | 20 | 6,252 |
| 3,708 | 0 | 499 | 12 | 3,201 | 0 | 215 | 8  | 2,309 | 20 | 6,224 |
| 3,709 | 0 | 499 | 12 | 3,202 | 0 | 218 | 8  | 2,308 | 20 | 6,227 |
| 3,710 | 0 | 492 | 12 | 3,172 | 0 | 215 | 7  | 2,273 | 19 | 6,152 |
| 3,711 | 0 | 473 | 12 | 3,064 | 0 | 205 | 7  | 2,155 | 19 | 5,897 |
| 3,712 | 0 | 473 | 12 | 3,081 | 0 | 206 | 7  | 2,166 | 19 | 5,926 |
| 3,713 | 0 | 473 | 12 | 3,083 | 0 | 207 | 7  | 2,173 | 19 | 5,936 |
| 3,714 | 0 | 469 | 12 | 3,037 | 0 | 205 | 7  | 2,146 | 19 | 5,857 |
| 3,715 | 0 | 471 | 12 | 3,062 | 0 | 208 | 7  | 2,227 | 19 | 5,968 |
| 3,716 | 0 | 478 | 13 | 3,127 | 0 | 212 | 7  | 2,288 | 20 | 6,105 |
| 3,717 | 0 | 472 | 13 | 3,081 | 0 | 207 | 7  | 2,292 | 20 | 6,052 |
| 3,718 | 0 | 420 | 13 | 2,732 | 0 | 169 | 7  | 1,910 | 20 | 5,231 |
| 3,719 | 0 | 420 | 13 | 2,723 | 0 | 169 | 7  | 1,901 | 20 | 5,213 |

|       |   |     |    |       |   |     |    |       |    |       |
|-------|---|-----|----|-------|---|-----|----|-------|----|-------|
| 3,720 | 0 | 345 | 13 | 2,463 | 0 | 153 | 7  | 1,664 | 20 | 4,625 |
| 3,721 | 0 | 325 | 13 | 2,353 | 0 | 146 | 7  | 1,633 | 20 | 4,457 |
| 3,722 | 0 | 303 | 13 | 2,115 | 0 | 135 | 7  | 1,511 | 20 | 4,064 |
| 3,723 | 0 | 250 | 13 | 1,929 | 0 | 118 | 7  | 1,340 | 20 | 3,637 |
| 3,724 | 0 | 250 | 13 | 1,930 | 0 | 119 | 7  | 1,339 | 20 | 3,638 |
| 3,725 | 0 | 239 | 13 | 1,875 | 0 | 117 | 7  | 1,304 | 20 | 3,535 |
| 3,726 | 0 | 112 | 13 | 1,324 | 0 | 102 | 7  | 1,136 | 20 | 2,674 |
| 3,727 | 0 | 112 | 12 | 1,325 | 0 | 102 | 7  | 1,136 | 19 | 2,675 |
| 3,728 | 0 | 109 | 11 | 1,280 | 0 | 102 | 7  | 1,124 | 18 | 2,615 |
| 3,729 | 0 | 109 | 11 | 1,278 | 0 | 102 | 7  | 1,125 | 18 | 2,614 |
| 3,730 | 0 | 104 | 10 | 1,249 | 0 | 102 | 7  | 1,120 | 17 | 2,575 |
| 3,731 | 0 | 104 | 10 | 1,249 | 0 | 102 | 7  | 1,120 | 17 | 2,575 |
| 3,732 | 0 | 109 | 10 | 1,300 | 0 | 108 | 7  | 1,157 | 17 | 2,674 |
| 3,733 | 0 | 88  | 6  | 1,137 | 0 | 77  | 4  | 931   | 10 | 2,233 |
| 3,734 | 0 | 92  | 6  | 1,164 | 0 | 77  | 4  | 938   | 10 | 2,271 |
| 3,735 | 0 | 93  | 5  | 1,187 | 0 | 77  | 4  | 945   | 9  | 2,302 |
| 3,736 | 0 | 82  | 4  | 1,047 | 0 | 65  | 4  | 800   | 8  | 1,994 |
| 3,737 | 0 | 73  | 4  | 920   | 0 | 54  | 3  | 720   | 7  | 1,767 |
| 3,738 | 0 | 73  | 3  | 921   | 0 | 54  | 3  | 720   | 6  | 1,768 |
| 3,739 | 0 | 66  | 3  | 897   | 0 | 51  | 3  | 692   | 6  | 1,706 |
| 3,740 | 0 | 65  | 3  | 888   | 0 | 51  | 3  | 686   | 6  | 1,690 |
| 3,741 | 0 | 54  | 3  | 711   | 0 | 46  | 3  | 596   | 6  | 1,407 |
| 3,742 | 0 | 54  | 3  | 725   | 0 | 47  | 3  | 602   | 6  | 1,428 |
| 3,743 | 0 | 67  | 3  | 761   | 1 | 55  | 3  | 671   | 7  | 1,554 |
| 3,744 | 0 | 64  | 2  | 763   | 1 | 51  | 3  | 678   | 6  | 1,556 |
| 3,745 | 0 | 106 | 2  | 899   | 1 | 64  | 3  | 856   | 6  | 1,925 |
| 3,746 | 0 | 120 | 3  | 960   | 1 | 69  | 3  | 889   | 7  | 2,038 |
| 3,747 | 0 | 126 | 3  | 979   | 1 | 72  | 3  | 923   | 7  | 2,100 |
| 3,748 | 0 | 126 | 2  | 953   | 1 | 72  | 2  | 916   | 5  | 2,067 |
| 3,749 | 1 | 262 | 15 | 1,875 | 1 | 136 | 11 | 1,508 | 28 | 3,781 |
| 3,750 | 1 | 261 | 15 | 1,879 | 1 | 136 | 11 | 1,504 | 28 | 3,780 |
| 3,751 | 1 | 264 | 16 | 1,891 | 1 | 135 | 13 | 1,503 | 31 | 3,793 |
| 3,752 | 1 | 264 | 16 | 1,881 | 1 | 135 | 13 | 1,497 | 31 | 3,777 |
| 3,753 | 1 | 263 | 16 | 1,880 | 1 | 136 | 13 | 1,491 | 31 | 3,770 |
| 3,754 | 1 | 281 | 16 | 1,932 | 1 | 136 | 13 | 1,510 | 31 | 3,859 |
| 3,755 | 1 | 281 | 16 | 1,936 | 1 | 135 | 13 | 1,511 | 31 | 3,863 |
| 3,756 | 1 | 281 | 17 | 1,945 | 1 | 135 | 11 | 1,502 | 30 | 3,863 |
| 3,757 | 1 | 282 | 17 | 1,927 | 1 | 135 | 11 | 1,495 | 30 | 3,839 |
| 3,758 | 1 | 281 | 17 | 1,917 | 1 | 135 | 11 | 1,493 | 30 | 3,826 |
| 3,759 | 1 | 281 | 17 | 1,893 | 1 | 132 | 11 | 1,483 | 30 | 3,789 |
| 3,760 | 1 | 282 | 17 | 1,897 | 1 | 132 | 11 | 1,486 | 30 | 3,797 |

|       |   |     |    |       |   |     |    |       |    |       |
|-------|---|-----|----|-------|---|-----|----|-------|----|-------|
| 3,761 | 1 | 282 | 17 | 1,895 | 1 | 131 | 11 | 1,488 | 30 | 3,796 |
| 3,762 | 2 | 281 | 22 | 1,884 | 1 | 131 | 14 | 1,480 | 39 | 3,776 |
| 3,763 | 2 | 284 | 22 | 1,904 | 1 | 132 | 14 | 1,490 | 39 | 3,810 |
| 3,764 | 2 | 285 | 22 | 1,915 | 1 | 131 | 14 | 1,493 | 39 | 3,824 |
| 3,765 | 2 | 273 | 22 | 1,761 | 1 | 121 | 14 | 1,313 | 39 | 3,468 |
| 3,766 | 2 | 273 | 22 | 1,768 | 1 | 121 | 14 | 1,316 | 39 | 3,478 |
| 3,767 | 2 | 273 | 21 | 1,767 | 1 | 121 | 14 | 1,316 | 38 | 3,477 |
| 3,768 | 2 | 268 | 23 | 1,741 | 1 | 120 | 14 | 1,271 | 40 | 3,400 |
| 3,769 | 2 | 268 | 23 | 1,741 | 1 | 120 | 14 | 1,280 | 40 | 3,409 |
| 3,770 | 2 | 266 | 24 | 1,743 | 1 | 120 | 14 | 1,281 | 41 | 3,410 |
| 3,771 | 3 | 280 | 25 | 1,807 | 1 | 121 | 14 | 1,350 | 43 | 3,558 |
| 3,772 | 3 | 281 | 25 | 1,820 | 1 | 122 | 14 | 1,367 | 43 | 3,590 |
| 3,773 | 3 | 281 | 25 | 1,815 | 1 | 122 | 15 | 1,363 | 44 | 3,581 |
| 3,774 | 3 | 281 | 25 | 1,802 | 1 | 121 | 15 | 1,358 | 44 | 3,562 |
| 3,775 | 3 | 282 | 25 | 1,808 | 1 | 122 | 15 | 1,364 | 44 | 3,576 |
| 3,776 | 3 | 285 | 25 | 1,829 | 1 | 122 | 15 | 1,374 | 44 | 3,610 |
| 3,777 | 3 | 286 | 25 | 1,843 | 1 | 122 | 15 | 1,377 | 44 | 3,628 |
| 3,778 | 3 | 293 | 25 | 1,865 | 1 | 123 | 15 | 1,394 | 44 | 3,675 |
| 3,779 | 3 | 293 | 25 | 1,867 | 1 | 123 | 15 | 1,398 | 44 | 3,681 |
| 3,780 | 3 | 295 | 33 | 1,891 | 1 | 126 | 16 | 1,410 | 53 | 3,722 |
| 3,781 | 3 | 295 | 33 | 1,890 | 1 | 126 | 16 | 1,407 | 53 | 3,718 |
| 3,782 | 3 | 290 | 33 | 1,836 | 1 | 119 | 16 | 1,370 | 53 | 3,615 |
| 3,783 | 3 | 290 | 33 | 1,840 | 1 | 119 | 16 | 1,370 | 53 | 3,619 |
| 3,784 | 3 | 290 | 33 | 1,834 | 1 | 119 | 16 | 1,369 | 53 | 3,612 |
| 3,785 | 3 | 285 | 33 | 1,786 | 1 | 119 | 17 | 1,357 | 54 | 3,547 |
| 3,786 | 3 | 285 | 33 | 1,786 | 1 | 119 | 17 | 1,357 | 54 | 3,547 |
| 3,787 | 3 | 287 | 33 | 1,795 | 4 | 123 | 17 | 1,369 | 57 | 3,574 |
| 3,788 | 3 | 288 | 35 | 1,804 | 4 | 123 | 17 | 1,375 | 59 | 3,590 |
| 3,789 | 3 | 289 | 35 | 1,805 | 4 | 123 | 17 | 1,375 | 59 | 3,592 |
| 3,790 | 3 | 286 | 35 | 1,793 | 4 | 120 | 18 | 1,370 | 60 | 3,569 |
| 3,791 | 3 | 286 | 35 | 1,792 | 4 | 120 | 18 | 1,368 | 60 | 3,566 |
| 3,792 | 3 | 285 | 35 | 1,775 | 4 | 116 | 18 | 1,356 | 60 | 3,532 |
| 3,793 | 3 | 285 | 35 | 1,817 | 4 | 117 | 18 | 1,383 | 60 | 3,602 |
| 3,794 | 3 | 275 | 35 | 1,811 | 3 | 113 | 18 | 1,347 | 59 | 3,546 |
| 3,795 | 3 | 282 | 35 | 1,806 | 3 | 117 | 18 | 1,354 | 59 | 3,559 |
| 3,796 | 3 | 295 | 35 | 1,996 | 3 | 154 | 18 | 1,584 | 59 | 4,029 |
| 3,797 | 3 | 300 | 34 | 2,107 | 3 | 171 | 18 | 1,712 | 58 | 4,290 |
| 3,798 | 3 | 300 | 34 | 2,241 | 3 | 180 | 18 | 1,775 | 58 | 4,496 |
| 3,799 | 3 | 311 | 26 | 2,311 | 3 | 190 | 11 | 1,848 | 43 | 4,660 |
| 3,800 | 2 | 256 | 22 | 1,878 | 3 | 153 | 9  | 1,552 | 36 | 3,839 |
| 3,801 | 2 | 256 | 21 | 1,879 | 3 | 152 | 7  | 1,552 | 33 | 3,839 |

|       |   |     |    |       |   |     |    |       |    |       |
|-------|---|-----|----|-------|---|-----|----|-------|----|-------|
| 3,802 | 2 | 254 | 21 | 1,872 | 3 | 153 | 7  | 1,552 | 33 | 3,831 |
| 3,803 | 2 | 256 | 21 | 1,888 | 3 | 154 | 7  | 1,567 | 33 | 3,865 |
| 3,804 | 2 | 256 | 21 | 1,883 | 3 | 154 | 7  | 1,567 | 33 | 3,860 |
| 3,805 | 2 | 238 | 21 | 1,809 | 3 | 153 | 7  | 1,533 | 33 | 3,733 |
| 3,806 | 2 | 238 | 20 | 1,827 | 3 | 155 | 7  | 1,545 | 32 | 3,765 |
| 3,807 | 3 | 239 | 25 | 1,820 | 3 | 155 | 20 | 1,547 | 51 | 3,761 |
| 3,808 | 4 | 246 | 30 | 1,893 | 3 | 163 | 25 | 1,643 | 62 | 3,945 |
| 3,809 | 6 | 253 | 32 | 1,993 | 3 | 168 | 25 | 1,739 | 66 | 4,153 |
| 3,810 | 6 | 257 | 32 | 2,104 | 3 | 175 | 25 | 1,803 | 66 | 4,339 |
| 3,811 | 7 | 257 | 31 | 2,122 | 3 | 175 | 25 | 1,813 | 66 | 4,367 |
| 3,812 | 6 | 258 | 27 | 2,124 | 3 | 177 | 22 | 1,815 | 58 | 4,374 |
| 3,813 | 6 | 256 | 29 | 2,099 | 3 | 176 | 22 | 1,798 | 60 | 4,329 |
| 3,814 | 6 | 256 | 29 | 2,101 | 3 | 176 | 22 | 1,803 | 60 | 4,336 |
| 3,815 | 6 | 258 | 29 | 2,127 | 3 | 177 | 22 | 1,839 | 60 | 4,401 |
| 3,816 | 6 | 259 | 29 | 2,142 | 3 | 179 | 22 | 1,844 | 60 | 4,424 |
| 3,817 | 6 | 271 | 33 | 2,200 | 3 | 180 | 25 | 1,903 | 67 | 4,554 |
| 3,818 | 6 | 271 | 33 | 2,202 | 3 | 180 | 25 | 1,904 | 67 | 4,557 |
| 3,819 | 6 | 271 | 31 | 2,179 | 3 | 178 | 25 | 1,871 | 65 | 4,499 |
| 3,820 | 6 | 271 | 30 | 2,183 | 4 | 178 | 25 | 1,873 | 65 | 4,505 |
| 3,821 | 5 | 271 | 29 | 2,190 | 4 | 178 | 25 | 1,875 | 63 | 4,514 |
| 3,822 | 5 | 264 | 29 | 2,148 | 4 | 177 | 25 | 1,800 | 63 | 4,389 |
| 3,823 | 5 | 265 | 29 | 2,152 | 4 | 176 | 24 | 1,805 | 62 | 4,398 |
| 3,824 | 5 | 264 | 30 | 2,158 | 4 | 182 | 24 | 1,837 | 63 | 4,441 |
| 3,825 | 5 | 268 | 30 | 2,176 | 4 | 185 | 24 | 1,876 | 63 | 4,505 |
| 3,826 | 5 | 264 | 27 | 2,154 | 4 | 184 | 23 | 1,864 | 59 | 4,466 |
| 3,827 | 5 | 269 | 25 | 2,162 | 4 | 185 | 23 | 1,876 | 57 | 4,492 |
| 3,828 | 5 | 273 | 24 | 2,161 | 4 | 185 | 23 | 1,895 | 56 | 4,514 |
| 3,829 | 5 | 266 | 24 | 2,142 | 4 | 184 | 23 | 1,883 | 56 | 4,475 |
| 3,830 | 5 | 274 | 24 | 2,173 | 4 | 186 | 23 | 1,926 | 56 | 4,559 |
| 3,831 | 5 | 273 | 22 | 2,174 | 4 | 183 | 23 | 1,923 | 54 | 4,553 |
| 3,832 | 5 | 278 | 23 | 2,199 | 4 | 184 | 25 | 1,965 | 57 | 4,626 |
| 3,833 | 5 | 278 | 23 | 2,204 | 4 | 184 | 25 | 1,972 | 57 | 4,638 |
| 3,834 | 5 | 279 | 25 | 2,208 | 4 | 184 | 29 | 1,981 | 63 | 4,652 |
| 3,835 | 5 | 283 | 27 | 2,273 | 4 | 188 | 29 | 2,032 | 65 | 4,776 |
| 3,836 | 5 | 290 | 27 | 2,317 | 4 | 190 | 28 | 2,072 | 64 | 4,869 |
| 3,837 | 5 | 290 | 27 | 2,329 | 2 | 191 | 28 | 2,076 | 62 | 4,886 |
| 3,838 | 5 | 291 | 27 | 2,332 | 1 | 188 | 28 | 2,077 | 61 | 4,888 |
| 3,839 | 5 | 292 | 25 | 2,319 | 1 | 189 | 28 | 2,061 | 59 | 4,861 |
| 3,840 | 5 | 291 | 25 | 2,321 | 1 | 189 | 28 | 2,060 | 59 | 4,861 |
| 3,841 | 5 | 291 | 25 | 2,329 | 1 | 189 | 27 | 2,067 | 58 | 4,876 |
| 3,842 | 5 | 292 | 25 | 2,353 | 1 | 190 | 27 | 2,078 | 58 | 4,913 |

|       |   |     |    |       |   |     |    |       |    |       |
|-------|---|-----|----|-------|---|-----|----|-------|----|-------|
| 3,843 | 5 | 293 | 25 | 2,313 | 1 | 187 | 27 | 2,051 | 58 | 4,844 |
| 3,844 | 5 | 293 | 25 | 2,316 | 1 | 187 | 27 | 2,051 | 58 | 4,847 |
| 3,845 | 5 | 290 | 25 | 2,293 | 1 | 185 | 27 | 2,021 | 58 | 4,789 |
| 3,846 | 5 | 289 | 25 | 2,282 | 1 | 182 | 27 | 2,000 | 58 | 4,753 |
| 3,847 | 5 | 235 | 25 | 1,982 | 1 | 133 | 27 | 1,600 | 58 | 3,950 |
| 3,848 | 5 | 216 | 25 | 1,802 | 1 | 112 | 27 | 1,442 | 58 | 3,572 |
| 3,849 | 5 | 209 | 25 | 1,640 | 1 | 100 | 27 | 1,336 | 58 | 3,285 |
| 3,850 | 5 | 198 | 24 | 1,569 | 1 | 90  | 27 | 1,261 | 57 | 3,118 |
| 3,851 | 5 | 116 | 25 | 1,067 | 1 | 65  | 27 | 966   | 58 | 2,214 |
| 3,852 | 7 | 116 | 27 | 1,089 | 1 | 69  | 27 | 998   | 62 | 2,272 |
| 3,853 | 7 | 117 | 27 | 1,177 | 1 | 70  | 27 | 1,031 | 62 | 2,395 |
| 3,854 | 7 | 121 | 29 | 1,211 | 2 | 72  | 28 | 1,068 | 66 | 2,472 |
| 3,855 | 7 | 150 | 29 | 1,539 | 2 | 82  | 29 | 1,166 | 67 | 2,937 |
| 3,856 | 7 | 154 | 30 | 1,579 | 2 | 85  | 29 | 1,183 | 68 | 3,001 |
| 3,857 | 7 | 156 | 29 | 1,587 | 2 | 85  | 30 | 1,190 | 68 | 3,018 |
| 3,858 | 6 | 155 | 25 | 1,586 | 2 | 85  | 17 | 1,188 | 50 | 3,014 |
| 3,859 | 5 | 141 | 20 | 1,427 | 2 | 72  | 12 | 1,002 | 39 | 2,642 |
| 3,860 | 3 | 137 | 17 | 1,321 | 2 | 65  | 12 | 940   | 34 | 2,463 |
| 3,861 | 3 | 137 | 17 | 1,325 | 2 | 65  | 12 | 940   | 34 | 2,467 |
| 3,862 | 2 | 138 | 19 | 1,324 | 2 | 64  | 14 | 935   | 37 | 2,461 |
| 3,863 | 4 | 144 | 20 | 1,349 | 2 | 64  | 14 | 942   | 40 | 2,499 |
| 3,864 | 4 | 143 | 20 | 1,339 | 3 | 63  | 14 | 932   | 41 | 2,477 |
| 3,865 | 4 | 140 | 21 | 1,299 | 3 | 62  | 14 | 883   | 42 | 2,384 |
| 3,866 | 4 | 140 | 21 | 1,301 | 3 | 62  | 14 | 883   | 42 | 2,386 |
| 3,867 | 4 | 127 | 17 | 1,222 | 3 | 59  | 12 | 816   | 36 | 2,224 |
| 3,868 | 4 | 128 | 17 | 1,220 | 3 | 59  | 11 | 815   | 35 | 2,222 |
| 3,869 | 4 | 128 | 17 | 1,220 | 3 | 59  | 11 | 816   | 35 | 2,223 |
| 3,870 | 4 | 128 | 17 | 1,219 | 3 | 59  | 11 | 816   | 35 | 2,222 |
| 3,871 | 4 | 128 | 17 | 1,206 | 2 | 59  | 11 | 811   | 34 | 2,204 |
| 3,872 | 4 | 108 | 16 | 1,136 | 2 | 53  | 11 | 732   | 33 | 2,029 |
| 3,873 | 4 | 107 | 17 | 1,101 | 2 | 47  | 11 | 670   | 34 | 1,925 |
| 3,874 | 4 | 107 | 17 | 1,102 | 2 | 47  | 11 | 671   | 34 | 1,927 |
| 3,875 | 4 | 107 | 17 | 1,102 | 2 | 47  | 11 | 670   | 34 | 1,926 |
| 3,876 | 4 | 103 | 17 | 1,088 | 3 | 45  | 12 | 632   | 36 | 1,868 |
| 3,877 | 4 | 103 | 17 | 1,095 | 4 | 45  | 12 | 631   | 37 | 1,874 |
| 3,878 | 5 | 98  | 17 | 1,177 | 4 | 47  | 15 | 651   | 41 | 1,973 |
| 3,879 | 5 | 114 | 17 | 1,406 | 4 | 76  | 16 | 783   | 42 | 2,379 |
| 3,880 | 5 | 151 | 16 | 1,690 | 4 | 89  | 16 | 856   | 41 | 2,786 |
| 3,881 | 5 | 158 | 16 | 1,938 | 4 | 98  | 15 | 888   | 40 | 3,082 |
| 3,882 | 5 | 157 | 14 | 1,949 | 4 | 99  | 11 | 880   | 34 | 3,085 |
| 3,883 | 7 | 157 | 16 | 1,949 | 4 | 100 | 12 | 854   | 39 | 3,060 |

|       |   |     |    |       |   |     |    |       |    |       |
|-------|---|-----|----|-------|---|-----|----|-------|----|-------|
| 3,884 | 7 | 160 | 17 | 1,945 | 4 | 100 | 12 | 848   | 40 | 3,053 |
| 3,885 | 7 | 155 | 18 | 1,874 | 4 | 96  | 14 | 789   | 43 | 2,914 |
| 3,886 | 7 | 155 | 18 | 1,879 | 4 | 96  | 14 | 789   | 43 | 2,919 |
| 3,887 | 7 | 153 | 18 | 1,835 | 4 | 95  | 15 | 750   | 44 | 2,833 |
| 3,888 | 7 | 154 | 18 | 1,827 | 5 | 94  | 15 | 749   | 45 | 2,824 |
| 3,889 | 7 | 152 | 18 | 1,858 | 5 | 96  | 16 | 744   | 46 | 2,850 |
| 3,890 | 7 | 150 | 18 | 1,863 | 5 | 97  | 16 | 746   | 46 | 2,856 |
| 3,891 | 7 | 152 | 18 | 1,876 | 5 | 98  | 16 | 746   | 46 | 2,872 |
| 3,892 | 7 | 152 | 18 | 1,878 | 5 | 98  | 16 | 740   | 46 | 2,868 |
| 3,893 | 7 | 177 | 18 | 2,027 | 5 | 103 | 16 | 787   | 46 | 3,094 |
| 3,894 | 7 | 269 | 18 | 2,694 | 5 | 123 | 16 | 1,006 | 46 | 4,092 |
| 3,895 | 7 | 271 | 18 | 2,722 | 5 | 123 | 16 | 1,016 | 46 | 4,132 |
| 3,896 | 7 | 270 | 18 | 2,799 | 6 | 121 | 16 | 1,015 | 47 | 4,205 |
| 3,897 | 7 | 276 | 18 | 2,864 | 6 | 121 | 16 | 1,026 | 47 | 4,287 |
| 3,898 | 7 | 283 | 18 | 2,946 | 6 | 123 | 16 | 1,046 | 47 | 4,398 |
| 3,899 | 7 | 283 | 18 | 2,959 | 6 | 123 | 16 | 1,047 | 47 | 4,412 |
| 3,900 | 7 | 283 | 18 | 2,963 | 7 | 123 | 16 | 1,048 | 48 | 4,417 |
| 3,901 | 7 | 283 | 18 | 2,967 | 7 | 123 | 16 | 1,048 | 48 | 4,421 |
| 3,902 | 7 | 289 | 17 | 2,981 | 7 | 123 | 16 | 1,060 | 47 | 4,453 |
| 3,903 | 5 | 287 | 15 | 2,868 | 7 | 120 | 16 | 996   | 43 | 4,271 |
| 3,904 | 5 | 287 | 15 | 2,878 | 7 | 122 | 16 | 1,007 | 43 | 4,294 |
| 3,905 | 5 | 285 | 13 | 2,836 | 6 | 121 | 15 | 959   | 39 | 4,201 |
| 3,906 | 5 | 256 | 13 | 2,507 | 6 | 111 | 14 | 864   | 38 | 3,738 |
| 3,907 | 5 | 256 | 12 | 2,494 | 6 | 110 | 14 | 873   | 37 | 3,733 |
| 3,908 | 5 | 256 | 12 | 2,470 | 6 | 110 | 13 | 862   | 36 | 3,698 |
| 3,909 | 5 | 256 | 12 | 2,469 | 6 | 110 | 14 | 859   | 37 | 3,694 |
| 3,910 | 5 | 258 | 14 | 2,477 | 6 | 111 | 14 | 885   | 39 | 3,731 |
| 3,911 | 5 | 267 | 13 | 2,511 | 6 | 116 | 14 | 918   | 38 | 3,812 |
| 3,912 | 5 | 272 | 13 | 2,533 | 6 | 116 | 14 | 945   | 38 | 3,866 |
| 3,913 | 5 | 269 | 12 | 2,517 | 6 | 115 | 10 | 944   | 33 | 3,845 |
| 3,914 | 3 | 270 | 12 | 2,545 | 6 | 116 | 9  | 988   | 30 | 3,919 |
| 3,915 | 3 | 272 | 13 | 2,549 | 5 | 116 | 9  | 998   | 30 | 3,935 |
| 3,916 | 3 | 288 | 12 | 2,647 | 5 | 123 | 9  | 1,174 | 29 | 4,232 |
| 3,917 | 3 | 290 | 12 | 2,673 | 5 | 123 | 9  | 1,186 | 29 | 4,272 |
| 3,918 | 3 | 290 | 12 | 2,676 | 5 | 123 | 9  | 1,191 | 29 | 4,280 |
| 3,919 | 3 | 289 | 12 | 2,682 | 5 | 123 | 9  | 1,197 | 29 | 4,291 |
| 3,920 | 3 | 311 | 12 | 2,849 | 5 | 130 | 8  | 1,284 | 28 | 4,574 |
| 3,921 | 3 | 311 | 12 | 2,852 | 5 | 130 | 8  | 1,284 | 28 | 4,577 |
| 3,922 | 3 | 311 | 12 | 2,870 | 5 | 130 | 8  | 1,285 | 28 | 4,596 |
| 3,923 | 3 | 311 | 12 | 2,872 | 4 | 130 | 7  | 1,286 | 26 | 4,599 |
| 3,924 | 3 | 313 | 11 | 2,880 | 4 | 131 | 6  | 1,286 | 24 | 4,610 |



|       |   |     |    |       |   |     |    |       |    |       |
|-------|---|-----|----|-------|---|-----|----|-------|----|-------|
| 3,925 | 3 | 313 | 11 | 2,880 | 4 | 131 | 6  | 1,284 | 24 | 4,608 |
| 3,926 | 3 | 313 | 12 | 2,874 | 3 | 130 | 5  | 1,282 | 23 | 4,599 |
| 3,927 | 3 | 313 | 12 | 2,862 | 3 | 130 | 4  | 1,278 | 22 | 4,583 |
| 3,928 | 2 | 313 | 12 | 2,862 | 3 | 130 | 4  | 1,276 | 21 | 4,581 |
| 3,929 | 2 | 292 | 12 | 2,541 | 3 | 97  | 4  | 1,101 | 21 | 4,031 |
| 3,930 | 2 | 294 | 12 | 2,583 | 3 | 98  | 4  | 1,140 | 21 | 4,115 |
| 3,931 | 2 | 265 | 12 | 2,346 | 3 | 86  | 4  | 1,118 | 21 | 3,815 |
| 3,932 | 2 | 267 | 12 | 2,201 | 3 | 84  | 4  | 1,139 | 21 | 3,691 |
| 3,933 | 2 | 269 | 12 | 2,170 | 3 | 83  | 4  | 1,137 | 21 | 3,659 |
| 3,934 | 0 | 283 | 10 | 2,304 | 3 | 89  | 4  | 1,178 | 17 | 3,854 |
| 3,935 | 0 | 280 | 9  | 2,303 | 3 | 89  | 4  | 1,179 | 16 | 3,851 |
| 3,936 | 0 | 286 | 6  | 2,316 | 3 | 89  | 2  | 1,193 | 11 | 3,884 |
| 3,937 | 0 | 286 | 6  | 2,317 | 3 | 89  | 1  | 1,193 | 10 | 3,885 |
| 3,938 | 0 | 279 | 6  | 2,315 | 3 | 87  | 1  | 1,190 | 10 | 3,871 |
| 3,939 | 0 | 286 | 6  | 2,295 | 3 | 85  | 1  | 1,186 | 10 | 3,852 |
| 3,940 | 0 | 287 | 6  | 2,302 | 3 | 85  | 1  | 1,186 | 10 | 3,860 |
| 3,941 | 0 | 286 | 6  | 2,277 | 3 | 82  | 1  | 1,187 | 10 | 3,832 |
| 3,942 | 0 | 286 | 6  | 2,296 | 3 | 88  | 1  | 1,210 | 10 | 3,880 |
| 3,943 | 2 | 293 | 6  | 2,423 | 3 | 94  | 2  | 1,286 | 13 | 4,096 |
| 3,944 | 2 | 270 | 6  | 2,257 | 3 | 91  | 2  | 1,240 | 13 | 3,858 |
| 3,945 | 2 | 180 | 6  | 1,627 | 3 | 72  | 2  | 1,043 | 13 | 2,922 |
| 3,946 | 2 | 178 | 6  | 1,600 | 3 | 72  | 2  | 1,040 | 13 | 2,890 |
| 3,947 | 2 | 172 | 6  | 1,460 | 2 | 72  | 2  | 1,020 | 12 | 2,724 |
| 3,948 | 3 | 163 | 11 | 1,345 | 2 | 70  | 2  | 1,025 | 18 | 2,603 |
| 3,949 | 3 | 163 | 11 | 1,348 | 1 | 70  | 2  | 1,025 | 17 | 2,606 |
| 3,950 | 3 | 168 | 11 | 1,387 | 1 | 73  | 2  | 1,058 | 17 | 2,686 |
| 3,951 | 3 | 168 | 11 | 1,385 | 1 | 73  | 2  | 1,059 | 17 | 2,685 |
| 3,952 | 3 | 168 | 11 | 1,397 | 1 | 73  | 3  | 1,059 | 18 | 2,697 |
| 3,953 | 3 | 162 | 12 | 1,382 | 1 | 72  | 4  | 1,045 | 20 | 2,661 |
| 3,954 | 3 | 158 | 12 | 1,344 | 1 | 65  | 4  | 1,021 | 20 | 2,588 |
| 3,955 | 3 | 158 | 12 | 1,350 | 1 | 65  | 4  | 1,023 | 20 | 2,596 |
| 3,956 | 3 | 158 | 12 | 1,350 | 1 | 65  | 4  | 1,023 | 20 | 2,596 |
| 3,957 | 4 | 154 | 12 | 1,317 | 1 | 62  | 5  | 993   | 22 | 2,526 |
| 3,958 | 6 | 154 | 15 | 1,317 | 1 | 62  | 12 | 993   | 34 | 2,526 |
| 3,959 | 6 | 152 | 15 | 1,318 | 1 | 60  | 11 | 986   | 33 | 2,516 |
| 3,960 | 6 | 152 | 15 | 1,313 | 1 | 60  | 11 | 986   | 33 | 2,511 |
| 3,961 | 6 | 149 | 13 | 1,290 | 1 | 59  | 11 | 955   | 31 | 2,453 |
| 3,962 | 6 | 140 | 13 | 1,252 | 1 | 54  | 11 | 920   | 31 | 2,366 |
| 3,963 | 6 | 135 | 12 | 1,228 | 1 | 54  | 11 | 891   | 30 | 2,308 |
| 3,964 | 6 | 128 | 11 | 1,167 | 1 | 53  | 11 | 829   | 29 | 2,177 |
| 3,965 | 6 | 128 | 11 | 1,167 | 1 | 53  | 11 | 829   | 29 | 2,177 |

|       |   |     |    |       |   |    |    |     |    |       |
|-------|---|-----|----|-------|---|----|----|-----|----|-------|
| 3,966 | 6 | 110 | 10 | 1,060 | 1 | 46 | 11 | 640 | 28 | 1,856 |
| 3,967 | 6 | 110 | 10 | 1,060 | 1 | 46 | 11 | 641 | 28 | 1,857 |
| 3,968 | 6 | 108 | 11 | 1,024 | 1 | 46 | 11 | 622 | 29 | 1,800 |
| 3,969 | 6 | 108 | 11 | 1,027 | 1 | 46 | 11 | 628 | 29 | 1,809 |
| 3,970 | 6 | 86  | 11 | 857   | 1 | 39 | 11 | 535 | 29 | 1,517 |
| 3,971 | 6 | 86  | 11 | 857   | 1 | 39 | 11 | 535 | 29 | 1,517 |
| 3,972 | 6 | 86  | 11 | 833   | 1 | 39 | 11 | 528 | 29 | 1,486 |
| 3,973 | 6 | 86  | 12 | 833   | 1 | 39 | 11 | 529 | 30 | 1,487 |
| 3,974 | 6 | 86  | 12 | 833   | 1 | 39 | 11 | 529 | 30 | 1,487 |
| 3,975 | 6 | 84  | 12 | 825   | 1 | 38 | 11 | 527 | 30 | 1,474 |
| 3,976 | 6 | 85  | 12 | 826   | 1 | 38 | 11 | 527 | 30 | 1,476 |
| 3,977 | 6 | 85  | 11 | 827   | 1 | 38 | 11 | 527 | 29 | 1,477 |
| 3,978 | 6 | 83  | 11 | 775   | 0 | 37 | 11 | 482 | 28 | 1,377 |
| 3,979 | 6 | 83  | 15 | 775   | 0 | 37 | 11 | 483 | 32 | 1,378 |
| 3,980 | 7 | 83  | 18 | 775   | 0 | 37 | 11 | 485 | 36 | 1,380 |
| 3,981 | 7 | 83  | 18 | 775   | 0 | 37 | 12 | 485 | 37 | 1,380 |
| 3,982 | 7 | 76  | 18 | 731   | 0 | 37 | 13 | 435 | 38 | 1,279 |
| 3,983 | 7 | 59  | 18 | 600   | 0 | 28 | 13 | 339 | 38 | 1,026 |
| 3,984 | 8 | 57  | 18 | 600   | 0 | 28 | 13 | 338 | 39 | 1,023 |
| 3,985 | 8 | 44  | 18 | 533   | 0 | 22 | 13 | 321 | 39 | 920   |
| 3,986 | 8 | 46  | 18 | 545   | 0 | 22 | 13 | 324 | 39 | 937   |
| 3,987 | 8 | 46  | 18 | 634   | 0 | 24 | 14 | 337 | 40 | 1,041 |
| 3,988 | 8 | 46  | 18 | 637   | 0 | 24 | 14 | 337 | 40 | 1,044 |
| 3,989 | 8 | 38  | 19 | 593   | 0 | 24 | 14 | 323 | 41 | 978   |
| 3,990 | 8 | 40  | 19 | 622   | 0 | 24 | 14 | 343 | 41 | 1,029 |
| 3,991 | 8 | 40  | 19 | 625   | 0 | 24 | 14 | 346 | 41 | 1,035 |
| 3,992 | 8 | 46  | 19 | 677   | 0 | 26 | 14 | 363 | 41 | 1,112 |
| 3,993 | 7 | 60  | 19 | 803   | 0 | 37 | 13 | 471 | 39 | 1,371 |
| 3,994 | 6 | 53  | 19 | 668   | 0 | 31 | 13 | 395 | 38 | 1,147 |
| 3,995 | 6 | 53  | 19 | 717   | 0 | 31 | 13 | 425 | 38 | 1,226 |
| 3,996 | 6 | 54  | 19 | 719   | 0 | 31 | 13 | 421 | 38 | 1,225 |
| 3,997 | 6 | 56  | 19 | 739   | 0 | 31 | 13 | 435 | 38 | 1,261 |
| 3,998 | 5 | 78  | 14 | 999   | 0 | 39 | 13 | 543 | 32 | 1,659 |
| 3,999 | 5 | 74  | 14 | 981   | 0 | 39 | 12 | 508 | 31 | 1,602 |
| 4,000 | 5 | 78  | 14 | 1,010 | 0 | 41 | 12 | 518 | 31 | 1,647 |
| 4,001 | 5 | 73  | 14 | 962   | 0 | 38 | 12 | 484 | 31 | 1,557 |
| 4,002 | 5 | 75  | 14 | 955   | 0 | 42 | 12 | 480 | 31 | 1,552 |
| 4,003 | 5 | 75  | 14 | 963   | 0 | 43 | 12 | 485 | 31 | 1,566 |
| 4,004 | 5 | 75  | 13 | 970   | 0 | 43 | 11 | 487 | 29 | 1,575 |
| 4,005 | 5 | 77  | 13 | 1,041 | 0 | 48 | 11 | 512 | 29 | 1,678 |
| 4,006 | 5 | 77  | 14 | 1,045 | 0 | 48 | 11 | 513 | 30 | 1,683 |

|       |   |    |    |       |   |    |    |     |    |       |
|-------|---|----|----|-------|---|----|----|-----|----|-------|
| 4,007 | 4 | 77 | 14 | 1,050 | 0 | 48 | 10 | 527 | 28 | 1,702 |
| 4,008 | 4 | 79 | 14 | 1,074 | 0 | 48 | 10 | 546 | 28 | 1,747 |
| 4,009 | 2 | 80 | 11 | 1,082 | 0 | 49 | 3  | 556 | 16 | 1,767 |
| 4,010 | 2 | 80 | 12 | 1,085 | 0 | 49 | 3  | 557 | 17 | 1,771 |
| 4,011 | 2 | 81 | 12 | 1,099 | 0 | 51 | 3  | 567 | 17 | 1,798 |
| 4,012 | 2 | 81 | 12 | 1,099 | 0 | 51 | 3  | 571 | 17 | 1,802 |
| 4,013 | 2 | 81 | 12 | 1,100 | 0 | 51 | 3  | 571 | 17 | 1,803 |
| 4,014 | 2 | 81 | 12 | 1,103 | 0 | 52 | 3  | 575 | 17 | 1,811 |
| 4,015 | 2 | 82 | 12 | 1,116 | 0 | 52 | 3  | 582 | 17 | 1,832 |
| 4,016 | 2 | 84 | 12 | 1,139 | 0 | 52 | 3  | 625 | 17 | 1,900 |
| 4,017 | 2 | 84 | 12 | 1,144 | 0 | 53 | 3  | 641 | 17 | 1,922 |
| 4,018 | 2 | 84 | 11 | 1,152 | 1 | 54 | 3  | 645 | 17 | 1,935 |
| 4,019 | 2 | 85 | 12 | 1,164 | 1 | 55 | 3  | 668 | 18 | 1,972 |
| 4,020 | 2 | 85 | 15 | 1,164 | 1 | 55 | 7  | 662 | 25 | 1,966 |
| 4,021 | 2 | 85 | 15 | 1,164 | 1 | 55 | 7  | 662 | 25 | 1,966 |
| 4,022 | 2 | 85 | 16 | 1,170 | 2 | 55 | 9  | 669 | 29 | 1,979 |
| 4,023 | 2 | 85 | 16 | 1,180 | 2 | 56 | 9  | 672 | 29 | 1,993 |
| 4,024 | 2 | 85 | 15 | 1,181 | 2 | 56 | 9  | 672 | 28 | 1,994 |
| 4,025 | 2 | 86 | 16 | 1,186 | 2 | 56 | 9  | 674 | 29 | 2,002 |
| 4,026 | 2 | 86 | 17 | 1,191 | 2 | 56 | 9  | 677 | 30 | 2,010 |
| 4,027 | 2 | 88 | 17 | 1,218 | 2 | 56 | 10 | 684 | 31 | 2,046 |
| 4,028 | 2 | 89 | 19 | 1,221 | 2 | 56 | 10 | 687 | 33 | 2,053 |
| 4,029 | 2 | 89 | 19 | 1,221 | 2 | 56 | 10 | 686 | 33 | 2,052 |
| 4,030 | 2 | 89 | 15 | 1,225 | 2 | 56 | 10 | 687 | 29 | 2,057 |
| 4,031 | 2 | 89 | 12 | 1,226 | 2 | 56 | 10 | 685 | 26 | 2,056 |
| 4,032 | 2 | 88 | 12 | 1,219 | 2 | 55 | 9  | 685 | 25 | 2,047 |
| 4,033 | 2 | 88 | 12 | 1,219 | 2 | 55 | 8  | 684 | 24 | 2,046 |
| 4,034 | 1 | 88 | 12 | 1,216 | 2 | 55 | 8  | 683 | 23 | 2,042 |
| 4,035 | 1 | 88 | 12 | 1,209 | 2 | 55 | 8  | 679 | 23 | 2,031 |
| 4,036 | 1 | 82 | 12 | 1,119 | 2 | 53 | 8  | 642 | 23 | 1,896 |
| 4,037 | 1 | 80 | 12 | 1,105 | 2 | 53 | 8  | 637 | 23 | 1,875 |
| 4,038 | 1 | 74 | 12 | 995   | 2 | 51 | 7  | 609 | 22 | 1,729 |
| 4,039 | 1 | 74 | 12 | 993   | 2 | 51 | 7  | 608 | 22 | 1,726 |
| 4,040 | 1 | 74 | 11 | 993   | 2 | 51 | 7  | 608 | 21 | 1,726 |
| 4,041 | 1 | 72 | 11 | 964   | 2 | 51 | 7  | 589 | 21 | 1,676 |
| 4,042 | 1 | 72 | 11 | 961   | 2 | 51 | 7  | 586 | 21 | 1,670 |
| 4,043 | 1 | 65 | 12 | 899   | 2 | 49 | 7  | 560 | 22 | 1,573 |
| 4,044 | 1 | 51 | 12 | 754   | 2 | 32 | 7  | 431 | 22 | 1,268 |
| 4,045 | 1 | 48 | 12 | 695   | 2 | 29 | 7  | 390 | 22 | 1,162 |
| 4,046 | 1 | 45 | 12 | 659   | 2 | 28 | 7  | 373 | 22 | 1,105 |
| 4,047 | 1 | 45 | 12 | 659   | 2 | 28 | 7  | 373 | 22 | 1,105 |

|       |   |    |    |     |   |    |   |     |    |       |
|-------|---|----|----|-----|---|----|---|-----|----|-------|
| 4,048 | 1 | 43 | 13 | 632 | 2 | 28 | 7 | 352 | 23 | 1,055 |
| 4,049 | 1 | 21 | 13 | 368 | 2 | 20 | 7 | 245 | 23 | 654   |
| 4,050 | 1 | 17 | 13 | 324 | 2 | 18 | 7 | 234 | 23 | 593   |
| 4,051 | 1 | 17 | 13 | 319 | 2 | 18 | 7 | 231 | 23 | 585   |
| 4,052 | 1 | 17 | 13 | 294 | 2 | 13 | 7 | 227 | 23 | 551   |
| 4,053 | 1 | 17 | 14 | 294 | 2 | 13 | 7 | 227 | 24 | 551   |
| 4,054 | 1 | 17 | 14 | 300 | 2 | 13 | 7 | 227 | 24 | 557   |
| 4,055 | 1 | 17 | 14 | 294 | 2 | 13 | 7 | 226 | 24 | 550   |
| 4,056 | 1 | 15 | 14 | 212 | 2 | 8  | 7 | 203 | 24 | 438   |
| 4,057 | 1 | 15 | 13 | 214 | 2 | 7  | 7 | 205 | 23 | 441   |
| 4,058 | 1 | 15 | 13 | 220 | 2 | 8  | 7 | 207 | 23 | 450   |
| 4,059 | 1 | 13 | 13 | 202 | 2 | 8  | 7 | 201 | 23 | 424   |
| 4,060 | 1 | 12 | 13 | 195 | 2 | 7  | 7 | 191 | 23 | 405   |
| 4,061 | 1 | 11 | 13 | 173 | 2 | 5  | 7 | 177 | 23 | 366   |
| 4,062 | 1 | 11 | 13 | 171 | 2 | 5  | 7 | 173 | 23 | 360   |
| 4,063 | 1 | 12 | 13 | 178 | 2 | 5  | 7 | 175 | 23 | 370   |
| 4,064 | 1 | 13 | 13 | 186 | 2 | 5  | 7 | 187 | 23 | 391   |
| 4,065 | 1 | 14 | 13 | 196 | 2 | 4  | 7 | 194 | 23 | 408   |
| 4,066 | 3 | 13 | 13 | 189 | 2 | 4  | 7 | 192 | 25 | 398   |
| 4,067 | 3 | 11 | 15 | 182 | 2 | 4  | 8 | 154 | 28 | 351   |
| 4,068 | 3 | 14 | 15 | 206 | 1 | 6  | 8 | 158 | 27 | 384   |
| 4,069 | 3 | 14 | 14 | 222 | 1 | 6  | 8 | 163 | 26 | 405   |
| 4,070 | 3 | 21 | 14 | 252 | 1 | 6  | 7 | 182 | 25 | 461   |
| 4,071 | 3 | 21 | 11 | 255 | 1 | 6  | 4 | 181 | 19 | 463   |
| 4,072 | 3 | 21 | 13 | 261 | 1 | 7  | 3 | 185 | 20 | 474   |
| 4,073 | 3 | 26 | 13 | 294 | 0 | 9  | 3 | 205 | 19 | 534   |
| 4,074 | 3 | 26 | 13 | 292 | 0 | 8  | 3 | 206 | 19 | 532   |
| 4,075 | 3 | 33 | 13 | 353 | 0 | 12 | 3 | 221 | 19 | 619   |
| 4,076 | 3 | 35 | 12 | 407 | 0 | 14 | 3 | 226 | 18 | 682   |
| 4,077 | 3 | 35 | 12 | 415 | 0 | 14 | 2 | 228 | 17 | 692   |
| 4,078 | 5 | 31 | 12 | 386 | 0 | 14 | 2 | 218 | 19 | 649   |
| 4,079 | 5 | 31 | 10 | 385 | 0 | 14 | 2 | 217 | 17 | 647   |
| 4,080 | 5 | 31 | 10 | 381 | 0 | 14 | 2 | 214 | 17 | 640   |
| 4,081 | 5 | 31 | 10 | 381 | 0 | 14 | 2 | 214 | 17 | 640   |
| 4,082 | 4 | 31 | 11 | 381 | 0 | 14 | 2 | 213 | 17 | 639   |
| 4,083 | 4 | 31 | 13 | 381 | 1 | 14 | 2 | 212 | 20 | 638   |
| 4,084 | 4 | 31 | 13 | 381 | 1 | 15 | 2 | 212 | 20 | 639   |
| 4,085 | 4 | 31 | 13 | 381 | 1 | 15 | 2 | 212 | 20 | 639   |
| 4,086 | 4 | 31 | 14 | 377 | 1 | 15 | 2 | 211 | 21 | 634   |
| 4,087 | 5 | 31 | 19 | 377 | 2 | 15 | 5 | 211 | 31 | 634   |
| 4,088 | 5 | 31 | 19 | 375 | 2 | 15 | 5 | 211 | 31 | 632   |

|       |   |    |    |     |   |    |   |     |    |     |
|-------|---|----|----|-----|---|----|---|-----|----|-----|
| 4,089 | 5 | 31 | 19 | 375 | 2 | 15 | 5 | 211 | 31 | 632 |
| 4,090 | 5 | 31 | 19 | 375 | 2 | 15 | 5 | 211 | 31 | 632 |
| 4,091 | 5 | 31 | 19 | 378 | 2 | 15 | 5 | 215 | 31 | 639 |
| 4,092 | 5 | 31 | 19 | 380 | 2 | 15 | 5 | 218 | 31 | 644 |
| 4,093 | 5 | 31 | 21 | 380 | 2 | 15 | 6 | 218 | 34 | 644 |
| 4,094 | 5 | 31 | 21 | 383 | 2 | 15 | 6 | 222 | 34 | 651 |
| 4,095 | 5 | 31 | 21 | 385 | 2 | 15 | 6 | 224 | 34 | 655 |
| 4,096 | 5 | 31 | 21 | 387 | 2 | 15 | 6 | 224 | 34 | 657 |
| 4,097 | 5 | 31 | 21 | 389 | 2 | 15 | 6 | 224 | 34 | 659 |
| 4,098 | 5 | 31 | 20 | 389 | 2 | 15 | 6 | 224 | 33 | 659 |
| 4,099 | 5 | 31 | 20 | 389 | 2 | 15 | 6 | 224 | 33 | 659 |
| 4,100 | 5 | 31 | 20 | 389 | 2 | 15 | 6 | 224 | 33 | 659 |
| 4,101 | 6 | 29 | 20 | 389 | 2 | 15 | 6 | 225 | 34 | 658 |
| 4,102 | 6 | 30 | 20 | 390 | 2 | 15 | 6 | 225 | 34 | 660 |
| 4,103 | 6 | 30 | 20 | 390 | 2 | 15 | 6 | 225 | 34 | 660 |
| 4,104 | 6 | 32 | 19 | 386 | 2 | 15 | 6 | 223 | 33 | 656 |
| 4,105 | 6 | 32 | 19 | 387 | 2 | 15 | 6 | 228 | 33 | 662 |
| 4,106 | 6 | 32 | 19 | 388 | 2 | 15 | 6 | 227 | 33 | 662 |
| 4,107 | 6 | 34 | 19 | 389 | 2 | 15 | 6 | 228 | 33 | 666 |
| 4,108 | 6 | 34 | 19 | 376 | 2 | 14 | 7 | 211 | 34 | 635 |
| 4,109 | 6 | 34 | 19 | 377 | 2 | 14 | 7 | 213 | 34 | 638 |
| 4,110 | 6 | 35 | 19 | 382 | 2 | 16 | 7 | 211 | 34 | 644 |
| 4,111 | 6 | 37 | 19 | 404 | 2 | 16 | 7 | 219 | 34 | 676 |
| 4,112 | 6 | 41 | 18 | 439 | 2 | 17 | 7 | 238 | 33 | 735 |
| 4,113 | 6 | 42 | 18 | 452 | 2 | 17 | 7 | 244 | 33 | 755 |
| 4,114 | 6 | 41 | 18 | 450 | 2 | 17 | 8 | 246 | 34 | 754 |
| 4,115 | 6 | 41 | 18 | 450 | 2 | 18 | 8 | 235 | 34 | 744 |
| 4,116 | 4 | 42 | 18 | 487 | 2 | 22 | 8 | 259 | 32 | 810 |
| 4,117 | 4 | 42 | 18 | 482 | 2 | 22 | 7 | 254 | 31 | 800 |
| 4,118 | 4 | 42 | 17 | 472 | 3 | 23 | 7 | 250 | 31 | 787 |
| 4,119 | 4 | 43 | 17 | 477 | 3 | 21 | 7 | 235 | 31 | 776 |
| 4,120 | 4 | 51 | 15 | 537 | 3 | 28 | 7 | 280 | 29 | 896 |
| 4,121 | 4 | 44 | 15 | 535 | 3 | 28 | 7 | 255 | 29 | 862 |
| 4,122 | 4 | 44 | 14 | 545 | 3 | 28 | 7 | 254 | 28 | 871 |
| 4,123 | 4 | 44 | 15 | 542 | 3 | 27 | 7 | 250 | 29 | 863 |
| 4,124 | 4 | 40 | 15 | 503 | 3 | 25 | 6 | 224 | 28 | 792 |
| 4,125 | 4 | 33 | 15 | 426 | 3 | 21 | 6 | 200 | 28 | 680 |
| 4,126 | 4 | 31 | 14 | 375 | 3 | 19 | 6 | 196 | 27 | 621 |
| 4,127 | 4 | 31 | 14 | 375 | 3 | 19 | 6 | 196 | 27 | 621 |
| 4,128 | 4 | 31 | 14 | 369 | 3 | 19 | 6 | 195 | 27 | 614 |
| 4,129 | 2 | 31 | 14 | 365 | 3 | 19 | 6 | 197 | 25 | 612 |

|       |   |    |    |     |   |    |   |     |    |     |
|-------|---|----|----|-----|---|----|---|-----|----|-----|
| 4,130 | 2 | 31 | 14 | 366 | 3 | 19 | 6 | 197 | 25 | 613 |
| 4,131 | 2 | 31 | 14 | 366 | 3 | 19 | 6 | 199 | 25 | 615 |
| 4,132 | 2 | 31 | 14 | 367 | 3 | 19 | 6 | 200 | 25 | 617 |
| 4,133 | 2 | 31 | 12 | 370 | 3 | 19 | 6 | 201 | 23 | 621 |
| 4,134 | 2 | 31 | 12 | 371 | 2 | 18 | 6 | 201 | 22 | 621 |
| 4,135 | 2 | 31 | 12 | 371 | 2 | 18 | 6 | 201 | 22 | 621 |
| 4,136 | 2 | 31 | 11 | 371 | 2 | 18 | 6 | 201 | 21 | 621 |
| 4,137 | 2 | 31 | 11 | 375 | 2 | 18 | 6 | 201 | 21 | 625 |
| 4,138 | 1 | 32 | 6  | 376 | 1 | 18 | 3 | 201 | 11 | 627 |
| 4,139 | 1 | 32 | 6  | 376 | 1 | 18 | 3 | 201 | 11 | 627 |
| 4,140 | 1 | 32 | 6  | 379 | 1 | 18 | 3 | 204 | 11 | 633 |
| 4,141 | 1 | 32 | 6  | 380 | 1 | 18 | 3 | 203 | 11 | 633 |
| 4,142 | 1 | 33 | 6  | 380 | 1 | 18 | 3 | 204 | 11 | 635 |
| 4,143 | 1 | 33 | 7  | 379 | 1 | 18 | 6 | 201 | 15 | 631 |
| 4,144 | 1 | 33 | 7  | 379 | 1 | 18 | 6 | 201 | 15 | 631 |
| 4,145 | 1 | 34 | 7  | 381 | 1 | 18 | 6 | 199 | 15 | 632 |
| 4,146 | 1 | 34 | 7  | 381 | 1 | 18 | 6 | 197 | 15 | 630 |
| 4,147 | 1 | 34 | 7  | 387 | 1 | 18 | 6 | 199 | 15 | 638 |
| 4,148 | 1 | 34 | 7  | 388 | 1 | 18 | 7 | 199 | 16 | 639 |
| 4,149 | 1 | 34 | 7  | 391 | 1 | 18 | 7 | 201 | 16 | 644 |
| 4,150 | 1 | 34 | 7  | 391 | 1 | 18 | 7 | 201 | 16 | 644 |
| 4,151 | 0 | 34 | 7  | 392 | 1 | 18 | 7 | 198 | 15 | 642 |
| 4,152 | 0 | 33 | 8  | 391 | 1 | 18 | 7 | 198 | 16 | 640 |
| 4,153 | 0 | 33 | 8  | 391 | 1 | 18 | 7 | 198 | 16 | 640 |
| 4,154 | 0 | 31 | 8  | 386 | 1 | 18 | 7 | 193 | 16 | 628 |
| 4,155 | 0 | 31 | 8  | 386 | 1 | 18 | 7 | 193 | 16 | 628 |
| 4,156 | 0 | 31 | 8  | 385 | 1 | 18 | 7 | 186 | 16 | 620 |
| 4,157 | 0 | 31 | 8  | 384 | 1 | 18 | 7 | 186 | 16 | 619 |
| 4,158 | 0 | 29 | 8  | 383 | 1 | 18 | 7 | 184 | 16 | 614 |
| 4,159 | 0 | 29 | 8  | 382 | 2 | 18 | 6 | 182 | 16 | 611 |
| 4,160 | 0 | 29 | 8  | 381 | 2 | 18 | 6 | 182 | 16 | 610 |
| 4,161 | 1 | 26 | 8  | 350 | 2 | 16 | 6 | 164 | 17 | 556 |
| 4,162 | 1 | 22 | 9  | 313 | 2 | 15 | 5 | 146 | 17 | 496 |
| 4,163 | 1 | 22 | 9  | 313 | 2 | 15 | 5 | 146 | 17 | 496 |
| 4,164 | 1 | 21 | 9  | 301 | 2 | 15 | 5 | 144 | 17 | 481 |
| 4,165 | 1 | 21 | 9  | 297 | 2 | 15 | 5 | 140 | 17 | 473 |
| 4,166 | 1 | 20 | 9  | 289 | 2 | 14 | 5 | 140 | 17 | 463 |
| 4,167 | 1 | 18 | 10 | 235 | 2 | 10 | 5 | 105 | 18 | 368 |
| 4,168 | 1 | 18 | 9  | 235 | 2 | 10 | 5 | 101 | 17 | 364 |
| 4,169 | 1 | 18 | 11 | 231 | 1 | 9  | 9 | 103 | 22 | 361 |
| 4,170 | 1 | 14 | 11 | 199 | 1 | 8  | 9 | 98  | 22 | 319 |

|       |   |   |    |     |   |    |    |    |    |     |
|-------|---|---|----|-----|---|----|----|----|----|-----|
| 4,171 | 1 | 6 | 11 | 115 | 1 | 1  | 10 | 46 | 23 | 168 |
| 4,172 | 1 | 5 | 12 | 75  | 1 | 0  | 10 | 32 | 24 | 112 |
| 4,173 | 1 | 5 | 12 | 59  | 1 | 0  | 11 | 31 | 25 | 95  |
| 4,174 | 1 | 5 | 11 | 56  | 1 | 0  | 11 | 31 | 24 | 92  |
| 4,175 | 1 | 4 | 12 | 50  | 1 | 0  | 11 | 31 | 25 | 85  |
| 4,176 | 1 | 4 | 12 | 51  | 1 | 0  | 11 | 32 | 25 | 87  |
| 4,177 | 1 | 4 | 12 | 51  | 1 | 0  | 11 | 32 | 25 | 87  |
| 4,178 | 1 | 4 | 12 | 52  | 1 | 1  | 11 | 32 | 25 | 89  |
| 4,179 | 1 | 4 | 13 | 50  | 1 | 1  | 13 | 32 | 28 | 87  |
| 4,180 | 1 | 4 | 17 | 55  | 1 | 2  | 14 | 32 | 33 | 93  |
| 4,181 | 1 | 6 | 17 | 58  | 1 | 3  | 14 | 39 | 33 | 106 |
| 4,182 | 1 | 6 | 17 | 59  | 1 | 3  | 14 | 37 | 33 | 105 |
| 4,183 | 1 | 6 | 16 | 62  | 1 | 3  | 14 | 38 | 32 | 109 |
| 4,184 | 1 | 6 | 16 | 59  | 1 | 3  | 14 | 37 | 32 | 105 |
| 4,185 | 1 | 6 | 16 | 60  | 1 | 4  | 14 | 37 | 32 | 107 |
| 4,186 | 1 | 7 | 16 | 62  | 1 | 4  | 14 | 37 | 32 | 110 |
| 4,187 | 1 | 7 | 16 | 66  | 1 | 6  | 14 | 45 | 32 | 124 |
| 4,188 | 1 | 7 | 16 | 64  | 1 | 6  | 14 | 48 | 32 | 125 |
| 4,189 | 1 | 6 | 17 | 67  | 1 | 6  | 15 | 52 | 34 | 131 |
| 4,190 | 1 | 6 | 17 | 69  | 1 | 6  | 15 | 65 | 34 | 146 |
| 4,191 | 1 | 6 | 17 | 76  | 1 | 10 | 15 | 77 | 34 | 169 |
| 4,192 | 1 | 6 | 16 | 74  | 1 | 10 | 14 | 74 | 32 | 164 |
| 4,193 | 1 | 5 | 16 | 75  | 1 | 10 | 14 | 73 | 32 | 163 |
| 4,194 | 1 | 5 | 13 | 74  | 1 | 10 | 11 | 75 | 26 | 164 |
| 4,195 | 1 | 4 | 13 | 69  | 1 | 10 | 11 | 73 | 26 | 156 |
| 4,196 | 1 | 4 | 13 | 67  | 1 | 10 | 11 | 73 | 26 | 154 |
| 4,197 | 1 | 4 | 13 | 68  | 1 | 10 | 11 | 73 | 26 | 155 |
| 4,198 | 1 | 4 | 13 | 60  | 1 | 10 | 11 | 71 | 26 | 145 |
| 4,199 | 1 | 4 | 13 | 57  | 1 | 10 | 10 | 71 | 25 | 142 |
| 4,200 | 1 | 4 | 13 | 54  | 1 | 10 | 10 | 71 | 25 | 139 |
| 4,201 | 1 | 4 | 13 | 60  | 1 | 10 | 10 | 72 | 25 | 146 |
| 4,202 | 1 | 4 | 13 | 60  | 1 | 10 | 10 | 72 | 25 | 146 |
| 4,203 | 1 | 4 | 12 | 65  | 1 | 10 | 10 | 71 | 24 | 150 |
| 4,204 | 1 | 4 | 12 | 66  | 1 | 10 | 10 | 71 | 24 | 151 |
| 4,205 | 1 | 4 | 12 | 67  | 1 | 10 | 10 | 71 | 24 | 152 |
| 4,206 | 1 | 4 | 12 | 67  | 1 | 10 | 10 | 71 | 24 | 152 |
| 4,207 | 1 | 4 | 12 | 67  | 1 | 10 | 10 | 71 | 24 | 152 |
| 4,208 | 1 | 4 | 12 | 67  | 1 | 10 | 10 | 71 | 24 | 152 |
| 4,209 | 1 | 4 | 13 | 67  | 1 | 10 | 10 | 71 | 25 | 152 |
| 4,210 | 1 | 4 | 13 | 70  | 0 | 10 | 10 | 71 | 24 | 155 |
| 4,211 | 1 | 4 | 13 | 70  | 0 | 10 | 10 | 71 | 24 | 155 |

|       |   |    |    |     |   |    |    |     |    |     |
|-------|---|----|----|-----|---|----|----|-----|----|-----|
| 4,212 | 0 | 4  | 14 | 71  | 0 | 10 | 10 | 72  | 24 | 157 |
| 4,213 | 0 | 4  | 16 | 86  | 0 | 10 | 10 | 77  | 26 | 177 |
| 4,214 | 0 | 4  | 16 | 96  | 0 | 10 | 10 | 77  | 26 | 187 |
| 4,215 | 0 | 7  | 16 | 95  | 0 | 10 | 10 | 79  | 26 | 191 |
| 4,216 | 0 | 7  | 16 | 95  | 0 | 10 | 10 | 81  | 26 | 193 |
| 4,217 | 0 | 7  | 20 | 97  | 1 | 10 | 12 | 81  | 33 | 195 |
| 4,218 | 0 | 7  | 19 | 98  | 1 | 10 | 13 | 81  | 33 | 196 |
| 4,219 | 0 | 7  | 19 | 102 | 1 | 10 | 11 | 81  | 31 | 200 |
| 4,220 | 0 | 7  | 17 | 99  | 1 | 10 | 9  | 78  | 27 | 194 |
| 4,221 | 0 | 7  | 17 | 101 | 1 | 10 | 8  | 77  | 26 | 195 |
| 4,222 | 0 | 7  | 16 | 101 | 1 | 10 | 8  | 79  | 25 | 197 |
| 4,223 | 0 | 7  | 17 | 101 | 1 | 10 | 8  | 79  | 26 | 197 |
| 4,224 | 0 | 7  | 17 | 102 | 1 | 10 | 7  | 80  | 25 | 199 |
| 4,225 | 0 | 9  | 17 | 110 | 1 | 10 | 7  | 83  | 25 | 212 |
| 4,226 | 0 | 12 | 16 | 122 | 1 | 10 | 7  | 88  | 24 | 232 |
| 4,227 | 0 | 12 | 16 | 122 | 1 | 10 | 7  | 90  | 24 | 234 |
| 4,228 | 0 | 12 | 16 | 127 | 1 | 10 | 7  | 90  | 24 | 239 |
| 4,229 | 0 | 12 | 16 | 128 | 1 | 9  | 6  | 90  | 23 | 239 |
| 4,230 | 0 | 12 | 18 | 123 | 1 | 8  | 7  | 87  | 26 | 230 |
| 4,231 | 0 | 10 | 14 | 120 | 1 | 7  | 6  | 83  | 21 | 220 |
| 4,232 | 0 | 11 | 14 | 128 | 1 | 7  | 6  | 89  | 21 | 235 |
| 4,233 | 0 | 11 | 15 | 127 | 1 | 7  | 6  | 90  | 22 | 235 |
| 4,234 | 0 | 19 | 15 | 191 | 1 | 18 | 6  | 127 | 22 | 355 |
| 4,235 | 0 | 19 | 15 | 211 | 1 | 18 | 6  | 136 | 22 | 384 |
| 4,236 | 0 | 19 | 15 | 221 | 1 | 17 | 8  | 144 | 24 | 401 |
| 4,237 | 0 | 20 | 14 | 237 | 1 | 17 | 7  | 153 | 22 | 427 |
| 4,238 | 0 | 20 | 14 | 234 | 1 | 16 | 7  | 145 | 22 | 415 |
| 4,239 | 0 | 26 | 14 | 269 | 1 | 16 | 7  | 145 | 22 | 456 |
| 4,240 | 0 | 26 | 14 | 266 | 1 | 16 | 7  | 142 | 22 | 450 |
| 4,241 | 0 | 26 | 15 | 265 | 1 | 16 | 7  | 129 | 23 | 436 |
| 4,242 | 0 | 26 | 15 | 255 | 1 | 13 | 7  | 115 | 23 | 409 |
| 4,243 | 0 | 26 | 16 | 256 | 1 | 13 | 7  | 113 | 24 | 408 |
| 4,244 | 0 | 26 | 19 | 261 | 1 | 13 | 9  | 117 | 29 | 417 |
| 4,245 | 0 | 26 | 19 | 262 | 1 | 13 | 9  | 117 | 29 | 418 |
| 4,246 | 0 | 26 | 29 | 268 | 1 | 13 | 12 | 123 | 42 | 430 |
| 4,247 | 1 | 26 | 31 | 270 | 2 | 13 | 12 | 123 | 46 | 432 |
| 4,248 | 1 | 27 | 34 | 275 | 2 | 13 | 13 | 126 | 50 | 441 |
| 4,249 | 1 | 27 | 36 | 276 | 2 | 13 | 13 | 127 | 52 | 443 |
| 4,250 | 1 | 27 | 36 | 276 | 2 | 13 | 13 | 129 | 52 | 445 |
| 4,251 | 1 | 30 | 40 | 280 | 2 | 13 | 16 | 130 | 59 | 453 |
| 4,252 | 1 | 31 | 40 | 276 | 2 | 13 | 16 | 130 | 59 | 450 |



|       |   |    |    |     |   |    |    |     |    |     |
|-------|---|----|----|-----|---|----|----|-----|----|-----|
| 4,253 | 1 | 31 | 40 | 276 | 2 | 13 | 16 | 130 | 59 | 450 |
| 4,254 | 1 | 31 | 40 | 274 | 2 | 13 | 16 | 131 | 59 | 449 |
| 4,255 | 1 | 31 | 40 | 272 | 2 | 13 | 16 | 131 | 59 | 447 |
| 4,256 | 1 | 31 | 40 | 272 | 2 | 13 | 16 | 131 | 59 | 447 |
| 4,257 | 1 | 31 | 40 | 272 | 2 | 13 | 16 | 131 | 59 | 447 |
| 4,258 | 1 | 31 | 40 | 276 | 2 | 13 | 16 | 132 | 59 | 452 |
| 4,259 | 1 | 31 | 39 | 276 | 2 | 13 | 16 | 132 | 58 | 452 |
| 4,260 | 1 | 31 | 39 | 276 | 2 | 13 | 16 | 132 | 58 | 452 |
| 4,261 | 1 | 32 | 39 | 275 | 2 | 13 | 16 | 132 | 58 | 452 |
| 4,262 | 1 | 32 | 39 | 286 | 2 | 15 | 16 | 135 | 58 | 468 |
| 4,263 | 1 | 32 | 38 | 286 | 2 | 15 | 16 | 134 | 57 | 467 |
| 4,264 | 1 | 32 | 36 | 271 | 2 | 15 | 17 | 130 | 56 | 448 |
| 4,265 | 1 | 32 | 36 | 268 | 2 | 15 | 17 | 130 | 56 | 445 |
| 4,266 | 1 | 29 | 33 | 267 | 1 | 15 | 16 | 125 | 51 | 436 |
| 4,267 | 1 | 28 | 32 | 263 | 1 | 15 | 15 | 121 | 49 | 427 |
| 4,268 | 1 | 28 | 32 | 263 | 1 | 15 | 15 | 121 | 49 | 427 |
| 4,269 | 1 | 28 | 32 | 263 | 1 | 15 | 14 | 121 | 48 | 427 |
| 4,270 | 1 | 28 | 32 | 259 | 1 | 15 | 15 | 121 | 49 | 423 |
| 4,271 | 1 | 28 | 32 | 259 | 2 | 15 | 15 | 121 | 50 | 423 |
| 4,272 | 1 | 28 | 32 | 257 | 2 | 15 | 15 | 121 | 50 | 421 |
| 4,273 | 1 | 28 | 34 | 257 | 2 | 15 | 15 | 117 | 52 | 417 |
| 4,274 | 3 | 28 | 34 | 256 | 3 | 15 | 16 | 116 | 56 | 415 |
| 4,275 | 3 | 28 | 34 | 256 | 3 | 15 | 16 | 115 | 56 | 414 |
| 4,276 | 3 | 26 | 34 | 248 | 3 | 14 | 16 | 112 | 56 | 400 |
| 4,277 | 3 | 23 | 35 | 236 | 3 | 14 | 16 | 107 | 57 | 380 |
| 4,278 | 3 | 23 | 35 | 235 | 3 | 15 | 16 | 106 | 57 | 379 |
| 4,279 | 3 | 23 | 35 | 235 | 3 | 15 | 18 | 111 | 59 | 384 |
| 4,280 | 3 | 23 | 35 | 238 | 3 | 15 | 19 | 112 | 60 | 388 |
| 4,281 | 3 | 23 | 32 | 239 | 3 | 15 | 18 | 111 | 56 | 388 |
| 4,282 | 3 | 23 | 32 | 238 | 3 | 15 | 18 | 110 | 56 | 386 |
| 4,283 | 3 | 22 | 32 | 232 | 3 | 15 | 18 | 103 | 56 | 372 |
| 4,284 | 3 | 14 | 31 | 164 | 3 | 5  | 18 | 65  | 55 | 248 |
| 4,285 | 3 | 14 | 31 | 143 | 3 | 5  | 18 | 58  | 55 | 220 |
| 4,286 | 3 | 14 | 31 | 143 | 3 | 5  | 18 | 58  | 55 | 220 |
| 4,287 | 3 | 12 | 31 | 115 | 3 | 5  | 16 | 41  | 53 | 173 |
| 4,288 | 3 | 6  | 31 | 78  | 3 | 4  | 16 | 37  | 53 | 125 |
| 4,289 | 3 | 6  | 31 | 78  | 3 | 4  | 17 | 38  | 54 | 126 |
| 4,290 | 3 | 6  | 31 | 78  | 3 | 4  | 17 | 39  | 54 | 127 |
| 4,291 | 3 | 6  | 30 | 77  | 3 | 4  | 17 | 40  | 53 | 127 |
| 4,292 | 3 | 6  | 30 | 75  | 3 | 4  | 17 | 40  | 53 | 125 |
| 4,293 | 3 | 6  | 30 | 71  | 3 | 3  | 17 | 43  | 53 | 123 |

|       |   |   |    |    |   |   |    |    |    |     |
|-------|---|---|----|----|---|---|----|----|----|-----|
| 4,294 | 3 | 6 | 30 | 73 | 3 | 3 | 17 | 43 | 53 | 125 |
| 4,295 | 3 | 6 | 27 | 74 | 3 | 3 | 15 | 40 | 48 | 123 |
| 4,296 | 3 | 6 | 23 | 73 | 3 | 3 | 13 | 42 | 42 | 124 |
| 4,297 | 4 | 6 | 17 | 76 | 3 | 4 | 12 | 40 | 36 | 126 |
| 4,298 | 3 | 9 | 16 | 74 | 2 | 5 | 12 | 47 | 33 | 135 |
| 4,299 | 3 | 9 | 13 | 73 | 2 | 5 | 11 | 47 | 29 | 134 |
| 4,300 | 3 | 9 | 11 | 76 | 2 | 5 | 12 | 52 | 28 | 142 |
| 4,301 | 3 | 9 | 7  | 78 | 2 | 5 | 9  | 51 | 21 | 143 |
| 4,302 | 3 | 9 | 7  | 88 | 2 | 8 | 9  | 61 | 21 | 166 |
| 4,303 | 3 | 8 | 7  | 85 | 2 | 8 | 9  | 62 | 21 | 163 |
| 4,304 | 3 | 8 | 7  | 85 | 2 | 8 | 9  | 62 | 21 | 163 |
| 4,305 | 3 | 8 | 7  | 83 | 2 | 8 | 9  | 61 | 21 | 160 |
| 4,306 | 3 | 8 | 7  | 90 | 2 | 8 | 9  | 62 | 21 | 168 |
| 4,307 | 3 | 8 | 7  | 90 | 2 | 8 | 9  | 62 | 21 | 168 |
| 4,308 | 3 | 8 | 7  | 91 | 2 | 8 | 9  | 62 | 21 | 169 |
| 4,309 | 3 | 9 | 7  | 87 | 2 | 8 | 9  | 61 | 21 | 165 |
| 4,310 | 4 | 9 | 7  | 87 | 2 | 8 | 9  | 61 | 22 | 165 |
| 4,311 | 4 | 9 | 7  | 88 | 2 | 8 | 9  | 61 | 22 | 166 |
| 4,312 | 5 | 8 | 8  | 75 | 2 | 6 | 8  | 58 | 23 | 147 |
| 4,313 | 5 | 8 | 8  | 74 | 2 | 6 | 8  | 58 | 23 | 146 |
| 4,314 | 5 | 8 | 7  | 74 | 2 | 6 | 8  | 58 | 22 | 146 |
| 4,315 | 5 | 8 | 7  | 74 | 2 | 6 | 9  | 57 | 23 | 145 |
| 4,316 | 5 | 8 | 7  | 67 | 2 | 6 | 9  | 57 | 23 | 138 |
| 4,317 | 5 | 8 | 7  | 68 | 2 | 6 | 10 | 57 | 24 | 139 |
| 4,318 | 5 | 8 | 7  | 68 | 2 | 6 | 10 | 57 | 24 | 139 |
| 4,319 | 5 | 8 | 7  | 68 | 2 | 6 | 10 | 57 | 24 | 139 |
| 4,320 | 5 | 8 | 7  | 68 | 3 | 6 | 9  | 57 | 24 | 139 |
| 4,321 | 5 | 8 | 8  | 68 | 2 | 6 | 9  | 57 | 24 | 139 |
| 4,322 | 5 | 8 | 8  | 68 | 2 | 6 | 9  | 57 | 24 | 139 |
| 4,323 | 5 | 8 | 8  | 68 | 2 | 6 | 9  | 57 | 24 | 139 |
| 4,324 | 5 | 8 | 6  | 68 | 2 | 6 | 9  | 57 | 22 | 139 |
| 4,325 | 3 | 8 | 6  | 68 | 1 | 6 | 8  | 57 | 18 | 139 |
| 4,326 | 4 | 8 | 8  | 68 | 2 | 6 | 8  | 57 | 22 | 139 |
| 4,327 | 4 | 9 | 10 | 69 | 2 | 6 | 11 | 58 | 27 | 142 |
| 4,328 | 4 | 9 | 10 | 72 | 2 | 6 | 11 | 62 | 27 | 149 |
| 4,329 | 5 | 9 | 11 | 67 | 2 | 6 | 12 | 55 | 30 | 137 |
| 4,330 | 5 | 9 | 11 | 66 | 2 | 6 | 11 | 55 | 29 | 136 |
| 4,331 | 5 | 9 | 11 | 62 | 2 | 6 | 10 | 55 | 28 | 132 |
| 4,332 | 5 | 9 | 11 | 61 | 2 | 6 | 9  | 55 | 27 | 131 |
| 4,333 | 5 | 9 | 11 | 61 | 2 | 6 | 9  | 53 | 27 | 129 |
| 4,334 | 5 | 9 | 11 | 58 | 2 | 6 | 9  | 53 | 27 | 126 |

|       |   |    |    |     |   |   |    |    |    |     |
|-------|---|----|----|-----|---|---|----|----|----|-----|
| 4,335 | 5 | 9  | 12 | 58  | 2 | 6 | 9  | 53 | 28 | 126 |
| 4,336 | 5 | 9  | 12 | 58  | 2 | 6 | 9  | 53 | 28 | 126 |
| 4,337 | 5 | 9  | 12 | 57  | 2 | 6 | 9  | 54 | 28 | 126 |
| 4,338 | 5 | 9  | 12 | 57  | 2 | 6 | 9  | 54 | 28 | 126 |
| 4,339 | 5 | 10 | 12 | 57  | 2 | 6 | 9  | 54 | 28 | 127 |
| 4,340 | 5 | 10 | 12 | 57  | 2 | 6 | 8  | 52 | 27 | 125 |
| 4,341 | 5 | 10 | 12 | 57  | 2 | 6 | 8  | 50 | 27 | 123 |
| 4,342 | 5 | 10 | 12 | 57  | 2 | 6 | 8  | 50 | 27 | 123 |
| 4,343 | 5 | 10 | 12 | 57  | 2 | 6 | 8  | 50 | 27 | 123 |
| 4,344 | 5 | 10 | 11 | 56  | 2 | 6 | 8  | 47 | 26 | 119 |
| 4,345 | 5 | 10 | 11 | 56  | 2 | 7 | 8  | 48 | 26 | 121 |
| 4,346 | 5 | 10 | 11 | 53  | 2 | 7 | 8  | 47 | 26 | 117 |
| 4,347 | 5 | 10 | 11 | 44  | 2 | 6 | 8  | 42 | 26 | 102 |
| 4,348 | 4 | 11 | 11 | 44  | 2 | 6 | 8  | 42 | 25 | 103 |
| 4,349 | 4 | 8  | 10 | 44  | 2 | 5 | 8  | 35 | 24 | 92  |
| 4,350 | 4 | 7  | 10 | 36  | 2 | 5 | 8  | 26 | 24 | 74  |
| 4,351 | 4 | 7  | 10 | 36  | 2 | 5 | 7  | 27 | 23 | 75  |
| 4,352 | 4 | 4  | 10 | 20  | 2 | 2 | 7  | 14 | 23 | 40  |
| 4,353 | 4 | 4  | 10 | 20  | 2 | 2 | 7  | 14 | 23 | 40  |
| 4,354 | 4 | 4  | 10 | 20  | 2 | 2 | 7  | 13 | 23 | 39  |
| 4,355 | 4 | 4  | 10 | 19  | 2 | 2 | 7  | 15 | 23 | 40  |
| 4,356 | 4 | 4  | 10 | 12  | 2 | 2 | 7  | 15 | 23 | 33  |
| 4,357 | 4 | 4  | 10 | 12  | 2 | 2 | 7  | 16 | 23 | 34  |
| 4,358 | 4 | 4  | 11 | 11  | 2 | 2 | 7  | 16 | 24 | 33  |
| 4,359 | 4 | 4  | 11 | 11  | 2 | 2 | 7  | 16 | 24 | 33  |
| 4,360 | 4 | 3  | 11 | 11  | 2 | 2 | 7  | 16 | 24 | 32  |
| 4,361 | 3 | 3  | 11 | 11  | 2 | 2 | 7  | 16 | 23 | 32  |
| 4,362 | 2 | 3  | 14 | 10  | 2 | 2 | 7  | 16 | 25 | 31  |
| 4,363 | 2 | 3  | 13 | 10  | 2 | 2 | 7  | 16 | 24 | 31  |
| 4,364 | 2 | 3  | 14 | 10  | 2 | 2 | 7  | 16 | 25 | 31  |
| 4,365 | 2 | 3  | 15 | 10  | 2 | 2 | 6  | 16 | 25 | 31  |
| 4,366 | 2 | 3  | 15 | 10  | 2 | 2 | 6  | 16 | 25 | 31  |
| 4,367 | 2 | 3  | 15 | 10  | 2 | 2 | 6  | 16 | 25 | 31  |
| 4,368 | 2 | 3  | 15 | 12  | 2 | 2 | 5  | 16 | 24 | 33  |
| 4,369 | 2 | 3  | 17 | 13  | 2 | 2 | 5  | 16 | 26 | 34  |
| 4,370 | 2 | 3  | 19 | 13  | 3 | 2 | 5  | 16 | 29 | 34  |
| 4,371 | 2 | 3  | 20 | 14  | 2 | 2 | 5  | 16 | 29 | 35  |
| 4,372 | 3 | 3  | 27 | 16  | 3 | 2 | 8  | 18 | 41 | 39  |
| 4,373 | 3 | 3  | 27 | 66  | 4 | 4 | 9  | 34 | 43 | 107 |
| 4,374 | 3 | 4  | 27 | 91  | 4 | 4 | 12 | 44 | 46 | 143 |
| 4,375 | 3 | 4  | 27 | 102 | 4 | 4 | 12 | 49 | 46 | 159 |

|       |   |   |    |     |   |   |    |    |    |     |
|-------|---|---|----|-----|---|---|----|----|----|-----|
| 4,376 | 3 | 7 | 27 | 114 | 4 | 4 | 12 | 49 | 46 | 174 |
| 4,377 | 2 | 7 | 24 | 114 | 3 | 4 | 12 | 49 | 41 | 174 |
| 4,378 | 2 | 6 | 22 | 110 | 3 | 4 | 9  | 43 | 36 | 163 |
| 4,379 | 2 | 6 | 22 | 110 | 3 | 4 | 9  | 43 | 36 | 163 |
| 4,380 | 1 | 6 | 22 | 111 | 3 | 3 | 7  | 43 | 33 | 163 |
| 4,381 | 1 | 6 | 22 | 111 | 3 | 3 | 7  | 43 | 33 | 163 |
| 4,382 | 1 | 6 | 22 | 111 | 3 | 3 | 7  | 43 | 33 | 163 |
| 4,383 | 1 | 6 | 22 | 111 | 3 | 3 | 7  | 43 | 33 | 163 |
| 4,384 | 1 | 6 | 22 | 111 | 3 | 3 | 7  | 43 | 33 | 163 |
| 4,385 | 1 | 6 | 22 | 111 | 3 | 3 | 7  | 43 | 33 | 163 |
| 4,386 | 1 | 6 | 21 | 111 | 3 | 3 | 7  | 43 | 32 | 163 |
| 4,387 | 1 | 6 | 21 | 113 | 3 | 3 | 7  | 43 | 32 | 165 |
| 4,388 | 1 | 5 | 21 | 115 | 3 | 3 | 7  | 45 | 32 | 168 |
| 4,389 | 1 | 5 | 21 | 121 | 3 | 3 | 7  | 49 | 32 | 178 |
| 4,390 | 1 | 5 | 21 | 121 | 3 | 3 | 7  | 51 | 32 | 180 |
| 4,391 | 1 | 5 | 21 | 122 | 3 | 4 | 7  | 52 | 32 | 183 |
| 4,392 | 1 | 5 | 21 | 122 | 3 | 4 | 7  | 52 | 32 | 183 |
| 4,393 | 1 | 5 | 21 | 122 | 3 | 4 | 7  | 52 | 32 | 183 |
| 4,394 | 1 | 5 | 21 | 121 | 3 | 4 | 7  | 52 | 32 | 182 |
| 4,395 | 1 | 5 | 21 | 121 | 3 | 4 | 7  | 52 | 32 | 182 |
| 4,396 | 1 | 5 | 21 | 118 | 3 | 3 | 7  | 50 | 32 | 176 |
| 4,397 | 1 | 5 | 21 | 118 | 3 | 3 | 7  | 50 | 32 | 176 |
| 4,398 | 1 | 5 | 21 | 118 | 3 | 3 | 7  | 50 | 32 | 176 |
| 4,399 | 1 | 4 | 21 | 119 | 3 | 3 | 7  | 50 | 32 | 176 |
| 4,400 | 1 | 4 | 21 | 118 | 3 | 3 | 7  | 51 | 32 | 176 |
| 4,401 | 2 | 4 | 21 | 119 | 3 | 3 | 7  | 53 | 33 | 179 |
| 4,402 | 2 | 4 | 21 | 120 | 3 | 3 | 7  | 52 | 33 | 179 |
| 4,403 | 2 | 4 | 21 | 124 | 3 | 3 | 7  | 51 | 33 | 182 |
| 4,404 | 2 | 4 | 21 | 124 | 3 | 3 | 7  | 54 | 33 | 185 |
| 4,405 | 2 | 4 | 21 | 126 | 3 | 3 | 7  | 51 | 33 | 184 |
| 4,406 | 2 | 4 | 21 | 127 | 3 | 3 | 7  | 51 | 33 | 185 |
| 4,407 | 2 | 4 | 21 | 127 | 3 | 3 | 7  | 50 | 33 | 184 |
| 4,408 | 2 | 4 | 21 | 127 | 3 | 3 | 7  | 49 | 33 | 183 |
| 4,409 | 2 | 4 | 20 | 129 | 3 | 3 | 7  | 48 | 32 | 184 |
| 4,410 | 2 | 4 | 20 | 129 | 3 | 3 | 7  | 47 | 32 | 183 |
| 4,411 | 2 | 4 | 20 | 130 | 3 | 3 | 7  | 47 | 32 | 184 |
| 4,412 | 2 | 5 | 17 | 130 | 3 | 3 | 7  | 47 | 29 | 185 |
| 4,413 | 2 | 5 | 17 | 130 | 3 | 3 | 7  | 47 | 29 | 185 |
| 4,414 | 2 | 5 | 16 | 130 | 3 | 3 | 7  | 47 | 28 | 185 |
| 4,415 | 2 | 5 | 15 | 130 | 3 | 3 | 7  | 47 | 27 | 185 |
| 4,416 | 2 | 5 | 15 | 130 | 3 | 3 | 7  | 47 | 27 | 185 |

|       |   |    |    |     |   |    |   |    |    |     |
|-------|---|----|----|-----|---|----|---|----|----|-----|
| 4,417 | 2 | 5  | 15 | 131 | 3 | 3  | 7 | 48 | 27 | 187 |
| 4,418 | 2 | 5  | 15 | 134 | 3 | 3  | 7 | 48 | 27 | 190 |
| 4,419 | 2 | 5  | 15 | 132 | 3 | 3  | 7 | 48 | 27 | 188 |
| 4,420 | 2 | 5  | 13 | 143 | 3 | 3  | 7 | 52 | 25 | 203 |
| 4,421 | 2 | 7  | 12 | 147 | 2 | 4  | 7 | 54 | 23 | 212 |
| 4,422 | 2 | 13 | 11 | 177 | 2 | 8  | 7 | 65 | 22 | 263 |
| 4,423 | 1 | 14 | 3  | 182 | 1 | 8  | 4 | 65 | 9  | 269 |
| 4,424 | 1 | 14 | 3  | 136 | 0 | 6  | 3 | 51 | 7  | 207 |
| 4,425 | 1 | 14 | 3  | 115 | 0 | 6  | 0 | 41 | 4  | 176 |
| 4,426 | 1 | 14 | 2  | 106 | 0 | 6  | 0 | 37 | 3  | 163 |
| 4,427 | 1 | 11 | 2  | 103 | 0 | 6  | 0 | 39 | 3  | 159 |
| 4,428 | 1 | 11 | 2  | 103 | 0 | 6  | 0 | 39 | 3  | 159 |
| 4,429 | 1 | 11 | 2  | 103 | 0 | 6  | 0 | 39 | 3  | 159 |
| 4,430 | 1 | 12 | 2  | 103 | 0 | 6  | 0 | 39 | 3  | 160 |
| 4,431 | 1 | 13 | 1  | 106 | 0 | 6  | 0 | 39 | 2  | 164 |
| 4,432 | 1 | 14 | 1  | 108 | 0 | 6  | 0 | 39 | 2  | 167 |
| 4,433 | 2 | 14 | 1  | 108 | 0 | 7  | 0 | 39 | 3  | 168 |
| 4,434 | 2 | 14 | 1  | 109 | 0 | 7  | 0 | 39 | 3  | 169 |
| 4,435 | 2 | 14 | 1  | 109 | 0 | 7  | 0 | 39 | 3  | 169 |
| 4,436 | 2 | 14 | 1  | 111 | 0 | 7  | 0 | 40 | 3  | 172 |
| 4,437 | 2 | 14 | 1  | 111 | 0 | 7  | 0 | 40 | 3  | 172 |
| 4,438 | 2 | 14 | 1  | 110 | 0 | 7  | 0 | 41 | 3  | 172 |
| 4,439 | 2 | 14 | 1  | 108 | 0 | 7  | 1 | 38 | 4  | 167 |
| 4,440 | 2 | 14 | 1  | 103 | 0 | 7  | 1 | 33 | 4  | 157 |
| 4,441 | 2 | 14 | 1  | 102 | 0 | 6  | 1 | 32 | 4  | 154 |
| 4,442 | 2 | 15 | 1  | 102 | 0 | 6  | 1 | 32 | 4  | 155 |
| 4,443 | 2 | 15 | 1  | 102 | 0 | 6  | 1 | 32 | 4  | 155 |
| 4,444 | 2 | 15 | 1  | 102 | 0 | 6  | 1 | 32 | 4  | 155 |
| 4,445 | 2 | 15 | 1  | 102 | 0 | 6  | 1 | 32 | 4  | 155 |
| 4,446 | 2 | 15 | 1  | 103 | 0 | 6  | 1 | 32 | 4  | 156 |
| 4,447 | 2 | 15 | 1  | 103 | 0 | 6  | 1 | 32 | 4  | 156 |
| 4,448 | 2 | 15 | 1  | 103 | 0 | 6  | 1 | 32 | 4  | 156 |
| 4,449 | 2 | 15 | 1  | 105 | 0 | 6  | 1 | 32 | 4  | 158 |
| 4,450 | 2 | 16 | 1  | 117 | 0 | 6  | 1 | 37 | 4  | 176 |
| 4,451 | 2 | 19 | 1  | 119 | 0 | 8  | 1 | 47 | 4  | 193 |
| 4,452 | 1 | 19 | 1  | 119 | 0 | 8  | 1 | 45 | 3  | 191 |
| 4,453 | 1 | 19 | 2  | 118 | 0 | 8  | 1 | 45 | 4  | 190 |
| 4,454 | 1 | 19 | 2  | 115 | 0 | 8  | 1 | 45 | 4  | 187 |
| 4,455 | 1 | 22 | 3  | 131 | 0 | 12 | 2 | 51 | 6  | 216 |
| 4,456 | 1 | 22 | 3  | 132 | 0 | 12 | 2 | 53 | 6  | 219 |
| 4,457 | 1 | 22 | 3  | 136 | 0 | 12 | 2 | 53 | 6  | 223 |

|       |   |    |    |     |   |    |    |    |    |     |
|-------|---|----|----|-----|---|----|----|----|----|-----|
| 4,458 | 1 | 22 | 3  | 139 | 0 | 12 | 2  | 52 | 6  | 225 |
| 4,459 | 1 | 22 | 3  | 150 | 0 | 13 | 2  | 57 | 6  | 242 |
| 4,460 | 1 | 22 | 3  | 154 | 0 | 13 | 2  | 57 | 6  | 246 |
| 4,461 | 2 | 23 | 3  | 155 | 0 | 13 | 3  | 57 | 8  | 248 |
| 4,462 | 2 | 24 | 3  | 155 | 0 | 13 | 4  | 57 | 9  | 249 |
| 4,463 | 2 | 23 | 3  | 156 | 0 | 13 | 4  | 57 | 9  | 249 |
| 4,464 | 2 | 23 | 6  | 156 | 1 | 13 | 6  | 57 | 15 | 249 |
| 4,465 | 2 | 24 | 6  | 172 | 1 | 16 | 6  | 82 | 15 | 294 |
| 4,466 | 2 | 24 | 6  | 172 | 1 | 16 | 6  | 82 | 15 | 294 |
| 4,467 | 2 | 30 | 6  | 191 | 1 | 16 | 6  | 97 | 15 | 334 |
| 4,468 | 2 | 30 | 6  | 193 | 1 | 16 | 6  | 96 | 15 | 335 |
| 4,469 | 2 | 30 | 8  | 189 | 1 | 16 | 7  | 96 | 18 | 331 |
| 4,470 | 2 | 30 | 8  | 178 | 1 | 16 | 7  | 92 | 18 | 316 |
| 4,471 | 2 | 30 | 8  | 179 | 1 | 16 | 7  | 92 | 18 | 317 |
| 4,472 | 2 | 24 | 7  | 157 | 1 | 13 | 7  | 87 | 17 | 281 |
| 4,473 | 2 | 24 | 7  | 157 | 1 | 13 | 7  | 87 | 17 | 281 |
| 4,474 | 3 | 23 | 7  | 146 | 1 | 13 | 7  | 85 | 18 | 267 |
| 4,475 | 3 | 22 | 7  | 131 | 1 | 13 | 7  | 83 | 18 | 249 |
| 4,476 | 3 | 22 | 7  | 132 | 1 | 13 | 7  | 83 | 18 | 250 |
| 4,477 | 3 | 22 | 7  | 133 | 1 | 13 | 7  | 83 | 18 | 251 |
| 4,478 | 3 | 22 | 7  | 133 | 1 | 13 | 7  | 83 | 18 | 251 |
| 4,479 | 3 | 22 | 7  | 134 | 1 | 13 | 7  | 83 | 18 | 252 |
| 4,480 | 3 | 22 | 7  | 134 | 1 | 13 | 7  | 83 | 18 | 252 |
| 4,481 | 4 | 20 | 7  | 130 | 1 | 13 | 7  | 84 | 19 | 247 |
| 4,482 | 4 | 19 | 7  | 129 | 1 | 12 | 7  | 84 | 19 | 244 |
| 4,483 | 5 | 19 | 7  | 129 | 1 | 12 | 7  | 84 | 20 | 244 |
| 4,484 | 4 | 22 | 7  | 134 | 1 | 12 | 7  | 85 | 19 | 253 |
| 4,485 | 4 | 22 | 7  | 133 | 1 | 12 | 7  | 85 | 19 | 252 |
| 4,486 | 4 | 22 | 7  | 133 | 1 | 12 | 7  | 85 | 19 | 252 |
| 4,487 | 4 | 22 | 7  | 131 | 1 | 12 | 7  | 84 | 19 | 249 |
| 4,488 | 4 | 22 | 10 | 130 | 1 | 12 | 7  | 83 | 22 | 247 |
| 4,489 | 4 | 22 | 10 | 130 | 1 | 12 | 6  | 86 | 21 | 250 |
| 4,490 | 4 | 22 | 10 | 130 | 1 | 12 | 6  | 86 | 21 | 250 |
| 4,491 | 7 | 22 | 11 | 130 | 1 | 12 | 10 | 85 | 29 | 249 |
| 4,492 | 7 | 22 | 11 | 130 | 1 | 12 | 10 | 86 | 29 | 250 |
| 4,493 | 7 | 21 | 11 | 130 | 2 | 12 | 10 | 90 | 30 | 253 |
| 4,494 | 7 | 21 | 11 | 135 | 2 | 12 | 10 | 91 | 30 | 259 |
| 4,495 | 7 | 23 | 11 | 138 | 2 | 12 | 10 | 95 | 30 | 268 |
| 4,496 | 7 | 23 | 11 | 138 | 2 | 12 | 10 | 95 | 30 | 268 |
| 4,497 | 7 | 23 | 11 | 138 | 2 | 12 | 10 | 97 | 30 | 270 |
| 4,498 | 7 | 23 | 11 | 138 | 2 | 12 | 10 | 98 | 30 | 271 |

|       |   |    |    |     |   |    |    |     |    |     |
|-------|---|----|----|-----|---|----|----|-----|----|-----|
| 4,499 | 7 | 26 | 11 | 159 | 2 | 13 | 10 | 110 | 30 | 308 |
| 4,500 | 7 | 29 | 12 | 176 | 2 | 15 | 10 | 118 | 31 | 338 |
| 4,501 | 7 | 28 | 12 | 166 | 2 | 15 | 10 | 115 | 31 | 324 |
| 4,502 | 7 | 25 | 13 | 176 | 2 | 14 | 11 | 107 | 33 | 322 |
| 4,503 | 7 | 25 | 12 | 178 | 2 | 14 | 11 | 111 | 32 | 328 |
| 4,504 | 7 | 26 | 14 | 186 | 2 | 14 | 11 | 120 | 34 | 346 |
| 4,505 | 7 | 26 | 14 | 186 | 2 | 14 | 11 | 120 | 34 | 346 |
| 4,506 | 7 | 23 | 14 | 168 | 2 | 10 | 10 | 110 | 33 | 311 |
| 4,507 | 7 | 24 | 14 | 176 | 2 | 10 | 10 | 115 | 33 | 325 |
| 4,508 | 7 | 25 | 14 | 170 | 2 | 10 | 10 | 115 | 33 | 320 |
| 4,509 | 7 | 25 | 14 | 159 | 2 | 9  | 10 | 110 | 33 | 303 |
| 4,510 | 7 | 25 | 14 | 159 | 2 | 9  | 10 | 110 | 33 | 303 |
| 4,511 | 6 | 24 | 14 | 152 | 2 | 9  | 9  | 110 | 31 | 295 |
| 4,512 | 6 | 23 | 14 | 157 | 2 | 10 | 8  | 122 | 30 | 312 |
| 4,513 | 6 | 26 | 14 | 189 | 2 | 12 | 8  | 145 | 30 | 372 |
| 4,514 | 6 | 31 | 12 | 222 | 1 | 14 | 7  | 166 | 26 | 433 |
| 4,515 | 6 | 31 | 11 | 234 | 1 | 14 | 6  | 169 | 24 | 448 |
| 4,516 | 6 | 24 | 11 | 202 | 2 | 11 | 6  | 128 | 25 | 365 |
| 4,517 | 6 | 27 | 11 | 233 | 2 | 11 | 6  | 143 | 25 | 414 |
| 4,518 | 6 | 30 | 11 | 251 | 2 | 11 | 5  | 155 | 24 | 447 |
| 4,519 | 6 | 32 | 11 | 273 | 2 | 12 | 5  | 161 | 24 | 478 |
| 4,520 | 6 | 32 | 9  | 279 | 2 | 12 | 5  | 163 | 22 | 486 |
| 4,521 | 6 | 30 | 9  | 265 | 2 | 10 | 5  | 156 | 22 | 461 |
| 4,522 | 6 | 30 | 9  | 265 | 2 | 10 | 5  | 156 | 22 | 461 |
| 4,523 | 6 | 30 | 9  | 265 | 2 | 10 | 5  | 156 | 22 | 461 |
| 4,524 | 5 | 30 | 9  | 266 | 2 | 10 | 5  | 156 | 21 | 462 |
| 4,525 | 5 | 30 | 9  | 267 | 2 | 10 | 5  | 156 | 21 | 463 |
| 4,526 | 5 | 30 | 9  | 269 | 2 | 10 | 5  | 156 | 21 | 465 |
| 4,527 | 5 | 30 | 9  | 268 | 2 | 10 | 5  | 156 | 21 | 464 |
| 4,528 | 5 | 30 | 9  | 267 | 2 | 10 | 5  | 156 | 21 | 463 |
| 4,529 | 5 | 30 | 9  | 266 | 2 | 10 | 5  | 156 | 21 | 462 |
| 4,530 | 5 | 30 | 9  | 266 | 2 | 10 | 5  | 156 | 21 | 462 |
| 4,531 | 5 | 30 | 9  | 266 | 2 | 10 | 5  | 156 | 21 | 462 |
| 4,532 | 4 | 30 | 9  | 266 | 2 | 10 | 5  | 155 | 20 | 461 |
| 4,533 | 4 | 30 | 9  | 265 | 2 | 10 | 5  | 155 | 20 | 460 |
| 4,534 | 3 | 27 | 9  | 260 | 2 | 10 | 5  | 154 | 19 | 451 |
| 4,535 | 3 | 27 | 9  | 261 | 2 | 10 | 5  | 154 | 19 | 452 |
| 4,536 | 3 | 27 | 9  | 262 | 2 | 10 | 5  | 155 | 19 | 454 |
| 4,537 | 3 | 27 | 9  | 264 | 2 | 11 | 5  | 159 | 19 | 461 |
| 4,538 | 3 | 29 | 9  | 273 | 2 | 11 | 5  | 162 | 19 | 475 |
| 4,539 | 3 | 31 | 6  | 289 | 2 | 11 | 5  | 175 | 16 | 506 |

|       |   |    |   |     |   |    |   |     |    |     |
|-------|---|----|---|-----|---|----|---|-----|----|-----|
| 4,540 | 2 | 33 | 6 | 291 | 2 | 12 | 5 | 172 | 15 | 508 |
| 4,541 | 0 | 34 | 5 | 299 | 2 | 13 | 3 | 175 | 10 | 521 |
| 4,542 | 0 | 34 | 5 | 299 | 2 | 13 | 1 | 176 | 8  | 522 |
| 4,543 | 1 | 38 | 5 | 322 | 1 | 15 | 2 | 179 | 9  | 554 |
| 4,544 | 1 | 38 | 5 | 325 | 1 | 15 | 2 | 180 | 9  | 558 |
| 4,545 | 1 | 36 | 5 | 319 | 1 | 15 | 2 | 175 | 9  | 545 |
| 4,546 | 1 | 36 | 5 | 320 | 1 | 15 | 2 | 177 | 9  | 548 |
| 4,547 | 1 | 36 | 5 | 323 | 1 | 15 | 2 | 177 | 9  | 551 |
| 4,548 | 1 | 36 | 5 | 323 | 1 | 15 | 2 | 174 | 9  | 548 |
| 4,549 | 1 | 33 | 5 | 304 | 1 | 14 | 2 | 162 | 9  | 513 |
| 4,550 | 2 | 33 | 5 | 309 | 1 | 14 | 2 | 167 | 10 | 523 |
| 4,551 | 2 | 30 | 4 | 292 | 1 | 12 | 2 | 159 | 9  | 493 |
| 4,552 | 2 | 30 | 3 | 292 | 1 | 12 | 2 | 159 | 8  | 493 |
| 4,553 | 2 | 31 | 3 | 281 | 1 | 11 | 1 | 156 | 7  | 479 |
| 4,554 | 2 | 31 | 3 | 279 | 1 | 11 | 1 | 152 | 7  | 473 |
| 4,555 | 2 | 30 | 1 | 271 | 1 | 11 | 1 | 143 | 5  | 455 |
| 4,556 | 2 | 30 | 0 | 271 | 1 | 11 | 1 | 143 | 4  | 455 |
| 4,557 | 2 | 32 | 0 | 272 | 2 | 11 | 1 | 142 | 5  | 457 |
| 4,558 | 2 | 31 | 1 | 264 | 2 | 11 | 1 | 137 | 6  | 443 |
| 4,559 | 2 | 30 | 1 | 263 | 2 | 11 | 1 | 137 | 6  | 441 |
| 4,560 | 2 | 30 | 1 | 263 | 2 | 11 | 1 | 138 | 6  | 442 |
| 4,561 | 2 | 30 | 1 | 263 | 2 | 11 | 1 | 138 | 6  | 442 |
| 4,562 | 2 | 30 | 2 | 257 | 2 | 10 | 1 | 125 | 7  | 422 |
| 4,563 | 2 | 30 | 2 | 257 | 2 | 10 | 1 | 125 | 7  | 422 |
| 4,564 | 2 | 22 | 2 | 191 | 2 | 6  | 3 | 81  | 9  | 300 |
| 4,565 | 2 | 22 | 2 | 191 | 2 | 6  | 3 | 81  | 9  | 300 |
| 4,566 | 2 | 22 | 2 | 179 | 2 | 6  | 3 | 78  | 9  | 285 |
| 4,567 | 2 | 22 | 3 | 177 | 1 | 6  | 3 | 79  | 9  | 284 |
| 4,568 | 2 | 16 | 3 | 128 | 1 | 6  | 3 | 52  | 9  | 202 |
| 4,569 | 2 | 14 | 5 | 104 | 1 | 5  | 4 | 47  | 12 | 170 |
| 4,570 | 2 | 14 | 5 | 104 | 1 | 5  | 6 | 48  | 14 | 171 |
| 4,571 | 2 | 14 | 6 | 98  | 1 | 5  | 6 | 46  | 15 | 163 |
| 4,572 | 3 | 14 | 6 | 97  | 1 | 5  | 6 | 47  | 16 | 163 |
| 4,573 | 3 | 14 | 7 | 97  | 1 | 5  | 6 | 47  | 17 | 163 |
| 4,574 | 3 | 14 | 7 | 96  | 1 | 5  | 6 | 47  | 17 | 162 |
| 4,575 | 3 | 14 | 7 | 93  | 1 | 5  | 6 | 47  | 17 | 159 |
| 4,576 | 3 | 14 | 7 | 93  | 1 | 5  | 6 | 47  | 17 | 159 |
| 4,577 | 3 | 14 | 7 | 93  | 1 | 5  | 6 | 46  | 17 | 158 |
| 4,578 | 3 | 14 | 8 | 95  | 1 | 5  | 6 | 46  | 18 | 160 |
| 4,579 | 3 | 14 | 8 | 95  | 1 | 5  | 6 | 46  | 18 | 160 |
| 4,580 | 3 | 14 | 8 | 95  | 1 | 5  | 6 | 46  | 18 | 160 |



|       |   |    |    |    |   |   |    |    |    |     |
|-------|---|----|----|----|---|---|----|----|----|-----|
| 4,581 | 3 | 14 | 9  | 95 | 1 | 5 | 6  | 46 | 19 | 160 |
| 4,582 | 3 | 14 | 9  | 95 | 1 | 5 | 7  | 46 | 20 | 160 |
| 4,583 | 3 | 14 | 9  | 95 | 1 | 5 | 7  | 46 | 20 | 160 |
| 4,584 | 3 | 14 | 10 | 94 | 1 | 5 | 7  | 46 | 21 | 159 |
| 4,585 | 3 | 14 | 10 | 95 | 1 | 5 | 8  | 46 | 22 | 160 |
| 4,586 | 3 | 14 | 10 | 97 | 1 | 5 | 8  | 48 | 22 | 164 |
| 4,587 | 4 | 14 | 11 | 94 | 1 | 4 | 9  | 44 | 25 | 156 |
| 4,588 | 4 | 14 | 13 | 95 | 2 | 4 | 11 | 44 | 30 | 157 |
| 4,589 | 5 | 10 | 15 | 72 | 2 | 4 | 11 | 28 | 33 | 114 |
| 4,590 | 5 | 8  | 15 | 70 | 2 | 3 | 12 | 28 | 34 | 109 |
| 4,591 | 5 | 8  | 15 | 70 | 2 | 3 | 12 | 28 | 34 | 109 |
| 4,592 | 5 | 7  | 18 | 61 | 3 | 2 | 17 | 24 | 43 | 94  |
| 4,593 | 4 | 7  | 19 | 61 | 3 | 2 | 17 | 24 | 43 | 94  |
| 4,594 | 4 | 3  | 19 | 36 | 3 | 0 | 16 | 18 | 42 | 57  |
| 4,595 | 4 | 3  | 19 | 36 | 3 | 0 | 16 | 18 | 42 | 57  |
| 4,596 | 4 | 3  | 19 | 35 | 3 | 0 | 16 | 18 | 42 | 56  |
| 4,597 | 4 | 3  | 19 | 34 | 3 | 0 | 16 | 16 | 42 | 53  |
| 4,598 | 4 | 3  | 19 | 21 | 3 | 0 | 16 | 11 | 42 | 35  |
| 4,599 | 4 | 3  | 19 | 21 | 3 | 0 | 16 | 11 | 42 | 35  |
| 4,600 | 5 | 3  | 19 | 22 | 3 | 0 | 16 | 12 | 43 | 37  |
| 4,601 | 4 | 3  | 19 | 22 | 3 | 0 | 16 | 12 | 42 | 37  |
| 4,602 | 4 | 3  | 20 | 22 | 3 | 0 | 16 | 12 | 43 | 37  |
| 4,603 | 4 | 2  | 20 | 17 | 3 | 0 | 16 | 10 | 43 | 29  |
| 4,604 | 4 | 2  | 20 | 17 | 3 | 0 | 16 | 10 | 43 | 29  |
| 4,605 | 4 | 2  | 20 | 16 | 3 | 0 | 16 | 10 | 43 | 28  |
| 4,606 | 4 | 2  | 20 | 16 | 3 | 0 | 16 | 10 | 43 | 28  |
| 4,607 | 4 | 1  | 20 | 14 | 3 | 0 | 16 | 10 | 43 | 25  |
| 4,608 | 4 | 1  | 20 | 15 | 2 | 0 | 16 | 10 | 42 | 26  |
| 4,609 | 5 | 1  | 19 | 15 | 2 | 0 | 16 | 10 | 42 | 26  |
| 4,610 | 5 | 1  | 19 | 14 | 2 | 0 | 16 | 9  | 42 | 24  |
| 4,611 | 5 | 2  | 19 | 17 | 2 | 0 | 16 | 10 | 42 | 29  |
| 4,612 | 5 | 2  | 18 | 19 | 2 | 1 | 16 | 13 | 41 | 35  |
| 4,613 | 5 | 2  | 18 | 20 | 2 | 1 | 16 | 13 | 41 | 36  |
| 4,614 | 5 | 2  | 18 | 21 | 2 | 1 | 14 | 13 | 39 | 37  |
| 4,615 | 5 | 2  | 18 | 21 | 2 | 1 | 14 | 14 | 39 | 38  |
| 4,616 | 5 | 2  | 19 | 21 | 2 | 1 | 14 | 14 | 40 | 38  |
| 4,617 | 5 | 2  | 19 | 21 | 2 | 1 | 14 | 13 | 40 | 37  |
| 4,618 | 5 | 2  | 18 | 24 | 2 | 1 | 14 | 13 | 39 | 40  |
| 4,619 | 5 | 3  | 18 | 24 | 2 | 1 | 14 | 14 | 39 | 42  |
| 4,620 | 5 | 3  | 16 | 23 | 2 | 1 | 13 | 15 | 36 | 42  |
| 4,621 | 6 | 3  | 19 | 27 | 2 | 1 | 11 | 18 | 38 | 49  |

|       |   |   |    |    |   |   |    |    |    |    |
|-------|---|---|----|----|---|---|----|----|----|----|
| 4,622 | 6 | 3 | 18 | 32 | 2 | 1 | 11 | 19 | 37 | 55 |
| 4,623 | 5 | 3 | 18 | 34 | 2 | 1 | 11 | 18 | 36 | 56 |
| 4,624 | 5 | 3 | 17 | 34 | 2 | 1 | 11 | 18 | 35 | 56 |
| 4,625 | 5 | 3 | 18 | 34 | 2 | 1 | 11 | 18 | 36 | 56 |
| 4,626 | 5 | 3 | 18 | 34 | 2 | 1 | 12 | 18 | 37 | 56 |
| 4,627 | 5 | 3 | 18 | 34 | 2 | 1 | 12 | 18 | 37 | 56 |
| 4,628 | 5 | 3 | 19 | 34 | 2 | 1 | 13 | 18 | 39 | 56 |
| 4,629 | 5 | 3 | 18 | 32 | 2 | 1 | 13 | 18 | 38 | 54 |
| 4,630 | 5 | 3 | 18 | 32 | 2 | 1 | 13 | 18 | 38 | 54 |
| 4,631 | 5 | 3 | 18 | 32 | 2 | 1 | 13 | 18 | 38 | 54 |
| 4,632 | 5 | 3 | 17 | 32 | 2 | 1 | 13 | 18 | 37 | 54 |
| 4,633 | 5 | 3 | 17 | 32 | 2 | 1 | 12 | 18 | 36 | 54 |
| 4,634 | 5 | 3 | 17 | 32 | 2 | 1 | 12 | 18 | 36 | 54 |
| 4,635 | 5 | 3 | 16 | 31 | 2 | 1 | 12 | 18 | 35 | 53 |
| 4,636 | 5 | 3 | 16 | 29 | 2 | 1 | 11 | 16 | 34 | 49 |
| 4,637 | 5 | 3 | 16 | 29 | 2 | 1 | 11 | 16 | 34 | 49 |
| 4,638 | 4 | 3 | 15 | 29 | 2 | 1 | 10 | 16 | 31 | 49 |
| 4,639 | 4 | 3 | 13 | 28 | 1 | 1 | 8  | 16 | 26 | 48 |
| 4,640 | 3 | 3 | 11 | 27 | 1 | 1 | 8  | 16 | 23 | 47 |
| 4,641 | 3 | 3 | 11 | 27 | 1 | 1 | 7  | 19 | 22 | 50 |
| 4,642 | 3 | 3 | 8  | 28 | 0 | 1 | 7  | 19 | 18 | 51 |
| 4,643 | 3 | 4 | 8  | 28 | 0 | 1 | 2  | 19 | 13 | 52 |
| 4,644 | 4 | 4 | 8  | 30 | 0 | 1 | 2  | 19 | 14 | 54 |
| 4,645 | 4 | 4 | 8  | 31 | 0 | 2 | 2  | 16 | 14 | 53 |
| 4,646 | 4 | 4 | 8  | 31 | 0 | 2 | 2  | 16 | 14 | 53 |
| 4,647 | 4 | 4 | 8  | 30 | 0 | 2 | 2  | 16 | 14 | 52 |
| 4,648 | 4 | 4 | 8  | 30 | 0 | 2 | 2  | 16 | 14 | 52 |
| 4,649 | 4 | 4 | 9  | 30 | 0 | 2 | 2  | 18 | 15 | 54 |
| 4,650 | 4 | 4 | 9  | 31 | 0 | 2 | 2  | 21 | 15 | 58 |
| 4,651 | 3 | 4 | 9  | 31 | 0 | 2 | 2  | 20 | 14 | 57 |
| 4,652 | 3 | 4 | 8  | 33 | 0 | 2 | 2  | 20 | 13 | 59 |
| 4,653 | 3 | 5 | 8  | 34 | 0 | 2 | 3  | 20 | 14 | 61 |
| 4,654 | 3 | 5 | 8  | 34 | 0 | 2 | 3  | 20 | 14 | 61 |
| 4,655 | 3 | 5 | 11 | 34 | 0 | 2 | 3  | 21 | 17 | 62 |
| 4,656 | 3 | 5 | 11 | 34 | 0 | 2 | 3  | 21 | 17 | 62 |
| 4,657 | 3 | 4 | 11 | 34 | 0 | 3 | 3  | 22 | 17 | 63 |
| 4,658 | 3 | 4 | 11 | 34 | 0 | 3 | 3  | 22 | 17 | 63 |
| 4,659 | 3 | 4 | 12 | 35 | 0 | 3 | 4  | 22 | 19 | 64 |
| 4,660 | 2 | 4 | 12 | 35 | 0 | 3 | 4  | 22 | 18 | 64 |
| 4,661 | 2 | 3 | 12 | 32 | 1 | 3 | 5  | 21 | 20 | 59 |
| 4,662 | 2 | 3 | 12 | 30 | 1 | 2 | 5  | 18 | 20 | 53 |

|       |   |    |    |     |   |    |    |     |    |     |
|-------|---|----|----|-----|---|----|----|-----|----|-----|
| 4,663 | 2 | 3  | 12 | 29  | 1 | 2  | 5  | 18  | 20 | 52  |
| 4,664 | 2 | 3  | 12 | 28  | 1 | 2  | 5  | 19  | 20 | 52  |
| 4,665 | 2 | 3  | 12 | 28  | 1 | 2  | 5  | 19  | 20 | 52  |
| 4,666 | 2 | 3  | 12 | 28  | 1 | 2  | 5  | 18  | 20 | 51  |
| 4,667 | 2 | 3  | 12 | 28  | 1 | 2  | 5  | 18  | 20 | 51  |
| 4,668 | 2 | 3  | 12 | 28  | 1 | 2  | 5  | 22  | 20 | 55  |
| 4,669 | 2 | 3  | 12 | 29  | 1 | 2  | 5  | 24  | 20 | 58  |
| 4,670 | 1 | 2  | 15 | 37  | 1 | 3  | 5  | 26  | 22 | 68  |
| 4,671 | 1 | 3  | 14 | 40  | 1 | 3  | 5  | 27  | 21 | 73  |
| 4,672 | 1 | 4  | 12 | 51  | 1 | 3  | 5  | 28  | 19 | 86  |
| 4,673 | 1 | 31 | 12 | 206 | 1 | 11 | 5  | 205 | 19 | 453 |
| 4,674 | 1 | 31 | 12 | 216 | 1 | 11 | 5  | 212 | 19 | 470 |
| 4,675 | 2 | 33 | 12 | 238 | 1 | 12 | 6  | 223 | 21 | 506 |
| 4,676 | 2 | 33 | 11 | 248 | 1 | 12 | 6  | 223 | 20 | 516 |
| 4,677 | 2 | 36 | 11 | 276 | 1 | 14 | 5  | 238 | 19 | 564 |
| 4,678 | 2 | 37 | 11 | 285 | 1 | 14 | 5  | 238 | 19 | 574 |
| 4,679 | 2 | 43 | 11 | 298 | 1 | 14 | 4  | 248 | 18 | 603 |
| 4,680 | 2 | 43 | 11 | 299 | 1 | 14 | 4  | 248 | 18 | 604 |
| 4,681 | 3 | 43 | 11 | 302 | 1 | 14 | 4  | 249 | 19 | 608 |
| 4,682 | 3 | 47 | 11 | 317 | 1 | 14 | 4  | 253 | 19 | 631 |
| 4,683 | 3 | 47 | 11 | 317 | 1 | 14 | 4  | 253 | 19 | 631 |
| 4,684 | 3 | 48 | 11 | 318 | 1 | 14 | 5  | 254 | 20 | 634 |
| 4,685 | 3 | 48 | 11 | 318 | 1 | 14 | 5  | 254 | 20 | 634 |
| 4,686 | 3 | 48 | 14 | 320 | 2 | 14 | 13 | 254 | 32 | 636 |
| 4,687 | 3 | 48 | 14 | 320 | 2 | 14 | 13 | 254 | 32 | 636 |
| 4,688 | 3 | 48 | 14 | 320 | 2 | 14 | 13 | 254 | 32 | 636 |
| 4,689 | 3 | 48 | 14 | 320 | 2 | 14 | 14 | 254 | 33 | 636 |
| 4,690 | 5 | 48 | 14 | 320 | 2 | 14 | 14 | 254 | 35 | 636 |
| 4,691 | 5 | 48 | 14 | 321 | 2 | 15 | 14 | 252 | 35 | 636 |
| 4,692 | 5 | 48 | 14 | 321 | 2 | 15 | 14 | 253 | 35 | 637 |
| 4,693 | 5 | 48 | 14 | 320 | 2 | 15 | 14 | 253 | 35 | 636 |
| 4,694 | 5 | 47 | 15 | 321 | 2 | 15 | 14 | 254 | 36 | 637 |
| 4,695 | 4 | 47 | 14 | 318 | 2 | 14 | 15 | 255 | 35 | 634 |
| 4,696 | 4 | 47 | 14 | 318 | 2 | 14 | 15 | 255 | 35 | 634 |
| 4,697 | 4 | 47 | 15 | 318 | 2 | 14 | 15 | 255 | 36 | 634 |
| 4,698 | 4 | 47 | 15 | 319 | 2 | 14 | 15 | 256 | 36 | 636 |
| 4,699 | 4 | 49 | 15 | 319 | 2 | 14 | 15 | 258 | 36 | 640 |
| 4,700 | 4 | 50 | 14 | 323 | 2 | 14 | 15 | 256 | 35 | 643 |
| 4,701 | 4 | 51 | 14 | 336 | 2 | 15 | 15 | 266 | 35 | 668 |
| 4,702 | 4 | 57 | 14 | 393 | 2 | 18 | 16 | 316 | 36 | 784 |
| 4,703 | 4 | 60 | 14 | 398 | 2 | 18 | 16 | 321 | 36 | 797 |

|       |   |    |    |     |   |    |    |     |    |       |
|-------|---|----|----|-----|---|----|----|-----|----|-------|
| 4,704 | 4 | 60 | 14 | 408 | 2 | 19 | 15 | 331 | 35 | 818   |
| 4,705 | 4 | 62 | 13 | 481 | 2 | 21 | 15 | 367 | 34 | 931   |
| 4,706 | 4 | 62 | 11 | 481 | 2 | 21 | 15 | 368 | 32 | 932   |
| 4,707 | 4 | 64 | 11 | 499 | 2 | 21 | 15 | 375 | 32 | 959   |
| 4,708 | 4 | 64 | 11 | 508 | 2 | 20 | 15 | 375 | 32 | 967   |
| 4,709 | 4 | 68 | 11 | 512 | 2 | 21 | 14 | 383 | 31 | 984   |
| 4,710 | 4 | 71 | 10 | 537 | 2 | 22 | 14 | 397 | 30 | 1,027 |
| 4,711 | 4 | 71 | 10 | 548 | 2 | 22 | 14 | 402 | 30 | 1,043 |
| 4,712 | 4 | 73 | 11 | 590 | 1 | 23 | 14 | 413 | 30 | 1,099 |
| 4,713 | 4 | 73 | 11 | 591 | 1 | 23 | 14 | 414 | 30 | 1,101 |
| 4,714 | 4 | 73 | 11 | 592 | 1 | 23 | 14 | 413 | 30 | 1,101 |
| 4,715 | 4 | 73 | 11 | 592 | 1 | 23 | 14 | 414 | 30 | 1,102 |
| 4,716 | 4 | 73 | 10 | 592 | 1 | 23 | 14 | 414 | 29 | 1,102 |
| 4,717 | 4 | 73 | 10 | 592 | 1 | 23 | 14 | 413 | 29 | 1,101 |
| 4,718 | 4 | 73 | 10 | 587 | 1 | 23 | 14 | 409 | 29 | 1,092 |
| 4,719 | 4 | 73 | 10 | 587 | 1 | 23 | 14 | 409 | 29 | 1,092 |
| 4,720 | 4 | 73 | 10 | 587 | 1 | 23 | 14 | 408 | 29 | 1,091 |
| 4,721 | 5 | 72 | 7  | 573 | 1 | 22 | 14 | 399 | 27 | 1,066 |
| 4,722 | 5 | 72 | 7  | 573 | 1 | 22 | 15 | 399 | 28 | 1,066 |
| 4,723 | 5 | 44 | 7  | 402 | 1 | 14 | 15 | 221 | 28 | 681   |
| 4,724 | 5 | 44 | 7  | 402 | 1 | 14 | 15 | 221 | 28 | 681   |
| 4,725 | 4 | 42 | 8  | 368 | 1 | 13 | 14 | 203 | 27 | 626   |
| 4,726 | 4 | 42 | 8  | 358 | 1 | 13 | 14 | 203 | 27 | 616   |
| 4,727 | 4 | 42 | 9  | 358 | 1 | 13 | 15 | 203 | 29 | 616   |
| 4,728 | 4 | 38 | 9  | 323 | 1 | 11 | 15 | 189 | 29 | 561   |
| 4,729 | 4 | 32 | 9  | 311 | 1 | 12 | 15 | 180 | 29 | 535   |
| 4,730 | 4 | 32 | 9  | 321 | 1 | 12 | 16 | 183 | 30 | 548   |
| 4,731 | 3 | 36 | 9  | 333 | 1 | 15 | 16 | 202 | 29 | 586   |
| 4,732 | 3 | 36 | 9  | 331 | 1 | 15 | 16 | 202 | 29 | 584   |
| 4,733 | 3 | 33 | 10 | 332 | 1 | 15 | 17 | 207 | 31 | 587   |
| 4,734 | 3 | 34 | 10 | 356 | 1 | 18 | 17 | 220 | 31 | 628   |
| 4,735 | 3 | 33 | 10 | 362 | 1 | 18 | 16 | 220 | 30 | 633   |
| 4,736 | 3 | 33 | 10 | 363 | 0 | 18 | 16 | 221 | 29 | 635   |
| 4,737 | 3 | 33 | 7  | 361 | 0 | 18 | 8  | 222 | 18 | 634   |
| 4,738 | 3 | 33 | 7  | 362 | 0 | 18 | 7  | 222 | 17 | 635   |
| 4,739 | 3 | 33 | 7  | 362 | 0 | 18 | 7  | 225 | 17 | 638   |
| 4,740 | 1 | 33 | 7  | 363 | 0 | 18 | 7  | 225 | 15 | 639   |
| 4,741 | 1 | 33 | 7  | 363 | 0 | 18 | 7  | 225 | 15 | 639   |
| 4,742 | 1 | 33 | 7  | 361 | 0 | 17 | 7  | 224 | 15 | 635   |
| 4,743 | 1 | 33 | 7  | 361 | 0 | 17 | 7  | 222 | 15 | 633   |
| 4,744 | 1 | 33 | 7  | 362 | 0 | 17 | 7  | 223 | 15 | 635   |

|       |   |    |    |     |   |    |    |     |    |     |
|-------|---|----|----|-----|---|----|----|-----|----|-----|
| 4,745 | 1 | 33 | 6  | 361 | 0 | 17 | 8  | 221 | 15 | 632 |
| 4,746 | 1 | 33 | 6  | 361 | 0 | 17 | 7  | 221 | 14 | 632 |
| 4,747 | 1 | 33 | 5  | 363 | 0 | 17 | 8  | 221 | 14 | 634 |
| 4,748 | 1 | 33 | 5  | 366 | 0 | 17 | 8  | 227 | 14 | 643 |
| 4,749 | 1 | 33 | 5  | 368 | 1 | 17 | 9  | 227 | 16 | 645 |
| 4,750 | 1 | 31 | 5  | 371 | 1 | 17 | 9  | 227 | 16 | 646 |
| 4,751 | 1 | 30 | 5  | 366 | 1 | 17 | 9  | 227 | 16 | 640 |
| 4,752 | 1 | 29 | 5  | 353 | 1 | 16 | 8  | 218 | 15 | 616 |
| 4,753 | 1 | 21 | 5  | 288 | 1 | 14 | 8  | 165 | 15 | 488 |
| 4,754 | 1 | 20 | 5  | 278 | 1 | 13 | 8  | 155 | 15 | 466 |
| 4,755 | 1 | 20 | 7  | 278 | 1 | 13 | 8  | 155 | 17 | 466 |
| 4,756 | 1 | 18 | 7  | 205 | 1 | 11 | 8  | 119 | 17 | 353 |
| 4,757 | 1 | 17 | 7  | 187 | 1 | 11 | 8  | 110 | 17 | 325 |
| 4,758 | 1 | 10 | 7  | 147 | 1 | 9  | 8  | 87  | 17 | 253 |
| 4,759 | 1 | 10 | 8  | 148 | 1 | 9  | 8  | 90  | 18 | 257 |
| 4,760 | 1 | 10 | 10 | 148 | 3 | 9  | 11 | 90  | 25 | 257 |
| 4,761 | 1 | 8  | 11 | 94  | 4 | 8  | 13 | 73  | 29 | 183 |
| 4,762 | 1 | 8  | 12 | 94  | 4 | 8  | 15 | 73  | 32 | 183 |
| 4,763 | 1 | 8  | 11 | 94  | 4 | 8  | 14 | 73  | 30 | 183 |
| 4,764 | 1 | 8  | 11 | 93  | 4 | 8  | 14 | 73  | 30 | 182 |
| 4,765 | 1 | 8  | 11 | 93  | 4 | 8  | 14 | 73  | 30 | 182 |
| 4,766 | 1 | 10 | 11 | 96  | 4 | 8  | 14 | 75  | 30 | 189 |
| 4,767 | 1 | 10 | 11 | 97  | 4 | 8  | 14 | 75  | 30 | 190 |
| 4,768 | 1 | 10 | 11 | 97  | 4 | 8  | 14 | 75  | 30 | 190 |
| 4,769 | 1 | 10 | 11 | 99  | 4 | 8  | 15 | 75  | 31 | 192 |
| 4,770 | 1 | 10 | 11 | 100 | 4 | 8  | 16 | 75  | 32 | 193 |
| 4,771 | 1 | 10 | 11 | 99  | 4 | 8  | 16 | 74  | 32 | 191 |
| 4,772 | 0 | 10 | 11 | 99  | 4 | 8  | 16 | 74  | 31 | 191 |
| 4,773 | 0 | 10 | 11 | 99  | 4 | 8  | 15 | 74  | 30 | 191 |
| 4,774 | 0 | 10 | 11 | 99  | 4 | 8  | 15 | 74  | 30 | 191 |
| 4,775 | 0 | 10 | 10 | 100 | 4 | 8  | 15 | 77  | 29 | 195 |
| 4,776 | 0 | 12 | 10 | 112 | 4 | 8  | 16 | 90  | 30 | 222 |
| 4,777 | 0 | 22 | 11 | 156 | 4 | 12 | 16 | 135 | 31 | 325 |
| 4,778 | 0 | 24 | 10 | 170 | 4 | 15 | 15 | 145 | 29 | 354 |
| 4,779 | 0 | 25 | 10 | 176 | 4 | 15 | 15 | 151 | 29 | 367 |
| 4,780 | 0 | 27 | 10 | 180 | 5 | 14 | 15 | 155 | 30 | 376 |
| 4,781 | 0 | 27 | 9  | 170 | 5 | 14 | 14 | 153 | 28 | 364 |
| 4,782 | 0 | 26 | 10 | 174 | 5 | 11 | 13 | 142 | 28 | 353 |
| 4,783 | 0 | 26 | 9  | 175 | 5 | 11 | 13 | 141 | 27 | 353 |
| 4,784 | 0 | 26 | 9  | 159 | 5 | 11 | 13 | 134 | 27 | 330 |
| 4,785 | 0 | 27 | 11 | 150 | 5 | 8  | 15 | 126 | 31 | 311 |

|       |   |    |    |     |    |    |    |     |     |     |
|-------|---|----|----|-----|----|----|----|-----|-----|-----|
| 4,786 | 0 | 28 | 11 | 165 | 5  | 8  | 15 | 132 | 31  | 333 |
| 4,787 | 0 | 28 | 13 | 172 | 6  | 8  | 18 | 134 | 37  | 342 |
| 4,788 | 0 | 28 | 13 | 172 | 6  | 8  | 18 | 133 | 37  | 341 |
| 4,789 | 1 | 28 | 23 | 176 | 6  | 8  | 20 | 130 | 50  | 342 |
| 4,790 | 1 | 28 | 23 | 179 | 6  | 8  | 20 | 131 | 50  | 346 |
| 4,791 | 1 | 28 | 23 | 179 | 6  | 8  | 20 | 131 | 50  | 346 |
| 4,792 | 1 | 28 | 31 | 180 | 7  | 8  | 28 | 132 | 67  | 348 |
| 4,793 | 1 | 28 | 48 | 184 | 13 | 8  | 44 | 134 | 106 | 354 |
| 4,794 | 1 | 29 | 50 | 185 | 13 | 8  | 48 | 134 | 112 | 356 |
| 4,795 | 2 | 29 | 51 | 190 | 13 | 8  | 47 | 134 | 113 | 361 |
| 4,796 | 2 | 29 | 51 | 190 | 13 | 8  | 47 | 134 | 113 | 361 |
| 4,797 | 2 | 29 | 51 | 190 | 13 | 8  | 46 | 134 | 112 | 361 |
| 4,798 | 2 | 29 | 51 | 185 | 13 | 8  | 46 | 128 | 112 | 350 |
| 4,799 | 2 | 29 | 51 | 184 | 12 | 8  | 45 | 128 | 110 | 349 |
| 4,800 | 2 | 29 | 51 | 185 | 12 | 8  | 45 | 128 | 110 | 350 |
| 4,801 | 2 | 29 | 51 | 182 | 12 | 8  | 47 | 122 | 112 | 341 |
| 4,802 | 2 | 29 | 51 | 182 | 12 | 8  | 47 | 122 | 112 | 341 |
| 4,803 | 2 | 29 | 51 | 182 | 12 | 8  | 47 | 121 | 112 | 340 |
| 4,804 | 2 | 28 | 51 | 181 | 12 | 8  | 48 | 121 | 113 | 338 |
| 4,805 | 2 | 28 | 51 | 182 | 12 | 8  | 48 | 121 | 113 | 339 |
| 4,806 | 2 | 28 | 49 | 184 | 12 | 8  | 48 | 121 | 111 | 341 |
| 4,807 | 2 | 30 | 49 | 188 | 12 | 8  | 48 | 127 | 111 | 353 |
| 4,808 | 2 | 40 | 49 | 283 | 12 | 18 | 48 | 165 | 111 | 506 |
| 4,809 | 2 | 62 | 49 | 438 | 12 | 28 | 48 | 229 | 111 | 757 |
| 4,810 | 2 | 70 | 48 | 528 | 12 | 37 | 48 | 252 | 110 | 887 |
| 4,811 | 2 | 76 | 46 | 553 | 10 | 38 | 45 | 256 | 103 | 923 |
| 4,812 | 2 | 76 | 45 | 561 | 9  | 38 | 43 | 256 | 99  | 931 |
| 4,813 | 2 | 79 | 46 | 573 | 9  | 41 | 41 | 258 | 98  | 951 |
| 4,814 | 2 | 79 | 46 | 583 | 9  | 41 | 41 | 265 | 98  | 968 |
| 4,815 | 2 | 81 | 46 | 599 | 9  | 41 | 41 | 270 | 98  | 991 |
| 4,816 | 2 | 81 | 46 | 599 | 9  | 41 | 41 | 270 | 98  | 991 |
| 4,817 | 2 | 79 | 46 | 596 | 9  | 41 | 41 | 269 | 98  | 985 |
| 4,818 | 2 | 79 | 46 | 595 | 9  | 41 | 41 | 269 | 98  | 984 |
| 4,819 | 2 | 79 | 46 | 594 | 9  | 41 | 41 | 269 | 98  | 983 |
| 4,820 | 2 | 80 | 46 | 596 | 9  | 41 | 40 | 271 | 97  | 988 |
| 4,821 | 2 | 80 | 46 | 595 | 9  | 41 | 39 | 271 | 96  | 987 |
| 4,822 | 2 | 80 | 50 | 598 | 9  | 41 | 39 | 274 | 100 | 993 |
| 4,823 | 2 | 80 | 51 | 599 | 9  | 41 | 39 | 274 | 101 | 994 |
| 4,824 | 2 | 80 | 51 | 599 | 9  | 41 | 39 | 276 | 101 | 996 |
| 4,825 | 3 | 78 | 51 | 589 | 9  | 40 | 41 | 260 | 104 | 967 |
| 4,826 | 3 | 78 | 51 | 593 | 9  | 40 | 41 | 262 | 104 | 973 |

|       |   |    |    |     |   |    |    |     |     |     |
|-------|---|----|----|-----|---|----|----|-----|-----|-----|
| 4,827 | 3 | 78 | 51 | 593 | 9 | 40 | 40 | 262 | 103 | 973 |
| 4,828 | 3 | 66 | 50 | 535 | 9 | 34 | 41 | 207 | 103 | 842 |
| 4,829 | 3 | 66 | 50 | 535 | 9 | 34 | 41 | 207 | 103 | 842 |
| 4,830 | 3 | 65 | 50 | 528 | 9 | 34 | 42 | 199 | 104 | 826 |
| 4,831 | 3 | 64 | 50 | 523 | 8 | 35 | 42 | 195 | 103 | 817 |
| 4,832 | 3 | 64 | 49 | 524 | 8 | 35 | 42 | 195 | 102 | 818 |
| 4,833 | 3 | 61 | 51 | 510 | 8 | 35 | 42 | 188 | 104 | 794 |
| 4,834 | 3 | 61 | 51 | 509 | 8 | 35 | 43 | 188 | 105 | 793 |
| 4,835 | 3 | 60 | 50 | 509 | 8 | 35 | 41 | 186 | 102 | 790 |
| 4,836 | 3 | 57 | 49 | 474 | 8 | 35 | 41 | 174 | 101 | 740 |
| 4,837 | 3 | 57 | 50 | 465 | 8 | 35 | 41 | 171 | 102 | 728 |
| 4,838 | 3 | 57 | 48 | 468 | 7 | 35 | 38 | 173 | 96  | 733 |
| 4,839 | 2 | 57 | 43 | 469 | 8 | 35 | 38 | 174 | 91  | 735 |
| 4,840 | 2 | 57 | 39 | 488 | 9 | 35 | 37 | 184 | 87  | 764 |
| 4,841 | 2 | 58 | 41 | 555 | 9 | 37 | 37 | 239 | 89  | 889 |
| 4,842 | 4 | 58 | 40 | 565 | 9 | 37 | 39 | 246 | 92  | 906 |
| 4,843 | 5 | 60 | 29 | 573 | 5 | 37 | 31 | 249 | 70  | 919 |
| 4,844 | 5 | 59 | 25 | 578 | 4 | 37 | 29 | 248 | 63  | 922 |
| 4,845 | 5 | 59 | 24 | 573 | 4 | 37 | 26 | 248 | 59  | 917 |
| 4,846 | 4 | 59 | 24 | 573 | 5 | 37 | 27 | 248 | 60  | 917 |
| 4,847 | 4 | 59 | 25 | 573 | 5 | 37 | 27 | 248 | 61  | 917 |
| 4,848 | 4 | 60 | 25 | 573 | 5 | 37 | 28 | 248 | 62  | 918 |
| 4,849 | 4 | 60 | 25 | 573 | 5 | 37 | 28 | 248 | 62  | 918 |
| 4,850 | 4 | 60 | 25 | 570 | 5 | 37 | 28 | 247 | 62  | 914 |
| 4,851 | 4 | 60 | 25 | 571 | 5 | 37 | 28 | 247 | 62  | 915 |
| 4,852 | 4 | 60 | 25 | 572 | 5 | 37 | 26 | 247 | 60  | 916 |
| 4,853 | 4 | 60 | 25 | 572 | 5 | 37 | 26 | 247 | 60  | 916 |
| 4,854 | 4 | 60 | 26 | 572 | 5 | 37 | 26 | 247 | 61  | 916 |
| 4,855 | 4 | 60 | 26 | 571 | 5 | 36 | 25 | 245 | 60  | 912 |
| 4,856 | 4 | 60 | 26 | 570 | 5 | 36 | 25 | 245 | 60  | 911 |
| 4,857 | 4 | 58 | 26 | 564 | 5 | 36 | 25 | 239 | 60  | 897 |
| 4,858 | 4 | 58 | 26 | 567 | 5 | 36 | 25 | 239 | 60  | 900 |
| 4,859 | 4 | 47 | 26 | 472 | 5 | 26 | 25 | 203 | 60  | 748 |
| 4,860 | 4 | 26 | 26 | 330 | 5 | 18 | 25 | 152 | 60  | 526 |
| 4,861 | 4 | 22 | 26 | 274 | 5 | 11 | 25 | 133 | 60  | 440 |
| 4,862 | 4 | 16 | 26 | 256 | 5 | 10 | 25 | 129 | 60  | 411 |
| 4,863 | 4 | 16 | 26 | 254 | 5 | 10 | 27 | 129 | 62  | 409 |
| 4,864 | 4 | 13 | 24 | 243 | 5 | 7  | 28 | 127 | 61  | 390 |
| 4,865 | 5 | 11 | 26 | 217 | 5 | 7  | 28 | 115 | 64  | 350 |
| 4,866 | 5 | 11 | 30 | 217 | 5 | 7  | 28 | 115 | 68  | 350 |
| 4,867 | 5 | 11 | 30 | 217 | 5 | 7  | 28 | 113 | 68  | 348 |

|       |   |    |    |     |   |   |    |     |    |     |
|-------|---|----|----|-----|---|---|----|-----|----|-----|
| 4,868 | 5 | 11 | 30 | 217 | 5 | 7 | 28 | 113 | 68 | 348 |
| 4,869 | 5 | 11 | 30 | 218 | 5 | 7 | 29 | 113 | 69 | 349 |
| 4,870 | 5 | 11 | 31 | 217 | 5 | 7 | 29 | 113 | 70 | 348 |
| 4,871 | 5 | 10 | 31 | 215 | 5 | 7 | 29 | 111 | 70 | 343 |
| 4,872 | 5 | 10 | 34 | 212 | 5 | 7 | 29 | 108 | 73 | 337 |
| 4,873 | 5 | 10 | 31 | 211 | 5 | 7 | 29 | 108 | 70 | 336 |
| 4,874 | 5 | 10 | 30 | 211 | 5 | 7 | 29 | 106 | 69 | 334 |
| 4,875 | 5 | 10 | 30 | 211 | 5 | 7 | 29 | 106 | 69 | 334 |
| 4,876 | 4 | 10 | 30 | 204 | 6 | 7 | 27 | 104 | 67 | 325 |
| 4,877 | 4 | 10 | 30 | 204 | 6 | 7 | 27 | 104 | 67 | 325 |
| 4,878 | 4 | 10 | 30 | 204 | 6 | 7 | 27 | 106 | 67 | 327 |
| 4,879 | 4 | 10 | 30 | 205 | 6 | 7 | 26 | 108 | 66 | 330 |
| 4,880 | 4 | 10 | 31 | 208 | 6 | 9 | 26 | 112 | 67 | 339 |
| 4,881 | 4 | 10 | 31 | 208 | 6 | 9 | 25 | 112 | 66 | 339 |
| 4,882 | 4 | 9  | 31 | 208 | 6 | 8 | 25 | 112 | 66 | 337 |
| 4,883 | 4 | 9  | 29 | 206 | 6 | 8 | 25 | 110 | 64 | 333 |
| 4,884 | 4 | 9  | 29 | 206 | 6 | 8 | 25 | 110 | 64 | 333 |
| 4,885 | 4 | 9  | 29 | 213 | 6 | 8 | 24 | 115 | 63 | 345 |
| 4,886 | 4 | 9  | 29 | 215 | 6 | 8 | 24 | 115 | 63 | 347 |
| 4,887 | 4 | 9  | 29 | 216 | 6 | 8 | 24 | 115 | 63 | 348 |
| 4,888 | 4 | 10 | 28 | 217 | 6 | 8 | 24 | 115 | 62 | 350 |
| 4,889 | 4 | 10 | 28 | 214 | 5 | 8 | 23 | 112 | 60 | 344 |
| 4,890 | 4 | 10 | 27 | 191 | 5 | 8 | 24 | 103 | 60 | 312 |
| 4,891 | 4 | 9  | 27 | 121 | 4 | 6 | 24 | 49  | 59 | 185 |
| 4,892 | 4 | 10 | 25 | 122 | 4 | 6 | 24 | 49  | 57 | 187 |
| 4,893 | 2 | 10 | 18 | 112 | 3 | 6 | 14 | 43  | 37 | 171 |
| 4,894 | 1 | 8  | 16 | 91  | 2 | 6 | 8  | 36  | 27 | 141 |
| 4,895 | 1 | 8  | 16 | 91  | 2 | 6 | 8  | 36  | 27 | 141 |
| 4,896 | 1 | 8  | 15 | 91  | 2 | 6 | 7  | 38  | 25 | 143 |
| 4,897 | 1 | 8  | 14 | 92  | 1 | 6 | 6  | 41  | 22 | 147 |
| 4,898 | 1 | 7  | 13 | 94  | 1 | 6 | 6  | 41  | 21 | 148 |
| 4,899 | 1 | 7  | 13 | 95  | 1 | 7 | 5  | 41  | 20 | 150 |
| 4,900 | 1 | 7  | 13 | 95  | 1 | 7 | 5  | 41  | 20 | 150 |
| 4,901 | 1 | 7  | 13 | 94  | 1 | 7 | 5  | 41  | 20 | 149 |
| 4,902 | 1 | 7  | 13 | 93  | 1 | 7 | 5  | 41  | 20 | 148 |
| 4,903 | 1 | 7  | 13 | 93  | 1 | 7 | 5  | 41  | 20 | 148 |
| 4,904 | 1 | 7  | 15 | 93  | 1 | 7 | 5  | 41  | 22 | 148 |
| 4,905 | 1 | 7  | 14 | 93  | 1 | 7 | 5  | 41  | 21 | 148 |
| 4,906 | 1 | 7  | 14 | 93  | 1 | 7 | 5  | 41  | 21 | 148 |
| 4,907 | 1 | 7  | 14 | 93  | 3 | 7 | 7  | 41  | 25 | 148 |
| 4,908 | 1 | 7  | 14 | 90  | 3 | 7 | 8  | 41  | 26 | 145 |



|       |   |    |    |     |   |    |   |     |    |     |
|-------|---|----|----|-----|---|----|---|-----|----|-----|
| 4,909 | 1 | 7  | 14 | 90  | 3 | 7  | 8 | 41  | 26 | 145 |
| 4,910 | 1 | 7  | 14 | 90  | 3 | 7  | 8 | 41  | 26 | 145 |
| 4,911 | 1 | 6  | 15 | 78  | 3 | 5  | 8 | 27  | 27 | 116 |
| 4,912 | 1 | 2  | 15 | 43  | 3 | 3  | 8 | 21  | 27 | 69  |
| 4,913 | 1 | 2  | 15 | 39  | 3 | 3  | 8 | 22  | 27 | 66  |
| 4,914 | 1 | 4  | 15 | 44  | 3 | 3  | 7 | 30  | 26 | 81  |
| 4,915 | 1 | 5  | 15 | 126 | 3 | 5  | 6 | 58  | 25 | 194 |
| 4,916 | 0 | 8  | 13 | 145 | 3 | 6  | 6 | 83  | 22 | 242 |
| 4,917 | 0 | 8  | 9  | 149 | 3 | 6  | 6 | 88  | 18 | 251 |
| 4,918 | 0 | 11 | 10 | 216 | 3 | 11 | 6 | 108 | 19 | 346 |
| 4,919 | 0 | 12 | 10 | 236 | 3 | 13 | 5 | 116 | 18 | 377 |
| 4,920 | 0 | 12 | 10 | 240 | 3 | 13 | 5 | 116 | 18 | 381 |
| 4,921 | 0 | 12 | 9  | 241 | 3 | 13 | 5 | 117 | 17 | 383 |
| 4,922 | 0 | 12 | 8  | 241 | 3 | 13 | 5 | 117 | 16 | 383 |
| 4,923 | 0 | 12 | 6  | 241 | 3 | 13 | 5 | 117 | 14 | 383 |
| 4,924 | 0 | 12 | 5  | 241 | 3 | 13 | 5 | 118 | 13 | 384 |
| 4,925 | 0 | 12 | 5  | 244 | 3 | 13 | 5 | 118 | 13 | 387 |
| 4,926 | 0 | 12 | 5  | 244 | 2 | 13 | 5 | 118 | 12 | 387 |
| 4,927 | 0 | 12 | 5  | 245 | 2 | 13 | 5 | 119 | 12 | 389 |
| 4,928 | 0 | 12 | 5  | 245 | 2 | 13 | 5 | 117 | 12 | 387 |
| 4,929 | 0 | 12 | 5  | 244 | 2 | 13 | 5 | 115 | 12 | 384 |
| 4,930 | 0 | 12 | 6  | 240 | 2 | 11 | 5 | 110 | 13 | 373 |
| 4,931 | 1 | 12 | 5  | 240 | 2 | 11 | 5 | 110 | 13 | 373 |
| 4,932 | 1 | 12 | 5  | 240 | 2 | 11 | 5 | 111 | 13 | 374 |
| 4,933 | 1 | 12 | 6  | 238 | 2 | 11 | 5 | 110 | 14 | 371 |
| 4,934 | 1 | 12 | 6  | 229 | 2 | 11 | 5 | 108 | 14 | 360 |
| 4,935 | 1 | 12 | 6  | 229 | 2 | 11 | 5 | 107 | 14 | 359 |
| 4,936 | 1 | 12 | 6  | 229 | 2 | 11 | 5 | 108 | 14 | 360 |
| 4,937 | 1 | 12 | 6  | 236 | 2 | 12 | 5 | 114 | 14 | 374 |
| 4,938 | 1 | 12 | 6  | 235 | 2 | 12 | 5 | 116 | 14 | 375 |
| 4,939 | 1 | 11 | 6  | 237 | 2 | 12 | 5 | 117 | 14 | 377 |
| 4,940 | 1 | 11 | 6  | 236 | 2 | 12 | 5 | 117 | 14 | 376 |
| 4,941 | 1 | 12 | 7  | 236 | 2 | 12 | 4 | 117 | 14 | 377 |
| 4,942 | 1 | 11 | 7  | 234 | 2 | 12 | 4 | 116 | 14 | 373 |
| 4,943 | 1 | 11 | 7  | 234 | 2 | 12 | 4 | 115 | 14 | 372 |
| 4,944 | 1 | 11 | 7  | 234 | 2 | 12 | 4 | 115 | 14 | 372 |
| 4,945 | 1 | 11 | 7  | 236 | 2 | 12 | 4 | 116 | 14 | 375 |
| 4,946 | 1 | 11 | 8  | 238 | 2 | 12 | 4 | 114 | 15 | 375 |
| 4,947 | 1 | 11 | 8  | 239 | 2 | 12 | 5 | 114 | 16 | 376 |
| 4,948 | 1 | 11 | 8  | 238 | 2 | 12 | 5 | 111 | 16 | 372 |
| 4,949 | 1 | 11 | 8  | 237 | 2 | 12 | 5 | 111 | 16 | 371 |

|       |   |    |    |     |   |    |    |     |    |     |
|-------|---|----|----|-----|---|----|----|-----|----|-----|
| 4,950 | 1 | 11 | 8  | 237 | 2 | 11 | 5  | 111 | 16 | 370 |
| 4,951 | 1 | 11 | 8  | 238 | 2 | 11 | 5  | 111 | 16 | 371 |
| 4,952 | 1 | 11 | 8  | 239 | 2 | 11 | 6  | 120 | 17 | 381 |
| 4,953 | 1 | 11 | 8  | 248 | 2 | 11 | 6  | 135 | 17 | 405 |
| 4,954 | 1 | 11 | 8  | 251 | 2 | 11 | 6  | 142 | 17 | 415 |
| 4,955 | 2 | 11 | 9  | 256 | 2 | 12 | 6  | 157 | 19 | 436 |
| 4,956 | 2 | 11 | 9  | 262 | 2 | 12 | 7  | 163 | 20 | 448 |
| 4,957 | 2 | 11 | 9  | 268 | 2 | 12 | 6  | 171 | 19 | 462 |
| 4,958 | 2 | 11 | 9  | 277 | 0 | 13 | 5  | 181 | 16 | 482 |
| 4,959 | 2 | 11 | 9  | 279 | 0 | 13 | 4  | 181 | 15 | 484 |
| 4,960 | 2 | 11 | 9  | 279 | 0 | 13 | 5  | 181 | 16 | 484 |
| 4,961 | 2 | 11 | 8  | 279 | 0 | 13 | 5  | 181 | 15 | 484 |
| 4,962 | 2 | 11 | 8  | 281 | 0 | 13 | 5  | 183 | 15 | 488 |
| 4,963 | 2 | 11 | 8  | 283 | 0 | 13 | 5  | 183 | 15 | 490 |
| 4,964 | 2 | 11 | 8  | 282 | 0 | 13 | 5  | 184 | 15 | 490 |
| 4,965 | 2 | 9  | 9  | 270 | 0 | 13 | 4  | 176 | 15 | 468 |
| 4,966 | 2 | 8  | 9  | 188 | 0 | 11 | 5  | 149 | 16 | 356 |
| 4,967 | 3 | 5  | 10 | 165 | 0 | 10 | 5  | 119 | 18 | 299 |
| 4,968 | 3 | 2  | 10 | 98  | 0 | 5  | 6  | 99  | 19 | 204 |
| 4,969 | 3 | 2  | 9  | 98  | 0 | 5  | 6  | 98  | 18 | 203 |
| 4,970 | 3 | 1  | 9  | 78  | 0 | 3  | 6  | 91  | 18 | 173 |
| 4,971 | 3 | 1  | 9  | 73  | 0 | 3  | 7  | 91  | 19 | 168 |
| 4,972 | 3 | 1  | 9  | 76  | 0 | 3  | 11 | 90  | 23 | 170 |
| 4,973 | 3 | 1  | 9  | 76  | 0 | 3  | 11 | 90  | 23 | 170 |
| 4,974 | 3 | 1  | 9  | 76  | 0 | 3  | 11 | 90  | 23 | 170 |
| 4,975 | 3 | 1  | 9  | 77  | 0 | 3  | 11 | 89  | 23 | 170 |
| 4,976 | 3 | 1  | 9  | 74  | 0 | 3  | 11 | 90  | 23 | 168 |
| 4,977 | 3 | 1  | 9  | 75  | 0 | 3  | 11 | 90  | 23 | 169 |
| 4,978 | 3 | 1  | 9  | 87  | 0 | 3  | 11 | 92  | 23 | 183 |
| 4,979 | 3 | 3  | 10 | 92  | 0 | 3  | 11 | 93  | 24 | 191 |
| 4,980 | 3 | 3  | 10 | 92  | 0 | 3  | 11 | 93  | 24 | 191 |
| 4,981 | 3 | 3  | 9  | 92  | 0 | 3  | 11 | 94  | 23 | 192 |
| 4,982 | 2 | 3  | 9  | 92  | 0 | 3  | 11 | 93  | 22 | 191 |
| 4,983 | 3 | 3  | 15 | 93  | 2 | 3  | 16 | 93  | 36 | 192 |
| 4,984 | 3 | 3  | 19 | 96  | 2 | 3  | 21 | 93  | 45 | 195 |
| 4,985 | 3 | 3  | 19 | 96  | 2 | 3  | 21 | 93  | 45 | 195 |
| 4,986 | 3 | 5  | 24 | 109 | 4 | 3  | 30 | 105 | 61 | 222 |
| 4,987 | 3 | 5  | 24 | 109 | 4 | 4  | 30 | 104 | 61 | 222 |
| 4,988 | 3 | 6  | 27 | 98  | 4 | 3  | 31 | 95  | 65 | 202 |
| 4,989 | 3 | 8  | 27 | 102 | 5 | 3  | 32 | 98  | 67 | 211 |
| 4,990 | 3 | 8  | 27 | 103 | 5 | 3  | 33 | 98  | 68 | 212 |

|       |   |    |    |     |   |   |    |     |     |     |
|-------|---|----|----|-----|---|---|----|-----|-----|-----|
| 4,991 | 3 | 7  | 29 | 105 | 5 | 3 | 33 | 98  | 70  | 213 |
| 4,992 | 3 | 7  | 28 | 106 | 5 | 3 | 33 | 98  | 69  | 214 |
| 4,993 | 3 | 7  | 28 | 110 | 5 | 3 | 33 | 98  | 69  | 218 |
| 4,994 | 3 | 9  | 28 | 130 | 5 | 3 | 33 | 118 | 69  | 260 |
| 4,995 | 3 | 11 | 28 | 184 | 5 | 5 | 33 | 138 | 69  | 338 |
| 4,996 | 3 | 11 | 27 | 186 | 5 | 5 | 33 | 139 | 68  | 341 |
| 4,997 | 3 | 11 | 27 | 188 | 5 | 5 | 33 | 139 | 68  | 343 |
| 4,998 | 3 | 13 | 27 | 190 | 5 | 5 | 32 | 137 | 67  | 345 |
| 4,999 | 3 | 13 | 27 | 190 | 5 | 5 | 32 | 136 | 67  | 344 |
| 5,000 | 3 | 13 | 27 | 189 | 5 | 5 | 32 | 137 | 67  | 344 |
| 5,001 | 3 | 13 | 27 | 189 | 5 | 5 | 32 | 137 | 67  | 344 |
| 5,002 | 3 | 13 | 27 | 188 | 5 | 5 | 31 | 137 | 66  | 343 |
| 5,003 | 3 | 13 | 27 | 187 | 5 | 5 | 32 | 128 | 67  | 333 |
| 5,004 | 3 | 13 | 27 | 175 | 5 | 5 | 36 | 108 | 71  | 301 |
| 5,005 | 3 | 13 | 29 | 177 | 5 | 6 | 44 | 108 | 81  | 304 |
| 5,006 | 2 | 13 | 27 | 172 | 5 | 5 | 45 | 94  | 79  | 284 |
| 5,007 | 2 | 13 | 28 | 160 | 5 | 5 | 46 | 80  | 81  | 258 |
| 5,008 | 2 | 13 | 28 | 160 | 5 | 5 | 46 | 80  | 81  | 258 |
| 5,009 | 3 | 13 | 28 | 150 | 5 | 4 | 46 | 70  | 82  | 237 |
| 5,010 | 3 | 13 | 28 | 150 | 5 | 4 | 46 | 70  | 82  | 237 |
| 5,011 | 3 | 13 | 28 | 150 | 5 | 4 | 45 | 70  | 81  | 237 |
| 5,012 | 5 | 13 | 28 | 150 | 5 | 4 | 49 | 68  | 87  | 235 |
| 5,013 | 5 | 13 | 28 | 151 | 5 | 4 | 49 | 72  | 87  | 240 |
| 5,014 | 5 | 16 | 28 | 162 | 5 | 6 | 49 | 114 | 87  | 298 |
| 5,015 | 5 | 16 | 28 | 162 | 5 | 6 | 49 | 113 | 87  | 297 |
| 5,016 | 5 | 16 | 36 | 170 | 8 | 6 | 58 | 121 | 107 | 313 |
| 5,017 | 5 | 19 | 36 | 184 | 8 | 6 | 57 | 143 | 106 | 352 |
| 5,018 | 4 | 19 | 35 | 198 | 8 | 6 | 57 | 151 | 104 | 374 |
| 5,019 | 4 | 19 | 35 | 200 | 8 | 6 | 56 | 151 | 103 | 376 |
| 5,020 | 4 | 19 | 35 | 204 | 8 | 6 | 56 | 152 | 103 | 381 |
| 5,021 | 4 | 19 | 35 | 204 | 8 | 6 | 55 | 152 | 102 | 381 |
| 5,022 | 4 | 19 | 35 | 201 | 8 | 6 | 51 | 153 | 98  | 379 |
| 5,023 | 4 | 20 | 35 | 204 | 8 | 6 | 51 | 153 | 98  | 383 |
| 5,024 | 4 | 20 | 35 | 205 | 8 | 6 | 51 | 153 | 98  | 384 |
| 5,025 | 4 | 21 | 35 | 190 | 8 | 6 | 51 | 149 | 98  | 366 |
| 5,026 | 4 | 21 | 36 | 192 | 8 | 6 | 51 | 149 | 99  | 368 |
| 5,027 | 4 | 21 | 36 | 192 | 8 | 6 | 51 | 149 | 99  | 368 |
| 5,028 | 4 | 21 | 36 | 192 | 8 | 6 | 51 | 149 | 99  | 368 |
| 5,029 | 4 | 21 | 36 | 192 | 8 | 6 | 51 | 149 | 99  | 368 |
| 5,030 | 4 | 19 | 35 | 187 | 8 | 6 | 51 | 150 | 98  | 362 |
| 5,031 | 4 | 19 | 35 | 195 | 8 | 6 | 51 | 151 | 98  | 371 |

|       |   |    |    |     |   |    |    |     |     |     |
|-------|---|----|----|-----|---|----|----|-----|-----|-----|
| 5,032 | 4 | 22 | 35 | 244 | 8 | 11 | 53 | 180 | 100 | 457 |
| 5,033 | 4 | 22 | 35 | 260 | 8 | 11 | 53 | 196 | 100 | 489 |
| 5,034 | 3 | 23 | 29 | 277 | 6 | 11 | 48 | 200 | 86  | 511 |
| 5,035 | 3 | 28 | 25 | 302 | 6 | 11 | 43 | 204 | 77  | 545 |
| 5,036 | 3 | 29 | 22 | 306 | 4 | 11 | 34 | 204 | 63  | 550 |
| 5,037 | 3 | 27 | 21 | 294 | 4 | 11 | 34 | 192 | 62  | 524 |
| 5,038 | 3 | 24 | 18 | 289 | 4 | 10 | 34 | 189 | 59  | 512 |
| 5,039 | 3 | 24 | 18 | 289 | 4 | 10 | 33 | 189 | 58  | 512 |
| 5,040 | 3 | 27 | 18 | 296 | 3 | 10 | 32 | 196 | 56  | 529 |
| 5,041 | 3 | 27 | 18 | 295 | 3 | 10 | 31 | 196 | 55  | 528 |
| 5,042 | 3 | 27 | 17 | 293 | 3 | 10 | 31 | 197 | 54  | 527 |
| 5,043 | 3 | 27 | 17 | 292 | 3 | 10 | 31 | 197 | 54  | 526 |
| 5,044 | 3 | 25 | 17 | 266 | 3 | 10 | 31 | 175 | 54  | 476 |
| 5,045 | 3 | 23 | 17 | 213 | 3 | 8  | 31 | 157 | 54  | 401 |
| 5,046 | 3 | 23 | 17 | 213 | 3 | 8  | 31 | 158 | 54  | 402 |
| 5,047 | 3 | 23 | 18 | 211 | 3 | 8  | 31 | 156 | 55  | 398 |
| 5,048 | 3 | 23 | 18 | 207 | 3 | 8  | 31 | 156 | 55  | 394 |
| 5,049 | 3 | 21 | 18 | 207 | 3 | 8  | 31 | 156 | 55  | 392 |
| 5,050 | 3 | 21 | 19 | 211 | 3 | 8  | 32 | 166 | 57  | 406 |
| 5,051 | 3 | 21 | 19 | 215 | 3 | 8  | 32 | 169 | 57  | 413 |
| 5,052 | 3 | 21 | 19 | 216 | 3 | 8  | 32 | 176 | 57  | 421 |
| 5,053 | 3 | 21 | 19 | 217 | 3 | 8  | 31 | 178 | 56  | 424 |
| 5,054 | 3 | 21 | 20 | 222 | 3 | 7  | 27 | 178 | 53  | 428 |
| 5,055 | 3 | 21 | 20 | 224 | 3 | 7  | 27 | 178 | 53  | 430 |
| 5,056 | 3 | 21 | 18 | 224 | 3 | 7  | 19 | 179 | 43  | 431 |
| 5,057 | 3 | 21 | 17 | 225 | 3 | 7  | 18 | 180 | 41  | 433 |
| 5,058 | 3 | 27 | 16 | 258 | 3 | 9  | 17 | 199 | 39  | 493 |
| 5,059 | 3 | 28 | 16 | 286 | 3 | 16 | 17 | 221 | 39  | 551 |
| 5,060 | 2 | 28 | 16 | 301 | 3 | 16 | 17 | 225 | 38  | 570 |
| 5,061 | 2 | 28 | 16 | 301 | 3 | 16 | 17 | 227 | 38  | 572 |
| 5,062 | 0 | 28 | 16 | 304 | 3 | 16 | 14 | 227 | 33  | 575 |
| 5,063 | 0 | 28 | 11 | 304 | 0 | 16 | 4  | 227 | 15  | 575 |
| 5,064 | 0 | 28 | 8  | 312 | 0 | 16 | 4  | 228 | 12  | 584 |
| 5,065 | 0 | 25 | 8  | 305 | 0 | 14 | 4  | 190 | 12  | 534 |
| 5,066 | 0 | 25 | 8  | 314 | 0 | 15 | 5  | 205 | 13  | 559 |
| 5,067 | 0 | 22 | 7  | 290 | 0 | 15 | 5  | 175 | 12  | 502 |
| 5,068 | 1 | 22 | 7  | 277 | 0 | 15 | 5  | 167 | 13  | 481 |
| 5,069 | 1 | 22 | 7  | 276 | 0 | 15 | 7  | 167 | 15  | 480 |
| 5,070 | 1 | 22 | 9  | 273 | 1 | 15 | 10 | 166 | 21  | 476 |
| 5,071 | 1 | 22 | 11 | 273 | 1 | 15 | 10 | 166 | 23  | 476 |
| 5,072 | 1 | 22 | 13 | 273 | 2 | 15 | 12 | 167 | 28  | 477 |

|       |   |    |    |     |   |    |    |     |    |     |
|-------|---|----|----|-----|---|----|----|-----|----|-----|
| 5,073 | 1 | 22 | 16 | 272 | 3 | 15 | 13 | 166 | 33 | 475 |
| 5,074 | 1 | 21 | 16 | 269 | 3 | 15 | 13 | 166 | 33 | 471 |
| 5,075 | 2 | 21 | 18 | 269 | 4 | 15 | 13 | 166 | 37 | 471 |
| 5,076 | 2 | 20 | 19 | 269 | 4 | 15 | 13 | 166 | 38 | 470 |
| 5,077 | 2 | 20 | 18 | 267 | 4 | 15 | 13 | 167 | 37 | 469 |
| 5,078 | 3 | 21 | 18 | 288 | 4 | 15 | 13 | 181 | 38 | 505 |
| 5,079 | 3 | 21 | 18 | 288 | 4 | 15 | 13 | 182 | 38 | 506 |
| 5,080 | 3 | 22 | 18 | 309 | 4 | 15 | 13 | 185 | 38 | 531 |
| 5,081 | 3 | 28 | 18 | 323 | 4 | 16 | 13 | 197 | 38 | 564 |
| 5,082 | 3 | 28 | 18 | 319 | 4 | 16 | 12 | 196 | 37 | 559 |
| 5,083 | 3 | 25 | 18 | 287 | 4 | 12 | 12 | 169 | 37 | 493 |
| 5,084 | 3 | 25 | 18 | 274 | 5 | 12 | 13 | 154 | 39 | 465 |
| 5,085 | 3 | 20 | 19 | 231 | 5 | 12 | 13 | 146 | 40 | 409 |
| 5,086 | 3 | 20 | 19 | 232 | 5 | 12 | 13 | 146 | 40 | 410 |
| 5,087 | 3 | 19 | 18 | 229 | 5 | 12 | 13 | 146 | 39 | 406 |
| 5,088 | 3 | 19 | 18 | 229 | 5 | 12 | 13 | 147 | 39 | 407 |
| 5,089 | 3 | 19 | 19 | 230 | 5 | 12 | 13 | 148 | 40 | 409 |
| 5,090 | 3 | 19 | 19 | 230 | 5 | 12 | 13 | 148 | 40 | 409 |
| 5,091 | 4 | 16 | 19 | 224 | 5 | 12 | 13 | 142 | 41 | 394 |
| 5,092 | 4 | 16 | 19 | 224 | 5 | 12 | 13 | 142 | 41 | 394 |
| 5,093 | 4 | 16 | 19 | 224 | 5 | 12 | 13 | 141 | 41 | 393 |
| 5,094 | 4 | 16 | 19 | 224 | 5 | 12 | 13 | 141 | 41 | 393 |
| 5,095 | 4 | 16 | 19 | 224 | 5 | 12 | 13 | 141 | 41 | 393 |
| 5,096 | 4 | 16 | 19 | 223 | 5 | 12 | 13 | 139 | 41 | 390 |
| 5,097 | 4 | 16 | 19 | 223 | 5 | 12 | 13 | 139 | 41 | 390 |
| 5,098 | 4 | 16 | 18 | 223 | 5 | 12 | 13 | 139 | 40 | 390 |
| 5,099 | 4 | 16 | 18 | 223 | 5 | 12 | 13 | 139 | 40 | 390 |
| 5,100 | 4 | 16 | 17 | 215 | 5 | 12 | 13 | 130 | 39 | 373 |
| 5,101 | 4 | 16 | 17 | 215 | 5 | 12 | 12 | 130 | 38 | 373 |
| 5,102 | 4 | 16 | 18 | 211 | 5 | 12 | 12 | 121 | 39 | 360 |
| 5,103 | 4 | 16 | 19 | 201 | 5 | 12 | 12 | 118 | 40 | 347 |
| 5,104 | 4 | 16 | 19 | 201 | 5 | 12 | 12 | 118 | 40 | 347 |
| 5,105 | 4 | 16 | 18 | 200 | 5 | 12 | 12 | 117 | 39 | 345 |
| 5,106 | 4 | 16 | 19 | 200 | 5 | 12 | 12 | 117 | 40 | 345 |
| 5,107 | 4 | 10 | 19 | 167 | 5 | 10 | 11 | 98  | 39 | 285 |
| 5,108 | 4 | 10 | 20 | 167 | 5 | 10 | 11 | 98  | 40 | 285 |
| 5,109 | 4 | 10 | 20 | 166 | 5 | 10 | 10 | 98  | 39 | 284 |
| 5,110 | 4 | 9  | 21 | 138 | 5 | 3  | 10 | 76  | 40 | 226 |
| 5,111 | 4 | 9  | 21 | 123 | 5 | 3  | 11 | 72  | 41 | 207 |
| 5,112 | 4 | 9  | 21 | 123 | 5 | 3  | 11 | 70  | 41 | 205 |
| 5,113 | 4 | 9  | 22 | 120 | 5 | 3  | 11 | 71  | 42 | 203 |

|       |   |    |    |     |   |    |    |     |    |     |
|-------|---|----|----|-----|---|----|----|-----|----|-----|
| 5,114 | 4 | 9  | 25 | 109 | 5 | 3  | 12 | 66  | 46 | 187 |
| 5,115 | 4 | 9  | 25 | 109 | 5 | 3  | 12 | 66  | 46 | 187 |
| 5,116 | 4 | 9  | 28 | 93  | 5 | 2  | 12 | 46  | 49 | 150 |
| 5,117 | 4 | 9  | 28 | 92  | 5 | 2  | 12 | 46  | 49 | 149 |
| 5,118 | 4 | 9  | 28 | 93  | 5 | 2  | 12 | 47  | 49 | 151 |
| 5,119 | 3 | 9  | 28 | 93  | 5 | 3  | 12 | 47  | 48 | 152 |
| 5,120 | 3 | 12 | 28 | 125 | 5 | 4  | 10 | 57  | 46 | 198 |
| 5,121 | 3 | 13 | 26 | 143 | 4 | 4  | 7  | 81  | 40 | 241 |
| 5,122 | 3 | 15 | 24 | 162 | 4 | 5  | 7  | 90  | 38 | 272 |
| 5,123 | 3 | 16 | 22 | 168 | 3 | 5  | 5  | 91  | 33 | 280 |
| 5,124 | 3 | 16 | 19 | 174 | 2 | 6  | 4  | 95  | 28 | 291 |
| 5,125 | 2 | 18 | 17 | 203 | 1 | 8  | 4  | 103 | 24 | 332 |
| 5,126 | 2 | 18 | 16 | 204 | 1 | 8  | 4  | 104 | 23 | 334 |
| 5,127 | 2 | 18 | 17 | 206 | 1 | 8  | 4  | 104 | 24 | 336 |
| 5,128 | 2 | 18 | 18 | 209 | 1 | 8  | 4  | 106 | 25 | 341 |
| 5,129 | 1 | 19 | 18 | 197 | 1 | 8  | 4  | 91  | 24 | 315 |
| 5,130 | 1 | 18 | 18 | 181 | 1 | 8  | 4  | 88  | 24 | 295 |
| 5,131 | 1 | 18 | 18 | 183 | 1 | 8  | 4  | 90  | 24 | 299 |
| 5,132 | 1 | 12 | 18 | 173 | 1 | 7  | 4  | 77  | 24 | 269 |
| 5,133 | 1 | 12 | 18 | 171 | 1 | 9  | 3  | 77  | 23 | 269 |
| 5,134 | 1 | 12 | 19 | 167 | 0 | 8  | 2  | 79  | 22 | 266 |
| 5,135 | 1 | 12 | 18 | 167 | 0 | 8  | 2  | 82  | 21 | 269 |
| 5,136 | 1 | 13 | 18 | 183 | 1 | 9  | 4  | 98  | 24 | 303 |
| 5,137 | 1 | 13 | 18 | 190 | 1 | 11 | 6  | 101 | 26 | 315 |
| 5,138 | 1 | 14 | 19 | 189 | 1 | 11 | 6  | 100 | 27 | 314 |
| 5,139 | 1 | 15 | 19 | 190 | 1 | 12 | 6  | 104 | 27 | 321 |
| 5,140 | 1 | 15 | 20 | 192 | 1 | 12 | 12 | 106 | 34 | 325 |
| 5,141 | 1 | 15 | 21 | 193 | 1 | 12 | 12 | 107 | 35 | 327 |
| 5,142 | 0 | 15 | 20 | 193 | 1 | 12 | 12 | 108 | 33 | 328 |
| 5,143 | 1 | 15 | 20 | 193 | 1 | 12 | 16 | 108 | 38 | 328 |
| 5,144 | 1 | 15 | 21 | 193 | 2 | 12 | 17 | 108 | 41 | 328 |
| 5,145 | 1 | 15 | 21 | 193 | 2 | 12 | 18 | 108 | 42 | 328 |
| 5,146 | 1 | 15 | 21 | 194 | 2 | 12 | 18 | 108 | 42 | 329 |
| 5,147 | 1 | 15 | 21 | 196 | 2 | 12 | 18 | 119 | 42 | 342 |
| 5,148 | 1 | 15 | 21 | 197 | 2 | 12 | 18 | 125 | 42 | 349 |
| 5,149 | 1 | 15 | 21 | 206 | 2 | 13 | 18 | 136 | 42 | 370 |
| 5,150 | 1 | 16 | 21 | 217 | 2 | 13 | 18 | 144 | 42 | 390 |
| 5,151 | 1 | 16 | 22 | 227 | 2 | 13 | 18 | 145 | 43 | 401 |
| 5,152 | 1 | 16 | 21 | 227 | 2 | 13 | 18 | 145 | 42 | 401 |
| 5,153 | 1 | 16 | 21 | 232 | 2 | 13 | 19 | 145 | 43 | 406 |
| 5,154 | 1 | 17 | 20 | 241 | 2 | 13 | 19 | 153 | 42 | 424 |

|       |   |    |    |     |   |    |    |     |    |     |
|-------|---|----|----|-----|---|----|----|-----|----|-----|
| 5,155 | 1 | 17 | 20 | 242 | 2 | 13 | 19 | 153 | 42 | 425 |
| 5,156 | 1 | 17 | 20 | 242 | 2 | 15 | 19 | 153 | 42 | 427 |
| 5,157 | 2 | 17 | 19 | 245 | 2 | 15 | 19 | 153 | 42 | 430 |
| 5,158 | 2 | 17 | 19 | 248 | 2 | 15 | 19 | 154 | 42 | 434 |
| 5,159 | 2 | 17 | 17 | 249 | 2 | 15 | 19 | 154 | 40 | 435 |
| 5,160 | 2 | 17 | 17 | 249 | 2 | 15 | 19 | 155 | 40 | 436 |
| 5,161 | 2 | 17 | 17 | 251 | 2 | 15 | 19 | 155 | 40 | 438 |
| 5,162 | 2 | 17 | 17 | 251 | 2 | 15 | 19 | 155 | 40 | 438 |
| 5,163 | 2 | 17 | 16 | 251 | 2 | 15 | 20 | 154 | 40 | 437 |
| 5,164 | 3 | 17 | 15 | 251 | 2 | 15 | 19 | 154 | 39 | 437 |
| 5,165 | 4 | 17 | 15 | 250 | 2 | 15 | 19 | 154 | 40 | 436 |
| 5,166 | 4 | 17 | 15 | 250 | 2 | 15 | 19 | 154 | 40 | 436 |
| 5,167 | 4 | 17 | 13 | 250 | 2 | 15 | 19 | 154 | 38 | 436 |
| 5,168 | 4 | 17 | 13 | 250 | 2 | 15 | 19 | 154 | 38 | 436 |
| 5,169 | 4 | 18 | 13 | 249 | 2 | 15 | 19 | 153 | 38 | 435 |
| 5,170 | 4 | 18 | 13 | 249 | 2 | 14 | 19 | 153 | 38 | 434 |
| 5,171 | 4 | 14 | 13 | 200 | 2 | 13 | 19 | 119 | 38 | 346 |
| 5,172 | 4 | 14 | 13 | 200 | 2 | 13 | 19 | 119 | 38 | 346 |
| 5,173 | 4 | 12 | 16 | 181 | 2 | 12 | 20 | 111 | 42 | 316 |
| 5,174 | 4 | 11 | 16 | 175 | 2 | 12 | 20 | 108 | 42 | 306 |
| 5,175 | 4 | 11 | 16 | 169 | 2 | 11 | 21 | 104 | 43 | 295 |
| 5,176 | 4 | 9  | 17 | 139 | 2 | 9  | 21 | 97  | 44 | 254 |
| 5,177 | 5 | 9  | 18 | 136 | 2 | 9  | 22 | 96  | 47 | 250 |
| 5,178 | 5 | 9  | 18 | 133 | 2 | 9  | 22 | 94  | 47 | 245 |
| 5,179 | 5 | 7  | 17 | 123 | 2 | 9  | 22 | 93  | 46 | 232 |
| 5,180 | 5 | 7  | 17 | 123 | 2 | 9  | 22 | 92  | 46 | 231 |
| 5,181 | 5 | 7  | 17 | 119 | 2 | 9  | 22 | 91  | 46 | 226 |
| 5,182 | 5 | 7  | 20 | 117 | 2 | 9  | 23 | 89  | 50 | 222 |
| 5,183 | 5 | 7  | 22 | 113 | 2 | 9  | 27 | 88  | 56 | 217 |
| 5,184 | 5 | 7  | 22 | 98  | 2 | 7  | 27 | 83  | 56 | 195 |
| 5,185 | 5 | 7  | 21 | 98  | 2 | 7  | 27 | 83  | 55 | 195 |
| 5,186 | 5 | 5  | 21 | 78  | 1 | 7  | 25 | 65  | 52 | 155 |
| 5,187 | 5 | 5  | 21 | 78  | 1 | 7  | 25 | 65  | 52 | 155 |
| 5,188 | 5 | 5  | 21 | 74  | 1 | 5  | 23 | 62  | 50 | 146 |
| 5,189 | 5 | 3  | 20 | 68  | 1 | 4  | 23 | 55  | 49 | 130 |
| 5,190 | 5 | 3  | 20 | 76  | 1 | 4  | 23 | 58  | 49 | 141 |
| 5,191 | 5 | 3  | 18 | 77  | 1 | 4  | 17 | 59  | 41 | 143 |
| 5,192 | 5 | 3  | 17 | 75  | 1 | 4  | 17 | 57  | 40 | 139 |
| 5,193 | 4 | 3  | 17 | 78  | 1 | 4  | 13 | 58  | 35 | 143 |
| 5,194 | 4 | 3  | 16 | 78  | 0 | 4  | 13 | 58  | 33 | 143 |
| 5,195 | 4 | 3  | 16 | 80  | 0 | 4  | 12 | 59  | 32 | 146 |

|       |   |   |    |    |   |   |    |    |    |     |
|-------|---|---|----|----|---|---|----|----|----|-----|
| 5,196 | 4 | 3 | 16 | 80 | 0 | 4 | 11 | 59 | 31 | 146 |
| 5,197 | 4 | 3 | 16 | 77 | 0 | 4 | 11 | 50 | 31 | 134 |
| 5,198 | 4 | 3 | 16 | 77 | 0 | 4 | 11 | 51 | 31 | 135 |
| 5,199 | 4 | 3 | 16 | 76 | 0 | 4 | 11 | 45 | 31 | 128 |
| 5,200 | 4 | 2 | 17 | 56 | 0 | 3 | 11 | 26 | 32 | 87  |
| 5,201 | 4 | 2 | 17 | 56 | 0 | 3 | 11 | 26 | 32 | 87  |
| 5,202 | 4 | 2 | 17 | 40 | 0 | 3 | 11 | 24 | 32 | 69  |
| 5,203 | 4 | 2 | 17 | 40 | 0 | 3 | 11 | 23 | 32 | 68  |
| 5,204 | 4 | 2 | 17 | 41 | 0 | 3 | 10 | 24 | 31 | 70  |
| 5,205 | 4 | 1 | 17 | 35 | 0 | 3 | 10 | 18 | 31 | 57  |
| 5,206 | 4 | 1 | 17 | 34 | 0 | 3 | 10 | 18 | 31 | 56  |
| 5,207 | 4 | 1 | 17 | 31 | 0 | 1 | 10 | 17 | 31 | 50  |
| 5,208 | 3 | 1 | 17 | 28 | 0 | 1 | 10 | 16 | 30 | 46  |
| 5,209 | 3 | 1 | 17 | 27 | 0 | 1 | 10 | 16 | 30 | 45  |
| 5,210 | 3 | 1 | 17 | 27 | 0 | 1 | 10 | 14 | 30 | 43  |
| 5,211 | 3 | 1 | 17 | 25 | 0 | 1 | 9  | 14 | 29 | 41  |
| 5,212 | 3 | 1 | 17 | 25 | 0 | 1 | 9  | 14 | 29 | 41  |
| 5,213 | 3 | 1 | 17 | 25 | 0 | 1 | 9  | 14 | 29 | 41  |
| 5,214 | 3 | 1 | 17 | 25 | 0 | 1 | 8  | 14 | 28 | 41  |
| 5,215 | 2 | 1 | 17 | 25 | 0 | 1 | 8  | 14 | 27 | 41  |
| 5,216 | 1 | 1 | 15 | 27 | 0 | 1 | 8  | 14 | 24 | 43  |
| 5,217 | 1 | 1 | 14 | 27 | 0 | 2 | 8  | 14 | 23 | 44  |
| 5,218 | 1 | 1 | 14 | 29 | 0 | 2 | 9  | 15 | 24 | 47  |
| 5,219 | 1 | 3 | 14 | 29 | 0 | 2 | 9  | 15 | 24 | 49  |
| 5,220 | 1 | 2 | 14 | 40 | 0 | 2 | 9  | 39 | 24 | 83  |
| 5,221 | 1 | 3 | 14 | 54 | 0 | 2 | 9  | 50 | 24 | 109 |
| 5,222 | 1 | 5 | 15 | 65 | 0 | 2 | 9  | 52 | 25 | 124 |
| 5,223 | 1 | 5 | 12 | 67 | 0 | 2 | 8  | 52 | 21 | 126 |
| 5,224 | 1 | 5 | 12 | 69 | 0 | 2 | 8  | 51 | 21 | 127 |
| 5,225 | 1 | 6 | 15 | 69 | 0 | 2 | 8  | 51 | 24 | 128 |
| 5,226 | 1 | 6 | 15 | 70 | 0 | 2 | 8  | 51 | 24 | 129 |
| 5,227 | 1 | 6 | 14 | 74 | 0 | 3 | 8  | 52 | 23 | 135 |
| 5,228 | 0 | 6 | 13 | 74 | 0 | 3 | 7  | 52 | 20 | 135 |
| 5,229 | 0 | 6 | 12 | 75 | 0 | 3 | 7  | 52 | 19 | 136 |
| 5,230 | 0 | 6 | 12 | 75 | 0 | 4 | 8  | 52 | 20 | 137 |
| 5,231 | 0 | 6 | 10 | 75 | 0 | 4 | 8  | 52 | 18 | 137 |
| 5,232 | 0 | 6 | 10 | 75 | 0 | 4 | 7  | 52 | 17 | 137 |
| 5,233 | 0 | 6 | 7  | 75 | 0 | 4 | 4  | 53 | 11 | 138 |
| 5,234 | 0 | 7 | 9  | 75 | 0 | 4 | 4  | 53 | 13 | 139 |
| 5,235 | 0 | 7 | 9  | 75 | 0 | 4 | 4  | 53 | 13 | 139 |
| 5,236 | 0 | 7 | 9  | 75 | 0 | 4 | 4  | 53 | 13 | 139 |



|       |   |    |    |     |   |    |    |     |    |     |
|-------|---|----|----|-----|---|----|----|-----|----|-----|
| 5,237 | 1 | 7  | 10 | 74  | 0 | 3  | 4  | 53  | 15 | 137 |
| 5,238 | 1 | 7  | 10 | 70  | 0 | 3  | 4  | 53  | 15 | 133 |
| 5,239 | 1 | 7  | 9  | 70  | 0 | 3  | 4  | 53  | 14 | 133 |
| 5,240 | 1 | 7  | 9  | 69  | 0 | 3  | 4  | 53  | 14 | 132 |
| 5,241 | 1 | 7  | 9  | 60  | 0 | 3  | 4  | 51  | 14 | 121 |
| 5,242 | 1 | 7  | 9  | 60  | 0 | 3  | 4  | 51  | 14 | 121 |
| 5,243 | 1 | 7  | 12 | 59  | 0 | 3  | 9  | 49  | 22 | 118 |
| 5,244 | 1 | 7  | 12 | 59  | 0 | 3  | 9  | 50  | 22 | 119 |
| 5,245 | 1 | 7  | 14 | 57  | 0 | 3  | 9  | 49  | 24 | 116 |
| 5,246 | 1 | 7  | 14 | 57  | 0 | 3  | 9  | 49  | 24 | 116 |
| 5,247 | 1 | 7  | 14 | 57  | 0 | 3  | 9  | 50  | 24 | 117 |
| 5,248 | 1 | 7  | 14 | 65  | 0 | 4  | 9  | 55  | 24 | 131 |
| 5,249 | 1 | 7  | 14 | 71  | 0 | 4  | 9  | 59  | 24 | 141 |
| 5,250 | 2 | 9  | 15 | 92  | 0 | 5  | 9  | 70  | 26 | 176 |
| 5,251 | 2 | 11 | 15 | 103 | 0 | 7  | 9  | 82  | 26 | 203 |
| 5,252 | 2 | 12 | 14 | 111 | 0 | 7  | 9  | 84  | 25 | 214 |
| 5,253 | 4 | 13 | 20 | 120 | 0 | 8  | 11 | 96  | 35 | 237 |
| 5,254 | 4 | 13 | 20 | 120 | 0 | 8  | 11 | 96  | 35 | 237 |
| 5,255 | 4 | 24 | 20 | 174 | 0 | 9  | 11 | 148 | 35 | 355 |
| 5,256 | 4 | 24 | 20 | 191 | 0 | 9  | 11 | 149 | 35 | 373 |
| 5,257 | 4 | 24 | 20 | 195 | 0 | 9  | 14 | 150 | 38 | 378 |
| 5,258 | 4 | 24 | 20 | 199 | 0 | 9  | 14 | 150 | 38 | 382 |
| 5,259 | 4 | 24 | 20 | 201 | 0 | 9  | 14 | 151 | 38 | 385 |
| 5,260 | 4 | 24 | 20 | 201 | 0 | 9  | 14 | 152 | 38 | 386 |
| 5,261 | 4 | 24 | 20 | 201 | 0 | 9  | 15 | 152 | 39 | 386 |
| 5,262 | 4 | 24 | 21 | 207 | 0 | 9  | 15 | 152 | 40 | 392 |
| 5,263 | 4 | 24 | 21 | 211 | 0 | 10 | 15 | 153 | 40 | 398 |
| 5,264 | 4 | 25 | 21 | 211 | 0 | 10 | 15 | 153 | 40 | 399 |
| 5,265 | 4 | 25 | 22 | 211 | 0 | 11 | 15 | 153 | 41 | 400 |
| 5,266 | 4 | 25 | 22 | 209 | 0 | 11 | 16 | 153 | 42 | 398 |
| 5,267 | 4 | 26 | 23 | 210 | 0 | 11 | 16 | 157 | 43 | 404 |
| 5,268 | 4 | 28 | 24 | 252 | 0 | 14 | 16 | 165 | 44 | 459 |
| 5,269 | 4 | 32 | 24 | 268 | 0 | 16 | 16 | 172 | 44 | 488 |
| 5,270 | 4 | 37 | 24 | 289 | 0 | 16 | 16 | 183 | 44 | 525 |
| 5,271 | 4 | 37 | 24 | 287 | 0 | 17 | 16 | 160 | 44 | 501 |
| 5,272 | 5 | 37 | 25 | 298 | 0 | 17 | 17 | 151 | 47 | 503 |
| 5,273 | 5 | 37 | 24 | 295 | 0 | 17 | 17 | 150 | 46 | 499 |
| 5,274 | 5 | 37 | 21 | 292 | 0 | 17 | 17 | 150 | 43 | 496 |
| 5,275 | 5 | 37 | 21 | 293 | 0 | 17 | 16 | 150 | 42 | 497 |
| 5,276 | 5 | 37 | 22 | 300 | 0 | 17 | 17 | 150 | 44 | 504 |
| 5,277 | 5 | 37 | 22 | 297 | 0 | 16 | 17 | 149 | 44 | 499 |

|       |   |    |    |     |   |    |    |     |    |     |
|-------|---|----|----|-----|---|----|----|-----|----|-----|
| 5,278 | 5 | 37 | 22 | 304 | 0 | 16 | 17 | 149 | 44 | 506 |
| 5,279 | 5 | 39 | 22 | 309 | 0 | 16 | 17 | 150 | 44 | 514 |
| 5,280 | 5 | 40 | 22 | 313 | 0 | 16 | 17 | 153 | 44 | 522 |
| 5,281 | 5 | 46 | 22 | 348 | 0 | 16 | 16 | 178 | 43 | 588 |
| 5,282 | 5 | 49 | 22 | 352 | 0 | 16 | 16 | 178 | 43 | 595 |
| 5,283 | 5 | 53 | 22 | 408 | 0 | 19 | 16 | 190 | 43 | 670 |
| 5,284 | 5 | 54 | 22 | 409 | 0 | 19 | 15 | 191 | 42 | 673 |
| 5,285 | 5 | 54 | 20 | 409 | 0 | 19 | 15 | 191 | 40 | 673 |
| 5,286 | 5 | 54 | 20 | 409 | 0 | 19 | 15 | 191 | 40 | 673 |
| 5,287 | 5 | 54 | 20 | 410 | 1 | 19 | 16 | 192 | 42 | 675 |
| 5,288 | 4 | 54 | 19 | 411 | 1 | 19 | 16 | 192 | 40 | 676 |
| 5,289 | 4 | 55 | 19 | 430 | 1 | 21 | 16 | 196 | 40 | 702 |
| 5,290 | 4 | 58 | 19 | 475 | 1 | 23 | 16 | 209 | 40 | 765 |
| 5,291 | 4 | 58 | 19 | 478 | 1 | 23 | 16 | 210 | 40 | 769 |
| 5,292 | 4 | 58 | 19 | 478 | 1 | 23 | 16 | 208 | 40 | 767 |
| 5,293 | 4 | 58 | 16 | 477 | 1 | 23 | 11 | 209 | 32 | 767 |
| 5,294 | 4 | 58 | 16 | 479 | 1 | 23 | 11 | 208 | 32 | 768 |
| 5,295 | 4 | 58 | 16 | 479 | 1 | 23 | 11 | 208 | 32 | 768 |
| 5,296 | 4 | 58 | 14 | 479 | 1 | 23 | 11 | 208 | 30 | 768 |
| 5,297 | 4 | 58 | 14 | 479 | 1 | 23 | 11 | 208 | 30 | 768 |
| 5,298 | 4 | 58 | 14 | 471 | 1 | 22 | 11 | 200 | 30 | 751 |
| 5,299 | 4 | 56 | 14 | 445 | 1 | 21 | 11 | 185 | 30 | 707 |
| 5,300 | 3 | 56 | 13 | 462 | 1 | 21 | 11 | 187 | 28 | 726 |
| 5,301 | 1 | 56 | 8  | 463 | 1 | 21 | 10 | 187 | 20 | 727 |
| 5,302 | 1 | 53 | 6  | 445 | 1 | 18 | 9  | 173 | 17 | 689 |
| 5,303 | 1 | 54 | 6  | 449 | 1 | 19 | 9  | 174 | 17 | 696 |
| 5,304 | 1 | 53 | 6  | 440 | 1 | 18 | 10 | 164 | 18 | 675 |
| 5,305 | 1 | 42 | 6  | 386 | 1 | 17 | 9  | 114 | 17 | 559 |
| 5,306 | 1 | 42 | 6  | 386 | 1 | 17 | 9  | 114 | 17 | 559 |
| 5,307 | 1 | 42 | 6  | 369 | 1 | 17 | 9  | 111 | 17 | 539 |
| 5,308 | 1 | 42 | 6  | 365 | 1 | 17 | 9  | 110 | 17 | 534 |
| 5,309 | 1 | 42 | 7  | 361 | 2 | 17 | 9  | 110 | 19 | 530 |
| 5,310 | 1 | 42 | 7  | 362 | 2 | 17 | 9  | 111 | 19 | 532 |
| 5,311 | 1 | 42 | 7  | 362 | 2 | 17 | 8  | 110 | 18 | 531 |
| 5,312 | 1 | 43 | 6  | 357 | 2 | 17 | 8  | 110 | 17 | 527 |
| 5,313 | 1 | 43 | 6  | 357 | 2 | 17 | 8  | 110 | 17 | 527 |
| 5,314 | 1 | 45 | 5  | 356 | 2 | 16 | 8  | 109 | 16 | 526 |
| 5,315 | 1 | 45 | 6  | 362 | 2 | 16 | 8  | 109 | 17 | 532 |
| 5,316 | 1 | 46 | 7  | 373 | 2 | 16 | 8  | 110 | 18 | 545 |
| 5,317 | 1 | 45 | 7  | 372 | 2 | 15 | 7  | 106 | 17 | 538 |
| 5,318 | 1 | 45 | 7  | 371 | 2 | 15 | 7  | 106 | 17 | 537 |

|       |   |    |   |     |   |    |   |     |    |     |
|-------|---|----|---|-----|---|----|---|-----|----|-----|
| 5,319 | 2 | 44 | 6 | 348 | 2 | 15 | 7 | 109 | 17 | 516 |
| 5,320 | 2 | 45 | 6 | 400 | 2 | 15 | 6 | 140 | 16 | 600 |
| 5,321 | 2 | 38 | 6 | 385 | 2 | 15 | 5 | 131 | 15 | 569 |
| 5,322 | 2 | 38 | 5 | 386 | 2 | 16 | 5 | 133 | 14 | 573 |
| 5,323 | 1 | 38 | 5 | 383 | 2 | 16 | 5 | 132 | 13 | 569 |
| 5,324 | 1 | 37 | 5 | 386 | 2 | 16 | 5 | 138 | 13 | 577 |
| 5,325 | 1 | 37 | 5 | 385 | 2 | 17 | 5 | 138 | 13 | 577 |
| 5,326 | 1 | 50 | 6 | 523 | 2 | 21 | 5 | 182 | 14 | 776 |
| 5,327 | 1 | 49 | 5 | 516 | 2 | 21 | 4 | 182 | 12 | 768 |
| 5,328 | 1 | 49 | 5 | 515 | 2 | 21 | 4 | 182 | 12 | 767 |
| 5,329 | 2 | 48 | 5 | 505 | 2 | 21 | 5 | 181 | 14 | 755 |
| 5,330 | 2 | 49 | 5 | 502 | 2 | 21 | 5 | 179 | 14 | 751 |
| 5,331 | 2 | 53 | 5 | 518 | 2 | 22 | 5 | 184 | 14 | 777 |
| 5,332 | 2 | 47 | 5 | 484 | 2 | 21 | 5 | 160 | 14 | 712 |
| 5,333 | 3 | 44 | 6 | 482 | 2 | 21 | 6 | 160 | 17 | 707 |
| 5,334 | 3 | 40 | 6 | 426 | 2 | 18 | 7 | 148 | 18 | 632 |
| 5,335 | 3 | 38 | 6 | 425 | 2 | 18 | 7 | 146 | 18 | 627 |
| 5,336 | 3 | 38 | 6 | 424 | 2 | 18 | 7 | 145 | 18 | 625 |
| 5,337 | 3 | 38 | 6 | 424 | 2 | 18 | 7 | 145 | 18 | 625 |
| 5,338 | 3 | 38 | 6 | 424 | 1 | 18 | 6 | 145 | 16 | 625 |
| 5,339 | 3 | 38 | 6 | 424 | 1 | 18 | 6 | 145 | 16 | 625 |
| 5,340 | 3 | 34 | 6 | 360 | 1 | 14 | 6 | 129 | 16 | 537 |
| 5,341 | 3 | 34 | 6 | 357 | 1 | 14 | 6 | 127 | 16 | 532 |
| 5,342 | 3 | 34 | 6 | 357 | 1 | 14 | 6 | 127 | 16 | 532 |
| 5,343 | 3 | 34 | 6 | 357 | 1 | 14 | 6 | 127 | 16 | 532 |
| 5,344 | 3 | 35 | 6 | 357 | 1 | 14 | 6 | 127 | 16 | 533 |
| 5,345 | 3 | 35 | 6 | 356 | 1 | 14 | 6 | 130 | 16 | 535 |
| 5,346 | 3 | 35 | 6 | 360 | 1 | 14 | 6 | 131 | 16 | 540 |
| 5,347 | 3 | 35 | 6 | 360 | 1 | 14 | 6 | 131 | 16 | 540 |
| 5,348 | 3 | 38 | 6 | 365 | 1 | 14 | 6 | 134 | 16 | 551 |
| 5,349 | 3 | 38 | 6 | 365 | 1 | 14 | 6 | 135 | 16 | 552 |
| 5,350 | 3 | 38 | 6 | 347 | 1 | 14 | 6 | 131 | 16 | 530 |
| 5,351 | 3 | 39 | 6 | 346 | 1 | 14 | 7 | 131 | 17 | 530 |
| 5,352 | 3 | 39 | 6 | 346 | 1 | 14 | 7 | 131 | 17 | 530 |
| 5,353 | 3 | 39 | 6 | 345 | 1 | 14 | 7 | 131 | 17 | 529 |
| 5,354 | 3 | 39 | 7 | 351 | 1 | 13 | 7 | 129 | 18 | 532 |
| 5,355 | 3 | 40 | 7 | 357 | 1 | 13 | 6 | 132 | 17 | 542 |
| 5,356 | 4 | 40 | 8 | 358 | 1 | 13 | 6 | 136 | 19 | 547 |
| 5,357 | 4 | 40 | 8 | 360 | 1 | 13 | 5 | 137 | 18 | 550 |
| 5,358 | 4 | 40 | 8 | 357 | 1 | 13 | 4 | 137 | 17 | 547 |
| 5,359 | 4 | 41 | 8 | 359 | 1 | 13 | 4 | 137 | 17 | 550 |

|       |   |    |    |     |   |    |    |     |    |     |
|-------|---|----|----|-----|---|----|----|-----|----|-----|
| 5,360 | 4 | 42 | 7  | 360 | 0 | 13 | 4  | 138 | 15 | 553 |
| 5,361 | 4 | 42 | 8  | 361 | 0 | 13 | 4  | 138 | 16 | 554 |
| 5,362 | 4 | 42 | 8  | 372 | 0 | 14 | 4  | 143 | 16 | 571 |
| 5,363 | 4 | 41 | 8  | 371 | 0 | 14 | 4  | 143 | 16 | 569 |
| 5,364 | 4 | 37 | 9  | 352 | 0 | 14 | 4  | 141 | 17 | 544 |
| 5,365 | 4 | 37 | 9  | 352 | 0 | 14 | 4  | 141 | 17 | 544 |
| 5,366 | 4 | 37 | 8  | 352 | 0 | 14 | 4  | 141 | 16 | 544 |
| 5,367 | 4 | 37 | 7  | 356 | 0 | 14 | 4  | 141 | 15 | 548 |
| 5,368 | 4 | 37 | 7  | 357 | 0 | 14 | 4  | 141 | 15 | 549 |
| 5,369 | 4 | 36 | 6  | 338 | 0 | 11 | 4  | 130 | 14 | 515 |
| 5,370 | 3 | 31 | 6  | 272 | 0 | 9  | 4  | 92  | 13 | 404 |
| 5,371 | 3 | 29 | 6  | 223 | 0 | 7  | 4  | 80  | 13 | 339 |
| 5,372 | 4 | 29 | 7  | 223 | 0 | 7  | 4  | 80  | 15 | 339 |
| 5,373 | 4 | 29 | 8  | 223 | 0 | 7  | 4  | 81  | 16 | 340 |
| 5,374 | 4 | 29 | 8  | 223 | 0 | 7  | 4  | 81  | 16 | 340 |
| 5,375 | 4 | 29 | 8  | 228 | 0 | 7  | 5  | 82  | 17 | 346 |
| 5,376 | 5 | 29 | 9  | 225 | 1 | 6  | 7  | 81  | 22 | 341 |
| 5,377 | 5 | 16 | 8  | 89  | 1 | 2  | 7  | 37  | 21 | 144 |
| 5,378 | 5 | 16 | 8  | 90  | 1 | 2  | 10 | 37  | 24 | 145 |
| 5,379 | 5 | 16 | 8  | 91  | 1 | 2  | 10 | 37  | 24 | 146 |
| 5,380 | 4 | 15 | 8  | 90  | 1 | 2  | 9  | 38  | 22 | 145 |
| 5,381 | 4 | 13 | 8  | 90  | 1 | 2  | 11 | 37  | 24 | 142 |
| 5,382 | 4 | 9  | 8  | 73  | 1 | 1  | 11 | 35  | 24 | 118 |
| 5,383 | 4 | 9  | 8  | 75  | 1 | 1  | 11 | 36  | 24 | 121 |
| 5,384 | 3 | 9  | 8  | 81  | 1 | 1  | 10 | 36  | 22 | 127 |
| 5,385 | 3 | 9  | 8  | 81  | 1 | 1  | 9  | 36  | 21 | 127 |
| 5,386 | 3 | 9  | 8  | 81  | 1 | 1  | 9  | 36  | 21 | 127 |
| 5,387 | 3 | 9  | 8  | 81  | 1 | 1  | 9  | 36  | 21 | 127 |
| 5,388 | 3 | 9  | 8  | 81  | 1 | 1  | 9  | 36  | 21 | 127 |
| 5,389 | 3 | 9  | 8  | 81  | 1 | 1  | 9  | 36  | 21 | 127 |
| 5,390 | 4 | 9  | 8  | 80  | 1 | 1  | 11 | 36  | 24 | 126 |
| 5,391 | 4 | 9  | 8  | 80  | 1 | 1  | 11 | 36  | 24 | 126 |
| 5,392 | 4 | 9  | 8  | 80  | 1 | 1  | 11 | 36  | 24 | 126 |
| 5,393 | 4 | 10 | 8  | 80  | 1 | 1  | 12 | 36  | 25 | 127 |
| 5,394 | 4 | 10 | 8  | 82  | 1 | 1  | 12 | 39  | 25 | 132 |
| 5,395 | 4 | 9  | 10 | 95  | 1 | 2  | 13 | 53  | 28 | 159 |
| 5,396 | 4 | 9  | 10 | 100 | 1 | 2  | 13 | 62  | 28 | 173 |
| 5,397 | 4 | 9  | 10 | 96  | 1 | 2  | 13 | 61  | 28 | 168 |
| 5,398 | 4 | 6  | 11 | 91  | 1 | 2  | 15 | 58  | 31 | 157 |
| 5,399 | 4 | 7  | 11 | 97  | 1 | 2  | 15 | 63  | 31 | 169 |
| 5,400 | 4 | 7  | 11 | 97  | 1 | 2  | 15 | 63  | 31 | 169 |

|       |   |    |    |     |   |   |    |    |    |     |
|-------|---|----|----|-----|---|---|----|----|----|-----|
| 5,401 | 4 | 7  | 11 | 99  | 1 | 2 | 15 | 63 | 31 | 171 |
| 5,402 | 4 | 6  | 12 | 100 | 1 | 2 | 14 | 63 | 31 | 171 |
| 5,403 | 4 | 6  | 16 | 100 | 1 | 2 | 14 | 63 | 35 | 171 |
| 5,404 | 4 | 6  | 16 | 100 | 1 | 2 | 14 | 64 | 35 | 172 |
| 5,405 | 5 | 5  | 15 | 84  | 1 | 2 | 16 | 58 | 37 | 149 |
| 5,406 | 5 | 9  | 15 | 117 | 1 | 2 | 16 | 75 | 37 | 203 |
| 5,407 | 4 | 9  | 14 | 119 | 1 | 4 | 16 | 79 | 35 | 211 |
| 5,408 | 5 | 11 | 19 | 120 | 1 | 4 | 17 | 78 | 42 | 213 |
| 5,409 | 5 | 10 | 21 | 120 | 1 | 4 | 17 | 80 | 44 | 214 |
| 5,410 | 5 | 9  | 22 | 117 | 1 | 4 | 17 | 77 | 45 | 207 |
| 5,411 | 5 | 9  | 22 | 116 | 2 | 4 | 22 | 76 | 51 | 205 |
| 5,412 | 5 | 9  | 22 | 117 | 2 | 4 | 22 | 77 | 51 | 207 |
| 5,413 | 5 | 9  | 25 | 106 | 2 | 3 | 22 | 73 | 54 | 191 |
| 5,414 | 5 | 9  | 25 | 106 | 2 | 3 | 22 | 73 | 54 | 191 |
| 5,415 | 5 | 9  | 24 | 105 | 2 | 3 | 22 | 73 | 53 | 190 |
| 5,416 | 5 | 9  | 25 | 105 | 2 | 3 | 22 | 74 | 54 | 191 |
| 5,417 | 5 | 9  | 25 | 103 | 2 | 3 | 22 | 73 | 54 | 188 |
| 5,418 | 5 | 9  | 25 | 99  | 2 | 3 | 22 | 73 | 54 | 184 |
| 5,419 | 5 | 9  | 26 | 103 | 2 | 3 | 22 | 79 | 55 | 194 |
| 5,420 | 5 | 9  | 26 | 103 | 2 | 3 | 22 | 80 | 55 | 195 |
| 5,421 | 5 | 9  | 28 | 105 | 2 | 3 | 22 | 81 | 57 | 198 |
| 5,422 | 5 | 9  | 28 | 105 | 2 | 3 | 22 | 81 | 57 | 198 |
| 5,423 | 4 | 9  | 27 | 105 | 2 | 3 | 22 | 82 | 55 | 199 |
| 5,424 | 4 | 9  | 26 | 100 | 2 | 3 | 22 | 81 | 54 | 193 |
| 5,425 | 4 | 9  | 30 | 101 | 2 | 3 | 21 | 82 | 57 | 195 |
| 5,426 | 4 | 9  | 31 | 101 | 3 | 3 | 22 | 82 | 60 | 195 |
| 5,427 | 4 | 9  | 31 | 101 | 3 | 3 | 24 | 82 | 62 | 195 |
| 5,428 | 4 | 9  | 34 | 99  | 3 | 3 | 23 | 82 | 64 | 193 |
| 5,429 | 5 | 9  | 35 | 98  | 3 | 3 | 26 | 82 | 69 | 192 |
| 5,430 | 5 | 9  | 35 | 97  | 3 | 3 | 26 | 81 | 69 | 190 |
| 5,431 | 5 | 9  | 35 | 98  | 3 | 3 | 26 | 81 | 69 | 191 |
| 5,432 | 5 | 9  | 36 | 96  | 3 | 3 | 25 | 78 | 69 | 186 |
| 5,433 | 5 | 9  | 36 | 96  | 3 | 3 | 26 | 78 | 70 | 186 |
| 5,434 | 5 | 9  | 35 | 86  | 3 | 3 | 26 | 77 | 69 | 175 |
| 5,435 | 5 | 10 | 35 | 87  | 3 | 3 | 26 | 77 | 69 | 177 |
| 5,436 | 6 | 10 | 35 | 87  | 3 | 3 | 27 | 77 | 71 | 177 |
| 5,437 | 6 | 10 | 35 | 87  | 3 | 3 | 27 | 79 | 71 | 179 |
| 5,438 | 6 | 10 | 35 | 88  | 3 | 3 | 27 | 79 | 71 | 180 |
| 5,439 | 6 | 10 | 35 | 97  | 3 | 3 | 27 | 84 | 71 | 194 |
| 5,440 | 6 | 10 | 35 | 97  | 3 | 4 | 26 | 84 | 70 | 195 |
| 5,441 | 5 | 11 | 35 | 99  | 3 | 6 | 25 | 92 | 68 | 208 |

|       |   |    |    |     |   |    |    |     |    |     |
|-------|---|----|----|-----|---|----|----|-----|----|-----|
| 5,442 | 5 | 11 | 35 | 100 | 3 | 6  | 24 | 93  | 67 | 210 |
| 5,443 | 5 | 11 | 35 | 101 | 3 | 6  | 24 | 94  | 67 | 212 |
| 5,444 | 5 | 11 | 35 | 109 | 3 | 6  | 24 | 107 | 67 | 233 |
| 5,445 | 5 | 12 | 35 | 111 | 3 | 6  | 24 | 110 | 67 | 239 |
| 5,446 | 5 | 12 | 33 | 97  | 3 | 5  | 23 | 95  | 64 | 209 |
| 5,447 | 5 | 12 | 33 | 91  | 3 | 5  | 23 | 83  | 64 | 191 |
| 5,448 | 5 | 12 | 33 | 91  | 3 | 5  | 23 | 83  | 64 | 191 |
| 5,449 | 5 | 12 | 33 | 91  | 3 | 5  | 21 | 83  | 62 | 191 |
| 5,450 | 5 | 11 | 33 | 85  | 3 | 5  | 21 | 78  | 62 | 179 |
| 5,451 | 5 | 11 | 33 | 87  | 3 | 5  | 21 | 78  | 62 | 181 |
| 5,452 | 6 | 12 | 32 | 86  | 3 | 5  | 21 | 80  | 62 | 183 |
| 5,453 | 6 | 12 | 32 | 85  | 3 | 5  | 21 | 80  | 62 | 182 |
| 5,454 | 6 | 12 | 28 | 85  | 3 | 5  | 21 | 79  | 58 | 181 |
| 5,455 | 6 | 12 | 28 | 90  | 3 | 5  | 21 | 80  | 58 | 187 |
| 5,456 | 5 | 11 | 28 | 89  | 3 | 5  | 19 | 77  | 55 | 182 |
| 5,457 | 5 | 7  | 28 | 57  | 3 | 5  | 20 | 64  | 56 | 133 |
| 5,458 | 5 | 7  | 29 | 55  | 3 | 3  | 20 | 60  | 57 | 125 |
| 5,459 | 4 | 5  | 24 | 52  | 3 | 3  | 19 | 61  | 50 | 121 |
| 5,460 | 4 | 5  | 22 | 49  | 3 | 3  | 19 | 59  | 48 | 116 |
| 5,461 | 4 | 5  | 21 | 49  | 3 | 3  | 19 | 59  | 47 | 116 |
| 5,462 | 4 | 5  | 22 | 49  | 3 | 3  | 19 | 58  | 48 | 115 |
| 5,463 | 4 | 5  | 22 | 49  | 3 | 3  | 19 | 59  | 48 | 116 |
| 5,464 | 4 | 5  | 19 | 49  | 3 | 3  | 19 | 59  | 45 | 116 |
| 5,465 | 4 | 5  | 19 | 49  | 3 | 3  | 19 | 59  | 45 | 116 |
| 5,466 | 4 | 5  | 18 | 49  | 3 | 3  | 19 | 58  | 44 | 115 |
| 5,467 | 4 | 6  | 19 | 49  | 3 | 3  | 20 | 58  | 46 | 116 |
| 5,468 | 4 | 6  | 19 | 49  | 3 | 3  | 20 | 58  | 46 | 116 |
| 5,469 | 4 | 6  | 18 | 45  | 3 | 3  | 22 | 52  | 47 | 106 |
| 5,470 | 4 | 6  | 18 | 45  | 3 | 3  | 22 | 51  | 47 | 105 |
| 5,471 | 4 | 6  | 17 | 45  | 3 | 3  | 22 | 51  | 46 | 105 |
| 5,472 | 4 | 6  | 23 | 44  | 3 | 3  | 24 | 54  | 54 | 107 |
| 5,473 | 4 | 7  | 23 | 51  | 3 | 3  | 24 | 60  | 54 | 121 |
| 5,474 | 4 | 8  | 24 | 190 | 3 | 12 | 27 | 116 | 58 | 326 |
| 5,475 | 4 | 13 | 25 | 281 | 3 | 18 | 27 | 171 | 59 | 483 |
| 5,476 | 4 | 15 | 21 | 305 | 3 | 19 | 27 | 181 | 55 | 520 |
| 5,477 | 4 | 18 | 20 | 352 | 2 | 21 | 25 | 188 | 51 | 579 |
| 5,478 | 3 | 18 | 19 | 366 | 1 | 21 | 22 | 188 | 45 | 593 |
| 5,479 | 3 | 18 | 16 | 378 | 1 | 21 | 21 | 191 | 41 | 608 |
| 5,480 | 2 | 20 | 15 | 416 | 1 | 22 | 18 | 222 | 36 | 680 |
| 5,481 | 2 | 21 | 17 | 438 | 1 | 23 | 18 | 241 | 38 | 723 |
| 5,482 | 2 | 22 | 16 | 442 | 1 | 23 | 17 | 242 | 36 | 729 |

|       |   |    |    |     |   |    |    |     |     |     |
|-------|---|----|----|-----|---|----|----|-----|-----|-----|
| 5,483 | 2 | 23 | 17 | 449 | 1 | 23 | 17 | 250 | 37  | 745 |
| 5,484 | 2 | 23 | 17 | 458 | 1 | 23 | 16 | 256 | 36  | 760 |
| 5,485 | 2 | 23 | 17 | 460 | 1 | 23 | 16 | 256 | 36  | 762 |
| 5,486 | 2 | 22 | 23 | 461 | 1 | 23 | 17 | 256 | 43  | 762 |
| 5,487 | 1 | 25 | 23 | 462 | 1 | 23 | 16 | 257 | 41  | 767 |
| 5,488 | 1 | 25 | 23 | 462 | 1 | 23 | 16 | 256 | 41  | 766 |
| 5,489 | 1 | 25 | 24 | 461 | 1 | 23 | 16 | 258 | 42  | 767 |
| 5,490 | 1 | 25 | 24 | 454 | 1 | 23 | 16 | 254 | 42  | 756 |
| 5,491 | 1 | 26 | 24 | 465 | 1 | 24 | 16 | 261 | 42  | 776 |
| 5,492 | 1 | 25 | 24 | 463 | 1 | 22 | 16 | 253 | 42  | 763 |
| 5,493 | 1 | 25 | 24 | 464 | 2 | 22 | 19 | 253 | 46  | 764 |
| 5,494 | 1 | 25 | 24 | 463 | 2 | 23 | 19 | 253 | 46  | 764 |
| 5,495 | 1 | 24 | 24 | 457 | 2 | 24 | 19 | 243 | 46  | 748 |
| 5,496 | 1 | 23 | 24 | 453 | 2 | 24 | 19 | 238 | 46  | 738 |
| 5,497 | 1 | 23 | 28 | 453 | 2 | 24 | 19 | 238 | 50  | 738 |
| 5,498 | 1 | 23 | 29 | 456 | 2 | 24 | 19 | 238 | 51  | 741 |
| 5,499 | 1 | 23 | 29 | 459 | 2 | 25 | 19 | 241 | 51  | 748 |
| 5,500 | 1 | 23 | 35 | 461 | 2 | 25 | 23 | 243 | 61  | 752 |
| 5,501 | 1 | 25 | 35 | 519 | 2 | 25 | 23 | 269 | 61  | 838 |
| 5,502 | 1 | 25 | 44 | 523 | 3 | 25 | 28 | 272 | 76  | 845 |
| 5,503 | 0 | 24 | 51 | 523 | 3 | 25 | 33 | 270 | 87  | 842 |
| 5,504 | 0 | 24 | 56 | 525 | 5 | 26 | 38 | 270 | 99  | 845 |
| 5,505 | 0 | 24 | 56 | 526 | 5 | 26 | 38 | 270 | 99  | 846 |
| 5,506 | 0 | 24 | 58 | 530 | 5 | 27 | 38 | 272 | 101 | 853 |
| 5,507 | 0 | 24 | 58 | 530 | 5 | 27 | 37 | 272 | 100 | 853 |
| 5,508 | 1 | 24 | 62 | 531 | 5 | 27 | 40 | 268 | 108 | 850 |
| 5,509 | 1 | 24 | 62 | 532 | 5 | 27 | 41 | 269 | 109 | 852 |
| 5,510 | 1 | 24 | 62 | 531 | 5 | 27 | 41 | 267 | 109 | 849 |
| 5,511 | 1 | 24 | 64 | 533 | 5 | 27 | 42 | 267 | 112 | 851 |
| 5,512 | 1 | 24 | 64 | 533 | 5 | 28 | 42 | 269 | 112 | 854 |
| 5,513 | 1 | 24 | 62 | 533 | 4 | 28 | 37 | 268 | 104 | 853 |
| 5,514 | 1 | 24 | 62 | 533 | 4 | 28 | 37 | 268 | 104 | 853 |
| 5,515 | 1 | 24 | 62 | 533 | 4 | 28 | 37 | 268 | 104 | 853 |
| 5,516 | 1 | 23 | 62 | 533 | 4 | 28 | 37 | 268 | 104 | 852 |
| 5,517 | 1 | 23 | 62 | 533 | 4 | 28 | 38 | 268 | 105 | 852 |
| 5,518 | 1 | 23 | 61 | 533 | 4 | 28 | 37 | 268 | 103 | 852 |
| 5,519 | 1 | 23 | 63 | 533 | 4 | 28 | 39 | 270 | 107 | 854 |
| 5,520 | 1 | 24 | 63 | 532 | 4 | 28 | 37 | 270 | 105 | 854 |
| 5,521 | 1 | 24 | 63 | 532 | 4 | 28 | 37 | 270 | 105 | 854 |
| 5,522 | 2 | 24 | 64 | 534 | 5 | 28 | 37 | 271 | 108 | 857 |
| 5,523 | 2 | 24 | 60 | 532 | 5 | 27 | 35 | 267 | 102 | 850 |

|       |   |    |    |     |   |    |    |     |     |     |
|-------|---|----|----|-----|---|----|----|-----|-----|-----|
| 5,524 | 2 | 26 | 60 | 524 | 5 | 28 | 32 | 266 | 99  | 844 |
| 5,525 | 2 | 25 | 59 | 386 | 5 | 19 | 32 | 210 | 98  | 640 |
| 5,526 | 3 | 20 | 61 | 296 | 5 | 13 | 38 | 157 | 107 | 486 |
| 5,527 | 3 | 18 | 61 | 271 | 5 | 13 | 38 | 146 | 107 | 448 |
| 5,528 | 3 | 15 | 61 | 224 | 5 | 11 | 38 | 140 | 107 | 390 |
| 5,529 | 3 | 15 | 61 | 210 | 5 | 11 | 38 | 140 | 107 | 376 |
| 5,530 | 3 | 15 | 61 | 198 | 5 | 11 | 37 | 138 | 106 | 362 |
| 5,531 | 3 | 13 | 61 | 160 | 5 | 10 | 37 | 108 | 106 | 291 |
| 5,532 | 3 | 12 | 59 | 140 | 5 | 11 | 38 | 95  | 105 | 258 |
| 5,533 | 3 | 11 | 59 | 138 | 5 | 11 | 38 | 94  | 105 | 254 |
| 5,534 | 3 | 10 | 58 | 131 | 5 | 11 | 38 | 86  | 104 | 238 |
| 5,535 | 3 | 10 | 58 | 122 | 5 | 11 | 38 | 80  | 104 | 223 |
| 5,536 | 3 | 10 | 52 | 118 | 5 | 11 | 37 | 80  | 97  | 219 |
| 5,537 | 3 | 10 | 52 | 118 | 5 | 11 | 37 | 80  | 97  | 219 |
| 5,538 | 3 | 7  | 51 | 117 | 5 | 11 | 38 | 78  | 97  | 213 |
| 5,539 | 3 | 7  | 51 | 117 | 5 | 11 | 38 | 78  | 97  | 213 |
| 5,540 | 3 | 7  | 51 | 117 | 5 | 11 | 38 | 76  | 97  | 211 |
| 5,541 | 3 | 7  | 51 | 104 | 5 | 9  | 38 | 68  | 97  | 188 |
| 5,542 | 4 | 7  | 51 | 104 | 5 | 9  | 38 | 68  | 98  | 188 |
| 5,543 | 4 | 7  | 51 | 104 | 4 | 9  | 35 | 69  | 94  | 189 |
| 5,544 | 4 | 7  | 51 | 102 | 4 | 9  | 35 | 67  | 94  | 185 |
| 5,545 | 5 | 7  | 51 | 102 | 4 | 8  | 35 | 67  | 95  | 184 |
| 5,546 | 5 | 8  | 51 | 100 | 4 | 7  | 35 | 63  | 95  | 178 |
| 5,547 | 5 | 8  | 51 | 100 | 4 | 7  | 35 | 63  | 95  | 178 |
| 5,548 | 5 | 8  | 47 | 97  | 4 | 7  | 35 | 63  | 91  | 175 |
| 5,549 | 5 | 8  | 46 | 97  | 4 | 7  | 35 | 63  | 90  | 175 |
| 5,550 | 5 | 8  | 40 | 92  | 4 | 6  | 32 | 58  | 81  | 164 |
| 5,551 | 5 | 6  | 39 | 34  | 4 | 6  | 31 | 31  | 79  | 77  |
| 5,552 | 5 | 7  | 40 | 35  | 4 | 7  | 31 | 31  | 80  | 80  |
| 5,553 | 5 | 7  | 31 | 31  | 3 | 7  | 26 | 28  | 65  | 73  |
| 5,554 | 5 | 7  | 24 | 32  | 3 | 7  | 21 | 30  | 53  | 76  |
| 5,555 | 5 | 7  | 21 | 32  | 1 | 6  | 16 | 31  | 43  | 76  |
| 5,556 | 5 | 7  | 21 | 32  | 1 | 6  | 16 | 31  | 43  | 76  |
| 5,557 | 5 | 7  | 19 | 20  | 1 | 5  | 16 | 28  | 41  | 60  |
| 5,558 | 5 | 7  | 19 | 21  | 1 | 5  | 16 | 31  | 41  | 64  |
| 5,559 | 4 | 8  | 15 | 22  | 1 | 5  | 13 | 31  | 33  | 66  |
| 5,560 | 4 | 8  | 14 | 22  | 1 | 5  | 12 | 33  | 31  | 68  |
| 5,561 | 4 | 8  | 14 | 25  | 1 | 5  | 12 | 33  | 31  | 71  |
| 5,562 | 4 | 9  | 12 | 27  | 1 | 6  | 11 | 38  | 28  | 80  |
| 5,563 | 4 | 9  | 12 | 29  | 1 | 5  | 11 | 35  | 28  | 78  |
| 5,564 | 5 | 9  | 13 | 29  | 1 | 5  | 12 | 35  | 31  | 78  |



|       |   |   |    |    |   |   |    |    |    |    |
|-------|---|---|----|----|---|---|----|----|----|----|
| 5,565 | 5 | 9 | 13 | 29 | 1 | 5 | 12 | 35 | 31 | 78 |
| 5,566 | 5 | 9 | 13 | 29 | 1 | 5 | 12 | 35 | 31 | 78 |
| 5,567 | 5 | 9 | 14 | 29 | 1 | 5 | 13 | 33 | 33 | 76 |
| 5,568 | 5 | 9 | 15 | 29 | 1 | 5 | 12 | 34 | 33 | 77 |
| 5,569 | 5 | 9 | 15 | 29 | 1 | 5 | 12 | 34 | 33 | 77 |
| 5,570 | 5 | 9 | 13 | 31 | 1 | 5 | 10 | 33 | 29 | 78 |
| 5,571 | 5 | 8 | 13 | 31 | 1 | 5 | 10 | 33 | 29 | 77 |
| 5,572 | 5 | 8 | 13 | 32 | 1 | 4 | 10 | 33 | 29 | 77 |
| 5,573 | 4 | 8 | 11 | 30 | 0 | 4 | 10 | 33 | 25 | 75 |
| 5,574 | 4 | 5 | 9  | 29 | 0 | 3 | 10 | 29 | 23 | 66 |
| 5,575 | 4 | 5 | 9  | 29 | 0 | 3 | 9  | 29 | 22 | 66 |
| 5,576 | 3 | 5 | 9  | 28 | 0 | 3 | 6  | 27 | 18 | 63 |
| 5,577 | 3 | 5 | 9  | 28 | 0 | 3 | 6  | 27 | 18 | 63 |
| 5,578 | 3 | 5 | 9  | 28 | 0 | 3 | 6  | 26 | 18 | 62 |
| 5,579 | 3 | 5 | 9  | 28 | 0 | 3 | 6  | 26 | 18 | 62 |
| 5,580 | 3 | 5 | 9  | 28 | 0 | 3 | 6  | 26 | 18 | 62 |
| 5,581 | 4 | 5 | 9  | 28 | 0 | 3 | 7  | 25 | 20 | 61 |
| 5,582 | 4 | 5 | 9  | 28 | 0 | 3 | 6  | 24 | 19 | 60 |
| 5,583 | 4 | 5 | 9  | 26 | 0 | 2 | 6  | 18 | 19 | 51 |
| 5,584 | 4 | 5 | 9  | 24 | 0 | 2 | 6  | 18 | 19 | 49 |
| 5,585 | 4 | 5 | 9  | 24 | 0 | 2 | 6  | 18 | 19 | 49 |
| 5,586 | 4 | 5 | 10 | 24 | 0 | 2 | 6  | 18 | 20 | 49 |
| 5,587 | 4 | 5 | 11 | 24 | 0 | 2 | 7  | 18 | 22 | 49 |
| 5,588 | 4 | 5 | 11 | 24 | 0 | 2 | 7  | 19 | 22 | 50 |
| 5,589 | 4 | 5 | 15 | 24 | 0 | 2 | 11 | 19 | 30 | 50 |
| 5,590 | 4 | 5 | 15 | 24 | 0 | 2 | 11 | 19 | 30 | 50 |
| 5,591 | 4 | 5 | 15 | 25 | 0 | 2 | 11 | 19 | 30 | 51 |
| 5,592 | 4 | 4 | 15 | 25 | 0 | 2 | 11 | 19 | 30 | 50 |
| 5,593 | 3 | 4 | 15 | 26 | 0 | 2 | 11 | 18 | 29 | 50 |
| 5,594 | 3 | 4 | 15 | 30 | 0 | 3 | 11 | 19 | 29 | 56 |
| 5,595 | 2 | 4 | 15 | 31 | 0 | 3 | 11 | 19 | 28 | 57 |
| 5,596 | 2 | 4 | 15 | 31 | 0 | 3 | 11 | 20 | 28 | 58 |
| 5,597 | 2 | 3 | 15 | 31 | 0 | 3 | 11 | 20 | 28 | 57 |
| 5,598 | 2 | 3 | 15 | 31 | 0 | 3 | 11 | 20 | 28 | 57 |
| 5,599 | 3 | 3 | 15 | 32 | 0 | 3 | 11 | 20 | 29 | 58 |
| 5,600 | 3 | 3 | 15 | 35 | 0 | 3 | 11 | 20 | 29 | 61 |
| 5,601 | 3 | 3 | 15 | 37 | 0 | 3 | 11 | 20 | 29 | 63 |
| 5,602 | 3 | 3 | 15 | 38 | 0 | 3 | 11 | 23 | 29 | 67 |
| 5,603 | 3 | 2 | 14 | 41 | 0 | 2 | 11 | 23 | 28 | 68 |
| 5,604 | 3 | 2 | 14 | 41 | 0 | 2 | 11 | 23 | 28 | 68 |
| 5,605 | 3 | 2 | 14 | 41 | 0 | 2 | 11 | 21 | 28 | 66 |

|       |   |   |    |    |   |   |    |    |    |     |
|-------|---|---|----|----|---|---|----|----|----|-----|
| 5,606 | 3 | 2 | 12 | 38 | 0 | 2 | 11 | 18 | 26 | 60  |
| 5,607 | 3 | 2 | 12 | 38 | 0 | 2 | 11 | 18 | 26 | 60  |
| 5,608 | 3 | 2 | 12 | 39 | 0 | 2 | 11 | 18 | 26 | 61  |
| 5,609 | 3 | 1 | 12 | 37 | 0 | 2 | 11 | 16 | 26 | 56  |
| 5,610 | 3 | 1 | 12 | 37 | 0 | 3 | 11 | 17 | 26 | 58  |
| 5,611 | 3 | 1 | 14 | 37 | 0 | 3 | 12 | 17 | 29 | 58  |
| 5,612 | 3 | 1 | 15 | 36 | 0 | 3 | 12 | 19 | 30 | 59  |
| 5,613 | 3 | 1 | 15 | 36 | 0 | 3 | 11 | 13 | 29 | 53  |
| 5,614 | 2 | 1 | 14 | 36 | 0 | 3 | 12 | 16 | 28 | 56  |
| 5,615 | 2 | 2 | 14 | 60 | 0 | 3 | 12 | 24 | 28 | 89  |
| 5,616 | 2 | 2 | 15 | 65 | 0 | 3 | 14 | 25 | 31 | 95  |
| 5,617 | 2 | 2 | 15 | 66 | 0 | 3 | 13 | 25 | 30 | 96  |
| 5,618 | 2 | 2 | 14 | 69 | 0 | 3 | 14 | 25 | 30 | 99  |
| 5,619 | 2 | 2 | 13 | 70 | 0 | 3 | 14 | 24 | 29 | 99  |
| 5,620 | 2 | 2 | 14 | 68 | 0 | 3 | 14 | 23 | 30 | 96  |
| 5,621 | 2 | 2 | 15 | 70 | 0 | 3 | 16 | 24 | 33 | 99  |
| 5,622 | 2 | 2 | 15 | 70 | 0 | 3 | 16 | 24 | 33 | 99  |
| 5,623 | 2 | 2 | 15 | 69 | 0 | 3 | 21 | 24 | 38 | 98  |
| 5,624 | 2 | 2 | 15 | 69 | 0 | 3 | 21 | 24 | 38 | 98  |
| 5,625 | 2 | 2 | 19 | 69 | 2 | 3 | 24 | 24 | 47 | 98  |
| 5,626 | 3 | 2 | 20 | 69 | 2 | 3 | 24 | 24 | 49 | 98  |
| 5,627 | 3 | 2 | 17 | 69 | 3 | 3 | 22 | 24 | 45 | 98  |
| 5,628 | 4 | 3 | 23 | 69 | 3 | 3 | 22 | 24 | 52 | 99  |
| 5,629 | 4 | 3 | 23 | 69 | 4 | 3 | 23 | 24 | 54 | 99  |
| 5,630 | 3 | 3 | 23 | 69 | 4 | 3 | 22 | 24 | 52 | 99  |
| 5,631 | 3 | 3 | 23 | 69 | 4 | 3 | 22 | 24 | 52 | 99  |
| 5,632 | 3 | 3 | 23 | 69 | 4 | 3 | 22 | 24 | 52 | 99  |
| 5,633 | 3 | 3 | 23 | 68 | 4 | 3 | 22 | 24 | 52 | 98  |
| 5,634 | 3 | 3 | 23 | 68 | 4 | 3 | 22 | 24 | 52 | 98  |
| 5,635 | 3 | 3 | 24 | 68 | 4 | 3 | 22 | 24 | 53 | 98  |
| 5,636 | 3 | 3 | 24 | 70 | 4 | 3 | 22 | 28 | 53 | 104 |
| 5,637 | 3 | 3 | 23 | 70 | 4 | 3 | 22 | 28 | 52 | 104 |
| 5,638 | 3 | 3 | 22 | 73 | 4 | 3 | 21 | 30 | 50 | 109 |
| 5,639 | 3 | 3 | 21 | 73 | 4 | 3 | 22 | 30 | 50 | 109 |
| 5,640 | 3 | 3 | 22 | 73 | 5 | 3 | 19 | 30 | 49 | 109 |
| 5,641 | 3 | 3 | 22 | 73 | 5 | 3 | 19 | 31 | 49 | 110 |
| 5,642 | 6 | 3 | 29 | 72 | 5 | 3 | 22 | 31 | 62 | 109 |
| 5,643 | 6 | 4 | 32 | 71 | 5 | 3 | 22 | 31 | 65 | 109 |
| 5,644 | 6 | 4 | 32 | 71 | 5 | 3 | 22 | 31 | 65 | 109 |
| 5,645 | 6 | 4 | 35 | 66 | 5 | 2 | 23 | 29 | 69 | 101 |
| 5,646 | 6 | 4 | 35 | 66 | 5 | 2 | 23 | 29 | 69 | 101 |

|       |   |   |    |    |   |    |    |    |    |     |
|-------|---|---|----|----|---|----|----|----|----|-----|
| 5,647 | 6 | 4 | 36 | 66 | 5 | 2  | 24 | 29 | 71 | 101 |
| 5,648 | 6 | 4 | 36 | 66 | 5 | 2  | 24 | 29 | 71 | 101 |
| 5,649 | 5 | 4 | 36 | 66 | 5 | 2  | 24 | 29 | 70 | 101 |
| 5,650 | 5 | 4 | 36 | 66 | 5 | 2  | 24 | 29 | 70 | 101 |
| 5,651 | 5 | 4 | 36 | 63 | 5 | 2  | 24 | 29 | 70 | 98  |
| 5,652 | 5 | 4 | 36 | 60 | 5 | 2  | 25 | 26 | 71 | 92  |
| 5,653 | 5 | 4 | 37 | 56 | 5 | 2  | 25 | 26 | 72 | 88  |
| 5,654 | 5 | 4 | 37 | 56 | 5 | 2  | 25 | 26 | 72 | 88  |
| 5,655 | 5 | 4 | 43 | 52 | 5 | 2  | 26 | 26 | 79 | 84  |
| 5,656 | 5 | 4 | 43 | 52 | 5 | 2  | 26 | 26 | 79 | 84  |
| 5,657 | 5 | 4 | 47 | 52 | 5 | 2  | 27 | 28 | 84 | 86  |
| 5,658 | 5 | 4 | 55 | 52 | 5 | 2  | 27 | 28 | 92 | 86  |
| 5,659 | 5 | 4 | 55 | 52 | 5 | 3  | 27 | 28 | 92 | 87  |
| 5,660 | 5 | 4 | 57 | 53 | 5 | 3  | 27 | 29 | 94 | 89  |
| 5,661 | 5 | 4 | 57 | 54 | 5 | 4  | 27 | 35 | 94 | 97  |
| 5,662 | 5 | 4 | 55 | 54 | 5 | 4  | 26 | 34 | 91 | 96  |
| 5,663 | 5 | 5 | 54 | 82 | 5 | 8  | 26 | 46 | 90 | 141 |
| 5,664 | 5 | 4 | 54 | 79 | 5 | 7  | 26 | 46 | 90 | 136 |
| 5,665 | 6 | 6 | 54 | 82 | 5 | 8  | 25 | 46 | 90 | 142 |
| 5,666 | 6 | 5 | 54 | 58 | 5 | 8  | 26 | 38 | 91 | 109 |
| 5,667 | 6 | 5 | 54 | 53 | 5 | 8  | 24 | 37 | 89 | 103 |
| 5,668 | 6 | 5 | 54 | 54 | 5 | 8  | 24 | 38 | 89 | 105 |
| 5,669 | 6 | 5 | 54 | 50 | 5 | 8  | 23 | 38 | 88 | 101 |
| 5,670 | 6 | 5 | 54 | 51 | 5 | 8  | 23 | 38 | 88 | 102 |
| 5,671 | 6 | 5 | 53 | 50 | 5 | 8  | 23 | 37 | 87 | 100 |
| 5,672 | 6 | 5 | 52 | 51 | 5 | 8  | 21 | 37 | 84 | 101 |
| 5,673 | 6 | 5 | 52 | 52 | 5 | 8  | 18 | 37 | 81 | 102 |
| 5,674 | 6 | 5 | 52 | 52 | 5 | 8  | 16 | 37 | 79 | 102 |
| 5,675 | 6 | 5 | 52 | 61 | 5 | 11 | 16 | 47 | 79 | 124 |
| 5,676 | 6 | 5 | 48 | 61 | 3 | 11 | 13 | 47 | 70 | 124 |
| 5,677 | 5 | 5 | 47 | 62 | 3 | 11 | 13 | 47 | 68 | 125 |
| 5,678 | 5 | 5 | 47 | 63 | 2 | 11 | 13 | 47 | 67 | 126 |
| 5,679 | 4 | 4 | 41 | 63 | 2 | 11 | 13 | 47 | 60 | 125 |
| 5,680 | 4 | 5 | 41 | 63 | 1 | 11 | 12 | 48 | 58 | 127 |
| 5,681 | 4 | 5 | 41 | 63 | 1 | 11 | 12 | 48 | 58 | 127 |
| 5,682 | 4 | 6 | 41 | 68 | 1 | 11 | 12 | 48 | 58 | 133 |
| 5,683 | 4 | 6 | 41 | 68 | 1 | 11 | 12 | 48 | 58 | 133 |
| 5,684 | 4 | 6 | 41 | 68 | 1 | 11 | 12 | 48 | 58 | 133 |
| 5,685 | 4 | 6 | 41 | 68 | 1 | 11 | 12 | 48 | 58 | 133 |
| 5,686 | 4 | 6 | 40 | 66 | 1 | 11 | 12 | 45 | 57 | 128 |
| 5,687 | 4 | 6 | 40 | 67 | 1 | 11 | 12 | 46 | 57 | 130 |

|       |   |    |    |     |   |    |    |    |    |     |
|-------|---|----|----|-----|---|----|----|----|----|-----|
| 5,688 | 4 | 6  | 40 | 68  | 1 | 11 | 12 | 46 | 57 | 131 |
| 5,689 | 4 | 6  | 40 | 67  | 1 | 11 | 12 | 44 | 57 | 128 |
| 5,690 | 4 | 6  | 40 | 79  | 1 | 13 | 11 | 63 | 56 | 161 |
| 5,691 | 4 | 6  | 36 | 80  | 0 | 13 | 9  | 63 | 49 | 162 |
| 5,692 | 4 | 6  | 36 | 81  | 0 | 13 | 9  | 62 | 49 | 162 |
| 5,693 | 1 | 7  | 29 | 88  | 0 | 13 | 6  | 65 | 36 | 173 |
| 5,694 | 1 | 10 | 26 | 108 | 0 | 16 | 6  | 75 | 33 | 209 |
| 5,695 | 1 | 10 | 24 | 112 | 0 | 16 | 5  | 76 | 30 | 214 |
| 5,696 | 1 | 11 | 23 | 113 | 0 | 16 | 5  | 77 | 29 | 217 |
| 5,697 | 1 | 11 | 24 | 113 | 0 | 16 | 5  | 77 | 30 | 217 |
| 5,698 | 1 | 11 | 23 | 114 | 0 | 16 | 4  | 77 | 28 | 218 |
| 5,699 | 1 | 11 | 23 | 113 | 0 | 16 | 4  | 77 | 28 | 217 |
| 5,700 | 1 | 11 | 23 | 113 | 0 | 16 | 4  | 77 | 28 | 217 |
| 5,701 | 1 | 11 | 23 | 113 | 0 | 16 | 4  | 77 | 28 | 217 |
| 5,702 | 1 | 11 | 23 | 113 | 0 | 16 | 3  | 77 | 27 | 217 |
| 5,703 | 1 | 11 | 23 | 113 | 0 | 16 | 3  | 78 | 27 | 218 |
| 5,704 | 1 | 11 | 22 | 114 | 0 | 16 | 3  | 78 | 26 | 219 |
| 5,705 | 1 | 11 | 18 | 114 | 0 | 16 | 2  | 79 | 21 | 220 |
| 5,706 | 1 | 11 | 16 | 116 | 0 | 16 | 2  | 79 | 19 | 222 |
| 5,707 | 1 | 11 | 12 | 116 | 0 | 16 | 1  | 79 | 14 | 222 |
| 5,708 | 1 | 11 | 7  | 118 | 0 | 16 | 1  | 77 | 9  | 222 |
| 5,709 | 1 | 11 | 4  | 118 | 0 | 16 | 1  | 77 | 6  | 222 |
| 5,710 | 1 | 11 | 3  | 117 | 0 | 15 | 1  | 77 | 5  | 220 |
| 5,711 | 1 | 11 | 2  | 116 | 0 | 15 | 1  | 76 | 4  | 218 |
| 5,712 | 1 | 11 | 2  | 115 | 0 | 13 | 1  | 69 | 4  | 208 |
| 5,713 | 1 | 11 | 2  | 114 | 0 | 13 | 1  | 68 | 4  | 206 |
| 5,714 | 1 | 10 | 2  | 84  | 0 | 9  | 1  | 55 | 4  | 158 |
| 5,715 | 1 | 10 | 2  | 83  | 0 | 9  | 1  | 55 | 4  | 157 |
| 5,716 | 0 | 8  | 2  | 78  | 0 | 8  | 1  | 53 | 3  | 147 |
| 5,717 | 1 | 8  | 2  | 78  | 0 | 8  | 1  | 53 | 4  | 147 |
| 5,718 | 1 | 8  | 3  | 75  | 0 | 8  | 1  | 53 | 5  | 144 |
| 5,719 | 1 | 8  | 3  | 75  | 0 | 8  | 1  | 53 | 5  | 144 |
| 5,720 | 1 | 8  | 4  | 75  | 0 | 8  | 1  | 53 | 6  | 144 |
| 5,721 | 1 | 8  | 4  | 75  | 0 | 8  | 1  | 53 | 6  | 144 |
| 5,722 | 1 | 8  | 4  | 75  | 0 | 8  | 1  | 53 | 6  | 144 |
| 5,723 | 1 | 9  | 4  | 77  | 0 | 8  | 1  | 55 | 6  | 149 |
| 5,724 | 1 | 9  | 4  | 76  | 0 | 8  | 1  | 55 | 6  | 148 |
| 5,725 | 1 | 9  | 4  | 77  | 0 | 8  | 1  | 55 | 6  | 149 |
| 5,726 | 1 | 9  | 5  | 68  | 0 | 5  | 1  | 46 | 7  | 128 |
| 5,727 | 1 | 9  | 5  | 69  | 0 | 5  | 1  | 46 | 7  | 129 |
| 5,728 | 1 | 9  | 5  | 68  | 0 | 5  | 1  | 46 | 7  | 128 |

|       |   |   |    |    |   |   |   |    |    |     |
|-------|---|---|----|----|---|---|---|----|----|-----|
| 5,729 | 1 | 9 | 5  | 67 | 0 | 5 | 1 | 46 | 7  | 127 |
| 5,730 | 1 | 8 | 5  | 69 | 0 | 5 | 1 | 45 | 7  | 127 |
| 5,731 | 1 | 8 | 5  | 70 | 0 | 5 | 1 | 45 | 7  | 128 |
| 5,732 | 1 | 7 | 5  | 65 | 0 | 5 | 1 | 45 | 7  | 122 |
| 5,733 | 1 | 7 | 5  | 65 | 0 | 5 | 1 | 46 | 7  | 123 |
| 5,734 | 1 | 7 | 5  | 65 | 0 | 5 | 1 | 46 | 7  | 123 |
| 5,735 | 1 | 7 | 5  | 65 | 0 | 5 | 1 | 46 | 7  | 123 |
| 5,736 | 1 | 7 | 5  | 66 | 0 | 5 | 1 | 45 | 7  | 123 |
| 5,737 | 1 | 7 | 5  | 66 | 0 | 5 | 1 | 45 | 7  | 123 |
| 5,738 | 1 | 7 | 5  | 65 | 0 | 5 | 1 | 44 | 7  | 121 |
| 5,739 | 1 | 7 | 5  | 65 | 0 | 5 | 1 | 44 | 7  | 121 |
| 5,740 | 1 | 7 | 5  | 69 | 0 | 5 | 2 | 47 | 8  | 128 |
| 5,741 | 1 | 7 | 6  | 58 | 0 | 4 | 2 | 34 | 9  | 103 |
| 5,742 | 1 | 7 | 6  | 60 | 0 | 4 | 2 | 35 | 9  | 106 |
| 5,743 | 1 | 7 | 6  | 59 | 0 | 4 | 2 | 35 | 9  | 105 |
| 5,744 | 1 | 6 | 6  | 53 | 0 | 4 | 2 | 32 | 9  | 95  |
| 5,745 | 1 | 2 | 8  | 35 | 0 | 1 | 2 | 23 | 11 | 61  |
| 5,746 | 1 | 1 | 9  | 30 | 0 | 1 | 2 | 21 | 12 | 53  |
| 5,747 | 1 | 5 | 9  | 30 | 0 | 1 | 2 | 22 | 12 | 58  |
| 5,748 | 1 | 5 | 8  | 32 | 0 | 1 | 2 | 22 | 11 | 60  |
| 5,749 | 1 | 5 | 8  | 31 | 0 | 1 | 2 | 22 | 11 | 59  |
| 5,750 | 1 | 5 | 8  | 32 | 0 | 1 | 2 | 22 | 11 | 60  |
| 5,751 | 1 | 5 | 14 | 32 | 1 | 1 | 2 | 22 | 18 | 60  |
| 5,752 | 1 | 5 | 15 | 32 | 1 | 1 | 4 | 23 | 21 | 61  |
| 5,753 | 1 | 5 | 15 | 32 | 1 | 1 | 4 | 23 | 21 | 61  |
| 5,754 | 1 | 6 | 25 | 31 | 2 | 1 | 7 | 22 | 35 | 60  |
| 5,755 | 1 | 6 | 25 | 31 | 2 | 1 | 7 | 22 | 35 | 60  |
| 5,756 | 1 | 6 | 30 | 31 | 4 | 1 | 7 | 21 | 42 | 59  |
| 5,757 | 1 | 6 | 30 | 29 | 4 | 1 | 7 | 21 | 42 | 57  |
| 5,758 | 1 | 6 | 31 | 29 | 4 | 1 | 7 | 21 | 43 | 57  |
| 5,759 | 1 | 6 | 31 | 27 | 4 | 1 | 7 | 21 | 43 | 55  |
| 5,760 | 1 | 6 | 31 | 27 | 4 | 1 | 7 | 21 | 43 | 55  |
| 5,761 | 2 | 6 | 31 | 28 | 4 | 1 | 7 | 21 | 44 | 56  |
| 5,762 | 2 | 6 | 31 | 28 | 4 | 1 | 7 | 21 | 44 | 56  |
| 5,763 | 2 | 6 | 31 | 28 | 4 | 1 | 7 | 21 | 44 | 56  |
| 5,764 | 2 | 6 | 31 | 28 | 4 | 1 | 7 | 21 | 44 | 56  |
| 5,765 | 2 | 6 | 31 | 28 | 4 | 1 | 7 | 20 | 44 | 55  |
| 5,766 | 2 | 6 | 31 | 28 | 4 | 1 | 7 | 22 | 44 | 57  |
| 5,767 | 1 | 6 | 32 | 30 | 4 | 1 | 6 | 21 | 43 | 58  |
| 5,768 | 1 | 6 | 32 | 30 | 4 | 1 | 6 | 23 | 43 | 60  |
| 5,769 | 1 | 6 | 30 | 34 | 4 | 1 | 6 | 22 | 41 | 63  |

|       |   |   |    |    |   |   |   |    |    |    |
|-------|---|---|----|----|---|---|---|----|----|----|
| 5,770 | 1 | 6 | 30 | 34 | 4 | 1 | 6 | 23 | 41 | 64 |
| 5,771 | 1 | 6 | 29 | 33 | 5 | 1 | 6 | 24 | 41 | 64 |
| 5,772 | 1 | 6 | 29 | 34 | 5 | 1 | 6 | 24 | 41 | 65 |
| 5,773 | 1 | 6 | 29 | 34 | 5 | 1 | 6 | 24 | 41 | 65 |
| 5,774 | 1 | 5 | 29 | 34 | 5 | 1 | 6 | 23 | 41 | 63 |
| 5,775 | 1 | 5 | 29 | 34 | 5 | 1 | 6 | 23 | 41 | 63 |
| 5,776 | 1 | 5 | 28 | 34 | 5 | 1 | 6 | 23 | 40 | 63 |
| 5,777 | 1 | 5 | 28 | 33 | 5 | 1 | 6 | 22 | 40 | 61 |
| 5,778 | 1 | 5 | 28 | 33 | 5 | 1 | 6 | 22 | 40 | 61 |
| 5,779 | 1 | 5 | 28 | 33 | 5 | 1 | 6 | 22 | 40 | 61 |
| 5,780 | 1 | 5 | 28 | 33 | 5 | 1 | 6 | 22 | 40 | 61 |
| 5,781 | 1 | 6 | 32 | 31 | 5 | 1 | 6 | 22 | 44 | 60 |
| 5,782 | 1 | 6 | 32 | 30 | 5 | 1 | 6 | 22 | 44 | 59 |
| 5,783 | 1 | 6 | 33 | 30 | 5 | 1 | 7 | 21 | 46 | 58 |
| 5,784 | 1 | 6 | 33 | 30 | 5 | 1 | 7 | 21 | 46 | 58 |
| 5,785 | 1 | 6 | 33 | 30 | 5 | 1 | 8 | 21 | 47 | 58 |
| 5,786 | 1 | 6 | 33 | 29 | 5 | 1 | 8 | 21 | 47 | 57 |
| 5,787 | 1 | 6 | 33 | 29 | 5 | 1 | 8 | 21 | 47 | 57 |
| 5,788 | 1 | 6 | 33 | 29 | 5 | 1 | 8 | 21 | 47 | 57 |
| 5,789 | 1 | 6 | 33 | 30 | 5 | 1 | 8 | 24 | 47 | 61 |
| 5,790 | 1 | 6 | 33 | 29 | 5 | 1 | 7 | 24 | 46 | 60 |
| 5,791 | 1 | 6 | 33 | 27 | 5 | 1 | 7 | 22 | 46 | 56 |
| 5,792 | 1 | 6 | 32 | 26 | 5 | 0 | 7 | 15 | 45 | 47 |
| 5,793 | 1 | 6 | 32 | 23 | 5 | 0 | 7 | 15 | 45 | 44 |
| 5,794 | 1 | 6 | 32 | 23 | 5 | 0 | 7 | 15 | 45 | 44 |
| 5,795 | 1 | 6 | 32 | 22 | 5 | 0 | 7 | 15 | 45 | 43 |
| 5,796 | 1 | 6 | 30 | 20 | 5 | 0 | 7 | 14 | 43 | 40 |
| 5,797 | 2 | 2 | 29 | 20 | 5 | 0 | 7 | 13 | 43 | 35 |
| 5,798 | 2 | 2 | 29 | 20 | 5 | 0 | 7 | 13 | 43 | 35 |
| 5,799 | 2 | 2 | 29 | 18 | 6 | 0 | 7 | 13 | 44 | 33 |
| 5,800 | 2 | 2 | 30 | 20 | 6 | 0 | 7 | 13 | 45 | 35 |
| 5,801 | 2 | 2 | 30 | 20 | 6 | 0 | 7 | 13 | 45 | 35 |
| 5,802 | 2 | 2 | 24 | 22 | 5 | 0 | 7 | 14 | 38 | 38 |
| 5,803 | 2 | 2 | 23 | 23 | 5 | 1 | 5 | 14 | 35 | 40 |
| 5,804 | 2 | 4 | 15 | 32 | 5 | 1 | 3 | 14 | 25 | 51 |
| 5,805 | 2 | 3 | 13 | 35 | 4 | 1 | 2 | 16 | 21 | 55 |
| 5,806 | 2 | 3 | 8  | 35 | 2 | 1 | 2 | 17 | 14 | 56 |
| 5,807 | 2 | 3 | 8  | 35 | 2 | 1 | 2 | 17 | 14 | 56 |
| 5,808 | 2 | 3 | 7  | 36 | 2 | 1 | 2 | 18 | 13 | 58 |
| 5,809 | 2 | 3 | 7  | 36 | 2 | 1 | 2 | 18 | 13 | 58 |
| 5,810 | 2 | 3 | 7  | 37 | 2 | 1 | 2 | 18 | 13 | 59 |

|       |   |   |    |    |   |   |    |    |    |     |
|-------|---|---|----|----|---|---|----|----|----|-----|
| 5,811 | 1 | 3 | 7  | 37 | 2 | 1 | 2  | 18 | 12 | 59  |
| 5,812 | 1 | 3 | 7  | 36 | 2 | 1 | 2  | 18 | 12 | 58  |
| 5,813 | 1 | 3 | 7  | 37 | 2 | 1 | 2  | 19 | 12 | 60  |
| 5,814 | 1 | 3 | 7  | 37 | 2 | 1 | 2  | 19 | 12 | 60  |
| 5,815 | 2 | 3 | 8  | 37 | 2 | 1 | 2  | 19 | 14 | 60  |
| 5,816 | 2 | 3 | 8  | 37 | 2 | 1 | 2  | 19 | 14 | 60  |
| 5,817 | 2 | 3 | 8  | 36 | 2 | 1 | 2  | 17 | 14 | 57  |
| 5,818 | 3 | 3 | 7  | 36 | 2 | 1 | 2  | 17 | 14 | 57  |
| 5,819 | 3 | 3 | 7  | 32 | 2 | 1 | 2  | 17 | 14 | 53  |
| 5,820 | 3 | 3 | 7  | 32 | 2 | 1 | 2  | 16 | 14 | 52  |
| 5,821 | 3 | 4 | 7  | 32 | 2 | 1 | 2  | 16 | 14 | 53  |
| 5,822 | 3 | 4 | 8  | 31 | 1 | 1 | 2  | 15 | 14 | 51  |
| 5,823 | 3 | 4 | 13 | 31 | 1 | 1 | 7  | 15 | 24 | 51  |
| 5,824 | 4 | 4 | 16 | 28 | 1 | 1 | 8  | 14 | 29 | 47  |
| 5,825 | 4 | 4 | 16 | 28 | 1 | 1 | 8  | 15 | 29 | 48  |
| 5,826 | 4 | 4 | 16 | 28 | 2 | 1 | 9  | 16 | 31 | 49  |
| 5,827 | 4 | 4 | 18 | 27 | 2 | 1 | 10 | 16 | 34 | 48  |
| 5,828 | 4 | 4 | 18 | 27 | 2 | 1 | 10 | 16 | 34 | 48  |
| 5,829 | 4 | 4 | 18 | 27 | 2 | 1 | 10 | 16 | 34 | 48  |
| 5,830 | 4 | 8 | 18 | 50 | 2 | 1 | 10 | 41 | 34 | 100 |
| 5,831 | 4 | 8 | 14 | 52 | 2 | 1 | 9  | 42 | 29 | 103 |
| 5,832 | 4 | 7 | 14 | 63 | 2 | 1 | 9  | 47 | 29 | 118 |
| 5,833 | 4 | 7 | 14 | 65 | 2 | 1 | 10 | 49 | 30 | 122 |
| 5,834 | 4 | 7 | 13 | 65 | 2 | 1 | 9  | 49 | 28 | 122 |
| 5,835 | 4 | 7 | 13 | 65 | 2 | 1 | 9  | 49 | 28 | 122 |
| 5,836 | 4 | 7 | 13 | 65 | 2 | 1 | 9  | 49 | 28 | 122 |
| 5,837 | 4 | 7 | 13 | 66 | 2 | 1 | 9  | 49 | 28 | 123 |
| 5,838 | 4 | 7 | 13 | 66 | 2 | 1 | 9  | 49 | 28 | 123 |
| 5,839 | 5 | 7 | 13 | 66 | 2 | 1 | 9  | 49 | 29 | 123 |
| 5,840 | 5 | 7 | 13 | 65 | 2 | 1 | 9  | 46 | 29 | 119 |
| 5,841 | 5 | 7 | 13 | 65 | 2 | 1 | 9  | 46 | 29 | 119 |
| 5,842 | 5 | 7 | 13 | 61 | 2 | 1 | 9  | 45 | 29 | 114 |
| 5,843 | 5 | 7 | 13 | 62 | 2 | 1 | 9  | 48 | 29 | 118 |
| 5,844 | 5 | 7 | 13 | 63 | 2 | 1 | 9  | 51 | 29 | 122 |
| 5,845 | 5 | 7 | 16 | 77 | 2 | 1 | 11 | 51 | 34 | 136 |
| 5,846 | 5 | 8 | 16 | 77 | 2 | 1 | 11 | 53 | 34 | 139 |
| 5,847 | 4 | 8 | 18 | 77 | 2 | 1 | 11 | 53 | 35 | 139 |
| 5,848 | 4 | 8 | 19 | 81 | 2 | 1 | 12 | 58 | 37 | 148 |
| 5,849 | 4 | 8 | 19 | 82 | 1 | 1 | 12 | 58 | 36 | 149 |
| 5,850 | 4 | 8 | 19 | 82 | 1 | 1 | 12 | 64 | 36 | 155 |
| 5,851 | 4 | 8 | 18 | 80 | 1 | 1 | 12 | 64 | 35 | 153 |

|       |   |    |    |     |   |   |    |     |    |     |
|-------|---|----|----|-----|---|---|----|-----|----|-----|
| 5,852 | 4 | 8  | 24 | 79  | 1 | 1 | 18 | 64  | 47 | 152 |
| 5,853 | 4 | 8  | 24 | 77  | 1 | 1 | 18 | 63  | 47 | 149 |
| 5,854 | 4 | 6  | 24 | 68  | 1 | 0 | 18 | 61  | 47 | 135 |
| 5,855 | 4 | 6  | 24 | 65  | 1 | 0 | 18 | 60  | 47 | 131 |
| 5,856 | 4 | 6  | 24 | 65  | 1 | 0 | 18 | 60  | 47 | 131 |
| 5,857 | 4 | 6  | 24 | 65  | 1 | 0 | 18 | 59  | 47 | 130 |
| 5,858 | 4 | 6  | 25 | 64  | 1 | 0 | 19 | 58  | 49 | 128 |
| 5,859 | 4 | 6  | 25 | 64  | 1 | 0 | 19 | 58  | 49 | 128 |
| 5,860 | 4 | 6  | 25 | 63  | 1 | 0 | 19 | 58  | 49 | 127 |
| 5,861 | 4 | 6  | 26 | 63  | 1 | 0 | 20 | 58  | 51 | 127 |
| 5,862 | 4 | 6  | 26 | 63  | 1 | 0 | 20 | 58  | 51 | 127 |
| 5,863 | 5 | 6  | 26 | 63  | 2 | 0 | 20 | 58  | 53 | 127 |
| 5,864 | 5 | 6  | 26 | 62  | 2 | 0 | 20 | 57  | 53 | 125 |
| 5,865 | 5 | 6  | 25 | 62  | 2 | 0 | 21 | 57  | 53 | 125 |
| 5,866 | 4 | 6  | 25 | 61  | 2 | 0 | 22 | 57  | 53 | 124 |
| 5,867 | 4 | 6  | 26 | 61  | 2 | 0 | 22 | 57  | 54 | 124 |
| 5,868 | 4 | 6  | 26 | 61  | 2 | 0 | 22 | 56  | 54 | 123 |
| 5,869 | 3 | 6  | 26 | 61  | 3 | 0 | 24 | 55  | 56 | 122 |
| 5,870 | 3 | 6  | 26 | 63  | 3 | 0 | 24 | 57  | 56 | 126 |
| 5,871 | 3 | 7  | 26 | 108 | 4 | 0 | 25 | 69  | 58 | 184 |
| 5,872 | 3 | 8  | 26 | 159 | 4 | 4 | 28 | 93  | 61 | 264 |
| 5,873 | 3 | 12 | 25 | 180 | 4 | 4 | 28 | 105 | 60 | 301 |
| 5,874 | 3 | 13 | 20 | 182 | 4 | 4 | 23 | 105 | 50 | 304 |
| 5,875 | 2 | 13 | 18 | 186 | 4 | 4 | 22 | 105 | 46 | 308 |
| 5,876 | 3 | 14 | 18 | 186 | 3 | 4 | 21 | 107 | 45 | 311 |
| 5,877 | 3 | 14 | 17 | 186 | 3 | 4 | 20 | 106 | 43 | 310 |
| 5,878 | 3 | 14 | 17 | 186 | 3 | 4 | 20 | 106 | 43 | 310 |
| 5,879 | 3 | 15 | 17 | 186 | 3 | 4 | 20 | 107 | 43 | 312 |
| 5,880 | 3 | 15 | 17 | 187 | 3 | 4 | 20 | 107 | 43 | 313 |
| 5,881 | 3 | 11 | 17 | 164 | 3 | 4 | 20 | 82  | 43 | 261 |
| 5,882 | 3 | 11 | 18 | 151 | 3 | 5 | 20 | 77  | 44 | 244 |
| 5,883 | 3 | 11 | 18 | 151 | 3 | 5 | 20 | 77  | 44 | 244 |
| 5,884 | 3 | 11 | 18 | 149 | 3 | 5 | 19 | 75  | 43 | 240 |
| 5,885 | 3 | 11 | 18 | 150 | 3 | 5 | 19 | 75  | 43 | 241 |
| 5,886 | 3 | 11 | 18 | 150 | 3 | 5 | 19 | 75  | 43 | 241 |
| 5,887 | 3 | 11 | 18 | 149 | 3 | 5 | 19 | 75  | 43 | 240 |
| 5,888 | 3 | 11 | 18 | 149 | 3 | 5 | 19 | 75  | 43 | 240 |
| 5,889 | 2 | 11 | 18 | 151 | 3 | 5 | 20 | 77  | 43 | 244 |
| 5,890 | 2 | 11 | 18 | 151 | 3 | 5 | 20 | 77  | 43 | 244 |
| 5,891 | 2 | 11 | 18 | 152 | 3 | 5 | 20 | 79  | 43 | 247 |
| 5,892 | 2 | 11 | 18 | 152 | 3 | 5 | 20 | 79  | 43 | 247 |



|       |   |    |    |     |   |   |    |    |    |     |
|-------|---|----|----|-----|---|---|----|----|----|-----|
| 5,893 | 2 | 11 | 18 | 152 | 3 | 5 | 20 | 79 | 43 | 247 |
| 5,894 | 2 | 11 | 15 | 150 | 3 | 5 | 18 | 73 | 38 | 239 |
| 5,895 | 2 | 11 | 15 | 136 | 3 | 5 | 18 | 73 | 38 | 225 |
| 5,896 | 2 | 10 | 15 | 136 | 3 | 5 | 18 | 71 | 38 | 222 |
| 5,897 | 2 | 10 | 15 | 137 | 3 | 5 | 18 | 74 | 38 | 226 |
| 5,898 | 2 | 10 | 13 | 137 | 3 | 6 | 18 | 74 | 36 | 227 |
| 5,899 | 2 | 10 | 12 | 136 | 3 | 7 | 17 | 71 | 34 | 224 |
| 5,900 | 2 | 10 | 10 | 135 | 3 | 7 | 16 | 71 | 31 | 223 |
| 5,901 | 2 | 10 | 6  | 136 | 4 | 7 | 11 | 65 | 23 | 218 |
| 5,902 | 2 | 10 | 6  | 136 | 4 | 7 | 11 | 64 | 23 | 217 |
| 5,903 | 2 | 10 | 6  | 136 | 4 | 7 | 11 | 64 | 23 | 217 |
| 5,904 | 2 | 10 | 8  | 135 | 4 | 7 | 12 | 65 | 26 | 217 |
| 5,905 | 2 | 10 | 8  | 135 | 4 | 7 | 12 | 65 | 26 | 217 |
| 5,906 | 2 | 10 | 11 | 135 | 4 | 7 | 12 | 64 | 29 | 216 |
| 5,907 | 2 | 10 | 11 | 135 | 4 | 7 | 12 | 64 | 29 | 216 |
| 5,908 | 2 | 10 | 17 | 135 | 4 | 7 | 16 | 65 | 39 | 217 |
| 5,909 | 2 | 10 | 16 | 135 | 4 | 7 | 15 | 65 | 37 | 217 |
| 5,910 | 2 | 10 | 16 | 135 | 4 | 7 | 15 | 66 | 37 | 218 |
| 5,911 | 2 | 10 | 16 | 135 | 4 | 7 | 15 | 66 | 37 | 218 |
| 5,912 | 2 | 10 | 16 | 135 | 4 | 7 | 14 | 66 | 36 | 218 |
| 5,913 | 2 | 10 | 16 | 135 | 4 | 7 | 14 | 66 | 36 | 218 |
| 5,914 | 1 | 10 | 16 | 135 | 3 | 7 | 14 | 67 | 34 | 219 |
| 5,915 | 1 | 10 | 16 | 135 | 3 | 7 | 14 | 68 | 34 | 220 |
| 5,916 | 1 | 10 | 16 | 136 | 3 | 7 | 13 | 68 | 33 | 221 |
| 5,917 | 1 | 10 | 16 | 137 | 3 | 7 | 12 | 68 | 32 | 222 |
| 5,918 | 1 | 12 | 15 | 154 | 3 | 7 | 12 | 87 | 31 | 260 |
| 5,919 | 1 | 12 | 15 | 154 | 2 | 7 | 10 | 89 | 28 | 262 |
| 5,920 | 1 | 12 | 15 | 154 | 2 | 7 | 10 | 90 | 28 | 263 |
| 5,921 | 1 | 9  | 15 | 57  | 1 | 3 | 10 | 52 | 27 | 121 |
| 5,922 | 1 | 9  | 15 | 56  | 1 | 3 | 9  | 52 | 26 | 120 |
| 5,923 | 1 | 9  | 15 | 59  | 1 | 3 | 6  | 54 | 23 | 125 |
| 5,924 | 1 | 5  | 15 | 38  | 1 | 3 | 6  | 43 | 23 | 89  |
| 5,925 | 1 | 4  | 15 | 32  | 1 | 3 | 6  | 43 | 23 | 82  |
| 5,926 | 1 | 4  | 14 | 32  | 1 | 3 | 6  | 43 | 22 | 82  |
| 5,927 | 0 | 3  | 14 | 32  | 1 | 3 | 6  | 40 | 21 | 78  |
| 5,928 | 0 | 3  | 13 | 32  | 1 | 3 | 6  | 40 | 20 | 78  |
| 5,929 | 0 | 3  | 13 | 32  | 1 | 3 | 7  | 40 | 21 | 78  |
| 5,930 | 0 | 2  | 12 | 31  | 1 | 3 | 7  | 39 | 20 | 75  |
| 5,931 | 0 | 2  | 12 | 31  | 1 | 3 | 7  | 39 | 20 | 75  |
| 5,932 | 0 | 2  | 13 | 31  | 1 | 2 | 10 | 39 | 24 | 74  |
| 5,933 | 0 | 2  | 13 | 31  | 1 | 2 | 10 | 39 | 24 | 74  |

|       |   |   |    |    |   |   |    |    |    |     |
|-------|---|---|----|----|---|---|----|----|----|-----|
| 5,934 | 0 | 2 | 13 | 31 | 1 | 2 | 10 | 39 | 24 | 74  |
| 5,935 | 0 | 2 | 13 | 30 | 1 | 2 | 10 | 39 | 24 | 73  |
| 5,936 | 0 | 2 | 13 | 30 | 1 | 2 | 10 | 39 | 24 | 73  |
| 5,937 | 0 | 3 | 14 | 31 | 1 | 3 | 10 | 40 | 25 | 77  |
| 5,938 | 2 | 3 | 14 | 34 | 1 | 3 | 13 | 43 | 30 | 83  |
| 5,939 | 2 | 3 | 14 | 34 | 1 | 3 | 13 | 43 | 30 | 83  |
| 5,940 | 2 | 3 | 14 | 31 | 1 | 3 | 13 | 40 | 30 | 77  |
| 5,941 | 2 | 3 | 14 | 34 | 1 | 3 | 15 | 40 | 32 | 80  |
| 5,942 | 2 | 3 | 14 | 34 | 1 | 3 | 15 | 40 | 32 | 80  |
| 5,943 | 2 | 3 | 14 | 34 | 1 | 3 | 17 | 38 | 34 | 78  |
| 5,944 | 2 | 3 | 14 | 34 | 1 | 3 | 17 | 38 | 34 | 78  |
| 5,945 | 2 | 3 | 14 | 34 | 1 | 3 | 17 | 38 | 34 | 78  |
| 5,946 | 2 | 3 | 14 | 35 | 1 | 3 | 17 | 38 | 34 | 79  |
| 5,947 | 2 | 3 | 14 | 35 | 1 | 3 | 17 | 38 | 34 | 79  |
| 5,948 | 2 | 3 | 14 | 34 | 1 | 3 | 17 | 35 | 34 | 75  |
| 5,949 | 2 | 3 | 14 | 34 | 1 | 2 | 17 | 35 | 34 | 74  |
| 5,950 | 2 | 3 | 15 | 31 | 1 | 1 | 17 | 33 | 35 | 68  |
| 5,951 | 2 | 3 | 15 | 30 | 0 | 2 | 17 | 33 | 34 | 68  |
| 5,952 | 2 | 3 | 16 | 30 | 0 | 2 | 17 | 33 | 35 | 68  |
| 5,953 | 2 | 4 | 17 | 30 | 0 | 2 | 17 | 33 | 36 | 69  |
| 5,954 | 2 | 4 | 18 | 30 | 0 | 2 | 17 | 34 | 37 | 70  |
| 5,955 | 2 | 4 | 16 | 32 | 0 | 2 | 16 | 37 | 34 | 75  |
| 5,956 | 2 | 4 | 13 | 32 | 0 | 2 | 16 | 38 | 31 | 76  |
| 5,957 | 2 | 4 | 13 | 37 | 0 | 2 | 16 | 38 | 31 | 81  |
| 5,958 | 2 | 4 | 13 | 41 | 0 | 2 | 12 | 38 | 27 | 85  |
| 5,959 | 2 | 4 | 9  | 41 | 0 | 2 | 12 | 37 | 23 | 84  |
| 5,960 | 2 | 4 | 12 | 41 | 0 | 2 | 16 | 37 | 30 | 84  |
| 5,961 | 2 | 4 | 15 | 42 | 0 | 2 | 19 | 37 | 36 | 85  |
| 5,962 | 2 | 4 | 14 | 48 | 0 | 4 | 19 | 44 | 35 | 100 |
| 5,963 | 2 | 4 | 14 | 54 | 0 | 5 | 19 | 45 | 35 | 108 |
| 5,964 | 2 | 4 | 16 | 60 | 0 | 5 | 20 | 46 | 38 | 115 |
| 5,965 | 2 | 4 | 16 | 62 | 0 | 5 | 20 | 45 | 38 | 116 |
| 5,966 | 2 | 4 | 16 | 66 | 0 | 6 | 20 | 44 | 38 | 120 |
| 5,967 | 2 | 4 | 16 | 66 | 0 | 6 | 20 | 47 | 38 | 123 |
| 5,968 | 2 | 4 | 16 | 65 | 0 | 6 | 20 | 47 | 38 | 122 |
| 5,969 | 2 | 2 | 17 | 49 | 0 | 6 | 20 | 28 | 39 | 85  |
| 5,970 | 2 | 3 | 17 | 58 | 0 | 7 | 20 | 31 | 39 | 99  |
| 5,971 | 2 | 3 | 17 | 58 | 0 | 7 | 20 | 30 | 39 | 98  |
| 5,972 | 2 | 3 | 17 | 59 | 0 | 7 | 21 | 30 | 40 | 99  |
| 5,973 | 2 | 3 | 17 | 56 | 0 | 7 | 21 | 28 | 40 | 94  |
| 5,974 | 2 | 3 | 17 | 57 | 0 | 7 | 21 | 32 | 40 | 99  |

|       |   |    |    |     |   |    |    |    |    |     |
|-------|---|----|----|-----|---|----|----|----|----|-----|
| 5,975 | 2 | 3  | 17 | 58  | 0 | 7  | 21 | 31 | 40 | 99  |
| 5,976 | 2 | 3  | 17 | 58  | 0 | 7  | 21 | 31 | 40 | 99  |
| 5,977 | 2 | 3  | 17 | 58  | 0 | 7  | 21 | 31 | 40 | 99  |
| 5,978 | 2 | 3  | 17 | 59  | 0 | 7  | 21 | 31 | 40 | 100 |
| 5,979 | 2 | 3  | 17 | 59  | 0 | 7  | 22 | 31 | 41 | 100 |
| 5,980 | 2 | 3  | 17 | 59  | 0 | 7  | 21 | 31 | 40 | 100 |
| 5,981 | 2 | 3  | 17 | 59  | 0 | 7  | 21 | 31 | 40 | 100 |
| 5,982 | 2 | 4  | 16 | 59  | 0 | 7  | 18 | 31 | 36 | 101 |
| 5,983 | 2 | 4  | 16 | 59  | 0 | 7  | 18 | 31 | 36 | 101 |
| 5,984 | 2 | 4  | 16 | 59  | 0 | 7  | 18 | 31 | 36 | 101 |
| 5,985 | 2 | 4  | 17 | 59  | 0 | 7  | 19 | 31 | 38 | 101 |
| 5,986 | 2 | 4  | 18 | 59  | 0 | 7  | 19 | 31 | 39 | 101 |
| 5,987 | 2 | 3  | 17 | 59  | 0 | 6  | 19 | 28 | 38 | 96  |
| 5,988 | 2 | 3  | 17 | 64  | 0 | 6  | 19 | 32 | 38 | 105 |
| 5,989 | 0 | 4  | 17 | 66  | 0 | 6  | 16 | 33 | 33 | 109 |
| 5,990 | 0 | 4  | 17 | 66  | 0 | 6  | 16 | 33 | 33 | 109 |
| 5,991 | 0 | 4  | 17 | 63  | 0 | 6  | 16 | 33 | 33 | 106 |
| 5,992 | 0 | 4  | 17 | 66  | 0 | 6  | 14 | 34 | 31 | 110 |
| 5,993 | 0 | 4  | 17 | 66  | 0 | 6  | 12 | 34 | 29 | 110 |
| 5,994 | 0 | 4  | 17 | 69  | 0 | 6  | 12 | 35 | 29 | 114 |
| 5,995 | 0 | 4  | 17 | 69  | 0 | 6  | 12 | 35 | 29 | 114 |
| 5,996 | 2 | 4  | 19 | 69  | 0 | 6  | 16 | 35 | 37 | 114 |
| 5,997 | 2 | 4  | 19 | 68  | 0 | 6  | 19 | 35 | 40 | 113 |
| 5,998 | 2 | 4  | 19 | 68  | 0 | 6  | 19 | 35 | 40 | 113 |
| 5,999 | 2 | 4  | 19 | 68  | 0 | 6  | 19 | 35 | 40 | 113 |
| 6,000 | 2 | 4  | 19 | 68  | 0 | 6  | 19 | 35 | 40 | 113 |
| 6,001 | 2 | 4  | 18 | 68  | 0 | 6  | 19 | 35 | 39 | 113 |
| 6,002 | 2 | 4  | 18 | 68  | 0 | 5  | 19 | 35 | 39 | 112 |
| 6,003 | 2 | 4  | 17 | 68  | 0 | 5  | 19 | 35 | 38 | 112 |
| 6,004 | 2 | 3  | 16 | 76  | 0 | 6  | 20 | 40 | 38 | 125 |
| 6,005 | 2 | 3  | 15 | 78  | 0 | 6  | 20 | 38 | 37 | 125 |
| 6,006 | 2 | 4  | 15 | 79  | 0 | 6  | 20 | 37 | 37 | 126 |
| 6,007 | 2 | 7  | 16 | 94  | 0 | 8  | 20 | 52 | 38 | 161 |
| 6,008 | 2 | 9  | 16 | 104 | 0 | 9  | 20 | 59 | 38 | 181 |
| 6,009 | 2 | 9  | 14 | 102 | 0 | 9  | 20 | 59 | 36 | 179 |
| 6,010 | 2 | 10 | 12 | 106 | 0 | 9  | 20 | 59 | 34 | 184 |
| 6,011 | 2 | 11 | 11 | 115 | 0 | 10 | 16 | 59 | 29 | 195 |
| 6,012 | 2 | 14 | 8  | 115 | 0 | 10 | 13 | 59 | 23 | 198 |
| 6,013 | 2 | 14 | 7  | 114 | 0 | 9  | 12 | 55 | 21 | 192 |
| 6,014 | 2 | 20 | 6  | 114 | 0 | 9  | 12 | 67 | 20 | 210 |
| 6,015 | 2 | 20 | 6  | 118 | 0 | 9  | 12 | 68 | 20 | 215 |

|       |   |    |   |     |   |   |    |    |    |     |
|-------|---|----|---|-----|---|---|----|----|----|-----|
| 6,016 | 2 | 20 | 6 | 116 | 1 | 8 | 13 | 67 | 22 | 211 |
| 6,017 | 2 | 20 | 6 | 115 | 1 | 8 | 13 | 65 | 22 | 208 |
| 6,018 | 2 | 20 | 6 | 115 | 1 | 8 | 13 | 65 | 22 | 208 |
| 6,019 | 2 | 20 | 5 | 115 | 2 | 8 | 13 | 65 | 22 | 208 |
| 6,020 | 2 | 19 | 5 | 105 | 2 | 7 | 13 | 61 | 22 | 192 |
| 6,021 | 2 | 19 | 5 | 107 | 2 | 7 | 13 | 61 | 22 | 194 |
| 6,022 | 2 | 19 | 5 | 107 | 2 | 7 | 12 | 61 | 21 | 194 |
| 6,023 | 2 | 19 | 5 | 105 | 2 | 7 | 12 | 57 | 21 | 188 |
| 6,024 | 2 | 19 | 5 | 105 | 2 | 7 | 13 | 57 | 22 | 188 |
| 6,025 | 2 | 19 | 5 | 105 | 2 | 7 | 13 | 57 | 22 | 188 |
| 6,026 | 2 | 19 | 5 | 104 | 2 | 7 | 13 | 57 | 22 | 187 |
| 6,027 | 2 | 19 | 5 | 104 | 2 | 7 | 13 | 57 | 22 | 187 |
| 6,028 | 2 | 19 | 5 | 104 | 2 | 7 | 13 | 59 | 22 | 189 |
| 6,029 | 2 | 19 | 5 | 104 | 2 | 7 | 13 | 59 | 22 | 189 |
| 6,030 | 2 | 19 | 9 | 105 | 2 | 7 | 14 | 59 | 27 | 190 |
| 6,031 | 2 | 19 | 9 | 105 | 2 | 7 | 14 | 59 | 27 | 190 |
| 6,032 | 2 | 18 | 9 | 105 | 2 | 7 | 15 | 61 | 28 | 191 |
| 6,033 | 2 | 18 | 9 | 105 | 2 | 7 | 15 | 61 | 28 | 191 |
| 6,034 | 2 | 18 | 9 | 105 | 2 | 7 | 15 | 61 | 28 | 191 |
| 6,035 | 2 | 18 | 9 | 105 | 2 | 7 | 15 | 61 | 28 | 191 |
| 6,036 | 2 | 18 | 9 | 105 | 2 | 7 | 14 | 61 | 27 | 191 |
| 6,037 | 2 | 18 | 8 | 101 | 2 | 7 | 14 | 60 | 26 | 186 |
| 6,038 | 2 | 18 | 8 | 96  | 2 | 7 | 14 | 56 | 26 | 177 |
| 6,039 | 2 | 17 | 8 | 94  | 2 | 7 | 14 | 55 | 26 | 173 |
| 6,040 | 2 | 17 | 8 | 94  | 2 | 7 | 14 | 55 | 26 | 173 |
| 6,041 | 2 | 17 | 8 | 97  | 2 | 7 | 14 | 55 | 26 | 176 |
| 6,042 | 2 | 17 | 8 | 97  | 2 | 7 | 13 | 55 | 25 | 176 |
| 6,043 | 2 | 17 | 8 | 96  | 2 | 7 | 14 | 60 | 26 | 180 |
| 6,044 | 2 | 17 | 7 | 98  | 2 | 7 | 13 | 60 | 24 | 182 |
| 6,045 | 0 | 17 | 6 | 98  | 2 | 7 | 12 | 62 | 20 | 184 |
| 6,046 | 0 | 19 | 6 | 113 | 2 | 8 | 11 | 64 | 19 | 204 |
| 6,047 | 0 | 19 | 6 | 113 | 2 | 8 | 7  | 64 | 15 | 204 |
| 6,048 | 0 | 19 | 6 | 113 | 2 | 8 | 7  | 64 | 15 | 204 |
| 6,049 | 0 | 19 | 6 | 113 | 2 | 8 | 7  | 64 | 15 | 204 |
| 6,050 | 0 | 19 | 6 | 115 | 2 | 8 | 7  | 64 | 15 | 206 |
| 6,051 | 0 | 19 | 6 | 115 | 2 | 8 | 7  | 64 | 15 | 206 |
| 6,052 | 0 | 19 | 6 | 115 | 2 | 8 | 7  | 64 | 15 | 206 |
| 6,053 | 0 | 19 | 6 | 118 | 2 | 8 | 7  | 64 | 15 | 209 |
| 6,054 | 0 | 20 | 6 | 118 | 2 | 8 | 6  | 64 | 14 | 210 |
| 6,055 | 0 | 20 | 6 | 111 | 2 | 7 | 6  | 59 | 14 | 197 |
| 6,056 | 0 | 19 | 6 | 106 | 2 | 7 | 6  | 58 | 14 | 190 |

|       |   |    |    |     |   |   |    |     |    |     |
|-------|---|----|----|-----|---|---|----|-----|----|-----|
| 6,057 | 0 | 19 | 6  | 107 | 2 | 8 | 5  | 60  | 13 | 194 |
| 6,058 | 0 | 16 | 5  | 92  | 2 | 6 | 5  | 46  | 12 | 160 |
| 6,059 | 0 | 14 | 5  | 77  | 2 | 5 | 5  | 40  | 12 | 136 |
| 6,060 | 0 | 13 | 5  | 73  | 2 | 5 | 5  | 40  | 12 | 131 |
| 6,061 | 0 | 13 | 5  | 73  | 2 | 5 | 5  | 40  | 12 | 131 |
| 6,062 | 0 | 9  | 5  | 63  | 2 | 4 | 6  | 39  | 13 | 115 |
| 6,063 | 0 | 9  | 5  | 63  | 2 | 4 | 6  | 39  | 13 | 115 |
| 6,064 | 0 | 3  | 8  | 46  | 2 | 2 | 6  | 22  | 16 | 73  |
| 6,065 | 0 | 3  | 8  | 46  | 2 | 2 | 6  | 22  | 16 | 73  |
| 6,066 | 1 | 3  | 8  | 42  | 1 | 2 | 6  | 22  | 16 | 69  |
| 6,067 | 1 | 3  | 13 | 38  | 1 | 2 | 11 | 22  | 26 | 65  |
| 6,068 | 1 | 3  | 13 | 39  | 1 | 2 | 11 | 22  | 26 | 66  |
| 6,069 | 1 | 3  | 14 | 39  | 1 | 2 | 11 | 22  | 27 | 66  |
| 6,070 | 1 | 3  | 16 | 40  | 0 | 2 | 12 | 22  | 29 | 67  |
| 6,071 | 1 | 3  | 16 | 38  | 0 | 2 | 13 | 21  | 30 | 64  |
| 6,072 | 1 | 3  | 16 | 38  | 0 | 2 | 13 | 21  | 30 | 64  |
| 6,073 | 1 | 3  | 16 | 38  | 0 | 2 | 13 | 22  | 30 | 65  |
| 6,074 | 1 | 4  | 16 | 55  | 0 | 4 | 13 | 30  | 30 | 93  |
| 6,075 | 1 | 9  | 16 | 112 | 0 | 5 | 12 | 63  | 29 | 189 |
| 6,076 | 1 | 9  | 16 | 136 | 0 | 8 | 12 | 90  | 29 | 243 |
| 6,077 | 1 | 9  | 16 | 136 | 0 | 8 | 12 | 93  | 29 | 246 |
| 6,078 | 1 | 10 | 16 | 141 | 0 | 8 | 12 | 97  | 29 | 256 |
| 6,079 | 1 | 11 | 14 | 146 | 0 | 9 | 11 | 99  | 26 | 265 |
| 6,080 | 1 | 11 | 13 | 146 | 0 | 9 | 10 | 99  | 24 | 265 |
| 6,081 | 1 | 11 | 13 | 147 | 0 | 9 | 10 | 100 | 24 | 267 |
| 6,082 | 1 | 11 | 13 | 153 | 0 | 9 | 10 | 104 | 24 | 277 |
| 6,083 | 1 | 11 | 13 | 153 | 0 | 9 | 10 | 102 | 24 | 275 |
| 6,084 | 1 | 13 | 13 | 156 | 0 | 9 | 10 | 103 | 24 | 281 |
| 6,085 | 1 | 13 | 13 | 157 | 0 | 9 | 10 | 103 | 24 | 282 |
| 6,086 | 3 | 13 | 15 | 158 | 0 | 9 | 10 | 103 | 28 | 283 |
| 6,087 | 3 | 13 | 16 | 158 | 0 | 9 | 11 | 103 | 30 | 283 |
| 6,088 | 3 | 13 | 16 | 158 | 0 | 9 | 11 | 103 | 30 | 283 |
| 6,089 | 3 | 13 | 16 | 158 | 0 | 9 | 11 | 104 | 30 | 284 |
| 6,090 | 4 | 13 | 16 | 159 | 0 | 9 | 11 | 105 | 31 | 286 |
| 6,091 | 4 | 13 | 16 | 159 | 0 | 9 | 11 | 107 | 31 | 288 |
| 6,092 | 4 | 13 | 16 | 156 | 0 | 9 | 11 | 108 | 31 | 286 |
| 6,093 | 4 | 13 | 16 | 160 | 0 | 9 | 11 | 109 | 31 | 291 |
| 6,094 | 4 | 13 | 16 | 160 | 0 | 9 | 10 | 103 | 30 | 285 |
| 6,095 | 4 | 13 | 16 | 159 | 0 | 9 | 10 | 103 | 30 | 284 |
| 6,096 | 4 | 14 | 16 | 156 | 0 | 9 | 10 | 100 | 30 | 279 |
| 6,097 | 4 | 12 | 16 | 141 | 0 | 8 | 10 | 98  | 30 | 259 |

|       |   |    |    |     |   |   |    |     |    |     |
|-------|---|----|----|-----|---|---|----|-----|----|-----|
| 6,098 | 4 | 12 | 16 | 141 | 0 | 8 | 10 | 98  | 30 | 259 |
| 6,099 | 4 | 12 | 16 | 141 | 0 | 8 | 10 | 98  | 30 | 259 |
| 6,100 | 4 | 12 | 16 | 145 | 0 | 8 | 12 | 103 | 32 | 268 |
| 6,101 | 4 | 12 | 16 | 143 | 0 | 8 | 12 | 103 | 32 | 266 |
| 6,102 | 5 | 12 | 17 | 143 | 0 | 8 | 12 | 103 | 34 | 266 |
| 6,103 | 5 | 12 | 17 | 140 | 0 | 8 | 12 | 103 | 34 | 263 |
| 6,104 | 5 | 13 | 17 | 141 | 0 | 8 | 12 | 103 | 34 | 265 |
| 6,105 | 5 | 12 | 17 | 143 | 0 | 8 | 12 | 103 | 34 | 266 |
| 6,106 | 5 | 12 | 17 | 143 | 0 | 8 | 12 | 103 | 34 | 266 |
| 6,107 | 5 | 12 | 17 | 143 | 0 | 8 | 12 | 103 | 34 | 266 |
| 6,108 | 5 | 12 | 17 | 142 | 0 | 7 | 12 | 101 | 34 | 262 |
| 6,109 | 5 | 12 | 18 | 142 | 0 | 7 | 12 | 99  | 35 | 260 |
| 6,110 | 5 | 12 | 18 | 140 | 0 | 7 | 12 | 98  | 35 | 257 |
| 6,111 | 5 | 12 | 18 | 141 | 0 | 7 | 12 | 98  | 35 | 258 |
| 6,112 | 5 | 12 | 18 | 141 | 0 | 7 | 12 | 98  | 35 | 258 |
| 6,113 | 5 | 12 | 18 | 141 | 0 | 7 | 11 | 98  | 34 | 258 |
| 6,114 | 5 | 12 | 16 | 141 | 0 | 7 | 11 | 98  | 32 | 258 |
| 6,115 | 5 | 12 | 15 | 141 | 0 | 7 | 11 | 98  | 31 | 258 |
| 6,116 | 4 | 12 | 17 | 141 | 0 | 7 | 11 | 98  | 32 | 258 |
| 6,117 | 4 | 12 | 12 | 141 | 0 | 7 | 8  | 97  | 24 | 257 |
| 6,118 | 4 | 12 | 12 | 141 | 0 | 7 | 7  | 97  | 23 | 257 |
| 6,119 | 4 | 12 | 12 | 140 | 0 | 7 | 7  | 97  | 23 | 256 |
| 6,120 | 4 | 12 | 11 | 140 | 0 | 7 | 7  | 97  | 22 | 256 |
| 6,121 | 4 | 12 | 9  | 139 | 0 | 7 | 6  | 97  | 19 | 255 |
| 6,122 | 4 | 12 | 9  | 139 | 0 | 7 | 5  | 97  | 18 | 255 |
| 6,123 | 4 | 12 | 11 | 139 | 0 | 7 | 5  | 96  | 20 | 254 |
| 6,124 | 4 | 11 | 11 | 122 | 0 | 5 | 5  | 88  | 20 | 226 |
| 6,125 | 4 | 6  | 12 | 41  | 0 | 1 | 5  | 28  | 21 | 76  |
| 6,126 | 4 | 6  | 12 | 41  | 0 | 1 | 6  | 28  | 22 | 76  |
| 6,127 | 4 | 6  | 12 | 41  | 0 | 1 | 6  | 28  | 22 | 76  |
| 6,128 | 4 | 6  | 14 | 41  | 0 | 1 | 6  | 25  | 24 | 73  |
| 6,129 | 4 | 5  | 14 | 36  | 0 | 1 | 6  | 21  | 24 | 63  |
| 6,130 | 4 | 4  | 14 | 30  | 0 | 0 | 6  | 17  | 24 | 51  |
| 6,131 | 4 | 4  | 14 | 22  | 0 | 0 | 6  | 13  | 24 | 39  |
| 6,132 | 4 | 4  | 14 | 22  | 0 | 0 | 5  | 13  | 23 | 39  |
| 6,133 | 4 | 4  | 14 | 22  | 0 | 0 | 5  | 13  | 23 | 39  |
| 6,134 | 4 | 4  | 14 | 22  | 0 | 0 | 5  | 14  | 23 | 40  |
| 6,135 | 4 | 2  | 14 | 19  | 0 | 0 | 5  | 13  | 23 | 34  |
| 6,136 | 4 | 2  | 14 | 19  | 0 | 0 | 5  | 14  | 23 | 35  |
| 6,137 | 2 | 2  | 12 | 18  | 0 | 0 | 5  | 14  | 19 | 34  |
| 6,138 | 2 | 2  | 10 | 18  | 0 | 0 | 4  | 14  | 16 | 34  |

|       |   |   |    |     |   |   |   |    |    |     |
|-------|---|---|----|-----|---|---|---|----|----|-----|
| 6,139 | 2 | 2 | 10 | 18  | 0 | 0 | 4 | 14 | 16 | 34  |
| 6,140 | 2 | 2 | 10 | 18  | 0 | 0 | 4 | 13 | 16 | 33  |
| 6,141 | 1 | 3 | 10 | 17  | 0 | 0 | 4 | 10 | 15 | 30  |
| 6,142 | 1 | 3 | 10 | 17  | 0 | 0 | 4 | 9  | 15 | 29  |
| 6,143 | 1 | 3 | 10 | 17  | 0 | 0 | 4 | 9  | 15 | 29  |
| 6,144 | 1 | 3 | 10 | 13  | 0 | 0 | 4 | 8  | 15 | 24  |
| 6,145 | 1 | 3 | 10 | 11  | 0 | 0 | 4 | 8  | 15 | 22  |
| 6,146 | 1 | 3 | 10 | 13  | 0 | 0 | 4 | 9  | 15 | 25  |
| 6,147 | 1 | 3 | 10 | 14  | 0 | 0 | 4 | 9  | 15 | 26  |
| 6,148 | 1 | 3 | 10 | 27  | 0 | 2 | 4 | 19 | 15 | 51  |
| 6,149 | 2 | 3 | 10 | 36  | 0 | 2 | 4 | 23 | 16 | 64  |
| 6,150 | 2 | 3 | 10 | 36  | 0 | 2 | 2 | 23 | 14 | 64  |
| 6,151 | 2 | 3 | 11 | 33  | 0 | 2 | 2 | 18 | 15 | 56  |
| 6,152 | 2 | 3 | 11 | 38  | 0 | 2 | 2 | 23 | 15 | 66  |
| 6,153 | 1 | 3 | 10 | 46  | 0 | 2 | 2 | 27 | 13 | 78  |
| 6,154 | 1 | 3 | 10 | 58  | 0 | 2 | 2 | 32 | 13 | 95  |
| 6,155 | 1 | 2 | 10 | 77  | 0 | 3 | 2 | 40 | 13 | 122 |
| 6,156 | 1 | 3 | 10 | 108 | 0 | 3 | 4 | 49 | 15 | 163 |
| 6,157 | 1 | 4 | 10 | 117 | 0 | 3 | 4 | 56 | 15 | 180 |
| 6,158 | 1 | 4 | 10 | 125 | 0 | 3 | 4 | 59 | 15 | 191 |
| 6,159 | 1 | 5 | 10 | 131 | 0 | 3 | 4 | 67 | 15 | 206 |
| 6,160 | 1 | 5 | 9  | 140 | 0 | 3 | 4 | 68 | 14 | 216 |
| 6,161 | 1 | 5 | 9  | 140 | 0 | 4 | 4 | 68 | 14 | 217 |
| 6,162 | 1 | 5 | 9  | 149 | 0 | 5 | 4 | 75 | 14 | 234 |
| 6,163 | 1 | 6 | 9  | 155 | 0 | 5 | 4 | 79 | 14 | 245 |
| 6,164 | 1 | 6 | 9  | 157 | 0 | 5 | 4 | 79 | 14 | 247 |
| 6,165 | 1 | 6 | 9  | 157 | 0 | 5 | 4 | 81 | 14 | 249 |
| 6,166 | 1 | 6 | 9  | 158 | 0 | 5 | 5 | 82 | 15 | 251 |
| 6,167 | 1 | 6 | 7  | 160 | 0 | 5 | 5 | 84 | 13 | 255 |
| 6,168 | 1 | 6 | 7  | 160 | 0 | 5 | 4 | 84 | 12 | 255 |
| 6,169 | 1 | 6 | 7  | 160 | 0 | 5 | 4 | 84 | 12 | 255 |
| 6,170 | 1 | 6 | 7  | 160 | 0 | 5 | 4 | 84 | 12 | 255 |
| 6,171 | 1 | 6 | 7  | 160 | 0 | 5 | 5 | 84 | 13 | 255 |
| 6,172 | 1 | 6 | 7  | 160 | 0 | 5 | 5 | 84 | 13 | 255 |
| 6,173 | 1 | 6 | 7  | 160 | 0 | 5 | 5 | 85 | 13 | 256 |
| 6,174 | 1 | 6 | 5  | 160 | 0 | 5 | 5 | 85 | 11 | 256 |
| 6,175 | 1 | 6 | 5  | 160 | 0 | 5 | 5 | 85 | 11 | 256 |
| 6,176 | 2 | 6 | 4  | 160 | 0 | 5 | 6 | 85 | 12 | 256 |
| 6,177 | 2 | 6 | 4  | 160 | 0 | 5 | 5 | 85 | 11 | 256 |
| 6,178 | 2 | 6 | 2  | 160 | 0 | 5 | 5 | 85 | 9  | 256 |
| 6,179 | 2 | 6 | 2  | 160 | 0 | 5 | 5 | 85 | 9  | 256 |

|       |   |   |    |     |   |   |    |     |    |     |
|-------|---|---|----|-----|---|---|----|-----|----|-----|
| 6,180 | 2 | 6 | 2  | 160 | 0 | 5 | 5  | 86  | 9  | 257 |
| 6,181 | 2 | 6 | 2  | 160 | 0 | 5 | 5  | 86  | 9  | 257 |
| 6,182 | 2 | 6 | 1  | 160 | 0 | 5 | 5  | 85  | 8  | 256 |
| 6,183 | 2 | 6 | 1  | 160 | 0 | 5 | 5  | 85  | 8  | 256 |
| 6,184 | 2 | 6 | 1  | 160 | 0 | 5 | 5  | 85  | 8  | 256 |
| 6,185 | 2 | 6 | 1  | 160 | 0 | 5 | 5  | 84  | 8  | 255 |
| 6,186 | 2 | 6 | 1  | 160 | 0 | 5 | 5  | 85  | 8  | 256 |
| 6,187 | 2 | 6 | 1  | 161 | 0 | 5 | 5  | 86  | 8  | 258 |
| 6,188 | 2 | 6 | 1  | 161 | 0 | 5 | 5  | 86  | 8  | 258 |
| 6,189 | 2 | 6 | 1  | 161 | 0 | 5 | 5  | 86  | 8  | 258 |
| 6,190 | 3 | 6 | 2  | 161 | 0 | 5 | 5  | 87  | 10 | 259 |
| 6,191 | 3 | 6 | 2  | 161 | 0 | 5 | 5  | 86  | 10 | 258 |
| 6,192 | 3 | 5 | 2  | 161 | 0 | 5 | 5  | 86  | 10 | 257 |
| 6,193 | 3 | 5 | 2  | 161 | 0 | 5 | 5  | 86  | 10 | 257 |
| 6,194 | 4 | 5 | 4  | 161 | 1 | 5 | 5  | 86  | 14 | 257 |
| 6,195 | 4 | 5 | 11 | 161 | 1 | 5 | 12 | 86  | 28 | 257 |
| 6,196 | 4 | 4 | 11 | 157 | 1 | 5 | 12 | 85  | 28 | 251 |
| 6,197 | 4 | 4 | 11 | 157 | 1 | 5 | 12 | 85  | 28 | 251 |
| 6,198 | 4 | 4 | 11 | 157 | 1 | 5 | 12 | 85  | 28 | 251 |
| 6,199 | 4 | 4 | 11 | 144 | 1 | 3 | 12 | 78  | 28 | 229 |
| 6,200 | 3 | 4 | 11 | 145 | 1 | 6 | 12 | 81  | 27 | 236 |
| 6,201 | 3 | 4 | 11 | 146 | 1 | 6 | 12 | 81  | 27 | 237 |
| 6,202 | 3 | 4 | 10 | 132 | 1 | 6 | 12 | 74  | 26 | 216 |
| 6,203 | 3 | 7 | 10 | 140 | 2 | 6 | 12 | 77  | 27 | 230 |
| 6,204 | 3 | 8 | 10 | 151 | 2 | 6 | 12 | 84  | 27 | 249 |
| 6,205 | 3 | 9 | 10 | 152 | 2 | 6 | 12 | 103 | 27 | 270 |
| 6,206 | 3 | 9 | 10 | 137 | 2 | 5 | 10 | 99  | 25 | 250 |
| 6,207 | 3 | 7 | 10 | 88  | 2 | 5 | 11 | 74  | 26 | 174 |
| 6,208 | 3 | 7 | 10 | 88  | 3 | 5 | 11 | 74  | 27 | 174 |
| 6,209 | 3 | 7 | 10 | 79  | 3 | 5 | 11 | 73  | 27 | 164 |
| 6,210 | 3 | 8 | 11 | 85  | 3 | 5 | 11 | 80  | 28 | 178 |
| 6,211 | 3 | 8 | 11 | 85  | 3 | 5 | 11 | 80  | 28 | 178 |
| 6,212 | 3 | 8 | 11 | 86  | 3 | 4 | 11 | 80  | 28 | 178 |
| 6,213 | 3 | 8 | 11 | 77  | 3 | 3 | 11 | 74  | 28 | 162 |
| 6,214 | 3 | 7 | 11 | 71  | 3 | 3 | 12 | 70  | 29 | 151 |
| 6,215 | 3 | 7 | 11 | 69  | 3 | 3 | 12 | 68  | 29 | 147 |
| 6,216 | 3 | 7 | 11 | 69  | 3 | 3 | 12 | 70  | 29 | 149 |
| 6,217 | 3 | 7 | 11 | 80  | 3 | 3 | 11 | 77  | 28 | 167 |
| 6,218 | 3 | 9 | 11 | 83  | 3 | 3 | 11 | 79  | 28 | 174 |
| 6,219 | 3 | 9 | 11 | 83  | 3 | 3 | 11 | 79  | 28 | 174 |
| 6,220 | 3 | 9 | 11 | 84  | 3 | 3 | 11 | 79  | 28 | 175 |



|       |   |    |    |     |   |   |    |     |    |     |
|-------|---|----|----|-----|---|---|----|-----|----|-----|
| 6,221 | 3 | 9  | 11 | 85  | 3 | 3 | 11 | 80  | 28 | 177 |
| 6,222 | 3 | 9  | 11 | 85  | 3 | 3 | 10 | 80  | 27 | 177 |
| 6,223 | 3 | 9  | 11 | 88  | 3 | 3 | 10 | 81  | 27 | 181 |
| 6,224 | 3 | 9  | 11 | 89  | 3 | 3 | 10 | 81  | 27 | 182 |
| 6,225 | 3 | 9  | 11 | 89  | 3 | 3 | 10 | 81  | 27 | 182 |
| 6,226 | 2 | 9  | 12 | 89  | 3 | 3 | 9  | 81  | 26 | 182 |
| 6,227 | 2 | 9  | 12 | 89  | 3 | 3 | 9  | 82  | 26 | 183 |
| 6,228 | 2 | 9  | 12 | 89  | 3 | 3 | 9  | 82  | 26 | 183 |
| 6,229 | 2 | 9  | 13 | 89  | 3 | 4 | 9  | 84  | 27 | 186 |
| 6,230 | 2 | 9  | 13 | 93  | 3 | 4 | 9  | 86  | 27 | 192 |
| 6,231 | 2 | 9  | 13 | 93  | 3 | 4 | 9  | 85  | 27 | 191 |
| 6,232 | 2 | 9  | 13 | 93  | 3 | 4 | 9  | 86  | 27 | 192 |
| 6,233 | 2 | 9  | 13 | 94  | 3 | 4 | 9  | 86  | 27 | 193 |
| 6,234 | 2 | 10 | 13 | 95  | 3 | 4 | 9  | 86  | 27 | 195 |
| 6,235 | 2 | 10 | 13 | 95  | 3 | 4 | 10 | 87  | 28 | 196 |
| 6,236 | 2 | 10 | 13 | 95  | 3 | 4 | 10 | 87  | 28 | 196 |
| 6,237 | 2 | 10 | 13 | 93  | 3 | 4 | 10 | 84  | 28 | 191 |
| 6,238 | 1 | 12 | 12 | 95  | 3 | 4 | 10 | 84  | 26 | 195 |
| 6,239 | 1 | 13 | 12 | 97  | 3 | 4 | 10 | 89  | 26 | 203 |
| 6,240 | 1 | 13 | 12 | 101 | 3 | 4 | 10 | 91  | 26 | 209 |
| 6,241 | 1 | 14 | 12 | 111 | 3 | 4 | 10 | 106 | 26 | 235 |
| 6,242 | 1 | 15 | 12 | 154 | 3 | 5 | 10 | 136 | 26 | 310 |
| 6,243 | 1 | 15 | 13 | 157 | 3 | 5 | 10 | 138 | 27 | 315 |
| 6,244 | 1 | 15 | 13 | 159 | 3 | 6 | 10 | 140 | 27 | 320 |
| 6,245 | 0 | 15 | 9  | 171 | 2 | 6 | 10 | 144 | 21 | 336 |
| 6,246 | 0 | 15 | 4  | 175 | 2 | 7 | 3  | 148 | 9  | 345 |
| 6,247 | 0 | 15 | 4  | 176 | 2 | 7 | 4  | 150 | 10 | 348 |
| 6,248 | 0 | 15 | 4  | 178 | 2 | 7 | 4  | 150 | 10 | 350 |
| 6,249 | 0 | 17 | 4  | 186 | 2 | 7 | 4  | 159 | 10 | 369 |
| 6,250 | 0 | 17 | 4  | 186 | 2 | 7 | 4  | 157 | 10 | 367 |
| 6,251 | 0 | 18 | 4  | 184 | 2 | 4 | 4  | 158 | 10 | 364 |
| 6,252 | 0 | 19 | 4  | 185 | 2 | 4 | 4  | 158 | 10 | 366 |
| 6,253 | 0 | 19 | 4  | 190 | 2 | 6 | 4  | 159 | 10 | 374 |
| 6,254 | 0 | 16 | 4  | 183 | 1 | 6 | 4  | 156 | 9  | 361 |
| 6,255 | 0 | 14 | 4  | 160 | 1 | 6 | 5  | 126 | 10 | 306 |
| 6,256 | 0 | 14 | 4  | 162 | 1 | 6 | 5  | 127 | 10 | 309 |
| 6,257 | 0 | 14 | 4  | 157 | 1 | 6 | 4  | 124 | 9  | 301 |
| 6,258 | 0 | 13 | 4  | 149 | 1 | 6 | 5  | 122 | 10 | 290 |
| 6,259 | 0 | 13 | 7  | 149 | 0 | 6 | 6  | 123 | 13 | 291 |
| 6,260 | 1 | 12 | 7  | 142 | 0 | 6 | 8  | 116 | 16 | 276 |
| 6,261 | 1 | 12 | 6  | 142 | 0 | 6 | 8  | 116 | 15 | 276 |

|       |   |    |    |     |   |   |    |     |    |     |
|-------|---|----|----|-----|---|---|----|-----|----|-----|
| 6,262 | 1 | 12 | 6  | 142 | 0 | 6 | 8  | 116 | 15 | 276 |
| 6,263 | 1 | 12 | 6  | 142 | 0 | 6 | 9  | 116 | 16 | 276 |
| 6,264 | 1 | 12 | 6  | 141 | 0 | 6 | 8  | 116 | 15 | 275 |
| 6,265 | 1 | 12 | 6  | 141 | 1 | 6 | 8  | 116 | 16 | 275 |
| 6,266 | 1 | 12 | 7  | 141 | 1 | 6 | 8  | 116 | 17 | 275 |
| 6,267 | 1 | 12 | 7  | 141 | 1 | 6 | 8  | 115 | 17 | 274 |
| 6,268 | 1 | 12 | 7  | 129 | 1 | 6 | 8  | 107 | 17 | 254 |
| 6,269 | 1 | 10 | 7  | 125 | 1 | 6 | 8  | 103 | 17 | 244 |
| 6,270 | 1 | 10 | 7  | 125 | 1 | 6 | 8  | 103 | 17 | 244 |
| 6,271 | 1 | 10 | 7  | 124 | 1 | 6 | 10 | 103 | 19 | 243 |
| 6,272 | 1 | 10 | 7  | 123 | 1 | 6 | 10 | 102 | 19 | 241 |
| 6,273 | 1 | 10 | 7  | 123 | 1 | 6 | 10 | 103 | 19 | 242 |
| 6,274 | 1 | 10 | 7  | 120 | 1 | 6 | 10 | 102 | 19 | 238 |
| 6,275 | 1 | 10 | 7  | 119 | 1 | 6 | 10 | 101 | 19 | 236 |
| 6,276 | 1 | 10 | 6  | 119 | 1 | 6 | 10 | 101 | 18 | 236 |
| 6,277 | 1 | 10 | 6  | 119 | 1 | 6 | 10 | 101 | 18 | 236 |
| 6,278 | 1 | 10 | 6  | 118 | 1 | 6 | 11 | 100 | 19 | 234 |
| 6,279 | 1 | 10 | 5  | 119 | 1 | 5 | 11 | 98  | 18 | 232 |
| 6,280 | 1 | 10 | 6  | 116 | 2 | 5 | 11 | 96  | 20 | 227 |
| 6,281 | 2 | 10 | 10 | 116 | 2 | 5 | 18 | 96  | 32 | 227 |
| 6,282 | 3 | 10 | 11 | 116 | 2 | 5 | 20 | 95  | 36 | 226 |
| 6,283 | 3 | 10 | 11 | 115 | 2 | 5 | 20 | 95  | 36 | 225 |
| 6,284 | 3 | 10 | 11 | 115 | 2 | 5 | 20 | 95  | 36 | 225 |
| 6,285 | 3 | 9  | 11 | 114 | 2 | 5 | 20 | 95  | 36 | 223 |
| 6,286 | 3 | 9  | 12 | 114 | 2 | 5 | 19 | 95  | 36 | 223 |
| 6,287 | 3 | 9  | 12 | 114 | 2 | 5 | 19 | 95  | 36 | 223 |
| 6,288 | 3 | 7  | 12 | 112 | 2 | 5 | 19 | 95  | 36 | 219 |
| 6,289 | 3 | 7  | 12 | 112 | 2 | 5 | 19 | 95  | 36 | 219 |
| 6,290 | 3 | 6  | 12 | 108 | 2 | 5 | 19 | 88  | 36 | 207 |
| 6,291 | 3 | 6  | 12 | 108 | 2 | 5 | 19 | 88  | 36 | 207 |
| 6,292 | 3 | 6  | 12 | 97  | 2 | 5 | 19 | 72  | 36 | 180 |
| 6,293 | 3 | 5  | 12 | 55  | 2 | 4 | 19 | 42  | 36 | 106 |
| 6,294 | 3 | 5  | 11 | 52  | 2 | 4 | 19 | 40  | 35 | 101 |
| 6,295 | 3 | 5  | 11 | 51  | 2 | 3 | 19 | 38  | 35 | 97  |
| 6,296 | 3 | 5  | 11 | 39  | 2 | 3 | 19 | 34  | 35 | 81  |
| 6,297 | 3 | 5  | 11 | 35  | 3 | 2 | 18 | 30  | 35 | 72  |
| 6,298 | 3 | 5  | 11 | 34  | 3 | 2 | 18 | 28  | 35 | 69  |
| 6,299 | 3 | 3  | 11 | 24  | 3 | 2 | 18 | 19  | 35 | 48  |
| 6,300 | 3 | 3  | 11 | 25  | 3 | 2 | 18 | 19  | 35 | 49  |
| 6,301 | 3 | 2  | 11 | 16  | 3 | 2 | 18 | 10  | 35 | 30  |
| 6,302 | 3 | 1  | 14 | 15  | 3 | 2 | 20 | 10  | 40 | 28  |

|       |   |   |    |    |   |   |    |    |    |    |
|-------|---|---|----|----|---|---|----|----|----|----|
| 6,303 | 3 | 1 | 14 | 15 | 3 | 2 | 20 | 10 | 40 | 28 |
| 6,304 | 3 | 1 | 14 | 10 | 3 | 0 | 20 | 8  | 40 | 19 |
| 6,305 | 3 | 2 | 14 | 9  | 3 | 0 | 20 | 10 | 40 | 21 |
| 6,306 | 3 | 2 | 14 | 8  | 3 | 0 | 19 | 10 | 39 | 20 |
| 6,307 | 3 | 2 | 14 | 6  | 3 | 0 | 19 | 11 | 39 | 19 |
| 6,308 | 3 | 2 | 14 | 6  | 3 | 0 | 18 | 10 | 38 | 18 |
| 6,309 | 3 | 2 | 14 | 6  | 3 | 0 | 18 | 11 | 38 | 19 |
| 6,310 | 3 | 2 | 14 | 6  | 3 | 0 | 18 | 13 | 38 | 21 |
| 6,311 | 2 | 2 | 14 | 6  | 3 | 0 | 16 | 13 | 35 | 21 |
| 6,312 | 2 | 2 | 15 | 6  | 3 | 0 | 16 | 13 | 36 | 21 |
| 6,313 | 2 | 2 | 15 | 7  | 3 | 0 | 16 | 13 | 36 | 22 |
| 6,314 | 2 | 2 | 15 | 7  | 3 | 0 | 15 | 13 | 35 | 22 |
| 6,315 | 2 | 2 | 15 | 7  | 2 | 0 | 15 | 14 | 34 | 23 |
| 6,316 | 2 | 2 | 14 | 7  | 2 | 0 | 15 | 14 | 33 | 23 |
| 6,317 | 2 | 2 | 14 | 7  | 2 | 0 | 15 | 14 | 33 | 23 |
| 6,318 | 2 | 2 | 14 | 7  | 2 | 0 | 15 | 13 | 33 | 22 |
| 6,319 | 2 | 2 | 14 | 7  | 2 | 0 | 14 | 13 | 32 | 22 |
| 6,320 | 2 | 2 | 14 | 11 | 2 | 0 | 14 | 13 | 32 | 26 |
| 6,321 | 2 | 2 | 14 | 11 | 2 | 0 | 13 | 13 | 31 | 26 |
| 6,322 | 2 | 2 | 14 | 11 | 2 | 0 | 13 | 13 | 31 | 26 |
| 6,323 | 2 | 2 | 14 | 11 | 2 | 0 | 13 | 13 | 31 | 26 |
| 6,324 | 2 | 2 | 14 | 11 | 2 | 0 | 13 | 12 | 31 | 25 |
| 6,325 | 2 | 2 | 14 | 11 | 2 | 0 | 13 | 12 | 31 | 25 |
| 6,326 | 2 | 2 | 14 | 11 | 2 | 0 | 13 | 12 | 31 | 25 |
| 6,327 | 2 | 2 | 14 | 12 | 2 | 0 | 13 | 14 | 31 | 28 |
| 6,328 | 2 | 3 | 14 | 16 | 2 | 0 | 14 | 20 | 32 | 39 |
| 6,329 | 2 | 4 | 14 | 22 | 2 | 0 | 13 | 26 | 31 | 52 |
| 6,330 | 2 | 4 | 14 | 23 | 2 | 0 | 13 | 26 | 31 | 53 |
| 6,331 | 2 | 4 | 13 | 23 | 1 | 0 | 13 | 26 | 29 | 53 |
| 6,332 | 1 | 4 | 9  | 23 | 1 | 0 | 7  | 27 | 18 | 54 |
| 6,333 | 0 | 4 | 8  | 23 | 1 | 0 | 5  | 27 | 14 | 54 |
| 6,334 | 0 | 4 | 8  | 23 | 1 | 0 | 5  | 27 | 14 | 54 |
| 6,335 | 0 | 4 | 8  | 23 | 1 | 0 | 5  | 27 | 14 | 54 |
| 6,336 | 0 | 4 | 8  | 23 | 1 | 0 | 5  | 27 | 14 | 54 |
| 6,337 | 0 | 4 | 7  | 23 | 1 | 0 | 5  | 26 | 13 | 53 |
| 6,338 | 0 | 4 | 7  | 24 | 1 | 0 | 5  | 26 | 13 | 54 |
| 6,339 | 2 | 4 | 8  | 24 | 2 | 0 | 6  | 26 | 18 | 54 |
| 6,340 | 2 | 4 | 8  | 24 | 2 | 0 | 6  | 26 | 18 | 54 |
| 6,341 | 3 | 4 | 8  | 23 | 2 | 0 | 6  | 26 | 19 | 53 |
| 6,342 | 3 | 4 | 8  | 23 | 2 | 0 | 6  | 26 | 19 | 53 |
| 6,343 | 5 | 3 | 14 | 22 | 2 | 0 | 10 | 26 | 31 | 51 |

|       |   |    |    |    |   |   |    |    |    |     |
|-------|---|----|----|----|---|---|----|----|----|-----|
| 6,344 | 5 | 3  | 14 | 22 | 2 | 0 | 10 | 26 | 31 | 51  |
| 6,345 | 5 | 3  | 15 | 22 | 1 | 0 | 10 | 26 | 31 | 51  |
| 6,346 | 5 | 3  | 15 | 22 | 1 | 0 | 10 | 26 | 31 | 51  |
| 6,347 | 5 | 4  | 15 | 22 | 1 | 0 | 10 | 26 | 31 | 52  |
| 6,348 | 5 | 4  | 15 | 22 | 1 | 0 | 10 | 26 | 31 | 52  |
| 6,349 | 5 | 4  | 15 | 22 | 1 | 0 | 10 | 26 | 31 | 52  |
| 6,350 | 5 | 4  | 15 | 22 | 1 | 0 | 10 | 28 | 31 | 54  |
| 6,351 | 5 | 4  | 15 | 21 | 1 | 0 | 11 | 28 | 32 | 53  |
| 6,352 | 5 | 4  | 15 | 22 | 1 | 0 | 11 | 28 | 32 | 54  |
| 6,353 | 5 | 4  | 12 | 23 | 1 | 0 | 10 | 31 | 28 | 58  |
| 6,354 | 5 | 4  | 12 | 23 | 1 | 0 | 10 | 31 | 28 | 58  |
| 6,355 | 5 | 4  | 12 | 23 | 1 | 1 | 10 | 30 | 28 | 58  |
| 6,356 | 6 | 3  | 12 | 23 | 1 | 1 | 10 | 26 | 29 | 53  |
| 6,357 | 6 | 3  | 12 | 23 | 1 | 1 | 10 | 26 | 29 | 53  |
| 6,358 | 6 | 3  | 9  | 23 | 1 | 1 | 10 | 26 | 26 | 53  |
| 6,359 | 6 | 3  | 9  | 23 | 1 | 1 | 9  | 25 | 25 | 52  |
| 6,360 | 6 | 3  | 9  | 26 | 1 | 1 | 9  | 25 | 25 | 55  |
| 6,361 | 6 | 3  | 8  | 26 | 1 | 1 | 9  | 22 | 24 | 52  |
| 6,362 | 6 | 3  | 8  | 39 | 1 | 4 | 9  | 33 | 24 | 79  |
| 6,363 | 6 | 6  | 8  | 45 | 1 | 4 | 9  | 42 | 24 | 97  |
| 6,364 | 6 | 6  | 8  | 45 | 1 | 4 | 9  | 44 | 24 | 99  |
| 6,365 | 7 | 6  | 16 | 45 | 1 | 4 | 16 | 43 | 40 | 98  |
| 6,366 | 8 | 7  | 16 | 52 | 1 | 5 | 16 | 46 | 41 | 110 |
| 6,367 | 8 | 7  | 16 | 52 | 1 | 5 | 16 | 46 | 41 | 110 |
| 6,368 | 8 | 7  | 16 | 54 | 1 | 5 | 17 | 46 | 42 | 112 |
| 6,369 | 8 | 8  | 16 | 57 | 1 | 5 | 17 | 46 | 42 | 116 |
| 6,370 | 8 | 8  | 16 | 57 | 1 | 5 | 17 | 46 | 42 | 116 |
| 6,371 | 8 | 8  | 16 | 53 | 1 | 5 | 17 | 47 | 42 | 113 |
| 6,372 | 8 | 9  | 16 | 53 | 1 | 5 | 17 | 47 | 42 | 114 |
| 6,373 | 8 | 9  | 16 | 54 | 1 | 5 | 18 | 47 | 43 | 115 |
| 6,374 | 8 | 10 | 16 | 55 | 2 | 5 | 18 | 47 | 44 | 117 |
| 6,375 | 8 | 10 | 16 | 56 | 2 | 5 | 18 | 47 | 44 | 118 |
| 6,376 | 8 | 10 | 16 | 57 | 2 | 5 | 18 | 47 | 44 | 119 |
| 6,377 | 8 | 10 | 16 | 57 | 2 | 5 | 18 | 47 | 44 | 119 |
| 6,378 | 9 | 9  | 16 | 52 | 2 | 5 | 17 | 39 | 44 | 105 |
| 6,379 | 9 | 8  | 16 | 46 | 2 | 5 | 17 | 33 | 44 | 92  |
| 6,380 | 9 | 8  | 16 | 48 | 2 | 5 | 17 | 33 | 44 | 94  |
| 6,381 | 9 | 8  | 16 | 48 | 2 | 5 | 17 | 33 | 44 | 94  |
| 6,382 | 9 | 8  | 16 | 47 | 2 | 5 | 17 | 33 | 44 | 93  |
| 6,383 | 9 | 8  | 16 | 47 | 2 | 5 | 16 | 32 | 43 | 92  |
| 6,384 | 9 | 8  | 16 | 47 | 2 | 5 | 16 | 32 | 43 | 92  |

|       |    |   |    |    |   |   |    |    |    |    |
|-------|----|---|----|----|---|---|----|----|----|----|
| 6,385 | 10 | 8 | 16 | 47 | 2 | 5 | 16 | 32 | 44 | 92 |
| 6,386 | 10 | 8 | 17 | 47 | 2 | 5 | 16 | 32 | 45 | 92 |
| 6,387 | 8  | 8 | 17 | 47 | 1 | 5 | 15 | 32 | 41 | 92 |
| 6,388 | 8  | 8 | 18 | 47 | 1 | 5 | 17 | 32 | 44 | 92 |
| 6,389 | 8  | 8 | 18 | 46 | 1 | 5 | 17 | 32 | 44 | 91 |
| 6,390 | 8  | 8 | 17 | 46 | 1 | 5 | 17 | 33 | 43 | 92 |
| 6,391 | 8  | 8 | 17 | 46 | 1 | 5 | 17 | 33 | 43 | 92 |
| 6,392 | 7  | 8 | 17 | 46 | 1 | 5 | 17 | 33 | 42 | 92 |
| 6,393 | 6  | 8 | 13 | 46 | 1 | 5 | 13 | 33 | 33 | 92 |
| 6,394 | 5  | 8 | 12 | 46 | 1 | 5 | 13 | 33 | 31 | 92 |
| 6,395 | 5  | 8 | 12 | 46 | 1 | 5 | 13 | 33 | 31 | 92 |
| 6,396 | 5  | 8 | 11 | 45 | 1 | 5 | 13 | 33 | 30 | 91 |
| 6,397 | 5  | 8 | 11 | 45 | 1 | 5 | 13 | 33 | 30 | 91 |
| 6,398 | 5  | 7 | 11 | 45 | 1 | 5 | 13 | 33 | 30 | 90 |
| 6,399 | 5  | 7 | 11 | 45 | 1 | 5 | 13 | 33 | 30 | 90 |
| 6,400 | 5  | 7 | 13 | 45 | 1 | 5 | 13 | 33 | 32 | 90 |
| 6,401 | 5  | 7 | 13 | 45 | 1 | 5 | 13 | 32 | 32 | 89 |
| 6,402 | 5  | 7 | 13 | 44 | 1 | 5 | 12 | 32 | 31 | 88 |
| 6,403 | 5  | 7 | 13 | 44 | 1 | 5 | 12 | 32 | 31 | 88 |
| 6,404 | 5  | 7 | 13 | 44 | 1 | 5 | 11 | 30 | 30 | 86 |
| 6,405 | 5  | 7 | 13 | 45 | 1 | 5 | 11 | 31 | 30 | 88 |
| 6,406 | 5  | 7 | 13 | 46 | 1 | 4 | 11 | 31 | 30 | 88 |
| 6,407 | 4  | 7 | 13 | 46 | 1 | 4 | 11 | 31 | 29 | 88 |
| 6,408 | 4  | 7 | 13 | 46 | 1 | 4 | 11 | 32 | 29 | 89 |
| 6,409 | 4  | 7 | 13 | 49 | 1 | 4 | 11 | 34 | 29 | 94 |
| 6,410 | 4  | 7 | 13 | 52 | 1 | 4 | 11 | 34 | 29 | 97 |
| 6,411 | 4  | 7 | 14 | 50 | 1 | 4 | 11 | 35 | 30 | 96 |
| 6,412 | 4  | 7 | 14 | 50 | 1 | 4 | 11 | 35 | 30 | 96 |
| 6,413 | 4  | 4 | 14 | 32 | 1 | 1 | 11 | 14 | 30 | 51 |
| 6,414 | 4  | 4 | 14 | 32 | 1 | 1 | 11 | 14 | 30 | 51 |
| 6,415 | 4  | 4 | 13 | 32 | 1 | 1 | 11 | 14 | 29 | 51 |
| 6,416 | 3  | 3 | 6  | 25 | 1 | 0 | 4  | 9  | 14 | 37 |
| 6,417 | 2  | 3 | 6  | 25 | 1 | 0 | 5  | 9  | 14 | 37 |
| 6,418 | 2  | 3 | 6  | 23 | 1 | 0 | 4  | 9  | 13 | 35 |
| 6,419 | 2  | 3 | 6  | 23 | 1 | 0 | 4  | 9  | 13 | 35 |
| 6,420 | 2  | 2 | 6  | 21 | 1 | 0 | 4  | 10 | 13 | 33 |
| 6,421 | 2  | 2 | 6  | 21 | 1 | 0 | 4  | 10 | 13 | 33 |
| 6,422 | 2  | 1 | 6  | 20 | 1 | 0 | 4  | 11 | 13 | 32 |
| 6,423 | 2  | 1 | 6  | 20 | 1 | 0 | 3  | 11 | 12 | 32 |
| 6,424 | 2  | 1 | 6  | 19 | 1 | 0 | 3  | 11 | 12 | 31 |
| 6,425 | 2  | 0 | 6  | 18 | 0 | 0 | 3  | 11 | 11 | 29 |

|       |   |    |   |    |   |    |   |    |    |     |
|-------|---|----|---|----|---|----|---|----|----|-----|
| 6,426 | 2 | 0  | 6 | 17 | 0 | 0  | 3 | 11 | 11 | 28  |
| 6,427 | 2 | 0  | 6 | 16 | 0 | 0  | 3 | 11 | 11 | 27  |
| 6,428 | 2 | 0  | 6 | 16 | 0 | 0  | 3 | 11 | 11 | 27  |
| 6,429 | 1 | 0  | 6 | 16 | 0 | 0  | 3 | 11 | 10 | 27  |
| 6,430 | 1 | 0  | 6 | 13 | 0 | 0  | 3 | 11 | 10 | 24  |
| 6,431 | 1 | 0  | 6 | 13 | 0 | 0  | 3 | 11 | 10 | 24  |
| 6,432 | 1 | 0  | 7 | 14 | 0 | 0  | 3 | 11 | 11 | 25  |
| 6,433 | 1 | 0  | 7 | 14 | 0 | 0  | 3 | 12 | 11 | 26  |
| 6,434 | 1 | 0  | 7 | 14 | 0 | 0  | 3 | 12 | 11 | 26  |
| 6,435 | 1 | 0  | 7 | 14 | 0 | 0  | 3 | 12 | 11 | 26  |
| 6,436 | 0 | 0  | 8 | 14 | 0 | 0  | 3 | 13 | 11 | 27  |
| 6,437 | 0 | 0  | 7 | 14 | 0 | 0  | 3 | 13 | 10 | 27  |
| 6,438 | 0 | 0  | 7 | 14 | 0 | 0  | 4 | 14 | 11 | 28  |
| 6,439 | 0 | 0  | 6 | 14 | 0 | 0  | 2 | 19 | 8  | 33  |
| 6,440 | 0 | 1  | 6 | 16 | 0 | 1  | 2 | 23 | 8  | 41  |
| 6,441 | 0 | 1  | 6 | 17 | 0 | 1  | 2 | 22 | 8  | 41  |
| 6,442 | 0 | 1  | 6 | 21 | 0 | 2  | 2 | 28 | 8  | 52  |
| 6,443 | 0 | 3  | 6 | 28 | 0 | 6  | 2 | 44 | 8  | 81  |
| 6,444 | 0 | 3  | 5 | 28 | 0 | 6  | 2 | 44 | 7  | 81  |
| 6,445 | 0 | 8  | 5 | 50 | 0 | 11 | 2 | 64 | 7  | 133 |
| 6,446 | 0 | 8  | 5 | 51 | 0 | 11 | 2 | 64 | 7  | 134 |
| 6,447 | 0 | 8  | 5 | 51 | 0 | 11 | 2 | 64 | 7  | 134 |
| 6,448 | 0 | 8  | 5 | 51 | 0 | 11 | 2 | 65 | 7  | 135 |
| 6,449 | 0 | 10 | 5 | 62 | 0 | 13 | 3 | 72 | 8  | 157 |
| 6,450 | 0 | 10 | 4 | 62 | 0 | 13 | 3 | 73 | 7  | 158 |
| 6,451 | 0 | 10 | 4 | 62 | 0 | 13 | 3 | 74 | 7  | 159 |
| 6,452 | 0 | 12 | 4 | 65 | 0 | 13 | 3 | 76 | 7  | 166 |
| 6,453 | 0 | 12 | 4 | 66 | 1 | 13 | 3 | 78 | 8  | 169 |
| 6,454 | 0 | 13 | 4 | 67 | 1 | 13 | 3 | 78 | 8  | 171 |
| 6,455 | 0 | 14 | 4 | 66 | 1 | 13 | 3 | 80 | 8  | 173 |
| 6,456 | 0 | 14 | 4 | 65 | 1 | 13 | 3 | 79 | 8  | 171 |
| 6,457 | 0 | 14 | 4 | 64 | 1 | 13 | 3 | 79 | 8  | 170 |
| 6,458 | 0 | 14 | 4 | 64 | 1 | 13 | 3 | 79 | 8  | 170 |
| 6,459 | 0 | 14 | 4 | 61 | 1 | 13 | 3 | 76 | 8  | 164 |
| 6,460 | 0 | 14 | 4 | 61 | 1 | 13 | 3 | 76 | 8  | 164 |
| 6,461 | 1 | 14 | 3 | 58 | 1 | 13 | 3 | 77 | 8  | 162 |
| 6,462 | 1 | 14 | 3 | 58 | 1 | 13 | 3 | 76 | 8  | 161 |
| 6,463 | 1 | 14 | 3 | 62 | 1 | 13 | 3 | 76 | 8  | 165 |
| 6,464 | 1 | 14 | 3 | 63 | 1 | 13 | 3 | 75 | 8  | 165 |
| 6,465 | 1 | 14 | 4 | 63 | 1 | 13 | 3 | 75 | 9  | 165 |
| 6,466 | 1 | 14 | 5 | 64 | 1 | 13 | 3 | 75 | 10 | 166 |

|       |   |    |    |    |   |    |    |    |    |     |
|-------|---|----|----|----|---|----|----|----|----|-----|
| 6,467 | 1 | 14 | 5  | 64 | 1 | 13 | 3  | 75 | 10 | 166 |
| 6,468 | 1 | 14 | 5  | 64 | 1 | 13 | 2  | 75 | 9  | 166 |
| 6,469 | 1 | 14 | 5  | 64 | 3 | 13 | 3  | 75 | 12 | 166 |
| 6,470 | 1 | 14 | 5  | 64 | 3 | 13 | 4  | 75 | 13 | 166 |
| 6,471 | 1 | 14 | 5  | 65 | 3 | 13 | 5  | 74 | 14 | 166 |
| 6,472 | 1 | 14 | 6  | 66 | 3 | 13 | 5  | 74 | 15 | 167 |
| 6,473 | 1 | 14 | 6  | 67 | 3 | 13 | 5  | 73 | 15 | 167 |
| 6,474 | 1 | 14 | 9  | 67 | 3 | 13 | 9  | 73 | 22 | 167 |
| 6,475 | 2 | 14 | 17 | 67 | 4 | 13 | 11 | 73 | 34 | 167 |
| 6,476 | 2 | 14 | 24 | 67 | 5 | 13 | 11 | 73 | 42 | 167 |
| 6,477 | 2 | 14 | 24 | 67 | 5 | 13 | 11 | 73 | 42 | 167 |
| 6,478 | 2 | 14 | 25 | 67 | 5 | 14 | 11 | 73 | 43 | 168 |
| 6,479 | 2 | 14 | 25 | 67 | 5 | 14 | 11 | 73 | 43 | 168 |
| 6,480 | 2 | 14 | 25 | 67 | 5 | 14 | 12 | 73 | 44 | 168 |
| 6,481 | 2 | 14 | 25 | 67 | 5 | 14 | 13 | 73 | 45 | 168 |
| 6,482 | 2 | 14 | 25 | 67 | 5 | 14 | 13 | 73 | 45 | 168 |
| 6,483 | 2 | 14 | 24 | 66 | 5 | 14 | 14 | 73 | 45 | 167 |
| 6,484 | 2 | 14 | 24 | 66 | 5 | 14 | 14 | 72 | 45 | 166 |
| 6,485 | 2 | 14 | 27 | 66 | 5 | 14 | 14 | 72 | 48 | 166 |
| 6,486 | 2 | 14 | 26 | 66 | 5 | 14 | 14 | 71 | 47 | 165 |
| 6,487 | 2 | 14 | 26 | 66 | 5 | 14 | 14 | 71 | 47 | 165 |
| 6,488 | 2 | 14 | 26 | 66 | 5 | 14 | 15 | 72 | 48 | 166 |
| 6,489 | 2 | 14 | 28 | 66 | 5 | 15 | 15 | 71 | 50 | 166 |
| 6,490 | 2 | 14 | 28 | 66 | 5 | 15 | 16 | 68 | 51 | 163 |
| 6,491 | 2 | 13 | 28 | 67 | 5 | 15 | 17 | 64 | 52 | 159 |
| 6,492 | 2 | 15 | 28 | 74 | 5 | 15 | 17 | 64 | 52 | 168 |
| 6,493 | 2 | 15 | 28 | 72 | 5 | 14 | 17 | 58 | 52 | 159 |
| 6,494 | 2 | 13 | 29 | 66 | 5 | 10 | 17 | 42 | 53 | 131 |
| 6,495 | 2 | 8  | 29 | 44 | 5 | 5  | 18 | 22 | 54 | 79  |
| 6,496 | 2 | 8  | 29 | 43 | 5 | 5  | 18 | 22 | 54 | 78  |
| 6,497 | 3 | 8  | 29 | 43 | 5 | 5  | 18 | 22 | 55 | 78  |
| 6,498 | 3 | 8  | 29 | 43 | 5 | 5  | 18 | 21 | 55 | 77  |
| 6,499 | 3 | 8  | 29 | 43 | 5 | 5  | 18 | 21 | 55 | 77  |
| 6,500 | 3 | 6  | 28 | 32 | 5 | 3  | 17 | 14 | 53 | 55  |
| 6,501 | 3 | 6  | 29 | 32 | 5 | 3  | 17 | 15 | 54 | 56  |
| 6,502 | 4 | 6  | 29 | 32 | 5 | 3  | 17 | 14 | 55 | 55  |
| 6,503 | 4 | 4  | 29 | 28 | 5 | 3  | 17 | 11 | 55 | 46  |
| 6,504 | 4 | 4  | 29 | 28 | 4 | 3  | 17 | 11 | 54 | 46  |
| 6,505 | 4 | 3  | 29 | 27 | 4 | 3  | 17 | 11 | 54 | 44  |
| 6,506 | 4 | 2  | 29 | 27 | 4 | 3  | 17 | 8  | 54 | 40  |
| 6,507 | 4 | 2  | 29 | 27 | 4 | 3  | 17 | 8  | 54 | 40  |

|       |   |   |    |    |   |   |    |    |    |     |
|-------|---|---|----|----|---|---|----|----|----|-----|
| 6,508 | 4 | 2 | 29 | 27 | 5 | 3 | 17 | 8  | 55 | 40  |
| 6,509 | 4 | 2 | 29 | 27 | 5 | 3 | 17 | 8  | 55 | 40  |
| 6,510 | 4 | 2 | 29 | 27 | 5 | 3 | 17 | 8  | 55 | 40  |
| 6,511 | 4 | 2 | 29 | 28 | 5 | 3 | 17 | 7  | 55 | 40  |
| 6,512 | 3 | 2 | 29 | 29 | 5 | 3 | 17 | 7  | 54 | 41  |
| 6,513 | 3 | 2 | 29 | 28 | 5 | 3 | 17 | 7  | 54 | 40  |
| 6,514 | 3 | 3 | 29 | 25 | 5 | 4 | 17 | 12 | 54 | 44  |
| 6,515 | 3 | 3 | 29 | 22 | 5 | 4 | 17 | 12 | 54 | 41  |
| 6,516 | 3 | 3 | 28 | 24 | 5 | 4 | 17 | 13 | 53 | 44  |
| 6,517 | 3 | 3 | 27 | 23 | 5 | 4 | 17 | 13 | 52 | 43  |
| 6,518 | 3 | 3 | 27 | 23 | 6 | 4 | 16 | 13 | 52 | 43  |
| 6,519 | 3 | 3 | 27 | 23 | 4 | 4 | 16 | 13 | 50 | 43  |
| 6,520 | 3 | 3 | 27 | 25 | 4 | 4 | 15 | 14 | 49 | 46  |
| 6,521 | 3 | 3 | 27 | 40 | 4 | 4 | 15 | 22 | 49 | 69  |
| 6,522 | 3 | 4 | 27 | 57 | 4 | 4 | 14 | 33 | 48 | 98  |
| 6,523 | 3 | 4 | 26 | 60 | 4 | 4 | 14 | 35 | 47 | 103 |
| 6,524 | 3 | 4 | 26 | 59 | 4 | 4 | 14 | 35 | 47 | 102 |
| 6,525 | 3 | 5 | 24 | 59 | 4 | 4 | 10 | 35 | 41 | 103 |
| 6,526 | 2 | 5 | 16 | 60 | 3 | 4 | 8  | 36 | 29 | 105 |
| 6,527 | 2 | 5 | 9  | 60 | 2 | 4 | 8  | 36 | 21 | 105 |
| 6,528 | 2 | 5 | 9  | 60 | 2 | 4 | 8  | 36 | 21 | 105 |
| 6,529 | 4 | 5 | 8  | 60 | 2 | 3 | 8  | 36 | 22 | 104 |
| 6,530 | 4 | 5 | 8  | 60 | 2 | 3 | 7  | 36 | 21 | 104 |
| 6,531 | 4 | 5 | 9  | 61 | 2 | 3 | 7  | 37 | 22 | 106 |
| 6,532 | 4 | 5 | 9  | 61 | 2 | 3 | 6  | 37 | 21 | 106 |
| 6,533 | 4 | 5 | 9  | 61 | 2 | 3 | 5  | 37 | 20 | 106 |
| 6,534 | 4 | 5 | 11 | 61 | 2 | 3 | 5  | 37 | 22 | 106 |
| 6,535 | 4 | 5 | 11 | 61 | 2 | 3 | 5  | 37 | 22 | 106 |
| 6,536 | 4 | 5 | 8  | 61 | 2 | 3 | 5  | 37 | 19 | 106 |
| 6,537 | 4 | 5 | 8  | 61 | 2 | 3 | 5  | 37 | 19 | 106 |
| 6,538 | 4 | 5 | 8  | 62 | 2 | 3 | 4  | 37 | 18 | 107 |
| 6,539 | 4 | 6 | 8  | 62 | 2 | 3 | 4  | 36 | 18 | 107 |
| 6,540 | 4 | 7 | 6  | 63 | 2 | 2 | 3  | 34 | 15 | 106 |
| 6,541 | 4 | 7 | 5  | 60 | 2 | 1 | 2  | 34 | 13 | 102 |
| 6,542 | 4 | 7 | 5  | 60 | 2 | 1 | 1  | 34 | 12 | 102 |
| 6,543 | 4 | 5 | 5  | 52 | 2 | 1 | 1  | 34 | 12 | 92  |
| 6,544 | 4 | 5 | 6  | 51 | 2 | 1 | 1  | 34 | 13 | 91  |
| 6,545 | 4 | 5 | 6  | 50 | 2 | 1 | 0  | 34 | 12 | 90  |
| 6,546 | 4 | 5 | 6  | 50 | 2 | 1 | 0  | 36 | 12 | 92  |
| 6,547 | 4 | 5 | 6  | 50 | 2 | 1 | 0  | 36 | 12 | 92  |
| 6,548 | 3 | 5 | 7  | 56 | 2 | 2 | 0  | 36 | 12 | 99  |



|       |   |   |   |    |   |   |   |    |    |     |
|-------|---|---|---|----|---|---|---|----|----|-----|
| 6,549 | 3 | 5 | 7 | 56 | 2 | 2 | 1 | 38 | 13 | 101 |
| 6,550 | 3 | 7 | 8 | 63 | 2 | 4 | 1 | 38 | 14 | 112 |
| 6,551 | 3 | 7 | 8 | 63 | 2 | 4 | 1 | 37 | 14 | 111 |
| 6,552 | 3 | 7 | 7 | 63 | 2 | 4 | 2 | 36 | 14 | 110 |
| 6,553 | 2 | 7 | 7 | 64 | 2 | 4 | 3 | 36 | 14 | 111 |
| 6,554 | 2 | 7 | 7 | 64 | 2 | 4 | 3 | 34 | 14 | 109 |
| 6,555 | 2 | 7 | 7 | 66 | 2 | 4 | 3 | 34 | 14 | 111 |
| 6,556 | 2 | 7 | 7 | 66 | 2 | 4 | 3 | 34 | 14 | 111 |
| 6,557 | 2 | 7 | 7 | 66 | 2 | 4 | 3 | 34 | 14 | 111 |
| 6,558 | 2 | 7 | 7 | 66 | 2 | 4 | 3 | 34 | 14 | 111 |
| 6,559 | 2 | 7 | 7 | 66 | 1 | 4 | 3 | 34 | 13 | 111 |
| 6,560 | 2 | 7 | 7 | 66 | 1 | 4 | 3 | 34 | 13 | 111 |
| 6,561 | 2 | 7 | 7 | 66 | 1 | 4 | 3 | 34 | 13 | 111 |
| 6,562 | 2 | 7 | 7 | 65 | 1 | 4 | 4 | 34 | 14 | 110 |
| 6,563 | 2 | 7 | 7 | 64 | 1 | 4 | 4 | 34 | 14 | 109 |
| 6,564 | 2 | 6 | 7 | 63 | 1 | 3 | 4 | 29 | 14 | 101 |
| 6,565 | 2 | 6 | 7 | 61 | 1 | 3 | 4 | 28 | 14 | 98  |
| 6,566 | 2 | 6 | 7 | 61 | 2 | 3 | 4 | 31 | 15 | 101 |
| 6,567 | 2 | 6 | 7 | 61 | 2 | 3 | 4 | 32 | 15 | 102 |
| 6,568 | 2 | 6 | 7 | 61 | 2 | 3 | 4 | 32 | 15 | 102 |
| 6,569 | 2 | 6 | 7 | 62 | 1 | 3 | 4 | 32 | 14 | 103 |
| 6,570 | 2 | 6 | 8 | 59 | 1 | 3 | 4 | 31 | 15 | 99  |
| 6,571 | 2 | 6 | 8 | 59 | 1 | 3 | 4 | 31 | 15 | 99  |
| 6,572 | 2 | 5 | 8 | 26 | 1 | 3 | 4 | 12 | 15 | 46  |
| 6,573 | 2 | 5 | 8 | 26 | 1 | 3 | 4 | 12 | 15 | 46  |
| 6,574 | 2 | 5 | 8 | 22 | 1 | 3 | 4 | 10 | 15 | 40  |
| 6,575 | 2 | 4 | 8 | 22 | 1 | 3 | 4 | 10 | 15 | 39  |
| 6,576 | 2 | 4 | 7 | 21 | 1 | 3 | 4 | 9  | 14 | 37  |
| 6,577 | 2 | 4 | 7 | 21 | 1 | 3 | 4 | 9  | 14 | 37  |
| 6,578 | 2 | 4 | 7 | 21 | 1 | 3 | 4 | 9  | 14 | 37  |
| 6,579 | 0 | 4 | 8 | 22 | 1 | 3 | 4 | 9  | 13 | 38  |
| 6,580 | 0 | 4 | 8 | 22 | 1 | 3 | 4 | 11 | 13 | 40  |
| 6,581 | 0 | 4 | 8 | 22 | 1 | 3 | 4 | 12 | 13 | 41  |
| 6,582 | 0 | 4 | 7 | 21 | 1 | 3 | 4 | 11 | 12 | 39  |
| 6,583 | 0 | 4 | 7 | 21 | 1 | 3 | 4 | 11 | 12 | 39  |
| 6,584 | 0 | 4 | 7 | 22 | 1 | 3 | 4 | 14 | 12 | 43  |
| 6,585 | 0 | 4 | 5 | 23 | 1 | 3 | 4 | 14 | 10 | 44  |
| 6,586 | 0 | 4 | 5 | 23 | 3 | 3 | 4 | 18 | 12 | 48  |
| 6,587 | 0 | 5 | 5 | 27 | 3 | 3 | 4 | 19 | 12 | 54  |
| 6,588 | 0 | 5 | 5 | 34 | 3 | 3 | 4 | 25 | 12 | 67  |
| 6,589 | 0 | 5 | 5 | 33 | 3 | 3 | 4 | 25 | 12 | 66  |

|       |   |   |   |    |   |   |   |    |    |    |
|-------|---|---|---|----|---|---|---|----|----|----|
| 6,590 | 0 | 4 | 5 | 34 | 4 | 3 | 4 | 25 | 13 | 66 |
| 6,591 | 0 | 3 | 5 | 33 | 4 | 3 | 4 | 25 | 13 | 64 |
| 6,592 | 0 | 4 | 5 | 33 | 4 | 3 | 4 | 25 | 13 | 65 |
| 6,593 | 0 | 4 | 5 | 34 | 4 | 3 | 4 | 25 | 13 | 66 |
| 6,594 | 0 | 5 | 5 | 36 | 4 | 3 | 4 | 26 | 13 | 70 |
| 6,595 | 0 | 5 | 4 | 36 | 4 | 3 | 4 | 27 | 12 | 71 |
| 6,596 | 0 | 5 | 4 | 36 | 4 | 3 | 5 | 25 | 13 | 69 |
| 6,597 | 0 | 3 | 4 | 23 | 4 | 0 | 5 | 23 | 13 | 49 |
| 6,598 | 0 | 3 | 4 | 23 | 4 | 0 | 5 | 24 | 13 | 50 |
| 6,599 | 0 | 3 | 3 | 23 | 4 | 0 | 5 | 24 | 12 | 50 |
| 6,600 | 0 | 3 | 3 | 23 | 4 | 0 | 3 | 24 | 10 | 50 |
| 6,601 | 0 | 3 | 2 | 23 | 4 | 0 | 3 | 24 | 9  | 50 |
| 6,602 | 0 | 3 | 2 | 23 | 4 | 0 | 2 | 24 | 8  | 50 |
| 6,603 | 0 | 3 | 2 | 23 | 4 | 0 | 2 | 24 | 8  | 50 |
| 6,604 | 0 | 3 | 2 | 22 | 4 | 0 | 2 | 25 | 8  | 50 |
| 6,605 | 0 | 3 | 2 | 20 | 4 | 0 | 2 | 25 | 8  | 48 |
| 6,606 | 0 | 3 | 2 | 20 | 4 | 0 | 2 | 25 | 8  | 48 |
| 6,607 | 0 | 3 | 2 | 20 | 4 | 0 | 3 | 25 | 9  | 48 |
| 6,608 | 0 | 3 | 2 | 20 | 4 | 0 | 3 | 25 | 9  | 48 |
| 6,609 | 0 | 3 | 3 | 20 | 4 | 0 | 3 | 26 | 10 | 49 |
| 6,610 | 0 | 3 | 3 | 20 | 4 | 0 | 3 | 26 | 10 | 49 |
| 6,611 | 0 | 3 | 3 | 20 | 4 | 0 | 3 | 26 | 10 | 49 |
| 6,612 | 0 | 3 | 3 | 20 | 4 | 0 | 2 | 26 | 9  | 49 |
| 6,613 | 0 | 3 | 3 | 23 | 4 | 0 | 2 | 28 | 9  | 54 |
| 6,614 | 0 | 3 | 3 | 26 | 4 | 0 | 2 | 29 | 9  | 58 |
| 6,615 | 0 | 4 | 3 | 26 | 4 | 0 | 2 | 29 | 9  | 59 |
| 6,616 | 0 | 4 | 3 | 27 | 4 | 0 | 3 | 29 | 10 | 60 |
| 6,617 | 1 | 4 | 3 | 27 | 3 | 0 | 3 | 25 | 10 | 56 |
| 6,618 | 1 | 4 | 3 | 27 | 3 | 0 | 3 | 26 | 10 | 57 |
| 6,619 | 1 | 4 | 3 | 29 | 3 | 1 | 3 | 30 | 10 | 64 |
| 6,620 | 1 | 4 | 2 | 29 | 3 | 1 | 3 | 35 | 9  | 69 |
| 6,621 | 1 | 4 | 2 | 29 | 3 | 1 | 3 | 36 | 9  | 70 |
| 6,622 | 1 | 4 | 2 | 30 | 3 | 1 | 3 | 38 | 9  | 73 |
| 6,623 | 1 | 5 | 2 | 40 | 3 | 1 | 3 | 43 | 9  | 89 |
| 6,624 | 1 | 5 | 2 | 40 | 3 | 1 | 3 | 43 | 9  | 89 |
| 6,625 | 1 | 5 | 2 | 40 | 3 | 1 | 3 | 43 | 9  | 89 |
| 6,626 | 1 | 5 | 2 | 40 | 3 | 1 | 3 | 43 | 9  | 89 |
| 6,627 | 1 | 6 | 3 | 40 | 3 | 1 | 3 | 43 | 10 | 90 |
| 6,628 | 1 | 6 | 3 | 41 | 3 | 1 | 3 | 43 | 10 | 91 |
| 6,629 | 1 | 7 | 3 | 40 | 3 | 1 | 3 | 43 | 10 | 91 |
| 6,630 | 1 | 7 | 2 | 40 | 3 | 1 | 3 | 43 | 9  | 91 |

|       |   |   |   |    |   |   |   |    |    |     |
|-------|---|---|---|----|---|---|---|----|----|-----|
| 6,631 | 2 | 7 | 2 | 40 | 3 | 1 | 3 | 40 | 10 | 88  |
| 6,632 | 2 | 7 | 2 | 40 | 3 | 1 | 3 | 40 | 10 | 88  |
| 6,633 | 2 | 7 | 2 | 39 | 3 | 1 | 3 | 37 | 10 | 84  |
| 6,634 | 2 | 7 | 2 | 39 | 3 | 1 | 3 | 38 | 10 | 85  |
| 6,635 | 2 | 7 | 2 | 40 | 3 | 1 | 3 | 40 | 10 | 88  |
| 6,636 | 2 | 7 | 2 | 39 | 1 | 1 | 3 | 41 | 8  | 88  |
| 6,637 | 2 | 7 | 2 | 40 | 1 | 1 | 3 | 37 | 8  | 85  |
| 6,638 | 2 | 6 | 2 | 29 | 1 | 1 | 3 | 30 | 8  | 66  |
| 6,639 | 2 | 6 | 2 | 29 | 1 | 1 | 3 | 30 | 8  | 66  |
| 6,640 | 2 | 6 | 2 | 34 | 1 | 1 | 3 | 30 | 8  | 71  |
| 6,641 | 2 | 6 | 2 | 35 | 0 | 1 | 3 | 30 | 7  | 72  |
| 6,642 | 2 | 6 | 2 | 36 | 0 | 1 | 3 | 32 | 7  | 75  |
| 6,643 | 2 | 5 | 2 | 36 | 0 | 1 | 3 | 32 | 7  | 74  |
| 6,644 | 2 | 5 | 3 | 35 | 0 | 1 | 3 | 34 | 8  | 75  |
| 6,645 | 2 | 4 | 3 | 34 | 0 | 1 | 3 | 34 | 8  | 73  |
| 6,646 | 2 | 4 | 3 | 38 | 0 | 1 | 3 | 35 | 8  | 78  |
| 6,647 | 2 | 4 | 3 | 38 | 0 | 1 | 2 | 35 | 7  | 78  |
| 6,648 | 2 | 5 | 3 | 38 | 0 | 1 | 2 | 34 | 7  | 78  |
| 6,649 | 2 | 5 | 3 | 38 | 0 | 1 | 2 | 34 | 7  | 78  |
| 6,650 | 2 | 7 | 3 | 49 | 0 | 2 | 2 | 40 | 7  | 98  |
| 6,651 | 2 | 7 | 3 | 49 | 0 | 2 | 2 | 40 | 7  | 98  |
| 6,652 | 2 | 7 | 3 | 49 | 0 | 2 | 2 | 40 | 7  | 98  |
| 6,653 | 2 | 7 | 3 | 49 | 0 | 2 | 2 | 40 | 7  | 98  |
| 6,654 | 2 | 7 | 3 | 49 | 0 | 2 | 2 | 40 | 7  | 98  |
| 6,655 | 2 | 7 | 3 | 57 | 0 | 2 | 2 | 40 | 7  | 106 |
| 6,656 | 2 | 7 | 3 | 58 | 0 | 2 | 2 | 42 | 7  | 109 |
| 6,657 | 2 | 7 | 3 | 59 | 0 | 2 | 1 | 42 | 6  | 110 |
| 6,658 | 2 | 7 | 3 | 59 | 0 | 2 | 1 | 42 | 6  | 110 |
| 6,659 | 2 | 7 | 3 | 59 | 0 | 2 | 1 | 41 | 6  | 109 |
| 6,660 | 2 | 7 | 2 | 59 | 0 | 2 | 1 | 41 | 5  | 109 |
| 6,661 | 2 | 7 | 2 | 59 | 0 | 2 | 1 | 41 | 5  | 109 |
| 6,662 | 2 | 7 | 2 | 59 | 0 | 2 | 1 | 41 | 5  | 109 |
| 6,663 | 2 | 7 | 2 | 59 | 0 | 2 | 1 | 41 | 5  | 109 |
| 6,664 | 2 | 7 | 2 | 56 | 0 | 2 | 1 | 40 | 5  | 105 |
| 6,665 | 2 | 6 | 3 | 52 | 0 | 2 | 1 | 39 | 6  | 99  |
| 6,666 | 2 | 6 | 3 | 52 | 0 | 2 | 0 | 39 | 5  | 99  |
| 6,667 | 2 | 6 | 3 | 53 | 0 | 2 | 0 | 39 | 5  | 100 |
| 6,668 | 1 | 6 | 3 | 53 | 0 | 2 | 0 | 39 | 4  | 100 |
| 6,669 | 1 | 6 | 3 | 51 | 0 | 1 | 0 | 35 | 4  | 93  |
| 6,670 | 1 | 6 | 3 | 51 | 0 | 1 | 0 | 35 | 4  | 93  |
| 6,671 | 1 | 6 | 3 | 50 | 0 | 1 | 0 | 30 | 4  | 87  |

|       |   |   |    |    |   |   |    |    |    |    |
|-------|---|---|----|----|---|---|----|----|----|----|
| 6,672 | 1 | 6 | 3  | 50 | 0 | 1 | 0  | 29 | 4  | 86 |
| 6,673 | 1 | 6 | 3  | 49 | 0 | 1 | 0  | 27 | 4  | 83 |
| 6,674 | 1 | 5 | 4  | 39 | 0 | 1 | 3  | 22 | 8  | 67 |
| 6,675 | 1 | 5 | 4  | 39 | 0 | 1 | 3  | 22 | 8  | 67 |
| 6,676 | 1 | 5 | 5  | 39 | 0 | 1 | 3  | 22 | 9  | 67 |
| 6,677 | 1 | 4 | 6  | 39 | 0 | 1 | 5  | 22 | 12 | 66 |
| 6,678 | 1 | 4 | 10 | 38 | 0 | 1 | 11 | 22 | 22 | 65 |
| 6,679 | 1 | 4 | 10 | 39 | 0 | 1 | 11 | 22 | 22 | 66 |
| 6,680 | 1 | 4 | 11 | 39 | 0 | 1 | 11 | 22 | 23 | 66 |
| 6,681 | 1 | 4 | 11 | 39 | 0 | 1 | 11 | 22 | 23 | 66 |
| 6,682 | 0 | 4 | 11 | 39 | 0 | 1 | 11 | 22 | 22 | 66 |
| 6,683 | 0 | 4 | 11 | 39 | 0 | 1 | 11 | 22 | 22 | 66 |
| 6,684 | 0 | 4 | 11 | 39 | 0 | 1 | 11 | 23 | 22 | 67 |
| 6,685 | 0 | 4 | 11 | 39 | 0 | 1 | 11 | 22 | 22 | 66 |
| 6,686 | 0 | 4 | 13 | 37 | 0 | 1 | 12 | 19 | 25 | 61 |
| 6,687 | 0 | 4 | 13 | 37 | 0 | 1 | 12 | 19 | 25 | 61 |
| 6,688 | 0 | 4 | 14 | 37 | 0 | 1 | 14 | 20 | 28 | 62 |
| 6,689 | 0 | 4 | 14 | 37 | 0 | 1 | 14 | 20 | 28 | 62 |
| 6,690 | 0 | 4 | 15 | 32 | 0 | 1 | 14 | 21 | 29 | 58 |
| 6,691 | 0 | 4 | 15 | 30 | 0 | 1 | 14 | 21 | 29 | 56 |
| 6,692 | 0 | 4 | 15 | 31 | 0 | 1 | 14 | 21 | 29 | 57 |
| 6,693 | 0 | 4 | 15 | 30 | 0 | 1 | 14 | 17 | 29 | 52 |
| 6,694 | 0 | 4 | 14 | 30 | 0 | 1 | 14 | 17 | 28 | 52 |
| 6,695 | 0 | 4 | 14 | 30 | 0 | 1 | 14 | 17 | 28 | 52 |
| 6,696 | 0 | 4 | 15 | 24 | 0 | 1 | 15 | 14 | 30 | 43 |
| 6,697 | 0 | 4 | 15 | 24 | 0 | 1 | 15 | 14 | 30 | 43 |
| 6,698 | 0 | 3 | 15 | 24 | 0 | 1 | 15 | 14 | 30 | 42 |
| 6,699 | 0 | 3 | 17 | 24 | 0 | 1 | 15 | 15 | 32 | 43 |
| 6,700 | 0 | 3 | 17 | 24 | 0 | 1 | 15 | 15 | 32 | 43 |
| 6,701 | 0 | 1 | 17 | 16 | 0 | 0 | 15 | 11 | 32 | 28 |
| 6,702 | 0 | 1 | 17 | 18 | 0 | 0 | 15 | 11 | 32 | 30 |
| 6,703 | 0 | 1 | 17 | 19 | 0 | 0 | 15 | 11 | 32 | 31 |
| 6,704 | 0 | 1 | 17 | 21 | 0 | 0 | 15 | 14 | 32 | 36 |
| 6,705 | 0 | 1 | 17 | 22 | 0 | 0 | 15 | 15 | 32 | 38 |
| 6,706 | 0 | 1 | 17 | 14 | 0 | 0 | 15 | 15 | 32 | 30 |
| 6,707 | 0 | 1 | 17 | 13 | 0 | 0 | 15 | 14 | 32 | 28 |
| 6,708 | 1 | 1 | 18 | 13 | 0 | 0 | 15 | 14 | 34 | 28 |
| 6,709 | 1 | 1 | 18 | 13 | 0 | 0 | 15 | 14 | 34 | 28 |
| 6,710 | 1 | 1 | 18 | 13 | 0 | 0 | 15 | 14 | 34 | 28 |
| 6,711 | 1 | 1 | 18 | 13 | 0 | 0 | 15 | 14 | 34 | 28 |
| 6,712 | 1 | 1 | 18 | 14 | 0 | 1 | 15 | 15 | 34 | 31 |

|       |   |   |    |    |   |   |    |    |    |    |
|-------|---|---|----|----|---|---|----|----|----|----|
| 6,713 | 1 | 1 | 18 | 14 | 0 | 1 | 15 | 15 | 34 | 31 |
| 6,714 | 1 | 1 | 24 | 15 | 0 | 1 | 18 | 15 | 43 | 32 |
| 6,715 | 1 | 1 | 24 | 15 | 0 | 1 | 18 | 14 | 43 | 31 |
| 6,716 | 1 | 1 | 23 | 16 | 0 | 1 | 18 | 14 | 42 | 32 |
| 6,717 | 1 | 1 | 26 | 15 | 0 | 1 | 18 | 13 | 45 | 30 |
| 6,718 | 1 | 1 | 26 | 15 | 0 | 1 | 18 | 13 | 45 | 30 |
| 6,719 | 1 | 1 | 26 | 15 | 0 | 1 | 18 | 13 | 45 | 30 |
| 6,720 | 1 | 1 | 27 | 15 | 0 | 1 | 18 | 13 | 46 | 30 |
| 6,721 | 1 | 1 | 27 | 15 | 0 | 1 | 18 | 13 | 46 | 30 |
| 6,722 | 1 | 1 | 27 | 16 | 0 | 1 | 18 | 14 | 46 | 32 |
| 6,723 | 1 | 1 | 27 | 24 | 0 | 1 | 18 | 14 | 46 | 40 |
| 6,724 | 1 | 1 | 28 | 29 | 0 | 1 | 16 | 14 | 45 | 45 |
| 6,725 | 1 | 1 | 29 | 32 | 0 | 1 | 17 | 14 | 47 | 48 |
| 6,726 | 1 | 1 | 28 | 32 | 0 | 1 | 17 | 14 | 46 | 48 |
| 6,727 | 1 | 1 | 27 | 35 | 0 | 1 | 18 | 15 | 46 | 52 |
| 6,728 | 1 | 1 | 27 | 36 | 0 | 1 | 20 | 16 | 48 | 54 |
| 6,729 | 1 | 1 | 23 | 35 | 0 | 1 | 15 | 16 | 39 | 53 |
| 6,730 | 1 | 1 | 23 | 35 | 0 | 1 | 15 | 16 | 39 | 53 |
| 6,731 | 1 | 0 | 22 | 35 | 0 | 1 | 15 | 16 | 38 | 52 |
| 6,732 | 1 | 0 | 23 | 35 | 0 | 1 | 15 | 16 | 39 | 52 |
| 6,733 | 1 | 0 | 23 | 35 | 0 | 1 | 15 | 16 | 39 | 52 |
| 6,734 | 1 | 0 | 25 | 35 | 0 | 1 | 16 | 15 | 42 | 51 |
| 6,735 | 1 | 0 | 25 | 35 | 0 | 1 | 16 | 15 | 42 | 51 |
| 6,736 | 1 | 0 | 23 | 35 | 0 | 1 | 16 | 15 | 40 | 51 |
| 6,737 | 1 | 0 | 23 | 35 | 0 | 1 | 15 | 15 | 39 | 51 |
| 6,738 | 1 | 0 | 23 | 35 | 0 | 1 | 15 | 15 | 39 | 51 |
| 6,739 | 1 | 0 | 22 | 35 | 0 | 1 | 13 | 14 | 36 | 50 |
| 6,740 | 1 | 0 | 22 | 35 | 0 | 1 | 13 | 14 | 36 | 50 |
| 6,741 | 1 | 0 | 21 | 35 | 0 | 1 | 13 | 13 | 35 | 49 |
| 6,742 | 1 | 0 | 21 | 36 | 0 | 1 | 13 | 13 | 35 | 50 |
| 6,743 | 1 | 0 | 21 | 36 | 0 | 1 | 13 | 13 | 35 | 50 |
| 6,744 | 1 | 0 | 21 | 36 | 0 | 1 | 13 | 13 | 35 | 50 |
| 6,745 | 1 | 0 | 22 | 36 | 0 | 1 | 13 | 13 | 36 | 50 |
| 6,746 | 1 | 1 | 21 | 36 | 0 | 1 | 12 | 13 | 34 | 51 |
| 6,747 | 1 | 1 | 21 | 36 | 0 | 1 | 12 | 14 | 34 | 52 |
| 6,748 | 1 | 1 | 21 | 36 | 0 | 1 | 12 | 14 | 34 | 52 |
| 6,749 | 1 | 1 | 21 | 36 | 0 | 1 | 14 | 14 | 36 | 52 |
| 6,750 | 1 | 1 | 20 | 36 | 0 | 1 | 14 | 13 | 35 | 51 |
| 6,751 | 1 | 1 | 20 | 37 | 0 | 1 | 14 | 13 | 35 | 52 |
| 6,752 | 1 | 1 | 20 | 34 | 0 | 1 | 14 | 11 | 35 | 47 |
| 6,753 | 1 | 1 | 20 | 32 | 0 | 1 | 14 | 11 | 35 | 45 |

|       |   |   |    |    |   |   |    |    |    |     |
|-------|---|---|----|----|---|---|----|----|----|-----|
| 6,754 | 1 | 1 | 20 | 31 | 0 | 1 | 14 | 11 | 35 | 44  |
| 6,755 | 1 | 1 | 21 | 28 | 0 | 1 | 14 | 7  | 36 | 37  |
| 6,756 | 1 | 1 | 21 | 28 | 0 | 1 | 14 | 6  | 36 | 36  |
| 6,757 | 1 | 1 | 21 | 28 | 0 | 1 | 14 | 6  | 36 | 36  |
| 6,758 | 1 | 1 | 22 | 28 | 0 | 1 | 14 | 6  | 37 | 36  |
| 6,759 | 0 | 1 | 21 | 28 | 0 | 1 | 14 | 6  | 35 | 36  |
| 6,760 | 0 | 1 | 21 | 29 | 0 | 1 | 16 | 6  | 37 | 37  |
| 6,761 | 0 | 3 | 21 | 35 | 0 | 1 | 16 | 18 | 37 | 57  |
| 6,762 | 0 | 3 | 21 | 35 | 0 | 1 | 16 | 20 | 37 | 59  |
| 6,763 | 0 | 3 | 21 | 43 | 0 | 0 | 20 | 24 | 41 | 70  |
| 6,764 | 0 | 4 | 20 | 43 | 0 | 0 | 20 | 24 | 40 | 71  |
| 6,765 | 0 | 4 | 17 | 42 | 0 | 0 | 23 | 25 | 40 | 71  |
| 6,766 | 0 | 4 | 18 | 42 | 0 | 0 | 23 | 25 | 41 | 71  |
| 6,767 | 0 | 4 | 17 | 43 | 0 | 0 | 23 | 25 | 40 | 72  |
| 6,768 | 1 | 4 | 16 | 43 | 0 | 0 | 26 | 25 | 43 | 72  |
| 6,769 | 1 | 4 | 16 | 43 | 0 | 0 | 26 | 25 | 43 | 72  |
| 6,770 | 1 | 4 | 16 | 43 | 0 | 0 | 26 | 25 | 43 | 72  |
| 6,771 | 1 | 4 | 16 | 43 | 0 | 0 | 26 | 25 | 43 | 72  |
| 6,772 | 1 | 4 | 16 | 42 | 0 | 0 | 26 | 24 | 43 | 70  |
| 6,773 | 1 | 4 | 16 | 42 | 0 | 0 | 26 | 24 | 43 | 70  |
| 6,774 | 1 | 4 | 16 | 35 | 0 | 0 | 26 | 26 | 43 | 65  |
| 6,775 | 1 | 4 | 14 | 31 | 0 | 0 | 25 | 26 | 40 | 61  |
| 6,776 | 2 | 4 | 13 | 26 | 0 | 0 | 24 | 25 | 39 | 55  |
| 6,777 | 2 | 4 | 14 | 26 | 0 | 0 | 24 | 25 | 40 | 55  |
| 6,778 | 2 | 4 | 14 | 27 | 0 | 1 | 22 | 25 | 38 | 57  |
| 6,779 | 2 | 4 | 13 | 31 | 1 | 1 | 19 | 25 | 35 | 61  |
| 6,780 | 2 | 4 | 13 | 32 | 1 | 1 | 18 | 25 | 34 | 62  |
| 6,781 | 2 | 4 | 13 | 33 | 1 | 1 | 18 | 26 | 34 | 64  |
| 6,782 | 2 | 4 | 13 | 35 | 1 | 1 | 18 | 28 | 34 | 68  |
| 6,783 | 2 | 4 | 12 | 36 | 1 | 1 | 18 | 28 | 33 | 69  |
| 6,784 | 2 | 4 | 13 | 43 | 1 | 1 | 18 | 32 | 34 | 80  |
| 6,785 | 2 | 4 | 11 | 47 | 1 | 1 | 17 | 40 | 31 | 92  |
| 6,786 | 2 | 4 | 11 | 56 | 1 | 1 | 17 | 41 | 31 | 102 |
| 6,787 | 2 | 4 | 11 | 78 | 1 | 2 | 17 | 46 | 31 | 130 |
| 6,788 | 2 | 4 | 11 | 78 | 1 | 2 | 17 | 46 | 31 | 130 |
| 6,789 | 2 | 4 | 11 | 80 | 2 | 2 | 17 | 47 | 32 | 133 |
| 6,790 | 2 | 4 | 11 | 80 | 2 | 2 | 17 | 47 | 32 | 133 |
| 6,791 | 2 | 4 | 11 | 79 | 2 | 2 | 17 | 48 | 32 | 133 |
| 6,792 | 2 | 4 | 11 | 80 | 2 | 2 | 17 | 48 | 32 | 134 |
| 6,793 | 2 | 4 | 11 | 80 | 2 | 2 | 17 | 48 | 32 | 134 |
| 6,794 | 2 | 5 | 11 | 80 | 2 | 2 | 17 | 49 | 32 | 136 |

|       |   |   |    |    |   |   |    |    |    |     |
|-------|---|---|----|----|---|---|----|----|----|-----|
| 6,795 | 2 | 5 | 10 | 80 | 2 | 2 | 17 | 49 | 31 | 136 |
| 6,796 | 2 | 6 | 10 | 81 | 2 | 2 | 17 | 51 | 31 | 140 |
| 6,797 | 2 | 6 | 10 | 85 | 2 | 2 | 18 | 50 | 32 | 143 |
| 6,798 | 2 | 6 | 10 | 85 | 2 | 2 | 18 | 50 | 32 | 143 |
| 6,799 | 2 | 6 | 10 | 88 | 2 | 2 | 16 | 50 | 30 | 146 |
| 6,800 | 2 | 6 | 10 | 89 | 2 | 2 | 16 | 51 | 30 | 148 |
| 6,801 | 2 | 6 | 10 | 90 | 2 | 2 | 16 | 51 | 30 | 149 |
| 6,802 | 2 | 6 | 10 | 91 | 2 | 2 | 16 | 52 | 30 | 151 |
| 6,803 | 2 | 6 | 10 | 91 | 2 | 2 | 16 | 52 | 30 | 151 |
| 6,804 | 2 | 6 | 10 | 92 | 2 | 2 | 16 | 53 | 30 | 153 |
| 6,805 | 2 | 6 | 9  | 92 | 2 | 2 | 16 | 53 | 29 | 153 |
| 6,806 | 2 | 6 | 9  | 92 | 2 | 2 | 16 | 53 | 29 | 153 |
| 6,807 | 2 | 6 | 9  | 92 | 2 | 2 | 16 | 52 | 29 | 152 |
| 6,808 | 2 | 6 | 9  | 92 | 2 | 2 | 16 | 52 | 29 | 152 |
| 6,809 | 2 | 6 | 8  | 94 | 2 | 2 | 17 | 52 | 29 | 154 |
| 6,810 | 2 | 6 | 8  | 93 | 2 | 2 | 16 | 52 | 28 | 153 |
| 6,811 | 2 | 5 | 8  | 86 | 2 | 2 | 15 | 40 | 27 | 133 |
| 6,812 | 2 | 5 | 8  | 86 | 2 | 2 | 15 | 40 | 27 | 133 |
| 6,813 | 2 | 5 | 8  | 87 | 2 | 2 | 12 | 38 | 24 | 132 |
| 6,814 | 2 | 4 | 8  | 78 | 2 | 2 | 12 | 33 | 24 | 117 |
| 6,815 | 2 | 4 | 9  | 80 | 2 | 2 | 12 | 34 | 25 | 120 |
| 6,816 | 2 | 4 | 7  | 80 | 2 | 2 | 6  | 34 | 17 | 120 |
| 6,817 | 2 | 4 | 6  | 78 | 2 | 2 | 6  | 34 | 16 | 118 |
| 6,818 | 2 | 4 | 6  | 81 | 2 | 2 | 6  | 34 | 16 | 121 |
| 6,819 | 1 | 4 | 7  | 81 | 2 | 2 | 4  | 34 | 14 | 121 |
| 6,820 | 1 | 4 | 6  | 81 | 2 | 2 | 4  | 34 | 13 | 121 |
| 6,821 | 1 | 4 | 12 | 85 | 2 | 2 | 5  | 35 | 20 | 126 |
| 6,822 | 1 | 4 | 12 | 85 | 2 | 2 | 5  | 35 | 20 | 126 |
| 6,823 | 2 | 4 | 12 | 85 | 2 | 2 | 6  | 35 | 22 | 126 |
| 6,824 | 2 | 4 | 12 | 84 | 2 | 2 | 6  | 33 | 22 | 123 |
| 6,825 | 2 | 4 | 12 | 84 | 2 | 2 | 6  | 33 | 22 | 123 |
| 6,826 | 2 | 4 | 12 | 83 | 2 | 2 | 7  | 33 | 23 | 122 |
| 6,827 | 1 | 4 | 13 | 81 | 2 | 1 | 7  | 33 | 23 | 119 |
| 6,828 | 1 | 4 | 15 | 82 | 2 | 1 | 7  | 33 | 25 | 120 |
| 6,829 | 1 | 4 | 15 | 83 | 2 | 1 | 8  | 33 | 26 | 121 |
| 6,830 | 2 | 4 | 15 | 77 | 1 | 1 | 9  | 32 | 27 | 114 |
| 6,831 | 2 | 4 | 15 | 76 | 1 | 1 | 9  | 31 | 27 | 112 |
| 6,832 | 2 | 4 | 15 | 76 | 1 | 1 | 9  | 31 | 27 | 112 |
| 6,833 | 2 | 4 | 15 | 73 | 1 | 1 | 10 | 29 | 28 | 107 |
| 6,834 | 2 | 4 | 14 | 66 | 1 | 1 | 10 | 25 | 27 | 96  |
| 6,835 | 2 | 4 | 14 | 66 | 1 | 1 | 10 | 25 | 27 | 96  |

|       |   |   |    |    |   |   |    |    |    |    |
|-------|---|---|----|----|---|---|----|----|----|----|
| 6,836 | 2 | 4 | 14 | 31 | 1 | 0 | 10 | 11 | 27 | 46 |
| 6,837 | 2 | 4 | 14 | 32 | 1 | 0 | 10 | 11 | 27 | 47 |
| 6,838 | 2 | 4 | 14 | 32 | 1 | 0 | 11 | 11 | 28 | 47 |
| 6,839 | 2 | 4 | 14 | 30 | 0 | 0 | 11 | 10 | 27 | 44 |
| 6,840 | 2 | 4 | 14 | 30 | 0 | 0 | 11 | 10 | 27 | 44 |
| 6,841 | 2 | 4 | 14 | 30 | 0 | 0 | 11 | 9  | 27 | 43 |
| 6,842 | 2 | 4 | 14 | 30 | 0 | 0 | 11 | 10 | 27 | 44 |
| 6,843 | 2 | 4 | 14 | 30 | 0 | 0 | 11 | 10 | 27 | 44 |
| 6,844 | 2 | 4 | 14 | 31 | 0 | 0 | 11 | 11 | 27 | 46 |
| 6,845 | 2 | 3 | 14 | 30 | 0 | 0 | 11 | 10 | 27 | 43 |
| 6,846 | 2 | 3 | 14 | 32 | 0 | 0 | 11 | 10 | 27 | 45 |
| 6,847 | 2 | 1 | 14 | 35 | 0 | 0 | 11 | 8  | 27 | 44 |
| 6,848 | 2 | 2 | 14 | 50 | 0 | 2 | 10 | 15 | 26 | 69 |
| 6,849 | 2 | 2 | 14 | 61 | 0 | 2 | 10 | 16 | 26 | 81 |
| 6,850 | 3 | 2 | 14 | 61 | 0 | 2 | 10 | 17 | 27 | 82 |
| 6,851 | 3 | 2 | 13 | 71 | 0 | 3 | 11 | 18 | 27 | 94 |
| 6,852 | 3 | 2 | 13 | 71 | 0 | 3 | 11 | 19 | 27 | 95 |
| 6,853 | 3 | 2 | 13 | 73 | 0 | 3 | 11 | 18 | 27 | 96 |
| 6,854 | 3 | 2 | 13 | 75 | 0 | 3 | 11 | 18 | 27 | 98 |
| 6,855 | 3 | 2 | 13 | 74 | 0 | 3 | 11 | 17 | 27 | 96 |
| 6,856 | 4 | 2 | 13 | 74 | 0 | 3 | 12 | 17 | 29 | 96 |
| 6,857 | 5 | 2 | 13 | 76 | 0 | 3 | 13 | 17 | 31 | 98 |
| 6,858 | 5 | 2 | 17 | 77 | 0 | 3 | 17 | 17 | 39 | 99 |
| 6,859 | 5 | 2 | 17 | 77 | 0 | 3 | 16 | 17 | 38 | 99 |
| 6,860 | 5 | 2 | 17 | 75 | 0 | 3 | 16 | 17 | 38 | 97 |
| 6,861 | 5 | 1 | 17 | 75 | 0 | 3 | 16 | 17 | 38 | 96 |
| 6,862 | 5 | 1 | 17 | 74 | 0 | 3 | 16 | 17 | 38 | 95 |
| 6,863 | 5 | 1 | 18 | 74 | 0 | 3 | 15 | 17 | 38 | 95 |
| 6,864 | 5 | 1 | 19 | 74 | 0 | 3 | 15 | 17 | 39 | 95 |
| 6,865 | 5 | 1 | 19 | 74 | 0 | 3 | 15 | 17 | 39 | 95 |
| 6,866 | 5 | 1 | 18 | 72 | 0 | 3 | 15 | 16 | 38 | 92 |
| 6,867 | 5 | 1 | 18 | 72 | 0 | 3 | 15 | 15 | 38 | 91 |
| 6,868 | 5 | 1 | 18 | 72 | 0 | 3 | 15 | 15 | 38 | 91 |
| 6,869 | 5 | 1 | 18 | 69 | 0 | 3 | 15 | 15 | 38 | 88 |
| 6,870 | 5 | 1 | 16 | 69 | 0 | 3 | 14 | 16 | 35 | 89 |
| 6,871 | 5 | 1 | 13 | 69 | 0 | 3 | 14 | 16 | 32 | 89 |
| 6,872 | 5 | 1 | 10 | 66 | 0 | 3 | 13 | 15 | 28 | 85 |
| 6,873 | 5 | 1 | 10 | 66 | 0 | 3 | 13 | 15 | 28 | 85 |
| 6,874 | 4 | 1 | 11 | 66 | 0 | 3 | 12 | 16 | 27 | 86 |
| 6,875 | 4 | 1 | 11 | 66 | 0 | 3 | 12 | 16 | 27 | 86 |
| 6,876 | 4 | 2 | 11 | 67 | 0 | 3 | 11 | 17 | 26 | 89 |



|       |   |    |    |     |   |   |    |    |    |     |
|-------|---|----|----|-----|---|---|----|----|----|-----|
| 6,877 | 5 | 2  | 11 | 68  | 0 | 3 | 11 | 19 | 27 | 92  |
| 6,878 | 5 | 2  | 11 | 66  | 0 | 3 | 11 | 20 | 27 | 91  |
| 6,879 | 5 | 2  | 8  | 66  | 0 | 3 | 11 | 20 | 24 | 91  |
| 6,880 | 5 | 3  | 8  | 66  | 0 | 3 | 10 | 20 | 23 | 92  |
| 6,881 | 4 | 3  | 8  | 67  | 0 | 3 | 9  | 21 | 21 | 94  |
| 6,882 | 4 | 3  | 8  | 67  | 0 | 3 | 9  | 21 | 21 | 94  |
| 6,883 | 4 | 3  | 8  | 68  | 0 | 3 | 8  | 21 | 20 | 95  |
| 6,884 | 4 | 3  | 8  | 69  | 0 | 3 | 8  | 21 | 20 | 96  |
| 6,885 | 4 | 3  | 8  | 71  | 0 | 3 | 8  | 23 | 20 | 100 |
| 6,886 | 4 | 7  | 8  | 89  | 0 | 5 | 8  | 31 | 20 | 132 |
| 6,887 | 4 | 7  | 8  | 90  | 0 | 5 | 8  | 31 | 20 | 133 |
| 6,888 | 4 | 7  | 8  | 96  | 0 | 5 | 8  | 33 | 20 | 141 |
| 6,889 | 4 | 7  | 8  | 99  | 0 | 5 | 7  | 34 | 19 | 145 |
| 6,890 | 4 | 7  | 8  | 102 | 0 | 5 | 7  | 34 | 19 | 148 |
| 6,891 | 4 | 7  | 8  | 106 | 0 | 5 | 7  | 37 | 19 | 155 |
| 6,892 | 4 | 7  | 8  | 106 | 0 | 5 | 7  | 37 | 19 | 155 |
| 6,893 | 4 | 7  | 8  | 106 | 0 | 5 | 7  | 37 | 19 | 155 |
| 6,894 | 4 | 7  | 8  | 104 | 0 | 5 | 7  | 36 | 19 | 152 |
| 6,895 | 4 | 7  | 8  | 105 | 0 | 5 | 8  | 36 | 20 | 153 |
| 6,896 | 4 | 9  | 8  | 107 | 0 | 5 | 8  | 37 | 20 | 158 |
| 6,897 | 4 | 9  | 8  | 105 | 0 | 5 | 8  | 37 | 20 | 156 |
| 6,898 | 4 | 9  | 8  | 103 | 1 | 5 | 8  | 37 | 21 | 154 |
| 6,899 | 4 | 8  | 8  | 59  | 1 | 2 | 8  | 26 | 21 | 95  |
| 6,900 | 4 | 8  | 8  | 59  | 1 | 2 | 8  | 26 | 21 | 95  |
| 6,901 | 3 | 8  | 8  | 59  | 1 | 2 | 8  | 26 | 20 | 95  |
| 6,902 | 3 | 8  | 8  | 58  | 2 | 2 | 7  | 25 | 20 | 93  |
| 6,903 | 3 | 8  | 8  | 58  | 2 | 2 | 7  | 25 | 20 | 93  |
| 6,904 | 3 | 8  | 8  | 57  | 2 | 2 | 7  | 25 | 20 | 92  |
| 6,905 | 3 | 8  | 8  | 59  | 2 | 2 | 7  | 26 | 20 | 95  |
| 6,906 | 3 | 8  | 8  | 60  | 2 | 2 | 7  | 26 | 20 | 96  |
| 6,907 | 2 | 8  | 8  | 60  | 2 | 2 | 6  | 26 | 18 | 96  |
| 6,908 | 1 | 8  | 8  | 58  | 2 | 2 | 5  | 26 | 16 | 94  |
| 6,909 | 1 | 8  | 5  | 57  | 2 | 2 | 1  | 26 | 9  | 93  |
| 6,910 | 1 | 8  | 5  | 57  | 2 | 2 | 1  | 27 | 9  | 94  |
| 6,911 | 1 | 8  | 6  | 58  | 2 | 2 | 2  | 28 | 11 | 96  |
| 6,912 | 1 | 10 | 6  | 66  | 2 | 3 | 2  | 37 | 11 | 116 |
| 6,913 | 1 | 10 | 6  | 72  | 2 | 3 | 2  | 38 | 11 | 123 |
| 6,914 | 1 | 11 | 5  | 81  | 2 | 3 | 2  | 40 | 10 | 135 |
| 6,915 | 1 | 11 | 5  | 85  | 2 | 3 | 2  | 40 | 10 | 139 |
| 6,916 | 1 | 13 | 5  | 93  | 2 | 3 | 2  | 45 | 10 | 154 |
| 6,917 | 1 | 13 | 5  | 99  | 2 | 4 | 2  | 49 | 10 | 165 |

|       |   |    |    |     |   |   |    |    |    |     |
|-------|---|----|----|-----|---|---|----|----|----|-----|
| 6,918 | 1 | 13 | 5  | 100 | 2 | 4 | 3  | 49 | 11 | 166 |
| 6,919 | 1 | 13 | 5  | 104 | 2 | 4 | 3  | 51 | 11 | 172 |
| 6,920 | 1 | 14 | 5  | 104 | 2 | 4 | 3  | 51 | 11 | 173 |
| 6,921 | 2 | 14 | 9  | 104 | 2 | 4 | 8  | 50 | 21 | 172 |
| 6,922 | 2 | 14 | 9  | 103 | 2 | 4 | 8  | 52 | 21 | 173 |
| 6,923 | 2 | 14 | 9  | 107 | 2 | 4 | 8  | 53 | 21 | 178 |
| 6,924 | 2 | 15 | 13 | 110 | 2 | 4 | 8  | 53 | 25 | 182 |
| 6,925 | 2 | 15 | 16 | 114 | 2 | 4 | 13 | 52 | 33 | 185 |
| 6,926 | 2 | 14 | 17 | 112 | 2 | 4 | 14 | 49 | 35 | 179 |
| 6,927 | 2 | 14 | 17 | 113 | 2 | 4 | 14 | 49 | 35 | 180 |
| 6,928 | 1 | 14 | 16 | 113 | 2 | 4 | 14 | 49 | 33 | 180 |
| 6,929 | 1 | 14 | 18 | 113 | 2 | 4 | 14 | 48 | 35 | 179 |
| 6,930 | 1 | 14 | 18 | 113 | 2 | 4 | 14 | 48 | 35 | 179 |
| 6,931 | 2 | 13 | 20 | 113 | 2 | 4 | 17 | 48 | 41 | 178 |
| 6,932 | 2 | 13 | 20 | 112 | 2 | 4 | 18 | 47 | 42 | 176 |
| 6,933 | 2 | 13 | 20 | 112 | 2 | 4 | 18 | 47 | 42 | 176 |
| 6,934 | 2 | 13 | 21 | 110 | 2 | 4 | 20 | 47 | 45 | 174 |
| 6,935 | 2 | 13 | 21 | 108 | 2 | 4 | 20 | 45 | 45 | 170 |
| 6,936 | 2 | 13 | 21 | 109 | 2 | 4 | 20 | 46 | 45 | 172 |
| 6,937 | 2 | 9  | 21 | 91  | 2 | 2 | 20 | 38 | 45 | 140 |
| 6,938 | 2 | 9  | 21 | 91  | 2 | 2 | 20 | 38 | 45 | 140 |
| 6,939 | 2 | 9  | 21 | 78  | 2 | 2 | 20 | 34 | 45 | 123 |
| 6,940 | 2 | 9  | 21 | 78  | 3 | 2 | 20 | 35 | 46 | 124 |
| 6,941 | 2 | 9  | 21 | 79  | 3 | 3 | 20 | 35 | 46 | 126 |
| 6,942 | 2 | 9  | 21 | 76  | 3 | 3 | 20 | 34 | 46 | 122 |
| 6,943 | 2 | 9  | 21 | 77  | 3 | 3 | 20 | 34 | 46 | 123 |
| 6,944 | 2 | 9  | 21 | 80  | 3 | 3 | 20 | 33 | 46 | 125 |
| 6,945 | 2 | 9  | 21 | 81  | 3 | 3 | 20 | 33 | 46 | 126 |
| 6,946 | 2 | 8  | 21 | 81  | 3 | 3 | 19 | 33 | 45 | 125 |
| 6,947 | 2 | 8  | 21 | 81  | 2 | 3 | 19 | 33 | 44 | 125 |
| 6,948 | 2 | 8  | 21 | 79  | 3 | 3 | 19 | 33 | 45 | 123 |
| 6,949 | 2 | 8  | 21 | 79  | 3 | 3 | 19 | 33 | 45 | 123 |
| 6,950 | 3 | 8  | 21 | 80  | 3 | 3 | 19 | 34 | 46 | 125 |
| 6,951 | 3 | 8  | 21 | 80  | 3 | 3 | 19 | 34 | 46 | 125 |
| 6,952 | 3 | 8  | 21 | 81  | 3 | 3 | 19 | 34 | 46 | 126 |
| 6,953 | 3 | 8  | 21 | 82  | 2 | 3 | 19 | 34 | 45 | 127 |
| 6,954 | 3 | 8  | 21 | 82  | 2 | 3 | 19 | 34 | 45 | 127 |
| 6,955 | 3 | 8  | 21 | 81  | 2 | 3 | 19 | 35 | 45 | 127 |
| 6,956 | 3 | 8  | 21 | 84  | 2 | 3 | 19 | 39 | 45 | 134 |
| 6,957 | 4 | 9  | 27 | 91  | 2 | 3 | 19 | 46 | 52 | 149 |
| 6,958 | 4 | 10 | 27 | 95  | 2 | 3 | 19 | 47 | 52 | 155 |

|       |   |    |    |     |   |   |    |    |    |     |
|-------|---|----|----|-----|---|---|----|----|----|-----|
| 6,959 | 4 | 16 | 33 | 148 | 2 | 5 | 21 | 74 | 60 | 243 |
| 6,960 | 4 | 16 | 32 | 151 | 2 | 5 | 22 | 77 | 60 | 249 |
| 6,961 | 4 | 16 | 32 | 159 | 2 | 7 | 21 | 80 | 59 | 262 |
| 6,962 | 4 | 16 | 31 | 162 | 2 | 7 | 21 | 80 | 58 | 265 |
| 6,963 | 4 | 15 | 31 | 150 | 2 | 6 | 21 | 72 | 58 | 243 |
| 6,964 | 4 | 15 | 31 | 150 | 2 | 6 | 21 | 72 | 58 | 243 |
| 6,965 | 4 | 15 | 31 | 154 | 2 | 6 | 21 | 74 | 58 | 249 |
| 6,966 | 4 | 16 | 30 | 152 | 2 | 7 | 21 | 75 | 57 | 250 |
| 6,967 | 4 | 14 | 30 | 147 | 2 | 7 | 21 | 70 | 57 | 238 |
| 6,968 | 4 | 14 | 30 | 136 | 2 | 6 | 20 | 64 | 56 | 220 |
| 6,969 | 4 | 14 | 30 | 138 | 2 | 6 | 20 | 65 | 56 | 223 |
| 6,970 | 4 | 15 | 26 | 138 | 2 | 6 | 17 | 65 | 49 | 224 |
| 6,971 | 4 | 14 | 26 | 144 | 2 | 6 | 17 | 66 | 49 | 230 |
| 6,972 | 3 | 14 | 26 | 148 | 2 | 6 | 15 | 67 | 46 | 235 |
| 6,973 | 3 | 14 | 27 | 153 | 2 | 6 | 16 | 66 | 48 | 239 |
| 6,974 | 3 | 13 | 28 | 145 | 2 | 6 | 17 | 65 | 50 | 229 |
| 6,975 | 3 | 13 | 24 | 150 | 2 | 6 | 17 | 65 | 46 | 234 |
| 6,976 | 3 | 13 | 20 | 153 | 2 | 6 | 14 | 66 | 39 | 238 |
| 6,977 | 3 | 13 | 20 | 154 | 2 | 6 | 13 | 66 | 38 | 239 |
| 6,978 | 3 | 15 | 20 | 158 | 2 | 6 | 13 | 68 | 38 | 247 |
| 6,979 | 3 | 15 | 18 | 160 | 2 | 6 | 13 | 70 | 36 | 251 |
| 6,980 | 3 | 15 | 19 | 165 | 2 | 6 | 13 | 70 | 37 | 256 |
| 6,981 | 2 | 15 | 17 | 167 | 2 | 6 | 10 | 70 | 31 | 258 |
| 6,982 | 2 | 15 | 18 | 167 | 2 | 6 | 10 | 70 | 32 | 258 |
| 6,983 | 2 | 15 | 18 | 167 | 2 | 6 | 9  | 71 | 31 | 259 |
| 6,984 | 2 | 15 | 17 | 167 | 2 | 6 | 9  | 71 | 30 | 259 |
| 6,985 | 2 | 15 | 17 | 167 | 2 | 6 | 8  | 71 | 29 | 259 |
| 6,986 | 2 | 15 | 17 | 168 | 2 | 6 | 8  | 71 | 29 | 260 |
| 6,987 | 2 | 15 | 17 | 166 | 2 | 6 | 8  | 70 | 29 | 257 |
| 6,988 | 2 | 15 | 17 | 166 | 2 | 6 | 8  | 70 | 29 | 257 |
| 6,989 | 2 | 15 | 17 | 166 | 2 | 6 | 8  | 70 | 29 | 257 |
| 6,990 | 2 | 15 | 17 | 166 | 2 | 6 | 8  | 69 | 29 | 256 |
| 6,991 | 2 | 15 | 17 | 165 | 1 | 5 | 8  | 69 | 28 | 254 |
| 6,992 | 2 | 15 | 17 | 165 | 1 | 5 | 8  | 69 | 28 | 254 |
| 6,993 | 2 | 15 | 17 | 160 | 1 | 5 | 8  | 68 | 28 | 248 |
| 6,994 | 2 | 15 | 17 | 160 | 1 | 5 | 8  | 68 | 28 | 248 |
| 6,995 | 2 | 15 | 17 | 160 | 1 | 5 | 8  | 68 | 28 | 248 |
| 6,996 | 2 | 15 | 17 | 159 | 1 | 5 | 8  | 68 | 28 | 247 |
| 6,997 | 2 | 14 | 17 | 156 | 1 | 5 | 8  | 67 | 28 | 242 |
| 6,998 | 4 | 14 | 17 | 156 | 1 | 5 | 8  | 66 | 30 | 241 |
| 6,999 | 4 | 14 | 17 | 156 | 0 | 5 | 8  | 67 | 29 | 242 |

|       |   |    |    |     |   |    |   |     |    |     |
|-------|---|----|----|-----|---|----|---|-----|----|-----|
| 7,000 | 4 | 14 | 17 | 156 | 0 | 5  | 8 | 67  | 29 | 242 |
| 7,001 | 3 | 14 | 17 | 155 | 0 | 5  | 8 | 66  | 28 | 240 |
| 7,002 | 3 | 14 | 17 | 154 | 0 | 5  | 8 | 66  | 28 | 239 |
| 7,003 | 3 | 14 | 17 | 155 | 0 | 6  | 8 | 70  | 28 | 245 |
| 7,004 | 3 | 15 | 17 | 189 | 0 | 8  | 7 | 106 | 27 | 318 |
| 7,005 | 3 | 16 | 17 | 218 | 0 | 8  | 8 | 138 | 28 | 380 |
| 7,006 | 3 | 19 | 18 | 266 | 0 | 9  | 8 | 167 | 29 | 461 |
| 7,007 | 2 | 21 | 17 | 288 | 0 | 9  | 8 | 168 | 27 | 486 |
| 7,008 | 2 | 20 | 12 | 283 | 0 | 9  | 8 | 162 | 22 | 474 |
| 7,009 | 2 | 19 | 8  | 280 | 0 | 9  | 8 | 161 | 18 | 469 |
| 7,010 | 2 | 13 | 6  | 230 | 0 | 10 | 6 | 144 | 14 | 397 |
| 7,011 | 2 | 21 | 6  | 282 | 0 | 14 | 5 | 177 | 13 | 494 |
| 7,012 | 2 | 21 | 6  | 279 | 0 | 12 | 5 | 173 | 13 | 485 |
| 7,013 | 2 | 21 | 6  | 275 | 0 | 12 | 5 | 172 | 13 | 480 |
| 7,014 | 2 | 21 | 7  | 274 | 0 | 12 | 5 | 170 | 14 | 477 |
| 7,015 | 2 | 21 | 7  | 274 | 0 | 12 | 5 | 170 | 14 | 477 |
| 7,016 | 2 | 22 | 9  | 273 | 0 | 13 | 5 | 172 | 16 | 480 |
| 7,017 | 2 | 22 | 9  | 273 | 0 | 13 | 5 | 172 | 16 | 480 |
| 7,018 | 2 | 22 | 9  | 270 | 0 | 13 | 5 | 174 | 16 | 479 |
| 7,019 | 2 | 22 | 9  | 267 | 0 | 13 | 5 | 173 | 16 | 475 |
| 7,020 | 2 | 22 | 9  | 268 | 0 | 13 | 5 | 173 | 16 | 476 |
| 7,021 | 2 | 22 | 9  | 262 | 0 | 13 | 5 | 172 | 16 | 469 |
| 7,022 | 2 | 22 | 9  | 258 | 0 | 13 | 8 | 171 | 19 | 464 |
| 7,023 | 2 | 22 | 9  | 258 | 0 | 13 | 8 | 172 | 19 | 465 |
| 7,024 | 2 | 22 | 8  | 254 | 0 | 13 | 7 | 171 | 17 | 460 |
| 7,025 | 2 | 22 | 7  | 243 | 0 | 14 | 6 | 170 | 15 | 449 |
| 7,026 | 2 | 22 | 7  | 243 | 0 | 14 | 7 | 170 | 16 | 449 |
| 7,027 | 2 | 22 | 7  | 243 | 0 | 14 | 5 | 170 | 14 | 449 |
| 7,028 | 2 | 20 | 7  | 237 | 0 | 14 | 5 | 168 | 14 | 439 |
| 7,029 | 2 | 20 | 10 | 237 | 0 | 14 | 5 | 171 | 17 | 442 |
| 7,030 | 2 | 20 | 10 | 236 | 0 | 14 | 5 | 169 | 17 | 439 |
| 7,031 | 2 | 20 | 9  | 229 | 0 | 14 | 5 | 169 | 16 | 432 |
| 7,032 | 2 | 20 | 10 | 230 | 0 | 14 | 5 | 169 | 17 | 433 |
| 7,033 | 2 | 20 | 9  | 230 | 0 | 14 | 5 | 169 | 16 | 433 |
| 7,034 | 2 | 20 | 9  | 230 | 0 | 14 | 5 | 168 | 16 | 432 |
| 7,035 | 2 | 21 | 9  | 231 | 0 | 14 | 5 | 168 | 16 | 434 |
| 7,036 | 2 | 21 | 9  | 231 | 0 | 14 | 5 | 169 | 16 | 435 |
| 7,037 | 2 | 21 | 9  | 230 | 0 | 14 | 5 | 169 | 16 | 434 |
| 7,038 | 2 | 21 | 10 | 230 | 0 | 14 | 5 | 169 | 17 | 434 |
| 7,039 | 2 | 21 | 10 | 231 | 0 | 14 | 5 | 169 | 17 | 435 |
| 7,040 | 2 | 21 | 12 | 231 | 0 | 14 | 5 | 170 | 19 | 436 |

|       |   |    |    |     |   |    |    |     |    |     |
|-------|---|----|----|-----|---|----|----|-----|----|-----|
| 7,041 | 2 | 21 | 12 | 232 | 0 | 14 | 5  | 169 | 19 | 436 |
| 7,042 | 2 | 21 | 12 | 232 | 0 | 14 | 5  | 171 | 19 | 438 |
| 7,043 | 2 | 21 | 15 | 235 | 0 | 14 | 6  | 174 | 23 | 444 |
| 7,044 | 2 | 21 | 15 | 242 | 0 | 14 | 6  | 177 | 23 | 454 |
| 7,045 | 4 | 21 | 15 | 248 | 0 | 14 | 6  | 177 | 25 | 460 |
| 7,046 | 4 | 21 | 15 | 250 | 0 | 14 | 6  | 177 | 25 | 462 |
| 7,047 | 4 | 21 | 15 | 252 | 0 | 14 | 6  | 185 | 25 | 472 |
| 7,048 | 2 | 21 | 15 | 252 | 0 | 14 | 6  | 185 | 23 | 472 |
| 7,049 | 2 | 22 | 15 | 272 | 0 | 15 | 7  | 208 | 24 | 517 |
| 7,050 | 2 | 22 | 15 | 272 | 0 | 15 | 7  | 208 | 24 | 517 |
| 7,051 | 3 | 24 | 16 | 292 | 0 | 15 | 7  | 220 | 26 | 551 |
| 7,052 | 3 | 26 | 16 | 298 | 0 | 16 | 7  | 231 | 26 | 571 |
| 7,053 | 3 | 26 | 16 | 298 | 0 | 16 | 7  | 231 | 26 | 571 |
| 7,054 | 3 | 26 | 16 | 305 | 0 | 16 | 7  | 227 | 26 | 574 |
| 7,055 | 3 | 26 | 16 | 272 | 0 | 15 | 7  | 194 | 26 | 507 |
| 7,056 | 3 | 26 | 16 | 249 | 0 | 15 | 7  | 167 | 26 | 457 |
| 7,057 | 3 | 23 | 15 | 201 | 0 | 14 | 7  | 138 | 25 | 376 |
| 7,058 | 3 | 21 | 15 | 169 | 0 | 14 | 7  | 131 | 25 | 335 |
| 7,059 | 3 | 21 | 15 | 168 | 0 | 14 | 7  | 131 | 25 | 334 |
| 7,060 | 3 | 13 | 15 | 110 | 0 | 7  | 7  | 88  | 25 | 218 |
| 7,061 | 3 | 14 | 15 | 114 | 0 | 7  | 7  | 93  | 25 | 228 |
| 7,062 | 3 | 14 | 15 | 115 | 0 | 7  | 7  | 93  | 25 | 229 |
| 7,063 | 3 | 14 | 15 | 118 | 0 | 7  | 7  | 100 | 25 | 239 |
| 7,064 | 3 | 16 | 15 | 142 | 0 | 8  | 7  | 130 | 25 | 296 |
| 7,065 | 3 | 15 | 14 | 206 | 0 | 12 | 7  | 176 | 24 | 409 |
| 7,066 | 3 | 19 | 14 | 234 | 0 | 15 | 7  | 219 | 24 | 487 |
| 7,067 | 3 | 16 | 12 | 228 | 0 | 14 | 7  | 220 | 22 | 478 |
| 7,068 | 3 | 18 | 13 | 251 | 0 | 15 | 7  | 235 | 23 | 519 |
| 7,069 | 3 | 27 | 13 | 275 | 0 | 16 | 7  | 269 | 23 | 587 |
| 7,070 | 3 | 27 | 13 | 281 | 0 | 16 | 7  | 269 | 23 | 593 |
| 7,071 | 3 | 26 | 14 | 290 | 0 | 16 | 7  | 270 | 24 | 602 |
| 7,072 | 3 | 26 | 14 | 296 | 0 | 16 | 7  | 273 | 24 | 611 |
| 7,073 | 3 | 26 | 14 | 296 | 0 | 16 | 4  | 273 | 21 | 611 |
| 7,074 | 3 | 26 | 14 | 296 | 0 | 16 | 4  | 274 | 21 | 612 |
| 7,075 | 3 | 26 | 15 | 296 | 0 | 15 | 4  | 276 | 22 | 613 |
| 7,076 | 3 | 27 | 16 | 297 | 0 | 15 | 4  | 279 | 23 | 618 |
| 7,077 | 3 | 27 | 16 | 297 | 0 | 15 | 3  | 279 | 22 | 618 |
| 7,078 | 5 | 27 | 17 | 297 | 1 | 15 | 6  | 280 | 29 | 619 |
| 7,079 | 5 | 27 | 16 | 300 | 1 | 15 | 6  | 287 | 28 | 629 |
| 7,080 | 5 | 27 | 13 | 300 | 1 | 15 | 6  | 284 | 25 | 626 |
| 7,081 | 5 | 27 | 16 | 301 | 1 | 16 | 10 | 286 | 32 | 630 |

|       |   |    |    |     |   |    |    |     |    |     |
|-------|---|----|----|-----|---|----|----|-----|----|-----|
| 7,082 | 5 | 27 | 16 | 311 | 1 | 16 | 10 | 297 | 32 | 651 |
| 7,083 | 5 | 27 | 15 | 319 | 1 | 16 | 10 | 297 | 31 | 659 |
| 7,084 | 5 | 27 | 15 | 320 | 1 | 16 | 10 | 297 | 31 | 660 |
| 7,085 | 5 | 27 | 15 | 320 | 1 | 16 | 10 | 297 | 31 | 660 |
| 7,086 | 5 | 26 | 15 | 319 | 1 | 16 | 10 | 297 | 31 | 658 |
| 7,087 | 5 | 26 | 15 | 320 | 1 | 16 | 10 | 296 | 31 | 658 |
| 7,088 | 5 | 26 | 14 | 320 | 1 | 16 | 10 | 296 | 30 | 658 |
| 7,089 | 5 | 26 | 15 | 319 | 1 | 16 | 12 | 296 | 33 | 657 |
| 7,090 | 5 | 26 | 15 | 319 | 1 | 16 | 12 | 295 | 33 | 656 |
| 7,091 | 5 | 26 | 13 | 318 | 1 | 16 | 12 | 295 | 31 | 655 |
| 7,092 | 5 | 26 | 13 | 318 | 1 | 16 | 12 | 296 | 31 | 656 |
| 7,093 | 5 | 26 | 13 | 320 | 1 | 16 | 12 | 294 | 31 | 656 |
| 7,094 | 5 | 27 | 10 | 317 | 1 | 16 | 11 | 290 | 27 | 650 |
| 7,095 | 5 | 27 | 10 | 310 | 1 | 16 | 11 | 288 | 27 | 641 |
| 7,096 | 3 | 27 | 11 | 302 | 1 | 16 | 11 | 288 | 26 | 633 |
| 7,097 | 3 | 27 | 11 | 300 | 1 | 16 | 11 | 280 | 26 | 623 |
| 7,098 | 3 | 27 | 11 | 300 | 1 | 16 | 11 | 280 | 26 | 623 |
| 7,099 | 3 | 27 | 11 | 300 | 1 | 16 | 10 | 281 | 25 | 624 |
| 7,100 | 3 | 26 | 11 | 280 | 1 | 15 | 10 | 259 | 25 | 580 |
| 7,101 | 3 | 26 | 10 | 280 | 1 | 15 | 10 | 258 | 24 | 579 |
| 7,102 | 4 | 24 | 11 | 260 | 1 | 15 | 13 | 246 | 29 | 545 |
| 7,103 | 4 | 22 | 12 | 254 | 1 | 14 | 13 | 235 | 30 | 525 |
| 7,104 | 4 | 22 | 12 | 247 | 1 | 13 | 14 | 235 | 31 | 517 |
| 7,105 | 4 | 21 | 12 | 245 | 1 | 12 | 14 | 232 | 31 | 510 |
| 7,106 | 4 | 20 | 13 | 238 | 1 | 12 | 15 | 227 | 33 | 497 |
| 7,107 | 4 | 20 | 13 | 238 | 1 | 12 | 15 | 227 | 33 | 497 |
| 7,108 | 4 | 20 | 13 | 237 | 1 | 12 | 15 | 227 | 33 | 496 |
| 7,109 | 4 | 19 | 13 | 233 | 1 | 12 | 15 | 220 | 33 | 484 |
| 7,110 | 4 | 19 | 13 | 233 | 1 | 12 | 15 | 220 | 33 | 484 |
| 7,111 | 4 | 19 | 13 | 233 | 1 | 12 | 15 | 220 | 33 | 484 |
| 7,112 | 4 | 19 | 13 | 233 | 1 | 12 | 15 | 220 | 33 | 484 |
| 7,113 | 5 | 19 | 13 | 224 | 1 | 12 | 15 | 213 | 34 | 468 |
| 7,114 | 5 | 17 | 13 | 200 | 1 | 11 | 15 | 183 | 34 | 411 |
| 7,115 | 5 | 17 | 13 | 200 | 1 | 11 | 15 | 183 | 34 | 411 |
| 7,116 | 5 | 17 | 13 | 135 | 1 | 7  | 15 | 137 | 34 | 296 |
| 7,117 | 5 | 13 | 13 | 107 | 1 | 4  | 15 | 94  | 34 | 218 |
| 7,118 | 5 | 13 | 13 | 99  | 1 | 3  | 15 | 86  | 34 | 201 |
| 7,119 | 5 | 11 | 13 | 76  | 1 | 2  | 15 | 71  | 34 | 160 |
| 7,120 | 5 | 2  | 13 | 52  | 1 | 2  | 15 | 35  | 34 | 91  |
| 7,121 | 5 | 2  | 12 | 37  | 1 | 2  | 15 | 34  | 33 | 75  |
| 7,122 | 5 | 2  | 12 | 31  | 1 | 2  | 15 | 31  | 33 | 66  |

|       |   |    |    |     |   |    |    |    |    |     |
|-------|---|----|----|-----|---|----|----|----|----|-----|
| 7,123 | 5 | 2  | 12 | 32  | 1 | 2  | 15 | 31 | 33 | 67  |
| 7,124 | 5 | 2  | 12 | 37  | 1 | 3  | 15 | 29 | 33 | 71  |
| 7,125 | 5 | 2  | 12 | 41  | 1 | 3  | 15 | 30 | 33 | 76  |
| 7,126 | 5 | 2  | 11 | 47  | 1 | 3  | 15 | 29 | 32 | 81  |
| 7,127 | 5 | 1  | 10 | 49  | 1 | 3  | 15 | 27 | 31 | 80  |
| 7,128 | 5 | 1  | 10 | 51  | 1 | 6  | 15 | 28 | 31 | 86  |
| 7,129 | 3 | 5  | 9  | 97  | 0 | 7  | 11 | 54 | 23 | 163 |
| 7,130 | 3 | 5  | 7  | 97  | 0 | 8  | 7  | 49 | 17 | 159 |
| 7,131 | 3 | 5  | 6  | 98  | 0 | 8  | 7  | 49 | 16 | 160 |
| 7,132 | 3 | 5  | 6  | 100 | 0 | 8  | 7  | 47 | 16 | 160 |
| 7,133 | 3 | 6  | 7  | 85  | 0 | 9  | 7  | 39 | 17 | 139 |
| 7,134 | 3 | 6  | 7  | 85  | 0 | 9  | 7  | 39 | 17 | 139 |
| 7,135 | 3 | 6  | 7  | 84  | 0 | 9  | 7  | 40 | 17 | 139 |
| 7,136 | 4 | 7  | 7  | 94  | 0 | 9  | 7  | 43 | 18 | 153 |
| 7,137 | 4 | 7  | 9  | 95  | 0 | 10 | 7  | 43 | 20 | 155 |
| 7,138 | 4 | 8  | 11 | 100 | 0 | 10 | 8  | 43 | 23 | 161 |
| 7,139 | 4 | 10 | 12 | 106 | 0 | 10 | 8  | 45 | 24 | 171 |
| 7,140 | 5 | 12 | 15 | 110 | 1 | 10 | 11 | 54 | 32 | 186 |
| 7,141 | 5 | 12 | 15 | 113 | 2 | 10 | 11 | 55 | 33 | 190 |
| 7,142 | 5 | 12 | 15 | 113 | 2 | 10 | 13 | 54 | 35 | 189 |
| 7,143 | 5 | 12 | 15 | 115 | 2 | 10 | 13 | 54 | 35 | 191 |
| 7,144 | 5 | 12 | 15 | 117 | 2 | 10 | 13 | 54 | 35 | 193 |
| 7,145 | 5 | 11 | 15 | 118 | 2 | 10 | 13 | 54 | 35 | 193 |
| 7,146 | 5 | 11 | 15 | 126 | 2 | 11 | 13 | 60 | 35 | 208 |
| 7,147 | 5 | 11 | 14 | 129 | 2 | 11 | 13 | 62 | 34 | 213 |
| 7,148 | 5 | 11 | 16 | 136 | 2 | 11 | 13 | 66 | 36 | 224 |
| 7,149 | 5 | 11 | 16 | 137 | 2 | 11 | 13 | 67 | 36 | 226 |
| 7,150 | 5 | 11 | 16 | 137 | 2 | 11 | 13 | 66 | 36 | 225 |
| 7,151 | 5 | 11 | 16 | 140 | 2 | 11 | 12 | 68 | 35 | 230 |
| 7,152 | 3 | 11 | 15 | 141 | 2 | 11 | 10 | 68 | 30 | 231 |
| 7,153 | 3 | 11 | 15 | 141 | 2 | 11 | 10 | 69 | 30 | 232 |
| 7,154 | 3 | 11 | 14 | 141 | 2 | 11 | 10 | 70 | 29 | 233 |
| 7,155 | 3 | 11 | 14 | 140 | 2 | 11 | 9  | 70 | 28 | 232 |
| 7,156 | 3 | 11 | 14 | 140 | 2 | 11 | 9  | 70 | 28 | 232 |
| 7,157 | 3 | 11 | 13 | 141 | 2 | 11 | 8  | 70 | 26 | 233 |
| 7,158 | 3 | 11 | 13 | 141 | 2 | 11 | 8  | 70 | 26 | 233 |
| 7,159 | 3 | 11 | 13 | 141 | 2 | 11 | 8  | 70 | 26 | 233 |
| 7,160 | 3 | 11 | 13 | 145 | 2 | 11 | 8  | 71 | 26 | 238 |
| 7,161 | 3 | 11 | 13 | 145 | 2 | 11 | 8  | 71 | 26 | 238 |
| 7,162 | 3 | 11 | 14 | 145 | 2 | 11 | 8  | 71 | 27 | 238 |
| 7,163 | 3 | 11 | 14 | 145 | 2 | 11 | 8  | 71 | 27 | 238 |

|       |   |    |    |     |   |    |    |    |    |     |
|-------|---|----|----|-----|---|----|----|----|----|-----|
| 7,164 | 2 | 12 | 15 | 145 | 2 | 11 | 8  | 71 | 27 | 239 |
| 7,165 | 2 | 12 | 16 | 145 | 2 | 11 | 8  | 71 | 28 | 239 |
| 7,166 | 2 | 12 | 17 | 145 | 2 | 11 | 8  | 71 | 29 | 239 |
| 7,167 | 2 | 12 | 17 | 145 | 2 | 11 | 8  | 71 | 29 | 239 |
| 7,168 | 2 | 12 | 16 | 146 | 2 | 11 | 8  | 71 | 28 | 240 |
| 7,169 | 2 | 12 | 17 | 144 | 2 | 11 | 8  | 72 | 29 | 239 |
| 7,170 | 2 | 13 | 17 | 146 | 2 | 10 | 8  | 72 | 29 | 241 |
| 7,171 | 2 | 13 | 18 | 146 | 2 | 10 | 8  | 72 | 30 | 241 |
| 7,172 | 2 | 13 | 18 | 146 | 2 | 10 | 8  | 72 | 30 | 241 |
| 7,173 | 2 | 13 | 18 | 146 | 2 | 10 | 8  | 72 | 30 | 241 |
| 7,174 | 3 | 13 | 18 | 145 | 2 | 10 | 11 | 72 | 34 | 240 |
| 7,175 | 3 | 13 | 18 | 139 | 2 | 9  | 11 | 72 | 34 | 233 |
| 7,176 | 3 | 13 | 19 | 135 | 2 | 9  | 12 | 71 | 36 | 228 |
| 7,177 | 3 | 13 | 19 | 129 | 2 | 9  | 13 | 70 | 37 | 221 |
| 7,178 | 4 | 13 | 21 | 126 | 2 | 9  | 13 | 69 | 40 | 217 |
| 7,179 | 4 | 13 | 22 | 124 | 2 | 6  | 17 | 68 | 45 | 211 |
| 7,180 | 4 | 9  | 23 | 78  | 2 | 5  | 17 | 41 | 46 | 133 |
| 7,181 | 4 | 9  | 23 | 74  | 2 | 4  | 17 | 39 | 46 | 126 |
| 7,182 | 4 | 9  | 23 | 70  | 2 | 3  | 17 | 39 | 46 | 121 |
| 7,183 | 4 | 9  | 23 | 70  | 2 | 3  | 17 | 39 | 46 | 121 |
| 7,184 | 4 | 8  | 22 | 67  | 2 | 2  | 17 | 36 | 45 | 113 |
| 7,185 | 4 | 8  | 22 | 67  | 2 | 2  | 17 | 36 | 45 | 113 |
| 7,186 | 3 | 8  | 22 | 67  | 2 | 2  | 17 | 35 | 44 | 112 |
| 7,187 | 3 | 7  | 22 | 57  | 2 | 2  | 17 | 32 | 44 | 98  |
| 7,188 | 3 | 7  | 20 | 56  | 2 | 1  | 17 | 32 | 42 | 96  |
| 7,189 | 3 | 8  | 18 | 50  | 2 | 1  | 16 | 33 | 39 | 92  |
| 7,190 | 3 | 6  | 17 | 48  | 2 | 1  | 16 | 34 | 38 | 89  |
| 7,191 | 2 | 4  | 13 | 43  | 1 | 1  | 11 | 24 | 27 | 72  |
| 7,192 | 2 | 4  | 13 | 43  | 0 | 1  | 11 | 24 | 26 | 72  |
| 7,193 | 2 | 4  | 13 | 41  | 0 | 1  | 9  | 26 | 24 | 72  |
| 7,194 | 2 | 5  | 13 | 44  | 0 | 1  | 9  | 34 | 24 | 84  |
| 7,195 | 2 | 5  | 13 | 45  | 0 | 1  | 9  | 36 | 24 | 87  |
| 7,196 | 2 | 5  | 13 | 40  | 0 | 0  | 9  | 31 | 24 | 76  |
| 7,197 | 2 | 5  | 13 | 44  | 0 | 1  | 9  | 34 | 24 | 84  |
| 7,198 | 2 | 5  | 11 | 41  | 0 | 1  | 9  | 32 | 22 | 79  |
| 7,199 | 2 | 6  | 11 | 35  | 0 | 1  | 9  | 26 | 22 | 68  |
| 7,200 | 2 | 7  | 11 | 36  | 0 | 1  | 9  | 26 | 22 | 70  |
| 7,201 | 2 | 7  | 11 | 36  | 0 | 1  | 9  | 28 | 22 | 72  |
| 7,202 | 2 | 7  | 11 | 36  | 0 | 1  | 9  | 27 | 22 | 71  |
| 7,203 | 2 | 7  | 11 | 36  | 0 | 1  | 9  | 27 | 22 | 71  |
| 7,204 | 2 | 7  | 11 | 36  | 0 | 1  | 9  | 27 | 22 | 71  |



|       |   |   |    |    |   |   |   |    |    |     |
|-------|---|---|----|----|---|---|---|----|----|-----|
| 7,205 | 2 | 7 | 11 | 36 | 0 | 1 | 9 | 27 | 22 | 71  |
| 7,206 | 2 | 7 | 11 | 41 | 0 | 1 | 9 | 31 | 22 | 80  |
| 7,207 | 2 | 7 | 11 | 41 | 0 | 1 | 9 | 31 | 22 | 80  |
| 7,208 | 2 | 8 | 11 | 42 | 0 | 1 | 9 | 32 | 22 | 83  |
| 7,209 | 2 | 8 | 11 | 47 | 0 | 1 | 9 | 34 | 22 | 90  |
| 7,210 | 2 | 8 | 11 | 47 | 0 | 1 | 9 | 34 | 22 | 90  |
| 7,211 | 3 | 8 | 12 | 52 | 0 | 1 | 9 | 38 | 24 | 99  |
| 7,212 | 3 | 8 | 12 | 56 | 0 | 2 | 9 | 40 | 24 | 106 |
| 7,213 | 3 | 8 | 11 | 60 | 0 | 4 | 9 | 42 | 23 | 114 |
| 7,214 | 3 | 8 | 11 | 60 | 0 | 4 | 9 | 42 | 23 | 114 |
| 7,215 | 3 | 7 | 11 | 60 | 0 | 4 | 9 | 42 | 23 | 113 |
| 7,216 | 3 | 7 | 10 | 60 | 0 | 4 | 9 | 42 | 22 | 113 |
| 7,217 | 3 | 7 | 9  | 60 | 0 | 4 | 9 | 42 | 21 | 113 |
| 7,218 | 3 | 7 | 8  | 60 | 0 | 4 | 9 | 42 | 20 | 113 |
| 7,219 | 3 | 7 | 8  | 59 | 0 | 4 | 9 | 42 | 20 | 112 |
| 7,220 | 3 | 6 | 8  | 59 | 0 | 4 | 9 | 41 | 20 | 110 |
| 7,221 | 3 | 6 | 8  | 59 | 0 | 4 | 9 | 41 | 20 | 110 |
| 7,222 | 3 | 6 | 7  | 59 | 0 | 4 | 9 | 41 | 19 | 110 |
| 7,223 | 3 | 6 | 7  | 59 | 0 | 4 | 9 | 41 | 19 | 110 |
| 7,224 | 2 | 6 | 7  | 59 | 0 | 4 | 6 | 41 | 15 | 110 |
| 7,225 | 2 | 6 | 7  | 59 | 0 | 4 | 6 | 41 | 15 | 110 |
| 7,226 | 2 | 6 | 6  | 59 | 0 | 4 | 6 | 41 | 14 | 110 |
| 7,227 | 2 | 6 | 6  | 59 | 0 | 4 | 5 | 41 | 13 | 110 |
| 7,228 | 1 | 6 | 4  | 59 | 0 | 4 | 5 | 41 | 10 | 110 |
| 7,229 | 1 | 6 | 3  | 59 | 0 | 4 | 1 | 41 | 5  | 110 |
| 7,230 | 1 | 6 | 2  | 59 | 0 | 4 | 1 | 41 | 4  | 110 |
| 7,231 | 1 | 6 | 2  | 59 | 0 | 4 | 1 | 41 | 4  | 110 |
| 7,232 | 2 | 6 | 2  | 59 | 0 | 4 | 1 | 41 | 5  | 110 |
| 7,233 | 2 | 6 | 2  | 59 | 0 | 4 | 1 | 41 | 5  | 110 |
| 7,234 | 2 | 6 | 2  | 58 | 0 | 4 | 1 | 41 | 5  | 109 |
| 7,235 | 2 | 6 | 2  | 58 | 0 | 4 | 1 | 41 | 5  | 109 |
| 7,236 | 2 | 6 | 2  | 58 | 0 | 4 | 1 | 41 | 5  | 109 |
| 7,237 | 2 | 7 | 2  | 58 | 0 | 4 | 1 | 41 | 5  | 110 |
| 7,238 | 2 | 7 | 2  | 59 | 0 | 4 | 1 | 42 | 5  | 112 |
| 7,239 | 2 | 7 | 2  | 61 | 0 | 5 | 1 | 46 | 5  | 119 |
| 7,240 | 2 | 5 | 2  | 61 | 0 | 5 | 1 | 45 | 5  | 116 |
| 7,241 | 2 | 5 | 2  | 55 | 0 | 5 | 1 | 42 | 5  | 107 |
| 7,242 | 2 | 5 | 2  | 56 | 0 | 5 | 2 | 42 | 6  | 108 |
| 7,243 | 2 | 5 | 3  | 57 | 0 | 5 | 2 | 42 | 7  | 109 |
| 7,244 | 2 | 5 | 3  | 57 | 0 | 5 | 2 | 40 | 7  | 107 |
| 7,245 | 2 | 4 | 3  | 54 | 0 | 5 | 2 | 32 | 7  | 95  |

|       |   |   |    |    |   |   |    |    |    |    |
|-------|---|---|----|----|---|---|----|----|----|----|
| 7,246 | 2 | 4 | 3  | 49 | 0 | 5 | 2  | 30 | 7  | 88 |
| 7,247 | 2 | 4 | 3  | 48 | 0 | 5 | 2  | 30 | 7  | 87 |
| 7,248 | 2 | 5 | 4  | 45 | 0 | 4 | 2  | 28 | 8  | 82 |
| 7,249 | 2 | 5 | 4  | 50 | 0 | 4 | 2  | 28 | 8  | 87 |
| 7,250 | 2 | 6 | 4  | 51 | 0 | 4 | 3  | 32 | 9  | 93 |
| 7,251 | 2 | 5 | 5  | 51 | 0 | 4 | 3  | 32 | 10 | 92 |
| 7,252 | 2 | 5 | 5  | 51 | 0 | 4 | 3  | 30 | 10 | 90 |
| 7,253 | 2 | 6 | 5  | 48 | 0 | 4 | 4  | 28 | 11 | 86 |
| 7,254 | 2 | 6 | 5  | 48 | 0 | 4 | 4  | 28 | 11 | 86 |
| 7,255 | 2 | 6 | 5  | 48 | 0 | 4 | 4  | 28 | 11 | 86 |
| 7,256 | 2 | 6 | 5  | 48 | 0 | 4 | 4  | 28 | 11 | 86 |
| 7,257 | 2 | 6 | 5  | 46 | 0 | 4 | 4  | 24 | 11 | 80 |
| 7,258 | 2 | 6 | 5  | 46 | 0 | 4 | 4  | 24 | 11 | 80 |
| 7,259 | 4 | 5 | 10 | 40 | 0 | 4 | 5  | 21 | 19 | 70 |
| 7,260 | 4 | 5 | 11 | 27 | 0 | 3 | 5  | 14 | 20 | 49 |
| 7,261 | 4 | 5 | 11 | 27 | 0 | 3 | 5  | 14 | 20 | 49 |
| 7,262 | 3 | 5 | 10 | 27 | 0 | 3 | 5  | 14 | 18 | 49 |
| 7,263 | 3 | 5 | 10 | 27 | 0 | 3 | 5  | 14 | 18 | 49 |
| 7,264 | 3 | 5 | 10 | 23 | 0 | 1 | 5  | 12 | 18 | 41 |
| 7,265 | 3 | 5 | 10 | 23 | 0 | 1 | 6  | 12 | 19 | 41 |
| 7,266 | 3 | 5 | 9  | 23 | 0 | 1 | 6  | 12 | 18 | 41 |
| 7,267 | 3 | 5 | 9  | 23 | 0 | 1 | 6  | 12 | 18 | 41 |
| 7,268 | 3 | 5 | 9  | 23 | 0 | 1 | 6  | 12 | 18 | 41 |
| 7,269 | 3 | 5 | 9  | 23 | 0 | 1 | 6  | 12 | 18 | 41 |
| 7,270 | 3 | 7 | 9  | 23 | 0 | 1 | 6  | 12 | 18 | 43 |
| 7,271 | 5 | 7 | 9  | 23 | 0 | 1 | 9  | 12 | 23 | 43 |
| 7,272 | 5 | 7 | 9  | 23 | 0 | 1 | 9  | 12 | 23 | 43 |
| 7,273 | 5 | 7 | 9  | 23 | 0 | 1 | 11 | 12 | 25 | 43 |
| 7,274 | 5 | 7 | 9  | 23 | 0 | 1 | 11 | 12 | 25 | 43 |
| 7,275 | 5 | 7 | 10 | 23 | 0 | 1 | 11 | 13 | 26 | 44 |
| 7,276 | 5 | 7 | 10 | 24 | 0 | 1 | 11 | 13 | 26 | 45 |
| 7,277 | 5 | 7 | 10 | 24 | 0 | 1 | 10 | 14 | 25 | 46 |
| 7,278 | 5 | 7 | 10 | 24 | 0 | 1 | 10 | 14 | 25 | 46 |
| 7,279 | 5 | 7 | 10 | 25 | 0 | 1 | 11 | 14 | 26 | 47 |
| 7,280 | 5 | 7 | 10 | 25 | 0 | 1 | 11 | 14 | 26 | 47 |
| 7,281 | 5 | 7 | 10 | 25 | 0 | 1 | 11 | 16 | 26 | 49 |
| 7,282 | 5 | 7 | 10 | 25 | 0 | 1 | 11 | 16 | 26 | 49 |
| 7,283 | 4 | 7 | 11 | 25 | 0 | 1 | 11 | 16 | 26 | 49 |
| 7,284 | 4 | 7 | 11 | 25 | 0 | 1 | 11 | 16 | 26 | 49 |
| 7,285 | 4 | 7 | 11 | 25 | 0 | 1 | 11 | 16 | 26 | 49 |
| 7,286 | 4 | 7 | 11 | 25 | 0 | 1 | 11 | 16 | 26 | 49 |

|       |   |   |    |    |   |   |    |    |    |     |
|-------|---|---|----|----|---|---|----|----|----|-----|
| 7,287 | 4 | 7 | 11 | 26 | 0 | 1 | 12 | 16 | 27 | 50  |
| 7,288 | 4 | 6 | 11 | 26 | 0 | 1 | 12 | 16 | 27 | 49  |
| 7,289 | 4 | 6 | 12 | 23 | 0 | 0 | 12 | 12 | 28 | 41  |
| 7,290 | 4 | 6 | 12 | 23 | 0 | 0 | 12 | 12 | 28 | 41  |
| 7,291 | 4 | 6 | 13 | 23 | 0 | 0 | 12 | 12 | 29 | 41  |
| 7,292 | 4 | 6 | 13 | 23 | 0 | 0 | 12 | 12 | 29 | 41  |
| 7,293 | 4 | 6 | 13 | 22 | 0 | 0 | 11 | 12 | 28 | 40  |
| 7,294 | 4 | 6 | 12 | 21 | 0 | 0 | 11 | 12 | 27 | 39  |
| 7,295 | 4 | 6 | 12 | 21 | 0 | 0 | 11 | 12 | 27 | 39  |
| 7,296 | 4 | 6 | 12 | 21 | 0 | 0 | 11 | 13 | 27 | 40  |
| 7,297 | 4 | 6 | 13 | 25 | 0 | 2 | 11 | 33 | 28 | 66  |
| 7,298 | 4 | 6 | 13 | 22 | 0 | 2 | 11 | 32 | 28 | 62  |
| 7,299 | 4 | 5 | 13 | 23 | 0 | 2 | 11 | 33 | 28 | 63  |
| 7,300 | 4 | 5 | 13 | 18 | 0 | 2 | 11 | 34 | 28 | 59  |
| 7,301 | 4 | 3 | 14 | 16 | 0 | 2 | 10 | 30 | 28 | 51  |
| 7,302 | 4 | 3 | 13 | 16 | 0 | 2 | 10 | 30 | 27 | 51  |
| 7,303 | 4 | 3 | 13 | 17 | 0 | 2 | 10 | 30 | 27 | 52  |
| 7,304 | 4 | 2 | 13 | 21 | 0 | 2 | 9  | 36 | 26 | 61  |
| 7,305 | 4 | 2 | 13 | 21 | 0 | 2 | 9  | 36 | 26 | 61  |
| 7,306 | 4 | 2 | 15 | 21 | 0 | 2 | 12 | 38 | 31 | 63  |
| 7,307 | 4 | 2 | 15 | 18 | 0 | 2 | 14 | 38 | 33 | 60  |
| 7,308 | 4 | 2 | 16 | 19 | 0 | 2 | 14 | 41 | 34 | 64  |
| 7,309 | 2 | 3 | 11 | 32 | 0 | 4 | 14 | 72 | 27 | 111 |
| 7,310 | 2 | 3 | 11 | 37 | 0 | 4 | 14 | 73 | 27 | 117 |
| 7,311 | 2 | 3 | 10 | 39 | 0 | 4 | 14 | 79 | 26 | 125 |
| 7,312 | 2 | 3 | 10 | 39 | 0 | 4 | 14 | 80 | 26 | 126 |
| 7,313 | 2 | 3 | 10 | 39 | 0 | 4 | 14 | 80 | 26 | 126 |
| 7,314 | 2 | 3 | 10 | 39 | 0 | 4 | 13 | 80 | 25 | 126 |
| 7,315 | 2 | 3 | 10 | 41 | 0 | 4 | 13 | 81 | 25 | 129 |
| 7,316 | 2 | 3 | 10 | 41 | 0 | 4 | 13 | 81 | 25 | 129 |
| 7,317 | 4 | 3 | 10 | 41 | 0 | 4 | 13 | 81 | 27 | 129 |
| 7,318 | 4 | 3 | 10 | 42 | 0 | 4 | 13 | 81 | 27 | 130 |
| 7,319 | 4 | 1 | 10 | 42 | 0 | 4 | 13 | 81 | 27 | 128 |
| 7,320 | 4 | 1 | 10 | 43 | 0 | 4 | 13 | 83 | 27 | 131 |
| 7,321 | 4 | 1 | 10 | 43 | 0 | 4 | 10 | 84 | 24 | 132 |
| 7,322 | 2 | 1 | 10 | 43 | 0 | 4 | 11 | 84 | 23 | 132 |
| 7,323 | 2 | 1 | 10 | 43 | 0 | 4 | 10 | 84 | 22 | 132 |
| 7,324 | 2 | 1 | 10 | 43 | 0 | 4 | 10 | 84 | 22 | 132 |
| 7,325 | 2 | 1 | 10 | 44 | 0 | 4 | 10 | 84 | 22 | 133 |
| 7,326 | 2 | 1 | 9  | 44 | 0 | 4 | 10 | 84 | 21 | 133 |
| 7,327 | 2 | 1 | 9  | 44 | 0 | 4 | 10 | 84 | 21 | 133 |

|       |   |   |   |    |   |   |    |    |    |     |
|-------|---|---|---|----|---|---|----|----|----|-----|
| 7,328 | 2 | 1 | 9 | 44 | 0 | 4 | 11 | 83 | 22 | 132 |
| 7,329 | 2 | 1 | 9 | 44 | 0 | 4 | 10 | 83 | 21 | 132 |
| 7,330 | 2 | 1 | 9 | 43 | 0 | 4 | 10 | 83 | 21 | 131 |
| 7,331 | 2 | 1 | 9 | 43 | 0 | 4 | 10 | 81 | 21 | 129 |
| 7,332 | 2 | 1 | 9 | 43 | 0 | 4 | 10 | 81 | 21 | 129 |
| 7,333 | 2 | 1 | 9 | 43 | 0 | 4 | 10 | 81 | 21 | 129 |
| 7,334 | 2 | 1 | 8 | 43 | 0 | 4 | 10 | 81 | 20 | 129 |
| 7,335 | 2 | 1 | 8 | 43 | 0 | 4 | 10 | 81 | 20 | 129 |
| 7,336 | 2 | 1 | 8 | 43 | 0 | 4 | 10 | 81 | 20 | 129 |
| 7,337 | 2 | 3 | 8 | 43 | 0 | 4 | 10 | 81 | 20 | 131 |
| 7,338 | 2 | 3 | 8 | 42 | 0 | 4 | 9  | 81 | 19 | 130 |
| 7,339 | 2 | 3 | 7 | 42 | 0 | 4 | 9  | 81 | 18 | 130 |
| 7,340 | 2 | 3 | 7 | 43 | 0 | 4 | 9  | 81 | 18 | 131 |
| 7,341 | 2 | 3 | 7 | 43 | 0 | 4 | 9  | 81 | 18 | 131 |
| 7,342 | 2 | 3 | 6 | 43 | 0 | 4 | 9  | 81 | 17 | 131 |
| 7,343 | 2 | 3 | 6 | 43 | 0 | 4 | 9  | 81 | 17 | 131 |
| 7,344 | 2 | 4 | 6 | 44 | 0 | 4 | 10 | 81 | 18 | 133 |
| 7,345 | 2 | 4 | 7 | 44 | 0 | 4 | 10 | 81 | 19 | 133 |
| 7,346 | 2 | 4 | 7 | 44 | 0 | 4 | 10 | 81 | 19 | 133 |
| 7,347 | 2 | 4 | 6 | 40 | 0 | 2 | 10 | 60 | 18 | 106 |
| 7,348 | 2 | 4 | 6 | 40 | 0 | 2 | 10 | 60 | 18 | 106 |
| 7,349 | 3 | 4 | 5 | 38 | 1 | 2 | 10 | 58 | 19 | 102 |
| 7,350 | 3 | 4 | 5 | 38 | 1 | 2 | 10 | 58 | 19 | 102 |
| 7,351 | 3 | 4 | 5 | 37 | 1 | 2 | 11 | 57 | 20 | 100 |
| 7,352 | 3 | 4 | 4 | 37 | 1 | 2 | 11 | 57 | 19 | 100 |
| 7,353 | 3 | 4 | 4 | 37 | 1 | 2 | 11 | 57 | 19 | 100 |
| 7,354 | 3 | 4 | 4 | 42 | 1 | 2 | 10 | 65 | 18 | 113 |
| 7,355 | 3 | 4 | 4 | 37 | 1 | 2 | 9  | 58 | 17 | 101 |
| 7,356 | 3 | 4 | 4 | 42 | 1 | 3 | 9  | 65 | 17 | 114 |
| 7,357 | 3 | 4 | 2 | 42 | 1 | 3 | 8  | 64 | 14 | 113 |
| 7,358 | 3 | 4 | 2 | 44 | 1 | 3 | 6  | 65 | 12 | 116 |
| 7,359 | 3 | 3 | 1 | 30 | 1 | 1 | 6  | 31 | 11 | 65  |
| 7,360 | 3 | 3 | 1 | 30 | 1 | 1 | 5  | 31 | 10 | 65  |
| 7,361 | 3 | 3 | 1 | 24 | 1 | 1 | 5  | 33 | 10 | 61  |
| 7,362 | 3 | 3 | 1 | 22 | 1 | 1 | 5  | 27 | 10 | 53  |
| 7,363 | 3 | 3 | 2 | 23 | 1 | 1 | 7  | 28 | 13 | 55  |
| 7,364 | 3 | 3 | 2 | 23 | 1 | 1 | 9  | 30 | 15 | 57  |
| 7,365 | 3 | 3 | 2 | 24 | 1 | 1 | 10 | 29 | 16 | 57  |
| 7,366 | 3 | 3 | 2 | 24 | 1 | 1 | 10 | 29 | 16 | 57  |
| 7,367 | 1 | 3 | 2 | 24 | 1 | 1 | 10 | 29 | 14 | 57  |
| 7,368 | 1 | 3 | 2 | 28 | 1 | 1 | 10 | 29 | 14 | 61  |

|       |   |   |    |    |   |   |    |    |    |    |
|-------|---|---|----|----|---|---|----|----|----|----|
| 7,369 | 1 | 3 | 2  | 27 | 1 | 1 | 10 | 29 | 14 | 60 |
| 7,370 | 1 | 3 | 2  | 26 | 1 | 1 | 10 | 26 | 14 | 56 |
| 7,371 | 1 | 3 | 2  | 26 | 1 | 1 | 10 | 26 | 14 | 56 |
| 7,372 | 1 | 3 | 2  | 26 | 1 | 1 | 10 | 26 | 14 | 56 |
| 7,373 | 1 | 3 | 2  | 26 | 1 | 1 | 9  | 26 | 13 | 56 |
| 7,374 | 1 | 3 | 2  | 26 | 1 | 1 | 8  | 26 | 12 | 56 |
| 7,375 | 1 | 3 | 2  | 27 | 1 | 1 | 8  | 27 | 12 | 58 |
| 7,376 | 1 | 4 | 2  | 26 | 1 | 1 | 8  | 26 | 12 | 57 |
| 7,377 | 1 | 4 | 2  | 26 | 1 | 1 | 8  | 26 | 12 | 57 |
| 7,378 | 1 | 4 | 2  | 26 | 1 | 1 | 8  | 26 | 12 | 57 |
| 7,379 | 1 | 4 | 3  | 26 | 1 | 1 | 8  | 27 | 13 | 58 |
| 7,380 | 1 | 4 | 3  | 26 | 1 | 1 | 8  | 27 | 13 | 58 |
| 7,381 | 3 | 4 | 10 | 26 | 1 | 1 | 18 | 27 | 32 | 58 |
| 7,382 | 3 | 4 | 10 | 26 | 1 | 1 | 18 | 27 | 32 | 58 |
| 7,383 | 3 | 4 | 10 | 26 | 1 | 1 | 18 | 27 | 32 | 58 |
| 7,384 | 3 | 4 | 10 | 26 | 1 | 1 | 19 | 28 | 33 | 59 |
| 7,385 | 3 | 4 | 13 | 26 | 4 | 1 | 29 | 28 | 49 | 59 |
| 7,386 | 3 | 4 | 13 | 26 | 4 | 1 | 32 | 28 | 52 | 59 |
| 7,387 | 3 | 3 | 13 | 26 | 4 | 1 | 37 | 28 | 57 | 58 |
| 7,388 | 3 | 3 | 15 | 26 | 5 | 1 | 39 | 28 | 62 | 58 |
| 7,389 | 3 | 3 | 17 | 26 | 5 | 1 | 42 | 28 | 67 | 58 |
| 7,390 | 3 | 3 | 17 | 25 | 5 | 1 | 42 | 27 | 67 | 56 |
| 7,391 | 3 | 3 | 17 | 25 | 5 | 1 | 42 | 27 | 67 | 56 |
| 7,392 | 3 | 3 | 17 | 25 | 5 | 1 | 42 | 27 | 67 | 56 |
| 7,393 | 3 | 4 | 17 | 25 | 5 | 1 | 42 | 28 | 67 | 58 |
| 7,394 | 3 | 3 | 18 | 25 | 5 | 1 | 41 | 30 | 67 | 59 |
| 7,395 | 3 | 3 | 17 | 27 | 5 | 1 | 41 | 31 | 66 | 62 |
| 7,396 | 3 | 3 | 17 | 28 | 5 | 1 | 41 | 32 | 66 | 64 |
| 7,397 | 3 | 3 | 17 | 29 | 5 | 1 | 41 | 34 | 66 | 67 |
| 7,398 | 3 | 3 | 17 | 29 | 5 | 1 | 41 | 34 | 66 | 67 |
| 7,399 | 2 | 3 | 17 | 30 | 5 | 1 | 41 | 34 | 65 | 68 |
| 7,400 | 2 | 3 | 17 | 29 | 4 | 1 | 41 | 35 | 64 | 68 |
| 7,401 | 2 | 5 | 17 | 32 | 4 | 3 | 41 | 35 | 64 | 75 |
| 7,402 | 2 | 6 | 17 | 32 | 4 | 3 | 40 | 36 | 63 | 77 |
| 7,403 | 2 | 6 | 17 | 32 | 4 | 3 | 40 | 37 | 63 | 78 |
| 7,404 | 2 | 7 | 17 | 35 | 4 | 3 | 40 | 39 | 63 | 84 |
| 7,405 | 2 | 7 | 17 | 30 | 4 | 3 | 40 | 31 | 63 | 71 |
| 7,406 | 2 | 7 | 17 | 30 | 4 | 3 | 40 | 31 | 63 | 71 |
| 7,407 | 2 | 7 | 17 | 25 | 4 | 2 | 40 | 25 | 63 | 59 |
| 7,408 | 3 | 7 | 17 | 25 | 4 | 2 | 42 | 24 | 66 | 58 |
| 7,409 | 3 | 7 | 17 | 24 | 4 | 3 | 42 | 25 | 66 | 59 |

|       |   |    |    |     |   |    |    |    |    |     |
|-------|---|----|----|-----|---|----|----|----|----|-----|
| 7,410 | 3 | 10 | 17 | 42  | 4 | 5  | 42 | 50 | 66 | 107 |
| 7,411 | 3 | 10 | 17 | 46  | 4 | 5  | 42 | 55 | 66 | 116 |
| 7,412 | 3 | 10 | 17 | 46  | 4 | 5  | 42 | 52 | 66 | 113 |
| 7,413 | 3 | 10 | 16 | 45  | 4 | 5  | 40 | 48 | 63 | 108 |
| 7,414 | 3 | 10 | 16 | 48  | 4 | 5  | 40 | 51 | 63 | 114 |
| 7,415 | 3 | 11 | 16 | 48  | 4 | 5  | 38 | 55 | 61 | 119 |
| 7,416 | 3 | 12 | 16 | 45  | 4 | 5  | 37 | 55 | 60 | 117 |
| 7,417 | 3 | 12 | 16 | 45  | 4 | 5  | 37 | 55 | 60 | 117 |
| 7,418 | 3 | 13 | 17 | 48  | 4 | 5  | 37 | 59 | 61 | 125 |
| 7,419 | 3 | 15 | 17 | 46  | 4 | 5  | 37 | 70 | 61 | 136 |
| 7,420 | 3 | 15 | 18 | 50  | 4 | 5  | 37 | 74 | 62 | 144 |
| 7,421 | 3 | 15 | 18 | 50  | 4 | 6  | 37 | 74 | 62 | 145 |
| 7,422 | 3 | 15 | 18 | 52  | 4 | 6  | 38 | 75 | 63 | 148 |
| 7,423 | 3 | 15 | 18 | 57  | 4 | 6  | 38 | 76 | 63 | 154 |
| 7,424 | 3 | 15 | 18 | 59  | 4 | 6  | 38 | 76 | 63 | 156 |
| 7,425 | 3 | 15 | 18 | 62  | 4 | 6  | 39 | 76 | 64 | 159 |
| 7,426 | 3 | 15 | 18 | 61  | 4 | 6  | 39 | 75 | 64 | 157 |
| 7,427 | 3 | 14 | 18 | 61  | 4 | 6  | 39 | 75 | 64 | 156 |
| 7,428 | 3 | 14 | 18 | 60  | 4 | 6  | 42 | 75 | 67 | 155 |
| 7,429 | 3 | 14 | 18 | 61  | 4 | 6  | 42 | 74 | 67 | 155 |
| 7,430 | 3 | 14 | 17 | 61  | 4 | 6  | 41 | 74 | 65 | 155 |
| 7,431 | 1 | 14 | 12 | 61  | 4 | 6  | 32 | 74 | 49 | 155 |
| 7,432 | 1 | 14 | 10 | 61  | 4 | 6  | 31 | 74 | 46 | 155 |
| 7,433 | 1 | 14 | 10 | 61  | 4 | 6  | 31 | 75 | 46 | 156 |
| 7,434 | 1 | 14 | 10 | 68  | 4 | 6  | 30 | 77 | 45 | 165 |
| 7,435 | 1 | 14 | 10 | 86  | 4 | 8  | 30 | 90 | 45 | 198 |
| 7,436 | 1 | 14 | 7  | 89  | 1 | 8  | 21 | 91 | 30 | 202 |
| 7,437 | 1 | 15 | 7  | 96  | 1 | 9  | 18 | 96 | 27 | 216 |
| 7,438 | 1 | 14 | 7  | 103 | 1 | 10 | 13 | 98 | 22 | 225 |
| 7,439 | 1 | 14 | 5  | 103 | 0 | 10 | 12 | 98 | 18 | 225 |
| 7,440 | 1 | 14 | 3  | 103 | 0 | 10 | 9  | 98 | 13 | 225 |
| 7,441 | 1 | 14 | 3  | 103 | 0 | 10 | 9  | 98 | 13 | 225 |
| 7,442 | 1 | 14 | 3  | 103 | 0 | 10 | 9  | 99 | 13 | 226 |
| 7,443 | 1 | 14 | 3  | 103 | 0 | 10 | 9  | 99 | 13 | 226 |
| 7,444 | 1 | 13 | 2  | 103 | 0 | 10 | 9  | 98 | 12 | 224 |
| 7,445 | 1 | 13 | 2  | 102 | 0 | 10 | 9  | 96 | 12 | 221 |
| 7,446 | 1 | 13 | 2  | 99  | 0 | 10 | 9  | 94 | 12 | 216 |
| 7,447 | 1 | 13 | 2  | 99  | 0 | 10 | 10 | 94 | 13 | 216 |
| 7,448 | 1 | 13 | 2  | 98  | 0 | 10 | 10 | 92 | 13 | 213 |
| 7,449 | 1 | 13 | 2  | 97  | 0 | 10 | 10 | 92 | 13 | 212 |
| 7,450 | 1 | 13 | 2  | 97  | 0 | 10 | 10 | 91 | 13 | 211 |

|       |   |    |    |     |   |    |    |    |    |     |
|-------|---|----|----|-----|---|----|----|----|----|-----|
| 7,451 | 1 | 11 | 2  | 94  | 0 | 8  | 10 | 91 | 13 | 204 |
| 7,452 | 1 | 11 | 2  | 94  | 0 | 8  | 10 | 92 | 13 | 205 |
| 7,453 | 1 | 10 | 2  | 95  | 0 | 8  | 10 | 90 | 13 | 203 |
| 7,454 | 1 | 10 | 2  | 95  | 0 | 8  | 10 | 89 | 13 | 202 |
| 7,455 | 1 | 9  | 2  | 92  | 0 | 8  | 12 | 87 | 15 | 196 |
| 7,456 | 1 | 9  | 2  | 91  | 0 | 8  | 12 | 87 | 15 | 195 |
| 7,457 | 1 | 9  | 2  | 92  | 0 | 8  | 12 | 87 | 15 | 196 |
| 7,458 | 0 | 9  | 2  | 92  | 0 | 8  | 10 | 87 | 12 | 196 |
| 7,459 | 0 | 9  | 3  | 92  | 0 | 7  | 10 | 85 | 13 | 193 |
| 7,460 | 0 | 9  | 3  | 92  | 0 | 7  | 10 | 85 | 13 | 193 |
| 7,461 | 0 | 6  | 3  | 74  | 0 | 5  | 10 | 60 | 13 | 145 |
| 7,462 | 0 | 6  | 3  | 70  | 0 | 6  | 10 | 55 | 13 | 137 |
| 7,463 | 0 | 6  | 4  | 72  | 0 | 6  | 11 | 58 | 15 | 142 |
| 7,464 | 0 | 6  | 4  | 69  | 0 | 6  | 11 | 56 | 15 | 137 |
| 7,465 | 0 | 6  | 6  | 69  | 1 | 6  | 18 | 57 | 25 | 138 |
| 7,466 | 0 | 5  | 9  | 69  | 1 | 6  | 21 | 54 | 31 | 134 |
| 7,467 | 1 | 4  | 19 | 69  | 6 | 6  | 29 | 56 | 55 | 135 |
| 7,468 | 1 | 4  | 19 | 69  | 6 | 6  | 29 | 58 | 55 | 137 |
| 7,469 | 1 | 3  | 18 | 66  | 6 | 6  | 29 | 55 | 54 | 130 |
| 7,470 | 1 | 1  | 21 | 64  | 7 | 6  | 37 | 44 | 66 | 115 |
| 7,471 | 1 | 1  | 21 | 60  | 7 | 6  | 38 | 40 | 67 | 107 |
| 7,472 | 1 | 1  | 21 | 60  | 7 | 5  | 37 | 40 | 66 | 106 |
| 7,473 | 1 | 3  | 21 | 59  | 7 | 5  | 37 | 40 | 66 | 107 |
| 7,474 | 1 | 3  | 21 | 60  | 7 | 5  | 38 | 40 | 67 | 108 |
| 7,475 | 1 | 3  | 21 | 63  | 7 | 6  | 37 | 44 | 66 | 116 |
| 7,476 | 1 | 3  | 21 | 60  | 7 | 6  | 37 | 44 | 66 | 113 |
| 7,477 | 1 | 3  | 21 | 61  | 7 | 7  | 38 | 44 | 67 | 115 |
| 7,478 | 1 | 3  | 21 | 71  | 7 | 7  | 38 | 53 | 67 | 134 |
| 7,479 | 1 | 3  | 21 | 73  | 7 | 7  | 35 | 53 | 64 | 136 |
| 7,480 | 1 | 8  | 21 | 108 | 7 | 12 | 35 | 88 | 64 | 216 |
| 7,481 | 1 | 8  | 21 | 109 | 7 | 12 | 35 | 89 | 64 | 218 |
| 7,482 | 2 | 8  | 22 | 111 | 7 | 12 | 36 | 92 | 67 | 223 |
| 7,483 | 2 | 8  | 22 | 111 | 7 | 12 | 36 | 92 | 67 | 223 |
| 7,484 | 2 | 8  | 22 | 111 | 7 | 12 | 36 | 91 | 67 | 222 |
| 7,485 | 2 | 8  | 22 | 86  | 7 | 10 | 36 | 76 | 67 | 180 |
| 7,486 | 2 | 8  | 22 | 86  | 7 | 10 | 36 | 76 | 67 | 180 |
| 7,487 | 2 | 8  | 22 | 83  | 7 | 10 | 34 | 75 | 65 | 176 |
| 7,488 | 2 | 7  | 22 | 76  | 7 | 9  | 34 | 70 | 65 | 162 |
| 7,489 | 2 | 7  | 23 | 69  | 7 | 8  | 35 | 69 | 67 | 153 |
| 7,490 | 2 | 7  | 23 | 69  | 7 | 8  | 35 | 69 | 67 | 153 |
| 7,491 | 2 | 7  | 23 | 69  | 7 | 8  | 35 | 70 | 67 | 154 |

|       |   |    |    |    |    |    |    |    |    |     |
|-------|---|----|----|----|----|----|----|----|----|-----|
| 7,492 | 2 | 7  | 23 | 69 | 7  | 8  | 35 | 70 | 67 | 154 |
| 7,493 | 2 | 7  | 25 | 69 | 7  | 8  | 40 | 69 | 74 | 153 |
| 7,494 | 2 | 7  | 27 | 69 | 10 | 8  | 48 | 69 | 87 | 153 |
| 7,495 | 2 | 7  | 27 | 69 | 10 | 8  | 49 | 69 | 88 | 153 |
| 7,496 | 2 | 7  | 27 | 70 | 10 | 8  | 49 | 69 | 88 | 154 |
| 7,497 | 2 | 7  | 27 | 70 | 10 | 8  | 49 | 69 | 88 | 154 |
| 7,498 | 2 | 7  | 27 | 70 | 10 | 8  | 48 | 69 | 87 | 154 |
| 7,499 | 2 | 7  | 27 | 70 | 10 | 8  | 49 | 69 | 88 | 154 |
| 7,500 | 2 | 7  | 27 | 70 | 10 | 8  | 49 | 69 | 88 | 154 |
| 7,501 | 2 | 7  | 27 | 70 | 10 | 8  | 49 | 69 | 88 | 154 |
| 7,502 | 2 | 7  | 27 | 70 | 10 | 8  | 48 | 68 | 87 | 153 |
| 7,503 | 2 | 7  | 27 | 70 | 10 | 8  | 47 | 68 | 86 | 153 |
| 7,504 | 2 | 7  | 27 | 69 | 10 | 8  | 47 | 68 | 86 | 152 |
| 7,505 | 2 | 7  | 27 | 69 | 10 | 8  | 47 | 68 | 86 | 152 |
| 7,506 | 2 | 7  | 27 | 70 | 10 | 8  | 48 | 68 | 87 | 153 |
| 7,507 | 2 | 7  | 27 | 70 | 11 | 8  | 48 | 68 | 88 | 153 |
| 7,508 | 2 | 7  | 30 | 69 | 11 | 8  | 51 | 68 | 94 | 152 |
| 7,509 | 2 | 7  | 29 | 68 | 11 | 8  | 53 | 68 | 95 | 151 |
| 7,510 | 2 | 7  | 29 | 68 | 11 | 8  | 53 | 68 | 95 | 151 |
| 7,511 | 2 | 7  | 29 | 68 | 11 | 8  | 53 | 69 | 95 | 152 |
| 7,512 | 2 | 7  | 29 | 68 | 11 | 8  | 53 | 69 | 95 | 152 |
| 7,513 | 2 | 7  | 29 | 72 | 11 | 8  | 53 | 73 | 95 | 160 |
| 7,514 | 2 | 7  | 29 | 71 | 11 | 8  | 52 | 72 | 94 | 158 |
| 7,515 | 2 | 7  | 29 | 81 | 12 | 9  | 52 | 85 | 95 | 182 |
| 7,516 | 2 | 7  | 27 | 82 | 11 | 9  | 45 | 86 | 85 | 184 |
| 7,517 | 2 | 7  | 24 | 83 | 11 | 9  | 42 | 89 | 79 | 188 |
| 7,518 | 1 | 8  | 14 | 88 | 6  | 10 | 34 | 84 | 55 | 190 |
| 7,519 | 1 | 8  | 12 | 92 | 6  | 10 | 34 | 91 | 53 | 201 |
| 7,520 | 1 | 9  | 11 | 93 | 5  | 11 | 26 | 92 | 43 | 205 |
| 7,521 | 1 | 9  | 10 | 94 | 5  | 11 | 25 | 94 | 41 | 208 |
| 7,522 | 1 | 9  | 10 | 97 | 5  | 11 | 25 | 96 | 41 | 213 |
| 7,523 | 1 | 9  | 11 | 91 | 5  | 11 | 25 | 96 | 42 | 207 |
| 7,524 | 2 | 10 | 11 | 91 | 4  | 11 | 25 | 96 | 42 | 208 |
| 7,525 | 2 | 10 | 11 | 91 | 4  | 11 | 24 | 96 | 41 | 208 |
| 7,526 | 2 | 11 | 11 | 91 | 5  | 10 | 24 | 94 | 42 | 206 |
| 7,527 | 2 | 11 | 11 | 91 | 5  | 10 | 23 | 94 | 41 | 206 |
| 7,528 | 2 | 11 | 11 | 80 | 5  | 9  | 23 | 85 | 41 | 185 |
| 7,529 | 2 | 11 | 11 | 79 | 5  | 9  | 23 | 85 | 41 | 184 |
| 7,530 | 2 | 11 | 11 | 79 | 5  | 9  | 22 | 85 | 40 | 184 |
| 7,531 | 2 | 6  | 11 | 43 | 5  | 5  | 22 | 51 | 40 | 105 |
| 7,532 | 2 | 6  | 11 | 40 | 5  | 6  | 22 | 48 | 40 | 100 |



|       |   |    |    |     |   |   |    |     |    |     |
|-------|---|----|----|-----|---|---|----|-----|----|-----|
| 7,533 | 1 | 7  | 10 | 40  | 5 | 6 | 22 | 48  | 38 | 101 |
| 7,534 | 1 | 7  | 10 | 40  | 5 | 6 | 22 | 48  | 38 | 101 |
| 7,535 | 1 | 7  | 10 | 40  | 5 | 6 | 22 | 47  | 38 | 100 |
| 7,536 | 1 | 7  | 10 | 41  | 5 | 6 | 21 | 47  | 37 | 101 |
| 7,537 | 1 | 7  | 10 | 41  | 5 | 6 | 22 | 48  | 38 | 102 |
| 7,538 | 1 | 7  | 10 | 41  | 5 | 6 | 22 | 48  | 38 | 102 |
| 7,539 | 1 | 7  | 10 | 41  | 5 | 6 | 22 | 49  | 38 | 103 |
| 7,540 | 1 | 7  | 9  | 41  | 5 | 6 | 22 | 50  | 37 | 104 |
| 7,541 | 1 | 7  | 9  | 44  | 5 | 6 | 22 | 51  | 37 | 108 |
| 7,542 | 1 | 7  | 9  | 44  | 5 | 6 | 22 | 51  | 37 | 108 |
| 7,543 | 1 | 7  | 7  | 44  | 5 | 6 | 18 | 51  | 31 | 108 |
| 7,544 | 1 | 7  | 9  | 45  | 5 | 6 | 17 | 54  | 32 | 112 |
| 7,545 | 1 | 7  | 7  | 45  | 2 | 6 | 9  | 55  | 19 | 113 |
| 7,546 | 1 | 7  | 7  | 51  | 2 | 6 | 8  | 58  | 18 | 122 |
| 7,547 | 1 | 7  | 7  | 55  | 2 | 6 | 8  | 61  | 18 | 129 |
| 7,548 | 1 | 7  | 7  | 59  | 2 | 6 | 8  | 63  | 18 | 135 |
| 7,549 | 1 | 7  | 7  | 59  | 2 | 6 | 7  | 63  | 17 | 135 |
| 7,550 | 1 | 7  | 8  | 59  | 2 | 6 | 7  | 63  | 18 | 135 |
| 7,551 | 1 | 8  | 8  | 59  | 2 | 6 | 7  | 63  | 18 | 136 |
| 7,552 | 1 | 8  | 8  | 59  | 2 | 6 | 7  | 63  | 18 | 136 |
| 7,553 | 1 | 8  | 8  | 59  | 2 | 6 | 7  | 63  | 18 | 136 |
| 7,554 | 1 | 8  | 8  | 59  | 2 | 6 | 7  | 63  | 18 | 136 |
| 7,555 | 1 | 8  | 8  | 59  | 3 | 6 | 7  | 63  | 19 | 136 |
| 7,556 | 1 | 8  | 8  | 59  | 3 | 6 | 6  | 64  | 18 | 137 |
| 7,557 | 1 | 9  | 8  | 63  | 3 | 6 | 6  | 69  | 18 | 147 |
| 7,558 | 1 | 11 | 8  | 89  | 3 | 6 | 7  | 85  | 19 | 191 |
| 7,559 | 1 | 15 | 5  | 117 | 2 | 7 | 4  | 106 | 12 | 245 |
| 7,560 | 1 | 16 | 5  | 118 | 2 | 7 | 2  | 107 | 10 | 248 |
| 7,561 | 1 | 18 | 5  | 130 | 2 | 8 | 2  | 115 | 10 | 271 |
| 7,562 | 1 | 18 | 5  | 131 | 2 | 8 | 2  | 116 | 10 | 273 |
| 7,563 | 1 | 18 | 4  | 133 | 2 | 8 | 2  | 115 | 9  | 274 |
| 7,564 | 1 | 18 | 4  | 129 | 2 | 7 | 2  | 111 | 9  | 265 |
| 7,565 | 1 | 18 | 4  | 128 | 2 | 7 | 2  | 109 | 9  | 262 |
| 7,566 | 1 | 18 | 4  | 119 | 1 | 6 | 2  | 96  | 8  | 239 |
| 7,567 | 1 | 18 | 4  | 118 | 1 | 6 | 2  | 94  | 8  | 236 |
| 7,568 | 1 | 17 | 4  | 112 | 1 | 5 | 2  | 90  | 8  | 224 |
| 7,569 | 1 | 17 | 4  | 112 | 1 | 5 | 2  | 90  | 8  | 224 |
| 7,570 | 1 | 17 | 4  | 108 | 1 | 5 | 2  | 83  | 8  | 213 |
| 7,571 | 1 | 16 | 4  | 109 | 1 | 4 | 2  | 83  | 8  | 212 |
| 7,572 | 1 | 16 | 4  | 108 | 1 | 4 | 2  | 81  | 8  | 209 |
| 7,573 | 1 | 16 | 4  | 108 | 1 | 4 | 2  | 80  | 8  | 208 |

|       |   |    |   |     |   |    |    |     |    |     |
|-------|---|----|---|-----|---|----|----|-----|----|-----|
| 7,574 | 1 | 14 | 3 | 106 | 1 | 4  | 3  | 78  | 8  | 202 |
| 7,575 | 0 | 13 | 3 | 106 | 1 | 4  | 4  | 79  | 8  | 202 |
| 7,576 | 0 | 13 | 3 | 106 | 1 | 4  | 4  | 79  | 8  | 202 |
| 7,577 | 0 | 12 | 4 | 103 | 1 | 4  | 4  | 77  | 9  | 196 |
| 7,578 | 0 | 12 | 4 | 103 | 1 | 4  | 4  | 77  | 9  | 196 |
| 7,579 | 0 | 12 | 4 | 103 | 1 | 4  | 4  | 77  | 9  | 196 |
| 7,580 | 0 | 12 | 4 | 102 | 1 | 4  | 4  | 77  | 9  | 195 |
| 7,581 | 0 | 12 | 4 | 102 | 1 | 4  | 4  | 77  | 9  | 195 |
| 7,582 | 0 | 12 | 4 | 102 | 1 | 2  | 4  | 75  | 9  | 191 |
| 7,583 | 0 | 13 | 4 | 105 | 1 | 2  | 4  | 80  | 9  | 200 |
| 7,584 | 0 | 12 | 4 | 105 | 1 | 2  | 4  | 80  | 9  | 199 |
| 7,585 | 0 | 12 | 4 | 108 | 1 | 2  | 4  | 80  | 9  | 202 |
| 7,586 | 0 | 12 | 4 | 110 | 1 | 2  | 4  | 82  | 9  | 206 |
| 7,587 | 0 | 12 | 4 | 109 | 1 | 2  | 4  | 82  | 9  | 205 |
| 7,588 | 0 | 12 | 5 | 109 | 1 | 2  | 3  | 81  | 9  | 204 |
| 7,589 | 0 | 12 | 5 | 109 | 1 | 2  | 3  | 81  | 9  | 204 |
| 7,590 | 0 | 12 | 5 | 109 | 1 | 2  | 3  | 78  | 9  | 201 |
| 7,591 | 0 | 12 | 5 | 116 | 1 | 3  | 3  | 84  | 9  | 215 |
| 7,592 | 0 | 12 | 5 | 117 | 1 | 3  | 3  | 88  | 9  | 220 |
| 7,593 | 1 | 13 | 5 | 122 | 1 | 5  | 4  | 94  | 11 | 234 |
| 7,594 | 1 | 13 | 5 | 129 | 2 | 5  | 7  | 100 | 15 | 247 |
| 7,595 | 1 | 17 | 3 | 145 | 2 | 8  | 7  | 112 | 13 | 282 |
| 7,596 | 1 | 19 | 3 | 150 | 2 | 9  | 7  | 114 | 13 | 292 |
| 7,597 | 1 | 20 | 4 | 152 | 2 | 10 | 7  | 116 | 14 | 298 |
| 7,598 | 1 | 20 | 4 | 148 | 2 | 11 | 7  | 115 | 14 | 294 |
| 7,599 | 1 | 21 | 4 | 148 | 2 | 11 | 7  | 115 | 14 | 295 |
| 7,600 | 1 | 21 | 4 | 150 | 2 | 12 | 7  | 116 | 14 | 299 |
| 7,601 | 1 | 21 | 3 | 152 | 2 | 12 | 7  | 120 | 13 | 305 |
| 7,602 | 1 | 20 | 3 | 153 | 2 | 12 | 7  | 120 | 13 | 305 |
| 7,603 | 1 | 20 | 3 | 156 | 2 | 13 | 8  | 124 | 14 | 313 |
| 7,604 | 1 | 21 | 3 | 157 | 2 | 14 | 10 | 126 | 16 | 318 |
| 7,605 | 1 | 21 | 4 | 158 | 1 | 15 | 10 | 128 | 16 | 322 |
| 7,606 | 1 | 21 | 4 | 158 | 1 | 15 | 10 | 129 | 16 | 323 |
| 7,607 | 1 | 21 | 4 | 159 | 1 | 16 | 10 | 132 | 16 | 328 |
| 7,608 | 1 | 20 | 4 | 155 | 1 | 16 | 10 | 127 | 16 | 318 |
| 7,609 | 1 | 18 | 4 | 128 | 1 | 16 | 9  | 112 | 15 | 274 |
| 7,610 | 1 | 16 | 4 | 114 | 1 | 18 | 9  | 113 | 15 | 261 |
| 7,611 | 1 | 16 | 4 | 118 | 1 | 18 | 9  | 115 | 15 | 267 |
| 7,612 | 1 | 14 | 4 | 106 | 1 | 17 | 9  | 110 | 15 | 247 |
| 7,613 | 1 | 14 | 4 | 105 | 1 | 17 | 9  | 109 | 15 | 245 |
| 7,614 | 1 | 19 | 4 | 107 | 1 | 17 | 12 | 118 | 18 | 261 |

|       |   |    |    |     |   |    |    |     |    |     |
|-------|---|----|----|-----|---|----|----|-----|----|-----|
| 7,615 | 1 | 19 | 4  | 108 | 1 | 18 | 12 | 122 | 18 | 267 |
| 7,616 | 1 | 21 | 4  | 110 | 1 | 18 | 14 | 127 | 20 | 276 |
| 7,617 | 1 | 21 | 4  | 113 | 1 | 18 | 14 | 128 | 20 | 280 |
| 7,618 | 1 | 21 | 4  | 113 | 1 | 18 | 15 | 129 | 21 | 281 |
| 7,619 | 1 | 21 | 4  | 113 | 1 | 18 | 15 | 129 | 21 | 281 |
| 7,620 | 1 | 23 | 4  | 122 | 1 | 18 | 15 | 137 | 21 | 300 |
| 7,621 | 1 | 23 | 4  | 122 | 1 | 18 | 15 | 137 | 21 | 300 |
| 7,622 | 1 | 23 | 4  | 120 | 1 | 18 | 15 | 137 | 21 | 298 |
| 7,623 | 1 | 23 | 4  | 122 | 1 | 18 | 15 | 137 | 21 | 300 |
| 7,624 | 1 | 23 | 4  | 120 | 1 | 18 | 14 | 136 | 20 | 297 |
| 7,625 | 1 | 23 | 4  | 121 | 1 | 18 | 14 | 138 | 20 | 300 |
| 7,626 | 1 | 23 | 4  | 120 | 1 | 18 | 13 | 138 | 19 | 299 |
| 7,627 | 1 | 27 | 4  | 127 | 1 | 18 | 14 | 146 | 20 | 318 |
| 7,628 | 1 | 27 | 3  | 127 | 1 | 18 | 14 | 146 | 19 | 318 |
| 7,629 | 1 | 27 | 4  | 129 | 1 | 18 | 17 | 146 | 23 | 320 |
| 7,630 | 1 | 27 | 4  | 129 | 1 | 18 | 17 | 146 | 23 | 320 |
| 7,631 | 1 | 27 | 4  | 129 | 1 | 18 | 17 | 147 | 23 | 321 |
| 7,632 | 1 | 27 | 4  | 130 | 1 | 18 | 17 | 147 | 23 | 322 |
| 7,633 | 1 | 27 | 4  | 130 | 1 | 18 | 17 | 147 | 23 | 322 |
| 7,634 | 1 | 26 | 7  | 134 | 1 | 18 | 19 | 144 | 28 | 322 |
| 7,635 | 1 | 26 | 7  | 135 | 1 | 18 | 19 | 144 | 28 | 323 |
| 7,636 | 1 | 26 | 9  | 130 | 1 | 18 | 19 | 143 | 30 | 317 |
| 7,637 | 1 | 26 | 9  | 132 | 1 | 18 | 20 | 144 | 31 | 320 |
| 7,638 | 1 | 26 | 9  | 132 | 1 | 19 | 21 | 144 | 32 | 321 |
| 7,639 | 1 | 26 | 9  | 132 | 1 | 20 | 21 | 144 | 32 | 322 |
| 7,640 | 1 | 26 | 9  | 132 | 1 | 20 | 21 | 144 | 32 | 322 |
| 7,641 | 1 | 26 | 13 | 116 | 1 | 17 | 27 | 126 | 42 | 285 |
| 7,642 | 1 | 26 | 13 | 116 | 1 | 17 | 27 | 127 | 42 | 286 |
| 7,643 | 1 | 26 | 15 | 110 | 1 | 17 | 27 | 121 | 44 | 274 |
| 7,644 | 0 | 27 | 16 | 110 | 1 | 17 | 31 | 121 | 48 | 275 |
| 7,645 | 1 | 27 | 17 | 110 | 0 | 17 | 34 | 122 | 52 | 276 |
| 7,646 | 1 | 21 | 17 | 88  | 0 | 14 | 35 | 105 | 53 | 228 |
| 7,647 | 1 | 21 | 17 | 88  | 0 | 14 | 35 | 105 | 53 | 228 |
| 7,648 | 1 | 20 | 16 | 82  | 0 | 13 | 36 | 100 | 53 | 215 |
| 7,649 | 1 | 20 | 16 | 82  | 0 | 12 | 36 | 98  | 53 | 212 |
| 7,650 | 1 | 19 | 16 | 86  | 0 | 14 | 37 | 98  | 54 | 217 |
| 7,651 | 1 | 20 | 16 | 90  | 0 | 13 | 37 | 108 | 54 | 231 |
| 7,652 | 1 | 20 | 16 | 92  | 0 | 13 | 37 | 105 | 54 | 230 |
| 7,653 | 2 | 20 | 16 | 95  | 0 | 13 | 36 | 106 | 54 | 234 |
| 7,654 | 2 | 20 | 16 | 93  | 0 | 12 | 36 | 104 | 54 | 229 |
| 7,655 | 2 | 19 | 16 | 98  | 0 | 11 | 34 | 106 | 52 | 234 |

|       |   |    |    |     |   |    |    |     |    |     |
|-------|---|----|----|-----|---|----|----|-----|----|-----|
| 7,656 | 2 | 21 | 15 | 126 | 0 | 13 | 36 | 133 | 53 | 293 |
| 7,657 | 2 | 21 | 15 | 126 | 0 | 13 | 36 | 132 | 53 | 292 |
| 7,658 | 2 | 22 | 15 | 133 | 0 | 13 | 36 | 134 | 53 | 302 |
| 7,659 | 2 | 22 | 15 | 133 | 0 | 13 | 37 | 133 | 54 | 301 |
| 7,660 | 2 | 20 | 15 | 121 | 3 | 10 | 42 | 111 | 62 | 262 |
| 7,661 | 2 | 19 | 15 | 115 | 3 | 10 | 42 | 108 | 62 | 252 |
| 7,662 | 3 | 19 | 15 | 115 | 3 | 10 | 42 | 108 | 63 | 252 |
| 7,663 | 3 | 20 | 15 | 118 | 3 | 11 | 39 | 111 | 60 | 260 |
| 7,664 | 3 | 20 | 15 | 118 | 3 | 11 | 39 | 110 | 60 | 259 |
| 7,665 | 3 | 15 | 15 | 114 | 3 | 11 | 41 | 104 | 62 | 244 |
| 7,666 | 3 | 15 | 15 | 113 | 3 | 10 | 41 | 101 | 62 | 239 |
| 7,667 | 3 | 13 | 15 | 110 | 3 | 10 | 39 | 96  | 60 | 229 |
| 7,668 | 3 | 13 | 17 | 107 | 3 | 10 | 38 | 95  | 61 | 225 |
| 7,669 | 3 | 13 | 17 | 107 | 3 | 10 | 38 | 94  | 61 | 224 |
| 7,670 | 3 | 11 | 18 | 98  | 3 | 10 | 39 | 86  | 63 | 205 |
| 7,671 | 3 | 11 | 18 | 98  | 3 | 10 | 39 | 86  | 63 | 205 |
| 7,672 | 3 | 11 | 19 | 98  | 3 | 10 | 41 | 85  | 66 | 204 |
| 7,673 | 3 | 11 | 19 | 98  | 3 | 10 | 41 | 85  | 66 | 204 |
| 7,674 | 3 | 13 | 19 | 97  | 3 | 10 | 42 | 85  | 67 | 205 |
| 7,675 | 3 | 13 | 19 | 97  | 3 | 10 | 42 | 85  | 67 | 205 |
| 7,676 | 3 | 13 | 19 | 97  | 3 | 10 | 42 | 84  | 67 | 204 |
| 7,677 | 3 | 13 | 20 | 97  | 3 | 10 | 42 | 83  | 68 | 203 |
| 7,678 | 3 | 9  | 20 | 88  | 3 | 10 | 41 | 74  | 67 | 181 |
| 7,679 | 3 | 10 | 21 | 88  | 3 | 10 | 42 | 74  | 69 | 182 |
| 7,680 | 3 | 10 | 21 | 88  | 3 | 10 | 41 | 74  | 68 | 182 |
| 7,681 | 3 | 10 | 23 | 88  | 3 | 10 | 43 | 74  | 72 | 182 |
| 7,682 | 4 | 10 | 23 | 87  | 3 | 10 | 45 | 74  | 75 | 181 |
| 7,683 | 4 | 10 | 31 | 87  | 4 | 10 | 50 | 74  | 89 | 181 |
| 7,684 | 4 | 10 | 30 | 80  | 4 | 10 | 48 | 72  | 86 | 172 |
| 7,685 | 4 | 10 | 30 | 79  | 6 | 10 | 54 | 72  | 94 | 171 |
| 7,686 | 4 | 10 | 28 | 79  | 6 | 10 | 54 | 72  | 92 | 171 |
| 7,687 | 4 | 10 | 30 | 77  | 6 | 10 | 57 | 70  | 97 | 167 |
| 7,688 | 4 | 10 | 31 | 77  | 6 | 9  | 57 | 70  | 98 | 166 |
| 7,689 | 4 | 10 | 31 | 77  | 6 | 8  | 56 | 70  | 97 | 165 |
| 7,690 | 4 | 10 | 30 | 77  | 6 | 8  | 56 | 70  | 96 | 165 |
| 7,691 | 4 | 10 | 30 | 77  | 6 | 8  | 57 | 70  | 97 | 165 |
| 7,692 | 4 | 10 | 26 | 77  | 6 | 8  | 51 | 69  | 87 | 164 |
| 7,693 | 4 | 10 | 26 | 77  | 6 | 8  | 51 | 69  | 87 | 164 |
| 7,694 | 4 | 10 | 24 | 76  | 6 | 8  | 50 | 69  | 84 | 163 |
| 7,695 | 4 | 9  | 23 | 76  | 6 | 8  | 46 | 69  | 79 | 162 |
| 7,696 | 3 | 9  | 22 | 76  | 6 | 7  | 42 | 68  | 73 | 160 |

|       |   |   |    |    |    |   |    |    |     |     |
|-------|---|---|----|----|----|---|----|----|-----|-----|
| 7,697 | 4 | 9 | 22 | 76 | 6  | 7 | 43 | 68 | 75  | 160 |
| 7,698 | 4 | 9 | 24 | 73 | 6  | 7 | 43 | 67 | 77  | 156 |
| 7,699 | 4 | 9 | 24 | 73 | 6  | 7 | 43 | 67 | 77  | 156 |
| 7,700 | 4 | 9 | 24 | 73 | 6  | 7 | 42 | 67 | 76  | 156 |
| 7,701 | 4 | 9 | 24 | 65 | 6  | 5 | 42 | 65 | 76  | 144 |
| 7,702 | 4 | 8 | 25 | 58 | 6  | 5 | 42 | 54 | 77  | 125 |
| 7,703 | 4 | 8 | 31 | 52 | 7  | 5 | 47 | 52 | 89  | 117 |
| 7,704 | 3 | 8 | 31 | 52 | 7  | 5 | 47 | 52 | 88  | 117 |
| 7,705 | 3 | 8 | 41 | 51 | 8  | 5 | 71 | 50 | 123 | 114 |
| 7,706 | 3 | 6 | 47 | 16 | 12 | 2 | 90 | 17 | 152 | 41  |
| 7,707 | 3 | 6 | 47 | 16 | 13 | 2 | 99 | 17 | 162 | 41  |
| 7,708 | 3 | 5 | 47 | 7  | 13 | 1 | 99 | 11 | 162 | 24  |
| 7,709 | 3 | 5 | 47 | 7  | 13 | 1 | 99 | 11 | 162 | 24  |
| 7,710 | 3 | 5 | 47 | 7  | 13 | 1 | 98 | 11 | 161 | 24  |
| 7,711 | 3 | 5 | 47 | 7  | 10 | 1 | 93 | 11 | 153 | 24  |
| 7,712 | 3 | 5 | 47 | 7  | 10 | 1 | 93 | 11 | 153 | 24  |
| 7,713 | 2 | 5 | 47 | 4  | 10 | 0 | 93 | 5  | 152 | 14  |
| 7,714 | 2 | 5 | 47 | 4  | 10 | 0 | 92 | 5  | 151 | 14  |
| 7,715 | 2 | 5 | 47 | 4  | 10 | 0 | 92 | 5  | 151 | 14  |
| 7,716 | 2 | 5 | 47 | 5  | 10 | 0 | 91 | 1  | 150 | 11  |
| 7,717 | 2 | 5 | 47 | 5  | 10 | 0 | 91 | 1  | 150 | 11  |
| 7,718 | 2 | 5 | 47 | 5  | 10 | 0 | 91 | 1  | 150 | 11  |
| 7,719 | 2 | 5 | 45 | 5  | 10 | 0 | 91 | 1  | 148 | 11  |
| 7,720 | 2 | 5 | 47 | 5  | 10 | 0 | 91 | 2  | 150 | 12  |
| 7,721 | 2 | 5 | 46 | 5  | 10 | 0 | 90 | 2  | 148 | 12  |
| 7,722 | 2 | 5 | 45 | 5  | 10 | 0 | 90 | 3  | 147 | 13  |
| 7,723 | 2 | 5 | 45 | 5  | 10 | 0 | 88 | 3  | 145 | 13  |
| 7,724 | 2 | 3 | 45 | 5  | 10 | 0 | 87 | 3  | 144 | 11  |
| 7,725 | 2 | 3 | 45 | 4  | 10 | 0 | 87 | 3  | 144 | 10  |
| 7,726 | 2 | 3 | 45 | 4  | 10 | 0 | 87 | 3  | 144 | 10  |
| 7,727 | 2 | 3 | 44 | 3  | 10 | 0 | 87 | 2  | 143 | 8   |
| 7,728 | 2 | 3 | 44 | 3  | 10 | 0 | 87 | 2  | 143 | 8   |
| 7,729 | 2 | 3 | 44 | 3  | 10 | 0 | 87 | 2  | 143 | 8   |
| 7,730 | 3 | 2 | 43 | 3  | 10 | 0 | 86 | 2  | 142 | 7   |
| 7,731 | 3 | 2 | 42 | 3  | 10 | 0 | 84 | 2  | 139 | 7   |
| 7,732 | 3 | 2 | 40 | 3  | 10 | 0 | 83 | 2  | 136 | 7   |
| 7,733 | 2 | 2 | 40 | 4  | 10 | 0 | 81 | 3  | 133 | 9   |
| 7,734 | 2 | 2 | 32 | 4  | 9  | 0 | 76 | 3  | 119 | 9   |
| 7,735 | 2 | 2 | 32 | 4  | 9  | 0 | 76 | 3  | 119 | 9   |
| 7,736 | 2 | 2 | 30 | 4  | 7  | 0 | 70 | 3  | 109 | 9   |
| 7,737 | 2 | 2 | 30 | 4  | 7  | 0 | 70 | 4  | 109 | 10  |

|       |   |   |    |    |   |   |    |    |     |     |
|-------|---|---|----|----|---|---|----|----|-----|-----|
| 7,738 | 2 | 2 | 28 | 4  | 7 | 0 | 67 | 4  | 104 | 10  |
| 7,739 | 2 | 2 | 27 | 4  | 7 | 0 | 67 | 4  | 103 | 10  |
| 7,740 | 2 | 2 | 31 | 4  | 7 | 0 | 73 | 4  | 113 | 10  |
| 7,741 | 2 | 2 | 32 | 4  | 7 | 0 | 73 | 4  | 114 | 10  |
| 7,742 | 2 | 1 | 32 | 4  | 7 | 0 | 75 | 4  | 116 | 9   |
| 7,743 | 2 | 1 | 32 | 4  | 7 | 0 | 75 | 4  | 116 | 9   |
| 7,744 | 2 | 1 | 32 | 4  | 7 | 0 | 75 | 4  | 116 | 9   |
| 7,745 | 2 | 1 | 32 | 4  | 7 | 0 | 76 | 4  | 117 | 9   |
| 7,746 | 2 | 1 | 32 | 4  | 7 | 0 | 76 | 4  | 117 | 9   |
| 7,747 | 2 | 1 | 32 | 4  | 7 | 0 | 74 | 4  | 115 | 9   |
| 7,748 | 1 | 1 | 32 | 4  | 7 | 0 | 72 | 4  | 112 | 9   |
| 7,749 | 1 | 1 | 30 | 4  | 7 | 0 | 71 | 4  | 109 | 9   |
| 7,750 | 1 | 1 | 31 | 5  | 7 | 0 | 71 | 4  | 110 | 10  |
| 7,751 | 1 | 1 | 31 | 7  | 7 | 0 | 71 | 7  | 110 | 15  |
| 7,752 | 1 | 1 | 30 | 45 | 7 | 0 | 71 | 19 | 109 | 65  |
| 7,753 | 1 | 4 | 30 | 54 | 7 | 0 | 69 | 34 | 107 | 92  |
| 7,754 | 1 | 4 | 24 | 61 | 6 | 0 | 67 | 39 | 98  | 104 |
| 7,755 | 2 | 4 | 21 | 67 | 6 | 0 | 64 | 39 | 93  | 110 |
| 7,756 | 2 | 4 | 16 | 68 | 7 | 0 | 43 | 39 | 68  | 111 |
| 7,757 | 2 | 4 | 12 | 68 | 3 | 1 | 30 | 39 | 47  | 112 |
| 7,758 | 2 | 4 | 12 | 68 | 2 | 1 | 22 | 39 | 38  | 112 |
| 7,759 | 2 | 4 | 12 | 68 | 2 | 1 | 22 | 40 | 38  | 113 |
| 7,760 | 2 | 4 | 12 | 68 | 2 | 1 | 22 | 40 | 38  | 113 |
| 7,761 | 3 | 4 | 15 | 69 | 3 | 1 | 24 | 40 | 45  | 114 |
| 7,762 | 3 | 4 | 15 | 70 | 3 | 1 | 24 | 40 | 45  | 115 |
| 7,763 | 3 | 4 | 15 | 70 | 3 | 1 | 24 | 41 | 45  | 116 |
| 7,764 | 3 | 3 | 15 | 70 | 3 | 1 | 24 | 41 | 45  | 115 |
| 7,765 | 3 | 3 | 15 | 70 | 3 | 1 | 24 | 41 | 45  | 115 |
| 7,766 | 3 | 3 | 15 | 69 | 3 | 1 | 24 | 42 | 45  | 115 |
| 7,767 | 3 | 3 | 15 | 69 | 3 | 1 | 24 | 43 | 45  | 116 |
| 7,768 | 3 | 3 | 15 | 69 | 3 | 1 | 24 | 43 | 45  | 116 |
| 7,769 | 3 | 4 | 15 | 69 | 3 | 1 | 24 | 43 | 45  | 117 |
| 7,770 | 3 | 4 | 14 | 69 | 3 | 1 | 24 | 42 | 44  | 116 |
| 7,771 | 3 | 4 | 13 | 69 | 3 | 1 | 24 | 42 | 43  | 116 |
| 7,772 | 3 | 4 | 13 | 69 | 3 | 1 | 24 | 41 | 43  | 115 |
| 7,773 | 3 | 4 | 13 | 69 | 3 | 1 | 24 | 41 | 43  | 115 |
| 7,774 | 3 | 4 | 13 | 68 | 3 | 1 | 24 | 41 | 43  | 114 |
| 7,775 | 3 | 4 | 13 | 68 | 3 | 1 | 24 | 41 | 43  | 114 |
| 7,776 | 3 | 4 | 13 | 68 | 3 | 1 | 24 | 41 | 43  | 114 |
| 7,777 | 3 | 4 | 13 | 68 | 3 | 1 | 24 | 41 | 43  | 114 |
| 7,778 | 3 | 4 | 13 | 68 | 3 | 1 | 24 | 41 | 43  | 114 |

|       |   |    |    |     |   |    |    |     |    |     |
|-------|---|----|----|-----|---|----|----|-----|----|-----|
| 7,779 | 3 | 4  | 13 | 68  | 3 | 1  | 24 | 41  | 43 | 114 |
| 7,780 | 2 | 4  | 13 | 68  | 3 | 1  | 24 | 41  | 42 | 114 |
| 7,781 | 2 | 4  | 13 | 68  | 3 | 1  | 24 | 41  | 42 | 114 |
| 7,782 | 2 | 4  | 14 | 68  | 3 | 1  | 24 | 41  | 43 | 114 |
| 7,783 | 2 | 4  | 14 | 68  | 3 | 1  | 24 | 41  | 43 | 114 |
| 7,784 | 2 | 4  | 14 | 67  | 3 | 1  | 24 | 40  | 43 | 112 |
| 7,785 | 3 | 4  | 14 | 68  | 3 | 1  | 24 | 40  | 44 | 113 |
| 7,786 | 3 | 4  | 14 | 68  | 3 | 1  | 24 | 40  | 44 | 113 |
| 7,787 | 3 | 4  | 14 | 69  | 3 | 2  | 24 | 43  | 44 | 118 |
| 7,788 | 3 | 4  | 14 | 75  | 3 | 3  | 24 | 47  | 44 | 129 |
| 7,789 | 3 | 6  | 14 | 86  | 3 | 4  | 23 | 52  | 43 | 148 |
| 7,790 | 3 | 12 | 14 | 102 | 3 | 6  | 23 | 69  | 43 | 189 |
| 7,791 | 3 | 14 | 10 | 112 | 3 | 7  | 17 | 74  | 33 | 207 |
| 7,792 | 3 | 14 | 9  | 126 | 3 | 7  | 17 | 81  | 32 | 228 |
| 7,793 | 3 | 14 | 9  | 126 | 3 | 7  | 14 | 81  | 29 | 228 |
| 7,794 | 3 | 14 | 10 | 134 | 3 | 7  | 14 | 85  | 30 | 240 |
| 7,795 | 3 | 14 | 10 | 135 | 3 | 7  | 13 | 85  | 29 | 241 |
| 7,796 | 4 | 14 | 10 | 142 | 3 | 7  | 13 | 87  | 30 | 250 |
| 7,797 | 4 | 14 | 10 | 142 | 3 | 7  | 13 | 87  | 30 | 250 |
| 7,798 | 4 | 14 | 10 | 144 | 3 | 7  | 15 | 88  | 32 | 253 |
| 7,799 | 4 | 16 | 10 | 147 | 3 | 7  | 15 | 89  | 32 | 259 |
| 7,800 | 4 | 16 | 10 | 148 | 3 | 7  | 15 | 89  | 32 | 260 |
| 7,801 | 4 | 17 | 9  | 148 | 3 | 7  | 15 | 86  | 31 | 258 |
| 7,802 | 4 | 17 | 9  | 148 | 3 | 7  | 15 | 86  | 31 | 258 |
| 7,803 | 4 | 14 | 9  | 101 | 3 | 7  | 15 | 59  | 31 | 181 |
| 7,804 | 4 | 16 | 9  | 87  | 3 | 7  | 15 | 56  | 31 | 166 |
| 7,805 | 4 | 16 | 9  | 94  | 4 | 7  | 14 | 57  | 31 | 174 |
| 7,806 | 3 | 24 | 9  | 167 | 3 | 10 | 14 | 102 | 29 | 303 |
| 7,807 | 3 | 24 | 7  | 170 | 2 | 10 | 13 | 104 | 25 | 308 |
| 7,808 | 3 | 25 | 5  | 175 | 2 | 9  | 7  | 106 | 17 | 315 |
| 7,809 | 3 | 25 | 5  | 177 | 2 | 9  | 6  | 111 | 16 | 322 |
| 7,810 | 2 | 26 | 4  | 180 | 1 | 9  | 4  | 113 | 11 | 328 |
| 7,811 | 2 | 26 | 2  | 181 | 1 | 9  | 5  | 114 | 10 | 330 |
| 7,812 | 2 | 26 | 3  | 180 | 1 | 9  | 7  | 114 | 13 | 329 |
| 7,813 | 2 | 26 | 4  | 182 | 1 | 9  | 9  | 118 | 16 | 335 |
| 7,814 | 2 | 26 | 4  | 182 | 1 | 9  | 9  | 118 | 16 | 335 |
| 7,815 | 2 | 26 | 9  | 183 | 1 | 9  | 12 | 119 | 24 | 337 |
| 7,816 | 2 | 26 | 9  | 183 | 1 | 9  | 12 | 118 | 24 | 336 |
| 7,817 | 2 | 26 | 9  | 183 | 1 | 9  | 12 | 118 | 24 | 336 |
| 7,818 | 2 | 26 | 9  | 184 | 1 | 9  | 12 | 117 | 24 | 336 |
| 7,819 | 2 | 26 | 9  | 184 | 1 | 9  | 12 | 118 | 24 | 337 |

|       |   |    |    |     |   |    |    |     |    |     |
|-------|---|----|----|-----|---|----|----|-----|----|-----|
| 7,820 | 2 | 25 | 9  | 186 | 1 | 9  | 12 | 118 | 24 | 338 |
| 7,821 | 2 | 25 | 9  | 186 | 1 | 9  | 12 | 119 | 24 | 339 |
| 7,822 | 2 | 25 | 10 | 186 | 1 | 9  | 12 | 119 | 25 | 339 |
| 7,823 | 2 | 25 | 10 | 186 | 1 | 9  | 13 | 120 | 26 | 340 |
| 7,824 | 2 | 25 | 10 | 186 | 1 | 9  | 13 | 120 | 26 | 340 |
| 7,825 | 2 | 25 | 10 | 186 | 1 | 9  | 13 | 120 | 26 | 340 |
| 7,826 | 2 | 25 | 10 | 186 | 1 | 9  | 13 | 120 | 26 | 340 |
| 7,827 | 2 | 25 | 10 | 186 | 1 | 9  | 13 | 120 | 26 | 340 |
| 7,828 | 2 | 25 | 10 | 186 | 1 | 9  | 13 | 120 | 26 | 340 |
| 7,829 | 2 | 25 | 10 | 186 | 1 | 9  | 13 | 120 | 26 | 340 |
| 7,830 | 2 | 25 | 12 | 186 | 1 | 9  | 14 | 120 | 29 | 340 |
| 7,831 | 2 | 25 | 12 | 186 | 1 | 9  | 13 | 120 | 28 | 340 |
| 7,832 | 2 | 35 | 13 | 250 | 1 | 13 | 16 | 171 | 32 | 469 |
| 7,833 | 2 | 35 | 13 | 256 | 1 | 13 | 16 | 177 | 32 | 481 |
| 7,834 | 2 | 35 | 13 | 259 | 1 | 13 | 16 | 181 | 32 | 488 |
| 7,835 | 2 | 35 | 13 | 261 | 1 | 13 | 16 | 181 | 32 | 490 |
| 7,836 | 1 | 40 | 15 | 280 | 1 | 14 | 16 | 190 | 33 | 524 |
| 7,837 | 1 | 40 | 14 | 282 | 1 | 14 | 16 | 189 | 32 | 525 |
| 7,838 | 1 | 40 | 17 | 282 | 1 | 13 | 16 | 187 | 35 | 522 |
| 7,839 | 1 | 40 | 19 | 277 | 1 | 12 | 16 | 182 | 37 | 511 |
| 7,840 | 1 | 38 | 19 | 269 | 2 | 11 | 16 | 178 | 38 | 496 |
| 7,841 | 1 | 32 | 19 | 253 | 2 | 9  | 16 | 160 | 38 | 454 |
| 7,842 | 1 | 30 | 19 | 229 | 2 | 8  | 16 | 148 | 38 | 415 |
| 7,843 | 1 | 30 | 20 | 229 | 2 | 8  | 16 | 148 | 39 | 415 |
| 7,844 | 1 | 30 | 20 | 230 | 2 | 8  | 16 | 150 | 39 | 418 |
| 7,845 | 1 | 30 | 19 | 221 | 2 | 8  | 16 | 146 | 38 | 405 |
| 7,846 | 1 | 30 | 19 | 214 | 2 | 8  | 16 | 144 | 38 | 396 |
| 7,847 | 0 | 30 | 19 | 214 | 2 | 8  | 16 | 144 | 37 | 396 |
| 7,848 | 0 | 30 | 19 | 214 | 2 | 8  | 14 | 144 | 35 | 396 |
| 7,849 | 0 | 28 | 19 | 209 | 2 | 8  | 14 | 142 | 35 | 387 |
| 7,850 | 0 | 28 | 19 | 208 | 2 | 8  | 14 | 142 | 35 | 386 |
| 7,851 | 0 | 28 | 19 | 208 | 2 | 8  | 14 | 142 | 35 | 386 |
| 7,852 | 0 | 27 | 19 | 205 | 2 | 9  | 14 | 142 | 35 | 383 |
| 7,853 | 0 | 27 | 19 | 205 | 2 | 9  | 14 | 142 | 35 | 383 |
| 7,854 | 0 | 28 | 19 | 206 | 2 | 9  | 14 | 144 | 35 | 387 |
| 7,855 | 0 | 26 | 19 | 206 | 2 | 9  | 14 | 143 | 35 | 384 |
| 7,856 | 0 | 26 | 19 | 200 | 1 | 9  | 14 | 142 | 34 | 377 |
| 7,857 | 0 | 18 | 19 | 132 | 1 | 7  | 14 | 101 | 34 | 258 |
| 7,858 | 0 | 18 | 19 | 128 | 1 | 7  | 13 | 98  | 33 | 251 |
| 7,859 | 0 | 17 | 19 | 120 | 1 | 7  | 13 | 91  | 33 | 235 |
| 7,860 | 0 | 17 | 19 | 129 | 1 | 7  | 14 | 97  | 34 | 250 |



|       |   |    |    |     |   |   |    |    |    |     |
|-------|---|----|----|-----|---|---|----|----|----|-----|
| 7,861 | 0 | 18 | 21 | 129 | 1 | 7 | 13 | 97 | 35 | 251 |
| 7,862 | 0 | 18 | 21 | 129 | 1 | 7 | 12 | 96 | 34 | 250 |
| 7,863 | 0 | 18 | 23 | 127 | 1 | 7 | 11 | 92 | 35 | 244 |
| 7,864 | 0 | 18 | 23 | 127 | 1 | 7 | 14 | 91 | 38 | 243 |
| 7,865 | 0 | 18 | 24 | 127 | 1 | 7 | 15 | 91 | 40 | 243 |
| 7,866 | 0 | 18 | 19 | 126 | 1 | 7 | 14 | 90 | 34 | 241 |
| 7,867 | 0 | 18 | 19 | 126 | 1 | 7 | 14 | 91 | 34 | 242 |
| 7,868 | 0 | 18 | 19 | 128 | 1 | 7 | 14 | 91 | 34 | 244 |
| 7,869 | 0 | 18 | 19 | 135 | 1 | 8 | 14 | 93 | 34 | 254 |
| 7,870 | 0 | 18 | 19 | 139 | 1 | 8 | 15 | 94 | 35 | 259 |
| 7,871 | 0 | 18 | 19 | 139 | 1 | 8 | 15 | 96 | 35 | 261 |
| 7,872 | 0 | 18 | 18 | 151 | 1 | 8 | 15 | 98 | 34 | 275 |
| 7,873 | 0 | 18 | 18 | 151 | 1 | 8 | 14 | 98 | 33 | 275 |
| 7,874 | 1 | 18 | 19 | 152 | 1 | 8 | 14 | 97 | 35 | 275 |
| 7,875 | 1 | 18 | 19 | 152 | 1 | 8 | 14 | 97 | 35 | 275 |
| 7,876 | 1 | 18 | 20 | 152 | 1 | 8 | 14 | 97 | 36 | 275 |
| 7,877 | 1 | 18 | 20 | 153 | 1 | 8 | 14 | 97 | 36 | 276 |
| 7,878 | 1 | 18 | 20 | 153 | 1 | 8 | 14 | 97 | 36 | 276 |
| 7,879 | 1 | 18 | 25 | 153 | 1 | 8 | 14 | 97 | 41 | 276 |
| 7,880 | 1 | 8  | 25 | 93  | 1 | 4 | 14 | 47 | 41 | 152 |
| 7,881 | 1 | 8  | 23 | 93  | 1 | 4 | 13 | 47 | 38 | 152 |
| 7,882 | 1 | 8  | 21 | 86  | 1 | 4 | 10 | 42 | 33 | 140 |
| 7,883 | 1 | 8  | 21 | 87  | 1 | 4 | 10 | 42 | 33 | 141 |
| 7,884 | 1 | 8  | 21 | 87  | 1 | 5 | 10 | 43 | 33 | 143 |
| 7,885 | 1 | 8  | 21 | 86  | 1 | 5 | 10 | 40 | 33 | 139 |
| 7,886 | 1 | 8  | 21 | 95  | 1 | 5 | 10 | 44 | 33 | 152 |
| 7,887 | 1 | 3  | 19 | 76  | 1 | 4 | 10 | 37 | 31 | 120 |
| 7,888 | 1 | 3  | 17 | 75  | 1 | 4 | 10 | 37 | 29 | 119 |
| 7,889 | 1 | 3  | 15 | 73  | 1 | 4 | 10 | 38 | 27 | 118 |
| 7,890 | 1 | 3  | 15 | 70  | 1 | 4 | 10 | 37 | 27 | 114 |
| 7,891 | 1 | 3  | 16 | 71  | 0 | 4 | 10 | 38 | 27 | 116 |
| 7,892 | 1 | 3  | 16 | 72  | 0 | 4 | 10 | 38 | 27 | 117 |
| 7,893 | 1 | 3  | 16 | 72  | 0 | 4 | 11 | 39 | 28 | 118 |
| 7,894 | 1 | 3  | 16 | 73  | 0 | 4 | 13 | 39 | 30 | 119 |
| 7,895 | 1 | 3  | 16 | 72  | 0 | 4 | 13 | 37 | 30 | 116 |
| 7,896 | 1 | 3  | 16 | 72  | 0 | 4 | 13 | 37 | 30 | 116 |
| 7,897 | 1 | 3  | 16 | 72  | 0 | 4 | 13 | 37 | 30 | 116 |
| 7,898 | 1 | 3  | 16 | 73  | 0 | 4 | 13 | 37 | 30 | 117 |
| 7,899 | 1 | 3  | 18 | 73  | 0 | 4 | 15 | 37 | 34 | 117 |
| 7,900 | 1 | 3  | 18 | 73  | 0 | 4 | 15 | 37 | 34 | 117 |
| 7,901 | 1 | 3  | 18 | 73  | 0 | 4 | 15 | 37 | 34 | 117 |

|       |   |   |    |     |   |    |    |    |    |     |
|-------|---|---|----|-----|---|----|----|----|----|-----|
| 7,902 | 1 | 3 | 18 | 73  | 0 | 4  | 15 | 37 | 34 | 117 |
| 7,903 | 1 | 3 | 18 | 73  | 0 | 3  | 15 | 37 | 34 | 116 |
| 7,904 | 1 | 3 | 18 | 73  | 0 | 3  | 15 | 37 | 34 | 116 |
| 7,905 | 1 | 2 | 18 | 72  | 0 | 3  | 15 | 35 | 34 | 112 |
| 7,906 | 1 | 2 | 18 | 71  | 0 | 3  | 15 | 34 | 34 | 110 |
| 7,907 | 1 | 2 | 18 | 66  | 1 | 2  | 15 | 32 | 35 | 102 |
| 7,908 | 1 | 2 | 18 | 66  | 1 | 2  | 15 | 32 | 35 | 102 |
| 7,909 | 1 | 1 | 18 | 66  | 1 | 2  | 15 | 29 | 35 | 98  |
| 7,910 | 1 | 1 | 18 | 69  | 1 | 2  | 15 | 29 | 35 | 101 |
| 7,911 | 1 | 1 | 18 | 61  | 1 | 2  | 14 | 23 | 34 | 87  |
| 7,912 | 1 | 0 | 16 | 64  | 1 | 2  | 14 | 23 | 32 | 89  |
| 7,913 | 1 | 0 | 15 | 71  | 1 | 3  | 13 | 29 | 30 | 103 |
| 7,914 | 1 | 0 | 13 | 70  | 1 | 3  | 13 | 29 | 28 | 102 |
| 7,915 | 1 | 0 | 12 | 70  | 1 | 3  | 8  | 30 | 22 | 103 |
| 7,916 | 1 | 0 | 12 | 70  | 1 | 3  | 8  | 30 | 22 | 103 |
| 7,917 | 1 | 0 | 12 | 70  | 1 | 3  | 6  | 31 | 20 | 104 |
| 7,918 | 1 | 0 | 12 | 70  | 1 | 5  | 6  | 32 | 20 | 107 |
| 7,919 | 1 | 0 | 12 | 70  | 1 | 5  | 6  | 33 | 20 | 108 |
| 7,920 | 1 | 0 | 12 | 61  | 1 | 4  | 7  | 30 | 21 | 95  |
| 7,921 | 1 | 0 | 12 | 57  | 1 | 4  | 6  | 29 | 20 | 90  |
| 7,922 | 1 | 0 | 12 | 45  | 1 | 4  | 6  | 25 | 20 | 74  |
| 7,923 | 1 | 0 | 12 | 45  | 1 | 4  | 6  | 25 | 20 | 74  |
| 7,924 | 0 | 0 | 11 | 45  | 1 | 4  | 6  | 27 | 18 | 76  |
| 7,925 | 0 | 1 | 11 | 51  | 1 | 4  | 6  | 31 | 18 | 87  |
| 7,926 | 0 | 1 | 10 | 81  | 1 | 8  | 7  | 57 | 18 | 147 |
| 7,927 | 0 | 3 | 10 | 88  | 1 | 9  | 7  | 63 | 18 | 163 |
| 7,928 | 0 | 3 | 10 | 93  | 1 | 9  | 7  | 63 | 18 | 168 |
| 7,929 | 0 | 3 | 5  | 100 | 1 | 11 | 7  | 71 | 13 | 185 |
| 7,930 | 0 | 3 | 5  | 104 | 1 | 11 | 7  | 74 | 13 | 192 |
| 7,931 | 0 | 5 | 5  | 122 | 1 | 11 | 8  | 82 | 14 | 220 |
| 7,932 | 0 | 5 | 5  | 124 | 1 | 11 | 8  | 82 | 14 | 222 |
| 7,933 | 0 | 5 | 5  | 125 | 1 | 11 | 8  | 79 | 14 | 220 |
| 7,934 | 0 | 5 | 5  | 127 | 1 | 11 | 8  | 79 | 14 | 222 |
| 7,935 | 0 | 5 | 5  | 116 | 1 | 11 | 8  | 75 | 14 | 207 |
| 7,936 | 0 | 6 | 6  | 121 | 1 | 12 | 8  | 75 | 15 | 214 |
| 7,937 | 0 | 6 | 6  | 121 | 1 | 12 | 8  | 75 | 15 | 214 |
| 7,938 | 0 | 6 | 6  | 121 | 1 | 12 | 8  | 77 | 15 | 216 |
| 7,939 | 0 | 8 | 6  | 122 | 1 | 12 | 8  | 77 | 15 | 219 |
| 7,940 | 0 | 8 | 6  | 122 | 1 | 12 | 8  | 76 | 15 | 218 |
| 7,941 | 0 | 8 | 7  | 122 | 1 | 12 | 9  | 76 | 17 | 218 |
| 7,942 | 0 | 8 | 6  | 121 | 1 | 12 | 9  | 75 | 16 | 216 |

|       |   |    |   |     |   |    |    |    |    |     |
|-------|---|----|---|-----|---|----|----|----|----|-----|
| 7,943 | 0 | 8  | 6 | 120 | 1 | 12 | 8  | 74 | 15 | 214 |
| 7,944 | 0 | 8  | 6 | 120 | 1 | 12 | 8  | 74 | 15 | 214 |
| 7,945 | 0 | 8  | 5 | 119 | 1 | 13 | 6  | 74 | 12 | 214 |
| 7,946 | 0 | 8  | 5 | 119 | 1 | 13 | 6  | 74 | 12 | 214 |
| 7,947 | 0 | 8  | 5 | 121 | 1 | 13 | 6  | 74 | 12 | 216 |
| 7,948 | 0 | 8  | 5 | 121 | 2 | 13 | 8  | 75 | 15 | 217 |
| 7,949 | 0 | 8  | 5 | 121 | 2 | 13 | 8  | 75 | 15 | 217 |
| 7,950 | 0 | 8  | 3 | 121 | 2 | 13 | 6  | 75 | 11 | 217 |
| 7,951 | 0 | 8  | 3 | 121 | 2 | 13 | 6  | 75 | 11 | 217 |
| 7,952 | 0 | 8  | 3 | 121 | 2 | 13 | 7  | 75 | 12 | 217 |
| 7,953 | 0 | 8  | 3 | 121 | 2 | 13 | 7  | 75 | 12 | 217 |
| 7,954 | 0 | 8  | 3 | 121 | 2 | 13 | 7  | 75 | 12 | 217 |
| 7,955 | 0 | 8  | 3 | 121 | 2 | 13 | 7  | 75 | 12 | 217 |
| 7,956 | 0 | 8  | 4 | 121 | 2 | 13 | 8  | 75 | 14 | 217 |
| 7,957 | 0 | 8  | 4 | 121 | 2 | 13 | 8  | 76 | 14 | 218 |
| 7,958 | 0 | 8  | 4 | 121 | 1 | 13 | 8  | 76 | 13 | 218 |
| 7,959 | 0 | 8  | 4 | 122 | 1 | 13 | 8  | 76 | 13 | 219 |
| 7,960 | 0 | 8  | 4 | 120 | 1 | 13 | 8  | 76 | 13 | 217 |
| 7,961 | 0 | 8  | 4 | 116 | 1 | 13 | 8  | 76 | 13 | 213 |
| 7,962 | 0 | 8  | 4 | 116 | 1 | 13 | 8  | 76 | 13 | 213 |
| 7,963 | 0 | 8  | 4 | 114 | 1 | 13 | 8  | 77 | 13 | 212 |
| 7,964 | 0 | 8  | 4 | 107 | 1 | 12 | 8  | 71 | 13 | 198 |
| 7,965 | 0 | 8  | 4 | 107 | 1 | 12 | 8  | 71 | 13 | 198 |
| 7,966 | 0 | 8  | 4 | 107 | 1 | 12 | 8  | 70 | 13 | 197 |
| 7,967 | 0 | 8  | 5 | 107 | 1 | 12 | 9  | 70 | 15 | 197 |
| 7,968 | 0 | 8  | 5 | 107 | 1 | 12 | 9  | 69 | 15 | 196 |
| 7,969 | 0 | 8  | 5 | 105 | 1 | 10 | 9  | 66 | 15 | 189 |
| 7,970 | 0 | 8  | 5 | 106 | 1 | 10 | 9  | 70 | 15 | 194 |
| 7,971 | 0 | 8  | 5 | 115 | 1 | 10 | 9  | 74 | 15 | 207 |
| 7,972 | 0 | 8  | 5 | 121 | 1 | 10 | 11 | 74 | 17 | 213 |
| 7,973 | 0 | 8  | 5 | 126 | 1 | 11 | 11 | 81 | 17 | 226 |
| 7,974 | 0 | 8  | 5 | 127 | 1 | 11 | 11 | 83 | 17 | 229 |
| 7,975 | 0 | 8  | 5 | 127 | 1 | 11 | 11 | 81 | 17 | 227 |
| 7,976 | 0 | 7  | 5 | 94  | 1 | 7  | 11 | 55 | 17 | 163 |
| 7,977 | 0 | 7  | 5 | 94  | 1 | 7  | 10 | 55 | 16 | 163 |
| 7,978 | 0 | 10 | 5 | 85  | 1 | 6  | 10 | 49 | 16 | 150 |
| 7,979 | 0 | 12 | 5 | 89  | 1 | 6  | 10 | 50 | 16 | 157 |
| 7,980 | 0 | 12 | 5 | 76  | 1 | 4  | 10 | 38 | 16 | 130 |
| 7,981 | 0 | 10 | 5 | 61  | 1 | 4  | 10 | 31 | 16 | 106 |
| 7,982 | 0 | 10 | 5 | 61  | 1 | 4  | 9  | 31 | 15 | 106 |
| 7,983 | 0 | 10 | 6 | 60  | 1 | 4  | 9  | 32 | 16 | 106 |

|       |   |    |    |     |   |   |    |    |    |     |
|-------|---|----|----|-----|---|---|----|----|----|-----|
| 7,984 | 0 | 10 | 6  | 54  | 1 | 3 | 9  | 32 | 16 | 99  |
| 7,985 | 0 | 10 | 6  | 54  | 1 | 3 | 9  | 32 | 16 | 99  |
| 7,986 | 0 | 11 | 6  | 57  | 1 | 3 | 9  | 35 | 16 | 106 |
| 7,987 | 0 | 10 | 5  | 53  | 1 | 2 | 9  | 35 | 15 | 100 |
| 7,988 | 0 | 10 | 5  | 55  | 1 | 2 | 9  | 35 | 15 | 102 |
| 7,989 | 0 | 8  | 5  | 53  | 1 | 2 | 9  | 31 | 15 | 94  |
| 7,990 | 0 | 8  | 5  | 53  | 2 | 2 | 9  | 31 | 16 | 94  |
| 7,991 | 0 | 12 | 4  | 64  | 2 | 2 | 9  | 53 | 15 | 131 |
| 7,992 | 0 | 12 | 4  | 64  | 2 | 2 | 8  | 54 | 14 | 132 |
| 7,993 | 0 | 12 | 6  | 64  | 2 | 2 | 8  | 55 | 16 | 133 |
| 7,994 | 0 | 15 | 6  | 97  | 2 | 2 | 8  | 67 | 16 | 181 |
| 7,995 | 0 | 15 | 6  | 107 | 2 | 2 | 8  | 68 | 16 | 192 |
| 7,996 | 0 | 15 | 6  | 108 | 2 | 1 | 8  | 68 | 16 | 192 |
| 7,997 | 1 | 15 | 6  | 106 | 2 | 1 | 8  | 68 | 17 | 190 |
| 7,998 | 1 | 15 | 6  | 114 | 2 | 1 | 8  | 71 | 17 | 201 |
| 7,999 | 2 | 15 | 7  | 116 | 1 | 1 | 6  | 70 | 16 | 202 |
| 8,000 | 2 | 15 | 9  | 115 | 1 | 1 | 7  | 70 | 19 | 201 |
| 8,001 | 2 | 15 | 10 | 115 | 1 | 1 | 8  | 72 | 21 | 203 |
| 8,002 | 2 | 15 | 12 | 117 | 1 | 1 | 8  | 72 | 23 | 205 |
| 8,003 | 2 | 15 | 17 | 117 | 1 | 1 | 9  | 72 | 29 | 205 |
| 8,004 | 2 | 15 | 18 | 117 | 1 | 1 | 12 | 72 | 33 | 205 |
| 8,005 | 2 | 16 | 18 | 118 | 1 | 1 | 12 | 72 | 33 | 207 |
| 8,006 | 2 | 16 | 17 | 119 | 1 | 1 | 12 | 72 | 32 | 208 |
| 8,007 | 2 | 16 | 17 | 119 | 1 | 1 | 11 | 72 | 31 | 208 |
| 8,008 | 2 | 16 | 17 | 119 | 1 | 1 | 11 | 71 | 31 | 207 |
| 8,009 | 2 | 16 | 17 | 119 | 1 | 1 | 11 | 71 | 31 | 207 |
| 8,010 | 2 | 16 | 17 | 118 | 1 | 1 | 11 | 71 | 31 | 206 |
| 8,011 | 2 | 16 | 17 | 118 | 1 | 1 | 11 | 71 | 31 | 206 |
| 8,012 | 2 | 16 | 17 | 118 | 1 | 1 | 11 | 71 | 31 | 206 |
| 8,013 | 2 | 16 | 17 | 118 | 1 | 1 | 11 | 71 | 31 | 206 |
| 8,014 | 2 | 16 | 17 | 117 | 1 | 1 | 11 | 70 | 31 | 204 |
| 8,015 | 2 | 16 | 17 | 116 | 1 | 1 | 11 | 69 | 31 | 202 |
| 8,016 | 2 | 16 | 17 | 116 | 1 | 1 | 11 | 69 | 31 | 202 |
| 8,017 | 2 | 16 | 17 | 116 | 1 | 1 | 11 | 69 | 31 | 202 |
| 8,018 | 2 | 16 | 15 | 116 | 1 | 2 | 10 | 69 | 28 | 203 |
| 8,019 | 2 | 16 | 17 | 116 | 1 | 2 | 11 | 69 | 31 | 203 |
| 8,020 | 2 | 16 | 17 | 114 | 2 | 2 | 11 | 66 | 32 | 198 |
| 8,021 | 2 | 16 | 17 | 114 | 2 | 2 | 10 | 66 | 31 | 198 |
| 8,022 | 2 | 16 | 17 | 105 | 2 | 2 | 9  | 62 | 30 | 185 |
| 8,023 | 2 | 16 | 17 | 100 | 2 | 2 | 8  | 62 | 29 | 180 |
| 8,024 | 2 | 16 | 17 | 98  | 2 | 1 | 9  | 54 | 30 | 169 |

|       |   |    |    |    |   |   |   |    |    |     |
|-------|---|----|----|----|---|---|---|----|----|-----|
| 8,025 | 3 | 16 | 17 | 97 | 2 | 1 | 9 | 52 | 31 | 166 |
| 8,026 | 3 | 11 | 17 | 89 | 2 | 1 | 9 | 48 | 31 | 149 |
| 8,027 | 3 | 11 | 17 | 89 | 2 | 1 | 9 | 48 | 31 | 149 |
| 8,028 | 3 | 9  | 17 | 85 | 2 | 1 | 9 | 47 | 31 | 142 |
| 8,029 | 3 | 9  | 17 | 85 | 2 | 1 | 9 | 47 | 31 | 142 |
| 8,030 | 3 | 9  | 17 | 85 | 2 | 1 | 9 | 47 | 31 | 142 |
| 8,031 | 3 | 9  | 18 | 85 | 2 | 1 | 9 | 49 | 32 | 144 |
| 8,032 | 3 | 9  | 18 | 82 | 2 | 1 | 9 | 48 | 32 | 140 |
| 8,033 | 3 | 9  | 18 | 82 | 2 | 2 | 9 | 48 | 32 | 141 |
| 8,034 | 3 | 9  | 17 | 86 | 2 | 2 | 9 | 47 | 31 | 144 |
| 8,035 | 3 | 9  | 17 | 87 | 2 | 2 | 9 | 47 | 31 | 145 |
| 8,036 | 3 | 9  | 17 | 90 | 2 | 2 | 9 | 52 | 31 | 153 |
| 8,037 | 3 | 8  | 17 | 87 | 2 | 2 | 9 | 49 | 31 | 146 |
| 8,038 | 3 | 8  | 17 | 88 | 2 | 2 | 9 | 49 | 31 | 147 |
| 8,039 | 3 | 8  | 17 | 87 | 2 | 2 | 9 | 49 | 31 | 146 |
| 8,040 | 3 | 9  | 17 | 88 | 2 | 2 | 9 | 49 | 31 | 148 |
| 8,041 | 3 | 9  | 17 | 88 | 1 | 2 | 9 | 50 | 30 | 149 |
| 8,042 | 3 | 5  | 17 | 78 | 1 | 2 | 9 | 31 | 30 | 116 |
| 8,043 | 3 | 5  | 16 | 78 | 1 | 2 | 9 | 29 | 29 | 114 |
| 8,044 | 3 | 5  | 16 | 78 | 1 | 2 | 9 | 29 | 29 | 114 |
| 8,045 | 3 | 2  | 16 | 45 | 1 | 3 | 9 | 17 | 29 | 67  |
| 8,046 | 3 | 2  | 16 | 35 | 1 | 3 | 9 | 16 | 29 | 56  |
| 8,047 | 3 | 2  | 16 | 34 | 1 | 3 | 9 | 16 | 29 | 55  |
| 8,048 | 2 | 2  | 16 | 34 | 1 | 3 | 9 | 16 | 28 | 55  |
| 8,049 | 2 | 3  | 16 | 26 | 1 | 3 | 9 | 13 | 28 | 45  |
| 8,050 | 1 | 10 | 15 | 61 | 1 | 6 | 9 | 34 | 26 | 111 |
| 8,051 | 1 | 10 | 13 | 66 | 1 | 6 | 8 | 36 | 23 | 118 |
| 8,052 | 1 | 10 | 12 | 67 | 1 | 6 | 7 | 34 | 21 | 117 |
| 8,053 | 1 | 10 | 10 | 68 | 1 | 6 | 7 | 35 | 19 | 119 |
| 8,054 | 1 | 10 | 5  | 72 | 1 | 6 | 5 | 37 | 12 | 125 |
| 8,055 | 1 | 10 | 4  | 72 | 1 | 6 | 2 | 37 | 8  | 125 |
| 8,056 | 1 | 9  | 4  | 71 | 1 | 6 | 2 | 37 | 8  | 123 |
| 8,057 | 1 | 14 | 4  | 83 | 1 | 6 | 2 | 42 | 8  | 145 |
| 8,058 | 1 | 14 | 4  | 85 | 1 | 6 | 2 | 43 | 8  | 148 |
| 8,059 | 1 | 14 | 4  | 91 | 1 | 7 | 2 | 46 | 8  | 158 |
| 8,060 | 1 | 19 | 4  | 96 | 1 | 7 | 2 | 51 | 8  | 173 |
| 8,061 | 1 | 19 | 4  | 96 | 1 | 7 | 2 | 51 | 8  | 173 |
| 8,062 | 1 | 19 | 5  | 96 | 1 | 7 | 2 | 51 | 9  | 173 |
| 8,063 | 1 | 19 | 5  | 97 | 1 | 7 | 2 | 51 | 9  | 174 |
| 8,064 | 2 | 19 | 7  | 97 | 1 | 7 | 2 | 51 | 12 | 174 |
| 8,065 | 2 | 19 | 7  | 97 | 1 | 7 | 2 | 51 | 12 | 174 |

|       |   |    |    |     |   |   |   |    |    |     |
|-------|---|----|----|-----|---|---|---|----|----|-----|
| 8,066 | 2 | 19 | 7  | 98  | 1 | 7 | 2 | 51 | 12 | 175 |
| 8,067 | 2 | 19 | 7  | 98  | 1 | 7 | 2 | 51 | 12 | 175 |
| 8,068 | 2 | 19 | 6  | 98  | 1 | 7 | 2 | 51 | 11 | 175 |
| 8,069 | 2 | 19 | 6  | 98  | 1 | 6 | 1 | 51 | 10 | 174 |
| 8,070 | 2 | 19 | 5  | 98  | 1 | 6 | 1 | 54 | 9  | 177 |
| 8,071 | 2 | 19 | 7  | 98  | 0 | 6 | 1 | 54 | 10 | 177 |
| 8,072 | 3 | 19 | 7  | 98  | 0 | 6 | 1 | 54 | 11 | 177 |
| 8,073 | 3 | 19 | 7  | 98  | 0 | 6 | 1 | 54 | 11 | 177 |
| 8,074 | 3 | 19 | 7  | 97  | 0 | 6 | 0 | 54 | 10 | 176 |
| 8,075 | 3 | 19 | 7  | 94  | 0 | 6 | 0 | 54 | 10 | 173 |
| 8,076 | 2 | 19 | 7  | 94  | 0 | 6 | 0 | 54 | 9  | 173 |
| 8,077 | 2 | 19 | 7  | 94  | 0 | 6 | 0 | 54 | 9  | 173 |
| 8,078 | 2 | 19 | 7  | 94  | 0 | 6 | 0 | 54 | 9  | 173 |
| 8,079 | 2 | 19 | 7  | 94  | 0 | 6 | 0 | 54 | 9  | 173 |
| 8,080 | 2 | 19 | 7  | 94  | 0 | 6 | 0 | 54 | 9  | 173 |
| 8,081 | 2 | 20 | 7  | 93  | 0 | 6 | 0 | 52 | 9  | 171 |
| 8,082 | 2 | 20 | 6  | 93  | 0 | 6 | 0 | 52 | 8  | 171 |
| 8,083 | 2 | 20 | 7  | 93  | 0 | 6 | 2 | 52 | 11 | 171 |
| 8,084 | 2 | 20 | 7  | 97  | 0 | 5 | 2 | 54 | 11 | 176 |
| 8,085 | 2 | 20 | 7  | 92  | 0 | 5 | 2 | 55 | 11 | 172 |
| 8,086 | 2 | 20 | 7  | 94  | 0 | 5 | 2 | 59 | 11 | 178 |
| 8,087 | 2 | 20 | 7  | 92  | 0 | 5 | 2 | 54 | 11 | 171 |
| 8,088 | 2 | 20 | 9  | 101 | 0 | 5 | 3 | 58 | 14 | 184 |
| 8,089 | 2 | 20 | 9  | 99  | 0 | 5 | 3 | 58 | 14 | 182 |
| 8,090 | 2 | 20 | 10 | 102 | 0 | 5 | 5 | 58 | 17 | 185 |
| 8,091 | 2 | 20 | 11 | 106 | 0 | 5 | 5 | 60 | 18 | 191 |
| 8,092 | 2 | 20 | 11 | 106 | 0 | 5 | 5 | 59 | 18 | 190 |
| 8,093 | 2 | 20 | 11 | 110 | 0 | 5 | 6 | 56 | 19 | 191 |
| 8,094 | 3 | 20 | 10 | 110 | 0 | 5 | 6 | 56 | 19 | 191 |
| 8,095 | 3 | 20 | 10 | 110 | 0 | 5 | 6 | 55 | 19 | 190 |
| 8,096 | 3 | 20 | 10 | 112 | 0 | 4 | 6 | 57 | 19 | 193 |
| 8,097 | 3 | 20 | 10 | 112 | 1 | 4 | 6 | 57 | 20 | 193 |
| 8,098 | 3 | 20 | 10 | 112 | 1 | 4 | 6 | 57 | 20 | 193 |
| 8,099 | 3 | 20 | 10 | 112 | 1 | 4 | 6 | 57 | 20 | 193 |
| 8,100 | 3 | 12 | 12 | 69  | 1 | 1 | 6 | 35 | 22 | 117 |
| 8,101 | 3 | 12 | 12 | 69  | 1 | 1 | 6 | 35 | 22 | 117 |
| 8,102 | 3 | 12 | 12 | 66  | 1 | 1 | 6 | 34 | 22 | 113 |
| 8,103 | 3 | 12 | 13 | 66  | 1 | 1 | 6 | 34 | 23 | 113 |
| 8,104 | 3 | 12 | 13 | 66  | 1 | 1 | 6 | 34 | 23 | 113 |
| 8,105 | 3 | 12 | 13 | 62  | 1 | 1 | 6 | 32 | 23 | 107 |
| 8,106 | 3 | 12 | 13 | 62  | 1 | 1 | 6 | 32 | 23 | 107 |

|       |   |    |    |    |   |   |    |    |    |     |
|-------|---|----|----|----|---|---|----|----|----|-----|
| 8,107 | 3 | 12 | 14 | 62 | 1 | 1 | 7  | 32 | 25 | 107 |
| 8,108 | 3 | 7  | 14 | 49 | 1 | 1 | 7  | 27 | 25 | 84  |
| 8,109 | 3 | 7  | 14 | 41 | 1 | 0 | 7  | 23 | 25 | 71  |
| 8,110 | 3 | 7  | 14 | 41 | 1 | 0 | 7  | 23 | 25 | 71  |
| 8,111 | 3 | 2  | 14 | 36 | 1 | 0 | 7  | 18 | 25 | 56  |
| 8,112 | 3 | 2  | 14 | 36 | 1 | 0 | 7  | 18 | 25 | 56  |
| 8,113 | 3 | 3  | 13 | 38 | 1 | 0 | 7  | 19 | 24 | 60  |
| 8,114 | 2 | 3  | 11 | 37 | 1 | 0 | 7  | 19 | 21 | 59  |
| 8,115 | 2 | 3  | 12 | 37 | 1 | 0 | 7  | 19 | 22 | 59  |
| 8,116 | 2 | 3  | 12 | 37 | 1 | 0 | 7  | 20 | 22 | 60  |
| 8,117 | 2 | 3  | 12 | 39 | 1 | 0 | 7  | 20 | 22 | 62  |
| 8,118 | 2 | 3  | 12 | 41 | 1 | 0 | 7  | 22 | 22 | 66  |
| 8,119 | 2 | 3  | 12 | 43 | 1 | 0 | 7  | 19 | 22 | 65  |
| 8,120 | 2 | 3  | 12 | 46 | 1 | 0 | 8  | 19 | 23 | 68  |
| 8,121 | 2 | 3  | 10 | 47 | 1 | 0 | 8  | 19 | 21 | 69  |
| 8,122 | 1 | 4  | 12 | 47 | 1 | 0 | 8  | 19 | 22 | 70  |
| 8,123 | 1 | 4  | 12 | 47 | 1 | 0 | 8  | 19 | 22 | 70  |
| 8,124 | 1 | 4  | 12 | 48 | 1 | 0 | 8  | 19 | 22 | 71  |
| 8,125 | 1 | 4  | 12 | 48 | 1 | 0 | 8  | 19 | 22 | 71  |
| 8,126 | 1 | 4  | 12 | 48 | 1 | 0 | 9  | 19 | 23 | 71  |
| 8,127 | 1 | 4  | 12 | 48 | 1 | 0 | 9  | 19 | 23 | 71  |
| 8,128 | 1 | 4  | 12 | 48 | 1 | 0 | 11 | 19 | 25 | 71  |
| 8,129 | 1 | 4  | 12 | 48 | 1 | 0 | 11 | 19 | 25 | 71  |
| 8,130 | 1 | 5  | 12 | 48 | 1 | 0 | 11 | 19 | 25 | 72  |
| 8,131 | 1 | 4  | 12 | 48 | 1 | 0 | 11 | 19 | 25 | 71  |
| 8,132 | 1 | 4  | 13 | 48 | 1 | 0 | 11 | 19 | 26 | 71  |
| 8,133 | 1 | 4  | 14 | 48 | 1 | 0 | 9  | 19 | 25 | 71  |
| 8,134 | 1 | 4  | 14 | 48 | 1 | 0 | 9  | 19 | 25 | 71  |
| 8,135 | 1 | 4  | 14 | 47 | 1 | 0 | 9  | 19 | 25 | 70  |
| 8,136 | 1 | 4  | 14 | 47 | 1 | 0 | 9  | 18 | 25 | 69  |
| 8,137 | 1 | 4  | 15 | 44 | 1 | 0 | 12 | 14 | 29 | 62  |
| 8,138 | 1 | 4  | 14 | 43 | 1 | 0 | 13 | 14 | 29 | 61  |
| 8,139 | 1 | 4  | 14 | 34 | 1 | 0 | 12 | 10 | 28 | 48  |
| 8,140 | 1 | 4  | 13 | 30 | 1 | 0 | 10 | 10 | 25 | 44  |
| 8,141 | 1 | 4  | 13 | 30 | 1 | 0 | 10 | 10 | 25 | 44  |
| 8,142 | 1 | 3  | 12 | 25 | 1 | 0 | 10 | 8  | 24 | 36  |
| 8,143 | 1 | 3  | 12 | 25 | 1 | 0 | 9  | 8  | 23 | 36  |
| 8,144 | 0 | 3  | 12 | 22 | 1 | 0 | 9  | 8  | 22 | 33  |
| 8,145 | 0 | 3  | 13 | 22 | 1 | 0 | 9  | 8  | 23 | 33  |
| 8,146 | 0 | 3  | 13 | 20 | 1 | 0 | 9  | 7  | 23 | 30  |
| 8,147 | 0 | 3  | 13 | 21 | 1 | 0 | 9  | 7  | 23 | 31  |

|       |   |   |    |    |   |   |    |    |    |    |
|-------|---|---|----|----|---|---|----|----|----|----|
| 8,148 | 0 | 3 | 16 | 22 | 0 | 0 | 11 | 12 | 27 | 37 |
| 8,149 | 0 | 3 | 16 | 22 | 0 | 0 | 11 | 12 | 27 | 37 |
| 8,150 | 0 | 3 | 16 | 22 | 0 | 0 | 11 | 12 | 27 | 37 |
| 8,151 | 0 | 3 | 14 | 22 | 0 | 0 | 11 | 12 | 25 | 37 |
| 8,152 | 0 | 3 | 14 | 22 | 0 | 0 | 11 | 12 | 25 | 37 |
| 8,153 | 0 | 3 | 14 | 23 | 0 | 0 | 11 | 13 | 25 | 39 |
| 8,154 | 0 | 4 | 13 | 23 | 0 | 0 | 11 | 14 | 24 | 41 |
| 8,155 | 0 | 4 | 13 | 24 | 0 | 0 | 11 | 17 | 24 | 45 |
| 8,156 | 0 | 4 | 13 | 26 | 0 | 0 | 11 | 19 | 24 | 49 |
| 8,157 | 0 | 4 | 13 | 26 | 0 | 0 | 11 | 19 | 24 | 49 |
| 8,158 | 0 | 4 | 12 | 26 | 0 | 0 | 10 | 20 | 22 | 50 |
| 8,159 | 0 | 4 | 12 | 26 | 0 | 0 | 10 | 20 | 22 | 50 |
| 8,160 | 2 | 5 | 12 | 26 | 0 | 0 | 10 | 20 | 24 | 51 |
| 8,161 | 2 | 5 | 12 | 26 | 0 | 0 | 10 | 20 | 24 | 51 |
| 8,162 | 2 | 5 | 12 | 26 | 0 | 0 | 10 | 20 | 24 | 51 |
| 8,163 | 2 | 4 | 12 | 24 | 0 | 0 | 10 | 19 | 24 | 47 |
| 8,164 | 2 | 4 | 11 | 24 | 0 | 0 | 10 | 19 | 23 | 47 |
| 8,165 | 2 | 4 | 11 | 24 | 0 | 0 | 10 | 19 | 23 | 47 |
| 8,166 | 2 | 4 | 11 | 25 | 0 | 0 | 10 | 19 | 23 | 48 |
| 8,167 | 2 | 4 | 11 | 26 | 0 | 0 | 10 | 19 | 23 | 49 |
| 8,168 | 2 | 4 | 11 | 23 | 0 | 0 | 10 | 19 | 23 | 46 |
| 8,169 | 2 | 4 | 11 | 21 | 0 | 0 | 10 | 17 | 23 | 42 |
| 8,170 | 2 | 4 | 11 | 19 | 0 | 0 | 10 | 17 | 23 | 40 |
| 8,171 | 2 | 4 | 11 | 15 | 0 | 0 | 9  | 17 | 22 | 36 |
| 8,172 | 2 | 4 | 9  | 15 | 0 | 0 | 9  | 17 | 20 | 36 |
| 8,173 | 2 | 3 | 9  | 15 | 0 | 0 | 9  | 17 | 20 | 35 |
| 8,174 | 2 | 3 | 9  | 16 | 0 | 0 | 9  | 18 | 20 | 37 |
| 8,175 | 2 | 3 | 9  | 15 | 0 | 0 | 9  | 21 | 20 | 39 |
| 8,176 | 2 | 3 | 9  | 15 | 0 | 0 | 9  | 21 | 20 | 39 |
| 8,177 | 2 | 4 | 9  | 26 | 0 | 3 | 8  | 24 | 19 | 57 |
| 8,178 | 2 | 4 | 9  | 26 | 0 | 3 | 6  | 25 | 17 | 58 |
| 8,179 | 2 | 4 | 9  | 31 | 0 | 3 | 6  | 31 | 17 | 69 |
| 8,180 | 2 | 4 | 9  | 31 | 0 | 3 | 6  | 31 | 17 | 69 |
| 8,181 | 2 | 3 | 9  | 36 | 0 | 3 | 6  | 32 | 17 | 74 |
| 8,182 | 2 | 5 | 9  | 38 | 0 | 6 | 6  | 38 | 17 | 87 |
| 8,183 | 2 | 5 | 8  | 39 | 0 | 6 | 6  | 38 | 16 | 88 |
| 8,184 | 2 | 5 | 7  | 41 | 0 | 6 | 6  | 38 | 15 | 90 |
| 8,185 | 2 | 5 | 7  | 41 | 0 | 6 | 6  | 39 | 15 | 91 |
| 8,186 | 2 | 5 | 6  | 38 | 0 | 6 | 5  | 37 | 13 | 86 |
| 8,187 | 2 | 5 | 6  | 38 | 0 | 6 | 5  | 37 | 13 | 86 |
| 8,188 | 2 | 5 | 6  | 38 | 0 | 6 | 3  | 37 | 11 | 86 |



|       |   |   |    |    |   |   |   |    |    |    |
|-------|---|---|----|----|---|---|---|----|----|----|
| 8,189 | 2 | 5 | 6  | 38 | 0 | 6 | 2 | 37 | 10 | 86 |
| 8,190 | 2 | 5 | 5  | 38 | 0 | 6 | 2 | 37 | 9  | 86 |
| 8,191 | 2 | 5 | 5  | 39 | 0 | 6 | 2 | 37 | 9  | 87 |
| 8,192 | 2 | 5 | 5  | 39 | 0 | 6 | 2 | 37 | 9  | 87 |
| 8,193 | 2 | 5 | 5  | 38 | 0 | 6 | 2 | 38 | 9  | 87 |
| 8,194 | 2 | 5 | 5  | 36 | 0 | 6 | 2 | 38 | 9  | 85 |
| 8,195 | 2 | 5 | 5  | 36 | 0 | 6 | 2 | 39 | 9  | 86 |
| 8,196 | 2 | 5 | 4  | 36 | 0 | 6 | 2 | 40 | 8  | 87 |
| 8,197 | 2 | 5 | 5  | 36 | 0 | 6 | 2 | 40 | 9  | 87 |
| 8,198 | 2 | 5 | 5  | 35 | 0 | 6 | 2 | 40 | 9  | 86 |
| 8,199 | 2 | 5 | 2  | 34 | 0 | 6 | 0 | 35 | 4  | 80 |
| 8,200 | 2 | 6 | 2  | 35 | 0 | 6 | 0 | 35 | 4  | 82 |
| 8,201 | 2 | 6 | 2  | 36 | 0 | 6 | 0 | 35 | 4  | 83 |
| 8,202 | 2 | 6 | 2  | 36 | 0 | 6 | 0 | 35 | 4  | 83 |
| 8,203 | 2 | 6 | 2  | 35 | 0 | 6 | 0 | 35 | 4  | 82 |
| 8,204 | 2 | 6 | 2  | 36 | 0 | 6 | 0 | 35 | 4  | 83 |
| 8,205 | 2 | 5 | 3  | 35 | 0 | 6 | 2 | 33 | 7  | 79 |
| 8,206 | 2 | 5 | 3  | 33 | 0 | 6 | 3 | 31 | 8  | 75 |
| 8,207 | 2 | 5 | 3  | 33 | 0 | 6 | 5 | 31 | 10 | 75 |
| 8,208 | 2 | 5 | 3  | 33 | 0 | 6 | 5 | 31 | 10 | 75 |
| 8,209 | 2 | 5 | 3  | 33 | 0 | 6 | 5 | 30 | 10 | 74 |
| 8,210 | 2 | 5 | 3  | 33 | 0 | 6 | 5 | 30 | 10 | 74 |
| 8,211 | 0 | 4 | 3  | 33 | 0 | 6 | 5 | 30 | 8  | 73 |
| 8,212 | 0 | 4 | 3  | 33 | 0 | 6 | 5 | 30 | 8  | 73 |
| 8,213 | 0 | 4 | 6  | 33 | 0 | 6 | 6 | 30 | 12 | 73 |
| 8,214 | 0 | 4 | 6  | 33 | 0 | 6 | 6 | 30 | 12 | 73 |
| 8,215 | 0 | 4 | 7  | 33 | 0 | 6 | 6 | 30 | 13 | 73 |
| 8,216 | 0 | 4 | 7  | 32 | 0 | 6 | 6 | 30 | 13 | 72 |
| 8,217 | 0 | 4 | 7  | 32 | 0 | 6 | 6 | 30 | 13 | 72 |
| 8,218 | 0 | 4 | 7  | 31 | 0 | 6 | 6 | 29 | 13 | 70 |
| 8,219 | 0 | 4 | 8  | 31 | 0 | 6 | 6 | 29 | 14 | 70 |
| 8,220 | 0 | 4 | 8  | 31 | 0 | 6 | 6 | 30 | 14 | 71 |
| 8,221 | 0 | 4 | 8  | 31 | 0 | 6 | 6 | 30 | 14 | 71 |
| 8,222 | 0 | 4 | 8  | 32 | 0 | 6 | 6 | 30 | 14 | 72 |
| 8,223 | 0 | 5 | 8  | 34 | 0 | 6 | 6 | 32 | 14 | 77 |
| 8,224 | 0 | 5 | 8  | 34 | 0 | 6 | 7 | 32 | 15 | 77 |
| 8,225 | 0 | 5 | 8  | 33 | 0 | 6 | 7 | 31 | 15 | 75 |
| 8,226 | 0 | 5 | 10 | 33 | 0 | 6 | 7 | 29 | 17 | 73 |
| 8,227 | 0 | 5 | 10 | 39 | 0 | 6 | 7 | 30 | 17 | 80 |
| 8,228 | 1 | 4 | 11 | 29 | 0 | 3 | 7 | 29 | 19 | 65 |
| 8,229 | 1 | 4 | 11 | 30 | 0 | 3 | 7 | 28 | 19 | 65 |

|       |   |   |    |    |   |   |    |    |    |     |
|-------|---|---|----|----|---|---|----|----|----|-----|
| 8,230 | 1 | 4 | 11 | 26 | 0 | 3 | 7  | 22 | 19 | 55  |
| 8,231 | 1 | 4 | 11 | 21 | 0 | 3 | 7  | 21 | 19 | 49  |
| 8,232 | 1 | 2 | 11 | 19 | 0 | 0 | 7  | 15 | 19 | 36  |
| 8,233 | 1 | 2 | 10 | 18 | 0 | 0 | 7  | 15 | 18 | 35  |
| 8,234 | 1 | 2 | 10 | 16 | 0 | 0 | 7  | 14 | 18 | 32  |
| 8,235 | 1 | 2 | 11 | 16 | 0 | 0 | 7  | 14 | 19 | 32  |
| 8,236 | 1 | 2 | 11 | 16 | 0 | 0 | 7  | 13 | 19 | 31  |
| 8,237 | 1 | 2 | 11 | 16 | 0 | 0 | 8  | 13 | 20 | 31  |
| 8,238 | 1 | 2 | 11 | 16 | 1 | 0 | 9  | 13 | 22 | 31  |
| 8,239 | 2 | 2 | 13 | 16 | 1 | 1 | 9  | 13 | 25 | 32  |
| 8,240 | 2 | 2 | 13 | 16 | 1 | 1 | 9  | 13 | 25 | 32  |
| 8,241 | 2 | 2 | 13 | 15 | 1 | 1 | 9  | 13 | 25 | 31  |
| 8,242 | 2 | 2 | 13 | 15 | 1 | 1 | 9  | 13 | 25 | 31  |
| 8,243 | 2 | 2 | 13 | 15 | 1 | 1 | 9  | 12 | 25 | 30  |
| 8,244 | 2 | 2 | 13 | 15 | 1 | 1 | 9  | 12 | 25 | 30  |
| 8,245 | 2 | 2 | 13 | 15 | 1 | 1 | 9  | 11 | 25 | 29  |
| 8,246 | 2 | 3 | 13 | 16 | 1 | 1 | 9  | 11 | 25 | 31  |
| 8,247 | 2 | 3 | 13 | 16 | 1 | 1 | 9  | 10 | 25 | 30  |
| 8,248 | 2 | 3 | 12 | 16 | 1 | 1 | 9  | 10 | 24 | 30  |
| 8,249 | 2 | 2 | 12 | 15 | 1 | 1 | 10 | 12 | 25 | 30  |
| 8,250 | 2 | 3 | 12 | 19 | 1 | 2 | 10 | 13 | 25 | 37  |
| 8,251 | 2 | 4 | 12 | 35 | 1 | 2 | 10 | 22 | 25 | 63  |
| 8,252 | 2 | 4 | 12 | 36 | 1 | 2 | 10 | 22 | 25 | 64  |
| 8,253 | 2 | 6 | 12 | 38 | 1 | 2 | 10 | 22 | 25 | 68  |
| 8,254 | 2 | 6 | 12 | 38 | 1 | 2 | 10 | 19 | 25 | 65  |
| 8,255 | 2 | 6 | 11 | 40 | 1 | 2 | 10 | 19 | 24 | 67  |
| 8,256 | 2 | 6 | 11 | 40 | 1 | 2 | 7  | 20 | 21 | 68  |
| 8,257 | 2 | 6 | 12 | 42 | 1 | 2 | 7  | 20 | 22 | 70  |
| 8,258 | 2 | 7 | 13 | 58 | 1 | 3 | 5  | 25 | 21 | 93  |
| 8,259 | 2 | 7 | 13 | 60 | 1 | 3 | 5  | 25 | 21 | 95  |
| 8,260 | 2 | 7 | 13 | 60 | 1 | 3 | 5  | 25 | 21 | 95  |
| 8,261 | 2 | 7 | 14 | 61 | 1 | 3 | 5  | 26 | 22 | 97  |
| 8,262 | 2 | 7 | 14 | 61 | 1 | 3 | 6  | 26 | 23 | 97  |
| 8,263 | 2 | 7 | 12 | 61 | 1 | 3 | 5  | 26 | 20 | 97  |
| 8,264 | 2 | 7 | 12 | 61 | 1 | 3 | 5  | 26 | 20 | 97  |
| 8,265 | 2 | 7 | 14 | 61 | 2 | 3 | 7  | 28 | 25 | 99  |
| 8,266 | 2 | 7 | 13 | 62 | 2 | 3 | 7  | 29 | 24 | 101 |
| 8,267 | 2 | 7 | 13 | 62 | 2 | 3 | 7  | 29 | 24 | 101 |
| 8,268 | 2 | 7 | 13 | 62 | 2 | 3 | 7  | 29 | 24 | 101 |
| 8,269 | 2 | 7 | 13 | 62 | 2 | 3 | 8  | 29 | 25 | 101 |
| 8,270 | 2 | 7 | 12 | 62 | 2 | 3 | 8  | 28 | 24 | 100 |

|       |   |   |    |    |   |   |    |    |    |     |
|-------|---|---|----|----|---|---|----|----|----|-----|
| 8,271 | 2 | 7 | 12 | 62 | 2 | 3 | 8  | 29 | 24 | 101 |
| 8,272 | 2 | 7 | 12 | 66 | 2 | 3 | 8  | 41 | 24 | 117 |
| 8,273 | 2 | 7 | 12 | 66 | 2 | 3 | 8  | 41 | 24 | 117 |
| 8,274 | 2 | 6 | 13 | 64 | 2 | 3 | 9  | 39 | 26 | 112 |
| 8,275 | 2 | 6 | 13 | 64 | 2 | 3 | 9  | 39 | 26 | 112 |
| 8,276 | 2 | 6 | 13 | 58 | 2 | 3 | 10 | 37 | 27 | 104 |
| 8,277 | 2 | 6 | 11 | 58 | 2 | 3 | 10 | 37 | 25 | 104 |
| 8,278 | 1 | 6 | 10 | 58 | 2 | 3 | 10 | 37 | 23 | 104 |
| 8,279 | 1 | 6 | 10 | 57 | 2 | 3 | 11 | 36 | 24 | 102 |
| 8,280 | 1 | 6 | 11 | 56 | 2 | 3 | 12 | 36 | 26 | 101 |
| 8,281 | 1 | 6 | 11 | 55 | 2 | 3 | 12 | 36 | 26 | 100 |
| 8,282 | 1 | 6 | 11 | 55 | 2 | 3 | 12 | 36 | 26 | 100 |
| 8,283 | 1 | 6 | 11 | 55 | 2 | 3 | 12 | 36 | 26 | 100 |
| 8,284 | 1 | 6 | 11 | 55 | 2 | 3 | 12 | 36 | 26 | 100 |
| 8,285 | 1 | 6 | 11 | 56 | 2 | 3 | 12 | 36 | 26 | 101 |
| 8,286 | 1 | 7 | 10 | 59 | 2 | 4 | 12 | 43 | 25 | 113 |
| 8,287 | 1 | 7 | 11 | 62 | 2 | 4 | 12 | 44 | 26 | 117 |
| 8,288 | 1 | 7 | 11 | 65 | 2 | 4 | 11 | 44 | 25 | 120 |
| 8,289 | 1 | 7 | 11 | 65 | 1 | 4 | 10 | 44 | 23 | 120 |
| 8,290 | 0 | 7 | 9  | 65 | 1 | 3 | 10 | 44 | 20 | 119 |
| 8,291 | 0 | 8 | 9  | 65 | 1 | 3 | 10 | 44 | 20 | 120 |
| 8,292 | 0 | 8 | 9  | 67 | 1 | 3 | 10 | 44 | 20 | 122 |
| 8,293 | 0 | 8 | 9  | 67 | 1 | 3 | 10 | 44 | 20 | 122 |
| 8,294 | 0 | 8 | 9  | 67 | 1 | 3 | 10 | 44 | 20 | 122 |
| 8,295 | 0 | 8 | 9  | 67 | 1 | 3 | 10 | 44 | 20 | 122 |
| 8,296 | 0 | 7 | 9  | 66 | 1 | 3 | 10 | 44 | 20 | 120 |
| 8,297 | 0 | 7 | 9  | 66 | 1 | 3 | 10 | 44 | 20 | 120 |
| 8,298 | 0 | 7 | 9  | 66 | 1 | 3 | 10 | 44 | 20 | 120 |
| 8,299 | 0 | 7 | 10 | 67 | 1 | 3 | 9  | 42 | 20 | 119 |
| 8,300 | 0 | 6 | 10 | 63 | 1 | 2 | 9  | 41 | 20 | 112 |
| 8,301 | 0 | 5 | 10 | 47 | 1 | 2 | 9  | 32 | 20 | 86  |
| 8,302 | 0 | 5 | 10 | 45 | 1 | 2 | 9  | 32 | 20 | 84  |
| 8,303 | 0 | 3 | 10 | 43 | 1 | 2 | 9  | 32 | 20 | 80  |
| 8,304 | 0 | 3 | 10 | 42 | 1 | 2 | 9  | 32 | 20 | 79  |
| 8,305 | 0 | 3 | 10 | 42 | 1 | 2 | 9  | 32 | 20 | 79  |
| 8,306 | 0 | 3 | 11 | 40 | 2 | 2 | 9  | 31 | 22 | 76  |
| 8,307 | 0 | 3 | 12 | 38 | 2 | 2 | 9  | 31 | 23 | 74  |
| 8,308 | 0 | 3 | 11 | 38 | 2 | 2 | 9  | 31 | 22 | 74  |
| 8,309 | 0 | 2 | 10 | 22 | 2 | 1 | 9  | 26 | 21 | 51  |
| 8,310 | 0 | 2 | 10 | 20 | 2 | 1 | 9  | 26 | 21 | 49  |
| 8,311 | 0 | 2 | 10 | 20 | 2 | 1 | 9  | 27 | 21 | 50  |

|       |   |    |    |    |   |   |   |    |    |     |
|-------|---|----|----|----|---|---|---|----|----|-----|
| 8,312 | 0 | 2  | 9  | 19 | 2 | 1 | 9 | 26 | 20 | 48  |
| 8,313 | 0 | 2  | 9  | 19 | 2 | 1 | 8 | 26 | 19 | 48  |
| 8,314 | 0 | 5  | 9  | 23 | 2 | 2 | 8 | 31 | 19 | 61  |
| 8,315 | 0 | 7  | 7  | 23 | 1 | 2 | 6 | 33 | 14 | 65  |
| 8,316 | 0 | 7  | 7  | 23 | 1 | 2 | 6 | 32 | 14 | 64  |
| 8,317 | 0 | 9  | 7  | 39 | 1 | 2 | 6 | 45 | 14 | 95  |
| 8,318 | 0 | 13 | 8  | 50 | 1 | 2 | 6 | 51 | 15 | 116 |
| 8,319 | 0 | 13 | 8  | 54 | 1 | 3 | 6 | 55 | 15 | 125 |
| 8,320 | 0 | 13 | 8  | 54 | 1 | 3 | 5 | 55 | 14 | 125 |
| 8,321 | 0 | 13 | 7  | 54 | 1 | 3 | 3 | 54 | 11 | 124 |
| 8,322 | 0 | 15 | 7  | 58 | 1 | 3 | 3 | 69 | 11 | 145 |
| 8,323 | 0 | 15 | 7  | 56 | 1 | 3 | 3 | 58 | 11 | 132 |
| 8,324 | 0 | 15 | 8  | 56 | 1 | 3 | 4 | 59 | 13 | 133 |
| 8,325 | 0 | 16 | 8  | 58 | 1 | 3 | 4 | 61 | 13 | 138 |
| 8,326 | 0 | 16 | 8  | 63 | 1 | 3 | 4 | 61 | 13 | 143 |
| 8,327 | 0 | 16 | 8  | 64 | 2 | 3 | 3 | 61 | 13 | 144 |
| 8,328 | 0 | 16 | 9  | 64 | 3 | 3 | 5 | 62 | 17 | 145 |
| 8,329 | 0 | 16 | 10 | 64 | 3 | 3 | 5 | 61 | 18 | 144 |
| 8,330 | 0 | 16 | 9  | 65 | 3 | 3 | 5 | 61 | 17 | 145 |
| 8,331 | 0 | 16 | 11 | 66 | 3 | 3 | 7 | 61 | 21 | 146 |
| 8,332 | 0 | 16 | 11 | 66 | 3 | 3 | 7 | 61 | 21 | 146 |
| 8,333 | 0 | 16 | 11 | 66 | 3 | 3 | 8 | 61 | 22 | 146 |
| 8,334 | 0 | 16 | 11 | 67 | 3 | 3 | 8 | 61 | 22 | 147 |
| 8,335 | 0 | 16 | 11 | 68 | 3 | 3 | 8 | 61 | 22 | 148 |
| 8,336 | 0 | 16 | 11 | 67 | 3 | 3 | 8 | 61 | 22 | 147 |
| 8,337 | 0 | 15 | 11 | 61 | 3 | 2 | 8 | 53 | 22 | 131 |
| 8,338 | 0 | 15 | 10 | 61 | 3 | 2 | 8 | 53 | 21 | 131 |
| 8,339 | 0 | 15 | 10 | 58 | 3 | 2 | 8 | 53 | 21 | 128 |
| 8,340 | 0 | 15 | 10 | 59 | 3 | 2 | 8 | 53 | 21 | 129 |
| 8,341 | 0 | 16 | 10 | 59 | 3 | 2 | 8 | 54 | 21 | 131 |
| 8,342 | 0 | 15 | 10 | 61 | 3 | 2 | 8 | 55 | 21 | 133 |
| 8,343 | 0 | 15 | 10 | 61 | 3 | 2 | 8 | 55 | 21 | 133 |
| 8,344 | 0 | 15 | 10 | 62 | 3 | 2 | 8 | 55 | 21 | 134 |
| 8,345 | 0 | 20 | 10 | 73 | 3 | 3 | 8 | 63 | 21 | 159 |
| 8,346 | 0 | 21 | 10 | 73 | 3 | 3 | 8 | 64 | 21 | 161 |
| 8,347 | 0 | 21 | 10 | 74 | 3 | 3 | 9 | 65 | 22 | 163 |
| 8,348 | 0 | 21 | 10 | 76 | 3 | 3 | 9 | 71 | 22 | 171 |
| 8,349 | 0 | 21 | 9  | 78 | 3 | 3 | 9 | 72 | 21 | 174 |
| 8,350 | 0 | 22 | 9  | 82 | 3 | 3 | 9 | 76 | 21 | 183 |
| 8,351 | 0 | 23 | 9  | 83 | 3 | 3 | 9 | 77 | 21 | 186 |
| 8,352 | 0 | 23 | 10 | 83 | 3 | 3 | 9 | 77 | 22 | 186 |

|       |   |    |    |     |   |    |    |     |    |     |
|-------|---|----|----|-----|---|----|----|-----|----|-----|
| 8,353 | 0 | 23 | 10 | 88  | 3 | 4  | 9  | 82  | 22 | 197 |
| 8,354 | 0 | 23 | 10 | 95  | 3 | 4  | 9  | 94  | 22 | 216 |
| 8,355 | 0 | 23 | 10 | 97  | 3 | 4  | 9  | 95  | 22 | 219 |
| 8,356 | 0 | 23 | 10 | 98  | 3 | 4  | 9  | 98  | 22 | 223 |
| 8,357 | 0 | 23 | 9  | 109 | 2 | 4  | 9  | 106 | 20 | 242 |
| 8,358 | 0 | 23 | 8  | 110 | 2 | 4  | 9  | 106 | 19 | 243 |
| 8,359 | 0 | 23 | 8  | 114 | 2 | 4  | 9  | 106 | 19 | 247 |
| 8,360 | 0 | 23 | 8  | 114 | 2 | 4  | 9  | 109 | 19 | 250 |
| 8,361 | 0 | 23 | 8  | 114 | 2 | 4  | 11 | 109 | 21 | 250 |
| 8,362 | 0 | 24 | 8  | 115 | 2 | 4  | 14 | 109 | 24 | 252 |
| 8,363 | 0 | 21 | 11 | 112 | 2 | 3  | 14 | 104 | 27 | 240 |
| 8,364 | 0 | 21 | 11 | 113 | 2 | 4  | 14 | 105 | 27 | 243 |
| 8,365 | 0 | 21 | 10 | 113 | 2 | 4  | 14 | 105 | 26 | 243 |
| 8,366 | 0 | 19 | 13 | 113 | 2 | 4  | 16 | 103 | 31 | 239 |
| 8,367 | 0 | 17 | 13 | 96  | 2 | 4  | 17 | 88  | 32 | 205 |
| 8,368 | 0 | 17 | 13 | 97  | 2 | 4  | 17 | 89  | 32 | 207 |
| 8,369 | 0 | 13 | 12 | 87  | 2 | 4  | 17 | 84  | 31 | 188 |
| 8,370 | 0 | 14 | 12 | 84  | 2 | 3  | 17 | 80  | 31 | 181 |
| 8,371 | 0 | 14 | 12 | 83  | 2 | 3  | 17 | 80  | 31 | 180 |
| 8,372 | 0 | 12 | 12 | 79  | 2 | 3  | 17 | 66  | 31 | 160 |
| 8,373 | 0 | 12 | 12 | 80  | 2 | 3  | 17 | 66  | 31 | 161 |
| 8,374 | 0 | 14 | 12 | 86  | 2 | 3  | 17 | 69  | 31 | 172 |
| 8,375 | 0 | 14 | 11 | 111 | 2 | 6  | 16 | 79  | 29 | 210 |
| 8,376 | 0 | 14 | 11 | 124 | 2 | 7  | 16 | 86  | 29 | 231 |
| 8,377 | 0 | 14 | 11 | 150 | 2 | 8  | 16 | 96  | 29 | 268 |
| 8,378 | 0 | 15 | 11 | 178 | 1 | 9  | 16 | 108 | 28 | 310 |
| 8,379 | 1 | 16 | 11 | 186 | 0 | 10 | 14 | 114 | 26 | 326 |
| 8,380 | 1 | 18 | 10 | 237 | 0 | 13 | 13 | 127 | 24 | 395 |
| 8,381 | 1 | 18 | 9  | 237 | 0 | 13 | 10 | 127 | 20 | 395 |
| 8,382 | 2 | 18 | 8  | 238 | 0 | 13 | 10 | 127 | 20 | 396 |
| 8,383 | 2 | 18 | 8  | 238 | 0 | 13 | 10 | 127 | 20 | 396 |
| 8,384 | 2 | 19 | 9  | 239 | 0 | 13 | 9  | 127 | 20 | 398 |
| 8,385 | 2 | 19 | 9  | 248 | 0 | 13 | 9  | 135 | 20 | 415 |
| 8,386 | 2 | 19 | 9  | 248 | 0 | 13 | 9  | 135 | 20 | 415 |
| 8,387 | 2 | 19 | 9  | 250 | 0 | 13 | 9  | 140 | 20 | 422 |
| 8,388 | 2 | 19 | 9  | 258 | 0 | 13 | 9  | 145 | 20 | 435 |
| 8,389 | 2 | 23 | 9  | 270 | 0 | 13 | 9  | 150 | 20 | 456 |
| 8,390 | 2 | 23 | 9  | 272 | 0 | 15 | 9  | 152 | 20 | 462 |
| 8,391 | 2 | 23 | 9  | 274 | 0 | 15 | 9  | 153 | 20 | 465 |
| 8,392 | 2 | 24 | 9  | 275 | 0 | 15 | 9  | 153 | 20 | 467 |
| 8,393 | 2 | 24 | 9  | 273 | 0 | 15 | 9  | 152 | 20 | 464 |

|       |   |    |    |     |   |    |    |     |    |     |
|-------|---|----|----|-----|---|----|----|-----|----|-----|
| 8,394 | 2 | 24 | 9  | 271 | 0 | 15 | 11 | 153 | 22 | 463 |
| 8,395 | 2 | 24 | 9  | 274 | 0 | 15 | 11 | 153 | 22 | 466 |
| 8,396 | 2 | 19 | 9  | 263 | 0 | 14 | 11 | 145 | 22 | 441 |
| 8,397 | 2 | 19 | 9  | 266 | 0 | 15 | 13 | 147 | 24 | 447 |
| 8,398 | 2 | 19 | 10 | 281 | 0 | 15 | 14 | 151 | 26 | 466 |
| 8,399 | 2 | 19 | 10 | 280 | 0 | 15 | 14 | 147 | 26 | 461 |
| 8,400 | 2 | 20 | 9  | 293 | 0 | 15 | 14 | 151 | 25 | 479 |
| 8,401 | 2 | 19 | 9  | 289 | 0 | 15 | 14 | 147 | 25 | 470 |
| 8,402 | 2 | 18 | 9  | 295 | 0 | 15 | 14 | 147 | 25 | 475 |
| 8,403 | 2 | 18 | 9  | 292 | 0 | 14 | 14 | 142 | 25 | 466 |
| 8,404 | 2 | 18 | 9  | 291 | 0 | 14 | 14 | 142 | 25 | 465 |
| 8,405 | 2 | 19 | 9  | 286 | 0 | 14 | 14 | 131 | 25 | 450 |
| 8,406 | 2 | 19 | 9  | 284 | 0 | 14 | 14 | 130 | 25 | 447 |
| 8,407 | 2 | 19 | 9  | 283 | 0 | 14 | 14 | 127 | 25 | 443 |
| 8,408 | 2 | 19 | 9  | 272 | 0 | 14 | 14 | 119 | 25 | 424 |
| 8,409 | 2 | 19 | 9  | 270 | 0 | 14 | 14 | 119 | 25 | 422 |
| 8,410 | 2 | 19 | 11 | 267 | 0 | 14 | 19 | 119 | 32 | 419 |
| 8,411 | 2 | 19 | 11 | 268 | 0 | 14 | 17 | 115 | 30 | 416 |
| 8,412 | 2 | 19 | 11 | 268 | 0 | 14 | 15 | 115 | 28 | 416 |
| 8,413 | 2 | 18 | 11 | 267 | 0 | 14 | 14 | 114 | 27 | 413 |
| 8,414 | 3 | 18 | 11 | 266 | 0 | 15 | 17 | 114 | 31 | 413 |
| 8,415 | 3 | 18 | 11 | 265 | 0 | 14 | 17 | 113 | 31 | 410 |
| 8,416 | 3 | 19 | 8  | 265 | 0 | 14 | 15 | 113 | 26 | 411 |
| 8,417 | 3 | 19 | 8  | 265 | 0 | 14 | 15 | 113 | 26 | 411 |
| 8,418 | 3 | 19 | 8  | 265 | 0 | 14 | 14 | 113 | 25 | 411 |
| 8,419 | 3 | 19 | 8  | 264 | 0 | 14 | 14 | 112 | 25 | 409 |
| 8,420 | 3 | 19 | 8  | 263 | 0 | 14 | 14 | 111 | 25 | 407 |
| 8,421 | 3 | 18 | 8  | 263 | 0 | 14 | 14 | 111 | 25 | 406 |
| 8,422 | 3 | 18 | 8  | 263 | 0 | 14 | 14 | 110 | 25 | 405 |
| 8,423 | 3 | 18 | 8  | 263 | 0 | 14 | 14 | 110 | 25 | 405 |
| 8,424 | 3 | 16 | 8  | 254 | 0 | 14 | 14 | 106 | 25 | 390 |
| 8,425 | 3 | 16 | 10 | 254 | 0 | 14 | 14 | 106 | 27 | 390 |
| 8,426 | 3 | 15 | 10 | 215 | 1 | 10 | 14 | 87  | 28 | 327 |
| 8,427 | 3 | 15 | 10 | 182 | 1 | 9  | 14 | 77  | 28 | 283 |
| 8,428 | 3 | 11 | 10 | 96  | 1 | 4  | 14 | 46  | 28 | 157 |
| 8,429 | 3 | 11 | 10 | 97  | 1 | 4  | 14 | 46  | 28 | 158 |
| 8,430 | 2 | 11 | 9  | 96  | 1 | 4  | 14 | 45  | 26 | 156 |
| 8,431 | 2 | 11 | 9  | 95  | 1 | 4  | 14 | 45  | 26 | 155 |
| 8,432 | 1 | 11 | 9  | 95  | 1 | 4  | 14 | 45  | 25 | 155 |
| 8,433 | 1 | 11 | 9  | 93  | 1 | 4  | 14 | 45  | 25 | 153 |
| 8,434 | 1 | 11 | 8  | 93  | 1 | 4  | 13 | 45  | 23 | 153 |

|       |   |    |    |     |   |   |    |    |    |     |
|-------|---|----|----|-----|---|---|----|----|----|-----|
| 8,435 | 1 | 10 | 8  | 82  | 1 | 4 | 13 | 37 | 23 | 133 |
| 8,436 | 1 | 10 | 8  | 82  | 1 | 4 | 13 | 37 | 23 | 133 |
| 8,437 | 1 | 10 | 8  | 82  | 1 | 4 | 13 | 37 | 23 | 133 |
| 8,438 | 1 | 10 | 8  | 80  | 1 | 4 | 13 | 33 | 23 | 127 |
| 8,439 | 1 | 6  | 8  | 60  | 1 | 4 | 13 | 23 | 23 | 93  |
| 8,440 | 1 | 5  | 8  | 55  | 1 | 2 | 13 | 19 | 23 | 81  |
| 8,441 | 1 | 5  | 8  | 59  | 1 | 3 | 13 | 29 | 23 | 96  |
| 8,442 | 1 | 5  | 8  | 62  | 1 | 3 | 13 | 28 | 23 | 98  |
| 8,443 | 1 | 5  | 11 | 93  | 1 | 6 | 13 | 55 | 26 | 159 |
| 8,444 | 1 | 5  | 12 | 100 | 1 | 6 | 13 | 60 | 27 | 171 |
| 8,445 | 1 | 5  | 14 | 99  | 1 | 6 | 11 | 59 | 27 | 169 |
| 8,446 | 1 | 5  | 14 | 96  | 1 | 6 | 11 | 59 | 27 | 166 |
| 8,447 | 1 | 4  | 14 | 77  | 1 | 5 | 9  | 52 | 25 | 138 |
| 8,448 | 1 | 5  | 15 | 82  | 1 | 6 | 9  | 59 | 26 | 152 |
| 8,449 | 1 | 5  | 14 | 85  | 1 | 7 | 8  | 59 | 24 | 156 |
| 8,450 | 1 | 5  | 14 | 84  | 1 | 7 | 8  | 59 | 24 | 155 |
| 8,451 | 1 | 4  | 14 | 69  | 1 | 7 | 8  | 54 | 24 | 134 |
| 8,452 | 1 | 4  | 14 | 62  | 1 | 7 | 8  | 53 | 24 | 126 |
| 8,453 | 1 | 4  | 14 | 61  | 1 | 7 | 9  | 53 | 25 | 125 |
| 8,454 | 1 | 4  | 14 | 61  | 1 | 7 | 9  | 53 | 25 | 125 |
| 8,455 | 1 | 4  | 14 | 61  | 1 | 7 | 9  | 53 | 25 | 125 |
| 8,456 | 1 | 3  | 14 | 59  | 1 | 7 | 9  | 52 | 25 | 121 |
| 8,457 | 1 | 3  | 14 | 59  | 1 | 7 | 9  | 52 | 25 | 121 |
| 8,458 | 2 | 3  | 14 | 59  | 1 | 7 | 9  | 52 | 26 | 121 |
| 8,459 | 2 | 3  | 14 | 59  | 1 | 7 | 9  | 52 | 26 | 121 |
| 8,460 | 2 | 3  | 14 | 59  | 1 | 7 | 7  | 52 | 24 | 121 |
| 8,461 | 2 | 3  | 12 | 59  | 1 | 7 | 4  | 52 | 19 | 121 |
| 8,462 | 2 | 4  | 13 | 58  | 1 | 7 | 5  | 52 | 21 | 121 |
| 8,463 | 3 | 4  | 12 | 58  | 1 | 7 | 5  | 52 | 21 | 121 |
| 8,464 | 3 | 4  | 12 | 58  | 1 | 7 | 5  | 52 | 21 | 121 |
| 8,465 | 2 | 4  | 10 | 59  | 1 | 6 | 2  | 52 | 15 | 121 |
| 8,466 | 2 | 3  | 10 | 59  | 1 | 6 | 2  | 52 | 15 | 120 |
| 8,467 | 2 | 3  | 10 | 59  | 1 | 6 | 2  | 52 | 15 | 120 |
| 8,468 | 2 | 3  | 10 | 59  | 1 | 6 | 3  | 52 | 16 | 120 |
| 8,469 | 2 | 3  | 10 | 59  | 1 | 6 | 3  | 52 | 16 | 120 |
| 8,470 | 2 | 3  | 11 | 59  | 1 | 6 | 3  | 52 | 17 | 120 |
| 8,471 | 2 | 3  | 11 | 59  | 1 | 6 | 3  | 52 | 17 | 120 |
| 8,472 | 2 | 3  | 11 | 59  | 1 | 6 | 3  | 52 | 17 | 120 |
| 8,473 | 2 | 3  | 11 | 59  | 1 | 6 | 3  | 52 | 17 | 120 |
| 8,474 | 2 | 3  | 11 | 59  | 1 | 6 | 3  | 52 | 17 | 120 |
| 8,475 | 2 | 3  | 11 | 59  | 1 | 6 | 3  | 52 | 17 | 120 |

|       |   |   |    |    |   |   |   |    |    |     |
|-------|---|---|----|----|---|---|---|----|----|-----|
| 8,476 | 2 | 3 | 9  | 59 | 1 | 6 | 3 | 53 | 15 | 121 |
| 8,477 | 2 | 3 | 9  | 59 | 0 | 6 | 3 | 53 | 14 | 121 |
| 8,478 | 2 | 3 | 9  | 59 | 0 | 6 | 3 | 53 | 14 | 121 |
| 8,479 | 2 | 3 | 9  | 59 | 0 | 6 | 3 | 53 | 14 | 121 |
| 8,480 | 2 | 3 | 9  | 58 | 0 | 6 | 3 | 53 | 14 | 120 |
| 8,481 | 2 | 3 | 9  | 58 | 0 | 6 | 3 | 53 | 14 | 120 |
| 8,482 | 2 | 3 | 9  | 58 | 0 | 6 | 3 | 53 | 14 | 120 |
| 8,483 | 2 | 3 | 9  | 58 | 0 | 6 | 3 | 52 | 14 | 119 |
| 8,484 | 2 | 3 | 9  | 58 | 0 | 6 | 3 | 52 | 14 | 119 |
| 8,485 | 2 | 3 | 9  | 58 | 0 | 6 | 3 | 52 | 14 | 119 |
| 8,486 | 2 | 3 | 10 | 57 | 0 | 6 | 3 | 52 | 15 | 118 |
| 8,487 | 2 | 3 | 10 | 57 | 0 | 6 | 3 | 52 | 15 | 118 |
| 8,488 | 2 | 3 | 10 | 57 | 0 | 6 | 3 | 52 | 15 | 118 |
| 8,489 | 2 | 3 | 10 | 58 | 0 | 6 | 3 | 51 | 15 | 118 |
| 8,490 | 2 | 3 | 10 | 59 | 0 | 6 | 3 | 51 | 15 | 119 |
| 8,491 | 2 | 3 | 10 | 60 | 0 | 6 | 3 | 52 | 15 | 121 |
| 8,492 | 2 | 3 | 10 | 56 | 0 | 5 | 3 | 44 | 15 | 108 |
| 8,493 | 2 | 3 | 9  | 58 | 0 | 6 | 3 | 52 | 14 | 119 |
| 8,494 | 2 | 3 | 7  | 28 | 0 | 3 | 3 | 26 | 12 | 60  |
| 8,495 | 2 | 3 | 6  | 21 | 0 | 3 | 3 | 23 | 11 | 50  |
| 8,496 | 2 | 3 | 4  | 21 | 0 | 3 | 4 | 23 | 10 | 50  |
| 8,497 | 2 | 3 | 4  | 21 | 0 | 3 | 4 | 23 | 10 | 50  |
| 8,498 | 2 | 2 | 5  | 16 | 1 | 2 | 4 | 16 | 12 | 36  |
| 8,499 | 2 | 2 | 5  | 13 | 1 | 1 | 5 | 14 | 13 | 30  |
| 8,500 | 2 | 2 | 5  | 13 | 1 | 1 | 5 | 14 | 13 | 30  |
| 8,501 | 2 | 2 | 5  | 13 | 1 | 1 | 5 | 14 | 13 | 30  |
| 8,502 | 2 | 2 | 6  | 12 | 1 | 1 | 6 | 14 | 15 | 29  |
| 8,503 | 2 | 2 | 6  | 12 | 1 | 1 | 6 | 14 | 15 | 29  |
| 8,504 | 2 | 2 | 7  | 12 | 1 | 1 | 5 | 14 | 15 | 29  |
| 8,505 | 2 | 2 | 7  | 12 | 1 | 1 | 5 | 14 | 15 | 29  |
| 8,506 | 2 | 2 | 7  | 12 | 1 | 2 | 5 | 14 | 15 | 30  |
| 8,507 | 2 | 3 | 7  | 12 | 1 | 2 | 5 | 16 | 15 | 33  |
| 8,508 | 1 | 3 | 7  | 13 | 1 | 2 | 5 | 16 | 14 | 34  |
| 8,509 | 1 | 3 | 8  | 13 | 1 | 2 | 5 | 16 | 15 | 34  |
| 8,510 | 1 | 3 | 8  | 13 | 1 | 2 | 5 | 16 | 15 | 34  |
| 8,511 | 1 | 3 | 8  | 13 | 1 | 2 | 5 | 16 | 15 | 34  |
| 8,512 | 1 | 3 | 7  | 13 | 1 | 2 | 4 | 16 | 13 | 34  |
| 8,513 | 1 | 3 | 7  | 14 | 1 | 2 | 4 | 17 | 13 | 36  |
| 8,514 | 0 | 3 | 7  | 14 | 1 | 2 | 4 | 18 | 12 | 37  |
| 8,515 | 0 | 3 | 8  | 18 | 1 | 2 | 4 | 22 | 13 | 45  |
| 8,516 | 0 | 3 | 8  | 17 | 1 | 2 | 4 | 23 | 13 | 45  |



|       |   |   |    |    |   |   |   |    |    |    |
|-------|---|---|----|----|---|---|---|----|----|----|
| 8,517 | 0 | 3 | 8  | 17 | 1 | 2 | 4 | 23 | 13 | 45 |
| 8,518 | 0 | 3 | 8  | 17 | 1 | 2 | 4 | 23 | 13 | 45 |
| 8,519 | 0 | 3 | 8  | 17 | 1 | 2 | 3 | 23 | 12 | 45 |
| 8,520 | 0 | 3 | 7  | 17 | 1 | 2 | 3 | 24 | 11 | 46 |
| 8,521 | 0 | 3 | 7  | 17 | 1 | 2 | 3 | 24 | 11 | 46 |
| 8,522 | 0 | 3 | 7  | 17 | 1 | 2 | 3 | 24 | 11 | 46 |
| 8,523 | 0 | 3 | 7  | 17 | 1 | 2 | 3 | 24 | 11 | 46 |
| 8,524 | 0 | 3 | 7  | 17 | 1 | 2 | 3 | 24 | 11 | 46 |
| 8,525 | 0 | 3 | 7  | 17 | 1 | 2 | 3 | 24 | 11 | 46 |
| 8,526 | 0 | 3 | 7  | 17 | 1 | 2 | 3 | 24 | 11 | 46 |
| 8,527 | 0 | 3 | 7  | 17 | 1 | 2 | 4 | 24 | 12 | 46 |
| 8,528 | 0 | 3 | 7  | 17 | 1 | 2 | 4 | 24 | 12 | 46 |
| 8,529 | 0 | 3 | 7  | 17 | 1 | 2 | 4 | 24 | 12 | 46 |
| 8,530 | 0 | 3 | 8  | 17 | 1 | 2 | 4 | 24 | 13 | 46 |
| 8,531 | 0 | 4 | 8  | 18 | 1 | 2 | 4 | 25 | 13 | 49 |
| 8,532 | 0 | 4 | 8  | 18 | 1 | 2 | 4 | 25 | 13 | 49 |
| 8,533 | 0 | 4 | 8  | 18 | 1 | 2 | 4 | 25 | 13 | 49 |
| 8,534 | 0 | 4 | 8  | 18 | 1 | 2 | 4 | 25 | 13 | 49 |
| 8,535 | 0 | 4 | 9  | 18 | 1 | 2 | 4 | 25 | 14 | 49 |
| 8,536 | 0 | 4 | 8  | 18 | 1 | 2 | 4 | 25 | 13 | 49 |
| 8,537 | 0 | 5 | 8  | 20 | 1 | 2 | 5 | 27 | 14 | 54 |
| 8,538 | 0 | 5 | 8  | 30 | 1 | 2 | 5 | 27 | 14 | 64 |
| 8,539 | 0 | 5 | 8  | 31 | 1 | 2 | 5 | 27 | 14 | 65 |
| 8,540 | 0 | 5 | 8  | 29 | 1 | 2 | 5 | 27 | 14 | 63 |
| 8,541 | 0 | 5 | 8  | 29 | 1 | 2 | 5 | 26 | 14 | 62 |
| 8,542 | 0 | 5 | 8  | 30 | 1 | 2 | 6 | 24 | 15 | 61 |
| 8,543 | 0 | 5 | 8  | 30 | 1 | 2 | 6 | 25 | 15 | 62 |
| 8,544 | 0 | 4 | 8  | 23 | 1 | 1 | 6 | 16 | 15 | 44 |
| 8,545 | 0 | 4 | 8  | 24 | 1 | 1 | 6 | 15 | 15 | 44 |
| 8,546 | 0 | 4 | 8  | 24 | 1 | 1 | 6 | 15 | 15 | 44 |
| 8,547 | 0 | 4 | 8  | 24 | 1 | 1 | 6 | 15 | 15 | 44 |
| 8,548 | 0 | 4 | 9  | 24 | 0 | 1 | 6 | 15 | 15 | 44 |
| 8,549 | 0 | 4 | 8  | 24 | 0 | 1 | 6 | 15 | 14 | 44 |
| 8,550 | 0 | 4 | 11 | 24 | 0 | 1 | 5 | 15 | 16 | 44 |
| 8,551 | 0 | 4 | 12 | 24 | 0 | 1 | 8 | 15 | 20 | 44 |
| 8,552 | 0 | 4 | 12 | 24 | 0 | 1 | 8 | 15 | 20 | 44 |
| 8,553 | 0 | 4 | 11 | 24 | 0 | 1 | 7 | 15 | 18 | 44 |
| 8,554 | 0 | 4 | 11 | 24 | 0 | 1 | 7 | 15 | 18 | 44 |
| 8,555 | 0 | 4 | 10 | 24 | 0 | 1 | 8 | 15 | 18 | 44 |
| 8,556 | 0 | 5 | 12 | 27 | 0 | 1 | 8 | 16 | 20 | 49 |
| 8,557 | 0 | 5 | 12 | 27 | 0 | 0 | 8 | 16 | 20 | 48 |

|       |   |   |    |    |   |   |    |    |    |    |
|-------|---|---|----|----|---|---|----|----|----|----|
| 8,558 | 0 | 4 | 12 | 27 | 0 | 0 | 9  | 14 | 21 | 45 |
| 8,559 | 0 | 4 | 12 | 26 | 0 | 0 | 9  | 14 | 21 | 44 |
| 8,560 | 0 | 4 | 11 | 26 | 0 | 0 | 9  | 14 | 20 | 44 |
| 8,561 | 0 | 4 | 11 | 26 | 0 | 0 | 9  | 14 | 20 | 44 |
| 8,562 | 0 | 5 | 14 | 26 | 0 | 0 | 12 | 15 | 26 | 46 |
| 8,563 | 0 | 4 | 14 | 27 | 0 | 0 | 12 | 16 | 26 | 47 |
| 8,564 | 0 | 5 | 14 | 33 | 0 | 0 | 12 | 16 | 26 | 54 |
| 8,565 | 0 | 5 | 14 | 36 | 0 | 0 | 13 | 16 | 27 | 57 |
| 8,566 | 0 | 5 | 14 | 35 | 0 | 0 | 13 | 12 | 27 | 52 |
| 8,567 | 0 | 5 | 14 | 39 | 0 | 0 | 15 | 13 | 29 | 57 |
| 8,568 | 0 | 5 | 14 | 39 | 0 | 0 | 16 | 13 | 30 | 57 |
| 8,569 | 0 | 5 | 14 | 40 | 0 | 0 | 17 | 14 | 31 | 59 |
| 8,570 | 0 | 5 | 14 | 40 | 0 | 0 | 17 | 14 | 31 | 59 |
| 8,571 | 0 | 5 | 15 | 40 | 0 | 0 | 17 | 13 | 32 | 58 |
| 8,572 | 0 | 5 | 15 | 40 | 0 | 0 | 17 | 13 | 32 | 58 |
| 8,573 | 0 | 5 | 15 | 41 | 0 | 0 | 17 | 13 | 32 | 59 |
| 8,574 | 0 | 5 | 15 | 41 | 0 | 0 | 17 | 13 | 32 | 59 |
| 8,575 | 0 | 5 | 15 | 41 | 0 | 0 | 17 | 13 | 32 | 59 |
| 8,576 | 0 | 5 | 15 | 41 | 0 | 0 | 19 | 13 | 34 | 59 |
| 8,577 | 0 | 5 | 24 | 41 | 0 | 0 | 28 | 12 | 52 | 58 |
| 8,578 | 0 | 5 | 24 | 41 | 0 | 0 | 27 | 12 | 51 | 58 |
| 8,579 | 0 | 5 | 24 | 41 | 0 | 0 | 27 | 12 | 51 | 58 |
| 8,580 | 0 | 5 | 24 | 41 | 0 | 0 | 27 | 12 | 51 | 58 |
| 8,581 | 0 | 5 | 23 | 41 | 0 | 0 | 27 | 12 | 50 | 58 |
| 8,582 | 0 | 4 | 23 | 40 | 0 | 0 | 27 | 11 | 50 | 55 |
| 8,583 | 0 | 4 | 23 | 40 | 0 | 0 | 27 | 11 | 50 | 55 |
| 8,584 | 0 | 4 | 23 | 39 | 0 | 0 | 28 | 11 | 51 | 54 |
| 8,585 | 0 | 4 | 22 | 39 | 0 | 0 | 28 | 11 | 50 | 54 |
| 8,586 | 0 | 4 | 22 | 39 | 0 | 0 | 28 | 11 | 50 | 54 |
| 8,587 | 0 | 3 | 22 | 37 | 0 | 0 | 28 | 9  | 50 | 49 |
| 8,588 | 0 | 3 | 22 | 37 | 0 | 0 | 28 | 9  | 50 | 49 |
| 8,589 | 0 | 3 | 22 | 27 | 0 | 0 | 29 | 10 | 51 | 40 |
| 8,590 | 0 | 3 | 22 | 26 | 0 | 0 | 29 | 10 | 51 | 39 |
| 8,591 | 0 | 3 | 22 | 26 | 0 | 0 | 29 | 11 | 51 | 40 |
| 8,592 | 0 | 3 | 22 | 26 | 0 | 0 | 29 | 11 | 51 | 40 |
| 8,593 | 0 | 3 | 22 | 25 | 0 | 0 | 28 | 11 | 50 | 39 |
| 8,594 | 0 | 3 | 25 | 25 | 0 | 0 | 28 | 10 | 53 | 38 |
| 8,595 | 1 | 3 | 27 | 24 | 0 | 0 | 31 | 10 | 59 | 37 |
| 8,596 | 1 | 3 | 27 | 25 | 0 | 0 | 32 | 12 | 60 | 40 |
| 8,597 | 1 | 3 | 28 | 25 | 0 | 0 | 32 | 14 | 61 | 42 |
| 8,598 | 1 | 3 | 35 | 26 | 1 | 0 | 37 | 15 | 74 | 44 |

|       |    |   |     |    |    |   |     |    |     |    |
|-------|----|---|-----|----|----|---|-----|----|-----|----|
| 8,599 | 1  | 3 | 34  | 26 | 1  | 0 | 38  | 15 | 74  | 44 |
| 8,600 | 2  | 4 | 34  | 27 | 1  | 0 | 40  | 17 | 77  | 48 |
| 8,601 | 3  | 4 | 34  | 27 | 1  | 0 | 42  | 18 | 80  | 49 |
| 8,602 | 3  | 4 | 33  | 28 | 1  | 0 | 39  | 18 | 76  | 50 |
| 8,603 | 5  | 4 | 52  | 28 | 1  | 1 | 45  | 19 | 103 | 52 |
| 8,604 | 7  | 4 | 58  | 28 | 1  | 1 | 49  | 19 | 115 | 52 |
| 8,605 | 7  | 4 | 66  | 28 | 1  | 1 | 48  | 19 | 122 | 52 |
| 8,606 | 7  | 4 | 66  | 28 | 1  | 1 | 48  | 19 | 122 | 52 |
| 8,607 | 7  | 3 | 69  | 25 | 1  | 1 | 49  | 18 | 126 | 47 |
| 8,608 | 7  | 3 | 87  | 25 | 1  | 1 | 53  | 18 | 148 | 47 |
| 8,609 | 7  | 3 | 87  | 25 | 1  | 1 | 52  | 18 | 147 | 47 |
| 8,610 | 16 | 3 | 128 | 25 | 6  | 1 | 93  | 18 | 243 | 47 |
| 8,611 | 29 | 3 | 151 | 25 | 8  | 1 | 119 | 18 | 307 | 47 |
| 8,612 | 29 | 3 | 151 | 17 | 8  | 1 | 116 | 15 | 304 | 36 |
| 8,613 | 29 | 3 | 159 | 18 | 8  | 1 | 119 | 15 | 315 | 37 |
| 8,614 | 32 | 3 | 176 | 18 | 10 | 1 | 131 | 15 | 349 | 37 |
| 8,615 | 32 | 3 | 181 | 18 | 10 | 1 | 133 | 15 | 356 | 37 |
| 8,616 | 32 | 3 | 182 | 16 | 10 | 1 | 133 | 14 | 357 | 34 |
| 8,617 | 32 | 3 | 182 | 15 | 10 | 1 | 133 | 13 | 357 | 32 |
| 8,618 | 32 | 3 | 182 | 12 | 10 | 1 | 131 | 12 | 355 | 28 |
| 8,619 | 32 | 3 | 182 | 12 | 10 | 1 | 130 | 12 | 354 | 28 |
| 8,620 | 32 | 3 | 182 | 11 | 10 | 1 | 129 | 11 | 353 | 26 |
| 8,621 | 32 | 3 | 181 | 15 | 10 | 1 | 129 | 11 | 352 | 30 |
| 8,622 | 32 | 3 | 181 | 17 | 10 | 1 | 129 | 13 | 352 | 34 |
| 8,623 | 32 | 4 | 181 | 27 | 10 | 3 | 130 | 18 | 353 | 52 |
| 8,624 | 32 | 4 | 182 | 27 | 10 | 3 | 130 | 20 | 354 | 54 |
| 8,625 | 32 | 4 | 182 | 30 | 10 | 3 | 130 | 20 | 354 | 57 |
| 8,626 | 34 | 4 | 182 | 30 | 10 | 3 | 130 | 19 | 356 | 56 |
| 8,627 | 34 | 4 | 184 | 33 | 10 | 3 | 128 | 19 | 356 | 59 |
| 8,628 | 34 | 4 | 175 | 34 | 10 | 3 | 119 | 20 | 338 | 61 |
| 8,629 | 34 | 4 | 175 | 35 | 10 | 3 | 119 | 20 | 338 | 62 |
| 8,630 | 34 | 4 | 175 | 35 | 10 | 3 | 121 | 20 | 340 | 62 |
| 8,631 | 34 | 4 | 176 | 36 | 10 | 3 | 126 | 20 | 346 | 63 |
| 8,632 | 34 | 4 | 176 | 37 | 10 | 3 | 126 | 20 | 346 | 64 |
| 8,633 | 34 | 4 | 176 | 40 | 10 | 3 | 126 | 20 | 346 | 67 |
| 8,634 | 34 | 4 | 176 | 40 | 10 | 3 | 126 | 20 | 346 | 67 |
| 8,635 | 34 | 4 | 176 | 40 | 10 | 3 | 125 | 20 | 345 | 67 |
| 8,636 | 34 | 4 | 176 | 40 | 10 | 3 | 125 | 20 | 345 | 67 |
| 8,637 | 34 | 4 | 176 | 40 | 10 | 3 | 125 | 21 | 345 | 68 |
| 8,638 | 34 | 4 | 176 | 40 | 10 | 3 | 124 | 21 | 344 | 68 |
| 8,639 | 34 | 4 | 176 | 40 | 10 | 3 | 124 | 20 | 344 | 67 |

|       |    |   |     |    |    |   |     |    |     |    |
|-------|----|---|-----|----|----|---|-----|----|-----|----|
| 8,640 | 34 | 4 | 176 | 40 | 10 | 3 | 123 | 20 | 343 | 67 |
| 8,641 | 34 | 4 | 176 | 40 | 10 | 3 | 123 | 21 | 343 | 68 |
| 8,642 | 34 | 4 | 176 | 45 | 10 | 4 | 123 | 23 | 343 | 76 |
| 8,643 | 34 | 4 | 176 | 44 | 10 | 4 | 123 | 23 | 343 | 75 |
| 8,644 | 34 | 4 | 178 | 44 | 10 | 4 | 123 | 23 | 345 | 75 |
| 8,645 | 34 | 4 | 175 | 44 | 10 | 4 | 123 | 24 | 342 | 76 |
| 8,646 | 33 | 4 | 174 | 43 | 10 | 4 | 120 | 22 | 337 | 73 |
| 8,647 | 33 | 4 | 176 | 43 | 10 | 4 | 119 | 20 | 338 | 71 |
| 8,648 | 33 | 4 | 175 | 44 | 10 | 4 | 119 | 20 | 337 | 72 |
| 8,649 | 33 | 4 | 169 | 44 | 9  | 4 | 114 | 19 | 325 | 71 |
| 8,650 | 33 | 4 | 170 | 45 | 9  | 4 | 113 | 19 | 325 | 72 |
| 8,651 | 32 | 3 | 172 | 44 | 9  | 4 | 120 | 17 | 333 | 68 |
| 8,652 | 31 | 3 | 168 | 43 | 9  | 4 | 118 | 16 | 326 | 66 |
| 8,653 | 29 | 3 | 153 | 43 | 9  | 3 | 112 | 15 | 303 | 64 |
| 8,654 | 29 | 3 | 149 | 43 | 9  | 3 | 112 | 15 | 299 | 64 |
| 8,655 | 27 | 3 | 144 | 43 | 9  | 3 | 108 | 15 | 288 | 64 |
| 8,656 | 27 | 3 | 146 | 43 | 10 | 3 | 113 | 16 | 296 | 65 |
| 8,657 | 27 | 3 | 149 | 43 | 11 | 3 | 116 | 16 | 303 | 65 |
| 8,658 | 27 | 3 | 176 | 43 | 11 | 3 | 116 | 17 | 330 | 66 |
| 8,659 | 27 | 3 | 168 | 43 | 13 | 3 | 117 | 17 | 325 | 66 |
| 8,660 | 18 | 3 | 129 | 43 | 8  | 3 | 79  | 17 | 234 | 66 |
| 8,661 | 18 | 3 | 129 | 43 | 8  | 3 | 81  | 18 | 236 | 67 |
| 8,662 | 5  | 3 | 108 | 44 | 6  | 3 | 54  | 19 | 173 | 69 |
| 8,663 | 5  | 1 | 105 | 44 | 6  | 3 | 57  | 19 | 173 | 67 |
| 8,664 | 5  | 1 | 97  | 44 | 6  | 3 | 54  | 19 | 162 | 67 |
| 8,665 | 2  | 1 | 80  | 44 | 4  | 3 | 42  | 19 | 128 | 67 |
| 8,666 | 2  | 1 | 74  | 45 | 4  | 3 | 40  | 19 | 120 | 68 |
| 8,667 | 2  | 1 | 73  | 44 | 4  | 3 | 40  | 20 | 119 | 68 |
| 8,668 | 2  | 1 | 77  | 42 | 4  | 3 | 41  | 20 | 124 | 66 |
| 8,669 | 2  | 1 | 77  | 41 | 4  | 3 | 41  | 20 | 124 | 65 |
| 8,670 | 2  | 1 | 77  | 41 | 4  | 3 | 41  | 20 | 124 | 65 |
| 8,671 | 3  | 1 | 78  | 41 | 4  | 3 | 41  | 21 | 126 | 66 |
| 8,672 | 4  | 1 | 78  | 35 | 4  | 3 | 41  | 19 | 127 | 58 |
| 8,673 | 4  | 0 | 78  | 21 | 4  | 1 | 42  | 12 | 128 | 34 |
| 8,674 | 4  | 0 | 78  | 22 | 4  | 1 | 42  | 12 | 128 | 35 |
| 8,675 | 4  | 0 | 81  | 22 | 4  | 1 | 45  | 12 | 134 | 35 |
| 8,676 | 4  | 0 | 81  | 22 | 4  | 1 | 45  | 12 | 134 | 35 |
| 8,677 | 4  | 0 | 81  | 22 | 4  | 1 | 46  | 12 | 135 | 35 |
| 8,678 | 4  | 0 | 79  | 19 | 4  | 1 | 46  | 12 | 133 | 32 |
| 8,679 | 4  | 1 | 80  | 19 | 4  | 1 | 46  | 11 | 134 | 32 |
| 8,680 | 4  | 1 | 80  | 18 | 4  | 1 | 46  | 11 | 134 | 31 |

|       |    |   |     |    |   |   |    |    |     |    |
|-------|----|---|-----|----|---|---|----|----|-----|----|
| 8,681 | 4  | 1 | 79  | 18 | 4 | 1 | 42 | 11 | 129 | 31 |
| 8,682 | 4  | 1 | 79  | 17 | 4 | 1 | 41 | 11 | 128 | 30 |
| 8,683 | 4  | 1 | 79  | 16 | 4 | 1 | 42 | 11 | 129 | 29 |
| 8,684 | 4  | 1 | 79  | 13 | 4 | 1 | 42 | 11 | 129 | 26 |
| 8,685 | 5  | 1 | 85  | 13 | 4 | 1 | 45 | 11 | 139 | 26 |
| 8,686 | 7  | 1 | 88  | 13 | 4 | 1 | 45 | 11 | 144 | 26 |
| 8,687 | 7  | 1 | 88  | 13 | 5 | 1 | 45 | 10 | 145 | 25 |
| 8,688 | 7  | 1 | 97  | 13 | 5 | 1 | 45 | 10 | 154 | 25 |
| 8,689 | 7  | 1 | 100 | 13 | 5 | 1 | 45 | 10 | 157 | 25 |
| 8,690 | 7  | 1 | 104 | 13 | 5 | 1 | 46 | 10 | 162 | 25 |
| 8,691 | 7  | 1 | 104 | 14 | 5 | 1 | 46 | 10 | 162 | 26 |
| 8,692 | 7  | 1 | 104 | 14 | 6 | 1 | 47 | 10 | 164 | 26 |
| 8,693 | 7  | 1 | 103 | 9  | 6 | 0 | 48 | 8  | 164 | 18 |
| 8,694 | 7  | 2 | 102 | 9  | 6 | 0 | 49 | 8  | 164 | 19 |
| 8,695 | 9  | 2 | 103 | 9  | 6 | 0 | 49 | 8  | 167 | 19 |
| 8,696 | 9  | 2 | 103 | 9  | 6 | 0 | 49 | 7  | 167 | 18 |
| 8,697 | 9  | 2 | 102 | 10 | 6 | 0 | 51 | 8  | 168 | 20 |
| 8,698 | 9  | 2 | 101 | 10 | 6 | 0 | 53 | 8  | 169 | 20 |
| 8,699 | 9  | 2 | 101 | 8  | 6 | 0 | 55 | 8  | 171 | 18 |
| 8,700 | 9  | 2 | 102 | 7  | 6 | 0 | 55 | 8  | 172 | 17 |
| 8,701 | 9  | 2 | 101 | 7  | 6 | 0 | 55 | 8  | 171 | 17 |
| 8,702 | 10 | 2 | 99  | 7  | 6 | 0 | 46 | 8  | 161 | 17 |
| 8,703 | 10 | 3 | 100 | 7  | 6 | 0 | 47 | 8  | 163 | 18 |
| 8,704 | 14 | 3 | 117 | 8  | 7 | 0 | 60 | 8  | 198 | 19 |
| 8,705 | 14 | 3 | 116 | 15 | 7 | 0 | 60 | 9  | 197 | 27 |
| 8,706 | 18 | 4 | 137 | 18 | 6 | 0 | 80 | 11 | 241 | 33 |
| 8,707 | 18 | 4 | 144 | 22 | 6 | 0 | 83 | 11 | 251 | 37 |
| 8,708 | 20 | 5 | 147 | 26 | 5 | 0 | 88 | 12 | 260 | 43 |
| 8,709 | 20 | 6 | 153 | 26 | 8 | 0 | 93 | 14 | 274 | 46 |
| 8,710 | 20 | 6 | 143 | 26 | 6 | 0 | 88 | 14 | 257 | 46 |
| 8,711 | 20 | 6 | 143 | 27 | 6 | 0 | 86 | 14 | 255 | 47 |
| 8,712 | 20 | 6 | 149 | 27 | 6 | 0 | 86 | 13 | 261 | 46 |
| 8,713 | 20 | 6 | 148 | 26 | 6 | 0 | 86 | 12 | 260 | 44 |
| 8,714 | 20 | 6 | 148 | 26 | 6 | 0 | 83 | 12 | 257 | 44 |
| 8,715 | 20 | 6 | 158 | 25 | 6 | 0 | 85 | 12 | 269 | 43 |
| 8,716 | 20 | 6 | 158 | 25 | 6 | 0 | 85 | 12 | 269 | 43 |
| 8,717 | 20 | 6 | 157 | 24 | 6 | 0 | 85 | 12 | 268 | 42 |
| 8,718 | 20 | 6 | 155 | 24 | 6 | 0 | 86 | 11 | 267 | 41 |
| 8,719 | 20 | 6 | 155 | 24 | 6 | 0 | 86 | 12 | 267 | 42 |
| 8,720 | 20 | 6 | 155 | 24 | 6 | 0 | 86 | 12 | 267 | 42 |
| 8,721 | 20 | 6 | 156 | 24 | 6 | 0 | 86 | 12 | 268 | 42 |

|       |    |   |     |    |    |   |     |    |     |    |
|-------|----|---|-----|----|----|---|-----|----|-----|----|
| 8,722 | 20 | 6 | 155 | 24 | 6  | 0 | 86  | 11 | 267 | 41 |
| 8,723 | 19 | 6 | 159 | 24 | 6  | 0 | 87  | 11 | 271 | 41 |
| 8,724 | 19 | 6 | 159 | 23 | 6  | 0 | 85  | 13 | 269 | 42 |
| 8,725 | 19 | 6 | 162 | 24 | 6  | 0 | 86  | 13 | 273 | 43 |
| 8,726 | 19 | 6 | 158 | 24 | 6  | 0 | 84  | 13 | 267 | 43 |
| 8,727 | 19 | 6 | 158 | 25 | 6  | 0 | 84  | 13 | 267 | 44 |
| 8,728 | 17 | 6 | 158 | 25 | 6  | 0 | 83  | 13 | 264 | 44 |
| 8,729 | 17 | 6 | 157 | 25 | 6  | 0 | 83  | 13 | 263 | 44 |
| 8,730 | 17 | 5 | 157 | 24 | 6  | 0 | 82  | 13 | 262 | 42 |
| 8,731 | 17 | 5 | 158 | 24 | 6  | 0 | 81  | 13 | 262 | 42 |
| 8,732 | 17 | 5 | 158 | 24 | 6  | 0 | 81  | 13 | 262 | 42 |
| 8,733 | 17 | 5 | 160 | 25 | 6  | 0 | 81  | 13 | 264 | 43 |
| 8,734 | 17 | 5 | 160 | 26 | 6  | 0 | 80  | 16 | 263 | 47 |
| 8,735 | 17 | 5 | 164 | 30 | 6  | 0 | 80  | 17 | 267 | 52 |
| 8,736 | 16 | 5 | 161 | 30 | 6  | 0 | 77  | 18 | 260 | 53 |
| 8,737 | 15 | 5 | 160 | 30 | 6  | 0 | 77  | 19 | 258 | 54 |
| 8,738 | 15 | 6 | 160 | 30 | 5  | 0 | 77  | 25 | 257 | 61 |
| 8,739 | 15 | 6 | 151 | 34 | 5  | 0 | 77  | 25 | 248 | 65 |
| 8,740 | 16 | 6 | 156 | 35 | 5  | 1 | 79  | 25 | 256 | 67 |
| 8,741 | 16 | 6 | 152 | 38 | 5  | 1 | 78  | 25 | 251 | 70 |
| 8,742 | 16 | 6 | 179 | 38 | 6  | 1 | 84  | 26 | 285 | 71 |
| 8,743 | 18 | 6 | 184 | 38 | 5  | 1 | 84  | 25 | 291 | 70 |
| 8,744 | 22 | 5 | 190 | 39 | 5  | 1 | 89  | 25 | 306 | 70 |
| 8,745 | 22 | 5 | 190 | 39 | 5  | 1 | 89  | 25 | 306 | 70 |
| 8,746 | 20 | 5 | 192 | 40 | 5  | 1 | 92  | 25 | 309 | 71 |
| 8,747 | 21 | 5 | 192 | 40 | 5  | 2 | 92  | 25 | 310 | 72 |
| 8,748 | 21 | 5 | 192 | 40 | 5  | 2 | 90  | 25 | 308 | 72 |
| 8,749 | 21 | 5 | 191 | 40 | 5  | 2 | 88  | 25 | 305 | 72 |
| 8,750 | 22 | 5 | 197 | 41 | 6  | 2 | 98  | 25 | 323 | 73 |
| 8,751 | 24 | 5 | 211 | 41 | 9  | 2 | 119 | 25 | 363 | 73 |
| 8,752 | 24 | 5 | 211 | 41 | 9  | 2 | 119 | 26 | 363 | 74 |
| 8,753 | 25 | 5 | 230 | 41 | 11 | 2 | 122 | 26 | 388 | 74 |
| 8,754 | 45 | 4 | 316 | 41 | 16 | 2 | 169 | 27 | 546 | 74 |
| 8,755 | 41 | 4 | 329 | 42 | 18 | 2 | 169 | 29 | 557 | 77 |
| 8,756 | 41 | 4 | 325 | 36 | 18 | 2 | 167 | 32 | 551 | 74 |
| 8,757 | 37 | 4 | 301 | 36 | 18 | 2 | 145 | 32 | 501 | 74 |
| 8,758 | 38 | 4 | 312 | 34 | 20 | 2 | 150 | 32 | 520 | 72 |
| 8,759 | 36 | 3 | 302 | 30 | 20 | 2 | 143 | 31 | 501 | 66 |
| 8,760 | 36 | 2 | 270 | 30 | 17 | 2 | 137 | 30 | 460 | 64 |
| 8,761 | 36 | 2 | 271 | 30 | 17 | 2 | 136 | 31 | 460 | 65 |
| 8,762 | 36 | 2 | 268 | 33 | 17 | 2 | 135 | 35 | 456 | 72 |

|       |    |   |     |    |    |   |     |    |     |    |
|-------|----|---|-----|----|----|---|-----|----|-----|----|
| 8,763 | 36 | 2 | 264 | 34 | 17 | 2 | 135 | 35 | 452 | 73 |
| 8,764 | 36 | 2 | 262 | 35 | 17 | 2 | 135 | 37 | 450 | 76 |
| 8,765 | 36 | 2 | 262 | 35 | 17 | 2 | 135 | 37 | 450 | 76 |
| 8,766 | 37 | 2 | 260 | 35 | 17 | 2 | 141 | 38 | 455 | 77 |
| 8,767 | 37 | 2 | 265 | 36 | 17 | 2 | 141 | 38 | 460 | 78 |
| 8,768 | 38 | 3 | 276 | 36 | 17 | 2 | 142 | 38 | 473 | 79 |
| 8,769 | 38 | 3 | 292 | 36 | 18 | 2 | 144 | 39 | 492 | 80 |
| 8,770 | 37 | 3 | 291 | 36 | 18 | 2 | 144 | 39 | 490 | 80 |
| 8,771 | 37 | 3 | 292 | 36 | 18 | 2 | 144 | 39 | 491 | 80 |
| 8,772 | 37 | 3 | 294 | 37 | 18 | 2 | 144 | 38 | 493 | 80 |
| 8,773 | 37 | 3 | 295 | 37 | 18 | 2 | 144 | 38 | 494 | 80 |
| 8,774 | 37 | 3 | 291 | 37 | 18 | 2 | 143 | 38 | 489 | 80 |
| 8,775 | 37 | 3 | 291 | 35 | 18 | 2 | 143 | 38 | 489 | 78 |
| 8,776 | 37 | 3 | 288 | 35 | 18 | 2 | 142 | 38 | 485 | 78 |
| 8,777 | 37 | 3 | 288 | 35 | 18 | 2 | 141 | 38 | 484 | 78 |
| 8,778 | 37 | 3 | 288 | 35 | 18 | 2 | 141 | 38 | 484 | 78 |
| 8,779 | 37 | 3 | 288 | 35 | 18 | 2 | 141 | 38 | 484 | 78 |
| 8,780 | 37 | 3 | 288 | 35 | 18 | 2 | 141 | 38 | 484 | 78 |
| 8,781 | 37 | 3 | 287 | 35 | 18 | 2 | 141 | 38 | 483 | 78 |
| 8,782 | 37 | 3 | 288 | 35 | 18 | 3 | 141 | 42 | 484 | 83 |
| 8,783 | 37 | 3 | 286 | 35 | 18 | 3 | 141 | 43 | 482 | 84 |
| 8,784 | 37 | 3 | 288 | 37 | 18 | 4 | 141 | 48 | 484 | 92 |
| 8,785 | 37 | 3 | 288 | 36 | 18 | 4 | 141 | 45 | 484 | 88 |
| 8,786 | 37 | 3 | 283 | 32 | 18 | 4 | 141 | 44 | 479 | 83 |
| 8,787 | 37 | 3 | 281 | 32 | 18 | 4 | 141 | 43 | 477 | 82 |
| 8,788 | 37 | 3 | 285 | 33 | 18 | 4 | 143 | 43 | 483 | 83 |
| 8,789 | 37 | 2 | 284 | 33 | 18 | 4 | 143 | 37 | 482 | 76 |
| 8,790 | 37 | 2 | 280 | 29 | 18 | 4 | 142 | 37 | 477 | 72 |
| 8,791 | 37 | 2 | 303 | 28 | 18 | 3 | 151 | 37 | 509 | 70 |
| 8,792 | 38 | 2 | 319 | 25 | 21 | 3 | 162 | 37 | 540 | 67 |
| 8,793 | 40 | 2 | 306 | 22 | 23 | 3 | 161 | 36 | 530 | 63 |
| 8,794 | 39 | 2 | 301 | 22 | 23 | 3 | 164 | 36 | 527 | 63 |
| 8,795 | 35 | 2 | 295 | 22 | 23 | 3 | 157 | 36 | 510 | 63 |
| 8,796 | 35 | 2 | 295 | 22 | 23 | 3 | 157 | 36 | 510 | 63 |
| 8,797 | 35 | 2 | 294 | 22 | 23 | 2 | 157 | 36 | 509 | 62 |
| 8,798 | 34 | 2 | 296 | 21 | 23 | 2 | 157 | 35 | 510 | 60 |
| 8,799 | 34 | 2 | 296 | 22 | 23 | 3 | 157 | 37 | 510 | 64 |
| 8,800 | 33 | 2 | 289 | 22 | 22 | 3 | 144 | 41 | 488 | 68 |
| 8,801 | 33 | 2 | 288 | 26 | 22 | 5 | 144 | 45 | 487 | 78 |
| 8,802 | 31 | 2 | 274 | 29 | 19 | 5 | 124 | 46 | 448 | 82 |
| 8,803 | 30 | 2 | 255 | 34 | 17 | 7 | 121 | 49 | 423 | 92 |

|       |    |   |     |    |    |   |     |    |     |     |
|-------|----|---|-----|----|----|---|-----|----|-----|-----|
| 8,804 | 23 | 3 | 214 | 39 | 13 | 8 | 114 | 54 | 364 | 104 |
| 8,805 | 10 | 4 | 168 | 39 | 12 | 8 | 73  | 53 | 263 | 104 |
| 8,806 | 10 | 4 | 141 | 41 | 10 | 8 | 61  | 50 | 222 | 103 |
| 8,807 | 10 | 4 | 128 | 43 | 8  | 8 | 55  | 46 | 201 | 101 |
| 8,808 | 9  | 3 | 120 | 40 | 8  | 8 | 52  | 46 | 189 | 97  |
| 8,809 | 9  | 3 | 120 | 38 | 8  | 8 | 52  | 45 | 189 | 94  |
| 8,810 | 9  | 3 | 120 | 38 | 8  | 8 | 52  | 45 | 189 | 94  |
| 8,811 | 9  | 3 | 118 | 39 | 8  | 8 | 52  | 43 | 187 | 93  |
| 8,812 | 9  | 3 | 115 | 39 | 8  | 8 | 51  | 42 | 183 | 92  |
| 8,813 | 9  | 3 | 115 | 35 | 8  | 8 | 51  | 38 | 183 | 84  |
| 8,814 | 9  | 4 | 115 | 34 | 8  | 8 | 50  | 38 | 182 | 84  |
| 8,815 | 8  | 4 | 113 | 33 | 8  | 8 | 43  | 36 | 172 | 81  |
| 8,816 | 8  | 4 | 114 | 33 | 8  | 8 | 43  | 36 | 173 | 81  |
| 8,817 | 8  | 4 | 111 | 33 | 8  | 8 | 42  | 35 | 169 | 80  |
| 8,818 | 8  | 4 | 105 | 32 | 8  | 8 | 42  | 35 | 163 | 79  |
| 8,819 | 7  | 3 | 94  | 32 | 8  | 8 | 41  | 35 | 150 | 78  |
| 8,820 | 8  | 3 | 79  | 32 | 7  | 8 | 39  | 35 | 133 | 78  |
| 8,821 | 8  | 3 | 92  | 32 | 9  | 9 | 39  | 34 | 148 | 78  |
| 8,822 | 9  | 3 | 92  | 31 | 9  | 9 | 39  | 33 | 149 | 76  |
| 8,823 | 9  | 3 | 107 | 31 | 10 | 9 | 45  | 33 | 171 | 76  |
| 8,824 | 9  | 3 | 115 | 31 | 10 | 9 | 46  | 33 | 180 | 76  |
| 8,825 | 9  | 3 | 115 | 31 | 10 | 9 | 46  | 33 | 180 | 76  |
| 8,826 | 9  | 3 | 115 | 31 | 10 | 9 | 46  | 33 | 180 | 76  |
| 8,827 | 16 | 3 | 164 | 31 | 15 | 9 | 87  | 33 | 282 | 76  |
| 8,828 | 25 | 3 | 194 | 31 | 17 | 9 | 109 | 33 | 345 | 76  |
| 8,829 | 31 | 3 | 281 | 31 | 20 | 9 | 149 | 33 | 481 | 76  |
| 8,830 | 31 | 3 | 287 | 32 | 21 | 9 | 152 | 33 | 491 | 77  |
| 8,831 | 31 | 3 | 287 | 33 | 21 | 9 | 152 | 33 | 491 | 78  |
| 8,832 | 31 | 3 | 293 | 33 | 22 | 9 | 156 | 33 | 502 | 78  |
| 8,833 | 31 | 3 | 293 | 33 | 22 | 8 | 156 | 29 | 502 | 73  |
| 8,834 | 31 | 3 | 293 | 33 | 22 | 8 | 156 | 28 | 502 | 72  |
| 8,835 | 31 | 3 | 291 | 30 | 22 | 7 | 156 | 23 | 500 | 63  |
| 8,836 | 31 | 3 | 292 | 30 | 22 | 7 | 156 | 23 | 501 | 63  |
| 8,837 | 31 | 3 | 292 | 30 | 22 | 7 | 156 | 23 | 501 | 63  |
| 8,838 | 30 | 3 | 286 | 30 | 22 | 7 | 154 | 23 | 492 | 63  |
| 8,839 | 31 | 3 | 290 | 29 | 22 | 7 | 155 | 22 | 498 | 61  |
| 8,840 | 31 | 3 | 293 | 29 | 22 | 7 | 155 | 22 | 501 | 61  |
| 8,841 | 31 | 3 | 289 | 29 | 22 | 7 | 155 | 22 | 497 | 61  |
| 8,842 | 30 | 3 | 268 | 30 | 22 | 7 | 145 | 22 | 465 | 62  |
| 8,843 | 29 | 3 | 251 | 30 | 19 | 7 | 134 | 22 | 433 | 62  |
| 8,844 | 27 | 3 | 238 | 30 | 16 | 7 | 129 | 22 | 410 | 62  |



|       |    |   |     |    |    |   |     |    |     |    |
|-------|----|---|-----|----|----|---|-----|----|-----|----|
| 8,845 | 37 | 3 | 262 | 32 | 16 | 7 | 138 | 22 | 453 | 64 |
| 8,846 | 37 | 3 | 263 | 32 | 16 | 7 | 138 | 22 | 454 | 64 |
| 8,847 | 37 | 3 | 262 | 32 | 16 | 7 | 135 | 22 | 450 | 64 |
| 8,848 | 37 | 3 | 261 | 32 | 16 | 7 | 135 | 22 | 449 | 64 |
| 8,849 | 40 | 3 | 287 | 32 | 17 | 7 | 145 | 23 | 489 | 65 |
| 8,850 | 40 | 3 | 287 | 31 | 17 | 6 | 145 | 21 | 489 | 61 |
| 8,851 | 41 | 3 | 307 | 30 | 18 | 6 | 150 | 18 | 516 | 57 |
| 8,852 | 41 | 3 | 307 | 27 | 18 | 4 | 150 | 17 | 516 | 51 |
| 8,853 | 41 | 3 | 307 | 24 | 18 | 4 | 150 | 18 | 516 | 49 |
| 8,854 | 51 | 3 | 387 | 19 | 22 | 2 | 191 | 15 | 651 | 39 |
| 8,855 | 51 | 3 | 388 | 16 | 22 | 1 | 194 | 12 | 655 | 32 |
| 8,856 | 51 | 3 | 387 | 16 | 21 | 1 | 193 | 12 | 652 | 32 |
| 8,857 | 51 | 3 | 386 | 9  | 21 | 1 | 193 | 12 | 651 | 25 |
| 8,858 | 51 | 3 | 386 | 9  | 21 | 1 | 192 | 11 | 650 | 24 |
| 8,859 | 51 | 3 | 386 | 9  | 21 | 1 | 192 | 11 | 650 | 24 |
| 8,860 | 51 | 3 | 386 | 9  | 21 | 1 | 192 | 11 | 650 | 24 |
| 8,861 | 51 | 3 | 386 | 9  | 21 | 1 | 192 | 11 | 650 | 24 |
| 8,862 | 51 | 3 | 386 | 8  | 21 | 1 | 192 | 11 | 650 | 23 |
| 8,863 | 51 | 3 | 386 | 9  | 21 | 1 | 192 | 11 | 650 | 24 |
| 8,864 | 51 | 2 | 385 | 9  | 21 | 1 | 192 | 11 | 649 | 23 |
| 8,865 | 51 | 2 | 385 | 9  | 21 | 1 | 193 | 11 | 650 | 23 |
| 8,866 | 51 | 2 | 385 | 9  | 21 | 1 | 193 | 11 | 650 | 23 |
| 8,867 | 52 | 2 | 384 | 9  | 21 | 1 | 193 | 11 | 650 | 23 |
| 8,868 | 52 | 2 | 383 | 9  | 21 | 1 | 193 | 11 | 649 | 23 |
| 8,869 | 52 | 2 | 384 | 9  | 21 | 1 | 193 | 11 | 650 | 23 |
| 8,870 | 52 | 2 | 384 | 9  | 21 | 1 | 193 | 11 | 650 | 23 |
| 8,871 | 51 | 2 | 388 | 9  | 21 | 0 | 195 | 10 | 655 | 21 |
| 8,872 | 51 | 2 | 377 | 9  | 19 | 0 | 195 | 10 | 642 | 21 |
| 8,873 | 50 | 2 | 378 | 9  | 19 | 0 | 195 | 10 | 642 | 21 |
| 8,874 | 51 | 2 | 372 | 9  | 19 | 0 | 190 | 10 | 632 | 21 |
| 8,875 | 51 | 2 | 365 | 9  | 19 | 0 | 189 | 10 | 624 | 21 |
| 8,876 | 44 | 2 | 318 | 9  | 14 | 0 | 151 | 10 | 527 | 21 |
| 8,877 | 44 | 2 | 319 | 9  | 15 | 0 | 151 | 11 | 529 | 22 |
| 8,878 | 36 | 3 | 294 | 9  | 13 | 0 | 138 | 12 | 481 | 24 |
| 8,879 | 30 | 3 | 212 | 9  | 11 | 0 | 108 | 12 | 361 | 24 |
| 8,880 | 30 | 3 | 209 | 11 | 10 | 0 | 98  | 12 | 347 | 26 |
| 8,881 | 31 | 3 | 205 | 10 | 9  | 0 | 96  | 12 | 341 | 25 |
| 8,882 | 33 | 3 | 210 | 9  | 9  | 0 | 101 | 12 | 353 | 24 |
| 8,883 | 33 | 3 | 204 | 9  | 8  | 0 | 97  | 12 | 342 | 24 |
| 8,884 | 33 | 3 | 206 | 9  | 8  | 0 | 101 | 12 | 348 | 24 |
| 8,885 | 33 | 3 | 207 | 9  | 8  | 0 | 102 | 12 | 350 | 24 |

|       |    |   |     |    |    |   |     |    |     |    |
|-------|----|---|-----|----|----|---|-----|----|-----|----|
| 8,886 | 33 | 3 | 208 | 9  | 9  | 0 | 103 | 12 | 353 | 24 |
| 8,887 | 33 | 3 | 212 | 9  | 9  | 0 | 107 | 12 | 361 | 24 |
| 8,888 | 33 | 3 | 212 | 9  | 9  | 0 | 107 | 12 | 361 | 24 |
| 8,889 | 32 | 3 | 208 | 9  | 9  | 0 | 106 | 12 | 355 | 24 |
| 8,890 | 32 | 3 | 207 | 10 | 9  | 0 | 106 | 12 | 354 | 25 |
| 8,891 | 32 | 3 | 206 | 10 | 9  | 0 | 107 | 12 | 354 | 25 |
| 8,892 | 32 | 3 | 208 | 7  | 9  | 0 | 107 | 12 | 356 | 22 |
| 8,893 | 32 | 3 | 208 | 7  | 9  | 0 | 107 | 12 | 356 | 22 |
| 8,894 | 31 | 3 | 194 | 7  | 9  | 0 | 103 | 12 | 337 | 22 |
| 8,895 | 30 | 3 | 194 | 7  | 9  | 0 | 102 | 12 | 335 | 22 |
| 8,896 | 23 | 3 | 195 | 7  | 9  | 0 | 94  | 12 | 321 | 22 |
| 8,897 | 27 | 3 | 250 | 8  | 14 | 0 | 116 | 12 | 407 | 23 |
| 8,898 | 27 | 3 | 263 | 9  | 14 | 1 | 123 | 13 | 427 | 26 |
| 8,899 | 24 | 3 | 242 | 11 | 13 | 1 | 118 | 16 | 397 | 31 |
| 8,900 | 24 | 3 | 235 | 11 | 13 | 1 | 113 | 15 | 385 | 30 |
| 8,901 | 23 | 3 | 215 | 12 | 12 | 1 | 108 | 15 | 358 | 31 |
| 8,902 | 23 | 3 | 207 | 12 | 11 | 1 | 104 | 14 | 345 | 30 |
| 8,903 | 16 | 3 | 176 | 11 | 11 | 1 | 86  | 12 | 289 | 27 |
| 8,904 | 12 | 3 | 145 | 11 | 10 | 1 | 68  | 10 | 235 | 25 |
| 8,905 | 12 | 3 | 135 | 12 | 8  | 1 | 67  | 9  | 222 | 25 |
| 8,906 | 12 | 2 | 133 | 10 | 8  | 1 | 64  | 7  | 217 | 20 |
| 8,907 | 12 | 1 | 133 | 10 | 8  | 1 | 64  | 7  | 217 | 19 |
| 8,908 | 12 | 1 | 133 | 8  | 8  | 1 | 64  | 7  | 217 | 17 |
| 8,909 | 12 | 1 | 134 | 10 | 8  | 1 | 64  | 7  | 218 | 19 |
| 8,910 | 12 | 1 | 134 | 11 | 8  | 1 | 65  | 7  | 219 | 20 |
| 8,911 | 12 | 2 | 134 | 11 | 8  | 1 | 66  | 7  | 220 | 21 |
| 8,912 | 12 | 2 | 134 | 12 | 8  | 1 | 66  | 7  | 220 | 22 |
| 8,913 | 12 | 2 | 134 | 13 | 8  | 1 | 68  | 7  | 222 | 23 |
| 8,914 | 12 | 2 | 134 | 12 | 8  | 1 | 68  | 7  | 222 | 22 |
| 8,915 | 12 | 2 | 134 | 12 | 8  | 1 | 68  | 7  | 222 | 22 |
| 8,916 | 14 | 2 | 143 | 13 | 8  | 1 | 73  | 7  | 238 | 23 |
| 8,917 | 13 | 2 | 144 | 15 | 8  | 1 | 73  | 14 | 238 | 32 |
| 8,918 | 13 | 3 | 144 | 15 | 8  | 1 | 73  | 14 | 238 | 33 |
| 8,919 | 13 | 3 | 151 | 18 | 8  | 1 | 78  | 14 | 250 | 36 |
| 8,920 | 14 | 3 | 151 | 18 | 8  | 1 | 79  | 14 | 252 | 36 |
| 8,921 | 14 | 3 | 153 | 26 | 8  | 1 | 79  | 14 | 254 | 44 |
| 8,922 | 14 | 3 | 148 | 26 | 8  | 1 | 76  | 14 | 246 | 44 |
| 8,923 | 14 | 3 | 146 | 26 | 8  | 1 | 78  | 14 | 246 | 44 |
| 8,924 | 14 | 3 | 147 | 26 | 8  | 1 | 80  | 14 | 249 | 44 |
| 8,925 | 13 | 3 | 140 | 26 | 7  | 1 | 80  | 14 | 240 | 44 |
| 8,926 | 16 | 3 | 170 | 26 | 7  | 1 | 91  | 14 | 284 | 44 |

|       |    |   |     |    |   |   |    |    |     |    |
|-------|----|---|-----|----|---|---|----|----|-----|----|
| 8,927 | 16 | 3 | 175 | 26 | 8 | 1 | 90 | 13 | 289 | 43 |
| 8,928 | 18 | 3 | 174 | 26 | 8 | 1 | 91 | 13 | 291 | 43 |
| 8,929 | 17 | 2 | 173 | 26 | 8 | 1 | 82 | 12 | 280 | 41 |
| 8,930 | 17 | 2 | 173 | 26 | 8 | 1 | 82 | 12 | 280 | 41 |
| 8,931 | 17 | 2 | 172 | 26 | 9 | 1 | 82 | 12 | 280 | 41 |
| 8,932 | 16 | 2 | 170 | 24 | 9 | 1 | 81 | 12 | 276 | 39 |
| 8,933 | 14 | 2 | 165 | 24 | 9 | 1 | 76 | 12 | 264 | 39 |
| 8,934 | 14 | 2 | 162 | 24 | 9 | 1 | 72 | 12 | 257 | 39 |
| 8,935 | 14 | 2 | 161 | 24 | 9 | 1 | 71 | 12 | 255 | 39 |
| 8,936 | 14 | 2 | 160 | 24 | 8 | 1 | 70 | 12 | 252 | 39 |
| 8,937 | 14 | 2 | 160 | 24 | 8 | 1 | 70 | 12 | 252 | 39 |
| 8,938 | 14 | 2 | 155 | 24 | 8 | 1 | 66 | 12 | 243 | 39 |
| 8,939 | 14 | 2 | 156 | 24 | 8 | 1 | 66 | 12 | 244 | 39 |
| 8,940 | 14 | 2 | 156 | 23 | 8 | 1 | 66 | 12 | 244 | 38 |
| 8,941 | 14 | 2 | 155 | 23 | 8 | 1 | 66 | 12 | 243 | 38 |
| 8,942 | 14 | 2 | 155 | 23 | 8 | 1 | 65 | 13 | 242 | 39 |
| 8,943 | 14 | 2 | 155 | 25 | 8 | 1 | 65 | 13 | 242 | 41 |
| 8,944 | 16 | 2 | 155 | 26 | 8 | 1 | 66 | 13 | 245 | 42 |
| 8,945 | 14 | 3 | 153 | 26 | 9 | 1 | 67 | 15 | 243 | 45 |
| 8,946 | 14 | 3 | 152 | 31 | 9 | 1 | 68 | 15 | 243 | 50 |
| 8,947 | 14 | 3 | 149 | 31 | 9 | 1 | 68 | 16 | 240 | 51 |
| 8,948 | 10 | 3 | 92  | 30 | 4 | 1 | 45 | 17 | 151 | 51 |
| 8,949 | 10 | 3 | 96  | 30 | 5 | 0 | 54 | 16 | 165 | 49 |
| 8,950 | 10 | 3 | 119 | 31 | 6 | 0 | 60 | 13 | 195 | 47 |
| 8,951 | 10 | 3 | 119 | 32 | 6 | 0 | 60 | 15 | 195 | 50 |
| 8,952 | 10 | 3 | 120 | 31 | 6 | 0 | 60 | 15 | 196 | 49 |
| 8,953 | 10 | 3 | 128 | 31 | 6 | 0 | 60 | 15 | 204 | 49 |
| 8,954 | 10 | 3 | 128 | 31 | 6 | 0 | 61 | 15 | 205 | 49 |
| 8,955 | 10 | 3 | 128 | 31 | 6 | 0 | 61 | 15 | 205 | 49 |
| 8,956 | 10 | 3 | 131 | 30 | 6 | 0 | 62 | 16 | 209 | 49 |
| 8,957 | 10 | 3 | 131 | 30 | 6 | 0 | 61 | 16 | 208 | 49 |
| 8,958 | 10 | 3 | 132 | 30 | 6 | 0 | 61 | 17 | 209 | 50 |
| 8,959 | 10 | 3 | 132 | 30 | 6 | 0 | 61 | 17 | 209 | 50 |
| 8,960 | 10 | 3 | 132 | 33 | 6 | 0 | 61 | 17 | 209 | 53 |
| 8,961 | 10 | 3 | 132 | 34 | 6 | 0 | 61 | 17 | 209 | 54 |
| 8,962 | 10 | 2 | 146 | 34 | 6 | 0 | 62 | 17 | 224 | 53 |
| 8,963 | 10 | 2 | 148 | 33 | 6 | 0 | 63 | 17 | 227 | 52 |
| 8,964 | 10 | 2 | 151 | 32 | 6 | 1 | 65 | 18 | 232 | 53 |
| 8,965 | 10 | 2 | 152 | 33 | 6 | 3 | 65 | 18 | 233 | 56 |
| 8,966 | 8  | 3 | 146 | 39 | 6 | 4 | 63 | 27 | 223 | 73 |
| 8,967 | 8  | 3 | 143 | 39 | 6 | 4 | 59 | 27 | 216 | 73 |

|       |    |   |     |    |   |   |     |    |     |    |
|-------|----|---|-----|----|---|---|-----|----|-----|----|
| 8,968 | 8  | 3 | 150 | 37 | 6 | 4 | 71  | 20 | 235 | 64 |
| 8,969 | 8  | 2 | 147 | 37 | 6 | 4 | 68  | 22 | 229 | 65 |
| 8,970 | 8  | 2 | 144 | 34 | 6 | 4 | 68  | 22 | 226 | 62 |
| 8,971 | 7  | 2 | 145 | 26 | 6 | 4 | 67  | 22 | 225 | 54 |
| 8,972 | 7  | 2 | 143 | 26 | 6 | 4 | 67  | 22 | 223 | 54 |
| 8,973 | 7  | 2 | 142 | 26 | 6 | 4 | 65  | 22 | 220 | 54 |
| 8,974 | 7  | 2 | 140 | 27 | 6 | 4 | 65  | 23 | 218 | 56 |
| 8,975 | 7  | 2 | 140 | 28 | 6 | 5 | 65  | 27 | 218 | 62 |
| 8,976 | 7  | 2 | 136 | 28 | 6 | 5 | 64  | 27 | 213 | 62 |
| 8,977 | 4  | 2 | 106 | 28 | 6 | 5 | 55  | 27 | 171 | 62 |
| 8,978 | 6  | 4 | 109 | 30 | 5 | 5 | 64  | 27 | 184 | 66 |
| 8,979 | 4  | 4 | 109 | 30 | 4 | 5 | 64  | 28 | 181 | 67 |
| 8,980 | 4  | 4 | 105 | 30 | 4 | 5 | 64  | 28 | 177 | 67 |
| 8,981 | 5  | 4 | 107 | 30 | 4 | 5 | 68  | 28 | 184 | 67 |
| 8,982 | 5  | 4 | 109 | 30 | 3 | 5 | 69  | 28 | 186 | 67 |
| 8,983 | 5  | 5 | 109 | 31 | 3 | 5 | 69  | 28 | 186 | 69 |
| 8,984 | 5  | 5 | 114 | 31 | 3 | 5 | 69  | 29 | 191 | 70 |
| 8,985 | 5  | 6 | 114 | 31 | 3 | 5 | 69  | 29 | 191 | 71 |
| 8,986 | 9  | 6 | 126 | 31 | 4 | 5 | 76  | 29 | 215 | 71 |
| 8,987 | 10 | 6 | 126 | 31 | 4 | 5 | 76  | 29 | 216 | 71 |
| 8,988 | 10 | 6 | 129 | 31 | 4 | 5 | 77  | 29 | 220 | 71 |
| 8,989 | 10 | 6 | 129 | 31 | 4 | 5 | 77  | 29 | 220 | 71 |
| 8,990 | 13 | 6 | 138 | 31 | 5 | 5 | 87  | 30 | 243 | 72 |
| 8,991 | 13 | 6 | 150 | 31 | 5 | 5 | 95  | 30 | 263 | 72 |
| 8,992 | 13 | 6 | 149 | 32 | 5 | 5 | 97  | 32 | 264 | 75 |
| 8,993 | 13 | 6 | 149 | 32 | 5 | 5 | 97  | 31 | 264 | 74 |
| 8,994 | 13 | 6 | 148 | 31 | 5 | 5 | 97  | 31 | 263 | 73 |
| 8,995 | 11 | 6 | 150 | 32 | 5 | 5 | 97  | 32 | 263 | 75 |
| 8,996 | 11 | 5 | 147 | 35 | 4 | 5 | 97  | 32 | 259 | 77 |
| 8,997 | 14 | 5 | 159 | 31 | 6 | 5 | 106 | 32 | 285 | 73 |
| 8,998 | 16 | 5 | 169 | 35 | 6 | 5 | 107 | 32 | 298 | 77 |
| 8,999 | 17 | 5 | 163 | 35 | 6 | 5 | 96  | 31 | 282 | 76 |
| 9,000 | 20 | 5 | 153 | 43 | 5 | 6 | 98  | 32 | 276 | 86 |
| 9,001 | 20 | 6 | 148 | 43 | 5 | 6 | 96  | 32 | 269 | 87 |
| 9,002 | 20 | 6 | 144 | 42 | 5 | 6 | 96  | 30 | 265 | 84 |
| 9,003 | 20 | 9 | 150 | 45 | 5 | 6 | 98  | 31 | 273 | 91 |
| 9,004 | 20 | 9 | 146 | 45 | 5 | 6 | 98  | 32 | 269 | 92 |
| 9,005 | 20 | 9 | 146 | 45 | 5 | 6 | 96  | 31 | 267 | 91 |
| 9,006 | 20 | 9 | 146 | 45 | 5 | 6 | 96  | 31 | 267 | 91 |
| 9,007 | 20 | 9 | 143 | 46 | 5 | 6 | 97  | 31 | 265 | 92 |
| 9,008 | 20 | 9 | 142 | 46 | 5 | 6 | 97  | 31 | 264 | 92 |

|       |    |    |     |    |   |   |    |    |     |    |
|-------|----|----|-----|----|---|---|----|----|-----|----|
| 9,009 | 20 | 9  | 142 | 46 | 5 | 6 | 97 | 30 | 264 | 91 |
| 9,010 | 20 | 9  | 141 | 43 | 5 | 6 | 97 | 30 | 263 | 88 |
| 9,011 | 20 | 10 | 141 | 43 | 5 | 6 | 97 | 34 | 263 | 93 |
| 9,012 | 20 | 10 | 127 | 41 | 5 | 6 | 96 | 34 | 248 | 91 |
| 9,013 | 20 | 10 | 125 | 41 | 5 | 6 | 95 | 34 | 245 | 91 |
| 9,014 | 20 | 10 | 124 | 41 | 5 | 6 | 95 | 34 | 244 | 91 |
| 9,015 | 20 | 10 | 122 | 42 | 5 | 5 | 91 | 37 | 238 | 94 |
| 9,016 | 20 | 10 | 121 | 41 | 5 | 3 | 92 | 38 | 238 | 92 |
| 9,017 | 20 | 9  | 120 | 34 | 5 | 2 | 89 | 30 | 234 | 75 |
| 9,018 | 20 | 9  | 118 | 35 | 5 | 2 | 87 | 30 | 230 | 76 |
| 9,019 | 20 | 9  | 113 | 35 | 5 | 2 | 80 | 31 | 218 | 77 |
| 9,020 | 20 | 9  | 112 | 35 | 5 | 3 | 78 | 29 | 215 | 76 |
| 9,021 | 20 | 9  | 112 | 35 | 5 | 3 | 78 | 29 | 215 | 76 |
| 9,022 | 20 | 9  | 112 | 35 | 5 | 3 | 78 | 29 | 215 | 76 |
| 9,023 | 20 | 9  | 112 | 36 | 5 | 3 | 78 | 29 | 215 | 77 |
| 9,024 | 20 | 9  | 112 | 36 | 5 | 3 | 77 | 30 | 214 | 78 |
| 9,025 | 20 | 9  | 112 | 35 | 5 | 3 | 76 | 29 | 213 | 76 |
| 9,026 | 20 | 9  | 112 | 34 | 5 | 2 | 76 | 25 | 213 | 70 |
| 9,027 | 20 | 9  | 111 | 35 | 5 | 2 | 76 | 25 | 212 | 71 |
| 9,028 | 20 | 9  | 110 | 35 | 5 | 2 | 74 | 25 | 209 | 71 |
| 9,029 | 18 | 7  | 99  | 33 | 5 | 2 | 62 | 24 | 184 | 66 |
| 9,030 | 18 | 7  | 99  | 33 | 5 | 2 | 62 | 24 | 184 | 66 |
| 9,031 | 17 | 7  | 98  | 33 | 5 | 2 | 59 | 24 | 179 | 66 |
| 9,032 | 17 | 7  | 97  | 34 | 5 | 2 | 59 | 24 | 178 | 67 |
| 9,033 | 17 | 6  | 96  | 34 | 5 | 2 | 58 | 24 | 176 | 66 |
| 9,034 | 17 | 6  | 92  | 34 | 5 | 2 | 58 | 23 | 172 | 65 |
| 9,035 | 17 | 6  | 92  | 34 | 5 | 2 | 58 | 23 | 172 | 65 |
| 9,036 | 14 | 5  | 80  | 34 | 4 | 2 | 53 | 23 | 151 | 64 |
| 9,037 | 13 | 5  | 80  | 34 | 4 | 2 | 53 | 24 | 150 | 65 |
| 9,038 | 13 | 5  | 80  | 34 | 4 | 3 | 52 | 24 | 149 | 66 |
| 9,039 | 14 | 5  | 84  | 34 | 4 | 3 | 54 | 24 | 156 | 66 |
| 9,040 | 11 | 5  | 89  | 33 | 4 | 3 | 56 | 21 | 160 | 62 |
| 9,041 | 12 | 5  | 85  | 33 | 4 | 3 | 54 | 21 | 155 | 62 |
| 9,042 | 12 | 5  | 73  | 33 | 4 | 3 | 44 | 21 | 133 | 62 |
| 9,043 | 12 | 5  | 73  | 33 | 4 | 3 | 42 | 21 | 131 | 62 |
| 9,044 | 12 | 5  | 73  | 33 | 4 | 3 | 42 | 21 | 131 | 62 |
| 9,045 | 12 | 5  | 73  | 32 | 4 | 3 | 44 | 21 | 133 | 61 |
| 9,046 | 12 | 5  | 73  | 27 | 4 | 3 | 43 | 18 | 132 | 53 |
| 9,047 | 12 | 5  | 73  | 27 | 4 | 3 | 43 | 18 | 132 | 53 |
| 9,048 | 9  | 6  | 61  | 26 | 2 | 3 | 35 | 18 | 107 | 53 |
| 9,049 | 8  | 6  | 49  | 22 | 2 | 3 | 35 | 17 | 94  | 48 |

|       |    |   |     |    |    |   |     |    |     |    |
|-------|----|---|-----|----|----|---|-----|----|-----|----|
| 9,050 | 7  | 7 | 43  | 22 | 1  | 3 | 31  | 17 | 82  | 49 |
| 9,051 | 4  | 7 | 38  | 13 | 1  | 2 | 28  | 16 | 71  | 38 |
| 9,052 | 5  | 6 | 44  | 10 | 2  | 2 | 34  | 16 | 85  | 34 |
| 9,053 | 5  | 3 | 40  | 7  | 2  | 2 | 32  | 15 | 79  | 27 |
| 9,054 | 5  | 3 | 38  | 7  | 2  | 2 | 33  | 15 | 78  | 27 |
| 9,055 | 5  | 3 | 38  | 7  | 2  | 2 | 35  | 15 | 80  | 27 |
| 9,056 | 5  | 3 | 38  | 8  | 2  | 2 | 36  | 15 | 81  | 28 |
| 9,057 | 5  | 3 | 38  | 8  | 2  | 2 | 36  | 15 | 81  | 28 |
| 9,058 | 5  | 3 | 40  | 7  | 2  | 2 | 36  | 14 | 83  | 26 |
| 9,059 | 5  | 3 | 40  | 7  | 2  | 2 | 36  | 14 | 83  | 26 |
| 9,060 | 5  | 2 | 41  | 7  | 2  | 2 | 36  | 12 | 84  | 23 |
| 9,061 | 5  | 2 | 41  | 8  | 2  | 2 | 36  | 12 | 84  | 24 |
| 9,062 | 5  | 2 | 41  | 8  | 2  | 3 | 36  | 12 | 84  | 25 |
| 9,063 | 5  | 2 | 46  | 9  | 2  | 3 | 39  | 12 | 92  | 26 |
| 9,064 | 5  | 2 | 49  | 10 | 2  | 3 | 40  | 18 | 96  | 33 |
| 9,065 | 5  | 2 | 49  | 10 | 2  | 3 | 40  | 18 | 96  | 33 |
| 9,066 | 5  | 2 | 54  | 11 | 2  | 3 | 49  | 14 | 110 | 30 |
| 9,067 | 5  | 3 | 57  | 12 | 2  | 3 | 49  | 12 | 113 | 30 |
| 9,068 | 5  | 3 | 57  | 12 | 2  | 3 | 49  | 12 | 113 | 30 |
| 9,069 | 5  | 3 | 64  | 19 | 2  | 4 | 61  | 17 | 132 | 43 |
| 9,070 | 5  | 3 | 64  | 19 | 2  | 4 | 61  | 16 | 132 | 42 |
| 9,071 | 5  | 5 | 64  | 20 | 2  | 3 | 62  | 22 | 133 | 50 |
| 9,072 | 5  | 5 | 63  | 22 | 2  | 3 | 62  | 26 | 132 | 56 |
| 9,073 | 8  | 5 | 106 | 22 | 5  | 3 | 151 | 26 | 270 | 56 |
| 9,074 | 8  | 5 | 106 | 21 | 5  | 3 | 152 | 25 | 271 | 54 |
| 9,075 | 8  | 5 | 106 | 21 | 5  | 3 | 152 | 25 | 271 | 54 |
| 9,076 | 8  | 5 | 108 | 21 | 5  | 3 | 153 | 25 | 274 | 54 |
| 9,077 | 8  | 5 | 108 | 21 | 5  | 3 | 153 | 25 | 274 | 54 |
| 9,078 | 8  | 5 | 108 | 20 | 5  | 3 | 153 | 25 | 274 | 53 |
| 9,079 | 8  | 5 | 108 | 22 | 5  | 3 | 154 | 26 | 275 | 56 |
| 9,080 | 8  | 5 | 108 | 22 | 5  | 3 | 154 | 26 | 275 | 56 |
| 9,081 | 8  | 5 | 109 | 22 | 5  | 3 | 154 | 26 | 276 | 56 |
| 9,082 | 8  | 5 | 109 | 23 | 5  | 3 | 154 | 26 | 276 | 57 |
| 9,083 | 8  | 5 | 109 | 22 | 5  | 3 | 154 | 26 | 276 | 56 |
| 9,084 | 9  | 5 | 110 | 22 | 5  | 3 | 160 | 26 | 284 | 56 |
| 9,085 | 9  | 5 | 109 | 22 | 5  | 3 | 160 | 26 | 283 | 56 |
| 9,086 | 9  | 5 | 109 | 22 | 5  | 3 | 160 | 26 | 283 | 56 |
| 9,087 | 11 | 5 | 146 | 22 | 6  | 3 | 176 | 26 | 339 | 56 |
| 9,088 | 18 | 5 | 218 | 23 | 12 | 3 | 256 | 25 | 504 | 56 |
| 9,089 | 34 | 5 | 352 | 23 | 23 | 2 | 368 | 25 | 777 | 55 |
| 9,090 | 34 | 5 | 362 | 23 | 24 | 2 | 376 | 25 | 796 | 55 |

|       |    |   |     |    |    |   |     |    |       |    |
|-------|----|---|-----|----|----|---|-----|----|-------|----|
| 9,091 | 36 | 5 | 416 | 23 | 31 | 2 | 431 | 25 | 914   | 55 |
| 9,092 | 35 | 5 | 415 | 23 | 31 | 2 | 441 | 25 | 922   | 55 |
| 9,093 | 35 | 5 | 416 | 23 | 31 | 2 | 441 | 25 | 923   | 55 |
| 9,094 | 35 | 5 | 417 | 23 | 31 | 2 | 444 | 25 | 927   | 55 |
| 9,095 | 35 | 6 | 417 | 23 | 31 | 2 | 444 | 25 | 927   | 56 |
| 9,096 | 35 | 6 | 415 | 23 | 31 | 2 | 442 | 25 | 923   | 56 |
| 9,097 | 35 | 6 | 417 | 23 | 31 | 2 | 444 | 25 | 927   | 56 |
| 9,098 | 35 | 6 | 416 | 23 | 31 | 2 | 443 | 25 | 925   | 56 |
| 9,099 | 35 | 5 | 420 | 28 | 31 | 3 | 447 | 25 | 933   | 61 |
| 9,100 | 35 | 5 | 420 | 29 | 31 | 3 | 450 | 25 | 936   | 62 |
| 9,101 | 34 | 4 | 417 | 29 | 31 | 3 | 449 | 26 | 931   | 62 |
| 9,102 | 34 | 5 | 415 | 29 | 30 | 3 | 445 | 26 | 924   | 63 |
| 9,103 | 34 | 6 | 411 | 33 | 30 | 3 | 442 | 34 | 917   | 76 |
| 9,104 | 34 | 6 | 411 | 33 | 30 | 3 | 442 | 34 | 917   | 76 |
| 9,105 | 34 | 6 | 416 | 38 | 30 | 3 | 445 | 35 | 925   | 82 |
| 9,106 | 35 | 7 | 418 | 38 | 30 | 3 | 445 | 35 | 928   | 83 |
| 9,107 | 35 | 7 | 418 | 38 | 30 | 3 | 444 | 35 | 927   | 83 |
| 9,108 | 35 | 7 | 417 | 39 | 30 | 3 | 444 | 35 | 926   | 84 |
| 9,109 | 36 | 7 | 420 | 39 | 30 | 3 | 453 | 35 | 939   | 84 |
| 9,110 | 36 | 7 | 420 | 40 | 30 | 3 | 453 | 36 | 939   | 86 |
| 9,111 | 36 | 7 | 419 | 40 | 30 | 3 | 453 | 34 | 938   | 84 |
| 9,112 | 39 | 7 | 431 | 38 | 30 | 2 | 455 | 34 | 955   | 81 |
| 9,113 | 40 | 7 | 432 | 39 | 30 | 2 | 456 | 34 | 958   | 82 |
| 9,114 | 40 | 7 | 430 | 38 | 30 | 2 | 453 | 28 | 953   | 75 |
| 9,115 | 40 | 7 | 456 | 38 | 31 | 2 | 469 | 28 | 996   | 75 |
| 9,116 | 40 | 7 | 453 | 39 | 31 | 2 | 462 | 29 | 986   | 77 |
| 9,117 | 40 | 7 | 451 | 37 | 31 | 2 | 460 | 29 | 982   | 75 |
| 9,118 | 48 | 6 | 489 | 36 | 31 | 2 | 512 | 29 | 1,080 | 73 |
| 9,119 | 48 | 6 | 496 | 28 | 31 | 1 | 522 | 24 | 1,097 | 59 |
| 9,120 | 52 | 6 | 504 | 28 | 32 | 1 | 538 | 24 | 1,126 | 59 |
| 9,121 | 51 | 6 | 477 | 28 | 29 | 1 | 476 | 24 | 1,033 | 59 |
| 9,122 | 51 | 4 | 479 | 28 | 29 | 1 | 466 | 19 | 1,025 | 52 |
| 9,123 | 51 | 4 | 479 | 26 | 29 | 1 | 464 | 15 | 1,023 | 46 |
| 9,124 | 51 | 4 | 479 | 26 | 29 | 1 | 464 | 15 | 1,023 | 46 |
| 9,125 | 51 | 4 | 479 | 26 | 29 | 1 | 463 | 15 | 1,022 | 46 |
| 9,126 | 51 | 4 | 479 | 27 | 29 | 1 | 463 | 16 | 1,022 | 48 |
| 9,127 | 51 | 4 | 477 | 27 | 29 | 1 | 462 | 16 | 1,019 | 48 |
| 9,128 | 51 | 4 | 477 | 27 | 29 | 1 | 462 | 16 | 1,019 | 48 |
| 9,129 | 51 | 4 | 479 | 27 | 29 | 1 | 463 | 17 | 1,022 | 49 |
| 9,130 | 51 | 4 | 480 | 25 | 29 | 1 | 463 | 16 | 1,023 | 46 |
| 9,131 | 51 | 4 | 478 | 25 | 29 | 1 | 462 | 16 | 1,020 | 46 |

|       |    |   |     |    |    |   |     |    |       |    |
|-------|----|---|-----|----|----|---|-----|----|-------|----|
| 9,132 | 51 | 4 | 478 | 25 | 29 | 1 | 462 | 16 | 1,020 | 46 |
| 9,133 | 51 | 4 | 477 | 24 | 29 | 1 | 458 | 16 | 1,015 | 45 |
| 9,134 | 50 | 4 | 477 | 25 | 29 | 1 | 456 | 16 | 1,012 | 46 |
| 9,135 | 50 | 4 | 477 | 25 | 29 | 1 | 456 | 16 | 1,012 | 46 |
| 9,136 | 50 | 4 | 477 | 25 | 29 | 1 | 456 | 16 | 1,012 | 46 |
| 9,137 | 50 | 4 | 474 | 25 | 29 | 2 | 456 | 17 | 1,009 | 48 |
| 9,138 | 47 | 4 | 441 | 25 | 28 | 2 | 438 | 17 | 954   | 48 |
| 9,139 | 40 | 4 | 367 | 24 | 22 | 2 | 357 | 17 | 786   | 47 |
| 9,140 | 23 | 4 | 229 | 24 | 11 | 2 | 241 | 17 | 504   | 47 |
| 9,141 | 23 | 4 | 218 | 24 | 10 | 2 | 234 | 17 | 485   | 47 |
| 9,142 | 21 | 4 | 154 | 24 | 2  | 2 | 169 | 17 | 346   | 47 |
| 9,143 | 21 | 4 | 154 | 24 | 2  | 2 | 161 | 17 | 338   | 47 |
| 9,144 | 21 | 5 | 153 | 24 | 2  | 2 | 161 | 17 | 337   | 48 |
| 9,145 | 21 | 5 | 152 | 24 | 2  | 2 | 158 | 17 | 333   | 48 |
| 9,146 | 21 | 4 | 150 | 24 | 2  | 2 | 156 | 17 | 329   | 47 |
| 9,147 | 21 | 4 | 150 | 24 | 2  | 2 | 156 | 17 | 329   | 47 |
| 9,148 | 21 | 4 | 149 | 24 | 2  | 2 | 156 | 17 | 328   | 47 |
| 9,149 | 21 | 4 | 145 | 19 | 2  | 1 | 150 | 17 | 318   | 41 |
| 9,150 | 20 | 4 | 141 | 18 | 2  | 1 | 145 | 17 | 308   | 40 |
| 9,151 | 20 | 4 | 141 | 18 | 2  | 1 | 145 | 17 | 308   | 40 |
| 9,152 | 20 | 4 | 141 | 18 | 2  | 1 | 145 | 16 | 308   | 39 |
| 9,153 | 20 | 2 | 143 | 14 | 2  | 1 | 145 | 8  | 310   | 25 |
| 9,154 | 20 | 2 | 143 | 14 | 2  | 1 | 144 | 8  | 309   | 25 |
| 9,155 | 20 | 2 | 142 | 14 | 2  | 1 | 143 | 8  | 307   | 25 |
| 9,156 | 20 | 2 | 138 | 9  | 2  | 1 | 140 | 6  | 300   | 18 |
| 9,157 | 30 | 1 | 195 | 8  | 16 | 1 | 180 | 6  | 421   | 16 |
| 9,158 | 30 | 1 | 195 | 8  | 16 | 1 | 180 | 6  | 421   | 16 |
| 9,159 | 29 | 1 | 195 | 6  | 16 | 1 | 175 | 5  | 415   | 13 |
| 9,160 | 29 | 1 | 196 | 6  | 17 | 1 | 177 | 5  | 419   | 13 |
| 9,161 | 27 | 1 | 196 | 6  | 17 | 1 | 176 | 5  | 416   | 13 |
| 9,162 | 26 | 1 | 184 | 6  | 17 | 1 | 175 | 5  | 402   | 13 |
| 9,163 | 28 | 1 | 218 | 5  | 18 | 1 | 190 | 5  | 454   | 12 |
| 9,164 | 27 | 1 | 216 | 5  | 18 | 1 | 189 | 6  | 450   | 13 |
| 9,165 | 27 | 1 | 215 | 4  | 18 | 1 | 189 | 5  | 449   | 11 |
| 9,166 | 27 | 1 | 186 | 5  | 17 | 1 | 172 | 5  | 402   | 12 |
| 9,167 | 22 | 1 | 173 | 5  | 17 | 1 | 138 | 5  | 350   | 12 |
| 9,168 | 20 | 1 | 158 | 6  | 17 | 1 | 128 | 5  | 323   | 13 |
| 9,169 | 19 | 1 | 146 | 6  | 17 | 1 | 119 | 5  | 301   | 13 |
| 9,170 | 19 | 1 | 137 | 6  | 17 | 1 | 106 | 5  | 279   | 13 |
| 9,171 | 16 | 1 | 124 | 6  | 16 | 1 | 81  | 5  | 237   | 13 |
| 9,172 | 14 | 2 | 110 | 5  | 16 | 1 | 65  | 4  | 205   | 12 |



|       |    |   |     |    |    |   |     |   |     |    |
|-------|----|---|-----|----|----|---|-----|---|-----|----|
| 9,173 | 14 | 2 | 107 | 5  | 16 | 1 | 65  | 4 | 202 | 12 |
| 9,174 | 14 | 2 | 107 | 5  | 16 | 1 | 65  | 4 | 202 | 12 |
| 9,175 | 14 | 2 | 107 | 7  | 16 | 1 | 65  | 5 | 202 | 15 |
| 9,176 | 14 | 2 | 107 | 7  | 16 | 1 | 65  | 5 | 202 | 15 |
| 9,177 | 15 | 2 | 110 | 6  | 17 | 1 | 66  | 4 | 208 | 13 |
| 9,178 | 15 | 2 | 111 | 7  | 17 | 1 | 66  | 4 | 209 | 14 |
| 9,179 | 15 | 2 | 109 | 7  | 17 | 1 | 65  | 4 | 206 | 14 |
| 9,180 | 15 | 2 | 108 | 8  | 17 | 1 | 64  | 3 | 204 | 14 |
| 9,181 | 15 | 2 | 112 | 8  | 17 | 1 | 64  | 5 | 208 | 16 |
| 9,182 | 16 | 2 | 122 | 8  | 18 | 1 | 69  | 5 | 225 | 16 |
| 9,183 | 38 | 2 | 187 | 8  | 24 | 1 | 109 | 5 | 358 | 16 |
| 9,184 | 38 | 2 | 193 | 7  | 24 | 1 | 110 | 5 | 365 | 15 |
| 9,185 | 39 | 2 | 198 | 6  | 25 | 1 | 111 | 5 | 373 | 14 |
| 9,186 | 40 | 2 | 209 | 6  | 26 | 1 | 122 | 5 | 397 | 14 |
| 9,187 | 40 | 2 | 216 | 6  | 27 | 0 | 128 | 4 | 411 | 12 |
| 9,188 | 40 | 2 | 217 | 6  | 27 | 0 | 129 | 4 | 413 | 12 |
| 9,189 | 40 | 2 | 216 | 6  | 27 | 0 | 129 | 4 | 412 | 12 |
| 9,190 | 40 | 2 | 216 | 6  | 27 | 0 | 129 | 4 | 412 | 12 |
| 9,191 | 40 | 2 | 216 | 6  | 27 | 0 | 129 | 5 | 412 | 13 |
| 9,192 | 40 | 2 | 216 | 6  | 27 | 0 | 129 | 5 | 412 | 13 |
| 9,193 | 40 | 2 | 216 | 6  | 27 | 0 | 129 | 5 | 412 | 13 |
| 9,194 | 40 | 2 | 216 | 6  | 27 | 0 | 129 | 5 | 412 | 13 |
| 9,195 | 40 | 1 | 216 | 6  | 27 | 0 | 129 | 5 | 412 | 12 |
| 9,196 | 40 | 1 | 216 | 6  | 27 | 0 | 129 | 6 | 412 | 13 |
| 9,197 | 40 | 1 | 216 | 6  | 27 | 0 | 129 | 6 | 412 | 13 |
| 9,198 | 40 | 1 | 216 | 6  | 27 | 0 | 129 | 6 | 412 | 13 |
| 9,199 | 40 | 1 | 216 | 6  | 27 | 0 | 129 | 6 | 412 | 13 |
| 9,200 | 40 | 1 | 216 | 6  | 27 | 0 | 129 | 6 | 412 | 13 |
| 9,201 | 40 | 1 | 216 | 6  | 27 | 0 | 129 | 6 | 412 | 13 |
| 9,202 | 40 | 1 | 216 | 6  | 27 | 0 | 129 | 6 | 412 | 13 |
| 9,203 | 41 | 1 | 218 | 6  | 28 | 0 | 133 | 6 | 420 | 13 |
| 9,204 | 41 | 1 | 218 | 7  | 28 | 0 | 134 | 6 | 421 | 14 |
| 9,205 | 40 | 1 | 212 | 7  | 28 | 0 | 138 | 6 | 418 | 14 |
| 9,206 | 40 | 1 | 205 | 7  | 29 | 0 | 135 | 6 | 409 | 14 |
| 9,207 | 40 | 1 | 204 | 9  | 29 | 0 | 132 | 7 | 405 | 17 |
| 9,208 | 30 | 1 | 162 | 10 | 15 | 0 | 97  | 7 | 304 | 18 |
| 9,209 | 30 | 1 | 162 | 11 | 15 | 0 | 95  | 7 | 302 | 19 |
| 9,210 | 30 | 1 | 159 | 11 | 15 | 0 | 94  | 7 | 298 | 19 |
| 9,211 | 30 | 1 | 159 | 11 | 14 | 0 | 91  | 7 | 294 | 19 |
| 9,212 | 30 | 1 | 158 | 11 | 14 | 0 | 91  | 7 | 293 | 19 |
| 9,213 | 28 | 1 | 128 | 11 | 13 | 0 | 78  | 7 | 247 | 19 |

|       |    |   |     |    |    |   |    |    |     |    |
|-------|----|---|-----|----|----|---|----|----|-----|----|
| 9,214 | 28 | 1 | 127 | 11 | 13 | 0 | 77 | 7  | 245 | 19 |
| 9,215 | 28 | 1 | 128 | 11 | 13 | 0 | 77 | 6  | 246 | 18 |
| 9,216 | 28 | 1 | 127 | 10 | 13 | 0 | 77 | 6  | 245 | 17 |
| 9,217 | 28 | 1 | 127 | 10 | 13 | 0 | 77 | 6  | 245 | 17 |
| 9,218 | 28 | 1 | 127 | 10 | 13 | 0 | 77 | 6  | 245 | 17 |
| 9,219 | 28 | 1 | 129 | 9  | 13 | 0 | 77 | 6  | 247 | 16 |
| 9,220 | 28 | 1 | 128 | 9  | 13 | 0 | 77 | 6  | 246 | 16 |
| 9,221 | 28 | 1 | 128 | 9  | 13 | 0 | 77 | 6  | 246 | 16 |
| 9,222 | 27 | 1 | 128 | 9  | 13 | 0 | 77 | 6  | 245 | 16 |
| 9,223 | 28 | 0 | 132 | 9  | 13 | 0 | 79 | 6  | 252 | 15 |
| 9,224 | 28 | 0 | 133 | 9  | 13 | 0 | 79 | 6  | 253 | 15 |
| 9,225 | 28 | 0 | 134 | 7  | 13 | 0 | 80 | 5  | 255 | 12 |
| 9,226 | 28 | 0 | 134 | 7  | 13 | 0 | 80 | 5  | 255 | 12 |
| 9,227 | 28 | 0 | 133 | 7  | 13 | 0 | 80 | 5  | 254 | 12 |
| 9,228 | 27 | 0 | 131 | 8  | 12 | 0 | 79 | 5  | 249 | 13 |
| 9,229 | 27 | 0 | 130 | 7  | 12 | 0 | 79 | 5  | 248 | 12 |
| 9,230 | 27 | 0 | 131 | 6  | 12 | 0 | 79 | 5  | 249 | 11 |
| 9,231 | 27 | 0 | 128 | 6  | 12 | 0 | 79 | 4  | 246 | 10 |
| 9,232 | 26 | 0 | 118 | 6  | 11 | 0 | 74 | 6  | 229 | 12 |
| 9,233 | 5  | 0 | 54  | 7  | 5  | 0 | 34 | 8  | 98  | 15 |
| 9,234 | 4  | 0 | 53  | 11 | 5  | 0 | 35 | 10 | 97  | 21 |
| 9,235 | 4  | 1 | 47  | 11 | 5  | 0 | 34 | 10 | 90  | 22 |
| 9,236 | 3  | 1 | 42  | 11 | 4  | 0 | 33 | 10 | 82  | 22 |
| 9,237 | 2  | 1 | 31  | 11 | 3  | 0 | 22 | 10 | 58  | 22 |
| 9,238 | 2  | 1 | 24  | 11 | 2  | 1 | 16 | 10 | 44  | 23 |
| 9,239 | 2  | 1 | 23  | 12 | 2  | 1 | 15 | 10 | 42  | 24 |
| 9,240 | 2  | 1 | 24  | 12 | 2  | 1 | 15 | 10 | 43  | 24 |
| 9,241 | 2  | 1 | 25  | 12 | 2  | 1 | 17 | 11 | 46  | 25 |
| 9,242 | 2  | 1 | 25  | 12 | 2  | 1 | 17 | 11 | 46  | 25 |
| 9,243 | 3  | 1 | 36  | 12 | 3  | 1 | 22 | 11 | 64  | 25 |
| 9,244 | 4  | 1 | 36  | 12 | 3  | 1 | 22 | 11 | 65  | 25 |
| 9,245 | 6  | 1 | 36  | 12 | 3  | 1 | 25 | 11 | 70  | 25 |
| 9,246 | 6  | 1 | 36  | 12 | 3  | 1 | 25 | 10 | 70  | 24 |
| 9,247 | 6  | 1 | 36  | 12 | 3  | 1 | 25 | 10 | 70  | 24 |
| 9,248 | 6  | 1 | 36  | 12 | 3  | 1 | 25 | 10 | 70  | 24 |
| 9,249 | 6  | 1 | 36  | 13 | 3  | 1 | 25 | 11 | 70  | 26 |
| 9,250 | 6  | 1 | 36  | 13 | 3  | 1 | 25 | 11 | 70  | 26 |
| 9,251 | 6  | 1 | 36  | 13 | 3  | 1 | 25 | 11 | 70  | 26 |
| 9,252 | 6  | 1 | 36  | 13 | 3  | 1 | 26 | 11 | 71  | 26 |
| 9,253 | 8  | 1 | 36  | 13 | 2  | 1 | 24 | 11 | 70  | 26 |
| 9,254 | 8  | 1 | 39  | 12 | 2  | 1 | 23 | 11 | 72  | 25 |

|       |    |   |     |    |   |   |    |    |     |    |
|-------|----|---|-----|----|---|---|----|----|-----|----|
| 9,255 | 8  | 1 | 39  | 12 | 2 | 1 | 22 | 11 | 71  | 25 |
| 9,256 | 10 | 1 | 44  | 12 | 2 | 1 | 18 | 11 | 74  | 25 |
| 9,257 | 10 | 1 | 45  | 10 | 1 | 1 | 22 | 10 | 78  | 22 |
| 9,258 | 10 | 1 | 45  | 10 | 1 | 1 | 22 | 10 | 78  | 22 |
| 9,259 | 10 | 1 | 50  | 8  | 1 | 1 | 25 | 10 | 86  | 20 |
| 9,260 | 10 | 1 | 52  | 8  | 1 | 1 | 26 | 10 | 89  | 20 |
| 9,261 | 10 | 1 | 54  | 8  | 1 | 1 | 28 | 10 | 93  | 20 |
| 9,262 | 10 | 1 | 52  | 8  | 1 | 1 | 30 | 10 | 93  | 20 |
| 9,263 | 10 | 1 | 51  | 8  | 1 | 1 | 30 | 10 | 92  | 20 |
| 9,264 | 10 | 1 | 50  | 8  | 1 | 1 | 29 | 10 | 90  | 20 |
| 9,265 | 10 | 1 | 50  | 8  | 1 | 1 | 29 | 10 | 90  | 20 |
| 9,266 | 10 | 1 | 49  | 8  | 1 | 1 | 29 | 11 | 89  | 21 |
| 9,267 | 10 | 1 | 49  | 8  | 1 | 2 | 29 | 11 | 89  | 22 |
| 9,268 | 12 | 1 | 73  | 8  | 2 | 2 | 46 | 11 | 133 | 22 |
| 9,269 | 13 | 1 | 72  | 8  | 2 | 2 | 46 | 12 | 133 | 23 |
| 9,270 | 13 | 1 | 76  | 8  | 3 | 2 | 48 | 12 | 140 | 23 |
| 9,271 | 12 | 1 | 74  | 8  | 3 | 2 | 46 | 12 | 135 | 23 |
| 9,272 | 12 | 1 | 71  | 8  | 3 | 2 | 46 | 12 | 132 | 23 |
| 9,273 | 12 | 1 | 73  | 8  | 3 | 2 | 49 | 13 | 137 | 24 |
| 9,274 | 12 | 1 | 73  | 8  | 3 | 2 | 49 | 13 | 137 | 24 |
| 9,275 | 12 | 1 | 76  | 8  | 3 | 2 | 55 | 13 | 146 | 24 |
| 9,276 | 12 | 1 | 75  | 8  | 3 | 2 | 54 | 13 | 144 | 24 |
| 9,277 | 13 | 1 | 84  | 9  | 3 | 2 | 60 | 13 | 160 | 25 |
| 9,278 | 13 | 1 | 86  | 8  | 4 | 2 | 62 | 13 | 165 | 24 |
| 9,279 | 13 | 1 | 96  | 8  | 6 | 2 | 82 | 13 | 197 | 24 |
| 9,280 | 13 | 1 | 97  | 9  | 6 | 2 | 82 | 13 | 198 | 25 |
| 9,281 | 13 | 1 | 96  | 9  | 6 | 2 | 82 | 12 | 197 | 24 |
| 9,282 | 13 | 1 | 97  | 9  | 6 | 2 | 84 | 10 | 200 | 22 |
| 9,283 | 13 | 1 | 97  | 8  | 6 | 2 | 85 | 8  | 201 | 19 |
| 9,284 | 15 | 1 | 100 | 8  | 6 | 2 | 90 | 8  | 211 | 19 |
| 9,285 | 15 | 1 | 100 | 4  | 6 | 2 | 89 | 6  | 210 | 13 |
| 9,286 | 15 | 0 | 100 | 4  | 6 | 2 | 89 | 6  | 210 | 12 |
| 9,287 | 15 | 0 | 101 | 4  | 6 | 2 | 89 | 6  | 211 | 12 |
| 9,288 | 15 | 0 | 101 | 4  | 6 | 2 | 89 | 6  | 211 | 12 |
| 9,289 | 15 | 0 | 101 | 4  | 6 | 1 | 89 | 6  | 211 | 11 |
| 9,290 | 16 | 0 | 106 | 4  | 6 | 2 | 89 | 7  | 217 | 13 |
| 9,291 | 16 | 0 | 110 | 4  | 6 | 2 | 93 | 7  | 225 | 13 |
| 9,292 | 16 | 0 | 110 | 4  | 6 | 2 | 92 | 5  | 224 | 11 |
| 9,293 | 16 | 0 | 115 | 4  | 7 | 2 | 94 | 5  | 232 | 11 |
| 9,294 | 17 | 0 | 109 | 4  | 6 | 2 | 93 | 5  | 225 | 11 |
| 9,295 | 17 | 0 | 133 | 4  | 6 | 2 | 94 | 6  | 250 | 12 |

|       |    |   |     |    |    |   |     |    |     |    |
|-------|----|---|-----|----|----|---|-----|----|-----|----|
| 9,296 | 15 | 0 | 133 | 4  | 6  | 2 | 92  | 6  | 246 | 12 |
| 9,297 | 17 | 0 | 150 | 4  | 6  | 2 | 99  | 6  | 272 | 12 |
| 9,298 | 17 | 0 | 150 | 4  | 6  | 2 | 101 | 6  | 274 | 12 |
| 9,299 | 17 | 0 | 150 | 4  | 6  | 2 | 101 | 6  | 274 | 12 |
| 9,300 | 17 | 0 | 150 | 3  | 6  | 2 | 101 | 5  | 274 | 10 |
| 9,301 | 17 | 0 | 150 | 3  | 6  | 2 | 102 | 5  | 275 | 10 |
| 9,302 | 17 | 0 | 150 | 3  | 6  | 2 | 102 | 5  | 275 | 10 |
| 9,303 | 18 | 0 | 158 | 3  | 7  | 2 | 106 | 5  | 289 | 10 |
| 9,304 | 16 | 0 | 196 | 3  | 8  | 2 | 127 | 5  | 347 | 10 |
| 9,305 | 19 | 0 | 213 | 4  | 9  | 2 | 138 | 5  | 379 | 11 |
| 9,306 | 19 | 0 | 245 | 4  | 11 | 2 | 143 | 9  | 418 | 15 |
| 9,307 | 17 | 1 | 250 | 10 | 12 | 2 | 143 | 13 | 422 | 26 |
| 9,308 | 17 | 1 | 250 | 11 | 12 | 2 | 139 | 13 | 418 | 27 |
| 9,309 | 17 | 1 | 249 | 11 | 12 | 2 | 138 | 13 | 416 | 27 |
| 9,310 | 17 | 1 | 246 | 12 | 12 | 2 | 136 | 14 | 411 | 29 |
| 9,311 | 17 | 1 | 242 | 12 | 12 | 2 | 134 | 14 | 405 | 29 |
| 9,312 | 17 | 1 | 243 | 17 | 12 | 2 | 133 | 15 | 405 | 35 |
| 9,313 | 17 | 1 | 243 | 17 | 12 | 2 | 131 | 15 | 403 | 35 |
| 9,314 | 17 | 1 | 245 | 17 | 12 | 2 | 135 | 15 | 409 | 35 |
| 9,315 | 17 | 1 | 246 | 17 | 12 | 2 | 137 | 15 | 412 | 35 |
| 9,316 | 17 | 1 | 249 | 17 | 12 | 2 | 138 | 14 | 416 | 34 |
| 9,317 | 18 | 1 | 253 | 17 | 13 | 2 | 141 | 14 | 425 | 34 |
| 9,318 | 18 | 1 | 251 | 18 | 12 | 2 | 134 | 17 | 415 | 38 |
| 9,319 | 17 | 1 | 254 | 19 | 12 | 2 | 136 | 17 | 419 | 39 |
| 9,320 | 25 | 1 | 296 | 20 | 13 | 2 | 155 | 16 | 489 | 39 |
| 9,321 | 27 | 1 | 300 | 20 | 12 | 2 | 158 | 16 | 497 | 39 |
| 9,322 | 27 | 1 | 302 | 20 | 12 | 3 | 162 | 15 | 503 | 39 |
| 9,323 | 27 | 1 | 305 | 20 | 13 | 3 | 162 | 15 | 507 | 39 |
| 9,324 | 27 | 1 | 304 | 21 | 13 | 3 | 161 | 15 | 505 | 40 |
| 9,325 | 27 | 1 | 304 | 21 | 13 | 4 | 161 | 15 | 505 | 41 |
| 9,326 | 27 | 1 | 300 | 20 | 13 | 4 | 153 | 15 | 493 | 40 |
| 9,327 | 27 | 1 | 301 | 20 | 13 | 4 | 153 | 15 | 494 | 40 |
| 9,328 | 26 | 1 | 292 | 20 | 13 | 4 | 148 | 15 | 479 | 40 |
| 9,329 | 26 | 1 | 291 | 20 | 12 | 4 | 145 | 16 | 474 | 41 |
| 9,330 | 26 | 1 | 281 | 22 | 10 | 4 | 128 | 16 | 445 | 43 |
| 9,331 | 26 | 1 | 280 | 21 | 10 | 4 | 128 | 16 | 444 | 42 |
| 9,332 | 26 | 1 | 280 | 21 | 10 | 4 | 128 | 16 | 444 | 42 |
| 9,333 | 26 | 1 | 280 | 21 | 10 | 4 | 127 | 16 | 443 | 42 |
| 9,334 | 26 | 1 | 280 | 21 | 10 | 4 | 126 | 16 | 442 | 42 |
| 9,335 | 24 | 1 | 277 | 21 | 10 | 4 | 121 | 16 | 432 | 42 |
| 9,336 | 24 | 1 | 277 | 21 | 10 | 4 | 121 | 16 | 432 | 42 |

|       |    |   |     |    |    |   |     |    |     |    |
|-------|----|---|-----|----|----|---|-----|----|-----|----|
| 9,337 | 24 | 1 | 276 | 21 | 10 | 4 | 122 | 16 | 432 | 42 |
| 9,338 | 24 | 1 | 276 | 21 | 10 | 4 | 122 | 16 | 432 | 42 |
| 9,339 | 24 | 1 | 275 | 21 | 10 | 4 | 122 | 16 | 431 | 42 |
| 9,340 | 24 | 1 | 275 | 21 | 10 | 4 | 122 | 16 | 431 | 42 |
| 9,341 | 23 | 1 | 270 | 20 | 10 | 3 | 122 | 15 | 425 | 39 |
| 9,342 | 23 | 1 | 265 | 20 | 10 | 3 | 119 | 15 | 417 | 39 |
| 9,343 | 23 | 1 | 265 | 20 | 10 | 3 | 119 | 15 | 417 | 39 |
| 9,344 | 23 | 1 | 260 | 20 | 9  | 3 | 118 | 15 | 410 | 39 |
| 9,345 | 21 | 1 | 256 | 20 | 9  | 3 | 114 | 15 | 400 | 39 |
| 9,346 | 20 | 1 | 232 | 20 | 9  | 3 | 112 | 14 | 373 | 38 |
| 9,347 | 20 | 1 | 231 | 20 | 9  | 3 | 111 | 14 | 371 | 38 |
| 9,348 | 18 | 1 | 214 | 20 | 9  | 3 | 104 | 14 | 345 | 38 |
| 9,349 | 18 | 1 | 214 | 20 | 9  | 3 | 102 | 14 | 343 | 38 |
| 9,350 | 18 | 1 | 213 | 20 | 9  | 3 | 102 | 15 | 342 | 39 |
| 9,351 | 18 | 1 | 211 | 20 | 8  | 3 | 100 | 15 | 337 | 39 |
| 9,352 | 18 | 1 | 211 | 21 | 8  | 3 | 100 | 17 | 337 | 42 |
| 9,353 | 17 | 1 | 207 | 24 | 8  | 3 | 99  | 19 | 331 | 47 |
| 9,354 | 17 | 1 | 201 | 25 | 8  | 3 | 96  | 19 | 322 | 48 |
| 9,355 | 16 | 1 | 168 | 25 | 7  | 3 | 78  | 19 | 269 | 48 |
| 9,356 | 13 | 1 | 145 | 24 | 6  | 3 | 66  | 19 | 230 | 47 |
| 9,357 | 13 | 1 | 109 | 23 | 4  | 3 | 61  | 15 | 187 | 42 |
| 9,358 | 13 | 0 | 99  | 17 | 3  | 3 | 60  | 11 | 175 | 31 |
| 9,359 | 13 | 0 | 99  | 17 | 3  | 3 | 60  | 11 | 175 | 31 |
| 9,360 | 14 | 0 | 98  | 17 | 3  | 2 | 62  | 11 | 177 | 30 |
| 9,361 | 14 | 0 | 98  | 16 | 3  | 2 | 63  | 10 | 178 | 28 |
| 9,362 | 14 | 0 | 98  | 11 | 3  | 2 | 63  | 9  | 178 | 22 |
| 9,363 | 14 | 0 | 98  | 11 | 3  | 2 | 64  | 9  | 179 | 22 |
| 9,364 | 14 | 0 | 96  | 11 | 3  | 2 | 60  | 9  | 173 | 22 |
| 9,365 | 14 | 0 | 94  | 11 | 3  | 2 | 59  | 9  | 170 | 22 |
| 9,366 | 14 | 0 | 92  | 11 | 3  | 2 | 57  | 10 | 166 | 23 |
| 9,367 | 14 | 0 | 88  | 11 | 3  | 2 | 56  | 10 | 161 | 23 |
| 9,368 | 13 | 0 | 84  | 14 | 2  | 2 | 54  | 11 | 153 | 27 |
| 9,369 | 11 | 0 | 71  | 13 | 2  | 1 | 48  | 8  | 132 | 22 |
| 9,370 | 11 | 0 | 63  | 12 | 2  | 1 | 42  | 8  | 118 | 21 |
| 9,371 | 3  | 0 | 20  | 11 | 1  | 1 | 23  | 8  | 47  | 20 |
| 9,372 | 1  | 0 | 12  | 11 | 1  | 1 | 16  | 8  | 30  | 20 |
| 9,373 | 1  | 0 | 10  | 12 | 1  | 0 | 11  | 8  | 23  | 20 |
| 9,374 | 1  | 1 | 7   | 13 | 0  | 0 | 11  | 8  | 19  | 22 |
| 9,375 | 1  | 1 | 6   | 12 | 0  | 0 | 11  | 8  | 18  | 21 |
| 9,376 | 1  | 1 | 6   | 12 | 0  | 0 | 11  | 9  | 18  | 22 |
| 9,377 | 1  | 1 | 6   | 13 | 0  | 0 | 11  | 11 | 18  | 25 |

|       |   |    |   |    |   |   |    |    |    |     |
|-------|---|----|---|----|---|---|----|----|----|-----|
| 9,378 | 1 | 1  | 5 | 17 | 0 | 0 | 11 | 11 | 17 | 29  |
| 9,379 | 1 | 2  | 5 | 17 | 0 | 0 | 11 | 13 | 17 | 32  |
| 9,380 | 1 | 2  | 4 | 17 | 0 | 0 | 11 | 12 | 16 | 31  |
| 9,381 | 1 | 2  | 4 | 15 | 0 | 0 | 10 | 12 | 15 | 29  |
| 9,382 | 1 | 2  | 4 | 16 | 0 | 0 | 10 | 13 | 15 | 31  |
| 9,383 | 1 | 2  | 4 | 17 | 0 | 0 | 10 | 13 | 15 | 32  |
| 9,384 | 1 | 2  | 2 | 17 | 0 | 0 | 9  | 13 | 12 | 32  |
| 9,385 | 1 | 2  | 2 | 19 | 0 | 0 | 9  | 13 | 12 | 34  |
| 9,386 | 2 | 2  | 2 | 20 | 0 | 0 | 9  | 14 | 13 | 36  |
| 9,387 | 2 | 2  | 2 | 20 | 0 | 0 | 8  | 14 | 12 | 36  |
| 9,388 | 2 | 2  | 2 | 20 | 0 | 0 | 8  | 14 | 12 | 36  |
| 9,389 | 2 | 2  | 2 | 20 | 0 | 0 | 8  | 14 | 12 | 36  |
| 9,390 | 2 | 2  | 2 | 20 | 0 | 0 | 8  | 14 | 12 | 36  |
| 9,391 | 2 | 2  | 2 | 20 | 0 | 0 | 8  | 14 | 12 | 36  |
| 9,392 | 2 | 2  | 2 | 20 | 0 | 0 | 8  | 14 | 12 | 36  |
| 9,393 | 2 | 2  | 2 | 20 | 0 | 0 | 8  | 15 | 12 | 37  |
| 9,394 | 2 | 2  | 2 | 20 | 0 | 0 | 8  | 15 | 12 | 37  |
| 9,395 | 2 | 2  | 2 | 20 | 0 | 0 | 8  | 15 | 12 | 37  |
| 9,396 | 2 | 2  | 2 | 21 | 0 | 0 | 8  | 16 | 12 | 39  |
| 9,397 | 2 | 2  | 2 | 21 | 0 | 0 | 8  | 16 | 12 | 39  |
| 9,398 | 2 | 2  | 2 | 21 | 0 | 0 | 8  | 16 | 12 | 39  |
| 9,399 | 2 | 3  | 2 | 21 | 0 | 0 | 8  | 16 | 12 | 40  |
| 9,400 | 2 | 3  | 3 | 21 | 0 | 0 | 8  | 15 | 13 | 39  |
| 9,401 | 2 | 3  | 3 | 21 | 0 | 0 | 8  | 15 | 13 | 39  |
| 9,402 | 2 | 3  | 3 | 20 | 0 | 0 | 8  | 13 | 13 | 36  |
| 9,403 | 2 | 3  | 3 | 20 | 0 | 0 | 8  | 13 | 13 | 36  |
| 9,404 | 2 | 3  | 2 | 18 | 0 | 0 | 6  | 11 | 10 | 32  |
| 9,405 | 2 | 3  | 2 | 17 | 0 | 0 | 6  | 11 | 10 | 31  |
| 9,406 | 2 | 3  | 2 | 17 | 0 | 0 | 6  | 11 | 10 | 31  |
| 9,407 | 2 | 3  | 2 | 19 | 0 | 0 | 6  | 11 | 10 | 33  |
| 9,408 | 2 | 3  | 2 | 19 | 0 | 0 | 6  | 11 | 10 | 33  |
| 9,409 | 2 | 3  | 2 | 19 | 0 | 0 | 6  | 11 | 10 | 33  |
| 9,410 | 2 | 3  | 4 | 19 | 0 | 0 | 6  | 11 | 12 | 33  |
| 9,411 | 1 | 3  | 4 | 19 | 0 | 0 | 4  | 11 | 9  | 33  |
| 9,412 | 1 | 4  | 4 | 19 | 0 | 0 | 3  | 11 | 8  | 34  |
| 9,413 | 1 | 4  | 4 | 22 | 0 | 1 | 3  | 12 | 8  | 39  |
| 9,414 | 1 | 4  | 3 | 34 | 0 | 1 | 3  | 16 | 7  | 55  |
| 9,415 | 1 | 11 | 3 | 63 | 0 | 2 | 3  | 36 | 7  | 112 |
| 9,416 | 1 | 11 | 3 | 64 | 0 | 2 | 3  | 36 | 7  | 113 |
| 9,417 | 1 | 13 | 7 | 80 | 0 | 3 | 6  | 39 | 14 | 135 |
| 9,418 | 1 | 14 | 7 | 84 | 0 | 3 | 5  | 39 | 13 | 140 |

|       |   |    |    |     |   |   |   |    |    |     |
|-------|---|----|----|-----|---|---|---|----|----|-----|
| 9,419 | 1 | 14 | 7  | 82  | 0 | 3 | 5 | 39 | 13 | 138 |
| 9,420 | 1 | 19 | 7  | 85  | 0 | 4 | 5 | 41 | 13 | 149 |
| 9,421 | 1 | 19 | 7  | 85  | 0 | 4 | 5 | 42 | 13 | 150 |
| 9,422 | 1 | 19 | 7  | 85  | 0 | 4 | 5 | 42 | 13 | 150 |
| 9,423 | 1 | 19 | 7  | 85  | 0 | 4 | 4 | 43 | 12 | 151 |
| 9,424 | 1 | 19 | 7  | 90  | 0 | 4 | 4 | 51 | 12 | 164 |
| 9,425 | 1 | 18 | 7  | 89  | 0 | 4 | 4 | 51 | 12 | 162 |
| 9,426 | 1 | 18 | 7  | 91  | 0 | 4 | 4 | 52 | 12 | 165 |
| 9,427 | 1 | 18 | 7  | 96  | 0 | 5 | 4 | 52 | 12 | 171 |
| 9,428 | 1 | 18 | 7  | 95  | 0 | 5 | 4 | 50 | 12 | 168 |
| 9,429 | 1 | 19 | 7  | 91  | 0 | 5 | 4 | 50 | 12 | 165 |
| 9,430 | 1 | 18 | 7  | 92  | 0 | 5 | 4 | 49 | 12 | 164 |
| 9,431 | 1 | 18 | 7  | 92  | 0 | 5 | 4 | 49 | 12 | 164 |
| 9,432 | 1 | 18 | 7  | 93  | 0 | 5 | 5 | 49 | 13 | 165 |
| 9,433 | 1 | 18 | 7  | 92  | 0 | 5 | 5 | 48 | 13 | 163 |
| 9,434 | 1 | 18 | 7  | 91  | 0 | 5 | 5 | 48 | 13 | 162 |
| 9,435 | 1 | 18 | 7  | 92  | 0 | 5 | 5 | 49 | 13 | 164 |
| 9,436 | 0 | 18 | 7  | 90  | 0 | 5 | 5 | 49 | 12 | 162 |
| 9,437 | 0 | 19 | 7  | 89  | 0 | 5 | 5 | 48 | 12 | 161 |
| 9,438 | 0 | 19 | 7  | 89  | 0 | 5 | 5 | 48 | 12 | 161 |
| 9,439 | 0 | 19 | 8  | 92  | 0 | 5 | 5 | 48 | 13 | 164 |
| 9,440 | 0 | 19 | 8  | 92  | 0 | 5 | 5 | 48 | 13 | 164 |
| 9,441 | 0 | 19 | 8  | 92  | 0 | 5 | 6 | 48 | 14 | 164 |
| 9,442 | 0 | 19 | 8  | 92  | 0 | 5 | 6 | 48 | 14 | 164 |
| 9,443 | 0 | 19 | 8  | 92  | 0 | 5 | 6 | 47 | 14 | 163 |
| 9,444 | 0 | 20 | 8  | 92  | 0 | 5 | 6 | 47 | 14 | 164 |
| 9,445 | 0 | 20 | 8  | 92  | 0 | 5 | 6 | 47 | 14 | 164 |
| 9,446 | 0 | 20 | 8  | 92  | 0 | 5 | 6 | 47 | 14 | 164 |
| 9,447 | 1 | 20 | 8  | 92  | 0 | 5 | 6 | 46 | 15 | 163 |
| 9,448 | 1 | 20 | 8  | 92  | 0 | 5 | 6 | 46 | 15 | 163 |
| 9,449 | 1 | 19 | 8  | 92  | 0 | 5 | 8 | 46 | 17 | 162 |
| 9,450 | 1 | 19 | 9  | 92  | 0 | 5 | 8 | 46 | 18 | 162 |
| 9,451 | 1 | 19 | 14 | 92  | 0 | 5 | 8 | 46 | 23 | 162 |
| 9,452 | 1 | 19 | 15 | 92  | 0 | 5 | 9 | 46 | 25 | 162 |
| 9,453 | 1 | 19 | 15 | 93  | 0 | 5 | 9 | 47 | 25 | 164 |
| 9,454 | 1 | 19 | 15 | 96  | 0 | 5 | 9 | 47 | 25 | 167 |
| 9,455 | 1 | 19 | 15 | 101 | 0 | 5 | 9 | 51 | 25 | 176 |
| 9,456 | 1 | 20 | 15 | 103 | 0 | 6 | 9 | 57 | 25 | 186 |
| 9,457 | 1 | 20 | 15 | 113 | 0 | 6 | 9 | 62 | 25 | 201 |
| 9,458 | 1 | 22 | 15 | 119 | 0 | 6 | 9 | 65 | 25 | 212 |
| 9,459 | 1 | 22 | 15 | 152 | 0 | 7 | 9 | 66 | 25 | 247 |

|       |   |    |    |     |   |    |   |     |    |     |
|-------|---|----|----|-----|---|----|---|-----|----|-----|
| 9,460 | 1 | 24 | 15 | 176 | 0 | 7  | 9 | 86  | 25 | 293 |
| 9,461 | 1 | 25 | 13 | 187 | 0 | 7  | 9 | 88  | 23 | 307 |
| 9,462 | 1 | 27 | 13 | 199 | 0 | 7  | 9 | 99  | 23 | 332 |
| 9,463 | 1 | 26 | 13 | 201 | 0 | 7  | 9 | 99  | 23 | 333 |
| 9,464 | 1 | 30 | 14 | 214 | 0 | 9  | 8 | 106 | 23 | 359 |
| 9,465 | 2 | 34 | 13 | 220 | 0 | 10 | 5 | 115 | 20 | 379 |
| 9,466 | 2 | 27 | 12 | 195 | 0 | 9  | 5 | 96  | 19 | 327 |
| 9,467 | 2 | 32 | 10 | 235 | 0 | 9  | 5 | 100 | 17 | 376 |
| 9,468 | 2 | 33 | 10 | 226 | 0 | 8  | 5 | 101 | 17 | 368 |
| 9,469 | 2 | 32 | 10 | 223 | 0 | 8  | 5 | 103 | 17 | 366 |
| 9,470 | 2 | 32 | 10 | 222 | 0 | 8  | 5 | 103 | 17 | 365 |
| 9,471 | 2 | 30 | 10 | 243 | 0 | 7  | 5 | 104 | 17 | 384 |
| 9,472 | 2 | 30 | 10 | 243 | 0 | 7  | 5 | 105 | 17 | 385 |
| 9,473 | 2 | 30 | 10 | 244 | 0 | 7  | 5 | 105 | 17 | 386 |
| 9,474 | 2 | 30 | 10 | 238 | 0 | 7  | 7 | 96  | 19 | 371 |
| 9,475 | 2 | 30 | 10 | 238 | 0 | 7  | 7 | 96  | 19 | 371 |
| 9,476 | 2 | 30 | 10 | 236 | 0 | 7  | 7 | 95  | 19 | 368 |
| 9,477 | 2 | 30 | 10 | 236 | 0 | 7  | 7 | 95  | 19 | 368 |
| 9,478 | 2 | 30 | 10 | 231 | 0 | 6  | 7 | 94  | 19 | 361 |
| 9,479 | 2 | 30 | 10 | 231 | 0 | 6  | 7 | 94  | 19 | 361 |
| 9,480 | 2 | 29 | 10 | 230 | 0 | 6  | 7 | 93  | 19 | 358 |
| 9,481 | 2 | 29 | 10 | 230 | 0 | 6  | 7 | 93  | 19 | 358 |
| 9,482 | 2 | 29 | 10 | 230 | 0 | 6  | 6 | 93  | 18 | 358 |
| 9,483 | 2 | 29 | 11 | 229 | 0 | 6  | 6 | 93  | 19 | 357 |
| 9,484 | 2 | 28 | 11 | 229 | 0 | 6  | 6 | 93  | 19 | 356 |
| 9,485 | 3 | 29 | 11 | 229 | 0 | 6  | 6 | 93  | 20 | 357 |
| 9,486 | 3 | 29 | 11 | 228 | 0 | 6  | 6 | 92  | 20 | 355 |
| 9,487 | 3 | 29 | 14 | 227 | 0 | 6  | 6 | 92  | 23 | 354 |
| 9,488 | 3 | 28 | 15 | 224 | 0 | 6  | 6 | 92  | 24 | 350 |
| 9,489 | 3 | 28 | 14 | 224 | 0 | 6  | 8 | 93  | 25 | 351 |
| 9,490 | 3 | 28 | 14 | 225 | 0 | 6  | 8 | 93  | 25 | 352 |
| 9,491 | 3 | 28 | 14 | 226 | 0 | 6  | 8 | 93  | 25 | 353 |
| 9,492 | 3 | 28 | 14 | 226 | 0 | 6  | 7 | 93  | 24 | 353 |
| 9,493 | 3 | 28 | 14 | 227 | 0 | 6  | 7 | 94  | 24 | 355 |
| 9,494 | 3 | 27 | 14 | 227 | 0 | 6  | 7 | 94  | 24 | 354 |
| 9,495 | 3 | 27 | 15 | 227 | 0 | 6  | 7 | 94  | 25 | 354 |
| 9,496 | 3 | 27 | 15 | 231 | 0 | 6  | 7 | 99  | 25 | 363 |
| 9,497 | 3 | 27 | 15 | 231 | 0 | 6  | 7 | 100 | 25 | 364 |
| 9,498 | 2 | 27 | 15 | 235 | 0 | 6  | 7 | 101 | 24 | 369 |
| 9,499 | 2 | 27 | 15 | 235 | 0 | 6  | 7 | 101 | 24 | 369 |
| 9,500 | 2 | 27 | 15 | 235 | 0 | 6  | 5 | 101 | 22 | 369 |



|       |   |    |    |     |   |   |   |     |    |     |
|-------|---|----|----|-----|---|---|---|-----|----|-----|
| 9,501 | 2 | 28 | 14 | 236 | 0 | 6 | 5 | 103 | 21 | 373 |
| 9,502 | 2 | 28 | 8  | 236 | 0 | 6 | 5 | 105 | 15 | 375 |
| 9,503 | 2 | 28 | 7  | 236 | 0 | 6 | 4 | 106 | 13 | 376 |
| 9,504 | 2 | 28 | 7  | 236 | 0 | 6 | 4 | 106 | 13 | 376 |
| 9,505 | 2 | 28 | 7  | 241 | 0 | 7 | 4 | 113 | 13 | 389 |
| 9,506 | 2 | 28 | 7  | 236 | 0 | 7 | 4 | 109 | 13 | 380 |
| 9,507 | 2 | 27 | 7  | 235 | 0 | 6 | 4 | 103 | 13 | 371 |
| 9,508 | 2 | 28 | 8  | 226 | 0 | 6 | 4 | 98  | 14 | 358 |
| 9,509 | 2 | 26 | 8  | 219 | 0 | 6 | 4 | 96  | 14 | 347 |
| 9,510 | 2 | 26 | 8  | 187 | 0 | 5 | 4 | 96  | 14 | 314 |
| 9,511 | 2 | 24 | 8  | 164 | 0 | 5 | 4 | 76  | 14 | 269 |
| 9,512 | 2 | 23 | 9  | 153 | 0 | 5 | 4 | 74  | 15 | 255 |
| 9,513 | 2 | 22 | 9  | 142 | 0 | 5 | 4 | 64  | 15 | 233 |
| 9,514 | 2 | 22 | 9  | 140 | 0 | 5 | 4 | 64  | 15 | 231 |
| 9,515 | 3 | 18 | 8  | 124 | 0 | 2 | 4 | 56  | 15 | 200 |
| 9,516 | 2 | 14 | 8  | 107 | 0 | 1 | 4 | 43  | 14 | 165 |
| 9,517 | 2 | 9  | 8  | 63  | 0 | 1 | 4 | 38  | 14 | 111 |
| 9,518 | 2 | 9  | 8  | 63  | 0 | 1 | 4 | 38  | 14 | 111 |
| 9,519 | 2 | 6  | 8  | 56  | 0 | 1 | 4 | 33  | 14 | 96  |
| 9,520 | 2 | 4  | 8  | 31  | 0 | 1 | 4 | 26  | 14 | 62  |
| 9,521 | 2 | 4  | 8  | 31  | 0 | 1 | 4 | 29  | 14 | 65  |
| 9,522 | 2 | 4  | 8  | 31  | 0 | 1 | 4 | 29  | 14 | 65  |
| 9,523 | 2 | 3  | 8  | 31  | 0 | 1 | 4 | 29  | 14 | 64  |
| 9,524 | 2 | 3  | 8  | 30  | 0 | 1 | 4 | 29  | 14 | 63  |
| 9,525 | 2 | 3  | 8  | 30  | 0 | 1 | 2 | 29  | 12 | 63  |
| 9,526 | 2 | 4  | 8  | 30  | 0 | 1 | 2 | 30  | 12 | 65  |
| 9,527 | 2 | 4  | 8  | 30  | 0 | 1 | 2 | 30  | 12 | 65  |
| 9,528 | 2 | 4  | 8  | 30  | 0 | 1 | 2 | 30  | 12 | 65  |
| 9,529 | 2 | 4  | 8  | 30  | 0 | 1 | 2 | 30  | 12 | 65  |
| 9,530 | 2 | 4  | 8  | 30  | 0 | 1 | 2 | 30  | 12 | 65  |
| 9,531 | 2 | 4  | 8  | 30  | 0 | 1 | 2 | 30  | 12 | 65  |
| 9,532 | 2 | 4  | 8  | 30  | 0 | 1 | 2 | 30  | 12 | 65  |
| 9,533 | 2 | 4  | 7  | 30  | 0 | 1 | 2 | 37  | 11 | 72  |
| 9,534 | 2 | 5  | 7  | 34  | 0 | 1 | 2 | 38  | 11 | 78  |
| 9,535 | 1 | 5  | 7  | 34  | 0 | 1 | 2 | 38  | 10 | 78  |
| 9,536 | 1 | 5  | 8  | 35  | 0 | 1 | 2 | 41  | 11 | 82  |
| 9,537 | 1 | 5  | 5  | 37  | 0 | 1 | 2 | 42  | 8  | 85  |
| 9,538 | 1 | 5  | 5  | 37  | 0 | 1 | 2 | 42  | 8  | 85  |
| 9,539 | 1 | 5  | 4  | 41  | 0 | 2 | 2 | 43  | 7  | 91  |
| 9,540 | 1 | 8  | 4  | 47  | 0 | 2 | 1 | 47  | 6  | 104 |
| 9,541 | 1 | 8  | 4  | 57  | 0 | 2 | 1 | 53  | 6  | 120 |

|       |   |    |   |     |   |   |    |     |    |     |
|-------|---|----|---|-----|---|---|----|-----|----|-----|
| 9,542 | 1 | 12 | 5 | 71  | 0 | 2 | 2  | 70  | 8  | 155 |
| 9,543 | 1 | 16 | 5 | 88  | 0 | 3 | 2  | 97  | 8  | 204 |
| 9,544 | 1 | 17 | 6 | 89  | 0 | 3 | 2  | 99  | 9  | 208 |
| 9,545 | 1 | 17 | 6 | 92  | 0 | 3 | 2  | 100 | 9  | 212 |
| 9,546 | 1 | 18 | 5 | 106 | 0 | 3 | 2  | 103 | 8  | 230 |
| 9,547 | 1 | 18 | 5 | 102 | 0 | 3 | 2  | 100 | 8  | 223 |
| 9,548 | 1 | 18 | 7 | 103 | 0 | 3 | 3  | 99  | 11 | 223 |
| 9,549 | 1 | 18 | 7 | 101 | 0 | 3 | 3  | 99  | 11 | 221 |
| 9,550 | 1 | 18 | 7 | 116 | 0 | 3 | 3  | 102 | 11 | 239 |
| 9,551 | 1 | 19 | 7 | 120 | 0 | 3 | 3  | 105 | 11 | 247 |
| 9,552 | 1 | 18 | 7 | 122 | 0 | 3 | 3  | 104 | 11 | 247 |
| 9,553 | 1 | 18 | 7 | 123 | 0 | 3 | 4  | 102 | 12 | 246 |
| 9,554 | 1 | 18 | 7 | 125 | 0 | 3 | 4  | 101 | 12 | 247 |
| 9,555 | 1 | 18 | 7 | 125 | 0 | 3 | 4  | 100 | 12 | 246 |
| 9,556 | 1 | 21 | 7 | 117 | 0 | 2 | 4  | 93  | 12 | 233 |
| 9,557 | 1 | 21 | 7 | 117 | 0 | 2 | 4  | 94  | 12 | 234 |
| 9,558 | 1 | 21 | 6 | 116 | 0 | 2 | 4  | 94  | 11 | 233 |
| 9,559 | 1 | 23 | 6 | 124 | 0 | 3 | 5  | 99  | 12 | 249 |
| 9,560 | 1 | 23 | 6 | 124 | 0 | 3 | 5  | 98  | 12 | 248 |
| 9,561 | 1 | 29 | 6 | 126 | 0 | 3 | 5  | 97  | 12 | 255 |
| 9,562 | 1 | 29 | 5 | 126 | 0 | 3 | 5  | 98  | 11 | 256 |
| 9,563 | 0 | 30 | 5 | 145 | 0 | 4 | 5  | 115 | 10 | 294 |
| 9,564 | 0 | 30 | 5 | 145 | 0 | 4 | 5  | 115 | 10 | 294 |
| 9,565 | 0 | 30 | 5 | 145 | 0 | 4 | 5  | 115 | 10 | 294 |
| 9,566 | 0 | 31 | 5 | 143 | 0 | 4 | 5  | 115 | 10 | 293 |
| 9,567 | 0 | 31 | 5 | 143 | 0 | 4 | 5  | 115 | 10 | 293 |
| 9,568 | 0 | 31 | 5 | 143 | 0 | 4 | 5  | 115 | 10 | 293 |
| 9,569 | 0 | 31 | 5 | 143 | 0 | 4 | 5  | 115 | 10 | 293 |
| 9,570 | 0 | 31 | 5 | 146 | 0 | 4 | 5  | 115 | 10 | 296 |
| 9,571 | 0 | 31 | 5 | 147 | 0 | 4 | 5  | 116 | 10 | 298 |
| 9,572 | 0 | 31 | 8 | 147 | 1 | 4 | 9  | 113 | 18 | 295 |
| 9,573 | 0 | 31 | 8 | 147 | 1 | 4 | 9  | 112 | 18 | 294 |
| 9,574 | 0 | 31 | 8 | 150 | 1 | 4 | 11 | 112 | 20 | 297 |
| 9,575 | 0 | 31 | 8 | 152 | 1 | 4 | 11 | 115 | 20 | 302 |
| 9,576 | 0 | 31 | 8 | 153 | 1 | 4 | 11 | 115 | 20 | 303 |
| 9,577 | 0 | 30 | 8 | 153 | 1 | 4 | 11 | 114 | 20 | 301 |
| 9,578 | 0 | 30 | 8 | 153 | 1 | 4 | 11 | 114 | 20 | 301 |
| 9,579 | 0 | 30 | 8 | 153 | 1 | 4 | 11 | 114 | 20 | 301 |
| 9,580 | 0 | 30 | 8 | 153 | 2 | 4 | 11 | 114 | 21 | 301 |
| 9,581 | 0 | 30 | 8 | 153 | 2 | 4 | 11 | 114 | 21 | 301 |
| 9,582 | 0 | 30 | 8 | 153 | 2 | 4 | 10 | 113 | 20 | 300 |

|       |   |    |   |     |   |   |    |     |    |     |
|-------|---|----|---|-----|---|---|----|-----|----|-----|
| 9,583 | 0 | 30 | 8 | 153 | 2 | 4 | 10 | 106 | 20 | 293 |
| 9,584 | 0 | 29 | 8 | 149 | 2 | 4 | 10 | 105 | 20 | 287 |
| 9,585 | 0 | 29 | 8 | 149 | 2 | 4 | 10 | 105 | 20 | 287 |
| 9,586 | 0 | 29 | 8 | 148 | 2 | 4 | 10 | 102 | 20 | 283 |
| 9,587 | 0 | 29 | 7 | 148 | 2 | 5 | 10 | 102 | 19 | 284 |
| 9,588 | 0 | 30 | 7 | 146 | 2 | 5 | 10 | 101 | 19 | 282 |
| 9,589 | 0 | 30 | 7 | 146 | 2 | 5 | 10 | 101 | 19 | 282 |
| 9,590 | 0 | 30 | 7 | 142 | 2 | 4 | 10 | 100 | 19 | 276 |
| 9,591 | 0 | 27 | 7 | 126 | 2 | 4 | 10 | 91  | 19 | 248 |
| 9,592 | 0 | 27 | 7 | 126 | 2 | 4 | 9  | 91  | 18 | 248 |
| 9,593 | 0 | 23 | 6 | 111 | 2 | 4 | 9  | 74  | 17 | 212 |
| 9,594 | 0 | 19 | 6 | 94  | 2 | 3 | 9  | 47  | 17 | 163 |
| 9,595 | 0 | 18 | 5 | 92  | 2 | 3 | 9  | 44  | 16 | 157 |
| 9,596 | 0 | 17 | 5 | 75  | 2 | 3 | 9  | 39  | 16 | 134 |
| 9,597 | 0 | 17 | 5 | 76  | 2 | 3 | 9  | 42  | 16 | 138 |
| 9,598 | 0 | 17 | 3 | 81  | 2 | 3 | 8  | 45  | 13 | 146 |
| 9,599 | 0 | 17 | 3 | 83  | 2 | 3 | 8  | 52  | 13 | 155 |
| 9,600 | 0 | 17 | 4 | 87  | 2 | 3 | 8  | 58  | 14 | 165 |
| 9,601 | 0 | 17 | 4 | 74  | 2 | 3 | 8  | 57  | 14 | 151 |
| 9,602 | 0 | 16 | 4 | 71  | 2 | 3 | 8  | 54  | 14 | 144 |
| 9,603 | 0 | 16 | 4 | 68  | 2 | 3 | 7  | 53  | 13 | 140 |
| 9,604 | 0 | 16 | 4 | 67  | 2 | 3 | 7  | 53  | 13 | 139 |
| 9,605 | 0 | 17 | 4 | 64  | 2 | 3 | 7  | 53  | 13 | 137 |
| 9,606 | 0 | 17 | 4 | 69  | 2 | 3 | 7  | 54  | 13 | 143 |
| 9,607 | 0 | 14 | 6 | 95  | 2 | 7 | 7  | 69  | 15 | 185 |
| 9,608 | 0 | 14 | 6 | 95  | 2 | 7 | 7  | 68  | 15 | 184 |
| 9,609 | 0 | 14 | 6 | 95  | 2 | 7 | 7  | 69  | 15 | 185 |
| 9,610 | 0 | 11 | 6 | 85  | 2 | 6 | 6  | 65  | 14 | 167 |
| 9,611 | 0 | 11 | 6 | 85  | 2 | 6 | 6  | 65  | 14 | 167 |
| 9,612 | 0 | 5  | 6 | 81  | 2 | 6 | 6  | 64  | 14 | 156 |
| 9,613 | 0 | 5  | 6 | 81  | 2 | 6 | 6  | 64  | 14 | 156 |
| 9,614 | 0 | 3  | 6 | 62  | 2 | 5 | 6  | 46  | 14 | 116 |
| 9,615 | 0 | 3  | 6 | 62  | 2 | 5 | 6  | 46  | 14 | 116 |
| 9,616 | 0 | 2  | 6 | 72  | 2 | 5 | 6  | 49  | 14 | 128 |
| 9,617 | 0 | 2  | 6 | 104 | 2 | 6 | 6  | 69  | 14 | 181 |
| 9,618 | 0 | 3  | 6 | 122 | 2 | 7 | 6  | 83  | 14 | 215 |
| 9,619 | 0 | 3  | 5 | 131 | 2 | 7 | 5  | 84  | 12 | 225 |
| 9,620 | 0 | 3  | 6 | 132 | 2 | 8 | 5  | 84  | 13 | 227 |
| 9,621 | 0 | 5  | 4 | 133 | 2 | 8 | 5  | 85  | 11 | 231 |
| 9,622 | 0 | 5  | 4 | 135 | 2 | 8 | 3  | 84  | 9  | 232 |
| 9,623 | 0 | 5  | 4 | 135 | 1 | 8 | 2  | 85  | 7  | 233 |

|       |   |   |    |     |   |   |   |    |    |     |
|-------|---|---|----|-----|---|---|---|----|----|-----|
| 9,624 | 0 | 5 | 4  | 135 | 1 | 8 | 2 | 85 | 7  | 233 |
| 9,625 | 0 | 5 | 5  | 129 | 1 | 8 | 0 | 82 | 6  | 224 |
| 9,626 | 0 | 5 | 5  | 129 | 1 | 8 | 0 | 82 | 6  | 224 |
| 9,627 | 0 | 5 | 6  | 129 | 1 | 8 | 1 | 82 | 8  | 224 |
| 9,628 | 0 | 5 | 6  | 129 | 1 | 8 | 1 | 82 | 8  | 224 |
| 9,629 | 0 | 5 | 6  | 130 | 1 | 8 | 1 | 82 | 8  | 225 |
| 9,630 | 0 | 5 | 6  | 130 | 2 | 8 | 1 | 82 | 9  | 225 |
| 9,631 | 0 | 5 | 6  | 130 | 1 | 8 | 1 | 83 | 8  | 226 |
| 9,632 | 0 | 5 | 6  | 130 | 1 | 8 | 1 | 83 | 8  | 226 |
| 9,633 | 0 | 5 | 6  | 130 | 1 | 8 | 1 | 83 | 8  | 226 |
| 9,634 | 0 | 5 | 6  | 131 | 1 | 8 | 1 | 83 | 8  | 227 |
| 9,635 | 0 | 5 | 7  | 131 | 1 | 8 | 1 | 83 | 9  | 227 |
| 9,636 | 0 | 5 | 7  | 131 | 1 | 8 | 1 | 84 | 9  | 228 |
| 9,637 | 0 | 5 | 7  | 131 | 1 | 8 | 1 | 84 | 9  | 228 |
| 9,638 | 0 | 5 | 8  | 131 | 1 | 7 | 1 | 84 | 10 | 227 |
| 9,639 | 0 | 4 | 8  | 131 | 1 | 7 | 1 | 84 | 10 | 226 |
| 9,640 | 0 | 5 | 8  | 131 | 1 | 7 | 1 | 84 | 10 | 227 |
| 9,641 | 0 | 5 | 8  | 131 | 1 | 7 | 1 | 83 | 10 | 226 |
| 9,642 | 0 | 5 | 8  | 131 | 1 | 7 | 1 | 83 | 10 | 226 |
| 9,643 | 0 | 5 | 9  | 131 | 1 | 7 | 1 | 83 | 11 | 226 |
| 9,644 | 0 | 5 | 9  | 131 | 1 | 7 | 1 | 83 | 11 | 226 |
| 9,645 | 0 | 5 | 10 | 131 | 1 | 7 | 2 | 83 | 13 | 226 |
| 9,646 | 1 | 5 | 11 | 131 | 1 | 7 | 2 | 82 | 15 | 225 |
| 9,647 | 1 | 5 | 11 | 132 | 1 | 7 | 2 | 82 | 15 | 226 |
| 9,648 | 1 | 5 | 11 | 131 | 1 | 7 | 2 | 79 | 15 | 222 |
| 9,649 | 1 | 5 | 13 | 125 | 1 | 7 | 3 | 76 | 18 | 213 |
| 9,650 | 1 | 5 | 13 | 116 | 1 | 7 | 3 | 62 | 18 | 190 |
| 9,651 | 1 | 5 | 12 | 114 | 1 | 7 | 3 | 60 | 17 | 186 |
| 9,652 | 2 | 5 | 12 | 113 | 1 | 7 | 3 | 60 | 18 | 185 |
| 9,653 | 2 | 5 | 12 | 113 | 1 | 7 | 4 | 61 | 19 | 186 |
| 9,654 | 2 | 5 | 13 | 113 | 1 | 7 | 4 | 61 | 20 | 186 |
| 9,655 | 2 | 6 | 13 | 113 | 1 | 7 | 4 | 61 | 20 | 187 |
| 9,656 | 2 | 5 | 13 | 113 | 1 | 7 | 4 | 62 | 20 | 187 |
| 9,657 | 2 | 5 | 13 | 109 | 1 | 7 | 4 | 62 | 20 | 183 |
| 9,658 | 2 | 5 | 11 | 83  | 1 | 3 | 6 | 47 | 20 | 138 |
| 9,659 | 2 | 5 | 11 | 82  | 1 | 3 | 6 | 47 | 20 | 137 |
| 9,660 | 2 | 6 | 11 | 86  | 2 | 3 | 6 | 49 | 21 | 144 |
| 9,661 | 2 | 6 | 11 | 87  | 2 | 3 | 6 | 48 | 21 | 144 |
| 9,662 | 2 | 6 | 12 | 87  | 2 | 3 | 6 | 49 | 22 | 145 |
| 9,663 | 2 | 6 | 13 | 87  | 2 | 3 | 6 | 49 | 23 | 145 |
| 9,664 | 2 | 6 | 13 | 87  | 2 | 3 | 6 | 49 | 23 | 145 |

|       |   |     |    |     |   |    |    |     |    |       |
|-------|---|-----|----|-----|---|----|----|-----|----|-------|
| 9,665 | 2 | 6   | 13 | 87  | 2 | 3  | 6  | 49  | 23 | 145   |
| 9,666 | 2 | 6   | 13 | 44  | 2 | 2  | 6  | 26  | 23 | 78    |
| 9,667 | 2 | 6   | 16 | 44  | 2 | 2  | 7  | 26  | 27 | 78    |
| 9,668 | 2 | 6   | 16 | 44  | 2 | 2  | 7  | 26  | 27 | 78    |
| 9,669 | 3 | 5   | 21 | 26  | 2 | 1  | 12 | 12  | 38 | 44    |
| 9,670 | 3 | 5   | 21 | 17  | 2 | 1  | 12 | 11  | 38 | 34    |
| 9,671 | 3 | 3   | 21 | 13  | 2 | 2  | 12 | 12  | 38 | 30    |
| 9,672 | 3 | 3   | 21 | 14  | 2 | 2  | 12 | 13  | 38 | 32    |
| 9,673 | 3 | 6   | 21 | 26  | 2 | 2  | 12 | 19  | 38 | 53    |
| 9,674 | 3 | 19  | 21 | 101 | 2 | 8  | 12 | 55  | 38 | 183   |
| 9,675 | 3 | 20  | 20 | 125 | 2 | 9  | 14 | 59  | 39 | 213   |
| 9,676 | 3 | 20  | 20 | 139 | 2 | 9  | 14 | 60  | 39 | 228   |
| 9,677 | 3 | 22  | 20 | 143 | 2 | 12 | 14 | 66  | 39 | 243   |
| 9,678 | 3 | 22  | 19 | 145 | 2 | 12 | 13 | 66  | 37 | 245   |
| 9,679 | 3 | 48  | 19 | 313 | 2 | 30 | 13 | 196 | 37 | 587   |
| 9,680 | 3 | 51  | 19 | 366 | 1 | 33 | 13 | 230 | 36 | 680   |
| 9,681 | 3 | 51  | 19 | 376 | 1 | 33 | 13 | 239 | 36 | 699   |
| 9,682 | 3 | 76  | 19 | 521 | 1 | 39 | 13 | 311 | 36 | 947   |
| 9,683 | 3 | 77  | 19 | 534 | 1 | 40 | 13 | 322 | 36 | 973   |
| 9,684 | 3 | 84  | 19 | 568 | 1 | 41 | 13 | 332 | 36 | 1,025 |
| 9,685 | 3 | 88  | 19 | 576 | 1 | 41 | 13 | 337 | 36 | 1,042 |
| 9,686 | 3 | 88  | 18 | 578 | 1 | 41 | 14 | 337 | 36 | 1,044 |
| 9,687 | 3 | 99  | 18 | 593 | 1 | 42 | 14 | 340 | 36 | 1,074 |
| 9,688 | 3 | 99  | 17 | 600 | 1 | 42 | 14 | 342 | 35 | 1,083 |
| 9,689 | 4 | 103 | 20 | 628 | 1 | 43 | 16 | 356 | 41 | 1,130 |
| 9,690 | 4 | 103 | 20 | 629 | 1 | 43 | 16 | 356 | 41 | 1,131 |
| 9,691 | 4 | 102 | 20 | 637 | 1 | 43 | 16 | 356 | 41 | 1,138 |
| 9,692 | 4 | 102 | 22 | 645 | 2 | 43 | 16 | 361 | 44 | 1,151 |
| 9,693 | 4 | 102 | 22 | 647 | 2 | 43 | 21 | 362 | 49 | 1,154 |
| 9,694 | 4 | 102 | 22 | 648 | 2 | 43 | 22 | 362 | 50 | 1,155 |
| 9,695 | 4 | 102 | 23 | 648 | 2 | 43 | 22 | 363 | 51 | 1,156 |
| 9,696 | 3 | 102 | 23 | 648 | 2 | 43 | 22 | 363 | 50 | 1,156 |
| 9,697 | 3 | 102 | 23 | 648 | 2 | 43 | 22 | 363 | 50 | 1,156 |
| 9,698 | 3 | 102 | 21 | 647 | 2 | 43 | 21 | 363 | 47 | 1,155 |
| 9,699 | 3 | 102 | 21 | 648 | 2 | 43 | 22 | 363 | 48 | 1,156 |
| 9,700 | 3 | 102 | 21 | 649 | 2 | 43 | 22 | 367 | 48 | 1,161 |
| 9,701 | 3 | 102 | 21 | 649 | 2 | 43 | 22 | 368 | 48 | 1,162 |
| 9,702 | 3 | 102 | 21 | 649 | 2 | 44 | 22 | 368 | 48 | 1,163 |
| 9,703 | 2 | 102 | 21 | 649 | 2 | 44 | 22 | 369 | 47 | 1,164 |
| 9,704 | 2 | 102 | 21 | 650 | 2 | 44 | 21 | 368 | 46 | 1,164 |
| 9,705 | 2 | 102 | 20 | 650 | 2 | 44 | 21 | 368 | 45 | 1,164 |

|       |   |     |    |     |   |    |    |     |    |       |
|-------|---|-----|----|-----|---|----|----|-----|----|-------|
| 9,706 | 2 | 101 | 20 | 649 | 2 | 44 | 21 | 368 | 45 | 1,162 |
| 9,707 | 2 | 101 | 20 | 652 | 2 | 44 | 21 | 370 | 45 | 1,167 |
| 9,708 | 2 | 101 | 20 | 652 | 2 | 44 | 21 | 370 | 45 | 1,167 |
| 9,709 | 2 | 101 | 20 | 652 | 2 | 44 | 19 | 370 | 43 | 1,167 |
| 9,710 | 2 | 101 | 20 | 652 | 2 | 44 | 19 | 370 | 43 | 1,167 |
| 9,711 | 2 | 100 | 20 | 648 | 1 | 44 | 19 | 367 | 42 | 1,159 |
| 9,712 | 2 | 100 | 19 | 647 | 1 | 44 | 19 | 367 | 41 | 1,158 |
| 9,713 | 2 | 100 | 18 | 649 | 1 | 44 | 19 | 367 | 40 | 1,160 |
| 9,714 | 2 | 106 | 18 | 674 | 1 | 49 | 19 | 425 | 40 | 1,254 |
| 9,715 | 2 | 106 | 18 | 675 | 1 | 49 | 19 | 434 | 40 | 1,264 |
| 9,716 | 2 | 107 | 20 | 684 | 1 | 49 | 19 | 454 | 42 | 1,294 |
| 9,717 | 2 | 107 | 21 | 690 | 1 | 49 | 19 | 460 | 43 | 1,306 |
| 9,718 | 2 | 108 | 18 | 703 | 1 | 49 | 18 | 471 | 39 | 1,331 |
| 9,719 | 2 | 109 | 15 | 706 | 1 | 49 | 15 | 472 | 33 | 1,336 |
| 9,720 | 1 | 109 | 13 | 706 | 1 | 49 | 13 | 472 | 28 | 1,336 |
| 9,721 | 1 | 110 | 12 | 707 | 1 | 49 | 13 | 472 | 27 | 1,338 |
| 9,722 | 1 | 110 | 12 | 707 | 1 | 47 | 13 | 470 | 27 | 1,334 |
| 9,723 | 1 | 110 | 12 | 706 | 1 | 47 | 13 | 469 | 27 | 1,332 |
| 9,724 | 1 | 107 | 12 | 691 | 1 | 47 | 13 | 463 | 27 | 1,308 |
| 9,725 | 1 | 93  | 12 | 592 | 1 | 40 | 12 | 423 | 26 | 1,148 |
| 9,726 | 1 | 93  | 12 | 592 | 1 | 40 | 11 | 423 | 25 | 1,148 |
| 9,727 | 1 | 91  | 15 | 574 | 2 | 37 | 12 | 416 | 30 | 1,118 |
| 9,728 | 1 | 91  | 20 | 574 | 2 | 37 | 14 | 416 | 37 | 1,118 |
| 9,729 | 1 | 91  | 21 | 572 | 2 | 37 | 14 | 416 | 38 | 1,116 |
| 9,730 | 1 | 65  | 21 | 405 | 2 | 19 | 14 | 287 | 38 | 776   |
| 9,731 | 1 | 62  | 21 | 343 | 2 | 16 | 15 | 245 | 39 | 666   |
| 9,732 | 1 | 62  | 21 | 343 | 2 | 17 | 15 | 245 | 39 | 667   |
| 9,733 | 1 | 37  | 25 | 198 | 2 | 11 | 16 | 172 | 44 | 418   |
| 9,734 | 1 | 36  | 25 | 185 | 2 | 10 | 16 | 161 | 44 | 392   |
| 9,735 | 2 | 29  | 28 | 151 | 2 | 9  | 16 | 151 | 48 | 340   |
| 9,736 | 1 | 25  | 29 | 140 | 2 | 9  | 16 | 146 | 48 | 320   |
| 9,737 | 1 | 25  | 29 | 140 | 2 | 9  | 15 | 146 | 47 | 320   |
| 9,738 | 1 | 14  | 29 | 128 | 2 | 8  | 14 | 151 | 46 | 301   |
| 9,739 | 1 | 10  | 30 | 93  | 2 | 7  | 14 | 136 | 47 | 246   |
| 9,740 | 1 | 10  | 28 | 93  | 2 | 7  | 13 | 137 | 44 | 247   |
| 9,741 | 1 | 12  | 29 | 97  | 2 | 8  | 13 | 139 | 45 | 256   |
| 9,742 | 1 | 13  | 28 | 92  | 1 | 8  | 13 | 142 | 43 | 255   |
| 9,743 | 2 | 17  | 28 | 110 | 1 | 9  | 13 | 163 | 44 | 299   |
| 9,744 | 2 | 17  | 27 | 109 | 1 | 9  | 7  | 163 | 37 | 298   |
| 9,745 | 2 | 17  | 30 | 118 | 1 | 9  | 7  | 164 | 40 | 308   |
| 9,746 | 2 | 18  | 28 | 124 | 1 | 9  | 6  | 164 | 37 | 315   |

|       |   |    |    |     |   |    |    |     |    |     |
|-------|---|----|----|-----|---|----|----|-----|----|-----|
| 9,747 | 2 | 18 | 29 | 127 | 1 | 9  | 7  | 164 | 39 | 318 |
| 9,748 | 2 | 18 | 29 | 129 | 1 | 9  | 7  | 166 | 39 | 322 |
| 9,749 | 2 | 18 | 29 | 131 | 1 | 9  | 7  | 167 | 39 | 325 |
| 9,750 | 2 | 18 | 29 | 131 | 1 | 9  | 6  | 166 | 38 | 324 |
| 9,751 | 2 | 18 | 29 | 132 | 1 | 9  | 6  | 161 | 38 | 320 |
| 9,752 | 2 | 18 | 29 | 132 | 1 | 9  | 6  | 162 | 38 | 321 |
| 9,753 | 2 | 18 | 29 | 132 | 1 | 8  | 6  | 161 | 38 | 319 |
| 9,754 | 2 | 18 | 29 | 132 | 1 | 8  | 6  | 161 | 38 | 319 |
| 9,755 | 2 | 18 | 29 | 132 | 1 | 8  | 9  | 161 | 41 | 319 |
| 9,756 | 2 | 18 | 29 | 133 | 1 | 8  | 9  | 161 | 41 | 320 |
| 9,757 | 2 | 20 | 29 | 133 | 1 | 8  | 9  | 163 | 41 | 324 |
| 9,758 | 2 | 20 | 29 | 130 | 1 | 8  | 9  | 161 | 41 | 319 |
| 9,759 | 2 | 20 | 29 | 130 | 1 | 8  | 9  | 161 | 41 | 319 |
| 9,760 | 2 | 20 | 29 | 130 | 1 | 8  | 9  | 161 | 41 | 319 |
| 9,761 | 2 | 20 | 28 | 130 | 2 | 8  | 12 | 161 | 44 | 319 |
| 9,762 | 2 | 20 | 28 | 130 | 2 | 8  | 16 | 160 | 48 | 318 |
| 9,763 | 2 | 19 | 28 | 130 | 2 | 8  | 16 | 160 | 48 | 317 |
| 9,764 | 2 | 20 | 29 | 128 | 2 | 8  | 16 | 159 | 49 | 315 |
| 9,765 | 2 | 14 | 29 | 103 | 2 | 3  | 16 | 100 | 49 | 220 |
| 9,766 | 3 | 13 | 29 | 92  | 2 | 4  | 16 | 71  | 50 | 180 |
| 9,767 | 3 | 13 | 29 | 92  | 2 | 4  | 16 | 72  | 50 | 181 |
| 9,768 | 3 | 13 | 28 | 71  | 2 | 4  | 16 | 53  | 49 | 141 |
| 9,769 | 3 | 12 | 29 | 72  | 2 | 4  | 16 | 54  | 50 | 142 |
| 9,770 | 3 | 12 | 29 | 72  | 2 | 4  | 16 | 55  | 50 | 143 |
| 9,771 | 3 | 12 | 29 | 76  | 2 | 4  | 16 | 59  | 50 | 151 |
| 9,772 | 3 | 11 | 29 | 76  | 2 | 4  | 16 | 61  | 50 | 152 |
| 9,773 | 3 | 12 | 30 | 76  | 3 | 4  | 17 | 66  | 53 | 158 |
| 9,774 | 3 | 12 | 30 | 87  | 3 | 6  | 17 | 78  | 53 | 183 |
| 9,775 | 3 | 12 | 30 | 88  | 3 | 6  | 17 | 78  | 53 | 184 |
| 9,776 | 3 | 13 | 30 | 94  | 3 | 6  | 17 | 79  | 53 | 192 |
| 9,777 | 3 | 13 | 29 | 99  | 2 | 6  | 17 | 92  | 51 | 210 |
| 9,778 | 3 | 13 | 27 | 100 | 2 | 6  | 16 | 93  | 48 | 212 |
| 9,779 | 3 | 13 | 22 | 104 | 2 | 7  | 14 | 97  | 41 | 221 |
| 9,780 | 3 | 14 | 21 | 108 | 2 | 8  | 14 | 104 | 40 | 234 |
| 9,781 | 3 | 14 | 21 | 110 | 2 | 8  | 14 | 107 | 40 | 239 |
| 9,782 | 3 | 14 | 21 | 118 | 2 | 10 | 13 | 113 | 39 | 255 |
| 9,783 | 3 | 14 | 17 | 120 | 2 | 10 | 12 | 114 | 34 | 258 |
| 9,784 | 3 | 14 | 29 | 121 | 2 | 11 | 14 | 119 | 48 | 265 |
| 9,785 | 4 | 14 | 28 | 121 | 2 | 11 | 14 | 119 | 48 | 265 |
| 9,786 | 3 | 14 | 27 | 122 | 2 | 12 | 14 | 119 | 46 | 267 |
| 9,787 | 3 | 14 | 26 | 123 | 2 | 12 | 14 | 124 | 45 | 273 |

|       |   |    |    |     |   |    |    |     |    |     |
|-------|---|----|----|-----|---|----|----|-----|----|-----|
| 9,788 | 3 | 15 | 27 | 128 | 2 | 13 | 14 | 124 | 46 | 280 |
| 9,789 | 3 | 15 | 27 | 127 | 2 | 13 | 14 | 117 | 46 | 272 |
| 9,790 | 3 | 15 | 27 | 129 | 2 | 13 | 15 | 118 | 47 | 275 |
| 9,791 | 3 | 16 | 27 | 132 | 2 | 15 | 17 | 120 | 49 | 283 |
| 9,792 | 3 | 15 | 26 | 127 | 2 | 14 | 17 | 118 | 48 | 274 |
| 9,793 | 3 | 14 | 26 | 128 | 2 | 14 | 17 | 116 | 48 | 272 |
| 9,794 | 2 | 11 | 25 | 103 | 2 | 13 | 18 | 91  | 47 | 218 |
| 9,795 | 4 | 11 | 27 | 102 | 2 | 13 | 18 | 90  | 51 | 216 |
| 9,796 | 4 | 10 | 26 | 85  | 2 | 13 | 20 | 88  | 52 | 196 |
| 9,797 | 4 | 10 | 28 | 86  | 2 | 13 | 20 | 88  | 54 | 197 |
| 9,798 | 4 | 10 | 26 | 81  | 2 | 13 | 19 | 86  | 51 | 190 |
| 9,799 | 4 | 10 | 26 | 81  | 2 | 13 | 19 | 86  | 51 | 190 |
| 9,800 | 4 | 11 | 26 | 79  | 2 | 13 | 19 | 85  | 51 | 188 |
| 9,801 | 4 | 11 | 26 | 79  | 2 | 13 | 19 | 85  | 51 | 188 |
| 9,802 | 4 | 11 | 26 | 77  | 2 | 13 | 19 | 86  | 51 | 187 |
| 9,803 | 4 | 11 | 26 | 77  | 2 | 13 | 19 | 85  | 51 | 186 |
| 9,804 | 4 | 11 | 26 | 77  | 2 | 13 | 19 | 85  | 51 | 186 |
| 9,805 | 4 | 11 | 26 | 76  | 2 | 13 | 16 | 85  | 48 | 185 |
| 9,806 | 4 | 11 | 26 | 75  | 2 | 13 | 16 | 85  | 48 | 184 |
| 9,807 | 4 | 11 | 26 | 76  | 2 | 14 | 16 | 85  | 48 | 186 |
| 9,808 | 4 | 9  | 33 | 77  | 2 | 14 | 20 | 83  | 59 | 183 |
| 9,809 | 4 | 9  | 33 | 77  | 2 | 14 | 20 | 83  | 59 | 183 |
| 9,810 | 4 | 9  | 33 | 78  | 2 | 14 | 20 | 83  | 59 | 184 |
| 9,811 | 4 | 9  | 33 | 80  | 2 | 14 | 20 | 83  | 59 | 186 |
| 9,812 | 4 | 9  | 32 | 80  | 1 | 14 | 18 | 83  | 55 | 186 |
| 9,813 | 4 | 9  | 32 | 82  | 1 | 14 | 14 | 85  | 51 | 190 |
| 9,814 | 4 | 9  | 31 | 89  | 1 | 14 | 14 | 86  | 50 | 198 |
| 9,815 | 4 | 10 | 32 | 95  | 1 | 15 | 14 | 89  | 51 | 209 |
| 9,816 | 3 | 10 | 32 | 116 | 1 | 15 | 14 | 95  | 50 | 236 |
| 9,817 | 3 | 10 | 32 | 117 | 1 | 14 | 14 | 95  | 50 | 236 |
| 9,818 | 3 | 12 | 32 | 120 | 1 | 14 | 14 | 98  | 50 | 244 |
| 9,819 | 3 | 11 | 32 | 122 | 1 | 14 | 14 | 98  | 50 | 245 |
| 9,820 | 3 | 11 | 31 | 125 | 1 | 14 | 14 | 99  | 49 | 249 |
| 9,821 | 3 | 11 | 31 | 125 | 1 | 14 | 14 | 98  | 49 | 248 |
| 9,822 | 3 | 11 | 31 | 121 | 1 | 14 | 14 | 94  | 49 | 240 |
| 9,823 | 3 | 11 | 34 | 122 | 1 | 14 | 14 | 92  | 52 | 239 |
| 9,824 | 4 | 10 | 36 | 121 | 1 | 14 | 18 | 87  | 59 | 232 |
| 9,825 | 4 | 10 | 36 | 109 | 1 | 12 | 18 | 74  | 59 | 205 |
| 9,826 | 4 | 10 | 36 | 110 | 1 | 12 | 18 | 74  | 59 | 206 |
| 9,827 | 4 | 9  | 36 | 104 | 1 | 12 | 18 | 73  | 59 | 198 |
| 9,828 | 4 | 9  | 36 | 98  | 1 | 12 | 18 | 59  | 59 | 178 |



|       |   |   |    |    |   |    |    |    |    |     |
|-------|---|---|----|----|---|----|----|----|----|-----|
| 9,829 | 4 | 9 | 36 | 98 | 1 | 12 | 18 | 59 | 59 | 178 |
| 9,830 | 4 | 9 | 36 | 93 | 1 | 11 | 18 | 56 | 59 | 169 |
| 9,831 | 4 | 8 | 36 | 89 | 1 | 10 | 18 | 50 | 59 | 157 |
| 9,832 | 5 | 8 | 36 | 85 | 1 | 9  | 18 | 47 | 60 | 149 |
| 9,833 | 5 | 8 | 37 | 77 | 1 | 7  | 18 | 41 | 61 | 133 |
| 9,834 | 5 | 8 | 37 | 76 | 1 | 7  | 18 | 42 | 61 | 133 |
| 9,835 | 5 | 8 | 25 | 76 | 1 | 6  | 16 | 37 | 47 | 127 |
| 9,836 | 4 | 8 | 24 | 75 | 1 | 5  | 16 | 36 | 45 | 124 |
| 9,837 | 4 | 9 | 26 | 74 | 1 | 5  | 16 | 31 | 47 | 119 |
| 9,838 | 4 | 8 | 26 | 69 | 1 | 4  | 17 | 31 | 48 | 112 |
| 9,839 | 4 | 8 | 28 | 67 | 1 | 4  | 21 | 29 | 54 | 108 |
| 9,840 | 4 | 8 | 28 | 67 | 1 | 4  | 21 | 29 | 54 | 108 |
| 9,841 | 4 | 7 | 27 | 62 | 1 | 2  | 20 | 25 | 52 | 96  |
| 9,842 | 4 | 7 | 26 | 62 | 1 | 2  | 18 | 25 | 49 | 96  |
| 9,843 | 4 | 6 | 26 | 58 | 1 | 2  | 18 | 25 | 49 | 91  |
| 9,844 | 4 | 5 | 26 | 58 | 1 | 2  | 18 | 26 | 49 | 91  |
| 9,845 | 4 | 5 | 27 | 58 | 1 | 2  | 17 | 27 | 49 | 92  |
| 9,846 | 3 | 6 | 24 | 59 | 1 | 2  | 17 | 27 | 45 | 94  |
| 9,847 | 3 | 6 | 23 | 60 | 1 | 2  | 15 | 27 | 42 | 95  |
| 9,848 | 3 | 6 | 21 | 59 | 1 | 2  | 15 | 28 | 40 | 95  |
| 9,849 | 3 | 6 | 21 | 61 | 1 | 2  | 15 | 28 | 40 | 97  |
| 9,850 | 3 | 6 | 21 | 61 | 1 | 2  | 15 | 28 | 40 | 97  |
| 9,851 | 3 | 5 | 21 | 61 | 1 | 2  | 15 | 29 | 40 | 97  |
| 9,852 | 3 | 5 | 21 | 61 | 1 | 2  | 15 | 29 | 40 | 97  |
| 9,853 | 3 | 5 | 22 | 62 | 1 | 2  | 15 | 29 | 41 | 98  |
| 9,854 | 3 | 8 | 22 | 73 | 1 | 3  | 15 | 38 | 41 | 122 |
| 9,855 | 3 | 8 | 22 | 73 | 1 | 3  | 15 | 39 | 41 | 123 |
| 9,856 | 3 | 8 | 22 | 74 | 1 | 3  | 15 | 42 | 41 | 127 |
| 9,857 | 3 | 8 | 22 | 75 | 1 | 3  | 15 | 42 | 41 | 128 |
| 9,858 | 3 | 8 | 22 | 74 | 1 | 2  | 14 | 42 | 40 | 126 |
| 9,859 | 3 | 8 | 15 | 74 | 1 | 2  | 11 | 42 | 30 | 126 |
| 9,860 | 3 | 8 | 15 | 74 | 1 | 2  | 11 | 42 | 30 | 126 |
| 9,861 | 3 | 8 | 15 | 78 | 1 | 2  | 11 | 42 | 30 | 130 |
| 9,862 | 3 | 8 | 15 | 76 | 1 | 2  | 11 | 42 | 30 | 128 |
| 9,863 | 3 | 8 | 15 | 80 | 1 | 2  | 11 | 42 | 30 | 132 |
| 9,864 | 3 | 8 | 15 | 79 | 1 | 2  | 11 | 41 | 30 | 130 |
| 9,865 | 3 | 8 | 14 | 72 | 1 | 2  | 11 | 40 | 29 | 122 |
| 9,866 | 3 | 7 | 14 | 45 | 1 | 1  | 11 | 30 | 29 | 83  |
| 9,867 | 3 | 5 | 14 | 41 | 1 | 1  | 11 | 26 | 29 | 73  |
| 9,868 | 3 | 6 | 14 | 54 | 1 | 1  | 11 | 38 | 29 | 99  |
| 9,869 | 3 | 6 | 14 | 63 | 1 | 2  | 11 | 50 | 29 | 121 |

|       |   |    |    |     |   |   |    |    |    |     |
|-------|---|----|----|-----|---|---|----|----|----|-----|
| 9,870 | 3 | 8  | 14 | 75  | 1 | 2 | 11 | 60 | 29 | 145 |
| 9,871 | 3 | 8  | 14 | 86  | 1 | 2 | 11 | 71 | 29 | 167 |
| 9,872 | 3 | 8  | 15 | 86  | 1 | 2 | 11 | 71 | 30 | 167 |
| 9,873 | 3 | 8  | 13 | 85  | 1 | 2 | 10 | 71 | 27 | 166 |
| 9,874 | 3 | 8  | 11 | 87  | 0 | 2 | 10 | 72 | 24 | 169 |
| 9,875 | 2 | 8  | 9  | 87  | 0 | 2 | 6  | 72 | 17 | 169 |
| 9,876 | 2 | 9  | 9  | 93  | 0 | 2 | 6  | 73 | 17 | 177 |
| 9,877 | 2 | 9  | 9  | 93  | 0 | 2 | 6  | 74 | 17 | 178 |
| 9,878 | 2 | 9  | 9  | 93  | 0 | 2 | 6  | 76 | 17 | 180 |
| 9,879 | 2 | 9  | 9  | 95  | 0 | 2 | 6  | 77 | 17 | 183 |
| 9,880 | 1 | 9  | 10 | 95  | 0 | 2 | 7  | 77 | 18 | 183 |
| 9,881 | 1 | 9  | 10 | 95  | 0 | 2 | 7  | 76 | 18 | 182 |
| 9,882 | 1 | 9  | 10 | 95  | 0 | 2 | 7  | 76 | 18 | 182 |
| 9,883 | 1 | 10 | 11 | 96  | 0 | 2 | 7  | 76 | 19 | 184 |
| 9,884 | 2 | 11 | 10 | 96  | 0 | 2 | 8  | 77 | 20 | 186 |
| 9,885 | 2 | 11 | 10 | 98  | 0 | 2 | 8  | 77 | 20 | 188 |
| 9,886 | 2 | 13 | 10 | 102 | 0 | 2 | 8  | 83 | 20 | 200 |
| 9,887 | 2 | 13 | 10 | 112 | 0 | 2 | 8  | 86 | 20 | 213 |
| 9,888 | 2 | 12 | 8  | 114 | 0 | 2 | 9  | 88 | 19 | 216 |
| 9,889 | 2 | 12 | 7  | 114 | 0 | 2 | 8  | 89 | 17 | 217 |
| 9,890 | 2 | 12 | 5  | 114 | 0 | 2 | 4  | 91 | 11 | 219 |
| 9,891 | 2 | 12 | 5  | 114 | 0 | 2 | 4  | 90 | 11 | 218 |
| 9,892 | 2 | 12 | 5  | 116 | 0 | 2 | 4  | 91 | 11 | 221 |
| 9,893 | 2 | 12 | 5  | 116 | 0 | 2 | 4  | 91 | 11 | 221 |
| 9,894 | 2 | 12 | 5  | 116 | 0 | 2 | 4  | 91 | 11 | 221 |
| 9,895 | 2 | 12 | 5  | 116 | 0 | 2 | 4  | 88 | 11 | 218 |
| 9,896 | 2 | 11 | 4  | 115 | 0 | 2 | 4  | 88 | 10 | 216 |
| 9,897 | 1 | 11 | 4  | 115 | 0 | 2 | 4  | 88 | 9  | 216 |
| 9,898 | 1 | 11 | 4  | 114 | 0 | 2 | 4  | 88 | 9  | 215 |
| 9,899 | 1 | 11 | 4  | 114 | 0 | 2 | 4  | 87 | 9  | 214 |
| 9,900 | 1 | 11 | 4  | 112 | 0 | 2 | 4  | 87 | 9  | 212 |
| 9,901 | 1 | 11 | 4  | 112 | 0 | 2 | 4  | 87 | 9  | 212 |
| 9,902 | 1 | 11 | 4  | 112 | 0 | 2 | 4  | 86 | 9  | 211 |
| 9,903 | 1 | 11 | 3  | 112 | 0 | 2 | 4  | 86 | 8  | 211 |
| 9,904 | 1 | 8  | 3  | 100 | 0 | 1 | 4  | 77 | 8  | 186 |
| 9,905 | 2 | 8  | 3  | 100 | 0 | 1 | 4  | 76 | 9  | 185 |
| 9,906 | 2 | 8  | 3  | 99  | 0 | 1 | 4  | 73 | 9  | 181 |
| 9,907 | 2 | 8  | 3  | 99  | 0 | 1 | 4  | 73 | 9  | 181 |
| 9,908 | 2 | 8  | 4  | 98  | 0 | 1 | 4  | 73 | 10 | 180 |
| 9,909 | 2 | 8  | 4  | 98  | 0 | 1 | 4  | 73 | 10 | 180 |
| 9,910 | 2 | 8  | 4  | 100 | 0 | 1 | 4  | 75 | 10 | 184 |

|       |   |    |   |     |   |   |   |    |    |     |
|-------|---|----|---|-----|---|---|---|----|----|-----|
| 9,911 | 2 | 9  | 4 | 102 | 0 | 1 | 3 | 77 | 9  | 189 |
| 9,912 | 2 | 9  | 4 | 97  | 0 | 1 | 3 | 79 | 9  | 186 |
| 9,913 | 2 | 9  | 4 | 97  | 0 | 1 | 3 | 79 | 9  | 186 |
| 9,914 | 2 | 10 | 4 | 96  | 0 | 1 | 3 | 81 | 9  | 188 |
| 9,915 | 2 | 10 | 4 | 95  | 0 | 1 | 3 | 80 | 9  | 186 |
| 9,916 | 2 | 10 | 5 | 97  | 0 | 1 | 3 | 80 | 10 | 188 |
| 9,917 | 2 | 10 | 5 | 97  | 0 | 1 | 3 | 80 | 10 | 188 |
| 9,918 | 2 | 10 | 5 | 97  | 0 | 1 | 3 | 80 | 10 | 188 |
| 9,919 | 2 | 9  | 5 | 84  | 0 | 1 | 3 | 68 | 10 | 162 |
| 9,920 | 2 | 7  | 5 | 61  | 0 | 0 | 3 | 46 | 10 | 114 |
| 9,921 | 2 | 7  | 5 | 46  | 0 | 0 | 3 | 33 | 10 | 86  |
| 9,922 | 2 | 7  | 5 | 46  | 0 | 0 | 3 | 33 | 10 | 86  |
| 9,923 | 2 | 7  | 4 | 46  | 0 | 0 | 3 | 33 | 9  | 86  |
| 9,924 | 2 | 8  | 4 | 43  | 0 | 0 | 3 | 33 | 9  | 84  |
| 9,925 | 2 | 8  | 4 | 47  | 0 | 0 | 3 | 33 | 9  | 88  |
| 9,926 | 2 | 7  | 4 | 41  | 0 | 0 | 3 | 32 | 9  | 80  |
| 9,927 | 2 | 7  | 4 | 41  | 0 | 0 | 3 | 32 | 9  | 80  |
| 9,928 | 2 | 9  | 4 | 41  | 0 | 0 | 3 | 37 | 9  | 87  |
| 9,929 | 2 | 9  | 3 | 41  | 0 | 0 | 2 | 35 | 7  | 85  |
| 9,930 | 2 | 9  | 3 | 40  | 0 | 0 | 2 | 34 | 7  | 83  |
| 9,931 | 2 | 10 | 3 | 43  | 0 | 0 | 2 | 36 | 7  | 89  |
| 9,932 | 2 | 10 | 3 | 44  | 0 | 0 | 2 | 36 | 7  | 90  |
| 9,933 | 2 | 9  | 2 | 48  | 0 | 0 | 2 | 43 | 6  | 100 |
| 9,934 | 2 | 9  | 2 | 53  | 0 | 0 | 2 | 43 | 6  | 105 |
| 9,935 | 1 | 8  | 2 | 54  | 0 | 0 | 1 | 41 | 4  | 103 |
| 9,936 | 1 | 8  | 2 | 55  | 0 | 0 | 1 | 41 | 4  | 104 |
| 9,937 | 1 | 6  | 2 | 50  | 0 | 0 | 1 | 36 | 4  | 92  |
| 9,938 | 1 | 6  | 2 | 38  | 0 | 0 | 1 | 33 | 4  | 77  |
| 9,939 | 1 | 6  | 2 | 46  | 0 | 4 | 0 | 51 | 3  | 107 |
| 9,940 | 1 | 6  | 2 | 49  | 0 | 4 | 0 | 49 | 3  | 108 |
| 9,941 | 1 | 6  | 2 | 52  | 0 | 4 | 0 | 49 | 3  | 111 |
| 9,942 | 1 | 8  | 2 | 51  | 0 | 4 | 1 | 48 | 4  | 111 |
| 9,943 | 1 | 8  | 2 | 51  | 0 | 4 | 1 | 48 | 4  | 111 |
| 9,944 | 1 | 8  | 2 | 51  | 0 | 4 | 1 | 48 | 4  | 111 |
| 9,945 | 1 | 8  | 2 | 53  | 0 | 4 | 1 | 48 | 4  | 113 |
| 9,946 | 1 | 8  | 2 | 52  | 0 | 4 | 1 | 48 | 4  | 112 |
| 9,947 | 1 | 8  | 2 | 52  | 0 | 4 | 1 | 48 | 4  | 112 |
| 9,948 | 2 | 8  | 2 | 52  | 0 | 4 | 1 | 48 | 5  | 112 |
| 9,949 | 2 | 8  | 2 | 52  | 0 | 4 | 1 | 48 | 5  | 112 |
| 9,950 | 2 | 8  | 2 | 52  | 0 | 4 | 1 | 48 | 5  | 112 |
| 9,951 | 3 | 8  | 4 | 56  | 1 | 4 | 6 | 48 | 14 | 116 |

|       |   |    |   |     |   |    |    |     |    |     |
|-------|---|----|---|-----|---|----|----|-----|----|-----|
| 9,952 | 3 | 8  | 4 | 62  | 1 | 4  | 6  | 48  | 14 | 122 |
| 9,953 | 3 | 11 | 6 | 83  | 1 | 8  | 10 | 72  | 20 | 174 |
| 9,954 | 3 | 11 | 6 | 86  | 1 | 8  | 11 | 79  | 21 | 184 |
| 9,955 | 3 | 13 | 8 | 105 | 1 | 11 | 13 | 86  | 25 | 215 |
| 9,956 | 2 | 14 | 8 | 110 | 1 | 13 | 17 | 90  | 28 | 227 |
| 9,957 | 2 | 14 | 8 | 110 | 1 | 13 | 17 | 92  | 28 | 229 |
| 9,958 | 2 | 15 | 7 | 120 | 1 | 14 | 17 | 107 | 27 | 256 |
| 9,959 | 2 | 15 | 7 | 121 | 1 | 14 | 17 | 107 | 27 | 257 |
| 9,960 | 2 | 19 | 7 | 134 | 1 | 14 | 17 | 112 | 27 | 279 |
| 9,961 | 2 | 19 | 7 | 132 | 1 | 14 | 17 | 111 | 27 | 276 |
| 9,962 | 2 | 18 | 7 | 130 | 1 | 14 | 17 | 110 | 27 | 272 |
| 9,963 | 2 | 27 | 7 | 145 | 1 | 15 | 17 | 126 | 27 | 313 |
| 9,964 | 2 | 27 | 7 | 150 | 1 | 15 | 17 | 127 | 27 | 319 |
| 9,965 | 2 | 26 | 7 | 151 | 1 | 15 | 17 | 131 | 27 | 323 |
| 9,966 | 2 | 29 | 6 | 204 | 1 | 16 | 17 | 152 | 26 | 401 |
| 9,967 | 2 | 29 | 6 | 206 | 1 | 16 | 17 | 153 | 26 | 404 |
| 9,968 | 2 | 29 | 6 | 206 | 1 | 16 | 17 | 153 | 26 | 404 |
| 9,969 | 2 | 29 | 6 | 217 | 1 | 17 | 17 | 159 | 26 | 422 |
| 9,970 | 2 | 29 | 6 | 217 | 1 | 17 | 17 | 161 | 26 | 424 |
| 9,971 | 2 | 29 | 7 | 227 | 1 | 17 | 17 | 161 | 27 | 434 |
| 9,972 | 2 | 29 | 7 | 227 | 1 | 17 | 17 | 161 | 27 | 434 |
| 9,973 | 2 | 29 | 7 | 229 | 1 | 17 | 17 | 161 | 27 | 436 |
| 9,974 | 2 | 29 | 8 | 229 | 1 | 17 | 17 | 161 | 28 | 436 |
| 9,975 | 2 | 28 | 8 | 229 | 1 | 17 | 17 | 160 | 28 | 434 |
| 9,976 | 2 | 28 | 8 | 225 | 1 | 17 | 17 | 159 | 28 | 429 |
| 9,977 | 2 | 28 | 8 | 225 | 1 | 17 | 17 | 159 | 28 | 429 |
| 9,978 | 2 | 28 | 8 | 225 | 1 | 17 | 17 | 160 | 28 | 430 |
| 9,979 | 2 | 26 | 8 | 225 | 1 | 17 | 17 | 155 | 28 | 423 |
| 9,980 | 2 | 26 | 8 | 224 | 1 | 17 | 17 | 155 | 28 | 422 |
| 9,981 | 2 | 26 | 8 | 224 | 1 | 17 | 17 | 155 | 28 | 422 |
| 9,982 | 2 | 25 | 9 | 221 | 1 | 17 | 17 | 153 | 29 | 416 |
| 9,983 | 2 | 25 | 9 | 215 | 1 | 17 | 17 | 146 | 29 | 403 |
| 9,984 | 2 | 25 | 9 | 215 | 1 | 17 | 17 | 146 | 29 | 403 |
| 9,985 | 2 | 25 | 9 | 208 | 1 | 17 | 17 | 146 | 29 | 396 |
| 9,986 | 2 | 25 | 9 | 208 | 1 | 17 | 17 | 146 | 29 | 396 |
| 9,987 | 2 | 25 | 9 | 205 | 1 | 17 | 17 | 146 | 29 | 393 |
| 9,988 | 2 | 25 | 9 | 205 | 1 | 17 | 17 | 145 | 29 | 392 |
| 9,989 | 2 | 25 | 9 | 205 | 1 | 17 | 17 | 143 | 29 | 390 |
| 9,990 | 2 | 25 | 9 | 199 | 1 | 13 | 17 | 125 | 29 | 362 |
| 9,991 | 2 | 25 | 9 | 196 | 1 | 13 | 19 | 123 | 31 | 357 |
| 9,992 | 2 | 25 | 9 | 194 | 1 | 13 | 19 | 123 | 31 | 355 |

|        |   |    |    |     |   |    |    |     |    |     |
|--------|---|----|----|-----|---|----|----|-----|----|-----|
| 9,993  | 2 | 23 | 9  | 193 | 1 | 13 | 19 | 123 | 31 | 352 |
| 9,994  | 2 | 23 | 9  | 200 | 1 | 13 | 19 | 124 | 31 | 360 |
| 9,995  | 2 | 23 | 12 | 202 | 1 | 13 | 19 | 129 | 34 | 367 |
| 9,996  | 2 | 23 | 12 | 200 | 1 | 13 | 19 | 129 | 34 | 365 |
| 9,997  | 2 | 23 | 15 | 206 | 1 | 13 | 21 | 130 | 39 | 372 |
| 9,998  | 1 | 24 | 15 | 209 | 1 | 14 | 23 | 130 | 40 | 377 |
| 9,999  | 1 | 28 | 15 | 213 | 1 | 14 | 24 | 138 | 41 | 393 |
| 10,000 | 1 | 28 | 15 | 214 | 1 | 15 | 24 | 140 | 41 | 397 |
| 10,001 | 0 | 28 | 15 | 226 | 1 | 15 | 22 | 139 | 38 | 408 |
| 10,002 | 0 | 28 | 13 | 223 | 0 | 15 | 19 | 139 | 32 | 405 |
| 10,003 | 0 | 25 | 11 | 196 | 0 | 11 | 15 | 116 | 26 | 348 |
| 10,004 | 0 | 25 | 11 | 193 | 0 | 11 | 15 | 109 | 26 | 338 |
| 10,005 | 0 | 25 | 11 | 193 | 0 | 11 | 14 | 110 | 25 | 339 |
| 10,006 | 0 | 22 | 9  | 172 | 0 | 6  | 12 | 103 | 21 | 303 |
| 10,007 | 0 | 22 | 9  | 172 | 0 | 6  | 8  | 103 | 17 | 303 |
| 10,008 | 0 | 22 | 10 | 173 | 0 | 6  | 8  | 101 | 18 | 302 |
| 10,009 | 0 | 21 | 10 | 163 | 0 | 5  | 8  | 86  | 18 | 275 |
| 10,010 | 0 | 17 | 10 | 149 | 0 | 5  | 8  | 81  | 18 | 252 |
| 10,011 | 0 | 17 | 10 | 149 | 0 | 5  | 8  | 81  | 18 | 252 |
| 10,012 | 1 | 17 | 11 | 149 | 0 | 5  | 8  | 83  | 20 | 254 |
| 10,013 | 1 | 17 | 11 | 150 | 0 | 5  | 8  | 85  | 20 | 257 |
| 10,014 | 1 | 8  | 11 | 136 | 0 | 4  | 8  | 67  | 20 | 215 |
| 10,015 | 2 | 8  | 11 | 131 | 0 | 4  | 8  | 67  | 21 | 210 |
| 10,016 | 2 | 8  | 11 | 127 | 0 | 4  | 8  | 62  | 21 | 201 |
| 10,017 | 2 | 5  | 11 | 71  | 0 | 3  | 8  | 42  | 21 | 121 |
| 10,018 | 2 | 5  | 11 | 71  | 0 | 3  | 8  | 42  | 21 | 121 |
| 10,019 | 2 | 5  | 11 | 71  | 0 | 3  | 9  | 42  | 22 | 121 |
| 10,020 | 2 | 5  | 11 | 63  | 0 | 2  | 9  | 45  | 22 | 115 |
| 10,021 | 2 | 5  | 10 | 63  | 0 | 2  | 9  | 44  | 21 | 114 |
| 10,022 | 3 | 5  | 18 | 59  | 1 | 2  | 20 | 44  | 42 | 110 |
| 10,023 | 3 | 5  | 18 | 59  | 1 | 2  | 21 | 45  | 43 | 111 |
| 10,024 | 3 | 6  | 19 | 56  | 1 | 2  | 21 | 45  | 44 | 109 |
| 10,025 | 3 | 6  | 19 | 56  | 1 | 2  | 21 | 45  | 44 | 109 |
| 10,026 | 3 | 7  | 19 | 56  | 1 | 2  | 21 | 45  | 44 | 110 |
| 10,027 | 3 | 7  | 20 | 58  | 1 | 2  | 21 | 45  | 45 | 112 |
| 10,028 | 3 | 9  | 20 | 59  | 1 | 2  | 21 | 46  | 45 | 116 |
| 10,029 | 4 | 10 | 20 | 60  | 1 | 2  | 21 | 47  | 46 | 119 |
| 10,030 | 4 | 10 | 20 | 61  | 1 | 2  | 21 | 47  | 46 | 120 |
| 10,031 | 4 | 10 | 20 | 62  | 1 | 2  | 21 | 48  | 46 | 122 |
| 10,032 | 4 | 10 | 20 | 62  | 1 | 2  | 21 | 48  | 46 | 122 |
| 10,033 | 4 | 10 | 19 | 62  | 1 | 2  | 21 | 48  | 45 | 122 |

|        |   |    |    |     |   |    |    |     |    |     |
|--------|---|----|----|-----|---|----|----|-----|----|-----|
| 10,034 | 4 | 10 | 19 | 62  | 1 | 2  | 21 | 49  | 45 | 123 |
| 10,035 | 4 | 10 | 20 | 65  | 1 | 2  | 21 | 51  | 46 | 128 |
| 10,036 | 4 | 10 | 20 | 65  | 1 | 2  | 21 | 51  | 46 | 128 |
| 10,037 | 4 | 10 | 21 | 65  | 1 | 2  | 21 | 52  | 47 | 129 |
| 10,038 | 4 | 10 | 22 | 66  | 1 | 2  | 21 | 52  | 48 | 130 |
| 10,039 | 4 | 10 | 22 | 64  | 2 | 2  | 21 | 54  | 49 | 130 |
| 10,040 | 4 | 12 | 27 | 65  | 2 | 3  | 24 | 56  | 57 | 136 |
| 10,041 | 4 | 12 | 27 | 67  | 2 | 3  | 23 | 62  | 56 | 144 |
| 10,042 | 4 | 12 | 27 | 69  | 2 | 3  | 22 | 62  | 55 | 146 |
| 10,043 | 4 | 13 | 27 | 79  | 2 | 5  | 22 | 72  | 55 | 169 |
| 10,044 | 4 | 14 | 27 | 82  | 2 | 5  | 21 | 73  | 54 | 174 |
| 10,045 | 4 | 14 | 27 | 79  | 2 | 6  | 21 | 72  | 54 | 171 |
| 10,046 | 4 | 17 | 25 | 128 | 2 | 9  | 21 | 114 | 52 | 268 |
| 10,047 | 4 | 18 | 22 | 128 | 2 | 10 | 19 | 118 | 47 | 274 |
| 10,048 | 4 | 19 | 22 | 129 | 2 | 13 | 19 | 129 | 47 | 290 |
| 10,049 | 4 | 18 | 22 | 127 | 2 | 13 | 17 | 130 | 45 | 288 |
| 10,050 | 4 | 14 | 22 | 127 | 3 | 13 | 16 | 125 | 45 | 279 |
| 10,051 | 4 | 14 | 22 | 128 | 3 | 12 | 16 | 123 | 45 | 277 |
| 10,052 | 4 | 14 | 22 | 117 | 3 | 12 | 16 | 123 | 45 | 266 |
| 10,053 | 4 | 14 | 26 | 120 | 3 | 12 | 18 | 124 | 51 | 270 |
| 10,054 | 4 | 14 | 26 | 120 | 3 | 12 | 18 | 124 | 51 | 270 |
| 10,055 | 4 | 14 | 34 | 121 | 4 | 12 | 33 | 123 | 75 | 270 |
| 10,056 | 4 | 14 | 35 | 122 | 4 | 12 | 34 | 125 | 77 | 273 |
| 10,057 | 4 | 14 | 39 | 122 | 4 | 12 | 37 | 124 | 84 | 272 |
| 10,058 | 4 | 17 | 41 | 131 | 4 | 12 | 38 | 130 | 87 | 290 |
| 10,059 | 4 | 17 | 41 | 133 | 4 | 12 | 38 | 131 | 87 | 293 |
| 10,060 | 5 | 17 | 45 | 141 | 4 | 12 | 38 | 141 | 92 | 311 |
| 10,061 | 6 | 17 | 48 | 143 | 4 | 12 | 38 | 141 | 96 | 313 |
| 10,062 | 5 | 17 | 47 | 142 | 4 | 12 | 38 | 136 | 94 | 307 |
| 10,063 | 5 | 17 | 47 | 145 | 4 | 12 | 38 | 134 | 94 | 308 |
| 10,064 | 5 | 17 | 47 | 144 | 4 | 12 | 38 | 134 | 94 | 307 |
| 10,065 | 5 | 17 | 47 | 144 | 4 | 12 | 38 | 134 | 94 | 307 |
| 10,066 | 4 | 17 | 47 | 148 | 4 | 12 | 38 | 132 | 93 | 309 |
| 10,067 | 4 | 17 | 47 | 148 | 4 | 12 | 38 | 132 | 93 | 309 |
| 10,068 | 4 | 17 | 47 | 147 | 4 | 12 | 38 | 130 | 93 | 306 |
| 10,069 | 4 | 17 | 47 | 146 | 4 | 12 | 37 | 121 | 92 | 296 |
| 10,070 | 4 | 17 | 47 | 148 | 4 | 12 | 33 | 121 | 88 | 298 |
| 10,071 | 3 | 17 | 44 | 148 | 3 | 12 | 31 | 121 | 81 | 298 |
| 10,072 | 3 | 17 | 41 | 142 | 3 | 12 | 26 | 120 | 73 | 291 |
| 10,073 | 3 | 17 | 40 | 142 | 3 | 12 | 26 | 119 | 72 | 290 |
| 10,074 | 3 | 16 | 40 | 142 | 3 | 12 | 25 | 121 | 71 | 291 |

|        |   |    |    |     |   |    |    |     |    |     |
|--------|---|----|----|-----|---|----|----|-----|----|-----|
| 10,075 | 3 | 16 | 38 | 142 | 3 | 12 | 25 | 121 | 69 | 291 |
| 10,076 | 3 | 16 | 38 | 144 | 3 | 12 | 25 | 120 | 69 | 292 |
| 10,077 | 3 | 15 | 38 | 144 | 3 | 12 | 25 | 120 | 69 | 291 |
| 10,078 | 3 | 12 | 37 | 140 | 3 | 12 | 25 | 117 | 68 | 281 |
| 10,079 | 3 | 12 | 37 | 141 | 3 | 12 | 25 | 117 | 68 | 282 |
| 10,080 | 3 | 12 | 37 | 143 | 3 | 12 | 25 | 117 | 68 | 284 |
| 10,081 | 3 | 12 | 37 | 142 | 3 | 12 | 25 | 117 | 68 | 283 |
| 10,082 | 3 | 13 | 37 | 142 | 3 | 12 | 25 | 115 | 68 | 282 |
| 10,083 | 3 | 13 | 37 | 143 | 3 | 12 | 25 | 115 | 68 | 283 |
| 10,084 | 3 | 13 | 37 | 144 | 3 | 13 | 25 | 116 | 68 | 286 |
| 10,085 | 3 | 13 | 36 | 165 | 3 | 13 | 25 | 119 | 67 | 310 |
| 10,086 | 3 | 16 | 36 | 187 | 3 | 14 | 25 | 127 | 67 | 344 |
| 10,087 | 3 | 18 | 35 | 193 | 3 | 15 | 25 | 134 | 66 | 360 |
| 10,088 | 3 | 19 | 35 | 196 | 3 | 15 | 25 | 137 | 66 | 367 |
| 10,089 | 3 | 21 | 34 | 205 | 3 | 17 | 25 | 140 | 65 | 383 |
| 10,090 | 3 | 21 | 34 | 205 | 2 | 17 | 25 | 138 | 64 | 381 |
| 10,091 | 3 | 19 | 29 | 205 | 2 | 16 | 22 | 137 | 56 | 377 |
| 10,092 | 3 | 19 | 30 | 204 | 2 | 16 | 22 | 132 | 57 | 371 |
| 10,093 | 3 | 19 | 30 | 202 | 2 | 16 | 22 | 132 | 57 | 369 |
| 10,094 | 3 | 18 | 30 | 191 | 2 | 14 | 22 | 122 | 57 | 345 |
| 10,095 | 3 | 17 | 32 | 189 | 2 | 14 | 22 | 121 | 59 | 341 |
| 10,096 | 6 | 14 | 32 | 134 | 2 | 10 | 22 | 74  | 62 | 232 |
| 10,097 | 6 | 14 | 31 | 134 | 2 | 10 | 22 | 74  | 61 | 232 |
| 10,098 | 6 | 12 | 34 | 127 | 2 | 6  | 24 | 58  | 66 | 203 |
| 10,099 | 6 | 12 | 34 | 126 | 2 | 5  | 26 | 58  | 68 | 201 |
| 10,100 | 6 | 12 | 34 | 126 | 2 | 5  | 26 | 58  | 68 | 201 |
| 10,101 | 6 | 12 | 34 | 122 | 1 | 5  | 26 | 56  | 67 | 195 |
| 10,102 | 6 | 12 | 34 | 126 | 1 | 5  | 27 | 56  | 68 | 199 |
| 10,103 | 6 | 12 | 33 | 126 | 1 | 5  | 28 | 57  | 68 | 200 |
| 10,104 | 6 | 12 | 30 | 128 | 1 | 5  | 26 | 59  | 63 | 204 |
| 10,105 | 6 | 15 | 30 | 177 | 1 | 8  | 31 | 79  | 68 | 279 |
| 10,106 | 6 | 16 | 22 | 237 | 0 | 9  | 17 | 91  | 45 | 353 |
| 10,107 | 6 | 16 | 21 | 271 | 0 | 10 | 19 | 91  | 46 | 388 |
| 10,108 | 6 | 16 | 17 | 275 | 0 | 10 | 16 | 89  | 39 | 390 |
| 10,109 | 6 | 13 | 14 | 267 | 0 | 10 | 15 | 83  | 35 | 373 |
| 10,110 | 5 | 13 | 12 | 254 | 0 | 10 | 15 | 72  | 32 | 349 |
| 10,111 | 5 | 14 | 10 | 258 | 0 | 10 | 15 | 73  | 30 | 355 |
| 10,112 | 4 | 14 | 7  | 258 | 0 | 10 | 15 | 72  | 26 | 354 |
| 10,113 | 4 | 14 | 7  | 259 | 0 | 10 | 15 | 73  | 26 | 356 |
| 10,114 | 4 | 14 | 7  | 256 | 0 | 10 | 15 | 73  | 26 | 353 |
| 10,115 | 4 | 14 | 8  | 256 | 0 | 10 | 15 | 73  | 27 | 353 |

|        |   |    |    |     |   |    |    |     |    |     |
|--------|---|----|----|-----|---|----|----|-----|----|-----|
| 10,116 | 4 | 14 | 9  | 252 | 0 | 10 | 15 | 73  | 28 | 349 |
| 10,117 | 4 | 14 | 9  | 252 | 0 | 10 | 15 | 73  | 28 | 349 |
| 10,118 | 4 | 14 | 9  | 252 | 0 | 10 | 15 | 73  | 28 | 349 |
| 10,119 | 4 | 14 | 9  | 253 | 0 | 10 | 15 | 74  | 28 | 351 |
| 10,120 | 4 | 14 | 9  | 254 | 0 | 10 | 15 | 75  | 28 | 353 |
| 10,121 | 4 | 14 | 9  | 267 | 0 | 12 | 15 | 88  | 28 | 381 |
| 10,122 | 4 | 15 | 9  | 295 | 0 | 13 | 15 | 116 | 28 | 439 |
| 10,123 | 4 | 15 | 8  | 298 | 0 | 13 | 15 | 117 | 27 | 443 |
| 10,124 | 4 | 15 | 8  | 318 | 0 | 13 | 15 | 118 | 27 | 464 |
| 10,125 | 4 | 15 | 8  | 325 | 0 | 13 | 17 | 116 | 29 | 469 |
| 10,126 | 4 | 15 | 8  | 323 | 0 | 13 | 17 | 116 | 29 | 467 |
| 10,127 | 4 | 15 | 8  | 323 | 0 | 13 | 17 | 116 | 29 | 467 |
| 10,128 | 4 | 16 | 8  | 331 | 0 | 14 | 17 | 121 | 29 | 482 |
| 10,129 | 4 | 16 | 8  | 331 | 0 | 14 | 17 | 121 | 29 | 482 |
| 10,130 | 4 | 16 | 11 | 330 | 0 | 14 | 19 | 121 | 34 | 481 |
| 10,131 | 3 | 16 | 11 | 328 | 0 | 14 | 19 | 121 | 33 | 479 |
| 10,132 | 3 | 16 | 11 | 328 | 0 | 14 | 19 | 123 | 33 | 481 |
| 10,133 | 3 | 22 | 13 | 334 | 0 | 16 | 22 | 146 | 38 | 518 |
| 10,134 | 3 | 22 | 13 | 335 | 0 | 16 | 22 | 146 | 38 | 519 |
| 10,135 | 3 | 23 | 13 | 336 | 0 | 15 | 24 | 145 | 40 | 519 |
| 10,136 | 3 | 23 | 15 | 312 | 0 | 15 | 24 | 140 | 42 | 490 |
| 10,137 | 4 | 18 | 18 | 285 | 0 | 13 | 27 | 124 | 49 | 440 |
| 10,138 | 4 | 18 | 18 | 291 | 0 | 13 | 27 | 125 | 49 | 447 |
| 10,139 | 4 | 17 | 18 | 288 | 0 | 13 | 28 | 122 | 50 | 440 |
| 10,140 | 4 | 15 | 18 | 282 | 0 | 11 | 28 | 119 | 50 | 427 |
| 10,141 | 4 | 15 | 18 | 281 | 0 | 11 | 29 | 118 | 51 | 425 |
| 10,142 | 4 | 15 | 17 | 281 | 0 | 11 | 29 | 118 | 50 | 425 |
| 10,143 | 4 | 15 | 17 | 281 | 0 | 11 | 29 | 118 | 50 | 425 |
| 10,144 | 4 | 15 | 17 | 281 | 0 | 11 | 29 | 118 | 50 | 425 |
| 10,145 | 4 | 15 | 15 | 282 | 0 | 11 | 29 | 120 | 48 | 428 |
| 10,146 | 4 | 15 | 15 | 283 | 0 | 11 | 29 | 120 | 48 | 429 |
| 10,147 | 1 | 16 | 15 | 283 | 0 | 11 | 29 | 122 | 45 | 432 |
| 10,148 | 1 | 16 | 15 | 284 | 0 | 11 | 29 | 123 | 45 | 434 |
| 10,149 | 1 | 16 | 12 | 287 | 0 | 11 | 27 | 124 | 40 | 438 |
| 10,150 | 1 | 16 | 12 | 294 | 0 | 13 | 25 | 131 | 38 | 454 |
| 10,151 | 1 | 17 | 12 | 308 | 0 | 14 | 25 | 137 | 38 | 476 |
| 10,152 | 2 | 19 | 13 | 322 | 0 | 15 | 25 | 151 | 40 | 507 |
| 10,153 | 2 | 23 | 26 | 356 | 0 | 16 | 29 | 184 | 57 | 579 |
| 10,154 | 2 | 22 | 30 | 220 | 0 | 12 | 30 | 153 | 62 | 407 |
| 10,155 | 2 | 22 | 31 | 221 | 0 | 12 | 31 | 153 | 64 | 408 |
| 10,156 | 2 | 23 | 31 | 223 | 0 | 12 | 27 | 155 | 60 | 413 |



|        |   |    |    |     |   |    |    |     |    |     |
|--------|---|----|----|-----|---|----|----|-----|----|-----|
| 10,157 | 2 | 23 | 31 | 223 | 0 | 12 | 26 | 155 | 59 | 413 |
| 10,158 | 2 | 30 | 36 | 245 | 0 | 12 | 26 | 161 | 64 | 448 |
| 10,159 | 2 | 30 | 36 | 241 | 0 | 12 | 26 | 161 | 64 | 444 |
| 10,160 | 2 | 30 | 36 | 245 | 0 | 13 | 26 | 163 | 64 | 451 |
| 10,161 | 2 | 30 | 36 | 245 | 0 | 13 | 28 | 164 | 66 | 452 |
| 10,162 | 3 | 29 | 36 | 241 | 0 | 13 | 28 | 163 | 67 | 446 |
| 10,163 | 3 | 29 | 36 | 239 | 0 | 13 | 28 | 163 | 67 | 444 |
| 10,164 | 3 | 29 | 36 | 240 | 0 | 13 | 29 | 163 | 68 | 445 |
| 10,165 | 3 | 29 | 35 | 240 | 0 | 13 | 29 | 163 | 67 | 445 |
| 10,166 | 4 | 29 | 35 | 240 | 0 | 13 | 30 | 163 | 69 | 445 |
| 10,167 | 4 | 29 | 34 | 241 | 0 | 13 | 30 | 163 | 68 | 446 |
| 10,168 | 4 | 29 | 34 | 241 | 0 | 13 | 30 | 164 | 68 | 447 |
| 10,169 | 4 | 29 | 34 | 241 | 0 | 13 | 30 | 164 | 68 | 447 |
| 10,170 | 4 | 29 | 34 | 236 | 0 | 13 | 30 | 163 | 68 | 441 |
| 10,171 | 4 | 29 | 34 | 237 | 0 | 13 | 30 | 162 | 68 | 441 |
| 10,172 | 4 | 29 | 34 | 226 | 0 | 11 | 30 | 149 | 68 | 415 |
| 10,173 | 4 | 28 | 34 | 204 | 0 | 10 | 30 | 122 | 68 | 364 |
| 10,174 | 4 | 28 | 34 | 214 | 0 | 10 | 30 | 123 | 68 | 375 |
| 10,175 | 4 | 29 | 34 | 205 | 0 | 12 | 30 | 132 | 68 | 378 |
| 10,176 | 4 | 29 | 34 | 220 | 0 | 12 | 28 | 138 | 66 | 399 |
| 10,177 | 4 | 32 | 34 | 233 | 0 | 13 | 28 | 146 | 66 | 424 |
| 10,178 | 4 | 31 | 34 | 228 | 0 | 12 | 28 | 141 | 66 | 412 |
| 10,179 | 4 | 31 | 35 | 231 | 0 | 12 | 28 | 144 | 67 | 418 |
| 10,180 | 4 | 31 | 32 | 231 | 0 | 12 | 26 | 144 | 62 | 418 |
| 10,181 | 4 | 31 | 34 | 235 | 0 | 12 | 26 | 144 | 64 | 422 |
| 10,182 | 4 | 33 | 34 | 286 | 0 | 12 | 26 | 170 | 64 | 501 |
| 10,183 | 4 | 34 | 32 | 301 | 0 | 12 | 23 | 172 | 59 | 519 |
| 10,184 | 4 | 27 | 32 | 297 | 0 | 11 | 23 | 156 | 59 | 491 |
| 10,185 | 4 | 27 | 32 | 298 | 0 | 11 | 23 | 156 | 59 | 492 |
| 10,186 | 4 | 26 | 32 | 297 | 0 | 11 | 21 | 155 | 57 | 489 |
| 10,187 | 4 | 26 | 30 | 301 | 0 | 12 | 21 | 157 | 55 | 496 |
| 10,188 | 3 | 26 | 27 | 303 | 0 | 12 | 18 | 158 | 48 | 499 |
| 10,189 | 3 | 26 | 27 | 297 | 0 | 12 | 17 | 157 | 47 | 492 |
| 10,190 | 3 | 26 | 27 | 297 | 0 | 12 | 17 | 156 | 47 | 491 |
| 10,191 | 3 | 26 | 27 | 293 | 0 | 12 | 16 | 157 | 46 | 488 |
| 10,192 | 3 | 26 | 27 | 293 | 0 | 12 | 16 | 157 | 46 | 488 |
| 10,193 | 3 | 26 | 27 | 293 | 0 | 12 | 16 | 157 | 46 | 488 |
| 10,194 | 3 | 26 | 27 | 293 | 0 | 12 | 16 | 157 | 46 | 488 |
| 10,195 | 3 | 26 | 27 | 293 | 0 | 12 | 17 | 157 | 47 | 488 |
| 10,196 | 3 | 26 | 27 | 290 | 0 | 12 | 17 | 155 | 47 | 483 |
| 10,197 | 3 | 25 | 27 | 290 | 0 | 12 | 17 | 153 | 47 | 480 |

|        |   |    |    |     |   |    |    |     |    |     |
|--------|---|----|----|-----|---|----|----|-----|----|-----|
| 10,198 | 3 | 25 | 27 | 291 | 0 | 12 | 17 | 153 | 47 | 481 |
| 10,199 | 3 | 26 | 27 | 290 | 0 | 12 | 17 | 151 | 47 | 479 |
| 10,200 | 3 | 26 | 27 | 286 | 0 | 12 | 17 | 149 | 47 | 473 |
| 10,201 | 3 | 26 | 27 | 279 | 0 | 10 | 17 | 142 | 47 | 457 |
| 10,202 | 5 | 23 | 26 | 252 | 0 | 8  | 16 | 122 | 47 | 405 |
| 10,203 | 4 | 23 | 26 | 256 | 0 | 9  | 16 | 124 | 46 | 412 |
| 10,204 | 4 | 19 | 13 | 216 | 0 | 8  | 11 | 91  | 28 | 334 |
| 10,205 | 4 | 16 | 10 | 201 | 0 | 7  | 12 | 86  | 26 | 310 |
| 10,206 | 4 | 16 | 9  | 200 | 0 | 8  | 11 | 86  | 24 | 310 |
| 10,207 | 4 | 15 | 9  | 199 | 0 | 8  | 10 | 84  | 23 | 306 |
| 10,208 | 4 | 8  | 7  | 177 | 0 | 8  | 9  | 78  | 20 | 271 |
| 10,209 | 4 | 8  | 5  | 174 | 0 | 8  | 8  | 77  | 17 | 267 |
| 10,210 | 4 | 8  | 5  | 174 | 0 | 8  | 10 | 77  | 19 | 267 |
| 10,211 | 4 | 8  | 5  | 169 | 0 | 7  | 8  | 74  | 17 | 258 |
| 10,212 | 4 | 8  | 5  | 168 | 0 | 7  | 8  | 74  | 17 | 257 |
| 10,213 | 3 | 8  | 5  | 168 | 0 | 7  | 9  | 74  | 17 | 257 |
| 10,214 | 3 | 8  | 5  | 168 | 0 | 7  | 9  | 74  | 17 | 257 |
| 10,215 | 3 | 8  | 5  | 167 | 0 | 7  | 9  | 73  | 17 | 255 |
| 10,216 | 3 | 8  | 5  | 168 | 0 | 7  | 9  | 73  | 17 | 256 |
| 10,217 | 2 | 8  | 5  | 168 | 0 | 7  | 8  | 73  | 15 | 256 |
| 10,218 | 2 | 8  | 5  | 168 | 0 | 7  | 8  | 73  | 15 | 256 |
| 10,219 | 2 | 8  | 5  | 168 | 0 | 7  | 8  | 73  | 15 | 256 |
| 10,220 | 3 | 8  | 7  | 168 | 0 | 7  | 10 | 73  | 20 | 256 |
| 10,221 | 3 | 8  | 7  | 168 | 0 | 7  | 10 | 73  | 20 | 256 |
| 10,222 | 3 | 8  | 10 | 167 | 0 | 7  | 14 | 73  | 27 | 255 |
| 10,223 | 3 | 8  | 14 | 159 | 0 | 7  | 26 | 72  | 43 | 246 |
| 10,224 | 3 | 8  | 14 | 146 | 0 | 7  | 29 | 70  | 46 | 231 |
| 10,225 | 3 | 7  | 14 | 135 | 0 | 5  | 29 | 60  | 46 | 207 |
| 10,226 | 3 | 7  | 14 | 137 | 0 | 5  | 29 | 61  | 46 | 210 |
| 10,227 | 3 | 7  | 14 | 133 | 0 | 6  | 29 | 81  | 46 | 227 |
| 10,228 | 3 | 5  | 14 | 142 | 0 | 5  | 29 | 79  | 46 | 231 |
| 10,229 | 3 | 8  | 14 | 166 | 0 | 6  | 31 | 100 | 48 | 280 |
| 10,230 | 3 | 8  | 13 | 177 | 0 | 6  | 31 | 103 | 47 | 294 |
| 10,231 | 3 | 17 | 13 | 256 | 0 | 7  | 32 | 140 | 48 | 420 |
| 10,232 | 3 | 19 | 12 | 316 | 0 | 10 | 32 | 158 | 47 | 503 |
| 10,233 | 3 | 23 | 12 | 323 | 0 | 15 | 32 | 175 | 47 | 536 |
| 10,234 | 3 | 23 | 12 | 310 | 0 | 15 | 32 | 173 | 47 | 521 |
| 10,235 | 3 | 24 | 12 | 332 | 0 | 14 | 33 | 185 | 48 | 555 |
| 10,236 | 3 | 25 | 12 | 334 | 0 | 14 | 33 | 186 | 48 | 559 |
| 10,237 | 3 | 26 | 12 | 340 | 0 | 13 | 33 | 184 | 48 | 563 |
| 10,238 | 3 | 28 | 12 | 341 | 0 | 13 | 33 | 185 | 48 | 567 |

|        |   |    |    |     |   |    |    |     |    |     |
|--------|---|----|----|-----|---|----|----|-----|----|-----|
| 10,239 | 3 | 28 | 12 | 342 | 0 | 13 | 33 | 185 | 48 | 568 |
| 10,240 | 3 | 29 | 13 | 344 | 0 | 13 | 34 | 187 | 50 | 573 |
| 10,241 | 3 | 29 | 13 | 344 | 0 | 13 | 34 | 187 | 50 | 573 |
| 10,242 | 3 | 29 | 14 | 345 | 0 | 13 | 35 | 187 | 52 | 574 |
| 10,243 | 3 | 30 | 14 | 354 | 0 | 13 | 35 | 189 | 52 | 586 |
| 10,244 | 4 | 30 | 15 | 353 | 0 | 14 | 35 | 192 | 54 | 589 |
| 10,245 | 4 | 30 | 15 | 353 | 0 | 14 | 34 | 192 | 53 | 589 |
| 10,246 | 5 | 30 | 15 | 353 | 0 | 14 | 35 | 192 | 55 | 589 |
| 10,247 | 5 | 30 | 33 | 353 | 0 | 14 | 35 | 193 | 73 | 590 |
| 10,248 | 5 | 31 | 33 | 361 | 0 | 14 | 35 | 201 | 73 | 607 |
| 10,249 | 5 | 31 | 33 | 360 | 0 | 14 | 35 | 202 | 73 | 607 |
| 10,250 | 5 | 30 | 35 | 363 | 0 | 14 | 35 | 204 | 75 | 611 |
| 10,251 | 5 | 32 | 35 | 374 | 0 | 16 | 35 | 211 | 75 | 633 |
| 10,252 | 3 | 32 | 35 | 375 | 0 | 16 | 35 | 215 | 73 | 638 |
| 10,253 | 3 | 32 | 35 | 394 | 0 | 16 | 35 | 224 | 73 | 666 |
| 10,254 | 3 | 32 | 35 | 425 | 0 | 18 | 35 | 239 | 73 | 714 |
| 10,255 | 3 | 32 | 35 | 429 | 0 | 18 | 34 | 242 | 72 | 721 |
| 10,256 | 3 | 38 | 33 | 467 | 0 | 20 | 31 | 253 | 67 | 778 |
| 10,257 | 3 | 38 | 33 | 473 | 0 | 21 | 31 | 257 | 67 | 789 |
| 10,258 | 3 | 38 | 33 | 475 | 0 | 21 | 31 | 259 | 67 | 793 |
| 10,259 | 3 | 38 | 33 | 475 | 0 | 21 | 30 | 259 | 66 | 793 |
| 10,260 | 3 | 38 | 34 | 475 | 0 | 21 | 33 | 259 | 70 | 793 |
| 10,261 | 4 | 38 | 34 | 475 | 0 | 21 | 31 | 259 | 69 | 793 |
| 10,262 | 4 | 38 | 34 | 476 | 0 | 21 | 31 | 259 | 69 | 794 |
| 10,263 | 4 | 38 | 34 | 476 | 0 | 21 | 31 | 259 | 69 | 794 |
| 10,264 | 4 | 38 | 35 | 476 | 0 | 21 | 31 | 259 | 70 | 794 |
| 10,265 | 4 | 38 | 41 | 476 | 1 | 21 | 35 | 258 | 81 | 793 |
| 10,266 | 4 | 38 | 41 | 475 | 1 | 21 | 35 | 259 | 81 | 793 |
| 10,267 | 4 | 38 | 41 | 476 | 1 | 21 | 35 | 259 | 81 | 794 |
| 10,268 | 5 | 38 | 41 | 477 | 1 | 21 | 35 | 259 | 82 | 795 |
| 10,269 | 5 | 38 | 41 | 477 | 1 | 21 | 35 | 259 | 82 | 795 |
| 10,270 | 4 | 38 | 39 | 481 | 1 | 21 | 33 | 268 | 77 | 808 |
| 10,271 | 4 | 38 | 39 | 498 | 1 | 24 | 33 | 290 | 77 | 850 |
| 10,272 | 4 | 39 | 36 | 518 | 1 | 25 | 29 | 314 | 70 | 896 |
| 10,273 | 4 | 39 | 32 | 527 | 1 | 25 | 24 | 317 | 61 | 908 |
| 10,274 | 4 | 39 | 32 | 532 | 1 | 25 | 17 | 320 | 54 | 916 |
| 10,275 | 4 | 39 | 32 | 532 | 1 | 25 | 14 | 320 | 51 | 916 |
| 10,276 | 4 | 39 | 32 | 533 | 1 | 25 | 14 | 319 | 51 | 916 |
| 10,277 | 4 | 39 | 32 | 515 | 1 | 24 | 14 | 294 | 51 | 872 |
| 10,278 | 4 | 39 | 32 | 516 | 1 | 24 | 14 | 294 | 51 | 873 |
| 10,279 | 4 | 38 | 32 | 495 | 1 | 24 | 13 | 287 | 50 | 844 |

|        |   |    |    |     |   |    |    |     |    |     |
|--------|---|----|----|-----|---|----|----|-----|----|-----|
| 10,280 | 4 | 35 | 32 | 454 | 1 | 23 | 12 | 260 | 49 | 772 |
| 10,281 | 4 | 39 | 32 | 471 | 1 | 24 | 12 | 278 | 49 | 812 |
| 10,282 | 4 | 30 | 32 | 394 | 1 | 23 | 11 | 242 | 48 | 689 |
| 10,283 | 4 | 27 | 32 | 333 | 1 | 20 | 11 | 223 | 48 | 603 |
| 10,284 | 4 | 23 | 32 | 277 | 1 | 15 | 11 | 183 | 48 | 498 |
| 10,285 | 4 | 23 | 32 | 279 | 1 | 15 | 11 | 185 | 48 | 502 |
| 10,286 | 4 | 23 | 32 | 260 | 1 | 16 | 10 | 175 | 47 | 474 |
| 10,287 | 4 | 22 | 32 | 260 | 1 | 16 | 10 | 176 | 47 | 474 |
| 10,288 | 4 | 21 | 35 | 251 | 1 | 16 | 11 | 176 | 51 | 464 |
| 10,289 | 4 | 19 | 35 | 251 | 1 | 16 | 11 | 175 | 51 | 461 |
| 10,290 | 4 | 18 | 34 | 247 | 1 | 16 | 11 | 174 | 50 | 455 |
| 10,291 | 4 | 20 | 37 | 253 | 1 | 16 | 10 | 177 | 52 | 466 |
| 10,292 | 5 | 22 | 37 | 283 | 1 | 18 | 12 | 229 | 55 | 552 |
| 10,293 | 5 | 22 | 37 | 293 | 1 | 18 | 11 | 244 | 54 | 577 |
| 10,294 | 5 | 22 | 37 | 308 | 2 | 18 | 12 | 267 | 56 | 615 |
| 10,295 | 4 | 23 | 36 | 318 | 2 | 17 | 13 | 265 | 55 | 623 |
| 10,296 | 3 | 23 | 37 | 320 | 3 | 17 | 13 | 265 | 56 | 625 |
| 10,297 | 3 | 25 | 20 | 323 | 4 | 17 | 13 | 269 | 40 | 634 |
| 10,298 | 3 | 25 | 19 | 324 | 4 | 17 | 13 | 269 | 39 | 635 |
| 10,299 | 3 | 24 | 17 | 321 | 4 | 17 | 13 | 266 | 37 | 628 |
| 10,300 | 3 | 25 | 17 | 319 | 4 | 17 | 13 | 262 | 37 | 623 |
| 10,301 | 3 | 23 | 17 | 309 | 4 | 15 | 13 | 255 | 37 | 602 |
| 10,302 | 3 | 23 | 17 | 309 | 4 | 15 | 13 | 255 | 37 | 602 |
| 10,303 | 3 | 23 | 17 | 289 | 4 | 15 | 13 | 243 | 37 | 570 |
| 10,304 | 3 | 23 | 17 | 262 | 4 | 12 | 13 | 232 | 37 | 529 |
| 10,305 | 3 | 35 | 17 | 308 | 4 | 17 | 13 | 287 | 37 | 647 |
| 10,306 | 3 | 35 | 17 | 307 | 4 | 17 | 13 | 285 | 37 | 644 |
| 10,307 | 3 | 29 | 17 | 283 | 4 | 17 | 14 | 281 | 38 | 610 |
| 10,308 | 3 | 30 | 17 | 281 | 4 | 15 | 14 | 278 | 38 | 604 |
| 10,309 | 3 | 32 | 20 | 312 | 4 | 16 | 14 | 296 | 41 | 656 |
| 10,310 | 3 | 32 | 19 | 313 | 4 | 16 | 12 | 296 | 38 | 657 |
| 10,311 | 3 | 32 | 19 | 318 | 4 | 16 | 11 | 298 | 37 | 664 |
| 10,312 | 2 | 33 | 19 | 328 | 4 | 16 | 11 | 305 | 36 | 682 |
| 10,313 | 2 | 33 | 19 | 332 | 4 | 16 | 11 | 305 | 36 | 686 |
| 10,314 | 2 | 33 | 19 | 334 | 4 | 16 | 11 | 307 | 36 | 690 |
| 10,315 | 2 | 33 | 18 | 334 | 4 | 16 | 11 | 307 | 35 | 690 |
| 10,316 | 2 | 33 | 12 | 334 | 3 | 16 | 7  | 307 | 24 | 690 |
| 10,317 | 2 | 33 | 12 | 337 | 3 | 16 | 8  | 307 | 25 | 693 |
| 10,318 | 2 | 33 | 12 | 334 | 3 | 16 | 8  | 305 | 25 | 688 |
| 10,319 | 2 | 33 | 12 | 336 | 3 | 16 | 8  | 307 | 25 | 692 |
| 10,320 | 2 | 33 | 13 | 332 | 3 | 16 | 8  | 298 | 26 | 679 |

|        |   |    |    |     |   |    |    |     |    |     |
|--------|---|----|----|-----|---|----|----|-----|----|-----|
| 10,321 | 2 | 33 | 13 | 315 | 3 | 13 | 8  | 276 | 26 | 637 |
| 10,322 | 2 | 32 | 13 | 295 | 3 | 12 | 8  | 252 | 26 | 591 |
| 10,323 | 2 | 32 | 13 | 284 | 3 | 12 | 8  | 250 | 26 | 578 |
| 10,324 | 2 | 32 | 14 | 279 | 3 | 11 | 8  | 247 | 27 | 569 |
| 10,325 | 2 | 32 | 14 | 279 | 3 | 11 | 8  | 247 | 27 | 569 |
| 10,326 | 2 | 31 | 16 | 279 | 3 | 11 | 9  | 247 | 30 | 568 |
| 10,327 | 3 | 32 | 16 | 277 | 3 | 12 | 9  | 250 | 31 | 571 |
| 10,328 | 3 | 32 | 16 | 280 | 3 | 12 | 9  | 252 | 31 | 576 |
| 10,329 | 3 | 32 | 16 | 280 | 3 | 12 | 9  | 255 | 31 | 579 |
| 10,330 | 3 | 32 | 16 | 281 | 3 | 12 | 9  | 255 | 31 | 580 |
| 10,331 | 3 | 32 | 16 | 281 | 3 | 12 | 9  | 253 | 31 | 578 |
| 10,332 | 3 | 29 | 16 | 266 | 3 | 12 | 9  | 237 | 31 | 544 |
| 10,333 | 3 | 32 | 15 | 259 | 3 | 12 | 9  | 233 | 30 | 536 |
| 10,334 | 3 | 32 | 15 | 259 | 3 | 12 | 9  | 231 | 30 | 534 |
| 10,335 | 3 | 30 | 15 | 259 | 3 | 12 | 11 | 228 | 32 | 529 |
| 10,336 | 3 | 29 | 17 | 245 | 3 | 11 | 10 | 217 | 33 | 502 |
| 10,337 | 3 | 29 | 18 | 245 | 3 | 11 | 11 | 218 | 35 | 503 |
| 10,338 | 4 | 29 | 19 | 245 | 3 | 11 | 12 | 219 | 38 | 504 |
| 10,339 | 4 | 29 | 19 | 240 | 3 | 11 | 12 | 218 | 38 | 498 |
| 10,340 | 4 | 26 | 20 | 237 | 3 | 12 | 12 | 214 | 39 | 489 |
| 10,341 | 4 | 28 | 20 | 256 | 3 | 16 | 12 | 228 | 39 | 528 |
| 10,342 | 4 | 28 | 19 | 286 | 3 | 18 | 12 | 250 | 38 | 582 |
| 10,343 | 3 | 27 | 20 | 296 | 3 | 18 | 10 | 224 | 36 | 565 |
| 10,344 | 3 | 27 | 21 | 299 | 3 | 20 | 10 | 217 | 37 | 563 |
| 10,345 | 3 | 26 | 21 | 276 | 2 | 22 | 9  | 197 | 35 | 521 |
| 10,346 | 3 | 31 | 21 | 285 | 2 | 23 | 8  | 206 | 34 | 545 |
| 10,347 | 3 | 32 | 20 | 297 | 1 | 23 | 7  | 207 | 31 | 559 |
| 10,348 | 3 | 31 | 20 | 299 | 0 | 23 | 7  | 205 | 30 | 558 |
| 10,349 | 3 | 31 | 20 | 299 | 0 | 23 | 7  | 206 | 30 | 559 |
| 10,350 | 3 | 33 | 20 | 307 | 0 | 23 | 7  | 207 | 30 | 570 |
| 10,351 | 3 | 32 | 20 | 312 | 0 | 23 | 7  | 209 | 30 | 576 |
| 10,352 | 3 | 32 | 21 | 312 | 0 | 23 | 7  | 209 | 31 | 576 |
| 10,353 | 3 | 32 | 21 | 312 | 0 | 23 | 7  | 209 | 31 | 576 |
| 10,354 | 3 | 32 | 21 | 313 | 0 | 23 | 7  | 209 | 31 | 577 |
| 10,355 | 3 | 32 | 21 | 305 | 0 | 23 | 8  | 203 | 32 | 563 |
| 10,356 | 3 | 20 | 22 | 257 | 0 | 18 | 7  | 148 | 32 | 443 |
| 10,357 | 3 | 20 | 22 | 257 | 0 | 18 | 7  | 148 | 32 | 443 |
| 10,358 | 3 | 20 | 22 | 243 | 0 | 16 | 7  | 142 | 32 | 421 |
| 10,359 | 3 | 19 | 22 | 241 | 0 | 16 | 8  | 141 | 33 | 417 |
| 10,360 | 3 | 17 | 19 | 208 | 0 | 15 | 8  | 121 | 30 | 361 |
| 10,361 | 3 | 17 | 19 | 204 | 0 | 15 | 10 | 120 | 32 | 356 |

|        |   |    |    |     |   |    |    |     |    |     |
|--------|---|----|----|-----|---|----|----|-----|----|-----|
| 10,362 | 3 | 17 | 19 | 204 | 0 | 15 | 10 | 120 | 32 | 356 |
| 10,363 | 3 | 16 | 19 | 194 | 0 | 15 | 10 | 113 | 32 | 338 |
| 10,364 | 3 | 16 | 19 | 188 | 0 | 15 | 10 | 111 | 32 | 330 |
| 10,365 | 3 | 17 | 19 | 188 | 0 | 15 | 10 | 111 | 32 | 331 |
| 10,366 | 3 | 17 | 19 | 188 | 0 | 15 | 10 | 112 | 32 | 332 |
| 10,367 | 3 | 17 | 19 | 186 | 0 | 15 | 10 | 112 | 32 | 330 |
| 10,368 | 3 | 17 | 19 | 185 | 0 | 15 | 9  | 112 | 31 | 329 |
| 10,369 | 3 | 17 | 19 | 185 | 0 | 15 | 9  | 112 | 31 | 329 |
| 10,370 | 2 | 17 | 19 | 190 | 0 | 17 | 9  | 113 | 30 | 337 |
| 10,371 | 2 | 18 | 18 | 206 | 0 | 19 | 9  | 136 | 29 | 379 |
| 10,372 | 2 | 18 | 18 | 225 | 0 | 22 | 9  | 161 | 29 | 426 |
| 10,373 | 2 | 19 | 18 | 240 | 0 | 22 | 9  | 170 | 29 | 451 |
| 10,374 | 2 | 19 | 18 | 251 | 0 | 22 | 9  | 177 | 29 | 469 |
| 10,375 | 2 | 20 | 17 | 265 | 0 | 22 | 9  | 184 | 28 | 491 |
| 10,376 | 2 | 20 | 15 | 266 | 0 | 22 | 8  | 186 | 25 | 494 |
| 10,377 | 2 | 20 | 15 | 278 | 0 | 21 | 8  | 195 | 25 | 514 |
| 10,378 | 1 | 20 | 15 | 278 | 0 | 21 | 8  | 197 | 24 | 516 |
| 10,379 | 1 | 20 | 15 | 275 | 0 | 21 | 8  | 196 | 24 | 512 |
| 10,380 | 1 | 20 | 16 | 286 | 0 | 21 | 8  | 196 | 25 | 523 |
| 10,381 | 1 | 21 | 20 | 301 | 1 | 21 | 8  | 206 | 30 | 549 |
| 10,382 | 1 | 21 | 20 | 309 | 1 | 21 | 8  | 208 | 30 | 559 |
| 10,383 | 1 | 21 | 23 | 321 | 1 | 21 | 8  | 214 | 33 | 577 |
| 10,384 | 4 | 18 | 42 | 328 | 1 | 21 | 9  | 218 | 56 | 585 |
| 10,385 | 4 | 19 | 42 | 334 | 1 | 21 | 9  | 219 | 56 | 593 |
| 10,386 | 4 | 19 | 43 | 335 | 1 | 21 | 7  | 221 | 55 | 596 |
| 10,387 | 4 | 19 | 41 | 337 | 1 | 21 | 7  | 218 | 53 | 595 |
| 10,388 | 4 | 19 | 39 | 343 | 1 | 21 | 6  | 219 | 50 | 602 |
| 10,389 | 3 | 19 | 38 | 361 | 1 | 22 | 5  | 222 | 47 | 624 |
| 10,390 | 3 | 19 | 37 | 398 | 1 | 28 | 5  | 279 | 46 | 724 |
| 10,391 | 3 | 20 | 36 | 449 | 1 | 27 | 5  | 299 | 45 | 795 |
| 10,392 | 3 | 18 | 36 | 431 | 1 | 23 | 5  | 285 | 45 | 757 |
| 10,393 | 3 | 18 | 34 | 401 | 1 | 21 | 5  | 264 | 43 | 704 |
| 10,394 | 3 | 18 | 32 | 361 | 1 | 19 | 5  | 248 | 41 | 646 |
| 10,395 | 3 | 17 | 31 | 337 | 1 | 15 | 5  | 236 | 40 | 605 |
| 10,396 | 3 | 17 | 31 | 339 | 1 | 15 | 5  | 237 | 40 | 608 |
| 10,397 | 3 | 12 | 31 | 330 | 1 | 14 | 5  | 228 | 40 | 584 |
| 10,398 | 3 | 11 | 32 | 318 | 1 | 14 | 5  | 227 | 41 | 570 |
| 10,399 | 3 | 10 | 32 | 312 | 1 | 14 | 5  | 224 | 41 | 560 |
| 10,400 | 3 | 8  | 32 | 299 | 1 | 14 | 5  | 218 | 41 | 539 |
| 10,401 | 3 | 8  | 32 | 299 | 1 | 14 | 5  | 218 | 41 | 539 |
| 10,402 | 3 | 8  | 34 | 293 | 1 | 14 | 8  | 216 | 46 | 531 |

|        |   |    |    |     |   |    |    |     |    |     |
|--------|---|----|----|-----|---|----|----|-----|----|-----|
| 10,403 | 3 | 8  | 35 | 292 | 1 | 14 | 9  | 216 | 48 | 530 |
| 10,404 | 3 | 8  | 35 | 291 | 1 | 14 | 10 | 216 | 49 | 529 |
| 10,405 | 3 | 8  | 35 | 291 | 1 | 14 | 10 | 216 | 49 | 529 |
| 10,406 | 3 | 8  | 35 | 289 | 1 | 14 | 9  | 215 | 48 | 526 |
| 10,407 | 3 | 8  | 34 | 290 | 1 | 14 | 9  | 215 | 47 | 527 |
| 10,408 | 3 | 8  | 34 | 290 | 1 | 14 | 9  | 215 | 47 | 527 |
| 10,409 | 3 | 8  | 34 | 290 | 1 | 14 | 9  | 214 | 47 | 526 |
| 10,410 | 3 | 8  | 35 | 288 | 1 | 14 | 9  | 214 | 48 | 524 |
| 10,411 | 4 | 8  | 35 | 286 | 1 | 14 | 9  | 214 | 49 | 522 |
| 10,412 | 4 | 8  | 36 | 285 | 1 | 14 | 7  | 213 | 48 | 520 |
| 10,413 | 4 | 8  | 36 | 285 | 1 | 14 | 7  | 212 | 48 | 519 |
| 10,414 | 4 | 8  | 36 | 285 | 1 | 14 | 7  | 213 | 48 | 520 |
| 10,415 | 4 | 8  | 36 | 286 | 1 | 14 | 7  | 213 | 48 | 521 |
| 10,416 | 4 | 7  | 36 | 290 | 1 | 15 | 7  | 214 | 48 | 526 |
| 10,417 | 4 | 7  | 36 | 292 | 1 | 16 | 7  | 214 | 48 | 529 |
| 10,418 | 4 | 7  | 36 | 292 | 1 | 16 | 7  | 214 | 48 | 529 |
| 10,419 | 4 | 7  | 36 | 292 | 1 | 16 | 7  | 214 | 48 | 529 |
| 10,420 | 4 | 7  | 36 | 292 | 1 | 16 | 7  | 214 | 48 | 529 |
| 10,421 | 4 | 6  | 37 | 271 | 1 | 12 | 7  | 190 | 49 | 479 |
| 10,422 | 4 | 6  | 37 | 272 | 1 | 12 | 7  | 190 | 49 | 480 |
| 10,423 | 4 | 6  | 38 | 238 | 1 | 9  | 8  | 157 | 51 | 410 |
| 10,424 | 4 | 7  | 38 | 238 | 1 | 9  | 8  | 157 | 51 | 411 |
| 10,425 | 4 | 6  | 38 | 213 | 1 | 9  | 8  | 143 | 51 | 371 |
| 10,426 | 4 | 6  | 38 | 212 | 1 | 9  | 8  | 141 | 51 | 368 |
| 10,427 | 4 | 5  | 38 | 199 | 1 | 9  | 8  | 128 | 51 | 341 |
| 10,428 | 4 | 5  | 38 | 200 | 1 | 9  | 8  | 128 | 51 | 342 |
| 10,429 | 4 | 5  | 38 | 203 | 1 | 9  | 8  | 128 | 51 | 345 |
| 10,430 | 4 | 5  | 37 | 204 | 1 | 9  | 8  | 132 | 50 | 350 |
| 10,431 | 4 | 5  | 38 | 203 | 1 | 10 | 8  | 131 | 51 | 349 |
| 10,432 | 4 | 4  | 35 | 230 | 0 | 17 | 9  | 138 | 48 | 389 |
| 10,433 | 4 | 12 | 34 | 284 | 0 | 23 | 10 | 174 | 48 | 493 |
| 10,434 | 3 | 20 | 26 | 332 | 0 | 29 | 11 | 205 | 40 | 586 |
| 10,435 | 3 | 30 | 19 | 441 | 1 | 33 | 20 | 291 | 43 | 795 |
| 10,436 | 3 | 32 | 19 | 462 | 1 | 35 | 20 | 310 | 43 | 839 |
| 10,437 | 3 | 35 | 18 | 470 | 1 | 37 | 20 | 315 | 42 | 857 |
| 10,438 | 3 | 35 | 18 | 468 | 1 | 37 | 20 | 315 | 42 | 855 |
| 10,439 | 3 | 38 | 18 | 474 | 1 | 38 | 20 | 317 | 42 | 867 |
| 10,440 | 3 | 38 | 17 | 456 | 1 | 37 | 20 | 314 | 41 | 845 |
| 10,441 | 3 | 38 | 17 | 424 | 1 | 33 | 20 | 261 | 41 | 756 |
| 10,442 | 3 | 38 | 17 | 383 | 1 | 33 | 20 | 241 | 41 | 695 |
| 10,443 | 3 | 38 | 17 | 393 | 1 | 33 | 20 | 244 | 41 | 708 |

|        |   |    |    |       |   |    |    |     |    |       |
|--------|---|----|----|-------|---|----|----|-----|----|-------|
| 10,444 | 3 | 39 | 17 | 401   | 1 | 33 | 20 | 236 | 41 | 709   |
| 10,445 | 3 | 39 | 17 | 410   | 1 | 33 | 20 | 238 | 41 | 720   |
| 10,446 | 3 | 39 | 17 | 412   | 1 | 33 | 22 | 239 | 43 | 723   |
| 10,447 | 3 | 39 | 17 | 414   | 1 | 33 | 22 | 239 | 43 | 725   |
| 10,448 | 4 | 39 | 17 | 415   | 1 | 33 | 22 | 239 | 44 | 726   |
| 10,449 | 4 | 40 | 18 | 415   | 1 | 33 | 22 | 240 | 45 | 728   |
| 10,450 | 4 | 40 | 19 | 415   | 1 | 33 | 22 | 239 | 46 | 727   |
| 10,451 | 4 | 40 | 19 | 415   | 1 | 33 | 22 | 240 | 46 | 728   |
| 10,452 | 4 | 40 | 19 | 415   | 1 | 33 | 22 | 241 | 46 | 729   |
| 10,453 | 4 | 40 | 16 | 415   | 1 | 33 | 19 | 241 | 40 | 729   |
| 10,454 | 4 | 40 | 15 | 415   | 1 | 33 | 18 | 241 | 38 | 729   |
| 10,455 | 4 | 40 | 15 | 419   | 1 | 33 | 20 | 244 | 40 | 736   |
| 10,456 | 4 | 40 | 15 | 432   | 1 | 36 | 20 | 261 | 40 | 769   |
| 10,457 | 4 | 52 | 15 | 709   | 1 | 63 | 20 | 527 | 40 | 1,351 |
| 10,458 | 4 | 52 | 15 | 722   | 1 | 64 | 20 | 534 | 40 | 1,372 |
| 10,459 | 4 | 52 | 15 | 724   | 1 | 64 | 20 | 535 | 40 | 1,375 |
| 10,460 | 4 | 52 | 15 | 730   | 1 | 65 | 20 | 535 | 40 | 1,382 |
| 10,461 | 4 | 56 | 15 | 755   | 1 | 67 | 20 | 554 | 40 | 1,432 |
| 10,462 | 3 | 56 | 15 | 762   | 1 | 67 | 20 | 560 | 39 | 1,445 |
| 10,463 | 3 | 56 | 14 | 769   | 1 | 67 | 20 | 569 | 38 | 1,461 |
| 10,464 | 3 | 58 | 14 | 788   | 1 | 69 | 20 | 582 | 38 | 1,497 |
| 10,465 | 3 | 58 | 14 | 791   | 1 | 69 | 20 | 586 | 38 | 1,504 |
| 10,466 | 3 | 58 | 15 | 787   | 1 | 67 | 25 | 585 | 44 | 1,497 |
| 10,467 | 3 | 58 | 15 | 788   | 1 | 68 | 26 | 593 | 45 | 1,507 |
| 10,468 | 3 | 58 | 15 | 790   | 1 | 68 | 26 | 595 | 45 | 1,511 |
| 10,469 | 3 | 58 | 15 | 790   | 1 | 68 | 26 | 596 | 45 | 1,512 |
| 10,470 | 3 | 58 | 21 | 791   | 1 | 68 | 32 | 597 | 57 | 1,514 |
| 10,471 | 3 | 61 | 22 | 803   | 1 | 68 | 33 | 608 | 59 | 1,540 |
| 10,472 | 3 | 61 | 21 | 808   | 1 | 69 | 33 | 608 | 58 | 1,546 |
| 10,473 | 3 | 61 | 25 | 815   | 1 | 69 | 40 | 614 | 69 | 1,559 |
| 10,474 | 4 | 62 | 25 | 830   | 1 | 71 | 42 | 636 | 72 | 1,599 |
| 10,475 | 4 | 61 | 25 | 834   | 1 | 71 | 42 | 636 | 72 | 1,602 |
| 10,476 | 4 | 61 | 27 | 834   | 1 | 71 | 42 | 638 | 74 | 1,604 |
| 10,477 | 4 | 62 | 27 | 877   | 1 | 75 | 45 | 677 | 77 | 1,691 |
| 10,478 | 4 | 64 | 27 | 917   | 1 | 81 | 46 | 720 | 78 | 1,782 |
| 10,479 | 4 | 64 | 29 | 938   | 1 | 83 | 47 | 748 | 81 | 1,833 |
| 10,480 | 4 | 66 | 29 | 964   | 1 | 87 | 47 | 782 | 81 | 1,899 |
| 10,481 | 4 | 68 | 29 | 992   | 1 | 97 | 47 | 823 | 81 | 1,980 |
| 10,482 | 4 | 71 | 28 | 1,005 | 1 | 98 | 47 | 836 | 80 | 2,010 |
| 10,483 | 4 | 71 | 27 | 964   | 1 | 91 | 46 | 818 | 78 | 1,944 |
| 10,484 | 4 | 45 | 26 | 724   | 1 | 75 | 45 | 656 | 76 | 1,500 |



|        |   |    |    |     |   |    |    |     |     |       |
|--------|---|----|----|-----|---|----|----|-----|-----|-------|
| 10,485 | 4 | 46 | 25 | 733 | 1 | 75 | 44 | 662 | 74  | 1,516 |
| 10,486 | 2 | 46 | 22 | 735 | 0 | 75 | 34 | 663 | 58  | 1,519 |
| 10,487 | 2 | 41 | 22 | 701 | 0 | 71 | 34 | 638 | 58  | 1,451 |
| 10,488 | 3 | 41 | 22 | 700 | 0 | 71 | 37 | 638 | 62  | 1,450 |
| 10,489 | 3 | 41 | 22 | 703 | 0 | 71 | 38 | 643 | 63  | 1,458 |
| 10,490 | 3 | 38 | 25 | 691 | 0 | 70 | 38 | 641 | 66  | 1,440 |
| 10,491 | 3 | 38 | 25 | 686 | 0 | 69 | 38 | 638 | 66  | 1,431 |
| 10,492 | 3 | 38 | 25 | 688 | 0 | 69 | 38 | 640 | 66  | 1,435 |
| 10,493 | 3 | 37 | 28 | 679 | 0 | 71 | 38 | 649 | 69  | 1,436 |
| 10,494 | 3 | 37 | 32 | 674 | 1 | 74 | 43 | 653 | 79  | 1,438 |
| 10,495 | 3 | 36 | 32 | 663 | 1 | 76 | 43 | 653 | 79  | 1,428 |
| 10,496 | 3 | 36 | 32 | 654 | 1 | 77 | 43 | 651 | 79  | 1,418 |
| 10,497 | 4 | 36 | 32 | 654 | 1 | 77 | 41 | 649 | 78  | 1,416 |
| 10,498 | 3 | 36 | 31 | 652 | 1 | 78 | 41 | 652 | 76  | 1,418 |
| 10,499 | 3 | 36 | 30 | 659 | 1 | 83 | 41 | 666 | 75  | 1,444 |
| 10,500 | 4 | 40 | 33 | 689 | 2 | 91 | 43 | 723 | 82  | 1,543 |
| 10,501 | 4 | 40 | 33 | 690 | 2 | 91 | 43 | 723 | 82  | 1,544 |
| 10,502 | 4 | 42 | 38 | 698 | 2 | 95 | 50 | 739 | 94  | 1,574 |
| 10,503 | 4 | 42 | 38 | 704 | 2 | 97 | 50 | 746 | 94  | 1,589 |
| 10,504 | 4 | 42 | 38 | 706 | 2 | 97 | 51 | 747 | 95  | 1,592 |
| 10,505 | 4 | 45 | 38 | 715 | 2 | 97 | 51 | 759 | 95  | 1,616 |
| 10,506 | 4 | 45 | 37 | 711 | 2 | 97 | 46 | 758 | 89  | 1,611 |
| 10,507 | 4 | 46 | 40 | 698 | 2 | 94 | 48 | 745 | 94  | 1,583 |
| 10,508 | 4 | 35 | 43 | 407 | 2 | 66 | 52 | 469 | 101 | 977   |
| 10,509 | 4 | 35 | 43 | 411 | 2 | 66 | 52 | 473 | 101 | 985   |
| 10,510 | 4 | 35 | 43 | 409 | 2 | 66 | 52 | 472 | 101 | 982   |
| 10,511 | 4 | 35 | 44 | 405 | 2 | 65 | 52 | 473 | 102 | 978   |
| 10,512 | 4 | 31 | 44 | 378 | 2 | 63 | 52 | 454 | 102 | 926   |
| 10,513 | 4 | 31 | 44 | 364 | 2 | 63 | 52 | 439 | 102 | 897   |
| 10,514 | 4 | 31 | 44 | 364 | 2 | 63 | 52 | 439 | 102 | 897   |
| 10,515 | 4 | 29 | 44 | 344 | 2 | 61 | 52 | 422 | 102 | 856   |
| 10,516 | 4 | 31 | 44 | 342 | 2 | 61 | 52 | 428 | 102 | 862   |
| 10,517 | 4 | 31 | 43 | 342 | 2 | 61 | 46 | 427 | 95  | 861   |
| 10,518 | 4 | 31 | 43 | 348 | 2 | 60 | 46 | 423 | 95  | 862   |
| 10,519 | 4 | 31 | 43 | 346 | 2 | 60 | 46 | 421 | 95  | 858   |
| 10,520 | 5 | 31 | 37 | 344 | 2 | 60 | 39 | 419 | 83  | 854   |
| 10,521 | 5 | 29 | 36 | 332 | 2 | 60 | 36 | 408 | 79  | 829   |
| 10,522 | 5 | 29 | 36 | 333 | 2 | 60 | 36 | 409 | 79  | 831   |
| 10,523 | 5 | 29 | 33 | 320 | 2 | 60 | 30 | 403 | 70  | 812   |
| 10,524 | 5 | 29 | 32 | 321 | 2 | 60 | 28 | 403 | 67  | 813   |
| 10,525 | 4 | 27 | 32 | 306 | 2 | 58 | 27 | 381 | 65  | 772   |

|        |    |    |     |     |    |    |     |     |     |     |
|--------|----|----|-----|-----|----|----|-----|-----|-----|-----|
| 10,526 | 4  | 27 | 32  | 302 | 2  | 58 | 27  | 380 | 65  | 767 |
| 10,527 | 4  | 26 | 30  | 260 | 2  | 54 | 27  | 340 | 63  | 680 |
| 10,528 | 4  | 26 | 30  | 260 | 2  | 54 | 24  | 341 | 60  | 681 |
| 10,529 | 4  | 24 | 28  | 220 | 2  | 48 | 25  | 298 | 59  | 590 |
| 10,530 | 5  | 24 | 32  | 198 | 2  | 46 | 30  | 267 | 69  | 535 |
| 10,531 | 5  | 22 | 33  | 170 | 3  | 43 | 34  | 234 | 75  | 469 |
| 10,532 | 5  | 17 | 36  | 117 | 3  | 32 | 38  | 175 | 82  | 341 |
| 10,533 | 8  | 17 | 40  | 117 | 3  | 32 | 49  | 175 | 100 | 341 |
| 10,534 | 8  | 17 | 40  | 118 | 3  | 32 | 49  | 175 | 100 | 342 |
| 10,535 | 8  | 17 | 40  | 118 | 3  | 32 | 51  | 174 | 102 | 341 |
| 10,536 | 8  | 16 | 40  | 109 | 3  | 32 | 51  | 168 | 102 | 325 |
| 10,537 | 8  | 15 | 50  | 105 | 3  | 32 | 53  | 165 | 114 | 317 |
| 10,538 | 8  | 15 | 50  | 105 | 3  | 32 | 53  | 165 | 114 | 317 |
| 10,539 | 7  | 23 | 50  | 115 | 3  | 37 | 51  | 192 | 111 | 367 |
| 10,540 | 7  | 23 | 50  | 117 | 3  | 38 | 51  | 192 | 111 | 370 |
| 10,541 | 10 | 24 | 66  | 130 | 6  | 39 | 90  | 197 | 172 | 390 |
| 10,542 | 10 | 24 | 67  | 130 | 6  | 39 | 90  | 197 | 173 | 390 |
| 10,543 | 10 | 24 | 67  | 123 | 6  | 37 | 91  | 184 | 174 | 368 |
| 10,544 | 10 | 24 | 67  | 123 | 6  | 37 | 92  | 184 | 175 | 368 |
| 10,545 | 10 | 24 | 65  | 116 | 5  | 32 | 89  | 180 | 169 | 352 |
| 10,546 | 10 | 24 | 65  | 116 | 5  | 32 | 89  | 180 | 169 | 352 |
| 10,547 | 9  | 24 | 65  | 121 | 5  | 31 | 90  | 182 | 169 | 358 |
| 10,548 | 9  | 24 | 67  | 119 | 6  | 32 | 90  | 185 | 172 | 360 |
| 10,549 | 9  | 19 | 67  | 81  | 6  | 19 | 91  | 110 | 173 | 229 |
| 10,550 | 9  | 19 | 65  | 89  | 6  | 19 | 93  | 114 | 173 | 241 |
| 10,551 | 10 | 19 | 67  | 103 | 5  | 24 | 107 | 136 | 189 | 282 |
| 10,552 | 10 | 19 | 63  | 106 | 5  | 24 | 100 | 138 | 178 | 287 |
| 10,553 | 11 | 18 | 72  | 104 | 5  | 21 | 125 | 121 | 213 | 264 |
| 10,554 | 11 | 18 | 105 | 100 | 11 | 20 | 183 | 114 | 310 | 252 |
| 10,555 | 11 | 15 | 112 | 89  | 12 | 20 | 195 | 102 | 330 | 226 |
| 10,556 | 11 | 15 | 110 | 90  | 12 | 20 | 194 | 100 | 327 | 225 |
| 10,557 | 11 | 18 | 108 | 98  | 12 | 20 | 193 | 105 | 324 | 241 |
| 10,558 | 11 | 17 | 108 | 98  | 12 | 20 | 190 | 105 | 321 | 240 |
| 10,559 | 11 | 16 | 109 | 98  | 12 | 20 | 192 | 106 | 324 | 240 |
| 10,560 | 11 | 18 | 108 | 94  | 12 | 20 | 192 | 102 | 323 | 234 |
| 10,561 | 11 | 18 | 108 | 94  | 12 | 20 | 192 | 103 | 323 | 235 |
| 10,562 | 13 | 18 | 124 | 96  | 12 | 20 | 203 | 104 | 352 | 238 |
| 10,563 | 13 | 18 | 124 | 96  | 12 | 20 | 203 | 104 | 352 | 238 |
| 10,564 | 13 | 18 | 124 | 96  | 13 | 20 | 204 | 104 | 354 | 238 |
| 10,565 | 14 | 18 | 139 | 96  | 13 | 20 | 221 | 104 | 387 | 238 |
| 10,566 | 14 | 16 | 139 | 93  | 13 | 20 | 221 | 98  | 387 | 227 |

|        |    |    |     |     |    |    |     |     |       |     |
|--------|----|----|-----|-----|----|----|-----|-----|-------|-----|
| 10,567 | 14 | 16 | 140 | 92  | 14 | 20 | 224 | 98  | 392   | 226 |
| 10,568 | 14 | 16 | 140 | 85  | 14 | 20 | 224 | 95  | 392   | 216 |
| 10,569 | 14 | 16 | 140 | 85  | 14 | 20 | 224 | 96  | 392   | 217 |
| 10,570 | 14 | 17 | 148 | 87  | 16 | 20 | 242 | 97  | 420   | 221 |
| 10,571 | 16 | 17 | 162 | 89  | 22 | 20 | 269 | 104 | 469   | 230 |
| 10,572 | 16 | 16 | 163 | 89  | 22 | 20 | 269 | 105 | 470   | 230 |
| 10,573 | 16 | 16 | 174 | 88  | 22 | 19 | 292 | 104 | 504   | 227 |
| 10,574 | 16 | 16 | 174 | 88  | 22 | 19 | 292 | 104 | 504   | 227 |
| 10,575 | 16 | 18 | 174 | 99  | 22 | 19 | 292 | 139 | 504   | 275 |
| 10,576 | 16 | 19 | 174 | 103 | 22 | 20 | 292 | 145 | 504   | 287 |
| 10,577 | 16 | 19 | 185 | 106 | 22 | 20 | 303 | 146 | 526   | 291 |
| 10,578 | 17 | 19 | 196 | 105 | 23 | 20 | 305 | 147 | 541   | 291 |
| 10,579 | 17 | 19 | 198 | 105 | 23 | 20 | 303 | 147 | 541   | 291 |
| 10,580 | 20 | 19 | 261 | 105 | 27 | 20 | 357 | 147 | 665   | 291 |
| 10,581 | 20 | 19 | 263 | 104 | 27 | 19 | 368 | 146 | 678   | 288 |
| 10,582 | 20 | 20 | 282 | 102 | 27 | 20 | 378 | 148 | 707   | 290 |
| 10,583 | 24 | 20 | 288 | 107 | 27 | 21 | 381 | 164 | 720   | 312 |
| 10,584 | 22 | 20 | 306 | 106 | 27 | 22 | 380 | 176 | 735   | 324 |
| 10,585 | 22 | 21 | 311 | 115 | 28 | 22 | 384 | 194 | 745   | 352 |
| 10,586 | 24 | 21 | 316 | 118 | 28 | 22 | 383 | 196 | 751   | 357 |
| 10,587 | 24 | 22 | 306 | 120 | 28 | 22 | 381 | 198 | 739   | 362 |
| 10,588 | 23 | 22 | 301 | 126 | 28 | 22 | 365 | 211 | 717   | 381 |
| 10,589 | 23 | 22 | 296 | 126 | 28 | 22 | 356 | 211 | 703   | 381 |
| 10,590 | 25 | 14 | 306 | 117 | 26 | 17 | 348 | 185 | 705   | 333 |
| 10,591 | 24 | 14 | 345 | 113 | 25 | 16 | 360 | 180 | 754   | 323 |
| 10,592 | 38 | 13 | 425 | 100 | 35 | 15 | 445 | 176 | 943   | 304 |
| 10,593 | 38 | 13 | 425 | 100 | 35 | 15 | 446 | 175 | 944   | 303 |
| 10,594 | 40 | 13 | 434 | 100 | 35 | 15 | 462 | 175 | 971   | 303 |
| 10,595 | 40 | 13 | 444 | 100 | 36 | 15 | 471 | 172 | 991   | 300 |
| 10,596 | 40 | 13 | 442 | 100 | 36 | 15 | 469 | 172 | 987   | 300 |
| 10,597 | 51 | 13 | 574 | 95  | 69 | 14 | 626 | 167 | 1,320 | 289 |
| 10,598 | 58 | 13 | 594 | 95  | 69 | 14 | 642 | 168 | 1,363 | 290 |
| 10,599 | 58 | 13 | 592 | 96  | 68 | 14 | 641 | 168 | 1,359 | 291 |
| 10,600 | 61 | 13 | 614 | 96  | 73 | 13 | 695 | 168 | 1,443 | 290 |
| 10,601 | 61 | 13 | 618 | 88  | 73 | 13 | 694 | 166 | 1,446 | 280 |
| 10,602 | 60 | 13 | 617 | 74  | 74 | 8  | 683 | 144 | 1,434 | 239 |
| 10,603 | 59 | 13 | 612 | 71  | 74 | 8  | 659 | 142 | 1,404 | 234 |
| 10,604 | 59 | 12 | 607 | 65  | 73 | 7  | 635 | 146 | 1,374 | 230 |
| 10,605 | 59 | 12 | 579 | 63  | 68 | 6  | 601 | 146 | 1,307 | 227 |
| 10,606 | 64 | 12 | 609 | 65  | 71 | 6  | 613 | 149 | 1,357 | 232 |
| 10,607 | 65 | 12 | 641 | 67  | 72 | 6  | 623 | 150 | 1,401 | 235 |

|        |    |    |     |     |    |    |     |     |       |     |
|--------|----|----|-----|-----|----|----|-----|-----|-------|-----|
| 10,608 | 74 | 9  | 734 | 63  | 81 | 7  | 676 | 147 | 1,565 | 226 |
| 10,609 | 75 | 9  | 777 | 64  | 83 | 7  | 697 | 149 | 1,632 | 229 |
| 10,610 | 75 | 7  | 795 | 64  | 86 | 7  | 720 | 149 | 1,676 | 227 |
| 10,611 | 75 | 7  | 788 | 64  | 86 | 7  | 718 | 148 | 1,667 | 226 |
| 10,612 | 75 | 7  | 788 | 65  | 86 | 7  | 717 | 148 | 1,666 | 227 |
| 10,613 | 73 | 7  | 781 | 63  | 86 | 5  | 710 | 146 | 1,650 | 221 |
| 10,614 | 73 | 7  | 781 | 63  | 85 | 5  | 709 | 146 | 1,648 | 221 |
| 10,615 | 72 | 7  | 772 | 63  | 86 | 7  | 694 | 146 | 1,624 | 223 |
| 10,616 | 72 | 7  | 766 | 63  | 86 | 7  | 692 | 146 | 1,616 | 223 |
| 10,617 | 72 | 7  | 769 | 70  | 86 | 8  | 692 | 160 | 1,619 | 245 |
| 10,618 | 73 | 7  | 768 | 70  | 85 | 8  | 689 | 160 | 1,615 | 245 |
| 10,619 | 72 | 9  | 768 | 78  | 85 | 9  | 690 | 176 | 1,615 | 272 |
| 10,620 | 72 | 10 | 760 | 79  | 83 | 9  | 673 | 180 | 1,588 | 278 |
| 10,621 | 71 | 9  | 759 | 78  | 83 | 12 | 670 | 180 | 1,583 | 279 |
| 10,622 | 70 | 9  | 749 | 78  | 77 | 12 | 646 | 176 | 1,542 | 275 |
| 10,623 | 70 | 10 | 738 | 78  | 77 | 12 | 623 | 175 | 1,508 | 275 |
| 10,624 | 74 | 11 | 740 | 83  | 78 | 12 | 624 | 179 | 1,516 | 285 |
| 10,625 | 74 | 11 | 739 | 83  | 78 | 12 | 624 | 179 | 1,515 | 285 |
| 10,626 | 74 | 9  | 735 | 71  | 78 | 12 | 619 | 144 | 1,506 | 236 |
| 10,627 | 74 | 8  | 733 | 67  | 78 | 11 | 619 | 138 | 1,504 | 224 |
| 10,628 | 73 | 8  | 723 | 65  | 77 | 11 | 624 | 135 | 1,497 | 219 |
| 10,629 | 73 | 10 | 721 | 72  | 77 | 11 | 624 | 154 | 1,495 | 247 |
| 10,630 | 71 | 10 | 698 | 76  | 74 | 11 | 590 | 159 | 1,433 | 256 |
| 10,631 | 70 | 10 | 655 | 108 | 74 | 14 | 572 | 177 | 1,371 | 309 |
| 10,632 | 70 | 10 | 652 | 108 | 74 | 15 | 561 | 179 | 1,357 | 312 |
| 10,633 | 70 | 9  | 632 | 108 | 73 | 15 | 547 | 176 | 1,322 | 308 |
| 10,634 | 66 | 9  | 623 | 104 | 73 | 14 | 540 | 160 | 1,302 | 287 |
| 10,635 | 65 | 9  | 601 | 104 | 73 | 11 | 530 | 148 | 1,269 | 272 |
| 10,636 | 65 | 8  | 596 | 95  | 72 | 11 | 526 | 130 | 1,259 | 244 |
| 10,637 | 63 | 8  | 590 | 92  | 72 | 10 | 525 | 128 | 1,250 | 238 |
| 10,638 | 63 | 7  | 591 | 90  | 72 | 10 | 525 | 126 | 1,251 | 233 |
| 10,639 | 62 | 7  | 591 | 84  | 72 | 10 | 525 | 113 | 1,250 | 214 |
| 10,640 | 60 | 7  | 573 | 83  | 72 | 10 | 519 | 112 | 1,224 | 212 |
| 10,641 | 60 | 7  | 568 | 83  | 72 | 10 | 518 | 110 | 1,218 | 210 |
| 10,642 | 60 | 8  | 534 | 85  | 72 | 10 | 507 | 110 | 1,173 | 213 |
| 10,643 | 46 | 8  | 456 | 85  | 62 | 10 | 422 | 110 | 986   | 213 |
| 10,644 | 46 | 8  | 455 | 86  | 62 | 10 | 421 | 110 | 984   | 214 |
| 10,645 | 44 | 8  | 446 | 94  | 62 | 10 | 405 | 115 | 957   | 227 |
| 10,646 | 44 | 10 | 433 | 99  | 61 | 10 | 395 | 124 | 933   | 243 |
| 10,647 | 43 | 11 | 377 | 103 | 48 | 11 | 328 | 128 | 796   | 253 |
| 10,648 | 33 | 11 | 307 | 108 | 28 | 11 | 244 | 138 | 612   | 268 |

|        |    |    |     |     |    |    |     |     |     |     |
|--------|----|----|-----|-----|----|----|-----|-----|-----|-----|
| 10,649 | 26 | 11 | 287 | 108 | 28 | 11 | 228 | 138 | 569 | 268 |
| 10,650 | 23 | 11 | 271 | 110 | 23 | 11 | 179 | 139 | 496 | 271 |
| 10,651 | 23 | 11 | 268 | 110 | 23 | 11 | 178 | 137 | 492 | 269 |
| 10,652 | 22 | 11 | 269 | 111 | 23 | 11 | 176 | 138 | 490 | 271 |
| 10,653 | 22 | 11 | 266 | 111 | 23 | 11 | 176 | 138 | 487 | 271 |
| 10,654 | 26 | 11 | 284 | 110 | 25 | 11 | 213 | 138 | 548 | 270 |
| 10,655 | 22 | 11 | 276 | 110 | 21 | 11 | 234 | 133 | 553 | 265 |
| 10,656 | 22 | 11 | 277 | 110 | 21 | 11 | 237 | 133 | 557 | 265 |
| 10,657 | 21 | 11 | 261 | 108 | 24 | 11 | 229 | 129 | 535 | 259 |
| 10,658 | 20 | 11 | 240 | 106 | 24 | 11 | 227 | 128 | 511 | 256 |
| 10,659 | 11 | 11 | 144 | 103 | 15 | 10 | 173 | 126 | 343 | 250 |
| 10,660 | 10 | 11 | 101 | 102 | 13 | 10 | 150 | 123 | 274 | 246 |
| 10,661 | 15 | 11 | 93  | 102 | 14 | 10 | 161 | 123 | 283 | 246 |
| 10,662 | 15 | 11 | 97  | 102 | 14 | 10 | 165 | 123 | 291 | 246 |
| 10,663 | 17 | 11 | 100 | 102 | 15 | 10 | 172 | 123 | 304 | 246 |
| 10,664 | 17 | 11 | 99  | 102 | 15 | 10 | 171 | 123 | 302 | 246 |
| 10,665 | 17 | 11 | 104 | 103 | 15 | 10 | 181 | 123 | 317 | 247 |
| 10,666 | 22 | 11 | 134 | 103 | 16 | 10 | 233 | 123 | 405 | 247 |
| 10,667 | 28 | 11 | 147 | 96  | 18 | 10 | 283 | 108 | 476 | 225 |
| 10,668 | 28 | 11 | 146 | 97  | 18 | 10 | 283 | 108 | 475 | 226 |
| 10,669 | 28 | 9  | 166 | 89  | 20 | 9  | 297 | 91  | 511 | 198 |
| 10,670 | 28 | 9  | 166 | 89  | 20 | 9  | 297 | 91  | 511 | 198 |
| 10,671 | 28 | 8  | 167 | 88  | 20 | 9  | 304 | 86  | 519 | 191 |
| 10,672 | 28 | 8  | 170 | 85  | 20 | 6  | 309 | 82  | 527 | 181 |
| 10,673 | 28 | 7  | 170 | 85  | 21 | 6  | 309 | 82  | 528 | 180 |
| 10,674 | 28 | 7  | 170 | 85  | 21 | 6  | 308 | 82  | 527 | 180 |
| 10,675 | 24 | 6  | 165 | 80  | 20 | 6  | 304 | 79  | 513 | 171 |
| 10,676 | 24 | 6  | 164 | 80  | 20 | 6  | 303 | 79  | 511 | 171 |
| 10,677 | 24 | 6  | 164 | 81  | 20 | 6  | 304 | 82  | 512 | 175 |
| 10,678 | 24 | 6  | 168 | 81  | 20 | 6  | 299 | 82  | 511 | 175 |
| 10,679 | 24 | 4  | 167 | 73  | 20 | 6  | 298 | 63  | 509 | 146 |
| 10,680 | 24 | 4  | 167 | 74  | 20 | 6  | 298 | 63  | 509 | 147 |
| 10,681 | 23 | 4  | 167 | 73  | 19 | 6  | 296 | 57  | 505 | 140 |
| 10,682 | 23 | 4  | 167 | 41  | 20 | 3  | 295 | 40  | 505 | 88  |
| 10,683 | 24 | 4  | 171 | 42  | 22 | 2  | 300 | 37  | 517 | 85  |
| 10,684 | 24 | 4  | 179 | 41  | 22 | 2  | 303 | 37  | 528 | 84  |
| 10,685 | 24 | 4  | 186 | 41  | 25 | 2  | 322 | 37  | 557 | 84  |
| 10,686 | 24 | 4  | 186 | 41  | 25 | 2  | 322 | 37  | 557 | 84  |
| 10,687 | 24 | 4  | 191 | 41  | 26 | 2  | 336 | 37  | 577 | 84  |
| 10,688 | 24 | 4  | 194 | 41  | 26 | 2  | 343 | 37  | 587 | 84  |
| 10,689 | 25 | 4  | 194 | 41  | 26 | 2  | 347 | 37  | 592 | 84  |

|        |    |   |     |    |    |   |     |    |     |    |
|--------|----|---|-----|----|----|---|-----|----|-----|----|
| 10,690 | 25 | 4 | 194 | 42 | 26 | 2 | 347 | 37 | 592 | 85 |
| 10,691 | 25 | 4 | 193 | 42 | 26 | 2 | 347 | 37 | 591 | 85 |
| 10,692 | 25 | 4 | 194 | 41 | 26 | 2 | 348 | 36 | 593 | 83 |
| 10,693 | 25 | 3 | 200 | 39 | 26 | 2 | 352 | 36 | 603 | 80 |
| 10,694 | 27 | 3 | 211 | 40 | 27 | 2 | 367 | 36 | 632 | 81 |
| 10,695 | 28 | 3 | 216 | 39 | 27 | 2 | 385 | 36 | 656 | 80 |
| 10,696 | 32 | 3 | 243 | 31 | 32 | 2 | 428 | 31 | 735 | 67 |
| 10,697 | 32 | 1 | 244 | 26 | 32 | 2 | 428 | 23 | 736 | 52 |
| 10,698 | 32 | 0 | 246 | 22 | 32 | 1 | 432 | 19 | 742 | 42 |
| 10,699 | 32 | 0 | 242 | 17 | 32 | 1 | 425 | 8  | 731 | 26 |
| 10,700 | 35 | 0 | 266 | 18 | 35 | 1 | 442 | 8  | 778 | 27 |
| 10,701 | 36 | 0 | 268 | 15 | 37 | 1 | 450 | 7  | 791 | 23 |
| 10,702 | 38 | 0 | 289 | 15 | 40 | 1 | 470 | 6  | 837 | 22 |
| 10,703 | 38 | 0 | 293 | 15 | 39 | 1 | 470 | 6  | 840 | 22 |
| 10,704 | 34 | 0 | 270 | 15 | 37 | 1 | 432 | 6  | 773 | 22 |
| 10,705 | 34 | 0 | 271 | 16 | 37 | 1 | 432 | 6  | 774 | 23 |
| 10,706 | 34 | 0 | 260 | 16 | 38 | 1 | 400 | 6  | 732 | 23 |
| 10,707 | 34 | 0 | 259 | 17 | 38 | 1 | 398 | 7  | 729 | 25 |
| 10,708 | 34 | 0 | 258 | 18 | 35 | 1 | 391 | 7  | 718 | 26 |
| 10,709 | 34 | 0 | 250 | 17 | 34 | 1 | 385 | 7  | 703 | 25 |
| 10,710 | 33 | 0 | 252 | 17 | 33 | 1 | 377 | 8  | 695 | 26 |
| 10,711 | 30 | 0 | 246 | 18 | 30 | 1 | 354 | 8  | 660 | 27 |
| 10,712 | 30 | 0 | 259 | 22 | 30 | 1 | 363 | 12 | 682 | 35 |
| 10,713 | 30 | 1 | 260 | 24 | 30 | 1 | 361 | 14 | 681 | 40 |
| 10,714 | 28 | 1 | 257 | 23 | 29 | 1 | 357 | 14 | 671 | 39 |
| 10,715 | 28 | 1 | 256 | 22 | 28 | 1 | 347 | 14 | 659 | 38 |
| 10,716 | 23 | 1 | 241 | 22 | 30 | 0 | 316 | 14 | 610 | 37 |
| 10,717 | 23 | 1 | 247 | 28 | 32 | 0 | 325 | 17 | 627 | 46 |
| 10,718 | 17 | 1 | 235 | 28 | 30 | 0 | 277 | 17 | 559 | 46 |
| 10,719 | 18 | 1 | 231 | 27 | 30 | 0 | 291 | 17 | 570 | 45 |
| 10,720 | 18 | 1 | 230 | 27 | 30 | 0 | 290 | 17 | 568 | 45 |
| 10,721 | 18 | 1 | 226 | 27 | 30 | 0 | 281 | 17 | 555 | 45 |
| 10,722 | 18 | 1 | 228 | 27 | 30 | 0 | 278 | 17 | 554 | 45 |
| 10,723 | 18 | 1 | 227 | 27 | 30 | 0 | 277 | 17 | 552 | 45 |
| 10,724 | 18 | 1 | 227 | 27 | 29 | 0 | 277 | 17 | 551 | 45 |
| 10,725 | 18 | 1 | 244 | 27 | 29 | 0 | 283 | 18 | 574 | 46 |
| 10,726 | 18 | 1 | 248 | 27 | 29 | 0 | 287 | 17 | 582 | 45 |
| 10,727 | 20 | 1 | 258 | 28 | 29 | 0 | 292 | 17 | 599 | 46 |
| 10,728 | 20 | 1 | 263 | 27 | 29 | 0 | 291 | 14 | 603 | 42 |
| 10,729 | 20 | 1 | 260 | 23 | 29 | 0 | 290 | 14 | 599 | 38 |
| 10,730 | 21 | 1 | 318 | 23 | 33 | 0 | 330 | 14 | 702 | 38 |

|        |     |   |       |    |    |   |     |    |       |    |
|--------|-----|---|-------|----|----|---|-----|----|-------|----|
| 10,731 | 36  | 1 | 411   | 23 | 41 | 0 | 453 | 14 | 941   | 38 |
| 10,732 | 38  | 1 | 424   | 23 | 45 | 0 | 476 | 13 | 983   | 37 |
| 10,733 | 41  | 1 | 432   | 23 | 44 | 0 | 489 | 13 | 1,006 | 37 |
| 10,734 | 40  | 1 | 429   | 24 | 43 | 0 | 489 | 13 | 1,001 | 38 |
| 10,735 | 40  | 1 | 430   | 24 | 43 | 0 | 489 | 13 | 1,002 | 38 |
| 10,736 | 40  | 1 | 427   | 24 | 40 | 0 | 470 | 13 | 977   | 38 |
| 10,737 | 40  | 1 | 424   | 24 | 39 | 0 | 456 | 13 | 959   | 38 |
| 10,738 | 40  | 1 | 421   | 24 | 39 | 0 | 449 | 13 | 949   | 38 |
| 10,739 | 41  | 1 | 461   | 24 | 39 | 0 | 449 | 13 | 990   | 38 |
| 10,740 | 50  | 1 | 522   | 25 | 39 | 0 | 476 | 13 | 1,087 | 39 |
| 10,741 | 50  | 1 | 521   | 24 | 39 | 0 | 477 | 13 | 1,087 | 38 |
| 10,742 | 58  | 1 | 546   | 24 | 42 | 0 | 495 | 13 | 1,141 | 38 |
| 10,743 | 77  | 1 | 728   | 26 | 49 | 0 | 579 | 13 | 1,433 | 40 |
| 10,744 | 90  | 1 | 873   | 26 | 54 | 0 | 663 | 13 | 1,680 | 40 |
| 10,745 | 110 | 1 | 991   | 25 | 59 | 0 | 726 | 13 | 1,886 | 39 |
| 10,746 | 107 | 1 | 979   | 27 | 54 | 0 | 689 | 13 | 1,829 | 41 |
| 10,747 | 107 | 1 | 978   | 28 | 54 | 0 | 688 | 13 | 1,827 | 42 |
| 10,748 | 112 | 1 | 1,007 | 32 | 56 | 0 | 726 | 18 | 1,901 | 51 |
| 10,749 | 114 | 1 | 1,040 | 32 | 57 | 0 | 727 | 18 | 1,938 | 51 |
| 10,750 | 115 | 2 | 1,065 | 33 | 59 | 0 | 747 | 18 | 1,986 | 53 |
| 10,751 | 112 | 2 | 1,047 | 31 | 55 | 0 | 735 | 18 | 1,949 | 51 |
| 10,752 | 111 | 2 | 1,040 | 31 | 54 | 0 | 725 | 18 | 1,930 | 51 |
| 10,753 | 109 | 2 | 1,018 | 31 | 51 | 0 | 703 | 19 | 1,881 | 52 |
| 10,754 | 109 | 2 | 1,013 | 31 | 51 | 0 | 701 | 19 | 1,874 | 52 |
| 10,755 | 109 | 2 | 1,028 | 32 | 51 | 0 | 706 | 19 | 1,894 | 53 |
| 10,756 | 109 | 2 | 1,028 | 32 | 51 | 0 | 706 | 20 | 1,894 | 54 |
| 10,757 | 109 | 2 | 1,036 | 32 | 50 | 0 | 708 | 20 | 1,903 | 54 |
| 10,758 | 110 | 2 | 1,050 | 33 | 50 | 0 | 713 | 22 | 1,923 | 57 |
| 10,759 | 110 | 2 | 1,052 | 34 | 50 | 0 | 713 | 22 | 1,925 | 58 |
| 10,760 | 110 | 2 | 1,057 | 34 | 51 | 0 | 717 | 22 | 1,935 | 58 |
| 10,761 | 109 | 2 | 1,051 | 37 | 51 | 2 | 714 | 23 | 1,925 | 64 |
| 10,762 | 109 | 2 | 1,041 | 37 | 51 | 2 | 708 | 23 | 1,909 | 64 |
| 10,763 | 109 | 3 | 1,046 | 34 | 51 | 3 | 708 | 26 | 1,914 | 66 |
| 10,764 | 109 | 2 | 1,042 | 36 | 51 | 3 | 707 | 26 | 1,909 | 67 |
| 10,765 | 109 | 2 | 1,042 | 37 | 51 | 3 | 703 | 27 | 1,905 | 69 |
| 10,766 | 109 | 2 | 1,040 | 55 | 51 | 3 | 703 | 33 | 1,903 | 93 |
| 10,767 | 109 | 2 | 1,030 | 55 | 48 | 3 | 687 | 33 | 1,874 | 93 |
| 10,768 | 109 | 2 | 1,023 | 49 | 46 | 3 | 674 | 30 | 1,852 | 84 |
| 10,769 | 109 | 2 | 1,021 | 52 | 46 | 3 | 672 | 35 | 1,848 | 92 |
| 10,770 | 107 | 2 | 1,008 | 53 | 44 | 3 | 646 | 35 | 1,805 | 93 |
| 10,771 | 107 | 2 | 1,006 | 53 | 44 | 3 | 646 | 36 | 1,803 | 94 |

|        |     |   |       |    |    |   |     |    |       |     |
|--------|-----|---|-------|----|----|---|-----|----|-------|-----|
| 10,772 | 107 | 2 | 1,005 | 54 | 44 | 3 | 647 | 36 | 1,803 | 95  |
| 10,773 | 107 | 2 | 1,001 | 54 | 44 | 3 | 647 | 36 | 1,799 | 95  |
| 10,774 | 107 | 2 | 998   | 54 | 44 | 3 | 646 | 36 | 1,795 | 95  |
| 10,775 | 107 | 2 | 984   | 55 | 44 | 3 | 640 | 35 | 1,775 | 95  |
| 10,776 | 107 | 2 | 980   | 55 | 44 | 3 | 637 | 35 | 1,768 | 95  |
| 10,777 | 105 | 2 | 974   | 60 | 44 | 6 | 634 | 47 | 1,757 | 115 |
| 10,778 | 105 | 2 | 970   | 62 | 44 | 6 | 632 | 48 | 1,751 | 118 |
| 10,779 | 105 | 2 | 965   | 62 | 44 | 6 | 632 | 51 | 1,746 | 121 |
| 10,780 | 105 | 2 | 964   | 64 | 44 | 6 | 632 | 51 | 1,745 | 123 |
| 10,781 | 104 | 2 | 906   | 66 | 40 | 6 | 592 | 51 | 1,642 | 125 |
| 10,782 | 89  | 2 | 814   | 66 | 32 | 6 | 464 | 52 | 1,399 | 126 |
| 10,783 | 87  | 2 | 812   | 66 | 28 | 6 | 442 | 52 | 1,369 | 126 |
| 10,784 | 84  | 2 | 804   | 66 | 28 | 6 | 429 | 52 | 1,345 | 126 |
| 10,785 | 91  | 2 | 816   | 64 | 27 | 6 | 439 | 52 | 1,373 | 124 |
| 10,786 | 93  | 2 | 854   | 64 | 28 | 6 | 443 | 52 | 1,418 | 124 |
| 10,787 | 94  | 2 | 865   | 64 | 28 | 6 | 451 | 52 | 1,438 | 124 |
| 10,788 | 94  | 2 | 863   | 64 | 28 | 6 | 451 | 52 | 1,436 | 124 |
| 10,789 | 95  | 2 | 876   | 64 | 28 | 6 | 465 | 52 | 1,464 | 124 |
| 10,790 | 87  | 2 | 821   | 63 | 29 | 6 | 445 | 52 | 1,382 | 123 |
| 10,791 | 87  | 2 | 821   | 63 | 29 | 6 | 444 | 52 | 1,381 | 123 |
| 10,792 | 81  | 2 | 799   | 63 | 26 | 6 | 429 | 52 | 1,335 | 123 |
| 10,793 | 71  | 2 | 714   | 61 | 25 | 6 | 419 | 52 | 1,229 | 121 |
| 10,794 | 62  | 2 | 616   | 62 | 19 | 6 | 343 | 55 | 1,040 | 125 |
| 10,795 | 48  | 2 | 459   | 62 | 13 | 6 | 244 | 58 | 764   | 128 |
| 10,796 | 27  | 2 | 339   | 60 | 8  | 6 | 164 | 58 | 538   | 126 |
| 10,797 | 26  | 2 | 329   | 62 | 8  | 6 | 157 | 59 | 520   | 129 |
| 10,798 | 24  | 2 | 321   | 61 | 7  | 6 | 123 | 59 | 475   | 128 |
| 10,799 | 22  | 2 | 307   | 57 | 7  | 6 | 123 | 55 | 459   | 120 |
| 10,800 | 20  | 2 | 272   | 60 | 6  | 6 | 120 | 59 | 418   | 127 |
| 10,801 | 19  | 1 | 243   | 60 | 4  | 6 | 102 | 59 | 368   | 126 |
| 10,802 | 19  | 1 | 244   | 62 | 4  | 6 | 104 | 59 | 371   | 128 |
| 10,803 | 19  | 1 | 247   | 62 | 4  | 6 | 109 | 59 | 379   | 128 |
| 10,804 | 19  | 1 | 242   | 64 | 4  | 6 | 109 | 58 | 374   | 129 |
| 10,805 | 19  | 1 | 237   | 64 | 4  | 6 | 107 | 58 | 367   | 129 |
| 10,806 | 19  | 1 | 257   | 63 | 5  | 6 | 109 | 58 | 390   | 128 |
| 10,807 | 19  | 1 | 250   | 62 | 5  | 6 | 107 | 58 | 381   | 127 |
| 10,808 | 19  | 1 | 243   | 61 | 5  | 6 | 105 | 58 | 372   | 126 |
| 10,809 | 21  | 1 | 275   | 57 | 7  | 6 | 127 | 55 | 430   | 119 |
| 10,810 | 21  | 1 | 281   | 57 | 8  | 6 | 136 | 57 | 446   | 121 |
| 10,811 | 22  | 1 | 306   | 57 | 9  | 6 | 154 | 57 | 491   | 121 |
| 10,812 | 22  | 1 | 311   | 54 | 9  | 4 | 152 | 55 | 494   | 114 |



|        |    |   |     |    |    |   |     |    |     |     |
|--------|----|---|-----|----|----|---|-----|----|-----|-----|
| 10,813 | 22 | 0 | 319 | 52 | 10 | 3 | 162 | 48 | 513 | 103 |
| 10,814 | 22 | 0 | 319 | 52 | 10 | 3 | 162 | 48 | 513 | 103 |
| 10,815 | 22 | 0 | 318 | 48 | 10 | 3 | 164 | 46 | 514 | 97  |
| 10,816 | 22 | 0 | 318 | 47 | 10 | 3 | 164 | 45 | 514 | 95  |
| 10,817 | 22 | 0 | 316 | 29 | 10 | 3 | 164 | 39 | 512 | 71  |
| 10,818 | 22 | 0 | 313 | 29 | 10 | 3 | 164 | 39 | 509 | 71  |
| 10,819 | 22 | 0 | 317 | 29 | 10 | 3 | 163 | 39 | 512 | 71  |
| 10,820 | 22 | 0 | 351 | 26 | 10 | 3 | 182 | 34 | 565 | 63  |
| 10,821 | 22 | 0 | 409 | 26 | 11 | 3 | 221 | 34 | 663 | 63  |
| 10,822 | 23 | 0 | 444 | 26 | 11 | 3 | 238 | 33 | 716 | 62  |
| 10,823 | 23 | 0 | 445 | 26 | 11 | 3 | 238 | 34 | 717 | 63  |
| 10,824 | 23 | 0 | 445 | 28 | 11 | 3 | 238 | 34 | 717 | 65  |
| 10,825 | 23 | 2 | 447 | 34 | 11 | 4 | 238 | 35 | 719 | 75  |
| 10,826 | 23 | 2 | 447 | 33 | 11 | 4 | 240 | 36 | 721 | 75  |
| 10,827 | 23 | 2 | 447 | 33 | 11 | 4 | 240 | 36 | 721 | 75  |
| 10,828 | 23 | 2 | 450 | 28 | 12 | 1 | 243 | 24 | 728 | 55  |
| 10,829 | 23 | 2 | 450 | 25 | 12 | 1 | 243 | 25 | 728 | 53  |
| 10,830 | 24 | 2 | 450 | 26 | 12 | 1 | 243 | 22 | 729 | 51  |
| 10,831 | 24 | 2 | 450 | 25 | 12 | 1 | 244 | 22 | 730 | 50  |
| 10,832 | 24 | 2 | 450 | 23 | 12 | 1 | 246 | 22 | 732 | 48  |
| 10,833 | 24 | 2 | 449 | 24 | 12 | 1 | 245 | 21 | 730 | 48  |
| 10,834 | 24 | 2 | 438 | 25 | 12 | 1 | 244 | 22 | 718 | 50  |
| 10,835 | 24 | 2 | 438 | 25 | 12 | 1 | 242 | 24 | 716 | 52  |
| 10,836 | 17 | 2 | 427 | 30 | 12 | 4 | 230 | 28 | 686 | 64  |
| 10,837 | 15 | 2 | 380 | 32 | 11 | 4 | 224 | 31 | 630 | 69  |
| 10,838 | 14 | 3 | 365 | 35 | 11 | 4 | 216 | 36 | 606 | 78  |
| 10,839 | 12 | 3 | 322 | 36 | 11 | 5 | 201 | 36 | 546 | 80  |
| 10,840 | 11 | 3 | 315 | 36 | 11 | 5 | 198 | 38 | 535 | 82  |
| 10,841 | 10 | 3 | 311 | 38 | 10 | 5 | 191 | 39 | 522 | 85  |
| 10,842 | 10 | 3 | 308 | 38 | 10 | 5 | 190 | 39 | 518 | 85  |
| 10,843 | 8  | 3 | 311 | 38 | 11 | 5 | 188 | 39 | 518 | 85  |
| 10,844 | 8  | 3 | 306 | 38 | 11 | 5 | 187 | 39 | 512 | 85  |
| 10,845 | 9  | 3 | 317 | 38 | 11 | 5 | 188 | 36 | 525 | 82  |
| 10,846 | 9  | 3 | 321 | 38 | 11 | 5 | 193 | 34 | 534 | 80  |
| 10,847 | 9  | 3 | 318 | 38 | 11 | 5 | 192 | 35 | 530 | 81  |
| 10,848 | 9  | 3 | 313 | 36 | 11 | 5 | 193 | 34 | 526 | 78  |
| 10,849 | 8  | 3 | 305 | 33 | 10 | 5 | 190 | 29 | 513 | 70  |
| 10,850 | 8  | 3 | 304 | 33 | 10 | 5 | 185 | 29 | 507 | 70  |
| 10,851 | 8  | 3 | 303 | 33 | 10 | 5 | 184 | 29 | 505 | 70  |
| 10,852 | 8  | 3 | 301 | 32 | 10 | 5 | 180 | 30 | 499 | 70  |
| 10,853 | 8  | 3 | 298 | 30 | 10 | 5 | 174 | 30 | 490 | 68  |

|        |    |   |     |    |    |   |     |    |     |    |
|--------|----|---|-----|----|----|---|-----|----|-----|----|
| 10,854 | 8  | 3 | 276 | 28 | 10 | 5 | 170 | 30 | 464 | 66 |
| 10,855 | 8  | 3 | 276 | 28 | 9  | 5 | 169 | 30 | 462 | 66 |
| 10,856 | 8  | 3 | 271 | 29 | 9  | 5 | 169 | 30 | 457 | 67 |
| 10,857 | 7  | 3 | 264 | 30 | 9  | 5 | 165 | 29 | 445 | 67 |
| 10,858 | 5  | 3 | 242 | 32 | 8  | 5 | 152 | 31 | 407 | 71 |
| 10,859 | 5  | 3 | 240 | 35 | 7  | 5 | 144 | 32 | 396 | 75 |
| 10,860 | 5  | 3 | 245 | 39 | 7  | 5 | 145 | 33 | 402 | 80 |
| 10,861 | 5  | 3 | 242 | 39 | 6  | 5 | 139 | 33 | 392 | 80 |
| 10,862 | 4  | 3 | 208 | 39 | 4  | 5 | 115 | 33 | 331 | 80 |
| 10,863 | 4  | 4 | 202 | 45 | 4  | 5 | 120 | 33 | 330 | 87 |
| 10,864 | 4  | 4 | 188 | 45 | 3  | 5 | 109 | 33 | 304 | 87 |
| 10,865 | 4  | 4 | 189 | 45 | 3  | 5 | 107 | 34 | 303 | 88 |
| 10,866 | 4  | 4 | 189 | 45 | 3  | 5 | 109 | 38 | 305 | 92 |
| 10,867 | 4  | 4 | 200 | 46 | 3  | 5 | 113 | 39 | 320 | 94 |
| 10,868 | 4  | 4 | 208 | 46 | 3  | 5 | 122 | 41 | 337 | 96 |
| 10,869 | 4  | 4 | 205 | 46 | 3  | 5 | 123 | 42 | 335 | 97 |
| 10,870 | 4  | 4 | 172 | 47 | 4  | 5 | 104 | 42 | 284 | 98 |
| 10,871 | 4  | 4 | 114 | 47 | 3  | 5 | 64  | 42 | 185 | 98 |
| 10,872 | 3  | 4 | 79  | 46 | 3  | 5 | 48  | 42 | 133 | 97 |
| 10,873 | 3  | 4 | 78  | 45 | 3  | 5 | 47  | 41 | 131 | 95 |
| 10,874 | 3  | 4 | 78  | 45 | 3  | 5 | 47  | 42 | 131 | 96 |
| 10,875 | 3  | 4 | 79  | 43 | 3  | 5 | 47  | 42 | 132 | 94 |
| 10,876 | 3  | 2 | 78  | 37 | 3  | 4 | 53  | 41 | 137 | 84 |
| 10,877 | 4  | 2 | 80  | 37 | 4  | 3 | 53  | 40 | 141 | 82 |
| 10,878 | 4  | 2 | 78  | 37 | 3  | 3 | 53  | 41 | 138 | 83 |
| 10,879 | 4  | 2 | 77  | 37 | 3  | 3 | 50  | 41 | 134 | 83 |
| 10,880 | 4  | 2 | 83  | 37 | 3  | 3 | 52  | 39 | 142 | 81 |
| 10,881 | 4  | 2 | 87  | 37 | 3  | 3 | 53  | 41 | 147 | 83 |
| 10,882 | 4  | 2 | 87  | 37 | 3  | 3 | 51  | 41 | 145 | 83 |
| 10,883 | 4  | 2 | 87  | 37 | 3  | 3 | 52  | 42 | 146 | 84 |
| 10,884 | 4  | 2 | 87  | 36 | 3  | 3 | 52  | 42 | 146 | 83 |
| 10,885 | 4  | 2 | 87  | 35 | 3  | 3 | 52  | 41 | 146 | 81 |
| 10,886 | 4  | 2 | 101 | 35 | 3  | 3 | 54  | 39 | 162 | 79 |
| 10,887 | 4  | 2 | 100 | 30 | 3  | 1 | 53  | 35 | 160 | 68 |
| 10,888 | 5  | 1 | 103 | 25 | 3  | 1 | 53  | 27 | 164 | 54 |
| 10,889 | 5  | 1 | 103 | 25 | 3  | 1 | 54  | 27 | 165 | 54 |
| 10,890 | 5  | 1 | 104 | 24 | 4  | 0 | 54  | 27 | 167 | 52 |
| 10,891 | 5  | 1 | 105 | 22 | 4  | 0 | 58  | 24 | 172 | 47 |
| 10,892 | 8  | 1 | 129 | 22 | 5  | 0 | 64  | 24 | 206 | 47 |
| 10,893 | 8  | 1 | 136 | 22 | 4  | 0 | 64  | 24 | 212 | 47 |
| 10,894 | 18 | 1 | 260 | 22 | 9  | 0 | 146 | 24 | 433 | 47 |

|        |     |   |       |    |    |   |     |    |       |    |
|--------|-----|---|-------|----|----|---|-----|----|-------|----|
| 10,895 | 18  | 1 | 265   | 21 | 9  | 0 | 156 | 23 | 448   | 45 |
| 10,896 | 35  | 1 | 385   | 21 | 11 | 0 | 227 | 23 | 658   | 45 |
| 10,897 | 46  | 1 | 554   | 21 | 14 | 0 | 293 | 24 | 907   | 46 |
| 10,898 | 53  | 1 | 681   | 21 | 26 | 0 | 370 | 23 | 1,130 | 45 |
| 10,899 | 76  | 1 | 1,121 | 21 | 43 | 0 | 535 | 23 | 1,775 | 45 |
| 10,900 | 85  | 1 | 1,276 | 21 | 52 | 0 | 588 | 23 | 2,001 | 45 |
| 10,901 | 85  | 1 | 1,277 | 21 | 52 | 0 | 591 | 23 | 2,005 | 45 |
| 10,902 | 90  | 1 | 1,387 | 22 | 61 | 0 | 652 | 23 | 2,190 | 46 |
| 10,903 | 90  | 1 | 1,393 | 22 | 61 | 0 | 652 | 22 | 2,196 | 45 |
| 10,904 | 90  | 1 | 1,393 | 22 | 61 | 0 | 652 | 21 | 2,196 | 44 |
| 10,905 | 90  | 1 | 1,396 | 22 | 61 | 0 | 652 | 21 | 2,199 | 44 |
| 10,906 | 90  | 1 | 1,399 | 21 | 61 | 0 | 652 | 21 | 2,202 | 43 |
| 10,907 | 90  | 1 | 1,399 | 20 | 61 | 0 | 653 | 22 | 2,203 | 43 |
| 10,908 | 90  | 1 | 1,406 | 21 | 61 | 0 | 656 | 23 | 2,213 | 45 |
| 10,909 | 90  | 1 | 1,405 | 19 | 61 | 0 | 659 | 21 | 2,215 | 41 |
| 10,910 | 90  | 1 | 1,402 | 16 | 61 | 0 | 662 | 20 | 2,215 | 37 |
| 10,911 | 90  | 1 | 1,395 | 12 | 61 | 0 | 660 | 19 | 2,206 | 32 |
| 10,912 | 90  | 1 | 1,388 | 12 | 61 | 0 | 656 | 17 | 2,195 | 30 |
| 10,913 | 91  | 1 | 1,390 | 12 | 61 | 0 | 654 | 17 | 2,196 | 30 |
| 10,914 | 92  | 0 | 1,412 | 6  | 61 | 0 | 659 | 17 | 2,224 | 23 |
| 10,915 | 92  | 0 | 1,423 | 6  | 61 | 0 | 669 | 17 | 2,245 | 23 |
| 10,916 | 92  | 0 | 1,423 | 6  | 61 | 0 | 667 | 17 | 2,243 | 23 |
| 10,917 | 92  | 0 | 1,423 | 6  | 61 | 0 | 667 | 13 | 2,243 | 19 |
| 10,918 | 92  | 0 | 1,411 | 6  | 61 | 0 | 664 | 12 | 2,228 | 18 |
| 10,919 | 92  | 0 | 1,401 | 6  | 61 | 0 | 655 | 9  | 2,209 | 15 |
| 10,920 | 92  | 0 | 1,402 | 6  | 61 | 0 | 653 | 9  | 2,208 | 15 |
| 10,921 | 92  | 0 | 1,407 | 6  | 60 | 0 | 655 | 9  | 2,214 | 15 |
| 10,922 | 92  | 0 | 1,409 | 7  | 60 | 0 | 655 | 9  | 2,216 | 16 |
| 10,923 | 92  | 0 | 1,410 | 7  | 60 | 0 | 657 | 9  | 2,219 | 16 |
| 10,924 | 92  | 0 | 1,410 | 7  | 60 | 0 | 657 | 8  | 2,219 | 15 |
| 10,925 | 92  | 0 | 1,409 | 7  | 60 | 0 | 657 | 8  | 2,218 | 15 |
| 10,926 | 93  | 0 | 1,410 | 7  | 60 | 0 | 651 | 8  | 2,214 | 15 |
| 10,927 | 93  | 0 | 1,411 | 7  | 59 | 0 | 650 | 8  | 2,213 | 15 |
| 10,928 | 93  | 0 | 1,415 | 7  | 59 | 0 | 649 | 8  | 2,216 | 15 |
| 10,929 | 92  | 0 | 1,415 | 7  | 59 | 0 | 650 | 9  | 2,216 | 16 |
| 10,930 | 97  | 0 | 1,454 | 6  | 59 | 0 | 652 | 7  | 2,262 | 13 |
| 10,931 | 97  | 0 | 1,461 | 8  | 59 | 0 | 651 | 8  | 2,268 | 16 |
| 10,932 | 98  | 0 | 1,461 | 8  | 59 | 0 | 650 | 8  | 2,268 | 16 |
| 10,933 | 98  | 2 | 1,471 | 8  | 60 | 0 | 649 | 8  | 2,278 | 18 |
| 10,934 | 102 | 2 | 1,484 | 8  | 60 | 0 | 651 | 7  | 2,297 | 17 |
| 10,935 | 102 | 2 | 1,483 | 8  | 60 | 0 | 651 | 7  | 2,296 | 17 |

|        |     |   |       |    |     |   |       |    |       |    |
|--------|-----|---|-------|----|-----|---|-------|----|-------|----|
| 10,936 | 149 | 2 | 2,062 | 9  | 73  | 0 | 789   | 7  | 3,073 | 18 |
| 10,937 | 149 | 2 | 2,052 | 9  | 73  | 0 | 787   | 7  | 3,061 | 18 |
| 10,938 | 176 | 2 | 2,368 | 11 | 97  | 0 | 1,077 | 7  | 3,718 | 20 |
| 10,939 | 176 | 2 | 2,367 | 12 | 97  | 0 | 1,077 | 7  | 3,717 | 21 |
| 10,940 | 186 | 2 | 2,433 | 14 | 101 | 0 | 1,161 | 7  | 3,881 | 23 |
| 10,941 | 187 | 2 | 2,433 | 14 | 101 | 0 | 1,161 | 7  | 3,882 | 23 |
| 10,942 | 187 | 2 | 2,445 | 15 | 101 | 0 | 1,166 | 7  | 3,899 | 24 |
| 10,943 | 199 | 2 | 2,485 | 15 | 104 | 0 | 1,199 | 7  | 3,987 | 24 |
| 10,944 | 199 | 2 | 2,486 | 15 | 104 | 0 | 1,199 | 7  | 3,988 | 24 |
| 10,945 | 189 | 2 | 2,365 | 16 | 99  | 0 | 1,119 | 8  | 3,772 | 26 |
| 10,946 | 188 | 2 | 2,350 | 17 | 99  | 0 | 1,109 | 8  | 3,746 | 27 |
| 10,947 | 171 | 2 | 2,229 | 21 | 97  | 0 | 1,036 | 8  | 3,533 | 31 |
| 10,948 | 159 | 2 | 2,056 | 22 | 94  | 0 | 964   | 9  | 3,273 | 33 |
| 10,949 | 152 | 2 | 1,929 | 23 | 82  | 0 | 886   | 10 | 3,049 | 35 |
| 10,950 | 129 | 2 | 1,487 | 24 | 64  | 0 | 716   | 13 | 2,396 | 39 |
| 10,951 | 120 | 2 | 1,331 | 24 | 56  | 0 | 663   | 12 | 2,170 | 38 |
| 10,952 | 116 | 2 | 1,247 | 30 | 48  | 0 | 616   | 15 | 2,027 | 47 |
| 10,953 | 115 | 2 | 1,227 | 29 | 47  | 0 | 606   | 15 | 1,995 | 46 |
| 10,954 | 115 | 2 | 1,222 | 30 | 47  | 0 | 606   | 15 | 1,990 | 47 |
| 10,955 | 115 | 2 | 1,225 | 30 | 47  | 0 | 608   | 15 | 1,995 | 47 |
| 10,956 | 115 | 2 | 1,230 | 30 | 47  | 0 | 613   | 15 | 2,005 | 47 |
| 10,957 | 115 | 3 | 1,236 | 30 | 47  | 0 | 615   | 14 | 2,013 | 47 |
| 10,958 | 115 | 3 | 1,236 | 30 | 47  | 0 | 614   | 14 | 2,012 | 47 |
| 10,959 | 116 | 3 | 1,242 | 31 | 47  | 0 | 616   | 14 | 2,021 | 48 |
| 10,960 | 116 | 3 | 1,241 | 34 | 47  | 0 | 613   | 15 | 2,017 | 52 |
| 10,961 | 116 | 3 | 1,247 | 36 | 47  | 0 | 612   | 16 | 2,022 | 55 |
| 10,962 | 116 | 3 | 1,247 | 36 | 47  | 0 | 614   | 16 | 2,024 | 55 |
| 10,963 | 115 | 3 | 1,263 | 37 | 47  | 0 | 622   | 17 | 2,047 | 57 |
| 10,964 | 116 | 3 | 1,276 | 39 | 47  | 0 | 630   | 17 | 2,069 | 59 |
| 10,965 | 116 | 3 | 1,269 | 39 | 47  | 0 | 622   | 17 | 2,054 | 59 |
| 10,966 | 116 | 3 | 1,265 | 44 | 47  | 0 | 620   | 19 | 2,048 | 66 |
| 10,967 | 116 | 3 | 1,265 | 44 | 47  | 0 | 620   | 19 | 2,048 | 66 |
| 10,968 | 117 | 3 | 1,287 | 46 | 50  | 0 | 631   | 22 | 2,085 | 71 |
| 10,969 | 117 | 3 | 1,287 | 45 | 50  | 0 | 631   | 25 | 2,085 | 73 |
| 10,970 | 117 | 3 | 1,290 | 50 | 50  | 0 | 633   | 25 | 2,090 | 78 |
| 10,971 | 119 | 3 | 1,297 | 50 | 50  | 2 | 641   | 25 | 2,107 | 80 |
| 10,972 | 119 | 3 | 1,289 | 49 | 50  | 2 | 639   | 25 | 2,097 | 79 |
| 10,973 | 128 | 4 | 1,341 | 50 | 51  | 2 | 655   | 26 | 2,175 | 82 |
| 10,974 | 128 | 4 | 1,341 | 51 | 51  | 2 | 653   | 27 | 2,173 | 84 |
| 10,975 | 144 | 4 | 1,467 | 55 | 58  | 2 | 713   | 27 | 2,382 | 88 |
| 10,976 | 147 | 4 | 1,496 | 55 | 58  | 2 | 725   | 27 | 2,426 | 88 |

|        |     |   |       |    |    |   |     |    |       |    |
|--------|-----|---|-------|----|----|---|-----|----|-------|----|
| 10,977 | 146 | 4 | 1,497 | 56 | 58 | 2 | 730 | 27 | 2,431 | 89 |
| 10,978 | 146 | 4 | 1,498 | 56 | 58 | 2 | 732 | 27 | 2,434 | 89 |
| 10,979 | 145 | 4 | 1,491 | 56 | 58 | 2 | 732 | 25 | 2,426 | 87 |
| 10,980 | 145 | 4 | 1,489 | 56 | 58 | 2 | 731 | 25 | 2,423 | 87 |
| 10,981 | 140 | 4 | 1,450 | 56 | 58 | 2 | 729 | 24 | 2,377 | 86 |
| 10,982 | 140 | 4 | 1,443 | 56 | 58 | 2 | 729 | 24 | 2,370 | 86 |
| 10,983 | 139 | 4 | 1,439 | 56 | 58 | 2 | 730 | 24 | 2,366 | 86 |
| 10,984 | 140 | 2 | 1,429 | 55 | 57 | 2 | 730 | 24 | 2,356 | 83 |
| 10,985 | 136 | 2 | 1,417 | 55 | 57 | 2 | 728 | 24 | 2,338 | 83 |
| 10,986 | 89  | 2 | 838   | 55 | 44 | 2 | 591 | 24 | 1,562 | 83 |
| 10,987 | 89  | 2 | 836   | 55 | 44 | 2 | 589 | 24 | 1,558 | 83 |
| 10,988 | 65  | 2 | 574   | 55 | 26 | 2 | 353 | 24 | 1,018 | 83 |
| 10,989 | 61  | 2 | 516   | 52 | 20 | 2 | 299 | 24 | 896   | 80 |
| 10,990 | 61  | 2 | 507   | 52 | 20 | 2 | 295 | 24 | 883   | 80 |
| 10,991 | 51  | 2 | 447   | 50 | 15 | 2 | 214 | 24 | 727   | 78 |
| 10,992 | 50  | 3 | 445   | 51 | 15 | 2 | 212 | 26 | 722   | 82 |
| 10,993 | 50  | 4 | 433   | 50 | 15 | 2 | 205 | 26 | 703   | 82 |
| 10,994 | 35  | 4 | 376   | 50 | 11 | 3 | 164 | 26 | 586   | 83 |
| 10,995 | 35  | 4 | 367   | 50 | 11 | 3 | 163 | 26 | 576   | 83 |
| 10,996 | 35  | 6 | 369   | 51 | 11 | 3 | 161 | 27 | 576   | 87 |
| 10,997 | 35  | 6 | 367   | 52 | 11 | 3 | 161 | 27 | 574   | 88 |
| 10,998 | 35  | 6 | 367   | 48 | 11 | 3 | 161 | 26 | 574   | 83 |
| 10,999 | 36  | 6 | 368   | 47 | 11 | 3 | 162 | 25 | 577   | 81 |
| 11,000 | 36  | 6 | 368   | 47 | 11 | 3 | 162 | 24 | 577   | 80 |
| 11,001 | 36  | 6 | 368   | 46 | 11 | 3 | 165 | 21 | 580   | 76 |
| 11,002 | 36  | 6 | 368   | 46 | 11 | 3 | 165 | 21 | 580   | 76 |
| 11,003 | 37  | 6 | 382   | 41 | 11 | 3 | 183 | 18 | 613   | 68 |
| 11,004 | 37  | 6 | 382   | 43 | 11 | 3 | 184 | 18 | 614   | 70 |
| 11,005 | 37  | 6 | 395   | 42 | 12 | 3 | 196 | 18 | 640   | 69 |
| 11,006 | 37  | 6 | 398   | 42 | 12 | 3 | 198 | 18 | 645   | 69 |
| 11,007 | 37  | 6 | 391   | 42 | 12 | 3 | 196 | 18 | 636   | 69 |
| 11,008 | 37  | 5 | 382   | 42 | 12 | 3 | 194 | 18 | 625   | 68 |
| 11,009 | 36  | 5 | 388   | 40 | 12 | 3 | 201 | 17 | 637   | 65 |
| 11,010 | 36  | 5 | 385   | 40 | 12 | 3 | 202 | 17 | 635   | 65 |
| 11,011 | 36  | 5 | 385   | 40 | 12 | 3 | 202 | 17 | 635   | 65 |
| 11,012 | 36  | 5 | 380   | 38 | 12 | 3 | 201 | 19 | 629   | 65 |
| 11,013 | 36  | 5 | 385   | 40 | 13 | 3 | 200 | 19 | 634   | 67 |
| 11,014 | 36  | 5 | 369   | 40 | 13 | 3 | 193 | 18 | 611   | 66 |
| 11,015 | 34  | 5 | 331   | 38 | 13 | 3 | 176 | 18 | 554   | 64 |
| 11,016 | 34  | 5 | 315   | 38 | 10 | 3 | 170 | 18 | 529   | 64 |
| 11,017 | 33  | 5 | 313   | 34 | 10 | 3 | 168 | 16 | 524   | 58 |

|        |     |   |       |    |     |   |       |    |       |    |
|--------|-----|---|-------|----|-----|---|-------|----|-------|----|
| 11,018 | 33  | 5 | 312   | 35 | 10  | 3 | 168   | 16 | 523   | 59 |
| 11,019 | 35  | 5 | 343   | 33 | 12  | 3 | 200   | 13 | 590   | 54 |
| 11,020 | 37  | 5 | 373   | 36 | 16  | 3 | 225   | 10 | 651   | 54 |
| 11,021 | 37  | 5 | 372   | 31 | 16  | 3 | 230   | 11 | 655   | 50 |
| 11,022 | 35  | 5 | 364   | 31 | 17  | 1 | 223   | 11 | 639   | 48 |
| 11,023 | 28  | 4 | 329   | 29 | 17  | 1 | 214   | 10 | 588   | 44 |
| 11,024 | 27  | 4 | 319   | 29 | 16  | 2 | 220   | 11 | 582   | 46 |
| 11,025 | 12  | 4 | 202   | 28 | 9   | 2 | 162   | 11 | 385   | 45 |
| 11,026 | 9   | 4 | 181   | 24 | 9   | 2 | 151   | 11 | 350   | 41 |
| 11,027 | 9   | 4 | 179   | 24 | 9   | 2 | 150   | 11 | 347   | 41 |
| 11,028 | 11  | 4 | 209   | 24 | 11  | 2 | 161   | 11 | 392   | 41 |
| 11,029 | 14  | 4 | 256   | 24 | 12  | 2 | 173   | 11 | 455   | 41 |
| 11,030 | 15  | 4 | 324   | 25 | 18  | 2 | 211   | 12 | 568   | 43 |
| 11,031 | 62  | 4 | 886   | 23 | 41  | 2 | 473   | 12 | 1,462 | 41 |
| 11,032 | 70  | 4 | 1,140 | 23 | 63  | 2 | 705   | 12 | 1,978 | 41 |
| 11,033 | 78  | 5 | 1,492 | 23 | 86  | 2 | 940   | 12 | 2,596 | 42 |
| 11,034 | 77  | 5 | 1,492 | 23 | 86  | 3 | 944   | 12 | 2,599 | 43 |
| 11,035 | 77  | 5 | 1,493 | 23 | 86  | 3 | 946   | 12 | 2,602 | 43 |
| 11,036 | 113 | 5 | 2,353 | 23 | 163 | 3 | 1,845 | 12 | 4,474 | 43 |
| 11,037 | 113 | 5 | 2,354 | 22 | 163 | 3 | 1,848 | 14 | 4,478 | 44 |
| 11,038 | 113 | 5 | 2,360 | 26 | 163 | 3 | 1,851 | 15 | 4,487 | 49 |
| 11,039 | 113 | 5 | 2,359 | 26 | 163 | 3 | 1,851 | 15 | 4,486 | 49 |
| 11,040 | 113 | 5 | 2,361 | 26 | 163 | 4 | 1,851 | 15 | 4,488 | 50 |
| 11,041 | 114 | 5 | 2,362 | 28 | 164 | 4 | 1,851 | 15 | 4,491 | 52 |
| 11,042 | 114 | 9 | 2,360 | 31 | 164 | 4 | 1,858 | 16 | 4,496 | 60 |
| 11,043 | 114 | 8 | 2,357 | 30 | 165 | 4 | 1,858 | 14 | 4,494 | 56 |
| 11,044 | 119 | 7 | 2,373 | 30 | 165 | 4 | 1,876 | 14 | 4,533 | 55 |
| 11,045 | 119 | 7 | 2,370 | 30 | 165 | 3 | 1,876 | 14 | 4,530 | 54 |
| 11,046 | 138 | 5 | 2,488 | 28 | 173 | 3 | 2,022 | 12 | 4,821 | 48 |
| 11,047 | 140 | 5 | 2,507 | 26 | 175 | 3 | 2,033 | 12 | 4,855 | 46 |
| 11,048 | 140 | 5 | 2,507 | 26 | 175 | 3 | 2,034 | 12 | 4,856 | 46 |
| 11,049 | 145 | 5 | 2,687 | 26 | 184 | 3 | 2,147 | 12 | 5,163 | 46 |
| 11,050 | 148 | 5 | 2,778 | 26 | 184 | 3 | 2,162 | 12 | 5,272 | 46 |
| 11,051 | 148 | 5 | 2,839 | 26 | 192 | 3 | 2,238 | 12 | 5,417 | 46 |
| 11,052 | 150 | 5 | 2,929 | 27 | 197 | 3 | 2,296 | 12 | 5,572 | 47 |
| 11,053 | 149 | 5 | 2,910 | 27 | 197 | 3 | 2,277 | 13 | 5,533 | 48 |
| 11,054 | 153 | 5 | 2,967 | 26 | 206 | 3 | 2,318 | 14 | 5,644 | 48 |
| 11,055 | 153 | 5 | 2,970 | 24 | 205 | 3 | 2,311 | 14 | 5,639 | 46 |
| 11,056 | 153 | 6 | 2,965 | 25 | 207 | 3 | 2,305 | 14 | 5,630 | 48 |
| 11,057 | 153 | 6 | 2,962 | 26 | 207 | 3 | 2,303 | 14 | 5,625 | 49 |
| 11,058 | 154 | 6 | 2,973 | 27 | 208 | 3 | 2,310 | 14 | 5,645 | 50 |

|        |     |   |       |    |     |   |       |    |        |    |
|--------|-----|---|-------|----|-----|---|-------|----|--------|----|
| 11,059 | 154 | 6 | 2,968 | 27 | 208 | 3 | 2,310 | 15 | 5,640  | 51 |
| 11,060 | 154 | 6 | 2,963 | 27 | 208 | 3 | 2,303 | 15 | 5,628  | 51 |
| 11,061 | 155 | 6 | 2,964 | 24 | 208 | 3 | 2,306 | 14 | 5,633  | 47 |
| 11,062 | 155 | 6 | 2,980 | 24 | 210 | 3 | 2,320 | 11 | 5,665  | 44 |
| 11,063 | 155 | 6 | 2,987 | 22 | 210 | 3 | 2,324 | 11 | 5,676  | 42 |
| 11,064 | 156 | 6 | 2,999 | 21 | 211 | 3 | 2,326 | 11 | 5,692  | 41 |
| 11,065 | 161 | 6 | 3,049 | 21 | 212 | 3 | 2,353 | 11 | 5,775  | 41 |
| 11,066 | 162 | 6 | 3,052 | 21 | 212 | 3 | 2,348 | 11 | 5,774  | 41 |
| 11,067 | 163 | 6 | 3,119 | 20 | 214 | 3 | 2,368 | 12 | 5,864  | 41 |
| 11,068 | 227 | 7 | 3,534 | 21 | 241 | 3 | 2,859 | 12 | 6,861  | 43 |
| 11,069 | 273 | 7 | 4,184 | 20 | 272 | 3 | 3,334 | 12 | 8,063  | 42 |
| 11,070 | 271 | 7 | 4,173 | 20 | 268 | 3 | 3,328 | 12 | 8,040  | 42 |
| 11,071 | 271 | 7 | 4,169 | 19 | 268 | 4 | 3,323 | 16 | 8,031  | 46 |
| 11,072 | 271 | 7 | 4,167 | 20 | 268 | 4 | 3,319 | 15 | 8,025  | 46 |
| 11,073 | 311 | 7 | 4,941 | 20 | 330 | 3 | 4,015 | 14 | 9,597  | 44 |
| 11,074 | 322 | 8 | 5,140 | 20 | 342 | 3 | 4,110 | 14 | 9,914  | 45 |
| 11,075 | 321 | 8 | 5,135 | 20 | 342 | 3 | 4,102 | 14 | 9,900  | 45 |
| 11,076 | 353 | 8 | 5,601 | 20 | 384 | 3 | 4,540 | 13 | 10,878 | 44 |
| 11,077 | 407 | 8 | 6,862 | 21 | 468 | 3 | 5,381 | 13 | 13,118 | 45 |
| 11,078 | 407 | 8 | 6,854 | 24 | 468 | 3 | 5,378 | 13 | 13,107 | 48 |
| 11,079 | 406 | 8 | 6,880 | 24 | 467 | 3 | 5,398 | 13 | 13,151 | 48 |
| 11,080 | 404 | 8 | 6,879 | 29 | 469 | 3 | 5,426 | 22 | 13,178 | 62 |
| 11,081 | 403 | 9 | 6,810 | 30 | 463 | 3 | 5,395 | 22 | 13,071 | 64 |
| 11,082 | 357 | 9 | 6,251 | 36 | 439 | 3 | 5,137 | 22 | 12,184 | 70 |
| 11,083 | 347 | 9 | 5,998 | 36 | 419 | 3 | 4,907 | 22 | 11,671 | 70 |
| 11,084 | 340 | 8 | 5,683 | 37 | 397 | 2 | 4,689 | 22 | 11,109 | 69 |
| 11,085 | 340 | 8 | 5,611 | 37 | 395 | 2 | 4,668 | 22 | 11,014 | 69 |
| 11,086 | 310 | 8 | 4,896 | 37 | 329 | 2 | 3,977 | 22 | 9,512  | 69 |
| 11,087 | 311 | 8 | 4,924 | 37 | 331 | 2 | 4,000 | 20 | 9,566  | 67 |
| 11,088 | 311 | 8 | 4,924 | 37 | 331 | 2 | 4,002 | 20 | 9,568  | 67 |
| 11,089 | 330 | 8 | 5,107 | 33 | 342 | 2 | 4,404 | 20 | 10,183 | 63 |
| 11,090 | 330 | 8 | 5,109 | 33 | 342 | 2 | 4,405 | 20 | 10,186 | 63 |
| 11,091 | 332 | 8 | 5,113 | 33 | 342 | 1 | 4,424 | 20 | 10,211 | 62 |
| 11,092 | 331 | 8 | 5,116 | 31 | 341 | 1 | 4,434 | 20 | 10,222 | 60 |
| 11,093 | 329 | 4 | 5,100 | 28 | 341 | 1 | 4,419 | 19 | 10,189 | 52 |
| 11,094 | 331 | 4 | 5,095 | 28 | 340 | 1 | 4,426 | 19 | 10,192 | 52 |
| 11,095 | 331 | 4 | 5,091 | 28 | 340 | 1 | 4,421 | 20 | 10,183 | 53 |
| 11,096 | 311 | 4 | 4,990 | 32 | 332 | 3 | 4,276 | 23 | 9,909  | 62 |
| 11,097 | 312 | 4 | 4,996 | 37 | 332 | 3 | 4,283 | 24 | 9,923  | 68 |
| 11,098 | 310 | 4 | 4,987 | 41 | 330 | 3 | 4,286 | 25 | 9,913  | 73 |
| 11,099 | 309 | 4 | 4,935 | 45 | 329 | 3 | 4,274 | 25 | 9,847  | 77 |

|        |     |   |       |    |     |   |       |    |        |    |
|--------|-----|---|-------|----|-----|---|-------|----|--------|----|
| 11,100 | 303 | 4 | 4,814 | 46 | 321 | 3 | 4,176 | 27 | 9,614  | 80 |
| 11,101 | 303 | 4 | 4,735 | 54 | 322 | 3 | 4,169 | 29 | 9,529  | 90 |
| 11,102 | 302 | 4 | 4,675 | 54 | 314 | 3 | 4,090 | 29 | 9,381  | 90 |
| 11,103 | 301 | 4 | 4,601 | 53 | 309 | 3 | 4,034 | 29 | 9,245  | 89 |
| 11,104 | 301 | 4 | 4,592 | 53 | 307 | 3 | 4,033 | 28 | 9,233  | 88 |
| 11,105 | 304 | 4 | 4,584 | 53 | 305 | 3 | 4,033 | 27 | 9,226  | 87 |
| 11,106 | 306 | 3 | 4,581 | 51 | 305 | 3 | 4,035 | 27 | 9,227  | 84 |
| 11,107 | 306 | 3 | 4,578 | 51 | 303 | 3 | 4,035 | 27 | 9,222  | 84 |
| 11,108 | 305 | 3 | 4,567 | 51 | 302 | 3 | 4,026 | 27 | 9,200  | 84 |
| 11,109 | 316 | 3 | 4,652 | 50 | 307 | 3 | 4,061 | 27 | 9,336  | 83 |
| 11,110 | 316 | 3 | 4,652 | 50 | 307 | 3 | 4,060 | 26 | 9,335  | 82 |
| 11,111 | 326 | 3 | 4,871 | 50 | 313 | 3 | 4,202 | 26 | 9,712  | 82 |
| 11,112 | 326 | 3 | 4,875 | 50 | 314 | 3 | 4,209 | 26 | 9,724  | 82 |
| 11,113 | 326 | 3 | 4,859 | 50 | 312 | 3 | 4,195 | 26 | 9,692  | 82 |
| 11,114 | 334 | 3 | 4,882 | 50 | 312 | 3 | 4,217 | 27 | 9,745  | 83 |
| 11,115 | 338 | 3 | 4,889 | 51 | 312 | 3 | 4,228 | 27 | 9,767  | 84 |
| 11,116 | 333 | 3 | 4,837 | 51 | 311 | 3 | 4,199 | 27 | 9,680  | 84 |
| 11,117 | 340 | 2 | 4,966 | 50 | 320 | 3 | 4,337 | 26 | 9,963  | 81 |
| 11,118 | 364 | 2 | 5,373 | 50 | 358 | 3 | 4,821 | 26 | 10,916 | 81 |
| 11,119 | 320 | 2 | 5,161 | 50 | 344 | 3 | 4,609 | 26 | 10,434 | 81 |
| 11,120 | 280 | 2 | 4,684 | 50 | 335 | 3 | 4,277 | 26 | 9,576  | 81 |
| 11,121 | 281 | 2 | 4,735 | 50 | 337 | 3 | 4,302 | 26 | 9,655  | 81 |
| 11,122 | 268 | 2 | 4,616 | 49 | 309 | 2 | 4,024 | 22 | 9,217  | 75 |
| 11,123 | 258 | 2 | 4,356 | 48 | 290 | 2 | 3,796 | 23 | 8,700  | 75 |
| 11,124 | 247 | 2 | 4,159 | 48 | 283 | 2 | 3,743 | 23 | 8,432  | 75 |
| 11,125 | 238 | 1 | 3,958 | 48 | 271 | 2 | 3,645 | 23 | 8,112  | 74 |
| 11,126 | 205 | 1 | 3,484 | 51 | 229 | 2 | 3,201 | 25 | 7,119  | 79 |
| 11,127 | 163 | 1 | 2,490 | 51 | 170 | 2 | 2,602 | 25 | 5,425  | 79 |
| 11,128 | 153 | 1 | 2,211 | 47 | 144 | 2 | 2,341 | 25 | 4,849  | 75 |
| 11,129 | 152 | 2 | 2,165 | 47 | 144 | 2 | 2,317 | 25 | 4,778  | 76 |
| 11,130 | 160 | 2 | 2,232 | 46 | 143 | 2 | 2,310 | 25 | 4,845  | 75 |
| 11,131 | 162 | 2 | 2,230 | 39 | 142 | 2 | 2,313 | 15 | 4,847  | 58 |
| 11,132 | 162 | 2 | 2,230 | 39 | 142 | 2 | 2,313 | 15 | 4,847  | 58 |
| 11,133 | 162 | 2 | 2,241 | 33 | 143 | 2 | 2,307 | 16 | 4,853  | 53 |
| 11,134 | 165 | 2 | 2,283 | 33 | 142 | 2 | 2,315 | 16 | 4,905  | 53 |
| 11,135 | 172 | 2 | 2,323 | 32 | 142 | 2 | 2,317 | 16 | 4,954  | 52 |
| 11,136 | 173 | 2 | 2,382 | 33 | 142 | 2 | 2,335 | 17 | 5,032  | 54 |
| 11,137 | 178 | 2 | 2,440 | 33 | 134 | 2 | 2,220 | 17 | 4,972  | 54 |
| 11,138 | 177 | 2 | 2,419 | 33 | 132 | 2 | 2,201 | 17 | 4,929  | 54 |
| 11,139 | 162 | 2 | 2,272 | 33 | 126 | 2 | 1,850 | 17 | 4,410  | 54 |
| 11,140 | 158 | 2 | 2,283 | 33 | 122 | 2 | 1,824 | 16 | 4,387  | 53 |



|        |     |   |       |    |     |   |       |    |        |    |
|--------|-----|---|-------|----|-----|---|-------|----|--------|----|
| 11,141 | 158 | 2 | 2,283 | 33 | 122 | 2 | 1,824 | 16 | 4,387  | 53 |
| 11,142 | 156 | 2 | 2,278 | 33 | 122 | 2 | 1,807 | 16 | 4,363  | 53 |
| 11,143 | 168 | 2 | 2,387 | 34 | 129 | 2 | 1,849 | 18 | 4,533  | 56 |
| 11,144 | 169 | 2 | 2,466 | 39 | 130 | 2 | 1,867 | 21 | 4,632  | 64 |
| 11,145 | 167 | 2 | 2,461 | 40 | 130 | 2 | 1,858 | 21 | 4,616  | 65 |
| 11,146 | 171 | 2 | 2,742 | 40 | 146 | 2 | 2,097 | 20 | 5,156  | 64 |
| 11,147 | 199 | 2 | 3,152 | 36 | 164 | 0 | 2,469 | 17 | 5,984  | 55 |
| 11,148 | 206 | 2 | 3,211 | 31 | 171 | 0 | 2,547 | 16 | 6,135  | 49 |
| 11,149 | 206 | 2 | 3,205 | 30 | 172 | 0 | 2,548 | 17 | 6,131  | 49 |
| 11,150 | 206 | 2 | 3,199 | 27 | 172 | 0 | 2,543 | 17 | 6,120  | 46 |
| 11,151 | 206 | 2 | 3,200 | 26 | 172 | 0 | 2,544 | 15 | 6,122  | 43 |
| 11,152 | 204 | 2 | 3,187 | 17 | 171 | 0 | 2,536 | 13 | 6,098  | 32 |
| 11,153 | 204 | 2 | 3,189 | 17 | 171 | 0 | 2,537 | 13 | 6,101  | 32 |
| 11,154 | 204 | 2 | 3,173 | 17 | 171 | 0 | 2,538 | 13 | 6,086  | 32 |
| 11,155 | 204 | 2 | 3,169 | 18 | 171 | 0 | 2,535 | 13 | 6,079  | 33 |
| 11,156 | 197 | 2 | 3,133 | 18 | 166 | 0 | 2,498 | 13 | 5,994  | 33 |
| 11,157 | 195 | 2 | 3,135 | 18 | 166 | 0 | 2,497 | 13 | 5,993  | 33 |
| 11,158 | 195 | 2 | 3,137 | 18 | 167 | 0 | 2,500 | 13 | 5,999  | 33 |
| 11,159 | 190 | 2 | 3,112 | 19 | 165 | 0 | 2,483 | 13 | 5,950  | 34 |
| 11,160 | 184 | 2 | 3,067 | 19 | 162 | 0 | 2,473 | 13 | 5,886  | 34 |
| 11,161 | 192 | 2 | 3,107 | 19 | 164 | 0 | 2,472 | 13 | 5,935  | 34 |
| 11,162 | 184 | 2 | 2,965 | 19 | 159 | 0 | 2,357 | 13 | 5,665  | 34 |
| 11,163 | 184 | 2 | 2,956 | 19 | 158 | 0 | 2,351 | 13 | 5,649  | 34 |
| 11,164 | 176 | 2 | 2,926 | 19 | 158 | 0 | 2,328 | 13 | 5,588  | 34 |
| 11,165 | 176 | 2 | 2,927 | 21 | 158 | 0 | 2,327 | 12 | 5,588  | 35 |
| 11,166 | 181 | 2 | 3,024 | 21 | 165 | 0 | 2,347 | 13 | 5,717  | 36 |
| 11,167 | 193 | 2 | 3,022 | 21 | 161 | 0 | 2,277 | 13 | 5,653  | 36 |
| 11,168 | 191 | 3 | 3,115 | 30 | 166 | 1 | 2,273 | 25 | 5,745  | 59 |
| 11,169 | 321 | 4 | 3,256 | 36 | 164 | 1 | 2,043 | 28 | 5,784  | 69 |
| 11,170 | 302 | 4 | 3,080 | 36 | 155 | 1 | 1,758 | 28 | 5,295  | 69 |
| 11,171 | 393 | 4 | 3,450 | 36 | 189 | 1 | 1,881 | 28 | 5,913  | 69 |
| 11,172 | 439 | 4 | 3,625 | 36 | 200 | 1 | 1,951 | 28 | 6,215  | 69 |
| 11,173 | 440 | 4 | 3,521 | 36 | 194 | 1 | 1,855 | 27 | 6,010  | 68 |
| 11,174 | 439 | 4 | 3,490 | 36 | 194 | 1 | 1,844 | 27 | 5,967  | 68 |
| 11,175 | 624 | 4 | 4,239 | 36 | 299 | 2 | 2,678 | 27 | 7,840  | 69 |
| 11,176 | 625 | 4 | 4,241 | 37 | 299 | 3 | 2,683 | 33 | 7,848  | 77 |
| 11,177 | 625 | 4 | 4,241 | 35 | 300 | 3 | 2,686 | 31 | 7,852  | 73 |
| 11,178 | 873 | 4 | 6,639 | 35 | 464 | 3 | 3,918 | 32 | 11,894 | 74 |
| 11,179 | 873 | 4 | 6,637 | 35 | 466 | 3 | 3,923 | 34 | 11,899 | 76 |
| 11,180 | 864 | 3 | 6,542 | 35 | 465 | 3 | 3,901 | 34 | 11,772 | 75 |
| 11,181 | 872 | 3 | 6,586 | 35 | 470 | 3 | 3,920 | 34 | 11,848 | 75 |

|        |     |   |       |    |     |   |       |    |        |    |
|--------|-----|---|-------|----|-----|---|-------|----|--------|----|
| 11,182 | 870 | 2 | 6,577 | 35 | 470 | 3 | 3,918 | 34 | 11,835 | 74 |
| 11,183 | 869 | 2 | 6,562 | 35 | 469 | 3 | 3,915 | 34 | 11,815 | 74 |
| 11,184 | 868 | 2 | 6,557 | 35 | 469 | 3 | 3,916 | 35 | 11,810 | 75 |
| 11,185 | 866 | 2 | 6,533 | 35 | 470 | 3 | 3,912 | 35 | 11,781 | 75 |
| 11,186 | 858 | 2 | 6,457 | 34 | 469 | 3 | 3,893 | 34 | 11,677 | 73 |
| 11,187 | 858 | 2 | 6,386 | 34 | 469 | 3 | 3,868 | 34 | 11,581 | 73 |
| 11,188 | 847 | 2 | 6,262 | 34 | 468 | 3 | 3,801 | 34 | 11,378 | 73 |
| 11,189 | 847 | 2 | 6,256 | 34 | 469 | 3 | 3,798 | 34 | 11,370 | 73 |
| 11,190 | 847 | 2 | 6,232 | 34 | 468 | 3 | 3,776 | 34 | 11,323 | 73 |
| 11,191 | 850 | 3 | 6,235 | 34 | 470 | 3 | 3,792 | 34 | 11,347 | 74 |
| 11,192 | 864 | 3 | 6,348 | 36 | 473 | 3 | 3,852 | 34 | 11,537 | 76 |
| 11,193 | 858 | 3 | 6,283 | 36 | 468 | 3 | 3,831 | 34 | 11,440 | 76 |
| 11,194 | 852 | 3 | 6,257 | 35 | 466 | 3 | 3,808 | 32 | 11,383 | 73 |
| 11,195 | 851 | 3 | 6,189 | 30 | 465 | 3 | 3,799 | 29 | 11,304 | 65 |
| 11,196 | 847 | 3 | 5,909 | 29 | 449 | 3 | 3,555 | 28 | 10,760 | 63 |
| 11,197 | 829 | 3 | 5,659 | 29 | 437 | 3 | 3,294 | 28 | 10,219 | 63 |
| 11,198 | 819 | 3 | 5,492 | 29 | 430 | 3 | 3,175 | 28 | 9,916  | 63 |
| 11,199 | 811 | 3 | 5,424 | 29 | 422 | 3 | 3,082 | 28 | 9,739  | 63 |
| 11,200 | 811 | 3 | 5,420 | 26 | 422 | 3 | 3,078 | 27 | 9,731  | 59 |
| 11,201 | 852 | 3 | 5,764 | 25 | 449 | 3 | 3,380 | 27 | 10,445 | 58 |
| 11,202 | 854 | 3 | 5,782 | 25 | 449 | 3 | 3,385 | 27 | 10,470 | 58 |
| 11,203 | 871 | 3 | 5,936 | 25 | 455 | 3 | 3,454 | 27 | 10,716 | 58 |
| 11,204 | 871 | 3 | 5,931 | 25 | 455 | 3 | 3,455 | 27 | 10,712 | 58 |
| 11,205 | 893 | 3 | 6,102 | 25 | 465 | 3 | 3,651 | 27 | 11,111 | 58 |
| 11,206 | 904 | 3 | 6,282 | 24 | 473 | 3 | 3,726 | 27 | 11,385 | 57 |
| 11,207 | 912 | 3 | 6,478 | 25 | 492 | 3 | 3,953 | 27 | 11,835 | 58 |
| 11,208 | 914 | 3 | 6,589 | 25 | 498 | 3 | 4,051 | 27 | 12,052 | 58 |
| 11,209 | 914 | 4 | 6,599 | 24 | 498 | 3 | 4,063 | 27 | 12,074 | 58 |
| 11,210 | 914 | 4 | 6,592 | 24 | 498 | 3 | 4,060 | 27 | 12,064 | 58 |
| 11,211 | 914 | 4 | 6,591 | 24 | 499 | 3 | 4,062 | 27 | 12,066 | 58 |
| 11,212 | 903 | 4 | 6,478 | 24 | 496 | 3 | 4,033 | 27 | 11,910 | 58 |
| 11,213 | 903 | 5 | 6,478 | 24 | 496 | 3 | 4,036 | 28 | 11,913 | 60 |
| 11,214 | 905 | 5 | 6,510 | 24 | 498 | 3 | 4,088 | 28 | 12,001 | 60 |
| 11,215 | 914 | 5 | 6,550 | 22 | 502 | 3 | 4,152 | 28 | 12,118 | 58 |
| 11,216 | 911 | 5 | 6,544 | 21 | 501 | 3 | 4,150 | 27 | 12,106 | 56 |
| 11,217 | 904 | 5 | 6,432 | 20 | 493 | 3 | 4,125 | 27 | 11,954 | 55 |
| 11,218 | 890 | 4 | 6,347 | 11 | 494 | 2 | 4,118 | 15 | 11,849 | 32 |
| 11,219 | 887 | 4 | 6,189 | 11 | 484 | 2 | 4,062 | 15 | 11,622 | 32 |
| 11,220 | 732 | 3 | 5,576 | 5  | 446 | 2 | 3,802 | 12 | 10,556 | 22 |
| 11,221 | 732 | 3 | 5,559 | 6  | 442 | 2 | 3,806 | 12 | 10,539 | 23 |
| 11,222 | 633 | 3 | 5,007 | 6  | 384 | 2 | 3,516 | 12 | 9,540  | 23 |

|        |     |   |       |    |     |   |       |    |       |    |
|--------|-----|---|-------|----|-----|---|-------|----|-------|----|
| 11,223 | 586 | 3 | 4,770 | 5  | 371 | 2 | 3,410 | 12 | 9,137 | 22 |
| 11,224 | 584 | 3 | 4,740 | 5  | 371 | 2 | 3,398 | 12 | 9,093 | 22 |
| 11,225 | 394 | 3 | 3,972 | 6  | 263 | 2 | 2,538 | 16 | 7,167 | 27 |
| 11,226 | 352 | 3 | 3,822 | 6  | 250 | 1 | 2,518 | 17 | 6,942 | 27 |
| 11,227 | 296 | 3 | 3,263 | 9  | 219 | 0 | 2,281 | 12 | 6,059 | 24 |
| 11,228 | 174 | 3 | 1,910 | 9  | 126 | 0 | 1,536 | 12 | 3,746 | 24 |
| 11,229 | 185 | 3 | 1,781 | 10 | 108 | 0 | 1,544 | 12 | 3,618 | 25 |
| 11,230 | 180 | 3 | 1,754 | 10 | 106 | 0 | 1,535 | 11 | 3,575 | 24 |
| 11,231 | 180 | 3 | 1,751 | 10 | 107 | 0 | 1,535 | 13 | 3,573 | 26 |
| 11,232 | 182 | 3 | 1,766 | 11 | 107 | 0 | 1,558 | 13 | 3,613 | 27 |
| 11,233 | 182 | 3 | 1,763 | 11 | 107 | 0 | 1,556 | 13 | 3,608 | 27 |
| 11,234 | 186 | 3 | 1,807 | 11 | 110 | 0 | 1,587 | 11 | 3,690 | 25 |
| 11,235 | 186 | 3 | 1,825 | 11 | 113 | 0 | 1,601 | 11 | 3,725 | 25 |
| 11,236 | 189 | 3 | 1,830 | 11 | 112 | 0 | 1,618 | 11 | 3,749 | 25 |
| 11,237 | 189 | 5 | 1,830 | 11 | 112 | 0 | 1,618 | 11 | 3,749 | 27 |
| 11,238 | 188 | 5 | 1,840 | 11 | 113 | 0 | 1,622 | 11 | 3,763 | 27 |
| 11,239 | 191 | 5 | 1,851 | 11 | 114 | 0 | 1,632 | 11 | 3,788 | 27 |
| 11,240 | 196 | 5 | 1,860 | 11 | 113 | 0 | 1,635 | 11 | 3,804 | 27 |
| 11,241 | 196 | 5 | 1,857 | 11 | 113 | 0 | 1,637 | 11 | 3,803 | 27 |
| 11,242 | 202 | 4 | 1,860 | 11 | 114 | 0 | 1,651 | 11 | 3,827 | 26 |
| 11,243 | 191 | 4 | 1,778 | 9  | 114 | 0 | 1,599 | 11 | 3,682 | 24 |
| 11,244 | 205 | 4 | 1,887 | 9  | 122 | 0 | 1,677 | 11 | 3,891 | 24 |
| 11,245 | 217 | 4 | 2,003 | 9  | 128 | 0 | 1,823 | 11 | 4,171 | 24 |
| 11,246 | 229 | 4 | 2,126 | 9  | 132 | 0 | 1,920 | 11 | 4,407 | 24 |
| 11,247 | 208 | 4 | 2,023 | 9  | 123 | 0 | 1,801 | 11 | 4,155 | 24 |
| 11,248 | 207 | 4 | 2,051 | 9  | 123 | 0 | 1,791 | 10 | 4,172 | 23 |
| 11,249 | 207 | 4 | 2,051 | 9  | 123 | 0 | 1,790 | 10 | 4,171 | 23 |
| 11,250 | 198 | 4 | 1,965 | 10 | 114 | 0 | 1,706 | 10 | 3,983 | 24 |
| 11,251 | 199 | 4 | 2,180 | 10 | 116 | 0 | 1,731 | 10 | 4,226 | 24 |
| 11,252 | 197 | 4 | 2,163 | 10 | 116 | 0 | 1,726 | 10 | 4,202 | 24 |
| 11,253 | 182 | 4 | 2,039 | 10 | 113 | 0 | 1,682 | 10 | 4,016 | 24 |
| 11,254 | 181 | 4 | 2,010 | 15 | 110 | 0 | 1,660 | 10 | 3,961 | 29 |
| 11,255 | 159 | 4 | 1,851 | 15 | 101 | 0 | 1,473 | 10 | 3,584 | 29 |
| 11,256 | 149 | 5 | 1,671 | 15 | 94  | 0 | 1,408 | 10 | 3,322 | 30 |
| 11,257 | 142 | 5 | 1,496 | 15 | 75  | 0 | 1,211 | 10 | 2,924 | 30 |
| 11,258 | 140 | 5 | 1,407 | 14 | 70  | 0 | 1,124 | 10 | 2,741 | 29 |
| 11,259 | 140 | 5 | 1,393 | 14 | 69  | 0 | 1,114 | 10 | 2,716 | 29 |
| 11,260 | 141 | 4 | 1,393 | 14 | 71  | 0 | 1,121 | 11 | 2,726 | 29 |
| 11,261 | 141 | 4 | 1,404 | 15 | 71  | 0 | 1,115 | 11 | 2,731 | 30 |
| 11,262 | 144 | 4 | 1,437 | 15 | 73  | 0 | 1,155 | 11 | 2,809 | 30 |
| 11,263 | 144 | 3 | 1,432 | 15 | 73  | 0 | 1,150 | 11 | 2,799 | 29 |

|        |     |   |       |    |    |   |       |    |       |    |
|--------|-----|---|-------|----|----|---|-------|----|-------|----|
| 11,264 | 149 | 3 | 1,445 | 15 | 73 | 0 | 1,161 | 11 | 2,828 | 29 |
| 11,265 | 147 | 3 | 1,424 | 15 | 71 | 0 | 1,131 | 11 | 2,773 | 29 |
| 11,266 | 138 | 3 | 1,387 | 15 | 67 | 0 | 1,073 | 11 | 2,665 | 29 |
| 11,267 | 138 | 3 | 1,385 | 15 | 67 | 1 | 1,070 | 11 | 2,660 | 30 |
| 11,268 | 139 | 3 | 1,393 | 15 | 67 | 1 | 1,070 | 11 | 2,669 | 30 |
| 11,269 | 138 | 3 | 1,392 | 15 | 66 | 1 | 1,059 | 11 | 2,655 | 30 |
| 11,270 | 138 | 4 | 1,390 | 15 | 66 | 1 | 1,056 | 11 | 2,650 | 31 |
| 11,271 | 138 | 4 | 1,388 | 15 | 66 | 1 | 1,042 | 11 | 2,634 | 31 |
| 11,272 | 144 | 4 | 1,428 | 14 | 66 | 1 | 1,070 | 11 | 2,708 | 30 |
| 11,273 | 145 | 4 | 1,442 | 14 | 67 | 1 | 1,087 | 11 | 2,741 | 30 |
| 11,274 | 147 | 4 | 1,449 | 14 | 67 | 1 | 1,087 | 12 | 2,750 | 31 |
| 11,275 | 150 | 4 | 1,472 | 13 | 68 | 1 | 1,113 | 8  | 2,803 | 26 |
| 11,276 | 150 | 4 | 1,484 | 9  | 68 | 1 | 1,124 | 6  | 2,826 | 20 |
| 11,277 | 150 | 4 | 1,441 | 9  | 67 | 1 | 1,079 | 6  | 2,737 | 20 |
| 11,278 | 112 | 4 | 1,314 | 9  | 58 | 1 | 927   | 6  | 2,411 | 20 |
| 11,279 | 113 | 4 | 1,316 | 9  | 59 | 1 | 930   | 6  | 2,418 | 20 |
| 11,280 | 114 | 4 | 1,318 | 8  | 58 | 1 | 916   | 4  | 2,406 | 17 |
| 11,281 | 113 | 4 | 1,305 | 8  | 56 | 1 | 908   | 4  | 2,382 | 17 |
| 11,282 | 117 | 4 | 1,332 | 8  | 55 | 1 | 934   | 2  | 2,438 | 15 |
| 11,283 | 118 | 4 | 1,323 | 7  | 57 | 1 | 924   | 2  | 2,422 | 14 |
| 11,284 | 114 | 4 | 1,299 | 7  | 55 | 1 | 910   | 2  | 2,378 | 14 |
| 11,285 | 114 | 4 | 1,282 | 7  | 54 | 1 | 905   | 3  | 2,355 | 15 |
| 11,286 | 114 | 4 | 1,272 | 7  | 51 | 1 | 895   | 3  | 2,332 | 15 |
| 11,287 | 127 | 2 | 1,328 | 7  | 56 | 1 | 951   | 3  | 2,462 | 13 |
| 11,288 | 127 | 2 | 1,348 | 7  | 58 | 1 | 963   | 3  | 2,496 | 13 |
| 11,289 | 134 | 2 | 1,360 | 8  | 58 | 1 | 997   | 3  | 2,549 | 14 |
| 11,290 | 131 | 2 | 1,349 | 8  | 57 | 1 | 987   | 3  | 2,524 | 14 |
| 11,291 | 127 | 2 | 1,384 | 8  | 64 | 1 | 1,015 | 3  | 2,590 | 14 |
| 11,292 | 136 | 2 | 1,430 | 10 | 68 | 1 | 1,077 | 3  | 2,711 | 16 |
| 11,293 | 127 | 2 | 1,405 | 11 | 65 | 1 | 1,048 | 3  | 2,645 | 17 |
| 11,294 | 128 | 2 | 1,418 | 12 | 68 | 1 | 1,080 | 3  | 2,694 | 18 |
| 11,295 | 114 | 2 | 1,304 | 12 | 60 | 3 | 1,003 | 3  | 2,481 | 20 |
| 11,296 | 103 | 2 | 1,182 | 12 | 54 | 3 | 858   | 3  | 2,197 | 20 |
| 11,297 | 91  | 2 | 1,045 | 14 | 50 | 3 | 752   | 3  | 1,938 | 22 |
| 11,298 | 85  | 2 | 936   | 14 | 44 | 3 | 709   | 3  | 1,774 | 22 |
| 11,299 | 84  | 2 | 904   | 14 | 42 | 3 | 691   | 3  | 1,721 | 22 |
| 11,300 | 82  | 2 | 736   | 14 | 41 | 3 | 662   | 3  | 1,521 | 22 |
| 11,301 | 81  | 2 | 670   | 13 | 39 | 3 | 640   | 3  | 1,430 | 21 |
| 11,302 | 81  | 2 | 698   | 13 | 40 | 3 | 646   | 3  | 1,465 | 21 |
| 11,303 | 83  | 2 | 713   | 13 | 40 | 3 | 660   | 3  | 1,496 | 21 |
| 11,304 | 135 | 2 | 1,042 | 13 | 60 | 3 | 885   | 3  | 2,122 | 21 |

|        |     |   |       |    |     |   |       |   |       |    |
|--------|-----|---|-------|----|-----|---|-------|---|-------|----|
| 11,305 | 147 | 2 | 1,184 | 8  | 68  | 3 | 932   | 3 | 2,331 | 16 |
| 11,306 | 166 | 2 | 1,468 | 8  | 82  | 3 | 977   | 3 | 2,693 | 16 |
| 11,307 | 272 | 1 | 2,381 | 8  | 165 | 3 | 1,542 | 3 | 4,360 | 15 |
| 11,308 | 354 | 1 | 5,219 | 8  | 284 | 3 | 2,529 | 3 | 8,386 | 15 |
| 11,309 | 393 | 1 | 5,596 | 8  | 330 | 3 | 2,867 | 3 | 9,186 | 15 |
| 11,310 | 393 | 1 | 5,602 | 9  | 331 | 3 | 2,876 | 3 | 9,202 | 16 |
| 11,311 | 393 | 1 | 5,597 | 9  | 329 | 3 | 2,872 | 2 | 9,191 | 15 |
| 11,312 | 393 | 1 | 5,580 | 8  | 329 | 3 | 2,863 | 2 | 9,165 | 14 |
| 11,313 | 390 | 1 | 5,548 | 8  | 326 | 3 | 2,828 | 2 | 9,092 | 14 |
| 11,314 | 390 | 1 | 5,544 | 8  | 326 | 3 | 2,832 | 2 | 9,092 | 14 |
| 11,315 | 385 | 1 | 5,528 | 8  | 326 | 3 | 2,811 | 2 | 9,050 | 14 |
| 11,316 | 385 | 1 | 5,525 | 9  | 326 | 3 | 2,809 | 2 | 9,045 | 15 |
| 11,317 | 385 | 3 | 5,521 | 9  | 326 | 3 | 2,810 | 3 | 9,042 | 18 |
| 11,318 | 385 | 3 | 5,526 | 9  | 326 | 2 | 2,814 | 3 | 9,051 | 17 |
| 11,319 | 385 | 2 | 5,527 | 9  | 326 | 2 | 2,816 | 3 | 9,054 | 16 |
| 11,320 | 385 | 2 | 5,535 | 9  | 326 | 2 | 2,817 | 3 | 9,063 | 16 |
| 11,321 | 379 | 2 | 5,495 | 9  | 326 | 2 | 2,787 | 3 | 8,987 | 16 |
| 11,322 | 379 | 2 | 5,505 | 9  | 326 | 2 | 2,784 | 3 | 8,994 | 16 |
| 11,323 | 390 | 2 | 5,604 | 9  | 325 | 2 | 2,819 | 3 | 9,138 | 16 |
| 11,324 | 390 | 2 | 5,601 | 9  | 325 | 2 | 2,820 | 3 | 9,136 | 16 |
| 11,325 | 415 | 2 | 5,778 | 9  | 332 | 2 | 2,915 | 2 | 9,440 | 15 |
| 11,326 | 413 | 2 | 5,756 | 9  | 331 | 2 | 2,896 | 2 | 9,396 | 15 |
| 11,327 | 415 | 2 | 5,739 | 9  | 331 | 2 | 2,891 | 2 | 9,376 | 15 |
| 11,328 | 415 | 2 | 5,728 | 9  | 326 | 2 | 2,875 | 2 | 9,344 | 15 |
| 11,329 | 409 | 2 | 5,699 | 9  | 326 | 2 | 2,851 | 2 | 9,285 | 15 |
| 11,330 | 414 | 2 | 5,720 | 10 | 326 | 2 | 2,852 | 2 | 9,312 | 16 |
| 11,331 | 415 | 2 | 5,720 | 10 | 326 | 2 | 2,857 | 2 | 9,318 | 16 |
| 11,332 | 412 | 2 | 5,707 | 10 | 326 | 2 | 2,842 | 2 | 9,287 | 16 |
| 11,333 | 414 | 2 | 5,698 | 10 | 326 | 2 | 2,829 | 2 | 9,267 | 16 |
| 11,334 | 412 | 2 | 5,683 | 10 | 324 | 2 | 2,817 | 2 | 9,236 | 16 |
| 11,335 | 412 | 2 | 5,679 | 10 | 324 | 2 | 2,805 | 1 | 9,220 | 15 |
| 11,336 | 413 | 2 | 5,675 | 10 | 324 | 2 | 2,803 | 1 | 9,215 | 15 |
| 11,337 | 413 | 2 | 5,679 | 10 | 328 | 2 | 2,813 | 1 | 9,233 | 15 |
| 11,338 | 397 | 2 | 5,615 | 10 | 323 | 2 | 2,738 | 1 | 9,073 | 15 |
| 11,339 | 397 | 2 | 5,590 | 11 | 321 | 2 | 2,720 | 1 | 9,028 | 16 |
| 11,340 | 390 | 2 | 5,573 | 12 | 320 | 2 | 2,691 | 1 | 8,974 | 17 |
| 11,341 | 390 | 2 | 5,567 | 13 | 320 | 2 | 2,685 | 2 | 8,962 | 19 |
| 11,342 | 389 | 2 | 5,523 | 13 | 313 | 2 | 2,658 | 2 | 8,883 | 19 |
| 11,343 | 381 | 2 | 5,478 | 12 | 309 | 2 | 2,593 | 2 | 8,761 | 18 |
| 11,344 | 379 | 2 | 5,467 | 11 | 309 | 2 | 2,574 | 2 | 8,729 | 17 |
| 11,345 | 379 | 2 | 5,453 | 10 | 305 | 0 | 2,555 | 2 | 8,692 | 14 |

|        |     |   |       |    |     |   |       |   |        |    |
|--------|-----|---|-------|----|-----|---|-------|---|--------|----|
| 11,346 | 379 | 2 | 5,449 | 10 | 305 | 0 | 2,552 | 2 | 8,685  | 14 |
| 11,347 | 384 | 2 | 5,472 | 9  | 305 | 0 | 2,565 | 3 | 8,726  | 14 |
| 11,348 | 384 | 2 | 5,471 | 9  | 305 | 0 | 2,565 | 3 | 8,725  | 14 |
| 11,349 | 408 | 2 | 5,872 | 9  | 320 | 0 | 2,798 | 3 | 9,398  | 14 |
| 11,350 | 444 | 2 | 6,118 | 9  | 336 | 1 | 3,009 | 3 | 9,907  | 15 |
| 11,351 | 475 | 2 | 6,365 | 9  | 351 | 1 | 3,241 | 3 | 10,432 | 15 |
| 11,352 | 488 | 2 | 6,471 | 10 | 357 | 1 | 3,375 | 3 | 10,691 | 16 |
| 11,353 | 486 | 2 | 6,513 | 10 | 363 | 1 | 3,422 | 3 | 10,784 | 16 |
| 11,354 | 487 | 2 | 6,512 | 10 | 363 | 1 | 3,416 | 3 | 10,778 | 16 |
| 11,355 | 434 | 3 | 6,248 | 10 | 346 | 1 | 3,229 | 5 | 10,257 | 19 |
| 11,356 | 423 | 4 | 6,104 | 12 | 338 | 1 | 3,184 | 6 | 10,049 | 23 |
| 11,357 | 404 | 4 | 5,810 | 13 | 322 | 1 | 3,127 | 6 | 9,663  | 24 |
| 11,358 | 297 | 4 | 4,889 | 13 | 238 | 1 | 2,545 | 6 | 7,969  | 24 |
| 11,359 | 214 | 4 | 2,029 | 13 | 119 | 1 | 1,515 | 6 | 3,877  | 24 |
| 11,360 | 176 | 4 | 1,655 | 12 | 73  | 1 | 1,176 | 6 | 3,080  | 23 |
| 11,361 | 175 | 4 | 1,636 | 12 | 72  | 1 | 1,152 | 6 | 3,035  | 23 |
| 11,362 | 175 | 4 | 1,635 | 12 | 72  | 1 | 1,152 | 6 | 3,034  | 23 |
| 11,363 | 175 | 4 | 1,635 | 12 | 72  | 1 | 1,152 | 6 | 3,034  | 23 |
| 11,364 | 176 | 4 | 1,641 | 13 | 72  | 1 | 1,154 | 6 | 3,043  | 24 |
| 11,365 | 176 | 4 | 1,641 | 13 | 72  | 1 | 1,154 | 6 | 3,043  | 24 |
| 11,366 | 178 | 2 | 1,641 | 12 | 72  | 1 | 1,156 | 5 | 3,047  | 20 |
| 11,367 | 178 | 2 | 1,640 | 13 | 72  | 1 | 1,156 | 5 | 3,046  | 21 |
| 11,368 | 177 | 2 | 1,642 | 13 | 72  | 1 | 1,156 | 5 | 3,047  | 21 |
| 11,369 | 179 | 2 | 1,644 | 13 | 72  | 1 | 1,155 | 6 | 3,050  | 22 |
| 11,370 | 185 | 2 | 1,653 | 13 | 73  | 1 | 1,174 | 7 | 3,085  | 23 |
| 11,371 | 186 | 2 | 1,645 | 13 | 73  | 1 | 1,175 | 7 | 3,079  | 23 |
| 11,372 | 185 | 2 | 1,644 | 13 | 73  | 1 | 1,173 | 7 | 3,075  | 23 |
| 11,373 | 185 | 2 | 1,625 | 13 | 73  | 1 | 1,172 | 7 | 3,055  | 23 |
| 11,374 | 173 | 2 | 1,508 | 13 | 72  | 1 | 1,118 | 7 | 2,871  | 23 |
| 11,375 | 149 | 2 | 1,332 | 13 | 68  | 1 | 1,033 | 7 | 2,582  | 23 |
| 11,376 | 146 | 2 | 1,325 | 13 | 66  | 1 | 1,025 | 7 | 2,562  | 23 |
| 11,377 | 145 | 2 | 1,318 | 14 | 66  | 1 | 1,015 | 7 | 2,544  | 24 |
| 11,378 | 143 | 2 | 1,316 | 14 | 66  | 1 | 1,008 | 7 | 2,533  | 24 |
| 11,379 | 146 | 2 | 1,336 | 13 | 68  | 1 | 1,022 | 7 | 2,572  | 23 |
| 11,380 | 146 | 2 | 1,334 | 13 | 68  | 1 | 1,022 | 7 | 2,570  | 23 |
| 11,381 | 143 | 2 | 1,323 | 13 | 68  | 1 | 1,019 | 7 | 2,553  | 23 |
| 11,382 | 142 | 2 | 1,316 | 13 | 68  | 1 | 1,013 | 7 | 2,539  | 23 |
| 11,383 | 137 | 2 | 1,307 | 13 | 68  | 1 | 1,009 | 7 | 2,521  | 23 |
| 11,384 | 136 | 2 | 1,306 | 13 | 67  | 1 | 1,007 | 7 | 2,516  | 23 |
| 11,385 | 138 | 2 | 1,331 | 13 | 68  | 1 | 1,020 | 7 | 2,557  | 23 |
| 11,386 | 138 | 2 | 1,331 | 13 | 68  | 1 | 1,020 | 7 | 2,557  | 23 |

|        |     |   |       |    |    |   |       |    |       |    |
|--------|-----|---|-------|----|----|---|-------|----|-------|----|
| 11,387 | 139 | 2 | 1,344 | 12 | 69 | 1 | 1,036 | 7  | 2,588 | 22 |
| 11,388 | 140 | 2 | 1,346 | 12 | 66 | 1 | 1,029 | 7  | 2,581 | 22 |
| 11,389 | 140 | 2 | 1,345 | 12 | 66 | 1 | 1,029 | 8  | 2,580 | 23 |
| 11,390 | 140 | 2 | 1,344 | 11 | 66 | 1 | 1,025 | 8  | 2,575 | 22 |
| 11,391 | 143 | 2 | 1,381 | 9  | 67 | 1 | 1,031 | 7  | 2,622 | 19 |
| 11,392 | 143 | 2 | 1,403 | 9  | 67 | 1 | 1,033 | 7  | 2,646 | 19 |
| 11,393 | 146 | 2 | 1,430 | 8  | 67 | 1 | 1,048 | 7  | 2,691 | 18 |
| 11,394 | 146 | 2 | 1,463 | 8  | 70 | 1 | 1,066 | 7  | 2,745 | 18 |
| 11,395 | 144 | 2 | 1,471 | 8  | 71 | 1 | 1,069 | 7  | 2,755 | 18 |
| 11,396 | 144 | 2 | 1,471 | 8  | 71 | 1 | 1,067 | 7  | 2,753 | 18 |
| 11,397 | 139 | 2 | 1,475 | 9  | 71 | 1 | 1,070 | 9  | 2,755 | 21 |
| 11,398 | 139 | 3 | 1,475 | 9  | 71 | 1 | 1,076 | 12 | 2,761 | 25 |
| 11,399 | 138 | 3 | 1,429 | 15 | 71 | 1 | 1,062 | 15 | 2,700 | 34 |
| 11,400 | 114 | 3 | 1,063 | 15 | 56 | 1 | 843   | 15 | 2,076 | 34 |
| 11,401 | 79  | 3 | 821   | 15 | 41 | 0 | 647   | 15 | 1,588 | 33 |
| 11,402 | 48  | 3 | 580   | 15 | 26 | 0 | 417   | 15 | 1,071 | 33 |
| 11,403 | 41  | 3 | 511   | 16 | 21 | 1 | 294   | 17 | 867   | 37 |
| 11,404 | 41  | 3 | 452   | 16 | 15 | 1 | 233   | 17 | 741   | 37 |
| 11,405 | 44  | 3 | 450   | 16 | 15 | 1 | 246   | 17 | 755   | 37 |
| 11,406 | 47  | 1 | 560   | 14 | 19 | 1 | 269   | 14 | 895   | 30 |
| 11,407 | 46  | 1 | 569   | 13 | 19 | 1 | 271   | 14 | 905   | 29 |
| 11,408 | 46  | 1 | 573   | 13 | 19 | 1 | 272   | 14 | 910   | 29 |
| 11,409 | 47  | 1 | 576   | 13 | 19 | 1 | 272   | 14 | 914   | 29 |
| 11,410 | 46  | 1 | 573   | 13 | 19 | 1 | 270   | 14 | 908   | 29 |
| 11,411 | 46  | 1 | 572   | 13 | 19 | 1 | 270   | 14 | 907   | 29 |
| 11,412 | 53  | 1 | 696   | 13 | 21 | 1 | 315   | 14 | 1,085 | 29 |
| 11,413 | 57  | 1 | 772   | 13 | 23 | 1 | 351   | 14 | 1,203 | 29 |
| 11,414 | 84  | 1 | 938   | 12 | 33 | 1 | 550   | 14 | 1,605 | 28 |
| 11,415 | 83  | 1 | 935   | 12 | 33 | 1 | 549   | 14 | 1,600 | 28 |
| 11,416 | 91  | 1 | 1,045 | 13 | 39 | 1 | 596   | 14 | 1,771 | 29 |
| 11,417 | 92  | 1 | 1,161 | 12 | 46 | 1 | 654   | 13 | 1,953 | 27 |
| 11,418 | 97  | 1 | 1,261 | 12 | 53 | 1 | 762   | 13 | 2,173 | 27 |
| 11,419 | 100 | 1 | 1,284 | 12 | 55 | 1 | 779   | 12 | 2,218 | 26 |
| 11,420 | 116 | 1 | 1,430 | 12 | 80 | 1 | 971   | 12 | 2,597 | 26 |
| 11,421 | 111 | 1 | 1,431 | 13 | 79 | 1 | 958   | 12 | 2,579 | 27 |
| 11,422 | 110 | 1 | 1,439 | 13 | 79 | 1 | 966   | 12 | 2,594 | 27 |
| 11,423 | 110 | 1 | 1,439 | 13 | 79 | 1 | 966   | 12 | 2,594 | 27 |
| 11,424 | 110 | 1 | 1,439 | 13 | 79 | 1 | 967   | 12 | 2,595 | 27 |
| 11,425 | 111 | 1 | 1,441 | 13 | 80 | 1 | 970   | 12 | 2,602 | 27 |
| 11,426 | 110 | 1 | 1,442 | 13 | 80 | 1 | 970   | 12 | 2,602 | 27 |
| 11,427 | 110 | 1 | 1,442 | 13 | 80 | 1 | 981   | 12 | 2,613 | 27 |

|        |     |   |       |    |     |   |       |    |       |    |
|--------|-----|---|-------|----|-----|---|-------|----|-------|----|
| 11,428 | 110 | 1 | 1,443 | 12 | 80  | 1 | 977   | 13 | 2,610 | 27 |
| 11,429 | 109 | 1 | 1,422 | 12 | 79  | 1 | 973   | 13 | 2,583 | 27 |
| 11,430 | 108 | 1 | 1,429 | 12 | 79  | 1 | 983   | 13 | 2,599 | 27 |
| 11,431 | 113 | 1 | 1,467 | 12 | 84  | 1 | 1,005 | 13 | 2,669 | 27 |
| 11,432 | 113 | 1 | 1,471 | 12 | 87  | 1 | 1,015 | 13 | 2,686 | 27 |
| 11,433 | 115 | 1 | 1,490 | 12 | 88  | 1 | 1,026 | 13 | 2,719 | 27 |
| 11,434 | 115 | 1 | 1,493 | 12 | 88  | 1 | 1,028 | 13 | 2,724 | 27 |
| 11,435 | 115 | 1 | 1,510 | 12 | 88  | 1 | 1,037 | 13 | 2,750 | 27 |
| 11,436 | 116 | 1 | 1,538 | 13 | 88  | 1 | 1,049 | 13 | 2,791 | 28 |
| 11,437 | 114 | 1 | 1,525 | 13 | 87  | 1 | 1,032 | 13 | 2,758 | 28 |
| 11,438 | 113 | 1 | 1,520 | 13 | 87  | 1 | 1,031 | 13 | 2,751 | 28 |
| 11,439 | 113 | 1 | 1,561 | 13 | 92  | 1 | 1,068 | 13 | 2,834 | 28 |
| 11,440 | 115 | 1 | 1,583 | 13 | 92  | 1 | 1,080 | 12 | 2,870 | 27 |
| 11,441 | 116 | 1 | 1,644 | 14 | 96  | 1 | 1,096 | 12 | 2,952 | 28 |
| 11,442 | 113 | 1 | 1,629 | 16 | 96  | 1 | 1,097 | 12 | 2,935 | 30 |
| 11,443 | 113 | 1 | 1,635 | 17 | 98  | 1 | 1,121 | 12 | 2,967 | 31 |
| 11,444 | 110 | 3 | 1,608 | 17 | 99  | 1 | 1,106 | 12 | 2,923 | 33 |
| 11,445 | 110 | 3 | 1,584 | 17 | 97  | 1 | 1,097 | 12 | 2,888 | 33 |
| 11,446 | 110 | 3 | 1,564 | 17 | 96  | 1 | 1,093 | 12 | 2,863 | 33 |
| 11,447 | 109 | 2 | 1,536 | 15 | 97  | 1 | 1,081 | 6  | 2,823 | 24 |
| 11,448 | 109 | 2 | 1,563 | 16 | 97  | 1 | 1,081 | 6  | 2,850 | 25 |
| 11,449 | 109 | 2 | 1,563 | 16 | 97  | 1 | 1,073 | 6  | 2,842 | 25 |
| 11,450 | 115 | 2 | 1,610 | 11 | 97  | 1 | 1,104 | 3  | 2,926 | 17 |
| 11,451 | 123 | 2 | 1,685 | 11 | 97  | 1 | 1,121 | 3  | 3,026 | 17 |
| 11,452 | 127 | 2 | 1,714 | 11 | 100 | 1 | 1,123 | 3  | 3,064 | 17 |
| 11,453 | 137 | 2 | 2,177 | 12 | 114 | 1 | 1,260 | 3  | 3,688 | 18 |
| 11,454 | 143 | 2 | 2,261 | 10 | 119 | 0 | 1,324 | 1  | 3,847 | 13 |
| 11,455 | 141 | 2 | 2,272 | 10 | 122 | 0 | 1,316 | 1  | 3,851 | 13 |
| 11,456 | 141 | 2 | 2,196 | 10 | 122 | 0 | 1,312 | 1  | 3,771 | 13 |
| 11,457 | 141 | 2 | 2,164 | 10 | 119 | 0 | 1,297 | 1  | 3,721 | 13 |
| 11,458 | 141 | 2 | 2,154 | 10 | 119 | 0 | 1,293 | 1  | 3,707 | 13 |
| 11,459 | 141 | 2 | 2,152 | 10 | 119 | 0 | 1,293 | 1  | 3,705 | 13 |
| 11,460 | 160 | 2 | 2,269 | 11 | 131 | 0 | 1,422 | 1  | 3,982 | 14 |
| 11,461 | 160 | 2 | 2,273 | 11 | 131 | 0 | 1,430 | 1  | 3,994 | 14 |
| 11,462 | 160 | 2 | 2,276 | 11 | 131 | 0 | 1,435 | 2  | 4,002 | 15 |
| 11,463 | 159 | 2 | 2,213 | 11 | 137 | 0 | 1,452 | 1  | 3,961 | 14 |
| 11,464 | 155 | 2 | 2,146 | 13 | 136 | 0 | 1,421 | 1  | 3,858 | 16 |
| 11,465 | 128 | 2 | 1,991 | 15 | 127 | 1 | 1,219 | 1  | 3,465 | 19 |
| 11,466 | 120 | 2 | 1,889 | 15 | 121 | 1 | 1,188 | 1  | 3,318 | 19 |
| 11,467 | 120 | 2 | 1,871 | 14 | 121 | 2 | 1,180 | 1  | 3,292 | 19 |
| 11,468 | 117 | 2 | 1,776 | 14 | 114 | 2 | 1,131 | 1  | 3,138 | 19 |



|        |     |   |       |    |     |   |       |   |       |    |
|--------|-----|---|-------|----|-----|---|-------|---|-------|----|
| 11,469 | 113 | 2 | 1,682 | 13 | 107 | 2 | 1,026 | 1 | 2,928 | 18 |
| 11,470 | 111 | 2 | 1,668 | 14 | 110 | 2 | 1,025 | 1 | 2,914 | 19 |
| 11,471 | 93  | 2 | 1,526 | 14 | 85  | 2 | 830   | 1 | 2,534 | 19 |
| 11,472 | 92  | 2 | 1,514 | 14 | 85  | 2 | 821   | 1 | 2,512 | 19 |
| 11,473 | 93  | 2 | 1,525 | 14 | 86  | 2 | 829   | 1 | 2,533 | 19 |
| 11,474 | 94  | 2 | 1,568 | 14 | 86  | 2 | 843   | 1 | 2,591 | 19 |
| 11,475 | 97  | 3 | 1,593 | 14 | 88  | 2 | 851   | 1 | 2,629 | 20 |
| 11,476 | 97  | 3 | 1,592 | 14 | 87  | 2 | 849   | 1 | 2,625 | 20 |
| 11,477 | 99  | 3 | 1,647 | 14 | 89  | 2 | 883   | 1 | 2,718 | 20 |
| 11,478 | 136 | 3 | 1,935 | 14 | 102 | 2 | 1,055 | 1 | 3,228 | 20 |
| 11,479 | 161 | 3 | 2,280 | 14 | 113 | 2 | 1,282 | 1 | 3,836 | 20 |
| 11,480 | 159 | 3 | 2,279 | 15 | 113 | 2 | 1,282 | 1 | 3,833 | 21 |
| 11,481 | 158 | 3 | 2,269 | 15 | 112 | 2 | 1,270 | 1 | 3,809 | 21 |
| 11,482 | 161 | 3 | 2,350 | 15 | 111 | 2 | 1,307 | 1 | 3,929 | 21 |
| 11,483 | 161 | 3 | 2,361 | 15 | 110 | 2 | 1,323 | 1 | 3,955 | 21 |
| 11,484 | 159 | 3 | 2,357 | 15 | 111 | 2 | 1,345 | 1 | 3,972 | 21 |
| 11,485 | 160 | 3 | 2,365 | 15 | 111 | 2 | 1,351 | 1 | 3,987 | 21 |
| 11,486 | 160 | 3 | 2,346 | 16 | 111 | 2 | 1,341 | 1 | 3,958 | 22 |
| 11,487 | 160 | 3 | 2,331 | 15 | 111 | 2 | 1,332 | 1 | 3,934 | 21 |
| 11,488 | 160 | 3 | 2,306 | 15 | 106 | 2 | 1,312 | 1 | 3,884 | 21 |
| 11,489 | 160 | 3 | 2,282 | 15 | 105 | 2 | 1,291 | 1 | 3,838 | 21 |
| 11,490 | 164 | 3 | 2,313 | 15 | 106 | 2 | 1,314 | 1 | 3,897 | 21 |
| 11,491 | 164 | 3 | 2,294 | 16 | 106 | 2 | 1,306 | 1 | 3,870 | 22 |
| 11,492 | 164 | 3 | 2,247 | 13 | 103 | 2 | 1,303 | 1 | 3,817 | 19 |
| 11,493 | 164 | 3 | 2,243 | 13 | 102 | 2 | 1,298 | 1 | 3,807 | 19 |
| 11,494 | 181 | 3 | 2,349 | 12 | 118 | 2 | 1,424 | 1 | 4,072 | 18 |
| 11,495 | 184 | 1 | 2,356 | 12 | 117 | 2 | 1,438 | 1 | 4,095 | 16 |
| 11,496 | 198 | 1 | 2,422 | 13 | 119 | 2 | 1,455 | 1 | 4,194 | 17 |
| 11,497 | 215 | 1 | 2,657 | 13 | 146 | 2 | 1,754 | 1 | 4,772 | 17 |
| 11,498 | 216 | 1 | 2,677 | 12 | 146 | 2 | 1,764 | 1 | 4,803 | 16 |
| 11,499 | 217 | 1 | 2,656 | 12 | 149 | 2 | 1,786 | 1 | 4,808 | 16 |
| 11,500 | 217 | 1 | 2,663 | 12 | 150 | 3 | 1,805 | 1 | 4,835 | 17 |
| 11,501 | 211 | 1 | 2,616 | 11 | 150 | 3 | 1,775 | 1 | 4,752 | 16 |
| 11,502 | 203 | 1 | 2,541 | 11 | 150 | 3 | 1,757 | 1 | 4,651 | 16 |
| 11,503 | 199 | 1 | 2,510 | 11 | 148 | 4 | 1,741 | 2 | 4,598 | 18 |
| 11,504 | 189 | 1 | 2,047 | 10 | 133 | 4 | 1,611 | 2 | 3,980 | 17 |
| 11,505 | 178 | 1 | 1,905 | 10 | 127 | 4 | 1,532 | 2 | 3,742 | 17 |
| 11,506 | 179 | 1 | 1,895 | 10 | 126 | 4 | 1,531 | 2 | 3,731 | 17 |
| 11,507 | 177 | 1 | 1,892 | 10 | 125 | 4 | 1,521 | 2 | 3,715 | 17 |
| 11,508 | 177 | 1 | 1,896 | 10 | 126 | 4 | 1,519 | 2 | 3,718 | 17 |
| 11,509 | 198 | 1 | 1,969 | 10 | 129 | 4 | 1,552 | 2 | 3,848 | 17 |

|        |     |   |       |    |     |   |       |    |       |    |
|--------|-----|---|-------|----|-----|---|-------|----|-------|----|
| 11,510 | 181 | 1 | 1,906 | 11 | 120 | 4 | 1,451 | 2  | 3,658 | 18 |
| 11,511 | 178 | 1 | 1,849 | 10 | 117 | 4 | 1,422 | 2  | 3,566 | 17 |
| 11,512 | 198 | 1 | 2,232 | 10 | 155 | 4 | 1,686 | 2  | 4,271 | 17 |
| 11,513 | 202 | 1 | 2,335 | 10 | 160 | 4 | 1,743 | 1  | 4,440 | 16 |
| 11,514 | 196 | 1 | 2,284 | 10 | 152 | 4 | 1,681 | 1  | 4,313 | 16 |
| 11,515 | 222 | 1 | 2,560 | 8  | 185 | 4 | 1,903 | 1  | 4,870 | 14 |
| 11,516 | 228 | 1 | 2,588 | 10 | 184 | 4 | 1,919 | 3  | 4,919 | 18 |
| 11,517 | 228 | 1 | 2,579 | 15 | 184 | 4 | 1,903 | 4  | 4,894 | 24 |
| 11,518 | 231 | 1 | 2,730 | 20 | 189 | 3 | 1,941 | 5  | 5,091 | 29 |
| 11,519 | 237 | 1 | 2,847 | 20 | 195 | 3 | 2,017 | 6  | 5,296 | 30 |
| 11,520 | 240 | 1 | 2,864 | 20 | 195 | 3 | 2,017 | 6  | 5,316 | 30 |
| 11,521 | 240 | 1 | 2,850 | 20 | 190 | 3 | 2,007 | 7  | 5,287 | 31 |
| 11,522 | 240 | 1 | 2,842 | 20 | 190 | 3 | 2,005 | 7  | 5,277 | 31 |
| 11,523 | 240 | 2 | 2,849 | 21 | 190 | 3 | 2,009 | 7  | 5,288 | 33 |
| 11,524 | 239 | 2 | 2,830 | 21 | 189 | 3 | 1,991 | 9  | 5,249 | 35 |
| 11,525 | 238 | 2 | 2,786 | 21 | 189 | 3 | 1,976 | 9  | 5,189 | 35 |
| 11,526 | 238 | 1 | 2,765 | 21 | 187 | 3 | 1,970 | 9  | 5,160 | 34 |
| 11,527 | 236 | 1 | 2,717 | 22 | 185 | 3 | 1,941 | 13 | 5,079 | 39 |
| 11,528 | 199 | 1 | 2,448 | 23 | 173 | 3 | 1,772 | 13 | 4,592 | 40 |
| 11,529 | 181 | 1 | 2,377 | 25 | 163 | 3 | 1,607 | 14 | 4,328 | 43 |
| 11,530 | 175 | 1 | 2,168 | 25 | 164 | 3 | 1,556 | 14 | 4,063 | 43 |
| 11,531 | 169 | 1 | 2,096 | 25 | 161 | 3 | 1,511 | 16 | 3,937 | 45 |
| 11,532 | 168 | 1 | 2,060 | 25 | 160 | 3 | 1,498 | 16 | 3,886 | 45 |
| 11,533 | 168 | 1 | 2,052 | 25 | 158 | 3 | 1,491 | 16 | 3,869 | 45 |
| 11,534 | 168 | 1 | 2,056 | 25 | 159 | 3 | 1,489 | 16 | 3,872 | 45 |
| 11,535 | 167 | 1 | 2,033 | 25 | 157 | 3 | 1,449 | 16 | 3,806 | 45 |
| 11,536 | 171 | 1 | 2,081 | 26 | 161 | 3 | 1,478 | 16 | 3,891 | 46 |
| 11,537 | 171 | 1 | 2,082 | 26 | 161 | 3 | 1,478 | 16 | 3,892 | 46 |
| 11,538 | 176 | 1 | 2,124 | 26 | 167 | 3 | 1,520 | 16 | 3,987 | 46 |
| 11,539 | 175 | 1 | 2,125 | 26 | 167 | 3 | 1,516 | 16 | 3,983 | 46 |
| 11,540 | 175 | 1 | 2,124 | 27 | 167 | 3 | 1,519 | 16 | 3,985 | 47 |
| 11,541 | 172 | 1 | 2,101 | 26 | 166 | 3 | 1,502 | 16 | 3,941 | 46 |
| 11,542 | 170 | 1 | 2,100 | 26 | 166 | 3 | 1,500 | 16 | 3,936 | 46 |
| 11,543 | 169 | 1 | 2,074 | 26 | 165 | 3 | 1,486 | 16 | 3,894 | 46 |
| 11,544 | 169 | 1 | 2,072 | 28 | 165 | 3 | 1,486 | 17 | 3,892 | 49 |
| 11,545 | 151 | 1 | 1,936 | 29 | 147 | 3 | 1,336 | 18 | 3,570 | 51 |
| 11,546 | 148 | 1 | 1,922 | 29 | 148 | 3 | 1,321 | 18 | 3,539 | 51 |
| 11,547 | 135 | 1 | 1,855 | 28 | 145 | 3 | 1,299 | 19 | 3,434 | 51 |
| 11,548 | 118 | 1 | 1,617 | 28 | 118 | 3 | 997   | 19 | 2,850 | 51 |
| 11,549 | 117 | 1 | 1,597 | 28 | 117 | 3 | 981   | 22 | 2,812 | 54 |
| 11,550 | 116 | 1 | 1,589 | 28 | 114 | 3 | 954   | 22 | 2,773 | 54 |

|        |     |   |       |    |     |   |       |    |       |    |
|--------|-----|---|-------|----|-----|---|-------|----|-------|----|
| 11,551 | 117 | 1 | 1,589 | 29 | 113 | 2 | 942   | 22 | 2,761 | 54 |
| 11,552 | 117 | 1 | 1,601 | 29 | 114 | 2 | 944   | 22 | 2,776 | 54 |
| 11,553 | 117 | 1 | 1,602 | 29 | 114 | 2 | 947   | 22 | 2,780 | 54 |
| 11,554 | 123 | 1 | 1,676 | 29 | 116 | 1 | 1,003 | 22 | 2,918 | 53 |
| 11,555 | 123 | 1 | 1,666 | 29 | 116 | 1 | 995   | 22 | 2,900 | 53 |
| 11,556 | 142 | 1 | 1,990 | 29 | 132 | 1 | 1,143 | 22 | 3,407 | 53 |
| 11,557 | 141 | 1 | 2,014 | 29 | 139 | 1 | 1,171 | 22 | 3,465 | 53 |
| 11,558 | 169 | 1 | 2,548 | 30 | 164 | 2 | 1,489 | 23 | 4,370 | 56 |
| 11,559 | 177 | 1 | 2,650 | 30 | 173 | 2 | 1,583 | 23 | 4,583 | 56 |
| 11,560 | 156 | 1 | 2,581 | 30 | 170 | 2 | 1,551 | 23 | 4,458 | 56 |
| 11,561 | 147 | 1 | 2,478 | 29 | 168 | 2 | 1,543 | 23 | 4,336 | 55 |
| 11,562 | 144 | 1 | 2,372 | 29 | 156 | 2 | 1,450 | 23 | 4,122 | 55 |
| 11,563 | 137 | 2 | 2,190 | 29 | 132 | 2 | 1,283 | 23 | 3,742 | 56 |
| 11,564 | 133 | 2 | 2,089 | 30 | 127 | 2 | 1,225 | 24 | 3,574 | 58 |
| 11,565 | 116 | 3 | 1,887 | 33 | 107 | 2 | 1,044 | 25 | 3,154 | 63 |
| 11,566 | 112 | 3 | 1,837 | 33 | 94  | 2 | 1,009 | 25 | 3,052 | 63 |
| 11,567 | 121 | 3 | 1,820 | 29 | 95  | 1 | 1,003 | 23 | 3,039 | 56 |
| 11,568 | 127 | 3 | 1,806 | 24 | 96  | 1 | 998   | 23 | 3,027 | 51 |
| 11,569 | 134 | 3 | 1,751 | 19 | 94  | 1 | 996   | 22 | 2,975 | 45 |
| 11,570 | 130 | 3 | 1,668 | 19 | 89  | 1 | 930   | 21 | 2,817 | 44 |
| 11,571 | 136 | 3 | 1,685 | 19 | 94  | 1 | 971   | 21 | 2,886 | 44 |
| 11,572 | 135 | 3 | 1,678 | 18 | 94  | 1 | 966   | 20 | 2,873 | 42 |
| 11,573 | 173 | 2 | 1,927 | 17 | 118 | 1 | 1,114 | 18 | 3,332 | 38 |
| 11,574 | 194 | 2 | 2,113 | 18 | 144 | 1 | 1,265 | 18 | 3,716 | 39 |
| 11,575 | 247 | 2 | 2,812 | 18 | 212 | 1 | 1,712 | 20 | 4,983 | 41 |
| 11,576 | 278 | 2 | 3,003 | 18 | 230 | 1 | 1,864 | 20 | 5,375 | 41 |
| 11,577 | 294 | 2 | 3,215 | 18 | 255 | 1 | 2,050 | 20 | 5,814 | 41 |
| 11,578 | 296 | 2 | 3,238 | 17 | 259 | 1 | 2,066 | 16 | 5,859 | 36 |
| 11,579 | 298 | 2 | 3,255 | 16 | 260 | 1 | 2,085 | 16 | 5,898 | 35 |
| 11,580 | 301 | 2 | 3,231 | 14 | 262 | 1 | 2,085 | 15 | 5,879 | 32 |
| 11,581 | 301 | 2 | 3,226 | 14 | 261 | 1 | 2,087 | 15 | 5,875 | 32 |
| 11,582 | 300 | 2 | 3,216 | 14 | 261 | 1 | 2,084 | 13 | 5,861 | 30 |
| 11,583 | 313 | 2 | 3,233 | 14 | 262 | 1 | 2,095 | 14 | 5,903 | 31 |
| 11,584 | 317 | 2 | 3,243 | 14 | 264 | 1 | 2,100 | 14 | 5,924 | 31 |
| 11,585 | 318 | 3 | 3,231 | 14 | 263 | 1 | 2,097 | 14 | 5,909 | 32 |
| 11,586 | 329 | 3 | 3,264 | 14 | 268 | 1 | 2,138 | 14 | 5,999 | 32 |
| 11,587 | 329 | 3 | 3,284 | 12 | 269 | 1 | 2,153 | 14 | 6,035 | 30 |
| 11,588 | 335 | 3 | 3,334 | 14 | 268 | 1 | 2,156 | 14 | 6,093 | 32 |
| 11,589 | 348 | 3 | 3,518 | 15 | 275 | 1 | 2,299 | 14 | 6,440 | 33 |
| 11,590 | 373 | 4 | 3,802 | 14 | 297 | 1 | 2,628 | 14 | 7,100 | 33 |
| 11,591 | 379 | 4 | 3,890 | 14 | 300 | 1 | 2,675 | 14 | 7,244 | 33 |

|        |     |   |       |    |     |   |       |    |       |    |
|--------|-----|---|-------|----|-----|---|-------|----|-------|----|
| 11,592 | 382 | 4 | 3,912 | 14 | 301 | 1 | 2,693 | 14 | 7,288 | 33 |
| 11,593 | 387 | 4 | 3,920 | 12 | 301 | 1 | 2,700 | 13 | 7,308 | 30 |
| 11,594 | 387 | 4 | 3,921 | 12 | 301 | 1 | 2,700 | 13 | 7,309 | 30 |
| 11,595 | 387 | 4 | 3,923 | 12 | 301 | 1 | 2,700 | 13 | 7,311 | 30 |
| 11,596 | 387 | 4 | 3,923 | 11 | 301 | 1 | 2,702 | 12 | 7,313 | 28 |
| 11,597 | 387 | 5 | 3,922 | 11 | 300 | 1 | 2,702 | 12 | 7,311 | 29 |
| 11,598 | 393 | 5 | 4,020 | 11 | 302 | 1 | 2,774 | 11 | 7,489 | 28 |
| 11,599 | 392 | 5 | 4,021 | 11 | 302 | 1 | 2,776 | 11 | 7,491 | 28 |
| 11,600 | 392 | 5 | 4,022 | 11 | 302 | 1 | 2,787 | 8  | 7,503 | 25 |
| 11,601 | 392 | 5 | 4,023 | 11 | 302 | 1 | 2,789 | 8  | 7,506 | 25 |
| 11,602 | 392 | 5 | 4,015 | 10 | 301 | 1 | 2,789 | 8  | 7,497 | 24 |
| 11,603 | 393 | 5 | 4,024 | 10 | 301 | 1 | 2,796 | 7  | 7,514 | 23 |
| 11,604 | 392 | 5 | 4,010 | 10 | 302 | 1 | 2,798 | 7  | 7,502 | 23 |
| 11,605 | 386 | 5 | 3,949 | 10 | 299 | 1 | 2,737 | 7  | 7,371 | 23 |
| 11,606 | 380 | 5 | 3,785 | 10 | 296 | 1 | 2,691 | 7  | 7,152 | 23 |
| 11,607 | 368 | 5 | 3,650 | 12 | 283 | 1 | 2,596 | 7  | 6,897 | 25 |
| 11,608 | 366 | 5 | 3,593 | 12 | 273 | 1 | 2,552 | 7  | 6,784 | 25 |
| 11,609 | 338 | 6 | 3,046 | 11 | 248 | 0 | 2,224 | 6  | 5,856 | 23 |
| 11,610 | 334 | 6 | 2,987 | 11 | 239 | 0 | 2,154 | 6  | 5,714 | 23 |
| 11,611 | 359 | 6 | 3,289 | 11 | 251 | 0 | 2,252 | 6  | 6,151 | 23 |
| 11,612 | 371 | 6 | 3,527 | 11 | 261 | 0 | 2,372 | 6  | 6,531 | 23 |
| 11,613 | 370 | 5 | 3,589 | 11 | 262 | 0 | 2,391 | 6  | 6,612 | 22 |
| 11,614 | 487 | 5 | 4,160 | 10 | 320 | 0 | 3,003 | 5  | 7,970 | 20 |
| 11,615 | 487 | 5 | 4,157 | 10 | 320 | 0 | 3,002 | 5  | 7,966 | 20 |
| 11,616 | 491 | 4 | 4,394 | 7  | 329 | 0 | 3,124 | 4  | 8,338 | 15 |
| 11,617 | 495 | 4 | 4,453 | 7  | 331 | 0 | 3,156 | 4  | 8,435 | 15 |
| 11,618 | 480 | 4 | 4,429 | 7  | 330 | 0 | 3,139 | 4  | 8,378 | 15 |
| 11,619 | 476 | 4 | 4,463 | 7  | 329 | 0 | 3,162 | 3  | 8,430 | 14 |
| 11,620 | 466 | 4 | 4,397 | 7  | 326 | 0 | 3,139 | 3  | 8,328 | 14 |
| 11,621 | 464 | 4 | 4,362 | 7  | 325 | 0 | 3,128 | 3  | 8,279 | 14 |
| 11,622 | 453 | 4 | 4,328 | 8  | 320 | 0 | 3,084 | 4  | 8,185 | 16 |
| 11,623 | 437 | 5 | 4,176 | 8  | 306 | 0 | 3,008 | 4  | 7,927 | 17 |
| 11,624 | 420 | 5 | 4,145 | 8  | 296 | 0 | 2,962 | 4  | 7,823 | 17 |
| 11,625 | 400 | 5 | 3,969 | 7  | 271 | 0 | 2,809 | 4  | 7,449 | 16 |
| 11,626 | 344 | 5 | 3,290 | 7  | 202 | 0 | 2,359 | 2  | 6,195 | 14 |
| 11,627 | 333 | 5 | 3,166 | 7  | 186 | 0 | 2,219 | 2  | 5,904 | 14 |
| 11,628 | 318 | 5 | 3,011 | 7  | 161 | 0 | 2,048 | 2  | 5,538 | 14 |
| 11,629 | 316 | 5 | 2,978 | 9  | 156 | 0 | 2,024 | 2  | 5,474 | 16 |
| 11,630 | 319 | 5 | 2,974 | 10 | 154 | 0 | 2,015 | 3  | 5,462 | 18 |
| 11,631 | 322 | 5 | 3,051 | 10 | 154 | 0 | 2,097 | 3  | 5,624 | 18 |
| 11,632 | 325 | 5 | 3,113 | 10 | 154 | 0 | 2,135 | 3  | 5,727 | 18 |

|        |     |   |       |    |     |   |       |    |       |    |
|--------|-----|---|-------|----|-----|---|-------|----|-------|----|
| 11,633 | 325 | 5 | 3,111 | 10 | 154 | 0 | 2,134 | 3  | 5,724 | 18 |
| 11,634 | 334 | 5 | 3,246 | 10 | 163 | 0 | 2,254 | 2  | 5,997 | 17 |
| 11,635 | 335 | 4 | 3,303 | 10 | 162 | 0 | 2,268 | 2  | 6,068 | 16 |
| 11,636 | 335 | 4 | 3,327 | 10 | 162 | 0 | 2,277 | 2  | 6,101 | 16 |
| 11,637 | 327 | 4 | 3,302 | 10 | 155 | 0 | 2,254 | 3  | 6,038 | 17 |
| 11,638 | 322 | 4 | 3,252 | 10 | 153 | 0 | 2,219 | 4  | 5,946 | 18 |
| 11,639 | 310 | 4 | 3,164 | 8  | 149 | 0 | 2,180 | 4  | 5,803 | 16 |
| 11,640 | 301 | 4 | 3,010 | 7  | 142 | 0 | 2,072 | 4  | 5,525 | 15 |
| 11,641 | 277 | 3 | 2,752 | 7  | 120 | 0 | 1,758 | 4  | 4,907 | 14 |
| 11,642 | 279 | 3 | 2,815 | 7  | 120 | 0 | 1,835 | 4  | 5,049 | 14 |
| 11,643 | 277 | 3 | 2,793 | 7  | 119 | 0 | 1,817 | 4  | 5,006 | 14 |
| 11,644 | 273 | 3 | 2,790 | 7  | 119 | 0 | 1,816 | 4  | 4,998 | 14 |
| 11,645 | 274 | 2 | 2,797 | 8  | 120 | 0 | 1,820 | 5  | 5,011 | 15 |
| 11,646 | 274 | 2 | 2,795 | 8  | 120 | 0 | 1,819 | 5  | 5,008 | 15 |
| 11,647 | 273 | 2 | 2,777 | 9  | 120 | 0 | 1,798 | 5  | 4,968 | 16 |
| 11,648 | 270 | 2 | 2,751 | 9  | 120 | 0 | 1,789 | 5  | 4,930 | 16 |
| 11,649 | 267 | 2 | 2,700 | 9  | 118 | 0 | 1,747 | 5  | 4,832 | 16 |
| 11,650 | 267 | 2 | 2,698 | 9  | 118 | 0 | 1,745 | 5  | 4,828 | 16 |
| 11,651 | 267 | 2 | 2,690 | 9  | 118 | 0 | 1,733 | 5  | 4,808 | 16 |
| 11,652 | 267 | 2 | 2,689 | 10 | 118 | 0 | 1,729 | 5  | 4,803 | 17 |
| 11,653 | 267 | 2 | 2,686 | 10 | 118 | 0 | 1,727 | 5  | 4,798 | 17 |
| 11,654 | 271 | 2 | 2,719 | 10 | 119 | 0 | 1,734 | 5  | 4,843 | 17 |
| 11,655 | 271 | 2 | 2,711 | 10 | 118 | 0 | 1,732 | 5  | 4,832 | 17 |
| 11,656 | 271 | 2 | 2,710 | 10 | 118 | 0 | 1,732 | 5  | 4,831 | 17 |
| 11,657 | 272 | 2 | 2,708 | 8  | 118 | 0 | 1,730 | 5  | 4,828 | 15 |
| 11,658 | 270 | 2 | 2,678 | 8  | 117 | 0 | 1,722 | 5  | 4,787 | 15 |
| 11,659 | 277 | 2 | 2,741 | 8  | 119 | 0 | 1,745 | 6  | 4,882 | 16 |
| 11,660 | 276 | 1 | 2,732 | 8  | 121 | 0 | 1,742 | 6  | 4,871 | 15 |
| 11,661 | 266 | 1 | 2,601 | 8  | 120 | 0 | 1,740 | 6  | 4,727 | 15 |
| 11,662 | 252 | 1 | 2,472 | 8  | 112 | 0 | 1,671 | 6  | 4,507 | 15 |
| 11,663 | 241 | 1 | 2,298 | 8  | 103 | 0 | 1,567 | 7  | 4,209 | 16 |
| 11,664 | 243 | 1 | 2,267 | 11 | 104 | 0 | 1,556 | 10 | 4,170 | 22 |
| 11,665 | 126 | 1 | 1,693 | 11 | 46  | 0 | 940   | 10 | 2,805 | 22 |
| 11,666 | 119 | 1 | 1,442 | 14 | 39  | 0 | 817   | 12 | 2,417 | 27 |
| 11,667 | 117 | 1 | 1,427 | 15 | 36  | 0 | 807   | 13 | 2,387 | 29 |
| 11,668 | 113 | 1 | 1,366 | 15 | 34  | 0 | 773   | 13 | 2,286 | 29 |
| 11,669 | 113 | 1 | 1,340 | 16 | 34  | 0 | 760   | 13 | 2,247 | 30 |
| 11,670 | 112 | 1 | 1,324 | 16 | 34  | 0 | 748   | 13 | 2,218 | 30 |
| 11,671 | 112 | 1 | 1,324 | 16 | 34  | 0 | 747   | 13 | 2,217 | 30 |
| 11,672 | 115 | 1 | 1,340 | 16 | 35  | 0 | 767   | 13 | 2,257 | 30 |
| 11,673 | 118 | 1 | 1,417 | 15 | 40  | 0 | 786   | 12 | 2,361 | 28 |

|        |     |   |       |    |     |   |       |    |       |    |
|--------|-----|---|-------|----|-----|---|-------|----|-------|----|
| 11,674 | 127 | 0 | 1,455 | 15 | 42  | 0 | 814   | 12 | 2,438 | 27 |
| 11,675 | 123 | 0 | 1,389 | 15 | 42  | 0 | 788   | 12 | 2,342 | 27 |
| 11,676 | 126 | 0 | 1,399 | 15 | 43  | 0 | 818   | 12 | 2,386 | 27 |
| 11,677 | 126 | 0 | 1,376 | 15 | 43  | 0 | 817   | 12 | 2,362 | 27 |
| 11,678 | 105 | 0 | 1,309 | 15 | 41  | 0 | 799   | 12 | 2,254 | 27 |
| 11,679 | 103 | 0 | 1,254 | 13 | 42  | 0 | 786   | 12 | 2,185 | 25 |
| 11,680 | 105 | 0 | 1,257 | 15 | 42  | 0 | 792   | 12 | 2,196 | 27 |
| 11,681 | 101 | 0 | 1,247 | 15 | 43  | 0 | 795   | 11 | 2,186 | 26 |
| 11,682 | 94  | 0 | 1,132 | 15 | 41  | 0 | 696   | 11 | 1,963 | 26 |
| 11,683 | 91  | 0 | 1,069 | 14 | 41  | 0 | 657   | 11 | 1,858 | 25 |
| 11,684 | 87  | 0 | 1,033 | 14 | 37  | 0 | 652   | 13 | 1,809 | 27 |
| 11,685 | 69  | 0 | 929   | 15 | 32  | 0 | 524   | 13 | 1,554 | 28 |
| 11,686 | 78  | 0 | 942   | 15 | 39  | 0 | 555   | 13 | 1,614 | 28 |
| 11,687 | 77  | 0 | 916   | 15 | 39  | 0 | 546   | 13 | 1,578 | 28 |
| 11,688 | 93  | 0 | 1,121 | 15 | 54  | 0 | 648   | 12 | 1,916 | 27 |
| 11,689 | 104 | 0 | 1,204 | 15 | 65  | 0 | 748   | 11 | 2,121 | 26 |
| 11,690 | 113 | 0 | 1,393 | 16 | 77  | 0 | 801   | 11 | 2,384 | 27 |
| 11,691 | 111 | 0 | 1,415 | 16 | 79  | 0 | 793   | 11 | 2,398 | 27 |
| 11,692 | 113 | 1 | 1,413 | 19 | 79  | 2 | 793   | 15 | 2,398 | 37 |
| 11,693 | 105 | 1 | 1,267 | 20 | 76  | 2 | 676   | 15 | 2,124 | 38 |
| 11,694 | 104 | 1 | 1,264 | 20 | 76  | 2 | 672   | 15 | 2,116 | 38 |
| 11,695 | 105 | 1 | 1,277 | 22 | 76  | 2 | 692   | 15 | 2,150 | 40 |
| 11,696 | 107 | 1 | 1,295 | 21 | 78  | 2 | 698   | 14 | 2,178 | 38 |
| 11,697 | 107 | 1 | 1,303 | 20 | 78  | 2 | 707   | 14 | 2,195 | 37 |
| 11,698 | 107 | 1 | 1,305 | 23 | 80  | 2 | 722   | 14 | 2,214 | 40 |
| 11,699 | 107 | 1 | 1,304 | 23 | 80  | 2 | 724   | 14 | 2,215 | 40 |
| 11,700 | 107 | 1 | 1,303 | 24 | 81  | 2 | 726   | 14 | 2,217 | 41 |
| 11,701 | 107 | 1 | 1,311 | 24 | 81  | 2 | 726   | 14 | 2,225 | 41 |
| 11,702 | 109 | 1 | 1,321 | 23 | 81  | 2 | 732   | 14 | 2,243 | 40 |
| 11,703 | 110 | 1 | 1,327 | 23 | 81  | 2 | 732   | 14 | 2,250 | 40 |
| 11,704 | 110 | 1 | 1,324 | 23 | 81  | 2 | 732   | 14 | 2,247 | 40 |
| 11,705 | 121 | 1 | 1,500 | 23 | 89  | 3 | 818   | 14 | 2,528 | 41 |
| 11,706 | 121 | 1 | 1,504 | 23 | 89  | 3 | 818   | 14 | 2,532 | 41 |
| 11,707 | 129 | 1 | 1,688 | 23 | 94  | 3 | 876   | 14 | 2,787 | 41 |
| 11,708 | 167 | 1 | 1,983 | 23 | 117 | 3 | 1,174 | 13 | 3,441 | 40 |
| 11,709 | 175 | 1 | 2,030 | 24 | 119 | 3 | 1,206 | 13 | 3,530 | 41 |
| 11,710 | 177 | 1 | 2,032 | 25 | 126 | 3 | 1,250 | 16 | 3,585 | 45 |
| 11,711 | 174 | 1 | 1,995 | 26 | 122 | 3 | 1,224 | 18 | 3,515 | 48 |
| 11,712 | 173 | 1 | 1,959 | 28 | 120 | 3 | 1,198 | 18 | 3,450 | 50 |
| 11,713 | 173 | 1 | 1,950 | 28 | 119 | 3 | 1,194 | 18 | 3,436 | 50 |
| 11,714 | 172 | 1 | 1,884 | 29 | 118 | 3 | 1,174 | 17 | 3,348 | 50 |

|        |     |   |       |    |     |   |       |    |       |    |
|--------|-----|---|-------|----|-----|---|-------|----|-------|----|
| 11,715 | 170 | 1 | 1,852 | 27 | 116 | 3 | 1,173 | 15 | 3,311 | 46 |
| 11,716 | 170 | 1 | 1,850 | 24 | 116 | 3 | 1,182 | 15 | 3,318 | 43 |
| 11,717 | 170 | 1 | 1,849 | 24 | 116 | 3 | 1,182 | 16 | 3,317 | 44 |
| 11,718 | 170 | 1 | 1,855 | 23 | 116 | 3 | 1,188 | 15 | 3,329 | 42 |
| 11,719 | 170 | 1 | 1,860 | 22 | 116 | 3 | 1,190 | 15 | 3,336 | 41 |
| 11,720 | 170 | 1 | 1,874 | 22 | 116 | 3 | 1,214 | 16 | 3,374 | 42 |
| 11,721 | 169 | 1 | 1,884 | 22 | 116 | 3 | 1,219 | 17 | 3,388 | 43 |
| 11,722 | 166 | 1 | 1,872 | 22 | 115 | 3 | 1,198 | 17 | 3,351 | 43 |
| 11,723 | 168 | 1 | 1,854 | 22 | 113 | 3 | 1,198 | 17 | 3,333 | 43 |
| 11,724 | 171 | 1 | 1,878 | 22 | 112 | 3 | 1,211 | 17 | 3,372 | 43 |
| 11,725 | 162 | 1 | 1,855 | 22 | 110 | 3 | 1,190 | 17 | 3,317 | 43 |
| 11,726 | 172 | 1 | 1,938 | 23 | 114 | 3 | 1,273 | 17 | 3,497 | 44 |
| 11,727 | 170 | 1 | 1,921 | 23 | 112 | 3 | 1,244 | 17 | 3,447 | 44 |
| 11,728 | 171 | 1 | 1,918 | 23 | 112 | 3 | 1,246 | 17 | 3,447 | 44 |
| 11,729 | 252 | 1 | 2,627 | 22 | 145 | 3 | 1,996 | 17 | 5,020 | 43 |
| 11,730 | 252 | 1 | 2,628 | 25 | 145 | 3 | 1,997 | 17 | 5,022 | 46 |
| 11,731 | 250 | 1 | 2,628 | 25 | 145 | 3 | 1,992 | 17 | 5,015 | 46 |
| 11,732 | 249 | 1 | 2,606 | 25 | 144 | 3 | 1,981 | 17 | 4,980 | 46 |
| 11,733 | 251 | 2 | 2,668 | 25 | 144 | 3 | 1,983 | 17 | 5,046 | 47 |
| 11,734 | 281 | 2 | 3,023 | 25 | 157 | 3 | 2,055 | 15 | 5,516 | 45 |
| 11,735 | 302 | 2 | 3,234 | 24 | 167 | 3 | 2,131 | 15 | 5,834 | 44 |
| 11,736 | 344 | 2 | 3,366 | 27 | 182 | 3 | 2,219 | 15 | 6,111 | 47 |
| 11,737 | 342 | 2 | 3,321 | 27 | 180 | 4 | 2,175 | 15 | 6,018 | 48 |
| 11,738 | 326 | 2 | 3,133 | 27 | 167 | 4 | 2,088 | 16 | 5,714 | 49 |
| 11,739 | 341 | 2 | 3,217 | 27 | 174 | 4 | 2,119 | 16 | 5,851 | 49 |
| 11,740 | 343 | 2 | 3,222 | 28 | 168 | 4 | 2,066 | 16 | 5,799 | 50 |
| 11,741 | 356 | 2 | 3,286 | 28 | 177 | 4 | 2,106 | 18 | 5,925 | 52 |
| 11,742 | 355 | 2 | 3,222 | 32 | 174 | 4 | 2,068 | 18 | 5,819 | 56 |
| 11,743 | 353 | 1 | 3,236 | 29 | 176 | 2 | 2,061 | 14 | 5,826 | 46 |
| 11,744 | 353 | 1 | 3,236 | 29 | 176 | 2 | 2,060 | 14 | 5,825 | 46 |
| 11,745 | 352 | 1 | 3,220 | 31 | 175 | 2 | 2,037 | 14 | 5,784 | 48 |
| 11,746 | 352 | 1 | 3,215 | 29 | 174 | 2 | 2,034 | 14 | 5,775 | 46 |
| 11,747 | 349 | 1 | 3,199 | 29 | 173 | 2 | 2,032 | 15 | 5,753 | 47 |
| 11,748 | 349 | 1 | 3,191 | 29 | 173 | 2 | 2,023 | 15 | 5,736 | 47 |
| 11,749 | 349 | 1 | 3,192 | 26 | 171 | 2 | 2,012 | 15 | 5,724 | 44 |
| 11,750 | 349 | 1 | 3,191 | 26 | 170 | 2 | 2,013 | 15 | 5,723 | 44 |
| 11,751 | 349 | 1 | 3,182 | 25 | 171 | 2 | 2,012 | 15 | 5,714 | 43 |
| 11,752 | 347 | 1 | 3,181 | 25 | 171 | 2 | 2,008 | 15 | 5,707 | 43 |
| 11,753 | 347 | 1 | 3,172 | 25 | 171 | 2 | 2,006 | 15 | 5,696 | 43 |
| 11,754 | 347 | 1 | 3,165 | 25 | 171 | 2 | 2,006 | 16 | 5,689 | 44 |
| 11,755 | 334 | 1 | 3,042 | 25 | 167 | 2 | 1,942 | 16 | 5,485 | 44 |

|        |     |   |       |    |     |   |       |    |       |    |
|--------|-----|---|-------|----|-----|---|-------|----|-------|----|
| 11,756 | 334 | 1 | 2,953 | 25 | 162 | 1 | 1,905 | 16 | 5,354 | 43 |
| 11,757 | 335 | 1 | 2,965 | 25 | 162 | 1 | 1,917 | 16 | 5,379 | 43 |
| 11,758 | 326 | 1 | 2,782 | 25 | 158 | 1 | 1,854 | 17 | 5,120 | 44 |
| 11,759 | 290 | 1 | 2,504 | 26 | 136 | 1 | 1,547 | 16 | 4,477 | 44 |
| 11,760 | 288 | 1 | 2,494 | 27 | 135 | 1 | 1,550 | 15 | 4,467 | 44 |
| 11,761 | 280 | 1 | 2,443 | 25 | 126 | 1 | 1,487 | 10 | 4,336 | 37 |
| 11,762 | 280 | 1 | 2,435 | 25 | 126 | 1 | 1,486 | 10 | 4,327 | 37 |
| 11,763 | 284 | 1 | 2,493 | 23 | 127 | 1 | 1,528 | 9  | 4,432 | 34 |
| 11,764 | 286 | 1 | 2,526 | 22 | 128 | 1 | 1,565 | 9  | 4,505 | 33 |
| 11,765 | 286 | 1 | 2,526 | 22 | 128 | 1 | 1,564 | 9  | 4,504 | 33 |
| 11,766 | 289 | 1 | 2,684 | 21 | 135 | 1 | 1,659 | 8  | 4,767 | 31 |
| 11,767 | 297 | 1 | 2,821 | 21 | 146 | 1 | 1,814 | 7  | 5,078 | 30 |
| 11,768 | 299 | 1 | 2,836 | 21 | 147 | 1 | 1,837 | 6  | 5,119 | 29 |
| 11,769 | 300 | 1 | 2,848 | 21 | 147 | 1 | 1,844 | 6  | 5,139 | 29 |
| 11,770 | 300 | 1 | 2,846 | 22 | 148 | 1 | 1,850 | 6  | 5,144 | 30 |
| 11,771 | 300 | 1 | 2,832 | 22 | 149 | 1 | 1,846 | 6  | 5,127 | 30 |
| 11,772 | 300 | 1 | 2,819 | 22 | 149 | 1 | 1,843 | 6  | 5,111 | 30 |
| 11,773 | 300 | 1 | 2,810 | 22 | 149 | 1 | 1,843 | 6  | 5,102 | 30 |
| 11,774 | 296 | 1 | 2,759 | 22 | 147 | 1 | 1,827 | 8  | 5,029 | 32 |
| 11,775 | 294 | 1 | 2,768 | 22 | 147 | 1 | 1,836 | 8  | 5,045 | 32 |
| 11,776 | 294 | 1 | 2,756 | 23 | 147 | 1 | 1,833 | 8  | 5,030 | 33 |
| 11,777 | 285 | 1 | 2,690 | 18 | 145 | 1 | 1,758 | 8  | 4,878 | 28 |
| 11,778 | 286 | 1 | 2,647 | 19 | 143 | 1 | 1,720 | 8  | 4,796 | 29 |
| 11,779 | 206 | 1 | 1,992 | 19 | 111 | 1 | 1,012 | 8  | 3,321 | 29 |
| 11,780 | 205 | 1 | 1,988 | 19 | 110 | 1 | 1,006 | 8  | 3,309 | 29 |
| 11,781 | 206 | 1 | 1,996 | 19 | 111 | 1 | 1,010 | 8  | 3,323 | 29 |
| 11,782 | 207 | 1 | 2,022 | 20 | 113 | 1 | 1,038 | 8  | 3,380 | 30 |
| 11,783 | 209 | 0 | 2,051 | 20 | 113 | 1 | 1,061 | 8  | 3,434 | 29 |
| 11,784 | 208 | 0 | 2,007 | 20 | 113 | 1 | 1,061 | 8  | 3,389 | 29 |
| 11,785 | 178 | 0 | 1,645 | 23 | 100 | 1 | 985   | 8  | 2,908 | 32 |
| 11,786 | 159 | 0 | 1,435 | 24 | 90  | 1 | 907   | 9  | 2,591 | 34 |
| 11,787 | 117 | 1 | 1,295 | 26 | 73  | 1 | 819   | 12 | 2,304 | 40 |
| 11,788 | 105 | 1 | 1,261 | 33 | 69  | 0 | 806   | 16 | 2,241 | 50 |
| 11,789 | 103 | 1 | 1,267 | 34 | 70  | 0 | 824   | 16 | 2,264 | 51 |
| 11,790 | 88  | 3 | 1,187 | 40 | 63  | 1 | 782   | 17 | 2,120 | 61 |
| 11,791 | 73  | 3 | 1,106 | 40 | 58  | 1 | 743   | 18 | 1,980 | 62 |
| 11,792 | 67  | 3 | 913   | 39 | 40  | 1 | 743   | 17 | 1,763 | 60 |
| 11,793 | 66  | 3 | 889   | 36 | 39  | 1 | 752   | 17 | 1,746 | 57 |
| 11,794 | 66  | 3 | 880   | 38 | 39  | 1 | 747   | 18 | 1,732 | 60 |
| 11,795 | 68  | 3 | 923   | 43 | 44  | 1 | 779   | 19 | 1,814 | 66 |
| 11,796 | 84  | 3 | 1,049 | 42 | 53  | 1 | 967   | 19 | 2,153 | 65 |



|        |     |   |       |    |     |   |       |    |       |    |
|--------|-----|---|-------|----|-----|---|-------|----|-------|----|
| 11,797 | 84  | 3 | 1,058 | 42 | 54  | 1 | 978   | 20 | 2,174 | 66 |
| 11,798 | 84  | 3 | 1,057 | 42 | 54  | 1 | 976   | 20 | 2,171 | 66 |
| 11,799 | 84  | 3 | 1,067 | 42 | 54  | 1 | 979   | 21 | 2,184 | 67 |
| 11,800 | 85  | 3 | 1,082 | 42 | 54  | 1 | 984   | 21 | 2,205 | 67 |
| 11,801 | 85  | 3 | 1,082 | 42 | 54  | 1 | 984   | 21 | 2,205 | 67 |
| 11,802 | 85  | 3 | 1,147 | 42 | 56  | 1 | 1,023 | 21 | 2,311 | 67 |
| 11,803 | 85  | 3 | 1,154 | 42 | 56  | 1 | 1,031 | 21 | 2,326 | 67 |
| 11,804 | 97  | 3 | 1,245 | 42 | 59  | 1 | 1,076 | 20 | 2,477 | 66 |
| 11,805 | 105 | 3 | 1,303 | 42 | 67  | 1 | 1,123 | 20 | 2,598 | 66 |
| 11,806 | 103 | 3 | 1,297 | 42 | 67  | 1 | 1,119 | 20 | 2,586 | 66 |
| 11,807 | 101 | 3 | 1,289 | 42 | 67  | 1 | 1,115 | 20 | 2,572 | 66 |
| 11,808 | 115 | 3 | 1,369 | 42 | 73  | 1 | 1,187 | 19 | 2,744 | 65 |
| 11,809 | 115 | 3 | 1,365 | 42 | 72  | 1 | 1,187 | 19 | 2,739 | 65 |
| 11,810 | 118 | 3 | 1,418 | 40 | 78  | 1 | 1,271 | 19 | 2,885 | 63 |
| 11,811 | 112 | 3 | 1,380 | 39 | 77  | 1 | 1,230 | 19 | 2,799 | 62 |
| 11,812 | 115 | 3 | 1,520 | 39 | 83  | 1 | 1,311 | 19 | 3,029 | 62 |
| 11,813 | 115 | 3 | 1,570 | 39 | 87  | 1 | 1,349 | 20 | 3,121 | 63 |
| 11,814 | 112 | 3 | 1,523 | 39 | 86  | 1 | 1,313 | 20 | 3,034 | 63 |
| 11,815 | 110 | 3 | 1,493 | 39 | 85  | 1 | 1,275 | 20 | 2,963 | 63 |
| 11,816 | 108 | 3 | 1,391 | 39 | 85  | 1 | 1,226 | 20 | 2,810 | 63 |
| 11,817 | 107 | 3 | 1,338 | 39 | 78  | 1 | 1,182 | 20 | 2,705 | 63 |
| 11,818 | 99  | 3 | 1,201 | 39 | 67  | 1 | 1,021 | 20 | 2,388 | 63 |
| 11,819 | 97  | 3 | 1,179 | 38 | 66  | 1 | 998   | 20 | 2,340 | 62 |
| 11,820 | 97  | 3 | 1,170 | 38 | 66  | 1 | 989   | 20 | 2,322 | 62 |
| 11,821 | 97  | 3 | 1,164 | 38 | 65  | 1 | 981   | 20 | 2,307 | 62 |
| 11,822 | 97  | 3 | 1,166 | 38 | 64  | 1 | 981   | 20 | 2,308 | 62 |
| 11,823 | 98  | 3 | 1,170 | 38 | 64  | 1 | 990   | 20 | 2,322 | 62 |
| 11,824 | 98  | 3 | 1,174 | 38 | 64  | 1 | 990   | 21 | 2,326 | 63 |
| 11,825 | 97  | 3 | 1,152 | 38 | 64  | 1 | 976   | 19 | 2,289 | 61 |
| 11,826 | 97  | 3 | 1,145 | 37 | 64  | 1 | 978   | 19 | 2,284 | 60 |
| 11,827 | 97  | 3 | 1,149 | 36 | 65  | 1 | 977   | 19 | 2,288 | 59 |
| 11,828 | 134 | 3 | 1,257 | 36 | 71  | 1 | 1,086 | 19 | 2,548 | 59 |
| 11,829 | 140 | 3 | 1,290 | 36 | 74  | 1 | 1,084 | 19 | 2,588 | 59 |
| 11,830 | 144 | 3 | 1,304 | 36 | 75  | 1 | 1,088 | 19 | 2,611 | 59 |
| 11,831 | 165 | 3 | 1,396 | 37 | 77  | 1 | 1,124 | 19 | 2,762 | 60 |
| 11,832 | 226 | 3 | 1,884 | 36 | 112 | 1 | 1,440 | 19 | 3,662 | 59 |
| 11,833 | 255 | 3 | 2,041 | 35 | 125 | 1 | 1,546 | 19 | 3,967 | 58 |
| 11,834 | 282 | 3 | 2,466 | 35 | 156 | 1 | 1,806 | 19 | 4,710 | 58 |
| 11,835 | 303 | 3 | 2,678 | 28 | 177 | 1 | 1,951 | 18 | 5,109 | 50 |
| 11,836 | 308 | 3 | 2,772 | 28 | 186 | 1 | 2,006 | 18 | 5,272 | 50 |
| 11,837 | 307 | 3 | 2,767 | 28 | 186 | 1 | 2,006 | 18 | 5,266 | 50 |

|        |     |   |       |    |     |   |       |    |       |    |
|--------|-----|---|-------|----|-----|---|-------|----|-------|----|
| 11,838 | 311 | 2 | 2,863 | 26 | 196 | 1 | 2,071 | 17 | 5,441 | 46 |
| 11,839 | 310 | 2 | 2,864 | 20 | 196 | 1 | 2,073 | 13 | 5,443 | 36 |
| 11,840 | 311 | 0 | 2,837 | 13 | 194 | 0 | 2,046 | 11 | 5,388 | 24 |
| 11,841 | 311 | 0 | 2,811 | 12 | 193 | 0 | 2,039 | 10 | 5,354 | 22 |
| 11,842 | 311 | 0 | 2,798 | 12 | 192 | 0 | 2,028 | 10 | 5,329 | 22 |
| 11,843 | 296 | 0 | 2,734 | 12 | 189 | 0 | 1,933 | 9  | 5,152 | 21 |
| 11,844 | 294 | 0 | 2,720 | 11 | 189 | 0 | 1,914 | 9  | 5,117 | 20 |
| 11,845 | 294 | 0 | 2,691 | 3  | 183 | 0 | 1,892 | 8  | 5,060 | 11 |
| 11,846 | 293 | 0 | 2,677 | 3  | 183 | 0 | 1,883 | 8  | 5,036 | 11 |
| 11,847 | 277 | 0 | 2,550 | 2  | 174 | 0 | 1,694 | 8  | 4,695 | 10 |
| 11,848 | 277 | 0 | 2,541 | 2  | 174 | 0 | 1,686 | 8  | 4,678 | 10 |
| 11,849 | 279 | 0 | 2,549 | 2  | 174 | 0 | 1,690 | 6  | 4,692 | 8  |
| 11,850 | 281 | 0 | 2,564 | 2  | 174 | 0 | 1,703 | 6  | 4,722 | 8  |
| 11,851 | 280 | 0 | 2,552 | 3  | 174 | 0 | 1,700 | 6  | 4,706 | 9  |
| 11,852 | 281 | 0 | 2,535 | 3  | 174 | 0 | 1,685 | 6  | 4,675 | 9  |
| 11,853 | 282 | 0 | 2,523 | 4  | 173 | 0 | 1,665 | 6  | 4,643 | 10 |
| 11,854 | 287 | 1 | 2,533 | 4  | 174 | 0 | 1,668 | 6  | 4,662 | 11 |
| 11,855 | 275 | 1 | 2,442 | 4  | 171 | 0 | 1,623 | 6  | 4,511 | 11 |
| 11,856 | 288 | 1 | 2,450 | 4  | 169 | 0 | 1,654 | 6  | 4,561 | 11 |
| 11,857 | 287 | 1 | 2,450 | 4  | 169 | 0 | 1,653 | 6  | 4,559 | 11 |
| 11,858 | 281 | 1 | 2,392 | 6  | 166 | 0 | 1,604 | 6  | 4,443 | 13 |
| 11,859 | 282 | 1 | 2,430 | 6  | 169 | 0 | 1,623 | 6  | 4,504 | 13 |
| 11,860 | 282 | 1 | 2,480 | 6  | 169 | 0 | 1,615 | 6  | 4,546 | 13 |
| 11,861 | 292 | 1 | 2,808 | 6  | 189 | 0 | 1,798 | 6  | 5,087 | 13 |
| 11,862 | 295 | 1 | 2,949 | 9  | 193 | 1 | 1,816 | 12 | 5,253 | 23 |
| 11,863 | 297 | 1 | 3,003 | 9  | 192 | 2 | 1,858 | 16 | 5,350 | 28 |
| 11,864 | 296 | 1 | 2,951 | 10 | 188 | 2 | 1,813 | 15 | 5,248 | 28 |
| 11,865 | 303 | 1 | 3,084 | 10 | 190 | 2 | 1,862 | 15 | 5,439 | 28 |
| 11,866 | 303 | 1 | 3,080 | 10 | 190 | 2 | 1,862 | 15 | 5,435 | 28 |
| 11,867 | 328 | 1 | 3,317 | 12 | 204 | 2 | 1,986 | 16 | 5,835 | 31 |
| 11,868 | 421 | 1 | 3,595 | 12 | 224 | 2 | 2,256 | 17 | 6,496 | 32 |
| 11,869 | 421 | 1 | 3,594 | 13 | 224 | 2 | 2,257 | 18 | 6,496 | 34 |
| 11,870 | 421 | 1 | 3,594 | 13 | 224 | 2 | 2,257 | 18 | 6,496 | 34 |
| 11,871 | 466 | 1 | 3,832 | 13 | 246 | 2 | 2,471 | 18 | 7,015 | 34 |
| 11,872 | 471 | 1 | 3,883 | 13 | 252 | 2 | 2,558 | 18 | 7,164 | 34 |
| 11,873 | 471 | 1 | 3,883 | 13 | 252 | 2 | 2,557 | 18 | 7,163 | 34 |
| 11,874 | 473 | 1 | 3,893 | 13 | 252 | 2 | 2,575 | 18 | 7,193 | 34 |
| 11,875 | 473 | 1 | 3,888 | 13 | 252 | 2 | 2,575 | 17 | 7,188 | 33 |
| 11,876 | 472 | 1 | 3,883 | 13 | 252 | 2 | 2,567 | 17 | 7,174 | 33 |
| 11,877 | 473 | 1 | 3,883 | 13 | 253 | 2 | 2,569 | 17 | 7,178 | 33 |
| 11,878 | 476 | 1 | 3,877 | 14 | 252 | 2 | 2,567 | 17 | 7,172 | 34 |

|        |     |   |       |    |     |   |       |    |       |    |
|--------|-----|---|-------|----|-----|---|-------|----|-------|----|
| 11,879 | 437 | 1 | 3,745 | 15 | 244 | 2 | 2,445 | 17 | 6,871 | 35 |
| 11,880 | 429 | 1 | 3,727 | 14 | 242 | 2 | 2,446 | 18 | 6,844 | 35 |
| 11,881 | 426 | 1 | 3,739 | 14 | 243 | 2 | 2,465 | 18 | 6,873 | 35 |
| 11,882 | 405 | 1 | 3,665 | 19 | 241 | 2 | 2,437 | 20 | 6,748 | 42 |
| 11,883 | 343 | 1 | 3,156 | 22 | 204 | 2 | 2,098 | 23 | 5,801 | 48 |
| 11,884 | 320 | 1 | 2,988 | 22 | 192 | 2 | 1,994 | 25 | 5,494 | 50 |
| 11,885 | 291 | 1 | 2,549 | 22 | 161 | 2 | 1,724 | 25 | 4,725 | 50 |
| 11,886 | 270 | 1 | 2,340 | 22 | 141 | 2 | 1,574 | 25 | 4,325 | 50 |
| 11,887 | 265 | 1 | 2,249 | 22 | 132 | 2 | 1,521 | 25 | 4,167 | 50 |
| 11,888 | 262 | 1 | 2,175 | 22 | 122 | 2 | 1,456 | 25 | 4,015 | 50 |
| 11,889 | 262 | 1 | 2,156 | 22 | 122 | 2 | 1,456 | 23 | 3,996 | 48 |
| 11,890 | 262 | 1 | 2,150 | 21 | 121 | 2 | 1,453 | 23 | 3,986 | 47 |
| 11,891 | 260 | 1 | 2,150 | 21 | 121 | 2 | 1,452 | 23 | 3,983 | 47 |
| 11,892 | 261 | 1 | 2,153 | 21 | 121 | 2 | 1,459 | 23 | 3,994 | 47 |
| 11,893 | 261 | 1 | 2,161 | 21 | 121 | 2 | 1,458 | 22 | 4,001 | 46 |
| 11,894 | 261 | 1 | 2,162 | 22 | 121 | 2 | 1,457 | 22 | 4,001 | 47 |
| 11,895 | 261 | 1 | 2,159 | 22 | 121 | 2 | 1,457 | 22 | 3,998 | 47 |
| 11,896 | 264 | 1 | 2,217 | 22 | 123 | 2 | 1,481 | 21 | 4,085 | 46 |
| 11,897 | 274 | 1 | 2,306 | 22 | 124 | 2 | 1,513 | 21 | 4,217 | 46 |
| 11,898 | 280 | 1 | 2,347 | 22 | 125 | 2 | 1,538 | 21 | 4,290 | 46 |
| 11,899 | 283 | 1 | 2,388 | 22 | 127 | 2 | 1,551 | 21 | 4,349 | 46 |
| 11,900 | 281 | 1 | 2,412 | 22 | 130 | 2 | 1,548 | 21 | 4,371 | 46 |
| 11,901 | 279 | 1 | 2,401 | 21 | 130 | 2 | 1,543 | 21 | 4,353 | 45 |
| 11,902 | 279 | 1 | 2,400 | 21 | 130 | 2 | 1,543 | 21 | 4,352 | 45 |
| 11,903 | 278 | 1 | 2,376 | 22 | 129 | 2 | 1,540 | 21 | 4,323 | 46 |
| 11,904 | 277 | 1 | 2,364 | 21 | 129 | 2 | 1,538 | 21 | 4,308 | 45 |
| 11,905 | 273 | 0 | 2,346 | 21 | 128 | 2 | 1,528 | 21 | 4,275 | 44 |
| 11,906 | 273 | 0 | 2,346 | 21 | 128 | 2 | 1,528 | 21 | 4,275 | 44 |
| 11,907 | 251 | 1 | 2,281 | 21 | 122 | 2 | 1,447 | 21 | 4,101 | 45 |
| 11,908 | 251 | 1 | 2,275 | 21 | 122 | 2 | 1,443 | 21 | 4,091 | 45 |
| 11,909 | 249 | 1 | 2,258 | 20 | 120 | 2 | 1,427 | 21 | 4,054 | 44 |
| 11,910 | 245 | 1 | 2,217 | 20 | 116 | 2 | 1,400 | 21 | 3,978 | 44 |
| 11,911 | 244 | 1 | 2,159 | 20 | 115 | 2 | 1,391 | 21 | 3,909 | 44 |
| 11,912 | 229 | 1 | 1,775 | 17 | 89  | 1 | 1,126 | 15 | 3,219 | 34 |
| 11,913 | 225 | 1 | 1,589 | 17 | 82  | 0 | 1,064 | 11 | 2,960 | 29 |
| 11,914 | 220 | 1 | 1,422 | 16 | 80  | 0 | 974   | 11 | 2,696 | 28 |
| 11,915 | 215 | 1 | 1,334 | 16 | 79  | 0 | 945   | 11 | 2,573 | 28 |
| 11,916 | 213 | 1 | 1,280 | 16 | 78  | 0 | 925   | 12 | 2,496 | 29 |
| 11,917 | 190 | 1 | 1,076 | 15 | 64  | 0 | 802   | 10 | 2,132 | 26 |
| 11,918 | 191 | 1 | 1,055 | 15 | 63  | 0 | 797   | 10 | 2,106 | 26 |
| 11,919 | 98  | 1 | 779   | 15 | 43  | 0 | 527   | 11 | 1,447 | 27 |

|        |     |   |     |    |    |   |     |    |       |    |
|--------|-----|---|-----|----|----|---|-----|----|-------|----|
| 11,920 | 82  | 1 | 728 | 15 | 41 | 0 | 480 | 12 | 1,331 | 28 |
| 11,921 | 62  | 1 | 654 | 18 | 28 | 0 | 399 | 12 | 1,143 | 31 |
| 11,922 | 58  | 1 | 593 | 18 | 24 | 0 | 340 | 12 | 1,015 | 31 |
| 11,923 | 54  | 1 | 547 | 18 | 19 | 0 | 259 | 12 | 879   | 31 |
| 11,924 | 51  | 1 | 536 | 18 | 19 | 0 | 234 | 12 | 840   | 31 |
| 11,925 | 54  | 1 | 556 | 19 | 20 | 0 | 245 | 12 | 875   | 32 |
| 11,926 | 55  | 1 | 567 | 19 | 20 | 0 | 248 | 12 | 890   | 32 |
| 11,927 | 55  | 1 | 564 | 19 | 20 | 0 | 247 | 12 | 886   | 32 |
| 11,928 | 54  | 1 | 573 | 20 | 19 | 0 | 251 | 12 | 897   | 33 |
| 11,929 | 102 | 1 | 851 | 18 | 31 | 0 | 472 | 12 | 1,456 | 31 |
| 11,930 | 102 | 1 | 850 | 18 | 31 | 0 | 468 | 12 | 1,451 | 31 |
| 11,931 | 102 | 1 | 836 | 18 | 30 | 0 | 481 | 11 | 1,449 | 30 |
| 11,932 | 103 | 1 | 824 | 18 | 28 | 0 | 466 | 11 | 1,421 | 30 |
| 11,933 | 103 | 1 | 799 | 10 | 28 | 0 | 467 | 4  | 1,397 | 15 |
| 11,934 | 104 | 1 | 806 | 10 | 28 | 0 | 466 | 4  | 1,404 | 15 |
| 11,935 | 97  | 1 | 782 | 10 | 27 | 0 | 444 | 4  | 1,350 | 15 |
| 11,936 | 99  | 1 | 789 | 10 | 27 | 0 | 447 | 4  | 1,362 | 15 |
| 11,937 | 99  | 1 | 784 | 10 | 26 | 0 | 448 | 5  | 1,357 | 16 |
| 11,938 | 99  | 1 | 791 | 10 | 26 | 0 | 451 | 5  | 1,367 | 16 |
| 11,939 | 99  | 1 | 794 | 11 | 26 | 0 | 457 | 5  | 1,376 | 17 |
| 11,940 | 99  | 1 | 796 | 12 | 26 | 0 | 458 | 5  | 1,379 | 18 |
| 11,941 | 99  | 1 | 795 | 12 | 26 | 0 | 456 | 5  | 1,376 | 18 |
| 11,942 | 99  | 1 | 795 | 12 | 26 | 0 | 454 | 5  | 1,374 | 18 |
| 11,943 | 98  | 1 | 793 | 12 | 26 | 0 | 452 | 6  | 1,369 | 19 |
| 11,944 | 98  | 1 | 783 | 11 | 26 | 0 | 452 | 8  | 1,359 | 20 |
| 11,945 | 98  | 2 | 779 | 12 | 26 | 1 | 452 | 9  | 1,355 | 24 |
| 11,946 | 97  | 3 | 740 | 18 | 27 | 1 | 437 | 10 | 1,301 | 32 |
| 11,947 | 94  | 3 | 718 | 19 | 25 | 2 | 427 | 10 | 1,264 | 34 |
| 11,948 | 84  | 3 | 629 | 20 | 24 | 2 | 395 | 10 | 1,132 | 35 |
| 11,949 | 78  | 3 | 587 | 20 | 23 | 2 | 367 | 10 | 1,055 | 35 |
| 11,950 | 75  | 4 | 546 | 20 | 21 | 2 | 354 | 10 | 996   | 36 |
| 11,951 | 75  | 4 | 512 | 20 | 18 | 2 | 351 | 11 | 956   | 37 |
| 11,952 | 75  | 4 | 497 | 20 | 18 | 2 | 347 | 11 | 937   | 37 |
| 11,953 | 75  | 4 | 497 | 20 | 18 | 2 | 347 | 11 | 937   | 37 |
| 11,954 | 75  | 5 | 497 | 19 | 18 | 2 | 347 | 11 | 937   | 37 |
| 11,955 | 75  | 5 | 497 | 19 | 18 | 2 | 347 | 11 | 937   | 37 |
| 11,956 | 74  | 5 | 497 | 19 | 18 | 2 | 347 | 11 | 936   | 37 |
| 11,957 | 74  | 5 | 497 | 19 | 18 | 2 | 347 | 11 | 936   | 37 |
| 11,958 | 74  | 4 | 497 | 20 | 18 | 2 | 346 | 11 | 935   | 37 |
| 11,959 | 74  | 4 | 497 | 20 | 18 | 2 | 346 | 11 | 935   | 37 |
| 11,960 | 72  | 4 | 494 | 19 | 18 | 2 | 346 | 12 | 930   | 37 |

|        |    |   |     |    |    |   |     |    |     |    |
|--------|----|---|-----|----|----|---|-----|----|-----|----|
| 11,961 | 72 | 4 | 494 | 19 | 18 | 2 | 346 | 12 | 930 | 37 |
| 11,962 | 72 | 4 | 494 | 21 | 18 | 2 | 346 | 12 | 930 | 39 |
| 11,963 | 72 | 4 | 491 | 21 | 18 | 2 | 346 | 13 | 927 | 40 |
| 11,964 | 72 | 4 | 491 | 21 | 18 | 2 | 346 | 13 | 927 | 40 |
| 11,965 | 72 | 4 | 482 | 21 | 18 | 2 | 346 | 13 | 918 | 40 |
| 11,966 | 72 | 4 | 482 | 21 | 18 | 2 | 346 | 13 | 918 | 40 |
| 11,967 | 70 | 4 | 472 | 20 | 19 | 2 | 346 | 12 | 907 | 38 |
| 11,968 | 70 | 4 | 472 | 20 | 19 | 2 | 346 | 12 | 907 | 38 |
| 11,969 | 69 | 4 | 469 | 20 | 19 | 2 | 346 | 11 | 903 | 37 |
| 11,970 | 69 | 4 | 465 | 20 | 19 | 2 | 344 | 11 | 897 | 37 |
| 11,971 | 65 | 4 | 422 | 19 | 16 | 2 | 329 | 9  | 832 | 34 |
| 11,972 | 63 | 4 | 410 | 17 | 16 | 2 | 318 | 9  | 807 | 32 |
| 11,973 | 62 | 4 | 410 | 17 | 16 | 2 | 318 | 10 | 806 | 33 |
| 11,974 | 62 | 4 | 403 | 17 | 15 | 2 | 314 | 10 | 794 | 33 |
| 11,975 | 59 | 4 | 389 | 16 | 14 | 2 | 307 | 10 | 769 | 32 |
| 11,976 | 59 | 4 | 381 | 16 | 14 | 2 | 302 | 10 | 756 | 32 |
| 11,977 | 58 | 4 | 369 | 16 | 14 | 2 | 299 | 10 | 740 | 32 |
| 11,978 | 58 | 4 | 356 | 15 | 14 | 2 | 293 | 10 | 721 | 31 |
| 11,979 | 53 | 4 | 315 | 15 | 14 | 2 | 276 | 10 | 658 | 31 |
| 11,980 | 7  | 4 | 73  | 15 | 2  | 2 | 70  | 10 | 152 | 31 |
| 11,981 | 7  | 4 | 73  | 16 | 2  | 2 | 69  | 10 | 151 | 32 |
| 11,982 | 6  | 4 | 64  | 16 | 2  | 2 | 44  | 10 | 116 | 32 |
| 11,983 | 5  | 4 | 50  | 16 | 2  | 2 | 36  | 14 | 93  | 36 |
| 11,984 | 4  | 4 | 42  | 16 | 2  | 2 | 23  | 14 | 71  | 36 |
| 11,985 | 3  | 4 | 30  | 18 | 2  | 3 | 19  | 23 | 54  | 48 |
| 11,986 | 3  | 4 | 29  | 19 | 2  | 4 | 18  | 24 | 52  | 51 |
| 11,987 | 1  | 4 | 22  | 19 | 2  | 4 | 16  | 24 | 41  | 51 |
| 11,988 | 1  | 4 | 23  | 19 | 2  | 4 | 14  | 24 | 40  | 51 |
| 11,989 | 1  | 5 | 14  | 21 | 2  | 4 | 11  | 34 | 28  | 64 |
| 11,990 | 0  | 5 | 7   | 20 | 2  | 4 | 3   | 34 | 12  | 63 |
| 11,991 | 0  | 5 | 4   | 19 | 2  | 4 | 0   | 34 | 6   | 62 |
| 11,992 | 0  | 5 | 4   | 19 | 2  | 4 | 0   | 34 | 6   | 62 |
| 11,993 | 0  | 5 | 4   | 20 | 2  | 5 | 0   | 34 | 6   | 64 |
| 11,994 | 0  | 5 | 4   | 20 | 2  | 5 | 0   | 33 | 6   | 63 |
| 11,995 | 0  | 5 | 5   | 22 | 2  | 5 | 1   | 34 | 8   | 66 |
| 11,996 | 0  | 4 | 5   | 21 | 2  | 4 | 1   | 33 | 8   | 62 |
| 11,997 | 0  | 3 | 5   | 16 | 1  | 4 | 1   | 32 | 7   | 55 |
| 11,998 | 0  | 3 | 5   | 15 | 1  | 3 | 1   | 32 | 7   | 53 |
| 11,999 | 0  | 3 | 5   | 14 | 1  | 3 | 1   | 33 | 7   | 53 |
| 12,000 | 0  | 3 | 5   | 15 | 1  | 3 | 1   | 33 | 7   | 54 |
| 12,001 | 0  | 2 | 5   | 16 | 1  | 3 | 1   | 33 | 7   | 54 |

|        |   |   |    |    |   |   |    |    |     |    |
|--------|---|---|----|----|---|---|----|----|-----|----|
| 12,002 | 0 | 2 | 5  | 16 | 1 | 3 | 1  | 32 | 7   | 53 |
| 12,003 | 0 | 2 | 5  | 16 | 1 | 3 | 1  | 32 | 7   | 53 |
| 12,004 | 0 | 1 | 6  | 16 | 1 | 3 | 1  | 32 | 8   | 52 |
| 12,005 | 0 | 1 | 6  | 16 | 1 | 3 | 1  | 32 | 8   | 52 |
| 12,006 | 0 | 1 | 6  | 16 | 1 | 3 | 1  | 32 | 8   | 52 |
| 12,007 | 0 | 1 | 6  | 16 | 1 | 3 | 1  | 32 | 8   | 52 |
| 12,008 | 0 | 1 | 6  | 16 | 1 | 3 | 1  | 33 | 8   | 53 |
| 12,009 | 0 | 1 | 6  | 15 | 1 | 3 | 1  | 33 | 8   | 52 |
| 12,010 | 0 | 1 | 6  | 15 | 1 | 3 | 1  | 33 | 8   | 52 |
| 12,011 | 0 | 1 | 6  | 15 | 1 | 3 | 1  | 32 | 8   | 51 |
| 12,012 | 0 | 3 | 6  | 13 | 1 | 3 | 1  | 34 | 8   | 53 |
| 12,013 | 0 | 3 | 6  | 13 | 1 | 3 | 1  | 34 | 8   | 53 |
| 12,014 | 0 | 3 | 7  | 13 | 1 | 3 | 1  | 34 | 9   | 53 |
| 12,015 | 0 | 3 | 9  | 13 | 1 | 3 | 1  | 35 | 11  | 54 |
| 12,016 | 0 | 3 | 9  | 14 | 1 | 3 | 1  | 35 | 11  | 55 |
| 12,017 | 0 | 3 | 8  | 14 | 0 | 3 | 1  | 35 | 9   | 55 |
| 12,018 | 0 | 3 | 8  | 14 | 0 | 3 | 1  | 35 | 9   | 55 |
| 12,019 | 0 | 3 | 8  | 15 | 0 | 3 | 1  | 35 | 9   | 56 |
| 12,020 | 0 | 3 | 8  | 15 | 0 | 3 | 1  | 35 | 9   | 56 |
| 12,021 | 0 | 3 | 9  | 15 | 0 | 3 | 1  | 35 | 10  | 56 |
| 12,022 | 0 | 3 | 9  | 14 | 0 | 3 | 1  | 35 | 10  | 55 |
| 12,023 | 0 | 3 | 9  | 14 | 0 | 3 | 1  | 35 | 10  | 55 |
| 12,024 | 0 | 3 | 10 | 14 | 0 | 3 | 1  | 34 | 11  | 54 |
| 12,025 | 0 | 3 | 10 | 14 | 0 | 3 | 1  | 34 | 11  | 54 |
| 12,026 | 0 | 3 | 12 | 14 | 0 | 3 | 1  | 34 | 13  | 54 |
| 12,027 | 0 | 3 | 12 | 14 | 0 | 3 | 1  | 34 | 13  | 54 |
| 12,028 | 0 | 3 | 13 | 14 | 0 | 3 | 1  | 34 | 14  | 54 |
| 12,029 | 4 | 3 | 23 | 14 | 0 | 3 | 5  | 34 | 32  | 54 |
| 12,030 | 4 | 3 | 23 | 14 | 0 | 3 | 5  | 34 | 32  | 54 |
| 12,031 | 5 | 3 | 32 | 13 | 0 | 3 | 12 | 34 | 49  | 53 |
| 12,032 | 6 | 3 | 41 | 13 | 0 | 3 | 14 | 34 | 61  | 53 |
| 12,033 | 6 | 3 | 46 | 13 | 0 | 3 | 17 | 30 | 69  | 49 |
| 12,034 | 6 | 3 | 46 | 13 | 0 | 3 | 17 | 30 | 69  | 49 |
| 12,035 | 6 | 3 | 46 | 13 | 0 | 3 | 17 | 30 | 69  | 49 |
| 12,036 | 8 | 3 | 59 | 11 | 0 | 2 | 25 | 21 | 92  | 37 |
| 12,037 | 8 | 3 | 59 | 10 | 0 | 1 | 25 | 20 | 92  | 34 |
| 12,038 | 8 | 3 | 61 | 10 | 0 | 1 | 26 | 20 | 95  | 34 |
| 12,039 | 8 | 3 | 62 | 10 | 0 | 1 | 26 | 19 | 96  | 33 |
| 12,040 | 8 | 2 | 73 | 8  | 0 | 1 | 32 | 9  | 113 | 20 |
| 12,041 | 8 | 2 | 73 | 8  | 0 | 1 | 32 | 9  | 113 | 20 |
| 12,042 | 8 | 2 | 73 | 8  | 0 | 1 | 34 | 9  | 115 | 20 |

|        |    |   |     |   |   |   |     |   |     |    |
|--------|----|---|-----|---|---|---|-----|---|-----|----|
| 12,043 | 8  | 2 | 73  | 8 | 0 | 1 | 34  | 9 | 115 | 20 |
| 12,044 | 10 | 2 | 109 | 5 | 0 | 0 | 43  | 6 | 162 | 13 |
| 12,045 | 10 | 2 | 115 | 5 | 0 | 0 | 44  | 6 | 169 | 13 |
| 12,046 | 10 | 2 | 114 | 5 | 0 | 0 | 43  | 6 | 167 | 13 |
| 12,047 | 11 | 2 | 120 | 4 | 0 | 0 | 55  | 6 | 186 | 12 |
| 12,048 | 11 | 2 | 121 | 4 | 0 | 0 | 56  | 6 | 188 | 12 |
| 12,049 | 11 | 2 | 123 | 4 | 0 | 0 | 59  | 6 | 193 | 12 |
| 12,050 | 13 | 2 | 123 | 3 | 0 | 0 | 61  | 5 | 197 | 10 |
| 12,051 | 13 | 2 | 126 | 3 | 0 | 0 | 61  | 5 | 200 | 10 |
| 12,052 | 16 | 3 | 132 | 2 | 0 | 0 | 62  | 6 | 210 | 11 |
| 12,053 | 16 | 3 | 132 | 2 | 0 | 0 | 62  | 6 | 210 | 11 |
| 12,054 | 17 | 3 | 138 | 2 | 0 | 0 | 74  | 6 | 229 | 11 |
| 12,055 | 17 | 3 | 143 | 2 | 0 | 0 | 80  | 6 | 240 | 11 |
| 12,056 | 17 | 3 | 143 | 2 | 0 | 0 | 80  | 6 | 240 | 11 |
| 12,057 | 18 | 3 | 156 | 3 | 0 | 0 | 82  | 6 | 256 | 12 |
| 12,058 | 18 | 3 | 156 | 3 | 0 | 0 | 82  | 6 | 256 | 12 |
| 12,059 | 19 | 3 | 161 | 3 | 0 | 0 | 89  | 5 | 269 | 11 |
| 12,060 | 21 | 3 | 176 | 3 | 0 | 0 | 95  | 5 | 292 | 11 |
| 12,061 | 21 | 3 | 176 | 3 | 0 | 0 | 95  | 5 | 292 | 11 |
| 12,062 | 21 | 3 | 177 | 3 | 0 | 0 | 95  | 5 | 293 | 11 |
| 12,063 | 21 | 1 | 177 | 3 | 0 | 0 | 95  | 3 | 293 | 7  |
| 12,064 | 21 | 1 | 176 | 3 | 0 | 0 | 95  | 2 | 292 | 6  |
| 12,065 | 21 | 1 | 176 | 3 | 0 | 0 | 95  | 2 | 292 | 6  |
| 12,066 | 21 | 1 | 174 | 2 | 0 | 0 | 95  | 1 | 290 | 4  |
| 12,067 | 21 | 1 | 178 | 2 | 0 | 0 | 97  | 1 | 296 | 4  |
| 12,068 | 21 | 1 | 178 | 2 | 0 | 0 | 98  | 1 | 297 | 4  |
| 12,069 | 21 | 1 | 179 | 2 | 0 | 0 | 98  | 1 | 298 | 4  |
| 12,070 | 21 | 1 | 180 | 1 | 0 | 0 | 98  | 1 | 299 | 3  |
| 12,071 | 26 | 1 | 198 | 1 | 3 | 0 | 113 | 1 | 340 | 3  |
| 12,072 | 26 | 1 | 198 | 1 | 3 | 0 | 113 | 1 | 340 | 3  |
| 12,073 | 39 | 1 | 237 | 1 | 4 | 0 | 141 | 1 | 421 | 3  |
| 12,074 | 39 | 1 | 241 | 1 | 4 | 0 | 145 | 1 | 429 | 3  |
| 12,075 | 39 | 1 | 240 | 1 | 4 | 0 | 145 | 1 | 428 | 3  |
| 12,076 | 41 | 1 | 249 | 1 | 4 | 0 | 159 | 1 | 453 | 3  |
| 12,077 | 41 | 1 | 252 | 1 | 4 | 0 | 159 | 1 | 456 | 3  |
| 12,078 | 41 | 1 | 252 | 1 | 4 | 0 | 159 | 2 | 456 | 4  |
| 12,079 | 38 | 1 | 247 | 1 | 4 | 0 | 155 | 3 | 444 | 5  |
| 12,080 | 37 | 1 | 243 | 2 | 4 | 0 | 157 | 3 | 441 | 6  |
| 12,081 | 37 | 1 | 244 | 2 | 4 | 0 | 158 | 3 | 443 | 6  |
| 12,082 | 36 | 1 | 238 | 3 | 4 | 1 | 155 | 6 | 433 | 11 |
| 12,083 | 35 | 1 | 229 | 3 | 4 | 1 | 153 | 8 | 421 | 13 |

|        |    |   |     |    |   |   |     |    |     |    |
|--------|----|---|-----|----|---|---|-----|----|-----|----|
| 12,084 | 35 | 1 | 225 | 4  | 4 | 1 | 150 | 8  | 414 | 14 |
| 12,085 | 33 | 1 | 220 | 4  | 4 | 1 | 147 | 9  | 404 | 15 |
| 12,086 | 33 | 1 | 213 | 6  | 4 | 1 | 143 | 14 | 393 | 22 |
| 12,087 | 33 | 2 | 211 | 8  | 4 | 1 | 142 | 16 | 390 | 27 |
| 12,088 | 33 | 2 | 208 | 8  | 4 | 1 | 141 | 16 | 386 | 27 |
| 12,089 | 33 | 2 | 207 | 8  | 4 | 1 | 141 | 16 | 385 | 27 |
| 12,090 | 33 | 2 | 206 | 8  | 4 | 1 | 141 | 16 | 384 | 27 |
| 12,091 | 33 | 2 | 196 | 8  | 4 | 1 | 135 | 16 | 368 | 27 |
| 12,092 | 33 | 2 | 196 | 8  | 4 | 1 | 135 | 16 | 368 | 27 |
| 12,093 | 33 | 2 | 196 | 8  | 4 | 1 | 133 | 17 | 366 | 28 |
| 12,094 | 33 | 2 | 193 | 9  | 4 | 1 | 133 | 18 | 363 | 30 |
| 12,095 | 31 | 2 | 160 | 9  | 4 | 1 | 124 | 18 | 319 | 30 |
| 12,096 | 31 | 2 | 154 | 9  | 4 | 1 | 123 | 18 | 312 | 30 |
| 12,097 | 30 | 2 | 151 | 9  | 4 | 1 | 120 | 18 | 305 | 30 |
| 12,098 | 30 | 2 | 148 | 9  | 4 | 1 | 111 | 18 | 293 | 30 |
| 12,099 | 30 | 2 | 147 | 9  | 4 | 1 | 110 | 18 | 291 | 30 |
| 12,100 | 30 | 2 | 145 | 10 | 4 | 1 | 107 | 19 | 286 | 32 |
| 12,101 | 28 | 1 | 146 | 10 | 4 | 2 | 105 | 18 | 283 | 31 |
| 12,102 | 28 | 1 | 143 | 11 | 4 | 2 | 105 | 18 | 280 | 32 |
| 12,103 | 25 | 1 | 137 | 11 | 4 | 2 | 104 | 18 | 270 | 32 |
| 12,104 | 25 | 1 | 137 | 12 | 4 | 2 | 104 | 18 | 270 | 33 |
| 12,105 | 24 | 1 | 130 | 17 | 4 | 2 | 91  | 26 | 249 | 46 |
| 12,106 | 24 | 2 | 125 | 26 | 4 | 4 | 85  | 30 | 238 | 62 |
| 12,107 | 24 | 2 | 122 | 29 | 4 | 4 | 84  | 35 | 234 | 70 |
| 12,108 | 23 | 2 | 114 | 28 | 4 | 4 | 83  | 35 | 224 | 69 |
| 12,109 | 22 | 2 | 109 | 28 | 4 | 5 | 76  | 35 | 211 | 70 |
| 12,110 | 20 | 2 | 98  | 30 | 4 | 5 | 71  | 37 | 193 | 74 |
| 12,111 | 20 | 2 | 94  | 30 | 4 | 5 | 70  | 38 | 188 | 75 |
| 12,112 | 20 | 2 | 93  | 30 | 4 | 5 | 70  | 38 | 187 | 75 |
| 12,113 | 20 | 2 | 93  | 30 | 4 | 5 | 70  | 38 | 187 | 75 |
| 12,114 | 20 | 2 | 93  | 31 | 4 | 5 | 70  | 38 | 187 | 76 |
| 12,115 | 20 | 2 | 94  | 31 | 4 | 5 | 70  | 38 | 188 | 76 |
| 12,116 | 21 | 2 | 94  | 31 | 4 | 5 | 70  | 39 | 189 | 77 |
| 12,117 | 21 | 2 | 94  | 32 | 4 | 5 | 70  | 39 | 189 | 78 |
| 12,118 | 21 | 2 | 90  | 32 | 4 | 5 | 68  | 39 | 183 | 78 |
| 12,119 | 21 | 2 | 89  | 32 | 4 | 5 | 68  | 39 | 182 | 78 |
| 12,120 | 21 | 2 | 88  | 33 | 4 | 5 | 68  | 41 | 181 | 81 |
| 12,121 | 21 | 2 | 83  | 33 | 4 | 5 | 68  | 41 | 176 | 81 |
| 12,122 | 16 | 2 | 71  | 33 | 1 | 5 | 54  | 41 | 142 | 81 |
| 12,123 | 10 | 2 | 48  | 33 | 0 | 5 | 40  | 41 | 98  | 81 |
| 12,124 | 3  | 2 | 32  | 33 | 0 | 5 | 27  | 41 | 62  | 81 |



|        |    |   |     |    |   |   |    |    |     |    |
|--------|----|---|-----|----|---|---|----|----|-----|----|
| 12,125 | 4  | 2 | 28  | 33 | 0 | 5 | 23 | 43 | 55  | 83 |
| 12,126 | 2  | 2 | 20  | 33 | 0 | 5 | 19 | 43 | 41  | 83 |
| 12,127 | 4  | 2 | 29  | 35 | 1 | 5 | 19 | 49 | 53  | 91 |
| 12,128 | 4  | 2 | 29  | 38 | 1 | 5 | 20 | 53 | 54  | 98 |
| 12,129 | 4  | 2 | 27  | 38 | 1 | 5 | 20 | 52 | 52  | 97 |
| 12,130 | 4  | 2 | 27  | 40 | 1 | 5 | 18 | 51 | 50  | 98 |
| 12,131 | 7  | 2 | 29  | 39 | 1 | 5 | 17 | 51 | 54  | 97 |
| 12,132 | 7  | 2 | 40  | 40 | 3 | 4 | 22 | 48 | 72  | 94 |
| 12,133 | 7  | 2 | 41  | 40 | 3 | 4 | 22 | 48 | 73  | 94 |
| 12,134 | 7  | 3 | 48  | 40 | 3 | 4 | 27 | 46 | 85  | 93 |
| 12,135 | 7  | 3 | 64  | 39 | 3 | 4 | 45 | 46 | 119 | 92 |
| 12,136 | 11 | 3 | 101 | 37 | 4 | 4 | 70 | 40 | 186 | 84 |
| 12,137 | 11 | 2 | 102 | 35 | 4 | 4 | 70 | 38 | 187 | 79 |
| 12,138 | 11 | 2 | 102 | 35 | 4 | 4 | 70 | 38 | 187 | 79 |
| 12,139 | 11 | 2 | 102 | 35 | 4 | 4 | 70 | 38 | 187 | 79 |
| 12,140 | 11 | 2 | 102 | 35 | 4 | 4 | 70 | 38 | 187 | 79 |
| 12,141 | 11 | 2 | 107 | 35 | 4 | 4 | 71 | 38 | 193 | 79 |
| 12,142 | 13 | 2 | 111 | 35 | 4 | 4 | 76 | 38 | 204 | 79 |
| 12,143 | 13 | 2 | 111 | 34 | 4 | 4 | 76 | 36 | 204 | 76 |
| 12,144 | 13 | 2 | 112 | 34 | 4 | 4 | 76 | 36 | 205 | 76 |
| 12,145 | 13 | 2 | 112 | 34 | 4 | 4 | 76 | 36 | 205 | 76 |
| 12,146 | 13 | 2 | 112 | 34 | 4 | 4 | 76 | 36 | 205 | 76 |
| 12,147 | 13 | 2 | 112 | 34 | 4 | 4 | 76 | 36 | 205 | 76 |
| 12,148 | 15 | 2 | 114 | 34 | 4 | 4 | 77 | 36 | 210 | 76 |
| 12,149 | 15 | 2 | 114 | 34 | 4 | 4 | 77 | 36 | 210 | 76 |
| 12,150 | 15 | 2 | 114 | 33 | 4 | 4 | 78 | 35 | 211 | 74 |
| 12,151 | 15 | 2 | 114 | 33 | 4 | 4 | 78 | 35 | 211 | 74 |
| 12,152 | 15 | 2 | 113 | 33 | 4 | 3 | 78 | 35 | 210 | 73 |
| 12,153 | 15 | 2 | 113 | 32 | 4 | 3 | 78 | 35 | 210 | 72 |
| 12,154 | 15 | 2 | 113 | 32 | 4 | 3 | 78 | 35 | 210 | 72 |
| 12,155 | 16 | 2 | 130 | 26 | 7 | 4 | 91 | 27 | 244 | 59 |
| 12,156 | 16 | 2 | 130 | 27 | 7 | 4 | 91 | 27 | 244 | 60 |
| 12,157 | 16 | 1 | 133 | 15 | 7 | 2 | 93 | 18 | 249 | 36 |
| 12,158 | 16 | 1 | 133 | 15 | 7 | 1 | 93 | 18 | 249 | 35 |
| 12,159 | 16 | 1 | 131 | 15 | 7 | 1 | 93 | 18 | 247 | 35 |
| 12,160 | 16 | 1 | 131 | 15 | 7 | 1 | 93 | 18 | 247 | 35 |
| 12,161 | 16 | 1 | 131 | 14 | 7 | 1 | 93 | 16 | 247 | 32 |
| 12,162 | 16 | 3 | 131 | 14 | 7 | 1 | 93 | 19 | 247 | 37 |
| 12,163 | 16 | 3 | 140 | 15 | 7 | 1 | 94 | 20 | 257 | 39 |
| 12,164 | 16 | 3 | 141 | 15 | 7 | 1 | 94 | 20 | 258 | 39 |
| 12,165 | 16 | 3 | 142 | 13 | 7 | 1 | 94 | 19 | 259 | 36 |

|        |    |   |     |    |    |   |     |    |     |    |
|--------|----|---|-----|----|----|---|-----|----|-----|----|
| 12,166 | 16 | 3 | 142 | 17 | 7  | 1 | 94  | 29 | 259 | 50 |
| 12,167 | 15 | 3 | 142 | 17 | 7  | 1 | 94  | 29 | 258 | 50 |
| 12,168 | 16 | 5 | 146 | 19 | 7  | 1 | 97  | 32 | 266 | 57 |
| 12,169 | 16 | 5 | 146 | 21 | 7  | 1 | 97  | 32 | 266 | 59 |
| 12,170 | 24 | 5 | 180 | 20 | 9  | 1 | 123 | 30 | 336 | 56 |
| 12,171 | 24 | 5 | 186 | 21 | 11 | 1 | 131 | 30 | 352 | 57 |
| 12,172 | 24 | 5 | 186 | 23 | 11 | 1 | 131 | 31 | 352 | 60 |
| 12,173 | 24 | 5 | 188 | 26 | 11 | 1 | 135 | 31 | 358 | 63 |
| 12,174 | 26 | 5 | 194 | 32 | 12 | 1 | 162 | 32 | 394 | 70 |
| 12,175 | 35 | 5 | 248 | 32 | 19 | 1 | 212 | 31 | 514 | 69 |
| 12,176 | 34 | 5 | 249 | 32 | 19 | 1 | 212 | 31 | 514 | 69 |
| 12,177 | 32 | 5 | 241 | 32 | 19 | 1 | 203 | 32 | 495 | 70 |
| 12,178 | 33 | 6 | 245 | 27 | 18 | 1 | 205 | 22 | 501 | 56 |
| 12,179 | 33 | 6 | 245 | 27 | 18 | 1 | 210 | 22 | 506 | 56 |
| 12,180 | 32 | 6 | 246 | 27 | 19 | 1 | 214 | 22 | 511 | 56 |
| 12,181 | 31 | 6 | 244 | 26 | 19 | 1 | 219 | 22 | 513 | 55 |
| 12,182 | 31 | 6 | 244 | 26 | 19 | 1 | 221 | 22 | 515 | 55 |
| 12,183 | 31 | 6 | 236 | 24 | 17 | 1 | 215 | 22 | 499 | 53 |
| 12,184 | 35 | 5 | 231 | 24 | 17 | 1 | 212 | 22 | 495 | 52 |
| 12,185 | 35 | 5 | 222 | 24 | 17 | 1 | 202 | 22 | 476 | 52 |
| 12,186 | 32 | 5 | 221 | 24 | 16 | 1 | 199 | 22 | 468 | 52 |
| 12,187 | 32 | 5 | 220 | 24 | 16 | 1 | 198 | 22 | 466 | 52 |
| 12,188 | 52 | 5 | 369 | 24 | 25 | 1 | 329 | 22 | 775 | 52 |
| 12,189 | 52 | 5 | 369 | 24 | 25 | 1 | 329 | 23 | 775 | 53 |
| 12,190 | 52 | 5 | 365 | 24 | 25 | 1 | 329 | 23 | 771 | 53 |
| 12,191 | 52 | 5 | 419 | 24 | 34 | 1 | 368 | 23 | 873 | 53 |
| 12,192 | 52 | 5 | 420 | 24 | 34 | 1 | 372 | 23 | 878 | 53 |
| 12,193 | 50 | 5 | 416 | 24 | 34 | 1 | 367 | 23 | 867 | 53 |
| 12,194 | 50 | 5 | 416 | 24 | 34 | 1 | 368 | 23 | 868 | 53 |
| 12,195 | 50 | 5 | 415 | 24 | 34 | 1 | 368 | 23 | 867 | 53 |
| 12,196 | 50 | 5 | 415 | 24 | 34 | 1 | 368 | 23 | 867 | 53 |
| 12,197 | 50 | 5 | 415 | 24 | 34 | 1 | 369 | 23 | 868 | 53 |
| 12,198 | 48 | 5 | 413 | 25 | 34 | 1 | 368 | 23 | 863 | 54 |
| 12,199 | 48 | 5 | 413 | 25 | 34 | 1 | 368 | 23 | 863 | 54 |
| 12,200 | 48 | 5 | 413 | 26 | 34 | 1 | 367 | 23 | 862 | 55 |
| 12,201 | 48 | 5 | 413 | 26 | 34 | 1 | 367 | 23 | 862 | 55 |
| 12,202 | 48 | 7 | 413 | 36 | 35 | 1 | 368 | 29 | 864 | 73 |
| 12,203 | 48 | 7 | 411 | 38 | 33 | 1 | 365 | 29 | 857 | 75 |
| 12,204 | 48 | 7 | 411 | 38 | 32 | 1 | 365 | 30 | 856 | 76 |
| 12,205 | 47 | 7 | 407 | 38 | 32 | 1 | 360 | 30 | 846 | 76 |
| 12,206 | 47 | 7 | 398 | 37 | 32 | 0 | 355 | 30 | 832 | 74 |

|        |    |   |     |    |    |   |     |    |     |    |
|--------|----|---|-----|----|----|---|-----|----|-----|----|
| 12,207 | 47 | 7 | 397 | 37 | 32 | 0 | 353 | 33 | 829 | 77 |
| 12,208 | 47 | 7 | 395 | 37 | 32 | 0 | 353 | 33 | 827 | 77 |
| 12,209 | 47 | 7 | 396 | 37 | 32 | 0 | 353 | 33 | 828 | 77 |
| 12,210 | 47 | 7 | 398 | 37 | 32 | 0 | 354 | 33 | 831 | 77 |
| 12,211 | 47 | 7 | 398 | 37 | 32 | 0 | 354 | 33 | 831 | 77 |
| 12,212 | 47 | 5 | 401 | 35 | 32 | 0 | 354 | 28 | 834 | 68 |
| 12,213 | 47 | 5 | 408 | 35 | 32 | 0 | 362 | 28 | 849 | 68 |
| 12,214 | 47 | 5 | 403 | 35 | 32 | 0 | 361 | 28 | 843 | 68 |
| 12,215 | 47 | 5 | 406 | 35 | 32 | 0 | 362 | 28 | 847 | 68 |
| 12,216 | 47 | 5 | 407 | 31 | 32 | 0 | 363 | 18 | 849 | 54 |
| 12,217 | 47 | 5 | 407 | 31 | 36 | 0 | 364 | 18 | 854 | 54 |
| 12,218 | 46 | 3 | 406 | 29 | 36 | 0 | 362 | 15 | 850 | 47 |
| 12,219 | 46 | 3 | 405 | 29 | 36 | 0 | 365 | 15 | 852 | 47 |
| 12,220 | 42 | 3 | 398 | 27 | 35 | 0 | 355 | 15 | 830 | 45 |
| 12,221 | 40 | 3 | 384 | 27 | 34 | 0 | 353 | 15 | 811 | 45 |
| 12,222 | 40 | 3 | 379 | 24 | 33 | 0 | 346 | 14 | 798 | 41 |
| 12,223 | 40 | 3 | 376 | 21 | 33 | 0 | 343 | 14 | 792 | 38 |
| 12,224 | 42 | 3 | 379 | 21 | 33 | 0 | 325 | 14 | 779 | 38 |
| 12,225 | 33 | 3 | 328 | 15 | 28 | 0 | 277 | 12 | 666 | 30 |
| 12,226 | 33 | 3 | 329 | 15 | 27 | 0 | 279 | 12 | 668 | 30 |
| 12,227 | 35 | 3 | 349 | 17 | 27 | 0 | 292 | 12 | 703 | 32 |
| 12,228 | 35 | 4 | 349 | 17 | 27 | 0 | 292 | 14 | 703 | 35 |
| 12,229 | 34 | 3 | 341 | 17 | 27 | 0 | 289 | 14 | 691 | 34 |
| 12,230 | 34 | 3 | 338 | 17 | 27 | 0 | 284 | 14 | 683 | 34 |
| 12,231 | 34 | 3 | 335 | 17 | 26 | 0 | 277 | 14 | 672 | 34 |
| 12,232 | 33 | 3 | 334 | 17 | 26 | 0 | 272 | 14 | 665 | 34 |
| 12,233 | 33 | 3 | 335 | 18 | 26 | 0 | 270 | 14 | 664 | 35 |
| 12,234 | 33 | 3 | 333 | 18 | 26 | 0 | 269 | 14 | 661 | 35 |
| 12,235 | 31 | 5 | 336 | 20 | 26 | 0 | 269 | 14 | 662 | 39 |
| 12,236 | 31 | 8 | 329 | 21 | 26 | 0 | 261 | 17 | 647 | 46 |
| 12,237 | 30 | 8 | 295 | 24 | 25 | 0 | 239 | 17 | 589 | 49 |
| 12,238 | 30 | 8 | 284 | 28 | 25 | 0 | 219 | 18 | 558 | 54 |
| 12,239 | 10 | 8 | 160 | 28 | 16 | 0 | 117 | 18 | 303 | 54 |
| 12,240 | 10 | 8 | 147 | 28 | 15 | 0 | 101 | 18 | 273 | 54 |
| 12,241 | 10 | 8 | 126 | 28 | 13 | 0 | 95  | 18 | 244 | 54 |
| 12,242 | 10 | 8 | 108 | 28 | 7  | 0 | 82  | 18 | 207 | 54 |
| 12,243 | 10 | 8 | 107 | 28 | 7  | 0 | 78  | 18 | 202 | 54 |
| 12,244 | 10 | 8 | 107 | 29 | 7  | 0 | 78  | 18 | 202 | 55 |
| 12,245 | 11 | 8 | 132 | 30 | 7  | 0 | 103 | 18 | 253 | 56 |
| 12,246 | 11 | 8 | 133 | 31 | 7  | 0 | 105 | 18 | 256 | 57 |
| 12,247 | 11 | 8 | 133 | 31 | 7  | 0 | 105 | 18 | 256 | 57 |

|        |    |    |     |    |    |   |     |    |     |    |
|--------|----|----|-----|----|----|---|-----|----|-----|----|
| 12,248 | 11 | 8  | 134 | 31 | 7  | 0 | 105 | 18 | 257 | 57 |
| 12,249 | 11 | 8  | 136 | 30 | 7  | 0 | 105 | 18 | 259 | 56 |
| 12,250 | 11 | 8  | 138 | 30 | 7  | 0 | 105 | 18 | 261 | 56 |
| 12,251 | 11 | 8  | 138 | 31 | 7  | 0 | 105 | 18 | 261 | 57 |
| 12,252 | 11 | 8  | 142 | 32 | 7  | 0 | 106 | 18 | 266 | 58 |
| 12,253 | 11 | 6  | 144 | 23 | 7  | 0 | 107 | 12 | 269 | 41 |
| 12,254 | 11 | 6  | 144 | 22 | 7  | 0 | 107 | 12 | 269 | 40 |
| 12,255 | 11 | 6  | 145 | 22 | 7  | 0 | 108 | 11 | 271 | 39 |
| 12,256 | 12 | 6  | 156 | 22 | 8  | 0 | 124 | 11 | 300 | 39 |
| 12,257 | 12 | 6  | 154 | 22 | 8  | 0 | 124 | 11 | 298 | 39 |
| 12,258 | 12 | 6  | 154 | 24 | 8  | 0 | 124 | 9  | 298 | 39 |
| 12,259 | 12 | 7  | 154 | 26 | 8  | 0 | 126 | 9  | 300 | 42 |
| 12,260 | 13 | 7  | 156 | 26 | 8  | 0 | 127 | 9  | 304 | 42 |
| 12,261 | 15 | 7  | 155 | 27 | 8  | 0 | 130 | 9  | 308 | 43 |
| 12,262 | 15 | 7  | 155 | 28 | 8  | 0 | 130 | 10 | 308 | 45 |
| 12,263 | 15 | 7  | 152 | 28 | 8  | 0 | 130 | 10 | 305 | 45 |
| 12,264 | 15 | 7  | 141 | 28 | 8  | 0 | 122 | 10 | 286 | 45 |
| 12,265 | 15 | 7  | 139 | 28 | 8  | 0 | 122 | 10 | 284 | 45 |
| 12,266 | 15 | 7  | 137 | 30 | 8  | 0 | 121 | 12 | 281 | 49 |
| 12,267 | 15 | 7  | 134 | 30 | 8  | 0 | 120 | 12 | 277 | 49 |
| 12,268 | 15 | 7  | 135 | 30 | 4  | 0 | 120 | 13 | 274 | 50 |
| 12,269 | 15 | 7  | 133 | 30 | 4  | 0 | 118 | 13 | 270 | 50 |
| 12,270 | 15 | 7  | 133 | 31 | 4  | 0 | 115 | 13 | 267 | 51 |
| 12,271 | 13 | 9  | 124 | 33 | 4  | 0 | 109 | 13 | 250 | 55 |
| 12,272 | 13 | 9  | 122 | 34 | 4  | 0 | 101 | 13 | 240 | 56 |
| 12,273 | 15 | 10 | 127 | 34 | 3  | 0 | 105 | 15 | 250 | 59 |
| 12,274 | 15 | 10 | 129 | 34 | 3  | 0 | 108 | 15 | 255 | 59 |
| 12,275 | 11 | 11 | 124 | 34 | 2  | 0 | 98  | 15 | 235 | 60 |
| 12,276 | 12 | 11 | 121 | 35 | 1  | 0 | 96  | 14 | 230 | 60 |
| 12,277 | 12 | 11 | 120 | 35 | 1  | 0 | 94  | 14 | 227 | 60 |
| 12,278 | 17 | 12 | 145 | 33 | 3  | 0 | 101 | 12 | 266 | 57 |
| 12,279 | 17 | 12 | 145 | 33 | 3  | 0 | 101 | 12 | 266 | 57 |
| 12,280 | 19 | 12 | 157 | 33 | 4  | 0 | 103 | 13 | 283 | 58 |
| 12,281 | 27 | 12 | 425 | 33 | 9  | 0 | 210 | 13 | 671 | 58 |
| 12,282 | 28 | 12 | 526 | 33 | 10 | 0 | 237 | 13 | 801 | 58 |
| 12,283 | 28 | 12 | 536 | 31 | 10 | 0 | 243 | 13 | 817 | 56 |
| 12,284 | 28 | 13 | 536 | 31 | 10 | 0 | 243 | 13 | 817 | 57 |
| 12,285 | 26 | 13 | 547 | 31 | 10 | 0 | 252 | 13 | 835 | 57 |
| 12,286 | 26 | 11 | 551 | 29 | 10 | 0 | 256 | 13 | 843 | 53 |
| 12,287 | 26 | 8  | 562 | 28 | 10 | 0 | 260 | 10 | 858 | 46 |
| 12,288 | 26 | 8  | 567 | 21 | 10 | 0 | 267 | 9  | 870 | 38 |

|        |    |   |     |    |    |   |     |    |       |    |
|--------|----|---|-----|----|----|---|-----|----|-------|----|
| 12,289 | 26 | 8 | 567 | 21 | 10 | 0 | 266 | 9  | 869   | 38 |
| 12,290 | 27 | 8 | 554 | 21 | 10 | 0 | 259 | 8  | 850   | 37 |
| 12,291 | 27 | 8 | 557 | 21 | 10 | 0 | 259 | 8  | 853   | 37 |
| 12,292 | 28 | 8 | 555 | 23 | 10 | 0 | 254 | 10 | 847   | 41 |
| 12,293 | 28 | 8 | 555 | 23 | 10 | 0 | 254 | 10 | 847   | 41 |
| 12,294 | 28 | 8 | 569 | 23 | 11 | 0 | 258 | 11 | 866   | 42 |
| 12,295 | 28 | 8 | 567 | 26 | 11 | 0 | 265 | 12 | 871   | 46 |
| 12,296 | 27 | 8 | 547 | 25 | 11 | 0 | 241 | 12 | 826   | 45 |
| 12,297 | 27 | 8 | 567 | 24 | 14 | 0 | 242 | 12 | 850   | 44 |
| 12,298 | 33 | 9 | 619 | 24 | 17 | 0 | 264 | 12 | 933   | 45 |
| 12,299 | 33 | 9 | 618 | 25 | 17 | 0 | 264 | 12 | 932   | 46 |
| 12,300 | 34 | 9 | 627 | 25 | 17 | 0 | 272 | 13 | 950   | 47 |
| 12,301 | 34 | 9 | 625 | 25 | 17 | 0 | 272 | 13 | 948   | 47 |
| 12,302 | 34 | 9 | 623 | 24 | 17 | 0 | 273 | 13 | 947   | 46 |
| 12,303 | 34 | 9 | 622 | 22 | 17 | 0 | 273 | 13 | 946   | 44 |
| 12,304 | 34 | 9 | 620 | 21 | 17 | 0 | 272 | 13 | 943   | 43 |
| 12,305 | 34 | 9 | 619 | 21 | 17 | 0 | 271 | 13 | 941   | 43 |
| 12,306 | 33 | 9 | 610 | 21 | 16 | 0 | 258 | 13 | 917   | 43 |
| 12,307 | 33 | 9 | 609 | 21 | 16 | 0 | 254 | 13 | 912   | 43 |
| 12,308 | 33 | 9 | 615 | 21 | 16 | 0 | 256 | 13 | 920   | 43 |
| 12,309 | 33 | 9 | 620 | 19 | 16 | 0 | 256 | 12 | 925   | 40 |
| 12,310 | 32 | 8 | 617 | 16 | 16 | 0 | 256 | 12 | 921   | 36 |
| 12,311 | 32 | 8 | 617 | 16 | 16 | 0 | 255 | 12 | 920   | 36 |
| 12,312 | 30 | 8 | 616 | 16 | 16 | 0 | 251 | 12 | 913   | 36 |
| 12,313 | 30 | 8 | 616 | 15 | 16 | 0 | 251 | 11 | 913   | 34 |
| 12,314 | 31 | 8 | 617 | 15 | 16 | 0 | 251 | 11 | 915   | 34 |
| 12,315 | 32 | 8 | 641 | 15 | 18 | 0 | 256 | 11 | 947   | 34 |
| 12,316 | 34 | 8 | 664 | 13 | 20 | 0 | 264 | 9  | 982   | 30 |
| 12,317 | 37 | 8 | 669 | 13 | 20 | 0 | 271 | 9  | 997   | 30 |
| 12,318 | 37 | 8 | 669 | 13 | 20 | 0 | 271 | 9  | 997   | 30 |
| 12,319 | 37 | 8 | 668 | 13 | 20 | 0 | 270 | 8  | 995   | 29 |
| 12,320 | 38 | 8 | 684 | 13 | 20 | 0 | 277 | 8  | 1,019 | 29 |
| 12,321 | 38 | 9 | 684 | 13 | 20 | 0 | 277 | 8  | 1,019 | 30 |
| 12,322 | 38 | 7 | 682 | 12 | 20 | 0 | 275 | 10 | 1,015 | 29 |
| 12,323 | 41 | 7 | 718 | 11 | 26 | 0 | 298 | 11 | 1,083 | 29 |
| 12,324 | 43 | 6 | 731 | 11 | 26 | 0 | 305 | 9  | 1,105 | 26 |
| 12,325 | 43 | 6 | 739 | 11 | 27 | 0 | 306 | 9  | 1,115 | 26 |
| 12,326 | 43 | 5 | 734 | 12 | 27 | 0 | 306 | 11 | 1,110 | 28 |
| 12,327 | 42 | 5 | 733 | 16 | 27 | 1 | 306 | 14 | 1,108 | 36 |
| 12,328 | 42 | 5 | 730 | 17 | 27 | 1 | 305 | 17 | 1,104 | 40 |
| 12,329 | 55 | 3 | 920 | 17 | 36 | 1 | 400 | 18 | 1,411 | 39 |

|        |    |   |     |    |    |   |     |    |       |    |
|--------|----|---|-----|----|----|---|-----|----|-------|----|
| 12,330 | 53 | 3 | 908 | 17 | 35 | 1 | 398 | 18 | 1,394 | 39 |
| 12,331 | 48 | 3 | 851 | 17 | 34 | 1 | 387 | 17 | 1,320 | 38 |
| 12,332 | 45 | 3 | 640 | 19 | 30 | 1 | 291 | 17 | 1,006 | 40 |
| 12,333 | 44 | 3 | 539 | 19 | 29 | 1 | 264 | 19 | 876   | 42 |
| 12,334 | 44 | 3 | 527 | 19 | 29 | 1 | 258 | 19 | 858   | 42 |
| 12,335 | 44 | 2 | 508 | 19 | 29 | 1 | 248 | 19 | 829   | 41 |
| 12,336 | 44 | 2 | 505 | 19 | 29 | 1 | 244 | 19 | 822   | 41 |
| 12,337 | 44 | 2 | 505 | 19 | 29 | 1 | 242 | 19 | 820   | 41 |
| 12,338 | 44 | 2 | 493 | 19 | 29 | 1 | 240 | 19 | 806   | 41 |
| 12,339 | 44 | 2 | 488 | 19 | 29 | 1 | 233 | 19 | 794   | 41 |
| 12,340 | 44 | 2 | 497 | 19 | 29 | 1 | 235 | 19 | 805   | 41 |
| 12,341 | 43 | 2 | 503 | 19 | 29 | 1 | 237 | 19 | 812   | 41 |
| 12,342 | 43 | 2 | 500 | 19 | 29 | 1 | 237 | 19 | 809   | 41 |
| 12,343 | 42 | 2 | 499 | 17 | 29 | 1 | 236 | 17 | 806   | 37 |
| 12,344 | 42 | 3 | 509 | 13 | 28 | 1 | 244 | 16 | 823   | 33 |
| 12,345 | 45 | 3 | 517 | 13 | 29 | 1 | 245 | 16 | 836   | 33 |
| 12,346 | 45 | 3 | 526 | 13 | 29 | 1 | 238 | 16 | 838   | 33 |
| 12,347 | 49 | 3 | 549 | 13 | 27 | 1 | 252 | 16 | 877   | 33 |
| 12,348 | 47 | 3 | 538 | 15 | 27 | 1 | 250 | 18 | 862   | 37 |
| 12,349 | 43 | 2 | 497 | 15 | 24 | 1 | 229 | 18 | 793   | 36 |
| 12,350 | 60 | 2 | 659 | 13 | 35 | 1 | 290 | 17 | 1,044 | 33 |
| 12,351 | 62 | 2 | 710 | 14 | 35 | 1 | 291 | 17 | 1,098 | 34 |
| 12,352 | 66 | 2 | 736 | 14 | 35 | 1 | 295 | 17 | 1,132 | 34 |
| 12,353 | 66 | 2 | 736 | 14 | 35 | 1 | 296 | 17 | 1,133 | 34 |
| 12,354 | 66 | 2 | 736 | 14 | 35 | 1 | 295 | 17 | 1,132 | 34 |
| 12,355 | 66 | 2 | 737 | 14 | 35 | 1 | 295 | 17 | 1,133 | 34 |
| 12,356 | 66 | 2 | 738 | 14 | 35 | 1 | 295 | 17 | 1,134 | 34 |
| 12,357 | 66 | 2 | 737 | 14 | 35 | 1 | 295 | 17 | 1,133 | 34 |
| 12,358 | 66 | 2 | 739 | 15 | 35 | 1 | 296 | 17 | 1,136 | 35 |
| 12,359 | 66 | 2 | 733 | 15 | 35 | 1 | 296 | 17 | 1,130 | 35 |
| 12,360 | 66 | 2 | 736 | 15 | 35 | 1 | 295 | 17 | 1,132 | 35 |
| 12,361 | 66 | 2 | 736 | 15 | 35 | 1 | 295 | 17 | 1,132 | 35 |
| 12,362 | 66 | 2 | 737 | 15 | 36 | 1 | 295 | 17 | 1,134 | 35 |
| 12,363 | 66 | 2 | 738 | 15 | 36 | 1 | 295 | 17 | 1,135 | 35 |
| 12,364 | 65 | 2 | 739 | 15 | 36 | 1 | 296 | 17 | 1,136 | 35 |
| 12,365 | 65 | 2 | 740 | 15 | 36 | 1 | 296 | 17 | 1,137 | 35 |
| 12,366 | 64 | 2 | 716 | 15 | 34 | 1 | 291 | 17 | 1,105 | 35 |
| 12,367 | 62 | 2 | 693 | 16 | 32 | 1 | 283 | 17 | 1,070 | 36 |
| 12,368 | 59 | 2 | 688 | 16 | 32 | 1 | 276 | 17 | 1,055 | 36 |
| 12,369 | 60 | 2 | 689 | 16 | 32 | 1 | 274 | 17 | 1,055 | 36 |
| 12,370 | 59 | 2 | 691 | 16 | 32 | 1 | 276 | 17 | 1,058 | 36 |

|        |    |   |     |    |    |   |     |    |       |    |
|--------|----|---|-----|----|----|---|-----|----|-------|----|
| 12,371 | 59 | 1 | 687 | 15 | 32 | 1 | 272 | 17 | 1,050 | 34 |
| 12,372 | 59 | 1 | 687 | 16 | 32 | 1 | 272 | 19 | 1,050 | 37 |
| 12,373 | 54 | 1 | 654 | 20 | 27 | 2 | 253 | 17 | 988   | 40 |
| 12,374 | 54 | 1 | 657 | 26 | 27 | 2 | 252 | 21 | 990   | 50 |
| 12,375 | 52 | 2 | 644 | 31 | 27 | 2 | 245 | 26 | 968   | 61 |
| 12,376 | 52 | 2 | 641 | 32 | 26 | 3 | 245 | 27 | 964   | 64 |
| 12,377 | 51 | 2 | 630 | 31 | 24 | 3 | 243 | 25 | 948   | 61 |
| 12,378 | 35 | 2 | 474 | 25 | 17 | 2 | 175 | 20 | 701   | 49 |
| 12,379 | 34 | 2 | 420 | 25 | 16 | 2 | 149 | 21 | 619   | 50 |
| 12,380 | 32 | 2 | 410 | 27 | 15 | 2 | 131 | 20 | 588   | 51 |
| 12,381 | 32 | 2 | 410 | 27 | 15 | 2 | 131 | 20 | 588   | 51 |
| 12,382 | 41 | 2 | 552 | 27 | 22 | 2 | 205 | 21 | 820   | 52 |
| 12,383 | 44 | 2 | 565 | 26 | 22 | 2 | 215 | 21 | 846   | 51 |
| 12,384 | 48 | 2 | 598 | 26 | 22 | 2 | 247 | 19 | 915   | 49 |
| 12,385 | 48 | 2 | 597 | 26 | 22 | 2 | 247 | 19 | 914   | 49 |
| 12,386 | 48 | 2 | 598 | 26 | 22 | 2 | 250 | 19 | 918   | 49 |
| 12,387 | 48 | 2 | 598 | 26 | 22 | 2 | 251 | 19 | 919   | 49 |
| 12,388 | 48 | 2 | 598 | 26 | 22 | 2 | 251 | 19 | 919   | 49 |
| 12,389 | 48 | 2 | 598 | 26 | 22 | 2 | 251 | 19 | 919   | 49 |
| 12,390 | 48 | 3 | 598 | 26 | 22 | 3 | 252 | 19 | 920   | 51 |
| 12,391 | 48 | 3 | 589 | 26 | 22 | 3 | 250 | 19 | 909   | 51 |
| 12,392 | 48 | 3 | 582 | 26 | 22 | 3 | 248 | 19 | 900   | 51 |
| 12,393 | 48 | 3 | 570 | 26 | 22 | 3 | 240 | 19 | 880   | 51 |
| 12,394 | 48 | 2 | 570 | 26 | 22 | 3 | 238 | 19 | 878   | 50 |
| 12,395 | 48 | 2 | 565 | 26 | 22 | 3 | 238 | 19 | 873   | 50 |
| 12,396 | 45 | 2 | 551 | 26 | 21 | 3 | 234 | 19 | 851   | 50 |
| 12,397 | 45 | 2 | 540 | 41 | 21 | 3 | 233 | 22 | 839   | 68 |
| 12,398 | 41 | 2 | 496 | 43 | 20 | 4 | 216 | 22 | 773   | 71 |
| 12,399 | 32 | 2 | 415 | 45 | 13 | 4 | 181 | 23 | 641   | 74 |
| 12,400 | 27 | 2 | 376 | 46 | 10 | 4 | 165 | 23 | 578   | 75 |
| 12,401 | 24 | 2 | 328 | 46 | 9  | 4 | 149 | 25 | 510   | 77 |
| 12,402 | 21 | 2 | 273 | 46 | 9  | 4 | 146 | 28 | 449   | 80 |
| 12,403 | 17 | 2 | 246 | 46 | 9  | 4 | 141 | 28 | 413   | 80 |
| 12,404 | 18 | 2 | 252 | 48 | 9  | 4 | 140 | 28 | 419   | 82 |
| 12,405 | 18 | 2 | 256 | 48 | 9  | 4 | 140 | 28 | 423   | 82 |
| 12,406 | 18 | 2 | 261 | 48 | 9  | 4 | 141 | 28 | 429   | 82 |
| 12,407 | 18 | 2 | 261 | 50 | 9  | 4 | 141 | 28 | 429   | 84 |
| 12,408 | 18 | 2 | 259 | 50 | 9  | 4 | 138 | 28 | 424   | 84 |
| 12,409 | 20 | 2 | 272 | 49 | 9  | 4 | 140 | 28 | 441   | 83 |
| 12,410 | 20 | 2 | 266 | 50 | 9  | 4 | 140 | 28 | 435   | 84 |
| 12,411 | 22 | 3 | 280 | 51 | 9  | 4 | 153 | 28 | 464   | 86 |

|        |    |   |     |    |    |   |     |    |     |    |
|--------|----|---|-----|----|----|---|-----|----|-----|----|
| 12,412 | 23 | 3 | 282 | 51 | 9  | 4 | 153 | 28 | 467 | 86 |
| 12,413 | 23 | 3 | 281 | 51 | 9  | 4 | 153 | 28 | 466 | 86 |
| 12,414 | 31 | 3 | 308 | 51 | 11 | 4 | 188 | 28 | 538 | 86 |
| 12,415 | 31 | 3 | 306 | 51 | 11 | 4 | 187 | 29 | 535 | 87 |
| 12,416 | 31 | 3 | 305 | 54 | 11 | 4 | 187 | 30 | 534 | 91 |
| 12,417 | 31 | 3 | 305 | 56 | 11 | 4 | 187 | 30 | 534 | 93 |
| 12,418 | 32 | 3 | 317 | 55 | 11 | 4 | 204 | 30 | 564 | 92 |
| 12,419 | 31 | 3 | 316 | 55 | 12 | 4 | 204 | 30 | 563 | 92 |
| 12,420 | 31 | 3 | 314 | 55 | 12 | 4 | 201 | 30 | 558 | 92 |
| 12,421 | 31 | 3 | 312 | 55 | 12 | 4 | 201 | 30 | 556 | 92 |
| 12,422 | 31 | 3 | 302 | 54 | 12 | 4 | 201 | 28 | 546 | 89 |
| 12,423 | 31 | 3 | 300 | 55 | 12 | 4 | 200 | 28 | 543 | 90 |
| 12,424 | 31 | 3 | 296 | 50 | 11 | 3 | 194 | 26 | 532 | 82 |
| 12,425 | 31 | 3 | 292 | 44 | 11 | 3 | 194 | 24 | 528 | 74 |
| 12,426 | 31 | 2 | 291 | 39 | 11 | 3 | 195 | 19 | 528 | 63 |
| 12,427 | 31 | 2 | 284 | 38 | 11 | 2 | 191 | 18 | 517 | 60 |
| 12,428 | 26 | 2 | 180 | 38 | 6  | 2 | 133 | 17 | 345 | 59 |
| 12,429 | 23 | 2 | 157 | 38 | 4  | 2 | 125 | 16 | 309 | 58 |
| 12,430 | 23 | 2 | 150 | 38 | 4  | 2 | 122 | 16 | 299 | 58 |
| 12,431 | 23 | 2 | 146 | 36 | 4  | 2 | 122 | 16 | 295 | 56 |
| 12,432 | 22 | 2 | 146 | 35 | 4  | 2 | 121 | 15 | 293 | 54 |
| 12,433 | 22 | 2 | 145 | 35 | 4  | 2 | 122 | 15 | 293 | 54 |
| 12,434 | 19 | 2 | 133 | 35 | 4  | 2 | 113 | 15 | 269 | 54 |
| 12,435 | 15 | 2 | 101 | 35 | 4  | 2 | 81  | 15 | 201 | 54 |
| 12,436 | 15 | 2 | 100 | 35 | 4  | 2 | 78  | 15 | 197 | 54 |
| 12,437 | 15 | 2 | 100 | 35 | 4  | 2 | 77  | 15 | 196 | 54 |
| 12,438 | 15 | 2 | 100 | 35 | 4  | 2 | 77  | 15 | 196 | 54 |
| 12,439 | 15 | 2 | 100 | 35 | 4  | 2 | 77  | 15 | 196 | 54 |
| 12,440 | 15 | 2 | 99  | 35 | 4  | 2 | 77  | 15 | 195 | 54 |
| 12,441 | 15 | 1 | 100 | 35 | 4  | 1 | 76  | 15 | 195 | 52 |
| 12,442 | 15 | 1 | 100 | 36 | 4  | 1 | 76  | 16 | 195 | 54 |
| 12,443 | 15 | 1 | 100 | 36 | 4  | 1 | 76  | 16 | 195 | 54 |
| 12,444 | 17 | 1 | 106 | 36 | 4  | 1 | 77  | 16 | 204 | 54 |
| 12,445 | 17 | 1 | 112 | 36 | 5  | 1 | 78  | 15 | 212 | 53 |
| 12,446 | 17 | 1 | 112 | 36 | 5  | 1 | 78  | 15 | 212 | 53 |
| 12,447 | 17 | 1 | 141 | 36 | 5  | 1 | 106 | 17 | 269 | 55 |
| 12,448 | 17 | 1 | 140 | 21 | 5  | 1 | 106 | 14 | 268 | 37 |
| 12,449 | 17 | 1 | 142 | 19 | 5  | 0 | 107 | 14 | 271 | 34 |
| 12,450 | 17 | 1 | 142 | 15 | 5  | 0 | 109 | 11 | 273 | 27 |
| 12,451 | 17 | 1 | 142 | 14 | 5  | 0 | 109 | 11 | 273 | 26 |
| 12,452 | 17 | 1 | 141 | 14 | 5  | 0 | 109 | 10 | 272 | 25 |



|        |    |   |     |    |    |   |     |    |     |    |
|--------|----|---|-----|----|----|---|-----|----|-----|----|
| 12,453 | 17 | 1 | 141 | 13 | 5  | 0 | 109 | 7  | 272 | 21 |
| 12,454 | 16 | 1 | 135 | 15 | 5  | 0 | 109 | 7  | 265 | 23 |
| 12,455 | 17 | 1 | 137 | 13 | 5  | 0 | 111 | 7  | 270 | 21 |
| 12,456 | 17 | 1 | 134 | 13 | 5  | 0 | 111 | 7  | 267 | 21 |
| 12,457 | 17 | 1 | 133 | 13 | 5  | 0 | 111 | 7  | 266 | 21 |
| 12,458 | 16 | 1 | 128 | 11 | 6  | 0 | 111 | 7  | 261 | 19 |
| 12,459 | 15 | 1 | 124 | 11 | 6  | 0 | 113 | 7  | 258 | 19 |
| 12,460 | 16 | 1 | 124 | 11 | 6  | 0 | 112 | 8  | 258 | 20 |
| 12,461 | 15 | 1 | 112 | 10 | 6  | 0 | 106 | 8  | 239 | 19 |
| 12,462 | 14 | 0 | 108 | 9  | 6  | 0 | 102 | 8  | 230 | 17 |
| 12,463 | 13 | 0 | 113 | 9  | 5  | 0 | 102 | 8  | 233 | 17 |
| 12,464 | 5  | 0 | 91  | 10 | 3  | 0 | 81  | 8  | 180 | 18 |
| 12,465 | 7  | 0 | 107 | 11 | 4  | 0 | 90  | 8  | 208 | 19 |
| 12,466 | 7  | 0 | 126 | 11 | 4  | 0 | 98  | 10 | 235 | 21 |
| 12,467 | 6  | 0 | 117 | 9  | 4  | 0 | 83  | 10 | 210 | 19 |
| 12,468 | 6  | 0 | 115 | 7  | 4  | 0 | 83  | 9  | 208 | 16 |
| 12,469 | 9  | 0 | 157 | 7  | 5  | 0 | 116 | 9  | 287 | 16 |
| 12,470 | 9  | 0 | 156 | 7  | 5  | 0 | 116 | 10 | 286 | 17 |
| 12,471 | 10 | 0 | 173 | 8  | 5  | 0 | 124 | 11 | 312 | 19 |
| 12,472 | 10 | 1 | 173 | 9  | 5  | 0 | 124 | 11 | 312 | 21 |
| 12,473 | 10 | 1 | 174 | 10 | 5  | 0 | 124 | 12 | 313 | 23 |
| 12,474 | 10 | 1 | 175 | 10 | 5  | 0 | 127 | 14 | 317 | 25 |
| 12,475 | 10 | 1 | 178 | 10 | 5  | 0 | 128 | 14 | 321 | 25 |
| 12,476 | 10 | 1 | 180 | 11 | 5  | 0 | 128 | 13 | 323 | 25 |
| 12,477 | 10 | 1 | 179 | 11 | 5  | 0 | 127 | 14 | 321 | 26 |
| 12,478 | 10 | 1 | 179 | 11 | 5  | 0 | 127 | 14 | 321 | 26 |
| 12,479 | 13 | 1 | 187 | 11 | 6  | 0 | 125 | 14 | 331 | 26 |
| 12,480 | 13 | 1 | 187 | 11 | 6  | 0 | 125 | 14 | 331 | 26 |
| 12,481 | 13 | 1 | 189 | 11 | 6  | 0 | 127 | 14 | 335 | 26 |
| 12,482 | 13 | 1 | 192 | 11 | 6  | 0 | 128 | 14 | 339 | 26 |
| 12,483 | 13 | 1 | 192 | 12 | 6  | 0 | 128 | 14 | 339 | 27 |
| 12,484 | 16 | 1 | 218 | 12 | 11 | 0 | 168 | 14 | 413 | 27 |
| 12,485 | 17 | 1 | 218 | 13 | 11 | 0 | 173 | 14 | 419 | 28 |
| 12,486 | 17 | 1 | 217 | 13 | 11 | 0 | 173 | 14 | 418 | 28 |
| 12,487 | 17 | 1 | 219 | 13 | 11 | 0 | 173 | 14 | 420 | 28 |
| 12,488 | 17 | 1 | 220 | 13 | 11 | 0 | 177 | 15 | 425 | 29 |
| 12,489 | 17 | 1 | 223 | 13 | 11 | 0 | 187 | 15 | 438 | 29 |
| 12,490 | 17 | 1 | 226 | 13 | 12 | 0 | 189 | 15 | 444 | 29 |
| 12,491 | 17 | 1 | 225 | 13 | 12 | 0 | 189 | 16 | 443 | 30 |
| 12,492 | 18 | 1 | 227 | 13 | 12 | 0 | 189 | 16 | 446 | 30 |
| 12,493 | 18 | 1 | 226 | 13 | 12 | 0 | 190 | 16 | 446 | 30 |

|        |    |   |     |    |    |   |     |    |     |    |
|--------|----|---|-----|----|----|---|-----|----|-----|----|
| 12,494 | 16 | 1 | 227 | 13 | 12 | 0 | 190 | 16 | 445 | 30 |
| 12,495 | 16 | 1 | 224 | 13 | 12 | 0 | 189 | 16 | 441 | 30 |
| 12,496 | 16 | 1 | 221 | 13 | 11 | 0 | 191 | 16 | 439 | 30 |
| 12,497 | 16 | 1 | 215 | 13 | 11 | 0 | 184 | 16 | 426 | 30 |
| 12,498 | 16 | 1 | 192 | 14 | 11 | 0 | 163 | 18 | 382 | 33 |
| 12,499 | 16 | 1 | 190 | 14 | 11 | 0 | 162 | 18 | 379 | 33 |
| 12,500 | 23 | 1 | 211 | 14 | 11 | 0 | 166 | 19 | 411 | 34 |
| 12,501 | 23 | 1 | 213 | 15 | 11 | 0 | 170 | 19 | 417 | 35 |
| 12,502 | 23 | 1 | 214 | 14 | 12 | 0 | 170 | 19 | 419 | 34 |
| 12,503 | 23 | 1 | 220 | 15 | 12 | 0 | 174 | 19 | 429 | 35 |
| 12,504 | 23 | 1 | 221 | 15 | 12 | 0 | 173 | 19 | 429 | 35 |
| 12,505 | 23 | 1 | 217 | 15 | 12 | 0 | 172 | 19 | 424 | 35 |
| 12,506 | 22 | 1 | 220 | 16 | 12 | 0 | 176 | 20 | 430 | 37 |
| 12,507 | 23 | 1 | 220 | 16 | 12 | 0 | 175 | 20 | 430 | 37 |
| 12,508 | 29 | 1 | 263 | 17 | 12 | 0 | 211 | 20 | 515 | 38 |
| 12,509 | 29 | 1 | 262 | 20 | 11 | 0 | 211 | 21 | 513 | 42 |
| 12,510 | 29 | 1 | 259 | 20 | 11 | 0 | 208 | 21 | 507 | 42 |
| 12,511 | 28 | 1 | 259 | 20 | 11 | 0 | 211 | 20 | 509 | 41 |
| 12,512 | 28 | 1 | 261 | 19 | 11 | 0 | 210 | 20 | 510 | 40 |
| 12,513 | 28 | 1 | 261 | 20 | 11 | 0 | 208 | 20 | 508 | 41 |
| 12,514 | 28 | 1 | 254 | 20 | 11 | 0 | 208 | 20 | 501 | 41 |
| 12,515 | 28 | 1 | 252 | 19 | 11 | 0 | 201 | 20 | 492 | 40 |
| 12,516 | 37 | 1 | 297 | 18 | 11 | 0 | 247 | 19 | 592 | 38 |
| 12,517 | 38 | 1 | 277 | 17 | 11 | 0 | 240 | 16 | 566 | 34 |
| 12,518 | 38 | 2 | 267 | 17 | 11 | 0 | 234 | 17 | 550 | 36 |
| 12,519 | 38 | 2 | 266 | 17 | 11 | 0 | 234 | 17 | 549 | 36 |
| 12,520 | 35 | 2 | 234 | 17 | 9  | 0 | 206 | 17 | 484 | 36 |
| 12,521 | 34 | 2 | 218 | 17 | 9  | 0 | 201 | 17 | 462 | 36 |
| 12,522 | 34 | 2 | 217 | 16 | 9  | 0 | 197 | 16 | 457 | 34 |
| 12,523 | 35 | 1 | 216 | 15 | 9  | 0 | 198 | 16 | 458 | 32 |
| 12,524 | 35 | 1 | 217 | 14 | 9  | 0 | 198 | 15 | 459 | 30 |
| 12,525 | 35 | 1 | 219 | 13 | 9  | 0 | 195 | 13 | 458 | 27 |
| 12,526 | 35 | 1 | 216 | 12 | 9  | 0 | 194 | 13 | 454 | 26 |
| 12,527 | 35 | 1 | 214 | 12 | 9  | 0 | 194 | 12 | 452 | 25 |
| 12,528 | 35 | 1 | 214 | 12 | 9  | 0 | 196 | 12 | 454 | 25 |
| 12,529 | 32 | 1 | 205 | 12 | 9  | 0 | 193 | 12 | 439 | 25 |
| 12,530 | 32 | 1 | 201 | 12 | 8  | 0 | 193 | 12 | 434 | 25 |
| 12,531 | 32 | 1 | 199 | 12 | 8  | 0 | 194 | 12 | 433 | 25 |
| 12,532 | 32 | 1 | 210 | 11 | 8  | 0 | 199 | 12 | 449 | 24 |
| 12,533 | 35 | 1 | 238 | 12 | 8  | 0 | 216 | 12 | 497 | 25 |
| 12,534 | 32 | 1 | 212 | 12 | 3  | 0 | 174 | 15 | 421 | 28 |

|        |    |   |     |    |    |   |     |    |     |    |
|--------|----|---|-----|----|----|---|-----|----|-----|----|
| 12,535 | 36 | 1 | 224 | 12 | 5  | 0 | 193 | 15 | 458 | 28 |
| 12,536 | 35 | 1 | 225 | 11 | 5  | 0 | 190 | 15 | 455 | 27 |
| 12,537 | 35 | 1 | 236 | 11 | 5  | 0 | 194 | 15 | 470 | 27 |
| 12,538 | 35 | 1 | 239 | 11 | 5  | 0 | 195 | 15 | 474 | 27 |
| 12,539 | 38 | 1 | 292 | 11 | 6  | 0 | 205 | 14 | 541 | 26 |
| 12,540 | 38 | 1 | 289 | 11 | 5  | 0 | 203 | 14 | 535 | 26 |
| 12,541 | 38 | 1 | 307 | 11 | 5  | 0 | 218 | 14 | 568 | 26 |
| 12,542 | 41 | 1 | 330 | 11 | 7  | 0 | 237 | 13 | 615 | 25 |
| 12,543 | 42 | 1 | 333 | 10 | 7  | 0 | 239 | 12 | 621 | 23 |
| 12,544 | 42 | 1 | 333 | 10 | 7  | 0 | 239 | 12 | 621 | 23 |
| 12,545 | 44 | 1 | 340 | 10 | 9  | 0 | 251 | 12 | 644 | 23 |
| 12,546 | 44 | 1 | 340 | 10 | 9  | 0 | 251 | 12 | 644 | 23 |
| 12,547 | 44 | 1 | 348 | 10 | 9  | 0 | 249 | 13 | 650 | 24 |
| 12,548 | 44 | 1 | 348 | 11 | 9  | 0 | 249 | 13 | 650 | 25 |
| 12,549 | 44 | 1 | 349 | 10 | 9  | 0 | 249 | 10 | 651 | 21 |
| 12,550 | 47 | 1 | 369 | 10 | 11 | 0 | 266 | 10 | 693 | 21 |
| 12,551 | 40 | 1 | 353 | 9  | 12 | 0 | 267 | 8  | 672 | 18 |
| 12,552 | 40 | 1 | 351 | 8  | 12 | 0 | 263 | 7  | 666 | 16 |
| 12,553 | 40 | 1 | 350 | 8  | 11 | 0 | 263 | 7  | 664 | 16 |
| 12,554 | 40 | 1 | 351 | 7  | 12 | 0 | 268 | 7  | 671 | 15 |
| 12,555 | 40 | 1 | 360 | 7  | 13 | 0 | 279 | 7  | 692 | 15 |
| 12,556 | 40 | 1 | 360 | 7  | 13 | 0 | 298 | 6  | 711 | 14 |
| 12,557 | 41 | 1 | 358 | 6  | 13 | 0 | 298 | 6  | 710 | 13 |
| 12,558 | 40 | 1 | 357 | 6  | 13 | 0 | 299 | 6  | 709 | 13 |
| 12,559 | 34 | 2 | 314 | 2  | 13 | 0 | 264 | 5  | 625 | 9  |
| 12,560 | 34 | 2 | 314 | 3  | 13 | 0 | 264 | 6  | 625 | 11 |
| 12,561 | 34 | 2 | 314 | 9  | 13 | 0 | 261 | 9  | 622 | 20 |
| 12,562 | 34 | 3 | 313 | 16 | 13 | 1 | 261 | 16 | 621 | 36 |
| 12,563 | 32 | 3 | 313 | 17 | 13 | 1 | 263 | 16 | 621 | 37 |
| 12,564 | 29 | 3 | 317 | 17 | 13 | 1 | 264 | 16 | 623 | 37 |
| 12,565 | 27 | 3 | 300 | 18 | 13 | 1 | 259 | 16 | 599 | 38 |
| 12,566 | 24 | 3 | 285 | 18 | 13 | 1 | 243 | 16 | 565 | 38 |
| 12,567 | 24 | 3 | 257 | 18 | 12 | 1 | 203 | 16 | 496 | 38 |
| 12,568 | 23 | 3 | 256 | 19 | 12 | 1 | 201 | 16 | 492 | 39 |
| 12,569 | 23 | 2 | 257 | 19 | 12 | 1 | 201 | 15 | 493 | 37 |
| 12,570 | 23 | 2 | 263 | 19 | 12 | 1 | 205 | 15 | 503 | 37 |
| 12,571 | 23 | 2 | 263 | 20 | 12 | 1 | 205 | 15 | 503 | 38 |
| 12,572 | 26 | 2 | 266 | 20 | 12 | 1 | 207 | 15 | 511 | 38 |
| 12,573 | 25 | 2 | 266 | 20 | 12 | 1 | 207 | 15 | 510 | 38 |
| 12,574 | 25 | 2 | 267 | 20 | 12 | 1 | 212 | 15 | 516 | 38 |
| 12,575 | 37 | 2 | 329 | 20 | 14 | 1 | 280 | 15 | 660 | 38 |

|        |     |   |       |    |    |   |       |    |       |    |
|--------|-----|---|-------|----|----|---|-------|----|-------|----|
| 12,576 | 42  | 2 | 421   | 20 | 20 | 1 | 388   | 15 | 871   | 38 |
| 12,577 | 42  | 2 | 423   | 20 | 20 | 1 | 401   | 15 | 886   | 38 |
| 12,578 | 42  | 2 | 423   | 20 | 20 | 1 | 401   | 15 | 886   | 38 |
| 12,579 | 48  | 2 | 459   | 20 | 23 | 1 | 471   | 15 | 1,001 | 38 |
| 12,580 | 50  | 2 | 482   | 20 | 24 | 1 | 494   | 15 | 1,050 | 38 |
| 12,581 | 51  | 2 | 509   | 20 | 25 | 1 | 543   | 15 | 1,128 | 38 |
| 12,582 | 51  | 2 | 509   | 20 | 25 | 1 | 542   | 15 | 1,127 | 38 |
| 12,583 | 51  | 2 | 498   | 20 | 25 | 1 | 536   | 15 | 1,110 | 38 |
| 12,584 | 53  | 2 | 519   | 20 | 28 | 1 | 608   | 12 | 1,208 | 35 |
| 12,585 | 55  | 2 | 605   | 20 | 34 | 1 | 704   | 12 | 1,398 | 35 |
| 12,586 | 51  | 2 | 593   | 20 | 32 | 1 | 685   | 12 | 1,361 | 35 |
| 12,587 | 54  | 2 | 618   | 20 | 34 | 1 | 718   | 12 | 1,424 | 35 |
| 12,588 | 54  | 2 | 605   | 20 | 34 | 1 | 716   | 12 | 1,409 | 35 |
| 12,589 | 51  | 2 | 549   | 21 | 33 | 2 | 694   | 12 | 1,327 | 37 |
| 12,590 | 51  | 2 | 552   | 22 | 33 | 2 | 694   | 12 | 1,330 | 38 |
| 12,591 | 51  | 2 | 534   | 22 | 33 | 2 | 680   | 12 | 1,298 | 38 |
| 12,592 | 50  | 2 | 539   | 22 | 33 | 2 | 691   | 12 | 1,313 | 38 |
| 12,593 | 48  | 2 | 531   | 22 | 31 | 2 | 686   | 12 | 1,296 | 38 |
| 12,594 | 47  | 2 | 529   | 22 | 31 | 2 | 687   | 12 | 1,294 | 38 |
| 12,595 | 51  | 2 | 551   | 23 | 32 | 2 | 710   | 12 | 1,344 | 39 |
| 12,596 | 51  | 2 | 574   | 23 | 31 | 2 | 721   | 12 | 1,377 | 39 |
| 12,597 | 54  | 2 | 640   | 23 | 35 | 2 | 783   | 11 | 1,512 | 38 |
| 12,598 | 54  | 2 | 646   | 22 | 35 | 2 | 783   | 11 | 1,518 | 37 |
| 12,599 | 54  | 2 | 649   | 22 | 35 | 2 | 785   | 11 | 1,523 | 37 |
| 12,600 | 58  | 2 | 676   | 22 | 38 | 2 | 845   | 11 | 1,617 | 37 |
| 12,601 | 58  | 2 | 680   | 23 | 38 | 2 | 843   | 11 | 1,619 | 38 |
| 12,602 | 60  | 2 | 682   | 23 | 37 | 2 | 841   | 11 | 1,620 | 38 |
| 12,603 | 60  | 2 | 700   | 26 | 41 | 2 | 850   | 12 | 1,651 | 42 |
| 12,604 | 60  | 2 | 698   | 32 | 40 | 2 | 843   | 13 | 1,641 | 49 |
| 12,605 | 60  | 2 | 686   | 32 | 39 | 2 | 833   | 13 | 1,618 | 49 |
| 12,606 | 61  | 2 | 713   | 33 | 39 | 2 | 830   | 13 | 1,643 | 50 |
| 12,607 | 81  | 2 | 837   | 33 | 49 | 2 | 898   | 13 | 1,865 | 50 |
| 12,608 | 80  | 2 | 837   | 33 | 49 | 2 | 898   | 13 | 1,864 | 50 |
| 12,609 | 80  | 2 | 836   | 37 | 49 | 2 | 897   | 13 | 1,862 | 54 |
| 12,610 | 94  | 1 | 1,056 | 37 | 61 | 2 | 1,021 | 14 | 2,232 | 54 |
| 12,611 | 104 | 2 | 1,321 | 38 | 70 | 2 | 1,086 | 13 | 2,581 | 55 |
| 12,612 | 106 | 2 | 1,374 | 32 | 73 | 2 | 1,099 | 10 | 2,652 | 46 |
| 12,613 | 115 | 1 | 1,533 | 24 | 77 | 1 | 1,171 | 3  | 2,896 | 29 |
| 12,614 | 120 | 1 | 1,659 | 24 | 83 | 1 | 1,237 | 3  | 3,099 | 29 |
| 12,615 | 120 | 1 | 1,654 | 25 | 83 | 1 | 1,236 | 3  | 3,093 | 30 |
| 12,616 | 120 | 1 | 1,654 | 24 | 83 | 1 | 1,235 | 3  | 3,092 | 29 |

|        |     |   |       |    |     |   |       |   |       |    |
|--------|-----|---|-------|----|-----|---|-------|---|-------|----|
| 12,617 | 123 | 1 | 1,778 | 24 | 97  | 1 | 1,338 | 3 | 3,336 | 29 |
| 12,618 | 125 | 1 | 1,837 | 23 | 100 | 1 | 1,360 | 3 | 3,422 | 28 |
| 12,619 | 125 | 1 | 1,844 | 24 | 100 | 1 | 1,362 | 3 | 3,431 | 29 |
| 12,620 | 127 | 1 | 1,865 | 24 | 101 | 1 | 1,369 | 3 | 3,462 | 29 |
| 12,621 | 127 | 1 | 1,864 | 24 | 101 | 1 | 1,369 | 3 | 3,461 | 29 |
| 12,622 | 149 | 1 | 1,936 | 24 | 101 | 1 | 1,416 | 3 | 3,602 | 29 |
| 12,623 | 163 | 1 | 2,167 | 24 | 107 | 1 | 1,498 | 3 | 3,935 | 29 |
| 12,624 | 191 | 1 | 2,274 | 24 | 110 | 1 | 1,548 | 3 | 4,123 | 29 |
| 12,625 | 193 | 1 | 2,299 | 24 | 111 | 1 | 1,583 | 3 | 4,186 | 29 |
| 12,626 | 201 | 1 | 2,352 | 24 | 112 | 1 | 1,583 | 3 | 4,248 | 29 |
| 12,627 | 196 | 1 | 2,263 | 24 | 107 | 1 | 1,477 | 3 | 4,043 | 29 |
| 12,628 | 198 | 1 | 2,273 | 24 | 108 | 1 | 1,471 | 3 | 4,050 | 29 |
| 12,629 | 194 | 1 | 2,261 | 26 | 105 | 1 | 1,418 | 6 | 3,978 | 34 |
| 12,630 | 193 | 1 | 2,254 | 26 | 104 | 1 | 1,409 | 6 | 3,960 | 34 |
| 12,631 | 195 | 1 | 2,265 | 29 | 104 | 1 | 1,406 | 6 | 3,970 | 37 |
| 12,632 | 195 | 1 | 2,243 | 29 | 103 | 1 | 1,358 | 6 | 3,899 | 37 |
| 12,633 | 197 | 1 | 2,258 | 28 | 105 | 1 | 1,363 | 6 | 3,923 | 36 |
| 12,634 | 196 | 1 | 2,238 | 28 | 105 | 1 | 1,344 | 6 | 3,883 | 36 |
| 12,635 | 194 | 1 | 2,213 | 28 | 103 | 1 | 1,287 | 6 | 3,797 | 36 |
| 12,636 | 192 | 1 | 2,132 | 29 | 97  | 1 | 1,190 | 6 | 3,611 | 37 |
| 12,637 | 191 | 1 | 2,110 | 29 | 96  | 1 | 1,160 | 6 | 3,557 | 37 |
| 12,638 | 189 | 1 | 2,108 | 29 | 95  | 1 | 1,155 | 6 | 3,547 | 37 |
| 12,639 | 189 | 1 | 2,109 | 30 | 95  | 1 | 1,156 | 6 | 3,549 | 38 |
| 12,640 | 189 | 1 | 2,106 | 29 | 95  | 0 | 1,155 | 6 | 3,545 | 36 |
| 12,641 | 189 | 1 | 2,100 | 28 | 95  | 0 | 1,154 | 6 | 3,538 | 35 |
| 12,642 | 189 | 1 | 2,103 | 28 | 95  | 0 | 1,153 | 6 | 3,540 | 35 |
| 12,643 | 189 | 1 | 2,091 | 28 | 95  | 0 | 1,134 | 6 | 3,509 | 35 |
| 12,644 | 188 | 1 | 2,082 | 28 | 95  | 0 | 1,127 | 6 | 3,492 | 35 |
| 12,645 | 188 | 1 | 2,080 | 28 | 95  | 0 | 1,125 | 6 | 3,488 | 35 |
| 12,646 | 184 | 1 | 2,058 | 27 | 94  | 0 | 1,101 | 7 | 3,437 | 35 |
| 12,647 | 182 | 1 | 2,024 | 27 | 93  | 0 | 1,078 | 7 | 3,377 | 35 |
| 12,648 | 179 | 1 | 1,946 | 27 | 89  | 0 | 1,014 | 7 | 3,228 | 35 |
| 12,649 | 179 | 1 | 1,940 | 26 | 89  | 0 | 1,014 | 7 | 3,222 | 34 |
| 12,650 | 179 | 1 | 1,936 | 26 | 89  | 0 | 1,012 | 7 | 3,216 | 34 |
| 12,651 | 172 | 3 | 1,889 | 26 | 84  | 0 | 933   | 7 | 3,078 | 36 |
| 12,652 | 172 | 3 | 1,882 | 26 | 84  | 0 | 931   | 7 | 3,069 | 36 |
| 12,653 | 170 | 3 | 1,878 | 26 | 84  | 0 | 929   | 7 | 3,061 | 36 |
| 12,654 | 170 | 3 | 1,860 | 22 | 80  | 0 | 921   | 6 | 3,031 | 31 |
| 12,655 | 170 | 3 | 1,859 | 17 | 80  | 0 | 919   | 5 | 3,028 | 25 |
| 12,656 | 171 | 3 | 1,862 | 17 | 80  | 0 | 919   | 7 | 3,032 | 27 |
| 12,657 | 169 | 3 | 1,835 | 16 | 80  | 0 | 914   | 7 | 2,998 | 26 |

|        |     |   |       |    |    |   |     |    |       |    |
|--------|-----|---|-------|----|----|---|-----|----|-------|----|
| 12,658 | 150 | 3 | 1,710 | 16 | 70 | 0 | 835 | 7  | 2,765 | 26 |
| 12,659 | 147 | 3 | 1,598 | 16 | 67 | 0 | 810 | 7  | 2,622 | 26 |
| 12,660 | 137 | 3 | 1,490 | 12 | 58 | 0 | 713 | 8  | 2,398 | 23 |
| 12,661 | 129 | 3 | 1,294 | 13 | 50 | 1 | 673 | 9  | 2,146 | 26 |
| 12,662 | 127 | 2 | 1,224 | 13 | 49 | 1 | 649 | 10 | 2,049 | 26 |
| 12,663 | 125 | 3 | 1,172 | 13 | 45 | 1 | 636 | 10 | 1,978 | 27 |
| 12,664 | 116 | 3 | 1,014 | 14 | 42 | 1 | 565 | 10 | 1,737 | 28 |
| 12,665 | 111 | 3 | 886   | 14 | 36 | 1 | 498 | 10 | 1,531 | 28 |
| 12,666 | 111 | 3 | 793   | 13 | 27 | 1 | 421 | 10 | 1,352 | 27 |
| 12,667 | 108 | 3 | 761   | 12 | 22 | 1 | 395 | 11 | 1,286 | 27 |
| 12,668 | 109 | 3 | 754   | 14 | 20 | 1 | 388 | 11 | 1,271 | 29 |
| 12,669 | 106 | 3 | 705   | 14 | 19 | 1 | 374 | 11 | 1,204 | 29 |
| 12,670 | 106 | 3 | 701   | 14 | 19 | 1 | 373 | 11 | 1,199 | 29 |
| 12,671 | 104 | 3 | 676   | 14 | 18 | 1 | 362 | 11 | 1,160 | 29 |
| 12,672 | 84  | 3 | 604   | 14 | 18 | 1 | 315 | 12 | 1,021 | 30 |
| 12,673 | 70  | 3 | 413   | 13 | 14 | 1 | 265 | 12 | 762   | 29 |
| 12,674 | 66  | 3 | 371   | 13 | 12 | 1 | 228 | 11 | 677   | 28 |
| 12,675 | 44  | 3 | 300   | 13 | 11 | 1 | 187 | 11 | 542   | 28 |
| 12,676 | 42  | 3 | 275   | 13 | 10 | 1 | 152 | 11 | 479   | 28 |
| 12,677 | 22  | 3 | 166   | 14 | 7  | 1 | 87  | 11 | 282   | 29 |
| 12,678 | 22  | 3 | 161   | 14 | 6  | 1 | 86  | 11 | 275   | 29 |
| 12,679 | 22  | 3 | 156   | 12 | 5  | 1 | 82  | 9  | 265   | 25 |
| 12,680 | 21  | 3 | 135   | 12 | 6  | 1 | 63  | 10 | 225   | 26 |
| 12,681 | 20  | 3 | 120   | 9  | 6  | 1 | 61  | 10 | 207   | 23 |
| 12,682 | 20  | 3 | 123   | 9  | 6  | 1 | 64  | 10 | 213   | 23 |
| 12,683 | 19  | 3 | 122   | 9  | 6  | 1 | 63  | 11 | 210   | 24 |
| 12,684 | 15  | 3 | 97    | 9  | 3  | 1 | 45  | 11 | 160   | 24 |
| 12,685 | 17  | 3 | 139   | 9  | 5  | 1 | 71  | 11 | 232   | 24 |
| 12,686 | 17  | 3 | 139   | 9  | 5  | 1 | 71  | 11 | 232   | 24 |
| 12,687 | 17  | 3 | 134   | 8  | 5  | 1 | 70  | 11 | 226   | 23 |
| 12,688 | 34  | 3 | 204   | 7  | 9  | 1 | 118 | 11 | 365   | 22 |
| 12,689 | 34  | 3 | 221   | 7  | 10 | 1 | 120 | 11 | 385   | 22 |
| 12,690 | 34  | 3 | 220   | 7  | 10 | 1 | 120 | 11 | 384   | 22 |
| 12,691 | 35  | 3 | 225   | 7  | 12 | 1 | 121 | 12 | 393   | 23 |
| 12,692 | 79  | 3 | 402   | 7  | 26 | 1 | 273 | 12 | 780   | 23 |
| 12,693 | 79  | 3 | 402   | 7  | 26 | 1 | 273 | 12 | 780   | 23 |
| 12,694 | 79  | 3 | 402   | 7  | 26 | 1 | 273 | 12 | 780   | 23 |
| 12,695 | 80  | 3 | 420   | 7  | 27 | 1 | 284 | 12 | 811   | 23 |
| 12,696 | 80  | 3 | 421   | 7  | 27 | 1 | 285 | 11 | 813   | 22 |
| 12,697 | 80  | 3 | 421   | 7  | 27 | 1 | 285 | 11 | 813   | 22 |
| 12,698 | 81  | 3 | 422   | 7  | 27 | 1 | 286 | 11 | 816   | 22 |

|        |     |   |     |    |    |   |     |    |       |    |
|--------|-----|---|-----|----|----|---|-----|----|-------|----|
| 12,699 | 81  | 3 | 422 | 7  | 27 | 1 | 286 | 11 | 816   | 22 |
| 12,700 | 81  | 3 | 422 | 7  | 27 | 1 | 286 | 11 | 816   | 22 |
| 12,701 | 81  | 1 | 424 | 7  | 27 | 1 | 286 | 11 | 818   | 20 |
| 12,702 | 81  | 1 | 424 | 7  | 27 | 1 | 288 | 11 | 820   | 20 |
| 12,703 | 81  | 1 | 426 | 7  | 27 | 1 | 288 | 11 | 822   | 20 |
| 12,704 | 81  | 1 | 426 | 7  | 27 | 1 | 288 | 11 | 822   | 20 |
| 12,705 | 81  | 1 | 424 | 8  | 27 | 1 | 288 | 11 | 820   | 21 |
| 12,706 | 81  | 1 | 425 | 9  | 27 | 1 | 288 | 11 | 821   | 22 |
| 12,707 | 80  | 1 | 428 | 9  | 27 | 1 | 288 | 9  | 823   | 20 |
| 12,708 | 80  | 1 | 428 | 9  | 27 | 1 | 288 | 9  | 823   | 20 |
| 12,709 | 80  | 1 | 426 | 9  | 27 | 1 | 285 | 9  | 818   | 20 |
| 12,710 | 79  | 1 | 428 | 9  | 27 | 1 | 284 | 7  | 818   | 18 |
| 12,711 | 79  | 1 | 429 | 10 | 27 | 1 | 283 | 7  | 818   | 19 |
| 12,712 | 81  | 1 | 438 | 7  | 27 | 0 | 285 | 5  | 831   | 13 |
| 12,713 | 81  | 1 | 440 | 7  | 27 | 0 | 285 | 5  | 833   | 13 |
| 12,714 | 82  | 0 | 459 | 8  | 28 | 1 | 290 | 5  | 859   | 14 |
| 12,715 | 82  | 0 | 459 | 7  | 28 | 1 | 289 | 5  | 858   | 13 |
| 12,716 | 81  | 0 | 459 | 7  | 28 | 1 | 289 | 6  | 857   | 14 |
| 12,717 | 87  | 0 | 475 | 7  | 30 | 1 | 297 | 5  | 889   | 13 |
| 12,718 | 88  | 0 | 475 | 7  | 30 | 1 | 297 | 5  | 890   | 13 |
| 12,719 | 87  | 0 | 473 | 6  | 30 | 1 | 297 | 5  | 887   | 12 |
| 12,720 | 87  | 0 | 472 | 6  | 30 | 1 | 296 | 5  | 885   | 12 |
| 12,721 | 112 | 0 | 546 | 6  | 33 | 1 | 322 | 6  | 1,013 | 13 |
| 12,722 | 119 | 0 | 562 | 6  | 34 | 1 | 330 | 7  | 1,045 | 14 |
| 12,723 | 118 | 0 | 565 | 6  | 34 | 1 | 330 | 6  | 1,047 | 13 |
| 12,724 | 118 | 0 | 563 | 6  | 34 | 1 | 330 | 6  | 1,045 | 13 |
| 12,725 | 117 | 0 | 566 | 8  | 34 | 1 | 339 | 6  | 1,056 | 15 |
| 12,726 | 113 | 0 | 542 | 8  | 33 | 1 | 323 | 6  | 1,011 | 15 |
| 12,727 | 113 | 0 | 540 | 7  | 34 | 1 | 322 | 6  | 1,009 | 14 |
| 12,728 | 113 | 0 | 541 | 7  | 34 | 1 | 323 | 6  | 1,011 | 14 |
| 12,729 | 113 | 0 | 543 | 7  | 34 | 1 | 324 | 7  | 1,014 | 15 |
| 12,730 | 111 | 0 | 539 | 8  | 34 | 1 | 322 | 8  | 1,006 | 17 |
| 12,731 | 111 | 0 | 536 | 10 | 33 | 1 | 319 | 7  | 999   | 18 |
| 12,732 | 112 | 0 | 543 | 11 | 34 | 1 | 323 | 9  | 1,012 | 21 |
| 12,733 | 109 | 0 | 540 | 11 | 35 | 1 | 317 | 9  | 1,001 | 21 |
| 12,734 | 128 | 0 | 566 | 11 | 37 | 1 | 327 | 8  | 1,058 | 20 |
| 12,735 | 128 | 0 | 561 | 11 | 37 | 1 | 324 | 8  | 1,050 | 20 |
| 12,736 | 128 | 0 | 559 | 11 | 37 | 1 | 328 | 8  | 1,052 | 20 |
| 12,737 | 129 | 0 | 551 | 11 | 37 | 1 | 328 | 8  | 1,045 | 20 |
| 12,738 | 129 | 0 | 544 | 11 | 37 | 1 | 329 | 8  | 1,039 | 20 |
| 12,739 | 112 | 1 | 505 | 11 | 33 | 1 | 291 | 9  | 941   | 22 |

|        |     |   |     |    |    |   |     |    |     |    |
|--------|-----|---|-----|----|----|---|-----|----|-----|----|
| 12,740 | 112 | 1 | 490 | 11 | 32 | 1 | 291 | 9  | 925 | 22 |
| 12,741 | 111 | 1 | 490 | 11 | 30 | 1 | 296 | 9  | 927 | 22 |
| 12,742 | 81  | 1 | 354 | 11 | 19 | 1 | 180 | 8  | 634 | 21 |
| 12,743 | 67  | 1 | 315 | 11 | 16 | 1 | 143 | 8  | 541 | 21 |
| 12,744 | 67  | 1 | 313 | 11 | 16 | 1 | 142 | 8  | 538 | 21 |
| 12,745 | 66  | 1 | 315 | 11 | 15 | 1 | 145 | 8  | 541 | 21 |
| 12,746 | 66  | 1 | 322 | 11 | 16 | 1 | 151 | 9  | 555 | 22 |
| 12,747 | 66  | 1 | 322 | 11 | 16 | 1 | 151 | 9  | 555 | 22 |
| 12,748 | 71  | 1 | 353 | 11 | 17 | 1 | 177 | 9  | 618 | 22 |
| 12,749 | 71  | 1 | 353 | 11 | 17 | 1 | 177 | 9  | 618 | 22 |
| 12,750 | 70  | 1 | 354 | 11 | 17 | 1 | 177 | 12 | 618 | 25 |
| 12,751 | 70  | 1 | 352 | 11 | 17 | 1 | 177 | 12 | 616 | 25 |
| 12,752 | 70  | 1 | 352 | 11 | 17 | 1 | 177 | 12 | 616 | 25 |
| 12,753 | 70  | 1 | 352 | 11 | 17 | 1 | 176 | 12 | 615 | 25 |
| 12,754 | 70  | 1 | 350 | 11 | 17 | 1 | 178 | 12 | 615 | 25 |
| 12,755 | 70  | 1 | 350 | 10 | 17 | 1 | 178 | 12 | 615 | 24 |
| 12,756 | 71  | 1 | 350 | 9  | 17 | 1 | 178 | 12 | 616 | 23 |
| 12,757 | 71  | 1 | 349 | 9  | 17 | 1 | 178 | 12 | 615 | 23 |
| 12,758 | 71  | 1 | 343 | 9  | 17 | 1 | 178 | 12 | 609 | 23 |
| 12,759 | 71  | 1 | 343 | 9  | 17 | 1 | 178 | 12 | 609 | 23 |
| 12,760 | 71  | 1 | 342 | 9  | 17 | 1 | 181 | 12 | 611 | 23 |
| 12,761 | 71  | 1 | 342 | 9  | 17 | 1 | 181 | 12 | 611 | 23 |
| 12,762 | 69  | 1 | 336 | 8  | 17 | 1 | 179 | 12 | 601 | 22 |
| 12,763 | 69  | 1 | 334 | 8  | 17 | 1 | 178 | 12 | 598 | 22 |
| 12,764 | 69  | 1 | 332 | 7  | 17 | 0 | 178 | 12 | 596 | 20 |
| 12,765 | 68  | 1 | 312 | 7  | 16 | 0 | 173 | 12 | 569 | 20 |
| 12,766 | 68  | 1 | 311 | 7  | 16 | 0 | 173 | 12 | 568 | 20 |
| 12,767 | 62  | 1 | 296 | 7  | 14 | 0 | 165 | 12 | 537 | 20 |
| 12,768 | 61  | 1 | 295 | 7  | 14 | 0 | 164 | 12 | 534 | 20 |
| 12,769 | 58  | 1 | 277 | 8  | 14 | 0 | 157 | 12 | 506 | 21 |
| 12,770 | 55  | 1 | 253 | 7  | 14 | 0 | 149 | 12 | 471 | 20 |
| 12,771 | 38  | 1 | 226 | 8  | 11 | 0 | 137 | 11 | 412 | 20 |
| 12,772 | 37  | 1 | 222 | 8  | 11 | 0 | 138 | 11 | 408 | 20 |
| 12,773 | 30  | 1 | 206 | 8  | 10 | 0 | 130 | 10 | 376 | 19 |
| 12,774 | 30  | 1 | 205 | 7  | 10 | 0 | 130 | 10 | 375 | 18 |
| 12,775 | 30  | 1 | 204 | 7  | 10 | 0 | 130 | 10 | 374 | 18 |
| 12,776 | 37  | 1 | 202 | 7  | 12 | 0 | 128 | 10 | 379 | 18 |
| 12,777 | 37  | 1 | 205 | 7  | 11 | 0 | 136 | 10 | 389 | 18 |
| 12,778 | 37  | 1 | 201 | 7  | 10 | 0 | 136 | 9  | 384 | 17 |
| 12,779 | 38  | 1 | 206 | 7  | 11 | 0 | 139 | 9  | 394 | 17 |
| 12,780 | 38  | 1 | 204 | 7  | 11 | 0 | 137 | 10 | 390 | 18 |



|        |    |   |     |   |    |   |     |   |     |    |
|--------|----|---|-----|---|----|---|-----|---|-----|----|
| 12,781 | 38 | 1 | 200 | 6 | 11 | 0 | 136 | 9 | 385 | 16 |
| 12,782 | 39 | 1 | 210 | 4 | 13 | 0 | 147 | 9 | 409 | 14 |
| 12,783 | 38 | 1 | 203 | 3 | 13 | 0 | 146 | 7 | 400 | 11 |
| 12,784 | 38 | 1 | 193 | 3 | 12 | 0 | 143 | 7 | 386 | 11 |
| 12,785 | 18 | 1 | 137 | 3 | 8  | 0 | 113 | 7 | 276 | 11 |
| 12,786 | 18 | 1 | 136 | 3 | 8  | 0 | 113 | 7 | 275 | 11 |
| 12,787 | 18 | 1 | 134 | 3 | 8  | 0 | 106 | 7 | 266 | 11 |
| 12,788 | 18 | 1 | 131 | 3 | 8  | 0 | 104 | 7 | 261 | 11 |
| 12,789 | 18 | 0 | 129 | 3 | 8  | 0 | 103 | 6 | 258 | 9  |
| 12,790 | 19 | 0 | 136 | 3 | 8  | 0 | 106 | 6 | 269 | 9  |
| 12,791 | 19 | 0 | 134 | 3 | 8  | 0 | 104 | 6 | 265 | 9  |
| 12,792 | 19 | 0 | 130 | 4 | 8  | 0 | 98  | 6 | 255 | 10 |
| 12,793 | 20 | 0 | 146 | 4 | 9  | 0 | 124 | 6 | 299 | 10 |
| 12,794 | 20 | 0 | 147 | 4 | 9  | 0 | 124 | 6 | 300 | 10 |
| 12,795 | 20 | 0 | 149 | 4 | 9  | 0 | 123 | 6 | 301 | 10 |
| 12,796 | 20 | 0 | 140 | 4 | 9  | 0 | 114 | 6 | 283 | 10 |
| 12,797 | 20 | 0 | 133 | 4 | 8  | 0 | 109 | 5 | 270 | 9  |
| 12,798 | 17 | 0 | 107 | 4 | 8  | 0 | 88  | 5 | 220 | 9  |
| 12,799 | 17 | 0 | 144 | 4 | 7  | 0 | 101 | 5 | 269 | 9  |
| 12,800 | 17 | 0 | 157 | 4 | 8  | 0 | 110 | 2 | 292 | 6  |
| 12,801 | 18 | 0 | 163 | 4 | 9  | 0 | 114 | 2 | 304 | 6  |
| 12,802 | 18 | 0 | 163 | 4 | 9  | 0 | 112 | 2 | 302 | 6  |
| 12,803 | 19 | 0 | 180 | 5 | 12 | 0 | 124 | 2 | 335 | 7  |
| 12,804 | 19 | 0 | 180 | 5 | 12 | 0 | 124 | 2 | 335 | 7  |
| 12,805 | 19 | 0 | 179 | 5 | 12 | 0 | 125 | 3 | 335 | 8  |
| 12,806 | 19 | 0 | 179 | 6 | 12 | 0 | 125 | 3 | 335 | 9  |
| 12,807 | 18 | 0 | 179 | 6 | 12 | 0 | 125 | 3 | 334 | 9  |
| 12,808 | 20 | 0 | 189 | 6 | 14 | 0 | 133 | 3 | 356 | 9  |
| 12,809 | 20 | 0 | 189 | 6 | 14 | 0 | 133 | 4 | 356 | 10 |
| 12,810 | 20 | 0 | 188 | 6 | 14 | 0 | 131 | 4 | 353 | 10 |
| 12,811 | 20 | 0 | 189 | 6 | 14 | 0 | 130 | 4 | 353 | 10 |
| 12,812 | 20 | 0 | 189 | 6 | 14 | 0 | 131 | 4 | 354 | 10 |
| 12,813 | 20 | 0 | 188 | 6 | 14 | 0 | 131 | 4 | 353 | 10 |
| 12,814 | 20 | 0 | 189 | 6 | 15 | 0 | 132 | 4 | 356 | 10 |
| 12,815 | 20 | 0 | 189 | 6 | 15 | 0 | 132 | 4 | 356 | 10 |
| 12,816 | 23 | 0 | 190 | 6 | 15 | 0 | 136 | 5 | 364 | 11 |
| 12,817 | 23 | 0 | 190 | 7 | 15 | 0 | 136 | 5 | 364 | 12 |
| 12,818 | 23 | 0 | 191 | 7 | 16 | 0 | 136 | 4 | 366 | 11 |
| 12,819 | 23 | 0 | 195 | 6 | 16 | 0 | 136 | 4 | 370 | 10 |
| 12,820 | 23 | 0 | 195 | 6 | 16 | 0 | 136 | 4 | 370 | 10 |
| 12,821 | 26 | 0 | 211 | 6 | 19 | 0 | 158 | 4 | 414 | 10 |

|        |    |   |     |    |    |   |     |    |     |    |
|--------|----|---|-----|----|----|---|-----|----|-----|----|
| 12,822 | 26 | 0 | 212 | 5  | 19 | 0 | 161 | 5  | 418 | 10 |
| 12,823 | 26 | 0 | 210 | 5  | 19 | 0 | 160 | 5  | 415 | 10 |
| 12,824 | 26 | 0 | 217 | 5  | 19 | 0 | 166 | 5  | 428 | 10 |
| 12,825 | 26 | 0 | 215 | 4  | 19 | 0 | 166 | 5  | 426 | 9  |
| 12,826 | 29 | 0 | 226 | 5  | 19 | 0 | 173 | 5  | 447 | 10 |
| 12,827 | 22 | 0 | 218 | 5  | 17 | 0 | 166 | 6  | 423 | 11 |
| 12,828 | 21 | 0 | 210 | 5  | 17 | 0 | 158 | 6  | 406 | 11 |
| 12,829 | 22 | 0 | 222 | 14 | 17 | 1 | 172 | 7  | 433 | 22 |
| 12,830 | 21 | 0 | 219 | 16 | 16 | 1 | 170 | 8  | 426 | 25 |
| 12,831 | 24 | 0 | 227 | 17 | 15 | 1 | 182 | 7  | 448 | 25 |
| 12,832 | 23 | 0 | 219 | 17 | 14 | 1 | 177 | 7  | 433 | 25 |
| 12,833 | 23 | 0 | 221 | 17 | 13 | 1 | 175 | 7  | 432 | 25 |
| 12,834 | 23 | 0 | 222 | 17 | 13 | 1 | 174 | 7  | 432 | 25 |
| 12,835 | 23 | 0 | 220 | 17 | 13 | 1 | 173 | 7  | 429 | 25 |
| 12,836 | 23 | 0 | 220 | 17 | 13 | 1 | 173 | 7  | 429 | 25 |
| 12,837 | 23 | 0 | 221 | 19 | 13 | 1 | 173 | 7  | 430 | 27 |
| 12,838 | 23 | 0 | 222 | 22 | 13 | 1 | 174 | 8  | 432 | 31 |
| 12,839 | 22 | 0 | 230 | 22 | 13 | 1 | 176 | 8  | 441 | 31 |
| 12,840 | 22 | 0 | 230 | 26 | 13 | 1 | 175 | 8  | 440 | 35 |
| 12,841 | 22 | 0 | 210 | 28 | 13 | 1 | 168 | 8  | 413 | 37 |
| 12,842 | 21 | 0 | 199 | 28 | 12 | 1 | 147 | 8  | 379 | 37 |
| 12,843 | 21 | 0 | 194 | 29 | 12 | 1 | 145 | 8  | 372 | 38 |
| 12,844 | 21 | 0 | 191 | 29 | 12 | 1 | 142 | 8  | 366 | 38 |
| 12,845 | 21 | 1 | 190 | 30 | 12 | 1 | 142 | 11 | 365 | 43 |
| 12,846 | 21 | 1 | 186 | 31 | 12 | 1 | 142 | 11 | 361 | 44 |
| 12,847 | 21 | 1 | 179 | 33 | 12 | 1 | 140 | 11 | 352 | 46 |
| 12,848 | 21 | 1 | 178 | 34 | 12 | 1 | 138 | 12 | 349 | 48 |
| 12,849 | 21 | 1 | 176 | 34 | 12 | 1 | 138 | 12 | 347 | 48 |
| 12,850 | 19 | 1 | 136 | 34 | 12 | 1 | 120 | 12 | 287 | 48 |
| 12,851 | 19 | 1 | 123 | 34 | 11 | 1 | 110 | 12 | 263 | 48 |
| 12,852 | 22 | 1 | 116 | 34 | 10 | 1 | 107 | 12 | 255 | 48 |
| 12,853 | 22 | 1 | 116 | 35 | 8  | 1 | 106 | 13 | 252 | 50 |
| 12,854 | 21 | 1 | 100 | 34 | 7  | 1 | 96  | 14 | 224 | 50 |
| 12,855 | 21 | 1 | 100 | 34 | 7  | 1 | 95  | 14 | 223 | 50 |
| 12,856 | 21 | 1 | 103 | 33 | 6  | 1 | 94  | 13 | 224 | 48 |
| 12,857 | 21 | 1 | 102 | 34 | 6  | 1 | 94  | 13 | 223 | 49 |
| 12,858 | 19 | 2 | 98  | 35 | 5  | 1 | 88  | 13 | 210 | 51 |
| 12,859 | 19 | 2 | 95  | 36 | 5  | 1 | 87  | 13 | 206 | 52 |
| 12,860 | 19 | 2 | 96  | 37 | 5  | 1 | 87  | 12 | 207 | 52 |
| 12,861 | 19 | 2 | 96  | 37 | 5  | 1 | 87  | 13 | 207 | 53 |
| 12,862 | 19 | 2 | 98  | 37 | 5  | 1 | 87  | 13 | 209 | 53 |

|        |    |   |     |    |    |   |     |    |     |    |
|--------|----|---|-----|----|----|---|-----|----|-----|----|
| 12,863 | 19 | 2 | 98  | 37 | 5  | 1 | 87  | 13 | 209 | 53 |
| 12,864 | 19 | 2 | 100 | 37 | 5  | 1 | 90  | 14 | 214 | 54 |
| 12,865 | 19 | 3 | 99  | 37 | 4  | 1 | 86  | 14 | 208 | 55 |
| 12,866 | 19 | 3 | 104 | 37 | 4  | 1 | 85  | 14 | 212 | 55 |
| 12,867 | 17 | 3 | 127 | 39 | 4  | 1 | 97  | 13 | 245 | 56 |
| 12,868 | 18 | 3 | 146 | 38 | 7  | 1 | 113 | 13 | 284 | 55 |
| 12,869 | 18 | 3 | 148 | 38 | 7  | 1 | 113 | 13 | 286 | 55 |
| 12,870 | 18 | 3 | 156 | 41 | 7  | 1 | 114 | 15 | 295 | 60 |
| 12,871 | 17 | 3 | 147 | 41 | 4  | 1 | 95  | 16 | 263 | 61 |
| 12,872 | 20 | 3 | 255 | 41 | 9  | 1 | 162 | 18 | 446 | 63 |
| 12,873 | 20 | 3 | 253 | 41 | 9  | 1 | 159 | 19 | 441 | 64 |
| 12,874 | 33 | 3 | 379 | 41 | 16 | 1 | 246 | 19 | 674 | 64 |
| 12,875 | 34 | 3 | 385 | 41 | 16 | 1 | 254 | 19 | 689 | 64 |
| 12,876 | 34 | 3 | 384 | 41 | 16 | 1 | 257 | 18 | 691 | 63 |
| 12,877 | 31 | 4 | 372 | 40 | 16 | 1 | 250 | 19 | 669 | 64 |
| 12,878 | 31 | 4 | 372 | 40 | 16 | 1 | 251 | 19 | 670 | 64 |
| 12,879 | 31 | 4 | 369 | 41 | 17 | 1 | 251 | 20 | 668 | 66 |
| 12,880 | 30 | 4 | 360 | 32 | 17 | 0 | 238 | 19 | 645 | 55 |
| 12,881 | 30 | 4 | 357 | 31 | 17 | 0 | 238 | 21 | 642 | 56 |
| 12,882 | 26 | 4 | 348 | 31 | 17 | 0 | 222 | 20 | 613 | 55 |
| 12,883 | 26 | 4 | 353 | 31 | 17 | 0 | 220 | 20 | 616 | 55 |
| 12,884 | 26 | 4 | 351 | 31 | 17 | 0 | 220 | 20 | 614 | 55 |
| 12,885 | 26 | 4 | 360 | 31 | 18 | 0 | 226 | 20 | 630 | 55 |
| 12,886 | 26 | 4 | 386 | 31 | 18 | 0 | 244 | 20 | 674 | 55 |
| 12,887 | 29 | 4 | 431 | 31 | 19 | 0 | 265 | 20 | 744 | 55 |
| 12,888 | 29 | 4 | 433 | 29 | 19 | 1 | 266 | 20 | 747 | 54 |
| 12,889 | 29 | 4 | 432 | 26 | 20 | 1 | 266 | 19 | 747 | 50 |
| 12,890 | 29 | 4 | 423 | 26 | 20 | 1 | 264 | 19 | 736 | 50 |
| 12,891 | 29 | 4 | 424 | 22 | 20 | 1 | 264 | 19 | 737 | 46 |
| 12,892 | 28 | 4 | 426 | 20 | 20 | 1 | 262 | 19 | 736 | 44 |
| 12,893 | 28 | 4 | 426 | 20 | 20 | 1 | 263 | 19 | 737 | 44 |
| 12,894 | 30 | 4 | 427 | 18 | 20 | 1 | 264 | 19 | 741 | 42 |
| 12,895 | 30 | 4 | 427 | 18 | 20 | 1 | 264 | 19 | 741 | 42 |
| 12,896 | 31 | 3 | 428 | 17 | 20 | 1 | 264 | 16 | 743 | 37 |
| 12,897 | 31 | 3 | 437 | 16 | 20 | 1 | 265 | 16 | 753 | 36 |
| 12,898 | 35 | 3 | 479 | 14 | 24 | 1 | 286 | 16 | 824 | 34 |
| 12,899 | 35 | 3 | 479 | 13 | 24 | 1 | 286 | 15 | 824 | 32 |
| 12,900 | 36 | 4 | 482 | 13 | 24 | 1 | 289 | 15 | 831 | 33 |
| 12,901 | 38 | 4 | 488 | 14 | 24 | 1 | 290 | 15 | 840 | 34 |
| 12,902 | 36 | 4 | 492 | 15 | 24 | 1 | 298 | 15 | 850 | 35 |
| 12,903 | 34 | 4 | 494 | 16 | 25 | 1 | 300 | 15 | 853 | 36 |

|        |    |   |     |    |    |   |     |    |       |    |
|--------|----|---|-----|----|----|---|-----|----|-------|----|
| 12,904 | 39 | 4 | 575 | 15 | 28 | 1 | 343 | 14 | 985   | 34 |
| 12,905 | 39 | 4 | 574 | 15 | 28 | 1 | 343 | 14 | 984   | 34 |
| 12,906 | 39 | 4 | 577 | 16 | 28 | 1 | 343 | 14 | 987   | 35 |
| 12,907 | 39 | 4 | 574 | 16 | 28 | 1 | 343 | 14 | 984   | 35 |
| 12,908 | 39 | 4 | 577 | 15 | 28 | 1 | 344 | 14 | 988   | 34 |
| 12,909 | 43 | 3 | 595 | 13 | 28 | 1 | 360 | 14 | 1,026 | 31 |
| 12,910 | 43 | 3 | 593 | 12 | 28 | 1 | 360 | 14 | 1,024 | 30 |
| 12,911 | 43 | 3 | 593 | 12 | 28 | 1 | 360 | 14 | 1,024 | 30 |
| 12,912 | 43 | 3 | 592 | 12 | 28 | 1 | 360 | 13 | 1,023 | 29 |
| 12,913 | 43 | 3 | 591 | 12 | 28 | 1 | 359 | 13 | 1,021 | 29 |
| 12,914 | 43 | 3 | 604 | 12 | 28 | 1 | 376 | 13 | 1,051 | 29 |
| 12,915 | 44 | 3 | 609 | 12 | 29 | 1 | 383 | 12 | 1,065 | 28 |
| 12,916 | 43 | 2 | 606 | 12 | 29 | 1 | 384 | 12 | 1,062 | 27 |
| 12,917 | 43 | 2 | 583 | 12 | 29 | 1 | 373 | 12 | 1,028 | 27 |
| 12,918 | 42 | 2 | 563 | 10 | 25 | 1 | 358 | 12 | 988   | 25 |
| 12,919 | 42 | 2 | 563 | 18 | 25 | 1 | 357 | 12 | 987   | 33 |
| 12,920 | 42 | 2 | 559 | 20 | 25 | 1 | 357 | 12 | 983   | 35 |
| 12,921 | 42 | 2 | 549 | 18 | 25 | 1 | 356 | 12 | 972   | 33 |
| 12,922 | 41 | 2 | 543 | 18 | 25 | 1 | 355 | 11 | 964   | 32 |
| 12,923 | 37 | 2 | 434 | 19 | 20 | 1 | 285 | 9  | 776   | 31 |
| 12,924 | 24 | 2 | 321 | 19 | 11 | 1 | 203 | 7  | 559   | 29 |
| 12,925 | 24 | 5 | 306 | 19 | 11 | 1 | 196 | 7  | 537   | 32 |
| 12,926 | 23 | 5 | 296 | 19 | 11 | 1 | 184 | 7  | 514   | 32 |
| 12,927 | 23 | 5 | 296 | 19 | 11 | 1 | 181 | 7  | 511   | 32 |
| 12,928 | 23 | 4 | 298 | 22 | 12 | 1 | 182 | 7  | 515   | 34 |
| 12,929 | 23 | 4 | 298 | 22 | 12 | 1 | 182 | 6  | 515   | 33 |
| 12,930 | 23 | 4 | 297 | 21 | 12 | 1 | 182 | 5  | 514   | 31 |
| 12,931 | 23 | 4 | 297 | 26 | 12 | 1 | 182 | 7  | 514   | 38 |
| 12,932 | 23 | 4 | 299 | 28 | 12 | 1 | 182 | 9  | 516   | 42 |
| 12,933 | 23 | 4 | 304 | 27 | 12 | 1 | 182 | 10 | 521   | 42 |
| 12,934 | 23 | 4 | 298 | 28 | 13 | 1 | 183 | 10 | 517   | 43 |
| 12,935 | 24 | 4 | 296 | 28 | 12 | 1 | 180 | 10 | 512   | 43 |
| 12,936 | 24 | 4 | 270 | 30 | 12 | 1 | 162 | 11 | 468   | 46 |
| 12,937 | 21 | 4 | 224 | 30 | 11 | 1 | 141 | 11 | 397   | 46 |
| 12,938 | 22 | 4 | 232 | 30 | 12 | 1 | 144 | 11 | 410   | 46 |
| 12,939 | 22 | 4 | 232 | 30 | 12 | 0 | 146 | 11 | 412   | 45 |
| 12,940 | 22 | 4 | 246 | 30 | 12 | 0 | 149 | 11 | 429   | 45 |
| 12,941 | 22 | 4 | 256 | 30 | 12 | 0 | 153 | 11 | 443   | 45 |
| 12,942 | 24 | 4 | 262 | 30 | 12 | 0 | 158 | 11 | 456   | 45 |
| 12,943 | 24 | 4 | 265 | 30 | 12 | 0 | 158 | 11 | 459   | 45 |
| 12,944 | 24 | 4 | 265 | 30 | 12 | 0 | 156 | 11 | 457   | 45 |

|        |    |   |     |    |    |   |     |    |       |    |
|--------|----|---|-----|----|----|---|-----|----|-------|----|
| 12,945 | 22 | 4 | 265 | 30 | 12 | 0 | 155 | 11 | 454   | 45 |
| 12,946 | 27 | 4 | 290 | 30 | 12 | 0 | 168 | 12 | 497   | 46 |
| 12,947 | 34 | 4 | 364 | 30 | 13 | 0 | 183 | 12 | 594   | 46 |
| 12,948 | 34 | 4 | 365 | 30 | 12 | 0 | 186 | 14 | 597   | 48 |
| 12,949 | 30 | 4 | 327 | 32 | 9  | 0 | 167 | 14 | 533   | 50 |
| 12,950 | 29 | 4 | 323 | 33 | 9  | 0 | 164 | 14 | 525   | 51 |
| 12,951 | 38 | 3 | 432 | 33 | 10 | 0 | 221 | 14 | 701   | 50 |
| 12,952 | 36 | 3 | 435 | 32 | 11 | 0 | 225 | 16 | 707   | 51 |
| 12,953 | 43 | 3 | 502 | 37 | 14 | 0 | 242 | 17 | 801   | 57 |
| 12,954 | 45 | 3 | 555 | 43 | 19 | 2 | 281 | 19 | 900   | 67 |
| 12,955 | 43 | 3 | 505 | 46 | 21 | 2 | 272 | 22 | 841   | 73 |
| 12,956 | 58 | 3 | 603 | 47 | 26 | 2 | 349 | 21 | 1,036 | 73 |
| 12,957 | 58 | 3 | 629 | 46 | 26 | 2 | 373 | 21 | 1,086 | 72 |
| 12,958 | 58 | 3 | 631 | 46 | 26 | 2 | 377 | 21 | 1,092 | 72 |
| 12,959 | 59 | 4 | 629 | 46 | 26 | 2 | 376 | 21 | 1,090 | 73 |
| 12,960 | 55 | 4 | 610 | 46 | 27 | 2 | 367 | 21 | 1,059 | 73 |
| 12,961 | 55 | 4 | 610 | 46 | 27 | 2 | 365 | 21 | 1,057 | 73 |
| 12,962 | 55 | 4 | 612 | 46 | 27 | 2 | 369 | 21 | 1,063 | 73 |
| 12,963 | 55 | 4 | 613 | 46 | 27 | 2 | 369 | 21 | 1,064 | 73 |
| 12,964 | 55 | 4 | 603 | 46 | 27 | 2 | 355 | 21 | 1,040 | 73 |
| 12,965 | 55 | 4 | 605 | 47 | 27 | 2 | 356 | 21 | 1,043 | 74 |
| 12,966 | 54 | 4 | 603 | 47 | 26 | 2 | 347 | 21 | 1,030 | 74 |
| 12,967 | 54 | 4 | 603 | 47 | 27 | 2 | 346 | 21 | 1,030 | 74 |
| 12,968 | 54 | 4 | 602 | 47 | 27 | 2 | 346 | 21 | 1,029 | 74 |
| 12,969 | 55 | 4 | 613 | 47 | 27 | 2 | 351 | 21 | 1,046 | 74 |
| 12,970 | 64 | 4 | 639 | 39 | 29 | 2 | 372 | 21 | 1,104 | 66 |
| 12,971 | 65 | 4 | 649 | 36 | 30 | 2 | 380 | 19 | 1,124 | 61 |
| 12,972 | 72 | 4 | 679 | 36 | 32 | 2 | 397 | 19 | 1,180 | 61 |
| 12,973 | 75 | 4 | 696 | 36 | 32 | 2 | 403 | 19 | 1,206 | 61 |
| 12,974 | 75 | 4 | 695 | 35 | 32 | 2 | 403 | 19 | 1,205 | 60 |
| 12,975 | 75 | 4 | 716 | 37 | 32 | 2 | 426 | 22 | 1,249 | 65 |
| 12,976 | 75 | 1 | 715 | 37 | 32 | 2 | 424 | 22 | 1,246 | 62 |
| 12,977 | 79 | 1 | 739 | 37 | 33 | 2 | 469 | 22 | 1,320 | 62 |
| 12,978 | 82 | 1 | 749 | 37 | 34 | 2 | 474 | 22 | 1,339 | 62 |
| 12,979 | 82 | 1 | 755 | 36 | 33 | 2 | 476 | 22 | 1,346 | 61 |
| 12,980 | 82 | 1 | 755 | 36 | 33 | 2 | 476 | 22 | 1,346 | 61 |
| 12,981 | 82 | 1 | 755 | 36 | 33 | 2 | 476 | 22 | 1,346 | 61 |
| 12,982 | 83 | 1 | 760 | 31 | 33 | 2 | 480 | 20 | 1,356 | 54 |
| 12,983 | 84 | 1 | 771 | 28 | 33 | 2 | 484 | 16 | 1,372 | 47 |
| 12,984 | 84 | 1 | 766 | 27 | 33 | 2 | 484 | 15 | 1,367 | 45 |
| 12,985 | 84 | 1 | 765 | 27 | 32 | 2 | 484 | 16 | 1,365 | 46 |

|        |     |   |     |    |    |   |     |    |       |    |
|--------|-----|---|-----|----|----|---|-----|----|-------|----|
| 12,986 | 83  | 1 | 763 | 28 | 32 | 2 | 489 | 16 | 1,367 | 47 |
| 12,987 | 83  | 2 | 759 | 28 | 31 | 2 | 488 | 15 | 1,361 | 47 |
| 12,988 | 82  | 2 | 753 | 28 | 31 | 2 | 484 | 15 | 1,350 | 47 |
| 12,989 | 84  | 2 | 791 | 30 | 31 | 2 | 504 | 16 | 1,410 | 50 |
| 12,990 | 84  | 2 | 791 | 30 | 31 | 2 | 503 | 16 | 1,409 | 50 |
| 12,991 | 85  | 2 | 786 | 30 | 31 | 2 | 510 | 16 | 1,412 | 50 |
| 12,992 | 85  | 2 | 776 | 30 | 31 | 2 | 506 | 16 | 1,398 | 50 |
| 12,993 | 83  | 2 | 779 | 30 | 31 | 2 | 511 | 16 | 1,404 | 50 |
| 12,994 | 84  | 3 | 784 | 31 | 31 | 2 | 512 | 16 | 1,411 | 52 |
| 12,995 | 84  | 3 | 783 | 32 | 31 | 2 | 513 | 16 | 1,411 | 53 |
| 12,996 | 79  | 3 | 796 | 32 | 31 | 2 | 516 | 16 | 1,422 | 53 |
| 12,997 | 79  | 3 | 789 | 32 | 32 | 2 | 510 | 15 | 1,410 | 52 |
| 12,998 | 73  | 3 | 712 | 32 | 31 | 2 | 498 | 13 | 1,314 | 50 |
| 12,999 | 73  | 4 | 713 | 30 | 32 | 2 | 493 | 13 | 1,311 | 49 |
| 13,000 | 77  | 4 | 757 | 32 | 34 | 2 | 543 | 13 | 1,411 | 51 |
| 13,001 | 72  | 4 | 715 | 31 | 33 | 2 | 512 | 13 | 1,332 | 50 |
| 13,002 | 73  | 4 | 713 | 34 | 33 | 2 | 517 | 11 | 1,336 | 51 |
| 13,003 | 74  | 4 | 724 | 34 | 34 | 2 | 532 | 11 | 1,364 | 51 |
| 13,004 | 67  | 4 | 657 | 27 | 33 | 2 | 510 | 10 | 1,267 | 43 |
| 13,005 | 66  | 4 | 611 | 21 | 29 | 0 | 472 | 8  | 1,178 | 33 |
| 13,006 | 64  | 4 | 584 | 18 | 24 | 0 | 437 | 5  | 1,109 | 27 |
| 13,007 | 49  | 4 | 486 | 17 | 18 | 0 | 357 | 5  | 910   | 26 |
| 13,008 | 49  | 4 | 457 | 17 | 18 | 0 | 331 | 5  | 855   | 26 |
| 13,009 | 49  | 4 | 454 | 17 | 18 | 0 | 327 | 4  | 848   | 25 |
| 13,010 | 55  | 3 | 483 | 17 | 18 | 0 | 333 | 4  | 889   | 24 |
| 13,011 | 55  | 3 | 483 | 17 | 18 | 0 | 333 | 5  | 889   | 25 |
| 13,012 | 67  | 3 | 522 | 17 | 18 | 0 | 344 | 5  | 951   | 25 |
| 13,013 | 67  | 3 | 521 | 17 | 18 | 0 | 344 | 5  | 950   | 25 |
| 13,014 | 78  | 3 | 574 | 17 | 20 | 0 | 359 | 5  | 1,031 | 25 |
| 13,015 | 89  | 3 | 682 | 16 | 25 | 0 | 419 | 5  | 1,215 | 24 |
| 13,016 | 89  | 3 | 679 | 16 | 25 | 0 | 417 | 5  | 1,210 | 24 |
| 13,017 | 95  | 3 | 741 | 16 | 25 | 0 | 430 | 5  | 1,291 | 24 |
| 13,018 | 100 | 3 | 861 | 16 | 29 | 1 | 471 | 5  | 1,461 | 25 |
| 13,019 | 99  | 3 | 919 | 16 | 30 | 1 | 479 | 5  | 1,527 | 25 |
| 13,020 | 96  | 3 | 978 | 16 | 30 | 1 | 491 | 5  | 1,595 | 25 |
| 13,021 | 95  | 3 | 997 | 16 | 30 | 1 | 498 | 5  | 1,620 | 25 |
| 13,022 | 94  | 3 | 990 | 16 | 30 | 1 | 491 | 5  | 1,605 | 25 |
| 13,023 | 89  | 3 | 991 | 16 | 30 | 1 | 493 | 5  | 1,603 | 25 |
| 13,024 | 86  | 3 | 977 | 16 | 30 | 1 | 486 | 5  | 1,579 | 25 |
| 13,025 | 86  | 3 | 961 | 14 | 30 | 1 | 473 | 2  | 1,550 | 20 |
| 13,026 | 87  | 3 | 962 | 14 | 30 | 1 | 461 | 2  | 1,540 | 20 |

|        |    |   |     |    |    |   |     |    |       |    |
|--------|----|---|-----|----|----|---|-----|----|-------|----|
| 13,027 | 83 | 3 | 946 | 14 | 30 | 1 | 427 | 2  | 1,486 | 20 |
| 13,028 | 83 | 3 | 942 | 14 | 29 | 1 | 418 | 2  | 1,472 | 20 |
| 13,029 | 80 | 3 | 937 | 14 | 28 | 1 | 415 | 2  | 1,460 | 20 |
| 13,030 | 83 | 3 | 971 | 12 | 28 | 1 | 439 | 2  | 1,521 | 18 |
| 13,031 | 83 | 3 | 971 | 12 | 29 | 1 | 440 | 2  | 1,523 | 18 |
| 13,032 | 82 | 3 | 965 | 12 | 29 | 1 | 436 | 3  | 1,512 | 19 |
| 13,033 | 82 | 3 | 975 | 12 | 29 | 1 | 448 | 3  | 1,534 | 19 |
| 13,034 | 82 | 3 | 975 | 12 | 29 | 1 | 447 | 3  | 1,533 | 19 |
| 13,035 | 82 | 3 | 976 | 12 | 29 | 1 | 446 | 3  | 1,533 | 19 |
| 13,036 | 84 | 2 | 990 | 9  | 29 | 1 | 449 | 2  | 1,552 | 14 |
| 13,037 | 84 | 2 | 990 | 9  | 29 | 1 | 446 | 2  | 1,549 | 14 |
| 13,038 | 83 | 2 | 984 | 9  | 29 | 1 | 439 | 2  | 1,535 | 14 |
| 13,039 | 83 | 2 | 965 | 11 | 29 | 1 | 439 | 4  | 1,516 | 18 |
| 13,040 | 82 | 2 | 955 | 10 | 29 | 1 | 426 | 5  | 1,492 | 18 |
| 13,041 | 82 | 2 | 948 | 11 | 29 | 1 | 422 | 8  | 1,481 | 22 |
| 13,042 | 81 | 2 | 945 | 11 | 29 | 2 | 417 | 7  | 1,472 | 22 |
| 13,043 | 81 | 2 | 937 | 11 | 30 | 2 | 410 | 7  | 1,458 | 22 |
| 13,044 | 80 | 3 | 933 | 12 | 30 | 2 | 410 | 7  | 1,453 | 24 |
| 13,045 | 80 | 2 | 927 | 12 | 30 | 2 | 409 | 7  | 1,446 | 23 |
| 13,046 | 80 | 2 | 901 | 11 | 30 | 2 | 401 | 7  | 1,412 | 22 |
| 13,047 | 79 | 2 | 897 | 12 | 30 | 2 | 398 | 7  | 1,404 | 23 |
| 13,048 | 79 | 2 | 896 | 12 | 29 | 2 | 399 | 7  | 1,403 | 23 |
| 13,049 | 78 | 1 | 890 | 10 | 30 | 2 | 395 | 8  | 1,393 | 21 |
| 13,050 | 78 | 1 | 884 | 11 | 29 | 2 | 395 | 8  | 1,386 | 22 |
| 13,051 | 73 | 1 | 823 | 11 | 27 | 2 | 337 | 8  | 1,260 | 22 |
| 13,052 | 71 | 1 | 791 | 11 | 27 | 2 | 324 | 10 | 1,213 | 24 |
| 13,053 | 69 | 1 | 776 | 8  | 27 | 2 | 312 | 10 | 1,184 | 21 |
| 13,054 | 68 | 1 | 756 | 8  | 25 | 2 | 293 | 10 | 1,142 | 21 |
| 13,055 | 68 | 1 | 752 | 8  | 23 | 2 | 288 | 10 | 1,131 | 21 |
| 13,056 | 67 | 1 | 743 | 9  | 21 | 2 | 283 | 10 | 1,114 | 22 |
| 13,057 | 66 | 1 | 738 | 9  | 21 | 2 | 283 | 10 | 1,108 | 22 |
| 13,058 | 66 | 1 | 738 | 9  | 21 | 2 | 283 | 10 | 1,108 | 22 |
| 13,059 | 66 | 1 | 738 | 9  | 21 | 2 | 283 | 10 | 1,108 | 22 |
| 13,060 | 66 | 1 | 729 | 9  | 21 | 2 | 283 | 10 | 1,099 | 22 |
| 13,061 | 59 | 1 | 709 | 9  | 21 | 2 | 277 | 10 | 1,066 | 22 |
| 13,062 | 48 | 1 | 672 | 9  | 21 | 2 | 267 | 10 | 1,008 | 22 |
| 13,063 | 48 | 1 | 672 | 9  | 21 | 2 | 269 | 13 | 1,010 | 25 |
| 13,064 | 37 | 1 | 618 | 11 | 19 | 2 | 255 | 15 | 929   | 29 |
| 13,065 | 36 | 2 | 575 | 21 | 18 | 2 | 249 | 18 | 878   | 43 |
| 13,066 | 26 | 2 | 512 | 23 | 13 | 2 | 195 | 18 | 746   | 45 |
| 13,067 | 20 | 2 | 470 | 23 | 13 | 2 | 203 | 21 | 706   | 48 |

|        |    |   |     |    |    |   |     |    |     |     |
|--------|----|---|-----|----|----|---|-----|----|-----|-----|
| 13,068 | 18 | 2 | 419 | 25 | 12 | 2 | 188 | 25 | 637 | 54  |
| 13,069 | 17 | 2 | 350 | 27 | 8  | 1 | 161 | 30 | 536 | 60  |
| 13,070 | 17 | 2 | 281 | 30 | 7  | 1 | 151 | 30 | 456 | 63  |
| 13,071 | 12 | 2 | 203 | 30 | 6  | 1 | 122 | 30 | 343 | 63  |
| 13,072 | 12 | 2 | 180 | 30 | 5  | 1 | 114 | 30 | 311 | 63  |
| 13,073 | 12 | 2 | 177 | 30 | 4  | 1 | 114 | 30 | 307 | 63  |
| 13,074 | 10 | 2 | 146 | 30 | 2  | 1 | 94  | 30 | 252 | 63  |
| 13,075 | 13 | 2 | 165 | 32 | 2  | 1 | 101 | 30 | 281 | 65  |
| 13,076 | 13 | 2 | 164 | 33 | 2  | 2 | 103 | 31 | 282 | 68  |
| 13,077 | 12 | 2 | 159 | 33 | 2  | 2 | 103 | 31 | 276 | 68  |
| 13,078 | 14 | 2 | 175 | 34 | 3  | 2 | 144 | 33 | 336 | 71  |
| 13,079 | 14 | 2 | 172 | 34 | 3  | 2 | 146 | 34 | 335 | 72  |
| 13,080 | 14 | 2 | 171 | 34 | 3  | 2 | 144 | 34 | 332 | 72  |
| 13,081 | 11 | 2 | 130 | 34 | 3  | 2 | 115 | 36 | 259 | 74  |
| 13,082 | 10 | 2 | 114 | 34 | 3  | 2 | 107 | 41 | 234 | 79  |
| 13,083 | 10 | 2 | 114 | 35 | 3  | 2 | 101 | 41 | 228 | 80  |
| 13,084 | 11 | 2 | 124 | 35 | 3  | 2 | 103 | 43 | 241 | 82  |
| 13,085 | 11 | 2 | 119 | 36 | 3  | 2 | 103 | 43 | 236 | 83  |
| 13,086 | 11 | 3 | 118 | 38 | 3  | 3 | 103 | 49 | 235 | 93  |
| 13,087 | 9  | 3 | 101 | 39 | 3  | 3 | 96  | 49 | 209 | 94  |
| 13,088 | 9  | 3 | 118 | 40 | 4  | 4 | 108 | 53 | 239 | 100 |
| 13,089 | 9  | 3 | 118 | 40 | 4  | 4 | 108 | 54 | 239 | 101 |
| 13,090 | 10 | 3 | 158 | 36 | 6  | 4 | 132 | 48 | 306 | 91  |
| 13,091 | 13 | 3 | 174 | 40 | 8  | 4 | 144 | 52 | 339 | 99  |
| 13,092 | 13 | 3 | 174 | 40 | 8  | 4 | 141 | 52 | 336 | 99  |
| 13,093 | 13 | 3 | 174 | 42 | 8  | 3 | 141 | 52 | 336 | 100 |
| 13,094 | 13 | 2 | 181 | 39 | 8  | 3 | 148 | 52 | 350 | 96  |
| 13,095 | 13 | 2 | 182 | 39 | 8  | 3 | 149 | 52 | 352 | 96  |
| 13,096 | 13 | 2 | 181 | 40 | 8  | 3 | 149 | 52 | 351 | 97  |
| 13,097 | 13 | 3 | 181 | 40 | 8  | 3 | 149 | 51 | 351 | 97  |
| 13,098 | 13 | 3 | 181 | 46 | 8  | 3 | 148 | 57 | 350 | 109 |
| 13,099 | 13 | 3 | 181 | 46 | 8  | 3 | 148 | 57 | 350 | 109 |
| 13,100 | 13 | 3 | 185 | 46 | 7  | 3 | 150 | 57 | 355 | 109 |
| 13,101 | 13 | 4 | 199 | 57 | 7  | 6 | 157 | 80 | 376 | 147 |
| 13,102 | 13 | 4 | 199 | 57 | 7  | 6 | 157 | 81 | 376 | 148 |
| 13,103 | 13 | 4 | 198 | 64 | 7  | 6 | 156 | 83 | 374 | 157 |
| 13,104 | 13 | 4 | 198 | 64 | 7  | 6 | 156 | 85 | 374 | 159 |
| 13,105 | 15 | 4 | 209 | 64 | 7  | 6 | 155 | 86 | 386 | 160 |
| 13,106 | 15 | 4 | 220 | 72 | 7  | 8 | 155 | 89 | 397 | 173 |
| 13,107 | 15 | 4 | 220 | 71 | 7  | 8 | 155 | 90 | 397 | 173 |
| 13,108 | 16 | 4 | 238 | 73 | 7  | 8 | 160 | 93 | 421 | 178 |



|        |    |   |     |    |    |    |     |    |     |     |
|--------|----|---|-----|----|----|----|-----|----|-----|-----|
| 13,109 | 24 | 4 | 255 | 78 | 8  | 10 | 166 | 96 | 453 | 188 |
| 13,110 | 25 | 4 | 273 | 85 | 9  | 10 | 189 | 96 | 496 | 195 |
| 13,111 | 38 | 4 | 419 | 86 | 13 | 10 | 227 | 94 | 697 | 194 |
| 13,112 | 38 | 4 | 433 | 86 | 13 | 10 | 241 | 93 | 725 | 193 |
| 13,113 | 40 | 4 | 445 | 86 | 14 | 10 | 259 | 93 | 758 | 193 |
| 13,114 | 39 | 4 | 449 | 84 | 14 | 10 | 259 | 91 | 761 | 189 |
| 13,115 | 39 | 3 | 461 | 74 | 15 | 10 | 264 | 88 | 779 | 175 |
| 13,116 | 40 | 3 | 470 | 72 | 15 | 10 | 266 | 89 | 791 | 174 |
| 13,117 | 40 | 3 | 476 | 72 | 16 | 10 | 271 | 89 | 803 | 174 |
| 13,118 | 40 | 3 | 457 | 70 | 16 | 10 | 252 | 82 | 765 | 165 |
| 13,119 | 38 | 3 | 457 | 68 | 16 | 10 | 252 | 78 | 763 | 159 |
| 13,120 | 38 | 3 | 455 | 65 | 16 | 10 | 252 | 78 | 761 | 156 |
| 13,121 | 38 | 3 | 455 | 65 | 16 | 10 | 250 | 79 | 759 | 157 |
| 13,122 | 38 | 4 | 454 | 67 | 16 | 10 | 247 | 81 | 755 | 162 |
| 13,123 | 38 | 4 | 452 | 67 | 16 | 10 | 247 | 81 | 753 | 162 |
| 13,124 | 38 | 6 | 454 | 67 | 17 | 10 | 251 | 81 | 760 | 164 |
| 13,125 | 38 | 6 | 454 | 68 | 17 | 10 | 250 | 82 | 759 | 166 |
| 13,126 | 35 | 6 | 432 | 66 | 17 | 10 | 243 | 82 | 727 | 164 |
| 13,127 | 33 | 6 | 421 | 65 | 16 | 9  | 208 | 81 | 678 | 161 |
| 13,128 | 33 | 6 | 417 | 65 | 16 | 9  | 202 | 82 | 668 | 162 |
| 13,129 | 33 | 6 | 417 | 64 | 16 | 9  | 204 | 81 | 670 | 160 |
| 13,130 | 34 | 6 | 417 | 64 | 16 | 9  | 201 | 80 | 668 | 159 |
| 13,131 | 34 | 6 | 413 | 64 | 16 | 9  | 201 | 80 | 664 | 159 |
| 13,132 | 34 | 6 | 412 | 64 | 16 | 9  | 201 | 78 | 663 | 157 |
| 13,133 | 35 | 6 | 412 | 64 | 18 | 9  | 202 | 73 | 667 | 152 |
| 13,134 | 34 | 6 | 410 | 63 | 18 | 9  | 200 | 70 | 662 | 148 |
| 13,135 | 35 | 6 | 406 | 62 | 18 | 9  | 200 | 70 | 659 | 147 |
| 13,136 | 35 | 6 | 406 | 62 | 18 | 9  | 200 | 70 | 659 | 147 |
| 13,137 | 35 | 5 | 386 | 59 | 17 | 8  | 187 | 64 | 625 | 136 |
| 13,138 | 35 | 5 | 374 | 58 | 16 | 7  | 176 | 60 | 601 | 130 |
| 13,139 | 35 | 5 | 374 | 58 | 16 | 7  | 176 | 60 | 601 | 130 |
| 13,140 | 35 | 5 | 374 | 58 | 16 | 7  | 173 | 61 | 598 | 131 |
| 13,141 | 34 | 5 | 344 | 58 | 15 | 7  | 161 | 62 | 554 | 132 |
| 13,142 | 31 | 5 | 327 | 54 | 12 | 7  | 149 | 58 | 519 | 124 |
| 13,143 | 31 | 5 | 327 | 54 | 12 | 7  | 149 | 58 | 519 | 124 |
| 13,144 | 31 | 5 | 326 | 52 | 12 | 7  | 149 | 59 | 518 | 123 |
| 13,145 | 31 | 5 | 320 | 52 | 12 | 7  | 142 | 59 | 505 | 123 |
| 13,146 | 31 | 5 | 320 | 52 | 12 | 7  | 142 | 59 | 505 | 123 |
| 13,147 | 31 | 5 | 324 | 51 | 12 | 7  | 144 | 59 | 511 | 122 |
| 13,148 | 31 | 4 | 330 | 51 | 12 | 7  | 146 | 59 | 519 | 121 |
| 13,149 | 32 | 4 | 332 | 45 | 12 | 7  | 146 | 54 | 522 | 110 |

|        |    |   |     |    |    |   |     |    |     |     |
|--------|----|---|-----|----|----|---|-----|----|-----|-----|
| 13,150 | 32 | 4 | 337 | 45 | 12 | 7 | 146 | 55 | 527 | 111 |
| 13,151 | 32 | 4 | 334 | 47 | 12 | 7 | 148 | 57 | 526 | 115 |
| 13,152 | 32 | 3 | 320 | 35 | 12 | 4 | 141 | 34 | 505 | 76  |
| 13,153 | 30 | 3 | 316 | 36 | 12 | 4 | 141 | 33 | 499 | 76  |
| 13,154 | 30 | 3 | 318 | 29 | 12 | 4 | 142 | 29 | 502 | 65  |
| 13,155 | 33 | 3 | 330 | 29 | 12 | 4 | 156 | 26 | 531 | 62  |
| 13,156 | 33 | 3 | 320 | 29 | 12 | 4 | 156 | 26 | 521 | 62  |
| 13,157 | 34 | 3 | 322 | 21 | 12 | 2 | 156 | 23 | 524 | 49  |
| 13,158 | 40 | 3 | 340 | 21 | 12 | 2 | 187 | 22 | 579 | 48  |
| 13,159 | 34 | 3 | 330 | 14 | 11 | 0 | 184 | 16 | 559 | 33  |
| 13,160 | 32 | 3 | 332 | 14 | 11 | 0 | 184 | 16 | 559 | 33  |
| 13,161 | 31 | 3 | 317 | 8  | 10 | 0 | 161 | 16 | 519 | 27  |
| 13,162 | 18 | 3 | 175 | 7  | 7  | 0 | 128 | 15 | 328 | 25  |
| 13,163 | 18 | 4 | 161 | 7  | 8  | 0 | 114 | 15 | 301 | 26  |
| 13,164 | 16 | 4 | 147 | 7  | 8  | 0 | 95  | 15 | 266 | 26  |
| 13,165 | 16 | 4 | 155 | 7  | 8  | 0 | 97  | 15 | 276 | 26  |
| 13,166 | 16 | 4 | 143 | 7  | 7  | 0 | 91  | 15 | 257 | 26  |
| 13,167 | 21 | 4 | 222 | 7  | 9  | 0 | 175 | 14 | 427 | 25  |
| 13,168 | 23 | 4 | 256 | 7  | 9  | 0 | 207 | 14 | 495 | 25  |
| 13,169 | 23 | 4 | 260 | 8  | 10 | 0 | 209 | 14 | 502 | 26  |
| 13,170 | 23 | 4 | 260 | 8  | 10 | 0 | 209 | 14 | 502 | 26  |
| 13,171 | 24 | 4 | 274 | 8  | 9  | 0 | 216 | 14 | 523 | 26  |
| 13,172 | 24 | 4 | 274 | 9  | 9  | 0 | 215 | 13 | 522 | 26  |
| 13,173 | 27 | 3 | 291 | 7  | 9  | 0 | 231 | 11 | 558 | 21  |
| 13,174 | 27 | 3 | 290 | 7  | 9  | 0 | 230 | 11 | 556 | 21  |
| 13,175 | 27 | 2 | 293 | 7  | 9  | 0 | 233 | 11 | 562 | 20  |
| 13,176 | 28 | 3 | 294 | 6  | 9  | 0 | 236 | 10 | 567 | 19  |
| 13,177 | 28 | 3 | 296 | 6  | 9  | 0 | 237 | 10 | 570 | 19  |
| 13,178 | 28 | 3 | 296 | 6  | 9  | 0 | 237 | 10 | 570 | 19  |
| 13,179 | 28 | 3 | 296 | 6  | 9  | 0 | 237 | 9  | 570 | 18  |
| 13,180 | 39 | 4 | 330 | 6  | 10 | 0 | 253 | 8  | 632 | 18  |
| 13,181 | 38 | 4 | 345 | 6  | 10 | 0 | 276 | 8  | 669 | 18  |
| 13,182 | 39 | 4 | 352 | 6  | 10 | 0 | 283 | 8  | 684 | 18  |
| 13,183 | 39 | 4 | 353 | 6  | 8  | 0 | 283 | 8  | 683 | 18  |
| 13,184 | 38 | 4 | 354 | 6  | 8  | 0 | 283 | 8  | 683 | 18  |
| 13,185 | 38 | 4 | 357 | 6  | 8  | 0 | 284 | 8  | 687 | 18  |
| 13,186 | 38 | 4 | 360 | 6  | 9  | 0 | 285 | 8  | 692 | 18  |
| 13,187 | 43 | 4 | 372 | 6  | 10 | 0 | 289 | 8  | 714 | 18  |
| 13,188 | 43 | 4 | 375 | 6  | 10 | 0 | 291 | 8  | 719 | 18  |
| 13,189 | 53 | 4 | 432 | 6  | 16 | 0 | 349 | 8  | 850 | 18  |
| 13,190 | 53 | 4 | 438 | 6  | 16 | 0 | 350 | 5  | 857 | 15  |

|        |    |   |     |    |    |   |     |   |       |    |
|--------|----|---|-----|----|----|---|-----|---|-------|----|
| 13,191 | 53 | 4 | 438 | 6  | 16 | 0 | 350 | 5 | 857   | 15 |
| 13,192 | 53 | 4 | 441 | 7  | 16 | 0 | 354 | 4 | 864   | 15 |
| 13,193 | 53 | 4 | 442 | 7  | 16 | 0 | 354 | 4 | 865   | 15 |
| 13,194 | 53 | 4 | 450 | 7  | 16 | 0 | 355 | 3 | 874   | 14 |
| 13,195 | 53 | 4 | 451 | 7  | 16 | 0 | 355 | 3 | 875   | 14 |
| 13,196 | 53 | 4 | 452 | 7  | 16 | 0 | 356 | 3 | 877   | 14 |
| 13,197 | 53 | 4 | 475 | 7  | 17 | 0 | 361 | 3 | 906   | 14 |
| 13,198 | 53 | 4 | 469 | 7  | 17 | 0 | 359 | 3 | 898   | 14 |
| 13,199 | 55 | 4 | 485 | 7  | 17 | 0 | 379 | 3 | 936   | 14 |
| 13,200 | 66 | 5 | 569 | 5  | 25 | 0 | 489 | 0 | 1,149 | 10 |
| 13,201 | 67 | 5 | 625 | 5  | 28 | 0 | 517 | 0 | 1,237 | 10 |
| 13,202 | 67 | 5 | 625 | 5  | 28 | 0 | 513 | 0 | 1,233 | 10 |
| 13,203 | 67 | 6 | 667 | 5  | 34 | 0 | 572 | 0 | 1,340 | 11 |
| 13,204 | 72 | 6 | 766 | 4  | 38 | 0 | 609 | 0 | 1,485 | 10 |
| 13,205 | 77 | 6 | 830 | 4  | 44 | 0 | 657 | 0 | 1,608 | 10 |
| 13,206 | 74 | 6 | 813 | 4  | 45 | 0 | 643 | 0 | 1,575 | 10 |
| 13,207 | 73 | 6 | 812 | 4  | 45 | 0 | 645 | 1 | 1,575 | 11 |
| 13,208 | 67 | 6 | 776 | 5  | 46 | 0 | 609 | 1 | 1,498 | 12 |
| 13,209 | 67 | 6 | 777 | 5  | 46 | 0 | 608 | 1 | 1,498 | 12 |
| 13,210 | 70 | 6 | 800 | 5  | 47 | 0 | 626 | 1 | 1,543 | 12 |
| 13,211 | 70 | 6 | 793 | 5  | 47 | 0 | 625 | 1 | 1,535 | 12 |
| 13,212 | 71 | 7 | 798 | 4  | 47 | 0 | 629 | 1 | 1,545 | 12 |
| 13,213 | 71 | 7 | 794 | 4  | 46 | 0 | 624 | 2 | 1,535 | 13 |
| 13,214 | 71 | 6 | 809 | 4  | 47 | 0 | 641 | 2 | 1,568 | 12 |
| 13,215 | 72 | 6 | 811 | 5  | 46 | 0 | 641 | 2 | 1,570 | 13 |
| 13,216 | 72 | 6 | 802 | 10 | 46 | 0 | 639 | 2 | 1,559 | 18 |
| 13,217 | 66 | 6 | 748 | 12 | 44 | 0 | 595 | 3 | 1,453 | 21 |
| 13,218 | 66 | 6 | 716 | 12 | 44 | 0 | 557 | 3 | 1,383 | 21 |
| 13,219 | 64 | 6 | 676 | 13 | 43 | 0 | 521 | 3 | 1,304 | 22 |
| 13,220 | 64 | 6 | 669 | 12 | 43 | 0 | 515 | 4 | 1,291 | 22 |
| 13,221 | 63 | 6 | 659 | 12 | 43 | 0 | 509 | 4 | 1,274 | 22 |
| 13,222 | 63 | 6 | 656 | 11 | 43 | 0 | 508 | 4 | 1,270 | 21 |
| 13,223 | 63 | 6 | 654 | 11 | 43 | 0 | 509 | 4 | 1,269 | 21 |
| 13,224 | 60 | 6 | 637 | 11 | 43 | 0 | 491 | 4 | 1,231 | 21 |
| 13,225 | 60 | 6 | 635 | 11 | 43 | 0 | 488 | 4 | 1,226 | 21 |
| 13,226 | 59 | 5 | 636 | 11 | 43 | 0 | 486 | 4 | 1,224 | 20 |
| 13,227 | 59 | 4 | 634 | 11 | 43 | 0 | 485 | 4 | 1,221 | 19 |
| 13,228 | 50 | 4 | 605 | 11 | 42 | 0 | 475 | 4 | 1,172 | 19 |
| 13,229 | 48 | 4 | 600 | 11 | 42 | 0 | 472 | 4 | 1,162 | 19 |
| 13,230 | 48 | 3 | 600 | 11 | 42 | 0 | 468 | 4 | 1,158 | 18 |
| 13,231 | 48 | 3 | 592 | 11 | 42 | 0 | 448 | 4 | 1,130 | 18 |

|        |    |   |     |    |    |   |     |   |       |    |
|--------|----|---|-----|----|----|---|-----|---|-------|----|
| 13,232 | 49 | 3 | 590 | 11 | 43 | 0 | 446 | 4 | 1,128 | 18 |
| 13,233 | 48 | 3 | 585 | 11 | 43 | 0 | 438 | 4 | 1,114 | 18 |
| 13,234 | 49 | 3 | 587 | 11 | 44 | 0 | 442 | 4 | 1,122 | 18 |
| 13,235 | 49 | 3 | 593 | 11 | 44 | 0 | 442 | 4 | 1,128 | 18 |
| 13,236 | 49 | 3 | 592 | 11 | 44 | 0 | 444 | 4 | 1,129 | 18 |
| 13,237 | 48 | 3 | 591 | 11 | 43 | 0 | 445 | 4 | 1,127 | 18 |
| 13,238 | 47 | 3 | 588 | 11 | 42 | 0 | 445 | 4 | 1,122 | 18 |
| 13,239 | 47 | 3 | 590 | 11 | 42 | 0 | 443 | 4 | 1,122 | 18 |
| 13,240 | 37 | 3 | 533 | 11 | 36 | 0 | 385 | 4 | 991   | 18 |
| 13,241 | 38 | 3 | 543 | 11 | 37 | 0 | 392 | 4 | 1,010 | 18 |
| 13,242 | 38 | 3 | 546 | 12 | 37 | 0 | 393 | 4 | 1,014 | 19 |
| 13,243 | 38 | 3 | 545 | 12 | 37 | 0 | 393 | 4 | 1,013 | 19 |
| 13,244 | 38 | 3 | 557 | 12 | 37 | 0 | 403 | 4 | 1,035 | 19 |
| 13,245 | 38 | 3 | 549 | 12 | 37 | 0 | 402 | 4 | 1,026 | 19 |
| 13,246 | 39 | 3 | 558 | 12 | 37 | 0 | 405 | 4 | 1,039 | 19 |
| 13,247 | 39 | 3 | 557 | 12 | 37 | 0 | 404 | 4 | 1,037 | 19 |
| 13,248 | 39 | 3 | 531 | 12 | 36 | 0 | 397 | 4 | 1,003 | 19 |
| 13,249 | 39 | 2 | 521 | 12 | 37 | 0 | 378 | 5 | 975   | 19 |
| 13,250 | 39 | 2 | 520 | 13 | 37 | 0 | 379 | 5 | 975   | 20 |
| 13,251 | 27 | 2 | 436 | 13 | 29 | 0 | 271 | 5 | 763   | 20 |
| 13,252 | 26 | 2 | 374 | 14 | 26 | 0 | 243 | 5 | 669   | 21 |
| 13,253 | 26 | 2 | 333 | 14 | 20 | 0 | 184 | 5 | 563   | 21 |
| 13,254 | 21 | 1 | 265 | 14 | 19 | 0 | 156 | 5 | 461   | 20 |
| 13,255 | 21 | 1 | 240 | 14 | 17 | 0 | 146 | 5 | 424   | 20 |
| 13,256 | 16 | 1 | 178 | 14 | 11 | 0 | 97  | 5 | 302   | 20 |
| 13,257 | 17 | 1 | 199 | 15 | 11 | 0 | 110 | 5 | 337   | 21 |
| 13,258 | 17 | 1 | 198 | 15 | 11 | 0 | 109 | 5 | 335   | 21 |
| 13,259 | 16 | 1 | 199 | 14 | 10 | 0 | 111 | 5 | 336   | 20 |
| 13,260 | 16 | 1 | 199 | 14 | 10 | 0 | 110 | 6 | 335   | 21 |
| 13,261 | 13 | 1 | 173 | 14 | 9  | 0 | 92  | 6 | 287   | 21 |
| 13,262 | 14 | 1 | 179 | 14 | 9  | 0 | 89  | 6 | 291   | 21 |
| 13,263 | 13 | 0 | 175 | 14 | 10 | 0 | 92  | 5 | 290   | 19 |
| 13,264 | 13 | 0 | 176 | 14 | 10 | 0 | 91  | 5 | 290   | 19 |
| 13,265 | 14 | 0 | 162 | 14 | 8  | 0 | 75  | 5 | 259   | 19 |
| 13,266 | 13 | 0 | 162 | 13 | 8  | 1 | 75  | 5 | 258   | 19 |
| 13,267 | 14 | 0 | 165 | 6  | 8  | 1 | 74  | 4 | 261   | 11 |
| 13,268 | 14 | 0 | 174 | 6  | 9  | 1 | 70  | 4 | 267   | 11 |
| 13,269 | 31 | 0 | 246 | 5  | 14 | 1 | 110 | 4 | 401   | 10 |
| 13,270 | 31 | 0 | 251 | 5  | 14 | 1 | 113 | 3 | 409   | 9  |
| 13,271 | 31 | 0 | 253 | 5  | 14 | 1 | 118 | 3 | 416   | 9  |
| 13,272 | 30 | 0 | 252 | 5  | 14 | 1 | 118 | 3 | 414   | 9  |

|        |    |   |       |   |    |   |     |   |       |    |
|--------|----|---|-------|---|----|---|-----|---|-------|----|
| 13,273 | 30 | 0 | 260   | 5 | 14 | 1 | 119 | 3 | 423   | 9  |
| 13,274 | 31 | 0 | 270   | 5 | 14 | 1 | 123 | 4 | 438   | 10 |
| 13,275 | 31 | 0 | 270   | 5 | 14 | 1 | 123 | 4 | 438   | 10 |
| 13,276 | 31 | 0 | 269   | 5 | 14 | 1 | 125 | 4 | 439   | 10 |
| 13,277 | 33 | 0 | 316   | 5 | 17 | 1 | 139 | 4 | 505   | 10 |
| 13,278 | 34 | 0 | 321   | 5 | 17 | 1 | 139 | 4 | 511   | 10 |
| 13,279 | 36 | 0 | 351   | 5 | 18 | 1 | 145 | 4 | 550   | 10 |
| 13,280 | 44 | 0 | 429   | 5 | 18 | 1 | 167 | 4 | 658   | 10 |
| 13,281 | 45 | 0 | 442   | 5 | 18 | 1 | 170 | 4 | 675   | 10 |
| 13,282 | 45 | 0 | 442   | 5 | 18 | 1 | 170 | 4 | 675   | 10 |
| 13,283 | 45 | 0 | 461   | 5 | 17 | 1 | 173 | 4 | 696   | 10 |
| 13,284 | 45 | 0 | 464   | 5 | 17 | 1 | 174 | 5 | 700   | 11 |
| 13,285 | 44 | 0 | 460   | 5 | 16 | 1 | 169 | 5 | 689   | 11 |
| 13,286 | 44 | 0 | 454   | 5 | 16 | 1 | 169 | 5 | 683   | 11 |
| 13,287 | 44 | 0 | 453   | 6 | 16 | 1 | 167 | 5 | 680   | 12 |
| 13,288 | 44 | 0 | 451   | 6 | 16 | 1 | 165 | 6 | 676   | 13 |
| 13,289 | 40 | 0 | 442   | 6 | 16 | 1 | 161 | 6 | 659   | 13 |
| 13,290 | 43 | 0 | 464   | 6 | 16 | 1 | 173 | 6 | 696   | 13 |
| 13,291 | 43 | 0 | 466   | 6 | 16 | 1 | 175 | 6 | 700   | 13 |
| 13,292 | 42 | 0 | 450   | 6 | 15 | 1 | 167 | 7 | 674   | 14 |
| 13,293 | 44 | 0 | 456   | 5 | 15 | 1 | 164 | 7 | 679   | 13 |
| 13,294 | 44 | 0 | 449   | 5 | 15 | 1 | 158 | 7 | 666   | 13 |
| 13,295 | 49 | 0 | 488   | 5 | 20 | 1 | 174 | 7 | 731   | 13 |
| 13,296 | 54 | 0 | 697   | 5 | 23 | 1 | 216 | 7 | 990   | 13 |
| 13,297 | 53 | 0 | 689   | 5 | 23 | 1 | 213 | 7 | 978   | 13 |
| 13,298 | 65 | 0 | 839   | 5 | 34 | 1 | 283 | 6 | 1,221 | 12 |
| 13,299 | 65 | 0 | 853   | 5 | 35 | 1 | 292 | 6 | 1,245 | 12 |
| 13,300 | 65 | 0 | 899   | 6 | 37 | 2 | 336 | 6 | 1,337 | 14 |
| 13,301 | 65 | 0 | 909   | 6 | 40 | 2 | 342 | 6 | 1,356 | 14 |
| 13,302 | 65 | 0 | 910   | 6 | 40 | 2 | 341 | 6 | 1,356 | 14 |
| 13,303 | 66 | 0 | 927   | 7 | 42 | 2 | 363 | 6 | 1,398 | 15 |
| 13,304 | 69 | 0 | 951   | 7 | 43 | 2 | 384 | 6 | 1,447 | 15 |
| 13,305 | 70 | 0 | 969   | 7 | 42 | 2 | 392 | 6 | 1,473 | 15 |
| 13,306 | 72 | 0 | 1,018 | 6 | 42 | 2 | 402 | 5 | 1,534 | 13 |
| 13,307 | 75 | 0 | 1,042 | 7 | 42 | 2 | 413 | 5 | 1,572 | 14 |
| 13,308 | 74 | 0 | 1,021 | 7 | 41 | 2 | 400 | 5 | 1,536 | 14 |
| 13,309 | 74 | 0 | 1,021 | 7 | 41 | 2 | 400 | 5 | 1,536 | 14 |
| 13,310 | 86 | 0 | 1,162 | 7 | 46 | 2 | 467 | 4 | 1,761 | 13 |
| 13,311 | 86 | 0 | 1,162 | 7 | 46 | 2 | 467 | 5 | 1,761 | 14 |
| 13,312 | 86 | 0 | 1,188 | 7 | 46 | 2 | 483 | 5 | 1,803 | 14 |
| 13,313 | 86 | 0 | 1,217 | 7 | 46 | 2 | 485 | 5 | 1,834 | 14 |

|        |    |   |       |    |    |   |     |   |       |    |
|--------|----|---|-------|----|----|---|-----|---|-------|----|
| 13,314 | 86 | 0 | 1,217 | 7  | 46 | 2 | 481 | 5 | 1,830 | 14 |
| 13,315 | 89 | 0 | 1,283 | 8  | 50 | 2 | 522 | 5 | 1,944 | 15 |
| 13,316 | 89 | 0 | 1,287 | 8  | 51 | 2 | 525 | 5 | 1,952 | 15 |
| 13,317 | 89 | 0 | 1,297 | 8  | 51 | 1 | 529 | 5 | 1,966 | 14 |
| 13,318 | 90 | 0 | 1,309 | 8  | 51 | 1 | 542 | 5 | 1,992 | 14 |
| 13,319 | 92 | 0 | 1,306 | 8  | 50 | 1 | 544 | 5 | 1,992 | 14 |
| 13,320 | 74 | 0 | 1,237 | 9  | 44 | 1 | 507 | 5 | 1,862 | 15 |
| 13,321 | 74 | 0 | 1,229 | 9  | 44 | 1 | 503 | 5 | 1,850 | 15 |
| 13,322 | 74 | 0 | 1,227 | 9  | 44 | 1 | 498 | 5 | 1,843 | 15 |
| 13,323 | 74 | 0 | 1,219 | 9  | 44 | 2 | 497 | 5 | 1,834 | 16 |
| 13,324 | 74 | 0 | 1,219 | 9  | 44 | 2 | 495 | 5 | 1,832 | 16 |
| 13,325 | 74 | 0 | 1,209 | 9  | 44 | 2 | 493 | 4 | 1,820 | 15 |
| 13,326 | 74 | 0 | 1,208 | 9  | 44 | 2 | 493 | 4 | 1,819 | 15 |
| 13,327 | 73 | 0 | 1,190 | 9  | 42 | 2 | 491 | 4 | 1,796 | 15 |
| 13,328 | 72 | 0 | 1,161 | 9  | 41 | 2 | 480 | 4 | 1,754 | 15 |
| 13,329 | 71 | 0 | 1,157 | 9  | 41 | 2 | 482 | 4 | 1,751 | 15 |
| 13,330 | 69 | 0 | 1,130 | 9  | 40 | 2 | 477 | 4 | 1,716 | 15 |
| 13,331 | 61 | 0 | 1,049 | 9  | 40 | 2 | 455 | 4 | 1,605 | 15 |
| 13,332 | 60 | 0 | 1,035 | 10 | 40 | 2 | 452 | 4 | 1,587 | 16 |
| 13,333 | 59 | 0 | 1,025 | 10 | 40 | 2 | 452 | 4 | 1,576 | 16 |
| 13,334 | 59 | 0 | 1,011 | 10 | 40 | 2 | 448 | 4 | 1,558 | 16 |
| 13,335 | 59 | 0 | 1,004 | 10 | 40 | 2 | 448 | 3 | 1,551 | 15 |
| 13,336 | 59 | 0 | 1,008 | 10 | 40 | 2 | 448 | 3 | 1,555 | 15 |
| 13,337 | 59 | 0 | 1,008 | 10 | 40 | 2 | 448 | 3 | 1,555 | 15 |
| 13,338 | 59 | 0 | 1,004 | 9  | 39 | 2 | 446 | 1 | 1,548 | 12 |
| 13,339 | 59 | 0 | 1,006 | 10 | 39 | 2 | 446 | 1 | 1,550 | 13 |
| 13,340 | 56 | 0 | 985   | 10 | 39 | 2 | 432 | 1 | 1,512 | 13 |
| 13,341 | 56 | 0 | 979   | 10 | 39 | 2 | 432 | 1 | 1,506 | 13 |
| 13,342 | 56 | 0 | 981   | 10 | 39 | 2 | 435 | 1 | 1,511 | 13 |
| 13,343 | 56 | 0 | 981   | 10 | 39 | 2 | 434 | 2 | 1,510 | 14 |
| 13,344 | 54 | 0 | 970   | 9  | 39 | 2 | 432 | 2 | 1,495 | 13 |
| 13,345 | 52 | 0 | 956   | 11 | 37 | 2 | 432 | 2 | 1,477 | 15 |
| 13,346 | 53 | 0 | 941   | 11 | 35 | 2 | 423 | 2 | 1,452 | 15 |
| 13,347 | 48 | 0 | 731   | 15 | 32 | 2 | 381 | 2 | 1,192 | 19 |
| 13,348 | 40 | 0 | 659   | 16 | 27 | 2 | 351 | 2 | 1,077 | 20 |
| 13,349 | 36 | 0 | 588   | 16 | 21 | 2 | 312 | 2 | 957   | 20 |
| 13,350 | 36 | 0 | 588   | 16 | 20 | 2 | 306 | 2 | 950   | 20 |
| 13,351 | 34 | 0 | 539   | 15 | 17 | 1 | 261 | 2 | 851   | 18 |
| 13,352 | 34 | 0 | 536   | 14 | 14 | 1 | 262 | 2 | 846   | 17 |
| 13,353 | 34 | 0 | 525   | 12 | 15 | 1 | 249 | 2 | 823   | 15 |
| 13,354 | 36 | 0 | 534   | 12 | 18 | 1 | 255 | 2 | 843   | 15 |

|        |    |   |     |    |    |   |     |   |     |    |
|--------|----|---|-----|----|----|---|-----|---|-----|----|
| 13,355 | 35 | 0 | 551 | 12 | 19 | 1 | 259 | 2 | 864 | 15 |
| 13,356 | 35 | 0 | 546 | 12 | 19 | 1 | 260 | 2 | 860 | 15 |
| 13,357 | 33 | 0 | 502 | 11 | 19 | 1 | 253 | 2 | 807 | 14 |
| 13,358 | 31 | 0 | 480 | 11 | 19 | 1 | 248 | 2 | 778 | 14 |
| 13,359 | 28 | 0 | 437 | 11 | 17 | 1 | 209 | 2 | 691 | 14 |
| 13,360 | 31 | 0 | 401 | 11 | 15 | 1 | 216 | 2 | 663 | 14 |
| 13,361 | 32 | 0 | 398 | 11 | 15 | 1 | 217 | 2 | 662 | 14 |
| 13,362 | 33 | 0 | 376 | 11 | 15 | 1 | 215 | 1 | 639 | 13 |
| 13,363 | 35 | 0 | 391 | 11 | 15 | 1 | 212 | 1 | 653 | 13 |
| 13,364 | 38 | 0 | 372 | 11 | 15 | 1 | 215 | 1 | 640 | 13 |
| 13,365 | 36 | 0 | 319 | 11 | 11 | 1 | 182 | 1 | 548 | 13 |
| 13,366 | 35 | 0 | 315 | 10 | 10 | 1 | 179 | 1 | 539 | 12 |
| 13,367 | 35 | 1 | 303 | 10 | 10 | 1 | 175 | 1 | 523 | 13 |
| 13,368 | 34 | 1 | 286 | 10 | 10 | 1 | 165 | 1 | 495 | 13 |
| 13,369 | 34 | 1 | 285 | 10 | 10 | 1 | 163 | 1 | 492 | 13 |
| 13,370 | 32 | 1 | 276 | 9  | 10 | 1 | 159 | 1 | 477 | 12 |
| 13,371 | 32 | 1 | 272 | 9  | 10 | 1 | 157 | 1 | 471 | 12 |
| 13,372 | 32 | 1 | 271 | 9  | 10 | 1 | 157 | 1 | 470 | 12 |
| 13,373 | 32 | 1 | 271 | 9  | 10 | 1 | 157 | 1 | 470 | 12 |
| 13,374 | 32 | 1 | 272 | 9  | 10 | 0 | 157 | 2 | 471 | 12 |
| 13,375 | 32 | 1 | 272 | 10 | 10 | 0 | 157 | 3 | 471 | 14 |
| 13,376 | 32 | 1 | 275 | 10 | 10 | 0 | 157 | 4 | 474 | 15 |
| 13,377 | 32 | 1 | 275 | 11 | 10 | 0 | 156 | 4 | 473 | 16 |
| 13,378 | 32 | 1 | 275 | 11 | 10 | 0 | 157 | 4 | 474 | 16 |
| 13,379 | 32 | 1 | 274 | 11 | 10 | 0 | 155 | 4 | 471 | 16 |
| 13,380 | 32 | 1 | 274 | 11 | 10 | 0 | 155 | 4 | 471 | 16 |
| 13,381 | 32 | 1 | 276 | 11 | 10 | 0 | 157 | 4 | 475 | 16 |
| 13,382 | 32 | 1 | 277 | 11 | 10 | 0 | 157 | 4 | 476 | 16 |
| 13,383 | 32 | 1 | 283 | 10 | 11 | 0 | 163 | 4 | 489 | 15 |
| 13,384 | 32 | 1 | 295 | 10 | 12 | 0 | 175 | 4 | 514 | 15 |
| 13,385 | 35 | 1 | 313 | 10 | 13 | 0 | 188 | 4 | 549 | 15 |
| 13,386 | 36 | 1 | 337 | 10 | 14 | 0 | 200 | 4 | 587 | 15 |
| 13,387 | 38 | 1 | 339 | 10 | 14 | 0 | 207 | 4 | 598 | 15 |
| 13,388 | 38 | 1 | 338 | 10 | 14 | 0 | 207 | 4 | 597 | 15 |
| 13,389 | 38 | 1 | 337 | 10 | 14 | 0 | 207 | 4 | 596 | 15 |
| 13,390 | 38 | 1 | 335 | 9  | 14 | 0 | 207 | 4 | 594 | 14 |
| 13,391 | 38 | 1 | 335 | 9  | 15 | 0 | 207 | 4 | 595 | 14 |
| 13,392 | 38 | 1 | 338 | 9  | 15 | 0 | 206 | 4 | 597 | 14 |
| 13,393 | 39 | 1 | 332 | 9  | 15 | 0 | 203 | 3 | 589 | 13 |
| 13,394 | 39 | 1 | 328 | 9  | 15 | 0 | 203 | 3 | 585 | 13 |
| 13,395 | 39 | 1 | 329 | 9  | 15 | 0 | 203 | 3 | 586 | 13 |

|        |    |   |     |    |    |   |     |   |     |    |
|--------|----|---|-----|----|----|---|-----|---|-----|----|
| 13,396 | 37 | 1 | 320 | 8  | 14 | 0 | 194 | 3 | 565 | 12 |
| 13,397 | 35 | 1 | 318 | 8  | 14 | 0 | 194 | 3 | 561 | 12 |
| 13,398 | 35 | 1 | 318 | 4  | 14 | 0 | 195 | 3 | 562 | 8  |
| 13,399 | 35 | 1 | 316 | 3  | 14 | 0 | 194 | 3 | 559 | 7  |
| 13,400 | 35 | 1 | 310 | 3  | 14 | 0 | 192 | 3 | 551 | 7  |
| 13,401 | 35 | 1 | 295 | 3  | 14 | 0 | 189 | 3 | 533 | 7  |
| 13,402 | 35 | 1 | 292 | 3  | 14 | 0 | 187 | 3 | 528 | 7  |
| 13,403 | 35 | 1 | 284 | 5  | 14 | 0 | 179 | 3 | 512 | 9  |
| 13,404 | 34 | 1 | 280 | 5  | 12 | 0 | 177 | 3 | 503 | 9  |
| 13,405 | 32 | 1 | 275 | 6  | 10 | 0 | 176 | 3 | 493 | 10 |
| 13,406 | 30 | 1 | 232 | 6  | 8  | 0 | 152 | 3 | 422 | 10 |
| 13,407 | 29 | 1 | 212 | 7  | 8  | 0 | 142 | 4 | 391 | 12 |
| 13,408 | 29 | 1 | 208 | 7  | 8  | 0 | 138 | 4 | 383 | 12 |
| 13,409 | 29 | 1 | 202 | 9  | 9  | 0 | 132 | 4 | 372 | 14 |
| 13,410 | 29 | 1 | 202 | 9  | 9  | 0 | 131 | 4 | 371 | 14 |
| 13,411 | 18 | 1 | 152 | 9  | 8  | 0 | 100 | 5 | 278 | 15 |
| 13,412 | 19 | 1 | 203 | 9  | 9  | 0 | 110 | 5 | 341 | 15 |
| 13,413 | 18 | 1 | 195 | 9  | 9  | 0 | 103 | 5 | 325 | 15 |
| 13,414 | 18 | 1 | 226 | 9  | 11 | 0 | 136 | 5 | 391 | 15 |
| 13,415 | 15 | 1 | 217 | 9  | 11 | 0 | 128 | 5 | 371 | 15 |
| 13,416 | 14 | 1 | 203 | 9  | 11 | 0 | 123 | 5 | 351 | 15 |
| 13,417 | 14 | 0 | 202 | 9  | 11 | 0 | 123 | 5 | 350 | 14 |
| 13,418 | 14 | 0 | 202 | 9  | 11 | 0 | 123 | 5 | 350 | 14 |
| 13,419 | 14 | 0 | 202 | 9  | 11 | 0 | 123 | 5 | 350 | 14 |
| 13,420 | 14 | 0 | 203 | 10 | 11 | 0 | 123 | 5 | 351 | 15 |
| 13,421 | 14 | 0 | 203 | 10 | 11 | 0 | 123 | 5 | 351 | 15 |
| 13,422 | 14 | 0 | 203 | 10 | 11 | 0 | 123 | 5 | 351 | 15 |
| 13,423 | 14 | 0 | 203 | 10 | 11 | 0 | 123 | 5 | 351 | 15 |
| 13,424 | 15 | 0 | 203 | 10 | 11 | 0 | 123 | 5 | 352 | 15 |
| 13,425 | 15 | 0 | 204 | 9  | 11 | 0 | 123 | 3 | 353 | 12 |
| 13,426 | 15 | 0 | 204 | 9  | 11 | 0 | 123 | 3 | 353 | 12 |
| 13,427 | 15 | 0 | 202 | 9  | 11 | 0 | 123 | 2 | 351 | 11 |
| 13,428 | 14 | 0 | 203 | 8  | 11 | 0 | 122 | 2 | 350 | 10 |
| 13,429 | 15 | 0 | 205 | 8  | 11 | 0 | 120 | 2 | 351 | 10 |
| 13,430 | 15 | 0 | 205 | 8  | 11 | 0 | 120 | 2 | 351 | 10 |
| 13,431 | 17 | 0 | 207 | 8  | 11 | 0 | 118 | 2 | 353 | 10 |
| 13,432 | 17 | 0 | 207 | 8  | 11 | 0 | 118 | 2 | 353 | 10 |
| 13,433 | 17 | 1 | 202 | 8  | 11 | 0 | 113 | 2 | 343 | 11 |
| 13,434 | 17 | 1 | 190 | 8  | 10 | 0 | 101 | 2 | 318 | 11 |
| 13,435 | 17 | 1 | 189 | 9  | 10 | 0 | 102 | 2 | 318 | 12 |
| 13,436 | 16 | 1 | 172 | 9  | 9  | 0 | 90  | 2 | 287 | 12 |



|        |    |   |     |    |    |   |    |   |     |    |
|--------|----|---|-----|----|----|---|----|---|-----|----|
| 13,437 | 14 | 1 | 150 | 9  | 8  | 0 | 79 | 2 | 251 | 12 |
| 13,438 | 12 | 1 | 146 | 9  | 8  | 0 | 72 | 2 | 238 | 12 |
| 13,439 | 12 | 1 | 149 | 10 | 9  | 0 | 75 | 2 | 245 | 13 |
| 13,440 | 12 | 1 | 150 | 10 | 9  | 0 | 75 | 2 | 246 | 13 |
| 13,441 | 12 | 1 | 150 | 10 | 8  | 0 | 75 | 2 | 245 | 13 |
| 13,442 | 12 | 1 | 148 | 10 | 8  | 0 | 75 | 2 | 243 | 13 |
| 13,443 | 12 | 1 | 147 | 10 | 8  | 0 | 75 | 2 | 242 | 13 |
| 13,444 | 11 | 1 | 148 | 11 | 8  | 0 | 75 | 2 | 242 | 14 |
| 13,445 | 16 | 1 | 152 | 11 | 8  | 0 | 78 | 2 | 254 | 14 |
| 13,446 | 16 | 1 | 151 | 11 | 8  | 0 | 78 | 2 | 253 | 14 |
| 13,447 | 16 | 1 | 151 | 10 | 8  | 0 | 80 | 2 | 255 | 13 |
| 13,448 | 22 | 1 | 185 | 10 | 11 | 0 | 85 | 2 | 303 | 13 |
| 13,449 | 22 | 1 | 185 | 10 | 11 | 0 | 85 | 2 | 303 | 13 |
| 13,450 | 25 | 1 | 189 | 10 | 12 | 0 | 88 | 2 | 314 | 13 |
| 13,451 | 25 | 1 | 190 | 10 | 12 | 0 | 92 | 2 | 319 | 13 |
| 13,452 | 25 | 1 | 190 | 10 | 12 | 0 | 92 | 2 | 319 | 13 |
| 13,453 | 25 | 1 | 192 | 10 | 12 | 0 | 92 | 2 | 321 | 13 |
| 13,454 | 25 | 1 | 193 | 8  | 12 | 0 | 92 | 2 | 322 | 11 |
| 13,455 | 25 | 1 | 193 | 8  | 12 | 0 | 91 | 2 | 321 | 11 |
| 13,456 | 25 | 1 | 186 | 7  | 11 | 0 | 81 | 2 | 303 | 10 |
| 13,457 | 25 | 1 | 185 | 6  | 11 | 0 | 81 | 2 | 302 | 9  |
| 13,458 | 25 | 1 | 185 | 6  | 11 | 0 | 81 | 1 | 302 | 8  |
| 13,459 | 29 | 1 | 209 | 6  | 11 | 0 | 91 | 1 | 340 | 8  |
| 13,460 | 28 | 1 | 210 | 4  | 10 | 0 | 91 | 3 | 339 | 8  |
| 13,461 | 28 | 1 | 211 | 5  | 11 | 0 | 91 | 3 | 341 | 9  |
| 13,462 | 35 | 1 | 217 | 5  | 12 | 0 | 94 | 2 | 358 | 8  |
| 13,463 | 33 | 1 | 170 | 5  | 12 | 0 | 87 | 2 | 302 | 8  |
| 13,464 | 35 | 1 | 140 | 5  | 13 | 0 | 65 | 2 | 253 | 8  |
| 13,465 | 34 | 1 | 133 | 5  | 12 | 0 | 57 | 2 | 236 | 8  |
| 13,466 | 37 | 1 | 142 | 5  | 13 | 0 | 60 | 2 | 252 | 8  |
| 13,467 | 37 | 1 | 142 | 5  | 13 | 0 | 60 | 2 | 252 | 8  |
| 13,468 | 39 | 2 | 163 | 5  | 14 | 0 | 70 | 2 | 286 | 9  |
| 13,469 | 39 | 2 | 163 | 5  | 14 | 0 | 70 | 2 | 286 | 9  |
| 13,470 | 39 | 2 | 162 | 5  | 14 | 0 | 72 | 2 | 287 | 9  |
| 13,471 | 39 | 2 | 162 | 4  | 14 | 0 | 72 | 3 | 287 | 9  |
| 13,472 | 39 | 2 | 162 | 4  | 14 | 0 | 73 | 3 | 288 | 9  |
| 13,473 | 39 | 2 | 162 | 4  | 14 | 0 | 73 | 4 | 288 | 10 |
| 13,474 | 38 | 2 | 162 | 4  | 14 | 0 | 73 | 4 | 287 | 10 |
| 13,475 | 38 | 2 | 160 | 4  | 14 | 0 | 73 | 4 | 285 | 10 |
| 13,476 | 38 | 2 | 160 | 5  | 14 | 0 | 73 | 4 | 285 | 11 |
| 13,477 | 38 | 2 | 160 | 7  | 14 | 0 | 74 | 7 | 286 | 16 |

|        |    |   |     |    |    |   |     |    |     |    |
|--------|----|---|-----|----|----|---|-----|----|-----|----|
| 13,478 | 38 | 2 | 159 | 7  | 14 | 0 | 74  | 8  | 285 | 17 |
| 13,479 | 38 | 2 | 159 | 8  | 14 | 0 | 75  | 9  | 286 | 19 |
| 13,480 | 38 | 2 | 157 | 8  | 14 | 0 | 75  | 9  | 284 | 19 |
| 13,481 | 38 | 2 | 158 | 8  | 14 | 0 | 78  | 9  | 288 | 19 |
| 13,482 | 36 | 3 | 154 | 8  | 14 | 0 | 78  | 9  | 282 | 20 |
| 13,483 | 36 | 3 | 153 | 8  | 14 | 0 | 78  | 9  | 281 | 20 |
| 13,484 | 36 | 2 | 152 | 9  | 13 | 0 | 78  | 9  | 279 | 20 |
| 13,485 | 36 | 2 | 151 | 10 | 13 | 0 | 78  | 9  | 278 | 21 |
| 13,486 | 36 | 2 | 153 | 10 | 13 | 0 | 76  | 9  | 278 | 21 |
| 13,487 | 35 | 2 | 152 | 12 | 13 | 0 | 75  | 9  | 275 | 23 |
| 13,488 | 35 | 2 | 151 | 12 | 13 | 0 | 74  | 9  | 273 | 23 |
| 13,489 | 35 | 2 | 149 | 12 | 12 | 0 | 74  | 10 | 270 | 24 |
| 13,490 | 35 | 2 | 148 | 11 | 12 | 0 | 72  | 10 | 267 | 23 |
| 13,491 | 37 | 2 | 154 | 11 | 12 | 0 | 76  | 10 | 279 | 23 |
| 13,492 | 37 | 2 | 155 | 11 | 12 | 0 | 76  | 10 | 280 | 23 |
| 13,493 | 37 | 2 | 168 | 10 | 12 | 0 | 78  | 11 | 295 | 23 |
| 13,494 | 37 | 2 | 174 | 10 | 12 | 0 | 80  | 11 | 303 | 23 |
| 13,495 | 32 | 2 | 170 | 10 | 12 | 0 | 77  | 11 | 291 | 23 |
| 13,496 | 36 | 3 | 201 | 13 | 14 | 0 | 96  | 12 | 347 | 28 |
| 13,497 | 36 | 3 | 212 | 14 | 14 | 0 | 94  | 12 | 356 | 29 |
| 13,498 | 34 | 3 | 197 | 14 | 12 | 0 | 90  | 12 | 333 | 29 |
| 13,499 | 30 | 3 | 182 | 14 | 11 | 0 | 88  | 12 | 311 | 29 |
| 13,500 | 27 | 3 | 177 | 14 | 10 | 0 | 85  | 12 | 299 | 29 |
| 13,501 | 28 | 3 | 210 | 17 | 13 | 0 | 99  | 12 | 350 | 32 |
| 13,502 | 28 | 3 | 210 | 17 | 13 | 0 | 99  | 12 | 350 | 32 |
| 13,503 | 30 | 3 | 237 | 17 | 16 | 0 | 115 | 15 | 398 | 35 |
| 13,504 | 30 | 3 | 237 | 17 | 16 | 0 | 115 | 15 | 398 | 35 |
| 13,505 | 30 | 3 | 237 | 18 | 16 | 0 | 115 | 15 | 398 | 36 |
| 13,506 | 30 | 3 | 237 | 18 | 16 | 0 | 115 | 15 | 398 | 36 |
| 13,507 | 30 | 3 | 238 | 18 | 16 | 0 | 115 | 15 | 399 | 36 |
| 13,508 | 30 | 3 | 239 | 18 | 16 | 0 | 116 | 13 | 401 | 34 |
| 13,509 | 30 | 3 | 236 | 18 | 16 | 0 | 119 | 13 | 401 | 34 |
| 13,510 | 26 | 3 | 216 | 19 | 16 | 0 | 110 | 13 | 368 | 35 |
| 13,511 | 26 | 3 | 229 | 18 | 16 | 0 | 116 | 13 | 387 | 34 |
| 13,512 | 26 | 3 | 225 | 22 | 15 | 0 | 117 | 20 | 383 | 45 |
| 13,513 | 20 | 3 | 216 | 23 | 14 | 0 | 115 | 20 | 365 | 46 |
| 13,514 | 19 | 3 | 207 | 27 | 13 | 0 | 109 | 20 | 348 | 50 |
| 13,515 | 15 | 3 | 199 | 27 | 10 | 0 | 99  | 21 | 323 | 51 |
| 13,516 | 15 | 3 | 206 | 29 | 10 | 0 | 106 | 21 | 337 | 53 |
| 13,517 | 12 | 3 | 206 | 29 | 10 | 0 | 106 | 21 | 334 | 53 |
| 13,518 | 11 | 2 | 192 | 30 | 9  | 0 | 101 | 21 | 313 | 53 |

|        |    |   |     |    |    |   |     |    |     |    |
|--------|----|---|-----|----|----|---|-----|----|-----|----|
| 13,519 | 12 | 2 | 192 | 31 | 9  | 0 | 101 | 21 | 314 | 54 |
| 13,520 | 12 | 2 | 192 | 31 | 9  | 0 | 100 | 21 | 313 | 54 |
| 13,521 | 12 | 2 | 192 | 31 | 9  | 0 | 100 | 20 | 313 | 53 |
| 13,522 | 12 | 2 | 192 | 31 | 9  | 0 | 100 | 20 | 313 | 53 |
| 13,523 | 12 | 2 | 192 | 31 | 9  | 0 | 100 | 20 | 313 | 53 |
| 13,524 | 12 | 2 | 192 | 31 | 9  | 0 | 100 | 19 | 313 | 52 |
| 13,525 | 12 | 2 | 192 | 31 | 9  | 0 | 100 | 20 | 313 | 53 |
| 13,526 | 15 | 2 | 199 | 30 | 9  | 0 | 103 | 20 | 326 | 52 |
| 13,527 | 15 | 2 | 199 | 30 | 9  | 0 | 103 | 20 | 326 | 52 |
| 13,528 | 15 | 2 | 200 | 28 | 9  | 0 | 103 | 18 | 327 | 48 |
| 13,529 | 15 | 2 | 205 | 28 | 9  | 0 | 106 | 17 | 335 | 47 |
| 13,530 | 18 | 2 | 211 | 27 | 10 | 0 | 108 | 16 | 347 | 45 |
| 13,531 | 18 | 2 | 211 | 27 | 10 | 0 | 105 | 16 | 344 | 45 |
| 13,532 | 18 | 1 | 223 | 27 | 11 | 0 | 109 | 18 | 361 | 46 |
| 13,533 | 18 | 1 | 223 | 28 | 11 | 0 | 109 | 18 | 361 | 47 |
| 13,534 | 18 | 1 | 231 | 28 | 11 | 0 | 113 | 19 | 373 | 48 |
| 13,535 | 18 | 1 | 234 | 27 | 11 | 0 | 115 | 19 | 378 | 47 |
| 13,536 | 19 | 1 | 234 | 26 | 11 | 0 | 115 | 19 | 379 | 46 |
| 13,537 | 19 | 1 | 233 | 25 | 11 | 0 | 115 | 19 | 378 | 45 |
| 13,538 | 19 | 1 | 233 | 23 | 11 | 0 | 114 | 19 | 377 | 43 |
| 13,539 | 20 | 1 | 232 | 23 | 11 | 0 | 114 | 18 | 377 | 42 |
| 13,540 | 20 | 1 | 232 | 23 | 11 | 0 | 114 | 18 | 377 | 42 |
| 13,541 | 19 | 1 | 227 | 23 | 11 | 0 | 110 | 18 | 367 | 42 |
| 13,542 | 19 | 1 | 231 | 23 | 11 | 0 | 111 | 18 | 372 | 42 |
| 13,543 | 20 | 1 | 230 | 23 | 11 | 0 | 113 | 19 | 374 | 43 |
| 13,544 | 20 | 1 | 217 | 23 | 11 | 0 | 112 | 18 | 360 | 42 |
| 13,545 | 21 | 1 | 213 | 23 | 11 | 1 | 111 | 19 | 356 | 44 |
| 13,546 | 21 | 1 | 214 | 23 | 11 | 1 | 117 | 20 | 363 | 45 |
| 13,547 | 17 | 0 | 185 | 22 | 9  | 1 | 99  | 19 | 310 | 42 |
| 13,548 | 17 | 0 | 174 | 28 | 9  | 1 | 99  | 20 | 299 | 49 |
| 13,549 | 17 | 0 | 173 | 28 | 9  | 1 | 99  | 20 | 298 | 49 |
| 13,550 | 25 | 0 | 264 | 29 | 13 | 1 | 129 | 20 | 431 | 50 |
| 13,551 | 33 | 0 | 357 | 29 | 19 | 1 | 201 | 20 | 610 | 50 |
| 13,552 | 34 | 0 | 346 | 26 | 16 | 1 | 191 | 20 | 587 | 47 |
| 13,553 | 32 | 0 | 321 | 26 | 13 | 1 | 179 | 17 | 545 | 44 |
| 13,554 | 32 | 0 | 318 | 27 | 13 | 1 | 177 | 17 | 540 | 45 |
| 13,555 | 32 | 0 | 317 | 27 | 13 | 1 | 178 | 17 | 540 | 45 |
| 13,556 | 32 | 0 | 317 | 26 | 13 | 2 | 178 | 17 | 540 | 45 |
| 13,557 | 32 | 0 | 317 | 26 | 13 | 2 | 179 | 17 | 541 | 45 |
| 13,558 | 32 | 0 | 317 | 26 | 13 | 2 | 179 | 17 | 541 | 45 |
| 13,559 | 32 | 0 | 317 | 26 | 14 | 2 | 178 | 17 | 541 | 45 |

|        |    |   |     |    |    |   |     |    |     |    |
|--------|----|---|-----|----|----|---|-----|----|-----|----|
| 13,560 | 33 | 0 | 317 | 26 | 14 | 2 | 175 | 17 | 539 | 45 |
| 13,561 | 34 | 0 | 319 | 26 | 14 | 2 | 175 | 17 | 542 | 45 |
| 13,562 | 35 | 0 | 305 | 21 | 14 | 2 | 169 | 10 | 523 | 33 |
| 13,563 | 36 | 0 | 305 | 25 | 15 | 2 | 170 | 11 | 526 | 38 |
| 13,564 | 36 | 0 | 308 | 25 | 15 | 2 | 166 | 13 | 525 | 40 |
| 13,565 | 36 | 0 | 313 | 27 | 15 | 2 | 167 | 14 | 531 | 43 |
| 13,566 | 37 | 0 | 314 | 29 | 16 | 2 | 170 | 13 | 537 | 44 |
| 13,567 | 37 | 1 | 307 | 27 | 16 | 2 | 163 | 13 | 523 | 43 |
| 13,568 | 37 | 1 | 294 | 28 | 15 | 2 | 162 | 13 | 508 | 44 |
| 13,569 | 36 | 1 | 288 | 27 | 15 | 2 | 156 | 13 | 495 | 43 |
| 13,570 | 36 | 1 | 288 | 27 | 15 | 2 | 157 | 13 | 496 | 43 |
| 13,571 | 36 | 1 | 288 | 27 | 15 | 2 | 157 | 13 | 496 | 43 |
| 13,572 | 36 | 1 | 288 | 28 | 15 | 2 | 158 | 13 | 497 | 44 |
| 13,573 | 36 | 1 | 288 | 28 | 15 | 2 | 158 | 13 | 497 | 44 |
| 13,574 | 36 | 1 | 290 | 28 | 15 | 2 | 158 | 13 | 499 | 44 |
| 13,575 | 36 | 1 | 292 | 28 | 15 | 2 | 158 | 13 | 501 | 44 |
| 13,576 | 33 | 1 | 311 | 28 | 15 | 2 | 164 | 12 | 523 | 43 |
| 13,577 | 33 | 1 | 306 | 28 | 15 | 2 | 162 | 12 | 516 | 43 |
| 13,578 | 33 | 2 | 306 | 34 | 15 | 2 | 163 | 23 | 517 | 61 |
| 13,579 | 33 | 2 | 305 | 34 | 15 | 2 | 162 | 22 | 515 | 60 |
| 13,580 | 34 | 2 | 353 | 34 | 17 | 2 | 186 | 23 | 590 | 61 |
| 13,581 | 31 | 3 | 346 | 35 | 16 | 2 | 185 | 23 | 578 | 63 |
| 13,582 | 32 | 3 | 342 | 35 | 15 | 2 | 184 | 23 | 573 | 63 |
| 13,583 | 32 | 3 | 335 | 35 | 15 | 2 | 183 | 21 | 565 | 61 |
| 13,584 | 32 | 3 | 328 | 35 | 15 | 2 | 180 | 21 | 555 | 61 |
| 13,585 | 34 | 3 | 385 | 35 | 19 | 2 | 244 | 20 | 682 | 60 |
| 13,586 | 34 | 3 | 384 | 35 | 19 | 2 | 244 | 20 | 681 | 60 |
| 13,587 | 35 | 3 | 396 | 35 | 19 | 2 | 255 | 20 | 705 | 60 |
| 13,588 | 35 | 3 | 396 | 36 | 19 | 2 | 257 | 20 | 707 | 61 |
| 13,589 | 35 | 3 | 396 | 36 | 19 | 2 | 257 | 20 | 707 | 61 |
| 13,590 | 34 | 3 | 395 | 36 | 19 | 2 | 257 | 20 | 705 | 61 |
| 13,591 | 35 | 3 | 400 | 36 | 19 | 2 | 260 | 21 | 714 | 62 |
| 13,592 | 35 | 3 | 400 | 36 | 19 | 2 | 260 | 21 | 714 | 62 |
| 13,593 | 35 | 3 | 411 | 37 | 21 | 2 | 268 | 21 | 735 | 63 |
| 13,594 | 40 | 3 | 444 | 37 | 21 | 2 | 296 | 22 | 801 | 64 |
| 13,595 | 41 | 3 | 445 | 40 | 21 | 1 | 299 | 20 | 806 | 64 |
| 13,596 | 40 | 4 | 453 | 49 | 23 | 1 | 304 | 26 | 820 | 80 |
| 13,597 | 40 | 4 | 450 | 49 | 23 | 1 | 298 | 27 | 811 | 81 |
| 13,598 | 41 | 4 | 473 | 51 | 24 | 2 | 325 | 30 | 863 | 87 |
| 13,599 | 43 | 4 | 477 | 46 | 24 | 2 | 331 | 30 | 875 | 82 |
| 13,600 | 37 | 4 | 437 | 47 | 21 | 2 | 319 | 32 | 814 | 85 |

|        |    |   |       |    |    |   |     |    |       |    |
|--------|----|---|-------|----|----|---|-----|----|-------|----|
| 13,601 | 37 | 4 | 402   | 46 | 20 | 2 | 315 | 33 | 774   | 85 |
| 13,602 | 29 | 4 | 303   | 46 | 14 | 2 | 240 | 33 | 586   | 85 |
| 13,603 | 31 | 4 | 328   | 46 | 20 | 2 | 299 | 33 | 678   | 85 |
| 13,604 | 35 | 4 | 364   | 45 | 27 | 2 | 386 | 33 | 812   | 84 |
| 13,605 | 35 | 4 | 364   | 45 | 27 | 2 | 386 | 33 | 812   | 84 |
| 13,606 | 35 | 4 | 364   | 45 | 27 | 2 | 386 | 33 | 812   | 84 |
| 13,607 | 36 | 4 | 372   | 48 | 28 | 1 | 390 | 33 | 826   | 86 |
| 13,608 | 36 | 4 | 371   | 48 | 28 | 1 | 390 | 33 | 825   | 86 |
| 13,609 | 37 | 4 | 437   | 48 | 30 | 1 | 398 | 33 | 902   | 86 |
| 13,610 | 39 | 4 | 504   | 50 | 32 | 1 | 420 | 34 | 995   | 89 |
| 13,611 | 47 | 4 | 679   | 50 | 44 | 1 | 488 | 34 | 1,258 | 89 |
| 13,612 | 57 | 4 | 785   | 50 | 50 | 1 | 548 | 34 | 1,440 | 89 |
| 13,613 | 60 | 4 | 840   | 53 | 52 | 1 | 565 | 34 | 1,517 | 92 |
| 13,614 | 59 | 4 | 868   | 49 | 53 | 1 | 578 | 33 | 1,558 | 87 |
| 13,615 | 58 | 4 | 866   | 41 | 53 | 1 | 578 | 30 | 1,555 | 76 |
| 13,616 | 59 | 4 | 898   | 41 | 53 | 1 | 593 | 30 | 1,603 | 76 |
| 13,617 | 58 | 4 | 896   | 41 | 52 | 1 | 593 | 30 | 1,599 | 76 |
| 13,618 | 61 | 3 | 928   | 41 | 55 | 1 | 609 | 30 | 1,653 | 75 |
| 13,619 | 61 | 3 | 929   | 40 | 55 | 1 | 611 | 30 | 1,656 | 74 |
| 13,620 | 60 | 3 | 947   | 39 | 55 | 1 | 625 | 30 | 1,687 | 73 |
| 13,621 | 60 | 4 | 947   | 39 | 55 | 1 | 625 | 30 | 1,687 | 74 |
| 13,622 | 63 | 4 | 960   | 39 | 56 | 1 | 632 | 30 | 1,711 | 74 |
| 13,623 | 63 | 4 | 963   | 38 | 56 | 1 | 634 | 30 | 1,716 | 73 |
| 13,624 | 65 | 4 | 989   | 38 | 56 | 1 | 637 | 31 | 1,747 | 74 |
| 13,625 | 68 | 4 | 1,021 | 38 | 59 | 1 | 672 | 31 | 1,820 | 74 |
| 13,626 | 70 | 4 | 1,043 | 38 | 60 | 1 | 704 | 31 | 1,877 | 74 |
| 13,627 | 70 | 4 | 1,067 | 39 | 65 | 1 | 721 | 31 | 1,923 | 75 |
| 13,628 | 70 | 4 | 1,048 | 40 | 64 | 1 | 724 | 31 | 1,906 | 76 |
| 13,629 | 71 | 3 | 1,043 | 34 | 66 | 1 | 754 | 20 | 1,934 | 58 |
| 13,630 | 71 | 3 | 1,046 | 34 | 66 | 1 | 757 | 20 | 1,940 | 58 |
| 13,631 | 71 | 2 | 1,047 | 34 | 66 | 1 | 753 | 19 | 1,937 | 56 |
| 13,632 | 71 | 3 | 1,050 | 34 | 67 | 1 | 753 | 21 | 1,941 | 59 |
| 13,633 | 70 | 3 | 1,054 | 35 | 67 | 1 | 756 | 21 | 1,947 | 60 |
| 13,634 | 71 | 3 | 1,057 | 35 | 67 | 1 | 757 | 21 | 1,952 | 60 |
| 13,635 | 71 | 3 | 1,058 | 34 | 67 | 1 | 754 | 21 | 1,950 | 59 |
| 13,636 | 73 | 3 | 1,032 | 34 | 63 | 1 | 709 | 21 | 1,877 | 59 |
| 13,637 | 72 | 3 | 1,030 | 34 | 63 | 1 | 706 | 21 | 1,871 | 59 |
| 13,638 | 80 | 3 | 1,163 | 33 | 67 | 1 | 779 | 21 | 2,089 | 58 |
| 13,639 | 80 | 3 | 1,162 | 33 | 67 | 1 | 777 | 21 | 2,086 | 58 |
| 13,640 | 85 | 3 | 1,252 | 33 | 71 | 1 | 865 | 21 | 2,273 | 58 |
| 13,641 | 84 | 3 | 1,267 | 33 | 72 | 1 | 875 | 21 | 2,298 | 58 |

|        |     |   |       |    |     |   |       |    |       |    |
|--------|-----|---|-------|----|-----|---|-------|----|-------|----|
| 13,642 | 85  | 3 | 1,264 | 33 | 72  | 1 | 873   | 20 | 2,294 | 57 |
| 13,643 | 85  | 3 | 1,256 | 33 | 71  | 1 | 872   | 20 | 2,284 | 57 |
| 13,644 | 84  | 3 | 1,249 | 32 | 70  | 1 | 866   | 20 | 2,269 | 56 |
| 13,645 | 81  | 3 | 1,293 | 29 | 72  | 1 | 879   | 18 | 2,325 | 51 |
| 13,646 | 82  | 2 | 1,295 | 20 | 72  | 1 | 876   | 12 | 2,325 | 35 |
| 13,647 | 82  | 2 | 1,284 | 20 | 70  | 1 | 870   | 12 | 2,306 | 35 |
| 13,648 | 81  | 2 | 1,274 | 16 | 69  | 0 | 852   | 8  | 2,276 | 26 |
| 13,649 | 85  | 2 | 1,312 | 16 | 70  | 0 | 850   | 8  | 2,317 | 26 |
| 13,650 | 89  | 2 | 1,329 | 14 | 71  | 0 | 857   | 7  | 2,346 | 23 |
| 13,651 | 88  | 2 | 1,351 | 14 | 72  | 0 | 864   | 4  | 2,375 | 20 |
| 13,652 | 89  | 2 | 1,376 | 14 | 74  | 0 | 867   | 4  | 2,406 | 20 |
| 13,653 | 91  | 2 | 1,405 | 14 | 71  | 0 | 827   | 3  | 2,394 | 19 |
| 13,654 | 114 | 2 | 1,488 | 14 | 72  | 0 | 846   | 3  | 2,520 | 19 |
| 13,655 | 113 | 2 | 1,477 | 14 | 65  | 0 | 762   | 3  | 2,417 | 19 |
| 13,656 | 113 | 2 | 1,477 | 14 | 65  | 0 | 762   | 3  | 2,417 | 19 |
| 13,657 | 112 | 2 | 1,476 | 14 | 64  | 0 | 757   | 3  | 2,409 | 19 |
| 13,658 | 140 | 2 | 1,798 | 12 | 89  | 0 | 918   | 3  | 2,945 | 17 |
| 13,659 | 143 | 3 | 1,823 | 13 | 90  | 0 | 929   | 3  | 2,985 | 19 |
| 13,660 | 145 | 3 | 1,817 | 13 | 89  | 0 | 927   | 3  | 2,978 | 19 |
| 13,661 | 169 | 3 | 2,232 | 11 | 103 | 0 | 1,029 | 4  | 3,533 | 18 |
| 13,662 | 163 | 3 | 2,138 | 12 | 92  | 0 | 974   | 5  | 3,367 | 20 |
| 13,663 | 158 | 3 | 2,112 | 12 | 91  | 0 | 955   | 5  | 3,316 | 20 |
| 13,664 | 171 | 3 | 2,268 | 13 | 104 | 0 | 1,050 | 5  | 3,593 | 21 |
| 13,665 | 171 | 3 | 2,240 | 13 | 102 | 0 | 1,036 | 5  | 3,549 | 21 |
| 13,666 | 184 | 3 | 2,539 | 13 | 113 | 0 | 1,116 | 5  | 3,952 | 21 |
| 13,667 | 185 | 3 | 2,569 | 13 | 114 | 0 | 1,121 | 5  | 3,989 | 21 |
| 13,668 | 185 | 3 | 2,597 | 13 | 115 | 0 | 1,125 | 5  | 4,022 | 21 |
| 13,669 | 187 | 3 | 2,629 | 13 | 114 | 0 | 1,151 | 5  | 4,081 | 21 |
| 13,670 | 187 | 3 | 2,634 | 13 | 114 | 0 | 1,152 | 5  | 4,087 | 21 |
| 13,671 | 187 | 2 | 2,620 | 14 | 114 | 0 | 1,141 | 5  | 4,062 | 21 |
| 13,672 | 187 | 2 | 2,618 | 17 | 113 | 0 | 1,139 | 10 | 4,057 | 29 |
| 13,673 | 184 | 2 | 2,608 | 17 | 113 | 0 | 1,135 | 10 | 4,040 | 29 |
| 13,674 | 184 | 2 | 2,605 | 17 | 113 | 0 | 1,134 | 10 | 4,036 | 29 |
| 13,675 | 182 | 3 | 2,578 | 18 | 113 | 0 | 1,137 | 9  | 4,010 | 30 |
| 13,676 | 180 | 3 | 2,549 | 18 | 110 | 0 | 1,102 | 9  | 3,941 | 30 |
| 13,677 | 178 | 3 | 2,531 | 17 | 110 | 0 | 1,074 | 9  | 3,893 | 29 |
| 13,678 | 180 | 3 | 2,514 | 16 | 107 | 0 | 1,059 | 9  | 3,860 | 28 |
| 13,679 | 180 | 3 | 2,509 | 16 | 107 | 0 | 1,050 | 9  | 3,846 | 28 |
| 13,680 | 178 | 3 | 2,493 | 17 | 104 | 0 | 1,010 | 9  | 3,785 | 29 |
| 13,681 | 178 | 3 | 2,499 | 17 | 104 | 0 | 1,007 | 10 | 3,788 | 30 |
| 13,682 | 179 | 3 | 2,499 | 16 | 104 | 0 | 1,007 | 10 | 3,789 | 29 |

|        |     |   |       |    |     |   |       |    |       |    |
|--------|-----|---|-------|----|-----|---|-------|----|-------|----|
| 13,683 | 179 | 2 | 2,496 | 16 | 103 | 0 | 1,006 | 8  | 3,784 | 26 |
| 13,684 | 179 | 2 | 2,494 | 15 | 103 | 0 | 1,005 | 8  | 3,781 | 25 |
| 13,685 | 178 | 2 | 2,507 | 15 | 103 | 0 | 1,012 | 8  | 3,800 | 25 |
| 13,686 | 178 | 2 | 2,502 | 16 | 103 | 0 | 1,011 | 8  | 3,794 | 26 |
| 13,687 | 175 | 2 | 2,488 | 20 | 103 | 5 | 1,005 | 15 | 3,771 | 42 |
| 13,688 | 174 | 2 | 2,482 | 24 | 103 | 5 | 1,005 | 17 | 3,764 | 48 |
| 13,689 | 166 | 2 | 2,352 | 25 | 99  | 5 | 927   | 17 | 3,544 | 49 |
| 13,690 | 161 | 2 | 2,279 | 25 | 95  | 5 | 848   | 17 | 3,383 | 49 |
| 13,691 | 160 | 4 | 2,265 | 26 | 95  | 5 | 841   | 17 | 3,361 | 52 |
| 13,692 | 160 | 4 | 2,249 | 26 | 94  | 5 | 830   | 20 | 3,333 | 55 |
| 13,693 | 158 | 4 | 2,209 | 26 | 92  | 5 | 795   | 20 | 3,254 | 55 |
| 13,694 | 159 | 4 | 2,202 | 27 | 92  | 5 | 800   | 20 | 3,253 | 56 |
| 13,695 | 159 | 4 | 2,187 | 27 | 92  | 5 | 799   | 20 | 3,237 | 56 |
| 13,696 | 159 | 4 | 2,172 | 27 | 92  | 5 | 795   | 20 | 3,218 | 56 |
| 13,697 | 157 | 4 | 2,169 | 27 | 92  | 5 | 794   | 20 | 3,212 | 56 |
| 13,698 | 157 | 4 | 2,168 | 27 | 92  | 5 | 794   | 20 | 3,211 | 56 |
| 13,699 | 157 | 4 | 2,171 | 27 | 92  | 5 | 792   | 21 | 3,212 | 57 |
| 13,700 | 153 | 4 | 2,147 | 27 | 92  | 5 | 792   | 21 | 3,184 | 57 |
| 13,701 | 148 | 4 | 2,135 | 27 | 92  | 5 | 784   | 21 | 3,159 | 57 |
| 13,702 | 148 | 4 | 2,108 | 26 | 91  | 5 | 774   | 21 | 3,121 | 56 |
| 13,703 | 146 | 4 | 2,071 | 26 | 89  | 5 | 761   | 21 | 3,067 | 56 |
| 13,704 | 141 | 4 | 2,002 | 26 | 87  | 5 | 739   | 20 | 2,969 | 55 |
| 13,705 | 117 | 4 | 1,917 | 26 | 85  | 5 | 712   | 20 | 2,831 | 55 |
| 13,706 | 114 | 4 | 1,893 | 26 | 85  | 5 | 704   | 20 | 2,796 | 55 |
| 13,707 | 110 | 4 | 1,798 | 26 | 84  | 5 | 699   | 20 | 2,691 | 55 |
| 13,708 | 109 | 4 | 1,784 | 26 | 83  | 5 | 698   | 20 | 2,674 | 55 |
| 13,709 | 86  | 3 | 1,564 | 24 | 60  | 5 | 543   | 20 | 2,253 | 52 |
| 13,710 | 83  | 3 | 1,539 | 24 | 59  | 5 | 533   | 20 | 2,214 | 52 |
| 13,711 | 80  | 3 | 1,480 | 25 | 57  | 6 | 528   | 20 | 2,145 | 54 |
| 13,712 | 53  | 3 | 1,002 | 25 | 41  | 6 | 400   | 20 | 1,496 | 54 |
| 13,713 | 51  | 3 | 923   | 24 | 40  | 6 | 387   | 20 | 1,401 | 53 |
| 13,714 | 45  | 3 | 841   | 24 | 34  | 6 | 346   | 20 | 1,266 | 53 |
| 13,715 | 28  | 3 | 628   | 22 | 19  | 6 | 234   | 24 | 909   | 55 |
| 13,716 | 22  | 4 | 503   | 22 | 12  | 6 | 202   | 24 | 739   | 56 |
| 13,717 | 15  | 4 | 333   | 22 | 9   | 6 | 158   | 27 | 515   | 59 |
| 13,718 | 13  | 4 | 265   | 21 | 8   | 6 | 136   | 27 | 422   | 58 |
| 13,719 | 13  | 4 | 234   | 21 | 8   | 6 | 131   | 27 | 386   | 58 |
| 13,720 | 8   | 4 | 174   | 22 | 6   | 6 | 91    | 27 | 279   | 59 |
| 13,721 | 8   | 4 | 169   | 22 | 6   | 6 | 89    | 27 | 272   | 59 |
| 13,722 | 8   | 4 | 176   | 19 | 6   | 6 | 93    | 22 | 283   | 51 |
| 13,723 | 8   | 4 | 176   | 19 | 6   | 6 | 93    | 22 | 283   | 51 |

|        |    |   |     |    |   |   |     |    |     |    |
|--------|----|---|-----|----|---|---|-----|----|-----|----|
| 13,724 | 16 | 4 | 200 | 19 | 7 | 6 | 142 | 23 | 365 | 52 |
| 13,725 | 16 | 4 | 211 | 20 | 7 | 7 | 148 | 25 | 382 | 56 |
| 13,726 | 16 | 4 | 211 | 19 | 7 | 7 | 144 | 25 | 378 | 55 |
| 13,727 | 15 | 5 | 207 | 19 | 7 | 7 | 144 | 25 | 373 | 56 |
| 13,728 | 15 | 5 | 203 | 19 | 6 | 7 | 138 | 25 | 362 | 56 |
| 13,729 | 13 | 5 | 178 | 19 | 4 | 7 | 130 | 25 | 325 | 56 |
| 13,730 | 13 | 5 | 175 | 19 | 4 | 7 | 129 | 25 | 321 | 56 |
| 13,731 | 13 | 5 | 172 | 19 | 4 | 7 | 126 | 25 | 315 | 56 |
| 13,732 | 13 | 5 | 164 | 19 | 4 | 7 | 126 | 25 | 307 | 56 |
| 13,733 | 12 | 5 | 163 | 20 | 4 | 7 | 126 | 25 | 305 | 57 |
| 13,734 | 14 | 5 | 173 | 20 | 4 | 7 | 127 | 25 | 318 | 57 |
| 13,735 | 15 | 5 | 182 | 20 | 4 | 7 | 135 | 25 | 336 | 57 |
| 13,736 | 15 | 5 | 166 | 20 | 4 | 7 | 126 | 25 | 311 | 57 |
| 13,737 | 14 | 5 | 158 | 17 | 4 | 2 | 125 | 18 | 301 | 42 |
| 13,738 | 14 | 5 | 153 | 13 | 4 | 2 | 118 | 16 | 289 | 36 |
| 13,739 | 14 | 5 | 149 | 13 | 4 | 2 | 116 | 18 | 283 | 38 |
| 13,740 | 14 | 5 | 145 | 12 | 4 | 2 | 118 | 18 | 281 | 37 |
| 13,741 | 14 | 5 | 145 | 12 | 4 | 2 | 118 | 18 | 281 | 37 |
| 13,742 | 14 | 3 | 145 | 11 | 4 | 2 | 117 | 18 | 280 | 34 |
| 13,743 | 15 | 3 | 144 | 10 | 4 | 2 | 117 | 15 | 280 | 30 |
| 13,744 | 15 | 3 | 144 | 10 | 4 | 2 | 117 | 15 | 280 | 30 |
| 13,745 | 14 | 3 | 144 | 10 | 4 | 2 | 110 | 16 | 272 | 31 |
| 13,746 | 13 | 3 | 144 | 13 | 4 | 2 | 108 | 16 | 269 | 34 |
| 13,747 | 13 | 3 | 148 | 14 | 4 | 2 | 111 | 16 | 276 | 35 |
| 13,748 | 13 | 3 | 149 | 14 | 4 | 2 | 111 | 16 | 277 | 35 |
| 13,749 | 13 | 4 | 140 | 15 | 4 | 2 | 111 | 16 | 268 | 37 |
| 13,750 | 13 | 4 | 128 | 16 | 4 | 2 | 106 | 15 | 251 | 37 |
| 13,751 | 13 | 4 | 120 | 16 | 3 | 2 | 103 | 15 | 239 | 37 |
| 13,752 | 12 | 4 | 112 | 16 | 2 | 2 | 99  | 15 | 225 | 37 |
| 13,753 | 12 | 4 | 111 | 16 | 2 | 2 | 99  | 15 | 224 | 37 |
| 13,754 | 12 | 4 | 112 | 16 | 2 | 2 | 99  | 15 | 225 | 37 |
| 13,755 | 12 | 4 | 112 | 16 | 2 | 2 | 99  | 15 | 225 | 37 |
| 13,756 | 12 | 4 | 114 | 16 | 2 | 2 | 99  | 15 | 227 | 37 |
| 13,757 | 12 | 4 | 112 | 16 | 2 | 2 | 98  | 15 | 224 | 37 |
| 13,758 | 12 | 4 | 111 | 16 | 2 | 2 | 98  | 15 | 223 | 37 |
| 13,759 | 12 | 4 | 110 | 17 | 2 | 2 | 98  | 15 | 222 | 38 |
| 13,760 | 12 | 4 | 110 | 17 | 2 | 2 | 97  | 15 | 221 | 38 |
| 13,761 | 12 | 4 | 110 | 17 | 2 | 1 | 98  | 15 | 222 | 37 |
| 13,762 | 12 | 4 | 110 | 17 | 2 | 1 | 99  | 15 | 223 | 37 |
| 13,763 | 12 | 4 | 107 | 16 | 2 | 1 | 98  | 14 | 219 | 35 |
| 13,764 | 20 | 4 | 204 | 16 | 6 | 1 | 140 | 14 | 370 | 35 |



|        |     |   |       |    |     |   |       |    |       |    |
|--------|-----|---|-------|----|-----|---|-------|----|-------|----|
| 13,765 | 30  | 4 | 386   | 14 | 17  | 1 | 308   | 10 | 741   | 29 |
| 13,766 | 35  | 3 | 552   | 14 | 27  | 1 | 488   | 10 | 1,102 | 28 |
| 13,767 | 35  | 3 | 551   | 14 | 26  | 1 | 485   | 10 | 1,097 | 28 |
| 13,768 | 35  | 3 | 544   | 14 | 26  | 1 | 483   | 7  | 1,088 | 25 |
| 13,769 | 40  | 3 | 621   | 14 | 36  | 1 | 568   | 7  | 1,265 | 25 |
| 13,770 | 40  | 3 | 630   | 14 | 37  | 1 | 573   | 7  | 1,280 | 25 |
| 13,771 | 49  | 3 | 727   | 13 | 39  | 1 | 622   | 7  | 1,437 | 24 |
| 13,772 | 52  | 3 | 767   | 12 | 41  | 0 | 648   | 4  | 1,508 | 19 |
| 13,773 | 57  | 3 | 835   | 12 | 42  | 0 | 672   | 4  | 1,606 | 19 |
| 13,774 | 80  | 3 | 1,482 | 12 | 72  | 0 | 979   | 4  | 2,613 | 19 |
| 13,775 | 80  | 3 | 1,471 | 12 | 72  | 0 | 973   | 4  | 2,596 | 19 |
| 13,776 | 84  | 3 | 1,535 | 12 | 76  | 0 | 1,051 | 4  | 2,746 | 19 |
| 13,777 | 85  | 2 | 1,540 | 12 | 77  | 0 | 1,059 | 4  | 2,761 | 18 |
| 13,778 | 87  | 1 | 1,567 | 12 | 78  | 0 | 1,094 | 4  | 2,826 | 17 |
| 13,779 | 87  | 1 | 1,565 | 12 | 78  | 0 | 1,094 | 4  | 2,824 | 17 |
| 13,780 | 87  | 1 | 1,569 | 12 | 78  | 0 | 1,093 | 4  | 2,827 | 17 |
| 13,781 | 87  | 1 | 1,571 | 11 | 78  | 0 | 1,096 | 3  | 2,832 | 15 |
| 13,782 | 87  | 1 | 1,577 | 11 | 79  | 0 | 1,098 | 3  | 2,841 | 15 |
| 13,783 | 87  | 2 | 1,583 | 11 | 80  | 0 | 1,098 | 3  | 2,848 | 16 |
| 13,784 | 87  | 2 | 1,586 | 9  | 80  | 0 | 1,097 | 3  | 2,850 | 14 |
| 13,785 | 90  | 2 | 1,624 | 9  | 81  | 0 | 1,116 | 3  | 2,911 | 14 |
| 13,786 | 92  | 2 | 1,633 | 8  | 81  | 0 | 1,121 | 3  | 2,927 | 13 |
| 13,787 | 92  | 2 | 1,635 | 8  | 81  | 0 | 1,124 | 3  | 2,932 | 13 |
| 13,788 | 93  | 2 | 1,670 | 8  | 83  | 0 | 1,139 | 3  | 2,985 | 13 |
| 13,789 | 93  | 2 | 1,680 | 8  | 83  | 0 | 1,149 | 1  | 3,005 | 11 |
| 13,790 | 99  | 2 | 1,697 | 8  | 83  | 0 | 1,163 | 1  | 3,042 | 11 |
| 13,791 | 99  | 2 | 1,697 | 8  | 83  | 0 | 1,159 | 1  | 3,038 | 11 |
| 13,792 | 99  | 2 | 1,698 | 8  | 83  | 0 | 1,160 | 1  | 3,040 | 11 |
| 13,793 | 99  | 2 | 1,698 | 8  | 83  | 0 | 1,160 | 1  | 3,040 | 11 |
| 13,794 | 98  | 2 | 1,697 | 8  | 83  | 0 | 1,160 | 1  | 3,038 | 11 |
| 13,795 | 103 | 2 | 1,721 | 8  | 84  | 0 | 1,189 | 1  | 3,097 | 11 |
| 13,796 | 103 | 2 | 1,734 | 5  | 85  | 0 | 1,193 | 0  | 3,115 | 7  |
| 13,797 | 106 | 2 | 1,744 | 5  | 86  | 0 | 1,200 | 0  | 3,136 | 7  |
| 13,798 | 106 | 2 | 1,741 | 4  | 86  | 0 | 1,198 | 0  | 3,131 | 6  |
| 13,799 | 112 | 2 | 1,780 | 4  | 88  | 0 | 1,250 | 0  | 3,230 | 6  |
| 13,800 | 112 | 1 | 1,786 | 2  | 88  | 0 | 1,260 | 0  | 3,246 | 3  |
| 13,801 | 112 | 1 | 1,785 | 2  | 88  | 0 | 1,260 | 0  | 3,245 | 3  |
| 13,802 | 124 | 1 | 1,915 | 2  | 102 | 0 | 1,352 | 0  | 3,493 | 3  |
| 13,803 | 124 | 1 | 1,952 | 2  | 102 | 0 | 1,368 | 0  | 3,546 | 3  |
| 13,804 | 128 | 1 | 2,234 | 2  | 111 | 0 | 1,460 | 0  | 3,933 | 3  |
| 13,805 | 170 | 1 | 2,888 | 2  | 143 | 0 | 1,860 | 0  | 5,061 | 3  |

|        |     |   |       |    |     |   |       |   |       |    |
|--------|-----|---|-------|----|-----|---|-------|---|-------|----|
| 13,806 | 170 | 1 | 2,888 | 2  | 143 | 0 | 1,861 | 0 | 5,062 | 3  |
| 13,807 | 171 | 1 | 2,896 | 2  | 147 | 0 | 1,874 | 0 | 5,088 | 3  |
| 13,808 | 171 | 1 | 2,902 | 2  | 147 | 0 | 1,876 | 0 | 5,096 | 3  |
| 13,809 | 171 | 1 | 2,902 | 2  | 147 | 0 | 1,874 | 0 | 5,094 | 3  |
| 13,810 | 172 | 1 | 2,913 | 1  | 149 | 0 | 1,881 | 0 | 5,115 | 2  |
| 13,811 | 182 | 1 | 2,935 | 1  | 150 | 0 | 1,906 | 0 | 5,173 | 2  |
| 13,812 | 182 | 1 | 2,936 | 1  | 150 | 0 | 1,904 | 0 | 5,172 | 2  |
| 13,813 | 182 | 1 | 2,940 | 2  | 150 | 0 | 1,906 | 0 | 5,178 | 3  |
| 13,814 | 182 | 1 | 2,935 | 2  | 150 | 0 | 1,904 | 0 | 5,171 | 3  |
| 13,815 | 174 | 1 | 2,842 | 2  | 146 | 0 | 1,869 | 0 | 5,031 | 3  |
| 13,816 | 167 | 1 | 2,662 | 2  | 135 | 0 | 1,702 | 0 | 4,666 | 3  |
| 13,817 | 162 | 1 | 2,497 | 2  | 125 | 0 | 1,519 | 0 | 4,303 | 3  |
| 13,818 | 161 | 1 | 2,457 | 2  | 120 | 0 | 1,466 | 1 | 4,204 | 4  |
| 13,819 | 161 | 1 | 2,449 | 2  | 120 | 0 | 1,454 | 1 | 4,184 | 4  |
| 13,820 | 159 | 1 | 2,433 | 3  | 115 | 0 | 1,437 | 2 | 4,144 | 6  |
| 13,821 | 160 | 1 | 2,424 | 3  | 114 | 0 | 1,431 | 2 | 4,129 | 6  |
| 13,822 | 151 | 1 | 2,332 | 4  | 112 | 0 | 1,386 | 3 | 3,981 | 8  |
| 13,823 | 150 | 1 | 2,303 | 4  | 110 | 0 | 1,362 | 3 | 3,925 | 8  |
| 13,824 | 145 | 1 | 2,228 | 5  | 109 | 0 | 1,338 | 3 | 3,820 | 9  |
| 13,825 | 114 | 1 | 1,554 | 5  | 78  | 0 | 983   | 3 | 2,729 | 9  |
| 13,826 | 118 | 1 | 1,569 | 5  | 78  | 0 | 990   | 3 | 2,755 | 9  |
| 13,827 | 119 | 1 | 1,549 | 6  | 78  | 0 | 968   | 3 | 2,714 | 10 |
| 13,828 | 118 | 1 | 1,545 | 8  | 77  | 0 | 961   | 3 | 2,701 | 12 |
| 13,829 | 116 | 1 | 1,521 | 9  | 76  | 0 | 926   | 3 | 2,639 | 13 |
| 13,830 | 116 | 1 | 1,518 | 9  | 76  | 0 | 923   | 3 | 2,633 | 13 |
| 13,831 | 116 | 1 | 1,520 | 9  | 76  | 0 | 925   | 3 | 2,637 | 13 |
| 13,832 | 116 | 1 | 1,518 | 9  | 76  | 0 | 924   | 3 | 2,634 | 13 |
| 13,833 | 116 | 1 | 1,511 | 9  | 75  | 0 | 922   | 3 | 2,624 | 13 |
| 13,834 | 116 | 0 | 1,505 | 10 | 74  | 0 | 922   | 3 | 2,617 | 13 |
| 13,835 | 116 | 0 | 1,501 | 10 | 74  | 0 | 922   | 3 | 2,613 | 13 |
| 13,836 | 111 | 0 | 1,450 | 10 | 73  | 0 | 899   | 3 | 2,533 | 13 |
| 13,837 | 111 | 0 | 1,516 | 10 | 73  | 0 | 907   | 3 | 2,607 | 13 |
| 13,838 | 111 | 0 | 1,535 | 10 | 75  | 0 | 916   | 3 | 2,637 | 13 |
| 13,839 | 113 | 0 | 1,525 | 10 | 75  | 0 | 920   | 3 | 2,633 | 13 |
| 13,840 | 113 | 0 | 1,513 | 10 | 75  | 0 | 908   | 3 | 2,609 | 13 |
| 13,841 | 107 | 0 | 1,497 | 10 | 75  | 0 | 897   | 3 | 2,576 | 13 |
| 13,842 | 107 | 0 | 1,496 | 10 | 75  | 0 | 897   | 3 | 2,575 | 13 |
| 13,843 | 106 | 0 | 1,491 | 10 | 75  | 0 | 893   | 3 | 2,565 | 13 |
| 13,844 | 106 | 0 | 1,481 | 10 | 75  | 0 | 888   | 3 | 2,550 | 13 |
| 13,845 | 106 | 0 | 1,480 | 10 | 75  | 0 | 888   | 3 | 2,549 | 13 |
| 13,846 | 102 | 1 | 1,480 | 10 | 74  | 0 | 869   | 3 | 2,525 | 14 |

|        |     |   |       |    |    |   |     |   |       |    |
|--------|-----|---|-------|----|----|---|-----|---|-------|----|
| 13,847 | 106 | 1 | 1,478 | 10 | 73 | 0 | 866 | 3 | 2,523 | 14 |
| 13,848 | 104 | 1 | 1,470 | 11 | 72 | 0 | 860 | 6 | 2,506 | 18 |
| 13,849 | 104 | 1 | 1,469 | 11 | 72 | 0 | 859 | 6 | 2,504 | 18 |
| 13,850 | 98  | 1 | 1,429 | 11 | 70 | 0 | 807 | 7 | 2,404 | 19 |
| 13,851 | 104 | 1 | 1,449 | 11 | 73 | 0 | 805 | 7 | 2,431 | 19 |
| 13,852 | 100 | 1 | 1,472 | 14 | 73 | 0 | 815 | 7 | 2,460 | 22 |
| 13,853 | 97  | 1 | 1,373 | 14 | 61 | 0 | 735 | 7 | 2,266 | 22 |
| 13,854 | 97  | 1 | 1,342 | 14 | 61 | 0 | 727 | 7 | 2,227 | 22 |
| 13,855 | 113 | 1 | 1,100 | 14 | 57 | 0 | 672 | 7 | 1,942 | 22 |
| 13,856 | 71  | 1 | 450   | 14 | 25 | 0 | 273 | 7 | 819   | 22 |
| 13,857 | 85  | 1 | 478   | 14 | 26 | 0 | 285 | 7 | 874   | 22 |
| 13,858 | 90  | 1 | 495   | 14 | 25 | 0 | 290 | 7 | 900   | 22 |
| 13,859 | 91  | 1 | 495   | 14 | 26 | 0 | 295 | 7 | 907   | 22 |
| 13,860 | 90  | 1 | 484   | 14 | 24 | 0 | 290 | 7 | 888   | 22 |
| 13,861 | 86  | 1 | 514   | 14 | 23 | 0 | 290 | 7 | 913   | 22 |
| 13,862 | 95  | 1 | 560   | 14 | 26 | 0 | 314 | 7 | 995   | 22 |
| 13,863 | 96  | 1 | 567   | 12 | 27 | 0 | 314 | 7 | 1,004 | 20 |
| 13,864 | 96  | 1 | 567   | 12 | 27 | 0 | 314 | 7 | 1,004 | 20 |
| 13,865 | 97  | 1 | 568   | 12 | 27 | 0 | 313 | 7 | 1,005 | 20 |
| 13,866 | 97  | 1 | 567   | 12 | 27 | 0 | 312 | 7 | 1,003 | 20 |
| 13,867 | 95  | 1 | 573   | 12 | 27 | 0 | 312 | 7 | 1,007 | 20 |
| 13,868 | 95  | 1 | 573   | 12 | 27 | 0 | 311 | 7 | 1,006 | 20 |
| 13,869 | 95  | 1 | 568   | 12 | 27 | 0 | 310 | 6 | 1,000 | 19 |
| 13,870 | 93  | 1 | 565   | 12 | 27 | 0 | 311 | 6 | 996   | 19 |
| 13,871 | 96  | 1 | 580   | 11 | 27 | 0 | 315 | 5 | 1,018 | 17 |
| 13,872 | 101 | 1 | 599   | 11 | 28 | 0 | 328 | 5 | 1,056 | 17 |
| 13,873 | 102 | 1 | 601   | 9  | 30 | 0 | 330 | 4 | 1,063 | 14 |
| 13,874 | 100 | 1 | 589   | 9  | 30 | 0 | 325 | 4 | 1,044 | 14 |
| 13,875 | 93  | 1 | 542   | 9  | 26 | 0 | 271 | 4 | 932   | 14 |
| 13,876 | 93  | 1 | 547   | 9  | 26 | 0 | 272 | 4 | 938   | 14 |
| 13,877 | 92  | 1 | 540   | 9  | 28 | 0 | 262 | 4 | 922   | 14 |
| 13,878 | 92  | 1 | 539   | 9  | 28 | 0 | 262 | 4 | 921   | 14 |
| 13,879 | 96  | 1 | 572   | 7  | 29 | 0 | 274 | 4 | 971   | 12 |
| 13,880 | 97  | 1 | 571   | 6  | 29 | 0 | 274 | 4 | 971   | 11 |
| 13,881 | 98  | 1 | 570   | 6  | 29 | 0 | 272 | 4 | 969   | 11 |
| 13,882 | 98  | 1 | 569   | 6  | 29 | 0 | 273 | 4 | 969   | 11 |
| 13,883 | 100 | 1 | 574   | 6  | 29 | 0 | 273 | 4 | 976   | 11 |
| 13,884 | 100 | 1 | 573   | 6  | 29 | 0 | 272 | 4 | 974   | 11 |
| 13,885 | 111 | 1 | 612   | 5  | 33 | 0 | 280 | 6 | 1,036 | 12 |
| 13,886 | 114 | 1 | 627   | 5  | 33 | 0 | 293 | 6 | 1,067 | 12 |
| 13,887 | 116 | 1 | 643   | 5  | 35 | 0 | 292 | 6 | 1,086 | 12 |

|        |     |   |     |    |    |   |     |    |       |    |
|--------|-----|---|-----|----|----|---|-----|----|-------|----|
| 13,888 | 116 | 1 | 587 | 5  | 35 | 0 | 290 | 6  | 1,028 | 12 |
| 13,889 | 116 | 1 | 566 | 5  | 34 | 0 | 280 | 6  | 996   | 12 |
| 13,890 | 123 | 1 | 640 | 5  | 38 | 0 | 283 | 6  | 1,084 | 12 |
| 13,891 | 123 | 1 | 639 | 5  | 38 | 0 | 283 | 6  | 1,083 | 12 |
| 13,892 | 157 | 1 | 784 | 5  | 48 | 0 | 370 | 6  | 1,359 | 12 |
| 13,893 | 157 | 1 | 801 | 5  | 55 | 0 | 382 | 6  | 1,395 | 12 |
| 13,894 | 161 | 1 | 822 | 5  | 58 | 0 | 406 | 6  | 1,447 | 12 |
| 13,895 | 161 | 1 | 831 | 5  | 58 | 0 | 406 | 6  | 1,456 | 12 |
| 13,896 | 161 | 1 | 834 | 5  | 59 | 0 | 408 | 6  | 1,462 | 12 |
| 13,897 | 161 | 1 | 828 | 5  | 59 | 0 | 408 | 6  | 1,456 | 12 |
| 13,898 | 157 | 1 | 821 | 5  | 59 | 0 | 407 | 6  | 1,444 | 12 |
| 13,899 | 156 | 1 | 831 | 4  | 59 | 0 | 409 | 3  | 1,455 | 8  |
| 13,900 | 157 | 1 | 850 | 4  | 60 | 0 | 422 | 2  | 1,489 | 7  |
| 13,901 | 162 | 1 | 892 | 4  | 67 | 0 | 442 | 3  | 1,563 | 8  |
| 13,902 | 156 | 1 | 873 | 5  | 64 | 0 | 434 | 3  | 1,527 | 9  |
| 13,903 | 159 | 1 | 866 | 2  | 63 | 0 | 428 | 3  | 1,516 | 6  |
| 13,904 | 158 | 1 | 868 | 2  | 63 | 0 | 425 | 3  | 1,514 | 6  |
| 13,905 | 158 | 1 | 873 | 2  | 63 | 0 | 419 | 3  | 1,513 | 6  |
| 13,906 | 147 | 1 | 859 | 2  | 59 | 1 | 393 | 3  | 1,458 | 7  |
| 13,907 | 152 | 1 | 873 | 6  | 60 | 1 | 400 | 3  | 1,485 | 11 |
| 13,908 | 142 | 1 | 867 | 12 | 58 | 1 | 393 | 5  | 1,460 | 19 |
| 13,909 | 138 | 1 | 859 | 12 | 58 | 1 | 391 | 5  | 1,446 | 19 |
| 13,910 | 140 | 2 | 861 | 13 | 58 | 1 | 399 | 8  | 1,458 | 24 |
| 13,911 | 140 | 2 | 837 | 13 | 58 | 1 | 385 | 8  | 1,420 | 24 |
| 13,912 | 137 | 2 | 821 | 13 | 60 | 1 | 379 | 8  | 1,397 | 24 |
| 13,913 | 129 | 4 | 775 | 14 | 57 | 1 | 358 | 12 | 1,319 | 31 |
| 13,914 | 128 | 4 | 763 | 14 | 56 | 1 | 356 | 12 | 1,303 | 31 |
| 13,915 | 128 | 4 | 765 | 14 | 56 | 1 | 358 | 12 | 1,307 | 31 |
| 13,916 | 128 | 4 | 765 | 14 | 56 | 1 | 360 | 13 | 1,309 | 32 |
| 13,917 | 128 | 4 | 766 | 14 | 56 | 1 | 359 | 13 | 1,309 | 32 |
| 13,918 | 130 | 5 | 760 | 20 | 56 | 2 | 357 | 21 | 1,303 | 48 |
| 13,919 | 130 | 5 | 759 | 26 | 58 | 4 | 356 | 29 | 1,303 | 64 |
| 13,920 | 130 | 5 | 759 | 31 | 58 | 4 | 356 | 30 | 1,303 | 70 |
| 13,921 | 127 | 5 | 742 | 31 | 58 | 4 | 352 | 30 | 1,279 | 70 |
| 13,922 | 122 | 5 | 736 | 31 | 58 | 4 | 346 | 31 | 1,262 | 71 |
| 13,923 | 121 | 5 | 727 | 34 | 57 | 4 | 340 | 31 | 1,245 | 74 |
| 13,924 | 120 | 6 | 719 | 35 | 55 | 4 | 337 | 34 | 1,231 | 79 |
| 13,925 | 120 | 6 | 716 | 35 | 55 | 4 | 334 | 34 | 1,225 | 79 |
| 13,926 | 119 | 6 | 718 | 39 | 55 | 4 | 334 | 39 | 1,226 | 88 |
| 13,927 | 119 | 6 | 712 | 38 | 55 | 4 | 332 | 39 | 1,218 | 87 |
| 13,928 | 119 | 6 | 713 | 38 | 53 | 4 | 333 | 39 | 1,218 | 87 |

|        |     |    |     |     |     |    |       |     |       |     |
|--------|-----|----|-----|-----|-----|----|-------|-----|-------|-----|
| 13,929 | 119 | 6  | 712 | 39  | 53  | 5  | 333   | 39  | 1,217 | 89  |
| 13,930 | 115 | 6  | 686 | 44  | 52  | 5  | 321   | 45  | 1,174 | 100 |
| 13,931 | 114 | 6  | 683 | 44  | 52  | 5  | 320   | 45  | 1,169 | 100 |
| 13,932 | 113 | 6  | 686 | 45  | 52  | 6  | 322   | 47  | 1,173 | 104 |
| 13,933 | 113 | 6  | 687 | 46  | 52  | 7  | 323   | 47  | 1,175 | 106 |
| 13,934 | 111 | 6  | 684 | 46  | 52  | 7  | 322   | 47  | 1,169 | 106 |
| 13,935 | 110 | 6  | 675 | 47  | 52  | 7  | 320   | 47  | 1,157 | 107 |
| 13,936 | 101 | 6  | 644 | 49  | 48  | 8  | 317   | 47  | 1,110 | 110 |
| 13,937 | 98  | 6  | 626 | 52  | 48  | 9  | 305   | 51  | 1,077 | 118 |
| 13,938 | 97  | 7  | 605 | 58  | 46  | 9  | 302   | 68  | 1,050 | 142 |
| 13,939 | 97  | 8  | 601 | 60  | 49  | 10 | 333   | 72  | 1,080 | 150 |
| 13,940 | 87  | 9  | 547 | 68  | 48  | 10 | 327   | 86  | 1,009 | 173 |
| 13,941 | 88  | 9  | 521 | 70  | 45  | 10 | 332   | 97  | 986   | 186 |
| 13,942 | 56  | 10 | 389 | 74  | 37  | 11 | 280   | 99  | 762   | 194 |
| 13,943 | 56  | 12 | 379 | 76  | 31  | 14 | 272   | 111 | 738   | 213 |
| 13,944 | 63  | 12 | 399 | 77  | 33  | 15 | 329   | 111 | 824   | 215 |
| 13,945 | 59  | 12 | 383 | 79  | 32  | 15 | 311   | 116 | 785   | 222 |
| 13,946 | 59  | 12 | 374 | 80  | 32  | 16 | 308   | 118 | 773   | 226 |
| 13,947 | 62  | 11 | 392 | 90  | 34  | 19 | 337   | 162 | 825   | 282 |
| 13,948 | 67  | 11 | 444 | 95  | 44  | 20 | 434   | 166 | 989   | 292 |
| 13,949 | 74  | 11 | 505 | 96  | 78  | 20 | 650   | 167 | 1,307 | 294 |
| 13,950 | 74  | 11 | 511 | 104 | 80  | 31 | 660   | 222 | 1,325 | 368 |
| 13,951 | 78  | 11 | 543 | 107 | 91  | 32 | 750   | 231 | 1,462 | 381 |
| 13,952 | 73  | 11 | 505 | 107 | 84  | 33 | 741   | 232 | 1,403 | 383 |
| 13,953 | 73  | 11 | 512 | 107 | 84  | 33 | 752   | 235 | 1,421 | 386 |
| 13,954 | 86  | 11 | 507 | 108 | 107 | 33 | 902   | 238 | 1,602 | 390 |
| 13,955 | 89  | 11 | 515 | 111 | 119 | 32 | 943   | 240 | 1,666 | 394 |
| 13,956 | 97  | 12 | 549 | 115 | 129 | 35 | 1,026 | 260 | 1,801 | 422 |
| 13,957 | 90  | 12 | 538 | 121 | 132 | 38 | 1,047 | 285 | 1,807 | 456 |
| 13,958 | 89  | 12 | 540 | 126 | 140 | 38 | 1,104 | 294 | 1,873 | 470 |
| 13,959 | 85  | 11 | 521 | 118 | 139 | 38 | 1,096 | 290 | 1,841 | 457 |
| 13,960 | 85  | 11 | 516 | 119 | 140 | 38 | 1,107 | 292 | 1,848 | 460 |
| 13,961 | 82  | 11 | 510 | 122 | 140 | 39 | 1,097 | 292 | 1,829 | 464 |
| 13,962 | 80  | 12 | 507 | 132 | 143 | 44 | 1,102 | 321 | 1,832 | 509 |
| 13,963 | 80  | 12 | 513 | 140 | 141 | 46 | 1,111 | 339 | 1,845 | 537 |
| 13,964 | 79  | 11 | 516 | 146 | 142 | 51 | 1,121 | 357 | 1,858 | 565 |
| 13,965 | 79  | 11 | 524 | 168 | 142 | 56 | 1,133 | 403 | 1,878 | 638 |
| 13,966 | 80  | 11 | 530 | 176 | 144 | 56 | 1,146 | 411 | 1,900 | 654 |
| 13,967 | 80  | 11 | 533 | 174 | 144 | 56 | 1,147 | 405 | 1,904 | 646 |
| 13,968 | 80  | 12 | 534 | 179 | 143 | 57 | 1,148 | 412 | 1,905 | 660 |
| 13,969 | 78  | 12 | 536 | 180 | 144 | 58 | 1,156 | 414 | 1,914 | 664 |

|        |     |    |     |     |     |    |       |     |       |     |
|--------|-----|----|-----|-----|-----|----|-------|-----|-------|-----|
| 13,970 | 79  | 13 | 543 | 169 | 146 | 56 | 1,167 | 408 | 1,935 | 646 |
| 13,971 | 82  | 15 | 550 | 178 | 148 | 58 | 1,177 | 439 | 1,957 | 690 |
| 13,972 | 82  | 18 | 550 | 183 | 148 | 61 | 1,180 | 459 | 1,960 | 721 |
| 13,973 | 82  | 18 | 551 | 186 | 150 | 61 | 1,184 | 469 | 1,967 | 734 |
| 13,974 | 84  | 17 | 549 | 178 | 150 | 61 | 1,184 | 465 | 1,967 | 721 |
| 13,975 | 85  | 17 | 547 | 178 | 151 | 61 | 1,184 | 465 | 1,967 | 721 |
| 13,976 | 85  | 17 | 547 | 183 | 151 | 61 | 1,189 | 470 | 1,972 | 731 |
| 13,977 | 85  | 17 | 546 | 189 | 152 | 61 | 1,189 | 479 | 1,972 | 746 |
| 13,978 | 85  | 17 | 545 | 191 | 152 | 61 | 1,193 | 482 | 1,975 | 751 |
| 13,979 | 86  | 18 | 544 | 202 | 152 | 62 | 1,192 | 506 | 1,974 | 788 |
| 13,980 | 88  | 18 | 543 | 206 | 152 | 61 | 1,193 | 516 | 1,976 | 801 |
| 13,981 | 88  | 18 | 542 | 205 | 153 | 62 | 1,202 | 519 | 1,985 | 804 |
| 13,982 | 88  | 18 | 541 | 203 | 153 | 60 | 1,205 | 518 | 1,987 | 799 |
| 13,983 | 88  | 18 | 539 | 212 | 153 | 60 | 1,203 | 530 | 1,983 | 820 |
| 13,984 | 90  | 18 | 539 | 214 | 153 | 62 | 1,208 | 542 | 1,990 | 836 |
| 13,985 | 92  | 18 | 547 | 212 | 153 | 61 | 1,213 | 542 | 2,005 | 833 |
| 13,986 | 92  | 19 | 549 | 216 | 153 | 62 | 1,219 | 553 | 2,013 | 850 |
| 13,987 | 94  | 19 | 562 | 218 | 157 | 64 | 1,243 | 561 | 2,056 | 862 |
| 13,988 | 94  | 21 | 567 | 218 | 161 | 64 | 1,264 | 548 | 2,086 | 851 |
| 13,989 | 93  | 21 | 574 | 219 | 162 | 65 | 1,274 | 560 | 2,103 | 865 |
| 13,990 | 95  | 21 | 576 | 221 | 163 | 64 | 1,263 | 561 | 2,097 | 867 |
| 13,991 | 95  | 20 | 576 | 213 | 160 | 65 | 1,257 | 559 | 2,088 | 857 |
| 13,992 | 96  | 21 | 576 | 212 | 165 | 65 | 1,307 | 551 | 2,144 | 849 |
| 13,993 | 94  | 19 | 565 | 206 | 163 | 62 | 1,273 | 538 | 2,095 | 825 |
| 13,994 | 94  | 18 | 558 | 207 | 162 | 62 | 1,268 | 540 | 2,082 | 827 |
| 13,995 | 91  | 18 | 557 | 213 | 160 | 67 | 1,235 | 573 | 2,043 | 871 |
| 13,996 | 100 | 18 | 624 | 214 | 175 | 68 | 1,317 | 570 | 2,216 | 870 |
| 13,997 | 119 | 18 | 676 | 204 | 198 | 64 | 1,499 | 525 | 2,492 | 811 |
| 13,998 | 119 | 18 | 682 | 210 | 198 | 72 | 1,511 | 572 | 2,510 | 872 |
| 13,999 | 124 | 18 | 668 | 206 | 203 | 71 | 1,502 | 575 | 2,497 | 870 |
| 14,000 | 119 | 18 | 596 | 198 | 166 | 61 | 1,284 | 518 | 2,165 | 795 |
| 14,001 | 120 | 18 | 602 | 200 | 164 | 61 | 1,288 | 523 | 2,174 | 802 |
| 14,002 | 132 | 18 | 591 | 202 | 173 | 61 | 1,330 | 516 | 2,226 | 797 |
| 14,003 | 135 | 18 | 618 | 202 | 181 | 60 | 1,368 | 509 | 2,302 | 789 |
| 14,004 | 141 | 22 | 632 | 211 | 195 | 61 | 1,439 | 529 | 2,407 | 823 |
| 14,005 | 124 | 21 | 597 | 214 | 178 | 63 | 1,304 | 550 | 2,203 | 848 |
| 14,006 | 123 | 21 | 610 | 214 | 175 | 63 | 1,334 | 560 | 2,242 | 858 |
| 14,007 | 117 | 20 | 580 | 195 | 166 | 57 | 1,264 | 507 | 2,127 | 779 |
| 14,008 | 118 | 20 | 574 | 196 | 165 | 57 | 1,232 | 510 | 2,089 | 783 |
| 14,009 | 114 | 20 | 555 | 199 | 157 | 57 | 1,177 | 516 | 2,003 | 792 |
| 14,010 | 113 | 21 | 547 | 213 | 155 | 61 | 1,174 | 541 | 1,989 | 836 |

|        |     |    |     |     |     |    |       |     |       |     |
|--------|-----|----|-----|-----|-----|----|-------|-----|-------|-----|
| 14,011 | 112 | 21 | 546 | 217 | 154 | 63 | 1,173 | 546 | 1,985 | 847 |
| 14,012 | 111 | 21 | 545 | 217 | 153 | 69 | 1,183 | 583 | 1,992 | 890 |
| 14,013 | 112 | 21 | 547 | 233 | 156 | 69 | 1,189 | 599 | 2,004 | 922 |
| 14,014 | 111 | 21 | 547 | 229 | 158 | 67 | 1,191 | 598 | 2,007 | 915 |
| 14,015 | 112 | 21 | 545 | 201 | 157 | 59 | 1,193 | 536 | 2,007 | 817 |
| 14,016 | 112 | 21 | 541 | 210 | 157 | 60 | 1,188 | 544 | 1,998 | 835 |
| 14,017 | 113 | 21 | 535 | 212 | 156 | 61 | 1,189 | 549 | 1,993 | 843 |
| 14,018 | 114 | 19 | 544 | 205 | 157 | 59 | 1,200 | 540 | 2,015 | 823 |
| 14,019 | 116 | 22 | 551 | 220 | 157 | 61 | 1,209 | 572 | 2,033 | 875 |
| 14,020 | 116 | 22 | 549 | 229 | 156 | 61 | 1,202 | 600 | 2,023 | 912 |
| 14,021 | 114 | 22 | 542 | 230 | 153 | 61 | 1,199 | 595 | 2,008 | 908 |
| 14,022 | 112 | 17 | 536 | 215 | 152 | 56 | 1,193 | 540 | 1,993 | 828 |
| 14,023 | 112 | 17 | 536 | 216 | 152 | 56 | 1,194 | 545 | 1,994 | 834 |
| 14,024 | 113 | 19 | 534 | 218 | 150 | 57 | 1,189 | 551 | 1,986 | 845 |
| 14,025 | 112 | 19 | 534 | 222 | 150 | 57 | 1,190 | 560 | 1,986 | 858 |
| 14,026 | 111 | 19 | 538 | 228 | 150 | 57 | 1,190 | 573 | 1,989 | 877 |
| 14,027 | 111 | 19 | 538 | 227 | 151 | 59 | 1,187 | 595 | 1,987 | 900 |
| 14,028 | 111 | 20 | 539 | 224 | 151 | 59 | 1,187 | 595 | 1,988 | 898 |
| 14,029 | 112 | 21 | 541 | 223 | 153 | 60 | 1,193 | 594 | 1,999 | 898 |
| 14,030 | 111 | 20 | 540 | 204 | 153 | 58 | 1,197 | 553 | 2,001 | 835 |
| 14,031 | 109 | 21 | 540 | 210 | 153 | 58 | 1,196 | 562 | 1,998 | 851 |
| 14,032 | 109 | 21 | 537 | 213 | 155 | 59 | 1,194 | 568 | 1,995 | 861 |
| 14,033 | 109 | 21 | 540 | 203 | 155 | 57 | 1,196 | 542 | 2,000 | 823 |
| 14,034 | 110 | 22 | 544 | 211 | 155 | 58 | 1,198 | 561 | 2,007 | 852 |
| 14,035 | 114 | 22 | 561 | 214 | 157 | 58 | 1,229 | 565 | 2,061 | 859 |
| 14,036 | 113 | 21 | 558 | 216 | 159 | 60 | 1,239 | 564 | 2,069 | 861 |
| 14,037 | 112 | 21 | 573 | 217 | 160 | 60 | 1,242 | 577 | 2,087 | 875 |
| 14,038 | 109 | 21 | 575 | 220 | 161 | 58 | 1,245 | 574 | 2,090 | 873 |
| 14,039 | 110 | 18 | 574 | 216 | 157 | 58 | 1,233 | 575 | 2,074 | 867 |
| 14,040 | 113 | 19 | 588 | 215 | 157 | 57 | 1,284 | 562 | 2,142 | 853 |
| 14,041 | 108 | 18 | 574 | 212 | 154 | 56 | 1,260 | 560 | 2,096 | 846 |
| 14,042 | 108 | 18 | 572 | 216 | 154 | 56 | 1,257 | 563 | 2,091 | 853 |
| 14,043 | 107 | 18 | 566 | 224 | 152 | 59 | 1,207 | 620 | 2,032 | 921 |
| 14,044 | 116 | 18 | 626 | 224 | 166 | 59 | 1,308 | 619 | 2,216 | 920 |
| 14,045 | 122 | 18 | 683 | 215 | 188 | 53 | 1,473 | 583 | 2,466 | 869 |
| 14,046 | 122 | 20 | 688 | 224 | 189 | 57 | 1,481 | 632 | 2,480 | 933 |
| 14,047 | 124 | 20 | 664 | 223 | 197 | 59 | 1,504 | 637 | 2,489 | 939 |
| 14,048 | 104 | 20 | 601 | 218 | 172 | 50 | 1,298 | 594 | 2,175 | 882 |
| 14,049 | 104 | 20 | 606 | 219 | 173 | 51 | 1,295 | 601 | 2,178 | 891 |
| 14,050 | 115 | 20 | 594 | 220 | 174 | 51 | 1,344 | 602 | 2,227 | 893 |
| 14,051 | 114 | 20 | 613 | 216 | 180 | 49 | 1,379 | 593 | 2,286 | 878 |

|        |     |    |     |     |     |    |       |     |       |     |
|--------|-----|----|-----|-----|-----|----|-------|-----|-------|-----|
| 14,052 | 124 | 22 | 639 | 223 | 201 | 50 | 1,462 | 615 | 2,426 | 910 |
| 14,053 | 112 | 26 | 603 | 232 | 185 | 51 | 1,359 | 632 | 2,259 | 941 |
| 14,054 | 119 | 26 | 584 | 231 | 186 | 51 | 1,374 | 640 | 2,263 | 948 |
| 14,055 | 115 | 22 | 563 | 219 | 171 | 48 | 1,302 | 587 | 2,151 | 876 |
| 14,056 | 112 | 22 | 560 | 219 | 169 | 49 | 1,282 | 588 | 2,123 | 878 |
| 14,057 | 111 | 22 | 531 | 220 | 161 | 49 | 1,214 | 589 | 2,017 | 880 |
| 14,058 | 111 | 22 | 521 | 236 | 161 | 53 | 1,208 | 616 | 2,001 | 927 |
| 14,059 | 108 | 22 | 521 | 251 | 159 | 55 | 1,214 | 621 | 2,002 | 949 |
| 14,060 | 108 | 24 | 521 | 253 | 162 | 57 | 1,215 | 642 | 2,006 | 976 |
| 14,061 | 108 | 25 | 522 | 261 | 163 | 55 | 1,220 | 653 | 2,013 | 994 |
| 14,062 | 109 | 25 | 528 | 259 | 163 | 53 | 1,224 | 660 | 2,024 | 997 |
| 14,063 | 110 | 25 | 528 | 232 | 162 | 40 | 1,220 | 579 | 2,020 | 876 |
| 14,064 | 110 | 25 | 526 | 237 | 162 | 40 | 1,219 | 589 | 2,017 | 891 |
| 14,065 | 109 | 25 | 524 | 236 | 161 | 40 | 1,225 | 597 | 2,019 | 898 |
| 14,066 | 110 | 24 | 530 | 217 | 160 | 39 | 1,233 | 577 | 2,033 | 857 |
| 14,067 | 110 | 25 | 541 | 225 | 160 | 39 | 1,235 | 586 | 2,046 | 875 |
| 14,068 | 113 | 25 | 559 | 230 | 164 | 41 | 1,266 | 595 | 2,102 | 891 |
| 14,069 | 112 | 25 | 552 | 225 | 167 | 41 | 1,272 | 597 | 2,103 | 888 |
| 14,070 | 110 | 21 | 564 | 206 | 168 | 38 | 1,269 | 537 | 2,111 | 802 |
| 14,071 | 113 | 22 | 574 | 206 | 171 | 38 | 1,301 | 535 | 2,159 | 801 |
| 14,072 | 113 | 22 | 578 | 211 | 172 | 38 | 1,304 | 536 | 2,167 | 807 |
| 14,073 | 114 | 22 | 593 | 215 | 174 | 39 | 1,333 | 547 | 2,214 | 823 |
| 14,074 | 114 | 22 | 597 | 223 | 176 | 39 | 1,335 | 552 | 2,222 | 836 |
| 14,075 | 113 | 22 | 601 | 226 | 176 | 40 | 1,336 | 578 | 2,226 | 866 |
| 14,076 | 113 | 22 | 603 | 229 | 176 | 40 | 1,335 | 574 | 2,227 | 865 |
| 14,077 | 113 | 22 | 610 | 229 | 177 | 40 | 1,352 | 563 | 2,252 | 854 |
| 14,078 | 113 | 21 | 610 | 221 | 176 | 37 | 1,353 | 526 | 2,252 | 805 |
| 14,079 | 113 | 20 | 611 | 223 | 177 | 38 | 1,356 | 539 | 2,257 | 820 |
| 14,080 | 116 | 20 | 614 | 227 | 182 | 38 | 1,375 | 540 | 2,287 | 825 |
| 14,081 | 117 | 20 | 618 | 219 | 186 | 38 | 1,378 | 528 | 2,299 | 805 |
| 14,082 | 118 | 21 | 626 | 222 | 188 | 38 | 1,382 | 548 | 2,314 | 829 |
| 14,083 | 120 | 21 | 641 | 222 | 192 | 37 | 1,424 | 555 | 2,377 | 835 |
| 14,084 | 120 | 20 | 642 | 218 | 197 | 38 | 1,438 | 550 | 2,397 | 826 |
| 14,085 | 119 | 20 | 652 | 218 | 201 | 38 | 1,451 | 559 | 2,423 | 835 |
| 14,086 | 115 | 20 | 656 | 217 | 207 | 37 | 1,455 | 556 | 2,433 | 830 |
| 14,087 | 114 | 20 | 653 | 212 | 205 | 35 | 1,442 | 553 | 2,414 | 820 |
| 14,088 | 119 | 20 | 675 | 212 | 215 | 35 | 1,522 | 543 | 2,531 | 810 |
| 14,089 | 119 | 20 | 666 | 203 | 211 | 34 | 1,490 | 536 | 2,486 | 793 |
| 14,090 | 118 | 20 | 660 | 202 | 212 | 34 | 1,480 | 538 | 2,470 | 794 |
| 14,091 | 118 | 19 | 660 | 208 | 216 | 35 | 1,457 | 560 | 2,451 | 822 |
| 14,092 | 133 | 20 | 755 | 207 | 225 | 35 | 1,594 | 547 | 2,707 | 809 |



|        |     |    |       |     |     |    |       |     |       |     |
|--------|-----|----|-------|-----|-----|----|-------|-----|-------|-----|
| 14,093 | 151 | 19 | 858   | 194 | 267 | 34 | 1,947 | 487 | 3,223 | 734 |
| 14,094 | 153 | 19 | 861   | 196 | 270 | 34 | 1,965 | 516 | 3,249 | 765 |
| 14,095 | 148 | 19 | 847   | 200 | 276 | 33 | 2,002 | 517 | 3,273 | 769 |
| 14,096 | 139 | 17 | 780   | 194 | 251 | 29 | 1,821 | 468 | 2,991 | 708 |
| 14,097 | 139 | 17 | 785   | 194 | 251 | 29 | 1,830 | 471 | 3,005 | 711 |
| 14,098 | 143 | 17 | 772   | 192 | 249 | 26 | 1,822 | 465 | 2,986 | 700 |
| 14,099 | 143 | 17 | 781   | 186 | 252 | 25 | 1,833 | 450 | 3,009 | 678 |
| 14,100 | 148 | 18 | 802   | 189 | 260 | 25 | 1,895 | 462 | 3,105 | 694 |
| 14,101 | 127 | 18 | 773   | 197 | 248 | 25 | 1,773 | 474 | 2,921 | 714 |
| 14,102 | 138 | 18 | 765   | 198 | 247 | 25 | 1,801 | 479 | 2,951 | 720 |
| 14,103 | 129 | 12 | 736   | 178 | 227 | 23 | 1,714 | 431 | 2,806 | 644 |
| 14,104 | 127 | 12 | 736   | 178 | 228 | 23 | 1,699 | 431 | 2,790 | 644 |
| 14,105 | 119 | 13 | 732   | 179 | 221 | 22 | 1,645 | 430 | 2,717 | 644 |
| 14,106 | 117 | 13 | 729   | 183 | 223 | 22 | 1,642 | 439 | 2,711 | 657 |
| 14,107 | 118 | 13 | 734   | 187 | 222 | 22 | 1,639 | 445 | 2,713 | 667 |
| 14,108 | 117 | 15 | 740   | 188 | 221 | 27 | 1,648 | 471 | 2,726 | 701 |
| 14,109 | 117 | 15 | 746   | 176 | 220 | 24 | 1,647 | 447 | 2,730 | 662 |
| 14,110 | 120 | 15 | 752   | 164 | 224 | 22 | 1,663 | 445 | 2,759 | 646 |
| 14,111 | 120 | 11 | 749   | 137 | 220 | 19 | 1,662 | 371 | 2,751 | 538 |
| 14,112 | 120 | 11 | 748   | 149 | 220 | 19 | 1,658 | 376 | 2,746 | 555 |
| 14,113 | 117 | 11 | 745   | 149 | 220 | 19 | 1,658 | 381 | 2,740 | 560 |
| 14,114 | 118 | 10 | 748   | 137 | 221 | 20 | 1,664 | 356 | 2,751 | 523 |
| 14,115 | 118 | 10 | 752   | 140 | 222 | 20 | 1,671 | 359 | 2,763 | 529 |
| 14,116 | 120 | 9  | 774   | 141 | 229 | 20 | 1,708 | 367 | 2,831 | 537 |
| 14,117 | 120 | 9  | 774   | 136 | 235 | 18 | 1,714 | 357 | 2,843 | 520 |
| 14,118 | 120 | 9  | 784   | 138 | 234 | 18 | 1,723 | 359 | 2,861 | 524 |
| 14,119 | 115 | 9  | 783   | 134 | 236 | 16 | 1,707 | 352 | 2,841 | 511 |
| 14,120 | 115 | 9  | 781   | 135 | 234 | 16 | 1,700 | 352 | 2,830 | 512 |
| 14,121 | 116 | 9  | 796   | 136 | 242 | 16 | 1,779 | 356 | 2,933 | 517 |
| 14,122 | 114 | 9  | 789   | 137 | 241 | 16 | 1,755 | 356 | 2,899 | 518 |
| 14,123 | 116 | 9  | 833   | 135 | 246 | 17 | 1,804 | 358 | 2,999 | 519 |
| 14,124 | 115 | 9  | 823   | 134 | 246 | 16 | 1,782 | 348 | 2,966 | 507 |
| 14,125 | 127 | 9  | 957   | 126 | 268 | 16 | 2,071 | 345 | 3,423 | 496 |
| 14,126 | 147 | 7  | 1,140 | 110 | 336 | 14 | 2,582 | 309 | 4,205 | 440 |
| 14,127 | 147 | 7  | 1,154 | 112 | 341 | 14 | 2,607 | 312 | 4,249 | 445 |
| 14,128 | 156 | 7  | 1,235 | 112 | 357 | 14 | 2,785 | 315 | 4,533 | 448 |
| 14,129 | 156 | 7  | 1,244 | 107 | 357 | 13 | 2,817 | 300 | 4,574 | 427 |
| 14,130 | 156 | 7  | 1,264 | 108 | 359 | 13 | 2,830 | 304 | 4,609 | 432 |
| 14,131 | 173 | 7  | 1,314 | 108 | 369 | 13 | 2,962 | 306 | 4,818 | 434 |
| 14,132 | 174 | 6  | 1,343 | 109 | 371 | 13 | 2,998 | 293 | 4,886 | 421 |
| 14,133 | 181 | 6  | 1,383 | 111 | 385 | 13 | 3,088 | 290 | 5,037 | 420 |

|        |     |   |       |     |     |    |       |     |       |     |
|--------|-----|---|-------|-----|-----|----|-------|-----|-------|-----|
| 14,134 | 179 | 6 | 1,377 | 111 | 384 | 13 | 3,060 | 283 | 5,000 | 413 |
| 14,135 | 186 | 6 | 1,393 | 107 | 384 | 12 | 3,109 | 274 | 5,072 | 399 |
| 14,136 | 188 | 6 | 1,395 | 107 | 383 | 12 | 3,113 | 264 | 5,079 | 389 |
| 14,137 | 192 | 6 | 1,384 | 104 | 381 | 12 | 3,107 | 251 | 5,064 | 373 |
| 14,138 | 192 | 6 | 1,380 | 104 | 381 | 12 | 3,107 | 251 | 5,060 | 373 |
| 14,139 | 190 | 7 | 1,360 | 102 | 372 | 13 | 3,035 | 248 | 4,957 | 370 |
| 14,140 | 192 | 7 | 1,363 | 101 | 374 | 13 | 3,051 | 239 | 4,980 | 360 |
| 14,141 | 192 | 7 | 1,360 | 96  | 370 | 11 | 3,033 | 214 | 4,955 | 328 |
| 14,142 | 194 | 7 | 1,368 | 97  | 372 | 11 | 3,042 | 216 | 4,976 | 331 |
| 14,143 | 188 | 6 | 1,296 | 99  | 370 | 11 | 2,936 | 214 | 4,790 | 330 |
| 14,144 | 169 | 6 | 1,190 | 96  | 326 | 10 | 2,569 | 184 | 4,254 | 296 |
| 14,145 | 168 | 6 | 1,187 | 96  | 323 | 10 | 2,555 | 183 | 4,233 | 295 |
| 14,146 | 168 | 6 | 1,142 | 95  | 303 | 11 | 2,426 | 184 | 4,039 | 296 |
| 14,147 | 167 | 6 | 1,132 | 91  | 301 | 11 | 2,431 | 180 | 4,031 | 288 |
| 14,148 | 168 | 6 | 1,129 | 92  | 300 | 12 | 2,421 | 194 | 4,018 | 304 |
| 14,149 | 155 | 7 | 1,121 | 94  | 283 | 14 | 2,356 | 210 | 3,915 | 325 |
| 14,150 | 156 | 7 | 1,113 | 98  | 279 | 14 | 2,340 | 213 | 3,888 | 332 |
| 14,151 | 150 | 6 | 1,101 | 88  | 271 | 14 | 2,277 | 182 | 3,799 | 290 |
| 14,152 | 149 | 6 | 1,115 | 91  | 269 | 14 | 2,292 | 182 | 3,825 | 293 |
| 14,153 | 138 | 7 | 1,105 | 92  | 264 | 14 | 2,220 | 180 | 3,727 | 293 |
| 14,154 | 138 | 7 | 1,134 | 93  | 273 | 14 | 2,307 | 183 | 3,852 | 297 |
| 14,155 | 137 | 7 | 1,135 | 96  | 269 | 14 | 2,296 | 184 | 3,837 | 301 |
| 14,156 | 136 | 6 | 1,163 | 99  | 272 | 14 | 2,345 | 190 | 3,916 | 309 |
| 14,157 | 136 | 6 | 1,170 | 95  | 272 | 14 | 2,346 | 184 | 3,924 | 299 |
| 14,158 | 153 | 6 | 1,319 | 91  | 298 | 14 | 2,555 | 178 | 4,325 | 289 |
| 14,159 | 176 | 4 | 1,521 | 81  | 373 | 8  | 3,124 | 144 | 5,194 | 237 |
| 14,160 | 179 | 4 | 1,530 | 83  | 376 | 8  | 3,145 | 146 | 5,230 | 241 |
| 14,161 | 187 | 4 | 1,594 | 83  | 404 | 10 | 3,325 | 148 | 5,510 | 245 |
| 14,162 | 187 | 4 | 1,602 | 71  | 405 | 10 | 3,350 | 139 | 5,544 | 224 |
| 14,163 | 188 | 5 | 1,623 | 74  | 411 | 10 | 3,366 | 140 | 5,588 | 229 |
| 14,164 | 203 | 5 | 1,664 | 74  | 427 | 10 | 3,484 | 141 | 5,778 | 230 |
| 14,165 | 204 | 5 | 1,691 | 73  | 434 | 9  | 3,526 | 139 | 5,855 | 226 |
| 14,166 | 212 | 5 | 1,718 | 73  | 440 | 9  | 3,623 | 141 | 5,993 | 228 |
| 14,167 | 211 | 5 | 1,701 | 72  | 436 | 9  | 3,593 | 135 | 5,941 | 221 |
| 14,168 | 212 | 5 | 1,718 | 70  | 436 | 9  | 3,652 | 135 | 6,018 | 219 |
| 14,169 | 213 | 5 | 1,708 | 68  | 437 | 9  | 3,655 | 134 | 6,013 | 216 |
| 14,170 | 217 | 5 | 1,703 | 62  | 435 | 9  | 3,650 | 127 | 6,005 | 203 |
| 14,171 | 217 | 5 | 1,702 | 61  | 434 | 9  | 3,641 | 126 | 5,994 | 201 |
| 14,172 | 217 | 5 | 1,679 | 60  | 429 | 9  | 3,586 | 129 | 5,911 | 203 |
| 14,173 | 217 | 5 | 1,684 | 61  | 430 | 9  | 3,608 | 131 | 5,939 | 206 |
| 14,174 | 218 | 6 | 1,643 | 54  | 429 | 8  | 3,561 | 119 | 5,851 | 187 |

|        |     |   |       |    |     |    |       |     |       |     |
|--------|-----|---|-------|----|-----|----|-------|-----|-------|-----|
| 14,175 | 218 | 6 | 1,648 | 54 | 432 | 8  | 3,574 | 128 | 5,872 | 196 |
| 14,176 | 211 | 6 | 1,519 | 54 | 412 | 8  | 3,316 | 126 | 5,458 | 194 |
| 14,177 | 190 | 6 | 1,334 | 51 | 345 | 7  | 2,795 | 121 | 4,664 | 185 |
| 14,178 | 190 | 6 | 1,325 | 51 | 341 | 8  | 2,781 | 123 | 4,637 | 188 |
| 14,179 | 181 | 6 | 1,237 | 53 | 323 | 8  | 2,594 | 122 | 4,335 | 189 |
| 14,180 | 182 | 5 | 1,242 | 52 | 323 | 9  | 2,573 | 117 | 4,320 | 183 |
| 14,181 | 182 | 5 | 1,234 | 58 | 322 | 10 | 2,568 | 121 | 4,306 | 194 |
| 14,182 | 164 | 5 | 1,180 | 61 | 307 | 10 | 2,414 | 124 | 4,065 | 200 |
| 14,183 | 163 | 5 | 1,151 | 58 | 301 | 10 | 2,379 | 118 | 3,994 | 191 |
| 14,184 | 156 | 5 | 1,102 | 56 | 284 | 10 | 2,288 | 114 | 3,830 | 185 |
| 14,185 | 156 | 5 | 1,093 | 56 | 280 | 9  | 2,268 | 114 | 3,797 | 184 |
| 14,186 | 150 | 5 | 1,071 | 55 | 275 | 9  | 2,200 | 114 | 3,696 | 183 |
| 14,187 | 149 | 5 | 1,062 | 55 | 272 | 9  | 2,183 | 115 | 3,666 | 184 |
| 14,188 | 141 | 5 | 1,052 | 55 | 266 | 9  | 2,145 | 115 | 3,604 | 184 |
| 14,189 | 140 | 6 | 1,035 | 56 | 265 | 9  | 2,125 | 115 | 3,565 | 186 |
| 14,190 | 139 | 5 | 1,031 | 56 | 265 | 9  | 2,124 | 115 | 3,559 | 185 |
| 14,191 | 138 | 5 | 1,027 | 56 | 262 | 9  | 2,112 | 115 | 3,539 | 185 |
| 14,192 | 135 | 5 | 1,020 | 53 | 260 | 9  | 2,107 | 113 | 3,522 | 180 |
| 14,193 | 135 | 5 | 1,009 | 55 | 258 | 9  | 2,099 | 113 | 3,501 | 182 |
| 14,194 | 126 | 5 | 985   | 55 | 250 | 9  | 2,068 | 113 | 3,429 | 182 |
| 14,195 | 125 | 5 | 982   | 53 | 249 | 8  | 2,060 | 107 | 3,416 | 173 |
| 14,196 | 129 | 5 | 994   | 53 | 251 | 8  | 2,074 | 107 | 3,448 | 173 |
| 14,197 | 123 | 5 | 993   | 52 | 251 | 8  | 2,059 | 107 | 3,426 | 172 |
| 14,198 | 124 | 5 | 995   | 52 | 253 | 7  | 2,043 | 90  | 3,415 | 154 |
| 14,199 | 124 | 5 | 999   | 53 | 253 | 7  | 2,041 | 87  | 3,417 | 152 |
| 14,200 | 121 | 4 | 984   | 51 | 249 | 5  | 2,002 | 73  | 3,356 | 133 |
| 14,201 | 119 | 4 | 978   | 47 | 250 | 5  | 2,004 | 70  | 3,351 | 126 |
| 14,202 | 119 | 5 | 960   | 45 | 249 | 5  | 2,000 | 68  | 3,328 | 123 |
| 14,203 | 118 | 4 | 942   | 41 | 245 | 5  | 1,963 | 67  | 3,268 | 117 |
| 14,204 | 118 | 4 | 936   | 42 | 243 | 5  | 1,957 | 66  | 3,254 | 117 |
| 14,205 | 115 | 4 | 897   | 40 | 234 | 5  | 1,863 | 63  | 3,109 | 112 |
| 14,206 | 115 | 4 | 900   | 37 | 233 | 5  | 1,850 | 63  | 3,098 | 109 |
| 14,207 | 115 | 4 | 865   | 34 | 228 | 5  | 1,789 | 53  | 2,997 | 96  |
| 14,208 | 115 | 4 | 863   | 34 | 228 | 5  | 1,791 | 53  | 2,997 | 96  |
| 14,209 | 97  | 4 | 700   | 34 | 201 | 5  | 1,568 | 52  | 2,566 | 95  |
| 14,210 | 72  | 4 | 489   | 32 | 120 | 4  | 968   | 47  | 1,649 | 87  |
| 14,211 | 71  | 4 | 491   | 32 | 122 | 4  | 960   | 47  | 1,644 | 87  |
| 14,212 | 60  | 4 | 429   | 33 | 92  | 3  | 751   | 45  | 1,332 | 85  |
| 14,213 | 74  | 3 | 685   | 30 | 130 | 3  | 1,047 | 42  | 1,936 | 78  |
| 14,214 | 73  | 3 | 666   | 30 | 124 | 3  | 1,039 | 42  | 1,902 | 78  |
| 14,215 | 61  | 3 | 633   | 29 | 110 | 3  | 936   | 42  | 1,740 | 77  |

|        |    |   |       |    |     |   |       |    |       |    |
|--------|----|---|-------|----|-----|---|-------|----|-------|----|
| 14,216 | 62 | 3 | 620   | 27 | 105 | 3 | 921   | 40 | 1,708 | 73 |
| 14,217 | 55 | 3 | 597   | 26 | 98  | 3 | 819   | 31 | 1,569 | 63 |
| 14,218 | 67 | 3 | 808   | 26 | 118 | 3 | 973   | 31 | 1,966 | 63 |
| 14,219 | 69 | 3 | 917   | 26 | 125 | 3 | 1,037 | 31 | 2,148 | 63 |
| 14,220 | 69 | 3 | 1,000 | 26 | 131 | 3 | 1,095 | 31 | 2,295 | 63 |
| 14,221 | 70 | 3 | 1,041 | 26 | 131 | 3 | 1,127 | 31 | 2,369 | 63 |
| 14,222 | 70 | 3 | 1,042 | 25 | 129 | 3 | 1,115 | 31 | 2,356 | 62 |
| 14,223 | 70 | 3 | 1,037 | 24 | 127 | 3 | 1,109 | 27 | 2,343 | 57 |
| 14,224 | 69 | 3 | 1,041 | 24 | 125 | 3 | 1,103 | 26 | 2,338 | 56 |
| 14,225 | 67 | 2 | 1,040 | 23 | 122 | 3 | 1,100 | 16 | 2,329 | 44 |
| 14,226 | 69 | 2 | 1,042 | 26 | 121 | 3 | 1,099 | 16 | 2,331 | 47 |
| 14,227 | 61 | 2 | 1,033 | 26 | 117 | 3 | 1,062 | 16 | 2,273 | 47 |
| 14,228 | 61 | 2 | 1,028 | 24 | 115 | 2 | 1,057 | 11 | 2,261 | 39 |
| 14,229 | 61 | 2 | 1,024 | 24 | 115 | 2 | 1,056 | 11 | 2,256 | 39 |
| 14,230 | 61 | 2 | 1,020 | 25 | 113 | 2 | 1,043 | 9  | 2,237 | 38 |
| 14,231 | 61 | 2 | 1,014 | 18 | 113 | 0 | 1,033 | 3  | 2,221 | 23 |
| 14,232 | 61 | 2 | 1,006 | 17 | 112 | 0 | 1,025 | 2  | 2,204 | 21 |
| 14,233 | 58 | 2 | 1,009 | 15 | 110 | 0 | 1,015 | 1  | 2,192 | 18 |
| 14,234 | 62 | 2 | 1,023 | 14 | 110 | 0 | 1,016 | 0  | 2,211 | 16 |
| 14,235 | 61 | 2 | 1,023 | 14 | 110 | 0 | 1,016 | 0  | 2,210 | 16 |
| 14,236 | 61 | 2 | 1,058 | 14 | 110 | 0 | 1,022 | 0  | 2,251 | 16 |
| 14,237 | 62 | 2 | 1,082 | 14 | 112 | 0 | 1,028 | 0  | 2,284 | 16 |
| 14,238 | 63 | 2 | 1,088 | 15 | 112 | 0 | 1,028 | 0  | 2,291 | 17 |
| 14,239 | 63 | 2 | 1,090 | 15 | 114 | 0 | 1,031 | 0  | 2,298 | 17 |
| 14,240 | 63 | 1 | 1,089 | 14 | 114 | 0 | 1,030 | 0  | 2,296 | 15 |
| 14,241 | 63 | 1 | 1,087 | 14 | 114 | 0 | 1,026 | 1  | 2,290 | 16 |
| 14,242 | 70 | 1 | 1,223 | 14 | 130 | 0 | 1,141 | 1  | 2,564 | 16 |
| 14,243 | 70 | 1 | 1,217 | 13 | 130 | 0 | 1,131 | 1  | 2,548 | 15 |
| 14,244 | 70 | 1 | 1,247 | 11 | 131 | 0 | 1,143 | 2  | 2,591 | 14 |
| 14,245 | 73 | 1 | 1,322 | 11 | 133 | 0 | 1,182 | 2  | 2,710 | 14 |
| 14,246 | 76 | 1 | 1,589 | 11 | 152 | 0 | 1,314 | 2  | 3,131 | 14 |
| 14,247 | 72 | 1 | 1,576 | 11 | 150 | 0 | 1,300 | 2  | 3,098 | 14 |
| 14,248 | 76 | 1 | 1,800 | 11 | 161 | 0 | 1,393 | 2  | 3,430 | 14 |
| 14,249 | 75 | 1 | 1,789 | 10 | 158 | 0 | 1,391 | 2  | 3,413 | 13 |
| 14,250 | 75 | 1 | 1,783 | 9  | 158 | 0 | 1,386 | 2  | 3,402 | 12 |
| 14,251 | 75 | 1 | 1,774 | 9  | 157 | 0 | 1,384 | 2  | 3,390 | 12 |
| 14,252 | 75 | 1 | 1,767 | 9  | 156 | 0 | 1,369 | 2  | 3,367 | 12 |
| 14,253 | 75 | 0 | 1,767 | 9  | 156 | 0 | 1,368 | 2  | 3,366 | 11 |
| 14,254 | 78 | 0 | 1,799 | 9  | 156 | 0 | 1,377 | 2  | 3,410 | 11 |
| 14,255 | 81 | 0 | 1,814 | 8  | 156 | 0 | 1,388 | 2  | 3,439 | 10 |
| 14,256 | 81 | 0 | 1,816 | 8  | 156 | 0 | 1,389 | 2  | 3,442 | 10 |

|        |    |   |       |    |     |   |       |    |       |    |
|--------|----|---|-------|----|-----|---|-------|----|-------|----|
| 14,257 | 80 | 0 | 1,840 | 9  | 158 | 0 | 1,403 | 2  | 3,481 | 11 |
| 14,258 | 80 | 0 | 1,837 | 9  | 158 | 0 | 1,400 | 2  | 3,475 | 11 |
| 14,259 | 80 | 0 | 1,831 | 9  | 157 | 0 | 1,394 | 2  | 3,462 | 11 |
| 14,260 | 82 | 0 | 1,857 | 11 | 157 | 0 | 1,416 | 2  | 3,512 | 13 |
| 14,261 | 82 | 0 | 1,857 | 11 | 157 | 0 | 1,416 | 2  | 3,512 | 13 |
| 14,262 | 81 | 0 | 1,846 | 10 | 154 | 0 | 1,408 | 2  | 3,489 | 12 |
| 14,263 | 81 | 0 | 1,842 | 10 | 153 | 0 | 1,407 | 2  | 3,483 | 12 |
| 14,264 | 71 | 0 | 1,640 | 11 | 117 | 0 | 1,093 | 2  | 2,921 | 13 |
| 14,265 | 71 | 0 | 1,640 | 11 | 116 | 0 | 1,090 | 2  | 2,917 | 13 |
| 14,266 | 69 | 0 | 1,631 | 12 | 114 | 0 | 1,064 | 2  | 2,878 | 14 |
| 14,267 | 65 | 0 | 1,611 | 12 | 111 | 0 | 1,031 | 2  | 2,818 | 14 |
| 14,268 | 65 | 0 | 1,604 | 15 | 111 | 0 | 1,032 | 3  | 2,812 | 18 |
| 14,269 | 52 | 0 | 1,384 | 15 | 88  | 0 | 855   | 3  | 2,379 | 18 |
| 14,270 | 49 | 0 | 1,248 | 15 | 74  | 0 | 710   | 3  | 2,081 | 18 |
| 14,271 | 46 | 0 | 1,156 | 15 | 67  | 0 | 639   | 3  | 1,908 | 18 |
| 14,272 | 42 | 0 | 1,115 | 15 | 61  | 0 | 580   | 3  | 1,798 | 18 |
| 14,273 | 41 | 1 | 1,106 | 15 | 61  | 1 | 573   | 3  | 1,781 | 20 |
| 14,274 | 41 | 1 | 1,104 | 15 | 61  | 1 | 573   | 3  | 1,779 | 20 |
| 14,275 | 41 | 2 | 1,090 | 17 | 60  | 1 | 549   | 5  | 1,740 | 25 |
| 14,276 | 41 | 2 | 1,081 | 17 | 60  | 1 | 537   | 5  | 1,719 | 25 |
| 14,277 | 39 | 2 | 1,069 | 14 | 59  | 1 | 526   | 5  | 1,693 | 22 |
| 14,278 | 39 | 2 | 1,065 | 14 | 59  | 1 | 523   | 5  | 1,686 | 22 |
| 14,279 | 39 | 2 | 1,066 | 14 | 59  | 1 | 523   | 5  | 1,687 | 22 |
| 14,280 | 39 | 2 | 1,066 | 14 | 59  | 1 | 522   | 5  | 1,686 | 22 |
| 14,281 | 39 | 2 | 1,066 | 13 | 59  | 1 | 522   | 5  | 1,686 | 21 |
| 14,282 | 39 | 2 | 1,074 | 13 | 59  | 1 | 524   | 6  | 1,696 | 22 |
| 14,283 | 39 | 2 | 1,072 | 13 | 59  | 1 | 524   | 7  | 1,694 | 23 |
| 14,284 | 36 | 2 | 1,064 | 12 | 59  | 1 | 525   | 7  | 1,684 | 22 |
| 14,285 | 35 | 2 | 1,064 | 12 | 59  | 1 | 526   | 7  | 1,684 | 22 |
| 14,286 | 45 | 2 | 1,075 | 12 | 60  | 1 | 541   | 7  | 1,721 | 22 |
| 14,287 | 44 | 2 | 1,051 | 12 | 58  | 1 | 535   | 7  | 1,688 | 22 |
| 14,288 | 47 | 2 | 1,077 | 12 | 59  | 1 | 556   | 7  | 1,739 | 22 |
| 14,289 | 50 | 2 | 1,097 | 10 | 61  | 1 | 566   | 6  | 1,774 | 19 |
| 14,290 | 56 | 2 | 1,148 | 10 | 61  | 1 | 595   | 6  | 1,860 | 19 |
| 14,291 | 54 | 2 | 1,149 | 10 | 57  | 1 | 585   | 6  | 1,845 | 19 |
| 14,292 | 59 | 2 | 1,180 | 13 | 57  | 3 | 599   | 8  | 1,895 | 26 |
| 14,293 | 57 | 2 | 1,134 | 21 | 47  | 4 | 521   | 11 | 1,759 | 38 |
| 14,294 | 61 | 2 | 1,136 | 22 | 46  | 4 | 523   | 12 | 1,766 | 40 |
| 14,295 | 63 | 2 | 1,273 | 22 | 49  | 4 | 548   | 11 | 1,933 | 39 |
| 14,296 | 60 | 2 | 1,234 | 23 | 53  | 4 | 516   | 11 | 1,863 | 40 |
| 14,297 | 59 | 2 | 1,016 | 23 | 36  | 4 | 392   | 11 | 1,503 | 40 |

|        |    |   |     |    |    |   |     |    |       |    |
|--------|----|---|-----|----|----|---|-----|----|-------|----|
| 14,298 | 56 | 2 | 858 | 23 | 26 | 4 | 325 | 11 | 1,265 | 40 |
| 14,299 | 55 | 2 | 821 | 23 | 25 | 4 | 303 | 11 | 1,204 | 40 |
| 14,300 | 55 | 2 | 821 | 23 | 25 | 4 | 303 | 11 | 1,204 | 40 |
| 14,301 | 55 | 2 | 819 | 23 | 25 | 4 | 303 | 11 | 1,202 | 40 |
| 14,302 | 55 | 2 | 821 | 23 | 25 | 4 | 303 | 11 | 1,204 | 40 |
| 14,303 | 55 | 2 | 820 | 24 | 25 | 4 | 302 | 11 | 1,202 | 41 |
| 14,304 | 52 | 2 | 787 | 24 | 25 | 4 | 293 | 11 | 1,157 | 41 |
| 14,305 | 52 | 2 | 790 | 24 | 25 | 4 | 291 | 11 | 1,158 | 41 |
| 14,306 | 57 | 2 | 832 | 24 | 31 | 4 | 325 | 11 | 1,245 | 41 |
| 14,307 | 57 | 2 | 832 | 24 | 32 | 4 | 327 | 11 | 1,248 | 41 |
| 14,308 | 59 | 2 | 801 | 23 | 30 | 4 | 314 | 11 | 1,204 | 40 |
| 14,309 | 59 | 2 | 810 | 23 | 30 | 4 | 321 | 11 | 1,220 | 40 |
| 14,310 | 57 | 2 | 786 | 24 | 30 | 4 | 299 | 11 | 1,172 | 41 |
| 14,311 | 57 | 2 | 784 | 22 | 30 | 4 | 302 | 11 | 1,173 | 39 |
| 14,312 | 57 | 2 | 784 | 22 | 30 | 4 | 303 | 11 | 1,174 | 39 |
| 14,313 | 57 | 2 | 784 | 23 | 30 | 4 | 303 | 11 | 1,174 | 40 |
| 14,314 | 57 | 2 | 776 | 23 | 30 | 4 | 302 | 11 | 1,165 | 40 |
| 14,315 | 53 | 2 | 712 | 22 | 27 | 4 | 280 | 11 | 1,072 | 39 |
| 14,316 | 53 | 2 | 709 | 22 | 27 | 4 | 280 | 11 | 1,069 | 39 |
| 14,317 | 53 | 2 | 702 | 21 | 26 | 4 | 277 | 11 | 1,058 | 38 |
| 14,318 | 53 | 2 | 700 | 21 | 26 | 4 | 275 | 11 | 1,054 | 38 |
| 14,319 | 53 | 2 | 701 | 18 | 26 | 4 | 279 | 10 | 1,059 | 34 |
| 14,320 | 53 | 2 | 704 | 18 | 26 | 4 | 280 | 10 | 1,063 | 34 |
| 14,321 | 53 | 2 | 704 | 18 | 26 | 4 | 281 | 10 | 1,064 | 34 |
| 14,322 | 53 | 2 | 698 | 18 | 26 | 4 | 281 | 10 | 1,058 | 34 |
| 14,323 | 53 | 1 | 693 | 18 | 26 | 3 | 281 | 10 | 1,053 | 32 |
| 14,324 | 53 | 1 | 693 | 18 | 26 | 3 | 281 | 10 | 1,053 | 32 |
| 14,325 | 54 | 1 | 699 | 18 | 26 | 3 | 286 | 10 | 1,065 | 32 |
| 14,326 | 54 | 0 | 700 | 16 | 26 | 3 | 286 | 8  | 1,066 | 27 |
| 14,327 | 54 | 0 | 701 | 16 | 26 | 3 | 284 | 8  | 1,065 | 27 |
| 14,328 | 54 | 0 | 703 | 16 | 26 | 3 | 288 | 8  | 1,071 | 27 |
| 14,329 | 54 | 0 | 702 | 16 | 26 | 3 | 288 | 8  | 1,070 | 27 |
| 14,330 | 54 | 0 | 705 | 16 | 26 | 3 | 289 | 8  | 1,074 | 27 |
| 14,331 | 54 | 0 | 704 | 16 | 26 | 3 | 290 | 8  | 1,074 | 27 |
| 14,332 | 53 | 0 | 691 | 16 | 26 | 3 | 288 | 8  | 1,058 | 27 |
| 14,333 | 53 | 0 | 687 | 16 | 26 | 3 | 288 | 7  | 1,054 | 26 |
| 14,334 | 53 | 0 | 688 | 16 | 26 | 3 | 289 | 6  | 1,056 | 25 |
| 14,335 | 53 | 0 | 683 | 16 | 26 | 3 | 285 | 6  | 1,047 | 25 |
| 14,336 | 53 | 0 | 682 | 16 | 26 | 3 | 284 | 6  | 1,045 | 25 |
| 14,337 | 43 | 0 | 648 | 18 | 25 | 3 | 274 | 7  | 990   | 28 |
| 14,338 | 39 | 0 | 616 | 18 | 24 | 3 | 253 | 7  | 932   | 28 |

|        |    |   |     |    |    |   |     |   |     |    |
|--------|----|---|-----|----|----|---|-----|---|-----|----|
| 14,339 | 36 | 0 | 601 | 18 | 22 | 3 | 240 | 7 | 899 | 28 |
| 14,340 | 36 | 0 | 602 | 18 | 20 | 3 | 243 | 7 | 901 | 28 |
| 14,341 | 30 | 0 | 553 | 18 | 20 | 3 | 216 | 7 | 819 | 28 |
| 14,342 | 27 | 0 | 507 | 18 | 20 | 3 | 200 | 7 | 754 | 28 |
| 14,343 | 22 | 0 | 470 | 15 | 19 | 1 | 186 | 5 | 697 | 21 |
| 14,344 | 21 | 0 | 433 | 8  | 18 | 0 | 175 | 2 | 647 | 10 |
| 14,345 | 16 | 0 | 407 | 7  | 18 | 0 | 161 | 1 | 602 | 8  |
| 14,346 | 14 | 0 | 272 | 8  | 14 | 0 | 138 | 1 | 438 | 9  |
| 14,347 | 14 | 0 | 235 | 7  | 9  | 0 | 127 | 1 | 385 | 8  |
| 14,348 | 12 | 0 | 178 | 7  | 7  | 0 | 111 | 1 | 308 | 8  |
| 14,349 | 12 | 0 | 157 | 7  | 7  | 0 | 108 | 2 | 284 | 9  |
| 14,350 | 12 | 0 | 151 | 7  | 7  | 0 | 105 | 2 | 275 | 9  |
| 14,351 | 12 | 0 | 151 | 7  | 7  | 0 | 106 | 2 | 276 | 9  |
| 14,352 | 12 | 1 | 151 | 8  | 7  | 0 | 106 | 2 | 276 | 11 |
| 14,353 | 12 | 1 | 152 | 7  | 7  | 0 | 108 | 3 | 279 | 11 |
| 14,354 | 12 | 1 | 156 | 7  | 7  | 0 | 108 | 3 | 283 | 11 |
| 14,355 | 12 | 1 | 149 | 7  | 7  | 0 | 108 | 3 | 276 | 11 |
| 14,356 | 7  | 1 | 110 | 7  | 3  | 0 | 65  | 3 | 185 | 11 |
| 14,357 | 4  | 1 | 98  | 7  | 1  | 0 | 64  | 3 | 167 | 11 |
| 14,358 | 4  | 1 | 97  | 7  | 0  | 0 | 61  | 3 | 162 | 11 |
| 14,359 | 2  | 1 | 94  | 7  | 0  | 0 | 59  | 3 | 155 | 11 |
| 14,360 | 2  | 1 | 84  | 7  | 0  | 0 | 51  | 3 | 137 | 11 |
| 14,361 | 2  | 1 | 85  | 6  | 0  | 0 | 48  | 3 | 135 | 10 |
| 14,362 | 2  | 1 | 88  | 6  | 0  | 0 | 48  | 3 | 138 | 10 |
| 14,363 | 10 | 1 | 129 | 5  | 0  | 0 | 60  | 3 | 199 | 9  |
| 14,364 | 10 | 1 | 129 | 5  | 0  | 0 | 60  | 3 | 199 | 9  |
| 14,365 | 16 | 1 | 228 | 5  | 1  | 0 | 98  | 3 | 343 | 9  |
| 14,366 | 16 | 1 | 228 | 5  | 1  | 0 | 97  | 3 | 342 | 9  |
| 14,367 | 19 | 1 | 301 | 5  | 2  | 0 | 117 | 3 | 439 | 9  |
| 14,368 | 19 | 1 | 301 | 5  | 2  | 0 | 117 | 3 | 439 | 9  |
| 14,369 | 19 | 1 | 309 | 5  | 2  | 0 | 125 | 3 | 455 | 9  |
| 14,370 | 21 | 2 | 312 | 5  | 2  | 0 | 126 | 3 | 461 | 10 |
| 14,371 | 21 | 2 | 314 | 5  | 2  | 0 | 125 | 3 | 462 | 10 |
| 14,372 | 21 | 2 | 315 | 5  | 2  | 0 | 124 | 3 | 462 | 10 |
| 14,373 | 21 | 2 | 319 | 5  | 2  | 0 | 131 | 3 | 473 | 10 |
| 14,374 | 21 | 2 | 327 | 5  | 2  | 0 | 134 | 3 | 484 | 10 |
| 14,375 | 21 | 2 | 340 | 6  | 2  | 0 | 135 | 3 | 498 | 11 |
| 14,376 | 21 | 2 | 340 | 6  | 2  | 0 | 135 | 3 | 498 | 11 |
| 14,377 | 22 | 2 | 342 | 6  | 2  | 0 | 135 | 3 | 501 | 11 |
| 14,378 | 22 | 2 | 351 | 6  | 2  | 0 | 138 | 3 | 513 | 11 |
| 14,379 | 22 | 2 | 349 | 6  | 2  | 0 | 134 | 3 | 507 | 11 |

|        |    |   |       |   |    |   |     |   |       |    |
|--------|----|---|-------|---|----|---|-----|---|-------|----|
| 14,380 | 22 | 2 | 357   | 6 | 2  | 0 | 142 | 3 | 523   | 11 |
| 14,381 | 22 | 2 | 354   | 6 | 2  | 0 | 141 | 3 | 519   | 11 |
| 14,382 | 22 | 2 | 357   | 6 | 2  | 0 | 142 | 3 | 523   | 11 |
| 14,383 | 22 | 2 | 366   | 6 | 2  | 0 | 143 | 3 | 533   | 11 |
| 14,384 | 22 | 2 | 366   | 6 | 3  | 0 | 142 | 3 | 533   | 11 |
| 14,385 | 22 | 2 | 368   | 6 | 3  | 0 | 143 | 3 | 536   | 11 |
| 14,386 | 22 | 2 | 376   | 6 | 4  | 0 | 153 | 3 | 555   | 11 |
| 14,387 | 22 | 2 | 363   | 6 | 4  | 0 | 144 | 3 | 533   | 11 |
| 14,388 | 22 | 2 | 363   | 4 | 4  | 0 | 142 | 2 | 531   | 8  |
| 14,389 | 28 | 2 | 422   | 4 | 5  | 0 | 212 | 2 | 667   | 8  |
| 14,390 | 28 | 2 | 418   | 4 | 5  | 0 | 211 | 2 | 662   | 8  |
| 14,391 | 28 | 2 | 447   | 4 | 6  | 0 | 235 | 2 | 716   | 8  |
| 14,392 | 29 | 2 | 446   | 4 | 6  | 0 | 236 | 2 | 717   | 8  |
| 14,393 | 28 | 2 | 445   | 4 | 6  | 0 | 237 | 2 | 716   | 8  |
| 14,394 | 29 | 2 | 446   | 4 | 6  | 0 | 234 | 2 | 715   | 8  |
| 14,395 | 29 | 3 | 444   | 3 | 6  | 0 | 234 | 2 | 713   | 8  |
| 14,396 | 29 | 3 | 440   | 3 | 6  | 0 | 233 | 2 | 708   | 8  |
| 14,397 | 30 | 4 | 442   | 2 | 6  | 0 | 233 | 2 | 711   | 8  |
| 14,398 | 30 | 4 | 439   | 2 | 6  | 0 | 233 | 2 | 708   | 8  |
| 14,399 | 30 | 4 | 439   | 2 | 6  | 0 | 233 | 2 | 708   | 8  |
| 14,400 | 30 | 4 | 442   | 2 | 6  | 0 | 237 | 1 | 715   | 7  |
| 14,401 | 30 | 4 | 461   | 2 | 7  | 0 | 240 | 1 | 738   | 7  |
| 14,402 | 30 | 4 | 472   | 2 | 7  | 0 | 252 | 1 | 761   | 7  |
| 14,403 | 30 | 3 | 472   | 1 | 7  | 0 | 252 | 1 | 761   | 5  |
| 14,404 | 30 | 3 | 469   | 1 | 7  | 0 | 250 | 0 | 756   | 4  |
| 14,405 | 30 | 3 | 468   | 1 | 7  | 0 | 251 | 0 | 756   | 4  |
| 14,406 | 30 | 3 | 468   | 1 | 7  | 0 | 250 | 0 | 755   | 4  |
| 14,407 | 31 | 3 | 488   | 1 | 8  | 0 | 255 | 0 | 782   | 4  |
| 14,408 | 31 | 3 | 488   | 1 | 8  | 0 | 255 | 0 | 782   | 4  |
| 14,409 | 41 | 4 | 581   | 1 | 14 | 0 | 304 | 0 | 940   | 5  |
| 14,410 | 41 | 4 | 581   | 1 | 14 | 0 | 304 | 0 | 940   | 5  |
| 14,411 | 53 | 4 | 780   | 1 | 20 | 0 | 369 | 0 | 1,222 | 5  |
| 14,412 | 76 | 4 | 1,207 | 1 | 46 | 0 | 628 | 0 | 1,957 | 5  |
| 14,413 | 76 | 4 | 1,227 | 2 | 46 | 0 | 633 | 0 | 1,982 | 6  |
| 14,414 | 69 | 4 | 1,289 | 4 | 55 | 0 | 669 | 1 | 2,082 | 9  |
| 14,415 | 70 | 4 | 1,334 | 4 | 64 | 0 | 738 | 1 | 2,206 | 9  |
| 14,416 | 69 | 4 | 1,466 | 4 | 67 | 0 | 755 | 1 | 2,357 | 9  |
| 14,417 | 67 | 4 | 1,431 | 4 | 68 | 0 | 763 | 1 | 2,329 | 9  |
| 14,418 | 66 | 4 | 1,427 | 4 | 68 | 0 | 755 | 1 | 2,316 | 9  |
| 14,419 | 67 | 4 | 1,447 | 4 | 68 | 0 | 762 | 1 | 2,344 | 9  |
| 14,420 | 72 | 3 | 1,475 | 5 | 68 | 0 | 764 | 2 | 2,379 | 10 |



|        |     |   |       |    |     |   |       |    |       |    |
|--------|-----|---|-------|----|-----|---|-------|----|-------|----|
| 14,421 | 70  | 3 | 1,470 | 5  | 68  | 0 | 763   | 2  | 2,371 | 10 |
| 14,422 | 72  | 3 | 1,492 | 5  | 69  | 0 | 768   | 2  | 2,401 | 10 |
| 14,423 | 72  | 3 | 1,494 | 6  | 69  | 0 | 770   | 2  | 2,405 | 11 |
| 14,424 | 75  | 3 | 1,495 | 8  | 70  | 0 | 764   | 2  | 2,404 | 13 |
| 14,425 | 75  | 3 | 1,486 | 11 | 70  | 0 | 760   | 2  | 2,391 | 16 |
| 14,426 | 85  | 3 | 1,529 | 10 | 71  | 0 | 774   | 2  | 2,459 | 15 |
| 14,427 | 84  | 3 | 1,528 | 10 | 71  | 0 | 775   | 2  | 2,458 | 15 |
| 14,428 | 99  | 3 | 1,619 | 10 | 77  | 0 | 871   | 2  | 2,666 | 15 |
| 14,429 | 104 | 3 | 1,678 | 10 | 82  | 0 | 924   | 2  | 2,788 | 15 |
| 14,430 | 104 | 3 | 1,678 | 10 | 82  | 0 | 924   | 2  | 2,788 | 15 |
| 14,431 | 107 | 3 | 1,694 | 10 | 83  | 0 | 942   | 2  | 2,826 | 15 |
| 14,432 | 107 | 3 | 1,709 | 10 | 84  | 0 | 949   | 2  | 2,849 | 15 |
| 14,433 | 108 | 3 | 1,715 | 10 | 86  | 0 | 956   | 3  | 2,865 | 16 |
| 14,434 | 108 | 3 | 1,706 | 11 | 86  | 0 | 954   | 3  | 2,854 | 17 |
| 14,435 | 109 | 3 | 1,727 | 14 | 85  | 0 | 968   | 6  | 2,889 | 23 |
| 14,436 | 109 | 3 | 1,725 | 19 | 85  | 0 | 969   | 10 | 2,888 | 32 |
| 14,437 | 109 | 3 | 1,715 | 19 | 84  | 0 | 959   | 10 | 2,867 | 32 |
| 14,438 | 112 | 4 | 1,729 | 19 | 84  | 0 | 960   | 10 | 2,885 | 33 |
| 14,439 | 113 | 4 | 1,725 | 20 | 85  | 0 | 947   | 10 | 2,870 | 34 |
| 14,440 | 108 | 4 | 1,685 | 20 | 84  | 0 | 899   | 10 | 2,776 | 34 |
| 14,441 | 111 | 4 | 1,658 | 20 | 84  | 0 | 875   | 10 | 2,728 | 34 |
| 14,442 | 111 | 4 | 1,693 | 20 | 84  | 0 | 879   | 10 | 2,767 | 34 |
| 14,443 | 136 | 4 | 1,850 | 20 | 91  | 0 | 926   | 10 | 3,003 | 34 |
| 14,444 | 136 | 4 | 1,850 | 20 | 91  | 0 | 924   | 10 | 3,001 | 34 |
| 14,445 | 135 | 4 | 1,847 | 20 | 91  | 0 | 924   | 10 | 2,997 | 34 |
| 14,446 | 154 | 3 | 1,935 | 20 | 100 | 0 | 993   | 10 | 3,182 | 33 |
| 14,447 | 154 | 3 | 1,931 | 21 | 100 | 0 | 992   | 10 | 3,177 | 34 |
| 14,448 | 154 | 2 | 1,945 | 21 | 100 | 0 | 1,001 | 10 | 3,200 | 33 |
| 14,449 | 158 | 2 | 1,958 | 21 | 100 | 0 | 1,010 | 12 | 3,226 | 35 |
| 14,450 | 158 | 2 | 1,959 | 21 | 100 | 0 | 1,010 | 12 | 3,227 | 35 |
| 14,451 | 159 | 2 | 1,956 | 21 | 101 | 0 | 1,013 | 12 | 3,229 | 35 |
| 14,452 | 159 | 2 | 1,936 | 21 | 100 | 0 | 1,009 | 12 | 3,204 | 35 |
| 14,453 | 159 | 2 | 1,927 | 21 | 100 | 0 | 997   | 12 | 3,183 | 35 |
| 14,454 | 159 | 2 | 1,924 | 21 | 100 | 0 | 996   | 12 | 3,179 | 35 |
| 14,455 | 159 | 2 | 1,915 | 21 | 100 | 0 | 996   | 12 | 3,170 | 35 |
| 14,456 | 160 | 2 | 1,914 | 21 | 100 | 0 | 997   | 12 | 3,171 | 35 |
| 14,457 | 159 | 2 | 1,910 | 21 | 100 | 0 | 994   | 12 | 3,163 | 35 |
| 14,458 | 161 | 2 | 1,913 | 21 | 99  | 0 | 994   | 12 | 3,167 | 35 |
| 14,459 | 162 | 2 | 1,915 | 22 | 97  | 0 | 993   | 12 | 3,167 | 36 |
| 14,460 | 152 | 1 | 1,837 | 22 | 93  | 0 | 950   | 12 | 3,032 | 35 |
| 14,461 | 141 | 1 | 1,649 | 22 | 88  | 0 | 892   | 13 | 2,770 | 36 |

|        |     |   |       |    |    |   |     |    |       |    |
|--------|-----|---|-------|----|----|---|-----|----|-------|----|
| 14,462 | 130 | 1 | 1,502 | 22 | 81 | 0 | 854 | 17 | 2,567 | 40 |
| 14,463 | 118 | 1 | 1,220 | 23 | 62 | 0 | 631 | 17 | 2,031 | 41 |
| 14,464 | 118 | 1 | 1,200 | 22 | 62 | 0 | 629 | 17 | 2,009 | 40 |
| 14,465 | 117 | 1 | 1,097 | 20 | 53 | 0 | 581 | 16 | 1,848 | 37 |
| 14,466 | 111 | 1 | 1,011 | 20 | 44 | 0 | 510 | 16 | 1,676 | 37 |
| 14,467 | 111 | 1 | 819   | 20 | 40 | 0 | 457 | 16 | 1,427 | 37 |
| 14,468 | 111 | 1 | 786   | 20 | 38 | 0 | 437 | 16 | 1,372 | 37 |
| 14,469 | 111 | 1 | 777   | 20 | 38 | 0 | 433 | 16 | 1,359 | 37 |
| 14,470 | 110 | 1 | 761   | 20 | 38 | 0 | 425 | 16 | 1,334 | 37 |
| 14,471 | 105 | 1 | 733   | 19 | 38 | 0 | 421 | 15 | 1,297 | 35 |
| 14,472 | 105 | 1 | 731   | 20 | 38 | 0 | 421 | 15 | 1,295 | 36 |
| 14,473 | 103 | 1 | 710   | 19 | 37 | 0 | 415 | 15 | 1,265 | 35 |
| 14,474 | 103 | 1 | 707   | 19 | 37 | 0 | 415 | 15 | 1,262 | 35 |
| 14,475 | 100 | 1 | 700   | 17 | 36 | 0 | 414 | 15 | 1,250 | 33 |
| 14,476 | 90  | 1 | 638   | 14 | 35 | 0 | 396 | 15 | 1,159 | 30 |
| 14,477 | 90  | 1 | 636   | 14 | 35 | 0 | 395 | 15 | 1,156 | 30 |
| 14,478 | 77  | 1 | 555   | 14 | 29 | 0 | 304 | 16 | 965   | 31 |
| 14,479 | 76  | 1 | 550   | 14 | 30 | 0 | 304 | 16 | 960   | 31 |
| 14,480 | 71  | 1 | 485   | 15 | 25 | 0 | 248 | 16 | 829   | 32 |
| 14,481 | 80  | 1 | 569   | 15 | 25 | 0 | 270 | 16 | 944   | 32 |
| 14,482 | 86  | 1 | 764   | 15 | 32 | 0 | 346 | 17 | 1,228 | 33 |
| 14,483 | 87  | 1 | 760   | 15 | 31 | 0 | 342 | 17 | 1,220 | 33 |
| 14,484 | 94  | 1 | 784   | 11 | 31 | 0 | 349 | 14 | 1,258 | 26 |
| 14,485 | 96  | 1 | 814   | 11 | 31 | 0 | 359 | 14 | 1,300 | 26 |
| 14,486 | 95  | 1 | 801   | 11 | 31 | 0 | 348 | 14 | 1,275 | 26 |
| 14,487 | 101 | 1 | 854   | 6  | 33 | 0 | 369 | 10 | 1,357 | 17 |
| 14,488 | 101 | 1 | 854   | 6  | 33 | 0 | 368 | 10 | 1,356 | 17 |
| 14,489 | 102 | 0 | 860   | 6  | 33 | 0 | 373 | 10 | 1,368 | 16 |
| 14,490 | 120 | 0 | 1,037 | 5  | 42 | 0 | 426 | 10 | 1,625 | 15 |
| 14,491 | 117 | 0 | 1,029 | 5  | 41 | 0 | 421 | 10 | 1,608 | 15 |
| 14,492 | 154 | 0 | 1,534 | 5  | 70 | 0 | 531 | 10 | 2,289 | 15 |
| 14,493 | 176 | 0 | 1,831 | 5  | 83 | 0 | 603 | 10 | 2,693 | 15 |
| 14,494 | 154 | 0 | 1,716 | 5  | 77 | 0 | 571 | 10 | 2,518 | 15 |
| 14,495 | 155 | 0 | 1,723 | 5  | 80 | 0 | 583 | 10 | 2,541 | 15 |
| 14,496 | 155 | 1 | 1,720 | 6  | 80 | 1 | 581 | 10 | 2,536 | 18 |
| 14,497 | 137 | 1 | 1,643 | 6  | 71 | 1 | 513 | 10 | 2,364 | 18 |
| 14,498 | 137 | 1 | 1,642 | 5  | 71 | 1 | 512 | 10 | 2,362 | 17 |
| 14,499 | 136 | 1 | 1,629 | 6  | 71 | 1 | 507 | 8  | 2,343 | 16 |
| 14,500 | 132 | 1 | 1,616 | 6  | 71 | 1 | 499 | 8  | 2,318 | 16 |
| 14,501 | 132 | 1 | 1,614 | 6  | 71 | 1 | 500 | 8  | 2,317 | 16 |
| 14,502 | 131 | 1 | 1,611 | 6  | 70 | 1 | 493 | 8  | 2,305 | 16 |

|        |     |   |       |   |     |   |     |   |       |    |
|--------|-----|---|-------|---|-----|---|-----|---|-------|----|
| 14,503 | 131 | 1 | 1,617 | 6 | 70  | 1 | 494 | 8 | 2,312 | 16 |
| 14,504 | 131 | 1 | 1,619 | 6 | 70  | 1 | 494 | 8 | 2,314 | 16 |
| 14,505 | 131 | 1 | 1,619 | 6 | 70  | 1 | 494 | 8 | 2,314 | 16 |
| 14,506 | 131 | 1 | 1,640 | 8 | 72  | 1 | 510 | 8 | 2,353 | 18 |
| 14,507 | 130 | 1 | 1,633 | 8 | 72  | 1 | 512 | 8 | 2,347 | 18 |
| 14,508 | 131 | 1 | 1,656 | 8 | 74  | 1 | 514 | 8 | 2,375 | 18 |
| 14,509 | 135 | 1 | 1,661 | 8 | 74  | 1 | 516 | 8 | 2,386 | 18 |
| 14,510 | 134 | 1 | 1,657 | 7 | 75  | 1 | 518 | 8 | 2,384 | 17 |
| 14,511 | 142 | 1 | 1,705 | 7 | 76  | 1 | 537 | 8 | 2,460 | 17 |
| 14,512 | 141 | 1 | 1,693 | 7 | 75  | 1 | 532 | 7 | 2,441 | 16 |
| 14,513 | 162 | 1 | 1,811 | 6 | 78  | 1 | 567 | 3 | 2,618 | 11 |
| 14,514 | 162 | 1 | 1,811 | 6 | 78  | 1 | 564 | 3 | 2,615 | 11 |
| 14,515 | 174 | 1 | 1,929 | 6 | 78  | 1 | 594 | 3 | 2,775 | 11 |
| 14,516 | 193 | 1 | 2,064 | 6 | 93  | 1 | 663 | 3 | 3,013 | 11 |
| 14,517 | 195 | 1 | 2,101 | 7 | 93  | 2 | 671 | 3 | 3,060 | 13 |
| 14,518 | 196 | 1 | 2,099 | 7 | 93  | 2 | 672 | 3 | 3,060 | 13 |
| 14,519 | 207 | 2 | 2,285 | 7 | 104 | 2 | 745 | 4 | 3,341 | 15 |
| 14,520 | 207 | 2 | 2,296 | 7 | 104 | 2 | 749 | 4 | 3,356 | 15 |
| 14,521 | 207 | 2 | 2,311 | 7 | 104 | 2 | 753 | 4 | 3,375 | 15 |
| 14,522 | 207 | 2 | 2,318 | 6 | 104 | 2 | 757 | 4 | 3,386 | 14 |
| 14,523 | 207 | 2 | 2,318 | 6 | 104 | 2 | 757 | 4 | 3,386 | 14 |
| 14,524 | 211 | 2 | 2,408 | 6 | 104 | 2 | 787 | 4 | 3,510 | 14 |
| 14,525 | 211 | 2 | 2,408 | 6 | 104 | 2 | 787 | 4 | 3,510 | 14 |
| 14,526 | 211 | 2 | 2,408 | 6 | 104 | 2 | 787 | 4 | 3,510 | 14 |
| 14,527 | 213 | 2 | 2,437 | 6 | 104 | 2 | 791 | 4 | 3,545 | 14 |
| 14,528 | 219 | 2 | 2,493 | 6 | 105 | 2 | 812 | 6 | 3,629 | 16 |
| 14,529 | 218 | 2 | 2,493 | 7 | 106 | 2 | 815 | 5 | 3,632 | 16 |
| 14,530 | 218 | 2 | 2,490 | 7 | 105 | 2 | 812 | 5 | 3,625 | 16 |
| 14,531 | 212 | 2 | 2,452 | 6 | 104 | 2 | 796 | 6 | 3,564 | 16 |
| 14,532 | 211 | 2 | 2,406 | 6 | 105 | 2 | 796 | 6 | 3,518 | 16 |
| 14,533 | 206 | 2 | 2,211 | 6 | 98  | 2 | 713 | 4 | 3,228 | 14 |
| 14,534 | 205 | 2 | 2,197 | 7 | 98  | 2 | 708 | 4 | 3,208 | 15 |
| 14,535 | 198 | 2 | 2,181 | 7 | 96  | 2 | 706 | 4 | 3,181 | 15 |
| 14,536 | 196 | 2 | 2,153 | 7 | 96  | 2 | 695 | 4 | 3,140 | 15 |
| 14,537 | 197 | 2 | 2,157 | 7 | 97  | 2 | 704 | 5 | 3,155 | 16 |
| 14,538 | 192 | 2 | 2,100 | 7 | 94  | 2 | 689 | 5 | 3,075 | 16 |
| 14,539 | 192 | 2 | 2,130 | 8 | 95  | 2 | 695 | 6 | 3,112 | 18 |
| 14,540 | 182 | 2 | 2,048 | 8 | 89  | 2 | 683 | 6 | 3,002 | 18 |
| 14,541 | 177 | 2 | 2,007 | 8 | 88  | 2 | 694 | 7 | 2,966 | 19 |
| 14,542 | 162 | 2 | 1,865 | 9 | 80  | 2 | 670 | 7 | 2,777 | 20 |
| 14,543 | 140 | 2 | 1,470 | 9 | 59  | 2 | 578 | 7 | 2,247 | 20 |

|        |     |   |       |    |    |   |     |    |       |    |
|--------|-----|---|-------|----|----|---|-----|----|-------|----|
| 14,544 | 118 | 2 | 1,167 | 9  | 46 | 2 | 503 | 7  | 1,834 | 20 |
| 14,545 | 115 | 2 | 1,134 | 9  | 45 | 2 | 492 | 7  | 1,786 | 20 |
| 14,546 | 114 | 1 | 1,121 | 7  | 42 | 1 | 480 | 7  | 1,757 | 16 |
| 14,547 | 114 | 1 | 1,120 | 7  | 42 | 1 | 480 | 7  | 1,756 | 16 |
| 14,548 | 113 | 1 | 1,120 | 7  | 42 | 1 | 479 | 7  | 1,754 | 16 |
| 14,549 | 113 | 1 | 1,118 | 7  | 42 | 1 | 478 | 7  | 1,751 | 16 |
| 14,550 | 113 | 1 | 1,118 | 7  | 42 | 1 | 478 | 7  | 1,751 | 16 |
| 14,551 | 113 | 1 | 1,118 | 7  | 42 | 1 | 478 | 7  | 1,751 | 16 |
| 14,552 | 113 | 1 | 1,118 | 7  | 42 | 1 | 478 | 7  | 1,751 | 16 |
| 14,553 | 113 | 1 | 1,115 | 7  | 42 | 1 | 478 | 8  | 1,748 | 17 |
| 14,554 | 113 | 1 | 1,112 | 5  | 42 | 1 | 477 | 8  | 1,744 | 15 |
| 14,555 | 113 | 1 | 1,108 | 7  | 42 | 1 | 478 | 8  | 1,741 | 17 |
| 14,556 | 113 | 1 | 1,086 | 7  | 40 | 1 | 460 | 8  | 1,699 | 17 |
| 14,557 | 113 | 1 | 1,086 | 7  | 40 | 1 | 457 | 8  | 1,696 | 17 |
| 14,558 | 113 | 1 | 1,086 | 8  | 40 | 1 | 455 | 8  | 1,694 | 18 |
| 14,559 | 110 | 1 | 1,064 | 9  | 38 | 1 | 454 | 8  | 1,666 | 19 |
| 14,560 | 106 | 1 | 1,060 | 9  | 38 | 1 | 453 | 8  | 1,657 | 19 |
| 14,561 | 106 | 1 | 1,057 | 9  | 37 | 1 | 451 | 8  | 1,651 | 19 |
| 14,562 | 98  | 1 | 997   | 9  | 36 | 1 | 427 | 8  | 1,558 | 19 |
| 14,563 | 96  | 1 | 973   | 9  | 36 | 1 | 418 | 8  | 1,523 | 19 |
| 14,564 | 77  | 1 | 878   | 9  | 33 | 1 | 389 | 8  | 1,377 | 19 |
| 14,565 | 67  | 1 | 811   | 9  | 33 | 1 | 378 | 8  | 1,289 | 19 |
| 14,566 | 65  | 1 | 758   | 9  | 32 | 1 | 361 | 10 | 1,216 | 21 |
| 14,567 | 45  | 1 | 627   | 9  | 17 | 1 | 291 | 12 | 980   | 23 |
| 14,568 | 43  | 1 | 592   | 8  | 17 | 0 | 283 | 12 | 935   | 21 |
| 14,569 | 32  | 1 | 407   | 9  | 7  | 0 | 211 | 12 | 657   | 22 |
| 14,570 | 32  | 0 | 396   | 11 | 7  | 0 | 208 | 11 | 643   | 22 |
| 14,571 | 32  | 0 | 395   | 12 | 8  | 0 | 207 | 11 | 642   | 23 |
| 14,572 | 46  | 0 | 472   | 12 | 11 | 0 | 264 | 11 | 793   | 23 |
| 14,573 | 46  | 0 | 465   | 12 | 11 | 0 | 260 | 11 | 782   | 23 |
| 14,574 | 46  | 0 | 419   | 12 | 11 | 0 | 238 | 11 | 714   | 23 |
| 14,575 | 46  | 0 | 414   | 12 | 13 | 0 | 251 | 11 | 724   | 23 |
| 14,576 | 43  | 0 | 412   | 13 | 13 | 0 | 258 | 11 | 726   | 24 |
| 14,577 | 45  | 0 | 428   | 13 | 13 | 0 | 266 | 11 | 752   | 24 |
| 14,578 | 41  | 0 | 452   | 13 | 18 | 0 | 321 | 9  | 832   | 22 |
| 14,579 | 41  | 0 | 450   | 13 | 18 | 0 | 321 | 10 | 830   | 23 |
| 14,580 | 42  | 0 | 462   | 12 | 18 | 0 | 328 | 10 | 850   | 22 |
| 14,581 | 42  | 0 | 460   | 12 | 18 | 0 | 327 | 9  | 847   | 21 |
| 14,582 | 42  | 0 | 460   | 12 | 18 | 0 | 327 | 10 | 847   | 22 |
| 14,583 | 38  | 0 | 445   | 12 | 17 | 0 | 306 | 10 | 806   | 22 |
| 14,584 | 36  | 0 | 436   | 13 | 17 | 0 | 302 | 10 | 791   | 23 |

|        |    |   |     |    |    |   |     |    |     |    |
|--------|----|---|-----|----|----|---|-----|----|-----|----|
| 14,585 | 35 | 0 | 423 | 12 | 17 | 0 | 295 | 11 | 770 | 23 |
| 14,586 | 35 | 0 | 422 | 12 | 17 | 0 | 291 | 11 | 765 | 23 |
| 14,587 | 35 | 0 | 420 | 12 | 17 | 0 | 291 | 11 | 763 | 23 |
| 14,588 | 34 | 0 | 410 | 12 | 16 | 0 | 281 | 10 | 741 | 22 |
| 14,589 | 32 | 0 | 395 | 12 | 16 | 0 | 272 | 10 | 715 | 22 |
| 14,590 | 30 | 0 | 364 | 13 | 16 | 0 | 260 | 9  | 670 | 22 |
| 14,591 | 27 | 0 | 323 | 13 | 14 | 0 | 220 | 8  | 584 | 21 |
| 14,592 | 26 | 0 | 298 | 12 | 14 | 0 | 200 | 8  | 538 | 20 |
| 14,593 | 26 | 1 | 295 | 12 | 14 | 0 | 199 | 8  | 534 | 21 |
| 14,594 | 25 | 1 | 290 | 12 | 14 | 0 | 198 | 8  | 527 | 21 |
| 14,595 | 25 | 1 | 295 | 12 | 14 | 0 | 198 | 8  | 532 | 21 |
| 14,596 | 25 | 1 | 295 | 12 | 14 | 0 | 198 | 8  | 532 | 21 |
| 14,597 | 25 | 1 | 295 | 12 | 14 | 0 | 198 | 8  | 532 | 21 |
| 14,598 | 25 | 1 | 296 | 12 | 14 | 0 | 199 | 8  | 534 | 21 |
| 14,599 | 25 | 1 | 295 | 12 | 14 | 0 | 199 | 8  | 533 | 21 |
| 14,600 | 25 | 1 | 296 | 12 | 14 | 0 | 199 | 8  | 534 | 21 |
| 14,601 | 25 | 1 | 297 | 12 | 14 | 0 | 199 | 8  | 535 | 21 |
| 14,602 | 25 | 1 | 297 | 12 | 14 | 0 | 199 | 8  | 535 | 21 |
| 14,603 | 25 | 1 | 297 | 12 | 14 | 0 | 199 | 8  | 535 | 21 |
| 14,604 | 25 | 1 | 297 | 12 | 14 | 0 | 200 | 7  | 536 | 20 |
| 14,605 | 25 | 1 | 297 | 12 | 14 | 0 | 200 | 7  | 536 | 20 |
| 14,606 | 26 | 1 | 303 | 10 | 14 | 0 | 200 | 7  | 543 | 18 |
| 14,607 | 26 | 1 | 303 | 10 | 14 | 0 | 201 | 7  | 544 | 18 |
| 14,608 | 27 | 1 | 303 | 10 | 14 | 0 | 202 | 7  | 546 | 18 |
| 14,609 | 27 | 2 | 302 | 9  | 14 | 0 | 202 | 7  | 545 | 18 |
| 14,610 | 27 | 2 | 299 | 8  | 14 | 0 | 201 | 7  | 541 | 17 |
| 14,611 | 29 | 2 | 312 | 8  | 14 | 0 | 221 | 7  | 576 | 17 |
| 14,612 | 29 | 2 | 312 | 9  | 14 | 0 | 221 | 7  | 576 | 18 |
| 14,613 | 29 | 2 | 312 | 9  | 14 | 0 | 222 | 7  | 577 | 18 |
| 14,614 | 30 | 2 | 312 | 9  | 14 | 0 | 223 | 7  | 579 | 18 |
| 14,615 | 30 | 2 | 312 | 9  | 14 | 0 | 224 | 8  | 580 | 19 |
| 14,616 | 30 | 2 | 312 | 9  | 14 | 0 | 224 | 6  | 580 | 17 |
| 14,617 | 30 | 2 | 312 | 10 | 14 | 0 | 221 | 6  | 577 | 18 |
| 14,618 | 30 | 2 | 308 | 10 | 14 | 0 | 219 | 4  | 571 | 16 |
| 14,619 | 30 | 2 | 308 | 10 | 14 | 0 | 219 | 4  | 571 | 16 |
| 14,620 | 30 | 2 | 300 | 7  | 13 | 0 | 215 | 4  | 558 | 13 |
| 14,621 | 30 | 2 | 299 | 7  | 13 | 0 | 215 | 4  | 557 | 13 |
| 14,622 | 27 | 2 | 273 | 6  | 11 | 0 | 202 | 4  | 513 | 12 |
| 14,623 | 17 | 2 | 216 | 7  | 10 | 0 | 158 | 4  | 401 | 13 |
| 14,624 | 17 | 3 | 212 | 7  | 10 | 0 | 154 | 4  | 393 | 14 |
| 14,625 | 15 | 3 | 188 | 7  | 9  | 0 | 140 | 5  | 352 | 15 |

|        |    |   |     |   |    |   |     |   |     |    |
|--------|----|---|-----|---|----|---|-----|---|-----|----|
| 14,626 | 13 | 3 | 178 | 7 | 8  | 0 | 140 | 5 | 339 | 15 |
| 14,627 | 14 | 3 | 169 | 6 | 8  | 0 | 135 | 5 | 326 | 14 |
| 14,628 | 14 | 3 | 150 | 6 | 8  | 0 | 135 | 5 | 307 | 14 |
| 14,629 | 12 | 3 | 75  | 6 | 2  | 0 | 61  | 5 | 150 | 14 |
| 14,630 | 12 | 3 | 75  | 6 | 2  | 0 | 62  | 4 | 151 | 13 |
| 14,631 | 11 | 3 | 70  | 6 | 1  | 0 | 56  | 4 | 138 | 13 |
| 14,632 | 11 | 3 | 72  | 6 | 1  | 0 | 56  | 3 | 140 | 12 |
| 14,633 | 11 | 3 | 72  | 6 | 1  | 0 | 56  | 3 | 140 | 12 |
| 14,634 | 11 | 3 | 72  | 6 | 1  | 0 | 56  | 3 | 140 | 12 |
| 14,635 | 11 | 3 | 72  | 5 | 1  | 0 | 56  | 3 | 140 | 11 |
| 14,636 | 11 | 3 | 72  | 5 | 1  | 0 | 56  | 2 | 140 | 10 |
| 14,637 | 11 | 3 | 72  | 5 | 1  | 0 | 56  | 2 | 140 | 10 |
| 14,638 | 11 | 3 | 78  | 5 | 1  | 0 | 58  | 2 | 148 | 10 |
| 14,639 | 11 | 3 | 75  | 5 | 1  | 0 | 58  | 2 | 145 | 10 |
| 14,640 | 12 | 3 | 73  | 3 | 0  | 0 | 58  | 2 | 143 | 8  |
| 14,641 | 12 | 3 | 77  | 3 | 0  | 0 | 57  | 2 | 146 | 8  |
| 14,642 | 11 | 3 | 88  | 3 | 0  | 0 | 60  | 2 | 159 | 8  |
| 14,643 | 16 | 2 | 122 | 3 | 1  | 0 | 75  | 2 | 214 | 7  |
| 14,644 | 16 | 2 | 122 | 3 | 1  | 0 | 75  | 2 | 214 | 7  |
| 14,645 | 16 | 2 | 120 | 3 | 1  | 0 | 76  | 2 | 213 | 7  |
| 14,646 | 16 | 2 | 120 | 3 | 1  | 0 | 76  | 2 | 213 | 7  |
| 14,647 | 17 | 2 | 125 | 3 | 1  | 0 | 78  | 2 | 221 | 7  |
| 14,648 | 17 | 2 | 125 | 3 | 1  | 0 | 77  | 2 | 220 | 7  |
| 14,649 | 17 | 2 | 126 | 3 | 1  | 0 | 78  | 2 | 222 | 7  |
| 14,650 | 17 | 2 | 127 | 3 | 1  | 0 | 78  | 2 | 223 | 7  |
| 14,651 | 17 | 2 | 130 | 3 | 1  | 0 | 78  | 2 | 226 | 7  |
| 14,652 | 22 | 3 | 156 | 3 | 1  | 0 | 85  | 2 | 264 | 8  |
| 14,653 | 32 | 3 | 184 | 4 | 1  | 0 | 99  | 2 | 316 | 9  |
| 14,654 | 32 | 3 | 184 | 4 | 1  | 0 | 98  | 2 | 315 | 9  |
| 14,655 | 33 | 3 | 206 | 4 | 1  | 0 | 107 | 2 | 347 | 9  |
| 14,656 | 48 | 3 | 392 | 4 | 14 | 0 | 193 | 2 | 647 | 9  |
| 14,657 | 50 | 4 | 409 | 4 | 14 | 0 | 204 | 2 | 677 | 10 |
| 14,658 | 49 | 3 | 422 | 4 | 14 | 0 | 212 | 2 | 697 | 9  |
| 14,659 | 51 | 3 | 435 | 4 | 15 | 0 | 220 | 2 | 721 | 9  |
| 14,660 | 49 | 3 | 473 | 4 | 16 | 0 | 213 | 2 | 751 | 9  |
| 14,661 | 49 | 3 | 472 | 4 | 16 | 0 | 210 | 2 | 747 | 9  |
| 14,662 | 49 | 3 | 486 | 4 | 18 | 0 | 216 | 2 | 769 | 9  |
| 14,663 | 49 | 3 | 486 | 3 | 18 | 0 | 215 | 2 | 768 | 8  |
| 14,664 | 48 | 3 | 486 | 3 | 18 | 0 | 215 | 4 | 767 | 10 |
| 14,665 | 48 | 3 | 485 | 4 | 18 | 0 | 213 | 4 | 764 | 11 |
| 14,666 | 48 | 3 | 486 | 4 | 18 | 0 | 212 | 3 | 764 | 10 |

|        |    |   |     |    |    |   |     |   |     |    |
|--------|----|---|-----|----|----|---|-----|---|-----|----|
| 14,667 | 48 | 3 | 486 | 4  | 18 | 0 | 213 | 3 | 765 | 10 |
| 14,668 | 48 | 3 | 486 | 3  | 18 | 0 | 213 | 3 | 765 | 9  |
| 14,669 | 48 | 3 | 486 | 3  | 18 | 0 | 213 | 3 | 765 | 9  |
| 14,670 | 48 | 3 | 486 | 2  | 18 | 0 | 213 | 3 | 765 | 8  |
| 14,671 | 48 | 3 | 489 | 2  | 19 | 0 | 213 | 3 | 769 | 8  |
| 14,672 | 47 | 3 | 511 | 2  | 19 | 0 | 230 | 3 | 807 | 8  |
| 14,673 | 47 | 3 | 511 | 2  | 19 | 0 | 230 | 3 | 807 | 8  |
| 14,674 | 48 | 2 | 525 | 3  | 19 | 0 | 236 | 2 | 828 | 7  |
| 14,675 | 49 | 2 | 537 | 5  | 19 | 0 | 245 | 2 | 850 | 9  |
| 14,676 | 49 | 2 | 537 | 7  | 19 | 0 | 244 | 2 | 849 | 11 |
| 14,677 | 49 | 3 | 538 | 9  | 20 | 0 | 245 | 5 | 852 | 17 |
| 14,678 | 48 | 3 | 546 | 9  | 20 | 1 | 253 | 5 | 867 | 18 |
| 14,679 | 46 | 3 | 539 | 9  | 20 | 1 | 241 | 5 | 846 | 18 |
| 14,680 | 46 | 3 | 539 | 9  | 20 | 1 | 239 | 5 | 844 | 18 |
| 14,681 | 46 | 3 | 532 | 9  | 20 | 1 | 235 | 6 | 833 | 19 |
| 14,682 | 46 | 4 | 529 | 11 | 20 | 1 | 234 | 6 | 829 | 22 |
| 14,683 | 46 | 4 | 526 | 11 | 20 | 1 | 233 | 6 | 825 | 22 |
| 14,684 | 46 | 4 | 526 | 11 | 20 | 1 | 233 | 6 | 825 | 22 |
| 14,685 | 47 | 4 | 526 | 11 | 20 | 1 | 234 | 6 | 827 | 22 |
| 14,686 | 47 | 4 | 525 | 11 | 20 | 1 | 234 | 6 | 826 | 22 |
| 14,687 | 48 | 4 | 526 | 12 | 20 | 1 | 233 | 6 | 827 | 23 |
| 14,688 | 48 | 4 | 525 | 12 | 20 | 1 | 232 | 6 | 825 | 23 |
| 14,689 | 48 | 4 | 523 | 13 | 20 | 1 | 234 | 6 | 825 | 24 |
| 14,690 | 48 | 4 | 523 | 13 | 20 | 1 | 234 | 6 | 825 | 24 |
| 14,691 | 46 | 4 | 524 | 13 | 20 | 1 | 234 | 6 | 824 | 24 |
| 14,692 | 46 | 4 | 518 | 13 | 20 | 1 | 234 | 6 | 818 | 24 |
| 14,693 | 46 | 4 | 509 | 13 | 20 | 1 | 231 | 6 | 806 | 24 |
| 14,694 | 41 | 4 | 479 | 13 | 19 | 1 | 217 | 6 | 756 | 24 |
| 14,695 | 41 | 4 | 486 | 13 | 19 | 1 | 224 | 6 | 770 | 24 |
| 14,696 | 42 | 4 | 521 | 13 | 21 | 1 | 243 | 6 | 827 | 24 |
| 14,697 | 42 | 4 | 518 | 13 | 21 | 1 | 243 | 6 | 824 | 24 |
| 14,698 | 44 | 4 | 546 | 13 | 23 | 1 | 267 | 6 | 880 | 24 |
| 14,699 | 44 | 4 | 544 | 13 | 23 | 1 | 266 | 6 | 877 | 24 |
| 14,700 | 44 | 4 | 542 | 13 | 23 | 1 | 266 | 6 | 875 | 24 |
| 14,701 | 44 | 4 | 539 | 13 | 23 | 1 | 266 | 6 | 872 | 24 |
| 14,702 | 39 | 3 | 519 | 13 | 23 | 1 | 261 | 6 | 842 | 23 |
| 14,703 | 41 | 3 | 519 | 13 | 23 | 1 | 259 | 6 | 842 | 23 |
| 14,704 | 31 | 3 | 492 | 13 | 24 | 1 | 245 | 6 | 792 | 23 |
| 14,705 | 30 | 3 | 470 | 13 | 24 | 1 | 237 | 6 | 761 | 23 |
| 14,706 | 28 | 3 | 438 | 13 | 23 | 1 | 221 | 6 | 710 | 23 |
| 14,707 | 22 | 4 | 293 | 13 | 11 | 1 | 161 | 7 | 487 | 25 |

|        |    |   |     |    |    |   |     |   |     |    |
|--------|----|---|-----|----|----|---|-----|---|-----|----|
| 14,708 | 21 | 3 | 279 | 13 | 11 | 1 | 150 | 7 | 461 | 24 |
| 14,709 | 21 | 3 | 266 | 13 | 11 | 1 | 141 | 7 | 439 | 24 |
| 14,710 | 19 | 3 | 253 | 13 | 10 | 1 | 134 | 7 | 416 | 24 |
| 14,711 | 22 | 3 | 224 | 13 | 10 | 1 | 137 | 7 | 393 | 24 |
| 14,712 | 22 | 3 | 212 | 13 | 8  | 1 | 129 | 7 | 371 | 24 |
| 14,713 | 27 | 3 | 242 | 13 | 8  | 1 | 143 | 7 | 420 | 24 |
| 14,714 | 27 | 3 | 248 | 14 | 8  | 1 | 147 | 7 | 430 | 25 |
| 14,715 | 27 | 3 | 248 | 14 | 8  | 1 | 147 | 5 | 430 | 23 |
| 14,716 | 27 | 3 | 247 | 13 | 8  | 1 | 149 | 5 | 431 | 22 |
| 14,717 | 27 | 3 | 249 | 14 | 8  | 1 | 149 | 5 | 433 | 23 |
| 14,718 | 27 | 3 | 249 | 14 | 8  | 1 | 149 | 5 | 433 | 23 |
| 14,719 | 27 | 3 | 250 | 15 | 8  | 1 | 152 | 5 | 437 | 24 |
| 14,720 | 27 | 3 | 256 | 16 | 8  | 1 | 152 | 5 | 443 | 25 |
| 14,721 | 30 | 3 | 272 | 16 | 9  | 1 | 153 | 6 | 464 | 26 |
| 14,722 | 31 | 5 | 272 | 16 | 8  | 1 | 153 | 6 | 464 | 28 |
| 14,723 | 31 | 6 | 251 | 16 | 8  | 1 | 135 | 6 | 425 | 29 |
| 14,724 | 30 | 6 | 249 | 17 | 8  | 1 | 135 | 6 | 422 | 30 |
| 14,725 | 30 | 6 | 237 | 16 | 8  | 1 | 129 | 6 | 404 | 29 |
| 14,726 | 43 | 6 | 329 | 13 | 16 | 1 | 192 | 6 | 580 | 26 |
| 14,727 | 43 | 6 | 330 | 15 | 16 | 1 | 192 | 6 | 581 | 28 |
| 14,728 | 44 | 5 | 326 | 13 | 15 | 1 | 190 | 3 | 575 | 22 |
| 14,729 | 44 | 5 | 319 | 13 | 15 | 0 | 180 | 3 | 558 | 21 |
| 14,730 | 44 | 5 | 314 | 13 | 15 | 0 | 180 | 3 | 553 | 21 |
| 14,731 | 44 | 5 | 311 | 13 | 15 | 0 | 180 | 3 | 550 | 21 |
| 14,732 | 44 | 5 | 311 | 13 | 15 | 0 | 179 | 2 | 549 | 20 |
| 14,733 | 52 | 4 | 331 | 11 | 15 | 0 | 186 | 2 | 584 | 17 |
| 14,734 | 52 | 4 | 334 | 11 | 15 | 0 | 190 | 2 | 591 | 17 |
| 14,735 | 52 | 4 | 337 | 11 | 15 | 0 | 190 | 2 | 594 | 17 |
| 14,736 | 51 | 4 | 338 | 11 | 15 | 0 | 191 | 2 | 595 | 17 |
| 14,737 | 51 | 4 | 338 | 11 | 15 | 0 | 191 | 2 | 595 | 17 |
| 14,738 | 52 | 4 | 345 | 10 | 15 | 0 | 197 | 2 | 609 | 16 |
| 14,739 | 52 | 4 | 345 | 10 | 15 | 0 | 195 | 2 | 607 | 16 |
| 14,740 | 53 | 4 | 357 | 9  | 15 | 0 | 202 | 2 | 627 | 15 |
| 14,741 | 54 | 4 | 360 | 9  | 15 | 0 | 206 | 2 | 635 | 15 |
| 14,742 | 54 | 4 | 359 | 10 | 15 | 0 | 206 | 2 | 634 | 16 |
| 14,743 | 54 | 4 | 361 | 11 | 15 | 0 | 207 | 2 | 637 | 17 |
| 14,744 | 56 | 4 | 364 | 12 | 15 | 0 | 210 | 2 | 645 | 18 |
| 14,745 | 56 | 4 | 367 | 12 | 15 | 0 | 215 | 2 | 653 | 18 |
| 14,746 | 56 | 4 | 364 | 14 | 15 | 0 | 210 | 2 | 645 | 20 |
| 14,747 | 55 | 6 | 331 | 21 | 13 | 0 | 193 | 6 | 592 | 33 |
| 14,748 | 52 | 6 | 305 | 21 | 12 | 0 | 172 | 6 | 541 | 33 |



|        |    |    |     |    |    |   |     |    |       |     |
|--------|----|----|-----|----|----|---|-----|----|-------|-----|
| 14,749 | 52 | 6  | 304 | 23 | 11 | 0 | 170 | 6  | 537   | 35  |
| 14,750 | 52 | 6  | 307 | 23 | 11 | 0 | 174 | 6  | 544   | 35  |
| 14,751 | 52 | 6  | 310 | 23 | 12 | 0 | 174 | 6  | 548   | 35  |
| 14,752 | 52 | 6  | 316 | 23 | 13 | 0 | 176 | 6  | 557   | 35  |
| 14,753 | 52 | 6  | 316 | 24 | 13 | 0 | 176 | 6  | 557   | 36  |
| 14,754 | 51 | 6  | 319 | 24 | 13 | 0 | 189 | 6  | 572   | 36  |
| 14,755 | 51 | 6  | 318 | 24 | 12 | 0 | 189 | 6  | 570   | 36  |
| 14,756 | 51 | 6  | 341 | 24 | 12 | 0 | 210 | 6  | 614   | 36  |
| 14,757 | 51 | 6  | 341 | 24 | 12 | 0 | 210 | 6  | 614   | 36  |
| 14,758 | 43 | 5  | 334 | 25 | 12 | 0 | 200 | 5  | 589   | 35  |
| 14,759 | 42 | 5  | 331 | 25 | 12 | 0 | 199 | 5  | 584   | 35  |
| 14,760 | 48 | 5  | 347 | 25 | 13 | 0 | 204 | 5  | 612   | 35  |
| 14,761 | 48 | 5  | 348 | 25 | 13 | 0 | 203 | 5  | 612   | 35  |
| 14,762 | 45 | 5  | 328 | 25 | 12 | 0 | 193 | 5  | 578   | 35  |
| 14,763 | 43 | 5  | 316 | 25 | 12 | 0 | 191 | 6  | 562   | 36  |
| 14,764 | 47 | 5  | 343 | 25 | 13 | 0 | 213 | 6  | 616   | 36  |
| 14,765 | 48 | 5  | 348 | 24 | 13 | 0 | 217 | 5  | 626   | 34  |
| 14,766 | 57 | 5  | 481 | 24 | 13 | 0 | 278 | 5  | 829   | 34  |
| 14,767 | 61 | 5  | 560 | 23 | 15 | 0 | 327 | 5  | 963   | 33  |
| 14,768 | 61 | 5  | 558 | 23 | 15 | 0 | 327 | 5  | 961   | 33  |
| 14,769 | 62 | 5  | 578 | 23 | 19 | 0 | 341 | 8  | 1,000 | 36  |
| 14,770 | 62 | 7  | 577 | 33 | 19 | 0 | 342 | 18 | 1,000 | 58  |
| 14,771 | 62 | 10 | 577 | 39 | 19 | 0 | 342 | 39 | 1,000 | 88  |
| 14,772 | 59 | 10 | 560 | 41 | 18 | 0 | 341 | 41 | 978   | 92  |
| 14,773 | 58 | 8  | 560 | 43 | 18 | 0 | 344 | 42 | 980   | 93  |
| 14,774 | 55 | 7  | 543 | 43 | 16 | 0 | 325 | 42 | 939   | 92  |
| 14,775 | 47 | 7  | 518 | 43 | 14 | 0 | 296 | 47 | 875   | 97  |
| 14,776 | 44 | 7  | 486 | 43 | 10 | 0 | 280 | 47 | 820   | 97  |
| 14,777 | 45 | 7  | 487 | 44 | 10 | 0 | 280 | 47 | 822   | 98  |
| 14,778 | 45 | 7  | 486 | 43 | 10 | 0 | 280 | 47 | 821   | 97  |
| 14,779 | 44 | 7  | 486 | 44 | 10 | 0 | 281 | 47 | 821   | 98  |
| 14,780 | 46 | 7  | 487 | 44 | 10 | 0 | 284 | 47 | 827   | 98  |
| 14,781 | 46 | 7  | 486 | 44 | 10 | 0 | 283 | 48 | 825   | 99  |
| 14,782 | 38 | 7  | 475 | 44 | 10 | 0 | 281 | 48 | 804   | 99  |
| 14,783 | 38 | 7  | 473 | 44 | 10 | 0 | 281 | 48 | 802   | 99  |
| 14,784 | 39 | 7  | 479 | 45 | 10 | 0 | 283 | 50 | 811   | 102 |
| 14,785 | 40 | 7  | 476 | 44 | 10 | 0 | 282 | 50 | 808   | 101 |
| 14,786 | 40 | 7  | 473 | 44 | 10 | 0 | 282 | 51 | 805   | 102 |
| 14,787 | 40 | 7  | 477 | 55 | 10 | 1 | 283 | 55 | 810   | 118 |
| 14,788 | 39 | 8  | 472 | 55 | 10 | 1 | 278 | 56 | 799   | 120 |
| 14,789 | 40 | 8  | 489 | 56 | 12 | 1 | 283 | 57 | 824   | 122 |

|        |    |   |     |    |    |   |     |    |       |     |
|--------|----|---|-----|----|----|---|-----|----|-------|-----|
| 14,790 | 40 | 8 | 487 | 60 | 12 | 1 | 281 | 62 | 820   | 131 |
| 14,791 | 39 | 8 | 476 | 60 | 12 | 1 | 276 | 62 | 803   | 131 |
| 14,792 | 59 | 8 | 637 | 60 | 18 | 1 | 325 | 62 | 1,039 | 131 |
| 14,793 | 62 | 8 | 683 | 58 | 22 | 1 | 360 | 62 | 1,127 | 129 |
| 14,794 | 62 | 8 | 689 | 58 | 22 | 1 | 366 | 62 | 1,139 | 129 |
| 14,795 | 60 | 8 | 696 | 57 | 22 | 1 | 373 | 62 | 1,151 | 128 |
| 14,796 | 60 | 8 | 688 | 57 | 22 | 1 | 367 | 62 | 1,137 | 128 |
| 14,797 | 60 | 8 | 716 | 55 | 25 | 1 | 376 | 62 | 1,177 | 126 |
| 14,798 | 61 | 6 | 710 | 49 | 25 | 1 | 373 | 59 | 1,169 | 115 |
| 14,799 | 61 | 6 | 709 | 49 | 25 | 1 | 372 | 59 | 1,167 | 115 |
| 14,800 | 62 | 6 | 744 | 47 | 26 | 1 | 412 | 59 | 1,244 | 113 |
| 14,801 | 62 | 6 | 741 | 47 | 26 | 1 | 408 | 59 | 1,237 | 113 |
| 14,802 | 63 | 6 | 741 | 47 | 25 | 1 | 409 | 59 | 1,238 | 113 |
| 14,803 | 64 | 6 | 763 | 48 | 24 | 1 | 415 | 59 | 1,266 | 114 |
| 14,804 | 66 | 6 | 776 | 47 | 24 | 1 | 418 | 59 | 1,284 | 113 |
| 14,805 | 66 | 6 | 816 | 47 | 24 | 1 | 415 | 59 | 1,321 | 113 |
| 14,806 | 68 | 6 | 848 | 47 | 26 | 1 | 416 | 59 | 1,358 | 113 |
| 14,807 | 70 | 6 | 848 | 47 | 26 | 1 | 415 | 59 | 1,359 | 113 |
| 14,808 | 70 | 6 | 841 | 46 | 26 | 1 | 413 | 59 | 1,350 | 112 |
| 14,809 | 70 | 6 | 841 | 46 | 26 | 1 | 414 | 60 | 1,351 | 113 |
| 14,810 | 68 | 6 | 839 | 46 | 26 | 1 | 413 | 60 | 1,346 | 113 |
| 14,811 | 64 | 6 | 825 | 46 | 25 | 1 | 409 | 60 | 1,323 | 113 |
| 14,812 | 64 | 6 | 824 | 46 | 25 | 1 | 409 | 60 | 1,322 | 113 |
| 14,813 | 64 | 6 | 825 | 47 | 25 | 1 | 409 | 60 | 1,323 | 114 |
| 14,814 | 61 | 6 | 805 | 48 | 25 | 1 | 397 | 61 | 1,288 | 116 |
| 14,815 | 57 | 6 | 778 | 48 | 24 | 1 | 381 | 61 | 1,240 | 116 |
| 14,816 | 56 | 6 | 770 | 48 | 24 | 1 | 373 | 61 | 1,223 | 116 |
| 14,817 | 47 | 6 | 637 | 48 | 24 | 1 | 311 | 61 | 1,019 | 116 |
| 14,818 | 43 | 6 | 562 | 48 | 22 | 1 | 260 | 61 | 887   | 116 |
| 14,819 | 42 | 6 | 541 | 48 | 18 | 1 | 243 | 61 | 844   | 116 |
| 14,820 | 42 | 6 | 539 | 48 | 18 | 1 | 244 | 58 | 843   | 113 |
| 14,821 | 42 | 4 | 539 | 39 | 18 | 1 | 245 | 49 | 844   | 93  |
| 14,822 | 42 | 1 | 539 | 32 | 18 | 1 | 244 | 28 | 843   | 62  |
| 14,823 | 42 | 3 | 537 | 30 | 18 | 1 | 242 | 26 | 839   | 60  |
| 14,824 | 42 | 3 | 536 | 29 | 18 | 1 | 242 | 25 | 838   | 58  |
| 14,825 | 44 | 3 | 519 | 30 | 18 | 1 | 240 | 23 | 821   | 57  |
| 14,826 | 44 | 3 | 513 | 30 | 18 | 1 | 238 | 23 | 813   | 57  |
| 14,827 | 43 | 3 | 511 | 30 | 18 | 1 | 240 | 23 | 812   | 57  |
| 14,828 | 43 | 3 | 511 | 28 | 18 | 1 | 240 | 23 | 812   | 55  |
| 14,829 | 43 | 3 | 512 | 29 | 18 | 1 | 240 | 23 | 813   | 56  |
| 14,830 | 43 | 3 | 509 | 30 | 18 | 1 | 238 | 23 | 808   | 57  |

|        |    |   |     |    |    |   |     |    |       |    |
|--------|----|---|-----|----|----|---|-----|----|-------|----|
| 14,831 | 41 | 3 | 509 | 30 | 18 | 1 | 237 | 23 | 805   | 57 |
| 14,832 | 44 | 3 | 513 | 30 | 18 | 1 | 242 | 22 | 817   | 56 |
| 14,833 | 44 | 3 | 511 | 30 | 18 | 1 | 242 | 22 | 815   | 56 |
| 14,834 | 44 | 3 | 510 | 30 | 18 | 1 | 241 | 23 | 813   | 57 |
| 14,835 | 43 | 3 | 504 | 30 | 18 | 1 | 238 | 21 | 803   | 55 |
| 14,836 | 42 | 3 | 504 | 30 | 18 | 1 | 236 | 21 | 800   | 55 |
| 14,837 | 42 | 3 | 504 | 30 | 19 | 1 | 234 | 20 | 799   | 54 |
| 14,838 | 42 | 2 | 502 | 21 | 19 | 0 | 233 | 15 | 796   | 38 |
| 14,839 | 42 | 2 | 501 | 21 | 19 | 0 | 233 | 15 | 795   | 38 |
| 14,840 | 40 | 2 | 481 | 20 | 17 | 0 | 226 | 14 | 764   | 36 |
| 14,841 | 40 | 2 | 473 | 17 | 15 | 0 | 219 | 9  | 747   | 28 |
| 14,842 | 19 | 2 | 317 | 17 | 11 | 0 | 173 | 9  | 520   | 28 |
| 14,843 | 19 | 2 | 314 | 18 | 11 | 0 | 170 | 9  | 514   | 29 |
| 14,844 | 16 | 2 | 269 | 18 | 7  | 0 | 137 | 9  | 429   | 29 |
| 14,845 | 16 | 2 | 263 | 18 | 7  | 0 | 131 | 9  | 417   | 29 |
| 14,846 | 16 | 2 | 251 | 18 | 7  | 0 | 121 | 9  | 395   | 29 |
| 14,847 | 16 | 2 | 223 | 17 | 4  | 0 | 110 | 9  | 353   | 28 |
| 14,848 | 16 | 2 | 242 | 17 | 4  | 0 | 115 | 9  | 377   | 28 |
| 14,849 | 14 | 2 | 225 | 17 | 3  | 0 | 84  | 9  | 326   | 28 |
| 14,850 | 14 | 2 | 229 | 18 | 3  | 0 | 84  | 9  | 330   | 29 |
| 14,851 | 14 | 2 | 220 | 18 | 3  | 0 | 73  | 9  | 310   | 29 |
| 14,852 | 24 | 2 | 247 | 19 | 4  | 0 | 79  | 9  | 354   | 30 |
| 14,853 | 24 | 2 | 248 | 20 | 4  | 0 | 80  | 9  | 356   | 31 |
| 14,854 | 25 | 2 | 255 | 23 | 6  | 0 | 89  | 9  | 375   | 34 |
| 14,855 | 23 | 2 | 239 | 23 | 6  | 0 | 85  | 10 | 353   | 35 |
| 14,856 | 22 | 2 | 193 | 23 | 6  | 0 | 76  | 10 | 297   | 35 |
| 14,857 | 37 | 2 | 343 | 22 | 11 | 0 | 158 | 11 | 549   | 35 |
| 14,858 | 35 | 2 | 340 | 22 | 11 | 0 | 156 | 11 | 542   | 35 |
| 14,859 | 48 | 2 | 511 | 22 | 26 | 0 | 263 | 11 | 848   | 35 |
| 14,860 | 61 | 2 | 944 | 22 | 54 | 0 | 411 | 10 | 1,470 | 34 |
| 14,861 | 61 | 2 | 944 | 22 | 54 | 0 | 412 | 10 | 1,471 | 34 |
| 14,862 | 61 | 2 | 944 | 22 | 54 | 0 | 412 | 10 | 1,471 | 34 |
| 14,863 | 63 | 2 | 974 | 21 | 56 | 0 | 425 | 10 | 1,518 | 33 |
| 14,864 | 63 | 2 | 972 | 20 | 56 | 0 | 425 | 8  | 1,516 | 30 |
| 14,865 | 63 | 2 | 971 | 20 | 56 | 0 | 425 | 8  | 1,515 | 30 |
| 14,866 | 63 | 2 | 970 | 20 | 56 | 0 | 423 | 8  | 1,512 | 30 |
| 14,867 | 63 | 2 | 970 | 20 | 56 | 0 | 423 | 8  | 1,512 | 30 |
| 14,868 | 66 | 2 | 980 | 20 | 56 | 0 | 425 | 8  | 1,527 | 30 |
| 14,869 | 66 | 2 | 981 | 20 | 56 | 0 | 424 | 8  | 1,527 | 30 |
| 14,870 | 66 | 2 | 978 | 20 | 56 | 0 | 423 | 8  | 1,523 | 30 |
| 14,871 | 66 | 2 | 978 | 20 | 56 | 0 | 421 | 8  | 1,521 | 30 |

|        |     |   |       |    |    |   |     |   |       |    |
|--------|-----|---|-------|----|----|---|-----|---|-------|----|
| 14,872 | 66  | 2 | 988   | 19 | 56 | 0 | 426 | 7 | 1,536 | 28 |
| 14,873 | 71  | 2 | 1,034 | 19 | 59 | 0 | 443 | 7 | 1,607 | 28 |
| 14,874 | 71  | 0 | 1,061 | 17 | 60 | 0 | 447 | 7 | 1,639 | 24 |
| 14,875 | 71  | 0 | 1,077 | 17 | 61 | 0 | 454 | 7 | 1,663 | 24 |
| 14,876 | 69  | 0 | 1,078 | 15 | 61 | 0 | 456 | 4 | 1,664 | 19 |
| 14,877 | 69  | 0 | 1,078 | 15 | 61 | 0 | 454 | 4 | 1,662 | 19 |
| 14,878 | 69  | 0 | 1,079 | 15 | 61 | 0 | 454 | 4 | 1,663 | 19 |
| 14,879 | 69  | 0 | 1,079 | 14 | 61 | 0 | 454 | 4 | 1,663 | 18 |
| 14,880 | 69  | 0 | 1,078 | 11 | 61 | 0 | 453 | 4 | 1,661 | 15 |
| 14,881 | 69  | 0 | 1,078 | 11 | 61 | 0 | 453 | 4 | 1,661 | 15 |
| 14,882 | 66  | 0 | 1,070 | 11 | 61 | 0 | 448 | 4 | 1,645 | 15 |
| 14,883 | 66  | 0 | 1,070 | 11 | 61 | 0 | 446 | 4 | 1,643 | 15 |
| 14,884 | 66  | 0 | 1,070 | 11 | 61 | 0 | 446 | 4 | 1,643 | 15 |
| 14,885 | 66  | 0 | 1,070 | 11 | 61 | 0 | 446 | 3 | 1,643 | 14 |
| 14,886 | 66  | 0 | 1,074 | 11 | 61 | 0 | 446 | 3 | 1,647 | 14 |
| 14,887 | 66  | 0 | 1,072 | 13 | 60 | 0 | 446 | 3 | 1,644 | 16 |
| 14,888 | 68  | 0 | 1,077 | 13 | 60 | 0 | 449 | 3 | 1,654 | 16 |
| 14,889 | 79  | 0 | 1,266 | 12 | 62 | 0 | 523 | 3 | 1,930 | 15 |
| 14,890 | 84  | 0 | 1,473 | 12 | 74 | 0 | 725 | 3 | 2,356 | 15 |
| 14,891 | 87  | 0 | 1,497 | 12 | 76 | 0 | 749 | 3 | 2,409 | 15 |
| 14,892 | 88  | 0 | 1,506 | 11 | 77 | 0 | 755 | 3 | 2,426 | 14 |
| 14,893 | 88  | 0 | 1,506 | 11 | 77 | 0 | 755 | 3 | 2,426 | 14 |
| 14,894 | 88  | 0 | 1,509 | 10 | 77 | 0 | 756 | 3 | 2,430 | 13 |
| 14,895 | 93  | 0 | 1,534 | 10 | 79 | 0 | 784 | 3 | 2,490 | 13 |
| 14,896 | 95  | 0 | 1,568 | 11 | 79 | 0 | 806 | 3 | 2,548 | 14 |
| 14,897 | 95  | 0 | 1,576 | 11 | 81 | 0 | 806 | 3 | 2,558 | 14 |
| 14,898 | 95  | 0 | 1,590 | 11 | 81 | 0 | 812 | 2 | 2,578 | 13 |
| 14,899 | 95  | 0 | 1,568 | 11 | 81 | 0 | 807 | 2 | 2,551 | 13 |
| 14,900 | 98  | 0 | 1,590 | 11 | 82 | 0 | 813 | 2 | 2,583 | 13 |
| 14,901 | 99  | 0 | 1,595 | 8  | 82 | 0 | 815 | 2 | 2,591 | 10 |
| 14,902 | 102 | 0 | 1,590 | 8  | 83 | 0 | 826 | 2 | 2,601 | 10 |
| 14,903 | 95  | 0 | 1,570 | 8  | 82 | 0 | 821 | 2 | 2,568 | 10 |
| 14,904 | 95  | 0 | 1,568 | 11 | 82 | 0 | 820 | 4 | 2,565 | 15 |
| 14,905 | 93  | 0 | 1,533 | 15 | 80 | 0 | 802 | 7 | 2,508 | 22 |
| 14,906 | 85  | 0 | 1,491 | 16 | 77 | 0 | 777 | 7 | 2,430 | 23 |
| 14,907 | 85  | 0 | 1,446 | 27 | 77 | 0 | 769 | 8 | 2,377 | 35 |
| 14,908 | 76  | 0 | 1,332 | 28 | 73 | 0 | 702 | 7 | 2,183 | 35 |
| 14,909 | 63  | 0 | 1,163 | 28 | 59 | 0 | 602 | 7 | 1,887 | 35 |
| 14,910 | 50  | 0 | 733   | 28 | 33 | 0 | 454 | 7 | 1,270 | 35 |
| 14,911 | 51  | 0 | 736   | 28 | 32 | 0 | 448 | 7 | 1,267 | 35 |
| 14,912 | 51  | 1 | 735   | 28 | 31 | 0 | 447 | 7 | 1,264 | 36 |

|        |    |   |     |    |    |   |     |    |       |    |
|--------|----|---|-----|----|----|---|-----|----|-------|----|
| 14,913 | 51 | 1 | 743 | 29 | 31 | 0 | 451 | 7  | 1,276 | 37 |
| 14,914 | 53 | 1 | 749 | 30 | 31 | 0 | 456 | 7  | 1,289 | 38 |
| 14,915 | 53 | 1 | 770 | 30 | 31 | 0 | 465 | 7  | 1,319 | 38 |
| 14,916 | 53 | 1 | 770 | 30 | 31 | 0 | 464 | 7  | 1,318 | 38 |
| 14,917 | 69 | 1 | 878 | 30 | 36 | 0 | 513 | 7  | 1,496 | 38 |
| 14,918 | 69 | 1 | 878 | 30 | 36 | 0 | 513 | 7  | 1,496 | 38 |
| 14,919 | 68 | 1 | 878 | 30 | 36 | 0 | 513 | 7  | 1,495 | 38 |
| 14,920 | 68 | 1 | 877 | 32 | 36 | 0 | 515 | 7  | 1,496 | 40 |
| 14,921 | 68 | 1 | 880 | 35 | 36 | 0 | 515 | 8  | 1,499 | 44 |
| 14,922 | 68 | 1 | 872 | 35 | 36 | 0 | 510 | 10 | 1,486 | 46 |
| 14,923 | 66 | 1 | 836 | 35 | 35 | 0 | 498 | 10 | 1,435 | 46 |
| 14,924 | 63 | 1 | 826 | 35 | 33 | 0 | 494 | 10 | 1,416 | 46 |
| 14,925 | 63 | 1 | 799 | 35 | 32 | 0 | 490 | 10 | 1,384 | 46 |
| 14,926 | 63 | 1 | 783 | 35 | 31 | 0 | 483 | 10 | 1,360 | 46 |
| 14,927 | 64 | 1 | 776 | 35 | 31 | 0 | 480 | 10 | 1,351 | 46 |
| 14,928 | 64 | 1 | 775 | 35 | 31 | 0 | 480 | 10 | 1,350 | 46 |
| 14,929 | 64 | 1 | 774 | 35 | 31 | 0 | 479 | 10 | 1,348 | 46 |
| 14,930 | 64 | 1 | 774 | 36 | 31 | 0 | 479 | 10 | 1,348 | 47 |
| 14,931 | 64 | 1 | 774 | 36 | 31 | 0 | 479 | 10 | 1,348 | 47 |
| 14,932 | 64 | 1 | 777 | 36 | 31 | 0 | 479 | 10 | 1,351 | 47 |
| 14,933 | 64 | 1 | 777 | 36 | 31 | 0 | 476 | 10 | 1,348 | 47 |
| 14,934 | 64 | 1 | 780 | 36 | 31 | 0 | 479 | 10 | 1,354 | 47 |
| 14,935 | 64 | 1 | 780 | 36 | 31 | 0 | 479 | 10 | 1,354 | 47 |
| 14,936 | 64 | 1 | 781 | 36 | 31 | 0 | 479 | 10 | 1,355 | 47 |
| 14,937 | 67 | 1 | 789 | 35 | 31 | 0 | 482 | 10 | 1,369 | 46 |
| 14,938 | 65 | 1 | 783 | 33 | 31 | 0 | 479 | 10 | 1,358 | 44 |
| 14,939 | 65 | 2 | 722 | 33 | 29 | 0 | 458 | 12 | 1,274 | 47 |
| 14,940 | 54 | 2 | 595 | 33 | 30 | 0 | 407 | 12 | 1,086 | 47 |
| 14,941 | 49 | 2 | 389 | 33 | 18 | 0 | 204 | 12 | 660   | 47 |
| 14,942 | 46 | 2 | 365 | 34 | 16 | 1 | 183 | 15 | 610   | 52 |
| 14,943 | 45 | 2 | 358 | 35 | 15 | 1 | 179 | 15 | 597   | 53 |
| 14,944 | 45 | 2 | 359 | 37 | 15 | 1 | 178 | 20 | 597   | 60 |
| 14,945 | 40 | 3 | 333 | 46 | 13 | 1 | 150 | 21 | 536   | 71 |
| 14,946 | 38 | 3 | 301 | 47 | 13 | 1 | 128 | 22 | 480   | 73 |
| 14,947 | 40 | 3 | 304 | 46 | 11 | 1 | 134 | 22 | 489   | 72 |
| 14,948 | 41 | 3 | 306 | 47 | 12 | 1 | 137 | 23 | 496   | 74 |
| 14,949 | 41 | 3 | 321 | 48 | 13 | 1 | 145 | 24 | 520   | 76 |
| 14,950 | 38 | 3 | 300 | 48 | 12 | 1 | 141 | 24 | 491   | 76 |
| 14,951 | 37 | 3 | 283 | 49 | 12 | 1 | 138 | 24 | 470   | 77 |
| 14,952 | 37 | 3 | 281 | 49 | 12 | 1 | 137 | 24 | 467   | 77 |
| 14,953 | 31 | 3 | 277 | 49 | 11 | 1 | 126 | 24 | 445   | 77 |

|        |    |   |       |    |    |   |     |    |       |     |
|--------|----|---|-------|----|----|---|-----|----|-------|-----|
| 14,954 | 30 | 3 | 280   | 47 | 11 | 1 | 126 | 22 | 447   | 73  |
| 14,955 | 30 | 3 | 280   | 47 | 11 | 1 | 126 | 22 | 447   | 73  |
| 14,956 | 31 | 3 | 282   | 39 | 11 | 1 | 127 | 19 | 451   | 62  |
| 14,957 | 31 | 3 | 282   | 38 | 11 | 1 | 127 | 18 | 451   | 60  |
| 14,958 | 32 | 3 | 289   | 27 | 11 | 1 | 131 | 18 | 463   | 49  |
| 14,959 | 32 | 3 | 291   | 26 | 11 | 1 | 132 | 18 | 466   | 48  |
| 14,960 | 36 | 3 | 309   | 27 | 10 | 2 | 139 | 18 | 494   | 50  |
| 14,961 | 36 | 3 | 310   | 27 | 8  | 2 | 138 | 18 | 492   | 50  |
| 14,962 | 33 | 3 | 283   | 27 | 9  | 2 | 134 | 19 | 459   | 51  |
| 14,963 | 33 | 2 | 275   | 28 | 9  | 3 | 130 | 22 | 447   | 55  |
| 14,964 | 37 | 4 | 300   | 51 | 11 | 3 | 149 | 31 | 497   | 89  |
| 14,965 | 47 | 4 | 403   | 58 | 15 | 3 | 167 | 32 | 632   | 97  |
| 14,966 | 48 | 4 | 424   | 59 | 19 | 4 | 191 | 33 | 682   | 100 |
| 14,967 | 51 | 4 | 519   | 60 | 26 | 4 | 228 | 33 | 824   | 101 |
| 14,968 | 37 | 5 | 510   | 61 | 25 | 4 | 211 | 33 | 783   | 103 |
| 14,969 | 45 | 5 | 609   | 62 | 31 | 4 | 286 | 33 | 971   | 104 |
| 14,970 | 45 | 5 | 605   | 62 | 31 | 4 | 285 | 33 | 966   | 104 |
| 14,971 | 57 | 5 | 819   | 60 | 34 | 4 | 313 | 33 | 1,223 | 102 |
| 14,972 | 61 | 5 | 1,046 | 57 | 38 | 4 | 385 | 32 | 1,530 | 98  |
| 14,973 | 62 | 5 | 1,156 | 57 | 39 | 4 | 417 | 30 | 1,674 | 96  |
| 14,974 | 62 | 5 | 1,156 | 57 | 39 | 4 | 417 | 30 | 1,674 | 96  |
| 14,975 | 68 | 5 | 1,448 | 57 | 45 | 4 | 583 | 30 | 2,144 | 96  |
| 14,976 | 68 | 5 | 1,448 | 57 | 45 | 4 | 583 | 30 | 2,144 | 96  |
| 14,977 | 69 | 5 | 1,453 | 57 | 45 | 4 | 586 | 30 | 2,153 | 96  |
| 14,978 | 70 | 5 | 1,458 | 57 | 45 | 4 | 587 | 31 | 2,160 | 97  |
| 14,979 | 70 | 5 | 1,465 | 57 | 45 | 4 | 591 | 31 | 2,171 | 97  |
| 14,980 | 70 | 5 | 1,465 | 56 | 45 | 4 | 591 | 31 | 2,171 | 96  |
| 14,981 | 70 | 5 | 1,467 | 56 | 45 | 4 | 594 | 31 | 2,176 | 96  |
| 14,982 | 71 | 5 | 1,519 | 56 | 45 | 4 | 604 | 31 | 2,239 | 96  |
| 14,983 | 71 | 5 | 1,562 | 56 | 45 | 4 | 611 | 31 | 2,289 | 96  |
| 14,984 | 86 | 5 | 1,671 | 56 | 46 | 4 | 700 | 31 | 2,503 | 96  |
| 14,985 | 92 | 5 | 1,738 | 56 | 47 | 4 | 719 | 31 | 2,596 | 96  |
| 14,986 | 93 | 5 | 1,742 | 57 | 47 | 4 | 727 | 31 | 2,609 | 97  |
| 14,987 | 90 | 5 | 1,730 | 57 | 47 | 4 | 724 | 31 | 2,591 | 97  |
| 14,988 | 93 | 5 | 1,757 | 57 | 48 | 4 | 755 | 31 | 2,653 | 97  |
| 14,989 | 94 | 5 | 1,774 | 57 | 48 | 4 | 776 | 31 | 2,692 | 97  |
| 14,990 | 94 | 4 | 1,774 | 57 | 48 | 4 | 775 | 30 | 2,691 | 95  |
| 14,991 | 94 | 4 | 1,773 | 57 | 47 | 4 | 774 | 30 | 2,688 | 95  |
| 14,992 | 94 | 4 | 1,770 | 57 | 47 | 4 | 772 | 31 | 2,683 | 96  |
| 14,993 | 94 | 4 | 1,770 | 56 | 47 | 3 | 772 | 29 | 2,683 | 92  |
| 14,994 | 97 | 4 | 1,815 | 59 | 51 | 3 | 836 | 32 | 2,799 | 98  |

|        |     |   |       |    |    |   |       |    |       |     |
|--------|-----|---|-------|----|----|---|-------|----|-------|-----|
| 14,995 | 97  | 4 | 1,813 | 65 | 51 | 3 | 837   | 32 | 2,798 | 104 |
| 14,996 | 97  | 3 | 1,812 | 57 | 51 | 3 | 837   | 32 | 2,797 | 95  |
| 14,997 | 97  | 3 | 1,812 | 58 | 51 | 3 | 837   | 34 | 2,797 | 98  |
| 14,998 | 95  | 3 | 1,801 | 60 | 51 | 3 | 832   | 34 | 2,779 | 100 |
| 14,999 | 94  | 3 | 1,788 | 59 | 50 | 3 | 825   | 33 | 2,757 | 98  |
| 15,000 | 94  | 3 | 1,769 | 58 | 49 | 3 | 814   | 32 | 2,726 | 96  |
| 15,001 | 94  | 3 | 1,767 | 58 | 49 | 3 | 812   | 32 | 2,722 | 96  |
| 15,002 | 94  | 3 | 1,767 | 58 | 49 | 3 | 812   | 32 | 2,722 | 96  |
| 15,003 | 97  | 3 | 1,785 | 58 | 49 | 3 | 821   | 32 | 2,752 | 96  |
| 15,004 | 97  | 3 | 1,788 | 58 | 49 | 3 | 822   | 32 | 2,756 | 96  |
| 15,005 | 97  | 3 | 1,786 | 57 | 49 | 3 | 823   | 32 | 2,755 | 95  |
| 15,006 | 96  | 3 | 1,796 | 57 | 49 | 3 | 821   | 32 | 2,762 | 95  |
| 15,007 | 97  | 3 | 1,812 | 59 | 49 | 3 | 824   | 32 | 2,782 | 97  |
| 15,008 | 96  | 3 | 1,827 | 59 | 49 | 3 | 822   | 33 | 2,794 | 98  |
| 15,009 | 100 | 3 | 1,860 | 58 | 49 | 2 | 840   | 32 | 2,849 | 95  |
| 15,010 | 101 | 3 | 1,916 | 58 | 49 | 2 | 856   | 32 | 2,922 | 95  |
| 15,011 | 115 | 3 | 2,151 | 58 | 60 | 2 | 1,050 | 32 | 3,376 | 95  |
| 15,012 | 120 | 3 | 2,205 | 57 | 65 | 1 | 1,140 | 28 | 3,530 | 89  |
| 15,013 | 121 | 3 | 2,206 | 57 | 65 | 1 | 1,145 | 28 | 3,537 | 89  |
| 15,014 | 116 | 3 | 2,193 | 57 | 65 | 1 | 1,134 | 28 | 3,508 | 89  |
| 15,015 | 116 | 1 | 2,187 | 33 | 63 | 1 | 1,128 | 19 | 3,494 | 54  |
| 15,016 | 105 | 1 | 2,088 | 25 | 59 | 1 | 1,105 | 19 | 3,357 | 46  |
| 15,017 | 104 | 1 | 2,045 | 24 | 55 | 0 | 1,070 | 18 | 3,274 | 43  |
| 15,018 | 100 | 0 | 1,913 | 22 | 46 | 0 | 1,023 | 18 | 3,082 | 40  |
| 15,019 | 101 | 0 | 1,869 | 22 | 44 | 0 | 1,012 | 18 | 3,026 | 40  |
| 15,020 | 91  | 0 | 1,766 | 21 | 38 | 0 | 935   | 18 | 2,830 | 39  |
| 15,021 | 85  | 0 | 1,689 | 21 | 37 | 0 | 925   | 18 | 2,736 | 39  |
| 15,022 | 79  | 0 | 1,555 | 21 | 35 | 0 | 907   | 18 | 2,576 | 39  |
| 15,023 | 75  | 0 | 1,325 | 21 | 31 | 0 | 837   | 18 | 2,268 | 39  |
| 15,024 | 74  | 0 | 1,214 | 21 | 30 | 0 | 806   | 18 | 2,124 | 39  |
| 15,025 | 72  | 0 | 957   | 21 | 24 | 0 | 666   | 19 | 1,719 | 40  |
| 15,026 | 70  | 0 | 930   | 21 | 24 | 0 | 646   | 19 | 1,670 | 40  |
| 15,027 | 69  | 0 | 931   | 21 | 24 | 0 | 645   | 19 | 1,669 | 40  |
| 15,028 | 69  | 0 | 929   | 22 | 24 | 0 | 644   | 19 | 1,666 | 41  |
| 15,029 | 67  | 0 | 926   | 22 | 24 | 0 | 644   | 18 | 1,661 | 40  |
| 15,030 | 68  | 0 | 933   | 22 | 24 | 0 | 644   | 18 | 1,669 | 40  |
| 15,031 | 68  | 0 | 932   | 22 | 24 | 0 | 644   | 18 | 1,668 | 40  |
| 15,032 | 68  | 0 | 906   | 22 | 26 | 0 | 641   | 18 | 1,641 | 40  |
| 15,033 | 67  | 0 | 906   | 22 | 26 | 0 | 660   | 18 | 1,659 | 40  |
| 15,034 | 68  | 0 | 864   | 22 | 26 | 0 | 658   | 18 | 1,616 | 40  |
| 15,035 | 52  | 0 | 752   | 22 | 25 | 0 | 568   | 18 | 1,397 | 40  |

|        |    |   |     |    |    |   |     |    |       |    |
|--------|----|---|-----|----|----|---|-----|----|-------|----|
| 15,036 | 49 | 0 | 711 | 22 | 24 | 0 | 574 | 18 | 1,358 | 40 |
| 15,037 | 48 | 0 | 712 | 21 | 24 | 0 | 569 | 18 | 1,353 | 39 |
| 15,038 | 48 | 0 | 713 | 21 | 24 | 0 | 573 | 18 | 1,358 | 39 |
| 15,039 | 45 | 0 | 686 | 21 | 23 | 0 | 542 | 18 | 1,296 | 39 |
| 15,040 | 45 | 0 | 671 | 21 | 23 | 0 | 521 | 18 | 1,260 | 39 |
| 15,041 | 45 | 0 | 659 | 21 | 23 | 0 | 508 | 16 | 1,235 | 37 |
| 15,042 | 44 | 0 | 652 | 21 | 22 | 0 | 496 | 16 | 1,214 | 37 |
| 15,043 | 42 | 0 | 636 | 21 | 20 | 0 | 458 | 16 | 1,156 | 37 |
| 15,044 | 44 | 0 | 704 | 21 | 19 | 0 | 496 | 15 | 1,263 | 36 |
| 15,045 | 47 | 0 | 741 | 17 | 21 | 0 | 532 | 12 | 1,341 | 29 |
| 15,046 | 51 | 0 | 755 | 9  | 22 | 0 | 540 | 7  | 1,368 | 16 |
| 15,047 | 51 | 0 | 754 | 8  | 22 | 0 | 541 | 6  | 1,368 | 14 |
| 15,048 | 51 | 0 | 759 | 6  | 22 | 0 | 549 | 3  | 1,381 | 9  |
| 15,049 | 52 | 0 | 768 | 4  | 23 | 0 | 554 | 3  | 1,397 | 7  |
| 15,050 | 52 | 0 | 780 | 4  | 24 | 0 | 582 | 3  | 1,438 | 7  |
| 15,051 | 53 | 0 | 791 | 4  | 24 | 0 | 584 | 5  | 1,452 | 9  |
| 15,052 | 53 | 0 | 792 | 4  | 24 | 0 | 586 | 5  | 1,455 | 9  |
| 15,053 | 52 | 0 | 790 | 3  | 24 | 0 | 588 | 5  | 1,454 | 8  |
| 15,054 | 50 | 0 | 781 | 3  | 26 | 0 | 583 | 5  | 1,440 | 8  |
| 15,055 | 50 | 0 | 782 | 3  | 26 | 0 | 583 | 5  | 1,441 | 8  |
| 15,056 | 50 | 0 | 784 | 3  | 26 | 0 | 586 | 5  | 1,446 | 8  |
| 15,057 | 50 | 0 | 772 | 4  | 26 | 0 | 586 | 5  | 1,434 | 9  |
| 15,058 | 49 | 1 | 764 | 4  | 28 | 0 | 587 | 5  | 1,428 | 10 |
| 15,059 | 49 | 1 | 743 | 4  | 29 | 0 | 586 | 4  | 1,407 | 9  |
| 15,060 | 47 | 1 | 724 | 4  | 30 | 0 | 576 | 4  | 1,377 | 9  |
| 15,061 | 46 | 1 | 672 | 4  | 30 | 0 | 570 | 4  | 1,318 | 9  |
| 15,062 | 28 | 1 | 442 | 5  | 22 | 0 | 395 | 5  | 887   | 11 |
| 15,063 | 23 | 1 | 385 | 6  | 17 | 0 | 306 | 5  | 731   | 12 |
| 15,064 | 48 | 1 | 678 | 7  | 35 | 0 | 576 | 6  | 1,337 | 14 |
| 15,065 | 59 | 1 | 822 | 8  | 46 | 0 | 814 | 9  | 1,741 | 18 |
| 15,066 | 61 | 1 | 854 | 9  | 46 | 0 | 840 | 8  | 1,801 | 18 |
| 15,067 | 61 | 1 | 848 | 9  | 46 | 0 | 844 | 8  | 1,799 | 18 |
| 15,068 | 61 | 1 | 860 | 9  | 46 | 0 | 858 | 8  | 1,825 | 18 |
| 15,069 | 60 | 1 | 850 | 9  | 46 | 0 | 851 | 8  | 1,807 | 18 |
| 15,070 | 59 | 1 | 841 | 10 | 46 | 0 | 846 | 8  | 1,792 | 19 |
| 15,071 | 59 | 1 | 839 | 10 | 46 | 0 | 846 | 8  | 1,790 | 19 |
| 15,072 | 59 | 1 | 839 | 11 | 46 | 0 | 849 | 9  | 1,793 | 21 |
| 15,073 | 59 | 1 | 839 | 11 | 46 | 0 | 847 | 9  | 1,791 | 21 |
| 15,074 | 59 | 1 | 839 | 11 | 46 | 0 | 846 | 9  | 1,790 | 21 |
| 15,075 | 59 | 1 | 839 | 12 | 46 | 0 | 846 | 9  | 1,790 | 22 |
| 15,076 | 57 | 1 | 833 | 12 | 46 | 0 | 841 | 8  | 1,777 | 21 |



|        |     |   |       |    |    |   |     |    |       |    |
|--------|-----|---|-------|----|----|---|-----|----|-------|----|
| 15,077 | 57  | 1 | 831   | 12 | 46 | 0 | 840 | 8  | 1,774 | 21 |
| 15,078 | 57  | 1 | 829   | 12 | 46 | 0 | 840 | 8  | 1,772 | 21 |
| 15,079 | 59  | 1 | 875   | 12 | 47 | 0 | 855 | 8  | 1,836 | 21 |
| 15,080 | 59  | 1 | 874   | 12 | 47 | 0 | 855 | 8  | 1,835 | 21 |
| 15,081 | 61  | 1 | 877   | 12 | 47 | 0 | 855 | 10 | 1,840 | 23 |
| 15,082 | 61  | 1 | 883   | 12 | 47 | 0 | 859 | 10 | 1,850 | 23 |
| 15,083 | 61  | 1 | 876   | 13 | 45 | 1 | 855 | 10 | 1,837 | 25 |
| 15,084 | 61  | 1 | 860   | 13 | 45 | 1 | 832 | 11 | 1,798 | 26 |
| 15,085 | 63  | 1 | 892   | 16 | 47 | 2 | 842 | 13 | 1,844 | 32 |
| 15,086 | 62  | 2 | 903   | 21 | 47 | 2 | 844 | 15 | 1,856 | 40 |
| 15,087 | 60  | 2 | 883   | 21 | 45 | 2 | 821 | 15 | 1,809 | 40 |
| 15,088 | 65  | 2 | 895   | 21 | 47 | 2 | 834 | 15 | 1,841 | 40 |
| 15,089 | 75  | 2 | 957   | 21 | 49 | 2 | 870 | 15 | 1,951 | 40 |
| 15,090 | 94  | 2 | 1,133 | 21 | 51 | 2 | 924 | 15 | 2,202 | 40 |
| 15,091 | 94  | 2 | 1,142 | 22 | 51 | 2 | 926 | 15 | 2,213 | 41 |
| 15,092 | 95  | 2 | 1,146 | 23 | 51 | 2 | 932 | 15 | 2,224 | 42 |
| 15,093 | 96  | 2 | 1,152 | 25 | 51 | 2 | 944 | 15 | 2,243 | 44 |
| 15,094 | 106 | 3 | 1,169 | 27 | 54 | 2 | 946 | 19 | 2,275 | 51 |
| 15,095 | 105 | 3 | 1,140 | 27 | 52 | 2 | 919 | 19 | 2,216 | 51 |
| 15,096 | 103 | 3 | 1,142 | 29 | 52 | 4 | 918 | 20 | 2,215 | 56 |
| 15,097 | 99  | 3 | 1,135 | 30 | 52 | 4 | 911 | 20 | 2,197 | 57 |
| 15,098 | 99  | 3 | 1,132 | 32 | 52 | 5 | 902 | 20 | 2,185 | 60 |
| 15,099 | 98  | 3 | 1,123 | 40 | 51 | 5 | 897 | 21 | 2,169 | 69 |
| 15,100 | 98  | 3 | 1,111 | 40 | 50 | 5 | 868 | 21 | 2,127 | 69 |
| 15,101 | 98  | 3 | 1,106 | 40 | 50 | 5 | 868 | 21 | 2,122 | 69 |
| 15,102 | 98  | 3 | 1,108 | 40 | 50 | 5 | 867 | 19 | 2,123 | 67 |
| 15,103 | 100 | 3 | 1,125 | 40 | 51 | 5 | 875 | 19 | 2,151 | 67 |
| 15,104 | 100 | 3 | 1,125 | 40 | 50 | 5 | 877 | 19 | 2,152 | 67 |
| 15,105 | 100 | 3 | 1,118 | 40 | 49 | 5 | 872 | 19 | 2,139 | 67 |
| 15,106 | 100 | 3 | 1,114 | 40 | 49 | 5 | 871 | 18 | 2,134 | 66 |
| 15,107 | 101 | 3 | 1,121 | 39 | 51 | 5 | 872 | 18 | 2,145 | 65 |
| 15,108 | 101 | 3 | 1,117 | 39 | 50 | 5 | 872 | 18 | 2,140 | 65 |
| 15,109 | 101 | 2 | 1,116 | 36 | 49 | 5 | 870 | 19 | 2,136 | 62 |
| 15,110 | 101 | 2 | 1,123 | 37 | 49 | 5 | 870 | 19 | 2,143 | 63 |
| 15,111 | 99  | 2 | 1,109 | 42 | 47 | 5 | 861 | 21 | 2,116 | 70 |
| 15,112 | 99  | 2 | 1,100 | 43 | 47 | 5 | 849 | 22 | 2,095 | 72 |
| 15,113 | 99  | 2 | 1,079 | 43 | 44 | 5 | 814 | 22 | 2,036 | 72 |
| 15,114 | 76  | 2 | 819   | 42 | 27 | 5 | 556 | 22 | 1,478 | 71 |
| 15,115 | 79  | 2 | 821   | 41 | 27 | 5 | 556 | 22 | 1,483 | 70 |
| 15,116 | 65  | 2 | 674   | 39 | 15 | 5 | 304 | 19 | 1,058 | 65 |
| 15,117 | 67  | 2 | 674   | 39 | 16 | 5 | 307 | 19 | 1,064 | 65 |

|        |    |   |     |    |    |   |     |    |       |    |
|--------|----|---|-----|----|----|---|-----|----|-------|----|
| 15,118 | 67 | 2 | 670 | 39 | 16 | 5 | 300 | 19 | 1,053 | 65 |
| 15,119 | 67 | 2 | 653 | 39 | 16 | 5 | 285 | 19 | 1,021 | 65 |
| 15,120 | 69 | 2 | 734 | 38 | 21 | 5 | 327 | 19 | 1,151 | 64 |
| 15,121 | 69 | 3 | 747 | 37 | 21 | 5 | 336 | 18 | 1,173 | 63 |
| 15,122 | 70 | 3 | 764 | 37 | 21 | 5 | 345 | 18 | 1,200 | 63 |
| 15,123 | 70 | 3 | 769 | 37 | 22 | 5 | 348 | 18 | 1,209 | 63 |
| 15,124 | 74 | 3 | 809 | 37 | 26 | 5 | 369 | 18 | 1,278 | 63 |
| 15,125 | 74 | 3 | 808 | 37 | 26 | 5 | 368 | 18 | 1,276 | 63 |
| 15,126 | 74 | 3 | 808 | 36 | 26 | 5 | 368 | 18 | 1,276 | 62 |
| 15,127 | 74 | 3 | 814 | 36 | 26 | 5 | 372 | 18 | 1,286 | 62 |
| 15,128 | 74 | 3 | 814 | 36 | 26 | 5 | 371 | 19 | 1,285 | 63 |
| 15,129 | 74 | 3 | 799 | 36 | 26 | 5 | 368 | 19 | 1,267 | 63 |
| 15,130 | 71 | 3 | 794 | 35 | 26 | 5 | 376 | 17 | 1,267 | 60 |
| 15,131 | 71 | 3 | 789 | 35 | 26 | 5 | 376 | 17 | 1,262 | 60 |
| 15,132 | 70 | 3 | 789 | 35 | 26 | 5 | 379 | 18 | 1,264 | 61 |
| 15,133 | 70 | 3 | 782 | 34 | 26 | 4 | 377 | 17 | 1,255 | 58 |
| 15,134 | 70 | 3 | 778 | 34 | 26 | 4 | 378 | 18 | 1,252 | 59 |
| 15,135 | 69 | 3 | 762 | 34 | 25 | 4 | 369 | 18 | 1,225 | 59 |
| 15,136 | 67 | 3 | 759 | 31 | 25 | 3 | 367 | 16 | 1,218 | 53 |
| 15,137 | 68 | 2 | 744 | 26 | 26 | 3 | 373 | 14 | 1,211 | 45 |
| 15,138 | 65 | 2 | 736 | 26 | 26 | 3 | 365 | 14 | 1,192 | 45 |
| 15,139 | 54 | 2 | 676 | 26 | 24 | 3 | 329 | 15 | 1,083 | 46 |
| 15,140 | 36 | 2 | 500 | 26 | 22 | 3 | 278 | 15 | 836   | 46 |
| 15,141 | 35 | 2 | 489 | 25 | 22 | 3 | 276 | 15 | 822   | 45 |
| 15,142 | 34 | 2 | 481 | 25 | 22 | 3 | 270 | 15 | 807   | 45 |
| 15,143 | 33 | 2 | 471 | 24 | 22 | 3 | 259 | 16 | 785   | 45 |
| 15,144 | 31 | 2 | 466 | 22 | 21 | 3 | 254 | 16 | 772   | 43 |
| 15,145 | 21 | 1 | 401 | 20 | 20 | 3 | 224 | 12 | 666   | 36 |
| 15,146 | 21 | 1 | 399 | 20 | 20 | 3 | 221 | 12 | 661   | 36 |
| 15,147 | 21 | 1 | 390 | 17 | 20 | 1 | 215 | 11 | 646   | 30 |
| 15,148 | 21 | 2 | 383 | 17 | 19 | 1 | 214 | 11 | 637   | 31 |
| 15,149 | 21 | 2 | 382 | 15 | 19 | 0 | 214 | 11 | 636   | 28 |
| 15,150 | 21 | 2 | 382 | 7  | 19 | 0 | 214 | 10 | 636   | 19 |
| 15,151 | 24 | 2 | 415 | 7  | 22 | 0 | 222 | 10 | 683   | 19 |
| 15,152 | 25 | 2 | 421 | 7  | 22 | 0 | 224 | 10 | 692   | 19 |
| 15,153 | 33 | 2 | 465 | 7  | 24 | 0 | 235 | 10 | 757   | 19 |
| 15,154 | 32 | 2 | 457 | 8  | 23 | 0 | 232 | 13 | 744   | 23 |
| 15,155 | 32 | 2 | 459 | 8  | 23 | 0 | 228 | 13 | 742   | 23 |
| 15,156 | 52 | 2 | 726 | 9  | 33 | 0 | 384 | 13 | 1,195 | 24 |
| 15,157 | 51 | 2 | 724 | 11 | 32 | 0 | 381 | 14 | 1,188 | 27 |
| 15,158 | 51 | 2 | 721 | 12 | 31 | 0 | 380 | 14 | 1,183 | 28 |

|        |     |   |       |    |     |   |     |    |       |    |
|--------|-----|---|-------|----|-----|---|-----|----|-------|----|
| 15,159 | 51  | 3 | 720   | 12 | 31  | 0 | 384 | 13 | 1,186 | 28 |
| 15,160 | 51  | 3 | 719   | 12 | 31  | 0 | 384 | 13 | 1,185 | 28 |
| 15,161 | 54  | 3 | 740   | 6  | 32  | 0 | 405 | 11 | 1,231 | 20 |
| 15,162 | 54  | 3 | 740   | 6  | 32  | 0 | 403 | 11 | 1,229 | 20 |
| 15,163 | 54  | 3 | 742   | 5  | 32  | 0 | 403 | 10 | 1,231 | 18 |
| 15,164 | 54  | 3 | 741   | 5  | 32  | 0 | 403 | 10 | 1,230 | 18 |
| 15,165 | 53  | 3 | 723   | 5  | 32  | 0 | 396 | 10 | 1,204 | 18 |
| 15,166 | 50  | 3 | 707   | 5  | 31  | 0 | 388 | 11 | 1,176 | 19 |
| 15,167 | 50  | 3 | 703   | 5  | 31  | 0 | 388 | 11 | 1,172 | 19 |
| 15,168 | 48  | 3 | 680   | 5  | 30  | 0 | 371 | 11 | 1,129 | 19 |
| 15,169 | 46  | 3 | 671   | 5  | 30  | 0 | 369 | 11 | 1,116 | 19 |
| 15,170 | 46  | 4 | 645   | 6  | 27  | 0 | 351 | 14 | 1,069 | 24 |
| 15,171 | 46  | 4 | 627   | 6  | 25  | 0 | 335 | 14 | 1,033 | 24 |
| 15,172 | 165 | 3 | 1,120 | 6  | 62  | 0 | 549 | 14 | 1,896 | 23 |
| 15,173 | 174 | 3 | 1,209 | 7  | 67  | 0 | 575 | 16 | 2,025 | 26 |
| 15,174 | 177 | 3 | 1,227 | 7  | 67  | 0 | 585 | 16 | 2,056 | 26 |
| 15,175 | 173 | 3 | 1,196 | 11 | 63  | 0 | 570 | 16 | 2,002 | 30 |
| 15,176 | 173 | 3 | 1,195 | 12 | 63  | 0 | 569 | 16 | 2,000 | 31 |
| 15,177 | 196 | 3 | 1,369 | 12 | 76  | 0 | 651 | 16 | 2,292 | 31 |
| 15,178 | 196 | 3 | 1,367 | 12 | 76  | 0 | 652 | 17 | 2,291 | 32 |
| 15,179 | 198 | 3 | 1,360 | 12 | 75  | 0 | 642 | 16 | 2,275 | 31 |
| 15,180 | 198 | 3 | 1,346 | 12 | 75  | 0 | 637 | 17 | 2,256 | 32 |
| 15,181 | 198 | 3 | 1,340 | 12 | 75  | 0 | 632 | 18 | 2,245 | 33 |
| 15,182 | 197 | 3 | 1,333 | 12 | 75  | 0 | 627 | 18 | 2,232 | 33 |
| 15,183 | 198 | 3 | 1,355 | 13 | 76  | 0 | 630 | 17 | 2,259 | 33 |
| 15,184 | 230 | 3 | 1,698 | 13 | 94  | 0 | 747 | 17 | 2,769 | 33 |
| 15,185 | 230 | 3 | 1,701 | 13 | 94  | 0 | 747 | 16 | 2,772 | 32 |
| 15,186 | 231 | 3 | 1,705 | 13 | 93  | 0 | 753 | 16 | 2,782 | 32 |
| 15,187 | 231 | 3 | 1,714 | 13 | 94  | 0 | 756 | 16 | 2,795 | 32 |
| 15,188 | 230 | 3 | 1,710 | 13 | 93  | 0 | 740 | 16 | 2,773 | 32 |
| 15,189 | 232 | 3 | 1,723 | 13 | 93  | 0 | 753 | 15 | 2,801 | 31 |
| 15,190 | 232 | 3 | 1,720 | 13 | 93  | 0 | 750 | 15 | 2,795 | 31 |
| 15,191 | 237 | 3 | 1,793 | 13 | 97  | 0 | 792 | 15 | 2,919 | 31 |
| 15,192 | 237 | 3 | 1,790 | 13 | 96  | 1 | 792 | 15 | 2,915 | 32 |
| 15,193 | 237 | 4 | 1,779 | 14 | 96  | 1 | 787 | 15 | 2,899 | 34 |
| 15,194 | 237 | 4 | 1,785 | 14 | 96  | 1 | 790 | 16 | 2,908 | 35 |
| 15,195 | 244 | 4 | 1,907 | 14 | 103 | 1 | 881 | 16 | 3,135 | 35 |
| 15,196 | 244 | 4 | 1,911 | 14 | 103 | 1 | 882 | 16 | 3,140 | 35 |
| 15,197 | 244 | 4 | 1,934 | 15 | 103 | 1 | 888 | 16 | 3,169 | 36 |
| 15,198 | 251 | 3 | 2,026 | 15 | 105 | 1 | 962 | 16 | 3,344 | 35 |
| 15,199 | 251 | 3 | 2,026 | 15 | 105 | 1 | 962 | 16 | 3,344 | 35 |

|        |     |   |       |    |     |   |     |    |       |    |
|--------|-----|---|-------|----|-----|---|-----|----|-------|----|
| 15,200 | 249 | 3 | 2,028 | 15 | 103 | 1 | 972 | 16 | 3,352 | 35 |
| 15,201 | 248 | 3 | 2,022 | 15 | 102 | 1 | 971 | 16 | 3,343 | 35 |
| 15,202 | 247 | 4 | 2,021 | 15 | 102 | 1 | 969 | 16 | 3,339 | 36 |
| 15,203 | 246 | 4 | 2,012 | 16 | 102 | 2 | 968 | 16 | 3,328 | 38 |
| 15,204 | 238 | 4 | 1,982 | 15 | 102 | 2 | 961 | 13 | 3,283 | 34 |
| 15,205 | 240 | 4 | 1,999 | 15 | 102 | 2 | 964 | 15 | 3,305 | 36 |
| 15,206 | 240 | 4 | 1,841 | 15 | 98  | 2 | 892 | 16 | 3,071 | 37 |
| 15,207 | 240 | 4 | 1,803 | 14 | 95  | 2 | 853 | 16 | 2,991 | 36 |
| 15,208 | 241 | 4 | 1,840 | 11 | 96  | 2 | 891 | 16 | 3,068 | 33 |
| 15,209 | 241 | 4 | 1,841 | 11 | 96  | 2 | 892 | 17 | 3,070 | 34 |
| 15,210 | 241 | 3 | 1,841 | 11 | 96  | 2 | 891 | 17 | 3,069 | 33 |
| 15,211 | 241 | 3 | 1,859 | 11 | 98  | 2 | 889 | 17 | 3,087 | 33 |
| 15,212 | 238 | 3 | 1,839 | 12 | 98  | 2 | 871 | 18 | 3,046 | 35 |
| 15,213 | 238 | 3 | 1,838 | 12 | 98  | 2 | 871 | 18 | 3,045 | 35 |
| 15,214 | 238 | 3 | 1,837 | 12 | 98  | 2 | 872 | 17 | 3,045 | 34 |
| 15,215 | 238 | 3 | 1,837 | 12 | 98  | 2 | 873 | 17 | 3,046 | 34 |
| 15,216 | 237 | 3 | 1,833 | 12 | 98  | 2 | 869 | 17 | 3,037 | 34 |
| 15,217 | 237 | 3 | 1,828 | 12 | 98  | 2 | 870 | 16 | 3,033 | 33 |
| 15,218 | 237 | 3 | 1,828 | 12 | 98  | 2 | 870 | 16 | 3,033 | 33 |
| 15,219 | 237 | 3 | 1,819 | 12 | 99  | 2 | 871 | 16 | 3,026 | 33 |
| 15,220 | 237 | 2 | 1,807 | 11 | 99  | 2 | 870 | 14 | 3,013 | 29 |
| 15,221 | 237 | 2 | 1,792 | 12 | 99  | 2 | 865 | 17 | 2,993 | 33 |
| 15,222 | 235 | 2 | 1,701 | 12 | 93  | 2 | 837 | 18 | 2,866 | 34 |
| 15,223 | 118 | 2 | 1,285 | 12 | 63  | 2 | 643 | 19 | 2,109 | 35 |
| 15,224 | 108 | 3 | 1,181 | 11 | 58  | 2 | 608 | 17 | 1,955 | 33 |
| 15,225 | 105 | 3 | 1,157 | 7  | 57  | 2 | 595 | 17 | 1,914 | 29 |
| 15,226 | 105 | 3 | 1,147 | 7  | 57  | 2 | 590 | 17 | 1,899 | 29 |
| 15,227 | 91  | 3 | 1,054 | 6  | 47  | 2 | 545 | 17 | 1,737 | 28 |
| 15,228 | 82  | 3 | 968   | 6  | 44  | 2 | 505 | 15 | 1,599 | 26 |
| 15,229 | 82  | 3 | 966   | 6  | 44  | 2 | 503 | 15 | 1,595 | 26 |
| 15,230 | 80  | 3 | 966   | 6  | 44  | 2 | 503 | 15 | 1,593 | 26 |
| 15,231 | 80  | 3 | 964   | 6  | 44  | 2 | 502 | 14 | 1,590 | 25 |
| 15,232 | 79  | 3 | 954   | 6  | 44  | 2 | 502 | 15 | 1,579 | 26 |
| 15,233 | 79  | 3 | 950   | 6  | 43  | 2 | 503 | 15 | 1,575 | 26 |
| 15,234 | 61  | 3 | 788   | 5  | 35  | 2 | 453 | 15 | 1,337 | 25 |
| 15,235 | 47  | 3 | 606   | 5  | 25  | 2 | 387 | 15 | 1,065 | 25 |
| 15,236 | 47  | 4 | 605   | 5  | 25  | 2 | 388 | 14 | 1,065 | 25 |
| 15,237 | 46  | 4 | 592   | 5  | 25  | 2 | 381 | 15 | 1,044 | 26 |
| 15,238 | 47  | 4 | 585   | 5  | 24  | 2 | 386 | 15 | 1,042 | 26 |
| 15,239 | 47  | 4 | 583   | 5  | 24  | 2 | 389 | 16 | 1,043 | 27 |
| 15,240 | 45  | 4 | 568   | 5  | 24  | 2 | 379 | 16 | 1,016 | 27 |

|        |    |   |     |    |    |   |     |    |     |    |
|--------|----|---|-----|----|----|---|-----|----|-----|----|
| 15,241 | 41 | 4 | 509 | 5  | 20 | 2 | 345 | 16 | 915 | 27 |
| 15,242 | 41 | 4 | 515 | 5  | 20 | 1 | 354 | 16 | 930 | 26 |
| 15,243 | 43 | 3 | 535 | 4  | 21 | 1 | 365 | 16 | 964 | 24 |
| 15,244 | 44 | 3 | 539 | 4  | 22 | 1 | 368 | 16 | 973 | 24 |
| 15,245 | 37 | 3 | 419 | 4  | 15 | 1 | 275 | 14 | 746 | 22 |
| 15,246 | 37 | 3 | 415 | 4  | 15 | 1 | 274 | 14 | 741 | 22 |
| 15,247 | 37 | 3 | 393 | 4  | 15 | 1 | 268 | 14 | 713 | 22 |
| 15,248 | 34 | 3 | 344 | 3  | 14 | 1 | 238 | 14 | 630 | 21 |
| 15,249 | 30 | 3 | 298 | 3  | 13 | 1 | 194 | 14 | 535 | 21 |
| 15,250 | 31 | 3 | 275 | 3  | 13 | 1 | 177 | 14 | 496 | 21 |
| 15,251 | 31 | 3 | 273 | 3  | 13 | 1 | 177 | 14 | 494 | 21 |
| 15,252 | 31 | 3 | 268 | 3  | 13 | 1 | 179 | 14 | 491 | 21 |
| 15,253 | 31 | 2 | 268 | 3  | 13 | 1 | 179 | 14 | 491 | 20 |
| 15,254 | 33 | 2 | 283 | 2  | 13 | 0 | 185 | 14 | 514 | 18 |
| 15,255 | 33 | 2 | 280 | 4  | 11 | 0 | 185 | 12 | 509 | 18 |
| 15,256 | 30 | 2 | 262 | 4  | 11 | 0 | 180 | 13 | 483 | 19 |
| 15,257 | 10 | 2 | 207 | 5  | 9  | 0 | 144 | 14 | 370 | 21 |
| 15,258 | 18 | 3 | 222 | 11 | 10 | 1 | 181 | 21 | 431 | 36 |
| 15,259 | 17 | 3 | 204 | 12 | 9  | 1 | 156 | 20 | 386 | 36 |
| 15,260 | 17 | 3 | 200 | 13 | 9  | 1 | 158 | 20 | 384 | 37 |
| 15,261 | 17 | 3 | 200 | 15 | 9  | 1 | 154 | 20 | 380 | 39 |
| 15,262 | 17 | 3 | 175 | 15 | 6  | 1 | 152 | 20 | 350 | 39 |
| 15,263 | 17 | 3 | 177 | 16 | 6  | 1 | 153 | 19 | 353 | 39 |
| 15,264 | 18 | 3 | 189 | 16 | 6  | 1 | 158 | 19 | 371 | 39 |
| 15,265 | 21 | 3 | 197 | 16 | 6  | 1 | 161 | 19 | 385 | 39 |
| 15,266 | 21 | 3 | 200 | 16 | 6  | 1 | 162 | 19 | 389 | 39 |
| 15,267 | 28 | 4 | 203 | 16 | 6  | 1 | 165 | 19 | 402 | 40 |
| 15,268 | 28 | 4 | 208 | 16 | 6  | 1 | 165 | 19 | 407 | 40 |
| 15,269 | 28 | 4 | 210 | 16 | 6  | 1 | 166 | 19 | 410 | 40 |
| 15,270 | 28 | 4 | 212 | 19 | 5  | 1 | 164 | 19 | 409 | 43 |
| 15,271 | 28 | 4 | 211 | 19 | 5  | 1 | 164 | 18 | 408 | 42 |
| 15,272 | 28 | 4 | 211 | 19 | 5  | 1 | 168 | 15 | 412 | 39 |
| 15,273 | 28 | 4 | 215 | 19 | 5  | 3 | 167 | 14 | 415 | 40 |
| 15,274 | 28 | 4 | 215 | 19 | 4  | 3 | 167 | 13 | 414 | 39 |
| 15,275 | 28 | 3 | 215 | 19 | 4  | 4 | 167 | 13 | 414 | 39 |
| 15,276 | 28 | 3 | 215 | 19 | 4  | 4 | 167 | 13 | 414 | 39 |
| 15,277 | 28 | 3 | 215 | 20 | 4  | 4 | 166 | 13 | 413 | 40 |
| 15,278 | 28 | 3 | 215 | 20 | 4  | 4 | 166 | 13 | 413 | 40 |
| 15,279 | 28 | 3 | 215 | 20 | 4  | 4 | 166 | 14 | 413 | 41 |
| 15,280 | 28 | 3 | 215 | 20 | 4  | 4 | 166 | 14 | 413 | 41 |
| 15,281 | 28 | 3 | 215 | 20 | 4  | 4 | 165 | 14 | 412 | 41 |

|        |    |   |     |    |    |   |     |    |       |    |
|--------|----|---|-----|----|----|---|-----|----|-------|----|
| 15,282 | 28 | 3 | 210 | 20 | 4  | 4 | 163 | 15 | 405   | 42 |
| 15,283 | 28 | 3 | 211 | 20 | 4  | 4 | 164 | 15 | 407   | 42 |
| 15,284 | 28 | 3 | 210 | 20 | 4  | 4 | 162 | 15 | 404   | 42 |
| 15,285 | 29 | 3 | 211 | 20 | 4  | 4 | 169 | 15 | 413   | 42 |
| 15,286 | 29 | 3 | 219 | 20 | 4  | 4 | 176 | 15 | 428   | 42 |
| 15,287 | 29 | 2 | 221 | 20 | 4  | 4 | 186 | 15 | 440   | 41 |
| 15,288 | 29 | 2 | 217 | 20 | 4  | 4 | 184 | 14 | 434   | 40 |
| 15,289 | 28 | 2 | 213 | 22 | 4  | 4 | 178 | 14 | 423   | 42 |
| 15,290 | 28 | 2 | 211 | 22 | 4  | 4 | 175 | 13 | 418   | 41 |
| 15,291 | 30 | 2 | 232 | 22 | 5  | 4 | 184 | 13 | 451   | 41 |
| 15,292 | 29 | 2 | 228 | 31 | 5  | 4 | 182 | 14 | 444   | 51 |
| 15,293 | 28 | 2 | 215 | 31 | 5  | 4 | 167 | 14 | 415   | 51 |
| 15,294 | 26 | 2 | 194 | 31 | 4  | 4 | 157 | 14 | 381   | 51 |
| 15,295 | 25 | 2 | 196 | 31 | 6  | 4 | 188 | 14 | 415   | 51 |
| 15,296 | 25 | 2 | 195 | 31 | 6  | 4 | 188 | 14 | 414   | 51 |
| 15,297 | 25 | 2 | 197 | 31 | 6  | 4 | 189 | 14 | 417   | 51 |
| 15,298 | 25 | 2 | 194 | 31 | 6  | 4 | 189 | 14 | 414   | 51 |
| 15,299 | 25 | 2 | 195 | 31 | 6  | 4 | 189 | 14 | 415   | 51 |
| 15,300 | 25 | 3 | 194 | 31 | 6  | 4 | 189 | 14 | 414   | 52 |
| 15,301 | 24 | 3 | 194 | 31 | 7  | 4 | 189 | 14 | 414   | 52 |
| 15,302 | 24 | 3 | 193 | 31 | 8  | 4 | 193 | 14 | 418   | 52 |
| 15,303 | 24 | 3 | 193 | 31 | 8  | 4 | 192 | 14 | 417   | 52 |
| 15,304 | 22 | 3 | 177 | 31 | 8  | 4 | 185 | 14 | 392   | 52 |
| 15,305 | 22 | 3 | 181 | 31 | 8  | 4 | 188 | 14 | 399   | 52 |
| 15,306 | 22 | 3 | 178 | 30 | 8  | 5 | 186 | 13 | 394   | 51 |
| 15,307 | 22 | 3 | 168 | 29 | 8  | 5 | 181 | 11 | 379   | 48 |
| 15,308 | 22 | 3 | 148 | 29 | 7  | 5 | 169 | 11 | 346   | 48 |
| 15,309 | 14 | 2 | 113 | 23 | 6  | 4 | 119 | 4  | 252   | 33 |
| 15,310 | 14 | 2 | 113 | 22 | 6  | 4 | 116 | 4  | 249   | 32 |
| 15,311 | 14 | 2 | 150 | 21 | 9  | 4 | 124 | 3  | 297   | 30 |
| 15,312 | 14 | 2 | 147 | 19 | 9  | 4 | 124 | 3  | 294   | 28 |
| 15,313 | 14 | 2 | 160 | 17 | 10 | 4 | 132 | 3  | 316   | 26 |
| 15,314 | 13 | 2 | 151 | 17 | 10 | 4 | 133 | 3  | 307   | 26 |
| 15,315 | 12 | 2 | 147 | 17 | 10 | 4 | 131 | 3  | 300   | 26 |
| 15,316 | 12 | 2 | 152 | 17 | 11 | 4 | 133 | 3  | 308   | 26 |
| 15,317 | 7  | 2 | 158 | 17 | 11 | 4 | 141 | 3  | 317   | 26 |
| 15,318 | 8  | 1 | 212 | 18 | 13 | 4 | 158 | 3  | 391   | 26 |
| 15,319 | 12 | 1 | 305 | 18 | 21 | 4 | 278 | 3  | 616   | 26 |
| 15,320 | 12 | 1 | 303 | 18 | 21 | 4 | 278 | 3  | 614   | 26 |
| 15,321 | 12 | 1 | 300 | 15 | 21 | 4 | 278 | 3  | 611   | 23 |
| 15,322 | 25 | 1 | 725 | 15 | 57 | 4 | 768 | 3  | 1,575 | 23 |

|        |     |   |       |    |     |   |       |    |       |    |
|--------|-----|---|-------|----|-----|---|-------|----|-------|----|
| 15,323 | 25  | 1 | 727   | 14 | 57  | 4 | 777   | 4  | 1,586 | 23 |
| 15,324 | 26  | 1 | 734   | 14 | 57  | 2 | 779   | 4  | 1,596 | 21 |
| 15,325 | 26  | 1 | 735   | 14 | 57  | 1 | 780   | 4  | 1,598 | 20 |
| 15,326 | 26  | 1 | 735   | 14 | 57  | 1 | 780   | 4  | 1,598 | 20 |
| 15,327 | 26  | 1 | 760   | 14 | 57  | 1 | 789   | 4  | 1,632 | 20 |
| 15,328 | 26  | 1 | 760   | 13 | 57  | 1 | 789   | 4  | 1,632 | 19 |
| 15,329 | 31  | 1 | 808   | 13 | 57  | 1 | 800   | 3  | 1,696 | 18 |
| 15,330 | 31  | 1 | 808   | 13 | 57  | 1 | 800   | 3  | 1,696 | 18 |
| 15,331 | 40  | 1 | 878   | 13 | 57  | 1 | 814   | 3  | 1,789 | 18 |
| 15,332 | 40  | 1 | 891   | 13 | 58  | 1 | 816   | 3  | 1,805 | 18 |
| 15,333 | 63  | 1 | 1,123 | 13 | 74  | 1 | 907   | 2  | 2,167 | 17 |
| 15,334 | 176 | 1 | 1,917 | 13 | 143 | 1 | 1,611 | 2  | 3,847 | 17 |
| 15,335 | 175 | 1 | 1,917 | 14 | 143 | 1 | 1,612 | 2  | 3,847 | 18 |
| 15,336 | 175 | 1 | 1,911 | 14 | 143 | 1 | 1,606 | 2  | 3,835 | 18 |
| 15,337 | 239 | 1 | 2,778 | 14 | 209 | 1 | 2,239 | 2  | 5,465 | 18 |
| 15,338 | 239 | 1 | 2,774 | 15 | 209 | 1 | 2,228 | 3  | 5,450 | 20 |
| 15,339 | 239 | 1 | 2,774 | 15 | 209 | 1 | 2,227 | 3  | 5,449 | 20 |
| 15,340 | 239 | 1 | 2,832 | 14 | 214 | 1 | 2,282 | 3  | 5,567 | 19 |
| 15,341 | 239 | 1 | 2,832 | 14 | 214 | 1 | 2,281 | 3  | 5,566 | 19 |
| 15,342 | 237 | 1 | 2,808 | 14 | 213 | 1 | 2,265 | 3  | 5,523 | 19 |
| 15,343 | 237 | 1 | 2,808 | 5  | 213 | 1 | 2,267 | 2  | 5,525 | 9  |
| 15,344 | 239 | 1 | 2,821 | 5  | 213 | 1 | 2,274 | 2  | 5,547 | 9  |
| 15,345 | 239 | 1 | 2,825 | 5  | 213 | 1 | 2,272 | 2  | 5,549 | 9  |
| 15,346 | 240 | 1 | 2,823 | 5  | 210 | 1 | 2,243 | 2  | 5,516 | 9  |
| 15,347 | 240 | 1 | 2,826 | 5  | 211 | 1 | 2,243 | 2  | 5,520 | 9  |
| 15,348 | 240 | 1 | 2,826 | 6  | 211 | 1 | 2,243 | 2  | 5,520 | 10 |
| 15,349 | 241 | 1 | 2,836 | 6  | 211 | 1 | 2,243 | 4  | 5,531 | 12 |
| 15,350 | 248 | 1 | 2,878 | 7  | 212 | 1 | 2,274 | 4  | 5,612 | 13 |
| 15,351 | 251 | 0 | 2,973 | 8  | 214 | 1 | 2,321 | 4  | 5,759 | 13 |
| 15,352 | 264 | 0 | 3,068 | 8  | 221 | 1 | 2,390 | 4  | 5,943 | 13 |
| 15,353 | 284 | 0 | 3,622 | 9  | 268 | 1 | 2,906 | 7  | 7,080 | 17 |
| 15,354 | 284 | 0 | 3,620 | 9  | 268 | 1 | 2,903 | 8  | 7,075 | 18 |
| 15,355 | 291 | 0 | 3,740 | 9  | 273 | 1 | 2,966 | 8  | 7,270 | 18 |
| 15,356 | 291 | 0 | 3,752 | 10 | 274 | 1 | 2,986 | 8  | 7,303 | 19 |
| 15,357 | 291 | 0 | 3,752 | 10 | 274 | 0 | 2,986 | 8  | 7,303 | 18 |
| 15,358 | 292 | 0 | 3,756 | 10 | 274 | 0 | 2,990 | 8  | 7,312 | 18 |
| 15,359 | 292 | 0 | 3,748 | 12 | 274 | 0 | 2,991 | 10 | 7,305 | 22 |
| 15,360 | 292 | 0 | 3,733 | 12 | 273 | 0 | 2,989 | 10 | 7,287 | 22 |
| 15,361 | 294 | 0 | 3,737 | 12 | 275 | 0 | 2,992 | 10 | 7,298 | 22 |
| 15,362 | 295 | 0 | 3,738 | 12 | 273 | 0 | 2,992 | 10 | 7,298 | 22 |
| 15,363 | 295 | 0 | 3,743 | 12 | 274 | 0 | 2,994 | 10 | 7,306 | 22 |

|        |     |   |       |    |     |   |       |    |       |    |
|--------|-----|---|-------|----|-----|---|-------|----|-------|----|
| 15,364 | 305 | 0 | 3,812 | 13 | 276 | 0 | 3,026 | 10 | 7,419 | 23 |
| 15,365 | 305 | 0 | 3,808 | 13 | 276 | 0 | 3,019 | 10 | 7,408 | 23 |
| 15,366 | 307 | 0 | 3,813 | 13 | 276 | 0 | 3,021 | 10 | 7,417 | 23 |
| 15,367 | 307 | 0 | 3,811 | 14 | 275 | 0 | 3,022 | 10 | 7,415 | 24 |
| 15,368 | 305 | 0 | 3,809 | 14 | 275 | 0 | 3,014 | 10 | 7,403 | 24 |
| 15,369 | 304 | 0 | 3,754 | 14 | 273 | 0 | 2,998 | 12 | 7,329 | 26 |
| 15,370 | 300 | 0 | 3,658 | 15 | 266 | 0 | 2,880 | 12 | 7,104 | 27 |
| 15,371 | 293 | 0 | 3,272 | 15 | 235 | 0 | 2,425 | 12 | 6,225 | 27 |
| 15,372 | 287 | 1 | 3,236 | 15 | 232 | 0 | 2,386 | 12 | 6,141 | 28 |
| 15,373 | 287 | 1 | 3,233 | 15 | 230 | 0 | 2,383 | 12 | 6,133 | 28 |
| 15,374 | 287 | 1 | 3,233 | 16 | 230 | 0 | 2,378 | 11 | 6,128 | 28 |
| 15,375 | 286 | 1 | 3,223 | 16 | 230 | 0 | 2,376 | 11 | 6,115 | 28 |
| 15,376 | 286 | 1 | 3,224 | 16 | 230 | 0 | 2,377 | 11 | 6,117 | 28 |
| 15,377 | 286 | 1 | 3,209 | 16 | 230 | 0 | 2,369 | 11 | 6,094 | 28 |
| 15,378 | 286 | 1 | 3,199 | 16 | 230 | 0 | 2,368 | 11 | 6,083 | 28 |
| 15,379 | 286 | 1 | 3,176 | 16 | 230 | 0 | 2,363 | 11 | 6,055 | 28 |
| 15,380 | 281 | 1 | 3,149 | 16 | 230 | 0 | 2,356 | 12 | 6,016 | 29 |
| 15,381 | 272 | 1 | 3,081 | 16 | 230 | 0 | 2,344 | 12 | 5,927 | 29 |
| 15,382 | 276 | 1 | 3,081 | 17 | 230 | 0 | 2,347 | 12 | 5,934 | 30 |
| 15,383 | 276 | 1 | 3,027 | 17 | 226 | 0 | 2,322 | 13 | 5,851 | 31 |
| 15,384 | 255 | 1 | 2,867 | 17 | 214 | 0 | 2,263 | 13 | 5,599 | 31 |
| 15,385 | 142 | 1 | 2,076 | 18 | 145 | 0 | 1,548 | 14 | 3,911 | 33 |
| 15,386 | 122 | 1 | 1,699 | 18 | 119 | 0 | 1,356 | 14 | 3,296 | 33 |
| 15,387 | 79  | 1 | 1,220 | 19 | 81  | 0 | 919   | 13 | 2,299 | 33 |
| 15,388 | 78  | 1 | 1,202 | 19 | 79  | 0 | 910   | 13 | 2,269 | 33 |
| 15,389 | 81  | 1 | 1,156 | 18 | 77  | 0 | 863   | 12 | 2,177 | 31 |
| 15,390 | 81  | 1 | 1,152 | 18 | 75  | 0 | 859   | 12 | 2,167 | 31 |
| 15,391 | 81  | 1 | 1,144 | 17 | 74  | 0 | 853   | 12 | 2,152 | 30 |
| 15,392 | 81  | 1 | 1,142 | 17 | 74  | 0 | 852   | 12 | 2,149 | 30 |
| 15,393 | 81  | 1 | 1,142 | 17 | 74  | 0 | 851   | 12 | 2,148 | 30 |
| 15,394 | 81  | 1 | 1,129 | 17 | 74  | 0 | 843   | 12 | 2,127 | 30 |
| 15,395 | 79  | 1 | 1,128 | 17 | 74  | 0 | 846   | 12 | 2,127 | 30 |
| 15,396 | 79  | 1 | 1,124 | 17 | 74  | 0 | 846   | 12 | 2,123 | 30 |
| 15,397 | 78  | 1 | 1,117 | 17 | 74  | 0 | 842   | 12 | 2,111 | 30 |
| 15,398 | 78  | 1 | 1,112 | 17 | 73  | 0 | 842   | 13 | 2,105 | 31 |
| 15,399 | 77  | 1 | 1,114 | 17 | 73  | 0 | 847   | 13 | 2,111 | 31 |
| 15,400 | 78  | 1 | 1,129 | 17 | 74  | 0 | 870   | 12 | 2,151 | 30 |
| 15,401 | 72  | 3 | 1,092 | 16 | 73  | 0 | 846   | 12 | 2,083 | 31 |
| 15,402 | 69  | 3 | 999   | 16 | 71  | 1 | 804   | 12 | 1,943 | 32 |
| 15,403 | 56  | 4 | 905   | 16 | 63  | 1 | 736   | 12 | 1,760 | 33 |
| 15,404 | 36  | 4 | 350   | 15 | 15  | 1 | 213   | 9  | 614   | 29 |



|        |    |   |       |    |    |   |     |   |       |    |
|--------|----|---|-------|----|----|---|-----|---|-------|----|
| 15,405 | 29 | 4 | 233   | 15 | 11 | 1 | 154 | 8 | 427   | 28 |
| 15,406 | 32 | 4 | 323   | 14 | 12 | 1 | 200 | 8 | 567   | 27 |
| 15,407 | 43 | 4 | 407   | 13 | 14 | 1 | 250 | 8 | 714   | 26 |
| 15,408 | 43 | 4 | 407   | 13 | 14 | 1 | 250 | 8 | 714   | 26 |
| 15,409 | 47 | 4 | 468   | 11 | 18 | 1 | 271 | 6 | 804   | 22 |
| 15,410 | 49 | 4 | 504   | 12 | 19 | 1 | 276 | 6 | 848   | 23 |
| 15,411 | 47 | 4 | 500   | 12 | 18 | 1 | 274 | 6 | 839   | 23 |
| 15,412 | 65 | 4 | 903   | 12 | 28 | 1 | 490 | 6 | 1,486 | 23 |
| 15,413 | 64 | 5 | 902   | 12 | 28 | 1 | 490 | 7 | 1,484 | 25 |
| 15,414 | 64 | 5 | 905   | 12 | 27 | 1 | 494 | 7 | 1,490 | 25 |
| 15,415 | 54 | 5 | 819   | 11 | 24 | 1 | 453 | 8 | 1,350 | 25 |
| 15,416 | 50 | 5 | 808   | 11 | 24 | 1 | 451 | 8 | 1,333 | 25 |
| 15,417 | 50 | 5 | 810   | 11 | 24 | 1 | 451 | 9 | 1,335 | 26 |
| 15,418 | 50 | 5 | 805   | 10 | 24 | 1 | 447 | 9 | 1,326 | 25 |
| 15,419 | 50 | 5 | 799   | 10 | 24 | 1 | 445 | 9 | 1,318 | 25 |
| 15,420 | 50 | 6 | 802   | 8  | 24 | 1 | 446 | 7 | 1,322 | 22 |
| 15,421 | 50 | 6 | 801   | 8  | 23 | 1 | 445 | 7 | 1,319 | 22 |
| 15,422 | 50 | 6 | 805   | 9  | 23 | 1 | 443 | 7 | 1,321 | 23 |
| 15,423 | 50 | 5 | 805   | 9  | 23 | 1 | 443 | 7 | 1,321 | 22 |
| 15,424 | 53 | 5 | 820   | 10 | 24 | 1 | 454 | 7 | 1,351 | 23 |
| 15,425 | 56 | 5 | 839   | 10 | 25 | 1 | 465 | 8 | 1,385 | 24 |
| 15,426 | 56 | 5 | 836   | 10 | 25 | 1 | 465 | 8 | 1,382 | 24 |
| 15,427 | 57 | 5 | 840   | 10 | 25 | 1 | 465 | 8 | 1,387 | 24 |
| 15,428 | 59 | 5 | 888   | 10 | 26 | 1 | 476 | 8 | 1,449 | 24 |
| 15,429 | 62 | 5 | 921   | 10 | 29 | 1 | 490 | 7 | 1,502 | 23 |
| 15,430 | 70 | 5 | 982   | 10 | 35 | 1 | 555 | 8 | 1,642 | 24 |
| 15,431 | 67 | 5 | 983   | 9  | 35 | 1 | 562 | 9 | 1,647 | 24 |
| 15,432 | 66 | 5 | 991   | 9  | 36 | 1 | 567 | 9 | 1,660 | 24 |
| 15,433 | 65 | 5 | 985   | 9  | 36 | 1 | 563 | 9 | 1,649 | 24 |
| 15,434 | 65 | 5 | 984   | 9  | 36 | 1 | 563 | 8 | 1,648 | 23 |
| 15,435 | 65 | 5 | 989   | 8  | 36 | 1 | 570 | 7 | 1,660 | 21 |
| 15,436 | 65 | 5 | 989   | 8  | 36 | 1 | 570 | 7 | 1,660 | 21 |
| 15,437 | 65 | 5 | 995   | 7  | 36 | 1 | 574 | 7 | 1,670 | 20 |
| 15,438 | 63 | 5 | 995   | 6  | 36 | 1 | 575 | 7 | 1,669 | 19 |
| 15,439 | 63 | 5 | 995   | 6  | 36 | 1 | 575 | 7 | 1,669 | 19 |
| 15,440 | 62 | 5 | 995   | 6  | 36 | 1 | 575 | 7 | 1,668 | 19 |
| 15,441 | 68 | 5 | 1,099 | 6  | 37 | 1 | 616 | 7 | 1,820 | 19 |
| 15,442 | 67 | 5 | 1,101 | 6  | 37 | 1 | 616 | 7 | 1,821 | 19 |
| 15,443 | 68 | 5 | 1,121 | 6  | 37 | 1 | 632 | 7 | 1,858 | 19 |
| 15,444 | 69 | 5 | 1,143 | 6  | 38 | 1 | 656 | 8 | 1,906 | 20 |
| 15,445 | 69 | 5 | 1,146 | 7  | 38 | 1 | 664 | 8 | 1,917 | 21 |

|        |    |   |       |   |    |   |     |   |       |    |
|--------|----|---|-------|---|----|---|-----|---|-------|----|
| 15,446 | 70 | 5 | 1,151 | 7 | 38 | 1 | 663 | 8 | 1,922 | 21 |
| 15,447 | 70 | 5 | 1,150 | 7 | 38 | 1 | 662 | 8 | 1,920 | 21 |
| 15,448 | 70 | 5 | 1,152 | 7 | 38 | 1 | 662 | 8 | 1,922 | 21 |
| 15,449 | 70 | 5 | 1,144 | 6 | 38 | 1 | 658 | 7 | 1,910 | 19 |
| 15,450 | 71 | 5 | 1,144 | 6 | 38 | 1 | 659 | 7 | 1,912 | 19 |
| 15,451 | 70 | 5 | 1,131 | 6 | 37 | 1 | 634 | 7 | 1,872 | 19 |
| 15,452 | 69 | 3 | 1,127 | 6 | 37 | 1 | 631 | 7 | 1,864 | 17 |
| 15,453 | 69 | 3 | 1,133 | 5 | 38 | 0 | 641 | 7 | 1,881 | 15 |
| 15,454 | 71 | 2 | 1,134 | 5 | 38 | 0 | 643 | 7 | 1,886 | 14 |
| 15,455 | 71 | 2 | 1,132 | 5 | 37 | 0 | 644 | 7 | 1,884 | 14 |
| 15,456 | 71 | 2 | 1,139 | 5 | 37 | 0 | 657 | 7 | 1,904 | 14 |
| 15,457 | 69 | 3 | 1,039 | 5 | 35 | 0 | 590 | 8 | 1,733 | 16 |
| 15,458 | 57 | 3 | 954   | 6 | 33 | 0 | 540 | 9 | 1,584 | 18 |
| 15,459 | 56 | 3 | 942   | 6 | 33 | 0 | 544 | 9 | 1,575 | 18 |
| 15,460 | 53 | 3 | 896   | 6 | 29 | 0 | 527 | 9 | 1,505 | 18 |
| 15,461 | 51 | 3 | 853   | 5 | 27 | 0 | 520 | 9 | 1,451 | 17 |
| 15,462 | 35 | 3 | 495   | 5 | 17 | 0 | 334 | 9 | 881   | 17 |
| 15,463 | 35 | 2 | 457   | 5 | 17 | 0 | 311 | 8 | 820   | 15 |
| 15,464 | 35 | 2 | 453   | 5 | 17 | 0 | 309 | 8 | 814   | 15 |
| 15,465 | 35 | 2 | 445   | 5 | 17 | 0 | 303 | 8 | 800   | 15 |
| 15,466 | 36 | 2 | 449   | 5 | 17 | 0 | 305 | 8 | 807   | 15 |
| 15,467 | 36 | 3 | 449   | 5 | 17 | 0 | 304 | 8 | 806   | 16 |
| 15,468 | 36 | 3 | 454   | 5 | 17 | 0 | 306 | 7 | 813   | 15 |
| 15,469 | 36 | 3 | 458   | 5 | 17 | 0 | 307 | 8 | 818   | 16 |
| 15,470 | 36 | 3 | 460   | 5 | 17 | 0 | 308 | 8 | 821   | 16 |
| 15,471 | 36 | 2 | 459   | 5 | 17 | 0 | 307 | 8 | 819   | 15 |
| 15,472 | 36 | 2 | 470   | 5 | 17 | 0 | 307 | 8 | 830   | 15 |
| 15,473 | 36 | 2 | 468   | 4 | 17 | 0 | 307 | 8 | 828   | 14 |
| 15,474 | 39 | 2 | 512   | 3 | 17 | 0 | 314 | 8 | 882   | 13 |
| 15,475 | 37 | 2 | 499   | 3 | 16 | 0 | 308 | 8 | 860   | 13 |
| 15,476 | 37 | 2 | 481   | 2 | 16 | 0 | 296 | 7 | 830   | 11 |
| 15,477 | 36 | 2 | 476   | 3 | 16 | 0 | 294 | 7 | 822   | 12 |
| 15,478 | 34 | 2 | 428   | 3 | 15 | 0 | 283 | 7 | 760   | 12 |
| 15,479 | 30 | 2 | 418   | 3 | 14 | 0 | 277 | 7 | 739   | 12 |
| 15,480 | 30 | 2 | 415   | 3 | 14 | 0 | 277 | 7 | 736   | 12 |
| 15,481 | 23 | 2 | 376   | 3 | 9  | 0 | 217 | 6 | 625   | 11 |
| 15,482 | 23 | 2 | 367   | 3 | 8  | 0 | 205 | 5 | 603   | 10 |
| 15,483 | 23 | 2 | 357   | 3 | 7  | 0 | 198 | 5 | 585   | 10 |
| 15,484 | 23 | 2 | 365   | 3 | 7  | 0 | 198 | 5 | 593   | 10 |
| 15,485 | 23 | 2 | 364   | 3 | 7  | 0 | 198 | 5 | 592   | 10 |
| 15,486 | 23 | 2 | 359   | 3 | 7  | 0 | 193 | 5 | 582   | 10 |

|        |     |   |     |   |    |   |     |   |       |    |
|--------|-----|---|-----|---|----|---|-----|---|-------|----|
| 15,487 | 23  | 2 | 356 | 3 | 7  | 0 | 190 | 5 | 576   | 10 |
| 15,488 | 23  | 2 | 356 | 3 | 7  | 0 | 190 | 5 | 576   | 10 |
| 15,489 | 23  | 2 | 355 | 3 | 7  | 0 | 189 | 5 | 574   | 10 |
| 15,490 | 23  | 2 | 354 | 3 | 7  | 0 | 188 | 5 | 572   | 10 |
| 15,491 | 22  | 2 | 336 | 3 | 7  | 0 | 182 | 5 | 547   | 10 |
| 15,492 | 17  | 3 | 254 | 3 | 6  | 0 | 151 | 5 | 428   | 11 |
| 15,493 | 17  | 4 | 235 | 3 | 6  | 0 | 135 | 5 | 393   | 12 |
| 15,494 | 16  | 4 | 214 | 3 | 5  | 0 | 112 | 4 | 347   | 11 |
| 15,495 | 16  | 4 | 213 | 3 | 5  | 0 | 112 | 4 | 346   | 11 |
| 15,496 | 16  | 4 | 210 | 2 | 5  | 0 | 103 | 4 | 334   | 10 |
| 15,497 | 15  | 4 | 206 | 2 | 6  | 0 | 108 | 4 | 335   | 10 |
| 15,498 | 15  | 4 | 207 | 2 | 6  | 0 | 110 | 4 | 338   | 10 |
| 15,499 | 15  | 4 | 203 | 2 | 6  | 0 | 109 | 4 | 333   | 10 |
| 15,500 | 15  | 5 | 208 | 2 | 6  | 0 | 118 | 4 | 347   | 11 |
| 15,501 | 14  | 5 | 208 | 2 | 6  | 0 | 118 | 4 | 346   | 11 |
| 15,502 | 14  | 5 | 208 | 3 | 6  | 0 | 119 | 5 | 347   | 13 |
| 15,503 | 14  | 5 | 210 | 5 | 6  | 0 | 121 | 6 | 351   | 16 |
| 15,504 | 15  | 5 | 226 | 5 | 5  | 0 | 109 | 8 | 355   | 18 |
| 15,505 | 22  | 5 | 371 | 6 | 12 | 0 | 163 | 8 | 568   | 19 |
| 15,506 | 31  | 5 | 472 | 6 | 13 | 0 | 218 | 8 | 734   | 19 |
| 15,507 | 33  | 4 | 502 | 6 | 14 | 0 | 228 | 7 | 777   | 17 |
| 15,508 | 33  | 4 | 497 | 6 | 14 | 0 | 224 | 7 | 768   | 17 |
| 15,509 | 32  | 4 | 516 | 5 | 15 | 0 | 238 | 6 | 801   | 15 |
| 15,510 | 32  | 4 | 515 | 5 | 15 | 0 | 237 | 6 | 799   | 15 |
| 15,511 | 32  | 4 | 516 | 5 | 15 | 0 | 237 | 6 | 800   | 15 |
| 15,512 | 32  | 4 | 516 | 5 | 15 | 0 | 237 | 6 | 800   | 15 |
| 15,513 | 32  | 4 | 518 | 5 | 15 | 0 | 237 | 6 | 802   | 15 |
| 15,514 | 30  | 4 | 512 | 5 | 15 | 0 | 233 | 6 | 790   | 15 |
| 15,515 | 30  | 4 | 511 | 5 | 15 | 0 | 233 | 6 | 789   | 15 |
| 15,516 | 30  | 4 | 508 | 5 | 15 | 0 | 232 | 6 | 785   | 15 |
| 15,517 | 29  | 4 | 528 | 5 | 16 | 0 | 249 | 5 | 822   | 14 |
| 15,518 | 29  | 3 | 523 | 5 | 16 | 0 | 247 | 5 | 815   | 13 |
| 15,519 | 32  | 3 | 523 | 5 | 16 | 0 | 251 | 5 | 822   | 13 |
| 15,520 | 33  | 3 | 524 | 5 | 16 | 0 | 257 | 4 | 830   | 12 |
| 15,521 | 34  | 3 | 535 | 5 | 16 | 0 | 260 | 4 | 845   | 12 |
| 15,522 | 42  | 3 | 558 | 5 | 18 | 0 | 274 | 4 | 892   | 12 |
| 15,523 | 42  | 3 | 559 | 5 | 18 | 0 | 275 | 4 | 894   | 12 |
| 15,524 | 43  | 3 | 582 | 5 | 19 | 0 | 297 | 4 | 941   | 12 |
| 15,525 | 41  | 3 | 553 | 5 | 19 | 0 | 294 | 4 | 907   | 12 |
| 15,526 | 130 | 3 | 852 | 6 | 36 | 0 | 532 | 4 | 1,550 | 13 |
| 15,527 | 134 | 3 | 921 | 6 | 41 | 0 | 585 | 4 | 1,681 | 13 |

|        |     |   |       |   |    |   |     |   |       |    |
|--------|-----|---|-------|---|----|---|-----|---|-------|----|
| 15,528 | 163 | 3 | 1,049 | 5 | 53 | 0 | 749 | 4 | 2,014 | 12 |
| 15,529 | 166 | 3 | 1,062 | 5 | 53 | 0 | 750 | 4 | 2,031 | 12 |
| 15,530 | 169 | 3 | 1,115 | 5 | 57 | 0 | 791 | 4 | 2,132 | 12 |
| 15,531 | 170 | 4 | 1,192 | 6 | 59 | 0 | 813 | 4 | 2,234 | 14 |
| 15,532 | 173 | 4 | 1,212 | 6 | 64 | 0 | 849 | 4 | 2,298 | 14 |
| 15,533 | 174 | 4 | 1,217 | 6 | 64 | 0 | 855 | 4 | 2,310 | 14 |
| 15,534 | 174 | 5 | 1,214 | 6 | 64 | 0 | 858 | 4 | 2,310 | 15 |
| 15,535 | 174 | 5 | 1,202 | 6 | 64 | 0 | 854 | 4 | 2,294 | 15 |
| 15,536 | 174 | 5 | 1,201 | 6 | 64 | 0 | 854 | 4 | 2,293 | 15 |
| 15,537 | 174 | 5 | 1,199 | 6 | 64 | 0 | 854 | 4 | 2,291 | 15 |
| 15,538 | 174 | 5 | 1,206 | 6 | 65 | 0 | 854 | 4 | 2,299 | 15 |
| 15,539 | 174 | 5 | 1,206 | 6 | 65 | 0 | 854 | 4 | 2,299 | 15 |
| 15,540 | 174 | 5 | 1,206 | 6 | 65 | 0 | 854 | 4 | 2,299 | 15 |
| 15,541 | 174 | 5 | 1,206 | 6 | 65 | 0 | 855 | 4 | 2,300 | 15 |
| 15,542 | 174 | 5 | 1,204 | 6 | 65 | 0 | 855 | 4 | 2,298 | 15 |
| 15,543 | 174 | 4 | 1,211 | 6 | 65 | 0 | 857 | 4 | 2,307 | 14 |
| 15,544 | 175 | 3 | 1,221 | 6 | 65 | 0 | 861 | 4 | 2,322 | 13 |
| 15,545 | 175 | 3 | 1,221 | 6 | 65 | 0 | 861 | 4 | 2,322 | 13 |
| 15,546 | 177 | 3 | 1,259 | 6 | 67 | 0 | 879 | 4 | 2,382 | 13 |
| 15,547 | 177 | 3 | 1,281 | 7 | 69 | 0 | 890 | 4 | 2,417 | 14 |
| 15,548 | 177 | 3 | 1,303 | 7 | 68 | 0 | 889 | 4 | 2,437 | 14 |
| 15,549 | 177 | 3 | 1,303 | 8 | 69 | 0 | 889 | 4 | 2,438 | 15 |
| 15,550 | 177 | 3 | 1,294 | 8 | 69 | 0 | 879 | 4 | 2,419 | 15 |
| 15,551 | 179 | 2 | 1,310 | 8 | 69 | 0 | 885 | 4 | 2,443 | 14 |
| 15,552 | 179 | 2 | 1,313 | 8 | 70 | 0 | 885 | 4 | 2,447 | 14 |
| 15,553 | 183 | 4 | 1,324 | 8 | 72 | 0 | 891 | 4 | 2,470 | 16 |
| 15,554 | 185 | 4 | 1,354 | 8 | 72 | 0 | 894 | 3 | 2,505 | 15 |
| 15,555 | 192 | 4 | 1,498 | 8 | 77 | 0 | 958 | 1 | 2,725 | 13 |
| 15,556 | 191 | 4 | 1,398 | 7 | 72 | 0 | 922 | 1 | 2,583 | 12 |
| 15,557 | 186 | 4 | 1,346 | 7 | 76 | 0 | 879 | 1 | 2,487 | 12 |
| 15,558 | 184 | 4 | 1,307 | 7 | 76 | 0 | 856 | 1 | 2,423 | 12 |
| 15,559 | 185 | 4 | 1,304 | 7 | 76 | 0 | 841 | 1 | 2,406 | 12 |
| 15,560 | 185 | 4 | 1,337 | 9 | 80 | 0 | 842 | 1 | 2,444 | 14 |
| 15,561 | 185 | 4 | 1,336 | 9 | 80 | 0 | 842 | 1 | 2,443 | 14 |
| 15,562 | 185 | 4 | 1,347 | 9 | 80 | 0 | 844 | 1 | 2,456 | 14 |
| 15,563 | 185 | 4 | 1,347 | 9 | 80 | 0 | 844 | 1 | 2,456 | 14 |
| 15,564 | 185 | 4 | 1,345 | 9 | 80 | 0 | 844 | 1 | 2,454 | 14 |
| 15,565 | 185 | 4 | 1,344 | 9 | 80 | 0 | 840 | 1 | 2,449 | 14 |
| 15,566 | 185 | 4 | 1,341 | 9 | 80 | 0 | 839 | 1 | 2,445 | 14 |
| 15,567 | 185 | 4 | 1,338 | 9 | 79 | 0 | 834 | 1 | 2,436 | 14 |
| 15,568 | 185 | 4 | 1,323 | 9 | 79 | 0 | 825 | 1 | 2,412 | 14 |

|        |     |   |       |    |    |   |     |   |       |    |
|--------|-----|---|-------|----|----|---|-----|---|-------|----|
| 15,569 | 182 | 4 | 1,319 | 9  | 79 | 0 | 820 | 1 | 2,400 | 14 |
| 15,570 | 182 | 4 | 1,320 | 9  | 79 | 0 | 819 | 1 | 2,400 | 14 |
| 15,571 | 181 | 4 | 1,317 | 9  | 79 | 0 | 817 | 1 | 2,394 | 14 |
| 15,572 | 181 | 4 | 1,312 | 9  | 79 | 0 | 818 | 1 | 2,390 | 14 |
| 15,573 | 173 | 4 | 1,285 | 9  | 77 | 0 | 804 | 1 | 2,339 | 14 |
| 15,574 | 173 | 4 | 1,278 | 9  | 77 | 0 | 803 | 1 | 2,331 | 14 |
| 15,575 | 172 | 4 | 1,256 | 8  | 76 | 0 | 781 | 1 | 2,285 | 13 |
| 15,576 | 170 | 4 | 1,245 | 8  | 76 | 0 | 778 | 2 | 2,269 | 14 |
| 15,577 | 81  | 4 | 946   | 8  | 59 | 0 | 541 | 2 | 1,627 | 14 |
| 15,578 | 75  | 4 | 880   | 8  | 53 | 0 | 488 | 2 | 1,496 | 14 |
| 15,579 | 46  | 4 | 755   | 8  | 42 | 0 | 325 | 2 | 1,168 | 14 |
| 15,580 | 46  | 4 | 744   | 8  | 41 | 0 | 325 | 2 | 1,156 | 14 |
| 15,581 | 43  | 3 | 686   | 7  | 36 | 0 | 281 | 2 | 1,046 | 12 |
| 15,582 | 42  | 3 | 604   | 7  | 34 | 0 | 258 | 2 | 938   | 12 |
| 15,583 | 38  | 3 | 560   | 7  | 28 | 1 | 214 | 2 | 840   | 13 |
| 15,584 | 37  | 3 | 560   | 7  | 28 | 1 | 210 | 2 | 835   | 13 |
| 15,585 | 37  | 2 | 576   | 7  | 29 | 1 | 213 | 2 | 855   | 12 |
| 15,586 | 37  | 2 | 577   | 7  | 29 | 1 | 214 | 2 | 857   | 12 |
| 15,587 | 37  | 2 | 577   | 7  | 29 | 1 | 214 | 2 | 857   | 12 |
| 15,588 | 38  | 2 | 572   | 7  | 28 | 1 | 218 | 2 | 856   | 12 |
| 15,589 | 38  | 3 | 573   | 8  | 28 | 1 | 218 | 2 | 857   | 14 |
| 15,590 | 38  | 3 | 573   | 9  | 28 | 1 | 218 | 2 | 857   | 15 |
| 15,591 | 38  | 3 | 581   | 9  | 30 | 1 | 222 | 3 | 871   | 16 |
| 15,592 | 38  | 3 | 583   | 9  | 30 | 1 | 221 | 3 | 872   | 16 |
| 15,593 | 38  | 3 | 582   | 9  | 30 | 1 | 220 | 3 | 870   | 16 |
| 15,594 | 38  | 3 | 574   | 10 | 30 | 1 | 217 | 3 | 859   | 17 |
| 15,595 | 37  | 3 | 563   | 10 | 30 | 1 | 213 | 3 | 843   | 17 |
| 15,596 | 37  | 3 | 561   | 10 | 30 | 1 | 205 | 3 | 833   | 17 |
| 15,597 | 35  | 3 | 525   | 10 | 28 | 1 | 194 | 3 | 782   | 17 |
| 15,598 | 35  | 3 | 503   | 9  | 26 | 1 | 183 | 3 | 747   | 16 |
| 15,599 | 35  | 3 | 479   | 8  | 26 | 1 | 178 | 3 | 718   | 15 |
| 15,600 | 35  | 3 | 478   | 8  | 25 | 1 | 176 | 3 | 714   | 15 |
| 15,601 | 33  | 3 | 462   | 11 | 25 | 1 | 169 | 3 | 689   | 18 |
| 15,602 | 33  | 3 | 459   | 11 | 24 | 1 | 169 | 3 | 685   | 18 |
| 15,603 | 33  | 3 | 459   | 11 | 24 | 2 | 169 | 3 | 685   | 19 |
| 15,604 | 29  | 1 | 447   | 12 | 22 | 2 | 162 | 2 | 660   | 17 |
| 15,605 | 27  | 1 | 416   | 10 | 22 | 2 | 158 | 2 | 623   | 15 |
| 15,606 | 19  | 1 | 248   | 15 | 17 | 3 | 91  | 4 | 375   | 23 |
| 15,607 | 11  | 1 | 203   | 17 | 15 | 3 | 71  | 4 | 300   | 25 |
| 15,608 | 7   | 1 | 152   | 17 | 9  | 3 | 52  | 5 | 220   | 26 |
| 15,609 | 6   | 2 | 137   | 18 | 8  | 3 | 47  | 5 | 198   | 28 |

|        |   |   |     |    |   |   |     |   |     |    |
|--------|---|---|-----|----|---|---|-----|---|-----|----|
| 15,610 | 6 | 3 | 131 | 21 | 8 | 3 | 47  | 5 | 192 | 32 |
| 15,611 | 6 | 3 | 105 | 19 | 4 | 3 | 46  | 5 | 161 | 30 |
| 15,612 | 6 | 3 | 98  | 19 | 4 | 3 | 45  | 5 | 153 | 30 |
| 15,613 | 6 | 3 | 98  | 19 | 4 | 3 | 45  | 5 | 153 | 30 |
| 15,614 | 6 | 3 | 98  | 19 | 4 | 3 | 45  | 5 | 153 | 30 |
| 15,615 | 6 | 3 | 108 | 19 | 4 | 3 | 51  | 5 | 169 | 30 |
| 15,616 | 6 | 3 | 108 | 19 | 4 | 3 | 51  | 5 | 169 | 30 |
| 15,617 | 6 | 3 | 117 | 19 | 4 | 3 | 55  | 5 | 182 | 30 |
| 15,618 | 7 | 3 | 155 | 19 | 4 | 3 | 79  | 5 | 245 | 30 |
| 15,619 | 7 | 3 | 155 | 19 | 4 | 3 | 79  | 5 | 245 | 30 |
| 15,620 | 7 | 3 | 164 | 19 | 4 | 3 | 81  | 5 | 256 | 30 |
| 15,621 | 7 | 3 | 167 | 19 | 5 | 3 | 82  | 5 | 261 | 30 |
| 15,622 | 7 | 3 | 167 | 19 | 5 | 3 | 81  | 5 | 260 | 30 |
| 15,623 | 6 | 3 | 162 | 19 | 5 | 3 | 76  | 5 | 249 | 30 |
| 15,624 | 6 | 3 | 161 | 19 | 5 | 3 | 77  | 5 | 249 | 30 |
| 15,625 | 6 | 3 | 160 | 21 | 5 | 3 | 79  | 6 | 250 | 33 |
| 15,626 | 6 | 3 | 157 | 21 | 5 | 3 | 79  | 6 | 247 | 33 |
| 15,627 | 6 | 3 | 152 | 21 | 6 | 3 | 74  | 5 | 238 | 32 |
| 15,628 | 6 | 3 | 151 | 21 | 6 | 3 | 74  | 5 | 237 | 32 |
| 15,629 | 5 | 3 | 148 | 21 | 6 | 3 | 73  | 5 | 232 | 32 |
| 15,630 | 5 | 3 | 136 | 23 | 5 | 3 | 69  | 6 | 215 | 35 |
| 15,631 | 2 | 3 | 130 | 24 | 5 | 3 | 66  | 6 | 203 | 36 |
| 15,632 | 2 | 3 | 138 | 24 | 5 | 3 | 66  | 6 | 211 | 36 |
| 15,633 | 2 | 3 | 140 | 30 | 5 | 3 | 70  | 8 | 217 | 44 |
| 15,634 | 2 | 3 | 134 | 30 | 5 | 2 | 72  | 8 | 213 | 43 |
| 15,635 | 4 | 3 | 135 | 30 | 5 | 2 | 91  | 8 | 235 | 43 |
| 15,636 | 4 | 3 | 131 | 30 | 4 | 2 | 90  | 8 | 229 | 43 |
| 15,637 | 5 | 3 | 150 | 30 | 6 | 2 | 104 | 8 | 265 | 43 |
| 15,638 | 4 | 3 | 150 | 30 | 6 | 2 | 103 | 8 | 263 | 43 |
| 15,639 | 4 | 3 | 148 | 32 | 6 | 2 | 101 | 8 | 259 | 45 |
| 15,640 | 4 | 2 | 149 | 31 | 6 | 2 | 103 | 8 | 262 | 43 |
| 15,641 | 4 | 2 | 149 | 30 | 5 | 2 | 103 | 8 | 261 | 42 |
| 15,642 | 4 | 2 | 141 | 30 | 4 | 2 | 99  | 7 | 248 | 41 |
| 15,643 | 4 | 2 | 140 | 30 | 4 | 2 | 99  | 7 | 247 | 41 |
| 15,644 | 4 | 2 | 140 | 29 | 4 | 2 | 99  | 7 | 247 | 40 |
| 15,645 | 4 | 2 | 140 | 29 | 4 | 2 | 99  | 7 | 247 | 40 |
| 15,646 | 4 | 2 | 139 | 29 | 4 | 2 | 99  | 7 | 246 | 40 |
| 15,647 | 4 | 2 | 139 | 29 | 4 | 2 | 99  | 7 | 246 | 40 |
| 15,648 | 4 | 2 | 141 | 29 | 4 | 2 | 102 | 7 | 251 | 40 |
| 15,649 | 4 | 2 | 141 | 29 | 4 | 2 | 102 | 7 | 251 | 40 |
| 15,650 | 4 | 2 | 141 | 29 | 4 | 2 | 102 | 7 | 251 | 40 |

|        |    |   |     |    |   |   |     |    |     |    |
|--------|----|---|-----|----|---|---|-----|----|-----|----|
| 15,651 | 4  | 2 | 143 | 29 | 4 | 2 | 104 | 7  | 255 | 40 |
| 15,652 | 5  | 2 | 143 | 26 | 4 | 2 | 104 | 7  | 256 | 37 |
| 15,653 | 5  | 2 | 143 | 26 | 4 | 2 | 104 | 8  | 256 | 38 |
| 15,654 | 6  | 2 | 145 | 26 | 4 | 1 | 107 | 8  | 262 | 37 |
| 15,655 | 6  | 2 | 145 | 24 | 4 | 1 | 106 | 8  | 261 | 35 |
| 15,656 | 6  | 2 | 144 | 24 | 4 | 1 | 107 | 8  | 261 | 35 |
| 15,657 | 6  | 2 | 170 | 19 | 5 | 0 | 115 | 6  | 296 | 27 |
| 15,658 | 6  | 2 | 167 | 18 | 5 | 0 | 115 | 8  | 293 | 28 |
| 15,659 | 6  | 2 | 167 | 18 | 5 | 0 | 115 | 7  | 293 | 27 |
| 15,660 | 6  | 1 | 174 | 17 | 5 | 0 | 120 | 7  | 305 | 25 |
| 15,661 | 6  | 0 | 171 | 14 | 5 | 0 | 120 | 7  | 302 | 21 |
| 15,662 | 6  | 0 | 168 | 14 | 5 | 0 | 119 | 7  | 298 | 21 |
| 15,663 | 6  | 0 | 168 | 15 | 5 | 0 | 119 | 11 | 298 | 26 |
| 15,664 | 6  | 0 | 168 | 16 | 5 | 2 | 119 | 12 | 298 | 30 |
| 15,665 | 8  | 0 | 167 | 16 | 5 | 2 | 121 | 12 | 301 | 30 |
| 15,666 | 9  | 0 | 168 | 16 | 5 | 2 | 123 | 14 | 305 | 32 |
| 15,667 | 9  | 0 | 163 | 16 | 7 | 2 | 120 | 14 | 299 | 32 |
| 15,668 | 12 | 0 | 172 | 18 | 8 | 2 | 149 | 14 | 341 | 34 |
| 15,669 | 11 | 0 | 151 | 19 | 8 | 2 | 131 | 14 | 301 | 35 |
| 15,670 | 11 | 0 | 151 | 19 | 8 | 2 | 136 | 14 | 306 | 35 |
| 15,671 | 11 | 1 | 149 | 23 | 7 | 2 | 135 | 23 | 302 | 49 |
| 15,672 | 11 | 1 | 147 | 23 | 7 | 2 | 134 | 23 | 299 | 49 |
| 15,673 | 11 | 1 | 148 | 23 | 7 | 2 | 138 | 23 | 304 | 49 |
| 15,674 | 11 | 1 | 149 | 23 | 7 | 2 | 148 | 23 | 315 | 49 |
| 15,675 | 11 | 1 | 160 | 23 | 7 | 2 | 149 | 23 | 327 | 49 |
| 15,676 | 11 | 1 | 160 | 21 | 7 | 2 | 147 | 22 | 325 | 46 |
| 15,677 | 11 | 1 | 161 | 21 | 7 | 2 | 148 | 22 | 327 | 46 |
| 15,678 | 11 | 1 | 160 | 21 | 6 | 2 | 148 | 22 | 325 | 46 |
| 15,679 | 11 | 1 | 160 | 21 | 6 | 2 | 146 | 22 | 323 | 46 |
| 15,680 | 11 | 1 | 160 | 19 | 6 | 2 | 146 | 21 | 323 | 43 |
| 15,681 | 11 | 1 | 160 | 19 | 6 | 2 | 146 | 21 | 323 | 43 |
| 15,682 | 11 | 1 | 152 | 19 | 6 | 2 | 146 | 21 | 315 | 43 |
| 15,683 | 12 | 1 | 151 | 19 | 6 | 2 | 144 | 21 | 313 | 43 |
| 15,684 | 12 | 1 | 149 | 13 | 6 | 2 | 142 | 19 | 309 | 35 |
| 15,685 | 12 | 1 | 150 | 13 | 6 | 2 | 140 | 19 | 308 | 35 |
| 15,686 | 10 | 1 | 137 | 13 | 6 | 2 | 115 | 19 | 268 | 35 |
| 15,687 | 9  | 1 | 123 | 13 | 4 | 2 | 102 | 19 | 238 | 35 |
| 15,688 | 9  | 1 | 123 | 14 | 4 | 2 | 101 | 19 | 237 | 36 |
| 15,689 | 10 | 1 | 125 | 14 | 4 | 2 | 99  | 19 | 238 | 36 |
| 15,690 | 10 | 1 | 125 | 12 | 4 | 2 | 97  | 19 | 236 | 34 |
| 15,691 | 11 | 1 | 123 | 12 | 4 | 2 | 98  | 19 | 236 | 34 |

|        |    |   |     |    |    |   |     |    |       |    |
|--------|----|---|-----|----|----|---|-----|----|-------|----|
| 15,692 | 19 | 1 | 195 | 12 | 6  | 2 | 125 | 19 | 345   | 34 |
| 15,693 | 40 | 1 | 395 | 12 | 20 | 2 | 222 | 19 | 677   | 34 |
| 15,694 | 40 | 1 | 401 | 12 | 25 | 2 | 228 | 19 | 694   | 34 |
| 15,695 | 40 | 1 | 401 | 12 | 25 | 2 | 228 | 19 | 694   | 34 |
| 15,696 | 43 | 1 | 438 | 12 | 27 | 2 | 258 | 19 | 766   | 34 |
| 15,697 | 44 | 1 | 451 | 12 | 28 | 2 | 269 | 19 | 792   | 34 |
| 15,698 | 44 | 1 | 460 | 12 | 28 | 2 | 271 | 19 | 803   | 34 |
| 15,699 | 44 | 1 | 469 | 12 | 28 | 2 | 277 | 19 | 818   | 34 |
| 15,700 | 44 | 1 | 468 | 12 | 28 | 2 | 277 | 19 | 817   | 34 |
| 15,701 | 44 | 1 | 467 | 12 | 28 | 2 | 276 | 19 | 815   | 34 |
| 15,702 | 43 | 1 | 469 | 12 | 28 | 2 | 278 | 20 | 818   | 35 |
| 15,703 | 43 | 1 | 470 | 14 | 28 | 3 | 281 | 20 | 822   | 38 |
| 15,704 | 43 | 1 | 478 | 15 | 28 | 3 | 284 | 20 | 833   | 39 |
| 15,705 | 44 | 1 | 493 | 15 | 28 | 4 | 288 | 20 | 853   | 40 |
| 15,706 | 44 | 2 | 508 | 15 | 29 | 4 | 296 | 21 | 877   | 42 |
| 15,707 | 47 | 2 | 502 | 15 | 29 | 4 | 300 | 21 | 878   | 42 |
| 15,708 | 47 | 3 | 495 | 14 | 28 | 4 | 299 | 19 | 869   | 40 |
| 15,709 | 51 | 3 | 527 | 14 | 28 | 4 | 323 | 19 | 929   | 40 |
| 15,710 | 52 | 3 | 533 | 14 | 29 | 4 | 323 | 19 | 937   | 40 |
| 15,711 | 52 | 3 | 533 | 14 | 29 | 4 | 323 | 19 | 937   | 40 |
| 15,712 | 52 | 3 | 573 | 15 | 29 | 4 | 341 | 19 | 995   | 41 |
| 15,713 | 52 | 3 | 572 | 15 | 29 | 4 | 341 | 19 | 994   | 41 |
| 15,714 | 52 | 3 | 577 | 14 | 29 | 4 | 341 | 15 | 999   | 36 |
| 15,715 | 50 | 3 | 585 | 14 | 29 | 2 | 344 | 14 | 1,008 | 33 |
| 15,716 | 53 | 3 | 606 | 14 | 30 | 2 | 354 | 14 | 1,043 | 33 |
| 15,717 | 52 | 3 | 619 | 12 | 30 | 2 | 355 | 12 | 1,056 | 29 |
| 15,718 | 52 | 3 | 616 | 12 | 28 | 2 | 354 | 12 | 1,050 | 29 |
| 15,719 | 49 | 3 | 590 | 12 | 27 | 2 | 319 | 12 | 985   | 29 |
| 15,720 | 49 | 3 | 590 | 12 | 27 | 2 | 318 | 12 | 984   | 29 |
| 15,721 | 49 | 3 | 583 | 12 | 27 | 2 | 316 | 12 | 975   | 29 |
| 15,722 | 49 | 2 | 583 | 9  | 27 | 2 | 316 | 3  | 975   | 16 |
| 15,723 | 48 | 4 | 582 | 10 | 27 | 2 | 315 | 3  | 972   | 19 |
| 15,724 | 48 | 4 | 581 | 10 | 27 | 2 | 311 | 4  | 967   | 20 |
| 15,725 | 49 | 4 | 581 | 10 | 27 | 2 | 302 | 4  | 959   | 20 |
| 15,726 | 49 | 4 | 569 | 11 | 27 | 2 | 300 | 4  | 945   | 21 |
| 15,727 | 51 | 4 | 574 | 11 | 27 | 2 | 307 | 4  | 959   | 21 |
| 15,728 | 51 | 4 | 574 | 11 | 27 | 2 | 308 | 4  | 960   | 21 |
| 15,729 | 51 | 4 | 574 | 11 | 27 | 2 | 308 | 4  | 960   | 21 |
| 15,730 | 52 | 4 | 581 | 11 | 27 | 2 | 309 | 4  | 969   | 21 |
| 15,731 | 52 | 4 | 581 | 12 | 27 | 2 | 309 | 4  | 969   | 22 |
| 15,732 | 52 | 4 | 581 | 12 | 27 | 2 | 309 | 4  | 969   | 22 |



|        |     |    |       |    |    |   |     |    |       |    |
|--------|-----|----|-------|----|----|---|-----|----|-------|----|
| 15,733 | 52  | 4  | 583   | 11 | 27 | 2 | 310 | 4  | 972   | 21 |
| 15,734 | 51  | 4  | 587   | 11 | 27 | 2 | 310 | 4  | 975   | 21 |
| 15,735 | 53  | 4  | 609   | 11 | 27 | 2 | 313 | 4  | 1,002 | 21 |
| 15,736 | 57  | 4  | 618   | 11 | 27 | 2 | 315 | 4  | 1,017 | 21 |
| 15,737 | 57  | 4  | 618   | 11 | 27 | 2 | 315 | 4  | 1,017 | 21 |
| 15,738 | 57  | 4  | 630   | 17 | 28 | 3 | 317 | 4  | 1,032 | 28 |
| 15,739 | 56  | 4  | 628   | 16 | 28 | 3 | 317 | 4  | 1,029 | 27 |
| 15,740 | 58  | 4  | 653   | 18 | 28 | 3 | 318 | 4  | 1,057 | 29 |
| 15,741 | 68  | 4  | 728   | 19 | 31 | 3 | 338 | 6  | 1,165 | 32 |
| 15,742 | 77  | 4  | 780   | 24 | 38 | 4 | 375 | 9  | 1,270 | 41 |
| 15,743 | 115 | 4  | 1,111 | 24 | 58 | 4 | 463 | 11 | 1,747 | 43 |
| 15,744 | 96  | 4  | 944   | 25 | 50 | 4 | 385 | 13 | 1,475 | 46 |
| 15,745 | 107 | 5  | 1,260 | 25 | 51 | 4 | 458 | 13 | 1,876 | 47 |
| 15,746 | 124 | 5  | 1,526 | 25 | 75 | 4 | 648 | 13 | 2,373 | 47 |
| 15,747 | 124 | 5  | 1,574 | 25 | 75 | 4 | 638 | 13 | 2,411 | 47 |
| 15,748 | 125 | 5  | 1,582 | 25 | 75 | 4 | 656 | 13 | 2,438 | 47 |
| 15,749 | 125 | 6  | 1,583 | 31 | 76 | 4 | 664 | 23 | 2,448 | 64 |
| 15,750 | 125 | 6  | 1,573 | 31 | 76 | 4 | 658 | 23 | 2,432 | 64 |
| 15,751 | 127 | 6  | 1,580 | 33 | 78 | 4 | 659 | 26 | 2,444 | 69 |
| 15,752 | 126 | 6  | 1,580 | 33 | 79 | 4 | 660 | 29 | 2,445 | 72 |
| 15,753 | 126 | 6  | 1,578 | 33 | 79 | 4 | 658 | 28 | 2,441 | 71 |
| 15,754 | 127 | 10 | 1,580 | 31 | 79 | 3 | 659 | 29 | 2,445 | 73 |
| 15,755 | 127 | 10 | 1,572 | 30 | 79 | 3 | 656 | 28 | 2,434 | 71 |
| 15,756 | 126 | 10 | 1,568 | 30 | 79 | 2 | 651 | 28 | 2,424 | 70 |
| 15,757 | 126 | 9  | 1,560 | 30 | 78 | 2 | 645 | 27 | 2,409 | 68 |
| 15,758 | 123 | 8  | 1,549 | 30 | 78 | 2 | 636 | 27 | 2,386 | 67 |
| 15,759 | 123 | 8  | 1,548 | 30 | 78 | 2 | 637 | 27 | 2,386 | 67 |
| 15,760 | 119 | 8  | 1,514 | 30 | 78 | 2 | 615 | 27 | 2,326 | 67 |
| 15,761 | 118 | 8  | 1,503 | 30 | 77 | 2 | 611 | 27 | 2,309 | 67 |
| 15,762 | 118 | 8  | 1,479 | 30 | 77 | 2 | 603 | 27 | 2,277 | 67 |
| 15,763 | 118 | 8  | 1,471 | 29 | 77 | 2 | 597 | 27 | 2,263 | 66 |
| 15,764 | 118 | 8  | 1,468 | 29 | 77 | 2 | 597 | 27 | 2,260 | 66 |
| 15,765 | 118 | 8  | 1,461 | 29 | 77 | 2 | 593 | 28 | 2,249 | 67 |
| 15,766 | 115 | 8  | 1,443 | 28 | 76 | 2 | 593 | 28 | 2,227 | 66 |
| 15,767 | 118 | 8  | 1,447 | 27 | 76 | 2 | 599 | 28 | 2,240 | 65 |
| 15,768 | 119 | 8  | 1,461 | 27 | 77 | 2 | 608 | 28 | 2,265 | 65 |
| 15,769 | 119 | 8  | 1,464 | 27 | 78 | 2 | 613 | 28 | 2,274 | 65 |
| 15,770 | 119 | 8  | 1,463 | 27 | 78 | 2 | 613 | 28 | 2,273 | 65 |
| 15,771 | 119 | 8  | 1,462 | 28 | 78 | 2 | 608 | 28 | 2,267 | 66 |
| 15,772 | 119 | 8  | 1,462 | 28 | 78 | 2 | 610 | 28 | 2,269 | 66 |
| 15,773 | 119 | 8  | 1,462 | 27 | 78 | 2 | 610 | 28 | 2,269 | 65 |

|        |     |   |       |    |    |   |       |    |       |    |
|--------|-----|---|-------|----|----|---|-------|----|-------|----|
| 15,774 | 121 | 6 | 1,480 | 26 | 78 | 2 | 618   | 27 | 2,297 | 61 |
| 15,775 | 121 | 6 | 1,479 | 26 | 78 | 2 | 618   | 27 | 2,296 | 61 |
| 15,776 | 123 | 6 | 1,527 | 26 | 79 | 2 | 644   | 27 | 2,373 | 61 |
| 15,777 | 121 | 6 | 1,526 | 25 | 79 | 2 | 639   | 27 | 2,365 | 60 |
| 15,778 | 121 | 6 | 1,526 | 25 | 79 | 2 | 639   | 27 | 2,365 | 60 |
| 15,779 | 121 | 6 | 1,528 | 25 | 79 | 2 | 646   | 27 | 2,374 | 60 |
| 15,780 | 121 | 6 | 1,527 | 25 | 79 | 2 | 646   | 27 | 2,373 | 60 |
| 15,781 | 121 | 6 | 1,521 | 25 | 79 | 2 | 645   | 27 | 2,366 | 60 |
| 15,782 | 121 | 6 | 1,543 | 24 | 79 | 2 | 655   | 27 | 2,398 | 59 |
| 15,783 | 120 | 6 | 1,543 | 24 | 79 | 2 | 655   | 27 | 2,397 | 59 |
| 15,784 | 120 | 6 | 1,540 | 24 | 79 | 2 | 654   | 27 | 2,393 | 59 |
| 15,785 | 120 | 6 | 1,544 | 24 | 80 | 2 | 661   | 27 | 2,405 | 59 |
| 15,786 | 119 | 6 | 1,528 | 24 | 80 | 2 | 660   | 27 | 2,387 | 59 |
| 15,787 | 115 | 6 | 1,522 | 24 | 80 | 2 | 665   | 27 | 2,382 | 59 |
| 15,788 | 115 | 6 | 1,517 | 18 | 79 | 2 | 667   | 27 | 2,378 | 53 |
| 15,789 | 115 | 6 | 1,505 | 17 | 79 | 1 | 665   | 25 | 2,364 | 49 |
| 15,790 | 113 | 6 | 1,480 | 18 | 79 | 1 | 664   | 25 | 2,336 | 50 |
| 15,791 | 102 | 6 | 1,415 | 20 | 76 | 3 | 643   | 27 | 2,236 | 56 |
| 15,792 | 102 | 7 | 1,406 | 30 | 76 | 4 | 644   | 31 | 2,228 | 72 |
| 15,793 | 89  | 7 | 1,327 | 27 | 69 | 3 | 598   | 31 | 2,083 | 68 |
| 15,794 | 48  | 7 | 952   | 28 | 47 | 3 | 487   | 30 | 1,534 | 68 |
| 15,795 | 45  | 7 | 922   | 29 | 41 | 3 | 469   | 32 | 1,477 | 71 |
| 15,796 | 34  | 6 | 598   | 29 | 34 | 3 | 392   | 32 | 1,058 | 70 |
| 15,797 | 14  | 6 | 294   | 30 | 7  | 3 | 165   | 32 | 480   | 71 |
| 15,798 | 13  | 6 | 232   | 30 | 6  | 3 | 162   | 32 | 413   | 71 |
| 15,799 | 12  | 6 | 217   | 30 | 6  | 3 | 140   | 32 | 375   | 71 |
| 15,800 | 12  | 5 | 217   | 24 | 6  | 3 | 139   | 22 | 374   | 54 |
| 15,801 | 12  | 5 | 217   | 24 | 6  | 3 | 139   | 22 | 374   | 54 |
| 15,802 | 10  | 5 | 210   | 22 | 4  | 3 | 138   | 19 | 362   | 49 |
| 15,803 | 10  | 5 | 210   | 22 | 4  | 3 | 138   | 16 | 362   | 46 |
| 15,804 | 9   | 1 | 203   | 22 | 4  | 3 | 139   | 15 | 355   | 41 |
| 15,805 | 9   | 1 | 204   | 22 | 4  | 3 | 139   | 15 | 356   | 41 |
| 15,806 | 9   | 1 | 202   | 22 | 4  | 3 | 139   | 15 | 354   | 41 |
| 15,807 | 20  | 1 | 241   | 22 | 6  | 3 | 176   | 15 | 443   | 41 |
| 15,808 | 30  | 1 | 267   | 22 | 8  | 3 | 221   | 15 | 526   | 41 |
| 15,809 | 30  | 1 | 268   | 22 | 8  | 3 | 227   | 15 | 533   | 41 |
| 15,810 | 53  | 1 | 374   | 22 | 13 | 3 | 453   | 15 | 893   | 41 |
| 15,811 | 67  | 1 | 487   | 22 | 23 | 3 | 641   | 15 | 1,218 | 41 |
| 15,812 | 67  | 1 | 486   | 22 | 23 | 3 | 641   | 15 | 1,217 | 41 |
| 15,813 | 67  | 1 | 481   | 22 | 23 | 3 | 638   | 15 | 1,209 | 41 |
| 15,814 | 100 | 1 | 664   | 22 | 54 | 3 | 1,184 | 15 | 2,002 | 41 |

|        |     |   |     |    |    |   |       |    |       |    |
|--------|-----|---|-----|----|----|---|-------|----|-------|----|
| 15,815 | 100 | 1 | 674 | 22 | 54 | 3 | 1,195 | 15 | 2,023 | 41 |
| 15,816 | 104 | 1 | 680 | 22 | 54 | 3 | 1,211 | 14 | 2,049 | 40 |
| 15,817 | 104 | 1 | 676 | 22 | 54 | 3 | 1,201 | 14 | 2,035 | 40 |
| 15,818 | 102 | 1 | 681 | 22 | 54 | 3 | 1,210 | 14 | 2,047 | 40 |
| 15,819 | 102 | 1 | 667 | 22 | 53 | 3 | 1,203 | 14 | 2,025 | 40 |
| 15,820 | 109 | 1 | 737 | 24 | 60 | 3 | 1,323 | 14 | 2,229 | 42 |
| 15,821 | 109 | 1 | 737 | 24 | 60 | 3 | 1,324 | 14 | 2,230 | 42 |
| 15,822 | 111 | 1 | 774 | 23 | 62 | 3 | 1,365 | 14 | 2,312 | 41 |
| 15,823 | 116 | 1 | 897 | 23 | 72 | 3 | 1,524 | 14 | 2,609 | 41 |
| 15,824 | 115 | 1 | 896 | 23 | 72 | 3 | 1,525 | 14 | 2,608 | 41 |
| 15,825 | 114 | 1 | 881 | 23 | 72 | 3 | 1,518 | 14 | 2,585 | 41 |
| 15,826 | 115 | 1 | 892 | 24 | 73 | 3 | 1,530 | 14 | 2,610 | 42 |
| 15,827 | 115 | 1 | 855 | 24 | 72 | 3 | 1,518 | 14 | 2,560 | 42 |
| 15,828 | 115 | 1 | 850 | 24 | 72 | 3 | 1,515 | 14 | 2,552 | 42 |
| 15,829 | 117 | 1 | 858 | 24 | 75 | 3 | 1,521 | 14 | 2,571 | 42 |
| 15,830 | 117 | 1 | 862 | 24 | 75 | 3 | 1,521 | 14 | 2,575 | 42 |
| 15,831 | 119 | 1 | 862 | 24 | 75 | 3 | 1,528 | 14 | 2,584 | 42 |
| 15,832 | 119 | 1 | 849 | 24 | 75 | 3 | 1,523 | 14 | 2,566 | 42 |
| 15,833 | 121 | 1 | 857 | 24 | 75 | 3 | 1,535 | 14 | 2,588 | 42 |
| 15,834 | 121 | 1 | 857 | 24 | 75 | 3 | 1,535 | 14 | 2,588 | 42 |
| 15,835 | 121 | 1 | 858 | 24 | 76 | 3 | 1,542 | 14 | 2,597 | 42 |
| 15,836 | 121 | 1 | 857 | 24 | 76 | 3 | 1,538 | 14 | 2,592 | 42 |
| 15,837 | 121 | 1 | 858 | 24 | 76 | 3 | 1,540 | 14 | 2,595 | 42 |
| 15,838 | 123 | 1 | 869 | 24 | 76 | 3 | 1,537 | 14 | 2,605 | 42 |
| 15,839 | 122 | 1 | 868 | 24 | 76 | 3 | 1,534 | 14 | 2,600 | 42 |
| 15,840 | 123 | 1 | 868 | 22 | 76 | 3 | 1,535 | 14 | 2,602 | 40 |
| 15,841 | 123 | 1 | 869 | 21 | 76 | 3 | 1,536 | 14 | 2,604 | 39 |
| 15,842 | 123 | 1 | 871 | 19 | 76 | 1 | 1,537 | 12 | 2,607 | 33 |
| 15,843 | 123 | 0 | 870 | 7  | 76 | 0 | 1,537 | 5  | 2,606 | 12 |
| 15,844 | 123 | 0 | 869 | 7  | 76 | 0 | 1,537 | 5  | 2,605 | 12 |
| 15,845 | 123 | 0 | 867 | 6  | 78 | 0 | 1,534 | 3  | 2,602 | 9  |
| 15,846 | 123 | 0 | 868 | 4  | 78 | 0 | 1,534 | 0  | 2,603 | 4  |
| 15,847 | 123 | 0 | 871 | 3  | 78 | 0 | 1,536 | 0  | 2,608 | 3  |
| 15,848 | 123 | 0 | 871 | 3  | 79 | 0 | 1,536 | 0  | 2,609 | 3  |
| 15,849 | 123 | 0 | 871 | 3  | 79 | 0 | 1,536 | 0  | 2,609 | 3  |
| 15,850 | 123 | 0 | 871 | 3  | 79 | 0 | 1,536 | 0  | 2,609 | 3  |
| 15,851 | 124 | 0 | 869 | 3  | 79 | 0 | 1,538 | 0  | 2,610 | 3  |
| 15,852 | 124 | 0 | 873 | 3  | 79 | 0 | 1,538 | 0  | 2,614 | 3  |
| 15,853 | 124 | 0 | 882 | 3  | 80 | 0 | 1,546 | 0  | 2,632 | 3  |
| 15,854 | 124 | 0 | 882 | 3  | 80 | 0 | 1,548 | 0  | 2,634 | 3  |
| 15,855 | 126 | 0 | 885 | 3  | 80 | 0 | 1,548 | 1  | 2,639 | 4  |

|        |     |   |       |   |     |   |       |   |       |    |
|--------|-----|---|-------|---|-----|---|-------|---|-------|----|
| 15,856 | 126 | 0 | 881   | 3 | 80  | 0 | 1,547 | 1 | 2,634 | 4  |
| 15,857 | 115 | 1 | 841   | 3 | 78  | 1 | 1,507 | 1 | 2,541 | 6  |
| 15,858 | 115 | 1 | 839   | 3 | 78  | 1 | 1,511 | 1 | 2,543 | 6  |
| 15,859 | 105 | 2 | 822   | 3 | 78  | 1 | 1,478 | 1 | 2,483 | 7  |
| 15,860 | 107 | 2 | 823   | 3 | 78  | 1 | 1,483 | 1 | 2,491 | 7  |
| 15,861 | 87  | 2 | 735   | 3 | 73  | 1 | 1,269 | 1 | 2,164 | 7  |
| 15,862 | 117 | 2 | 804   | 3 | 85  | 1 | 1,404 | 1 | 2,410 | 7  |
| 15,863 | 113 | 2 | 770   | 3 | 79  | 1 | 1,305 | 1 | 2,267 | 7  |
| 15,864 | 87  | 2 | 627   | 3 | 56  | 1 | 877   | 1 | 1,647 | 7  |
| 15,865 | 88  | 2 | 622   | 3 | 57  | 1 | 872   | 1 | 1,639 | 7  |
| 15,866 | 85  | 2 | 613   | 3 | 57  | 1 | 856   | 1 | 1,611 | 7  |
| 15,867 | 85  | 2 | 617   | 3 | 57  | 1 | 860   | 1 | 1,619 | 7  |
| 15,868 | 87  | 2 | 634   | 3 | 58  | 1 | 866   | 1 | 1,645 | 7  |
| 15,869 | 86  | 2 | 619   | 1 | 58  | 1 | 850   | 1 | 1,613 | 5  |
| 15,870 | 85  | 2 | 619   | 2 | 58  | 1 | 846   | 1 | 1,608 | 6  |
| 15,871 | 78  | 2 | 553   | 2 | 50  | 1 | 722   | 1 | 1,403 | 6  |
| 15,872 | 79  | 2 | 521   | 2 | 48  | 1 | 684   | 1 | 1,332 | 6  |
| 15,873 | 81  | 2 | 463   | 2 | 45  | 1 | 568   | 1 | 1,157 | 6  |
| 15,874 | 81  | 2 | 452   | 2 | 42  | 1 | 539   | 1 | 1,114 | 6  |
| 15,875 | 90  | 2 | 531   | 2 | 44  | 1 | 560   | 1 | 1,225 | 6  |
| 15,876 | 107 | 2 | 666   | 1 | 52  | 1 | 623   | 1 | 1,448 | 5  |
| 15,877 | 107 | 2 | 732   | 1 | 52  | 1 | 629   | 1 | 1,520 | 5  |
| 15,878 | 105 | 2 | 720   | 1 | 52  | 1 | 620   | 1 | 1,497 | 5  |
| 15,879 | 105 | 2 | 720   | 1 | 52  | 1 | 617   | 1 | 1,494 | 5  |
| 15,880 | 144 | 2 | 1,322 | 1 | 103 | 1 | 1,062 | 1 | 2,631 | 5  |
| 15,881 | 144 | 2 | 1,318 | 1 | 103 | 1 | 1,065 | 1 | 2,630 | 5  |
| 15,882 | 191 | 2 | 1,753 | 1 | 146 | 1 | 1,254 | 1 | 3,344 | 5  |
| 15,883 | 344 | 2 | 2,284 | 1 | 221 | 1 | 1,819 | 1 | 4,668 | 5  |
| 15,884 | 359 | 2 | 2,456 | 1 | 232 | 1 | 1,878 | 1 | 4,925 | 5  |
| 15,885 | 436 | 2 | 2,968 | 1 | 315 | 1 | 2,368 | 1 | 6,087 | 5  |
| 15,886 | 468 | 2 | 3,354 | 1 | 340 | 1 | 2,534 | 1 | 6,696 | 5  |
| 15,887 | 468 | 2 | 3,351 | 2 | 340 | 1 | 2,531 | 1 | 6,690 | 6  |
| 15,888 | 484 | 2 | 3,475 | 2 | 347 | 1 | 2,623 | 1 | 6,929 | 6  |
| 15,889 | 482 | 2 | 3,463 | 2 | 347 | 1 | 2,619 | 1 | 6,911 | 6  |
| 15,890 | 484 | 2 | 3,471 | 2 | 348 | 1 | 2,623 | 1 | 6,926 | 6  |
| 15,891 | 484 | 3 | 3,470 | 5 | 348 | 1 | 2,622 | 1 | 6,924 | 10 |
| 15,892 | 484 | 3 | 3,470 | 5 | 348 | 1 | 2,622 | 1 | 6,924 | 10 |
| 15,893 | 490 | 3 | 3,546 | 5 | 351 | 1 | 2,653 | 1 | 7,040 | 10 |
| 15,894 | 495 | 3 | 3,595 | 5 | 353 | 1 | 2,684 | 1 | 7,127 | 10 |
| 15,895 | 499 | 3 | 3,639 | 5 | 353 | 1 | 2,694 | 1 | 7,185 | 10 |
| 15,896 | 500 | 3 | 3,648 | 5 | 351 | 1 | 2,706 | 2 | 7,205 | 11 |

|        |     |   |       |    |     |   |       |   |       |    |
|--------|-----|---|-------|----|-----|---|-------|---|-------|----|
| 15,897 | 500 | 3 | 3,646 | 5  | 351 | 1 | 2,705 | 2 | 7,202 | 11 |
| 15,898 | 500 | 3 | 3,661 | 5  | 351 | 1 | 2,709 | 2 | 7,221 | 11 |
| 15,899 | 502 | 3 | 3,709 | 5  | 351 | 1 | 2,739 | 3 | 7,301 | 12 |
| 15,900 | 503 | 3 | 3,729 | 5  | 354 | 1 | 2,768 | 3 | 7,354 | 12 |
| 15,901 | 504 | 3 | 3,747 | 12 | 357 | 1 | 2,784 | 6 | 7,392 | 22 |
| 15,902 | 503 | 3 | 3,749 | 12 | 357 | 1 | 2,785 | 6 | 7,394 | 22 |
| 15,903 | 504 | 3 | 3,781 | 12 | 357 | 1 | 2,792 | 6 | 7,434 | 22 |
| 15,904 | 504 | 3 | 3,782 | 12 | 356 | 1 | 2,791 | 6 | 7,433 | 22 |
| 15,905 | 512 | 3 | 3,803 | 14 | 356 | 1 | 2,811 | 7 | 7,482 | 25 |
| 15,906 | 528 | 4 | 4,245 | 14 | 377 | 1 | 2,979 | 6 | 8,129 | 25 |
| 15,907 | 528 | 4 | 4,245 | 14 | 377 | 1 | 2,983 | 6 | 8,133 | 25 |
| 15,908 | 531 | 4 | 4,310 | 14 | 379 | 0 | 3,021 | 6 | 8,241 | 24 |
| 15,909 | 536 | 4 | 4,512 | 15 | 393 | 0 | 3,128 | 6 | 8,569 | 25 |
| 15,910 | 536 | 3 | 4,594 | 15 | 392 | 0 | 3,154 | 6 | 8,676 | 24 |
| 15,911 | 534 | 3 | 4,615 | 15 | 392 | 0 | 3,154 | 6 | 8,695 | 24 |
| 15,912 | 532 | 3 | 4,599 | 15 | 392 | 0 | 3,141 | 6 | 8,664 | 24 |
| 15,913 | 488 | 3 | 4,428 | 15 | 372 | 0 | 2,818 | 6 | 8,106 | 24 |
| 15,914 | 487 | 3 | 4,424 | 15 | 372 | 0 | 2,814 | 6 | 8,097 | 24 |
| 15,915 | 485 | 3 | 4,431 | 15 | 370 | 0 | 2,800 | 6 | 8,086 | 24 |
| 15,916 | 484 | 3 | 4,427 | 15 | 369 | 0 | 2,797 | 6 | 8,077 | 24 |
| 15,917 | 484 | 3 | 4,423 | 15 | 369 | 0 | 2,793 | 6 | 8,069 | 24 |
| 15,918 | 482 | 3 | 4,408 | 15 | 368 | 0 | 2,786 | 6 | 8,044 | 24 |
| 15,919 | 482 | 3 | 4,408 | 15 | 368 | 0 | 2,786 | 6 | 8,044 | 24 |
| 15,920 | 513 | 3 | 4,467 | 15 | 370 | 0 | 2,811 | 6 | 8,161 | 24 |
| 15,921 | 513 | 3 | 4,462 | 15 | 370 | 0 | 2,811 | 6 | 8,156 | 24 |
| 15,922 | 513 | 3 | 4,468 | 15 | 370 | 0 | 2,813 | 6 | 8,164 | 24 |
| 15,923 | 513 | 3 | 4,499 | 15 | 372 | 0 | 2,830 | 6 | 8,214 | 24 |
| 15,924 | 507 | 3 | 4,448 | 15 | 369 | 0 | 2,823 | 6 | 8,147 | 24 |
| 15,925 | 508 | 3 | 4,441 | 15 | 367 | 0 | 2,828 | 6 | 8,144 | 24 |
| 15,926 | 503 | 3 | 4,392 | 15 | 366 | 0 | 2,814 | 6 | 8,075 | 24 |
| 15,927 | 497 | 3 | 4,305 | 15 | 365 | 0 | 2,799 | 6 | 7,966 | 24 |
| 15,928 | 506 | 3 | 4,290 | 15 | 370 | 0 | 2,847 | 6 | 8,013 | 24 |
| 15,929 | 470 | 3 | 3,748 | 15 | 321 | 0 | 2,443 | 6 | 6,982 | 24 |
| 15,930 | 474 | 3 | 3,774 | 15 | 322 | 0 | 2,463 | 6 | 7,033 | 24 |
| 15,931 | 473 | 3 | 3,769 | 15 | 320 | 0 | 2,459 | 6 | 7,021 | 24 |
| 15,932 | 425 | 3 | 3,375 | 16 | 281 | 0 | 2,280 | 6 | 6,361 | 25 |
| 15,933 | 424 | 3 | 3,330 | 17 | 277 | 0 | 2,258 | 7 | 6,289 | 27 |
| 15,934 | 271 | 3 | 2,794 | 17 | 202 | 0 | 1,688 | 7 | 4,955 | 27 |
| 15,935 | 254 | 3 | 2,617 | 17 | 191 | 0 | 1,620 | 7 | 4,682 | 27 |
| 15,936 | 177 | 3 | 2,107 | 17 | 108 | 0 | 1,129 | 7 | 3,521 | 27 |
| 15,937 | 144 | 3 | 1,714 | 16 | 81  | 1 | 958   | 7 | 2,897 | 27 |

|        |     |   |       |    |    |   |     |    |       |    |
|--------|-----|---|-------|----|----|---|-----|----|-------|----|
| 15,938 | 130 | 3 | 1,606 | 16 | 75 | 1 | 879 | 7  | 2,690 | 27 |
| 15,939 | 128 | 3 | 1,589 | 16 | 74 | 1 | 858 | 7  | 2,649 | 27 |
| 15,940 | 129 | 3 | 1,595 | 16 | 76 | 1 | 864 | 7  | 2,664 | 27 |
| 15,941 | 127 | 3 | 1,591 | 16 | 76 | 1 | 862 | 7  | 2,656 | 27 |
| 15,942 | 121 | 2 | 1,529 | 13 | 74 | 1 | 837 | 8  | 2,561 | 24 |
| 15,943 | 121 | 2 | 1,514 | 13 | 73 | 1 | 831 | 8  | 2,539 | 24 |
| 15,944 | 120 | 2 | 1,503 | 13 | 73 | 1 | 824 | 10 | 2,520 | 26 |
| 15,945 | 116 | 2 | 1,467 | 15 | 71 | 1 | 805 | 10 | 2,459 | 28 |
| 15,946 | 112 | 2 | 1,424 | 16 | 71 | 2 | 795 | 10 | 2,402 | 30 |
| 15,947 | 111 | 2 | 1,411 | 16 | 71 | 2 | 783 | 9  | 2,376 | 29 |
| 15,948 | 111 | 2 | 1,396 | 17 | 71 | 2 | 781 | 9  | 2,359 | 30 |
| 15,949 | 109 | 2 | 1,348 | 17 | 70 | 2 | 751 | 9  | 2,278 | 30 |
| 15,950 | 108 | 2 | 1,328 | 17 | 67 | 2 | 719 | 9  | 2,222 | 30 |
| 15,951 | 108 | 2 | 1,328 | 20 | 66 | 2 | 719 | 9  | 2,221 | 33 |
| 15,952 | 107 | 2 | 1,305 | 14 | 64 | 2 | 697 | 6  | 2,173 | 24 |
| 15,953 | 107 | 2 | 1,272 | 14 | 64 | 2 | 691 | 6  | 2,134 | 24 |
| 15,954 | 106 | 2 | 1,270 | 12 | 64 | 2 | 691 | 5  | 2,131 | 21 |
| 15,955 | 106 | 2 | 1,264 | 12 | 64 | 2 | 690 | 7  | 2,124 | 23 |
| 15,956 | 98  | 2 | 1,243 | 13 | 64 | 2 | 671 | 7  | 2,076 | 24 |
| 15,957 | 81  | 1 | 804   | 13 | 43 | 2 | 502 | 8  | 1,430 | 24 |
| 15,958 | 80  | 2 | 760   | 13 | 42 | 2 | 470 | 8  | 1,352 | 25 |
| 15,959 | 101 | 1 | 764   | 12 | 39 | 2 | 515 | 8  | 1,419 | 23 |
| 15,960 | 104 | 1 | 717   | 12 | 37 | 2 | 519 | 8  | 1,377 | 23 |
| 15,961 | 105 | 1 | 646   | 12 | 39 | 2 | 517 | 8  | 1,307 | 23 |
| 15,962 | 106 | 1 | 621   | 12 | 39 | 2 | 513 | 8  | 1,279 | 23 |
| 15,963 | 105 | 1 | 617   | 12 | 39 | 2 | 512 | 8  | 1,273 | 23 |
| 15,964 | 105 | 1 | 607   | 12 | 37 | 2 | 503 | 8  | 1,252 | 23 |
| 15,965 | 105 | 1 | 607   | 12 | 37 | 2 | 502 | 8  | 1,251 | 23 |
| 15,966 | 179 | 1 | 817   | 12 | 70 | 2 | 793 | 8  | 1,859 | 23 |
| 15,967 | 202 | 1 | 928   | 12 | 83 | 2 | 935 | 8  | 2,148 | 23 |
| 15,968 | 202 | 1 | 919   | 12 | 83 | 2 | 929 | 8  | 2,133 | 23 |
| 15,969 | 178 | 1 | 921   | 12 | 82 | 2 | 937 | 8  | 2,118 | 23 |
| 15,970 | 178 | 1 | 925   | 13 | 82 | 2 | 941 | 8  | 2,126 | 24 |
| 15,971 | 176 | 1 | 911   | 12 | 81 | 2 | 938 | 8  | 2,106 | 23 |
| 15,972 | 177 | 1 | 908   | 12 | 81 | 2 | 936 | 8  | 2,102 | 23 |
| 15,973 | 177 | 1 | 902   | 12 | 81 | 2 | 934 | 8  | 2,094 | 23 |
| 15,974 | 175 | 1 | 874   | 12 | 79 | 2 | 921 | 8  | 2,049 | 23 |
| 15,975 | 174 | 1 | 872   | 12 | 79 | 2 | 922 | 8  | 2,047 | 23 |
| 15,976 | 170 | 1 | 849   | 12 | 79 | 2 | 906 | 8  | 2,004 | 23 |
| 15,977 | 172 | 1 | 851   | 12 | 79 | 2 | 911 | 8  | 2,013 | 23 |
| 15,978 | 161 | 1 | 802   | 12 | 72 | 2 | 863 | 8  | 1,898 | 23 |

|        |     |   |     |    |    |   |     |    |       |    |
|--------|-----|---|-----|----|----|---|-----|----|-------|----|
| 15,979 | 151 | 1 | 741 | 12 | 66 | 2 | 802 | 8  | 1,760 | 23 |
| 15,980 | 147 | 1 | 707 | 12 | 65 | 2 | 768 | 8  | 1,687 | 23 |
| 15,981 | 143 | 1 | 665 | 12 | 62 | 2 | 739 | 8  | 1,609 | 23 |
| 15,982 | 143 | 1 | 671 | 12 | 62 | 2 | 742 | 8  | 1,618 | 23 |
| 15,983 | 144 | 1 | 675 | 10 | 62 | 2 | 742 | 7  | 1,623 | 20 |
| 15,984 | 145 | 1 | 674 | 10 | 62 | 2 | 745 | 7  | 1,626 | 20 |
| 15,985 | 149 | 1 | 694 | 10 | 62 | 2 | 764 | 7  | 1,669 | 20 |
| 15,986 | 149 | 1 | 694 | 10 | 62 | 2 | 764 | 7  | 1,669 | 20 |
| 15,987 | 149 | 1 | 694 | 10 | 62 | 2 | 765 | 9  | 1,670 | 22 |
| 15,988 | 149 | 1 | 694 | 10 | 62 | 1 | 765 | 15 | 1,670 | 27 |
| 15,989 | 149 | 1 | 694 | 10 | 62 | 1 | 765 | 15 | 1,670 | 27 |
| 15,990 | 152 | 1 | 738 | 11 | 68 | 1 | 818 | 15 | 1,776 | 28 |
| 15,991 | 153 | 1 | 731 | 11 | 66 | 1 | 814 | 17 | 1,764 | 30 |
| 15,992 | 153 | 2 | 728 | 11 | 65 | 1 | 820 | 22 | 1,766 | 36 |
| 15,993 | 153 | 2 | 725 | 12 | 65 | 1 | 817 | 22 | 1,760 | 37 |
| 15,994 | 153 | 2 | 727 | 13 | 66 | 1 | 819 | 22 | 1,765 | 38 |
| 15,995 | 154 | 2 | 727 | 13 | 66 | 1 | 821 | 20 | 1,768 | 36 |
| 15,996 | 154 | 2 | 731 | 11 | 66 | 0 | 823 | 20 | 1,774 | 33 |
| 15,997 | 154 | 2 | 731 | 12 | 66 | 0 | 823 | 20 | 1,774 | 34 |
| 15,998 | 154 | 2 | 731 | 12 | 66 | 0 | 822 | 21 | 1,773 | 35 |
| 15,999 | 154 | 2 | 731 | 12 | 66 | 0 | 822 | 21 | 1,773 | 35 |
| 16,000 | 154 | 2 | 730 | 12 | 66 | 0 | 821 | 21 | 1,771 | 35 |
| 16,001 | 155 | 2 | 730 | 13 | 66 | 0 | 821 | 20 | 1,772 | 35 |
| 16,002 | 155 | 2 | 730 | 10 | 66 | 0 | 820 | 20 | 1,771 | 32 |
| 16,003 | 155 | 3 | 730 | 9  | 66 | 0 | 820 | 20 | 1,771 | 32 |
| 16,004 | 155 | 3 | 730 | 9  | 66 | 0 | 820 | 20 | 1,771 | 32 |
| 16,005 | 155 | 3 | 731 | 9  | 66 | 0 | 821 | 18 | 1,773 | 30 |
| 16,006 | 155 | 3 | 730 | 8  | 66 | 0 | 818 | 17 | 1,769 | 28 |
| 16,007 | 155 | 3 | 728 | 8  | 66 | 0 | 815 | 17 | 1,764 | 28 |
| 16,008 | 154 | 3 | 720 | 8  | 66 | 0 | 810 | 17 | 1,750 | 28 |
| 16,009 | 152 | 2 | 698 | 8  | 65 | 0 | 804 | 17 | 1,719 | 27 |
| 16,010 | 126 | 2 | 548 | 8  | 56 | 0 | 660 | 17 | 1,390 | 27 |
| 16,011 | 123 | 2 | 538 | 8  | 57 | 0 | 646 | 18 | 1,364 | 28 |
| 16,012 | 122 | 2 | 518 | 8  | 54 | 0 | 608 | 18 | 1,302 | 28 |
| 16,013 | 50  | 2 | 366 | 8  | 28 | 0 | 357 | 18 | 801   | 28 |
| 16,014 | 50  | 2 | 346 | 8  | 25 | 0 | 347 | 18 | 768   | 28 |
| 16,015 | 47  | 2 | 309 | 8  | 23 | 0 | 325 | 18 | 704   | 28 |
| 16,016 | 47  | 2 | 297 | 8  | 21 | 0 | 313 | 18 | 678   | 28 |
| 16,017 | 41  | 2 | 243 | 8  | 16 | 0 | 261 | 18 | 561   | 28 |
| 16,018 | 24  | 2 | 180 | 8  | 8  | 0 | 169 | 18 | 381   | 28 |
| 16,019 | 22  | 2 | 157 | 8  | 8  | 0 | 162 | 18 | 349   | 28 |

|        |    |   |     |    |    |   |     |    |       |    |
|--------|----|---|-----|----|----|---|-----|----|-------|----|
| 16,020 | 21 | 2 | 143 | 8  | 8  | 0 | 145 | 18 | 317   | 28 |
| 16,021 | 20 | 2 | 137 | 7  | 8  | 0 | 140 | 18 | 305   | 27 |
| 16,022 | 20 | 2 | 137 | 7  | 8  | 0 | 140 | 18 | 305   | 27 |
| 16,023 | 20 | 2 | 138 | 7  | 8  | 0 | 141 | 18 | 307   | 27 |
| 16,024 | 20 | 2 | 138 | 8  | 8  | 0 | 141 | 18 | 307   | 28 |
| 16,025 | 20 | 2 | 129 | 8  | 8  | 0 | 132 | 18 | 289   | 28 |
| 16,026 | 20 | 2 | 136 | 8  | 8  | 0 | 134 | 18 | 298   | 28 |
| 16,027 | 22 | 2 | 173 | 8  | 8  | 0 | 143 | 18 | 346   | 28 |
| 16,028 | 32 | 2 | 275 | 8  | 8  | 0 | 185 | 19 | 500   | 29 |
| 16,029 | 61 | 2 | 466 | 8  | 12 | 0 | 262 | 20 | 801   | 30 |
| 16,030 | 67 | 2 | 556 | 8  | 15 | 0 | 300 | 20 | 938   | 30 |
| 16,031 | 87 | 2 | 647 | 8  | 23 | 0 | 362 | 20 | 1,119 | 30 |
| 16,032 | 90 | 2 | 686 | 8  | 24 | 0 | 372 | 20 | 1,172 | 30 |
| 16,033 | 90 | 2 | 679 | 8  | 24 | 0 | 370 | 20 | 1,163 | 30 |
| 16,034 | 92 | 2 | 710 | 8  | 27 | 0 | 380 | 20 | 1,209 | 30 |
| 16,035 | 91 | 2 | 711 | 8  | 27 | 0 | 377 | 20 | 1,206 | 30 |
| 16,036 | 89 | 2 | 713 | 8  | 27 | 0 | 376 | 20 | 1,205 | 30 |
| 16,037 | 90 | 2 | 727 | 8  | 27 | 0 | 383 | 18 | 1,227 | 28 |
| 16,038 | 90 | 2 | 741 | 9  | 27 | 0 | 393 | 15 | 1,251 | 26 |
| 16,039 | 90 | 2 | 734 | 10 | 26 | 1 | 379 | 15 | 1,229 | 28 |
| 16,040 | 89 | 2 | 725 | 10 | 24 | 1 | 358 | 15 | 1,196 | 28 |
| 16,041 | 87 | 2 | 719 | 9  | 21 | 1 | 354 | 15 | 1,181 | 27 |
| 16,042 | 86 | 2 | 719 | 9  | 21 | 1 | 352 | 13 | 1,178 | 25 |
| 16,043 | 86 | 1 | 723 | 9  | 22 | 1 | 345 | 9  | 1,176 | 20 |
| 16,044 | 86 | 3 | 722 | 11 | 21 | 1 | 343 | 10 | 1,172 | 25 |
| 16,045 | 85 | 3 | 722 | 10 | 21 | 1 | 341 | 10 | 1,169 | 24 |
| 16,046 | 85 | 3 | 719 | 11 | 21 | 1 | 343 | 11 | 1,168 | 26 |
| 16,047 | 85 | 3 | 718 | 10 | 21 | 1 | 342 | 12 | 1,166 | 26 |
| 16,048 | 85 | 3 | 716 | 10 | 21 | 1 | 341 | 12 | 1,163 | 26 |
| 16,049 | 86 | 3 | 729 | 9  | 22 | 1 | 354 | 11 | 1,191 | 24 |
| 16,050 | 86 | 3 | 732 | 9  | 22 | 1 | 355 | 11 | 1,195 | 24 |
| 16,051 | 86 | 3 | 734 | 9  | 22 | 1 | 357 | 11 | 1,199 | 24 |
| 16,052 | 85 | 3 | 734 | 8  | 22 | 1 | 357 | 11 | 1,198 | 23 |
| 16,053 | 85 | 3 | 734 | 8  | 23 | 1 | 357 | 11 | 1,199 | 23 |
| 16,054 | 85 | 3 | 733 | 8  | 23 | 1 | 356 | 11 | 1,197 | 23 |
| 16,055 | 85 | 3 | 734 | 8  | 23 | 1 | 356 | 11 | 1,198 | 23 |
| 16,056 | 85 | 3 | 733 | 8  | 23 | 1 | 354 | 11 | 1,195 | 23 |
| 16,057 | 85 | 3 | 733 | 8  | 23 | 1 | 354 | 12 | 1,195 | 24 |
| 16,058 | 85 | 3 | 733 | 9  | 23 | 1 | 354 | 12 | 1,195 | 25 |
| 16,059 | 85 | 3 | 735 | 10 | 23 | 2 | 355 | 12 | 1,198 | 27 |
| 16,060 | 85 | 3 | 735 | 10 | 23 | 2 | 355 | 12 | 1,198 | 27 |



|        |     |   |     |    |    |   |     |    |       |    |
|--------|-----|---|-----|----|----|---|-----|----|-------|----|
| 16,061 | 85  | 3 | 733 | 10 | 22 | 2 | 353 | 12 | 1,193 | 27 |
| 16,062 | 85  | 3 | 735 | 10 | 22 | 2 | 352 | 11 | 1,194 | 26 |
| 16,063 | 85  | 3 | 734 | 10 | 22 | 2 | 352 | 11 | 1,193 | 26 |
| 16,064 | 85  | 3 | 738 | 10 | 22 | 2 | 351 | 11 | 1,196 | 26 |
| 16,065 | 86  | 3 | 739 | 10 | 23 | 2 | 351 | 11 | 1,199 | 26 |
| 16,066 | 87  | 3 | 739 | 10 | 23 | 2 | 351 | 11 | 1,200 | 26 |
| 16,067 | 88  | 3 | 752 | 10 | 23 | 2 | 350 | 11 | 1,213 | 26 |
| 16,068 | 91  | 3 | 767 | 10 | 23 | 2 | 358 | 11 | 1,239 | 26 |
| 16,069 | 90  | 4 | 766 | 10 | 23 | 2 | 356 | 12 | 1,235 | 28 |
| 16,070 | 90  | 4 | 768 | 10 | 23 | 2 | 359 | 12 | 1,240 | 28 |
| 16,071 | 92  | 4 | 778 | 10 | 23 | 2 | 362 | 12 | 1,255 | 28 |
| 16,072 | 93  | 4 | 794 | 11 | 24 | 2 | 365 | 12 | 1,276 | 29 |
| 16,073 | 109 | 4 | 836 | 11 | 26 | 2 | 409 | 12 | 1,380 | 29 |
| 16,074 | 108 | 4 | 835 | 11 | 26 | 2 | 409 | 12 | 1,378 | 29 |
| 16,075 | 109 | 4 | 850 | 10 | 27 | 2 | 416 | 12 | 1,402 | 28 |
| 16,076 | 119 | 4 | 893 | 10 | 28 | 2 | 458 | 12 | 1,498 | 28 |
| 16,077 | 118 | 4 | 889 | 10 | 28 | 2 | 452 | 13 | 1,487 | 29 |
| 16,078 | 114 | 4 | 853 | 10 | 28 | 2 | 444 | 14 | 1,439 | 30 |
| 16,079 | 102 | 4 | 747 | 10 | 28 | 2 | 393 | 14 | 1,270 | 30 |
| 16,080 | 73  | 4 | 556 | 11 | 24 | 2 | 320 | 13 | 973   | 30 |
| 16,081 | 68  | 4 | 466 | 14 | 21 | 2 | 284 | 16 | 839   | 36 |
| 16,082 | 48  | 4 | 369 | 14 | 13 | 2 | 218 | 16 | 648   | 36 |
| 16,083 | 45  | 4 | 323 | 14 | 12 | 2 | 206 | 16 | 586   | 36 |
| 16,084 | 43  | 4 | 290 | 14 | 9  | 2 | 196 | 16 | 538   | 36 |
| 16,085 | 42  | 4 | 286 | 14 | 9  | 2 | 196 | 16 | 533   | 36 |
| 16,086 | 40  | 4 | 263 | 14 | 9  | 2 | 179 | 16 | 491   | 36 |
| 16,087 | 40  | 4 | 249 | 14 | 9  | 2 | 175 | 16 | 473   | 36 |
| 16,088 | 39  | 4 | 246 | 14 | 9  | 2 | 172 | 16 | 466   | 36 |
| 16,089 | 39  | 4 | 228 | 13 | 9  | 2 | 156 | 13 | 432   | 32 |
| 16,090 | 39  | 4 | 216 | 12 | 9  | 1 | 154 | 13 | 418   | 30 |
| 16,091 | 38  | 4 | 213 | 12 | 9  | 1 | 151 | 13 | 411   | 30 |
| 16,092 | 39  | 4 | 210 | 12 | 9  | 1 | 149 | 13 | 407   | 30 |
| 16,093 | 39  | 4 | 206 | 12 | 8  | 1 | 148 | 12 | 401   | 29 |
| 16,094 | 39  | 2 | 207 | 9  | 8  | 1 | 147 | 10 | 401   | 22 |
| 16,095 | 39  | 2 | 207 | 10 | 8  | 1 | 147 | 10 | 401   | 23 |
| 16,096 | 39  | 2 | 208 | 10 | 8  | 1 | 144 | 10 | 399   | 23 |
| 16,097 | 39  | 2 | 210 | 10 | 8  | 1 | 144 | 8  | 401   | 21 |
| 16,098 | 39  | 2 | 211 | 10 | 8  | 1 | 144 | 8  | 402   | 21 |
| 16,099 | 37  | 2 | 200 | 11 | 7  | 1 | 132 | 8  | 376   | 22 |
| 16,100 | 38  | 2 | 197 | 11 | 7  | 1 | 131 | 8  | 373   | 22 |
| 16,101 | 38  | 2 | 200 | 11 | 7  | 2 | 130 | 8  | 375   | 23 |

|        |    |   |     |    |    |   |     |   |     |    |
|--------|----|---|-----|----|----|---|-----|---|-----|----|
| 16,102 | 38 | 2 | 210 | 11 | 7  | 2 | 140 | 8 | 395 | 23 |
| 16,103 | 38 | 2 | 210 | 11 | 6  | 2 | 140 | 8 | 394 | 23 |
| 16,104 | 39 | 1 | 227 | 11 | 6  | 2 | 153 | 8 | 425 | 22 |
| 16,105 | 45 | 1 | 244 | 11 | 10 | 2 | 170 | 8 | 469 | 22 |
| 16,106 | 45 | 1 | 254 | 11 | 10 | 3 | 173 | 8 | 482 | 23 |
| 16,107 | 45 | 1 | 255 | 11 | 10 | 3 | 174 | 7 | 484 | 22 |
| 16,108 | 45 | 1 | 255 | 11 | 10 | 3 | 174 | 7 | 484 | 22 |
| 16,109 | 45 | 1 | 256 | 9  | 10 | 2 | 173 | 7 | 484 | 19 |
| 16,110 | 45 | 1 | 255 | 9  | 10 | 2 | 173 | 7 | 483 | 19 |
| 16,111 | 45 | 1 | 255 | 9  | 10 | 2 | 173 | 7 | 483 | 19 |
| 16,112 | 45 | 1 | 255 | 9  | 10 | 2 | 172 | 7 | 482 | 19 |
| 16,113 | 45 | 2 | 253 | 9  | 10 | 2 | 172 | 7 | 480 | 20 |
| 16,114 | 44 | 2 | 247 | 10 | 10 | 2 | 171 | 7 | 472 | 21 |
| 16,115 | 44 | 2 | 247 | 10 | 10 | 2 | 171 | 7 | 472 | 21 |
| 16,116 | 43 | 2 | 247 | 10 | 9  | 2 | 172 | 7 | 471 | 21 |
| 16,117 | 42 | 2 | 246 | 10 | 9  | 2 | 171 | 7 | 468 | 21 |
| 16,118 | 41 | 2 | 234 | 10 | 9  | 2 | 171 | 7 | 455 | 21 |
| 16,119 | 38 | 2 | 217 | 10 | 9  | 2 | 163 | 7 | 427 | 21 |
| 16,120 | 38 | 1 | 219 | 10 | 9  | 2 | 163 | 7 | 429 | 20 |
| 16,121 | 38 | 1 | 218 | 10 | 9  | 2 | 160 | 7 | 425 | 20 |
| 16,122 | 37 | 1 | 213 | 9  | 9  | 2 | 161 | 8 | 420 | 20 |
| 16,123 | 38 | 1 | 198 | 9  | 8  | 2 | 159 | 8 | 403 | 20 |
| 16,124 | 21 | 1 | 152 | 10 | 6  | 3 | 113 | 9 | 292 | 23 |
| 16,125 | 21 | 1 | 137 | 10 | 5  | 3 | 106 | 9 | 269 | 23 |
| 16,126 | 11 | 1 | 93  | 10 | 4  | 3 | 62  | 9 | 170 | 23 |
| 16,127 | 11 | 1 | 91  | 10 | 4  | 3 | 62  | 9 | 168 | 23 |
| 16,128 | 11 | 1 | 90  | 11 | 4  | 3 | 62  | 8 | 167 | 23 |
| 16,129 | 11 | 1 | 87  | 11 | 4  | 3 | 63  | 6 | 165 | 21 |
| 16,130 | 11 | 1 | 86  | 10 | 5  | 3 | 61  | 6 | 163 | 20 |
| 16,131 | 11 | 1 | 86  | 7  | 5  | 3 | 59  | 3 | 161 | 14 |
| 16,132 | 11 | 1 | 84  | 7  | 5  | 3 | 57  | 3 | 157 | 14 |
| 16,133 | 11 | 1 | 84  | 7  | 5  | 3 | 57  | 3 | 157 | 14 |
| 16,134 | 11 | 1 | 84  | 7  | 5  | 3 | 56  | 3 | 156 | 14 |
| 16,135 | 11 | 1 | 84  | 7  | 5  | 3 | 56  | 3 | 156 | 14 |
| 16,136 | 12 | 1 | 85  | 7  | 5  | 3 | 56  | 3 | 158 | 14 |
| 16,137 | 12 | 1 | 85  | 7  | 5  | 3 | 56  | 3 | 158 | 14 |
| 16,138 | 12 | 1 | 85  | 7  | 5  | 3 | 56  | 3 | 158 | 14 |
| 16,139 | 12 | 1 | 86  | 7  | 5  | 3 | 57  | 3 | 160 | 14 |
| 16,140 | 12 | 1 | 86  | 10 | 5  | 3 | 57  | 3 | 160 | 17 |
| 16,141 | 12 | 1 | 90  | 11 | 5  | 3 | 58  | 3 | 165 | 18 |
| 16,142 | 12 | 1 | 89  | 11 | 5  | 3 | 57  | 3 | 163 | 18 |

|        |    |   |     |    |   |   |    |    |     |    |
|--------|----|---|-----|----|---|---|----|----|-----|----|
| 16,143 | 13 | 1 | 101 | 11 | 5 | 3 | 60 | 6  | 179 | 21 |
| 16,144 | 13 | 1 | 99  | 11 | 5 | 3 | 59 | 6  | 176 | 21 |
| 16,145 | 14 | 1 | 111 | 12 | 5 | 3 | 60 | 7  | 190 | 23 |
| 16,146 | 14 | 1 | 111 | 11 | 5 | 3 | 60 | 7  | 190 | 22 |
| 16,147 | 14 | 1 | 112 | 13 | 5 | 3 | 60 | 7  | 191 | 24 |
| 16,148 | 14 | 1 | 113 | 11 | 5 | 3 | 62 | 7  | 194 | 22 |
| 16,149 | 14 | 1 | 112 | 11 | 5 | 3 | 62 | 7  | 193 | 22 |
| 16,150 | 14 | 1 | 116 | 16 | 6 | 3 | 64 | 7  | 200 | 27 |
| 16,151 | 14 | 1 | 111 | 16 | 6 | 3 | 63 | 9  | 194 | 29 |
| 16,152 | 16 | 1 | 128 | 27 | 8 | 2 | 66 | 9  | 218 | 39 |
| 16,153 | 16 | 1 | 127 | 27 | 8 | 2 | 64 | 9  | 215 | 39 |
| 16,154 | 16 | 1 | 119 | 30 | 8 | 2 | 60 | 9  | 203 | 42 |
| 16,155 | 15 | 1 | 110 | 32 | 8 | 2 | 51 | 9  | 184 | 44 |
| 16,156 | 9  | 1 | 92  | 32 | 4 | 2 | 34 | 9  | 139 | 44 |
| 16,157 | 9  | 1 | 82  | 32 | 4 | 1 | 31 | 9  | 126 | 43 |
| 16,158 | 9  | 1 | 81  | 32 | 4 | 1 | 30 | 9  | 124 | 43 |
| 16,159 | 9  | 1 | 81  | 32 | 4 | 1 | 30 | 9  | 124 | 43 |
| 16,160 | 9  | 1 | 81  | 33 | 4 | 1 | 30 | 9  | 124 | 44 |
| 16,161 | 9  | 1 | 83  | 35 | 4 | 1 | 30 | 9  | 126 | 46 |
| 16,162 | 9  | 1 | 83  | 36 | 4 | 1 | 30 | 9  | 126 | 47 |
| 16,163 | 10 | 1 | 84  | 36 | 4 | 1 | 30 | 9  | 128 | 47 |
| 16,164 | 10 | 0 | 83  | 35 | 4 | 1 | 29 | 9  | 126 | 45 |
| 16,165 | 10 | 0 | 83  | 36 | 4 | 1 | 29 | 9  | 126 | 46 |
| 16,166 | 10 | 0 | 83  | 36 | 4 | 1 | 29 | 9  | 126 | 46 |
| 16,167 | 10 | 0 | 83  | 38 | 4 | 1 | 29 | 9  | 126 | 48 |
| 16,168 | 10 | 0 | 83  | 38 | 4 | 1 | 29 | 9  | 126 | 48 |
| 16,169 | 10 | 1 | 82  | 39 | 4 | 1 | 30 | 12 | 126 | 53 |
| 16,170 | 10 | 1 | 83  | 39 | 4 | 1 | 34 | 13 | 131 | 54 |
| 16,171 | 12 | 1 | 88  | 39 | 5 | 1 | 35 | 12 | 140 | 53 |
| 16,172 | 12 | 1 | 90  | 39 | 5 | 1 | 35 | 12 | 142 | 53 |
| 16,173 | 11 | 1 | 85  | 39 | 5 | 1 | 31 | 11 | 132 | 52 |
| 16,174 | 10 | 1 | 84  | 42 | 5 | 1 | 30 | 11 | 129 | 55 |
| 16,175 | 10 | 1 | 85  | 41 | 5 | 0 | 30 | 11 | 130 | 53 |
| 16,176 | 9  | 1 | 85  | 41 | 5 | 0 | 30 | 11 | 129 | 53 |
| 16,177 | 9  | 1 | 85  | 42 | 5 | 0 | 30 | 11 | 129 | 54 |
| 16,178 | 9  | 1 | 84  | 42 | 5 | 0 | 30 | 11 | 128 | 54 |
| 16,179 | 9  | 1 | 84  | 41 | 5 | 0 | 28 | 11 | 126 | 53 |
| 16,180 | 9  | 1 | 84  | 42 | 5 | 0 | 30 | 11 | 128 | 54 |
| 16,181 | 9  | 1 | 84  | 42 | 4 | 0 | 30 | 11 | 127 | 54 |
| 16,182 | 9  | 1 | 93  | 42 | 4 | 0 | 34 | 11 | 140 | 54 |
| 16,183 | 9  | 1 | 93  | 42 | 4 | 0 | 34 | 11 | 140 | 54 |

|        |    |   |     |    |   |   |    |    |     |    |
|--------|----|---|-----|----|---|---|----|----|-----|----|
| 16,184 | 9  | 1 | 105 | 42 | 5 | 0 | 42 | 11 | 161 | 54 |
| 16,185 | 9  | 1 | 105 | 42 | 5 | 0 | 42 | 11 | 161 | 54 |
| 16,186 | 9  | 1 | 106 | 42 | 5 | 0 | 43 | 11 | 163 | 54 |
| 16,187 | 9  | 1 | 105 | 42 | 5 | 0 | 43 | 11 | 162 | 54 |
| 16,188 | 9  | 1 | 105 | 42 | 5 | 0 | 43 | 11 | 162 | 54 |
| 16,189 | 9  | 1 | 107 | 42 | 5 | 0 | 44 | 11 | 165 | 54 |
| 16,190 | 11 | 1 | 111 | 45 | 5 | 0 | 46 | 11 | 173 | 57 |
| 16,191 | 11 | 2 | 108 | 42 | 5 | 0 | 46 | 13 | 170 | 57 |
| 16,192 | 11 | 2 | 107 | 41 | 5 | 0 | 45 | 13 | 168 | 56 |
| 16,193 | 11 | 3 | 103 | 46 | 5 | 0 | 44 | 16 | 163 | 65 |
| 16,194 | 9  | 3 | 94  | 46 | 5 | 0 | 42 | 14 | 150 | 63 |
| 16,195 | 8  | 3 | 85  | 45 | 5 | 0 | 41 | 13 | 139 | 61 |
| 16,196 | 8  | 3 | 80  | 45 | 5 | 0 | 41 | 14 | 134 | 62 |
| 16,197 | 8  | 3 | 79  | 43 | 5 | 1 | 41 | 20 | 133 | 67 |
| 16,198 | 8  | 3 | 80  | 43 | 5 | 1 | 41 | 20 | 134 | 67 |
| 16,199 | 8  | 3 | 78  | 43 | 5 | 2 | 41 | 21 | 132 | 69 |
| 16,200 | 8  | 3 | 75  | 45 | 4 | 2 | 39 | 21 | 126 | 71 |
| 16,201 | 8  | 3 | 74  | 39 | 4 | 2 | 39 | 21 | 125 | 65 |
| 16,202 | 8  | 3 | 62  | 28 | 2 | 2 | 37 | 20 | 109 | 53 |
| 16,203 | 6  | 3 | 50  | 28 | 2 | 2 | 32 | 20 | 90  | 53 |
| 16,204 | 6  | 3 | 48  | 28 | 2 | 2 | 28 | 20 | 84  | 53 |
| 16,205 | 6  | 3 | 49  | 27 | 2 | 2 | 29 | 20 | 86  | 52 |
| 16,206 | 6  | 3 | 49  | 25 | 2 | 2 | 29 | 20 | 86  | 50 |
| 16,207 | 6  | 3 | 49  | 26 | 2 | 2 | 29 | 20 | 86  | 51 |
| 16,208 | 6  | 3 | 50  | 27 | 2 | 2 | 29 | 21 | 87  | 53 |
| 16,209 | 6  | 3 | 50  | 28 | 2 | 2 | 29 | 21 | 87  | 54 |
| 16,210 | 6  | 5 | 50  | 32 | 2 | 2 | 29 | 26 | 87  | 65 |
| 16,211 | 6  | 5 | 48  | 31 | 2 | 2 | 29 | 26 | 85  | 64 |
| 16,212 | 8  | 5 | 50  | 29 | 2 | 2 | 32 | 26 | 92  | 62 |
| 16,213 | 8  | 5 | 50  | 29 | 2 | 2 | 32 | 26 | 92  | 62 |
| 16,214 | 8  | 5 | 50  | 29 | 2 | 2 | 33 | 26 | 93  | 62 |
| 16,215 | 8  | 5 | 50  | 29 | 2 | 2 | 33 | 26 | 93  | 62 |
| 16,216 | 8  | 5 | 51  | 28 | 2 | 2 | 33 | 26 | 94  | 61 |
| 16,217 | 8  | 5 | 53  | 28 | 2 | 2 | 33 | 26 | 96  | 61 |
| 16,218 | 8  | 5 | 57  | 27 | 3 | 2 | 38 | 26 | 106 | 60 |
| 16,219 | 8  | 5 | 58  | 27 | 3 | 2 | 38 | 26 | 107 | 60 |
| 16,220 | 8  | 5 | 62  | 26 | 4 | 2 | 38 | 24 | 112 | 57 |
| 16,221 | 8  | 5 | 62  | 26 | 5 | 2 | 34 | 23 | 109 | 56 |
| 16,222 | 7  | 5 | 78  | 26 | 6 | 2 | 44 | 23 | 135 | 56 |
| 16,223 | 7  | 5 | 76  | 26 | 6 | 2 | 44 | 23 | 133 | 56 |
| 16,224 | 8  | 5 | 84  | 26 | 6 | 2 | 52 | 23 | 150 | 56 |

|        |    |   |     |    |    |   |     |    |       |    |
|--------|----|---|-----|----|----|---|-----|----|-------|----|
| 16,225 | 14 | 5 | 122 | 23 | 7  | 2 | 78  | 23 | 221   | 53 |
| 16,226 | 14 | 5 | 123 | 23 | 7  | 2 | 78  | 22 | 222   | 52 |
| 16,227 | 14 | 5 | 123 | 24 | 7  | 2 | 78  | 22 | 222   | 53 |
| 16,228 | 33 | 5 | 195 | 23 | 12 | 2 | 152 | 22 | 392   | 52 |
| 16,229 | 36 | 5 | 208 | 23 | 13 | 2 | 159 | 22 | 416   | 52 |
| 16,230 | 36 | 5 | 208 | 23 | 13 | 2 | 160 | 22 | 417   | 52 |
| 16,231 | 36 | 5 | 210 | 22 | 13 | 2 | 158 | 22 | 417   | 51 |
| 16,232 | 36 | 5 | 210 | 22 | 13 | 2 | 158 | 22 | 417   | 51 |
| 16,233 | 36 | 5 | 201 | 23 | 13 | 2 | 154 | 22 | 404   | 52 |
| 16,234 | 36 | 5 | 190 | 23 | 12 | 2 | 148 | 22 | 386   | 52 |
| 16,235 | 36 | 5 | 189 | 23 | 12 | 2 | 147 | 22 | 384   | 52 |
| 16,236 | 36 | 5 | 189 | 23 | 12 | 2 | 146 | 22 | 383   | 52 |
| 16,237 | 35 | 5 | 188 | 23 | 12 | 2 | 146 | 22 | 381   | 52 |
| 16,238 | 35 | 5 | 188 | 23 | 12 | 2 | 146 | 22 | 381   | 52 |
| 16,239 | 35 | 5 | 185 | 23 | 12 | 2 | 145 | 22 | 377   | 52 |
| 16,240 | 33 | 5 | 181 | 20 | 12 | 2 | 143 | 22 | 369   | 49 |
| 16,241 | 33 | 5 | 181 | 20 | 12 | 2 | 143 | 22 | 369   | 49 |
| 16,242 | 33 | 3 | 182 | 15 | 12 | 2 | 144 | 16 | 371   | 36 |
| 16,243 | 33 | 3 | 184 | 15 | 12 | 2 | 144 | 16 | 373   | 36 |
| 16,244 | 33 | 3 | 184 | 15 | 12 | 2 | 144 | 16 | 373   | 36 |
| 16,245 | 33 | 3 | 184 | 15 | 12 | 2 | 144 | 16 | 373   | 36 |
| 16,246 | 33 | 3 | 184 | 16 | 12 | 2 | 144 | 16 | 373   | 37 |
| 16,247 | 33 | 3 | 183 | 16 | 12 | 2 | 144 | 15 | 372   | 36 |
| 16,248 | 33 | 3 | 189 | 18 | 12 | 1 | 146 | 10 | 380   | 32 |
| 16,249 | 33 | 3 | 189 | 18 | 12 | 1 | 145 | 10 | 379   | 32 |
| 16,250 | 33 | 3 | 190 | 18 | 12 | 0 | 144 | 9  | 379   | 30 |
| 16,251 | 34 | 3 | 206 | 16 | 14 | 0 | 149 | 9  | 403   | 28 |
| 16,252 | 35 | 3 | 272 | 16 | 16 | 0 | 178 | 8  | 501   | 27 |
| 16,253 | 35 | 3 | 271 | 16 | 16 | 0 | 178 | 8  | 500   | 27 |
| 16,254 | 35 | 3 | 271 | 16 | 16 | 0 | 178 | 8  | 500   | 27 |
| 16,255 | 35 | 3 | 272 | 17 | 16 | 0 | 178 | 8  | 501   | 28 |
| 16,256 | 35 | 3 | 272 | 15 | 16 | 0 | 177 | 8  | 500   | 26 |
| 16,257 | 69 | 3 | 741 | 15 | 38 | 0 | 438 | 8  | 1,286 | 26 |
| 16,258 | 69 | 3 | 744 | 13 | 38 | 0 | 441 | 7  | 1,292 | 23 |
| 16,259 | 69 | 3 | 744 | 13 | 38 | 0 | 441 | 7  | 1,292 | 23 |
| 16,260 | 67 | 3 | 741 | 12 | 38 | 0 | 438 | 7  | 1,284 | 22 |
| 16,261 | 67 | 1 | 742 | 8  | 38 | 0 | 438 | 2  | 1,285 | 11 |
| 16,262 | 67 | 1 | 742 | 8  | 38 | 0 | 438 | 2  | 1,285 | 11 |
| 16,263 | 67 | 1 | 743 | 11 | 38 | 0 | 438 | 2  | 1,286 | 14 |
| 16,264 | 67 | 1 | 745 | 10 | 38 | 0 | 438 | 3  | 1,288 | 14 |
| 16,265 | 66 | 1 | 744 | 10 | 38 | 0 | 437 | 3  | 1,285 | 14 |

|        |    |   |     |    |    |   |     |    |       |    |
|--------|----|---|-----|----|----|---|-----|----|-------|----|
| 16,266 | 66 | 1 | 744 | 10 | 38 | 0 | 437 | 3  | 1,285 | 14 |
| 16,267 | 66 | 1 | 742 | 11 | 38 | 0 | 437 | 3  | 1,283 | 15 |
| 16,268 | 65 | 1 | 743 | 12 | 37 | 0 | 437 | 4  | 1,282 | 17 |
| 16,269 | 66 | 1 | 745 | 12 | 37 | 0 | 441 | 4  | 1,289 | 17 |
| 16,270 | 4  | 0 | 65  | 3  | 4  | 0 | 25  | 1  | 98    | 4  |
| 16,271 | 68 | 0 | 782 | 12 | 37 | 0 | 452 | 4  | 1,339 | 16 |
| 16,272 | 68 | 0 | 789 | 12 | 36 | 0 | 451 | 7  | 1,344 | 19 |
| 16,273 | 67 | 0 | 768 | 18 | 34 | 0 | 439 | 9  | 1,308 | 27 |
| 16,274 | 67 | 0 | 774 | 25 | 34 | 1 | 443 | 11 | 1,318 | 37 |
| 16,275 | 66 | 0 | 765 | 25 | 34 | 1 | 435 | 12 | 1,300 | 38 |
| 16,276 | 61 | 0 | 747 | 25 | 34 | 1 | 421 | 12 | 1,263 | 38 |
| 16,277 | 60 | 0 | 726 | 24 | 33 | 1 | 411 | 12 | 1,230 | 37 |
| 16,278 | 60 | 0 | 725 | 24 | 33 | 1 | 410 | 12 | 1,228 | 37 |
| 16,279 | 41 | 0 | 659 | 24 | 28 | 1 | 339 | 12 | 1,067 | 37 |
| 16,280 | 38 | 0 | 646 | 24 | 27 | 1 | 332 | 12 | 1,043 | 37 |
| 16,281 | 38 | 0 | 646 | 24 | 27 | 1 | 331 | 12 | 1,042 | 37 |
| 16,282 | 44 | 0 | 690 | 24 | 27 | 1 | 369 | 13 | 1,130 | 38 |
| 16,283 | 44 | 0 | 692 | 25 | 27 | 1 | 371 | 13 | 1,134 | 39 |
| 16,284 | 44 | 0 | 692 | 25 | 27 | 1 | 371 | 13 | 1,134 | 39 |
| 16,285 | 45 | 0 | 695 | 24 | 27 | 1 | 371 | 13 | 1,138 | 38 |
| 16,286 | 45 | 0 | 697 | 24 | 27 | 1 | 371 | 14 | 1,140 | 39 |
| 16,287 | 45 | 0 | 697 | 24 | 27 | 1 | 370 | 14 | 1,139 | 39 |
| 16,288 | 45 | 0 | 702 | 24 | 27 | 1 | 370 | 14 | 1,144 | 39 |
| 16,289 | 45 | 0 | 702 | 24 | 27 | 1 | 370 | 14 | 1,144 | 39 |
| 16,290 | 47 | 0 | 707 | 24 | 27 | 1 | 370 | 14 | 1,151 | 39 |
| 16,291 | 49 | 0 | 724 | 24 | 27 | 1 | 379 | 14 | 1,179 | 39 |
| 16,292 | 49 | 0 | 724 | 24 | 27 | 1 | 378 | 16 | 1,178 | 41 |
| 16,293 | 49 | 0 | 727 | 24 | 28 | 1 | 377 | 18 | 1,181 | 43 |
| 16,294 | 52 | 0 | 769 | 24 | 29 | 1 | 395 | 18 | 1,245 | 43 |
| 16,295 | 56 | 0 | 776 | 24 | 29 | 1 | 397 | 18 | 1,258 | 43 |
| 16,296 | 56 | 0 | 781 | 24 | 29 | 1 | 403 | 18 | 1,269 | 43 |
| 16,297 | 57 | 0 | 797 | 23 | 30 | 1 | 412 | 18 | 1,296 | 42 |
| 16,298 | 57 | 0 | 806 | 21 | 30 | 1 | 425 | 17 | 1,318 | 39 |
| 16,299 | 62 | 0 | 837 | 21 | 31 | 1 | 462 | 17 | 1,392 | 39 |
| 16,300 | 62 | 0 | 831 | 21 | 31 | 1 | 460 | 17 | 1,384 | 39 |
| 16,301 | 66 | 0 | 848 | 23 | 33 | 1 | 480 | 17 | 1,427 | 41 |
| 16,302 | 66 | 0 | 844 | 25 | 32 | 1 | 482 | 21 | 1,424 | 47 |
| 16,303 | 65 | 0 | 833 | 27 | 33 | 1 | 478 | 21 | 1,409 | 49 |
| 16,304 | 64 | 0 | 768 | 27 | 31 | 1 | 447 | 21 | 1,310 | 49 |
| 16,305 | 46 | 0 | 561 | 27 | 25 | 1 | 357 | 21 | 989   | 49 |
| 16,306 | 39 | 0 | 439 | 27 | 19 | 1 | 273 | 21 | 770   | 49 |

|        |    |   |       |    |    |   |     |    |       |    |
|--------|----|---|-------|----|----|---|-----|----|-------|----|
| 16,307 | 30 | 0 | 307   | 26 | 10 | 1 | 198 | 21 | 545   | 48 |
| 16,308 | 30 | 0 | 296   | 26 | 9  | 1 | 185 | 21 | 520   | 48 |
| 16,309 | 30 | 0 | 293   | 26 | 9  | 1 | 184 | 21 | 516   | 48 |
| 16,310 | 30 | 0 | 292   | 26 | 9  | 1 | 182 | 21 | 513   | 48 |
| 16,311 | 31 | 0 | 292   | 26 | 9  | 2 | 182 | 21 | 514   | 49 |
| 16,312 | 31 | 0 | 292   | 26 | 9  | 2 | 182 | 21 | 514   | 49 |
| 16,313 | 31 | 0 | 290   | 26 | 9  | 2 | 182 | 21 | 512   | 49 |
| 16,314 | 31 | 0 | 289   | 26 | 9  | 2 | 182 | 21 | 511   | 49 |
| 16,315 | 31 | 0 | 290   | 23 | 9  | 2 | 182 | 21 | 512   | 46 |
| 16,316 | 32 | 0 | 290   | 23 | 10 | 2 | 186 | 20 | 518   | 45 |
| 16,317 | 32 | 0 | 290   | 22 | 10 | 2 | 186 | 20 | 518   | 44 |
| 16,318 | 33 | 0 | 293   | 22 | 10 | 2 | 189 | 21 | 525   | 45 |
| 16,319 | 33 | 0 | 287   | 21 | 10 | 2 | 184 | 21 | 514   | 44 |
| 16,320 | 31 | 0 | 262   | 21 | 10 | 2 | 182 | 21 | 485   | 44 |
| 16,321 | 31 | 0 | 251   | 21 | 10 | 2 | 181 | 21 | 473   | 44 |
| 16,322 | 31 | 0 | 244   | 21 | 9  | 2 | 175 | 20 | 459   | 43 |
| 16,323 | 31 | 0 | 234   | 21 | 9  | 2 | 176 | 17 | 450   | 40 |
| 16,324 | 31 | 0 | 232   | 8  | 9  | 1 | 174 | 13 | 446   | 22 |
| 16,325 | 31 | 0 | 236   | 8  | 9  | 2 | 174 | 12 | 450   | 22 |
| 16,326 | 31 | 0 | 236   | 8  | 9  | 2 | 174 | 13 | 450   | 23 |
| 16,327 | 31 | 0 | 234   | 8  | 9  | 2 | 174 | 13 | 448   | 23 |
| 16,328 | 32 | 0 | 252   | 8  | 10 | 2 | 184 | 13 | 478   | 23 |
| 16,329 | 36 | 0 | 350   | 8  | 10 | 2 | 209 | 13 | 605   | 23 |
| 16,330 | 48 | 0 | 498   | 8  | 19 | 2 | 335 | 13 | 900   | 23 |
| 16,331 | 47 | 0 | 508   | 8  | 21 | 2 | 344 | 13 | 920   | 23 |
| 16,332 | 42 | 0 | 467   | 8  | 21 | 2 | 308 | 13 | 838   | 23 |
| 16,333 | 48 | 0 | 535   | 7  | 24 | 2 | 448 | 12 | 1,055 | 21 |
| 16,334 | 48 | 0 | 535   | 7  | 24 | 2 | 451 | 12 | 1,058 | 21 |
| 16,335 | 47 | 0 | 532   | 7  | 24 | 2 | 451 | 12 | 1,054 | 21 |
| 16,336 | 47 | 0 | 551   | 7  | 26 | 2 | 462 | 12 | 1,086 | 21 |
| 16,337 | 60 | 0 | 743   | 7  | 28 | 2 | 550 | 11 | 1,381 | 20 |
| 16,338 | 60 | 0 | 750   | 7  | 29 | 2 | 556 | 11 | 1,395 | 20 |
| 16,339 | 72 | 0 | 781   | 7  | 30 | 2 | 583 | 11 | 1,466 | 20 |
| 16,340 | 73 | 0 | 805   | 7  | 31 | 2 | 619 | 11 | 1,528 | 20 |
| 16,341 | 74 | 0 | 885   | 7  | 34 | 2 | 685 | 11 | 1,678 | 20 |
| 16,342 | 76 | 0 | 901   | 7  | 37 | 2 | 731 | 9  | 1,745 | 18 |
| 16,343 | 76 | 0 | 906   | 7  | 37 | 2 | 738 | 7  | 1,757 | 16 |
| 16,344 | 76 | 0 | 930   | 7  | 37 | 2 | 746 | 7  | 1,789 | 16 |
| 16,345 | 73 | 0 | 887   | 7  | 36 | 2 | 728 | 7  | 1,724 | 16 |
| 16,346 | 70 | 0 | 960   | 12 | 38 | 2 | 803 | 10 | 1,871 | 24 |
| 16,347 | 70 | 0 | 1,094 | 12 | 42 | 2 | 874 | 10 | 2,080 | 24 |

|        |     |   |       |    |    |   |       |    |       |    |
|--------|-----|---|-------|----|----|---|-------|----|-------|----|
| 16,348 | 71  | 0 | 1,107 | 12 | 41 | 2 | 894   | 11 | 2,113 | 25 |
| 16,349 | 71  | 0 | 1,098 | 13 | 41 | 2 | 881   | 13 | 2,091 | 28 |
| 16,350 | 67  | 0 | 1,079 | 13 | 40 | 2 | 879   | 14 | 2,065 | 29 |
| 16,351 | 64  | 0 | 1,066 | 11 | 38 | 2 | 861   | 14 | 2,029 | 27 |
| 16,352 | 63  | 0 | 1,062 | 11 | 38 | 2 | 859   | 14 | 2,022 | 27 |
| 16,353 | 63  | 0 | 1,061 | 7  | 37 | 2 | 858   | 13 | 2,019 | 22 |
| 16,354 | 63  | 0 | 1,060 | 8  | 36 | 2 | 858   | 13 | 2,017 | 23 |
| 16,355 | 63  | 0 | 1,060 | 8  | 36 | 2 | 859   | 13 | 2,018 | 23 |
| 16,356 | 63  | 0 | 1,061 | 8  | 36 | 2 | 859   | 13 | 2,019 | 23 |
| 16,357 | 64  | 0 | 1,064 | 8  | 36 | 2 | 861   | 13 | 2,025 | 23 |
| 16,358 | 66  | 0 | 1,068 | 8  | 36 | 2 | 868   | 13 | 2,038 | 23 |
| 16,359 | 66  | 0 | 1,071 | 8  | 36 | 2 | 870   | 13 | 2,043 | 23 |
| 16,360 | 69  | 0 | 1,083 | 8  | 36 | 2 | 878   | 13 | 2,066 | 23 |
| 16,361 | 69  | 0 | 1,102 | 8  | 37 | 2 | 886   | 15 | 2,094 | 25 |
| 16,362 | 69  | 0 | 1,102 | 8  | 37 | 1 | 886   | 15 | 2,094 | 24 |
| 16,363 | 71  | 0 | 1,122 | 9  | 37 | 1 | 901   | 15 | 2,131 | 25 |
| 16,364 | 71  | 0 | 1,122 | 12 | 37 | 1 | 901   | 15 | 2,131 | 28 |
| 16,365 | 71  | 0 | 1,131 | 12 | 38 | 1 | 914   | 17 | 2,154 | 30 |
| 16,366 | 72  | 0 | 1,137 | 12 | 38 | 1 | 921   | 17 | 2,168 | 30 |
| 16,367 | 74  | 0 | 1,151 | 12 | 38 | 1 | 931   | 16 | 2,194 | 29 |
| 16,368 | 74  | 1 | 1,151 | 12 | 38 | 1 | 931   | 17 | 2,194 | 31 |
| 16,369 | 73  | 1 | 1,147 | 12 | 38 | 1 | 928   | 17 | 2,186 | 31 |
| 16,370 | 73  | 1 | 1,154 | 13 | 38 | 1 | 928   | 16 | 2,193 | 31 |
| 16,371 | 73  | 1 | 1,291 | 12 | 42 | 1 | 999   | 16 | 2,405 | 30 |
| 16,372 | 91  | 1 | 1,361 | 12 | 46 | 1 | 1,103 | 16 | 2,601 | 30 |
| 16,373 | 95  | 1 | 1,417 | 12 | 48 | 1 | 1,129 | 16 | 2,689 | 30 |
| 16,374 | 96  | 1 | 1,436 | 12 | 49 | 1 | 1,142 | 16 | 2,723 | 30 |
| 16,375 | 96  | 1 | 1,434 | 12 | 49 | 0 | 1,143 | 16 | 2,722 | 29 |
| 16,376 | 101 | 1 | 1,511 | 13 | 54 | 0 | 1,224 | 15 | 2,890 | 29 |
| 16,377 | 101 | 1 | 1,518 | 13 | 54 | 0 | 1,230 | 15 | 2,903 | 29 |
| 16,378 | 102 | 1 | 1,526 | 13 | 56 | 0 | 1,248 | 15 | 2,932 | 29 |
| 16,379 | 102 | 1 | 1,519 | 13 | 56 | 0 | 1,245 | 15 | 2,922 | 29 |
| 16,380 | 99  | 1 | 1,428 | 13 | 56 | 0 | 1,222 | 15 | 2,805 | 29 |
| 16,381 | 87  | 1 | 1,279 | 13 | 47 | 0 | 1,092 | 15 | 2,505 | 29 |
| 16,382 | 87  | 1 | 1,263 | 13 | 45 | 0 | 1,081 | 15 | 2,476 | 29 |
| 16,383 | 81  | 1 | 1,202 | 13 | 42 | 0 | 946   | 15 | 2,271 | 29 |
| 16,384 | 81  | 1 | 1,194 | 13 | 42 | 0 | 941   | 15 | 2,258 | 29 |
| 16,385 | 82  | 1 | 1,179 | 13 | 41 | 0 | 930   | 15 | 2,232 | 29 |
| 16,386 | 82  | 1 | 1,173 | 13 | 40 | 0 | 930   | 15 | 2,225 | 29 |
| 16,387 | 82  | 1 | 1,167 | 13 | 41 | 0 | 929   | 15 | 2,219 | 29 |
| 16,388 | 69  | 1 | 986   | 13 | 39 | 0 | 848   | 15 | 1,942 | 29 |



|        |    |   |     |    |    |   |     |    |       |    |
|--------|----|---|-----|----|----|---|-----|----|-------|----|
| 16,389 | 69 | 1 | 974 | 14 | 38 | 0 | 842 | 15 | 1,923 | 30 |
| 16,390 | 57 | 1 | 943 | 14 | 37 | 0 | 818 | 15 | 1,855 | 30 |
| 16,391 | 54 | 1 | 914 | 14 | 36 | 0 | 783 | 15 | 1,787 | 30 |
| 16,392 | 53 | 1 | 833 | 14 | 33 | 0 | 717 | 16 | 1,636 | 31 |
| 16,393 | 49 | 1 | 801 | 14 | 30 | 0 | 663 | 16 | 1,543 | 31 |
| 16,394 | 49 | 1 | 796 | 15 | 30 | 0 | 657 | 16 | 1,532 | 32 |
| 16,395 | 49 | 1 | 769 | 15 | 29 | 0 | 649 | 16 | 1,496 | 32 |
| 16,396 | 49 | 1 | 753 | 15 | 29 | 0 | 640 | 16 | 1,471 | 32 |
| 16,397 | 48 | 1 | 684 | 10 | 27 | 0 | 572 | 13 | 1,331 | 24 |
| 16,398 | 48 | 1 | 548 | 10 | 23 | 0 | 496 | 12 | 1,115 | 23 |
| 16,399 | 46 | 1 | 519 | 10 | 23 | 0 | 466 | 12 | 1,054 | 23 |
| 16,400 | 45 | 1 | 513 | 9  | 23 | 0 | 434 | 11 | 1,015 | 21 |
| 16,401 | 45 | 1 | 511 | 9  | 23 | 0 | 431 | 10 | 1,010 | 20 |
| 16,402 | 47 | 1 | 515 | 9  | 23 | 0 | 435 | 10 | 1,020 | 20 |
| 16,403 | 47 | 1 | 519 | 9  | 23 | 0 | 433 | 7  | 1,022 | 17 |
| 16,404 | 47 | 1 | 519 | 9  | 23 | 0 | 433 | 7  | 1,022 | 17 |
| 16,405 | 47 | 1 | 519 | 8  | 23 | 0 | 432 | 7  | 1,021 | 16 |
| 16,406 | 47 | 1 | 518 | 8  | 23 | 0 | 432 | 7  | 1,020 | 16 |
| 16,407 | 47 | 1 | 516 | 8  | 24 | 0 | 438 | 7  | 1,025 | 16 |
| 16,408 | 47 | 1 | 516 | 8  | 24 | 0 | 440 | 7  | 1,027 | 16 |
| 16,409 | 45 | 1 | 520 | 8  | 24 | 0 | 440 | 8  | 1,029 | 17 |
| 16,410 | 45 | 2 | 517 | 11 | 24 | 0 | 438 | 8  | 1,024 | 21 |
| 16,411 | 43 | 2 | 508 | 11 | 24 | 0 | 430 | 8  | 1,005 | 21 |
| 16,412 | 42 | 2 | 489 | 11 | 23 | 0 | 422 | 6  | 976   | 19 |
| 16,413 | 43 | 2 | 480 | 11 | 23 | 0 | 419 | 6  | 965   | 19 |
| 16,414 | 42 | 2 | 478 | 10 | 23 | 0 | 410 | 6  | 953   | 18 |
| 16,415 | 44 | 2 | 497 | 8  | 22 | 0 | 413 | 4  | 976   | 14 |
| 16,416 | 47 | 3 | 507 | 8  | 24 | 0 | 445 | 4  | 1,023 | 15 |
| 16,417 | 45 | 3 | 500 | 8  | 24 | 0 | 435 | 4  | 1,004 | 15 |
| 16,418 | 46 | 3 | 500 | 8  | 26 | 0 | 437 | 4  | 1,009 | 15 |
| 16,419 | 46 | 2 | 530 | 8  | 27 | 0 | 454 | 3  | 1,057 | 13 |
| 16,420 | 48 | 2 | 553 | 8  | 30 | 0 | 497 | 3  | 1,128 | 13 |
| 16,421 | 48 | 2 | 556 | 8  | 31 | 0 | 495 | 3  | 1,130 | 13 |
| 16,422 | 48 | 2 | 425 | 8  | 27 | 0 | 429 | 3  | 929   | 13 |
| 16,423 | 30 | 2 | 355 | 8  | 23 | 0 | 325 | 5  | 733   | 15 |
| 16,424 | 26 | 3 | 299 | 8  | 21 | 0 | 296 | 5  | 642   | 16 |
| 16,425 | 28 | 3 | 283 | 8  | 20 | 0 | 285 | 5  | 616   | 16 |
| 16,426 | 28 | 3 | 297 | 8  | 20 | 0 | 292 | 5  | 637   | 16 |
| 16,427 | 31 | 3 | 313 | 7  | 20 | 0 | 254 | 5  | 618   | 15 |
| 16,428 | 31 | 3 | 305 | 7  | 20 | 0 | 249 | 5  | 605   | 15 |
| 16,429 | 39 | 3 | 353 | 7  | 25 | 0 | 283 | 5  | 700   | 15 |

|        |    |   |     |   |    |   |     |   |       |    |
|--------|----|---|-----|---|----|---|-----|---|-------|----|
| 16,430 | 49 | 3 | 392 | 7 | 30 | 0 | 323 | 5 | 794   | 15 |
| 16,431 | 51 | 3 | 404 | 7 | 31 | 0 | 327 | 5 | 813   | 15 |
| 16,432 | 52 | 3 | 418 | 7 | 32 | 0 | 332 | 5 | 834   | 15 |
| 16,433 | 52 | 3 | 418 | 7 | 32 | 0 | 332 | 5 | 834   | 15 |
| 16,434 | 59 | 3 | 501 | 7 | 36 | 0 | 371 | 6 | 967   | 16 |
| 16,435 | 65 | 3 | 563 | 7 | 43 | 0 | 434 | 6 | 1,105 | 16 |
| 16,436 | 72 | 3 | 672 | 8 | 48 | 0 | 510 | 6 | 1,302 | 17 |
| 16,437 | 73 | 3 | 676 | 8 | 48 | 0 | 513 | 6 | 1,310 | 17 |
| 16,438 | 74 | 3 | 680 | 8 | 47 | 0 | 521 | 6 | 1,322 | 17 |
| 16,439 | 74 | 3 | 679 | 7 | 48 | 0 | 517 | 6 | 1,318 | 16 |
| 16,440 | 74 | 3 | 681 | 7 | 48 | 0 | 517 | 6 | 1,320 | 16 |
| 16,441 | 74 | 3 | 686 | 7 | 48 | 0 | 517 | 6 | 1,325 | 16 |
| 16,442 | 74 | 3 | 686 | 7 | 48 | 0 | 516 | 6 | 1,324 | 16 |
| 16,443 | 74 | 3 | 696 | 7 | 48 | 0 | 520 | 5 | 1,338 | 15 |
| 16,444 | 74 | 3 | 704 | 6 | 48 | 0 | 523 | 5 | 1,349 | 14 |
| 16,445 | 74 | 3 | 705 | 6 | 48 | 0 | 522 | 5 | 1,349 | 14 |
| 16,446 | 74 | 3 | 705 | 6 | 48 | 0 | 522 | 5 | 1,349 | 14 |
| 16,447 | 74 | 3 | 708 | 7 | 48 | 0 | 524 | 7 | 1,354 | 17 |
| 16,448 | 74 | 3 | 708 | 7 | 48 | 0 | 526 | 9 | 1,356 | 19 |
| 16,449 | 74 | 3 | 709 | 7 | 48 | 0 | 525 | 9 | 1,356 | 19 |
| 16,450 | 74 | 3 | 709 | 9 | 48 | 0 | 525 | 9 | 1,356 | 21 |
| 16,451 | 74 | 3 | 705 | 9 | 48 | 0 | 525 | 8 | 1,352 | 20 |
| 16,452 | 72 | 3 | 701 | 9 | 48 | 0 | 521 | 8 | 1,342 | 20 |
| 16,453 | 72 | 3 | 695 | 9 | 48 | 0 | 520 | 8 | 1,335 | 20 |
| 16,454 | 72 | 3 | 697 | 9 | 48 | 0 | 520 | 8 | 1,337 | 20 |
| 16,455 | 71 | 3 | 697 | 9 | 48 | 0 | 521 | 8 | 1,337 | 20 |
| 16,456 | 71 | 3 | 696 | 9 | 48 | 0 | 522 | 8 | 1,337 | 20 |
| 16,457 | 71 | 3 | 696 | 9 | 48 | 0 | 519 | 8 | 1,334 | 20 |
| 16,458 | 72 | 3 | 692 | 9 | 48 | 0 | 516 | 8 | 1,328 | 20 |
| 16,459 | 72 | 3 | 691 | 9 | 48 | 0 | 516 | 8 | 1,327 | 20 |
| 16,460 | 72 | 3 | 688 | 9 | 48 | 0 | 510 | 7 | 1,318 | 19 |
| 16,461 | 72 | 2 | 687 | 6 | 48 | 0 | 510 | 7 | 1,317 | 15 |
| 16,462 | 72 | 2 | 693 | 6 | 48 | 0 | 512 | 7 | 1,325 | 15 |
| 16,463 | 72 | 2 | 689 | 6 | 48 | 0 | 512 | 7 | 1,321 | 15 |
| 16,464 | 70 | 2 | 691 | 6 | 48 | 0 | 513 | 7 | 1,322 | 15 |
| 16,465 | 70 | 1 | 701 | 5 | 48 | 0 | 523 | 7 | 1,342 | 13 |
| 16,466 | 69 | 1 | 688 | 5 | 49 | 0 | 526 | 8 | 1,332 | 14 |
| 16,467 | 66 | 1 | 673 | 5 | 47 | 1 | 490 | 8 | 1,276 | 15 |
| 16,468 | 66 | 1 | 669 | 5 | 47 | 1 | 489 | 8 | 1,271 | 15 |
| 16,469 | 63 | 1 | 658 | 5 | 44 | 1 | 477 | 8 | 1,242 | 15 |
| 16,470 | 63 | 1 | 628 | 5 | 43 | 1 | 461 | 8 | 1,195 | 15 |

|        |    |   |     |   |    |   |     |   |       |    |
|--------|----|---|-----|---|----|---|-----|---|-------|----|
| 16,471 | 61 | 1 | 596 | 4 | 40 | 1 | 418 | 8 | 1,115 | 14 |
| 16,472 | 61 | 1 | 589 | 4 | 39 | 1 | 414 | 8 | 1,103 | 14 |
| 16,473 | 61 | 1 | 591 | 4 | 39 | 1 | 415 | 8 | 1,106 | 14 |
| 16,474 | 61 | 1 | 592 | 4 | 39 | 1 | 415 | 6 | 1,107 | 12 |
| 16,475 | 59 | 0 | 589 | 4 | 39 | 1 | 414 | 6 | 1,101 | 11 |
| 16,476 | 59 | 0 | 589 | 4 | 39 | 1 | 414 | 6 | 1,101 | 11 |
| 16,477 | 59 | 0 | 573 | 5 | 39 | 1 | 407 | 6 | 1,078 | 12 |
| 16,478 | 51 | 0 | 476 | 5 | 34 | 1 | 361 | 6 | 922   | 12 |
| 16,479 | 42 | 0 | 410 | 5 | 26 | 1 | 305 | 6 | 783   | 12 |
| 16,480 | 41 | 0 | 403 | 5 | 26 | 1 | 298 | 6 | 768   | 12 |
| 16,481 | 30 | 0 | 364 | 5 | 21 | 1 | 256 | 6 | 671   | 12 |
| 16,482 | 28 | 0 | 351 | 5 | 20 | 1 | 252 | 6 | 651   | 12 |
| 16,483 | 28 | 0 | 338 | 6 | 19 | 1 | 249 | 7 | 634   | 14 |
| 16,484 | 21 | 0 | 253 | 6 | 15 | 1 | 208 | 7 | 497   | 14 |
| 16,485 | 15 | 0 | 190 | 7 | 8  | 1 | 144 | 6 | 357   | 14 |
| 16,486 | 7  | 0 | 98  | 7 | 3  | 1 | 73  | 6 | 181   | 14 |
| 16,487 | 7  | 0 | 82  | 6 | 3  | 1 | 70  | 6 | 162   | 13 |
| 16,488 | 6  | 0 | 78  | 6 | 3  | 1 | 68  | 6 | 155   | 13 |
| 16,489 | 5  | 0 | 72  | 6 | 3  | 1 | 60  | 6 | 140   | 13 |
| 16,490 | 6  | 0 | 85  | 6 | 2  | 1 | 62  | 6 | 155   | 13 |
| 16,491 | 7  | 0 | 85  | 6 | 3  | 1 | 65  | 6 | 160   | 13 |
| 16,492 | 7  | 0 | 83  | 6 | 6  | 1 | 68  | 6 | 164   | 13 |
| 16,493 | 7  | 0 | 92  | 6 | 6  | 1 | 72  | 6 | 177   | 13 |
| 16,494 | 7  | 0 | 90  | 6 | 6  | 1 | 74  | 6 | 177   | 13 |
| 16,495 | 7  | 0 | 83  | 6 | 6  | 1 | 70  | 6 | 166   | 13 |
| 16,496 | 7  | 0 | 86  | 6 | 6  | 1 | 73  | 6 | 172   | 13 |
| 16,497 | 7  | 0 | 82  | 6 | 6  | 1 | 71  | 6 | 166   | 13 |
| 16,498 | 7  | 0 | 93  | 5 | 6  | 1 | 71  | 4 | 177   | 10 |
| 16,499 | 19 | 0 | 139 | 5 | 8  | 1 | 104 | 2 | 270   | 8  |
| 16,500 | 19 | 0 | 139 | 5 | 8  | 1 | 104 | 2 | 270   | 8  |
| 16,501 | 27 | 0 | 155 | 3 | 8  | 1 | 128 | 2 | 318   | 6  |
| 16,502 | 30 | 0 | 179 | 3 | 11 | 1 | 149 | 2 | 369   | 6  |
| 16,503 | 30 | 0 | 179 | 3 | 10 | 1 | 147 | 2 | 366   | 6  |
| 16,504 | 38 | 0 | 209 | 3 | 10 | 1 | 170 | 2 | 427   | 6  |
| 16,505 | 38 | 0 | 210 | 3 | 10 | 1 | 169 | 2 | 427   | 6  |
| 16,506 | 38 | 0 | 210 | 3 | 10 | 1 | 168 | 2 | 426   | 6  |
| 16,507 | 39 | 0 | 216 | 3 | 10 | 1 | 171 | 2 | 436   | 6  |
| 16,508 | 39 | 0 | 230 | 3 | 11 | 1 | 178 | 2 | 458   | 6  |
| 16,509 | 39 | 0 | 243 | 3 | 11 | 1 | 188 | 2 | 481   | 6  |
| 16,510 | 38 | 0 | 243 | 3 | 11 | 1 | 188 | 2 | 480   | 6  |
| 16,511 | 45 | 0 | 263 | 4 | 12 | 1 | 203 | 2 | 523   | 7  |

|        |    |   |     |   |    |   |     |   |     |   |
|--------|----|---|-----|---|----|---|-----|---|-----|---|
| 16,512 | 46 | 0 | 272 | 4 | 13 | 1 | 215 | 2 | 546 | 7 |
| 16,513 | 53 | 0 | 331 | 4 | 18 | 1 | 283 | 2 | 685 | 7 |
| 16,514 | 54 | 0 | 352 | 4 | 19 | 1 | 305 | 2 | 730 | 7 |
| 16,515 | 55 | 0 | 359 | 4 | 20 | 1 | 326 | 2 | 760 | 7 |
| 16,516 | 55 | 0 | 347 | 4 | 20 | 1 | 319 | 2 | 741 | 7 |
| 16,517 | 54 | 0 | 343 | 4 | 19 | 1 | 309 | 1 | 725 | 6 |
| 16,518 | 54 | 0 | 338 | 4 | 19 | 0 | 305 | 1 | 716 | 5 |
| 16,519 | 55 | 0 | 347 | 4 | 19 | 0 | 307 | 1 | 728 | 5 |
| 16,520 | 55 | 0 | 347 | 4 | 19 | 0 | 307 | 1 | 728 | 5 |
| 16,521 | 57 | 1 | 358 | 5 | 19 | 0 | 308 | 1 | 742 | 7 |
| 16,522 | 59 | 1 | 371 | 5 | 20 | 0 | 313 | 1 | 763 | 7 |
| 16,523 | 61 | 1 | 375 | 5 | 20 | 0 | 319 | 1 | 775 | 7 |
| 16,524 | 64 | 1 | 379 | 5 | 20 | 0 | 321 | 1 | 784 | 7 |
| 16,525 | 64 | 1 | 382 | 5 | 20 | 0 | 324 | 1 | 790 | 7 |
| 16,526 | 64 | 1 | 382 | 5 | 20 | 0 | 324 | 1 | 790 | 7 |
| 16,527 | 65 | 1 | 384 | 5 | 20 | 0 | 324 | 1 | 793 | 7 |
| 16,528 | 65 | 1 | 391 | 4 | 20 | 0 | 329 | 1 | 805 | 6 |
| 16,529 | 65 | 1 | 404 | 4 | 21 | 0 | 357 | 1 | 847 | 6 |
| 16,530 | 68 | 1 | 427 | 4 | 22 | 0 | 370 | 1 | 887 | 6 |
| 16,531 | 68 | 1 | 429 | 4 | 23 | 0 | 378 | 1 | 898 | 6 |
| 16,532 | 68 | 1 | 429 | 3 | 23 | 0 | 378 | 0 | 898 | 4 |
| 16,533 | 68 | 1 | 429 | 3 | 23 | 0 | 378 | 0 | 898 | 4 |
| 16,534 | 67 | 1 | 429 | 3 | 23 | 0 | 377 | 0 | 896 | 4 |
| 16,535 | 67 | 1 | 429 | 2 | 23 | 0 | 377 | 0 | 896 | 3 |
| 16,536 | 67 | 1 | 429 | 3 | 23 | 0 | 377 | 0 | 896 | 4 |
| 16,537 | 67 | 1 | 429 | 3 | 23 | 0 | 376 | 0 | 895 | 4 |
| 16,538 | 67 | 1 | 429 | 3 | 23 | 0 | 376 | 0 | 895 | 4 |
| 16,539 | 67 | 1 | 429 | 3 | 23 | 0 | 375 | 0 | 894 | 4 |
| 16,540 | 67 | 1 | 427 | 3 | 23 | 0 | 374 | 0 | 891 | 4 |
| 16,541 | 67 | 1 | 414 | 3 | 23 | 0 | 371 | 0 | 875 | 4 |
| 16,542 | 66 | 1 | 412 | 3 | 22 | 0 | 368 | 0 | 868 | 4 |
| 16,543 | 66 | 1 | 409 | 3 | 19 | 0 | 362 | 0 | 856 | 4 |
| 16,544 | 66 | 1 | 393 | 3 | 19 | 0 | 355 | 0 | 833 | 4 |
| 16,545 | 66 | 1 | 394 | 3 | 19 | 0 | 354 | 0 | 833 | 4 |
| 16,546 | 66 | 1 | 393 | 3 | 19 | 0 | 354 | 0 | 832 | 4 |
| 16,547 | 66 | 1 | 389 | 3 | 19 | 0 | 352 | 0 | 826 | 4 |
| 16,548 | 66 | 1 | 380 | 3 | 19 | 0 | 350 | 0 | 815 | 4 |
| 16,549 | 54 | 1 | 337 | 3 | 17 | 0 | 321 | 0 | 729 | 4 |
| 16,550 | 54 | 1 | 335 | 3 | 17 | 0 | 317 | 0 | 723 | 4 |
| 16,551 | 46 | 1 | 321 | 3 | 17 | 0 | 294 | 0 | 678 | 4 |
| 16,552 | 46 | 1 | 316 | 3 | 17 | 0 | 289 | 0 | 668 | 4 |

|        |    |   |     |   |    |   |     |   |     |    |
|--------|----|---|-----|---|----|---|-----|---|-----|----|
| 16,553 | 43 | 1 | 300 | 3 | 15 | 0 | 275 | 0 | 633 | 4  |
| 16,554 | 40 | 1 | 290 | 3 | 15 | 0 | 273 | 0 | 618 | 4  |
| 16,555 | 36 | 1 | 275 | 3 | 15 | 0 | 252 | 0 | 578 | 4  |
| 16,556 | 36 | 1 | 274 | 3 | 15 | 0 | 253 | 0 | 578 | 4  |
| 16,557 | 35 | 1 | 273 | 3 | 15 | 0 | 248 | 0 | 571 | 4  |
| 16,558 | 35 | 1 | 259 | 3 | 14 | 0 | 241 | 0 | 549 | 4  |
| 16,559 | 34 | 1 | 259 | 3 | 14 | 0 | 238 | 0 | 545 | 4  |
| 16,560 | 34 | 1 | 249 | 3 | 14 | 0 | 234 | 0 | 531 | 4  |
| 16,561 | 29 | 1 | 260 | 5 | 16 | 0 | 235 | 2 | 540 | 8  |
| 16,562 | 42 | 1 | 366 | 4 | 20 | 0 | 296 | 2 | 724 | 7  |
| 16,563 | 41 | 1 | 358 | 4 | 19 | 0 | 284 | 2 | 702 | 7  |
| 16,564 | 35 | 1 | 296 | 4 | 15 | 0 | 222 | 2 | 568 | 7  |
| 16,565 | 34 | 1 | 274 | 4 | 14 | 0 | 198 | 2 | 520 | 7  |
| 16,566 | 36 | 1 | 275 | 4 | 14 | 0 | 192 | 2 | 517 | 7  |
| 16,567 | 36 | 1 | 273 | 4 | 14 | 0 | 188 | 2 | 511 | 7  |
| 16,568 | 42 | 1 | 284 | 4 | 15 | 0 | 197 | 2 | 538 | 7  |
| 16,569 | 42 | 1 | 283 | 4 | 15 | 0 | 198 | 2 | 538 | 7  |
| 16,570 | 47 | 1 | 321 | 4 | 16 | 0 | 231 | 2 | 615 | 7  |
| 16,571 | 49 | 1 | 345 | 4 | 16 | 0 | 247 | 2 | 657 | 7  |
| 16,572 | 50 | 0 | 339 | 3 | 17 | 0 | 251 | 2 | 657 | 5  |
| 16,573 | 49 | 0 | 338 | 4 | 16 | 0 | 253 | 3 | 656 | 7  |
| 16,574 | 47 | 0 | 343 | 4 | 16 | 0 | 249 | 3 | 655 | 7  |
| 16,575 | 43 | 0 | 337 | 4 | 16 | 0 | 246 | 3 | 642 | 7  |
| 16,576 | 43 | 0 | 336 | 5 | 16 | 0 | 243 | 3 | 638 | 8  |
| 16,577 | 42 | 0 | 334 | 5 | 16 | 0 | 243 | 3 | 635 | 8  |
| 16,578 | 42 | 0 | 327 | 6 | 16 | 0 | 238 | 4 | 623 | 10 |
| 16,579 | 42 | 0 | 328 | 6 | 16 | 0 | 238 | 4 | 624 | 10 |
| 16,580 | 42 | 0 | 318 | 6 | 15 | 0 | 210 | 4 | 585 | 10 |
| 16,581 | 39 | 0 | 306 | 6 | 14 | 0 | 199 | 4 | 558 | 10 |
| 16,582 | 41 | 0 | 327 | 6 | 14 | 0 | 194 | 4 | 576 | 10 |
| 16,583 | 41 | 0 | 331 | 6 | 14 | 0 | 194 | 4 | 580 | 10 |
| 16,584 | 41 | 0 | 331 | 6 | 14 | 0 | 194 | 4 | 580 | 10 |
| 16,585 | 41 | 0 | 334 | 6 | 14 | 0 | 195 | 4 | 584 | 10 |
| 16,586 | 41 | 0 | 335 | 6 | 15 | 0 | 197 | 4 | 588 | 10 |
| 16,587 | 41 | 0 | 335 | 5 | 15 | 0 | 197 | 4 | 588 | 9  |
| 16,588 | 41 | 0 | 335 | 5 | 15 | 0 | 197 | 4 | 588 | 9  |
| 16,589 | 42 | 0 | 335 | 5 | 15 | 0 | 198 | 4 | 590 | 9  |
| 16,590 | 42 | 0 | 335 | 5 | 15 | 0 | 200 | 4 | 592 | 9  |
| 16,591 | 42 | 0 | 335 | 5 | 15 | 0 | 200 | 4 | 592 | 9  |
| 16,592 | 41 | 0 | 335 | 5 | 15 | 0 | 200 | 4 | 591 | 9  |
| 16,593 | 41 | 0 | 337 | 5 | 15 | 0 | 202 | 4 | 595 | 9  |

|        |    |   |     |   |    |   |     |   |     |    |
|--------|----|---|-----|---|----|---|-----|---|-----|----|
| 16,594 | 41 | 0 | 337 | 5 | 15 | 0 | 202 | 4 | 595 | 9  |
| 16,595 | 41 | 0 | 336 | 5 | 15 | 0 | 201 | 4 | 593 | 9  |
| 16,596 | 41 | 0 | 335 | 5 | 15 | 0 | 200 | 4 | 591 | 9  |
| 16,597 | 41 | 0 | 339 | 5 | 15 | 0 | 200 | 4 | 595 | 9  |
| 16,598 | 41 | 0 | 339 | 5 | 15 | 0 | 199 | 4 | 594 | 9  |
| 16,599 | 41 | 0 | 342 | 6 | 15 | 0 | 205 | 4 | 603 | 10 |
| 16,600 | 41 | 0 | 342 | 6 | 15 | 0 | 206 | 4 | 604 | 10 |
| 16,601 | 41 | 0 | 342 | 7 | 15 | 0 | 205 | 4 | 603 | 11 |
| 16,602 | 41 | 0 | 340 | 7 | 15 | 0 | 205 | 4 | 601 | 11 |
| 16,603 | 41 | 0 | 339 | 7 | 14 | 0 | 208 | 4 | 602 | 11 |
| 16,604 | 43 | 0 | 350 | 7 | 14 | 0 | 224 | 4 | 631 | 11 |
| 16,605 | 43 | 0 | 352 | 7 | 14 | 0 | 224 | 4 | 633 | 11 |
| 16,606 | 42 | 0 | 347 | 7 | 14 | 0 | 224 | 4 | 627 | 11 |
| 16,607 | 42 | 0 | 347 | 7 | 14 | 0 | 223 | 4 | 626 | 11 |
| 16,608 | 42 | 0 | 346 | 7 | 14 | 0 | 225 | 4 | 627 | 11 |
| 16,609 | 42 | 0 | 346 | 7 | 14 | 0 | 224 | 4 | 626 | 11 |
| 16,610 | 42 | 0 | 343 | 7 | 14 | 0 | 223 | 4 | 622 | 11 |
| 16,611 | 42 | 0 | 342 | 5 | 14 | 0 | 222 | 2 | 620 | 7  |
| 16,612 | 42 | 0 | 329 | 5 | 12 | 0 | 221 | 2 | 604 | 7  |
| 16,613 | 27 | 0 | 211 | 5 | 7  | 0 | 147 | 2 | 392 | 7  |
| 16,614 | 27 | 0 | 211 | 6 | 7  | 0 | 148 | 2 | 393 | 8  |
| 16,615 | 27 | 0 | 214 | 6 | 7  | 0 | 141 | 2 | 389 | 8  |
| 16,616 | 28 | 1 | 213 | 6 | 7  | 0 | 138 | 3 | 386 | 10 |
| 16,617 | 25 | 2 | 205 | 7 | 6  | 0 | 126 | 3 | 362 | 12 |
| 16,618 | 22 | 2 | 202 | 7 | 7  | 0 | 129 | 3 | 360 | 12 |
| 16,619 | 19 | 2 | 210 | 7 | 6  | 0 | 129 | 3 | 364 | 12 |
| 16,620 | 15 | 2 | 180 | 7 | 5  | 0 | 107 | 3 | 307 | 12 |
| 16,621 | 14 | 2 | 175 | 7 | 6  | 0 | 104 | 3 | 299 | 12 |
| 16,622 | 12 | 2 | 151 | 7 | 6  | 0 | 88  | 3 | 257 | 12 |
| 16,623 | 9  | 2 | 146 | 7 | 5  | 0 | 82  | 4 | 242 | 13 |
| 16,624 | 8  | 2 | 130 | 6 | 5  | 0 | 75  | 3 | 218 | 11 |
| 16,625 | 8  | 2 | 127 | 7 | 5  | 0 | 74  | 3 | 214 | 12 |
| 16,626 | 8  | 2 | 127 | 7 | 5  | 0 | 75  | 3 | 215 | 12 |
| 16,627 | 8  | 2 | 125 | 6 | 5  | 0 | 75  | 3 | 213 | 11 |
| 16,628 | 13 | 2 | 138 | 7 | 5  | 0 | 85  | 4 | 241 | 13 |
| 16,629 | 14 | 2 | 141 | 6 | 5  | 0 | 86  | 3 | 246 | 11 |
| 16,630 | 14 | 2 | 141 | 6 | 5  | 0 | 86  | 3 | 246 | 11 |
| 16,631 | 14 | 2 | 139 | 6 | 5  | 0 | 85  | 3 | 243 | 11 |
| 16,632 | 14 | 2 | 132 | 6 | 5  | 0 | 85  | 3 | 236 | 11 |
| 16,633 | 12 | 2 | 113 | 6 | 4  | 0 | 84  | 3 | 213 | 11 |
| 16,634 | 12 | 2 | 114 | 6 | 4  | 0 | 88  | 3 | 218 | 11 |

|        |    |   |     |    |    |   |     |   |     |    |
|--------|----|---|-----|----|----|---|-----|---|-----|----|
| 16,635 | 12 | 2 | 111 | 6  | 4  | 0 | 88  | 3 | 215 | 11 |
| 16,636 | 12 | 2 | 110 | 6  | 3  | 0 | 87  | 3 | 212 | 11 |
| 16,637 | 12 | 2 | 110 | 6  | 3  | 0 | 86  | 3 | 211 | 11 |
| 16,638 | 12 | 2 | 111 | 6  | 3  | 0 | 88  | 3 | 214 | 11 |
| 16,639 | 12 | 2 | 111 | 6  | 3  | 0 | 89  | 3 | 215 | 11 |
| 16,640 | 11 | 2 | 111 | 6  | 3  | 0 | 89  | 3 | 214 | 11 |
| 16,641 | 11 | 2 | 112 | 9  | 3  | 0 | 91  | 3 | 217 | 14 |
| 16,642 | 11 | 2 | 112 | 9  | 3  | 0 | 91  | 3 | 217 | 14 |
| 16,643 | 11 | 2 | 111 | 9  | 3  | 0 | 91  | 4 | 216 | 15 |
| 16,644 | 11 | 2 | 110 | 9  | 3  | 0 | 89  | 4 | 213 | 15 |
| 16,645 | 11 | 2 | 110 | 9  | 3  | 0 | 90  | 4 | 214 | 15 |
| 16,646 | 11 | 2 | 113 | 9  | 4  | 0 | 92  | 4 | 220 | 15 |
| 16,647 | 11 | 2 | 114 | 10 | 4  | 0 | 92  | 4 | 221 | 16 |
| 16,648 | 12 | 2 | 114 | 9  | 4  | 0 | 96  | 5 | 226 | 16 |
| 16,649 | 12 | 2 | 112 | 10 | 4  | 0 | 96  | 5 | 224 | 17 |
| 16,650 | 12 | 2 | 109 | 10 | 4  | 0 | 90  | 5 | 215 | 17 |
| 16,651 | 17 | 2 | 115 | 10 | 5  | 0 | 91  | 5 | 228 | 17 |
| 16,652 | 17 | 2 | 114 | 9  | 5  | 0 | 88  | 5 | 224 | 16 |
| 16,653 | 17 | 2 | 113 | 9  | 5  | 0 | 88  | 6 | 223 | 17 |
| 16,654 | 20 | 2 | 122 | 9  | 5  | 0 | 95  | 6 | 242 | 17 |
| 16,655 | 22 | 2 | 146 | 9  | 8  | 0 | 101 | 6 | 277 | 17 |
| 16,656 | 22 | 2 | 144 | 9  | 8  | 0 | 103 | 6 | 277 | 17 |
| 16,657 | 22 | 2 | 144 | 9  | 8  | 0 | 105 | 6 | 279 | 17 |
| 16,658 | 22 | 2 | 141 | 9  | 8  | 0 | 105 | 6 | 276 | 17 |
| 16,659 | 22 | 2 | 140 | 9  | 8  | 0 | 105 | 6 | 275 | 17 |
| 16,660 | 22 | 2 | 143 | 9  | 8  | 0 | 105 | 6 | 278 | 17 |
| 16,661 | 23 | 2 | 152 | 9  | 8  | 0 | 111 | 6 | 294 | 17 |
| 16,662 | 25 | 2 | 174 | 9  | 8  | 0 | 128 | 6 | 335 | 17 |
| 16,663 | 26 | 2 | 184 | 9  | 8  | 0 | 135 | 6 | 353 | 17 |
| 16,664 | 29 | 2 | 185 | 8  | 8  | 0 | 138 | 7 | 360 | 17 |
| 16,665 | 40 | 2 | 227 | 15 | 12 | 0 | 173 | 8 | 452 | 25 |
| 16,666 | 39 | 2 | 224 | 15 | 11 | 0 | 174 | 9 | 448 | 26 |
| 16,667 | 45 | 1 | 245 | 16 | 13 | 0 | 197 | 8 | 500 | 25 |
| 16,668 | 46 | 0 | 247 | 15 | 13 | 0 | 201 | 8 | 507 | 23 |
| 16,669 | 46 | 0 | 249 | 16 | 12 | 0 | 194 | 8 | 501 | 24 |
| 16,670 | 46 | 0 | 249 | 16 | 12 | 0 | 196 | 8 | 503 | 24 |
| 16,671 | 45 | 0 | 241 | 16 | 12 | 0 | 186 | 8 | 484 | 24 |
| 16,672 | 45 | 0 | 248 | 16 | 11 | 0 | 189 | 8 | 493 | 24 |
| 16,673 | 45 | 0 | 248 | 16 | 11 | 0 | 189 | 8 | 493 | 24 |
| 16,674 | 45 | 0 | 251 | 16 | 11 | 0 | 194 | 7 | 501 | 23 |
| 16,675 | 45 | 0 | 252 | 15 | 11 | 0 | 194 | 7 | 502 | 22 |

|        |     |   |     |    |    |   |     |   |       |    |
|--------|-----|---|-----|----|----|---|-----|---|-------|----|
| 16,676 | 45  | 0 | 249 | 14 | 11 | 0 | 194 | 6 | 499   | 20 |
| 16,677 | 45  | 0 | 252 | 14 | 11 | 0 | 193 | 7 | 501   | 21 |
| 16,678 | 40  | 0 | 244 | 14 | 11 | 0 | 188 | 7 | 483   | 21 |
| 16,679 | 40  | 0 | 243 | 14 | 11 | 0 | 188 | 7 | 482   | 21 |
| 16,680 | 39  | 0 | 241 | 15 | 11 | 1 | 186 | 7 | 477   | 23 |
| 16,681 | 41  | 0 | 246 | 15 | 12 | 1 | 188 | 8 | 487   | 24 |
| 16,682 | 41  | 0 | 245 | 15 | 12 | 1 | 188 | 8 | 486   | 24 |
| 16,683 | 41  | 0 | 241 | 15 | 12 | 1 | 189 | 8 | 483   | 24 |
| 16,684 | 41  | 0 | 237 | 17 | 12 | 1 | 187 | 8 | 477   | 26 |
| 16,685 | 41  | 0 | 232 | 17 | 12 | 1 | 183 | 8 | 468   | 26 |
| 16,686 | 41  | 0 | 232 | 17 | 12 | 1 | 182 | 8 | 467   | 26 |
| 16,687 | 42  | 0 | 235 | 18 | 12 | 1 | 184 | 8 | 473   | 27 |
| 16,688 | 42  | 0 | 234 | 18 | 12 | 1 | 182 | 8 | 470   | 27 |
| 16,689 | 42  | 0 | 234 | 18 | 12 | 2 | 181 | 8 | 469   | 28 |
| 16,690 | 42  | 0 | 235 | 18 | 12 | 2 | 181 | 8 | 470   | 28 |
| 16,691 | 42  | 0 | 235 | 18 | 12 | 2 | 181 | 8 | 470   | 28 |
| 16,692 | 42  | 0 | 234 | 15 | 12 | 2 | 177 | 8 | 465   | 25 |
| 16,693 | 42  | 0 | 247 | 15 | 12 | 2 | 179 | 7 | 480   | 24 |
| 16,694 | 42  | 0 | 247 | 15 | 12 | 2 | 179 | 7 | 480   | 24 |
| 16,695 | 46  | 0 | 264 | 15 | 13 | 2 | 184 | 7 | 507   | 24 |
| 16,696 | 46  | 0 | 264 | 15 | 12 | 2 | 183 | 7 | 505   | 24 |
| 16,697 | 46  | 0 | 264 | 14 | 12 | 2 | 184 | 7 | 506   | 23 |
| 16,698 | 64  | 0 | 316 | 14 | 12 | 2 | 222 | 7 | 614   | 23 |
| 16,699 | 65  | 0 | 316 | 13 | 12 | 2 | 220 | 6 | 613   | 21 |
| 16,700 | 65  | 0 | 320 | 13 | 12 | 2 | 220 | 6 | 617   | 21 |
| 16,701 | 64  | 0 | 328 | 13 | 13 | 2 | 225 | 6 | 630   | 21 |
| 16,702 | 92  | 0 | 413 | 13 | 16 | 2 | 299 | 6 | 820   | 21 |
| 16,703 | 94  | 0 | 442 | 13 | 16 | 2 | 316 | 5 | 868   | 20 |
| 16,704 | 95  | 0 | 448 | 13 | 16 | 2 | 318 | 5 | 877   | 20 |
| 16,705 | 92  | 0 | 445 | 13 | 16 | 2 | 312 | 5 | 865   | 20 |
| 16,706 | 88  | 0 | 414 | 13 | 13 | 2 | 288 | 5 | 803   | 20 |
| 16,707 | 88  | 0 | 417 | 13 | 13 | 2 | 286 | 5 | 804   | 20 |
| 16,708 | 88  | 0 | 417 | 13 | 13 | 2 | 284 | 5 | 802   | 20 |
| 16,709 | 99  | 0 | 481 | 13 | 17 | 2 | 324 | 5 | 921   | 20 |
| 16,710 | 99  | 0 | 495 | 13 | 17 | 2 | 328 | 5 | 939   | 20 |
| 16,711 | 109 | 0 | 599 | 13 | 29 | 2 | 388 | 5 | 1,125 | 20 |
| 16,712 | 109 | 0 | 597 | 13 | 29 | 2 | 387 | 5 | 1,122 | 20 |
| 16,713 | 108 | 0 | 592 | 13 | 32 | 2 | 394 | 5 | 1,126 | 20 |
| 16,714 | 107 | 0 | 581 | 6  | 32 | 2 | 388 | 3 | 1,108 | 11 |
| 16,715 | 104 | 0 | 577 | 6  | 32 | 2 | 384 | 3 | 1,097 | 11 |
| 16,716 | 93  | 0 | 535 | 6  | 28 | 2 | 348 | 3 | 1,004 | 11 |



|        |    |   |     |   |    |   |     |   |     |    |
|--------|----|---|-----|---|----|---|-----|---|-----|----|
| 16,717 | 93 | 0 | 532 | 6 | 28 | 2 | 344 | 2 | 997 | 10 |
| 16,718 | 86 | 0 | 510 | 5 | 26 | 2 | 321 | 2 | 943 | 9  |
| 16,719 | 85 | 0 | 508 | 5 | 26 | 2 | 316 | 2 | 935 | 9  |
| 16,720 | 85 | 0 | 498 | 4 | 26 | 2 | 313 | 2 | 922 | 8  |
| 16,721 | 85 | 0 | 488 | 4 | 26 | 2 | 308 | 2 | 907 | 8  |
| 16,722 | 85 | 0 | 478 | 4 | 26 | 2 | 306 | 2 | 895 | 8  |
| 16,723 | 85 | 0 | 478 | 4 | 26 | 2 | 305 | 2 | 894 | 8  |
| 16,724 | 85 | 0 | 475 | 5 | 26 | 2 | 303 | 2 | 889 | 9  |
| 16,725 | 85 | 0 | 476 | 5 | 26 | 2 | 300 | 2 | 887 | 9  |
| 16,726 | 85 | 1 | 475 | 5 | 26 | 2 | 300 | 2 | 886 | 10 |
| 16,727 | 85 | 1 | 474 | 5 | 26 | 2 | 299 | 3 | 884 | 11 |
| 16,728 | 86 | 1 | 469 | 5 | 26 | 2 | 297 | 2 | 878 | 10 |
| 16,729 | 86 | 1 | 466 | 5 | 26 | 2 | 297 | 2 | 875 | 10 |
| 16,730 | 84 | 1 | 461 | 4 | 25 | 1 | 296 | 1 | 866 | 7  |
| 16,731 | 84 | 1 | 462 | 4 | 25 | 1 | 297 | 1 | 868 | 7  |
| 16,732 | 84 | 1 | 463 | 4 | 25 | 1 | 296 | 1 | 868 | 7  |
| 16,733 | 84 | 1 | 463 | 4 | 25 | 1 | 296 | 1 | 868 | 7  |
| 16,734 | 84 | 1 | 463 | 2 | 25 | 1 | 294 | 2 | 866 | 6  |
| 16,735 | 84 | 1 | 463 | 2 | 25 | 1 | 294 | 2 | 866 | 6  |
| 16,736 | 84 | 1 | 465 | 2 | 25 | 1 | 294 | 2 | 868 | 6  |
| 16,737 | 83 | 1 | 462 | 2 | 25 | 1 | 292 | 2 | 862 | 6  |
| 16,738 | 83 | 1 | 462 | 2 | 25 | 1 | 292 | 2 | 862 | 6  |
| 16,739 | 83 | 1 | 464 | 2 | 25 | 1 | 294 | 2 | 866 | 6  |
| 16,740 | 83 | 1 | 468 | 2 | 25 | 0 | 311 | 2 | 887 | 5  |
| 16,741 | 84 | 1 | 468 | 2 | 25 | 0 | 312 | 2 | 889 | 5  |
| 16,742 | 84 | 1 | 468 | 2 | 25 | 0 | 312 | 2 | 889 | 5  |
| 16,743 | 84 | 1 | 459 | 2 | 25 | 0 | 311 | 2 | 879 | 5  |
| 16,744 | 84 | 1 | 455 | 2 | 25 | 0 | 312 | 2 | 876 | 5  |
| 16,745 | 80 | 1 | 440 | 2 | 24 | 0 | 308 | 2 | 852 | 5  |
| 16,746 | 80 | 1 | 442 | 2 | 24 | 0 | 313 | 2 | 859 | 5  |
| 16,747 | 80 | 1 | 451 | 3 | 25 | 0 | 323 | 2 | 879 | 6  |
| 16,748 | 81 | 1 | 485 | 3 | 25 | 0 | 343 | 2 | 934 | 6  |
| 16,749 | 63 | 1 | 441 | 3 | 28 | 0 | 317 | 3 | 849 | 7  |
| 16,750 | 62 | 1 | 455 | 3 | 28 | 0 | 329 | 3 | 874 | 7  |
| 16,751 | 64 | 1 | 460 | 3 | 28 | 0 | 334 | 3 | 886 | 7  |
| 16,752 | 64 | 1 | 453 | 3 | 28 | 0 | 331 | 3 | 876 | 7  |
| 16,753 | 33 | 1 | 363 | 3 | 24 | 0 | 255 | 3 | 675 | 7  |
| 16,754 | 33 | 1 | 339 | 3 | 24 | 0 | 241 | 3 | 637 | 7  |
| 16,755 | 32 | 1 | 336 | 3 | 24 | 0 | 238 | 3 | 630 | 7  |
| 16,756 | 34 | 1 | 333 | 3 | 24 | 0 | 238 | 3 | 629 | 7  |
| 16,757 | 35 | 1 | 332 | 3 | 24 | 0 | 239 | 3 | 630 | 7  |

|        |    |   |     |   |    |   |     |   |     |   |
|--------|----|---|-----|---|----|---|-----|---|-----|---|
| 16,758 | 35 | 1 | 331 | 4 | 24 | 0 | 241 | 3 | 631 | 8 |
| 16,759 | 33 | 1 | 362 | 4 | 23 | 0 | 249 | 3 | 667 | 8 |
| 16,760 | 25 | 1 | 313 | 4 | 20 | 0 | 215 | 3 | 573 | 8 |
| 16,761 | 25 | 1 | 300 | 4 | 20 | 0 | 211 | 3 | 556 | 8 |
| 16,762 | 14 | 1 | 192 | 4 | 10 | 0 | 150 | 3 | 366 | 8 |
| 16,763 | 14 | 1 | 205 | 4 | 8  | 0 | 137 | 3 | 364 | 8 |
| 16,764 | 15 | 1 | 221 | 4 | 8  | 0 | 136 | 3 | 380 | 8 |
| 16,765 | 15 | 1 | 219 | 4 | 8  | 0 | 135 | 3 | 377 | 8 |
| 16,766 | 22 | 1 | 256 | 4 | 11 | 0 | 156 | 3 | 445 | 8 |
| 16,767 | 22 | 1 | 263 | 4 | 12 | 0 | 156 | 3 | 453 | 8 |
| 16,768 | 22 | 1 | 263 | 4 | 12 | 0 | 156 | 3 | 453 | 8 |
| 16,769 | 22 | 1 | 270 | 4 | 12 | 0 | 156 | 3 | 460 | 8 |
| 16,770 | 22 | 1 | 283 | 4 | 13 | 0 | 164 | 3 | 482 | 8 |
| 16,771 | 22 | 1 | 283 | 4 | 13 | 0 | 164 | 3 | 482 | 8 |
| 16,772 | 22 | 1 | 287 | 4 | 13 | 0 | 165 | 3 | 487 | 8 |
| 16,773 | 22 | 1 | 287 | 4 | 13 | 0 | 165 | 3 | 487 | 8 |
| 16,774 | 23 | 1 | 318 | 4 | 13 | 0 | 177 | 3 | 531 | 8 |
| 16,775 | 23 | 1 | 318 | 3 | 13 | 0 | 179 | 3 | 533 | 7 |
| 16,776 | 23 | 2 | 318 | 3 | 13 | 0 | 179 | 3 | 533 | 8 |
| 16,777 | 23 | 1 | 318 | 3 | 13 | 0 | 178 | 3 | 532 | 7 |
| 16,778 | 23 | 1 | 318 | 3 | 13 | 0 | 178 | 2 | 532 | 6 |
| 16,779 | 22 | 1 | 320 | 3 | 13 | 0 | 180 | 2 | 535 | 6 |
| 16,780 | 22 | 1 | 322 | 3 | 13 | 0 | 182 | 2 | 539 | 6 |
| 16,781 | 22 | 1 | 322 | 3 | 13 | 0 | 182 | 2 | 539 | 6 |
| 16,782 | 22 | 1 | 323 | 3 | 13 | 0 | 181 | 2 | 539 | 6 |
| 16,783 | 22 | 1 | 325 | 3 | 13 | 0 | 181 | 2 | 541 | 6 |
| 16,784 | 22 | 1 | 325 | 3 | 13 | 0 | 181 | 2 | 541 | 6 |
| 16,785 | 22 | 1 | 327 | 3 | 14 | 0 | 181 | 1 | 544 | 5 |
| 16,786 | 22 | 1 | 327 | 3 | 14 | 0 | 181 | 1 | 544 | 5 |
| 16,787 | 22 | 1 | 325 | 2 | 14 | 0 | 181 | 1 | 542 | 4 |
| 16,788 | 22 | 1 | 325 | 2 | 14 | 0 | 181 | 1 | 542 | 4 |
| 16,789 | 22 | 1 | 323 | 2 | 14 | 0 | 179 | 2 | 538 | 5 |
| 16,790 | 22 | 1 | 322 | 2 | 14 | 0 | 176 | 3 | 534 | 6 |
| 16,791 | 22 | 1 | 329 | 2 | 14 | 0 | 163 | 3 | 528 | 6 |
| 16,792 | 21 | 1 | 328 | 2 | 14 | 0 | 163 | 3 | 526 | 6 |
| 16,793 | 21 | 1 | 328 | 2 | 14 | 0 | 163 | 3 | 526 | 6 |
| 16,794 | 21 | 1 | 330 | 2 | 14 | 0 | 163 | 3 | 528 | 6 |
| 16,795 | 21 | 1 | 330 | 2 | 14 | 0 | 162 | 3 | 527 | 6 |
| 16,796 | 21 | 1 | 332 | 2 | 14 | 0 | 160 | 3 | 527 | 6 |
| 16,797 | 21 | 2 | 329 | 2 | 14 | 0 | 158 | 5 | 522 | 9 |
| 16,798 | 21 | 2 | 320 | 1 | 13 | 0 | 148 | 5 | 502 | 8 |

|        |     |   |       |    |    |   |     |    |       |    |
|--------|-----|---|-------|----|----|---|-----|----|-------|----|
| 16,799 | 20  | 2 | 286   | 1  | 13 | 0 | 126 | 5  | 445   | 8  |
| 16,800 | 20  | 2 | 276   | 2  | 10 | 0 | 114 | 4  | 420   | 8  |
| 16,801 | 19  | 2 | 263   | 2  | 10 | 0 | 104 | 4  | 396   | 8  |
| 16,802 | 17  | 2 | 259   | 2  | 10 | 0 | 100 | 4  | 386   | 8  |
| 16,803 | 16  | 2 | 259   | 2  | 9  | 0 | 101 | 4  | 385   | 8  |
| 16,804 | 16  | 2 | 259   | 2  | 9  | 0 | 100 | 4  | 384   | 8  |
| 16,805 | 14  | 2 | 255   | 2  | 10 | 0 | 105 | 4  | 384   | 8  |
| 16,806 | 14  | 2 | 253   | 2  | 10 | 0 | 105 | 4  | 382   | 8  |
| 16,807 | 12  | 2 | 249   | 2  | 10 | 0 | 103 | 4  | 374   | 8  |
| 16,808 | 12  | 2 | 253   | 1  | 10 | 0 | 104 | 4  | 379   | 7  |
| 16,809 | 12  | 2 | 253   | 2  | 10 | 0 | 103 | 4  | 378   | 8  |
| 16,810 | 11  | 2 | 210   | 2  | 10 | 0 | 89  | 4  | 320   | 8  |
| 16,811 | 13  | 2 | 251   | 2  | 10 | 0 | 110 | 4  | 384   | 8  |
| 16,812 | 69  | 3 | 682   | 2  | 35 | 0 | 255 | 4  | 1,041 | 9  |
| 16,813 | 69  | 4 | 677   | 5  | 33 | 0 | 252 | 8  | 1,031 | 17 |
| 16,814 | 68  | 4 | 647   | 6  | 33 | 0 | 242 | 8  | 990   | 18 |
| 16,815 | 86  | 4 | 772   | 7  | 44 | 0 | 394 | 11 | 1,296 | 22 |
| 16,816 | 85  | 4 | 791   | 7  | 48 | 0 | 415 | 11 | 1,339 | 22 |
| 16,817 | 80  | 4 | 790   | 7  | 48 | 0 | 424 | 11 | 1,342 | 22 |
| 16,818 | 80  | 4 | 783   | 7  | 47 | 0 | 424 | 11 | 1,334 | 22 |
| 16,819 | 83  | 4 | 793   | 8  | 48 | 0 | 430 | 11 | 1,354 | 23 |
| 16,820 | 83  | 4 | 781   | 8  | 48 | 0 | 423 | 11 | 1,335 | 23 |
| 16,821 | 83  | 4 | 780   | 9  | 47 | 0 | 424 | 11 | 1,334 | 24 |
| 16,822 | 84  | 4 | 786   | 9  | 47 | 0 | 425 | 11 | 1,342 | 24 |
| 16,823 | 84  | 4 | 788   | 9  | 47 | 0 | 425 | 11 | 1,344 | 24 |
| 16,824 | 83  | 4 | 770   | 9  | 47 | 0 | 422 | 11 | 1,322 | 24 |
| 16,825 | 85  | 4 | 777   | 9  | 47 | 0 | 425 | 11 | 1,334 | 24 |
| 16,826 | 85  | 4 | 782   | 9  | 47 | 0 | 427 | 11 | 1,341 | 24 |
| 16,827 | 85  | 3 | 780   | 10 | 47 | 0 | 424 | 11 | 1,336 | 24 |
| 16,828 | 93  | 3 | 824   | 10 | 48 | 0 | 481 | 11 | 1,446 | 24 |
| 16,829 | 104 | 3 | 898   | 10 | 51 | 0 | 610 | 12 | 1,663 | 25 |
| 16,830 | 104 | 3 | 898   | 10 | 51 | 0 | 609 | 12 | 1,662 | 25 |
| 16,831 | 104 | 3 | 898   | 11 | 51 | 0 | 611 | 13 | 1,664 | 27 |
| 16,832 | 104 | 3 | 898   | 11 | 51 | 0 | 611 | 13 | 1,664 | 27 |
| 16,833 | 104 | 3 | 913   | 11 | 51 | 0 | 619 | 13 | 1,687 | 27 |
| 16,834 | 104 | 3 | 932   | 11 | 52 | 0 | 634 | 13 | 1,722 | 27 |
| 16,835 | 110 | 3 | 977   | 11 | 54 | 0 | 697 | 13 | 1,838 | 27 |
| 16,836 | 110 | 3 | 974   | 11 | 53 | 0 | 695 | 13 | 1,832 | 27 |
| 16,837 | 116 | 3 | 1,081 | 11 | 55 | 0 | 800 | 13 | 2,052 | 27 |
| 16,838 | 118 | 3 | 1,108 | 11 | 55 | 0 | 846 | 13 | 2,127 | 27 |
| 16,839 | 118 | 3 | 1,111 | 11 | 56 | 0 | 853 | 13 | 2,138 | 27 |

|        |     |   |       |    |    |   |     |    |       |    |
|--------|-----|---|-------|----|----|---|-----|----|-------|----|
| 16,840 | 118 | 4 | 1,113 | 11 | 56 | 0 | 853 | 11 | 2,140 | 26 |
| 16,841 | 118 | 4 | 1,113 | 11 | 57 | 0 | 854 | 11 | 2,142 | 26 |
| 16,842 | 119 | 4 | 1,106 | 11 | 57 | 0 | 853 | 11 | 2,135 | 26 |
| 16,843 | 119 | 4 | 1,104 | 11 | 57 | 0 | 852 | 11 | 2,132 | 26 |
| 16,844 | 119 | 4 | 1,106 | 11 | 57 | 0 | 857 | 11 | 2,139 | 26 |
| 16,845 | 121 | 4 | 1,130 | 11 | 58 | 0 | 870 | 11 | 2,179 | 26 |
| 16,846 | 121 | 4 | 1,131 | 11 | 58 | 0 | 873 | 11 | 2,183 | 26 |
| 16,847 | 121 | 3 | 1,128 | 11 | 58 | 0 | 872 | 9  | 2,179 | 23 |
| 16,848 | 121 | 3 | 1,128 | 11 | 58 | 0 | 869 | 9  | 2,176 | 23 |
| 16,849 | 121 | 3 | 1,126 | 11 | 58 | 0 | 869 | 9  | 2,174 | 23 |
| 16,850 | 122 | 3 | 1,128 | 11 | 58 | 0 | 876 | 9  | 2,184 | 23 |
| 16,851 | 122 | 3 | 1,129 | 10 | 58 | 0 | 876 | 9  | 2,185 | 22 |
| 16,852 | 122 | 3 | 1,126 | 10 | 58 | 0 | 878 | 9  | 2,184 | 22 |
| 16,853 | 122 | 3 | 1,125 | 10 | 58 | 0 | 878 | 9  | 2,183 | 22 |
| 16,854 | 122 | 3 | 1,122 | 11 | 58 | 0 | 875 | 9  | 2,177 | 23 |
| 16,855 | 122 | 3 | 1,122 | 11 | 57 | 0 | 871 | 9  | 2,172 | 23 |
| 16,856 | 123 | 3 | 1,126 | 11 | 57 | 0 | 870 | 9  | 2,176 | 23 |
| 16,857 | 123 | 3 | 1,125 | 11 | 57 | 0 | 870 | 9  | 2,175 | 23 |
| 16,858 | 122 | 3 | 1,127 | 11 | 57 | 0 | 875 | 9  | 2,181 | 23 |
| 16,859 | 122 | 3 | 1,127 | 10 | 57 | 0 | 874 | 9  | 2,180 | 22 |
| 16,860 | 121 | 3 | 1,124 | 10 | 57 | 0 | 873 | 9  | 2,175 | 22 |
| 16,861 | 120 | 3 | 1,107 | 10 | 57 | 0 | 864 | 9  | 2,148 | 22 |
| 16,862 | 120 | 3 | 1,085 | 10 | 57 | 0 | 853 | 10 | 2,115 | 23 |
| 16,863 | 62  | 2 | 651   | 10 | 32 | 0 | 705 | 10 | 1,450 | 22 |
| 16,864 | 57  | 1 | 635   | 10 | 28 | 0 | 687 | 7  | 1,407 | 18 |
| 16,865 | 47  | 1 | 568   | 9  | 22 | 0 | 585 | 7  | 1,222 | 17 |
| 16,866 | 46  | 1 | 520   | 10 | 20 | 0 | 554 | 4  | 1,140 | 15 |
| 16,867 | 46  | 1 | 501   | 10 | 16 | 0 | 531 | 4  | 1,094 | 15 |
| 16,868 | 45  | 1 | 486   | 9  | 13 | 0 | 517 | 4  | 1,061 | 14 |
| 16,869 | 46  | 1 | 479   | 9  | 13 | 0 | 520 | 4  | 1,058 | 14 |
| 16,870 | 43  | 1 | 473   | 9  | 12 | 0 | 517 | 5  | 1,045 | 15 |
| 16,871 | 49  | 1 | 530   | 8  | 18 | 0 | 589 | 5  | 1,186 | 14 |
| 16,872 | 49  | 1 | 529   | 8  | 18 | 0 | 589 | 5  | 1,185 | 14 |
| 16,873 | 49  | 1 | 533   | 8  | 18 | 0 | 596 | 5  | 1,196 | 14 |
| 16,874 | 49  | 1 | 533   | 8  | 18 | 0 | 596 | 5  | 1,196 | 14 |
| 16,875 | 49  | 1 | 526   | 9  | 18 | 0 | 589 | 5  | 1,182 | 15 |
| 16,876 | 47  | 1 | 518   | 8  | 18 | 0 | 587 | 5  | 1,170 | 14 |
| 16,877 | 47  | 1 | 519   | 8  | 19 | 0 | 585 | 5  | 1,170 | 14 |
| 16,878 | 40  | 1 | 489   | 7  | 18 | 0 | 533 | 3  | 1,080 | 11 |
| 16,879 | 41  | 1 | 497   | 7  | 19 | 0 | 546 | 3  | 1,103 | 11 |
| 16,880 | 30  | 1 | 427   | 7  | 18 | 0 | 419 | 3  | 894   | 11 |

|        |    |   |     |    |    |   |     |    |     |    |
|--------|----|---|-----|----|----|---|-----|----|-----|----|
| 16,881 | 30 | 1 | 425 | 8  | 18 | 0 | 418 | 3  | 891 | 12 |
| 16,882 | 30 | 2 | 424 | 10 | 18 | 0 | 416 | 4  | 888 | 16 |
| 16,883 | 31 | 2 | 417 | 13 | 18 | 0 | 416 | 7  | 882 | 22 |
| 16,884 | 31 | 2 | 428 | 14 | 19 | 0 | 410 | 8  | 888 | 24 |
| 16,885 | 31 | 2 | 407 | 15 | 18 | 0 | 395 | 8  | 851 | 25 |
| 16,886 | 27 | 2 | 380 | 15 | 18 | 0 | 340 | 8  | 765 | 25 |
| 16,887 | 23 | 2 | 276 | 15 | 16 | 0 | 236 | 8  | 551 | 25 |
| 16,888 | 21 | 2 | 252 | 15 | 16 | 0 | 193 | 8  | 482 | 25 |
| 16,889 | 21 | 2 | 249 | 16 | 15 | 0 | 186 | 8  | 471 | 26 |
| 16,890 | 21 | 1 | 260 | 17 | 15 | 0 | 189 | 8  | 485 | 26 |
| 16,891 | 21 | 1 | 259 | 19 | 15 | 0 | 189 | 8  | 484 | 28 |
| 16,892 | 21 | 1 | 259 | 19 | 14 | 0 | 188 | 8  | 482 | 28 |
| 16,893 | 20 | 1 | 257 | 19 | 14 | 0 | 188 | 8  | 479 | 28 |
| 16,894 | 20 | 1 | 255 | 22 | 14 | 0 | 183 | 8  | 472 | 31 |
| 16,895 | 18 | 1 | 241 | 24 | 14 | 0 | 170 | 11 | 443 | 36 |
| 16,896 | 18 | 1 | 231 | 24 | 13 | 1 | 169 | 14 | 431 | 40 |
| 16,897 | 18 | 2 | 229 | 24 | 13 | 1 | 166 | 14 | 426 | 41 |
| 16,898 | 26 | 2 | 244 | 24 | 15 | 1 | 169 | 14 | 454 | 41 |
| 16,899 | 27 | 2 | 249 | 24 | 15 | 1 | 170 | 15 | 461 | 42 |
| 16,900 | 27 | 2 | 261 | 24 | 15 | 1 | 174 | 16 | 477 | 43 |
| 16,901 | 26 | 2 | 260 | 24 | 15 | 1 | 171 | 16 | 472 | 43 |
| 16,902 | 26 | 2 | 268 | 24 | 15 | 1 | 167 | 16 | 476 | 43 |
| 16,903 | 26 | 2 | 267 | 25 | 15 | 1 | 163 | 16 | 471 | 44 |
| 16,904 | 26 | 2 | 268 | 24 | 15 | 1 | 163 | 16 | 472 | 43 |
| 16,905 | 26 | 2 | 269 | 24 | 15 | 1 | 164 | 17 | 474 | 44 |
| 16,906 | 26 | 2 | 268 | 25 | 15 | 1 | 163 | 17 | 472 | 45 |
| 16,907 | 25 | 2 | 270 | 25 | 15 | 1 | 167 | 17 | 477 | 45 |
| 16,908 | 25 | 2 | 264 | 25 | 15 | 1 | 161 | 17 | 465 | 45 |
| 16,909 | 25 | 2 | 262 | 25 | 15 | 1 | 161 | 17 | 463 | 45 |
| 16,910 | 27 | 2 | 274 | 25 | 15 | 1 | 181 | 17 | 497 | 45 |
| 16,911 | 27 | 2 | 272 | 25 | 15 | 1 | 181 | 17 | 495 | 45 |
| 16,912 | 28 | 2 | 272 | 25 | 16 | 1 | 182 | 16 | 498 | 44 |
| 16,913 | 28 | 2 | 272 | 25 | 16 | 1 | 183 | 16 | 499 | 44 |
| 16,914 | 27 | 2 | 267 | 22 | 17 | 1 | 183 | 15 | 494 | 40 |
| 16,915 | 27 | 2 | 267 | 22 | 17 | 1 | 183 | 15 | 494 | 40 |
| 16,916 | 27 | 2 | 267 | 23 | 17 | 1 | 183 | 16 | 494 | 42 |
| 16,917 | 28 | 2 | 270 | 22 | 17 | 1 | 185 | 18 | 500 | 43 |
| 16,918 | 28 | 3 | 268 | 22 | 17 | 1 | 185 | 19 | 498 | 45 |
| 16,919 | 28 | 3 | 246 | 26 | 17 | 1 | 171 | 19 | 462 | 49 |
| 16,920 | 35 | 3 | 280 | 26 | 18 | 1 | 181 | 19 | 514 | 49 |
| 16,921 | 33 | 3 | 252 | 26 | 14 | 1 | 133 | 18 | 432 | 48 |

|        |     |   |       |    |     |   |       |    |       |    |
|--------|-----|---|-------|----|-----|---|-------|----|-------|----|
| 16,922 | 48  | 3 | 442   | 26 | 24  | 1 | 249   | 18 | 763   | 48 |
| 16,923 | 48  | 3 | 436   | 26 | 24  | 1 | 244   | 18 | 752   | 48 |
| 16,924 | 204 | 3 | 1,229 | 26 | 128 | 1 | 1,058 | 18 | 2,619 | 48 |
| 16,925 | 204 | 3 | 1,228 | 26 | 128 | 1 | 1,059 | 18 | 2,619 | 48 |
| 16,926 | 204 | 3 | 1,224 | 26 | 129 | 1 | 1,064 | 18 | 2,621 | 48 |
| 16,927 | 204 | 3 | 1,223 | 26 | 129 | 1 | 1,065 | 18 | 2,621 | 48 |
| 16,928 | 205 | 3 | 1,217 | 26 | 129 | 1 | 1,064 | 18 | 2,615 | 48 |
| 16,929 | 204 | 3 | 1,203 | 26 | 129 | 1 | 1,060 | 18 | 2,596 | 48 |
| 16,930 | 203 | 3 | 1,192 | 26 | 127 | 1 | 1,045 | 18 | 2,567 | 48 |
| 16,931 | 203 | 3 | 1,193 | 26 | 126 | 1 | 1,046 | 18 | 2,568 | 48 |
| 16,932 | 203 | 3 | 1,193 | 25 | 126 | 1 | 1,047 | 18 | 2,569 | 47 |
| 16,933 | 203 | 2 | 1,193 | 23 | 126 | 1 | 1,047 | 17 | 2,569 | 43 |
| 16,934 | 208 | 2 | 1,217 | 20 | 128 | 1 | 1,053 | 14 | 2,606 | 37 |
| 16,935 | 210 | 2 | 1,199 | 18 | 127 | 1 | 1,053 | 13 | 2,589 | 34 |
| 16,936 | 210 | 2 | 1,203 | 18 | 127 | 1 | 1,057 | 13 | 2,597 | 34 |
| 16,937 | 208 | 2 | 1,185 | 18 | 125 | 1 | 1,048 | 13 | 2,566 | 34 |
| 16,938 | 206 | 2 | 1,183 | 18 | 125 | 1 | 1,047 | 13 | 2,561 | 34 |
| 16,939 | 213 | 2 | 1,214 | 17 | 126 | 1 | 1,059 | 13 | 2,612 | 33 |
| 16,940 | 214 | 2 | 1,217 | 17 | 127 | 1 | 1,059 | 13 | 2,617 | 33 |
| 16,941 | 215 | 2 | 1,212 | 14 | 129 | 1 | 1,062 | 13 | 2,618 | 30 |
| 16,942 | 215 | 2 | 1,211 | 14 | 129 | 1 | 1,062 | 13 | 2,617 | 30 |
| 16,943 | 219 | 2 | 1,247 | 11 | 129 | 1 | 1,073 | 13 | 2,668 | 27 |
| 16,944 | 243 | 2 | 1,355 | 11 | 136 | 1 | 1,136 | 13 | 2,870 | 27 |
| 16,945 | 243 | 2 | 1,355 | 11 | 136 | 1 | 1,136 | 13 | 2,870 | 27 |
| 16,946 | 258 | 1 | 1,418 | 10 | 143 | 0 | 1,176 | 7  | 2,995 | 18 |
| 16,947 | 258 | 1 | 1,426 | 10 | 143 | 0 | 1,178 | 7  | 3,005 | 18 |
| 16,948 | 250 | 1 | 1,416 | 11 | 142 | 0 | 1,177 | 7  | 2,985 | 19 |
| 16,949 | 250 | 1 | 1,431 | 11 | 142 | 0 | 1,178 | 8  | 3,001 | 20 |
| 16,950 | 249 | 1 | 1,432 | 11 | 142 | 0 | 1,177 | 7  | 3,000 | 19 |
| 16,951 | 250 | 1 | 1,426 | 12 | 142 | 1 | 1,175 | 6  | 2,993 | 20 |
| 16,952 | 250 | 1 | 1,422 | 12 | 142 | 1 | 1,172 | 6  | 2,986 | 20 |
| 16,953 | 252 | 1 | 1,420 | 12 | 143 | 1 | 1,174 | 6  | 2,989 | 20 |
| 16,954 | 252 | 1 | 1,420 | 11 | 143 | 1 | 1,174 | 6  | 2,989 | 19 |
| 16,955 | 252 | 1 | 1,419 | 11 | 143 | 1 | 1,174 | 6  | 2,988 | 19 |
| 16,956 | 252 | 1 | 1,418 | 10 | 143 | 1 | 1,173 | 5  | 2,986 | 17 |
| 16,957 | 252 | 1 | 1,420 | 11 | 143 | 1 | 1,173 | 6  | 2,988 | 19 |
| 16,958 | 252 | 1 | 1,413 | 11 | 143 | 1 | 1,167 | 6  | 2,975 | 19 |
| 16,959 | 252 | 1 | 1,414 | 12 | 143 | 1 | 1,168 | 6  | 2,977 | 20 |
| 16,960 | 252 | 1 | 1,403 | 12 | 143 | 1 | 1,151 | 6  | 2,949 | 20 |
| 16,961 | 251 | 1 | 1,402 | 12 | 143 | 1 | 1,148 | 6  | 2,944 | 20 |
| 16,962 | 251 | 1 | 1,402 | 12 | 143 | 1 | 1,147 | 6  | 2,943 | 20 |

|        |     |   |       |    |     |   |       |    |       |    |
|--------|-----|---|-------|----|-----|---|-------|----|-------|----|
| 16,963 | 250 | 1 | 1,402 | 12 | 142 | 1 | 1,145 | 6  | 2,939 | 20 |
| 16,964 | 250 | 1 | 1,403 | 12 | 142 | 1 | 1,147 | 6  | 2,942 | 20 |
| 16,965 | 250 | 1 | 1,403 | 12 | 141 | 1 | 1,149 | 6  | 2,943 | 20 |
| 16,966 | 250 | 1 | 1,403 | 11 | 141 | 1 | 1,150 | 5  | 2,944 | 18 |
| 16,967 | 250 | 1 | 1,402 | 10 | 141 | 1 | 1,150 | 3  | 2,943 | 15 |
| 16,968 | 249 | 0 | 1,398 | 13 | 141 | 1 | 1,148 | 2  | 2,936 | 16 |
| 16,969 | 249 | 0 | 1,399 | 13 | 141 | 1 | 1,148 | 5  | 2,937 | 19 |
| 16,970 | 242 | 0 | 1,381 | 11 | 141 | 2 | 1,135 | 9  | 2,899 | 22 |
| 16,971 | 242 | 0 | 1,366 | 12 | 140 | 2 | 1,135 | 9  | 2,883 | 23 |
| 16,972 | 242 | 0 | 1,353 | 12 | 139 | 2 | 1,131 | 9  | 2,865 | 23 |
| 16,973 | 223 | 0 | 1,148 | 11 | 128 | 2 | 992   | 9  | 2,491 | 22 |
| 16,974 | 215 | 0 | 994   | 11 | 111 | 2 | 877   | 9  | 2,197 | 22 |
| 16,975 | 66  | 0 | 346   | 11 | 23  | 2 | 166   | 10 | 601   | 23 |
| 16,976 | 66  | 0 | 346   | 11 | 23  | 2 | 164   | 10 | 599   | 23 |
| 16,977 | 66  | 0 | 345   | 11 | 23  | 2 | 165   | 10 | 599   | 23 |
| 16,978 | 66  | 0 | 345   | 11 | 23  | 2 | 165   | 10 | 599   | 23 |
| 16,979 | 65  | 0 | 345   | 11 | 22  | 2 | 163   | 10 | 595   | 23 |
| 16,980 | 65  | 0 | 342   | 11 | 22  | 2 | 163   | 11 | 592   | 24 |
| 16,981 | 65  | 0 | 342   | 11 | 22  | 2 | 163   | 11 | 592   | 24 |
| 16,982 | 60  | 0 | 325   | 11 | 20  | 2 | 158   | 11 | 563   | 24 |
| 16,983 | 59  | 0 | 325   | 11 | 20  | 2 | 157   | 11 | 561   | 24 |
| 16,984 | 59  | 0 | 319   | 11 | 20  | 2 | 157   | 11 | 555   | 24 |
| 16,985 | 58  | 0 | 318   | 11 | 20  | 2 | 157   | 11 | 553   | 24 |
| 16,986 | 57  | 0 | 317   | 11 | 20  | 2 | 158   | 11 | 552   | 24 |
| 16,987 | 57  | 0 | 313   | 11 | 20  | 2 | 154   | 11 | 544   | 24 |
| 16,988 | 50  | 0 | 280   | 11 | 20  | 2 | 145   | 11 | 495   | 24 |
| 16,989 | 50  | 0 | 286   | 11 | 19  | 2 | 147   | 11 | 502   | 24 |
| 16,990 | 50  | 0 | 286   | 14 | 19  | 2 | 147   | 11 | 502   | 27 |
| 16,991 | 49  | 0 | 283   | 19 | 18  | 2 | 147   | 13 | 497   | 34 |
| 16,992 | 48  | 0 | 278   | 19 | 16  | 3 | 142   | 13 | 484   | 35 |
| 16,993 | 47  | 0 | 270   | 21 | 17  | 3 | 144   | 16 | 478   | 40 |
| 16,994 | 46  | 0 | 282   | 21 | 17  | 3 | 142   | 16 | 487   | 40 |
| 16,995 | 22  | 0 | 175   | 21 | 10  | 3 | 80    | 17 | 287   | 41 |
| 16,996 | 8   | 0 | 124   | 20 | 3   | 3 | 42    | 18 | 177   | 41 |
| 16,997 | 8   | 0 | 117   | 20 | 3   | 3 | 41    | 18 | 169   | 41 |
| 16,998 | 12  | 0 | 179   | 20 | 3   | 3 | 61    | 18 | 255   | 41 |
| 16,999 | 12  | 0 | 178   | 20 | 3   | 3 | 63    | 20 | 256   | 43 |
| 17,000 | 12  | 0 | 167   | 20 | 3   | 3 | 69    | 19 | 251   | 42 |
| 17,001 | 12  | 0 | 165   | 20 | 3   | 3 | 71    | 19 | 251   | 42 |
| 17,002 | 11  | 0 | 160   | 19 | 3   | 2 | 69    | 19 | 243   | 40 |
| 17,003 | 9   | 0 | 154   | 19 | 3   | 2 | 67    | 19 | 233   | 40 |

|        |    |   |     |    |   |   |     |    |     |    |
|--------|----|---|-----|----|---|---|-----|----|-----|----|
| 17,004 | 9  | 0 | 161 | 19 | 2 | 2 | 71  | 19 | 243 | 40 |
| 17,005 | 9  | 0 | 161 | 19 | 2 | 2 | 71  | 19 | 243 | 40 |
| 17,006 | 10 | 0 | 162 | 19 | 2 | 2 | 74  | 19 | 248 | 40 |
| 17,007 | 10 | 0 | 164 | 19 | 2 | 2 | 74  | 19 | 250 | 40 |
| 17,008 | 10 | 0 | 163 | 18 | 2 | 2 | 75  | 18 | 250 | 38 |
| 17,009 | 10 | 0 | 163 | 18 | 2 | 2 | 75  | 18 | 250 | 38 |
| 17,010 | 10 | 0 | 162 | 17 | 2 | 2 | 74  | 18 | 248 | 37 |
| 17,011 | 9  | 0 | 166 | 17 | 2 | 2 | 75  | 18 | 252 | 37 |
| 17,012 | 11 | 0 | 171 | 17 | 2 | 2 | 78  | 18 | 262 | 37 |
| 17,013 | 14 | 0 | 182 | 17 | 2 | 2 | 81  | 18 | 279 | 37 |
| 17,014 | 16 | 0 | 192 | 18 | 2 | 2 | 85  | 18 | 295 | 38 |
| 17,015 | 16 | 0 | 192 | 18 | 2 | 2 | 86  | 18 | 296 | 38 |
| 17,016 | 18 | 1 | 236 | 18 | 2 | 2 | 90  | 18 | 346 | 39 |
| 17,017 | 18 | 1 | 249 | 18 | 2 | 2 | 96  | 18 | 365 | 39 |
| 17,018 | 18 | 1 | 249 | 18 | 2 | 2 | 96  | 18 | 365 | 39 |
| 17,019 | 20 | 1 | 277 | 15 | 2 | 2 | 105 | 15 | 404 | 33 |
| 17,020 | 20 | 1 | 275 | 15 | 2 | 2 | 105 | 15 | 402 | 33 |
| 17,021 | 19 | 1 | 292 | 12 | 2 | 1 | 108 | 11 | 421 | 25 |
| 17,022 | 19 | 1 | 293 | 12 | 2 | 1 | 108 | 11 | 422 | 25 |
| 17,023 | 19 | 1 | 293 | 12 | 2 | 1 | 108 | 12 | 422 | 26 |
| 17,024 | 19 | 1 | 293 | 12 | 2 | 1 | 108 | 12 | 422 | 26 |
| 17,025 | 19 | 2 | 293 | 13 | 3 | 1 | 108 | 12 | 423 | 28 |
| 17,026 | 19 | 2 | 293 | 14 | 3 | 1 | 108 | 11 | 423 | 28 |
| 17,027 | 19 | 2 | 293 | 14 | 3 | 1 | 108 | 11 | 423 | 28 |
| 17,028 | 19 | 2 | 294 | 14 | 3 | 1 | 108 | 11 | 424 | 28 |
| 17,029 | 19 | 3 | 294 | 14 | 3 | 1 | 108 | 11 | 424 | 29 |
| 17,030 | 19 | 3 | 294 | 14 | 3 | 1 | 108 | 10 | 424 | 28 |
| 17,031 | 19 | 3 | 298 | 14 | 3 | 1 | 108 | 10 | 428 | 28 |
| 17,032 | 20 | 3 | 301 | 14 | 3 | 1 | 108 | 10 | 432 | 28 |
| 17,033 | 22 | 3 | 303 | 14 | 3 | 1 | 108 | 10 | 436 | 28 |
| 17,034 | 22 | 3 | 302 | 14 | 3 | 1 | 108 | 10 | 435 | 28 |
| 17,035 | 22 | 3 | 302 | 14 | 3 | 1 | 108 | 11 | 435 | 29 |
| 17,036 | 22 | 3 | 303 | 16 | 3 | 1 | 108 | 11 | 436 | 31 |
| 17,037 | 22 | 3 | 309 | 16 | 3 | 1 | 109 | 13 | 443 | 33 |
| 17,038 | 22 | 3 | 308 | 16 | 3 | 1 | 108 | 13 | 441 | 33 |
| 17,039 | 22 | 3 | 307 | 16 | 3 | 4 | 108 | 14 | 440 | 37 |
| 17,040 | 22 | 3 | 301 | 16 | 3 | 4 | 104 | 14 | 430 | 37 |
| 17,041 | 22 | 3 | 300 | 13 | 3 | 4 | 104 | 14 | 429 | 34 |
| 17,042 | 22 | 3 | 305 | 7  | 5 | 3 | 112 | 10 | 444 | 23 |
| 17,043 | 22 | 3 | 304 | 7  | 5 | 3 | 112 | 13 | 443 | 26 |
| 17,044 | 21 | 3 | 301 | 7  | 4 | 3 | 109 | 14 | 435 | 27 |



|        |    |   |     |    |    |   |     |    |     |    |
|--------|----|---|-----|----|----|---|-----|----|-----|----|
| 17,045 | 20 | 4 | 264 | 7  | 4  | 3 | 101 | 16 | 389 | 30 |
| 17,046 | 20 | 4 | 266 | 8  | 4  | 3 | 104 | 15 | 394 | 30 |
| 17,047 | 19 | 4 | 262 | 8  | 4  | 3 | 104 | 14 | 389 | 29 |
| 17,048 | 15 | 4 | 201 | 8  | 3  | 3 | 84  | 14 | 303 | 29 |
| 17,049 | 15 | 4 | 193 | 8  | 3  | 3 | 82  | 14 | 293 | 29 |
| 17,050 | 17 | 4 | 190 | 7  | 3  | 3 | 79  | 12 | 289 | 26 |
| 17,051 | 17 | 4 | 189 | 8  | 3  | 3 | 74  | 13 | 283 | 28 |
| 17,052 | 24 | 4 | 251 | 8  | 6  | 3 | 124 | 14 | 405 | 29 |
| 17,053 | 24 | 4 | 259 | 8  | 6  | 3 | 130 | 15 | 419 | 30 |
| 17,054 | 24 | 4 | 259 | 8  | 6  | 3 | 129 | 15 | 418 | 30 |
| 17,055 | 25 | 4 | 252 | 8  | 7  | 3 | 135 | 15 | 419 | 30 |
| 17,056 | 24 | 4 | 250 | 8  | 8  | 3 | 133 | 15 | 415 | 30 |
| 17,057 | 24 | 4 | 248 | 8  | 8  | 3 | 134 | 15 | 414 | 30 |
| 17,058 | 24 | 4 | 248 | 8  | 8  | 3 | 135 | 15 | 415 | 30 |
| 17,059 | 24 | 5 | 247 | 8  | 8  | 3 | 133 | 15 | 412 | 31 |
| 17,060 | 24 | 5 | 244 | 8  | 8  | 3 | 133 | 15 | 409 | 31 |
| 17,061 | 24 | 5 | 254 | 8  | 8  | 3 | 136 | 15 | 422 | 31 |
| 17,062 | 24 | 5 | 258 | 8  | 8  | 3 | 139 | 15 | 429 | 31 |
| 17,063 | 33 | 5 | 296 | 8  | 13 | 3 | 181 | 15 | 523 | 31 |
| 17,064 | 34 | 6 | 290 | 11 | 14 | 3 | 181 | 24 | 519 | 44 |
| 17,065 | 32 | 6 | 279 | 13 | 14 | 4 | 176 | 29 | 501 | 52 |
| 17,066 | 30 | 6 | 238 | 13 | 14 | 4 | 170 | 29 | 452 | 52 |
| 17,067 | 39 | 5 | 282 | 13 | 18 | 4 | 208 | 30 | 547 | 52 |
| 17,068 | 57 | 5 | 320 | 13 | 28 | 4 | 303 | 30 | 708 | 52 |
| 17,069 | 55 | 5 | 311 | 13 | 28 | 4 | 300 | 31 | 694 | 53 |
| 17,070 | 55 | 5 | 292 | 13 | 28 | 4 | 295 | 33 | 670 | 55 |
| 17,071 | 55 | 5 | 275 | 13 | 28 | 4 | 291 | 33 | 649 | 55 |
| 17,072 | 55 | 5 | 273 | 13 | 28 | 4 | 289 | 33 | 645 | 55 |
| 17,073 | 55 | 5 | 273 | 13 | 28 | 4 | 289 | 33 | 645 | 55 |
| 17,074 | 55 | 5 | 273 | 13 | 28 | 4 | 289 | 33 | 645 | 55 |
| 17,075 | 55 | 4 | 275 | 12 | 27 | 5 | 289 | 35 | 646 | 56 |
| 17,076 | 55 | 4 | 275 | 11 | 27 | 5 | 289 | 35 | 646 | 55 |
| 17,077 | 55 | 4 | 274 | 12 | 27 | 5 | 289 | 35 | 645 | 56 |
| 17,078 | 55 | 4 | 277 | 12 | 27 | 5 | 289 | 35 | 648 | 56 |
| 17,079 | 55 | 3 | 277 | 13 | 27 | 5 | 289 | 35 | 648 | 56 |
| 17,080 | 55 | 3 | 277 | 13 | 27 | 5 | 289 | 35 | 648 | 56 |
| 17,081 | 55 | 3 | 277 | 13 | 27 | 5 | 289 | 35 | 648 | 56 |
| 17,082 | 55 | 3 | 274 | 13 | 27 | 5 | 293 | 35 | 649 | 56 |
| 17,083 | 54 | 3 | 274 | 14 | 27 | 5 | 293 | 35 | 648 | 57 |
| 17,084 | 52 | 3 | 272 | 14 | 27 | 5 | 293 | 35 | 644 | 57 |
| 17,085 | 52 | 3 | 272 | 15 | 27 | 5 | 294 | 34 | 645 | 57 |

|        |    |   |     |    |    |   |     |    |       |    |
|--------|----|---|-----|----|----|---|-----|----|-------|----|
| 17,086 | 52 | 3 | 271 | 13 | 27 | 5 | 294 | 34 | 644   | 55 |
| 17,087 | 52 | 3 | 271 | 13 | 27 | 5 | 293 | 35 | 643   | 56 |
| 17,088 | 54 | 3 | 273 | 13 | 27 | 5 | 292 | 33 | 646   | 54 |
| 17,089 | 54 | 3 | 273 | 13 | 27 | 5 | 292 | 33 | 646   | 54 |
| 17,090 | 54 | 3 | 276 | 13 | 27 | 2 | 290 | 33 | 647   | 51 |
| 17,091 | 55 | 3 | 283 | 13 | 26 | 2 | 292 | 33 | 656   | 51 |
| 17,092 | 55 | 3 | 285 | 13 | 26 | 2 | 292 | 33 | 658   | 51 |
| 17,093 | 61 | 2 | 325 | 11 | 29 | 2 | 301 | 26 | 716   | 41 |
| 17,094 | 61 | 2 | 329 | 11 | 29 | 2 | 301 | 27 | 720   | 42 |
| 17,095 | 61 | 2 | 381 | 11 | 31 | 2 | 337 | 27 | 810   | 42 |
| 17,096 | 61 | 2 | 380 | 11 | 31 | 2 | 336 | 27 | 808   | 42 |
| 17,097 | 71 | 2 | 406 | 11 | 31 | 2 | 348 | 27 | 856   | 42 |
| 17,098 | 71 | 2 | 404 | 11 | 31 | 2 | 347 | 27 | 853   | 42 |
| 17,099 | 75 | 2 | 430 | 11 | 33 | 2 | 358 | 27 | 896   | 42 |
| 17,100 | 78 | 2 | 486 | 12 | 43 | 2 | 391 | 27 | 998   | 43 |
| 17,101 | 80 | 2 | 541 | 11 | 44 | 2 | 415 | 27 | 1,080 | 42 |
| 17,102 | 92 | 2 | 645 | 11 | 50 | 2 | 460 | 27 | 1,247 | 42 |
| 17,103 | 91 | 2 | 656 | 11 | 50 | 2 | 444 | 26 | 1,241 | 41 |
| 17,104 | 92 | 2 | 657 | 11 | 50 | 2 | 442 | 25 | 1,241 | 40 |
| 17,105 | 92 | 2 | 657 | 11 | 50 | 2 | 442 | 25 | 1,241 | 40 |
| 17,106 | 91 | 2 | 655 | 11 | 49 | 2 | 433 | 25 | 1,228 | 40 |
| 17,107 | 91 | 2 | 665 | 11 | 48 | 2 | 435 | 25 | 1,239 | 40 |
| 17,108 | 91 | 2 | 665 | 11 | 48 | 2 | 435 | 25 | 1,239 | 40 |
| 17,109 | 91 | 1 | 666 | 11 | 48 | 2 | 434 | 25 | 1,239 | 39 |
| 17,110 | 91 | 1 | 666 | 11 | 48 | 2 | 433 | 25 | 1,238 | 39 |
| 17,111 | 91 | 1 | 654 | 11 | 48 | 2 | 431 | 25 | 1,224 | 39 |
| 17,112 | 91 | 1 | 651 | 11 | 48 | 2 | 429 | 28 | 1,219 | 42 |
| 17,113 | 80 | 1 | 608 | 11 | 43 | 2 | 384 | 28 | 1,115 | 42 |
| 17,114 | 78 | 1 | 606 | 11 | 43 | 4 | 381 | 34 | 1,108 | 50 |
| 17,115 | 76 | 0 | 605 | 15 | 42 | 4 | 383 | 39 | 1,106 | 58 |
| 17,116 | 69 | 1 | 570 | 17 | 38 | 4 | 359 | 35 | 1,036 | 57 |
| 17,117 | 68 | 1 | 566 | 18 | 38 | 4 | 347 | 36 | 1,019 | 59 |
| 17,118 | 50 | 1 | 515 | 18 | 28 | 4 | 246 | 35 | 839   | 58 |
| 17,119 | 50 | 1 | 521 | 18 | 28 | 4 | 252 | 34 | 851   | 57 |
| 17,120 | 50 | 1 | 521 | 18 | 28 | 4 | 251 | 34 | 850   | 57 |
| 17,121 | 64 | 1 | 667 | 18 | 35 | 4 | 351 | 32 | 1,117 | 55 |
| 17,122 | 64 | 1 | 686 | 19 | 35 | 4 | 376 | 33 | 1,161 | 57 |
| 17,123 | 64 | 1 | 687 | 19 | 35 | 4 | 378 | 33 | 1,164 | 57 |
| 17,124 | 65 | 1 | 692 | 19 | 35 | 5 | 389 | 32 | 1,181 | 57 |
| 17,125 | 65 | 1 | 692 | 19 | 35 | 4 | 390 | 30 | 1,182 | 54 |
| 17,126 | 65 | 2 | 692 | 19 | 35 | 4 | 391 | 30 | 1,183 | 55 |

|        |    |   |     |    |    |   |     |    |       |    |
|--------|----|---|-----|----|----|---|-----|----|-------|----|
| 17,127 | 65 | 2 | 692 | 19 | 35 | 4 | 391 | 31 | 1,183 | 56 |
| 17,128 | 65 | 2 | 689 | 18 | 35 | 4 | 391 | 31 | 1,180 | 55 |
| 17,129 | 65 | 2 | 691 | 18 | 35 | 4 | 393 | 33 | 1,184 | 57 |
| 17,130 | 66 | 2 | 695 | 17 | 36 | 4 | 400 | 33 | 1,197 | 56 |
| 17,131 | 66 | 2 | 695 | 17 | 36 | 4 | 400 | 33 | 1,197 | 56 |
| 17,132 | 66 | 2 | 695 | 17 | 36 | 4 | 400 | 33 | 1,197 | 56 |
| 17,133 | 66 | 2 | 694 | 17 | 36 | 4 | 396 | 33 | 1,192 | 56 |
| 17,134 | 66 | 2 | 691 | 16 | 36 | 4 | 396 | 33 | 1,189 | 55 |
| 17,135 | 66 | 2 | 691 | 15 | 36 | 4 | 397 | 34 | 1,190 | 55 |
| 17,136 | 66 | 2 | 691 | 16 | 36 | 4 | 396 | 35 | 1,189 | 57 |
| 17,137 | 66 | 2 | 692 | 16 | 36 | 4 | 396 | 34 | 1,190 | 56 |
| 17,138 | 66 | 2 | 688 | 16 | 36 | 4 | 395 | 34 | 1,185 | 56 |
| 17,139 | 64 | 2 | 684 | 16 | 36 | 4 | 395 | 35 | 1,179 | 57 |
| 17,140 | 64 | 2 | 682 | 16 | 36 | 4 | 395 | 34 | 1,177 | 56 |
| 17,141 | 64 | 2 | 681 | 16 | 36 | 4 | 395 | 34 | 1,176 | 56 |
| 17,142 | 63 | 2 | 671 | 16 | 36 | 4 | 391 | 34 | 1,161 | 56 |
| 17,143 | 63 | 2 | 669 | 16 | 36 | 4 | 391 | 34 | 1,159 | 56 |
| 17,144 | 57 | 2 | 626 | 16 | 32 | 4 | 377 | 33 | 1,092 | 55 |
| 17,145 | 58 | 2 | 626 | 16 | 32 | 4 | 377 | 33 | 1,093 | 55 |
| 17,146 | 58 | 2 | 573 | 16 | 30 | 4 | 339 | 33 | 1,000 | 55 |
| 17,147 | 57 | 2 | 565 | 17 | 30 | 4 | 335 | 33 | 987   | 56 |
| 17,148 | 48 | 2 | 550 | 17 | 30 | 4 | 331 | 33 | 959   | 56 |
| 17,149 | 46 | 2 | 534 | 17 | 29 | 4 | 330 | 33 | 939   | 56 |
| 17,150 | 46 | 2 | 529 | 17 | 30 | 4 | 330 | 33 | 935   | 56 |
| 17,151 | 43 | 2 | 475 | 16 | 20 | 4 | 299 | 33 | 837   | 55 |
| 17,152 | 39 | 3 | 419 | 16 | 19 | 4 | 275 | 32 | 752   | 55 |
| 17,153 | 27 | 3 | 310 | 16 | 13 | 4 | 229 | 32 | 579   | 55 |
| 17,154 | 21 | 3 | 236 | 17 | 10 | 4 | 193 | 33 | 460   | 57 |
| 17,155 | 20 | 3 | 227 | 17 | 10 | 4 | 189 | 33 | 446   | 57 |
| 17,156 | 25 | 4 | 226 | 17 | 11 | 4 | 200 | 33 | 462   | 58 |
| 17,157 | 25 | 4 | 224 | 17 | 11 | 4 | 199 | 33 | 459   | 58 |
| 17,158 | 25 | 4 | 226 | 17 | 11 | 4 | 200 | 33 | 462   | 58 |
| 17,159 | 25 | 4 | 226 | 17 | 11 | 4 | 200 | 33 | 462   | 58 |
| 17,160 | 25 | 4 | 225 | 17 | 11 | 4 | 201 | 33 | 462   | 58 |
| 17,161 | 25 | 4 | 225 | 17 | 11 | 4 | 201 | 33 | 462   | 58 |
| 17,162 | 25 | 4 | 225 | 17 | 11 | 4 | 206 | 33 | 467   | 58 |
| 17,163 | 25 | 4 | 226 | 17 | 11 | 4 | 207 | 30 | 469   | 55 |
| 17,164 | 25 | 4 | 226 | 17 | 11 | 2 | 207 | 24 | 469   | 47 |
| 17,165 | 25 | 4 | 226 | 10 | 11 | 2 | 207 | 10 | 469   | 26 |
| 17,166 | 26 | 3 | 226 | 5  | 12 | 1 | 205 | 9  | 469   | 18 |
| 17,167 | 26 | 3 | 225 | 6  | 12 | 1 | 204 | 9  | 467   | 19 |

|        |    |   |     |    |    |   |     |    |     |    |
|--------|----|---|-----|----|----|---|-----|----|-----|----|
| 17,168 | 25 | 3 | 220 | 6  | 12 | 1 | 205 | 9  | 462 | 19 |
| 17,169 | 25 | 3 | 220 | 6  | 12 | 1 | 205 | 9  | 462 | 19 |
| 17,170 | 25 | 3 | 216 | 6  | 12 | 1 | 201 | 9  | 454 | 19 |
| 17,171 | 11 | 3 | 65  | 6  | 5  | 1 | 96  | 9  | 177 | 19 |
| 17,172 | 11 | 3 | 49  | 11 | 5  | 1 | 71  | 19 | 136 | 34 |
| 17,173 | 11 | 3 | 47  | 11 | 5  | 1 | 70  | 18 | 133 | 33 |
| 17,174 | 10 | 3 | 43  | 11 | 5  | 1 | 61  | 18 | 119 | 33 |
| 17,175 | 10 | 3 | 47  | 11 | 5  | 0 | 60  | 18 | 122 | 32 |
| 17,176 | 10 | 2 | 51  | 11 | 5  | 0 | 60  | 18 | 126 | 31 |
| 17,177 | 10 | 2 | 54  | 15 | 5  | 0 | 60  | 17 | 129 | 34 |
| 17,178 | 11 | 2 | 53  | 15 | 5  | 0 | 63  | 18 | 132 | 35 |
| 17,179 | 16 | 2 | 74  | 15 | 5  | 0 | 72  | 18 | 167 | 35 |
| 17,180 | 18 | 2 | 83  | 15 | 4  | 0 | 77  | 17 | 182 | 34 |
| 17,181 | 18 | 2 | 81  | 15 | 4  | 0 | 76  | 17 | 179 | 34 |
| 17,182 | 18 | 2 | 81  | 15 | 4  | 0 | 76  | 17 | 179 | 34 |
| 17,183 | 21 | 2 | 97  | 15 | 6  | 0 | 80  | 17 | 204 | 34 |
| 17,184 | 21 | 2 | 102 | 15 | 6  | 0 | 83  | 17 | 212 | 34 |
| 17,185 | 27 | 2 | 121 | 15 | 6  | 0 | 89  | 17 | 243 | 34 |
| 17,186 | 27 | 2 | 121 | 15 | 6  | 0 | 89  | 16 | 243 | 33 |
| 17,187 | 31 | 2 | 138 | 14 | 6  | 0 | 104 | 15 | 279 | 31 |
| 17,188 | 34 | 2 | 159 | 14 | 6  | 0 | 127 | 15 | 326 | 31 |
| 17,189 | 35 | 2 | 165 | 14 | 6  | 0 | 133 | 14 | 339 | 30 |
| 17,190 | 35 | 2 | 165 | 14 | 6  | 0 | 133 | 14 | 339 | 30 |
| 17,191 | 48 | 2 | 205 | 14 | 6  | 0 | 184 | 14 | 443 | 30 |
| 17,192 | 48 | 2 | 205 | 14 | 6  | 0 | 184 | 14 | 443 | 30 |
| 17,193 | 50 | 2 | 218 | 15 | 6  | 1 | 190 | 14 | 464 | 32 |
| 17,194 | 51 | 2 | 224 | 16 | 6  | 1 | 196 | 18 | 477 | 37 |
| 17,195 | 51 | 2 | 223 | 16 | 6  | 1 | 194 | 18 | 474 | 37 |
| 17,196 | 50 | 2 | 221 | 19 | 6  | 1 | 195 | 19 | 472 | 41 |
| 17,197 | 50 | 2 | 219 | 18 | 6  | 1 | 193 | 19 | 468 | 40 |
| 17,198 | 50 | 2 | 219 | 18 | 6  | 1 | 192 | 20 | 467 | 41 |
| 17,199 | 50 | 2 | 216 | 18 | 6  | 1 | 190 | 20 | 462 | 41 |
| 17,200 | 48 | 2 | 210 | 18 | 5  | 1 | 179 | 20 | 442 | 41 |
| 17,201 | 48 | 2 | 210 | 18 | 4  | 1 | 179 | 20 | 441 | 41 |
| 17,202 | 48 | 1 | 209 | 19 | 4  | 1 | 177 | 22 | 438 | 43 |
| 17,203 | 48 | 1 | 206 | 19 | 4  | 1 | 177 | 22 | 435 | 43 |
| 17,204 | 48 | 1 | 206 | 19 | 4  | 1 | 176 | 22 | 434 | 43 |
| 17,205 | 44 | 0 | 207 | 18 | 4  | 1 | 173 | 21 | 428 | 40 |
| 17,206 | 44 | 0 | 207 | 18 | 4  | 1 | 173 | 21 | 428 | 40 |
| 17,207 | 43 | 0 | 201 | 18 | 3  | 1 | 162 | 21 | 409 | 40 |
| 17,208 | 43 | 0 | 201 | 18 | 3  | 1 | 161 | 21 | 408 | 40 |

|        |    |   |     |    |   |   |     |    |     |    |
|--------|----|---|-----|----|---|---|-----|----|-----|----|
| 17,209 | 43 | 0 | 201 | 18 | 3 | 1 | 159 | 21 | 406 | 40 |
| 17,210 | 43 | 0 | 201 | 18 | 3 | 1 | 160 | 21 | 407 | 40 |
| 17,211 | 43 | 0 | 201 | 19 | 3 | 1 | 159 | 21 | 406 | 41 |
| 17,212 | 43 | 0 | 201 | 19 | 3 | 1 | 154 | 21 | 401 | 41 |
| 17,213 | 43 | 0 | 201 | 19 | 3 | 1 | 154 | 21 | 401 | 41 |
| 17,214 | 43 | 0 | 201 | 19 | 3 | 1 | 153 | 21 | 400 | 41 |
| 17,215 | 43 | 0 | 201 | 19 | 3 | 1 | 154 | 21 | 401 | 41 |
| 17,216 | 43 | 0 | 200 | 19 | 3 | 1 | 154 | 21 | 400 | 41 |
| 17,217 | 42 | 0 | 199 | 18 | 2 | 1 | 153 | 21 | 396 | 40 |
| 17,218 | 42 | 0 | 198 | 17 | 2 | 1 | 153 | 20 | 395 | 38 |
| 17,219 | 42 | 0 | 197 | 17 | 2 | 1 | 152 | 20 | 393 | 38 |
| 17,220 | 42 | 0 | 195 | 17 | 3 | 1 | 151 | 20 | 391 | 38 |
| 17,221 | 42 | 0 | 195 | 17 | 3 | 1 | 151 | 20 | 391 | 38 |
| 17,222 | 43 | 0 | 194 | 12 | 3 | 1 | 152 | 10 | 392 | 23 |
| 17,223 | 43 | 0 | 194 | 11 | 3 | 1 | 152 | 10 | 392 | 22 |
| 17,224 | 43 | 0 | 194 | 11 | 3 | 1 | 152 | 10 | 392 | 22 |
| 17,225 | 43 | 0 | 194 | 12 | 3 | 1 | 151 | 10 | 391 | 23 |
| 17,226 | 43 | 0 | 193 | 12 | 3 | 1 | 153 | 10 | 392 | 23 |
| 17,227 | 43 | 0 | 191 | 8  | 3 | 1 | 153 | 10 | 390 | 19 |
| 17,228 | 43 | 0 | 186 | 8  | 3 | 1 | 152 | 9  | 384 | 18 |
| 17,229 | 42 | 0 | 185 | 8  | 3 | 1 | 149 | 9  | 379 | 18 |
| 17,230 | 37 | 0 | 164 | 8  | 3 | 1 | 139 | 9  | 343 | 18 |
| 17,231 | 34 | 0 | 154 | 8  | 3 | 1 | 130 | 8  | 321 | 17 |
| 17,232 | 34 | 0 | 153 | 8  | 3 | 1 | 128 | 8  | 318 | 17 |
| 17,233 | 31 | 0 | 137 | 8  | 1 | 1 | 124 | 8  | 293 | 17 |
| 17,234 | 31 | 0 | 132 | 8  | 1 | 1 | 121 | 8  | 285 | 17 |
| 17,235 | 25 | 0 | 113 | 8  | 1 | 1 | 115 | 8  | 254 | 17 |
| 17,236 | 25 | 0 | 113 | 8  | 1 | 1 | 117 | 8  | 256 | 17 |
| 17,237 | 22 | 0 | 105 | 8  | 1 | 1 | 107 | 8  | 235 | 17 |
| 17,238 | 21 | 0 | 97  | 8  | 1 | 1 | 105 | 8  | 224 | 17 |
| 17,239 | 18 | 0 | 75  | 9  | 1 | 1 | 81  | 8  | 175 | 18 |
| 17,240 | 17 | 0 | 69  | 10 | 1 | 1 | 75  | 8  | 162 | 19 |
| 17,241 | 5  | 0 | 45  | 11 | 1 | 1 | 32  | 8  | 83  | 20 |
| 17,242 | 4  | 0 | 29  | 12 | 1 | 1 | 24  | 8  | 58  | 21 |
| 17,243 | 2  | 0 | 16  | 12 | 1 | 1 | 18  | 8  | 37  | 21 |
| 17,244 | 1  | 0 | 12  | 11 | 1 | 0 | 14  | 8  | 28  | 19 |
| 17,245 | 1  | 0 | 10  | 15 | 1 | 0 | 13  | 4  | 25  | 19 |
| 17,246 | 1  | 0 | 10  | 15 | 1 | 0 | 13  | 4  | 25  | 19 |
| 17,247 | 1  | 0 | 10  | 12 | 1 | 0 | 12  | 3  | 24  | 15 |
| 17,248 | 1  | 0 | 10  | 12 | 1 | 0 | 12  | 4  | 24  | 16 |
| 17,249 | 1  | 0 | 10  | 12 | 1 | 0 | 12  | 3  | 24  | 15 |

|        |   |   |    |    |   |   |    |    |    |    |
|--------|---|---|----|----|---|---|----|----|----|----|
| 17,250 | 1 | 0 | 11 | 19 | 1 | 1 | 12 | 20 | 25 | 40 |
| 17,251 | 1 | 0 | 11 | 19 | 1 | 1 | 12 | 20 | 25 | 40 |
| 17,252 | 1 | 0 | 12 | 19 | 1 | 1 | 12 | 20 | 26 | 40 |
| 17,253 | 1 | 0 | 12 | 20 | 1 | 1 | 13 | 18 | 27 | 39 |
| 17,254 | 1 | 0 | 12 | 20 | 1 | 1 | 13 | 19 | 27 | 40 |
| 17,255 | 1 | 0 | 12 | 21 | 1 | 1 | 13 | 19 | 27 | 41 |
| 17,256 | 1 | 0 | 11 | 21 | 1 | 1 | 13 | 19 | 26 | 41 |
| 17,257 | 1 | 0 | 12 | 21 | 2 | 1 | 13 | 19 | 28 | 41 |
| 17,258 | 1 | 0 | 12 | 21 | 2 | 1 | 13 | 19 | 28 | 41 |
| 17,259 | 1 | 0 | 11 | 21 | 2 | 1 | 13 | 19 | 27 | 41 |
| 17,260 | 1 | 0 | 11 | 23 | 2 | 1 | 15 | 19 | 29 | 43 |
| 17,261 | 1 | 0 | 11 | 24 | 2 | 1 | 15 | 19 | 29 | 44 |
| 17,262 | 1 | 0 | 15 | 23 | 3 | 1 | 16 | 19 | 35 | 43 |
| 17,263 | 1 | 0 | 15 | 23 | 3 | 1 | 16 | 19 | 35 | 43 |
| 17,264 | 1 | 0 | 15 | 23 | 3 | 1 | 17 | 19 | 36 | 43 |
| 17,265 | 1 | 0 | 14 | 23 | 3 | 1 | 17 | 19 | 35 | 43 |
| 17,266 | 1 | 0 | 14 | 23 | 3 | 1 | 16 | 19 | 34 | 43 |
| 17,267 | 2 | 0 | 14 | 23 | 3 | 1 | 15 | 19 | 34 | 43 |
| 17,268 | 2 | 0 | 15 | 23 | 3 | 1 | 15 | 19 | 35 | 43 |
| 17,269 | 2 | 0 | 16 | 23 | 3 | 1 | 15 | 19 | 36 | 43 |
| 17,270 | 2 | 0 | 16 | 23 | 2 | 1 | 15 | 19 | 35 | 43 |
| 17,271 | 2 | 0 | 16 | 23 | 3 | 1 | 15 | 19 | 36 | 43 |
| 17,272 | 2 | 0 | 16 | 23 | 3 | 1 | 14 | 19 | 35 | 43 |
| 17,273 | 1 | 0 | 16 | 23 | 3 | 1 | 14 | 19 | 34 | 43 |
| 17,274 | 1 | 0 | 19 | 23 | 3 | 1 | 14 | 19 | 37 | 43 |
| 17,275 | 2 | 0 | 20 | 23 | 3 | 1 | 14 | 19 | 39 | 43 |
| 17,276 | 2 | 0 | 17 | 22 | 3 | 1 | 15 | 19 | 37 | 42 |
| 17,277 | 2 | 0 | 17 | 22 | 3 | 1 | 13 | 19 | 35 | 42 |
| 17,278 | 3 | 0 | 19 | 22 | 3 | 1 | 14 | 19 | 39 | 42 |
| 17,279 | 3 | 0 | 19 | 22 | 3 | 1 | 14 | 19 | 39 | 42 |
| 17,280 | 3 | 0 | 19 | 24 | 3 | 1 | 13 | 19 | 38 | 44 |
| 17,281 | 3 | 0 | 20 | 24 | 3 | 1 | 14 | 19 | 40 | 44 |
| 17,282 | 3 | 0 | 20 | 25 | 3 | 1 | 14 | 19 | 40 | 45 |
| 17,283 | 3 | 0 | 20 | 26 | 3 | 1 | 14 | 19 | 40 | 46 |
| 17,284 | 3 | 0 | 33 | 26 | 4 | 1 | 15 | 19 | 55 | 46 |
| 17,285 | 3 | 0 | 33 | 26 | 4 | 1 | 16 | 19 | 56 | 46 |
| 17,286 | 3 | 0 | 33 | 27 | 4 | 1 | 16 | 19 | 56 | 47 |
| 17,287 | 3 | 0 | 36 | 30 | 4 | 1 | 14 | 20 | 57 | 51 |
| 17,288 | 3 | 0 | 35 | 30 | 4 | 1 | 14 | 20 | 56 | 51 |
| 17,289 | 3 | 0 | 36 | 30 | 4 | 1 | 12 | 20 | 55 | 51 |
| 17,290 | 3 | 0 | 36 | 30 | 4 | 1 | 12 | 20 | 55 | 51 |

|        |   |   |    |    |   |   |    |    |    |    |
|--------|---|---|----|----|---|---|----|----|----|----|
| 17,291 | 3 | 0 | 36 | 30 | 4 | 1 | 12 | 20 | 55 | 51 |
| 17,292 | 3 | 0 | 37 | 29 | 4 | 1 | 12 | 20 | 56 | 50 |
| 17,293 | 3 | 0 | 37 | 28 | 4 | 1 | 12 | 20 | 56 | 49 |
| 17,294 | 3 | 0 | 37 | 28 | 4 | 1 | 12 | 20 | 56 | 49 |
| 17,295 | 3 | 0 | 37 | 23 | 4 | 1 | 11 | 20 | 55 | 44 |
| 17,296 | 3 | 0 | 37 | 23 | 4 | 1 | 11 | 20 | 55 | 44 |
| 17,297 | 3 | 0 | 37 | 23 | 4 | 1 | 11 | 20 | 55 | 44 |
| 17,298 | 3 | 0 | 37 | 23 | 4 | 1 | 11 | 20 | 55 | 44 |
| 17,299 | 3 | 0 | 38 | 23 | 4 | 1 | 12 | 19 | 57 | 43 |
| 17,300 | 3 | 1 | 38 | 23 | 4 | 1 | 12 | 19 | 57 | 44 |
| 17,301 | 3 | 1 | 38 | 16 | 4 | 0 | 12 | 2  | 57 | 19 |
| 17,302 | 3 | 1 | 38 | 16 | 4 | 0 | 13 | 2  | 58 | 19 |
| 17,303 | 3 | 1 | 38 | 16 | 4 | 0 | 13 | 2  | 58 | 19 |
| 17,304 | 3 | 1 | 38 | 14 | 4 | 0 | 12 | 1  | 57 | 16 |
| 17,305 | 3 | 1 | 40 | 13 | 4 | 0 | 12 | 1  | 59 | 15 |
| 17,306 | 3 | 1 | 41 | 13 | 4 | 0 | 12 | 1  | 60 | 15 |
| 17,307 | 3 | 1 | 40 | 13 | 3 | 0 | 12 | 1  | 58 | 15 |
| 17,308 | 3 | 1 | 40 | 13 | 3 | 0 | 12 | 1  | 58 | 15 |
| 17,309 | 3 | 1 | 39 | 14 | 3 | 0 | 11 | 1  | 56 | 16 |
| 17,310 | 3 | 1 | 39 | 14 | 3 | 0 | 11 | 1  | 56 | 16 |
| 17,311 | 3 | 1 | 39 | 11 | 3 | 0 | 10 | 1  | 55 | 13 |
| 17,312 | 3 | 1 | 35 | 11 | 2 | 0 | 9  | 1  | 49 | 13 |
| 17,313 | 3 | 1 | 35 | 11 | 2 | 0 | 9  | 1  | 49 | 13 |
| 17,314 | 3 | 1 | 36 | 11 | 2 | 0 | 8  | 1  | 49 | 13 |
| 17,315 | 3 | 1 | 36 | 11 | 2 | 0 | 8  | 1  | 49 | 13 |
| 17,316 | 3 | 1 | 36 | 11 | 2 | 0 | 8  | 2  | 49 | 14 |
| 17,317 | 3 | 1 | 36 | 12 | 2 | 0 | 8  | 3  | 49 | 16 |
| 17,318 | 2 | 3 | 36 | 14 | 2 | 0 | 8  | 4  | 48 | 21 |
| 17,319 | 2 | 4 | 35 | 15 | 2 | 0 | 8  | 4  | 47 | 23 |
| 17,320 | 2 | 4 | 35 | 15 | 2 | 0 | 7  | 4  | 46 | 23 |
| 17,321 | 2 | 4 | 35 | 15 | 2 | 0 | 7  | 4  | 46 | 23 |
| 17,322 | 2 | 4 | 35 | 15 | 1 | 0 | 7  | 5  | 45 | 24 |
| 17,323 | 2 | 4 | 35 | 15 | 1 | 0 | 8  | 5  | 46 | 24 |
| 17,324 | 2 | 4 | 35 | 15 | 1 | 0 | 8  | 5  | 46 | 24 |
| 17,325 | 2 | 4 | 33 | 15 | 1 | 0 | 8  | 5  | 44 | 24 |
| 17,326 | 1 | 4 | 32 | 15 | 1 | 0 | 8  | 5  | 42 | 24 |
| 17,327 | 2 | 4 | 32 | 15 | 1 | 0 | 7  | 5  | 42 | 24 |
| 17,328 | 2 | 4 | 31 | 15 | 1 | 0 | 7  | 5  | 41 | 24 |
| 17,329 | 1 | 4 | 30 | 15 | 1 | 0 | 6  | 5  | 38 | 24 |
| 17,330 | 1 | 4 | 30 | 15 | 1 | 0 | 6  | 5  | 38 | 24 |
| 17,331 | 1 | 4 | 31 | 13 | 1 | 0 | 9  | 5  | 42 | 22 |

|        |   |   |    |    |   |   |    |    |     |    |
|--------|---|---|----|----|---|---|----|----|-----|----|
| 17,332 | 1 | 4 | 30 | 12 | 1 | 0 | 8  | 5  | 40  | 21 |
| 17,333 | 1 | 4 | 30 | 12 | 1 | 0 | 8  | 5  | 40  | 21 |
| 17,334 | 1 | 4 | 17 | 11 | 0 | 0 | 7  | 5  | 25  | 20 |
| 17,335 | 1 | 4 | 17 | 11 | 0 | 0 | 8  | 5  | 26  | 20 |
| 17,336 | 1 | 4 | 17 | 11 | 0 | 0 | 7  | 5  | 25  | 20 |
| 17,337 | 1 | 4 | 17 | 8  | 0 | 0 | 7  | 4  | 25  | 16 |
| 17,338 | 1 | 4 | 15 | 8  | 0 | 0 | 8  | 4  | 24  | 16 |
| 17,339 | 1 | 4 | 14 | 8  | 0 | 0 | 8  | 4  | 23  | 16 |
| 17,340 | 1 | 4 | 14 | 8  | 0 | 0 | 8  | 4  | 23  | 16 |
| 17,341 | 1 | 4 | 14 | 6  | 0 | 0 | 8  | 4  | 23  | 14 |
| 17,342 | 1 | 4 | 14 | 6  | 0 | 0 | 8  | 4  | 23  | 14 |
| 17,343 | 1 | 4 | 13 | 6  | 0 | 0 | 8  | 4  | 22  | 14 |
| 17,344 | 1 | 4 | 14 | 6  | 0 | 0 | 8  | 4  | 23  | 14 |
| 17,345 | 1 | 4 | 14 | 6  | 0 | 0 | 8  | 4  | 23  | 14 |
| 17,346 | 1 | 4 | 14 | 6  | 0 | 0 | 8  | 5  | 23  | 15 |
| 17,347 | 1 | 4 | 23 | 6  | 0 | 0 | 10 | 5  | 34  | 15 |
| 17,348 | 1 | 4 | 23 | 7  | 0 | 0 | 9  | 5  | 33  | 16 |
| 17,349 | 1 | 4 | 23 | 7  | 0 | 0 | 9  | 5  | 33  | 16 |
| 17,350 | 3 | 4 | 53 | 9  | 1 | 0 | 24 | 5  | 81  | 18 |
| 17,351 | 3 | 4 | 58 | 9  | 1 | 0 | 35 | 5  | 97  | 18 |
| 17,352 | 3 | 4 | 57 | 11 | 1 | 0 | 36 | 5  | 97  | 20 |
| 17,353 | 3 | 4 | 56 | 11 | 1 | 0 | 35 | 5  | 95  | 20 |
| 17,354 | 3 | 4 | 56 | 11 | 1 | 0 | 35 | 5  | 95  | 20 |
| 17,355 | 3 | 4 | 56 | 11 | 1 | 0 | 35 | 5  | 95  | 20 |
| 17,356 | 5 | 4 | 54 | 11 | 1 | 0 | 37 | 5  | 97  | 20 |
| 17,357 | 5 | 4 | 55 | 11 | 1 | 0 | 37 | 5  | 98  | 20 |
| 17,358 | 6 | 4 | 59 | 11 | 1 | 0 | 40 | 5  | 106 | 20 |
| 17,359 | 6 | 4 | 60 | 10 | 1 | 0 | 40 | 5  | 107 | 19 |
| 17,360 | 7 | 4 | 73 | 10 | 2 | 0 | 55 | 5  | 137 | 19 |
| 17,361 | 7 | 4 | 73 | 10 | 2 | 0 | 55 | 5  | 137 | 19 |
| 17,362 | 7 | 4 | 78 | 10 | 3 | 0 | 59 | 5  | 147 | 19 |
| 17,363 | 7 | 4 | 78 | 10 | 3 | 0 | 59 | 5  | 147 | 19 |
| 17,364 | 7 | 4 | 79 | 10 | 3 | 0 | 59 | 5  | 148 | 19 |
| 17,365 | 7 | 4 | 79 | 10 | 3 | 0 | 59 | 6  | 148 | 20 |
| 17,366 | 7 | 4 | 79 | 11 | 3 | 0 | 59 | 7  | 148 | 22 |
| 17,367 | 7 | 4 | 79 | 11 | 3 | 0 | 59 | 10 | 148 | 25 |
| 17,368 | 7 | 4 | 79 | 10 | 3 | 0 | 59 | 9  | 148 | 23 |
| 17,369 | 7 | 2 | 80 | 10 | 3 | 0 | 59 | 9  | 149 | 21 |
| 17,370 | 7 | 1 | 80 | 14 | 3 | 0 | 59 | 10 | 149 | 25 |
| 17,371 | 7 | 1 | 79 | 15 | 3 | 0 | 59 | 10 | 148 | 26 |
| 17,372 | 8 | 3 | 79 | 15 | 3 | 0 | 59 | 9  | 149 | 27 |



|        |   |   |    |    |   |   |    |    |     |    |
|--------|---|---|----|----|---|---|----|----|-----|----|
| 17,373 | 8 | 3 | 79 | 23 | 3 | 0 | 59 | 14 | 149 | 40 |
| 17,374 | 8 | 3 | 79 | 24 | 3 | 0 | 58 | 14 | 148 | 41 |
| 17,375 | 8 | 3 | 79 | 24 | 3 | 0 | 58 | 14 | 148 | 41 |
| 17,376 | 8 | 3 | 79 | 24 | 3 | 0 | 58 | 14 | 148 | 41 |
| 17,377 | 8 | 3 | 79 | 24 | 3 | 0 | 58 | 15 | 148 | 42 |
| 17,378 | 7 | 5 | 79 | 24 | 3 | 0 | 58 | 15 | 147 | 44 |
| 17,379 | 7 | 5 | 78 | 24 | 3 | 0 | 58 | 15 | 146 | 44 |
| 17,380 | 7 | 5 | 79 | 24 | 3 | 0 | 59 | 15 | 148 | 44 |
| 17,381 | 7 | 5 | 78 | 25 | 3 | 0 | 57 | 15 | 145 | 45 |
| 17,382 | 7 | 5 | 78 | 25 | 3 | 0 | 56 | 15 | 144 | 45 |
| 17,383 | 7 | 5 | 78 | 25 | 3 | 0 | 56 | 15 | 144 | 45 |
| 17,384 | 8 | 5 | 79 | 26 | 3 | 0 | 57 | 20 | 147 | 51 |
| 17,385 | 8 | 5 | 81 | 27 | 3 | 0 | 58 | 22 | 150 | 54 |
| 17,386 | 8 | 5 | 81 | 28 | 3 | 0 | 57 | 22 | 149 | 55 |
| 17,387 | 8 | 5 | 81 | 27 | 3 | 0 | 58 | 22 | 150 | 54 |
| 17,388 | 8 | 5 | 82 | 27 | 3 | 0 | 58 | 22 | 151 | 54 |
| 17,389 | 8 | 5 | 81 | 27 | 3 | 0 | 57 | 23 | 149 | 55 |
| 17,390 | 8 | 5 | 81 | 27 | 3 | 0 | 57 | 24 | 149 | 56 |
| 17,391 | 8 | 5 | 84 | 27 | 3 | 0 | 61 | 24 | 156 | 56 |
| 17,392 | 8 | 5 | 84 | 27 | 3 | 0 | 61 | 24 | 156 | 56 |
| 17,393 | 8 | 5 | 85 | 28 | 3 | 0 | 65 | 25 | 161 | 58 |
| 17,394 | 8 | 5 | 85 | 28 | 3 | 0 | 65 | 25 | 161 | 58 |
| 17,395 | 8 | 5 | 84 | 28 | 3 | 0 | 65 | 25 | 160 | 58 |
| 17,396 | 8 | 5 | 83 | 28 | 3 | 0 | 65 | 25 | 159 | 58 |
| 17,397 | 8 | 5 | 77 | 28 | 3 | 0 | 63 | 24 | 151 | 57 |
| 17,398 | 8 | 5 | 75 | 28 | 3 | 0 | 63 | 25 | 149 | 58 |
| 17,399 | 8 | 5 | 75 | 27 | 3 | 0 | 64 | 28 | 150 | 60 |
| 17,400 | 6 | 5 | 52 | 28 | 2 | 0 | 58 | 28 | 118 | 61 |
| 17,401 | 6 | 4 | 47 | 26 | 2 | 0 | 49 | 28 | 104 | 58 |
| 17,402 | 6 | 4 | 42 | 24 | 2 | 0 | 39 | 28 | 89  | 56 |
| 17,403 | 6 | 4 | 42 | 24 | 2 | 0 | 38 | 28 | 88  | 56 |
| 17,404 | 6 | 4 | 42 | 24 | 2 | 0 | 38 | 30 | 88  | 58 |
| 17,405 | 6 | 4 | 44 | 24 | 2 | 0 | 39 | 30 | 91  | 58 |
| 17,406 | 6 | 4 | 44 | 24 | 2 | 0 | 39 | 32 | 91  | 60 |
| 17,407 | 4 | 4 | 44 | 25 | 2 | 0 | 37 | 33 | 87  | 62 |
| 17,408 | 4 | 4 | 43 | 25 | 2 | 0 | 39 | 33 | 88  | 62 |
| 17,409 | 3 | 4 | 40 | 25 | 2 | 0 | 37 | 33 | 82  | 62 |
| 17,410 | 3 | 4 | 40 | 26 | 2 | 0 | 37 | 35 | 82  | 65 |
| 17,411 | 2 | 4 | 27 | 29 | 1 | 0 | 22 | 38 | 52  | 71 |
| 17,412 | 2 | 4 | 24 | 34 | 0 | 0 | 19 | 39 | 45  | 77 |
| 17,413 | 2 | 4 | 23 | 34 | 0 | 0 | 18 | 39 | 43  | 77 |

|        |   |   |    |    |   |   |    |    |    |    |
|--------|---|---|----|----|---|---|----|----|----|----|
| 17,414 | 2 | 4 | 21 | 34 | 0 | 0 | 18 | 39 | 41 | 77 |
| 17,415 | 2 | 4 | 21 | 34 | 0 | 0 | 18 | 39 | 41 | 77 |
| 17,416 | 2 | 4 | 21 | 35 | 0 | 0 | 18 | 38 | 41 | 77 |
| 17,417 | 2 | 4 | 21 | 34 | 0 | 0 | 18 | 37 | 41 | 75 |
| 17,418 | 2 | 4 | 21 | 35 | 0 | 0 | 18 | 33 | 41 | 72 |
| 17,419 | 2 | 4 | 21 | 36 | 0 | 0 | 18 | 33 | 41 | 73 |
| 17,420 | 2 | 4 | 20 | 35 | 0 | 0 | 18 | 30 | 40 | 69 |
| 17,421 | 2 | 2 | 20 | 29 | 0 | 0 | 18 | 30 | 40 | 61 |
| 17,422 | 2 | 2 | 20 | 30 | 0 | 0 | 20 | 30 | 42 | 62 |
| 17,423 | 1 | 2 | 20 | 30 | 0 | 0 | 20 | 30 | 41 | 62 |
| 17,424 | 1 | 2 | 20 | 22 | 0 | 0 | 20 | 26 | 41 | 50 |
| 17,425 | 1 | 2 | 20 | 21 | 0 | 0 | 20 | 26 | 41 | 49 |
| 17,426 | 1 | 2 | 20 | 21 | 0 | 0 | 20 | 26 | 41 | 49 |
| 17,427 | 1 | 2 | 19 | 21 | 0 | 0 | 21 | 26 | 41 | 49 |
| 17,428 | 1 | 2 | 19 | 21 | 0 | 0 | 21 | 26 | 41 | 49 |
| 17,429 | 1 | 0 | 18 | 21 | 0 | 0 | 21 | 26 | 40 | 47 |
| 17,430 | 1 | 0 | 18 | 21 | 0 | 0 | 20 | 26 | 39 | 47 |
| 17,431 | 1 | 0 | 17 | 22 | 0 | 0 | 20 | 26 | 38 | 48 |
| 17,432 | 1 | 1 | 17 | 22 | 0 | 0 | 20 | 26 | 38 | 49 |
| 17,433 | 1 | 1 | 17 | 22 | 0 | 0 | 20 | 26 | 38 | 49 |
| 17,434 | 0 | 1 | 18 | 19 | 0 | 0 | 20 | 20 | 38 | 40 |
| 17,435 | 0 | 1 | 18 | 19 | 0 | 0 | 20 | 20 | 38 | 40 |
| 17,436 | 0 | 1 | 16 | 19 | 0 | 0 | 19 | 20 | 35 | 40 |
| 17,437 | 0 | 1 | 16 | 19 | 0 | 0 | 18 | 20 | 34 | 40 |
| 17,438 | 0 | 1 | 17 | 19 | 0 | 0 | 18 | 20 | 35 | 40 |
| 17,439 | 0 | 1 | 16 | 19 | 0 | 0 | 18 | 19 | 34 | 39 |
| 17,440 | 0 | 1 | 19 | 19 | 0 | 0 | 18 | 19 | 37 | 39 |
| 17,441 | 0 | 1 | 16 | 19 | 0 | 0 | 12 | 18 | 28 | 38 |
| 17,442 | 0 | 1 | 16 | 20 | 0 | 0 | 12 | 18 | 28 | 39 |
| 17,443 | 0 | 1 | 15 | 20 | 0 | 0 | 11 | 18 | 26 | 39 |
| 17,444 | 0 | 1 | 15 | 19 | 0 | 0 | 8  | 17 | 23 | 37 |
| 17,445 | 0 | 1 | 15 | 19 | 0 | 0 | 8  | 17 | 23 | 37 |
| 17,446 | 0 | 1 | 15 | 19 | 0 | 0 | 8  | 17 | 23 | 37 |
| 17,447 | 0 | 1 | 15 | 19 | 0 | 0 | 8  | 16 | 23 | 36 |
| 17,448 | 0 | 1 | 16 | 19 | 0 | 0 | 8  | 16 | 24 | 36 |
| 17,449 | 0 | 1 | 16 | 19 | 0 | 0 | 8  | 17 | 24 | 37 |
| 17,450 | 0 | 1 | 16 | 19 | 0 | 0 | 8  | 14 | 24 | 34 |
| 17,451 | 0 | 1 | 15 | 18 | 0 | 0 | 8  | 14 | 23 | 33 |
| 17,452 | 0 | 1 | 14 | 18 | 0 | 0 | 8  | 14 | 22 | 33 |
| 17,453 | 0 | 1 | 14 | 18 | 0 | 0 | 8  | 14 | 22 | 33 |
| 17,454 | 0 | 1 | 14 | 18 | 0 | 0 | 8  | 13 | 22 | 32 |

|        |   |   |    |    |   |   |    |    |     |    |
|--------|---|---|----|----|---|---|----|----|-----|----|
| 17,455 | 0 | 1 | 14 | 28 | 0 | 0 | 8  | 16 | 22  | 45 |
| 17,456 | 0 | 1 | 12 | 28 | 0 | 0 | 7  | 16 | 19  | 45 |
| 17,457 | 0 | 1 | 12 | 28 | 0 | 0 | 7  | 14 | 19  | 43 |
| 17,458 | 0 | 1 | 12 | 33 | 1 | 0 | 7  | 16 | 20  | 50 |
| 17,459 | 0 | 1 | 11 | 35 | 1 | 0 | 5  | 19 | 17  | 55 |
| 17,460 | 0 | 1 | 12 | 36 | 1 | 1 | 4  | 24 | 17  | 62 |
| 17,461 | 0 | 1 | 11 | 36 | 1 | 1 | 4  | 22 | 16  | 60 |
| 17,462 | 0 | 1 | 21 | 33 | 1 | 1 | 8  | 19 | 30  | 54 |
| 17,463 | 0 | 1 | 22 | 28 | 1 | 1 | 9  | 18 | 32  | 48 |
| 17,464 | 0 | 1 | 23 | 28 | 1 | 1 | 9  | 19 | 33  | 49 |
| 17,465 | 1 | 1 | 34 | 28 | 1 | 1 | 19 | 20 | 55  | 50 |
| 17,466 | 1 | 2 | 34 | 28 | 1 | 2 | 19 | 20 | 55  | 52 |
| 17,467 | 1 | 2 | 41 | 27 | 1 | 2 | 24 | 20 | 67  | 51 |
| 17,468 | 1 | 2 | 48 | 28 | 1 | 2 | 27 | 21 | 77  | 53 |
| 17,469 | 1 | 2 | 48 | 27 | 1 | 2 | 28 | 21 | 78  | 52 |
| 17,470 | 2 | 2 | 63 | 26 | 1 | 2 | 38 | 21 | 104 | 51 |
| 17,471 | 2 | 2 | 65 | 26 | 1 | 2 | 41 | 20 | 109 | 50 |
| 17,472 | 2 | 2 | 65 | 26 | 1 | 2 | 41 | 20 | 109 | 50 |
| 17,473 | 2 | 2 | 69 | 25 | 1 | 2 | 40 | 20 | 112 | 49 |
| 17,474 | 2 | 2 | 69 | 25 | 1 | 2 | 40 | 20 | 112 | 49 |
| 17,475 | 2 | 2 | 75 | 26 | 1 | 2 | 40 | 20 | 118 | 50 |
| 17,476 | 3 | 2 | 81 | 26 | 3 | 2 | 45 | 20 | 132 | 50 |
| 17,477 | 3 | 2 | 81 | 28 | 3 | 2 | 45 | 20 | 132 | 52 |
| 17,478 | 3 | 2 | 82 | 28 | 3 | 2 | 44 | 19 | 132 | 51 |
| 17,479 | 3 | 2 | 82 | 28 | 3 | 2 | 44 | 20 | 132 | 52 |
| 17,480 | 3 | 2 | 82 | 28 | 3 | 2 | 44 | 20 | 132 | 52 |
| 17,481 | 3 | 1 | 82 | 26 | 3 | 2 | 44 | 20 | 132 | 49 |
| 17,482 | 3 | 1 | 82 | 26 | 3 | 2 | 43 | 20 | 131 | 49 |
| 17,483 | 3 | 1 | 82 | 26 | 3 | 2 | 43 | 20 | 131 | 49 |
| 17,484 | 3 | 1 | 80 | 26 | 3 | 2 | 43 | 20 | 129 | 49 |
| 17,485 | 3 | 1 | 80 | 26 | 3 | 2 | 43 | 20 | 129 | 49 |
| 17,486 | 3 | 1 | 80 | 26 | 3 | 2 | 43 | 20 | 129 | 49 |
| 17,487 | 3 | 1 | 80 | 26 | 3 | 2 | 43 | 20 | 129 | 49 |
| 17,488 | 3 | 1 | 80 | 26 | 3 | 2 | 43 | 20 | 129 | 49 |
| 17,489 | 3 | 1 | 81 | 26 | 3 | 2 | 43 | 20 | 130 | 49 |
| 17,490 | 3 | 1 | 81 | 26 | 3 | 2 | 43 | 20 | 130 | 49 |
| 17,491 | 3 | 1 | 78 | 26 | 3 | 2 | 43 | 20 | 127 | 49 |
| 17,492 | 3 | 1 | 78 | 26 | 3 | 2 | 43 | 20 | 127 | 49 |
| 17,493 | 3 | 1 | 79 | 25 | 3 | 2 | 44 | 24 | 129 | 52 |
| 17,494 | 3 | 1 | 79 | 25 | 3 | 2 | 44 | 24 | 129 | 52 |
| 17,495 | 3 | 1 | 79 | 25 | 3 | 2 | 44 | 24 | 129 | 52 |

|        |   |   |    |    |   |   |    |    |     |    |
|--------|---|---|----|----|---|---|----|----|-----|----|
| 17,496 | 3 | 1 | 81 | 25 | 3 | 2 | 44 | 24 | 131 | 52 |
| 17,497 | 3 | 1 | 81 | 25 | 3 | 2 | 44 | 24 | 131 | 52 |
| 17,498 | 3 | 1 | 81 | 25 | 3 | 2 | 44 | 24 | 131 | 52 |
| 17,499 | 3 | 1 | 80 | 25 | 3 | 2 | 44 | 23 | 130 | 51 |
| 17,500 | 3 | 1 | 80 | 25 | 3 | 2 | 44 | 23 | 130 | 51 |
| 17,501 | 3 | 1 | 80 | 26 | 3 | 2 | 44 | 23 | 130 | 52 |
| 17,502 | 3 | 1 | 81 | 26 | 3 | 2 | 44 | 23 | 131 | 52 |
| 17,503 | 3 | 1 | 80 | 27 | 3 | 2 | 44 | 24 | 130 | 54 |
| 17,504 | 3 | 1 | 80 | 30 | 3 | 2 | 44 | 27 | 130 | 60 |
| 17,505 | 3 | 1 | 80 | 30 | 3 | 2 | 43 | 26 | 129 | 59 |
| 17,506 | 3 | 1 | 80 | 20 | 3 | 2 | 44 | 23 | 130 | 46 |
| 17,507 | 3 | 1 | 81 | 20 | 3 | 2 | 44 | 23 | 131 | 46 |
| 17,508 | 4 | 1 | 85 | 20 | 3 | 2 | 49 | 23 | 141 | 46 |
| 17,509 | 4 | 1 | 85 | 14 | 2 | 2 | 49 | 20 | 140 | 37 |
| 17,510 | 4 | 1 | 86 | 12 | 2 | 2 | 49 | 17 | 141 | 32 |
| 17,511 | 4 | 1 | 84 | 11 | 2 | 1 | 49 | 12 | 139 | 25 |
| 17,512 | 4 | 1 | 79 | 10 | 2 | 1 | 48 | 12 | 133 | 24 |
| 17,513 | 4 | 1 | 76 | 11 | 2 | 1 | 45 | 12 | 127 | 25 |
| 17,514 | 4 | 1 | 75 | 11 | 2 | 1 | 47 | 11 | 128 | 24 |
| 17,515 | 4 | 1 | 74 | 11 | 2 | 1 | 47 | 11 | 127 | 24 |
| 17,516 | 3 | 1 | 66 | 11 | 2 | 1 | 39 | 10 | 110 | 23 |
| 17,517 | 4 | 0 | 62 | 11 | 2 | 0 | 38 | 10 | 106 | 21 |
| 17,518 | 4 | 0 | 62 | 11 | 2 | 0 | 38 | 10 | 106 | 21 |
| 17,519 | 4 | 0 | 59 | 10 | 2 | 0 | 37 | 9  | 102 | 19 |
| 17,520 | 4 | 0 | 59 | 10 | 2 | 0 | 36 | 9  | 101 | 19 |
| 17,521 | 3 | 0 | 44 | 9  | 2 | 0 | 26 | 9  | 75  | 18 |
| 17,522 | 3 | 0 | 43 | 9  | 2 | 0 | 23 | 9  | 71  | 18 |
| 17,523 | 3 | 0 | 42 | 9  | 2 | 1 | 24 | 9  | 71  | 19 |
| 17,524 | 3 | 0 | 39 | 9  | 2 | 1 | 23 | 10 | 67  | 20 |
| 17,525 | 3 | 0 | 33 | 13 | 2 | 1 | 23 | 10 | 61  | 24 |
| 17,526 | 3 | 0 | 30 | 10 | 2 | 1 | 20 | 10 | 55  | 21 |
| 17,527 | 2 | 0 | 29 | 10 | 0 | 1 | 18 | 11 | 49  | 22 |
| 17,528 | 2 | 0 | 29 | 10 | 0 | 1 | 18 | 11 | 49  | 22 |
| 17,529 | 2 | 0 | 28 | 10 | 0 | 1 | 18 | 10 | 48  | 21 |
| 17,530 | 2 | 0 | 28 | 10 | 0 | 1 | 18 | 10 | 48  | 21 |
| 17,531 | 2 | 0 | 28 | 10 | 0 | 2 | 18 | 10 | 48  | 22 |
| 17,532 | 2 | 0 | 28 | 10 | 0 | 2 | 18 | 10 | 48  | 22 |
| 17,533 | 2 | 0 | 28 | 10 | 0 | 2 | 18 | 10 | 48  | 22 |
| 17,534 | 2 | 0 | 34 | 10 | 0 | 2 | 21 | 10 | 57  | 22 |
| 17,535 | 2 | 0 | 39 | 10 | 0 | 2 | 22 | 10 | 63  | 22 |
| 17,536 | 2 | 0 | 39 | 10 | 0 | 2 | 22 | 11 | 63  | 23 |

|        |   |   |     |    |   |   |    |    |     |    |
|--------|---|---|-----|----|---|---|----|----|-----|----|
| 17,537 | 2 | 0 | 39  | 10 | 0 | 2 | 22 | 11 | 63  | 23 |
| 17,538 | 3 | 0 | 46  | 10 | 2 | 2 | 26 | 12 | 77  | 24 |
| 17,539 | 3 | 0 | 45  | 11 | 2 | 2 | 26 | 12 | 76  | 25 |
| 17,540 | 4 | 0 | 46  | 11 | 2 | 2 | 28 | 12 | 80  | 25 |
| 17,541 | 4 | 0 | 59  | 12 | 2 | 2 | 31 | 12 | 96  | 26 |
| 17,542 | 5 | 0 | 68  | 12 | 2 | 2 | 32 | 12 | 107 | 26 |
| 17,543 | 6 | 0 | 99  | 13 | 4 | 2 | 47 | 12 | 156 | 27 |
| 17,544 | 6 | 0 | 104 | 13 | 4 | 2 | 48 | 9  | 162 | 24 |
| 17,545 | 6 | 0 | 104 | 13 | 4 | 2 | 48 | 9  | 162 | 24 |
| 17,546 | 6 | 0 | 103 | 17 | 4 | 2 | 50 | 9  | 163 | 28 |
| 17,547 | 6 | 1 | 103 | 18 | 4 | 2 | 50 | 10 | 163 | 31 |
| 17,548 | 6 | 1 | 103 | 18 | 4 | 2 | 50 | 10 | 163 | 31 |
| 17,549 | 6 | 1 | 108 | 19 | 4 | 2 | 50 | 10 | 168 | 32 |
| 17,550 | 6 | 2 | 108 | 19 | 4 | 2 | 50 | 10 | 168 | 33 |
| 17,551 | 6 | 2 | 108 | 19 | 4 | 2 | 50 | 10 | 168 | 33 |
| 17,552 | 6 | 2 | 108 | 21 | 4 | 2 | 50 | 10 | 168 | 35 |
| 17,553 | 6 | 2 | 107 | 21 | 4 | 2 | 50 | 10 | 167 | 35 |
| 17,554 | 7 | 2 | 107 | 25 | 4 | 2 | 50 | 9  | 168 | 38 |
| 17,555 | 7 | 2 | 107 | 22 | 4 | 2 | 50 | 6  | 168 | 32 |
| 17,556 | 7 | 2 | 107 | 22 | 4 | 2 | 49 | 6  | 167 | 32 |
| 17,557 | 7 | 2 | 106 | 22 | 4 | 2 | 49 | 6  | 166 | 32 |
| 17,558 | 6 | 2 | 104 | 22 | 4 | 2 | 44 | 6  | 158 | 32 |
| 17,559 | 6 | 2 | 102 | 22 | 4 | 2 | 45 | 6  | 157 | 32 |
| 17,560 | 6 | 2 | 101 | 22 | 4 | 2 | 45 | 6  | 156 | 32 |
| 17,561 | 6 | 2 | 114 | 22 | 4 | 2 | 47 | 6  | 171 | 32 |
| 17,562 | 6 | 2 | 114 | 22 | 4 | 2 | 48 | 6  | 172 | 32 |
| 17,563 | 6 | 2 | 113 | 22 | 4 | 2 | 48 | 5  | 171 | 31 |
| 17,564 | 6 | 2 | 113 | 21 | 4 | 2 | 48 | 5  | 171 | 30 |
| 17,565 | 6 | 2 | 112 | 21 | 4 | 2 | 45 | 6  | 167 | 31 |
| 17,566 | 6 | 2 | 110 | 21 | 4 | 2 | 43 | 6  | 163 | 31 |
| 17,567 | 6 | 2 | 110 | 21 | 4 | 2 | 43 | 6  | 163 | 31 |
| 17,568 | 5 | 2 | 107 | 21 | 4 | 2 | 39 | 7  | 155 | 32 |
| 17,569 | 5 | 2 | 107 | 21 | 4 | 2 | 39 | 7  | 155 | 32 |
| 17,570 | 5 | 2 | 103 | 21 | 4 | 2 | 38 | 7  | 150 | 32 |
| 17,571 | 5 | 2 | 103 | 21 | 4 | 2 | 38 | 7  | 150 | 32 |
| 17,572 | 5 | 2 | 103 | 21 | 4 | 2 | 38 | 8  | 150 | 33 |
| 17,573 | 5 | 2 | 102 | 21 | 4 | 1 | 39 | 8  | 150 | 32 |
| 17,574 | 5 | 2 | 102 | 21 | 4 | 1 | 38 | 8  | 149 | 32 |
| 17,575 | 5 | 2 | 102 | 17 | 4 | 1 | 38 | 7  | 149 | 27 |
| 17,576 | 5 | 2 | 103 | 17 | 4 | 1 | 38 | 7  | 150 | 27 |
| 17,577 | 6 | 2 | 102 | 19 | 4 | 1 | 39 | 8  | 151 | 30 |

|        |   |   |     |    |   |   |    |   |     |    |
|--------|---|---|-----|----|---|---|----|---|-----|----|
| 17,578 | 6 | 2 | 101 | 19 | 4 | 1 | 39 | 8 | 150 | 30 |
| 17,579 | 7 | 2 | 101 | 19 | 4 | 1 | 39 | 8 | 151 | 30 |
| 17,580 | 7 | 2 | 101 | 20 | 4 | 1 | 39 | 8 | 151 | 31 |
| 17,581 | 7 | 2 | 101 | 20 | 4 | 1 | 39 | 8 | 151 | 31 |
| 17,582 | 7 | 2 | 102 | 20 | 4 | 0 | 39 | 8 | 152 | 30 |
| 17,583 | 7 | 2 | 102 | 20 | 4 | 0 | 39 | 8 | 152 | 30 |
| 17,584 | 7 | 2 | 103 | 20 | 4 | 0 | 38 | 8 | 152 | 30 |
| 17,585 | 7 | 2 | 101 | 20 | 4 | 0 | 38 | 8 | 150 | 30 |
| 17,586 | 7 | 2 | 96  | 20 | 4 | 0 | 37 | 7 | 144 | 29 |
| 17,587 | 7 | 2 | 94  | 20 | 3 | 0 | 36 | 7 | 140 | 29 |
| 17,588 | 7 | 2 | 93  | 20 | 3 | 0 | 37 | 7 | 140 | 29 |
| 17,589 | 6 | 2 | 89  | 20 | 2 | 0 | 34 | 6 | 131 | 28 |
| 17,590 | 5 | 2 | 87  | 19 | 2 | 0 | 32 | 6 | 126 | 27 |
| 17,591 | 5 | 2 | 74  | 19 | 2 | 0 | 29 | 6 | 110 | 27 |
| 17,592 | 4 | 2 | 65  | 18 | 2 | 0 | 28 | 6 | 99  | 26 |
| 17,593 | 4 | 2 | 59  | 18 | 2 | 0 | 26 | 6 | 91  | 26 |
| 17,594 | 3 | 2 | 34  | 17 | 0 | 0 | 11 | 6 | 48  | 25 |
| 17,595 | 3 | 2 | 29  | 17 | 0 | 0 | 10 | 5 | 42  | 24 |
| 17,596 | 3 | 2 | 28  | 17 | 0 | 0 | 10 | 5 | 41  | 24 |
| 17,597 | 3 | 2 | 28  | 13 | 0 | 0 | 9  | 5 | 40  | 20 |
| 17,598 | 3 | 1 | 28  | 12 | 0 | 0 | 9  | 4 | 40  | 17 |
| 17,599 | 3 | 1 | 24  | 12 | 0 | 0 | 9  | 4 | 36  | 17 |
| 17,600 | 3 | 1 | 24  | 12 | 0 | 0 | 9  | 4 | 36  | 17 |
| 17,601 | 3 | 0 | 24  | 12 | 0 | 0 | 9  | 4 | 36  | 16 |
| 17,602 | 3 | 0 | 24  | 12 | 0 | 0 | 9  | 4 | 36  | 16 |
| 17,603 | 3 | 0 | 24  | 10 | 0 | 0 | 9  | 4 | 36  | 14 |
| 17,604 | 3 | 0 | 24  | 10 | 0 | 0 | 9  | 4 | 36  | 14 |
| 17,605 | 2 | 0 | 24  | 5  | 0 | 0 | 9  | 4 | 35  | 9  |
| 17,606 | 2 | 0 | 24  | 5  | 0 | 0 | 9  | 5 | 35  | 10 |
| 17,607 | 2 | 0 | 24  | 5  | 0 | 0 | 9  | 5 | 35  | 10 |
| 17,608 | 2 | 0 | 25  | 6  | 0 | 0 | 9  | 5 | 36  | 11 |
| 17,609 | 2 | 0 | 25  | 6  | 0 | 0 | 9  | 5 | 36  | 11 |
| 17,610 | 2 | 0 | 25  | 9  | 0 | 0 | 10 | 7 | 37  | 16 |
| 17,611 | 2 | 0 | 15  | 9  | 0 | 1 | 8  | 8 | 25  | 18 |
| 17,612 | 2 | 0 | 12  | 9  | 0 | 1 | 8  | 8 | 22  | 18 |
| 17,613 | 2 | 0 | 13  | 9  | 0 | 1 | 7  | 8 | 22  | 18 |
| 17,614 | 2 | 0 | 12  | 9  | 0 | 1 | 7  | 8 | 21  | 18 |
| 17,615 | 2 | 0 | 12  | 10 | 0 | 1 | 7  | 7 | 21  | 18 |
| 17,616 | 2 | 0 | 12  | 10 | 0 | 1 | 7  | 8 | 21  | 19 |
| 17,617 | 2 | 0 | 16  | 10 | 0 | 1 | 9  | 8 | 27  | 19 |
| 17,618 | 2 | 0 | 16  | 10 | 0 | 1 | 9  | 8 | 27  | 19 |

|        |   |   |    |    |   |   |    |    |     |    |
|--------|---|---|----|----|---|---|----|----|-----|----|
| 17,619 | 2 | 1 | 16 | 10 | 0 | 1 | 9  | 7  | 27  | 19 |
| 17,620 | 2 | 1 | 17 | 10 | 0 | 1 | 9  | 7  | 28  | 19 |
| 17,621 | 2 | 1 | 17 | 10 | 0 | 1 | 9  | 7  | 28  | 19 |
| 17,622 | 3 | 1 | 28 | 10 | 0 | 1 | 13 | 7  | 44  | 19 |
| 17,623 | 3 | 1 | 28 | 10 | 0 | 1 | 13 | 6  | 44  | 18 |
| 17,624 | 3 | 1 | 33 | 10 | 0 | 1 | 17 | 6  | 53  | 18 |
| 17,625 | 3 | 1 | 33 | 10 | 0 | 1 | 17 | 6  | 53  | 18 |
| 17,626 | 3 | 1 | 34 | 11 | 0 | 1 | 18 | 6  | 55  | 19 |
| 17,627 | 3 | 1 | 33 | 11 | 0 | 1 | 18 | 6  | 54  | 19 |
| 17,628 | 4 | 1 | 39 | 9  | 0 | 1 | 19 | 5  | 62  | 16 |
| 17,629 | 4 | 1 | 39 | 9  | 0 | 1 | 19 | 5  | 62  | 16 |
| 17,630 | 3 | 1 | 40 | 9  | 0 | 1 | 21 | 5  | 64  | 16 |
| 17,631 | 4 | 1 | 44 | 8  | 0 | 1 | 22 | 5  | 70  | 15 |
| 17,632 | 4 | 1 | 46 | 8  | 0 | 1 | 21 | 5  | 71  | 15 |
| 17,633 | 4 | 1 | 43 | 8  | 0 | 1 | 21 | 5  | 68  | 15 |
| 17,634 | 4 | 1 | 54 | 8  | 0 | 1 | 27 | 5  | 85  | 15 |
| 17,635 | 4 | 1 | 51 | 8  | 0 | 1 | 28 | 5  | 83  | 15 |
| 17,636 | 4 | 1 | 52 | 8  | 0 | 1 | 28 | 5  | 84  | 15 |
| 17,637 | 6 | 1 | 58 | 8  | 2 | 1 | 32 | 5  | 98  | 15 |
| 17,638 | 6 | 1 | 58 | 8  | 2 | 1 | 32 | 5  | 98  | 15 |
| 17,639 | 6 | 1 | 58 | 8  | 2 | 1 | 31 | 5  | 97  | 15 |
| 17,640 | 6 | 1 | 58 | 8  | 2 | 1 | 31 | 5  | 97  | 15 |
| 17,641 | 6 | 1 | 59 | 8  | 2 | 1 | 31 | 5  | 98  | 15 |
| 17,642 | 6 | 1 | 59 | 8  | 2 | 1 | 31 | 5  | 98  | 15 |
| 17,643 | 6 | 1 | 59 | 8  | 2 | 1 | 32 | 5  | 99  | 15 |
| 17,644 | 6 | 1 | 62 | 8  | 2 | 1 | 32 | 5  | 102 | 15 |
| 17,645 | 6 | 1 | 61 | 8  | 2 | 1 | 32 | 5  | 101 | 15 |
| 17,646 | 6 | 1 | 61 | 8  | 2 | 1 | 32 | 5  | 101 | 15 |
| 17,647 | 6 | 1 | 62 | 8  | 2 | 1 | 32 | 5  | 102 | 15 |
| 17,648 | 6 | 2 | 63 | 9  | 2 | 1 | 32 | 5  | 103 | 17 |
| 17,649 | 6 | 2 | 63 | 9  | 2 | 1 | 32 | 6  | 103 | 18 |
| 17,650 | 6 | 2 | 62 | 8  | 2 | 1 | 32 | 6  | 102 | 17 |
| 17,651 | 6 | 2 | 63 | 8  | 2 | 2 | 32 | 7  | 103 | 19 |
| 17,652 | 7 | 2 | 65 | 8  | 2 | 2 | 33 | 10 | 107 | 22 |
| 17,653 | 8 | 2 | 68 | 10 | 2 | 2 | 33 | 10 | 111 | 24 |
| 17,654 | 8 | 2 | 68 | 10 | 2 | 2 | 33 | 11 | 111 | 25 |
| 17,655 | 8 | 2 | 69 | 10 | 2 | 2 | 34 | 11 | 113 | 25 |
| 17,656 | 8 | 2 | 70 | 10 | 2 | 2 | 34 | 10 | 114 | 24 |
| 17,657 | 8 | 2 | 70 | 10 | 2 | 2 | 34 | 10 | 114 | 24 |
| 17,658 | 8 | 2 | 71 | 10 | 2 | 2 | 34 | 11 | 115 | 25 |
| 17,659 | 8 | 2 | 89 | 9  | 2 | 3 | 40 | 11 | 139 | 25 |

|        |   |   |    |    |   |   |    |    |     |    |
|--------|---|---|----|----|---|---|----|----|-----|----|
| 17,660 | 8 | 2 | 89 | 10 | 2 | 3 | 40 | 11 | 139 | 26 |
| 17,661 | 8 | 2 | 90 | 7  | 2 | 2 | 38 | 8  | 138 | 19 |
| 17,662 | 8 | 2 | 90 | 7  | 2 | 2 | 38 | 8  | 138 | 19 |
| 17,663 | 8 | 2 | 90 | 7  | 2 | 2 | 38 | 8  | 138 | 19 |
| 17,664 | 8 | 2 | 91 | 7  | 2 | 2 | 38 | 8  | 139 | 19 |
| 17,665 | 8 | 2 | 91 | 7  | 2 | 2 | 38 | 8  | 139 | 19 |
| 17,666 | 8 | 2 | 91 | 8  | 2 | 2 | 39 | 8  | 140 | 20 |
| 17,667 | 8 | 2 | 91 | 8  | 2 | 2 | 39 | 8  | 140 | 20 |
| 17,668 | 8 | 2 | 86 | 8  | 2 | 2 | 37 | 8  | 133 | 20 |
| 17,669 | 8 | 2 | 85 | 8  | 2 | 2 | 37 | 8  | 132 | 20 |
| 17,670 | 8 | 1 | 85 | 10 | 2 | 2 | 37 | 8  | 132 | 21 |
| 17,671 | 8 | 1 | 85 | 10 | 2 | 2 | 37 | 8  | 132 | 21 |
| 17,672 | 8 | 1 | 78 | 10 | 2 | 2 | 33 | 9  | 121 | 22 |
| 17,673 | 7 | 1 | 74 | 11 | 2 | 2 | 33 | 9  | 116 | 23 |
| 17,674 | 7 | 1 | 72 | 11 | 2 | 2 | 30 | 10 | 111 | 24 |
| 17,675 | 7 | 1 | 69 | 12 | 2 | 2 | 28 | 10 | 106 | 25 |
| 17,676 | 7 | 1 | 69 | 11 | 2 | 2 | 27 | 10 | 105 | 24 |
| 17,677 | 7 | 1 | 68 | 11 | 2 | 2 | 27 | 10 | 104 | 24 |
| 17,678 | 7 | 1 | 68 | 11 | 2 | 2 | 27 | 10 | 104 | 24 |
| 17,679 | 5 | 1 | 62 | 11 | 2 | 2 | 25 | 10 | 94  | 24 |
| 17,680 | 5 | 1 | 61 | 11 | 2 | 2 | 23 | 10 | 91  | 24 |
| 17,681 | 5 | 1 | 61 | 11 | 2 | 2 | 23 | 11 | 91  | 25 |
| 17,682 | 4 | 1 | 57 | 11 | 2 | 2 | 22 | 11 | 85  | 25 |
| 17,683 | 4 | 1 | 55 | 11 | 2 | 2 | 21 | 11 | 82  | 25 |
| 17,684 | 4 | 2 | 51 | 11 | 2 | 2 | 17 | 11 | 74  | 26 |
| 17,685 | 4 | 2 | 44 | 11 | 2 | 2 | 15 | 11 | 65  | 26 |
| 17,686 | 4 | 2 | 44 | 11 | 2 | 2 | 14 | 12 | 64  | 27 |
| 17,687 | 3 | 2 | 37 | 11 | 0 | 2 | 10 | 12 | 50  | 27 |
| 17,688 | 2 | 2 | 37 | 11 | 0 | 2 | 10 | 12 | 49  | 27 |
| 17,689 | 2 | 4 | 37 | 11 | 0 | 2 | 10 | 12 | 49  | 29 |
| 17,690 | 2 | 4 | 36 | 11 | 0 | 2 | 10 | 12 | 48  | 29 |
| 17,691 | 2 | 4 | 36 | 11 | 0 | 2 | 10 | 12 | 48  | 29 |
| 17,692 | 2 | 4 | 36 | 11 | 0 | 2 | 10 | 12 | 48  | 29 |
| 17,693 | 2 | 4 | 36 | 11 | 0 | 2 | 10 | 12 | 48  | 29 |
| 17,694 | 2 | 4 | 36 | 11 | 0 | 2 | 9  | 12 | 47  | 29 |
| 17,695 | 2 | 4 | 33 | 11 | 0 | 2 | 9  | 12 | 44  | 29 |
| 17,696 | 2 | 4 | 33 | 11 | 0 | 2 | 9  | 12 | 44  | 29 |
| 17,697 | 2 | 4 | 33 | 11 | 0 | 2 | 9  | 12 | 44  | 29 |
| 17,698 | 2 | 4 | 32 | 11 | 0 | 2 | 9  | 12 | 43  | 29 |
| 17,699 | 2 | 3 | 31 | 10 | 0 | 2 | 9  | 12 | 42  | 27 |
| 17,700 | 2 | 3 | 31 | 9  | 0 | 1 | 9  | 7  | 42  | 20 |



|        |   |   |    |   |   |   |    |   |    |    |
|--------|---|---|----|---|---|---|----|---|----|----|
| 17,701 | 2 | 3 | 30 | 9 | 0 | 1 | 9  | 7 | 41 | 20 |
| 17,702 | 1 | 3 | 28 | 7 | 0 | 1 | 9  | 6 | 38 | 17 |
| 17,703 | 1 | 3 | 28 | 8 | 0 | 1 | 8  | 7 | 37 | 19 |
| 17,704 | 0 | 4 | 25 | 8 | 0 | 1 | 8  | 7 | 33 | 20 |
| 17,705 | 0 | 4 | 25 | 8 | 0 | 1 | 8  | 7 | 33 | 20 |
| 17,706 | 0 | 4 | 24 | 8 | 0 | 1 | 7  | 7 | 31 | 20 |
| 17,707 | 0 | 4 | 23 | 8 | 0 | 1 | 7  | 7 | 30 | 20 |
| 17,708 | 0 | 4 | 23 | 8 | 0 | 1 | 7  | 7 | 30 | 20 |
| 17,709 | 0 | 4 | 4  | 8 | 0 | 0 | 1  | 6 | 5  | 18 |
| 17,710 | 0 | 4 | 4  | 8 | 0 | 0 | 1  | 6 | 5  | 18 |
| 17,711 | 0 | 4 | 4  | 7 | 0 | 0 | 2  | 6 | 6  | 17 |
| 17,712 | 0 | 4 | 3  | 7 | 0 | 0 | 2  | 6 | 5  | 17 |
| 17,713 | 0 | 4 | 3  | 7 | 0 | 0 | 2  | 6 | 5  | 17 |
| 17,714 | 0 | 4 | 2  | 6 | 0 | 0 | 2  | 6 | 4  | 16 |
| 17,715 | 0 | 4 | 1  | 6 | 0 | 0 | 2  | 6 | 3  | 16 |
| 17,716 | 0 | 4 | 1  | 5 | 0 | 0 | 2  | 6 | 3  | 15 |
| 17,717 | 0 | 4 | 1  | 5 | 0 | 0 | 1  | 6 | 2  | 15 |
| 17,718 | 0 | 4 | 1  | 5 | 0 | 0 | 1  | 5 | 2  | 14 |
| 17,719 | 0 | 4 | 1  | 5 | 0 | 0 | 1  | 5 | 2  | 14 |
| 17,720 | 0 | 4 | 1  | 3 | 0 | 0 | 1  | 5 | 2  | 12 |
| 17,721 | 0 | 4 | 1  | 3 | 0 | 0 | 1  | 5 | 2  | 12 |
| 17,722 | 0 | 4 | 1  | 3 | 0 | 0 | 1  | 4 | 2  | 11 |
| 17,723 | 0 | 4 | 1  | 2 | 0 | 0 | 1  | 4 | 2  | 10 |
| 17,724 | 0 | 4 | 1  | 2 | 0 | 0 | 1  | 3 | 2  | 9  |
| 17,725 | 0 | 4 | 1  | 1 | 0 | 0 | 1  | 3 | 2  | 8  |
| 17,726 | 0 | 4 | 1  | 1 | 0 | 0 | 1  | 3 | 2  | 8  |
| 17,727 | 0 | 4 | 1  | 1 | 0 | 0 | 1  | 3 | 2  | 8  |
| 17,728 | 0 | 4 | 1  | 1 | 0 | 0 | 1  | 3 | 2  | 8  |
| 17,729 | 0 | 4 | 1  | 1 | 0 | 0 | 1  | 3 | 2  | 8  |
| 17,730 | 0 | 4 | 5  | 1 | 0 | 0 | 1  | 3 | 6  | 8  |
| 17,731 | 0 | 4 | 7  | 1 | 0 | 0 | 2  | 4 | 9  | 9  |
| 17,732 | 0 | 4 | 7  | 1 | 0 | 0 | 2  | 3 | 9  | 8  |
| 17,733 | 0 | 4 | 7  | 1 | 0 | 0 | 2  | 3 | 9  | 8  |
| 17,734 | 0 | 4 | 9  | 1 | 0 | 0 | 4  | 3 | 13 | 8  |
| 17,735 | 0 | 3 | 11 | 1 | 0 | 0 | 4  | 3 | 15 | 7  |
| 17,736 | 0 | 3 | 14 | 1 | 0 | 0 | 5  | 3 | 19 | 7  |
| 17,737 | 0 | 3 | 25 | 1 | 0 | 0 | 10 | 2 | 35 | 6  |
| 17,738 | 0 | 4 | 25 | 1 | 0 | 0 | 10 | 2 | 35 | 7  |
| 17,739 | 0 | 4 | 31 | 1 | 0 | 0 | 16 | 2 | 47 | 7  |
| 17,740 | 0 | 2 | 31 | 1 | 0 | 0 | 16 | 2 | 47 | 5  |
| 17,741 | 0 | 2 | 31 | 2 | 0 | 0 | 16 | 3 | 47 | 7  |

|        |   |   |    |    |   |   |    |   |    |    |
|--------|---|---|----|----|---|---|----|---|----|----|
| 17,742 | 0 | 2 | 31 | 3  | 0 | 0 | 16 | 3 | 47 | 8  |
| 17,743 | 0 | 2 | 33 | 3  | 0 | 0 | 16 | 3 | 49 | 8  |
| 17,744 | 0 | 2 | 33 | 4  | 0 | 1 | 16 | 3 | 49 | 10 |
| 17,745 | 0 | 2 | 33 | 6  | 0 | 2 | 16 | 3 | 49 | 13 |
| 17,746 | 0 | 2 | 33 | 6  | 0 | 2 | 16 | 3 | 49 | 13 |
| 17,747 | 0 | 2 | 33 | 7  | 0 | 3 | 16 | 3 | 49 | 15 |
| 17,748 | 0 | 2 | 33 | 7  | 0 | 3 | 16 | 3 | 49 | 15 |
| 17,749 | 0 | 4 | 33 | 17 | 1 | 4 | 17 | 5 | 51 | 30 |
| 17,750 | 0 | 4 | 33 | 17 | 1 | 4 | 17 | 5 | 51 | 30 |
| 17,751 | 0 | 4 | 33 | 18 | 1 | 4 | 17 | 5 | 51 | 31 |
| 17,752 | 0 | 4 | 33 | 18 | 1 | 4 | 17 | 5 | 51 | 31 |
| 17,753 | 0 | 4 | 34 | 17 | 1 | 4 | 17 | 4 | 52 | 29 |
| 17,754 | 0 | 3 | 34 | 17 | 1 | 4 | 17 | 4 | 52 | 28 |
| 17,755 | 0 | 3 | 34 | 17 | 1 | 4 | 17 | 4 | 52 | 28 |
| 17,756 | 0 | 3 | 36 | 17 | 1 | 4 | 17 | 4 | 54 | 28 |
| 17,757 | 1 | 3 | 38 | 17 | 1 | 4 | 20 | 4 | 60 | 28 |
| 17,758 | 1 | 3 | 38 | 17 | 1 | 4 | 20 | 4 | 60 | 28 |
| 17,759 | 1 | 3 | 38 | 17 | 1 | 4 | 20 | 4 | 60 | 28 |
| 17,760 | 1 | 3 | 37 | 17 | 1 | 4 | 20 | 4 | 59 | 28 |
| 17,761 | 1 | 3 | 37 | 17 | 1 | 4 | 20 | 4 | 59 | 28 |
| 17,762 | 1 | 3 | 38 | 17 | 1 | 4 | 19 | 4 | 59 | 28 |
| 17,763 | 1 | 3 | 38 | 17 | 1 | 4 | 19 | 4 | 59 | 28 |
| 17,764 | 1 | 3 | 38 | 17 | 1 | 4 | 19 | 4 | 59 | 28 |
| 17,765 | 1 | 3 | 42 | 17 | 1 | 4 | 19 | 4 | 63 | 28 |
| 17,766 | 2 | 3 | 42 | 17 | 1 | 4 | 19 | 4 | 64 | 28 |
| 17,767 | 2 | 3 | 42 | 17 | 1 | 4 | 19 | 4 | 64 | 28 |
| 17,768 | 2 | 3 | 42 | 17 | 1 | 4 | 19 | 4 | 64 | 28 |
| 17,769 | 2 | 3 | 42 | 17 | 1 | 4 | 19 | 4 | 64 | 28 |
| 17,770 | 2 | 3 | 42 | 17 | 1 | 4 | 19 | 4 | 64 | 28 |
| 17,771 | 2 | 3 | 43 | 19 | 1 | 4 | 19 | 6 | 65 | 32 |
| 17,772 | 2 | 3 | 43 | 19 | 1 | 4 | 19 | 7 | 65 | 33 |
| 17,773 | 2 | 3 | 43 | 19 | 2 | 4 | 19 | 7 | 66 | 33 |
| 17,774 | 2 | 3 | 43 | 19 | 2 | 5 | 19 | 7 | 66 | 34 |
| 17,775 | 2 | 3 | 43 | 19 | 2 | 5 | 19 | 7 | 66 | 34 |
| 17,776 | 2 | 3 | 43 | 19 | 2 | 5 | 19 | 7 | 66 | 34 |
| 17,777 | 2 | 3 | 43 | 19 | 2 | 5 | 19 | 7 | 66 | 34 |
| 17,778 | 2 | 3 | 43 | 19 | 2 | 5 | 19 | 7 | 66 | 34 |
| 17,779 | 2 | 3 | 44 | 19 | 2 | 5 | 20 | 7 | 68 | 34 |
| 17,780 | 2 | 3 | 41 | 19 | 2 | 6 | 20 | 7 | 65 | 35 |
| 17,781 | 2 | 3 | 40 | 19 | 2 | 6 | 20 | 7 | 64 | 35 |
| 17,782 | 3 | 3 | 38 | 19 | 2 | 6 | 19 | 6 | 62 | 34 |

|        |   |   |    |    |   |   |    |    |    |    |
|--------|---|---|----|----|---|---|----|----|----|----|
| 17,783 | 3 | 3 | 38 | 19 | 2 | 6 | 19 | 6  | 62 | 34 |
| 17,784 | 3 | 3 | 36 | 19 | 2 | 6 | 17 | 6  | 58 | 34 |
| 17,785 | 3 | 3 | 35 | 21 | 2 | 6 | 17 | 7  | 57 | 37 |
| 17,786 | 3 | 3 | 34 | 22 | 2 | 6 | 17 | 7  | 56 | 38 |
| 17,787 | 3 | 3 | 31 | 22 | 2 | 6 | 16 | 7  | 52 | 38 |
| 17,788 | 3 | 3 | 20 | 22 | 2 | 6 | 11 | 7  | 36 | 38 |
| 17,789 | 3 | 2 | 14 | 22 | 2 | 6 | 6  | 8  | 25 | 38 |
| 17,790 | 3 | 2 | 14 | 22 | 2 | 6 | 4  | 8  | 23 | 38 |
| 17,791 | 3 | 2 | 14 | 21 | 2 | 6 | 4  | 7  | 23 | 36 |
| 17,792 | 3 | 2 | 14 | 21 | 2 | 6 | 4  | 7  | 23 | 36 |
| 17,793 | 3 | 2 | 13 | 20 | 2 | 6 | 4  | 7  | 22 | 35 |
| 17,794 | 3 | 2 | 12 | 20 | 2 | 6 | 4  | 7  | 21 | 35 |
| 17,795 | 3 | 2 | 12 | 17 | 2 | 4 | 4  | 7  | 21 | 30 |
| 17,796 | 3 | 2 | 13 | 17 | 2 | 4 | 4  | 7  | 22 | 30 |
| 17,797 | 3 | 2 | 13 | 17 | 2 | 4 | 4  | 7  | 22 | 30 |
| 17,798 | 3 | 2 | 13 | 16 | 2 | 3 | 4  | 7  | 22 | 28 |
| 17,799 | 3 | 0 | 13 | 6  | 2 | 2 | 4  | 5  | 22 | 13 |
| 17,800 | 3 | 0 | 13 | 6  | 1 | 2 | 4  | 5  | 21 | 13 |
| 17,801 | 3 | 0 | 13 | 5  | 1 | 2 | 4  | 5  | 21 | 12 |
| 17,802 | 3 | 0 | 13 | 5  | 1 | 2 | 4  | 5  | 21 | 12 |
| 17,803 | 3 | 0 | 12 | 5  | 1 | 2 | 4  | 5  | 20 | 12 |
| 17,804 | 3 | 0 | 12 | 5  | 1 | 2 | 4  | 5  | 20 | 12 |
| 17,805 | 3 | 0 | 12 | 5  | 1 | 2 | 4  | 5  | 20 | 12 |
| 17,806 | 3 | 0 | 11 | 5  | 1 | 2 | 4  | 6  | 19 | 13 |
| 17,807 | 3 | 0 | 11 | 5  | 1 | 2 | 5  | 6  | 20 | 13 |
| 17,808 | 2 | 0 | 9  | 5  | 1 | 2 | 2  | 7  | 14 | 14 |
| 17,809 | 2 | 0 | 9  | 7  | 1 | 2 | 2  | 7  | 14 | 16 |
| 17,810 | 2 | 0 | 9  | 8  | 1 | 2 | 2  | 8  | 14 | 18 |
| 17,811 | 2 | 0 | 9  | 11 | 1 | 2 | 2  | 9  | 14 | 22 |
| 17,812 | 2 | 0 | 9  | 11 | 1 | 2 | 2  | 9  | 14 | 22 |
| 17,813 | 2 | 0 | 8  | 11 | 1 | 2 | 2  | 9  | 13 | 22 |
| 17,814 | 2 | 0 | 8  | 11 | 1 | 2 | 2  | 9  | 13 | 22 |
| 17,815 | 2 | 0 | 4  | 12 | 1 | 2 | 2  | 9  | 9  | 23 |
| 17,816 | 1 | 0 | 4  | 12 | 1 | 2 | 2  | 9  | 8  | 23 |
| 17,817 | 1 | 0 | 4  | 12 | 1 | 2 | 2  | 9  | 8  | 23 |
| 17,818 | 1 | 0 | 4  | 12 | 1 | 2 | 2  | 9  | 8  | 23 |
| 17,819 | 1 | 0 | 4  | 12 | 1 | 2 | 2  | 10 | 8  | 24 |
| 17,820 | 1 | 0 | 3  | 12 | 1 | 2 | 2  | 10 | 7  | 24 |
| 17,821 | 1 | 0 | 3  | 12 | 1 | 2 | 2  | 10 | 7  | 24 |
| 17,822 | 1 | 0 | 4  | 10 | 1 | 2 | 2  | 8  | 8  | 20 |
| 17,823 | 1 | 0 | 4  | 10 | 0 | 2 | 2  | 7  | 7  | 19 |

|        |   |   |    |    |   |   |   |   |    |    |
|--------|---|---|----|----|---|---|---|---|----|----|
| 17,824 | 3 | 0 | 13 | 10 | 0 | 1 | 6 | 7 | 22 | 18 |
| 17,825 | 3 | 0 | 13 | 10 | 0 | 1 | 6 | 7 | 22 | 18 |
| 17,826 | 3 | 0 | 14 | 10 | 0 | 1 | 6 | 7 | 23 | 18 |
| 17,827 | 3 | 0 | 17 | 11 | 0 | 1 | 6 | 7 | 26 | 19 |
| 17,828 | 3 | 0 | 17 | 11 | 0 | 1 | 6 | 7 | 26 | 19 |
| 17,829 | 3 | 0 | 17 | 11 | 0 | 0 | 6 | 7 | 26 | 18 |
| 17,830 | 3 | 0 | 17 | 11 | 0 | 0 | 5 | 7 | 25 | 18 |
| 17,831 | 3 | 0 | 17 | 11 | 0 | 0 | 5 | 7 | 25 | 18 |
| 17,832 | 3 | 0 | 17 | 11 | 0 | 0 | 5 | 7 | 25 | 18 |
| 17,833 | 2 | 0 | 17 | 11 | 0 | 0 | 5 | 7 | 24 | 18 |
| 17,834 | 2 | 0 | 17 | 11 | 0 | 0 | 5 | 7 | 24 | 18 |
| 17,835 | 2 | 0 | 17 | 11 | 0 | 0 | 5 | 7 | 24 | 18 |
| 17,836 | 2 | 0 | 17 | 8  | 0 | 0 | 5 | 6 | 24 | 14 |
| 17,837 | 2 | 0 | 17 | 8  | 0 | 0 | 5 | 6 | 24 | 14 |
| 17,838 | 2 | 0 | 17 | 8  | 0 | 0 | 5 | 6 | 24 | 14 |
| 17,839 | 2 | 0 | 17 | 8  | 0 | 0 | 6 | 5 | 25 | 13 |
| 17,840 | 2 | 0 | 18 | 8  | 0 | 0 | 6 | 5 | 26 | 13 |
| 17,841 | 2 | 0 | 18 | 8  | 0 | 0 | 6 | 5 | 26 | 13 |
| 17,842 | 2 | 0 | 18 | 8  | 0 | 0 | 6 | 5 | 26 | 13 |
| 17,843 | 2 | 0 | 18 | 8  | 0 | 0 | 6 | 5 | 26 | 13 |
| 17,844 | 2 | 1 | 18 | 8  | 0 | 0 | 6 | 5 | 26 | 14 |
| 17,845 | 2 | 1 | 18 | 8  | 0 | 0 | 6 | 5 | 26 | 14 |
| 17,846 | 2 | 1 | 18 | 10 | 0 | 0 | 6 | 6 | 26 | 17 |
| 17,847 | 2 | 1 | 17 | 11 | 0 | 0 | 6 | 6 | 25 | 18 |
| 17,848 | 2 | 2 | 17 | 12 | 0 | 0 | 6 | 6 | 25 | 20 |
| 17,849 | 2 | 2 | 17 | 12 | 0 | 0 | 6 | 6 | 25 | 20 |
| 17,850 | 2 | 3 | 17 | 12 | 0 | 0 | 6 | 6 | 25 | 21 |
| 17,851 | 2 | 3 | 17 | 13 | 0 | 0 | 6 | 6 | 25 | 22 |
| 17,852 | 2 | 3 | 17 | 13 | 0 | 0 | 6 | 6 | 25 | 22 |
| 17,853 | 2 | 3 | 18 | 13 | 0 | 0 | 6 | 6 | 26 | 22 |
| 17,854 | 2 | 3 | 18 | 13 | 0 | 0 | 6 | 6 | 26 | 22 |
| 17,855 | 2 | 3 | 18 | 13 | 0 | 0 | 6 | 6 | 26 | 22 |
| 17,856 | 2 | 3 | 18 | 13 | 0 | 0 | 6 | 5 | 26 | 21 |
| 17,857 | 2 | 3 | 18 | 13 | 0 | 0 | 6 | 5 | 26 | 21 |
| 17,858 | 2 | 3 | 17 | 13 | 0 | 0 | 5 | 5 | 24 | 21 |
| 17,859 | 2 | 3 | 17 | 11 | 0 | 0 | 5 | 4 | 24 | 18 |
| 17,860 | 2 | 3 | 17 | 10 | 0 | 0 | 5 | 3 | 24 | 16 |
| 17,861 | 2 | 3 | 18 | 7  | 0 | 0 | 5 | 2 | 25 | 12 |
| 17,862 | 2 | 3 | 18 | 7  | 0 | 0 | 7 | 2 | 27 | 12 |
| 17,863 | 2 | 3 | 18 | 7  | 0 | 0 | 7 | 2 | 27 | 12 |
| 17,864 | 2 | 3 | 18 | 7  | 0 | 0 | 7 | 2 | 27 | 12 |

|        |   |   |    |    |   |   |    |   |    |    |
|--------|---|---|----|----|---|---|----|---|----|----|
| 17,865 | 2 | 3 | 18 | 7  | 0 | 0 | 7  | 2 | 27 | 12 |
| 17,866 | 2 | 3 | 18 | 6  | 0 | 0 | 7  | 2 | 27 | 11 |
| 17,867 | 2 | 3 | 18 | 6  | 1 | 0 | 7  | 2 | 28 | 11 |
| 17,868 | 2 | 3 | 18 | 6  | 1 | 0 | 7  | 1 | 28 | 10 |
| 17,869 | 2 | 3 | 21 | 6  | 1 | 0 | 11 | 1 | 35 | 10 |
| 17,870 | 2 | 3 | 21 | 6  | 1 | 0 | 11 | 1 | 35 | 10 |
| 17,871 | 2 | 3 | 21 | 6  | 1 | 0 | 11 | 2 | 35 | 11 |
| 17,872 | 2 | 3 | 22 | 6  | 1 | 0 | 11 | 2 | 36 | 11 |
| 17,873 | 2 | 3 | 23 | 6  | 1 | 0 | 12 | 2 | 38 | 11 |
| 17,874 | 2 | 3 | 35 | 6  | 1 | 0 | 14 | 2 | 52 | 11 |
| 17,875 | 1 | 3 | 26 | 6  | 1 | 0 | 11 | 2 | 39 | 11 |
| 17,876 | 1 | 3 | 25 | 6  | 2 | 0 | 12 | 2 | 40 | 11 |
| 17,877 | 1 | 3 | 29 | 5  | 2 | 0 | 12 | 2 | 44 | 10 |
| 17,878 | 1 | 3 | 29 | 6  | 2 | 0 | 12 | 2 | 44 | 11 |
| 17,879 | 1 | 3 | 29 | 6  | 2 | 0 | 12 | 2 | 44 | 11 |
| 17,880 | 1 | 3 | 28 | 6  | 2 | 0 | 12 | 2 | 43 | 11 |
| 17,881 | 1 | 3 | 28 | 6  | 2 | 0 | 12 | 2 | 43 | 11 |
| 17,882 | 1 | 3 | 28 | 6  | 2 | 0 | 12 | 2 | 43 | 11 |
| 17,883 | 1 | 3 | 28 | 6  | 2 | 0 | 12 | 2 | 43 | 11 |
| 17,884 | 1 | 3 | 28 | 6  | 2 | 0 | 12 | 2 | 43 | 11 |
| 17,885 | 1 | 3 | 28 | 6  | 2 | 0 | 12 | 2 | 43 | 11 |
| 17,886 | 1 | 3 | 28 | 6  | 2 | 0 | 12 | 2 | 43 | 11 |
| 17,887 | 1 | 3 | 28 | 6  | 2 | 0 | 12 | 2 | 43 | 11 |
| 17,888 | 1 | 3 | 29 | 6  | 2 | 0 | 12 | 2 | 44 | 11 |
| 17,889 | 1 | 3 | 29 | 7  | 2 | 0 | 12 | 2 | 44 | 12 |
| 17,890 | 1 | 3 | 29 | 7  | 2 | 0 | 11 | 2 | 43 | 12 |
| 17,891 | 1 | 3 | 29 | 8  | 2 | 0 | 12 | 2 | 44 | 13 |
| 17,892 | 1 | 3 | 29 | 8  | 2 | 0 | 12 | 2 | 44 | 13 |
| 17,893 | 1 | 3 | 29 | 8  | 2 | 0 | 12 | 2 | 44 | 13 |
| 17,894 | 1 | 3 | 29 | 10 | 2 | 0 | 12 | 2 | 44 | 15 |
| 17,895 | 1 | 2 | 29 | 10 | 2 | 0 | 12 | 2 | 44 | 14 |
| 17,896 | 1 | 2 | 29 | 12 | 2 | 0 | 12 | 3 | 44 | 17 |
| 17,897 | 1 | 2 | 29 | 10 | 2 | 0 | 12 | 2 | 44 | 14 |
| 17,898 | 1 | 1 | 29 | 8  | 2 | 0 | 12 | 3 | 44 | 12 |
| 17,899 | 1 | 1 | 29 | 8  | 2 | 0 | 12 | 3 | 44 | 12 |
| 17,900 | 1 | 0 | 29 | 8  | 2 | 0 | 12 | 3 | 44 | 11 |
| 17,901 | 1 | 0 | 29 | 7  | 2 | 0 | 12 | 4 | 44 | 11 |
| 17,902 | 1 | 0 | 29 | 7  | 2 | 0 | 12 | 4 | 44 | 11 |
| 17,903 | 3 | 0 | 30 | 7  | 2 | 0 | 12 | 4 | 47 | 11 |
| 17,904 | 3 | 0 | 29 | 8  | 2 | 0 | 12 | 4 | 46 | 12 |
| 17,905 | 3 | 0 | 29 | 8  | 2 | 0 | 12 | 4 | 46 | 12 |

|        |   |   |    |    |   |   |    |    |    |    |
|--------|---|---|----|----|---|---|----|----|----|----|
| 17,906 | 3 | 0 | 29 | 8  | 2 | 0 | 13 | 4  | 47 | 12 |
| 17,907 | 3 | 0 | 29 | 8  | 2 | 0 | 13 | 4  | 47 | 12 |
| 17,908 | 6 | 0 | 55 | 8  | 2 | 0 | 21 | 4  | 84 | 12 |
| 17,909 | 6 | 0 | 55 | 8  | 2 | 0 | 22 | 4  | 85 | 12 |
| 17,910 | 6 | 0 | 55 | 8  | 2 | 0 | 22 | 4  | 85 | 12 |
| 17,911 | 6 | 0 | 58 | 8  | 2 | 0 | 28 | 4  | 94 | 12 |
| 17,912 | 6 | 0 | 57 | 8  | 2 | 0 | 28 | 4  | 93 | 12 |
| 17,913 | 6 | 0 | 57 | 10 | 2 | 0 | 26 | 5  | 91 | 15 |
| 17,914 | 6 | 0 | 57 | 10 | 2 | 0 | 26 | 5  | 91 | 15 |
| 17,915 | 6 | 0 | 57 | 10 | 2 | 0 | 26 | 5  | 91 | 15 |
| 17,916 | 6 | 1 | 57 | 10 | 2 | 0 | 27 | 5  | 92 | 16 |
| 17,917 | 6 | 2 | 57 | 10 | 2 | 0 | 28 | 5  | 93 | 17 |
| 17,918 | 6 | 2 | 57 | 10 | 1 | 0 | 28 | 5  | 92 | 17 |
| 17,919 | 6 | 2 | 57 | 10 | 1 | 0 | 28 | 5  | 92 | 17 |
| 17,920 | 6 | 2 | 54 | 10 | 1 | 0 | 24 | 5  | 85 | 17 |
| 17,921 | 6 | 2 | 54 | 10 | 1 | 0 | 24 | 4  | 85 | 16 |
| 17,922 | 6 | 2 | 54 | 13 | 1 | 0 | 24 | 6  | 85 | 21 |
| 17,923 | 6 | 2 | 54 | 15 | 1 | 0 | 24 | 8  | 85 | 25 |
| 17,924 | 6 | 2 | 52 | 16 | 1 | 1 | 23 | 12 | 82 | 31 |
| 17,925 | 5 | 2 | 40 | 18 | 1 | 2 | 21 | 12 | 67 | 34 |
| 17,926 | 5 | 2 | 43 | 26 | 2 | 2 | 24 | 12 | 74 | 42 |
| 17,927 | 5 | 2 | 43 | 26 | 1 | 2 | 24 | 12 | 73 | 42 |
| 17,928 | 5 | 2 | 36 | 26 | 1 | 2 | 24 | 13 | 66 | 43 |
| 17,929 | 5 | 2 | 36 | 25 | 1 | 2 | 24 | 13 | 66 | 42 |
| 17,930 | 5 | 2 | 36 | 25 | 1 | 2 | 24 | 13 | 66 | 42 |
| 17,931 | 5 | 2 | 36 | 26 | 1 | 2 | 24 | 13 | 66 | 43 |
| 17,932 | 5 | 2 | 36 | 26 | 1 | 2 | 24 | 13 | 66 | 43 |
| 17,933 | 5 | 2 | 36 | 26 | 1 | 2 | 24 | 13 | 66 | 43 |
| 17,934 | 5 | 2 | 36 | 27 | 1 | 2 | 24 | 14 | 66 | 45 |
| 17,935 | 5 | 2 | 36 | 27 | 1 | 2 | 24 | 15 | 66 | 46 |
| 17,936 | 5 | 4 | 36 | 30 | 1 | 2 | 24 | 18 | 66 | 54 |
| 17,937 | 5 | 4 | 36 | 31 | 1 | 2 | 24 | 18 | 66 | 55 |
| 17,938 | 5 | 4 | 36 | 34 | 1 | 2 | 24 | 20 | 66 | 60 |
| 17,939 | 5 | 4 | 35 | 35 | 1 | 2 | 24 | 20 | 65 | 61 |
| 17,940 | 5 | 4 | 35 | 34 | 1 | 2 | 24 | 22 | 65 | 62 |
| 17,941 | 6 | 4 | 34 | 35 | 1 | 2 | 24 | 24 | 65 | 65 |
| 17,942 | 6 | 4 | 34 | 34 | 1 | 2 | 23 | 24 | 64 | 64 |
| 17,943 | 6 | 4 | 34 | 34 | 1 | 2 | 23 | 24 | 64 | 64 |
| 17,944 | 6 | 4 | 34 | 32 | 1 | 2 | 23 | 24 | 64 | 62 |
| 17,945 | 6 | 4 | 34 | 30 | 1 | 2 | 23 | 23 | 64 | 59 |
| 17,946 | 6 | 4 | 34 | 30 | 1 | 2 | 23 | 23 | 64 | 59 |

|        |   |   |    |    |   |   |    |    |    |    |
|--------|---|---|----|----|---|---|----|----|----|----|
| 17,947 | 6 | 4 | 34 | 32 | 1 | 2 | 23 | 23 | 64 | 61 |
| 17,948 | 6 | 4 | 34 | 32 | 1 | 2 | 23 | 23 | 64 | 61 |
| 17,949 | 6 | 4 | 34 | 32 | 1 | 2 | 23 | 22 | 64 | 60 |
| 17,950 | 6 | 4 | 35 | 33 | 1 | 2 | 23 | 22 | 65 | 61 |
| 17,951 | 6 | 4 | 35 | 33 | 1 | 2 | 23 | 22 | 65 | 61 |
| 17,952 | 6 | 5 | 35 | 35 | 1 | 2 | 23 | 21 | 65 | 63 |
| 17,953 | 4 | 5 | 35 | 35 | 1 | 2 | 23 | 21 | 63 | 63 |
| 17,954 | 4 | 5 | 34 | 36 | 1 | 2 | 23 | 21 | 62 | 64 |
| 17,955 | 4 | 5 | 34 | 35 | 1 | 2 | 22 | 21 | 61 | 63 |
| 17,956 | 4 | 5 | 35 | 35 | 1 | 2 | 22 | 21 | 62 | 63 |
| 17,957 | 4 | 5 | 36 | 35 | 1 | 2 | 22 | 21 | 63 | 63 |
| 17,958 | 4 | 5 | 34 | 36 | 1 | 2 | 22 | 21 | 61 | 64 |
| 17,959 | 1 | 5 | 10 | 36 | 1 | 2 | 18 | 21 | 30 | 64 |
| 17,960 | 1 | 5 | 17 | 36 | 1 | 2 | 19 | 21 | 38 | 64 |
| 17,961 | 1 | 5 | 17 | 37 | 1 | 2 | 13 | 21 | 32 | 65 |
| 17,962 | 1 | 5 | 22 | 38 | 1 | 2 | 16 | 21 | 40 | 66 |
| 17,963 | 1 | 5 | 25 | 39 | 1 | 2 | 16 | 21 | 43 | 67 |
| 17,964 | 2 | 5 | 25 | 37 | 1 | 2 | 16 | 20 | 44 | 64 |
| 17,965 | 2 | 5 | 25 | 37 | 1 | 2 | 16 | 20 | 44 | 64 |
| 17,966 | 2 | 5 | 25 | 37 | 1 | 2 | 15 | 20 | 43 | 64 |
| 17,967 | 2 | 3 | 26 | 37 | 1 | 2 | 20 | 20 | 49 | 62 |
| 17,968 | 2 | 3 | 28 | 37 | 1 | 2 | 19 | 20 | 50 | 62 |
| 17,969 | 2 | 3 | 28 | 37 | 1 | 2 | 19 | 20 | 50 | 62 |
| 17,970 | 2 | 3 | 28 | 39 | 1 | 2 | 19 | 21 | 50 | 65 |
| 17,971 | 2 | 3 | 28 | 39 | 1 | 2 | 19 | 21 | 50 | 65 |
| 17,972 | 2 | 3 | 28 | 39 | 1 | 2 | 19 | 21 | 50 | 65 |
| 17,973 | 2 | 3 | 28 | 36 | 1 | 2 | 19 | 21 | 50 | 62 |
| 17,974 | 2 | 3 | 27 | 35 | 1 | 2 | 19 | 20 | 49 | 60 |
| 17,975 | 2 | 3 | 27 | 34 | 1 | 1 | 17 | 19 | 47 | 57 |
| 17,976 | 2 | 3 | 24 | 25 | 0 | 0 | 15 | 19 | 41 | 47 |
| 17,977 | 2 | 3 | 24 | 25 | 0 | 0 | 15 | 19 | 41 | 47 |
| 17,978 | 2 | 3 | 24 | 25 | 0 | 0 | 14 | 19 | 40 | 47 |
| 17,979 | 2 | 3 | 24 | 25 | 0 | 0 | 14 | 18 | 40 | 46 |
| 17,980 | 2 | 3 | 24 | 25 | 0 | 0 | 14 | 18 | 40 | 46 |
| 17,981 | 3 | 3 | 24 | 24 | 0 | 0 | 14 | 18 | 41 | 45 |
| 17,982 | 3 | 3 | 24 | 24 | 0 | 0 | 14 | 18 | 41 | 45 |
| 17,983 | 3 | 3 | 24 | 24 | 0 | 0 | 14 | 18 | 41 | 45 |
| 17,984 | 3 | 3 | 25 | 23 | 0 | 0 | 14 | 17 | 42 | 43 |
| 17,985 | 3 | 3 | 25 | 23 | 0 | 0 | 14 | 17 | 42 | 43 |
| 17,986 | 3 | 3 | 25 | 23 | 0 | 0 | 14 | 16 | 42 | 42 |
| 17,987 | 3 | 1 | 25 | 20 | 0 | 0 | 14 | 13 | 42 | 34 |

|        |    |   |     |    |   |   |    |    |     |    |
|--------|----|---|-----|----|---|---|----|----|-----|----|
| 17,988 | 3  | 1 | 25  | 19 | 0 | 0 | 14 | 13 | 42  | 33 |
| 17,989 | 3  | 2 | 33  | 16 | 0 | 0 | 19 | 11 | 55  | 29 |
| 17,990 | 3  | 2 | 33  | 15 | 0 | 0 | 19 | 11 | 55  | 28 |
| 17,991 | 3  | 2 | 35  | 14 | 1 | 0 | 19 | 7  | 58  | 23 |
| 17,992 | 2  | 2 | 35  | 14 | 1 | 0 | 19 | 7  | 57  | 23 |
| 17,993 | 2  | 2 | 35  | 14 | 1 | 0 | 19 | 8  | 57  | 24 |
| 17,994 | 2  | 2 | 35  | 14 | 1 | 0 | 19 | 8  | 57  | 24 |
| 17,995 | 3  | 2 | 72  | 14 | 3 | 0 | 31 | 8  | 109 | 24 |
| 17,996 | 3  | 2 | 72  | 14 | 3 | 0 | 31 | 8  | 109 | 24 |
| 17,997 | 4  | 2 | 101 | 12 | 4 | 0 | 42 | 8  | 151 | 22 |
| 17,998 | 4  | 2 | 102 | 12 | 4 | 0 | 42 | 8  | 152 | 22 |
| 17,999 | 4  | 2 | 102 | 12 | 4 | 0 | 42 | 8  | 152 | 22 |
| 18,000 | 4  | 2 | 101 | 12 | 4 | 0 | 43 | 8  | 152 | 22 |
| 18,001 | 4  | 2 | 101 | 12 | 4 | 0 | 43 | 10 | 152 | 24 |
| 18,002 | 4  | 2 | 101 | 12 | 4 | 0 | 43 | 10 | 152 | 24 |
| 18,003 | 5  | 1 | 101 | 10 | 5 | 0 | 43 | 10 | 154 | 21 |
| 18,004 | 5  | 1 | 101 | 10 | 5 | 0 | 43 | 10 | 154 | 21 |
| 18,005 | 5  | 1 | 101 | 10 | 5 | 0 | 43 | 17 | 154 | 28 |
| 18,006 | 5  | 1 | 101 | 15 | 5 | 2 | 43 | 20 | 154 | 38 |
| 18,007 | 5  | 1 | 100 | 18 | 5 | 2 | 43 | 22 | 153 | 43 |
| 18,008 | 5  | 1 | 99  | 23 | 5 | 3 | 43 | 25 | 152 | 52 |
| 18,009 | 5  | 1 | 101 | 25 | 5 | 4 | 43 | 26 | 154 | 56 |
| 18,010 | 7  | 1 | 102 | 25 | 5 | 4 | 41 | 26 | 155 | 56 |
| 18,011 | 8  | 1 | 98  | 25 | 5 | 5 | 43 | 28 | 154 | 59 |
| 18,012 | 8  | 1 | 96  | 25 | 5 | 5 | 43 | 28 | 152 | 59 |
| 18,013 | 10 | 1 | 92  | 23 | 5 | 5 | 42 | 28 | 149 | 57 |
| 18,014 | 10 | 1 | 89  | 23 | 5 | 5 | 42 | 28 | 146 | 57 |
| 18,015 | 9  | 1 | 91  | 24 | 5 | 5 | 43 | 30 | 148 | 60 |
| 18,016 | 9  | 1 | 95  | 24 | 5 | 5 | 47 | 30 | 156 | 60 |
| 18,017 | 9  | 1 | 96  | 24 | 5 | 5 | 47 | 30 | 157 | 60 |
| 18,018 | 9  | 1 | 96  | 24 | 5 | 5 | 42 | 31 | 152 | 61 |
| 18,019 | 9  | 1 | 94  | 24 | 5 | 5 | 42 | 31 | 150 | 61 |
| 18,020 | 9  | 1 | 94  | 24 | 5 | 5 | 42 | 31 | 150 | 61 |
| 18,021 | 9  | 1 | 94  | 22 | 5 | 5 | 42 | 30 | 150 | 58 |
| 18,022 | 9  | 1 | 94  | 22 | 5 | 5 | 42 | 30 | 150 | 58 |
| 18,023 | 9  | 1 | 98  | 22 | 5 | 5 | 44 | 30 | 156 | 58 |
| 18,024 | 9  | 1 | 98  | 21 | 5 | 5 | 45 | 24 | 157 | 51 |
| 18,025 | 9  | 1 | 98  | 21 | 5 | 5 | 46 | 24 | 158 | 51 |
| 18,026 | 9  | 1 | 98  | 21 | 5 | 5 | 46 | 24 | 158 | 51 |
| 18,027 | 9  | 1 | 98  | 20 | 5 | 5 | 46 | 24 | 158 | 50 |
| 18,028 | 9  | 1 | 98  | 21 | 5 | 5 | 46 | 24 | 158 | 51 |



|        |    |   |     |    |   |   |    |    |     |    |
|--------|----|---|-----|----|---|---|----|----|-----|----|
| 18,029 | 9  | 1 | 100 | 21 | 5 | 5 | 47 | 24 | 161 | 51 |
| 18,030 | 9  | 1 | 100 | 21 | 5 | 5 | 47 | 24 | 161 | 51 |
| 18,031 | 9  | 1 | 100 | 21 | 5 | 5 | 47 | 24 | 161 | 51 |
| 18,032 | 8  | 1 | 100 | 21 | 5 | 5 | 47 | 24 | 160 | 51 |
| 18,033 | 8  | 1 | 101 | 21 | 5 | 5 | 47 | 24 | 161 | 51 |
| 18,034 | 8  | 1 | 100 | 21 | 5 | 5 | 47 | 24 | 160 | 51 |
| 18,035 | 8  | 1 | 100 | 21 | 5 | 5 | 47 | 24 | 160 | 51 |
| 18,036 | 8  | 1 | 100 | 21 | 5 | 5 | 47 | 24 | 160 | 51 |
| 18,037 | 8  | 1 | 100 | 22 | 5 | 5 | 47 | 24 | 160 | 52 |
| 18,038 | 8  | 1 | 100 | 22 | 5 | 5 | 47 | 24 | 160 | 52 |
| 18,039 | 8  | 1 | 96  | 22 | 5 | 5 | 43 | 24 | 152 | 52 |
| 18,040 | 8  | 0 | 92  | 22 | 5 | 5 | 42 | 24 | 147 | 51 |
| 18,041 | 8  | 0 | 92  | 22 | 5 | 5 | 42 | 25 | 147 | 52 |
| 18,042 | 8  | 0 | 90  | 22 | 4 | 5 | 42 | 25 | 144 | 52 |
| 18,043 | 8  | 0 | 90  | 22 | 4 | 5 | 42 | 29 | 144 | 56 |
| 18,044 | 8  | 0 | 89  | 26 | 3 | 6 | 42 | 29 | 142 | 61 |
| 18,045 | 8  | 0 | 79  | 26 | 2 | 6 | 34 | 31 | 123 | 63 |
| 18,046 | 8  | 0 | 54  | 26 | 2 | 6 | 30 | 31 | 94  | 63 |
| 18,047 | 7  | 0 | 29  | 26 | 2 | 6 | 21 | 31 | 59  | 63 |
| 18,048 | 7  | 0 | 25  | 26 | 1 | 6 | 19 | 31 | 52  | 63 |
| 18,049 | 7  | 0 | 25  | 26 | 1 | 6 | 19 | 31 | 52  | 63 |
| 18,050 | 7  | 0 | 25  | 26 | 1 | 6 | 18 | 31 | 51  | 63 |
| 18,051 | 10 | 0 | 27  | 25 | 1 | 6 | 21 | 29 | 59  | 60 |
| 18,052 | 10 | 0 | 27  | 25 | 1 | 7 | 21 | 29 | 59  | 61 |
| 18,053 | 9  | 0 | 28  | 25 | 1 | 7 | 23 | 29 | 61  | 61 |
| 18,054 | 9  | 0 | 29  | 25 | 0 | 7 | 23 | 29 | 61  | 61 |
| 18,055 | 9  | 0 | 29  | 26 | 0 | 7 | 24 | 29 | 62  | 62 |
| 18,056 | 9  | 0 | 29  | 25 | 0 | 7 | 24 | 22 | 62  | 54 |
| 18,057 | 9  | 0 | 29  | 20 | 0 | 5 | 24 | 21 | 62  | 46 |
| 18,058 | 9  | 0 | 29  | 17 | 0 | 5 | 24 | 19 | 62  | 41 |
| 18,059 | 9  | 0 | 30  | 14 | 0 | 4 | 24 | 16 | 63  | 34 |
| 18,060 | 9  | 0 | 28  | 14 | 0 | 3 | 24 | 19 | 61  | 36 |
| 18,061 | 7  | 0 | 27  | 14 | 0 | 3 | 22 | 18 | 56  | 35 |
| 18,062 | 6  | 0 | 24  | 14 | 0 | 2 | 18 | 18 | 48  | 34 |
| 18,063 | 5  | 1 | 22  | 14 | 0 | 3 | 16 | 20 | 43  | 38 |
| 18,064 | 4  | 1 | 22  | 16 | 0 | 3 | 16 | 20 | 42  | 40 |
| 18,065 | 4  | 1 | 20  | 16 | 0 | 3 | 15 | 20 | 39  | 40 |
| 18,066 | 4  | 1 | 19  | 15 | 0 | 3 | 15 | 18 | 38  | 37 |
| 18,067 | 4  | 1 | 16  | 15 | 0 | 3 | 11 | 18 | 31  | 37 |
| 18,068 | 4  | 1 | 15  | 15 | 0 | 3 | 11 | 18 | 30  | 37 |
| 18,069 | 4  | 1 | 14  | 16 | 0 | 3 | 11 | 17 | 29  | 37 |

|        |   |   |    |    |   |   |    |    |    |    |
|--------|---|---|----|----|---|---|----|----|----|----|
| 18,070 | 4 | 1 | 14 | 16 | 0 | 3 | 11 | 18 | 29 | 38 |
| 18,071 | 4 | 1 | 12 | 16 | 0 | 3 | 9  | 18 | 25 | 38 |
| 18,072 | 4 | 2 | 11 | 16 | 0 | 4 | 9  | 18 | 24 | 40 |
| 18,073 | 4 | 2 | 10 | 16 | 0 | 4 | 9  | 18 | 23 | 40 |
| 18,074 | 4 | 2 | 10 | 17 | 0 | 4 | 9  | 18 | 23 | 41 |
| 18,075 | 4 | 2 | 10 | 17 | 0 | 4 | 9  | 19 | 23 | 42 |
| 18,076 | 4 | 2 | 10 | 17 | 0 | 4 | 8  | 19 | 22 | 42 |
| 18,077 | 4 | 2 | 10 | 17 | 0 | 4 | 8  | 19 | 22 | 42 |
| 18,078 | 4 | 2 | 10 | 16 | 0 | 4 | 9  | 19 | 23 | 41 |
| 18,079 | 4 | 2 | 8  | 16 | 0 | 4 | 8  | 19 | 20 | 41 |
| 18,080 | 4 | 2 | 8  | 16 | 0 | 4 | 8  | 20 | 20 | 42 |
| 18,081 | 4 | 2 | 8  | 16 | 0 | 4 | 8  | 20 | 20 | 42 |
| 18,082 | 4 | 2 | 8  | 16 | 0 | 4 | 8  | 20 | 20 | 42 |
| 18,083 | 4 | 2 | 7  | 16 | 0 | 4 | 8  | 20 | 19 | 42 |
| 18,084 | 4 | 2 | 7  | 16 | 0 | 4 | 8  | 20 | 19 | 42 |
| 18,085 | 4 | 2 | 7  | 16 | 0 | 4 | 8  | 20 | 19 | 42 |
| 18,086 | 4 | 2 | 7  | 16 | 0 | 4 | 8  | 20 | 19 | 42 |
| 18,087 | 4 | 2 | 7  | 16 | 0 | 4 | 8  | 20 | 19 | 42 |
| 18,088 | 4 | 2 | 10 | 15 | 0 | 4 | 10 | 20 | 24 | 41 |
| 18,089 | 4 | 2 | 10 | 15 | 0 | 4 | 10 | 20 | 24 | 41 |
| 18,090 | 4 | 2 | 10 | 15 | 0 | 4 | 10 | 20 | 24 | 41 |
| 18,091 | 4 | 2 | 10 | 16 | 0 | 4 | 13 | 19 | 27 | 41 |
| 18,092 | 4 | 2 | 10 | 16 | 0 | 4 | 13 | 19 | 27 | 41 |
| 18,093 | 4 | 2 | 13 | 12 | 0 | 3 | 14 | 12 | 31 | 29 |
| 18,094 | 4 | 2 | 16 | 12 | 1 | 3 | 17 | 12 | 38 | 29 |
| 18,095 | 4 | 2 | 16 | 12 | 1 | 3 | 17 | 12 | 38 | 29 |
| 18,096 | 3 | 2 | 16 | 12 | 1 | 3 | 18 | 12 | 38 | 29 |
| 18,097 | 3 | 2 | 16 | 12 | 1 | 3 | 18 | 12 | 38 | 29 |
| 18,098 | 3 | 2 | 18 | 12 | 1 | 3 | 19 | 12 | 41 | 29 |
| 18,099 | 3 | 2 | 18 | 12 | 1 | 3 | 20 | 12 | 42 | 29 |
| 18,100 | 3 | 2 | 17 | 12 | 1 | 3 | 20 | 12 | 41 | 29 |
| 18,101 | 0 | 2 | 16 | 12 | 1 | 3 | 17 | 12 | 34 | 29 |
| 18,102 | 0 | 2 | 15 | 12 | 1 | 2 | 17 | 12 | 33 | 28 |
| 18,103 | 0 | 2 | 14 | 12 | 1 | 2 | 15 | 12 | 30 | 28 |
| 18,104 | 0 | 2 | 14 | 12 | 1 | 2 | 15 | 12 | 30 | 28 |
| 18,105 | 0 | 2 | 13 | 12 | 1 | 2 | 15 | 12 | 29 | 28 |
| 18,106 | 0 | 2 | 14 | 11 | 1 | 2 | 14 | 12 | 29 | 27 |
| 18,107 | 0 | 2 | 14 | 11 | 1 | 2 | 14 | 12 | 29 | 27 |
| 18,108 | 0 | 2 | 14 | 11 | 1 | 2 | 14 | 10 | 29 | 25 |
| 18,109 | 0 | 2 | 21 | 12 | 1 | 2 | 18 | 11 | 40 | 27 |
| 18,110 | 0 | 2 | 20 | 10 | 1 | 2 | 18 | 11 | 39 | 25 |

|        |   |   |    |    |   |   |    |    |    |    |
|--------|---|---|----|----|---|---|----|----|----|----|
| 18,111 | 0 | 3 | 25 | 7  | 4 | 2 | 28 | 7  | 57 | 19 |
| 18,112 | 0 | 3 | 25 | 7  | 4 | 2 | 30 | 7  | 59 | 19 |
| 18,113 | 0 | 3 | 25 | 6  | 4 | 2 | 32 | 6  | 61 | 17 |
| 18,114 | 0 | 2 | 27 | 4  | 4 | 1 | 32 | 4  | 63 | 11 |
| 18,115 | 0 | 2 | 27 | 4  | 4 | 1 | 32 | 4  | 63 | 11 |
| 18,116 | 0 | 2 | 27 | 4  | 4 | 1 | 32 | 4  | 63 | 11 |
| 18,117 | 0 | 2 | 27 | 4  | 4 | 1 | 32 | 4  | 63 | 11 |
| 18,118 | 0 | 2 | 27 | 4  | 4 | 1 | 32 | 4  | 63 | 11 |
| 18,119 | 0 | 2 | 27 | 6  | 4 | 1 | 32 | 4  | 63 | 13 |
| 18,120 | 0 | 2 | 27 | 5  | 4 | 1 | 32 | 4  | 63 | 12 |
| 18,121 | 0 | 2 | 27 | 6  | 4 | 1 | 32 | 3  | 63 | 12 |
| 18,122 | 0 | 2 | 27 | 6  | 4 | 1 | 33 | 3  | 64 | 12 |
| 18,123 | 0 | 1 | 27 | 6  | 4 | 0 | 33 | 3  | 64 | 10 |
| 18,124 | 0 | 1 | 27 | 5  | 4 | 0 | 32 | 3  | 63 | 9  |
| 18,125 | 0 | 1 | 27 | 5  | 4 | 0 | 32 | 3  | 63 | 9  |
| 18,126 | 0 | 1 | 27 | 5  | 4 | 0 | 32 | 3  | 63 | 9  |
| 18,127 | 0 | 1 | 27 | 5  | 4 | 0 | 32 | 3  | 63 | 9  |
| 18,128 | 0 | 1 | 27 | 5  | 4 | 0 | 31 | 3  | 62 | 9  |
| 18,129 | 0 | 1 | 27 | 5  | 4 | 0 | 31 | 3  | 62 | 9  |
| 18,130 | 0 | 1 | 27 | 5  | 4 | 0 | 31 | 3  | 62 | 9  |
| 18,131 | 0 | 1 | 30 | 5  | 5 | 0 | 33 | 2  | 68 | 8  |
| 18,132 | 0 | 1 | 32 | 6  | 5 | 0 | 33 | 2  | 70 | 9  |
| 18,133 | 0 | 1 | 32 | 6  | 5 | 0 | 33 | 2  | 70 | 9  |
| 18,134 | 1 | 1 | 32 | 6  | 5 | 0 | 33 | 2  | 71 | 9  |
| 18,135 | 1 | 1 | 32 | 6  | 5 | 0 | 33 | 2  | 71 | 9  |
| 18,136 | 1 | 1 | 44 | 6  | 6 | 0 | 39 | 2  | 90 | 9  |
| 18,137 | 1 | 1 | 49 | 6  | 6 | 0 | 40 | 2  | 96 | 9  |
| 18,138 | 1 | 1 | 49 | 6  | 6 | 0 | 40 | 2  | 96 | 9  |
| 18,139 | 1 | 1 | 46 | 7  | 6 | 0 | 38 | 2  | 91 | 10 |
| 18,140 | 1 | 1 | 46 | 7  | 6 | 0 | 38 | 2  | 91 | 10 |
| 18,141 | 1 | 1 | 46 | 7  | 6 | 0 | 35 | 4  | 88 | 12 |
| 18,142 | 1 | 1 | 46 | 7  | 6 | 0 | 35 | 4  | 88 | 12 |
| 18,143 | 1 | 1 | 46 | 7  | 6 | 0 | 35 | 5  | 88 | 13 |
| 18,144 | 1 | 1 | 43 | 8  | 6 | 0 | 34 | 5  | 84 | 14 |
| 18,145 | 1 | 1 | 40 | 8  | 5 | 0 | 31 | 5  | 77 | 14 |
| 18,146 | 1 | 1 | 39 | 10 | 5 | 0 | 31 | 5  | 76 | 16 |
| 18,147 | 1 | 1 | 39 | 10 | 5 | 0 | 30 | 9  | 75 | 20 |
| 18,148 | 1 | 1 | 39 | 11 | 5 | 0 | 30 | 10 | 75 | 22 |
| 18,149 | 1 | 1 | 37 | 13 | 5 | 0 | 29 | 10 | 72 | 24 |
| 18,150 | 1 | 1 | 38 | 14 | 5 | 0 | 28 | 10 | 72 | 25 |
| 18,151 | 1 | 1 | 38 | 14 | 5 | 0 | 29 | 10 | 73 | 25 |

|        |   |   |    |    |   |   |    |    |    |    |
|--------|---|---|----|----|---|---|----|----|----|----|
| 18,152 | 1 | 1 | 38 | 14 | 5 | 0 | 29 | 10 | 73 | 25 |
| 18,153 | 1 | 1 | 38 | 15 | 5 | 0 | 29 | 10 | 73 | 26 |
| 18,154 | 1 | 1 | 38 | 15 | 5 | 0 | 29 | 10 | 73 | 26 |
| 18,155 | 1 | 1 | 38 | 15 | 5 | 0 | 29 | 10 | 73 | 26 |
| 18,156 | 1 | 1 | 38 | 16 | 5 | 0 | 29 | 10 | 73 | 27 |
| 18,157 | 1 | 1 | 37 | 16 | 5 | 0 | 29 | 10 | 72 | 27 |
| 18,158 | 1 | 1 | 40 | 16 | 7 | 0 | 29 | 10 | 77 | 27 |
| 18,159 | 2 | 1 | 35 | 18 | 7 | 0 | 28 | 9  | 72 | 28 |
| 18,160 | 2 | 1 | 37 | 18 | 7 | 0 | 27 | 9  | 73 | 28 |
| 18,161 | 2 | 1 | 32 | 18 | 4 | 0 | 17 | 10 | 55 | 29 |
| 18,162 | 2 | 0 | 33 | 18 | 4 | 0 | 15 | 12 | 54 | 30 |
| 18,163 | 2 | 0 | 33 | 18 | 4 | 0 | 13 | 12 | 52 | 30 |
| 18,164 | 2 | 0 | 31 | 20 | 4 | 0 | 13 | 13 | 50 | 33 |
| 18,165 | 2 | 0 | 31 | 20 | 4 | 0 | 13 | 14 | 50 | 34 |
| 18,166 | 2 | 0 | 31 | 20 | 4 | 0 | 13 | 14 | 50 | 34 |
| 18,167 | 2 | 0 | 31 | 20 | 4 | 0 | 13 | 14 | 50 | 34 |
| 18,168 | 2 | 0 | 31 | 21 | 4 | 0 | 13 | 14 | 50 | 35 |
| 18,169 | 3 | 1 | 35 | 20 | 4 | 0 | 18 | 16 | 60 | 37 |
| 18,170 | 3 | 1 | 35 | 20 | 4 | 0 | 18 | 16 | 60 | 37 |
| 18,171 | 3 | 1 | 35 | 20 | 4 | 0 | 18 | 16 | 60 | 37 |
| 18,172 | 3 | 1 | 35 | 20 | 4 | 0 | 18 | 16 | 60 | 37 |
| 18,173 | 3 | 1 | 36 | 20 | 4 | 0 | 17 | 16 | 60 | 37 |
| 18,174 | 3 | 2 | 36 | 20 | 4 | 0 | 19 | 16 | 62 | 38 |
| 18,175 | 3 | 2 | 36 | 20 | 4 | 0 | 19 | 16 | 62 | 38 |
| 18,176 | 3 | 2 | 36 | 20 | 4 | 0 | 19 | 16 | 62 | 38 |
| 18,177 | 3 | 2 | 36 | 20 | 4 | 0 | 19 | 15 | 62 | 37 |
| 18,178 | 3 | 2 | 36 | 21 | 4 | 0 | 19 | 15 | 62 | 38 |
| 18,179 | 3 | 2 | 36 | 21 | 4 | 0 | 19 | 15 | 62 | 38 |
| 18,180 | 3 | 2 | 36 | 22 | 4 | 0 | 20 | 15 | 63 | 39 |
| 18,181 | 3 | 2 | 35 | 22 | 4 | 0 | 20 | 15 | 62 | 39 |
| 18,182 | 3 | 2 | 33 | 22 | 3 | 0 | 18 | 16 | 57 | 40 |
| 18,183 | 3 | 2 | 31 | 21 | 3 | 0 | 18 | 17 | 55 | 40 |
| 18,184 | 2 | 2 | 31 | 21 | 3 | 0 | 19 | 17 | 55 | 40 |
| 18,185 | 2 | 2 | 31 | 23 | 3 | 0 | 19 | 17 | 55 | 42 |
| 18,186 | 2 | 2 | 19 | 23 | 2 | 0 | 13 | 17 | 36 | 42 |
| 18,187 | 2 | 2 | 14 | 23 | 2 | 0 | 12 | 18 | 30 | 43 |
| 18,188 | 2 | 2 | 14 | 24 | 2 | 0 | 12 | 18 | 30 | 44 |
| 18,189 | 3 | 2 | 14 | 24 | 2 | 0 | 12 | 18 | 31 | 44 |
| 18,190 | 3 | 2 | 14 | 23 | 2 | 0 | 12 | 18 | 31 | 43 |
| 18,191 | 3 | 2 | 14 | 23 | 2 | 0 | 12 | 18 | 31 | 43 |
| 18,192 | 3 | 2 | 15 | 22 | 2 | 0 | 13 | 16 | 33 | 40 |

|        |   |   |    |    |   |   |    |    |    |    |
|--------|---|---|----|----|---|---|----|----|----|----|
| 18,193 | 3 | 2 | 15 | 22 | 2 | 0 | 13 | 16 | 33 | 40 |
| 18,194 | 3 | 2 | 15 | 22 | 2 | 0 | 13 | 15 | 33 | 39 |
| 18,195 | 3 | 2 | 16 | 21 | 2 | 0 | 14 | 15 | 35 | 38 |
| 18,196 | 3 | 2 | 16 | 21 | 2 | 0 | 14 | 15 | 35 | 38 |
| 18,197 | 4 | 2 | 16 | 20 | 2 | 0 | 14 | 11 | 36 | 33 |
| 18,198 | 4 | 2 | 16 | 20 | 2 | 0 | 14 | 11 | 36 | 33 |
| 18,199 | 4 | 2 | 19 | 17 | 2 | 0 | 15 | 10 | 40 | 29 |
| 18,200 | 5 | 2 | 18 | 16 | 2 | 0 | 15 | 10 | 40 | 28 |
| 18,201 | 5 | 2 | 18 | 16 | 2 | 0 | 15 | 10 | 40 | 28 |
| 18,202 | 5 | 2 | 19 | 16 | 2 | 0 | 14 | 10 | 40 | 28 |
| 18,203 | 5 | 2 | 19 | 16 | 2 | 0 | 14 | 10 | 40 | 28 |
| 18,204 | 5 | 2 | 21 | 15 | 2 | 0 | 15 | 10 | 43 | 27 |
| 18,205 | 5 | 2 | 21 | 15 | 2 | 0 | 15 | 11 | 43 | 28 |
| 18,206 | 5 | 2 | 21 | 16 | 2 | 0 | 16 | 11 | 44 | 29 |
| 18,207 | 5 | 2 | 21 | 15 | 2 | 0 | 16 | 11 | 44 | 28 |
| 18,208 | 5 | 2 | 21 | 16 | 2 | 0 | 16 | 12 | 44 | 30 |
| 18,209 | 5 | 2 | 18 | 16 | 0 | 0 | 16 | 12 | 39 | 30 |
| 18,210 | 4 | 2 | 17 | 13 | 0 | 0 | 15 | 12 | 36 | 27 |
| 18,211 | 4 | 2 | 14 | 13 | 0 | 0 | 14 | 11 | 32 | 26 |
| 18,212 | 4 | 2 | 14 | 13 | 0 | 0 | 14 | 9  | 32 | 24 |
| 18,213 | 4 | 2 | 13 | 13 | 0 | 0 | 14 | 9  | 31 | 24 |
| 18,214 | 4 | 2 | 13 | 14 | 0 | 0 | 14 | 9  | 31 | 25 |
| 18,215 | 4 | 2 | 13 | 14 | 0 | 0 | 14 | 8  | 31 | 24 |
| 18,216 | 4 | 2 | 13 | 14 | 0 | 0 | 14 | 7  | 31 | 23 |
| 18,217 | 5 | 2 | 14 | 15 | 0 | 0 | 17 | 7  | 36 | 24 |
| 18,218 | 5 | 2 | 15 | 16 | 0 | 0 | 19 | 7  | 39 | 25 |
| 18,219 | 4 | 2 | 16 | 16 | 0 | 0 | 19 | 7  | 39 | 25 |
| 18,220 | 5 | 1 | 12 | 15 | 0 | 0 | 15 | 5  | 32 | 21 |
| 18,221 | 5 | 1 | 12 | 15 | 0 | 0 | 15 | 5  | 32 | 21 |
| 18,222 | 5 | 1 | 13 | 15 | 0 | 0 | 16 | 5  | 34 | 21 |
| 18,223 | 5 | 1 | 13 | 14 | 0 | 0 | 16 | 5  | 34 | 20 |
| 18,224 | 5 | 1 | 12 | 14 | 0 | 0 | 16 | 5  | 33 | 20 |
| 18,225 | 5 | 0 | 12 | 14 | 0 | 0 | 14 | 5  | 31 | 19 |
| 18,226 | 5 | 0 | 12 | 14 | 0 | 0 | 14 | 5  | 31 | 19 |
| 18,227 | 5 | 0 | 12 | 14 | 0 | 0 | 14 | 5  | 31 | 19 |
| 18,228 | 5 | 0 | 12 | 14 | 0 | 0 | 15 | 5  | 32 | 19 |
| 18,229 | 5 | 0 | 14 | 13 | 0 | 0 | 16 | 5  | 35 | 18 |
| 18,230 | 5 | 0 | 14 | 12 | 0 | 0 | 16 | 5  | 35 | 17 |
| 18,231 | 5 | 0 | 14 | 12 | 0 | 0 | 17 | 5  | 36 | 17 |
| 18,232 | 5 | 0 | 14 | 12 | 0 | 0 | 17 | 5  | 36 | 17 |
| 18,233 | 5 | 0 | 14 | 13 | 0 | 0 | 17 | 4  | 36 | 17 |

|        |   |   |    |    |   |   |    |   |    |    |
|--------|---|---|----|----|---|---|----|---|----|----|
| 18,234 | 5 | 0 | 14 | 13 | 0 | 0 | 17 | 3 | 36 | 16 |
| 18,235 | 5 | 0 | 14 | 13 | 0 | 0 | 16 | 3 | 35 | 16 |
| 18,236 | 5 | 0 | 14 | 11 | 0 | 0 | 16 | 3 | 35 | 14 |
| 18,237 | 5 | 0 | 14 | 13 | 0 | 0 | 16 | 3 | 35 | 16 |
| 18,238 | 5 | 0 | 14 | 13 | 0 | 0 | 16 | 2 | 35 | 15 |
| 18,239 | 5 | 0 | 14 | 13 | 0 | 0 | 16 | 3 | 35 | 16 |
| 18,240 | 5 | 0 | 14 | 13 | 0 | 0 | 16 | 3 | 35 | 16 |
| 18,241 | 5 | 0 | 14 | 13 | 0 | 0 | 16 | 3 | 35 | 16 |
| 18,242 | 5 | 0 | 14 | 13 | 0 | 0 | 16 | 4 | 35 | 17 |
| 18,243 | 5 | 0 | 13 | 13 | 0 | 0 | 16 | 4 | 34 | 17 |
| 18,244 | 5 | 0 | 13 | 13 | 0 | 0 | 16 | 5 | 34 | 18 |
| 18,245 | 5 | 0 | 13 | 13 | 0 | 0 | 16 | 5 | 34 | 18 |
| 18,246 | 5 | 0 | 12 | 13 | 0 | 0 | 15 | 5 | 32 | 18 |
| 18,247 | 5 | 0 | 12 | 13 | 0 | 0 | 16 | 5 | 33 | 18 |
| 18,248 | 5 | 0 | 18 | 12 | 1 | 0 | 18 | 5 | 42 | 17 |
| 18,249 | 7 | 0 | 22 | 13 | 1 | 0 | 26 | 5 | 56 | 18 |
| 18,250 | 7 | 0 | 22 | 13 | 1 | 0 | 25 | 6 | 55 | 19 |
| 18,251 | 6 | 0 | 35 | 17 | 2 | 0 | 32 | 6 | 75 | 23 |
| 18,252 | 6 | 2 | 39 | 19 | 2 | 0 | 33 | 6 | 80 | 27 |
| 18,253 | 6 | 2 | 38 | 19 | 2 | 0 | 35 | 6 | 81 | 27 |
| 18,254 | 6 | 2 | 36 | 19 | 2 | 0 | 34 | 6 | 78 | 27 |
| 18,255 | 6 | 2 | 36 | 19 | 2 | 0 | 34 | 6 | 78 | 27 |
| 18,256 | 6 | 2 | 36 | 19 | 2 | 0 | 34 | 6 | 78 | 27 |
| 18,257 | 6 | 2 | 36 | 18 | 2 | 0 | 33 | 6 | 77 | 26 |
| 18,258 | 6 | 2 | 36 | 19 | 2 | 0 | 33 | 6 | 77 | 27 |
| 18,259 | 6 | 2 | 38 | 18 | 2 | 0 | 33 | 5 | 79 | 25 |
| 18,260 | 6 | 2 | 38 | 18 | 2 | 0 | 33 | 5 | 79 | 25 |
| 18,261 | 6 | 2 | 42 | 18 | 2 | 0 | 34 | 5 | 84 | 25 |
| 18,262 | 6 | 2 | 46 | 18 | 2 | 0 | 38 | 5 | 92 | 25 |
| 18,263 | 6 | 2 | 47 | 18 | 2 | 0 | 38 | 5 | 93 | 25 |
| 18,264 | 6 | 2 | 46 | 18 | 2 | 0 | 35 | 5 | 89 | 25 |
| 18,265 | 6 | 2 | 46 | 17 | 2 | 0 | 35 | 5 | 89 | 24 |
| 18,266 | 7 | 2 | 47 | 15 | 2 | 0 | 35 | 5 | 91 | 22 |
| 18,267 | 7 | 2 | 47 | 14 | 2 | 0 | 35 | 6 | 91 | 22 |
| 18,268 | 6 | 2 | 48 | 14 | 2 | 0 | 37 | 6 | 93 | 22 |
| 18,269 | 6 | 2 | 48 | 14 | 2 | 0 | 35 | 6 | 91 | 22 |
| 18,270 | 6 | 2 | 47 | 13 | 2 | 0 | 35 | 6 | 90 | 21 |
| 18,271 | 5 | 2 | 48 | 13 | 2 | 0 | 35 | 6 | 90 | 21 |
| 18,272 | 5 | 2 | 47 | 13 | 2 | 0 | 34 | 6 | 88 | 21 |
| 18,273 | 5 | 2 | 47 | 13 | 2 | 0 | 34 | 7 | 88 | 22 |
| 18,274 | 5 | 2 | 47 | 13 | 2 | 0 | 34 | 7 | 88 | 22 |

|        |   |   |    |    |   |   |    |   |     |    |
|--------|---|---|----|----|---|---|----|---|-----|----|
| 18,275 | 5 | 2 | 47 | 13 | 2 | 0 | 34 | 7 | 88  | 22 |
| 18,276 | 5 | 2 | 47 | 13 | 2 | 0 | 34 | 7 | 88  | 22 |
| 18,277 | 5 | 2 | 47 | 13 | 2 | 0 | 34 | 7 | 88  | 22 |
| 18,278 | 5 | 2 | 47 | 13 | 2 | 0 | 33 | 7 | 87  | 22 |
| 18,279 | 5 | 2 | 45 | 13 | 2 | 0 | 32 | 7 | 84  | 22 |
| 18,280 | 5 | 2 | 46 | 13 | 2 | 0 | 32 | 7 | 85  | 22 |
| 18,281 | 5 | 2 | 46 | 13 | 2 | 0 | 32 | 7 | 85  | 22 |
| 18,282 | 5 | 2 | 46 | 13 | 2 | 0 | 30 | 7 | 83  | 22 |
| 18,283 | 5 | 2 | 46 | 13 | 2 | 0 | 30 | 7 | 83  | 22 |
| 18,284 | 5 | 2 | 46 | 12 | 2 | 0 | 30 | 7 | 83  | 21 |
| 18,285 | 5 | 2 | 47 | 12 | 2 | 0 | 30 | 7 | 84  | 21 |
| 18,286 | 5 | 2 | 48 | 11 | 2 | 0 | 30 | 7 | 85  | 20 |
| 18,287 | 5 | 2 | 48 | 11 | 2 | 0 | 30 | 7 | 85  | 20 |
| 18,288 | 5 | 2 | 48 | 10 | 2 | 0 | 30 | 7 | 85  | 19 |
| 18,289 | 5 | 2 | 48 | 10 | 2 | 0 | 30 | 7 | 85  | 19 |
| 18,290 | 4 | 2 | 51 | 9  | 2 | 0 | 36 | 6 | 93  | 17 |
| 18,291 | 7 | 2 | 55 | 9  | 2 | 0 | 40 | 6 | 104 | 17 |
| 18,292 | 7 | 1 | 60 | 9  | 2 | 0 | 40 | 4 | 109 | 14 |
| 18,293 | 7 | 1 | 60 | 9  | 2 | 0 | 39 | 4 | 108 | 14 |
| 18,294 | 7 | 1 | 60 | 9  | 2 | 0 | 39 | 4 | 108 | 14 |
| 18,295 | 7 | 1 | 60 | 9  | 2 | 0 | 39 | 4 | 108 | 14 |
| 18,296 | 7 | 1 | 60 | 10 | 2 | 0 | 39 | 5 | 108 | 16 |
| 18,297 | 7 | 1 | 60 | 10 | 2 | 0 | 40 | 5 | 109 | 16 |
| 18,298 | 8 | 1 | 60 | 10 | 2 | 0 | 39 | 5 | 109 | 16 |
| 18,299 | 7 | 3 | 54 | 12 | 1 | 0 | 37 | 6 | 99  | 21 |
| 18,300 | 5 | 3 | 47 | 12 | 1 | 0 | 29 | 6 | 82  | 21 |
| 18,301 | 5 | 3 | 36 | 13 | 1 | 0 | 22 | 5 | 64  | 21 |
| 18,302 | 5 | 3 | 34 | 10 | 0 | 0 | 22 | 7 | 61  | 20 |
| 18,303 | 5 | 2 | 30 | 8  | 0 | 0 | 21 | 7 | 56  | 17 |
| 18,304 | 5 | 2 | 30 | 9  | 0 | 0 | 19 | 7 | 54  | 18 |
| 18,305 | 5 | 2 | 30 | 9  | 0 | 0 | 19 | 7 | 54  | 18 |
| 18,306 | 5 | 2 | 29 | 9  | 0 | 0 | 19 | 6 | 53  | 17 |
| 18,307 | 5 | 2 | 29 | 8  | 0 | 0 | 19 | 6 | 53  | 16 |
| 18,308 | 5 | 2 | 29 | 10 | 0 | 0 | 19 | 6 | 53  | 18 |
| 18,309 | 5 | 2 | 30 | 10 | 0 | 0 | 19 | 6 | 54  | 18 |
| 18,310 | 5 | 2 | 29 | 10 | 0 | 0 | 19 | 6 | 53  | 18 |
| 18,311 | 5 | 2 | 25 | 10 | 0 | 0 | 18 | 6 | 48  | 18 |
| 18,312 | 5 | 2 | 25 | 10 | 0 | 0 | 18 | 6 | 48  | 18 |
| 18,313 | 5 | 2 | 21 | 10 | 0 | 0 | 14 | 6 | 40  | 18 |
| 18,314 | 6 | 2 | 20 | 10 | 0 | 0 | 14 | 6 | 40  | 18 |
| 18,315 | 6 | 2 | 20 | 11 | 0 | 0 | 14 | 8 | 40  | 21 |

|        |   |   |    |    |   |   |    |   |    |    |
|--------|---|---|----|----|---|---|----|---|----|----|
| 18,316 | 6 | 2 | 19 | 11 | 0 | 0 | 14 | 8 | 39 | 21 |
| 18,317 | 5 | 2 | 19 | 11 | 0 | 0 | 13 | 7 | 37 | 20 |
| 18,318 | 5 | 2 | 19 | 11 | 0 | 0 | 13 | 7 | 37 | 20 |
| 18,319 | 5 | 2 | 18 | 11 | 0 | 0 | 11 | 7 | 34 | 20 |
| 18,320 | 5 | 2 | 17 | 11 | 0 | 0 | 11 | 7 | 33 | 20 |
| 18,321 | 5 | 2 | 17 | 11 | 0 | 0 | 11 | 7 | 33 | 20 |
| 18,322 | 5 | 2 | 17 | 11 | 0 | 0 | 11 | 7 | 33 | 20 |
| 18,323 | 5 | 2 | 17 | 11 | 0 | 0 | 11 | 7 | 33 | 20 |
| 18,324 | 5 | 2 | 18 | 11 | 0 | 0 | 11 | 6 | 34 | 19 |
| 18,325 | 5 | 2 | 19 | 11 | 0 | 0 | 11 | 6 | 35 | 19 |
| 18,326 | 5 | 2 | 19 | 11 | 0 | 0 | 11 | 6 | 35 | 19 |
| 18,327 | 5 | 2 | 19 | 11 | 0 | 0 | 11 | 6 | 35 | 19 |
| 18,328 | 5 | 2 | 19 | 11 | 0 | 0 | 11 | 6 | 35 | 19 |
| 18,329 | 5 | 2 | 19 | 11 | 0 | 0 | 11 | 6 | 35 | 19 |
| 18,330 | 5 | 2 | 19 | 11 | 0 | 0 | 11 | 6 | 35 | 19 |
| 18,331 | 5 | 2 | 18 | 11 | 0 | 0 | 11 | 6 | 34 | 19 |
| 18,332 | 5 | 2 | 19 | 11 | 0 | 0 | 11 | 7 | 35 | 20 |
| 18,333 | 5 | 2 | 19 | 11 | 0 | 0 | 11 | 7 | 35 | 20 |
| 18,334 | 5 | 2 | 22 | 11 | 0 | 0 | 11 | 7 | 38 | 20 |
| 18,335 | 5 | 2 | 22 | 11 | 0 | 0 | 11 | 7 | 38 | 20 |
| 18,336 | 5 | 3 | 21 | 11 | 0 | 0 | 11 | 7 | 37 | 21 |
| 18,337 | 5 | 3 | 20 | 11 | 0 | 0 | 11 | 7 | 36 | 21 |
| 18,338 | 5 | 3 | 22 | 11 | 0 | 0 | 11 | 7 | 38 | 21 |
| 18,339 | 5 | 3 | 34 | 12 | 0 | 0 | 14 | 7 | 53 | 22 |
| 18,340 | 5 | 3 | 34 | 12 | 0 | 0 | 14 | 7 | 53 | 22 |
| 18,341 | 5 | 3 | 32 | 12 | 0 | 0 | 8  | 7 | 45 | 22 |
| 18,342 | 2 | 3 | 28 | 12 | 0 | 0 | 3  | 7 | 33 | 22 |
| 18,343 | 2 | 3 | 23 | 12 | 0 | 0 | 3  | 7 | 28 | 22 |
| 18,344 | 2 | 3 | 23 | 12 | 0 | 0 | 3  | 7 | 28 | 22 |
| 18,345 | 2 | 3 | 23 | 12 | 0 | 0 | 3  | 7 | 28 | 22 |
| 18,346 | 2 | 3 | 23 | 11 | 0 | 0 | 3  | 6 | 28 | 20 |
| 18,347 | 2 | 3 | 23 | 11 | 0 | 0 | 3  | 6 | 28 | 20 |
| 18,348 | 2 | 1 | 23 | 8  | 0 | 0 | 3  | 5 | 28 | 14 |
| 18,349 | 1 | 1 | 24 | 8  | 0 | 0 | 3  | 5 | 28 | 14 |
| 18,350 | 1 | 1 | 24 | 8  | 0 | 0 | 3  | 5 | 28 | 14 |
| 18,351 | 1 | 1 | 24 | 7  | 0 | 0 | 3  | 5 | 28 | 13 |
| 18,352 | 1 | 1 | 24 | 7  | 0 | 0 | 3  | 5 | 28 | 13 |
| 18,353 | 1 | 1 | 26 | 6  | 0 | 0 | 3  | 3 | 30 | 10 |
| 18,354 | 1 | 1 | 26 | 6  | 0 | 0 | 3  | 3 | 30 | 10 |
| 18,355 | 1 | 1 | 26 | 5  | 0 | 0 | 3  | 3 | 30 | 9  |
| 18,356 | 1 | 1 | 26 | 5  | 0 | 0 | 3  | 3 | 30 | 9  |



|        |   |   |    |   |   |   |    |   |    |    |
|--------|---|---|----|---|---|---|----|---|----|----|
| 18,357 | 1 | 1 | 26 | 5 | 0 | 0 | 3  | 3 | 30 | 9  |
| 18,358 | 1 | 1 | 26 | 5 | 0 | 0 | 3  | 3 | 30 | 9  |
| 18,359 | 1 | 1 | 26 | 3 | 0 | 0 | 3  | 3 | 30 | 7  |
| 18,360 | 1 | 1 | 25 | 3 | 0 | 0 | 4  | 3 | 30 | 7  |
| 18,361 | 1 | 1 | 25 | 3 | 0 | 0 | 4  | 3 | 30 | 7  |
| 18,362 | 1 | 1 | 25 | 4 | 0 | 0 | 4  | 3 | 30 | 8  |
| 18,363 | 1 | 1 | 25 | 4 | 0 | 0 | 4  | 3 | 30 | 8  |
| 18,364 | 0 | 1 | 26 | 4 | 0 | 0 | 4  | 3 | 30 | 8  |
| 18,365 | 0 | 1 | 26 | 4 | 0 | 0 | 4  | 3 | 30 | 8  |
| 18,366 | 0 | 1 | 26 | 3 | 0 | 0 | 4  | 1 | 30 | 5  |
| 18,367 | 0 | 1 | 26 | 3 | 0 | 0 | 4  | 1 | 30 | 5  |
| 18,368 | 0 | 1 | 26 | 3 | 0 | 0 | 4  | 1 | 30 | 5  |
| 18,369 | 0 | 1 | 26 | 3 | 0 | 0 | 4  | 1 | 30 | 5  |
| 18,370 | 0 | 1 | 26 | 3 | 0 | 0 | 4  | 1 | 30 | 5  |
| 18,371 | 0 | 1 | 27 | 2 | 0 | 0 | 4  | 1 | 31 | 4  |
| 18,372 | 0 | 1 | 26 | 2 | 0 | 0 | 4  | 1 | 30 | 4  |
| 18,373 | 3 | 1 | 26 | 2 | 0 | 0 | 4  | 1 | 33 | 4  |
| 18,374 | 3 | 1 | 25 | 2 | 0 | 0 | 6  | 1 | 34 | 4  |
| 18,375 | 3 | 1 | 25 | 3 | 0 | 0 | 6  | 1 | 34 | 5  |
| 18,376 | 3 | 1 | 24 | 3 | 0 | 0 | 6  | 1 | 33 | 5  |
| 18,377 | 4 | 1 | 24 | 4 | 0 | 0 | 7  | 2 | 35 | 7  |
| 18,378 | 4 | 1 | 24 | 4 | 0 | 1 | 7  | 4 | 35 | 10 |
| 18,379 | 4 | 1 | 24 | 4 | 0 | 1 | 7  | 4 | 35 | 10 |
| 18,380 | 4 | 1 | 24 | 4 | 0 | 1 | 7  | 4 | 35 | 10 |
| 18,381 | 4 | 1 | 25 | 4 | 0 | 1 | 7  | 4 | 36 | 10 |
| 18,382 | 4 | 1 | 25 | 4 | 0 | 1 | 7  | 3 | 36 | 9  |
| 18,383 | 4 | 1 | 24 | 4 | 0 | 1 | 7  | 3 | 35 | 9  |
| 18,384 | 4 | 1 | 24 | 4 | 0 | 1 | 7  | 3 | 35 | 9  |
| 18,385 | 4 | 1 | 21 | 6 | 0 | 1 | 8  | 3 | 33 | 11 |
| 18,386 | 5 | 1 | 21 | 6 | 0 | 1 | 8  | 3 | 34 | 11 |
| 18,387 | 5 | 0 | 21 | 6 | 0 | 1 | 8  | 3 | 34 | 10 |
| 18,388 | 5 | 0 | 21 | 6 | 0 | 1 | 8  | 3 | 34 | 10 |
| 18,389 | 5 | 0 | 19 | 6 | 0 | 1 | 8  | 3 | 32 | 10 |
| 18,390 | 5 | 0 | 7  | 5 | 0 | 1 | 5  | 3 | 17 | 9  |
| 18,391 | 5 | 0 | 6  | 5 | 0 | 1 | 5  | 3 | 16 | 9  |
| 18,392 | 6 | 0 | 7  | 5 | 0 | 1 | 6  | 3 | 19 | 9  |
| 18,393 | 6 | 0 | 7  | 5 | 0 | 1 | 7  | 3 | 20 | 9  |
| 18,394 | 6 | 0 | 7  | 5 | 0 | 1 | 8  | 3 | 21 | 9  |
| 18,395 | 7 | 0 | 11 | 5 | 0 | 1 | 10 | 3 | 28 | 9  |
| 18,396 | 7 | 0 | 11 | 5 | 0 | 1 | 10 | 3 | 28 | 9  |
| 18,397 | 7 | 0 | 13 | 5 | 0 | 1 | 12 | 3 | 32 | 9  |

|        |   |   |    |   |   |   |    |   |    |    |
|--------|---|---|----|---|---|---|----|---|----|----|
| 18,398 | 7 | 0 | 13 | 5 | 0 | 1 | 12 | 3 | 32 | 9  |
| 18,399 | 7 | 0 | 14 | 5 | 0 | 1 | 12 | 3 | 33 | 9  |
| 18,400 | 7 | 0 | 14 | 6 | 0 | 1 | 12 | 3 | 33 | 10 |
| 18,401 | 7 | 0 | 14 | 6 | 0 | 1 | 12 | 3 | 33 | 10 |
| 18,402 | 7 | 0 | 14 | 6 | 0 | 1 | 12 | 3 | 33 | 10 |
| 18,403 | 7 | 0 | 12 | 7 | 0 | 1 | 12 | 3 | 31 | 11 |
| 18,404 | 7 | 0 | 12 | 7 | 0 | 1 | 12 | 3 | 31 | 11 |
| 18,405 | 7 | 0 | 12 | 7 | 0 | 1 | 12 | 3 | 31 | 11 |
| 18,406 | 7 | 0 | 12 | 7 | 0 | 1 | 12 | 3 | 31 | 11 |
| 18,407 | 7 | 0 | 12 | 7 | 0 | 1 | 12 | 3 | 31 | 11 |
| 18,408 | 7 | 0 | 12 | 7 | 0 | 1 | 12 | 4 | 31 | 12 |
| 18,409 | 7 | 0 | 12 | 7 | 0 | 1 | 12 | 4 | 31 | 12 |
| 18,410 | 7 | 0 | 12 | 7 | 0 | 1 | 12 | 4 | 31 | 12 |
| 18,411 | 7 | 0 | 12 | 7 | 0 | 1 | 11 | 4 | 30 | 12 |
| 18,412 | 7 | 0 | 12 | 6 | 0 | 1 | 11 | 4 | 30 | 11 |
| 18,413 | 7 | 0 | 12 | 6 | 0 | 1 | 11 | 4 | 30 | 11 |
| 18,414 | 9 | 0 | 23 | 6 | 0 | 1 | 11 | 4 | 43 | 11 |
| 18,415 | 9 | 0 | 22 | 6 | 0 | 1 | 11 | 4 | 42 | 11 |
| 18,416 | 9 | 0 | 31 | 6 | 0 | 1 | 15 | 4 | 55 | 11 |
| 18,417 | 9 | 0 | 33 | 6 | 0 | 1 | 18 | 4 | 60 | 11 |
| 18,418 | 9 | 0 | 34 | 6 | 0 | 1 | 19 | 4 | 62 | 11 |
| 18,419 | 9 | 0 | 34 | 6 | 0 | 1 | 21 | 4 | 64 | 11 |
| 18,420 | 9 | 0 | 36 | 6 | 0 | 1 | 21 | 4 | 66 | 11 |
| 18,421 | 9 | 0 | 35 | 7 | 0 | 1 | 21 | 4 | 65 | 12 |
| 18,422 | 9 | 0 | 37 | 7 | 0 | 1 | 21 | 4 | 67 | 12 |
| 18,423 | 6 | 0 | 38 | 7 | 0 | 1 | 21 | 4 | 65 | 12 |
| 18,424 | 6 | 0 | 38 | 7 | 0 | 1 | 20 | 4 | 64 | 12 |
| 18,425 | 6 | 0 | 38 | 7 | 0 | 1 | 19 | 4 | 63 | 12 |
| 18,426 | 6 | 0 | 38 | 6 | 0 | 1 | 19 | 4 | 63 | 11 |
| 18,427 | 6 | 0 | 38 | 5 | 0 | 1 | 19 | 3 | 63 | 9  |
| 18,428 | 5 | 0 | 38 | 5 | 0 | 1 | 18 | 3 | 61 | 9  |
| 18,429 | 5 | 0 | 38 | 5 | 0 | 0 | 18 | 1 | 61 | 6  |
| 18,430 | 5 | 0 | 38 | 5 | 0 | 0 | 18 | 1 | 61 | 6  |
| 18,431 | 5 | 0 | 38 | 5 | 0 | 0 | 18 | 1 | 61 | 6  |
| 18,432 | 5 | 0 | 37 | 5 | 0 | 0 | 18 | 1 | 60 | 6  |
| 18,433 | 5 | 0 | 37 | 5 | 0 | 0 | 18 | 1 | 60 | 6  |
| 18,434 | 5 | 0 | 37 | 5 | 0 | 0 | 18 | 1 | 60 | 6  |
| 18,435 | 5 | 0 | 37 | 7 | 0 | 0 | 18 | 1 | 60 | 8  |
| 18,436 | 5 | 0 | 37 | 5 | 0 | 0 | 17 | 1 | 59 | 6  |
| 18,437 | 4 | 0 | 38 | 5 | 0 | 0 | 17 | 1 | 59 | 6  |
| 18,438 | 4 | 0 | 38 | 5 | 0 | 0 | 17 | 1 | 59 | 6  |

|        |   |   |    |    |   |   |    |   |    |    |
|--------|---|---|----|----|---|---|----|---|----|----|
| 18,439 | 4 | 0 | 38 | 5  | 0 | 0 | 17 | 1 | 59 | 6  |
| 18,440 | 4 | 0 | 38 | 5  | 0 | 0 | 17 | 1 | 59 | 6  |
| 18,441 | 4 | 0 | 38 | 5  | 0 | 0 | 16 | 1 | 58 | 6  |
| 18,442 | 4 | 0 | 37 | 5  | 0 | 0 | 16 | 1 | 57 | 6  |
| 18,443 | 3 | 0 | 37 | 5  | 0 | 0 | 15 | 1 | 55 | 6  |
| 18,444 | 3 | 0 | 37 | 5  | 0 | 0 | 14 | 2 | 54 | 7  |
| 18,445 | 2 | 0 | 33 | 6  | 0 | 0 | 12 | 2 | 47 | 8  |
| 18,446 | 2 | 0 | 34 | 6  | 0 | 0 | 13 | 2 | 49 | 8  |
| 18,447 | 2 | 0 | 34 | 10 | 0 | 0 | 11 | 2 | 47 | 12 |
| 18,448 | 2 | 0 | 32 | 10 | 0 | 0 | 11 | 2 | 45 | 12 |
| 18,449 | 2 | 0 | 32 | 11 | 0 | 0 | 11 | 2 | 45 | 13 |
| 18,450 | 2 | 0 | 36 | 12 | 1 | 0 | 16 | 2 | 55 | 14 |
| 18,451 | 2 | 1 | 37 | 11 | 1 | 0 | 17 | 2 | 57 | 14 |
| 18,452 | 2 | 1 | 37 | 12 | 1 | 0 | 17 | 2 | 57 | 15 |
| 18,453 | 2 | 1 | 37 | 13 | 1 | 0 | 17 | 2 | 57 | 16 |
| 18,454 | 2 | 1 | 39 | 12 | 1 | 0 | 17 | 2 | 59 | 15 |
| 18,455 | 2 | 1 | 39 | 12 | 1 | 0 | 17 | 2 | 59 | 15 |
| 18,456 | 2 | 1 | 39 | 12 | 1 | 0 | 17 | 2 | 59 | 15 |
| 18,457 | 2 | 1 | 39 | 12 | 1 | 1 | 17 | 2 | 59 | 16 |
| 18,458 | 2 | 1 | 39 | 12 | 1 | 1 | 17 | 2 | 59 | 16 |
| 18,459 | 2 | 1 | 40 | 13 | 1 | 1 | 17 | 1 | 60 | 16 |
| 18,460 | 2 | 1 | 40 | 14 | 1 | 1 | 17 | 1 | 60 | 17 |
| 18,461 | 2 | 1 | 40 | 16 | 1 | 1 | 17 | 2 | 60 | 20 |
| 18,462 | 2 | 1 | 41 | 18 | 1 | 1 | 18 | 3 | 62 | 23 |
| 18,463 | 6 | 1 | 44 | 18 | 1 | 1 | 18 | 3 | 69 | 23 |
| 18,464 | 7 | 2 | 40 | 20 | 2 | 1 | 19 | 5 | 68 | 28 |
| 18,465 | 5 | 2 | 38 | 21 | 2 | 1 | 20 | 6 | 65 | 30 |
| 18,466 | 5 | 2 | 30 | 21 | 2 | 1 | 16 | 6 | 53 | 30 |
| 18,467 | 6 | 2 | 30 | 21 | 2 | 1 | 16 | 6 | 54 | 30 |
| 18,468 | 6 | 2 | 28 | 23 | 2 | 1 | 13 | 6 | 49 | 32 |
| 18,469 | 6 | 2 | 27 | 23 | 2 | 1 | 12 | 6 | 47 | 32 |
| 18,470 | 6 | 2 | 27 | 23 | 2 | 1 | 10 | 6 | 45 | 32 |
| 18,471 | 6 | 2 | 26 | 23 | 2 | 1 | 10 | 6 | 44 | 32 |
| 18,472 | 6 | 2 | 26 | 22 | 2 | 1 | 10 | 6 | 44 | 31 |
| 18,473 | 6 | 2 | 24 | 22 | 2 | 1 | 10 | 6 | 42 | 31 |
| 18,474 | 6 | 2 | 23 | 22 | 2 | 1 | 10 | 6 | 41 | 31 |
| 18,475 | 6 | 2 | 23 | 22 | 2 | 1 | 10 | 6 | 41 | 31 |
| 18,476 | 6 | 2 | 26 | 22 | 2 | 1 | 10 | 6 | 44 | 31 |
| 18,477 | 6 | 3 | 26 | 22 | 2 | 1 | 10 | 6 | 44 | 32 |
| 18,478 | 6 | 3 | 26 | 22 | 2 | 1 | 10 | 6 | 44 | 32 |
| 18,479 | 6 | 3 | 26 | 22 | 2 | 1 | 10 | 6 | 44 | 32 |

|        |   |   |    |    |   |   |    |    |    |     |
|--------|---|---|----|----|---|---|----|----|----|-----|
| 18,480 | 6 | 3 | 27 | 22 | 2 | 1 | 10 | 7  | 45 | 33  |
| 18,481 | 6 | 3 | 27 | 22 | 2 | 1 | 10 | 7  | 45 | 33  |
| 18,482 | 7 | 3 | 27 | 22 | 2 | 1 | 10 | 7  | 46 | 33  |
| 18,483 | 7 | 3 | 27 | 22 | 2 | 1 | 10 | 7  | 46 | 33  |
| 18,484 | 7 | 3 | 28 | 22 | 2 | 1 | 11 | 7  | 48 | 33  |
| 18,485 | 7 | 3 | 28 | 23 | 2 | 1 | 12 | 7  | 49 | 34  |
| 18,486 | 7 | 3 | 28 | 21 | 2 | 1 | 12 | 7  | 49 | 32  |
| 18,487 | 7 | 3 | 28 | 21 | 2 | 1 | 12 | 7  | 49 | 32  |
| 18,488 | 7 | 3 | 27 | 21 | 2 | 1 | 12 | 7  | 48 | 32  |
| 18,489 | 7 | 3 | 27 | 21 | 2 | 1 | 12 | 7  | 48 | 32  |
| 18,490 | 8 | 3 | 27 | 21 | 2 | 1 | 12 | 7  | 49 | 32  |
| 18,491 | 8 | 3 | 27 | 21 | 2 | 1 | 13 | 7  | 50 | 32  |
| 18,492 | 8 | 3 | 28 | 21 | 2 | 1 | 13 | 7  | 51 | 32  |
| 18,493 | 8 | 3 | 28 | 21 | 2 | 1 | 13 | 7  | 51 | 32  |
| 18,494 | 8 | 3 | 29 | 21 | 2 | 1 | 13 | 6  | 52 | 31  |
| 18,495 | 8 | 3 | 30 | 21 | 2 | 1 | 14 | 6  | 54 | 31  |
| 18,496 | 8 | 3 | 32 | 22 | 2 | 1 | 15 | 7  | 57 | 33  |
| 18,497 | 8 | 3 | 31 | 22 | 2 | 1 | 15 | 9  | 56 | 35  |
| 18,498 | 8 | 3 | 31 | 18 | 2 | 1 | 15 | 9  | 56 | 31  |
| 18,499 | 8 | 3 | 38 | 19 | 2 | 1 | 17 | 10 | 65 | 33  |
| 18,500 | 8 | 3 | 34 | 21 | 2 | 1 | 15 | 10 | 59 | 35  |
| 18,501 | 8 | 3 | 33 | 20 | 1 | 1 | 12 | 10 | 54 | 34  |
| 18,502 | 8 | 2 | 31 | 27 | 1 | 1 | 12 | 13 | 52 | 43  |
| 18,503 | 8 | 2 | 34 | 41 | 1 | 2 | 17 | 26 | 60 | 71  |
| 18,504 | 8 | 2 | 32 | 41 | 1 | 2 | 17 | 26 | 58 | 71  |
| 18,505 | 8 | 2 | 33 | 42 | 1 | 2 | 18 | 26 | 60 | 72  |
| 18,506 | 8 | 2 | 34 | 42 | 1 | 2 | 18 | 26 | 61 | 72  |
| 18,507 | 8 | 2 | 39 | 42 | 1 | 1 | 21 | 26 | 69 | 71  |
| 18,508 | 8 | 2 | 39 | 42 | 1 | 1 | 21 | 26 | 69 | 71  |
| 18,509 | 8 | 2 | 45 | 44 | 1 | 1 | 22 | 29 | 76 | 76  |
| 18,510 | 8 | 2 | 45 | 43 | 1 | 1 | 22 | 29 | 76 | 75  |
| 18,511 | 8 | 2 | 48 | 47 | 1 | 2 | 22 | 35 | 79 | 86  |
| 18,512 | 8 | 2 | 50 | 49 | 1 | 2 | 22 | 34 | 81 | 87  |
| 18,513 | 8 | 2 | 50 | 49 | 1 | 2 | 22 | 34 | 81 | 87  |
| 18,514 | 4 | 2 | 47 | 49 | 1 | 2 | 23 | 35 | 75 | 88  |
| 18,515 | 3 | 1 | 42 | 47 | 0 | 2 | 22 | 33 | 67 | 83  |
| 18,516 | 3 | 1 | 43 | 52 | 0 | 2 | 21 | 42 | 67 | 97  |
| 18,517 | 2 | 1 | 42 | 54 | 0 | 2 | 21 | 42 | 65 | 99  |
| 18,518 | 2 | 1 | 42 | 54 | 0 | 2 | 21 | 43 | 65 | 100 |
| 18,519 | 2 | 2 | 42 | 56 | 0 | 2 | 21 | 45 | 65 | 105 |
| 18,520 | 2 | 2 | 43 | 57 | 0 | 3 | 21 | 46 | 66 | 108 |

|        |   |   |    |    |   |   |    |    |     |     |
|--------|---|---|----|----|---|---|----|----|-----|-----|
| 18,521 | 2 | 2 | 43 | 61 | 0 | 3 | 21 | 49 | 66  | 115 |
| 18,522 | 2 | 2 | 42 | 63 | 0 | 3 | 21 | 49 | 65  | 117 |
| 18,523 | 2 | 2 | 44 | 74 | 0 | 3 | 21 | 52 | 67  | 131 |
| 18,524 | 2 | 2 | 44 | 74 | 0 | 3 | 21 | 53 | 67  | 132 |
| 18,525 | 2 | 2 | 44 | 74 | 0 | 3 | 22 | 54 | 68  | 133 |
| 18,526 | 3 | 2 | 45 | 74 | 0 | 3 | 23 | 54 | 71  | 133 |
| 18,527 | 3 | 2 | 42 | 74 | 0 | 3 | 24 | 54 | 69  | 133 |
| 18,528 | 3 | 1 | 42 | 74 | 0 | 3 | 24 | 54 | 69  | 132 |
| 18,529 | 3 | 1 | 42 | 75 | 0 | 3 | 24 | 56 | 69  | 135 |
| 18,530 | 3 | 1 | 44 | 78 | 0 | 6 | 24 | 72 | 71  | 157 |
| 18,531 | 3 | 1 | 43 | 79 | 0 | 6 | 24 | 71 | 70  | 157 |
| 18,532 | 2 | 1 | 44 | 79 | 0 | 6 | 24 | 71 | 70  | 157 |
| 18,533 | 2 | 1 | 45 | 80 | 0 | 6 | 25 | 71 | 72  | 158 |
| 18,534 | 2 | 1 | 44 | 80 | 0 | 6 | 25 | 72 | 71  | 159 |
| 18,535 | 2 | 1 | 44 | 80 | 0 | 6 | 23 | 72 | 69  | 159 |
| 18,536 | 2 | 1 | 44 | 79 | 0 | 6 | 23 | 72 | 69  | 158 |
| 18,537 | 2 | 1 | 44 | 79 | 0 | 6 | 23 | 72 | 69  | 158 |
| 18,538 | 2 | 1 | 51 | 79 | 0 | 6 | 31 | 72 | 84  | 158 |
| 18,539 | 2 | 1 | 51 | 79 | 0 | 6 | 31 | 74 | 84  | 160 |
| 18,540 | 1 | 1 | 58 | 79 | 0 | 6 | 36 | 73 | 95  | 159 |
| 18,541 | 1 | 1 | 63 | 79 | 0 | 6 | 38 | 73 | 102 | 159 |
| 18,542 | 1 | 1 | 62 | 79 | 0 | 6 | 37 | 73 | 100 | 159 |
| 18,543 | 1 | 1 | 64 | 79 | 1 | 6 | 39 | 73 | 105 | 159 |
| 18,544 | 1 | 1 | 65 | 79 | 1 | 6 | 42 | 73 | 109 | 159 |
| 18,545 | 1 | 1 | 65 | 80 | 1 | 6 | 45 | 73 | 112 | 160 |
| 18,546 | 1 | 1 | 64 | 79 | 1 | 6 | 44 | 74 | 110 | 160 |
| 18,547 | 1 | 1 | 62 | 79 | 1 | 6 | 42 | 73 | 106 | 159 |
| 18,548 | 1 | 1 | 62 | 79 | 1 | 6 | 42 | 71 | 106 | 157 |
| 18,549 | 1 | 1 | 64 | 79 | 1 | 6 | 45 | 71 | 111 | 157 |
| 18,550 | 1 | 1 | 57 | 78 | 1 | 6 | 44 | 70 | 103 | 155 |
| 18,551 | 1 | 1 | 58 | 69 | 1 | 6 | 46 | 67 | 106 | 143 |
| 18,552 | 1 | 1 | 59 | 69 | 1 | 6 | 46 | 66 | 107 | 142 |
| 18,553 | 1 | 1 | 59 | 68 | 1 | 6 | 45 | 66 | 106 | 141 |
| 18,554 | 1 | 1 | 58 | 53 | 1 | 5 | 43 | 55 | 103 | 114 |
| 18,555 | 1 | 1 | 58 | 52 | 1 | 5 | 45 | 55 | 105 | 113 |
| 18,556 | 1 | 1 | 58 | 52 | 1 | 5 | 45 | 56 | 105 | 114 |
| 18,557 | 1 | 1 | 57 | 52 | 1 | 5 | 45 | 56 | 104 | 114 |
| 18,558 | 1 | 1 | 52 | 52 | 1 | 5 | 42 | 56 | 96  | 114 |
| 18,559 | 1 | 2 | 52 | 52 | 1 | 5 | 43 | 56 | 97  | 115 |
| 18,560 | 1 | 2 | 52 | 49 | 2 | 6 | 44 | 53 | 99  | 110 |
| 18,561 | 1 | 2 | 50 | 49 | 2 | 6 | 44 | 53 | 97  | 110 |

|        |   |   |    |    |   |   |    |    |     |     |
|--------|---|---|----|----|---|---|----|----|-----|-----|
| 18,562 | 1 | 2 | 49 | 41 | 2 | 5 | 44 | 47 | 96  | 95  |
| 18,563 | 1 | 2 | 48 | 42 | 2 | 5 | 44 | 48 | 95  | 97  |
| 18,564 | 1 | 2 | 49 | 40 | 2 | 5 | 44 | 48 | 96  | 95  |
| 18,565 | 1 | 2 | 50 | 46 | 2 | 5 | 43 | 47 | 96  | 100 |
| 18,566 | 1 | 2 | 51 | 46 | 2 | 5 | 44 | 47 | 98  | 100 |
| 18,567 | 1 | 2 | 53 | 39 | 2 | 5 | 44 | 37 | 100 | 83  |
| 18,568 | 2 | 2 | 55 | 37 | 2 | 5 | 45 | 37 | 104 | 81  |
| 18,569 | 2 | 2 | 55 | 37 | 2 | 5 | 45 | 36 | 104 | 80  |
| 18,570 | 2 | 1 | 55 | 32 | 2 | 4 | 45 | 36 | 104 | 73  |
| 18,571 | 2 | 1 | 54 | 32 | 2 | 4 | 45 | 36 | 103 | 73  |
| 18,572 | 2 | 3 | 54 | 28 | 2 | 4 | 45 | 41 | 103 | 76  |
| 18,573 | 2 | 4 | 53 | 30 | 2 | 4 | 46 | 41 | 103 | 79  |
| 18,574 | 2 | 4 | 53 | 19 | 2 | 4 | 46 | 39 | 103 | 66  |
| 18,575 | 2 | 4 | 55 | 19 | 2 | 4 | 47 | 38 | 106 | 65  |
| 18,576 | 2 | 5 | 55 | 21 | 2 | 4 | 46 | 39 | 105 | 69  |
| 18,577 | 1 | 5 | 54 | 21 | 2 | 4 | 45 | 39 | 102 | 69  |
| 18,578 | 1 | 5 | 55 | 21 | 2 | 4 | 44 | 40 | 102 | 70  |
| 18,579 | 1 | 5 | 57 | 21 | 2 | 4 | 44 | 40 | 104 | 70  |
| 18,580 | 1 | 5 | 62 | 20 | 3 | 4 | 46 | 40 | 112 | 69  |
| 18,581 | 1 | 5 | 62 | 17 | 3 | 1 | 50 | 25 | 116 | 48  |
| 18,582 | 1 | 5 | 65 | 18 | 3 | 1 | 53 | 25 | 122 | 49  |
| 18,583 | 1 | 5 | 69 | 19 | 3 | 1 | 60 | 25 | 133 | 50  |
| 18,584 | 1 | 5 | 68 | 18 | 3 | 1 | 59 | 26 | 131 | 50  |
| 18,585 | 1 | 5 | 68 | 18 | 3 | 1 | 60 | 25 | 132 | 49  |
| 18,586 | 1 | 5 | 69 | 18 | 3 | 1 | 65 | 25 | 138 | 49  |
| 18,587 | 1 | 5 | 70 | 18 | 3 | 1 | 65 | 26 | 139 | 50  |
| 18,588 | 1 | 5 | 69 | 18 | 3 | 1 | 64 | 26 | 137 | 50  |
| 18,589 | 1 | 6 | 65 | 19 | 3 | 1 | 57 | 27 | 126 | 53  |
| 18,590 | 1 | 6 | 66 | 21 | 3 | 1 | 58 | 26 | 128 | 54  |
| 18,591 | 1 | 6 | 61 | 21 | 3 | 1 | 58 | 26 | 123 | 54  |
| 18,592 | 1 | 6 | 58 | 21 | 3 | 1 | 56 | 27 | 118 | 55  |
| 18,593 | 1 | 6 | 57 | 21 | 3 | 1 | 54 | 27 | 115 | 55  |
| 18,594 | 1 | 5 | 57 | 21 | 3 | 1 | 54 | 27 | 115 | 54  |
| 18,595 | 1 | 5 | 56 | 21 | 3 | 1 | 53 | 27 | 113 | 54  |
| 18,596 | 1 | 5 | 55 | 20 | 3 | 1 | 50 | 27 | 109 | 53  |
| 18,597 | 1 | 5 | 58 | 19 | 3 | 1 | 52 | 26 | 114 | 51  |
| 18,598 | 1 | 5 | 59 | 21 | 3 | 1 | 52 | 27 | 115 | 54  |
| 18,599 | 1 | 5 | 59 | 22 | 3 | 1 | 52 | 28 | 115 | 56  |
| 18,600 | 1 | 5 | 59 | 23 | 3 | 1 | 48 | 28 | 111 | 57  |
| 18,601 | 1 | 5 | 60 | 24 | 3 | 1 | 48 | 29 | 112 | 59  |
| 18,602 | 1 | 5 | 60 | 24 | 3 | 1 | 46 | 29 | 110 | 59  |

|        |   |   |    |    |   |   |    |    |     |    |
|--------|---|---|----|----|---|---|----|----|-----|----|
| 18,603 | 1 | 5 | 61 | 24 | 3 | 1 | 47 | 29 | 112 | 59 |
| 18,604 | 1 | 5 | 59 | 24 | 3 | 1 | 47 | 29 | 110 | 59 |
| 18,605 | 1 | 5 | 59 | 26 | 3 | 1 | 46 | 29 | 109 | 61 |
| 18,606 | 1 | 5 | 59 | 27 | 3 | 1 | 45 | 29 | 108 | 62 |
| 18,607 | 1 | 5 | 59 | 26 | 3 | 1 | 44 | 28 | 107 | 60 |
| 18,608 | 1 | 5 | 59 | 26 | 3 | 1 | 44 | 29 | 107 | 61 |
| 18,609 | 1 | 5 | 57 | 26 | 3 | 1 | 47 | 29 | 108 | 61 |
| 18,610 | 1 | 5 | 59 | 27 | 3 | 1 | 46 | 29 | 109 | 62 |
| 18,611 | 1 | 5 | 55 | 27 | 2 | 0 | 44 | 29 | 102 | 61 |
| 18,612 | 1 | 5 | 54 | 27 | 2 | 0 | 44 | 31 | 101 | 63 |
| 18,613 | 1 | 5 | 54 | 29 | 2 | 0 | 44 | 32 | 101 | 66 |
| 18,614 | 1 | 6 | 54 | 35 | 2 | 1 | 45 | 39 | 102 | 81 |
| 18,615 | 1 | 6 | 54 | 39 | 2 | 1 | 44 | 42 | 101 | 88 |
| 18,616 | 1 | 6 | 57 | 34 | 2 | 1 | 44 | 42 | 104 | 83 |
| 18,617 | 1 | 6 | 57 | 34 | 2 | 1 | 45 | 42 | 105 | 83 |
| 18,618 | 1 | 6 | 56 | 36 | 2 | 1 | 45 | 46 | 104 | 89 |
| 18,619 | 0 | 6 | 52 | 37 | 2 | 1 | 44 | 46 | 98  | 90 |
| 18,620 | 0 | 6 | 52 | 37 | 2 | 1 | 44 | 46 | 98  | 90 |
| 18,621 | 0 | 6 | 53 | 38 | 2 | 1 | 44 | 43 | 99  | 88 |
| 18,622 | 0 | 6 | 58 | 38 | 2 | 1 | 46 | 43 | 106 | 88 |
| 18,623 | 0 | 4 | 58 | 38 | 3 | 1 | 48 | 35 | 109 | 78 |
| 18,624 | 1 | 3 | 60 | 34 | 4 | 1 | 47 | 35 | 112 | 73 |
| 18,625 | 1 | 3 | 65 | 34 | 4 | 1 | 50 | 35 | 120 | 73 |
| 18,626 | 1 | 3 | 63 | 35 | 4 | 1 | 48 | 34 | 116 | 73 |
| 18,627 | 1 | 2 | 63 | 34 | 4 | 1 | 48 | 31 | 116 | 68 |
| 18,628 | 1 | 2 | 64 | 36 | 4 | 1 | 57 | 31 | 126 | 70 |
| 18,629 | 1 | 2 | 63 | 36 | 4 | 1 | 58 | 31 | 126 | 70 |
| 18,630 | 1 | 2 | 60 | 36 | 4 | 1 | 58 | 32 | 123 | 71 |
| 18,631 | 1 | 2 | 57 | 36 | 3 | 1 | 56 | 30 | 117 | 69 |
| 18,632 | 1 | 2 | 55 | 37 | 3 | 2 | 52 | 30 | 111 | 71 |
| 18,633 | 1 | 2 | 56 | 37 | 3 | 2 | 53 | 30 | 113 | 71 |
| 18,634 | 1 | 2 | 53 | 36 | 3 | 2 | 46 | 30 | 103 | 70 |
| 18,635 | 1 | 2 | 54 | 36 | 3 | 2 | 48 | 29 | 106 | 69 |
| 18,636 | 1 | 2 | 55 | 36 | 3 | 2 | 48 | 29 | 107 | 69 |
| 18,637 | 1 | 2 | 55 | 36 | 3 | 2 | 44 | 30 | 103 | 70 |
| 18,638 | 1 | 2 | 54 | 37 | 3 | 2 | 44 | 29 | 102 | 70 |
| 18,639 | 1 | 2 | 54 | 36 | 3 | 2 | 45 | 29 | 103 | 69 |
| 18,640 | 1 | 1 | 53 | 36 | 3 | 2 | 45 | 28 | 102 | 67 |
| 18,641 | 1 | 1 | 52 | 36 | 3 | 2 | 44 | 28 | 100 | 67 |
| 18,642 | 1 | 1 | 50 | 37 | 3 | 2 | 40 | 28 | 94  | 68 |
| 18,643 | 1 | 1 | 48 | 37 | 3 | 2 | 40 | 27 | 92  | 67 |

|        |   |   |    |    |   |   |    |    |    |    |
|--------|---|---|----|----|---|---|----|----|----|----|
| 18,644 | 1 | 1 | 48 | 37 | 2 | 2 | 41 | 26 | 92 | 66 |
| 18,645 | 1 | 1 | 51 | 37 | 2 | 2 | 43 | 26 | 97 | 66 |
| 18,646 | 1 | 1 | 54 | 37 | 2 | 2 | 41 | 26 | 98 | 66 |
| 18,647 | 1 | 1 | 54 | 37 | 2 | 2 | 41 | 26 | 98 | 66 |
| 18,648 | 1 | 1 | 51 | 37 | 2 | 2 | 39 | 26 | 93 | 66 |
| 18,649 | 1 | 1 | 50 | 37 | 2 | 2 | 40 | 25 | 93 | 65 |
| 18,650 | 1 | 1 | 51 | 36 | 2 | 2 | 39 | 25 | 93 | 64 |
| 18,651 | 1 | 1 | 47 | 35 | 2 | 2 | 40 | 25 | 90 | 63 |
| 18,652 | 1 | 1 | 49 | 34 | 2 | 2 | 41 | 24 | 93 | 61 |
| 18,653 | 1 | 1 | 48 | 34 | 2 | 2 | 41 | 24 | 92 | 61 |
| 18,654 | 1 | 1 | 46 | 34 | 2 | 2 | 39 | 24 | 88 | 61 |
| 18,655 | 1 | 1 | 46 | 35 | 2 | 2 | 39 | 24 | 88 | 62 |
| 18,656 | 1 | 1 | 46 | 36 | 2 | 2 | 39 | 32 | 88 | 71 |
| 18,657 | 1 | 1 | 46 | 38 | 2 | 2 | 39 | 33 | 88 | 74 |
| 18,658 | 1 | 1 | 48 | 38 | 2 | 2 | 40 | 34 | 91 | 75 |
| 18,659 | 1 | 1 | 50 | 39 | 2 | 2 | 41 | 33 | 94 | 75 |
| 18,660 | 1 | 1 | 50 | 40 | 2 | 2 | 38 | 33 | 91 | 76 |
| 18,661 | 1 | 1 | 48 | 38 | 2 | 2 | 38 | 33 | 89 | 74 |
| 18,662 | 1 | 1 | 48 | 38 | 2 | 2 | 38 | 34 | 89 | 75 |
| 18,663 | 1 | 1 | 49 | 38 | 2 | 2 | 39 | 32 | 91 | 73 |
| 18,664 | 1 | 1 | 49 | 36 | 2 | 2 | 39 | 32 | 91 | 71 |
| 18,665 | 1 | 0 | 50 | 30 | 2 | 1 | 39 | 25 | 92 | 56 |
| 18,666 | 1 | 0 | 50 | 27 | 2 | 1 | 40 | 22 | 93 | 50 |
| 18,667 | 1 | 0 | 50 | 26 | 2 | 1 | 42 | 22 | 95 | 49 |
| 18,668 | 1 | 0 | 49 | 25 | 2 | 1 | 40 | 20 | 92 | 46 |
| 18,669 | 1 | 0 | 50 | 23 | 2 | 1 | 41 | 17 | 94 | 41 |
| 18,670 | 1 | 0 | 51 | 23 | 2 | 1 | 41 | 17 | 95 | 41 |
| 18,671 | 1 | 0 | 50 | 24 | 2 | 1 | 41 | 17 | 94 | 42 |
| 18,672 | 1 | 0 | 48 | 23 | 2 | 1 | 41 | 18 | 92 | 42 |
| 18,673 | 1 | 0 | 45 | 23 | 2 | 1 | 41 | 21 | 89 | 45 |
| 18,674 | 1 | 0 | 45 | 23 | 1 | 1 | 40 | 21 | 87 | 45 |
| 18,675 | 0 | 0 | 45 | 23 | 0 | 1 | 42 | 21 | 87 | 45 |
| 18,676 | 0 | 0 | 39 | 23 | 1 | 1 | 39 | 20 | 79 | 44 |
| 18,677 | 0 | 0 | 39 | 19 | 1 | 1 | 42 | 20 | 82 | 40 |
| 18,678 | 0 | 0 | 39 | 19 | 1 | 1 | 43 | 20 | 83 | 40 |
| 18,679 | 0 | 0 | 38 | 19 | 1 | 1 | 34 | 20 | 73 | 40 |
| 18,680 | 0 | 0 | 38 | 19 | 1 | 1 | 33 | 20 | 72 | 40 |
| 18,681 | 0 | 0 | 39 | 19 | 1 | 1 | 35 | 20 | 75 | 40 |
| 18,682 | 0 | 0 | 39 | 19 | 1 | 1 | 35 | 20 | 75 | 40 |
| 18,683 | 0 | 0 | 39 | 19 | 1 | 0 | 35 | 20 | 75 | 39 |
| 18,684 | 0 | 0 | 35 | 18 | 1 | 0 | 31 | 20 | 67 | 38 |



|        |   |   |    |    |   |   |    |    |    |    |
|--------|---|---|----|----|---|---|----|----|----|----|
| 18,685 | 0 | 0 | 34 | 19 | 1 | 0 | 31 | 20 | 66 | 39 |
| 18,686 | 0 | 0 | 33 | 19 | 1 | 0 | 30 | 20 | 64 | 39 |
| 18,687 | 0 | 0 | 32 | 19 | 1 | 0 | 35 | 20 | 68 | 39 |
| 18,688 | 0 | 0 | 31 | 18 | 1 | 0 | 33 | 19 | 65 | 37 |
| 18,689 | 0 | 0 | 32 | 18 | 1 | 0 | 33 | 21 | 66 | 39 |
| 18,690 | 0 | 0 | 31 | 18 | 1 | 0 | 32 | 22 | 64 | 40 |
| 18,691 | 0 | 0 | 31 | 22 | 1 | 0 | 32 | 24 | 64 | 46 |
| 18,692 | 0 | 2 | 31 | 21 | 1 | 0 | 32 | 23 | 64 | 46 |
| 18,693 | 0 | 2 | 33 | 20 | 1 | 0 | 32 | 23 | 66 | 45 |
| 18,694 | 0 | 2 | 34 | 20 | 1 | 0 | 33 | 23 | 68 | 45 |
| 18,695 | 0 | 2 | 33 | 20 | 1 | 0 | 33 | 23 | 67 | 45 |
| 18,696 | 0 | 2 | 30 | 20 | 1 | 0 | 31 | 23 | 62 | 45 |
| 18,697 | 0 | 2 | 27 | 21 | 1 | 0 | 31 | 24 | 59 | 47 |
| 18,698 | 0 | 2 | 27 | 22 | 1 | 0 | 32 | 34 | 60 | 58 |
| 18,699 | 0 | 2 | 27 | 23 | 1 | 0 | 33 | 37 | 61 | 62 |
| 18,700 | 0 | 2 | 28 | 21 | 1 | 0 | 32 | 37 | 61 | 60 |
| 18,701 | 0 | 2 | 29 | 21 | 1 | 0 | 32 | 37 | 62 | 60 |
| 18,702 | 0 | 2 | 29 | 22 | 1 | 0 | 31 | 40 | 61 | 64 |
| 18,703 | 0 | 2 | 26 | 23 | 1 | 0 | 30 | 40 | 57 | 65 |
| 18,704 | 0 | 2 | 26 | 23 | 1 | 0 | 30 | 40 | 57 | 65 |
| 18,705 | 0 | 2 | 26 | 23 | 1 | 0 | 30 | 40 | 57 | 65 |
| 18,706 | 0 | 2 | 28 | 22 | 1 | 0 | 31 | 41 | 60 | 65 |
| 18,707 | 0 | 2 | 29 | 20 | 1 | 0 | 34 | 33 | 64 | 55 |
| 18,708 | 0 | 2 | 29 | 18 | 1 | 0 | 35 | 32 | 65 | 52 |
| 18,709 | 0 | 2 | 28 | 18 | 1 | 0 | 35 | 30 | 64 | 50 |
| 18,710 | 0 | 2 | 26 | 16 | 2 | 0 | 34 | 30 | 62 | 48 |
| 18,711 | 0 | 2 | 28 | 16 | 2 | 0 | 35 | 29 | 65 | 47 |
| 18,712 | 0 | 2 | 29 | 16 | 2 | 0 | 37 | 29 | 68 | 47 |
| 18,713 | 0 | 2 | 28 | 16 | 2 | 0 | 36 | 30 | 66 | 48 |
| 18,714 | 0 | 2 | 28 | 17 | 2 | 0 | 36 | 30 | 66 | 49 |
| 18,715 | 0 | 2 | 28 | 20 | 2 | 0 | 37 | 32 | 67 | 54 |
| 18,716 | 0 | 2 | 27 | 19 | 2 | 1 | 38 | 32 | 67 | 54 |
| 18,717 | 0 | 2 | 26 | 19 | 2 | 1 | 38 | 31 | 66 | 53 |
| 18,718 | 0 | 2 | 22 | 19 | 2 | 1 | 36 | 31 | 60 | 53 |
| 18,719 | 0 | 2 | 21 | 19 | 2 | 1 | 36 | 31 | 59 | 53 |
| 18,720 | 0 | 2 | 24 | 19 | 2 | 1 | 35 | 31 | 61 | 53 |
| 18,721 | 0 | 2 | 23 | 19 | 2 | 1 | 37 | 31 | 62 | 53 |
| 18,722 | 0 | 2 | 23 | 18 | 2 | 1 | 37 | 30 | 62 | 51 |
| 18,723 | 0 | 2 | 24 | 18 | 2 | 1 | 37 | 30 | 63 | 51 |
| 18,724 | 1 | 2 | 24 | 18 | 2 | 1 | 35 | 29 | 62 | 50 |
| 18,725 | 1 | 2 | 24 | 18 | 2 | 1 | 34 | 30 | 61 | 51 |

|        |   |   |    |    |   |   |    |    |    |    |
|--------|---|---|----|----|---|---|----|----|----|----|
| 18,726 | 1 | 2 | 22 | 19 | 2 | 1 | 32 | 30 | 57 | 52 |
| 18,727 | 1 | 2 | 22 | 20 | 1 | 1 | 33 | 30 | 57 | 53 |
| 18,728 | 1 | 2 | 22 | 20 | 1 | 1 | 32 | 30 | 56 | 53 |
| 18,729 | 1 | 2 | 23 | 20 | 1 | 1 | 31 | 30 | 56 | 53 |
| 18,730 | 1 | 2 | 24 | 20 | 1 | 1 | 31 | 30 | 57 | 53 |
| 18,731 | 1 | 2 | 24 | 20 | 1 | 1 | 31 | 30 | 57 | 53 |
| 18,732 | 1 | 2 | 25 | 20 | 1 | 1 | 30 | 31 | 57 | 54 |
| 18,733 | 1 | 2 | 25 | 22 | 1 | 1 | 30 | 31 | 57 | 56 |
| 18,734 | 1 | 2 | 25 | 22 | 1 | 1 | 30 | 31 | 57 | 56 |
| 18,735 | 1 | 2 | 26 | 22 | 1 | 1 | 30 | 31 | 58 | 56 |
| 18,736 | 1 | 2 | 27 | 20 | 1 | 1 | 30 | 31 | 59 | 54 |
| 18,737 | 1 | 2 | 27 | 20 | 1 | 1 | 29 | 31 | 58 | 54 |
| 18,738 | 1 | 2 | 27 | 22 | 1 | 2 | 24 | 32 | 53 | 58 |
| 18,739 | 1 | 2 | 27 | 23 | 1 | 2 | 24 | 32 | 53 | 59 |
| 18,740 | 1 | 3 | 26 | 28 | 1 | 3 | 24 | 41 | 52 | 75 |
| 18,741 | 1 | 4 | 26 | 31 | 1 | 3 | 24 | 41 | 52 | 79 |
| 18,742 | 1 | 4 | 26 | 27 | 1 | 3 | 25 | 39 | 53 | 73 |
| 18,743 | 1 | 2 | 26 | 27 | 1 | 3 | 26 | 39 | 54 | 71 |
| 18,744 | 1 | 2 | 24 | 29 | 1 | 3 | 26 | 41 | 52 | 75 |
| 18,745 | 1 | 2 | 23 | 29 | 1 | 3 | 25 | 41 | 50 | 75 |
| 18,746 | 1 | 2 | 23 | 29 | 1 | 3 | 23 | 41 | 48 | 75 |
| 18,747 | 1 | 2 | 24 | 29 | 1 | 3 | 23 | 41 | 49 | 75 |
| 18,748 | 1 | 2 | 28 | 27 | 1 | 3 | 23 | 40 | 53 | 72 |
| 18,749 | 1 | 2 | 29 | 26 | 1 | 3 | 23 | 30 | 54 | 61 |
| 18,750 | 1 | 2 | 30 | 26 | 2 | 3 | 26 | 27 | 59 | 58 |
| 18,751 | 1 | 2 | 32 | 26 | 2 | 3 | 28 | 27 | 63 | 58 |
| 18,752 | 1 | 2 | 30 | 26 | 2 | 3 | 28 | 27 | 61 | 58 |
| 18,753 | 1 | 2 | 31 | 24 | 2 | 3 | 28 | 25 | 62 | 54 |
| 18,754 | 1 | 2 | 33 | 24 | 2 | 3 | 30 | 25 | 66 | 54 |
| 18,755 | 1 | 2 | 33 | 26 | 2 | 3 | 30 | 26 | 66 | 57 |
| 18,756 | 1 | 2 | 32 | 27 | 2 | 3 | 30 | 29 | 65 | 61 |
| 18,757 | 1 | 2 | 31 | 30 | 2 | 3 | 29 | 29 | 63 | 64 |
| 18,758 | 1 | 2 | 32 | 30 | 2 | 3 | 26 | 30 | 61 | 65 |
| 18,759 | 1 | 2 | 33 | 29 | 3 | 3 | 27 | 30 | 64 | 64 |
| 18,760 | 1 | 2 | 33 | 29 | 3 | 3 | 26 | 30 | 63 | 64 |
| 18,761 | 1 | 2 | 34 | 29 | 2 | 3 | 26 | 30 | 63 | 64 |
| 18,762 | 1 | 2 | 36 | 30 | 2 | 3 | 25 | 30 | 64 | 65 |
| 18,763 | 1 | 2 | 36 | 30 | 2 | 3 | 24 | 30 | 63 | 65 |
| 18,764 | 1 | 2 | 36 | 30 | 2 | 3 | 24 | 28 | 63 | 63 |
| 18,765 | 1 | 2 | 37 | 29 | 2 | 3 | 27 | 27 | 67 | 61 |
| 18,766 | 1 | 2 | 38 | 27 | 2 | 3 | 26 | 25 | 67 | 57 |

|        |   |   |    |    |   |   |    |    |     |    |
|--------|---|---|----|----|---|---|----|----|-----|----|
| 18,767 | 1 | 3 | 38 | 28 | 2 | 2 | 25 | 25 | 66  | 58 |
| 18,768 | 1 | 3 | 38 | 28 | 2 | 2 | 24 | 26 | 65  | 59 |
| 18,769 | 1 | 3 | 38 | 28 | 2 | 2 | 24 | 26 | 65  | 59 |
| 18,770 | 1 | 3 | 39 | 28 | 2 | 2 | 26 | 26 | 68  | 59 |
| 18,771 | 1 | 3 | 38 | 29 | 2 | 2 | 28 | 26 | 69  | 60 |
| 18,772 | 1 | 3 | 40 | 29 | 2 | 2 | 27 | 26 | 70  | 60 |
| 18,773 | 1 | 3 | 40 | 29 | 2 | 2 | 27 | 26 | 70  | 60 |
| 18,774 | 1 | 3 | 41 | 29 | 2 | 2 | 27 | 25 | 71  | 59 |
| 18,775 | 0 | 3 | 41 | 29 | 2 | 2 | 27 | 25 | 70  | 59 |
| 18,776 | 0 | 3 | 43 | 29 | 2 | 2 | 27 | 24 | 72  | 58 |
| 18,777 | 0 | 3 | 46 | 28 | 2 | 2 | 30 | 24 | 78  | 57 |
| 18,778 | 0 | 3 | 49 | 27 | 2 | 2 | 31 | 24 | 82  | 56 |
| 18,779 | 0 | 3 | 50 | 27 | 2 | 2 | 29 | 24 | 81  | 56 |
| 18,780 | 0 | 3 | 49 | 28 | 2 | 2 | 29 | 24 | 80  | 57 |
| 18,781 | 0 | 3 | 48 | 30 | 2 | 2 | 29 | 26 | 79  | 61 |
| 18,782 | 0 | 5 | 48 | 36 | 2 | 2 | 29 | 31 | 79  | 74 |
| 18,783 | 0 | 5 | 47 | 39 | 2 | 2 | 29 | 33 | 78  | 79 |
| 18,784 | 0 | 5 | 48 | 37 | 2 | 2 | 29 | 33 | 79  | 77 |
| 18,785 | 0 | 5 | 48 | 37 | 2 | 2 | 30 | 33 | 80  | 77 |
| 18,786 | 0 | 5 | 47 | 37 | 2 | 3 | 30 | 37 | 79  | 82 |
| 18,787 | 0 | 5 | 45 | 37 | 2 | 3 | 30 | 37 | 77  | 82 |
| 18,788 | 0 | 5 | 46 | 37 | 2 | 3 | 30 | 37 | 78  | 82 |
| 18,789 | 0 | 5 | 47 | 35 | 2 | 2 | 32 | 36 | 81  | 78 |
| 18,790 | 2 | 5 | 51 | 35 | 2 | 2 | 34 | 36 | 89  | 78 |
| 18,791 | 2 | 4 | 53 | 30 | 3 | 1 | 35 | 25 | 93  | 60 |
| 18,792 | 2 | 3 | 55 | 27 | 3 | 1 | 41 | 24 | 101 | 55 |
| 18,793 | 2 | 3 | 57 | 28 | 4 | 1 | 41 | 24 | 104 | 56 |
| 18,794 | 2 | 3 | 57 | 28 | 4 | 1 | 40 | 25 | 103 | 57 |
| 18,795 | 2 | 3 | 58 | 26 | 4 | 1 | 42 | 23 | 106 | 53 |
| 18,796 | 2 | 3 | 58 | 26 | 4 | 1 | 44 | 23 | 108 | 53 |
| 18,797 | 2 | 3 | 59 | 27 | 4 | 1 | 44 | 24 | 109 | 55 |
| 18,798 | 2 | 3 | 57 | 27 | 4 | 1 | 44 | 25 | 107 | 56 |
| 18,799 | 2 | 3 | 54 | 27 | 4 | 1 | 44 | 25 | 104 | 56 |
| 18,800 | 2 | 3 | 53 | 27 | 4 | 1 | 43 | 25 | 102 | 56 |
| 18,801 | 2 | 3 | 52 | 27 | 3 | 1 | 39 | 25 | 96  | 56 |
| 18,802 | 2 | 3 | 49 | 27 | 3 | 1 | 37 | 25 | 91  | 56 |
| 18,803 | 2 | 3 | 49 | 27 | 3 | 1 | 37 | 24 | 91  | 55 |
| 18,804 | 2 | 3 | 48 | 27 | 3 | 1 | 37 | 24 | 90  | 55 |
| 18,805 | 2 | 3 | 46 | 27 | 3 | 1 | 35 | 24 | 86  | 55 |
| 18,806 | 2 | 3 | 46 | 25 | 3 | 1 | 35 | 23 | 86  | 52 |
| 18,807 | 2 | 3 | 46 | 23 | 3 | 1 | 35 | 20 | 86  | 47 |

|        |   |   |    |    |   |   |    |    |    |    |
|--------|---|---|----|----|---|---|----|----|----|----|
| 18,808 | 2 | 3 | 46 | 21 | 3 | 1 | 35 | 19 | 86 | 44 |
| 18,809 | 3 | 3 | 45 | 21 | 3 | 1 | 36 | 18 | 87 | 43 |
| 18,810 | 3 | 3 | 44 | 21 | 2 | 1 | 34 | 18 | 83 | 43 |
| 18,811 | 3 | 3 | 43 | 21 | 2 | 1 | 34 | 18 | 82 | 43 |
| 18,812 | 3 | 3 | 41 | 21 | 2 | 1 | 33 | 18 | 79 | 43 |
| 18,813 | 3 | 3 | 39 | 20 | 2 | 1 | 33 | 18 | 77 | 42 |
| 18,814 | 3 | 3 | 38 | 20 | 2 | 1 | 32 | 18 | 75 | 42 |
| 18,815 | 3 | 3 | 40 | 20 | 2 | 1 | 33 | 18 | 78 | 42 |
| 18,816 | 3 | 3 | 39 | 20 | 2 | 1 | 30 | 18 | 74 | 42 |
| 18,817 | 3 | 3 | 38 | 20 | 2 | 1 | 30 | 18 | 73 | 42 |
| 18,818 | 3 | 2 | 38 | 20 | 2 | 1 | 30 | 19 | 73 | 42 |
| 18,819 | 3 | 2 | 38 | 20 | 2 | 1 | 30 | 18 | 73 | 41 |
| 18,820 | 4 | 2 | 44 | 20 | 2 | 1 | 33 | 19 | 83 | 42 |
| 18,821 | 4 | 2 | 44 | 20 | 2 | 1 | 31 | 19 | 81 | 42 |
| 18,822 | 4 | 2 | 43 | 19 | 2 | 1 | 31 | 19 | 80 | 41 |
| 18,823 | 4 | 2 | 41 | 20 | 2 | 1 | 30 | 19 | 77 | 42 |
| 18,824 | 4 | 2 | 41 | 21 | 2 | 1 | 32 | 20 | 79 | 44 |
| 18,825 | 4 | 2 | 39 | 24 | 2 | 1 | 32 | 20 | 77 | 47 |
| 18,826 | 4 | 2 | 41 | 24 | 2 | 1 | 32 | 20 | 79 | 47 |
| 18,827 | 4 | 2 | 39 | 24 | 2 | 1 | 32 | 20 | 77 | 47 |
| 18,828 | 4 | 2 | 37 | 24 | 2 | 1 | 29 | 21 | 72 | 48 |
| 18,829 | 4 | 2 | 32 | 24 | 2 | 1 | 27 | 20 | 65 | 47 |
| 18,830 | 4 | 2 | 31 | 24 | 2 | 1 | 27 | 20 | 64 | 47 |
| 18,831 | 4 | 2 | 32 | 23 | 2 | 1 | 28 | 20 | 66 | 46 |
| 18,832 | 4 | 2 | 32 | 21 | 2 | 1 | 28 | 18 | 66 | 42 |
| 18,833 | 4 | 0 | 32 | 15 | 2 | 1 | 28 | 13 | 66 | 29 |
| 18,834 | 4 | 0 | 32 | 12 | 2 | 0 | 27 | 10 | 65 | 22 |
| 18,835 | 4 | 0 | 31 | 12 | 2 | 0 | 27 | 10 | 64 | 22 |
| 18,836 | 4 | 0 | 31 | 11 | 2 | 0 | 26 | 9  | 63 | 20 |
| 18,837 | 4 | 0 | 30 | 11 | 2 | 0 | 26 | 8  | 62 | 19 |
| 18,838 | 4 | 0 | 33 | 12 | 2 | 0 | 26 | 8  | 65 | 20 |
| 18,839 | 4 | 0 | 34 | 12 | 2 | 0 | 25 | 8  | 65 | 20 |
| 18,840 | 4 | 0 | 33 | 13 | 2 | 0 | 24 | 8  | 63 | 21 |
| 18,841 | 2 | 0 | 30 | 12 | 2 | 0 | 23 | 8  | 57 | 20 |
| 18,842 | 2 | 0 | 28 | 14 | 1 | 0 | 22 | 9  | 53 | 23 |
| 18,843 | 2 | 0 | 26 | 14 | 1 | 0 | 16 | 9  | 45 | 23 |
| 18,844 | 2 | 2 | 24 | 14 | 0 | 0 | 15 | 9  | 41 | 25 |
| 18,845 | 2 | 2 | 24 | 14 | 0 | 0 | 13 | 8  | 39 | 24 |
| 18,846 | 2 | 2 | 23 | 14 | 0 | 0 | 13 | 9  | 38 | 25 |
| 18,847 | 2 | 2 | 23 | 14 | 0 | 0 | 11 | 9  | 36 | 25 |
| 18,848 | 2 | 2 | 22 | 13 | 0 | 0 | 11 | 8  | 35 | 23 |

|        |   |   |    |    |   |   |    |    |     |    |
|--------|---|---|----|----|---|---|----|----|-----|----|
| 18,849 | 2 | 2 | 31 | 13 | 0 | 0 | 11 | 8  | 44  | 23 |
| 18,850 | 2 | 2 | 31 | 13 | 0 | 0 | 11 | 8  | 44  | 23 |
| 18,851 | 2 | 2 | 32 | 13 | 0 | 0 | 11 | 8  | 45  | 23 |
| 18,852 | 2 | 2 | 32 | 13 | 0 | 0 | 11 | 8  | 45  | 23 |
| 18,853 | 5 | 2 | 42 | 13 | 0 | 0 | 11 | 8  | 58  | 23 |
| 18,854 | 5 | 2 | 45 | 13 | 0 | 0 | 11 | 8  | 61  | 23 |
| 18,855 | 5 | 2 | 45 | 13 | 0 | 0 | 11 | 8  | 61  | 23 |
| 18,856 | 5 | 2 | 46 | 13 | 0 | 0 | 11 | 8  | 62  | 23 |
| 18,857 | 5 | 2 | 58 | 13 | 0 | 0 | 21 | 8  | 84  | 23 |
| 18,858 | 6 | 3 | 59 | 12 | 0 | 0 | 22 | 8  | 87  | 23 |
| 18,859 | 7 | 3 | 80 | 12 | 0 | 0 | 30 | 8  | 117 | 23 |
| 18,860 | 6 | 3 | 79 | 12 | 0 | 0 | 29 | 8  | 114 | 23 |
| 18,861 | 6 | 3 | 79 | 12 | 0 | 0 | 29 | 8  | 114 | 23 |
| 18,862 | 6 | 3 | 79 | 12 | 0 | 0 | 30 | 8  | 115 | 23 |
| 18,863 | 6 | 3 | 78 | 12 | 0 | 0 | 30 | 8  | 114 | 23 |
| 18,864 | 6 | 3 | 78 | 12 | 0 | 0 | 30 | 8  | 114 | 23 |
| 18,865 | 6 | 3 | 78 | 12 | 0 | 0 | 30 | 8  | 114 | 23 |
| 18,866 | 6 | 3 | 76 | 12 | 0 | 0 | 29 | 8  | 111 | 23 |
| 18,867 | 6 | 3 | 76 | 12 | 0 | 0 | 29 | 8  | 111 | 23 |
| 18,868 | 6 | 3 | 76 | 10 | 0 | 0 | 29 | 7  | 111 | 20 |
| 18,869 | 6 | 3 | 76 | 10 | 0 | 0 | 29 | 7  | 111 | 20 |
| 18,870 | 6 | 3 | 75 | 10 | 0 | 0 | 29 | 7  | 110 | 20 |
| 18,871 | 5 | 3 | 70 | 10 | 0 | 0 | 26 | 6  | 101 | 19 |
| 18,872 | 5 | 3 | 69 | 10 | 0 | 0 | 26 | 7  | 100 | 20 |
| 18,873 | 5 | 4 | 68 | 10 | 0 | 0 | 24 | 9  | 97  | 23 |
| 18,874 | 5 | 4 | 68 | 11 | 0 | 0 | 24 | 13 | 97  | 28 |
| 18,875 | 5 | 4 | 68 | 10 | 0 | 0 | 22 | 12 | 95  | 26 |
| 18,876 | 5 | 4 | 68 | 7  | 0 | 0 | 22 | 12 | 95  | 23 |
| 18,877 | 5 | 4 | 66 | 8  | 0 | 0 | 22 | 12 | 93  | 24 |
| 18,878 | 5 | 5 | 66 | 13 | 0 | 1 | 22 | 23 | 93  | 42 |
| 18,879 | 5 | 5 | 66 | 15 | 0 | 1 | 22 | 25 | 93  | 46 |
| 18,880 | 5 | 5 | 66 | 15 | 0 | 1 | 22 | 25 | 93  | 46 |
| 18,881 | 5 | 5 | 65 | 15 | 0 | 1 | 22 | 27 | 92  | 48 |
| 18,882 | 5 | 5 | 66 | 15 | 0 | 1 | 22 | 28 | 93  | 49 |
| 18,883 | 5 | 5 | 66 | 15 | 0 | 2 | 22 | 28 | 93  | 50 |
| 18,884 | 5 | 5 | 65 | 16 | 0 | 2 | 22 | 28 | 92  | 51 |
| 18,885 | 5 | 5 | 65 | 16 | 0 | 2 | 22 | 28 | 92  | 51 |
| 18,886 | 5 | 5 | 67 | 16 | 0 | 2 | 22 | 28 | 94  | 51 |
| 18,887 | 5 | 5 | 69 | 16 | 1 | 2 | 23 | 28 | 98  | 51 |
| 18,888 | 5 | 5 | 69 | 15 | 1 | 2 | 23 | 27 | 98  | 49 |
| 18,889 | 5 | 5 | 73 | 15 | 1 | 2 | 23 | 28 | 102 | 50 |

|        |   |   |    |    |   |   |    |    |     |    |
|--------|---|---|----|----|---|---|----|----|-----|----|
| 18,890 | 5 | 5 | 71 | 15 | 1 | 2 | 22 | 28 | 99  | 50 |
| 18,891 | 5 | 5 | 80 | 15 | 1 | 2 | 24 | 30 | 110 | 52 |
| 18,892 | 5 | 5 | 80 | 15 | 1 | 2 | 24 | 30 | 110 | 52 |
| 18,893 | 5 | 5 | 80 | 13 | 1 | 2 | 24 | 30 | 110 | 50 |
| 18,894 | 5 | 5 | 80 | 13 | 1 | 2 | 24 | 30 | 110 | 50 |
| 18,895 | 5 | 3 | 80 | 12 | 1 | 2 | 24 | 30 | 110 | 47 |
| 18,896 | 5 | 3 | 79 | 12 | 1 | 2 | 24 | 29 | 109 | 46 |
| 18,897 | 5 | 3 | 79 | 12 | 1 | 2 | 24 | 29 | 109 | 46 |
| 18,898 | 5 | 3 | 79 | 12 | 1 | 2 | 24 | 29 | 109 | 46 |
| 18,899 | 5 | 3 | 83 | 12 | 2 | 2 | 25 | 29 | 115 | 46 |
| 18,900 | 5 | 3 | 75 | 12 | 2 | 2 | 25 | 28 | 107 | 45 |
| 18,901 | 5 | 3 | 80 | 12 | 2 | 2 | 26 | 28 | 113 | 45 |
| 18,902 | 5 | 3 | 79 | 12 | 2 | 2 | 26 | 28 | 112 | 45 |
| 18,903 | 2 | 3 | 69 | 12 | 2 | 2 | 26 | 28 | 99  | 45 |
| 18,904 | 2 | 3 | 69 | 12 | 2 | 2 | 26 | 28 | 99  | 45 |
| 18,905 | 2 | 3 | 66 | 12 | 2 | 2 | 26 | 29 | 96  | 46 |
| 18,906 | 2 | 3 | 66 | 12 | 2 | 2 | 27 | 30 | 97  | 47 |
| 18,907 | 2 | 3 | 63 | 15 | 3 | 2 | 24 | 30 | 92  | 50 |
| 18,908 | 2 | 3 | 54 | 15 | 3 | 2 | 17 | 32 | 76  | 52 |
| 18,909 | 1 | 2 | 53 | 16 | 3 | 2 | 16 | 32 | 73  | 52 |
| 18,910 | 0 | 2 | 32 | 16 | 3 | 2 | 8  | 32 | 43  | 52 |
| 18,911 | 0 | 2 | 32 | 16 | 3 | 2 | 8  | 32 | 43  | 52 |
| 18,912 | 0 | 2 | 34 | 16 | 3 | 3 | 7  | 34 | 44  | 55 |
| 18,913 | 0 | 2 | 34 | 16 | 3 | 3 | 7  | 38 | 44  | 59 |
| 18,914 | 0 | 2 | 34 | 16 | 3 | 3 | 7  | 38 | 44  | 59 |
| 18,915 | 0 | 2 | 34 | 16 | 3 | 3 | 7  | 38 | 44  | 59 |
| 18,916 | 0 | 2 | 34 | 16 | 3 | 3 | 7  | 38 | 44  | 59 |
| 18,917 | 0 | 2 | 34 | 16 | 3 | 3 | 7  | 38 | 44  | 59 |
| 18,918 | 1 | 2 | 36 | 16 | 3 | 3 | 7  | 38 | 47  | 59 |
| 18,919 | 1 | 2 | 39 | 16 | 3 | 3 | 11 | 38 | 54  | 59 |
| 18,920 | 1 | 2 | 39 | 16 | 3 | 3 | 11 | 38 | 54  | 59 |
| 18,921 | 1 | 2 | 41 | 16 | 3 | 3 | 11 | 39 | 56  | 60 |
| 18,922 | 1 | 2 | 42 | 16 | 3 | 3 | 11 | 38 | 57  | 59 |
| 18,923 | 1 | 1 | 42 | 16 | 3 | 3 | 11 | 36 | 57  | 56 |
| 18,924 | 2 | 1 | 42 | 14 | 3 | 3 | 13 | 32 | 60  | 50 |
| 18,925 | 2 | 0 | 42 | 14 | 3 | 3 | 13 | 32 | 60  | 49 |
| 18,926 | 2 | 1 | 42 | 14 | 3 | 3 | 13 | 32 | 60  | 50 |
| 18,927 | 2 | 1 | 42 | 15 | 3 | 3 | 15 | 32 | 62  | 51 |
| 18,928 | 2 | 1 | 42 | 9  | 3 | 2 | 17 | 21 | 64  | 33 |
| 18,929 | 2 | 1 | 42 | 9  | 3 | 2 | 17 | 21 | 64  | 33 |
| 18,930 | 2 | 0 | 42 | 7  | 3 | 2 | 17 | 18 | 64  | 27 |

|        |   |   |    |    |   |    |    |    |    |    |
|--------|---|---|----|----|---|----|----|----|----|----|
| 18,931 | 2 | 0 | 42 | 7  | 3 | 2  | 17 | 18 | 64 | 27 |
| 18,932 | 2 | 0 | 42 | 7  | 3 | 2  | 16 | 16 | 63 | 25 |
| 18,933 | 2 | 0 | 41 | 7  | 3 | 2  | 16 | 15 | 62 | 24 |
| 18,934 | 2 | 0 | 41 | 7  | 3 | 1  | 16 | 31 | 62 | 39 |
| 18,935 | 2 | 0 | 41 | 9  | 3 | 1  | 16 | 33 | 62 | 43 |
| 18,936 | 4 | 0 | 39 | 13 | 3 | 2  | 16 | 37 | 62 | 52 |
| 18,937 | 4 | 0 | 38 | 15 | 2 | 3  | 15 | 37 | 59 | 55 |
| 18,938 | 4 | 0 | 37 | 18 | 2 | 3  | 16 | 37 | 59 | 58 |
| 18,939 | 4 | 0 | 37 | 18 | 2 | 3  | 16 | 40 | 59 | 61 |
| 18,940 | 4 | 0 | 30 | 18 | 2 | 3  | 16 | 39 | 52 | 60 |
| 18,941 | 4 | 0 | 24 | 18 | 2 | 3  | 14 | 39 | 44 | 60 |
| 18,942 | 4 | 0 | 23 | 17 | 2 | 3  | 14 | 37 | 43 | 57 |
| 18,943 | 4 | 0 | 24 | 17 | 2 | 3  | 16 | 36 | 46 | 56 |
| 18,944 | 4 | 0 | 24 | 18 | 2 | 3  | 16 | 36 | 46 | 57 |
| 18,945 | 6 | 0 | 34 | 19 | 2 | 4  | 29 | 42 | 71 | 65 |
| 18,946 | 6 | 1 | 34 | 20 | 2 | 7  | 29 | 49 | 71 | 77 |
| 18,947 | 6 | 1 | 34 | 20 | 2 | 7  | 29 | 49 | 71 | 77 |
| 18,948 | 7 | 1 | 47 | 21 | 4 | 7  | 38 | 49 | 96 | 78 |
| 18,949 | 7 | 2 | 45 | 24 | 4 | 11 | 41 | 51 | 97 | 88 |
| 18,950 | 7 | 2 | 43 | 24 | 3 | 11 | 40 | 51 | 93 | 88 |
| 18,951 | 7 | 2 | 39 | 25 | 3 | 11 | 41 | 51 | 90 | 89 |
| 18,952 | 7 | 2 | 41 | 25 | 3 | 11 | 41 | 51 | 92 | 89 |
| 18,953 | 7 | 2 | 43 | 25 | 3 | 11 | 41 | 51 | 94 | 89 |
| 18,954 | 7 | 2 | 43 | 25 | 3 | 11 | 41 | 51 | 94 | 89 |
| 18,955 | 7 | 2 | 45 | 25 | 3 | 11 | 41 | 49 | 96 | 87 |
| 18,956 | 7 | 2 | 45 | 25 | 3 | 11 | 41 | 49 | 96 | 87 |
| 18,957 | 7 | 2 | 45 | 25 | 5 | 11 | 40 | 48 | 97 | 86 |
| 18,958 | 7 | 2 | 46 | 22 | 4 | 11 | 40 | 48 | 97 | 83 |
| 18,959 | 7 | 2 | 46 | 21 | 4 | 11 | 40 | 46 | 97 | 80 |
| 18,960 | 7 | 2 | 46 | 21 | 4 | 11 | 40 | 47 | 97 | 81 |
| 18,961 | 7 | 2 | 46 | 21 | 4 | 11 | 40 | 47 | 97 | 81 |
| 18,962 | 7 | 2 | 45 | 21 | 4 | 12 | 40 | 47 | 96 | 82 |
| 18,963 | 7 | 2 | 44 | 21 | 4 | 11 | 40 | 42 | 95 | 76 |
| 18,964 | 7 | 2 | 44 | 21 | 4 | 11 | 40 | 43 | 95 | 77 |
| 18,965 | 7 | 2 | 44 | 21 | 4 | 11 | 41 | 46 | 96 | 80 |
| 18,966 | 7 | 2 | 44 | 21 | 4 | 11 | 41 | 46 | 96 | 80 |
| 18,967 | 7 | 2 | 44 | 21 | 4 | 11 | 41 | 47 | 96 | 81 |
| 18,968 | 7 | 2 | 44 | 21 | 4 | 11 | 41 | 47 | 96 | 81 |
| 18,969 | 6 | 2 | 43 | 23 | 4 | 11 | 42 | 47 | 95 | 83 |
| 18,970 | 6 | 2 | 40 | 25 | 4 | 12 | 38 | 47 | 88 | 86 |
| 18,971 | 6 | 2 | 38 | 25 | 4 | 12 | 38 | 47 | 86 | 86 |

|        |   |   |    |    |   |    |    |    |    |    |
|--------|---|---|----|----|---|----|----|----|----|----|
| 18,972 | 6 | 2 | 38 | 26 | 4 | 12 | 38 | 48 | 86 | 88 |
| 18,973 | 6 | 2 | 38 | 27 | 4 | 12 | 38 | 49 | 86 | 90 |
| 18,974 | 6 | 2 | 38 | 27 | 4 | 12 | 38 | 49 | 86 | 90 |
| 18,975 | 5 | 2 | 37 | 30 | 4 | 12 | 36 | 51 | 82 | 95 |
| 18,976 | 5 | 2 | 37 | 31 | 4 | 12 | 36 | 51 | 82 | 96 |
| 18,977 | 5 | 2 | 37 | 31 | 4 | 12 | 34 | 51 | 80 | 96 |
| 18,978 | 5 | 2 | 37 | 30 | 4 | 12 | 32 | 51 | 78 | 95 |
| 18,979 | 5 | 2 | 37 | 30 | 4 | 12 | 32 | 51 | 78 | 95 |
| 18,980 | 5 | 2 | 37 | 30 | 4 | 12 | 32 | 51 | 78 | 95 |
| 18,981 | 5 | 2 | 37 | 30 | 4 | 12 | 32 | 51 | 78 | 95 |
| 18,982 | 5 | 2 | 37 | 30 | 4 | 12 | 32 | 51 | 78 | 95 |
| 18,983 | 5 | 2 | 37 | 30 | 4 | 12 | 32 | 51 | 78 | 95 |
| 18,984 | 5 | 2 | 37 | 29 | 4 | 12 | 32 | 35 | 78 | 78 |
| 18,985 | 5 | 2 | 37 | 18 | 4 | 10 | 32 | 29 | 78 | 59 |
| 18,986 | 5 | 2 | 37 | 18 | 4 | 10 | 32 | 29 | 78 | 59 |
| 18,987 | 3 | 2 | 38 | 18 | 4 | 10 | 32 | 29 | 77 | 59 |
| 18,988 | 3 | 2 | 38 | 18 | 4 | 10 | 32 | 29 | 77 | 59 |
| 18,989 | 3 | 2 | 38 | 18 | 4 | 10 | 31 | 29 | 76 | 59 |
| 18,990 | 3 | 2 | 42 | 18 | 4 | 10 | 33 | 26 | 82 | 56 |
| 18,991 | 3 | 2 | 42 | 18 | 4 | 10 | 35 | 26 | 84 | 56 |
| 18,992 | 3 | 2 | 41 | 18 | 4 | 10 | 35 | 26 | 83 | 56 |
| 18,993 | 3 | 2 | 41 | 18 | 5 | 10 | 36 | 26 | 85 | 56 |
| 18,994 | 3 | 2 | 40 | 18 | 5 | 10 | 34 | 26 | 82 | 56 |
| 18,995 | 1 | 2 | 31 | 16 | 5 | 9  | 21 | 20 | 58 | 47 |
| 18,996 | 1 | 2 | 30 | 18 | 5 | 9  | 21 | 20 | 57 | 49 |
| 18,997 | 1 | 1 | 28 | 18 | 5 | 6  | 20 | 13 | 54 | 38 |
| 18,998 | 1 | 1 | 23 | 18 | 5 | 6  | 19 | 13 | 48 | 38 |
| 18,999 | 0 | 0 | 18 | 14 | 3 | 2  | 12 | 11 | 33 | 27 |
| 19,000 | 0 | 0 | 16 | 14 | 3 | 2  | 9  | 11 | 28 | 27 |
| 19,001 | 0 | 0 | 15 | 16 | 3 | 2  | 7  | 13 | 25 | 31 |
| 19,002 | 0 | 0 | 14 | 20 | 3 | 2  | 7  | 13 | 24 | 35 |
| 19,003 | 0 | 0 | 12 | 20 | 3 | 2  | 9  | 13 | 24 | 35 |
| 19,004 | 0 | 0 | 12 | 20 | 3 | 2  | 10 | 13 | 25 | 35 |
| 19,005 | 0 | 0 | 12 | 20 | 3 | 2  | 12 | 13 | 27 | 35 |
| 19,006 | 0 | 0 | 13 | 20 | 4 | 2  | 18 | 13 | 35 | 35 |
| 19,007 | 0 | 0 | 12 | 20 | 2 | 2  | 24 | 13 | 38 | 35 |
| 19,008 | 0 | 0 | 11 | 20 | 2 | 2  | 24 | 13 | 37 | 35 |
| 19,009 | 0 | 0 | 12 | 20 | 2 | 2  | 24 | 13 | 38 | 35 |
| 19,010 | 0 | 0 | 13 | 20 | 2 | 2  | 24 | 13 | 39 | 35 |
| 19,011 | 0 | 0 | 13 | 20 | 2 | 2  | 24 | 12 | 39 | 34 |
| 19,012 | 0 | 0 | 14 | 20 | 2 | 1  | 24 | 12 | 40 | 33 |



|        |   |   |    |    |   |   |    |    |    |    |
|--------|---|---|----|----|---|---|----|----|----|----|
| 19,013 | 0 | 0 | 14 | 20 | 2 | 1 | 24 | 12 | 40 | 33 |
| 19,014 | 0 | 0 | 14 | 20 | 2 | 1 | 24 | 13 | 40 | 34 |
| 19,015 | 0 | 0 | 14 | 20 | 2 | 1 | 23 | 12 | 39 | 33 |
| 19,016 | 0 | 1 | 14 | 20 | 2 | 1 | 23 | 9  | 39 | 31 |
| 19,017 | 0 | 1 | 14 | 22 | 2 | 1 | 23 | 11 | 39 | 35 |
| 19,018 | 0 | 1 | 14 | 22 | 2 | 1 | 23 | 12 | 39 | 36 |
| 19,019 | 0 | 1 | 14 | 22 | 2 | 1 | 23 | 12 | 39 | 36 |
| 19,020 | 0 | 1 | 13 | 18 | 2 | 0 | 22 | 12 | 37 | 31 |
| 19,021 | 0 | 1 | 13 | 19 | 2 | 0 | 22 | 12 | 37 | 32 |
| 19,022 | 0 | 1 | 14 | 18 | 2 | 0 | 22 | 10 | 38 | 29 |
| 19,023 | 0 | 1 | 14 | 18 | 2 | 0 | 22 | 10 | 38 | 29 |
| 19,024 | 0 | 1 | 14 | 17 | 2 | 0 | 22 | 9  | 38 | 27 |
| 19,025 | 0 | 0 | 14 | 17 | 2 | 0 | 22 | 9  | 38 | 26 |
| 19,026 | 0 | 0 | 14 | 14 | 2 | 0 | 22 | 7  | 38 | 21 |
| 19,027 | 1 | 1 | 14 | 13 | 2 | 0 | 22 | 7  | 39 | 21 |
| 19,028 | 1 | 1 | 14 | 13 | 2 | 0 | 22 | 7  | 39 | 21 |
| 19,029 | 1 | 1 | 14 | 13 | 2 | 0 | 22 | 7  | 39 | 21 |
| 19,030 | 1 | 1 | 14 | 13 | 2 | 0 | 22 | 7  | 39 | 21 |
| 19,031 | 1 | 1 | 14 | 13 | 2 | 0 | 22 | 8  | 39 | 22 |
| 19,032 | 1 | 1 | 15 | 13 | 2 | 0 | 22 | 9  | 40 | 23 |
| 19,033 | 1 | 1 | 15 | 13 | 2 | 0 | 22 | 9  | 40 | 23 |
| 19,034 | 1 | 1 | 15 | 13 | 2 | 0 | 22 | 9  | 40 | 23 |
| 19,035 | 1 | 1 | 15 | 13 | 2 | 0 | 23 | 9  | 41 | 23 |
| 19,036 | 1 | 1 | 15 | 13 | 2 | 0 | 23 | 9  | 41 | 23 |
| 19,037 | 1 | 1 | 15 | 13 | 2 | 0 | 23 | 9  | 41 | 23 |
| 19,038 | 1 | 1 | 14 | 13 | 2 | 0 | 23 | 9  | 40 | 23 |
| 19,039 | 1 | 1 | 15 | 13 | 2 | 0 | 24 | 9  | 42 | 23 |
| 19,040 | 1 | 1 | 15 | 16 | 2 | 0 | 24 | 12 | 42 | 29 |
| 19,041 | 1 | 1 | 11 | 17 | 2 | 0 | 22 | 12 | 36 | 30 |
| 19,042 | 1 | 1 | 11 | 18 | 2 | 0 | 20 | 12 | 34 | 31 |
| 19,043 | 1 | 1 | 10 | 19 | 2 | 0 | 20 | 12 | 33 | 32 |
| 19,044 | 1 | 1 | 10 | 20 | 1 | 0 | 19 | 12 | 31 | 33 |
| 19,045 | 1 | 1 | 10 | 20 | 1 | 0 | 20 | 12 | 32 | 33 |
| 19,046 | 1 | 1 | 10 | 18 | 1 | 0 | 20 | 12 | 32 | 31 |
| 19,047 | 1 | 1 | 10 | 18 | 1 | 0 | 20 | 12 | 32 | 31 |
| 19,048 | 1 | 1 | 9  | 17 | 1 | 0 | 20 | 12 | 31 | 30 |
| 19,049 | 1 | 1 | 9  | 17 | 1 | 0 | 20 | 12 | 31 | 30 |
| 19,050 | 2 | 1 | 13 | 17 | 1 | 0 | 21 | 12 | 37 | 30 |
| 19,051 | 2 | 1 | 16 | 15 | 1 | 0 | 21 | 10 | 40 | 26 |
| 19,052 | 2 | 1 | 18 | 11 | 1 | 0 | 21 | 13 | 42 | 25 |
| 19,053 | 2 | 1 | 18 | 12 | 1 | 0 | 21 | 18 | 42 | 31 |

|        |   |    |    |     |   |   |    |    |    |     |
|--------|---|----|----|-----|---|---|----|----|----|-----|
| 19,054 | 2 | 1  | 18 | 19  | 1 | 0 | 20 | 27 | 41 | 47  |
| 19,055 | 2 | 1  | 22 | 19  | 1 | 0 | 24 | 29 | 49 | 49  |
| 19,056 | 2 | 1  | 21 | 19  | 1 | 0 | 22 | 30 | 46 | 50  |
| 19,057 | 2 | 1  | 19 | 19  | 0 | 0 | 15 | 30 | 36 | 50  |
| 19,058 | 2 | 1  | 21 | 23  | 0 | 0 | 13 | 30 | 36 | 54  |
| 19,059 | 2 | 1  | 22 | 25  | 0 | 0 | 15 | 30 | 39 | 56  |
| 19,060 | 2 | 1  | 21 | 33  | 0 | 0 | 17 | 34 | 40 | 68  |
| 19,061 | 2 | 5  | 21 | 79  | 0 | 0 | 17 | 45 | 40 | 129 |
| 19,062 | 2 | 5  | 23 | 81  | 0 | 0 | 19 | 45 | 44 | 131 |
| 19,063 | 2 | 5  | 22 | 82  | 0 | 0 | 19 | 45 | 43 | 132 |
| 19,064 | 2 | 5  | 22 | 82  | 0 | 0 | 20 | 45 | 44 | 132 |
| 19,065 | 2 | 8  | 22 | 83  | 0 | 1 | 20 | 46 | 44 | 138 |
| 19,066 | 2 | 8  | 22 | 83  | 0 | 1 | 20 | 49 | 44 | 141 |
| 19,067 | 2 | 8  | 22 | 83  | 0 | 1 | 22 | 48 | 46 | 140 |
| 19,068 | 3 | 8  | 24 | 83  | 0 | 1 | 23 | 47 | 50 | 139 |
| 19,069 | 3 | 7  | 25 | 86  | 1 | 1 | 24 | 46 | 53 | 140 |
| 19,070 | 3 | 7  | 25 | 86  | 1 | 1 | 25 | 46 | 54 | 140 |
| 19,071 | 4 | 7  | 25 | 85  | 1 | 1 | 27 | 46 | 57 | 139 |
| 19,072 | 4 | 7  | 25 | 85  | 1 | 1 | 27 | 46 | 57 | 139 |
| 19,073 | 4 | 7  | 24 | 85  | 1 | 1 | 27 | 46 | 56 | 139 |
| 19,074 | 4 | 7  | 24 | 86  | 1 | 1 | 27 | 47 | 56 | 141 |
| 19,075 | 4 | 7  | 24 | 86  | 1 | 1 | 27 | 47 | 56 | 141 |
| 19,076 | 4 | 7  | 24 | 86  | 1 | 1 | 27 | 47 | 56 | 141 |
| 19,077 | 3 | 7  | 24 | 86  | 1 | 1 | 27 | 47 | 55 | 141 |
| 19,078 | 4 | 7  | 27 | 87  | 1 | 1 | 28 | 47 | 60 | 142 |
| 19,079 | 4 | 7  | 27 | 87  | 1 | 1 | 28 | 47 | 60 | 142 |
| 19,080 | 4 | 7  | 27 | 87  | 1 | 1 | 28 | 47 | 60 | 142 |
| 19,081 | 4 | 7  | 28 | 87  | 1 | 1 | 28 | 47 | 61 | 142 |
| 19,082 | 4 | 7  | 28 | 89  | 1 | 1 | 28 | 47 | 61 | 144 |
| 19,083 | 4 | 7  | 27 | 92  | 1 | 1 | 28 | 49 | 60 | 149 |
| 19,084 | 4 | 10 | 27 | 105 | 1 | 1 | 28 | 74 | 60 | 190 |
| 19,085 | 4 | 10 | 27 | 105 | 1 | 1 | 28 | 74 | 60 | 190 |
| 19,086 | 4 | 11 | 35 | 109 | 1 | 1 | 31 | 75 | 71 | 196 |
| 19,087 | 5 | 13 | 37 | 112 | 1 | 1 | 31 | 75 | 74 | 201 |
| 19,088 | 5 | 13 | 37 | 113 | 1 | 1 | 31 | 76 | 74 | 203 |
| 19,089 | 5 | 13 | 36 | 115 | 1 | 1 | 30 | 76 | 72 | 205 |
| 19,090 | 5 | 13 | 44 | 115 | 2 | 1 | 32 | 77 | 83 | 206 |
| 19,091 | 5 | 13 | 44 | 111 | 2 | 1 | 37 | 74 | 88 | 199 |
| 19,092 | 5 | 13 | 44 | 111 | 2 | 1 | 39 | 75 | 90 | 200 |
| 19,093 | 5 | 13 | 45 | 110 | 3 | 1 | 42 | 75 | 95 | 199 |
| 19,094 | 7 | 13 | 45 | 110 | 3 | 1 | 42 | 75 | 97 | 199 |

|        |   |    |    |     |   |   |    |    |     |     |
|--------|---|----|----|-----|---|---|----|----|-----|-----|
| 19,095 | 7 | 13 | 45 | 110 | 3 | 1 | 42 | 75 | 97  | 199 |
| 19,096 | 7 | 13 | 49 | 110 | 3 | 1 | 44 | 75 | 103 | 199 |
| 19,097 | 7 | 13 | 49 | 110 | 3 | 1 | 44 | 75 | 103 | 199 |
| 19,098 | 7 | 13 | 52 | 110 | 4 | 1 | 44 | 75 | 107 | 199 |
| 19,099 | 7 | 13 | 52 | 110 | 4 | 1 | 44 | 75 | 107 | 199 |
| 19,100 | 7 | 13 | 52 | 110 | 4 | 1 | 45 | 75 | 108 | 199 |
| 19,101 | 6 | 13 | 48 | 110 | 4 | 1 | 44 | 75 | 102 | 199 |
| 19,102 | 6 | 13 | 45 | 110 | 4 | 1 | 44 | 75 | 99  | 199 |
| 19,103 | 6 | 13 | 43 | 109 | 4 | 1 | 44 | 72 | 97  | 195 |
| 19,104 | 6 | 13 | 44 | 101 | 4 | 1 | 44 | 58 | 98  | 173 |
| 19,105 | 6 | 13 | 44 | 101 | 4 | 1 | 43 | 58 | 97  | 173 |
| 19,106 | 6 | 13 | 40 | 102 | 4 | 1 | 38 | 56 | 88  | 172 |
| 19,107 | 6 | 13 | 39 | 103 | 4 | 1 | 35 | 55 | 84  | 172 |
| 19,108 | 6 | 13 | 37 | 104 | 4 | 1 | 35 | 55 | 82  | 173 |
| 19,109 | 6 | 13 | 36 | 98  | 4 | 1 | 33 | 56 | 79  | 168 |
| 19,110 | 6 | 13 | 36 | 99  | 4 | 1 | 31 | 56 | 77  | 169 |
| 19,111 | 6 | 9  | 36 | 48  | 4 | 1 | 31 | 41 | 77  | 99  |
| 19,112 | 6 | 9  | 36 | 48  | 4 | 1 | 31 | 41 | 77  | 99  |
| 19,113 | 6 | 9  | 34 | 48  | 4 | 1 | 29 | 43 | 73  | 101 |
| 19,114 | 6 | 9  | 34 | 48  | 4 | 1 | 29 | 43 | 73  | 101 |
| 19,115 | 6 | 6  | 34 | 47  | 4 | 0 | 29 | 39 | 73  | 92  |
| 19,116 | 6 | 6  | 34 | 47  | 4 | 0 | 27 | 39 | 71  | 92  |
| 19,117 | 6 | 6  | 34 | 50  | 4 | 0 | 28 | 43 | 72  | 99  |
| 19,118 | 7 | 6  | 36 | 49  | 5 | 0 | 28 | 45 | 76  | 100 |
| 19,119 | 7 | 6  | 36 | 49  | 5 | 0 | 28 | 45 | 76  | 100 |
| 19,120 | 7 | 7  | 35 | 47  | 5 | 0 | 31 | 43 | 78  | 97  |
| 19,121 | 7 | 7  | 35 | 49  | 5 | 0 | 30 | 44 | 77  | 100 |
| 19,122 | 6 | 7  | 38 | 53  | 6 | 0 | 33 | 46 | 83  | 106 |
| 19,123 | 6 | 7  | 38 | 53  | 6 | 0 | 33 | 46 | 83  | 106 |
| 19,124 | 6 | 7  | 43 | 55  | 6 | 0 | 48 | 46 | 103 | 108 |
| 19,125 | 6 | 7  | 44 | 54  | 6 | 0 | 49 | 46 | 105 | 107 |
| 19,126 | 6 | 9  | 44 | 59  | 6 | 0 | 49 | 46 | 105 | 114 |
| 19,127 | 6 | 9  | 44 | 62  | 6 | 0 | 49 | 46 | 105 | 117 |
| 19,128 | 6 | 9  | 44 | 63  | 6 | 0 | 49 | 46 | 105 | 118 |
| 19,129 | 5 | 9  | 42 | 63  | 6 | 0 | 49 | 46 | 102 | 118 |
| 19,130 | 5 | 9  | 42 | 63  | 6 | 0 | 49 | 46 | 102 | 118 |
| 19,131 | 6 | 9  | 41 | 63  | 6 | 0 | 53 | 46 | 106 | 118 |
| 19,132 | 6 | 9  | 43 | 61  | 6 | 0 | 56 | 44 | 111 | 114 |
| 19,133 | 6 | 9  | 41 | 61  | 6 | 0 | 56 | 44 | 109 | 114 |
| 19,134 | 6 | 6  | 41 | 45  | 6 | 0 | 55 | 17 | 108 | 68  |
| 19,135 | 6 | 6  | 39 | 45  | 6 | 0 | 52 | 17 | 103 | 68  |

|        |   |    |    |    |   |   |    |    |     |     |
|--------|---|----|----|----|---|---|----|----|-----|-----|
| 19,136 | 6 | 5  | 37 | 41 | 6 | 0 | 54 | 16 | 103 | 62  |
| 19,137 | 6 | 3  | 37 | 38 | 7 | 0 | 54 | 16 | 104 | 57  |
| 19,138 | 5 | 3  | 35 | 37 | 7 | 0 | 54 | 15 | 101 | 55  |
| 19,139 | 5 | 3  | 36 | 37 | 7 | 0 | 54 | 15 | 102 | 55  |
| 19,140 | 5 | 3  | 28 | 37 | 6 | 0 | 52 | 14 | 91  | 54  |
| 19,141 | 5 | 3  | 28 | 38 | 6 | 0 | 50 | 15 | 89  | 56  |
| 19,142 | 5 | 3  | 29 | 38 | 6 | 0 | 47 | 15 | 87  | 56  |
| 19,143 | 5 | 3  | 29 | 40 | 6 | 0 | 45 | 17 | 85  | 60  |
| 19,144 | 5 | 5  | 28 | 42 | 5 | 0 | 42 | 22 | 80  | 69  |
| 19,145 | 3 | 5  | 28 | 46 | 5 | 0 | 42 | 22 | 78  | 73  |
| 19,146 | 3 | 6  | 28 | 47 | 5 | 0 | 42 | 24 | 78  | 77  |
| 19,147 | 3 | 6  | 24 | 48 | 5 | 0 | 39 | 24 | 71  | 78  |
| 19,148 | 3 | 6  | 24 | 48 | 5 | 0 | 39 | 24 | 71  | 78  |
| 19,149 | 3 | 9  | 21 | 49 | 4 | 0 | 39 | 25 | 67  | 83  |
| 19,150 | 3 | 9  | 21 | 50 | 4 | 0 | 38 | 25 | 66  | 84  |
| 19,151 | 3 | 10 | 21 | 51 | 4 | 0 | 38 | 25 | 66  | 86  |
| 19,152 | 3 | 10 | 21 | 51 | 4 | 0 | 38 | 25 | 66  | 86  |
| 19,153 | 3 | 10 | 21 | 52 | 4 | 1 | 38 | 25 | 66  | 88  |
| 19,154 | 3 | 10 | 20 | 57 | 4 | 1 | 38 | 25 | 65  | 93  |
| 19,155 | 3 | 10 | 20 | 58 | 4 | 1 | 38 | 25 | 65  | 94  |
| 19,156 | 3 | 10 | 20 | 60 | 4 | 1 | 38 | 25 | 65  | 96  |
| 19,157 | 3 | 10 | 20 | 59 | 4 | 1 | 38 | 25 | 65  | 95  |
| 19,158 | 3 | 10 | 21 | 58 | 4 | 1 | 38 | 24 | 66  | 93  |
| 19,159 | 3 | 10 | 21 | 58 | 4 | 1 | 38 | 24 | 66  | 93  |
| 19,160 | 3 | 10 | 21 | 58 | 4 | 1 | 38 | 25 | 66  | 94  |
| 19,161 | 3 | 10 | 21 | 61 | 4 | 1 | 38 | 25 | 66  | 97  |
| 19,162 | 3 | 10 | 21 | 58 | 4 | 1 | 38 | 25 | 66  | 94  |
| 19,163 | 3 | 10 | 21 | 58 | 4 | 1 | 38 | 27 | 66  | 96  |
| 19,164 | 3 | 11 | 22 | 61 | 4 | 1 | 38 | 28 | 67  | 101 |
| 19,165 | 3 | 11 | 22 | 62 | 4 | 1 | 38 | 29 | 67  | 103 |
| 19,166 | 3 | 12 | 22 | 62 | 4 | 1 | 37 | 29 | 66  | 104 |
| 19,167 | 3 | 12 | 22 | 64 | 4 | 1 | 38 | 23 | 67  | 100 |
| 19,168 | 3 | 12 | 22 | 64 | 4 | 1 | 37 | 23 | 66  | 100 |
| 19,169 | 1 | 12 | 20 | 65 | 3 | 1 | 36 | 24 | 60  | 102 |
| 19,170 | 1 | 12 | 20 | 66 | 3 | 1 | 34 | 24 | 58  | 103 |
| 19,171 | 1 | 12 | 20 | 67 | 2 | 2 | 32 | 26 | 55  | 107 |
| 19,172 | 1 | 12 | 20 | 66 | 2 | 2 | 34 | 29 | 57  | 109 |
| 19,173 | 1 | 12 | 17 | 70 | 1 | 3 | 29 | 34 | 48  | 119 |
| 19,174 | 1 | 13 | 13 | 79 | 1 | 3 | 14 | 38 | 29  | 133 |
| 19,175 | 1 | 13 | 12 | 80 | 1 | 3 | 13 | 38 | 27  | 134 |
| 19,176 | 1 | 11 | 12 | 82 | 1 | 3 | 13 | 41 | 27  | 137 |

|        |   |    |    |    |   |   |    |    |    |     |
|--------|---|----|----|----|---|---|----|----|----|-----|
| 19,177 | 1 | 11 | 12 | 79 | 1 | 3 | 13 | 42 | 27 | 135 |
| 19,178 | 1 | 11 | 13 | 79 | 1 | 3 | 13 | 42 | 28 | 135 |
| 19,179 | 1 | 11 | 12 | 78 | 1 | 3 | 13 | 42 | 27 | 134 |
| 19,180 | 1 | 11 | 12 | 79 | 1 | 3 | 12 | 42 | 26 | 135 |
| 19,181 | 0 | 11 | 13 | 81 | 1 | 3 | 10 | 42 | 24 | 137 |
| 19,182 | 0 | 11 | 17 | 81 | 3 | 3 | 21 | 42 | 41 | 137 |
| 19,183 | 0 | 11 | 15 | 81 | 3 | 3 | 18 | 42 | 36 | 137 |
| 19,184 | 0 | 11 | 22 | 81 | 3 | 3 | 26 | 42 | 51 | 137 |
| 19,185 | 0 | 11 | 21 | 81 | 3 | 3 | 26 | 42 | 50 | 137 |
| 19,186 | 0 | 11 | 20 | 81 | 3 | 3 | 25 | 42 | 48 | 137 |
| 19,187 | 0 | 11 | 20 | 81 | 3 | 3 | 25 | 42 | 48 | 137 |
| 19,188 | 0 | 11 | 21 | 81 | 2 | 3 | 25 | 42 | 48 | 137 |
| 19,189 | 0 | 11 | 21 | 81 | 2 | 3 | 25 | 42 | 48 | 137 |
| 19,190 | 0 | 11 | 20 | 81 | 2 | 3 | 25 | 42 | 47 | 137 |
| 19,191 | 0 | 11 | 20 | 79 | 2 | 3 | 25 | 42 | 47 | 135 |
| 19,192 | 0 | 11 | 20 | 78 | 2 | 3 | 25 | 41 | 47 | 133 |
| 19,193 | 0 | 11 | 20 | 78 | 2 | 3 | 25 | 40 | 47 | 132 |
| 19,194 | 0 | 9  | 20 | 72 | 2 | 3 | 25 | 33 | 47 | 117 |
| 19,195 | 0 | 9  | 20 | 68 | 2 | 3 | 25 | 33 | 47 | 113 |
| 19,196 | 0 | 9  | 20 | 68 | 2 | 3 | 25 | 33 | 47 | 113 |
| 19,197 | 0 | 8  | 20 | 69 | 2 | 3 | 25 | 31 | 47 | 111 |
| 19,198 | 0 | 10 | 20 | 69 | 2 | 3 | 25 | 33 | 47 | 115 |
| 19,199 | 0 | 10 | 20 | 69 | 2 | 3 | 25 | 33 | 47 | 115 |
| 19,200 | 0 | 7  | 20 | 68 | 2 | 3 | 25 | 32 | 47 | 110 |
| 19,201 | 0 | 6  | 20 | 67 | 3 | 3 | 26 | 32 | 49 | 108 |
| 19,202 | 0 | 6  | 20 | 67 | 3 | 3 | 26 | 33 | 49 | 109 |
| 19,203 | 0 | 6  | 20 | 67 | 3 | 3 | 26 | 33 | 49 | 109 |
| 19,204 | 0 | 8  | 20 | 69 | 3 | 2 | 26 | 35 | 49 | 114 |
| 19,205 | 0 | 8  | 20 | 65 | 3 | 2 | 26 | 35 | 49 | 110 |
| 19,206 | 0 | 8  | 20 | 64 | 3 | 2 | 26 | 35 | 49 | 109 |
| 19,207 | 0 | 8  | 20 | 62 | 4 | 2 | 26 | 35 | 50 | 107 |
| 19,208 | 0 | 8  | 20 | 62 | 4 | 2 | 26 | 35 | 50 | 107 |
| 19,209 | 0 | 8  | 19 | 62 | 4 | 2 | 26 | 37 | 49 | 109 |
| 19,210 | 0 | 8  | 19 | 62 | 4 | 2 | 26 | 37 | 49 | 109 |
| 19,211 | 0 | 8  | 19 | 62 | 4 | 2 | 26 | 37 | 49 | 109 |
| 19,212 | 0 | 8  | 19 | 58 | 4 | 2 | 26 | 37 | 49 | 105 |
| 19,213 | 0 | 8  | 19 | 55 | 4 | 2 | 26 | 36 | 49 | 101 |
| 19,214 | 2 | 9  | 20 | 55 | 4 | 2 | 26 | 34 | 52 | 100 |
| 19,215 | 2 | 8  | 20 | 51 | 4 | 2 | 26 | 30 | 52 | 91  |
| 19,216 | 4 | 7  | 27 | 51 | 6 | 2 | 29 | 30 | 66 | 90  |
| 19,217 | 4 | 7  | 27 | 51 | 6 | 2 | 29 | 30 | 66 | 90  |

|        |    |    |    |    |    |   |    |    |     |     |
|--------|----|----|----|----|----|---|----|----|-----|-----|
| 19,218 | 4  | 6  | 27 | 44 | 6  | 2 | 30 | 30 | 67  | 82  |
| 19,219 | 4  | 6  | 27 | 44 | 6  | 2 | 30 | 30 | 67  | 82  |
| 19,220 | 4  | 6  | 25 | 42 | 6  | 2 | 30 | 29 | 65  | 79  |
| 19,221 | 4  | 6  | 25 | 42 | 6  | 2 | 30 | 30 | 65  | 80  |
| 19,222 | 4  | 6  | 25 | 42 | 6  | 1 | 30 | 28 | 65  | 77  |
| 19,223 | 4  | 6  | 25 | 41 | 6  | 1 | 28 | 24 | 63  | 72  |
| 19,224 | 4  | 6  | 25 | 33 | 6  | 0 | 28 | 18 | 63  | 57  |
| 19,225 | 4  | 5  | 24 | 21 | 6  | 0 | 28 | 14 | 62  | 40  |
| 19,226 | 4  | 5  | 24 | 14 | 6  | 0 | 28 | 11 | 62  | 30  |
| 19,227 | 4  | 5  | 26 | 15 | 6  | 0 | 28 | 10 | 64  | 30  |
| 19,228 | 6  | 5  | 30 | 20 | 8  | 1 | 30 | 12 | 74  | 38  |
| 19,229 | 8  | 5  | 46 | 20 | 12 | 1 | 45 | 13 | 111 | 39  |
| 19,230 | 9  | 6  | 50 | 32 | 13 | 4 | 52 | 27 | 124 | 69  |
| 19,231 | 9  | 8  | 50 | 49 | 13 | 7 | 52 | 31 | 124 | 95  |
| 19,232 | 9  | 8  | 49 | 54 | 13 | 7 | 50 | 33 | 121 | 102 |
| 19,233 | 9  | 8  | 45 | 63 | 11 | 7 | 39 | 40 | 104 | 118 |
| 19,234 | 9  | 8  | 43 | 65 | 11 | 7 | 33 | 40 | 96  | 120 |
| 19,235 | 9  | 9  | 40 | 65 | 11 | 7 | 31 | 40 | 91  | 121 |
| 19,236 | 9  | 9  | 40 | 65 | 11 | 7 | 31 | 40 | 91  | 121 |
| 19,237 | 9  | 9  | 40 | 65 | 11 | 7 | 31 | 40 | 91  | 121 |
| 19,238 | 9  | 9  | 40 | 66 | 11 | 7 | 31 | 40 | 91  | 122 |
| 19,239 | 9  | 9  | 39 | 66 | 11 | 7 | 31 | 41 | 90  | 123 |
| 19,240 | 10 | 9  | 39 | 68 | 12 | 7 | 36 | 42 | 97  | 126 |
| 19,241 | 10 | 9  | 39 | 68 | 12 | 7 | 36 | 42 | 97  | 126 |
| 19,242 | 10 | 9  | 40 | 69 | 12 | 7 | 37 | 46 | 99  | 131 |
| 19,243 | 10 | 9  | 41 | 69 | 12 | 7 | 37 | 46 | 100 | 131 |
| 19,244 | 10 | 9  | 41 | 69 | 12 | 7 | 37 | 46 | 100 | 131 |
| 19,245 | 10 | 10 | 41 | 69 | 12 | 7 | 37 | 46 | 100 | 132 |
| 19,246 | 10 | 11 | 41 | 72 | 12 | 7 | 38 | 51 | 101 | 141 |
| 19,247 | 10 | 11 | 41 | 73 | 12 | 7 | 38 | 53 | 101 | 144 |
| 19,248 | 11 | 11 | 42 | 72 | 12 | 7 | 38 | 53 | 103 | 143 |
| 19,249 | 11 | 9  | 45 | 73 | 12 | 7 | 38 | 51 | 106 | 140 |
| 19,250 | 11 | 9  | 48 | 75 | 13 | 7 | 39 | 53 | 111 | 144 |
| 19,251 | 11 | 9  | 50 | 76 | 12 | 7 | 39 | 53 | 112 | 145 |
| 19,252 | 11 | 9  | 55 | 77 | 12 | 7 | 40 | 52 | 118 | 145 |
| 19,253 | 11 | 9  | 55 | 77 | 12 | 7 | 40 | 51 | 118 | 144 |
| 19,254 | 11 | 9  | 57 | 79 | 12 | 7 | 40 | 51 | 120 | 146 |
| 19,255 | 11 | 7  | 57 | 76 | 12 | 7 | 40 | 49 | 120 | 139 |
| 19,256 | 11 | 7  | 57 | 76 | 12 | 7 | 40 | 50 | 120 | 140 |
| 19,257 | 11 | 7  | 57 | 76 | 12 | 7 | 40 | 50 | 120 | 140 |
| 19,258 | 11 | 7  | 58 | 76 | 11 | 7 | 40 | 50 | 120 | 140 |

|        |    |    |    |     |    |    |    |     |     |     |
|--------|----|----|----|-----|----|----|----|-----|-----|-----|
| 19,259 | 11 | 7  | 58 | 77  | 11 | 7  | 40 | 50  | 120 | 141 |
| 19,260 | 11 | 7  | 58 | 78  | 11 | 7  | 40 | 49  | 120 | 141 |
| 19,261 | 11 | 7  | 58 | 81  | 11 | 7  | 40 | 49  | 120 | 144 |
| 19,262 | 11 | 14 | 58 | 118 | 11 | 9  | 40 | 82  | 120 | 223 |
| 19,263 | 11 | 14 | 58 | 121 | 11 | 9  | 40 | 83  | 120 | 227 |
| 19,264 | 11 | 14 | 58 | 123 | 11 | 9  | 40 | 89  | 120 | 235 |
| 19,265 | 9  | 15 | 57 | 126 | 11 | 9  | 40 | 93  | 117 | 243 |
| 19,266 | 9  | 18 | 56 | 138 | 11 | 11 | 40 | 104 | 116 | 271 |
| 19,267 | 8  | 19 | 49 | 146 | 9  | 13 | 37 | 113 | 103 | 291 |
| 19,268 | 8  | 21 | 49 | 179 | 9  | 19 | 37 | 131 | 103 | 350 |
| 19,269 | 8  | 21 | 49 | 180 | 9  | 19 | 35 | 131 | 101 | 351 |
| 19,270 | 8  | 22 | 49 | 182 | 9  | 19 | 35 | 132 | 101 | 355 |
| 19,271 | 8  | 22 | 49 | 182 | 9  | 20 | 35 | 131 | 101 | 355 |
| 19,272 | 8  | 22 | 49 | 186 | 9  | 20 | 35 | 131 | 101 | 359 |
| 19,273 | 8  | 22 | 49 | 190 | 9  | 20 | 35 | 131 | 101 | 363 |
| 19,274 | 8  | 22 | 49 | 193 | 9  | 21 | 35 | 137 | 101 | 373 |
| 19,275 | 8  | 22 | 49 | 220 | 9  | 22 | 35 | 149 | 101 | 413 |
| 19,276 | 8  | 23 | 49 | 242 | 9  | 28 | 35 | 176 | 101 | 469 |
| 19,277 | 8  | 25 | 49 | 266 | 9  | 29 | 35 | 188 | 101 | 508 |
| 19,278 | 8  | 37 | 47 | 362 | 9  | 34 | 35 | 225 | 99  | 658 |
| 19,279 | 6  | 37 | 43 | 360 | 7  | 33 | 33 | 225 | 89  | 655 |
| 19,280 | 4  | 37 | 27 | 363 | 3  | 33 | 18 | 225 | 52  | 658 |
| 19,281 | 3  | 35 | 23 | 333 | 2  | 27 | 12 | 209 | 40  | 604 |
| 19,282 | 3  | 35 | 23 | 326 | 2  | 27 | 12 | 207 | 40  | 595 |
| 19,283 | 3  | 35 | 23 | 317 | 2  | 27 | 13 | 200 | 41  | 579 |
| 19,284 | 3  | 35 | 23 | 317 | 2  | 27 | 13 | 200 | 41  | 579 |
| 19,285 | 3  | 35 | 21 | 315 | 2  | 27 | 13 | 200 | 39  | 577 |
| 19,286 | 3  | 34 | 21 | 315 | 2  | 27 | 13 | 200 | 39  | 576 |
| 19,287 | 3  | 34 | 21 | 315 | 2  | 27 | 13 | 200 | 39  | 576 |
| 19,288 | 3  | 34 | 21 | 314 | 2  | 27 | 12 | 200 | 38  | 575 |
| 19,289 | 3  | 34 | 21 | 314 | 2  | 27 | 12 | 200 | 38  | 575 |
| 19,290 | 2  | 34 | 21 | 312 | 2  | 27 | 7  | 198 | 32  | 571 |
| 19,291 | 2  | 34 | 21 | 312 | 1  | 27 | 7  | 198 | 31  | 571 |
| 19,292 | 2  | 34 | 20 | 312 | 1  | 27 | 6  | 198 | 29  | 571 |
| 19,293 | 2  | 34 | 19 | 311 | 1  | 27 | 6  | 194 | 28  | 566 |
| 19,294 | 2  | 34 | 18 | 314 | 1  | 27 | 6  | 195 | 27  | 570 |
| 19,295 | 2  | 34 | 18 | 315 | 1  | 27 | 6  | 195 | 27  | 571 |
| 19,296 | 2  | 32 | 19 | 313 | 1  | 27 | 6  | 192 | 28  | 564 |
| 19,297 | 2  | 32 | 19 | 321 | 1  | 28 | 5  | 204 | 27  | 585 |
| 19,298 | 1  | 32 | 18 | 331 | 1  | 28 | 5  | 213 | 25  | 604 |
| 19,299 | 1  | 33 | 18 | 332 | 1  | 28 | 5  | 215 | 25  | 608 |

|        |   |    |    |     |   |    |    |     |    |     |
|--------|---|----|----|-----|---|----|----|-----|----|-----|
| 19,300 | 1 | 35 | 15 | 336 | 1 | 28 | 5  | 220 | 22 | 619 |
| 19,301 | 1 | 35 | 12 | 334 | 0 | 28 | 4  | 219 | 17 | 616 |
| 19,302 | 2 | 35 | 11 | 338 | 0 | 28 | 4  | 219 | 17 | 620 |
| 19,303 | 2 | 35 | 6  | 337 | 0 | 28 | 2  | 219 | 10 | 619 |
| 19,304 | 2 | 35 | 4  | 337 | 0 | 28 | 2  | 219 | 8  | 619 |
| 19,305 | 2 | 35 | 5  | 335 | 0 | 28 | 2  | 221 | 9  | 619 |
| 19,306 | 2 | 35 | 5  | 334 | 0 | 28 | 2  | 221 | 9  | 618 |
| 19,307 | 2 | 35 | 5  | 334 | 0 | 28 | 2  | 220 | 9  | 617 |
| 19,308 | 2 | 35 | 5  | 334 | 0 | 28 | 2  | 220 | 9  | 617 |
| 19,309 | 2 | 35 | 5  | 335 | 0 | 28 | 2  | 220 | 9  | 618 |
| 19,310 | 2 | 35 | 5  | 334 | 0 | 28 | 2  | 220 | 9  | 617 |
| 19,311 | 3 | 35 | 12 | 332 | 0 | 28 | 5  | 219 | 20 | 614 |
| 19,312 | 3 | 35 | 15 | 329 | 0 | 28 | 6  | 219 | 24 | 611 |
| 19,313 | 3 | 28 | 15 | 292 | 0 | 26 | 6  | 186 | 24 | 532 |
| 19,314 | 3 | 28 | 16 | 289 | 0 | 26 | 7  | 185 | 26 | 528 |
| 19,315 | 3 | 28 | 28 | 287 | 1 | 26 | 24 | 179 | 56 | 520 |
| 19,316 | 3 | 26 | 28 | 283 | 1 | 26 | 24 | 175 | 56 | 510 |
| 19,317 | 3 | 22 | 31 | 263 | 2 | 22 | 29 | 155 | 65 | 462 |
| 19,318 | 2 | 22 | 31 | 264 | 2 | 22 | 29 | 155 | 64 | 463 |
| 19,319 | 2 | 20 | 32 | 229 | 2 | 16 | 29 | 137 | 65 | 402 |
| 19,320 | 2 | 20 | 32 | 229 | 2 | 16 | 29 | 137 | 65 | 402 |
| 19,321 | 2 | 19 | 32 | 227 | 2 | 15 | 30 | 136 | 66 | 397 |
| 19,322 | 2 | 19 | 32 | 224 | 2 | 15 | 30 | 136 | 66 | 394 |
| 19,323 | 2 | 19 | 32 | 225 | 2 | 15 | 30 | 136 | 66 | 395 |
| 19,324 | 2 | 19 | 33 | 218 | 2 | 14 | 31 | 130 | 68 | 381 |
| 19,325 | 2 | 19 | 33 | 218 | 2 | 14 | 31 | 130 | 68 | 381 |
| 19,326 | 2 | 18 | 33 | 169 | 2 | 7  | 31 | 90  | 68 | 284 |
| 19,327 | 2 | 16 | 33 | 145 | 2 | 6  | 31 | 78  | 68 | 245 |
| 19,328 | 2 | 16 | 33 | 146 | 2 | 6  | 31 | 78  | 68 | 246 |
| 19,329 | 2 | 4  | 33 | 50  | 2 | 1  | 31 | 41  | 68 | 96  |
| 19,330 | 2 | 4  | 32 | 42  | 2 | 1  | 32 | 38  | 68 | 85  |
| 19,331 | 2 | 4  | 32 | 42  | 2 | 1  | 34 | 38  | 70 | 85  |
| 19,332 | 2 | 3  | 32 | 42  | 2 | 1  | 33 | 36  | 69 | 82  |
| 19,333 | 2 | 3  | 32 | 42  | 2 | 1  | 33 | 37  | 69 | 83  |
| 19,334 | 2 | 3  | 32 | 42  | 2 | 1  | 32 | 37  | 68 | 83  |
| 19,335 | 2 | 3  | 32 | 42  | 2 | 1  | 32 | 37  | 68 | 83  |
| 19,336 | 2 | 3  | 32 | 42  | 2 | 1  | 32 | 37  | 68 | 83  |
| 19,337 | 2 | 3  | 32 | 42  | 2 | 1  | 32 | 37  | 68 | 83  |
| 19,338 | 2 | 3  | 32 | 42  | 2 | 1  | 32 | 37  | 68 | 83  |
| 19,339 | 0 | 2  | 6  | 30  | 2 | 1  | 6  | 29  | 14 | 62  |
| 19,340 | 3 | 3  | 33 | 42  | 2 | 1  | 29 | 37  | 67 | 83  |



|        |   |   |    |    |   |   |    |    |     |    |
|--------|---|---|----|----|---|---|----|----|-----|----|
| 19,341 | 3 | 3 | 33 | 42 | 2 | 1 | 32 | 37 | 70  | 83 |
| 19,342 | 3 | 3 | 33 | 42 | 2 | 1 | 32 | 37 | 70  | 83 |
| 19,343 | 3 | 3 | 33 | 42 | 2 | 1 | 32 | 37 | 70  | 83 |
| 19,344 | 3 | 3 | 33 | 42 | 2 | 1 | 32 | 37 | 70  | 83 |
| 19,345 | 4 | 3 | 33 | 39 | 2 | 1 | 32 | 35 | 71  | 78 |
| 19,346 | 4 | 3 | 33 | 38 | 2 | 1 | 33 | 35 | 72  | 77 |
| 19,347 | 4 | 3 | 34 | 37 | 2 | 1 | 33 | 33 | 73  | 74 |
| 19,348 | 7 | 3 | 43 | 30 | 3 | 0 | 40 | 22 | 93  | 55 |
| 19,349 | 7 | 3 | 44 | 19 | 3 | 0 | 40 | 12 | 94  | 34 |
| 19,350 | 7 | 2 | 44 | 17 | 3 | 0 | 40 | 9  | 94  | 28 |
| 19,351 | 7 | 1 | 44 | 12 | 3 | 0 | 40 | 9  | 94  | 22 |
| 19,352 | 9 | 0 | 45 | 9  | 3 | 0 | 43 | 5  | 100 | 14 |
| 19,353 | 9 | 0 | 46 | 9  | 3 | 0 | 44 | 4  | 102 | 13 |
| 19,354 | 8 | 0 | 45 | 4  | 3 | 0 | 43 | 4  | 99  | 8  |
| 19,355 | 8 | 0 | 45 | 4  | 3 | 0 | 43 | 4  | 99  | 8  |
| 19,356 | 8 | 0 | 45 | 4  | 3 | 0 | 44 | 2  | 100 | 6  |
| 19,357 | 8 | 0 | 44 | 4  | 3 | 0 | 44 | 2  | 99  | 6  |
| 19,358 | 8 | 0 | 44 | 4  | 3 | 0 | 44 | 2  | 99  | 6  |
| 19,359 | 8 | 0 | 44 | 4  | 3 | 0 | 44 | 2  | 99  | 6  |
| 19,360 | 8 | 0 | 45 | 4  | 3 | 0 | 44 | 2  | 100 | 6  |
| 19,361 | 8 | 0 | 44 | 5  | 3 | 0 | 44 | 2  | 99  | 7  |
| 19,362 | 8 | 0 | 43 | 7  | 3 | 0 | 44 | 4  | 98  | 11 |
| 19,363 | 7 | 0 | 35 | 14 | 3 | 0 | 42 | 7  | 87  | 21 |
| 19,364 | 7 | 0 | 37 | 15 | 3 | 0 | 48 | 7  | 95  | 22 |
| 19,365 | 7 | 0 | 36 | 15 | 3 | 0 | 48 | 8  | 94  | 23 |
| 19,366 | 7 | 0 | 26 | 15 | 2 | 0 | 34 | 8  | 69  | 23 |
| 19,367 | 7 | 1 | 22 | 15 | 1 | 0 | 28 | 8  | 58  | 24 |
| 19,368 | 7 | 1 | 21 | 15 | 1 | 0 | 26 | 8  | 55  | 24 |
| 19,369 | 7 | 1 | 21 | 18 | 1 | 0 | 26 | 10 | 55  | 29 |
| 19,370 | 7 | 1 | 21 | 19 | 1 | 0 | 26 | 10 | 55  | 30 |
| 19,371 | 7 | 1 | 20 | 20 | 1 | 0 | 26 | 10 | 54  | 31 |
| 19,372 | 7 | 3 | 20 | 30 | 1 | 0 | 25 | 22 | 53  | 55 |
| 19,373 | 7 | 3 | 20 | 31 | 1 | 0 | 25 | 22 | 53  | 56 |
| 19,374 | 7 | 3 | 20 | 32 | 1 | 0 | 25 | 22 | 53  | 57 |
| 19,375 | 7 | 3 | 19 | 31 | 1 | 0 | 24 | 22 | 51  | 56 |
| 19,376 | 7 | 3 | 19 | 34 | 1 | 0 | 24 | 22 | 51  | 59 |
| 19,377 | 7 | 3 | 19 | 34 | 1 | 0 | 24 | 22 | 51  | 59 |
| 19,378 | 7 | 3 | 19 | 37 | 1 | 0 | 24 | 24 | 51  | 64 |
| 19,379 | 7 | 3 | 19 | 38 | 1 | 0 | 24 | 25 | 51  | 66 |
| 19,380 | 7 | 3 | 19 | 37 | 1 | 0 | 24 | 25 | 51  | 65 |
| 19,381 | 7 | 3 | 19 | 37 | 1 | 0 | 24 | 25 | 51  | 65 |

|        |   |    |    |     |   |   |    |     |    |     |
|--------|---|----|----|-----|---|---|----|-----|----|-----|
| 19,382 | 7 | 3  | 19 | 37  | 1 | 0 | 23 | 26  | 50 | 66  |
| 19,383 | 7 | 3  | 19 | 37  | 1 | 0 | 21 | 26  | 48 | 66  |
| 19,384 | 7 | 3  | 19 | 37  | 1 | 0 | 21 | 26  | 48 | 66  |
| 19,385 | 7 | 3  | 20 | 37  | 1 | 0 | 21 | 25  | 49 | 65  |
| 19,386 | 7 | 3  | 20 | 37  | 1 | 0 | 21 | 26  | 49 | 66  |
| 19,387 | 7 | 3  | 20 | 37  | 1 | 0 | 21 | 26  | 49 | 66  |
| 19,388 | 7 | 3  | 20 | 37  | 1 | 0 | 21 | 26  | 49 | 66  |
| 19,389 | 7 | 3  | 20 | 37  | 1 | 0 | 21 | 26  | 49 | 66  |
| 19,390 | 6 | 3  | 20 | 37  | 1 | 0 | 21 | 26  | 48 | 66  |
| 19,391 | 6 | 3  | 19 | 37  | 1 | 0 | 21 | 26  | 47 | 66  |
| 19,392 | 6 | 3  | 19 | 37  | 1 | 0 | 21 | 26  | 47 | 66  |
| 19,393 | 6 | 3  | 19 | 37  | 1 | 0 | 21 | 26  | 47 | 66  |
| 19,394 | 6 | 5  | 19 | 38  | 1 | 0 | 21 | 29  | 47 | 72  |
| 19,395 | 5 | 5  | 19 | 40  | 1 | 0 | 21 | 31  | 46 | 76  |
| 19,396 | 5 | 6  | 19 | 45  | 1 | 0 | 21 | 32  | 46 | 83  |
| 19,397 | 5 | 6  | 18 | 46  | 1 | 0 | 21 | 32  | 45 | 84  |
| 19,398 | 2 | 21 | 9  | 98  | 0 | 4 | 13 | 84  | 24 | 207 |
| 19,399 | 2 | 21 | 8  | 107 | 0 | 5 | 13 | 85  | 23 | 218 |
| 19,400 | 1 | 22 | 7  | 112 | 0 | 5 | 11 | 87  | 19 | 226 |
| 19,401 | 1 | 24 | 7  | 116 | 0 | 5 | 11 | 89  | 19 | 234 |
| 19,402 | 0 | 24 | 7  | 121 | 0 | 5 | 10 | 91  | 17 | 241 |
| 19,403 | 0 | 29 | 6  | 132 | 0 | 5 | 10 | 98  | 16 | 264 |
| 19,404 | 0 | 29 | 6  | 133 | 0 | 5 | 9  | 98  | 15 | 265 |
| 19,405 | 0 | 29 | 6  | 136 | 0 | 7 | 9  | 100 | 15 | 272 |
| 19,406 | 0 | 29 | 6  | 142 | 0 | 7 | 9  | 101 | 15 | 279 |
| 19,407 | 0 | 29 | 6  | 142 | 0 | 7 | 9  | 101 | 15 | 279 |
| 19,408 | 0 | 29 | 6  | 142 | 0 | 7 | 9  | 101 | 15 | 279 |
| 19,409 | 0 | 29 | 6  | 142 | 0 | 7 | 9  | 101 | 15 | 279 |
| 19,410 | 0 | 30 | 6  | 142 | 0 | 7 | 9  | 103 | 15 | 282 |
| 19,411 | 0 | 30 | 5  | 142 | 0 | 7 | 9  | 104 | 14 | 283 |
| 19,412 | 0 | 31 | 5  | 148 | 0 | 8 | 9  | 105 | 14 | 292 |
| 19,413 | 0 | 32 | 5  | 148 | 0 | 9 | 9  | 104 | 14 | 293 |
| 19,414 | 0 | 32 | 5  | 141 | 0 | 9 | 7  | 101 | 12 | 283 |
| 19,415 | 0 | 33 | 3  | 140 | 0 | 9 | 0  | 100 | 3  | 282 |
| 19,416 | 0 | 33 | 3  | 141 | 0 | 9 | 0  | 100 | 3  | 283 |
| 19,417 | 0 | 33 | 3  | 141 | 0 | 9 | 0  | 101 | 3  | 284 |
| 19,418 | 1 | 32 | 3  | 142 | 0 | 9 | 1  | 101 | 5  | 284 |
| 19,419 | 1 | 32 | 3  | 142 | 0 | 9 | 1  | 101 | 5  | 284 |
| 19,420 | 2 | 32 | 3  | 139 | 0 | 9 | 1  | 99  | 6  | 279 |
| 19,421 | 3 | 32 | 6  | 139 | 0 | 9 | 2  | 99  | 11 | 279 |
| 19,422 | 3 | 32 | 6  | 139 | 0 | 9 | 2  | 100 | 11 | 280 |

|        |   |    |    |     |   |   |    |    |    |     |
|--------|---|----|----|-----|---|---|----|----|----|-----|
| 19,423 | 3 | 30 | 6  | 129 | 0 | 9 | 2  | 89 | 11 | 257 |
| 19,424 | 5 | 30 | 10 | 128 | 0 | 9 | 5  | 88 | 20 | 255 |
| 19,425 | 5 | 30 | 10 | 129 | 0 | 9 | 6  | 89 | 21 | 257 |
| 19,426 | 5 | 31 | 10 | 129 | 0 | 9 | 6  | 89 | 21 | 258 |
| 19,427 | 5 | 31 | 10 | 134 | 0 | 9 | 6  | 92 | 21 | 266 |
| 19,428 | 5 | 31 | 10 | 134 | 0 | 9 | 6  | 92 | 21 | 266 |
| 19,429 | 5 | 31 | 10 | 131 | 0 | 9 | 6  | 89 | 21 | 260 |
| 19,430 | 5 | 31 | 10 | 131 | 0 | 9 | 6  | 88 | 21 | 259 |
| 19,431 | 5 | 31 | 10 | 134 | 0 | 9 | 6  | 88 | 21 | 262 |
| 19,432 | 5 | 31 | 10 | 134 | 0 | 9 | 6  | 88 | 21 | 262 |
| 19,433 | 5 | 31 | 10 | 134 | 0 | 9 | 6  | 88 | 21 | 262 |
| 19,434 | 5 | 31 | 10 | 136 | 0 | 9 | 6  | 88 | 21 | 264 |
| 19,435 | 5 | 31 | 10 | 136 | 0 | 9 | 7  | 88 | 22 | 264 |
| 19,436 | 5 | 31 | 9  | 136 | 0 | 9 | 7  | 87 | 21 | 263 |
| 19,437 | 5 | 31 | 9  | 136 | 0 | 9 | 7  | 87 | 21 | 263 |
| 19,438 | 5 | 31 | 9  | 136 | 0 | 9 | 8  | 87 | 22 | 263 |
| 19,439 | 5 | 31 | 9  | 138 | 0 | 9 | 8  | 87 | 22 | 265 |
| 19,440 | 5 | 31 | 9  | 138 | 0 | 9 | 8  | 87 | 22 | 265 |
| 19,441 | 5 | 31 | 9  | 138 | 0 | 9 | 9  | 87 | 23 | 265 |
| 19,442 | 5 | 31 | 9  | 138 | 0 | 9 | 9  | 87 | 23 | 265 |
| 19,443 | 5 | 31 | 9  | 138 | 0 | 9 | 10 | 87 | 24 | 265 |
| 19,444 | 5 | 29 | 9  | 137 | 0 | 9 | 11 | 84 | 25 | 259 |
| 19,445 | 5 | 29 | 9  | 137 | 0 | 9 | 11 | 84 | 25 | 259 |
| 19,446 | 5 | 29 | 9  | 135 | 0 | 9 | 11 | 82 | 25 | 255 |
| 19,447 | 5 | 28 | 8  | 130 | 0 | 9 | 11 | 81 | 24 | 248 |
| 19,448 | 5 | 13 | 9  | 77  | 0 | 5 | 14 | 29 | 28 | 124 |
| 19,449 | 5 | 13 | 9  | 69  | 1 | 4 | 14 | 28 | 29 | 114 |
| 19,450 | 5 | 13 | 9  | 70  | 1 | 4 | 14 | 28 | 29 | 115 |
| 19,451 | 5 | 12 | 9  | 65  | 1 | 4 | 14 | 25 | 29 | 106 |
| 19,452 | 5 | 10 | 9  | 61  | 1 | 4 | 14 | 23 | 29 | 98  |
| 19,453 | 6 | 5  | 11 | 45  | 2 | 4 | 20 | 14 | 39 | 68  |
| 19,454 | 7 | 5  | 16 | 45  | 3 | 4 | 31 | 14 | 57 | 68  |
| 19,455 | 7 | 5  | 16 | 45  | 3 | 4 | 31 | 14 | 57 | 68  |
| 19,456 | 8 | 5  | 24 | 42  | 4 | 2 | 43 | 12 | 79 | 61  |
| 19,457 | 8 | 5  | 24 | 36  | 4 | 2 | 44 | 11 | 80 | 54  |
| 19,458 | 8 | 5  | 24 | 36  | 4 | 2 | 44 | 11 | 80 | 54  |
| 19,459 | 8 | 5  | 24 | 36  | 4 | 2 | 44 | 11 | 80 | 54  |
| 19,460 | 8 | 5  | 24 | 36  | 4 | 2 | 44 | 11 | 80 | 54  |
| 19,461 | 8 | 4  | 24 | 37  | 5 | 2 | 45 | 9  | 82 | 52  |
| 19,462 | 8 | 4  | 24 | 37  | 5 | 2 | 45 | 8  | 82 | 51  |
| 19,463 | 8 | 3  | 25 | 30  | 6 | 1 | 45 | 7  | 84 | 41  |

|        |   |    |    |     |   |    |    |     |    |     |
|--------|---|----|----|-----|---|----|----|-----|----|-----|
| 19,464 | 8 | 1  | 25 | 27  | 6 | 0  | 45 | 7   | 84 | 35  |
| 19,465 | 8 | 1  | 25 | 27  | 6 | 0  | 45 | 7   | 84 | 35  |
| 19,466 | 8 | 1  | 24 | 27  | 6 | 0  | 45 | 7   | 83 | 35  |
| 19,467 | 8 | 1  | 24 | 27  | 6 | 0  | 45 | 7   | 83 | 35  |
| 19,468 | 8 | 1  | 24 | 27  | 6 | 0  | 45 | 7   | 83 | 35  |
| 19,469 | 7 | 1  | 24 | 26  | 6 | 0  | 44 | 8   | 81 | 35  |
| 19,470 | 6 | 1  | 24 | 26  | 6 | 0  | 44 | 8   | 80 | 35  |
| 19,471 | 6 | 1  | 24 | 26  | 6 | 0  | 44 | 8   | 80 | 35  |
| 19,472 | 5 | 1  | 21 | 24  | 6 | 0  | 43 | 8   | 75 | 33  |
| 19,473 | 3 | 1  | 19 | 24  | 6 | 0  | 44 | 7   | 72 | 32  |
| 19,474 | 3 | 1  | 17 | 24  | 6 | 0  | 41 | 7   | 67 | 32  |
| 19,475 | 3 | 1  | 17 | 21  | 6 | 0  | 40 | 6   | 66 | 28  |
| 19,476 | 3 | 1  | 17 | 21  | 6 | 0  | 40 | 7   | 66 | 29  |
| 19,477 | 3 | 0  | 17 | 21  | 6 | 0  | 41 | 7   | 67 | 28  |
| 19,478 | 3 | 0  | 17 | 13  | 6 | 0  | 41 | 4   | 67 | 17  |
| 19,479 | 3 | 0  | 17 | 12  | 6 | 0  | 41 | 6   | 67 | 18  |
| 19,480 | 3 | 2  | 17 | 42  | 6 | 1  | 41 | 27  | 67 | 72  |
| 19,481 | 3 | 5  | 17 | 69  | 6 | 2  | 42 | 53  | 68 | 129 |
| 19,482 | 3 | 9  | 17 | 104 | 6 | 5  | 42 | 72  | 68 | 190 |
| 19,483 | 3 | 26 | 17 | 203 | 6 | 15 | 42 | 148 | 68 | 392 |
| 19,484 | 3 | 33 | 17 | 257 | 6 | 22 | 42 | 190 | 68 | 502 |
| 19,485 | 3 | 34 | 17 | 266 | 6 | 22 | 42 | 195 | 68 | 517 |
| 19,486 | 3 | 36 | 18 | 269 | 7 | 22 | 41 | 196 | 69 | 523 |
| 19,487 | 3 | 39 | 18 | 290 | 7 | 24 | 41 | 201 | 69 | 554 |
| 19,488 | 3 | 47 | 18 | 304 | 7 | 24 | 40 | 208 | 68 | 583 |
| 19,489 | 3 | 47 | 18 | 310 | 7 | 24 | 40 | 207 | 68 | 588 |
| 19,490 | 3 | 51 | 18 | 314 | 7 | 24 | 40 | 207 | 68 | 596 |
| 19,491 | 3 | 51 | 18 | 314 | 7 | 24 | 40 | 208 | 68 | 597 |
| 19,492 | 3 | 51 | 19 | 319 | 8 | 24 | 41 | 211 | 71 | 605 |
| 19,493 | 3 | 51 | 19 | 319 | 8 | 24 | 41 | 211 | 71 | 605 |
| 19,494 | 3 | 53 | 19 | 326 | 8 | 24 | 41 | 212 | 71 | 615 |
| 19,495 | 3 | 53 | 19 | 326 | 8 | 24 | 40 | 213 | 70 | 616 |
| 19,496 | 3 | 53 | 19 | 326 | 8 | 24 | 40 | 213 | 70 | 616 |
| 19,497 | 3 | 53 | 19 | 326 | 8 | 24 | 40 | 213 | 70 | 616 |
| 19,498 | 4 | 54 | 19 | 330 | 8 | 25 | 40 | 218 | 71 | 627 |
| 19,499 | 4 | 54 | 18 | 343 | 8 | 27 | 37 | 221 | 67 | 645 |
| 19,500 | 4 | 56 | 18 | 377 | 7 | 31 | 38 | 252 | 67 | 716 |
| 19,501 | 4 | 61 | 18 | 474 | 7 | 43 | 38 | 303 | 67 | 881 |
| 19,502 | 4 | 62 | 18 | 487 | 7 | 44 | 38 | 312 | 67 | 905 |
| 19,503 | 3 | 65 | 17 | 519 | 7 | 46 | 38 | 325 | 65 | 955 |
| 19,504 | 3 | 69 | 16 | 539 | 6 | 46 | 33 | 333 | 58 | 987 |

|        |   |    |    |     |   |    |    |     |    |       |
|--------|---|----|----|-----|---|----|----|-----|----|-------|
| 19,505 | 3 | 70 | 11 | 556 | 5 | 46 | 22 | 346 | 41 | 1,018 |
| 19,506 | 2 | 72 | 3  | 572 | 4 | 47 | 11 | 362 | 20 | 1,053 |
| 19,507 | 2 | 72 | 3  | 574 | 4 | 48 | 10 | 362 | 19 | 1,056 |
| 19,508 | 2 | 74 | 3  | 595 | 4 | 50 | 10 | 373 | 19 | 1,092 |
| 19,509 | 2 | 74 | 3  | 597 | 4 | 50 | 10 | 373 | 19 | 1,094 |
| 19,510 | 2 | 74 | 3  | 607 | 4 | 51 | 10 | 379 | 19 | 1,111 |
| 19,511 | 2 | 75 | 3  | 606 | 3 | 51 | 10 | 379 | 18 | 1,111 |
| 19,512 | 2 | 77 | 3  | 620 | 3 | 51 | 9  | 387 | 17 | 1,135 |
| 19,513 | 2 | 78 | 2  | 628 | 2 | 51 | 9  | 389 | 15 | 1,146 |
| 19,514 | 2 | 78 | 2  | 628 | 2 | 51 | 9  | 389 | 15 | 1,146 |
| 19,515 | 2 | 78 | 2  | 628 | 2 | 51 | 9  | 389 | 15 | 1,146 |
| 19,516 | 2 | 78 | 3  | 628 | 2 | 51 | 9  | 389 | 16 | 1,146 |
| 19,517 | 2 | 78 | 3  | 626 | 2 | 51 | 9  | 389 | 16 | 1,144 |
| 19,518 | 2 | 78 | 3  | 627 | 2 | 51 | 9  | 389 | 16 | 1,145 |
| 19,519 | 2 | 78 | 3  | 627 | 2 | 51 | 9  | 389 | 16 | 1,145 |
| 19,520 | 2 | 78 | 3  | 631 | 2 | 51 | 9  | 388 | 16 | 1,148 |
| 19,521 | 2 | 78 | 3  | 631 | 2 | 51 | 9  | 390 | 16 | 1,150 |
| 19,522 | 2 | 78 | 3  | 636 | 2 | 51 | 9  | 391 | 16 | 1,156 |
| 19,523 | 2 | 78 | 3  | 636 | 2 | 52 | 9  | 391 | 16 | 1,157 |
| 19,524 | 2 | 78 | 3  | 636 | 2 | 52 | 9  | 391 | 16 | 1,157 |
| 19,525 | 2 | 78 | 3  | 637 | 2 | 52 | 9  | 391 | 16 | 1,158 |
| 19,526 | 2 | 78 | 3  | 637 | 2 | 52 | 9  | 390 | 16 | 1,157 |
| 19,527 | 2 | 78 | 3  | 637 | 2 | 52 | 8  | 390 | 15 | 1,157 |
| 19,528 | 2 | 78 | 4  | 637 | 2 | 52 | 8  | 390 | 16 | 1,157 |
| 19,529 | 2 | 78 | 4  | 637 | 2 | 52 | 9  | 390 | 17 | 1,157 |
| 19,530 | 2 | 78 | 4  | 637 | 2 | 52 | 9  | 390 | 17 | 1,157 |
| 19,531 | 2 | 76 | 4  | 607 | 2 | 51 | 8  | 369 | 16 | 1,103 |
| 19,532 | 2 | 73 | 5  | 581 | 2 | 50 | 8  | 343 | 17 | 1,047 |
| 19,533 | 2 | 69 | 5  | 543 | 2 | 47 | 8  | 324 | 17 | 983   |
| 19,534 | 2 | 45 | 5  | 391 | 2 | 30 | 8  | 207 | 17 | 673   |
| 19,535 | 3 | 44 | 5  | 380 | 2 | 30 | 8  | 202 | 18 | 656   |
| 19,536 | 3 | 42 | 9  | 375 | 1 | 30 | 8  | 200 | 21 | 647   |
| 19,537 | 3 | 43 | 11 | 379 | 1 | 30 | 9  | 204 | 24 | 656   |
| 19,538 | 3 | 32 | 11 | 345 | 1 | 28 | 10 | 195 | 25 | 600   |
| 19,539 | 3 | 32 | 11 | 347 | 1 | 28 | 10 | 197 | 25 | 604   |
| 19,540 | 3 | 32 | 11 | 341 | 1 | 28 | 10 | 198 | 25 | 599   |
| 19,541 | 3 | 28 | 11 | 336 | 1 | 28 | 10 | 198 | 25 | 590   |
| 19,542 | 3 | 29 | 10 | 339 | 0 | 28 | 9  | 199 | 22 | 595   |
| 19,543 | 3 | 29 | 10 | 334 | 0 | 28 | 8  | 196 | 21 | 587   |
| 19,544 | 3 | 29 | 10 | 334 | 0 | 28 | 7  | 196 | 20 | 587   |
| 19,545 | 3 | 28 | 10 | 327 | 0 | 28 | 8  | 195 | 21 | 578   |

|        |    |    |    |     |   |    |    |     |    |       |
|--------|----|----|----|-----|---|----|----|-----|----|-------|
| 19,546 | 3  | 28 | 10 | 327 | 0 | 28 | 8  | 194 | 21 | 577   |
| 19,547 | 3  | 27 | 10 | 323 | 0 | 27 | 8  | 190 | 21 | 567   |
| 19,548 | 4  | 27 | 10 | 323 | 0 | 27 | 8  | 189 | 22 | 566   |
| 19,549 | 3  | 27 | 11 | 324 | 0 | 27 | 8  | 189 | 22 | 567   |
| 19,550 | 3  | 28 | 11 | 317 | 0 | 25 | 8  | 199 | 22 | 569   |
| 19,551 | 3  | 26 | 11 | 300 | 0 | 22 | 8  | 175 | 22 | 523   |
| 19,552 | 3  | 23 | 11 | 284 | 0 | 16 | 8  | 212 | 22 | 535   |
| 19,553 | 5  | 28 | 12 | 370 | 0 | 27 | 8  | 300 | 25 | 725   |
| 19,554 | 5  | 38 | 12 | 434 | 0 | 28 | 7  | 332 | 24 | 832   |
| 19,555 | 6  | 41 | 12 | 464 | 0 | 29 | 8  | 341 | 26 | 875   |
| 19,556 | 5  | 40 | 14 | 452 | 0 | 29 | 9  | 331 | 28 | 852   |
| 19,557 | 5  | 38 | 14 | 434 | 0 | 27 | 8  | 315 | 27 | 814   |
| 19,558 | 6  | 37 | 15 | 414 | 1 | 26 | 12 | 305 | 34 | 782   |
| 19,559 | 6  | 37 | 15 | 420 | 1 | 26 | 12 | 308 | 34 | 791   |
| 19,560 | 6  | 37 | 15 | 420 | 1 | 26 | 12 | 309 | 34 | 792   |
| 19,561 | 6  | 37 | 17 | 412 | 1 | 25 | 16 | 304 | 40 | 778   |
| 19,562 | 7  | 36 | 24 | 416 | 2 | 25 | 20 | 307 | 53 | 784   |
| 19,563 | 7  | 34 | 25 | 406 | 2 | 27 | 20 | 303 | 54 | 770   |
| 19,564 | 7  | 33 | 25 | 397 | 2 | 27 | 20 | 300 | 54 | 757   |
| 19,565 | 7  | 33 | 34 | 401 | 2 | 28 | 24 | 310 | 67 | 772   |
| 19,566 | 9  | 33 | 36 | 403 | 2 | 28 | 25 | 310 | 72 | 774   |
| 19,567 | 10 | 34 | 35 | 404 | 2 | 28 | 25 | 312 | 72 | 778   |
| 19,568 | 10 | 34 | 35 | 405 | 2 | 28 | 25 | 312 | 72 | 779   |
| 19,569 | 10 | 35 | 35 | 405 | 2 | 28 | 25 | 312 | 72 | 780   |
| 19,570 | 10 | 37 | 35 | 429 | 2 | 30 | 25 | 336 | 72 | 832   |
| 19,571 | 10 | 37 | 35 | 427 | 2 | 30 | 25 | 335 | 72 | 829   |
| 19,572 | 10 | 37 | 35 | 434 | 2 | 32 | 25 | 339 | 72 | 842   |
| 19,573 | 10 | 38 | 35 | 432 | 2 | 32 | 25 | 339 | 72 | 841   |
| 19,574 | 10 | 38 | 35 | 434 | 2 | 32 | 25 | 340 | 72 | 844   |
| 19,575 | 10 | 39 | 35 | 442 | 2 | 32 | 24 | 342 | 71 | 855   |
| 19,576 | 10 | 39 | 35 | 442 | 2 | 32 | 24 | 342 | 71 | 855   |
| 19,577 | 10 | 39 | 35 | 442 | 2 | 32 | 24 | 342 | 71 | 855   |
| 19,578 | 10 | 39 | 34 | 444 | 2 | 32 | 24 | 344 | 70 | 859   |
| 19,579 | 10 | 39 | 34 | 451 | 2 | 32 | 23 | 347 | 69 | 869   |
| 19,580 | 11 | 39 | 34 | 463 | 2 | 32 | 23 | 362 | 70 | 896   |
| 19,581 | 11 | 39 | 34 | 471 | 2 | 32 | 23 | 365 | 70 | 907   |
| 19,582 | 11 | 45 | 33 | 523 | 2 | 38 | 23 | 420 | 69 | 1,026 |
| 19,583 | 11 | 46 | 33 | 571 | 2 | 39 | 23 | 445 | 69 | 1,101 |
| 19,584 | 11 | 47 | 33 | 593 | 2 | 39 | 23 | 456 | 69 | 1,135 |
| 19,585 | 11 | 47 | 33 | 603 | 2 | 39 | 23 | 459 | 69 | 1,148 |
| 19,586 | 10 | 47 | 33 | 614 | 2 | 39 | 21 | 472 | 66 | 1,172 |

|        |    |    |    |     |   |    |    |     |    |       |
|--------|----|----|----|-----|---|----|----|-----|----|-------|
| 19,587 | 10 | 47 | 28 | 621 | 2 | 39 | 21 | 476 | 61 | 1,183 |
| 19,588 | 11 | 50 | 26 | 647 | 2 | 38 | 21 | 495 | 60 | 1,230 |
| 19,589 | 11 | 50 | 26 | 646 | 2 | 38 | 20 | 492 | 59 | 1,226 |
| 19,590 | 11 | 52 | 26 | 647 | 2 | 38 | 20 | 490 | 59 | 1,227 |
| 19,591 | 11 | 53 | 26 | 657 | 2 | 38 | 20 | 491 | 59 | 1,239 |
| 19,592 | 11 | 53 | 26 | 657 | 2 | 38 | 20 | 490 | 59 | 1,238 |
| 19,593 | 11 | 52 | 26 | 655 | 2 | 38 | 20 | 490 | 59 | 1,235 |
| 19,594 | 11 | 52 | 26 | 655 | 2 | 38 | 20 | 490 | 59 | 1,235 |
| 19,595 | 11 | 52 | 26 | 656 | 2 | 38 | 19 | 490 | 58 | 1,236 |
| 19,596 | 11 | 51 | 26 | 656 | 2 | 38 | 19 | 489 | 58 | 1,234 |
| 19,597 | 11 | 51 | 26 | 656 | 2 | 38 | 19 | 489 | 58 | 1,234 |
| 19,598 | 11 | 51 | 26 | 656 | 2 | 38 | 19 | 488 | 58 | 1,233 |
| 19,599 | 10 | 51 | 26 | 656 | 2 | 37 | 19 | 485 | 57 | 1,229 |
| 19,600 | 10 | 50 | 27 | 647 | 2 | 37 | 19 | 472 | 58 | 1,206 |
| 19,601 | 10 | 50 | 27 | 647 | 2 | 37 | 19 | 472 | 58 | 1,206 |
| 19,602 | 10 | 48 | 27 | 548 | 2 | 31 | 19 | 380 | 58 | 1,007 |
| 19,603 | 10 | 48 | 27 | 548 | 2 | 31 | 19 | 379 | 58 | 1,006 |
| 19,604 | 8  | 29 | 26 | 355 | 2 | 18 | 19 | 241 | 55 | 643   |
| 19,605 | 8  | 29 | 26 | 355 | 2 | 18 | 19 | 241 | 55 | 643   |
| 19,606 | 7  | 22 | 26 | 300 | 2 | 17 | 18 | 222 | 53 | 561   |
| 19,607 | 7  | 22 | 24 | 299 | 2 | 17 | 17 | 222 | 50 | 560   |
| 19,608 | 7  | 22 | 24 | 300 | 2 | 17 | 18 | 225 | 51 | 564   |
| 19,609 | 6  | 22 | 23 | 304 | 1 | 17 | 14 | 225 | 44 | 568   |
| 19,610 | 6  | 22 | 21 | 302 | 1 | 17 | 13 | 222 | 41 | 563   |
| 19,611 | 6  | 22 | 21 | 301 | 1 | 17 | 10 | 222 | 38 | 562   |
| 19,612 | 5  | 22 | 14 | 293 | 0 | 17 | 7  | 219 | 26 | 551   |
| 19,613 | 5  | 22 | 11 | 290 | 0 | 15 | 4  | 215 | 20 | 542   |
| 19,614 | 5  | 22 | 4  | 291 | 0 | 15 | 3  | 214 | 12 | 542   |
| 19,615 | 5  | 22 | 4  | 287 | 0 | 14 | 3  | 204 | 12 | 527   |
| 19,616 | 5  | 22 | 4  | 287 | 0 | 14 | 3  | 204 | 12 | 527   |
| 19,617 | 3  | 23 | 2  | 285 | 0 | 14 | 2  | 204 | 7  | 526   |
| 19,618 | 2  | 22 | 2  | 284 | 0 | 14 | 2  | 202 | 6  | 522   |
| 19,619 | 2  | 21 | 2  | 282 | 0 | 14 | 2  | 202 | 6  | 519   |
| 19,620 | 2  | 19 | 2  | 259 | 0 | 12 | 2  | 178 | 6  | 468   |
| 19,621 | 2  | 19 | 2  | 259 | 0 | 12 | 2  | 178 | 6  | 468   |
| 19,622 | 2  | 19 | 2  | 259 | 0 | 12 | 2  | 176 | 6  | 466   |
| 19,623 | 2  | 19 | 2  | 252 | 0 | 10 | 2  | 171 | 6  | 452   |
| 19,624 | 2  | 18 | 2  | 249 | 0 | 9  | 2  | 171 | 6  | 447   |
| 19,625 | 2  | 18 | 2  | 247 | 0 | 9  | 2  | 171 | 6  | 445   |
| 19,626 | 2  | 17 | 2  | 239 | 0 | 9  | 2  | 169 | 6  | 434   |
| 19,627 | 2  | 17 | 2  | 239 | 0 | 9  | 2  | 169 | 6  | 434   |

|        |   |    |    |     |   |   |    |     |    |     |
|--------|---|----|----|-----|---|---|----|-----|----|-----|
| 19,628 | 2 | 17 | 2  | 239 | 0 | 9 | 2  | 169 | 6  | 434 |
| 19,629 | 1 | 17 | 5  | 230 | 0 | 9 | 2  | 164 | 8  | 420 |
| 19,630 | 1 | 17 | 5  | 210 | 0 | 9 | 2  | 144 | 8  | 380 |
| 19,631 | 1 | 17 | 5  | 210 | 0 | 9 | 2  | 145 | 8  | 381 |
| 19,632 | 1 | 17 | 5  | 210 | 0 | 9 | 2  | 145 | 8  | 381 |
| 19,633 | 1 | 11 | 5  | 157 | 0 | 3 | 2  | 92  | 8  | 263 |
| 19,634 | 1 | 10 | 5  | 109 | 0 | 2 | 2  | 68  | 8  | 189 |
| 19,635 | 2 | 9  | 6  | 87  | 0 | 2 | 2  | 56  | 10 | 154 |
| 19,636 | 2 | 9  | 6  | 79  | 0 | 2 | 3  | 53  | 11 | 143 |
| 19,637 | 3 | 9  | 9  | 61  | 0 | 2 | 6  | 36  | 18 | 108 |
| 19,638 | 3 | 5  | 9  | 31  | 0 | 1 | 10 | 12  | 22 | 49  |
| 19,639 | 2 | 5  | 9  | 32  | 0 | 1 | 10 | 12  | 21 | 50  |
| 19,640 | 2 | 5  | 9  | 33  | 0 | 1 | 11 | 13  | 22 | 52  |
| 19,641 | 2 | 3  | 16 | 31  | 0 | 1 | 16 | 13  | 34 | 48  |
| 19,642 | 2 | 2  | 16 | 24  | 0 | 1 | 16 | 15  | 34 | 42  |
| 19,643 | 2 | 2  | 16 | 24  | 0 | 1 | 16 | 15  | 34 | 42  |
| 19,644 | 3 | 2  | 23 | 24  | 0 | 1 | 19 | 16  | 45 | 43  |
| 19,645 | 3 | 2  | 23 | 26  | 0 | 1 | 20 | 16  | 46 | 45  |
| 19,646 | 3 | 2  | 23 | 28  | 0 | 1 | 20 | 18  | 46 | 49  |
| 19,647 | 3 | 5  | 23 | 75  | 0 | 2 | 20 | 61  | 46 | 143 |
| 19,648 | 3 | 5  | 23 | 100 | 0 | 3 | 22 | 72  | 48 | 180 |
| 19,649 | 3 | 5  | 23 | 105 | 0 | 3 | 22 | 73  | 48 | 186 |
| 19,650 | 3 | 5  | 21 | 107 | 0 | 3 | 22 | 74  | 46 | 189 |
| 19,651 | 3 | 5  | 21 | 107 | 0 | 4 | 22 | 74  | 46 | 190 |
| 19,652 | 3 | 5  | 21 | 107 | 0 | 4 | 22 | 74  | 46 | 190 |
| 19,653 | 3 | 5  | 21 | 107 | 0 | 4 | 22 | 74  | 46 | 190 |
| 19,654 | 3 | 5  | 21 | 107 | 0 | 4 | 22 | 74  | 46 | 190 |
| 19,655 | 3 | 5  | 22 | 106 | 0 | 4 | 22 | 74  | 47 | 189 |
| 19,656 | 3 | 5  | 22 | 106 | 0 | 4 | 22 | 73  | 47 | 188 |
| 19,657 | 3 | 5  | 23 | 105 | 0 | 4 | 23 | 73  | 49 | 187 |
| 19,658 | 3 | 5  | 23 | 105 | 0 | 4 | 23 | 73  | 49 | 187 |
| 19,659 | 3 | 5  | 23 | 104 | 0 | 4 | 22 | 70  | 48 | 183 |
| 19,660 | 3 | 4  | 23 | 94  | 1 | 3 | 26 | 69  | 53 | 170 |
| 19,661 | 3 | 4  | 23 | 94  | 1 | 3 | 26 | 69  | 53 | 170 |
| 19,662 | 3 | 4  | 26 | 95  | 1 | 3 | 26 | 67  | 56 | 169 |
| 19,663 | 3 | 4  | 26 | 95  | 1 | 3 | 25 | 67  | 55 | 169 |
| 19,664 | 3 | 4  | 29 | 95  | 1 | 3 | 25 | 67  | 58 | 169 |
| 19,665 | 3 | 4  | 29 | 95  | 1 | 3 | 25 | 67  | 58 | 169 |
| 19,666 | 3 | 4  | 30 | 96  | 1 | 3 | 25 | 67  | 59 | 170 |
| 19,667 | 3 | 4  | 30 | 99  | 1 | 3 | 26 | 73  | 60 | 179 |
| 19,668 | 3 | 3  | 30 | 99  | 1 | 3 | 26 | 73  | 60 | 178 |



|        |   |    |    |     |   |   |    |     |    |     |
|--------|---|----|----|-----|---|---|----|-----|----|-----|
| 19,669 | 3 | 3  | 30 | 99  | 1 | 3 | 26 | 74  | 60 | 179 |
| 19,670 | 3 | 3  | 30 | 99  | 1 | 3 | 26 | 76  | 60 | 181 |
| 19,671 | 3 | 3  | 30 | 99  | 1 | 3 | 26 | 76  | 60 | 181 |
| 19,672 | 3 | 3  | 30 | 101 | 1 | 3 | 26 | 76  | 60 | 183 |
| 19,673 | 3 | 3  | 30 | 104 | 1 | 3 | 26 | 76  | 60 | 186 |
| 19,674 | 3 | 5  | 30 | 109 | 1 | 3 | 26 | 78  | 60 | 195 |
| 19,675 | 3 | 5  | 30 | 111 | 1 | 3 | 26 | 78  | 60 | 197 |
| 19,676 | 3 | 5  | 32 | 111 | 1 | 3 | 26 | 77  | 62 | 196 |
| 19,677 | 3 | 5  | 32 | 113 | 1 | 3 | 26 | 77  | 62 | 198 |
| 19,678 | 3 | 5  | 32 | 112 | 1 | 3 | 29 | 77  | 65 | 197 |
| 19,679 | 3 | 5  | 31 | 113 | 1 | 3 | 29 | 77  | 64 | 198 |
| 19,680 | 3 | 5  | 31 | 113 | 1 | 3 | 29 | 77  | 64 | 198 |
| 19,681 | 3 | 5  | 31 | 114 | 1 | 3 | 29 | 76  | 64 | 198 |
| 19,682 | 3 | 5  | 31 | 114 | 1 | 3 | 29 | 77  | 64 | 199 |
| 19,683 | 3 | 5  | 33 | 114 | 1 | 3 | 29 | 77  | 66 | 199 |
| 19,684 | 3 | 5  | 34 | 114 | 1 | 3 | 30 | 77  | 68 | 199 |
| 19,685 | 4 | 5  | 33 | 116 | 1 | 3 | 30 | 78  | 68 | 202 |
| 19,686 | 4 | 5  | 33 | 122 | 1 | 4 | 29 | 79  | 67 | 210 |
| 19,687 | 6 | 5  | 38 | 138 | 2 | 6 | 36 | 83  | 82 | 232 |
| 19,688 | 5 | 8  | 35 | 243 | 2 | 6 | 33 | 97  | 75 | 354 |
| 19,689 | 5 | 8  | 35 | 245 | 2 | 6 | 33 | 98  | 75 | 357 |
| 19,690 | 6 | 12 | 36 | 264 | 2 | 7 | 32 | 109 | 76 | 392 |
| 19,691 | 6 | 12 | 39 | 268 | 2 | 8 | 32 | 109 | 79 | 397 |
| 19,692 | 6 | 12 | 33 | 268 | 2 | 8 | 31 | 109 | 72 | 397 |
| 19,693 | 7 | 15 | 29 | 273 | 3 | 8 | 36 | 116 | 75 | 412 |
| 19,694 | 7 | 15 | 27 | 273 | 3 | 8 | 34 | 116 | 71 | 412 |
| 19,695 | 7 | 20 | 31 | 298 | 3 | 9 | 33 | 144 | 74 | 471 |
| 19,696 | 7 | 20 | 31 | 297 | 3 | 9 | 33 | 144 | 74 | 470 |
| 19,697 | 7 | 17 | 32 | 248 | 3 | 8 | 37 | 99  | 79 | 372 |
| 19,698 | 7 | 17 | 32 | 248 | 3 | 8 | 38 | 99  | 80 | 372 |
| 19,699 | 7 | 17 | 32 | 218 | 3 | 7 | 36 | 87  | 78 | 329 |
| 19,700 | 7 | 17 | 32 | 216 | 3 | 7 | 36 | 86  | 78 | 326 |
| 19,701 | 7 | 17 | 32 | 216 | 3 | 7 | 36 | 86  | 78 | 326 |
| 19,702 | 7 | 17 | 32 | 217 | 3 | 6 | 36 | 86  | 78 | 326 |
| 19,703 | 7 | 17 | 32 | 217 | 3 | 6 | 36 | 87  | 78 | 327 |
| 19,704 | 7 | 17 | 36 | 217 | 3 | 6 | 45 | 87  | 91 | 327 |
| 19,705 | 8 | 17 | 36 | 217 | 3 | 6 | 46 | 87  | 93 | 327 |
| 19,706 | 8 | 17 | 36 | 217 | 3 | 6 | 46 | 87  | 93 | 327 |
| 19,707 | 8 | 17 | 36 | 217 | 3 | 6 | 46 | 87  | 93 | 327 |
| 19,708 | 8 | 17 | 35 | 217 | 3 | 6 | 45 | 87  | 91 | 327 |
| 19,709 | 8 | 17 | 35 | 217 | 3 | 6 | 50 | 87  | 96 | 327 |

|        |   |    |    |     |   |   |    |    |    |     |
|--------|---|----|----|-----|---|---|----|----|----|-----|
| 19,710 | 8 | 17 | 35 | 218 | 3 | 6 | 50 | 87 | 96 | 328 |
| 19,711 | 8 | 17 | 35 | 220 | 2 | 6 | 46 | 88 | 91 | 331 |
| 19,712 | 9 | 19 | 33 | 232 | 2 | 6 | 46 | 95 | 90 | 352 |
| 19,713 | 9 | 19 | 32 | 234 | 2 | 6 | 46 | 96 | 89 | 355 |
| 19,714 | 9 | 19 | 32 | 236 | 2 | 6 | 46 | 96 | 89 | 357 |
| 19,715 | 9 | 19 | 29 | 236 | 2 | 6 | 46 | 96 | 86 | 357 |
| 19,716 | 9 | 19 | 29 | 237 | 2 | 6 | 46 | 96 | 86 | 358 |
| 19,717 | 9 | 19 | 28 | 241 | 2 | 6 | 46 | 94 | 85 | 360 |
| 19,718 | 9 | 20 | 28 | 242 | 2 | 6 | 45 | 95 | 84 | 363 |
| 19,719 | 9 | 20 | 28 | 245 | 2 | 6 | 45 | 95 | 84 | 366 |
| 19,720 | 9 | 20 | 28 | 239 | 2 | 6 | 45 | 92 | 84 | 357 |
| 19,721 | 9 | 20 | 28 | 239 | 2 | 6 | 45 | 93 | 84 | 358 |
| 19,722 | 9 | 20 | 28 | 242 | 2 | 6 | 45 | 93 | 84 | 361 |
| 19,723 | 9 | 20 | 28 | 242 | 2 | 6 | 45 | 94 | 84 | 362 |
| 19,724 | 9 | 19 | 26 | 239 | 2 | 6 | 45 | 92 | 82 | 356 |
| 19,725 | 9 | 19 | 26 | 239 | 2 | 6 | 45 | 92 | 82 | 356 |
| 19,726 | 9 | 19 | 28 | 238 | 3 | 6 | 45 | 92 | 85 | 355 |
| 19,727 | 9 | 19 | 28 | 238 | 3 | 6 | 45 | 92 | 85 | 355 |
| 19,728 | 9 | 19 | 28 | 236 | 3 | 6 | 45 | 92 | 85 | 353 |
| 19,729 | 9 | 19 | 28 | 236 | 3 | 6 | 44 | 92 | 84 | 353 |
| 19,730 | 9 | 19 | 26 | 235 | 3 | 6 | 44 | 92 | 82 | 352 |
| 19,731 | 9 | 19 | 27 | 234 | 3 | 6 | 44 | 92 | 83 | 351 |
| 19,732 | 9 | 19 | 27 | 234 | 3 | 6 | 44 | 92 | 83 | 351 |
| 19,733 | 9 | 19 | 28 | 234 | 3 | 6 | 44 | 91 | 84 | 350 |
| 19,734 | 9 | 19 | 26 | 234 | 3 | 6 | 44 | 91 | 82 | 350 |
| 19,735 | 9 | 19 | 26 | 231 | 3 | 6 | 43 | 90 | 81 | 346 |
| 19,736 | 7 | 19 | 26 | 225 | 3 | 5 | 43 | 89 | 79 | 338 |
| 19,737 | 7 | 19 | 26 | 225 | 3 | 5 | 43 | 89 | 79 | 338 |
| 19,738 | 5 | 16 | 23 | 105 | 2 | 3 | 39 | 70 | 69 | 194 |
| 19,739 | 5 | 12 | 23 | 78  | 2 | 1 | 40 | 59 | 70 | 150 |
| 19,740 | 5 | 12 | 23 | 78  | 2 | 1 | 38 | 59 | 68 | 150 |
| 19,741 | 4 | 12 | 24 | 78  | 2 | 1 | 38 | 59 | 68 | 150 |
| 19,742 | 4 | 12 | 28 | 78  | 3 | 1 | 38 | 59 | 73 | 150 |
| 19,743 | 4 | 12 | 28 | 79  | 3 | 1 | 37 | 59 | 72 | 151 |
| 19,744 | 2 | 10 | 27 | 74  | 2 | 1 | 31 | 53 | 62 | 138 |
| 19,745 | 2 | 10 | 23 | 75  | 2 | 1 | 31 | 53 | 58 | 139 |
| 19,746 | 2 | 5  | 23 | 48  | 2 | 0 | 33 | 24 | 60 | 77  |
| 19,747 | 2 | 5  | 23 | 46  | 2 | 0 | 33 | 24 | 60 | 75  |
| 19,748 | 2 | 5  | 22 | 46  | 2 | 0 | 29 | 24 | 55 | 75  |
| 19,749 | 2 | 5  | 24 | 46  | 2 | 0 | 29 | 24 | 57 | 75  |
| 19,750 | 2 | 5  | 24 | 46  | 2 | 0 | 29 | 24 | 57 | 75  |

|        |    |   |    |    |   |   |    |    |     |    |
|--------|----|---|----|----|---|---|----|----|-----|----|
| 19,751 | 2  | 5 | 24 | 47 | 2 | 0 | 29 | 24 | 57  | 76 |
| 19,752 | 3  | 5 | 24 | 47 | 2 | 0 | 29 | 24 | 58  | 76 |
| 19,753 | 4  | 5 | 25 | 46 | 2 | 0 | 30 | 23 | 61  | 74 |
| 19,754 | 4  | 5 | 25 | 47 | 2 | 0 | 30 | 25 | 61  | 77 |
| 19,755 | 4  | 5 | 21 | 47 | 2 | 0 | 21 | 26 | 48  | 78 |
| 19,756 | 5  | 5 | 26 | 48 | 3 | 0 | 27 | 26 | 61  | 79 |
| 19,757 | 5  | 5 | 29 | 48 | 4 | 0 | 28 | 26 | 66  | 79 |
| 19,758 | 5  | 5 | 29 | 49 | 4 | 0 | 27 | 26 | 65  | 80 |
| 19,759 | 5  | 5 | 29 | 49 | 4 | 0 | 24 | 26 | 62  | 80 |
| 19,760 | 5  | 5 | 29 | 49 | 4 | 0 | 23 | 26 | 61  | 80 |
| 19,761 | 5  | 5 | 29 | 46 | 4 | 0 | 23 | 25 | 61  | 76 |
| 19,762 | 5  | 5 | 29 | 46 | 4 | 0 | 23 | 26 | 61  | 77 |
| 19,763 | 6  | 3 | 29 | 32 | 4 | 0 | 24 | 18 | 63  | 53 |
| 19,764 | 6  | 3 | 29 | 32 | 4 | 0 | 24 | 18 | 63  | 53 |
| 19,765 | 6  | 3 | 29 | 31 | 4 | 0 | 26 | 18 | 65  | 52 |
| 19,766 | 6  | 3 | 29 | 31 | 4 | 0 | 26 | 18 | 65  | 52 |
| 19,767 | 6  | 3 | 29 | 23 | 4 | 0 | 26 | 14 | 65  | 40 |
| 19,768 | 6  | 3 | 29 | 23 | 4 | 0 | 26 | 14 | 65  | 40 |
| 19,769 | 6  | 2 | 29 | 20 | 4 | 0 | 26 | 13 | 65  | 35 |
| 19,770 | 6  | 2 | 29 | 20 | 4 | 0 | 26 | 13 | 65  | 35 |
| 19,771 | 6  | 2 | 29 | 20 | 4 | 0 | 27 | 12 | 66  | 34 |
| 19,772 | 6  | 2 | 29 | 17 | 4 | 0 | 27 | 12 | 66  | 31 |
| 19,773 | 6  | 2 | 29 | 17 | 4 | 0 | 27 | 12 | 66  | 31 |
| 19,774 | 6  | 2 | 29 | 15 | 4 | 0 | 27 | 14 | 66  | 31 |
| 19,775 | 6  | 2 | 29 | 18 | 4 | 0 | 27 | 15 | 66  | 35 |
| 19,776 | 7  | 2 | 29 | 20 | 3 | 0 | 28 | 17 | 67  | 39 |
| 19,777 | 7  | 2 | 28 | 29 | 3 | 0 | 29 | 17 | 67  | 48 |
| 19,778 | 7  | 2 | 28 | 31 | 3 | 0 | 29 | 17 | 67  | 50 |
| 19,779 | 7  | 2 | 28 | 32 | 3 | 0 | 29 | 17 | 67  | 51 |
| 19,780 | 8  | 2 | 28 | 32 | 3 | 0 | 27 | 17 | 66  | 51 |
| 19,781 | 8  | 2 | 29 | 33 | 3 | 1 | 27 | 17 | 67  | 53 |
| 19,782 | 12 | 2 | 36 | 37 | 4 | 1 | 37 | 20 | 89  | 60 |
| 19,783 | 12 | 2 | 36 | 37 | 4 | 1 | 37 | 20 | 89  | 60 |
| 19,784 | 12 | 2 | 42 | 37 | 4 | 1 | 47 | 20 | 105 | 60 |
| 19,785 | 12 | 2 | 42 | 38 | 4 | 1 | 47 | 20 | 105 | 61 |
| 19,786 | 12 | 2 | 41 | 38 | 4 | 1 | 47 | 20 | 104 | 61 |
| 19,787 | 12 | 2 | 42 | 39 | 4 | 1 | 47 | 20 | 105 | 62 |
| 19,788 | 12 | 3 | 41 | 44 | 4 | 1 | 44 | 27 | 101 | 75 |
| 19,789 | 12 | 3 | 40 | 43 | 4 | 1 | 44 | 27 | 100 | 74 |
| 19,790 | 12 | 3 | 40 | 43 | 4 | 1 | 43 | 27 | 99  | 74 |
| 19,791 | 12 | 3 | 40 | 44 | 4 | 1 | 41 | 27 | 97  | 75 |

|        |    |    |    |     |   |    |    |     |    |     |
|--------|----|----|----|-----|---|----|----|-----|----|-----|
| 19,792 | 12 | 3  | 38 | 44  | 4 | 1  | 41 | 27  | 95 | 75  |
| 19,793 | 12 | 3  | 31 | 42  | 3 | 1  | 38 | 27  | 84 | 73  |
| 19,794 | 12 | 2  | 31 | 42  | 3 | 1  | 38 | 23  | 84 | 68  |
| 19,795 | 12 | 2  | 31 | 43  | 3 | 1  | 37 | 23  | 83 | 69  |
| 19,796 | 12 | 2  | 32 | 45  | 3 | 1  | 36 | 26  | 83 | 74  |
| 19,797 | 12 | 2  | 35 | 45  | 3 | 1  | 36 | 26  | 86 | 74  |
| 19,798 | 12 | 2  | 36 | 45  | 3 | 1  | 37 | 26  | 88 | 74  |
| 19,799 | 12 | 3  | 35 | 48  | 3 | 1  | 37 | 28  | 87 | 80  |
| 19,800 | 12 | 4  | 34 | 51  | 3 | 1  | 36 | 31  | 85 | 87  |
| 19,801 | 12 | 4  | 34 | 55  | 3 | 1  | 36 | 34  | 85 | 94  |
| 19,802 | 11 | 5  | 34 | 65  | 3 | 1  | 36 | 44  | 84 | 115 |
| 19,803 | 10 | 5  | 34 | 75  | 3 | 1  | 35 | 51  | 82 | 132 |
| 19,804 | 10 | 7  | 33 | 81  | 3 | 1  | 35 | 52  | 81 | 141 |
| 19,805 | 10 | 7  | 31 | 81  | 3 | 1  | 34 | 49  | 78 | 138 |
| 19,806 | 10 | 7  | 28 | 81  | 2 | 1  | 29 | 49  | 69 | 138 |
| 19,807 | 8  | 7  | 28 | 82  | 2 | 1  | 28 | 49  | 66 | 139 |
| 19,808 | 8  | 7  | 25 | 81  | 1 | 1  | 27 | 49  | 61 | 138 |
| 19,809 | 8  | 7  | 25 | 82  | 1 | 1  | 27 | 50  | 61 | 140 |
| 19,810 | 8  | 7  | 25 | 82  | 1 | 1  | 27 | 50  | 61 | 140 |
| 19,811 | 8  | 7  | 25 | 82  | 1 | 1  | 27 | 50  | 61 | 140 |
| 19,812 | 8  | 7  | 25 | 82  | 1 | 1  | 27 | 50  | 61 | 140 |
| 19,813 | 7  | 7  | 25 | 82  | 1 | 1  | 27 | 49  | 60 | 139 |
| 19,814 | 6  | 7  | 25 | 82  | 1 | 1  | 26 | 49  | 58 | 139 |
| 19,815 | 6  | 7  | 25 | 82  | 1 | 1  | 26 | 49  | 58 | 139 |
| 19,816 | 6  | 7  | 25 | 81  | 1 | 1  | 24 | 50  | 56 | 139 |
| 19,817 | 6  | 7  | 25 | 81  | 1 | 1  | 24 | 50  | 56 | 139 |
| 19,818 | 6  | 7  | 25 | 80  | 1 | 1  | 25 | 50  | 57 | 138 |
| 19,819 | 7  | 7  | 25 | 79  | 1 | 1  | 25 | 50  | 58 | 137 |
| 19,820 | 7  | 7  | 25 | 79  | 1 | 1  | 25 | 50  | 58 | 137 |
| 19,821 | 7  | 7  | 25 | 79  | 1 | 1  | 25 | 50  | 58 | 137 |
| 19,822 | 7  | 7  | 25 | 79  | 1 | 1  | 24 | 50  | 57 | 137 |
| 19,823 | 7  | 7  | 25 | 79  | 1 | 1  | 24 | 50  | 57 | 137 |
| 19,824 | 7  | 6  | 27 | 79  | 1 | 1  | 24 | 46  | 59 | 132 |
| 19,825 | 7  | 6  | 27 | 76  | 1 | 1  | 24 | 45  | 59 | 128 |
| 19,826 | 7  | 6  | 27 | 74  | 2 | 1  | 24 | 43  | 60 | 124 |
| 19,827 | 6  | 6  | 27 | 74  | 2 | 1  | 23 | 43  | 58 | 124 |
| 19,828 | 6  | 6  | 28 | 66  | 2 | 1  | 23 | 47  | 59 | 120 |
| 19,829 | 6  | 6  | 28 | 88  | 2 | 1  | 23 | 54  | 59 | 149 |
| 19,830 | 5  | 7  | 33 | 150 | 3 | 4  | 33 | 64  | 74 | 225 |
| 19,831 | 5  | 10 | 33 | 162 | 3 | 4  | 33 | 74  | 74 | 250 |
| 19,832 | 5  | 15 | 37 | 290 | 3 | 13 | 36 | 112 | 81 | 430 |

|        |   |    |    |     |   |    |    |     |    |       |
|--------|---|----|----|-----|---|----|----|-----|----|-------|
| 19,833 | 1 | 26 | 32 | 403 | 2 | 19 | 26 | 158 | 61 | 606   |
| 19,834 | 1 | 26 | 28 | 404 | 2 | 19 | 20 | 158 | 51 | 607   |
| 19,835 | 3 | 30 | 26 | 418 | 2 | 21 | 16 | 161 | 47 | 630   |
| 19,836 | 3 | 33 | 26 | 450 | 2 | 22 | 16 | 167 | 47 | 672   |
| 19,837 | 4 | 39 | 26 | 496 | 2 | 23 | 16 | 188 | 48 | 746   |
| 19,838 | 4 | 39 | 25 | 497 | 2 | 23 | 16 | 188 | 47 | 747   |
| 19,839 | 4 | 42 | 25 | 535 | 2 | 24 | 16 | 190 | 47 | 791   |
| 19,840 | 4 | 43 | 25 | 562 | 2 | 24 | 16 | 196 | 47 | 825   |
| 19,841 | 5 | 43 | 25 | 562 | 2 | 24 | 16 | 195 | 48 | 824   |
| 19,842 | 5 | 43 | 25 | 565 | 2 | 24 | 16 | 196 | 48 | 828   |
| 19,843 | 5 | 43 | 25 | 570 | 2 | 25 | 16 | 200 | 48 | 838   |
| 19,844 | 5 | 49 | 25 | 644 | 2 | 32 | 16 | 253 | 48 | 978   |
| 19,845 | 5 | 49 | 24 | 644 | 2 | 32 | 16 | 252 | 47 | 977   |
| 19,846 | 5 | 49 | 24 | 645 | 2 | 32 | 16 | 253 | 47 | 979   |
| 19,847 | 5 | 53 | 23 | 669 | 2 | 34 | 17 | 259 | 47 | 1,015 |
| 19,848 | 5 | 54 | 20 | 678 | 2 | 35 | 17 | 265 | 44 | 1,032 |
| 19,849 | 5 | 53 | 19 | 684 | 2 | 35 | 16 | 264 | 42 | 1,036 |
| 19,850 | 5 | 52 | 19 | 683 | 2 | 35 | 16 | 265 | 42 | 1,035 |
| 19,851 | 5 | 52 | 19 | 690 | 2 | 35 | 19 | 268 | 45 | 1,045 |
| 19,852 | 5 | 51 | 19 | 676 | 2 | 35 | 20 | 256 | 46 | 1,018 |
| 19,853 | 5 | 51 | 19 | 668 | 2 | 35 | 20 | 250 | 46 | 1,004 |
| 19,854 | 5 | 49 | 19 | 662 | 2 | 35 | 20 | 249 | 46 | 995   |
| 19,855 | 5 | 49 | 19 | 662 | 2 | 35 | 20 | 249 | 46 | 995   |
| 19,856 | 5 | 49 | 18 | 663 | 2 | 35 | 20 | 249 | 45 | 996   |
| 19,857 | 5 | 49 | 18 | 663 | 2 | 35 | 20 | 249 | 45 | 996   |
| 19,858 | 5 | 50 | 18 | 671 | 2 | 36 | 20 | 255 | 45 | 1,012 |
| 19,859 | 5 | 50 | 18 | 671 | 2 | 36 | 20 | 255 | 45 | 1,012 |
| 19,860 | 5 | 50 | 18 | 670 | 2 | 36 | 20 | 254 | 45 | 1,010 |
| 19,861 | 5 | 50 | 18 | 677 | 2 | 36 | 20 | 258 | 45 | 1,021 |
| 19,862 | 5 | 50 | 18 | 677 | 2 | 36 | 20 | 259 | 45 | 1,022 |
| 19,863 | 5 | 51 | 18 | 681 | 2 | 36 | 20 | 264 | 45 | 1,032 |
| 19,864 | 5 | 51 | 18 | 682 | 2 | 36 | 20 | 268 | 45 | 1,037 |
| 19,865 | 5 | 51 | 18 | 697 | 2 | 36 | 20 | 273 | 45 | 1,057 |
| 19,866 | 6 | 51 | 21 | 700 | 2 | 36 | 26 | 274 | 55 | 1,061 |
| 19,867 | 6 | 51 | 24 | 701 | 2 | 36 | 29 | 275 | 61 | 1,063 |
| 19,868 | 6 | 51 | 25 | 704 | 2 | 36 | 29 | 275 | 62 | 1,066 |
| 19,869 | 6 | 51 | 25 | 704 | 2 | 36 | 29 | 275 | 62 | 1,066 |
| 19,870 | 5 | 51 | 25 | 714 | 2 | 36 | 29 | 277 | 61 | 1,078 |
| 19,871 | 5 | 52 | 25 | 715 | 2 | 36 | 29 | 278 | 61 | 1,081 |
| 19,872 | 5 | 52 | 25 | 722 | 2 | 36 | 29 | 278 | 61 | 1,088 |
| 19,873 | 5 | 52 | 25 | 722 | 2 | 36 | 29 | 280 | 61 | 1,090 |

|        |   |    |    |     |   |    |    |     |    |       |
|--------|---|----|----|-----|---|----|----|-----|----|-------|
| 19,874 | 5 | 53 | 25 | 724 | 2 | 36 | 29 | 280 | 61 | 1,093 |
| 19,875 | 5 | 54 | 23 | 727 | 2 | 36 | 29 | 281 | 59 | 1,098 |
| 19,876 | 5 | 56 | 24 | 736 | 2 | 36 | 29 | 293 | 60 | 1,121 |
| 19,877 | 5 | 56 | 24 | 751 | 1 | 36 | 29 | 299 | 59 | 1,142 |
| 19,878 | 5 | 56 | 22 | 761 | 1 | 36 | 29 | 305 | 57 | 1,158 |
| 19,879 | 4 | 58 | 23 | 703 | 1 | 35 | 28 | 300 | 56 | 1,096 |
| 19,880 | 4 | 58 | 23 | 739 | 1 | 36 | 28 | 327 | 56 | 1,160 |
| 19,881 | 4 | 59 | 18 | 760 | 0 | 36 | 18 | 339 | 40 | 1,194 |
| 19,882 | 5 | 57 | 18 | 753 | 0 | 37 | 18 | 333 | 41 | 1,180 |
| 19,883 | 5 | 41 | 13 | 508 | 0 | 21 | 15 | 247 | 33 | 817   |
| 19,884 | 5 | 41 | 10 | 511 | 0 | 21 | 15 | 247 | 30 | 820   |
| 19,885 | 5 | 41 | 10 | 515 | 0 | 21 | 15 | 248 | 30 | 825   |
| 19,886 | 3 | 38 | 9  | 506 | 0 | 19 | 15 | 245 | 27 | 808   |
| 19,887 | 3 | 35 | 9  | 476 | 0 | 19 | 15 | 240 | 27 | 770   |
| 19,888 | 3 | 29 | 9  | 429 | 0 | 18 | 15 | 221 | 27 | 697   |
| 19,889 | 3 | 29 | 9  | 434 | 0 | 18 | 15 | 231 | 27 | 712   |
| 19,890 | 3 | 26 | 9  | 397 | 0 | 17 | 15 | 224 | 27 | 664   |
| 19,891 | 3 | 25 | 10 | 371 | 0 | 18 | 15 | 218 | 28 | 632   |
| 19,892 | 2 | 25 | 12 | 371 | 0 | 18 | 16 | 220 | 30 | 634   |
| 19,893 | 2 | 25 | 12 | 368 | 0 | 18 | 16 | 217 | 30 | 628   |
| 19,894 | 2 | 19 | 15 | 289 | 2 | 10 | 19 | 162 | 38 | 480   |
| 19,895 | 2 | 19 | 15 | 288 | 2 | 10 | 19 | 163 | 38 | 480   |
| 19,896 | 2 | 19 | 15 | 292 | 2 | 10 | 19 | 164 | 38 | 485   |
| 19,897 | 2 | 19 | 15 | 314 | 2 | 13 | 19 | 184 | 38 | 530   |
| 19,898 | 2 | 15 | 15 | 311 | 2 | 11 | 18 | 186 | 37 | 523   |
| 19,899 | 2 | 14 | 15 | 311 | 2 | 10 | 18 | 180 | 37 | 515   |
| 19,900 | 2 | 14 | 15 | 304 | 2 | 10 | 18 | 181 | 37 | 509   |
| 19,901 | 2 | 14 | 15 | 302 | 2 | 10 | 18 | 177 | 37 | 503   |
| 19,902 | 2 | 14 | 15 | 294 | 2 | 10 | 15 | 173 | 34 | 491   |
| 19,903 | 2 | 14 | 15 | 294 | 2 | 10 | 14 | 173 | 33 | 491   |
| 19,904 | 2 | 14 | 15 | 291 | 2 | 10 | 14 | 173 | 33 | 488   |
| 19,905 | 2 | 14 | 15 | 292 | 2 | 10 | 14 | 174 | 33 | 490   |
| 19,906 | 2 | 16 | 15 | 293 | 2 | 10 | 15 | 175 | 34 | 494   |
| 19,907 | 2 | 17 | 16 | 293 | 2 | 10 | 16 | 175 | 36 | 495   |
| 19,908 | 2 | 16 | 16 | 283 | 2 | 9  | 16 | 169 | 36 | 477   |
| 19,909 | 2 | 16 | 16 | 283 | 2 | 9  | 16 | 169 | 36 | 477   |
| 19,910 | 2 | 16 | 16 | 284 | 2 | 9  | 16 | 169 | 36 | 478   |
| 19,911 | 2 | 16 | 16 | 284 | 2 | 9  | 16 | 169 | 36 | 478   |
| 19,912 | 2 | 16 | 17 | 278 | 2 | 9  | 16 | 165 | 37 | 468   |
| 19,913 | 2 | 17 | 19 | 281 | 2 | 9  | 18 | 173 | 41 | 480   |
| 19,914 | 3 | 16 | 22 | 277 | 2 | 9  | 19 | 168 | 46 | 470   |

|        |   |    |    |     |   |   |    |     |    |     |
|--------|---|----|----|-----|---|---|----|-----|----|-----|
| 19,915 | 3 | 17 | 22 | 277 | 2 | 9 | 20 | 169 | 47 | 472 |
| 19,916 | 2 | 17 | 24 | 263 | 2 | 9 | 17 | 161 | 45 | 450 |
| 19,917 | 2 | 17 | 22 | 264 | 2 | 9 | 14 | 162 | 40 | 452 |
| 19,918 | 2 | 17 | 19 | 264 | 2 | 9 | 11 | 162 | 34 | 452 |
| 19,919 | 2 | 17 | 18 | 262 | 2 | 9 | 11 | 162 | 33 | 450 |
| 19,920 | 2 | 17 | 18 | 252 | 2 | 9 | 11 | 160 | 33 | 438 |
| 19,921 | 2 | 17 | 18 | 252 | 2 | 9 | 11 | 160 | 33 | 438 |
| 19,922 | 2 | 16 | 18 | 251 | 2 | 9 | 11 | 159 | 33 | 435 |
| 19,923 | 2 | 16 | 18 | 244 | 2 | 9 | 11 | 159 | 33 | 428 |
| 19,924 | 2 | 16 | 18 | 244 | 2 | 9 | 11 | 157 | 33 | 426 |
| 19,925 | 2 | 14 | 18 | 239 | 3 | 9 | 13 | 156 | 36 | 418 |
| 19,926 | 2 | 14 | 19 | 239 | 3 | 9 | 13 | 156 | 37 | 418 |
| 19,927 | 2 | 12 | 18 | 215 | 3 | 9 | 13 | 137 | 36 | 373 |
| 19,928 | 2 | 12 | 18 | 205 | 3 | 9 | 13 | 131 | 36 | 357 |
| 19,929 | 4 | 9  | 22 | 174 | 3 | 7 | 15 | 115 | 44 | 305 |
| 19,930 | 4 | 9  | 21 | 174 | 3 | 7 | 15 | 115 | 43 | 305 |
| 19,931 | 4 | 9  | 25 | 138 | 3 | 6 | 17 | 90  | 49 | 243 |
| 19,932 | 4 | 8  | 25 | 117 | 4 | 6 | 17 | 76  | 50 | 207 |
| 19,933 | 3 | 7  | 26 | 111 | 4 | 5 | 18 | 73  | 51 | 196 |
| 19,934 | 6 | 6  | 33 | 95  | 4 | 4 | 23 | 70  | 66 | 175 |
| 19,935 | 6 | 6  | 33 | 95  | 4 | 4 | 23 | 70  | 66 | 175 |
| 19,936 | 6 | 6  | 33 | 95  | 4 | 4 | 23 | 70  | 66 | 175 |
| 19,937 | 6 | 6  | 33 | 99  | 4 | 4 | 23 | 80  | 66 | 189 |
| 19,938 | 6 | 8  | 34 | 110 | 4 | 4 | 23 | 98  | 67 | 220 |
| 19,939 | 6 | 9  | 41 | 145 | 5 | 7 | 25 | 164 | 77 | 325 |
| 19,940 | 6 | 9  | 41 | 148 | 5 | 7 | 25 | 163 | 77 | 327 |
| 19,941 | 6 | 11 | 41 | 157 | 5 | 7 | 25 | 172 | 77 | 347 |
| 19,942 | 6 | 11 | 41 | 156 | 5 | 6 | 25 | 172 | 77 | 345 |
| 19,943 | 6 | 11 | 40 | 155 | 5 | 6 | 24 | 170 | 75 | 342 |
| 19,944 | 6 | 11 | 37 | 155 | 3 | 7 | 21 | 170 | 67 | 343 |
| 19,945 | 6 | 11 | 37 | 155 | 3 | 7 | 21 | 170 | 67 | 343 |
| 19,946 | 6 | 11 | 37 | 149 | 3 | 7 | 21 | 168 | 67 | 335 |
| 19,947 | 6 | 11 | 36 | 150 | 3 | 7 | 21 | 168 | 66 | 336 |
| 19,948 | 6 | 11 | 36 | 131 | 3 | 5 | 21 | 148 | 66 | 295 |
| 19,949 | 7 | 11 | 38 | 108 | 3 | 5 | 21 | 137 | 69 | 261 |
| 19,950 | 7 | 11 | 38 | 99  | 3 | 5 | 21 | 138 | 69 | 253 |
| 19,951 | 7 | 11 | 39 | 99  | 3 | 5 | 21 | 136 | 70 | 251 |
| 19,952 | 7 | 11 | 39 | 99  | 3 | 5 | 21 | 137 | 70 | 252 |
| 19,953 | 7 | 11 | 41 | 99  | 3 | 5 | 22 | 137 | 73 | 252 |
| 19,954 | 7 | 11 | 41 | 99  | 3 | 5 | 22 | 136 | 73 | 251 |
| 19,955 | 7 | 11 | 41 | 99  | 3 | 5 | 22 | 136 | 73 | 251 |

|        |    |    |    |     |   |   |    |     |     |     |
|--------|----|----|----|-----|---|---|----|-----|-----|-----|
| 19,956 | 7  | 11 | 44 | 98  | 3 | 5 | 22 | 135 | 76  | 249 |
| 19,957 | 7  | 8  | 44 | 96  | 3 | 5 | 22 | 134 | 76  | 243 |
| 19,958 | 7  | 8  | 47 | 97  | 3 | 5 | 21 | 134 | 78  | 244 |
| 19,959 | 9  | 8  | 53 | 97  | 3 | 5 | 25 | 137 | 90  | 247 |
| 19,960 | 11 | 8  | 68 | 103 | 3 | 6 | 35 | 143 | 117 | 260 |
| 19,961 | 11 | 8  | 68 | 107 | 3 | 6 | 35 | 145 | 117 | 266 |
| 19,962 | 12 | 9  | 69 | 108 | 3 | 6 | 36 | 145 | 120 | 268 |
| 19,963 | 12 | 9  | 68 | 109 | 3 | 6 | 34 | 148 | 117 | 272 |
| 19,964 | 12 | 8  | 67 | 107 | 3 | 6 | 34 | 141 | 116 | 262 |
| 19,965 | 11 | 7  | 64 | 107 | 3 | 6 | 33 | 137 | 111 | 257 |
| 19,966 | 11 | 7  | 64 | 108 | 3 | 6 | 32 | 138 | 110 | 259 |
| 19,967 | 11 | 7  | 61 | 102 | 3 | 6 | 33 | 136 | 108 | 251 |
| 19,968 | 11 | 7  | 61 | 103 | 3 | 6 | 33 | 136 | 108 | 252 |
| 19,969 | 11 | 7  | 61 | 103 | 3 | 6 | 33 | 136 | 108 | 252 |
| 19,970 | 11 | 7  | 61 | 102 | 3 | 6 | 32 | 136 | 107 | 251 |
| 19,971 | 11 | 7  | 61 | 102 | 3 | 6 | 32 | 136 | 107 | 251 |
| 19,972 | 11 | 7  | 61 | 102 | 3 | 6 | 32 | 137 | 107 | 252 |
| 19,973 | 11 | 7  | 61 | 106 | 3 | 6 | 32 | 137 | 107 | 256 |
| 19,974 | 11 | 7  | 61 | 106 | 2 | 6 | 32 | 137 | 106 | 256 |
| 19,975 | 11 | 7  | 61 | 106 | 1 | 6 | 31 | 137 | 104 | 256 |
| 19,976 | 11 | 7  | 61 | 106 | 1 | 6 | 30 | 137 | 103 | 256 |
| 19,977 | 11 | 7  | 60 | 106 | 1 | 6 | 32 | 138 | 104 | 257 |
| 19,978 | 11 | 7  | 61 | 107 | 1 | 6 | 32 | 139 | 105 | 259 |
| 19,979 | 11 | 7  | 61 | 112 | 1 | 6 | 33 | 145 | 106 | 270 |
| 19,980 | 9  | 7  | 59 | 114 | 2 | 6 | 31 | 146 | 101 | 273 |
| 19,981 | 9  | 7  | 57 | 115 | 2 | 6 | 30 | 147 | 98  | 275 |
| 19,982 | 9  | 7  | 55 | 115 | 2 | 6 | 30 | 146 | 96  | 274 |
| 19,983 | 9  | 7  | 55 | 115 | 1 | 6 | 29 | 146 | 94  | 274 |
| 19,984 | 9  | 7  | 54 | 116 | 1 | 6 | 28 | 146 | 92  | 275 |
| 19,985 | 6  | 7  | 47 | 116 | 1 | 6 | 23 | 145 | 77  | 274 |
| 19,986 | 6  | 7  | 47 | 116 | 1 | 6 | 23 | 146 | 77  | 275 |
| 19,987 | 6  | 7  | 47 | 117 | 1 | 6 | 23 | 145 | 77  | 275 |
| 19,988 | 6  | 5  | 46 | 104 | 1 | 6 | 23 | 118 | 76  | 233 |
| 19,989 | 6  | 9  | 46 | 117 | 1 | 6 | 23 | 138 | 76  | 270 |
| 19,990 | 6  | 9  | 39 | 86  | 1 | 4 | 22 | 82  | 68  | 181 |
| 19,991 | 6  | 6  | 39 | 75  | 1 | 4 | 22 | 69  | 68  | 154 |
| 19,992 | 6  | 6  | 39 | 76  | 1 | 4 | 22 | 70  | 68  | 156 |
| 19,993 | 6  | 6  | 39 | 80  | 1 | 4 | 22 | 74  | 68  | 164 |
| 19,994 | 6  | 6  | 38 | 82  | 1 | 4 | 22 | 77  | 67  | 169 |
| 19,995 | 6  | 6  | 37 | 82  | 1 | 3 | 22 | 77  | 66  | 168 |
| 19,996 | 6  | 6  | 37 | 86  | 1 | 3 | 22 | 79  | 66  | 174 |



|        |   |    |    |     |   |    |    |     |     |     |
|--------|---|----|----|-----|---|----|----|-----|-----|-----|
| 19,997 | 6 | 6  | 37 | 87  | 1 | 3  | 22 | 81  | 66  | 177 |
| 19,998 | 6 | 6  | 37 | 91  | 1 | 3  | 22 | 81  | 66  | 181 |
| 19,999 | 6 | 7  | 37 | 89  | 1 | 2  | 22 | 80  | 66  | 178 |
| 20,000 | 5 | 7  | 36 | 88  | 1 | 2  | 22 | 79  | 64  | 176 |
| 20,001 | 5 | 7  | 36 | 86  | 1 | 2  | 25 | 79  | 67  | 174 |
| 20,002 | 5 | 7  | 36 | 86  | 1 | 2  | 25 | 78  | 67  | 173 |
| 20,003 | 5 | 7  | 37 | 86  | 1 | 2  | 25 | 78  | 68  | 173 |
| 20,004 | 5 | 7  | 37 | 86  | 1 | 2  | 24 | 80  | 67  | 175 |
| 20,005 | 5 | 7  | 37 | 86  | 1 | 2  | 24 | 81  | 67  | 176 |
| 20,006 | 5 | 7  | 39 | 91  | 1 | 2  | 26 | 88  | 71  | 188 |
| 20,007 | 5 | 9  | 37 | 101 | 1 | 3  | 26 | 99  | 69  | 212 |
| 20,008 | 5 | 9  | 37 | 108 | 1 | 4  | 25 | 109 | 68  | 230 |
| 20,009 | 5 | 16 | 36 | 175 | 1 | 7  | 25 | 162 | 67  | 360 |
| 20,010 | 3 | 16 | 35 | 183 | 1 | 7  | 24 | 164 | 63  | 370 |
| 20,011 | 1 | 17 | 22 | 186 | 1 | 7  | 14 | 163 | 38  | 373 |
| 20,012 | 1 | 17 | 24 | 186 | 1 | 7  | 14 | 161 | 40  | 371 |
| 20,013 | 0 | 18 | 22 | 187 | 1 | 7  | 13 | 160 | 36  | 372 |
| 20,014 | 0 | 18 | 22 | 192 | 1 | 7  | 13 | 160 | 36  | 377 |
| 20,015 | 0 | 18 | 22 | 192 | 1 | 7  | 13 | 158 | 36  | 375 |
| 20,016 | 0 | 18 | 23 | 192 | 1 | 7  | 13 | 157 | 37  | 374 |
| 20,017 | 0 | 18 | 23 | 192 | 1 | 7  | 13 | 156 | 37  | 373 |
| 20,018 | 0 | 18 | 30 | 193 | 1 | 8  | 12 | 156 | 43  | 375 |
| 20,019 | 0 | 20 | 30 | 195 | 1 | 8  | 12 | 157 | 43  | 380 |
| 20,020 | 0 | 20 | 30 | 195 | 1 | 8  | 12 | 157 | 43  | 380 |
| 20,021 | 2 | 20 | 36 | 195 | 1 | 8  | 15 | 157 | 54  | 380 |
| 20,022 | 2 | 20 | 37 | 196 | 1 | 8  | 16 | 157 | 56  | 381 |
| 20,023 | 2 | 21 | 37 | 211 | 1 | 8  | 16 | 167 | 56  | 407 |
| 20,024 | 4 | 21 | 49 | 212 | 5 | 8  | 24 | 168 | 82  | 409 |
| 20,025 | 4 | 21 | 49 | 212 | 5 | 8  | 24 | 169 | 82  | 410 |
| 20,026 | 8 | 22 | 76 | 213 | 5 | 8  | 38 | 169 | 127 | 412 |
| 20,027 | 8 | 22 | 82 | 221 | 5 | 8  | 40 | 181 | 135 | 432 |
| 20,028 | 8 | 28 | 86 | 260 | 6 | 13 | 39 | 209 | 139 | 510 |
| 20,029 | 8 | 28 | 85 | 289 | 6 | 16 | 39 | 219 | 138 | 552 |
| 20,030 | 8 | 42 | 91 | 440 | 6 | 21 | 38 | 262 | 143 | 765 |
| 20,031 | 8 | 45 | 89 | 500 | 5 | 22 | 38 | 273 | 140 | 840 |
| 20,032 | 8 | 46 | 89 | 503 | 5 | 22 | 38 | 273 | 140 | 844 |
| 20,033 | 8 | 46 | 89 | 506 | 5 | 22 | 37 | 273 | 139 | 847 |
| 20,034 | 8 | 46 | 89 | 513 | 5 | 22 | 37 | 272 | 139 | 853 |
| 20,035 | 8 | 46 | 89 | 513 | 5 | 22 | 37 | 272 | 139 | 853 |
| 20,036 | 8 | 46 | 89 | 514 | 5 | 22 | 37 | 276 | 139 | 858 |
| 20,037 | 8 | 46 | 89 | 516 | 5 | 22 | 37 | 275 | 139 | 859 |

|        |    |    |    |     |   |    |    |     |     |       |
|--------|----|----|----|-----|---|----|----|-----|-----|-------|
| 20,038 | 8  | 48 | 89 | 534 | 5 | 22 | 37 | 293 | 139 | 897   |
| 20,039 | 8  | 44 | 89 | 521 | 5 | 22 | 37 | 273 | 139 | 860   |
| 20,040 | 8  | 45 | 89 | 530 | 5 | 23 | 37 | 276 | 139 | 874   |
| 20,041 | 8  | 44 | 89 | 526 | 5 | 22 | 37 | 266 | 139 | 858   |
| 20,042 | 8  | 44 | 90 | 514 | 5 | 22 | 37 | 260 | 140 | 840   |
| 20,043 | 8  | 44 | 90 | 509 | 5 | 22 | 37 | 256 | 140 | 831   |
| 20,044 | 8  | 44 | 90 | 511 | 5 | 22 | 37 | 256 | 140 | 833   |
| 20,045 | 8  | 45 | 93 | 541 | 5 | 23 | 38 | 265 | 144 | 874   |
| 20,046 | 8  | 45 | 93 | 542 | 5 | 23 | 38 | 269 | 144 | 879   |
| 20,047 | 8  | 45 | 93 | 554 | 5 | 24 | 38 | 270 | 144 | 893   |
| 20,048 | 8  | 47 | 93 | 569 | 5 | 25 | 39 | 276 | 145 | 917   |
| 20,049 | 8  | 47 | 94 | 614 | 5 | 25 | 39 | 306 | 146 | 992   |
| 20,050 | 8  | 46 | 94 | 624 | 5 | 25 | 39 | 311 | 146 | 1,006 |
| 20,051 | 8  | 46 | 94 | 627 | 5 | 25 | 39 | 312 | 146 | 1,010 |
| 20,052 | 8  | 46 | 94 | 639 | 5 | 25 | 36 | 314 | 143 | 1,024 |
| 20,053 | 8  | 46 | 93 | 639 | 5 | 25 | 36 | 315 | 142 | 1,025 |
| 20,054 | 8  | 46 | 95 | 639 | 5 | 25 | 36 | 314 | 144 | 1,024 |
| 20,055 | 8  | 46 | 94 | 639 | 5 | 25 | 36 | 313 | 143 | 1,023 |
| 20,056 | 9  | 46 | 94 | 643 | 5 | 25 | 36 | 314 | 144 | 1,028 |
| 20,057 | 9  | 47 | 94 | 652 | 5 | 25 | 37 | 321 | 145 | 1,045 |
| 20,058 | 10 | 46 | 93 | 647 | 5 | 24 | 37 | 315 | 145 | 1,032 |
| 20,059 | 10 | 46 | 92 | 639 | 5 | 23 | 39 | 305 | 146 | 1,013 |
| 20,060 | 10 | 39 | 90 | 575 | 5 | 20 | 39 | 252 | 144 | 886   |
| 20,061 | 10 | 39 | 87 | 557 | 5 | 19 | 36 | 242 | 138 | 857   |
| 20,062 | 10 | 38 | 85 | 552 | 5 | 19 | 38 | 242 | 138 | 851   |
| 20,063 | 10 | 37 | 83 | 549 | 5 | 19 | 38 | 240 | 136 | 845   |
| 20,064 | 10 | 37 | 84 | 549 | 5 | 19 | 38 | 242 | 137 | 847   |
| 20,065 | 10 | 37 | 84 | 544 | 5 | 19 | 38 | 242 | 137 | 842   |
| 20,066 | 10 | 37 | 83 | 542 | 5 | 19 | 38 | 242 | 136 | 840   |
| 20,067 | 10 | 37 | 83 | 542 | 5 | 19 | 38 | 242 | 136 | 840   |
| 20,068 | 10 | 37 | 79 | 541 | 5 | 19 | 38 | 242 | 132 | 839   |
| 20,069 | 10 | 35 | 76 | 537 | 5 | 18 | 38 | 241 | 129 | 831   |
| 20,070 | 10 | 35 | 75 | 537 | 5 | 18 | 38 | 241 | 128 | 831   |
| 20,071 | 10 | 35 | 70 | 537 | 5 | 18 | 36 | 242 | 121 | 832   |
| 20,072 | 8  | 35 | 70 | 536 | 5 | 18 | 35 | 244 | 118 | 833   |
| 20,073 | 8  | 34 | 69 | 522 | 5 | 18 | 34 | 234 | 116 | 808   |
| 20,074 | 8  | 36 | 69 | 529 | 5 | 18 | 34 | 244 | 116 | 827   |
| 20,075 | 6  | 36 | 57 | 529 | 1 | 18 | 26 | 243 | 90  | 826   |
| 20,076 | 2  | 37 | 31 | 533 | 1 | 18 | 15 | 242 | 49  | 830   |
| 20,077 | 2  | 37 | 30 | 533 | 1 | 18 | 12 | 245 | 45  | 833   |
| 20,078 | 2  | 31 | 25 | 493 | 1 | 13 | 10 | 211 | 38  | 748   |

|        |   |    |    |     |   |    |    |     |    |     |
|--------|---|----|----|-----|---|----|----|-----|----|-----|
| 20,079 | 2 | 31 | 21 | 493 | 0 | 13 | 9  | 211 | 32 | 748 |
| 20,080 | 2 | 17 | 15 | 307 | 0 | 5  | 11 | 149 | 28 | 478 |
| 20,081 | 3 | 14 | 17 | 247 | 0 | 4  | 12 | 137 | 32 | 402 |
| 20,082 | 3 | 14 | 17 | 248 | 0 | 4  | 12 | 137 | 32 | 403 |
| 20,083 | 3 | 13 | 29 | 234 | 0 | 4  | 18 | 140 | 50 | 391 |
| 20,084 | 3 | 13 | 36 | 251 | 0 | 4  | 23 | 152 | 62 | 420 |
| 20,085 | 3 | 13 | 36 | 251 | 0 | 4  | 23 | 152 | 62 | 420 |
| 20,086 | 3 | 13 | 36 | 251 | 0 | 4  | 23 | 153 | 62 | 421 |
| 20,087 | 3 | 13 | 36 | 252 | 0 | 4  | 23 | 150 | 62 | 419 |
| 20,088 | 3 | 13 | 36 | 251 | 0 | 4  | 23 | 149 | 62 | 417 |
| 20,089 | 3 | 12 | 36 | 238 | 0 | 6  | 23 | 134 | 62 | 390 |
| 20,090 | 3 | 12 | 36 | 241 | 0 | 6  | 23 | 134 | 62 | 393 |
| 20,091 | 3 | 11 | 36 | 234 | 0 | 5  | 23 | 133 | 62 | 383 |
| 20,092 | 3 | 13 | 36 | 241 | 0 | 5  | 23 | 135 | 62 | 394 |
| 20,093 | 3 | 13 | 35 | 249 | 0 | 5  | 23 | 139 | 61 | 406 |
| 20,094 | 3 | 14 | 35 | 306 | 0 | 6  | 23 | 161 | 61 | 487 |
| 20,095 | 3 | 19 | 35 | 377 | 0 | 7  | 23 | 184 | 61 | 587 |
| 20,096 | 3 | 20 | 32 | 374 | 0 | 6  | 22 | 184 | 57 | 584 |
| 20,097 | 3 | 20 | 32 | 390 | 0 | 6  | 22 | 185 | 57 | 601 |
| 20,098 | 3 | 18 | 32 | 313 | 0 | 4  | 21 | 145 | 56 | 480 |
| 20,099 | 3 | 18 | 32 | 334 | 0 | 4  | 22 | 150 | 57 | 506 |
| 20,100 | 3 | 21 | 31 | 357 | 0 | 4  | 22 | 165 | 56 | 547 |
| 20,101 | 3 | 21 | 31 | 348 | 0 | 4  | 22 | 163 | 56 | 536 |
| 20,102 | 3 | 22 | 31 | 350 | 0 | 4  | 22 | 165 | 56 | 541 |
| 20,103 | 3 | 22 | 31 | 343 | 0 | 5  | 22 | 174 | 56 | 544 |
| 20,104 | 4 | 22 | 35 | 365 | 0 | 6  | 23 | 175 | 62 | 568 |
| 20,105 | 4 | 22 | 33 | 370 | 0 | 7  | 24 | 175 | 61 | 574 |
| 20,106 | 4 | 21 | 32 | 349 | 0 | 7  | 24 | 158 | 60 | 535 |
| 20,107 | 3 | 21 | 33 | 350 | 0 | 7  | 26 | 158 | 62 | 536 |
| 20,108 | 3 | 21 | 34 | 356 | 0 | 7  | 27 | 159 | 64 | 543 |
| 20,109 | 2 | 22 | 41 | 358 | 0 | 7  | 29 | 159 | 72 | 546 |
| 20,110 | 2 | 26 | 44 | 400 | 0 | 10 | 27 | 181 | 73 | 617 |
| 20,111 | 2 | 26 | 44 | 401 | 0 | 10 | 27 | 183 | 73 | 620 |
| 20,112 | 2 | 25 | 43 | 404 | 0 | 10 | 34 | 183 | 79 | 622 |
| 20,113 | 2 | 25 | 44 | 405 | 0 | 10 | 35 | 183 | 81 | 623 |
| 20,114 | 2 | 25 | 44 | 405 | 0 | 10 | 35 | 183 | 81 | 623 |
| 20,115 | 2 | 25 | 45 | 405 | 0 | 10 | 35 | 181 | 82 | 621 |
| 20,116 | 2 | 26 | 45 | 406 | 0 | 10 | 35 | 181 | 82 | 623 |
| 20,117 | 2 | 26 | 45 | 408 | 0 | 10 | 35 | 181 | 82 | 625 |
| 20,118 | 2 | 26 | 45 | 410 | 0 | 10 | 35 | 182 | 82 | 628 |
| 20,119 | 2 | 26 | 45 | 410 | 0 | 10 | 35 | 182 | 82 | 628 |

|        |   |    |    |     |   |    |    |     |    |       |
|--------|---|----|----|-----|---|----|----|-----|----|-------|
| 20,120 | 3 | 26 | 46 | 410 | 0 | 10 | 36 | 182 | 85 | 628   |
| 20,121 | 4 | 26 | 49 | 410 | 0 | 10 | 36 | 181 | 89 | 627   |
| 20,122 | 4 | 26 | 51 | 410 | 0 | 10 | 36 | 178 | 91 | 624   |
| 20,123 | 4 | 26 | 51 | 410 | 0 | 10 | 36 | 178 | 91 | 624   |
| 20,124 | 4 | 26 | 51 | 410 | 0 | 10 | 36 | 178 | 91 | 624   |
| 20,125 | 4 | 25 | 52 | 403 | 0 | 10 | 38 | 168 | 94 | 606   |
| 20,126 | 4 | 24 | 52 | 397 | 0 | 10 | 38 | 169 | 94 | 600   |
| 20,127 | 4 | 24 | 52 | 409 | 0 | 10 | 38 | 171 | 94 | 614   |
| 20,128 | 4 | 24 | 52 | 430 | 0 | 10 | 38 | 196 | 94 | 660   |
| 20,129 | 4 | 27 | 51 | 444 | 0 | 11 | 38 | 220 | 93 | 702   |
| 20,130 | 4 | 27 | 51 | 470 | 0 | 11 | 36 | 239 | 91 | 747   |
| 20,131 | 4 | 28 | 51 | 491 | 0 | 11 | 36 | 248 | 91 | 778   |
| 20,132 | 3 | 28 | 50 | 492 | 0 | 11 | 35 | 250 | 88 | 781   |
| 20,133 | 3 | 28 | 40 | 494 | 0 | 11 | 30 | 249 | 73 | 782   |
| 20,134 | 3 | 28 | 38 | 495 | 0 | 11 | 29 | 251 | 70 | 785   |
| 20,135 | 3 | 29 | 31 | 482 | 0 | 12 | 24 | 244 | 58 | 767   |
| 20,136 | 3 | 30 | 31 | 482 | 0 | 12 | 24 | 245 | 58 | 769   |
| 20,137 | 3 | 30 | 31 | 482 | 0 | 12 | 24 | 245 | 58 | 769   |
| 20,138 | 3 | 30 | 32 | 484 | 0 | 12 | 26 | 248 | 61 | 774   |
| 20,139 | 3 | 30 | 32 | 486 | 0 | 12 | 26 | 249 | 61 | 777   |
| 20,140 | 3 | 30 | 35 | 478 | 0 | 11 | 32 | 247 | 70 | 766   |
| 20,141 | 3 | 30 | 35 | 478 | 0 | 11 | 32 | 245 | 70 | 764   |
| 20,142 | 3 | 30 | 36 | 489 | 0 | 15 | 33 | 268 | 72 | 802   |
| 20,143 | 3 | 29 | 37 | 540 | 0 | 19 | 36 | 302 | 76 | 890   |
| 20,144 | 3 | 46 | 37 | 685 | 0 | 24 | 36 | 478 | 76 | 1,233 |
| 20,145 | 3 | 45 | 37 | 634 | 0 | 23 | 36 | 459 | 76 | 1,161 |
| 20,146 | 3 | 40 | 38 | 563 | 0 | 23 | 36 | 444 | 77 | 1,070 |
| 20,147 | 3 | 40 | 39 | 566 | 0 | 26 | 36 | 444 | 78 | 1,076 |
| 20,148 | 3 | 46 | 39 | 564 | 0 | 26 | 36 | 450 | 78 | 1,086 |
| 20,149 | 3 | 46 | 39 | 573 | 0 | 28 | 36 | 452 | 78 | 1,099 |
| 20,150 | 3 | 46 | 39 | 554 | 1 | 28 | 36 | 450 | 79 | 1,078 |
| 20,151 | 3 | 43 | 39 | 533 | 1 | 28 | 36 | 437 | 79 | 1,041 |
| 20,152 | 3 | 43 | 39 | 529 | 1 | 28 | 36 | 434 | 79 | 1,034 |
| 20,153 | 3 | 43 | 39 | 500 | 1 | 26 | 36 | 420 | 79 | 989   |
| 20,154 | 3 | 43 | 39 | 500 | 1 | 27 | 36 | 425 | 79 | 995   |
| 20,155 | 2 | 43 | 34 | 501 | 1 | 27 | 35 | 426 | 72 | 997   |
| 20,156 | 2 | 44 | 36 | 510 | 1 | 27 | 34 | 441 | 73 | 1,022 |
| 20,157 | 2 | 43 | 36 | 517 | 1 | 28 | 34 | 448 | 73 | 1,036 |
| 20,158 | 2 | 43 | 35 | 521 | 1 | 28 | 33 | 453 | 71 | 1,045 |
| 20,159 | 2 | 43 | 32 | 535 | 1 | 29 | 29 | 460 | 64 | 1,067 |
| 20,160 | 2 | 48 | 25 | 563 | 2 | 29 | 27 | 498 | 56 | 1,138 |

|        |   |    |    |     |   |    |    |     |    |       |
|--------|---|----|----|-----|---|----|----|-----|----|-------|
| 20,161 | 2 | 44 | 22 | 530 | 2 | 26 | 27 | 476 | 53 | 1,076 |
| 20,162 | 2 | 45 | 21 | 527 | 2 | 26 | 20 | 474 | 45 | 1,072 |
| 20,163 | 2 | 45 | 21 | 531 | 2 | 26 | 21 | 477 | 46 | 1,079 |
| 20,164 | 2 | 46 | 20 | 531 | 2 | 26 | 18 | 477 | 42 | 1,080 |
| 20,165 | 2 | 46 | 18 | 532 | 2 | 26 | 18 | 477 | 40 | 1,081 |
| 20,166 | 2 | 45 | 18 | 531 | 2 | 26 | 19 | 477 | 41 | 1,079 |
| 20,167 | 2 | 45 | 18 | 531 | 2 | 26 | 19 | 478 | 41 | 1,080 |
| 20,168 | 2 | 45 | 21 | 527 | 2 | 26 | 21 | 477 | 46 | 1,075 |
| 20,169 | 2 | 45 | 22 | 527 | 2 | 26 | 22 | 477 | 48 | 1,075 |
| 20,170 | 2 | 45 | 29 | 530 | 2 | 26 | 26 | 478 | 59 | 1,079 |
| 20,171 | 1 | 45 | 28 | 531 | 2 | 26 | 27 | 480 | 58 | 1,082 |
| 20,172 | 0 | 45 | 25 | 533 | 2 | 26 | 27 | 481 | 54 | 1,085 |
| 20,173 | 0 | 45 | 23 | 533 | 2 | 26 | 27 | 482 | 52 | 1,086 |
| 20,174 | 0 | 45 | 23 | 532 | 2 | 26 | 27 | 482 | 52 | 1,085 |
| 20,175 | 0 | 44 | 22 | 532 | 2 | 26 | 25 | 482 | 49 | 1,084 |
| 20,176 | 0 | 44 | 22 | 533 | 2 | 26 | 25 | 482 | 49 | 1,085 |
| 20,177 | 0 | 44 | 22 | 534 | 2 | 26 | 25 | 482 | 49 | 1,086 |
| 20,178 | 0 | 44 | 22 | 523 | 2 | 26 | 25 | 480 | 49 | 1,073 |
| 20,179 | 0 | 44 | 22 | 504 | 2 | 26 | 25 | 463 | 49 | 1,037 |
| 20,180 | 0 | 41 | 22 | 483 | 2 | 25 | 25 | 433 | 49 | 982   |
| 20,181 | 0 | 40 | 22 | 433 | 2 | 25 | 25 | 403 | 49 | 901   |
| 20,182 | 0 | 40 | 22 | 438 | 2 | 27 | 25 | 408 | 49 | 913   |
| 20,183 | 0 | 40 | 21 | 438 | 2 | 27 | 25 | 410 | 48 | 915   |
| 20,184 | 0 | 40 | 21 | 435 | 2 | 27 | 25 | 409 | 48 | 911   |
| 20,185 | 0 | 40 | 21 | 437 | 2 | 27 | 25 | 410 | 48 | 914   |
| 20,186 | 0 | 38 | 21 | 434 | 2 | 26 | 25 | 407 | 48 | 905   |
| 20,187 | 0 | 38 | 21 | 436 | 2 | 26 | 25 | 408 | 48 | 908   |
| 20,188 | 0 | 38 | 21 | 438 | 2 | 27 | 25 | 408 | 48 | 911   |
| 20,189 | 0 | 38 | 20 | 433 | 2 | 27 | 23 | 405 | 45 | 903   |
| 20,190 | 0 | 38 | 20 | 434 | 2 | 28 | 18 | 414 | 40 | 914   |
| 20,191 | 0 | 39 | 20 | 430 | 2 | 27 | 18 | 423 | 40 | 919   |
| 20,192 | 0 | 39 | 21 | 451 | 3 | 29 | 21 | 452 | 45 | 971   |
| 20,193 | 0 | 38 | 20 | 391 | 3 | 21 | 20 | 396 | 43 | 846   |
| 20,194 | 0 | 38 | 20 | 402 | 4 | 21 | 19 | 401 | 43 | 862   |
| 20,195 | 0 | 21 | 23 | 250 | 5 | 16 | 23 | 226 | 51 | 513   |
| 20,196 | 0 | 22 | 22 | 243 | 5 | 15 | 23 | 215 | 50 | 495   |
| 20,197 | 0 | 20 | 22 | 214 | 5 | 12 | 23 | 204 | 50 | 450   |
| 20,198 | 0 | 20 | 21 | 215 | 5 | 12 | 23 | 205 | 49 | 452   |
| 20,199 | 0 | 14 | 21 | 200 | 5 | 12 | 22 | 194 | 48 | 420   |
| 20,200 | 0 | 14 | 21 | 184 | 4 | 10 | 22 | 188 | 47 | 396   |
| 20,201 | 0 | 14 | 21 | 184 | 4 | 10 | 22 | 188 | 47 | 396   |

|        |   |    |    |     |   |    |    |     |    |     |
|--------|---|----|----|-----|---|----|----|-----|----|-----|
| 20,202 | 0 | 14 | 24 | 182 | 4 | 10 | 22 | 186 | 50 | 392 |
| 20,203 | 0 | 14 | 24 | 182 | 4 | 10 | 22 | 186 | 50 | 392 |
| 20,204 | 1 | 13 | 24 | 179 | 4 | 10 | 22 | 184 | 51 | 386 |
| 20,205 | 1 | 14 | 24 | 179 | 4 | 9  | 22 | 182 | 51 | 384 |
| 20,206 | 1 | 14 | 23 | 180 | 4 | 9  | 22 | 183 | 50 | 386 |
| 20,207 | 1 | 13 | 26 | 178 | 4 | 10 | 24 | 195 | 55 | 396 |
| 20,208 | 1 | 14 | 32 | 171 | 4 | 11 | 27 | 194 | 64 | 390 |
| 20,209 | 1 | 13 | 34 | 132 | 4 | 12 | 28 | 154 | 67 | 311 |
| 20,210 | 2 | 20 | 37 | 148 | 4 | 12 | 29 | 167 | 72 | 347 |
| 20,211 | 2 | 20 | 40 | 153 | 3 | 12 | 31 | 173 | 76 | 358 |
| 20,212 | 2 | 26 | 43 | 164 | 3 | 17 | 31 | 204 | 79 | 411 |
| 20,213 | 2 | 25 | 43 | 162 | 3 | 17 | 31 | 205 | 79 | 409 |
| 20,214 | 2 | 25 | 50 | 165 | 3 | 17 | 36 | 208 | 91 | 415 |
| 20,215 | 2 | 24 | 50 | 171 | 3 | 17 | 36 | 211 | 91 | 423 |
| 20,216 | 2 | 24 | 50 | 171 | 3 | 17 | 37 | 216 | 92 | 428 |
| 20,217 | 2 | 24 | 51 | 172 | 3 | 17 | 37 | 216 | 93 | 429 |
| 20,218 | 2 | 24 | 51 | 172 | 3 | 17 | 38 | 215 | 94 | 428 |
| 20,219 | 2 | 24 | 48 | 172 | 3 | 17 | 36 | 215 | 89 | 428 |
| 20,220 | 2 | 24 | 48 | 172 | 3 | 17 | 37 | 215 | 90 | 428 |
| 20,221 | 2 | 24 | 46 | 168 | 3 | 17 | 36 | 212 | 87 | 421 |
| 20,222 | 3 | 24 | 46 | 168 | 4 | 17 | 35 | 212 | 88 | 421 |
| 20,223 | 3 | 25 | 46 | 166 | 4 | 17 | 35 | 210 | 88 | 418 |
| 20,224 | 3 | 25 | 46 | 166 | 4 | 17 | 35 | 210 | 88 | 418 |
| 20,225 | 3 | 25 | 47 | 170 | 4 | 17 | 35 | 215 | 89 | 427 |
| 20,226 | 3 | 28 | 47 | 173 | 4 | 19 | 35 | 228 | 89 | 448 |
| 20,227 | 3 | 28 | 47 | 172 | 4 | 19 | 35 | 228 | 89 | 447 |
| 20,228 | 3 | 28 | 47 | 168 | 4 | 19 | 35 | 227 | 89 | 442 |
| 20,229 | 3 | 27 | 49 | 166 | 4 | 19 | 35 | 224 | 91 | 436 |
| 20,230 | 3 | 27 | 49 | 165 | 4 | 19 | 35 | 220 | 91 | 431 |
| 20,231 | 3 | 27 | 49 | 164 | 4 | 19 | 35 | 219 | 91 | 429 |
| 20,232 | 3 | 27 | 49 | 164 | 4 | 19 | 35 | 219 | 91 | 429 |
| 20,233 | 3 | 27 | 49 | 159 | 4 | 17 | 35 | 214 | 91 | 417 |
| 20,234 | 3 | 27 | 52 | 159 | 4 | 17 | 35 | 212 | 94 | 415 |
| 20,235 | 3 | 27 | 55 | 156 | 4 | 17 | 35 | 208 | 97 | 408 |
| 20,236 | 3 | 27 | 55 | 156 | 4 | 17 | 35 | 208 | 97 | 408 |
| 20,237 | 3 | 27 | 56 | 155 | 4 | 17 | 35 | 205 | 98 | 404 |
| 20,238 | 3 | 27 | 56 | 153 | 4 | 17 | 35 | 204 | 98 | 401 |
| 20,239 | 3 | 27 | 56 | 149 | 4 | 15 | 36 | 194 | 99 | 385 |
| 20,240 | 3 | 27 | 56 | 184 | 4 | 17 | 36 | 208 | 99 | 436 |
| 20,241 | 3 | 30 | 55 | 205 | 4 | 19 | 37 | 239 | 99 | 493 |
| 20,242 | 3 | 28 | 53 | 215 | 4 | 19 | 36 | 230 | 96 | 492 |

|        |   |    |    |     |   |    |    |     |     |     |
|--------|---|----|----|-----|---|----|----|-----|-----|-----|
| 20,243 | 3 | 28 | 52 | 197 | 3 | 17 | 33 | 207 | 91  | 449 |
| 20,244 | 3 | 30 | 53 | 188 | 3 | 19 | 33 | 204 | 92  | 441 |
| 20,245 | 3 | 31 | 52 | 181 | 2 | 19 | 31 | 203 | 88  | 434 |
| 20,246 | 3 | 30 | 49 | 180 | 1 | 19 | 27 | 200 | 80  | 429 |
| 20,247 | 3 | 30 | 49 | 182 | 1 | 19 | 27 | 202 | 80  | 433 |
| 20,248 | 4 | 30 | 50 | 180 | 1 | 19 | 27 | 202 | 82  | 431 |
| 20,249 | 5 | 30 | 52 | 179 | 1 | 19 | 29 | 201 | 87  | 429 |
| 20,250 | 5 | 30 | 53 | 179 | 1 | 19 | 29 | 201 | 88  | 429 |
| 20,251 | 5 | 30 | 53 | 179 | 1 | 19 | 29 | 203 | 88  | 431 |
| 20,252 | 5 | 30 | 53 | 186 | 1 | 21 | 29 | 207 | 88  | 444 |
| 20,253 | 5 | 31 | 50 | 191 | 1 | 21 | 29 | 222 | 85  | 465 |
| 20,254 | 4 | 31 | 50 | 191 | 1 | 21 | 29 | 225 | 84  | 468 |
| 20,255 | 4 | 31 | 51 | 194 | 1 | 21 | 29 | 228 | 85  | 474 |
| 20,256 | 4 | 30 | 50 | 194 | 1 | 21 | 28 | 225 | 83  | 470 |
| 20,257 | 6 | 29 | 74 | 201 | 3 | 23 | 36 | 231 | 119 | 484 |
| 20,258 | 6 | 29 | 68 | 190 | 3 | 21 | 33 | 202 | 110 | 442 |
| 20,259 | 6 | 28 | 68 | 196 | 3 | 19 | 32 | 201 | 109 | 444 |
| 20,260 | 6 | 23 | 66 | 182 | 3 | 17 | 30 | 192 | 105 | 414 |
| 20,261 | 5 | 17 | 69 | 161 | 3 | 17 | 30 | 173 | 107 | 368 |
| 20,262 | 5 | 11 | 66 | 141 | 3 | 12 | 28 | 143 | 102 | 307 |
| 20,263 | 5 | 11 | 63 | 141 | 3 | 12 | 28 | 143 | 99  | 307 |
| 20,264 | 5 | 11 | 56 | 131 | 3 | 12 | 22 | 135 | 86  | 289 |
| 20,265 | 5 | 11 | 56 | 131 | 3 | 12 | 23 | 137 | 87  | 291 |
| 20,266 | 5 | 11 | 56 | 125 | 3 | 12 | 22 | 132 | 86  | 280 |
| 20,267 | 5 | 12 | 56 | 152 | 3 | 13 | 22 | 176 | 86  | 353 |
| 20,268 | 5 | 14 | 55 | 171 | 3 | 18 | 22 | 215 | 85  | 418 |
| 20,269 | 5 | 17 | 55 | 198 | 3 | 19 | 24 | 235 | 87  | 469 |
| 20,270 | 5 | 17 | 55 | 200 | 3 | 21 | 24 | 235 | 87  | 473 |
| 20,271 | 5 | 17 | 54 | 202 | 3 | 21 | 22 | 236 | 84  | 476 |
| 20,272 | 5 | 17 | 49 | 207 | 3 | 21 | 19 | 242 | 76  | 487 |
| 20,273 | 4 | 17 | 49 | 208 | 2 | 21 | 18 | 242 | 73  | 488 |
| 20,274 | 4 | 16 | 49 | 209 | 2 | 21 | 18 | 242 | 73  | 488 |
| 20,275 | 4 | 16 | 49 | 209 | 2 | 21 | 18 | 242 | 73  | 488 |
| 20,276 | 4 | 16 | 48 | 205 | 2 | 21 | 18 | 237 | 72  | 479 |
| 20,277 | 4 | 13 | 48 | 202 | 2 | 19 | 18 | 224 | 72  | 458 |
| 20,278 | 4 | 13 | 48 | 203 | 2 | 19 | 18 | 225 | 72  | 460 |
| 20,279 | 4 | 13 | 48 | 203 | 2 | 19 | 18 | 224 | 72  | 459 |
| 20,280 | 4 | 13 | 48 | 203 | 2 | 20 | 18 | 224 | 72  | 460 |
| 20,281 | 4 | 13 | 48 | 203 | 2 | 20 | 18 | 221 | 72  | 457 |
| 20,282 | 4 | 13 | 48 | 203 | 2 | 20 | 18 | 221 | 72  | 457 |
| 20,283 | 4 | 13 | 48 | 204 | 2 | 20 | 18 | 221 | 72  | 458 |

|        |   |    |    |     |   |    |    |     |    |     |
|--------|---|----|----|-----|---|----|----|-----|----|-----|
| 20,284 | 4 | 13 | 48 | 206 | 2 | 20 | 18 | 221 | 72 | 460 |
| 20,285 | 4 | 13 | 45 | 206 | 2 | 20 | 18 | 221 | 69 | 460 |
| 20,286 | 4 | 13 | 42 | 207 | 2 | 20 | 18 | 224 | 66 | 464 |
| 20,287 | 4 | 13 | 41 | 208 | 2 | 20 | 18 | 227 | 65 | 468 |
| 20,288 | 4 | 13 | 41 | 211 | 2 | 20 | 18 | 228 | 65 | 472 |
| 20,289 | 4 | 13 | 41 | 211 | 2 | 20 | 18 | 229 | 65 | 473 |
| 20,290 | 4 | 13 | 41 | 210 | 2 | 20 | 17 | 227 | 64 | 470 |
| 20,291 | 4 | 13 | 41 | 177 | 2 | 18 | 17 | 216 | 64 | 424 |
| 20,292 | 4 | 10 | 41 | 156 | 2 | 16 | 16 | 185 | 63 | 367 |
| 20,293 | 4 | 10 | 41 | 145 | 2 | 16 | 16 | 184 | 63 | 355 |
| 20,294 | 4 | 10 | 41 | 144 | 2 | 16 | 16 | 177 | 63 | 347 |
| 20,295 | 4 | 8  | 40 | 144 | 2 | 14 | 16 | 176 | 62 | 342 |
| 20,296 | 6 | 7  | 40 | 139 | 2 | 14 | 16 | 171 | 64 | 331 |
| 20,297 | 6 | 7  | 40 | 139 | 2 | 14 | 16 | 171 | 64 | 331 |
| 20,298 | 5 | 7  | 39 | 137 | 2 | 14 | 16 | 170 | 62 | 328 |
| 20,299 | 4 | 7  | 38 | 138 | 2 | 14 | 15 | 169 | 59 | 328 |
| 20,300 | 4 | 7  | 38 | 139 | 2 | 14 | 14 | 169 | 58 | 329 |
| 20,301 | 4 | 7  | 37 | 139 | 2 | 14 | 14 | 169 | 57 | 329 |
| 20,302 | 4 | 7  | 37 | 144 | 2 | 14 | 14 | 171 | 57 | 336 |
| 20,303 | 4 | 6  | 36 | 134 | 2 | 12 | 14 | 153 | 56 | 305 |
| 20,304 | 4 | 7  | 37 | 143 | 2 | 13 | 14 | 161 | 57 | 324 |
| 20,305 | 4 | 7  | 27 | 146 | 1 | 13 | 14 | 157 | 46 | 323 |
| 20,306 | 3 | 9  | 23 | 162 | 0 | 13 | 8  | 163 | 34 | 347 |
| 20,307 | 3 | 12 | 21 | 168 | 0 | 13 | 7  | 166 | 31 | 359 |
| 20,308 | 2 | 16 | 11 | 161 | 0 | 12 | 4  | 162 | 17 | 351 |
| 20,309 | 2 | 16 | 9  | 153 | 0 | 12 | 4  | 155 | 15 | 336 |
| 20,310 | 2 | 16 | 6  | 153 | 0 | 12 | 3  | 155 | 11 | 336 |
| 20,311 | 2 | 16 | 5  | 151 | 0 | 12 | 3  | 158 | 10 | 337 |
| 20,312 | 2 | 16 | 5  | 151 | 0 | 12 | 3  | 158 | 10 | 337 |
| 20,313 | 2 | 20 | 5  | 165 | 0 | 13 | 3  | 159 | 10 | 357 |
| 20,314 | 2 | 20 | 5  | 165 | 0 | 13 | 3  | 158 | 10 | 356 |
| 20,315 | 2 | 20 | 5  | 165 | 0 | 13 | 3  | 158 | 10 | 356 |
| 20,316 | 2 | 20 | 5  | 164 | 0 | 13 | 3  | 153 | 10 | 350 |
| 20,317 | 2 | 17 | 5  | 117 | 0 | 7  | 3  | 75  | 10 | 216 |
| 20,318 | 2 | 17 | 5  | 120 | 0 | 7  | 2  | 75  | 9  | 219 |
| 20,319 | 2 | 17 | 5  | 120 | 0 | 7  | 1  | 74  | 8  | 218 |
| 20,320 | 2 | 14 | 5  | 93  | 0 | 6  | 0  | 57  | 7  | 170 |
| 20,321 | 2 | 14 | 6  | 92  | 0 | 4  | 0  | 60  | 8  | 170 |
| 20,322 | 2 | 14 | 6  | 85  | 0 | 4  | 0  | 53  | 8  | 156 |
| 20,323 | 2 | 14 | 6  | 84  | 0 | 4  | 0  | 53  | 8  | 155 |
| 20,324 | 2 | 14 | 6  | 84  | 0 | 4  | 0  | 53  | 8  | 155 |



|        |   |    |    |     |   |   |   |    |    |     |
|--------|---|----|----|-----|---|---|---|----|----|-----|
| 20,325 | 2 | 14 | 6  | 83  | 0 | 4 | 0 | 53 | 8  | 154 |
| 20,326 | 2 | 14 | 6  | 83  | 0 | 4 | 0 | 53 | 8  | 154 |
| 20,327 | 2 | 14 | 6  | 83  | 0 | 4 | 0 | 54 | 8  | 155 |
| 20,328 | 2 | 14 | 6  | 83  | 0 | 4 | 0 | 54 | 8  | 155 |
| 20,329 | 2 | 14 | 8  | 83  | 0 | 4 | 0 | 53 | 10 | 154 |
| 20,330 | 2 | 14 | 6  | 83  | 0 | 3 | 0 | 53 | 8  | 153 |
| 20,331 | 2 | 14 | 6  | 83  | 0 | 3 | 0 | 53 | 8  | 153 |
| 20,332 | 2 | 14 | 6  | 83  | 0 | 3 | 0 | 53 | 8  | 153 |
| 20,333 | 2 | 14 | 7  | 83  | 0 | 3 | 0 | 53 | 9  | 153 |
| 20,334 | 2 | 14 | 7  | 83  | 0 | 3 | 0 | 53 | 9  | 153 |
| 20,335 | 2 | 14 | 8  | 81  | 0 | 3 | 0 | 53 | 10 | 151 |
| 20,336 | 2 | 14 | 9  | 80  | 2 | 3 | 0 | 50 | 13 | 147 |
| 20,337 | 2 | 14 | 9  | 79  | 3 | 3 | 0 | 47 | 14 | 143 |
| 20,338 | 2 | 14 | 9  | 79  | 3 | 3 | 0 | 47 | 14 | 143 |
| 20,339 | 2 | 14 | 9  | 76  | 3 | 3 | 0 | 45 | 14 | 138 |
| 20,340 | 2 | 14 | 9  | 76  | 3 | 3 | 0 | 44 | 14 | 137 |
| 20,341 | 2 | 14 | 9  | 74  | 3 | 3 | 0 | 42 | 14 | 133 |
| 20,342 | 2 | 14 | 9  | 74  | 3 | 3 | 0 | 42 | 14 | 133 |
| 20,343 | 2 | 14 | 10 | 74  | 3 | 3 | 1 | 42 | 16 | 133 |
| 20,344 | 2 | 14 | 10 | 75  | 3 | 3 | 1 | 43 | 16 | 135 |
| 20,345 | 2 | 14 | 10 | 73  | 3 | 3 | 1 | 43 | 16 | 133 |
| 20,346 | 2 | 14 | 10 | 73  | 3 | 3 | 1 | 44 | 16 | 134 |
| 20,347 | 0 | 17 | 14 | 107 | 3 | 4 | 3 | 58 | 20 | 186 |
| 20,348 | 0 | 17 | 14 | 114 | 3 | 4 | 3 | 59 | 20 | 194 |
| 20,349 | 0 | 18 | 14 | 115 | 3 | 4 | 3 | 59 | 20 | 196 |
| 20,350 | 0 | 18 | 13 | 118 | 3 | 4 | 3 | 62 | 19 | 202 |
| 20,351 | 0 | 19 | 13 | 120 | 3 | 4 | 3 | 63 | 19 | 206 |
| 20,352 | 0 | 20 | 13 | 120 | 3 | 4 | 3 | 63 | 19 | 207 |
| 20,353 | 0 | 28 | 13 | 123 | 3 | 4 | 3 | 65 | 19 | 220 |
| 20,354 | 0 | 28 | 13 | 122 | 3 | 4 | 3 | 65 | 19 | 219 |
| 20,355 | 0 | 28 | 13 | 111 | 3 | 3 | 3 | 58 | 19 | 200 |
| 20,356 | 0 | 28 | 13 | 111 | 3 | 3 | 3 | 58 | 19 | 200 |
| 20,357 | 0 | 28 | 13 | 105 | 3 | 3 | 3 | 47 | 19 | 183 |
| 20,358 | 0 | 26 | 13 | 103 | 3 | 3 | 3 | 43 | 19 | 175 |
| 20,359 | 0 | 22 | 13 | 100 | 3 | 2 | 3 | 40 | 19 | 164 |
| 20,360 | 0 | 22 | 13 | 101 | 3 | 2 | 3 | 40 | 19 | 165 |
| 20,361 | 0 | 22 | 13 | 101 | 3 | 2 | 3 | 40 | 19 | 165 |
| 20,362 | 0 | 22 | 13 | 101 | 3 | 2 | 4 | 36 | 20 | 161 |
| 20,363 | 1 | 22 | 13 | 101 | 3 | 2 | 4 | 36 | 21 | 161 |
| 20,364 | 1 | 18 | 13 | 87  | 3 | 1 | 4 | 35 | 21 | 141 |
| 20,365 | 1 | 18 | 15 | 88  | 3 | 1 | 4 | 35 | 23 | 142 |

|        |   |    |    |     |   |   |    |    |    |     |
|--------|---|----|----|-----|---|---|----|----|----|-----|
| 20,366 | 1 | 18 | 15 | 88  | 3 | 1 | 4  | 35 | 23 | 142 |
| 20,367 | 1 | 18 | 15 | 85  | 3 | 1 | 4  | 35 | 23 | 139 |
| 20,368 | 1 | 18 | 15 | 85  | 3 | 1 | 5  | 35 | 24 | 139 |
| 20,369 | 1 | 18 | 15 | 85  | 3 | 1 | 5  | 35 | 24 | 139 |
| 20,370 | 1 | 18 | 15 | 85  | 3 | 1 | 5  | 36 | 24 | 140 |
| 20,371 | 1 | 18 | 14 | 85  | 3 | 1 | 5  | 34 | 23 | 138 |
| 20,372 | 1 | 18 | 14 | 84  | 3 | 1 | 5  | 31 | 23 | 134 |
| 20,373 | 1 | 18 | 14 | 84  | 3 | 1 | 5  | 31 | 23 | 134 |
| 20,374 | 1 | 18 | 15 | 84  | 5 | 1 | 6  | 31 | 27 | 134 |
| 20,375 | 1 | 18 | 15 | 84  | 5 | 1 | 6  | 31 | 27 | 134 |
| 20,376 | 1 | 18 | 16 | 87  | 5 | 1 | 10 | 31 | 32 | 137 |
| 20,377 | 1 | 18 | 16 | 87  | 5 | 1 | 10 | 31 | 32 | 137 |
| 20,378 | 1 | 18 | 17 | 87  | 5 | 1 | 10 | 30 | 33 | 136 |
| 20,379 | 1 | 18 | 16 | 86  | 5 | 1 | 10 | 30 | 32 | 135 |
| 20,380 | 1 | 18 | 17 | 86  | 5 | 1 | 10 | 31 | 33 | 136 |
| 20,381 | 1 | 18 | 17 | 85  | 5 | 1 | 13 | 31 | 36 | 135 |
| 20,382 | 1 | 18 | 17 | 86  | 5 | 1 | 13 | 31 | 36 | 136 |
| 20,383 | 1 | 18 | 18 | 86  | 5 | 1 | 15 | 31 | 39 | 136 |
| 20,384 | 1 | 18 | 17 | 86  | 5 | 1 | 15 | 31 | 38 | 136 |
| 20,385 | 1 | 18 | 17 | 86  | 5 | 1 | 15 | 31 | 38 | 136 |
| 20,386 | 1 | 18 | 16 | 86  | 5 | 1 | 15 | 31 | 37 | 136 |
| 20,387 | 1 | 18 | 15 | 86  | 3 | 1 | 15 | 32 | 34 | 137 |
| 20,388 | 1 | 18 | 15 | 86  | 2 | 1 | 15 | 32 | 33 | 137 |
| 20,389 | 1 | 18 | 15 | 86  | 2 | 1 | 15 | 32 | 33 | 137 |
| 20,390 | 1 | 18 | 15 | 86  | 2 | 1 | 15 | 32 | 33 | 137 |
| 20,391 | 1 | 18 | 16 | 86  | 2 | 1 | 15 | 32 | 34 | 137 |
| 20,392 | 1 | 18 | 16 | 86  | 2 | 1 | 15 | 33 | 34 | 138 |
| 20,393 | 1 | 19 | 16 | 86  | 2 | 1 | 15 | 34 | 34 | 140 |
| 20,394 | 1 | 20 | 15 | 86  | 2 | 1 | 14 | 34 | 32 | 141 |
| 20,395 | 1 | 22 | 15 | 87  | 2 | 1 | 14 | 35 | 32 | 145 |
| 20,396 | 1 | 23 | 15 | 95  | 2 | 2 | 14 | 41 | 32 | 161 |
| 20,397 | 1 | 28 | 15 | 103 | 2 | 4 | 13 | 49 | 31 | 184 |
| 20,398 | 1 | 26 | 11 | 68  | 2 | 3 | 12 | 34 | 26 | 131 |
| 20,399 | 1 | 29 | 11 | 75  | 2 | 3 | 12 | 37 | 26 | 144 |
| 20,400 | 1 | 28 | 11 | 75  | 2 | 3 | 12 | 39 | 26 | 145 |
| 20,401 | 1 | 28 | 11 | 70  | 2 | 3 | 12 | 36 | 26 | 137 |
| 20,402 | 1 | 28 | 10 | 73  | 2 | 3 | 12 | 41 | 25 | 145 |
| 20,403 | 1 | 28 | 10 | 75  | 2 | 3 | 12 | 42 | 25 | 148 |
| 20,404 | 5 | 20 | 12 | 67  | 3 | 3 | 13 | 36 | 33 | 126 |
| 20,405 | 6 | 20 | 14 | 66  | 3 | 3 | 14 | 36 | 37 | 125 |
| 20,406 | 6 | 19 | 14 | 65  | 3 | 3 | 15 | 34 | 38 | 121 |

|        |   |    |    |    |   |   |    |     |    |     |
|--------|---|----|----|----|---|---|----|-----|----|-----|
| 20,407 | 6 | 17 | 14 | 52 | 3 | 3 | 15 | 34  | 38 | 106 |
| 20,408 | 6 | 17 | 13 | 52 | 3 | 3 | 15 | 35  | 37 | 107 |
| 20,409 | 6 | 16 | 13 | 48 | 3 | 3 | 15 | 35  | 37 | 102 |
| 20,410 | 7 | 16 | 13 | 50 | 3 | 3 | 16 | 35  | 39 | 104 |
| 20,411 | 7 | 16 | 13 | 49 | 3 | 3 | 16 | 35  | 39 | 103 |
| 20,412 | 7 | 16 | 14 | 49 | 3 | 3 | 16 | 36  | 40 | 104 |
| 20,413 | 7 | 16 | 14 | 50 | 3 | 3 | 15 | 36  | 39 | 105 |
| 20,414 | 6 | 16 | 14 | 50 | 3 | 3 | 15 | 38  | 38 | 107 |
| 20,415 | 6 | 16 | 14 | 51 | 3 | 3 | 15 | 39  | 38 | 109 |
| 20,416 | 6 | 16 | 12 | 51 | 3 | 3 | 17 | 41  | 38 | 111 |
| 20,417 | 6 | 16 | 12 | 51 | 3 | 3 | 17 | 41  | 38 | 111 |
| 20,418 | 6 | 16 | 12 | 51 | 3 | 3 | 17 | 41  | 38 | 111 |
| 20,419 | 6 | 16 | 12 | 51 | 3 | 3 | 16 | 41  | 37 | 111 |
| 20,420 | 6 | 16 | 12 | 53 | 3 | 3 | 16 | 41  | 37 | 113 |
| 20,421 | 6 | 19 | 12 | 73 | 3 | 3 | 16 | 67  | 37 | 162 |
| 20,422 | 6 | 19 | 12 | 74 | 3 | 3 | 16 | 67  | 37 | 163 |
| 20,423 | 6 | 19 | 12 | 74 | 3 | 3 | 16 | 68  | 37 | 164 |
| 20,424 | 6 | 19 | 12 | 71 | 3 | 3 | 15 | 68  | 36 | 161 |
| 20,425 | 6 | 19 | 11 | 71 | 1 | 3 | 15 | 68  | 33 | 161 |
| 20,426 | 6 | 19 | 10 | 73 | 1 | 3 | 12 | 68  | 29 | 163 |
| 20,427 | 6 | 19 | 10 | 73 | 1 | 3 | 12 | 70  | 29 | 165 |
| 20,428 | 6 | 20 | 9  | 77 | 1 | 3 | 12 | 71  | 28 | 171 |
| 20,429 | 6 | 21 | 10 | 78 | 1 | 3 | 12 | 86  | 29 | 188 |
| 20,430 | 6 | 21 | 9  | 78 | 1 | 3 | 12 | 86  | 28 | 188 |
| 20,431 | 6 | 22 | 9  | 78 | 1 | 3 | 12 | 88  | 28 | 191 |
| 20,432 | 6 | 24 | 9  | 81 | 1 | 3 | 9  | 101 | 25 | 209 |
| 20,433 | 6 | 24 | 9  | 84 | 1 | 4 | 7  | 103 | 23 | 215 |
| 20,434 | 6 | 24 | 9  | 87 | 1 | 4 | 7  | 106 | 23 | 221 |
| 20,435 | 6 | 24 | 9  | 88 | 1 | 4 | 7  | 106 | 23 | 222 |
| 20,436 | 6 | 24 | 9  | 89 | 1 | 4 | 7  | 106 | 23 | 223 |
| 20,437 | 6 | 24 | 10 | 89 | 1 | 4 | 7  | 105 | 24 | 222 |
| 20,438 | 6 | 25 | 10 | 91 | 1 | 5 | 7  | 106 | 24 | 227 |
| 20,439 | 6 | 25 | 10 | 91 | 1 | 6 | 7  | 106 | 24 | 228 |
| 20,440 | 6 | 25 | 10 | 91 | 2 | 6 | 7  | 106 | 25 | 228 |
| 20,441 | 6 | 25 | 10 | 92 | 2 | 6 | 7  | 107 | 25 | 230 |
| 20,442 | 6 | 23 | 9  | 94 | 2 | 6 | 7  | 105 | 24 | 228 |
| 20,443 | 6 | 23 | 9  | 94 | 2 | 6 | 7  | 106 | 24 | 229 |
| 20,444 | 6 | 23 | 10 | 94 | 2 | 6 | 8  | 106 | 26 | 229 |
| 20,445 | 6 | 21 | 11 | 92 | 2 | 6 | 11 | 104 | 30 | 223 |
| 20,446 | 6 | 21 | 11 | 93 | 2 | 6 | 11 | 104 | 30 | 224 |
| 20,447 | 6 | 15 | 11 | 77 | 2 | 3 | 11 | 89  | 30 | 184 |

|        |   |    |    |     |   |   |    |     |    |     |
|--------|---|----|----|-----|---|---|----|-----|----|-----|
| 20,448 | 6 | 15 | 11 | 71  | 2 | 3 | 11 | 89  | 30 | 178 |
| 20,449 | 6 | 15 | 11 | 72  | 2 | 3 | 11 | 90  | 30 | 180 |
| 20,450 | 6 | 12 | 11 | 73  | 2 | 3 | 11 | 107 | 30 | 195 |
| 20,451 | 7 | 14 | 12 | 77  | 2 | 3 | 11 | 111 | 32 | 205 |
| 20,452 | 7 | 12 | 12 | 71  | 2 | 3 | 11 | 104 | 32 | 190 |
| 20,453 | 7 | 12 | 13 | 71  | 2 | 3 | 11 | 104 | 33 | 190 |
| 20,454 | 4 | 12 | 12 | 83  | 1 | 3 | 11 | 111 | 28 | 209 |
| 20,455 | 3 | 13 | 10 | 87  | 1 | 3 | 10 | 117 | 24 | 220 |
| 20,456 | 3 | 13 | 10 | 88  | 1 | 3 | 9  | 118 | 23 | 222 |
| 20,457 | 3 | 13 | 10 | 90  | 1 | 3 | 9  | 119 | 23 | 225 |
| 20,458 | 4 | 14 | 13 | 93  | 1 | 3 | 11 | 120 | 29 | 230 |
| 20,459 | 3 | 15 | 13 | 108 | 1 | 5 | 11 | 126 | 28 | 254 |
| 20,460 | 3 | 15 | 13 | 111 | 1 | 5 | 11 | 126 | 28 | 257 |
| 20,461 | 4 | 15 | 19 | 120 | 1 | 5 | 13 | 129 | 37 | 269 |
| 20,462 | 4 | 15 | 21 | 121 | 1 | 5 | 13 | 133 | 39 | 274 |
| 20,463 | 4 | 15 | 20 | 121 | 1 | 5 | 14 | 131 | 39 | 272 |
| 20,464 | 4 | 15 | 22 | 122 | 1 | 5 | 14 | 131 | 41 | 273 |
| 20,465 | 4 | 15 | 22 | 123 | 1 | 5 | 14 | 131 | 41 | 274 |
| 20,466 | 4 | 15 | 22 | 122 | 1 | 6 | 14 | 135 | 41 | 278 |
| 20,467 | 4 | 15 | 22 | 121 | 1 | 6 | 12 | 133 | 39 | 275 |
| 20,468 | 4 | 15 | 23 | 121 | 1 | 6 | 12 | 133 | 40 | 275 |
| 20,469 | 4 | 16 | 23 | 123 | 1 | 6 | 12 | 134 | 40 | 279 |
| 20,470 | 4 | 17 | 23 | 121 | 1 | 6 | 12 | 134 | 40 | 278 |
| 20,471 | 4 | 17 | 23 | 121 | 1 | 6 | 12 | 135 | 40 | 279 |
| 20,472 | 4 | 14 | 23 | 102 | 1 | 6 | 12 | 108 | 40 | 230 |
| 20,473 | 4 | 14 | 23 | 101 | 1 | 6 | 12 | 108 | 40 | 229 |
| 20,474 | 4 | 14 | 23 | 101 | 1 | 6 | 12 | 107 | 40 | 228 |
| 20,475 | 4 | 14 | 24 | 100 | 1 | 6 | 12 | 107 | 41 | 227 |
| 20,476 | 4 | 14 | 24 | 103 | 1 | 6 | 12 | 107 | 41 | 230 |
| 20,477 | 4 | 14 | 24 | 104 | 1 | 6 | 11 | 107 | 40 | 231 |
| 20,478 | 4 | 12 | 24 | 102 | 1 | 6 | 11 | 90  | 40 | 210 |
| 20,479 | 4 | 12 | 24 | 109 | 1 | 6 | 11 | 95  | 40 | 222 |
| 20,480 | 4 | 12 | 23 | 111 | 1 | 6 | 11 | 99  | 39 | 228 |
| 20,481 | 4 | 12 | 23 | 112 | 1 | 6 | 11 | 99  | 39 | 229 |
| 20,482 | 4 | 9  | 22 | 114 | 1 | 6 | 11 | 86  | 38 | 215 |
| 20,483 | 4 | 10 | 22 | 114 | 1 | 6 | 11 | 91  | 38 | 221 |
| 20,484 | 4 | 12 | 22 | 109 | 1 | 5 | 11 | 87  | 38 | 213 |
| 20,485 | 4 | 12 | 21 | 110 | 1 | 5 | 11 | 87  | 37 | 214 |
| 20,486 | 4 | 12 | 26 | 108 | 1 | 5 | 14 | 87  | 45 | 212 |
| 20,487 | 7 | 12 | 37 | 108 | 1 | 5 | 19 | 87  | 64 | 212 |
| 20,488 | 7 | 12 | 37 | 109 | 1 | 5 | 19 | 87  | 64 | 213 |

|        |   |    |    |     |   |   |    |    |     |     |
|--------|---|----|----|-----|---|---|----|----|-----|-----|
| 20,489 | 7 | 11 | 51 | 108 | 1 | 3 | 26 | 86 | 85  | 208 |
| 20,490 | 7 | 11 | 51 | 109 | 0 | 3 | 26 | 85 | 84  | 208 |
| 20,491 | 7 | 11 | 51 | 109 | 0 | 3 | 28 | 86 | 86  | 209 |
| 20,492 | 7 | 11 | 51 | 112 | 0 | 3 | 28 | 87 | 86  | 213 |
| 20,493 | 7 | 11 | 51 | 113 | 0 | 3 | 28 | 87 | 86  | 214 |
| 20,494 | 7 | 11 | 51 | 113 | 0 | 3 | 28 | 87 | 86  | 214 |
| 20,495 | 7 | 11 | 50 | 113 | 0 | 3 | 27 | 87 | 84  | 214 |
| 20,496 | 7 | 11 | 49 | 112 | 0 | 3 | 24 | 87 | 80  | 213 |
| 20,497 | 7 | 11 | 49 | 111 | 0 | 3 | 24 | 87 | 80  | 212 |
| 20,498 | 7 | 11 | 49 | 113 | 0 | 3 | 24 | 88 | 80  | 215 |
| 20,499 | 7 | 10 | 49 | 113 | 0 | 3 | 24 | 88 | 80  | 214 |
| 20,500 | 7 | 10 | 53 | 112 | 0 | 3 | 25 | 87 | 85  | 212 |
| 20,501 | 7 | 10 | 53 | 104 | 0 | 3 | 25 | 67 | 85  | 184 |
| 20,502 | 6 | 8  | 52 | 99  | 0 | 3 | 25 | 61 | 83  | 171 |
| 20,503 | 6 | 10 | 58 | 97  | 0 | 3 | 27 | 63 | 91  | 173 |
| 20,504 | 6 | 10 | 57 | 97  | 0 | 3 | 27 | 64 | 90  | 174 |
| 20,505 | 5 | 11 | 62 | 85  | 0 | 3 | 31 | 57 | 98  | 156 |
| 20,506 | 5 | 10 | 68 | 81  | 0 | 3 | 34 | 56 | 107 | 150 |
| 20,507 | 5 | 10 | 68 | 84  | 0 | 3 | 34 | 56 | 107 | 153 |
| 20,508 | 5 | 10 | 68 | 86  | 0 | 3 | 34 | 61 | 107 | 160 |
| 20,509 | 4 | 9  | 65 | 86  | 0 | 3 | 32 | 60 | 101 | 158 |
| 20,510 | 3 | 10 | 63 | 78  | 0 | 1 | 31 | 56 | 97  | 145 |
| 20,511 | 3 | 10 | 63 | 84  | 0 | 2 | 31 | 69 | 97  | 165 |
| 20,512 | 3 | 12 | 59 | 77  | 0 | 2 | 29 | 70 | 91  | 161 |
| 20,513 | 3 | 12 | 57 | 78  | 0 | 2 | 29 | 66 | 89  | 158 |
| 20,514 | 3 | 12 | 57 | 78  | 0 | 2 | 28 | 66 | 88  | 158 |
| 20,515 | 3 | 12 | 55 | 78  | 0 | 2 | 28 | 68 | 86  | 160 |
| 20,516 | 3 | 12 | 55 | 77  | 0 | 1 | 28 | 65 | 86  | 155 |
| 20,517 | 3 | 12 | 55 | 77  | 0 | 1 | 28 | 65 | 86  | 155 |
| 20,518 | 4 | 12 | 54 | 83  | 0 | 1 | 28 | 67 | 86  | 163 |
| 20,519 | 4 | 12 | 54 | 83  | 0 | 1 | 28 | 67 | 86  | 163 |
| 20,520 | 4 | 11 | 54 | 81  | 0 | 1 | 28 | 66 | 86  | 159 |
| 20,521 | 4 | 12 | 54 | 90  | 0 | 1 | 28 | 71 | 86  | 174 |
| 20,522 | 4 | 12 | 54 | 91  | 0 | 1 | 28 | 70 | 86  | 174 |
| 20,523 | 4 | 12 | 54 | 90  | 0 | 1 | 28 | 70 | 86  | 173 |
| 20,524 | 4 | 13 | 54 | 92  | 0 | 1 | 28 | 69 | 86  | 175 |
| 20,525 | 4 | 13 | 57 | 93  | 0 | 1 | 28 | 69 | 89  | 176 |
| 20,526 | 4 | 14 | 56 | 94  | 0 | 1 | 28 | 69 | 88  | 178 |
| 20,527 | 4 | 14 | 56 | 91  | 0 | 1 | 28 | 69 | 88  | 175 |
| 20,528 | 4 | 14 | 56 | 90  | 0 | 1 | 28 | 69 | 88  | 174 |
| 20,529 | 4 | 14 | 56 | 87  | 0 | 1 | 28 | 68 | 88  | 170 |

|        |   |    |    |     |   |    |    |     |    |     |
|--------|---|----|----|-----|---|----|----|-----|----|-----|
| 20,530 | 4 | 14 | 56 | 77  | 0 | 1  | 28 | 58  | 88 | 150 |
| 20,531 | 4 | 14 | 56 | 77  | 0 | 1  | 28 | 58  | 88 | 150 |
| 20,532 | 4 | 14 | 56 | 77  | 0 | 1  | 28 | 58  | 88 | 150 |
| 20,533 | 4 | 14 | 56 | 72  | 0 | 1  | 28 | 57  | 88 | 144 |
| 20,534 | 4 | 13 | 58 | 72  | 0 | 1  | 28 | 52  | 90 | 138 |
| 20,535 | 4 | 11 | 58 | 70  | 0 | 1  | 28 | 53  | 90 | 135 |
| 20,536 | 4 | 11 | 58 | 69  | 0 | 1  | 30 | 53  | 92 | 134 |
| 20,537 | 4 | 11 | 56 | 69  | 0 | 1  | 28 | 53  | 88 | 134 |
| 20,538 | 1 | 12 | 44 | 69  | 0 | 1  | 24 | 53  | 69 | 135 |
| 20,539 | 1 | 12 | 32 | 68  | 0 | 1  | 17 | 53  | 50 | 134 |
| 20,540 | 1 | 12 | 32 | 67  | 0 | 1  | 17 | 53  | 50 | 133 |
| 20,541 | 1 | 12 | 32 | 67  | 0 | 1  | 15 | 53  | 48 | 133 |
| 20,542 | 1 | 12 | 32 | 64  | 0 | 1  | 15 | 51  | 48 | 128 |
| 20,543 | 1 | 12 | 32 | 67  | 0 | 1  | 15 | 51  | 48 | 131 |
| 20,544 | 1 | 12 | 32 | 64  | 0 | 1  | 15 | 51  | 48 | 128 |
| 20,545 | 1 | 12 | 32 | 64  | 0 | 1  | 15 | 50  | 48 | 127 |
| 20,546 | 1 | 12 | 32 | 64  | 0 | 1  | 15 | 50  | 48 | 127 |
| 20,547 | 1 | 12 | 33 | 64  | 1 | 1  | 15 | 50  | 50 | 127 |
| 20,548 | 1 | 12 | 33 | 67  | 1 | 1  | 15 | 50  | 50 | 130 |
| 20,549 | 1 | 12 | 33 | 72  | 1 | 3  | 15 | 57  | 50 | 144 |
| 20,550 | 1 | 14 | 31 | 93  | 1 | 4  | 15 | 67  | 48 | 178 |
| 20,551 | 1 | 24 | 31 | 122 | 1 | 6  | 14 | 96  | 47 | 248 |
| 20,552 | 1 | 27 | 31 | 127 | 1 | 6  | 14 | 98  | 47 | 258 |
| 20,553 | 1 | 27 | 33 | 131 | 1 | 7  | 14 | 98  | 49 | 263 |
| 20,554 | 1 | 25 | 27 | 137 | 1 | 7  | 13 | 106 | 42 | 275 |
| 20,555 | 1 | 25 | 21 | 138 | 1 | 7  | 8  | 105 | 31 | 275 |
| 20,556 | 1 | 33 | 15 | 159 | 1 | 10 | 5  | 110 | 22 | 312 |
| 20,557 | 1 | 34 | 15 | 160 | 1 | 10 | 5  | 110 | 22 | 314 |
| 20,558 | 1 | 34 | 15 | 160 | 1 | 10 | 5  | 109 | 22 | 313 |
| 20,559 | 1 | 34 | 15 | 156 | 1 | 10 | 5  | 103 | 22 | 303 |
| 20,560 | 1 | 34 | 15 | 155 | 1 | 10 | 5  | 104 | 22 | 303 |
| 20,561 | 1 | 32 | 15 | 152 | 1 | 10 | 5  | 101 | 22 | 295 |
| 20,562 | 1 | 33 | 15 | 147 | 1 | 11 | 5  | 89  | 22 | 280 |
| 20,563 | 1 | 31 | 15 | 145 | 1 | 11 | 5  | 86  | 22 | 273 |
| 20,564 | 1 | 31 | 17 | 143 | 1 | 11 | 5  | 89  | 24 | 274 |
| 20,565 | 1 | 32 | 17 | 144 | 1 | 12 | 5  | 96  | 24 | 284 |
| 20,566 | 1 | 32 | 17 | 143 | 1 | 12 | 5  | 94  | 24 | 281 |
| 20,567 | 1 | 32 | 17 | 145 | 1 | 13 | 5  | 92  | 24 | 282 |
| 20,568 | 0 | 32 | 17 | 145 | 1 | 13 | 5  | 92  | 23 | 282 |
| 20,569 | 0 | 36 | 17 | 145 | 1 | 13 | 5  | 92  | 23 | 286 |
| 20,570 | 0 | 36 | 17 | 145 | 1 | 13 | 5  | 91  | 23 | 285 |

|        |   |    |    |     |   |    |   |     |    |     |
|--------|---|----|----|-----|---|----|---|-----|----|-----|
| 20,571 | 0 | 36 | 17 | 145 | 1 | 13 | 5 | 92  | 23 | 286 |
| 20,572 | 0 | 34 | 17 | 136 | 1 | 13 | 5 | 87  | 23 | 270 |
| 20,573 | 0 | 34 | 17 | 135 | 1 | 13 | 5 | 87  | 23 | 269 |
| 20,574 | 0 | 34 | 17 | 135 | 1 | 13 | 5 | 87  | 23 | 269 |
| 20,575 | 0 | 33 | 19 | 133 | 1 | 13 | 5 | 87  | 25 | 266 |
| 20,576 | 0 | 33 | 16 | 132 | 1 | 13 | 5 | 87  | 22 | 265 |
| 20,577 | 0 | 32 | 16 | 130 | 1 | 13 | 5 | 88  | 22 | 263 |
| 20,578 | 0 | 32 | 17 | 130 | 1 | 13 | 6 | 88  | 24 | 263 |
| 20,579 | 0 | 32 | 18 | 130 | 1 | 14 | 6 | 88  | 25 | 264 |
| 20,580 | 0 | 32 | 18 | 130 | 1 | 14 | 6 | 88  | 25 | 264 |
| 20,581 | 0 | 32 | 18 | 130 | 1 | 14 | 6 | 88  | 25 | 264 |
| 20,582 | 0 | 33 | 18 | 130 | 1 | 14 | 6 | 88  | 25 | 265 |
| 20,583 | 0 | 33 | 19 | 130 | 1 | 14 | 6 | 88  | 26 | 265 |
| 20,584 | 0 | 33 | 17 | 131 | 1 | 14 | 6 | 90  | 24 | 268 |
| 20,585 | 0 | 33 | 17 | 139 | 1 | 14 | 6 | 95  | 24 | 281 |
| 20,586 | 0 | 33 | 18 | 141 | 1 | 14 | 6 | 100 | 25 | 288 |
| 20,587 | 0 | 33 | 18 | 141 | 1 | 14 | 4 | 105 | 23 | 293 |
| 20,588 | 0 | 33 | 15 | 143 | 1 | 14 | 3 | 117 | 19 | 307 |
| 20,589 | 0 | 32 | 15 | 143 | 1 | 14 | 2 | 117 | 18 | 306 |
| 20,590 | 0 | 43 | 14 | 172 | 1 | 18 | 2 | 161 | 17 | 394 |
| 20,591 | 0 | 43 | 13 | 180 | 1 | 18 | 2 | 161 | 16 | 402 |
| 20,592 | 0 | 43 | 14 | 183 | 1 | 18 | 2 | 161 | 17 | 405 |
| 20,593 | 0 | 43 | 15 | 184 | 1 | 18 | 2 | 161 | 18 | 406 |
| 20,594 | 0 | 43 | 15 | 182 | 1 | 18 | 2 | 161 | 18 | 404 |
| 20,595 | 0 | 43 | 15 | 184 | 1 | 18 | 2 | 163 | 18 | 408 |
| 20,596 | 0 | 43 | 15 | 184 | 1 | 18 | 2 | 163 | 18 | 408 |
| 20,597 | 0 | 43 | 14 | 184 | 1 | 18 | 2 | 163 | 17 | 408 |
| 20,598 | 0 | 43 | 14 | 184 | 0 | 18 | 2 | 163 | 16 | 408 |
| 20,599 | 0 | 43 | 15 | 173 | 0 | 16 | 2 | 156 | 17 | 388 |
| 20,600 | 0 | 40 | 15 | 153 | 0 | 15 | 4 | 145 | 19 | 353 |
| 20,601 | 0 | 41 | 15 | 162 | 0 | 15 | 4 | 156 | 19 | 374 |
| 20,602 | 0 | 32 | 15 | 146 | 0 | 15 | 4 | 142 | 19 | 335 |
| 20,603 | 0 | 29 | 15 | 142 | 0 | 15 | 4 | 147 | 19 | 333 |
| 20,604 | 0 | 29 | 13 | 138 | 0 | 14 | 3 | 148 | 16 | 329 |
| 20,605 | 0 | 29 | 13 | 149 | 0 | 15 | 3 | 152 | 16 | 345 |
| 20,606 | 0 | 38 | 13 | 185 | 0 | 19 | 3 | 175 | 16 | 417 |
| 20,607 | 0 | 30 | 13 | 166 | 0 | 16 | 3 | 168 | 16 | 380 |
| 20,608 | 0 | 30 | 13 | 167 | 0 | 17 | 3 | 171 | 16 | 385 |
| 20,609 | 0 | 30 | 13 | 164 | 0 | 17 | 3 | 174 | 16 | 385 |
| 20,610 | 0 | 31 | 13 | 164 | 0 | 18 | 3 | 174 | 16 | 387 |
| 20,611 | 0 | 31 | 13 | 164 | 0 | 18 | 3 | 174 | 16 | 387 |

|        |   |    |    |     |   |    |   |     |    |     |
|--------|---|----|----|-----|---|----|---|-----|----|-----|
| 20,612 | 0 | 31 | 13 | 163 | 0 | 18 | 3 | 175 | 16 | 387 |
| 20,613 | 0 | 30 | 13 | 159 | 0 | 16 | 3 | 176 | 16 | 381 |
| 20,614 | 0 | 30 | 11 | 157 | 0 | 16 | 3 | 175 | 14 | 378 |
| 20,615 | 0 | 30 | 11 | 160 | 0 | 16 | 3 | 174 | 14 | 380 |
| 20,616 | 0 | 29 | 11 | 158 | 0 | 15 | 3 | 167 | 14 | 369 |
| 20,617 | 0 | 29 | 11 | 157 | 0 | 14 | 3 | 167 | 14 | 367 |
| 20,618 | 0 | 29 | 11 | 157 | 0 | 14 | 3 | 168 | 14 | 368 |
| 20,619 | 0 | 25 | 11 | 151 | 0 | 14 | 3 | 166 | 14 | 356 |
| 20,620 | 0 | 25 | 11 | 151 | 0 | 14 | 3 | 166 | 14 | 356 |
| 20,621 | 0 | 25 | 11 | 152 | 0 | 15 | 3 | 166 | 14 | 358 |
| 20,622 | 0 | 25 | 11 | 154 | 0 | 15 | 3 | 166 | 14 | 360 |
| 20,623 | 0 | 25 | 11 | 157 | 0 | 15 | 3 | 168 | 14 | 365 |
| 20,624 | 0 | 25 | 11 | 157 | 1 | 15 | 4 | 168 | 16 | 365 |
| 20,625 | 0 | 25 | 11 | 157 | 1 | 15 | 4 | 168 | 16 | 365 |
| 20,626 | 0 | 25 | 9  | 158 | 1 | 15 | 4 | 168 | 14 | 366 |
| 20,627 | 0 | 25 | 9  | 158 | 1 | 15 | 4 | 168 | 14 | 366 |
| 20,628 | 0 | 25 | 8  | 159 | 1 | 15 | 3 | 170 | 12 | 369 |
| 20,629 | 0 | 25 | 8  | 159 | 1 | 15 | 3 | 170 | 12 | 369 |
| 20,630 | 0 | 25 | 7  | 159 | 1 | 14 | 3 | 170 | 11 | 368 |
| 20,631 | 0 | 25 | 7  | 160 | 1 | 14 | 3 | 172 | 11 | 371 |
| 20,632 | 0 | 25 | 7  | 160 | 1 | 14 | 3 | 172 | 11 | 371 |
| 20,633 | 0 | 24 | 7  | 161 | 1 | 14 | 3 | 172 | 11 | 371 |
| 20,634 | 0 | 25 | 6  | 159 | 1 | 14 | 3 | 170 | 10 | 368 |
| 20,635 | 0 | 25 | 6  | 152 | 1 | 14 | 3 | 163 | 10 | 354 |
| 20,636 | 0 | 25 | 5  | 149 | 1 | 14 | 3 | 158 | 9  | 346 |
| 20,637 | 0 | 25 | 5  | 149 | 1 | 14 | 3 | 158 | 9  | 346 |
| 20,638 | 0 | 25 | 5  | 147 | 1 | 14 | 4 | 141 | 10 | 327 |
| 20,639 | 0 | 25 | 5  | 148 | 1 | 14 | 5 | 141 | 11 | 328 |
| 20,640 | 0 | 25 | 5  | 148 | 1 | 14 | 5 | 141 | 11 | 328 |
| 20,641 | 0 | 14 | 5  | 119 | 1 | 10 | 5 | 97  | 11 | 240 |
| 20,642 | 0 | 14 | 4  | 111 | 1 | 10 | 6 | 97  | 11 | 232 |
| 20,643 | 0 | 14 | 3  | 107 | 1 | 10 | 6 | 97  | 10 | 228 |
| 20,644 | 0 | 16 | 3  | 119 | 1 | 12 | 6 | 112 | 10 | 259 |
| 20,645 | 0 | 16 | 3  | 128 | 1 | 12 | 6 | 113 | 10 | 269 |
| 20,646 | 0 | 21 | 4  | 146 | 1 | 13 | 6 | 126 | 11 | 306 |
| 20,647 | 0 | 21 | 4  | 147 | 1 | 13 | 6 | 125 | 11 | 306 |
| 20,648 | 0 | 21 | 4  | 147 | 1 | 13 | 6 | 125 | 11 | 306 |
| 20,649 | 0 | 22 | 4  | 148 | 1 | 13 | 7 | 127 | 12 | 310 |
| 20,650 | 0 | 22 | 3  | 151 | 1 | 13 | 8 | 136 | 12 | 322 |
| 20,651 | 0 | 22 | 1  | 152 | 1 | 13 | 6 | 136 | 8  | 323 |
| 20,652 | 0 | 21 | 1  | 144 | 1 | 13 | 6 | 124 | 8  | 302 |



|        |   |    |    |     |   |    |    |     |    |     |
|--------|---|----|----|-----|---|----|----|-----|----|-----|
| 20,653 | 0 | 21 | 2  | 133 | 1 | 11 | 6  | 104 | 9  | 269 |
| 20,654 | 0 | 21 | 4  | 140 | 1 | 11 | 6  | 108 | 11 | 280 |
| 20,655 | 0 | 21 | 4  | 144 | 1 | 11 | 6  | 109 | 11 | 285 |
| 20,656 | 0 | 20 | 4  | 129 | 1 | 10 | 7  | 95  | 12 | 254 |
| 20,657 | 0 | 11 | 4  | 92  | 1 | 6  | 8  | 72  | 13 | 181 |
| 20,658 | 1 | 11 | 4  | 90  | 1 | 6  | 8  | 71  | 14 | 178 |
| 20,659 | 1 | 10 | 5  | 88  | 1 | 5  | 10 | 68  | 17 | 171 |
| 20,660 | 1 | 10 | 5  | 88  | 1 | 5  | 10 | 66  | 17 | 169 |
| 20,661 | 1 | 9  | 5  | 85  | 1 | 4  | 10 | 66  | 17 | 164 |
| 20,662 | 2 | 9  | 8  | 86  | 1 | 4  | 17 | 66  | 28 | 165 |
| 20,663 | 2 | 9  | 8  | 84  | 1 | 4  | 17 | 65  | 28 | 162 |
| 20,664 | 3 | 9  | 13 | 84  | 1 | 4  | 24 | 64  | 41 | 161 |
| 20,665 | 3 | 10 | 13 | 81  | 1 | 4  | 24 | 61  | 41 | 156 |
| 20,666 | 3 | 10 | 14 | 81  | 1 | 4  | 24 | 61  | 42 | 156 |
| 20,667 | 3 | 10 | 14 | 81  | 1 | 4  | 24 | 61  | 42 | 156 |
| 20,668 | 3 | 10 | 14 | 81  | 1 | 4  | 24 | 61  | 42 | 156 |
| 20,669 | 3 | 13 | 14 | 85  | 1 | 4  | 24 | 65  | 42 | 167 |
| 20,670 | 3 | 14 | 14 | 88  | 1 | 4  | 24 | 66  | 42 | 172 |
| 20,671 | 3 | 14 | 14 | 92  | 1 | 4  | 25 | 66  | 43 | 176 |
| 20,672 | 3 | 15 | 14 | 102 | 1 | 3  | 25 | 80  | 43 | 200 |
| 20,673 | 3 | 15 | 14 | 104 | 1 | 3  | 26 | 83  | 44 | 205 |
| 20,674 | 3 | 16 | 14 | 111 | 1 | 3  | 25 | 88  | 43 | 218 |
| 20,675 | 3 | 16 | 14 | 114 | 0 | 3  | 25 | 92  | 42 | 225 |
| 20,676 | 3 | 16 | 14 | 113 | 0 | 3  | 25 | 93  | 42 | 225 |
| 20,677 | 3 | 18 | 14 | 117 | 0 | 4  | 25 | 101 | 42 | 240 |
| 20,678 | 3 | 18 | 14 | 118 | 0 | 4  | 25 | 103 | 42 | 243 |
| 20,679 | 3 | 18 | 14 | 122 | 0 | 4  | 25 | 100 | 42 | 244 |
| 20,680 | 3 | 18 | 14 | 122 | 0 | 4  | 25 | 100 | 42 | 244 |
| 20,681 | 3 | 18 | 14 | 120 | 0 | 4  | 25 | 99  | 42 | 241 |
| 20,682 | 3 | 18 | 14 | 120 | 0 | 4  | 25 | 99  | 42 | 241 |
| 20,683 | 3 | 18 | 14 | 121 | 0 | 4  | 25 | 100 | 42 | 243 |
| 20,684 | 3 | 17 | 14 | 121 | 0 | 4  | 25 | 100 | 42 | 242 |
| 20,685 | 3 | 18 | 14 | 126 | 0 | 4  | 25 | 106 | 42 | 254 |
| 20,686 | 3 | 18 | 14 | 131 | 0 | 5  | 25 | 107 | 42 | 261 |
| 20,687 | 3 | 18 | 14 | 132 | 0 | 5  | 25 | 107 | 42 | 262 |
| 20,688 | 3 | 18 | 14 | 132 | 0 | 5  | 25 | 107 | 42 | 262 |
| 20,689 | 3 | 18 | 14 | 133 | 0 | 5  | 25 | 107 | 42 | 263 |
| 20,690 | 3 | 18 | 15 | 132 | 0 | 5  | 24 | 107 | 42 | 262 |
| 20,691 | 3 | 18 | 15 | 133 | 0 | 6  | 24 | 108 | 42 | 265 |
| 20,692 | 3 | 18 | 15 | 134 | 0 | 6  | 23 | 108 | 41 | 266 |
| 20,693 | 4 | 18 | 18 | 137 | 0 | 7  | 24 | 109 | 46 | 271 |

|        |   |    |    |     |   |   |    |    |    |     |
|--------|---|----|----|-----|---|---|----|----|----|-----|
| 20,694 | 4 | 16 | 20 | 123 | 0 | 5 | 25 | 93 | 49 | 237 |
| 20,695 | 4 | 16 | 24 | 116 | 0 | 5 | 26 | 93 | 54 | 230 |
| 20,696 | 4 | 11 | 24 | 98  | 0 | 4 | 29 | 79 | 57 | 192 |
| 20,697 | 4 | 11 | 23 | 97  | 0 | 4 | 30 | 79 | 57 | 191 |
| 20,698 | 4 | 11 | 25 | 97  | 0 | 4 | 38 | 79 | 67 | 191 |
| 20,699 | 4 | 10 | 25 | 96  | 0 | 4 | 38 | 77 | 67 | 187 |
| 20,700 | 4 | 10 | 25 | 90  | 0 | 4 | 37 | 67 | 66 | 171 |
| 20,701 | 4 | 10 | 25 | 90  | 0 | 4 | 36 | 67 | 65 | 171 |
| 20,702 | 4 | 10 | 25 | 90  | 0 | 4 | 36 | 67 | 65 | 171 |
| 20,703 | 4 | 10 | 25 | 88  | 0 | 4 | 36 | 67 | 65 | 169 |
| 20,704 | 4 | 10 | 24 | 88  | 0 | 4 | 36 | 67 | 64 | 169 |
| 20,705 | 4 | 10 | 22 | 82  | 0 | 4 | 36 | 62 | 62 | 158 |
| 20,706 | 4 | 10 | 22 | 80  | 0 | 4 | 35 | 64 | 61 | 158 |
| 20,707 | 4 | 10 | 25 | 80  | 2 | 4 | 34 | 66 | 65 | 160 |
| 20,708 | 3 | 10 | 25 | 89  | 2 | 4 | 35 | 71 | 65 | 174 |
| 20,709 | 3 | 11 | 31 | 95  | 3 | 4 | 34 | 71 | 71 | 181 |
| 20,710 | 3 | 11 | 32 | 98  | 3 | 4 | 32 | 71 | 70 | 184 |
| 20,711 | 3 | 12 | 32 | 100 | 3 | 5 | 31 | 75 | 69 | 192 |
| 20,712 | 2 | 12 | 29 | 99  | 3 | 5 | 27 | 74 | 61 | 190 |
| 20,713 | 4 | 12 | 36 | 151 | 6 | 7 | 39 | 80 | 85 | 250 |
| 20,714 | 3 | 12 | 32 | 153 | 6 | 7 | 33 | 82 | 74 | 254 |
| 20,715 | 3 | 12 | 31 | 162 | 6 | 7 | 33 | 81 | 73 | 262 |
| 20,716 | 4 | 11 | 31 | 162 | 6 | 7 | 33 | 81 | 74 | 261 |
| 20,717 | 4 | 11 | 30 | 162 | 6 | 7 | 33 | 81 | 73 | 261 |
| 20,718 | 4 | 11 | 30 | 162 | 6 | 7 | 33 | 81 | 73 | 261 |
| 20,719 | 4 | 11 | 30 | 162 | 6 | 7 | 33 | 81 | 73 | 261 |
| 20,720 | 4 | 8  | 31 | 159 | 6 | 7 | 32 | 76 | 73 | 250 |
| 20,721 | 4 | 7  | 31 | 156 | 6 | 7 | 32 | 75 | 73 | 245 |
| 20,722 | 4 | 7  | 31 | 154 | 6 | 7 | 32 | 73 | 73 | 241 |
| 20,723 | 4 | 6  | 32 | 143 | 6 | 7 | 31 | 61 | 73 | 217 |
| 20,724 | 4 | 6  | 32 | 139 | 6 | 7 | 32 | 58 | 74 | 210 |
| 20,725 | 4 | 5  | 32 | 126 | 6 | 7 | 32 | 47 | 74 | 185 |
| 20,726 | 4 | 5  | 32 | 126 | 6 | 7 | 32 | 47 | 74 | 185 |
| 20,727 | 4 | 3  | 32 | 123 | 6 | 6 | 32 | 38 | 74 | 170 |
| 20,728 | 4 | 3  | 32 | 123 | 6 | 6 | 32 | 38 | 74 | 170 |
| 20,729 | 4 | 3  | 32 | 117 | 6 | 6 | 34 | 36 | 76 | 162 |
| 20,730 | 4 | 3  | 32 | 117 | 6 | 6 | 34 | 36 | 76 | 162 |
| 20,731 | 4 | 3  | 32 | 117 | 6 | 6 | 35 | 35 | 77 | 161 |
| 20,732 | 4 | 3  | 32 | 117 | 6 | 6 | 35 | 35 | 77 | 161 |
| 20,733 | 4 | 3  | 32 | 117 | 6 | 6 | 35 | 35 | 77 | 161 |
| 20,734 | 4 | 3  | 32 | 116 | 6 | 7 | 35 | 35 | 77 | 161 |

|        |   |    |    |     |   |    |    |     |    |     |
|--------|---|----|----|-----|---|----|----|-----|----|-----|
| 20,735 | 4 | 3  | 32 | 116 | 6 | 7  | 35 | 35  | 77 | 161 |
| 20,736 | 4 | 3  | 32 | 106 | 6 | 6  | 35 | 28  | 77 | 143 |
| 20,737 | 4 | 3  | 32 | 105 | 6 | 6  | 36 | 28  | 78 | 142 |
| 20,738 | 4 | 3  | 32 | 107 | 6 | 6  | 36 | 29  | 78 | 145 |
| 20,739 | 4 | 3  | 32 | 107 | 6 | 6  | 36 | 30  | 78 | 146 |
| 20,740 | 4 | 3  | 32 | 106 | 6 | 7  | 35 | 30  | 77 | 146 |
| 20,741 | 4 | 4  | 31 | 122 | 6 | 9  | 35 | 37  | 76 | 172 |
| 20,742 | 4 | 10 | 31 | 160 | 6 | 12 | 35 | 70  | 76 | 252 |
| 20,743 | 4 | 12 | 30 | 175 | 6 | 13 | 34 | 74  | 74 | 274 |
| 20,744 | 3 | 13 | 28 | 190 | 6 | 13 | 34 | 82  | 71 | 298 |
| 20,745 | 3 | 14 | 26 | 211 | 6 | 13 | 33 | 91  | 68 | 329 |
| 20,746 | 3 | 15 | 22 | 215 | 6 | 13 | 32 | 91  | 63 | 334 |
| 20,747 | 3 | 15 | 22 | 216 | 6 | 13 | 29 | 96  | 60 | 340 |
| 20,748 | 3 | 15 | 23 | 219 | 6 | 13 | 28 | 100 | 60 | 347 |
| 20,749 | 3 | 15 | 21 | 219 | 6 | 13 | 20 | 101 | 50 | 348 |
| 20,750 | 3 | 15 | 21 | 219 | 6 | 13 | 20 | 101 | 50 | 348 |
| 20,751 | 3 | 15 | 22 | 221 | 6 | 13 | 20 | 101 | 51 | 350 |
| 20,752 | 3 | 16 | 22 | 227 | 6 | 13 | 20 | 102 | 51 | 358 |
| 20,753 | 3 | 16 | 22 | 228 | 6 | 13 | 20 | 102 | 51 | 359 |
| 20,754 | 3 | 16 | 22 | 229 | 6 | 13 | 20 | 103 | 51 | 361 |
| 20,755 | 3 | 17 | 22 | 229 | 6 | 14 | 21 | 103 | 52 | 363 |
| 20,756 | 3 | 17 | 22 | 229 | 6 | 15 | 21 | 100 | 52 | 361 |
| 20,757 | 3 | 20 | 22 | 257 | 6 | 15 | 21 | 109 | 52 | 401 |
| 20,758 | 3 | 20 | 19 | 277 | 4 | 15 | 21 | 111 | 47 | 423 |
| 20,759 | 3 | 21 | 19 | 270 | 4 | 15 | 21 | 107 | 47 | 413 |
| 20,760 | 3 | 20 | 14 | 266 | 3 | 15 | 21 | 107 | 41 | 408 |
| 20,761 | 3 | 19 | 18 | 205 | 3 | 12 | 22 | 94  | 46 | 330 |
| 20,762 | 3 | 19 | 19 | 205 | 3 | 12 | 22 | 96  | 47 | 332 |
| 20,763 | 1 | 20 | 12 | 207 | 0 | 12 | 12 | 96  | 25 | 335 |
| 20,764 | 1 | 20 | 12 | 207 | 0 | 12 | 11 | 96  | 24 | 335 |
| 20,765 | 1 | 20 | 12 | 199 | 0 | 12 | 10 | 96  | 23 | 327 |
| 20,766 | 1 | 20 | 17 | 199 | 0 | 12 | 12 | 96  | 30 | 327 |
| 20,767 | 0 | 20 | 20 | 200 | 0 | 12 | 14 | 96  | 34 | 328 |
| 20,768 | 2 | 21 | 31 | 200 | 1 | 12 | 27 | 97  | 61 | 330 |
| 20,769 | 2 | 21 | 32 | 200 | 1 | 12 | 27 | 97  | 62 | 330 |
| 20,770 | 2 | 21 | 32 | 200 | 1 | 12 | 27 | 97  | 62 | 330 |
| 20,771 | 3 | 21 | 31 | 199 | 1 | 12 | 28 | 97  | 63 | 329 |
| 20,772 | 3 | 21 | 31 | 198 | 1 | 12 | 29 | 97  | 64 | 328 |
| 20,773 | 3 | 21 | 31 | 198 | 1 | 12 | 29 | 97  | 64 | 328 |
| 20,774 | 3 | 22 | 30 | 198 | 1 | 12 | 29 | 97  | 63 | 329 |
| 20,775 | 3 | 22 | 30 | 198 | 1 | 12 | 28 | 97  | 62 | 329 |

|        |   |    |    |     |   |    |    |     |    |     |
|--------|---|----|----|-----|---|----|----|-----|----|-----|
| 20,776 | 3 | 22 | 30 | 198 | 1 | 12 | 28 | 97  | 62 | 329 |
| 20,777 | 3 | 22 | 30 | 197 | 1 | 12 | 28 | 97  | 62 | 328 |
| 20,778 | 3 | 22 | 30 | 198 | 1 | 12 | 28 | 97  | 62 | 329 |
| 20,779 | 3 | 22 | 30 | 198 | 1 | 12 | 27 | 98  | 61 | 330 |
| 20,780 | 3 | 22 | 30 | 198 | 1 | 12 | 26 | 98  | 60 | 330 |
| 20,781 | 3 | 22 | 31 | 198 | 1 | 12 | 26 | 98  | 61 | 330 |
| 20,782 | 3 | 22 | 31 | 198 | 1 | 12 | 25 | 100 | 60 | 332 |
| 20,783 | 3 | 22 | 31 | 198 | 1 | 12 | 25 | 100 | 60 | 332 |
| 20,784 | 3 | 22 | 31 | 199 | 1 | 12 | 25 | 100 | 60 | 333 |
| 20,785 | 3 | 22 | 31 | 199 | 1 | 11 | 25 | 99  | 60 | 331 |
| 20,786 | 3 | 22 | 31 | 199 | 1 | 11 | 25 | 99  | 60 | 331 |
| 20,787 | 3 | 21 | 31 | 199 | 1 | 11 | 25 | 101 | 60 | 332 |
| 20,788 | 3 | 21 | 31 | 203 | 1 | 11 | 24 | 105 | 59 | 340 |
| 20,789 | 3 | 26 | 31 | 215 | 1 | 11 | 24 | 124 | 59 | 376 |
| 20,790 | 4 | 28 | 31 | 215 | 1 | 12 | 24 | 124 | 60 | 379 |
| 20,791 | 4 | 28 | 31 | 215 | 1 | 11 | 24 | 127 | 60 | 381 |
| 20,792 | 4 | 27 | 31 | 200 | 1 | 9  | 24 | 121 | 60 | 357 |
| 20,793 | 4 | 21 | 31 | 163 | 1 | 5  | 24 | 88  | 60 | 277 |
| 20,794 | 4 | 20 | 31 | 160 | 1 | 4  | 24 | 91  | 60 | 275 |
| 20,795 | 4 | 19 | 31 | 142 | 1 | 3  | 24 | 82  | 60 | 246 |
| 20,796 | 4 | 18 | 31 | 121 | 1 | 3  | 24 | 73  | 60 | 215 |
| 20,797 | 4 | 17 | 31 | 112 | 1 | 3  | 24 | 66  | 60 | 198 |
| 20,798 | 4 | 17 | 31 | 109 | 1 | 3  | 24 | 62  | 60 | 191 |
| 20,799 | 4 | 17 | 30 | 111 | 1 | 3  | 24 | 62  | 59 | 193 |
| 20,800 | 4 | 17 | 30 | 113 | 1 | 3  | 24 | 61  | 59 | 194 |
| 20,801 | 4 | 17 | 31 | 113 | 1 | 3  | 24 | 61  | 60 | 194 |
| 20,802 | 6 | 16 | 31 | 105 | 1 | 3  | 24 | 60  | 62 | 184 |
| 20,803 | 6 | 15 | 31 | 99  | 1 | 1  | 24 | 57  | 62 | 172 |
| 20,804 | 6 | 15 | 31 | 99  | 1 | 1  | 26 | 57  | 64 | 172 |
| 20,805 | 6 | 15 | 31 | 100 | 1 | 1  | 25 | 57  | 63 | 173 |
| 20,806 | 6 | 15 | 31 | 100 | 1 | 1  | 25 | 57  | 63 | 173 |
| 20,807 | 7 | 15 | 31 | 100 | 1 | 1  | 25 | 57  | 64 | 173 |
| 20,808 | 7 | 13 | 31 | 72  | 1 | 1  | 25 | 48  | 64 | 134 |
| 20,809 | 7 | 13 | 31 | 52  | 1 | 1  | 25 | 46  | 64 | 112 |
| 20,810 | 8 | 12 | 39 | 51  | 1 | 1  | 32 | 46  | 80 | 110 |
| 20,811 | 8 | 12 | 37 | 49  | 1 | 1  | 31 | 46  | 77 | 108 |
| 20,812 | 8 | 12 | 32 | 49  | 2 | 1  | 33 | 44  | 75 | 106 |
| 20,813 | 8 | 12 | 32 | 52  | 2 | 1  | 34 | 48  | 76 | 113 |
| 20,814 | 8 | 11 | 33 | 62  | 2 | 1  | 33 | 55  | 76 | 129 |
| 20,815 | 8 | 11 | 33 | 74  | 2 | 1  | 33 | 55  | 76 | 141 |
| 20,816 | 8 | 11 | 37 | 74  | 2 | 1  | 33 | 55  | 80 | 141 |

|        |   |    |    |    |   |   |    |    |    |     |
|--------|---|----|----|----|---|---|----|----|----|-----|
| 20,817 | 8 | 10 | 32 | 77 | 2 | 1 | 31 | 54 | 73 | 142 |
| 20,818 | 8 | 11 | 29 | 78 | 2 | 1 | 29 | 54 | 68 | 144 |
| 20,819 | 6 | 11 | 19 | 80 | 1 | 1 | 16 | 54 | 42 | 146 |
| 20,820 | 6 | 12 | 18 | 82 | 1 | 1 | 16 | 54 | 41 | 149 |
| 20,821 | 5 | 12 | 21 | 82 | 1 | 1 | 18 | 54 | 45 | 149 |
| 20,822 | 5 | 12 | 25 | 84 | 1 | 1 | 18 | 54 | 49 | 151 |
| 20,823 | 5 | 12 | 25 | 83 | 1 | 1 | 20 | 54 | 51 | 150 |
| 20,824 | 5 | 11 | 25 | 83 | 1 | 1 | 20 | 54 | 51 | 149 |
| 20,825 | 5 | 11 | 25 | 83 | 1 | 1 | 20 | 55 | 51 | 150 |
| 20,826 | 5 | 11 | 25 | 83 | 1 | 1 | 20 | 55 | 51 | 150 |
| 20,827 | 6 | 11 | 25 | 87 | 1 | 1 | 20 | 56 | 52 | 155 |
| 20,828 | 6 | 11 | 25 | 87 | 1 | 1 | 21 | 56 | 53 | 155 |
| 20,829 | 6 | 11 | 25 | 87 | 1 | 1 | 21 | 56 | 53 | 155 |
| 20,830 | 6 | 11 | 25 | 87 | 1 | 1 | 21 | 57 | 53 | 156 |
| 20,831 | 6 | 11 | 25 | 87 | 1 | 1 | 21 | 59 | 53 | 158 |
| 20,832 | 6 | 11 | 25 | 89 | 1 | 1 | 23 | 62 | 55 | 163 |
| 20,833 | 6 | 11 | 25 | 91 | 1 | 1 | 23 | 61 | 55 | 164 |
| 20,834 | 6 | 11 | 25 | 92 | 1 | 1 | 23 | 63 | 55 | 167 |
| 20,835 | 6 | 11 | 25 | 91 | 1 | 1 | 23 | 63 | 55 | 166 |
| 20,836 | 6 | 11 | 25 | 92 | 1 | 1 | 23 | 64 | 55 | 168 |
| 20,837 | 6 | 11 | 25 | 92 | 1 | 1 | 23 | 64 | 55 | 168 |
| 20,838 | 6 | 12 | 25 | 93 | 1 | 1 | 23 | 63 | 55 | 169 |
| 20,839 | 6 | 12 | 25 | 89 | 1 | 1 | 23 | 59 | 55 | 161 |
| 20,840 | 6 | 7  | 25 | 75 | 1 | 1 | 25 | 40 | 57 | 123 |
| 20,841 | 5 | 5  | 25 | 77 | 1 | 0 | 26 | 40 | 57 | 122 |
| 20,842 | 5 | 5  | 26 | 76 | 2 | 0 | 28 | 37 | 61 | 118 |
| 20,843 | 5 | 5  | 27 | 74 | 2 | 0 | 29 | 37 | 63 | 116 |
| 20,844 | 5 | 5  | 27 | 74 | 2 | 0 | 29 | 38 | 63 | 117 |
| 20,845 | 6 | 4  | 29 | 61 | 4 | 0 | 34 | 31 | 73 | 96  |
| 20,846 | 6 | 4  | 29 | 60 | 4 | 0 | 34 | 31 | 73 | 95  |
| 20,847 | 6 | 4  | 29 | 60 | 4 | 0 | 34 | 31 | 73 | 95  |
| 20,848 | 6 | 4  | 30 | 60 | 4 | 0 | 34 | 31 | 74 | 95  |
| 20,849 | 6 | 4  | 30 | 60 | 4 | 0 | 34 | 31 | 74 | 95  |
| 20,850 | 6 | 4  | 29 | 59 | 4 | 0 | 34 | 31 | 73 | 94  |
| 20,851 | 6 | 4  | 30 | 57 | 4 | 0 | 34 | 31 | 74 | 92  |
| 20,852 | 5 | 4  | 30 | 58 | 4 | 0 | 34 | 31 | 73 | 93  |
| 20,853 | 4 | 4  | 29 | 58 | 4 | 0 | 34 | 31 | 71 | 93  |
| 20,854 | 4 | 4  | 29 | 58 | 4 | 0 | 34 | 31 | 71 | 93  |
| 20,855 | 4 | 4  | 29 | 57 | 4 | 0 | 32 | 29 | 69 | 90  |
| 20,856 | 4 | 5  | 29 | 57 | 4 | 0 | 32 | 29 | 69 | 91  |
| 20,857 | 3 | 5  | 29 | 58 | 4 | 0 | 32 | 29 | 68 | 92  |

|        |   |   |    |    |   |   |    |    |    |    |
|--------|---|---|----|----|---|---|----|----|----|----|
| 20,858 | 3 | 5 | 29 | 58 | 4 | 0 | 32 | 29 | 68 | 92 |
| 20,859 | 3 | 4 | 29 | 58 | 4 | 0 | 32 | 29 | 68 | 91 |
| 20,860 | 3 | 4 | 28 | 58 | 4 | 0 | 31 | 29 | 66 | 91 |
| 20,861 | 2 | 4 | 22 | 57 | 4 | 0 | 24 | 28 | 52 | 89 |
| 20,862 | 2 | 4 | 23 | 57 | 3 | 0 | 21 | 28 | 49 | 89 |
| 20,863 | 2 | 4 | 23 | 54 | 3 | 0 | 21 | 26 | 49 | 84 |
| 20,864 | 2 | 4 | 22 | 54 | 3 | 0 | 20 | 26 | 47 | 84 |
| 20,865 | 2 | 4 | 22 | 30 | 3 | 0 | 21 | 19 | 48 | 53 |
| 20,866 | 2 | 4 | 22 | 32 | 3 | 0 | 21 | 21 | 48 | 57 |
| 20,867 | 2 | 4 | 18 | 31 | 3 | 0 | 21 | 21 | 44 | 56 |
| 20,868 | 2 | 4 | 18 | 28 | 3 | 0 | 21 | 22 | 44 | 54 |
| 20,869 | 4 | 3 | 19 | 28 | 5 | 0 | 26 | 26 | 54 | 57 |
| 20,870 | 4 | 3 | 25 | 29 | 6 | 0 | 31 | 26 | 66 | 58 |
| 20,871 | 4 | 2 | 30 | 28 | 6 | 0 | 41 | 26 | 81 | 56 |
| 20,872 | 4 | 2 | 27 | 28 | 6 | 0 | 38 | 26 | 75 | 56 |
| 20,873 | 4 | 2 | 23 | 26 | 6 | 0 | 37 | 26 | 70 | 54 |
| 20,874 | 4 | 2 | 24 | 27 | 6 | 0 | 38 | 27 | 72 | 56 |
| 20,875 | 4 | 2 | 24 | 27 | 6 | 0 | 38 | 27 | 72 | 56 |
| 20,876 | 4 | 2 | 24 | 28 | 6 | 0 | 38 | 26 | 72 | 56 |
| 20,877 | 3 | 2 | 24 | 24 | 6 | 0 | 38 | 25 | 71 | 51 |
| 20,878 | 3 | 2 | 24 | 24 | 6 | 0 | 38 | 25 | 71 | 51 |
| 20,879 | 3 | 2 | 25 | 24 | 6 | 0 | 38 | 24 | 72 | 50 |
| 20,880 | 3 | 2 | 25 | 24 | 6 | 0 | 38 | 23 | 72 | 49 |
| 20,881 | 3 | 2 | 25 | 24 | 6 | 0 | 40 | 21 | 74 | 47 |
| 20,882 | 3 | 2 | 24 | 24 | 6 | 0 | 40 | 21 | 73 | 47 |
| 20,883 | 3 | 2 | 24 | 20 | 6 | 0 | 38 | 17 | 71 | 39 |
| 20,884 | 5 | 2 | 25 | 19 | 6 | 0 | 38 | 15 | 74 | 36 |
| 20,885 | 5 | 2 | 25 | 19 | 6 | 0 | 38 | 15 | 74 | 36 |
| 20,886 | 5 | 2 | 25 | 18 | 6 | 0 | 39 | 14 | 75 | 34 |
| 20,887 | 5 | 2 | 25 | 18 | 6 | 0 | 39 | 14 | 75 | 34 |
| 20,888 | 5 | 2 | 25 | 18 | 6 | 0 | 39 | 14 | 75 | 34 |
| 20,889 | 6 | 1 | 28 | 17 | 7 | 0 | 40 | 13 | 81 | 31 |
| 20,890 | 6 | 1 | 28 | 17 | 7 | 0 | 40 | 14 | 81 | 32 |
| 20,891 | 6 | 1 | 28 | 17 | 7 | 0 | 38 | 13 | 79 | 31 |
| 20,892 | 8 | 1 | 31 | 15 | 8 | 0 | 40 | 10 | 87 | 26 |
| 20,893 | 8 | 1 | 35 | 16 | 7 | 0 | 41 | 9  | 91 | 26 |
| 20,894 | 8 | 1 | 34 | 16 | 7 | 0 | 40 | 9  | 89 | 26 |
| 20,895 | 7 | 1 | 33 | 16 | 5 | 0 | 36 | 10 | 81 | 27 |
| 20,896 | 7 | 1 | 33 | 17 | 5 | 0 | 36 | 13 | 81 | 31 |
| 20,897 | 7 | 1 | 33 | 18 | 5 | 0 | 36 | 15 | 81 | 34 |
| 20,898 | 7 | 1 | 32 | 21 | 5 | 0 | 37 | 17 | 81 | 39 |

|        |   |    |    |     |   |   |    |    |    |     |
|--------|---|----|----|-----|---|---|----|----|----|-----|
| 20,899 | 7 | 3  | 32 | 26  | 5 | 0 | 37 | 20 | 81 | 49  |
| 20,900 | 7 | 3  | 32 | 29  | 5 | 0 | 37 | 23 | 81 | 55  |
| 20,901 | 7 | 3  | 31 | 30  | 5 | 2 | 37 | 24 | 80 | 59  |
| 20,902 | 7 | 3  | 31 | 32  | 5 | 2 | 37 | 24 | 80 | 61  |
| 20,903 | 7 | 3  | 31 | 31  | 5 | 2 | 37 | 25 | 80 | 61  |
| 20,904 | 7 | 3  | 31 | 31  | 5 | 2 | 37 | 25 | 80 | 61  |
| 20,905 | 7 | 3  | 31 | 31  | 5 | 2 | 37 | 25 | 80 | 61  |
| 20,906 | 7 | 2  | 31 | 31  | 5 | 2 | 37 | 25 | 80 | 60  |
| 20,907 | 7 | 2  | 31 | 30  | 5 | 2 | 37 | 26 | 80 | 60  |
| 20,908 | 7 | 2  | 31 | 30  | 5 | 2 | 37 | 26 | 80 | 60  |
| 20,909 | 7 | 2  | 31 | 30  | 5 | 3 | 37 | 26 | 80 | 61  |
| 20,910 | 7 | 2  | 31 | 30  | 5 | 3 | 37 | 26 | 80 | 61  |
| 20,911 | 7 | 2  | 31 | 30  | 5 | 3 | 37 | 26 | 80 | 61  |
| 20,912 | 7 | 2  | 30 | 29  | 5 | 3 | 37 | 26 | 79 | 60  |
| 20,913 | 7 | 2  | 30 | 30  | 5 | 3 | 38 | 26 | 80 | 61  |
| 20,914 | 8 | 3  | 33 | 30  | 6 | 3 | 43 | 26 | 90 | 62  |
| 20,915 | 8 | 3  | 33 | 30  | 6 | 3 | 42 | 26 | 89 | 62  |
| 20,916 | 8 | 3  | 32 | 33  | 6 | 3 | 47 | 29 | 93 | 68  |
| 20,917 | 8 | 3  | 32 | 34  | 6 | 3 | 49 | 30 | 95 | 70  |
| 20,918 | 8 | 3  | 32 | 43  | 6 | 3 | 49 | 28 | 95 | 77  |
| 20,919 | 8 | 3  | 32 | 48  | 6 | 3 | 50 | 30 | 96 | 84  |
| 20,920 | 6 | 3  | 32 | 48  | 4 | 3 | 45 | 30 | 87 | 84  |
| 20,921 | 6 | 4  | 25 | 48  | 3 | 3 | 40 | 33 | 74 | 88  |
| 20,922 | 6 | 4  | 20 | 47  | 3 | 3 | 30 | 33 | 59 | 87  |
| 20,923 | 6 | 7  | 20 | 58  | 3 | 3 | 28 | 33 | 57 | 101 |
| 20,924 | 6 | 7  | 19 | 62  | 3 | 3 | 27 | 34 | 55 | 106 |
| 20,925 | 6 | 7  | 19 | 61  | 3 | 3 | 27 | 33 | 55 | 104 |
| 20,926 | 6 | 7  | 20 | 67  | 3 | 3 | 27 | 34 | 56 | 111 |
| 20,927 | 6 | 7  | 20 | 69  | 3 | 3 | 27 | 34 | 56 | 113 |
| 20,928 | 6 | 7  | 20 | 69  | 3 | 3 | 27 | 34 | 56 | 113 |
| 20,929 | 6 | 7  | 20 | 69  | 3 | 3 | 27 | 34 | 56 | 113 |
| 20,930 | 6 | 7  | 22 | 67  | 3 | 3 | 26 | 34 | 57 | 111 |
| 20,931 | 6 | 7  | 24 | 73  | 4 | 3 | 27 | 34 | 61 | 117 |
| 20,932 | 6 | 7  | 24 | 74  | 4 | 3 | 25 | 34 | 59 | 118 |
| 20,933 | 6 | 7  | 24 | 76  | 4 | 3 | 26 | 35 | 60 | 121 |
| 20,934 | 6 | 7  | 24 | 76  | 4 | 3 | 26 | 35 | 60 | 121 |
| 20,935 | 4 | 9  | 25 | 77  | 4 | 3 | 26 | 35 | 59 | 124 |
| 20,936 | 6 | 13 | 32 | 92  | 5 | 3 | 32 | 43 | 75 | 151 |
| 20,937 | 6 | 13 | 32 | 97  | 5 | 3 | 31 | 48 | 74 | 161 |
| 20,938 | 6 | 16 | 33 | 124 | 5 | 3 | 31 | 55 | 75 | 198 |
| 20,939 | 5 | 16 | 32 | 126 | 4 | 3 | 31 | 55 | 72 | 200 |

|        |   |    |    |     |   |   |    |    |    |     |
|--------|---|----|----|-----|---|---|----|----|----|-----|
| 20,940 | 5 | 16 | 35 | 133 | 5 | 3 | 34 | 55 | 79 | 207 |
| 20,941 | 7 | 18 | 35 | 157 | 5 | 3 | 34 | 63 | 81 | 241 |
| 20,942 | 5 | 18 | 34 | 162 | 4 | 3 | 32 | 64 | 75 | 247 |
| 20,943 | 5 | 22 | 33 | 174 | 4 | 4 | 31 | 76 | 73 | 276 |
| 20,944 | 5 | 22 | 28 | 173 | 4 | 4 | 29 | 78 | 66 | 277 |
| 20,945 | 5 | 22 | 33 | 173 | 4 | 4 | 29 | 78 | 71 | 277 |
| 20,946 | 5 | 22 | 43 | 173 | 5 | 4 | 31 | 78 | 84 | 277 |
| 20,947 | 5 | 26 | 43 | 175 | 5 | 4 | 30 | 77 | 83 | 282 |
| 20,948 | 5 | 26 | 43 | 174 | 5 | 4 | 29 | 77 | 82 | 281 |
| 20,949 | 5 | 26 | 43 | 171 | 5 | 4 | 29 | 76 | 82 | 277 |
| 20,950 | 5 | 24 | 43 | 166 | 5 | 4 | 29 | 73 | 82 | 267 |
| 20,951 | 5 | 24 | 43 | 164 | 5 | 4 | 29 | 71 | 82 | 263 |
| 20,952 | 5 | 24 | 43 | 162 | 5 | 2 | 29 | 70 | 82 | 258 |
| 20,953 | 5 | 24 | 43 | 160 | 5 | 2 | 28 | 70 | 81 | 256 |
| 20,954 | 5 | 24 | 43 | 161 | 5 | 2 | 29 | 69 | 82 | 256 |
| 20,955 | 5 | 24 | 43 | 161 | 5 | 2 | 29 | 69 | 82 | 256 |
| 20,956 | 5 | 24 | 43 | 161 | 5 | 2 | 30 | 69 | 83 | 256 |
| 20,957 | 5 | 24 | 43 | 162 | 5 | 2 | 30 | 69 | 83 | 257 |
| 20,958 | 5 | 24 | 43 | 162 | 5 | 2 | 30 | 68 | 83 | 256 |
| 20,959 | 5 | 24 | 43 | 162 | 5 | 2 | 30 | 68 | 83 | 256 |
| 20,960 | 5 | 24 | 43 | 163 | 5 | 2 | 30 | 68 | 83 | 257 |
| 20,961 | 5 | 24 | 43 | 163 | 5 | 2 | 30 | 69 | 83 | 258 |
| 20,962 | 5 | 24 | 43 | 163 | 5 | 2 | 30 | 71 | 83 | 260 |
| 20,963 | 5 | 23 | 42 | 162 | 5 | 2 | 30 | 71 | 82 | 258 |
| 20,964 | 5 | 23 | 42 | 162 | 5 | 2 | 30 | 72 | 82 | 259 |
| 20,965 | 4 | 23 | 39 | 163 | 4 | 2 | 24 | 72 | 71 | 260 |
| 20,966 | 4 | 23 | 43 | 160 | 4 | 2 | 21 | 69 | 72 | 254 |
| 20,967 | 4 | 23 | 43 | 157 | 4 | 2 | 21 | 66 | 72 | 248 |
| 20,968 | 4 | 24 | 43 | 146 | 4 | 2 | 21 | 63 | 72 | 235 |
| 20,969 | 4 | 24 | 43 | 147 | 4 | 2 | 22 | 63 | 73 | 236 |
| 20,970 | 4 | 24 | 43 | 142 | 4 | 2 | 21 | 61 | 72 | 229 |
| 20,971 | 4 | 24 | 42 | 142 | 4 | 2 | 21 | 61 | 71 | 229 |
| 20,972 | 4 | 23 | 42 | 139 | 4 | 2 | 21 | 58 | 71 | 222 |
| 20,973 | 4 | 20 | 42 | 128 | 4 | 2 | 21 | 58 | 71 | 208 |
| 20,974 | 4 | 20 | 42 | 124 | 4 | 2 | 21 | 57 | 71 | 203 |
| 20,975 | 4 | 20 | 42 | 124 | 4 | 2 | 21 | 57 | 71 | 203 |
| 20,976 | 4 | 20 | 42 | 124 | 4 | 2 | 21 | 57 | 71 | 203 |
| 20,977 | 4 | 20 | 42 | 118 | 4 | 2 | 21 | 56 | 71 | 196 |
| 20,978 | 4 | 20 | 42 | 109 | 4 | 2 | 21 | 56 | 71 | 187 |
| 20,979 | 6 | 20 | 42 | 109 | 4 | 2 | 21 | 56 | 73 | 187 |
| 20,980 | 6 | 20 | 39 | 110 | 4 | 2 | 21 | 56 | 70 | 188 |



|        |   |    |    |     |   |    |    |     |    |     |
|--------|---|----|----|-----|---|----|----|-----|----|-----|
| 20,981 | 6 | 20 | 39 | 110 | 4 | 2  | 21 | 56  | 70 | 188 |
| 20,982 | 6 | 20 | 38 | 110 | 3 | 2  | 20 | 56  | 67 | 188 |
| 20,983 | 7 | 20 | 49 | 108 | 4 | 2  | 26 | 55  | 86 | 185 |
| 20,984 | 7 | 20 | 50 | 108 | 4 | 2  | 25 | 55  | 86 | 185 |
| 20,985 | 7 | 18 | 48 | 107 | 4 | 2  | 25 | 55  | 84 | 182 |
| 20,986 | 7 | 18 | 48 | 107 | 4 | 2  | 25 | 55  | 84 | 182 |
| 20,987 | 5 | 14 | 41 | 92  | 3 | 2  | 20 | 47  | 69 | 155 |
| 20,988 | 5 | 11 | 40 | 60  | 3 | 2  | 20 | 35  | 68 | 108 |
| 20,989 | 5 | 11 | 40 | 64  | 3 | 2  | 20 | 37  | 68 | 114 |
| 20,990 | 5 | 11 | 36 | 75  | 3 | 3  | 16 | 40  | 60 | 129 |
| 20,991 | 5 | 16 | 35 | 77  | 3 | 3  | 15 | 45  | 58 | 141 |
| 20,992 | 3 | 15 | 35 | 86  | 3 | 3  | 15 | 48  | 56 | 152 |
| 20,993 | 3 | 15 | 34 | 126 | 3 | 3  | 15 | 68  | 55 | 212 |
| 20,994 | 3 | 11 | 33 | 119 | 3 | 2  | 16 | 63  | 55 | 195 |
| 20,995 | 3 | 11 | 31 | 135 | 3 | 3  | 17 | 61  | 54 | 210 |
| 20,996 | 3 | 11 | 24 | 135 | 2 | 3  | 16 | 61  | 45 | 210 |
| 20,997 | 3 | 11 | 21 | 135 | 2 | 3  | 15 | 61  | 41 | 210 |
| 20,998 | 3 | 10 | 25 | 144 | 3 | 5  | 16 | 68  | 47 | 227 |
| 20,999 | 3 | 10 | 25 | 152 | 3 | 5  | 16 | 69  | 47 | 236 |
| 21,000 | 3 | 12 | 25 | 157 | 3 | 5  | 16 | 75  | 47 | 249 |
| 21,001 | 3 | 12 | 25 | 160 | 3 | 5  | 16 | 76  | 47 | 253 |
| 21,002 | 4 | 13 | 26 | 162 | 3 | 5  | 17 | 76  | 50 | 256 |
| 21,003 | 4 | 13 | 26 | 163 | 3 | 5  | 17 | 78  | 50 | 259 |
| 21,004 | 4 | 13 | 26 | 162 | 3 | 5  | 17 | 79  | 50 | 259 |
| 21,005 | 4 | 13 | 26 | 163 | 3 | 5  | 17 | 82  | 50 | 263 |
| 21,006 | 4 | 13 | 26 | 168 | 3 | 5  | 16 | 82  | 49 | 268 |
| 21,007 | 4 | 13 | 26 | 168 | 3 | 5  | 16 | 82  | 49 | 268 |
| 21,008 | 4 | 13 | 27 | 167 | 3 | 5  | 16 | 82  | 50 | 267 |
| 21,009 | 4 | 13 | 28 | 167 | 3 | 5  | 16 | 82  | 51 | 267 |
| 21,010 | 4 | 14 | 28 | 167 | 3 | 4  | 16 | 82  | 51 | 267 |
| 21,011 | 4 | 14 | 28 | 168 | 3 | 4  | 16 | 82  | 51 | 268 |
| 21,012 | 4 | 14 | 29 | 168 | 3 | 5  | 16 | 83  | 52 | 270 |
| 21,013 | 4 | 14 | 29 | 169 | 3 | 5  | 16 | 84  | 52 | 272 |
| 21,014 | 4 | 14 | 30 | 172 | 3 | 6  | 16 | 89  | 53 | 281 |
| 21,015 | 5 | 14 | 31 | 189 | 3 | 8  | 20 | 103 | 59 | 314 |
| 21,016 | 5 | 14 | 36 | 192 | 3 | 9  | 20 | 107 | 64 | 322 |
| 21,017 | 5 | 14 | 32 | 194 | 3 | 9  | 18 | 112 | 58 | 329 |
| 21,018 | 5 | 17 | 33 | 235 | 3 | 13 | 18 | 138 | 59 | 403 |
| 21,019 | 5 | 16 | 33 | 243 | 3 | 13 | 16 | 138 | 57 | 410 |
| 21,020 | 5 | 16 | 33 | 252 | 3 | 13 | 15 | 142 | 56 | 423 |
| 21,021 | 5 | 16 | 33 | 253 | 3 | 13 | 15 | 143 | 56 | 425 |

|        |   |    |    |     |   |    |    |     |    |     |
|--------|---|----|----|-----|---|----|----|-----|----|-----|
| 21,022 | 5 | 40 | 33 | 403 | 3 | 32 | 15 | 278 | 56 | 753 |
| 21,023 | 5 | 40 | 33 | 416 | 3 | 32 | 15 | 282 | 56 | 770 |
| 21,024 | 5 | 40 | 33 | 419 | 3 | 32 | 16 | 282 | 57 | 773 |
| 21,025 | 5 | 40 | 33 | 425 | 3 | 32 | 16 | 283 | 57 | 780 |
| 21,026 | 5 | 41 | 34 | 443 | 4 | 34 | 20 | 285 | 63 | 803 |
| 21,027 | 5 | 41 | 33 | 444 | 4 | 34 | 20 | 285 | 62 | 804 |
| 21,028 | 5 | 41 | 33 | 446 | 4 | 34 | 21 | 285 | 63 | 806 |
| 21,029 | 5 | 41 | 33 | 446 | 4 | 34 | 21 | 285 | 63 | 806 |
| 21,030 | 3 | 41 | 34 | 446 | 4 | 35 | 21 | 285 | 62 | 807 |
| 21,031 | 3 | 41 | 34 | 445 | 4 | 35 | 21 | 285 | 62 | 806 |
| 21,032 | 3 | 41 | 34 | 450 | 4 | 35 | 21 | 287 | 62 | 813 |
| 21,033 | 3 | 41 | 33 | 461 | 4 | 35 | 21 | 295 | 61 | 832 |
| 21,034 | 2 | 41 | 22 | 464 | 3 | 35 | 15 | 297 | 42 | 837 |
| 21,035 | 2 | 41 | 21 | 469 | 3 | 35 | 15 | 297 | 41 | 842 |
| 21,036 | 2 | 41 | 21 | 469 | 3 | 35 | 15 | 298 | 41 | 843 |
| 21,037 | 2 | 41 | 24 | 470 | 3 | 35 | 15 | 300 | 44 | 846 |
| 21,038 | 2 | 41 | 24 | 470 | 3 | 35 | 14 | 301 | 43 | 847 |
| 21,039 | 2 | 41 | 24 | 474 | 3 | 35 | 14 | 303 | 43 | 853 |
| 21,040 | 2 | 41 | 25 | 471 | 3 | 35 | 15 | 303 | 45 | 850 |
| 21,041 | 2 | 41 | 25 | 460 | 2 | 34 | 15 | 300 | 44 | 835 |
| 21,042 | 2 | 35 | 25 | 420 | 2 | 34 | 15 | 284 | 44 | 773 |
| 21,043 | 3 | 35 | 25 | 375 | 2 | 34 | 16 | 264 | 46 | 708 |
| 21,044 | 3 | 35 | 25 | 370 | 2 | 34 | 16 | 257 | 46 | 696 |
| 21,045 | 3 | 35 | 24 | 371 | 2 | 34 | 15 | 257 | 44 | 697 |
| 21,046 | 3 | 36 | 23 | 355 | 2 | 33 | 14 | 257 | 42 | 681 |
| 21,047 | 3 | 36 | 23 | 355 | 2 | 33 | 14 | 257 | 42 | 681 |
| 21,048 | 3 | 33 | 22 | 343 | 2 | 31 | 14 | 247 | 41 | 654 |
| 21,049 | 3 | 33 | 18 | 335 | 1 | 31 | 13 | 244 | 35 | 643 |
| 21,050 | 2 | 31 | 17 | 330 | 1 | 31 | 12 | 237 | 32 | 629 |
| 21,051 | 2 | 30 | 17 | 324 | 1 | 31 | 12 | 235 | 32 | 620 |
| 21,052 | 2 | 30 | 17 | 324 | 1 | 31 | 12 | 235 | 32 | 620 |
| 21,053 | 2 | 30 | 17 | 324 | 1 | 31 | 12 | 235 | 32 | 620 |
| 21,054 | 2 | 30 | 17 | 323 | 1 | 31 | 12 | 233 | 32 | 617 |
| 21,055 | 2 | 30 | 17 | 323 | 1 | 31 | 12 | 232 | 32 | 616 |
| 21,056 | 2 | 30 | 17 | 322 | 1 | 31 | 12 | 229 | 32 | 612 |
| 21,057 | 3 | 30 | 17 | 317 | 1 | 31 | 12 | 229 | 33 | 607 |
| 21,058 | 3 | 30 | 17 | 317 | 1 | 31 | 12 | 228 | 33 | 606 |
| 21,059 | 3 | 30 | 16 | 317 | 1 | 31 | 13 | 228 | 33 | 606 |
| 21,060 | 3 | 30 | 15 | 317 | 1 | 31 | 13 | 228 | 32 | 606 |
| 21,061 | 3 | 29 | 15 | 320 | 1 | 31 | 13 | 232 | 32 | 612 |
| 21,062 | 3 | 29 | 16 | 331 | 1 | 32 | 13 | 240 | 33 | 632 |

|        |   |    |    |     |   |    |    |     |    |     |
|--------|---|----|----|-----|---|----|----|-----|----|-----|
| 21,063 | 3 | 29 | 15 | 331 | 1 | 32 | 13 | 240 | 32 | 632 |
| 21,064 | 3 | 30 | 15 | 330 | 1 | 32 | 17 | 242 | 36 | 634 |
| 21,065 | 4 | 30 | 19 | 330 | 1 | 31 | 20 | 236 | 44 | 627 |
| 21,066 | 3 | 33 | 18 | 324 | 1 | 29 | 16 | 240 | 38 | 626 |
| 21,067 | 3 | 33 | 13 | 322 | 1 | 28 | 16 | 236 | 33 | 619 |
| 21,068 | 3 | 34 | 12 | 324 | 1 | 28 | 16 | 234 | 32 | 620 |
| 21,069 | 3 | 31 | 12 | 283 | 1 | 24 | 16 | 209 | 32 | 547 |
| 21,070 | 3 | 31 | 12 | 275 | 1 | 25 | 17 | 210 | 33 | 541 |
| 21,071 | 3 | 31 | 12 | 277 | 1 | 25 | 17 | 209 | 33 | 542 |
| 21,072 | 3 | 7  | 13 | 129 | 1 | 6  | 17 | 75  | 34 | 217 |
| 21,073 | 3 | 7  | 13 | 131 | 1 | 6  | 17 | 79  | 34 | 223 |
| 21,074 | 3 | 7  | 13 | 119 | 1 | 6  | 16 | 77  | 33 | 209 |
| 21,075 | 3 | 7  | 14 | 124 | 1 | 7  | 17 | 87  | 35 | 225 |
| 21,076 | 4 | 8  | 14 | 122 | 1 | 8  | 18 | 90  | 37 | 228 |
| 21,077 | 4 | 7  | 13 | 104 | 0 | 6  | 14 | 89  | 31 | 206 |
| 21,078 | 4 | 8  | 13 | 108 | 0 | 6  | 14 | 91  | 31 | 213 |
| 21,079 | 4 | 9  | 13 | 107 | 0 | 6  | 13 | 92  | 30 | 214 |
| 21,080 | 4 | 9  | 12 | 107 | 0 | 5  | 13 | 92  | 29 | 213 |
| 21,081 | 4 | 9  | 12 | 108 | 0 | 5  | 13 | 92  | 29 | 214 |
| 21,082 | 4 | 9  | 12 | 108 | 0 | 5  | 13 | 92  | 29 | 214 |
| 21,083 | 4 | 9  | 15 | 103 | 0 | 5  | 13 | 90  | 32 | 207 |
| 21,084 | 4 | 10 | 15 | 92  | 0 | 5  | 13 | 90  | 32 | 197 |
| 21,085 | 4 | 10 | 15 | 94  | 0 | 5  | 13 | 92  | 32 | 201 |
| 21,086 | 4 | 10 | 15 | 104 | 0 | 6  | 13 | 111 | 32 | 231 |
| 21,087 | 4 | 10 | 12 | 104 | 0 | 6  | 13 | 113 | 29 | 233 |
| 21,088 | 4 | 10 | 12 | 103 | 0 | 6  | 13 | 110 | 29 | 229 |
| 21,089 | 4 | 11 | 13 | 103 | 0 | 6  | 14 | 110 | 31 | 230 |
| 21,090 | 4 | 11 | 12 | 99  | 0 | 6  | 14 | 108 | 30 | 224 |
| 21,091 | 4 | 11 | 14 | 98  | 0 | 6  | 13 | 106 | 31 | 221 |
| 21,092 | 4 | 11 | 14 | 96  | 0 | 6  | 13 | 106 | 31 | 219 |
| 21,093 | 4 | 11 | 14 | 94  | 0 | 6  | 13 | 105 | 31 | 216 |
| 21,094 | 3 | 11 | 14 | 94  | 0 | 6  | 12 | 105 | 29 | 216 |
| 21,095 | 3 | 10 | 14 | 93  | 0 | 6  | 14 | 105 | 31 | 214 |
| 21,096 | 4 | 10 | 15 | 93  | 0 | 6  | 15 | 105 | 34 | 214 |
| 21,097 | 4 | 10 | 18 | 93  | 0 | 6  | 18 | 105 | 40 | 214 |
| 21,098 | 4 | 10 | 18 | 93  | 0 | 6  | 19 | 105 | 41 | 214 |
| 21,099 | 4 | 10 | 22 | 93  | 0 | 6  | 21 | 105 | 47 | 214 |
| 21,100 | 4 | 10 | 22 | 93  | 0 | 6  | 21 | 105 | 47 | 214 |
| 21,101 | 4 | 10 | 22 | 93  | 0 | 6  | 21 | 105 | 47 | 214 |
| 21,102 | 4 | 10 | 22 | 93  | 0 | 6  | 22 | 105 | 48 | 214 |
| 21,103 | 4 | 10 | 22 | 93  | 0 | 6  | 22 | 106 | 48 | 215 |

|        |   |    |    |     |   |   |    |     |    |     |
|--------|---|----|----|-----|---|---|----|-----|----|-----|
| 21,104 | 4 | 11 | 22 | 93  | 0 | 6 | 22 | 106 | 48 | 216 |
| 21,105 | 4 | 11 | 22 | 92  | 0 | 6 | 22 | 106 | 48 | 215 |
| 21,106 | 4 | 11 | 22 | 92  | 0 | 6 | 22 | 106 | 48 | 215 |
| 21,107 | 3 | 11 | 22 | 93  | 0 | 6 | 22 | 106 | 47 | 216 |
| 21,108 | 3 | 11 | 22 | 95  | 0 | 6 | 22 | 113 | 47 | 225 |
| 21,109 | 3 | 11 | 22 | 104 | 0 | 6 | 22 | 114 | 47 | 235 |
| 21,110 | 3 | 16 | 22 | 135 | 0 | 8 | 21 | 154 | 46 | 313 |
| 21,111 | 3 | 16 | 22 | 140 | 0 | 8 | 21 | 154 | 46 | 318 |
| 21,112 | 3 | 17 | 22 | 139 | 0 | 7 | 22 | 147 | 47 | 310 |
| 21,113 | 3 | 17 | 21 | 129 | 0 | 6 | 22 | 139 | 46 | 291 |
| 21,114 | 3 | 16 | 21 | 126 | 0 | 6 | 21 | 136 | 45 | 284 |
| 21,115 | 3 | 20 | 20 | 142 | 0 | 8 | 18 | 156 | 41 | 326 |
| 21,116 | 2 | 20 | 16 | 146 | 0 | 8 | 15 | 156 | 33 | 330 |
| 21,117 | 2 | 17 | 16 | 139 | 0 | 8 | 15 | 138 | 33 | 302 |
| 21,118 | 2 | 16 | 16 | 121 | 0 | 7 | 15 | 130 | 33 | 274 |
| 21,119 | 2 | 16 | 16 | 122 | 0 | 7 | 15 | 130 | 33 | 275 |
| 21,120 | 2 | 17 | 16 | 123 | 0 | 7 | 14 | 136 | 32 | 283 |
| 21,121 | 2 | 17 | 16 | 124 | 0 | 7 | 14 | 137 | 32 | 285 |
| 21,122 | 2 | 17 | 16 | 124 | 0 | 7 | 14 | 137 | 32 | 285 |
| 21,123 | 2 | 17 | 15 | 122 | 0 | 7 | 14 | 137 | 31 | 283 |
| 21,124 | 2 | 17 | 15 | 120 | 0 | 7 | 14 | 133 | 31 | 277 |
| 21,125 | 2 | 17 | 15 | 119 | 0 | 7 | 14 | 131 | 31 | 274 |
| 21,126 | 2 | 16 | 14 | 107 | 0 | 5 | 13 | 117 | 29 | 245 |
| 21,127 | 1 | 16 | 14 | 107 | 0 | 5 | 12 | 116 | 27 | 244 |
| 21,128 | 1 | 15 | 14 | 103 | 0 | 5 | 12 | 114 | 27 | 237 |
| 21,129 | 1 | 15 | 14 | 103 | 0 | 5 | 12 | 114 | 27 | 237 |
| 21,130 | 1 | 14 | 14 | 103 | 0 | 5 | 12 | 113 | 27 | 235 |
| 21,131 | 1 | 14 | 14 | 103 | 0 | 5 | 12 | 113 | 27 | 235 |
| 21,132 | 1 | 14 | 15 | 102 | 0 | 5 | 13 | 113 | 29 | 234 |
| 21,133 | 1 | 14 | 14 | 102 | 0 | 5 | 13 | 113 | 28 | 234 |
| 21,134 | 1 | 14 | 12 | 102 | 0 | 5 | 13 | 113 | 26 | 234 |
| 21,135 | 1 | 13 | 12 | 99  | 0 | 5 | 13 | 103 | 26 | 220 |
| 21,136 | 2 | 13 | 12 | 97  | 0 | 5 | 13 | 101 | 27 | 216 |
| 21,137 | 2 | 14 | 12 | 82  | 0 | 4 | 13 | 82  | 27 | 182 |
| 21,138 | 2 | 14 | 12 | 82  | 0 | 4 | 14 | 79  | 28 | 179 |
| 21,139 | 2 | 14 | 12 | 82  | 0 | 4 | 14 | 79  | 28 | 179 |
| 21,140 | 2 | 13 | 13 | 82  | 0 | 4 | 14 | 78  | 29 | 177 |
| 21,141 | 2 | 13 | 11 | 82  | 0 | 4 | 14 | 78  | 27 | 177 |
| 21,142 | 2 | 13 | 18 | 82  | 0 | 4 | 17 | 78  | 37 | 177 |
| 21,143 | 2 | 13 | 23 | 82  | 0 | 4 | 18 | 80  | 43 | 179 |
| 21,144 | 2 | 13 | 24 | 83  | 1 | 5 | 19 | 91  | 46 | 192 |

|        |   |    |    |     |   |   |    |     |    |     |
|--------|---|----|----|-----|---|---|----|-----|----|-----|
| 21,145 | 2 | 13 | 25 | 93  | 1 | 5 | 19 | 98  | 47 | 209 |
| 21,146 | 4 | 13 | 46 | 95  | 3 | 5 | 34 | 99  | 87 | 212 |
| 21,147 | 3 | 13 | 45 | 95  | 3 | 5 | 34 | 99  | 85 | 212 |
| 21,148 | 3 | 13 | 42 | 95  | 3 | 5 | 31 | 99  | 79 | 212 |
| 21,149 | 3 | 13 | 42 | 95  | 3 | 5 | 31 | 100 | 79 | 213 |
| 21,150 | 3 | 14 | 38 | 96  | 3 | 5 | 29 | 103 | 73 | 218 |
| 21,151 | 3 | 16 | 38 | 99  | 3 | 6 | 30 | 105 | 74 | 226 |
| 21,152 | 3 | 16 | 38 | 100 | 3 | 6 | 30 | 107 | 74 | 229 |
| 21,153 | 3 | 16 | 38 | 101 | 3 | 6 | 29 | 106 | 73 | 229 |
| 21,154 | 3 | 16 | 38 | 101 | 3 | 7 | 29 | 106 | 73 | 230 |
| 21,155 | 3 | 15 | 38 | 103 | 3 | 7 | 29 | 107 | 73 | 232 |
| 21,156 | 3 | 15 | 38 | 103 | 3 | 7 | 29 | 109 | 73 | 234 |
| 21,157 | 3 | 15 | 38 | 103 | 3 | 7 | 30 | 110 | 74 | 235 |
| 21,158 | 4 | 15 | 41 | 103 | 3 | 7 | 30 | 110 | 78 | 235 |
| 21,159 | 4 | 15 | 41 | 101 | 3 | 7 | 31 | 103 | 79 | 226 |
| 21,160 | 4 | 10 | 42 | 62  | 4 | 5 | 33 | 62  | 83 | 139 |
| 21,161 | 4 | 10 | 42 | 62  | 4 | 5 | 33 | 62  | 83 | 139 |
| 21,162 | 4 | 9  | 42 | 53  | 4 | 5 | 34 | 61  | 84 | 128 |
| 21,163 | 4 | 9  | 42 | 52  | 4 | 5 | 34 | 61  | 84 | 127 |
| 21,164 | 4 | 9  | 42 | 53  | 4 | 5 | 34 | 61  | 84 | 128 |
| 21,165 | 4 | 9  | 42 | 53  | 4 | 5 | 34 | 61  | 84 | 128 |
| 21,166 | 4 | 5  | 43 | 37  | 4 | 3 | 34 | 40  | 85 | 85  |
| 21,167 | 4 | 5  | 46 | 33  | 4 | 3 | 34 | 40  | 88 | 81  |
| 21,168 | 4 | 5  | 46 | 29  | 4 | 3 | 34 | 40  | 88 | 77  |
| 21,169 | 4 | 5  | 46 | 29  | 4 | 3 | 34 | 40  | 88 | 77  |
| 21,170 | 4 | 5  | 47 | 28  | 4 | 3 | 34 | 40  | 89 | 76  |
| 21,171 | 4 | 4  | 47 | 30  | 4 | 3 | 34 | 35  | 89 | 72  |
| 21,172 | 4 | 4  | 47 | 29  | 4 | 3 | 34 | 35  | 89 | 71  |
| 21,173 | 4 | 4  | 48 | 29  | 4 | 3 | 34 | 35  | 90 | 71  |
| 21,174 | 4 | 4  | 48 | 29  | 4 | 3 | 34 | 35  | 90 | 71  |
| 21,175 | 4 | 4  | 48 | 29  | 4 | 3 | 34 | 35  | 90 | 71  |
| 21,176 | 4 | 4  | 48 | 29  | 5 | 3 | 34 | 35  | 91 | 71  |
| 21,177 | 4 | 4  | 48 | 29  | 5 | 3 | 34 | 35  | 91 | 71  |
| 21,178 | 4 | 4  | 48 | 32  | 5 | 3 | 34 | 35  | 91 | 74  |
| 21,179 | 4 | 4  | 48 | 32  | 5 | 6 | 34 | 36  | 91 | 78  |
| 21,180 | 4 | 4  | 48 | 33  | 5 | 6 | 34 | 36  | 91 | 79  |
| 21,181 | 4 | 6  | 48 | 35  | 5 | 6 | 34 | 42  | 91 | 89  |
| 21,182 | 4 | 6  | 48 | 40  | 5 | 6 | 34 | 49  | 91 | 101 |
| 21,183 | 4 | 6  | 47 | 43  | 5 | 6 | 34 | 50  | 90 | 105 |
| 21,184 | 4 | 6  | 47 | 44  | 5 | 6 | 34 | 52  | 90 | 108 |
| 21,185 | 4 | 6  | 47 | 44  | 5 | 6 | 34 | 53  | 90 | 109 |

|        |   |   |    |    |   |   |    |    |    |     |
|--------|---|---|----|----|---|---|----|----|----|-----|
| 21,186 | 3 | 6 | 47 | 45 | 5 | 6 | 34 | 53 | 89 | 110 |
| 21,187 | 3 | 6 | 47 | 45 | 5 | 6 | 34 | 53 | 89 | 110 |
| 21,188 | 3 | 5 | 47 | 46 | 5 | 6 | 33 | 54 | 88 | 111 |
| 21,189 | 3 | 5 | 47 | 47 | 5 | 6 | 33 | 54 | 88 | 112 |
| 21,190 | 3 | 5 | 47 | 47 | 5 | 6 | 32 | 54 | 87 | 112 |
| 21,191 | 3 | 5 | 45 | 48 | 5 | 7 | 32 | 63 | 85 | 123 |
| 21,192 | 3 | 5 | 45 | 48 | 5 | 7 | 32 | 64 | 85 | 124 |
| 21,193 | 3 | 5 | 38 | 49 | 5 | 7 | 29 | 64 | 75 | 125 |
| 21,194 | 3 | 5 | 33 | 49 | 5 | 7 | 28 | 62 | 69 | 123 |
| 21,195 | 3 | 6 | 32 | 39 | 4 | 6 | 27 | 46 | 66 | 97  |
| 21,196 | 3 | 6 | 31 | 40 | 4 | 6 | 27 | 47 | 65 | 99  |
| 21,197 | 1 | 6 | 10 | 41 | 2 | 6 | 10 | 46 | 23 | 99  |
| 21,198 | 1 | 6 | 10 | 41 | 2 | 6 | 9  | 46 | 22 | 99  |
| 21,199 | 1 | 6 | 10 | 41 | 2 | 6 | 9  | 46 | 22 | 99  |
| 21,200 | 1 | 5 | 10 | 40 | 2 | 6 | 8  | 42 | 21 | 93  |
| 21,201 | 2 | 3 | 10 | 37 | 2 | 5 | 7  | 40 | 21 | 85  |
| 21,202 | 2 | 3 | 10 | 37 | 2 | 5 | 7  | 40 | 21 | 85  |
| 21,203 | 2 | 3 | 10 | 36 | 2 | 5 | 7  | 39 | 21 | 83  |
| 21,204 | 2 | 3 | 10 | 35 | 2 | 4 | 7  | 39 | 21 | 81  |
| 21,205 | 2 | 3 | 10 | 37 | 2 | 5 | 7  | 41 | 21 | 86  |
| 21,206 | 2 | 3 | 10 | 35 | 2 | 5 | 7  | 45 | 21 | 88  |
| 21,207 | 2 | 3 | 11 | 35 | 2 | 5 | 6  | 43 | 21 | 86  |
| 21,208 | 1 | 3 | 8  | 36 | 2 | 5 | 6  | 43 | 17 | 87  |
| 21,209 | 1 | 3 | 8  | 36 | 2 | 5 | 5  | 43 | 16 | 87  |
| 21,210 | 1 | 3 | 7  | 36 | 1 | 5 | 3  | 43 | 12 | 87  |
| 21,211 | 3 | 3 | 7  | 42 | 1 | 5 | 3  | 43 | 14 | 93  |
| 21,212 | 3 | 3 | 7  | 42 | 1 | 5 | 2  | 43 | 13 | 93  |
| 21,213 | 3 | 3 | 7  | 43 | 1 | 5 | 1  | 43 | 12 | 94  |
| 21,214 | 3 | 3 | 7  | 44 | 1 | 5 | 1  | 44 | 12 | 96  |
| 21,215 | 3 | 3 | 7  | 45 | 1 | 5 | 1  | 44 | 12 | 97  |
| 21,216 | 3 | 3 | 6  | 45 | 1 | 5 | 1  | 44 | 11 | 97  |
| 21,217 | 3 | 3 | 5  | 45 | 1 | 5 | 1  | 44 | 10 | 97  |
| 21,218 | 3 | 3 | 3  | 46 | 1 | 5 | 1  | 45 | 8  | 99  |
| 21,219 | 3 | 3 | 3  | 46 | 1 | 5 | 1  | 45 | 8  | 99  |
| 21,220 | 3 | 3 | 3  | 46 | 1 | 5 | 2  | 45 | 9  | 99  |
| 21,221 | 3 | 3 | 4  | 46 | 1 | 5 | 2  | 45 | 10 | 99  |
| 21,222 | 3 | 3 | 4  | 42 | 1 | 5 | 2  | 44 | 10 | 94  |
| 21,223 | 3 | 3 | 3  | 42 | 1 | 6 | 2  | 43 | 9  | 94  |
| 21,224 | 3 | 3 | 3  | 42 | 1 | 6 | 2  | 43 | 9  | 94  |
| 21,225 | 3 | 3 | 4  | 42 | 2 | 6 | 2  | 43 | 11 | 94  |
| 21,226 | 5 | 3 | 6  | 43 | 2 | 6 | 3  | 43 | 16 | 95  |

|        |   |    |    |     |   |   |   |    |    |     |
|--------|---|----|----|-----|---|---|---|----|----|-----|
| 21,227 | 5 | 3  | 6  | 43  | 1 | 6 | 2 | 43 | 14 | 95  |
| 21,228 | 5 | 3  | 6  | 43  | 1 | 6 | 3 | 44 | 15 | 96  |
| 21,229 | 5 | 3  | 6  | 40  | 1 | 6 | 3 | 44 | 15 | 93  |
| 21,230 | 5 | 3  | 9  | 39  | 1 | 3 | 3 | 46 | 18 | 91  |
| 21,231 | 5 | 3  | 10 | 38  | 1 | 3 | 3 | 46 | 19 | 90  |
| 21,232 | 5 | 1  | 11 | 30  | 1 | 3 | 3 | 33 | 20 | 67  |
| 21,233 | 5 | 1  | 11 | 30  | 1 | 3 | 3 | 33 | 20 | 67  |
| 21,234 | 5 | 1  | 12 | 26  | 1 | 3 | 3 | 30 | 21 | 60  |
| 21,235 | 5 | 1  | 12 | 26  | 1 | 3 | 4 | 29 | 22 | 59  |
| 21,236 | 5 | 1  | 12 | 26  | 1 | 3 | 4 | 29 | 22 | 59  |
| 21,237 | 5 | 1  | 15 | 25  | 1 | 3 | 6 | 29 | 27 | 58  |
| 21,238 | 5 | 1  | 15 | 25  | 1 | 3 | 6 | 33 | 27 | 62  |
| 21,239 | 5 | 1  | 15 | 24  | 1 | 3 | 6 | 32 | 27 | 60  |
| 21,240 | 5 | 1  | 20 | 23  | 1 | 3 | 7 | 33 | 33 | 60  |
| 21,241 | 5 | 1  | 25 | 23  | 1 | 3 | 7 | 33 | 38 | 60  |
| 21,242 | 5 | 1  | 25 | 23  | 1 | 2 | 7 | 25 | 38 | 51  |
| 21,243 | 5 | 1  | 25 | 25  | 1 | 3 | 7 | 24 | 38 | 53  |
| 21,244 | 5 | 1  | 25 | 26  | 1 | 3 | 7 | 24 | 38 | 54  |
| 21,245 | 6 | 1  | 25 | 35  | 1 | 3 | 8 | 25 | 40 | 64  |
| 21,246 | 6 | 1  | 25 | 42  | 1 | 3 | 8 | 23 | 40 | 69  |
| 21,247 | 6 | 3  | 25 | 62  | 1 | 3 | 8 | 34 | 40 | 102 |
| 21,248 | 6 | 4  | 25 | 66  | 1 | 3 | 8 | 35 | 40 | 108 |
| 21,249 | 6 | 5  | 25 | 82  | 1 | 5 | 8 | 46 | 40 | 138 |
| 21,250 | 6 | 5  | 25 | 84  | 1 | 5 | 8 | 47 | 40 | 141 |
| 21,251 | 6 | 5  | 25 | 97  | 1 | 5 | 8 | 51 | 40 | 158 |
| 21,252 | 5 | 5  | 25 | 97  | 1 | 5 | 8 | 51 | 39 | 158 |
| 21,253 | 5 | 5  | 25 | 98  | 1 | 5 | 8 | 52 | 39 | 160 |
| 21,254 | 5 | 6  | 26 | 99  | 1 | 5 | 8 | 55 | 40 | 165 |
| 21,255 | 5 | 6  | 26 | 99  | 1 | 5 | 8 | 55 | 40 | 165 |
| 21,256 | 5 | 6  | 26 | 99  | 1 | 4 | 8 | 56 | 40 | 165 |
| 21,257 | 5 | 6  | 26 | 100 | 1 | 4 | 8 | 53 | 40 | 163 |
| 21,258 | 5 | 9  | 25 | 114 | 1 | 6 | 8 | 60 | 39 | 189 |
| 21,259 | 5 | 11 | 25 | 124 | 1 | 7 | 9 | 66 | 40 | 208 |
| 21,260 | 5 | 11 | 25 | 124 | 1 | 7 | 9 | 66 | 40 | 208 |
| 21,261 | 5 | 11 | 25 | 117 | 1 | 7 | 9 | 66 | 40 | 201 |
| 21,262 | 3 | 11 | 25 | 118 | 1 | 7 | 9 | 66 | 38 | 202 |
| 21,263 | 3 | 12 | 25 | 117 | 1 | 7 | 9 | 66 | 38 | 202 |
| 21,264 | 3 | 12 | 25 | 117 | 1 | 7 | 9 | 66 | 38 | 202 |
| 21,265 | 4 | 12 | 25 | 118 | 1 | 7 | 9 | 65 | 39 | 202 |
| 21,266 | 4 | 12 | 26 | 116 | 1 | 7 | 9 | 65 | 40 | 200 |
| 21,267 | 4 | 12 | 26 | 116 | 1 | 7 | 9 | 66 | 40 | 201 |

|        |   |    |    |     |   |    |    |     |    |     |
|--------|---|----|----|-----|---|----|----|-----|----|-----|
| 21,268 | 4 | 12 | 26 | 115 | 1 | 7  | 9  | 65  | 40 | 199 |
| 21,269 | 4 | 12 | 26 | 115 | 1 | 7  | 9  | 65  | 40 | 199 |
| 21,270 | 4 | 12 | 25 | 115 | 1 | 7  | 8  | 65  | 38 | 199 |
| 21,271 | 4 | 13 | 25 | 115 | 1 | 7  | 8  | 65  | 38 | 200 |
| 21,272 | 4 | 13 | 24 | 115 | 1 | 7  | 8  | 65  | 37 | 200 |
| 21,273 | 4 | 13 | 24 | 115 | 1 | 7  | 8  | 65  | 37 | 200 |
| 21,274 | 4 | 13 | 24 | 115 | 1 | 6  | 8  | 67  | 37 | 201 |
| 21,275 | 4 | 13 | 26 | 117 | 1 | 7  | 8  | 76  | 39 | 213 |
| 21,276 | 4 | 13 | 25 | 123 | 0 | 8  | 8  | 79  | 37 | 223 |
| 21,277 | 4 | 13 | 25 | 124 | 0 | 8  | 12 | 80  | 41 | 225 |
| 21,278 | 4 | 13 | 25 | 129 | 0 | 9  | 11 | 80  | 40 | 231 |
| 21,279 | 4 | 13 | 25 | 130 | 0 | 9  | 11 | 80  | 40 | 232 |
| 21,280 | 4 | 13 | 24 | 168 | 0 | 11 | 11 | 105 | 39 | 297 |
| 21,281 | 4 | 14 | 22 | 182 | 0 | 12 | 11 | 107 | 37 | 315 |
| 21,282 | 4 | 15 | 21 | 190 | 0 | 12 | 12 | 110 | 37 | 327 |
| 21,283 | 4 | 16 | 20 | 205 | 0 | 12 | 12 | 113 | 36 | 346 |
| 21,284 | 4 | 22 | 19 | 214 | 0 | 12 | 12 | 117 | 35 | 365 |
| 21,285 | 4 | 23 | 19 | 240 | 0 | 13 | 12 | 124 | 35 | 400 |
| 21,286 | 4 | 30 | 19 | 334 | 0 | 20 | 11 | 185 | 34 | 569 |
| 21,287 | 4 | 30 | 18 | 336 | 0 | 21 | 9  | 187 | 31 | 574 |
| 21,288 | 4 | 32 | 16 | 393 | 0 | 23 | 9  | 216 | 29 | 664 |
| 21,289 | 4 | 34 | 16 | 414 | 0 | 23 | 8  | 216 | 28 | 687 |
| 21,290 | 4 | 34 | 13 | 419 | 0 | 23 | 8  | 216 | 25 | 692 |
| 21,291 | 4 | 37 | 11 | 442 | 0 | 23 | 8  | 235 | 23 | 737 |
| 21,292 | 4 | 37 | 6  | 444 | 0 | 24 | 8  | 237 | 18 | 742 |
| 21,293 | 4 | 38 | 6  | 445 | 0 | 24 | 8  | 240 | 18 | 747 |
| 21,294 | 4 | 38 | 6  | 441 | 0 | 23 | 7  | 241 | 17 | 743 |
| 21,295 | 4 | 38 | 6  | 441 | 0 | 23 | 7  | 241 | 17 | 743 |
| 21,296 | 3 | 38 | 6  | 440 | 0 | 23 | 7  | 249 | 16 | 750 |
| 21,297 | 3 | 37 | 6  | 432 | 0 | 23 | 7  | 249 | 16 | 741 |
| 21,298 | 3 | 35 | 17 | 411 | 0 | 23 | 7  | 237 | 27 | 706 |
| 21,299 | 3 | 34 | 17 | 404 | 0 | 23 | 8  | 236 | 28 | 697 |
| 21,300 | 3 | 33 | 18 | 389 | 0 | 21 | 8  | 225 | 29 | 668 |
| 21,301 | 3 | 33 | 19 | 387 | 0 | 21 | 12 | 223 | 34 | 664 |
| 21,302 | 3 | 34 | 19 | 374 | 0 | 21 | 12 | 219 | 34 | 648 |
| 21,303 | 3 | 34 | 19 | 373 | 0 | 21 | 12 | 218 | 34 | 646 |
| 21,304 | 3 | 34 | 19 | 375 | 0 | 21 | 12 | 219 | 34 | 649 |
| 21,305 | 3 | 34 | 19 | 376 | 0 | 21 | 12 | 216 | 34 | 647 |
| 21,306 | 3 | 34 | 19 | 376 | 0 | 21 | 12 | 216 | 34 | 647 |
| 21,307 | 3 | 34 | 19 | 374 | 0 | 21 | 12 | 214 | 34 | 643 |
| 21,308 | 3 | 34 | 19 | 373 | 0 | 21 | 12 | 213 | 34 | 641 |



|        |   |    |    |     |   |    |    |     |    |     |
|--------|---|----|----|-----|---|----|----|-----|----|-----|
| 21,309 | 3 | 29 | 19 | 348 | 0 | 18 | 12 | 199 | 34 | 594 |
| 21,310 | 3 | 29 | 19 | 348 | 0 | 18 | 11 | 199 | 33 | 594 |
| 21,311 | 3 | 29 | 19 | 348 | 0 | 18 | 11 | 199 | 33 | 594 |
| 21,312 | 3 | 29 | 19 | 349 | 0 | 18 | 11 | 201 | 33 | 597 |
| 21,313 | 3 | 29 | 22 | 350 | 0 | 18 | 11 | 201 | 36 | 598 |
| 21,314 | 3 | 28 | 24 | 350 | 0 | 18 | 12 | 202 | 39 | 598 |
| 21,315 | 2 | 28 | 26 | 350 | 2 | 18 | 17 | 204 | 47 | 600 |
| 21,316 | 2 | 28 | 25 | 351 | 2 | 18 | 17 | 204 | 46 | 601 |
| 21,317 | 2 | 28 | 33 | 351 | 2 | 18 | 19 | 204 | 56 | 601 |
| 21,318 | 2 | 28 | 33 | 350 | 2 | 18 | 19 | 203 | 56 | 599 |
| 21,319 | 2 | 28 | 35 | 351 | 2 | 18 | 22 | 203 | 61 | 600 |
| 21,320 | 2 | 28 | 35 | 351 | 2 | 18 | 22 | 203 | 61 | 600 |
| 21,321 | 2 | 27 | 36 | 352 | 2 | 18 | 23 | 203 | 63 | 600 |
| 21,322 | 2 | 28 | 36 | 352 | 3 | 18 | 23 | 203 | 64 | 601 |
| 21,323 | 2 | 28 | 36 | 352 | 3 | 18 | 23 | 203 | 64 | 601 |
| 21,324 | 2 | 29 | 36 | 352 | 3 | 18 | 23 | 203 | 64 | 602 |
| 21,325 | 2 | 29 | 36 | 352 | 3 | 18 | 23 | 201 | 64 | 600 |
| 21,326 | 2 | 29 | 35 | 342 | 3 | 16 | 23 | 188 | 63 | 575 |
| 21,327 | 2 | 29 | 35 | 341 | 3 | 16 | 23 | 188 | 63 | 574 |
| 21,328 | 0 | 29 | 33 | 341 | 3 | 16 | 18 | 188 | 54 | 574 |
| 21,329 | 0 | 29 | 35 | 335 | 3 | 15 | 18 | 187 | 56 | 566 |
| 21,330 | 0 | 29 | 35 | 336 | 3 | 15 | 18 | 187 | 56 | 567 |
| 21,331 | 0 | 29 | 36 | 299 | 3 | 13 | 23 | 164 | 62 | 505 |
| 21,332 | 0 | 29 | 36 | 285 | 3 | 12 | 22 | 161 | 61 | 487 |
| 21,333 | 0 | 28 | 36 | 278 | 3 | 12 | 22 | 160 | 61 | 478 |
| 21,334 | 0 | 27 | 36 | 262 | 3 | 12 | 22 | 164 | 61 | 465 |
| 21,335 | 0 | 21 | 36 | 254 | 3 | 12 | 22 | 161 | 61 | 448 |
| 21,336 | 0 | 21 | 36 | 234 | 3 | 11 | 22 | 159 | 61 | 425 |
| 21,337 | 0 | 14 | 36 | 142 | 3 | 4  | 22 | 99  | 61 | 259 |
| 21,338 | 0 | 14 | 36 | 140 | 3 | 3  | 22 | 98  | 61 | 255 |
| 21,339 | 0 | 12 | 36 | 85  | 3 | 1  | 22 | 68  | 61 | 166 |
| 21,340 | 0 | 11 | 36 | 66  | 3 | 1  | 22 | 65  | 61 | 143 |
| 21,341 | 0 | 11 | 36 | 61  | 3 | 1  | 22 | 64  | 61 | 137 |
| 21,342 | 0 | 8  | 36 | 38  | 3 | 1  | 22 | 46  | 61 | 93  |
| 21,343 | 0 | 8  | 36 | 39  | 3 | 0  | 22 | 49  | 61 | 96  |
| 21,344 | 0 | 7  | 33 | 37  | 3 | 0  | 22 | 45  | 58 | 89  |
| 21,345 | 0 | 7  | 33 | 39  | 3 | 0  | 22 | 46  | 58 | 92  |
| 21,346 | 0 | 7  | 33 | 45  | 3 | 0  | 22 | 46  | 58 | 98  |
| 21,347 | 0 | 7  | 31 | 37  | 3 | 0  | 22 | 37  | 56 | 81  |
| 21,348 | 0 | 7  | 25 | 37  | 3 | 0  | 22 | 37  | 50 | 81  |
| 21,349 | 0 | 7  | 25 | 37  | 3 | 0  | 21 | 37  | 49 | 81  |

|        |   |    |    |    |   |   |    |    |    |     |
|--------|---|----|----|----|---|---|----|----|----|-----|
| 21,350 | 0 | 7  | 24 | 37 | 3 | 0 | 21 | 38 | 48 | 82  |
| 21,351 | 0 | 7  | 23 | 37 | 3 | 0 | 17 | 38 | 43 | 82  |
| 21,352 | 0 | 6  | 24 | 37 | 3 | 0 | 18 | 38 | 45 | 81  |
| 21,353 | 0 | 6  | 24 | 37 | 3 | 0 | 18 | 39 | 45 | 82  |
| 21,354 | 0 | 6  | 24 | 35 | 3 | 0 | 18 | 39 | 45 | 80  |
| 21,355 | 0 | 5  | 23 | 33 | 3 | 0 | 18 | 38 | 44 | 76  |
| 21,356 | 0 | 5  | 23 | 33 | 3 | 0 | 18 | 38 | 44 | 76  |
| 21,357 | 0 | 5  | 23 | 34 | 3 | 0 | 19 | 38 | 45 | 77  |
| 21,358 | 0 | 5  | 23 | 34 | 3 | 0 | 19 | 37 | 45 | 76  |
| 21,359 | 0 | 5  | 23 | 34 | 3 | 0 | 19 | 39 | 45 | 78  |
| 21,360 | 0 | 5  | 23 | 34 | 3 | 0 | 19 | 39 | 45 | 78  |
| 21,361 | 0 | 7  | 23 | 43 | 3 | 0 | 19 | 41 | 45 | 91  |
| 21,362 | 0 | 7  | 23 | 44 | 3 | 0 | 19 | 42 | 45 | 93  |
| 21,363 | 0 | 7  | 23 | 45 | 3 | 0 | 19 | 41 | 45 | 93  |
| 21,364 | 0 | 7  | 20 | 43 | 3 | 0 | 19 | 42 | 42 | 92  |
| 21,365 | 0 | 12 | 18 | 83 | 3 | 2 | 18 | 52 | 39 | 149 |
| 21,366 | 0 | 12 | 16 | 87 | 2 | 2 | 13 | 52 | 31 | 153 |
| 21,367 | 1 | 12 | 8  | 84 | 2 | 2 | 11 | 52 | 22 | 150 |
| 21,368 | 1 | 12 | 8  | 84 | 2 | 2 | 11 | 54 | 22 | 152 |
| 21,369 | 1 | 12 | 8  | 83 | 2 | 2 | 11 | 54 | 22 | 151 |
| 21,370 | 1 | 14 | 6  | 85 | 2 | 2 | 8  | 58 | 17 | 159 |
| 21,371 | 1 | 14 | 5  | 85 | 2 | 2 | 7  | 58 | 15 | 159 |
| 21,372 | 1 | 14 | 5  | 85 | 2 | 2 | 7  | 58 | 15 | 159 |
| 21,373 | 1 | 13 | 5  | 85 | 1 | 2 | 7  | 58 | 14 | 158 |
| 21,374 | 1 | 13 | 5  | 85 | 1 | 2 | 7  | 58 | 14 | 158 |
| 21,375 | 1 | 13 | 5  | 85 | 1 | 2 | 7  | 59 | 14 | 159 |
| 21,376 | 1 | 13 | 5  | 85 | 1 | 2 | 7  | 59 | 14 | 159 |
| 21,377 | 1 | 13 | 4  | 85 | 1 | 2 | 7  | 59 | 13 | 159 |
| 21,378 | 1 | 13 | 5  | 85 | 1 | 2 | 7  | 58 | 14 | 158 |
| 21,379 | 1 | 13 | 5  | 85 | 1 | 2 | 7  | 58 | 14 | 158 |
| 21,380 | 1 | 13 | 3  | 84 | 1 | 2 | 7  | 58 | 12 | 157 |
| 21,381 | 1 | 13 | 3  | 84 | 1 | 2 | 7  | 58 | 12 | 157 |
| 21,382 | 1 | 13 | 2  | 84 | 1 | 2 | 2  | 56 | 6  | 155 |
| 21,383 | 1 | 12 | 7  | 86 | 1 | 2 | 3  | 55 | 12 | 155 |
| 21,384 | 1 | 12 | 7  | 86 | 1 | 2 | 3  | 53 | 12 | 153 |
| 21,385 | 1 | 12 | 7  | 85 | 1 | 2 | 3  | 46 | 12 | 145 |
| 21,386 | 1 | 12 | 8  | 84 | 1 | 2 | 3  | 45 | 13 | 143 |
| 21,387 | 1 | 11 | 9  | 77 | 1 | 2 | 3  | 39 | 14 | 129 |
| 21,388 | 2 | 11 | 9  | 79 | 1 | 2 | 5  | 38 | 17 | 130 |
| 21,389 | 2 | 11 | 9  | 78 | 1 | 2 | 5  | 38 | 17 | 129 |
| 21,390 | 2 | 11 | 9  | 79 | 1 | 2 | 6  | 38 | 18 | 130 |

|        |   |    |    |     |   |   |    |    |    |     |
|--------|---|----|----|-----|---|---|----|----|----|-----|
| 21,391 | 2 | 10 | 9  | 78  | 1 | 2 | 6  | 37 | 18 | 127 |
| 21,392 | 2 | 10 | 9  | 78  | 1 | 2 | 6  | 37 | 18 | 127 |
| 21,393 | 2 | 10 | 9  | 75  | 1 | 2 | 7  | 33 | 19 | 120 |
| 21,394 | 2 | 10 | 9  | 75  | 1 | 2 | 7  | 33 | 19 | 120 |
| 21,395 | 2 | 10 | 10 | 75  | 1 | 3 | 7  | 34 | 20 | 122 |
| 21,396 | 2 | 11 | 10 | 86  | 1 | 4 | 7  | 40 | 20 | 141 |
| 21,397 | 2 | 12 | 10 | 99  | 1 | 6 | 8  | 48 | 21 | 165 |
| 21,398 | 2 | 12 | 11 | 109 | 1 | 7 | 8  | 55 | 22 | 183 |
| 21,399 | 2 | 12 | 11 | 118 | 1 | 7 | 8  | 60 | 22 | 197 |
| 21,400 | 2 | 12 | 11 | 120 | 1 | 7 | 8  | 62 | 22 | 201 |
| 21,401 | 2 | 12 | 11 | 122 | 1 | 7 | 8  | 62 | 22 | 203 |
| 21,402 | 2 | 13 | 10 | 122 | 1 | 7 | 8  | 62 | 21 | 204 |
| 21,403 | 2 | 14 | 11 | 131 | 1 | 7 | 7  | 61 | 21 | 213 |
| 21,404 | 2 | 14 | 11 | 133 | 1 | 7 | 7  | 61 | 21 | 215 |
| 21,405 | 2 | 15 | 12 | 134 | 2 | 7 | 7  | 61 | 23 | 217 |
| 21,406 | 2 | 15 | 13 | 139 | 2 | 7 | 11 | 61 | 28 | 222 |
| 21,407 | 2 | 15 | 13 | 139 | 2 | 7 | 11 | 62 | 28 | 223 |
| 21,408 | 2 | 15 | 13 | 138 | 2 | 7 | 10 | 62 | 27 | 222 |
| 21,409 | 3 | 16 | 17 | 138 | 2 | 7 | 13 | 60 | 35 | 221 |
| 21,410 | 3 | 16 | 17 | 138 | 2 | 7 | 13 | 60 | 35 | 221 |
| 21,411 | 3 | 14 | 18 | 128 | 2 | 7 | 16 | 58 | 39 | 207 |
| 21,412 | 3 | 14 | 18 | 128 | 2 | 7 | 16 | 58 | 39 | 207 |
| 21,413 | 3 | 14 | 20 | 125 | 2 | 7 | 16 | 56 | 41 | 202 |
| 21,414 | 3 | 14 | 20 | 125 | 2 | 7 | 16 | 56 | 41 | 202 |
| 21,415 | 3 | 9  | 20 | 82  | 2 | 5 | 16 | 42 | 41 | 138 |
| 21,416 | 3 | 9  | 20 | 82  | 2 | 5 | 16 | 42 | 41 | 138 |
| 21,417 | 3 | 9  | 20 | 82  | 1 | 5 | 16 | 42 | 40 | 138 |
| 21,418 | 2 | 9  | 20 | 82  | 1 | 5 | 16 | 42 | 39 | 138 |
| 21,419 | 2 | 9  | 20 | 82  | 1 | 5 | 16 | 40 | 39 | 136 |
| 21,420 | 2 | 9  | 20 | 82  | 1 | 5 | 16 | 40 | 39 | 136 |
| 21,421 | 2 | 7  | 20 | 81  | 1 | 5 | 16 | 36 | 39 | 129 |
| 21,422 | 2 | 7  | 20 | 83  | 1 | 5 | 16 | 37 | 39 | 132 |
| 21,423 | 2 | 7  | 20 | 83  | 1 | 5 | 16 | 37 | 39 | 132 |
| 21,424 | 2 | 7  | 22 | 84  | 1 | 5 | 17 | 38 | 42 | 134 |
| 21,425 | 2 | 6  | 22 | 88  | 1 | 5 | 17 | 39 | 42 | 138 |
| 21,426 | 2 | 6  | 22 | 91  | 1 | 5 | 18 | 38 | 43 | 140 |
| 21,427 | 2 | 6  | 22 | 91  | 1 | 5 | 18 | 38 | 43 | 140 |
| 21,428 | 3 | 6  | 22 | 91  | 1 | 5 | 20 | 38 | 46 | 140 |
| 21,429 | 3 | 6  | 21 | 91  | 1 | 5 | 20 | 38 | 45 | 140 |
| 21,430 | 3 | 6  | 22 | 91  | 1 | 5 | 20 | 38 | 46 | 140 |
| 21,431 | 3 | 6  | 22 | 91  | 1 | 5 | 20 | 38 | 46 | 140 |

|        |   |    |    |     |   |    |    |    |    |     |
|--------|---|----|----|-----|---|----|----|----|----|-----|
| 21,432 | 3 | 6  | 23 | 91  | 1 | 5  | 19 | 38 | 46 | 140 |
| 21,433 | 3 | 6  | 22 | 91  | 1 | 5  | 19 | 38 | 45 | 140 |
| 21,434 | 3 | 6  | 19 | 89  | 1 | 5  | 19 | 38 | 42 | 138 |
| 21,435 | 4 | 6  | 19 | 88  | 1 | 5  | 20 | 38 | 44 | 137 |
| 21,436 | 5 | 6  | 18 | 88  | 1 | 5  | 20 | 39 | 44 | 138 |
| 21,437 | 5 | 6  | 18 | 86  | 1 | 5  | 20 | 38 | 44 | 135 |
| 21,438 | 5 | 6  | 17 | 88  | 1 | 5  | 21 | 38 | 44 | 137 |
| 21,439 | 4 | 6  | 17 | 88  | 1 | 5  | 19 | 39 | 41 | 138 |
| 21,440 | 4 | 6  | 17 | 88  | 1 | 5  | 19 | 39 | 41 | 138 |
| 21,441 | 4 | 6  | 17 | 87  | 1 | 5  | 18 | 39 | 40 | 137 |
| 21,442 | 4 | 6  | 17 | 88  | 1 | 5  | 18 | 39 | 40 | 138 |
| 21,443 | 4 | 6  | 17 | 88  | 1 | 5  | 18 | 39 | 40 | 138 |
| 21,444 | 4 | 6  | 17 | 88  | 1 | 5  | 17 | 38 | 39 | 137 |
| 21,445 | 4 | 6  | 16 | 88  | 1 | 4  | 17 | 37 | 38 | 135 |
| 21,446 | 4 | 6  | 16 | 88  | 1 | 4  | 17 | 37 | 38 | 135 |
| 21,447 | 4 | 5  | 16 | 74  | 1 | 3  | 17 | 30 | 38 | 112 |
| 21,448 | 4 | 4  | 16 | 45  | 1 | 0  | 16 | 15 | 37 | 64  |
| 21,449 | 4 | 4  | 15 | 36  | 1 | 0  | 20 | 10 | 40 | 50  |
| 21,450 | 4 | 4  | 15 | 37  | 1 | 0  | 20 | 10 | 40 | 51  |
| 21,451 | 4 | 4  | 15 | 38  | 1 | 0  | 20 | 10 | 40 | 52  |
| 21,452 | 4 | 5  | 15 | 39  | 1 | 1  | 20 | 10 | 40 | 55  |
| 21,453 | 4 | 4  | 14 | 40  | 1 | 1  | 20 | 10 | 39 | 55  |
| 21,454 | 4 | 3  | 14 | 31  | 1 | 1  | 20 | 12 | 39 | 47  |
| 21,455 | 4 | 4  | 14 | 41  | 0 | 4  | 20 | 18 | 38 | 67  |
| 21,456 | 4 | 4  | 13 | 49  | 0 | 4  | 20 | 25 | 37 | 82  |
| 21,457 | 4 | 4  | 12 | 45  | 0 | 4  | 16 | 26 | 32 | 79  |
| 21,458 | 4 | 6  | 12 | 52  | 0 | 4  | 16 | 29 | 32 | 91  |
| 21,459 | 4 | 9  | 12 | 86  | 0 | 5  | 16 | 41 | 32 | 141 |
| 21,460 | 3 | 15 | 8  | 117 | 0 | 10 | 13 | 57 | 24 | 199 |
| 21,461 | 3 | 15 | 7  | 124 | 0 | 10 | 11 | 64 | 21 | 213 |
| 21,462 | 3 | 15 | 7  | 126 | 0 | 10 | 10 | 64 | 20 | 215 |
| 21,463 | 3 | 15 | 7  | 126 | 0 | 10 | 10 | 64 | 20 | 215 |
| 21,464 | 3 | 15 | 5  | 126 | 0 | 10 | 10 | 64 | 18 | 215 |
| 21,465 | 3 | 16 | 5  | 126 | 0 | 10 | 10 | 64 | 18 | 216 |
| 21,466 | 3 | 17 | 5  | 131 | 0 | 10 | 10 | 65 | 18 | 223 |
| 21,467 | 3 | 17 | 5  | 131 | 0 | 10 | 10 | 65 | 18 | 223 |
| 21,468 | 3 | 17 | 5  | 131 | 0 | 10 | 10 | 65 | 18 | 223 |
| 21,469 | 3 | 17 | 5  | 131 | 0 | 10 | 12 | 65 | 20 | 223 |
| 21,470 | 4 | 17 | 7  | 131 | 0 | 10 | 14 | 65 | 25 | 223 |
| 21,471 | 4 | 17 | 7  | 130 | 0 | 10 | 14 | 65 | 25 | 222 |
| 21,472 | 4 | 17 | 7  | 128 | 0 | 10 | 14 | 64 | 25 | 219 |

|        |   |    |    |     |   |    |    |     |    |     |
|--------|---|----|----|-----|---|----|----|-----|----|-----|
| 21,473 | 4 | 17 | 6  | 128 | 0 | 10 | 14 | 64  | 24 | 219 |
| 21,474 | 4 | 17 | 7  | 120 | 0 | 10 | 14 | 62  | 25 | 209 |
| 21,475 | 4 | 17 | 9  | 120 | 0 | 10 | 14 | 62  | 27 | 209 |
| 21,476 | 4 | 17 | 9  | 121 | 0 | 10 | 13 | 63  | 26 | 211 |
| 21,477 | 4 | 19 | 9  | 122 | 0 | 12 | 13 | 70  | 26 | 223 |
| 21,478 | 4 | 19 | 9  | 126 | 0 | 12 | 12 | 73  | 25 | 230 |
| 21,479 | 3 | 20 | 9  | 137 | 0 | 12 | 11 | 82  | 23 | 251 |
| 21,480 | 3 | 25 | 9  | 184 | 0 | 13 | 11 | 112 | 23 | 334 |
| 21,481 | 3 | 26 | 8  | 188 | 0 | 13 | 11 | 123 | 22 | 350 |
| 21,482 | 3 | 27 | 8  | 193 | 0 | 14 | 11 | 124 | 22 | 358 |
| 21,483 | 3 | 27 | 6  | 194 | 0 | 14 | 11 | 124 | 20 | 359 |
| 21,484 | 2 | 28 | 6  | 194 | 0 | 14 | 11 | 123 | 19 | 359 |
| 21,485 | 2 | 28 | 6  | 194 | 0 | 14 | 10 | 123 | 18 | 359 |
| 21,486 | 2 | 28 | 6  | 194 | 0 | 14 | 10 | 123 | 18 | 359 |
| 21,487 | 1 | 28 | 6  | 195 | 0 | 14 | 10 | 125 | 17 | 362 |
| 21,488 | 1 | 28 | 6  | 195 | 0 | 14 | 10 | 125 | 17 | 362 |
| 21,489 | 1 | 28 | 6  | 193 | 0 | 14 | 9  | 125 | 16 | 360 |
| 21,490 | 1 | 28 | 6  | 193 | 0 | 14 | 9  | 125 | 16 | 360 |
| 21,491 | 1 | 28 | 6  | 193 | 0 | 14 | 10 | 125 | 17 | 360 |
| 21,492 | 1 | 28 | 6  | 192 | 0 | 14 | 10 | 125 | 17 | 359 |
| 21,493 | 1 | 28 | 6  | 192 | 0 | 14 | 10 | 125 | 17 | 359 |
| 21,494 | 1 | 28 | 6  | 192 | 0 | 14 | 10 | 126 | 17 | 360 |
| 21,495 | 1 | 28 | 6  | 192 | 0 | 14 | 10 | 126 | 17 | 360 |
| 21,496 | 1 | 28 | 7  | 192 | 0 | 14 | 10 | 126 | 18 | 360 |
| 21,497 | 1 | 28 | 7  | 192 | 0 | 14 | 10 | 126 | 18 | 360 |
| 21,498 | 1 | 28 | 7  | 193 | 0 | 14 | 10 | 126 | 18 | 361 |
| 21,499 | 1 | 28 | 8  | 193 | 0 | 14 | 10 | 126 | 19 | 361 |
| 21,500 | 1 | 28 | 8  | 193 | 0 | 14 | 6  | 126 | 15 | 361 |
| 21,501 | 1 | 28 | 8  | 192 | 0 | 14 | 6  | 126 | 15 | 360 |
| 21,502 | 1 | 28 | 8  | 188 | 0 | 14 | 6  | 124 | 15 | 354 |
| 21,503 | 1 | 27 | 8  | 184 | 0 | 13 | 6  | 124 | 15 | 348 |
| 21,504 | 1 | 27 | 8  | 184 | 0 | 14 | 6  | 124 | 15 | 349 |
| 21,505 | 1 | 26 | 8  | 172 | 0 | 11 | 6  | 116 | 15 | 325 |
| 21,506 | 1 | 26 | 8  | 172 | 0 | 11 | 6  | 116 | 15 | 325 |
| 21,507 | 1 | 20 | 8  | 121 | 0 | 10 | 6  | 92  | 15 | 243 |
| 21,508 | 1 | 20 | 8  | 121 | 0 | 10 | 6  | 95  | 15 | 246 |
| 21,509 | 1 | 20 | 8  | 121 | 0 | 10 | 6  | 95  | 15 | 246 |
| 21,510 | 1 | 20 | 9  | 121 | 0 | 10 | 6  | 95  | 16 | 246 |
| 21,511 | 1 | 13 | 9  | 90  | 0 | 5  | 6  | 79  | 16 | 187 |
| 21,512 | 1 | 13 | 10 | 81  | 0 | 5  | 9  | 72  | 20 | 171 |
| 21,513 | 1 | 13 | 12 | 81  | 0 | 5  | 10 | 72  | 23 | 171 |

|        |   |    |    |    |   |   |    |    |    |     |
|--------|---|----|----|----|---|---|----|----|----|-----|
| 21,514 | 1 | 13 | 12 | 82 | 0 | 5 | 10 | 72 | 23 | 172 |
| 21,515 | 1 | 13 | 12 | 82 | 0 | 5 | 10 | 72 | 23 | 172 |
| 21,516 | 1 | 12 | 12 | 82 | 0 | 5 | 10 | 72 | 23 | 171 |
| 21,517 | 1 | 11 | 12 | 77 | 0 | 5 | 10 | 71 | 23 | 164 |
| 21,518 | 1 | 11 | 12 | 77 | 0 | 5 | 10 | 71 | 23 | 164 |
| 21,519 | 1 | 11 | 12 | 77 | 0 | 5 | 12 | 71 | 25 | 164 |
| 21,520 | 1 | 11 | 12 | 77 | 0 | 5 | 10 | 71 | 23 | 164 |
| 21,521 | 0 | 11 | 10 | 77 | 0 | 5 | 8  | 71 | 18 | 164 |
| 21,522 | 0 | 11 | 10 | 77 | 0 | 5 | 8  | 71 | 18 | 164 |
| 21,523 | 0 | 11 | 10 | 77 | 0 | 5 | 8  | 71 | 18 | 164 |
| 21,524 | 0 | 11 | 10 | 77 | 0 | 5 | 7  | 71 | 17 | 164 |
| 21,525 | 0 | 11 | 8  | 77 | 0 | 5 | 8  | 71 | 16 | 164 |
| 21,526 | 0 | 9  | 7  | 76 | 0 | 3 | 9  | 63 | 16 | 151 |
| 21,527 | 1 | 10 | 10 | 76 | 0 | 3 | 13 | 63 | 24 | 152 |
| 21,528 | 2 | 10 | 34 | 76 | 0 | 3 | 18 | 63 | 54 | 152 |
| 21,529 | 2 | 10 | 36 | 74 | 0 | 3 | 19 | 62 | 57 | 149 |
| 21,530 | 2 | 9  | 37 | 63 | 0 | 3 | 19 | 53 | 58 | 128 |
| 21,531 | 2 | 4  | 37 | 17 | 0 | 2 | 19 | 23 | 58 | 46  |
| 21,532 | 2 | 3  | 37 | 14 | 0 | 2 | 19 | 12 | 58 | 31  |
| 21,533 | 2 | 2  | 37 | 13 | 0 | 1 | 19 | 13 | 58 | 29  |
| 21,534 | 2 | 2  | 38 | 12 | 0 | 1 | 19 | 13 | 59 | 28  |
| 21,535 | 2 | 1  | 38 | 12 | 0 | 1 | 19 | 13 | 59 | 27  |
| 21,536 | 2 | 1  | 39 | 12 | 0 | 1 | 19 | 13 | 60 | 27  |
| 21,537 | 2 | 1  | 41 | 12 | 0 | 1 | 19 | 13 | 62 | 27  |
| 21,538 | 2 | 1  | 42 | 13 | 0 | 1 | 19 | 10 | 63 | 25  |
| 21,539 | 2 | 1  | 42 | 13 | 0 | 1 | 19 | 11 | 63 | 26  |
| 21,540 | 2 | 1  | 42 | 14 | 0 | 1 | 19 | 10 | 63 | 26  |
| 21,541 | 3 | 1  | 44 | 15 | 0 | 1 | 23 | 10 | 70 | 27  |
| 21,542 | 3 | 1  | 44 | 15 | 0 | 1 | 23 | 10 | 70 | 27  |
| 21,543 | 3 | 1  | 44 | 15 | 1 | 1 | 23 | 10 | 71 | 27  |
| 21,544 | 3 | 1  | 44 | 15 | 1 | 1 | 23 | 9  | 71 | 26  |
| 21,545 | 3 | 1  | 44 | 15 | 1 | 1 | 24 | 9  | 72 | 26  |
| 21,546 | 3 | 1  | 44 | 15 | 1 | 1 | 24 | 9  | 72 | 26  |
| 21,547 | 3 | 1  | 45 | 15 | 1 | 1 | 24 | 9  | 73 | 26  |
| 21,548 | 3 | 1  | 45 | 17 | 1 | 1 | 24 | 10 | 73 | 29  |
| 21,549 | 3 | 1  | 45 | 16 | 1 | 1 | 24 | 11 | 73 | 29  |
| 21,550 | 3 | 1  | 45 | 24 | 2 | 2 | 24 | 16 | 74 | 43  |
| 21,551 | 3 | 1  | 45 | 26 | 2 | 2 | 24 | 16 | 74 | 45  |
| 21,552 | 3 | 1  | 47 | 32 | 2 | 2 | 25 | 18 | 77 | 53  |
| 21,553 | 3 | 1  | 47 | 32 | 2 | 2 | 25 | 18 | 77 | 53  |
| 21,554 | 3 | 1  | 47 | 32 | 2 | 2 | 25 | 17 | 77 | 52  |

|        |   |   |    |    |   |   |    |    |     |     |
|--------|---|---|----|----|---|---|----|----|-----|-----|
| 21,555 | 3 | 1 | 48 | 32 | 2 | 1 | 25 | 17 | 78  | 51  |
| 21,556 | 3 | 1 | 49 | 32 | 2 | 1 | 25 | 17 | 79  | 51  |
| 21,557 | 3 | 1 | 49 | 32 | 2 | 1 | 25 | 17 | 79  | 51  |
| 21,558 | 3 | 1 | 50 | 32 | 2 | 1 | 26 | 17 | 81  | 51  |
| 21,559 | 3 | 1 | 51 | 32 | 2 | 1 | 26 | 14 | 82  | 48  |
| 21,560 | 3 | 1 | 51 | 34 | 2 | 1 | 26 | 15 | 82  | 51  |
| 21,561 | 3 | 1 | 50 | 39 | 2 | 2 | 26 | 20 | 81  | 62  |
| 21,562 | 4 | 1 | 58 | 42 | 2 | 2 | 27 | 20 | 91  | 65  |
| 21,563 | 4 | 1 | 71 | 46 | 3 | 2 | 29 | 22 | 107 | 71  |
| 21,564 | 4 | 1 | 69 | 51 | 3 | 2 | 29 | 23 | 105 | 77  |
| 21,565 | 7 | 1 | 91 | 52 | 5 | 2 | 44 | 23 | 147 | 78  |
| 21,566 | 7 | 1 | 91 | 52 | 5 | 2 | 47 | 25 | 150 | 80  |
| 21,567 | 7 | 4 | 92 | 58 | 5 | 3 | 48 | 33 | 152 | 98  |
| 21,568 | 7 | 4 | 92 | 58 | 5 | 3 | 48 | 33 | 152 | 98  |
| 21,569 | 7 | 4 | 93 | 58 | 5 | 3 | 49 | 33 | 154 | 98  |
| 21,570 | 7 | 4 | 94 | 59 | 5 | 3 | 46 | 33 | 152 | 99  |
| 21,571 | 7 | 4 | 94 | 59 | 5 | 3 | 47 | 33 | 153 | 99  |
| 21,572 | 9 | 4 | 96 | 59 | 5 | 3 | 48 | 33 | 158 | 99  |
| 21,573 | 9 | 4 | 96 | 59 | 5 | 3 | 48 | 33 | 158 | 99  |
| 21,574 | 9 | 4 | 96 | 61 | 5 | 3 | 48 | 33 | 158 | 101 |
| 21,575 | 9 | 4 | 96 | 61 | 5 | 3 | 47 | 33 | 157 | 101 |
| 21,576 | 9 | 4 | 97 | 61 | 5 | 3 | 48 | 33 | 159 | 101 |
| 21,577 | 9 | 4 | 97 | 60 | 5 | 3 | 48 | 33 | 159 | 100 |
| 21,578 | 8 | 3 | 94 | 60 | 5 | 3 | 44 | 33 | 151 | 99  |
| 21,579 | 7 | 3 | 70 | 58 | 4 | 3 | 40 | 32 | 121 | 96  |
| 21,580 | 7 | 3 | 68 | 60 | 4 | 3 | 39 | 32 | 118 | 98  |
| 21,581 | 7 | 3 | 68 | 63 | 4 | 3 | 39 | 31 | 118 | 100 |
| 21,582 | 7 | 3 | 68 | 62 | 4 | 3 | 39 | 31 | 118 | 99  |
| 21,583 | 7 | 3 | 68 | 57 | 4 | 3 | 39 | 29 | 118 | 92  |
| 21,584 | 7 | 3 | 67 | 57 | 4 | 3 | 39 | 29 | 117 | 92  |
| 21,585 | 7 | 3 | 67 | 57 | 4 | 3 | 39 | 29 | 117 | 92  |
| 21,586 | 7 | 3 | 66 | 57 | 4 | 3 | 39 | 30 | 116 | 93  |
| 21,587 | 7 | 4 | 66 | 57 | 4 | 4 | 39 | 30 | 116 | 95  |
| 21,588 | 7 | 4 | 64 | 57 | 4 | 4 | 39 | 30 | 114 | 95  |
| 21,589 | 7 | 4 | 63 | 55 | 4 | 4 | 39 | 29 | 113 | 92  |
| 21,590 | 7 | 4 | 63 | 55 | 4 | 4 | 39 | 29 | 113 | 92  |
| 21,591 | 7 | 4 | 61 | 56 | 4 | 4 | 34 | 32 | 106 | 96  |
| 21,592 | 6 | 4 | 61 | 55 | 4 | 4 | 34 | 32 | 105 | 95  |
| 21,593 | 6 | 4 | 61 | 56 | 4 | 4 | 34 | 32 | 105 | 96  |
| 21,594 | 6 | 4 | 61 | 56 | 4 | 4 | 34 | 32 | 105 | 96  |
| 21,595 | 6 | 4 | 61 | 56 | 4 | 4 | 34 | 34 | 105 | 98  |

|        |   |   |    |    |   |   |    |    |     |    |
|--------|---|---|----|----|---|---|----|----|-----|----|
| 21,596 | 6 | 5 | 61 | 56 | 4 | 4 | 33 | 34 | 104 | 99 |
| 21,597 | 7 | 5 | 61 | 54 | 4 | 4 | 33 | 33 | 105 | 96 |
| 21,598 | 7 | 5 | 59 | 54 | 4 | 4 | 33 | 33 | 103 | 96 |
| 21,599 | 7 | 5 | 58 | 54 | 3 | 4 | 33 | 33 | 101 | 96 |
| 21,600 | 7 | 5 | 57 | 46 | 3 | 3 | 32 | 27 | 99  | 81 |
| 21,601 | 7 | 5 | 57 | 46 | 3 | 3 | 32 | 27 | 99  | 81 |
| 21,602 | 7 | 5 | 57 | 45 | 3 | 4 | 32 | 28 | 99  | 82 |
| 21,603 | 7 | 5 | 56 | 39 | 3 | 4 | 32 | 27 | 98  | 75 |
| 21,604 | 7 | 5 | 56 | 39 | 3 | 4 | 32 | 27 | 98  | 75 |
| 21,605 | 7 | 5 | 56 | 39 | 3 | 4 | 32 | 28 | 98  | 76 |
| 21,606 | 7 | 5 | 55 | 39 | 3 | 4 | 32 | 28 | 97  | 76 |
| 21,607 | 7 | 5 | 54 | 39 | 3 | 4 | 32 | 28 | 96  | 76 |
| 21,608 | 7 | 6 | 53 | 39 | 3 | 4 | 31 | 28 | 94  | 77 |
| 21,609 | 7 | 6 | 52 | 39 | 3 | 4 | 31 | 27 | 93  | 76 |
| 21,610 | 7 | 6 | 52 | 41 | 3 | 4 | 31 | 29 | 93  | 80 |
| 21,611 | 6 | 6 | 45 | 42 | 3 | 4 | 30 | 28 | 84  | 80 |
| 21,612 | 6 | 6 | 44 | 37 | 3 | 3 | 30 | 23 | 83  | 69 |
| 21,613 | 6 | 6 | 43 | 34 | 3 | 3 | 30 | 22 | 82  | 65 |
| 21,614 | 6 | 6 | 30 | 25 | 2 | 3 | 24 | 20 | 62  | 54 |
| 21,615 | 6 | 6 | 30 | 27 | 2 | 3 | 24 | 20 | 62  | 56 |
| 21,616 | 3 | 6 | 8  | 27 | 0 | 3 | 8  | 21 | 19  | 57 |
| 21,617 | 3 | 6 | 8  | 27 | 0 | 3 | 5  | 19 | 16  | 55 |
| 21,618 | 3 | 3 | 7  | 22 | 0 | 2 | 4  | 13 | 14  | 40 |
| 21,619 | 3 | 3 | 7  | 22 | 2 | 2 | 3  | 13 | 15  | 40 |
| 21,620 | 3 | 3 | 7  | 21 | 2 | 2 | 3  | 13 | 15  | 39 |
| 21,621 | 3 | 3 | 6  | 21 | 2 | 2 | 3  | 13 | 14  | 39 |
| 21,622 | 3 | 3 | 6  | 21 | 2 | 2 | 3  | 13 | 14  | 39 |
| 21,623 | 1 | 3 | 5  | 22 | 2 | 2 | 2  | 13 | 10  | 40 |
| 21,624 | 1 | 3 | 6  | 22 | 2 | 2 | 2  | 13 | 11  | 40 |
| 21,625 | 2 | 3 | 8  | 20 | 2 | 2 | 2  | 13 | 14  | 38 |
| 21,626 | 2 | 3 | 8  | 20 | 2 | 2 | 2  | 13 | 14  | 38 |
| 21,627 | 2 | 3 | 8  | 20 | 2 | 2 | 1  | 13 | 13  | 38 |
| 21,628 | 2 | 3 | 7  | 20 | 2 | 2 | 0  | 13 | 11  | 38 |
| 21,629 | 2 | 3 | 7  | 20 | 2 | 2 | 0  | 13 | 11  | 38 |
| 21,630 | 2 | 3 | 7  | 20 | 2 | 2 | 0  | 13 | 11  | 38 |
| 21,631 | 2 | 3 | 7  | 18 | 2 | 2 | 1  | 13 | 12  | 36 |
| 21,632 | 3 | 3 | 7  | 15 | 2 | 2 | 4  | 13 | 16  | 33 |
| 21,633 | 3 | 3 | 7  | 15 | 2 | 2 | 4  | 13 | 16  | 33 |
| 21,634 | 3 | 3 | 7  | 15 | 2 | 2 | 4  | 13 | 16  | 33 |
| 21,635 | 3 | 3 | 7  | 15 | 2 | 2 | 4  | 13 | 16  | 33 |
| 21,636 | 3 | 3 | 7  | 16 | 2 | 2 | 4  | 13 | 16  | 34 |



|        |   |   |    |    |   |   |    |    |    |    |
|--------|---|---|----|----|---|---|----|----|----|----|
| 21,637 | 3 | 3 | 7  | 16 | 2 | 2 | 4  | 12 | 16 | 33 |
| 21,638 | 3 | 2 | 7  | 16 | 2 | 1 | 4  | 12 | 16 | 31 |
| 21,639 | 3 | 2 | 7  | 16 | 2 | 1 | 4  | 12 | 16 | 31 |
| 21,640 | 3 | 2 | 7  | 16 | 2 | 1 | 4  | 12 | 16 | 31 |
| 21,641 | 3 | 2 | 7  | 14 | 2 | 1 | 4  | 9  | 16 | 26 |
| 21,642 | 3 | 2 | 7  | 14 | 2 | 1 | 4  | 9  | 16 | 26 |
| 21,643 | 3 | 2 | 7  | 14 | 2 | 1 | 4  | 9  | 16 | 26 |
| 21,644 | 3 | 2 | 7  | 13 | 2 | 2 | 4  | 9  | 16 | 26 |
| 21,645 | 3 | 2 | 7  | 13 | 2 | 2 | 4  | 9  | 16 | 26 |
| 21,646 | 3 | 2 | 7  | 13 | 2 | 2 | 4  | 7  | 16 | 24 |
| 21,647 | 3 | 1 | 7  | 13 | 2 | 2 | 4  | 7  | 16 | 23 |
| 21,648 | 2 | 1 | 8  | 14 | 2 | 2 | 4  | 7  | 16 | 24 |
| 21,649 | 2 | 1 | 8  | 14 | 2 | 2 | 4  | 7  | 16 | 24 |
| 21,650 | 2 | 1 | 8  | 14 | 2 | 2 | 4  | 7  | 16 | 24 |
| 21,651 | 2 | 1 | 8  | 14 | 2 | 2 | 4  | 7  | 16 | 24 |
| 21,652 | 2 | 1 | 8  | 14 | 2 | 2 | 4  | 7  | 16 | 24 |
| 21,653 | 5 | 1 | 10 | 13 | 2 | 1 | 4  | 4  | 21 | 19 |
| 21,654 | 5 | 1 | 10 | 13 | 2 | 1 | 4  | 4  | 21 | 19 |
| 21,655 | 5 | 1 | 11 | 13 | 4 | 1 | 5  | 4  | 25 | 19 |
| 21,656 | 7 | 1 | 14 | 13 | 4 | 1 | 7  | 4  | 32 | 19 |
| 21,657 | 7 | 1 | 14 | 13 | 4 | 1 | 7  | 3  | 32 | 18 |
| 21,658 | 7 | 0 | 14 | 13 | 4 | 1 | 9  | 3  | 34 | 17 |
| 21,659 | 7 | 0 | 14 | 11 | 4 | 1 | 9  | 1  | 34 | 13 |
| 21,660 | 7 | 0 | 14 | 11 | 4 | 1 | 9  | 1  | 34 | 13 |
| 21,661 | 7 | 0 | 14 | 11 | 4 | 1 | 9  | 1  | 34 | 13 |
| 21,662 | 7 | 0 | 16 | 8  | 4 | 1 | 9  | 1  | 36 | 10 |
| 21,663 | 7 | 0 | 16 | 8  | 4 | 1 | 9  | 1  | 36 | 10 |
| 21,664 | 7 | 0 | 16 | 8  | 4 | 1 | 9  | 1  | 36 | 10 |
| 21,665 | 7 | 0 | 17 | 8  | 4 | 1 | 9  | 1  | 37 | 10 |
| 21,666 | 7 | 0 | 19 | 4  | 4 | 1 | 9  | 0  | 39 | 5  |
| 21,667 | 7 | 0 | 19 | 4  | 4 | 1 | 9  | 0  | 39 | 5  |
| 21,668 | 7 | 0 | 19 | 3  | 4 | 1 | 9  | 0  | 39 | 4  |
| 21,669 | 7 | 0 | 19 | 3  | 4 | 1 | 9  | 0  | 39 | 4  |
| 21,670 | 7 | 0 | 18 | 3  | 2 | 1 | 10 | 0  | 37 | 4  |
| 21,671 | 7 | 0 | 18 | 3  | 2 | 1 | 10 | 0  | 37 | 4  |
| 21,672 | 7 | 0 | 18 | 3  | 2 | 1 | 10 | 0  | 37 | 4  |
| 21,673 | 8 | 0 | 18 | 2  | 2 | 1 | 11 | 0  | 39 | 3  |
| 21,674 | 9 | 0 | 18 | 2  | 2 | 1 | 12 | 0  | 41 | 3  |
| 21,675 | 9 | 0 | 17 | 2  | 2 | 1 | 12 | 0  | 40 | 3  |
| 21,676 | 8 | 0 | 15 | 2  | 2 | 1 | 12 | 0  | 37 | 3  |
| 21,677 | 8 | 0 | 15 | 3  | 2 | 1 | 12 | 2  | 37 | 6  |

|        |    |   |    |    |   |   |    |    |    |    |
|--------|----|---|----|----|---|---|----|----|----|----|
| 21,678 | 8  | 0 | 15 | 3  | 2 | 1 | 12 | 2  | 37 | 6  |
| 21,679 | 8  | 0 | 15 | 3  | 2 | 1 | 12 | 2  | 37 | 6  |
| 21,680 | 8  | 0 | 14 | 4  | 2 | 1 | 12 | 2  | 36 | 7  |
| 21,681 | 8  | 0 | 14 | 4  | 2 | 1 | 11 | 2  | 35 | 7  |
| 21,682 | 8  | 0 | 14 | 4  | 2 | 1 | 12 | 2  | 36 | 7  |
| 21,683 | 7  | 1 | 14 | 4  | 2 | 1 | 9  | 2  | 32 | 8  |
| 21,684 | 7  | 1 | 15 | 4  | 3 | 1 | 9  | 2  | 34 | 8  |
| 21,685 | 9  | 1 | 15 | 4  | 3 | 1 | 10 | 2  | 37 | 8  |
| 21,686 | 9  | 1 | 20 | 5  | 3 | 1 | 12 | 2  | 44 | 9  |
| 21,687 | 9  | 1 | 21 | 5  | 3 | 1 | 14 | 2  | 47 | 9  |
| 21,688 | 9  | 1 | 21 | 5  | 3 | 1 | 14 | 2  | 47 | 9  |
| 21,689 | 9  | 1 | 21 | 5  | 3 | 1 | 14 | 2  | 47 | 9  |
| 21,690 | 9  | 1 | 21 | 5  | 3 | 1 | 14 | 2  | 47 | 9  |
| 21,691 | 10 | 1 | 21 | 5  | 3 | 1 | 14 | 2  | 48 | 9  |
| 21,692 | 10 | 1 | 21 | 5  | 3 | 1 | 14 | 2  | 48 | 9  |
| 21,693 | 10 | 1 | 21 | 5  | 3 | 1 | 14 | 2  | 48 | 9  |
| 21,694 | 10 | 1 | 21 | 5  | 3 | 1 | 14 | 2  | 48 | 9  |
| 21,695 | 10 | 1 | 21 | 6  | 3 | 0 | 14 | 2  | 48 | 9  |
| 21,696 | 10 | 1 | 21 | 6  | 3 | 0 | 14 | 2  | 48 | 9  |
| 21,697 | 10 | 1 | 21 | 6  | 3 | 0 | 14 | 2  | 48 | 9  |
| 21,698 | 10 | 1 | 21 | 6  | 3 | 0 | 14 | 2  | 48 | 9  |
| 21,699 | 10 | 1 | 21 | 6  | 3 | 0 | 14 | 2  | 48 | 9  |
| 21,700 | 10 | 1 | 21 | 6  | 3 | 0 | 14 | 2  | 48 | 9  |
| 21,701 | 10 | 1 | 21 | 6  | 3 | 0 | 14 | 2  | 48 | 9  |
| 21,702 | 10 | 1 | 21 | 6  | 3 | 0 | 14 | 2  | 48 | 9  |
| 21,703 | 8  | 1 | 20 | 6  | 3 | 0 | 14 | 2  | 45 | 9  |
| 21,704 | 8  | 1 | 30 | 6  | 3 | 0 | 18 | 2  | 59 | 9  |
| 21,705 | 8  | 1 | 30 | 6  | 3 | 0 | 18 | 4  | 59 | 11 |
| 21,706 | 8  | 1 | 34 | 6  | 1 | 0 | 18 | 5  | 61 | 12 |
| 21,707 | 6  | 1 | 37 | 6  | 1 | 0 | 16 | 5  | 60 | 12 |
| 21,708 | 6  | 1 | 41 | 7  | 1 | 0 | 20 | 5  | 68 | 13 |
| 21,709 | 8  | 1 | 41 | 10 | 1 | 0 | 18 | 5  | 68 | 16 |
| 21,710 | 9  | 1 | 41 | 11 | 1 | 0 | 18 | 5  | 69 | 17 |
| 21,711 | 9  | 1 | 45 | 15 | 1 | 0 | 18 | 10 | 73 | 26 |
| 21,712 | 9  | 2 | 44 | 23 | 1 | 0 | 18 | 14 | 72 | 39 |
| 21,713 | 9  | 3 | 44 | 32 | 1 | 1 | 18 | 16 | 72 | 52 |
| 21,714 | 9  | 3 | 44 | 32 | 1 | 1 | 18 | 17 | 72 | 53 |
| 21,715 | 9  | 3 | 43 | 32 | 1 | 1 | 18 | 18 | 71 | 54 |
| 21,716 | 9  | 3 | 45 | 33 | 1 | 1 | 18 | 19 | 73 | 56 |
| 21,717 | 9  | 3 | 44 | 34 | 1 | 1 | 18 | 19 | 72 | 57 |
| 21,718 | 9  | 3 | 44 | 35 | 1 | 1 | 18 | 19 | 72 | 58 |

|        |   |   |    |    |   |   |    |    |    |    |
|--------|---|---|----|----|---|---|----|----|----|----|
| 21,719 | 9 | 3 | 44 | 35 | 1 | 1 | 18 | 19 | 72 | 58 |
| 21,720 | 9 | 3 | 44 | 35 | 1 | 1 | 19 | 19 | 73 | 58 |
| 21,721 | 9 | 3 | 44 | 35 | 1 | 1 | 19 | 19 | 73 | 58 |
| 21,722 | 9 | 3 | 44 | 35 | 1 | 1 | 19 | 19 | 73 | 58 |
| 21,723 | 9 | 3 | 45 | 35 | 1 | 1 | 19 | 19 | 74 | 58 |
| 21,724 | 8 | 3 | 45 | 35 | 1 | 1 | 18 | 19 | 72 | 58 |
| 21,725 | 7 | 3 | 44 | 35 | 1 | 1 | 17 | 19 | 69 | 58 |
| 21,726 | 7 | 3 | 44 | 35 | 1 | 1 | 17 | 19 | 69 | 58 |
| 21,727 | 7 | 3 | 44 | 34 | 1 | 1 | 17 | 17 | 69 | 55 |
| 21,728 | 7 | 3 | 43 | 34 | 1 | 1 | 17 | 17 | 68 | 55 |
| 21,729 | 7 | 3 | 43 | 34 | 1 | 1 | 17 | 17 | 68 | 55 |
| 21,730 | 7 | 3 | 43 | 33 | 1 | 1 | 17 | 17 | 68 | 54 |
| 21,731 | 7 | 3 | 43 | 33 | 1 | 1 | 17 | 17 | 68 | 54 |
| 21,732 | 7 | 3 | 43 | 36 | 1 | 1 | 17 | 19 | 68 | 59 |
| 21,733 | 7 | 3 | 43 | 39 | 1 | 1 | 16 | 19 | 67 | 62 |
| 21,734 | 7 | 3 | 42 | 40 | 0 | 1 | 16 | 19 | 65 | 63 |
| 21,735 | 5 | 3 | 42 | 41 | 0 | 1 | 15 | 22 | 62 | 67 |
| 21,736 | 5 | 3 | 42 | 41 | 0 | 1 | 14 | 22 | 61 | 67 |
| 21,737 | 5 | 3 | 37 | 42 | 0 | 1 | 13 | 25 | 55 | 71 |
| 21,738 | 5 | 3 | 36 | 45 | 0 | 1 | 11 | 30 | 52 | 79 |
| 21,739 | 5 | 3 | 37 | 46 | 0 | 1 | 11 | 30 | 53 | 80 |
| 21,740 | 5 | 3 | 37 | 47 | 0 | 1 | 11 | 30 | 53 | 81 |
| 21,741 | 5 | 3 | 37 | 50 | 0 | 1 | 11 | 30 | 53 | 84 |
| 21,742 | 4 | 3 | 37 | 51 | 0 | 1 | 11 | 30 | 52 | 85 |
| 21,743 | 4 | 3 | 37 | 52 | 0 | 1 | 11 | 30 | 52 | 86 |
| 21,744 | 4 | 3 | 37 | 52 | 0 | 1 | 11 | 30 | 52 | 86 |
| 21,745 | 4 | 3 | 37 | 52 | 0 | 1 | 11 | 30 | 52 | 86 |
| 21,746 | 4 | 3 | 38 | 52 | 0 | 1 | 11 | 30 | 53 | 86 |
| 21,747 | 4 | 3 | 38 | 52 | 0 | 1 | 12 | 30 | 54 | 86 |
| 21,748 | 4 | 3 | 38 | 52 | 0 | 1 | 12 | 30 | 54 | 86 |
| 21,749 | 4 | 3 | 38 | 52 | 0 | 1 | 12 | 30 | 54 | 86 |
| 21,750 | 4 | 3 | 37 | 51 | 0 | 1 | 12 | 30 | 53 | 85 |
| 21,751 | 4 | 3 | 37 | 51 | 0 | 1 | 12 | 30 | 53 | 85 |
| 21,752 | 4 | 3 | 37 | 52 | 0 | 1 | 12 | 30 | 53 | 86 |
| 21,753 | 4 | 3 | 36 | 54 | 0 | 1 | 12 | 30 | 52 | 88 |
| 21,754 | 4 | 3 | 36 | 54 | 0 | 1 | 12 | 31 | 52 | 89 |
| 21,755 | 3 | 3 | 26 | 56 | 0 | 1 | 8  | 33 | 37 | 93 |
| 21,756 | 3 | 3 | 26 | 56 | 0 | 1 | 8  | 32 | 37 | 92 |
| 21,757 | 3 | 3 | 22 | 57 | 0 | 1 | 7  | 31 | 32 | 92 |
| 21,758 | 3 | 3 | 16 | 58 | 0 | 1 | 8  | 31 | 27 | 93 |
| 21,759 | 3 | 3 | 12 | 62 | 0 | 1 | 5  | 31 | 20 | 97 |

|        |   |   |    |    |   |   |    |    |    |     |
|--------|---|---|----|----|---|---|----|----|----|-----|
| 21,760 | 1 | 5 | 12 | 63 | 0 | 1 | 5  | 35 | 18 | 104 |
| 21,761 | 1 | 5 | 9  | 64 | 0 | 1 | 5  | 35 | 15 | 105 |
| 21,762 | 1 | 5 | 8  | 61 | 0 | 2 | 6  | 30 | 15 | 98  |
| 21,763 | 1 | 4 | 8  | 59 | 0 | 2 | 7  | 26 | 16 | 91  |
| 21,764 | 1 | 3 | 7  | 51 | 0 | 1 | 7  | 25 | 15 | 80  |
| 21,765 | 1 | 3 | 7  | 51 | 0 | 1 | 7  | 22 | 15 | 77  |
| 21,766 | 1 | 3 | 7  | 54 | 0 | 2 | 7  | 23 | 15 | 82  |
| 21,767 | 1 | 3 | 5  | 55 | 0 | 2 | 7  | 23 | 13 | 83  |
| 21,768 | 1 | 3 | 4  | 54 | 0 | 2 | 7  | 23 | 12 | 82  |
| 21,769 | 1 | 3 | 4  | 53 | 0 | 2 | 6  | 23 | 11 | 81  |
| 21,770 | 1 | 3 | 5  | 53 | 0 | 2 | 6  | 23 | 12 | 81  |
| 21,771 | 1 | 3 | 5  | 53 | 0 | 2 | 6  | 23 | 12 | 81  |
| 21,772 | 1 | 3 | 5  | 54 | 0 | 2 | 6  | 23 | 12 | 82  |
| 21,773 | 1 | 3 | 5  | 54 | 0 | 2 | 6  | 23 | 12 | 82  |
| 21,774 | 1 | 3 | 4  | 54 | 0 | 2 | 6  | 23 | 11 | 82  |
| 21,775 | 1 | 3 | 4  | 54 | 0 | 3 | 6  | 24 | 11 | 84  |
| 21,776 | 1 | 3 | 4  | 54 | 0 | 3 | 6  | 25 | 11 | 85  |
| 21,777 | 1 | 3 | 5  | 54 | 0 | 3 | 6  | 25 | 12 | 85  |
| 21,778 | 1 | 3 | 5  | 55 | 0 | 3 | 6  | 25 | 12 | 86  |
| 21,779 | 1 | 3 | 5  | 55 | 0 | 3 | 6  | 26 | 12 | 87  |
| 21,780 | 1 | 3 | 5  | 55 | 0 | 3 | 6  | 26 | 12 | 87  |
| 21,781 | 1 | 4 | 5  | 55 | 0 | 3 | 6  | 26 | 12 | 88  |
| 21,782 | 1 | 4 | 5  | 55 | 0 | 3 | 6  | 26 | 12 | 88  |
| 21,783 | 1 | 4 | 5  | 52 | 0 | 3 | 6  | 25 | 12 | 84  |
| 21,784 | 1 | 4 | 5  | 49 | 0 | 3 | 6  | 25 | 12 | 81  |
| 21,785 | 1 | 4 | 5  | 48 | 0 | 3 | 8  | 25 | 14 | 80  |
| 21,786 | 1 | 4 | 6  | 47 | 0 | 3 | 8  | 22 | 15 | 76  |
| 21,787 | 1 | 4 | 6  | 44 | 0 | 3 | 8  | 19 | 15 | 70  |
| 21,788 | 1 | 4 | 6  | 41 | 0 | 3 | 8  | 14 | 15 | 62  |
| 21,789 | 1 | 4 | 6  | 41 | 0 | 3 | 8  | 14 | 15 | 62  |
| 21,790 | 1 | 4 | 6  | 40 | 0 | 3 | 8  | 14 | 15 | 61  |
| 21,791 | 1 | 4 | 11 | 42 | 0 | 3 | 12 | 15 | 24 | 64  |
| 21,792 | 1 | 4 | 12 | 40 | 0 | 3 | 13 | 16 | 26 | 63  |
| 21,793 | 1 | 4 | 12 | 43 | 0 | 3 | 13 | 18 | 26 | 68  |
| 21,794 | 1 | 5 | 13 | 47 | 0 | 3 | 17 | 21 | 31 | 76  |
| 21,795 | 1 | 6 | 15 | 50 | 0 | 3 | 17 | 27 | 33 | 86  |
| 21,796 | 2 | 6 | 15 | 51 | 0 | 3 | 18 | 27 | 35 | 87  |
| 21,797 | 2 | 6 | 14 | 50 | 0 | 3 | 19 | 28 | 35 | 87  |
| 21,798 | 2 | 6 | 14 | 50 | 0 | 3 | 18 | 28 | 34 | 87  |
| 21,799 | 2 | 6 | 15 | 52 | 0 | 4 | 18 | 28 | 35 | 90  |
| 21,800 | 2 | 6 | 15 | 52 | 0 | 4 | 18 | 28 | 35 | 90  |

|        |   |   |    |    |   |   |    |    |    |    |
|--------|---|---|----|----|---|---|----|----|----|----|
| 21,801 | 2 | 6 | 15 | 53 | 0 | 4 | 18 | 28 | 35 | 91 |
| 21,802 | 2 | 6 | 15 | 54 | 0 | 4 | 18 | 28 | 35 | 92 |
| 21,803 | 2 | 6 | 15 | 54 | 0 | 4 | 18 | 29 | 35 | 93 |
| 21,804 | 2 | 6 | 15 | 52 | 0 | 4 | 18 | 28 | 35 | 90 |
| 21,805 | 2 | 6 | 15 | 52 | 0 | 4 | 18 | 27 | 35 | 89 |
| 21,806 | 2 | 6 | 15 | 51 | 0 | 4 | 19 | 24 | 36 | 85 |
| 21,807 | 2 | 6 | 16 | 52 | 0 | 4 | 19 | 24 | 37 | 86 |
| 21,808 | 2 | 6 | 15 | 52 | 0 | 4 | 19 | 24 | 36 | 86 |
| 21,809 | 3 | 4 | 15 | 41 | 0 | 4 | 18 | 22 | 36 | 71 |
| 21,810 | 3 | 4 | 15 | 41 | 0 | 4 | 17 | 22 | 35 | 71 |
| 21,811 | 2 | 4 | 15 | 49 | 0 | 4 | 19 | 26 | 36 | 83 |
| 21,812 | 2 | 4 | 16 | 48 | 0 | 4 | 19 | 26 | 37 | 82 |
| 21,813 | 2 | 4 | 16 | 41 | 0 | 3 | 18 | 26 | 36 | 74 |
| 21,814 | 2 | 5 | 16 | 43 | 0 | 3 | 17 | 27 | 35 | 78 |
| 21,815 | 2 | 5 | 16 | 42 | 0 | 3 | 17 | 28 | 35 | 78 |
| 21,816 | 2 | 5 | 16 | 42 | 0 | 3 | 17 | 28 | 35 | 78 |
| 21,817 | 2 | 5 | 16 | 39 | 0 | 2 | 17 | 27 | 35 | 73 |
| 21,818 | 2 | 5 | 16 | 39 | 0 | 2 | 18 | 27 | 36 | 73 |
| 21,819 | 2 | 5 | 16 | 41 | 0 | 2 | 18 | 27 | 36 | 75 |
| 21,820 | 2 | 5 | 16 | 41 | 0 | 2 | 18 | 27 | 36 | 75 |
| 21,821 | 2 | 5 | 15 | 42 | 0 | 2 | 18 | 27 | 35 | 76 |
| 21,822 | 2 | 5 | 15 | 42 | 0 | 2 | 18 | 27 | 35 | 76 |
| 21,823 | 3 | 5 | 15 | 42 | 0 | 2 | 17 | 27 | 35 | 76 |
| 21,824 | 3 | 5 | 15 | 42 | 0 | 2 | 17 | 27 | 35 | 76 |
| 21,825 | 3 | 5 | 15 | 42 | 0 | 1 | 17 | 26 | 35 | 74 |
| 21,826 | 3 | 5 | 15 | 42 | 0 | 1 | 17 | 25 | 35 | 73 |
| 21,827 | 3 | 5 | 15 | 42 | 0 | 1 | 17 | 25 | 35 | 73 |
| 21,828 | 3 | 5 | 15 | 41 | 0 | 1 | 17 | 25 | 35 | 72 |
| 21,829 | 3 | 5 | 15 | 41 | 1 | 1 | 17 | 25 | 36 | 72 |
| 21,830 | 3 | 5 | 15 | 42 | 1 | 1 | 17 | 26 | 36 | 74 |
| 21,831 | 3 | 5 | 15 | 43 | 1 | 1 | 17 | 26 | 36 | 75 |
| 21,832 | 3 | 4 | 15 | 44 | 1 | 1 | 17 | 26 | 36 | 75 |
| 21,833 | 3 | 3 | 15 | 44 | 1 | 1 | 17 | 25 | 36 | 73 |
| 21,834 | 3 | 3 | 15 | 44 | 1 | 1 | 17 | 25 | 36 | 73 |
| 21,835 | 3 | 3 | 15 | 44 | 1 | 1 | 15 | 25 | 34 | 73 |
| 21,836 | 3 | 3 | 15 | 44 | 1 | 1 | 15 | 25 | 34 | 73 |
| 21,837 | 3 | 3 | 14 | 44 | 1 | 1 | 15 | 25 | 33 | 73 |
| 21,838 | 3 | 4 | 14 | 44 | 1 | 1 | 15 | 25 | 33 | 74 |
| 21,839 | 3 | 4 | 14 | 44 | 1 | 1 | 15 | 25 | 33 | 74 |
| 21,840 | 3 | 4 | 13 | 43 | 2 | 1 | 15 | 25 | 33 | 73 |
| 21,841 | 3 | 4 | 13 | 43 | 2 | 1 | 16 | 26 | 34 | 74 |

|        |    |   |    |    |   |   |    |    |    |    |
|--------|----|---|----|----|---|---|----|----|----|----|
| 21,842 | 3  | 4 | 8  | 41 | 2 | 1 | 12 | 25 | 25 | 71 |
| 21,843 | 3  | 2 | 7  | 27 | 2 | 1 | 11 | 13 | 23 | 43 |
| 21,844 | 3  | 2 | 7  | 27 | 2 | 1 | 11 | 14 | 23 | 44 |
| 21,845 | 3  | 2 | 7  | 27 | 2 | 1 | 7  | 15 | 19 | 45 |
| 21,846 | 3  | 2 | 5  | 27 | 2 | 1 | 7  | 15 | 17 | 45 |
| 21,847 | 2  | 2 | 5  | 27 | 2 | 1 | 6  | 15 | 15 | 45 |
| 21,848 | 2  | 2 | 5  | 27 | 2 | 1 | 5  | 14 | 14 | 44 |
| 21,849 | 2  | 2 | 4  | 27 | 2 | 1 | 6  | 14 | 14 | 44 |
| 21,850 | 2  | 2 | 4  | 25 | 2 | 0 | 6  | 14 | 14 | 41 |
| 21,851 | 2  | 2 | 4  | 25 | 2 | 0 | 6  | 14 | 14 | 41 |
| 21,852 | 2  | 2 | 4  | 24 | 2 | 0 | 6  | 14 | 14 | 40 |
| 21,853 | 2  | 2 | 4  | 23 | 2 | 0 | 6  | 14 | 14 | 39 |
| 21,854 | 2  | 2 | 10 | 22 | 3 | 0 | 6  | 13 | 21 | 37 |
| 21,855 | 2  | 2 | 11 | 22 | 3 | 0 | 6  | 14 | 22 | 38 |
| 21,856 | 2  | 2 | 11 | 22 | 3 | 0 | 6  | 14 | 22 | 38 |
| 21,857 | 2  | 3 | 11 | 22 | 3 | 0 | 5  | 15 | 21 | 40 |
| 21,858 | 2  | 3 | 10 | 20 | 3 | 0 | 5  | 15 | 20 | 38 |
| 21,859 | 3  | 3 | 16 | 20 | 3 | 0 | 6  | 15 | 28 | 38 |
| 21,860 | 2  | 3 | 16 | 20 | 3 | 0 | 6  | 14 | 27 | 37 |
| 21,861 | 3  | 3 | 20 | 20 | 3 | 0 | 6  | 14 | 32 | 37 |
| 21,862 | 3  | 3 | 20 | 12 | 3 | 0 | 4  | 10 | 30 | 25 |
| 21,863 | 3  | 3 | 27 | 12 | 3 | 0 | 6  | 10 | 39 | 25 |
| 21,864 | 3  | 2 | 27 | 10 | 3 | 0 | 6  | 9  | 39 | 21 |
| 21,865 | 3  | 2 | 27 | 10 | 3 | 0 | 6  | 9  | 39 | 21 |
| 21,866 | 3  | 2 | 30 | 10 | 4 | 0 | 6  | 7  | 43 | 19 |
| 21,867 | 3  | 2 | 30 | 10 | 4 | 0 | 6  | 7  | 43 | 19 |
| 21,868 | 3  | 2 | 30 | 9  | 4 | 0 | 5  | 7  | 42 | 18 |
| 21,869 | 3  | 2 | 33 | 7  | 4 | 0 | 5  | 7  | 45 | 16 |
| 21,870 | 4  | 2 | 34 | 7  | 4 | 0 | 6  | 7  | 48 | 16 |
| 21,871 | 4  | 2 | 34 | 6  | 4 | 0 | 6  | 7  | 48 | 15 |
| 21,872 | 4  | 2 | 34 | 6  | 4 | 0 | 6  | 7  | 48 | 15 |
| 21,873 | 4  | 2 | 37 | 5  | 4 | 0 | 6  | 7  | 51 | 14 |
| 21,874 | 4  | 2 | 37 | 5  | 4 | 0 | 6  | 7  | 51 | 14 |
| 21,875 | 4  | 2 | 38 | 5  | 4 | 1 | 6  | 8  | 52 | 16 |
| 21,876 | 4  | 2 | 38 | 5  | 4 | 1 | 6  | 8  | 52 | 16 |
| 21,877 | 6  | 2 | 44 | 5  | 4 | 1 | 11 | 8  | 65 | 16 |
| 21,878 | 6  | 2 | 45 | 5  | 4 | 1 | 12 | 8  | 67 | 16 |
| 21,879 | 6  | 2 | 45 | 6  | 4 | 1 | 12 | 8  | 67 | 17 |
| 21,880 | 6  | 2 | 45 | 6  | 3 | 1 | 12 | 9  | 66 | 18 |
| 21,881 | 8  | 2 | 58 | 7  | 5 | 1 | 19 | 7  | 90 | 17 |
| 21,882 | 10 | 2 | 60 | 6  | 5 | 1 | 19 | 7  | 94 | 16 |

|        |    |   |    |    |   |   |    |    |     |    |
|--------|----|---|----|----|---|---|----|----|-----|----|
| 21,883 | 10 | 2 | 60 | 6  | 5 | 1 | 19 | 7  | 94  | 16 |
| 21,884 | 13 | 2 | 66 | 6  | 5 | 1 | 25 | 7  | 109 | 16 |
| 21,885 | 14 | 2 | 90 | 6  | 7 | 1 | 33 | 7  | 144 | 16 |
| 21,886 | 14 | 2 | 90 | 6  | 7 | 1 | 33 | 7  | 144 | 16 |
| 21,887 | 17 | 2 | 93 | 6  | 8 | 1 | 38 | 7  | 156 | 16 |
| 21,888 | 17 | 2 | 93 | 6  | 8 | 1 | 38 | 8  | 156 | 17 |
| 21,889 | 17 | 1 | 94 | 6  | 8 | 1 | 38 | 8  | 157 | 16 |
| 21,890 | 17 | 1 | 95 | 6  | 7 | 1 | 38 | 8  | 157 | 16 |
| 21,891 | 17 | 1 | 95 | 6  | 7 | 1 | 38 | 8  | 157 | 16 |
| 21,892 | 17 | 1 | 95 | 6  | 7 | 1 | 37 | 7  | 156 | 15 |
| 21,893 | 17 | 1 | 95 | 6  | 7 | 2 | 37 | 11 | 156 | 20 |
| 21,894 | 17 | 1 | 95 | 7  | 7 | 2 | 37 | 11 | 156 | 21 |
| 21,895 | 17 | 1 | 95 | 9  | 7 | 2 | 37 | 11 | 156 | 23 |
| 21,896 | 17 | 1 | 94 | 9  | 7 | 2 | 37 | 10 | 155 | 22 |
| 21,897 | 17 | 2 | 94 | 10 | 7 | 2 | 37 | 12 | 155 | 26 |
| 21,898 | 17 | 2 | 96 | 10 | 7 | 2 | 38 | 13 | 158 | 27 |
| 21,899 | 17 | 2 | 96 | 10 | 7 | 2 | 37 | 13 | 157 | 27 |
| 21,900 | 17 | 2 | 96 | 11 | 7 | 2 | 37 | 13 | 157 | 28 |
| 21,901 | 17 | 2 | 97 | 11 | 7 | 2 | 42 | 13 | 163 | 28 |
| 21,902 | 17 | 2 | 97 | 11 | 7 | 2 | 42 | 13 | 163 | 28 |
| 21,903 | 17 | 2 | 98 | 11 | 8 | 2 | 44 | 13 | 167 | 28 |
| 21,904 | 17 | 2 | 93 | 12 | 7 | 2 | 44 | 13 | 161 | 29 |
| 21,905 | 17 | 2 | 93 | 12 | 7 | 2 | 44 | 13 | 161 | 29 |
| 21,906 | 17 | 2 | 92 | 12 | 7 | 2 | 46 | 12 | 162 | 28 |
| 21,907 | 17 | 1 | 92 | 11 | 7 | 2 | 46 | 11 | 162 | 25 |
| 21,908 | 17 | 1 | 92 | 11 | 7 | 2 | 48 | 11 | 164 | 25 |
| 21,909 | 16 | 1 | 86 | 11 | 7 | 2 | 47 | 11 | 156 | 25 |
| 21,910 | 16 | 1 | 86 | 11 | 7 | 2 | 47 | 11 | 156 | 25 |
| 21,911 | 16 | 1 | 84 | 11 | 7 | 2 | 49 | 11 | 156 | 25 |
| 21,912 | 15 | 1 | 83 | 11 | 8 | 2 | 49 | 11 | 155 | 25 |
| 21,913 | 15 | 1 | 83 | 11 | 8 | 2 | 50 | 12 | 156 | 26 |
| 21,914 | 15 | 1 | 75 | 11 | 8 | 2 | 48 | 12 | 146 | 26 |
| 21,915 | 15 | 1 | 75 | 11 | 8 | 2 | 48 | 12 | 146 | 26 |
| 21,916 | 15 | 1 | 72 | 11 | 8 | 2 | 48 | 12 | 143 | 26 |
| 21,917 | 15 | 1 | 74 | 10 | 7 | 2 | 49 | 12 | 145 | 25 |
| 21,918 | 15 | 1 | 74 | 10 | 7 | 2 | 49 | 12 | 145 | 25 |
| 21,919 | 15 | 1 | 74 | 10 | 7 | 2 | 49 | 12 | 145 | 25 |
| 21,920 | 15 | 1 | 71 | 10 | 7 | 2 | 49 | 12 | 142 | 25 |
| 21,921 | 14 | 1 | 70 | 10 | 7 | 2 | 48 | 12 | 139 | 25 |
| 21,922 | 14 | 1 | 70 | 10 | 7 | 3 | 48 | 12 | 139 | 26 |
| 21,923 | 14 | 1 | 69 | 10 | 7 | 3 | 48 | 12 | 138 | 26 |

|        |    |   |     |    |   |   |     |    |     |    |
|--------|----|---|-----|----|---|---|-----|----|-----|----|
| 21,924 | 13 | 1 | 67  | 10 | 7 | 3 | 49  | 12 | 136 | 26 |
| 21,925 | 13 | 1 | 67  | 10 | 7 | 2 | 49  | 11 | 136 | 24 |
| 21,926 | 13 | 1 | 67  | 10 | 7 | 2 | 49  | 11 | 136 | 24 |
| 21,927 | 11 | 1 | 63  | 10 | 7 | 2 | 45  | 11 | 126 | 24 |
| 21,928 | 11 | 2 | 62  | 10 | 7 | 2 | 44  | 11 | 124 | 25 |
| 21,929 | 11 | 2 | 63  | 10 | 7 | 2 | 43  | 12 | 124 | 26 |
| 21,930 | 11 | 3 | 65  | 10 | 7 | 3 | 43  | 12 | 126 | 28 |
| 21,931 | 11 | 5 | 62  | 23 | 5 | 3 | 40  | 14 | 118 | 45 |
| 21,932 | 10 | 5 | 57  | 32 | 5 | 3 | 37  | 15 | 109 | 55 |
| 21,933 | 11 | 5 | 61  | 31 | 6 | 3 | 57  | 15 | 135 | 54 |
| 21,934 | 9  | 5 | 57  | 32 | 6 | 3 | 53  | 17 | 125 | 57 |
| 21,935 | 9  | 5 | 51  | 32 | 6 | 3 | 51  | 18 | 117 | 58 |
| 21,936 | 8  | 5 | 33  | 33 | 4 | 3 | 45  | 18 | 90  | 59 |
| 21,937 | 6  | 5 | 62  | 35 | 8 | 3 | 63  | 20 | 139 | 63 |
| 21,938 | 6  | 5 | 62  | 35 | 8 | 3 | 64  | 20 | 140 | 63 |
| 21,939 | 7  | 5 | 64  | 37 | 8 | 3 | 68  | 19 | 147 | 64 |
| 21,940 | 7  | 5 | 64  | 37 | 8 | 3 | 68  | 19 | 147 | 64 |
| 21,941 | 7  | 5 | 63  | 37 | 8 | 3 | 68  | 19 | 146 | 64 |
| 21,942 | 7  | 5 | 63  | 37 | 8 | 3 | 68  | 19 | 146 | 64 |
| 21,943 | 8  | 5 | 64  | 37 | 8 | 3 | 69  | 19 | 149 | 64 |
| 21,944 | 8  | 5 | 64  | 37 | 8 | 2 | 69  | 15 | 149 | 59 |
| 21,945 | 8  | 5 | 64  | 36 | 8 | 2 | 69  | 15 | 149 | 58 |
| 21,946 | 8  | 5 | 67  | 34 | 8 | 2 | 70  | 14 | 153 | 55 |
| 21,947 | 8  | 5 | 71  | 34 | 8 | 2 | 76  | 14 | 163 | 55 |
| 21,948 | 8  | 4 | 71  | 33 | 8 | 2 | 78  | 12 | 165 | 51 |
| 21,949 | 8  | 4 | 69  | 33 | 8 | 2 | 77  | 11 | 162 | 50 |
| 21,950 | 9  | 4 | 80  | 33 | 8 | 2 | 81  | 11 | 178 | 50 |
| 21,951 | 9  | 4 | 87  | 32 | 8 | 2 | 82  | 11 | 186 | 49 |
| 21,952 | 9  | 4 | 93  | 31 | 8 | 2 | 88  | 11 | 198 | 48 |
| 21,953 | 9  | 4 | 105 | 31 | 8 | 2 | 96  | 11 | 218 | 48 |
| 21,954 | 9  | 4 | 107 | 31 | 7 | 2 | 100 | 11 | 223 | 48 |
| 21,955 | 9  | 4 | 118 | 31 | 8 | 2 | 106 | 11 | 241 | 48 |
| 21,956 | 9  | 4 | 117 | 31 | 8 | 2 | 106 | 11 | 240 | 48 |
| 21,957 | 9  | 4 | 118 | 31 | 8 | 2 | 104 | 11 | 239 | 48 |
| 21,958 | 9  | 4 | 118 | 31 | 8 | 2 | 104 | 12 | 239 | 49 |
| 21,959 | 9  | 5 | 119 | 31 | 8 | 2 | 102 | 12 | 238 | 50 |
| 21,960 | 9  | 5 | 119 | 31 | 8 | 2 | 102 | 12 | 238 | 50 |
| 21,961 | 9  | 5 | 120 | 31 | 8 | 2 | 102 | 12 | 239 | 50 |
| 21,962 | 9  | 5 | 120 | 31 | 8 | 2 | 102 | 12 | 239 | 50 |
| 21,963 | 9  | 5 | 120 | 31 | 7 | 2 | 102 | 13 | 238 | 51 |
| 21,964 | 9  | 6 | 120 | 32 | 7 | 2 | 101 | 13 | 237 | 53 |



|        |    |    |     |     |   |   |     |    |     |     |
|--------|----|----|-----|-----|---|---|-----|----|-----|-----|
| 21,965 | 9  | 6  | 120 | 32  | 7 | 2 | 101 | 13 | 237 | 53  |
| 21,966 | 10 | 6  | 121 | 32  | 7 | 2 | 106 | 13 | 244 | 53  |
| 21,967 | 10 | 6  | 121 | 32  | 7 | 2 | 106 | 14 | 244 | 54  |
| 21,968 | 10 | 6  | 119 | 32  | 7 | 2 | 105 | 14 | 241 | 54  |
| 21,969 | 10 | 6  | 119 | 32  | 7 | 2 | 105 | 14 | 241 | 54  |
| 21,970 | 10 | 6  | 119 | 32  | 7 | 2 | 105 | 14 | 241 | 54  |
| 21,971 | 10 | 6  | 119 | 32  | 7 | 2 | 105 | 14 | 241 | 54  |
| 21,972 | 10 | 6  | 119 | 32  | 7 | 1 | 105 | 14 | 241 | 53  |
| 21,973 | 10 | 6  | 119 | 32  | 7 | 1 | 106 | 14 | 242 | 53  |
| 21,974 | 10 | 6  | 119 | 32  | 7 | 1 | 105 | 14 | 241 | 53  |
| 21,975 | 10 | 6  | 119 | 32  | 7 | 1 | 105 | 14 | 241 | 53  |
| 21,976 | 10 | 6  | 118 | 33  | 7 | 1 | 105 | 14 | 240 | 54  |
| 21,977 | 10 | 6  | 118 | 33  | 7 | 1 | 107 | 14 | 242 | 54  |
| 21,978 | 10 | 6  | 118 | 33  | 7 | 1 | 107 | 14 | 242 | 54  |
| 21,979 | 10 | 5  | 117 | 34  | 8 | 1 | 107 | 14 | 242 | 54  |
| 21,980 | 10 | 5  | 116 | 34  | 8 | 1 | 108 | 13 | 242 | 53  |
| 21,981 | 10 | 3  | 114 | 19  | 8 | 0 | 108 | 11 | 240 | 33  |
| 21,982 | 10 | 5  | 114 | 33  | 8 | 0 | 108 | 23 | 240 | 61  |
| 21,983 | 14 | 5  | 113 | 26  | 8 | 1 | 120 | 24 | 255 | 56  |
| 21,984 | 11 | 5  | 107 | 39  | 7 | 1 | 100 | 26 | 225 | 71  |
| 21,985 | 10 | 7  | 105 | 60  | 7 | 3 | 98  | 38 | 220 | 108 |
| 21,986 | 15 | 8  | 88  | 67  | 5 | 4 | 108 | 44 | 216 | 123 |
| 21,987 | 15 | 8  | 85  | 66  | 3 | 4 | 102 | 45 | 205 | 123 |
| 21,988 | 15 | 8  | 76  | 64  | 3 | 4 | 97  | 43 | 191 | 119 |
| 21,989 | 14 | 11 | 96  | 82  | 3 | 5 | 102 | 46 | 215 | 144 |
| 21,990 | 14 | 11 | 96  | 89  | 3 | 5 | 102 | 47 | 215 | 152 |
| 21,991 | 14 | 11 | 96  | 89  | 3 | 5 | 104 | 47 | 217 | 152 |
| 21,992 | 14 | 11 | 96  | 90  | 3 | 5 | 104 | 47 | 217 | 153 |
| 21,993 | 14 | 11 | 96  | 91  | 3 | 5 | 104 | 47 | 217 | 154 |
| 21,994 | 13 | 11 | 96  | 92  | 3 | 5 | 103 | 47 | 215 | 155 |
| 21,995 | 13 | 11 | 94  | 92  | 3 | 5 | 102 | 47 | 212 | 155 |
| 21,996 | 13 | 11 | 93  | 92  | 3 | 5 | 102 | 47 | 211 | 155 |
| 21,997 | 13 | 12 | 89  | 93  | 3 | 5 | 96  | 48 | 201 | 158 |
| 21,998 | 14 | 12 | 104 | 94  | 4 | 5 | 106 | 48 | 228 | 159 |
| 21,999 | 15 | 12 | 107 | 94  | 4 | 5 | 104 | 51 | 230 | 162 |
| 22,000 | 15 | 12 | 109 | 95  | 4 | 5 | 104 | 55 | 232 | 167 |
| 22,001 | 14 | 12 | 101 | 96  | 4 | 5 | 101 | 55 | 220 | 168 |
| 22,002 | 14 | 12 | 95  | 97  | 4 | 5 | 96  | 56 | 209 | 170 |
| 22,003 | 14 | 12 | 93  | 99  | 6 | 5 | 97  | 57 | 210 | 173 |
| 22,004 | 14 | 12 | 81  | 100 | 6 | 5 | 89  | 57 | 190 | 174 |
| 22,005 | 14 | 12 | 78  | 100 | 6 | 5 | 83  | 57 | 181 | 174 |

|        |    |    |    |     |   |   |    |    |     |     |
|--------|----|----|----|-----|---|---|----|----|-----|-----|
| 22,006 | 14 | 12 | 69 | 100 | 5 | 5 | 77 | 57 | 165 | 174 |
| 22,007 | 14 | 12 | 70 | 100 | 5 | 5 | 78 | 57 | 167 | 174 |
| 22,008 | 14 | 12 | 70 | 100 | 5 | 5 | 80 | 56 | 169 | 173 |
| 22,009 | 14 | 12 | 70 | 100 | 5 | 5 | 80 | 56 | 169 | 173 |
| 22,010 | 14 | 11 | 71 | 101 | 5 | 5 | 83 | 56 | 173 | 173 |
| 22,011 | 14 | 11 | 71 | 102 | 5 | 5 | 82 | 56 | 172 | 174 |
| 22,012 | 14 | 11 | 69 | 102 | 5 | 5 | 81 | 57 | 169 | 175 |
| 22,013 | 14 | 11 | 69 | 102 | 5 | 5 | 81 | 57 | 169 | 175 |
| 22,014 | 14 | 11 | 70 | 102 | 5 | 5 | 81 | 55 | 170 | 173 |
| 22,015 | 13 | 10 | 69 | 101 | 5 | 5 | 76 | 55 | 163 | 171 |
| 22,016 | 13 | 10 | 71 | 101 | 5 | 5 | 76 | 55 | 165 | 171 |
| 22,017 | 13 | 10 | 71 | 101 | 5 | 5 | 76 | 56 | 165 | 172 |
| 22,018 | 13 | 10 | 71 | 101 | 5 | 5 | 76 | 55 | 165 | 171 |
| 22,019 | 13 | 10 | 71 | 101 | 5 | 5 | 76 | 55 | 165 | 171 |
| 22,020 | 13 | 10 | 71 | 101 | 5 | 5 | 76 | 55 | 165 | 171 |
| 22,021 | 13 | 10 | 71 | 101 | 5 | 5 | 79 | 55 | 168 | 171 |
| 22,022 | 13 | 10 | 71 | 101 | 5 | 5 | 79 | 55 | 168 | 171 |
| 22,023 | 13 | 10 | 71 | 101 | 5 | 5 | 79 | 55 | 168 | 171 |
| 22,024 | 13 | 10 | 71 | 101 | 5 | 5 | 78 | 55 | 167 | 171 |
| 22,025 | 13 | 10 | 71 | 101 | 5 | 5 | 78 | 55 | 167 | 171 |
| 22,026 | 13 | 10 | 71 | 101 | 5 | 5 | 78 | 55 | 167 | 171 |
| 22,027 | 13 | 10 | 71 | 100 | 5 | 5 | 78 | 55 | 167 | 170 |
| 22,028 | 13 | 10 | 72 | 100 | 5 | 5 | 76 | 55 | 166 | 170 |
| 22,029 | 13 | 10 | 72 | 99  | 4 | 5 | 76 | 55 | 165 | 169 |
| 22,030 | 13 | 10 | 72 | 98  | 4 | 5 | 76 | 55 | 165 | 168 |
| 22,031 | 13 | 9  | 70 | 98  | 4 | 5 | 75 | 53 | 162 | 165 |
| 22,032 | 13 | 9  | 70 | 103 | 4 | 5 | 75 | 57 | 162 | 174 |
| 22,033 | 12 | 7  | 69 | 89  | 4 | 5 | 74 | 49 | 159 | 150 |
| 22,034 | 8  | 7  | 66 | 88  | 4 | 4 | 62 | 48 | 140 | 147 |
| 22,035 | 8  | 4  | 66 | 46  | 4 | 1 | 62 | 25 | 140 | 76  |
| 22,036 | 8  | 4  | 66 | 46  | 4 | 1 | 62 | 25 | 140 | 76  |
| 22,037 | 2  | 5  | 63 | 48  | 3 | 1 | 39 | 27 | 107 | 81  |
| 22,038 | 2  | 5  | 41 | 48  | 3 | 1 | 30 | 26 | 76  | 80  |
| 22,039 | 2  | 5  | 40 | 48  | 3 | 1 | 28 | 26 | 73  | 80  |
| 22,040 | 2  | 2  | 40 | 30  | 3 | 0 | 29 | 23 | 74  | 55  |
| 22,041 | 2  | 3  | 41 | 22  | 4 | 0 | 31 | 22 | 78  | 47  |
| 22,042 | 2  | 3  | 41 | 22  | 4 | 0 | 31 | 22 | 78  | 47  |
| 22,043 | 2  | 3  | 41 | 21  | 4 | 0 | 31 | 22 | 78  | 46  |
| 22,044 | 2  | 3  | 41 | 20  | 4 | 0 | 31 | 22 | 78  | 45  |
| 22,045 | 2  | 3  | 43 | 19  | 4 | 0 | 33 | 22 | 82  | 44  |
| 22,046 | 5  | 3  | 44 | 19  | 4 | 0 | 35 | 22 | 88  | 44  |

|        |   |   |    |    |   |   |    |    |    |    |
|--------|---|---|----|----|---|---|----|----|----|----|
| 22,047 | 5 | 2 | 45 | 18 | 4 | 0 | 34 | 21 | 88 | 41 |
| 22,048 | 5 | 2 | 48 | 18 | 4 | 0 | 34 | 21 | 91 | 41 |
| 22,049 | 4 | 2 | 34 | 17 | 3 | 0 | 25 | 20 | 66 | 39 |
| 22,050 | 4 | 2 | 36 | 17 | 3 | 0 | 25 | 18 | 68 | 37 |
| 22,051 | 4 | 2 | 34 | 16 | 3 | 0 | 25 | 14 | 66 | 32 |
| 22,052 | 4 | 2 | 31 | 14 | 3 | 0 | 25 | 13 | 63 | 29 |
| 22,053 | 4 | 2 | 29 | 14 | 3 | 0 | 25 | 13 | 61 | 29 |
| 22,054 | 4 | 2 | 25 | 11 | 1 | 0 | 18 | 12 | 48 | 25 |
| 22,055 | 4 | 2 | 25 | 11 | 1 | 0 | 18 | 12 | 48 | 25 |
| 22,056 | 4 | 2 | 23 | 11 | 1 | 0 | 19 | 12 | 47 | 25 |
| 22,057 | 4 | 2 | 22 | 11 | 1 | 0 | 18 | 12 | 45 | 25 |
| 22,058 | 4 | 2 | 24 | 11 | 1 | 0 | 17 | 12 | 46 | 25 |
| 22,059 | 4 | 2 | 26 | 11 | 1 | 0 | 19 | 12 | 50 | 25 |
| 22,060 | 4 | 2 | 24 | 11 | 1 | 0 | 16 | 12 | 45 | 25 |
| 22,061 | 6 | 2 | 25 | 10 | 1 | 0 | 16 | 12 | 48 | 24 |
| 22,062 | 6 | 2 | 25 | 9  | 1 | 0 | 16 | 12 | 48 | 23 |
| 22,063 | 6 | 2 | 25 | 9  | 1 | 0 | 17 | 11 | 49 | 22 |
| 22,064 | 6 | 2 | 27 | 9  | 1 | 0 | 18 | 11 | 52 | 22 |
| 22,065 | 6 | 2 | 26 | 9  | 1 | 0 | 18 | 11 | 51 | 22 |
| 22,066 | 6 | 2 | 26 | 9  | 1 | 0 | 18 | 12 | 51 | 23 |
| 22,067 | 6 | 2 | 24 | 10 | 1 | 0 | 18 | 12 | 49 | 24 |
| 22,068 | 6 | 2 | 24 | 10 | 1 | 0 | 18 | 12 | 49 | 24 |
| 22,069 | 6 | 2 | 24 | 12 | 1 | 0 | 18 | 12 | 49 | 26 |
| 22,070 | 6 | 2 | 24 | 14 | 1 | 0 | 18 | 12 | 49 | 28 |
| 22,071 | 6 | 2 | 24 | 15 | 1 | 0 | 19 | 14 | 50 | 31 |
| 22,072 | 6 | 2 | 24 | 20 | 1 | 0 | 16 | 14 | 47 | 36 |
| 22,073 | 6 | 2 | 24 | 21 | 1 | 0 | 16 | 14 | 47 | 37 |
| 22,074 | 6 | 2 | 24 | 21 | 1 | 0 | 16 | 14 | 47 | 37 |
| 22,075 | 6 | 2 | 27 | 21 | 1 | 0 | 17 | 14 | 51 | 37 |
| 22,076 | 6 | 2 | 27 | 24 | 1 | 0 | 18 | 14 | 52 | 40 |
| 22,077 | 6 | 2 | 27 | 26 | 1 | 0 | 18 | 15 | 52 | 43 |
| 22,078 | 6 | 2 | 26 | 26 | 1 | 0 | 18 | 15 | 51 | 43 |
| 22,079 | 6 | 2 | 26 | 26 | 1 | 0 | 18 | 14 | 51 | 42 |
| 22,080 | 6 | 2 | 26 | 27 | 1 | 0 | 18 | 14 | 51 | 43 |
| 22,081 | 6 | 2 | 26 | 28 | 1 | 0 | 18 | 14 | 51 | 44 |
| 22,082 | 6 | 2 | 26 | 28 | 1 | 0 | 18 | 14 | 51 | 44 |
| 22,083 | 6 | 2 | 26 | 23 | 1 | 0 | 18 | 10 | 51 | 35 |
| 22,084 | 6 | 2 | 26 | 24 | 1 | 0 | 18 | 8  | 51 | 34 |
| 22,085 | 6 | 2 | 26 | 23 | 2 | 0 | 18 | 7  | 52 | 32 |
| 22,086 | 6 | 2 | 26 | 24 | 2 | 0 | 18 | 8  | 52 | 34 |
| 22,087 | 6 | 2 | 26 | 24 | 2 | 0 | 18 | 8  | 52 | 34 |

|        |    |   |     |    |    |   |     |    |     |    |
|--------|----|---|-----|----|----|---|-----|----|-----|----|
| 22,088 | 6  | 1 | 27  | 22 | 2  | 0 | 18  | 6  | 53  | 29 |
| 22,089 | 10 | 1 | 37  | 22 | 2  | 0 | 32  | 7  | 81  | 30 |
| 22,090 | 10 | 1 | 38  | 22 | 2  | 0 | 32  | 7  | 82  | 30 |
| 22,091 | 10 | 1 | 38  | 22 | 2  | 0 | 32  | 8  | 82  | 31 |
| 22,092 | 10 | 0 | 38  | 21 | 1  | 0 | 30  | 8  | 79  | 29 |
| 22,093 | 10 | 0 | 38  | 21 | 1  | 0 | 30  | 8  | 79  | 29 |
| 22,094 | 14 | 0 | 52  | 21 | 1  | 0 | 34  | 8  | 101 | 29 |
| 22,095 | 14 | 0 | 53  | 21 | 1  | 0 | 33  | 8  | 101 | 29 |
| 22,096 | 14 | 0 | 50  | 21 | 1  | 0 | 32  | 9  | 97  | 30 |
| 22,097 | 28 | 0 | 214 | 21 | 12 | 0 | 122 | 9  | 376 | 30 |
| 22,098 | 28 | 0 | 212 | 24 | 12 | 0 | 122 | 12 | 374 | 36 |
| 22,099 | 32 | 0 | 240 | 25 | 15 | 0 | 140 | 12 | 427 | 37 |
| 22,100 | 33 | 0 | 244 | 25 | 15 | 0 | 141 | 13 | 433 | 38 |
| 22,101 | 32 | 0 | 242 | 25 | 16 | 0 | 143 | 13 | 433 | 38 |
| 22,102 | 33 | 0 | 268 | 26 | 20 | 1 | 185 | 13 | 506 | 40 |
| 22,103 | 33 | 0 | 295 | 26 | 24 | 1 | 195 | 13 | 547 | 40 |
| 22,104 | 33 | 0 | 295 | 26 | 24 | 1 | 195 | 13 | 547 | 40 |
| 22,105 | 33 | 0 | 295 | 26 | 24 | 1 | 195 | 13 | 547 | 40 |
| 22,106 | 34 | 0 | 295 | 27 | 24 | 2 | 195 | 13 | 548 | 42 |
| 22,107 | 34 | 0 | 295 | 27 | 24 | 2 | 194 | 13 | 547 | 42 |
| 22,108 | 37 | 0 | 300 | 28 | 24 | 2 | 196 | 13 | 557 | 43 |
| 22,109 | 37 | 1 | 302 | 32 | 24 | 2 | 197 | 13 | 560 | 48 |
| 22,110 | 37 | 1 | 301 | 32 | 24 | 2 | 194 | 14 | 556 | 49 |
| 22,111 | 35 | 1 | 300 | 32 | 24 | 2 | 194 | 14 | 553 | 49 |
| 22,112 | 35 | 1 | 300 | 32 | 25 | 2 | 195 | 14 | 555 | 49 |
| 22,113 | 35 | 1 | 301 | 32 | 25 | 2 | 195 | 14 | 556 | 49 |
| 22,114 | 35 | 1 | 300 | 33 | 25 | 2 | 194 | 14 | 554 | 50 |
| 22,115 | 35 | 1 | 299 | 33 | 24 | 2 | 194 | 14 | 552 | 50 |
| 22,116 | 35 | 1 | 301 | 34 | 25 | 2 | 195 | 14 | 556 | 51 |
| 22,117 | 35 | 1 | 301 | 34 | 25 | 2 | 197 | 13 | 558 | 50 |
| 22,118 | 35 | 1 | 303 | 33 | 26 | 2 | 197 | 12 | 561 | 48 |
| 22,119 | 35 | 1 | 303 | 33 | 26 | 2 | 197 | 12 | 561 | 48 |
| 22,120 | 35 | 1 | 303 | 29 | 26 | 2 | 197 | 12 | 561 | 44 |
| 22,121 | 35 | 1 | 303 | 29 | 26 | 2 | 197 | 12 | 561 | 44 |
| 22,122 | 35 | 1 | 303 | 28 | 26 | 2 | 196 | 10 | 560 | 41 |
| 22,123 | 35 | 1 | 303 | 24 | 26 | 2 | 196 | 10 | 560 | 37 |
| 22,124 | 35 | 1 | 303 | 23 | 26 | 2 | 196 | 10 | 560 | 36 |
| 22,125 | 35 | 1 | 304 | 23 | 26 | 2 | 200 | 10 | 565 | 36 |
| 22,126 | 35 | 1 | 301 | 24 | 26 | 2 | 200 | 10 | 562 | 37 |
| 22,127 | 36 | 1 | 304 | 21 | 26 | 2 | 204 | 10 | 570 | 34 |
| 22,128 | 36 | 1 | 304 | 22 | 26 | 2 | 204 | 9  | 570 | 34 |

|        |    |   |     |    |    |   |     |    |     |    |
|--------|----|---|-----|----|----|---|-----|----|-----|----|
| 22,129 | 36 | 1 | 308 | 22 | 26 | 2 | 206 | 10 | 576 | 35 |
| 22,130 | 36 | 1 | 308 | 22 | 26 | 2 | 206 | 10 | 576 | 35 |
| 22,131 | 36 | 2 | 308 | 21 | 27 | 2 | 206 | 10 | 577 | 35 |
| 22,132 | 36 | 2 | 309 | 22 | 27 | 2 | 206 | 10 | 578 | 36 |
| 22,133 | 36 | 2 | 309 | 22 | 27 | 2 | 206 | 10 | 578 | 36 |
| 22,134 | 36 | 2 | 309 | 27 | 27 | 2 | 206 | 11 | 578 | 42 |
| 22,135 | 36 | 2 | 309 | 29 | 27 | 2 | 206 | 14 | 578 | 47 |
| 22,136 | 36 | 2 | 309 | 34 | 26 | 2 | 206 | 15 | 577 | 53 |
| 22,137 | 36 | 2 | 312 | 33 | 26 | 2 | 206 | 14 | 580 | 51 |
| 22,138 | 36 | 2 | 313 | 33 | 26 | 2 | 206 | 13 | 581 | 50 |
| 22,139 | 38 | 2 | 322 | 33 | 26 | 2 | 209 | 13 | 595 | 50 |
| 22,140 | 34 | 2 | 321 | 33 | 27 | 2 | 198 | 13 | 580 | 50 |
| 22,141 | 35 | 2 | 349 | 33 | 28 | 2 | 207 | 12 | 619 | 49 |
| 22,142 | 35 | 2 | 349 | 33 | 28 | 2 | 207 | 12 | 619 | 49 |
| 22,143 | 35 | 2 | 352 | 33 | 28 | 2 | 210 | 12 | 625 | 49 |
| 22,144 | 35 | 2 | 352 | 34 | 28 | 2 | 210 | 12 | 625 | 50 |
| 22,145 | 31 | 2 | 342 | 35 | 28 | 2 | 206 | 12 | 607 | 51 |
| 22,146 | 31 | 2 | 342 | 44 | 28 | 2 | 206 | 12 | 607 | 60 |
| 22,147 | 14 | 2 | 192 | 45 | 17 | 2 | 122 | 11 | 345 | 60 |
| 22,148 | 14 | 2 | 188 | 45 | 17 | 2 | 115 | 11 | 334 | 60 |
| 22,149 | 11 | 2 | 167 | 44 | 14 | 2 | 106 | 8  | 298 | 56 |
| 22,150 | 11 | 2 | 173 | 43 | 14 | 2 | 100 | 9  | 298 | 56 |
| 22,151 | 10 | 2 | 171 | 43 | 14 | 2 | 100 | 9  | 295 | 56 |
| 22,152 | 10 | 2 | 168 | 43 | 14 | 2 | 98  | 9  | 290 | 56 |
| 22,153 | 9  | 2 | 147 | 42 | 9  | 1 | 58  | 9  | 223 | 54 |
| 22,154 | 9  | 2 | 120 | 43 | 5  | 1 | 46  | 10 | 180 | 56 |
| 22,155 | 9  | 2 | 120 | 43 | 5  | 1 | 46  | 10 | 180 | 56 |
| 22,156 | 9  | 2 | 120 | 43 | 5  | 1 | 46  | 11 | 180 | 57 |
| 22,157 | 8  | 2 | 120 | 42 | 5  | 0 | 46  | 11 | 179 | 55 |
| 22,158 | 7  | 2 | 130 | 44 | 5  | 0 | 54  | 11 | 196 | 57 |
| 22,159 | 7  | 2 | 128 | 43 | 5  | 0 | 53  | 11 | 193 | 56 |
| 22,160 | 7  | 1 | 126 | 39 | 5  | 0 | 54  | 10 | 192 | 50 |
| 22,161 | 7  | 1 | 125 | 39 | 5  | 0 | 54  | 10 | 191 | 50 |
| 22,162 | 7  | 1 | 126 | 39 | 5  | 0 | 54  | 10 | 192 | 50 |
| 22,163 | 7  | 1 | 126 | 39 | 4  | 0 | 53  | 10 | 190 | 50 |
| 22,164 | 7  | 1 | 125 | 38 | 4  | 0 | 52  | 10 | 188 | 49 |
| 22,165 | 7  | 1 | 125 | 38 | 4  | 0 | 52  | 10 | 188 | 49 |
| 22,166 | 7  | 1 | 125 | 37 | 4  | 0 | 51  | 10 | 187 | 48 |
| 22,167 | 7  | 1 | 125 | 37 | 4  | 0 | 49  | 10 | 185 | 48 |
| 22,168 | 7  | 1 | 124 | 37 | 3  | 0 | 49  | 10 | 183 | 48 |
| 22,169 | 7  | 1 | 123 | 37 | 3  | 0 | 49  | 10 | 182 | 48 |

|        |   |   |     |    |   |   |    |    |     |     |
|--------|---|---|-----|----|---|---|----|----|-----|-----|
| 22,170 | 8 | 1 | 123 | 37 | 3 | 0 | 51 | 10 | 185 | 48  |
| 22,171 | 8 | 1 | 125 | 37 | 3 | 0 | 51 | 10 | 187 | 48  |
| 22,172 | 8 | 1 | 125 | 39 | 3 | 0 | 51 | 10 | 187 | 50  |
| 22,173 | 8 | 3 | 125 | 41 | 3 | 0 | 51 | 16 | 187 | 60  |
| 22,174 | 8 | 3 | 125 | 43 | 3 | 0 | 51 | 16 | 187 | 62  |
| 22,175 | 8 | 4 | 124 | 49 | 3 | 0 | 49 | 17 | 184 | 70  |
| 22,176 | 9 | 4 | 124 | 50 | 3 | 0 | 47 | 18 | 183 | 72  |
| 22,177 | 9 | 4 | 123 | 49 | 3 | 2 | 43 | 19 | 178 | 74  |
| 22,178 | 8 | 4 | 122 | 47 | 3 | 2 | 41 | 18 | 174 | 71  |
| 22,179 | 8 | 6 | 122 | 48 | 3 | 2 | 41 | 21 | 174 | 77  |
| 22,180 | 8 | 6 | 118 | 48 | 3 | 2 | 39 | 21 | 168 | 77  |
| 22,181 | 8 | 6 | 118 | 50 | 3 | 2 | 39 | 21 | 168 | 79  |
| 22,182 | 8 | 5 | 118 | 49 | 2 | 2 | 39 | 21 | 167 | 77  |
| 22,183 | 8 | 5 | 117 | 48 | 2 | 2 | 39 | 21 | 166 | 76  |
| 22,184 | 8 | 5 | 117 | 43 | 2 | 2 | 39 | 21 | 166 | 71  |
| 22,185 | 8 | 5 | 117 | 44 | 2 | 2 | 39 | 21 | 166 | 72  |
| 22,186 | 8 | 5 | 117 | 45 | 2 | 2 | 39 | 20 | 166 | 72  |
| 22,187 | 8 | 5 | 118 | 65 | 2 | 2 | 41 | 28 | 169 | 100 |
| 22,188 | 8 | 5 | 115 | 74 | 2 | 2 | 41 | 34 | 166 | 115 |
| 22,189 | 8 | 5 | 114 | 77 | 2 | 2 | 41 | 36 | 165 | 120 |
| 22,190 | 6 | 5 | 109 | 77 | 2 | 2 | 39 | 36 | 156 | 120 |
| 22,191 | 6 | 5 | 100 | 78 | 1 | 2 | 36 | 38 | 143 | 123 |
| 22,192 | 5 | 6 | 71  | 78 | 0 | 2 | 26 | 38 | 102 | 124 |
| 22,193 | 5 | 6 | 68  | 79 | 0 | 2 | 25 | 40 | 98  | 127 |
| 22,194 | 5 | 6 | 67  | 79 | 0 | 2 | 25 | 40 | 97  | 127 |
| 22,195 | 5 | 6 | 67  | 79 | 0 | 2 | 27 | 40 | 99  | 127 |
| 22,196 | 5 | 6 | 66  | 69 | 1 | 2 | 27 | 41 | 99  | 118 |
| 22,197 | 6 | 6 | 79  | 68 | 1 | 2 | 38 | 41 | 124 | 117 |
| 22,198 | 6 | 6 | 82  | 69 | 1 | 2 | 43 | 41 | 132 | 118 |
| 22,199 | 6 | 6 | 71  | 67 | 1 | 2 | 43 | 41 | 121 | 116 |
| 22,200 | 6 | 6 | 70  | 67 | 1 | 2 | 43 | 41 | 120 | 116 |
| 22,201 | 5 | 6 | 57  | 67 | 1 | 2 | 40 | 40 | 103 | 115 |
| 22,202 | 5 | 6 | 55  | 67 | 1 | 2 | 39 | 40 | 100 | 115 |
| 22,203 | 5 | 6 | 55  | 68 | 1 | 2 | 39 | 40 | 100 | 116 |
| 22,204 | 5 | 6 | 51  | 68 | 1 | 2 | 38 | 40 | 95  | 116 |
| 22,205 | 5 | 6 | 44  | 67 | 1 | 2 | 36 | 39 | 86  | 114 |
| 22,206 | 5 | 6 | 42  | 67 | 1 | 2 | 30 | 39 | 78  | 114 |
| 22,207 | 5 | 6 | 47  | 67 | 1 | 2 | 32 | 38 | 85  | 113 |
| 22,208 | 5 | 6 | 48  | 65 | 1 | 2 | 31 | 38 | 85  | 111 |
| 22,209 | 5 | 6 | 46  | 65 | 1 | 2 | 30 | 38 | 82  | 111 |
| 22,210 | 5 | 6 | 45  | 65 | 1 | 2 | 30 | 38 | 81  | 111 |

|        |    |   |     |    |    |   |     |    |     |     |
|--------|----|---|-----|----|----|---|-----|----|-----|-----|
| 22,211 | 5  | 6 | 45  | 65 | 1  | 2 | 30  | 38 | 81  | 111 |
| 22,212 | 5  | 6 | 45  | 65 | 1  | 2 | 30  | 38 | 81  | 111 |
| 22,213 | 5  | 6 | 56  | 65 | 2  | 2 | 50  | 39 | 113 | 112 |
| 22,214 | 5  | 6 | 56  | 65 | 2  | 2 | 50  | 39 | 113 | 112 |
| 22,215 | 5  | 6 | 58  | 66 | 2  | 2 | 50  | 41 | 115 | 115 |
| 22,216 | 5  | 6 | 57  | 66 | 2  | 2 | 50  | 41 | 114 | 115 |
| 22,217 | 5  | 6 | 56  | 66 | 2  | 2 | 50  | 42 | 113 | 116 |
| 22,218 | 5  | 6 | 57  | 66 | 2  | 2 | 52  | 42 | 116 | 116 |
| 22,219 | 5  | 6 | 57  | 66 | 2  | 2 | 52  | 42 | 116 | 116 |
| 22,220 | 4  | 6 | 57  | 66 | 2  | 2 | 50  | 42 | 113 | 116 |
| 22,221 | 4  | 6 | 55  | 66 | 2  | 2 | 50  | 42 | 111 | 116 |
| 22,222 | 4  | 6 | 55  | 66 | 2  | 2 | 50  | 42 | 111 | 116 |
| 22,223 | 4  | 6 | 55  | 64 | 2  | 2 | 50  | 42 | 111 | 114 |
| 22,224 | 4  | 4 | 56  | 62 | 2  | 2 | 50  | 36 | 112 | 104 |
| 22,225 | 4  | 4 | 56  | 59 | 2  | 2 | 50  | 36 | 112 | 101 |
| 22,226 | 4  | 3 | 56  | 52 | 2  | 2 | 50  | 34 | 112 | 91  |
| 22,227 | 3  | 3 | 56  | 52 | 2  | 2 | 50  | 34 | 111 | 91  |
| 22,228 | 4  | 3 | 55  | 52 | 2  | 0 | 50  | 33 | 111 | 88  |
| 22,229 | 5  | 3 | 80  | 51 | 2  | 0 | 54  | 33 | 141 | 87  |
| 22,230 | 6  | 1 | 92  | 50 | 2  | 0 | 61  | 30 | 161 | 81  |
| 22,231 | 6  | 1 | 118 | 48 | 4  | 0 | 72  | 30 | 200 | 79  |
| 22,232 | 8  | 1 | 130 | 48 | 4  | 0 | 83  | 30 | 225 | 79  |
| 22,233 | 9  | 1 | 156 | 48 | 7  | 0 | 104 | 30 | 276 | 79  |
| 22,234 | 9  | 1 | 166 | 48 | 9  | 0 | 117 | 30 | 301 | 79  |
| 22,235 | 9  | 1 | 166 | 48 | 9  | 0 | 117 | 29 | 301 | 78  |
| 22,236 | 9  | 1 | 168 | 47 | 9  | 0 | 118 | 29 | 304 | 77  |
| 22,237 | 9  | 1 | 183 | 43 | 10 | 0 | 124 | 28 | 326 | 72  |
| 22,238 | 9  | 1 | 182 | 18 | 10 | 0 | 122 | 20 | 323 | 39  |
| 22,239 | 9  | 1 | 188 | 6  | 10 | 0 | 123 | 12 | 330 | 19  |
| 22,240 | 9  | 1 | 189 | 6  | 11 | 0 | 123 | 12 | 332 | 19  |
| 22,241 | 9  | 0 | 184 | 5  | 11 | 0 | 122 | 8  | 326 | 13  |
| 22,242 | 9  | 0 | 189 | 5  | 12 | 0 | 124 | 8  | 334 | 13  |
| 22,243 | 9  | 0 | 193 | 5  | 12 | 0 | 122 | 8  | 336 | 13  |
| 22,244 | 9  | 0 | 193 | 6  | 12 | 0 | 122 | 8  | 336 | 14  |
| 22,245 | 9  | 0 | 197 | 6  | 12 | 0 | 121 | 8  | 339 | 14  |
| 22,246 | 10 | 0 | 206 | 7  | 12 | 1 | 122 | 14 | 350 | 22  |
| 22,247 | 10 | 0 | 209 | 7  | 12 | 1 | 124 | 14 | 355 | 22  |
| 22,248 | 10 | 0 | 196 | 7  | 12 | 1 | 113 | 14 | 331 | 22  |
| 22,249 | 10 | 0 | 193 | 6  | 12 | 1 | 108 | 14 | 323 | 21  |
| 22,250 | 10 | 0 | 192 | 6  | 12 | 1 | 107 | 14 | 321 | 21  |
| 22,251 | 10 | 0 | 191 | 6  | 12 | 1 | 107 | 14 | 320 | 21  |

|        |    |   |     |    |    |   |     |    |     |    |
|--------|----|---|-----|----|----|---|-----|----|-----|----|
| 22,252 | 11 | 0 | 191 | 6  | 12 | 1 | 108 | 13 | 322 | 20 |
| 22,253 | 13 | 0 | 203 | 5  | 12 | 1 | 116 | 13 | 344 | 19 |
| 22,254 | 13 | 0 | 203 | 5  | 12 | 1 | 116 | 13 | 344 | 19 |
| 22,255 | 15 | 0 | 209 | 5  | 12 | 1 | 121 | 13 | 357 | 19 |
| 22,256 | 17 | 0 | 212 | 5  | 12 | 1 | 126 | 14 | 367 | 20 |
| 22,257 | 18 | 1 | 231 | 6  | 12 | 1 | 135 | 14 | 396 | 22 |
| 22,258 | 16 | 1 | 230 | 8  | 14 | 1 | 137 | 15 | 397 | 25 |
| 22,259 | 16 | 1 | 226 | 8  | 14 | 1 | 137 | 15 | 393 | 25 |
| 22,260 | 16 | 1 | 226 | 11 | 14 | 1 | 141 | 15 | 397 | 28 |
| 22,261 | 16 | 1 | 226 | 11 | 14 | 1 | 140 | 15 | 396 | 28 |
| 22,262 | 16 | 1 | 221 | 12 | 14 | 1 | 136 | 15 | 387 | 29 |
| 22,263 | 16 | 1 | 221 | 14 | 14 | 1 | 139 | 15 | 390 | 31 |
| 22,264 | 16 | 1 | 226 | 14 | 13 | 1 | 127 | 15 | 382 | 31 |
| 22,265 | 16 | 2 | 224 | 14 | 13 | 1 | 127 | 17 | 380 | 34 |
| 22,266 | 17 | 2 | 232 | 14 | 13 | 1 | 128 | 15 | 390 | 32 |
| 22,267 | 17 | 2 | 232 | 14 | 13 | 1 | 128 | 14 | 390 | 31 |
| 22,268 | 17 | 2 | 233 | 14 | 13 | 1 | 128 | 14 | 391 | 31 |
| 22,269 | 17 | 2 | 232 | 14 | 13 | 1 | 126 | 14 | 388 | 31 |
| 22,270 | 17 | 2 | 232 | 14 | 13 | 1 | 126 | 14 | 388 | 31 |
| 22,271 | 17 | 2 | 232 | 14 | 13 | 1 | 126 | 14 | 388 | 31 |
| 22,272 | 17 | 2 | 232 | 14 | 13 | 1 | 126 | 14 | 388 | 31 |
| 22,273 | 17 | 2 | 232 | 14 | 13 | 1 | 126 | 14 | 388 | 31 |
| 22,274 | 17 | 2 | 232 | 14 | 13 | 1 | 126 | 14 | 388 | 31 |
| 22,275 | 17 | 2 | 232 | 14 | 13 | 1 | 128 | 14 | 390 | 31 |
| 22,276 | 17 | 2 | 232 | 14 | 13 | 1 | 128 | 14 | 390 | 31 |
| 22,277 | 17 | 2 | 232 | 14 | 13 | 1 | 131 | 14 | 393 | 31 |
| 22,278 | 16 | 2 | 232 | 14 | 13 | 1 | 131 | 14 | 392 | 31 |
| 22,279 | 16 | 2 | 231 | 14 | 13 | 2 | 132 | 14 | 392 | 32 |
| 22,280 | 15 | 2 | 210 | 14 | 13 | 2 | 128 | 16 | 366 | 34 |
| 22,281 | 14 | 2 | 198 | 20 | 13 | 2 | 121 | 21 | 346 | 45 |
| 22,282 | 14 | 2 | 173 | 26 | 11 | 3 | 111 | 22 | 309 | 53 |
| 22,283 | 12 | 2 | 161 | 26 | 11 | 3 | 100 | 22 | 284 | 53 |
| 22,284 | 11 | 2 | 135 | 27 | 8  | 3 | 79  | 26 | 233 | 58 |
| 22,285 | 11 | 4 | 126 | 29 | 6  | 3 | 66  | 29 | 209 | 65 |
| 22,286 | 11 | 4 | 124 | 31 | 6  | 3 | 65  | 29 | 206 | 67 |
| 22,287 | 11 | 4 | 116 | 35 | 6  | 4 | 65  | 28 | 198 | 71 |
| 22,288 | 11 | 4 | 110 | 36 | 5  | 4 | 60  | 28 | 186 | 72 |
| 22,289 | 11 | 4 | 110 | 36 | 5  | 4 | 61  | 27 | 187 | 71 |
| 22,290 | 14 | 4 | 114 | 37 | 5  | 4 | 61  | 27 | 194 | 72 |
| 22,291 | 14 | 4 | 113 | 37 | 4  | 4 | 61  | 28 | 192 | 73 |
| 22,292 | 14 | 4 | 114 | 37 | 4  | 4 | 62  | 28 | 194 | 73 |



|        |    |   |     |    |   |   |    |    |     |    |
|--------|----|---|-----|----|---|---|----|----|-----|----|
| 22,293 | 15 | 4 | 116 | 37 | 3 | 4 | 65 | 28 | 199 | 73 |
| 22,294 | 15 | 4 | 111 | 36 | 3 | 4 | 65 | 28 | 194 | 72 |
| 22,295 | 15 | 4 | 111 | 36 | 3 | 4 | 65 | 28 | 194 | 72 |
| 22,296 | 15 | 4 | 107 | 36 | 3 | 4 | 65 | 28 | 190 | 72 |
| 22,297 | 14 | 4 | 96  | 34 | 2 | 3 | 64 | 21 | 176 | 62 |
| 22,298 | 14 | 4 | 93  | 34 | 2 | 3 | 62 | 21 | 171 | 62 |
| 22,299 | 14 | 4 | 94  | 34 | 2 | 3 | 64 | 21 | 174 | 62 |
| 22,300 | 14 | 4 | 95  | 34 | 2 | 3 | 64 | 21 | 175 | 62 |
| 22,301 | 14 | 4 | 95  | 35 | 2 | 3 | 64 | 21 | 175 | 63 |
| 22,302 | 13 | 4 | 95  | 36 | 2 | 3 | 63 | 22 | 173 | 65 |
| 22,303 | 13 | 6 | 94  | 38 | 2 | 3 | 63 | 25 | 172 | 72 |
| 22,304 | 11 | 6 | 83  | 38 | 2 | 3 | 55 | 27 | 151 | 74 |
| 22,305 | 13 | 6 | 81  | 39 | 2 | 3 | 54 | 28 | 150 | 76 |
| 22,306 | 11 | 6 | 76  | 40 | 2 | 3 | 49 | 28 | 138 | 77 |
| 22,307 | 9  | 5 | 72  | 39 | 2 | 3 | 47 | 27 | 130 | 74 |
| 22,308 | 9  | 5 | 53  | 37 | 2 | 3 | 40 | 26 | 104 | 71 |
| 22,309 | 9  | 5 | 50  | 37 | 0 | 3 | 37 | 26 | 96  | 71 |
| 22,310 | 9  | 5 | 50  | 37 | 0 | 3 | 33 | 28 | 92  | 73 |
| 22,311 | 9  | 5 | 50  | 34 | 0 | 3 | 33 | 28 | 92  | 70 |
| 22,312 | 9  | 5 | 53  | 34 | 0 | 3 | 34 | 28 | 96  | 70 |
| 22,313 | 9  | 5 | 53  | 33 | 0 | 3 | 34 | 27 | 96  | 68 |
| 22,314 | 9  | 5 | 53  | 31 | 0 | 3 | 31 | 27 | 93  | 66 |
| 22,315 | 9  | 4 | 41  | 31 | 0 | 3 | 27 | 25 | 77  | 63 |
| 22,316 | 9  | 4 | 41  | 31 | 0 | 3 | 27 | 25 | 77  | 63 |
| 22,317 | 8  | 4 | 33  | 30 | 0 | 3 | 26 | 25 | 67  | 62 |
| 22,318 | 9  | 4 | 34  | 30 | 0 | 3 | 27 | 25 | 70  | 62 |
| 22,319 | 9  | 4 | 36  | 30 | 0 | 3 | 29 | 25 | 74  | 62 |
| 22,320 | 9  | 4 | 36  | 30 | 0 | 3 | 29 | 25 | 74  | 62 |
| 22,321 | 9  | 4 | 36  | 32 | 0 | 3 | 29 | 28 | 74  | 67 |
| 22,322 | 13 | 4 | 41  | 33 | 0 | 3 | 33 | 29 | 87  | 69 |
| 22,323 | 13 | 4 | 41  | 33 | 0 | 3 | 33 | 29 | 87  | 69 |
| 22,324 | 13 | 4 | 41  | 33 | 0 | 3 | 33 | 29 | 87  | 69 |
| 22,325 | 13 | 4 | 41  | 33 | 0 | 3 | 31 | 29 | 85  | 69 |
| 22,326 | 13 | 4 | 43  | 37 | 1 | 3 | 39 | 29 | 96  | 73 |
| 22,327 | 13 | 4 | 43  | 37 | 1 | 3 | 36 | 29 | 93  | 73 |
| 22,328 | 14 | 4 | 50  | 37 | 1 | 3 | 48 | 29 | 113 | 73 |
| 22,329 | 14 | 4 | 50  | 37 | 1 | 3 | 47 | 29 | 112 | 73 |
| 22,330 | 14 | 4 | 50  | 37 | 1 | 2 | 47 | 29 | 112 | 72 |
| 22,331 | 14 | 4 | 53  | 31 | 1 | 2 | 50 | 23 | 118 | 60 |
| 22,332 | 14 | 4 | 53  | 31 | 1 | 2 | 50 | 23 | 118 | 60 |
| 22,333 | 14 | 4 | 52  | 25 | 1 | 1 | 49 | 22 | 116 | 52 |

|        |    |   |    |    |   |   |    |    |     |    |
|--------|----|---|----|----|---|---|----|----|-----|----|
| 22,334 | 14 | 4 | 52 | 24 | 1 | 1 | 50 | 18 | 117 | 47 |
| 22,335 | 14 | 4 | 51 | 24 | 1 | 1 | 50 | 18 | 116 | 47 |
| 22,336 | 14 | 2 | 51 | 22 | 1 | 1 | 50 | 15 | 116 | 40 |
| 22,337 | 14 | 2 | 52 | 16 | 1 | 0 | 50 | 15 | 117 | 33 |
| 22,338 | 14 | 2 | 51 | 16 | 1 | 0 | 49 | 15 | 115 | 33 |
| 22,339 | 14 | 2 | 51 | 15 | 1 | 0 | 49 | 16 | 115 | 33 |
| 22,340 | 14 | 2 | 51 | 15 | 1 | 0 | 48 | 16 | 114 | 33 |
| 22,341 | 11 | 2 | 42 | 13 | 1 | 0 | 47 | 15 | 101 | 30 |
| 22,342 | 12 | 2 | 42 | 13 | 1 | 0 | 47 | 15 | 102 | 30 |
| 22,343 | 12 | 2 | 41 | 13 | 1 | 0 | 46 | 15 | 100 | 30 |
| 22,344 | 11 | 2 | 34 | 13 | 1 | 0 | 41 | 15 | 87  | 30 |
| 22,345 | 11 | 2 | 34 | 13 | 1 | 0 | 41 | 15 | 87  | 30 |
| 22,346 | 11 | 2 | 34 | 13 | 1 | 0 | 41 | 16 | 87  | 31 |
| 22,347 | 11 | 2 | 34 | 13 | 1 | 0 | 41 | 16 | 87  | 31 |
| 22,348 | 11 | 2 | 34 | 13 | 1 | 0 | 41 | 16 | 87  | 31 |
| 22,349 | 11 | 2 | 34 | 13 | 1 | 0 | 39 | 16 | 85  | 31 |
| 22,350 | 11 | 2 | 32 | 13 | 1 | 0 | 39 | 16 | 83  | 31 |
| 22,351 | 11 | 2 | 31 | 13 | 1 | 0 | 39 | 16 | 82  | 31 |
| 22,352 | 11 | 2 | 31 | 12 | 1 | 0 | 39 | 16 | 82  | 30 |
| 22,353 | 11 | 2 | 31 | 11 | 1 | 0 | 39 | 15 | 82  | 28 |
| 22,354 | 11 | 0 | 31 | 9  | 1 | 0 | 39 | 12 | 82  | 21 |
| 22,355 | 11 | 0 | 31 | 9  | 1 | 0 | 39 | 10 | 82  | 19 |
| 22,356 | 10 | 0 | 33 | 8  | 1 | 0 | 39 | 9  | 83  | 17 |
| 22,357 | 10 | 0 | 33 | 8  | 1 | 0 | 39 | 9  | 83  | 17 |
| 22,358 | 11 | 0 | 34 | 8  | 2 | 0 | 36 | 9  | 83  | 17 |
| 22,359 | 12 | 0 | 38 | 8  | 2 | 0 | 41 | 9  | 93  | 17 |
| 22,360 | 12 | 0 | 37 | 8  | 2 | 0 | 40 | 7  | 91  | 15 |
| 22,361 | 12 | 0 | 37 | 8  | 2 | 0 | 39 | 7  | 90  | 15 |
| 22,362 | 12 | 0 | 35 | 8  | 2 | 0 | 39 | 7  | 88  | 15 |
| 22,363 | 12 | 0 | 38 | 8  | 2 | 0 | 39 | 7  | 91  | 15 |
| 22,364 | 12 | 0 | 38 | 8  | 2 | 0 | 39 | 7  | 91  | 15 |
| 22,365 | 12 | 0 | 42 | 8  | 4 | 0 | 41 | 7  | 99  | 15 |
| 22,366 | 12 | 0 | 42 | 8  | 4 | 0 | 41 | 7  | 99  | 15 |
| 22,367 | 12 | 0 | 42 | 8  | 4 | 0 | 41 | 9  | 99  | 17 |
| 22,368 | 11 | 0 | 41 | 8  | 4 | 0 | 40 | 9  | 96  | 17 |
| 22,369 | 11 | 0 | 43 | 8  | 4 | 0 | 40 | 9  | 98  | 17 |
| 22,370 | 11 | 0 | 43 | 8  | 4 | 0 | 40 | 9  | 98  | 17 |
| 22,371 | 11 | 0 | 45 | 6  | 4 | 0 | 40 | 6  | 100 | 12 |
| 22,372 | 11 | 0 | 47 | 6  | 4 | 0 | 42 | 7  | 104 | 13 |
| 22,373 | 9  | 0 | 53 | 6  | 4 | 0 | 39 | 8  | 105 | 14 |
| 22,374 | 9  | 0 | 53 | 6  | 4 | 0 | 39 | 8  | 105 | 14 |

|        |    |   |     |    |   |   |     |    |     |    |
|--------|----|---|-----|----|---|---|-----|----|-----|----|
| 22,375 | 10 | 0 | 73  | 8  | 4 | 0 | 49  | 8  | 136 | 16 |
| 22,376 | 12 | 0 | 75  | 8  | 4 | 0 | 56  | 9  | 147 | 17 |
| 22,377 | 13 | 0 | 85  | 4  | 4 | 0 | 57  | 10 | 159 | 14 |
| 22,378 | 12 | 0 | 82  | 4  | 4 | 0 | 46  | 10 | 144 | 14 |
| 22,379 | 12 | 0 | 81  | 4  | 4 | 0 | 44  | 10 | 141 | 14 |
| 22,380 | 12 | 0 | 80  | 4  | 4 | 0 | 44  | 10 | 140 | 14 |
| 22,381 | 15 | 0 | 96  | 4  | 4 | 0 | 57  | 10 | 172 | 14 |
| 22,382 | 15 | 0 | 96  | 4  | 4 | 0 | 58  | 9  | 173 | 13 |
| 22,383 | 15 | 0 | 96  | 4  | 4 | 0 | 57  | 9  | 172 | 13 |
| 22,384 | 15 | 0 | 97  | 5  | 4 | 0 | 57  | 9  | 173 | 14 |
| 22,385 | 15 | 0 | 97  | 6  | 4 | 0 | 57  | 11 | 173 | 17 |
| 22,386 | 18 | 0 | 97  | 6  | 4 | 0 | 57  | 11 | 176 | 17 |
| 22,387 | 18 | 0 | 97  | 6  | 4 | 0 | 57  | 12 | 176 | 18 |
| 22,388 | 18 | 0 | 100 | 6  | 4 | 0 | 57  | 13 | 179 | 19 |
| 22,389 | 18 | 0 | 101 | 7  | 4 | 0 | 58  | 12 | 181 | 19 |
| 22,390 | 18 | 1 | 102 | 9  | 4 | 1 | 60  | 13 | 184 | 24 |
| 22,391 | 18 | 1 | 101 | 11 | 4 | 1 | 60  | 18 | 183 | 31 |
| 22,392 | 18 | 1 | 102 | 15 | 4 | 1 | 61  | 19 | 185 | 36 |
| 22,393 | 17 | 1 | 102 | 15 | 4 | 1 | 61  | 19 | 184 | 36 |
| 22,394 | 20 | 2 | 120 | 19 | 5 | 4 | 72  | 24 | 217 | 49 |
| 22,395 | 20 | 2 | 120 | 21 | 5 | 4 | 71  | 28 | 216 | 55 |
| 22,396 | 24 | 2 | 174 | 24 | 6 | 4 | 120 | 31 | 324 | 61 |
| 22,397 | 25 | 2 | 191 | 27 | 7 | 4 | 133 | 30 | 356 | 63 |
| 22,398 | 25 | 2 | 192 | 28 | 7 | 4 | 133 | 31 | 357 | 65 |
| 22,399 | 25 | 2 | 192 | 28 | 7 | 4 | 133 | 31 | 357 | 65 |
| 22,400 | 24 | 2 | 192 | 28 | 7 | 4 | 133 | 31 | 356 | 65 |
| 22,401 | 24 | 2 | 192 | 28 | 7 | 4 | 134 | 31 | 357 | 65 |
| 22,402 | 24 | 2 | 192 | 28 | 7 | 4 | 134 | 31 | 357 | 65 |
| 22,403 | 24 | 2 | 192 | 28 | 7 | 4 | 134 | 31 | 357 | 65 |
| 22,404 | 24 | 2 | 192 | 28 | 7 | 4 | 134 | 31 | 356 | 65 |
| 22,405 | 23 | 2 | 192 | 28 | 7 | 4 | 134 | 31 | 356 | 65 |
| 22,406 | 23 | 2 | 192 | 28 | 7 | 4 | 134 | 31 | 356 | 65 |
| 22,407 | 23 | 2 | 192 | 27 | 7 | 4 | 134 | 31 | 356 | 64 |
| 22,408 | 23 | 2 | 191 | 28 | 6 | 4 | 134 | 31 | 354 | 65 |
| 22,409 | 22 | 2 | 190 | 29 | 6 | 4 | 134 | 31 | 352 | 66 |
| 22,410 | 20 | 2 | 186 | 29 | 6 | 4 | 128 | 31 | 340 | 66 |
| 22,411 | 20 | 2 | 186 | 29 | 6 | 4 | 128 | 31 | 340 | 66 |
| 22,412 | 20 | 2 | 185 | 29 | 6 | 4 | 128 | 31 | 339 | 66 |
| 22,413 | 20 | 2 | 184 | 29 | 6 | 4 | 128 | 31 | 338 | 66 |
| 22,414 | 20 | 2 | 182 | 29 | 6 | 4 | 128 | 31 | 336 | 66 |
| 22,415 | 20 | 3 | 178 | 29 | 4 | 4 | 126 | 31 | 328 | 67 |

|        |    |   |     |    |    |   |     |    |     |    |
|--------|----|---|-----|----|----|---|-----|----|-----|----|
| 22,416 | 20 | 3 | 180 | 29 | 4  | 4 | 127 | 31 | 331 | 67 |
| 22,417 | 20 | 3 | 181 | 29 | 4  | 4 | 128 | 31 | 333 | 67 |
| 22,418 | 20 | 3 | 181 | 29 | 4  | 4 | 128 | 29 | 333 | 65 |
| 22,419 | 21 | 3 | 203 | 29 | 4  | 4 | 129 | 29 | 357 | 65 |
| 22,420 | 21 | 3 | 201 | 29 | 4  | 4 | 128 | 29 | 354 | 65 |
| 22,421 | 21 | 3 | 205 | 29 | 4  | 4 | 132 | 29 | 362 | 65 |
| 22,422 | 22 | 3 | 210 | 29 | 4  | 4 | 132 | 29 | 368 | 65 |
| 22,423 | 22 | 3 | 208 | 29 | 4  | 4 | 130 | 30 | 364 | 66 |
| 22,424 | 20 | 3 | 197 | 28 | 4  | 4 | 129 | 28 | 350 | 63 |
| 22,425 | 20 | 3 | 203 | 27 | 4  | 4 | 137 | 27 | 364 | 61 |
| 22,426 | 19 | 3 | 187 | 27 | 5  | 4 | 136 | 27 | 347 | 61 |
| 22,427 | 19 | 4 | 192 | 27 | 5  | 4 | 135 | 27 | 351 | 62 |
| 22,428 | 18 | 4 | 181 | 28 | 4  | 4 | 126 | 26 | 329 | 62 |
| 22,429 | 18 | 4 | 182 | 28 | 4  | 4 | 127 | 26 | 331 | 62 |
| 22,430 | 18 | 4 | 184 | 28 | 4  | 4 | 127 | 26 | 333 | 62 |
| 22,431 | 28 | 4 | 267 | 29 | 9  | 4 | 209 | 26 | 513 | 63 |
| 22,432 | 25 | 4 | 250 | 29 | 9  | 4 | 203 | 26 | 487 | 63 |
| 22,433 | 25 | 4 | 251 | 29 | 9  | 4 | 208 | 26 | 493 | 63 |
| 22,434 | 31 | 4 | 273 | 28 | 11 | 4 | 236 | 26 | 551 | 62 |
| 22,435 | 32 | 4 | 273 | 27 | 11 | 4 | 236 | 24 | 552 | 59 |
| 22,436 | 32 | 4 | 276 | 27 | 11 | 4 | 244 | 24 | 563 | 59 |
| 22,437 | 30 | 4 | 286 | 27 | 12 | 4 | 265 | 23 | 593 | 58 |
| 22,438 | 30 | 4 | 287 | 27 | 12 | 4 | 267 | 22 | 596 | 57 |
| 22,439 | 31 | 4 | 287 | 26 | 12 | 4 | 287 | 22 | 617 | 56 |
| 22,440 | 31 | 4 | 286 | 26 | 12 | 4 | 287 | 23 | 616 | 57 |
| 22,441 | 31 | 6 | 290 | 31 | 12 | 3 | 289 | 31 | 622 | 71 |
| 22,442 | 31 | 7 | 289 | 32 | 12 | 3 | 289 | 32 | 621 | 74 |
| 22,443 | 31 | 7 | 290 | 30 | 12 | 3 | 289 | 33 | 622 | 73 |
| 22,444 | 30 | 6 | 301 | 26 | 13 | 0 | 305 | 24 | 649 | 56 |
| 22,445 | 29 | 6 | 293 | 26 | 12 | 0 | 302 | 24 | 636 | 56 |
| 22,446 | 25 | 6 | 242 | 26 | 14 | 0 | 256 | 24 | 537 | 56 |
| 22,447 | 24 | 6 | 230 | 21 | 13 | 0 | 243 | 22 | 510 | 49 |
| 22,448 | 24 | 6 | 229 | 21 | 13 | 0 | 243 | 22 | 509 | 49 |
| 22,449 | 24 | 6 | 253 | 20 | 13 | 0 | 265 | 21 | 555 | 47 |
| 22,450 | 24 | 6 | 253 | 20 | 13 | 0 | 265 | 21 | 555 | 47 |
| 22,451 | 25 | 6 | 280 | 20 | 15 | 0 | 289 | 21 | 609 | 47 |
| 22,452 | 25 | 6 | 280 | 20 | 15 | 0 | 288 | 21 | 608 | 47 |
| 22,453 | 25 | 6 | 285 | 20 | 15 | 0 | 298 | 21 | 623 | 47 |
| 22,454 | 25 | 6 | 286 | 20 | 15 | 0 | 300 | 21 | 626 | 47 |
| 22,455 | 25 | 6 | 286 | 21 | 15 | 0 | 302 | 21 | 628 | 48 |
| 22,456 | 25 | 6 | 285 | 21 | 15 | 1 | 303 | 21 | 628 | 49 |

|        |    |   |     |    |    |   |     |    |     |    |
|--------|----|---|-----|----|----|---|-----|----|-----|----|
| 22,457 | 25 | 6 | 284 | 26 | 15 | 1 | 303 | 23 | 627 | 56 |
| 22,458 | 25 | 6 | 286 | 27 | 15 | 1 | 305 | 25 | 631 | 59 |
| 22,459 | 25 | 6 | 286 | 25 | 15 | 1 | 306 | 25 | 632 | 57 |
| 22,460 | 25 | 7 | 286 | 32 | 15 | 1 | 306 | 25 | 632 | 65 |
| 22,461 | 25 | 7 | 287 | 32 | 15 | 1 | 306 | 25 | 633 | 65 |
| 22,462 | 25 | 7 | 290 | 34 | 15 | 1 | 310 | 25 | 640 | 67 |
| 22,463 | 25 | 7 | 290 | 34 | 15 | 1 | 310 | 25 | 640 | 67 |
| 22,464 | 25 | 7 | 290 | 34 | 15 | 1 | 310 | 25 | 640 | 67 |
| 22,465 | 25 | 7 | 290 | 36 | 16 | 1 | 311 | 25 | 642 | 69 |
| 22,466 | 25 | 6 | 288 | 37 | 16 | 1 | 310 | 25 | 639 | 69 |
| 22,467 | 25 | 7 | 287 | 37 | 16 | 1 | 310 | 26 | 638 | 71 |
| 22,468 | 25 | 7 | 287 | 37 | 16 | 1 | 309 | 26 | 637 | 71 |
| 22,469 | 25 | 7 | 269 | 37 | 16 | 1 | 309 | 26 | 619 | 71 |
| 22,470 | 25 | 7 | 267 | 39 | 16 | 1 | 309 | 26 | 617 | 73 |
| 22,471 | 25 | 7 | 263 | 39 | 16 | 1 | 306 | 26 | 610 | 73 |
| 22,472 | 25 | 7 | 262 | 39 | 17 | 1 | 313 | 26 | 617 | 73 |
| 22,473 | 25 | 7 | 271 | 39 | 17 | 1 | 317 | 27 | 630 | 74 |
| 22,474 | 26 | 7 | 264 | 39 | 17 | 1 | 304 | 25 | 611 | 72 |
| 22,475 | 26 | 7 | 267 | 38 | 17 | 1 | 304 | 25 | 614 | 71 |
| 22,476 | 26 | 7 | 272 | 38 | 17 | 1 | 306 | 25 | 621 | 71 |
| 22,477 | 26 | 7 | 272 | 38 | 16 | 1 | 303 | 25 | 617 | 71 |
| 22,478 | 24 | 6 | 264 | 38 | 16 | 1 | 296 | 25 | 600 | 70 |
| 22,479 | 27 | 6 | 291 | 37 | 17 | 1 | 311 | 25 | 646 | 69 |
| 22,480 | 28 | 6 | 289 | 37 | 17 | 1 | 309 | 25 | 643 | 69 |
| 22,481 | 28 | 6 | 290 | 37 | 17 | 1 | 313 | 25 | 648 | 69 |
| 22,482 | 21 | 6 | 210 | 36 | 12 | 1 | 239 | 25 | 482 | 68 |
| 22,483 | 23 | 6 | 241 | 36 | 16 | 1 | 252 | 25 | 532 | 68 |
| 22,484 | 26 | 6 | 274 | 36 | 16 | 1 | 268 | 25 | 584 | 68 |
| 22,485 | 23 | 6 | 284 | 36 | 16 | 1 | 263 | 25 | 586 | 68 |
| 22,486 | 23 | 6 | 283 | 36 | 17 | 1 | 263 | 25 | 586 | 68 |
| 22,487 | 23 | 6 | 280 | 36 | 17 | 1 | 255 | 25 | 575 | 68 |
| 22,488 | 22 | 6 | 269 | 36 | 16 | 1 | 235 | 26 | 542 | 69 |
| 22,489 | 22 | 6 | 267 | 36 | 16 | 1 | 235 | 26 | 540 | 69 |
| 22,490 | 21 | 6 | 263 | 38 | 16 | 1 | 213 | 29 | 513 | 74 |
| 22,491 | 21 | 6 | 262 | 38 | 16 | 1 | 211 | 29 | 510 | 74 |
| 22,492 | 41 | 3 | 411 | 33 | 28 | 1 | 366 | 21 | 846 | 58 |
| 22,493 | 43 | 2 | 434 | 30 | 32 | 2 | 405 | 16 | 914 | 50 |
| 22,494 | 43 | 2 | 434 | 33 | 32 | 2 | 405 | 14 | 914 | 51 |
| 22,495 | 42 | 2 | 415 | 34 | 31 | 2 | 383 | 14 | 871 | 52 |
| 22,496 | 42 | 2 | 417 | 39 | 32 | 2 | 386 | 14 | 877 | 57 |
| 22,497 | 42 | 2 | 415 | 39 | 29 | 2 | 383 | 15 | 869 | 58 |

|        |    |   |     |    |    |   |     |    |     |    |
|--------|----|---|-----|----|----|---|-----|----|-----|----|
| 22,498 | 42 | 2 | 412 | 38 | 29 | 2 | 384 | 14 | 867 | 56 |
| 22,499 | 44 | 2 | 409 | 38 | 29 | 2 | 374 | 14 | 856 | 56 |
| 22,500 | 46 | 2 | 401 | 38 | 29 | 2 | 375 | 14 | 851 | 56 |
| 22,501 | 45 | 2 | 384 | 38 | 28 | 2 | 353 | 14 | 810 | 56 |
| 22,502 | 46 | 2 | 387 | 41 | 27 | 2 | 356 | 14 | 816 | 59 |
| 22,503 | 50 | 2 | 419 | 41 | 28 | 2 | 382 | 14 | 879 | 59 |
| 22,504 | 52 | 2 | 423 | 41 | 28 | 2 | 385 | 14 | 888 | 59 |
| 22,505 | 52 | 2 | 425 | 40 | 28 | 2 | 384 | 14 | 889 | 58 |
| 22,506 | 52 | 2 | 425 | 40 | 28 | 1 | 383 | 14 | 888 | 57 |
| 22,507 | 52 | 2 | 426 | 35 | 28 | 1 | 383 | 13 | 889 | 51 |
| 22,508 | 52 | 2 | 436 | 35 | 29 | 1 | 396 | 13 | 913 | 51 |
| 22,509 | 52 | 2 | 434 | 34 | 29 | 1 | 395 | 11 | 910 | 48 |
| 22,510 | 52 | 2 | 434 | 34 | 29 | 1 | 394 | 11 | 909 | 48 |
| 22,511 | 52 | 1 | 435 | 27 | 29 | 1 | 394 | 11 | 910 | 40 |
| 22,512 | 52 | 1 | 434 | 27 | 29 | 1 | 393 | 11 | 908 | 40 |
| 22,513 | 52 | 1 | 431 | 25 | 29 | 1 | 389 | 11 | 901 | 38 |
| 22,514 | 52 | 1 | 431 | 25 | 29 | 1 | 389 | 11 | 901 | 38 |
| 22,515 | 53 | 1 | 431 | 22 | 29 | 1 | 389 | 11 | 902 | 35 |
| 22,516 | 53 | 2 | 431 | 22 | 28 | 1 | 388 | 11 | 900 | 36 |
| 22,517 | 53 | 2 | 431 | 23 | 28 | 1 | 388 | 11 | 900 | 37 |
| 22,518 | 53 | 1 | 431 | 23 | 28 | 1 | 388 | 10 | 900 | 35 |
| 22,519 | 53 | 1 | 431 | 23 | 28 | 1 | 388 | 10 | 900 | 35 |
| 22,520 | 52 | 1 | 429 | 23 | 28 | 1 | 387 | 10 | 896 | 35 |
| 22,521 | 52 | 1 | 431 | 21 | 28 | 1 | 387 | 10 | 898 | 33 |
| 22,522 | 52 | 1 | 429 | 21 | 28 | 1 | 385 | 10 | 894 | 33 |
| 22,523 | 51 | 1 | 424 | 22 | 27 | 1 | 378 | 12 | 880 | 36 |
| 22,524 | 51 | 1 | 414 | 22 | 27 | 1 | 374 | 11 | 866 | 35 |
| 22,525 | 50 | 1 | 411 | 22 | 27 | 1 | 373 | 12 | 861 | 36 |
| 22,526 | 50 | 1 | 408 | 22 | 27 | 1 | 373 | 13 | 858 | 37 |
| 22,527 | 51 | 1 | 412 | 22 | 27 | 1 | 380 | 13 | 870 | 37 |
| 22,528 | 52 | 1 | 412 | 22 | 27 | 1 | 382 | 13 | 873 | 37 |
| 22,529 | 50 | 1 | 394 | 22 | 27 | 1 | 371 | 13 | 842 | 37 |
| 22,530 | 49 | 1 | 385 | 22 | 26 | 1 | 368 | 13 | 828 | 37 |
| 22,531 | 48 | 1 | 382 | 22 | 26 | 1 | 368 | 13 | 824 | 37 |
| 22,532 | 49 | 1 | 385 | 23 | 26 | 1 | 365 | 13 | 825 | 38 |
| 22,533 | 46 | 1 | 381 | 23 | 26 | 1 | 355 | 13 | 808 | 38 |
| 22,534 | 44 | 1 | 347 | 23 | 22 | 1 | 336 | 13 | 749 | 38 |
| 22,535 | 41 | 1 | 314 | 23 | 22 | 1 | 315 | 13 | 692 | 38 |
| 22,536 | 37 | 1 | 282 | 23 | 20 | 1 | 292 | 13 | 631 | 38 |
| 22,537 | 31 | 1 | 245 | 24 | 14 | 1 | 265 | 13 | 555 | 39 |
| 22,538 | 31 | 1 | 245 | 25 | 14 | 1 | 266 | 13 | 556 | 40 |

|        |    |   |     |    |    |   |     |    |     |    |
|--------|----|---|-----|----|----|---|-----|----|-----|----|
| 22,539 | 31 | 2 | 233 | 27 | 14 | 2 | 251 | 12 | 529 | 43 |
| 22,540 | 29 | 2 | 231 | 27 | 14 | 2 | 250 | 12 | 524 | 43 |
| 22,541 | 29 | 3 | 217 | 24 | 14 | 2 | 239 | 8  | 499 | 37 |
| 22,542 | 29 | 3 | 209 | 25 | 13 | 2 | 234 | 8  | 485 | 38 |
| 22,543 | 17 | 3 | 135 | 25 | 7  | 2 | 134 | 8  | 293 | 38 |
| 22,544 | 15 | 3 | 113 | 20 | 3  | 1 | 94  | 7  | 225 | 31 |
| 22,545 | 15 | 3 | 114 | 20 | 3  | 1 | 93  | 7  | 225 | 31 |
| 22,546 | 15 | 3 | 110 | 13 | 2  | 1 | 89  | 7  | 216 | 24 |
| 22,547 | 15 | 3 | 110 | 13 | 2  | 1 | 89  | 7  | 216 | 24 |
| 22,548 | 15 | 3 | 112 | 13 | 2  | 1 | 92  | 6  | 221 | 23 |
| 22,549 | 15 | 3 | 110 | 13 | 2  | 1 | 91  | 6  | 218 | 23 |
| 22,550 | 13 | 3 | 102 | 13 | 2  | 1 | 86  | 6  | 203 | 23 |
| 22,551 | 12 | 3 | 99  | 13 | 2  | 1 | 78  | 6  | 191 | 23 |
| 22,552 | 12 | 3 | 92  | 10 | 3  | 1 | 80  | 6  | 187 | 20 |
| 22,553 | 11 | 3 | 87  | 10 | 3  | 1 | 78  | 6  | 179 | 20 |
| 22,554 | 7  | 3 | 50  | 11 | 2  | 1 | 41  | 6  | 100 | 21 |
| 22,555 | 5  | 3 | 45  | 11 | 2  | 1 | 36  | 6  | 88  | 21 |
| 22,556 | 5  | 3 | 43  | 11 | 2  | 1 | 36  | 6  | 86  | 21 |
| 22,557 | 5  | 3 | 45  | 11 | 2  | 1 | 36  | 6  | 88  | 21 |
| 22,558 | 5  | 3 | 44  | 11 | 2  | 1 | 36  | 5  | 87  | 20 |
| 22,559 | 5  | 3 | 34  | 11 | 1  | 1 | 23  | 5  | 63  | 20 |
| 22,560 | 5  | 3 | 34  | 11 | 1  | 1 | 22  | 5  | 62  | 20 |
| 22,561 | 5  | 3 | 35  | 11 | 1  | 1 | 22  | 5  | 63  | 20 |
| 22,562 | 5  | 3 | 35  | 11 | 1  | 1 | 22  | 5  | 63  | 20 |
| 22,563 | 5  | 3 | 35  | 11 | 1  | 1 | 22  | 5  | 63  | 20 |
| 22,564 | 5  | 3 | 35  | 11 | 1  | 1 | 23  | 5  | 64  | 20 |
| 22,565 | 5  | 3 | 35  | 11 | 1  | 1 | 23  | 5  | 64  | 20 |
| 22,566 | 6  | 3 | 38  | 11 | 1  | 1 | 35  | 5  | 80  | 20 |
| 22,567 | 6  | 2 | 41  | 10 | 1  | 1 | 40  | 5  | 88  | 18 |
| 22,568 | 6  | 2 | 43  | 10 | 2  | 1 | 41  | 5  | 92  | 18 |
| 22,569 | 6  | 2 | 45  | 10 | 2  | 1 | 43  | 5  | 96  | 18 |
| 22,570 | 6  | 2 | 49  | 10 | 2  | 1 | 48  | 5  | 105 | 18 |
| 22,571 | 7  | 2 | 52  | 11 | 2  | 1 | 49  | 5  | 110 | 19 |
| 22,572 | 7  | 2 | 52  | 11 | 2  | 1 | 49  | 5  | 110 | 19 |
| 22,573 | 7  | 2 | 52  | 11 | 2  | 1 | 49  | 6  | 110 | 20 |
| 22,574 | 7  | 2 | 52  | 10 | 2  | 1 | 49  | 4  | 110 | 17 |
| 22,575 | 7  | 2 | 52  | 10 | 2  | 1 | 49  | 4  | 110 | 17 |
| 22,576 | 7  | 2 | 51  | 15 | 2  | 1 | 50  | 3  | 110 | 21 |
| 22,577 | 7  | 2 | 44  | 15 | 2  | 1 | 40  | 2  | 93  | 20 |
| 22,578 | 6  | 2 | 43  | 19 | 2  | 1 | 40  | 3  | 91  | 25 |
| 22,579 | 5  | 2 | 43  | 23 | 2  | 1 | 38  | 3  | 88  | 29 |

|        |    |   |     |    |    |   |     |    |     |     |
|--------|----|---|-----|----|----|---|-----|----|-----|-----|
| 22,580 | 5  | 2 | 45  | 24 | 2  | 1 | 38  | 3  | 90  | 30  |
| 22,581 | 6  | 2 | 47  | 23 | 3  | 1 | 53  | 4  | 109 | 30  |
| 22,582 | 8  | 2 | 50  | 24 | 6  | 1 | 60  | 4  | 124 | 31  |
| 22,583 | 7  | 2 | 45  | 24 | 6  | 1 | 59  | 4  | 117 | 31  |
| 22,584 | 7  | 2 | 45  | 24 | 6  | 1 | 58  | 6  | 116 | 33  |
| 22,585 | 7  | 2 | 45  | 24 | 6  | 1 | 58  | 6  | 116 | 33  |
| 22,586 | 8  | 2 | 54  | 24 | 7  | 2 | 73  | 6  | 142 | 34  |
| 22,587 | 9  | 3 | 73  | 23 | 8  | 2 | 79  | 6  | 169 | 34  |
| 22,588 | 9  | 3 | 73  | 23 | 8  | 2 | 79  | 6  | 169 | 34  |
| 22,589 | 9  | 3 | 73  | 22 | 8  | 2 | 79  | 6  | 169 | 33  |
| 22,590 | 10 | 1 | 82  | 18 | 8  | 1 | 89  | 5  | 189 | 25  |
| 22,591 | 10 | 1 | 88  | 18 | 8  | 1 | 90  | 5  | 196 | 25  |
| 22,592 | 12 | 1 | 103 | 18 | 8  | 1 | 95  | 5  | 218 | 25  |
| 22,593 | 12 | 1 | 103 | 18 | 8  | 1 | 95  | 5  | 218 | 25  |
| 22,594 | 13 | 1 | 107 | 18 | 8  | 1 | 95  | 5  | 223 | 25  |
| 22,595 | 13 | 1 | 108 | 18 | 8  | 1 | 97  | 5  | 226 | 25  |
| 22,596 | 13 | 1 | 111 | 18 | 8  | 1 | 99  | 8  | 231 | 28  |
| 22,597 | 13 | 2 | 111 | 22 | 9  | 2 | 99  | 9  | 232 | 35  |
| 22,598 | 13 | 2 | 123 | 30 | 9  | 5 | 105 | 10 | 250 | 47  |
| 22,599 | 13 | 2 | 122 | 33 | 9  | 5 | 102 | 12 | 246 | 52  |
| 22,600 | 13 | 2 | 124 | 41 | 9  | 5 | 104 | 13 | 250 | 61  |
| 22,601 | 12 | 2 | 124 | 41 | 9  | 5 | 104 | 14 | 249 | 62  |
| 22,602 | 12 | 2 | 122 | 42 | 9  | 5 | 103 | 15 | 246 | 64  |
| 22,603 | 13 | 7 | 126 | 49 | 8  | 5 | 104 | 16 | 251 | 77  |
| 22,604 | 13 | 7 | 125 | 49 | 8  | 5 | 103 | 16 | 249 | 77  |
| 22,605 | 13 | 7 | 126 | 48 | 8  | 5 | 103 | 16 | 250 | 76  |
| 22,606 | 14 | 7 | 126 | 48 | 8  | 5 | 103 | 18 | 251 | 78  |
| 22,607 | 14 | 7 | 126 | 51 | 8  | 5 | 104 | 18 | 252 | 81  |
| 22,608 | 14 | 7 | 126 | 51 | 8  | 5 | 104 | 18 | 252 | 81  |
| 22,609 | 14 | 7 | 132 | 51 | 8  | 5 | 106 | 18 | 260 | 81  |
| 22,610 | 14 | 7 | 132 | 53 | 8  | 5 | 106 | 19 | 260 | 84  |
| 22,611 | 14 | 7 | 130 | 54 | 8  | 5 | 106 | 19 | 258 | 85  |
| 22,612 | 14 | 7 | 130 | 54 | 8  | 5 | 106 | 19 | 258 | 85  |
| 22,613 | 16 | 8 | 136 | 57 | 9  | 5 | 111 | 19 | 272 | 89  |
| 22,614 | 17 | 8 | 136 | 58 | 9  | 5 | 112 | 20 | 274 | 91  |
| 22,615 | 17 | 8 | 136 | 61 | 9  | 5 | 111 | 22 | 273 | 96  |
| 22,616 | 17 | 8 | 145 | 63 | 11 | 5 | 125 | 22 | 298 | 98  |
| 22,617 | 16 | 8 | 153 | 65 | 11 | 5 | 116 | 24 | 296 | 102 |
| 22,618 | 16 | 8 | 151 | 65 | 11 | 5 | 113 | 25 | 291 | 103 |
| 22,619 | 18 | 8 | 150 | 68 | 11 | 5 | 112 | 26 | 291 | 107 |
| 22,620 | 18 | 8 | 150 | 68 | 11 | 5 | 110 | 27 | 289 | 108 |



|        |    |    |     |    |    |   |     |    |     |     |
|--------|----|----|-----|----|----|---|-----|----|-----|-----|
| 22,621 | 18 | 8  | 146 | 69 | 11 | 5 | 106 | 27 | 281 | 109 |
| 22,622 | 17 | 8  | 142 | 69 | 11 | 5 | 106 | 27 | 276 | 109 |
| 22,623 | 20 | 8  | 147 | 69 | 11 | 5 | 110 | 27 | 288 | 109 |
| 22,624 | 20 | 8  | 152 | 69 | 11 | 5 | 115 | 26 | 298 | 108 |
| 22,625 | 20 | 8  | 156 | 69 | 11 | 5 | 118 | 26 | 305 | 108 |
| 22,626 | 20 | 8  | 159 | 65 | 11 | 5 | 124 | 26 | 314 | 104 |
| 22,627 | 20 | 8  | 159 | 65 | 11 | 5 | 123 | 26 | 313 | 104 |
| 22,628 | 20 | 8  | 159 | 65 | 11 | 5 | 123 | 26 | 313 | 104 |
| 22,629 | 22 | 8  | 159 | 61 | 11 | 5 | 123 | 25 | 315 | 99  |
| 22,630 | 22 | 8  | 158 | 57 | 11 | 5 | 123 | 27 | 314 | 97  |
| 22,631 | 22 | 10 | 156 | 60 | 11 | 5 | 123 | 28 | 312 | 103 |
| 22,632 | 21 | 10 | 156 | 62 | 9  | 5 | 109 | 28 | 295 | 105 |
| 22,633 | 19 | 10 | 154 | 62 | 6  | 5 | 103 | 28 | 282 | 105 |
| 22,634 | 19 | 10 | 156 | 66 | 6  | 6 | 103 | 28 | 284 | 110 |
| 22,635 | 18 | 10 | 154 | 66 | 5  | 6 | 89  | 26 | 266 | 108 |
| 22,636 | 18 | 10 | 153 | 67 | 5  | 5 | 95  | 26 | 271 | 108 |
| 22,637 | 22 | 10 | 171 | 67 | 5  | 5 | 109 | 26 | 307 | 108 |
| 22,638 | 21 | 9  | 157 | 67 | 4  | 5 | 103 | 26 | 285 | 107 |
| 22,639 | 21 | 9  | 157 | 68 | 4  | 5 | 103 | 26 | 285 | 108 |
| 22,640 | 21 | 9  | 163 | 69 | 4  | 5 | 107 | 26 | 295 | 109 |
| 22,641 | 20 | 9  | 156 | 70 | 4  | 5 | 97  | 26 | 277 | 110 |
| 22,642 | 20 | 9  | 155 | 70 | 4  | 5 | 104 | 26 | 283 | 110 |
| 22,643 | 18 | 9  | 140 | 70 | 5  | 5 | 100 | 26 | 263 | 110 |
| 22,644 | 17 | 9  | 139 | 71 | 5  | 5 | 100 | 26 | 261 | 111 |
| 22,645 | 17 | 9  | 136 | 75 | 5  | 6 | 101 | 29 | 259 | 119 |
| 22,646 | 17 | 9  | 134 | 76 | 5  | 6 | 99  | 29 | 255 | 120 |
| 22,647 | 17 | 9  | 130 | 78 | 5  | 6 | 98  | 26 | 250 | 119 |
| 22,648 | 17 | 8  | 127 | 75 | 5  | 5 | 95  | 25 | 244 | 113 |
| 22,649 | 17 | 8  | 117 | 64 | 5  | 2 | 92  | 22 | 231 | 96  |
| 22,650 | 17 | 8  | 117 | 58 | 5  | 2 | 92  | 21 | 231 | 89  |
| 22,651 | 17 | 8  | 115 | 58 | 5  | 2 | 90  | 20 | 227 | 88  |
| 22,652 | 17 | 8  | 115 | 58 | 5  | 2 | 90  | 20 | 227 | 88  |
| 22,653 | 16 | 8  | 113 | 57 | 5  | 2 | 86  | 19 | 220 | 86  |
| 22,654 | 16 | 3  | 115 | 50 | 5  | 2 | 86  | 18 | 222 | 73  |
| 22,655 | 17 | 3  | 125 | 50 | 5  | 2 | 91  | 18 | 238 | 73  |
| 22,656 | 17 | 4  | 124 | 50 | 5  | 2 | 91  | 18 | 237 | 74  |
| 22,657 | 17 | 4  | 138 | 50 | 8  | 2 | 95  | 16 | 258 | 72  |
| 22,658 | 18 | 4  | 139 | 47 | 8  | 2 | 96  | 16 | 261 | 69  |
| 22,659 | 18 | 4  | 138 | 47 | 8  | 2 | 95  | 16 | 259 | 69  |
| 22,660 | 20 | 4  | 138 | 45 | 8  | 2 | 97  | 15 | 263 | 66  |
| 22,661 | 20 | 4  | 138 | 45 | 8  | 2 | 97  | 15 | 263 | 66  |

|        |    |    |     |    |    |   |     |    |     |    |
|--------|----|----|-----|----|----|---|-----|----|-----|----|
| 22,662 | 23 | 4  | 165 | 44 | 10 | 2 | 119 | 15 | 317 | 65 |
| 22,663 | 22 | 4  | 168 | 44 | 9  | 2 | 124 | 16 | 323 | 66 |
| 22,664 | 24 | 3  | 174 | 41 | 9  | 2 | 126 | 16 | 333 | 62 |
| 22,665 | 23 | 3  | 176 | 40 | 9  | 2 | 125 | 15 | 333 | 60 |
| 22,666 | 23 | 3  | 182 | 37 | 9  | 2 | 127 | 13 | 341 | 55 |
| 22,667 | 23 | 3  | 173 | 35 | 7  | 2 | 112 | 13 | 315 | 53 |
| 22,668 | 22 | 3  | 162 | 33 | 7  | 2 | 110 | 10 | 301 | 48 |
| 22,669 | 23 | 4  | 161 | 33 | 7  | 2 | 110 | 10 | 301 | 49 |
| 22,670 | 21 | 4  | 160 | 29 | 6  | 2 | 110 | 8  | 297 | 43 |
| 22,671 | 21 | 4  | 158 | 31 | 6  | 2 | 112 | 14 | 297 | 51 |
| 22,672 | 21 | 4  | 157 | 31 | 6  | 2 | 111 | 14 | 295 | 51 |
| 22,673 | 20 | 4  | 156 | 31 | 6  | 2 | 111 | 14 | 293 | 51 |
| 22,674 | 18 | 4  | 152 | 32 | 6  | 2 | 107 | 16 | 283 | 54 |
| 22,675 | 18 | 9  | 147 | 45 | 6  | 2 | 102 | 21 | 273 | 77 |
| 22,676 | 18 | 10 | 143 | 49 | 6  | 2 | 99  | 24 | 266 | 85 |
| 22,677 | 18 | 10 | 140 | 50 | 6  | 2 | 93  | 24 | 257 | 86 |
| 22,678 | 18 | 10 | 140 | 51 | 6  | 2 | 94  | 24 | 258 | 87 |
| 22,679 | 18 | 10 | 145 | 52 | 6  | 2 | 97  | 24 | 266 | 88 |
| 22,680 | 17 | 10 | 145 | 53 | 6  | 2 | 97  | 27 | 265 | 92 |
| 22,681 | 17 | 10 | 145 | 52 | 6  | 2 | 97  | 24 | 265 | 88 |
| 22,682 | 17 | 8  | 146 | 51 | 6  | 2 | 98  | 23 | 267 | 84 |
| 22,683 | 17 | 9  | 144 | 49 | 6  | 2 | 97  | 23 | 264 | 83 |
| 22,684 | 17 | 9  | 142 | 45 | 6  | 1 | 96  | 23 | 261 | 78 |
| 22,685 | 17 | 9  | 139 | 45 | 6  | 1 | 96  | 23 | 258 | 78 |
| 22,686 | 17 | 9  | 139 | 44 | 6  | 1 | 96  | 23 | 258 | 77 |
| 22,687 | 17 | 9  | 137 | 44 | 6  | 1 | 88  | 24 | 248 | 78 |
| 22,688 | 13 | 9  | 113 | 44 | 6  | 1 | 74  | 24 | 206 | 78 |
| 22,689 | 13 | 9  | 112 | 43 | 6  | 1 | 74  | 24 | 205 | 77 |
| 22,690 | 13 | 9  | 112 | 43 | 6  | 1 | 74  | 24 | 205 | 77 |
| 22,691 | 13 | 9  | 105 | 40 | 6  | 1 | 70  | 24 | 194 | 74 |
| 22,692 | 13 | 9  | 104 | 40 | 6  | 1 | 70  | 24 | 193 | 74 |
| 22,693 | 13 | 9  | 99  | 40 | 6  | 1 | 62  | 24 | 180 | 74 |
| 22,694 | 13 | 9  | 96  | 40 | 5  | 1 | 61  | 25 | 175 | 75 |
| 22,695 | 13 | 9  | 96  | 36 | 5  | 0 | 61  | 22 | 175 | 67 |
| 22,696 | 13 | 9  | 96  | 36 | 5  | 0 | 60  | 22 | 174 | 67 |
| 22,697 | 13 | 9  | 96  | 35 | 5  | 0 | 60  | 22 | 174 | 66 |
| 22,698 | 13 | 9  | 96  | 32 | 5  | 0 | 60  | 23 | 174 | 64 |
| 22,699 | 13 | 9  | 96  | 31 | 5  | 0 | 60  | 23 | 174 | 63 |
| 22,700 | 13 | 9  | 96  | 31 | 5  | 0 | 60  | 23 | 174 | 63 |
| 22,701 | 13 | 9  | 95  | 30 | 5  | 0 | 60  | 23 | 173 | 62 |
| 22,702 | 13 | 9  | 97  | 29 | 5  | 0 | 62  | 23 | 177 | 61 |

|        |    |    |    |    |   |   |    |    |     |     |
|--------|----|----|----|----|---|---|----|----|-----|-----|
| 22,703 | 13 | 9  | 95 | 29 | 5 | 0 | 62 | 23 | 175 | 61  |
| 22,704 | 13 | 9  | 95 | 29 | 5 | 0 | 62 | 23 | 175 | 61  |
| 22,705 | 12 | 9  | 87 | 29 | 5 | 0 | 59 | 23 | 163 | 61  |
| 22,706 | 12 | 9  | 85 | 29 | 5 | 0 | 57 | 23 | 159 | 61  |
| 22,707 | 11 | 8  | 71 | 29 | 2 | 0 | 53 | 23 | 137 | 60  |
| 22,708 | 11 | 8  | 68 | 30 | 2 | 0 | 53 | 23 | 134 | 61  |
| 22,709 | 11 | 8  | 68 | 30 | 2 | 1 | 53 | 23 | 134 | 62  |
| 22,710 | 11 | 8  | 65 | 32 | 2 | 1 | 53 | 24 | 131 | 65  |
| 22,711 | 9  | 8  | 63 | 32 | 2 | 2 | 50 | 25 | 124 | 67  |
| 22,712 | 7  | 8  | 37 | 34 | 1 | 2 | 36 | 26 | 81  | 70  |
| 22,713 | 6  | 9  | 38 | 36 | 0 | 2 | 29 | 26 | 73  | 73  |
| 22,714 | 6  | 9  | 35 | 36 | 0 | 2 | 24 | 25 | 65  | 72  |
| 22,715 | 3  | 9  | 23 | 38 | 0 | 4 | 17 | 33 | 43  | 84  |
| 22,716 | 3  | 9  | 21 | 38 | 0 | 4 | 17 | 34 | 41  | 85  |
| 22,717 | 4  | 12 | 15 | 48 | 0 | 6 | 15 | 40 | 34  | 106 |
| 22,718 | 4  | 12 | 15 | 50 | 0 | 6 | 14 | 41 | 33  | 109 |
| 22,719 | 4  | 12 | 18 | 53 | 0 | 6 | 14 | 41 | 36  | 112 |
| 22,720 | 3  | 11 | 19 | 56 | 0 | 6 | 12 | 41 | 34  | 114 |
| 22,721 | 3  | 11 | 19 | 56 | 0 | 6 | 12 | 41 | 34  | 114 |
| 22,722 | 3  | 15 | 21 | 57 | 0 | 6 | 10 | 36 | 34  | 114 |
| 22,723 | 3  | 15 | 21 | 57 | 0 | 6 | 10 | 36 | 34  | 114 |
| 22,724 | 3  | 15 | 21 | 56 | 0 | 6 | 10 | 36 | 34  | 113 |
| 22,725 | 3  | 15 | 21 | 55 | 0 | 6 | 10 | 34 | 34  | 110 |
| 22,726 | 3  | 10 | 21 | 42 | 0 | 6 | 10 | 29 | 34  | 87  |
| 22,727 | 3  | 9  | 23 | 39 | 0 | 6 | 11 | 26 | 37  | 80  |
| 22,728 | 3  | 9  | 23 | 37 | 0 | 6 | 10 | 26 | 36  | 78  |
| 22,729 | 3  | 9  | 22 | 36 | 0 | 6 | 10 | 26 | 35  | 77  |
| 22,730 | 3  | 8  | 19 | 32 | 0 | 6 | 7  | 23 | 29  | 69  |
| 22,731 | 2  | 8  | 19 | 32 | 0 | 6 | 7  | 23 | 28  | 69  |
| 22,732 | 2  | 8  | 18 | 32 | 0 | 6 | 6  | 23 | 26  | 69  |
| 22,733 | 2  | 8  | 18 | 32 | 0 | 6 | 6  | 23 | 26  | 69  |
| 22,734 | 2  | 8  | 18 | 32 | 0 | 6 | 6  | 23 | 26  | 69  |
| 22,735 | 2  | 8  | 18 | 31 | 0 | 6 | 6  | 23 | 26  | 68  |
| 22,736 | 2  | 8  | 18 | 31 | 0 | 6 | 6  | 23 | 26  | 68  |
| 22,737 | 2  | 8  | 15 | 31 | 0 | 6 | 6  | 22 | 23  | 67  |
| 22,738 | 2  | 8  | 15 | 31 | 0 | 6 | 6  | 22 | 23  | 67  |
| 22,739 | 2  | 8  | 15 | 31 | 0 | 6 | 6  | 22 | 23  | 67  |
| 22,740 | 2  | 8  | 17 | 31 | 0 | 6 | 6  | 22 | 25  | 67  |
| 22,741 | 2  | 8  | 17 | 31 | 0 | 6 | 6  | 22 | 25  | 67  |
| 22,742 | 2  | 8  | 17 | 31 | 0 | 6 | 6  | 22 | 25  | 67  |
| 22,743 | 2  | 8  | 18 | 31 | 0 | 6 | 6  | 22 | 26  | 67  |

|        |   |   |    |    |   |    |    |    |    |     |
|--------|---|---|----|----|---|----|----|----|----|-----|
| 22,744 | 2 | 8 | 18 | 31 | 0 | 6  | 6  | 22 | 26 | 67  |
| 22,745 | 2 | 8 | 21 | 31 | 0 | 6  | 6  | 21 | 29 | 66  |
| 22,746 | 2 | 8 | 21 | 31 | 0 | 6  | 6  | 20 | 29 | 65  |
| 22,747 | 2 | 8 | 24 | 31 | 0 | 6  | 7  | 20 | 33 | 65  |
| 22,748 | 2 | 8 | 24 | 31 | 0 | 6  | 8  | 20 | 34 | 65  |
| 22,749 | 2 | 8 | 25 | 31 | 0 | 6  | 8  | 20 | 35 | 65  |
| 22,750 | 2 | 9 | 25 | 38 | 0 | 10 | 8  | 29 | 35 | 86  |
| 22,751 | 2 | 9 | 25 | 41 | 0 | 10 | 8  | 30 | 35 | 90  |
| 22,752 | 2 | 9 | 25 | 50 | 0 | 10 | 8  | 32 | 35 | 101 |
| 22,753 | 2 | 9 | 25 | 53 | 1 | 10 | 12 | 33 | 40 | 105 |
| 22,754 | 2 | 9 | 29 | 53 | 2 | 10 | 12 | 34 | 45 | 106 |
| 22,755 | 2 | 9 | 30 | 54 | 2 | 11 | 13 | 34 | 47 | 108 |
| 22,756 | 1 | 9 | 30 | 54 | 2 | 11 | 12 | 34 | 45 | 108 |
| 22,757 | 1 | 9 | 30 | 53 | 2 | 11 | 12 | 34 | 45 | 107 |
| 22,758 | 1 | 9 | 30 | 57 | 2 | 11 | 11 | 35 | 44 | 112 |
| 22,759 | 1 | 9 | 30 | 57 | 2 | 11 | 11 | 35 | 44 | 112 |
| 22,760 | 2 | 9 | 30 | 55 | 2 | 10 | 11 | 34 | 45 | 108 |
| 22,761 | 2 | 9 | 32 | 55 | 2 | 10 | 11 | 34 | 47 | 108 |
| 22,762 | 2 | 9 | 32 | 55 | 2 | 9  | 10 | 33 | 46 | 106 |
| 22,763 | 2 | 8 | 32 | 51 | 2 | 9  | 10 | 32 | 46 | 100 |
| 22,764 | 2 | 8 | 30 | 51 | 2 | 9  | 10 | 33 | 44 | 101 |
| 22,765 | 2 | 8 | 30 | 59 | 2 | 9  | 10 | 38 | 44 | 114 |
| 22,766 | 2 | 8 | 30 | 57 | 2 | 7  | 10 | 31 | 44 | 103 |
| 22,767 | 1 | 8 | 31 | 60 | 2 | 7  | 11 | 33 | 45 | 108 |
| 22,768 | 1 | 5 | 33 | 50 | 2 | 5  | 11 | 28 | 47 | 88  |
| 22,769 | 1 | 5 | 33 | 50 | 2 | 5  | 11 | 27 | 47 | 87  |
| 22,770 | 1 | 5 | 30 | 47 | 2 | 5  | 11 | 27 | 44 | 84  |
| 22,771 | 1 | 5 | 29 | 44 | 2 | 5  | 11 | 27 | 43 | 81  |
| 22,772 | 1 | 5 | 27 | 45 | 2 | 5  | 11 | 27 | 41 | 82  |
| 22,773 | 1 | 1 | 27 | 42 | 2 | 5  | 11 | 26 | 41 | 74  |
| 22,774 | 1 | 1 | 28 | 43 | 2 | 6  | 11 | 27 | 42 | 77  |
| 22,775 | 1 | 1 | 30 | 43 | 2 | 6  | 13 | 27 | 46 | 77  |
| 22,776 | 1 | 3 | 30 | 45 | 2 | 6  | 13 | 28 | 46 | 82  |
| 22,777 | 1 | 3 | 29 | 46 | 2 | 6  | 13 | 28 | 45 | 83  |
| 22,778 | 1 | 3 | 31 | 46 | 2 | 6  | 16 | 28 | 50 | 83  |
| 22,779 | 1 | 3 | 34 | 47 | 2 | 6  | 18 | 28 | 55 | 84  |
| 22,780 | 1 | 3 | 34 | 47 | 2 | 6  | 18 | 28 | 55 | 84  |
| 22,781 | 1 | 3 | 33 | 47 | 2 | 6  | 18 | 28 | 54 | 84  |
| 22,782 | 1 | 3 | 33 | 47 | 2 | 6  | 18 | 28 | 54 | 84  |
| 22,783 | 1 | 3 | 39 | 47 | 2 | 6  | 29 | 28 | 71 | 84  |
| 22,784 | 1 | 3 | 39 | 47 | 2 | 6  | 29 | 28 | 71 | 84  |

|        |    |   |     |    |   |   |     |    |     |    |
|--------|----|---|-----|----|---|---|-----|----|-----|----|
| 22,785 | 1  | 3 | 40  | 47 | 2 | 6 | 30  | 28 | 73  | 84 |
| 22,786 | 1  | 3 | 41  | 47 | 2 | 6 | 31  | 28 | 75  | 84 |
| 22,787 | 1  | 3 | 46  | 47 | 2 | 6 | 32  | 28 | 81  | 84 |
| 22,788 | 1  | 3 | 46  | 48 | 2 | 6 | 32  | 28 | 81  | 85 |
| 22,789 | 1  | 3 | 47  | 48 | 2 | 6 | 32  | 28 | 82  | 85 |
| 22,790 | 1  | 3 | 46  | 48 | 2 | 6 | 32  | 28 | 81  | 85 |
| 22,791 | 1  | 3 | 45  | 48 | 2 | 6 | 32  | 28 | 80  | 85 |
| 22,792 | 1  | 3 | 44  | 48 | 2 | 6 | 32  | 28 | 79  | 85 |
| 22,793 | 1  | 3 | 45  | 48 | 2 | 6 | 32  | 28 | 80  | 85 |
| 22,794 | 1  | 3 | 50  | 48 | 2 | 6 | 32  | 28 | 85  | 85 |
| 22,795 | 1  | 3 | 50  | 48 | 2 | 6 | 32  | 28 | 85  | 85 |
| 22,796 | 1  | 3 | 48  | 48 | 2 | 6 | 32  | 28 | 83  | 85 |
| 22,797 | 1  | 3 | 45  | 48 | 2 | 6 | 31  | 28 | 79  | 85 |
| 22,798 | 1  | 3 | 45  | 48 | 2 | 6 | 30  | 28 | 78  | 85 |
| 22,799 | 3  | 3 | 62  | 48 | 2 | 6 | 39  | 28 | 106 | 85 |
| 22,800 | 3  | 3 | 64  | 48 | 2 | 6 | 39  | 28 | 108 | 85 |
| 22,801 | 3  | 2 | 64  | 43 | 2 | 2 | 39  | 20 | 108 | 67 |
| 22,802 | 3  | 2 | 64  | 40 | 2 | 2 | 39  | 19 | 108 | 63 |
| 22,803 | 3  | 2 | 77  | 33 | 2 | 2 | 41  | 17 | 123 | 54 |
| 22,804 | 3  | 2 | 76  | 30 | 1 | 2 | 37  | 15 | 117 | 49 |
| 22,805 | 3  | 2 | 73  | 29 | 0 | 1 | 36  | 15 | 112 | 47 |
| 22,806 | 3  | 2 | 72  | 29 | 0 | 1 | 36  | 15 | 111 | 47 |
| 22,807 | 3  | 2 | 73  | 29 | 0 | 1 | 38  | 15 | 114 | 47 |
| 22,808 | 3  | 2 | 73  | 29 | 0 | 1 | 38  | 15 | 114 | 47 |
| 22,809 | 3  | 2 | 75  | 25 | 0 | 1 | 38  | 14 | 116 | 42 |
| 22,810 | 3  | 2 | 75  | 26 | 0 | 1 | 38  | 14 | 116 | 43 |
| 22,811 | 2  | 2 | 75  | 26 | 0 | 1 | 39  | 15 | 116 | 44 |
| 22,812 | 2  | 2 | 73  | 26 | 0 | 1 | 39  | 15 | 114 | 44 |
| 22,813 | 2  | 2 | 73  | 26 | 0 | 1 | 39  | 15 | 114 | 44 |
| 22,814 | 3  | 2 | 73  | 26 | 0 | 1 | 39  | 18 | 115 | 47 |
| 22,815 | 3  | 2 | 74  | 26 | 0 | 1 | 39  | 17 | 116 | 46 |
| 22,816 | 3  | 2 | 77  | 18 | 0 | 1 | 41  | 12 | 121 | 33 |
| 22,817 | 3  | 2 | 76  | 19 | 0 | 1 | 41  | 11 | 120 | 33 |
| 22,818 | 3  | 2 | 76  | 17 | 0 | 1 | 41  | 8  | 120 | 28 |
| 22,819 | 4  | 2 | 92  | 17 | 0 | 1 | 56  | 7  | 152 | 27 |
| 22,820 | 5  | 2 | 97  | 15 | 0 | 1 | 58  | 8  | 160 | 26 |
| 22,821 | 5  | 2 | 121 | 16 | 2 | 1 | 72  | 9  | 200 | 28 |
| 22,822 | 5  | 2 | 121 | 16 | 2 | 1 | 72  | 9  | 200 | 28 |
| 22,823 | 6  | 2 | 172 | 15 | 4 | 1 | 99  | 9  | 281 | 27 |
| 22,824 | 10 | 2 | 225 | 17 | 7 | 1 | 139 | 9  | 381 | 29 |
| 22,825 | 11 | 2 | 233 | 16 | 7 | 0 | 143 | 8  | 394 | 26 |

|        |    |   |     |    |    |   |     |    |     |    |
|--------|----|---|-----|----|----|---|-----|----|-----|----|
| 22,826 | 11 | 2 | 232 | 16 | 7  | 0 | 141 | 8  | 391 | 26 |
| 22,827 | 11 | 0 | 232 | 14 | 7  | 0 | 140 | 8  | 390 | 22 |
| 22,828 | 11 | 0 | 232 | 13 | 7  | 0 | 139 | 8  | 389 | 21 |
| 22,829 | 11 | 0 | 231 | 12 | 7  | 0 | 137 | 8  | 386 | 20 |
| 22,830 | 11 | 0 | 231 | 11 | 7  | 0 | 138 | 8  | 387 | 19 |
| 22,831 | 12 | 0 | 243 | 11 | 7  | 0 | 144 | 8  | 406 | 19 |
| 22,832 | 12 | 0 | 246 | 11 | 8  | 0 | 147 | 9  | 413 | 20 |
| 22,833 | 12 | 0 | 246 | 12 | 8  | 0 | 139 | 10 | 405 | 22 |
| 22,834 | 12 | 0 | 250 | 13 | 8  | 0 | 140 | 11 | 410 | 24 |
| 22,835 | 12 | 0 | 254 | 14 | 8  | 0 | 140 | 11 | 414 | 25 |
| 22,836 | 15 | 0 | 260 | 14 | 10 | 0 | 149 | 11 | 434 | 25 |
| 22,837 | 15 | 0 | 258 | 14 | 10 | 0 | 149 | 11 | 432 | 25 |
| 22,838 | 15 | 0 | 256 | 15 | 10 | 0 | 149 | 11 | 430 | 26 |
| 22,839 | 15 | 0 | 258 | 14 | 10 | 0 | 149 | 11 | 432 | 25 |
| 22,840 | 17 | 0 | 269 | 14 | 10 | 0 | 153 | 11 | 449 | 25 |
| 22,841 | 21 | 0 | 348 | 14 | 15 | 0 | 217 | 11 | 601 | 25 |
| 22,842 | 23 | 0 | 387 | 14 | 19 | 0 | 240 | 11 | 669 | 25 |
| 22,843 | 23 | 0 | 424 | 14 | 22 | 0 | 264 | 11 | 733 | 25 |
| 22,844 | 23 | 0 | 423 | 14 | 22 | 0 | 264 | 11 | 732 | 25 |
| 22,845 | 23 | 0 | 421 | 14 | 22 | 0 | 264 | 11 | 730 | 25 |
| 22,846 | 23 | 0 | 421 | 14 | 22 | 0 | 264 | 11 | 730 | 25 |
| 22,847 | 23 | 0 | 420 | 14 | 22 | 1 | 264 | 11 | 729 | 26 |
| 22,848 | 23 | 0 | 421 | 15 | 22 | 1 | 264 | 11 | 730 | 27 |
| 22,849 | 23 | 0 | 421 | 16 | 22 | 1 | 264 | 11 | 730 | 28 |
| 22,850 | 21 | 0 | 404 | 16 | 22 | 1 | 255 | 11 | 702 | 28 |
| 22,851 | 21 | 0 | 402 | 17 | 22 | 1 | 255 | 11 | 700 | 29 |
| 22,852 | 22 | 0 | 402 | 15 | 22 | 1 | 254 | 10 | 700 | 26 |
| 22,853 | 26 | 0 | 418 | 15 | 22 | 1 | 264 | 10 | 730 | 26 |
| 22,854 | 26 | 0 | 403 | 13 | 22 | 1 | 262 | 10 | 713 | 24 |
| 22,855 | 26 | 0 | 407 | 13 | 23 | 1 | 270 | 10 | 726 | 24 |
| 22,856 | 26 | 0 | 409 | 13 | 23 | 1 | 271 | 10 | 729 | 24 |
| 22,857 | 26 | 0 | 408 | 13 | 23 | 1 | 269 | 10 | 726 | 24 |
| 22,858 | 26 | 0 | 408 | 13 | 23 | 1 | 269 | 10 | 726 | 24 |
| 22,859 | 26 | 0 | 406 | 13 | 23 | 1 | 270 | 10 | 725 | 24 |
| 22,860 | 27 | 0 | 408 | 12 | 23 | 1 | 270 | 10 | 728 | 23 |
| 22,861 | 27 | 0 | 408 | 12 | 23 | 1 | 270 | 9  | 728 | 22 |
| 22,862 | 27 | 0 | 408 | 12 | 23 | 1 | 269 | 9  | 727 | 22 |
| 22,863 | 27 | 0 | 408 | 12 | 23 | 1 | 269 | 9  | 727 | 22 |
| 22,864 | 26 | 0 | 408 | 13 | 23 | 1 | 269 | 10 | 726 | 24 |
| 22,865 | 26 | 0 | 407 | 15 | 23 | 1 | 269 | 7  | 725 | 23 |
| 22,866 | 28 | 1 | 442 | 16 | 26 | 1 | 300 | 8  | 796 | 26 |

|        |    |    |     |    |    |   |     |    |     |     |
|--------|----|----|-----|----|----|---|-----|----|-----|-----|
| 22,867 | 28 | 1  | 439 | 17 | 26 | 1 | 297 | 9  | 790 | 28  |
| 22,868 | 28 | 1  | 436 | 22 | 26 | 1 | 295 | 10 | 785 | 34  |
| 22,869 | 27 | 2  | 423 | 37 | 26 | 2 | 284 | 20 | 760 | 61  |
| 22,870 | 26 | 3  | 418 | 51 | 26 | 2 | 282 | 25 | 752 | 81  |
| 22,871 | 26 | 3  | 407 | 59 | 25 | 2 | 272 | 25 | 730 | 89  |
| 22,872 | 26 | 3  | 401 | 60 | 24 | 2 | 270 | 24 | 721 | 89  |
| 22,873 | 25 | 3  | 351 | 61 | 22 | 4 | 243 | 24 | 641 | 92  |
| 22,874 | 26 | 3  | 333 | 59 | 21 | 4 | 221 | 24 | 601 | 90  |
| 22,875 | 23 | 3  | 323 | 60 | 19 | 4 | 222 | 24 | 587 | 91  |
| 22,876 | 22 | 3  | 314 | 60 | 19 | 4 | 218 | 24 | 573 | 91  |
| 22,877 | 22 | 3  | 326 | 60 | 19 | 4 | 216 | 24 | 583 | 91  |
| 22,878 | 22 | 4  | 387 | 62 | 22 | 4 | 224 | 23 | 655 | 93  |
| 22,879 | 22 | 4  | 387 | 62 | 22 | 4 | 224 | 23 | 655 | 93  |
| 22,880 | 27 | 4  | 448 | 62 | 25 | 4 | 237 | 23 | 737 | 93  |
| 22,881 | 30 | 4  | 482 | 62 | 25 | 4 | 244 | 23 | 781 | 93  |
| 22,882 | 32 | 4  | 517 | 61 | 26 | 4 | 248 | 21 | 823 | 90  |
| 22,883 | 32 | 4  | 549 | 61 | 25 | 4 | 248 | 21 | 854 | 90  |
| 22,884 | 34 | 4  | 585 | 61 | 26 | 4 | 250 | 21 | 895 | 90  |
| 22,885 | 34 | 4  | 598 | 59 | 27 | 4 | 257 | 20 | 916 | 87  |
| 22,886 | 34 | 4  | 594 | 60 | 27 | 4 | 256 | 21 | 911 | 89  |
| 22,887 | 31 | 4  | 588 | 64 | 25 | 4 | 246 | 22 | 890 | 94  |
| 22,888 | 31 | 4  | 588 | 67 | 25 | 4 | 245 | 30 | 889 | 105 |
| 22,889 | 31 | 6  | 587 | 70 | 25 | 4 | 245 | 30 | 888 | 110 |
| 22,890 | 29 | 6  | 579 | 70 | 25 | 4 | 242 | 30 | 875 | 110 |
| 22,891 | 29 | 6  | 574 | 71 | 25 | 5 | 236 | 31 | 864 | 113 |
| 22,892 | 25 | 6  | 502 | 71 | 20 | 5 | 178 | 33 | 725 | 115 |
| 22,893 | 23 | 6  | 462 | 73 | 16 | 5 | 155 | 39 | 656 | 123 |
| 22,894 | 23 | 7  | 425 | 76 | 13 | 5 | 131 | 39 | 592 | 127 |
| 22,895 | 23 | 7  | 430 | 78 | 14 | 5 | 133 | 39 | 600 | 129 |
| 22,896 | 23 | 7  | 430 | 79 | 14 | 5 | 133 | 39 | 600 | 130 |
| 22,897 | 24 | 7  | 431 | 79 | 14 | 4 | 133 | 39 | 602 | 129 |
| 22,898 | 25 | 7  | 435 | 77 | 14 | 4 | 136 | 39 | 610 | 127 |
| 22,899 | 25 | 8  | 435 | 78 | 14 | 4 | 144 | 39 | 618 | 129 |
| 22,900 | 25 | 9  | 435 | 78 | 14 | 4 | 144 | 39 | 618 | 130 |
| 22,901 | 25 | 10 | 437 | 78 | 14 | 4 | 146 | 41 | 622 | 133 |
| 22,902 | 27 | 10 | 438 | 78 | 14 | 4 | 153 | 41 | 632 | 133 |
| 22,903 | 26 | 10 | 438 | 78 | 14 | 4 | 154 | 41 | 632 | 133 |
| 22,904 | 22 | 10 | 422 | 78 | 14 | 4 | 144 | 41 | 602 | 133 |
| 22,905 | 22 | 10 | 422 | 78 | 14 | 4 | 143 | 41 | 601 | 133 |
| 22,906 | 22 | 10 | 418 | 78 | 14 | 4 | 139 | 42 | 593 | 134 |
| 22,907 | 22 | 10 | 415 | 78 | 14 | 4 | 138 | 42 | 589 | 134 |

|        |    |    |     |    |    |   |     |    |     |     |
|--------|----|----|-----|----|----|---|-----|----|-----|-----|
| 22,908 | 23 | 10 | 417 | 81 | 14 | 4 | 140 | 44 | 594 | 139 |
| 22,909 | 23 | 10 | 418 | 81 | 14 | 4 | 142 | 44 | 597 | 139 |
| 22,910 | 23 | 10 | 418 | 81 | 14 | 4 | 141 | 44 | 596 | 139 |
| 22,911 | 23 | 10 | 424 | 81 | 14 | 4 | 153 | 44 | 614 | 139 |
| 22,912 | 23 | 10 | 424 | 81 | 14 | 4 | 153 | 44 | 614 | 139 |
| 22,913 | 23 | 10 | 419 | 83 | 14 | 4 | 148 | 44 | 604 | 141 |
| 22,914 | 22 | 10 | 417 | 83 | 14 | 4 | 146 | 44 | 599 | 141 |
| 22,915 | 22 | 10 | 417 | 80 | 14 | 4 | 145 | 43 | 598 | 137 |
| 22,916 | 22 | 11 | 415 | 80 | 14 | 4 | 145 | 43 | 596 | 138 |
| 22,917 | 21 | 10 | 391 | 78 | 11 | 4 | 124 | 41 | 547 | 133 |
| 22,918 | 21 | 10 | 391 | 78 | 11 | 4 | 122 | 42 | 545 | 134 |
| 22,919 | 21 | 10 | 389 | 72 | 11 | 4 | 122 | 41 | 543 | 127 |
| 22,920 | 21 | 9  | 389 | 56 | 11 | 3 | 122 | 31 | 543 | 99  |
| 22,921 | 22 | 8  | 389 | 42 | 11 | 3 | 122 | 26 | 544 | 79  |
| 22,922 | 22 | 8  | 383 | 32 | 11 | 3 | 120 | 25 | 536 | 68  |
| 22,923 | 22 | 8  | 382 | 31 | 11 | 1 | 120 | 25 | 535 | 65  |
| 22,924 | 22 | 8  | 381 | 32 | 11 | 1 | 120 | 27 | 534 | 68  |
| 22,925 | 21 | 8  | 365 | 35 | 11 | 1 | 108 | 28 | 505 | 72  |
| 22,926 | 20 | 8  | 357 | 35 | 11 | 1 | 102 | 28 | 490 | 72  |
| 22,927 | 20 | 8  | 344 | 37 | 11 | 1 | 102 | 28 | 477 | 74  |
| 22,928 | 20 | 8  | 340 | 38 | 9  | 2 | 99  | 29 | 468 | 77  |
| 22,929 | 20 | 7  | 281 | 36 | 8  | 2 | 94  | 29 | 403 | 74  |
| 22,930 | 17 | 7  | 220 | 37 | 5  | 3 | 81  | 32 | 323 | 79  |
| 22,931 | 16 | 7  | 216 | 37 | 5  | 3 | 81  | 32 | 318 | 79  |
| 22,932 | 14 | 8  | 187 | 44 | 5  | 3 | 74  | 32 | 280 | 87  |
| 22,933 | 11 | 8  | 140 | 44 | 4  | 3 | 67  | 33 | 222 | 88  |
| 22,934 | 11 | 8  | 105 | 44 | 4  | 3 | 63  | 33 | 183 | 88  |
| 22,935 | 9  | 9  | 64  | 45 | 3  | 3 | 58  | 33 | 134 | 90  |
| 22,936 | 9  | 10 | 47  | 46 | 2  | 3 | 52  | 33 | 110 | 92  |
| 22,937 | 9  | 10 | 45  | 47 | 2  | 3 | 52  | 32 | 108 | 92  |
| 22,938 | 10 | 10 | 46  | 43 | 2  | 3 | 52  | 31 | 110 | 87  |
| 22,939 | 10 | 8  | 46  | 36 | 2  | 3 | 53  | 23 | 111 | 70  |
| 22,940 | 10 | 8  | 46  | 37 | 2  | 3 | 53  | 26 | 111 | 74  |
| 22,941 | 10 | 8  | 44  | 37 | 2  | 3 | 52  | 26 | 108 | 74  |
| 22,942 | 10 | 8  | 43  | 36 | 2  | 2 | 52  | 23 | 107 | 69  |
| 22,943 | 10 | 8  | 43  | 38 | 2  | 3 | 52  | 29 | 107 | 78  |
| 22,944 | 10 | 8  | 37  | 36 | 1  | 3 | 50  | 23 | 98  | 70  |
| 22,945 | 10 | 7  | 41  | 33 | 1  | 3 | 51  | 24 | 103 | 67  |
| 22,946 | 10 | 7  | 41  | 33 | 1  | 3 | 51  | 25 | 103 | 68  |
| 22,947 | 10 | 7  | 40  | 32 | 1  | 3 | 51  | 25 | 102 | 67  |
| 22,948 | 9  | 7  | 39  | 36 | 1  | 3 | 51  | 25 | 100 | 71  |



|        |    |   |     |    |   |   |    |    |     |    |
|--------|----|---|-----|----|---|---|----|----|-----|----|
| 22,949 | 9  | 7 | 40  | 36 | 2 | 3 | 52 | 25 | 103 | 71 |
| 22,950 | 10 | 4 | 39  | 34 | 2 | 3 | 44 | 23 | 95  | 64 |
| 22,951 | 10 | 4 | 37  | 35 | 3 | 3 | 45 | 23 | 95  | 65 |
| 22,952 | 8  | 4 | 36  | 35 | 3 | 3 | 40 | 23 | 87  | 65 |
| 22,953 | 8  | 4 | 41  | 36 | 3 | 3 | 45 | 23 | 97  | 66 |
| 22,954 | 8  | 4 | 42  | 36 | 3 | 3 | 45 | 23 | 98  | 66 |
| 22,955 | 8  | 4 | 42  | 36 | 3 | 3 | 45 | 23 | 98  | 66 |
| 22,956 | 8  | 4 | 42  | 36 | 3 | 3 | 46 | 23 | 99  | 66 |
| 22,957 | 8  | 4 | 41  | 41 | 2 | 4 | 43 | 24 | 94  | 73 |
| 22,958 | 8  | 4 | 46  | 41 | 2 | 4 | 43 | 24 | 99  | 73 |
| 22,959 | 8  | 4 | 44  | 40 | 2 | 4 | 43 | 23 | 97  | 71 |
| 22,960 | 9  | 4 | 48  | 40 | 2 | 4 | 44 | 23 | 103 | 71 |
| 22,961 | 9  | 4 | 49  | 40 | 2 | 4 | 44 | 23 | 104 | 71 |
| 22,962 | 8  | 4 | 41  | 40 | 2 | 4 | 32 | 23 | 83  | 71 |
| 22,963 | 8  | 4 | 39  | 40 | 2 | 4 | 30 | 23 | 79  | 71 |
| 22,964 | 8  | 4 | 39  | 38 | 2 | 4 | 30 | 23 | 79  | 69 |
| 22,965 | 8  | 4 | 39  | 39 | 2 | 4 | 30 | 23 | 79  | 70 |
| 22,966 | 8  | 4 | 39  | 39 | 2 | 4 | 30 | 23 | 79  | 70 |
| 22,967 | 8  | 3 | 40  | 39 | 2 | 4 | 31 | 23 | 81  | 69 |
| 22,968 | 8  | 3 | 41  | 39 | 3 | 4 | 32 | 22 | 84  | 68 |
| 22,969 | 8  | 3 | 41  | 39 | 3 | 4 | 32 | 22 | 84  | 68 |
| 22,970 | 8  | 3 | 42  | 39 | 3 | 4 | 32 | 22 | 85  | 68 |
| 22,971 | 7  | 3 | 43  | 39 | 3 | 4 | 32 | 22 | 85  | 68 |
| 22,972 | 7  | 3 | 45  | 39 | 3 | 4 | 32 | 22 | 87  | 68 |
| 22,973 | 7  | 3 | 45  | 39 | 3 | 4 | 32 | 22 | 87  | 68 |
| 22,974 | 7  | 3 | 45  | 39 | 3 | 4 | 32 | 22 | 87  | 68 |
| 22,975 | 7  | 3 | 45  | 39 | 3 | 4 | 32 | 20 | 87  | 66 |
| 22,976 | 7  | 3 | 66  | 36 | 3 | 4 | 36 | 19 | 112 | 62 |
| 22,977 | 7  | 3 | 69  | 34 | 3 | 5 | 37 | 19 | 116 | 61 |
| 22,978 | 7  | 3 | 73  | 34 | 3 | 5 | 44 | 19 | 127 | 61 |
| 22,979 | 6  | 3 | 85  | 33 | 3 | 4 | 53 | 18 | 147 | 58 |
| 22,980 | 6  | 3 | 86  | 33 | 3 | 4 | 54 | 18 | 149 | 58 |
| 22,981 | 6  | 3 | 84  | 32 | 3 | 3 | 54 | 15 | 147 | 53 |
| 22,982 | 7  | 2 | 88  | 27 | 3 | 3 | 56 | 14 | 154 | 46 |
| 22,983 | 7  | 2 | 91  | 31 | 3 | 3 | 58 | 14 | 159 | 50 |
| 22,984 | 7  | 2 | 92  | 31 | 3 | 3 | 55 | 14 | 157 | 50 |
| 22,985 | 7  | 2 | 92  | 31 | 3 | 3 | 55 | 14 | 157 | 50 |
| 22,986 | 11 | 0 | 109 | 29 | 3 | 3 | 67 | 14 | 190 | 46 |
| 22,987 | 12 | 0 | 112 | 30 | 3 | 3 | 67 | 15 | 194 | 48 |
| 22,988 | 13 | 0 | 121 | 29 | 3 | 3 | 76 | 16 | 213 | 48 |
| 22,989 | 13 | 0 | 121 | 30 | 3 | 3 | 75 | 16 | 212 | 49 |

|        |    |   |     |    |    |   |     |    |     |    |
|--------|----|---|-----|----|----|---|-----|----|-----|----|
| 22,990 | 13 | 0 | 132 | 30 | 3  | 3 | 78  | 17 | 226 | 50 |
| 22,991 | 13 | 0 | 132 | 29 | 3  | 3 | 79  | 15 | 227 | 47 |
| 22,992 | 14 | 0 | 135 | 31 | 4  | 3 | 81  | 17 | 234 | 51 |
| 22,993 | 14 | 0 | 134 | 34 | 4  | 3 | 85  | 19 | 237 | 56 |
| 22,994 | 14 | 0 | 132 | 32 | 4  | 2 | 84  | 14 | 234 | 48 |
| 22,995 | 24 | 0 | 146 | 32 | 6  | 2 | 101 | 14 | 277 | 48 |
| 22,996 | 24 | 0 | 145 | 30 | 6  | 2 | 101 | 14 | 276 | 46 |
| 22,997 | 24 | 0 | 145 | 30 | 6  | 2 | 101 | 14 | 276 | 46 |
| 22,998 | 24 | 0 | 146 | 26 | 7  | 2 | 101 | 14 | 278 | 42 |
| 22,999 | 24 | 0 | 147 | 26 | 7  | 2 | 103 | 14 | 281 | 42 |
| 23,000 | 26 | 0 | 146 | 25 | 6  | 2 | 104 | 14 | 282 | 41 |
| 23,001 | 25 | 0 | 147 | 25 | 6  | 2 | 105 | 14 | 283 | 41 |
| 23,002 | 25 | 0 | 149 | 25 | 6  | 2 | 104 | 14 | 284 | 41 |
| 23,003 | 25 | 0 | 149 | 24 | 6  | 2 | 102 | 14 | 282 | 40 |
| 23,004 | 25 | 0 | 144 | 24 | 6  | 2 | 97  | 14 | 272 | 40 |
| 23,005 | 27 | 0 | 152 | 24 | 6  | 2 | 108 | 14 | 293 | 40 |
| 23,006 | 27 | 0 | 154 | 24 | 6  | 2 | 109 | 14 | 296 | 40 |
| 23,007 | 30 | 0 | 180 | 26 | 10 | 2 | 125 | 14 | 345 | 42 |
| 23,008 | 31 | 0 | 185 | 21 | 10 | 2 | 128 | 12 | 354 | 35 |
| 23,009 | 31 | 0 | 188 | 19 | 11 | 2 | 133 | 11 | 363 | 32 |
| 23,010 | 31 | 0 | 202 | 19 | 11 | 2 | 142 | 11 | 386 | 32 |
| 23,011 | 30 | 0 | 197 | 19 | 11 | 2 | 139 | 11 | 377 | 32 |
| 23,012 | 30 | 0 | 210 | 19 | 11 | 2 | 148 | 13 | 399 | 34 |
| 23,013 | 30 | 0 | 210 | 21 | 11 | 2 | 148 | 13 | 399 | 36 |
| 23,014 | 30 | 0 | 217 | 21 | 11 | 2 | 151 | 13 | 409 | 36 |
| 23,015 | 30 | 0 | 219 | 21 | 11 | 2 | 151 | 13 | 411 | 36 |
| 23,016 | 30 | 0 | 219 | 21 | 11 | 2 | 152 | 14 | 412 | 37 |
| 23,017 | 30 | 0 | 219 | 21 | 11 | 2 | 151 | 14 | 411 | 37 |
| 23,018 | 30 | 0 | 225 | 21 | 12 | 2 | 152 | 14 | 419 | 37 |
| 23,019 | 30 | 0 | 244 | 21 | 14 | 2 | 163 | 14 | 451 | 37 |
| 23,020 | 30 | 0 | 247 | 21 | 14 | 2 | 167 | 14 | 458 | 37 |
| 23,021 | 30 | 0 | 246 | 21 | 14 | 2 | 167 | 14 | 457 | 37 |
| 23,022 | 30 | 0 | 245 | 21 | 14 | 2 | 167 | 14 | 456 | 37 |
| 23,023 | 30 | 0 | 244 | 21 | 14 | 2 | 167 | 14 | 455 | 37 |
| 23,024 | 30 | 0 | 234 | 21 | 14 | 2 | 167 | 14 | 445 | 37 |
| 23,025 | 30 | 0 | 233 | 21 | 14 | 2 | 167 | 14 | 444 | 37 |
| 23,026 | 30 | 0 | 225 | 20 | 14 | 2 | 162 | 14 | 431 | 36 |
| 23,027 | 30 | 0 | 224 | 21 | 14 | 2 | 162 | 14 | 430 | 37 |
| 23,028 | 30 | 0 | 221 | 20 | 14 | 1 | 160 | 14 | 425 | 35 |
| 23,029 | 30 | 0 | 217 | 20 | 14 | 1 | 157 | 14 | 418 | 35 |
| 23,030 | 29 | 0 | 205 | 20 | 14 | 2 | 148 | 14 | 396 | 36 |

|        |    |   |     |    |    |   |     |    |     |    |
|--------|----|---|-----|----|----|---|-----|----|-----|----|
| 23,031 | 29 | 0 | 204 | 20 | 14 | 2 | 146 | 14 | 393 | 36 |
| 23,032 | 28 | 0 | 204 | 21 | 14 | 2 | 144 | 16 | 390 | 39 |
| 23,033 | 28 | 0 | 200 | 19 | 14 | 2 | 144 | 16 | 386 | 37 |
| 23,034 | 28 | 1 | 211 | 15 | 15 | 2 | 156 | 18 | 410 | 36 |
| 23,035 | 28 | 1 | 211 | 15 | 15 | 2 | 156 | 18 | 410 | 36 |
| 23,036 | 28 | 1 | 215 | 15 | 15 | 2 | 156 | 18 | 414 | 36 |
| 23,037 | 25 | 1 | 198 | 15 | 16 | 2 | 144 | 18 | 383 | 36 |
| 23,038 | 24 | 1 | 197 | 14 | 16 | 2 | 144 | 17 | 381 | 34 |
| 23,039 | 22 | 1 | 189 | 13 | 16 | 2 | 135 | 16 | 362 | 32 |
| 23,040 | 22 | 1 | 186 | 13 | 16 | 2 | 135 | 16 | 359 | 32 |
| 23,041 | 24 | 1 | 181 | 13 | 16 | 2 | 135 | 15 | 356 | 31 |
| 23,042 | 24 | 1 | 186 | 13 | 16 | 2 | 137 | 14 | 363 | 30 |
| 23,043 | 28 | 1 | 200 | 11 | 15 | 2 | 145 | 12 | 388 | 26 |
| 23,044 | 29 | 1 | 201 | 10 | 15 | 2 | 145 | 8  | 390 | 21 |
| 23,045 | 30 | 1 | 200 | 10 | 15 | 2 | 146 | 8  | 391 | 21 |
| 23,046 | 22 | 1 | 266 | 10 | 18 | 2 | 145 | 8  | 451 | 21 |
| 23,047 | 22 | 1 | 266 | 10 | 18 | 2 | 145 | 7  | 451 | 20 |
| 23,048 | 35 | 1 | 382 | 10 | 24 | 2 | 195 | 7  | 636 | 20 |
| 23,049 | 35 | 1 | 384 | 10 | 23 | 2 | 198 | 7  | 640 | 20 |
| 23,050 | 35 | 1 | 387 | 10 | 23 | 2 | 196 | 7  | 641 | 20 |
| 23,051 | 32 | 1 | 385 | 10 | 23 | 2 | 190 | 7  | 630 | 20 |
| 23,052 | 32 | 1 | 384 | 10 | 23 | 2 | 189 | 7  | 628 | 20 |
| 23,053 | 32 | 1 | 382 | 10 | 22 | 2 | 187 | 7  | 623 | 20 |
| 23,054 | 32 | 1 | 381 | 10 | 22 | 2 | 187 | 7  | 622 | 20 |
| 23,055 | 32 | 2 | 382 | 10 | 22 | 2 | 187 | 7  | 623 | 21 |
| 23,056 | 30 | 2 | 376 | 10 | 22 | 2 | 175 | 7  | 603 | 21 |
| 23,057 | 30 | 2 | 374 | 10 | 22 | 2 | 174 | 7  | 600 | 21 |
| 23,058 | 28 | 2 | 349 | 8  | 18 | 2 | 157 | 7  | 552 | 19 |
| 23,059 | 27 | 2 | 344 | 8  | 18 | 1 | 154 | 7  | 543 | 18 |
| 23,060 | 27 | 2 | 341 | 8  | 17 | 1 | 154 | 7  | 539 | 18 |
| 23,061 | 26 | 2 | 331 | 8  | 17 | 1 | 147 | 5  | 521 | 16 |
| 23,062 | 26 | 2 | 346 | 8  | 18 | 1 | 157 | 5  | 547 | 16 |
| 23,063 | 26 | 3 | 332 | 8  | 18 | 1 | 148 | 6  | 524 | 18 |
| 23,064 | 29 | 3 | 333 | 6  | 18 | 1 | 149 | 6  | 529 | 16 |
| 23,065 | 30 | 3 | 332 | 6  | 19 | 1 | 164 | 6  | 545 | 16 |
| 23,066 | 30 | 3 | 329 | 6  | 19 | 1 | 164 | 6  | 542 | 16 |
| 23,067 | 30 | 3 | 331 | 5  | 19 | 1 | 164 | 5  | 544 | 14 |
| 23,068 | 30 | 3 | 324 | 7  | 18 | 1 | 163 | 5  | 535 | 16 |
| 23,069 | 30 | 3 | 304 | 7  | 15 | 1 | 152 | 5  | 501 | 16 |
| 23,070 | 32 | 3 | 440 | 7  | 19 | 1 | 192 | 5  | 683 | 16 |
| 23,071 | 32 | 3 | 459 | 7  | 19 | 1 | 211 | 5  | 721 | 16 |

|        |    |   |     |    |    |   |     |   |     |    |
|--------|----|---|-----|----|----|---|-----|---|-----|----|
| 23,072 | 32 | 2 | 460 | 7  | 19 | 1 | 216 | 5 | 727 | 15 |
| 23,073 | 32 | 3 | 461 | 7  | 19 | 1 | 216 | 5 | 728 | 16 |
| 23,074 | 32 | 3 | 460 | 7  | 19 | 1 | 216 | 6 | 727 | 17 |
| 23,075 | 32 | 3 | 460 | 7  | 19 | 1 | 216 | 6 | 727 | 17 |
| 23,076 | 32 | 3 | 458 | 7  | 19 | 1 | 216 | 6 | 725 | 17 |
| 23,077 | 32 | 3 | 457 | 7  | 19 | 1 | 216 | 6 | 724 | 17 |
| 23,078 | 33 | 3 | 459 | 6  | 19 | 1 | 218 | 6 | 729 | 16 |
| 23,079 | 33 | 3 | 459 | 6  | 19 | 1 | 218 | 6 | 729 | 16 |
| 23,080 | 33 | 3 | 459 | 6  | 19 | 1 | 214 | 6 | 725 | 16 |
| 23,081 | 33 | 3 | 458 | 6  | 19 | 0 | 209 | 7 | 719 | 16 |
| 23,082 | 34 | 3 | 456 | 6  | 18 | 0 | 204 | 7 | 712 | 16 |
| 23,083 | 34 | 3 | 454 | 5  | 18 | 0 | 203 | 5 | 709 | 13 |
| 23,084 | 34 | 3 | 446 | 5  | 18 | 0 | 201 | 3 | 699 | 11 |
| 23,085 | 34 | 3 | 447 | 5  | 18 | 0 | 201 | 3 | 700 | 11 |
| 23,086 | 34 | 2 | 446 | 6  | 18 | 0 | 201 | 3 | 699 | 11 |
| 23,087 | 34 | 2 | 441 | 6  | 18 | 0 | 201 | 3 | 694 | 11 |
| 23,088 | 33 | 2 | 440 | 7  | 17 | 0 | 201 | 3 | 691 | 12 |
| 23,089 | 33 | 2 | 441 | 7  | 17 | 0 | 202 | 3 | 693 | 12 |
| 23,090 | 33 | 2 | 448 | 6  | 17 | 0 | 205 | 3 | 703 | 11 |
| 23,091 | 33 | 2 | 448 | 6  | 17 | 0 | 205 | 3 | 703 | 11 |
| 23,092 | 32 | 2 | 484 | 6  | 17 | 0 | 224 | 3 | 757 | 11 |
| 23,093 | 32 | 2 | 478 | 7  | 17 | 0 | 221 | 3 | 748 | 12 |
| 23,094 | 27 | 2 | 460 | 8  | 17 | 0 | 210 | 3 | 714 | 13 |
| 23,095 | 26 | 2 | 462 | 7  | 17 | 0 | 210 | 3 | 715 | 12 |
| 23,096 | 25 | 2 | 463 | 7  | 17 | 1 | 208 | 3 | 713 | 13 |
| 23,097 | 23 | 2 | 384 | 8  | 12 | 1 | 193 | 3 | 612 | 14 |
| 23,098 | 12 | 2 | 281 | 8  | 7  | 1 | 145 | 3 | 445 | 14 |
| 23,099 | 10 | 4 | 269 | 9  | 6  | 1 | 143 | 3 | 428 | 17 |
| 23,100 | 10 | 4 | 266 | 9  | 6  | 1 | 140 | 3 | 422 | 17 |
| 23,101 | 10 | 4 | 262 | 10 | 6  | 1 | 140 | 3 | 418 | 18 |
| 23,102 | 10 | 4 | 261 | 10 | 6  | 1 | 139 | 3 | 416 | 18 |
| 23,103 | 10 | 4 | 262 | 11 | 6  | 1 | 139 | 3 | 417 | 19 |
| 23,104 | 10 | 4 | 262 | 13 | 6  | 1 | 139 | 3 | 417 | 21 |
| 23,105 | 10 | 4 | 262 | 13 | 6  | 1 | 139 | 3 | 417 | 21 |
| 23,106 | 11 | 3 | 265 | 13 | 6  | 1 | 139 | 3 | 421 | 20 |
| 23,107 | 11 | 3 | 263 | 14 | 6  | 1 | 139 | 3 | 419 | 21 |
| 23,108 | 11 | 3 | 263 | 14 | 6  | 1 | 139 | 4 | 419 | 22 |
| 23,109 | 10 | 3 | 262 | 14 | 6  | 1 | 139 | 4 | 417 | 22 |
| 23,110 | 13 | 3 | 274 | 14 | 6  | 1 | 146 | 4 | 439 | 22 |
| 23,111 | 14 | 3 | 275 | 14 | 6  | 1 | 142 | 4 | 437 | 22 |
| 23,112 | 14 | 3 | 285 | 15 | 6  | 1 | 140 | 4 | 445 | 23 |

|        |    |   |     |    |   |   |     |    |     |    |
|--------|----|---|-----|----|---|---|-----|----|-----|----|
| 23,113 | 14 | 2 | 276 | 15 | 6 | 1 | 130 | 4  | 426 | 22 |
| 23,114 | 11 | 2 | 273 | 17 | 6 | 1 | 130 | 4  | 420 | 24 |
| 23,115 | 11 | 3 | 271 | 20 | 6 | 1 | 130 | 5  | 418 | 29 |
| 23,116 | 10 | 3 | 270 | 23 | 5 | 1 | 115 | 5  | 400 | 32 |
| 23,117 | 10 | 3 | 270 | 25 | 5 | 1 | 115 | 6  | 400 | 35 |
| 23,118 | 10 | 3 | 268 | 25 | 5 | 1 | 114 | 6  | 397 | 35 |
| 23,119 | 9  | 3 | 252 | 24 | 5 | 1 | 101 | 6  | 367 | 34 |
| 23,120 | 8  | 3 | 130 | 25 | 1 | 1 | 70  | 6  | 209 | 35 |
| 23,121 | 8  | 3 | 112 | 25 | 1 | 1 | 51  | 6  | 172 | 35 |
| 23,122 | 8  | 3 | 111 | 25 | 1 | 1 | 48  | 6  | 168 | 35 |
| 23,123 | 8  | 3 | 111 | 25 | 1 | 1 | 46  | 6  | 166 | 35 |
| 23,124 | 8  | 3 | 113 | 26 | 1 | 1 | 47  | 6  | 169 | 36 |
| 23,125 | 8  | 3 | 113 | 26 | 1 | 1 | 47  | 5  | 169 | 35 |
| 23,126 | 8  | 3 | 113 | 26 | 1 | 1 | 47  | 6  | 169 | 36 |
| 23,127 | 7  | 3 | 112 | 26 | 1 | 1 | 45  | 6  | 165 | 36 |
| 23,128 | 7  | 3 | 112 | 26 | 1 | 1 | 45  | 6  | 165 | 36 |
| 23,129 | 9  | 3 | 111 | 26 | 1 | 1 | 46  | 6  | 167 | 36 |
| 23,130 | 10 | 3 | 111 | 26 | 1 | 1 | 46  | 6  | 168 | 36 |
| 23,131 | 10 | 3 | 111 | 26 | 1 | 1 | 46  | 5  | 168 | 35 |
| 23,132 | 10 | 3 | 111 | 26 | 1 | 1 | 46  | 5  | 168 | 35 |
| 23,133 | 9  | 3 | 111 | 26 | 1 | 1 | 48  | 6  | 169 | 36 |
| 23,134 | 9  | 3 | 111 | 27 | 1 | 1 | 48  | 6  | 169 | 37 |
| 23,135 | 10 | 3 | 118 | 27 | 1 | 1 | 47  | 6  | 176 | 37 |
| 23,136 | 11 | 3 | 118 | 27 | 1 | 1 | 47  | 6  | 177 | 37 |
| 23,137 | 11 | 3 | 118 | 27 | 1 | 1 | 47  | 6  | 177 | 37 |
| 23,138 | 11 | 4 | 129 | 35 | 2 | 2 | 54  | 9  | 196 | 50 |
| 23,139 | 11 | 4 | 128 | 37 | 2 | 2 | 56  | 10 | 197 | 53 |
| 23,140 | 11 | 4 | 126 | 37 | 2 | 2 | 55  | 10 | 194 | 53 |
| 23,141 | 11 | 4 | 117 | 37 | 2 | 2 | 52  | 10 | 182 | 53 |
| 23,142 | 11 | 4 | 93  | 37 | 2 | 2 | 44  | 10 | 150 | 53 |
| 23,143 | 10 | 4 | 78  | 38 | 2 | 2 | 30  | 10 | 120 | 54 |
| 23,144 | 10 | 4 | 75  | 52 | 2 | 2 | 29  | 12 | 116 | 70 |
| 23,145 | 10 | 4 | 74  | 52 | 2 | 2 | 26  | 13 | 112 | 71 |
| 23,146 | 10 | 4 | 74  | 51 | 2 | 2 | 26  | 13 | 112 | 70 |
| 23,147 | 10 | 4 | 74  | 50 | 2 | 1 | 26  | 13 | 112 | 68 |
| 23,148 | 10 | 4 | 73  | 50 | 2 | 1 | 27  | 13 | 112 | 68 |
| 23,149 | 10 | 6 | 73  | 50 | 2 | 1 | 27  | 14 | 112 | 71 |
| 23,150 | 10 | 4 | 72  | 49 | 2 | 1 | 27  | 14 | 111 | 68 |
| 23,151 | 10 | 4 | 74  | 49 | 2 | 1 | 27  | 14 | 113 | 68 |
| 23,152 | 12 | 4 | 81  | 48 | 2 | 1 | 27  | 15 | 122 | 68 |
| 23,153 | 12 | 4 | 80  | 47 | 2 | 1 | 27  | 15 | 121 | 67 |

|        |    |   |     |    |    |   |     |    |     |    |
|--------|----|---|-----|----|----|---|-----|----|-----|----|
| 23,154 | 12 | 4 | 79  | 47 | 2  | 1 | 27  | 15 | 120 | 67 |
| 23,155 | 15 | 4 | 87  | 45 | 2  | 1 | 29  | 15 | 133 | 65 |
| 23,156 | 14 | 4 | 90  | 45 | 4  | 1 | 33  | 15 | 141 | 65 |
| 23,157 | 15 | 4 | 95  | 46 | 4  | 1 | 34  | 18 | 148 | 69 |
| 23,158 | 17 | 4 | 117 | 47 | 8  | 2 | 46  | 18 | 188 | 71 |
| 23,159 | 23 | 4 | 226 | 48 | 12 | 2 | 110 | 18 | 371 | 72 |
| 23,160 | 20 | 4 | 221 | 49 | 12 | 2 | 107 | 18 | 360 | 73 |
| 23,161 | 21 | 4 | 237 | 51 | 18 | 2 | 131 | 18 | 407 | 75 |
| 23,162 | 21 | 4 | 234 | 52 | 18 | 2 | 131 | 21 | 404 | 79 |
| 23,163 | 21 | 4 | 222 | 54 | 18 | 2 | 132 | 21 | 393 | 81 |
| 23,164 | 21 | 4 | 217 | 57 | 17 | 2 | 133 | 23 | 388 | 86 |
| 23,165 | 21 | 4 | 214 | 55 | 17 | 2 | 130 | 23 | 382 | 84 |
| 23,166 | 21 | 3 | 220 | 52 | 17 | 2 | 131 | 22 | 389 | 79 |
| 23,167 | 21 | 3 | 222 | 52 | 17 | 2 | 132 | 24 | 392 | 81 |
| 23,168 | 21 | 3 | 223 | 52 | 17 | 2 | 132 | 25 | 393 | 82 |
| 23,169 | 21 | 4 | 223 | 55 | 17 | 2 | 132 | 25 | 393 | 86 |
| 23,170 | 21 | 4 | 222 | 55 | 17 | 2 | 132 | 25 | 392 | 86 |
| 23,171 | 21 | 4 | 221 | 54 | 17 | 2 | 132 | 25 | 391 | 85 |
| 23,172 | 21 | 4 | 221 | 54 | 17 | 2 | 132 | 25 | 391 | 85 |
| 23,173 | 21 | 4 | 221 | 53 | 17 | 2 | 133 | 25 | 392 | 84 |
| 23,174 | 21 | 4 | 220 | 53 | 17 | 2 | 133 | 25 | 391 | 84 |
| 23,175 | 21 | 4 | 219 | 53 | 17 | 2 | 132 | 25 | 389 | 84 |
| 23,176 | 21 | 4 | 219 | 53 | 17 | 2 | 132 | 25 | 389 | 84 |
| 23,177 | 21 | 4 | 219 | 53 | 17 | 2 | 132 | 24 | 389 | 83 |
| 23,178 | 21 | 4 | 219 | 53 | 17 | 2 | 132 | 24 | 389 | 83 |
| 23,179 | 21 | 4 | 218 | 53 | 17 | 2 | 132 | 24 | 388 | 83 |
| 23,180 | 19 | 4 | 219 | 54 | 17 | 2 | 131 | 24 | 386 | 84 |
| 23,181 | 18 | 4 | 219 | 54 | 17 | 2 | 131 | 25 | 385 | 85 |
| 23,182 | 18 | 4 | 219 | 54 | 17 | 2 | 131 | 26 | 385 | 86 |
| 23,183 | 18 | 4 | 219 | 54 | 17 | 2 | 129 | 25 | 383 | 85 |
| 23,184 | 18 | 4 | 219 | 54 | 17 | 2 | 129 | 26 | 383 | 86 |
| 23,185 | 17 | 4 | 214 | 53 | 17 | 2 | 129 | 26 | 377 | 85 |
| 23,186 | 17 | 4 | 212 | 53 | 17 | 2 | 129 | 26 | 375 | 85 |
| 23,187 | 16 | 4 | 211 | 53 | 17 | 3 | 129 | 28 | 373 | 88 |
| 23,188 | 16 | 4 | 206 | 53 | 16 | 3 | 128 | 28 | 366 | 88 |
| 23,189 | 16 | 3 | 201 | 42 | 16 | 2 | 122 | 24 | 355 | 71 |
| 23,190 | 16 | 3 | 203 | 42 | 16 | 2 | 120 | 24 | 355 | 71 |
| 23,191 | 16 | 3 | 203 | 42 | 16 | 2 | 120 | 24 | 355 | 71 |
| 23,192 | 16 | 3 | 203 | 42 | 16 | 2 | 120 | 24 | 355 | 71 |
| 23,193 | 16 | 3 | 205 | 41 | 16 | 2 | 120 | 24 | 357 | 70 |
| 23,194 | 16 | 3 | 205 | 41 | 16 | 2 | 120 | 24 | 357 | 70 |

|        |    |   |     |    |    |   |     |    |     |    |
|--------|----|---|-----|----|----|---|-----|----|-----|----|
| 23,195 | 16 | 3 | 205 | 26 | 16 | 2 | 120 | 22 | 357 | 53 |
| 23,196 | 16 | 3 | 207 | 25 | 16 | 2 | 120 | 21 | 359 | 51 |
| 23,197 | 16 | 3 | 207 | 25 | 16 | 2 | 120 | 21 | 359 | 51 |
| 23,198 | 16 | 3 | 206 | 25 | 16 | 2 | 120 | 21 | 358 | 51 |
| 23,199 | 16 | 3 | 206 | 25 | 16 | 2 | 119 | 21 | 357 | 51 |
| 23,200 | 16 | 1 | 205 | 25 | 16 | 2 | 119 | 20 | 356 | 48 |
| 23,201 | 16 | 1 | 204 | 25 | 17 | 2 | 119 | 20 | 356 | 48 |
| 23,202 | 20 | 1 | 218 | 25 | 19 | 2 | 126 | 19 | 383 | 47 |
| 23,203 | 18 | 1 | 212 | 25 | 19 | 2 | 127 | 19 | 376 | 47 |
| 23,204 | 18 | 1 | 212 | 25 | 19 | 2 | 127 | 19 | 376 | 47 |
| 23,205 | 15 | 1 | 213 | 26 | 19 | 2 | 126 | 19 | 373 | 48 |
| 23,206 | 19 | 1 | 233 | 28 | 20 | 2 | 141 | 21 | 413 | 52 |
| 23,207 | 20 | 1 | 244 | 31 | 18 | 4 | 153 | 25 | 435 | 61 |
| 23,208 | 19 | 1 | 238 | 29 | 18 | 4 | 152 | 22 | 427 | 56 |
| 23,209 | 17 | 1 | 216 | 28 | 14 | 3 | 140 | 22 | 387 | 54 |
| 23,210 | 11 | 1 | 107 | 23 | 10 | 3 | 76  | 18 | 204 | 45 |
| 23,211 | 11 | 1 | 100 | 24 | 10 | 3 | 72  | 18 | 193 | 46 |
| 23,212 | 9  | 1 | 82  | 24 | 4  | 3 | 48  | 18 | 143 | 46 |
| 23,213 | 10 | 1 | 83  | 24 | 4  | 3 | 48  | 18 | 145 | 46 |
| 23,214 | 10 | 1 | 82  | 21 | 4  | 3 | 45  | 18 | 141 | 43 |
| 23,215 | 10 | 1 | 81  | 18 | 7  | 3 | 44  | 17 | 142 | 39 |
| 23,216 | 10 | 1 | 82  | 18 | 6  | 3 | 45  | 17 | 143 | 39 |
| 23,217 | 10 | 1 | 77  | 18 | 6  | 3 | 44  | 17 | 137 | 39 |
| 23,218 | 10 | 1 | 77  | 14 | 7  | 3 | 43  | 14 | 137 | 32 |
| 23,219 | 10 | 2 | 76  | 14 | 7  | 3 | 43  | 15 | 136 | 34 |
| 23,220 | 10 | 1 | 83  | 10 | 7  | 3 | 45  | 16 | 145 | 30 |
| 23,221 | 10 | 1 | 83  | 10 | 7  | 3 | 45  | 16 | 145 | 30 |
| 23,222 | 10 | 1 | 89  | 10 | 8  | 3 | 46  | 16 | 153 | 30 |
| 23,223 | 10 | 3 | 89  | 10 | 8  | 3 | 46  | 18 | 153 | 34 |
| 23,224 | 10 | 3 | 89  | 10 | 8  | 3 | 45  | 18 | 152 | 34 |
| 23,225 | 11 | 3 | 95  | 10 | 8  | 3 | 46  | 18 | 160 | 34 |
| 23,226 | 11 | 3 | 97  | 10 | 8  | 3 | 46  | 19 | 162 | 35 |
| 23,227 | 11 | 3 | 97  | 10 | 8  | 3 | 46  | 19 | 162 | 35 |
| 23,228 | 11 | 3 | 97  | 10 | 8  | 3 | 46  | 19 | 162 | 35 |
| 23,229 | 11 | 3 | 100 | 10 | 8  | 3 | 47  | 19 | 166 | 35 |
| 23,230 | 11 | 3 | 103 | 9  | 8  | 3 | 51  | 20 | 173 | 35 |
| 23,231 | 12 | 3 | 102 | 10 | 8  | 3 | 53  | 21 | 175 | 37 |
| 23,232 | 12 | 3 | 103 | 10 | 8  | 3 | 53  | 19 | 176 | 35 |
| 23,233 | 12 | 3 | 103 | 10 | 8  | 3 | 53  | 19 | 176 | 35 |
| 23,234 | 12 | 3 | 103 | 10 | 8  | 3 | 53  | 21 | 176 | 37 |
| 23,235 | 12 | 3 | 103 | 10 | 8  | 3 | 53  | 20 | 176 | 36 |

|        |    |   |     |    |    |   |    |    |     |     |
|--------|----|---|-----|----|----|---|----|----|-----|-----|
| 23,236 | 12 | 3 | 104 | 11 | 8  | 3 | 53 | 20 | 177 | 37  |
| 23,237 | 12 | 3 | 104 | 11 | 9  | 2 | 53 | 18 | 178 | 34  |
| 23,238 | 12 | 3 | 104 | 11 | 9  | 2 | 53 | 18 | 178 | 34  |
| 23,239 | 12 | 3 | 104 | 11 | 9  | 2 | 53 | 18 | 178 | 34  |
| 23,240 | 12 | 3 | 103 | 11 | 9  | 2 | 53 | 18 | 177 | 34  |
| 23,241 | 12 | 3 | 101 | 11 | 9  | 2 | 53 | 18 | 175 | 34  |
| 23,242 | 12 | 3 | 101 | 12 | 9  | 2 | 53 | 18 | 175 | 35  |
| 23,243 | 12 | 3 | 100 | 12 | 9  | 2 | 53 | 18 | 174 | 35  |
| 23,244 | 12 | 3 | 99  | 12 | 9  | 2 | 53 | 18 | 173 | 35  |
| 23,245 | 12 | 3 | 99  | 12 | 9  | 2 | 53 | 18 | 173 | 35  |
| 23,246 | 12 | 3 | 98  | 12 | 9  | 2 | 53 | 18 | 172 | 35  |
| 23,247 | 12 | 3 | 97  | 12 | 9  | 2 | 53 | 18 | 171 | 35  |
| 23,248 | 13 | 3 | 97  | 12 | 9  | 2 | 55 | 18 | 174 | 35  |
| 23,249 | 14 | 3 | 103 | 12 | 9  | 2 | 55 | 18 | 181 | 35  |
| 23,250 | 14 | 3 | 103 | 12 | 9  | 2 | 55 | 18 | 181 | 35  |
| 23,251 | 15 | 3 | 108 | 12 | 9  | 2 | 55 | 21 | 187 | 38  |
| 23,252 | 15 | 3 | 113 | 12 | 10 | 2 | 60 | 22 | 198 | 39  |
| 23,253 | 11 | 3 | 99  | 12 | 8  | 2 | 53 | 22 | 171 | 39  |
| 23,254 | 11 | 3 | 98  | 14 | 7  | 2 | 52 | 26 | 168 | 45  |
| 23,255 | 15 | 3 | 105 | 22 | 8  | 4 | 58 | 34 | 186 | 63  |
| 23,256 | 16 | 3 | 105 | 25 | 8  | 4 | 57 | 44 | 186 | 76  |
| 23,257 | 12 | 3 | 89  | 20 | 7  | 2 | 42 | 39 | 150 | 64  |
| 23,258 | 11 | 3 | 81  | 21 | 7  | 2 | 30 | 41 | 129 | 67  |
| 23,259 | 11 | 3 | 79  | 21 | 7  | 2 | 31 | 41 | 128 | 67  |
| 23,260 | 12 | 3 | 93  | 21 | 8  | 2 | 37 | 41 | 150 | 67  |
| 23,261 | 12 | 3 | 93  | 20 | 8  | 2 | 37 | 41 | 150 | 66  |
| 23,262 | 12 | 3 | 98  | 20 | 8  | 2 | 40 | 44 | 158 | 69  |
| 23,263 | 12 | 3 | 98  | 22 | 8  | 2 | 41 | 44 | 159 | 71  |
| 23,264 | 12 | 3 | 103 | 22 | 8  | 2 | 42 | 44 | 165 | 71  |
| 23,265 | 12 | 3 | 109 | 22 | 8  | 2 | 44 | 45 | 173 | 72  |
| 23,266 | 12 | 5 | 109 | 26 | 5  | 5 | 44 | 84 | 170 | 120 |
| 23,267 | 12 | 5 | 107 | 28 | 5  | 5 | 43 | 86 | 167 | 124 |
| 23,268 | 14 | 5 | 108 | 28 | 5  | 6 | 46 | 94 | 173 | 133 |
| 23,269 | 14 | 5 | 107 | 31 | 5  | 6 | 46 | 94 | 172 | 136 |
| 23,270 | 14 | 4 | 106 | 32 | 5  | 7 | 46 | 94 | 171 | 137 |
| 23,271 | 14 | 4 | 103 | 32 | 5  | 7 | 45 | 93 | 167 | 136 |
| 23,272 | 14 | 4 | 98  | 33 | 4  | 7 | 44 | 93 | 160 | 137 |
| 23,273 | 14 | 2 | 97  | 33 | 4  | 7 | 44 | 91 | 159 | 133 |
| 23,274 | 14 | 2 | 97  | 33 | 4  | 7 | 44 | 92 | 159 | 134 |
| 23,275 | 13 | 2 | 91  | 33 | 4  | 7 | 43 | 92 | 151 | 134 |
| 23,276 | 13 | 2 | 89  | 35 | 4  | 7 | 43 | 95 | 149 | 139 |



|        |    |    |    |    |   |    |    |     |     |     |
|--------|----|----|----|----|---|----|----|-----|-----|-----|
| 23,277 | 13 | 2  | 89 | 37 | 4 | 8  | 43 | 95  | 149 | 142 |
| 23,278 | 13 | 2  | 89 | 37 | 4 | 8  | 43 | 98  | 149 | 145 |
| 23,279 | 13 | 2  | 88 | 37 | 4 | 8  | 43 | 98  | 148 | 145 |
| 23,280 | 14 | 2  | 85 | 40 | 4 | 10 | 42 | 100 | 145 | 152 |
| 23,281 | 14 | 2  | 82 | 40 | 4 | 10 | 38 | 99  | 138 | 151 |
| 23,282 | 13 | 2  | 81 | 39 | 4 | 10 | 36 | 98  | 134 | 149 |
| 23,283 | 13 | 3  | 81 | 40 | 4 | 10 | 36 | 101 | 134 | 154 |
| 23,284 | 13 | 3  | 81 | 40 | 4 | 10 | 36 | 102 | 134 | 155 |
| 23,285 | 13 | 3  | 81 | 40 | 4 | 10 | 36 | 100 | 134 | 153 |
| 23,286 | 13 | 3  | 80 | 40 | 4 | 10 | 36 | 100 | 133 | 153 |
| 23,287 | 13 | 3  | 80 | 39 | 4 | 10 | 36 | 100 | 133 | 152 |
| 23,288 | 13 | 3  | 80 | 38 | 3 | 10 | 36 | 100 | 132 | 151 |
| 23,289 | 13 | 3  | 80 | 38 | 3 | 10 | 36 | 100 | 132 | 151 |
| 23,290 | 13 | 3  | 80 | 38 | 3 | 10 | 36 | 100 | 132 | 151 |
| 23,291 | 13 | 3  | 80 | 39 | 3 | 10 | 36 | 100 | 132 | 152 |
| 23,292 | 13 | 3  | 81 | 39 | 3 | 10 | 38 | 100 | 135 | 152 |
| 23,293 | 13 | 3  | 81 | 38 | 3 | 10 | 39 | 100 | 136 | 151 |
| 23,294 | 13 | 3  | 82 | 39 | 3 | 10 | 39 | 101 | 137 | 153 |
| 23,295 | 13 | 3  | 82 | 39 | 3 | 10 | 39 | 101 | 137 | 153 |
| 23,296 | 13 | 3  | 83 | 39 | 3 | 10 | 39 | 101 | 138 | 153 |
| 23,297 | 13 | 3  | 83 | 39 | 3 | 10 | 39 | 101 | 138 | 153 |
| 23,298 | 12 | 3  | 84 | 41 | 3 | 10 | 37 | 101 | 136 | 155 |
| 23,299 | 12 | 3  | 84 | 41 | 3 | 10 | 37 | 101 | 136 | 155 |
| 23,300 | 11 | 4  | 89 | 43 | 4 | 10 | 46 | 101 | 150 | 158 |
| 23,301 | 17 | 4  | 97 | 43 | 4 | 10 | 60 | 103 | 178 | 160 |
| 23,302 | 16 | 4  | 93 | 47 | 4 | 10 | 60 | 102 | 173 | 163 |
| 23,303 | 16 | 4  | 87 | 47 | 3 | 10 | 55 | 101 | 161 | 162 |
| 23,304 | 16 | 4  | 91 | 46 | 3 | 10 | 58 | 98  | 168 | 158 |
| 23,305 | 16 | 7  | 91 | 52 | 3 | 12 | 58 | 101 | 168 | 172 |
| 23,306 | 12 | 7  | 79 | 46 | 2 | 10 | 51 | 93  | 144 | 156 |
| 23,307 | 12 | 10 | 77 | 43 | 2 | 10 | 56 | 90  | 147 | 153 |
| 23,308 | 12 | 10 | 75 | 45 | 2 | 10 | 56 | 90  | 145 | 155 |
| 23,309 | 12 | 10 | 71 | 46 | 2 | 10 | 52 | 89  | 137 | 155 |
| 23,310 | 12 | 12 | 70 | 59 | 2 | 11 | 51 | 104 | 135 | 186 |
| 23,311 | 11 | 12 | 56 | 63 | 1 | 11 | 45 | 105 | 113 | 191 |
| 23,312 | 13 | 12 | 76 | 66 | 3 | 11 | 66 | 105 | 158 | 194 |
| 23,313 | 15 | 13 | 79 | 73 | 4 | 13 | 63 | 105 | 161 | 204 |
| 23,314 | 14 | 13 | 91 | 71 | 6 | 13 | 69 | 105 | 180 | 202 |
| 23,315 | 14 | 13 | 90 | 73 | 6 | 13 | 70 | 107 | 180 | 206 |
| 23,316 | 14 | 14 | 84 | 79 | 6 | 13 | 68 | 108 | 172 | 214 |
| 23,317 | 12 | 12 | 82 | 75 | 6 | 10 | 65 | 69  | 165 | 166 |

|        |    |    |    |    |    |   |    |    |     |     |
|--------|----|----|----|----|----|---|----|----|-----|-----|
| 23,318 | 12 | 12 | 86 | 73 | 10 | 9 | 72 | 59 | 180 | 153 |
| 23,319 | 12 | 12 | 86 | 69 | 10 | 9 | 72 | 58 | 180 | 148 |
| 23,320 | 12 | 12 | 86 | 68 | 10 | 8 | 72 | 59 | 180 | 147 |
| 23,321 | 12 | 12 | 86 | 69 | 10 | 8 | 71 | 61 | 179 | 150 |
| 23,322 | 12 | 12 | 83 | 68 | 10 | 8 | 71 | 61 | 176 | 149 |
| 23,323 | 12 | 12 | 83 | 68 | 10 | 8 | 71 | 61 | 176 | 149 |
| 23,324 | 12 | 12 | 83 | 69 | 10 | 8 | 71 | 62 | 176 | 151 |
| 23,325 | 12 | 12 | 83 | 71 | 10 | 8 | 71 | 61 | 176 | 152 |
| 23,326 | 12 | 12 | 82 | 71 | 10 | 8 | 71 | 61 | 175 | 152 |
| 23,327 | 13 | 12 | 82 | 68 | 10 | 7 | 71 | 57 | 176 | 144 |
| 23,328 | 13 | 12 | 83 | 68 | 10 | 7 | 71 | 57 | 177 | 144 |
| 23,329 | 13 | 12 | 83 | 70 | 10 | 7 | 71 | 54 | 177 | 143 |
| 23,330 | 13 | 12 | 83 | 67 | 10 | 5 | 71 | 52 | 177 | 136 |
| 23,331 | 12 | 12 | 83 | 68 | 10 | 5 | 71 | 53 | 176 | 138 |
| 23,332 | 12 | 12 | 83 | 68 | 10 | 5 | 71 | 54 | 176 | 139 |
| 23,333 | 12 | 11 | 83 | 67 | 10 | 5 | 71 | 51 | 176 | 134 |
| 23,334 | 12 | 11 | 83 | 67 | 10 | 5 | 71 | 50 | 176 | 133 |
| 23,335 | 12 | 11 | 83 | 67 | 10 | 5 | 71 | 50 | 176 | 133 |
| 23,336 | 12 | 11 | 83 | 67 | 10 | 5 | 71 | 50 | 176 | 133 |
| 23,337 | 12 | 11 | 83 | 68 | 10 | 5 | 71 | 50 | 176 | 134 |
| 23,338 | 12 | 11 | 83 | 68 | 10 | 5 | 71 | 51 | 176 | 135 |
| 23,339 | 12 | 11 | 83 | 68 | 10 | 5 | 71 | 51 | 176 | 135 |
| 23,340 | 12 | 11 | 83 | 68 | 10 | 5 | 71 | 51 | 176 | 135 |
| 23,341 | 12 | 11 | 83 | 68 | 10 | 5 | 71 | 51 | 176 | 135 |
| 23,342 | 12 | 11 | 83 | 67 | 10 | 5 | 74 | 51 | 179 | 134 |
| 23,343 | 12 | 12 | 82 | 67 | 10 | 5 | 72 | 51 | 176 | 135 |
| 23,344 | 12 | 12 | 84 | 66 | 10 | 5 | 72 | 50 | 178 | 133 |
| 23,345 | 12 | 12 | 83 | 66 | 10 | 5 | 72 | 50 | 177 | 133 |
| 23,346 | 12 | 12 | 82 | 67 | 10 | 5 | 72 | 50 | 176 | 134 |
| 23,347 | 12 | 13 | 82 | 67 | 10 | 5 | 72 | 51 | 176 | 136 |
| 23,348 | 12 | 13 | 81 | 65 | 10 | 5 | 72 | 51 | 175 | 134 |
| 23,349 | 12 | 13 | 81 | 65 | 10 | 5 | 72 | 51 | 175 | 134 |
| 23,350 | 12 | 12 | 71 | 63 | 9  | 5 | 63 | 51 | 155 | 131 |
| 23,351 | 11 | 12 | 68 | 63 | 9  | 5 | 63 | 51 | 151 | 131 |
| 23,352 | 6  | 12 | 62 | 59 | 9  | 5 | 49 | 47 | 126 | 123 |
| 23,353 | 6  | 12 | 61 | 59 | 9  | 5 | 48 | 47 | 124 | 123 |
| 23,354 | 6  | 12 | 61 | 58 | 9  | 5 | 46 | 46 | 122 | 121 |
| 23,355 | 6  | 12 | 58 | 58 | 9  | 5 | 46 | 46 | 119 | 121 |
| 23,356 | 6  | 9  | 54 | 50 | 9  | 3 | 45 | 43 | 114 | 105 |
| 23,357 | 5  | 9  | 54 | 50 | 9  | 3 | 42 | 43 | 110 | 105 |
| 23,358 | 5  | 6  | 54 | 48 | 9  | 3 | 41 | 35 | 109 | 92  |

|        |   |    |    |     |   |    |    |     |     |     |
|--------|---|----|----|-----|---|----|----|-----|-----|-----|
| 23,359 | 5 | 4  | 53 | 29  | 9 | 2  | 41 | 18  | 108 | 53  |
| 23,360 | 5 | 4  | 52 | 30  | 9 | 2  | 41 | 19  | 107 | 55  |
| 23,361 | 5 | 5  | 43 | 28  | 9 | 2  | 37 | 20  | 94  | 55  |
| 23,362 | 5 | 5  | 42 | 28  | 9 | 2  | 35 | 23  | 91  | 58  |
| 23,363 | 3 | 5  | 32 | 29  | 7 | 2  | 20 | 24  | 62  | 60  |
| 23,364 | 1 | 4  | 25 | 22  | 6 | 0  | 20 | 22  | 52  | 48  |
| 23,365 | 1 | 4  | 9  | 20  | 4 | 0  | 12 | 19  | 26  | 43  |
| 23,366 | 1 | 4  | 6  | 20  | 4 | 0  | 11 | 19  | 22  | 43  |
| 23,367 | 1 | 3  | 2  | 14  | 0 | 0  | 6  | 18  | 9   | 35  |
| 23,368 | 1 | 3  | 2  | 14  | 0 | 0  | 4  | 16  | 7   | 33  |
| 23,369 | 1 | 4  | 2  | 17  | 0 | 0  | 4  | 18  | 7   | 39  |
| 23,370 | 1 | 4  | 2  | 17  | 0 | 0  | 4  | 17  | 7   | 38  |
| 23,371 | 1 | 4  | 2  | 24  | 0 | 0  | 4  | 21  | 7   | 49  |
| 23,372 | 1 | 4  | 2  | 23  | 0 | 0  | 5  | 21  | 8   | 48  |
| 23,373 | 1 | 10 | 2  | 49  | 0 | 0  | 5  | 46  | 8   | 105 |
| 23,374 | 1 | 10 | 2  | 50  | 0 | 0  | 5  | 46  | 8   | 106 |
| 23,375 | 1 | 10 | 2  | 49  | 0 | 0  | 5  | 47  | 8   | 106 |
| 23,376 | 1 | 10 | 3  | 56  | 0 | 0  | 5  | 60  | 9   | 126 |
| 23,377 | 0 | 11 | 4  | 58  | 0 | 0  | 6  | 66  | 10  | 135 |
| 23,378 | 0 | 11 | 4  | 58  | 0 | 0  | 6  | 66  | 10  | 135 |
| 23,379 | 0 | 11 | 6  | 59  | 0 | 0  | 13 | 66  | 19  | 136 |
| 23,380 | 1 | 16 | 19 | 109 | 6 | 1  | 27 | 90  | 53  | 216 |
| 23,381 | 1 | 16 | 19 | 110 | 6 | 1  | 27 | 91  | 53  | 218 |
| 23,382 | 1 | 18 | 26 | 110 | 9 | 1  | 31 | 90  | 67  | 219 |
| 23,383 | 1 | 18 | 26 | 110 | 9 | 1  | 31 | 89  | 67  | 218 |
| 23,384 | 1 | 18 | 26 | 110 | 9 | 1  | 31 | 89  | 67  | 218 |
| 23,385 | 1 | 18 | 26 | 110 | 9 | 1  | 31 | 89  | 67  | 218 |
| 23,386 | 1 | 18 | 26 | 110 | 9 | 1  | 31 | 89  | 67  | 218 |
| 23,387 | 1 | 18 | 26 | 110 | 9 | 1  | 31 | 89  | 67  | 218 |
| 23,388 | 1 | 19 | 26 | 111 | 9 | 1  | 31 | 91  | 67  | 222 |
| 23,389 | 1 | 19 | 26 | 123 | 9 | 3  | 31 | 104 | 67  | 249 |
| 23,390 | 1 | 21 | 26 | 140 | 9 | 5  | 31 | 118 | 67  | 284 |
| 23,391 | 1 | 71 | 26 | 352 | 9 | 33 | 31 | 331 | 67  | 787 |
| 23,392 | 1 | 71 | 26 | 356 | 9 | 33 | 31 | 332 | 67  | 792 |
| 23,393 | 1 | 71 | 27 | 374 | 9 | 35 | 28 | 342 | 65  | 822 |
| 23,394 | 1 | 75 | 27 | 387 | 9 | 35 | 28 | 347 | 65  | 844 |
| 23,395 | 1 | 75 | 25 | 387 | 9 | 35 | 27 | 348 | 62  | 845 |
| 23,396 | 1 | 75 | 27 | 391 | 9 | 35 | 28 | 353 | 65  | 854 |
| 23,397 | 1 | 78 | 27 | 395 | 9 | 35 | 28 | 356 | 65  | 864 |
| 23,398 | 1 | 77 | 30 | 395 | 9 | 36 | 28 | 358 | 68  | 866 |
| 23,399 | 1 | 78 | 30 | 396 | 9 | 36 | 28 | 361 | 68  | 871 |

|        |   |    |    |     |   |    |    |     |    |       |
|--------|---|----|----|-----|---|----|----|-----|----|-------|
| 23,400 | 1 | 78 | 32 | 402 | 9 | 36 | 28 | 361 | 70 | 877   |
| 23,401 | 1 | 78 | 32 | 402 | 9 | 36 | 28 | 361 | 70 | 877   |
| 23,402 | 1 | 78 | 32 | 404 | 9 | 36 | 28 | 361 | 70 | 879   |
| 23,403 | 1 | 78 | 32 | 404 | 9 | 36 | 28 | 361 | 70 | 879   |
| 23,404 | 1 | 78 | 32 | 406 | 9 | 36 | 28 | 363 | 70 | 883   |
| 23,405 | 1 | 79 | 32 | 406 | 9 | 36 | 28 | 363 | 70 | 884   |
| 23,406 | 1 | 79 | 32 | 412 | 9 | 36 | 28 | 363 | 70 | 890   |
| 23,407 | 1 | 79 | 32 | 413 | 9 | 36 | 28 | 363 | 70 | 891   |
| 23,408 | 1 | 79 | 32 | 414 | 9 | 36 | 28 | 363 | 70 | 892   |
| 23,409 | 1 | 80 | 32 | 415 | 9 | 36 | 28 | 363 | 70 | 894   |
| 23,410 | 1 | 80 | 32 | 414 | 9 | 36 | 28 | 363 | 70 | 893   |
| 23,411 | 1 | 79 | 32 | 414 | 9 | 37 | 28 | 364 | 70 | 894   |
| 23,412 | 1 | 79 | 32 | 415 | 9 | 37 | 28 | 364 | 70 | 895   |
| 23,413 | 1 | 79 | 32 | 418 | 9 | 37 | 28 | 361 | 70 | 895   |
| 23,414 | 1 | 79 | 32 | 418 | 9 | 39 | 28 | 361 | 70 | 897   |
| 23,415 | 1 | 79 | 32 | 418 | 9 | 39 | 28 | 361 | 70 | 897   |
| 23,416 | 1 | 79 | 32 | 419 | 9 | 39 | 28 | 361 | 70 | 898   |
| 23,417 | 1 | 79 | 32 | 419 | 9 | 39 | 28 | 361 | 70 | 898   |
| 23,418 | 1 | 80 | 32 | 419 | 9 | 39 | 28 | 362 | 70 | 900   |
| 23,419 | 1 | 80 | 32 | 422 | 9 | 39 | 28 | 362 | 70 | 903   |
| 23,420 | 1 | 79 | 32 | 419 | 9 | 39 | 28 | 361 | 70 | 898   |
| 23,421 | 1 | 79 | 33 | 412 | 9 | 39 | 28 | 356 | 71 | 886   |
| 23,422 | 1 | 79 | 33 | 412 | 9 | 39 | 27 | 356 | 70 | 886   |
| 23,423 | 1 | 80 | 33 | 414 | 9 | 39 | 27 | 355 | 70 | 888   |
| 23,424 | 1 | 74 | 33 | 395 | 9 | 39 | 27 | 335 | 70 | 843   |
| 23,425 | 1 | 74 | 33 | 402 | 9 | 39 | 27 | 341 | 70 | 856   |
| 23,426 | 2 | 75 | 32 | 467 | 9 | 44 | 28 | 360 | 71 | 946   |
| 23,427 | 2 | 76 | 32 | 498 | 9 | 49 | 28 | 371 | 71 | 994   |
| 23,428 | 2 | 77 | 32 | 520 | 9 | 51 | 28 | 375 | 71 | 1,023 |
| 23,429 | 3 | 78 | 30 | 547 | 9 | 58 | 22 | 398 | 64 | 1,081 |
| 23,430 | 2 | 78 | 26 | 564 | 7 | 59 | 21 | 401 | 56 | 1,102 |
| 23,431 | 2 | 77 | 17 | 528 | 3 | 59 | 9  | 381 | 31 | 1,045 |
| 23,432 | 2 | 82 | 10 | 554 | 0 | 63 | 5  | 403 | 17 | 1,102 |
| 23,433 | 2 | 82 | 10 | 555 | 0 | 63 | 5  | 404 | 17 | 1,104 |
| 23,434 | 2 | 82 | 10 | 560 | 0 | 63 | 5  | 407 | 17 | 1,112 |
| 23,435 | 2 | 81 | 10 | 559 | 0 | 63 | 5  | 405 | 17 | 1,108 |
| 23,436 | 2 | 81 | 10 | 562 | 0 | 63 | 5  | 406 | 17 | 1,112 |
| 23,437 | 2 | 81 | 10 | 564 | 0 | 63 | 5  | 407 | 17 | 1,115 |
| 23,438 | 2 | 81 | 10 | 565 | 0 | 63 | 5  | 408 | 17 | 1,117 |
| 23,439 | 2 | 81 | 11 | 568 | 0 | 65 | 5  | 410 | 18 | 1,124 |
| 23,440 | 2 | 81 | 11 | 558 | 0 | 63 | 5  | 396 | 18 | 1,098 |

|        |   |    |    |     |   |    |    |     |    |     |
|--------|---|----|----|-----|---|----|----|-----|----|-----|
| 23,441 | 2 | 30 | 15 | 332 | 0 | 33 | 7  | 174 | 24 | 569 |
| 23,442 | 2 | 33 | 15 | 332 | 0 | 34 | 7  | 179 | 24 | 578 |
| 23,443 | 2 | 33 | 14 | 332 | 0 | 34 | 7  | 188 | 23 | 587 |
| 23,444 | 2 | 34 | 15 | 323 | 0 | 35 | 9  | 187 | 26 | 579 |
| 23,445 | 2 | 30 | 15 | 321 | 0 | 36 | 9  | 191 | 26 | 578 |
| 23,446 | 2 | 31 | 14 | 335 | 0 | 38 | 13 | 196 | 29 | 600 |
| 23,447 | 2 | 31 | 13 | 334 | 0 | 37 | 12 | 193 | 27 | 595 |
| 23,448 | 2 | 32 | 10 | 347 | 0 | 38 | 12 | 211 | 24 | 628 |
| 23,449 | 2 | 32 | 10 | 357 | 0 | 38 | 12 | 217 | 24 | 644 |
| 23,450 | 2 | 32 | 10 | 378 | 0 | 40 | 15 | 264 | 27 | 714 |
| 23,451 | 2 | 32 | 8  | 373 | 0 | 40 | 15 | 264 | 25 | 709 |
| 23,452 | 3 | 32 | 13 | 400 | 2 | 42 | 31 | 299 | 49 | 773 |
| 23,453 | 3 | 34 | 17 | 448 | 2 | 46 | 33 | 337 | 55 | 865 |
| 23,454 | 3 | 35 | 18 | 460 | 2 | 46 | 34 | 346 | 57 | 887 |
| 23,455 | 3 | 34 | 18 | 467 | 2 | 46 | 37 | 349 | 60 | 896 |
| 23,456 | 3 | 34 | 18 | 462 | 2 | 46 | 37 | 350 | 60 | 892 |
| 23,457 | 3 | 34 | 18 | 461 | 2 | 46 | 37 | 350 | 60 | 891 |
| 23,458 | 3 | 34 | 18 | 460 | 2 | 46 | 37 | 350 | 60 | 890 |
| 23,459 | 3 | 33 | 19 | 458 | 2 | 46 | 40 | 350 | 64 | 887 |
| 23,460 | 3 | 33 | 19 | 458 | 2 | 46 | 40 | 350 | 64 | 887 |
| 23,461 | 3 | 33 | 19 | 459 | 2 | 46 | 40 | 350 | 64 | 888 |
| 23,462 | 3 | 33 | 21 | 459 | 2 | 45 | 40 | 348 | 66 | 885 |
| 23,463 | 5 | 33 | 21 | 459 | 2 | 45 | 40 | 349 | 68 | 886 |
| 23,464 | 5 | 33 | 21 | 456 | 2 | 45 | 40 | 349 | 68 | 883 |
| 23,465 | 5 | 36 | 21 | 467 | 2 | 44 | 42 | 361 | 70 | 908 |
| 23,466 | 5 | 37 | 21 | 471 | 2 | 44 | 42 | 360 | 70 | 912 |
| 23,467 | 6 | 37 | 22 | 471 | 2 | 44 | 42 | 360 | 72 | 912 |
| 23,468 | 6 | 37 | 23 | 471 | 2 | 44 | 45 | 360 | 76 | 912 |
| 23,469 | 6 | 36 | 24 | 471 | 2 | 44 | 46 | 359 | 78 | 910 |
| 23,470 | 6 | 37 | 24 | 468 | 2 | 44 | 48 | 359 | 80 | 908 |
| 23,471 | 6 | 37 | 24 | 471 | 2 | 44 | 48 | 360 | 80 | 912 |
| 23,472 | 6 | 39 | 23 | 475 | 2 | 44 | 48 | 361 | 79 | 919 |
| 23,473 | 6 | 40 | 23 | 481 | 2 | 44 | 48 | 372 | 79 | 937 |
| 23,474 | 6 | 39 | 23 | 479 | 2 | 44 | 48 | 373 | 79 | 935 |
| 23,475 | 7 | 39 | 23 | 473 | 2 | 44 | 48 | 370 | 80 | 926 |
| 23,476 | 6 | 39 | 23 | 464 | 2 | 44 | 47 | 363 | 78 | 910 |
| 23,477 | 6 | 37 | 23 | 360 | 2 | 35 | 48 | 320 | 79 | 752 |
| 23,478 | 6 | 35 | 23 | 335 | 2 | 33 | 48 | 310 | 79 | 713 |
| 23,479 | 6 | 35 | 22 | 335 | 2 | 33 | 47 | 310 | 77 | 713 |
| 23,480 | 5 | 34 | 22 | 310 | 3 | 25 | 49 | 286 | 79 | 655 |
| 23,481 | 5 | 30 | 23 | 277 | 3 | 23 | 49 | 280 | 80 | 610 |

|        |   |    |    |     |   |    |    |     |    |     |
|--------|---|----|----|-----|---|----|----|-----|----|-----|
| 23,482 | 5 | 30 | 23 | 277 | 3 | 23 | 49 | 280 | 80 | 610 |
| 23,483 | 6 | 23 | 24 | 247 | 3 | 19 | 52 | 255 | 85 | 544 |
| 23,484 | 6 | 23 | 24 | 242 | 3 | 19 | 53 | 253 | 86 | 537 |
| 23,485 | 6 | 23 | 24 | 241 | 3 | 19 | 53 | 253 | 86 | 536 |
| 23,486 | 6 | 23 | 24 | 242 | 3 | 19 | 53 | 254 | 86 | 538 |
| 23,487 | 6 | 23 | 25 | 247 | 3 | 19 | 53 | 254 | 87 | 543 |
| 23,488 | 6 | 23 | 25 | 245 | 3 | 19 | 53 | 253 | 87 | 540 |
| 23,489 | 6 | 23 | 25 | 241 | 3 | 17 | 53 | 249 | 87 | 530 |
| 23,490 | 6 | 22 | 24 | 238 | 3 | 17 | 53 | 246 | 86 | 523 |
| 23,491 | 6 | 22 | 22 | 256 | 3 | 17 | 52 | 260 | 83 | 555 |
| 23,492 | 6 | 22 | 20 | 258 | 3 | 17 | 51 | 260 | 80 | 557 |
| 23,493 | 6 | 21 | 21 | 264 | 3 | 16 | 53 | 266 | 83 | 567 |
| 23,494 | 7 | 21 | 21 | 261 | 3 | 16 | 52 | 258 | 83 | 556 |
| 23,495 | 7 | 19 | 20 | 241 | 3 | 12 | 49 | 240 | 79 | 512 |
| 23,496 | 8 | 18 | 20 | 227 | 3 | 10 | 50 | 234 | 81 | 489 |
| 23,497 | 8 | 14 | 22 | 207 | 4 | 9  | 50 | 212 | 84 | 442 |
| 23,498 | 8 | 14 | 22 | 220 | 4 | 10 | 50 | 221 | 84 | 465 |
| 23,499 | 8 | 14 | 22 | 221 | 4 | 10 | 47 | 223 | 81 | 468 |
| 23,500 | 8 | 14 | 22 | 212 | 4 | 10 | 46 | 218 | 80 | 454 |
| 23,501 | 8 | 13 | 22 | 192 | 4 | 8  | 46 | 169 | 80 | 382 |
| 23,502 | 8 | 13 | 19 | 192 | 2 | 8  | 41 | 166 | 70 | 379 |
| 23,503 | 7 | 11 | 17 | 115 | 2 | 2  | 30 | 97  | 56 | 225 |
| 23,504 | 7 | 10 | 13 | 104 | 2 | 2  | 32 | 86  | 54 | 202 |
| 23,505 | 7 | 10 | 12 | 104 | 2 | 2  | 31 | 86  | 52 | 202 |
| 23,506 | 7 | 12 | 12 | 103 | 2 | 2  | 29 | 84  | 50 | 201 |
| 23,507 | 7 | 12 | 12 | 108 | 2 | 2  | 29 | 83  | 50 | 205 |
| 23,508 | 7 | 13 | 12 | 108 | 2 | 2  | 31 | 83  | 52 | 206 |
| 23,509 | 7 | 15 | 12 | 110 | 2 | 2  | 31 | 84  | 52 | 211 |
| 23,510 | 7 | 15 | 11 | 109 | 2 | 2  | 28 | 82  | 48 | 208 |
| 23,511 | 7 | 15 | 13 | 110 | 2 | 2  | 28 | 82  | 50 | 209 |
| 23,512 | 7 | 15 | 13 | 124 | 2 | 4  | 29 | 103 | 51 | 246 |
| 23,513 | 5 | 16 | 13 | 148 | 2 | 6  | 29 | 115 | 49 | 285 |
| 23,514 | 5 | 21 | 16 | 205 | 2 | 8  | 34 | 131 | 57 | 365 |
| 23,515 | 5 | 22 | 22 | 223 | 2 | 8  | 37 | 137 | 66 | 390 |
| 23,516 | 5 | 20 | 22 | 220 | 2 | 8  | 35 | 125 | 64 | 373 |
| 23,517 | 4 | 24 | 22 | 249 | 2 | 13 | 35 | 163 | 63 | 449 |
| 23,518 | 4 | 24 | 21 | 255 | 2 | 13 | 32 | 168 | 59 | 460 |
| 23,519 | 4 | 46 | 20 | 396 | 2 | 22 | 31 | 244 | 57 | 708 |
| 23,520 | 4 | 46 | 20 | 404 | 2 | 22 | 29 | 247 | 55 | 719 |
| 23,521 | 4 | 45 | 20 | 416 | 2 | 24 | 29 | 248 | 55 | 733 |
| 23,522 | 4 | 72 | 20 | 486 | 2 | 28 | 29 | 263 | 55 | 849 |

|        |   |     |    |       |   |    |    |     |    |       |
|--------|---|-----|----|-------|---|----|----|-----|----|-------|
| 23,523 | 4 | 73  | 20 | 500   | 2 | 28 | 29 | 260 | 55 | 861   |
| 23,524 | 4 | 83  | 20 | 538   | 2 | 31 | 29 | 266 | 55 | 918   |
| 23,525 | 4 | 83  | 20 | 544   | 2 | 31 | 29 | 267 | 55 | 925   |
| 23,526 | 3 | 85  | 20 | 567   | 2 | 31 | 29 | 268 | 54 | 951   |
| 23,527 | 3 | 88  | 20 | 641   | 2 | 34 | 29 | 286 | 54 | 1,049 |
| 23,528 | 3 | 88  | 20 | 647   | 2 | 35 | 28 | 291 | 53 | 1,061 |
| 23,529 | 3 | 89  | 20 | 656   | 2 | 35 | 28 | 293 | 53 | 1,073 |
| 23,530 | 3 | 89  | 20 | 659   | 2 | 35 | 28 | 299 | 53 | 1,082 |
| 23,531 | 3 | 89  | 20 | 687   | 1 | 36 | 25 | 321 | 49 | 1,133 |
| 23,532 | 3 | 90  | 19 | 691   | 1 | 36 | 24 | 327 | 47 | 1,144 |
| 23,533 | 2 | 93  | 19 | 714   | 1 | 38 | 23 | 348 | 45 | 1,193 |
| 23,534 | 2 | 93  | 18 | 716   | 1 | 38 | 21 | 349 | 42 | 1,196 |
| 23,535 | 2 | 95  | 18 | 718   | 1 | 38 | 20 | 352 | 41 | 1,203 |
| 23,536 | 2 | 97  | 18 | 738   | 1 | 39 | 20 | 366 | 41 | 1,240 |
| 23,537 | 2 | 99  | 18 | 762   | 1 | 39 | 20 | 399 | 41 | 1,299 |
| 23,538 | 2 | 99  | 17 | 767   | 1 | 39 | 20 | 400 | 40 | 1,305 |
| 23,539 | 2 | 99  | 17 | 775   | 1 | 39 | 20 | 405 | 40 | 1,318 |
| 23,540 | 2 | 99  | 18 | 788   | 1 | 39 | 20 | 410 | 41 | 1,336 |
| 23,541 | 2 | 100 | 18 | 783   | 1 | 39 | 20 | 429 | 41 | 1,351 |
| 23,542 | 2 | 100 | 18 | 790   | 1 | 39 | 20 | 432 | 41 | 1,361 |
| 23,543 | 2 | 101 | 18 | 812   | 1 | 39 | 21 | 450 | 42 | 1,402 |
| 23,544 | 2 | 100 | 17 | 817   | 1 | 39 | 20 | 438 | 40 | 1,394 |
| 23,545 | 1 | 103 | 17 | 824   | 1 | 39 | 20 | 444 | 39 | 1,410 |
| 23,546 | 1 | 104 | 17 | 829   | 1 | 39 | 20 | 448 | 39 | 1,420 |
| 23,547 | 0 | 104 | 18 | 835   | 1 | 39 | 18 | 451 | 37 | 1,429 |
| 23,548 | 0 | 107 | 16 | 823   | 0 | 38 | 17 | 445 | 33 | 1,413 |
| 23,549 | 0 | 107 | 16 | 825   | 0 | 39 | 17 | 445 | 33 | 1,416 |
| 23,550 | 0 | 107 | 16 | 822   | 0 | 39 | 17 | 439 | 33 | 1,407 |
| 23,551 | 0 | 107 | 16 | 822   | 0 | 39 | 18 | 437 | 34 | 1,405 |
| 23,552 | 0 | 107 | 20 | 820   | 0 | 39 | 22 | 438 | 42 | 1,404 |
| 23,553 | 0 | 109 | 22 | 857   | 0 | 41 | 24 | 470 | 46 | 1,477 |
| 23,554 | 0 | 111 | 22 | 867   | 0 | 41 | 24 | 480 | 46 | 1,499 |
| 23,555 | 0 | 115 | 23 | 901   | 0 | 46 | 22 | 508 | 45 | 1,570 |
| 23,556 | 0 | 115 | 23 | 907   | 0 | 48 | 21 | 514 | 44 | 1,584 |
| 23,557 | 0 | 112 | 23 | 904   | 0 | 48 | 21 | 515 | 44 | 1,579 |
| 23,558 | 0 | 125 | 27 | 1,013 | 0 | 60 | 22 | 653 | 49 | 1,851 |
| 23,559 | 0 | 125 | 27 | 1,046 | 0 | 65 | 20 | 673 | 47 | 1,909 |
| 23,560 | 0 | 130 | 28 | 1,232 | 0 | 67 | 21 | 779 | 49 | 2,208 |
| 23,561 | 0 | 133 | 28 | 1,266 | 0 | 67 | 21 | 800 | 49 | 2,266 |
| 23,562 | 0 | 134 | 26 | 1,325 | 1 | 70 | 21 | 816 | 48 | 2,345 |
| 23,563 | 0 | 136 | 24 | 1,323 | 1 | 69 | 20 | 812 | 45 | 2,340 |

|        |   |     |    |       |   |    |    |     |    |       |
|--------|---|-----|----|-------|---|----|----|-----|----|-------|
| 23,564 | 0 | 141 | 22 | 1,385 | 1 | 72 | 20 | 846 | 43 | 2,444 |
| 23,565 | 0 | 143 | 21 | 1,373 | 1 | 70 | 15 | 870 | 37 | 2,456 |
| 23,566 | 0 | 142 | 15 | 1,362 | 1 | 70 | 12 | 865 | 28 | 2,439 |
| 23,567 | 0 | 141 | 15 | 1,353 | 1 | 69 | 13 | 864 | 29 | 2,427 |
| 23,568 | 0 | 136 | 15 | 1,313 | 1 | 64 | 13 | 821 | 29 | 2,334 |
| 23,569 | 0 | 114 | 15 | 1,172 | 1 | 55 | 14 | 747 | 30 | 2,088 |
| 23,570 | 0 | 114 | 15 | 1,172 | 1 | 55 | 14 | 748 | 30 | 2,089 |
| 23,571 | 0 | 114 | 15 | 1,167 | 1 | 56 | 14 | 746 | 30 | 2,083 |
| 23,572 | 0 | 114 | 16 | 1,156 | 1 | 54 | 14 | 745 | 31 | 2,069 |
| 23,573 | 0 | 85  | 17 | 1,080 | 1 | 50 | 17 | 731 | 35 | 1,946 |
| 23,574 | 0 | 73  | 17 | 1,023 | 1 | 47 | 17 | 718 | 35 | 1,861 |
| 23,575 | 0 | 73  | 17 | 1,024 | 4 | 47 | 20 | 718 | 41 | 1,862 |
| 23,576 | 1 | 73  | 17 | 1,017 | 4 | 47 | 22 | 717 | 44 | 1,854 |
| 23,577 | 1 | 71  | 17 | 992   | 4 | 47 | 22 | 713 | 44 | 1,823 |
| 23,578 | 1 | 68  | 17 | 913   | 4 | 43 | 23 | 691 | 45 | 1,715 |
| 23,579 | 1 | 68  | 17 | 913   | 4 | 43 | 23 | 691 | 45 | 1,715 |
| 23,580 | 1 | 67  | 17 | 904   | 4 | 43 | 23 | 690 | 45 | 1,704 |
| 23,581 | 1 | 67  | 17 | 904   | 4 | 43 | 23 | 688 | 45 | 1,702 |
| 23,582 | 1 | 67  | 17 | 875   | 4 | 42 | 23 | 668 | 45 | 1,652 |
| 23,583 | 1 | 66  | 17 | 874   | 4 | 42 | 23 | 666 | 45 | 1,648 |
| 23,584 | 1 | 63  | 17 | 851   | 4 | 40 | 23 | 645 | 45 | 1,599 |
| 23,585 | 2 | 61  | 19 | 848   | 4 | 40 | 23 | 641 | 48 | 1,590 |
| 23,586 | 2 | 59  | 19 | 836   | 4 | 39 | 23 | 631 | 48 | 1,565 |
| 23,587 | 2 | 59  | 19 | 838   | 4 | 39 | 23 | 631 | 48 | 1,567 |
| 23,588 | 3 | 58  | 20 | 808   | 4 | 39 | 23 | 605 | 50 | 1,510 |
| 23,589 | 4 | 58  | 26 | 807   | 4 | 39 | 26 | 605 | 60 | 1,509 |
| 23,590 | 5 | 60  | 30 | 816   | 5 | 40 | 31 | 616 | 71 | 1,532 |
| 23,591 | 5 | 84  | 30 | 920   | 5 | 45 | 31 | 720 | 71 | 1,769 |
| 23,592 | 5 | 84  | 30 | 981   | 5 | 45 | 31 | 750 | 71 | 1,860 |
| 23,593 | 5 | 89  | 30 | 1,024 | 5 | 46 | 30 | 793 | 70 | 1,952 |
| 23,594 | 5 | 88  | 30 | 1,001 | 5 | 46 | 30 | 776 | 70 | 1,911 |
| 23,595 | 5 | 84  | 31 | 981   | 5 | 46 | 29 | 768 | 70 | 1,879 |
| 23,596 | 5 | 84  | 31 | 988   | 5 | 46 | 29 | 773 | 70 | 1,891 |
| 23,597 | 5 | 83  | 31 | 996   | 5 | 46 | 29 | 777 | 70 | 1,902 |
| 23,598 | 5 | 83  | 30 | 990   | 5 | 46 | 29 | 774 | 69 | 1,893 |
| 23,599 | 5 | 80  | 30 | 989   | 5 | 46 | 29 | 772 | 69 | 1,887 |
| 23,600 | 5 | 81  | 30 | 995   | 5 | 45 | 29 | 784 | 69 | 1,905 |
| 23,601 | 5 | 81  | 30 | 994   | 5 | 45 | 29 | 784 | 69 | 1,904 |
| 23,602 | 5 | 81  | 30 | 995   | 5 | 45 | 28 | 784 | 68 | 1,905 |
| 23,603 | 5 | 81  | 36 | 996   | 5 | 46 | 25 | 782 | 71 | 1,905 |
| 23,604 | 5 | 77  | 35 | 948   | 5 | 44 | 26 | 742 | 71 | 1,811 |



|        |   |    |    |       |   |    |    |     |    |       |
|--------|---|----|----|-------|---|----|----|-----|----|-------|
| 23,605 | 5 | 73 | 35 | 921   | 5 | 39 | 26 | 717 | 71 | 1,750 |
| 23,606 | 5 | 74 | 35 | 951   | 5 | 39 | 25 | 741 | 70 | 1,805 |
| 23,607 | 5 | 76 | 35 | 1,025 | 5 | 40 | 25 | 776 | 70 | 1,917 |
| 23,608 | 5 | 77 | 32 | 1,028 | 5 | 40 | 25 | 776 | 67 | 1,921 |
| 23,609 | 5 | 65 | 31 | 915   | 5 | 28 | 25 | 639 | 66 | 1,647 |
| 23,610 | 5 | 66 | 30 | 895   | 5 | 25 | 25 | 636 | 65 | 1,622 |
| 23,611 | 5 | 59 | 30 | 706   | 5 | 23 | 24 | 530 | 64 | 1,318 |
| 23,612 | 5 | 56 | 30 | 679   | 5 | 23 | 24 | 510 | 64 | 1,268 |
| 23,613 | 6 | 55 | 30 | 622   | 4 | 20 | 24 | 495 | 64 | 1,192 |
| 23,614 | 6 | 54 | 30 | 614   | 4 | 19 | 24 | 481 | 64 | 1,168 |
| 23,615 | 6 | 48 | 30 | 534   | 4 | 14 | 24 | 434 | 64 | 1,030 |
| 23,616 | 6 | 42 | 30 | 512   | 4 | 16 | 23 | 404 | 63 | 974   |
| 23,617 | 6 | 44 | 30 | 522   | 4 | 20 | 23 | 412 | 63 | 998   |
| 23,618 | 6 | 44 | 30 | 524   | 4 | 20 | 23 | 413 | 63 | 1,001 |
| 23,619 | 6 | 45 | 29 | 532   | 4 | 23 | 23 | 420 | 62 | 1,020 |
| 23,620 | 6 | 45 | 29 | 532   | 4 | 23 | 22 | 420 | 61 | 1,020 |
| 23,621 | 6 | 48 | 29 | 555   | 4 | 25 | 22 | 464 | 61 | 1,092 |
| 23,622 | 6 | 49 | 28 | 588   | 4 | 27 | 22 | 487 | 60 | 1,151 |
| 23,623 | 6 | 59 | 28 | 680   | 4 | 27 | 22 | 512 | 60 | 1,278 |
| 23,624 | 6 | 59 | 27 | 694   | 4 | 27 | 19 | 513 | 56 | 1,293 |
| 23,625 | 6 | 59 | 27 | 698   | 4 | 27 | 19 | 512 | 56 | 1,296 |
| 23,626 | 6 | 59 | 27 | 701   | 1 | 28 | 16 | 513 | 50 | 1,301 |
| 23,627 | 5 | 59 | 27 | 701   | 1 | 28 | 14 | 515 | 47 | 1,303 |
| 23,628 | 5 | 59 | 27 | 705   | 1 | 28 | 13 | 516 | 46 | 1,308 |
| 23,629 | 5 | 59 | 27 | 705   | 1 | 28 | 13 | 516 | 46 | 1,308 |
| 23,630 | 5 | 59 | 27 | 705   | 1 | 28 | 13 | 516 | 46 | 1,308 |
| 23,631 | 6 | 59 | 27 | 702   | 1 | 28 | 13 | 511 | 47 | 1,300 |
| 23,632 | 6 | 59 | 28 | 701   | 1 | 28 | 13 | 509 | 48 | 1,297 |
| 23,633 | 6 | 59 | 28 | 698   | 1 | 28 | 13 | 505 | 48 | 1,290 |
| 23,634 | 6 | 59 | 28 | 698   | 1 | 28 | 14 | 505 | 49 | 1,290 |
| 23,635 | 5 | 59 | 26 | 700   | 1 | 28 | 14 | 509 | 46 | 1,296 |
| 23,636 | 5 | 59 | 26 | 708   | 1 | 28 | 14 | 520 | 46 | 1,315 |
| 23,637 | 5 | 60 | 27 | 752   | 1 | 30 | 14 | 532 | 47 | 1,374 |
| 23,638 | 4 | 60 | 26 | 751   | 1 | 31 | 14 | 535 | 45 | 1,377 |
| 23,639 | 3 | 60 | 25 | 744   | 1 | 31 | 13 | 526 | 42 | 1,361 |
| 23,640 | 3 | 60 | 22 | 744   | 1 | 31 | 11 | 529 | 37 | 1,364 |
| 23,641 | 2 | 33 | 23 | 596   | 0 | 25 | 9  | 373 | 34 | 1,027 |
| 23,642 | 2 | 36 | 22 | 613   | 0 | 25 | 9  | 397 | 33 | 1,071 |
| 23,643 | 2 | 36 | 22 | 552   | 0 | 25 | 9  | 367 | 33 | 980   |
| 23,644 | 2 | 31 | 30 | 502   | 0 | 24 | 13 | 321 | 45 | 878   |
| 23,645 | 2 | 31 | 30 | 501   | 0 | 24 | 13 | 320 | 45 | 876   |

|        |   |    |    |     |   |    |    |     |    |     |
|--------|---|----|----|-----|---|----|----|-----|----|-----|
| 23,646 | 2 | 31 | 29 | 494 | 0 | 24 | 13 | 314 | 44 | 863 |
| 23,647 | 2 | 31 | 29 | 494 | 0 | 24 | 13 | 314 | 44 | 863 |
| 23,648 | 2 | 31 | 29 | 481 | 0 | 24 | 13 | 306 | 44 | 842 |
| 23,649 | 2 | 31 | 30 | 481 | 0 | 24 | 13 | 306 | 45 | 842 |
| 23,650 | 2 | 31 | 30 | 483 | 1 | 24 | 15 | 306 | 48 | 844 |
| 23,651 | 2 | 30 | 30 | 474 | 1 | 24 | 15 | 295 | 48 | 823 |
| 23,652 | 2 | 31 | 30 | 479 | 1 | 25 | 15 | 299 | 48 | 834 |
| 23,653 | 2 | 31 | 30 | 487 | 1 | 25 | 15 | 314 | 48 | 857 |
| 23,654 | 2 | 32 | 20 | 488 | 1 | 24 | 14 | 315 | 37 | 859 |
| 23,655 | 2 | 32 | 19 | 488 | 1 | 24 | 11 | 315 | 33 | 859 |
| 23,656 | 2 | 32 | 19 | 485 | 1 | 24 | 11 | 313 | 33 | 854 |
| 23,657 | 2 | 32 | 18 | 450 | 1 | 22 | 11 | 286 | 32 | 790 |
| 23,658 | 2 | 30 | 19 | 380 | 1 | 21 | 11 | 251 | 33 | 682 |
| 23,659 | 2 | 29 | 19 | 384 | 1 | 22 | 10 | 258 | 32 | 693 |
| 23,660 | 2 | 28 | 19 | 383 | 1 | 22 | 10 | 259 | 32 | 692 |
| 23,661 | 2 | 27 | 19 | 370 | 1 | 20 | 10 | 242 | 32 | 659 |
| 23,662 | 2 | 27 | 19 | 366 | 1 | 20 | 10 | 241 | 32 | 654 |
| 23,663 | 1 | 27 | 19 | 362 | 1 | 20 | 10 | 240 | 31 | 649 |
| 23,664 | 1 | 26 | 19 | 358 | 1 | 20 | 10 | 236 | 31 | 640 |
| 23,665 | 1 | 26 | 19 | 351 | 1 | 20 | 10 | 234 | 31 | 631 |
| 23,666 | 1 | 26 | 19 | 351 | 1 | 20 | 11 | 234 | 32 | 631 |
| 23,667 | 1 | 23 | 21 | 308 | 1 | 14 | 12 | 215 | 35 | 560 |
| 23,668 | 1 | 23 | 21 | 308 | 1 | 14 | 12 | 215 | 35 | 560 |
| 23,669 | 1 | 23 | 21 | 308 | 1 | 14 | 12 | 215 | 35 | 560 |
| 23,670 | 1 | 22 | 22 | 300 | 1 | 11 | 13 | 207 | 37 | 540 |
| 23,671 | 1 | 22 | 22 | 301 | 1 | 11 | 14 | 207 | 38 | 541 |
| 23,672 | 1 | 18 | 24 | 243 | 1 | 6  | 15 | 139 | 41 | 406 |
| 23,673 | 1 | 18 | 24 | 243 | 1 | 6  | 15 | 139 | 41 | 406 |
| 23,674 | 1 | 8  | 24 | 151 | 1 | 6  | 15 | 115 | 41 | 280 |
| 23,675 | 1 | 8  | 24 | 136 | 1 | 6  | 15 | 111 | 41 | 261 |
| 23,676 | 2 | 8  | 24 | 130 | 1 | 5  | 17 | 110 | 44 | 253 |
| 23,677 | 2 | 8  | 24 | 130 | 1 | 5  | 17 | 111 | 44 | 254 |
| 23,678 | 2 | 8  | 24 | 131 | 1 | 5  | 17 | 111 | 44 | 255 |
| 23,679 | 2 | 8  | 24 | 134 | 1 | 6  | 17 | 123 | 44 | 271 |
| 23,680 | 2 | 8  | 24 | 135 | 1 | 6  | 17 | 125 | 44 | 274 |
| 23,681 | 4 | 8  | 31 | 137 | 1 | 6  | 22 | 125 | 58 | 276 |
| 23,682 | 3 | 8  | 31 | 141 | 1 | 6  | 22 | 130 | 57 | 285 |
| 23,683 | 3 | 8  | 30 | 142 | 1 | 6  | 22 | 131 | 56 | 287 |
| 23,684 | 3 | 8  | 32 | 142 | 1 | 6  | 27 | 131 | 63 | 287 |
| 23,685 | 3 | 8  | 32 | 140 | 1 | 6  | 26 | 128 | 62 | 282 |
| 23,686 | 3 | 8  | 32 | 140 | 1 | 6  | 26 | 129 | 62 | 283 |

|        |   |    |    |     |   |    |    |     |    |     |
|--------|---|----|----|-----|---|----|----|-----|----|-----|
| 23,687 | 3 | 8  | 32 | 92  | 1 | 5  | 29 | 111 | 65 | 216 |
| 23,688 | 3 | 15 | 31 | 227 | 1 | 15 | 29 | 160 | 64 | 417 |
| 23,689 | 3 | 20 | 31 | 255 | 1 | 22 | 29 | 186 | 64 | 483 |
| 23,690 | 3 | 19 | 30 | 261 | 1 | 22 | 29 | 188 | 63 | 490 |
| 23,691 | 3 | 19 | 29 | 284 | 1 | 22 | 29 | 189 | 62 | 514 |
| 23,692 | 3 | 20 | 24 | 286 | 1 | 22 | 26 | 191 | 54 | 519 |
| 23,693 | 3 | 17 | 17 | 268 | 1 | 22 | 23 | 166 | 44 | 473 |
| 23,694 | 3 | 17 | 19 | 271 | 1 | 22 | 22 | 167 | 45 | 477 |
| 23,695 | 3 | 17 | 20 | 271 | 1 | 22 | 22 | 169 | 46 | 479 |
| 23,696 | 3 | 17 | 20 | 273 | 1 | 22 | 22 | 174 | 46 | 486 |
| 23,697 | 3 | 17 | 21 | 283 | 1 | 22 | 22 | 174 | 47 | 496 |
| 23,698 | 3 | 17 | 21 | 296 | 1 | 22 | 22 | 190 | 47 | 525 |
| 23,699 | 3 | 17 | 20 | 296 | 1 | 22 | 22 | 194 | 46 | 529 |
| 23,700 | 3 | 17 | 21 | 299 | 1 | 22 | 21 | 193 | 46 | 531 |
| 23,701 | 3 | 17 | 21 | 302 | 0 | 22 | 20 | 201 | 44 | 542 |
| 23,702 | 3 | 17 | 21 | 303 | 0 | 22 | 20 | 200 | 44 | 542 |
| 23,703 | 3 | 16 | 21 | 289 | 0 | 21 | 20 | 184 | 44 | 510 |
| 23,704 | 4 | 17 | 22 | 291 | 0 | 22 | 20 | 186 | 46 | 516 |
| 23,705 | 4 | 17 | 22 | 292 | 0 | 22 | 20 | 183 | 46 | 514 |
| 23,706 | 4 | 17 | 22 | 292 | 0 | 22 | 20 | 184 | 46 | 515 |
| 23,707 | 4 | 16 | 25 | 284 | 0 | 22 | 22 | 181 | 51 | 503 |
| 23,708 | 4 | 16 | 25 | 286 | 0 | 22 | 22 | 186 | 51 | 510 |
| 23,709 | 4 | 16 | 25 | 286 | 0 | 22 | 22 | 186 | 51 | 510 |
| 23,710 | 4 | 18 | 25 | 276 | 0 | 21 | 22 | 178 | 51 | 493 |
| 23,711 | 4 | 18 | 25 | 275 | 0 | 21 | 22 | 175 | 51 | 489 |
| 23,712 | 4 | 18 | 25 | 275 | 0 | 21 | 22 | 175 | 51 | 489 |
| 23,713 | 4 | 18 | 25 | 274 | 0 | 21 | 22 | 176 | 51 | 489 |
| 23,714 | 4 | 18 | 25 | 274 | 0 | 21 | 22 | 176 | 51 | 489 |
| 23,715 | 4 | 18 | 25 | 274 | 0 | 21 | 22 | 176 | 51 | 489 |
| 23,716 | 4 | 18 | 25 | 274 | 0 | 21 | 22 | 176 | 51 | 489 |
| 23,717 | 4 | 18 | 25 | 274 | 0 | 21 | 21 | 176 | 50 | 489 |
| 23,718 | 4 | 18 | 24 | 275 | 0 | 21 | 22 | 176 | 50 | 490 |
| 23,719 | 4 | 18 | 24 | 275 | 0 | 21 | 22 | 176 | 50 | 490 |
| 23,720 | 4 | 18 | 23 | 275 | 0 | 21 | 21 | 175 | 48 | 489 |
| 23,721 | 4 | 18 | 23 | 275 | 0 | 21 | 23 | 175 | 50 | 489 |
| 23,722 | 4 | 18 | 23 | 273 | 0 | 21 | 22 | 174 | 49 | 486 |
| 23,723 | 4 | 18 | 21 | 273 | 0 | 21 | 21 | 174 | 46 | 486 |
| 23,724 | 4 | 18 | 21 | 273 | 0 | 21 | 21 | 175 | 46 | 487 |
| 23,725 | 4 | 18 | 21 | 272 | 0 | 21 | 21 | 175 | 46 | 486 |
| 23,726 | 4 | 19 | 21 | 273 | 0 | 21 | 21 | 177 | 46 | 490 |
| 23,727 | 3 | 19 | 22 | 271 | 0 | 21 | 19 | 176 | 44 | 487 |

|        |   |    |    |     |   |    |    |     |    |     |
|--------|---|----|----|-----|---|----|----|-----|----|-----|
| 23,728 | 3 | 19 | 22 | 273 | 0 | 22 | 21 | 174 | 46 | 488 |
| 23,729 | 2 | 19 | 22 | 279 | 0 | 23 | 21 | 175 | 45 | 496 |
| 23,730 | 1 | 19 | 16 | 294 | 0 | 23 | 18 | 167 | 35 | 503 |
| 23,731 | 1 | 20 | 17 | 304 | 0 | 25 | 19 | 184 | 37 | 533 |
| 23,732 | 1 | 20 | 16 | 322 | 0 | 26 | 18 | 191 | 35 | 559 |
| 23,733 | 1 | 23 | 16 | 392 | 0 | 34 | 18 | 242 | 35 | 691 |
| 23,734 | 1 | 23 | 14 | 395 | 0 | 35 | 17 | 243 | 32 | 696 |
| 23,735 | 1 | 23 | 23 | 407 | 2 | 34 | 16 | 246 | 42 | 710 |
| 23,736 | 1 | 24 | 23 | 417 | 2 | 34 | 18 | 246 | 44 | 721 |
| 23,737 | 1 | 24 | 23 | 418 | 2 | 34 | 16 | 245 | 42 | 721 |
| 23,738 | 1 | 17 | 25 | 272 | 2 | 23 | 20 | 186 | 48 | 498 |
| 23,739 | 1 | 17 | 25 | 278 | 2 | 23 | 20 | 186 | 48 | 504 |
| 23,740 | 1 | 12 | 25 | 267 | 2 | 16 | 20 | 160 | 48 | 455 |
| 23,741 | 1 | 12 | 25 | 265 | 2 | 16 | 20 | 161 | 48 | 454 |
| 23,742 | 1 | 11 | 25 | 249 | 2 | 16 | 20 | 156 | 48 | 432 |
| 23,743 | 1 | 11 | 25 | 252 | 2 | 16 | 20 | 158 | 48 | 437 |
| 23,744 | 1 | 13 | 22 | 252 | 2 | 16 | 21 | 159 | 46 | 440 |
| 23,745 | 1 | 15 | 21 | 270 | 2 | 18 | 22 | 164 | 46 | 467 |
| 23,746 | 1 | 16 | 21 | 277 | 2 | 18 | 22 | 169 | 46 | 480 |
| 23,747 | 1 | 16 | 20 | 278 | 2 | 18 | 22 | 167 | 45 | 479 |
| 23,748 | 2 | 16 | 20 | 268 | 2 | 18 | 23 | 166 | 47 | 468 |
| 23,749 | 3 | 16 | 21 | 255 | 2 | 18 | 23 | 151 | 49 | 440 |
| 23,750 | 3 | 16 | 21 | 253 | 2 | 18 | 23 | 149 | 49 | 436 |
| 23,751 | 3 | 17 | 20 | 256 | 2 | 18 | 23 | 152 | 48 | 443 |
| 23,752 | 3 | 26 | 20 | 275 | 2 | 23 | 23 | 178 | 48 | 502 |
| 23,753 | 3 | 26 | 20 | 279 | 2 | 23 | 23 | 181 | 48 | 509 |
| 23,754 | 3 | 27 | 20 | 286 | 2 | 24 | 23 | 183 | 48 | 520 |
| 23,755 | 2 | 26 | 19 | 285 | 2 | 23 | 23 | 180 | 46 | 514 |
| 23,756 | 2 | 25 | 19 | 282 | 2 | 23 | 23 | 180 | 46 | 510 |
| 23,757 | 2 | 25 | 19 | 285 | 2 | 23 | 22 | 180 | 45 | 513 |
| 23,758 | 2 | 25 | 15 | 285 | 2 | 23 | 21 | 182 | 40 | 515 |
| 23,759 | 2 | 25 | 15 | 283 | 2 | 23 | 21 | 179 | 40 | 510 |
| 23,760 | 2 | 23 | 15 | 283 | 2 | 23 | 21 | 180 | 40 | 509 |
| 23,761 | 2 | 23 | 15 | 283 | 2 | 23 | 21 | 181 | 40 | 510 |
| 23,762 | 2 | 23 | 16 | 283 | 2 | 23 | 21 | 182 | 41 | 511 |
| 23,763 | 2 | 23 | 16 | 285 | 2 | 23 | 21 | 184 | 41 | 515 |
| 23,764 | 2 | 23 | 16 | 286 | 2 | 23 | 21 | 185 | 41 | 517 |
| 23,765 | 2 | 25 | 16 | 287 | 2 | 23 | 21 | 186 | 41 | 521 |
| 23,766 | 2 | 25 | 16 | 287 | 2 | 23 | 21 | 186 | 41 | 521 |
| 23,767 | 2 | 25 | 18 | 292 | 2 | 23 | 21 | 197 | 43 | 537 |
| 23,768 | 2 | 29 | 17 | 339 | 2 | 25 | 21 | 240 | 42 | 633 |

|        |   |    |    |     |   |    |    |     |    |     |
|--------|---|----|----|-----|---|----|----|-----|----|-----|
| 23,769 | 2 | 29 | 17 | 341 | 2 | 25 | 19 | 239 | 40 | 634 |
| 23,770 | 3 | 29 | 17 | 353 | 2 | 27 | 19 | 241 | 41 | 650 |
| 23,771 | 3 | 29 | 18 | 358 | 2 | 27 | 19 | 245 | 42 | 659 |
| 23,772 | 3 | 31 | 18 | 358 | 2 | 27 | 17 | 245 | 40 | 661 |
| 23,773 | 3 | 32 | 18 | 363 | 3 | 27 | 18 | 246 | 42 | 668 |
| 23,774 | 3 | 32 | 18 | 363 | 3 | 27 | 18 | 246 | 42 | 668 |
| 23,775 | 3 | 32 | 19 | 365 | 3 | 27 | 20 | 245 | 45 | 669 |
| 23,776 | 3 | 33 | 21 | 366 | 4 | 27 | 29 | 245 | 57 | 671 |
| 23,777 | 3 | 32 | 21 | 365 | 4 | 27 | 29 | 243 | 57 | 667 |
| 23,778 | 3 | 32 | 24 | 365 | 4 | 27 | 29 | 243 | 60 | 667 |
| 23,779 | 3 | 32 | 24 | 356 | 4 | 25 | 27 | 241 | 58 | 654 |
| 23,780 | 3 | 31 | 24 | 324 | 4 | 22 | 26 | 218 | 57 | 595 |
| 23,781 | 3 | 31 | 24 | 323 | 4 | 22 | 29 | 218 | 60 | 594 |
| 23,782 | 3 | 31 | 23 | 323 | 4 | 22 | 28 | 218 | 58 | 594 |
| 23,783 | 3 | 31 | 24 | 304 | 4 | 21 | 29 | 211 | 60 | 567 |
| 23,784 | 3 | 28 | 22 | 227 | 4 | 12 | 33 | 154 | 62 | 421 |
| 23,785 | 3 | 28 | 21 | 227 | 4 | 12 | 33 | 154 | 61 | 421 |
| 23,786 | 3 | 27 | 15 | 204 | 3 | 12 | 31 | 150 | 52 | 393 |
| 23,787 | 3 | 27 | 15 | 203 | 3 | 12 | 29 | 149 | 50 | 391 |
| 23,788 | 3 | 27 | 15 | 203 | 3 | 12 | 27 | 149 | 48 | 391 |
| 23,789 | 4 | 26 | 13 | 196 | 3 | 13 | 24 | 148 | 44 | 383 |
| 23,790 | 4 | 26 | 13 | 178 | 3 | 13 | 24 | 148 | 44 | 365 |
| 23,791 | 4 | 26 | 13 | 174 | 3 | 13 | 24 | 144 | 44 | 357 |
| 23,792 | 4 | 26 | 13 | 174 | 3 | 13 | 24 | 144 | 44 | 357 |
| 23,793 | 5 | 24 | 13 | 162 | 3 | 13 | 24 | 137 | 45 | 336 |
| 23,794 | 5 | 27 | 15 | 183 | 3 | 13 | 24 | 170 | 47 | 393 |
| 23,795 | 5 | 27 | 15 | 185 | 3 | 13 | 23 | 172 | 46 | 397 |
| 23,796 | 6 | 31 | 19 | 175 | 6 | 11 | 32 | 170 | 63 | 387 |
| 23,797 | 6 | 31 | 20 | 174 | 6 | 12 | 33 | 164 | 65 | 381 |
| 23,798 | 5 | 31 | 21 | 174 | 6 | 12 | 35 | 163 | 67 | 380 |
| 23,799 | 3 | 31 | 20 | 174 | 6 | 12 | 35 | 162 | 64 | 379 |
| 23,800 | 3 | 31 | 20 | 174 | 6 | 12 | 36 | 162 | 65 | 379 |
| 23,801 | 4 | 30 | 22 | 172 | 7 | 12 | 36 | 156 | 69 | 370 |
| 23,802 | 5 | 30 | 22 | 172 | 7 | 12 | 36 | 156 | 70 | 370 |
| 23,803 | 5 | 21 | 23 | 148 | 7 | 7  | 38 | 124 | 73 | 300 |
| 23,804 | 5 | 21 | 23 | 143 | 7 | 7  | 39 | 122 | 74 | 293 |
| 23,805 | 5 | 20 | 23 | 136 | 7 | 6  | 39 | 120 | 74 | 282 |
| 23,806 | 5 | 20 | 23 | 136 | 7 | 6  | 39 | 119 | 74 | 281 |
| 23,807 | 5 | 20 | 23 | 135 | 7 | 6  | 39 | 119 | 74 | 280 |
| 23,808 | 5 | 20 | 23 | 131 | 7 | 6  | 39 | 115 | 74 | 272 |
| 23,809 | 5 | 20 | 23 | 131 | 7 | 6  | 39 | 115 | 74 | 272 |

|        |   |    |    |     |   |    |    |     |    |     |
|--------|---|----|----|-----|---|----|----|-----|----|-----|
| 23,810 | 5 | 20 | 23 | 131 | 7 | 6  | 39 | 114 | 74 | 271 |
| 23,811 | 5 | 20 | 23 | 131 | 7 | 6  | 39 | 114 | 74 | 271 |
| 23,812 | 5 | 20 | 22 | 131 | 7 | 6  | 39 | 112 | 73 | 269 |
| 23,813 | 5 | 20 | 22 | 131 | 7 | 6  | 39 | 112 | 73 | 269 |
| 23,814 | 5 | 20 | 22 | 129 | 7 | 6  | 39 | 109 | 73 | 264 |
| 23,815 | 5 | 20 | 22 | 128 | 7 | 7  | 39 | 108 | 73 | 263 |
| 23,816 | 5 | 18 | 22 | 127 | 7 | 7  | 39 | 106 | 73 | 258 |
| 23,817 | 5 | 18 | 22 | 122 | 7 | 7  | 39 | 95  | 73 | 242 |
| 23,818 | 5 | 18 | 20 | 122 | 7 | 7  | 39 | 95  | 71 | 242 |
| 23,819 | 5 | 15 | 20 | 68  | 7 | 3  | 39 | 59  | 71 | 145 |
| 23,820 | 4 | 15 | 20 | 82  | 7 | 4  | 39 | 71  | 70 | 172 |
| 23,821 | 4 | 20 | 19 | 138 | 7 | 9  | 39 | 106 | 69 | 273 |
| 23,822 | 4 | 21 | 19 | 176 | 7 | 11 | 39 | 127 | 69 | 335 |
| 23,823 | 4 | 21 | 19 | 202 | 7 | 11 | 39 | 133 | 69 | 367 |
| 23,824 | 4 | 20 | 19 | 202 | 6 | 11 | 38 | 132 | 67 | 365 |
| 23,825 | 4 | 20 | 18 | 211 | 6 | 11 | 36 | 133 | 64 | 375 |
| 23,826 | 4 | 19 | 16 | 211 | 5 | 11 | 27 | 133 | 52 | 374 |
| 23,827 | 4 | 19 | 16 | 211 | 5 | 11 | 27 | 133 | 52 | 374 |
| 23,828 | 4 | 20 | 16 | 213 | 5 | 11 | 27 | 134 | 52 | 378 |
| 23,829 | 4 | 20 | 13 | 213 | 5 | 11 | 27 | 134 | 49 | 378 |
| 23,830 | 4 | 20 | 13 | 213 | 5 | 11 | 28 | 134 | 50 | 378 |
| 23,831 | 4 | 20 | 13 | 214 | 5 | 11 | 28 | 134 | 50 | 379 |
| 23,832 | 4 | 20 | 13 | 214 | 5 | 11 | 25 | 134 | 47 | 379 |
| 23,833 | 4 | 20 | 12 | 213 | 5 | 11 | 24 | 134 | 45 | 378 |
| 23,834 | 4 | 20 | 12 | 213 | 5 | 11 | 24 | 134 | 45 | 378 |
| 23,835 | 4 | 20 | 12 | 212 | 5 | 11 | 21 | 133 | 42 | 376 |
| 23,836 | 4 | 20 | 13 | 212 | 5 | 11 | 21 | 133 | 43 | 376 |
| 23,837 | 4 | 20 | 13 | 208 | 4 | 11 | 21 | 129 | 42 | 368 |
| 23,838 | 4 | 20 | 13 | 212 | 4 | 11 | 21 | 133 | 42 | 376 |
| 23,839 | 4 | 20 | 13 | 212 | 4 | 10 | 21 | 133 | 42 | 375 |
| 23,840 | 3 | 20 | 13 | 212 | 4 | 10 | 21 | 133 | 41 | 375 |
| 23,841 | 3 | 20 | 13 | 212 | 4 | 10 | 21 | 133 | 41 | 375 |
| 23,842 | 3 | 20 | 13 | 212 | 4 | 10 | 21 | 133 | 41 | 375 |
| 23,843 | 3 | 20 | 13 | 212 | 4 | 10 | 21 | 133 | 41 | 375 |
| 23,844 | 3 | 17 | 13 | 195 | 4 | 10 | 21 | 102 | 41 | 324 |
| 23,845 | 3 | 19 | 11 | 205 | 4 | 12 | 21 | 123 | 39 | 359 |
| 23,846 | 1 | 36 | 10 | 310 | 1 | 17 | 11 | 189 | 23 | 552 |
| 23,847 | 1 | 31 | 7  | 309 | 1 | 18 | 11 | 194 | 20 | 552 |
| 23,848 | 1 | 35 | 7  | 324 | 2 | 21 | 11 | 219 | 21 | 599 |
| 23,849 | 1 | 43 | 6  | 343 | 2 | 26 | 7  | 233 | 16 | 645 |
| 23,850 | 1 | 45 | 6  | 347 | 2 | 26 | 7  | 236 | 16 | 654 |

|        |   |    |    |     |   |    |    |     |    |     |
|--------|---|----|----|-----|---|----|----|-----|----|-----|
| 23,851 | 1 | 50 | 5  | 369 | 1 | 27 | 10 | 242 | 17 | 688 |
| 23,852 | 1 | 52 | 5  | 382 | 1 | 28 | 10 | 246 | 17 | 708 |
| 23,853 | 2 | 69 | 5  | 415 | 1 | 34 | 9  | 278 | 17 | 796 |
| 23,854 | 2 | 70 | 5  | 421 | 1 | 34 | 9  | 282 | 17 | 807 |
| 23,855 | 2 | 70 | 5  | 435 | 1 | 35 | 9  | 286 | 17 | 826 |
| 23,856 | 2 | 72 | 5  | 436 | 1 | 36 | 9  | 287 | 17 | 831 |
| 23,857 | 2 | 72 | 5  | 440 | 1 | 37 | 9  | 291 | 17 | 840 |
| 23,858 | 2 | 73 | 7  | 442 | 1 | 37 | 9  | 292 | 19 | 844 |
| 23,859 | 2 | 73 | 11 | 443 | 1 | 37 | 13 | 292 | 27 | 845 |
| 23,860 | 2 | 73 | 11 | 444 | 1 | 37 | 13 | 292 | 27 | 846 |
| 23,861 | 2 | 73 | 15 | 446 | 1 | 37 | 20 | 293 | 38 | 849 |
| 23,862 | 2 | 74 | 24 | 446 | 2 | 37 | 21 | 294 | 49 | 851 |
| 23,863 | 2 | 74 | 24 | 447 | 2 | 37 | 21 | 294 | 49 | 852 |
| 23,864 | 2 | 74 | 25 | 447 | 2 | 37 | 24 | 294 | 53 | 852 |
| 23,865 | 2 | 74 | 25 | 448 | 2 | 36 | 26 | 294 | 55 | 852 |
| 23,866 | 2 | 74 | 25 | 448 | 2 | 36 | 26 | 295 | 55 | 853 |
| 23,867 | 2 | 74 | 25 | 448 | 2 | 36 | 26 | 294 | 55 | 852 |
| 23,868 | 2 | 75 | 25 | 449 | 2 | 36 | 26 | 294 | 55 | 854 |
| 23,869 | 2 | 75 | 25 | 449 | 2 | 36 | 26 | 294 | 55 | 854 |
| 23,870 | 2 | 74 | 25 | 427 | 2 | 35 | 26 | 274 | 55 | 810 |
| 23,871 | 2 | 74 | 25 | 428 | 2 | 35 | 26 | 276 | 55 | 813 |
| 23,872 | 3 | 68 | 25 | 330 | 2 | 28 | 26 | 220 | 56 | 646 |
| 23,873 | 3 | 68 | 25 | 331 | 2 | 28 | 26 | 221 | 56 | 648 |
| 23,874 | 3 | 66 | 25 | 307 | 2 | 28 | 26 | 214 | 56 | 615 |
| 23,875 | 3 | 66 | 25 | 304 | 2 | 28 | 26 | 214 | 56 | 612 |
| 23,876 | 3 | 67 | 25 | 303 | 2 | 28 | 26 | 215 | 56 | 613 |
| 23,877 | 4 | 69 | 25 | 311 | 2 | 29 | 26 | 226 | 57 | 635 |
| 23,878 | 4 | 69 | 25 | 326 | 2 | 29 | 26 | 251 | 57 | 675 |
| 23,879 | 4 | 68 | 25 | 326 | 2 | 29 | 26 | 252 | 57 | 675 |
| 23,880 | 5 | 68 | 24 | 341 | 2 | 30 | 27 | 259 | 58 | 698 |
| 23,881 | 5 | 70 | 24 | 361 | 2 | 30 | 27 | 283 | 58 | 744 |
| 23,882 | 5 | 71 | 24 | 360 | 2 | 30 | 27 | 287 | 58 | 748 |
| 23,883 | 5 | 71 | 25 | 361 | 2 | 30 | 27 | 287 | 59 | 749 |
| 23,884 | 5 | 71 | 25 | 362 | 2 | 31 | 27 | 299 | 59 | 763 |
| 23,885 | 5 | 72 | 25 | 372 | 2 | 31 | 26 | 303 | 58 | 778 |
| 23,886 | 5 | 72 | 25 | 379 | 2 | 31 | 26 | 305 | 58 | 787 |
| 23,887 | 5 | 74 | 24 | 396 | 2 | 31 | 26 | 315 | 57 | 816 |
| 23,888 | 5 | 74 | 24 | 400 | 2 | 31 | 25 | 320 | 56 | 825 |
| 23,889 | 5 | 74 | 26 | 408 | 2 | 31 | 26 | 328 | 59 | 841 |
| 23,890 | 7 | 74 | 28 | 411 | 2 | 31 | 35 | 329 | 72 | 845 |
| 23,891 | 7 | 76 | 28 | 435 | 2 | 32 | 38 | 349 | 75 | 892 |

|        |   |    |    |     |   |    |    |     |    |       |
|--------|---|----|----|-----|---|----|----|-----|----|-------|
| 23,892 | 7 | 76 | 28 | 439 | 2 | 32 | 38 | 350 | 75 | 897   |
| 23,893 | 7 | 77 | 29 | 441 | 2 | 33 | 40 | 356 | 78 | 907   |
| 23,894 | 7 | 77 | 29 | 452 | 2 | 34 | 41 | 379 | 79 | 942   |
| 23,895 | 7 | 77 | 29 | 465 | 2 | 35 | 41 | 394 | 79 | 971   |
| 23,896 | 7 | 79 | 29 | 504 | 2 | 39 | 41 | 447 | 79 | 1,069 |
| 23,897 | 7 | 66 | 29 | 424 | 2 | 38 | 41 | 401 | 79 | 929   |
| 23,898 | 7 | 70 | 31 | 443 | 2 | 37 | 43 | 416 | 83 | 966   |
| 23,899 | 7 | 76 | 30 | 462 | 1 | 38 | 42 | 441 | 80 | 1,017 |
| 23,900 | 6 | 69 | 29 | 443 | 1 | 33 | 39 | 438 | 75 | 983   |
| 23,901 | 6 | 65 | 30 | 432 | 1 | 32 | 41 | 432 | 78 | 961   |
| 23,902 | 7 | 65 | 31 | 439 | 1 | 33 | 41 | 432 | 80 | 969   |
| 23,903 | 6 | 65 | 30 | 442 | 1 | 33 | 39 | 431 | 76 | 971   |
| 23,904 | 6 | 49 | 30 | 415 | 1 | 28 | 39 | 404 | 76 | 896   |
| 23,905 | 6 | 48 | 30 | 409 | 1 | 28 | 40 | 400 | 77 | 885   |
| 23,906 | 6 | 48 | 30 | 395 | 1 | 27 | 40 | 395 | 77 | 865   |
| 23,907 | 6 | 46 | 30 | 393 | 1 | 26 | 50 | 395 | 87 | 860   |
| 23,908 | 6 | 46 | 30 | 392 | 1 | 25 | 50 | 396 | 87 | 859   |
| 23,909 | 6 | 45 | 28 | 391 | 1 | 25 | 50 | 395 | 85 | 856   |
| 23,910 | 6 | 45 | 25 | 390 | 1 | 25 | 46 | 395 | 78 | 855   |
| 23,911 | 6 | 45 | 22 | 389 | 1 | 25 | 42 | 396 | 71 | 855   |
| 23,912 | 6 | 45 | 21 | 387 | 1 | 25 | 39 | 398 | 67 | 855   |
| 23,913 | 6 | 44 | 13 | 388 | 0 | 25 | 38 | 400 | 57 | 857   |
| 23,914 | 6 | 44 | 12 | 389 | 0 | 25 | 35 | 400 | 53 | 858   |
| 23,915 | 6 | 44 | 12 | 389 | 0 | 25 | 34 | 400 | 52 | 858   |
| 23,916 | 6 | 44 | 13 | 388 | 0 | 25 | 33 | 401 | 52 | 858   |
| 23,917 | 6 | 44 | 13 | 388 | 0 | 25 | 33 | 401 | 52 | 858   |
| 23,918 | 6 | 44 | 13 | 388 | 0 | 25 | 33 | 401 | 52 | 858   |
| 23,919 | 6 | 43 | 13 | 387 | 0 | 25 | 33 | 401 | 52 | 856   |
| 23,920 | 6 | 44 | 13 | 387 | 0 | 25 | 36 | 402 | 55 | 858   |
| 23,921 | 6 | 44 | 13 | 386 | 0 | 25 | 36 | 400 | 55 | 855   |
| 23,922 | 6 | 44 | 15 | 383 | 1 | 25 | 39 | 397 | 61 | 849   |
| 23,923 | 5 | 45 | 15 | 384 | 1 | 25 | 39 | 397 | 60 | 851   |
| 23,924 | 5 | 45 | 15 | 386 | 1 | 25 | 39 | 395 | 60 | 851   |
| 23,925 | 9 | 45 | 21 | 386 | 2 | 25 | 42 | 395 | 74 | 851   |
| 23,926 | 9 | 45 | 25 | 384 | 3 | 25 | 43 | 396 | 80 | 850   |
| 23,927 | 8 | 44 | 27 | 376 | 3 | 25 | 44 | 394 | 82 | 839   |
| 23,928 | 7 | 42 | 27 | 365 | 3 | 24 | 44 | 383 | 81 | 814   |
| 23,929 | 7 | 42 | 27 | 358 | 3 | 24 | 44 | 360 | 81 | 784   |
| 23,930 | 7 | 42 | 27 | 356 | 3 | 24 | 43 | 356 | 80 | 778   |
| 23,931 | 7 | 42 | 27 | 343 | 3 | 23 | 43 | 351 | 80 | 759   |
| 23,932 | 7 | 40 | 27 | 331 | 3 | 23 | 42 | 330 | 79 | 724   |



|        |    |    |    |     |   |    |    |     |     |     |
|--------|----|----|----|-----|---|----|----|-----|-----|-----|
| 23,933 | 7  | 39 | 29 | 331 | 4 | 23 | 42 | 327 | 82  | 720 |
| 23,934 | 7  | 40 | 32 | 332 | 4 | 22 | 42 | 316 | 85  | 710 |
| 23,935 | 7  | 40 | 32 | 333 | 4 | 22 | 42 | 316 | 85  | 711 |
| 23,936 | 7  | 49 | 35 | 381 | 4 | 23 | 44 | 345 | 90  | 798 |
| 23,937 | 10 | 52 | 38 | 388 | 4 | 23 | 49 | 356 | 101 | 819 |
| 23,938 | 10 | 50 | 39 | 376 | 4 | 23 | 55 | 350 | 108 | 799 |
| 23,939 | 10 | 55 | 42 | 395 | 4 | 23 | 56 | 365 | 112 | 838 |
| 23,940 | 10 | 58 | 42 | 395 | 4 | 23 | 55 | 364 | 111 | 840 |
| 23,941 | 8  | 60 | 41 | 395 | 4 | 23 | 46 | 363 | 99  | 841 |
| 23,942 | 8  | 60 | 41 | 370 | 4 | 22 | 43 | 342 | 96  | 794 |
| 23,943 | 8  | 60 | 40 | 371 | 4 | 22 | 41 | 342 | 93  | 795 |
| 23,944 | 8  | 60 | 41 | 372 | 4 | 21 | 43 | 336 | 96  | 789 |
| 23,945 | 8  | 61 | 42 | 346 | 4 | 19 | 42 | 298 | 96  | 724 |
| 23,946 | 8  | 61 | 42 | 347 | 4 | 19 | 42 | 298 | 96  | 725 |
| 23,947 | 8  | 57 | 43 | 297 | 4 | 13 | 43 | 226 | 98  | 593 |
| 23,948 | 8  | 48 | 43 | 245 | 4 | 9  | 43 | 180 | 98  | 482 |
| 23,949 | 8  | 37 | 41 | 203 | 4 | 4  | 41 | 129 | 94  | 373 |
| 23,950 | 8  | 37 | 41 | 203 | 4 | 4  | 41 | 129 | 94  | 373 |
| 23,951 | 8  | 33 | 41 | 181 | 4 | 2  | 39 | 115 | 92  | 331 |
| 23,952 | 8  | 36 | 40 | 196 | 4 | 3  | 39 | 147 | 91  | 382 |
| 23,953 | 7  | 38 | 39 | 203 | 4 | 3  | 39 | 149 | 89  | 393 |
| 23,954 | 7  | 36 | 39 | 187 | 4 | 2  | 39 | 146 | 89  | 371 |
| 23,955 | 7  | 35 | 39 | 181 | 4 | 2  | 38 | 141 | 88  | 359 |
| 23,956 | 7  | 37 | 39 | 181 | 4 | 2  | 38 | 145 | 88  | 365 |
| 23,957 | 7  | 37 | 39 | 185 | 4 | 2  | 29 | 148 | 79  | 372 |
| 23,958 | 7  | 37 | 38 | 187 | 4 | 2  | 29 | 152 | 78  | 378 |
| 23,959 | 7  | 38 | 38 | 184 | 4 | 2  | 29 | 148 | 78  | 372 |
| 23,960 | 7  | 38 | 38 | 186 | 4 | 2  | 29 | 148 | 78  | 374 |
| 23,961 | 7  | 38 | 38 | 186 | 4 | 2  | 29 | 147 | 78  | 373 |
| 23,962 | 7  | 38 | 38 | 186 | 4 | 2  | 29 | 147 | 78  | 373 |
| 23,963 | 7  | 38 | 38 | 186 | 4 | 2  | 29 | 144 | 78  | 370 |
| 23,964 | 7  | 38 | 37 | 184 | 4 | 2  | 29 | 141 | 77  | 365 |
| 23,965 | 8  | 38 | 44 | 183 | 4 | 2  | 30 | 141 | 86  | 364 |
| 23,966 | 8  | 38 | 44 | 183 | 4 | 2  | 30 | 141 | 86  | 364 |
| 23,967 | 8  | 38 | 43 | 183 | 4 | 2  | 30 | 140 | 85  | 363 |
| 23,968 | 8  | 38 | 43 | 184 | 4 | 2  | 30 | 140 | 85  | 364 |
| 23,969 | 8  | 38 | 43 | 185 | 4 | 2  | 30 | 140 | 85  | 365 |
| 23,970 | 8  | 37 | 47 | 187 | 6 | 2  | 30 | 139 | 91  | 365 |
| 23,971 | 8  | 39 | 47 | 198 | 6 | 4  | 29 | 164 | 90  | 405 |
| 23,972 | 9  | 39 | 49 | 204 | 5 | 4  | 28 | 164 | 91  | 411 |
| 23,973 | 9  | 40 | 49 | 212 | 5 | 5  | 27 | 177 | 90  | 434 |

|        |    |     |    |     |   |    |    |     |    |       |
|--------|----|-----|----|-----|---|----|----|-----|----|-------|
| 23,974 | 5  | 39  | 45 | 217 | 4 | 5  | 25 | 178 | 79 | 439   |
| 23,975 | 5  | 40  | 46 | 218 | 4 | 6  | 30 | 181 | 85 | 445   |
| 23,976 | 5  | 40  | 42 | 221 | 3 | 6  | 30 | 181 | 80 | 448   |
| 23,977 | 5  | 40  | 49 | 221 | 5 | 6  | 33 | 181 | 92 | 448   |
| 23,978 | 5  | 40  | 51 | 221 | 5 | 6  | 33 | 181 | 94 | 448   |
| 23,979 | 5  | 40  | 51 | 221 | 5 | 6  | 34 | 181 | 95 | 448   |
| 23,980 | 5  | 40  | 51 | 213 | 5 | 6  | 34 | 177 | 95 | 436   |
| 23,981 | 5  | 40  | 51 | 213 | 5 | 6  | 34 | 177 | 95 | 436   |
| 23,982 | 5  | 40  | 51 | 211 | 5 | 6  | 34 | 176 | 95 | 433   |
| 23,983 | 5  | 40  | 52 | 205 | 5 | 6  | 34 | 178 | 96 | 429   |
| 23,984 | 5  | 45  | 50 | 212 | 4 | 6  | 35 | 194 | 94 | 457   |
| 23,985 | 5  | 46  | 46 | 243 | 4 | 9  | 35 | 221 | 90 | 519   |
| 23,986 | 5  | 58  | 46 | 285 | 4 | 15 | 33 | 261 | 88 | 619   |
| 23,987 | 5  | 51  | 43 | 237 | 4 | 14 | 34 | 236 | 86 | 538   |
| 23,988 | 2  | 58  | 40 | 276 | 4 | 19 | 29 | 268 | 75 | 621   |
| 23,989 | 2  | 98  | 39 | 406 | 4 | 37 | 23 | 415 | 68 | 956   |
| 23,990 | 2  | 93  | 36 | 405 | 4 | 37 | 22 | 403 | 64 | 938   |
| 23,991 | 2  | 100 | 35 | 460 | 4 | 40 | 22 | 422 | 63 | 1,022 |
| 23,992 | 2  | 100 | 34 | 461 | 4 | 40 | 22 | 427 | 62 | 1,028 |
| 23,993 | 9  | 100 | 38 | 506 | 4 | 41 | 33 | 447 | 84 | 1,094 |
| 23,994 | 9  | 99  | 37 | 505 | 4 | 43 | 33 | 453 | 83 | 1,100 |
| 23,995 | 9  | 99  | 37 | 505 | 4 | 43 | 34 | 451 | 84 | 1,098 |
| 23,996 | 9  | 100 | 37 | 509 | 4 | 44 | 34 | 451 | 84 | 1,104 |
| 23,997 | 9  | 100 | 37 | 508 | 4 | 44 | 34 | 451 | 84 | 1,103 |
| 23,998 | 9  | 100 | 38 | 507 | 4 | 44 | 34 | 451 | 85 | 1,102 |
| 23,999 | 9  | 100 | 38 | 510 | 4 | 44 | 34 | 452 | 85 | 1,106 |
| 24,000 | 10 | 100 | 38 | 511 | 4 | 44 | 34 | 452 | 86 | 1,107 |
| 24,001 | 10 | 100 | 38 | 511 | 4 | 44 | 34 | 452 | 86 | 1,107 |
| 24,002 | 10 | 100 | 38 | 509 | 4 | 44 | 34 | 448 | 86 | 1,101 |
| 24,003 | 10 | 95  | 38 | 486 | 4 | 43 | 34 | 414 | 86 | 1,038 |
| 24,004 | 10 | 96  | 38 | 494 | 4 | 43 | 34 | 415 | 86 | 1,048 |
| 24,005 | 10 | 96  | 38 | 495 | 4 | 43 | 34 | 415 | 86 | 1,049 |
| 24,006 | 10 | 96  | 38 | 494 | 4 | 43 | 34 | 415 | 86 | 1,048 |
| 24,007 | 10 | 94  | 38 | 494 | 4 | 43 | 34 | 411 | 86 | 1,042 |
| 24,008 | 10 | 94  | 39 | 488 | 4 | 43 | 33 | 403 | 86 | 1,028 |
| 24,009 | 10 | 93  | 39 | 488 | 4 | 43 | 33 | 402 | 86 | 1,026 |
| 24,010 | 10 | 93  | 39 | 488 | 4 | 43 | 33 | 403 | 86 | 1,027 |
| 24,011 | 10 | 93  | 39 | 486 | 4 | 43 | 33 | 403 | 86 | 1,025 |
| 24,012 | 10 | 93  | 39 | 489 | 4 | 43 | 33 | 403 | 86 | 1,028 |
| 24,013 | 10 | 93  | 39 | 489 | 4 | 43 | 33 | 403 | 86 | 1,028 |
| 24,014 | 10 | 93  | 39 | 489 | 4 | 43 | 33 | 403 | 86 | 1,028 |

|        |    |    |    |     |   |    |    |     |    |       |
|--------|----|----|----|-----|---|----|----|-----|----|-------|
| 24,015 | 10 | 94 | 39 | 489 | 4 | 43 | 33 | 403 | 86 | 1,029 |
| 24,016 | 9  | 94 | 32 | 487 | 4 | 43 | 32 | 404 | 77 | 1,028 |
| 24,017 | 9  | 94 | 34 | 489 | 4 | 43 | 32 | 404 | 79 | 1,030 |
| 24,018 | 9  | 94 | 34 | 491 | 4 | 43 | 32 | 404 | 79 | 1,032 |
| 24,019 | 9  | 92 | 34 | 476 | 4 | 41 | 32 | 381 | 79 | 990   |
| 24,020 | 9  | 92 | 34 | 476 | 4 | 41 | 33 | 382 | 80 | 991   |
| 24,021 | 9  | 92 | 32 | 477 | 2 | 41 | 31 | 383 | 74 | 993   |
| 24,022 | 9  | 92 | 32 | 479 | 2 | 41 | 31 | 386 | 74 | 998   |
| 24,023 | 8  | 91 | 28 | 475 | 2 | 40 | 30 | 377 | 68 | 983   |
| 24,024 | 8  | 92 | 28 | 512 | 2 | 43 | 30 | 408 | 68 | 1,055 |
| 24,025 | 8  | 92 | 27 | 510 | 2 | 43 | 29 | 413 | 66 | 1,058 |
| 24,026 | 8  | 93 | 25 | 574 | 2 | 48 | 24 | 478 | 59 | 1,193 |
| 24,027 | 8  | 95 | 25 | 624 | 2 | 49 | 23 | 483 | 58 | 1,251 |
| 24,028 | 8  | 95 | 16 | 648 | 0 | 49 | 19 | 489 | 43 | 1,281 |
| 24,029 | 8  | 97 | 14 | 710 | 0 | 53 | 19 | 519 | 41 | 1,379 |
| 24,030 | 8  | 97 | 14 | 724 | 0 | 55 | 18 | 534 | 40 | 1,410 |
| 24,031 | 8  | 99 | 14 | 791 | 1 | 56 | 18 | 568 | 41 | 1,514 |
| 24,032 | 8  | 99 | 14 | 797 | 1 | 56 | 18 | 572 | 41 | 1,524 |
| 24,033 | 8  | 99 | 13 | 798 | 1 | 56 | 18 | 571 | 40 | 1,524 |
| 24,034 | 8  | 99 | 13 | 798 | 1 | 56 | 18 | 573 | 40 | 1,526 |
| 24,035 | 9  | 92 | 14 | 757 | 1 | 53 | 17 | 528 | 41 | 1,430 |
| 24,036 | 9  | 80 | 14 | 715 | 1 | 47 | 17 | 488 | 41 | 1,330 |
| 24,037 | 9  | 81 | 14 | 726 | 1 | 48 | 17 | 502 | 41 | 1,357 |
| 24,038 | 9  | 80 | 14 | 724 | 1 | 48 | 16 | 500 | 40 | 1,352 |
| 24,039 | 9  | 70 | 14 | 671 | 1 | 43 | 16 | 454 | 40 | 1,238 |
| 24,040 | 9  | 30 | 13 | 537 | 1 | 25 | 16 | 306 | 39 | 898   |
| 24,041 | 9  | 30 | 12 | 519 | 1 | 25 | 16 | 303 | 38 | 877   |
| 24,042 | 2  | 18 | 11 | 458 | 1 | 23 | 16 | 279 | 30 | 778   |
| 24,043 | 2  | 18 | 11 | 460 | 1 | 23 | 16 | 282 | 30 | 783   |
| 24,044 | 2  | 16 | 9  | 432 | 1 | 24 | 7  | 288 | 19 | 760   |
| 24,045 | 2  | 18 | 9  | 442 | 1 | 24 | 5  | 298 | 17 | 782   |
| 24,046 | 2  | 17 | 8  | 437 | 1 | 23 | 5  | 298 | 16 | 775   |
| 24,047 | 2  | 25 | 8  | 476 | 1 | 24 | 5  | 339 | 16 | 864   |
| 24,048 | 2  | 27 | 7  | 480 | 1 | 25 | 4  | 340 | 14 | 872   |
| 24,049 | 2  | 28 | 6  | 489 | 1 | 25 | 4  | 354 | 13 | 896   |
| 24,050 | 2  | 28 | 6  | 486 | 1 | 25 | 4  | 353 | 13 | 892   |
| 24,051 | 1  | 28 | 6  | 485 | 1 | 25 | 4  | 354 | 12 | 892   |
| 24,052 | 1  | 30 | 6  | 495 | 1 | 25 | 5  | 366 | 13 | 916   |
| 24,053 | 1  | 30 | 6  | 496 | 1 | 25 | 5  | 367 | 13 | 918   |
| 24,054 | 1  | 30 | 6  | 496 | 1 | 25 | 5  | 368 | 13 | 919   |
| 24,055 | 1  | 30 | 6  | 492 | 1 | 25 | 5  | 368 | 13 | 915   |

|        |   |    |    |     |   |    |    |     |    |       |
|--------|---|----|----|-----|---|----|----|-----|----|-------|
| 24,056 | 1 | 30 | 6  | 491 | 1 | 25 | 5  | 368 | 13 | 914   |
| 24,057 | 1 | 30 | 6  | 491 | 1 | 26 | 7  | 368 | 15 | 915   |
| 24,058 | 1 | 30 | 6  | 491 | 1 | 26 | 7  | 368 | 15 | 915   |
| 24,059 | 2 | 31 | 5  | 492 | 1 | 26 | 7  | 368 | 15 | 917   |
| 24,060 | 2 | 31 | 5  | 494 | 1 | 26 | 7  | 368 | 15 | 919   |
| 24,061 | 2 | 31 | 5  | 490 | 1 | 26 | 7  | 367 | 15 | 914   |
| 24,062 | 3 | 31 | 5  | 496 | 1 | 26 | 7  | 369 | 16 | 922   |
| 24,063 | 3 | 31 | 5  | 497 | 1 | 26 | 7  | 369 | 16 | 923   |
| 24,064 | 3 | 31 | 5  | 499 | 1 | 26 | 7  | 370 | 16 | 926   |
| 24,065 | 3 | 35 | 5  | 500 | 1 | 27 | 7  | 383 | 16 | 945   |
| 24,066 | 3 | 37 | 4  | 507 | 1 | 27 | 7  | 385 | 15 | 956   |
| 24,067 | 4 | 40 | 3  | 564 | 1 | 33 | 7  | 440 | 15 | 1,077 |
| 24,068 | 4 | 42 | 3  | 592 | 1 | 33 | 7  | 466 | 15 | 1,133 |
| 24,069 | 4 | 43 | 3  | 608 | 1 | 33 | 7  | 476 | 15 | 1,160 |
| 24,070 | 4 | 44 | 3  | 611 | 1 | 33 | 7  | 476 | 15 | 1,164 |
| 24,071 | 4 | 44 | 3  | 612 | 1 | 33 | 7  | 473 | 15 | 1,162 |
| 24,072 | 4 | 47 | 4  | 613 | 1 | 33 | 7  | 470 | 16 | 1,163 |
| 24,073 | 4 | 48 | 4  | 615 | 1 | 33 | 7  | 470 | 16 | 1,166 |
| 24,074 | 4 | 47 | 4  | 570 | 1 | 30 | 7  | 438 | 16 | 1,085 |
| 24,075 | 4 | 47 | 4  | 570 | 1 | 30 | 7  | 438 | 16 | 1,085 |
| 24,076 | 4 | 47 | 4  | 568 | 1 | 30 | 7  | 433 | 16 | 1,078 |
| 24,077 | 4 | 45 | 4  | 508 | 1 | 24 | 7  | 371 | 16 | 948   |
| 24,078 | 4 | 43 | 4  | 458 | 1 | 23 | 7  | 367 | 16 | 891   |
| 24,079 | 4 | 44 | 4  | 438 | 1 | 23 | 8  | 363 | 17 | 868   |
| 24,080 | 4 | 42 | 5  | 377 | 1 | 19 | 8  | 333 | 18 | 771   |
| 24,081 | 4 | 42 | 5  | 363 | 1 | 17 | 8  | 318 | 18 | 740   |
| 24,082 | 6 | 40 | 10 | 296 | 0 | 16 | 14 | 287 | 30 | 639   |
| 24,083 | 6 | 40 | 13 | 291 | 0 | 16 | 14 | 284 | 33 | 631   |
| 24,084 | 6 | 40 | 22 | 290 | 0 | 16 | 16 | 285 | 44 | 631   |
| 24,085 | 6 | 40 | 32 | 290 | 1 | 16 | 22 | 283 | 61 | 629   |
| 24,086 | 5 | 40 | 38 | 290 | 2 | 16 | 27 | 281 | 72 | 627   |
| 24,087 | 5 | 39 | 42 | 279 | 2 | 15 | 27 | 267 | 76 | 600   |
| 24,088 | 5 | 37 | 47 | 268 | 2 | 15 | 30 | 258 | 84 | 578   |
| 24,089 | 5 | 37 | 47 | 268 | 2 | 15 | 31 | 258 | 85 | 578   |
| 24,090 | 5 | 37 | 48 | 268 | 2 | 15 | 31 | 256 | 86 | 576   |
| 24,091 | 5 | 37 | 48 | 275 | 2 | 16 | 32 | 270 | 87 | 598   |
| 24,092 | 5 | 37 | 48 | 281 | 2 | 16 | 32 | 272 | 87 | 606   |
| 24,093 | 5 | 37 | 48 | 276 | 2 | 15 | 31 | 267 | 86 | 595   |
| 24,094 | 5 | 37 | 48 | 282 | 2 | 15 | 31 | 270 | 86 | 604   |
| 24,095 | 5 | 40 | 48 | 267 | 2 | 13 | 30 | 250 | 85 | 570   |
| 24,096 | 5 | 38 | 48 | 265 | 2 | 11 | 30 | 244 | 85 | 558   |

|        |   |    |    |     |   |    |    |     |    |     |
|--------|---|----|----|-----|---|----|----|-----|----|-----|
| 24,097 | 5 | 37 | 48 | 268 | 2 | 11 | 29 | 243 | 84 | 559 |
| 24,098 | 5 | 29 | 48 | 229 | 2 | 10 | 29 | 203 | 84 | 471 |
| 24,099 | 5 | 27 | 49 | 222 | 2 | 9  | 29 | 194 | 85 | 452 |
| 24,100 | 5 | 27 | 49 | 223 | 2 | 9  | 29 | 194 | 85 | 453 |
| 24,101 | 5 | 25 | 49 | 213 | 2 | 9  | 29 | 181 | 85 | 428 |
| 24,102 | 5 | 25 | 49 | 212 | 2 | 9  | 29 | 181 | 85 | 427 |
| 24,103 | 5 | 25 | 49 | 214 | 2 | 9  | 28 | 182 | 84 | 430 |
| 24,104 | 5 | 25 | 49 | 226 | 2 | 9  | 28 | 192 | 84 | 452 |
| 24,105 | 5 | 25 | 49 | 235 | 2 | 9  | 28 | 205 | 84 | 474 |
| 24,106 | 5 | 24 | 49 | 231 | 2 | 10 | 28 | 206 | 84 | 471 |
| 24,107 | 5 | 24 | 49 | 232 | 2 | 10 | 28 | 208 | 84 | 474 |
| 24,108 | 5 | 24 | 49 | 233 | 2 | 9  | 26 | 207 | 82 | 473 |
| 24,109 | 4 | 23 | 49 | 232 | 2 | 9  | 26 | 208 | 81 | 472 |
| 24,110 | 4 | 23 | 49 | 234 | 2 | 9  | 26 | 208 | 81 | 474 |
| 24,111 | 4 | 23 | 49 | 236 | 2 | 9  | 26 | 208 | 81 | 476 |
| 24,112 | 4 | 23 | 49 | 236 | 2 | 9  | 26 | 208 | 81 | 476 |
| 24,113 | 3 | 23 | 49 | 229 | 2 | 9  | 27 | 207 | 81 | 468 |
| 24,114 | 3 | 23 | 49 | 227 | 2 | 9  | 32 | 207 | 86 | 466 |
| 24,115 | 3 | 23 | 49 | 227 | 2 | 9  | 32 | 207 | 86 | 466 |
| 24,116 | 3 | 16 | 49 | 219 | 2 | 8  | 32 | 191 | 86 | 434 |
| 24,117 | 3 | 16 | 49 | 219 | 2 | 8  | 32 | 191 | 86 | 434 |
| 24,118 | 2 | 13 | 49 | 162 | 2 | 2  | 32 | 136 | 85 | 313 |
| 24,119 | 2 | 11 | 49 | 135 | 2 | 2  | 32 | 113 | 85 | 261 |
| 24,120 | 2 | 9  | 49 | 122 | 2 | 2  | 32 | 102 | 85 | 235 |
| 24,121 | 2 | 9  | 49 | 122 | 2 | 2  | 32 | 102 | 85 | 235 |
| 24,122 | 2 | 9  | 49 | 121 | 2 | 2  | 31 | 103 | 84 | 235 |
| 24,123 | 2 | 5  | 47 | 107 | 2 | 3  | 31 | 93  | 82 | 208 |
| 24,124 | 2 | 5  | 47 | 108 | 2 | 3  | 31 | 93  | 82 | 209 |
| 24,125 | 3 | 5  | 47 | 109 | 2 | 3  | 31 | 93  | 83 | 210 |
| 24,126 | 3 | 5  | 47 | 109 | 2 | 3  | 31 | 93  | 83 | 210 |
| 24,127 | 3 | 5  | 48 | 109 | 2 | 3  | 31 | 93  | 84 | 210 |
| 24,128 | 3 | 5  | 48 | 106 | 2 | 3  | 30 | 92  | 83 | 206 |
| 24,129 | 3 | 5  | 48 | 107 | 2 | 3  | 30 | 92  | 83 | 207 |
| 24,130 | 3 | 5  | 47 | 116 | 2 | 4  | 30 | 103 | 82 | 228 |
| 24,131 | 3 | 5  | 47 | 130 | 2 | 6  | 30 | 113 | 82 | 254 |
| 24,132 | 2 | 10 | 44 | 235 | 2 | 16 | 25 | 162 | 73 | 423 |
| 24,133 | 1 | 16 | 43 | 309 | 2 | 30 | 26 | 208 | 72 | 563 |
| 24,134 | 1 | 17 | 41 | 388 | 2 | 34 | 26 | 252 | 70 | 691 |
| 24,135 | 1 | 20 | 32 | 406 | 2 | 36 | 24 | 255 | 59 | 717 |
| 24,136 | 1 | 22 | 23 | 409 | 1 | 36 | 18 | 257 | 43 | 724 |
| 24,137 | 1 | 25 | 16 | 419 | 0 | 37 | 13 | 263 | 30 | 744 |

|        |   |    |    |     |   |    |    |     |    |     |
|--------|---|----|----|-----|---|----|----|-----|----|-----|
| 24,138 | 1 | 25 | 14 | 421 | 0 | 37 | 13 | 265 | 28 | 748 |
| 24,139 | 2 | 25 | 10 | 431 | 0 | 37 | 11 | 267 | 23 | 760 |
| 24,140 | 2 | 25 | 10 | 434 | 0 | 37 | 10 | 267 | 22 | 763 |
| 24,141 | 2 | 25 | 9  | 430 | 0 | 36 | 10 | 252 | 21 | 743 |
| 24,142 | 2 | 25 | 9  | 424 | 0 | 36 | 9  | 251 | 20 | 736 |
| 24,143 | 2 | 25 | 9  | 421 | 0 | 36 | 12 | 249 | 23 | 731 |
| 24,144 | 3 | 25 | 12 | 413 | 1 | 36 | 17 | 243 | 33 | 717 |
| 24,145 | 3 | 22 | 13 | 408 | 1 | 36 | 18 | 237 | 35 | 703 |
| 24,146 | 3 | 22 | 13 | 408 | 1 | 36 | 18 | 237 | 35 | 703 |
| 24,147 | 3 | 22 | 13 | 396 | 1 | 36 | 18 | 228 | 35 | 682 |
| 24,148 | 3 | 22 | 13 | 393 | 1 | 36 | 18 | 227 | 35 | 678 |
| 24,149 | 3 | 21 | 12 | 387 | 1 | 36 | 18 | 222 | 34 | 666 |
| 24,150 | 3 | 21 | 12 | 386 | 1 | 36 | 18 | 221 | 34 | 664 |
| 24,151 | 3 | 21 | 12 | 386 | 1 | 36 | 18 | 221 | 34 | 664 |
| 24,152 | 3 | 21 | 12 | 387 | 1 | 36 | 18 | 221 | 34 | 665 |
| 24,153 | 3 | 21 | 12 | 385 | 1 | 36 | 18 | 221 | 34 | 663 |
| 24,154 | 3 | 21 | 12 | 385 | 1 | 36 | 18 | 221 | 34 | 663 |
| 24,155 | 3 | 21 | 12 | 364 | 1 | 36 | 18 | 198 | 34 | 619 |
| 24,156 | 3 | 21 | 12 | 364 | 1 | 35 | 18 | 196 | 34 | 616 |
| 24,157 | 3 | 21 | 12 | 363 | 1 | 35 | 18 | 194 | 34 | 613 |
| 24,158 | 3 | 21 | 12 | 363 | 1 | 35 | 18 | 194 | 34 | 613 |
| 24,159 | 3 | 21 | 12 | 364 | 1 | 35 | 18 | 195 | 34 | 615 |
| 24,160 | 3 | 21 | 12 | 364 | 1 | 35 | 18 | 195 | 34 | 615 |
| 24,161 | 3 | 21 | 13 | 370 | 1 | 37 | 18 | 209 | 35 | 637 |
| 24,162 | 3 | 21 | 13 | 371 | 1 | 37 | 18 | 212 | 35 | 641 |
| 24,163 | 3 | 21 | 13 | 374 | 1 | 37 | 17 | 213 | 34 | 645 |
| 24,164 | 3 | 21 | 13 | 375 | 1 | 37 | 17 | 215 | 34 | 648 |
| 24,165 | 3 | 21 | 13 | 375 | 1 | 37 | 12 | 215 | 29 | 648 |
| 24,166 | 3 | 21 | 13 | 375 | 1 | 37 | 12 | 216 | 29 | 649 |
| 24,167 | 3 | 21 | 13 | 375 | 1 | 37 | 12 | 217 | 29 | 650 |
| 24,168 | 3 | 21 | 13 | 376 | 1 | 37 | 12 | 217 | 29 | 651 |
| 24,169 | 3 | 21 | 13 | 376 | 1 | 37 | 12 | 217 | 29 | 651 |
| 24,170 | 3 | 21 | 13 | 373 | 1 | 37 | 12 | 214 | 29 | 645 |
| 24,171 | 3 | 21 | 13 | 368 | 1 | 38 | 12 | 212 | 29 | 639 |
| 24,172 | 4 | 21 | 13 | 371 | 1 | 38 | 12 | 216 | 30 | 646 |
| 24,173 | 4 | 21 | 12 | 372 | 1 | 38 | 12 | 218 | 29 | 649 |
| 24,174 | 4 | 21 | 12 | 370 | 1 | 39 | 12 | 223 | 29 | 653 |
| 24,175 | 4 | 21 | 12 | 370 | 1 | 39 | 13 | 223 | 30 | 653 |
| 24,176 | 3 | 21 | 12 | 369 | 1 | 39 | 13 | 224 | 29 | 653 |
| 24,177 | 3 | 21 | 11 | 370 | 1 | 39 | 13 | 229 | 28 | 659 |
| 24,178 | 3 | 34 | 11 | 417 | 1 | 41 | 13 | 329 | 28 | 821 |

|        |   |    |    |     |   |    |    |     |    |     |
|--------|---|----|----|-----|---|----|----|-----|----|-----|
| 24,179 | 3 | 34 | 11 | 421 | 1 | 41 | 13 | 333 | 28 | 829 |
| 24,180 | 3 | 35 | 11 | 422 | 1 | 41 | 13 | 336 | 28 | 834 |
| 24,181 | 3 | 34 | 11 | 413 | 1 | 40 | 13 | 328 | 28 | 815 |
| 24,182 | 3 | 35 | 11 | 401 | 1 | 38 | 13 | 330 | 28 | 804 |
| 24,183 | 3 | 30 | 11 | 313 | 1 | 28 | 12 | 296 | 27 | 667 |
| 24,184 | 3 | 24 | 10 | 239 | 1 | 14 | 11 | 247 | 25 | 524 |
| 24,185 | 5 | 23 | 9  | 160 | 1 | 10 | 11 | 203 | 26 | 396 |
| 24,186 | 5 | 18 | 10 | 139 | 2 | 8  | 12 | 197 | 29 | 362 |
| 24,187 | 5 | 15 | 9  | 129 | 3 | 7  | 12 | 191 | 29 | 342 |
| 24,188 | 5 | 15 | 9  | 127 | 3 | 7  | 12 | 190 | 29 | 339 |
| 24,189 | 5 | 15 | 7  | 127 | 3 | 7  | 12 | 190 | 27 | 339 |
| 24,190 | 4 | 15 | 6  | 111 | 3 | 7  | 11 | 188 | 24 | 321 |
| 24,191 | 4 | 15 | 6  | 115 | 3 | 7  | 11 | 198 | 24 | 335 |
| 24,192 | 4 | 15 | 6  | 117 | 3 | 7  | 11 | 209 | 24 | 348 |
| 24,193 | 4 | 17 | 6  | 125 | 3 | 8  | 11 | 226 | 24 | 376 |
| 24,194 | 4 | 19 | 6  | 133 | 3 | 10 | 8  | 236 | 21 | 398 |
| 24,195 | 3 | 19 | 3  | 134 | 2 | 10 | 3  | 236 | 11 | 399 |
| 24,196 | 3 | 19 | 2  | 134 | 2 | 10 | 2  | 236 | 9  | 399 |
| 24,197 | 3 | 20 | 2  | 134 | 2 | 10 | 3  | 236 | 10 | 400 |
| 24,198 | 3 | 20 | 2  | 134 | 2 | 10 | 3  | 236 | 10 | 400 |
| 24,199 | 3 | 20 | 2  | 135 | 2 | 10 | 3  | 237 | 10 | 402 |
| 24,200 | 3 | 20 | 2  | 135 | 2 | 10 | 3  | 238 | 10 | 403 |
| 24,201 | 3 | 20 | 2  | 136 | 2 | 10 | 3  | 239 | 10 | 405 |
| 24,202 | 3 | 20 | 3  | 136 | 2 | 10 | 4  | 239 | 12 | 405 |
| 24,203 | 3 | 20 | 5  | 135 | 2 | 10 | 5  | 239 | 15 | 404 |
| 24,204 | 3 | 20 | 5  | 135 | 2 | 10 | 5  | 237 | 15 | 402 |
| 24,205 | 3 | 20 | 11 | 135 | 2 | 10 | 6  | 238 | 22 | 403 |
| 24,206 | 4 | 20 | 17 | 135 | 4 | 10 | 14 | 240 | 39 | 405 |
| 24,207 | 4 | 20 | 17 | 135 | 4 | 10 | 14 | 240 | 39 | 405 |
| 24,208 | 5 | 20 | 18 | 135 | 4 | 10 | 18 | 240 | 45 | 405 |
| 24,209 | 5 | 20 | 18 | 133 | 4 | 10 | 18 | 239 | 45 | 402 |
| 24,210 | 5 | 20 | 17 | 133 | 4 | 10 | 18 | 239 | 44 | 402 |
| 24,211 | 5 | 20 | 17 | 135 | 4 | 11 | 18 | 239 | 44 | 405 |
| 24,212 | 5 | 20 | 17 | 125 | 4 | 9  | 18 | 225 | 44 | 379 |
| 24,213 | 6 | 20 | 18 | 122 | 4 | 9  | 22 | 222 | 50 | 373 |
| 24,214 | 6 | 20 | 18 | 119 | 4 | 9  | 22 | 220 | 50 | 368 |
| 24,215 | 6 | 20 | 18 | 118 | 4 | 9  | 22 | 218 | 50 | 365 |
| 24,216 | 6 | 20 | 18 | 118 | 4 | 9  | 22 | 217 | 50 | 364 |
| 24,217 | 6 | 20 | 18 | 118 | 4 | 9  | 22 | 217 | 50 | 364 |
| 24,218 | 6 | 20 | 18 | 118 | 4 | 9  | 22 | 216 | 50 | 363 |
| 24,219 | 6 | 20 | 18 | 117 | 4 | 9  | 22 | 215 | 50 | 361 |

|        |   |    |    |     |    |   |    |     |     |     |
|--------|---|----|----|-----|----|---|----|-----|-----|-----|
| 24,220 | 6 | 20 | 18 | 117 | 4  | 9 | 22 | 215 | 50  | 361 |
| 24,221 | 6 | 20 | 18 | 115 | 4  | 8 | 22 | 215 | 50  | 358 |
| 24,222 | 6 | 20 | 19 | 112 | 4  | 8 | 23 | 211 | 52  | 351 |
| 24,223 | 5 | 20 | 19 | 111 | 4  | 8 | 23 | 210 | 51  | 349 |
| 24,224 | 5 | 21 | 19 | 112 | 4  | 6 | 24 | 206 | 52  | 345 |
| 24,225 | 5 | 21 | 19 | 114 | 4  | 6 | 23 | 206 | 51  | 347 |
| 24,226 | 5 | 21 | 19 | 115 | 5  | 7 | 23 | 206 | 52  | 349 |
| 24,227 | 5 | 21 | 19 | 115 | 5  | 7 | 23 | 205 | 52  | 348 |
| 24,228 | 5 | 21 | 19 | 114 | 5  | 7 | 23 | 200 | 52  | 342 |
| 24,229 | 5 | 8  | 19 | 69  | 5  | 5 | 23 | 101 | 52  | 183 |
| 24,230 | 5 | 8  | 20 | 65  | 6  | 5 | 25 | 97  | 56  | 175 |
| 24,231 | 5 | 7  | 20 | 63  | 6  | 5 | 26 | 95  | 57  | 170 |
| 24,232 | 5 | 7  | 20 | 59  | 6  | 5 | 26 | 90  | 57  | 161 |
| 24,233 | 5 | 6  | 20 | 56  | 6  | 5 | 26 | 79  | 57  | 146 |
| 24,234 | 5 | 6  | 26 | 39  | 7  | 5 | 36 | 64  | 74  | 114 |
| 24,235 | 3 | 6  | 26 | 38  | 7  | 5 | 36 | 63  | 72  | 112 |
| 24,236 | 3 | 6  | 26 | 39  | 6  | 5 | 35 | 63  | 70  | 113 |
| 24,237 | 3 | 6  | 28 | 36  | 6  | 5 | 36 | 61  | 73  | 108 |
| 24,238 | 3 | 6  | 29 | 36  | 5  | 5 | 37 | 60  | 74  | 107 |
| 24,239 | 3 | 6  | 37 | 37  | 5  | 5 | 43 | 60  | 88  | 108 |
| 24,240 | 3 | 6  | 45 | 37  | 11 | 5 | 52 | 60  | 111 | 108 |
| 24,241 | 3 | 7  | 47 | 37  | 11 | 5 | 52 | 59  | 113 | 108 |
| 24,242 | 3 | 7  | 47 | 31  | 11 | 5 | 53 | 38  | 114 | 81  |
| 24,243 | 3 | 7  | 47 | 32  | 11 | 5 | 53 | 38  | 114 | 82  |
| 24,244 | 3 | 5  | 49 | 24  | 11 | 4 | 53 | 21  | 116 | 54  |
| 24,245 | 3 | 3  | 49 | 16  | 11 | 2 | 53 | 11  | 116 | 32  |
| 24,246 | 3 | 3  | 49 | 15  | 11 | 2 | 53 | 11  | 116 | 31  |
| 24,247 | 3 | 2  | 49 | 15  | 11 | 2 | 53 | 11  | 116 | 30  |
| 24,248 | 3 | 2  | 51 | 15  | 11 | 2 | 52 | 11  | 117 | 30  |
| 24,249 | 3 | 2  | 51 | 15  | 11 | 2 | 52 | 10  | 117 | 29  |
| 24,250 | 3 | 2  | 51 | 15  | 11 | 2 | 52 | 10  | 117 | 29  |
| 24,251 | 3 | 3  | 56 | 18  | 11 | 2 | 52 | 10  | 122 | 33  |
| 24,252 | 3 | 3  | 56 | 20  | 11 | 3 | 51 | 12  | 121 | 38  |
| 24,253 | 3 | 3  | 55 | 20  | 11 | 3 | 51 | 12  | 120 | 38  |
| 24,254 | 8 | 6  | 57 | 28  | 12 | 5 | 69 | 18  | 146 | 57  |
| 24,255 | 8 | 6  | 55 | 32  | 12 | 5 | 69 | 24  | 144 | 67  |
| 24,256 | 9 | 7  | 53 | 40  | 12 | 5 | 75 | 26  | 149 | 78  |
| 24,257 | 8 | 7  | 47 | 48  | 10 | 6 | 70 | 29  | 135 | 90  |
| 24,258 | 7 | 7  | 47 | 49  | 10 | 6 | 70 | 30  | 134 | 92  |
| 24,259 | 7 | 9  | 47 | 61  | 11 | 7 | 73 | 44  | 138 | 121 |
| 24,260 | 7 | 10 | 46 | 63  | 11 | 7 | 71 | 46  | 135 | 126 |



|        |   |    |    |     |    |    |    |     |     |     |
|--------|---|----|----|-----|----|----|----|-----|-----|-----|
| 24,261 | 7 | 16 | 48 | 83  | 11 | 9  | 71 | 61  | 137 | 169 |
| 24,262 | 6 | 26 | 48 | 123 | 11 | 9  | 71 | 79  | 136 | 237 |
| 24,263 | 6 | 26 | 48 | 123 | 11 | 9  | 71 | 79  | 136 | 237 |
| 24,264 | 6 | 27 | 50 | 134 | 11 | 11 | 71 | 82  | 138 | 254 |
| 24,265 | 6 | 29 | 50 | 135 | 11 | 11 | 71 | 82  | 138 | 257 |
| 24,266 | 6 | 30 | 50 | 139 | 11 | 11 | 71 | 84  | 138 | 264 |
| 24,267 | 6 | 30 | 50 | 139 | 11 | 11 | 71 | 84  | 138 | 264 |
| 24,268 | 6 | 30 | 50 | 143 | 11 | 11 | 71 | 84  | 138 | 268 |
| 24,269 | 6 | 30 | 51 | 146 | 11 | 12 | 71 | 85  | 139 | 273 |
| 24,270 | 6 | 30 | 51 | 147 | 11 | 12 | 71 | 85  | 139 | 274 |
| 24,271 | 6 | 30 | 51 | 147 | 11 | 12 | 71 | 86  | 139 | 275 |
| 24,272 | 6 | 30 | 51 | 147 | 11 | 12 | 71 | 86  | 139 | 275 |
| 24,273 | 6 | 30 | 50 | 147 | 11 | 12 | 70 | 85  | 137 | 274 |
| 24,274 | 6 | 30 | 50 | 147 | 11 | 12 | 70 | 85  | 137 | 274 |
| 24,275 | 6 | 29 | 50 | 145 | 11 | 12 | 69 | 88  | 136 | 274 |
| 24,276 | 6 | 29 | 50 | 148 | 10 | 12 | 69 | 90  | 135 | 279 |
| 24,277 | 6 | 31 | 50 | 159 | 10 | 11 | 69 | 101 | 135 | 302 |
| 24,278 | 6 | 33 | 50 | 160 | 10 | 11 | 69 | 103 | 135 | 307 |
| 24,279 | 6 | 33 | 50 | 167 | 10 | 11 | 70 | 104 | 136 | 315 |
| 24,280 | 6 | 34 | 49 | 167 | 9  | 11 | 68 | 103 | 132 | 315 |
| 24,281 | 6 | 34 | 49 | 167 | 9  | 11 | 67 | 102 | 131 | 314 |
| 24,282 | 6 | 34 | 49 | 167 | 9  | 11 | 64 | 102 | 128 | 314 |
| 24,283 | 6 | 34 | 43 | 167 | 9  | 11 | 57 | 101 | 115 | 313 |
| 24,284 | 6 | 36 | 43 | 173 | 8  | 12 | 57 | 114 | 114 | 335 |
| 24,285 | 6 | 36 | 43 | 178 | 8  | 12 | 57 | 121 | 114 | 347 |
| 24,286 | 6 | 37 | 43 | 222 | 8  | 13 | 57 | 154 | 114 | 426 |
| 24,287 | 6 | 37 | 43 | 240 | 8  | 14 | 57 | 168 | 114 | 459 |
| 24,288 | 6 | 41 | 40 | 257 | 8  | 15 | 56 | 186 | 110 | 499 |
| 24,289 | 6 | 42 | 39 | 264 | 8  | 17 | 55 | 197 | 108 | 520 |
| 24,290 | 7 | 44 | 34 | 267 | 9  | 18 | 51 | 204 | 101 | 533 |
| 24,291 | 7 | 46 | 26 | 268 | 3  | 20 | 42 | 216 | 78  | 550 |
| 24,292 | 7 | 45 | 24 | 271 | 3  | 20 | 42 | 216 | 76  | 552 |
| 24,293 | 9 | 46 | 34 | 277 | 5  | 20 | 50 | 229 | 98  | 572 |
| 24,294 | 9 | 46 | 32 | 276 | 5  | 20 | 50 | 231 | 96  | 573 |
| 24,295 | 9 | 46 | 34 | 278 | 5  | 21 | 54 | 235 | 102 | 580 |
| 24,296 | 9 | 47 | 34 | 294 | 5  | 21 | 55 | 242 | 103 | 604 |
| 24,297 | 9 | 48 | 34 | 297 | 5  | 21 | 55 | 242 | 103 | 608 |
| 24,298 | 9 | 48 | 34 | 297 | 5  | 21 | 55 | 242 | 103 | 608 |
| 24,299 | 9 | 48 | 32 | 296 | 5  | 21 | 55 | 242 | 101 | 607 |
| 24,300 | 9 | 48 | 32 | 296 | 5  | 21 | 55 | 242 | 101 | 607 |
| 24,301 | 9 | 47 | 32 | 293 | 5  | 21 | 55 | 242 | 101 | 603 |

|        |   |    |    |     |   |    |    |     |    |     |
|--------|---|----|----|-----|---|----|----|-----|----|-----|
| 24,302 | 9 | 47 | 27 | 291 | 5 | 20 | 55 | 239 | 96 | 597 |
| 24,303 | 9 | 47 | 27 | 299 | 5 | 20 | 55 | 244 | 96 | 610 |
| 24,304 | 6 | 47 | 23 | 298 | 5 | 20 | 41 | 244 | 75 | 609 |
| 24,305 | 4 | 44 | 23 | 291 | 4 | 18 | 38 | 232 | 69 | 585 |
| 24,306 | 4 | 53 | 23 | 324 | 4 | 21 | 38 | 295 | 69 | 693 |
| 24,307 | 3 | 52 | 21 | 329 | 4 | 22 | 31 | 308 | 59 | 711 |
| 24,308 | 3 | 56 | 22 | 362 | 4 | 22 | 28 | 326 | 57 | 766 |
| 24,309 | 3 | 64 | 22 | 373 | 4 | 23 | 25 | 334 | 54 | 794 |
| 24,310 | 4 | 60 | 22 | 373 | 3 | 23 | 26 | 323 | 55 | 779 |
| 24,311 | 4 | 55 | 22 | 354 | 3 | 22 | 24 | 312 | 53 | 743 |
| 24,312 | 4 | 55 | 20 | 356 | 3 | 22 | 24 | 312 | 51 | 745 |
| 24,313 | 4 | 49 | 20 | 325 | 3 | 21 | 24 | 298 | 51 | 693 |
| 24,314 | 4 | 48 | 19 | 328 | 3 | 21 | 24 | 297 | 50 | 694 |
| 24,315 | 4 | 46 | 20 | 321 | 3 | 19 | 26 | 296 | 53 | 682 |
| 24,316 | 4 | 45 | 20 | 321 | 3 | 19 | 28 | 296 | 55 | 681 |
| 24,317 | 4 | 44 | 20 | 319 | 3 | 19 | 28 | 296 | 55 | 678 |
| 24,318 | 4 | 44 | 20 | 319 | 3 | 19 | 28 | 297 | 55 | 679 |
| 24,319 | 4 | 44 | 23 | 315 | 3 | 19 | 29 | 297 | 59 | 675 |
| 24,320 | 4 | 44 | 22 | 312 | 3 | 18 | 29 | 297 | 58 | 671 |
| 24,321 | 4 | 44 | 22 | 312 | 3 | 18 | 29 | 297 | 58 | 671 |
| 24,322 | 4 | 44 | 22 | 315 | 3 | 18 | 30 | 298 | 59 | 675 |
| 24,323 | 5 | 44 | 22 | 315 | 3 | 18 | 31 | 299 | 61 | 676 |
| 24,324 | 5 | 48 | 22 | 320 | 3 | 18 | 31 | 301 | 61 | 687 |
| 24,325 | 5 | 48 | 22 | 323 | 3 | 18 | 31 | 301 | 61 | 690 |
| 24,326 | 5 | 48 | 22 | 323 | 3 | 18 | 31 | 299 | 61 | 688 |
| 24,327 | 5 | 48 | 22 | 320 | 3 | 18 | 30 | 296 | 60 | 682 |
| 24,328 | 5 | 46 | 22 | 309 | 3 | 18 | 31 | 286 | 61 | 659 |
| 24,329 | 5 | 44 | 22 | 307 | 3 | 18 | 31 | 284 | 61 | 653 |
| 24,330 | 5 | 44 | 22 | 301 | 3 | 18 | 31 | 286 | 61 | 649 |
| 24,331 | 5 | 43 | 22 | 299 | 3 | 18 | 31 | 285 | 61 | 645 |
| 24,332 | 5 | 43 | 24 | 300 | 3 | 18 | 37 | 284 | 69 | 645 |
| 24,333 | 5 | 43 | 24 | 300 | 3 | 18 | 37 | 284 | 69 | 645 |
| 24,334 | 5 | 41 | 24 | 289 | 3 | 16 | 37 | 266 | 69 | 612 |
| 24,335 | 5 | 41 | 24 | 289 | 3 | 16 | 37 | 266 | 69 | 612 |
| 24,336 | 5 | 41 | 24 | 290 | 3 | 16 | 37 | 268 | 69 | 615 |
| 24,337 | 7 | 43 | 27 | 262 | 3 | 20 | 37 | 261 | 74 | 586 |
| 24,338 | 7 | 44 | 30 | 280 | 4 | 22 | 43 | 278 | 84 | 624 |
| 24,339 | 7 | 55 | 32 | 331 | 4 | 27 | 44 | 332 | 87 | 745 |
| 24,340 | 7 | 55 | 33 | 332 | 4 | 25 | 44 | 330 | 88 | 742 |
| 24,341 | 6 | 53 | 30 | 334 | 3 | 24 | 42 | 326 | 81 | 737 |
| 24,342 | 5 | 54 | 28 | 356 | 3 | 24 | 39 | 333 | 75 | 767 |

|        |   |    |    |     |   |    |    |     |    |       |
|--------|---|----|----|-----|---|----|----|-----|----|-------|
| 24,343 | 4 | 56 | 21 | 358 | 1 | 24 | 34 | 342 | 60 | 780   |
| 24,344 | 4 | 66 | 20 | 467 | 1 | 26 | 33 | 425 | 58 | 984   |
| 24,345 | 4 | 66 | 18 | 473 | 1 | 26 | 30 | 427 | 53 | 992   |
| 24,346 | 4 | 68 | 18 | 470 | 1 | 26 | 28 | 422 | 51 | 986   |
| 24,347 | 4 | 68 | 18 | 469 | 1 | 26 | 28 | 424 | 51 | 987   |
| 24,348 | 4 | 69 | 19 | 472 | 1 | 26 | 31 | 427 | 55 | 994   |
| 24,349 | 4 | 69 | 19 | 476 | 1 | 26 | 31 | 427 | 55 | 998   |
| 24,350 | 4 | 69 | 19 | 481 | 1 | 26 | 31 | 428 | 55 | 1,004 |
| 24,351 | 4 | 69 | 19 | 484 | 1 | 26 | 32 | 428 | 56 | 1,007 |
| 24,352 | 4 | 69 | 21 | 485 | 1 | 27 | 32 | 427 | 58 | 1,008 |
| 24,353 | 4 | 69 | 21 | 485 | 1 | 27 | 32 | 427 | 58 | 1,008 |
| 24,354 | 4 | 69 | 21 | 477 | 1 | 27 | 32 | 422 | 58 | 995   |
| 24,355 | 4 | 69 | 21 | 473 | 1 | 27 | 31 | 420 | 57 | 989   |
| 24,356 | 4 | 60 | 21 | 429 | 1 | 23 | 30 | 342 | 56 | 854   |
| 24,357 | 4 | 60 | 21 | 435 | 1 | 23 | 30 | 346 | 56 | 864   |
| 24,358 | 4 | 60 | 21 | 441 | 1 | 23 | 30 | 353 | 56 | 877   |
| 24,359 | 4 | 48 | 20 | 389 | 1 | 21 | 30 | 323 | 55 | 781   |
| 24,360 | 4 | 48 | 20 | 391 | 1 | 21 | 30 | 323 | 55 | 783   |
| 24,361 | 3 | 48 | 19 | 377 | 1 | 19 | 25 | 315 | 48 | 759   |
| 24,362 | 3 | 48 | 18 | 375 | 1 | 19 | 24 | 316 | 46 | 758   |
| 24,363 | 3 | 50 | 18 | 378 | 1 | 19 | 24 | 319 | 46 | 766   |
| 24,364 | 3 | 47 | 17 | 368 | 1 | 19 | 23 | 315 | 44 | 749   |
| 24,365 | 3 | 47 | 18 | 365 | 1 | 19 | 23 | 315 | 45 | 746   |
| 24,366 | 3 | 47 | 18 | 369 | 1 | 19 | 21 | 323 | 43 | 758   |
| 24,367 | 3 | 47 | 17 | 368 | 1 | 19 | 21 | 324 | 42 | 758   |
| 24,368 | 3 | 47 | 16 | 366 | 1 | 19 | 20 | 321 | 40 | 753   |
| 24,369 | 3 | 47 | 16 | 366 | 1 | 19 | 20 | 326 | 40 | 758   |
| 24,370 | 3 | 47 | 15 | 365 | 2 | 19 | 20 | 325 | 40 | 756   |
| 24,371 | 3 | 49 | 15 | 375 | 2 | 19 | 21 | 328 | 41 | 771   |
| 24,372 | 3 | 49 | 15 | 378 | 2 | 19 | 21 | 329 | 41 | 775   |
| 24,373 | 3 | 49 | 15 | 375 | 2 | 19 | 20 | 327 | 40 | 770   |
| 24,374 | 2 | 49 | 15 | 375 | 2 | 19 | 19 | 326 | 38 | 769   |
| 24,375 | 2 | 45 | 16 | 367 | 2 | 19 | 19 | 324 | 39 | 755   |
| 24,376 | 2 | 45 | 16 | 365 | 2 | 19 | 20 | 322 | 40 | 751   |
| 24,377 | 2 | 45 | 16 | 367 | 2 | 19 | 20 | 323 | 40 | 754   |
| 24,378 | 2 | 45 | 17 | 367 | 2 | 19 | 19 | 323 | 40 | 754   |
| 24,379 | 2 | 45 | 19 | 370 | 2 | 19 | 19 | 327 | 42 | 761   |
| 24,380 | 2 | 46 | 20 | 377 | 2 | 19 | 21 | 331 | 45 | 773   |
| 24,381 | 2 | 46 | 23 | 379 | 2 | 19 | 23 | 333 | 50 | 777   |
| 24,382 | 2 | 47 | 23 | 381 | 2 | 19 | 23 | 343 | 50 | 790   |
| 24,383 | 2 | 47 | 21 | 384 | 2 | 19 | 17 | 343 | 42 | 793   |

|        |   |    |    |     |   |    |    |     |    |     |
|--------|---|----|----|-----|---|----|----|-----|----|-----|
| 24,384 | 2 | 47 | 23 | 392 | 2 | 20 | 17 | 356 | 44 | 815 |
| 24,385 | 3 | 47 | 23 | 405 | 2 | 20 | 17 | 365 | 45 | 837 |
| 24,386 | 3 | 47 | 23 | 411 | 2 | 20 | 19 | 366 | 47 | 844 |
| 24,387 | 2 | 47 | 21 | 412 | 2 | 20 | 20 | 365 | 45 | 844 |
| 24,388 | 2 | 44 | 25 | 398 | 2 | 16 | 19 | 340 | 48 | 798 |
| 24,389 | 2 | 28 | 29 | 294 | 2 | 7  | 22 | 236 | 55 | 565 |
| 24,390 | 2 | 27 | 29 | 286 | 2 | 7  | 21 | 228 | 54 | 548 |
| 24,391 | 2 | 27 | 28 | 280 | 2 | 7  | 21 | 225 | 53 | 539 |
| 24,392 | 3 | 28 | 28 | 280 | 2 | 7  | 21 | 225 | 54 | 540 |
| 24,393 | 3 | 12 | 28 | 137 | 2 | 3  | 21 | 100 | 54 | 252 |
| 24,394 | 3 | 17 | 28 | 164 | 2 | 3  | 21 | 141 | 54 | 325 |
| 24,395 | 3 | 17 | 28 | 170 | 2 | 3  | 21 | 146 | 54 | 336 |
| 24,396 | 3 | 18 | 29 | 188 | 2 | 5  | 21 | 170 | 55 | 381 |
| 24,397 | 3 | 17 | 29 | 194 | 2 | 5  | 21 | 186 | 55 | 402 |
| 24,398 | 3 | 17 | 29 | 219 | 2 | 5  | 21 | 194 | 55 | 435 |
| 24,399 | 3 | 17 | 28 | 221 | 2 | 5  | 18 | 192 | 51 | 435 |
| 24,400 | 3 | 17 | 28 | 219 | 2 | 5  | 18 | 192 | 51 | 433 |
| 24,401 | 3 | 19 | 38 | 218 | 3 | 6  | 22 | 196 | 66 | 439 |
| 24,402 | 3 | 19 | 36 | 215 | 3 | 6  | 22 | 196 | 64 | 436 |
| 24,403 | 3 | 19 | 36 | 213 | 3 | 5  | 22 | 197 | 64 | 434 |
| 24,404 | 3 | 19 | 36 | 225 | 3 | 5  | 24 | 207 | 66 | 456 |
| 24,405 | 3 | 20 | 36 | 230 | 3 | 5  | 24 | 208 | 66 | 463 |
| 24,406 | 3 | 20 | 36 | 230 | 3 | 5  | 24 | 208 | 66 | 463 |
| 24,407 | 4 | 20 | 39 | 216 | 3 | 5  | 25 | 196 | 71 | 437 |
| 24,408 | 6 | 20 | 41 | 220 | 3 | 5  | 27 | 197 | 77 | 442 |
| 24,409 | 6 | 22 | 41 | 222 | 3 | 5  | 27 | 199 | 77 | 448 |
| 24,410 | 6 | 22 | 41 | 222 | 3 | 5  | 27 | 201 | 77 | 450 |
| 24,411 | 6 | 22 | 41 | 220 | 3 | 5  | 27 | 201 | 77 | 448 |
| 24,412 | 6 | 22 | 41 | 220 | 3 | 5  | 27 | 202 | 77 | 449 |
| 24,413 | 9 | 20 | 44 | 218 | 3 | 5  | 30 | 198 | 86 | 441 |
| 24,414 | 9 | 20 | 44 | 218 | 3 | 5  | 30 | 198 | 86 | 441 |
| 24,415 | 9 | 20 | 43 | 217 | 3 | 5  | 30 | 198 | 85 | 440 |
| 24,416 | 9 | 20 | 43 | 210 | 3 | 5  | 30 | 189 | 85 | 424 |
| 24,417 | 9 | 20 | 43 | 210 | 4 | 5  | 30 | 188 | 86 | 423 |
| 24,418 | 9 | 20 | 43 | 210 | 4 | 5  | 30 | 188 | 86 | 423 |
| 24,419 | 9 | 20 | 43 | 210 | 4 | 5  | 30 | 188 | 86 | 423 |
| 24,420 | 9 | 20 | 43 | 210 | 4 | 5  | 30 | 183 | 86 | 418 |
| 24,421 | 9 | 20 | 43 | 210 | 3 | 5  | 30 | 183 | 85 | 418 |
| 24,422 | 9 | 18 | 43 | 197 | 3 | 5  | 29 | 179 | 84 | 399 |
| 24,423 | 9 | 19 | 43 | 197 | 3 | 5  | 29 | 180 | 84 | 401 |
| 24,424 | 9 | 19 | 43 | 197 | 3 | 5  | 29 | 179 | 84 | 400 |

|        |    |    |    |     |   |    |    |     |    |     |
|--------|----|----|----|-----|---|----|----|-----|----|-----|
| 24,425 | 9  | 19 | 43 | 197 | 3 | 5  | 29 | 179 | 84 | 400 |
| 24,426 | 9  | 19 | 42 | 197 | 3 | 5  | 29 | 179 | 83 | 400 |
| 24,427 | 9  | 19 | 43 | 194 | 3 | 5  | 28 | 178 | 83 | 396 |
| 24,428 | 9  | 19 | 42 | 194 | 3 | 5  | 28 | 178 | 82 | 396 |
| 24,429 | 9  | 19 | 40 | 194 | 3 | 5  | 28 | 178 | 80 | 396 |
| 24,430 | 10 | 18 | 42 | 184 | 3 | 5  | 28 | 170 | 83 | 377 |
| 24,431 | 10 | 18 | 43 | 184 | 3 | 5  | 26 | 170 | 82 | 377 |
| 24,432 | 10 | 17 | 40 | 179 | 3 | 5  | 24 | 156 | 77 | 357 |
| 24,433 | 10 | 17 | 40 | 179 | 3 | 5  | 24 | 156 | 77 | 357 |
| 24,434 | 10 | 17 | 43 | 173 | 3 | 4  | 25 | 151 | 81 | 345 |
| 24,435 | 10 | 18 | 45 | 177 | 3 | 4  | 26 | 153 | 84 | 352 |
| 24,436 | 9  | 18 | 46 | 165 | 3 | 4  | 28 | 146 | 86 | 333 |
| 24,437 | 10 | 18 | 46 | 159 | 3 | 4  | 26 | 146 | 85 | 327 |
| 24,438 | 9  | 18 | 50 | 158 | 3 | 4  | 27 | 145 | 89 | 325 |
| 24,439 | 9  | 18 | 43 | 156 | 2 | 4  | 22 | 145 | 76 | 323 |
| 24,440 | 9  | 18 | 37 | 155 | 2 | 4  | 19 | 144 | 67 | 321 |
| 24,441 | 9  | 18 | 37 | 155 | 2 | 4  | 19 | 144 | 67 | 321 |
| 24,442 | 10 | 18 | 37 | 155 | 2 | 4  | 19 | 144 | 68 | 321 |
| 24,443 | 9  | 17 | 37 | 156 | 2 | 4  | 22 | 144 | 70 | 321 |
| 24,444 | 9  | 12 | 38 | 126 | 2 | 5  | 24 | 99  | 73 | 242 |
| 24,445 | 9  | 14 | 38 | 143 | 2 | 5  | 24 | 104 | 73 | 266 |
| 24,446 | 9  | 25 | 37 | 356 | 2 | 16 | 24 | 178 | 72 | 575 |
| 24,447 | 9  | 42 | 37 | 421 | 2 | 20 | 24 | 206 | 72 | 689 |
| 24,448 | 9  | 47 | 37 | 468 | 2 | 22 | 25 | 213 | 73 | 750 |
| 24,449 | 9  | 51 | 37 | 450 | 2 | 23 | 25 | 207 | 73 | 731 |
| 24,450 | 9  | 52 | 38 | 451 | 2 | 23 | 25 | 213 | 74 | 739 |
| 24,451 | 9  | 53 | 37 | 453 | 2 | 23 | 22 | 214 | 70 | 743 |
| 24,452 | 9  | 51 | 28 | 453 | 1 | 22 | 20 | 209 | 58 | 735 |
| 24,453 | 9  | 51 | 28 | 453 | 1 | 22 | 20 | 209 | 58 | 735 |
| 24,454 | 9  | 51 | 28 | 453 | 1 | 22 | 20 | 208 | 58 | 734 |
| 24,455 | 9  | 50 | 29 | 437 | 1 | 22 | 18 | 197 | 57 | 706 |
| 24,456 | 9  | 50 | 29 | 437 | 1 | 22 | 18 | 197 | 57 | 706 |
| 24,457 | 10 | 51 | 28 | 434 | 1 | 22 | 18 | 198 | 57 | 705 |
| 24,458 | 9  | 55 | 26 | 458 | 1 | 24 | 17 | 231 | 53 | 768 |
| 24,459 | 7  | 56 | 24 | 489 | 1 | 25 | 15 | 253 | 47 | 823 |
| 24,460 | 7  | 54 | 24 | 494 | 1 | 25 | 15 | 262 | 47 | 835 |
| 24,461 | 7  | 55 | 24 | 493 | 1 | 25 | 15 | 259 | 47 | 832 |
| 24,462 | 7  | 55 | 24 | 495 | 1 | 26 | 15 | 281 | 47 | 857 |
| 24,463 | 8  | 59 | 24 | 500 | 1 | 26 | 14 | 286 | 47 | 871 |
| 24,464 | 5  | 59 | 21 | 500 | 1 | 26 | 12 | 287 | 39 | 872 |
| 24,465 | 5  | 59 | 21 | 503 | 1 | 26 | 12 | 291 | 39 | 879 |

|        |   |    |    |     |   |    |    |     |    |     |
|--------|---|----|----|-----|---|----|----|-----|----|-----|
| 24,466 | 5 | 59 | 21 | 508 | 1 | 26 | 12 | 291 | 39 | 884 |
| 24,467 | 5 | 59 | 21 | 512 | 1 | 26 | 12 | 293 | 39 | 890 |
| 24,468 | 5 | 60 | 21 | 521 | 0 | 27 | 12 | 300 | 38 | 908 |
| 24,469 | 5 | 60 | 21 | 524 | 0 | 27 | 12 | 300 | 38 | 911 |
| 24,470 | 5 | 60 | 21 | 524 | 0 | 27 | 12 | 300 | 38 | 911 |
| 24,471 | 5 | 60 | 21 | 523 | 0 | 27 | 12 | 300 | 38 | 910 |
| 24,472 | 5 | 60 | 21 | 524 | 0 | 27 | 12 | 300 | 38 | 911 |
| 24,473 | 5 | 59 | 21 | 524 | 0 | 27 | 12 | 299 | 38 | 909 |
| 24,474 | 5 | 59 | 21 | 524 | 0 | 27 | 12 | 299 | 38 | 909 |
| 24,475 | 5 | 59 | 21 | 524 | 0 | 27 | 12 | 299 | 38 | 909 |
| 24,476 | 5 | 59 | 21 | 524 | 0 | 27 | 12 | 299 | 38 | 909 |
| 24,477 | 5 | 59 | 21 | 525 | 0 | 27 | 12 | 299 | 38 | 910 |
| 24,478 | 5 | 59 | 20 | 525 | 0 | 27 | 12 | 299 | 37 | 910 |
| 24,479 | 5 | 59 | 20 | 525 | 0 | 27 | 12 | 299 | 37 | 910 |
| 24,480 | 5 | 59 | 20 | 525 | 0 | 27 | 12 | 300 | 37 | 911 |
| 24,481 | 4 | 59 | 19 | 522 | 0 | 27 | 12 | 300 | 35 | 908 |
| 24,482 | 4 | 59 | 17 | 522 | 0 | 27 | 12 | 300 | 33 | 908 |
| 24,483 | 4 | 59 | 17 | 525 | 0 | 27 | 12 | 300 | 33 | 911 |
| 24,484 | 4 | 59 | 17 | 525 | 0 | 27 | 12 | 300 | 33 | 911 |
| 24,485 | 4 | 59 | 13 | 519 | 0 | 27 | 11 | 293 | 28 | 898 |
| 24,486 | 4 | 58 | 10 | 515 | 0 | 27 | 10 | 291 | 24 | 891 |
| 24,487 | 4 | 58 | 9  | 513 | 0 | 27 | 8  | 288 | 21 | 886 |
| 24,488 | 3 | 58 | 9  | 517 | 0 | 27 | 8  | 289 | 20 | 891 |
| 24,489 | 3 | 60 | 4  | 523 | 0 | 27 | 6  | 296 | 13 | 906 |
| 24,490 | 3 | 61 | 4  | 532 | 0 | 27 | 6  | 306 | 13 | 926 |
| 24,491 | 3 | 61 | 4  | 540 | 0 | 27 | 6  | 307 | 13 | 935 |
| 24,492 | 2 | 61 | 4  | 542 | 0 | 27 | 6  | 307 | 12 | 937 |
| 24,493 | 2 | 61 | 4  | 542 | 0 | 27 | 6  | 307 | 12 | 937 |
| 24,494 | 2 | 61 | 4  | 538 | 0 | 26 | 3  | 305 | 9  | 930 |
| 24,495 | 2 | 59 | 3  | 520 | 0 | 26 | 1  | 300 | 6  | 905 |
| 24,496 | 2 | 59 | 3  | 520 | 0 | 26 | 1  | 300 | 6  | 905 |
| 24,497 | 2 | 48 | 3  | 309 | 0 | 15 | 1  | 227 | 6  | 599 |
| 24,498 | 2 | 30 | 3  | 223 | 0 | 9  | 1  | 176 | 6  | 438 |
| 24,499 | 2 | 23 | 3  | 154 | 0 | 6  | 0  | 147 | 5  | 330 |
| 24,500 | 2 | 23 | 3  | 150 | 0 | 5  | 0  | 147 | 5  | 325 |
| 24,501 | 2 | 21 | 2  | 144 | 0 | 5  | 0  | 140 | 4  | 310 |
| 24,502 | 2 | 20 | 3  | 141 | 0 | 5  | 0  | 143 | 5  | 309 |
| 24,503 | 2 | 22 | 3  | 138 | 0 | 5  | 0  | 148 | 5  | 313 |
| 24,504 | 2 | 22 | 3  | 153 | 0 | 5  | 0  | 150 | 5  | 330 |
| 24,505 | 2 | 26 | 2  | 163 | 0 | 7  | 0  | 167 | 4  | 363 |
| 24,506 | 2 | 30 | 2  | 182 | 0 | 9  | 0  | 178 | 4  | 399 |

|        |   |    |    |     |   |    |   |     |    |     |
|--------|---|----|----|-----|---|----|---|-----|----|-----|
| 24,507 | 1 | 39 | 2  | 222 | 0 | 10 | 0 | 198 | 3  | 469 |
| 24,508 | 1 | 39 | 2  | 256 | 0 | 10 | 0 | 214 | 3  | 519 |
| 24,509 | 1 | 35 | 2  | 252 | 0 | 11 | 0 | 186 | 3  | 484 |
| 24,510 | 1 | 35 | 2  | 231 | 0 | 10 | 0 | 167 | 3  | 443 |
| 24,511 | 1 | 36 | 2  | 237 | 0 | 11 | 0 | 163 | 3  | 447 |
| 24,512 | 1 | 36 | 2  | 240 | 0 | 11 | 0 | 167 | 3  | 454 |
| 24,513 | 1 | 36 | 2  | 238 | 0 | 10 | 0 | 147 | 3  | 431 |
| 24,514 | 0 | 33 | 2  | 236 | 0 | 10 | 0 | 144 | 2  | 423 |
| 24,515 | 0 | 36 | 2  | 243 | 0 | 10 | 0 | 147 | 2  | 436 |
| 24,516 | 0 | 37 | 2  | 242 | 0 | 10 | 0 | 145 | 2  | 434 |
| 24,517 | 2 | 37 | 6  | 240 | 1 | 11 | 2 | 153 | 11 | 441 |
| 24,518 | 3 | 36 | 18 | 228 | 2 | 12 | 5 | 144 | 28 | 420 |
| 24,519 | 3 | 36 | 18 | 225 | 2 | 12 | 5 | 145 | 28 | 418 |
| 24,520 | 3 | 36 | 18 | 225 | 2 | 12 | 5 | 145 | 28 | 418 |
| 24,521 | 3 | 37 | 18 | 234 | 2 | 13 | 5 | 147 | 28 | 431 |
| 24,522 | 3 | 37 | 18 | 235 | 2 | 13 | 5 | 148 | 28 | 433 |
| 24,523 | 3 | 37 | 18 | 237 | 2 | 13 | 5 | 148 | 28 | 435 |
| 24,524 | 3 | 38 | 18 | 238 | 2 | 13 | 5 | 148 | 28 | 437 |
| 24,525 | 3 | 38 | 18 | 239 | 2 | 13 | 5 | 148 | 28 | 438 |
| 24,526 | 3 | 38 | 18 | 239 | 2 | 13 | 5 | 148 | 28 | 438 |
| 24,527 | 3 | 38 | 18 | 238 | 2 | 13 | 5 | 148 | 28 | 437 |
| 24,528 | 3 | 38 | 18 | 240 | 2 | 13 | 5 | 148 | 28 | 439 |
| 24,529 | 3 | 38 | 18 | 240 | 2 | 13 | 5 | 148 | 28 | 439 |
| 24,530 | 3 | 38 | 18 | 241 | 2 | 13 | 5 | 148 | 28 | 440 |
| 24,531 | 3 | 38 | 20 | 241 | 2 | 13 | 6 | 147 | 31 | 439 |
| 24,532 | 3 | 38 | 20 | 241 | 2 | 13 | 6 | 147 | 31 | 439 |
| 24,533 | 3 | 38 | 20 | 241 | 2 | 13 | 6 | 147 | 31 | 439 |
| 24,534 | 3 | 38 | 21 | 241 | 2 | 13 | 7 | 147 | 33 | 439 |
| 24,535 | 3 | 38 | 21 | 241 | 2 | 13 | 7 | 146 | 33 | 438 |
| 24,536 | 3 | 38 | 21 | 241 | 2 | 13 | 7 | 146 | 33 | 438 |
| 24,537 | 3 | 38 | 21 | 241 | 2 | 13 | 7 | 146 | 33 | 438 |
| 24,538 | 3 | 38 | 21 | 241 | 2 | 13 | 7 | 146 | 33 | 438 |
| 24,539 | 3 | 36 | 21 | 231 | 2 | 13 | 7 | 138 | 33 | 418 |
| 24,540 | 3 | 36 | 21 | 231 | 2 | 13 | 7 | 138 | 33 | 418 |
| 24,541 | 3 | 35 | 21 | 222 | 2 | 13 | 7 | 128 | 33 | 398 |
| 24,542 | 3 | 35 | 21 | 215 | 2 | 13 | 7 | 127 | 33 | 390 |
| 24,543 | 3 | 35 | 21 | 212 | 2 | 13 | 7 | 127 | 33 | 387 |
| 24,544 | 3 | 35 | 21 | 212 | 2 | 13 | 7 | 128 | 33 | 388 |
| 24,545 | 3 | 35 | 21 | 212 | 2 | 13 | 7 | 128 | 33 | 388 |
| 24,546 | 3 | 35 | 21 | 212 | 2 | 13 | 7 | 128 | 33 | 388 |
| 24,547 | 3 | 35 | 24 | 214 | 2 | 13 | 7 | 130 | 36 | 392 |

|        |   |    |    |     |   |    |    |     |    |     |
|--------|---|----|----|-----|---|----|----|-----|----|-----|
| 24,548 | 3 | 35 | 24 | 213 | 2 | 13 | 7  | 126 | 36 | 387 |
| 24,549 | 3 | 36 | 24 | 214 | 2 | 13 | 7  | 126 | 36 | 389 |
| 24,550 | 3 | 36 | 24 | 214 | 2 | 13 | 7  | 126 | 36 | 389 |
| 24,551 | 3 | 31 | 25 | 207 | 2 | 13 | 7  | 122 | 37 | 373 |
| 24,552 | 3 | 31 | 25 | 207 | 2 | 13 | 7  | 118 | 37 | 369 |
| 24,553 | 3 | 29 | 26 | 206 | 2 | 13 | 7  | 114 | 38 | 362 |
| 24,554 | 3 | 29 | 26 | 212 | 2 | 13 | 7  | 123 | 38 | 377 |
| 24,555 | 3 | 29 | 31 | 216 | 2 | 13 | 11 | 133 | 47 | 391 |
| 24,556 | 5 | 26 | 33 | 260 | 2 | 14 | 13 | 138 | 53 | 438 |
| 24,557 | 5 | 38 | 33 | 304 | 3 | 20 | 13 | 190 | 54 | 552 |
| 24,558 | 5 | 42 | 34 | 330 | 3 | 27 | 13 | 222 | 55 | 621 |
| 24,559 | 5 | 41 | 34 | 295 | 3 | 27 | 14 | 205 | 56 | 568 |
| 24,560 | 5 | 45 | 34 | 301 | 3 | 25 | 15 | 206 | 57 | 577 |
| 24,561 | 5 | 46 | 34 | 321 | 3 | 25 | 15 | 225 | 57 | 617 |
| 24,562 | 5 | 45 | 34 | 313 | 3 | 24 | 15 | 221 | 57 | 603 |
| 24,563 | 5 | 45 | 34 | 311 | 3 | 24 | 15 | 221 | 57 | 601 |
| 24,564 | 5 | 45 | 34 | 315 | 3 | 24 | 15 | 222 | 57 | 606 |
| 24,565 | 5 | 44 | 34 | 324 | 3 | 28 | 15 | 250 | 57 | 646 |
| 24,566 | 5 | 41 | 34 | 318 | 3 | 29 | 15 | 253 | 57 | 641 |
| 24,567 | 3 | 40 | 31 | 323 | 3 | 29 | 13 | 254 | 50 | 646 |
| 24,568 | 3 | 40 | 30 | 325 | 2 | 30 | 13 | 264 | 48 | 659 |
| 24,569 | 2 | 42 | 18 | 327 | 1 | 28 | 10 | 268 | 31 | 665 |
| 24,570 | 2 | 49 | 18 | 337 | 1 | 28 | 10 | 281 | 31 | 695 |
| 24,571 | 2 | 48 | 18 | 327 | 1 | 27 | 10 | 280 | 31 | 682 |
| 24,572 | 2 | 48 | 18 | 327 | 1 | 27 | 10 | 280 | 31 | 682 |
| 24,573 | 2 | 50 | 18 | 328 | 1 | 27 | 10 | 283 | 31 | 688 |
| 24,574 | 2 | 50 | 18 | 331 | 1 | 27 | 10 | 285 | 31 | 693 |
| 24,575 | 3 | 50 | 18 | 332 | 1 | 27 | 10 | 288 | 32 | 697 |
| 24,576 | 3 | 50 | 18 | 332 | 1 | 27 | 10 | 288 | 32 | 697 |
| 24,577 | 3 | 50 | 18 | 333 | 1 | 27 | 10 | 292 | 32 | 702 |
| 24,578 | 3 | 52 | 18 | 331 | 1 | 27 | 10 | 293 | 32 | 703 |
| 24,579 | 3 | 52 | 18 | 331 | 1 | 27 | 12 | 298 | 34 | 708 |
| 24,580 | 3 | 53 | 18 | 333 | 1 | 27 | 13 | 299 | 35 | 712 |
| 24,581 | 3 | 53 | 17 | 333 | 1 | 27 | 15 | 299 | 36 | 712 |
| 24,582 | 3 | 53 | 15 | 334 | 1 | 27 | 14 | 300 | 33 | 714 |
| 24,583 | 3 | 53 | 16 | 335 | 1 | 27 | 14 | 300 | 34 | 715 |
| 24,584 | 3 | 53 | 17 | 338 | 1 | 27 | 13 | 318 | 34 | 736 |
| 24,585 | 3 | 53 | 16 | 340 | 1 | 28 | 13 | 322 | 33 | 743 |
| 24,586 | 3 | 55 | 16 | 347 | 1 | 28 | 13 | 332 | 33 | 762 |
| 24,587 | 3 | 59 | 16 | 366 | 1 | 30 | 13 | 365 | 33 | 820 |
| 24,588 | 3 | 59 | 16 | 372 | 1 | 30 | 13 | 370 | 33 | 831 |



|        |   |    |    |     |   |    |    |     |    |     |
|--------|---|----|----|-----|---|----|----|-----|----|-----|
| 24,589 | 3 | 59 | 16 | 380 | 1 | 31 | 13 | 384 | 33 | 854 |
| 24,590 | 3 | 59 | 16 | 382 | 1 | 31 | 13 | 384 | 33 | 856 |
| 24,591 | 3 | 59 | 18 | 383 | 1 | 31 | 13 | 384 | 35 | 857 |
| 24,592 | 3 | 59 | 18 | 384 | 1 | 31 | 13 | 386 | 35 | 860 |
| 24,593 | 3 | 65 | 18 | 399 | 1 | 31 | 13 | 407 | 35 | 902 |
| 24,594 | 3 | 65 | 18 | 401 | 1 | 31 | 13 | 407 | 35 | 904 |
| 24,595 | 3 | 65 | 20 | 401 | 1 | 31 | 15 | 407 | 39 | 904 |
| 24,596 | 3 | 65 | 20 | 400 | 1 | 31 | 16 | 408 | 40 | 904 |
| 24,597 | 3 | 65 | 18 | 400 | 1 | 31 | 16 | 409 | 38 | 905 |
| 24,598 | 3 | 67 | 17 | 402 | 1 | 32 | 16 | 407 | 37 | 908 |
| 24,599 | 3 | 67 | 17 | 402 | 1 | 32 | 16 | 407 | 37 | 908 |
| 24,600 | 3 | 66 | 17 | 401 | 1 | 32 | 16 | 406 | 37 | 905 |
| 24,601 | 3 | 66 | 16 | 401 | 1 | 32 | 18 | 407 | 38 | 906 |
| 24,602 | 3 | 66 | 16 | 401 | 1 | 32 | 18 | 407 | 38 | 906 |
| 24,603 | 3 | 66 | 16 | 401 | 1 | 32 | 18 | 406 | 38 | 905 |
| 24,604 | 3 | 66 | 14 | 398 | 1 | 32 | 18 | 397 | 36 | 893 |
| 24,605 | 3 | 69 | 13 | 410 | 1 | 32 | 18 | 409 | 35 | 920 |
| 24,606 | 3 | 69 | 9  | 403 | 1 | 32 | 14 | 399 | 27 | 903 |
| 24,607 | 1 | 68 | 7  | 358 | 1 | 30 | 12 | 388 | 21 | 844 |
| 24,608 | 1 | 52 | 7  | 298 | 0 | 22 | 12 | 325 | 20 | 697 |
| 24,609 | 2 | 42 | 7  | 244 | 0 | 15 | 12 | 282 | 21 | 583 |
| 24,610 | 2 | 43 | 7  | 242 | 0 | 15 | 11 | 280 | 20 | 580 |
| 24,611 | 2 | 39 | 7  | 221 | 0 | 14 | 10 | 276 | 19 | 550 |
| 24,612 | 2 | 37 | 7  | 197 | 0 | 14 | 10 | 254 | 19 | 502 |
| 24,613 | 2 | 37 | 9  | 194 | 0 | 14 | 10 | 252 | 21 | 497 |
| 24,614 | 2 | 36 | 9  | 189 | 0 | 14 | 12 | 245 | 23 | 484 |
| 24,615 | 2 | 36 | 9  | 189 | 0 | 14 | 12 | 245 | 23 | 484 |
| 24,616 | 2 | 36 | 9  | 177 | 0 | 9  | 14 | 207 | 25 | 429 |
| 24,617 | 2 | 36 | 9  | 177 | 0 | 9  | 14 | 207 | 25 | 429 |
| 24,618 | 2 | 36 | 9  | 170 | 0 | 9  | 14 | 204 | 25 | 419 |
| 24,619 | 3 | 36 | 11 | 165 | 0 | 7  | 23 | 186 | 37 | 394 |
| 24,620 | 3 | 34 | 11 | 161 | 0 | 7  | 23 | 181 | 37 | 383 |
| 24,621 | 3 | 27 | 11 | 152 | 0 | 7  | 23 | 167 | 37 | 353 |
| 24,622 | 3 | 25 | 11 | 145 | 0 | 7  | 23 | 161 | 37 | 338 |
| 24,623 | 3 | 25 | 11 | 145 | 0 | 7  | 23 | 162 | 37 | 339 |
| 24,624 | 3 | 24 | 11 | 142 | 0 | 8  | 23 | 161 | 37 | 335 |
| 24,625 | 3 | 24 | 11 | 153 | 0 | 8  | 23 | 165 | 37 | 350 |
| 24,626 | 2 | 24 | 11 | 154 | 0 | 11 | 23 | 171 | 36 | 360 |
| 24,627 | 2 | 24 | 11 | 168 | 0 | 11 | 23 | 172 | 36 | 375 |
| 24,628 | 2 | 27 | 11 | 218 | 0 | 13 | 23 | 205 | 36 | 463 |
| 24,629 | 2 | 37 | 11 | 328 | 0 | 25 | 23 | 306 | 36 | 696 |

|        |   |    |    |     |   |    |    |     |    |     |
|--------|---|----|----|-----|---|----|----|-----|----|-----|
| 24,630 | 2 | 39 | 11 | 344 | 0 | 25 | 21 | 312 | 34 | 720 |
| 24,631 | 2 | 40 | 11 | 347 | 0 | 25 | 20 | 314 | 33 | 726 |
| 24,632 | 2 | 40 | 11 | 348 | 0 | 26 | 18 | 315 | 31 | 729 |
| 24,633 | 2 | 45 | 11 | 370 | 0 | 26 | 18 | 324 | 31 | 765 |
| 24,634 | 2 | 45 | 10 | 374 | 0 | 26 | 18 | 325 | 30 | 770 |
| 24,635 | 2 | 46 | 10 | 375 | 0 | 25 | 18 | 313 | 30 | 759 |
| 24,636 | 2 | 46 | 10 | 376 | 0 | 25 | 18 | 313 | 30 | 760 |
| 24,637 | 2 | 44 | 10 | 373 | 0 | 25 | 18 | 306 | 30 | 748 |
| 24,638 | 2 | 41 | 10 | 344 | 0 | 22 | 18 | 259 | 30 | 666 |
| 24,639 | 2 | 41 | 10 | 347 | 0 | 22 | 18 | 259 | 30 | 669 |
| 24,640 | 2 | 41 | 8  | 349 | 0 | 22 | 18 | 260 | 28 | 672 |
| 24,641 | 2 | 41 | 8  | 350 | 0 | 22 | 18 | 263 | 28 | 676 |
| 24,642 | 2 | 41 | 8  | 349 | 0 | 22 | 18 | 264 | 28 | 676 |
| 24,643 | 2 | 35 | 8  | 334 | 0 | 22 | 18 | 243 | 28 | 634 |
| 24,644 | 2 | 35 | 8  | 332 | 0 | 22 | 18 | 243 | 28 | 632 |
| 24,645 | 2 | 35 | 10 | 332 | 0 | 22 | 20 | 243 | 32 | 632 |
| 24,646 | 2 | 35 | 8  | 332 | 0 | 23 | 19 | 241 | 29 | 631 |
| 24,647 | 2 | 35 | 8  | 336 | 0 | 23 | 18 | 241 | 28 | 635 |
| 24,648 | 2 | 35 | 8  | 336 | 0 | 23 | 18 | 241 | 28 | 635 |
| 24,649 | 2 | 33 | 8  | 334 | 0 | 23 | 18 | 241 | 28 | 631 |
| 24,650 | 2 | 33 | 9  | 335 | 0 | 23 | 20 | 243 | 31 | 634 |
| 24,651 | 2 | 33 | 17 | 335 | 0 | 23 | 32 | 242 | 51 | 633 |
| 24,652 | 2 | 33 | 17 | 335 | 0 | 23 | 35 | 242 | 54 | 633 |
| 24,653 | 2 | 33 | 18 | 335 | 2 | 23 | 54 | 242 | 76 | 633 |
| 24,654 | 2 | 33 | 20 | 335 | 3 | 23 | 57 | 242 | 82 | 633 |
| 24,655 | 2 | 30 | 20 | 320 | 3 | 23 | 57 | 230 | 82 | 603 |
| 24,656 | 2 | 30 | 20 | 309 | 3 | 23 | 58 | 228 | 83 | 590 |
| 24,657 | 2 | 30 | 20 | 309 | 3 | 23 | 58 | 228 | 83 | 590 |
| 24,658 | 1 | 30 | 21 | 299 | 3 | 22 | 58 | 217 | 83 | 568 |
| 24,659 | 1 | 30 | 21 | 298 | 3 | 22 | 58 | 217 | 83 | 567 |
| 24,660 | 1 | 26 | 21 | 287 | 3 | 21 | 58 | 209 | 83 | 543 |
| 24,661 | 1 | 26 | 21 | 287 | 3 | 21 | 58 | 209 | 83 | 543 |
| 24,662 | 1 | 26 | 21 | 283 | 3 | 21 | 59 | 207 | 84 | 537 |
| 24,663 | 1 | 26 | 21 | 277 | 3 | 22 | 59 | 208 | 84 | 533 |
| 24,664 | 1 | 26 | 21 | 280 | 3 | 22 | 59 | 208 | 84 | 536 |
| 24,665 | 1 | 26 | 21 | 282 | 3 | 23 | 57 | 211 | 82 | 542 |
| 24,666 | 2 | 26 | 22 | 282 | 3 | 23 | 57 | 211 | 84 | 542 |
| 24,667 | 2 | 26 | 22 | 279 | 3 | 23 | 57 | 210 | 84 | 538 |
| 24,668 | 2 | 26 | 22 | 280 | 3 | 23 | 57 | 210 | 84 | 539 |
| 24,669 | 1 | 26 | 20 | 280 | 3 | 23 | 49 | 210 | 73 | 539 |
| 24,670 | 1 | 26 | 20 | 280 | 3 | 23 | 50 | 210 | 74 | 539 |

|        |   |    |    |     |   |    |    |     |    |     |
|--------|---|----|----|-----|---|----|----|-----|----|-----|
| 24,671 | 1 | 26 | 20 | 283 | 3 | 23 | 50 | 212 | 74 | 544 |
| 24,672 | 1 | 26 | 20 | 283 | 3 | 23 | 50 | 212 | 74 | 544 |
| 24,673 | 1 | 26 | 20 | 286 | 3 | 23 | 51 | 211 | 75 | 546 |
| 24,674 | 1 | 27 | 20 | 291 | 3 | 24 | 52 | 222 | 76 | 564 |
| 24,675 | 1 | 27 | 20 | 291 | 3 | 23 | 52 | 220 | 76 | 561 |
| 24,676 | 1 | 27 | 20 | 280 | 3 | 23 | 52 | 217 | 76 | 547 |
| 24,677 | 1 | 27 | 20 | 279 | 3 | 20 | 52 | 210 | 76 | 536 |
| 24,678 | 1 | 27 | 20 | 265 | 3 | 20 | 52 | 208 | 76 | 520 |
| 24,679 | 1 | 24 | 20 | 216 | 3 | 18 | 52 | 172 | 76 | 430 |
| 24,680 | 1 | 12 | 20 | 108 | 3 | 6  | 52 | 72  | 76 | 198 |
| 24,681 | 1 | 10 | 20 | 92  | 3 | 6  | 52 | 61  | 76 | 169 |
| 24,682 | 1 | 8  | 21 | 87  | 3 | 6  | 52 | 58  | 77 | 159 |
| 24,683 | 1 | 3  | 21 | 62  | 3 | 5  | 52 | 47  | 77 | 117 |
| 24,684 | 1 | 2  | 21 | 51  | 3 | 5  | 52 | 36  | 77 | 94  |
| 24,685 | 1 | 2  | 21 | 52  | 3 | 5  | 52 | 37  | 77 | 96  |
| 24,686 | 1 | 2  | 20 | 53  | 3 | 5  | 52 | 38  | 76 | 98  |
| 24,687 | 1 | 2  | 20 | 48  | 3 | 5  | 52 | 35  | 76 | 90  |
| 24,688 | 1 | 2  | 20 | 48  | 3 | 5  | 52 | 35  | 76 | 90  |
| 24,689 | 1 | 1  | 20 | 41  | 3 | 5  | 52 | 32  | 76 | 79  |
| 24,690 | 1 | 1  | 20 | 39  | 3 | 5  | 52 | 32  | 76 | 77  |
| 24,691 | 1 | 2  | 20 | 37  | 3 | 5  | 52 | 31  | 76 | 75  |
| 24,692 | 1 | 2  | 20 | 36  | 3 | 5  | 52 | 29  | 76 | 72  |
| 24,693 | 1 | 2  | 22 | 36  | 3 | 5  | 57 | 26  | 83 | 69  |
| 24,694 | 1 | 2  | 22 | 36  | 3 | 5  | 57 | 26  | 83 | 69  |
| 24,695 | 1 | 2  | 22 | 36  | 3 | 5  | 57 | 26  | 83 | 69  |
| 24,696 | 1 | 2  | 20 | 35  | 3 | 4  | 55 | 25  | 79 | 66  |
| 24,697 | 1 | 3  | 20 | 46  | 3 | 4  | 55 | 28  | 79 | 81  |
| 24,698 | 1 | 3  | 20 | 49  | 3 | 4  | 55 | 33  | 79 | 89  |
| 24,699 | 1 | 3  | 20 | 56  | 3 | 5  | 55 | 38  | 79 | 102 |
| 24,700 | 1 | 6  | 20 | 61  | 3 | 4  | 55 | 54  | 79 | 125 |
| 24,701 | 1 | 7  | 19 | 68  | 4 | 4  | 53 | 53  | 77 | 132 |
| 24,702 | 1 | 7  | 11 | 70  | 4 | 4  | 39 | 55  | 55 | 136 |
| 24,703 | 1 | 14 | 11 | 93  | 4 | 12 | 36 | 89  | 52 | 208 |
| 24,704 | 1 | 14 | 10 | 95  | 2 | 12 | 17 | 91  | 30 | 212 |
| 24,705 | 1 | 15 | 8  | 100 | 1 | 13 | 16 | 104 | 26 | 232 |
| 24,706 | 1 | 16 | 8  | 138 | 1 | 13 | 16 | 119 | 26 | 286 |
| 24,707 | 1 | 16 | 8  | 139 | 1 | 13 | 15 | 119 | 25 | 287 |
| 24,708 | 1 | 17 | 8  | 140 | 1 | 13 | 15 | 119 | 25 | 289 |
| 24,709 | 1 | 17 | 7  | 141 | 1 | 13 | 15 | 119 | 24 | 290 |
| 24,710 | 1 | 17 | 7  | 141 | 1 | 13 | 16 | 119 | 25 | 290 |
| 24,711 | 1 | 18 | 8  | 143 | 1 | 13 | 18 | 119 | 28 | 293 |

|        |   |    |   |     |   |    |    |     |    |     |
|--------|---|----|---|-----|---|----|----|-----|----|-----|
| 24,712 | 1 | 19 | 8 | 146 | 1 | 13 | 17 | 121 | 27 | 299 |
| 24,713 | 1 | 19 | 8 | 145 | 1 | 13 | 17 | 121 | 27 | 298 |
| 24,714 | 1 | 19 | 6 | 144 | 1 | 12 | 17 | 120 | 25 | 295 |
| 24,715 | 1 | 19 | 5 | 142 | 1 | 12 | 17 | 122 | 24 | 295 |
| 24,716 | 0 | 19 | 6 | 139 | 1 | 11 | 17 | 119 | 24 | 288 |
| 24,717 | 0 | 19 | 6 | 139 | 1 | 11 | 17 | 119 | 24 | 288 |
| 24,718 | 0 | 20 | 6 | 139 | 1 | 11 | 15 | 119 | 22 | 289 |
| 24,719 | 0 | 20 | 6 | 139 | 1 | 11 | 15 | 120 | 22 | 290 |
| 24,720 | 0 | 20 | 6 | 139 | 1 | 11 | 14 | 120 | 21 | 290 |
| 24,721 | 0 | 20 | 6 | 135 | 1 | 11 | 13 | 119 | 20 | 285 |
| 24,722 | 0 | 20 | 6 | 135 | 1 | 11 | 14 | 119 | 21 | 285 |
| 24,723 | 0 | 20 | 6 | 136 | 1 | 11 | 14 | 119 | 21 | 286 |
| 24,724 | 0 | 19 | 6 | 128 | 1 | 10 | 13 | 108 | 20 | 265 |
| 24,725 | 0 | 19 | 6 | 128 | 1 | 10 | 12 | 108 | 19 | 265 |
| 24,726 | 0 | 19 | 6 | 128 | 1 | 10 | 13 | 108 | 20 | 265 |
| 24,727 | 0 | 19 | 6 | 128 | 1 | 10 | 13 | 109 | 20 | 266 |
| 24,728 | 0 | 19 | 6 | 128 | 1 | 10 | 14 | 112 | 21 | 269 |
| 24,729 | 0 | 19 | 6 | 128 | 1 | 10 | 14 | 112 | 21 | 269 |
| 24,730 | 0 | 23 | 6 | 131 | 1 | 10 | 14 | 122 | 21 | 286 |
| 24,731 | 0 | 23 | 6 | 133 | 1 | 10 | 14 | 122 | 21 | 288 |
| 24,732 | 0 | 24 | 8 | 140 | 1 | 13 | 16 | 133 | 25 | 310 |
| 24,733 | 0 | 24 | 7 | 140 | 1 | 13 | 16 | 133 | 24 | 310 |
| 24,734 | 0 | 24 | 7 | 140 | 1 | 13 | 19 | 133 | 27 | 310 |
| 24,735 | 0 | 24 | 8 | 139 | 1 | 13 | 19 | 132 | 28 | 308 |
| 24,736 | 0 | 25 | 8 | 141 | 1 | 13 | 19 | 135 | 28 | 314 |
| 24,737 | 0 | 26 | 8 | 144 | 1 | 13 | 19 | 136 | 28 | 319 |
| 24,738 | 0 | 26 | 8 | 148 | 1 | 13 | 19 | 136 | 28 | 323 |
| 24,739 | 0 | 26 | 8 | 152 | 1 | 13 | 19 | 138 | 28 | 329 |
| 24,740 | 0 | 26 | 8 | 154 | 1 | 13 | 19 | 138 | 28 | 331 |
| 24,741 | 0 | 26 | 8 | 153 | 1 | 13 | 19 | 138 | 28 | 330 |
| 24,742 | 0 | 25 | 8 | 156 | 1 | 13 | 19 | 138 | 28 | 332 |
| 24,743 | 0 | 25 | 6 | 157 | 1 | 13 | 19 | 138 | 26 | 333 |
| 24,744 | 0 | 25 | 6 | 164 | 1 | 13 | 15 | 142 | 22 | 344 |
| 24,745 | 0 | 25 | 6 | 164 | 1 | 13 | 14 | 142 | 21 | 344 |
| 24,746 | 0 | 25 | 6 | 164 | 1 | 13 | 14 | 142 | 21 | 344 |
| 24,747 | 0 | 24 | 6 | 146 | 1 | 14 | 14 | 134 | 21 | 318 |
| 24,748 | 0 | 24 | 6 | 146 | 1 | 14 | 14 | 134 | 21 | 318 |
| 24,749 | 0 | 24 | 6 | 147 | 1 | 14 | 14 | 134 | 21 | 319 |
| 24,750 | 0 | 24 | 6 | 140 | 1 | 13 | 14 | 129 | 21 | 306 |
| 24,751 | 0 | 22 | 6 | 136 | 1 | 13 | 14 | 115 | 21 | 286 |
| 24,752 | 0 | 21 | 6 | 128 | 0 | 13 | 14 | 114 | 20 | 276 |

|        |   |    |    |     |   |   |    |    |    |     |
|--------|---|----|----|-----|---|---|----|----|----|-----|
| 24,753 | 0 | 14 | 6  | 103 | 0 | 5 | 14 | 78 | 20 | 200 |
| 24,754 | 0 | 13 | 6  | 96  | 0 | 4 | 14 | 63 | 20 | 176 |
| 24,755 | 0 | 13 | 6  | 105 | 0 | 5 | 14 | 66 | 20 | 189 |
| 24,756 | 0 | 13 | 6  | 107 | 0 | 5 | 12 | 70 | 18 | 195 |
| 24,757 | 0 | 12 | 6  | 76  | 0 | 5 | 12 | 57 | 18 | 150 |
| 24,758 | 0 | 12 | 6  | 76  | 0 | 5 | 12 | 57 | 18 | 150 |
| 24,759 | 0 | 12 | 5  | 98  | 0 | 5 | 12 | 58 | 17 | 173 |
| 24,760 | 0 | 12 | 5  | 110 | 0 | 5 | 11 | 71 | 16 | 198 |
| 24,761 | 0 | 12 | 4  | 112 | 0 | 5 | 9  | 71 | 13 | 200 |
| 24,762 | 0 | 13 | 4  | 124 | 0 | 7 | 9  | 85 | 13 | 229 |
| 24,763 | 0 | 12 | 4  | 130 | 0 | 7 | 9  | 86 | 13 | 235 |
| 24,764 | 0 | 13 | 5  | 149 | 0 | 7 | 11 | 94 | 16 | 263 |
| 24,765 | 0 | 13 | 5  | 152 | 0 | 8 | 11 | 93 | 16 | 266 |
| 24,766 | 0 | 14 | 7  | 160 | 0 | 8 | 11 | 97 | 18 | 279 |
| 24,767 | 0 | 14 | 6  | 161 | 0 | 8 | 11 | 97 | 17 | 280 |
| 24,768 | 0 | 13 | 6  | 164 | 0 | 8 | 11 | 97 | 17 | 282 |
| 24,769 | 0 | 13 | 6  | 166 | 0 | 8 | 11 | 96 | 17 | 283 |
| 24,770 | 0 | 13 | 6  | 167 | 0 | 8 | 11 | 96 | 17 | 284 |
| 24,771 | 0 | 13 | 6  | 167 | 0 | 8 | 11 | 96 | 17 | 284 |
| 24,772 | 0 | 13 | 8  | 167 | 0 | 8 | 12 | 96 | 20 | 284 |
| 24,773 | 0 | 13 | 8  | 166 | 0 | 8 | 11 | 96 | 19 | 283 |
| 24,774 | 0 | 13 | 9  | 167 | 0 | 8 | 11 | 96 | 20 | 284 |
| 24,775 | 2 | 13 | 10 | 168 | 0 | 8 | 13 | 95 | 25 | 284 |
| 24,776 | 2 | 13 | 13 | 168 | 0 | 8 | 14 | 95 | 29 | 284 |
| 24,777 | 2 | 13 | 13 | 168 | 0 | 8 | 13 | 95 | 28 | 284 |
| 24,778 | 2 | 13 | 14 | 168 | 0 | 8 | 13 | 91 | 29 | 280 |
| 24,779 | 2 | 14 | 14 | 169 | 0 | 8 | 13 | 91 | 29 | 282 |
| 24,780 | 2 | 14 | 12 | 170 | 0 | 8 | 12 | 91 | 26 | 283 |
| 24,781 | 2 | 10 | 12 | 167 | 0 | 8 | 10 | 81 | 24 | 266 |
| 24,782 | 2 | 11 | 12 | 169 | 0 | 8 | 9  | 83 | 23 | 271 |
| 24,783 | 2 | 10 | 13 | 165 | 0 | 5 | 8  | 72 | 23 | 252 |
| 24,784 | 2 | 11 | 13 | 172 | 0 | 5 | 7  | 72 | 22 | 260 |
| 24,785 | 2 | 11 | 13 | 187 | 0 | 6 | 7  | 76 | 22 | 280 |
| 24,786 | 2 | 12 | 12 | 190 | 0 | 6 | 7  | 73 | 21 | 281 |
| 24,787 | 2 | 15 | 12 | 205 | 0 | 6 | 7  | 82 | 21 | 308 |
| 24,788 | 2 | 19 | 12 | 213 | 0 | 6 | 7  | 86 | 21 | 324 |
| 24,789 | 2 | 20 | 12 | 217 | 0 | 6 | 7  | 88 | 21 | 331 |
| 24,790 | 2 | 20 | 12 | 214 | 0 | 6 | 7  | 88 | 21 | 328 |
| 24,791 | 2 | 21 | 12 | 215 | 0 | 6 | 7  | 88 | 21 | 330 |
| 24,792 | 2 | 23 | 12 | 218 | 0 | 6 | 7  | 90 | 21 | 337 |
| 24,793 | 2 | 23 | 12 | 217 | 0 | 6 | 7  | 91 | 21 | 337 |

|        |   |    |    |     |   |   |    |    |    |     |
|--------|---|----|----|-----|---|---|----|----|----|-----|
| 24,794 | 3 | 25 | 12 | 210 | 0 | 6 | 7  | 86 | 22 | 327 |
| 24,795 | 3 | 25 | 12 | 210 | 0 | 6 | 7  | 86 | 22 | 327 |
| 24,796 | 3 | 25 | 12 | 210 | 0 | 6 | 7  | 86 | 22 | 327 |
| 24,797 | 3 | 25 | 12 | 210 | 0 | 6 | 7  | 86 | 22 | 327 |
| 24,798 | 3 | 25 | 12 | 210 | 0 | 5 | 7  | 86 | 22 | 326 |
| 24,799 | 3 | 25 | 12 | 210 | 0 | 5 | 7  | 86 | 22 | 326 |
| 24,800 | 3 | 25 | 12 | 210 | 0 | 5 | 7  | 86 | 22 | 326 |
| 24,801 | 3 | 25 | 12 | 210 | 0 | 5 | 7  | 86 | 22 | 326 |
| 24,802 | 3 | 24 | 12 | 208 | 0 | 5 | 7  | 84 | 22 | 321 |
| 24,803 | 3 | 24 | 12 | 208 | 0 | 5 | 7  | 84 | 22 | 321 |
| 24,804 | 3 | 24 | 12 | 208 | 0 | 5 | 7  | 84 | 22 | 321 |
| 24,805 | 3 | 24 | 12 | 208 | 0 | 5 | 7  | 84 | 22 | 321 |
| 24,806 | 4 | 24 | 12 | 197 | 1 | 4 | 7  | 77 | 24 | 302 |
| 24,807 | 4 | 24 | 12 | 197 | 1 | 4 | 7  | 77 | 24 | 302 |
| 24,808 | 4 | 24 | 12 | 188 | 1 | 4 | 7  | 75 | 24 | 291 |
| 24,809 | 4 | 23 | 12 | 166 | 1 | 4 | 7  | 74 | 24 | 267 |
| 24,810 | 4 | 23 | 15 | 153 | 2 | 4 | 8  | 63 | 29 | 243 |
| 24,811 | 4 | 23 | 15 | 153 | 2 | 5 | 8  | 63 | 29 | 244 |
| 24,812 | 4 | 23 | 18 | 156 | 3 | 5 | 8  | 64 | 33 | 248 |
| 24,813 | 4 | 22 | 18 | 152 | 4 | 3 | 9  | 50 | 35 | 227 |
| 24,814 | 4 | 22 | 18 | 145 | 4 | 3 | 10 | 48 | 36 | 218 |
| 24,815 | 4 | 21 | 18 | 120 | 4 | 2 | 9  | 37 | 35 | 180 |
| 24,816 | 4 | 22 | 18 | 136 | 4 | 2 | 9  | 42 | 35 | 202 |
| 24,817 | 4 | 22 | 16 | 133 | 4 | 2 | 9  | 43 | 33 | 200 |
| 24,818 | 4 | 24 | 16 | 141 | 4 | 2 | 9  | 43 | 33 | 210 |
| 24,819 | 4 | 24 | 16 | 141 | 4 | 2 | 9  | 43 | 33 | 210 |
| 24,820 | 4 | 24 | 16 | 142 | 4 | 2 | 9  | 43 | 33 | 211 |
| 24,821 | 4 | 24 | 15 | 142 | 4 | 2 | 9  | 43 | 32 | 211 |
| 24,822 | 4 | 24 | 15 | 142 | 4 | 2 | 8  | 44 | 31 | 212 |
| 24,823 | 4 | 24 | 15 | 149 | 4 | 2 | 8  | 44 | 31 | 219 |
| 24,824 | 4 | 24 | 15 | 149 | 4 | 2 | 8  | 44 | 31 | 219 |
| 24,825 | 4 | 24 | 14 | 148 | 4 | 2 | 8  | 44 | 30 | 218 |
| 24,826 | 2 | 24 | 13 | 148 | 4 | 2 | 6  | 46 | 25 | 220 |
| 24,827 | 2 | 24 | 10 | 148 | 4 | 2 | 5  | 46 | 21 | 220 |
| 24,828 | 2 | 24 | 10 | 149 | 4 | 2 | 5  | 48 | 21 | 223 |
| 24,829 | 2 | 24 | 9  | 149 | 4 | 2 | 4  | 48 | 19 | 223 |
| 24,830 | 2 | 23 | 9  | 148 | 4 | 2 | 4  | 49 | 19 | 222 |
| 24,831 | 2 | 24 | 9  | 147 | 4 | 2 | 4  | 49 | 19 | 222 |
| 24,832 | 2 | 23 | 9  | 140 | 4 | 2 | 5  | 48 | 20 | 213 |
| 24,833 | 2 | 23 | 9  | 146 | 4 | 2 | 5  | 51 | 20 | 222 |
| 24,834 | 2 | 23 | 8  | 146 | 4 | 2 | 5  | 52 | 19 | 223 |

|        |   |    |    |     |   |    |    |     |    |     |
|--------|---|----|----|-----|---|----|----|-----|----|-----|
| 24,835 | 2 | 22 | 10 | 140 | 4 | 2  | 8  | 53  | 24 | 217 |
| 24,836 | 2 | 22 | 10 | 126 | 4 | 1  | 8  | 49  | 24 | 198 |
| 24,837 | 2 | 20 | 10 | 122 | 4 | 1  | 8  | 48  | 24 | 191 |
| 24,838 | 2 | 17 | 10 | 108 | 4 | 1  | 8  | 39  | 24 | 165 |
| 24,839 | 2 | 12 | 10 | 99  | 4 | 1  | 8  | 33  | 24 | 145 |
| 24,840 | 2 | 11 | 10 | 92  | 4 | 1  | 9  | 29  | 25 | 133 |
| 24,841 | 2 | 11 | 10 | 94  | 4 | 1  | 9  | 29  | 25 | 135 |
| 24,842 | 2 | 10 | 10 | 91  | 4 | 1  | 9  | 29  | 25 | 131 |
| 24,843 | 2 | 8  | 10 | 88  | 4 | 1  | 9  | 27  | 25 | 124 |
| 24,844 | 1 | 10 | 10 | 116 | 4 | 1  | 11 | 43  | 26 | 170 |
| 24,845 | 1 | 8  | 10 | 117 | 4 | 1  | 11 | 44  | 26 | 170 |
| 24,846 | 1 | 8  | 14 | 119 | 4 | 1  | 11 | 44  | 30 | 172 |
| 24,847 | 1 | 8  | 14 | 119 | 4 | 1  | 12 | 44  | 31 | 172 |
| 24,848 | 1 | 9  | 14 | 121 | 4 | 1  | 12 | 45  | 31 | 176 |
| 24,849 | 1 | 9  | 14 | 127 | 4 | 2  | 12 | 45  | 31 | 183 |
| 24,850 | 2 | 9  | 16 | 131 | 4 | 2  | 12 | 46  | 34 | 188 |
| 24,851 | 2 | 9  | 16 | 133 | 4 | 2  | 12 | 49  | 34 | 193 |
| 24,852 | 2 | 9  | 18 | 137 | 4 | 2  | 13 | 50  | 37 | 198 |
| 24,853 | 3 | 9  | 26 | 137 | 5 | 2  | 14 | 50  | 48 | 198 |
| 24,854 | 3 | 10 | 27 | 137 | 5 | 2  | 15 | 50  | 50 | 199 |
| 24,855 | 3 | 10 | 31 | 137 | 5 | 2  | 15 | 50  | 54 | 199 |
| 24,856 | 3 | 10 | 31 | 139 | 5 | 3  | 15 | 51  | 54 | 203 |
| 24,857 | 2 | 10 | 31 | 144 | 4 | 3  | 15 | 52  | 52 | 209 |
| 24,858 | 2 | 20 | 31 | 239 | 4 | 12 | 15 | 132 | 52 | 403 |
| 24,859 | 2 | 24 | 31 | 273 | 4 | 12 | 15 | 149 | 52 | 458 |
| 24,860 | 2 | 51 | 32 | 474 | 4 | 17 | 15 | 178 | 53 | 720 |
| 24,861 | 2 | 63 | 29 | 543 | 3 | 24 | 14 | 225 | 48 | 855 |
| 24,862 | 2 | 64 | 26 | 551 | 2 | 23 | 14 | 232 | 44 | 870 |
| 24,863 | 2 | 65 | 27 | 560 | 1 | 25 | 14 | 245 | 44 | 895 |
| 24,864 | 2 | 77 | 27 | 597 | 1 | 27 | 13 | 253 | 43 | 954 |
| 24,865 | 2 | 77 | 26 | 600 | 1 | 27 | 11 | 253 | 40 | 957 |
| 24,866 | 2 | 76 | 26 | 603 | 1 | 27 | 11 | 251 | 40 | 957 |
| 24,867 | 2 | 75 | 29 | 598 | 1 | 27 | 11 | 246 | 43 | 946 |
| 24,868 | 2 | 73 | 29 | 595 | 1 | 27 | 11 | 246 | 43 | 941 |
| 24,869 | 2 | 73 | 29 | 596 | 1 | 27 | 11 | 246 | 43 | 942 |
| 24,870 | 2 | 74 | 29 | 604 | 1 | 27 | 12 | 247 | 44 | 952 |
| 24,871 | 2 | 78 | 29 | 606 | 1 | 27 | 12 | 252 | 44 | 963 |
| 24,872 | 2 | 79 | 29 | 606 | 1 | 27 | 12 | 252 | 44 | 964 |
| 24,873 | 2 | 79 | 28 | 599 | 1 | 27 | 12 | 251 | 43 | 956 |
| 24,874 | 2 | 79 | 28 | 598 | 2 | 27 | 13 | 249 | 45 | 953 |
| 24,875 | 2 | 79 | 28 | 598 | 2 | 27 | 13 | 249 | 45 | 953 |

|        |   |    |    |     |   |    |    |     |    |     |
|--------|---|----|----|-----|---|----|----|-----|----|-----|
| 24,876 | 2 | 79 | 28 | 598 | 2 | 27 | 14 | 250 | 46 | 954 |
| 24,877 | 2 | 79 | 29 | 598 | 2 | 27 | 14 | 250 | 47 | 954 |
| 24,878 | 2 | 79 | 29 | 598 | 2 | 27 | 14 | 250 | 47 | 954 |
| 24,879 | 2 | 79 | 29 | 597 | 2 | 27 | 14 | 248 | 47 | 951 |
| 24,880 | 2 | 79 | 29 | 597 | 2 | 27 | 14 | 248 | 47 | 951 |
| 24,881 | 2 | 79 | 29 | 597 | 2 | 27 | 15 | 247 | 48 | 950 |
| 24,882 | 2 | 78 | 29 | 597 | 2 | 27 | 16 | 247 | 49 | 949 |
| 24,883 | 2 | 78 | 29 | 588 | 2 | 27 | 15 | 242 | 48 | 935 |
| 24,884 | 2 | 78 | 29 | 589 | 2 | 27 | 15 | 242 | 48 | 936 |
| 24,885 | 2 | 78 | 27 | 589 | 2 | 27 | 12 | 242 | 43 | 936 |
| 24,886 | 2 | 78 | 27 | 588 | 2 | 27 | 12 | 241 | 43 | 934 |
| 24,887 | 2 | 78 | 27 | 587 | 2 | 27 | 12 | 241 | 43 | 933 |
| 24,888 | 2 | 78 | 27 | 585 | 2 | 27 | 12 | 241 | 43 | 931 |
| 24,889 | 2 | 78 | 27 | 582 | 2 | 27 | 13 | 241 | 44 | 928 |
| 24,890 | 2 | 78 | 27 | 582 | 2 | 27 | 13 | 241 | 44 | 928 |
| 24,891 | 2 | 79 | 27 | 578 | 2 | 27 | 12 | 242 | 43 | 926 |
| 24,892 | 3 | 79 | 27 | 580 | 2 | 27 | 12 | 242 | 44 | 928 |
| 24,893 | 3 | 79 | 27 | 583 | 2 | 27 | 12 | 242 | 44 | 931 |
| 24,894 | 3 | 79 | 27 | 583 | 2 | 27 | 12 | 245 | 44 | 934 |
| 24,895 | 3 | 77 | 27 | 555 | 2 | 27 | 10 | 228 | 42 | 887 |
| 24,896 | 3 | 78 | 23 | 555 | 2 | 27 | 10 | 228 | 38 | 888 |
| 24,897 | 3 | 78 | 23 | 555 | 2 | 27 | 10 | 228 | 38 | 888 |
| 24,898 | 3 | 77 | 23 | 552 | 2 | 27 | 9  | 227 | 37 | 883 |
| 24,899 | 3 | 78 | 23 | 544 | 2 | 26 | 9  | 227 | 37 | 875 |
| 24,900 | 3 | 78 | 23 | 548 | 2 | 26 | 9  | 227 | 37 | 879 |
| 24,901 | 2 | 78 | 21 | 555 | 2 | 26 | 9  | 233 | 34 | 892 |
| 24,902 | 2 | 78 | 20 | 554 | 2 | 26 | 9  | 230 | 33 | 888 |
| 24,903 | 2 | 78 | 20 | 550 | 2 | 26 | 8  | 229 | 32 | 883 |
| 24,904 | 1 | 77 | 12 | 550 | 1 | 26 | 7  | 229 | 21 | 882 |
| 24,905 | 1 | 77 | 11 | 550 | 1 | 26 | 6  | 229 | 19 | 882 |
| 24,906 | 1 | 77 | 7  | 548 | 1 | 25 | 6  | 228 | 15 | 878 |
| 24,907 | 1 | 77 | 7  | 548 | 1 | 25 | 6  | 228 | 15 | 878 |
| 24,908 | 1 | 67 | 7  | 446 | 1 | 16 | 6  | 147 | 15 | 676 |
| 24,909 | 1 | 67 | 7  | 446 | 1 | 16 | 6  | 148 | 15 | 677 |
| 24,910 | 1 | 63 | 7  | 413 | 1 | 16 | 6  | 131 | 15 | 623 |
| 24,911 | 1 | 24 | 6  | 144 | 1 | 4  | 6  | 55  | 14 | 227 |
| 24,912 | 1 | 24 | 6  | 144 | 1 | 4  | 6  | 55  | 14 | 227 |
| 24,913 | 1 | 23 | 6  | 138 | 1 | 5  | 6  | 53  | 14 | 219 |
| 24,914 | 1 | 22 | 5  | 122 | 1 | 3  | 6  | 39  | 13 | 186 |
| 24,915 | 1 | 9  | 7  | 73  | 1 | 1  | 6  | 32  | 15 | 115 |
| 24,916 | 1 | 10 | 7  | 74  | 1 | 1  | 6  | 32  | 15 | 117 |



|        |   |    |   |    |   |   |   |    |    |     |
|--------|---|----|---|----|---|---|---|----|----|-----|
| 24,917 | 1 | 10 | 7 | 64 | 1 | 2 | 6 | 31 | 15 | 107 |
| 24,918 | 1 | 10 | 4 | 43 | 1 | 2 | 6 | 30 | 12 | 85  |
| 24,919 | 1 | 10 | 4 | 43 | 1 | 2 | 6 | 30 | 12 | 85  |
| 24,920 | 1 | 10 | 4 | 43 | 1 | 2 | 6 | 30 | 12 | 85  |
| 24,921 | 1 | 9  | 4 | 36 | 1 | 2 | 5 | 29 | 11 | 76  |
| 24,922 | 1 | 5  | 4 | 32 | 1 | 2 | 5 | 24 | 11 | 63  |
| 24,923 | 1 | 4  | 4 | 32 | 1 | 2 | 5 | 24 | 11 | 62  |
| 24,924 | 1 | 4  | 4 | 32 | 1 | 2 | 5 | 24 | 11 | 62  |
| 24,925 | 1 | 4  | 4 | 32 | 0 | 2 | 5 | 24 | 10 | 62  |
| 24,926 | 1 | 4  | 4 | 34 | 0 | 2 | 5 | 24 | 10 | 64  |
| 24,927 | 1 | 4  | 4 | 34 | 0 | 2 | 4 | 23 | 9  | 63  |
| 24,928 | 1 | 4  | 3 | 34 | 0 | 2 | 4 | 23 | 8  | 63  |
| 24,929 | 1 | 4  | 3 | 34 | 0 | 2 | 4 | 23 | 8  | 63  |
| 24,930 | 1 | 4  | 4 | 34 | 0 | 2 | 5 | 23 | 10 | 63  |
| 24,931 | 1 | 4  | 4 | 35 | 0 | 2 | 5 | 25 | 10 | 66  |
| 24,932 | 1 | 4  | 4 | 35 | 0 | 2 | 4 | 25 | 9  | 66  |
| 24,933 | 1 | 4  | 5 | 35 | 0 | 2 | 3 | 25 | 9  | 66  |
| 24,934 | 1 | 4  | 5 | 34 | 0 | 2 | 3 | 25 | 9  | 65  |
| 24,935 | 1 | 4  | 5 | 34 | 0 | 2 | 3 | 25 | 9  | 65  |
| 24,936 | 1 | 4  | 5 | 34 | 0 | 2 | 3 | 25 | 9  | 65  |
| 24,937 | 1 | 4  | 5 | 34 | 0 | 2 | 3 | 25 | 9  | 65  |
| 24,938 | 1 | 4  | 5 | 34 | 0 | 2 | 3 | 25 | 9  | 65  |
| 24,939 | 1 | 4  | 5 | 34 | 0 | 2 | 2 | 25 | 8  | 65  |
| 24,940 | 2 | 4  | 5 | 34 | 0 | 2 | 2 | 25 | 9  | 65  |
| 24,941 | 2 | 3  | 5 | 34 | 0 | 2 | 2 | 25 | 9  | 64  |
| 24,942 | 2 | 3  | 5 | 34 | 0 | 2 | 2 | 25 | 9  | 64  |
| 24,943 | 1 | 3  | 5 | 29 | 0 | 2 | 2 | 24 | 8  | 58  |
| 24,944 | 1 | 3  | 5 | 29 | 0 | 2 | 2 | 21 | 8  | 55  |
| 24,945 | 1 | 3  | 5 | 29 | 0 | 2 | 2 | 21 | 8  | 55  |
| 24,946 | 1 | 3  | 5 | 27 | 0 | 2 | 2 | 21 | 8  | 53  |
| 24,947 | 1 | 2  | 5 | 23 | 0 | 2 | 2 | 19 | 8  | 46  |
| 24,948 | 1 | 2  | 5 | 23 | 0 | 2 | 2 | 19 | 8  | 46  |
| 24,949 | 1 | 2  | 5 | 23 | 0 | 2 | 2 | 19 | 8  | 46  |
| 24,950 | 1 | 2  | 6 | 22 | 0 | 2 | 2 | 18 | 9  | 44  |
| 24,951 | 1 | 2  | 6 | 19 | 0 | 2 | 2 | 19 | 9  | 42  |
| 24,952 | 1 | 2  | 6 | 12 | 0 | 2 | 2 | 13 | 9  | 29  |
| 24,953 | 1 | 2  | 6 | 14 | 0 | 2 | 2 | 13 | 9  | 31  |
| 24,954 | 1 | 2  | 5 | 14 | 0 | 2 | 2 | 13 | 8  | 31  |
| 24,955 | 1 | 2  | 6 | 14 | 0 | 2 | 2 | 13 | 9  | 31  |
| 24,956 | 1 | 2  | 6 | 14 | 0 | 2 | 2 | 13 | 9  | 31  |
| 24,957 | 1 | 2  | 6 | 15 | 0 | 2 | 2 | 17 | 9  | 36  |

|        |   |    |    |     |   |   |    |     |    |     |
|--------|---|----|----|-----|---|---|----|-----|----|-----|
| 24,958 | 1 | 4  | 6  | 27  | 0 | 2 | 2  | 23  | 9  | 56  |
| 24,959 | 1 | 4  | 6  | 51  | 0 | 2 | 2  | 42  | 9  | 99  |
| 24,960 | 1 | 4  | 6  | 55  | 0 | 2 | 2  | 48  | 9  | 109 |
| 24,961 | 1 | 4  | 6  | 55  | 0 | 2 | 2  | 52  | 9  | 113 |
| 24,962 | 1 | 4  | 6  | 63  | 0 | 2 | 2  | 57  | 9  | 126 |
| 24,963 | 1 | 4  | 6  | 70  | 0 | 3 | 2  | 62  | 9  | 139 |
| 24,964 | 1 | 6  | 4  | 79  | 0 | 2 | 2  | 68  | 7  | 155 |
| 24,965 | 1 | 6  | 4  | 81  | 0 | 2 | 2  | 69  | 7  | 158 |
| 24,966 | 1 | 6  | 4  | 86  | 0 | 2 | 2  | 70  | 7  | 164 |
| 24,967 | 1 | 5  | 4  | 87  | 0 | 2 | 2  | 72  | 7  | 166 |
| 24,968 | 1 | 6  | 4  | 93  | 0 | 1 | 2  | 76  | 7  | 176 |
| 24,969 | 1 | 7  | 4  | 96  | 0 | 1 | 2  | 77  | 7  | 181 |
| 24,970 | 1 | 12 | 4  | 111 | 0 | 1 | 2  | 83  | 7  | 207 |
| 24,971 | 1 | 12 | 4  | 114 | 0 | 1 | 2  | 83  | 7  | 210 |
| 24,972 | 1 | 12 | 5  | 116 | 0 | 1 | 2  | 85  | 8  | 214 |
| 24,973 | 1 | 12 | 5  | 117 | 0 | 1 | 2  | 86  | 8  | 216 |
| 24,974 | 1 | 12 | 6  | 122 | 0 | 1 | 3  | 92  | 10 | 227 |
| 24,975 | 1 | 16 | 8  | 133 | 0 | 4 | 3  | 103 | 12 | 256 |
| 24,976 | 1 | 17 | 11 | 135 | 1 | 4 | 2  | 110 | 15 | 266 |
| 24,977 | 1 | 18 | 11 | 140 | 1 | 4 | 2  | 118 | 15 | 280 |
| 24,978 | 1 | 18 | 20 | 147 | 2 | 4 | 6  | 129 | 29 | 298 |
| 24,979 | 1 | 19 | 20 | 174 | 2 | 5 | 6  | 155 | 29 | 353 |
| 24,980 | 1 | 21 | 20 | 187 | 2 | 6 | 5  | 165 | 28 | 379 |
| 24,981 | 1 | 21 | 19 | 195 | 2 | 6 | 5  | 168 | 27 | 390 |
| 24,982 | 1 | 21 | 19 | 195 | 2 | 6 | 5  | 167 | 27 | 389 |
| 24,983 | 1 | 21 | 18 | 205 | 2 | 8 | 5  | 172 | 26 | 406 |
| 24,984 | 1 | 21 | 18 | 208 | 2 | 8 | 5  | 174 | 26 | 411 |
| 24,985 | 1 | 21 | 20 | 208 | 2 | 8 | 5  | 174 | 28 | 411 |
| 24,986 | 1 | 21 | 20 | 209 | 2 | 8 | 5  | 174 | 28 | 412 |
| 24,987 | 1 | 21 | 20 | 209 | 2 | 8 | 5  | 174 | 28 | 412 |
| 24,988 | 1 | 21 | 21 | 209 | 2 | 8 | 5  | 175 | 29 | 413 |
| 24,989 | 1 | 21 | 21 | 209 | 2 | 8 | 5  | 175 | 29 | 413 |
| 24,990 | 1 | 21 | 21 | 209 | 2 | 8 | 5  | 175 | 29 | 413 |
| 24,991 | 0 | 21 | 21 | 209 | 2 | 8 | 5  | 175 | 28 | 413 |
| 24,992 | 0 | 21 | 26 | 209 | 2 | 8 | 8  | 174 | 36 | 412 |
| 24,993 | 0 | 21 | 26 | 209 | 2 | 8 | 8  | 174 | 36 | 412 |
| 24,994 | 0 | 21 | 26 | 210 | 2 | 8 | 8  | 174 | 36 | 413 |
| 24,995 | 0 | 21 | 28 | 211 | 2 | 8 | 11 | 174 | 41 | 414 |
| 24,996 | 0 | 21 | 30 | 211 | 2 | 8 | 11 | 174 | 43 | 414 |
| 24,997 | 0 | 21 | 30 | 211 | 2 | 8 | 11 | 174 | 43 | 414 |
| 24,998 | 0 | 21 | 30 | 212 | 2 | 8 | 11 | 174 | 43 | 415 |

|        |   |    |    |     |   |    |    |     |    |     |
|--------|---|----|----|-----|---|----|----|-----|----|-----|
| 24,999 | 0 | 21 | 30 | 212 | 2 | 8  | 11 | 174 | 43 | 415 |
| 25,000 | 0 | 21 | 30 | 212 | 2 | 8  | 11 | 174 | 43 | 415 |
| 25,001 | 0 | 20 | 29 | 210 | 2 | 8  | 11 | 172 | 42 | 410 |
| 25,002 | 0 | 20 | 29 | 210 | 2 | 8  | 11 | 172 | 42 | 410 |
| 25,003 | 0 | 20 | 29 | 207 | 2 | 8  | 11 | 173 | 42 | 408 |
| 25,004 | 0 | 20 | 29 | 207 | 2 | 8  | 11 | 173 | 42 | 408 |
| 25,005 | 0 | 20 | 29 | 207 | 2 | 8  | 11 | 173 | 42 | 408 |
| 25,006 | 0 | 20 | 28 | 205 | 2 | 9  | 11 | 172 | 41 | 406 |
| 25,007 | 0 | 20 | 28 | 205 | 2 | 9  | 11 | 172 | 41 | 406 |
| 25,008 | 0 | 20 | 28 | 204 | 2 | 9  | 11 | 168 | 41 | 401 |
| 25,009 | 0 | 18 | 28 | 192 | 2 | 9  | 12 | 161 | 42 | 380 |
| 25,010 | 0 | 18 | 28 | 167 | 2 | 9  | 12 | 135 | 42 | 329 |
| 25,011 | 0 | 18 | 28 | 167 | 2 | 9  | 12 | 131 | 42 | 325 |
| 25,012 | 0 | 18 | 28 | 160 | 2 | 9  | 14 | 127 | 44 | 314 |
| 25,013 | 0 | 18 | 28 | 167 | 2 | 9  | 15 | 129 | 45 | 323 |
| 25,014 | 0 | 18 | 28 | 160 | 2 | 8  | 15 | 125 | 45 | 311 |
| 25,015 | 0 | 16 | 29 | 149 | 2 | 8  | 15 | 114 | 46 | 287 |
| 25,016 | 0 | 16 | 29 | 158 | 2 | 8  | 16 | 121 | 47 | 303 |
| 25,017 | 0 | 16 | 29 | 158 | 2 | 8  | 17 | 119 | 48 | 301 |
| 25,018 | 0 | 16 | 29 | 159 | 2 | 8  | 17 | 117 | 48 | 300 |
| 25,019 | 0 | 15 | 29 | 158 | 2 | 8  | 17 | 116 | 48 | 297 |
| 25,020 | 0 | 9  | 29 | 141 | 2 | 8  | 17 | 111 | 48 | 269 |
| 25,021 | 0 | 9  | 29 | 149 | 2 | 9  | 17 | 119 | 48 | 286 |
| 25,022 | 0 | 9  | 29 | 168 | 2 | 14 | 17 | 136 | 48 | 327 |
| 25,023 | 0 | 9  | 28 | 202 | 2 | 16 | 17 | 180 | 47 | 407 |
| 25,024 | 0 | 20 | 29 | 365 | 2 | 39 | 17 | 394 | 48 | 818 |
| 25,025 | 0 | 27 | 28 | 444 | 2 | 42 | 16 | 417 | 46 | 930 |
| 25,026 | 0 | 23 | 29 | 440 | 2 | 41 | 17 | 408 | 48 | 912 |
| 25,027 | 0 | 22 | 26 | 440 | 1 | 41 | 17 | 401 | 44 | 904 |
| 25,028 | 0 | 21 | 19 | 428 | 0 | 41 | 14 | 383 | 33 | 873 |
| 25,029 | 0 | 21 | 17 | 401 | 0 | 40 | 13 | 358 | 30 | 820 |
| 25,030 | 0 | 21 | 17 | 401 | 0 | 40 | 13 | 357 | 30 | 819 |
| 25,031 | 0 | 19 | 17 | 390 | 0 | 39 | 13 | 347 | 30 | 795 |
| 25,032 | 0 | 19 | 17 | 382 | 0 | 39 | 13 | 345 | 30 | 785 |
| 25,033 | 0 | 19 | 25 | 381 | 2 | 39 | 29 | 344 | 56 | 783 |
| 25,034 | 0 | 19 | 26 | 368 | 2 | 37 | 30 | 337 | 58 | 761 |
| 25,035 | 0 | 19 | 26 | 368 | 2 | 37 | 30 | 338 | 58 | 762 |
| 25,036 | 0 | 19 | 24 | 367 | 2 | 37 | 30 | 338 | 56 | 761 |
| 25,037 | 0 | 19 | 24 | 367 | 2 | 37 | 30 | 338 | 56 | 761 |
| 25,038 | 0 | 19 | 23 | 367 | 3 | 37 | 30 | 337 | 56 | 760 |
| 25,039 | 0 | 19 | 23 | 367 | 3 | 37 | 30 | 339 | 56 | 762 |

|        |   |    |    |     |   |    |    |     |    |       |
|--------|---|----|----|-----|---|----|----|-----|----|-------|
| 25,040 | 0 | 20 | 23 | 373 | 3 | 37 | 30 | 345 | 56 | 775   |
| 25,041 | 0 | 20 | 23 | 380 | 3 | 37 | 30 | 352 | 56 | 789   |
| 25,042 | 0 | 22 | 22 | 399 | 3 | 37 | 29 | 373 | 54 | 831   |
| 25,043 | 0 | 23 | 18 | 404 | 3 | 37 | 27 | 376 | 48 | 840   |
| 25,044 | 0 | 23 | 16 | 405 | 3 | 37 | 27 | 377 | 46 | 842   |
| 25,045 | 0 | 23 | 16 | 408 | 3 | 37 | 25 | 385 | 44 | 853   |
| 25,046 | 0 | 25 | 15 | 434 | 3 | 39 | 25 | 404 | 43 | 902   |
| 25,047 | 0 | 35 | 15 | 472 | 3 | 43 | 25 | 472 | 43 | 1,022 |
| 25,048 | 0 | 35 | 15 | 472 | 3 | 43 | 25 | 477 | 43 | 1,027 |
| 25,049 | 0 | 35 | 16 | 477 | 3 | 43 | 31 | 478 | 50 | 1,033 |
| 25,050 | 0 | 37 | 16 | 489 | 3 | 44 | 31 | 491 | 50 | 1,061 |
| 25,051 | 0 | 37 | 16 | 490 | 3 | 44 | 31 | 491 | 50 | 1,062 |
| 25,052 | 0 | 37 | 16 | 497 | 3 | 44 | 31 | 494 | 50 | 1,072 |
| 25,053 | 0 | 37 | 16 | 497 | 3 | 44 | 31 | 494 | 50 | 1,072 |
| 25,054 | 0 | 37 | 16 | 497 | 3 | 44 | 32 | 495 | 51 | 1,073 |
| 25,055 | 0 | 37 | 16 | 497 | 3 | 44 | 32 | 495 | 51 | 1,073 |
| 25,056 | 0 | 37 | 16 | 498 | 3 | 43 | 32 | 495 | 51 | 1,073 |
| 25,057 | 0 | 37 | 16 | 498 | 3 | 43 | 32 | 495 | 51 | 1,073 |
| 25,058 | 0 | 37 | 16 | 498 | 3 | 43 | 31 | 495 | 50 | 1,073 |
| 25,059 | 0 | 38 | 16 | 502 | 3 | 43 | 31 | 505 | 50 | 1,088 |
| 25,060 | 0 | 38 | 16 | 502 | 3 | 43 | 31 | 507 | 50 | 1,090 |
| 25,061 | 0 | 39 | 16 | 507 | 3 | 43 | 31 | 515 | 50 | 1,104 |
| 25,062 | 0 | 39 | 16 | 507 | 3 | 43 | 31 | 516 | 50 | 1,105 |
| 25,063 | 0 | 40 | 16 | 507 | 3 | 44 | 29 | 517 | 48 | 1,108 |
| 25,064 | 0 | 41 | 17 | 507 | 3 | 44 | 28 | 512 | 48 | 1,104 |
| 25,065 | 0 | 41 | 17 | 509 | 3 | 44 | 28 | 513 | 48 | 1,107 |
| 25,066 | 0 | 42 | 17 | 499 | 3 | 44 | 29 | 507 | 49 | 1,092 |
| 25,067 | 0 | 42 | 17 | 499 | 3 | 44 | 28 | 508 | 48 | 1,093 |
| 25,068 | 0 | 42 | 17 | 489 | 3 | 44 | 27 | 508 | 47 | 1,083 |
| 25,069 | 0 | 42 | 17 | 484 | 3 | 44 | 27 | 505 | 47 | 1,075 |
| 25,070 | 0 | 42 | 17 | 485 | 3 | 44 | 27 | 506 | 47 | 1,077 |
| 25,071 | 0 | 42 | 17 | 471 | 3 | 43 | 27 | 493 | 47 | 1,049 |
| 25,072 | 0 | 42 | 17 | 471 | 3 | 43 | 27 | 493 | 47 | 1,049 |
| 25,073 | 0 | 42 | 17 | 452 | 3 | 38 | 27 | 477 | 47 | 1,009 |
| 25,074 | 0 | 31 | 17 | 254 | 3 | 13 | 27 | 222 | 47 | 520   |
| 25,075 | 0 | 24 | 16 | 170 | 3 | 10 | 27 | 193 | 46 | 397   |
| 25,076 | 0 | 32 | 16 | 233 | 3 | 12 | 27 | 299 | 46 | 576   |
| 25,077 | 0 | 33 | 13 | 243 | 3 | 10 | 26 | 306 | 42 | 592   |
| 25,078 | 0 | 36 | 14 | 262 | 3 | 11 | 27 | 337 | 44 | 646   |
| 25,079 | 0 | 38 | 14 | 293 | 3 | 12 | 27 | 367 | 44 | 710   |
| 25,080 | 0 | 38 | 13 | 304 | 3 | 12 | 26 | 375 | 42 | 729   |

|        |   |    |    |     |   |    |    |     |    |     |
|--------|---|----|----|-----|---|----|----|-----|----|-----|
| 25,081 | 0 | 38 | 12 | 305 | 2 | 12 | 22 | 376 | 36 | 731 |
| 25,082 | 0 | 38 | 7  | 304 | 2 | 12 | 18 | 376 | 27 | 730 |
| 25,083 | 0 | 39 | 6  | 305 | 1 | 12 | 12 | 378 | 19 | 734 |
| 25,084 | 0 | 39 | 5  | 306 | 1 | 12 | 11 | 379 | 17 | 736 |
| 25,085 | 0 | 39 | 5  | 307 | 1 | 12 | 11 | 379 | 17 | 737 |
| 25,086 | 1 | 39 | 5  | 309 | 1 | 12 | 11 | 379 | 18 | 739 |
| 25,087 | 1 | 39 | 6  | 315 | 1 | 12 | 11 | 380 | 19 | 746 |
| 25,088 | 1 | 39 | 6  | 315 | 1 | 12 | 11 | 379 | 19 | 745 |
| 25,089 | 1 | 39 | 7  | 315 | 0 | 12 | 11 | 377 | 19 | 743 |
| 25,090 | 1 | 39 | 7  | 315 | 0 | 12 | 11 | 376 | 19 | 742 |
| 25,091 | 1 | 38 | 7  | 303 | 0 | 12 | 11 | 365 | 19 | 718 |
| 25,092 | 1 | 38 | 7  | 303 | 0 | 12 | 11 | 364 | 19 | 717 |
| 25,093 | 1 | 36 | 7  | 285 | 0 | 12 | 11 | 344 | 19 | 677 |
| 25,094 | 1 | 35 | 7  | 283 | 0 | 12 | 11 | 346 | 19 | 676 |
| 25,095 | 1 | 35 | 7  | 278 | 0 | 12 | 10 | 340 | 18 | 665 |
| 25,096 | 1 | 34 | 6  | 257 | 0 | 10 | 10 | 323 | 17 | 624 |
| 25,097 | 1 | 34 | 6  | 261 | 0 | 10 | 10 | 328 | 17 | 633 |
| 25,098 | 1 | 26 | 5  | 227 | 0 | 7  | 7  | 264 | 13 | 524 |
| 25,099 | 1 | 28 | 5  | 235 | 0 | 7  | 4  | 260 | 10 | 530 |
| 25,100 | 1 | 28 | 5  | 232 | 0 | 7  | 4  | 260 | 10 | 527 |
| 25,101 | 1 | 29 | 5  | 224 | 0 | 6  | 4  | 250 | 10 | 509 |
| 25,102 | 1 | 29 | 5  | 225 | 0 | 6  | 4  | 252 | 10 | 512 |
| 25,103 | 1 | 31 | 6  | 234 | 0 | 6  | 4  | 253 | 11 | 524 |
| 25,104 | 1 | 31 | 6  | 256 | 0 | 7  | 5  | 258 | 12 | 552 |
| 25,105 | 1 | 39 | 6  | 291 | 0 | 10 | 5  | 292 | 12 | 632 |
| 25,106 | 1 | 40 | 6  | 297 | 0 | 10 | 5  | 298 | 12 | 645 |
| 25,107 | 1 | 41 | 8  | 313 | 0 | 11 | 5  | 301 | 14 | 666 |
| 25,108 | 1 | 45 | 9  | 357 | 0 | 13 | 5  | 322 | 15 | 737 |
| 25,109 | 1 | 45 | 9  | 381 | 0 | 13 | 5  | 333 | 15 | 772 |
| 25,110 | 1 | 45 | 9  | 425 | 0 | 14 | 5  | 345 | 15 | 829 |
| 25,111 | 1 | 48 | 10 | 480 | 0 | 18 | 8  | 360 | 19 | 906 |
| 25,112 | 1 | 47 | 12 | 501 | 0 | 18 | 9  | 362 | 22 | 928 |
| 25,113 | 1 | 47 | 12 | 504 | 0 | 18 | 9  | 361 | 22 | 930 |
| 25,114 | 1 | 45 | 12 | 497 | 0 | 17 | 9  | 357 | 22 | 916 |
| 25,115 | 1 | 44 | 11 | 499 | 0 | 17 | 9  | 356 | 21 | 916 |
| 25,116 | 1 | 46 | 15 | 508 | 1 | 17 | 11 | 362 | 28 | 933 |
| 25,117 | 1 | 46 | 15 | 508 | 1 | 17 | 10 | 362 | 27 | 933 |
| 25,118 | 1 | 46 | 15 | 508 | 1 | 17 | 10 | 362 | 27 | 933 |
| 25,119 | 1 | 46 | 17 | 511 | 1 | 17 | 13 | 362 | 32 | 936 |
| 25,120 | 1 | 46 | 17 | 510 | 1 | 17 | 13 | 361 | 32 | 934 |
| 25,121 | 1 | 48 | 17 | 513 | 1 | 17 | 13 | 363 | 32 | 941 |

|        |   |    |    |     |   |    |    |     |    |     |
|--------|---|----|----|-----|---|----|----|-----|----|-----|
| 25,122 | 1 | 48 | 17 | 514 | 1 | 17 | 13 | 362 | 32 | 941 |
| 25,123 | 1 | 48 | 21 | 514 | 1 | 17 | 15 | 361 | 38 | 940 |
| 25,124 | 1 | 48 | 22 | 514 | 1 | 17 | 16 | 363 | 40 | 942 |
| 25,125 | 1 | 48 | 22 | 514 | 1 | 17 | 16 | 363 | 40 | 942 |
| 25,126 | 1 | 40 | 22 | 451 | 1 | 15 | 17 | 259 | 41 | 765 |
| 25,127 | 1 | 40 | 22 | 451 | 1 | 15 | 17 | 259 | 41 | 765 |
| 25,128 | 2 | 39 | 21 | 434 | 1 | 15 | 16 | 250 | 40 | 738 |
| 25,129 | 2 | 36 | 21 | 411 | 1 | 14 | 16 | 219 | 40 | 680 |
| 25,130 | 2 | 34 | 21 | 380 | 1 | 13 | 16 | 189 | 40 | 616 |
| 25,131 | 2 | 33 | 21 | 368 | 2 | 13 | 17 | 179 | 42 | 593 |
| 25,132 | 2 | 32 | 21 | 377 | 2 | 13 | 16 | 179 | 41 | 601 |
| 25,133 | 2 | 32 | 21 | 411 | 2 | 13 | 16 | 180 | 41 | 636 |
| 25,134 | 2 | 32 | 23 | 411 | 2 | 13 | 17 | 182 | 44 | 638 |
| 25,135 | 2 | 33 | 23 | 417 | 2 | 13 | 17 | 182 | 44 | 645 |
| 25,136 | 1 | 33 | 23 | 422 | 2 | 13 | 17 | 182 | 43 | 650 |
| 25,137 | 1 | 33 | 22 | 415 | 2 | 13 | 17 | 181 | 42 | 642 |
| 25,138 | 1 | 33 | 22 | 427 | 2 | 13 | 17 | 187 | 42 | 660 |
| 25,139 | 1 | 34 | 21 | 427 | 2 | 13 | 17 | 188 | 41 | 662 |
| 25,140 | 2 | 34 | 21 | 427 | 2 | 13 | 17 | 188 | 42 | 662 |
| 25,141 | 2 | 34 | 21 | 426 | 2 | 13 | 17 | 186 | 42 | 659 |
| 25,142 | 2 | 34 | 21 | 425 | 2 | 13 | 18 | 186 | 43 | 658 |
| 25,143 | 2 | 34 | 21 | 429 | 2 | 13 | 19 | 187 | 44 | 663 |
| 25,144 | 2 | 34 | 21 | 429 | 2 | 13 | 19 | 187 | 44 | 663 |
| 25,145 | 2 | 34 | 21 | 426 | 2 | 13 | 19 | 183 | 44 | 656 |
| 25,146 | 2 | 35 | 21 | 426 | 2 | 13 | 20 | 180 | 45 | 654 |
| 25,147 | 2 | 34 | 21 | 420 | 2 | 13 | 20 | 178 | 45 | 645 |
| 25,148 | 2 | 32 | 21 | 412 | 2 | 12 | 20 | 172 | 45 | 628 |
| 25,149 | 2 | 32 | 21 | 413 | 2 | 12 | 20 | 173 | 45 | 630 |
| 25,150 | 2 | 30 | 21 | 408 | 2 | 12 | 21 | 171 | 46 | 621 |
| 25,151 | 2 | 30 | 21 | 405 | 2 | 12 | 21 | 170 | 46 | 617 |
| 25,152 | 2 | 27 | 20 | 400 | 2 | 12 | 21 | 166 | 45 | 605 |
| 25,153 | 2 | 25 | 20 | 384 | 2 | 12 | 21 | 161 | 45 | 582 |
| 25,154 | 2 | 26 | 20 | 399 | 2 | 14 | 21 | 176 | 45 | 615 |
| 25,155 | 2 | 28 | 20 | 383 | 2 | 13 | 19 | 172 | 43 | 596 |
| 25,156 | 2 | 21 | 20 | 360 | 2 | 11 | 19 | 151 | 43 | 543 |
| 25,157 | 2 | 20 | 20 | 356 | 2 | 11 | 19 | 148 | 43 | 535 |
| 25,158 | 2 | 19 | 19 | 339 | 2 | 10 | 19 | 145 | 42 | 513 |
| 25,159 | 2 | 15 | 18 | 297 | 2 | 8  | 19 | 126 | 41 | 446 |
| 25,160 | 2 | 15 | 18 | 273 | 2 | 8  | 19 | 118 | 41 | 414 |
| 25,161 | 3 | 12 | 17 | 175 | 2 | 7  | 18 | 85  | 40 | 279 |
| 25,162 | 3 | 12 | 17 | 178 | 2 | 7  | 16 | 86  | 38 | 283 |

|        |   |    |    |     |   |    |    |     |    |     |
|--------|---|----|----|-----|---|----|----|-----|----|-----|
| 25,163 | 3 | 13 | 15 | 173 | 2 | 7  | 15 | 89  | 35 | 282 |
| 25,164 | 3 | 13 | 15 | 173 | 2 | 7  | 15 | 93  | 35 | 286 |
| 25,165 | 3 | 13 | 15 | 172 | 2 | 7  | 15 | 93  | 35 | 285 |
| 25,166 | 3 | 11 | 15 | 160 | 2 | 7  | 16 | 85  | 36 | 263 |
| 25,167 | 3 | 11 | 10 | 161 | 1 | 7  | 14 | 86  | 28 | 265 |
| 25,168 | 3 | 11 | 10 | 161 | 1 | 7  | 14 | 88  | 28 | 267 |
| 25,169 | 3 | 11 | 9  | 171 | 1 | 8  | 11 | 95  | 24 | 285 |
| 25,170 | 3 | 12 | 8  | 169 | 1 | 9  | 13 | 96  | 25 | 286 |
| 25,171 | 3 | 13 | 8  | 171 | 1 | 9  | 13 | 96  | 25 | 289 |
| 25,172 | 3 | 11 | 8  | 169 | 1 | 9  | 13 | 96  | 25 | 285 |
| 25,173 | 3 | 11 | 7  | 169 | 1 | 9  | 15 | 94  | 26 | 283 |
| 25,174 | 3 | 11 | 11 | 170 | 1 | 9  | 16 | 94  | 31 | 284 |
| 25,175 | 3 | 11 | 10 | 171 | 1 | 9  | 15 | 96  | 29 | 287 |
| 25,176 | 6 | 14 | 28 | 184 | 1 | 9  | 31 | 107 | 66 | 314 |
| 25,177 | 7 | 20 | 31 | 196 | 1 | 10 | 38 | 131 | 77 | 357 |
| 25,178 | 7 | 20 | 31 | 198 | 1 | 10 | 38 | 135 | 77 | 363 |
| 25,179 | 6 | 23 | 32 | 205 | 1 | 10 | 38 | 144 | 77 | 382 |
| 25,180 | 6 | 24 | 33 | 206 | 1 | 10 | 37 | 147 | 77 | 387 |
| 25,181 | 6 | 36 | 34 | 285 | 0 | 14 | 38 | 204 | 78 | 539 |
| 25,182 | 6 | 36 | 34 | 287 | 0 | 15 | 38 | 207 | 78 | 545 |
| 25,183 | 6 | 36 | 35 | 278 | 0 | 15 | 39 | 207 | 80 | 536 |
| 25,184 | 8 | 41 | 40 | 309 | 0 | 15 | 41 | 230 | 89 | 595 |
| 25,185 | 8 | 41 | 38 | 311 | 0 | 15 | 40 | 228 | 86 | 595 |
| 25,186 | 8 | 40 | 39 | 306 | 0 | 15 | 40 | 227 | 87 | 588 |
| 25,187 | 8 | 40 | 39 | 301 | 0 | 15 | 40 | 228 | 87 | 584 |
| 25,188 | 8 | 40 | 40 | 300 | 0 | 15 | 40 | 227 | 88 | 582 |
| 25,189 | 8 | 40 | 40 | 290 | 0 | 15 | 40 | 222 | 88 | 567 |
| 25,190 | 8 | 39 | 40 | 290 | 0 | 15 | 40 | 221 | 88 | 565 |
| 25,191 | 7 | 39 | 46 | 291 | 0 | 15 | 42 | 222 | 95 | 567 |
| 25,192 | 7 | 40 | 47 | 298 | 0 | 15 | 42 | 229 | 96 | 582 |
| 25,193 | 7 | 40 | 47 | 294 | 0 | 15 | 41 | 229 | 95 | 578 |
| 25,194 | 7 | 40 | 46 | 295 | 0 | 15 | 40 | 230 | 93 | 580 |
| 25,195 | 7 | 42 | 47 | 298 | 0 | 15 | 40 | 235 | 94 | 590 |
| 25,196 | 7 | 42 | 47 | 300 | 0 | 15 | 39 | 235 | 93 | 592 |
| 25,197 | 7 | 41 | 47 | 300 | 0 | 15 | 39 | 235 | 93 | 591 |
| 25,198 | 7 | 41 | 47 | 300 | 0 | 15 | 39 | 235 | 93 | 591 |
| 25,199 | 7 | 41 | 47 | 300 | 0 | 15 | 39 | 233 | 93 | 589 |
| 25,200 | 7 | 41 | 47 | 301 | 0 | 15 | 39 | 234 | 93 | 591 |
| 25,201 | 7 | 41 | 47 | 298 | 0 | 15 | 38 | 234 | 92 | 588 |
| 25,202 | 7 | 41 | 47 | 298 | 0 | 15 | 38 | 234 | 92 | 588 |
| 25,203 | 7 | 41 | 47 | 297 | 1 | 15 | 39 | 233 | 94 | 586 |

|        |   |    |    |     |   |    |    |     |    |     |
|--------|---|----|----|-----|---|----|----|-----|----|-----|
| 25,204 | 7 | 41 | 47 | 282 | 1 | 13 | 39 | 218 | 94 | 554 |
| 25,205 | 7 | 41 | 47 | 282 | 1 | 13 | 39 | 218 | 94 | 554 |
| 25,206 | 7 | 39 | 47 | 276 | 1 | 13 | 39 | 217 | 94 | 545 |
| 25,207 | 7 | 38 | 48 | 264 | 1 | 12 | 39 | 204 | 95 | 518 |
| 25,208 | 7 | 38 | 47 | 262 | 2 | 12 | 39 | 201 | 95 | 513 |
| 25,209 | 7 | 38 | 47 | 262 | 2 | 12 | 39 | 201 | 95 | 513 |
| 25,210 | 7 | 38 | 47 | 260 | 2 | 12 | 39 | 199 | 95 | 509 |
| 25,211 | 6 | 37 | 47 | 255 | 2 | 8  | 39 | 189 | 94 | 489 |
| 25,212 | 6 | 37 | 47 | 255 | 2 | 8  | 40 | 189 | 95 | 489 |
| 25,213 | 6 | 37 | 47 | 231 | 2 | 8  | 40 | 175 | 95 | 451 |
| 25,214 | 6 | 37 | 47 | 231 | 2 | 8  | 40 | 175 | 95 | 451 |
| 25,215 | 6 | 37 | 47 | 231 | 2 | 8  | 40 | 172 | 95 | 448 |
| 25,216 | 6 | 37 | 47 | 231 | 2 | 8  | 40 | 172 | 95 | 448 |
| 25,217 | 6 | 37 | 47 | 228 | 2 | 8  | 39 | 171 | 94 | 444 |
| 25,218 | 6 | 37 | 49 | 228 | 2 | 8  | 39 | 169 | 96 | 442 |
| 25,219 | 6 | 36 | 49 | 217 | 2 | 6  | 39 | 161 | 96 | 420 |
| 25,220 | 6 | 36 | 49 | 217 | 2 | 6  | 39 | 161 | 96 | 420 |
| 25,221 | 6 | 36 | 49 | 217 | 2 | 6  | 37 | 163 | 94 | 422 |
| 25,222 | 6 | 35 | 49 | 217 | 2 | 6  | 37 | 163 | 94 | 421 |
| 25,223 | 6 | 35 | 49 | 218 | 2 | 6  | 37 | 163 | 94 | 422 |
| 25,224 | 6 | 35 | 49 | 221 | 2 | 6  | 33 | 163 | 90 | 425 |
| 25,225 | 6 | 35 | 43 | 222 | 2 | 6  | 32 | 163 | 83 | 426 |
| 25,226 | 3 | 26 | 30 | 201 | 2 | 5  | 23 | 128 | 58 | 360 |
| 25,227 | 3 | 26 | 25 | 213 | 2 | 5  | 16 | 130 | 46 | 374 |
| 25,228 | 2 | 26 | 24 | 215 | 2 | 5  | 8  | 130 | 36 | 376 |
| 25,229 | 2 | 26 | 28 | 215 | 2 | 5  | 11 | 131 | 43 | 377 |
| 25,230 | 2 | 24 | 27 | 220 | 2 | 6  | 11 | 124 | 42 | 374 |
| 25,231 | 2 | 23 | 26 | 219 | 2 | 6  | 12 | 121 | 42 | 369 |
| 25,232 | 2 | 11 | 25 | 141 | 2 | 2  | 11 | 64  | 40 | 218 |
| 25,233 | 3 | 6  | 25 | 72  | 2 | 1  | 11 | 36  | 41 | 115 |
| 25,234 | 2 | 6  | 24 | 74  | 2 | 1  | 11 | 38  | 39 | 119 |
| 25,235 | 1 | 6  | 20 | 74  | 2 | 1  | 10 | 38  | 33 | 119 |
| 25,236 | 1 | 6  | 19 | 71  | 2 | 1  | 10 | 38  | 32 | 116 |
| 25,237 | 1 | 6  | 19 | 84  | 2 | 3  | 10 | 46  | 32 | 139 |
| 25,238 | 1 | 7  | 18 | 101 | 2 | 4  | 10 | 59  | 31 | 171 |
| 25,239 | 1 | 7  | 18 | 104 | 2 | 4  | 10 | 60  | 31 | 175 |
| 25,240 | 1 | 7  | 18 | 102 | 2 | 4  | 10 | 60  | 31 | 173 |
| 25,241 | 1 | 7  | 14 | 107 | 2 | 5  | 9  | 62  | 26 | 181 |
| 25,242 | 1 | 7  | 12 | 106 | 2 | 5  | 8  | 61  | 23 | 179 |
| 25,243 | 1 | 6  | 11 | 99  | 2 | 5  | 8  | 54  | 22 | 164 |
| 25,244 | 1 | 7  | 11 | 100 | 2 | 5  | 8  | 53  | 22 | 165 |



|        |   |    |    |     |   |    |    |     |    |     |
|--------|---|----|----|-----|---|----|----|-----|----|-----|
| 25,245 | 1 | 5  | 11 | 97  | 2 | 5  | 8  | 50  | 22 | 157 |
| 25,246 | 1 | 5  | 11 | 95  | 2 | 5  | 8  | 50  | 22 | 155 |
| 25,247 | 1 | 5  | 11 | 95  | 2 | 5  | 8  | 50  | 22 | 155 |
| 25,248 | 1 | 5  | 11 | 95  | 2 | 5  | 8  | 50  | 22 | 155 |
| 25,249 | 1 | 5  | 12 | 95  | 2 | 5  | 8  | 50  | 23 | 155 |
| 25,250 | 1 | 5  | 14 | 94  | 2 | 5  | 9  | 49  | 26 | 153 |
| 25,251 | 1 | 6  | 14 | 94  | 2 | 5  | 9  | 49  | 26 | 154 |
| 25,252 | 1 | 6  | 14 | 94  | 2 | 5  | 9  | 49  | 26 | 154 |
| 25,253 | 1 | 6  | 16 | 94  | 1 | 5  | 8  | 49  | 26 | 154 |
| 25,254 | 1 | 5  | 20 | 94  | 2 | 5  | 9  | 49  | 32 | 153 |
| 25,255 | 1 | 5  | 28 | 94  | 2 | 5  | 13 | 50  | 44 | 154 |
| 25,256 | 1 | 5  | 28 | 96  | 2 | 7  | 15 | 50  | 46 | 158 |
| 25,257 | 1 | 6  | 27 | 100 | 2 | 7  | 15 | 50  | 45 | 163 |
| 25,258 | 1 | 6  | 27 | 101 | 1 | 8  | 15 | 50  | 44 | 165 |
| 25,259 | 1 | 6  | 28 | 103 | 1 | 8  | 15 | 53  | 45 | 170 |
| 25,260 | 1 | 6  | 28 | 106 | 1 | 8  | 16 | 56  | 46 | 176 |
| 25,261 | 1 | 6  | 28 | 108 | 1 | 8  | 16 | 56  | 46 | 178 |
| 25,262 | 1 | 7  | 28 | 112 | 1 | 8  | 16 | 59  | 46 | 186 |
| 25,263 | 1 | 9  | 28 | 119 | 1 | 9  | 15 | 65  | 45 | 202 |
| 25,264 | 1 | 8  | 28 | 118 | 1 | 9  | 15 | 67  | 45 | 202 |
| 25,265 | 1 | 8  | 28 | 118 | 1 | 9  | 15 | 69  | 45 | 204 |
| 25,266 | 1 | 8  | 28 | 115 | 1 | 9  | 15 | 68  | 45 | 200 |
| 25,267 | 1 | 9  | 28 | 115 | 1 | 10 | 15 | 68  | 45 | 202 |
| 25,268 | 1 | 9  | 28 | 117 | 1 | 10 | 15 | 69  | 45 | 205 |
| 25,269 | 2 | 10 | 30 | 122 | 1 | 11 | 18 | 77  | 51 | 220 |
| 25,270 | 2 | 10 | 30 | 122 | 1 | 11 | 18 | 77  | 51 | 220 |
| 25,271 | 2 | 10 | 32 | 124 | 1 | 11 | 19 | 78  | 54 | 223 |
| 25,272 | 2 | 10 | 32 | 124 | 1 | 11 | 19 | 77  | 54 | 222 |
| 25,273 | 2 | 12 | 32 | 121 | 1 | 11 | 19 | 77  | 54 | 221 |
| 25,274 | 2 | 12 | 32 | 121 | 1 | 11 | 19 | 78  | 54 | 222 |
| 25,275 | 2 | 12 | 31 | 118 | 1 | 11 | 19 | 78  | 53 | 219 |
| 25,276 | 2 | 12 | 31 | 118 | 1 | 11 | 19 | 78  | 53 | 219 |
| 25,277 | 2 | 12 | 31 | 100 | 1 | 11 | 19 | 74  | 53 | 197 |
| 25,278 | 2 | 14 | 31 | 106 | 1 | 14 | 19 | 72  | 53 | 206 |
| 25,279 | 2 | 16 | 29 | 109 | 1 | 16 | 19 | 79  | 51 | 220 |
| 25,280 | 2 | 16 | 26 | 111 | 1 | 16 | 16 | 86  | 45 | 229 |
| 25,281 | 2 | 15 | 26 | 99  | 1 | 15 | 16 | 83  | 45 | 212 |
| 25,282 | 3 | 15 | 26 | 101 | 1 | 15 | 16 | 92  | 46 | 223 |
| 25,283 | 3 | 38 | 27 | 205 | 1 | 31 | 16 | 193 | 47 | 467 |
| 25,284 | 2 | 38 | 27 | 214 | 1 | 33 | 15 | 199 | 45 | 484 |
| 25,285 | 2 | 38 | 29 | 219 | 2 | 34 | 16 | 197 | 49 | 488 |

|        |   |    |    |     |   |    |    |     |    |     |
|--------|---|----|----|-----|---|----|----|-----|----|-----|
| 25,286 | 2 | 38 | 30 | 222 | 2 | 34 | 15 | 198 | 49 | 492 |
| 25,287 | 2 | 38 | 31 | 222 | 2 | 33 | 15 | 195 | 50 | 488 |
| 25,288 | 4 | 37 | 33 | 213 | 2 | 32 | 16 | 185 | 55 | 467 |
| 25,289 | 5 | 37 | 39 | 220 | 2 | 32 | 17 | 189 | 63 | 478 |
| 25,290 | 5 | 37 | 39 | 220 | 2 | 32 | 17 | 189 | 63 | 478 |
| 25,291 | 5 | 37 | 40 | 220 | 2 | 32 | 18 | 188 | 65 | 477 |
| 25,292 | 5 | 37 | 40 | 217 | 2 | 31 | 18 | 188 | 65 | 473 |
| 25,293 | 5 | 37 | 40 | 217 | 2 | 31 | 18 | 188 | 65 | 473 |
| 25,294 | 5 | 36 | 40 | 216 | 2 | 31 | 18 | 188 | 65 | 471 |
| 25,295 | 5 | 38 | 40 | 217 | 2 | 31 | 18 | 189 | 65 | 475 |
| 25,296 | 5 | 38 | 40 | 216 | 2 | 31 | 18 | 186 | 65 | 471 |
| 25,297 | 5 | 38 | 41 | 216 | 2 | 31 | 18 | 186 | 66 | 471 |
| 25,298 | 5 | 38 | 41 | 216 | 2 | 31 | 20 | 186 | 68 | 471 |
| 25,299 | 6 | 38 | 44 | 216 | 2 | 31 | 22 | 187 | 74 | 472 |
| 25,300 | 6 | 43 | 43 | 224 | 2 | 32 | 22 | 206 | 73 | 505 |
| 25,301 | 6 | 44 | 41 | 243 | 2 | 32 | 21 | 228 | 70 | 547 |
| 25,302 | 6 | 46 | 41 | 262 | 2 | 39 | 21 | 242 | 70 | 589 |
| 25,303 | 6 | 48 | 41 | 297 | 2 | 41 | 21 | 266 | 70 | 652 |
| 25,304 | 6 | 49 | 39 | 301 | 2 | 42 | 22 | 268 | 69 | 660 |
| 25,305 | 6 | 50 | 35 | 310 | 1 | 43 | 21 | 272 | 63 | 675 |
| 25,306 | 6 | 74 | 27 | 369 | 1 | 53 | 17 | 338 | 51 | 834 |
| 25,307 | 6 | 74 | 27 | 380 | 1 | 51 | 15 | 342 | 49 | 847 |
| 25,308 | 6 | 73 | 27 | 379 | 1 | 52 | 15 | 342 | 49 | 846 |
| 25,309 | 6 | 73 | 28 | 383 | 1 | 51 | 15 | 342 | 50 | 849 |
| 25,310 | 6 | 73 | 27 | 381 | 1 | 51 | 15 | 340 | 49 | 845 |
| 25,311 | 6 | 73 | 27 | 379 | 1 | 51 | 14 | 337 | 48 | 840 |
| 25,312 | 6 | 72 | 27 | 373 | 1 | 51 | 15 | 335 | 49 | 831 |
| 25,313 | 6 | 72 | 27 | 373 | 1 | 51 | 15 | 335 | 49 | 831 |
| 25,314 | 6 | 70 | 27 | 366 | 1 | 50 | 16 | 327 | 50 | 813 |
| 25,315 | 6 | 70 | 27 | 369 | 1 | 51 | 16 | 327 | 50 | 817 |
| 25,316 | 6 | 71 | 27 | 396 | 1 | 51 | 16 | 340 | 50 | 858 |
| 25,317 | 6 | 71 | 29 | 398 | 1 | 51 | 17 | 344 | 53 | 864 |
| 25,318 | 5 | 70 | 26 | 396 | 1 | 50 | 17 | 342 | 49 | 858 |
| 25,319 | 5 | 70 | 25 | 398 | 1 | 50 | 15 | 342 | 46 | 860 |
| 25,320 | 5 | 69 | 27 | 394 | 1 | 49 | 14 | 335 | 47 | 847 |
| 25,321 | 5 | 69 | 26 | 396 | 1 | 49 | 13 | 335 | 45 | 849 |
| 25,322 | 5 | 69 | 25 | 395 | 1 | 49 | 13 | 334 | 44 | 847 |
| 25,323 | 5 | 71 | 25 | 400 | 1 | 50 | 13 | 336 | 44 | 857 |
| 25,324 | 5 | 69 | 25 | 400 | 1 | 50 | 13 | 335 | 44 | 854 |
| 25,325 | 5 | 69 | 25 | 400 | 1 | 50 | 13 | 334 | 44 | 853 |
| 25,326 | 5 | 65 | 25 | 387 | 1 | 45 | 13 | 324 | 44 | 821 |

|        |   |    |    |     |    |    |    |     |    |     |
|--------|---|----|----|-----|----|----|----|-----|----|-----|
| 25,327 | 5 | 65 | 25 | 387 | 1  | 45 | 13 | 325 | 44 | 822 |
| 25,328 | 5 | 65 | 25 | 389 | 1  | 45 | 13 | 323 | 44 | 822 |
| 25,329 | 5 | 65 | 25 | 389 | 1  | 45 | 13 | 323 | 44 | 822 |
| 25,330 | 5 | 65 | 25 | 390 | 1  | 45 | 13 | 323 | 44 | 823 |
| 25,331 | 5 | 65 | 24 | 388 | 1  | 45 | 13 | 316 | 43 | 814 |
| 25,332 | 4 | 66 | 25 | 387 | 1  | 45 | 12 | 309 | 42 | 807 |
| 25,333 | 4 | 66 | 25 | 394 | 1  | 45 | 12 | 315 | 42 | 820 |
| 25,334 | 4 | 43 | 25 | 297 | 1  | 29 | 12 | 218 | 42 | 587 |
| 25,335 | 4 | 43 | 22 | 292 | 0  | 28 | 11 | 224 | 37 | 587 |
| 25,336 | 4 | 44 | 21 | 297 | 0  | 27 | 11 | 234 | 36 | 602 |
| 25,337 | 5 | 64 | 21 | 441 | 0  | 39 | 11 | 333 | 37 | 877 |
| 25,338 | 5 | 66 | 22 | 494 | 0  | 39 | 15 | 339 | 42 | 938 |
| 25,339 | 7 | 68 | 27 | 506 | 3  | 39 | 22 | 344 | 59 | 957 |
| 25,340 | 6 | 70 | 21 | 496 | 3  | 39 | 21 | 339 | 51 | 944 |
| 25,341 | 6 | 71 | 20 | 498 | 3  | 39 | 21 | 339 | 50 | 947 |
| 25,342 | 6 | 71 | 20 | 500 | 3  | 39 | 21 | 340 | 50 | 950 |
| 25,343 | 6 | 71 | 20 | 501 | 3  | 39 | 21 | 342 | 50 | 953 |
| 25,344 | 6 | 71 | 20 | 502 | 3  | 39 | 21 | 342 | 50 | 954 |
| 25,345 | 6 | 71 | 21 | 503 | 3  | 39 | 21 | 342 | 51 | 955 |
| 25,346 | 6 | 69 | 21 | 502 | 3  | 39 | 21 | 341 | 51 | 951 |
| 25,347 | 6 | 69 | 21 | 505 | 3  | 39 | 21 | 341 | 51 | 954 |
| 25,348 | 6 | 69 | 20 | 505 | 3  | 39 | 22 | 341 | 51 | 954 |
| 25,349 | 6 | 69 | 20 | 506 | 3  | 40 | 20 | 341 | 49 | 956 |
| 25,350 | 5 | 64 | 19 | 497 | 3  | 39 | 18 | 322 | 45 | 922 |
| 25,351 | 5 | 66 | 21 | 497 | 4  | 39 | 19 | 322 | 49 | 924 |
| 25,352 | 5 | 65 | 21 | 483 | 4  | 40 | 19 | 301 | 49 | 889 |
| 25,353 | 5 | 63 | 29 | 464 | 8  | 33 | 33 | 288 | 75 | 848 |
| 25,354 | 6 | 61 | 29 | 429 | 9  | 31 | 35 | 264 | 79 | 785 |
| 25,355 | 6 | 59 | 29 | 417 | 9  | 29 | 35 | 258 | 79 | 763 |
| 25,356 | 6 | 59 | 29 | 418 | 9  | 29 | 35 | 259 | 79 | 765 |
| 25,357 | 6 | 36 | 32 | 359 | 9  | 19 | 36 | 194 | 83 | 608 |
| 25,358 | 6 | 36 | 32 | 349 | 9  | 19 | 36 | 190 | 83 | 594 |
| 25,359 | 6 | 38 | 32 | 347 | 10 | 18 | 38 | 190 | 86 | 593 |
| 25,360 | 6 | 38 | 34 | 342 | 12 | 18 | 40 | 190 | 92 | 588 |
| 25,361 | 6 | 38 | 34 | 344 | 12 | 18 | 40 | 190 | 92 | 590 |
| 25,362 | 6 | 38 | 34 | 347 | 12 | 18 | 40 | 195 | 92 | 598 |
| 25,363 | 6 | 38 | 34 | 347 | 12 | 18 | 39 | 194 | 91 | 597 |
| 25,364 | 6 | 38 | 34 | 343 | 12 | 17 | 38 | 194 | 90 | 592 |
| 25,365 | 6 | 38 | 34 | 346 | 12 | 17 | 38 | 194 | 90 | 595 |
| 25,366 | 6 | 38 | 35 | 347 | 12 | 17 | 38 | 195 | 91 | 597 |
| 25,367 | 6 | 37 | 35 | 331 | 12 | 17 | 38 | 191 | 91 | 576 |

|        |   |    |    |     |    |    |    |     |     |     |
|--------|---|----|----|-----|----|----|----|-----|-----|-----|
| 25,368 | 6 | 38 | 33 | 335 | 12 | 18 | 37 | 188 | 88  | 579 |
| 25,369 | 6 | 59 | 33 | 376 | 12 | 19 | 37 | 233 | 88  | 687 |
| 25,370 | 6 | 61 | 33 | 396 | 12 | 19 | 37 | 243 | 88  | 719 |
| 25,371 | 6 | 62 | 33 | 403 | 12 | 19 | 38 | 244 | 89  | 728 |
| 25,372 | 6 | 62 | 33 | 401 | 12 | 19 | 39 | 244 | 90  | 726 |
| 25,373 | 6 | 65 | 33 | 421 | 12 | 20 | 39 | 256 | 90  | 762 |
| 25,374 | 6 | 63 | 33 | 418 | 12 | 19 | 39 | 253 | 90  | 753 |
| 25,375 | 6 | 63 | 36 | 418 | 12 | 19 | 41 | 252 | 95  | 752 |
| 25,376 | 6 | 63 | 36 | 418 | 12 | 19 | 41 | 252 | 95  | 752 |
| 25,377 | 6 | 63 | 36 | 418 | 12 | 19 | 41 | 252 | 95  | 752 |
| 25,378 | 6 | 63 | 36 | 420 | 12 | 19 | 41 | 252 | 95  | 754 |
| 25,379 | 6 | 63 | 36 | 418 | 12 | 19 | 41 | 252 | 95  | 752 |
| 25,380 | 6 | 63 | 36 | 416 | 12 | 19 | 41 | 252 | 95  | 750 |
| 25,381 | 6 | 63 | 36 | 416 | 12 | 19 | 41 | 252 | 95  | 750 |
| 25,382 | 6 | 63 | 35 | 415 | 12 | 19 | 41 | 250 | 94  | 747 |
| 25,383 | 6 | 63 | 35 | 409 | 12 | 19 | 41 | 244 | 94  | 735 |
| 25,384 | 6 | 63 | 35 | 412 | 12 | 19 | 41 | 247 | 94  | 741 |
| 25,385 | 6 | 63 | 34 | 421 | 12 | 19 | 41 | 249 | 93  | 752 |
| 25,386 | 6 | 63 | 34 | 423 | 12 | 18 | 41 | 244 | 93  | 748 |
| 25,387 | 6 | 63 | 34 | 426 | 12 | 18 | 41 | 243 | 93  | 750 |
| 25,388 | 6 | 43 | 35 | 283 | 12 | 6  | 41 | 145 | 94  | 477 |
| 25,389 | 6 | 43 | 33 | 217 | 12 | 5  | 37 | 138 | 88  | 403 |
| 25,390 | 2 | 42 | 26 | 196 | 9  | 5  | 29 | 129 | 66  | 372 |
| 25,391 | 2 | 39 | 27 | 193 | 9  | 5  | 30 | 128 | 68  | 365 |
| 25,392 | 2 | 39 | 27 | 206 | 9  | 5  | 29 | 129 | 67  | 379 |
| 25,393 | 2 | 39 | 27 | 202 | 9  | 5  | 29 | 126 | 67  | 372 |
| 25,394 | 2 | 39 | 29 | 202 | 9  | 5  | 30 | 126 | 70  | 372 |
| 25,395 | 2 | 39 | 28 | 200 | 9  | 5  | 30 | 126 | 69  | 370 |
| 25,396 | 3 | 39 | 28 | 200 | 9  | 5  | 32 | 126 | 72  | 370 |
| 25,397 | 3 | 39 | 31 | 197 | 9  | 5  | 33 | 126 | 76  | 367 |
| 25,398 | 3 | 39 | 31 | 197 | 9  | 5  | 33 | 126 | 76  | 367 |
| 25,399 | 4 | 39 | 32 | 197 | 9  | 5  | 32 | 127 | 77  | 368 |
| 25,400 | 4 | 39 | 32 | 200 | 9  | 4  | 33 | 127 | 78  | 370 |
| 25,401 | 7 | 39 | 42 | 200 | 17 | 4  | 58 | 127 | 124 | 370 |
| 25,402 | 7 | 37 | 40 | 202 | 16 | 3  | 58 | 127 | 121 | 369 |
| 25,403 | 7 | 39 | 41 | 222 | 16 | 7  | 58 | 138 | 122 | 406 |
| 25,404 | 7 | 39 | 33 | 251 | 12 | 8  | 44 | 158 | 96  | 456 |
| 25,405 | 6 | 41 | 33 | 267 | 11 | 10 | 42 | 168 | 92  | 486 |
| 25,406 | 6 | 42 | 33 | 280 | 11 | 11 | 41 | 173 | 91  | 506 |
| 25,407 | 6 | 42 | 32 | 297 | 11 | 13 | 41 | 178 | 90  | 530 |
| 25,408 | 6 | 41 | 31 | 298 | 11 | 13 | 40 | 176 | 88  | 528 |

|        |    |    |    |     |    |    |    |     |     |     |
|--------|----|----|----|-----|----|----|----|-----|-----|-----|
| 25,409 | 7  | 45 | 30 | 301 | 10 | 13 | 38 | 177 | 85  | 536 |
| 25,410 | 7  | 43 | 28 | 306 | 9  | 13 | 36 | 181 | 80  | 543 |
| 25,411 | 7  | 43 | 28 | 309 | 8  | 13 | 36 | 182 | 79  | 547 |
| 25,412 | 7  | 43 | 28 | 307 | 8  | 13 | 36 | 175 | 79  | 538 |
| 25,413 | 7  | 43 | 28 | 310 | 8  | 13 | 36 | 175 | 79  | 541 |
| 25,414 | 7  | 43 | 28 | 311 | 8  | 13 | 36 | 174 | 79  | 541 |
| 25,415 | 7  | 43 | 28 | 313 | 8  | 13 | 36 | 172 | 79  | 541 |
| 25,416 | 7  | 43 | 28 | 313 | 8  | 13 | 36 | 172 | 79  | 541 |
| 25,417 | 7  | 43 | 27 | 312 | 8  | 13 | 36 | 172 | 78  | 540 |
| 25,418 | 7  | 43 | 27 | 302 | 8  | 13 | 37 | 166 | 79  | 524 |
| 25,419 | 7  | 45 | 27 | 301 | 9  | 12 | 37 | 166 | 80  | 524 |
| 25,420 | 7  | 34 | 26 | 303 | 9  | 14 | 37 | 163 | 79  | 514 |
| 25,421 | 7  | 32 | 26 | 286 | 9  | 15 | 36 | 157 | 78  | 490 |
| 25,422 | 7  | 32 | 27 | 288 | 9  | 16 | 37 | 161 | 80  | 497 |
| 25,423 | 7  | 32 | 30 | 297 | 10 | 16 | 40 | 161 | 87  | 506 |
| 25,424 | 8  | 30 | 30 | 281 | 10 | 15 | 38 | 150 | 86  | 476 |
| 25,425 | 12 | 31 | 31 | 285 | 10 | 16 | 41 | 152 | 94  | 484 |
| 25,426 | 12 | 31 | 31 | 286 | 10 | 16 | 41 | 152 | 94  | 485 |
| 25,427 | 12 | 32 | 34 | 295 | 10 | 16 | 43 | 153 | 99  | 496 |
| 25,428 | 12 | 32 | 34 | 296 | 10 | 16 | 43 | 154 | 99  | 498 |
| 25,429 | 12 | 32 | 34 | 294 | 10 | 16 | 43 | 153 | 99  | 495 |
| 25,430 | 12 | 32 | 34 | 295 | 10 | 16 | 43 | 153 | 99  | 496 |
| 25,431 | 13 | 32 | 34 | 299 | 10 | 16 | 43 | 153 | 100 | 500 |
| 25,432 | 13 | 32 | 34 | 299 | 10 | 16 | 43 | 154 | 100 | 501 |
| 25,433 | 13 | 32 | 36 | 299 | 10 | 16 | 43 | 156 | 102 | 503 |
| 25,434 | 13 | 32 | 36 | 300 | 10 | 16 | 43 | 156 | 102 | 504 |
| 25,435 | 13 | 32 | 40 | 299 | 11 | 16 | 43 | 153 | 107 | 500 |
| 25,436 | 13 | 32 | 42 | 278 | 11 | 16 | 44 | 144 | 110 | 470 |
| 25,437 | 12 | 32 | 42 | 278 | 11 | 16 | 44 | 144 | 109 | 470 |
| 25,438 | 12 | 31 | 44 | 260 | 12 | 16 | 48 | 133 | 116 | 440 |
| 25,439 | 12 | 29 | 45 | 261 | 12 | 16 | 48 | 129 | 117 | 435 |
| 25,440 | 12 | 29 | 45 | 261 | 12 | 16 | 48 | 129 | 117 | 435 |
| 25,441 | 12 | 28 | 45 | 261 | 12 | 16 | 48 | 129 | 117 | 434 |
| 25,442 | 12 | 28 | 46 | 247 | 12 | 16 | 53 | 127 | 123 | 418 |
| 25,443 | 12 | 28 | 49 | 247 | 12 | 16 | 57 | 127 | 130 | 418 |
| 25,444 | 12 | 28 | 49 | 247 | 12 | 16 | 59 | 127 | 132 | 418 |
| 25,445 | 12 | 28 | 47 | 247 | 12 | 16 | 58 | 127 | 129 | 418 |
| 25,446 | 12 | 28 | 47 | 247 | 12 | 16 | 58 | 127 | 129 | 418 |
| 25,447 | 11 | 28 | 47 | 247 | 12 | 16 | 58 | 127 | 128 | 418 |
| 25,448 | 11 | 28 | 44 | 252 | 12 | 16 | 57 | 130 | 124 | 426 |
| 25,449 | 10 | 31 | 43 | 265 | 12 | 16 | 57 | 148 | 122 | 460 |

|        |    |    |    |     |    |    |    |     |     |     |
|--------|----|----|----|-----|----|----|----|-----|-----|-----|
| 25,450 | 11 | 32 | 43 | 265 | 12 | 16 | 56 | 150 | 122 | 463 |
| 25,451 | 11 | 35 | 41 | 294 | 10 | 16 | 51 | 163 | 113 | 508 |
| 25,452 | 8  | 35 | 31 | 312 | 4  | 16 | 31 | 176 | 74  | 539 |
| 25,453 | 8  | 35 | 31 | 312 | 4  | 16 | 30 | 177 | 73  | 540 |
| 25,454 | 8  | 34 | 30 | 267 | 4  | 11 | 30 | 147 | 72  | 459 |
| 25,455 | 8  | 34 | 30 | 270 | 4  | 11 | 30 | 147 | 72  | 462 |
| 25,456 | 8  | 34 | 30 | 262 | 4  | 9  | 30 | 144 | 72  | 449 |
| 25,457 | 8  | 33 | 30 | 250 | 4  | 8  | 30 | 139 | 72  | 430 |
| 25,458 | 8  | 33 | 30 | 233 | 5  | 6  | 30 | 133 | 73  | 405 |
| 25,459 | 8  | 33 | 30 | 237 | 5  | 6  | 30 | 133 | 73  | 409 |
| 25,460 | 7  | 29 | 30 | 229 | 5  | 6  | 30 | 132 | 72  | 396 |
| 25,461 | 7  | 29 | 31 | 222 | 5  | 6  | 30 | 128 | 73  | 385 |
| 25,462 | 7  | 29 | 31 | 218 | 5  | 6  | 30 | 128 | 73  | 381 |
| 25,463 | 7  | 29 | 31 | 219 | 5  | 6  | 30 | 128 | 73  | 382 |
| 25,464 | 7  | 29 | 31 | 215 | 5  | 6  | 31 | 128 | 74  | 378 |
| 25,465 | 7  | 29 | 31 | 215 | 5  | 6  | 31 | 128 | 74  | 378 |
| 25,466 | 7  | 29 | 31 | 210 | 5  | 7  | 31 | 127 | 74  | 373 |
| 25,467 | 7  | 29 | 31 | 210 | 5  | 7  | 32 | 126 | 75  | 372 |
| 25,468 | 7  | 29 | 31 | 209 | 5  | 7  | 31 | 125 | 74  | 370 |
| 25,469 | 7  | 26 | 31 | 204 | 4  | 7  | 31 | 124 | 73  | 361 |
| 25,470 | 7  | 16 | 31 | 161 | 4  | 4  | 31 | 84  | 73  | 265 |
| 25,471 | 7  | 18 | 29 | 189 | 4  | 7  | 31 | 110 | 71  | 324 |
| 25,472 | 7  | 27 | 29 | 328 | 4  | 26 | 30 | 192 | 70  | 573 |
| 25,473 | 7  | 28 | 26 | 349 | 3  | 27 | 26 | 208 | 62  | 612 |
| 25,474 | 7  | 28 | 26 | 362 | 3  | 30 | 26 | 224 | 62  | 644 |
| 25,475 | 6  | 27 | 24 | 412 | 3  | 33 | 26 | 241 | 59  | 713 |
| 25,476 | 2  | 29 | 22 | 424 | 3  | 35 | 23 | 258 | 50  | 746 |
| 25,477 | 2  | 30 | 21 | 436 | 3  | 37 | 21 | 265 | 47  | 768 |
| 25,478 | 2  | 30 | 20 | 428 | 3  | 37 | 21 | 267 | 46  | 762 |
| 25,479 | 2  | 32 | 22 | 429 | 3  | 37 | 25 | 268 | 52  | 766 |
| 25,480 | 2  | 32 | 22 | 432 | 3  | 38 | 25 | 268 | 52  | 770 |
| 25,481 | 2  | 33 | 22 | 431 | 3  | 39 | 25 | 268 | 52  | 771 |
| 25,482 | 2  | 33 | 27 | 427 | 3  | 39 | 29 | 271 | 61  | 770 |
| 25,483 | 2  | 33 | 26 | 427 | 3  | 39 | 29 | 270 | 60  | 769 |
| 25,484 | 2  | 32 | 25 | 427 | 3  | 39 | 29 | 268 | 59  | 766 |
| 25,485 | 2  | 32 | 21 | 424 | 2  | 39 | 30 | 267 | 55  | 762 |
| 25,486 | 2  | 32 | 21 | 424 | 2  | 39 | 32 | 266 | 57  | 761 |
| 25,487 | 2  | 32 | 19 | 422 | 2  | 39 | 31 | 267 | 54  | 760 |
| 25,488 | 2  | 32 | 19 | 422 | 2  | 39 | 29 | 267 | 52  | 760 |
| 25,489 | 2  | 32 | 17 | 422 | 1  | 39 | 27 | 267 | 47  | 760 |
| 25,490 | 2  | 32 | 15 | 420 | 1  | 39 | 27 | 267 | 45  | 758 |

|        |   |    |    |     |   |    |    |     |    |     |
|--------|---|----|----|-----|---|----|----|-----|----|-----|
| 25,491 | 2 | 32 | 15 | 421 | 1 | 39 | 26 | 267 | 44 | 759 |
| 25,492 | 2 | 32 | 14 | 422 | 1 | 39 | 24 | 268 | 41 | 761 |
| 25,493 | 2 | 32 | 21 | 427 | 1 | 39 | 31 | 268 | 55 | 766 |
| 25,494 | 2 | 32 | 18 | 433 | 1 | 39 | 27 | 278 | 48 | 782 |
| 25,495 | 2 | 32 | 18 | 437 | 1 | 39 | 25 | 280 | 46 | 788 |
| 25,496 | 2 | 34 | 18 | 447 | 1 | 39 | 27 | 283 | 48 | 803 |
| 25,497 | 2 | 34 | 18 | 448 | 1 | 39 | 25 | 283 | 46 | 804 |
| 25,498 | 2 | 37 | 18 | 462 | 1 | 39 | 25 | 297 | 46 | 835 |
| 25,499 | 2 | 37 | 18 | 458 | 1 | 39 | 25 | 296 | 46 | 830 |
| 25,500 | 2 | 36 | 18 | 444 | 1 | 39 | 25 | 282 | 46 | 801 |
| 25,501 | 1 | 36 | 18 | 444 | 1 | 39 | 25 | 284 | 45 | 803 |
| 25,502 | 1 | 33 | 18 | 417 | 1 | 39 | 27 | 271 | 47 | 760 |
| 25,503 | 1 | 35 | 18 | 405 | 1 | 39 | 27 | 264 | 47 | 743 |
| 25,504 | 1 | 35 | 18 | 407 | 1 | 39 | 27 | 265 | 47 | 746 |
| 25,505 | 1 | 33 | 17 | 411 | 0 | 39 | 27 | 265 | 45 | 748 |
| 25,506 | 1 | 33 | 17 | 424 | 0 | 43 | 27 | 268 | 45 | 768 |
| 25,507 | 1 | 31 | 17 | 414 | 0 | 43 | 27 | 261 | 45 | 749 |
| 25,508 | 1 | 31 | 18 | 420 | 0 | 43 | 27 | 264 | 46 | 758 |
| 25,509 | 2 | 31 | 18 | 414 | 0 | 43 | 27 | 263 | 47 | 751 |
| 25,510 | 2 | 31 | 18 | 414 | 0 | 43 | 27 | 265 | 47 | 753 |
| 25,511 | 2 | 33 | 18 | 417 | 0 | 44 | 27 | 271 | 47 | 765 |
| 25,512 | 2 | 35 | 17 | 442 | 2 | 44 | 27 | 287 | 48 | 808 |
| 25,513 | 3 | 35 | 17 | 444 | 2 | 44 | 27 | 290 | 49 | 813 |
| 25,514 | 3 | 35 | 17 | 454 | 2 | 44 | 27 | 292 | 49 | 825 |
| 25,515 | 3 | 35 | 17 | 455 | 2 | 44 | 26 | 292 | 48 | 826 |
| 25,516 | 3 | 35 | 17 | 455 | 2 | 44 | 26 | 292 | 48 | 826 |
| 25,517 | 3 | 35 | 17 | 456 | 2 | 43 | 26 | 295 | 48 | 829 |
| 25,518 | 3 | 35 | 17 | 456 | 2 | 43 | 25 | 295 | 47 | 829 |
| 25,519 | 3 | 35 | 17 | 460 | 2 | 43 | 25 | 300 | 47 | 838 |
| 25,520 | 3 | 35 | 17 | 460 | 2 | 43 | 25 | 301 | 47 | 839 |
| 25,521 | 3 | 35 | 20 | 460 | 2 | 43 | 25 | 298 | 50 | 836 |
| 25,522 | 3 | 32 | 20 | 417 | 2 | 38 | 25 | 259 | 50 | 746 |
| 25,523 | 3 | 22 | 20 | 260 | 2 | 18 | 25 | 164 | 50 | 464 |
| 25,524 | 3 | 22 | 20 | 240 | 2 | 15 | 25 | 151 | 50 | 428 |
| 25,525 | 3 | 22 | 20 | 242 | 2 | 15 | 25 | 153 | 50 | 432 |
| 25,526 | 3 | 22 | 20 | 189 | 2 | 12 | 25 | 136 | 50 | 359 |
| 25,527 | 3 | 19 | 19 | 172 | 2 | 9  | 25 | 117 | 49 | 317 |
| 25,528 | 4 | 18 | 19 | 166 | 2 | 7  | 26 | 117 | 51 | 308 |
| 25,529 | 4 | 15 | 17 | 164 | 2 | 7  | 25 | 112 | 48 | 298 |
| 25,530 | 4 | 15 | 17 | 160 | 2 | 6  | 22 | 112 | 45 | 293 |
| 25,531 | 4 | 15 | 14 | 161 | 2 | 7  | 21 | 116 | 41 | 299 |

|        |   |    |    |     |   |   |    |     |    |     |
|--------|---|----|----|-----|---|---|----|-----|----|-----|
| 25,532 | 3 | 15 | 13 | 165 | 2 | 6 | 18 | 115 | 36 | 301 |
| 25,533 | 3 | 15 | 17 | 166 | 2 | 6 | 19 | 118 | 41 | 305 |
| 25,534 | 3 | 15 | 18 | 167 | 2 | 6 | 21 | 118 | 44 | 306 |
| 25,535 | 3 | 15 | 19 | 167 | 2 | 6 | 22 | 117 | 46 | 305 |
| 25,536 | 3 | 15 | 23 | 167 | 2 | 6 | 22 | 117 | 50 | 305 |
| 25,537 | 4 | 15 | 23 | 167 | 2 | 6 | 20 | 117 | 49 | 305 |
| 25,538 | 6 | 15 | 26 | 167 | 2 | 6 | 22 | 117 | 56 | 305 |
| 25,539 | 6 | 15 | 28 | 167 | 2 | 6 | 22 | 117 | 58 | 305 |
| 25,540 | 6 | 15 | 34 | 169 | 2 | 6 | 25 | 119 | 67 | 309 |
| 25,541 | 6 | 16 | 36 | 171 | 2 | 6 | 25 | 124 | 69 | 317 |
| 25,542 | 6 | 16 | 37 | 170 | 3 | 6 | 26 | 125 | 72 | 317 |
| 25,543 | 6 | 16 | 36 | 172 | 3 | 6 | 26 | 124 | 71 | 318 |
| 25,544 | 6 | 16 | 29 | 167 | 3 | 6 | 16 | 124 | 54 | 313 |
| 25,545 | 6 | 16 | 30 | 157 | 3 | 6 | 14 | 112 | 53 | 291 |
| 25,546 | 6 | 14 | 30 | 147 | 3 | 6 | 15 | 109 | 54 | 276 |
| 25,547 | 6 | 14 | 30 | 147 | 3 | 6 | 15 | 109 | 54 | 276 |
| 25,548 | 6 | 14 | 30 | 146 | 3 | 6 | 15 | 109 | 54 | 275 |
| 25,549 | 6 | 11 | 30 | 132 | 3 | 6 | 15 | 98  | 54 | 247 |
| 25,550 | 6 | 11 | 30 | 131 | 3 | 6 | 15 | 95  | 54 | 243 |
| 25,551 | 6 | 8  | 31 | 128 | 3 | 6 | 15 | 90  | 55 | 232 |
| 25,552 | 6 | 8  | 31 | 127 | 3 | 6 | 15 | 88  | 55 | 229 |
| 25,553 | 6 | 8  | 31 | 127 | 3 | 6 | 13 | 88  | 53 | 229 |
| 25,554 | 6 | 6  | 33 | 115 | 3 | 6 | 13 | 80  | 55 | 207 |
| 25,555 | 6 | 6  | 33 | 113 | 3 | 6 | 13 | 79  | 55 | 204 |
| 25,556 | 6 | 6  | 34 | 110 | 3 | 6 | 14 | 81  | 57 | 203 |
| 25,557 | 6 | 6  | 34 | 99  | 3 | 2 | 14 | 78  | 57 | 185 |
| 25,558 | 6 | 6  | 33 | 101 | 3 | 2 | 14 | 78  | 56 | 187 |
| 25,559 | 6 | 6  | 33 | 93  | 3 | 2 | 14 | 75  | 56 | 176 |
| 25,560 | 5 | 6  | 33 | 94  | 3 | 2 | 14 | 73  | 55 | 175 |
| 25,561 | 5 | 4  | 33 | 92  | 3 | 1 | 14 | 68  | 55 | 165 |
| 25,562 | 5 | 2  | 33 | 67  | 3 | 1 | 14 | 51  | 55 | 121 |
| 25,563 | 5 | 2  | 33 | 68  | 1 | 1 | 14 | 52  | 53 | 123 |
| 25,564 | 4 | 2  | 33 | 66  | 1 | 1 | 14 | 49  | 52 | 118 |
| 25,565 | 4 | 2  | 33 | 55  | 1 | 1 | 14 | 47  | 52 | 105 |
| 25,566 | 4 | 2  | 33 | 54  | 1 | 2 | 15 | 47  | 53 | 105 |
| 25,567 | 4 | 2  | 33 | 55  | 1 | 2 | 15 | 44  | 53 | 103 |
| 25,568 | 4 | 2  | 33 | 55  | 1 | 2 | 15 | 44  | 53 | 103 |
| 25,569 | 4 | 2  | 33 | 55  | 1 | 2 | 15 | 44  | 53 | 103 |
| 25,570 | 4 | 2  | 31 | 50  | 1 | 2 | 15 | 41  | 51 | 95  |
| 25,571 | 4 | 2  | 30 | 51  | 1 | 2 | 15 | 43  | 50 | 98  |
| 25,572 | 4 | 4  | 30 | 64  | 1 | 3 | 15 | 58  | 50 | 129 |



|        |   |    |    |     |   |    |    |     |    |     |
|--------|---|----|----|-----|---|----|----|-----|----|-----|
| 25,573 | 4 | 4  | 30 | 64  | 1 | 3  | 15 | 58  | 50 | 129 |
| 25,574 | 4 | 4  | 30 | 66  | 1 | 3  | 16 | 58  | 51 | 131 |
| 25,575 | 4 | 6  | 30 | 67  | 1 | 3  | 16 | 58  | 51 | 134 |
| 25,576 | 4 | 6  | 30 | 64  | 1 | 3  | 16 | 56  | 51 | 129 |
| 25,577 | 4 | 6  | 30 | 54  | 1 | 3  | 16 | 51  | 51 | 114 |
| 25,578 | 4 | 7  | 30 | 56  | 1 | 3  | 16 | 51  | 51 | 117 |
| 25,579 | 3 | 7  | 30 | 56  | 1 | 3  | 15 | 52  | 49 | 118 |
| 25,580 | 3 | 7  | 31 | 56  | 1 | 3  | 15 | 52  | 50 | 118 |
| 25,581 | 3 | 7  | 31 | 55  | 1 | 2  | 15 | 48  | 50 | 112 |
| 25,582 | 3 | 6  | 31 | 50  | 1 | 2  | 18 | 46  | 53 | 104 |
| 25,583 | 3 | 6  | 31 | 61  | 1 | 3  | 18 | 50  | 53 | 120 |
| 25,584 | 3 | 6  | 26 | 69  | 1 | 3  | 17 | 53  | 47 | 131 |
| 25,585 | 3 | 7  | 26 | 72  | 1 | 3  | 15 | 53  | 45 | 135 |
| 25,586 | 3 | 20 | 25 | 102 | 1 | 8  | 14 | 85  | 43 | 215 |
| 25,587 | 3 | 20 | 21 | 111 | 1 | 8  | 13 | 92  | 38 | 231 |
| 25,588 | 2 | 21 | 23 | 129 | 1 | 8  | 15 | 102 | 41 | 260 |
| 25,589 | 0 | 25 | 20 | 178 | 1 | 9  | 14 | 124 | 35 | 336 |
| 25,590 | 0 | 26 | 18 | 187 | 1 | 9  | 14 | 127 | 33 | 349 |
| 25,591 | 0 | 27 | 12 | 195 | 1 | 9  | 11 | 127 | 24 | 358 |
| 25,592 | 0 | 31 | 10 | 223 | 1 | 11 | 11 | 133 | 22 | 398 |
| 25,593 | 0 | 31 | 9  | 223 | 0 | 11 | 10 | 132 | 19 | 397 |
| 25,594 | 0 | 34 | 8  | 252 | 0 | 13 | 10 | 136 | 18 | 435 |
| 25,595 | 0 | 34 | 8  | 254 | 0 | 13 | 10 | 139 | 18 | 440 |
| 25,596 | 0 | 34 | 8  | 255 | 0 | 13 | 10 | 139 | 18 | 441 |
| 25,597 | 0 | 34 | 10 | 255 | 0 | 13 | 14 | 139 | 24 | 441 |
| 25,598 | 0 | 34 | 10 | 255 | 0 | 13 | 14 | 139 | 24 | 441 |
| 25,599 | 0 | 34 | 11 | 270 | 0 | 13 | 14 | 142 | 25 | 459 |
| 25,600 | 0 | 34 | 10 | 272 | 0 | 13 | 14 | 139 | 24 | 458 |
| 25,601 | 0 | 34 | 10 | 273 | 0 | 13 | 15 | 139 | 25 | 459 |
| 25,602 | 1 | 34 | 10 | 275 | 0 | 13 | 18 | 139 | 29 | 461 |
| 25,603 | 1 | 34 | 9  | 277 | 0 | 13 | 19 | 140 | 29 | 464 |
| 25,604 | 1 | 34 | 13 | 277 | 0 | 13 | 20 | 141 | 34 | 465 |
| 25,605 | 1 | 36 | 14 | 278 | 0 | 13 | 23 | 139 | 38 | 466 |
| 25,606 | 1 | 36 | 15 | 278 | 1 | 13 | 23 | 139 | 40 | 466 |
| 25,607 | 1 | 38 | 15 | 278 | 1 | 13 | 23 | 139 | 40 | 468 |
| 25,608 | 1 | 38 | 15 | 271 | 1 | 13 | 23 | 139 | 40 | 461 |
| 25,609 | 1 | 38 | 15 | 271 | 1 | 13 | 23 | 140 | 40 | 462 |
| 25,610 | 1 | 38 | 15 | 278 | 1 | 13 | 23 | 143 | 40 | 472 |
| 25,611 | 1 | 39 | 15 | 283 | 1 | 13 | 23 | 143 | 40 | 478 |
| 25,612 | 1 | 40 | 15 | 294 | 1 | 16 | 24 | 151 | 41 | 501 |
| 25,613 | 1 | 42 | 15 | 295 | 1 | 16 | 24 | 153 | 41 | 506 |

|        |   |    |    |     |   |    |    |     |    |     |
|--------|---|----|----|-----|---|----|----|-----|----|-----|
| 25,614 | 1 | 42 | 15 | 294 | 1 | 16 | 24 | 153 | 41 | 505 |
| 25,615 | 1 | 45 | 15 | 301 | 1 | 17 | 24 | 161 | 41 | 524 |
| 25,616 | 1 | 45 | 15 | 303 | 1 | 17 | 23 | 163 | 40 | 528 |
| 25,617 | 1 | 48 | 15 | 317 | 1 | 18 | 23 | 178 | 40 | 561 |
| 25,618 | 1 | 48 | 15 | 317 | 1 | 18 | 23 | 178 | 40 | 561 |
| 25,619 | 1 | 48 | 16 | 320 | 1 | 18 | 23 | 179 | 41 | 565 |
| 25,620 | 1 | 49 | 16 | 320 | 1 | 18 | 23 | 179 | 41 | 566 |
| 25,621 | 1 | 49 | 16 | 320 | 1 | 18 | 24 | 176 | 42 | 563 |
| 25,622 | 1 | 47 | 16 | 317 | 1 | 17 | 24 | 160 | 42 | 541 |
| 25,623 | 1 | 47 | 16 | 317 | 1 | 17 | 24 | 160 | 42 | 541 |
| 25,624 | 1 | 47 | 16 | 318 | 1 | 17 | 23 | 161 | 41 | 543 |
| 25,625 | 1 | 46 | 16 | 310 | 1 | 17 | 23 | 159 | 41 | 532 |
| 25,626 | 1 | 46 | 16 | 310 | 1 | 17 | 23 | 159 | 41 | 532 |
| 25,627 | 1 | 46 | 16 | 310 | 1 | 17 | 23 | 158 | 41 | 531 |
| 25,628 | 1 | 45 | 16 | 308 | 1 | 17 | 23 | 158 | 41 | 528 |
| 25,629 | 1 | 45 | 16 | 307 | 1 | 17 | 23 | 157 | 41 | 526 |
| 25,630 | 1 | 45 | 16 | 307 | 1 | 17 | 23 | 157 | 41 | 526 |
| 25,631 | 1 | 45 | 15 | 307 | 1 | 17 | 23 | 157 | 40 | 526 |
| 25,632 | 1 | 45 | 15 | 308 | 1 | 17 | 23 | 158 | 40 | 528 |
| 25,633 | 1 | 45 | 15 | 308 | 1 | 17 | 20 | 159 | 37 | 529 |
| 25,634 | 1 | 45 | 15 | 303 | 1 | 17 | 20 | 169 | 37 | 534 |
| 25,635 | 1 | 45 | 15 | 296 | 1 | 17 | 20 | 166 | 37 | 524 |
| 25,636 | 1 | 31 | 15 | 265 | 1 | 12 | 21 | 136 | 38 | 444 |
| 25,637 | 1 | 31 | 15 | 288 | 1 | 14 | 21 | 156 | 38 | 489 |
| 25,638 | 1 | 31 | 13 | 283 | 1 | 14 | 19 | 148 | 34 | 476 |
| 25,639 | 1 | 30 | 16 | 268 | 1 | 14 | 19 | 140 | 37 | 452 |
| 25,640 | 1 | 25 | 16 | 212 | 1 | 13 | 18 | 116 | 36 | 366 |
| 25,641 | 1 | 24 | 16 | 202 | 1 | 13 | 18 | 115 | 36 | 354 |
| 25,642 | 1 | 24 | 18 | 202 | 1 | 13 | 18 | 115 | 38 | 354 |
| 25,643 | 1 | 19 | 19 | 172 | 1 | 11 | 19 | 104 | 40 | 306 |
| 25,644 | 1 | 19 | 19 | 172 | 1 | 11 | 19 | 104 | 40 | 306 |
| 25,645 | 2 | 16 | 25 | 140 | 2 | 9  | 24 | 100 | 53 | 265 |
| 25,646 | 2 | 16 | 26 | 137 | 2 | 9  | 25 | 98  | 55 | 260 |
| 25,647 | 2 | 17 | 26 | 140 | 2 | 9  | 25 | 98  | 55 | 264 |
| 25,648 | 2 | 17 | 24 | 140 | 2 | 9  | 20 | 101 | 48 | 267 |
| 25,649 | 2 | 18 | 24 | 142 | 2 | 10 | 21 | 130 | 49 | 300 |
| 25,650 | 2 | 30 | 24 | 252 | 2 | 24 | 21 | 247 | 49 | 553 |
| 25,651 | 2 | 32 | 25 | 275 | 2 | 26 | 20 | 273 | 49 | 606 |
| 25,652 | 1 | 35 | 25 | 293 | 2 | 27 | 18 | 288 | 46 | 643 |
| 25,653 | 1 | 36 | 25 | 304 | 2 | 26 | 17 | 289 | 45 | 655 |
| 25,654 | 1 | 54 | 24 | 391 | 2 | 33 | 16 | 347 | 43 | 825 |

|        |   |    |    |     |   |    |    |     |    |       |
|--------|---|----|----|-----|---|----|----|-----|----|-------|
| 25,655 | 1 | 54 | 19 | 395 | 2 | 33 | 14 | 349 | 36 | 831   |
| 25,656 | 2 | 52 | 20 | 393 | 2 | 33 | 11 | 348 | 35 | 826   |
| 25,657 | 2 | 52 | 19 | 392 | 1 | 33 | 11 | 349 | 33 | 826   |
| 25,658 | 2 | 50 | 19 | 392 | 1 | 33 | 11 | 349 | 33 | 824   |
| 25,659 | 2 | 49 | 19 | 373 | 1 | 31 | 11 | 337 | 33 | 790   |
| 25,660 | 2 | 49 | 19 | 375 | 1 | 31 | 11 | 338 | 33 | 793   |
| 25,661 | 2 | 49 | 19 | 376 | 1 | 31 | 11 | 338 | 33 | 794   |
| 25,662 | 2 | 49 | 19 | 376 | 1 | 31 | 11 | 338 | 33 | 794   |
| 25,663 | 2 | 47 | 19 | 374 | 1 | 31 | 10 | 336 | 32 | 788   |
| 25,664 | 2 | 47 | 19 | 378 | 1 | 31 | 10 | 338 | 32 | 794   |
| 25,665 | 2 | 49 | 19 | 380 | 1 | 31 | 10 | 345 | 32 | 805   |
| 25,666 | 2 | 46 | 19 | 373 | 1 | 30 | 10 | 337 | 32 | 786   |
| 25,667 | 2 | 46 | 19 | 372 | 1 | 30 | 10 | 337 | 32 | 785   |
| 25,668 | 2 | 43 | 18 | 355 | 1 | 28 | 11 | 321 | 32 | 747   |
| 25,669 | 2 | 43 | 18 | 358 | 1 | 28 | 11 | 321 | 32 | 750   |
| 25,670 | 2 | 47 | 18 | 368 | 1 | 29 | 11 | 331 | 32 | 775   |
| 25,671 | 2 | 46 | 18 | 370 | 1 | 29 | 10 | 333 | 31 | 778   |
| 25,672 | 2 | 46 | 18 | 360 | 1 | 30 | 11 | 334 | 32 | 770   |
| 25,673 | 2 | 46 | 18 | 360 | 1 | 30 | 11 | 334 | 32 | 770   |
| 25,674 | 2 | 48 | 18 | 365 | 1 | 30 | 11 | 336 | 32 | 779   |
| 25,675 | 2 | 48 | 18 | 366 | 1 | 31 | 11 | 335 | 32 | 780   |
| 25,676 | 2 | 47 | 21 | 367 | 1 | 31 | 13 | 335 | 37 | 780   |
| 25,677 | 2 | 47 | 21 | 367 | 1 | 31 | 14 | 335 | 38 | 780   |
| 25,678 | 2 | 47 | 21 | 369 | 1 | 31 | 14 | 337 | 38 | 784   |
| 25,679 | 2 | 47 | 21 | 370 | 1 | 31 | 14 | 337 | 38 | 785   |
| 25,680 | 2 | 47 | 22 | 370 | 1 | 31 | 15 | 337 | 40 | 785   |
| 25,681 | 2 | 47 | 22 | 370 | 1 | 31 | 15 | 337 | 40 | 785   |
| 25,682 | 2 | 47 | 23 | 369 | 1 | 31 | 15 | 336 | 41 | 783   |
| 25,683 | 2 | 47 | 24 | 371 | 1 | 31 | 17 | 335 | 44 | 784   |
| 25,684 | 2 | 47 | 24 | 365 | 1 | 30 | 17 | 321 | 44 | 763   |
| 25,685 | 2 | 47 | 24 | 365 | 1 | 30 | 17 | 321 | 44 | 763   |
| 25,686 | 2 | 47 | 27 | 360 | 2 | 30 | 21 | 315 | 52 | 752   |
| 25,687 | 2 | 47 | 27 | 338 | 2 | 28 | 24 | 295 | 55 | 708   |
| 25,688 | 2 | 47 | 26 | 334 | 2 | 28 | 24 | 295 | 54 | 704   |
| 25,689 | 2 | 47 | 26 | 339 | 2 | 29 | 24 | 301 | 54 | 716   |
| 25,690 | 2 | 58 | 24 | 411 | 2 | 44 | 24 | 400 | 52 | 913   |
| 25,691 | 2 | 58 | 24 | 450 | 2 | 49 | 24 | 427 | 52 | 984   |
| 25,692 | 2 | 65 | 29 | 543 | 2 | 54 | 27 | 485 | 60 | 1,147 |
| 25,693 | 3 | 67 | 32 | 564 | 2 | 55 | 30 | 489 | 67 | 1,175 |
| 25,694 | 3 | 68 | 32 | 598 | 2 | 55 | 29 | 494 | 66 | 1,215 |
| 25,695 | 2 | 80 | 26 | 660 | 1 | 65 | 24 | 562 | 53 | 1,367 |

|        |   |     |    |     |   |    |    |     |    |       |
|--------|---|-----|----|-----|---|----|----|-----|----|-------|
| 25,696 | 2 | 82  | 26 | 677 | 1 | 67 | 23 | 591 | 52 | 1,417 |
| 25,697 | 2 | 105 | 25 | 780 | 1 | 81 | 23 | 681 | 51 | 1,647 |
| 25,698 | 2 | 106 | 26 | 817 | 1 | 83 | 24 | 712 | 53 | 1,718 |
| 25,699 | 2 | 144 | 26 | 969 | 1 | 91 | 23 | 773 | 52 | 1,977 |
| 25,700 | 2 | 144 | 26 | 990 | 1 | 92 | 23 | 803 | 52 | 2,029 |
| 25,701 | 2 | 136 | 25 | 885 | 1 | 78 | 23 | 670 | 51 | 1,769 |
| 25,702 | 2 | 134 | 25 | 867 | 1 | 77 | 23 | 657 | 51 | 1,735 |
| 25,703 | 2 | 133 | 26 | 857 | 1 | 77 | 23 | 655 | 52 | 1,722 |
| 25,704 | 2 | 137 | 27 | 877 | 1 | 77 | 23 | 660 | 53 | 1,751 |
| 25,705 | 1 | 119 | 28 | 794 | 1 | 70 | 26 | 598 | 56 | 1,581 |
| 25,706 | 1 | 119 | 28 | 792 | 1 | 71 | 26 | 597 | 56 | 1,579 |
| 25,707 | 1 | 119 | 29 | 794 | 1 | 71 | 26 | 597 | 57 | 1,581 |
| 25,708 | 1 | 119 | 29 | 796 | 1 | 71 | 27 | 597 | 58 | 1,583 |
| 25,709 | 1 | 118 | 29 | 793 | 1 | 71 | 27 | 596 | 58 | 1,578 |
| 25,710 | 1 | 118 | 30 | 791 | 1 | 71 | 27 | 595 | 59 | 1,575 |
| 25,711 | 1 | 118 | 31 | 791 | 1 | 71 | 27 | 595 | 60 | 1,575 |
| 25,712 | 1 | 118 | 31 | 792 | 1 | 71 | 27 | 595 | 60 | 1,576 |
| 25,713 | 1 | 118 | 35 | 793 | 1 | 71 | 31 | 594 | 68 | 1,576 |
| 25,714 | 1 | 118 | 35 | 793 | 1 | 71 | 31 | 594 | 68 | 1,576 |
| 25,715 | 1 | 118 | 38 | 790 | 1 | 71 | 31 | 592 | 71 | 1,571 |
| 25,716 | 1 | 116 | 38 | 789 | 1 | 71 | 31 | 585 | 71 | 1,561 |
| 25,717 | 1 | 116 | 38 | 789 | 1 | 71 | 31 | 586 | 71 | 1,562 |
| 25,718 | 1 | 116 | 38 | 796 | 1 | 72 | 31 | 590 | 71 | 1,574 |
| 25,719 | 1 | 116 | 38 | 797 | 1 | 72 | 30 | 590 | 70 | 1,575 |
| 25,720 | 1 | 116 | 38 | 796 | 1 | 72 | 30 | 591 | 70 | 1,575 |
| 25,721 | 1 | 112 | 38 | 784 | 1 | 71 | 30 | 580 | 70 | 1,547 |
| 25,722 | 1 | 112 | 38 | 784 | 1 | 71 | 29 | 579 | 69 | 1,546 |
| 25,723 | 1 | 112 | 37 | 786 | 1 | 70 | 27 | 578 | 66 | 1,546 |
| 25,724 | 1 | 112 | 36 | 788 | 1 | 70 | 27 | 581 | 65 | 1,551 |
| 25,725 | 1 | 110 | 36 | 788 | 1 | 70 | 27 | 582 | 65 | 1,550 |
| 25,726 | 1 | 111 | 35 | 789 | 1 | 69 | 27 | 584 | 64 | 1,553 |
| 25,727 | 1 | 111 | 35 | 789 | 1 | 69 | 26 | 583 | 63 | 1,552 |
| 25,728 | 1 | 111 | 35 | 787 | 1 | 69 | 26 | 581 | 63 | 1,548 |
| 25,729 | 1 | 111 | 35 | 786 | 1 | 69 | 26 | 581 | 63 | 1,547 |
| 25,730 | 1 | 111 | 35 | 786 | 1 | 69 | 26 | 581 | 63 | 1,547 |
| 25,731 | 1 | 113 | 35 | 786 | 1 | 69 | 26 | 581 | 63 | 1,549 |
| 25,732 | 1 | 113 | 35 | 786 | 1 | 69 | 26 | 581 | 63 | 1,549 |
| 25,733 | 1 | 113 | 34 | 786 | 1 | 69 | 26 | 584 | 62 | 1,552 |
| 25,734 | 1 | 113 | 35 | 784 | 1 | 69 | 24 | 584 | 61 | 1,550 |
| 25,735 | 1 | 113 | 36 | 784 | 1 | 69 | 28 | 584 | 66 | 1,550 |
| 25,736 | 1 | 113 | 33 | 789 | 0 | 69 | 26 | 589 | 60 | 1,560 |

|        |   |     |    |     |   |    |    |     |    |       |
|--------|---|-----|----|-----|---|----|----|-----|----|-------|
| 25,737 | 1 | 113 | 33 | 791 | 0 | 69 | 25 | 590 | 59 | 1,563 |
| 25,738 | 1 | 113 | 32 | 797 | 0 | 69 | 22 | 592 | 55 | 1,571 |
| 25,739 | 1 | 113 | 34 | 792 | 0 | 68 | 23 | 586 | 58 | 1,559 |
| 25,740 | 1 | 113 | 34 | 792 | 0 | 68 | 23 | 587 | 58 | 1,560 |
| 25,741 | 1 | 103 | 31 | 717 | 0 | 52 | 22 | 486 | 54 | 1,358 |
| 25,742 | 1 | 96  | 31 | 583 | 0 | 43 | 21 | 405 | 53 | 1,127 |
| 25,743 | 1 | 94  | 30 | 563 | 0 | 42 | 21 | 402 | 52 | 1,101 |
| 25,744 | 0 | 94  | 25 | 575 | 0 | 42 | 18 | 408 | 43 | 1,119 |
| 25,745 | 0 | 94  | 24 | 543 | 0 | 42 | 18 | 409 | 42 | 1,088 |
| 25,746 | 0 | 80  | 24 | 465 | 1 | 30 | 18 | 310 | 43 | 885   |
| 25,747 | 0 | 57  | 24 | 362 | 1 | 16 | 18 | 220 | 43 | 655   |
| 25,748 | 0 | 57  | 24 | 362 | 1 | 16 | 18 | 220 | 43 | 655   |
| 25,749 | 0 | 16  | 23 | 151 | 1 | 5  | 17 | 94  | 41 | 266   |
| 25,750 | 0 | 16  | 23 | 153 | 1 | 5  | 17 | 99  | 41 | 273   |
| 25,751 | 0 | 18  | 23 | 161 | 1 | 8  | 17 | 90  | 41 | 277   |
| 25,752 | 0 | 16  | 23 | 158 | 1 | 9  | 17 | 140 | 41 | 323   |
| 25,753 | 0 | 15  | 23 | 163 | 1 | 9  | 17 | 145 | 41 | 332   |
| 25,754 | 0 | 12  | 22 | 140 | 2 | 9  | 19 | 140 | 43 | 301   |
| 25,755 | 0 | 13  | 21 | 148 | 2 | 9  | 19 | 150 | 42 | 320   |
| 25,756 | 0 | 13  | 18 | 143 | 2 | 10 | 16 | 154 | 36 | 320   |
| 25,757 | 0 | 13  | 18 | 149 | 2 | 9  | 16 | 155 | 36 | 326   |
| 25,758 | 0 | 14  | 18 | 149 | 2 | 9  | 19 | 156 | 39 | 328   |
| 25,759 | 0 | 14  | 18 | 149 | 2 | 9  | 18 | 162 | 38 | 334   |
| 25,760 | 0 | 23  | 22 | 262 | 2 | 17 | 20 | 242 | 44 | 544   |
| 25,761 | 0 | 28  | 21 | 352 | 2 | 20 | 20 | 304 | 43 | 704   |
| 25,762 | 0 | 28  | 20 | 358 | 2 | 20 | 20 | 309 | 42 | 715   |
| 25,763 | 0 | 28  | 19 | 364 | 3 | 24 | 17 | 317 | 39 | 733   |
| 25,764 | 0 | 34  | 17 | 380 | 3 | 25 | 16 | 320 | 36 | 759   |
| 25,765 | 0 | 35  | 17 | 382 | 3 | 25 | 21 | 323 | 41 | 765   |
| 25,766 | 0 | 36  | 16 | 387 | 3 | 25 | 21 | 328 | 40 | 776   |
| 25,767 | 0 | 36  | 16 | 389 | 3 | 25 | 21 | 328 | 40 | 778   |
| 25,768 | 0 | 36  | 16 | 389 | 3 | 25 | 22 | 329 | 41 | 779   |
| 25,769 | 1 | 36  | 16 | 376 | 3 | 24 | 22 | 322 | 42 | 758   |
| 25,770 | 1 | 36  | 16 | 377 | 3 | 24 | 22 | 322 | 42 | 759   |
| 25,771 | 1 | 36  | 16 | 378 | 3 | 25 | 22 | 321 | 42 | 760   |
| 25,772 | 1 | 36  | 16 | 379 | 3 | 25 | 22 | 321 | 42 | 761   |
| 25,773 | 1 | 36  | 16 | 381 | 3 | 25 | 22 | 324 | 42 | 766   |
| 25,774 | 1 | 36  | 16 | 379 | 3 | 25 | 22 | 324 | 42 | 764   |
| 25,775 | 1 | 36  | 16 | 377 | 3 | 25 | 22 | 323 | 42 | 761   |
| 25,776 | 1 | 33  | 16 | 368 | 3 | 25 | 22 | 316 | 42 | 742   |
| 25,777 | 1 | 33  | 16 | 368 | 3 | 25 | 22 | 318 | 42 | 744   |

|        |    |    |    |     |    |    |    |     |     |       |
|--------|----|----|----|-----|----|----|----|-----|-----|-------|
| 25,778 | 1  | 33 | 16 | 370 | 3  | 25 | 22 | 318 | 42  | 746   |
| 25,779 | 1  | 33 | 16 | 371 | 3  | 25 | 22 | 318 | 42  | 747   |
| 25,780 | 1  | 33 | 16 | 379 | 3  | 25 | 22 | 321 | 42  | 758   |
| 25,781 | 1  | 33 | 16 | 381 | 3  | 25 | 22 | 321 | 42  | 760   |
| 25,782 | 2  | 33 | 15 | 381 | 3  | 25 | 21 | 321 | 41  | 760   |
| 25,783 | 2  | 33 | 15 | 383 | 3  | 25 | 21 | 325 | 41  | 766   |
| 25,784 | 2  | 33 | 13 | 394 | 3  | 25 | 21 | 329 | 39  | 781   |
| 25,785 | 2  | 34 | 12 | 396 | 3  | 25 | 17 | 334 | 34  | 789   |
| 25,786 | 2  | 35 | 13 | 408 | 3  | 25 | 17 | 356 | 35  | 824   |
| 25,787 | 2  | 40 | 13 | 429 | 3  | 29 | 16 | 385 | 34  | 883   |
| 25,788 | 2  | 43 | 13 | 470 | 3  | 31 | 16 | 429 | 34  | 973   |
| 25,789 | 2  | 45 | 13 | 466 | 3  | 32 | 15 | 429 | 33  | 972   |
| 25,790 | 2  | 45 | 10 | 466 | 3  | 32 | 14 | 432 | 29  | 975   |
| 25,791 | 2  | 45 | 10 | 472 | 3  | 32 | 15 | 432 | 30  | 981   |
| 25,792 | 2  | 48 | 11 | 523 | 3  | 34 | 14 | 466 | 30  | 1,071 |
| 25,793 | 2  | 48 | 11 | 525 | 3  | 34 | 14 | 463 | 30  | 1,070 |
| 25,794 | 2  | 49 | 13 | 528 | 3  | 34 | 14 | 462 | 32  | 1,073 |
| 25,795 | 2  | 51 | 13 | 521 | 3  | 34 | 14 | 459 | 32  | 1,065 |
| 25,796 | 2  | 50 | 13 | 521 | 3  | 34 | 14 | 454 | 32  | 1,059 |
| 25,797 | 8  | 50 | 21 | 521 | 7  | 34 | 34 | 456 | 70  | 1,061 |
| 25,798 | 8  | 50 | 21 | 522 | 7  | 35 | 34 | 456 | 70  | 1,063 |
| 25,799 | 10 | 52 | 22 | 527 | 8  | 35 | 38 | 458 | 78  | 1,072 |
| 25,800 | 10 | 52 | 22 | 526 | 8  | 35 | 38 | 457 | 78  | 1,070 |
| 25,801 | 11 | 50 | 26 | 495 | 11 | 31 | 52 | 433 | 100 | 1,009 |
| 25,802 | 11 | 46 | 26 | 471 | 12 | 28 | 55 | 374 | 104 | 919   |
| 25,803 | 11 | 46 | 29 | 468 | 12 | 28 | 66 | 366 | 118 | 908   |
| 25,804 | 11 | 46 | 29 | 468 | 14 | 28 | 72 | 366 | 126 | 908   |
| 25,805 | 11 | 44 | 30 | 463 | 14 | 28 | 78 | 356 | 133 | 891   |
| 25,806 | 11 | 44 | 30 | 463 | 14 | 28 | 79 | 356 | 134 | 891   |
| 25,807 | 11 | 44 | 30 | 451 | 14 | 27 | 79 | 351 | 134 | 873   |
| 25,808 | 11 | 43 | 30 | 449 | 14 | 27 | 76 | 350 | 131 | 869   |
| 25,809 | 11 | 43 | 29 | 448 | 14 | 27 | 78 | 343 | 132 | 861   |
| 25,810 | 11 | 47 | 26 | 465 | 14 | 29 | 78 | 351 | 129 | 892   |
| 25,811 | 11 | 38 | 25 | 356 | 14 | 21 | 76 | 272 | 126 | 687   |
| 25,812 | 11 | 33 | 25 | 267 | 14 | 18 | 77 | 210 | 127 | 528   |
| 25,813 | 11 | 33 | 25 | 260 | 14 | 18 | 77 | 205 | 127 | 516   |
| 25,814 | 11 | 26 | 24 | 233 | 13 | 13 | 77 | 192 | 125 | 464   |
| 25,815 | 11 | 26 | 24 | 237 | 13 | 13 | 77 | 194 | 125 | 470   |
| 25,816 | 11 | 26 | 22 | 237 | 13 | 13 | 72 | 194 | 118 | 470   |
| 25,817 | 11 | 26 | 22 | 243 | 13 | 14 | 72 | 199 | 118 | 482   |
| 25,818 | 12 | 26 | 23 | 243 | 13 | 14 | 72 | 199 | 120 | 482   |

|        |    |    |    |     |    |    |     |     |     |     |
|--------|----|----|----|-----|----|----|-----|-----|-----|-----|
| 25,819 | 12 | 29 | 23 | 277 | 13 | 19 | 71  | 237 | 119 | 562 |
| 25,820 | 11 | 29 | 23 | 277 | 13 | 19 | 71  | 237 | 118 | 562 |
| 25,821 | 11 | 29 | 23 | 281 | 13 | 19 | 71  | 237 | 118 | 566 |
| 25,822 | 11 | 36 | 23 | 362 | 13 | 19 | 72  | 268 | 119 | 685 |
| 25,823 | 11 | 37 | 23 | 372 | 13 | 21 | 72  | 279 | 119 | 709 |
| 25,824 | 11 | 38 | 23 | 373 | 13 | 21 | 73  | 276 | 120 | 708 |
| 25,825 | 11 | 38 | 23 | 373 | 13 | 21 | 73  | 277 | 120 | 709 |
| 25,826 | 11 | 38 | 24 | 374 | 13 | 21 | 76  | 277 | 124 | 710 |
| 25,827 | 11 | 38 | 27 | 374 | 13 | 21 | 77  | 277 | 128 | 710 |
| 25,828 | 11 | 38 | 27 | 373 | 14 | 21 | 78  | 275 | 130 | 707 |
| 25,829 | 12 | 38 | 30 | 372 | 14 | 21 | 84  | 276 | 140 | 707 |
| 25,830 | 12 | 38 | 30 | 372 | 14 | 21 | 84  | 276 | 140 | 707 |
| 25,831 | 12 | 38 | 32 | 364 | 14 | 21 | 87  | 274 | 145 | 697 |
| 25,832 | 12 | 38 | 33 | 363 | 14 | 21 | 94  | 274 | 153 | 696 |
| 25,833 | 11 | 38 | 33 | 363 | 14 | 21 | 94  | 275 | 152 | 697 |
| 25,834 | 11 | 38 | 33 | 361 | 14 | 21 | 94  | 271 | 152 | 691 |
| 25,835 | 11 | 38 | 37 | 350 | 16 | 21 | 111 | 264 | 175 | 673 |
| 25,836 | 11 | 37 | 37 | 348 | 16 | 21 | 111 | 259 | 175 | 665 |
| 25,837 | 11 | 36 | 37 | 337 | 16 | 21 | 114 | 237 | 178 | 631 |
| 25,838 | 11 | 28 | 38 | 270 | 16 | 16 | 114 | 158 | 179 | 472 |
| 25,839 | 11 | 26 | 38 | 270 | 16 | 15 | 114 | 155 | 179 | 466 |
| 25,840 | 11 | 26 | 38 | 275 | 16 | 15 | 114 | 156 | 179 | 472 |
| 25,841 | 11 | 26 | 38 | 280 | 16 | 15 | 114 | 156 | 179 | 477 |
| 25,842 | 11 | 26 | 38 | 279 | 16 | 15 | 113 | 159 | 178 | 479 |
| 25,843 | 11 | 23 | 37 | 230 | 16 | 13 | 113 | 127 | 177 | 393 |
| 25,844 | 11 | 24 | 36 | 228 | 16 | 13 | 113 | 126 | 176 | 391 |
| 25,845 | 11 | 21 | 35 | 218 | 16 | 13 | 111 | 123 | 173 | 375 |
| 25,846 | 11 | 21 | 34 | 219 | 16 | 13 | 108 | 124 | 169 | 377 |
| 25,847 | 5  | 21 | 32 | 215 | 11 | 13 | 97  | 122 | 145 | 371 |
| 25,848 | 5  | 21 | 28 | 214 | 11 | 12 | 93  | 122 | 137 | 369 |
| 25,849 | 5  | 21 | 27 | 214 | 11 | 12 | 94  | 122 | 137 | 369 |
| 25,850 | 3  | 19 | 27 | 209 | 10 | 12 | 90  | 120 | 130 | 360 |
| 25,851 | 2  | 20 | 25 | 211 | 7  | 12 | 81  | 127 | 115 | 370 |
| 25,852 | 2  | 20 | 25 | 211 | 7  | 12 | 79  | 127 | 113 | 370 |
| 25,853 | 2  | 20 | 30 | 212 | 6  | 12 | 85  | 127 | 123 | 371 |
| 25,854 | 3  | 20 | 27 | 212 | 6  | 12 | 74  | 127 | 110 | 371 |
| 25,855 | 4  | 20 | 29 | 209 | 4  | 12 | 69  | 127 | 106 | 368 |
| 25,856 | 4  | 21 | 28 | 209 | 3  | 12 | 61  | 127 | 96  | 369 |
| 25,857 | 4  | 21 | 28 | 209 | 3  | 12 | 60  | 127 | 95  | 369 |
| 25,858 | 4  | 21 | 28 | 211 | 3  | 12 | 60  | 127 | 95  | 371 |
| 25,859 | 4  | 21 | 28 | 212 | 3  | 12 | 60  | 127 | 95  | 372 |

|        |   |    |    |     |   |    |    |     |     |     |
|--------|---|----|----|-----|---|----|----|-----|-----|-----|
| 25,860 | 4 | 17 | 28 | 194 | 3 | 10 | 58 | 119 | 93  | 340 |
| 25,861 | 4 | 17 | 28 | 190 | 3 | 10 | 58 | 118 | 93  | 335 |
| 25,862 | 4 | 17 | 29 | 189 | 3 | 10 | 57 | 118 | 93  | 334 |
| 25,863 | 4 | 17 | 29 | 189 | 3 | 10 | 57 | 117 | 93  | 333 |
| 25,864 | 4 | 17 | 29 | 189 | 3 | 10 | 58 | 117 | 94  | 333 |
| 25,865 | 4 | 17 | 29 | 189 | 3 | 10 | 58 | 117 | 94  | 333 |
| 25,866 | 4 | 17 | 29 | 185 | 3 | 10 | 58 | 115 | 94  | 327 |
| 25,867 | 4 | 17 | 29 | 185 | 3 | 10 | 58 | 115 | 94  | 327 |
| 25,868 | 4 | 16 | 30 | 173 | 3 | 9  | 58 | 105 | 95  | 303 |
| 25,869 | 3 | 13 | 31 | 137 | 4 | 4  | 62 | 65  | 100 | 219 |
| 25,870 | 3 | 13 | 32 | 137 | 4 | 4  | 64 | 65  | 103 | 219 |
| 25,871 | 3 | 13 | 32 | 132 | 4 | 4  | 64 | 65  | 103 | 214 |
| 25,872 | 3 | 6  | 32 | 51  | 4 | 3  | 64 | 34  | 103 | 94  |
| 25,873 | 3 | 6  | 32 | 50  | 4 | 3  | 63 | 34  | 102 | 93  |
| 25,874 | 3 | 5  | 32 | 41  | 4 | 1  | 62 | 23  | 101 | 70  |
| 25,875 | 3 | 4  | 32 | 40  | 4 | 1  | 62 | 24  | 101 | 69  |
| 25,876 | 4 | 4  | 32 | 40  | 4 | 1  | 62 | 23  | 102 | 68  |
| 25,877 | 4 | 4  | 32 | 39  | 4 | 1  | 60 | 24  | 100 | 68  |
| 25,878 | 4 | 4  | 29 | 38  | 4 | 1  | 59 | 23  | 96  | 66  |
| 25,879 | 4 | 4  | 29 | 38  | 3 | 1  | 58 | 23  | 94  | 66  |
| 25,880 | 3 | 4  | 26 | 38  | 3 | 1  | 52 | 23  | 84  | 66  |
| 25,881 | 3 | 4  | 24 | 39  | 3 | 2  | 49 | 29  | 79  | 74  |
| 25,882 | 3 | 4  | 25 | 40  | 3 | 3  | 49 | 32  | 80  | 79  |
| 25,883 | 3 | 4  | 24 | 41  | 3 | 3  | 42 | 32  | 72  | 80  |
| 25,884 | 3 | 4  | 22 | 42  | 3 | 3  | 37 | 34  | 65  | 83  |
| 25,885 | 3 | 10 | 20 | 56  | 1 | 6  | 25 | 43  | 49  | 115 |
| 25,886 | 3 | 10 | 20 | 63  | 1 | 7  | 25 | 47  | 49  | 127 |
| 25,887 | 3 | 10 | 21 | 65  | 1 | 7  | 26 | 50  | 51  | 132 |
| 25,888 | 5 | 10 | 33 | 66  | 3 | 7  | 29 | 50  | 70  | 133 |
| 25,889 | 5 | 10 | 36 | 66  | 5 | 6  | 33 | 50  | 79  | 132 |
| 25,890 | 5 | 13 | 36 | 82  | 5 | 6  | 33 | 72  | 79  | 173 |
| 25,891 | 5 | 13 | 36 | 80  | 5 | 6  | 33 | 73  | 79  | 172 |
| 25,892 | 5 | 13 | 36 | 77  | 5 | 6  | 33 | 70  | 79  | 166 |
| 25,893 | 5 | 13 | 36 | 72  | 5 | 6  | 34 | 66  | 80  | 157 |
| 25,894 | 7 | 12 | 39 | 71  | 5 | 7  | 34 | 65  | 85  | 155 |
| 25,895 | 7 | 11 | 38 | 73  | 5 | 7  | 34 | 66  | 84  | 157 |
| 25,896 | 7 | 11 | 38 | 74  | 5 | 7  | 34 | 66  | 84  | 158 |
| 25,897 | 7 | 11 | 38 | 75  | 5 | 7  | 35 | 68  | 85  | 161 |
| 25,898 | 7 | 11 | 38 | 77  | 5 | 8  | 35 | 74  | 85  | 170 |
| 25,899 | 7 | 11 | 38 | 79  | 5 | 9  | 35 | 76  | 85  | 175 |
| 25,900 | 7 | 11 | 38 | 81  | 5 | 12 | 34 | 81  | 84  | 185 |



|        |   |    |    |     |   |    |    |     |    |     |
|--------|---|----|----|-----|---|----|----|-----|----|-----|
| 25,901 | 7 | 11 | 38 | 87  | 5 | 12 | 34 | 91  | 84 | 201 |
| 25,902 | 7 | 13 | 36 | 103 | 5 | 12 | 31 | 102 | 79 | 230 |
| 25,903 | 7 | 15 | 32 | 103 | 5 | 12 | 22 | 102 | 66 | 232 |
| 25,904 | 7 | 15 | 31 | 102 | 5 | 12 | 22 | 103 | 65 | 232 |
| 25,905 | 6 | 15 | 31 | 102 | 5 | 12 | 22 | 103 | 64 | 232 |
| 25,906 | 5 | 15 | 28 | 103 | 5 | 12 | 21 | 103 | 59 | 233 |
| 25,907 | 5 | 14 | 28 | 104 | 5 | 12 | 21 | 103 | 59 | 233 |
| 25,908 | 5 | 22 | 28 | 115 | 5 | 12 | 21 | 120 | 59 | 269 |
| 25,909 | 5 | 22 | 28 | 116 | 5 | 12 | 21 | 121 | 59 | 271 |
| 25,910 | 5 | 22 | 28 | 118 | 5 | 12 | 21 | 125 | 59 | 277 |
| 25,911 | 6 | 22 | 30 | 118 | 5 | 12 | 21 | 125 | 62 | 277 |
| 25,912 | 6 | 22 | 33 | 118 | 5 | 12 | 23 | 125 | 67 | 277 |
| 25,913 | 7 | 22 | 33 | 121 | 5 | 12 | 23 | 128 | 68 | 283 |
| 25,914 | 7 | 22 | 33 | 122 | 5 | 12 | 23 | 128 | 68 | 284 |
| 25,915 | 7 | 22 | 34 | 122 | 5 | 12 | 23 | 128 | 69 | 284 |
| 25,916 | 7 | 22 | 35 | 123 | 5 | 12 | 27 | 128 | 74 | 285 |
| 25,917 | 7 | 22 | 38 | 123 | 5 | 12 | 30 | 130 | 80 | 287 |
| 25,918 | 7 | 22 | 37 | 123 | 5 | 12 | 30 | 130 | 79 | 287 |
| 25,919 | 7 | 22 | 36 | 123 | 4 | 12 | 27 | 130 | 74 | 287 |
| 25,920 | 7 | 22 | 36 | 123 | 4 | 12 | 27 | 131 | 74 | 288 |
| 25,921 | 7 | 22 | 35 | 123 | 4 | 12 | 25 | 131 | 71 | 288 |
| 25,922 | 7 | 24 | 36 | 125 | 4 | 12 | 25 | 132 | 72 | 293 |
| 25,923 | 7 | 24 | 36 | 127 | 4 | 12 | 25 | 132 | 72 | 295 |
| 25,924 | 7 | 24 | 37 | 127 | 4 | 12 | 26 | 136 | 74 | 299 |
| 25,925 | 7 | 24 | 37 | 126 | 4 | 12 | 26 | 136 | 74 | 298 |
| 25,926 | 7 | 25 | 37 | 125 | 4 | 12 | 27 | 138 | 75 | 300 |
| 25,927 | 6 | 25 | 37 | 128 | 4 | 12 | 27 | 142 | 74 | 307 |
| 25,928 | 6 | 26 | 36 | 130 | 4 | 12 | 26 | 142 | 72 | 310 |
| 25,929 | 6 | 26 | 36 | 131 | 4 | 12 | 26 | 142 | 72 | 311 |
| 25,930 | 6 | 26 | 36 | 131 | 4 | 12 | 26 | 142 | 72 | 311 |
| 25,931 | 6 | 26 | 37 | 129 | 4 | 11 | 26 | 134 | 73 | 300 |
| 25,932 | 6 | 26 | 38 | 128 | 4 | 10 | 26 | 132 | 74 | 296 |
| 25,933 | 6 | 26 | 37 | 128 | 4 | 10 | 26 | 132 | 73 | 296 |
| 25,934 | 6 | 27 | 37 | 129 | 4 | 12 | 26 | 133 | 73 | 301 |
| 25,935 | 6 | 27 | 37 | 129 | 4 | 12 | 26 | 135 | 73 | 303 |
| 25,936 | 6 | 21 | 39 | 115 | 4 | 9  | 23 | 125 | 72 | 270 |
| 25,937 | 6 | 21 | 37 | 109 | 4 | 8  | 24 | 122 | 71 | 260 |
| 25,938 | 4 | 21 | 24 | 105 | 2 | 8  | 21 | 119 | 51 | 253 |
| 25,939 | 4 | 22 | 22 | 107 | 2 | 9  | 20 | 126 | 48 | 264 |
| 25,940 | 4 | 23 | 21 | 113 | 0 | 9  | 17 | 132 | 42 | 277 |
| 25,941 | 4 | 21 | 22 | 95  | 0 | 9  | 20 | 116 | 46 | 241 |

|        |   |    |    |     |   |    |    |     |    |     |
|--------|---|----|----|-----|---|----|----|-----|----|-----|
| 25,942 | 4 | 21 | 23 | 94  | 0 | 9  | 20 | 118 | 47 | 242 |
| 25,943 | 4 | 21 | 24 | 93  | 0 | 8  | 19 | 121 | 47 | 243 |
| 25,944 | 5 | 21 | 24 | 102 | 0 | 8  | 19 | 126 | 48 | 257 |
| 25,945 | 3 | 30 | 21 | 136 | 0 | 10 | 19 | 177 | 43 | 353 |
| 25,946 | 3 | 30 | 21 | 137 | 0 | 10 | 19 | 178 | 43 | 355 |
| 25,947 | 3 | 33 | 22 | 152 | 0 | 10 | 18 | 182 | 43 | 377 |
| 25,948 | 3 | 35 | 23 | 151 | 0 | 10 | 18 | 179 | 44 | 375 |
| 25,949 | 3 | 35 | 28 | 146 | 0 | 9  | 18 | 170 | 49 | 360 |
| 25,950 | 3 | 36 | 28 | 148 | 0 | 9  | 18 | 175 | 49 | 368 |
| 25,951 | 3 | 36 | 28 | 146 | 0 | 6  | 18 | 171 | 49 | 359 |
| 25,952 | 4 | 36 | 29 | 140 | 0 | 6  | 19 | 164 | 52 | 346 |
| 25,953 | 4 | 33 | 29 | 121 | 0 | 6  | 19 | 146 | 52 | 306 |
| 25,954 | 4 | 31 | 29 | 121 | 0 | 6  | 19 | 146 | 52 | 304 |
| 25,955 | 4 | 31 | 29 | 121 | 0 | 6  | 19 | 145 | 52 | 303 |
| 25,956 | 4 | 31 | 32 | 121 | 0 | 6  | 19 | 146 | 55 | 304 |
| 25,957 | 4 | 31 | 32 | 121 | 0 | 6  | 19 | 151 | 55 | 309 |
| 25,958 | 4 | 32 | 32 | 126 | 0 | 6  | 19 | 157 | 55 | 321 |
| 25,959 | 4 | 24 | 32 | 114 | 0 | 6  | 19 | 143 | 55 | 287 |
| 25,960 | 4 | 24 | 32 | 116 | 0 | 6  | 19 | 143 | 55 | 289 |
| 25,961 | 3 | 25 | 32 | 117 | 0 | 6  | 19 | 140 | 54 | 288 |
| 25,962 | 3 | 28 | 30 | 130 | 0 | 6  | 19 | 149 | 52 | 313 |
| 25,963 | 3 | 28 | 27 | 130 | 0 | 6  | 17 | 151 | 47 | 315 |
| 25,964 | 2 | 28 | 27 | 134 | 0 | 6  | 17 | 153 | 46 | 321 |
| 25,965 | 2 | 31 | 26 | 157 | 0 | 6  | 16 | 164 | 44 | 358 |
| 25,966 | 2 | 31 | 25 | 160 | 0 | 6  | 14 | 165 | 41 | 362 |
| 25,967 | 2 | 31 | 27 | 163 | 0 | 6  | 12 | 166 | 41 | 366 |
| 25,968 | 2 | 31 | 24 | 163 | 0 | 6  | 10 | 164 | 36 | 364 |
| 25,969 | 2 | 31 | 26 | 163 | 0 | 6  | 10 | 165 | 38 | 365 |
| 25,970 | 2 | 31 | 24 | 164 | 0 | 6  | 10 | 168 | 36 | 369 |
| 25,971 | 2 | 31 | 24 | 166 | 0 | 6  | 10 | 168 | 36 | 371 |
| 25,972 | 2 | 31 | 24 | 185 | 0 | 6  | 10 | 180 | 36 | 402 |
| 25,973 | 2 | 29 | 25 | 204 | 0 | 6  | 10 | 195 | 37 | 434 |
| 25,974 | 2 | 31 | 25 | 208 | 0 | 6  | 10 | 199 | 37 | 444 |
| 25,975 | 2 | 35 | 24 | 215 | 0 | 7  | 9  | 199 | 35 | 456 |
| 25,976 | 2 | 35 | 24 | 217 | 0 | 7  | 9  | 200 | 35 | 459 |
| 25,977 | 2 | 34 | 24 | 216 | 0 | 7  | 8  | 198 | 34 | 455 |
| 25,978 | 2 | 34 | 24 | 213 | 0 | 7  | 8  | 194 | 34 | 448 |
| 25,979 | 2 | 33 | 25 | 223 | 0 | 7  | 8  | 198 | 35 | 461 |
| 25,980 | 2 | 33 | 25 | 225 | 1 | 7  | 8  | 198 | 36 | 463 |
| 25,981 | 2 | 33 | 25 | 228 | 1 | 7  | 8  | 198 | 36 | 466 |
| 25,982 | 2 | 33 | 24 | 234 | 1 | 7  | 8  | 198 | 35 | 472 |

|        |   |    |    |     |   |    |    |     |    |     |
|--------|---|----|----|-----|---|----|----|-----|----|-----|
| 25,983 | 2 | 33 | 26 | 251 | 1 | 7  | 8  | 202 | 37 | 493 |
| 25,984 | 2 | 34 | 26 | 259 | 1 | 9  | 8  | 210 | 37 | 512 |
| 25,985 | 2 | 33 | 26 | 258 | 1 | 7  | 8  | 209 | 37 | 507 |
| 25,986 | 3 | 34 | 28 | 262 | 1 | 7  | 9  | 207 | 41 | 510 |
| 25,987 | 5 | 34 | 26 | 263 | 1 | 7  | 9  | 206 | 41 | 510 |
| 25,988 | 5 | 34 | 40 | 262 | 1 | 7  | 15 | 206 | 61 | 509 |
| 25,989 | 5 | 33 | 40 | 260 | 1 | 6  | 16 | 199 | 62 | 498 |
| 25,990 | 5 | 33 | 42 | 260 | 1 | 6  | 17 | 199 | 65 | 498 |
| 25,991 | 5 | 32 | 41 | 251 | 1 | 6  | 14 | 183 | 61 | 472 |
| 25,992 | 5 | 32 | 41 | 252 | 1 | 6  | 14 | 184 | 61 | 474 |
| 25,993 | 5 | 32 | 40 | 254 | 1 | 8  | 14 | 188 | 60 | 482 |
| 25,994 | 5 | 32 | 39 | 259 | 1 | 8  | 14 | 185 | 59 | 484 |
| 25,995 | 4 | 33 | 41 | 275 | 1 | 11 | 14 | 219 | 60 | 538 |
| 25,996 | 4 | 24 | 41 | 243 | 1 | 8  | 14 | 168 | 60 | 443 |
| 25,997 | 4 | 24 | 50 | 244 | 1 | 8  | 14 | 173 | 69 | 449 |
| 25,998 | 4 | 22 | 49 | 236 | 1 | 8  | 14 | 173 | 68 | 439 |
| 25,999 | 4 | 20 | 48 | 240 | 1 | 9  | 14 | 176 | 67 | 445 |
| 26,000 | 4 | 19 | 43 | 240 | 1 | 9  | 14 | 171 | 62 | 439 |
| 26,001 | 3 | 19 | 42 | 240 | 1 | 9  | 13 | 172 | 59 | 440 |
| 26,002 | 4 | 19 | 42 | 241 | 1 | 9  | 13 | 172 | 60 | 441 |
| 26,003 | 4 | 19 | 42 | 241 | 1 | 9  | 13 | 169 | 60 | 438 |
| 26,004 | 4 | 19 | 42 | 242 | 1 | 9  | 14 | 170 | 61 | 440 |
| 26,005 | 4 | 19 | 42 | 242 | 1 | 9  | 14 | 171 | 61 | 441 |
| 26,006 | 4 | 20 | 44 | 241 | 1 | 9  | 14 | 171 | 63 | 441 |
| 26,007 | 4 | 20 | 42 | 239 | 1 | 9  | 14 | 167 | 61 | 435 |
| 26,008 | 4 | 20 | 42 | 239 | 1 | 9  | 14 | 167 | 61 | 435 |
| 26,009 | 4 | 19 | 42 | 234 | 1 | 9  | 14 | 161 | 61 | 423 |
| 26,010 | 4 | 19 | 42 | 232 | 1 | 9  | 14 | 157 | 61 | 417 |
| 26,011 | 4 | 18 | 42 | 226 | 1 | 10 | 14 | 157 | 61 | 411 |
| 26,012 | 4 | 18 | 42 | 232 | 1 | 10 | 14 | 159 | 61 | 419 |
| 26,013 | 4 | 15 | 42 | 238 | 1 | 10 | 14 | 159 | 61 | 422 |
| 26,014 | 4 | 16 | 41 | 255 | 1 | 10 | 14 | 174 | 60 | 455 |
| 26,015 | 4 | 16 | 41 | 258 | 1 | 12 | 14 | 174 | 60 | 460 |
| 26,016 | 4 | 13 | 41 | 236 | 1 | 12 | 15 | 164 | 61 | 425 |
| 26,017 | 4 | 13 | 41 | 233 | 1 | 13 | 15 | 164 | 61 | 423 |
| 26,018 | 4 | 13 | 39 | 231 | 1 | 13 | 15 | 166 | 59 | 423 |
| 26,019 | 4 | 13 | 39 | 232 | 1 | 13 | 14 | 166 | 58 | 424 |
| 26,020 | 4 | 13 | 38 | 233 | 1 | 13 | 14 | 171 | 57 | 430 |
| 26,021 | 4 | 13 | 38 | 234 | 1 | 13 | 13 | 169 | 56 | 429 |
| 26,022 | 4 | 14 | 38 | 222 | 1 | 15 | 13 | 167 | 56 | 418 |
| 26,023 | 4 | 14 | 38 | 224 | 1 | 15 | 13 | 173 | 56 | 426 |

|        |   |    |    |     |   |    |    |     |    |     |
|--------|---|----|----|-----|---|----|----|-----|----|-----|
| 26,024 | 4 | 17 | 37 | 208 | 1 | 15 | 13 | 158 | 55 | 398 |
| 26,025 | 4 | 11 | 37 | 201 | 1 | 14 | 13 | 153 | 55 | 379 |
| 26,026 | 4 | 11 | 37 | 202 | 1 | 14 | 13 | 152 | 55 | 379 |
| 26,027 | 4 | 14 | 37 | 209 | 1 | 15 | 13 | 151 | 55 | 389 |
| 26,028 | 4 | 14 | 37 | 216 | 1 | 15 | 13 | 156 | 55 | 401 |
| 26,029 | 4 | 14 | 37 | 209 | 1 | 15 | 13 | 153 | 55 | 391 |
| 26,030 | 4 | 15 | 37 | 206 | 1 | 15 | 13 | 153 | 55 | 389 |
| 26,031 | 4 | 15 | 37 | 209 | 0 | 15 | 14 | 153 | 55 | 392 |
| 26,032 | 4 | 15 | 37 | 200 | 0 | 15 | 14 | 153 | 55 | 383 |
| 26,033 | 4 | 15 | 37 | 187 | 0 | 15 | 14 | 149 | 55 | 366 |
| 26,034 | 4 | 21 | 34 | 210 | 0 | 17 | 14 | 170 | 52 | 418 |
| 26,035 | 3 | 21 | 33 | 218 | 0 | 17 | 13 | 170 | 49 | 426 |
| 26,036 | 3 | 23 | 33 | 264 | 0 | 20 | 13 | 202 | 49 | 509 |
| 26,037 | 3 | 25 | 33 | 302 | 0 | 23 | 13 | 226 | 49 | 576 |
| 26,038 | 1 | 25 | 33 | 311 | 0 | 24 | 13 | 236 | 47 | 596 |
| 26,039 | 1 | 28 | 19 | 334 | 0 | 27 | 5  | 249 | 25 | 638 |
| 26,040 | 1 | 28 | 19 | 344 | 0 | 27 | 4  | 254 | 24 | 653 |
| 26,041 | 1 | 28 | 17 | 344 | 0 | 27 | 3  | 254 | 21 | 653 |
| 26,042 | 1 | 27 | 17 | 345 | 0 | 27 | 3  | 254 | 21 | 653 |
| 26,043 | 1 | 28 | 17 | 350 | 0 | 28 | 3  | 255 | 21 | 661 |
| 26,044 | 1 | 31 | 15 | 380 | 0 | 29 | 3  | 282 | 19 | 722 |
| 26,045 | 1 | 36 | 9  | 399 | 0 | 29 | 3  | 304 | 13 | 768 |
| 26,046 | 1 | 35 | 8  | 392 | 0 | 28 | 3  | 276 | 12 | 731 |
| 26,047 | 1 | 35 | 7  | 389 | 0 | 28 | 3  | 278 | 11 | 730 |
| 26,048 | 1 | 35 | 7  | 392 | 0 | 28 | 3  | 274 | 11 | 729 |
| 26,049 | 1 | 34 | 7  | 384 | 0 | 28 | 3  | 270 | 11 | 716 |
| 26,050 | 1 | 34 | 7  | 379 | 0 | 27 | 3  | 268 | 11 | 708 |
| 26,051 | 1 | 34 | 7  | 381 | 0 | 27 | 3  | 270 | 11 | 712 |
| 26,052 | 1 | 34 | 7  | 382 | 0 | 27 | 3  | 268 | 11 | 711 |
| 26,053 | 0 | 34 | 9  | 387 | 0 | 27 | 4  | 280 | 13 | 728 |
| 26,054 | 0 | 34 | 9  | 387 | 0 | 27 | 4  | 280 | 13 | 728 |
| 26,055 | 0 | 34 | 12 | 387 | 0 | 27 | 3  | 279 | 15 | 727 |
| 26,056 | 0 | 34 | 13 | 387 | 0 | 27 | 3  | 278 | 16 | 726 |
| 26,057 | 0 | 33 | 12 | 387 | 0 | 27 | 3  | 277 | 15 | 724 |
| 26,058 | 0 | 33 | 12 | 387 | 0 | 27 | 3  | 278 | 15 | 725 |
| 26,059 | 0 | 33 | 12 | 389 | 0 | 27 | 3  | 279 | 15 | 728 |
| 26,060 | 0 | 33 | 12 | 390 | 0 | 27 | 3  | 279 | 15 | 729 |
| 26,061 | 0 | 33 | 14 | 391 | 0 | 26 | 3  | 278 | 17 | 728 |
| 26,062 | 0 | 33 | 14 | 385 | 0 | 26 | 3  | 276 | 17 | 720 |
| 26,063 | 0 | 33 | 14 | 366 | 0 | 26 | 3  | 267 | 17 | 692 |
| 26,064 | 0 | 32 | 14 | 349 | 0 | 26 | 3  | 250 | 17 | 657 |

|        |   |    |    |     |   |    |    |     |    |     |
|--------|---|----|----|-----|---|----|----|-----|----|-----|
| 26,065 | 0 | 32 | 14 | 339 | 0 | 24 | 3  | 245 | 17 | 640 |
| 26,066 | 0 | 32 | 14 | 339 | 0 | 24 | 3  | 245 | 17 | 640 |
| 26,067 | 0 | 32 | 15 | 337 | 0 | 23 | 2  | 242 | 17 | 634 |
| 26,068 | 0 | 32 | 15 | 337 | 0 | 23 | 2  | 242 | 17 | 634 |
| 26,069 | 0 | 32 | 17 | 337 | 0 | 23 | 2  | 241 | 19 | 633 |
| 26,070 | 0 | 32 | 20 | 336 | 0 | 23 | 5  | 235 | 25 | 626 |
| 26,071 | 0 | 32 | 20 | 336 | 0 | 23 | 5  | 235 | 25 | 626 |
| 26,072 | 2 | 31 | 21 | 330 | 0 | 21 | 7  | 225 | 30 | 607 |
| 26,073 | 2 | 31 | 21 | 330 | 0 | 21 | 8  | 219 | 31 | 601 |
| 26,074 | 2 | 31 | 23 | 334 | 0 | 21 | 8  | 219 | 33 | 605 |
| 26,075 | 3 | 29 | 25 | 329 | 1 | 21 | 10 | 218 | 39 | 597 |
| 26,076 | 3 | 29 | 28 | 327 | 1 | 22 | 10 | 216 | 42 | 594 |
| 26,077 | 3 | 29 | 29 | 323 | 2 | 22 | 12 | 216 | 46 | 590 |
| 26,078 | 3 | 26 | 29 | 315 | 2 | 21 | 12 | 215 | 46 | 577 |
| 26,079 | 3 | 26 | 33 | 310 | 2 | 21 | 13 | 210 | 51 | 567 |
| 26,080 | 3 | 26 | 33 | 306 | 2 | 21 | 13 | 209 | 51 | 562 |
| 26,081 | 3 | 25 | 33 | 303 | 2 | 21 | 13 | 208 | 51 | 557 |
| 26,082 | 3 | 26 | 33 | 313 | 2 | 21 | 12 | 209 | 50 | 569 |
| 26,083 | 3 | 26 | 33 | 315 | 2 | 21 | 12 | 212 | 50 | 574 |
| 26,084 | 3 | 26 | 33 | 313 | 2 | 21 | 12 | 213 | 50 | 573 |
| 26,085 | 3 | 21 | 33 | 293 | 2 | 19 | 12 | 192 | 50 | 525 |
| 26,086 | 3 | 23 | 36 | 279 | 2 | 17 | 12 | 186 | 53 | 505 |
| 26,087 | 3 | 21 | 36 | 234 | 3 | 14 | 12 | 154 | 54 | 423 |
| 26,088 | 3 | 18 | 36 | 182 | 3 | 10 | 12 | 119 | 54 | 329 |
| 26,089 | 3 | 18 | 36 | 184 | 3 | 10 | 12 | 119 | 54 | 331 |
| 26,090 | 3 | 15 | 36 | 151 | 3 | 7  | 12 | 101 | 54 | 274 |
| 26,091 | 3 | 15 | 37 | 152 | 3 | 7  | 12 | 101 | 55 | 275 |
| 26,092 | 3 | 15 | 37 | 152 | 3 | 7  | 12 | 101 | 55 | 275 |
| 26,093 | 3 | 15 | 38 | 152 | 3 | 7  | 12 | 100 | 56 | 274 |
| 26,094 | 3 | 14 | 38 | 146 | 3 | 6  | 12 | 99  | 56 | 265 |
| 26,095 | 3 | 11 | 39 | 114 | 3 | 3  | 12 | 68  | 57 | 196 |
| 26,096 | 3 | 6  | 39 | 89  | 3 | 3  | 12 | 46  | 57 | 144 |
| 26,097 | 3 | 6  | 38 | 71  | 3 | 1  | 12 | 35  | 56 | 113 |
| 26,098 | 3 | 6  | 39 | 71  | 3 | 1  | 14 | 33  | 59 | 111 |
| 26,099 | 3 | 6  | 39 | 63  | 3 | 1  | 15 | 30  | 60 | 100 |
| 26,100 | 3 | 6  | 39 | 63  | 3 | 1  | 16 | 30  | 61 | 100 |
| 26,101 | 3 | 6  | 37 | 60  | 3 | 1  | 15 | 27  | 58 | 94  |
| 26,102 | 3 | 6  | 37 | 60  | 3 | 1  | 15 | 27  | 58 | 94  |
| 26,103 | 3 | 7  | 37 | 61  | 3 | 1  | 15 | 31  | 58 | 100 |
| 26,104 | 3 | 7  | 37 | 57  | 3 | 1  | 15 | 20  | 58 | 85  |
| 26,105 | 3 | 8  | 35 | 57  | 3 | 1  | 15 | 21  | 56 | 87  |

|        |   |   |    |     |   |   |    |    |    |     |
|--------|---|---|----|-----|---|---|----|----|----|-----|
| 26,106 | 3 | 8 | 34 | 56  | 3 | 1 | 15 | 22 | 55 | 87  |
| 26,107 | 3 | 8 | 33 | 61  | 3 | 1 | 15 | 24 | 54 | 94  |
| 26,108 | 3 | 8 | 32 | 61  | 3 | 1 | 15 | 25 | 53 | 95  |
| 26,109 | 3 | 8 | 31 | 62  | 3 | 1 | 15 | 25 | 52 | 96  |
| 26,110 | 3 | 8 | 30 | 60  | 3 | 1 | 15 | 25 | 51 | 94  |
| 26,111 | 3 | 8 | 29 | 59  | 3 | 1 | 15 | 25 | 50 | 93  |
| 26,112 | 3 | 8 | 34 | 75  | 3 | 1 | 17 | 42 | 57 | 126 |
| 26,113 | 3 | 8 | 34 | 77  | 3 | 1 | 17 | 43 | 57 | 129 |
| 26,114 | 3 | 8 | 36 | 84  | 3 | 1 | 21 | 45 | 63 | 138 |
| 26,115 | 3 | 8 | 40 | 84  | 3 | 1 | 23 | 46 | 69 | 139 |
| 26,116 | 3 | 8 | 40 | 85  | 3 | 1 | 23 | 47 | 69 | 141 |
| 26,117 | 3 | 8 | 40 | 85  | 3 | 1 | 23 | 47 | 69 | 141 |
| 26,118 | 3 | 8 | 39 | 85  | 3 | 1 | 23 | 47 | 68 | 141 |
| 26,119 | 3 | 8 | 37 | 83  | 3 | 1 | 23 | 45 | 66 | 137 |
| 26,120 | 3 | 8 | 37 | 85  | 3 | 1 | 23 | 47 | 66 | 141 |
| 26,121 | 3 | 8 | 33 | 88  | 3 | 2 | 20 | 48 | 59 | 146 |
| 26,122 | 3 | 8 | 33 | 91  | 3 | 2 | 20 | 51 | 59 | 152 |
| 26,123 | 1 | 8 | 32 | 88  | 3 | 2 | 18 | 54 | 54 | 152 |
| 26,124 | 1 | 9 | 32 | 101 | 3 | 2 | 17 | 60 | 53 | 172 |
| 26,125 | 1 | 9 | 30 | 98  | 3 | 2 | 17 | 61 | 51 | 170 |
| 26,126 | 0 | 8 | 28 | 94  | 2 | 1 | 15 | 60 | 45 | 163 |
| 26,127 | 0 | 8 | 25 | 96  | 2 | 1 | 15 | 61 | 42 | 166 |
| 26,128 | 0 | 8 | 24 | 96  | 1 | 1 | 13 | 61 | 38 | 166 |
| 26,129 | 0 | 8 | 21 | 96  | 2 | 1 | 13 | 61 | 36 | 166 |
| 26,130 | 0 | 8 | 19 | 96  | 2 | 1 | 12 | 61 | 33 | 166 |
| 26,131 | 0 | 8 | 19 | 96  | 2 | 1 | 12 | 61 | 33 | 166 |
| 26,132 | 0 | 7 | 19 | 85  | 2 | 1 | 12 | 60 | 33 | 153 |
| 26,133 | 0 | 7 | 19 | 86  | 2 | 1 | 12 | 60 | 33 | 154 |
| 26,134 | 0 | 7 | 19 | 85  | 3 | 1 | 13 | 57 | 35 | 150 |
| 26,135 | 0 | 3 | 19 | 78  | 3 | 1 | 13 | 54 | 35 | 136 |
| 26,136 | 0 | 4 | 19 | 87  | 3 | 1 | 13 | 56 | 35 | 148 |
| 26,137 | 0 | 4 | 16 | 92  | 3 | 1 | 13 | 63 | 32 | 160 |
| 26,138 | 0 | 5 | 16 | 95  | 2 | 1 | 13 | 73 | 31 | 174 |
| 26,139 | 1 | 5 | 16 | 94  | 2 | 1 | 15 | 72 | 34 | 172 |
| 26,140 | 1 | 5 | 16 | 95  | 2 | 1 | 15 | 72 | 34 | 173 |
| 26,141 | 1 | 5 | 16 | 100 | 2 | 1 | 15 | 72 | 34 | 178 |
| 26,142 | 1 | 8 | 16 | 106 | 2 | 2 | 15 | 75 | 34 | 191 |
| 26,143 | 1 | 8 | 15 | 106 | 2 | 2 | 15 | 75 | 33 | 191 |
| 26,144 | 1 | 9 | 15 | 110 | 2 | 2 | 15 | 78 | 33 | 199 |
| 26,145 | 1 | 9 | 14 | 110 | 2 | 2 | 15 | 78 | 32 | 199 |
| 26,146 | 1 | 9 | 14 | 114 | 2 | 2 | 14 | 77 | 31 | 202 |

|        |   |    |    |     |   |    |    |     |    |     |
|--------|---|----|----|-----|---|----|----|-----|----|-----|
| 26,147 | 1 | 9  | 13 | 114 | 2 | 2  | 13 | 78  | 29 | 203 |
| 26,148 | 1 | 9  | 14 | 115 | 2 | 2  | 13 | 79  | 30 | 205 |
| 26,149 | 1 | 9  | 14 | 116 | 2 | 2  | 13 | 79  | 30 | 206 |
| 26,150 | 1 | 9  | 14 | 116 | 2 | 2  | 12 | 79  | 29 | 206 |
| 26,151 | 1 | 9  | 14 | 116 | 2 | 2  | 11 | 79  | 28 | 206 |
| 26,152 | 1 | 9  | 15 | 115 | 2 | 2  | 11 | 79  | 29 | 205 |
| 26,153 | 1 | 9  | 15 | 117 | 2 | 2  | 11 | 76  | 29 | 204 |
| 26,154 | 1 | 9  | 15 | 117 | 2 | 2  | 11 | 76  | 29 | 204 |
| 26,155 | 1 | 9  | 15 | 115 | 2 | 2  | 11 | 75  | 29 | 201 |
| 26,156 | 1 | 8  | 15 | 115 | 2 | 2  | 11 | 74  | 29 | 199 |
| 26,157 | 1 | 8  | 15 | 111 | 2 | 2  | 11 | 72  | 29 | 193 |
| 26,158 | 1 | 10 | 15 | 121 | 2 | 2  | 11 | 77  | 29 | 210 |
| 26,159 | 1 | 12 | 16 | 187 | 2 | 4  | 11 | 101 | 30 | 304 |
| 26,160 | 1 | 20 | 22 | 275 | 2 | 10 | 13 | 174 | 38 | 479 |
| 26,161 | 1 | 22 | 21 | 321 | 2 | 13 | 12 | 190 | 36 | 546 |
| 26,162 | 1 | 29 | 23 | 340 | 2 | 14 | 12 | 194 | 38 | 577 |
| 26,163 | 2 | 29 | 21 | 327 | 2 | 15 | 13 | 178 | 38 | 549 |
| 26,164 | 2 | 29 | 21 | 329 | 2 | 15 | 12 | 177 | 37 | 550 |
| 26,165 | 2 | 30 | 21 | 324 | 2 | 15 | 10 | 174 | 35 | 543 |
| 26,166 | 2 | 30 | 17 | 325 | 3 | 15 | 8  | 174 | 30 | 544 |
| 26,167 | 2 | 30 | 17 | 326 | 3 | 15 | 8  | 174 | 30 | 545 |
| 26,168 | 2 | 30 | 18 | 326 | 3 | 15 | 9  | 175 | 32 | 546 |
| 26,169 | 2 | 30 | 18 | 320 | 3 | 14 | 9  | 173 | 32 | 537 |
| 26,170 | 2 | 30 | 18 | 320 | 3 | 14 | 9  | 173 | 32 | 537 |
| 26,171 | 2 | 30 | 18 | 319 | 3 | 14 | 9  | 171 | 32 | 534 |
| 26,172 | 2 | 30 | 18 | 319 | 3 | 14 | 9  | 174 | 32 | 537 |
| 26,173 | 2 | 30 | 18 | 320 | 3 | 14 | 9  | 174 | 32 | 538 |
| 26,174 | 2 | 30 | 18 | 326 | 3 | 15 | 9  | 175 | 32 | 546 |
| 26,175 | 2 | 30 | 18 | 324 | 3 | 15 | 9  | 172 | 32 | 541 |
| 26,176 | 2 | 30 | 18 | 323 | 3 | 15 | 9  | 174 | 32 | 542 |
| 26,177 | 2 | 30 | 18 | 323 | 3 | 15 | 9  | 174 | 32 | 542 |
| 26,178 | 2 | 33 | 18 | 320 | 3 | 15 | 9  | 174 | 32 | 542 |
| 26,179 | 2 | 33 | 18 | 320 | 3 | 15 | 9  | 174 | 32 | 542 |
| 26,180 | 2 | 33 | 19 | 320 | 2 | 15 | 9  | 174 | 32 | 542 |
| 26,181 | 2 | 33 | 19 | 320 | 2 | 15 | 9  | 174 | 32 | 542 |
| 26,182 | 2 | 33 | 19 | 320 | 2 | 15 | 9  | 175 | 32 | 543 |
| 26,183 | 2 | 33 | 19 | 335 | 2 | 18 | 9  | 182 | 32 | 568 |
| 26,184 | 2 | 45 | 19 | 462 | 1 | 28 | 9  | 276 | 31 | 811 |
| 26,185 | 2 | 48 | 19 | 515 | 1 | 29 | 8  | 302 | 30 | 894 |
| 26,186 | 2 | 54 | 19 | 529 | 1 | 29 | 8  | 311 | 30 | 923 |
| 26,187 | 2 | 52 | 19 | 514 | 1 | 29 | 8  | 295 | 30 | 890 |

|        |   |    |    |     |   |    |    |     |    |       |
|--------|---|----|----|-----|---|----|----|-----|----|-------|
| 26,188 | 2 | 53 | 19 | 517 | 1 | 29 | 9  | 296 | 31 | 895   |
| 26,189 | 2 | 57 | 19 | 542 | 1 | 33 | 9  | 310 | 31 | 942   |
| 26,190 | 1 | 58 | 18 | 550 | 1 | 33 | 7  | 312 | 27 | 953   |
| 26,191 | 1 | 59 | 18 | 557 | 1 | 33 | 7  | 317 | 27 | 966   |
| 26,192 | 1 | 60 | 18 | 555 | 1 | 33 | 7  | 317 | 27 | 965   |
| 26,193 | 1 | 57 | 21 | 553 | 1 | 32 | 7  | 314 | 30 | 956   |
| 26,194 | 1 | 58 | 22 | 555 | 1 | 32 | 9  | 314 | 33 | 959   |
| 26,195 | 1 | 57 | 22 | 553 | 1 | 32 | 9  | 312 | 33 | 954   |
| 26,196 | 1 | 57 | 22 | 551 | 1 | 32 | 10 | 313 | 34 | 953   |
| 26,197 | 1 | 57 | 22 | 551 | 1 | 32 | 10 | 313 | 34 | 953   |
| 26,198 | 1 | 57 | 22 | 552 | 1 | 32 | 10 | 316 | 34 | 957   |
| 26,199 | 2 | 57 | 21 | 553 | 1 | 32 | 10 | 315 | 34 | 957   |
| 26,200 | 2 | 57 | 21 | 555 | 1 | 32 | 10 | 318 | 34 | 962   |
| 26,201 | 2 | 57 | 21 | 555 | 1 | 32 | 10 | 318 | 34 | 962   |
| 26,202 | 2 | 57 | 22 | 558 | 1 | 32 | 10 | 319 | 35 | 966   |
| 26,203 | 2 | 57 | 21 | 558 | 1 | 32 | 10 | 318 | 34 | 965   |
| 26,204 | 2 | 56 | 21 | 555 | 1 | 32 | 10 | 317 | 34 | 960   |
| 26,205 | 2 | 56 | 21 | 575 | 1 | 33 | 10 | 338 | 34 | 1,002 |
| 26,206 | 2 | 56 | 21 | 577 | 1 | 33 | 10 | 338 | 34 | 1,004 |
| 26,207 | 2 | 56 | 21 | 580 | 1 | 34 | 10 | 341 | 34 | 1,011 |
| 26,208 | 2 | 54 | 21 | 580 | 1 | 34 | 10 | 337 | 34 | 1,005 |
| 26,209 | 2 | 54 | 20 | 580 | 1 | 35 | 11 | 337 | 34 | 1,006 |
| 26,210 | 2 | 53 | 14 | 514 | 1 | 33 | 9  | 311 | 26 | 911   |
| 26,211 | 2 | 46 | 15 | 445 | 1 | 28 | 9  | 248 | 27 | 767   |
| 26,212 | 2 | 44 | 15 | 400 | 1 | 25 | 8  | 231 | 26 | 700   |
| 26,213 | 2 | 37 | 14 | 410 | 1 | 25 | 8  | 234 | 25 | 706   |
| 26,214 | 1 | 37 | 12 | 424 | 1 | 25 | 8  | 238 | 22 | 724   |
| 26,215 | 1 | 37 | 12 | 425 | 1 | 25 | 8  | 243 | 22 | 730   |
| 26,216 | 1 | 39 | 10 | 441 | 1 | 25 | 7  | 254 | 19 | 759   |
| 26,217 | 1 | 39 | 10 | 444 | 0 | 25 | 7  | 257 | 18 | 765   |
| 26,218 | 1 | 39 | 9  | 443 | 0 | 26 | 7  | 259 | 17 | 767   |
| 26,219 | 1 | 39 | 9  | 443 | 0 | 26 | 6  | 258 | 16 | 766   |
| 26,220 | 1 | 39 | 9  | 441 | 0 | 26 | 7  | 256 | 17 | 762   |
| 26,221 | 1 | 39 | 9  | 441 | 0 | 26 | 7  | 256 | 17 | 762   |
| 26,222 | 1 | 39 | 9  | 442 | 0 | 26 | 7  | 256 | 17 | 763   |
| 26,223 | 1 | 39 | 9  | 442 | 0 | 26 | 7  | 253 | 17 | 760   |
| 26,224 | 1 | 39 | 9  | 441 | 0 | 26 | 7  | 252 | 17 | 758   |
| 26,225 | 1 | 39 | 9  | 433 | 0 | 25 | 7  | 248 | 17 | 745   |
| 26,226 | 1 | 38 | 9  | 420 | 0 | 25 | 7  | 244 | 17 | 727   |
| 26,227 | 1 | 38 | 9  | 420 | 0 | 25 | 7  | 245 | 17 | 728   |
| 26,228 | 1 | 35 | 9  | 420 | 0 | 25 | 7  | 244 | 17 | 724   |



|        |   |    |    |     |   |    |   |     |    |     |
|--------|---|----|----|-----|---|----|---|-----|----|-----|
| 26,229 | 1 | 35 | 9  | 420 | 0 | 25 | 7 | 244 | 17 | 724 |
| 26,230 | 1 | 35 | 8  | 420 | 0 | 25 | 7 | 243 | 16 | 723 |
| 26,231 | 1 | 35 | 9  | 420 | 0 | 25 | 7 | 243 | 17 | 723 |
| 26,232 | 1 | 35 | 10 | 420 | 0 | 25 | 7 | 242 | 18 | 722 |
| 26,233 | 1 | 35 | 10 | 403 | 0 | 22 | 7 | 235 | 18 | 695 |
| 26,234 | 1 | 35 | 10 | 404 | 0 | 22 | 7 | 236 | 18 | 697 |
| 26,235 | 1 | 24 | 10 | 277 | 0 | 12 | 7 | 142 | 18 | 455 |
| 26,236 | 1 | 22 | 10 | 224 | 0 | 11 | 7 | 117 | 18 | 374 |
| 26,237 | 1 | 16 | 10 | 210 | 0 | 11 | 7 | 108 | 18 | 345 |
| 26,238 | 1 | 16 | 10 | 206 | 0 | 11 | 7 | 106 | 18 | 339 |
| 26,239 | 1 | 11 | 10 | 178 | 0 | 8  | 6 | 91  | 17 | 288 |
| 26,240 | 1 | 10 | 10 | 170 | 0 | 8  | 6 | 89  | 17 | 277 |
| 26,241 | 1 | 8  | 10 | 159 | 0 | 8  | 6 | 88  | 17 | 263 |
| 26,242 | 1 | 8  | 9  | 169 | 0 | 8  | 6 | 89  | 16 | 274 |
| 26,243 | 1 | 8  | 7  | 175 | 0 | 8  | 6 | 91  | 14 | 282 |
| 26,244 | 1 | 8  | 6  | 173 | 0 | 8  | 6 | 91  | 13 | 280 |
| 26,245 | 2 | 7  | 5  | 168 | 0 | 8  | 4 | 90  | 11 | 273 |
| 26,246 | 2 | 8  | 5  | 173 | 0 | 8  | 4 | 98  | 11 | 287 |
| 26,247 | 2 | 8  | 5  | 172 | 0 | 8  | 3 | 97  | 10 | 285 |
| 26,248 | 2 | 8  | 5  | 172 | 0 | 8  | 3 | 97  | 10 | 285 |
| 26,249 | 1 | 8  | 5  | 171 | 0 | 9  | 3 | 93  | 9  | 281 |
| 26,250 | 1 | 8  | 6  | 166 | 0 | 9  | 3 | 89  | 10 | 272 |
| 26,251 | 2 | 8  | 7  | 166 | 0 | 9  | 3 | 91  | 12 | 274 |
| 26,252 | 2 | 8  | 6  | 168 | 0 | 9  | 3 | 92  | 11 | 277 |
| 26,253 | 2 | 8  | 6  | 166 | 0 | 9  | 3 | 91  | 11 | 274 |
| 26,254 | 2 | 8  | 7  | 166 | 0 | 9  | 3 | 95  | 12 | 278 |
| 26,255 | 2 | 8  | 7  | 145 | 0 | 8  | 3 | 77  | 12 | 238 |
| 26,256 | 2 | 12 | 7  | 154 | 0 | 8  | 3 | 84  | 12 | 258 |
| 26,257 | 2 | 13 | 7  | 157 | 0 | 8  | 3 | 85  | 12 | 263 |
| 26,258 | 2 | 13 | 7  | 155 | 0 | 7  | 3 | 82  | 12 | 257 |
| 26,259 | 2 | 13 | 7  | 144 | 0 | 7  | 3 | 80  | 12 | 244 |
| 26,260 | 2 | 13 | 7  | 148 | 0 | 6  | 2 | 82  | 11 | 249 |
| 26,261 | 2 | 13 | 7  | 155 | 0 | 7  | 2 | 89  | 11 | 264 |
| 26,262 | 2 | 12 | 6  | 135 | 0 | 6  | 2 | 79  | 10 | 232 |
| 26,263 | 2 | 12 | 6  | 135 | 0 | 6  | 2 | 79  | 10 | 232 |
| 26,264 | 2 | 12 | 5  | 106 | 0 | 5  | 2 | 73  | 9  | 196 |
| 26,265 | 2 | 12 | 9  | 84  | 0 | 4  | 6 | 63  | 17 | 163 |
| 26,266 | 2 | 9  | 9  | 66  | 0 | 4  | 6 | 52  | 17 | 131 |
| 26,267 | 2 | 9  | 9  | 66  | 0 | 4  | 6 | 52  | 17 | 131 |
| 26,268 | 2 | 9  | 9  | 61  | 0 | 4  | 6 | 49  | 17 | 123 |
| 26,269 | 2 | 9  | 10 | 62  | 0 | 3  | 6 | 47  | 18 | 121 |

|        |   |    |    |     |   |   |    |    |    |     |
|--------|---|----|----|-----|---|---|----|----|----|-----|
| 26,270 | 2 | 9  | 10 | 62  | 0 | 3 | 7  | 47 | 19 | 121 |
| 26,271 | 2 | 9  | 10 | 62  | 0 | 3 | 7  | 47 | 19 | 121 |
| 26,272 | 2 | 9  | 10 | 62  | 0 | 3 | 7  | 47 | 19 | 121 |
| 26,273 | 2 | 9  | 10 | 61  | 0 | 3 | 7  | 47 | 19 | 120 |
| 26,274 | 2 | 9  | 10 | 61  | 0 | 4 | 7  | 47 | 19 | 121 |
| 26,275 | 2 | 9  | 10 | 61  | 0 | 4 | 7  | 47 | 19 | 121 |
| 26,276 | 2 | 9  | 10 | 61  | 0 | 4 | 7  | 46 | 19 | 120 |
| 26,277 | 2 | 9  | 10 | 61  | 0 | 4 | 7  | 46 | 19 | 120 |
| 26,278 | 2 | 9  | 10 | 60  | 0 | 4 | 10 | 45 | 22 | 118 |
| 26,279 | 2 | 9  | 14 | 60  | 0 | 4 | 18 | 45 | 34 | 118 |
| 26,280 | 2 | 9  | 16 | 60  | 3 | 4 | 28 | 45 | 49 | 118 |
| 26,281 | 2 | 9  | 16 | 60  | 3 | 4 | 29 | 45 | 50 | 118 |
| 26,282 | 2 | 9  | 15 | 60  | 3 | 4 | 29 | 45 | 49 | 118 |
| 26,283 | 2 | 9  | 14 | 60  | 3 | 4 | 29 | 45 | 48 | 118 |
| 26,284 | 2 | 15 | 14 | 87  | 3 | 4 | 29 | 68 | 48 | 174 |
| 26,285 | 2 | 15 | 14 | 91  | 3 | 4 | 29 | 72 | 48 | 182 |
| 26,286 | 2 | 14 | 15 | 98  | 3 | 4 | 29 | 74 | 49 | 190 |
| 26,287 | 2 | 16 | 15 | 99  | 3 | 4 | 29 | 76 | 49 | 195 |
| 26,288 | 2 | 16 | 15 | 101 | 3 | 4 | 29 | 79 | 49 | 200 |
| 26,289 | 2 | 16 | 15 | 101 | 3 | 4 | 29 | 79 | 49 | 200 |
| 26,290 | 2 | 16 | 15 | 101 | 3 | 3 | 29 | 79 | 49 | 199 |
| 26,291 | 2 | 18 | 15 | 114 | 3 | 3 | 29 | 82 | 49 | 217 |
| 26,292 | 2 | 18 | 15 | 112 | 3 | 3 | 29 | 78 | 49 | 211 |
| 26,293 | 2 | 18 | 15 | 103 | 3 | 3 | 29 | 77 | 49 | 201 |
| 26,294 | 2 | 18 | 15 | 98  | 3 | 3 | 29 | 75 | 49 | 194 |
| 26,295 | 2 | 18 | 15 | 96  | 3 | 3 | 29 | 76 | 49 | 193 |
| 26,296 | 1 | 17 | 15 | 91  | 3 | 3 | 29 | 68 | 48 | 179 |
| 26,297 | 1 | 17 | 15 | 90  | 3 | 3 | 29 | 70 | 48 | 180 |
| 26,298 | 1 | 17 | 15 | 105 | 3 | 3 | 29 | 71 | 48 | 196 |
| 26,299 | 1 | 17 | 15 | 105 | 3 | 3 | 29 | 72 | 48 | 197 |
| 26,300 | 1 | 17 | 16 | 107 | 3 | 2 | 31 | 71 | 51 | 197 |
| 26,301 | 1 | 17 | 17 | 107 | 3 | 2 | 32 | 71 | 53 | 197 |
| 26,302 | 0 | 17 | 17 | 107 | 3 | 2 | 32 | 71 | 52 | 197 |
| 26,303 | 0 | 18 | 17 | 113 | 3 | 3 | 32 | 80 | 52 | 214 |
| 26,304 | 0 | 18 | 16 | 113 | 3 | 3 | 32 | 80 | 51 | 214 |
| 26,305 | 0 | 18 | 17 | 116 | 3 | 3 | 32 | 76 | 52 | 213 |
| 26,306 | 0 | 18 | 17 | 116 | 3 | 3 | 32 | 75 | 52 | 212 |
| 26,307 | 1 | 13 | 17 | 101 | 3 | 3 | 33 | 64 | 54 | 181 |
| 26,308 | 1 | 14 | 17 | 114 | 3 | 4 | 33 | 78 | 54 | 210 |
| 26,309 | 1 | 14 | 17 | 114 | 3 | 4 | 33 | 82 | 54 | 214 |
| 26,310 | 1 | 14 | 17 | 126 | 3 | 6 | 33 | 89 | 54 | 235 |

|        |   |    |    |     |   |    |    |     |    |       |
|--------|---|----|----|-----|---|----|----|-----|----|-------|
| 26,311 | 1 | 14 | 17 | 123 | 3 | 6  | 34 | 88  | 55 | 231   |
| 26,312 | 1 | 13 | 17 | 116 | 3 | 5  | 34 | 83  | 55 | 217   |
| 26,313 | 1 | 13 | 20 | 117 | 3 | 5  | 34 | 85  | 58 | 220   |
| 26,314 | 1 | 13 | 21 | 117 | 3 | 5  | 36 | 85  | 61 | 220   |
| 26,315 | 1 | 14 | 27 | 125 | 3 | 5  | 34 | 87  | 65 | 231   |
| 26,316 | 1 | 14 | 25 | 128 | 3 | 5  | 34 | 87  | 63 | 234   |
| 26,317 | 1 | 14 | 25 | 128 | 3 | 5  | 34 | 87  | 63 | 234   |
| 26,318 | 2 | 15 | 27 | 127 | 3 | 5  | 36 | 86  | 68 | 233   |
| 26,319 | 2 | 16 | 26 | 136 | 3 | 5  | 36 | 89  | 67 | 246   |
| 26,320 | 2 | 18 | 26 | 146 | 3 | 5  | 35 | 91  | 66 | 260   |
| 26,321 | 2 | 18 | 26 | 147 | 3 | 5  | 35 | 91  | 66 | 261   |
| 26,322 | 2 | 18 | 26 | 153 | 3 | 5  | 34 | 91  | 65 | 267   |
| 26,323 | 2 | 18 | 26 | 155 | 3 | 5  | 34 | 91  | 65 | 269   |
| 26,324 | 2 | 19 | 27 | 162 | 3 | 4  | 34 | 91  | 66 | 276   |
| 26,325 | 2 | 19 | 28 | 311 | 3 | 7  | 35 | 116 | 68 | 453   |
| 26,326 | 2 | 37 | 28 | 373 | 3 | 13 | 35 | 157 | 68 | 580   |
| 26,327 | 2 | 70 | 29 | 670 | 3 | 16 | 35 | 232 | 69 | 988   |
| 26,328 | 3 | 72 | 30 | 727 | 3 | 18 | 34 | 244 | 70 | 1,061 |
| 26,329 | 3 | 73 | 30 | 744 | 3 | 18 | 32 | 248 | 68 | 1,083 |
| 26,330 | 3 | 75 | 26 | 752 | 3 | 21 | 24 | 255 | 56 | 1,103 |
| 26,331 | 3 | 76 | 24 | 757 | 0 | 23 | 14 | 258 | 41 | 1,114 |
| 26,332 | 3 | 80 | 27 | 773 | 1 | 26 | 13 | 267 | 44 | 1,146 |
| 26,333 | 3 | 80 | 27 | 776 | 1 | 26 | 13 | 269 | 44 | 1,151 |
| 26,334 | 3 | 85 | 27 | 804 | 1 | 27 | 13 | 283 | 44 | 1,199 |
| 26,335 | 3 | 81 | 26 | 794 | 1 | 30 | 13 | 267 | 43 | 1,172 |
| 26,336 | 3 | 81 | 26 | 783 | 1 | 30 | 13 | 261 | 43 | 1,155 |
| 26,337 | 3 | 81 | 26 | 786 | 1 | 30 | 13 | 261 | 43 | 1,158 |
| 26,338 | 3 | 79 | 26 | 790 | 1 | 30 | 13 | 265 | 43 | 1,164 |
| 26,339 | 3 | 80 | 26 | 792 | 1 | 30 | 13 | 263 | 43 | 1,165 |
| 26,340 | 3 | 80 | 32 | 794 | 1 | 30 | 13 | 264 | 49 | 1,168 |
| 26,341 | 3 | 80 | 32 | 796 | 1 | 30 | 13 | 264 | 49 | 1,170 |
| 26,342 | 3 | 79 | 32 | 783 | 1 | 30 | 13 | 262 | 49 | 1,154 |
| 26,343 | 3 | 79 | 32 | 782 | 2 | 30 | 13 | 262 | 50 | 1,153 |
| 26,344 | 3 | 79 | 32 | 781 | 2 | 30 | 13 | 262 | 50 | 1,152 |
| 26,345 | 3 | 79 | 32 | 783 | 2 | 30 | 13 | 261 | 50 | 1,153 |
| 26,346 | 3 | 79 | 32 | 786 | 2 | 30 | 13 | 264 | 50 | 1,159 |
| 26,347 | 3 | 79 | 32 | 788 | 2 | 30 | 13 | 264 | 50 | 1,161 |
| 26,348 | 3 | 79 | 32 | 791 | 2 | 30 | 13 | 267 | 50 | 1,167 |
| 26,349 | 3 | 80 | 32 | 777 | 2 | 30 | 13 | 266 | 50 | 1,153 |
| 26,350 | 3 | 83 | 32 | 798 | 2 | 31 | 13 | 274 | 50 | 1,186 |
| 26,351 | 3 | 85 | 31 | 808 | 2 | 32 | 11 | 289 | 47 | 1,214 |

|        |   |     |    |       |   |    |    |     |    |       |
|--------|---|-----|----|-------|---|----|----|-----|----|-------|
| 26,352 | 3 | 85  | 30 | 808   | 2 | 32 | 10 | 290 | 45 | 1,215 |
| 26,353 | 3 | 92  | 29 | 818   | 2 | 32 | 10 | 297 | 44 | 1,239 |
| 26,354 | 3 | 91  | 28 | 813   | 2 | 31 | 10 | 288 | 43 | 1,223 |
| 26,355 | 3 | 91  | 28 | 809   | 2 | 31 | 10 | 288 | 43 | 1,219 |
| 26,356 | 3 | 94  | 28 | 809   | 2 | 31 | 10 | 289 | 43 | 1,223 |
| 26,357 | 3 | 94  | 28 | 810   | 2 | 31 | 10 | 289 | 43 | 1,224 |
| 26,358 | 2 | 93  | 28 | 797   | 2 | 30 | 10 | 274 | 42 | 1,194 |
| 26,359 | 2 | 93  | 28 | 799   | 2 | 30 | 10 | 275 | 42 | 1,197 |
| 26,360 | 2 | 94  | 28 | 860   | 2 | 40 | 10 | 395 | 42 | 1,389 |
| 26,361 | 3 | 94  | 28 | 923   | 2 | 40 | 10 | 437 | 43 | 1,494 |
| 26,362 | 3 | 95  | 28 | 932   | 2 | 43 | 9  | 456 | 42 | 1,526 |
| 26,363 | 3 | 98  | 28 | 981   | 2 | 48 | 9  | 577 | 42 | 1,704 |
| 26,364 | 3 | 114 | 25 | 1,114 | 2 | 65 | 9  | 778 | 39 | 2,071 |
| 26,365 | 4 | 129 | 24 | 1,302 | 2 | 78 | 6  | 900 | 36 | 2,409 |
| 26,366 | 4 | 128 | 18 | 1,325 | 2 | 80 | 5  | 903 | 29 | 2,436 |
| 26,367 | 4 | 136 | 16 | 1,373 | 2 | 85 | 4  | 911 | 26 | 2,505 |
| 26,368 | 3 | 136 | 15 | 1,375 | 2 | 85 | 3  | 911 | 23 | 2,507 |
| 26,369 | 3 | 134 | 15 | 1,366 | 2 | 85 | 2  | 908 | 22 | 2,493 |
| 26,370 | 3 | 132 | 15 | 1,356 | 2 | 85 | 2  | 906 | 22 | 2,479 |
| 26,371 | 3 | 132 | 15 | 1,356 | 2 | 85 | 2  | 906 | 22 | 2,479 |
| 26,372 | 3 | 132 | 15 | 1,356 | 2 | 85 | 2  | 907 | 22 | 2,480 |
| 26,373 | 3 | 132 | 19 | 1,351 | 2 | 85 | 2  | 907 | 26 | 2,475 |
| 26,374 | 3 | 132 | 19 | 1,351 | 2 | 85 | 3  | 907 | 27 | 2,475 |
| 26,375 | 3 | 131 | 18 | 1,345 | 2 | 85 | 3  | 907 | 26 | 2,468 |
| 26,376 | 3 | 131 | 17 | 1,196 | 2 | 82 | 2  | 882 | 24 | 2,291 |
| 26,377 | 4 | 113 | 17 | 1,134 | 2 | 76 | 3  | 841 | 26 | 2,164 |
| 26,378 | 4 | 81  | 16 | 840   | 2 | 73 | 3  | 766 | 25 | 1,760 |
| 26,379 | 3 | 79  | 15 | 785   | 2 | 73 | 3  | 760 | 23 | 1,697 |
| 26,380 | 3 | 78  | 15 | 768   | 2 | 73 | 3  | 756 | 23 | 1,675 |
| 26,381 | 3 | 79  | 17 | 767   | 2 | 70 | 8  | 751 | 30 | 1,667 |
| 26,382 | 3 | 78  | 19 | 765   | 2 | 68 | 8  | 751 | 32 | 1,662 |
| 26,383 | 3 | 74  | 16 | 749   | 1 | 65 | 8  | 742 | 28 | 1,630 |
| 26,384 | 3 | 74  | 16 | 747   | 1 | 65 | 8  | 740 | 28 | 1,626 |
| 26,385 | 3 | 69  | 16 | 721   | 1 | 65 | 8  | 729 | 28 | 1,584 |
| 26,386 | 3 | 70  | 11 | 710   | 1 | 62 | 8  | 733 | 23 | 1,575 |
| 26,387 | 3 | 70  | 10 | 709   | 1 | 62 | 8  | 733 | 22 | 1,574 |
| 26,388 | 3 | 70  | 10 | 707   | 1 | 62 | 8  | 733 | 22 | 1,572 |
| 26,389 | 3 | 69  | 15 | 702   | 1 | 62 | 11 | 727 | 30 | 1,560 |
| 26,390 | 3 | 68  | 15 | 696   | 1 | 62 | 11 | 725 | 30 | 1,551 |
| 26,391 | 4 | 68  | 15 | 694   | 1 | 62 | 11 | 725 | 31 | 1,549 |
| 26,392 | 4 | 68  | 15 | 694   | 1 | 62 | 11 | 725 | 31 | 1,549 |

|        |   |    |    |     |   |    |    |     |    |       |
|--------|---|----|----|-----|---|----|----|-----|----|-------|
| 26,393 | 4 | 67 | 15 | 694 | 1 | 62 | 11 | 725 | 31 | 1,548 |
| 26,394 | 4 | 67 | 15 | 695 | 0 | 62 | 11 | 726 | 30 | 1,550 |
| 26,395 | 4 | 67 | 15 | 696 | 0 | 62 | 11 | 727 | 30 | 1,552 |
| 26,396 | 4 | 67 | 15 | 693 | 0 | 62 | 11 | 727 | 30 | 1,549 |
| 26,397 | 4 | 68 | 15 | 699 | 0 | 62 | 11 | 731 | 30 | 1,560 |
| 26,398 | 4 | 69 | 15 | 717 | 1 | 62 | 11 | 736 | 31 | 1,584 |
| 26,399 | 4 | 70 | 15 | 741 | 1 | 62 | 11 | 734 | 31 | 1,607 |
| 26,400 | 4 | 69 | 15 | 742 | 1 | 62 | 11 | 734 | 31 | 1,607 |
| 26,401 | 4 | 66 | 14 | 724 | 1 | 61 | 11 | 724 | 30 | 1,575 |
| 26,402 | 4 | 64 | 15 | 712 | 1 | 59 | 11 | 709 | 31 | 1,544 |
| 26,403 | 4 | 58 | 15 | 703 | 1 | 59 | 11 | 700 | 31 | 1,520 |
| 26,404 | 4 | 61 | 15 | 716 | 1 | 59 | 11 | 721 | 31 | 1,557 |
| 26,405 | 4 | 61 | 15 | 719 | 1 | 59 | 11 | 724 | 31 | 1,563 |
| 26,406 | 4 | 63 | 16 | 749 | 1 | 60 | 11 | 757 | 32 | 1,629 |
| 26,407 | 4 | 62 | 16 | 766 | 1 | 61 | 11 | 764 | 32 | 1,653 |
| 26,408 | 4 | 63 | 16 | 777 | 1 | 61 | 11 | 768 | 32 | 1,669 |
| 26,409 | 4 | 63 | 16 | 778 | 1 | 61 | 10 | 768 | 31 | 1,670 |
| 26,410 | 4 | 63 | 16 | 777 | 1 | 60 | 10 | 765 | 31 | 1,665 |
| 26,411 | 4 | 61 | 16 | 633 | 1 | 45 | 10 | 576 | 31 | 1,315 |
| 26,412 | 3 | 62 | 16 | 645 | 1 | 45 | 10 | 590 | 30 | 1,342 |
| 26,413 | 3 | 62 | 16 | 645 | 1 | 45 | 10 | 590 | 30 | 1,342 |
| 26,414 | 3 | 59 | 16 | 599 | 1 | 40 | 10 | 467 | 30 | 1,165 |
| 26,415 | 3 | 28 | 16 | 279 | 1 | 13 | 10 | 147 | 30 | 467   |
| 26,416 | 2 | 28 | 16 | 244 | 1 | 11 | 10 | 142 | 29 | 425   |
| 26,417 | 2 | 20 | 17 | 197 | 1 | 6  | 10 | 135 | 30 | 358   |
| 26,418 | 2 | 20 | 17 | 197 | 1 | 8  | 10 | 138 | 30 | 363   |
| 26,419 | 2 | 21 | 16 | 201 | 1 | 8  | 10 | 139 | 29 | 369   |
| 26,420 | 2 | 21 | 16 | 202 | 1 | 8  | 10 | 139 | 29 | 370   |
| 26,421 | 2 | 21 | 17 | 200 | 1 | 8  | 10 | 138 | 30 | 367   |
| 26,422 | 2 | 21 | 17 | 200 | 1 | 8  | 11 | 138 | 31 | 367   |
| 26,423 | 2 | 22 | 13 | 200 | 1 | 8  | 11 | 138 | 27 | 368   |
| 26,424 | 2 | 23 | 13 | 199 | 1 | 8  | 10 | 140 | 26 | 370   |
| 26,425 | 2 | 23 | 13 | 219 | 1 | 8  | 10 | 161 | 26 | 411   |
| 26,426 | 2 | 30 | 15 | 271 | 1 | 11 | 12 | 208 | 30 | 520   |
| 26,427 | 3 | 47 | 17 | 467 | 1 | 23 | 14 | 345 | 35 | 882   |
| 26,428 | 2 | 52 | 17 | 541 | 1 | 26 | 13 | 383 | 33 | 1,002 |
| 26,429 | 2 | 53 | 17 | 559 | 1 | 26 | 13 | 394 | 33 | 1,032 |
| 26,430 | 2 | 53 | 16 | 565 | 1 | 24 | 11 | 395 | 30 | 1,037 |
| 26,431 | 2 | 50 | 15 | 560 | 2 | 24 | 8  | 394 | 27 | 1,028 |
| 26,432 | 2 | 50 | 15 | 560 | 2 | 24 | 8  | 391 | 27 | 1,025 |
| 26,433 | 2 | 51 | 13 | 570 | 2 | 24 | 8  | 399 | 25 | 1,044 |

|        |   |    |    |     |   |    |    |     |    |       |
|--------|---|----|----|-----|---|----|----|-----|----|-------|
| 26,434 | 2 | 51 | 13 | 570 | 2 | 24 | 8  | 399 | 25 | 1,044 |
| 26,435 | 2 | 51 | 14 | 573 | 2 | 24 | 8  | 402 | 26 | 1,050 |
| 26,436 | 2 | 48 | 14 | 566 | 2 | 23 | 8  | 389 | 26 | 1,026 |
| 26,437 | 2 | 48 | 14 | 567 | 2 | 23 | 8  | 389 | 26 | 1,027 |
| 26,438 | 2 | 48 | 14 | 568 | 2 | 23 | 8  | 390 | 26 | 1,029 |
| 26,439 | 2 | 48 | 9  | 567 | 2 | 23 | 7  | 392 | 20 | 1,030 |
| 26,440 | 2 | 48 | 9  | 567 | 2 | 23 | 5  | 391 | 18 | 1,029 |
| 26,441 | 2 | 48 | 10 | 568 | 2 | 23 | 7  | 391 | 21 | 1,030 |
| 26,442 | 1 | 48 | 11 | 568 | 2 | 23 | 7  | 391 | 21 | 1,030 |
| 26,443 | 1 | 48 | 11 | 568 | 2 | 23 | 7  | 391 | 21 | 1,030 |
| 26,444 | 1 | 48 | 11 | 568 | 2 | 23 | 7  | 390 | 21 | 1,029 |
| 26,445 | 1 | 48 | 11 | 566 | 2 | 23 | 7  | 389 | 21 | 1,026 |
| 26,446 | 1 | 48 | 12 | 566 | 2 | 23 | 7  | 388 | 22 | 1,025 |
| 26,447 | 1 | 48 | 12 | 566 | 2 | 23 | 7  | 388 | 22 | 1,025 |
| 26,448 | 1 | 46 | 12 | 537 | 2 | 23 | 7  | 374 | 22 | 980   |
| 26,449 | 1 | 46 | 12 | 538 | 1 | 23 | 7  | 375 | 21 | 982   |
| 26,450 | 1 | 45 | 13 | 511 | 1 | 23 | 7  | 373 | 22 | 952   |
| 26,451 | 1 | 45 | 17 | 509 | 1 | 23 | 10 | 373 | 29 | 950   |
| 26,452 | 1 | 45 | 17 | 504 | 1 | 23 | 13 | 373 | 32 | 945   |
| 26,453 | 1 | 44 | 20 | 505 | 1 | 23 | 14 | 375 | 36 | 947   |
| 26,454 | 1 | 41 | 20 | 493 | 1 | 23 | 14 | 355 | 36 | 912   |
| 26,455 | 1 | 41 | 20 | 496 | 1 | 23 | 14 | 356 | 36 | 916   |
| 26,456 | 1 | 41 | 19 | 494 | 1 | 23 | 14 | 353 | 35 | 911   |
| 26,457 | 1 | 39 | 19 | 464 | 1 | 22 | 14 | 320 | 35 | 845   |
| 26,458 | 1 | 36 | 19 | 436 | 1 | 21 | 14 | 313 | 35 | 806   |
| 26,459 | 1 | 36 | 19 | 441 | 1 | 21 | 14 | 316 | 35 | 814   |
| 26,460 | 1 | 38 | 21 | 461 | 1 | 21 | 15 | 331 | 38 | 851   |
| 26,461 | 1 | 43 | 21 | 483 | 1 | 23 | 15 | 351 | 38 | 900   |
| 26,462 | 1 | 43 | 21 | 484 | 1 | 23 | 15 | 350 | 38 | 900   |
| 26,463 | 1 | 42 | 21 | 475 | 1 | 23 | 15 | 336 | 38 | 876   |
| 26,464 | 1 | 44 | 21 | 505 | 1 | 24 | 15 | 348 | 38 | 921   |
| 26,465 | 1 | 45 | 21 | 521 | 1 | 25 | 15 | 362 | 38 | 953   |
| 26,466 | 1 | 45 | 21 | 520 | 1 | 24 | 15 | 361 | 38 | 950   |
| 26,467 | 1 | 46 | 21 | 523 | 1 | 24 | 15 | 365 | 38 | 958   |
| 26,468 | 1 | 46 | 20 | 522 | 1 | 22 | 15 | 361 | 37 | 951   |
| 26,469 | 1 | 47 | 20 | 517 | 1 | 22 | 16 | 361 | 38 | 947   |
| 26,470 | 1 | 47 | 20 | 521 | 1 | 22 | 16 | 363 | 38 | 953   |
| 26,471 | 1 | 47 | 21 | 540 | 1 | 23 | 18 | 372 | 41 | 982   |
| 26,472 | 1 | 48 | 22 | 573 | 1 | 23 | 18 | 402 | 42 | 1,046 |
| 26,473 | 1 | 48 | 24 | 577 | 1 | 23 | 17 | 404 | 43 | 1,052 |
| 26,474 | 1 | 47 | 24 | 601 | 1 | 23 | 17 | 415 | 43 | 1,086 |

|        |   |    |    |     |   |    |    |     |    |       |
|--------|---|----|----|-----|---|----|----|-----|----|-------|
| 26,475 | 1 | 46 | 24 | 604 | 2 | 23 | 17 | 419 | 44 | 1,092 |
| 26,476 | 1 | 39 | 22 | 534 | 2 | 20 | 15 | 351 | 40 | 944   |
| 26,477 | 1 | 22 | 20 | 338 | 2 | 8  | 13 | 214 | 36 | 582   |
| 26,478 | 0 | 22 | 20 | 339 | 2 | 8  | 13 | 215 | 35 | 584   |
| 26,479 | 0 | 19 | 26 | 268 | 2 | 5  | 13 | 177 | 41 | 469   |
| 26,480 | 0 | 17 | 27 | 253 | 2 | 5  | 13 | 168 | 42 | 443   |
| 26,481 | 0 | 18 | 28 | 245 | 2 | 5  | 13 | 159 | 43 | 427   |
| 26,482 | 0 | 18 | 28 | 249 | 1 | 5  | 13 | 160 | 42 | 432   |
| 26,483 | 0 | 17 | 28 | 236 | 1 | 5  | 13 | 152 | 42 | 410   |
| 26,484 | 0 | 17 | 28 | 232 | 1 | 5  | 13 | 149 | 42 | 403   |
| 26,485 | 0 | 19 | 28 | 236 | 1 | 5  | 13 | 157 | 42 | 417   |
| 26,486 | 0 | 19 | 27 | 237 | 1 | 5  | 13 | 159 | 41 | 420   |
| 26,487 | 0 | 20 | 27 | 240 | 1 | 5  | 13 | 161 | 41 | 426   |
| 26,488 | 0 | 26 | 27 | 267 | 1 | 6  | 13 | 214 | 41 | 513   |
| 26,489 | 0 | 26 | 27 | 268 | 1 | 6  | 13 | 213 | 41 | 513   |
| 26,490 | 0 | 26 | 27 | 272 | 1 | 6  | 13 | 221 | 41 | 525   |
| 26,491 | 0 | 26 | 27 | 277 | 1 | 6  | 13 | 224 | 41 | 533   |
| 26,492 | 0 | 26 | 26 | 277 | 1 | 6  | 11 | 225 | 38 | 534   |
| 26,493 | 0 | 26 | 25 | 277 | 2 | 6  | 11 | 225 | 38 | 534   |
| 26,494 | 0 | 26 | 25 | 277 | 2 | 6  | 11 | 225 | 38 | 534   |
| 26,495 | 1 | 26 | 25 | 278 | 2 | 6  | 12 | 225 | 40 | 535   |
| 26,496 | 1 | 28 | 25 | 279 | 2 | 6  | 12 | 228 | 40 | 541   |
| 26,497 | 1 | 28 | 24 | 281 | 2 | 6  | 12 | 230 | 39 | 545   |
| 26,498 | 1 | 28 | 24 | 281 | 2 | 6  | 12 | 230 | 39 | 545   |
| 26,499 | 1 | 28 | 25 | 287 | 2 | 7  | 13 | 231 | 41 | 553   |
| 26,500 | 1 | 28 | 25 | 293 | 2 | 8  | 15 | 230 | 43 | 559   |
| 26,501 | 1 | 28 | 24 | 296 | 2 | 9  | 15 | 232 | 42 | 565   |
| 26,502 | 1 | 28 | 20 | 296 | 2 | 9  | 12 | 232 | 35 | 565   |
| 26,503 | 1 | 28 | 21 | 294 | 2 | 9  | 11 | 230 | 35 | 561   |
| 26,504 | 1 | 28 | 17 | 294 | 2 | 9  | 10 | 232 | 30 | 563   |
| 26,505 | 1 | 28 | 17 | 290 | 2 | 9  | 10 | 231 | 30 | 558   |
| 26,506 | 1 | 28 | 17 | 290 | 2 | 9  | 10 | 236 | 30 | 563   |
| 26,507 | 1 | 28 | 17 | 288 | 2 | 9  | 10 | 236 | 30 | 561   |
| 26,508 | 1 | 29 | 17 | 298 | 2 | 10 | 10 | 247 | 30 | 584   |
| 26,509 | 1 | 29 | 17 | 297 | 2 | 10 | 10 | 243 | 30 | 579   |
| 26,510 | 1 | 29 | 16 | 298 | 2 | 10 | 9  | 246 | 28 | 583   |
| 26,511 | 1 | 27 | 15 | 276 | 2 | 10 | 9  | 231 | 27 | 544   |
| 26,512 | 1 | 22 | 16 | 256 | 2 | 8  | 12 | 212 | 31 | 498   |
| 26,513 | 1 | 22 | 16 | 250 | 2 | 9  | 12 | 211 | 31 | 492   |
| 26,514 | 1 | 22 | 16 | 250 | 2 | 9  | 12 | 211 | 31 | 492   |
| 26,515 | 1 | 20 | 16 | 225 | 2 | 8  | 12 | 200 | 31 | 453   |

|        |   |    |    |     |   |   |    |     |    |     |
|--------|---|----|----|-----|---|---|----|-----|----|-----|
| 26,516 | 1 | 19 | 16 | 209 | 2 | 7 | 12 | 186 | 31 | 421 |
| 26,517 | 2 | 19 | 19 | 212 | 3 | 7 | 13 | 185 | 37 | 423 |
| 26,518 | 2 | 18 | 19 | 211 | 3 | 7 | 13 | 183 | 37 | 419 |
| 26,519 | 2 | 18 | 19 | 211 | 3 | 7 | 13 | 183 | 37 | 419 |
| 26,520 | 2 | 17 | 19 | 220 | 3 | 7 | 12 | 188 | 36 | 432 |
| 26,521 | 2 | 17 | 19 | 221 | 3 | 7 | 11 | 186 | 35 | 431 |
| 26,522 | 2 | 17 | 18 | 203 | 3 | 6 | 10 | 176 | 33 | 402 |
| 26,523 | 2 | 16 | 18 | 171 | 3 | 6 | 10 | 149 | 33 | 342 |
| 26,524 | 2 | 16 | 16 | 167 | 3 | 6 | 10 | 146 | 31 | 335 |
| 26,525 | 2 | 16 | 16 | 146 | 3 | 6 | 11 | 137 | 32 | 305 |
| 26,526 | 2 | 16 | 16 | 140 | 2 | 6 | 11 | 133 | 31 | 295 |
| 26,527 | 2 | 16 | 16 | 141 | 2 | 6 | 11 | 133 | 31 | 296 |
| 26,528 | 2 | 16 | 16 | 140 | 2 | 6 | 11 | 134 | 31 | 296 |
| 26,529 | 2 | 16 | 15 | 139 | 2 | 6 | 11 | 133 | 30 | 294 |
| 26,530 | 2 | 14 | 10 | 136 | 2 | 6 | 12 | 133 | 26 | 289 |
| 26,531 | 2 | 15 | 9  | 131 | 2 | 6 | 12 | 133 | 25 | 285 |
| 26,532 | 2 | 14 | 8  | 129 | 2 | 6 | 12 | 133 | 24 | 282 |
| 26,533 | 2 | 14 | 8  | 125 | 2 | 6 | 12 | 132 | 24 | 277 |
| 26,534 | 2 | 14 | 8  | 125 | 2 | 6 | 12 | 131 | 24 | 276 |
| 26,535 | 2 | 12 | 8  | 120 | 2 | 6 | 12 | 121 | 24 | 259 |
| 26,536 | 2 | 12 | 8  | 120 | 2 | 6 | 12 | 121 | 24 | 259 |
| 26,537 | 2 | 12 | 8  | 120 | 2 | 6 | 12 | 121 | 24 | 259 |
| 26,538 | 2 | 11 | 8  | 116 | 2 | 6 | 12 | 119 | 24 | 252 |
| 26,539 | 2 | 5  | 8  | 88  | 2 | 5 | 12 | 69  | 24 | 167 |
| 26,540 | 2 | 5  | 8  | 87  | 2 | 5 | 12 | 70  | 24 | 167 |
| 26,541 | 3 | 5  | 9  | 84  | 2 | 5 | 12 | 61  | 26 | 155 |
| 26,542 | 3 | 5  | 9  | 79  | 2 | 5 | 12 | 59  | 26 | 148 |
| 26,543 | 3 | 5  | 13 | 82  | 2 | 5 | 14 | 59  | 32 | 151 |
| 26,544 | 3 | 5  | 17 | 82  | 2 | 5 | 19 | 59  | 41 | 151 |
| 26,545 | 3 | 5  | 17 | 83  | 2 | 5 | 21 | 61  | 43 | 154 |
| 26,546 | 2 | 5  | 17 | 85  | 2 | 5 | 22 | 61  | 43 | 156 |
| 26,547 | 2 | 3  | 17 | 82  | 2 | 5 | 22 | 56  | 43 | 146 |
| 26,548 | 2 | 3  | 17 | 84  | 2 | 5 | 22 | 56  | 43 | 148 |
| 26,549 | 2 | 3  | 17 | 74  | 2 | 3 | 21 | 56  | 42 | 136 |
| 26,550 | 2 | 4  | 16 | 80  | 2 | 3 | 21 | 56  | 41 | 143 |
| 26,551 | 2 | 4  | 16 | 87  | 2 | 4 | 19 | 61  | 39 | 156 |
| 26,552 | 2 | 5  | 16 | 86  | 2 | 3 | 19 | 60  | 39 | 154 |
| 26,553 | 2 | 5  | 16 | 93  | 2 | 3 | 17 | 74  | 37 | 175 |
| 26,554 | 2 | 5  | 15 | 96  | 2 | 3 | 17 | 75  | 36 | 179 |
| 26,555 | 2 | 5  | 16 | 97  | 2 | 3 | 17 | 72  | 37 | 177 |
| 26,556 | 2 | 5  | 17 | 101 | 2 | 3 | 17 | 67  | 38 | 176 |



|        |   |    |    |     |   |    |    |     |    |     |
|--------|---|----|----|-----|---|----|----|-----|----|-----|
| 26,557 | 2 | 5  | 17 | 102 | 2 | 3  | 17 | 68  | 38 | 178 |
| 26,558 | 2 | 4  | 18 | 95  | 2 | 2  | 17 | 59  | 39 | 160 |
| 26,559 | 2 | 4  | 18 | 95  | 2 | 2  | 17 | 61  | 39 | 162 |
| 26,560 | 2 | 5  | 20 | 94  | 2 | 2  | 17 | 61  | 41 | 162 |
| 26,561 | 2 | 8  | 20 | 119 | 2 | 4  | 17 | 76  | 41 | 207 |
| 26,562 | 2 | 8  | 20 | 123 | 2 | 5  | 16 | 77  | 40 | 213 |
| 26,563 | 2 | 11 | 20 | 127 | 2 | 5  | 18 | 81  | 42 | 224 |
| 26,564 | 2 | 11 | 20 | 131 | 1 | 4  | 17 | 85  | 40 | 231 |
| 26,565 | 1 | 19 | 18 | 159 | 1 | 7  | 18 | 117 | 38 | 302 |
| 26,566 | 1 | 19 | 17 | 159 | 1 | 7  | 18 | 118 | 37 | 303 |
| 26,567 | 1 | 19 | 17 | 159 | 1 | 7  | 18 | 118 | 37 | 303 |
| 26,568 | 1 | 20 | 17 | 152 | 1 | 7  | 18 | 116 | 37 | 295 |
| 26,569 | 1 | 20 | 17 | 149 | 2 | 7  | 18 | 111 | 38 | 287 |
| 26,570 | 1 | 20 | 18 | 154 | 2 | 7  | 20 | 112 | 41 | 293 |
| 26,571 | 1 | 19 | 18 | 155 | 2 | 7  | 21 | 113 | 42 | 294 |
| 26,572 | 1 | 21 | 18 | 174 | 2 | 9  | 21 | 132 | 42 | 336 |
| 26,573 | 1 | 21 | 18 | 194 | 2 | 12 | 21 | 156 | 42 | 383 |
| 26,574 | 1 | 21 | 16 | 201 | 2 | 12 | 21 | 154 | 40 | 388 |
| 26,575 | 1 | 22 | 16 | 210 | 2 | 12 | 21 | 166 | 40 | 410 |
| 26,576 | 1 | 22 | 16 | 212 | 2 | 12 | 20 | 172 | 39 | 418 |
| 26,577 | 1 | 23 | 16 | 214 | 2 | 12 | 20 | 171 | 39 | 420 |
| 26,578 | 1 | 23 | 16 | 215 | 2 | 15 | 20 | 175 | 39 | 428 |
| 26,579 | 1 | 23 | 16 | 216 | 2 | 15 | 20 | 174 | 39 | 428 |
| 26,580 | 1 | 23 | 16 | 220 | 2 | 16 | 20 | 177 | 39 | 436 |
| 26,581 | 1 | 23 | 16 | 220 | 2 | 16 | 19 | 178 | 38 | 437 |
| 26,582 | 1 | 22 | 16 | 228 | 2 | 18 | 19 | 181 | 38 | 449 |
| 26,583 | 1 | 26 | 16 | 302 | 2 | 20 | 19 | 215 | 38 | 563 |
| 26,584 | 1 | 26 | 16 | 303 | 2 | 20 | 19 | 216 | 38 | 565 |
| 26,585 | 1 | 27 | 16 | 306 | 2 | 20 | 19 | 215 | 38 | 568 |
| 26,586 | 1 | 27 | 16 | 307 | 2 | 20 | 19 | 216 | 38 | 570 |
| 26,587 | 1 | 27 | 16 | 316 | 2 | 20 | 19 | 220 | 38 | 583 |
| 26,588 | 1 | 28 | 16 | 317 | 2 | 20 | 19 | 220 | 38 | 585 |
| 26,589 | 1 | 28 | 16 | 317 | 2 | 20 | 19 | 221 | 38 | 586 |
| 26,590 | 1 | 28 | 16 | 333 | 2 | 20 | 19 | 226 | 38 | 607 |
| 26,591 | 0 | 28 | 16 | 345 | 2 | 21 | 19 | 227 | 37 | 621 |
| 26,592 | 0 | 30 | 15 | 376 | 2 | 28 | 19 | 255 | 36 | 689 |
| 26,593 | 0 | 30 | 15 | 402 | 2 | 28 | 19 | 258 | 36 | 718 |
| 26,594 | 0 | 32 | 11 | 401 | 2 | 29 | 17 | 261 | 30 | 723 |
| 26,595 | 0 | 33 | 7  | 410 | 1 | 29 | 12 | 263 | 20 | 735 |
| 26,596 | 0 | 33 | 7  | 411 | 1 | 29 | 10 | 261 | 18 | 734 |
| 26,597 | 0 | 33 | 7  | 408 | 1 | 29 | 8  | 261 | 16 | 731 |

|        |   |    |   |     |   |    |   |     |    |     |
|--------|---|----|---|-----|---|----|---|-----|----|-----|
| 26,598 | 0 | 33 | 7 | 406 | 1 | 29 | 8 | 261 | 16 | 729 |
| 26,599 | 0 | 33 | 7 | 406 | 1 | 29 | 8 | 261 | 16 | 729 |
| 26,600 | 0 | 33 | 7 | 404 | 1 | 29 | 8 | 260 | 16 | 726 |
| 26,601 | 0 | 32 | 7 | 391 | 1 | 28 | 8 | 255 | 16 | 706 |
| 26,602 | 0 | 32 | 7 | 391 | 1 | 28 | 8 | 255 | 16 | 706 |
| 26,603 | 0 | 31 | 7 | 389 | 1 | 28 | 8 | 254 | 16 | 702 |
| 26,604 | 0 | 31 | 7 | 382 | 1 | 28 | 8 | 240 | 16 | 681 |
| 26,605 | 0 | 31 | 6 | 378 | 1 | 28 | 8 | 240 | 15 | 677 |
| 26,606 | 0 | 31 | 6 | 378 | 1 | 28 | 8 | 241 | 15 | 678 |
| 26,607 | 0 | 31 | 5 | 374 | 1 | 28 | 8 | 241 | 14 | 674 |
| 26,608 | 0 | 31 | 5 | 374 | 1 | 28 | 8 | 240 | 14 | 673 |
| 26,609 | 0 | 31 | 4 | 371 | 1 | 28 | 8 | 238 | 13 | 668 |
| 26,610 | 0 | 31 | 2 | 371 | 1 | 28 | 8 | 236 | 11 | 666 |
| 26,611 | 0 | 30 | 2 | 365 | 1 | 28 | 8 | 229 | 11 | 652 |
| 26,612 | 0 | 27 | 2 | 340 | 1 | 26 | 6 | 213 | 9  | 606 |
| 26,613 | 0 | 27 | 2 | 336 | 1 | 25 | 5 | 213 | 8  | 601 |
| 26,614 | 0 | 17 | 1 | 292 | 1 | 22 | 4 | 173 | 6  | 504 |
| 26,615 | 0 | 17 | 1 | 298 | 1 | 22 | 4 | 183 | 6  | 520 |
| 26,616 | 0 | 16 | 1 | 298 | 1 | 22 | 3 | 183 | 5  | 519 |
| 26,617 | 0 | 16 | 1 | 298 | 1 | 22 | 3 | 182 | 5  | 518 |
| 26,618 | 0 | 15 | 1 | 298 | 1 | 22 | 3 | 182 | 5  | 517 |
| 26,619 | 0 | 15 | 1 | 298 | 1 | 22 | 3 | 185 | 5  | 520 |
| 26,620 | 0 | 15 | 2 | 294 | 0 | 22 | 6 | 184 | 8  | 515 |
| 26,621 | 0 | 15 | 1 | 289 | 0 | 22 | 3 | 183 | 4  | 509 |
| 26,622 | 0 | 15 | 1 | 285 | 0 | 22 | 3 | 182 | 4  | 504 |
| 26,623 | 2 | 13 | 3 | 261 | 0 | 20 | 3 | 165 | 8  | 459 |
| 26,624 | 2 | 13 | 3 | 232 | 0 | 17 | 3 | 140 | 8  | 402 |
| 26,625 | 2 | 13 | 4 | 232 | 0 | 17 | 3 | 140 | 9  | 402 |
| 26,626 | 2 | 12 | 5 | 218 | 0 | 17 | 3 | 119 | 10 | 366 |
| 26,627 | 2 | 12 | 5 | 218 | 0 | 17 | 3 | 119 | 10 | 366 |
| 26,628 | 2 | 11 | 5 | 215 | 0 | 14 | 3 | 115 | 10 | 355 |
| 26,629 | 2 | 12 | 5 | 217 | 0 | 14 | 3 | 117 | 10 | 360 |
| 26,630 | 2 | 12 | 5 | 218 | 0 | 14 | 3 | 117 | 10 | 361 |
| 26,631 | 2 | 12 | 5 | 214 | 1 | 13 | 4 | 115 | 12 | 354 |
| 26,632 | 2 | 13 | 6 | 216 | 1 | 13 | 4 | 115 | 13 | 357 |
| 26,633 | 2 | 13 | 6 | 206 | 1 | 11 | 4 | 110 | 13 | 340 |
| 26,634 | 2 | 9  | 6 | 132 | 1 | 10 | 4 | 77  | 13 | 228 |
| 26,635 | 2 | 9  | 8 | 131 | 1 | 10 | 5 | 77  | 16 | 227 |
| 26,636 | 2 | 8  | 8 | 128 | 1 | 10 | 5 | 77  | 16 | 223 |
| 26,637 | 2 | 8  | 8 | 118 | 1 | 10 | 5 | 72  | 16 | 208 |
| 26,638 | 2 | 8  | 8 | 118 | 1 | 10 | 5 | 72  | 16 | 208 |

|        |   |   |    |     |   |    |    |    |    |     |
|--------|---|---|----|-----|---|----|----|----|----|-----|
| 26,639 | 2 | 7 | 8  | 117 | 1 | 10 | 5  | 72 | 16 | 206 |
| 26,640 | 2 | 7 | 8  | 101 | 1 | 10 | 5  | 67 | 16 | 185 |
| 26,641 | 2 | 7 | 8  | 101 | 1 | 10 | 5  | 67 | 16 | 185 |
| 26,642 | 2 | 7 | 8  | 88  | 1 | 9  | 5  | 65 | 16 | 169 |
| 26,643 | 2 | 5 | 8  | 57  | 1 | 2  | 5  | 36 | 16 | 100 |
| 26,644 | 2 | 5 | 8  | 30  | 1 | 2  | 5  | 31 | 16 | 68  |
| 26,645 | 2 | 2 | 8  | 19  | 1 | 1  | 5  | 26 | 16 | 48  |
| 26,646 | 2 | 2 | 8  | 19  | 1 | 1  | 5  | 26 | 16 | 48  |
| 26,647 | 3 | 2 | 9  | 17  | 1 | 1  | 7  | 27 | 20 | 47  |
| 26,648 | 3 | 2 | 11 | 17  | 1 | 1  | 8  | 28 | 23 | 48  |
| 26,649 | 3 | 2 | 12 | 18  | 1 | 1  | 8  | 28 | 24 | 49  |
| 26,650 | 3 | 2 | 12 | 19  | 1 | 1  | 8  | 28 | 24 | 50  |
| 26,651 | 3 | 2 | 13 | 19  | 1 | 1  | 8  | 28 | 25 | 50  |
| 26,652 | 3 | 2 | 16 | 19  | 1 | 1  | 8  | 28 | 28 | 50  |
| 26,653 | 3 | 2 | 16 | 19  | 1 | 1  | 8  | 29 | 28 | 51  |
| 26,654 | 3 | 2 | 16 | 19  | 1 | 1  | 8  | 29 | 28 | 51  |
| 26,655 | 3 | 2 | 16 | 19  | 1 | 1  | 8  | 29 | 28 | 51  |
| 26,656 | 3 | 2 | 16 | 19  | 1 | 1  | 8  | 28 | 28 | 50  |
| 26,657 | 3 | 2 | 16 | 19  | 1 | 1  | 8  | 27 | 28 | 49  |
| 26,658 | 3 | 2 | 16 | 18  | 1 | 1  | 8  | 27 | 28 | 48  |
| 26,659 | 3 | 2 | 17 | 19  | 1 | 1  | 10 | 27 | 31 | 49  |
| 26,660 | 3 | 2 | 17 | 19  | 1 | 1  | 10 | 27 | 31 | 49  |
| 26,661 | 3 | 2 | 17 | 20  | 1 | 1  | 10 | 27 | 31 | 50  |
| 26,662 | 3 | 2 | 17 | 20  | 1 | 2  | 10 | 27 | 31 | 51  |
| 26,663 | 3 | 2 | 18 | 20  | 1 | 2  | 10 | 27 | 32 | 51  |
| 26,664 | 3 | 2 | 18 | 20  | 1 | 2  | 10 | 27 | 32 | 51  |
| 26,665 | 3 | 2 | 18 | 19  | 1 | 2  | 10 | 25 | 32 | 48  |
| 26,666 | 3 | 2 | 18 | 14  | 2 | 2  | 12 | 15 | 35 | 33  |
| 26,667 | 3 | 2 | 18 | 14  | 2 | 2  | 12 | 15 | 35 | 33  |
| 26,668 | 3 | 2 | 22 | 14  | 2 | 2  | 18 | 15 | 45 | 33  |
| 26,669 | 3 | 2 | 22 | 14  | 2 | 2  | 19 | 15 | 46 | 33  |
| 26,670 | 3 | 2 | 23 | 12  | 2 | 2  | 16 | 12 | 44 | 28  |
| 26,671 | 3 | 2 | 24 | 12  | 2 | 2  | 16 | 12 | 45 | 28  |
| 26,672 | 3 | 2 | 24 | 12  | 2 | 2  | 16 | 12 | 45 | 28  |
| 26,673 | 1 | 2 | 22 | 12  | 2 | 2  | 16 | 12 | 41 | 28  |
| 26,674 | 1 | 2 | 22 | 12  | 2 | 2  | 16 | 11 | 41 | 27  |
| 26,675 | 1 | 2 | 22 | 12  | 2 | 2  | 16 | 11 | 41 | 27  |
| 26,676 | 1 | 2 | 21 | 12  | 2 | 2  | 16 | 11 | 40 | 27  |
| 26,677 | 1 | 2 | 20 | 12  | 2 | 2  | 16 | 11 | 39 | 27  |
| 26,678 | 1 | 2 | 22 | 11  | 2 | 2  | 16 | 10 | 41 | 25  |
| 26,679 | 1 | 1 | 22 | 8   | 2 | 2  | 16 | 8  | 41 | 19  |

|        |   |   |    |    |   |   |    |    |    |    |
|--------|---|---|----|----|---|---|----|----|----|----|
| 26,680 | 1 | 1 | 22 | 8  | 2 | 2 | 16 | 9  | 41 | 20 |
| 26,681 | 1 | 1 | 22 | 7  | 1 | 2 | 16 | 9  | 40 | 19 |
| 26,682 | 1 | 1 | 22 | 7  | 1 | 2 | 15 | 8  | 39 | 18 |
| 26,683 | 1 | 0 | 21 | 5  | 1 | 2 | 15 | 7  | 38 | 14 |
| 26,684 | 1 | 0 | 21 | 5  | 1 | 2 | 15 | 7  | 38 | 14 |
| 26,685 | 1 | 0 | 19 | 5  | 1 | 1 | 14 | 6  | 35 | 12 |
| 26,686 | 1 | 0 | 20 | 5  | 1 | 1 | 14 | 6  | 36 | 12 |
| 26,687 | 1 | 0 | 20 | 5  | 1 | 1 | 14 | 6  | 36 | 12 |
| 26,688 | 1 | 0 | 20 | 5  | 1 | 1 | 14 | 6  | 36 | 12 |
| 26,689 | 1 | 0 | 20 | 5  | 1 | 1 | 14 | 6  | 36 | 12 |
| 26,690 | 1 | 0 | 20 | 5  | 1 | 1 | 14 | 5  | 36 | 11 |
| 26,691 | 1 | 0 | 20 | 5  | 1 | 1 | 14 | 5  | 36 | 11 |
| 26,692 | 1 | 0 | 20 | 5  | 1 | 1 | 14 | 5  | 36 | 11 |
| 26,693 | 1 | 0 | 20 | 5  | 1 | 1 | 14 | 5  | 36 | 11 |
| 26,694 | 1 | 0 | 20 | 5  | 1 | 1 | 14 | 5  | 36 | 11 |
| 26,695 | 1 | 0 | 20 | 5  | 1 | 1 | 14 | 5  | 36 | 11 |
| 26,696 | 1 | 0 | 20 | 5  | 1 | 1 | 14 | 5  | 36 | 11 |
| 26,697 | 0 | 0 | 19 | 8  | 1 | 2 | 14 | 15 | 34 | 25 |
| 26,698 | 0 | 0 | 19 | 8  | 1 | 2 | 12 | 14 | 32 | 24 |
| 26,699 | 0 | 0 | 17 | 13 | 1 | 4 | 11 | 19 | 29 | 36 |
| 26,700 | 0 | 0 | 16 | 16 | 1 | 4 | 11 | 20 | 28 | 40 |
| 26,701 | 0 | 0 | 16 | 16 | 1 | 4 | 11 | 20 | 28 | 40 |
| 26,702 | 0 | 0 | 15 | 15 | 1 | 4 | 11 | 20 | 27 | 39 |
| 26,703 | 0 | 0 | 12 | 15 | 1 | 4 | 11 | 19 | 24 | 38 |
| 26,704 | 0 | 0 | 12 | 15 | 1 | 4 | 11 | 19 | 24 | 38 |
| 26,705 | 0 | 0 | 12 | 15 | 1 | 4 | 11 | 19 | 24 | 38 |
| 26,706 | 0 | 0 | 13 | 15 | 1 | 4 | 11 | 19 | 25 | 38 |
| 26,707 | 0 | 0 | 13 | 15 | 1 | 4 | 11 | 19 | 25 | 38 |
| 26,708 | 0 | 0 | 13 | 15 | 1 | 4 | 11 | 19 | 25 | 38 |
| 26,709 | 0 | 0 | 13 | 15 | 1 | 4 | 11 | 19 | 25 | 38 |
| 26,710 | 0 | 0 | 12 | 14 | 1 | 4 | 9  | 19 | 22 | 37 |
| 26,711 | 0 | 0 | 12 | 14 | 1 | 4 | 9  | 20 | 22 | 38 |
| 26,712 | 1 | 0 | 12 | 13 | 1 | 4 | 9  | 20 | 23 | 37 |
| 26,713 | 1 | 1 | 11 | 13 | 1 | 3 | 9  | 20 | 22 | 37 |
| 26,714 | 1 | 1 | 11 | 13 | 1 | 3 | 9  | 19 | 22 | 36 |
| 26,715 | 1 | 1 | 11 | 14 | 1 | 3 | 9  | 19 | 22 | 37 |
| 26,716 | 1 | 2 | 11 | 14 | 0 | 3 | 7  | 19 | 19 | 38 |
| 26,717 | 1 | 2 | 11 | 14 | 0 | 3 | 7  | 19 | 19 | 38 |
| 26,718 | 1 | 3 | 7  | 14 | 0 | 3 | 1  | 19 | 9  | 39 |
| 26,719 | 1 | 3 | 7  | 15 | 0 | 3 | 0  | 19 | 8  | 40 |
| 26,720 | 1 | 3 | 7  | 15 | 0 | 3 | 0  | 19 | 8  | 40 |

|        |   |    |    |    |   |   |   |    |    |    |
|--------|---|----|----|----|---|---|---|----|----|----|
| 26,721 | 1 | 3  | 6  | 15 | 0 | 3 | 0 | 19 | 7  | 40 |
| 26,722 | 1 | 3  | 5  | 15 | 0 | 3 | 0 | 19 | 6  | 40 |
| 26,723 | 1 | 3  | 6  | 15 | 0 | 3 | 0 | 19 | 7  | 40 |
| 26,724 | 1 | 4  | 6  | 15 | 0 | 3 | 0 | 19 | 7  | 41 |
| 26,725 | 1 | 4  | 6  | 15 | 0 | 3 | 0 | 19 | 7  | 41 |
| 26,726 | 1 | 4  | 8  | 15 | 0 | 3 | 0 | 19 | 9  | 41 |
| 26,727 | 1 | 4  | 8  | 15 | 0 | 3 | 0 | 19 | 9  | 41 |
| 26,728 | 1 | 4  | 8  | 15 | 0 | 3 | 0 | 19 | 9  | 41 |
| 26,729 | 1 | 5  | 6  | 15 | 1 | 3 | 1 | 18 | 9  | 41 |
| 26,730 | 1 | 5  | 6  | 15 | 1 | 3 | 1 | 18 | 9  | 41 |
| 26,731 | 1 | 5  | 6  | 15 | 1 | 4 | 1 | 18 | 9  | 42 |
| 26,732 | 1 | 5  | 6  | 15 | 1 | 4 | 1 | 18 | 9  | 42 |
| 26,733 | 1 | 5  | 7  | 15 | 1 | 4 | 1 | 18 | 10 | 42 |
| 26,734 | 2 | 5  | 8  | 15 | 1 | 4 | 1 | 18 | 12 | 42 |
| 26,735 | 2 | 5  | 8  | 15 | 1 | 4 | 1 | 18 | 12 | 42 |
| 26,736 | 2 | 5  | 8  | 15 | 1 | 4 | 1 | 18 | 12 | 42 |
| 26,737 | 2 | 5  | 10 | 15 | 1 | 4 | 1 | 18 | 14 | 42 |
| 26,738 | 2 | 5  | 13 | 16 | 1 | 4 | 1 | 18 | 17 | 43 |
| 26,739 | 2 | 5  | 13 | 16 | 1 | 4 | 2 | 18 | 18 | 43 |
| 26,740 | 2 | 5  | 13 | 16 | 1 | 4 | 2 | 18 | 18 | 43 |
| 26,741 | 2 | 5  | 13 | 16 | 1 | 4 | 2 | 18 | 18 | 43 |
| 26,742 | 2 | 5  | 13 | 16 | 1 | 4 | 2 | 18 | 18 | 43 |
| 26,743 | 2 | 5  | 13 | 16 | 1 | 4 | 2 | 18 | 18 | 43 |
| 26,744 | 2 | 5  | 17 | 16 | 1 | 5 | 3 | 18 | 23 | 44 |
| 26,745 | 2 | 5  | 17 | 16 | 1 | 5 | 3 | 18 | 23 | 44 |
| 26,746 | 2 | 5  | 20 | 16 | 1 | 5 | 3 | 18 | 26 | 44 |
| 26,747 | 2 | 5  | 20 | 13 | 1 | 4 | 3 | 7  | 26 | 29 |
| 26,748 | 2 | 5  | 20 | 14 | 1 | 4 | 3 | 7  | 26 | 30 |
| 26,749 | 3 | 5  | 20 | 9  | 1 | 2 | 3 | 2  | 27 | 18 |
| 26,750 | 3 | 5  | 20 | 9  | 1 | 2 | 3 | 2  | 27 | 18 |
| 26,751 | 3 | 5  | 20 | 5  | 1 | 2 | 3 | 1  | 27 | 13 |
| 26,752 | 3 | 5  | 20 | 4  | 1 | 2 | 3 | 1  | 27 | 12 |
| 26,753 | 3 | 5  | 20 | 4  | 1 | 2 | 3 | 1  | 27 | 12 |
| 26,754 | 3 | 5  | 20 | 5  | 1 | 2 | 3 | 1  | 27 | 13 |
| 26,755 | 3 | 5  | 20 | 6  | 1 | 2 | 3 | 1  | 27 | 14 |
| 26,756 | 3 | 6  | 19 | 7  | 1 | 2 | 3 | 1  | 26 | 16 |
| 26,757 | 3 | 10 | 19 | 16 | 1 | 2 | 3 | 15 | 26 | 43 |
| 26,758 | 3 | 10 | 19 | 16 | 1 | 2 | 3 | 16 | 26 | 44 |
| 26,759 | 4 | 14 | 21 | 21 | 3 | 2 | 4 | 17 | 32 | 54 |
| 26,760 | 5 | 14 | 21 | 23 | 3 | 2 | 5 | 17 | 34 | 56 |
| 26,761 | 4 | 15 | 21 | 28 | 3 | 2 | 5 | 19 | 33 | 64 |

|        |   |    |    |    |   |   |    |    |    |    |
|--------|---|----|----|----|---|---|----|----|----|----|
| 26,762 | 4 | 15 | 21 | 30 | 3 | 2 | 5  | 18 | 33 | 65 |
| 26,763 | 4 | 15 | 28 | 30 | 3 | 2 | 8  | 18 | 43 | 65 |
| 26,764 | 4 | 14 | 32 | 30 | 3 | 2 | 8  | 18 | 47 | 64 |
| 26,765 | 4 | 14 | 32 | 30 | 3 | 2 | 8  | 18 | 47 | 64 |
| 26,766 | 6 | 13 | 38 | 29 | 3 | 2 | 13 | 18 | 60 | 62 |
| 26,767 | 6 | 13 | 38 | 29 | 3 | 2 | 13 | 18 | 60 | 62 |
| 26,768 | 6 | 12 | 42 | 29 | 3 | 2 | 14 | 20 | 65 | 63 |
| 26,769 | 6 | 12 | 42 | 29 | 3 | 2 | 14 | 21 | 65 | 64 |
| 26,770 | 9 | 12 | 50 | 29 | 3 | 2 | 23 | 21 | 85 | 64 |
| 26,771 | 9 | 12 | 50 | 33 | 3 | 2 | 23 | 24 | 85 | 71 |
| 26,772 | 9 | 12 | 50 | 33 | 3 | 2 | 23 | 24 | 85 | 71 |
| 26,773 | 9 | 12 | 50 | 33 | 3 | 2 | 23 | 24 | 85 | 71 |
| 26,774 | 9 | 11 | 49 | 33 | 3 | 2 | 23 | 24 | 84 | 70 |
| 26,775 | 9 | 11 | 49 | 33 | 3 | 2 | 23 | 25 | 84 | 71 |
| 26,776 | 9 | 11 | 47 | 33 | 3 | 2 | 23 | 25 | 82 | 71 |
| 26,777 | 9 | 11 | 47 | 33 | 3 | 2 | 23 | 25 | 82 | 71 |
| 26,778 | 9 | 11 | 47 | 33 | 3 | 2 | 24 | 25 | 83 | 71 |
| 26,779 | 9 | 11 | 47 | 33 | 3 | 2 | 24 | 25 | 83 | 71 |
| 26,780 | 9 | 10 | 47 | 34 | 2 | 1 | 23 | 25 | 81 | 70 |
| 26,781 | 9 | 10 | 47 | 34 | 2 | 1 | 23 | 25 | 81 | 70 |
| 26,782 | 9 | 10 | 47 | 34 | 2 | 1 | 23 | 26 | 81 | 71 |
| 26,783 | 9 | 10 | 46 | 34 | 2 | 1 | 23 | 26 | 80 | 71 |
| 26,784 | 9 | 10 | 46 | 34 | 2 | 1 | 23 | 26 | 80 | 71 |
| 26,785 | 8 | 10 | 45 | 34 | 2 | 1 | 23 | 26 | 78 | 71 |
| 26,786 | 8 | 10 | 45 | 35 | 2 | 1 | 23 | 26 | 78 | 72 |
| 26,787 | 8 | 10 | 42 | 35 | 2 | 1 | 23 | 26 | 75 | 72 |
| 26,788 | 8 | 10 | 40 | 35 | 2 | 1 | 23 | 26 | 73 | 72 |
| 26,789 | 8 | 11 | 39 | 38 | 2 | 1 | 23 | 27 | 72 | 77 |
| 26,790 | 8 | 11 | 39 | 39 | 2 | 1 | 22 | 27 | 71 | 78 |
| 26,791 | 8 | 11 | 40 | 39 | 2 | 1 | 22 | 28 | 72 | 79 |
| 26,792 | 8 | 11 | 40 | 39 | 2 | 1 | 22 | 28 | 72 | 79 |
| 26,793 | 8 | 11 | 37 | 41 | 2 | 1 | 22 | 29 | 69 | 82 |
| 26,794 | 8 | 11 | 37 | 41 | 2 | 1 | 21 | 29 | 68 | 82 |
| 26,795 | 8 | 12 | 37 | 41 | 2 | 0 | 21 | 29 | 68 | 82 |
| 26,796 | 8 | 12 | 37 | 41 | 2 | 0 | 21 | 29 | 68 | 82 |
| 26,797 | 8 | 12 | 34 | 41 | 2 | 0 | 21 | 29 | 65 | 82 |
| 26,798 | 8 | 12 | 34 | 40 | 2 | 0 | 21 | 29 | 65 | 81 |
| 26,799 | 8 | 12 | 34 | 40 | 2 | 0 | 21 | 29 | 65 | 81 |
| 26,800 | 7 | 12 | 34 | 40 | 2 | 0 | 21 | 29 | 64 | 81 |
| 26,801 | 7 | 12 | 34 | 39 | 2 | 0 | 21 | 29 | 64 | 80 |
| 26,802 | 8 | 12 | 34 | 40 | 2 | 0 | 21 | 29 | 65 | 81 |

|        |   |    |    |    |   |   |    |    |    |    |
|--------|---|----|----|----|---|---|----|----|----|----|
| 26,803 | 8 | 12 | 34 | 40 | 2 | 0 | 21 | 29 | 65 | 81 |
| 26,804 | 8 | 12 | 34 | 40 | 2 | 0 | 21 | 29 | 65 | 81 |
| 26,805 | 8 | 12 | 35 | 38 | 2 | 0 | 22 | 30 | 67 | 80 |
| 26,806 | 8 | 12 | 35 | 38 | 2 | 0 | 22 | 30 | 67 | 80 |
| 26,807 | 8 | 11 | 35 | 38 | 2 | 0 | 22 | 30 | 67 | 79 |
| 26,808 | 7 | 7  | 36 | 29 | 2 | 0 | 22 | 15 | 67 | 51 |
| 26,809 | 7 | 7  | 34 | 32 | 2 | 0 | 22 | 15 | 65 | 54 |
| 26,810 | 7 | 3  | 34 | 29 | 0 | 0 | 21 | 14 | 62 | 46 |
| 26,811 | 6 | 3  | 34 | 27 | 0 | 0 | 20 | 14 | 60 | 44 |
| 26,812 | 6 | 2  | 27 | 20 | 0 | 0 | 19 | 12 | 52 | 34 |
| 26,813 | 6 | 2  | 27 | 20 | 0 | 0 | 17 | 12 | 50 | 34 |
| 26,814 | 6 | 2  | 26 | 20 | 0 | 0 | 17 | 12 | 49 | 34 |
| 26,815 | 6 | 2  | 24 | 22 | 0 | 0 | 17 | 13 | 47 | 37 |
| 26,816 | 6 | 2  | 23 | 22 | 0 | 1 | 16 | 15 | 45 | 40 |
| 26,817 | 4 | 4  | 18 | 24 | 0 | 1 | 12 | 19 | 34 | 48 |
| 26,818 | 4 | 4  | 18 | 28 | 0 | 1 | 11 | 19 | 33 | 52 |
| 26,819 | 4 | 4  | 14 | 29 | 0 | 1 | 11 | 16 | 29 | 50 |
| 26,820 | 4 | 4  | 14 | 30 | 0 | 1 | 11 | 16 | 29 | 51 |
| 26,821 | 1 | 4  | 6  | 29 | 0 | 1 | 2  | 18 | 9  | 52 |
| 26,822 | 1 | 5  | 6  | 25 | 0 | 1 | 2  | 15 | 9  | 46 |
| 26,823 | 1 | 5  | 6  | 25 | 0 | 1 | 2  | 15 | 9  | 46 |
| 26,824 | 1 | 5  | 8  | 26 | 0 | 1 | 3  | 15 | 12 | 47 |
| 26,825 | 1 | 5  | 8  | 26 | 0 | 1 | 3  | 15 | 12 | 47 |
| 26,826 | 1 | 5  | 10 | 33 | 0 | 1 | 3  | 17 | 14 | 56 |
| 26,827 | 1 | 5  | 10 | 33 | 0 | 1 | 3  | 17 | 14 | 56 |
| 26,828 | 1 | 5  | 10 | 34 | 0 | 1 | 2  | 17 | 13 | 57 |
| 26,829 | 1 | 5  | 10 | 34 | 0 | 1 | 2  | 17 | 13 | 57 |
| 26,830 | 1 | 5  | 10 | 33 | 0 | 1 | 2  | 17 | 13 | 56 |
| 26,831 | 1 | 6  | 10 | 34 | 0 | 1 | 3  | 19 | 14 | 60 |
| 26,832 | 1 | 6  | 10 | 35 | 0 | 1 | 3  | 20 | 14 | 62 |
| 26,833 | 1 | 6  | 10 | 35 | 0 | 1 | 3  | 19 | 14 | 61 |
| 26,834 | 1 | 6  | 10 | 35 | 0 | 1 | 3  | 20 | 14 | 62 |
| 26,835 | 1 | 6  | 10 | 34 | 0 | 1 | 3  | 20 | 14 | 61 |
| 26,836 | 1 | 6  | 10 | 37 | 0 | 1 | 3  | 23 | 14 | 67 |
| 26,837 | 1 | 6  | 10 | 37 | 0 | 1 | 3  | 23 | 14 | 67 |
| 26,838 | 1 | 6  | 11 | 39 | 0 | 1 | 3  | 22 | 15 | 68 |
| 26,839 | 1 | 6  | 11 | 39 | 0 | 1 | 3  | 22 | 15 | 68 |
| 26,840 | 1 | 5  | 11 | 34 | 0 | 1 | 3  | 22 | 15 | 62 |
| 26,841 | 1 | 5  | 10 | 34 | 0 | 1 | 3  | 22 | 14 | 62 |
| 26,842 | 1 | 5  | 11 | 34 | 1 | 1 | 3  | 21 | 16 | 61 |
| 26,843 | 1 | 5  | 16 | 35 | 1 | 1 | 3  | 21 | 21 | 62 |

|        |   |    |    |    |   |   |   |    |    |     |
|--------|---|----|----|----|---|---|---|----|----|-----|
| 26,844 | 1 | 5  | 17 | 33 | 1 | 1 | 3 | 20 | 22 | 59  |
| 26,845 | 1 | 4  | 16 | 33 | 1 | 1 | 3 | 20 | 21 | 58  |
| 26,846 | 1 | 4  | 16 | 33 | 1 | 1 | 3 | 20 | 21 | 58  |
| 26,847 | 1 | 4  | 16 | 33 | 1 | 1 | 3 | 20 | 21 | 58  |
| 26,848 | 1 | 4  | 16 | 33 | 1 | 1 | 3 | 20 | 21 | 58  |
| 26,849 | 1 | 4  | 16 | 34 | 1 | 1 | 3 | 20 | 21 | 59  |
| 26,850 | 1 | 4  | 16 | 34 | 1 | 1 | 3 | 20 | 21 | 59  |
| 26,851 | 3 | 4  | 16 | 34 | 1 | 1 | 3 | 20 | 23 | 59  |
| 26,852 | 2 | 4  | 16 | 37 | 1 | 1 | 3 | 20 | 22 | 62  |
| 26,853 | 2 | 4  | 18 | 37 | 1 | 1 | 4 | 20 | 25 | 62  |
| 26,854 | 2 | 9  | 18 | 37 | 1 | 1 | 4 | 20 | 25 | 67  |
| 26,855 | 2 | 9  | 18 | 39 | 1 | 1 | 3 | 20 | 24 | 69  |
| 26,856 | 4 | 9  | 18 | 39 | 1 | 1 | 6 | 19 | 29 | 68  |
| 26,857 | 4 | 9  | 18 | 39 | 1 | 1 | 6 | 19 | 29 | 68  |
| 26,858 | 4 | 9  | 18 | 39 | 1 | 1 | 6 | 19 | 29 | 68  |
| 26,859 | 4 | 9  | 17 | 36 | 1 | 1 | 6 | 19 | 28 | 65  |
| 26,860 | 4 | 9  | 17 | 36 | 1 | 1 | 6 | 19 | 28 | 65  |
| 26,861 | 4 | 9  | 17 | 34 | 1 | 1 | 6 | 19 | 28 | 63  |
| 26,862 | 4 | 9  | 17 | 34 | 1 | 1 | 6 | 19 | 28 | 63  |
| 26,863 | 4 | 9  | 17 | 34 | 1 | 1 | 6 | 19 | 28 | 63  |
| 26,864 | 4 | 9  | 17 | 34 | 1 | 1 | 6 | 19 | 28 | 63  |
| 26,865 | 4 | 9  | 16 | 32 | 1 | 1 | 6 | 18 | 27 | 60  |
| 26,866 | 4 | 9  | 16 | 32 | 1 | 1 | 6 | 18 | 27 | 60  |
| 26,867 | 4 | 7  | 16 | 34 | 1 | 0 | 6 | 15 | 27 | 56  |
| 26,868 | 4 | 7  | 16 | 34 | 1 | 0 | 6 | 17 | 27 | 58  |
| 26,869 | 4 | 7  | 16 | 31 | 1 | 0 | 6 | 17 | 27 | 55  |
| 26,870 | 4 | 7  | 17 | 32 | 1 | 0 | 6 | 19 | 28 | 58  |
| 26,871 | 4 | 8  | 16 | 35 | 1 | 3 | 6 | 23 | 27 | 69  |
| 26,872 | 4 | 9  | 16 | 35 | 1 | 3 | 6 | 21 | 27 | 68  |
| 26,873 | 4 | 10 | 17 | 38 | 3 | 3 | 6 | 23 | 30 | 74  |
| 26,874 | 4 | 11 | 15 | 43 | 3 | 3 | 6 | 23 | 28 | 80  |
| 26,875 | 4 | 11 | 15 | 45 | 3 | 3 | 7 | 23 | 29 | 82  |
| 26,876 | 4 | 13 | 13 | 49 | 3 | 6 | 7 | 23 | 27 | 91  |
| 26,877 | 4 | 13 | 13 | 58 | 3 | 6 | 7 | 28 | 27 | 105 |
| 26,878 | 4 | 15 | 13 | 73 | 3 | 6 | 7 | 31 | 27 | 125 |
| 26,879 | 4 | 16 | 13 | 74 | 3 | 6 | 7 | 31 | 27 | 127 |
| 26,880 | 4 | 18 | 14 | 88 | 3 | 6 | 7 | 34 | 28 | 146 |
| 26,881 | 4 | 18 | 14 | 88 | 3 | 6 | 7 | 34 | 28 | 146 |
| 26,882 | 4 | 17 | 14 | 90 | 3 | 6 | 6 | 32 | 27 | 145 |
| 26,883 | 4 | 17 | 14 | 89 | 3 | 6 | 6 | 31 | 27 | 143 |
| 26,884 | 4 | 17 | 16 | 89 | 3 | 6 | 7 | 31 | 30 | 143 |



|        |   |    |    |     |   |    |   |     |    |     |
|--------|---|----|----|-----|---|----|---|-----|----|-----|
| 26,885 | 4 | 17 | 16 | 89  | 3 | 6  | 7 | 30  | 30 | 142 |
| 26,886 | 4 | 17 | 21 | 86  | 3 | 6  | 7 | 27  | 35 | 136 |
| 26,887 | 4 | 17 | 20 | 85  | 3 | 6  | 7 | 27  | 34 | 135 |
| 26,888 | 4 | 17 | 20 | 86  | 3 | 6  | 7 | 28  | 34 | 137 |
| 26,889 | 4 | 17 | 20 | 86  | 3 | 6  | 7 | 31  | 34 | 140 |
| 26,890 | 4 | 19 | 21 | 88  | 3 | 6  | 7 | 32  | 35 | 145 |
| 26,891 | 4 | 20 | 21 | 90  | 3 | 6  | 7 | 33  | 35 | 149 |
| 26,892 | 4 | 20 | 20 | 91  | 2 | 6  | 7 | 35  | 33 | 152 |
| 26,893 | 4 | 20 | 15 | 91  | 2 | 6  | 7 | 35  | 28 | 152 |
| 26,894 | 4 | 20 | 15 | 90  | 2 | 6  | 7 | 35  | 28 | 151 |
| 26,895 | 4 | 20 | 15 | 90  | 2 | 6  | 7 | 35  | 28 | 151 |
| 26,896 | 4 | 20 | 15 | 90  | 2 | 6  | 7 | 35  | 28 | 151 |
| 26,897 | 4 | 20 | 15 | 90  | 2 | 6  | 8 | 35  | 29 | 151 |
| 26,898 | 4 | 20 | 15 | 92  | 2 | 6  | 8 | 35  | 29 | 153 |
| 26,899 | 4 | 26 | 15 | 106 | 2 | 6  | 8 | 48  | 29 | 186 |
| 26,900 | 4 | 26 | 15 | 117 | 2 | 6  | 8 | 58  | 29 | 207 |
| 26,901 | 4 | 26 | 15 | 128 | 2 | 7  | 8 | 64  | 29 | 225 |
| 26,902 | 2 | 26 | 15 | 129 | 2 | 7  | 8 | 65  | 27 | 227 |
| 26,903 | 2 | 28 | 13 | 145 | 2 | 7  | 8 | 88  | 25 | 268 |
| 26,904 | 2 | 37 | 13 | 167 | 2 | 7  | 7 | 108 | 24 | 319 |
| 26,905 | 2 | 32 | 13 | 170 | 2 | 7  | 6 | 108 | 23 | 317 |
| 26,906 | 0 | 32 | 12 | 175 | 2 | 7  | 4 | 110 | 18 | 324 |
| 26,907 | 0 | 32 | 12 | 176 | 2 | 7  | 4 | 111 | 18 | 326 |
| 26,908 | 0 | 32 | 12 | 177 | 2 | 7  | 4 | 112 | 18 | 328 |
| 26,909 | 0 | 32 | 12 | 176 | 2 | 7  | 4 | 112 | 18 | 327 |
| 26,910 | 0 | 32 | 12 | 176 | 2 | 7  | 4 | 114 | 18 | 329 |
| 26,911 | 0 | 32 | 12 | 178 | 2 | 7  | 4 | 114 | 18 | 331 |
| 26,912 | 0 | 32 | 12 | 178 | 2 | 7  | 4 | 115 | 18 | 332 |
| 26,913 | 0 | 32 | 12 | 178 | 2 | 7  | 4 | 115 | 18 | 332 |
| 26,914 | 0 | 32 | 12 | 178 | 2 | 7  | 4 | 116 | 18 | 333 |
| 26,915 | 0 | 32 | 12 | 178 | 2 | 7  | 4 | 116 | 18 | 333 |
| 26,916 | 0 | 32 | 12 | 179 | 2 | 7  | 4 | 117 | 18 | 335 |
| 26,917 | 0 | 33 | 12 | 188 | 2 | 7  | 4 | 124 | 18 | 352 |
| 26,918 | 0 | 33 | 12 | 186 | 2 | 7  | 4 | 124 | 18 | 350 |
| 26,919 | 0 | 36 | 12 | 199 | 2 | 8  | 4 | 136 | 18 | 379 |
| 26,920 | 0 | 37 | 12 | 231 | 2 | 11 | 4 | 154 | 18 | 433 |
| 26,921 | 0 | 48 | 11 | 411 | 2 | 15 | 4 | 226 | 17 | 700 |
| 26,922 | 0 | 49 | 11 | 424 | 2 | 13 | 4 | 242 | 17 | 728 |
| 26,923 | 0 | 46 | 10 | 427 | 0 | 13 | 4 | 241 | 14 | 727 |
| 26,924 | 0 | 46 | 11 | 432 | 0 | 13 | 5 | 241 | 16 | 732 |
| 26,925 | 0 | 49 | 11 | 454 | 0 | 15 | 5 | 248 | 16 | 766 |

|        |   |    |    |     |   |    |   |     |    |       |
|--------|---|----|----|-----|---|----|---|-----|----|-------|
| 26,926 | 0 | 49 | 11 | 453 | 0 | 15 | 3 | 248 | 14 | 765   |
| 26,927 | 0 | 47 | 11 | 449 | 0 | 12 | 3 | 246 | 14 | 754   |
| 26,928 | 0 | 45 | 13 | 427 | 0 | 12 | 3 | 239 | 16 | 723   |
| 26,929 | 0 | 45 | 13 | 431 | 0 | 12 | 3 | 242 | 16 | 730   |
| 26,930 | 0 | 42 | 13 | 419 | 0 | 12 | 3 | 240 | 16 | 713   |
| 26,931 | 0 | 42 | 12 | 419 | 0 | 12 | 3 | 241 | 15 | 714   |
| 26,932 | 0 | 43 | 12 | 432 | 0 | 12 | 3 | 256 | 15 | 743   |
| 26,933 | 0 | 58 | 12 | 496 | 0 | 22 | 3 | 375 | 15 | 951   |
| 26,934 | 0 | 58 | 12 | 504 | 0 | 22 | 2 | 377 | 14 | 961   |
| 26,935 | 0 | 58 | 10 | 518 | 0 | 24 | 2 | 394 | 12 | 994   |
| 26,936 | 0 | 58 | 10 | 527 | 0 | 25 | 2 | 399 | 12 | 1,009 |
| 26,937 | 0 | 58 | 5  | 529 | 0 | 25 | 2 | 399 | 7  | 1,011 |
| 26,938 | 0 | 58 | 5  | 529 | 0 | 25 | 2 | 398 | 7  | 1,010 |
| 26,939 | 0 | 58 | 5  | 527 | 0 | 25 | 2 | 395 | 7  | 1,005 |
| 26,940 | 0 | 58 | 5  | 527 | 0 | 25 | 2 | 397 | 7  | 1,007 |
| 26,941 | 0 | 56 | 4  | 526 | 0 | 25 | 2 | 396 | 6  | 1,003 |
| 26,942 | 0 | 56 | 4  | 527 | 0 | 25 | 2 | 396 | 6  | 1,004 |
| 26,943 | 0 | 56 | 4  | 527 | 0 | 25 | 2 | 394 | 6  | 1,002 |
| 26,944 | 0 | 56 | 4  | 527 | 0 | 25 | 2 | 394 | 6  | 1,002 |
| 26,945 | 0 | 57 | 3  | 527 | 0 | 25 | 2 | 394 | 5  | 1,003 |
| 26,946 | 0 | 57 | 3  | 528 | 0 | 25 | 2 | 394 | 5  | 1,004 |
| 26,947 | 0 | 57 | 3  | 528 | 0 | 25 | 2 | 394 | 5  | 1,004 |
| 26,948 | 0 | 57 | 3  | 528 | 0 | 25 | 1 | 394 | 4  | 1,004 |
| 26,949 | 0 | 57 | 3  | 526 | 0 | 25 | 1 | 396 | 4  | 1,004 |
| 26,950 | 0 | 51 | 3  | 511 | 0 | 26 | 2 | 383 | 5  | 971   |
| 26,951 | 0 | 51 | 3  | 500 | 0 | 26 | 2 | 373 | 5  | 950   |
| 26,952 | 0 | 51 | 3  | 489 | 0 | 25 | 2 | 366 | 5  | 931   |
| 26,953 | 0 | 52 | 3  | 490 | 0 | 25 | 2 | 366 | 5  | 933   |
| 26,954 | 0 | 50 | 3  | 471 | 0 | 25 | 2 | 343 | 5  | 889   |
| 26,955 | 0 | 41 | 3  | 449 | 0 | 25 | 2 | 323 | 5  | 838   |
| 26,956 | 0 | 41 | 5  | 445 | 0 | 25 | 3 | 324 | 8  | 835   |
| 26,957 | 0 | 41 | 5  | 438 | 0 | 25 | 3 | 322 | 8  | 826   |
| 26,958 | 0 | 41 | 5  | 437 | 0 | 25 | 3 | 320 | 8  | 823   |
| 26,959 | 0 | 41 | 5  | 437 | 0 | 25 | 3 | 320 | 8  | 823   |
| 26,960 | 0 | 41 | 7  | 437 | 0 | 25 | 3 | 318 | 10 | 821   |
| 26,961 | 0 | 41 | 8  | 435 | 0 | 25 | 3 | 318 | 11 | 819   |
| 26,962 | 0 | 41 | 9  | 441 | 0 | 25 | 3 | 321 | 12 | 828   |
| 26,963 | 0 | 41 | 9  | 452 | 0 | 25 | 3 | 322 | 12 | 840   |
| 26,964 | 0 | 41 | 9  | 473 | 0 | 26 | 4 | 331 | 13 | 871   |
| 26,965 | 1 | 41 | 10 | 480 | 0 | 26 | 5 | 332 | 16 | 879   |
| 26,966 | 1 | 41 | 12 | 484 | 0 | 26 | 6 | 336 | 19 | 887   |

|        |   |    |    |     |   |    |    |     |    |     |
|--------|---|----|----|-----|---|----|----|-----|----|-----|
| 26,967 | 1 | 37 | 12 | 462 | 0 | 25 | 6  | 315 | 19 | 839 |
| 26,968 | 1 | 37 | 12 | 463 | 0 | 25 | 6  | 316 | 19 | 841 |
| 26,969 | 1 | 37 | 12 | 464 | 0 | 26 | 6  | 316 | 19 | 843 |
| 26,970 | 1 | 38 | 12 | 474 | 0 | 26 | 6  | 335 | 19 | 873 |
| 26,971 | 1 | 37 | 12 | 440 | 0 | 23 | 6  | 317 | 19 | 817 |
| 26,972 | 1 | 26 | 12 | 261 | 0 | 18 | 6  | 244 | 19 | 549 |
| 26,973 | 1 | 25 | 12 | 244 | 0 | 18 | 6  | 224 | 19 | 511 |
| 26,974 | 1 | 25 | 12 | 239 | 0 | 18 | 7  | 224 | 20 | 506 |
| 26,975 | 1 | 22 | 11 | 206 | 0 | 16 | 7  | 217 | 19 | 461 |
| 26,976 | 1 | 22 | 11 | 210 | 0 | 16 | 7  | 218 | 19 | 466 |
| 26,977 | 1 | 22 | 11 | 207 | 0 | 16 | 7  | 219 | 19 | 464 |
| 26,978 | 1 | 22 | 10 | 202 | 0 | 16 | 7  | 218 | 18 | 458 |
| 26,979 | 1 | 23 | 11 | 198 | 0 | 16 | 7  | 215 | 19 | 452 |
| 26,980 | 1 | 23 | 11 | 195 | 0 | 16 | 7  | 214 | 19 | 448 |
| 26,981 | 1 | 23 | 11 | 195 | 0 | 16 | 7  | 214 | 19 | 448 |
| 26,982 | 1 | 23 | 11 | 194 | 0 | 16 | 7  | 211 | 19 | 444 |
| 26,983 | 1 | 23 | 11 | 197 | 0 | 18 | 7  | 221 | 19 | 459 |
| 26,984 | 1 | 9  | 11 | 136 | 0 | 10 | 7  | 107 | 19 | 262 |
| 26,985 | 1 | 9  | 12 | 130 | 0 | 10 | 7  | 107 | 20 | 256 |
| 26,986 | 1 | 9  | 14 | 117 | 0 | 8  | 8  | 91  | 23 | 225 |
| 26,987 | 1 | 10 | 15 | 109 | 1 | 7  | 12 | 91  | 29 | 217 |
| 26,988 | 2 | 11 | 15 | 110 | 1 | 7  | 18 | 92  | 36 | 220 |
| 26,989 | 2 | 11 | 16 | 112 | 1 | 7  | 18 | 93  | 37 | 223 |
| 26,990 | 2 | 11 | 16 | 114 | 1 | 7  | 18 | 94  | 37 | 226 |
| 26,991 | 2 | 11 | 16 | 114 | 1 | 7  | 18 | 92  | 37 | 224 |
| 26,992 | 2 | 10 | 16 | 111 | 1 | 7  | 19 | 92  | 38 | 220 |
| 26,993 | 2 | 10 | 17 | 111 | 1 | 7  | 19 | 93  | 39 | 221 |
| 26,994 | 2 | 10 | 17 | 112 | 1 | 8  | 19 | 94  | 39 | 224 |
| 26,995 | 2 | 10 | 18 | 114 | 1 | 8  | 19 | 94  | 40 | 226 |
| 26,996 | 2 | 9  | 18 | 114 | 1 | 8  | 19 | 94  | 40 | 225 |
| 26,997 | 4 | 9  | 27 | 113 | 1 | 8  | 21 | 95  | 53 | 225 |
| 26,998 | 4 | 9  | 27 | 114 | 1 | 8  | 21 | 95  | 53 | 226 |
| 26,999 | 4 | 9  | 30 | 116 | 1 | 8  | 24 | 95  | 59 | 228 |
| 27,000 | 4 | 10 | 30 | 141 | 1 | 11 | 24 | 115 | 59 | 277 |
| 27,001 | 4 | 18 | 30 | 323 | 1 | 20 | 23 | 224 | 58 | 585 |
| 27,002 | 4 | 22 | 30 | 354 | 1 | 23 | 23 | 264 | 58 | 663 |
| 27,003 | 4 | 22 | 30 | 394 | 1 | 25 | 24 | 296 | 59 | 737 |
| 27,004 | 4 | 21 | 30 | 398 | 1 | 25 | 24 | 301 | 59 | 745 |
| 27,005 | 4 | 21 | 31 | 414 | 1 | 26 | 24 | 307 | 60 | 768 |
| 27,006 | 4 | 21 | 29 | 422 | 1 | 27 | 23 | 306 | 57 | 776 |
| 27,007 | 4 | 21 | 29 | 422 | 1 | 27 | 23 | 306 | 57 | 776 |

|        |   |    |    |       |   |    |    |     |    |       |
|--------|---|----|----|-------|---|----|----|-----|----|-------|
| 27,008 | 4 | 21 | 29 | 421   | 1 | 27 | 23 | 306 | 57 | 775   |
| 27,009 | 4 | 21 | 29 | 421   | 1 | 27 | 24 | 306 | 58 | 775   |
| 27,010 | 4 | 21 | 28 | 422   | 1 | 27 | 24 | 309 | 57 | 779   |
| 27,011 | 4 | 21 | 27 | 423   | 1 | 28 | 24 | 312 | 56 | 784   |
| 27,012 | 4 | 21 | 26 | 439   | 1 | 28 | 24 | 318 | 55 | 806   |
| 27,013 | 4 | 23 | 25 | 453   | 1 | 30 | 24 | 344 | 54 | 850   |
| 27,014 | 4 | 23 | 25 | 422   | 1 | 31 | 24 | 334 | 54 | 810   |
| 27,015 | 4 | 31 | 25 | 473   | 1 | 32 | 24 | 363 | 54 | 899   |
| 27,016 | 3 | 31 | 24 | 477   | 1 | 32 | 23 | 366 | 51 | 906   |
| 27,017 | 3 | 31 | 23 | 471   | 1 | 32 | 23 | 360 | 50 | 894   |
| 27,018 | 3 | 31 | 23 | 472   | 1 | 32 | 23 | 361 | 50 | 896   |
| 27,019 | 3 | 31 | 24 | 472   | 1 | 31 | 23 | 360 | 51 | 894   |
| 27,020 | 3 | 30 | 24 | 463   | 1 | 31 | 23 | 344 | 51 | 868   |
| 27,021 | 3 | 30 | 24 | 468   | 1 | 31 | 23 | 344 | 51 | 873   |
| 27,022 | 3 | 31 | 24 | 469   | 1 | 31 | 23 | 344 | 51 | 875   |
| 27,023 | 5 | 31 | 24 | 470   | 1 | 31 | 24 | 344 | 54 | 876   |
| 27,024 | 5 | 30 | 24 | 475   | 1 | 31 | 23 | 345 | 53 | 881   |
| 27,025 | 5 | 43 | 26 | 603   | 1 | 39 | 25 | 453 | 57 | 1,138 |
| 27,026 | 5 | 46 | 26 | 645   | 1 | 40 | 24 | 472 | 56 | 1,203 |
| 27,027 | 5 | 68 | 26 | 1,040 | 1 | 54 | 24 | 592 | 56 | 1,754 |
| 27,028 | 6 | 71 | 26 | 1,078 | 1 | 56 | 24 | 604 | 57 | 1,809 |
| 27,029 | 6 | 71 | 26 | 1,098 | 1 | 57 | 24 | 607 | 57 | 1,833 |
| 27,030 | 6 | 70 | 24 | 1,109 | 1 | 57 | 24 | 609 | 55 | 1,845 |
| 27,031 | 6 | 72 | 24 | 1,110 | 1 | 58 | 24 | 611 | 55 | 1,851 |
| 27,032 | 6 | 72 | 24 | 1,121 | 1 | 58 | 24 | 614 | 55 | 1,865 |
| 27,033 | 6 | 72 | 24 | 1,121 | 1 | 58 | 24 | 614 | 55 | 1,865 |
| 27,034 | 6 | 72 | 24 | 1,104 | 1 | 56 | 24 | 595 | 55 | 1,827 |
| 27,035 | 6 | 71 | 24 | 1,108 | 1 | 54 | 24 | 604 | 55 | 1,837 |
| 27,036 | 6 | 73 | 24 | 1,123 | 1 | 54 | 23 | 617 | 54 | 1,867 |
| 27,037 | 6 | 73 | 22 | 1,147 | 2 | 55 | 23 | 629 | 53 | 1,904 |
| 27,038 | 6 | 72 | 21 | 1,146 | 1 | 55 | 19 | 624 | 47 | 1,897 |
| 27,039 | 5 | 71 | 22 | 1,141 | 1 | 55 | 13 | 622 | 41 | 1,889 |
| 27,040 | 5 | 71 | 21 | 1,139 | 1 | 55 | 13 | 621 | 40 | 1,886 |
| 27,041 | 6 | 71 | 22 | 1,139 | 1 | 55 | 13 | 621 | 42 | 1,886 |
| 27,042 | 6 | 71 | 22 | 1,137 | 1 | 55 | 12 | 621 | 41 | 1,884 |
| 27,043 | 6 | 72 | 22 | 1,155 | 1 | 55 | 12 | 623 | 41 | 1,905 |
| 27,044 | 6 | 77 | 21 | 1,362 | 1 | 77 | 12 | 738 | 40 | 2,254 |
| 27,045 | 6 | 83 | 21 | 1,455 | 1 | 83 | 12 | 771 | 40 | 2,392 |
| 27,046 | 6 | 87 | 20 | 1,558 | 1 | 90 | 12 | 818 | 39 | 2,553 |
| 27,047 | 5 | 87 | 21 | 1,573 | 1 | 93 | 12 | 830 | 39 | 2,583 |
| 27,048 | 4 | 89 | 12 | 1,613 | 1 | 94 | 10 | 834 | 27 | 2,630 |

|        |   |     |    |       |   |     |   |     |    |       |
|--------|---|-----|----|-------|---|-----|---|-----|----|-------|
| 27,049 | 5 | 95  | 9  | 1,684 | 1 | 103 | 7 | 877 | 22 | 2,759 |
| 27,050 | 5 | 95  | 9  | 1,686 | 1 | 103 | 7 | 876 | 22 | 2,760 |
| 27,051 | 5 | 95  | 9  | 1,666 | 1 | 101 | 7 | 857 | 22 | 2,719 |
| 27,052 | 5 | 89  | 9  | 1,516 | 1 | 93  | 7 | 769 | 22 | 2,467 |
| 27,053 | 5 | 86  | 13 | 1,461 | 1 | 88  | 7 | 700 | 26 | 2,335 |
| 27,054 | 5 | 86  | 13 | 1,461 | 1 | 88  | 6 | 700 | 25 | 2,335 |
| 27,055 | 5 | 88  | 21 | 1,462 | 2 | 88  | 6 | 699 | 34 | 2,337 |
| 27,056 | 5 | 89  | 20 | 1,461 | 2 | 87  | 7 | 696 | 34 | 2,333 |
| 27,057 | 5 | 90  | 20 | 1,463 | 2 | 86  | 7 | 698 | 34 | 2,337 |
| 27,058 | 5 | 90  | 20 | 1,466 | 2 | 86  | 7 | 698 | 34 | 2,340 |
| 27,059 | 5 | 91  | 21 | 1,467 | 2 | 86  | 7 | 698 | 35 | 2,342 |
| 27,060 | 5 | 91  | 21 | 1,468 | 2 | 86  | 5 | 698 | 33 | 2,343 |
| 27,061 | 5 | 91  | 22 | 1,467 | 2 | 85  | 5 | 697 | 34 | 2,340 |
| 27,062 | 5 | 94  | 23 | 1,461 | 2 | 87  | 5 | 722 | 35 | 2,364 |
| 27,063 | 5 | 95  | 23 | 1,494 | 2 | 89  | 5 | 738 | 35 | 2,416 |
| 27,064 | 5 | 96  | 23 | 1,501 | 2 | 92  | 5 | 760 | 35 | 2,449 |
| 27,065 | 5 | 96  | 23 | 1,510 | 2 | 94  | 5 | 769 | 35 | 2,469 |
| 27,066 | 5 | 89  | 23 | 1,462 | 2 | 93  | 5 | 744 | 35 | 2,388 |
| 27,067 | 5 | 89  | 23 | 1,465 | 2 | 94  | 5 | 749 | 35 | 2,397 |
| 27,068 | 5 | 91  | 24 | 1,482 | 2 | 96  | 4 | 776 | 35 | 2,445 |
| 27,069 | 5 | 93  | 23 | 1,481 | 2 | 96  | 4 | 774 | 34 | 2,444 |
| 27,070 | 5 | 99  | 23 | 1,491 | 2 | 97  | 4 | 785 | 34 | 2,472 |
| 27,071 | 5 | 99  | 23 | 1,504 | 2 | 97  | 4 | 786 | 34 | 2,486 |
| 27,072 | 5 | 99  | 28 | 1,507 | 2 | 98  | 5 | 808 | 40 | 2,512 |
| 27,073 | 5 | 100 | 28 | 1,549 | 2 | 102 | 5 | 834 | 40 | 2,585 |
| 27,074 | 3 | 101 | 28 | 1,567 | 2 | 102 | 4 | 855 | 37 | 2,625 |
| 27,075 | 3 | 101 | 27 | 1,564 | 2 | 102 | 3 | 854 | 35 | 2,621 |
| 27,076 | 3 | 84  | 26 | 1,393 | 2 | 93  | 2 | 727 | 33 | 2,297 |
| 27,077 | 3 | 59  | 26 | 957   | 2 | 77  | 2 | 598 | 33 | 1,691 |
| 27,078 | 3 | 59  | 26 | 959   | 2 | 77  | 2 | 602 | 33 | 1,697 |
| 27,079 | 2 | 59  | 26 | 960   | 2 | 77  | 2 | 604 | 32 | 1,700 |
| 27,080 | 2 | 59  | 27 | 939   | 2 | 76  | 2 | 600 | 33 | 1,674 |
| 27,081 | 2 | 59  | 27 | 926   | 2 | 76  | 2 | 597 | 33 | 1,658 |
| 27,082 | 2 | 57  | 27 | 925   | 2 | 75  | 2 | 595 | 33 | 1,652 |
| 27,083 | 2 | 57  | 27 | 914   | 2 | 75  | 2 | 592 | 33 | 1,638 |
| 27,084 | 2 | 56  | 28 | 915   | 2 | 75  | 2 | 588 | 34 | 1,634 |
| 27,085 | 2 | 56  | 28 | 915   | 2 | 75  | 2 | 588 | 34 | 1,634 |
| 27,086 | 2 | 56  | 27 | 908   | 2 | 75  | 2 | 576 | 33 | 1,615 |
| 27,087 | 2 | 54  | 27 | 891   | 2 | 75  | 2 | 561 | 33 | 1,581 |
| 27,088 | 2 | 54  | 27 | 868   | 1 | 74  | 2 | 549 | 32 | 1,545 |
| 27,089 | 2 | 61  | 27 | 885   | 1 | 75  | 2 | 578 | 32 | 1,599 |

|        |   |     |    |     |   |    |   |     |    |       |
|--------|---|-----|----|-----|---|----|---|-----|----|-------|
| 27,090 | 2 | 61  | 26 | 884 | 1 | 75 | 2 | 578 | 31 | 1,598 |
| 27,091 | 2 | 61  | 27 | 888 | 1 | 77 | 2 | 580 | 32 | 1,606 |
| 27,092 | 1 | 64  | 26 | 897 | 1 | 78 | 2 | 605 | 30 | 1,644 |
| 27,093 | 1 | 68  | 26 | 915 | 1 | 79 | 2 | 614 | 30 | 1,676 |
| 27,094 | 4 | 70  | 31 | 918 | 1 | 80 | 6 | 628 | 42 | 1,696 |
| 27,095 | 4 | 65  | 31 | 713 | 1 | 58 | 6 | 513 | 42 | 1,349 |
| 27,096 | 4 | 55  | 35 | 534 | 3 | 44 | 8 | 436 | 50 | 1,069 |
| 27,097 | 4 | 55  | 35 | 530 | 3 | 41 | 8 | 424 | 50 | 1,050 |
| 27,098 | 4 | 55  | 34 | 537 | 3 | 41 | 8 | 430 | 49 | 1,063 |
| 27,099 | 4 | 53  | 34 | 510 | 3 | 41 | 8 | 433 | 49 | 1,037 |
| 27,100 | 3 | 47  | 35 | 449 | 3 | 32 | 9 | 397 | 50 | 925   |
| 27,101 | 3 | 47  | 35 | 494 | 3 | 36 | 9 | 467 | 50 | 1,044 |
| 27,102 | 3 | 47  | 35 | 527 | 3 | 35 | 9 | 481 | 50 | 1,090 |
| 27,103 | 3 | 45  | 35 | 497 | 3 | 33 | 9 | 462 | 50 | 1,037 |
| 27,104 | 3 | 46  | 31 | 486 | 3 | 33 | 9 | 463 | 46 | 1,028 |
| 27,105 | 3 | 44  | 23 | 479 | 2 | 33 | 9 | 459 | 37 | 1,015 |
| 27,106 | 3 | 43  | 23 | 464 | 2 | 33 | 9 | 457 | 37 | 997   |
| 27,107 | 3 | 43  | 23 | 464 | 2 | 33 | 8 | 457 | 36 | 997   |
| 27,108 | 5 | 42  | 24 | 454 | 2 | 33 | 8 | 457 | 39 | 986   |
| 27,109 | 5 | 42  | 24 | 456 | 2 | 33 | 8 | 458 | 39 | 989   |
| 27,110 | 5 | 41  | 23 | 455 | 2 | 33 | 8 | 458 | 38 | 987   |
| 27,111 | 5 | 41  | 26 | 453 | 2 | 33 | 8 | 453 | 41 | 980   |
| 27,112 | 5 | 41  | 25 | 453 | 2 | 33 | 8 | 453 | 40 | 980   |
| 27,113 | 5 | 38  | 24 | 412 | 2 | 29 | 8 | 407 | 39 | 886   |
| 27,114 | 5 | 38  | 24 | 413 | 2 | 29 | 8 | 409 | 39 | 889   |
| 27,115 | 5 | 35  | 24 | 396 | 2 | 24 | 8 | 365 | 39 | 820   |
| 27,116 | 5 | 36  | 24 | 384 | 2 | 20 | 8 | 356 | 39 | 796   |
| 27,117 | 5 | 33  | 23 | 362 | 2 | 17 | 8 | 316 | 38 | 728   |
| 27,118 | 5 | 34  | 23 | 370 | 2 | 18 | 8 | 317 | 38 | 739   |
| 27,119 | 5 | 39  | 23 | 409 | 2 | 18 | 8 | 348 | 38 | 814   |
| 27,120 | 5 | 38  | 18 | 422 | 2 | 18 | 8 | 347 | 33 | 825   |
| 27,121 | 5 | 39  | 18 | 430 | 2 | 18 | 8 | 351 | 33 | 838   |
| 27,122 | 5 | 39  | 18 | 421 | 2 | 18 | 7 | 347 | 32 | 825   |
| 27,123 | 5 | 39  | 18 | 438 | 2 | 20 | 7 | 334 | 32 | 831   |
| 27,124 | 5 | 50  | 18 | 575 | 2 | 34 | 7 | 395 | 32 | 1,054 |
| 27,125 | 5 | 51  | 18 | 599 | 2 | 37 | 7 | 388 | 32 | 1,075 |
| 27,126 | 5 | 82  | 18 | 741 | 2 | 48 | 8 | 490 | 33 | 1,361 |
| 27,127 | 5 | 95  | 18 | 890 | 2 | 56 | 8 | 537 | 33 | 1,578 |
| 27,128 | 5 | 104 | 18 | 937 | 2 | 58 | 8 | 558 | 33 | 1,657 |
| 27,129 | 5 | 113 | 18 | 988 | 2 | 64 | 8 | 621 | 33 | 1,786 |
| 27,130 | 5 | 113 | 17 | 993 | 2 | 64 | 8 | 619 | 32 | 1,789 |

|        |   |     |    |       |   |    |    |     |    |       |
|--------|---|-----|----|-------|---|----|----|-----|----|-------|
| 27,131 | 5 | 114 | 17 | 1,016 | 2 | 65 | 9  | 636 | 33 | 1,831 |
| 27,132 | 5 | 119 | 17 | 1,069 | 2 | 66 | 9  | 666 | 33 | 1,920 |
| 27,133 | 5 | 119 | 17 | 1,080 | 2 | 66 | 9  | 668 | 33 | 1,933 |
| 27,134 | 5 | 121 | 17 | 1,112 | 2 | 66 | 9  | 680 | 33 | 1,979 |
| 27,135 | 5 | 129 | 16 | 1,129 | 2 | 66 | 9  | 698 | 32 | 2,022 |
| 27,136 | 5 | 131 | 16 | 1,145 | 2 | 66 | 9  | 703 | 32 | 2,045 |
| 27,137 | 5 | 132 | 16 | 1,144 | 2 | 66 | 9  | 706 | 32 | 2,048 |
| 27,138 | 5 | 132 | 16 | 1,154 | 2 | 66 | 9  | 710 | 32 | 2,062 |
| 27,139 | 5 | 125 | 17 | 1,137 | 2 | 65 | 9  | 681 | 33 | 2,008 |
| 27,140 | 5 | 125 | 17 | 1,137 | 2 | 65 | 9  | 680 | 33 | 2,007 |
| 27,141 | 5 | 125 | 17 | 1,137 | 2 | 65 | 9  | 680 | 33 | 2,007 |
| 27,142 | 5 | 125 | 16 | 1,134 | 2 | 63 | 9  | 679 | 32 | 2,001 |
| 27,143 | 5 | 122 | 18 | 1,129 | 2 | 62 | 9  | 654 | 34 | 1,967 |
| 27,144 | 3 | 118 | 15 | 1,111 | 2 | 61 | 5  | 644 | 25 | 1,934 |
| 27,145 | 2 | 115 | 15 | 1,088 | 2 | 60 | 5  | 628 | 24 | 1,891 |
| 27,146 | 2 | 117 | 16 | 1,095 | 1 | 60 | 4  | 629 | 23 | 1,901 |
| 27,147 | 2 | 117 | 12 | 1,069 | 0 | 60 | 3  | 625 | 17 | 1,871 |
| 27,148 | 2 | 117 | 12 | 1,052 | 0 | 59 | 3  | 610 | 17 | 1,838 |
| 27,149 | 2 | 118 | 13 | 1,057 | 0 | 59 | 4  | 611 | 19 | 1,845 |
| 27,150 | 2 | 118 | 12 | 1,060 | 0 | 59 | 3  | 613 | 17 | 1,850 |
| 27,151 | 2 | 118 | 12 | 1,052 | 0 | 59 | 3  | 604 | 17 | 1,833 |
| 27,152 | 2 | 118 | 13 | 1,004 | 1 | 55 | 3  | 534 | 19 | 1,711 |
| 27,153 | 2 | 118 | 14 | 966   | 1 | 55 | 3  | 518 | 20 | 1,657 |
| 27,154 | 3 | 116 | 21 | 961   | 1 | 55 | 4  | 515 | 29 | 1,647 |
| 27,155 | 3 | 116 | 27 | 963   | 1 | 55 | 5  | 515 | 36 | 1,649 |
| 27,156 | 4 | 117 | 30 | 971   | 1 | 55 | 5  | 532 | 40 | 1,675 |
| 27,157 | 4 | 117 | 32 | 972   | 1 | 55 | 5  | 534 | 42 | 1,678 |
| 27,158 | 3 | 119 | 32 | 978   | 1 | 55 | 5  | 554 | 41 | 1,706 |
| 27,159 | 2 | 124 | 32 | 984   | 1 | 57 | 5  | 566 | 40 | 1,731 |
| 27,160 | 2 | 129 | 30 | 1,004 | 1 | 57 | 5  | 617 | 38 | 1,807 |
| 27,161 | 2 | 129 | 29 | 1,011 | 1 | 57 | 5  | 622 | 37 | 1,819 |
| 27,162 | 3 | 130 | 29 | 1,012 | 1 | 57 | 5  | 625 | 38 | 1,824 |
| 27,163 | 3 | 131 | 30 | 1,024 | 1 | 57 | 8  | 639 | 42 | 1,851 |
| 27,164 | 3 | 130 | 30 | 1,024 | 1 | 57 | 8  | 638 | 42 | 1,849 |
| 27,165 | 3 | 130 | 30 | 1,032 | 1 | 59 | 8  | 638 | 42 | 1,859 |
| 27,166 | 3 | 130 | 30 | 1,023 | 1 | 59 | 8  | 632 | 42 | 1,844 |
| 27,167 | 3 | 129 | 30 | 1,023 | 1 | 59 | 8  | 630 | 42 | 1,841 |
| 27,168 | 4 | 128 | 30 | 1,013 | 1 | 58 | 8  | 630 | 43 | 1,829 |
| 27,169 | 4 | 128 | 30 | 1,021 | 1 | 59 | 8  | 632 | 43 | 1,840 |
| 27,170 | 4 | 124 | 29 | 971   | 1 | 59 | 11 | 605 | 45 | 1,759 |
| 27,171 | 4 | 124 | 29 | 985   | 1 | 59 | 11 | 615 | 45 | 1,783 |

|        |   |     |    |       |   |     |    |       |    |       |
|--------|---|-----|----|-------|---|-----|----|-------|----|-------|
| 27,172 | 4 | 117 | 29 | 979   | 1 | 59  | 11 | 617   | 45 | 1,772 |
| 27,173 | 4 | 117 | 29 | 985   | 1 | 60  | 11 | 620   | 45 | 1,782 |
| 27,174 | 4 | 123 | 29 | 1,055 | 1 | 76  | 11 | 770   | 45 | 2,024 |
| 27,175 | 4 | 111 | 29 | 881   | 1 | 58  | 11 | 687   | 45 | 1,737 |
| 27,176 | 4 | 112 | 29 | 874   | 1 | 59  | 11 | 700   | 45 | 1,745 |
| 27,177 | 4 | 103 | 30 | 846   | 1 | 61  | 11 | 774   | 46 | 1,784 |
| 27,178 | 4 | 94  | 30 | 719   | 1 | 58  | 11 | 760   | 46 | 1,631 |
| 27,179 | 4 | 90  | 30 | 734   | 1 | 59  | 11 | 759   | 46 | 1,642 |
| 27,180 | 4 | 99  | 30 | 848   | 1 | 65  | 11 | 773   | 46 | 1,785 |
| 27,181 | 4 | 102 | 31 | 877   | 1 | 67  | 10 | 818   | 46 | 1,864 |
| 27,182 | 4 | 101 | 31 | 856   | 1 | 67  | 10 | 804   | 46 | 1,828 |
| 27,183 | 4 | 115 | 34 | 911   | 1 | 71  | 10 | 875   | 49 | 1,972 |
| 27,184 | 4 | 115 | 34 | 917   | 1 | 72  | 10 | 880   | 49 | 1,984 |
| 27,185 | 4 | 113 | 34 | 892   | 1 | 72  | 10 | 870   | 49 | 1,947 |
| 27,186 | 4 | 105 | 34 | 873   | 1 | 72  | 10 | 853   | 49 | 1,903 |
| 27,187 | 4 | 103 | 34 | 861   | 1 | 72  | 11 | 855   | 50 | 1,891 |
| 27,188 | 4 | 102 | 34 | 864   | 1 | 72  | 11 | 853   | 50 | 1,891 |
| 27,189 | 4 | 103 | 33 | 858   | 1 | 72  | 11 | 856   | 49 | 1,889 |
| 27,190 | 4 | 106 | 33 | 870   | 1 | 72  | 11 | 868   | 49 | 1,916 |
| 27,191 | 4 | 106 | 33 | 881   | 1 | 72  | 11 | 891   | 49 | 1,950 |
| 27,192 | 4 | 109 | 31 | 898   | 1 | 72  | 11 | 919   | 47 | 1,998 |
| 27,193 | 4 | 110 | 32 | 903   | 1 | 72  | 12 | 931   | 49 | 2,016 |
| 27,194 | 4 | 115 | 32 | 942   | 1 | 76  | 12 | 1,020 | 49 | 2,153 |
| 27,195 | 4 | 115 | 32 | 945   | 1 | 76  | 12 | 1,022 | 49 | 2,158 |
| 27,196 | 4 | 115 | 30 | 947   | 1 | 76  | 12 | 1,022 | 47 | 2,160 |
| 27,197 | 4 | 113 | 34 | 941   | 1 | 76  | 12 | 1,023 | 51 | 2,153 |
| 27,198 | 6 | 113 | 36 | 932   | 1 | 76  | 12 | 1,022 | 55 | 2,143 |
| 27,199 | 6 | 113 | 36 | 937   | 1 | 77  | 12 | 1,028 | 55 | 2,155 |
| 27,200 | 6 | 113 | 35 | 939   | 1 | 77  | 11 | 1,038 | 53 | 2,167 |
| 27,201 | 7 | 113 | 36 | 951   | 1 | 80  | 12 | 1,063 | 56 | 2,207 |
| 27,202 | 7 | 122 | 36 | 1,057 | 1 | 94  | 12 | 1,213 | 56 | 2,486 |
| 27,203 | 7 | 123 | 40 | 1,114 | 0 | 103 | 14 | 1,266 | 61 | 2,606 |
| 27,204 | 7 | 130 | 43 | 1,242 | 0 | 121 | 17 | 1,386 | 67 | 2,879 |
| 27,205 | 6 | 130 | 36 | 1,265 | 0 | 123 | 16 | 1,420 | 58 | 2,938 |
| 27,206 | 7 | 129 | 33 | 1,273 | 2 | 125 | 16 | 1,409 | 58 | 2,936 |
| 27,207 | 6 | 130 | 30 | 1,291 | 2 | 126 | 16 | 1,424 | 54 | 2,971 |
| 27,208 | 6 | 135 | 28 | 1,507 | 2 | 147 | 16 | 1,572 | 52 | 3,361 |
| 27,209 | 6 | 143 | 28 | 1,584 | 2 | 160 | 16 | 1,698 | 52 | 3,585 |
| 27,210 | 6 | 146 | 27 | 1,768 | 2 | 169 | 16 | 1,811 | 51 | 3,894 |
| 27,211 | 5 | 141 | 27 | 1,769 | 2 | 171 | 16 | 1,765 | 50 | 3,846 |
| 27,212 | 5 | 141 | 27 | 1,763 | 2 | 171 | 16 | 1,760 | 50 | 3,835 |



|        |   |     |    |       |   |     |    |       |    |       |
|--------|---|-----|----|-------|---|-----|----|-------|----|-------|
| 27,213 | 5 | 140 | 27 | 1,761 | 2 | 172 | 15 | 1,751 | 49 | 3,824 |
| 27,214 | 5 | 140 | 26 | 1,758 | 2 | 172 | 14 | 1,750 | 47 | 3,820 |
| 27,215 | 5 | 141 | 26 | 1,760 | 2 | 173 | 14 | 1,754 | 47 | 3,828 |
| 27,216 | 5 | 142 | 26 | 1,758 | 2 | 171 | 14 | 1,761 | 47 | 3,832 |
| 27,217 | 5 | 142 | 26 | 1,758 | 2 | 171 | 14 | 1,765 | 47 | 3,836 |
| 27,218 | 5 | 142 | 26 | 1,760 | 2 | 174 | 14 | 1,787 | 47 | 3,863 |
| 27,219 | 4 | 143 | 26 | 1,756 | 2 | 173 | 14 | 1,804 | 46 | 3,876 |
| 27,220 | 4 | 143 | 26 | 1,777 | 2 | 175 | 14 | 1,823 | 46 | 3,918 |
| 27,221 | 4 | 165 | 26 | 1,927 | 2 | 189 | 11 | 2,091 | 43 | 4,372 |
| 27,222 | 4 | 165 | 26 | 1,922 | 2 | 189 | 11 | 2,080 | 43 | 4,356 |
| 27,223 | 4 | 167 | 27 | 1,929 | 2 | 189 | 11 | 2,075 | 44 | 4,360 |
| 27,224 | 4 | 168 | 27 | 1,940 | 2 | 189 | 11 | 2,081 | 44 | 4,378 |
| 27,225 | 4 | 161 | 27 | 1,848 | 2 | 170 | 11 | 1,927 | 44 | 4,106 |
| 27,226 | 4 | 160 | 28 | 1,832 | 2 | 167 | 11 | 1,911 | 45 | 4,070 |
| 27,227 | 4 | 160 | 28 | 1,835 | 2 | 168 | 11 | 1,919 | 45 | 4,082 |
| 27,228 | 5 | 139 | 27 | 1,728 | 2 | 155 | 10 | 1,748 | 44 | 3,770 |
| 27,229 | 5 | 135 | 27 | 1,709 | 2 | 150 | 10 | 1,723 | 44 | 3,717 |
| 27,230 | 5 | 134 | 27 | 1,666 | 2 | 151 | 10 | 1,754 | 44 | 3,705 |
| 27,231 | 5 | 116 | 27 | 1,500 | 2 | 139 | 10 | 1,673 | 44 | 3,428 |
| 27,232 | 5 | 113 | 26 | 1,484 | 2 | 139 | 10 | 1,648 | 43 | 3,384 |
| 27,233 | 5 | 118 | 25 | 1,523 | 2 | 140 | 10 | 1,684 | 42 | 3,465 |
| 27,234 | 5 | 100 | 23 | 1,430 | 2 | 137 | 10 | 1,601 | 40 | 3,268 |
| 27,235 | 5 | 102 | 23 | 1,426 | 2 | 136 | 10 | 1,601 | 40 | 3,265 |
| 27,236 | 5 | 102 | 24 | 1,429 | 2 | 136 | 10 | 1,604 | 41 | 3,271 |
| 27,237 | 5 | 102 | 24 | 1,438 | 2 | 136 | 10 | 1,617 | 41 | 3,293 |
| 27,238 | 5 | 101 | 24 | 1,426 | 2 | 136 | 9  | 1,603 | 40 | 3,266 |
| 27,239 | 5 | 101 | 24 | 1,426 | 2 | 136 | 9  | 1,604 | 40 | 3,267 |
| 27,240 | 6 | 101 | 24 | 1,426 | 2 | 136 | 9  | 1,604 | 41 | 3,267 |
| 27,241 | 6 | 98  | 24 | 1,404 | 2 | 136 | 9  | 1,569 | 41 | 3,207 |
| 27,242 | 6 | 94  | 24 | 1,382 | 2 | 136 | 9  | 1,529 | 41 | 3,141 |
| 27,243 | 6 | 94  | 24 | 1,387 | 2 | 136 | 9  | 1,529 | 41 | 3,146 |
| 27,244 | 6 | 94  | 23 | 1,387 | 2 | 137 | 8  | 1,529 | 39 | 3,147 |
| 27,245 | 6 | 89  | 23 | 1,344 | 2 | 133 | 8  | 1,440 | 39 | 3,006 |
| 27,246 | 7 | 89  | 25 | 1,338 | 2 | 133 | 8  | 1,437 | 42 | 2,997 |
| 27,247 | 7 | 89  | 25 | 1,338 | 2 | 133 | 8  | 1,435 | 42 | 2,995 |
| 27,248 | 7 | 89  | 20 | 1,338 | 2 | 133 | 8  | 1,432 | 37 | 2,992 |
| 27,249 | 5 | 88  | 18 | 1,335 | 2 | 132 | 8  | 1,425 | 33 | 2,980 |
| 27,250 | 5 | 88  | 18 | 1,335 | 2 | 132 | 8  | 1,425 | 33 | 2,980 |
| 27,251 | 4 | 88  | 17 | 1,333 | 2 | 132 | 7  | 1,417 | 30 | 2,970 |
| 27,252 | 5 | 79  | 18 | 1,210 | 2 | 115 | 12 | 1,241 | 37 | 2,645 |
| 27,253 | 6 | 79  | 18 | 1,209 | 2 | 115 | 13 | 1,242 | 39 | 2,645 |

|        |   |    |    |       |   |     |    |       |    |       |
|--------|---|----|----|-------|---|-----|----|-------|----|-------|
| 27,254 | 6 | 78 | 13 | 1,152 | 2 | 106 | 11 | 1,187 | 32 | 2,523 |
| 27,255 | 6 | 70 | 9  | 999   | 2 | 86  | 8  | 1,035 | 25 | 2,190 |
| 27,256 | 6 | 70 | 9  | 998   | 2 | 86  | 8  | 1,035 | 25 | 2,189 |
| 27,257 | 5 | 70 | 6  | 979   | 0 | 84  | 6  | 1,024 | 17 | 2,157 |
| 27,258 | 5 | 64 | 6  | 745   | 0 | 62  | 6  | 862   | 17 | 1,733 |
| 27,259 | 5 | 54 | 6  | 663   | 0 | 49  | 6  | 718   | 17 | 1,484 |
| 27,260 | 5 | 46 | 6  | 470   | 0 | 38  | 6  | 589   | 17 | 1,143 |
| 27,261 | 5 | 46 | 6  | 447   | 0 | 36  | 6  | 583   | 17 | 1,112 |
| 27,262 | 5 | 46 | 6  | 447   | 0 | 36  | 6  | 583   | 17 | 1,112 |
| 27,263 | 5 | 45 | 6  | 435   | 0 | 35  | 7  | 575   | 18 | 1,090 |
| 27,264 | 5 | 45 | 6  | 435   | 0 | 35  | 7  | 575   | 18 | 1,090 |
| 27,265 | 5 | 45 | 7  | 435   | 0 | 35  | 7  | 582   | 19 | 1,097 |
| 27,266 | 5 | 45 | 8  | 439   | 0 | 34  | 8  | 595   | 21 | 1,113 |
| 27,267 | 5 | 44 | 8  | 434   | 0 | 34  | 8  | 589   | 21 | 1,101 |
| 27,268 | 5 | 44 | 9  | 434   | 1 | 34  | 8  | 586   | 23 | 1,098 |
| 27,269 | 5 | 46 | 10 | 429   | 1 | 31  | 9  | 566   | 25 | 1,072 |
| 27,270 | 5 | 48 | 10 | 440   | 1 | 31  | 9  | 554   | 25 | 1,073 |
| 27,271 | 5 | 48 | 10 | 419   | 1 | 29  | 9  | 534   | 25 | 1,030 |
| 27,272 | 5 | 26 | 11 | 271   | 1 | 15  | 9  | 268   | 26 | 580   |
| 27,273 | 5 | 26 | 11 | 262   | 1 | 15  | 9  | 267   | 26 | 570   |
| 27,274 | 6 | 23 | 11 | 226   | 1 | 13  | 9  | 248   | 27 | 510   |
| 27,275 | 6 | 29 | 11 | 263   | 1 | 17  | 9  | 269   | 27 | 578   |
| 27,276 | 6 | 29 | 10 | 270   | 1 | 17  | 9  | 275   | 26 | 591   |
| 27,277 | 6 | 28 | 10 | 256   | 1 | 17  | 9  | 266   | 26 | 567   |
| 27,278 | 5 | 28 | 10 | 262   | 1 | 17  | 9  | 274   | 25 | 581   |
| 27,279 | 5 | 28 | 10 | 341   | 1 | 22  | 9  | 327   | 25 | 718   |
| 27,280 | 5 | 29 | 10 | 362   | 1 | 23  | 9  | 343   | 25 | 757   |
| 27,281 | 5 | 25 | 10 | 344   | 1 | 19  | 9  | 293   | 25 | 681   |
| 27,282 | 5 | 25 | 10 | 343   | 1 | 20  | 9  | 296   | 25 | 684   |
| 27,283 | 5 | 20 | 10 | 281   | 1 | 16  | 9  | 237   | 25 | 554   |
| 27,284 | 5 | 19 | 10 | 260   | 1 | 14  | 9  | 219   | 25 | 512   |
| 27,285 | 5 | 19 | 10 | 262   | 1 | 14  | 9  | 220   | 25 | 515   |
| 27,286 | 5 | 18 | 11 | 259   | 1 | 14  | 9  | 217   | 26 | 508   |
| 27,287 | 5 | 18 | 10 | 256   | 1 | 14  | 9  | 213   | 25 | 501   |
| 27,288 | 5 | 19 | 10 | 246   | 1 | 14  | 12 | 198   | 28 | 477   |
| 27,289 | 5 | 19 | 11 | 244   | 1 | 14  | 12 | 197   | 29 | 474   |
| 27,290 | 5 | 19 | 12 | 244   | 1 | 14  | 13 | 197   | 31 | 474   |
| 27,291 | 4 | 19 | 12 | 248   | 1 | 14  | 13 | 198   | 30 | 479   |
| 27,292 | 4 | 19 | 12 | 248   | 1 | 14  | 13 | 198   | 30 | 479   |
| 27,293 | 5 | 19 | 15 | 253   | 1 | 14  | 21 | 200   | 42 | 486   |
| 27,294 | 5 | 19 | 15 | 248   | 1 | 14  | 21 | 201   | 42 | 482   |

|        |   |    |    |     |   |    |    |     |    |     |
|--------|---|----|----|-----|---|----|----|-----|----|-----|
| 27,295 | 5 | 19 | 15 | 247 | 1 | 13 | 23 | 201 | 44 | 480 |
| 27,296 | 5 | 19 | 15 | 247 | 1 | 13 | 23 | 202 | 44 | 481 |
| 27,297 | 4 | 19 | 13 | 247 | 1 | 13 | 23 | 202 | 41 | 481 |
| 27,298 | 4 | 19 | 13 | 246 | 1 | 13 | 23 | 203 | 41 | 481 |
| 27,299 | 4 | 19 | 13 | 246 | 1 | 13 | 23 | 203 | 41 | 481 |
| 27,300 | 4 | 19 | 14 | 245 | 1 | 13 | 23 | 203 | 42 | 480 |
| 27,301 | 4 | 19 | 14 | 247 | 1 | 13 | 23 | 203 | 42 | 482 |
| 27,302 | 4 | 19 | 15 | 249 | 1 | 13 | 23 | 204 | 43 | 485 |
| 27,303 | 3 | 19 | 14 | 249 | 1 | 13 | 18 | 203 | 36 | 484 |
| 27,304 | 2 | 19 | 14 | 252 | 1 | 13 | 17 | 203 | 34 | 487 |
| 27,305 | 2 | 21 | 14 | 254 | 1 | 13 | 17 | 205 | 34 | 493 |
| 27,306 | 2 | 21 | 14 | 255 | 1 | 13 | 17 | 208 | 34 | 497 |
| 27,307 | 2 | 21 | 14 | 255 | 1 | 13 | 17 | 208 | 34 | 497 |
| 27,308 | 2 | 21 | 14 | 258 | 1 | 13 | 17 | 219 | 34 | 511 |
| 27,309 | 2 | 21 | 14 | 258 | 1 | 13 | 17 | 219 | 34 | 511 |
| 27,310 | 2 | 22 | 14 | 259 | 1 | 14 | 17 | 220 | 34 | 515 |
| 27,311 | 2 | 22 | 14 | 266 | 1 | 14 | 17 | 225 | 34 | 527 |
| 27,312 | 2 | 22 | 14 | 271 | 1 | 14 | 17 | 225 | 34 | 532 |
| 27,313 | 2 | 24 | 14 | 274 | 1 | 14 | 17 | 231 | 34 | 543 |
| 27,314 | 2 | 27 | 14 | 289 | 1 | 15 | 16 | 244 | 33 | 575 |
| 27,315 | 2 | 27 | 14 | 303 | 1 | 16 | 16 | 247 | 33 | 593 |
| 27,316 | 2 | 29 | 14 | 319 | 1 | 19 | 16 | 255 | 33 | 622 |
| 27,317 | 2 | 33 | 13 | 346 | 2 | 21 | 17 | 265 | 34 | 665 |
| 27,318 | 2 | 33 | 12 | 359 | 1 | 21 | 17 | 261 | 32 | 674 |
| 27,319 | 2 | 35 | 11 | 366 | 1 | 21 | 16 | 274 | 30 | 696 |
| 27,320 | 2 | 35 | 11 | 379 | 1 | 22 | 16 | 280 | 30 | 716 |
| 27,321 | 2 | 30 | 11 | 361 | 1 | 22 | 16 | 267 | 30 | 680 |
| 27,322 | 2 | 30 | 9  | 371 | 1 | 24 | 16 | 272 | 28 | 697 |
| 27,323 | 2 | 32 | 9  | 372 | 1 | 24 | 16 | 272 | 28 | 700 |
| 27,324 | 1 | 32 | 9  | 375 | 1 | 24 | 16 | 274 | 27 | 705 |
| 27,325 | 1 | 34 | 9  | 370 | 1 | 26 | 16 | 276 | 27 | 706 |
| 27,326 | 1 | 28 | 9  | 333 | 1 | 22 | 16 | 255 | 27 | 638 |
| 27,327 | 2 | 28 | 9  | 320 | 1 | 21 | 16 | 244 | 28 | 613 |
| 27,328 | 2 | 28 | 9  | 321 | 1 | 21 | 16 | 244 | 28 | 614 |
| 27,329 | 2 | 29 | 9  | 230 | 1 | 15 | 16 | 172 | 28 | 446 |
| 27,330 | 2 | 29 | 9  | 230 | 1 | 15 | 16 | 171 | 28 | 445 |
| 27,331 | 2 | 27 | 9  | 208 | 1 | 15 | 16 | 150 | 28 | 400 |
| 27,332 | 2 | 27 | 9  | 209 | 1 | 15 | 16 | 152 | 28 | 403 |
| 27,333 | 2 | 27 | 9  | 208 | 1 | 14 | 16 | 148 | 28 | 397 |
| 27,334 | 2 | 27 | 9  | 205 | 1 | 14 | 18 | 146 | 30 | 392 |
| 27,335 | 2 | 27 | 9  | 203 | 1 | 14 | 18 | 146 | 30 | 390 |

|        |   |    |    |     |   |    |    |     |    |     |
|--------|---|----|----|-----|---|----|----|-----|----|-----|
| 27,336 | 2 | 26 | 10 | 198 | 1 | 14 | 21 | 141 | 34 | 379 |
| 27,337 | 2 | 26 | 9  | 201 | 1 | 14 | 21 | 143 | 33 | 384 |
| 27,338 | 2 | 26 | 9  | 201 | 1 | 14 | 21 | 143 | 33 | 384 |
| 27,339 | 2 | 25 | 9  | 203 | 1 | 14 | 19 | 144 | 31 | 386 |
| 27,340 | 2 | 25 | 10 | 204 | 1 | 14 | 22 | 144 | 35 | 387 |
| 27,341 | 2 | 25 | 9  | 195 | 1 | 14 | 22 | 141 | 34 | 375 |
| 27,342 | 2 | 25 | 9  | 195 | 1 | 14 | 22 | 142 | 34 | 376 |
| 27,343 | 1 | 25 | 6  | 197 | 1 | 14 | 15 | 142 | 23 | 378 |
| 27,344 | 1 | 26 | 11 | 199 | 1 | 14 | 17 | 141 | 30 | 380 |
| 27,345 | 1 | 26 | 12 | 200 | 1 | 14 | 18 | 144 | 32 | 384 |
| 27,346 | 1 | 26 | 12 | 204 | 1 | 14 | 16 | 154 | 30 | 398 |
| 27,347 | 1 | 26 | 12 | 205 | 1 | 14 | 16 | 162 | 30 | 407 |
| 27,348 | 1 | 26 | 11 | 208 | 1 | 14 | 16 | 162 | 29 | 410 |
| 27,349 | 1 | 26 | 11 | 209 | 1 | 14 | 16 | 163 | 29 | 412 |
| 27,350 | 1 | 26 | 11 | 210 | 1 | 14 | 16 | 163 | 29 | 413 |
| 27,351 | 1 | 28 | 11 | 218 | 1 | 14 | 16 | 173 | 29 | 433 |
| 27,352 | 1 | 28 | 11 | 216 | 1 | 14 | 16 | 171 | 29 | 429 |
| 27,353 | 1 | 28 | 12 | 216 | 1 | 14 | 16 | 170 | 30 | 428 |
| 27,354 | 1 | 28 | 12 | 216 | 1 | 14 | 16 | 171 | 30 | 429 |
| 27,355 | 1 | 26 | 14 | 215 | 1 | 14 | 17 | 170 | 33 | 425 |
| 27,356 | 1 | 26 | 14 | 215 | 1 | 14 | 18 | 174 | 34 | 429 |
| 27,357 | 1 | 26 | 14 | 215 | 1 | 14 | 18 | 174 | 34 | 429 |
| 27,358 | 1 | 27 | 17 | 217 | 1 | 14 | 19 | 179 | 38 | 437 |
| 27,359 | 1 | 27 | 18 | 219 | 1 | 14 | 19 | 180 | 39 | 440 |
| 27,360 | 1 | 28 | 18 | 231 | 1 | 15 | 19 | 212 | 39 | 486 |
| 27,361 | 1 | 27 | 18 | 232 | 1 | 13 | 19 | 212 | 39 | 484 |
| 27,362 | 1 | 27 | 19 | 245 | 1 | 14 | 19 | 236 | 40 | 522 |
| 27,363 | 1 | 28 | 19 | 257 | 1 | 15 | 19 | 285 | 40 | 585 |
| 27,364 | 1 | 31 | 19 | 325 | 1 | 17 | 19 | 296 | 40 | 669 |
| 27,365 | 1 | 28 | 19 | 316 | 1 | 16 | 21 | 299 | 42 | 659 |
| 27,366 | 1 | 30 | 18 | 315 | 1 | 16 | 21 | 304 | 41 | 665 |
| 27,367 | 1 | 27 | 19 | 306 | 1 | 13 | 20 | 291 | 41 | 637 |
| 27,368 | 1 | 23 | 19 | 259 | 0 | 11 | 19 | 266 | 39 | 559 |
| 27,369 | 1 | 21 | 19 | 251 | 0 | 11 | 19 | 250 | 39 | 533 |
| 27,370 | 1 | 17 | 19 | 218 | 0 | 8  | 20 | 234 | 40 | 477 |
| 27,371 | 1 | 17 | 19 | 218 | 0 | 8  | 20 | 234 | 40 | 477 |
| 27,372 | 1 | 17 | 19 | 218 | 0 | 8  | 20 | 233 | 40 | 476 |
| 27,373 | 1 | 17 | 19 | 218 | 0 | 8  | 20 | 233 | 40 | 476 |
| 27,374 | 2 | 17 | 19 | 218 | 0 | 8  | 20 | 233 | 41 | 476 |
| 27,375 | 2 | 17 | 19 | 215 | 0 | 8  | 20 | 230 | 41 | 470 |
| 27,376 | 2 | 15 | 23 | 208 | 0 | 6  | 22 | 225 | 47 | 454 |

|        |   |    |    |     |   |    |    |     |    |     |
|--------|---|----|----|-----|---|----|----|-----|----|-----|
| 27,377 | 1 | 14 | 23 | 206 | 0 | 6  | 22 | 225 | 46 | 451 |
| 27,378 | 1 | 14 | 23 | 205 | 0 | 6  | 22 | 225 | 46 | 450 |
| 27,379 | 1 | 14 | 23 | 207 | 0 | 6  | 22 | 225 | 46 | 452 |
| 27,380 | 1 | 13 | 23 | 202 | 0 | 6  | 22 | 229 | 46 | 450 |
| 27,381 | 1 | 13 | 23 | 202 | 0 | 6  | 22 | 229 | 46 | 450 |
| 27,382 | 1 | 13 | 25 | 198 | 1 | 5  | 31 | 226 | 58 | 442 |
| 27,383 | 1 | 13 | 25 | 197 | 1 | 5  | 31 | 224 | 58 | 439 |
| 27,384 | 1 | 13 | 25 | 197 | 1 | 5  | 31 | 227 | 58 | 442 |
| 27,385 | 1 | 13 | 25 | 197 | 1 | 5  | 29 | 227 | 56 | 442 |
| 27,386 | 1 | 16 | 25 | 202 | 1 | 5  | 29 | 226 | 56 | 449 |
| 27,387 | 1 | 16 | 25 | 198 | 1 | 6  | 26 | 224 | 53 | 444 |
| 27,388 | 1 | 16 | 25 | 198 | 1 | 6  | 26 | 224 | 53 | 444 |
| 27,389 | 1 | 16 | 25 | 199 | 1 | 6  | 26 | 224 | 53 | 445 |
| 27,390 | 1 | 16 | 26 | 203 | 1 | 6  | 25 | 236 | 53 | 461 |
| 27,391 | 1 | 16 | 24 | 202 | 1 | 6  | 22 | 236 | 48 | 460 |
| 27,392 | 1 | 16 | 24 | 209 | 1 | 8  | 21 | 249 | 47 | 482 |
| 27,393 | 1 | 17 | 24 | 222 | 1 | 8  | 21 | 260 | 47 | 507 |
| 27,394 | 1 | 17 | 24 | 225 | 1 | 8  | 20 | 265 | 46 | 515 |
| 27,395 | 1 | 16 | 20 | 227 | 1 | 8  | 18 | 261 | 40 | 512 |
| 27,396 | 1 | 16 | 19 | 223 | 1 | 8  | 17 | 250 | 38 | 497 |
| 27,397 | 1 | 16 | 22 | 224 | 1 | 8  | 17 | 242 | 41 | 490 |
| 27,398 | 1 | 16 | 22 | 222 | 1 | 8  | 17 | 241 | 41 | 487 |
| 27,399 | 1 | 16 | 22 | 222 | 1 | 8  | 17 | 241 | 41 | 487 |
| 27,400 | 1 | 16 | 22 | 220 | 1 | 8  | 17 | 239 | 41 | 483 |
| 27,401 | 1 | 16 | 23 | 221 | 1 | 8  | 19 | 240 | 44 | 485 |
| 27,402 | 1 | 14 | 21 | 212 | 1 | 8  | 19 | 232 | 42 | 466 |
| 27,403 | 1 | 14 | 21 | 212 | 1 | 8  | 19 | 232 | 42 | 466 |
| 27,404 | 1 | 14 | 21 | 205 | 2 | 8  | 19 | 224 | 43 | 451 |
| 27,405 | 1 | 14 | 22 | 205 | 2 | 8  | 17 | 224 | 42 | 451 |
| 27,406 | 1 | 15 | 20 | 242 | 2 | 9  | 18 | 238 | 41 | 504 |
| 27,407 | 1 | 18 | 22 | 409 | 2 | 22 | 19 | 320 | 44 | 769 |
| 27,408 | 1 | 23 | 22 | 458 | 2 | 26 | 20 | 333 | 45 | 840 |
| 27,409 | 1 | 23 | 20 | 498 | 2 | 29 | 20 | 342 | 43 | 892 |
| 27,410 | 1 | 24 | 19 | 503 | 2 | 29 | 20 | 334 | 42 | 890 |
| 27,411 | 1 | 23 | 19 | 496 | 2 | 28 | 20 | 305 | 42 | 852 |
| 27,412 | 1 | 23 | 19 | 474 | 2 | 27 | 20 | 277 | 42 | 801 |
| 27,413 | 1 | 23 | 19 | 480 | 2 | 27 | 20 | 277 | 42 | 807 |
| 27,414 | 2 | 26 | 27 | 509 | 2 | 31 | 23 | 253 | 54 | 819 |
| 27,415 | 2 | 21 | 27 | 443 | 2 | 29 | 23 | 239 | 54 | 732 |
| 27,416 | 2 | 24 | 35 | 450 | 3 | 29 | 37 | 225 | 77 | 728 |
| 27,417 | 2 | 22 | 37 | 443 | 3 | 30 | 45 | 221 | 87 | 716 |

|        |   |    |    |     |   |    |    |     |     |       |
|--------|---|----|----|-----|---|----|----|-----|-----|-------|
| 27,418 | 2 | 22 | 36 | 440 | 3 | 30 | 45 | 220 | 86  | 712   |
| 27,419 | 2 | 24 | 36 | 463 | 3 | 30 | 45 | 242 | 86  | 759   |
| 27,420 | 2 | 24 | 36 | 471 | 3 | 30 | 45 | 248 | 86  | 773   |
| 27,421 | 2 | 24 | 40 | 487 | 3 | 30 | 49 | 250 | 94  | 791   |
| 27,422 | 2 | 24 | 40 | 490 | 3 | 30 | 49 | 250 | 94  | 794   |
| 27,423 | 2 | 25 | 40 | 504 | 3 | 30 | 49 | 257 | 94  | 816   |
| 27,424 | 1 | 25 | 42 | 507 | 3 | 30 | 49 | 259 | 95  | 821   |
| 27,425 | 2 | 25 | 42 | 508 | 3 | 30 | 50 | 261 | 97  | 824   |
| 27,426 | 4 | 26 | 45 | 528 | 3 | 32 | 48 | 278 | 100 | 864   |
| 27,427 | 4 | 28 | 42 | 552 | 3 | 33 | 48 | 308 | 97  | 921   |
| 27,428 | 4 | 28 | 42 | 592 | 3 | 33 | 48 | 311 | 97  | 964   |
| 27,429 | 6 | 28 | 45 | 660 | 2 | 33 | 49 | 315 | 102 | 1,036 |
| 27,430 | 6 | 28 | 46 | 659 | 2 | 33 | 49 | 315 | 103 | 1,035 |
| 27,431 | 6 | 28 | 45 | 660 | 2 | 33 | 49 | 311 | 102 | 1,032 |
| 27,432 | 6 | 30 | 53 | 661 | 3 | 33 | 45 | 311 | 107 | 1,035 |
| 27,433 | 6 | 31 | 54 | 666 | 3 | 33 | 49 | 317 | 112 | 1,047 |
| 27,434 | 6 | 31 | 54 | 666 | 3 | 33 | 49 | 318 | 112 | 1,048 |
| 27,435 | 6 | 31 | 54 | 667 | 3 | 33 | 49 | 317 | 112 | 1,048 |
| 27,436 | 6 | 31 | 55 | 668 | 3 | 33 | 49 | 319 | 113 | 1,051 |
| 27,437 | 6 | 28 | 55 | 664 | 3 | 32 | 49 | 319 | 113 | 1,043 |
| 27,438 | 6 | 28 | 54 | 663 | 3 | 32 | 49 | 319 | 112 | 1,042 |
| 27,439 | 6 | 28 | 54 | 664 | 3 | 32 | 49 | 320 | 112 | 1,044 |
| 27,440 | 6 | 28 | 54 | 665 | 3 | 32 | 49 | 320 | 112 | 1,045 |
| 27,441 | 6 | 28 | 53 | 662 | 3 | 32 | 49 | 307 | 111 | 1,029 |
| 27,442 | 6 | 28 | 53 | 663 | 3 | 31 | 49 | 307 | 111 | 1,029 |
| 27,443 | 7 | 28 | 53 | 659 | 3 | 29 | 49 | 299 | 112 | 1,015 |
| 27,444 | 7 | 28 | 53 | 655 | 3 | 29 | 49 | 300 | 112 | 1,012 |
| 27,445 | 7 | 28 | 53 | 650 | 3 | 29 | 49 | 295 | 112 | 1,002 |
| 27,446 | 7 | 29 | 52 | 657 | 3 | 29 | 49 | 302 | 111 | 1,017 |
| 27,447 | 7 | 29 | 52 | 666 | 3 | 29 | 49 | 313 | 111 | 1,037 |
| 27,448 | 7 | 32 | 49 | 687 | 3 | 30 | 50 | 332 | 109 | 1,081 |
| 27,449 | 7 | 32 | 49 | 686 | 3 | 30 | 50 | 332 | 109 | 1,080 |
| 27,450 | 7 | 32 | 49 | 687 | 3 | 30 | 50 | 334 | 109 | 1,083 |
| 27,451 | 7 | 32 | 49 | 692 | 3 | 30 | 50 | 341 | 109 | 1,095 |
| 27,452 | 7 | 33 | 48 | 706 | 3 | 31 | 48 | 347 | 106 | 1,117 |
| 27,453 | 7 | 33 | 48 | 714 | 3 | 31 | 48 | 352 | 106 | 1,130 |
| 27,454 | 7 | 37 | 48 | 764 | 3 | 31 | 48 | 364 | 106 | 1,196 |
| 27,455 | 7 | 37 | 48 | 776 | 2 | 31 | 48 | 368 | 105 | 1,212 |
| 27,456 | 8 | 34 | 47 | 582 | 2 | 18 | 48 | 273 | 105 | 907   |
| 27,457 | 8 | 34 | 47 | 583 | 2 | 18 | 46 | 274 | 103 | 909   |
| 27,458 | 8 | 34 | 45 | 582 | 2 | 18 | 44 | 274 | 99  | 908   |

|        |   |    |    |     |   |    |    |     |    |     |
|--------|---|----|----|-----|---|----|----|-----|----|-----|
| 27,459 | 8 | 29 | 44 | 533 | 2 | 14 | 42 | 262 | 96 | 838 |
| 27,460 | 8 | 28 | 44 | 492 | 2 | 11 | 43 | 248 | 97 | 779 |
| 27,461 | 8 | 27 | 44 | 490 | 2 | 11 | 43 | 250 | 97 | 778 |
| 27,462 | 8 | 27 | 44 | 487 | 2 | 11 | 43 | 250 | 97 | 775 |
| 27,463 | 8 | 27 | 43 | 496 | 2 | 11 | 43 | 252 | 96 | 786 |
| 27,464 | 8 | 30 | 42 | 505 | 2 | 11 | 41 | 261 | 93 | 807 |
| 27,465 | 7 | 28 | 35 | 467 | 2 | 8  | 40 | 240 | 84 | 743 |
| 27,466 | 7 | 29 | 27 | 477 | 1 | 8  | 26 | 252 | 61 | 766 |
| 27,467 | 7 | 26 | 27 | 467 | 1 | 8  | 20 | 254 | 55 | 755 |
| 27,468 | 7 | 26 | 26 | 457 | 1 | 7  | 17 | 250 | 51 | 740 |
| 27,469 | 7 | 27 | 26 | 458 | 1 | 7  | 17 | 253 | 51 | 745 |
| 27,470 | 7 | 25 | 23 | 437 | 1 | 7  | 13 | 235 | 44 | 704 |
| 27,471 | 7 | 25 | 22 | 429 | 1 | 7  | 13 | 228 | 43 | 689 |
| 27,472 | 7 | 25 | 24 | 414 | 1 | 7  | 13 | 228 | 45 | 674 |
| 27,473 | 7 | 25 | 24 | 413 | 1 | 7  | 13 | 227 | 45 | 672 |
| 27,474 | 7 | 24 | 24 | 399 | 1 | 7  | 13 | 219 | 45 | 649 |
| 27,475 | 7 | 26 | 22 | 407 | 1 | 9  | 13 | 217 | 43 | 659 |
| 27,476 | 6 | 26 | 24 | 410 | 1 | 10 | 12 | 214 | 43 | 660 |
| 27,477 | 4 | 25 | 20 | 402 | 1 | 11 | 12 | 208 | 37 | 646 |
| 27,478 | 2 | 23 | 18 | 345 | 1 | 10 | 11 | 180 | 32 | 558 |
| 27,479 | 2 | 25 | 19 | 389 | 1 | 10 | 11 | 199 | 33 | 623 |
| 27,480 | 2 | 29 | 18 | 398 | 1 | 11 | 11 | 247 | 32 | 685 |
| 27,481 | 2 | 29 | 17 | 423 | 1 | 12 | 9  | 255 | 29 | 719 |
| 27,482 | 2 | 35 | 17 | 499 | 1 | 19 | 9  | 309 | 29 | 862 |
| 27,483 | 2 | 39 | 9  | 528 | 0 | 19 | 6  | 316 | 17 | 902 |
| 27,484 | 2 | 43 | 8  | 557 | 0 | 20 | 2  | 326 | 12 | 946 |
| 27,485 | 2 | 43 | 8  | 560 | 0 | 20 | 2  | 327 | 12 | 950 |
| 27,486 | 2 | 43 | 7  | 561 | 0 | 20 | 2  | 327 | 11 | 951 |
| 27,487 | 3 | 45 | 7  | 562 | 0 | 20 | 2  | 326 | 12 | 953 |
| 27,488 | 3 | 45 | 7  | 563 | 0 | 20 | 2  | 326 | 12 | 954 |
| 27,489 | 3 | 45 | 7  | 563 | 0 | 20 | 2  | 327 | 12 | 955 |
| 27,490 | 3 | 45 | 7  | 563 | 0 | 21 | 2  | 326 | 12 | 955 |
| 27,491 | 3 | 45 | 7  | 561 | 0 | 21 | 2  | 328 | 12 | 955 |
| 27,492 | 3 | 45 | 7  | 560 | 0 | 22 | 2  | 332 | 12 | 959 |
| 27,493 | 2 | 45 | 7  | 560 | 0 | 22 | 2  | 338 | 11 | 965 |
| 27,494 | 2 | 44 | 7  | 549 | 0 | 22 | 2  | 321 | 11 | 936 |
| 27,495 | 2 | 44 | 7  | 549 | 0 | 22 | 2  | 321 | 11 | 936 |
| 27,496 | 2 | 44 | 7  | 540 | 0 | 22 | 2  | 315 | 11 | 921 |
| 27,497 | 2 | 44 | 7  | 532 | 0 | 22 | 3  | 304 | 12 | 902 |
| 27,498 | 2 | 43 | 7  | 509 | 0 | 21 | 2  | 291 | 11 | 864 |
| 27,499 | 2 | 43 | 7  | 509 | 0 | 21 | 2  | 291 | 11 | 864 |

|        |   |    |    |     |   |    |   |     |    |     |
|--------|---|----|----|-----|---|----|---|-----|----|-----|
| 27,500 | 2 | 43 | 7  | 510 | 0 | 21 | 2 | 291 | 11 | 865 |
| 27,501 | 2 | 45 | 7  | 513 | 0 | 21 | 2 | 292 | 11 | 871 |
| 27,502 | 2 | 46 | 7  | 514 | 0 | 22 | 2 | 294 | 11 | 876 |
| 27,503 | 3 | 46 | 8  | 523 | 0 | 21 | 2 | 308 | 13 | 898 |
| 27,504 | 3 | 51 | 8  | 536 | 0 | 23 | 2 | 330 | 13 | 940 |
| 27,505 | 3 | 47 | 8  | 488 | 0 | 23 | 2 | 322 | 13 | 880 |
| 27,506 | 3 | 48 | 8  | 479 | 0 | 23 | 3 | 322 | 14 | 872 |
| 27,507 | 2 | 47 | 8  | 471 | 0 | 23 | 3 | 318 | 13 | 859 |
| 27,508 | 2 | 48 | 8  | 476 | 0 | 23 | 3 | 320 | 13 | 867 |
| 27,509 | 2 | 48 | 8  | 477 | 0 | 24 | 3 | 321 | 13 | 870 |
| 27,510 | 2 | 51 | 8  | 486 | 0 | 24 | 3 | 322 | 13 | 883 |
| 27,511 | 2 | 52 | 8  | 492 | 0 | 24 | 3 | 330 | 13 | 898 |
| 27,512 | 2 | 52 | 8  | 483 | 0 | 24 | 3 | 325 | 13 | 884 |
| 27,513 | 3 | 52 | 8  | 473 | 0 | 24 | 3 | 318 | 14 | 867 |
| 27,514 | 3 | 52 | 8  | 473 | 0 | 24 | 3 | 318 | 14 | 867 |
| 27,515 | 3 | 47 | 8  | 450 | 0 | 22 | 3 | 304 | 14 | 823 |
| 27,516 | 3 | 47 | 8  | 451 | 0 | 22 | 3 | 304 | 14 | 824 |
| 27,517 | 3 | 46 | 8  | 438 | 0 | 22 | 3 | 293 | 14 | 799 |
| 27,518 | 3 | 46 | 7  | 440 | 0 | 22 | 3 | 295 | 13 | 803 |
| 27,519 | 3 | 46 | 7  | 444 | 0 | 22 | 3 | 295 | 13 | 807 |
| 27,520 | 3 | 45 | 7  | 442 | 0 | 23 | 3 | 289 | 13 | 799 |
| 27,521 | 3 | 45 | 6  | 455 | 0 | 24 | 3 | 291 | 12 | 815 |
| 27,522 | 3 | 49 | 6  | 485 | 0 | 28 | 3 | 327 | 12 | 889 |
| 27,523 | 3 | 53 | 6  | 496 | 0 | 28 | 3 | 337 | 12 | 914 |
| 27,524 | 3 | 55 | 7  | 508 | 0 | 28 | 3 | 342 | 13 | 933 |
| 27,525 | 4 | 55 | 7  | 518 | 0 | 28 | 3 | 344 | 14 | 945 |
| 27,526 | 4 | 53 | 7  | 509 | 0 | 26 | 3 | 343 | 14 | 931 |
| 27,527 | 4 | 53 | 7  | 496 | 0 | 22 | 5 | 334 | 16 | 905 |
| 27,528 | 4 | 55 | 9  | 504 | 0 | 24 | 5 | 338 | 18 | 921 |
| 27,529 | 4 | 55 | 10 | 498 | 0 | 25 | 5 | 336 | 19 | 914 |
| 27,530 | 4 | 53 | 9  | 459 | 0 | 25 | 5 | 324 | 18 | 861 |
| 27,531 | 5 | 51 | 9  | 400 | 0 | 25 | 5 | 284 | 19 | 760 |
| 27,532 | 5 | 45 | 9  | 331 | 0 | 18 | 5 | 242 | 19 | 636 |
| 27,533 | 5 | 39 | 8  | 307 | 1 | 18 | 5 | 237 | 19 | 601 |
| 27,534 | 5 | 34 | 8  | 273 | 1 | 17 | 5 | 223 | 19 | 547 |
| 27,535 | 6 | 34 | 8  | 270 | 1 | 17 | 5 | 221 | 20 | 542 |
| 27,536 | 6 | 34 | 9  | 268 | 1 | 17 | 5 | 219 | 21 | 538 |
| 27,537 | 5 | 32 | 9  | 265 | 1 | 17 | 5 | 218 | 20 | 532 |
| 27,538 | 5 | 32 | 9  | 265 | 1 | 17 | 5 | 218 | 20 | 532 |
| 27,539 | 5 | 32 | 9  | 264 | 1 | 17 | 5 | 218 | 20 | 531 |
| 27,540 | 5 | 32 | 10 | 264 | 1 | 17 | 5 | 218 | 21 | 531 |



|        |   |    |    |     |   |    |   |     |    |     |
|--------|---|----|----|-----|---|----|---|-----|----|-----|
| 27,541 | 5 | 32 | 13 | 265 | 1 | 16 | 5 | 216 | 24 | 529 |
| 27,542 | 5 | 32 | 13 | 265 | 1 | 16 | 5 | 216 | 24 | 529 |
| 27,543 | 6 | 32 | 17 | 263 | 1 | 15 | 5 | 206 | 29 | 516 |
| 27,544 | 6 | 32 | 18 | 262 | 1 | 16 | 5 | 206 | 30 | 516 |
| 27,545 | 6 | 33 | 19 | 263 | 1 | 16 | 5 | 207 | 31 | 519 |
| 27,546 | 6 | 33 | 19 | 266 | 1 | 16 | 5 | 208 | 31 | 523 |
| 27,547 | 6 | 32 | 20 | 263 | 1 | 16 | 5 | 207 | 32 | 518 |
| 27,548 | 6 | 32 | 21 | 262 | 1 | 16 | 5 | 206 | 33 | 516 |
| 27,549 | 6 | 30 | 21 | 262 | 1 | 16 | 5 | 201 | 33 | 509 |
| 27,550 | 6 | 30 | 21 | 265 | 1 | 17 | 5 | 203 | 33 | 515 |
| 27,551 | 6 | 31 | 21 | 279 | 1 | 18 | 5 | 224 | 33 | 552 |
| 27,552 | 6 | 31 | 21 | 274 | 1 | 19 | 5 | 214 | 33 | 538 |
| 27,553 | 5 | 35 | 23 | 289 | 1 | 18 | 5 | 219 | 34 | 561 |
| 27,554 | 5 | 34 | 23 | 270 | 1 | 18 | 5 | 201 | 34 | 523 |
| 27,555 | 5 | 29 | 23 | 251 | 1 | 16 | 5 | 172 | 34 | 468 |
| 27,556 | 5 | 28 | 23 | 249 | 1 | 16 | 5 | 168 | 34 | 461 |
| 27,557 | 5 | 28 | 24 | 251 | 1 | 16 | 4 | 168 | 34 | 463 |
| 27,558 | 5 | 28 | 24 | 251 | 1 | 16 | 4 | 168 | 34 | 463 |
| 27,559 | 5 | 28 | 27 | 246 | 1 | 15 | 5 | 165 | 38 | 454 |
| 27,560 | 5 | 28 | 28 | 246 | 1 | 15 | 6 | 166 | 40 | 455 |
| 27,561 | 5 | 27 | 28 | 230 | 1 | 15 | 5 | 155 | 39 | 427 |
| 27,562 | 5 | 27 | 28 | 231 | 1 | 15 | 5 | 156 | 39 | 429 |
| 27,563 | 4 | 27 | 28 | 231 | 1 | 15 | 5 | 156 | 38 | 429 |
| 27,564 | 4 | 27 | 28 | 229 | 1 | 15 | 6 | 156 | 39 | 427 |
| 27,565 | 4 | 27 | 29 | 229 | 1 | 15 | 7 | 156 | 41 | 427 |
| 27,566 | 4 | 27 | 29 | 229 | 1 | 15 | 7 | 156 | 41 | 427 |
| 27,567 | 4 | 27 | 29 | 229 | 1 | 15 | 7 | 156 | 41 | 427 |
| 27,568 | 4 | 27 | 29 | 228 | 1 | 15 | 7 | 154 | 41 | 424 |
| 27,569 | 4 | 29 | 34 | 238 | 1 | 15 | 7 | 154 | 46 | 436 |
| 27,570 | 4 | 31 | 34 | 237 | 1 | 15 | 7 | 155 | 46 | 438 |
| 27,571 | 4 | 31 | 34 | 223 | 1 | 13 | 7 | 152 | 46 | 419 |
| 27,572 | 4 | 31 | 34 | 225 | 1 | 13 | 8 | 152 | 47 | 421 |
| 27,573 | 4 | 28 | 34 | 196 | 1 | 9  | 8 | 117 | 47 | 350 |
| 27,574 | 4 | 22 | 34 | 176 | 1 | 10 | 8 | 109 | 47 | 317 |
| 27,575 | 4 | 22 | 33 | 179 | 1 | 10 | 8 | 111 | 46 | 322 |
| 27,576 | 3 | 23 | 34 | 182 | 1 | 10 | 9 | 121 | 47 | 336 |
| 27,577 | 3 | 23 | 34 | 182 | 1 | 10 | 9 | 122 | 47 | 337 |
| 27,578 | 3 | 23 | 32 | 193 | 1 | 10 | 7 | 122 | 43 | 348 |
| 27,579 | 3 | 21 | 30 | 185 | 1 | 7  | 7 | 118 | 41 | 331 |
| 27,580 | 3 | 22 | 29 | 195 | 1 | 7  | 7 | 122 | 40 | 346 |
| 27,581 | 3 | 23 | 29 | 204 | 1 | 9  | 7 | 120 | 40 | 356 |

|        |   |    |    |     |   |    |    |     |    |     |
|--------|---|----|----|-----|---|----|----|-----|----|-----|
| 27,582 | 2 | 21 | 29 | 160 | 1 | 7  | 7  | 101 | 39 | 289 |
| 27,583 | 2 | 22 | 29 | 159 | 1 | 7  | 8  | 89  | 40 | 277 |
| 27,584 | 2 | 22 | 29 | 161 | 0 | 7  | 8  | 89  | 39 | 279 |
| 27,585 | 2 | 22 | 29 | 161 | 0 | 7  | 8  | 89  | 39 | 279 |
| 27,586 | 1 | 22 | 29 | 161 | 0 | 7  | 8  | 90  | 38 | 280 |
| 27,587 | 1 | 22 | 28 | 161 | 0 | 7  | 9  | 91  | 38 | 281 |
| 27,588 | 1 | 22 | 28 | 173 | 0 | 8  | 9  | 104 | 38 | 307 |
| 27,589 | 1 | 22 | 27 | 174 | 0 | 8  | 9  | 104 | 37 | 308 |
| 27,590 | 1 | 22 | 27 | 183 | 0 | 8  | 10 | 118 | 38 | 331 |
| 27,591 | 1 | 28 | 27 | 202 | 0 | 9  | 10 | 131 | 38 | 370 |
| 27,592 | 1 | 28 | 24 | 204 | 0 | 9  | 10 | 132 | 35 | 373 |
| 27,593 | 0 | 28 | 20 | 203 | 0 | 9  | 10 | 132 | 30 | 372 |
| 27,594 | 0 | 28 | 20 | 204 | 0 | 8  | 10 | 132 | 30 | 372 |
| 27,595 | 0 | 27 | 19 | 203 | 0 | 8  | 10 | 131 | 29 | 369 |
| 27,596 | 0 | 27 | 18 | 200 | 0 | 8  | 10 | 131 | 28 | 366 |
| 27,597 | 0 | 27 | 18 | 200 | 0 | 8  | 10 | 131 | 28 | 366 |
| 27,598 | 0 | 28 | 17 | 201 | 0 | 9  | 10 | 131 | 27 | 369 |
| 27,599 | 0 | 28 | 16 | 201 | 0 | 9  | 9  | 131 | 25 | 369 |
| 27,600 | 0 | 28 | 16 | 201 | 0 | 9  | 9  | 131 | 25 | 369 |
| 27,601 | 0 | 27 | 16 | 183 | 0 | 7  | 9  | 108 | 25 | 325 |
| 27,602 | 0 | 27 | 16 | 186 | 0 | 7  | 9  | 112 | 25 | 332 |
| 27,603 | 0 | 25 | 14 | 182 | 0 | 6  | 9  | 111 | 23 | 324 |
| 27,604 | 0 | 21 | 14 | 166 | 0 | 7  | 9  | 104 | 23 | 298 |
| 27,605 | 0 | 23 | 14 | 252 | 0 | 11 | 9  | 146 | 23 | 432 |
| 27,606 | 0 | 27 | 14 | 295 | 0 | 19 | 9  | 178 | 23 | 519 |
| 27,607 | 0 | 30 | 14 | 374 | 0 | 22 | 9  | 205 | 23 | 631 |
| 27,608 | 0 | 30 | 13 | 375 | 0 | 22 | 9  | 205 | 22 | 632 |
| 27,609 | 0 | 31 | 14 | 382 | 0 | 23 | 9  | 205 | 23 | 641 |
| 27,610 | 0 | 33 | 11 | 387 | 0 | 23 | 8  | 205 | 19 | 648 |
| 27,611 | 0 | 33 | 10 | 387 | 0 | 23 | 7  | 205 | 17 | 648 |
| 27,612 | 0 | 30 | 11 | 387 | 0 | 23 | 7  | 206 | 18 | 646 |
| 27,613 | 0 | 30 | 11 | 386 | 0 | 23 | 7  | 205 | 18 | 644 |
| 27,614 | 0 | 30 | 12 | 387 | 0 | 23 | 7  | 205 | 19 | 645 |
| 27,615 | 0 | 30 | 12 | 387 | 0 | 23 | 6  | 205 | 18 | 645 |
| 27,616 | 0 | 30 | 11 | 386 | 0 | 23 | 5  | 205 | 16 | 644 |
| 27,617 | 0 | 30 | 11 | 386 | 0 | 23 | 5  | 205 | 16 | 644 |
| 27,618 | 0 | 30 | 12 | 386 | 0 | 23 | 5  | 205 | 17 | 644 |
| 27,619 | 0 | 30 | 9  | 386 | 0 | 23 | 5  | 205 | 14 | 644 |
| 27,620 | 0 | 28 | 7  | 371 | 0 | 23 | 5  | 200 | 12 | 622 |
| 27,621 | 0 | 26 | 7  | 369 | 0 | 23 | 5  | 201 | 12 | 619 |
| 27,622 | 0 | 27 | 7  | 370 | 0 | 23 | 5  | 203 | 12 | 623 |

|        |   |    |    |     |   |    |   |     |    |     |
|--------|---|----|----|-----|---|----|---|-----|----|-----|
| 27,623 | 0 | 27 | 7  | 368 | 0 | 23 | 4 | 202 | 11 | 620 |
| 27,624 | 0 | 26 | 7  | 367 | 0 | 23 | 4 | 200 | 11 | 616 |
| 27,625 | 0 | 26 | 7  | 361 | 0 | 22 | 4 | 192 | 11 | 601 |
| 27,626 | 0 | 26 | 6  | 347 | 0 | 22 | 4 | 179 | 10 | 574 |
| 27,627 | 0 | 26 | 6  | 347 | 0 | 22 | 3 | 179 | 9  | 574 |
| 27,628 | 0 | 26 | 7  | 346 | 0 | 22 | 3 | 178 | 10 | 572 |
| 27,629 | 0 | 27 | 7  | 333 | 0 | 22 | 4 | 177 | 11 | 559 |
| 27,630 | 0 | 26 | 8  | 324 | 0 | 22 | 4 | 174 | 12 | 546 |
| 27,631 | 0 | 26 | 8  | 324 | 0 | 22 | 4 | 174 | 12 | 546 |
| 27,632 | 0 | 24 | 8  | 297 | 0 | 20 | 5 | 167 | 13 | 508 |
| 27,633 | 0 | 24 | 8  | 304 | 0 | 20 | 5 | 169 | 13 | 517 |
| 27,634 | 0 | 24 | 8  | 308 | 0 | 20 | 4 | 169 | 12 | 521 |
| 27,635 | 0 | 24 | 8  | 307 | 0 | 20 | 4 | 170 | 12 | 521 |
| 27,636 | 0 | 24 | 8  | 295 | 0 | 19 | 4 | 156 | 12 | 494 |
| 27,637 | 1 | 24 | 8  | 296 | 0 | 19 | 4 | 156 | 13 | 495 |
| 27,638 | 1 | 24 | 8  | 295 | 0 | 19 | 3 | 156 | 12 | 494 |
| 27,639 | 1 | 24 | 8  | 296 | 0 | 19 | 2 | 156 | 11 | 495 |
| 27,640 | 1 | 24 | 8  | 287 | 0 | 19 | 2 | 142 | 11 | 472 |
| 27,641 | 1 | 24 | 8  | 287 | 0 | 19 | 2 | 142 | 11 | 472 |
| 27,642 | 1 | 18 | 8  | 264 | 0 | 18 | 2 | 127 | 11 | 427 |
| 27,643 | 1 | 19 | 8  | 268 | 0 | 18 | 2 | 127 | 11 | 432 |
| 27,644 | 1 | 20 | 8  | 288 | 0 | 18 | 2 | 137 | 11 | 463 |
| 27,645 | 1 | 21 | 9  | 314 | 0 | 20 | 2 | 152 | 12 | 507 |
| 27,646 | 1 | 21 | 11 | 318 | 0 | 20 | 2 | 153 | 14 | 512 |
| 27,647 | 1 | 25 | 11 | 358 | 0 | 22 | 2 | 184 | 14 | 589 |
| 27,648 | 1 | 25 | 11 | 358 | 0 | 22 | 2 | 186 | 14 | 591 |
| 27,649 | 1 | 36 | 14 | 444 | 0 | 28 | 2 | 244 | 17 | 752 |
| 27,650 | 1 | 36 | 14 | 445 | 0 | 28 | 2 | 244 | 17 | 753 |
| 27,651 | 1 | 36 | 14 | 449 | 0 | 28 | 2 | 245 | 17 | 758 |
| 27,652 | 1 | 41 | 14 | 469 | 0 | 28 | 2 | 251 | 17 | 789 |
| 27,653 | 1 | 42 | 14 | 483 | 0 | 28 | 2 | 252 | 17 | 805 |
| 27,654 | 1 | 48 | 15 | 515 | 0 | 28 | 4 | 259 | 20 | 850 |
| 27,655 | 1 | 47 | 14 | 510 | 0 | 27 | 4 | 257 | 19 | 841 |
| 27,656 | 1 | 45 | 16 | 426 | 0 | 23 | 4 | 215 | 21 | 709 |
| 27,657 | 1 | 41 | 16 | 390 | 0 | 15 | 4 | 185 | 21 | 631 |
| 27,658 | 1 | 38 | 16 | 313 | 0 | 12 | 4 | 159 | 21 | 522 |
| 27,659 | 1 | 38 | 16 | 307 | 0 | 13 | 4 | 159 | 21 | 517 |
| 27,660 | 1 | 34 | 15 | 295 | 0 | 13 | 5 | 161 | 21 | 503 |
| 27,661 | 1 | 34 | 15 | 295 | 0 | 13 | 5 | 161 | 21 | 503 |
| 27,662 | 1 | 34 | 14 | 297 | 0 | 13 | 5 | 160 | 20 | 504 |
| 27,663 | 1 | 35 | 14 | 297 | 0 | 13 | 5 | 162 | 20 | 507 |

|        |   |    |    |     |   |    |    |     |    |       |
|--------|---|----|----|-----|---|----|----|-----|----|-------|
| 27,664 | 1 | 36 | 13 | 299 | 0 | 13 | 5  | 162 | 19 | 510   |
| 27,665 | 1 | 38 | 13 | 301 | 0 | 14 | 5  | 163 | 19 | 516   |
| 27,666 | 1 | 39 | 13 | 307 | 0 | 14 | 5  | 165 | 19 | 525   |
| 27,667 | 4 | 40 | 15 | 321 | 0 | 14 | 11 | 168 | 30 | 543   |
| 27,668 | 4 | 41 | 15 | 325 | 0 | 14 | 11 | 170 | 30 | 550   |
| 27,669 | 4 | 43 | 14 | 327 | 0 | 15 | 11 | 172 | 29 | 557   |
| 27,670 | 4 | 43 | 14 | 330 | 0 | 15 | 11 | 173 | 29 | 561   |
| 27,671 | 4 | 43 | 14 | 341 | 0 | 15 | 13 | 180 | 31 | 579   |
| 27,672 | 4 | 43 | 14 | 342 | 0 | 15 | 13 | 178 | 31 | 578   |
| 27,673 | 4 | 43 | 13 | 341 | 0 | 15 | 13 | 178 | 30 | 577   |
| 27,674 | 4 | 43 | 14 | 351 | 0 | 17 | 14 | 185 | 32 | 596   |
| 27,675 | 4 | 44 | 14 | 380 | 0 | 21 | 15 | 211 | 33 | 656   |
| 27,676 | 4 | 45 | 14 | 399 | 0 | 22 | 15 | 225 | 33 | 691   |
| 27,677 | 4 | 45 | 15 | 403 | 0 | 22 | 15 | 230 | 34 | 700   |
| 27,678 | 4 | 49 | 15 | 411 | 0 | 24 | 15 | 239 | 34 | 723   |
| 27,679 | 4 | 59 | 15 | 450 | 0 | 27 | 16 | 268 | 35 | 804   |
| 27,680 | 4 | 58 | 15 | 450 | 0 | 29 | 15 | 269 | 34 | 806   |
| 27,681 | 4 | 68 | 14 | 474 | 0 | 29 | 15 | 280 | 33 | 851   |
| 27,682 | 4 | 69 | 14 | 484 | 0 | 29 | 15 | 283 | 33 | 865   |
| 27,683 | 5 | 71 | 15 | 492 | 0 | 30 | 14 | 285 | 34 | 878   |
| 27,684 | 5 | 71 | 15 | 495 | 0 | 31 | 14 | 288 | 34 | 885   |
| 27,685 | 5 | 71 | 15 | 492 | 0 | 31 | 15 | 289 | 35 | 883   |
| 27,686 | 5 | 73 | 15 | 500 | 0 | 31 | 15 | 294 | 35 | 898   |
| 27,687 | 5 | 73 | 15 | 503 | 0 | 31 | 15 | 295 | 35 | 902   |
| 27,688 | 4 | 73 | 18 | 507 | 0 | 31 | 15 | 295 | 37 | 906   |
| 27,689 | 4 | 73 | 18 | 513 | 0 | 31 | 15 | 299 | 37 | 916   |
| 27,690 | 4 | 74 | 18 | 518 | 0 | 31 | 15 | 300 | 37 | 923   |
| 27,691 | 7 | 74 | 47 | 549 | 0 | 32 | 23 | 306 | 77 | 961   |
| 27,692 | 8 | 76 | 53 | 573 | 0 | 33 | 23 | 316 | 84 | 998   |
| 27,693 | 8 | 76 | 54 | 604 | 0 | 35 | 24 | 328 | 86 | 1,043 |
| 27,694 | 8 | 76 | 57 | 616 | 0 | 35 | 24 | 332 | 89 | 1,059 |
| 27,695 | 8 | 75 | 56 | 598 | 0 | 35 | 24 | 324 | 88 | 1,032 |
| 27,696 | 8 | 74 | 56 | 573 | 0 | 33 | 24 | 311 | 88 | 991   |
| 27,697 | 8 | 74 | 54 | 569 | 0 | 33 | 24 | 310 | 86 | 986   |
| 27,698 | 8 | 70 | 52 | 531 | 0 | 31 | 24 | 276 | 84 | 908   |
| 27,699 | 8 | 70 | 52 | 537 | 0 | 31 | 24 | 278 | 84 | 916   |
| 27,700 | 8 | 58 | 52 | 536 | 0 | 25 | 24 | 232 | 84 | 851   |
| 27,701 | 8 | 58 | 52 | 574 | 0 | 25 | 24 | 244 | 84 | 901   |
| 27,702 | 8 | 59 | 53 | 573 | 1 | 25 | 24 | 246 | 86 | 903   |
| 27,703 | 8 | 54 | 53 | 556 | 1 | 25 | 25 | 240 | 87 | 875   |
| 27,704 | 8 | 53 | 52 | 540 | 1 | 25 | 23 | 235 | 84 | 853   |

|        |   |    |    |     |   |    |    |     |     |     |
|--------|---|----|----|-----|---|----|----|-----|-----|-----|
| 27,705 | 8 | 47 | 53 | 515 | 1 | 25 | 23 | 235 | 85  | 822 |
| 27,706 | 8 | 47 | 52 | 515 | 1 | 26 | 24 | 243 | 85  | 831 |
| 27,707 | 8 | 47 | 52 | 517 | 1 | 26 | 24 | 243 | 85  | 833 |
| 27,708 | 8 | 48 | 54 | 515 | 1 | 26 | 24 | 243 | 87  | 832 |
| 27,709 | 8 | 48 | 55 | 516 | 1 | 25 | 25 | 242 | 89  | 831 |
| 27,710 | 8 | 48 | 55 | 518 | 1 | 24 | 26 | 240 | 90  | 830 |
| 27,711 | 8 | 48 | 56 | 518 | 1 | 24 | 26 | 240 | 91  | 830 |
| 27,712 | 8 | 48 | 56 | 519 | 1 | 24 | 26 | 240 | 91  | 831 |
| 27,713 | 8 | 48 | 56 | 517 | 1 | 24 | 26 | 240 | 91  | 829 |
| 27,714 | 8 | 47 | 57 | 518 | 1 | 24 | 27 | 237 | 93  | 826 |
| 27,715 | 8 | 44 | 58 | 513 | 1 | 23 | 27 | 236 | 94  | 816 |
| 27,716 | 6 | 43 | 58 | 510 | 1 | 23 | 26 | 236 | 91  | 812 |
| 27,717 | 6 | 43 | 58 | 515 | 1 | 23 | 25 | 240 | 90  | 821 |
| 27,718 | 6 | 42 | 57 | 503 | 1 | 24 | 22 | 240 | 86  | 809 |
| 27,719 | 6 | 39 | 58 | 501 | 1 | 23 | 22 | 236 | 87  | 799 |
| 27,720 | 6 | 40 | 58 | 510 | 1 | 23 | 22 | 244 | 87  | 817 |
| 27,721 | 6 | 44 | 62 | 549 | 1 | 24 | 21 | 277 | 90  | 894 |
| 27,722 | 6 | 44 | 62 | 539 | 1 | 24 | 21 | 273 | 90  | 880 |
| 27,723 | 6 | 44 | 62 | 544 | 1 | 24 | 21 | 279 | 90  | 891 |
| 27,724 | 6 | 43 | 68 | 535 | 1 | 22 | 23 | 270 | 98  | 870 |
| 27,725 | 6 | 43 | 69 | 536 | 1 | 22 | 22 | 270 | 98  | 871 |
| 27,726 | 7 | 55 | 72 | 524 | 1 | 17 | 24 | 238 | 104 | 834 |
| 27,727 | 7 | 57 | 72 | 526 | 1 | 17 | 24 | 240 | 104 | 840 |
| 27,728 | 7 | 52 | 71 | 520 | 1 | 15 | 24 | 225 | 103 | 812 |
| 27,729 | 7 | 52 | 71 | 521 | 1 | 15 | 24 | 225 | 103 | 813 |
| 27,730 | 7 | 42 | 70 | 491 | 1 | 12 | 23 | 197 | 101 | 742 |
| 27,731 | 7 | 43 | 70 | 492 | 1 | 10 | 23 | 199 | 101 | 744 |
| 27,732 | 7 | 33 | 70 | 467 | 1 | 10 | 23 | 188 | 101 | 698 |
| 27,733 | 6 | 33 | 69 | 458 | 1 | 10 | 23 | 186 | 99  | 687 |
| 27,734 | 6 | 31 | 69 | 443 | 1 | 10 | 23 | 182 | 99  | 666 |
| 27,735 | 6 | 31 | 69 | 440 | 1 | 9  | 22 | 178 | 98  | 658 |
| 27,736 | 6 | 30 | 69 | 434 | 1 | 9  | 22 | 174 | 98  | 647 |
| 27,737 | 6 | 30 | 68 | 441 | 1 | 10 | 22 | 176 | 97  | 657 |
| 27,738 | 6 | 31 | 66 | 452 | 1 | 10 | 22 | 182 | 95  | 675 |
| 27,739 | 6 | 33 | 59 | 474 | 1 | 13 | 21 | 200 | 87  | 720 |
| 27,740 | 5 | 35 | 54 | 498 | 1 | 14 | 20 | 218 | 80  | 765 |
| 27,741 | 4 | 38 | 53 | 533 | 1 | 17 | 18 | 231 | 76  | 819 |
| 27,742 | 3 | 40 | 37 | 527 | 1 | 16 | 14 | 236 | 55  | 819 |
| 27,743 | 2 | 38 | 31 | 507 | 1 | 15 | 14 | 227 | 48  | 787 |
| 27,744 | 2 | 37 | 30 | 466 | 1 | 13 | 13 | 215 | 46  | 731 |
| 27,745 | 2 | 37 | 28 | 466 | 1 | 13 | 13 | 219 | 44  | 735 |

|        |   |    |    |     |   |    |    |     |    |     |
|--------|---|----|----|-----|---|----|----|-----|----|-----|
| 27,746 | 2 | 38 | 28 | 466 | 1 | 14 | 13 | 221 | 44 | 739 |
| 27,747 | 2 | 38 | 28 | 465 | 1 | 14 | 13 | 224 | 44 | 741 |
| 27,748 | 2 | 38 | 31 | 466 | 1 | 14 | 13 | 225 | 47 | 743 |
| 27,749 | 2 | 38 | 30 | 471 | 1 | 15 | 13 | 229 | 46 | 753 |
| 27,750 | 2 | 38 | 30 | 465 | 1 | 15 | 13 | 227 | 46 | 745 |
| 27,751 | 2 | 38 | 32 | 381 | 1 | 14 | 13 | 218 | 48 | 651 |
| 27,752 | 2 | 38 | 32 | 344 | 1 | 14 | 13 | 211 | 48 | 607 |
| 27,753 | 2 | 38 | 31 | 339 | 0 | 14 | 13 | 209 | 46 | 600 |
| 27,754 | 2 | 38 | 31 | 338 | 0 | 14 | 12 | 209 | 45 | 599 |
| 27,755 | 2 | 38 | 31 | 339 | 0 | 14 | 12 | 209 | 45 | 600 |
| 27,756 | 2 | 38 | 30 | 333 | 0 | 14 | 12 | 202 | 44 | 587 |
| 27,757 | 2 | 39 | 29 | 331 | 0 | 13 | 10 | 196 | 41 | 579 |
| 27,758 | 2 | 39 | 27 | 330 | 0 | 13 | 10 | 197 | 39 | 579 |
| 27,759 | 2 | 40 | 29 | 334 | 0 | 16 | 10 | 201 | 41 | 591 |
| 27,760 | 2 | 43 | 28 | 336 | 0 | 17 | 9  | 209 | 39 | 605 |
| 27,761 | 2 | 43 | 28 | 334 | 0 | 17 | 8  | 210 | 38 | 604 |
| 27,762 | 2 | 43 | 27 | 333 | 0 | 17 | 8  | 212 | 37 | 605 |
| 27,763 | 2 | 43 | 27 | 335 | 0 | 17 | 9  | 213 | 38 | 608 |
| 27,764 | 2 | 43 | 27 | 341 | 0 | 17 | 8  | 213 | 37 | 614 |
| 27,765 | 2 | 43 | 26 | 338 | 0 | 17 | 8  | 213 | 36 | 611 |
| 27,766 | 2 | 44 | 26 | 348 | 0 | 17 | 8  | 217 | 36 | 626 |
| 27,767 | 2 | 44 | 26 | 349 | 0 | 17 | 8  | 218 | 36 | 628 |
| 27,768 | 1 | 44 | 26 | 345 | 0 | 18 | 8  | 216 | 35 | 623 |
| 27,769 | 1 | 46 | 25 | 353 | 0 | 17 | 7  | 214 | 33 | 630 |
| 27,770 | 1 | 46 | 24 | 350 | 0 | 17 | 7  | 220 | 32 | 633 |
| 27,771 | 1 | 45 | 24 | 365 | 0 | 17 | 7  | 224 | 32 | 651 |
| 27,772 | 1 | 45 | 20 | 394 | 0 | 19 | 6  | 273 | 27 | 731 |
| 27,773 | 1 | 47 | 21 | 398 | 0 | 19 | 6  | 266 | 28 | 730 |
| 27,774 | 1 | 47 | 21 | 410 | 0 | 19 | 5  | 267 | 27 | 743 |
| 27,775 | 1 | 49 | 14 | 425 | 0 | 20 | 3  | 272 | 18 | 766 |
| 27,776 | 1 | 51 | 13 | 427 | 0 | 20 | 3  | 276 | 17 | 774 |
| 27,777 | 0 | 35 | 10 | 394 | 0 | 20 | 1  | 269 | 11 | 718 |
| 27,778 | 0 | 35 | 10 | 394 | 0 | 20 | 1  | 269 | 11 | 718 |
| 27,779 | 0 | 35 | 10 | 390 | 0 | 20 | 1  | 270 | 11 | 715 |
| 27,780 | 0 | 36 | 10 | 394 | 0 | 20 | 1  | 272 | 11 | 722 |
| 27,781 | 0 | 35 | 10 | 383 | 0 | 20 | 1  | 266 | 11 | 704 |
| 27,782 | 0 | 35 | 10 | 382 | 0 | 20 | 1  | 266 | 11 | 703 |
| 27,783 | 0 | 35 | 10 | 383 | 0 | 20 | 1  | 266 | 11 | 704 |
| 27,784 | 0 | 34 | 10 | 380 | 0 | 19 | 1  | 266 | 11 | 699 |
| 27,785 | 0 | 34 | 10 | 381 | 0 | 19 | 1  | 266 | 11 | 700 |
| 27,786 | 0 | 35 | 10 | 381 | 0 | 19 | 1  | 266 | 11 | 701 |

|        |   |    |    |     |   |    |   |     |    |     |
|--------|---|----|----|-----|---|----|---|-----|----|-----|
| 27,787 | 0 | 34 | 10 | 375 | 0 | 19 | 1 | 263 | 11 | 691 |
| 27,788 | 0 | 34 | 10 | 368 | 0 | 18 | 1 | 262 | 11 | 682 |
| 27,789 | 0 | 33 | 10 | 356 | 0 | 18 | 1 | 256 | 11 | 663 |
| 27,790 | 1 | 31 | 10 | 330 | 0 | 15 | 1 | 239 | 12 | 615 |
| 27,791 | 1 | 29 | 10 | 301 | 0 | 14 | 1 | 216 | 12 | 560 |
| 27,792 | 1 | 25 | 10 | 261 | 0 | 11 | 1 | 201 | 12 | 498 |
| 27,793 | 1 | 23 | 10 | 233 | 0 | 11 | 1 | 188 | 12 | 455 |
| 27,794 | 1 | 23 | 10 | 228 | 0 | 11 | 1 | 187 | 12 | 449 |
| 27,795 | 1 | 23 | 10 | 234 | 0 | 11 | 1 | 188 | 12 | 456 |
| 27,796 | 1 | 24 | 9  | 244 | 0 | 12 | 1 | 198 | 11 | 478 |
| 27,797 | 1 | 24 | 8  | 246 | 0 | 11 | 1 | 197 | 10 | 478 |
| 27,798 | 1 | 28 | 7  | 283 | 0 | 18 | 1 | 230 | 9  | 559 |
| 27,799 | 1 | 28 | 5  | 291 | 0 | 19 | 1 | 230 | 7  | 568 |
| 27,800 | 1 | 29 | 4  | 295 | 0 | 18 | 1 | 238 | 6  | 580 |
| 27,801 | 1 | 29 | 4  | 303 | 0 | 18 | 1 | 238 | 6  | 588 |
| 27,802 | 1 | 28 | 5  | 300 | 0 | 18 | 1 | 228 | 7  | 574 |
| 27,803 | 1 | 28 | 5  | 303 | 0 | 18 | 1 | 233 | 7  | 582 |
| 27,804 | 1 | 28 | 5  | 303 | 0 | 18 | 1 | 233 | 7  | 582 |
| 27,805 | 1 | 31 | 5  | 310 | 0 | 18 | 1 | 237 | 7  | 596 |
| 27,806 | 1 | 31 | 5  | 311 | 0 | 18 | 1 | 237 | 7  | 597 |
| 27,807 | 1 | 31 | 5  | 311 | 0 | 18 | 1 | 238 | 7  | 598 |
| 27,808 | 1 | 30 | 5  | 306 | 0 | 18 | 1 | 232 | 7  | 586 |
| 27,809 | 1 | 30 | 5  | 308 | 0 | 18 | 1 | 233 | 7  | 589 |
| 27,810 | 1 | 25 | 3  | 304 | 0 | 15 | 1 | 232 | 5  | 576 |
| 27,811 | 1 | 25 | 3  | 315 | 0 | 15 | 1 | 231 | 5  | 586 |
| 27,812 | 1 | 25 | 3  | 336 | 0 | 15 | 1 | 256 | 5  | 632 |
| 27,813 | 1 | 25 | 3  | 359 | 0 | 16 | 1 | 262 | 5  | 662 |
| 27,814 | 1 | 25 | 3  | 375 | 0 | 17 | 0 | 267 | 4  | 684 |
| 27,815 | 1 | 25 | 2  | 375 | 0 | 18 | 0 | 270 | 3  | 688 |
| 27,816 | 1 | 28 | 2  | 441 | 0 | 22 | 0 | 343 | 3  | 834 |
| 27,817 | 1 | 27 | 2  | 435 | 0 | 22 | 0 | 339 | 3  | 823 |
| 27,818 | 1 | 28 | 2  | 439 | 0 | 23 | 0 | 342 | 3  | 832 |
| 27,819 | 1 | 26 | 2  | 428 | 0 | 22 | 0 | 338 | 3  | 814 |
| 27,820 | 1 | 26 | 2  | 428 | 0 | 22 | 0 | 339 | 3  | 815 |
| 27,821 | 1 | 27 | 3  | 444 | 0 | 23 | 0 | 346 | 4  | 840 |
| 27,822 | 1 | 27 | 3  | 423 | 0 | 23 | 0 | 339 | 4  | 812 |
| 27,823 | 1 | 25 | 3  | 376 | 0 | 20 | 0 | 277 | 4  | 698 |
| 27,824 | 1 | 28 | 2  | 370 | 0 | 20 | 0 | 289 | 3  | 707 |
| 27,825 | 1 | 27 | 2  | 404 | 0 | 23 | 0 | 349 | 3  | 803 |
| 27,826 | 1 | 32 | 2  | 437 | 0 | 24 | 0 | 404 | 3  | 897 |
| 27,827 | 1 | 36 | 2  | 468 | 0 | 25 | 0 | 424 | 3  | 953 |

|        |   |    |    |     |   |    |    |     |    |       |
|--------|---|----|----|-----|---|----|----|-----|----|-------|
| 27,828 | 1 | 44 | 2  | 488 | 0 | 28 | 0  | 455 | 3  | 1,015 |
| 27,829 | 1 | 44 | 2  | 493 | 0 | 29 | 0  | 462 | 3  | 1,028 |
| 27,830 | 1 | 51 | 3  | 568 | 0 | 36 | 0  | 541 | 4  | 1,196 |
| 27,831 | 1 | 50 | 3  | 590 | 0 | 41 | 0  | 567 | 4  | 1,248 |
| 27,832 | 1 | 60 | 4  | 629 | 0 | 47 | 0  | 616 | 5  | 1,352 |
| 27,833 | 1 | 61 | 4  | 633 | 0 | 47 | 0  | 617 | 5  | 1,358 |
| 27,834 | 1 | 65 | 4  | 651 | 0 | 49 | 0  | 623 | 5  | 1,388 |
| 27,835 | 1 | 64 | 4  | 666 | 0 | 49 | 0  | 630 | 5  | 1,409 |
| 27,836 | 1 | 65 | 4  | 678 | 0 | 51 | 0  | 638 | 5  | 1,432 |
| 27,837 | 1 | 65 | 4  | 679 | 0 | 51 | 0  | 640 | 5  | 1,435 |
| 27,838 | 1 | 69 | 4  | 690 | 0 | 53 | 0  | 644 | 5  | 1,456 |
| 27,839 | 1 | 69 | 4  | 692 | 0 | 53 | 0  | 645 | 5  | 1,459 |
| 27,840 | 0 | 88 | 4  | 763 | 0 | 57 | 0  | 683 | 4  | 1,591 |
| 27,841 | 0 | 88 | 4  | 766 | 0 | 57 | 0  | 690 | 4  | 1,601 |
| 27,842 | 0 | 88 | 4  | 764 | 0 | 57 | 0  | 695 | 4  | 1,604 |
| 27,843 | 1 | 88 | 4  | 789 | 0 | 57 | 0  | 719 | 5  | 1,653 |
| 27,844 | 1 | 88 | 4  | 793 | 0 | 57 | 0  | 720 | 5  | 1,658 |
| 27,845 | 1 | 89 | 4  | 805 | 0 | 57 | 0  | 729 | 5  | 1,680 |
| 27,846 | 1 | 89 | 4  | 799 | 0 | 57 | 0  | 725 | 5  | 1,670 |
| 27,847 | 2 | 88 | 4  | 792 | 0 | 56 | 0  | 718 | 6  | 1,654 |
| 27,848 | 2 | 95 | 4  | 806 | 0 | 56 | 0  | 736 | 6  | 1,693 |
| 27,849 | 2 | 91 | 4  | 769 | 0 | 49 | 0  | 701 | 6  | 1,610 |
| 27,850 | 2 | 91 | 4  | 759 | 0 | 48 | 0  | 700 | 6  | 1,598 |
| 27,851 | 2 | 90 | 3  | 751 | 0 | 48 | 0  | 688 | 5  | 1,577 |
| 27,852 | 2 | 90 | 3  | 743 | 0 | 48 | 0  | 688 | 5  | 1,569 |
| 27,853 | 2 | 90 | 4  | 741 | 0 | 48 | 0  | 683 | 6  | 1,562 |
| 27,854 | 2 | 90 | 4  | 741 | 0 | 48 | 0  | 683 | 6  | 1,562 |
| 27,855 | 2 | 90 | 4  | 741 | 0 | 48 | 0  | 683 | 6  | 1,562 |
| 27,856 | 2 | 87 | 6  | 731 | 0 | 48 | 0  | 678 | 8  | 1,544 |
| 27,857 | 2 | 87 | 6  | 731 | 0 | 48 | 0  | 679 | 8  | 1,545 |
| 27,858 | 2 | 87 | 6  | 732 | 0 | 48 | 0  | 679 | 8  | 1,546 |
| 27,859 | 2 | 87 | 6  | 732 | 0 | 48 | 0  | 678 | 8  | 1,545 |
| 27,860 | 6 | 87 | 18 | 730 | 5 | 48 | 7  | 676 | 36 | 1,541 |
| 27,861 | 6 | 87 | 30 | 650 | 6 | 45 | 18 | 632 | 60 | 1,414 |
| 27,862 | 6 | 87 | 33 | 650 | 6 | 45 | 18 | 632 | 63 | 1,414 |
| 27,863 | 6 | 87 | 34 | 650 | 8 | 45 | 21 | 632 | 69 | 1,414 |
| 27,864 | 6 | 88 | 34 | 658 | 8 | 45 | 21 | 638 | 69 | 1,429 |
| 27,865 | 6 | 89 | 36 | 664 | 8 | 45 | 21 | 645 | 71 | 1,443 |
| 27,866 | 6 | 89 | 36 | 658 | 8 | 44 | 21 | 642 | 71 | 1,433 |
| 27,867 | 6 | 86 | 36 | 591 | 8 | 40 | 21 | 573 | 71 | 1,290 |
| 27,868 | 6 | 86 | 36 | 595 | 8 | 40 | 21 | 577 | 71 | 1,298 |



|        |   |    |    |     |   |    |    |     |    |       |
|--------|---|----|----|-----|---|----|----|-----|----|-------|
| 27,869 | 6 | 85 | 36 | 592 | 8 | 39 | 21 | 575 | 71 | 1,291 |
| 27,870 | 6 | 86 | 36 | 597 | 8 | 39 | 21 | 574 | 71 | 1,296 |
| 27,871 | 6 | 87 | 36 | 605 | 8 | 39 | 21 | 585 | 71 | 1,316 |
| 27,872 | 6 | 86 | 35 | 602 | 8 | 38 | 21 | 579 | 70 | 1,305 |
| 27,873 | 6 | 84 | 35 | 577 | 8 | 38 | 21 | 555 | 70 | 1,254 |
| 27,874 | 6 | 76 | 35 | 507 | 8 | 34 | 21 | 471 | 70 | 1,088 |
| 27,875 | 6 | 77 | 35 | 512 | 9 | 34 | 21 | 474 | 71 | 1,097 |
| 27,876 | 6 | 77 | 35 | 513 | 9 | 34 | 23 | 474 | 73 | 1,098 |
| 27,877 | 6 | 70 | 35 | 452 | 9 | 32 | 23 | 399 | 73 | 953   |
| 27,878 | 6 | 70 | 35 | 452 | 9 | 32 | 23 | 399 | 73 | 953   |
| 27,879 | 6 | 64 | 37 | 426 | 9 | 29 | 23 | 365 | 75 | 884   |
| 27,880 | 6 | 57 | 37 | 345 | 9 | 21 | 23 | 278 | 75 | 701   |
| 27,881 | 6 | 46 | 36 | 282 | 9 | 10 | 24 | 201 | 75 | 539   |
| 27,882 | 6 | 46 | 36 | 283 | 9 | 10 | 24 | 201 | 75 | 540   |
| 27,883 | 6 | 46 | 35 | 283 | 9 | 10 | 24 | 201 | 74 | 540   |
| 27,884 | 6 | 46 | 36 | 283 | 9 | 10 | 25 | 201 | 76 | 540   |
| 27,885 | 6 | 42 | 36 | 264 | 9 | 8  | 25 | 194 | 76 | 508   |
| 27,886 | 6 | 41 | 36 | 238 | 9 | 6  | 25 | 179 | 76 | 464   |
| 27,887 | 6 | 41 | 36 | 238 | 9 | 6  | 25 | 179 | 76 | 464   |
| 27,888 | 6 | 41 | 36 | 238 | 9 | 6  | 25 | 176 | 76 | 461   |
| 27,889 | 6 | 37 | 36 | 227 | 9 | 4  | 25 | 173 | 76 | 441   |
| 27,890 | 6 | 18 | 37 | 158 | 9 | 0  | 25 | 134 | 77 | 310   |
| 27,891 | 6 | 18 | 37 | 165 | 9 | 0  | 25 | 141 | 77 | 324   |
| 27,892 | 6 | 18 | 37 | 183 | 9 | 0  | 25 | 141 | 77 | 342   |
| 27,893 | 5 | 18 | 37 | 186 | 9 | 0  | 25 | 139 | 76 | 343   |
| 27,894 | 5 | 18 | 38 | 153 | 9 | 0  | 25 | 108 | 77 | 279   |
| 27,895 | 5 | 18 | 38 | 157 | 9 | 0  | 25 | 111 | 77 | 286   |
| 27,896 | 5 | 18 | 38 | 158 | 9 | 0  | 25 | 111 | 77 | 287   |
| 27,897 | 4 | 18 | 38 | 157 | 9 | 0  | 25 | 108 | 76 | 283   |
| 27,898 | 4 | 18 | 38 | 158 | 9 | 0  | 25 | 110 | 76 | 286   |
| 27,899 | 4 | 10 | 38 | 148 | 9 | 0  | 25 | 90  | 76 | 248   |
| 27,900 | 4 | 10 | 38 | 148 | 9 | 1  | 25 | 90  | 76 | 249   |
| 27,901 | 4 | 10 | 38 | 148 | 9 | 1  | 25 | 91  | 76 | 250   |
| 27,902 | 4 | 10 | 38 | 145 | 9 | 1  | 25 | 91  | 76 | 247   |
| 27,903 | 4 | 10 | 38 | 143 | 9 | 1  | 25 | 90  | 76 | 244   |
| 27,904 | 4 | 10 | 37 | 143 | 9 | 1  | 25 | 90  | 75 | 244   |
| 27,905 | 4 | 10 | 37 | 143 | 9 | 1  | 25 | 90  | 75 | 244   |
| 27,906 | 4 | 16 | 38 | 258 | 9 | 9  | 25 | 190 | 76 | 473   |
| 27,907 | 4 | 16 | 36 | 262 | 9 | 9  | 25 | 193 | 74 | 480   |
| 27,908 | 4 | 17 | 36 | 332 | 9 | 11 | 25 | 213 | 74 | 573   |
| 27,909 | 4 | 19 | 36 | 356 | 9 | 12 | 25 | 228 | 74 | 615   |

|        |    |    |    |     |   |    |    |     |    |     |
|--------|----|----|----|-----|---|----|----|-----|----|-----|
| 27,910 | 3  | 22 | 35 | 381 | 9 | 15 | 27 | 240 | 74 | 658 |
| 27,911 | 0  | 22 | 24 | 384 | 4 | 15 | 18 | 244 | 46 | 665 |
| 27,912 | 0  | 22 | 12 | 382 | 3 | 15 | 8  | 238 | 23 | 657 |
| 27,913 | 0  | 22 | 9  | 384 | 3 | 15 | 8  | 239 | 20 | 660 |
| 27,914 | 0  | 23 | 8  | 391 | 1 | 15 | 5  | 239 | 14 | 668 |
| 27,915 | 0  | 21 | 6  | 380 | 1 | 15 | 5  | 226 | 12 | 642 |
| 27,916 | 0  | 21 | 8  | 381 | 1 | 15 | 5  | 226 | 14 | 643 |
| 27,917 | 1  | 21 | 13 | 376 | 1 | 15 | 5  | 222 | 20 | 634 |
| 27,918 | 1  | 21 | 14 | 372 | 1 | 15 | 5  | 218 | 21 | 626 |
| 27,919 | 1  | 21 | 14 | 370 | 1 | 15 | 5  | 216 | 21 | 622 |
| 27,920 | 1  | 20 | 14 | 366 | 1 | 15 | 5  | 218 | 21 | 619 |
| 27,921 | 1  | 19 | 16 | 359 | 1 | 15 | 5  | 208 | 23 | 601 |
| 27,922 | 1  | 19 | 16 | 359 | 1 | 15 | 5  | 208 | 23 | 601 |
| 27,923 | 1  | 20 | 16 | 347 | 1 | 16 | 6  | 201 | 24 | 584 |
| 27,924 | 1  | 20 | 19 | 350 | 1 | 16 | 7  | 201 | 28 | 587 |
| 27,925 | 1  | 21 | 22 | 349 | 2 | 16 | 12 | 201 | 37 | 587 |
| 27,926 | 1  | 20 | 22 | 344 | 1 | 16 | 12 | 197 | 36 | 577 |
| 27,927 | 2  | 20 | 23 | 344 | 1 | 16 | 13 | 197 | 39 | 577 |
| 27,928 | 2  | 16 | 29 | 343 | 5 | 16 | 23 | 197 | 59 | 572 |
| 27,929 | 3  | 16 | 27 | 342 | 5 | 16 | 23 | 196 | 58 | 570 |
| 27,930 | 3  | 16 | 27 | 342 | 5 | 16 | 23 | 198 | 58 | 572 |
| 27,931 | 10 | 16 | 39 | 344 | 8 | 16 | 37 | 198 | 94 | 574 |
| 27,932 | 10 | 16 | 39 | 335 | 8 | 16 | 36 | 196 | 93 | 563 |
| 27,933 | 10 | 16 | 39 | 335 | 8 | 16 | 36 | 197 | 93 | 564 |
| 27,934 | 10 | 16 | 40 | 335 | 8 | 16 | 36 | 197 | 94 | 564 |
| 27,935 | 10 | 16 | 39 | 335 | 8 | 16 | 35 | 197 | 92 | 564 |
| 27,936 | 10 | 16 | 39 | 335 | 8 | 16 | 35 | 196 | 92 | 563 |
| 27,937 | 10 | 17 | 39 | 344 | 8 | 16 | 35 | 200 | 92 | 577 |
| 27,938 | 10 | 17 | 39 | 354 | 8 | 17 | 35 | 207 | 92 | 595 |
| 27,939 | 10 | 17 | 39 | 354 | 8 | 17 | 34 | 207 | 91 | 595 |
| 27,940 | 10 | 18 | 39 | 362 | 8 | 17 | 35 | 210 | 92 | 607 |
| 27,941 | 10 | 19 | 38 | 369 | 8 | 16 | 35 | 212 | 91 | 616 |
| 27,942 | 10 | 19 | 38 | 361 | 8 | 16 | 35 | 207 | 91 | 603 |
| 27,943 | 10 | 19 | 38 | 341 | 8 | 16 | 35 | 203 | 91 | 579 |
| 27,944 | 10 | 19 | 38 | 341 | 8 | 16 | 35 | 204 | 91 | 580 |
| 27,945 | 10 | 18 | 37 | 333 | 8 | 17 | 35 | 199 | 90 | 567 |
| 27,946 | 10 | 18 | 37 | 325 | 8 | 17 | 36 | 197 | 91 | 557 |
| 27,947 | 10 | 18 | 37 | 326 | 8 | 17 | 36 | 202 | 91 | 563 |
| 27,948 | 10 | 19 | 37 | 328 | 8 | 18 | 36 | 205 | 91 | 570 |
| 27,949 | 10 | 20 | 37 | 326 | 8 | 18 | 36 | 202 | 91 | 566 |
| 27,950 | 10 | 20 | 38 | 320 | 8 | 18 | 37 | 199 | 93 | 557 |

|        |    |     |    |     |   |    |    |     |    |       |
|--------|----|-----|----|-----|---|----|----|-----|----|-------|
| 27,951 | 10 | 20  | 38 | 322 | 8 | 17 | 37 | 199 | 93 | 558   |
| 27,952 | 10 | 21  | 38 | 325 | 8 | 17 | 37 | 201 | 93 | 564   |
| 27,953 | 10 | 21  | 38 | 325 | 8 | 17 | 37 | 201 | 93 | 564   |
| 27,954 | 10 | 30  | 38 | 368 | 8 | 21 | 37 | 227 | 93 | 646   |
| 27,955 | 10 | 39  | 38 | 439 | 8 | 21 | 37 | 258 | 93 | 757   |
| 27,956 | 10 | 39  | 38 | 440 | 8 | 21 | 37 | 258 | 93 | 758   |
| 27,957 | 10 | 34  | 37 | 330 | 8 | 14 | 37 | 163 | 92 | 541   |
| 27,958 | 10 | 34  | 37 | 331 | 8 | 14 | 38 | 162 | 93 | 541   |
| 27,959 | 10 | 34  | 37 | 253 | 8 | 11 | 39 | 127 | 94 | 425   |
| 27,960 | 10 | 34  | 37 | 259 | 8 | 11 | 39 | 128 | 94 | 432   |
| 27,961 | 11 | 32  | 37 | 238 | 8 | 8  | 37 | 117 | 93 | 395   |
| 27,962 | 11 | 32  | 37 | 236 | 8 | 8  | 37 | 113 | 93 | 389   |
| 27,963 | 11 | 33  | 39 | 236 | 8 | 8  | 37 | 113 | 95 | 390   |
| 27,964 | 11 | 33  | 39 | 231 | 8 | 8  | 37 | 115 | 95 | 387   |
| 27,965 | 11 | 33  | 39 | 228 | 8 | 8  | 37 | 116 | 95 | 385   |
| 27,966 | 11 | 33  | 39 | 227 | 8 | 8  | 38 | 116 | 96 | 384   |
| 27,967 | 11 | 33  | 37 | 227 | 8 | 8  | 38 | 116 | 94 | 384   |
| 27,968 | 10 | 33  | 32 | 227 | 8 | 8  | 38 | 116 | 88 | 384   |
| 27,969 | 10 | 33  | 31 | 227 | 8 | 8  | 38 | 116 | 87 | 384   |
| 27,970 | 10 | 33  | 31 | 227 | 8 | 8  | 38 | 117 | 87 | 385   |
| 27,971 | 10 | 33  | 31 | 226 | 8 | 8  | 38 | 115 | 87 | 382   |
| 27,972 | 10 | 33  | 29 | 226 | 8 | 8  | 38 | 114 | 85 | 381   |
| 27,973 | 10 | 32  | 29 | 231 | 8 | 7  | 37 | 116 | 84 | 386   |
| 27,974 | 10 | 36  | 29 | 291 | 8 | 9  | 37 | 139 | 84 | 475   |
| 27,975 | 10 | 68  | 26 | 626 | 8 | 25 | 37 | 375 | 81 | 1,094 |
| 27,976 | 10 | 71  | 23 | 649 | 7 | 26 | 31 | 390 | 71 | 1,136 |
| 27,977 | 10 | 78  | 22 | 722 | 7 | 30 | 29 | 407 | 68 | 1,237 |
| 27,978 | 10 | 78  | 17 | 724 | 5 | 30 | 26 | 408 | 58 | 1,240 |
| 27,979 | 10 | 79  | 16 | 726 | 3 | 30 | 19 | 406 | 48 | 1,241 |
| 27,980 | 9  | 91  | 16 | 785 | 3 | 32 | 19 | 440 | 47 | 1,348 |
| 27,981 | 2  | 91  | 4  | 788 | 0 | 32 | 5  | 442 | 11 | 1,353 |
| 27,982 | 2  | 100 | 4  | 802 | 0 | 32 | 5  | 454 | 11 | 1,388 |
| 27,983 | 2  | 100 | 4  | 803 | 0 | 32 | 5  | 454 | 11 | 1,389 |
| 27,984 | 2  | 100 | 5  | 803 | 0 | 32 | 5  | 453 | 12 | 1,388 |
| 27,985 | 2  | 100 | 4  | 807 | 0 | 32 | 5  | 455 | 11 | 1,394 |
| 27,986 | 2  | 100 | 4  | 810 | 0 | 32 | 5  | 458 | 11 | 1,400 |
| 27,987 | 2  | 100 | 4  | 820 | 0 | 32 | 5  | 459 | 11 | 1,411 |
| 27,988 | 2  | 99  | 4  | 815 | 0 | 34 | 5  | 455 | 11 | 1,403 |
| 27,989 | 2  | 99  | 4  | 806 | 0 | 33 | 5  | 448 | 11 | 1,386 |
| 27,990 | 2  | 98  | 4  | 797 | 0 | 33 | 5  | 444 | 11 | 1,372 |
| 27,991 | 2  | 97  | 4  | 788 | 0 | 33 | 5  | 439 | 11 | 1,357 |

|        |   |     |    |     |   |    |    |     |    |       |
|--------|---|-----|----|-----|---|----|----|-----|----|-------|
| 27,992 | 2 | 97  | 4  | 790 | 0 | 33 | 5  | 439 | 11 | 1,359 |
| 27,993 | 2 | 97  | 4  | 790 | 0 | 33 | 5  | 439 | 11 | 1,359 |
| 27,994 | 2 | 97  | 4  | 792 | 0 | 34 | 5  | 439 | 11 | 1,362 |
| 27,995 | 2 | 97  | 4  | 814 | 0 | 35 | 5  | 448 | 11 | 1,394 |
| 27,996 | 2 | 104 | 5  | 823 | 0 | 35 | 4  | 462 | 11 | 1,424 |
| 27,997 | 2 | 104 | 5  | 827 | 0 | 35 | 5  | 461 | 12 | 1,427 |
| 27,998 | 2 | 104 | 5  | 829 | 0 | 35 | 5  | 456 | 12 | 1,424 |
| 27,999 | 2 | 104 | 5  | 828 | 0 | 34 | 5  | 457 | 12 | 1,423 |
| 28,000 | 2 | 103 | 5  | 828 | 0 | 34 | 4  | 456 | 11 | 1,421 |
| 28,001 | 2 | 103 | 4  | 830 | 0 | 34 | 4  | 456 | 10 | 1,423 |
| 28,002 | 2 | 102 | 5  | 826 | 0 | 34 | 4  | 454 | 11 | 1,416 |
| 28,003 | 2 | 102 | 5  | 826 | 0 | 34 | 4  | 454 | 11 | 1,416 |
| 28,004 | 2 | 102 | 5  | 826 | 0 | 34 | 4  | 454 | 11 | 1,416 |
| 28,005 | 2 | 85  | 5  | 712 | 0 | 30 | 4  | 397 | 11 | 1,224 |
| 28,006 | 2 | 85  | 5  | 711 | 0 | 30 | 4  | 397 | 11 | 1,223 |
| 28,007 | 2 | 85  | 5  | 712 | 0 | 30 | 4  | 397 | 11 | 1,224 |
| 28,008 | 2 | 84  | 13 | 708 | 0 | 30 | 5  | 395 | 20 | 1,217 |
| 28,009 | 2 | 84  | 14 | 703 | 0 | 30 | 4  | 395 | 20 | 1,212 |
| 28,010 | 2 | 81  | 15 | 679 | 0 | 30 | 3  | 392 | 20 | 1,182 |
| 28,011 | 1 | 81  | 20 | 677 | 0 | 30 | 7  | 395 | 28 | 1,183 |
| 28,012 | 3 | 82  | 24 | 691 | 0 | 33 | 10 | 429 | 37 | 1,235 |
| 28,013 | 3 | 82  | 22 | 691 | 0 | 33 | 10 | 430 | 35 | 1,236 |
| 28,014 | 3 | 82  | 23 | 701 | 0 | 33 | 10 | 433 | 36 | 1,249 |
| 28,015 | 3 | 84  | 24 | 711 | 0 | 33 | 10 | 439 | 37 | 1,267 |
| 28,016 | 3 | 85  | 24 | 725 | 0 | 34 | 10 | 452 | 37 | 1,296 |
| 28,017 | 3 | 98  | 24 | 788 | 0 | 34 | 9  | 497 | 36 | 1,417 |
| 28,018 | 3 | 98  | 24 | 792 | 0 | 34 | 9  | 498 | 36 | 1,422 |
| 28,019 | 3 | 98  | 24 | 801 | 0 | 34 | 9  | 498 | 36 | 1,431 |
| 28,020 | 3 | 98  | 24 | 801 | 0 | 34 | 9  | 501 | 36 | 1,434 |
| 28,021 | 3 | 101 | 24 | 818 | 0 | 34 | 9  | 508 | 36 | 1,461 |
| 28,022 | 3 | 101 | 24 | 825 | 0 | 34 | 9  | 512 | 36 | 1,472 |
| 28,023 | 3 | 101 | 24 | 826 | 0 | 34 | 9  | 513 | 36 | 1,474 |
| 28,024 | 3 | 101 | 24 | 822 | 0 | 33 | 10 | 511 | 37 | 1,467 |
| 28,025 | 3 | 97  | 26 | 759 | 0 | 31 | 10 | 487 | 39 | 1,374 |
| 28,026 | 3 | 61  | 26 | 402 | 0 | 15 | 10 | 237 | 39 | 715   |
| 28,027 | 3 | 54  | 26 | 329 | 0 | 11 | 11 | 221 | 40 | 615   |
| 28,028 | 2 | 54  | 26 | 329 | 0 | 11 | 11 | 228 | 39 | 622   |
| 28,029 | 2 | 54  | 26 | 326 | 0 | 11 | 12 | 229 | 40 | 620   |
| 28,030 | 2 | 53  | 26 | 322 | 0 | 11 | 12 | 229 | 40 | 615   |
| 28,031 | 2 | 42  | 27 | 264 | 0 | 9  | 20 | 199 | 49 | 514   |
| 28,032 | 2 | 43  | 29 | 268 | 0 | 9  | 24 | 210 | 55 | 530   |

|        |   |     |    |       |   |     |    |       |    |       |
|--------|---|-----|----|-------|---|-----|----|-------|----|-------|
| 28,033 | 2 | 34  | 29 | 251   | 0 | 9   | 24 | 198   | 55 | 492   |
| 28,034 | 2 | 34  | 30 | 252   | 0 | 9   | 24 | 198   | 56 | 493   |
| 28,035 | 2 | 35  | 29 | 263   | 0 | 9   | 24 | 202   | 55 | 509   |
| 28,036 | 2 | 38  | 29 | 266   | 0 | 10  | 24 | 210   | 55 | 524   |
| 28,037 | 2 | 38  | 29 | 268   | 0 | 10  | 24 | 210   | 55 | 526   |
| 28,038 | 2 | 38  | 29 | 262   | 0 | 8   | 24 | 216   | 55 | 524   |
| 28,039 | 2 | 41  | 29 | 277   | 0 | 9   | 24 | 236   | 55 | 563   |
| 28,040 | 2 | 42  | 29 | 284   | 0 | 9   | 24 | 240   | 55 | 575   |
| 28,041 | 2 | 43  | 29 | 287   | 0 | 9   | 24 | 244   | 55 | 583   |
| 28,042 | 2 | 43  | 29 | 287   | 0 | 9   | 24 | 244   | 55 | 583   |
| 28,043 | 2 | 43  | 29 | 288   | 0 | 9   | 24 | 245   | 55 | 585   |
| 28,044 | 2 | 43  | 29 | 283   | 0 | 8   | 24 | 239   | 55 | 573   |
| 28,045 | 2 | 43  | 29 | 261   | 0 | 7   | 24 | 229   | 55 | 540   |
| 28,046 | 2 | 43  | 29 | 264   | 0 | 7   | 24 | 233   | 55 | 547   |
| 28,047 | 2 | 36  | 28 | 250   | 0 | 6   | 24 | 218   | 54 | 510   |
| 28,048 | 2 | 36  | 28 | 249   | 0 | 6   | 23 | 218   | 53 | 509   |
| 28,049 | 2 | 36  | 28 | 249   | 0 | 6   | 23 | 218   | 53 | 509   |
| 28,050 | 2 | 35  | 28 | 248   | 0 | 6   | 23 | 214   | 53 | 503   |
| 28,051 | 2 | 35  | 28 | 244   | 0 | 6   | 23 | 215   | 53 | 500   |
| 28,052 | 2 | 35  | 28 | 244   | 0 | 6   | 23 | 215   | 53 | 500   |
| 28,053 | 2 | 35  | 27 | 244   | 0 | 6   | 23 | 215   | 52 | 500   |
| 28,054 | 2 | 35  | 28 | 245   | 0 | 6   | 23 | 215   | 53 | 501   |
| 28,055 | 2 | 34  | 28 | 245   | 0 | 6   | 23 | 216   | 53 | 501   |
| 28,056 | 2 | 34  | 28 | 270   | 0 | 7   | 23 | 225   | 53 | 536   |
| 28,057 | 2 | 41  | 28 | 415   | 0 | 20  | 23 | 343   | 53 | 819   |
| 28,058 | 2 | 44  | 20 | 463   | 0 | 27  | 22 | 365   | 44 | 899   |
| 28,059 | 2 | 60  | 20 | 680   | 0 | 53  | 22 | 516   | 44 | 1,309 |
| 28,060 | 2 | 75  | 19 | 889   | 0 | 80  | 22 | 671   | 43 | 1,715 |
| 28,061 | 2 | 85  | 19 | 995   | 0 | 91  | 23 | 730   | 44 | 1,901 |
| 28,062 | 2 | 134 | 14 | 1,612 | 0 | 132 | 19 | 1,058 | 35 | 2,936 |
| 28,063 | 0 | 146 | 10 | 1,695 | 0 | 134 | 16 | 1,087 | 26 | 3,062 |
| 28,064 | 0 | 146 | 9  | 1,703 | 0 | 134 | 16 | 1,086 | 25 | 3,069 |
| 28,065 | 0 | 148 | 9  | 1,705 | 0 | 134 | 16 | 1,096 | 25 | 3,083 |
| 28,066 | 0 | 149 | 9  | 1,713 | 0 | 137 | 16 | 1,092 | 25 | 3,091 |
| 28,067 | 0 | 183 | 9  | 1,933 | 0 | 147 | 16 | 1,215 | 25 | 3,478 |
| 28,068 | 0 | 170 | 9  | 1,881 | 0 | 147 | 16 | 1,171 | 25 | 3,369 |
| 28,069 | 0 | 170 | 9  | 1,885 | 0 | 147 | 16 | 1,176 | 25 | 3,378 |
| 28,070 | 0 | 170 | 9  | 1,888 | 0 | 147 | 16 | 1,177 | 25 | 3,382 |
| 28,071 | 0 | 167 | 9  | 1,874 | 0 | 147 | 16 | 1,167 | 25 | 3,355 |
| 28,072 | 0 | 170 | 9  | 1,873 | 0 | 147 | 17 | 1,168 | 26 | 3,358 |
| 28,073 | 0 | 170 | 9  | 1,873 | 0 | 147 | 17 | 1,168 | 26 | 3,358 |

|        |   |     |    |       |   |     |    |       |    |       |
|--------|---|-----|----|-------|---|-----|----|-------|----|-------|
| 28,074 | 0 | 170 | 9  | 1,869 | 0 | 147 | 16 | 1,167 | 25 | 3,353 |
| 28,075 | 0 | 170 | 8  | 1,870 | 0 | 147 | 16 | 1,171 | 24 | 3,358 |
| 28,076 | 0 | 170 | 7  | 1,885 | 0 | 147 | 16 | 1,185 | 23 | 3,387 |
| 28,077 | 0 | 186 | 8  | 2,081 | 0 | 164 | 16 | 1,385 | 24 | 3,816 |
| 28,078 | 0 | 188 | 8  | 2,250 | 0 | 171 | 15 | 1,449 | 23 | 4,058 |
| 28,079 | 0 | 189 | 8  | 2,259 | 0 | 174 | 14 | 1,457 | 22 | 4,079 |
| 28,080 | 0 | 198 | 9  | 2,358 | 0 | 177 | 14 | 1,501 | 23 | 4,234 |
| 28,081 | 0 | 199 | 8  | 2,380 | 0 | 178 | 5  | 1,522 | 13 | 4,279 |
| 28,082 | 0 | 199 | 6  | 2,381 | 0 | 178 | 3  | 1,519 | 9  | 4,277 |
| 28,083 | 0 | 198 | 6  | 2,375 | 0 | 178 | 2  | 1,509 | 8  | 4,260 |
| 28,084 | 0 | 198 | 5  | 2,375 | 0 | 178 | 2  | 1,509 | 7  | 4,260 |
| 28,085 | 0 | 198 | 5  | 2,377 | 0 | 178 | 2  | 1,512 | 7  | 4,265 |
| 28,086 | 0 | 198 | 5  | 2,368 | 0 | 178 | 2  | 1,508 | 7  | 4,252 |
| 28,087 | 1 | 199 | 9  | 2,361 | 1 | 177 | 2  | 1,507 | 13 | 4,244 |
| 28,088 | 1 | 199 | 9  | 2,359 | 1 | 177 | 2  | 1,508 | 13 | 4,243 |
| 28,089 | 5 | 196 | 28 | 2,334 | 4 | 176 | 36 | 1,481 | 73 | 4,187 |
| 28,090 | 6 | 196 | 31 | 2,334 | 4 | 176 | 38 | 1,481 | 79 | 4,187 |
| 28,091 | 6 | 195 | 32 | 2,329 | 4 | 176 | 38 | 1,480 | 80 | 4,180 |
| 28,092 | 6 | 194 | 32 | 2,325 | 4 | 176 | 38 | 1,475 | 80 | 4,170 |
| 28,093 | 6 | 194 | 33 | 2,326 | 4 | 176 | 39 | 1,475 | 82 | 4,171 |
| 28,094 | 6 | 194 | 37 | 2,323 | 4 | 176 | 41 | 1,476 | 88 | 4,169 |
| 28,095 | 6 | 195 | 37 | 2,332 | 4 | 178 | 41 | 1,477 | 88 | 4,182 |
| 28,096 | 6 | 195 | 37 | 2,334 | 4 | 178 | 41 | 1,480 | 88 | 4,187 |
| 28,097 | 6 | 195 | 37 | 2,334 | 4 | 178 | 42 | 1,484 | 89 | 4,191 |
| 28,098 | 6 | 195 | 37 | 2,337 | 4 | 178 | 42 | 1,488 | 89 | 4,198 |
| 28,099 | 6 | 200 | 37 | 2,405 | 4 | 184 | 42 | 1,521 | 89 | 4,310 |
| 28,100 | 6 | 201 | 37 | 2,431 | 4 | 188 | 42 | 1,539 | 89 | 4,359 |
| 28,101 | 6 | 201 | 37 | 2,436 | 4 | 188 | 42 | 1,542 | 89 | 4,367 |
| 28,102 | 6 | 201 | 37 | 2,438 | 4 | 188 | 42 | 1,539 | 89 | 4,366 |
| 28,103 | 6 | 203 | 37 | 2,445 | 4 | 188 | 42 | 1,548 | 89 | 4,384 |
| 28,104 | 6 | 203 | 36 | 2,445 | 4 | 188 | 43 | 1,549 | 89 | 4,385 |
| 28,105 | 6 | 203 | 36 | 2,445 | 4 | 188 | 43 | 1,549 | 89 | 4,385 |
| 28,106 | 6 | 204 | 38 | 2,446 | 4 | 188 | 43 | 1,547 | 91 | 4,385 |
| 28,107 | 6 | 206 | 38 | 2,421 | 4 | 187 | 43 | 1,545 | 91 | 4,359 |
| 28,108 | 6 | 201 | 40 | 2,259 | 4 | 173 | 44 | 1,462 | 94 | 4,095 |
| 28,109 | 6 | 201 | 40 | 2,264 | 4 | 174 | 44 | 1,469 | 94 | 4,108 |
| 28,110 | 6 | 186 | 41 | 2,089 | 4 | 150 | 45 | 1,361 | 96 | 3,786 |
| 28,111 | 6 | 172 | 41 | 1,898 | 4 | 125 | 45 | 1,215 | 96 | 3,410 |
| 28,112 | 6 | 164 | 40 | 1,821 | 4 | 118 | 44 | 1,197 | 94 | 3,300 |
| 28,113 | 6 | 114 | 40 | 1,204 | 4 | 77  | 44 | 863   | 94 | 2,258 |
| 28,114 | 6 | 102 | 40 | 1,119 | 4 | 73  | 44 | 810   | 94 | 2,104 |

|        |   |     |    |       |   |    |    |     |     |       |
|--------|---|-----|----|-------|---|----|----|-----|-----|-------|
| 28,115 | 6 | 113 | 39 | 1,237 | 4 | 80 | 44 | 901 | 93  | 2,331 |
| 28,116 | 6 | 110 | 39 | 1,226 | 4 | 80 | 44 | 889 | 93  | 2,305 |
| 28,117 | 6 | 105 | 39 | 1,193 | 4 | 76 | 46 | 872 | 95  | 2,246 |
| 28,118 | 6 | 71  | 39 | 973   | 4 | 66 | 46 | 750 | 95  | 1,860 |
| 28,119 | 6 | 72  | 39 | 989   | 4 | 67 | 47 | 755 | 96  | 1,883 |
| 28,120 | 6 | 72  | 39 | 983   | 4 | 67 | 47 | 747 | 96  | 1,869 |
| 28,121 | 6 | 72  | 39 | 973   | 4 | 67 | 47 | 745 | 96  | 1,857 |
| 28,122 | 6 | 72  | 40 | 970   | 4 | 67 | 48 | 745 | 98  | 1,854 |
| 28,123 | 6 | 69  | 41 | 959   | 4 | 67 | 48 | 734 | 99  | 1,829 |
| 28,124 | 6 | 69  | 41 | 961   | 4 | 67 | 48 | 735 | 99  | 1,832 |
| 28,125 | 6 | 69  | 41 | 962   | 4 | 67 | 48 | 735 | 99  | 1,833 |
| 28,126 | 6 | 70  | 44 | 962   | 4 | 67 | 57 | 735 | 111 | 1,834 |
| 28,127 | 6 | 70  | 44 | 948   | 4 | 67 | 57 | 721 | 111 | 1,806 |
| 28,128 | 6 | 54  | 43 | 751   | 4 | 50 | 57 | 526 | 110 | 1,381 |
| 28,129 | 8 | 52  | 47 | 585   | 4 | 43 | 59 | 461 | 118 | 1,141 |
| 28,130 | 8 | 51  | 50 | 578   | 4 | 40 | 65 | 446 | 127 | 1,115 |
| 28,131 | 8 | 41  | 60 | 461   | 6 | 36 | 76 | 382 | 150 | 920   |
| 28,132 | 8 | 40  | 62 | 459   | 6 | 36 | 77 | 381 | 153 | 916   |
| 28,133 | 8 | 40  | 63 | 458   | 7 | 36 | 83 | 378 | 161 | 912   |
| 28,134 | 8 | 40  | 63 | 465   | 7 | 36 | 83 | 379 | 161 | 920   |
| 28,135 | 7 | 40  | 64 | 466   | 7 | 37 | 83 | 379 | 161 | 922   |
| 28,136 | 7 | 40  | 63 | 463   | 7 | 37 | 83 | 376 | 160 | 916   |
| 28,137 | 7 | 35  | 63 | 460   | 7 | 37 | 83 | 367 | 160 | 899   |
| 28,138 | 7 | 35  | 61 | 460   | 6 | 37 | 83 | 367 | 157 | 899   |
| 28,139 | 5 | 37  | 46 | 472   | 3 | 37 | 64 | 387 | 118 | 933   |
| 28,140 | 3 | 41  | 42 | 565   | 3 | 42 | 51 | 435 | 99  | 1,083 |
| 28,141 | 2 | 42  | 40 | 569   | 3 | 42 | 49 | 441 | 94  | 1,094 |
| 28,142 | 2 | 42  | 39 | 570   | 3 | 44 | 49 | 442 | 93  | 1,098 |
| 28,143 | 2 | 44  | 38 | 570   | 3 | 44 | 48 | 442 | 91  | 1,100 |
| 28,144 | 2 | 44  | 34 | 572   | 3 | 44 | 46 | 440 | 85  | 1,100 |
| 28,145 | 2 | 44  | 34 | 572   | 3 | 44 | 46 | 441 | 85  | 1,101 |
| 28,146 | 2 | 43  | 40 | 561   | 3 | 42 | 46 | 439 | 91  | 1,085 |
| 28,147 | 2 | 43  | 40 | 564   | 3 | 42 | 46 | 437 | 91  | 1,086 |
| 28,148 | 2 | 43  | 40 | 561   | 3 | 42 | 45 | 429 | 90  | 1,075 |
| 28,149 | 2 | 43  | 40 | 561   | 3 | 42 | 46 | 425 | 91  | 1,071 |
| 28,150 | 3 | 37  | 48 | 465   | 3 | 32 | 50 | 374 | 104 | 908   |
| 28,151 | 3 | 37  | 50 | 460   | 3 | 32 | 51 | 371 | 107 | 900   |
| 28,152 | 3 | 37  | 54 | 457   | 3 | 32 | 51 | 371 | 111 | 897   |
| 28,153 | 3 | 37  | 54 | 457   | 3 | 32 | 51 | 372 | 111 | 898   |
| 28,154 | 6 | 38  | 64 | 466   | 3 | 33 | 51 | 376 | 124 | 913   |
| 28,155 | 6 | 38  | 64 | 471   | 4 | 33 | 50 | 374 | 124 | 916   |

|        |   |    |    |     |   |    |    |     |     |     |
|--------|---|----|----|-----|---|----|----|-----|-----|-----|
| 28,156 | 6 | 38 | 64 | 475 | 4 | 32 | 50 | 374 | 124 | 919 |
| 28,157 | 6 | 37 | 62 | 474 | 4 | 32 | 51 | 373 | 123 | 916 |
| 28,158 | 7 | 30 | 60 | 442 | 4 | 27 | 51 | 316 | 122 | 815 |
| 28,159 | 7 | 30 | 60 | 444 | 4 | 27 | 50 | 321 | 121 | 822 |
| 28,160 | 7 | 30 | 59 | 439 | 4 | 26 | 49 | 315 | 119 | 810 |
| 28,161 | 7 | 29 | 59 | 399 | 4 | 24 | 49 | 273 | 119 | 725 |
| 28,162 | 7 | 28 | 59 | 382 | 4 | 22 | 49 | 263 | 119 | 695 |
| 28,163 | 7 | 26 | 59 | 351 | 4 | 18 | 49 | 223 | 119 | 618 |
| 28,164 | 7 | 25 | 59 | 338 | 4 | 17 | 49 | 212 | 119 | 592 |
| 28,165 | 7 | 25 | 59 | 338 | 4 | 17 | 49 | 212 | 119 | 592 |
| 28,166 | 7 | 14 | 59 | 213 | 4 | 10 | 49 | 122 | 119 | 359 |
| 28,167 | 7 | 14 | 59 | 208 | 4 | 10 | 47 | 121 | 117 | 353 |
| 28,168 | 7 | 14 | 59 | 207 | 4 | 10 | 47 | 120 | 117 | 351 |
| 28,169 | 7 | 14 | 59 | 207 | 4 | 10 | 47 | 120 | 117 | 351 |
| 28,170 | 7 | 13 | 59 | 180 | 4 | 9  | 46 | 115 | 116 | 317 |
| 28,171 | 7 | 13 | 59 | 176 | 4 | 9  | 46 | 115 | 116 | 313 |
| 28,172 | 7 | 13 | 59 | 174 | 4 | 9  | 47 | 114 | 117 | 310 |
| 28,173 | 7 | 13 | 59 | 174 | 4 | 9  | 46 | 114 | 116 | 310 |
| 28,174 | 7 | 13 | 58 | 174 | 4 | 9  | 45 | 113 | 114 | 309 |
| 28,175 | 7 | 12 | 58 | 174 | 4 | 9  | 45 | 113 | 114 | 308 |
| 28,176 | 7 | 12 | 58 | 188 | 4 | 10 | 47 | 124 | 116 | 334 |
| 28,177 | 7 | 12 | 55 | 197 | 4 | 10 | 38 | 130 | 104 | 349 |
| 28,178 | 7 | 13 | 52 | 212 | 4 | 13 | 38 | 138 | 101 | 376 |
| 28,179 | 7 | 15 | 52 | 231 | 4 | 14 | 36 | 139 | 99  | 399 |
| 28,180 | 6 | 15 | 51 | 235 | 4 | 14 | 36 | 142 | 97  | 406 |
| 28,181 | 6 | 15 | 48 | 233 | 4 | 14 | 30 | 142 | 88  | 404 |
| 28,182 | 7 | 15 | 37 | 233 | 2 | 14 | 19 | 143 | 65  | 405 |
| 28,183 | 7 | 15 | 35 | 234 | 2 | 14 | 18 | 143 | 62  | 406 |
| 28,184 | 7 | 16 | 34 | 234 | 1 | 14 | 12 | 143 | 54  | 407 |
| 28,185 | 7 | 16 | 34 | 228 | 1 | 13 | 12 | 143 | 54  | 400 |
| 28,186 | 7 | 16 | 33 | 228 | 1 | 13 | 12 | 143 | 53  | 400 |
| 28,187 | 7 | 16 | 32 | 225 | 1 | 13 | 12 | 140 | 52  | 394 |
| 28,188 | 7 | 14 | 33 | 212 | 1 | 13 | 13 | 122 | 54  | 361 |
| 28,189 | 7 | 14 | 33 | 213 | 1 | 13 | 13 | 122 | 54  | 362 |
| 28,190 | 7 | 14 | 33 | 213 | 1 | 13 | 11 | 122 | 52  | 362 |
| 28,191 | 7 | 10 | 33 | 121 | 1 | 8  | 11 | 75  | 52  | 214 |
| 28,192 | 7 | 9  | 32 | 113 | 1 | 6  | 11 | 65  | 51  | 193 |
| 28,193 | 7 | 9  | 32 | 113 | 1 | 6  | 11 | 65  | 51  | 193 |
| 28,194 | 7 | 7  | 32 | 110 | 1 | 6  | 12 | 65  | 52  | 188 |
| 28,195 | 7 | 7  | 32 | 110 | 1 | 6  | 12 | 65  | 52  | 188 |
| 28,196 | 7 | 7  | 26 | 110 | 1 | 6  | 12 | 64  | 46  | 187 |



|        |   |    |    |     |   |    |    |     |    |     |
|--------|---|----|----|-----|---|----|----|-----|----|-----|
| 28,197 | 7 | 7  | 26 | 104 | 1 | 6  | 12 | 63  | 46 | 180 |
| 28,198 | 7 | 7  | 26 | 108 | 1 | 6  | 12 | 67  | 46 | 188 |
| 28,199 | 7 | 7  | 26 | 110 | 1 | 6  | 11 | 75  | 45 | 198 |
| 28,200 | 6 | 7  | 25 | 116 | 1 | 8  | 10 | 83  | 42 | 214 |
| 28,201 | 6 | 7  | 18 | 127 | 1 | 8  | 7  | 91  | 32 | 233 |
| 28,202 | 6 | 7  | 16 | 127 | 1 | 8  | 6  | 91  | 29 | 233 |
| 28,203 | 6 | 8  | 12 | 129 | 1 | 8  | 9  | 95  | 28 | 240 |
| 28,204 | 3 | 8  | 7  | 129 | 1 | 9  | 9  | 96  | 20 | 242 |
| 28,205 | 3 | 5  | 2  | 114 | 1 | 8  | 9  | 83  | 15 | 210 |
| 28,206 | 3 | 6  | 3  | 121 | 0 | 9  | 9  | 102 | 15 | 238 |
| 28,207 | 3 | 6  | 4  | 122 | 0 | 9  | 9  | 104 | 16 | 241 |
| 28,208 | 3 | 6  | 4  | 122 | 0 | 9  | 8  | 103 | 15 | 240 |
| 28,209 | 2 | 6  | 4  | 124 | 0 | 9  | 8  | 104 | 14 | 243 |
| 28,210 | 2 | 9  | 4  | 130 | 0 | 9  | 8  | 98  | 14 | 246 |
| 28,211 | 2 | 9  | 4  | 130 | 0 | 9  | 8  | 99  | 14 | 247 |
| 28,212 | 2 | 9  | 4  | 130 | 0 | 9  | 8  | 98  | 14 | 246 |
| 28,213 | 2 | 9  | 4  | 129 | 0 | 9  | 8  | 99  | 14 | 246 |
| 28,214 | 2 | 9  | 4  | 131 | 0 | 9  | 8  | 99  | 14 | 248 |
| 28,215 | 2 | 9  | 4  | 131 | 0 | 9  | 8  | 101 | 14 | 250 |
| 28,216 | 2 | 9  | 4  | 130 | 0 | 9  | 8  | 101 | 14 | 249 |
| 28,217 | 2 | 9  | 4  | 130 | 0 | 9  | 8  | 101 | 14 | 249 |
| 28,218 | 2 | 9  | 4  | 130 | 0 | 9  | 8  | 102 | 14 | 250 |
| 28,219 | 2 | 9  | 4  | 131 | 0 | 9  | 8  | 103 | 14 | 252 |
| 28,220 | 2 | 9  | 4  | 131 | 0 | 10 | 8  | 103 | 14 | 253 |
| 28,221 | 2 | 9  | 4  | 135 | 0 | 10 | 8  | 105 | 14 | 259 |
| 28,222 | 2 | 9  | 4  | 140 | 0 | 10 | 8  | 107 | 14 | 266 |
| 28,223 | 2 | 10 | 3  | 144 | 0 | 10 | 7  | 107 | 12 | 271 |
| 28,224 | 2 | 10 | 3  | 155 | 0 | 10 | 7  | 118 | 12 | 293 |
| 28,225 | 2 | 10 | 3  | 155 | 0 | 10 | 7  | 118 | 12 | 293 |
| 28,226 | 2 | 10 | 3  | 154 | 0 | 10 | 7  | 117 | 12 | 291 |
| 28,227 | 2 | 10 | 3  | 132 | 0 | 9  | 5  | 102 | 10 | 253 |
| 28,228 | 2 | 11 | 3  | 132 | 0 | 9  | 5  | 103 | 10 | 255 |
| 28,229 | 1 | 10 | 3  | 116 | 0 | 6  | 5  | 93  | 9  | 225 |
| 28,230 | 1 | 8  | 3  | 97  | 0 | 6  | 5  | 89  | 9  | 200 |
| 28,231 | 1 | 9  | 3  | 95  | 0 | 6  | 5  | 86  | 9  | 196 |
| 28,232 | 1 | 9  | 3  | 96  | 0 | 7  | 5  | 88  | 9  | 200 |
| 28,233 | 0 | 9  | 3  | 93  | 0 | 7  | 5  | 88  | 8  | 197 |
| 28,234 | 0 | 8  | 3  | 92  | 0 | 7  | 6  | 89  | 9  | 196 |
| 28,235 | 1 | 8  | 3  | 90  | 0 | 7  | 6  | 88  | 10 | 193 |
| 28,236 | 1 | 8  | 3  | 90  | 0 | 7  | 6  | 88  | 10 | 193 |
| 28,237 | 1 | 8  | 4  | 90  | 0 | 8  | 8  | 91  | 13 | 197 |

|        |   |    |   |     |   |    |   |     |    |     |
|--------|---|----|---|-----|---|----|---|-----|----|-----|
| 28,238 | 1 | 8  | 4 | 92  | 0 | 8  | 8 | 93  | 13 | 201 |
| 28,239 | 1 | 8  | 3 | 92  | 0 | 8  | 7 | 95  | 11 | 203 |
| 28,240 | 1 | 8  | 3 | 96  | 0 | 8  | 7 | 103 | 11 | 215 |
| 28,241 | 1 | 9  | 3 | 97  | 0 | 8  | 7 | 103 | 11 | 217 |
| 28,242 | 1 | 9  | 3 | 98  | 0 | 8  | 7 | 104 | 11 | 219 |
| 28,243 | 1 | 10 | 3 | 98  | 0 | 8  | 7 | 104 | 11 | 220 |
| 28,244 | 1 | 10 | 3 | 98  | 0 | 8  | 6 | 104 | 10 | 220 |
| 28,245 | 1 | 10 | 3 | 99  | 0 | 8  | 6 | 108 | 10 | 225 |
| 28,246 | 1 | 10 | 3 | 99  | 0 | 8  | 6 | 108 | 10 | 225 |
| 28,247 | 1 | 10 | 3 | 99  | 0 | 8  | 6 | 108 | 10 | 225 |
| 28,248 | 1 | 10 | 4 | 93  | 0 | 8  | 6 | 96  | 11 | 207 |
| 28,249 | 1 | 12 | 4 | 103 | 0 | 9  | 6 | 103 | 11 | 227 |
| 28,250 | 1 | 12 | 4 | 107 | 0 | 9  | 6 | 104 | 11 | 232 |
| 28,251 | 1 | 12 | 4 | 105 | 0 | 7  | 6 | 108 | 11 | 232 |
| 28,252 | 1 | 14 | 4 | 98  | 0 | 7  | 7 | 101 | 12 | 220 |
| 28,253 | 1 | 15 | 5 | 100 | 0 | 7  | 7 | 103 | 13 | 225 |
| 28,254 | 1 | 14 | 5 | 101 | 0 | 6  | 4 | 97  | 10 | 218 |
| 28,255 | 1 | 14 | 6 | 101 | 0 | 6  | 5 | 98  | 12 | 219 |
| 28,256 | 1 | 14 | 6 | 87  | 0 | 5  | 5 | 79  | 12 | 185 |
| 28,257 | 1 | 14 | 6 | 88  | 0 | 5  | 5 | 79  | 12 | 186 |
| 28,258 | 1 | 15 | 5 | 91  | 0 | 6  | 5 | 89  | 11 | 201 |
| 28,259 | 1 | 15 | 5 | 93  | 0 | 7  | 5 | 94  | 11 | 209 |
| 28,260 | 1 | 15 | 5 | 95  | 0 | 7  | 5 | 99  | 11 | 216 |
| 28,261 | 2 | 14 | 5 | 94  | 0 | 7  | 5 | 107 | 12 | 222 |
| 28,262 | 2 | 14 | 5 | 94  | 0 | 7  | 5 | 106 | 12 | 221 |
| 28,263 | 2 | 14 | 5 | 94  | 0 | 7  | 5 | 107 | 12 | 222 |
| 28,264 | 2 | 14 | 5 | 98  | 0 | 7  | 5 | 121 | 12 | 240 |
| 28,265 | 2 | 15 | 6 | 122 | 0 | 9  | 6 | 156 | 14 | 302 |
| 28,266 | 2 | 15 | 6 | 125 | 0 | 9  | 6 | 156 | 14 | 305 |
| 28,267 | 2 | 15 | 8 | 125 | 0 | 9  | 6 | 156 | 16 | 305 |
| 28,268 | 2 | 15 | 8 | 126 | 0 | 9  | 6 | 156 | 16 | 306 |
| 28,269 | 2 | 15 | 8 | 146 | 0 | 10 | 6 | 180 | 16 | 351 |
| 28,270 | 2 | 15 | 8 | 146 | 0 | 10 | 6 | 179 | 16 | 350 |
| 28,271 | 2 | 15 | 8 | 149 | 0 | 9  | 6 | 179 | 16 | 352 |
| 28,272 | 2 | 15 | 8 | 145 | 0 | 9  | 6 | 177 | 16 | 346 |
| 28,273 | 2 | 13 | 8 | 135 | 0 | 9  | 6 | 175 | 16 | 332 |
| 28,274 | 2 | 14 | 8 | 125 | 0 | 9  | 6 | 164 | 16 | 312 |
| 28,275 | 2 | 14 | 8 | 125 | 0 | 9  | 6 | 164 | 16 | 312 |
| 28,276 | 2 | 14 | 8 | 126 | 0 | 9  | 7 | 165 | 17 | 314 |
| 28,277 | 2 | 15 | 8 | 126 | 0 | 9  | 7 | 165 | 17 | 315 |
| 28,278 | 2 | 14 | 9 | 125 | 0 | 9  | 7 | 162 | 18 | 310 |

|        |   |    |    |     |   |    |   |     |    |     |
|--------|---|----|----|-----|---|----|---|-----|----|-----|
| 28,279 | 2 | 14 | 10 | 125 | 0 | 9  | 7 | 161 | 19 | 309 |
| 28,280 | 2 | 14 | 10 | 124 | 0 | 8  | 7 | 161 | 19 | 307 |
| 28,281 | 2 | 13 | 10 | 120 | 0 | 8  | 7 | 162 | 19 | 303 |
| 28,282 | 2 | 13 | 10 | 121 | 0 | 8  | 7 | 164 | 19 | 306 |
| 28,283 | 2 | 13 | 10 | 126 | 0 | 7  | 7 | 165 | 19 | 311 |
| 28,284 | 2 | 13 | 10 | 126 | 0 | 7  | 7 | 166 | 19 | 312 |
| 28,285 | 2 | 13 | 10 | 126 | 0 | 7  | 6 | 164 | 18 | 310 |
| 28,286 | 1 | 13 | 10 | 126 | 0 | 6  | 6 | 163 | 17 | 308 |
| 28,287 | 1 | 13 | 10 | 127 | 0 | 6  | 6 | 170 | 17 | 316 |
| 28,288 | 1 | 13 | 9  | 127 | 0 | 6  | 4 | 170 | 14 | 316 |
| 28,289 | 2 | 13 | 9  | 126 | 0 | 6  | 4 | 170 | 15 | 315 |
| 28,290 | 2 | 14 | 10 | 134 | 0 | 8  | 4 | 179 | 16 | 335 |
| 28,291 | 2 | 15 | 12 | 133 | 0 | 9  | 5 | 172 | 19 | 329 |
| 28,292 | 2 | 14 | 12 | 133 | 0 | 9  | 5 | 172 | 19 | 328 |
| 28,293 | 2 | 14 | 12 | 133 | 0 | 9  | 5 | 172 | 19 | 328 |
| 28,294 | 3 | 13 | 12 | 139 | 0 | 9  | 5 | 176 | 20 | 337 |
| 28,295 | 3 | 14 | 12 | 141 | 0 | 10 | 5 | 180 | 20 | 345 |
| 28,296 | 3 | 14 | 12 | 140 | 0 | 10 | 5 | 176 | 20 | 340 |
| 28,297 | 3 | 14 | 12 | 140 | 0 | 10 | 5 | 178 | 20 | 342 |
| 28,298 | 3 | 14 | 13 | 140 | 0 | 10 | 5 | 178 | 21 | 342 |
| 28,299 | 3 | 12 | 12 | 129 | 0 | 9  | 5 | 172 | 20 | 322 |
| 28,300 | 3 | 12 | 12 | 129 | 0 | 11 | 5 | 175 | 20 | 327 |
| 28,301 | 3 | 12 | 12 | 125 | 0 | 11 | 5 | 174 | 20 | 322 |
| 28,302 | 3 | 12 | 12 | 122 | 0 | 11 | 5 | 164 | 20 | 309 |
| 28,303 | 3 | 10 | 12 | 118 | 0 | 11 | 4 | 165 | 19 | 304 |
| 28,304 | 3 | 10 | 11 | 116 | 0 | 11 | 4 | 165 | 18 | 302 |
| 28,305 | 3 | 9  | 11 | 113 | 0 | 12 | 4 | 165 | 18 | 299 |
| 28,306 | 3 | 8  | 10 | 113 | 0 | 12 | 3 | 163 | 16 | 296 |
| 28,307 | 3 | 8  | 9  | 112 | 0 | 12 | 3 | 163 | 15 | 295 |
| 28,308 | 3 | 7  | 9  | 100 | 0 | 10 | 3 | 145 | 15 | 262 |
| 28,309 | 3 | 7  | 9  | 101 | 0 | 10 | 3 | 145 | 15 | 263 |
| 28,310 | 3 | 7  | 9  | 101 | 0 | 10 | 3 | 146 | 15 | 264 |
| 28,311 | 3 | 7  | 9  | 100 | 0 | 10 | 3 | 148 | 15 | 265 |
| 28,312 | 2 | 5  | 10 | 93  | 0 | 10 | 3 | 139 | 15 | 247 |
| 28,313 | 2 | 5  | 12 | 89  | 0 | 10 | 3 | 123 | 17 | 227 |
| 28,314 | 2 | 5  | 15 | 89  | 0 | 10 | 3 | 123 | 20 | 227 |
| 28,315 | 2 | 5  | 19 | 89  | 0 | 10 | 4 | 123 | 25 | 227 |
| 28,316 | 2 | 4  | 22 | 64  | 1 | 8  | 6 | 90  | 31 | 166 |
| 28,317 | 4 | 4  | 21 | 83  | 1 | 9  | 8 | 104 | 34 | 200 |
| 28,318 | 4 | 4  | 21 | 83  | 1 | 9  | 8 | 104 | 34 | 200 |
| 28,319 | 4 | 4  | 23 | 82  | 1 | 9  | 8 | 104 | 36 | 199 |

|        |   |   |    |    |   |   |    |    |     |     |
|--------|---|---|----|----|---|---|----|----|-----|-----|
| 28,320 | 4 | 4 | 38 | 61 | 5 | 8 | 22 | 80 | 69  | 153 |
| 28,321 | 4 | 4 | 48 | 59 | 6 | 8 | 38 | 80 | 96  | 151 |
| 28,322 | 4 | 4 | 53 | 60 | 6 | 8 | 38 | 81 | 101 | 153 |
| 28,323 | 4 | 4 | 53 | 60 | 6 | 8 | 38 | 81 | 101 | 153 |
| 28,324 | 4 | 4 | 53 | 60 | 6 | 8 | 38 | 81 | 101 | 153 |
| 28,325 | 4 | 4 | 53 | 60 | 6 | 8 | 38 | 81 | 101 | 153 |
| 28,326 | 4 | 4 | 53 | 59 | 6 | 8 | 39 | 80 | 102 | 151 |
| 28,327 | 4 | 4 | 53 | 59 | 6 | 8 | 38 | 80 | 101 | 151 |
| 28,328 | 4 | 3 | 52 | 59 | 6 | 8 | 38 | 80 | 100 | 150 |
| 28,329 | 4 | 3 | 52 | 59 | 6 | 8 | 38 | 79 | 100 | 149 |
| 28,330 | 4 | 3 | 51 | 59 | 6 | 8 | 38 | 79 | 99  | 149 |
| 28,331 | 4 | 3 | 52 | 59 | 6 | 8 | 38 | 78 | 100 | 148 |
| 28,332 | 4 | 3 | 52 | 59 | 6 | 8 | 38 | 78 | 100 | 148 |
| 28,333 | 4 | 3 | 52 | 58 | 6 | 8 | 38 | 77 | 100 | 146 |
| 28,334 | 4 | 3 | 52 | 52 | 6 | 8 | 38 | 74 | 100 | 137 |
| 28,335 | 4 | 3 | 52 | 52 | 6 | 8 | 38 | 72 | 100 | 135 |
| 28,336 | 4 | 3 | 52 | 51 | 6 | 8 | 38 | 70 | 100 | 132 |
| 28,337 | 4 | 3 | 52 | 51 | 6 | 8 | 38 | 70 | 100 | 132 |
| 28,338 | 4 | 3 | 52 | 50 | 6 | 8 | 38 | 63 | 100 | 124 |
| 28,339 | 3 | 3 | 52 | 51 | 6 | 8 | 38 | 63 | 99  | 125 |
| 28,340 | 3 | 3 | 51 | 50 | 6 | 9 | 38 | 61 | 98  | 123 |
| 28,341 | 3 | 2 | 51 | 42 | 6 | 7 | 38 | 51 | 98  | 102 |
| 28,342 | 3 | 1 | 49 | 39 | 6 | 6 | 37 | 50 | 95  | 96  |
| 28,343 | 3 | 1 | 49 | 40 | 6 | 6 | 37 | 53 | 95  | 100 |
| 28,344 | 3 | 2 | 49 | 42 | 6 | 6 | 37 | 51 | 95  | 101 |
| 28,345 | 2 | 3 | 49 | 36 | 6 | 7 | 37 | 47 | 94  | 93  |
| 28,346 | 2 | 2 | 49 | 38 | 6 | 6 | 37 | 44 | 94  | 90  |
| 28,347 | 2 | 3 | 50 | 44 | 6 | 8 | 37 | 50 | 95  | 105 |
| 28,348 | 2 | 3 | 49 | 46 | 6 | 8 | 37 | 49 | 94  | 106 |
| 28,349 | 2 | 3 | 49 | 47 | 6 | 8 | 38 | 49 | 95  | 107 |
| 28,350 | 2 | 3 | 49 | 47 | 6 | 8 | 38 | 49 | 95  | 107 |
| 28,351 | 2 | 3 | 49 | 50 | 6 | 6 | 38 | 46 | 95  | 105 |
| 28,352 | 2 | 3 | 49 | 50 | 6 | 6 | 38 | 45 | 95  | 104 |
| 28,353 | 2 | 3 | 49 | 50 | 6 | 6 | 38 | 45 | 95  | 104 |
| 28,354 | 2 | 3 | 49 | 54 | 6 | 6 | 38 | 47 | 95  | 110 |
| 28,355 | 2 | 3 | 49 | 54 | 6 | 6 | 38 | 46 | 95  | 109 |
| 28,356 | 2 | 3 | 49 | 54 | 6 | 5 | 39 | 45 | 96  | 107 |
| 28,357 | 2 | 3 | 49 | 54 | 6 | 5 | 39 | 46 | 96  | 108 |
| 28,358 | 2 | 3 | 49 | 53 | 6 | 5 | 39 | 44 | 96  | 105 |
| 28,359 | 2 | 3 | 49 | 52 | 6 | 5 | 39 | 43 | 96  | 103 |
| 28,360 | 2 | 3 | 49 | 52 | 6 | 5 | 39 | 43 | 96  | 103 |

|        |   |   |    |    |   |   |    |    |    |     |
|--------|---|---|----|----|---|---|----|----|----|-----|
| 28,361 | 2 | 3 | 49 | 52 | 6 | 5 | 39 | 42 | 96 | 102 |
| 28,362 | 2 | 3 | 49 | 51 | 6 | 5 | 39 | 37 | 96 | 96  |
| 28,363 | 2 | 3 | 48 | 51 | 6 | 5 | 39 | 38 | 95 | 97  |
| 28,364 | 2 | 3 | 46 | 56 | 6 | 6 | 39 | 39 | 93 | 104 |
| 28,365 | 2 | 3 | 43 | 56 | 6 | 6 | 39 | 37 | 90 | 102 |
| 28,366 | 2 | 3 | 38 | 60 | 6 | 8 | 37 | 45 | 83 | 116 |
| 28,367 | 2 | 3 | 35 | 61 | 5 | 8 | 35 | 45 | 77 | 117 |
| 28,368 | 0 | 3 | 36 | 39 | 5 | 7 | 33 | 36 | 74 | 85  |
| 28,369 | 0 | 3 | 36 | 39 | 5 | 7 | 33 | 36 | 74 | 85  |
| 28,370 | 0 | 3 | 28 | 41 | 1 | 7 | 25 | 36 | 54 | 87  |
| 28,371 | 1 | 3 | 22 | 41 | 1 | 7 | 19 | 37 | 43 | 88  |
| 28,372 | 1 | 3 | 12 | 42 | 0 | 7 | 3  | 37 | 16 | 89  |
| 28,373 | 1 | 3 | 7  | 42 | 0 | 7 | 4  | 36 | 12 | 88  |
| 28,374 | 1 | 3 | 7  | 43 | 0 | 7 | 4  | 36 | 12 | 89  |
| 28,375 | 2 | 3 | 13 | 43 | 1 | 7 | 5  | 37 | 21 | 90  |
| 28,376 | 2 | 3 | 13 | 43 | 1 | 7 | 5  | 37 | 21 | 90  |
| 28,377 | 3 | 5 | 16 | 44 | 1 | 7 | 6  | 37 | 26 | 93  |
| 28,378 | 3 | 5 | 16 | 45 | 1 | 7 | 6  | 38 | 26 | 95  |
| 28,379 | 4 | 5 | 19 | 45 | 1 | 7 | 7  | 38 | 31 | 95  |
| 28,380 | 4 | 5 | 20 | 45 | 1 | 7 | 7  | 38 | 32 | 95  |
| 28,381 | 4 | 5 | 20 | 45 | 1 | 7 | 7  | 38 | 32 | 95  |
| 28,382 | 5 | 5 | 19 | 45 | 1 | 7 | 7  | 38 | 32 | 95  |
| 28,383 | 5 | 5 | 19 | 45 | 1 | 7 | 7  | 38 | 32 | 95  |
| 28,384 | 5 | 5 | 19 | 45 | 1 | 7 | 7  | 38 | 32 | 95  |
| 28,385 | 5 | 5 | 19 | 45 | 1 | 7 | 7  | 38 | 32 | 95  |
| 28,386 | 5 | 5 | 19 | 45 | 1 | 7 | 7  | 38 | 32 | 95  |
| 28,387 | 5 | 5 | 19 | 45 | 1 | 7 | 7  | 38 | 32 | 95  |
| 28,388 | 5 | 5 | 19 | 45 | 1 | 7 | 7  | 38 | 32 | 95  |
| 28,389 | 5 | 5 | 19 | 45 | 1 | 7 | 7  | 38 | 32 | 95  |
| 28,390 | 5 | 5 | 19 | 45 | 1 | 6 | 7  | 37 | 32 | 93  |
| 28,391 | 5 | 5 | 19 | 45 | 1 | 6 | 7  | 37 | 32 | 93  |
| 28,392 | 5 | 5 | 19 | 45 | 1 | 6 | 7  | 37 | 32 | 93  |
| 28,393 | 5 | 5 | 19 | 44 | 1 | 6 | 7  | 37 | 32 | 92  |
| 28,394 | 5 | 5 | 19 | 44 | 1 | 6 | 7  | 35 | 32 | 90  |
| 28,395 | 5 | 4 | 19 | 41 | 1 | 6 | 7  | 34 | 32 | 85  |
| 28,396 | 5 | 2 | 19 | 32 | 1 | 3 | 8  | 27 | 33 | 64  |
| 28,397 | 5 | 2 | 19 | 33 | 1 | 4 | 8  | 27 | 33 | 66  |
| 28,398 | 5 | 2 | 18 | 32 | 1 | 4 | 8  | 27 | 32 | 65  |
| 28,399 | 5 | 2 | 18 | 30 | 1 | 4 | 8  | 27 | 32 | 63  |
| 28,400 | 5 | 2 | 18 | 30 | 1 | 4 | 8  | 28 | 32 | 64  |
| 28,401 | 5 | 2 | 27 | 33 | 2 | 4 | 11 | 31 | 45 | 70  |

|        |   |   |    |    |   |   |    |    |    |    |
|--------|---|---|----|----|---|---|----|----|----|----|
| 28,402 | 5 | 2 | 30 | 32 | 2 | 4 | 12 | 31 | 49 | 69 |
| 28,403 | 5 | 2 | 30 | 31 | 2 | 4 | 12 | 30 | 49 | 67 |
| 28,404 | 5 | 2 | 31 | 31 | 2 | 4 | 11 | 30 | 49 | 67 |
| 28,405 | 5 | 2 | 31 | 27 | 2 | 4 | 11 | 26 | 49 | 59 |
| 28,406 | 5 | 2 | 31 | 28 | 2 | 4 | 11 | 26 | 49 | 60 |
| 28,407 | 5 | 2 | 31 | 28 | 2 | 4 | 11 | 26 | 49 | 60 |
| 28,408 | 5 | 2 | 32 | 28 | 2 | 4 | 11 | 25 | 50 | 59 |
| 28,409 | 5 | 2 | 32 | 28 | 2 | 4 | 11 | 25 | 50 | 59 |
| 28,410 | 5 | 2 | 32 | 28 | 2 | 4 | 11 | 24 | 50 | 58 |
| 28,411 | 5 | 2 | 32 | 28 | 2 | 4 | 11 | 24 | 50 | 58 |
| 28,412 | 5 | 2 | 32 | 28 | 2 | 4 | 11 | 24 | 50 | 58 |
| 28,413 | 5 | 2 | 33 | 29 | 2 | 4 | 11 | 24 | 51 | 59 |
| 28,414 | 5 | 2 | 33 | 29 | 2 | 4 | 11 | 23 | 51 | 58 |
| 28,415 | 5 | 2 | 33 | 24 | 2 | 3 | 11 | 22 | 51 | 51 |
| 28,416 | 5 | 2 | 33 | 19 | 2 | 1 | 11 | 13 | 51 | 35 |
| 28,417 | 5 | 2 | 33 | 19 | 2 | 1 | 11 | 13 | 51 | 35 |
| 28,418 | 5 | 2 | 32 | 19 | 2 | 1 | 11 | 13 | 50 | 35 |
| 28,419 | 5 | 2 | 31 | 20 | 2 | 1 | 11 | 10 | 49 | 33 |
| 28,420 | 5 | 2 | 29 | 20 | 2 | 1 | 11 | 10 | 47 | 33 |
| 28,421 | 5 | 2 | 28 | 26 | 2 | 1 | 11 | 13 | 46 | 42 |
| 28,422 | 4 | 2 | 28 | 30 | 2 | 1 | 11 | 14 | 45 | 47 |
| 28,423 | 4 | 2 | 28 | 26 | 2 | 1 | 12 | 15 | 46 | 44 |
| 28,424 | 4 | 3 | 30 | 32 | 2 | 1 | 12 | 17 | 48 | 53 |
| 28,425 | 4 | 3 | 24 | 33 | 1 | 1 | 12 | 17 | 41 | 54 |
| 28,426 | 3 | 1 | 24 | 33 | 1 | 1 | 11 | 17 | 39 | 52 |
| 28,427 | 3 | 1 | 23 | 34 | 1 | 1 | 10 | 17 | 37 | 53 |
| 28,428 | 2 | 1 | 22 | 34 | 1 | 1 | 9  | 18 | 34 | 54 |
| 28,429 | 1 | 2 | 19 | 33 | 1 | 1 | 9  | 17 | 30 | 53 |
| 28,430 | 1 | 2 | 19 | 35 | 1 | 1 | 8  | 17 | 29 | 55 |
| 28,431 | 1 | 3 | 18 | 35 | 3 | 1 | 10 | 17 | 32 | 56 |
| 28,432 | 1 | 3 | 18 | 35 | 3 | 1 | 10 | 18 | 32 | 57 |
| 28,433 | 0 | 3 | 19 | 37 | 3 | 1 | 11 | 19 | 33 | 60 |
| 28,434 | 1 | 3 | 19 | 37 | 3 | 1 | 11 | 19 | 34 | 60 |
| 28,435 | 1 | 3 | 19 | 37 | 3 | 1 | 11 | 19 | 34 | 60 |
| 28,436 | 1 | 3 | 19 | 37 | 3 | 1 | 11 | 19 | 34 | 60 |
| 28,437 | 1 | 3 | 21 | 37 | 3 | 1 | 11 | 19 | 36 | 60 |
| 28,438 | 1 | 3 | 21 | 37 | 3 | 1 | 11 | 19 | 36 | 60 |
| 28,439 | 1 | 3 | 25 | 37 | 3 | 1 | 12 | 19 | 41 | 60 |
| 28,440 | 1 | 3 | 25 | 37 | 3 | 1 | 12 | 19 | 41 | 60 |
| 28,441 | 1 | 3 | 26 | 36 | 3 | 1 | 12 | 19 | 42 | 59 |
| 28,442 | 1 | 3 | 26 | 36 | 3 | 1 | 13 | 19 | 43 | 59 |

|        |   |   |    |    |   |   |    |    |    |     |
|--------|---|---|----|----|---|---|----|----|----|-----|
| 28,443 | 1 | 3 | 26 | 36 | 3 | 1 | 14 | 20 | 44 | 60  |
| 28,444 | 1 | 3 | 26 | 36 | 3 | 1 | 14 | 20 | 44 | 60  |
| 28,445 | 1 | 4 | 26 | 36 | 3 | 1 | 14 | 25 | 44 | 66  |
| 28,446 | 1 | 4 | 26 | 38 | 3 | 1 | 14 | 29 | 44 | 72  |
| 28,447 | 1 | 4 | 26 | 39 | 3 | 1 | 13 | 31 | 43 | 75  |
| 28,448 | 1 | 5 | 32 | 42 | 3 | 0 | 15 | 36 | 51 | 83  |
| 28,449 | 1 | 5 | 33 | 42 | 3 | 0 | 15 | 37 | 52 | 84  |
| 28,450 | 2 | 5 | 33 | 42 | 3 | 0 | 15 | 43 | 53 | 90  |
| 28,451 | 2 | 5 | 33 | 50 | 3 | 0 | 14 | 49 | 52 | 104 |
| 28,452 | 2 | 5 | 24 | 48 | 2 | 0 | 11 | 46 | 39 | 99  |
| 28,453 | 2 | 5 | 21 | 48 | 2 | 0 | 10 | 48 | 35 | 101 |
| 28,454 | 2 | 6 | 20 | 51 | 2 | 0 | 10 | 52 | 34 | 109 |
| 28,455 | 2 | 6 | 20 | 51 | 2 | 0 | 10 | 52 | 34 | 109 |
| 28,456 | 2 | 6 | 20 | 51 | 2 | 0 | 10 | 52 | 34 | 109 |
| 28,457 | 2 | 6 | 21 | 51 | 2 | 0 | 11 | 53 | 36 | 110 |
| 28,458 | 2 | 6 | 21 | 51 | 2 | 0 | 11 | 53 | 36 | 110 |
| 28,459 | 2 | 6 | 20 | 51 | 2 | 0 | 11 | 53 | 35 | 110 |
| 28,460 | 2 | 6 | 20 | 51 | 2 | 0 | 11 | 53 | 35 | 110 |
| 28,461 | 2 | 6 | 20 | 51 | 2 | 0 | 11 | 53 | 35 | 110 |
| 28,462 | 2 | 6 | 20 | 51 | 2 | 0 | 11 | 53 | 35 | 110 |
| 28,463 | 2 | 6 | 20 | 52 | 2 | 0 | 11 | 53 | 35 | 111 |
| 28,464 | 2 | 6 | 20 | 51 | 2 | 0 | 11 | 53 | 35 | 110 |
| 28,465 | 2 | 6 | 20 | 52 | 2 | 0 | 11 | 53 | 35 | 111 |
| 28,466 | 2 | 6 | 20 | 52 | 2 | 0 | 11 | 53 | 35 | 111 |
| 28,467 | 2 | 6 | 20 | 52 | 2 | 0 | 11 | 53 | 35 | 111 |
| 28,468 | 2 | 6 | 20 | 53 | 2 | 0 | 11 | 53 | 35 | 112 |
| 28,469 | 2 | 6 | 20 | 53 | 2 | 0 | 11 | 53 | 35 | 112 |
| 28,470 | 2 | 6 | 20 | 52 | 3 | 0 | 11 | 53 | 36 | 111 |
| 28,471 | 2 | 6 | 20 | 46 | 3 | 0 | 11 | 48 | 36 | 100 |
| 28,472 | 2 | 6 | 20 | 47 | 3 | 0 | 11 | 49 | 36 | 102 |
| 28,473 | 2 | 6 | 20 | 43 | 3 | 0 | 11 | 51 | 36 | 100 |
| 28,474 | 2 | 6 | 20 | 44 | 3 | 0 | 9  | 50 | 34 | 100 |
| 28,475 | 2 | 5 | 18 | 38 | 3 | 0 | 9  | 48 | 32 | 91  |
| 28,476 | 2 | 6 | 18 | 37 | 3 | 1 | 9  | 48 | 32 | 92  |
| 28,477 | 2 | 6 | 18 | 35 | 3 | 1 | 9  | 47 | 32 | 89  |
| 28,478 | 2 | 6 | 18 | 36 | 3 | 1 | 9  | 49 | 32 | 92  |
| 28,479 | 2 | 6 | 17 | 36 | 3 | 1 | 9  | 52 | 31 | 95  |
| 28,480 | 2 | 5 | 17 | 36 | 1 | 1 | 7  | 52 | 27 | 94  |
| 28,481 | 3 | 5 | 17 | 34 | 1 | 1 | 7  | 53 | 28 | 93  |
| 28,482 | 3 | 6 | 17 | 37 | 1 | 4 | 7  | 68 | 28 | 115 |
| 28,483 | 3 | 6 | 17 | 39 | 1 | 4 | 7  | 68 | 28 | 117 |

|        |   |   |    |    |   |   |   |    |    |     |
|--------|---|---|----|----|---|---|---|----|----|-----|
| 28,484 | 3 | 6 | 17 | 38 | 1 | 4 | 6 | 67 | 27 | 115 |
| 28,485 | 2 | 6 | 17 | 38 | 1 | 4 | 6 | 68 | 26 | 116 |
| 28,486 | 3 | 6 | 18 | 38 | 1 | 4 | 8 | 69 | 30 | 117 |
| 28,487 | 3 | 6 | 18 | 38 | 1 | 4 | 8 | 69 | 30 | 117 |
| 28,488 | 3 | 6 | 18 | 39 | 2 | 4 | 9 | 69 | 32 | 118 |
| 28,489 | 3 | 6 | 18 | 39 | 2 | 4 | 8 | 69 | 31 | 118 |
| 28,490 | 3 | 6 | 14 | 39 | 2 | 4 | 7 | 69 | 26 | 118 |
| 28,491 | 3 | 6 | 13 | 39 | 2 | 4 | 7 | 70 | 25 | 119 |
| 28,492 | 3 | 6 | 13 | 39 | 2 | 4 | 6 | 70 | 24 | 119 |
| 28,493 | 3 | 6 | 13 | 39 | 2 | 4 | 6 | 70 | 24 | 119 |
| 28,494 | 3 | 6 | 13 | 39 | 2 | 4 | 6 | 69 | 24 | 118 |
| 28,495 | 3 | 6 | 13 | 39 | 2 | 4 | 6 | 70 | 24 | 119 |
| 28,496 | 3 | 5 | 13 | 38 | 2 | 4 | 7 | 65 | 25 | 112 |
| 28,497 | 3 | 6 | 13 | 36 | 2 | 4 | 7 | 64 | 25 | 110 |
| 28,498 | 3 | 6 | 12 | 40 | 2 | 4 | 6 | 67 | 23 | 117 |
| 28,499 | 3 | 5 | 7  | 38 | 2 | 4 | 5 | 62 | 17 | 109 |
| 28,500 | 3 | 5 | 6  | 38 | 2 | 4 | 5 | 63 | 16 | 110 |
| 28,501 | 2 | 5 | 6  | 37 | 2 | 4 | 5 | 56 | 15 | 102 |
| 28,502 | 2 | 5 | 6  | 29 | 2 | 4 | 5 | 49 | 15 | 87  |
| 28,503 | 2 | 5 | 6  | 28 | 2 | 4 | 5 | 49 | 15 | 86  |
| 28,504 | 2 | 4 | 6  | 23 | 2 | 4 | 5 | 43 | 15 | 74  |
| 28,505 | 2 | 4 | 6  | 23 | 2 | 4 | 5 | 43 | 15 | 74  |
| 28,506 | 2 | 4 | 6  | 23 | 2 | 4 | 5 | 43 | 15 | 74  |
| 28,507 | 2 | 4 | 7  | 22 | 2 | 4 | 5 | 43 | 16 | 73  |
| 28,508 | 2 | 4 | 6  | 22 | 2 | 4 | 4 | 42 | 14 | 72  |
| 28,509 | 2 | 4 | 6  | 22 | 2 | 4 | 4 | 42 | 14 | 72  |
| 28,510 | 2 | 4 | 7  | 24 | 2 | 4 | 4 | 44 | 15 | 76  |
| 28,511 | 2 | 4 | 7  | 24 | 2 | 4 | 4 | 44 | 15 | 76  |
| 28,512 | 2 | 4 | 7  | 25 | 2 | 4 | 4 | 44 | 15 | 77  |
| 28,513 | 2 | 4 | 7  | 24 | 2 | 4 | 4 | 44 | 15 | 76  |
| 28,514 | 2 | 4 | 6  | 24 | 2 | 4 | 4 | 44 | 14 | 76  |
| 28,515 | 2 | 5 | 6  | 23 | 2 | 4 | 4 | 44 | 14 | 76  |
| 28,516 | 2 | 5 | 6  | 23 | 2 | 4 | 4 | 44 | 14 | 76  |
| 28,517 | 2 | 5 | 6  | 23 | 2 | 4 | 4 | 45 | 14 | 77  |
| 28,518 | 2 | 5 | 6  | 24 | 2 | 4 | 4 | 47 | 14 | 80  |
| 28,519 | 2 | 5 | 6  | 23 | 2 | 4 | 4 | 48 | 14 | 80  |
| 28,520 | 2 | 5 | 6  | 23 | 1 | 4 | 4 | 54 | 13 | 86  |
| 28,521 | 2 | 5 | 7  | 24 | 1 | 4 | 4 | 56 | 14 | 89  |
| 28,522 | 2 | 5 | 7  | 22 | 1 | 4 | 4 | 58 | 14 | 89  |
| 28,523 | 2 | 5 | 7  | 21 | 1 | 4 | 4 | 64 | 14 | 94  |
| 28,524 | 2 | 5 | 7  | 21 | 1 | 4 | 4 | 61 | 14 | 91  |



|        |   |   |    |    |   |    |    |     |     |     |
|--------|---|---|----|----|---|----|----|-----|-----|-----|
| 28,525 | 2 | 5 | 11 | 20 | 1 | 5  | 6  | 62  | 20  | 92  |
| 28,526 | 2 | 5 | 12 | 22 | 1 | 5  | 6  | 62  | 21  | 94  |
| 28,527 | 2 | 4 | 12 | 22 | 1 | 4  | 6  | 62  | 21  | 92  |
| 28,528 | 2 | 4 | 16 | 22 | 1 | 4  | 15 | 63  | 34  | 93  |
| 28,529 | 2 | 4 | 17 | 21 | 4 | 4  | 22 | 57  | 45  | 86  |
| 28,530 | 2 | 5 | 17 | 22 | 4 | 4  | 22 | 58  | 45  | 89  |
| 28,531 | 1 | 5 | 17 | 24 | 4 | 4  | 22 | 59  | 44  | 92  |
| 28,532 | 2 | 5 | 21 | 26 | 4 | 4  | 30 | 63  | 57  | 98  |
| 28,533 | 2 | 3 | 20 | 24 | 4 | 1  | 30 | 51  | 56  | 79  |
| 28,534 | 2 | 4 | 21 | 26 | 4 | 1  | 32 | 57  | 59  | 88  |
| 28,535 | 2 | 4 | 23 | 43 | 4 | 5  | 34 | 78  | 63  | 130 |
| 28,536 | 1 | 4 | 22 | 43 | 4 | 5  | 32 | 77  | 59  | 129 |
| 28,537 | 1 | 4 | 23 | 45 | 4 | 7  | 33 | 86  | 61  | 142 |
| 28,538 | 1 | 4 | 21 | 46 | 3 | 8  | 32 | 90  | 57  | 148 |
| 28,539 | 3 | 4 | 26 | 45 | 5 | 8  | 44 | 90  | 78  | 147 |
| 28,540 | 3 | 4 | 26 | 45 | 5 | 8  | 46 | 91  | 80  | 148 |
| 28,541 | 3 | 4 | 26 | 45 | 5 | 8  | 46 | 93  | 80  | 150 |
| 28,542 | 3 | 4 | 26 | 47 | 5 | 8  | 49 | 97  | 83  | 156 |
| 28,543 | 3 | 4 | 26 | 47 | 5 | 10 | 49 | 97  | 83  | 158 |
| 28,544 | 4 | 4 | 28 | 48 | 5 | 10 | 57 | 97  | 94  | 159 |
| 28,545 | 4 | 4 | 28 | 52 | 5 | 12 | 58 | 99  | 95  | 167 |
| 28,546 | 4 | 4 | 28 | 55 | 5 | 12 | 58 | 103 | 95  | 174 |
| 28,547 | 4 | 4 | 28 | 57 | 5 | 12 | 58 | 102 | 95  | 175 |
| 28,548 | 4 | 3 | 28 | 57 | 5 | 12 | 61 | 101 | 98  | 173 |
| 28,549 | 4 | 3 | 28 | 52 | 5 | 12 | 61 | 96  | 98  | 163 |
| 28,550 | 4 | 3 | 29 | 50 | 5 | 12 | 61 | 96  | 99  | 161 |
| 28,551 | 4 | 3 | 29 | 50 | 5 | 12 | 62 | 94  | 100 | 159 |
| 28,552 | 5 | 3 | 32 | 50 | 5 | 12 | 63 | 94  | 105 | 159 |
| 28,553 | 5 | 3 | 32 | 50 | 5 | 12 | 63 | 94  | 105 | 159 |
| 28,554 | 5 | 3 | 32 | 50 | 5 | 12 | 63 | 94  | 105 | 159 |
| 28,555 | 5 | 3 | 32 | 51 | 6 | 13 | 63 | 97  | 106 | 164 |
| 28,556 | 5 | 3 | 32 | 51 | 6 | 13 | 63 | 98  | 106 | 165 |
| 28,557 | 5 | 3 | 32 | 51 | 6 | 14 | 65 | 103 | 108 | 171 |
| 28,558 | 5 | 4 | 32 | 52 | 6 | 14 | 65 | 103 | 108 | 173 |
| 28,559 | 5 | 4 | 34 | 52 | 6 | 14 | 68 | 103 | 113 | 173 |
| 28,560 | 5 | 5 | 34 | 52 | 6 | 14 | 71 | 104 | 116 | 175 |
| 28,561 | 5 | 5 | 33 | 50 | 6 | 14 | 71 | 102 | 115 | 171 |
| 28,562 | 5 | 6 | 34 | 51 | 6 | 14 | 74 | 103 | 119 | 174 |
| 28,563 | 5 | 6 | 34 | 50 | 6 | 14 | 74 | 103 | 119 | 173 |
| 28,564 | 5 | 6 | 34 | 50 | 6 | 14 | 74 | 103 | 119 | 173 |
| 28,565 | 5 | 5 | 34 | 50 | 6 | 14 | 78 | 103 | 123 | 172 |

|        |   |   |    |    |   |    |    |     |     |     |
|--------|---|---|----|----|---|----|----|-----|-----|-----|
| 28,566 | 6 | 5 | 34 | 50 | 6 | 14 | 78 | 103 | 124 | 172 |
| 28,567 | 6 | 5 | 34 | 50 | 6 | 14 | 78 | 101 | 124 | 170 |
| 28,568 | 6 | 5 | 34 | 52 | 6 | 14 | 79 | 101 | 125 | 172 |
| 28,569 | 6 | 5 | 34 | 53 | 6 | 14 | 79 | 101 | 125 | 173 |
| 28,570 | 6 | 5 | 34 | 53 | 6 | 14 | 81 | 100 | 127 | 172 |
| 28,571 | 6 | 5 | 35 | 52 | 6 | 14 | 82 | 92  | 129 | 163 |
| 28,572 | 6 | 5 | 34 | 52 | 6 | 14 | 82 | 84  | 128 | 155 |
| 28,573 | 6 | 6 | 34 | 55 | 6 | 16 | 82 | 93  | 128 | 170 |
| 28,574 | 6 | 6 | 30 | 55 | 6 | 16 | 80 | 93  | 122 | 170 |
| 28,575 | 6 | 6 | 30 | 56 | 7 | 16 | 80 | 94  | 123 | 172 |
| 28,576 | 6 | 6 | 29 | 54 | 7 | 15 | 80 | 95  | 122 | 170 |
| 28,577 | 6 | 6 | 29 | 55 | 7 | 15 | 80 | 95  | 122 | 171 |
| 28,578 | 6 | 6 | 27 | 55 | 7 | 15 | 82 | 97  | 122 | 173 |
| 28,579 | 6 | 6 | 25 | 56 | 7 | 15 | 75 | 104 | 113 | 181 |
| 28,580 | 6 | 6 | 24 | 56 | 4 | 15 | 68 | 104 | 102 | 181 |
| 28,581 | 6 | 6 | 24 | 51 | 4 | 15 | 68 | 94  | 102 | 166 |
| 28,582 | 6 | 6 | 24 | 51 | 4 | 15 | 68 | 95  | 102 | 167 |
| 28,583 | 5 | 6 | 20 | 51 | 4 | 15 | 61 | 95  | 90  | 167 |
| 28,584 | 5 | 5 | 20 | 47 | 4 | 15 | 61 | 88  | 90  | 155 |
| 28,585 | 5 | 5 | 19 | 47 | 4 | 15 | 59 | 88  | 87  | 155 |
| 28,586 | 5 | 5 | 17 | 29 | 4 | 11 | 57 | 66  | 83  | 111 |
| 28,587 | 5 | 5 | 17 | 29 | 4 | 11 | 57 | 66  | 83  | 111 |
| 28,588 | 5 | 5 | 17 | 26 | 4 | 8  | 56 | 53  | 82  | 92  |
| 28,589 | 5 | 6 | 17 | 26 | 4 | 8  | 56 | 55  | 82  | 95  |
| 28,590 | 3 | 6 | 13 | 26 | 2 | 8  | 44 | 55  | 62  | 95  |
| 28,591 | 3 | 6 | 13 | 26 | 2 | 8  | 42 | 52  | 60  | 92  |
| 28,592 | 3 | 6 | 13 | 26 | 2 | 8  | 41 | 52  | 59  | 92  |
| 28,593 | 3 | 6 | 13 | 28 | 2 | 8  | 39 | 61  | 57  | 103 |
| 28,594 | 3 | 6 | 12 | 28 | 2 | 6  | 39 | 61  | 56  | 101 |
| 28,595 | 2 | 6 | 11 | 23 | 2 | 4  | 31 | 58  | 46  | 91  |
| 28,596 | 2 | 6 | 11 | 18 | 2 | 4  | 31 | 52  | 46  | 80  |
| 28,597 | 2 | 6 | 11 | 18 | 2 | 4  | 31 | 52  | 46  | 80  |
| 28,598 | 2 | 6 | 11 | 18 | 2 | 4  | 28 | 53  | 43  | 81  |
| 28,599 | 2 | 6 | 11 | 18 | 2 | 4  | 28 | 53  | 43  | 81  |
| 28,600 | 2 | 6 | 11 | 18 | 2 | 5  | 28 | 53  | 43  | 82  |
| 28,601 | 2 | 6 | 11 | 18 | 2 | 5  | 28 | 53  | 43  | 82  |
| 28,602 | 1 | 6 | 9  | 18 | 2 | 5  | 28 | 53  | 40  | 82  |
| 28,603 | 1 | 6 | 8  | 18 | 2 | 5  | 27 | 53  | 38  | 82  |
| 28,604 | 1 | 6 | 8  | 18 | 2 | 5  | 27 | 53  | 38  | 82  |
| 28,605 | 1 | 6 | 8  | 18 | 1 | 5  | 28 | 53  | 38  | 82  |
| 28,606 | 1 | 6 | 8  | 17 | 1 | 4  | 28 | 50  | 38  | 77  |

|        |    |   |     |    |    |   |     |    |     |     |
|--------|----|---|-----|----|----|---|-----|----|-----|-----|
| 28,607 | 1  | 6 | 8   | 18 | 1  | 4 | 29  | 50 | 39  | 78  |
| 28,608 | 1  | 6 | 7   | 18 | 1  | 3 | 27  | 45 | 36  | 72  |
| 28,609 | 1  | 5 | 9   | 17 | 1  | 3 | 28  | 45 | 39  | 70  |
| 28,610 | 1  | 4 | 7   | 17 | 1  | 3 | 25  | 44 | 34  | 68  |
| 28,611 | 1  | 4 | 7   | 17 | 1  | 3 | 22  | 44 | 31  | 68  |
| 28,612 | 3  | 4 | 26  | 17 | 7  | 3 | 40  | 44 | 76  | 68  |
| 28,613 | 3  | 3 | 37  | 17 | 13 | 3 | 62  | 43 | 115 | 66  |
| 28,614 | 3  | 3 | 37  | 17 | 13 | 3 | 62  | 43 | 115 | 66  |
| 28,615 | 10 | 3 | 93  | 17 | 35 | 3 | 128 | 43 | 266 | 66  |
| 28,616 | 11 | 3 | 94  | 18 | 35 | 3 | 126 | 43 | 266 | 67  |
| 28,617 | 10 | 3 | 94  | 17 | 35 | 3 | 126 | 42 | 265 | 65  |
| 28,618 | 10 | 3 | 94  | 17 | 35 | 3 | 126 | 42 | 265 | 65  |
| 28,619 | 10 | 3 | 94  | 14 | 35 | 3 | 125 | 42 | 264 | 62  |
| 28,620 | 10 | 3 | 95  | 14 | 35 | 3 | 124 | 42 | 264 | 62  |
| 28,621 | 10 | 3 | 96  | 14 | 35 | 3 | 123 | 42 | 264 | 62  |
| 28,622 | 10 | 3 | 95  | 14 | 35 | 3 | 124 | 41 | 264 | 61  |
| 28,623 | 10 | 2 | 95  | 11 | 35 | 1 | 132 | 32 | 272 | 46  |
| 28,624 | 10 | 2 | 95  | 11 | 35 | 1 | 132 | 32 | 272 | 46  |
| 28,625 | 10 | 2 | 95  | 12 | 35 | 1 | 131 | 32 | 271 | 47  |
| 28,626 | 10 | 2 | 95  | 11 | 34 | 1 | 135 | 31 | 274 | 45  |
| 28,627 | 11 | 2 | 95  | 11 | 34 | 1 | 135 | 31 | 275 | 45  |
| 28,628 | 11 | 2 | 95  | 12 | 34 | 1 | 137 | 36 | 277 | 51  |
| 28,629 | 11 | 2 | 100 | 30 | 34 | 5 | 135 | 69 | 280 | 106 |
| 28,630 | 11 | 2 | 100 | 34 | 34 | 5 | 134 | 67 | 279 | 108 |
| 28,631 | 11 | 1 | 103 | 33 | 34 | 5 | 134 | 69 | 282 | 108 |
| 28,632 | 11 | 1 | 103 | 33 | 34 | 5 | 134 | 70 | 282 | 109 |
| 28,633 | 11 | 1 | 107 | 37 | 34 | 6 | 135 | 78 | 287 | 122 |
| 28,634 | 11 | 1 | 119 | 40 | 34 | 7 | 140 | 80 | 304 | 128 |
| 28,635 | 11 | 1 | 119 | 42 | 34 | 7 | 140 | 81 | 304 | 131 |
| 28,636 | 11 | 1 | 124 | 45 | 35 | 7 | 145 | 81 | 315 | 134 |
| 28,637 | 13 | 2 | 133 | 45 | 36 | 7 | 146 | 81 | 328 | 135 |
| 28,638 | 14 | 2 | 151 | 45 | 39 | 7 | 166 | 81 | 370 | 135 |
| 28,639 | 15 | 1 | 169 | 46 | 39 | 7 | 192 | 82 | 415 | 136 |
| 28,640 | 15 | 1 | 171 | 51 | 41 | 7 | 194 | 84 | 421 | 143 |
| 28,641 | 15 | 1 | 170 | 51 | 41 | 7 | 193 | 84 | 419 | 143 |
| 28,642 | 15 | 1 | 172 | 51 | 41 | 7 | 195 | 84 | 423 | 143 |
| 28,643 | 15 | 1 | 172 | 47 | 41 | 7 | 195 | 70 | 423 | 125 |
| 28,644 | 15 | 1 | 172 | 47 | 41 | 7 | 195 | 71 | 423 | 126 |
| 28,645 | 15 | 1 | 172 | 47 | 41 | 7 | 195 | 71 | 423 | 126 |
| 28,646 | 15 | 1 | 178 | 47 | 41 | 7 | 199 | 71 | 433 | 126 |
| 28,647 | 15 | 1 | 186 | 47 | 41 | 7 | 208 | 71 | 450 | 126 |

|        |    |   |     |    |    |    |     |     |     |     |
|--------|----|---|-----|----|----|----|-----|-----|-----|-----|
| 28,648 | 15 | 1 | 188 | 47 | 41 | 7  | 209 | 70  | 453 | 125 |
| 28,649 | 15 | 1 | 189 | 47 | 41 | 7  | 210 | 70  | 455 | 125 |
| 28,650 | 15 | 1 | 189 | 47 | 41 | 6  | 210 | 70  | 455 | 124 |
| 28,651 | 15 | 1 | 188 | 47 | 41 | 6  | 210 | 70  | 454 | 124 |
| 28,652 | 15 | 1 | 188 | 47 | 41 | 6  | 209 | 70  | 453 | 124 |
| 28,653 | 15 | 1 | 207 | 47 | 41 | 6  | 220 | 70  | 483 | 124 |
| 28,654 | 17 | 1 | 286 | 47 | 46 | 6  | 270 | 70  | 619 | 124 |
| 28,655 | 18 | 1 | 298 | 47 | 47 | 6  | 271 | 70  | 634 | 124 |
| 28,656 | 27 | 1 | 318 | 46 | 47 | 6  | 325 | 69  | 717 | 122 |
| 28,657 | 27 | 1 | 326 | 46 | 47 | 6  | 333 | 69  | 733 | 122 |
| 28,658 | 27 | 1 | 328 | 47 | 47 | 6  | 334 | 70  | 736 | 124 |
| 28,659 | 27 | 1 | 328 | 48 | 47 | 7  | 333 | 71  | 735 | 127 |
| 28,660 | 27 | 1 | 328 | 50 | 47 | 7  | 333 | 72  | 735 | 130 |
| 28,661 | 27 | 2 | 328 | 64 | 47 | 9  | 333 | 90  | 735 | 165 |
| 28,662 | 27 | 3 | 316 | 78 | 47 | 9  | 328 | 94  | 718 | 184 |
| 28,663 | 25 | 3 | 308 | 81 | 41 | 9  | 315 | 94  | 689 | 187 |
| 28,664 | 25 | 3 | 297 | 80 | 35 | 9  | 292 | 94  | 649 | 186 |
| 28,665 | 24 | 3 | 289 | 81 | 31 | 9  | 278 | 96  | 622 | 189 |
| 28,666 | 18 | 3 | 241 | 80 | 13 | 9  | 224 | 96  | 496 | 188 |
| 28,667 | 17 | 3 | 241 | 80 | 13 | 9  | 225 | 96  | 496 | 188 |
| 28,668 | 17 | 3 | 241 | 81 | 13 | 9  | 225 | 96  | 496 | 189 |
| 28,669 | 17 | 3 | 241 | 81 | 13 | 9  | 227 | 96  | 498 | 189 |
| 28,670 | 17 | 3 | 241 | 81 | 13 | 9  | 227 | 96  | 498 | 189 |
| 28,671 | 17 | 3 | 240 | 81 | 13 | 9  | 226 | 96  | 496 | 189 |
| 28,672 | 17 | 3 | 239 | 81 | 13 | 9  | 226 | 96  | 495 | 189 |
| 28,673 | 17 | 3 | 239 | 81 | 13 | 9  | 225 | 96  | 494 | 189 |
| 28,674 | 17 | 3 | 239 | 83 | 13 | 10 | 217 | 100 | 486 | 196 |
| 28,675 | 17 | 3 | 239 | 83 | 13 | 10 | 217 | 100 | 486 | 196 |
| 28,676 | 17 | 3 | 239 | 83 | 13 | 10 | 214 | 100 | 483 | 196 |
| 28,677 | 16 | 3 | 239 | 83 | 13 | 10 | 215 | 98  | 483 | 194 |
| 28,678 | 16 | 3 | 239 | 83 | 13 | 10 | 213 | 98  | 481 | 194 |
| 28,679 | 16 | 3 | 239 | 83 | 13 | 10 | 214 | 94  | 482 | 190 |
| 28,680 | 16 | 3 | 237 | 66 | 13 | 6  | 215 | 62  | 481 | 137 |
| 28,681 | 16 | 3 | 237 | 61 | 13 | 6  | 215 | 56  | 481 | 126 |
| 28,682 | 16 | 3 | 234 | 64 | 13 | 7  | 215 | 56  | 478 | 130 |
| 28,683 | 16 | 3 | 235 | 60 | 13 | 6  | 215 | 48  | 479 | 117 |
| 28,684 | 16 | 4 | 233 | 60 | 13 | 6  | 213 | 49  | 475 | 119 |
| 28,685 | 16 | 4 | 221 | 57 | 13 | 5  | 208 | 47  | 458 | 113 |
| 28,686 | 16 | 4 | 219 | 54 | 12 | 5  | 206 | 48  | 453 | 111 |
| 28,687 | 17 | 4 | 220 | 58 | 11 | 5  | 218 | 51  | 466 | 118 |
| 28,688 | 16 | 4 | 203 | 54 | 9  | 5  | 199 | 46  | 427 | 109 |

|        |    |   |     |    |    |   |     |    |     |     |
|--------|----|---|-----|----|----|---|-----|----|-----|-----|
| 28,689 | 16 | 4 | 202 | 54 | 9  | 5 | 199 | 46 | 426 | 109 |
| 28,690 | 16 | 4 | 185 | 55 | 9  | 5 | 180 | 46 | 390 | 110 |
| 28,691 | 16 | 4 | 184 | 56 | 7  | 5 | 180 | 46 | 387 | 111 |
| 28,692 | 16 | 4 | 183 | 56 | 7  | 5 | 179 | 46 | 385 | 111 |
| 28,693 | 16 | 4 | 184 | 56 | 7  | 5 | 178 | 46 | 385 | 111 |
| 28,694 | 16 | 4 | 184 | 57 | 7  | 5 | 178 | 46 | 385 | 112 |
| 28,695 | 16 | 4 | 180 | 57 | 7  | 5 | 175 | 45 | 378 | 111 |
| 28,696 | 17 | 5 | 181 | 57 | 8  | 6 | 175 | 45 | 381 | 113 |
| 28,697 | 17 | 5 | 197 | 57 | 8  | 6 | 175 | 45 | 397 | 113 |
| 28,698 | 21 | 5 | 245 | 57 | 12 | 6 | 204 | 45 | 482 | 113 |
| 28,699 | 23 | 5 | 257 | 57 | 13 | 6 | 215 | 46 | 508 | 114 |
| 28,700 | 23 | 5 | 256 | 57 | 13 | 6 | 214 | 46 | 506 | 114 |
| 28,701 | 46 | 5 | 325 | 57 | 36 | 6 | 367 | 47 | 774 | 115 |
| 28,702 | 46 | 5 | 326 | 58 | 36 | 6 | 376 | 49 | 784 | 118 |
| 28,703 | 46 | 5 | 327 | 58 | 36 | 6 | 378 | 50 | 787 | 119 |
| 28,704 | 46 | 5 | 308 | 58 | 36 | 6 | 369 | 50 | 759 | 119 |
| 28,705 | 44 | 5 | 229 | 58 | 31 | 6 | 318 | 50 | 622 | 119 |
| 28,706 | 43 | 5 | 217 | 58 | 30 | 6 | 316 | 50 | 606 | 119 |
| 28,707 | 34 | 5 | 197 | 57 | 30 | 6 | 261 | 49 | 522 | 117 |
| 28,708 | 34 | 5 | 189 | 57 | 30 | 6 | 253 | 49 | 506 | 117 |
| 28,709 | 34 | 5 | 187 | 57 | 30 | 6 | 251 | 49 | 502 | 117 |
| 28,710 | 34 | 5 | 185 | 56 | 30 | 5 | 251 | 48 | 500 | 114 |
| 28,711 | 34 | 4 | 186 | 40 | 30 | 3 | 254 | 29 | 504 | 76  |
| 28,712 | 34 | 3 | 186 | 24 | 30 | 3 | 255 | 25 | 505 | 55  |
| 28,713 | 34 | 3 | 186 | 24 | 30 | 3 | 256 | 25 | 506 | 55  |
| 28,714 | 34 | 3 | 186 | 24 | 30 | 4 | 254 | 26 | 504 | 57  |
| 28,715 | 34 | 3 | 186 | 24 | 30 | 4 | 254 | 26 | 504 | 57  |
| 28,716 | 35 | 3 | 186 | 23 | 30 | 4 | 255 | 24 | 506 | 54  |
| 28,717 | 35 | 3 | 186 | 23 | 30 | 4 | 255 | 24 | 506 | 54  |
| 28,718 | 35 | 3 | 185 | 23 | 30 | 4 | 254 | 24 | 504 | 54  |
| 28,719 | 35 | 4 | 185 | 22 | 30 | 4 | 256 | 24 | 506 | 54  |
| 28,720 | 35 | 4 | 185 | 22 | 31 | 4 | 257 | 24 | 508 | 54  |
| 28,721 | 35 | 4 | 185 | 22 | 32 | 4 | 257 | 24 | 509 | 54  |
| 28,722 | 35 | 4 | 187 | 22 | 32 | 4 | 257 | 24 | 511 | 54  |
| 28,723 | 35 | 4 | 187 | 22 | 32 | 4 | 257 | 24 | 511 | 54  |
| 28,724 | 36 | 4 | 191 | 22 | 32 | 4 | 261 | 24 | 520 | 54  |
| 28,725 | 39 | 4 | 199 | 20 | 33 | 3 | 267 | 20 | 538 | 47  |
| 28,726 | 39 | 4 | 200 | 20 | 33 | 3 | 270 | 20 | 542 | 47  |
| 28,727 | 39 | 4 | 200 | 19 | 33 | 3 | 274 | 20 | 546 | 46  |
| 28,728 | 41 | 4 | 210 | 19 | 33 | 3 | 285 | 20 | 569 | 46  |
| 28,729 | 41 | 4 | 209 | 19 | 33 | 3 | 285 | 20 | 568 | 46  |

|        |    |   |     |    |    |   |     |    |     |    |
|--------|----|---|-----|----|----|---|-----|----|-----|----|
| 28,730 | 42 | 4 | 207 | 17 | 33 | 3 | 283 | 19 | 565 | 43 |
| 28,731 | 42 | 4 | 207 | 16 | 33 | 3 | 282 | 16 | 564 | 39 |
| 28,732 | 42 | 4 | 207 | 16 | 33 | 3 | 282 | 16 | 564 | 39 |
| 28,733 | 42 | 4 | 207 | 13 | 33 | 2 | 282 | 15 | 564 | 34 |
| 28,734 | 42 | 4 | 205 | 13 | 33 | 2 | 282 | 13 | 562 | 32 |
| 28,735 | 51 | 3 | 275 | 13 | 37 | 2 | 346 | 12 | 709 | 30 |
| 28,736 | 51 | 3 | 275 | 13 | 37 | 2 | 346 | 12 | 709 | 30 |
| 28,737 | 51 | 2 | 272 | 11 | 37 | 2 | 342 | 10 | 702 | 25 |
| 28,738 | 48 | 2 | 262 | 7  | 37 | 2 | 329 | 7  | 676 | 18 |
| 28,739 | 48 | 2 | 262 | 3  | 36 | 2 | 329 | 7  | 675 | 14 |
| 28,740 | 48 | 2 | 262 | 4  | 36 | 2 | 329 | 7  | 675 | 15 |
| 28,741 | 47 | 2 | 260 | 5  | 36 | 2 | 322 | 7  | 665 | 16 |
| 28,742 | 47 | 2 | 259 | 5  | 36 | 2 | 320 | 7  | 662 | 16 |
| 28,743 | 47 | 2 | 259 | 5  | 36 | 2 | 320 | 7  | 662 | 16 |
| 28,744 | 47 | 2 | 257 | 4  | 36 | 2 | 320 | 7  | 660 | 15 |
| 28,745 | 47 | 2 | 257 | 5  | 36 | 2 | 320 | 7  | 660 | 16 |
| 28,746 | 47 | 2 | 256 | 7  | 36 | 2 | 319 | 7  | 658 | 18 |
| 28,747 | 46 | 1 | 255 | 7  | 35 | 1 | 319 | 9  | 655 | 18 |
| 28,748 | 46 | 1 | 237 | 7  | 35 | 1 | 312 | 11 | 630 | 20 |
| 28,749 | 42 | 1 | 182 | 7  | 31 | 1 | 280 | 11 | 535 | 20 |
| 28,750 | 40 | 1 | 168 | 9  | 30 | 1 | 268 | 12 | 506 | 23 |
| 28,751 | 17 | 1 | 99  | 9  | 9  | 1 | 117 | 12 | 242 | 23 |
| 28,752 | 17 | 2 | 99  | 10 | 7  | 1 | 111 | 11 | 234 | 24 |
| 28,753 | 17 | 2 | 98  | 11 | 7  | 1 | 102 | 8  | 224 | 22 |
| 28,754 | 17 | 2 | 97  | 11 | 7  | 1 | 102 | 8  | 223 | 22 |
| 28,755 | 17 | 2 | 97  | 11 | 7  | 1 | 102 | 8  | 223 | 22 |
| 28,756 | 17 | 3 | 97  | 11 | 7  | 1 | 102 | 8  | 223 | 23 |
| 28,757 | 17 | 3 | 97  | 12 | 7  | 1 | 102 | 8  | 223 | 24 |
| 28,758 | 17 | 3 | 97  | 12 | 7  | 1 | 102 | 8  | 223 | 24 |
| 28,759 | 17 | 3 | 98  | 12 | 7  | 1 | 102 | 8  | 224 | 24 |
| 28,760 | 20 | 3 | 104 | 12 | 7  | 1 | 107 | 8  | 238 | 24 |
| 28,761 | 20 | 3 | 104 | 12 | 7  | 1 | 107 | 8  | 238 | 24 |
| 28,762 | 20 | 4 | 105 | 11 | 7  | 1 | 109 | 8  | 241 | 24 |
| 28,763 | 20 | 4 | 105 | 11 | 7  | 1 | 108 | 8  | 240 | 24 |
| 28,764 | 20 | 4 | 105 | 11 | 7  | 1 | 107 | 8  | 239 | 24 |
| 28,765 | 20 | 4 | 105 | 11 | 7  | 0 | 107 | 7  | 239 | 22 |
| 28,766 | 19 | 3 | 105 | 11 | 7  | 0 | 106 | 7  | 237 | 21 |
| 28,767 | 19 | 3 | 105 | 11 | 7  | 0 | 106 | 7  | 237 | 21 |
| 28,768 | 19 | 4 | 105 | 11 | 7  | 0 | 106 | 7  | 237 | 22 |
| 28,769 | 19 | 4 | 105 | 11 | 7  | 0 | 104 | 7  | 235 | 22 |
| 28,770 | 19 | 4 | 104 | 11 | 6  | 0 | 103 | 7  | 232 | 22 |

|        |    |    |     |    |    |   |     |    |     |     |
|--------|----|----|-----|----|----|---|-----|----|-----|-----|
| 28,771 | 19 | 4  | 104 | 11 | 6  | 0 | 103 | 7  | 232 | 22  |
| 28,772 | 21 | 4  | 108 | 13 | 5  | 0 | 105 | 7  | 239 | 24  |
| 28,773 | 21 | 4  | 113 | 13 | 5  | 0 | 109 | 7  | 248 | 24  |
| 28,774 | 21 | 4  | 111 | 13 | 5  | 0 | 113 | 7  | 250 | 24  |
| 28,775 | 19 | 4  | 107 | 14 | 4  | 0 | 108 | 8  | 238 | 26  |
| 28,776 | 19 | 4  | 110 | 14 | 4  | 0 | 105 | 8  | 238 | 26  |
| 28,777 | 20 | 6  | 133 | 15 | 5  | 1 | 110 | 20 | 268 | 42  |
| 28,778 | 20 | 7  | 136 | 16 | 5  | 2 | 102 | 21 | 263 | 46  |
| 28,779 | 19 | 10 | 134 | 21 | 5  | 2 | 104 | 22 | 262 | 55  |
| 28,780 | 19 | 14 | 133 | 46 | 5  | 2 | 100 | 43 | 257 | 105 |
| 28,781 | 16 | 14 | 116 | 47 | 4  | 2 | 87  | 43 | 223 | 106 |
| 28,782 | 12 | 14 | 116 | 47 | 3  | 2 | 78  | 44 | 209 | 107 |
| 28,783 | 10 | 14 | 102 | 47 | 1  | 2 | 65  | 44 | 178 | 107 |
| 28,784 | 9  | 14 | 75  | 48 | 1  | 2 | 47  | 43 | 132 | 107 |
| 28,785 | 9  | 14 | 73  | 48 | 1  | 2 | 41  | 44 | 124 | 108 |
| 28,786 | 9  | 14 | 72  | 48 | 1  | 2 | 42  | 44 | 124 | 108 |
| 28,787 | 9  | 16 | 72  | 48 | 1  | 2 | 42  | 44 | 124 | 110 |
| 28,788 | 9  | 16 | 72  | 48 | 1  | 2 | 42  | 44 | 124 | 110 |
| 28,789 | 16 | 16 | 105 | 49 | 1  | 2 | 51  | 44 | 173 | 111 |
| 28,790 | 16 | 16 | 105 | 48 | 1  | 2 | 51  | 44 | 173 | 110 |
| 28,791 | 16 | 16 | 105 | 48 | 1  | 2 | 51  | 44 | 173 | 110 |
| 28,792 | 16 | 16 | 106 | 47 | 2  | 2 | 55  | 45 | 179 | 110 |
| 28,793 | 16 | 16 | 106 | 47 | 2  | 2 | 55  | 45 | 179 | 110 |
| 28,794 | 16 | 16 | 106 | 47 | 2  | 2 | 55  | 48 | 179 | 113 |
| 28,795 | 16 | 16 | 106 | 47 | 2  | 2 | 55  | 48 | 179 | 113 |
| 28,796 | 17 | 16 | 122 | 46 | 2  | 2 | 68  | 51 | 209 | 115 |
| 28,797 | 17 | 16 | 122 | 44 | 2  | 3 | 68  | 51 | 209 | 114 |
| 28,798 | 17 | 16 | 123 | 45 | 2  | 3 | 68  | 49 | 210 | 113 |
| 28,799 | 21 | 16 | 126 | 45 | 2  | 3 | 68  | 47 | 217 | 111 |
| 28,800 | 21 | 16 | 128 | 45 | 2  | 3 | 69  | 46 | 220 | 110 |
| 28,801 | 24 | 16 | 152 | 44 | 3  | 3 | 72  | 48 | 251 | 111 |
| 28,802 | 24 | 16 | 152 | 44 | 3  | 3 | 72  | 48 | 251 | 111 |
| 28,803 | 40 | 15 | 249 | 41 | 8  | 3 | 123 | 48 | 420 | 107 |
| 28,804 | 40 | 15 | 249 | 41 | 8  | 3 | 123 | 48 | 420 | 107 |
| 28,805 | 46 | 15 | 264 | 41 | 10 | 3 | 129 | 48 | 449 | 107 |
| 28,806 | 46 | 15 | 264 | 41 | 10 | 3 | 129 | 49 | 449 | 108 |
| 28,807 | 49 | 14 | 304 | 41 | 11 | 3 | 155 | 49 | 519 | 107 |
| 28,808 | 49 | 14 | 332 | 42 | 13 | 3 | 176 | 49 | 570 | 108 |
| 28,809 | 49 | 14 | 333 | 42 | 13 | 3 | 176 | 49 | 571 | 108 |
| 28,810 | 46 | 14 | 327 | 42 | 13 | 3 | 171 | 49 | 557 | 108 |
| 28,811 | 46 | 14 | 327 | 42 | 13 | 3 | 171 | 49 | 557 | 108 |

|        |    |    |     |    |    |   |     |    |     |     |
|--------|----|----|-----|----|----|---|-----|----|-----|-----|
| 28,812 | 46 | 14 | 326 | 42 | 13 | 3 | 171 | 49 | 556 | 108 |
| 28,813 | 46 | 13 | 325 | 42 | 13 | 3 | 168 | 50 | 552 | 108 |
| 28,814 | 46 | 13 | 326 | 42 | 13 | 3 | 168 | 50 | 553 | 108 |
| 28,815 | 46 | 13 | 326 | 43 | 13 | 3 | 168 | 50 | 553 | 109 |
| 28,816 | 46 | 13 | 326 | 43 | 13 | 3 | 168 | 50 | 553 | 109 |
| 28,817 | 46 | 13 | 326 | 43 | 13 | 3 | 168 | 50 | 553 | 109 |
| 28,818 | 46 | 14 | 326 | 43 | 13 | 3 | 170 | 50 | 555 | 110 |
| 28,819 | 46 | 13 | 328 | 43 | 13 | 3 | 171 | 50 | 558 | 109 |
| 28,820 | 46 | 13 | 329 | 45 | 13 | 3 | 173 | 50 | 561 | 111 |
| 28,821 | 48 | 13 | 332 | 48 | 14 | 3 | 180 | 50 | 574 | 114 |
| 28,822 | 46 | 13 | 329 | 55 | 14 | 3 | 179 | 51 | 568 | 122 |
| 28,823 | 46 | 13 | 328 | 54 | 14 | 3 | 178 | 51 | 566 | 121 |
| 28,824 | 46 | 13 | 322 | 56 | 14 | 3 | 175 | 51 | 557 | 123 |
| 28,825 | 45 | 13 | 320 | 56 | 14 | 3 | 167 | 51 | 546 | 123 |
| 28,826 | 44 | 11 | 317 | 54 | 14 | 2 | 169 | 40 | 544 | 107 |
| 28,827 | 44 | 11 | 313 | 55 | 14 | 2 | 169 | 40 | 540 | 108 |
| 28,828 | 43 | 11 | 291 | 62 | 13 | 4 | 160 | 44 | 507 | 121 |
| 28,829 | 43 | 10 | 285 | 65 | 13 | 3 | 159 | 45 | 500 | 123 |
| 28,830 | 42 | 7  | 280 | 60 | 13 | 3 | 155 | 44 | 490 | 114 |
| 28,831 | 42 | 3  | 280 | 37 | 13 | 3 | 155 | 24 | 490 | 67  |
| 28,832 | 42 | 3  | 279 | 37 | 13 | 4 | 155 | 24 | 489 | 68  |
| 28,833 | 42 | 3  | 274 | 37 | 13 | 4 | 155 | 23 | 484 | 67  |
| 28,834 | 43 | 3  | 276 | 37 | 13 | 4 | 157 | 23 | 489 | 67  |
| 28,835 | 44 | 3  | 284 | 37 | 13 | 4 | 164 | 23 | 505 | 67  |
| 28,836 | 44 | 3  | 287 | 37 | 13 | 4 | 164 | 22 | 508 | 66  |
| 28,837 | 49 | 1  | 298 | 37 | 14 | 4 | 175 | 22 | 536 | 64  |
| 28,838 | 49 | 1  | 299 | 37 | 14 | 4 | 175 | 22 | 537 | 64  |
| 28,839 | 47 | 1  | 300 | 37 | 15 | 4 | 192 | 22 | 554 | 64  |
| 28,840 | 45 | 1  | 287 | 36 | 15 | 4 | 186 | 22 | 533 | 63  |
| 28,841 | 45 | 1  | 287 | 36 | 15 | 4 | 186 | 22 | 533 | 63  |
| 28,842 | 45 | 1  | 286 | 37 | 16 | 5 | 183 | 21 | 530 | 64  |
| 28,843 | 44 | 1  | 283 | 37 | 16 | 5 | 182 | 20 | 525 | 63  |
| 28,844 | 46 | 1  | 291 | 37 | 16 | 5 | 172 | 17 | 525 | 60  |
| 28,845 | 46 | 1  | 287 | 37 | 16 | 5 | 171 | 17 | 520 | 60  |
| 28,846 | 49 | 1  | 296 | 37 | 16 | 5 | 177 | 14 | 538 | 57  |
| 28,847 | 52 | 1  | 309 | 37 | 16 | 4 | 192 | 14 | 569 | 56  |
| 28,848 | 52 | 1  | 308 | 37 | 16 | 4 | 192 | 14 | 568 | 56  |
| 28,849 | 48 | 1  | 309 | 36 | 16 | 4 | 194 | 15 | 567 | 56  |
| 28,850 | 56 | 1  | 322 | 37 | 17 | 4 | 214 | 15 | 609 | 57  |
| 28,851 | 54 | 1  | 308 | 41 | 17 | 4 | 214 | 14 | 593 | 60  |
| 28,852 | 53 | 1  | 305 | 43 | 17 | 7 | 214 | 17 | 589 | 68  |



|        |    |   |     |    |    |   |     |    |     |     |
|--------|----|---|-----|----|----|---|-----|----|-----|-----|
| 28,853 | 43 | 1 | 255 | 57 | 15 | 8 | 187 | 25 | 500 | 91  |
| 28,854 | 38 | 1 | 211 | 60 | 12 | 8 | 167 | 27 | 428 | 96  |
| 28,855 | 36 | 1 | 208 | 60 | 12 | 8 | 164 | 28 | 420 | 97  |
| 28,856 | 32 | 1 | 196 | 60 | 10 | 8 | 160 | 28 | 398 | 97  |
| 28,857 | 29 | 1 | 156 | 60 | 9  | 8 | 134 | 27 | 328 | 96  |
| 28,858 | 29 | 1 | 138 | 60 | 8  | 8 | 125 | 27 | 300 | 96  |
| 28,859 | 29 | 1 | 128 | 58 | 7  | 8 | 113 | 27 | 277 | 94  |
| 28,860 | 29 | 1 | 126 | 58 | 7  | 8 | 113 | 27 | 275 | 94  |
| 28,861 | 29 | 1 | 126 | 58 | 7  | 8 | 113 | 27 | 275 | 94  |
| 28,862 | 29 | 1 | 126 | 58 | 7  | 8 | 114 | 27 | 276 | 94  |
| 28,863 | 29 | 1 | 126 | 58 | 7  | 8 | 114 | 27 | 276 | 94  |
| 28,864 | 29 | 1 | 126 | 57 | 7  | 8 | 114 | 26 | 276 | 92  |
| 28,865 | 29 | 1 | 125 | 59 | 7  | 8 | 114 | 26 | 275 | 94  |
| 28,866 | 29 | 1 | 125 | 58 | 7  | 8 | 114 | 28 | 275 | 95  |
| 28,867 | 29 | 1 | 125 | 59 | 7  | 8 | 114 | 29 | 275 | 97  |
| 28,868 | 29 | 1 | 125 | 63 | 7  | 8 | 112 | 29 | 273 | 101 |
| 28,869 | 29 | 0 | 123 | 63 | 7  | 8 | 111 | 29 | 270 | 100 |
| 28,870 | 29 | 0 | 122 | 51 | 7  | 8 | 108 | 28 | 266 | 87  |
| 28,871 | 29 | 0 | 123 | 51 | 7  | 8 | 107 | 28 | 266 | 87  |
| 28,872 | 27 | 0 | 130 | 53 | 6  | 8 | 101 | 30 | 264 | 91  |
| 28,873 | 27 | 0 | 130 | 54 | 6  | 8 | 101 | 30 | 264 | 92  |
| 28,874 | 27 | 0 | 130 | 54 | 6  | 8 | 101 | 30 | 264 | 92  |
| 28,875 | 33 | 0 | 140 | 40 | 7  | 6 | 102 | 22 | 282 | 68  |
| 28,876 | 33 | 0 | 140 | 40 | 7  | 6 | 102 | 22 | 282 | 68  |
| 28,877 | 33 | 0 | 139 | 40 | 7  | 6 | 99  | 23 | 278 | 69  |
| 28,878 | 33 | 0 | 139 | 40 | 7  | 6 | 99  | 24 | 278 | 70  |
| 28,879 | 33 | 2 | 138 | 41 | 7  | 6 | 100 | 24 | 278 | 73  |
| 28,880 | 33 | 2 | 139 | 41 | 7  | 6 | 100 | 24 | 279 | 73  |
| 28,881 | 38 | 2 | 194 | 38 | 12 | 5 | 127 | 23 | 371 | 68  |
| 28,882 | 38 | 2 | 196 | 38 | 12 | 5 | 127 | 23 | 373 | 68  |
| 28,883 | 37 | 2 | 195 | 38 | 10 | 5 | 127 | 23 | 369 | 68  |
| 28,884 | 37 | 2 | 193 | 40 | 10 | 5 | 124 | 24 | 364 | 71  |
| 28,885 | 36 | 3 | 183 | 40 | 10 | 5 | 117 | 26 | 346 | 74  |
| 28,886 | 36 | 4 | 183 | 48 | 10 | 5 | 118 | 30 | 347 | 87  |
| 28,887 | 38 | 4 | 180 | 48 | 10 | 5 | 118 | 30 | 346 | 87  |
| 28,888 | 33 | 4 | 165 | 49 | 9  | 5 | 107 | 31 | 314 | 89  |
| 28,889 | 33 | 4 | 165 | 50 | 9  | 5 | 107 | 32 | 314 | 91  |
| 28,890 | 30 | 4 | 149 | 51 | 8  | 5 | 86  | 32 | 273 | 92  |
| 28,891 | 31 | 4 | 148 | 51 | 8  | 5 | 86  | 32 | 273 | 92  |
| 28,892 | 31 | 4 | 148 | 52 | 8  | 5 | 86  | 32 | 273 | 93  |
| 28,893 | 31 | 4 | 149 | 52 | 8  | 4 | 88  | 34 | 276 | 94  |

|        |    |   |     |    |    |   |     |    |     |    |
|--------|----|---|-----|----|----|---|-----|----|-----|----|
| 28,894 | 32 | 4 | 149 | 52 | 8  | 4 | 89  | 34 | 278 | 94 |
| 28,895 | 30 | 4 | 139 | 52 | 8  | 4 | 88  | 34 | 265 | 94 |
| 28,896 | 30 | 4 | 139 | 52 | 8  | 4 | 88  | 34 | 265 | 94 |
| 28,897 | 27 | 4 | 130 | 53 | 8  | 4 | 82  | 34 | 247 | 95 |
| 28,898 | 24 | 4 | 112 | 53 | 8  | 4 | 67  | 33 | 211 | 94 |
| 28,899 | 24 | 4 | 109 | 53 | 8  | 4 | 65  | 33 | 206 | 94 |
| 28,900 | 16 | 4 | 94  | 53 | 7  | 4 | 45  | 33 | 162 | 94 |
| 28,901 | 16 | 4 | 91  | 52 | 7  | 4 | 45  | 33 | 159 | 93 |
| 28,902 | 16 | 4 | 90  | 31 | 6  | 0 | 43  | 21 | 155 | 56 |
| 28,903 | 17 | 4 | 91  | 31 | 6  | 0 | 43  | 21 | 157 | 56 |
| 28,904 | 16 | 4 | 92  | 31 | 6  | 0 | 44  | 21 | 158 | 56 |
| 28,905 | 16 | 4 | 91  | 28 | 6  | 0 | 41  | 19 | 154 | 51 |
| 28,906 | 16 | 4 | 103 | 28 | 6  | 0 | 54  | 18 | 179 | 50 |
| 28,907 | 16 | 4 | 104 | 28 | 6  | 0 | 56  | 18 | 182 | 50 |
| 28,908 | 16 | 4 | 104 | 28 | 6  | 0 | 56  | 18 | 182 | 50 |
| 28,909 | 16 | 4 | 105 | 28 | 6  | 1 | 56  | 18 | 183 | 51 |
| 28,910 | 16 | 4 | 105 | 28 | 6  | 1 | 56  | 18 | 183 | 51 |
| 28,911 | 16 | 4 | 105 | 29 | 6  | 1 | 56  | 18 | 183 | 52 |
| 28,912 | 16 | 4 | 105 | 29 | 6  | 1 | 55  | 18 | 182 | 52 |
| 28,913 | 16 | 4 | 105 | 29 | 6  | 1 | 55  | 18 | 182 | 52 |
| 28,914 | 16 | 4 | 105 | 29 | 6  | 1 | 55  | 18 | 182 | 52 |
| 28,915 | 16 | 4 | 105 | 28 | 6  | 1 | 55  | 18 | 182 | 51 |
| 28,916 | 16 | 4 | 107 | 29 | 6  | 1 | 55  | 16 | 184 | 50 |
| 28,917 | 17 | 4 | 107 | 28 | 6  | 1 | 55  | 15 | 185 | 48 |
| 28,918 | 17 | 4 | 108 | 24 | 6  | 1 | 55  | 15 | 186 | 44 |
| 28,919 | 17 | 4 | 108 | 25 | 6  | 1 | 55  | 15 | 186 | 45 |
| 28,920 | 17 | 4 | 108 | 25 | 6  | 1 | 55  | 15 | 186 | 45 |
| 28,921 | 17 | 4 | 126 | 25 | 6  | 1 | 60  | 15 | 209 | 45 |
| 28,922 | 17 | 4 | 125 | 26 | 6  | 1 | 63  | 15 | 211 | 46 |
| 28,923 | 17 | 4 | 121 | 23 | 6  | 1 | 66  | 13 | 210 | 41 |
| 28,924 | 22 | 5 | 139 | 22 | 10 | 1 | 87  | 13 | 258 | 41 |
| 28,925 | 22 | 6 | 141 | 23 | 11 | 1 | 96  | 18 | 270 | 48 |
| 28,926 | 16 | 6 | 145 | 25 | 10 | 2 | 98  | 22 | 269 | 55 |
| 28,927 | 17 | 6 | 167 | 28 | 10 | 2 | 108 | 23 | 302 | 59 |
| 28,928 | 17 | 4 | 170 | 27 | 10 | 2 | 111 | 21 | 308 | 54 |
| 28,929 | 17 | 4 | 166 | 27 | 10 | 2 | 113 | 21 | 306 | 54 |
| 28,930 | 16 | 4 | 151 | 27 | 8  | 2 | 99  | 21 | 274 | 54 |
| 28,931 | 12 | 4 | 123 | 27 | 5  | 2 | 88  | 21 | 228 | 54 |
| 28,932 | 12 | 4 | 121 | 27 | 5  | 2 | 84  | 21 | 222 | 54 |
| 28,933 | 12 | 4 | 119 | 27 | 5  | 2 | 84  | 21 | 220 | 54 |
| 28,934 | 12 | 4 | 119 | 27 | 5  | 2 | 84  | 21 | 220 | 54 |

|        |    |   |     |    |   |   |     |    |     |    |
|--------|----|---|-----|----|---|---|-----|----|-----|----|
| 28,935 | 12 | 3 | 123 | 25 | 5 | 2 | 87  | 18 | 227 | 48 |
| 28,936 | 12 | 2 | 123 | 16 | 5 | 2 | 87  | 14 | 227 | 34 |
| 28,937 | 12 | 3 | 123 | 16 | 5 | 2 | 87  | 14 | 227 | 35 |
| 28,938 | 10 | 3 | 123 | 16 | 5 | 2 | 86  | 14 | 224 | 35 |
| 28,939 | 10 | 3 | 123 | 15 | 5 | 2 | 87  | 13 | 225 | 33 |
| 28,940 | 10 | 3 | 122 | 14 | 5 | 2 | 87  | 12 | 224 | 31 |
| 28,941 | 10 | 3 | 123 | 12 | 5 | 2 | 92  | 13 | 230 | 30 |
| 28,942 | 9  | 4 | 123 | 12 | 5 | 2 | 92  | 14 | 229 | 32 |
| 28,943 | 9  | 4 | 122 | 13 | 5 | 2 | 90  | 14 | 226 | 33 |
| 28,944 | 9  | 4 | 122 | 12 | 5 | 2 | 90  | 12 | 226 | 30 |
| 28,945 | 9  | 4 | 123 | 12 | 5 | 2 | 90  | 12 | 227 | 30 |
| 28,946 | 9  | 4 | 123 | 12 | 5 | 2 | 90  | 12 | 227 | 30 |
| 28,947 | 9  | 4 | 123 | 12 | 5 | 2 | 91  | 12 | 228 | 30 |
| 28,948 | 9  | 4 | 125 | 12 | 5 | 2 | 91  | 12 | 230 | 30 |
| 28,949 | 9  | 4 | 124 | 12 | 5 | 2 | 91  | 12 | 229 | 30 |
| 28,950 | 9  | 4 | 123 | 12 | 5 | 3 | 91  | 12 | 228 | 31 |
| 28,951 | 9  | 4 | 123 | 13 | 5 | 3 | 90  | 12 | 227 | 32 |
| 28,952 | 9  | 4 | 125 | 15 | 5 | 3 | 90  | 12 | 229 | 34 |
| 28,953 | 9  | 4 | 122 | 15 | 5 | 3 | 90  | 13 | 226 | 35 |
| 28,954 | 8  | 4 | 121 | 15 | 5 | 3 | 90  | 13 | 224 | 35 |
| 28,955 | 8  | 4 | 125 | 15 | 5 | 3 | 90  | 13 | 228 | 35 |
| 28,956 | 8  | 4 | 124 | 15 | 5 | 3 | 93  | 13 | 230 | 35 |
| 28,957 | 8  | 4 | 121 | 15 | 5 | 3 | 86  | 13 | 220 | 35 |
| 28,958 | 9  | 4 | 127 | 15 | 5 | 3 | 93  | 13 | 234 | 35 |
| 28,959 | 9  | 5 | 128 | 15 | 5 | 3 | 93  | 14 | 235 | 37 |
| 28,960 | 9  | 5 | 127 | 15 | 5 | 2 | 93  | 14 | 234 | 36 |
| 28,961 | 9  | 5 | 127 | 15 | 5 | 2 | 93  | 14 | 234 | 36 |
| 28,962 | 9  | 5 | 132 | 14 | 5 | 2 | 98  | 14 | 244 | 35 |
| 28,963 | 9  | 5 | 133 | 14 | 5 | 2 | 99  | 14 | 246 | 35 |
| 28,964 | 9  | 5 | 133 | 14 | 5 | 2 | 100 | 14 | 247 | 35 |
| 28,965 | 9  | 5 | 133 | 14 | 5 | 2 | 100 | 14 | 247 | 35 |
| 28,966 | 9  | 5 | 133 | 14 | 5 | 2 | 101 | 14 | 248 | 35 |
| 28,967 | 9  | 5 | 131 | 13 | 5 | 2 | 101 | 14 | 246 | 34 |
| 28,968 | 8  | 5 | 131 | 13 | 5 | 2 | 101 | 14 | 245 | 34 |
| 28,969 | 8  | 5 | 130 | 13 | 5 | 2 | 102 | 14 | 245 | 34 |
| 28,970 | 8  | 5 | 130 | 12 | 5 | 2 | 102 | 14 | 245 | 33 |
| 28,971 | 8  | 5 | 112 | 13 | 5 | 3 | 97  | 15 | 222 | 36 |
| 28,972 | 8  | 5 | 112 | 16 | 5 | 3 | 94  | 15 | 219 | 39 |
| 28,973 | 8  | 5 | 112 | 21 | 5 | 4 | 93  | 16 | 218 | 46 |
| 28,974 | 8  | 5 | 106 | 25 | 5 | 4 | 91  | 18 | 210 | 52 |
| 28,975 | 3  | 4 | 86  | 25 | 1 | 4 | 70  | 18 | 160 | 51 |

|        |   |   |    |    |   |   |    |    |     |    |
|--------|---|---|----|----|---|---|----|----|-----|----|
| 28,976 | 3 | 3 | 84 | 25 | 0 | 4 | 61 | 14 | 148 | 46 |
| 28,977 | 3 | 3 | 72 | 27 | 0 | 3 | 56 | 10 | 131 | 43 |
| 28,978 | 2 | 3 | 48 | 24 | 0 | 3 | 46 | 9  | 96  | 39 |
| 28,979 | 2 | 3 | 43 | 24 | 0 | 3 | 43 | 9  | 88  | 39 |
| 28,980 | 2 | 3 | 43 | 26 | 0 | 3 | 41 | 10 | 86  | 42 |
| 28,981 | 2 | 3 | 43 | 26 | 0 | 3 | 41 | 11 | 86  | 43 |
| 28,982 | 2 | 3 | 45 | 26 | 0 | 3 | 41 | 11 | 88  | 43 |
| 28,983 | 3 | 3 | 51 | 27 | 1 | 3 | 47 | 11 | 102 | 44 |
| 28,984 | 3 | 3 | 51 | 27 | 1 | 3 | 47 | 11 | 102 | 44 |
| 28,985 | 3 | 3 | 53 | 27 | 1 | 3 | 47 | 11 | 104 | 44 |
| 28,986 | 3 | 3 | 51 | 27 | 1 | 3 | 44 | 11 | 99  | 44 |
| 28,987 | 3 | 3 | 53 | 27 | 1 | 3 | 48 | 11 | 105 | 44 |
| 28,988 | 3 | 2 | 53 | 27 | 1 | 3 | 48 | 11 | 105 | 43 |
| 28,989 | 3 | 2 | 53 | 27 | 1 | 3 | 49 | 11 | 106 | 43 |
| 28,990 | 3 | 2 | 53 | 27 | 2 | 3 | 48 | 11 | 106 | 43 |
| 28,991 | 3 | 2 | 52 | 27 | 2 | 3 | 47 | 11 | 104 | 43 |
| 28,992 | 3 | 2 | 52 | 27 | 2 | 3 | 43 | 10 | 100 | 42 |
| 28,993 | 3 | 1 | 52 | 27 | 2 | 3 | 43 | 9  | 100 | 40 |
| 28,994 | 3 | 1 | 52 | 26 | 2 | 3 | 44 | 9  | 101 | 39 |
| 28,995 | 3 | 1 | 52 | 26 | 2 | 3 | 44 | 9  | 101 | 39 |
| 28,996 | 2 | 1 | 51 | 26 | 2 | 3 | 43 | 9  | 98  | 39 |
| 28,997 | 2 | 1 | 50 | 26 | 2 | 3 | 43 | 9  | 97  | 39 |
| 28,998 | 2 | 1 | 50 | 25 | 2 | 3 | 42 | 9  | 96  | 38 |
| 28,999 | 2 | 1 | 49 | 25 | 2 | 3 | 44 | 9  | 97  | 38 |
| 29,000 | 2 | 1 | 49 | 26 | 2 | 2 | 44 | 9  | 97  | 38 |
| 29,001 | 2 | 1 | 49 | 25 | 2 | 2 | 44 | 9  | 97  | 37 |
| 29,002 | 2 | 1 | 49 | 26 | 2 | 2 | 43 | 9  | 96  | 38 |
| 29,003 | 2 | 1 | 47 | 25 | 2 | 2 | 43 | 9  | 94  | 37 |
| 29,004 | 2 | 1 | 47 | 25 | 2 | 2 | 43 | 8  | 94  | 36 |
| 29,005 | 2 | 1 | 47 | 25 | 2 | 2 | 43 | 9  | 94  | 37 |
| 29,006 | 2 | 1 | 40 | 25 | 2 | 2 | 41 | 9  | 85  | 37 |
| 29,007 | 2 | 1 | 33 | 25 | 2 | 2 | 35 | 10 | 72  | 38 |
| 29,008 | 2 | 1 | 32 | 27 | 2 | 2 | 32 | 17 | 68  | 47 |
| 29,009 | 1 | 1 | 25 | 28 | 2 | 2 | 23 | 18 | 51  | 49 |
| 29,010 | 1 | 0 | 24 | 30 | 3 | 2 | 23 | 17 | 51  | 49 |
| 29,011 | 1 | 0 | 26 | 35 | 3 | 2 | 23 | 22 | 53  | 59 |
| 29,012 | 1 | 0 | 26 | 35 | 3 | 2 | 18 | 22 | 48  | 59 |
| 29,013 | 1 | 0 | 21 | 35 | 3 | 2 | 18 | 22 | 43  | 59 |
| 29,014 | 1 | 1 | 20 | 35 | 3 | 2 | 17 | 22 | 41  | 60 |
| 29,015 | 1 | 1 | 20 | 35 | 3 | 2 | 16 | 23 | 40  | 61 |
| 29,016 | 1 | 1 | 22 | 35 | 3 | 2 | 20 | 23 | 46  | 61 |

|        |    |    |     |    |    |   |     |    |     |     |
|--------|----|----|-----|----|----|---|-----|----|-----|-----|
| 29,017 | 4  | 1  | 38  | 35 | 3  | 2 | 33  | 23 | 78  | 61  |
| 29,018 | 4  | 1  | 38  | 35 | 3  | 2 | 33  | 23 | 78  | 61  |
| 29,019 | 4  | 1  | 38  | 35 | 3  | 2 | 36  | 23 | 81  | 61  |
| 29,020 | 5  | 1  | 43  | 35 | 3  | 2 | 37  | 23 | 88  | 61  |
| 29,021 | 5  | 1  | 47  | 34 | 3  | 1 | 43  | 22 | 98  | 58  |
| 29,022 | 5  | 1  | 47  | 34 | 3  | 1 | 43  | 22 | 98  | 58  |
| 29,023 | 5  | 1  | 47  | 31 | 3  | 1 | 43  | 22 | 98  | 55  |
| 29,024 | 5  | 1  | 74  | 25 | 6  | 0 | 57  | 22 | 142 | 48  |
| 29,025 | 5  | 1  | 86  | 21 | 6  | 0 | 61  | 20 | 158 | 42  |
| 29,026 | 5  | 1  | 92  | 20 | 6  | 0 | 61  | 19 | 164 | 40  |
| 29,027 | 5  | 1  | 92  | 20 | 6  | 0 | 61  | 19 | 164 | 40  |
| 29,028 | 5  | 1  | 93  | 16 | 6  | 0 | 62  | 19 | 166 | 36  |
| 29,029 | 7  | 1  | 114 | 16 | 6  | 0 | 72  | 19 | 199 | 36  |
| 29,030 | 7  | 1  | 114 | 16 | 6  | 0 | 72  | 20 | 199 | 37  |
| 29,031 | 9  | 1  | 134 | 14 | 6  | 0 | 80  | 18 | 229 | 33  |
| 29,032 | 14 | 1  | 188 | 15 | 9  | 0 | 104 | 18 | 315 | 34  |
| 29,033 | 16 | 1  | 193 | 19 | 10 | 0 | 110 | 18 | 329 | 38  |
| 29,034 | 15 | 1  | 189 | 27 | 9  | 1 | 104 | 22 | 317 | 51  |
| 29,035 | 15 | 2  | 187 | 27 | 9  | 1 | 105 | 23 | 316 | 53  |
| 29,036 | 15 | 2  | 186 | 30 | 9  | 1 | 105 | 25 | 315 | 58  |
| 29,037 | 15 | 3  | 185 | 34 | 9  | 1 | 105 | 31 | 314 | 69  |
| 29,038 | 15 | 3  | 183 | 39 | 9  | 1 | 101 | 31 | 308 | 74  |
| 29,039 | 16 | 5  | 188 | 58 | 9  | 1 | 106 | 33 | 319 | 97  |
| 29,040 | 16 | 5  | 194 | 61 | 9  | 1 | 107 | 36 | 326 | 103 |
| 29,041 | 16 | 5  | 194 | 64 | 8  | 2 | 107 | 36 | 325 | 107 |
| 29,042 | 16 | 5  | 194 | 69 | 8  | 2 | 107 | 36 | 325 | 112 |
| 29,043 | 17 | 7  | 205 | 69 | 8  | 2 | 109 | 38 | 339 | 116 |
| 29,044 | 17 | 7  | 210 | 70 | 8  | 2 | 112 | 38 | 347 | 117 |
| 29,045 | 17 | 7  | 209 | 71 | 8  | 2 | 115 | 38 | 349 | 118 |
| 29,046 | 17 | 7  | 209 | 71 | 8  | 2 | 115 | 38 | 349 | 118 |
| 29,047 | 17 | 7  | 211 | 71 | 9  | 2 | 116 | 38 | 353 | 118 |
| 29,048 | 17 | 7  | 211 | 74 | 9  | 2 | 114 | 38 | 351 | 121 |
| 29,049 | 17 | 8  | 223 | 74 | 9  | 2 | 118 | 40 | 367 | 124 |
| 29,050 | 17 | 8  | 223 | 75 | 9  | 2 | 118 | 40 | 367 | 125 |
| 29,051 | 18 | 8  | 238 | 76 | 9  | 2 | 123 | 40 | 388 | 126 |
| 29,052 | 18 | 8  | 243 | 76 | 9  | 2 | 123 | 41 | 393 | 127 |
| 29,053 | 18 | 8  | 252 | 75 | 9  | 2 | 127 | 41 | 406 | 126 |
| 29,054 | 18 | 8  | 259 | 74 | 9  | 2 | 130 | 40 | 416 | 124 |
| 29,055 | 18 | 8  | 281 | 76 | 9  | 4 | 134 | 41 | 442 | 129 |
| 29,056 | 18 | 10 | 281 | 91 | 9  | 6 | 135 | 63 | 443 | 170 |
| 29,057 | 18 | 10 | 281 | 91 | 9  | 6 | 135 | 63 | 443 | 170 |

|        |    |    |     |     |    |   |     |    |     |     |
|--------|----|----|-----|-----|----|---|-----|----|-----|-----|
| 29,058 | 18 | 10 | 288 | 96  | 10 | 6 | 137 | 63 | 453 | 175 |
| 29,059 | 20 | 10 | 290 | 95  | 10 | 6 | 138 | 59 | 458 | 170 |
| 29,060 | 20 | 10 | 290 | 96  | 10 | 6 | 138 | 59 | 458 | 171 |
| 29,061 | 20 | 10 | 290 | 95  | 9  | 6 | 138 | 61 | 457 | 172 |
| 29,062 | 20 | 11 | 288 | 93  | 9  | 6 | 138 | 58 | 455 | 168 |
| 29,063 | 20 | 11 | 288 | 95  | 9  | 6 | 138 | 58 | 455 | 170 |
| 29,064 | 20 | 10 | 289 | 96  | 9  | 6 | 138 | 60 | 456 | 172 |
| 29,065 | 20 | 10 | 289 | 96  | 9  | 6 | 138 | 59 | 456 | 171 |
| 29,066 | 20 | 10 | 289 | 96  | 9  | 6 | 138 | 59 | 456 | 171 |
| 29,067 | 20 | 10 | 287 | 97  | 9  | 6 | 134 | 59 | 450 | 172 |
| 29,068 | 17 | 10 | 271 | 97  | 9  | 6 | 120 | 59 | 417 | 172 |
| 29,069 | 18 | 10 | 271 | 97  | 9  | 6 | 116 | 59 | 414 | 172 |
| 29,070 | 18 | 10 | 271 | 97  | 9  | 6 | 116 | 59 | 414 | 172 |
| 29,071 | 17 | 10 | 266 | 99  | 9  | 6 | 116 | 59 | 408 | 174 |
| 29,072 | 18 | 10 | 263 | 99  | 9  | 6 | 113 | 59 | 403 | 174 |
| 29,073 | 18 | 10 | 238 | 99  | 6  | 6 | 101 | 59 | 363 | 174 |
| 29,074 | 18 | 10 | 236 | 99  | 6  | 6 | 101 | 58 | 361 | 173 |
| 29,075 | 18 | 10 | 236 | 99  | 6  | 6 | 103 | 58 | 363 | 173 |
| 29,076 | 20 | 10 | 225 | 99  | 6  | 6 | 102 | 58 | 353 | 173 |
| 29,077 | 20 | 10 | 223 | 99  | 6  | 6 | 102 | 58 | 351 | 173 |
| 29,078 | 20 | 10 | 222 | 101 | 7  | 6 | 105 | 58 | 354 | 175 |
| 29,079 | 19 | 10 | 248 | 103 | 9  | 6 | 115 | 58 | 391 | 177 |
| 29,080 | 19 | 10 | 247 | 103 | 13 | 6 | 117 | 59 | 396 | 178 |
| 29,081 | 19 | 10 | 244 | 103 | 13 | 6 | 115 | 59 | 391 | 178 |
| 29,082 | 18 | 11 | 231 | 105 | 13 | 6 | 113 | 59 | 375 | 181 |
| 29,083 | 13 | 11 | 178 | 100 | 10 | 6 | 89  | 60 | 290 | 177 |
| 29,084 | 11 | 11 | 171 | 100 | 9  | 6 | 83  | 60 | 274 | 177 |
| 29,085 | 11 | 11 | 169 | 93  | 9  | 5 | 83  | 56 | 272 | 165 |
| 29,086 | 11 | 10 | 169 | 93  | 9  | 5 | 82  | 55 | 271 | 163 |
| 29,087 | 11 | 9  | 174 | 86  | 9  | 5 | 83  | 47 | 277 | 147 |
| 29,088 | 11 | 9  | 175 | 81  | 9  | 5 | 83  | 47 | 278 | 142 |
| 29,089 | 11 | 9  | 174 | 82  | 9  | 5 | 80  | 48 | 274 | 144 |
| 29,090 | 10 | 7  | 170 | 64  | 9  | 5 | 78  | 47 | 267 | 123 |
| 29,091 | 10 | 7  | 164 | 58  | 9  | 4 | 76  | 44 | 259 | 113 |
| 29,092 | 10 | 7  | 165 | 58  | 9  | 4 | 76  | 44 | 260 | 113 |
| 29,093 | 10 | 7  | 160 | 54  | 9  | 4 | 75  | 44 | 254 | 109 |
| 29,094 | 9  | 5  | 154 | 54  | 9  | 4 | 74  | 42 | 246 | 105 |
| 29,095 | 9  | 5  | 149 | 54  | 9  | 4 | 70  | 42 | 237 | 105 |
| 29,096 | 9  | 5  | 150 | 53  | 9  | 4 | 67  | 42 | 235 | 104 |
| 29,097 | 9  | 5  | 149 | 53  | 9  | 4 | 67  | 42 | 234 | 104 |
| 29,098 | 9  | 5  | 148 | 50  | 8  | 4 | 66  | 42 | 231 | 101 |

|        |   |   |     |    |    |   |    |    |     |     |
|--------|---|---|-----|----|----|---|----|----|-----|-----|
| 29,099 | 9 | 5 | 146 | 50 | 8  | 4 | 66 | 42 | 229 | 101 |
| 29,100 | 9 | 4 | 136 | 50 | 8  | 4 | 62 | 41 | 215 | 99  |
| 29,101 | 8 | 4 | 131 | 49 | 8  | 4 | 59 | 43 | 206 | 100 |
| 29,102 | 8 | 4 | 125 | 47 | 8  | 4 | 58 | 42 | 199 | 97  |
| 29,103 | 8 | 4 | 121 | 53 | 8  | 4 | 58 | 51 | 195 | 112 |
| 29,104 | 8 | 4 | 112 | 54 | 8  | 4 | 54 | 51 | 182 | 113 |
| 29,105 | 8 | 9 | 105 | 71 | 8  | 5 | 51 | 74 | 172 | 159 |
| 29,106 | 8 | 9 | 83  | 69 | 8  | 3 | 47 | 73 | 146 | 154 |
| 29,107 | 8 | 7 | 83  | 54 | 8  | 1 | 46 | 51 | 145 | 113 |
| 29,108 | 8 | 8 | 83  | 54 | 8  | 1 | 46 | 52 | 145 | 115 |
| 29,109 | 8 | 8 | 76  | 49 | 7  | 1 | 44 | 51 | 135 | 109 |
| 29,110 | 6 | 8 | 79  | 51 | 7  | 1 | 47 | 49 | 139 | 109 |
| 29,111 | 6 | 8 | 79  | 51 | 7  | 1 | 47 | 49 | 139 | 109 |
| 29,112 | 6 | 8 | 79  | 50 | 7  | 1 | 47 | 47 | 139 | 106 |
| 29,113 | 6 | 7 | 79  | 48 | 7  | 1 | 48 | 45 | 140 | 101 |
| 29,114 | 6 | 7 | 79  | 46 | 7  | 1 | 48 | 45 | 140 | 99  |
| 29,115 | 6 | 7 | 78  | 45 | 7  | 1 | 48 | 43 | 139 | 96  |
| 29,116 | 6 | 7 | 78  | 45 | 7  | 1 | 48 | 43 | 139 | 96  |
| 29,117 | 6 | 7 | 78  | 45 | 7  | 1 | 48 | 44 | 139 | 97  |
| 29,118 | 6 | 7 | 79  | 45 | 7  | 1 | 48 | 44 | 140 | 97  |
| 29,119 | 6 | 7 | 79  | 45 | 7  | 1 | 48 | 44 | 140 | 97  |
| 29,120 | 6 | 7 | 79  | 45 | 8  | 1 | 49 | 44 | 142 | 97  |
| 29,121 | 6 | 7 | 82  | 45 | 8  | 1 | 51 | 44 | 147 | 97  |
| 29,122 | 7 | 7 | 83  | 43 | 8  | 1 | 51 | 44 | 149 | 95  |
| 29,123 | 6 | 7 | 82  | 43 | 8  | 1 | 49 | 44 | 145 | 95  |
| 29,124 | 6 | 8 | 82  | 43 | 8  | 1 | 48 | 44 | 144 | 96  |
| 29,125 | 6 | 8 | 82  | 43 | 8  | 1 | 47 | 45 | 143 | 97  |
| 29,126 | 6 | 8 | 90  | 43 | 8  | 1 | 51 | 45 | 155 | 97  |
| 29,127 | 6 | 8 | 129 | 44 | 12 | 1 | 72 | 45 | 219 | 98  |
| 29,128 | 7 | 8 | 133 | 44 | 12 | 1 | 75 | 45 | 227 | 98  |
| 29,129 | 7 | 8 | 135 | 42 | 11 | 1 | 74 | 45 | 227 | 96  |
| 29,130 | 6 | 8 | 94  | 40 | 9  | 1 | 55 | 45 | 164 | 94  |
| 29,131 | 6 | 8 | 90  | 40 | 5  | 1 | 52 | 44 | 153 | 93  |
| 29,132 | 5 | 8 | 86  | 40 | 5  | 1 | 49 | 44 | 145 | 93  |
| 29,133 | 5 | 7 | 83  | 38 | 5  | 1 | 48 | 44 | 141 | 90  |
| 29,134 | 5 | 7 | 82  | 40 | 5  | 1 | 48 | 43 | 140 | 91  |
| 29,135 | 6 | 7 | 92  | 41 | 5  | 1 | 49 | 43 | 152 | 92  |
| 29,136 | 6 | 7 | 93  | 41 | 6  | 1 | 51 | 43 | 156 | 92  |
| 29,137 | 6 | 7 | 96  | 43 | 6  | 1 | 51 | 43 | 159 | 94  |
| 29,138 | 6 | 7 | 91  | 43 | 6  | 1 | 50 | 43 | 153 | 94  |
| 29,139 | 6 | 7 | 90  | 43 | 6  | 1 | 50 | 43 | 152 | 94  |

|        |    |   |     |    |    |   |     |    |     |    |
|--------|----|---|-----|----|----|---|-----|----|-----|----|
| 29,140 | 12 | 7 | 132 | 42 | 8  | 1 | 65  | 42 | 217 | 92 |
| 29,141 | 19 | 7 | 157 | 41 | 12 | 1 | 97  | 41 | 285 | 90 |
| 29,142 | 22 | 7 | 184 | 41 | 15 | 1 | 113 | 41 | 334 | 90 |
| 29,143 | 48 | 7 | 303 | 40 | 24 | 1 | 186 | 41 | 561 | 89 |
| 29,144 | 48 | 7 | 311 | 41 | 26 | 1 | 192 | 41 | 577 | 90 |
| 29,145 | 49 | 7 | 319 | 40 | 26 | 1 | 200 | 41 | 594 | 89 |
| 29,146 | 49 | 7 | 318 | 40 | 26 | 1 | 200 | 41 | 593 | 89 |
| 29,147 | 49 | 7 | 318 | 40 | 26 | 1 | 200 | 41 | 593 | 89 |
| 29,148 | 49 | 7 | 319 | 40 | 26 | 1 | 200 | 41 | 594 | 89 |
| 29,149 | 49 | 7 | 319 | 41 | 26 | 1 | 200 | 41 | 594 | 90 |
| 29,150 | 49 | 7 | 315 | 41 | 26 | 1 | 200 | 40 | 590 | 89 |
| 29,151 | 49 | 7 | 315 | 41 | 26 | 1 | 200 | 40 | 590 | 89 |
| 29,152 | 49 | 7 | 316 | 41 | 26 | 1 | 199 | 38 | 590 | 87 |
| 29,153 | 49 | 7 | 316 | 35 | 26 | 1 | 199 | 29 | 590 | 72 |
| 29,154 | 49 | 7 | 315 | 34 | 26 | 1 | 199 | 29 | 589 | 71 |
| 29,155 | 49 | 7 | 315 | 34 | 26 | 1 | 199 | 29 | 589 | 71 |
| 29,156 | 49 | 2 | 315 | 19 | 26 | 1 | 199 | 6  | 589 | 28 |
| 29,157 | 49 | 3 | 315 | 19 | 26 | 2 | 199 | 6  | 589 | 30 |
| 29,158 | 49 | 3 | 319 | 24 | 26 | 2 | 200 | 12 | 594 | 41 |
| 29,159 | 49 | 3 | 319 | 31 | 26 | 3 | 200 | 13 | 594 | 50 |
| 29,160 | 49 | 3 | 319 | 34 | 26 | 3 | 199 | 16 | 593 | 56 |
| 29,161 | 49 | 3 | 314 | 29 | 26 | 3 | 196 | 15 | 585 | 50 |
| 29,162 | 49 | 3 | 314 | 29 | 26 | 3 | 196 | 15 | 585 | 50 |
| 29,163 | 49 | 3 | 318 | 29 | 26 | 3 | 195 | 15 | 588 | 50 |
| 29,164 | 49 | 3 | 318 | 28 | 26 | 3 | 195 | 15 | 588 | 49 |
| 29,165 | 49 | 3 | 318 | 28 | 26 | 3 | 195 | 15 | 588 | 49 |
| 29,166 | 49 | 3 | 318 | 30 | 26 | 3 | 196 | 17 | 589 | 53 |
| 29,167 | 49 | 3 | 326 | 30 | 26 | 3 | 198 | 17 | 599 | 53 |
| 29,168 | 53 | 3 | 339 | 29 | 26 | 3 | 222 | 17 | 640 | 52 |
| 29,169 | 60 | 3 | 368 | 29 | 27 | 3 | 257 | 17 | 712 | 52 |
| 29,170 | 59 | 3 | 370 | 29 | 26 | 3 | 256 | 17 | 711 | 52 |
| 29,171 | 59 | 3 | 368 | 29 | 26 | 3 | 254 | 17 | 707 | 52 |
| 29,172 | 59 | 3 | 368 | 29 | 26 | 3 | 254 | 17 | 707 | 52 |
| 29,173 | 59 | 3 | 370 | 30 | 26 | 3 | 253 | 20 | 708 | 56 |
| 29,174 | 59 | 3 | 370 | 31 | 26 | 3 | 252 | 26 | 707 | 63 |
| 29,175 | 61 | 2 | 382 | 38 | 27 | 4 | 258 | 36 | 728 | 80 |
| 29,176 | 61 | 2 | 382 | 38 | 27 | 4 | 259 | 35 | 729 | 79 |
| 29,177 | 61 | 2 | 374 | 40 | 27 | 4 | 253 | 39 | 715 | 85 |
| 29,178 | 59 | 3 | 334 | 43 | 23 | 4 | 229 | 43 | 645 | 93 |
| 29,179 | 58 | 3 | 326 | 43 | 23 | 4 | 226 | 43 | 633 | 93 |
| 29,180 | 58 | 3 | 325 | 44 | 23 | 4 | 224 | 43 | 630 | 94 |



|        |    |    |     |    |    |    |     |    |     |     |
|--------|----|----|-----|----|----|----|-----|----|-----|-----|
| 29,181 | 58 | 3  | 325 | 44 | 23 | 4  | 223 | 42 | 629 | 93  |
| 29,182 | 58 | 3  | 328 | 47 | 23 | 4  | 223 | 44 | 632 | 98  |
| 29,183 | 58 | 3  | 328 | 47 | 23 | 4  | 223 | 46 | 632 | 100 |
| 29,184 | 58 | 3  | 328 | 47 | 23 | 4  | 223 | 46 | 632 | 100 |
| 29,185 | 58 | 3  | 328 | 45 | 23 | 4  | 224 | 46 | 633 | 98  |
| 29,186 | 57 | 3  | 318 | 42 | 23 | 4  | 223 | 46 | 621 | 95  |
| 29,187 | 57 | 3  | 317 | 40 | 22 | 4  | 221 | 47 | 617 | 94  |
| 29,188 | 57 | 3  | 314 | 41 | 22 | 4  | 221 | 47 | 614 | 95  |
| 29,189 | 54 | 3  | 292 | 43 | 20 | 5  | 208 | 51 | 574 | 102 |
| 29,190 | 52 | 7  | 272 | 81 | 20 | 14 | 206 | 91 | 550 | 193 |
| 29,191 | 45 | 7  | 247 | 81 | 16 | 14 | 174 | 94 | 482 | 196 |
| 29,192 | 45 | 9  | 242 | 83 | 16 | 14 | 170 | 94 | 473 | 200 |
| 29,193 | 42 | 9  | 221 | 83 | 13 | 14 | 159 | 95 | 435 | 201 |
| 29,194 | 16 | 9  | 101 | 82 | 4  | 14 | 87  | 95 | 208 | 200 |
| 29,195 | 16 | 9  | 93  | 82 | 2  | 14 | 81  | 95 | 192 | 200 |
| 29,196 | 15 | 9  | 85  | 82 | 2  | 14 | 74  | 95 | 176 | 200 |
| 29,197 | 15 | 10 | 85  | 82 | 2  | 14 | 74  | 96 | 176 | 202 |
| 29,198 | 15 | 10 | 86  | 83 | 2  | 14 | 74  | 96 | 177 | 203 |
| 29,199 | 15 | 10 | 85  | 83 | 2  | 14 | 74  | 96 | 176 | 203 |
| 29,200 | 16 | 10 | 86  | 82 | 2  | 14 | 75  | 96 | 179 | 202 |
| 29,201 | 16 | 10 | 86  | 82 | 2  | 14 | 75  | 96 | 179 | 202 |
| 29,202 | 16 | 10 | 85  | 82 | 2  | 14 | 75  | 96 | 178 | 202 |
| 29,203 | 16 | 10 | 85  | 82 | 2  | 14 | 75  | 96 | 178 | 202 |
| 29,204 | 16 | 10 | 85  | 82 | 2  | 14 | 75  | 96 | 178 | 202 |
| 29,205 | 16 | 10 | 85  | 82 | 2  | 14 | 75  | 96 | 178 | 202 |
| 29,206 | 17 | 10 | 85  | 80 | 2  | 13 | 75  | 96 | 179 | 199 |
| 29,207 | 17 | 10 | 85  | 80 | 2  | 13 | 75  | 96 | 179 | 199 |
| 29,208 | 17 | 9  | 81  | 75 | 2  | 12 | 74  | 90 | 174 | 186 |
| 29,209 | 17 | 9  | 81  | 75 | 2  | 12 | 74  | 90 | 174 | 186 |
| 29,210 | 17 | 8  | 86  | 65 | 2  | 11 | 75  | 85 | 180 | 169 |
| 29,211 | 17 | 8  | 88  | 65 | 2  | 11 | 75  | 84 | 182 | 168 |
| 29,212 | 17 | 8  | 88  | 65 | 2  | 12 | 75  | 84 | 182 | 169 |
| 29,213 | 17 | 8  | 92  | 65 | 2  | 12 | 76  | 84 | 187 | 169 |
| 29,214 | 17 | 8  | 92  | 66 | 2  | 12 | 76  | 84 | 187 | 170 |
| 29,215 | 22 | 8  | 125 | 66 | 2  | 12 | 92  | 84 | 241 | 170 |
| 29,216 | 23 | 8  | 127 | 66 | 2  | 13 | 92  | 84 | 244 | 171 |
| 29,217 | 23 | 8  | 120 | 64 | 2  | 13 | 92  | 84 | 237 | 169 |
| 29,218 | 23 | 8  | 114 | 65 | 2  | 13 | 88  | 86 | 227 | 172 |
| 29,219 | 23 | 8  | 115 | 65 | 3  | 13 | 76  | 86 | 217 | 172 |
| 29,220 | 15 | 8  | 86  | 66 | 3  | 13 | 41  | 87 | 145 | 174 |
| 29,221 | 15 | 8  | 84  | 66 | 3  | 13 | 41  | 88 | 143 | 175 |

|        |    |   |     |    |   |    |     |    |     |     |
|--------|----|---|-----|----|---|----|-----|----|-----|-----|
| 29,222 | 15 | 8 | 91  | 67 | 3 | 13 | 46  | 88 | 155 | 176 |
| 29,223 | 16 | 8 | 93  | 73 | 3 | 13 | 48  | 88 | 160 | 182 |
| 29,224 | 15 | 8 | 90  | 72 | 3 | 13 | 48  | 85 | 156 | 178 |
| 29,225 | 14 | 8 | 84  | 71 | 3 | 13 | 46  | 79 | 147 | 171 |
| 29,226 | 14 | 8 | 82  | 64 | 2 | 12 | 42  | 69 | 140 | 153 |
| 29,227 | 14 | 8 | 82  | 66 | 2 | 12 | 41  | 75 | 139 | 161 |
| 29,228 | 14 | 8 | 82  | 65 | 2 | 12 | 41  | 71 | 139 | 156 |
| 29,229 | 14 | 7 | 92  | 61 | 2 | 12 | 42  | 67 | 150 | 147 |
| 29,230 | 16 | 7 | 100 | 61 | 2 | 12 | 48  | 67 | 166 | 147 |
| 29,231 | 16 | 7 | 101 | 60 | 2 | 12 | 48  | 67 | 167 | 146 |
| 29,232 | 17 | 7 | 100 | 63 | 3 | 12 | 50  | 67 | 170 | 149 |
| 29,233 | 17 | 7 | 100 | 60 | 3 | 12 | 50  | 65 | 170 | 144 |
| 29,234 | 17 | 7 | 103 | 60 | 3 | 12 | 55  | 63 | 178 | 142 |
| 29,235 | 18 | 6 | 107 | 60 | 3 | 12 | 56  | 63 | 184 | 141 |
| 29,236 | 18 | 6 | 116 | 60 | 3 | 12 | 59  | 63 | 196 | 141 |
| 29,237 | 27 | 6 | 143 | 60 | 4 | 12 | 87  | 62 | 261 | 140 |
| 29,238 | 27 | 6 | 143 | 60 | 4 | 12 | 87  | 62 | 261 | 140 |
| 29,239 | 28 | 6 | 150 | 59 | 4 | 12 | 99  | 62 | 281 | 139 |
| 29,240 | 28 | 6 | 150 | 57 | 4 | 11 | 99  | 58 | 281 | 132 |
| 29,241 | 27 | 3 | 152 | 19 | 4 | 2  | 101 | 18 | 284 | 42  |
| 29,242 | 27 | 1 | 162 | 17 | 4 | 2  | 106 | 17 | 299 | 37  |
| 29,243 | 27 | 1 | 162 | 17 | 4 | 2  | 106 | 17 | 299 | 37  |
| 29,244 | 27 | 1 | 161 | 19 | 4 | 3  | 105 | 19 | 297 | 42  |
| 29,245 | 27 | 1 | 161 | 19 | 4 | 3  | 104 | 19 | 296 | 42  |
| 29,246 | 27 | 1 | 161 | 22 | 4 | 3  | 103 | 20 | 295 | 46  |
| 29,247 | 27 | 1 | 161 | 22 | 4 | 3  | 103 | 20 | 295 | 46  |
| 29,248 | 27 | 0 | 161 | 21 | 4 | 3  | 103 | 19 | 295 | 43  |
| 29,249 | 27 | 2 | 161 | 24 | 4 | 3  | 103 | 19 | 295 | 48  |
| 29,250 | 27 | 2 | 161 | 24 | 4 | 3  | 102 | 19 | 294 | 48  |
| 29,251 | 26 | 2 | 160 | 24 | 4 | 3  | 102 | 19 | 292 | 48  |
| 29,252 | 26 | 2 | 160 | 24 | 4 | 3  | 102 | 19 | 292 | 48  |
| 29,253 | 26 | 2 | 160 | 24 | 4 | 3  | 102 | 19 | 292 | 48  |
| 29,254 | 26 | 2 | 160 | 24 | 4 | 3  | 102 | 19 | 292 | 48  |
| 29,255 | 26 | 2 | 160 | 24 | 4 | 3  | 102 | 19 | 292 | 48  |
| 29,256 | 26 | 2 | 160 | 24 | 4 | 3  | 103 | 19 | 293 | 48  |
| 29,257 | 25 | 2 | 160 | 24 | 4 | 3  | 103 | 19 | 292 | 48  |
| 29,258 | 25 | 2 | 160 | 24 | 4 | 3  | 103 | 19 | 292 | 48  |
| 29,259 | 25 | 2 | 160 | 24 | 4 | 3  | 103 | 19 | 292 | 48  |
| 29,260 | 25 | 2 | 160 | 24 | 4 | 3  | 103 | 19 | 292 | 48  |
| 29,261 | 25 | 2 | 156 | 24 | 4 | 3  | 103 | 19 | 288 | 48  |
| 29,262 | 25 | 2 | 154 | 24 | 4 | 3  | 103 | 19 | 286 | 48  |

|        |    |   |     |    |    |   |     |    |     |    |
|--------|----|---|-----|----|----|---|-----|----|-----|----|
| 29,263 | 25 | 2 | 146 | 23 | 4  | 2 | 104 | 19 | 279 | 46 |
| 29,264 | 25 | 2 | 147 | 23 | 4  | 2 | 104 | 19 | 280 | 46 |
| 29,265 | 22 | 2 | 143 | 23 | 4  | 2 | 99  | 19 | 268 | 46 |
| 29,266 | 20 | 2 | 114 | 23 | 4  | 2 | 88  | 19 | 226 | 46 |
| 29,267 | 19 | 2 | 114 | 23 | 4  | 2 | 87  | 19 | 224 | 46 |
| 29,268 | 19 | 2 | 113 | 24 | 4  | 2 | 86  | 15 | 222 | 43 |
| 29,269 | 19 | 2 | 110 | 25 | 4  | 2 | 84  | 15 | 217 | 44 |
| 29,270 | 15 | 2 | 104 | 26 | 3  | 2 | 78  | 15 | 200 | 45 |
| 29,271 | 15 | 2 | 106 | 25 | 2  | 2 | 82  | 15 | 205 | 44 |
| 29,272 | 15 | 2 | 114 | 25 | 2  | 2 | 82  | 14 | 213 | 43 |
| 29,273 | 15 | 2 | 109 | 25 | 2  | 2 | 78  | 17 | 204 | 46 |
| 29,274 | 14 | 2 | 107 | 19 | 2  | 2 | 76  | 17 | 199 | 40 |
| 29,275 | 15 | 2 | 119 | 19 | 2  | 2 | 84  | 17 | 220 | 40 |
| 29,276 | 15 | 2 | 118 | 19 | 2  | 2 | 84  | 17 | 219 | 40 |
| 29,277 | 15 | 2 | 110 | 19 | 2  | 3 | 83  | 18 | 210 | 42 |
| 29,278 | 17 | 2 | 115 | 18 | 5  | 3 | 87  | 12 | 224 | 35 |
| 29,279 | 17 | 2 | 114 | 17 | 5  | 3 | 87  | 12 | 223 | 34 |
| 29,280 | 18 | 2 | 130 | 17 | 10 | 3 | 92  | 12 | 250 | 34 |
| 29,281 | 18 | 2 | 134 | 17 | 10 | 3 | 94  | 12 | 256 | 34 |
| 29,282 | 18 | 2 | 137 | 17 | 10 | 3 | 98  | 12 | 263 | 34 |
| 29,283 | 18 | 2 | 179 | 14 | 11 | 3 | 127 | 12 | 335 | 31 |
| 29,284 | 19 | 2 | 177 | 14 | 11 | 3 | 130 | 13 | 337 | 32 |
| 29,285 | 28 | 2 | 205 | 14 | 12 | 3 | 169 | 13 | 414 | 32 |
| 29,286 | 29 | 5 | 204 | 16 | 12 | 3 | 168 | 14 | 413 | 38 |
| 29,287 | 29 | 5 | 198 | 17 | 12 | 3 | 167 | 16 | 406 | 41 |
| 29,288 | 21 | 5 | 171 | 17 | 11 | 3 | 139 | 16 | 342 | 41 |
| 29,289 | 21 | 5 | 168 | 20 | 11 | 6 | 137 | 19 | 337 | 50 |
| 29,290 | 20 | 8 | 163 | 22 | 11 | 6 | 128 | 22 | 322 | 58 |
| 29,291 | 20 | 8 | 161 | 24 | 11 | 6 | 126 | 23 | 318 | 61 |
| 29,292 | 20 | 8 | 157 | 24 | 11 | 6 | 126 | 23 | 314 | 61 |
| 29,293 | 20 | 8 | 151 | 24 | 11 | 6 | 123 | 21 | 305 | 59 |
| 29,294 | 20 | 8 | 151 | 24 | 11 | 6 | 127 | 21 | 309 | 59 |
| 29,295 | 20 | 8 | 152 | 22 | 11 | 5 | 127 | 18 | 310 | 53 |
| 29,296 | 20 | 8 | 152 | 19 | 11 | 5 | 128 | 17 | 311 | 49 |
| 29,297 | 20 | 8 | 152 | 19 | 11 | 5 | 128 | 17 | 311 | 49 |
| 29,298 | 20 | 8 | 152 | 19 | 11 | 5 | 128 | 17 | 311 | 49 |
| 29,299 | 20 | 6 | 152 | 16 | 11 | 5 | 128 | 17 | 311 | 44 |
| 29,300 | 20 | 6 | 152 | 16 | 11 | 5 | 128 | 17 | 311 | 44 |
| 29,301 | 20 | 6 | 152 | 16 | 11 | 5 | 128 | 17 | 311 | 44 |
| 29,302 | 20 | 6 | 152 | 16 | 11 | 5 | 128 | 17 | 311 | 44 |
| 29,303 | 20 | 6 | 154 | 16 | 11 | 5 | 130 | 18 | 315 | 45 |

|        |    |   |     |    |    |   |     |    |     |    |
|--------|----|---|-----|----|----|---|-----|----|-----|----|
| 29,304 | 20 | 6 | 154 | 16 | 11 | 5 | 130 | 18 | 315 | 45 |
| 29,305 | 20 | 6 | 155 | 16 | 11 | 5 | 130 | 18 | 316 | 45 |
| 29,306 | 20 | 6 | 155 | 16 | 11 | 5 | 129 | 18 | 315 | 45 |
| 29,307 | 20 | 6 | 155 | 16 | 11 | 5 | 129 | 18 | 315 | 45 |
| 29,308 | 21 | 6 | 157 | 16 | 11 | 5 | 129 | 18 | 318 | 45 |
| 29,309 | 21 | 6 | 157 | 16 | 11 | 5 | 129 | 18 | 318 | 45 |
| 29,310 | 21 | 6 | 157 | 16 | 11 | 6 | 130 | 18 | 319 | 46 |
| 29,311 | 21 | 6 | 158 | 15 | 11 | 6 | 132 | 18 | 322 | 45 |
| 29,312 | 21 | 6 | 159 | 16 | 11 | 6 | 134 | 18 | 325 | 46 |
| 29,313 | 21 | 8 | 159 | 16 | 11 | 6 | 134 | 19 | 325 | 49 |
| 29,314 | 21 | 8 | 162 | 16 | 11 | 6 | 132 | 19 | 326 | 49 |
| 29,315 | 21 | 8 | 161 | 16 | 11 | 6 | 132 | 19 | 325 | 49 |
| 29,316 | 21 | 8 | 161 | 16 | 11 | 6 | 132 | 19 | 325 | 49 |
| 29,317 | 21 | 8 | 161 | 16 | 11 | 6 | 132 | 19 | 325 | 49 |
| 29,318 | 21 | 8 | 159 | 14 | 11 | 5 | 132 | 18 | 323 | 45 |
| 29,319 | 21 | 8 | 159 | 15 | 11 | 5 | 131 | 18 | 322 | 46 |
| 29,320 | 21 | 8 | 159 | 16 | 11 | 5 | 129 | 23 | 320 | 52 |
| 29,321 | 21 | 8 | 158 | 17 | 11 | 5 | 127 | 23 | 317 | 53 |
| 29,322 | 21 | 8 | 158 | 19 | 11 | 5 | 127 | 29 | 317 | 61 |
| 29,323 | 21 | 8 | 147 | 18 | 11 | 5 | 126 | 26 | 305 | 57 |
| 29,324 | 21 | 8 | 149 | 20 | 11 | 5 | 126 | 29 | 307 | 62 |
| 29,325 | 20 | 8 | 136 | 20 | 11 | 5 | 119 | 29 | 286 | 62 |
| 29,326 | 20 | 8 | 134 | 20 | 11 | 5 | 118 | 29 | 283 | 62 |
| 29,327 | 18 | 8 | 128 | 20 | 8  | 4 | 114 | 28 | 268 | 60 |
| 29,328 | 18 | 8 | 126 | 19 | 7  | 4 | 114 | 29 | 265 | 60 |
| 29,329 | 18 | 8 | 121 | 20 | 7  | 4 | 114 | 29 | 260 | 61 |
| 29,330 | 18 | 8 | 120 | 20 | 7  | 5 | 113 | 29 | 258 | 62 |
| 29,331 | 16 | 8 | 104 | 20 | 3  | 5 | 105 | 30 | 228 | 63 |
| 29,332 | 16 | 9 | 100 | 21 | 3  | 6 | 100 | 32 | 219 | 68 |
| 29,333 | 17 | 9 | 99  | 22 | 3  | 6 | 97  | 32 | 216 | 69 |
| 29,334 | 16 | 9 | 56  | 22 | 1  | 6 | 66  | 31 | 139 | 68 |
| 29,335 | 15 | 9 | 55  | 22 | 1  | 6 | 60  | 31 | 131 | 68 |
| 29,336 | 5  | 9 | 23  | 22 | 0  | 6 | 19  | 31 | 47  | 68 |
| 29,337 | 4  | 6 | 21  | 19 | 0  | 6 | 18  | 28 | 43  | 59 |
| 29,338 | 13 | 6 | 40  | 19 | 1  | 6 | 24  | 28 | 78  | 59 |
| 29,339 | 12 | 6 | 41  | 16 | 4  | 3 | 26  | 25 | 83  | 50 |
| 29,340 | 12 | 6 | 41  | 16 | 4  | 3 | 25  | 25 | 82  | 50 |
| 29,341 | 12 | 3 | 47  | 12 | 4  | 4 | 28  | 21 | 91  | 40 |
| 29,342 | 12 | 3 | 48  | 12 | 4  | 4 | 28  | 21 | 92  | 40 |
| 29,343 | 12 | 3 | 48  | 13 | 4  | 5 | 28  | 21 | 92  | 42 |
| 29,344 | 12 | 3 | 48  | 13 | 4  | 5 | 24  | 21 | 88  | 42 |

|        |    |   |     |    |    |   |    |    |     |    |
|--------|----|---|-----|----|----|---|----|----|-----|----|
| 29,345 | 12 | 3 | 47  | 13 | 4  | 5 | 24 | 21 | 87  | 42 |
| 29,346 | 12 | 3 | 47  | 13 | 4  | 5 | 24 | 21 | 87  | 42 |
| 29,347 | 12 | 3 | 47  | 13 | 4  | 5 | 23 | 21 | 86  | 42 |
| 29,348 | 12 | 3 | 48  | 15 | 4  | 5 | 23 | 21 | 87  | 44 |
| 29,349 | 14 | 3 | 51  | 16 | 4  | 5 | 23 | 21 | 92  | 45 |
| 29,350 | 14 | 3 | 51  | 16 | 4  | 5 | 23 | 21 | 92  | 45 |
| 29,351 | 14 | 3 | 50  | 17 | 4  | 5 | 22 | 21 | 90  | 46 |
| 29,352 | 14 | 3 | 50  | 17 | 4  | 5 | 22 | 21 | 90  | 46 |
| 29,353 | 14 | 3 | 50  | 17 | 4  | 5 | 22 | 21 | 90  | 46 |
| 29,354 | 14 | 3 | 50  | 17 | 4  | 5 | 21 | 20 | 89  | 45 |
| 29,355 | 14 | 3 | 52  | 17 | 4  | 5 | 24 | 20 | 94  | 45 |
| 29,356 | 14 | 3 | 52  | 17 | 4  | 5 | 24 | 20 | 94  | 45 |
| 29,357 | 14 | 3 | 52  | 17 | 4  | 5 | 24 | 20 | 94  | 45 |
| 29,358 | 14 | 3 | 53  | 18 | 4  | 5 | 26 | 20 | 97  | 46 |
| 29,359 | 13 | 3 | 51  | 18 | 5  | 5 | 27 | 20 | 96  | 46 |
| 29,360 | 13 | 3 | 53  | 18 | 5  | 4 | 26 | 20 | 97  | 45 |
| 29,361 | 14 | 1 | 52  | 19 | 6  | 4 | 26 | 22 | 98  | 46 |
| 29,362 | 15 | 1 | 55  | 19 | 7  | 5 | 29 | 22 | 106 | 47 |
| 29,363 | 15 | 1 | 57  | 20 | 7  | 5 | 35 | 22 | 114 | 48 |
| 29,364 | 15 | 1 | 55  | 20 | 7  | 5 | 35 | 22 | 112 | 48 |
| 29,365 | 18 | 1 | 77  | 20 | 8  | 5 | 47 | 22 | 150 | 48 |
| 29,366 | 18 | 1 | 77  | 20 | 8  | 5 | 47 | 22 | 150 | 48 |
| 29,367 | 17 | 1 | 77  | 20 | 8  | 5 | 47 | 22 | 149 | 48 |
| 29,368 | 17 | 1 | 77  | 20 | 8  | 5 | 48 | 22 | 150 | 48 |
| 29,369 | 18 | 1 | 77  | 20 | 8  | 5 | 48 | 22 | 151 | 48 |
| 29,370 | 18 | 1 | 77  | 17 | 8  | 5 | 50 | 17 | 153 | 40 |
| 29,371 | 18 | 1 | 79  | 15 | 8  | 5 | 51 | 17 | 156 | 38 |
| 29,372 | 18 | 1 | 78  | 13 | 8  | 5 | 51 | 10 | 155 | 29 |
| 29,373 | 18 | 1 | 78  | 13 | 8  | 5 | 51 | 10 | 155 | 29 |
| 29,374 | 19 | 1 | 79  | 13 | 8  | 5 | 51 | 10 | 157 | 29 |
| 29,375 | 20 | 1 | 80  | 11 | 8  | 5 | 52 | 7  | 160 | 24 |
| 29,376 | 25 | 1 | 92  | 11 | 8  | 5 | 60 | 7  | 185 | 24 |
| 29,377 | 25 | 1 | 95  | 11 | 8  | 5 | 61 | 7  | 189 | 24 |
| 29,378 | 25 | 1 | 95  | 11 | 8  | 5 | 61 | 7  | 189 | 24 |
| 29,379 | 25 | 1 | 95  | 11 | 8  | 5 | 61 | 6  | 189 | 23 |
| 29,380 | 26 | 1 | 101 | 10 | 8  | 4 | 65 | 6  | 200 | 21 |
| 29,381 | 26 | 1 | 108 | 10 | 9  | 4 | 67 | 5  | 210 | 20 |
| 29,382 | 26 | 0 | 113 | 8  | 9  | 3 | 68 | 3  | 216 | 14 |
| 29,383 | 28 | 0 | 129 | 9  | 9  | 3 | 72 | 3  | 238 | 15 |
| 29,384 | 26 | 1 | 139 | 9  | 10 | 3 | 76 | 3  | 251 | 16 |
| 29,385 | 26 | 1 | 138 | 10 | 10 | 3 | 76 | 3  | 250 | 17 |

|        |    |   |     |    |    |   |     |    |     |    |
|--------|----|---|-----|----|----|---|-----|----|-----|----|
| 29,386 | 29 | 1 | 157 | 10 | 10 | 3 | 79  | 3  | 275 | 17 |
| 29,387 | 29 | 1 | 157 | 10 | 10 | 3 | 79  | 3  | 275 | 17 |
| 29,388 | 29 | 1 | 158 | 19 | 10 | 4 | 79  | 11 | 276 | 35 |
| 29,389 | 20 | 1 | 152 | 22 | 12 | 4 | 99  | 14 | 283 | 41 |
| 29,390 | 20 | 1 | 152 | 29 | 9  | 5 | 98  | 17 | 279 | 52 |
| 29,391 | 20 | 3 | 148 | 34 | 9  | 5 | 98  | 17 | 275 | 59 |
| 29,392 | 20 | 3 | 146 | 35 | 9  | 4 | 94  | 17 | 269 | 59 |
| 29,393 | 20 | 3 | 147 | 35 | 9  | 4 | 94  | 17 | 270 | 59 |
| 29,394 | 21 | 3 | 149 | 34 | 9  | 3 | 94  | 17 | 273 | 57 |
| 29,395 | 22 | 3 | 152 | 34 | 9  | 3 | 94  | 17 | 277 | 57 |
| 29,396 | 22 | 3 | 152 | 34 | 9  | 4 | 94  | 17 | 277 | 58 |
| 29,397 | 22 | 3 | 153 | 34 | 9  | 4 | 96  | 17 | 280 | 58 |
| 29,398 | 22 | 3 | 153 | 34 | 9  | 4 | 96  | 17 | 280 | 58 |
| 29,399 | 22 | 3 | 152 | 33 | 9  | 4 | 96  | 17 | 279 | 57 |
| 29,400 | 20 | 3 | 149 | 32 | 9  | 5 | 96  | 17 | 274 | 57 |
| 29,401 | 20 | 3 | 151 | 31 | 9  | 5 | 98  | 17 | 278 | 56 |
| 29,402 | 20 | 3 | 151 | 31 | 9  | 5 | 98  | 17 | 278 | 56 |
| 29,403 | 21 | 3 | 150 | 32 | 9  | 5 | 100 | 18 | 280 | 58 |
| 29,404 | 21 | 4 | 151 | 32 | 9  | 5 | 100 | 18 | 281 | 59 |
| 29,405 | 21 | 4 | 149 | 32 | 9  | 5 | 98  | 18 | 277 | 59 |
| 29,406 | 21 | 4 | 149 | 31 | 9  | 5 | 97  | 18 | 276 | 58 |
| 29,407 | 21 | 4 | 149 | 31 | 9  | 5 | 97  | 18 | 276 | 58 |
| 29,408 | 21 | 4 | 148 | 31 | 9  | 5 | 95  | 18 | 273 | 58 |
| 29,409 | 21 | 4 | 148 | 31 | 9  | 6 | 95  | 18 | 273 | 59 |
| 29,410 | 21 | 4 | 149 | 31 | 8  | 6 | 94  | 19 | 272 | 60 |
| 29,411 | 21 | 4 | 150 | 31 | 8  | 6 | 95  | 19 | 274 | 60 |
| 29,412 | 20 | 4 | 157 | 30 | 7  | 6 | 95  | 16 | 279 | 56 |
| 29,413 | 19 | 4 | 154 | 30 | 6  | 5 | 94  | 17 | 273 | 56 |
| 29,414 | 19 | 4 | 150 | 29 | 6  | 5 | 85  | 17 | 260 | 55 |
| 29,415 | 17 | 4 | 133 | 30 | 5  | 5 | 80  | 17 | 235 | 56 |
| 29,416 | 19 | 4 | 134 | 30 | 5  | 5 | 76  | 17 | 234 | 56 |
| 29,417 | 20 | 4 | 138 | 30 | 5  | 5 | 76  | 17 | 239 | 56 |
| 29,418 | 22 | 4 | 175 | 30 | 7  | 5 | 98  | 17 | 302 | 56 |
| 29,419 | 22 | 4 | 179 | 30 | 7  | 5 | 99  | 17 | 307 | 56 |
| 29,420 | 24 | 4 | 204 | 30 | 12 | 5 | 144 | 17 | 384 | 56 |
| 29,421 | 24 | 4 | 204 | 30 | 12 | 5 | 143 | 18 | 383 | 57 |
| 29,422 | 30 | 4 | 237 | 30 | 18 | 5 | 190 | 18 | 475 | 57 |
| 29,423 | 32 | 4 | 246 | 30 | 18 | 5 | 192 | 18 | 488 | 57 |
| 29,424 | 31 | 4 | 246 | 31 | 18 | 5 | 192 | 18 | 487 | 58 |
| 29,425 | 34 | 4 | 262 | 31 | 18 | 5 | 206 | 18 | 520 | 58 |
| 29,426 | 30 | 4 | 261 | 32 | 18 | 5 | 210 | 18 | 519 | 59 |

|        |    |   |     |    |    |   |     |    |     |    |
|--------|----|---|-----|----|----|---|-----|----|-----|----|
| 29,427 | 29 | 4 | 255 | 32 | 18 | 5 | 203 | 18 | 505 | 59 |
| 29,428 | 29 | 4 | 253 | 32 | 18 | 5 | 202 | 18 | 502 | 59 |
| 29,429 | 29 | 5 | 252 | 32 | 18 | 5 | 202 | 19 | 501 | 61 |
| 29,430 | 28 | 5 | 249 | 32 | 18 | 5 | 201 | 19 | 496 | 61 |
| 29,431 | 28 | 5 | 246 | 32 | 18 | 5 | 198 | 20 | 490 | 62 |
| 29,432 | 28 | 5 | 239 | 34 | 17 | 5 | 196 | 20 | 480 | 64 |
| 29,433 | 28 | 5 | 234 | 40 | 17 | 5 | 195 | 22 | 474 | 72 |
| 29,434 | 26 | 6 | 218 | 41 | 17 | 5 | 191 | 22 | 452 | 74 |
| 29,435 | 27 | 5 | 211 | 40 | 16 | 5 | 188 | 22 | 442 | 72 |
| 29,436 | 27 | 5 | 209 | 40 | 16 | 5 | 185 | 24 | 437 | 74 |
| 29,437 | 24 | 5 | 193 | 40 | 16 | 5 | 187 | 24 | 420 | 74 |
| 29,438 | 24 | 5 | 192 | 28 | 16 | 4 | 187 | 13 | 419 | 50 |
| 29,439 | 24 | 5 | 193 | 28 | 16 | 4 | 187 | 13 | 420 | 50 |
| 29,440 | 24 | 5 | 180 | 28 | 13 | 4 | 160 | 13 | 377 | 50 |
| 29,441 | 24 | 5 | 180 | 22 | 13 | 3 | 161 | 10 | 378 | 40 |
| 29,442 | 24 | 3 | 181 | 17 | 14 | 3 | 161 | 10 | 380 | 33 |
| 29,443 | 27 | 3 | 187 | 17 | 14 | 3 | 164 | 10 | 392 | 33 |
| 29,444 | 27 | 3 | 197 | 17 | 15 | 3 | 167 | 10 | 406 | 33 |
| 29,445 | 27 | 3 | 210 | 17 | 16 | 3 | 167 | 10 | 420 | 33 |
| 29,446 | 35 | 3 | 263 | 17 | 20 | 2 | 201 | 10 | 519 | 32 |
| 29,447 | 35 | 3 | 262 | 17 | 20 | 2 | 199 | 10 | 516 | 32 |
| 29,448 | 42 | 3 | 321 | 18 | 24 | 2 | 239 | 10 | 626 | 33 |
| 29,449 | 46 | 4 | 370 | 18 | 30 | 2 | 278 | 10 | 724 | 34 |
| 29,450 | 46 | 4 | 375 | 18 | 30 | 2 | 282 | 12 | 733 | 36 |
| 29,451 | 46 | 4 | 375 | 18 | 30 | 1 | 282 | 12 | 733 | 35 |
| 29,452 | 46 | 4 | 373 | 18 | 30 | 1 | 280 | 12 | 729 | 35 |
| 29,453 | 46 | 4 | 374 | 18 | 30 | 1 | 280 | 12 | 730 | 35 |
| 29,454 | 45 | 3 | 375 | 17 | 30 | 1 | 280 | 11 | 730 | 32 |
| 29,455 | 45 | 3 | 374 | 17 | 30 | 1 | 281 | 11 | 730 | 32 |
| 29,456 | 45 | 4 | 373 | 22 | 30 | 1 | 281 | 14 | 729 | 41 |
| 29,457 | 45 | 4 | 373 | 23 | 30 | 1 | 281 | 14 | 729 | 42 |
| 29,458 | 45 | 4 | 374 | 24 | 30 | 1 | 281 | 16 | 730 | 45 |
| 29,459 | 45 | 4 | 374 | 24 | 30 | 1 | 281 | 16 | 730 | 45 |
| 29,460 | 57 | 5 | 400 | 27 | 30 | 1 | 300 | 17 | 787 | 50 |
| 29,461 | 58 | 5 | 408 | 27 | 30 | 1 | 308 | 16 | 804 | 49 |
| 29,462 | 58 | 5 | 405 | 27 | 30 | 1 | 306 | 16 | 799 | 49 |
| 29,463 | 58 | 5 | 398 | 27 | 30 | 1 | 304 | 16 | 790 | 49 |
| 29,464 | 64 | 5 | 428 | 27 | 30 | 1 | 337 | 15 | 859 | 48 |
| 29,465 | 63 | 5 | 434 | 26 | 30 | 1 | 338 | 15 | 865 | 47 |
| 29,466 | 63 | 6 | 434 | 26 | 30 | 1 | 338 | 15 | 865 | 48 |
| 29,467 | 61 | 6 | 427 | 26 | 30 | 1 | 337 | 15 | 855 | 48 |

|        |    |   |     |    |    |   |     |    |     |    |
|--------|----|---|-----|----|----|---|-----|----|-----|----|
| 29,468 | 60 | 6 | 423 | 26 | 30 | 1 | 337 | 15 | 850 | 48 |
| 29,469 | 58 | 6 | 388 | 26 | 29 | 1 | 315 | 15 | 790 | 48 |
| 29,470 | 59 | 6 | 384 | 28 | 29 | 1 | 314 | 15 | 786 | 50 |
| 29,471 | 57 | 6 | 361 | 28 | 24 | 1 | 268 | 15 | 710 | 50 |
| 29,472 | 56 | 6 | 345 | 29 | 24 | 1 | 260 | 15 | 685 | 51 |
| 29,473 | 51 | 6 | 326 | 29 | 18 | 1 | 219 | 15 | 614 | 51 |
| 29,474 | 48 | 6 | 317 | 29 | 18 | 1 | 218 | 18 | 601 | 54 |
| 29,475 | 48 | 6 | 316 | 28 | 18 | 1 | 218 | 18 | 600 | 53 |
| 29,476 | 45 | 6 | 298 | 28 | 19 | 1 | 204 | 18 | 566 | 53 |
| 29,477 | 46 | 6 | 302 | 27 | 19 | 1 | 208 | 18 | 575 | 52 |
| 29,478 | 46 | 6 | 300 | 27 | 19 | 1 | 208 | 18 | 573 | 52 |
| 29,479 | 46 | 6 | 300 | 29 | 19 | 1 | 208 | 18 | 573 | 54 |
| 29,480 | 46 | 5 | 300 | 29 | 19 | 1 | 208 | 17 | 573 | 52 |
| 29,481 | 47 | 5 | 300 | 30 | 19 | 1 | 209 | 17 | 575 | 53 |
| 29,482 | 47 | 5 | 301 | 30 | 19 | 1 | 214 | 16 | 581 | 52 |
| 29,483 | 48 | 5 | 303 | 28 | 19 | 1 | 214 | 16 | 584 | 50 |
| 29,484 | 48 | 5 | 303 | 22 | 19 | 1 | 214 | 14 | 584 | 42 |
| 29,485 | 49 | 4 | 305 | 21 | 19 | 1 | 216 | 14 | 589 | 40 |
| 29,486 | 48 | 4 | 301 | 22 | 19 | 1 | 215 | 12 | 583 | 39 |
| 29,487 | 48 | 4 | 301 | 23 | 19 | 1 | 215 | 12 | 583 | 40 |
| 29,488 | 49 | 4 | 302 | 23 | 19 | 1 | 211 | 12 | 581 | 40 |
| 29,489 | 50 | 4 | 306 | 23 | 19 | 1 | 215 | 12 | 590 | 40 |
| 29,490 | 50 | 5 | 308 | 23 | 19 | 1 | 219 | 12 | 596 | 41 |
| 29,491 | 50 | 5 | 307 | 23 | 19 | 1 | 219 | 12 | 595 | 41 |
| 29,492 | 50 | 5 | 310 | 23 | 19 | 1 | 221 | 15 | 600 | 44 |
| 29,493 | 50 | 5 | 312 | 28 | 18 | 2 | 224 | 23 | 604 | 58 |
| 29,494 | 48 | 5 | 308 | 32 | 18 | 2 | 222 | 24 | 596 | 63 |
| 29,495 | 48 | 5 | 298 | 34 | 17 | 2 | 219 | 26 | 582 | 67 |
| 29,496 | 47 | 5 | 283 | 34 | 16 | 2 | 220 | 26 | 566 | 67 |
| 29,497 | 38 | 5 | 231 | 34 | 12 | 2 | 189 | 26 | 470 | 67 |
| 29,498 | 32 | 5 | 176 | 34 | 8  | 2 | 149 | 26 | 365 | 67 |
| 29,499 | 28 | 4 | 127 | 33 | 2  | 2 | 109 | 26 | 266 | 65 |
| 29,500 | 28 | 4 | 122 | 32 | 2  | 2 | 108 | 24 | 260 | 62 |
| 29,501 | 28 | 4 | 122 | 32 | 2  | 2 | 107 | 24 | 259 | 62 |
| 29,502 | 28 | 4 | 121 | 32 | 2  | 2 | 106 | 24 | 257 | 62 |
| 29,503 | 28 | 4 | 121 | 33 | 2  | 2 | 106 | 26 | 257 | 65 |
| 29,504 | 28 | 4 | 121 | 34 | 2  | 2 | 106 | 26 | 257 | 66 |
| 29,505 | 28 | 4 | 121 | 35 | 2  | 2 | 106 | 26 | 257 | 67 |
| 29,506 | 28 | 4 | 122 | 35 | 2  | 2 | 107 | 27 | 259 | 68 |
| 29,507 | 28 | 3 | 121 | 31 | 2  | 2 | 107 | 24 | 258 | 60 |
| 29,508 | 28 | 3 | 115 | 34 | 2  | 2 | 106 | 24 | 251 | 63 |



|        |    |   |     |    |    |   |     |    |     |    |
|--------|----|---|-----|----|----|---|-----|----|-----|----|
| 29,509 | 30 | 2 | 120 | 33 | 2  | 1 | 104 | 23 | 256 | 59 |
| 29,510 | 31 | 2 | 120 | 36 | 2  | 1 | 105 | 23 | 258 | 62 |
| 29,511 | 20 | 2 | 113 | 36 | 2  | 1 | 92  | 23 | 227 | 62 |
| 29,512 | 19 | 2 | 111 | 36 | 3  | 1 | 87  | 23 | 220 | 62 |
| 29,513 | 19 | 2 | 112 | 36 | 3  | 1 | 87  | 23 | 221 | 62 |
| 29,514 | 13 | 2 | 97  | 36 | 5  | 1 | 55  | 23 | 170 | 62 |
| 29,515 | 13 | 2 | 91  | 37 | 5  | 1 | 53  | 23 | 162 | 63 |
| 29,516 | 13 | 2 | 91  | 37 | 5  | 1 | 52  | 23 | 161 | 63 |
| 29,517 | 14 | 1 | 101 | 37 | 5  | 1 | 53  | 23 | 173 | 62 |
| 29,518 | 14 | 1 | 115 | 35 | 5  | 1 | 58  | 22 | 192 | 59 |
| 29,519 | 15 | 1 | 142 | 35 | 5  | 1 | 70  | 22 | 232 | 59 |
| 29,520 | 17 | 1 | 209 | 36 | 7  | 1 | 103 | 22 | 336 | 60 |
| 29,521 | 16 | 1 | 209 | 36 | 7  | 1 | 103 | 22 | 335 | 60 |
| 29,522 | 16 | 2 | 214 | 36 | 7  | 1 | 105 | 22 | 342 | 61 |
| 29,523 | 16 | 2 | 215 | 35 | 7  | 1 | 106 | 19 | 344 | 57 |
| 29,524 | 17 | 2 | 217 | 35 | 7  | 1 | 106 | 19 | 347 | 57 |
| 29,525 | 17 | 2 | 217 | 35 | 6  | 1 | 105 | 19 | 345 | 57 |
| 29,526 | 17 | 2 | 217 | 35 | 6  | 1 | 105 | 19 | 345 | 57 |
| 29,527 | 16 | 2 | 216 | 35 | 7  | 1 | 97  | 19 | 336 | 57 |
| 29,528 | 16 | 2 | 219 | 36 | 7  | 1 | 97  | 19 | 339 | 58 |
| 29,529 | 16 | 2 | 219 | 36 | 7  | 1 | 97  | 19 | 339 | 58 |
| 29,530 | 17 | 2 | 223 | 34 | 7  | 2 | 97  | 19 | 344 | 57 |
| 29,531 | 16 | 2 | 223 | 34 | 7  | 2 | 96  | 19 | 342 | 57 |
| 29,532 | 16 | 2 | 221 | 33 | 7  | 2 | 91  | 19 | 335 | 56 |
| 29,533 | 20 | 2 | 262 | 33 | 10 | 2 | 122 | 20 | 414 | 57 |
| 29,534 | 20 | 2 | 263 | 33 | 10 | 2 | 122 | 20 | 415 | 57 |
| 29,535 | 23 | 2 | 297 | 34 | 10 | 2 | 140 | 21 | 470 | 59 |
| 29,536 | 23 | 2 | 296 | 34 | 10 | 2 | 140 | 21 | 469 | 59 |
| 29,537 | 26 | 2 | 349 | 36 | 12 | 3 | 178 | 22 | 565 | 63 |
| 29,538 | 26 | 2 | 364 | 36 | 13 | 3 | 185 | 22 | 588 | 63 |
| 29,539 | 26 | 2 | 370 | 38 | 14 | 3 | 194 | 22 | 604 | 65 |
| 29,540 | 25 | 1 | 366 | 41 | 14 | 3 | 190 | 22 | 595 | 67 |
| 29,541 | 25 | 1 | 362 | 42 | 14 | 3 | 186 | 22 | 587 | 68 |
| 29,542 | 25 | 1 | 359 | 35 | 14 | 2 | 183 | 11 | 581 | 49 |
| 29,543 | 25 | 2 | 359 | 35 | 14 | 2 | 183 | 11 | 581 | 50 |
| 29,544 | 25 | 2 | 360 | 36 | 14 | 2 | 179 | 11 | 578 | 51 |
| 29,545 | 24 | 2 | 356 | 30 | 14 | 2 | 178 | 8  | 572 | 42 |
| 29,546 | 24 | 2 | 356 | 30 | 14 | 2 | 178 | 8  | 572 | 42 |
| 29,547 | 24 | 2 | 357 | 30 | 14 | 2 | 178 | 8  | 573 | 42 |
| 29,548 | 24 | 2 | 353 | 30 | 14 | 2 | 173 | 9  | 564 | 43 |
| 29,549 | 23 | 2 | 349 | 30 | 14 | 2 | 173 | 9  | 559 | 43 |

|        |    |   |     |    |    |   |     |    |     |     |
|--------|----|---|-----|----|----|---|-----|----|-----|-----|
| 29,550 | 23 | 2 | 349 | 31 | 14 | 2 | 173 | 9  | 559 | 44  |
| 29,551 | 23 | 2 | 349 | 31 | 14 | 2 | 173 | 9  | 559 | 44  |
| 29,552 | 23 | 2 | 354 | 31 | 14 | 2 | 177 | 9  | 568 | 44  |
| 29,553 | 23 | 2 | 356 | 30 | 14 | 2 | 178 | 7  | 571 | 41  |
| 29,554 | 23 | 2 | 355 | 30 | 14 | 2 | 178 | 7  | 570 | 41  |
| 29,555 | 23 | 2 | 357 | 29 | 14 | 2 | 179 | 7  | 573 | 40  |
| 29,556 | 23 | 2 | 357 | 28 | 15 | 2 | 179 | 7  | 574 | 39  |
| 29,557 | 23 | 2 | 357 | 28 | 15 | 2 | 178 | 6  | 573 | 38  |
| 29,558 | 23 | 2 | 368 | 27 | 15 | 2 | 179 | 6  | 585 | 37  |
| 29,559 | 23 | 2 | 400 | 23 | 15 | 2 | 190 | 6  | 628 | 33  |
| 29,560 | 22 | 2 | 394 | 20 | 15 | 2 | 190 | 4  | 621 | 28  |
| 29,561 | 24 | 2 | 442 | 18 | 18 | 2 | 228 | 5  | 712 | 27  |
| 29,562 | 23 | 2 | 435 | 20 | 18 | 2 | 225 | 5  | 701 | 29  |
| 29,563 | 23 | 2 | 430 | 20 | 17 | 2 | 226 | 5  | 696 | 29  |
| 29,564 | 24 | 2 | 441 | 20 | 18 | 2 | 233 | 5  | 716 | 29  |
| 29,565 | 24 | 2 | 440 | 25 | 17 | 3 | 233 | 10 | 714 | 40  |
| 29,566 | 23 | 2 | 441 | 28 | 17 | 4 | 235 | 12 | 716 | 46  |
| 29,567 | 24 | 2 | 450 | 33 | 18 | 4 | 247 | 18 | 739 | 57  |
| 29,568 | 24 | 2 | 440 | 35 | 18 | 4 | 243 | 18 | 725 | 59  |
| 29,569 | 24 | 2 | 436 | 37 | 18 | 4 | 243 | 18 | 721 | 61  |
| 29,570 | 23 | 2 | 415 | 37 | 18 | 4 | 232 | 18 | 688 | 61  |
| 29,571 | 22 | 2 | 353 | 36 | 15 | 4 | 199 | 18 | 589 | 60  |
| 29,572 | 22 | 1 | 369 | 36 | 15 | 4 | 201 | 18 | 607 | 59  |
| 29,573 | 22 | 1 | 368 | 36 | 15 | 4 | 200 | 18 | 605 | 59  |
| 29,574 | 24 | 1 | 369 | 36 | 15 | 4 | 200 | 18 | 608 | 59  |
| 29,575 | 27 | 1 | 402 | 36 | 15 | 4 | 224 | 18 | 668 | 59  |
| 29,576 | 27 | 1 | 402 | 36 | 15 | 4 | 225 | 18 | 669 | 59  |
| 29,577 | 27 | 2 | 401 | 36 | 15 | 4 | 225 | 18 | 668 | 60  |
| 29,578 | 28 | 2 | 403 | 35 | 17 | 4 | 234 | 18 | 682 | 59  |
| 29,579 | 28 | 2 | 400 | 35 | 17 | 4 | 233 | 18 | 678 | 59  |
| 29,580 | 27 | 2 | 402 | 35 | 17 | 4 | 234 | 18 | 680 | 59  |
| 29,581 | 27 | 2 | 400 | 35 | 17 | 3 | 236 | 18 | 680 | 58  |
| 29,582 | 27 | 3 | 403 | 36 | 17 | 3 | 237 | 19 | 684 | 61  |
| 29,583 | 27 | 4 | 402 | 42 | 17 | 3 | 239 | 27 | 685 | 76  |
| 29,584 | 22 | 4 | 365 | 57 | 14 | 4 | 207 | 30 | 608 | 95  |
| 29,585 | 20 | 4 | 349 | 64 | 14 | 4 | 196 | 35 | 579 | 107 |
| 29,586 | 18 | 4 | 334 | 64 | 14 | 4 | 190 | 34 | 556 | 106 |
| 29,587 | 16 | 4 | 301 | 64 | 12 | 4 | 157 | 35 | 486 | 107 |
| 29,588 | 15 | 4 | 279 | 61 | 12 | 3 | 154 | 34 | 460 | 102 |
| 29,589 | 15 | 4 | 264 | 66 | 11 | 3 | 148 | 38 | 438 | 111 |
| 29,590 | 14 | 4 | 256 | 64 | 10 | 3 | 139 | 38 | 419 | 109 |

|        |    |   |     |    |    |   |     |    |     |     |
|--------|----|---|-----|----|----|---|-----|----|-----|-----|
| 29,591 | 15 | 4 | 261 | 62 | 10 | 4 | 143 | 38 | 429 | 108 |
| 29,592 | 15 | 4 | 262 | 62 | 10 | 4 | 143 | 38 | 430 | 108 |
| 29,593 | 15 | 4 | 263 | 67 | 10 | 4 | 143 | 38 | 431 | 113 |
| 29,594 | 15 | 3 | 267 | 69 | 11 | 4 | 148 | 38 | 441 | 114 |
| 29,595 | 15 | 3 | 264 | 69 | 11 | 4 | 148 | 38 | 438 | 114 |
| 29,596 | 15 | 3 | 271 | 69 | 11 | 4 | 152 | 38 | 449 | 114 |
| 29,597 | 15 | 3 | 276 | 69 | 11 | 4 | 156 | 38 | 458 | 114 |
| 29,598 | 15 | 3 | 288 | 69 | 11 | 4 | 174 | 37 | 488 | 113 |
| 29,599 | 15 | 3 | 288 | 70 | 11 | 4 | 174 | 37 | 488 | 114 |
| 29,600 | 15 | 3 | 288 | 70 | 11 | 4 | 174 | 37 | 488 | 114 |
| 29,601 | 17 | 3 | 326 | 69 | 11 | 4 | 194 | 37 | 548 | 113 |
| 29,602 | 18 | 3 | 346 | 69 | 11 | 4 | 210 | 37 | 585 | 113 |
| 29,603 | 18 | 4 | 344 | 69 | 11 | 4 | 210 | 37 | 583 | 114 |
| 29,604 | 18 | 4 | 344 | 69 | 11 | 4 | 210 | 37 | 583 | 114 |
| 29,605 | 18 | 4 | 343 | 69 | 11 | 4 | 209 | 37 | 581 | 114 |
| 29,606 | 19 | 4 | 355 | 69 | 14 | 4 | 224 | 37 | 612 | 114 |
| 29,607 | 22 | 4 | 385 | 70 | 16 | 4 | 250 | 37 | 673 | 115 |
| 29,608 | 22 | 4 | 375 | 70 | 16 | 4 | 252 | 37 | 665 | 115 |
| 29,609 | 23 | 4 | 378 | 70 | 18 | 4 | 263 | 37 | 682 | 115 |
| 29,610 | 22 | 4 | 385 | 70 | 19 | 4 | 278 | 39 | 704 | 117 |
| 29,611 | 19 | 4 | 345 | 71 | 17 | 5 | 249 | 40 | 630 | 120 |
| 29,612 | 19 | 4 | 347 | 71 | 17 | 5 | 248 | 39 | 631 | 119 |
| 29,613 | 19 | 4 | 347 | 70 | 17 | 5 | 248 | 39 | 631 | 118 |
| 29,614 | 19 | 4 | 346 | 70 | 17 | 5 | 245 | 39 | 627 | 118 |
| 29,615 | 18 | 4 | 332 | 65 | 16 | 4 | 237 | 34 | 603 | 107 |
| 29,616 | 18 | 4 | 323 | 56 | 15 | 3 | 235 | 26 | 591 | 89  |
| 29,617 | 18 | 4 | 317 | 56 | 15 | 3 | 234 | 26 | 584 | 89  |
| 29,618 | 18 | 4 | 307 | 56 | 14 | 3 | 223 | 26 | 562 | 89  |
| 29,619 | 18 | 4 | 307 | 54 | 14 | 3 | 223 | 26 | 562 | 87  |
| 29,620 | 18 | 4 | 309 | 52 | 14 | 3 | 223 | 26 | 564 | 85  |
| 29,621 | 19 | 4 | 304 | 52 | 14 | 3 | 222 | 26 | 559 | 85  |
| 29,622 | 18 | 4 | 297 | 52 | 14 | 3 | 221 | 26 | 550 | 85  |
| 29,623 | 18 | 4 | 278 | 52 | 14 | 3 | 224 | 26 | 534 | 85  |
| 29,624 | 17 | 4 | 280 | 52 | 14 | 3 | 226 | 26 | 537 | 85  |
| 29,625 | 13 | 4 | 251 | 53 | 14 | 3 | 202 | 27 | 480 | 87  |
| 29,626 | 13 | 4 | 246 | 53 | 14 | 3 | 203 | 27 | 476 | 87  |
| 29,627 | 15 | 4 | 256 | 53 | 15 | 3 | 208 | 27 | 494 | 87  |
| 29,628 | 14 | 3 | 251 | 53 | 14 | 3 | 203 | 27 | 482 | 86  |
| 29,629 | 14 | 3 | 248 | 54 | 12 | 3 | 200 | 27 | 474 | 87  |
| 29,630 | 14 | 4 | 244 | 55 | 12 | 3 | 199 | 27 | 469 | 89  |
| 29,631 | 14 | 5 | 244 | 56 | 12 | 3 | 199 | 27 | 469 | 91  |

|        |    |   |     |    |    |   |     |    |     |    |
|--------|----|---|-----|----|----|---|-----|----|-----|----|
| 29,632 | 18 | 5 | 287 | 56 | 13 | 3 | 236 | 27 | 554 | 91 |
| 29,633 | 18 | 4 | 284 | 55 | 13 | 3 | 236 | 25 | 551 | 87 |
| 29,634 | 18 | 3 | 287 | 35 | 13 | 2 | 234 | 14 | 552 | 54 |
| 29,635 | 18 | 3 | 283 | 26 | 13 | 2 | 233 | 9  | 547 | 40 |
| 29,636 | 18 | 3 | 279 | 26 | 13 | 2 | 231 | 10 | 541 | 41 |
| 29,637 | 18 | 3 | 279 | 26 | 13 | 2 | 230 | 10 | 540 | 41 |
| 29,638 | 18 | 3 | 279 | 26 | 13 | 2 | 230 | 9  | 540 | 40 |
| 29,639 | 18 | 3 | 279 | 20 | 13 | 2 | 233 | 5  | 543 | 30 |
| 29,640 | 18 | 3 | 278 | 20 | 13 | 2 | 232 | 5  | 541 | 30 |
| 29,641 | 17 | 3 | 275 | 20 | 13 | 2 | 229 | 5  | 534 | 30 |
| 29,642 | 17 | 3 | 275 | 20 | 13 | 1 | 229 | 5  | 534 | 29 |
| 29,643 | 20 | 3 | 289 | 11 | 13 | 1 | 233 | 5  | 555 | 20 |
| 29,644 | 20 | 3 | 291 | 11 | 13 | 1 | 238 | 5  | 562 | 20 |
| 29,645 | 20 | 3 | 288 | 11 | 12 | 1 | 233 | 5  | 553 | 20 |
| 29,646 | 21 | 3 | 282 | 11 | 12 | 1 | 229 | 5  | 544 | 20 |
| 29,647 | 21 | 3 | 278 | 11 | 12 | 1 | 225 | 5  | 536 | 20 |
| 29,648 | 21 | 3 | 269 | 12 | 12 | 1 | 208 | 5  | 510 | 21 |
| 29,649 | 22 | 3 | 266 | 11 | 12 | 1 | 207 | 5  | 507 | 20 |
| 29,650 | 21 | 3 | 253 | 11 | 12 | 1 | 206 | 5  | 492 | 20 |
| 29,651 | 20 | 3 | 224 | 11 | 12 | 1 | 187 | 5  | 443 | 20 |
| 29,652 | 20 | 3 | 223 | 11 | 12 | 1 | 183 | 6  | 438 | 21 |
| 29,653 | 19 | 2 | 205 | 11 | 12 | 1 | 167 | 6  | 403 | 20 |
| 29,654 | 19 | 2 | 208 | 12 | 12 | 1 | 169 | 6  | 408 | 21 |
| 29,655 | 19 | 2 | 211 | 13 | 11 | 1 | 167 | 6  | 408 | 22 |
| 29,656 | 20 | 3 | 210 | 14 | 10 | 1 | 160 | 7  | 400 | 25 |
| 29,657 | 20 | 3 | 217 | 15 | 10 | 1 | 161 | 9  | 408 | 28 |
| 29,658 | 17 | 3 | 186 | 20 | 7  | 1 | 135 | 9  | 345 | 33 |
| 29,659 | 28 | 3 | 244 | 27 | 10 | 1 | 156 | 9  | 438 | 40 |
| 29,660 | 30 | 3 | 239 | 31 | 9  | 1 | 145 | 9  | 423 | 44 |
| 29,661 | 35 | 3 | 283 | 31 | 11 | 1 | 182 | 7  | 511 | 42 |
| 29,662 | 38 | 3 | 272 | 31 | 10 | 0 | 173 | 8  | 493 | 42 |
| 29,663 | 38 | 3 | 270 | 31 | 10 | 0 | 173 | 8  | 491 | 42 |
| 29,664 | 38 | 3 | 274 | 32 | 10 | 0 | 174 | 8  | 496 | 43 |
| 29,665 | 38 | 3 | 275 | 33 | 10 | 0 | 174 | 8  | 497 | 44 |
| 29,666 | 38 | 3 | 274 | 33 | 10 | 0 | 175 | 8  | 497 | 44 |
| 29,667 | 38 | 3 | 274 | 34 | 10 | 0 | 175 | 8  | 497 | 45 |
| 29,668 | 38 | 3 | 277 | 35 | 10 | 0 | 174 | 9  | 499 | 47 |
| 29,669 | 37 | 3 | 274 | 35 | 10 | 0 | 169 | 9  | 490 | 47 |
| 29,670 | 37 | 3 | 274 | 35 | 10 | 0 | 170 | 10 | 491 | 48 |
| 29,671 | 37 | 3 | 272 | 35 | 10 | 0 | 170 | 10 | 489 | 48 |
| 29,672 | 36 | 3 | 271 | 35 | 10 | 0 | 170 | 10 | 487 | 48 |

|        |    |   |     |    |    |   |     |    |     |    |
|--------|----|---|-----|----|----|---|-----|----|-----|----|
| 29,673 | 36 | 3 | 271 | 35 | 10 | 0 | 170 | 10 | 487 | 48 |
| 29,674 | 36 | 3 | 267 | 36 | 10 | 0 | 163 | 10 | 476 | 49 |
| 29,675 | 35 | 3 | 264 | 36 | 10 | 0 | 161 | 10 | 470 | 49 |
| 29,676 | 35 | 3 | 265 | 36 | 10 | 0 | 160 | 9  | 470 | 48 |
| 29,677 | 37 | 3 | 282 | 36 | 13 | 0 | 170 | 9  | 502 | 48 |
| 29,678 | 35 | 3 | 273 | 35 | 12 | 0 | 164 | 9  | 484 | 47 |
| 29,679 | 34 | 3 | 267 | 35 | 12 | 0 | 162 | 9  | 475 | 47 |
| 29,680 | 32 | 4 | 262 | 36 | 11 | 0 | 150 | 9  | 455 | 49 |
| 29,681 | 31 | 3 | 250 | 37 | 11 | 2 | 141 | 9  | 433 | 51 |
| 29,682 | 31 | 2 | 235 | 36 | 11 | 2 | 127 | 9  | 404 | 49 |
| 29,683 | 31 | 2 | 232 | 35 | 11 | 2 | 127 | 9  | 401 | 48 |
| 29,684 | 31 | 2 | 232 | 35 | 11 | 2 | 127 | 9  | 401 | 48 |
| 29,685 | 31 | 2 | 229 | 35 | 11 | 2 | 127 | 9  | 398 | 48 |
| 29,686 | 31 | 2 | 228 | 35 | 11 | 2 | 127 | 8  | 397 | 47 |
| 29,687 | 31 | 2 | 228 | 35 | 11 | 2 | 127 | 8  | 397 | 47 |
| 29,688 | 31 | 2 | 228 | 36 | 11 | 2 | 127 | 8  | 397 | 48 |
| 29,689 | 31 | 2 | 228 | 36 | 11 | 2 | 127 | 8  | 397 | 48 |
| 29,690 | 32 | 2 | 231 | 37 | 11 | 2 | 126 | 10 | 400 | 51 |
| 29,691 | 32 | 2 | 232 | 38 | 11 | 3 | 127 | 11 | 402 | 54 |
| 29,692 | 32 | 2 | 242 | 39 | 11 | 3 | 140 | 11 | 425 | 55 |
| 29,693 | 31 | 2 | 230 | 42 | 11 | 3 | 137 | 13 | 409 | 60 |
| 29,694 | 29 | 2 | 228 | 42 | 11 | 3 | 136 | 13 | 404 | 60 |
| 29,695 | 29 | 2 | 226 | 42 | 11 | 3 | 133 | 13 | 399 | 60 |
| 29,696 | 29 | 2 | 224 | 43 | 11 | 3 | 134 | 13 | 398 | 61 |
| 29,697 | 28 | 2 | 223 | 44 | 11 | 3 | 134 | 14 | 396 | 63 |
| 29,698 | 28 | 2 | 224 | 43 | 11 | 3 | 134 | 15 | 397 | 63 |
| 29,699 | 28 | 2 | 224 | 46 | 11 | 3 | 133 | 15 | 396 | 66 |
| 29,700 | 27 | 2 | 223 | 47 | 11 | 3 | 135 | 16 | 396 | 68 |
| 29,701 | 27 | 2 | 223 | 49 | 11 | 3 | 135 | 16 | 396 | 70 |
| 29,702 | 27 | 4 | 223 | 49 | 11 | 3 | 135 | 16 | 396 | 72 |
| 29,703 | 27 | 5 | 227 | 49 | 11 | 3 | 135 | 15 | 400 | 72 |
| 29,704 | 27 | 5 | 225 | 48 | 11 | 3 | 135 | 15 | 398 | 71 |
| 29,705 | 27 | 5 | 222 | 48 | 11 | 3 | 133 | 15 | 393 | 71 |
| 29,706 | 27 | 4 | 218 | 47 | 11 | 3 | 131 | 14 | 387 | 68 |
| 29,707 | 25 | 4 | 213 | 40 | 11 | 3 | 129 | 12 | 378 | 59 |
| 29,708 | 26 | 4 | 202 | 42 | 11 | 3 | 126 | 12 | 365 | 61 |
| 29,709 | 16 | 4 | 192 | 42 | 10 | 3 | 115 | 13 | 333 | 62 |
| 29,710 | 15 | 4 | 160 | 32 | 8  | 3 | 105 | 13 | 288 | 52 |
| 29,711 | 12 | 4 | 143 | 36 | 7  | 3 | 98  | 15 | 260 | 58 |
| 29,712 | 8  | 4 | 86  | 38 | 4  | 3 | 45  | 15 | 143 | 60 |
| 29,713 | 5  | 4 | 85  | 38 | 4  | 3 | 44  | 15 | 138 | 60 |

|        |    |   |     |    |   |   |     |    |     |    |
|--------|----|---|-----|----|---|---|-----|----|-----|----|
| 29,714 | 5  | 4 | 81  | 39 | 4 | 3 | 43  | 16 | 133 | 62 |
| 29,715 | 6  | 5 | 89  | 37 | 4 | 3 | 43  | 16 | 142 | 61 |
| 29,716 | 8  | 5 | 113 | 42 | 4 | 3 | 46  | 17 | 171 | 67 |
| 29,717 | 8  | 5 | 138 | 42 | 4 | 3 | 51  | 18 | 201 | 68 |
| 29,718 | 9  | 5 | 155 | 41 | 4 | 3 | 58  | 18 | 226 | 67 |
| 29,719 | 9  | 5 | 154 | 40 | 4 | 3 | 62  | 17 | 229 | 65 |
| 29,720 | 11 | 5 | 207 | 40 | 4 | 3 | 73  | 16 | 295 | 64 |
| 29,721 | 11 | 5 | 217 | 40 | 4 | 3 | 78  | 17 | 310 | 65 |
| 29,722 | 11 | 5 | 217 | 41 | 4 | 3 | 78  | 17 | 310 | 66 |
| 29,723 | 16 | 7 | 247 | 44 | 5 | 3 | 99  | 20 | 367 | 74 |
| 29,724 | 16 | 7 | 249 | 46 | 5 | 3 | 99  | 25 | 369 | 81 |
| 29,725 | 16 | 7 | 255 | 45 | 6 | 3 | 99  | 25 | 376 | 80 |
| 29,726 | 16 | 7 | 254 | 45 | 6 | 3 | 99  | 25 | 375 | 80 |
| 29,727 | 14 | 7 | 248 | 44 | 6 | 3 | 95  | 26 | 363 | 80 |
| 29,728 | 14 | 7 | 236 | 44 | 3 | 3 | 88  | 26 | 341 | 80 |
| 29,729 | 14 | 7 | 235 | 44 | 3 | 3 | 90  | 26 | 342 | 80 |
| 29,730 | 14 | 7 | 236 | 44 | 3 | 3 | 90  | 26 | 343 | 80 |
| 29,731 | 14 | 6 | 236 | 41 | 3 | 1 | 90  | 26 | 343 | 74 |
| 29,732 | 14 | 6 | 249 | 41 | 4 | 1 | 91  | 26 | 358 | 74 |
| 29,733 | 16 | 6 | 249 | 42 | 5 | 1 | 90  | 26 | 360 | 75 |
| 29,734 | 17 | 6 | 261 | 42 | 5 | 1 | 92  | 26 | 375 | 75 |
| 29,735 | 21 | 6 | 278 | 42 | 5 | 1 | 98  | 26 | 402 | 75 |
| 29,736 | 22 | 6 | 299 | 42 | 6 | 1 | 106 | 26 | 433 | 75 |
| 29,737 | 22 | 6 | 299 | 42 | 6 | 1 | 106 | 26 | 433 | 75 |
| 29,738 | 22 | 6 | 303 | 42 | 6 | 1 | 108 | 26 | 439 | 75 |
| 29,739 | 22 | 6 | 305 | 41 | 6 | 1 | 109 | 26 | 442 | 74 |
| 29,740 | 21 | 7 | 304 | 41 | 6 | 1 | 109 | 26 | 440 | 75 |
| 29,741 | 22 | 7 | 302 | 40 | 6 | 1 | 108 | 24 | 438 | 72 |
| 29,742 | 23 | 7 | 300 | 38 | 6 | 0 | 107 | 24 | 436 | 69 |
| 29,743 | 23 | 7 | 289 | 38 | 6 | 0 | 92  | 24 | 410 | 69 |
| 29,744 | 25 | 7 | 289 | 34 | 6 | 0 | 91  | 22 | 411 | 63 |
| 29,745 | 25 | 7 | 289 | 36 | 6 | 0 | 90  | 22 | 410 | 65 |
| 29,746 | 25 | 7 | 290 | 35 | 6 | 0 | 90  | 22 | 411 | 64 |
| 29,747 | 25 | 7 | 291 | 34 | 6 | 0 | 91  | 21 | 413 | 62 |
| 29,748 | 25 | 7 | 297 | 34 | 6 | 0 | 94  | 20 | 422 | 61 |
| 29,749 | 25 | 7 | 297 | 34 | 6 | 0 | 94  | 20 | 422 | 61 |
| 29,750 | 25 | 7 | 296 | 31 | 6 | 0 | 94  | 20 | 421 | 58 |
| 29,751 | 25 | 7 | 298 | 30 | 6 | 0 | 96  | 19 | 425 | 56 |
| 29,752 | 25 | 7 | 298 | 28 | 6 | 0 | 96  | 19 | 425 | 54 |
| 29,753 | 25 | 5 | 296 | 28 | 6 | 0 | 96  | 19 | 423 | 52 |
| 29,754 | 25 | 4 | 296 | 28 | 6 | 0 | 97  | 19 | 424 | 51 |

|        |    |   |     |    |   |   |     |    |     |     |
|--------|----|---|-----|----|---|---|-----|----|-----|-----|
| 29,755 | 25 | 5 | 298 | 30 | 6 | 0 | 96  | 21 | 425 | 56  |
| 29,756 | 25 | 5 | 297 | 50 | 5 | 0 | 96  | 45 | 423 | 100 |
| 29,757 | 25 | 5 | 297 | 51 | 5 | 0 | 96  | 45 | 423 | 101 |
| 29,758 | 25 | 5 | 300 | 54 | 5 | 0 | 97  | 48 | 427 | 107 |
| 29,759 | 25 | 5 | 302 | 55 | 5 | 0 | 103 | 49 | 435 | 109 |
| 29,760 | 25 | 5 | 295 | 56 | 5 | 0 | 102 | 50 | 427 | 111 |
| 29,761 | 25 | 5 | 289 | 55 | 5 | 0 | 100 | 50 | 419 | 110 |
| 29,762 | 25 | 5 | 289 | 53 | 5 | 0 | 99  | 50 | 418 | 108 |
| 29,763 | 24 | 5 | 296 | 51 | 5 | 0 | 103 | 50 | 428 | 106 |
| 29,764 | 23 | 5 | 312 | 48 | 5 | 0 | 113 | 47 | 453 | 100 |
| 29,765 | 23 | 5 | 308 | 48 | 5 | 0 | 113 | 47 | 449 | 100 |
| 29,766 | 23 | 4 | 305 | 48 | 5 | 0 | 115 | 47 | 448 | 99  |
| 29,767 | 21 | 4 | 303 | 42 | 8 | 0 | 133 | 46 | 465 | 92  |
| 29,768 | 21 | 4 | 277 | 42 | 8 | 0 | 128 | 45 | 434 | 91  |
| 29,769 | 20 | 4 | 260 | 42 | 8 | 0 | 121 | 45 | 409 | 91  |
| 29,770 | 20 | 4 | 257 | 43 | 8 | 0 | 117 | 45 | 402 | 92  |
| 29,771 | 18 | 4 | 205 | 43 | 8 | 0 | 107 | 44 | 338 | 91  |
| 29,772 | 18 | 5 | 196 | 43 | 8 | 0 | 101 | 44 | 323 | 92  |
| 29,773 | 14 | 5 | 167 | 44 | 7 | 0 | 81  | 44 | 269 | 93  |
| 29,774 | 13 | 3 | 165 | 39 | 7 | 0 | 80  | 36 | 265 | 78  |
| 29,775 | 13 | 3 | 167 | 39 | 7 | 0 | 82  | 36 | 269 | 78  |
| 29,776 | 13 | 3 | 162 | 39 | 6 | 0 | 82  | 36 | 263 | 78  |
| 29,777 | 13 | 3 | 165 | 39 | 6 | 0 | 84  | 36 | 268 | 78  |
| 29,778 | 13 | 3 | 165 | 39 | 6 | 0 | 84  | 35 | 268 | 77  |
| 29,779 | 13 | 3 | 165 | 39 | 6 | 0 | 82  | 35 | 266 | 77  |
| 29,780 | 13 | 3 | 164 | 39 | 6 | 0 | 82  | 35 | 265 | 77  |
| 29,781 | 13 | 3 | 163 | 41 | 6 | 0 | 82  | 36 | 264 | 80  |
| 29,782 | 13 | 3 | 169 | 45 | 6 | 1 | 82  | 40 | 270 | 89  |
| 29,783 | 15 | 3 | 170 | 48 | 5 | 1 | 83  | 41 | 273 | 93  |
| 29,784 | 13 | 3 | 189 | 48 | 4 | 1 | 86  | 41 | 292 | 93  |
| 29,785 | 13 | 3 | 179 | 49 | 4 | 1 | 83  | 41 | 279 | 94  |
| 29,786 | 11 | 3 | 178 | 50 | 8 | 1 | 87  | 41 | 284 | 95  |
| 29,787 | 10 | 3 | 157 | 50 | 7 | 1 | 79  | 41 | 253 | 95  |
| 29,788 | 10 | 3 | 153 | 50 | 7 | 1 | 77  | 41 | 247 | 95  |
| 29,789 | 10 | 3 | 151 | 50 | 7 | 1 | 76  | 41 | 244 | 95  |
| 29,790 | 10 | 3 | 151 | 49 | 7 | 1 | 76  | 41 | 244 | 94  |
| 29,791 | 11 | 2 | 156 | 49 | 7 | 1 | 77  | 41 | 251 | 93  |
| 29,792 | 10 | 2 | 156 | 50 | 7 | 2 | 77  | 41 | 250 | 95  |
| 29,793 | 9  | 3 | 156 | 50 | 8 | 2 | 77  | 40 | 250 | 95  |
| 29,794 | 9  | 3 | 159 | 51 | 8 | 2 | 78  | 40 | 254 | 96  |
| 29,795 | 7  | 3 | 161 | 49 | 8 | 2 | 81  | 40 | 257 | 94  |

|        |   |   |     |    |   |   |    |    |     |    |
|--------|---|---|-----|----|---|---|----|----|-----|----|
| 29,796 | 7 | 3 | 163 | 49 | 8 | 2 | 81 | 41 | 259 | 95 |
| 29,797 | 7 | 3 | 163 | 50 | 8 | 2 | 80 | 41 | 258 | 96 |
| 29,798 | 7 | 3 | 162 | 50 | 8 | 2 | 79 | 41 | 256 | 96 |
| 29,799 | 7 | 3 | 155 | 50 | 8 | 2 | 76 | 40 | 246 | 95 |
| 29,800 | 7 | 3 | 155 | 50 | 8 | 2 | 75 | 40 | 245 | 95 |
| 29,801 | 7 | 3 | 155 | 50 | 8 | 2 | 75 | 40 | 245 | 95 |
| 29,802 | 7 | 3 | 154 | 50 | 8 | 2 | 72 | 41 | 241 | 96 |
| 29,803 | 7 | 3 | 153 | 50 | 8 | 2 | 72 | 43 | 240 | 98 |
| 29,804 | 7 | 3 | 153 | 50 | 8 | 2 | 72 | 43 | 240 | 98 |
| 29,805 | 7 | 3 | 152 | 50 | 8 | 2 | 72 | 43 | 239 | 98 |
| 29,806 | 7 | 2 | 153 | 49 | 8 | 2 | 72 | 41 | 240 | 94 |
| 29,807 | 7 | 2 | 152 | 30 | 8 | 2 | 72 | 18 | 239 | 52 |
| 29,808 | 7 | 2 | 152 | 23 | 8 | 2 | 72 | 14 | 239 | 41 |
| 29,809 | 7 | 2 | 149 | 24 | 8 | 2 | 71 | 15 | 235 | 43 |
| 29,810 | 6 | 2 | 148 | 25 | 8 | 2 | 65 | 15 | 227 | 44 |
| 29,811 | 6 | 2 | 143 | 22 | 8 | 2 | 65 | 12 | 222 | 38 |
| 29,812 | 6 | 2 | 139 | 22 | 8 | 2 | 66 | 12 | 219 | 38 |
| 29,813 | 7 | 3 | 129 | 22 | 8 | 2 | 61 | 12 | 205 | 39 |
| 29,814 | 7 | 3 | 129 | 23 | 8 | 2 | 61 | 12 | 205 | 40 |
| 29,815 | 7 | 3 | 108 | 23 | 8 | 2 | 51 | 12 | 174 | 40 |
| 29,816 | 7 | 3 | 108 | 23 | 9 | 3 | 50 | 12 | 174 | 41 |
| 29,817 | 7 | 3 | 107 | 25 | 9 | 3 | 50 | 12 | 173 | 43 |
| 29,818 | 7 | 3 | 89  | 25 | 6 | 3 | 28 | 12 | 130 | 43 |
| 29,819 | 7 | 3 | 91  | 25 | 6 | 3 | 28 | 12 | 132 | 43 |
| 29,820 | 7 | 3 | 91  | 25 | 6 | 3 | 28 | 12 | 132 | 43 |
| 29,821 | 7 | 3 | 92  | 24 | 6 | 3 | 29 | 12 | 134 | 42 |
| 29,822 | 7 | 3 | 91  | 24 | 6 | 3 | 29 | 12 | 133 | 42 |
| 29,823 | 7 | 2 | 93  | 24 | 6 | 3 | 29 | 12 | 135 | 41 |
| 29,824 | 7 | 2 | 95  | 22 | 6 | 3 | 29 | 12 | 137 | 39 |
| 29,825 | 7 | 3 | 95  | 22 | 6 | 3 | 29 | 12 | 137 | 40 |
| 29,826 | 7 | 3 | 91  | 22 | 6 | 3 | 28 | 12 | 132 | 40 |
| 29,827 | 7 | 3 | 92  | 22 | 6 | 3 | 28 | 12 | 133 | 40 |
| 29,828 | 7 | 3 | 89  | 22 | 6 | 3 | 26 | 12 | 128 | 40 |
| 29,829 | 7 | 3 | 89  | 22 | 6 | 3 | 26 | 12 | 128 | 40 |
| 29,830 | 7 | 3 | 89  | 23 | 6 | 3 | 26 | 12 | 128 | 41 |
| 29,831 | 7 | 3 | 89  | 23 | 6 | 3 | 26 | 12 | 128 | 41 |
| 29,832 | 7 | 3 | 90  | 21 | 6 | 3 | 26 | 11 | 129 | 38 |
| 29,833 | 7 | 3 | 84  | 17 | 6 | 2 | 26 | 7  | 123 | 29 |
| 29,834 | 4 | 3 | 71  | 13 | 7 | 2 | 26 | 6  | 108 | 24 |
| 29,835 | 4 | 3 | 51  | 12 | 7 | 2 | 23 | 6  | 85  | 23 |
| 29,836 | 4 | 3 | 53  | 14 | 7 | 2 | 24 | 6  | 88  | 25 |



|        |   |    |     |    |   |   |    |    |     |     |
|--------|---|----|-----|----|---|---|----|----|-----|-----|
| 29,837 | 2 | 3  | 38  | 13 | 3 | 2 | 16 | 6  | 59  | 24  |
| 29,838 | 3 | 3  | 38  | 13 | 3 | 2 | 18 | 6  | 62  | 24  |
| 29,839 | 3 | 3  | 39  | 13 | 3 | 2 | 19 | 6  | 64  | 24  |
| 29,840 | 3 | 3  | 39  | 13 | 3 | 2 | 19 | 6  | 64  | 24  |
| 29,841 | 4 | 4  | 51  | 13 | 3 | 2 | 29 | 6  | 87  | 25  |
| 29,842 | 3 | 4  | 51  | 13 | 3 | 2 | 29 | 7  | 86  | 26  |
| 29,843 | 3 | 4  | 51  | 13 | 2 | 1 | 29 | 7  | 85  | 25  |
| 29,844 | 3 | 3  | 53  | 13 | 2 | 1 | 31 | 8  | 89  | 25  |
| 29,845 | 6 | 3  | 96  | 13 | 3 | 1 | 66 | 8  | 171 | 25  |
| 29,846 | 7 | 3  | 96  | 13 | 3 | 1 | 67 | 8  | 173 | 25  |
| 29,847 | 7 | 3  | 104 | 12 | 3 | 1 | 70 | 7  | 184 | 23  |
| 29,848 | 7 | 3  | 103 | 12 | 3 | 1 | 70 | 8  | 183 | 24  |
| 29,849 | 7 | 4  | 111 | 12 | 3 | 2 | 72 | 11 | 193 | 29  |
| 29,850 | 7 | 4  | 111 | 22 | 3 | 2 | 72 | 15 | 193 | 43  |
| 29,851 | 7 | 8  | 111 | 38 | 3 | 2 | 72 | 32 | 193 | 80  |
| 29,852 | 7 | 8  | 111 | 40 | 3 | 2 | 72 | 32 | 193 | 82  |
| 29,853 | 7 | 8  | 135 | 42 | 3 | 2 | 80 | 32 | 225 | 84  |
| 29,854 | 7 | 8  | 135 | 45 | 3 | 2 | 80 | 30 | 225 | 85  |
| 29,855 | 7 | 8  | 135 | 45 | 3 | 2 | 79 | 30 | 224 | 85  |
| 29,856 | 7 | 8  | 133 | 45 | 3 | 2 | 79 | 30 | 222 | 85  |
| 29,857 | 7 | 8  | 131 | 44 | 3 | 2 | 80 | 30 | 221 | 84  |
| 29,858 | 7 | 8  | 132 | 44 | 3 | 2 | 81 | 30 | 223 | 84  |
| 29,859 | 7 | 8  | 134 | 40 | 3 | 2 | 83 | 30 | 227 | 80  |
| 29,860 | 7 | 8  | 139 | 40 | 4 | 3 | 88 | 30 | 238 | 81  |
| 29,861 | 7 | 8  | 138 | 44 | 4 | 4 | 88 | 30 | 237 | 86  |
| 29,862 | 7 | 8  | 138 | 49 | 4 | 4 | 88 | 31 | 237 | 92  |
| 29,863 | 7 | 8  | 138 | 56 | 4 | 5 | 86 | 36 | 235 | 105 |
| 29,864 | 6 | 8  | 138 | 65 | 4 | 5 | 86 | 39 | 234 | 117 |
| 29,865 | 6 | 8  | 138 | 66 | 4 | 5 | 86 | 39 | 234 | 118 |
| 29,866 | 6 | 10 | 138 | 80 | 4 | 5 | 86 | 40 | 234 | 135 |
| 29,867 | 6 | 11 | 138 | 85 | 3 | 4 | 85 | 40 | 232 | 140 |
| 29,868 | 6 | 11 | 138 | 83 | 3 | 4 | 85 | 40 | 232 | 138 |
| 29,869 | 6 | 12 | 138 | 91 | 3 | 4 | 85 | 43 | 232 | 150 |
| 29,870 | 6 | 12 | 136 | 92 | 3 | 5 | 85 | 45 | 230 | 154 |
| 29,871 | 6 | 12 | 137 | 95 | 3 | 5 | 85 | 45 | 231 | 157 |
| 29,872 | 6 | 12 | 136 | 95 | 3 | 5 | 85 | 45 | 230 | 157 |
| 29,873 | 6 | 12 | 133 | 95 | 3 | 5 | 85 | 45 | 227 | 157 |
| 29,874 | 6 | 12 | 132 | 95 | 3 | 5 | 85 | 45 | 226 | 157 |
| 29,875 | 6 | 12 | 132 | 95 | 3 | 5 | 85 | 45 | 226 | 157 |
| 29,876 | 6 | 11 | 133 | 95 | 3 | 5 | 85 | 45 | 227 | 156 |
| 29,877 | 6 | 11 | 133 | 95 | 3 | 5 | 86 | 45 | 228 | 156 |

|        |    |    |     |     |   |   |     |    |     |     |
|--------|----|----|-----|-----|---|---|-----|----|-----|-----|
| 29,878 | 6  | 11 | 132 | 95  | 3 | 5 | 86  | 45 | 227 | 156 |
| 29,879 | 7  | 11 | 132 | 96  | 3 | 5 | 86  | 45 | 228 | 157 |
| 29,880 | 7  | 11 | 132 | 95  | 3 | 5 | 86  | 45 | 228 | 156 |
| 29,881 | 7  | 11 | 132 | 95  | 3 | 5 | 86  | 45 | 228 | 156 |
| 29,882 | 7  | 11 | 134 | 95  | 3 | 5 | 88  | 45 | 232 | 156 |
| 29,883 | 7  | 11 | 134 | 95  | 3 | 5 | 92  | 45 | 236 | 156 |
| 29,884 | 7  | 11 | 135 | 96  | 3 | 6 | 92  | 45 | 237 | 158 |
| 29,885 | 7  | 11 | 134 | 96  | 2 | 6 | 90  | 46 | 233 | 159 |
| 29,886 | 7  | 11 | 135 | 97  | 2 | 6 | 90  | 46 | 234 | 160 |
| 29,887 | 7  | 11 | 132 | 95  | 2 | 6 | 89  | 46 | 230 | 158 |
| 29,888 | 7  | 11 | 134 | 95  | 2 | 6 | 87  | 46 | 230 | 158 |
| 29,889 | 7  | 11 | 134 | 95  | 2 | 6 | 85  | 46 | 228 | 158 |
| 29,890 | 8  | 11 | 140 | 95  | 2 | 6 | 91  | 46 | 241 | 158 |
| 29,891 | 8  | 11 | 144 | 95  | 2 | 6 | 93  | 46 | 247 | 158 |
| 29,892 | 7  | 10 | 127 | 96  | 2 | 6 | 82  | 47 | 218 | 159 |
| 29,893 | 7  | 10 | 126 | 98  | 2 | 6 | 82  | 46 | 217 | 160 |
| 29,894 | 8  | 10 | 158 | 98  | 7 | 6 | 158 | 45 | 331 | 159 |
| 29,895 | 9  | 10 | 158 | 99  | 8 | 6 | 169 | 45 | 344 | 160 |
| 29,896 | 6  | 10 | 119 | 104 | 7 | 6 | 136 | 46 | 268 | 166 |
| 29,897 | 5  | 10 | 117 | 105 | 7 | 6 | 133 | 48 | 262 | 169 |
| 29,898 | 5  | 10 | 107 | 105 | 7 | 6 | 130 | 48 | 249 | 169 |
| 29,899 | 5  | 10 | 113 | 105 | 8 | 6 | 140 | 46 | 266 | 167 |
| 29,900 | 5  | 9  | 112 | 107 | 8 | 5 | 139 | 43 | 264 | 164 |
| 29,901 | 5  | 9  | 102 | 97  | 8 | 5 | 134 | 39 | 249 | 150 |
| 29,902 | 6  | 5  | 98  | 79  | 8 | 5 | 135 | 22 | 247 | 111 |
| 29,903 | 6  | 5  | 95  | 79  | 8 | 5 | 135 | 22 | 244 | 111 |
| 29,904 | 6  | 5  | 89  | 77  | 8 | 5 | 134 | 21 | 237 | 108 |
| 29,905 | 8  | 5  | 98  | 74  | 9 | 5 | 141 | 21 | 256 | 105 |
| 29,906 | 8  | 5  | 100 | 74  | 9 | 5 | 145 | 21 | 262 | 105 |
| 29,907 | 8  | 5  | 101 | 74  | 9 | 5 | 144 | 21 | 262 | 105 |
| 29,908 | 8  | 5  | 100 | 74  | 9 | 5 | 145 | 21 | 262 | 105 |
| 29,909 | 8  | 5  | 98  | 74  | 9 | 4 | 145 | 20 | 260 | 103 |
| 29,910 | 8  | 5  | 98  | 74  | 9 | 4 | 143 | 20 | 258 | 103 |
| 29,911 | 8  | 5  | 93  | 74  | 8 | 4 | 138 | 20 | 247 | 103 |
| 29,912 | 8  | 5  | 94  | 65  | 8 | 3 | 140 | 18 | 250 | 91  |
| 29,913 | 8  | 5  | 94  | 65  | 8 | 3 | 140 | 18 | 250 | 91  |
| 29,914 | 13 | 5  | 105 | 58  | 8 | 2 | 159 | 13 | 285 | 78  |
| 29,915 | 13 | 4  | 105 | 49  | 8 | 2 | 159 | 11 | 285 | 66  |
| 29,916 | 19 | 4  | 152 | 47  | 9 | 2 | 196 | 11 | 376 | 64  |
| 29,917 | 19 | 2  | 152 | 33  | 9 | 2 | 196 | 10 | 376 | 47  |
| 29,918 | 19 | 1  | 154 | 28  | 9 | 2 | 197 | 10 | 379 | 41  |

|        |    |   |     |    |    |   |     |   |       |    |
|--------|----|---|-----|----|----|---|-----|---|-------|----|
| 29,919 | 20 | 0 | 159 | 20 | 11 | 2 | 204 | 7 | 394   | 29 |
| 29,920 | 20 | 0 | 159 | 19 | 11 | 1 | 204 | 5 | 394   | 25 |
| 29,921 | 20 | 0 | 163 | 19 | 13 | 1 | 204 | 5 | 400   | 25 |
| 29,922 | 20 | 0 | 169 | 16 | 13 | 1 | 214 | 5 | 416   | 22 |
| 29,923 | 20 | 0 | 169 | 16 | 13 | 1 | 214 | 6 | 416   | 23 |
| 29,924 | 31 | 0 | 283 | 16 | 22 | 1 | 279 | 6 | 615   | 23 |
| 29,925 | 31 | 0 | 282 | 16 | 22 | 1 | 279 | 6 | 614   | 23 |
| 29,926 | 35 | 0 | 440 | 18 | 25 | 1 | 334 | 6 | 834   | 25 |
| 29,927 | 35 | 0 | 446 | 18 | 27 | 1 | 335 | 6 | 843   | 25 |
| 29,928 | 35 | 0 | 449 | 18 | 28 | 1 | 333 | 6 | 845   | 25 |
| 29,929 | 35 | 0 | 449 | 19 | 28 | 1 | 333 | 6 | 845   | 26 |
| 29,930 | 34 | 0 | 451 | 18 | 28 | 1 | 336 | 6 | 849   | 25 |
| 29,931 | 35 | 0 | 460 | 18 | 28 | 1 | 340 | 6 | 863   | 25 |
| 29,932 | 35 | 0 | 458 | 18 | 30 | 1 | 338 | 6 | 861   | 25 |
| 29,933 | 35 | 0 | 460 | 18 | 30 | 1 | 339 | 6 | 864   | 25 |
| 29,934 | 35 | 0 | 461 | 17 | 30 | 0 | 337 | 5 | 863   | 22 |
| 29,935 | 35 | 0 | 461 | 17 | 30 | 0 | 338 | 6 | 864   | 23 |
| 29,936 | 35 | 0 | 461 | 17 | 30 | 0 | 338 | 6 | 864   | 23 |
| 29,937 | 39 | 0 | 510 | 16 | 34 | 0 | 374 | 6 | 957   | 22 |
| 29,938 | 42 | 0 | 526 | 16 | 37 | 0 | 379 | 6 | 984   | 22 |
| 29,939 | 43 | 0 | 529 | 18 | 37 | 0 | 385 | 6 | 994   | 24 |
| 29,940 | 42 | 0 | 541 | 18 | 38 | 0 | 385 | 6 | 1,006 | 24 |
| 29,941 | 41 | 0 | 547 | 18 | 40 | 0 | 385 | 6 | 1,013 | 24 |
| 29,942 | 41 | 0 | 564 | 14 | 40 | 0 | 399 | 5 | 1,044 | 19 |
| 29,943 | 42 | 0 | 611 | 14 | 42 | 0 | 444 | 5 | 1,139 | 19 |
| 29,944 | 41 | 0 | 582 | 14 | 38 | 0 | 368 | 5 | 1,029 | 19 |
| 29,945 | 45 | 0 | 584 | 14 | 39 | 0 | 385 | 5 | 1,053 | 19 |
| 29,946 | 44 | 0 | 581 | 13 | 38 | 0 | 373 | 5 | 1,036 | 18 |
| 29,947 | 44 | 0 | 586 | 8  | 39 | 0 | 376 | 4 | 1,045 | 12 |
| 29,948 | 44 | 0 | 592 | 8  | 38 | 0 | 383 | 2 | 1,057 | 10 |
| 29,949 | 44 | 0 | 588 | 8  | 38 | 0 | 380 | 2 | 1,050 | 10 |
| 29,950 | 45 | 0 | 590 | 6  | 38 | 0 | 386 | 3 | 1,059 | 9  |
| 29,951 | 47 | 0 | 609 | 7  | 38 | 0 | 400 | 3 | 1,094 | 10 |
| 29,952 | 47 | 0 | 633 | 7  | 42 | 0 | 446 | 3 | 1,168 | 10 |
| 29,953 | 47 | 0 | 633 | 7  | 42 | 0 | 448 | 3 | 1,170 | 10 |
| 29,954 | 46 | 0 | 628 | 7  | 42 | 0 | 453 | 3 | 1,169 | 10 |
| 29,955 | 45 | 0 | 626 | 7  | 41 | 0 | 451 | 3 | 1,163 | 10 |
| 29,956 | 45 | 0 | 625 | 7  | 41 | 0 | 446 | 3 | 1,157 | 10 |
| 29,957 | 45 | 0 | 624 | 10 | 41 | 0 | 442 | 3 | 1,152 | 13 |
| 29,958 | 45 | 0 | 623 | 11 | 41 | 0 | 442 | 3 | 1,151 | 14 |
| 29,959 | 45 | 0 | 639 | 12 | 41 | 0 | 444 | 3 | 1,169 | 15 |

|        |    |   |     |    |    |   |     |    |       |    |
|--------|----|---|-----|----|----|---|-----|----|-------|----|
| 29,960 | 46 | 0 | 639 | 12 | 41 | 0 | 444 | 3  | 1,170 | 15 |
| 29,961 | 49 | 0 | 642 | 12 | 41 | 0 | 448 | 3  | 1,180 | 15 |
| 29,962 | 50 | 0 | 649 | 12 | 41 | 0 | 451 | 3  | 1,191 | 15 |
| 29,963 | 50 | 0 | 680 | 12 | 42 | 0 | 459 | 3  | 1,231 | 15 |
| 29,964 | 49 | 0 | 689 | 12 | 43 | 0 | 466 | 3  | 1,247 | 15 |
| 29,965 | 47 | 0 | 688 | 12 | 43 | 0 | 463 | 3  | 1,241 | 15 |
| 29,966 | 46 | 0 | 668 | 12 | 43 | 0 | 451 | 3  | 1,208 | 15 |
| 29,967 | 44 | 0 | 668 | 12 | 43 | 0 | 445 | 3  | 1,200 | 15 |
| 29,968 | 44 | 0 | 666 | 12 | 43 | 0 | 444 | 3  | 1,197 | 15 |
| 29,969 | 44 | 0 | 687 | 13 | 42 | 0 | 442 | 3  | 1,215 | 16 |
| 29,970 | 44 | 0 | 686 | 15 | 41 | 0 | 444 | 5  | 1,215 | 20 |
| 29,971 | 44 | 0 | 686 | 17 | 41 | 0 | 444 | 6  | 1,215 | 23 |
| 29,972 | 44 | 0 | 682 | 17 | 39 | 0 | 443 | 6  | 1,208 | 23 |
| 29,973 | 44 | 0 | 675 | 19 | 39 | 0 | 433 | 7  | 1,191 | 26 |
| 29,974 | 44 | 0 | 616 | 19 | 34 | 0 | 415 | 6  | 1,109 | 25 |
| 29,975 | 33 | 0 | 566 | 19 | 30 | 0 | 367 | 6  | 996   | 25 |
| 29,976 | 29 | 1 | 426 | 22 | 27 | 0 | 319 | 7  | 801   | 30 |
| 29,977 | 29 | 1 | 407 | 21 | 27 | 0 | 312 | 7  | 775   | 29 |
| 29,978 | 33 | 1 | 445 | 21 | 25 | 0 | 320 | 7  | 823   | 29 |
| 29,979 | 38 | 1 | 514 | 20 | 26 | 0 | 327 | 7  | 905   | 28 |
| 29,980 | 38 | 1 | 515 | 20 | 26 | 0 | 327 | 7  | 906   | 28 |
| 29,981 | 39 | 1 | 549 | 20 | 26 | 0 | 330 | 7  | 944   | 28 |
| 29,982 | 40 | 1 | 576 | 20 | 28 | 0 | 342 | 7  | 986   | 28 |
| 29,983 | 40 | 1 | 576 | 20 | 26 | 0 | 342 | 7  | 984   | 28 |
| 29,984 | 40 | 1 | 587 | 20 | 26 | 0 | 343 | 7  | 996   | 28 |
| 29,985 | 45 | 1 | 660 | 20 | 32 | 0 | 380 | 6  | 1,117 | 27 |
| 29,986 | 48 | 1 | 685 | 20 | 32 | 0 | 386 | 6  | 1,151 | 27 |
| 29,987 | 46 | 1 | 685 | 20 | 30 | 0 | 381 | 7  | 1,142 | 28 |
| 29,988 | 44 | 1 | 655 | 21 | 28 | 0 | 357 | 7  | 1,084 | 29 |
| 29,989 | 41 | 2 | 641 | 22 | 25 | 0 | 357 | 7  | 1,064 | 31 |
| 29,990 | 40 | 2 | 638 | 21 | 25 | 0 | 354 | 7  | 1,057 | 30 |
| 29,991 | 40 | 2 | 626 | 24 | 24 | 0 | 354 | 9  | 1,044 | 35 |
| 29,992 | 40 | 2 | 613 | 25 | 22 | 0 | 347 | 9  | 1,022 | 36 |
| 29,993 | 40 | 2 | 592 | 25 | 22 | 0 | 330 | 9  | 984   | 36 |
| 29,994 | 39 | 2 | 545 | 25 | 20 | 0 | 285 | 9  | 889   | 36 |
| 29,995 | 39 | 3 | 542 | 25 | 20 | 0 | 285 | 9  | 886   | 37 |
| 29,996 | 35 | 3 | 541 | 28 | 18 | 0 | 267 | 10 | 861   | 41 |
| 29,997 | 35 | 3 | 542 | 28 | 18 | 0 | 266 | 11 | 861   | 42 |
| 29,998 | 35 | 3 | 533 | 29 | 17 | 0 | 261 | 11 | 846   | 43 |
| 29,999 | 35 | 3 | 524 | 28 | 17 | 0 | 252 | 11 | 828   | 42 |
| 30,000 | 35 | 3 | 523 | 28 | 17 | 0 | 252 | 11 | 827   | 42 |

|        |    |   |     |    |    |   |     |    |     |    |
|--------|----|---|-----|----|----|---|-----|----|-----|----|
| 30,001 | 34 | 3 | 521 | 28 | 17 | 0 | 242 | 10 | 814 | 41 |
| 30,002 | 34 | 3 | 506 | 29 | 17 | 0 | 227 | 10 | 784 | 42 |
| 30,003 | 33 | 3 | 483 | 29 | 13 | 0 | 181 | 10 | 710 | 42 |
| 30,004 | 33 | 3 | 483 | 29 | 13 | 0 | 180 | 10 | 709 | 42 |
| 30,005 | 38 | 3 | 488 | 29 | 13 | 0 | 184 | 10 | 723 | 42 |
| 30,006 | 38 | 3 | 499 | 29 | 13 | 0 | 189 | 10 | 739 | 42 |
| 30,007 | 45 | 3 | 573 | 26 | 17 | 0 | 245 | 10 | 880 | 39 |
| 30,008 | 45 | 3 | 572 | 26 | 17 | 0 | 245 | 10 | 879 | 39 |
| 30,009 | 45 | 3 | 566 | 26 | 17 | 0 | 244 | 10 | 872 | 39 |
| 30,010 | 53 | 3 | 604 | 25 | 20 | 1 | 284 | 10 | 961 | 39 |
| 30,011 | 52 | 3 | 604 | 29 | 20 | 1 | 284 | 11 | 960 | 44 |
| 30,012 | 52 | 3 | 616 | 29 | 21 | 1 | 295 | 11 | 984 | 44 |
| 30,013 | 52 | 3 | 611 | 36 | 21 | 3 | 293 | 11 | 977 | 53 |
| 30,014 | 55 | 5 | 594 | 36 | 22 | 3 | 292 | 11 | 963 | 55 |
| 30,015 | 53 | 6 | 578 | 45 | 21 | 3 | 270 | 13 | 922 | 67 |
| 30,016 | 53 | 6 | 577 | 48 | 21 | 5 | 264 | 17 | 915 | 76 |
| 30,017 | 53 | 6 | 567 | 48 | 21 | 5 | 259 | 18 | 900 | 77 |
| 30,018 | 50 | 6 | 554 | 52 | 20 | 5 | 251 | 19 | 875 | 82 |
| 30,019 | 50 | 6 | 531 | 52 | 20 | 5 | 247 | 19 | 848 | 82 |
| 30,020 | 49 | 6 | 529 | 52 | 20 | 5 | 246 | 19 | 844 | 82 |
| 30,021 | 49 | 6 | 529 | 50 | 20 | 5 | 245 | 17 | 843 | 78 |
| 30,022 | 49 | 6 | 529 | 48 | 20 | 5 | 245 | 16 | 843 | 75 |
| 30,023 | 49 | 6 | 529 | 48 | 20 | 5 | 245 | 16 | 843 | 75 |
| 30,024 | 49 | 6 | 529 | 47 | 20 | 5 | 245 | 15 | 843 | 73 |
| 30,025 | 49 | 6 | 528 | 48 | 20 | 5 | 245 | 16 | 842 | 75 |
| 30,026 | 49 | 6 | 524 | 49 | 20 | 5 | 245 | 16 | 838 | 76 |
| 30,027 | 49 | 5 | 511 | 47 | 20 | 5 | 244 | 15 | 824 | 72 |
| 30,028 | 45 | 5 | 480 | 46 | 20 | 5 | 236 | 15 | 781 | 71 |
| 30,029 | 41 | 5 | 431 | 47 | 19 | 5 | 235 | 15 | 726 | 72 |
| 30,030 | 40 | 5 | 407 | 48 | 18 | 5 | 229 | 15 | 694 | 73 |
| 30,031 | 40 | 5 | 407 | 50 | 18 | 5 | 229 | 16 | 694 | 76 |
| 30,032 | 39 | 5 | 371 | 50 | 18 | 5 | 224 | 16 | 652 | 76 |
| 30,033 | 37 | 5 | 335 | 50 | 16 | 5 | 208 | 16 | 596 | 76 |
| 30,034 | 37 | 5 | 323 | 50 | 16 | 5 | 206 | 16 | 582 | 76 |
| 30,035 | 33 | 6 | 253 | 54 | 10 | 5 | 168 | 19 | 464 | 84 |
| 30,036 | 33 | 6 | 252 | 56 | 10 | 5 | 166 | 20 | 461 | 87 |
| 30,037 | 30 | 6 | 227 | 57 | 10 | 5 | 159 | 21 | 426 | 89 |
| 30,038 | 30 | 6 | 210 | 59 | 10 | 5 | 154 | 20 | 404 | 90 |
| 30,039 | 34 | 6 | 226 | 58 | 12 | 5 | 162 | 20 | 434 | 89 |
| 30,040 | 34 | 5 | 224 | 59 | 12 | 5 | 158 | 20 | 428 | 89 |
| 30,041 | 34 | 5 | 221 | 59 | 12 | 5 | 158 | 20 | 425 | 89 |

|        |    |   |     |    |    |   |     |    |     |    |
|--------|----|---|-----|----|----|---|-----|----|-----|----|
| 30,042 | 34 | 5 | 221 | 57 | 12 | 5 | 158 | 18 | 425 | 85 |
| 30,043 | 34 | 5 | 224 | 57 | 12 | 5 | 159 | 18 | 429 | 85 |
| 30,044 | 36 | 5 | 235 | 57 | 12 | 5 | 163 | 18 | 446 | 85 |
| 30,045 | 36 | 4 | 237 | 57 | 12 | 5 | 164 | 18 | 449 | 84 |
| 30,046 | 36 | 4 | 238 | 54 | 12 | 5 | 165 | 16 | 451 | 79 |
| 30,047 | 36 | 4 | 241 | 54 | 12 | 5 | 167 | 16 | 456 | 79 |
| 30,048 | 36 | 4 | 239 | 54 | 12 | 5 | 167 | 16 | 454 | 79 |
| 30,049 | 37 | 4 | 243 | 53 | 12 | 5 | 167 | 16 | 459 | 78 |
| 30,050 | 37 | 4 | 243 | 53 | 12 | 5 | 166 | 16 | 458 | 78 |
| 30,051 | 47 | 4 | 280 | 53 | 13 | 5 | 181 | 16 | 521 | 78 |
| 30,052 | 48 | 4 | 294 | 54 | 13 | 5 | 190 | 16 | 545 | 79 |
| 30,053 | 50 | 4 | 296 | 52 | 14 | 5 | 196 | 16 | 556 | 77 |
| 30,054 | 50 | 4 | 296 | 52 | 14 | 5 | 197 | 16 | 557 | 77 |
| 30,055 | 50 | 4 | 301 | 54 | 14 | 5 | 204 | 16 | 569 | 79 |
| 30,056 | 45 | 4 | 296 | 54 | 14 | 5 | 195 | 17 | 550 | 80 |
| 30,057 | 45 | 4 | 289 | 54 | 14 | 5 | 192 | 17 | 540 | 80 |
| 30,058 | 40 | 4 | 239 | 54 | 11 | 5 | 149 | 18 | 439 | 81 |
| 30,059 | 40 | 4 | 239 | 55 | 11 | 5 | 148 | 18 | 438 | 82 |
| 30,060 | 34 | 5 | 203 | 54 | 9  | 4 | 117 | 18 | 363 | 81 |
| 30,061 | 32 | 5 | 194 | 55 | 9  | 4 | 109 | 19 | 344 | 83 |
| 30,062 | 32 | 5 | 188 | 54 | 9  | 4 | 108 | 18 | 337 | 81 |
| 30,063 | 29 | 5 | 179 | 55 | 8  | 4 | 94  | 18 | 310 | 82 |
| 30,064 | 28 | 5 | 176 | 48 | 8  | 2 | 93  | 18 | 305 | 73 |
| 30,065 | 25 | 3 | 162 | 48 | 6  | 2 | 84  | 18 | 277 | 71 |
| 30,066 | 25 | 2 | 158 | 36 | 6  | 0 | 84  | 13 | 273 | 51 |
| 30,067 | 25 | 2 | 156 | 36 | 6  | 0 | 85  | 12 | 272 | 50 |
| 30,068 | 25 | 2 | 155 | 36 | 6  | 0 | 85  | 13 | 271 | 51 |
| 30,069 | 25 | 2 | 158 | 32 | 6  | 0 | 85  | 12 | 274 | 46 |
| 30,070 | 25 | 2 | 158 | 32 | 6  | 0 | 85  | 12 | 274 | 46 |
| 30,071 | 25 | 2 | 158 | 31 | 6  | 0 | 84  | 12 | 273 | 45 |
| 30,072 | 28 | 2 | 170 | 31 | 6  | 0 | 94  | 12 | 298 | 45 |
| 30,073 | 28 | 2 | 169 | 31 | 6  | 0 | 94  | 12 | 297 | 45 |
| 30,074 | 28 | 3 | 169 | 31 | 6  | 0 | 94  | 12 | 297 | 46 |
| 30,075 | 28 | 3 | 173 | 30 | 6  | 0 | 94  | 12 | 301 | 45 |
| 30,076 | 34 | 3 | 209 | 28 | 8  | 0 | 111 | 11 | 362 | 42 |
| 30,077 | 34 | 3 | 211 | 27 | 8  | 0 | 111 | 11 | 364 | 41 |
| 30,078 | 34 | 3 | 211 | 27 | 8  | 0 | 111 | 11 | 364 | 41 |
| 30,079 | 34 | 3 | 211 | 27 | 8  | 0 | 113 | 11 | 366 | 41 |
| 30,080 | 34 | 3 | 211 | 25 | 8  | 0 | 114 | 11 | 367 | 39 |
| 30,081 | 34 | 3 | 211 | 23 | 8  | 0 | 114 | 10 | 367 | 36 |
| 30,082 | 34 | 3 | 211 | 23 | 8  | 0 | 114 | 10 | 367 | 36 |

|        |    |   |     |    |   |   |     |    |     |    |
|--------|----|---|-----|----|---|---|-----|----|-----|----|
| 30,083 | 34 | 3 | 211 | 23 | 8 | 0 | 114 | 10 | 367 | 36 |
| 30,084 | 34 | 3 | 211 | 23 | 8 | 0 | 114 | 10 | 367 | 36 |
| 30,085 | 34 | 3 | 211 | 23 | 8 | 0 | 114 | 10 | 367 | 36 |
| 30,086 | 33 | 2 | 211 | 19 | 8 | 0 | 114 | 7  | 366 | 28 |
| 30,087 | 33 | 2 | 207 | 16 | 8 | 0 | 114 | 6  | 362 | 24 |
| 30,088 | 32 | 2 | 208 | 16 | 8 | 0 | 114 | 6  | 362 | 24 |
| 30,089 | 29 | 2 | 187 | 15 | 6 | 0 | 102 | 6  | 324 | 23 |
| 30,090 | 29 | 2 | 187 | 15 | 6 | 0 | 102 | 6  | 324 | 23 |
| 30,091 | 30 | 2 | 191 | 17 | 7 | 0 | 103 | 7  | 331 | 26 |
| 30,092 | 31 | 2 | 196 | 19 | 7 | 0 | 105 | 7  | 339 | 28 |
| 30,093 | 31 | 2 | 197 | 17 | 7 | 0 | 106 | 7  | 341 | 26 |
| 30,094 | 31 | 2 | 195 | 17 | 7 | 0 | 105 | 7  | 338 | 26 |
| 30,095 | 29 | 2 | 185 | 17 | 7 | 0 | 101 | 7  | 322 | 26 |
| 30,096 | 29 | 2 | 183 | 18 | 7 | 0 | 100 | 7  | 319 | 27 |
| 30,097 | 29 | 2 | 182 | 18 | 7 | 0 | 99  | 7  | 317 | 27 |
| 30,098 | 29 | 2 | 177 | 18 | 7 | 0 | 97  | 7  | 310 | 27 |
| 30,099 | 29 | 2 | 177 | 18 | 7 | 0 | 97  | 7  | 310 | 27 |
| 30,100 | 28 | 2 | 174 | 17 | 7 | 0 | 96  | 7  | 305 | 26 |
| 30,101 | 28 | 2 | 169 | 17 | 7 | 0 | 96  | 7  | 300 | 26 |
| 30,102 | 18 | 2 | 136 | 17 | 6 | 0 | 81  | 7  | 241 | 26 |
| 30,103 | 17 | 2 | 118 | 17 | 6 | 0 | 70  | 7  | 211 | 26 |
| 30,104 | 14 | 2 | 115 | 15 | 5 | 0 | 63  | 6  | 197 | 23 |
| 30,105 | 14 | 2 | 113 | 15 | 5 | 0 | 62  | 6  | 194 | 23 |
| 30,106 | 14 | 2 | 107 | 15 | 5 | 0 | 54  | 6  | 180 | 23 |
| 30,107 | 14 | 2 | 108 | 15 | 5 | 0 | 53  | 6  | 180 | 23 |
| 30,108 | 14 | 2 | 104 | 15 | 5 | 0 | 51  | 5  | 174 | 22 |
| 30,109 | 12 | 2 | 80  | 14 | 4 | 0 | 38  | 5  | 134 | 21 |
| 30,110 | 12 | 2 | 78  | 14 | 4 | 0 | 38  | 5  | 132 | 21 |
| 30,111 | 12 | 1 | 79  | 13 | 3 | 0 | 36  | 4  | 130 | 18 |
| 30,112 | 12 | 1 | 79  | 13 | 3 | 0 | 36  | 4  | 130 | 18 |
| 30,113 | 12 | 1 | 79  | 9  | 3 | 0 | 37  | 4  | 131 | 14 |
| 30,114 | 12 | 1 | 79  | 9  | 3 | 0 | 37  | 4  | 131 | 14 |
| 30,115 | 13 | 1 | 81  | 9  | 3 | 0 | 40  | 4  | 137 | 14 |
| 30,116 | 13 | 1 | 82  | 9  | 3 | 0 | 43  | 4  | 141 | 14 |
| 30,117 | 13 | 1 | 83  | 9  | 3 | 0 | 43  | 3  | 142 | 13 |
| 30,118 | 13 | 1 | 83  | 9  | 3 | 0 | 43  | 2  | 142 | 12 |
| 30,119 | 13 | 1 | 83  | 9  | 3 | 0 | 43  | 2  | 142 | 12 |
| 30,120 | 13 | 1 | 82  | 9  | 3 | 0 | 44  | 2  | 142 | 12 |
| 30,121 | 11 | 1 | 78  | 9  | 3 | 0 | 38  | 2  | 130 | 12 |
| 30,122 | 10 | 1 | 72  | 9  | 3 | 0 | 34  | 2  | 119 | 12 |
| 30,123 | 10 | 1 | 76  | 9  | 3 | 0 | 35  | 2  | 124 | 12 |

|        |    |   |    |    |   |   |    |    |     |     |
|--------|----|---|----|----|---|---|----|----|-----|-----|
| 30,124 | 14 | 0 | 92 | 9  | 3 | 0 | 42 | 2  | 151 | 11  |
| 30,125 | 15 | 0 | 98 | 9  | 3 | 0 | 47 | 2  | 163 | 11  |
| 30,126 | 9  | 0 | 64 | 9  | 1 | 0 | 31 | 2  | 105 | 11  |
| 30,127 | 9  | 0 | 66 | 9  | 1 | 0 | 32 | 2  | 108 | 11  |
| 30,128 | 9  | 0 | 64 | 9  | 1 | 0 | 32 | 2  | 106 | 11  |
| 30,129 | 9  | 0 | 64 | 9  | 1 | 0 | 30 | 2  | 104 | 11  |
| 30,130 | 9  | 0 | 67 | 9  | 1 | 0 | 30 | 2  | 107 | 11  |
| 30,131 | 9  | 0 | 68 | 9  | 1 | 0 | 30 | 2  | 108 | 11  |
| 30,132 | 9  | 0 | 68 | 9  | 1 | 0 | 31 | 2  | 109 | 11  |
| 30,133 | 9  | 0 | 68 | 9  | 1 | 0 | 31 | 2  | 109 | 11  |
| 30,134 | 9  | 0 | 68 | 9  | 1 | 0 | 32 | 2  | 110 | 11  |
| 30,135 | 10 | 1 | 71 | 9  | 1 | 0 | 33 | 2  | 115 | 12  |
| 30,136 | 10 | 1 | 71 | 9  | 1 | 0 | 33 | 2  | 115 | 12  |
| 30,137 | 10 | 1 | 71 | 11 | 1 | 0 | 33 | 4  | 115 | 16  |
| 30,138 | 10 | 2 | 71 | 14 | 1 | 1 | 33 | 4  | 115 | 21  |
| 30,139 | 10 | 2 | 68 | 15 | 1 | 2 | 33 | 6  | 112 | 25  |
| 30,140 | 10 | 2 | 68 | 17 | 1 | 2 | 35 | 7  | 114 | 28  |
| 30,141 | 9  | 2 | 67 | 10 | 0 | 3 | 34 | 6  | 110 | 21  |
| 30,142 | 10 | 2 | 65 | 10 | 0 | 3 | 34 | 6  | 109 | 21  |
| 30,143 | 9  | 3 | 60 | 25 | 0 | 4 | 33 | 26 | 102 | 58  |
| 30,144 | 9  | 3 | 59 | 35 | 0 | 5 | 32 | 29 | 100 | 72  |
| 30,145 | 11 | 3 | 58 | 50 | 0 | 6 | 32 | 32 | 101 | 91  |
| 30,146 | 11 | 4 | 57 | 58 | 1 | 6 | 32 | 33 | 101 | 101 |
| 30,147 | 11 | 4 | 58 | 62 | 1 | 6 | 32 | 36 | 102 | 108 |
| 30,148 | 11 | 4 | 58 | 62 | 1 | 6 | 32 | 36 | 102 | 108 |
| 30,149 | 11 | 4 | 57 | 66 | 1 | 6 | 33 | 36 | 102 | 112 |
| 30,150 | 11 | 4 | 58 | 69 | 1 | 6 | 34 | 36 | 104 | 115 |
| 30,151 | 11 | 4 | 58 | 69 | 1 | 6 | 34 | 36 | 104 | 115 |
| 30,152 | 11 | 4 | 59 | 71 | 1 | 6 | 34 | 37 | 105 | 118 |
| 30,153 | 11 | 4 | 59 | 72 | 1 | 6 | 34 | 37 | 105 | 119 |
| 30,154 | 11 | 4 | 59 | 72 | 1 | 6 | 37 | 37 | 108 | 119 |
| 30,155 | 10 | 4 | 58 | 72 | 1 | 6 | 37 | 37 | 106 | 119 |
| 30,156 | 10 | 4 | 59 | 72 | 1 | 6 | 37 | 37 | 107 | 119 |
| 30,157 | 10 | 4 | 59 | 72 | 1 | 6 | 37 | 37 | 107 | 119 |
| 30,158 | 10 | 4 | 57 | 72 | 1 | 6 | 37 | 37 | 105 | 119 |
| 30,159 | 10 | 4 | 57 | 72 | 1 | 6 | 37 | 37 | 105 | 119 |
| 30,160 | 10 | 4 | 57 | 72 | 1 | 6 | 37 | 37 | 105 | 119 |
| 30,161 | 10 | 4 | 57 | 72 | 1 | 6 | 37 | 37 | 105 | 119 |
| 30,162 | 10 | 4 | 55 | 72 | 1 | 6 | 37 | 37 | 103 | 119 |
| 30,163 | 10 | 4 | 55 | 72 | 1 | 6 | 36 | 37 | 102 | 119 |
| 30,164 | 10 | 4 | 55 | 72 | 1 | 6 | 37 | 37 | 103 | 119 |



|        |   |   |    |    |   |    |    |    |     |     |
|--------|---|---|----|----|---|----|----|----|-----|-----|
| 30,165 | 9 | 4 | 53 | 72 | 1 | 6  | 34 | 37 | 97  | 119 |
| 30,166 | 9 | 4 | 53 | 72 | 1 | 6  | 30 | 37 | 93  | 119 |
| 30,167 | 9 | 4 | 52 | 72 | 1 | 6  | 30 | 37 | 92  | 119 |
| 30,168 | 9 | 4 | 52 | 72 | 1 | 6  | 30 | 37 | 92  | 119 |
| 30,169 | 9 | 4 | 52 | 72 | 1 | 6  | 30 | 37 | 92  | 119 |
| 30,170 | 9 | 4 | 52 | 73 | 1 | 6  | 30 | 37 | 92  | 120 |
| 30,171 | 9 | 4 | 50 | 73 | 1 | 6  | 29 | 37 | 89  | 120 |
| 30,172 | 9 | 4 | 56 | 73 | 1 | 6  | 31 | 37 | 97  | 120 |
| 30,173 | 9 | 4 | 57 | 73 | 1 | 6  | 31 | 37 | 98  | 120 |
| 30,174 | 9 | 5 | 53 | 73 | 1 | 6  | 30 | 37 | 93  | 121 |
| 30,175 | 5 | 5 | 34 | 73 | 1 | 6  | 23 | 37 | 63  | 121 |
| 30,176 | 4 | 5 | 28 | 73 | 1 | 6  | 19 | 37 | 52  | 121 |
| 30,177 | 4 | 5 | 41 | 73 | 1 | 6  | 30 | 37 | 76  | 121 |
| 30,178 | 4 | 5 | 40 | 73 | 1 | 6  | 30 | 37 | 75  | 121 |
| 30,179 | 4 | 5 | 40 | 73 | 1 | 6  | 30 | 37 | 75  | 121 |
| 30,180 | 4 | 5 | 40 | 73 | 1 | 6  | 32 | 37 | 77  | 121 |
| 30,181 | 4 | 5 | 37 | 73 | 1 | 6  | 32 | 37 | 74  | 121 |
| 30,182 | 4 | 5 | 36 | 73 | 1 | 6  | 30 | 37 | 71  | 121 |
| 30,183 | 4 | 5 | 36 | 74 | 1 | 6  | 33 | 37 | 74  | 122 |
| 30,184 | 4 | 5 | 39 | 74 | 1 | 7  | 35 | 37 | 79  | 123 |
| 30,185 | 4 | 5 | 40 | 75 | 1 | 7  | 34 | 37 | 79  | 124 |
| 30,186 | 3 | 4 | 41 | 75 | 1 | 7  | 35 | 37 | 80  | 123 |
| 30,187 | 3 | 4 | 51 | 75 | 2 | 9  | 37 | 38 | 93  | 126 |
| 30,188 | 3 | 4 | 51 | 73 | 2 | 10 | 37 | 36 | 93  | 123 |
| 30,189 | 3 | 3 | 52 | 69 | 2 | 8  | 40 | 33 | 97  | 113 |
| 30,190 | 3 | 3 | 52 | 69 | 2 | 8  | 40 | 33 | 97  | 113 |
| 30,191 | 3 | 3 | 52 | 66 | 2 | 8  | 37 | 32 | 94  | 109 |
| 30,192 | 3 | 3 | 60 | 66 | 2 | 7  | 39 | 32 | 104 | 108 |
| 30,193 | 3 | 2 | 60 | 51 | 2 | 6  | 39 | 12 | 104 | 71  |
| 30,194 | 3 | 2 | 61 | 51 | 2 | 7  | 39 | 13 | 105 | 73  |
| 30,195 | 1 | 2 | 61 | 41 | 2 | 6  | 39 | 10 | 103 | 59  |
| 30,196 | 1 | 2 | 61 | 26 | 2 | 5  | 39 | 7  | 103 | 40  |
| 30,197 | 1 | 1 | 61 | 18 | 1 | 5  | 39 | 6  | 102 | 30  |
| 30,198 | 1 | 1 | 60 | 14 | 1 | 5  | 39 | 3  | 101 | 23  |
| 30,199 | 1 | 1 | 60 | 14 | 1 | 5  | 38 | 3  | 100 | 23  |
| 30,200 | 2 | 1 | 61 | 10 | 1 | 5  | 37 | 3  | 101 | 19  |
| 30,201 | 2 | 1 | 64 | 7  | 2 | 5  | 38 | 3  | 106 | 16  |
| 30,202 | 3 | 1 | 73 | 7  | 2 | 5  | 41 | 3  | 119 | 16  |
| 30,203 | 3 | 1 | 73 | 5  | 2 | 5  | 41 | 2  | 119 | 13  |
| 30,204 | 3 | 1 | 74 | 5  | 2 | 5  | 42 | 2  | 121 | 13  |
| 30,205 | 3 | 1 | 74 | 5  | 2 | 5  | 39 | 3  | 118 | 14  |

|        |   |   |    |    |   |   |    |    |     |    |
|--------|---|---|----|----|---|---|----|----|-----|----|
| 30,206 | 3 | 1 | 72 | 5  | 2 | 5 | 39 | 3  | 116 | 14 |
| 30,207 | 3 | 1 | 79 | 5  | 3 | 5 | 42 | 3  | 127 | 14 |
| 30,208 | 3 | 1 | 79 | 5  | 3 | 5 | 42 | 3  | 127 | 14 |
| 30,209 | 3 | 1 | 82 | 5  | 4 | 5 | 45 | 4  | 134 | 15 |
| 30,210 | 3 | 2 | 82 | 5  | 4 | 5 | 45 | 4  | 134 | 16 |
| 30,211 | 3 | 2 | 83 | 7  | 5 | 5 | 46 | 5  | 137 | 19 |
| 30,212 | 3 | 2 | 83 | 7  | 5 | 5 | 46 | 5  | 137 | 19 |
| 30,213 | 3 | 2 | 88 | 9  | 5 | 5 | 49 | 6  | 145 | 22 |
| 30,214 | 3 | 2 | 89 | 9  | 5 | 5 | 49 | 6  | 146 | 22 |
| 30,215 | 3 | 2 | 89 | 10 | 5 | 5 | 48 | 6  | 145 | 23 |
| 30,216 | 3 | 2 | 89 | 11 | 5 | 5 | 48 | 6  | 145 | 24 |
| 30,217 | 3 | 2 | 88 | 11 | 5 | 5 | 48 | 6  | 144 | 24 |
| 30,218 | 3 | 2 | 88 | 11 | 5 | 5 | 48 | 6  | 144 | 24 |
| 30,219 | 3 | 2 | 88 | 11 | 5 | 5 | 48 | 6  | 144 | 24 |
| 30,220 | 4 | 2 | 88 | 11 | 5 | 5 | 48 | 6  | 145 | 24 |
| 30,221 | 4 | 2 | 92 | 11 | 5 | 5 | 49 | 6  | 150 | 24 |
| 30,222 | 4 | 2 | 84 | 13 | 5 | 5 | 47 | 8  | 140 | 28 |
| 30,223 | 4 | 3 | 84 | 14 | 5 | 5 | 47 | 9  | 140 | 31 |
| 30,224 | 4 | 3 | 83 | 18 | 5 | 5 | 48 | 11 | 140 | 37 |
| 30,225 | 4 | 2 | 84 | 20 | 5 | 5 | 48 | 12 | 141 | 39 |
| 30,226 | 4 | 2 | 85 | 21 | 5 | 5 | 48 | 12 | 142 | 40 |
| 30,227 | 4 | 2 | 75 | 23 | 5 | 5 | 38 | 12 | 122 | 42 |
| 30,228 | 4 | 2 | 73 | 23 | 5 | 5 | 35 | 14 | 117 | 44 |
| 30,229 | 7 | 2 | 74 | 23 | 5 | 5 | 34 | 14 | 120 | 44 |
| 30,230 | 7 | 2 | 74 | 23 | 5 | 6 | 33 | 14 | 119 | 45 |
| 30,231 | 7 | 2 | 77 | 23 | 5 | 6 | 33 | 14 | 122 | 45 |
| 30,232 | 7 | 2 | 83 | 23 | 5 | 6 | 37 | 14 | 132 | 45 |
| 30,233 | 7 | 2 | 83 | 23 | 5 | 6 | 37 | 14 | 132 | 45 |
| 30,234 | 7 | 2 | 83 | 22 | 5 | 6 | 34 | 14 | 129 | 44 |
| 30,235 | 8 | 2 | 87 | 22 | 5 | 5 | 38 | 15 | 138 | 44 |
| 30,236 | 8 | 2 | 87 | 22 | 5 | 5 | 38 | 15 | 138 | 44 |
| 30,237 | 8 | 3 | 86 | 22 | 5 | 5 | 38 | 14 | 137 | 44 |
| 30,238 | 8 | 3 | 79 | 22 | 4 | 3 | 36 | 14 | 127 | 42 |
| 30,239 | 8 | 3 | 81 | 22 | 4 | 2 | 36 | 14 | 129 | 41 |
| 30,240 | 8 | 3 | 81 | 22 | 4 | 2 | 35 | 14 | 128 | 41 |
| 30,241 | 8 | 3 | 76 | 22 | 4 | 2 | 33 | 14 | 121 | 41 |
| 30,242 | 8 | 3 | 76 | 22 | 4 | 2 | 33 | 14 | 121 | 41 |
| 30,243 | 8 | 3 | 79 | 22 | 4 | 2 | 33 | 14 | 124 | 41 |
| 30,244 | 7 | 3 | 78 | 22 | 4 | 2 | 33 | 14 | 122 | 41 |
| 30,245 | 7 | 3 | 77 | 22 | 4 | 1 | 33 | 14 | 121 | 40 |
| 30,246 | 7 | 3 | 77 | 23 | 4 | 1 | 33 | 14 | 121 | 41 |

|        |    |   |     |    |    |   |     |    |     |     |
|--------|----|---|-----|----|----|---|-----|----|-----|-----|
| 30,247 | 7  | 3 | 82  | 28 | 4  | 1 | 36  | 17 | 129 | 49  |
| 30,248 | 7  | 3 | 82  | 30 | 4  | 1 | 36  | 17 | 129 | 51  |
| 30,249 | 8  | 3 | 92  | 54 | 4  | 2 | 41  | 19 | 145 | 78  |
| 30,250 | 7  | 4 | 94  | 54 | 4  | 2 | 41  | 20 | 146 | 80  |
| 30,251 | 7  | 5 | 97  | 57 | 3  | 2 | 46  | 21 | 153 | 85  |
| 30,252 | 6  | 5 | 89  | 57 | 3  | 2 | 43  | 22 | 141 | 86  |
| 30,253 | 7  | 5 | 121 | 58 | 6  | 2 | 52  | 24 | 186 | 89  |
| 30,254 | 7  | 5 | 121 | 58 | 6  | 2 | 52  | 24 | 186 | 89  |
| 30,255 | 8  | 5 | 131 | 58 | 6  | 2 | 53  | 24 | 198 | 89  |
| 30,256 | 8  | 5 | 132 | 58 | 6  | 2 | 52  | 23 | 198 | 88  |
| 30,257 | 8  | 5 | 132 | 61 | 6  | 2 | 52  | 23 | 198 | 91  |
| 30,258 | 10 | 5 | 132 | 61 | 5  | 2 | 52  | 23 | 199 | 91  |
| 30,259 | 10 | 5 | 138 | 62 | 5  | 2 | 53  | 25 | 206 | 94  |
| 30,260 | 10 | 7 | 135 | 63 | 4  | 3 | 50  | 27 | 199 | 100 |
| 30,261 | 11 | 6 | 134 | 63 | 4  | 3 | 49  | 27 | 198 | 99  |
| 30,262 | 12 | 6 | 165 | 63 | 5  | 3 | 59  | 26 | 241 | 98  |
| 30,263 | 12 | 7 | 165 | 63 | 5  | 3 | 57  | 26 | 239 | 99  |
| 30,264 | 12 | 7 | 160 | 61 | 5  | 3 | 56  | 26 | 233 | 97  |
| 30,265 | 14 | 7 | 208 | 63 | 8  | 3 | 103 | 27 | 333 | 100 |
| 30,266 | 14 | 7 | 208 | 63 | 8  | 3 | 103 | 27 | 333 | 100 |
| 30,267 | 24 | 7 | 233 | 62 | 8  | 3 | 144 | 27 | 409 | 99  |
| 30,268 | 25 | 7 | 261 | 62 | 9  | 3 | 154 | 27 | 449 | 99  |
| 30,269 | 25 | 7 | 290 | 62 | 10 | 3 | 174 | 27 | 499 | 99  |
| 30,270 | 25 | 7 | 290 | 62 | 10 | 3 | 174 | 29 | 499 | 101 |
| 30,271 | 26 | 7 | 305 | 61 | 10 | 3 | 191 | 29 | 532 | 100 |
| 30,272 | 26 | 7 | 301 | 61 | 10 | 3 | 190 | 29 | 527 | 100 |
| 30,273 | 26 | 7 | 303 | 59 | 10 | 3 | 191 | 27 | 530 | 96  |
| 30,274 | 27 | 6 | 304 | 58 | 10 | 3 | 194 | 26 | 535 | 93  |
| 30,275 | 27 | 6 | 304 | 52 | 10 | 3 | 194 | 23 | 535 | 84  |
| 30,276 | 27 | 6 | 303 | 52 | 10 | 3 | 194 | 23 | 534 | 84  |
| 30,277 | 27 | 6 | 302 | 51 | 10 | 3 | 194 | 23 | 533 | 83  |
| 30,278 | 28 | 6 | 300 | 50 | 10 | 3 | 193 | 24 | 531 | 83  |
| 30,279 | 28 | 6 | 325 | 50 | 10 | 3 | 195 | 22 | 558 | 81  |
| 30,280 | 28 | 6 | 332 | 50 | 10 | 3 | 199 | 23 | 569 | 82  |
| 30,281 | 39 | 6 | 350 | 54 | 10 | 2 | 205 | 23 | 604 | 85  |
| 30,282 | 39 | 6 | 350 | 54 | 10 | 2 | 203 | 23 | 602 | 85  |
| 30,283 | 41 | 6 | 347 | 54 | 10 | 2 | 203 | 23 | 601 | 85  |
| 30,284 | 41 | 6 | 345 | 56 | 10 | 2 | 199 | 25 | 595 | 89  |
| 30,285 | 41 | 6 | 342 | 58 | 10 | 2 | 199 | 25 | 592 | 91  |
| 30,286 | 52 | 6 | 447 | 57 | 14 | 2 | 229 | 24 | 742 | 89  |
| 30,287 | 52 | 6 | 452 | 57 | 16 | 2 | 230 | 25 | 750 | 90  |

|        |    |   |     |    |    |   |     |    |     |     |
|--------|----|---|-----|----|----|---|-----|----|-----|-----|
| 30,288 | 52 | 5 | 459 | 57 | 17 | 2 | 247 | 25 | 775 | 89  |
| 30,289 | 52 | 5 | 459 | 57 | 17 | 2 | 250 | 25 | 778 | 89  |
| 30,290 | 54 | 5 | 477 | 57 | 17 | 2 | 257 | 25 | 805 | 89  |
| 30,291 | 54 | 5 | 476 | 63 | 17 | 2 | 256 | 28 | 803 | 98  |
| 30,292 | 54 | 5 | 473 | 63 | 17 | 2 | 256 | 28 | 800 | 98  |
| 30,293 | 54 | 5 | 472 | 65 | 17 | 2 | 258 | 29 | 801 | 101 |
| 30,294 | 55 | 5 | 475 | 71 | 17 | 2 | 260 | 31 | 807 | 109 |
| 30,295 | 55 | 5 | 475 | 71 | 17 | 2 | 260 | 31 | 807 | 109 |
| 30,296 | 55 | 5 | 475 | 71 | 17 | 2 | 260 | 30 | 807 | 108 |
| 30,297 | 55 | 5 | 477 | 65 | 17 | 2 | 260 | 27 | 809 | 99  |
| 30,298 | 56 | 5 | 476 | 65 | 17 | 2 | 257 | 28 | 806 | 100 |
| 30,299 | 55 | 5 | 466 | 65 | 17 | 2 | 252 | 28 | 790 | 100 |
| 30,300 | 55 | 5 | 466 | 40 | 17 | 1 | 252 | 26 | 790 | 72  |
| 30,301 | 55 | 4 | 467 | 40 | 17 | 1 | 258 | 27 | 797 | 72  |
| 30,302 | 55 | 3 | 461 | 37 | 17 | 1 | 253 | 26 | 786 | 67  |
| 30,303 | 54 | 3 | 449 | 37 | 16 | 1 | 251 | 25 | 770 | 66  |
| 30,304 | 54 | 3 | 433 | 35 | 14 | 1 | 245 | 23 | 746 | 62  |
| 30,305 | 54 | 3 | 432 | 36 | 14 | 1 | 244 | 23 | 744 | 63  |
| 30,306 | 53 | 3 | 423 | 36 | 14 | 1 | 243 | 23 | 733 | 63  |
| 30,307 | 53 | 3 | 421 | 33 | 14 | 1 | 243 | 23 | 731 | 60  |
| 30,308 | 53 | 3 | 421 | 33 | 14 | 1 | 243 | 23 | 731 | 60  |
| 30,309 | 51 | 3 | 414 | 33 | 14 | 1 | 242 | 21 | 721 | 58  |
| 30,310 | 52 | 1 | 408 | 32 | 14 | 0 | 241 | 18 | 715 | 51  |
| 30,311 | 52 | 1 | 407 | 32 | 14 | 0 | 241 | 18 | 714 | 51  |
| 30,312 | 50 | 0 | 386 | 31 | 12 | 0 | 235 | 17 | 683 | 48  |
| 30,313 | 50 | 0 | 378 | 32 | 12 | 0 | 231 | 17 | 671 | 49  |
| 30,314 | 48 | 0 | 351 | 32 | 9  | 0 | 210 | 17 | 618 | 49  |
| 30,315 | 48 | 0 | 350 | 29 | 9  | 0 | 207 | 16 | 614 | 45  |
| 30,316 | 48 | 0 | 341 | 29 | 9  | 0 | 187 | 16 | 585 | 45  |
| 30,317 | 41 | 1 | 326 | 29 | 9  | 0 | 159 | 16 | 535 | 46  |
| 30,318 | 40 | 1 | 302 | 30 | 8  | 0 | 152 | 17 | 502 | 48  |
| 30,319 | 40 | 2 | 288 | 30 | 7  | 0 | 143 | 17 | 478 | 49  |
| 30,320 | 40 | 2 | 273 | 30 | 7  | 0 | 132 | 17 | 452 | 49  |
| 30,321 | 40 | 2 | 278 | 31 | 8  | 0 | 124 | 15 | 450 | 48  |
| 30,322 | 39 | 2 | 281 | 31 | 9  | 0 | 119 | 15 | 448 | 48  |
| 30,323 | 39 | 2 | 281 | 32 | 9  | 0 | 118 | 15 | 447 | 49  |
| 30,324 | 40 | 2 | 288 | 32 | 9  | 0 | 121 | 15 | 458 | 49  |
| 30,325 | 40 | 2 | 307 | 32 | 9  | 0 | 127 | 15 | 483 | 49  |
| 30,326 | 40 | 2 | 308 | 32 | 9  | 0 | 127 | 15 | 484 | 49  |
| 30,327 | 40 | 2 | 309 | 32 | 9  | 0 | 127 | 16 | 485 | 50  |
| 30,328 | 40 | 2 | 310 | 32 | 9  | 0 | 128 | 16 | 487 | 50  |

|        |    |   |     |    |    |   |     |    |     |    |
|--------|----|---|-----|----|----|---|-----|----|-----|----|
| 30,329 | 40 | 2 | 311 | 31 | 9  | 0 | 129 | 15 | 489 | 48 |
| 30,330 | 38 | 2 | 282 | 31 | 9  | 1 | 126 | 14 | 455 | 48 |
| 30,331 | 38 | 2 | 277 | 31 | 9  | 1 | 122 | 14 | 446 | 48 |
| 30,332 | 28 | 2 | 268 | 27 | 11 | 1 | 121 | 14 | 428 | 44 |
| 30,333 | 28 | 2 | 267 | 27 | 11 | 1 | 121 | 14 | 427 | 44 |
| 30,334 | 26 | 2 | 269 | 28 | 11 | 1 | 120 | 14 | 426 | 45 |
| 30,335 | 25 | 2 | 262 | 26 | 11 | 1 | 118 | 12 | 416 | 41 |
| 30,336 | 20 | 2 | 225 | 24 | 10 | 1 | 109 | 12 | 364 | 39 |
| 30,337 | 14 | 2 | 161 | 24 | 7  | 1 | 89  | 11 | 271 | 38 |
| 30,338 | 14 | 2 | 157 | 24 | 5  | 1 | 89  | 11 | 265 | 38 |
| 30,339 | 14 | 2 | 147 | 24 | 4  | 1 | 70  | 11 | 235 | 38 |
| 30,340 | 14 | 2 | 144 | 24 | 4  | 1 | 67  | 11 | 229 | 38 |
| 30,341 | 12 | 2 | 124 | 18 | 4  | 1 | 59  | 9  | 199 | 30 |
| 30,342 | 12 | 2 | 125 | 18 | 4  | 1 | 59  | 9  | 200 | 30 |
| 30,343 | 12 | 2 | 124 | 18 | 4  | 1 | 57  | 9  | 197 | 30 |
| 30,344 | 11 | 2 | 121 | 10 | 4  | 1 | 56  | 6  | 192 | 19 |
| 30,345 | 11 | 2 | 121 | 10 | 4  | 1 | 56  | 6  | 192 | 19 |
| 30,346 | 11 | 2 | 121 | 9  | 4  | 1 | 57  | 6  | 193 | 18 |
| 30,347 | 11 | 2 | 121 | 8  | 4  | 1 | 57  | 6  | 193 | 17 |
| 30,348 | 11 | 2 | 117 | 8  | 4  | 1 | 57  | 6  | 189 | 17 |
| 30,349 | 10 | 2 | 116 | 8  | 4  | 1 | 57  | 7  | 187 | 18 |
| 30,350 | 10 | 2 | 115 | 8  | 4  | 1 | 56  | 7  | 185 | 18 |
| 30,351 | 10 | 3 | 111 | 8  | 4  | 1 | 51  | 9  | 176 | 21 |
| 30,352 | 10 | 3 | 111 | 8  | 4  | 1 | 51  | 7  | 176 | 19 |
| 30,353 | 10 | 5 | 110 | 9  | 4  | 1 | 51  | 7  | 175 | 22 |
| 30,354 | 10 | 5 | 107 | 11 | 4  | 1 | 50  | 7  | 171 | 24 |
| 30,355 | 10 | 5 | 113 | 11 | 4  | 1 | 52  | 11 | 179 | 28 |
| 30,356 | 10 | 5 | 114 | 13 | 4  | 1 | 53  | 11 | 181 | 30 |
| 30,357 | 10 | 5 | 113 | 14 | 4  | 1 | 53  | 11 | 180 | 31 |
| 30,358 | 10 | 7 | 113 | 16 | 4  | 1 | 54  | 11 | 181 | 35 |
| 30,359 | 10 | 7 | 113 | 16 | 4  | 1 | 53  | 11 | 180 | 35 |
| 30,360 | 10 | 7 | 113 | 15 | 4  | 1 | 53  | 15 | 180 | 38 |
| 30,361 | 9  | 7 | 113 | 15 | 4  | 1 | 53  | 15 | 179 | 38 |
| 30,362 | 9  | 7 | 113 | 18 | 4  | 1 | 53  | 15 | 179 | 41 |
| 30,363 | 9  | 7 | 113 | 18 | 4  | 1 | 53  | 16 | 179 | 42 |
| 30,364 | 9  | 7 | 112 | 22 | 4  | 1 | 55  | 16 | 180 | 46 |
| 30,365 | 9  | 7 | 112 | 22 | 4  | 1 | 55  | 16 | 180 | 46 |
| 30,366 | 9  | 7 | 111 | 25 | 4  | 1 | 54  | 17 | 178 | 50 |
| 30,367 | 9  | 7 | 100 | 26 | 4  | 1 | 52  | 17 | 165 | 51 |
| 30,368 | 6  | 6 | 90  | 25 | 4  | 1 | 40  | 16 | 140 | 48 |
| 30,369 | 6  | 5 | 87  | 26 | 4  | 1 | 37  | 17 | 134 | 49 |

|        |    |    |     |    |    |   |     |    |     |     |
|--------|----|----|-----|----|----|---|-----|----|-----|-----|
| 30,370 | 6  | 6  | 86  | 28 | 5  | 1 | 39  | 18 | 136 | 53  |
| 30,371 | 5  | 7  | 81  | 29 | 5  | 2 | 40  | 20 | 131 | 58  |
| 30,372 | 5  | 9  | 84  | 30 | 4  | 2 | 41  | 20 | 134 | 61  |
| 30,373 | 5  | 9  | 75  | 30 | 3  | 2 | 41  | 20 | 124 | 61  |
| 30,374 | 5  | 9  | 75  | 30 | 3  | 2 | 42  | 20 | 125 | 61  |
| 30,375 | 4  | 9  | 68  | 31 | 3  | 2 | 39  | 21 | 114 | 63  |
| 30,376 | 3  | 9  | 48  | 31 | 3  | 2 | 29  | 21 | 83  | 63  |
| 30,377 | 3  | 9  | 47  | 32 | 3  | 2 | 29  | 21 | 82  | 64  |
| 30,378 | 3  | 9  | 47  | 33 | 3  | 2 | 28  | 21 | 81  | 65  |
| 30,379 | 3  | 9  | 45  | 36 | 3  | 3 | 28  | 22 | 79  | 70  |
| 30,380 | 2  | 9  | 44  | 38 | 3  | 3 | 27  | 23 | 76  | 73  |
| 30,381 | 2  | 9  | 45  | 43 | 3  | 3 | 27  | 28 | 77  | 83  |
| 30,382 | 2  | 10 | 42  | 44 | 1  | 3 | 25  | 28 | 70  | 85  |
| 30,383 | 1  | 11 | 33  | 54 | 1  | 3 | 21  | 34 | 56  | 102 |
| 30,384 | 1  | 13 | 30  | 59 | 1  | 3 | 20  | 38 | 52  | 113 |
| 30,385 | 1  | 13 | 29  | 58 | 1  | 3 | 20  | 38 | 51  | 112 |
| 30,386 | 1  | 14 | 29  | 60 | 1  | 3 | 20  | 40 | 51  | 117 |
| 30,387 | 1  | 14 | 28  | 60 | 1  | 3 | 20  | 41 | 50  | 118 |
| 30,388 | 1  | 14 | 34  | 60 | 1  | 3 | 19  | 41 | 55  | 118 |
| 30,389 | 1  | 14 | 34  | 60 | 1  | 3 | 19  | 41 | 55  | 118 |
| 30,390 | 1  | 14 | 34  | 61 | 1  | 3 | 19  | 42 | 55  | 120 |
| 30,391 | 1  | 14 | 38  | 62 | 1  | 3 | 19  | 42 | 59  | 121 |
| 30,392 | 1  | 14 | 38  | 62 | 1  | 3 | 19  | 42 | 59  | 121 |
| 30,393 | 1  | 14 | 44  | 63 | 1  | 3 | 24  | 42 | 70  | 122 |
| 30,394 | 1  | 14 | 59  | 64 | 1  | 3 | 28  | 42 | 89  | 123 |
| 30,395 | 1  | 14 | 62  | 65 | 1  | 3 | 28  | 42 | 92  | 124 |
| 30,396 | 2  | 14 | 68  | 65 | 1  | 3 | 29  | 42 | 100 | 124 |
| 30,397 | 2  | 14 | 68  | 65 | 1  | 3 | 29  | 42 | 100 | 124 |
| 30,398 | 4  | 14 | 76  | 65 | 2  | 3 | 30  | 42 | 112 | 124 |
| 30,399 | 8  | 14 | 106 | 65 | 2  | 3 | 46  | 40 | 162 | 122 |
| 30,400 | 12 | 13 | 127 | 65 | 3  | 3 | 63  | 38 | 205 | 119 |
| 30,401 | 23 | 13 | 172 | 65 | 13 | 3 | 89  | 38 | 297 | 119 |
| 30,402 | 32 | 13 | 193 | 65 | 14 | 3 | 109 | 38 | 348 | 119 |
| 30,403 | 32 | 11 | 202 | 64 | 16 | 3 | 115 | 38 | 365 | 116 |
| 30,404 | 32 | 11 | 206 | 64 | 16 | 3 | 115 | 38 | 369 | 116 |
| 30,405 | 33 | 11 | 208 | 62 | 16 | 3 | 115 | 38 | 372 | 114 |
| 30,406 | 33 | 11 | 206 | 61 | 16 | 3 | 115 | 34 | 370 | 109 |
| 30,407 | 33 | 11 | 206 | 60 | 16 | 3 | 114 | 34 | 369 | 108 |
| 30,408 | 33 | 11 | 207 | 59 | 16 | 3 | 114 | 34 | 370 | 107 |
| 30,409 | 33 | 9  | 209 | 57 | 16 | 3 | 115 | 34 | 373 | 103 |
| 30,410 | 35 | 9  | 214 | 57 | 16 | 3 | 116 | 30 | 381 | 99  |

|        |    |   |     |    |    |   |     |    |     |     |
|--------|----|---|-----|----|----|---|-----|----|-----|-----|
| 30,411 | 35 | 9 | 214 | 57 | 16 | 3 | 116 | 32 | 381 | 101 |
| 30,412 | 35 | 9 | 214 | 60 | 16 | 3 | 119 | 34 | 384 | 106 |
| 30,413 | 35 | 9 | 215 | 57 | 16 | 3 | 122 | 34 | 388 | 103 |
| 30,414 | 36 | 9 | 223 | 56 | 16 | 3 | 125 | 33 | 400 | 101 |
| 30,415 | 36 | 9 | 223 | 51 | 16 | 3 | 124 | 35 | 399 | 98  |
| 30,416 | 36 | 9 | 223 | 53 | 16 | 3 | 124 | 35 | 399 | 100 |
| 30,417 | 36 | 9 | 223 | 50 | 16 | 3 | 124 | 34 | 399 | 96  |
| 30,418 | 36 | 9 | 223 | 49 | 16 | 3 | 124 | 34 | 399 | 95  |
| 30,419 | 36 | 9 | 224 | 49 | 16 | 3 | 123 | 34 | 399 | 95  |
| 30,420 | 36 | 9 | 224 | 48 | 16 | 3 | 123 | 33 | 399 | 93  |
| 30,421 | 36 | 9 | 222 | 46 | 15 | 3 | 121 | 32 | 394 | 90  |
| 30,422 | 36 | 8 | 221 | 45 | 15 | 2 | 118 | 31 | 390 | 86  |
| 30,423 | 36 | 6 | 213 | 43 | 15 | 2 | 115 | 31 | 379 | 82  |
| 30,424 | 36 | 6 | 211 | 42 | 15 | 2 | 114 | 31 | 376 | 81  |
| 30,425 | 36 | 6 | 211 | 42 | 15 | 2 | 114 | 31 | 376 | 81  |
| 30,426 | 36 | 6 | 211 | 41 | 15 | 2 | 114 | 30 | 376 | 79  |
| 30,427 | 36 | 6 | 210 | 40 | 15 | 2 | 114 | 30 | 375 | 78  |
| 30,428 | 36 | 7 | 210 | 40 | 15 | 2 | 114 | 30 | 375 | 79  |
| 30,429 | 36 | 7 | 210 | 34 | 15 | 1 | 114 | 27 | 375 | 69  |
| 30,430 | 36 | 7 | 210 | 34 | 15 | 1 | 116 | 27 | 377 | 69  |
| 30,431 | 35 | 7 | 210 | 34 | 15 | 1 | 116 | 27 | 376 | 69  |
| 30,432 | 35 | 8 | 209 | 29 | 15 | 0 | 116 | 22 | 375 | 59  |
| 30,433 | 35 | 7 | 210 | 28 | 15 | 0 | 116 | 22 | 376 | 57  |
| 30,434 | 35 | 6 | 211 | 18 | 15 | 0 | 116 | 18 | 377 | 42  |
| 30,435 | 35 | 4 | 214 | 13 | 15 | 0 | 118 | 14 | 382 | 31  |
| 30,436 | 35 | 4 | 214 | 14 | 15 | 0 | 118 | 14 | 382 | 32  |
| 30,437 | 35 | 3 | 214 | 12 | 15 | 0 | 118 | 12 | 382 | 27  |
| 30,438 | 35 | 3 | 211 | 12 | 15 | 0 | 118 | 11 | 379 | 26  |
| 30,439 | 35 | 3 | 212 | 12 | 15 | 0 | 120 | 11 | 382 | 26  |
| 30,440 | 35 | 3 | 212 | 12 | 15 | 0 | 120 | 11 | 382 | 26  |
| 30,441 | 35 | 3 | 215 | 11 | 15 | 0 | 121 | 11 | 386 | 25  |
| 30,442 | 35 | 3 | 213 | 10 | 15 | 0 | 121 | 10 | 384 | 23  |
| 30,443 | 35 | 3 | 206 | 9  | 15 | 0 | 116 | 10 | 372 | 22  |
| 30,444 | 35 | 3 | 205 | 9  | 15 | 0 | 116 | 10 | 371 | 22  |
| 30,445 | 35 | 3 | 192 | 7  | 15 | 0 | 114 | 10 | 356 | 20  |
| 30,446 | 35 | 4 | 188 | 7  | 15 | 0 | 113 | 12 | 351 | 23  |
| 30,447 | 34 | 4 | 187 | 8  | 15 | 1 | 113 | 12 | 349 | 25  |
| 30,448 | 34 | 4 | 188 | 11 | 15 | 1 | 113 | 14 | 350 | 30  |
| 30,449 | 32 | 6 | 181 | 19 | 14 | 1 | 113 | 18 | 340 | 44  |
| 30,450 | 28 | 6 | 151 | 24 | 14 | 1 | 97  | 20 | 290 | 51  |
| 30,451 | 24 | 6 | 129 | 24 | 13 | 1 | 80  | 20 | 246 | 51  |

|        |    |    |     |    |   |   |    |    |     |    |
|--------|----|----|-----|----|---|---|----|----|-----|----|
| 30,452 | 13 | 6  | 91  | 25 | 3 | 1 | 56 | 20 | 163 | 52 |
| 30,453 | 4  | 8  | 72  | 25 | 4 | 1 | 43 | 20 | 123 | 54 |
| 30,454 | 4  | 8  | 69  | 25 | 2 | 1 | 37 | 20 | 112 | 54 |
| 30,455 | 4  | 9  | 65  | 25 | 2 | 1 | 37 | 20 | 108 | 55 |
| 30,456 | 4  | 9  | 78  | 25 | 4 | 1 | 46 | 20 | 132 | 55 |
| 30,457 | 5  | 9  | 78  | 25 | 4 | 1 | 46 | 20 | 133 | 55 |
| 30,458 | 5  | 9  | 80  | 25 | 4 | 1 | 46 | 20 | 135 | 55 |
| 30,459 | 6  | 9  | 84  | 25 | 4 | 1 | 46 | 20 | 140 | 55 |
| 30,460 | 10 | 9  | 94  | 25 | 4 | 1 | 48 | 20 | 156 | 55 |
| 30,461 | 9  | 9  | 101 | 25 | 5 | 1 | 52 | 18 | 167 | 53 |
| 30,462 | 11 | 9  | 108 | 22 | 7 | 1 | 56 | 16 | 182 | 48 |
| 30,463 | 12 | 9  | 120 | 23 | 7 | 1 | 55 | 17 | 194 | 50 |
| 30,464 | 12 | 9  | 124 | 23 | 7 | 1 | 53 | 17 | 196 | 50 |
| 30,465 | 11 | 12 | 116 | 27 | 7 | 1 | 50 | 20 | 184 | 60 |
| 30,466 | 11 | 12 | 116 | 27 | 7 | 1 | 50 | 18 | 184 | 58 |
| 30,467 | 11 | 12 | 116 | 25 | 7 | 1 | 50 | 18 | 184 | 56 |
| 30,468 | 11 | 12 | 116 | 27 | 7 | 1 | 52 | 18 | 186 | 58 |
| 30,469 | 11 | 12 | 115 | 27 | 7 | 1 | 52 | 18 | 185 | 58 |
| 30,470 | 11 | 12 | 115 | 27 | 7 | 1 | 52 | 18 | 185 | 58 |
| 30,471 | 11 | 12 | 114 | 27 | 7 | 1 | 52 | 18 | 184 | 58 |
| 30,472 | 11 | 11 | 116 | 27 | 7 | 1 | 53 | 17 | 187 | 56 |
| 30,473 | 11 | 11 | 116 | 27 | 7 | 1 | 53 | 17 | 187 | 56 |
| 30,474 | 11 | 11 | 116 | 28 | 7 | 1 | 53 | 17 | 187 | 57 |
| 30,475 | 11 | 11 | 116 | 28 | 7 | 1 | 53 | 18 | 187 | 58 |
| 30,476 | 11 | 11 | 116 | 28 | 7 | 1 | 53 | 18 | 187 | 58 |
| 30,477 | 11 | 11 | 117 | 28 | 7 | 1 | 53 | 18 | 188 | 58 |
| 30,478 | 11 | 11 | 121 | 28 | 7 | 1 | 53 | 18 | 192 | 58 |
| 30,479 | 11 | 10 | 121 | 28 | 7 | 1 | 53 | 18 | 192 | 57 |
| 30,480 | 12 | 10 | 121 | 28 | 8 | 1 | 53 | 18 | 194 | 57 |
| 30,481 | 12 | 10 | 121 | 28 | 8 | 1 | 51 | 19 | 192 | 58 |
| 30,482 | 13 | 10 | 153 | 28 | 8 | 1 | 67 | 19 | 241 | 58 |
| 30,483 | 13 | 9  | 162 | 29 | 8 | 1 | 87 | 19 | 270 | 58 |
| 30,484 | 13 | 9  | 162 | 30 | 8 | 1 | 87 | 19 | 270 | 59 |
| 30,485 | 13 | 9  | 162 | 33 | 8 | 1 | 87 | 19 | 270 | 62 |
| 30,486 | 13 | 9  | 159 | 33 | 8 | 1 | 85 | 19 | 265 | 62 |
| 30,487 | 13 | 9  | 160 | 32 | 8 | 1 | 84 | 19 | 265 | 61 |
| 30,488 | 14 | 9  | 165 | 33 | 8 | 1 | 92 | 19 | 279 | 62 |
| 30,489 | 14 | 9  | 166 | 34 | 8 | 1 | 92 | 19 | 280 | 63 |
| 30,490 | 14 | 9  | 166 | 34 | 8 | 1 | 93 | 19 | 281 | 63 |
| 30,491 | 15 | 9  | 172 | 36 | 9 | 1 | 95 | 18 | 291 | 64 |
| 30,492 | 15 | 9  | 172 | 36 | 9 | 2 | 95 | 18 | 291 | 65 |



|        |    |   |     |    |    |   |     |    |     |    |
|--------|----|---|-----|----|----|---|-----|----|-----|----|
| 30,493 | 15 | 9 | 175 | 36 | 9  | 2 | 96  | 18 | 295 | 65 |
| 30,494 | 15 | 9 | 180 | 36 | 9  | 2 | 99  | 18 | 303 | 65 |
| 30,495 | 16 | 9 | 189 | 36 | 9  | 2 | 104 | 18 | 318 | 65 |
| 30,496 | 17 | 9 | 194 | 37 | 9  | 2 | 103 | 18 | 323 | 66 |
| 30,497 | 17 | 8 | 196 | 37 | 9  | 2 | 103 | 16 | 325 | 63 |
| 30,498 | 17 | 8 | 194 | 33 | 9  | 1 | 104 | 15 | 324 | 57 |
| 30,499 | 17 | 8 | 193 | 33 | 9  | 1 | 104 | 15 | 323 | 57 |
| 30,500 | 17 | 6 | 193 | 25 | 10 | 1 | 103 | 11 | 323 | 43 |
| 30,501 | 17 | 6 | 193 | 20 | 10 | 1 | 103 | 9  | 323 | 36 |
| 30,502 | 17 | 6 | 193 | 20 | 10 | 1 | 103 | 9  | 323 | 36 |
| 30,503 | 17 | 6 | 185 | 19 | 10 | 1 | 101 | 9  | 313 | 35 |
| 30,504 | 17 | 4 | 185 | 20 | 8  | 1 | 94  | 9  | 304 | 34 |
| 30,505 | 17 | 3 | 175 | 20 | 8  | 1 | 90  | 9  | 290 | 33 |
| 30,506 | 16 | 3 | 164 | 20 | 6  | 1 | 82  | 9  | 268 | 33 |
| 30,507 | 16 | 3 | 159 | 20 | 6  | 1 | 82  | 10 | 263 | 34 |
| 30,508 | 15 | 3 | 161 | 20 | 6  | 1 | 85  | 11 | 267 | 35 |
| 30,509 | 15 | 3 | 158 | 19 | 6  | 1 | 85  | 11 | 264 | 34 |
| 30,510 | 16 | 3 | 155 | 22 | 6  | 1 | 85  | 13 | 262 | 39 |
| 30,511 | 12 | 3 | 144 | 22 | 6  | 1 | 84  | 13 | 246 | 39 |
| 30,512 | 11 | 3 | 135 | 22 | 5  | 1 | 81  | 13 | 232 | 39 |
| 30,513 | 9  | 3 | 128 | 22 | 3  | 1 | 77  | 13 | 217 | 39 |
| 30,514 | 8  | 3 | 121 | 21 | 4  | 1 | 80  | 12 | 213 | 37 |
| 30,515 | 8  | 0 | 116 | 17 | 4  | 1 | 79  | 9  | 207 | 27 |
| 30,516 | 8  | 0 | 116 | 17 | 4  | 1 | 79  | 9  | 207 | 27 |
| 30,517 | 8  | 0 | 116 | 17 | 4  | 1 | 80  | 9  | 208 | 27 |
| 30,518 | 8  | 0 | 116 | 17 | 4  | 1 | 79  | 9  | 207 | 27 |
| 30,519 | 8  | 0 | 116 | 15 | 4  | 1 | 79  | 9  | 207 | 25 |
| 30,520 | 11 | 0 | 129 | 15 | 4  | 1 | 85  | 9  | 229 | 25 |
| 30,521 | 11 | 0 | 127 | 15 | 4  | 1 | 85  | 9  | 227 | 25 |
| 30,522 | 11 | 0 | 127 | 15 | 4  | 1 | 85  | 9  | 227 | 25 |
| 30,523 | 14 | 0 | 152 | 15 | 4  | 1 | 89  | 9  | 259 | 25 |
| 30,524 | 14 | 0 | 159 | 15 | 4  | 1 | 90  | 9  | 267 | 25 |
| 30,525 | 15 | 0 | 167 | 14 | 4  | 1 | 91  | 8  | 277 | 23 |
| 30,526 | 15 | 0 | 167 | 14 | 4  | 1 | 91  | 8  | 277 | 23 |
| 30,527 | 15 | 0 | 176 | 14 | 4  | 1 | 91  | 8  | 286 | 23 |
| 30,528 | 15 | 0 | 173 | 14 | 4  | 1 | 91  | 8  | 283 | 23 |
| 30,529 | 17 | 0 | 203 | 14 | 4  | 1 | 102 | 8  | 326 | 23 |
| 30,530 | 20 | 0 | 228 | 14 | 4  | 1 | 108 | 8  | 360 | 23 |
| 30,531 | 19 | 0 | 229 | 15 | 3  | 1 | 109 | 8  | 360 | 24 |
| 30,532 | 20 | 0 | 215 | 16 | 6  | 1 | 96  | 7  | 337 | 24 |
| 30,533 | 20 | 0 | 256 | 16 | 9  | 1 | 99  | 7  | 384 | 24 |

|        |    |   |     |    |    |   |     |   |     |    |
|--------|----|---|-----|----|----|---|-----|---|-----|----|
| 30,534 | 20 | 0 | 250 | 14 | 9  | 1 | 79  | 7 | 358 | 22 |
| 30,535 | 25 | 0 | 345 | 11 | 13 | 1 | 107 | 5 | 490 | 17 |
| 30,536 | 26 | 0 | 348 | 11 | 13 | 1 | 109 | 5 | 496 | 17 |
| 30,537 | 26 | 0 | 358 | 11 | 13 | 1 | 115 | 5 | 512 | 17 |
| 30,538 | 26 | 0 | 358 | 11 | 13 | 1 | 114 | 5 | 511 | 17 |
| 30,539 | 25 | 0 | 352 | 11 | 13 | 1 | 106 | 5 | 496 | 17 |
| 30,540 | 25 | 0 | 372 | 11 | 14 | 1 | 111 | 5 | 522 | 17 |
| 30,541 | 25 | 0 | 372 | 11 | 14 | 1 | 110 | 5 | 521 | 17 |
| 30,542 | 24 | 1 | 363 | 9  | 13 | 1 | 107 | 8 | 507 | 19 |
| 30,543 | 24 | 2 | 358 | 9  | 13 | 0 | 106 | 8 | 501 | 19 |
| 30,544 | 24 | 2 | 355 | 10 | 13 | 0 | 104 | 8 | 496 | 20 |
| 30,545 | 24 | 3 | 354 | 12 | 13 | 0 | 103 | 8 | 494 | 23 |
| 30,546 | 23 | 3 | 340 | 12 | 13 | 0 | 98  | 8 | 474 | 23 |
| 30,547 | 22 | 3 | 338 | 11 | 13 | 0 | 97  | 8 | 470 | 22 |
| 30,548 | 22 | 4 | 336 | 12 | 13 | 0 | 97  | 8 | 468 | 24 |
| 30,549 | 22 | 4 | 334 | 12 | 13 | 0 | 94  | 7 | 463 | 23 |
| 30,550 | 22 | 4 | 338 | 12 | 12 | 0 | 94  | 7 | 466 | 23 |
| 30,551 | 22 | 5 | 338 | 12 | 12 | 0 | 94  | 7 | 466 | 24 |
| 30,552 | 22 | 5 | 338 | 12 | 12 | 0 | 94  | 7 | 466 | 24 |
| 30,553 | 22 | 5 | 338 | 12 | 12 | 0 | 94  | 8 | 466 | 25 |
| 30,554 | 22 | 5 | 340 | 13 | 12 | 0 | 94  | 9 | 468 | 27 |
| 30,555 | 22 | 5 | 339 | 12 | 12 | 0 | 93  | 9 | 466 | 26 |
| 30,556 | 22 | 6 | 343 | 12 | 12 | 0 | 93  | 9 | 470 | 27 |
| 30,557 | 22 | 6 | 343 | 12 | 12 | 0 | 93  | 9 | 470 | 27 |
| 30,558 | 22 | 6 | 343 | 12 | 12 | 0 | 92  | 7 | 469 | 25 |
| 30,559 | 22 | 6 | 341 | 12 | 12 | 0 | 89  | 7 | 464 | 25 |
| 30,560 | 20 | 6 | 341 | 12 | 12 | 0 | 89  | 7 | 462 | 25 |
| 30,561 | 20 | 6 | 341 | 9  | 12 | 0 | 89  | 5 | 462 | 20 |
| 30,562 | 20 | 6 | 340 | 9  | 12 | 0 | 87  | 5 | 459 | 20 |
| 30,563 | 20 | 6 | 337 | 9  | 12 | 0 | 85  | 5 | 454 | 20 |
| 30,564 | 20 | 6 | 337 | 9  | 12 | 0 | 84  | 5 | 453 | 20 |
| 30,565 | 20 | 6 | 332 | 9  | 11 | 0 | 80  | 5 | 443 | 20 |
| 30,566 | 20 | 7 | 332 | 9  | 11 | 0 | 80  | 5 | 443 | 21 |
| 30,567 | 20 | 8 | 332 | 9  | 11 | 0 | 78  | 5 | 441 | 22 |
| 30,568 | 20 | 8 | 332 | 9  | 11 | 0 | 79  | 5 | 442 | 22 |
| 30,569 | 20 | 8 | 332 | 10 | 11 | 0 | 79  | 5 | 442 | 23 |
| 30,570 | 20 | 8 | 333 | 11 | 11 | 0 | 78  | 5 | 442 | 24 |
| 30,571 | 17 | 8 | 320 | 11 | 11 | 0 | 72  | 5 | 420 | 24 |
| 30,572 | 17 | 8 | 320 | 11 | 11 | 0 | 72  | 5 | 420 | 24 |
| 30,573 | 14 | 8 | 305 | 11 | 11 | 0 | 68  | 5 | 398 | 24 |
| 30,574 | 15 | 8 | 298 | 11 | 11 | 0 | 67  | 5 | 391 | 24 |

|        |    |    |     |    |    |   |    |    |     |    |
|--------|----|----|-----|----|----|---|----|----|-----|----|
| 30,575 | 16 | 8  | 293 | 11 | 11 | 0 | 66 | 5  | 386 | 24 |
| 30,576 | 15 | 8  | 285 | 11 | 11 | 0 | 65 | 6  | 376 | 25 |
| 30,577 | 16 | 8  | 279 | 11 | 11 | 0 | 67 | 6  | 373 | 25 |
| 30,578 | 16 | 8  | 280 | 11 | 11 | 0 | 67 | 6  | 374 | 25 |
| 30,579 | 14 | 9  | 257 | 11 | 11 | 0 | 57 | 6  | 339 | 26 |
| 30,580 | 14 | 9  | 251 | 11 | 11 | 0 | 56 | 6  | 332 | 26 |
| 30,581 | 11 | 9  | 227 | 10 | 11 | 0 | 51 | 6  | 300 | 25 |
| 30,582 | 11 | 9  | 226 | 11 | 11 | 0 | 50 | 9  | 298 | 29 |
| 30,583 | 9  | 9  | 209 | 10 | 8  | 0 | 47 | 9  | 273 | 28 |
| 30,584 | 9  | 9  | 170 | 13 | 5  | 0 | 45 | 10 | 229 | 32 |
| 30,585 | 9  | 9  | 168 | 13 | 5  | 0 | 47 | 10 | 229 | 32 |
| 30,586 | 4  | 9  | 77  | 13 | 1  | 0 | 19 | 10 | 101 | 32 |
| 30,587 | 4  | 9  | 74  | 13 | 1  | 0 | 17 | 10 | 96  | 32 |
| 30,588 | 4  | 9  | 63  | 12 | 1  | 0 | 12 | 11 | 80  | 32 |
| 30,589 | 4  | 10 | 44  | 14 | 1  | 0 | 8  | 11 | 57  | 35 |
| 30,590 | 4  | 10 | 42  | 14 | 0  | 0 | 6  | 11 | 52  | 35 |
| 30,591 | 4  | 10 | 43  | 13 | 0  | 0 | 6  | 11 | 53  | 34 |
| 30,592 | 4  | 10 | 42  | 13 | 0  | 0 | 6  | 11 | 52  | 34 |
| 30,593 | 4  | 9  | 42  | 13 | 0  | 0 | 6  | 8  | 52  | 30 |
| 30,594 | 4  | 9  | 48  | 13 | 0  | 0 | 8  | 8  | 60  | 30 |
| 30,595 | 5  | 9  | 53  | 12 | 0  | 0 | 14 | 8  | 72  | 29 |
| 30,596 | 5  | 8  | 53  | 12 | 0  | 0 | 14 | 10 | 72  | 30 |
| 30,597 | 5  | 8  | 53  | 15 | 0  | 0 | 15 | 13 | 73  | 36 |
| 30,598 | 5  | 8  | 53  | 16 | 0  | 0 | 15 | 15 | 73  | 39 |
| 30,599 | 5  | 7  | 53  | 17 | 0  | 0 | 15 | 15 | 73  | 39 |
| 30,600 | 5  | 7  | 48  | 17 | 0  | 0 | 15 | 15 | 68  | 39 |
| 30,601 | 5  | 7  | 48  | 17 | 0  | 0 | 15 | 15 | 68  | 39 |
| 30,602 | 5  | 8  | 48  | 26 | 0  | 0 | 15 | 23 | 68  | 57 |
| 30,603 | 5  | 8  | 48  | 27 | 0  | 0 | 15 | 24 | 68  | 59 |
| 30,604 | 5  | 8  | 50  | 32 | 0  | 0 | 17 | 26 | 72  | 66 |
| 30,605 | 5  | 8  | 48  | 31 | 0  | 0 | 17 | 25 | 70  | 64 |
| 30,606 | 5  | 8  | 47  | 34 | 1  | 0 | 17 | 25 | 70  | 67 |
| 30,607 | 5  | 7  | 42  | 35 | 1  | 0 | 17 | 25 | 65  | 67 |
| 30,608 | 5  | 7  | 42  | 35 | 1  | 0 | 17 | 25 | 65  | 67 |
| 30,609 | 5  | 7  | 42  | 37 | 1  | 0 | 17 | 25 | 65  | 69 |
| 30,610 | 5  | 7  | 42  | 37 | 1  | 0 | 17 | 25 | 65  | 69 |
| 30,611 | 5  | 7  | 42  | 37 | 1  | 0 | 17 | 25 | 65  | 69 |
| 30,612 | 5  | 7  | 42  | 37 | 1  | 0 | 17 | 25 | 65  | 69 |
| 30,613 | 5  | 7  | 42  | 38 | 2  | 0 | 17 | 25 | 66  | 70 |
| 30,614 | 5  | 7  | 42  | 38 | 2  | 0 | 17 | 26 | 66  | 71 |
| 30,615 | 5  | 7  | 42  | 39 | 2  | 0 | 17 | 26 | 66  | 72 |

|        |   |   |     |    |   |   |    |    |     |     |
|--------|---|---|-----|----|---|---|----|----|-----|-----|
| 30,616 | 6 | 6 | 46  | 39 | 2 | 0 | 18 | 26 | 72  | 71  |
| 30,617 | 6 | 6 | 46  | 39 | 2 | 0 | 18 | 26 | 72  | 71  |
| 30,618 | 6 | 5 | 46  | 37 | 2 | 0 | 18 | 26 | 72  | 68  |
| 30,619 | 6 | 5 | 46  | 37 | 2 | 0 | 18 | 26 | 72  | 68  |
| 30,620 | 6 | 5 | 48  | 37 | 2 | 0 | 18 | 26 | 74  | 68  |
| 30,621 | 6 | 6 | 48  | 41 | 2 | 0 | 18 | 30 | 74  | 77  |
| 30,622 | 6 | 6 | 49  | 42 | 2 | 0 | 18 | 30 | 75  | 78  |
| 30,623 | 6 | 9 | 51  | 52 | 2 | 0 | 18 | 43 | 77  | 104 |
| 30,624 | 6 | 9 | 52  | 54 | 2 | 0 | 19 | 44 | 79  | 107 |
| 30,625 | 5 | 9 | 49  | 60 | 2 | 0 | 19 | 47 | 75  | 116 |
| 30,626 | 4 | 9 | 47  | 63 | 2 | 0 | 19 | 47 | 72  | 119 |
| 30,627 | 3 | 9 | 59  | 63 | 2 | 0 | 21 | 46 | 85  | 118 |
| 30,628 | 3 | 9 | 61  | 64 | 2 | 0 | 21 | 46 | 87  | 119 |
| 30,629 | 3 | 9 | 60  | 64 | 2 | 0 | 21 | 46 | 86  | 119 |
| 30,630 | 3 | 8 | 60  | 66 | 2 | 0 | 21 | 46 | 86  | 120 |
| 30,631 | 3 | 8 | 60  | 66 | 2 | 0 | 21 | 46 | 86  | 120 |
| 30,632 | 3 | 8 | 59  | 68 | 2 | 1 | 21 | 47 | 85  | 124 |
| 30,633 | 3 | 8 | 59  | 67 | 2 | 1 | 21 | 45 | 85  | 121 |
| 30,634 | 3 | 8 | 58  | 67 | 2 | 1 | 21 | 45 | 84  | 121 |
| 30,635 | 3 | 8 | 56  | 64 | 2 | 1 | 20 | 44 | 81  | 117 |
| 30,636 | 3 | 8 | 54  | 64 | 2 | 1 | 19 | 44 | 78  | 117 |
| 30,637 | 3 | 8 | 49  | 64 | 2 | 1 | 19 | 44 | 73  | 117 |
| 30,638 | 2 | 8 | 47  | 64 | 2 | 1 | 19 | 44 | 70  | 117 |
| 30,639 | 2 | 8 | 48  | 64 | 2 | 1 | 19 | 43 | 71  | 116 |
| 30,640 | 2 | 7 | 53  | 62 | 2 | 1 | 19 | 44 | 76  | 114 |
| 30,641 | 2 | 7 | 54  | 63 | 2 | 1 | 19 | 44 | 77  | 115 |
| 30,642 | 2 | 7 | 53  | 63 | 2 | 1 | 19 | 44 | 76  | 115 |
| 30,643 | 2 | 7 | 53  | 63 | 2 | 1 | 19 | 46 | 76  | 117 |
| 30,644 | 2 | 7 | 48  | 64 | 2 | 1 | 18 | 46 | 70  | 118 |
| 30,645 | 1 | 6 | 43  | 64 | 2 | 1 | 12 | 46 | 58  | 117 |
| 30,646 | 1 | 6 | 44  | 62 | 3 | 1 | 13 | 44 | 61  | 113 |
| 30,647 | 1 | 7 | 44  | 62 | 3 | 1 | 13 | 44 | 61  | 114 |
| 30,648 | 1 | 7 | 43  | 59 | 3 | 1 | 12 | 41 | 59  | 108 |
| 30,649 | 1 | 7 | 56  | 61 | 3 | 1 | 14 | 44 | 74  | 113 |
| 30,650 | 1 | 7 | 56  | 59 | 3 | 1 | 14 | 44 | 74  | 111 |
| 30,651 | 1 | 7 | 71  | 59 | 4 | 1 | 19 | 47 | 95  | 114 |
| 30,652 | 8 | 7 | 117 | 59 | 8 | 1 | 38 | 49 | 171 | 116 |
| 30,653 | 8 | 5 | 124 | 50 | 8 | 1 | 39 | 41 | 179 | 97  |
| 30,654 | 8 | 5 | 133 | 49 | 8 | 1 | 43 | 40 | 192 | 95  |
| 30,655 | 8 | 6 | 138 | 44 | 9 | 1 | 45 | 38 | 200 | 89  |
| 30,656 | 8 | 6 | 138 | 44 | 9 | 1 | 45 | 38 | 200 | 89  |

|        |    |   |     |    |   |   |    |    |     |     |
|--------|----|---|-----|----|---|---|----|----|-----|-----|
| 30,657 | 8  | 6 | 144 | 43 | 8 | 2 | 48 | 41 | 208 | 92  |
| 30,658 | 12 | 6 | 177 | 44 | 9 | 2 | 72 | 42 | 270 | 94  |
| 30,659 | 12 | 6 | 180 | 46 | 9 | 2 | 72 | 44 | 273 | 98  |
| 30,660 | 12 | 6 | 180 | 46 | 9 | 2 | 73 | 51 | 274 | 105 |
| 30,661 | 12 | 6 | 180 | 46 | 9 | 2 | 73 | 52 | 274 | 106 |
| 30,662 | 12 | 6 | 180 | 46 | 9 | 2 | 73 | 52 | 274 | 106 |
| 30,663 | 12 | 6 | 180 | 46 | 9 | 3 | 73 | 52 | 274 | 107 |
| 30,664 | 12 | 6 | 181 | 45 | 8 | 3 | 73 | 52 | 274 | 106 |
| 30,665 | 12 | 6 | 181 | 45 | 8 | 3 | 73 | 52 | 274 | 106 |
| 30,666 | 12 | 6 | 182 | 45 | 8 | 3 | 73 | 53 | 275 | 107 |
| 30,667 | 11 | 6 | 178 | 45 | 8 | 3 | 72 | 53 | 269 | 107 |
| 30,668 | 11 | 6 | 178 | 45 | 8 | 3 | 72 | 53 | 269 | 107 |
| 30,669 | 11 | 6 | 179 | 45 | 8 | 3 | 73 | 53 | 271 | 107 |
| 30,670 | 11 | 6 | 179 | 47 | 8 | 3 | 73 | 53 | 271 | 109 |
| 30,671 | 11 | 6 | 176 | 47 | 8 | 3 | 73 | 53 | 268 | 109 |
| 30,672 | 11 | 5 | 176 | 44 | 8 | 3 | 73 | 49 | 268 | 101 |
| 30,673 | 11 | 5 | 180 | 43 | 8 | 3 | 79 | 53 | 278 | 104 |
| 30,674 | 11 | 2 | 185 | 35 | 8 | 3 | 82 | 41 | 286 | 81  |
| 30,675 | 11 | 2 | 184 | 37 | 8 | 4 | 80 | 43 | 283 | 86  |
| 30,676 | 12 | 2 | 180 | 32 | 8 | 4 | 80 | 40 | 280 | 78  |
| 30,677 | 12 | 2 | 172 | 29 | 8 | 4 | 79 | 40 | 271 | 75  |
| 30,678 | 12 | 2 | 168 | 30 | 8 | 4 | 78 | 40 | 266 | 76  |
| 30,679 | 12 | 2 | 166 | 30 | 8 | 4 | 77 | 40 | 263 | 76  |
| 30,680 | 12 | 2 | 164 | 28 | 8 | 4 | 77 | 40 | 261 | 74  |
| 30,681 | 12 | 2 | 168 | 28 | 8 | 4 | 79 | 40 | 267 | 74  |
| 30,682 | 12 | 2 | 172 | 30 | 8 | 4 | 80 | 42 | 272 | 78  |
| 30,683 | 12 | 2 | 172 | 30 | 8 | 3 | 80 | 41 | 272 | 76  |
| 30,684 | 12 | 2 | 173 | 30 | 8 | 3 | 81 | 42 | 274 | 77  |
| 30,685 | 12 | 2 | 173 | 33 | 8 | 3 | 81 | 42 | 274 | 80  |
| 30,686 | 12 | 2 | 173 | 33 | 8 | 3 | 82 | 43 | 275 | 81  |
| 30,687 | 12 | 2 | 173 | 33 | 8 | 3 | 81 | 43 | 274 | 81  |
| 30,688 | 13 | 2 | 177 | 33 | 8 | 3 | 84 | 43 | 282 | 81  |
| 30,689 | 13 | 2 | 176 | 34 | 8 | 3 | 84 | 46 | 281 | 85  |
| 30,690 | 13 | 2 | 170 | 35 | 8 | 3 | 84 | 49 | 275 | 89  |
| 30,691 | 13 | 2 | 171 | 35 | 8 | 3 | 84 | 50 | 276 | 90  |
| 30,692 | 13 | 2 | 172 | 34 | 8 | 3 | 84 | 50 | 277 | 89  |
| 30,693 | 13 | 2 | 173 | 34 | 8 | 3 | 84 | 50 | 278 | 89  |
| 30,694 | 13 | 2 | 172 | 34 | 8 | 3 | 83 | 48 | 276 | 87  |
| 30,695 | 13 | 2 | 172 | 34 | 8 | 3 | 83 | 48 | 276 | 87  |
| 30,696 | 13 | 2 | 172 | 34 | 8 | 3 | 83 | 48 | 276 | 87  |
| 30,697 | 13 | 2 | 171 | 34 | 7 | 3 | 82 | 48 | 273 | 87  |

|        |    |   |     |    |   |   |    |    |     |    |
|--------|----|---|-----|----|---|---|----|----|-----|----|
| 30,698 | 13 | 1 | 166 | 34 | 7 | 3 | 82 | 48 | 268 | 86 |
| 30,699 | 13 | 1 | 162 | 34 | 7 | 3 | 81 | 48 | 263 | 86 |
| 30,700 | 13 | 1 | 158 | 31 | 7 | 3 | 81 | 43 | 259 | 78 |
| 30,701 | 13 | 1 | 143 | 31 | 6 | 3 | 77 | 40 | 239 | 75 |
| 30,702 | 13 | 1 | 139 | 31 | 4 | 3 | 77 | 40 | 233 | 75 |
| 30,703 | 6  | 1 | 97  | 31 | 2 | 3 | 58 | 38 | 163 | 73 |
| 30,704 | 6  | 1 | 92  | 31 | 2 | 3 | 57 | 39 | 157 | 74 |
| 30,705 | 6  | 1 | 83  | 31 | 2 | 3 | 53 | 39 | 144 | 74 |
| 30,706 | 6  | 0 | 77  | 31 | 1 | 3 | 49 | 39 | 133 | 73 |
| 30,707 | 6  | 0 | 71  | 33 | 1 | 3 | 46 | 39 | 124 | 75 |
| 30,708 | 2  | 0 | 46  | 31 | 0 | 2 | 28 | 36 | 76  | 69 |
| 30,709 | 2  | 0 | 38  | 29 | 0 | 2 | 22 | 35 | 62  | 66 |
| 30,710 | 2  | 0 | 35  | 27 | 0 | 2 | 22 | 33 | 59  | 62 |
| 30,711 | 2  | 0 | 35  | 25 | 0 | 2 | 22 | 26 | 59  | 53 |
| 30,712 | 3  | 0 | 37  | 25 | 0 | 2 | 24 | 25 | 64  | 52 |
| 30,713 | 3  | 0 | 37  | 25 | 0 | 2 | 24 | 26 | 64  | 53 |
| 30,714 | 3  | 0 | 37  | 26 | 0 | 1 | 24 | 26 | 64  | 53 |
| 30,715 | 3  | 0 | 36  | 25 | 0 | 1 | 24 | 25 | 63  | 51 |
| 30,716 | 3  | 0 | 36  | 25 | 0 | 1 | 26 | 25 | 65  | 51 |
| 30,717 | 3  | 0 | 36  | 25 | 0 | 1 | 27 | 24 | 66  | 50 |
| 30,718 | 3  | 0 | 37  | 25 | 0 | 1 | 27 | 24 | 67  | 50 |
| 30,719 | 3  | 0 | 36  | 25 | 0 | 1 | 26 | 25 | 65  | 51 |
| 30,720 | 3  | 0 | 36  | 25 | 0 | 1 | 26 | 25 | 65  | 51 |
| 30,721 | 3  | 0 | 43  | 24 | 1 | 1 | 30 | 27 | 77  | 52 |
| 30,722 | 3  | 0 | 43  | 26 | 1 | 1 | 30 | 27 | 77  | 54 |
| 30,723 | 3  | 0 | 45  | 27 | 1 | 1 | 31 | 27 | 80  | 55 |
| 30,724 | 3  | 0 | 40  | 28 | 1 | 1 | 25 | 23 | 69  | 52 |
| 30,725 | 3  | 0 | 34  | 26 | 1 | 1 | 22 | 22 | 60  | 49 |
| 30,726 | 3  | 0 | 44  | 22 | 1 | 0 | 29 | 19 | 77  | 41 |
| 30,727 | 2  | 0 | 44  | 21 | 1 | 0 | 29 | 19 | 76  | 40 |
| 30,728 | 2  | 0 | 44  | 20 | 1 | 0 | 29 | 19 | 76  | 39 |
| 30,729 | 2  | 0 | 45  | 19 | 1 | 0 | 29 | 19 | 77  | 38 |
| 30,730 | 2  | 0 | 45  | 19 | 1 | 0 | 29 | 19 | 77  | 38 |
| 30,731 | 3  | 0 | 47  | 19 | 1 | 0 | 36 | 19 | 87  | 38 |
| 30,732 | 3  | 1 | 44  | 16 | 1 | 0 | 34 | 17 | 82  | 34 |
| 30,733 | 3  | 1 | 40  | 17 | 1 | 0 | 33 | 17 | 77  | 35 |
| 30,734 | 3  | 1 | 40  | 17 | 1 | 0 | 33 | 17 | 77  | 35 |
| 30,735 | 7  | 1 | 48  | 14 | 1 | 0 | 38 | 15 | 94  | 30 |
| 30,736 | 7  | 1 | 48  | 14 | 1 | 0 | 38 | 14 | 94  | 29 |
| 30,737 | 7  | 1 | 47  | 14 | 1 | 0 | 37 | 15 | 92  | 30 |
| 30,738 | 7  | 1 | 47  | 14 | 1 | 0 | 36 | 15 | 91  | 30 |

|        |    |   |     |    |    |   |     |    |     |    |
|--------|----|---|-----|----|----|---|-----|----|-----|----|
| 30,739 | 6  | 1 | 46  | 15 | 1  | 0 | 36  | 18 | 89  | 34 |
| 30,740 | 6  | 1 | 45  | 14 | 1  | 0 | 36  | 15 | 88  | 30 |
| 30,741 | 9  | 1 | 60  | 13 | 1  | 0 | 48  | 12 | 118 | 26 |
| 30,742 | 9  | 1 | 58  | 13 | 1  | 0 | 48  | 10 | 116 | 24 |
| 30,743 | 11 | 1 | 178 | 13 | 12 | 0 | 164 | 10 | 365 | 24 |
| 30,744 | 11 | 1 | 178 | 13 | 12 | 0 | 165 | 10 | 366 | 24 |
| 30,745 | 11 | 2 | 188 | 13 | 13 | 0 | 182 | 10 | 394 | 25 |
| 30,746 | 11 | 2 | 205 | 12 | 13 | 0 | 195 | 10 | 424 | 24 |
| 30,747 | 11 | 2 | 205 | 12 | 13 | 0 | 195 | 11 | 424 | 25 |
| 30,748 | 11 | 2 | 207 | 12 | 13 | 0 | 197 | 11 | 428 | 25 |
| 30,749 | 11 | 2 | 210 | 15 | 13 | 0 | 197 | 11 | 431 | 28 |
| 30,750 | 11 | 2 | 210 | 15 | 13 | 0 | 197 | 11 | 431 | 28 |
| 30,751 | 11 | 2 | 211 | 15 | 13 | 0 | 196 | 11 | 431 | 28 |
| 30,752 | 11 | 2 | 211 | 15 | 13 | 0 | 196 | 11 | 431 | 28 |
| 30,753 | 12 | 2 | 211 | 15 | 13 | 0 | 195 | 11 | 431 | 28 |
| 30,754 | 12 | 2 | 211 | 15 | 13 | 0 | 195 | 11 | 431 | 28 |
| 30,755 | 12 | 2 | 209 | 15 | 13 | 0 | 195 | 10 | 429 | 27 |
| 30,756 | 12 | 2 | 209 | 15 | 13 | 0 | 195 | 10 | 429 | 27 |
| 30,757 | 12 | 2 | 208 | 17 | 13 | 0 | 195 | 9  | 428 | 28 |
| 30,758 | 12 | 2 | 208 | 16 | 13 | 0 | 195 | 9  | 428 | 27 |
| 30,759 | 12 | 2 | 208 | 17 | 13 | 0 | 195 | 9  | 428 | 28 |
| 30,760 | 12 | 2 | 207 | 17 | 13 | 0 | 195 | 13 | 427 | 32 |
| 30,761 | 12 | 2 | 206 | 21 | 13 | 0 | 194 | 13 | 425 | 36 |
| 30,762 | 11 | 2 | 206 | 21 | 13 | 0 | 194 | 13 | 424 | 36 |
| 30,763 | 11 | 3 | 207 | 22 | 13 | 0 | 194 | 14 | 425 | 39 |
| 30,764 | 11 | 3 | 207 | 23 | 13 | 0 | 194 | 14 | 425 | 40 |
| 30,765 | 11 | 3 | 207 | 23 | 13 | 0 | 194 | 14 | 425 | 40 |
| 30,766 | 12 | 3 | 207 | 23 | 13 | 0 | 194 | 14 | 426 | 40 |
| 30,767 | 12 | 3 | 207 | 24 | 13 | 0 | 192 | 14 | 424 | 41 |
| 30,768 | 12 | 3 | 206 | 24 | 13 | 0 | 191 | 14 | 422 | 41 |
| 30,769 | 12 | 3 | 206 | 26 | 13 | 0 | 192 | 13 | 423 | 42 |
| 30,770 | 12 | 3 | 206 | 26 | 13 | 0 | 192 | 14 | 423 | 43 |
| 30,771 | 12 | 3 | 200 | 26 | 13 | 0 | 188 | 14 | 413 | 43 |
| 30,772 | 12 | 3 | 198 | 25 | 12 | 0 | 188 | 14 | 410 | 42 |
| 30,773 | 12 | 3 | 198 | 23 | 12 | 0 | 188 | 14 | 410 | 40 |
| 30,774 | 12 | 3 | 197 | 21 | 12 | 0 | 187 | 15 | 408 | 39 |
| 30,775 | 12 | 3 | 197 | 21 | 12 | 0 | 187 | 17 | 408 | 41 |
| 30,776 | 12 | 3 | 186 | 21 | 12 | 0 | 180 | 17 | 390 | 41 |
| 30,777 | 12 | 3 | 188 | 22 | 12 | 0 | 180 | 18 | 392 | 43 |
| 30,778 | 12 | 3 | 188 | 23 | 12 | 0 | 181 | 21 | 393 | 47 |
| 30,779 | 12 | 3 | 187 | 23 | 12 | 1 | 181 | 22 | 392 | 49 |

|        |    |   |     |    |    |   |     |    |     |    |
|--------|----|---|-----|----|----|---|-----|----|-----|----|
| 30,780 | 12 | 3 | 187 | 23 | 12 | 1 | 181 | 24 | 392 | 51 |
| 30,781 | 11 | 3 | 186 | 23 | 12 | 1 | 175 | 25 | 384 | 52 |
| 30,782 | 11 | 2 | 188 | 22 | 12 | 1 | 176 | 25 | 387 | 50 |
| 30,783 | 12 | 2 | 189 | 21 | 12 | 1 | 178 | 25 | 391 | 49 |
| 30,784 | 12 | 2 | 194 | 21 | 12 | 1 | 178 | 25 | 396 | 49 |
| 30,785 | 12 | 2 | 204 | 21 | 13 | 1 | 181 | 25 | 410 | 49 |
| 30,786 | 21 | 2 | 288 | 21 | 17 | 1 | 228 | 25 | 554 | 49 |
| 30,787 | 21 | 2 | 287 | 21 | 17 | 1 | 228 | 25 | 553 | 49 |
| 30,788 | 21 | 2 | 302 | 21 | 18 | 1 | 242 | 25 | 583 | 49 |
| 30,789 | 20 | 2 | 297 | 22 | 18 | 1 | 243 | 25 | 578 | 50 |
| 30,790 | 18 | 2 | 289 | 21 | 18 | 1 | 232 | 22 | 557 | 46 |
| 30,791 | 17 | 2 | 237 | 21 | 18 | 1 | 213 | 22 | 485 | 46 |
| 30,792 | 17 | 2 | 231 | 21 | 17 | 1 | 212 | 22 | 477 | 46 |
| 30,793 | 17 | 2 | 173 | 21 | 9  | 1 | 122 | 22 | 321 | 46 |
| 30,794 | 16 | 2 | 167 | 21 | 7  | 1 | 115 | 22 | 305 | 46 |
| 30,795 | 16 | 2 | 157 | 21 | 6  | 1 | 97  | 22 | 276 | 46 |
| 30,796 | 16 | 1 | 148 | 21 | 6  | 1 | 84  | 22 | 254 | 45 |
| 30,797 | 16 | 1 | 140 | 21 | 6  | 1 | 84  | 22 | 246 | 45 |
| 30,798 | 16 | 1 | 140 | 21 | 6  | 1 | 83  | 21 | 245 | 44 |
| 30,799 | 16 | 1 | 139 | 21 | 6  | 1 | 83  | 21 | 244 | 44 |
| 30,800 | 16 | 1 | 136 | 18 | 6  | 1 | 83  | 21 | 241 | 41 |
| 30,801 | 16 | 1 | 135 | 18 | 6  | 1 | 83  | 22 | 240 | 42 |
| 30,802 | 16 | 1 | 135 | 18 | 6  | 1 | 83  | 22 | 240 | 42 |
| 30,803 | 16 | 1 | 135 | 18 | 6  | 1 | 83  | 22 | 240 | 42 |
| 30,804 | 15 | 1 | 136 | 18 | 6  | 1 | 83  | 22 | 240 | 42 |
| 30,805 | 15 | 1 | 136 | 18 | 6  | 1 | 83  | 22 | 240 | 42 |
| 30,806 | 15 | 1 | 136 | 18 | 6  | 1 | 83  | 22 | 240 | 42 |
| 30,807 | 15 | 1 | 136 | 18 | 6  | 1 | 83  | 22 | 240 | 42 |
| 30,808 | 16 | 1 | 136 | 16 | 6  | 1 | 83  | 22 | 241 | 40 |
| 30,809 | 16 | 1 | 136 | 15 | 6  | 1 | 83  | 23 | 241 | 40 |
| 30,810 | 16 | 1 | 136 | 14 | 6  | 1 | 83  | 23 | 241 | 39 |
| 30,811 | 16 | 1 | 136 | 10 | 6  | 1 | 83  | 19 | 241 | 31 |
| 30,812 | 16 | 1 | 139 | 10 | 6  | 1 | 84  | 19 | 245 | 31 |
| 30,813 | 16 | 0 | 141 | 9  | 6  | 1 | 84  | 18 | 247 | 28 |
| 30,814 | 16 | 0 | 141 | 9  | 6  | 1 | 84  | 18 | 247 | 28 |
| 30,815 | 16 | 0 | 155 | 8  | 6  | 1 | 90  | 17 | 267 | 26 |
| 30,816 | 16 | 0 | 171 | 7  | 6  | 1 | 96  | 17 | 289 | 25 |
| 30,817 | 17 | 0 | 176 | 6  | 6  | 1 | 107 | 17 | 306 | 24 |
| 30,818 | 17 | 0 | 176 | 6  | 6  | 1 | 107 | 17 | 306 | 24 |
| 30,819 | 18 | 0 | 177 | 6  | 6  | 1 | 108 | 17 | 309 | 24 |
| 30,820 | 18 | 0 | 179 | 5  | 6  | 1 | 108 | 17 | 311 | 23 |



|        |    |   |     |    |   |   |     |    |     |     |
|--------|----|---|-----|----|---|---|-----|----|-----|-----|
| 30,821 | 18 | 1 | 180 | 5  | 6 | 1 | 111 | 16 | 315 | 23  |
| 30,822 | 18 | 1 | 184 | 5  | 6 | 1 | 115 | 16 | 323 | 23  |
| 30,823 | 18 | 1 | 184 | 4  | 6 | 1 | 115 | 14 | 323 | 20  |
| 30,824 | 18 | 1 | 185 | 5  | 6 | 1 | 116 | 14 | 325 | 21  |
| 30,825 | 18 | 2 | 185 | 7  | 6 | 1 | 116 | 11 | 325 | 21  |
| 30,826 | 18 | 2 | 185 | 8  | 6 | 1 | 116 | 13 | 325 | 24  |
| 30,827 | 18 | 2 | 183 | 8  | 6 | 1 | 116 | 13 | 323 | 24  |
| 30,828 | 18 | 2 | 183 | 7  | 6 | 1 | 116 | 14 | 323 | 24  |
| 30,829 | 19 | 2 | 183 | 13 | 6 | 1 | 116 | 14 | 324 | 30  |
| 30,830 | 19 | 2 | 183 | 13 | 6 | 0 | 116 | 13 | 324 | 28  |
| 30,831 | 19 | 2 | 186 | 15 | 6 | 0 | 118 | 14 | 329 | 31  |
| 30,832 | 19 | 2 | 187 | 25 | 6 | 2 | 117 | 16 | 329 | 45  |
| 30,833 | 19 | 9 | 184 | 50 | 6 | 2 | 116 | 42 | 325 | 103 |
| 30,834 | 18 | 9 | 183 | 51 | 6 | 2 | 114 | 42 | 321 | 104 |
| 30,835 | 18 | 9 | 185 | 51 | 8 | 2 | 118 | 42 | 329 | 104 |
| 30,836 | 19 | 9 | 178 | 54 | 7 | 2 | 116 | 42 | 320 | 107 |
| 30,837 | 7  | 9 | 88  | 55 | 3 | 2 | 68  | 42 | 166 | 108 |
| 30,838 | 7  | 9 | 77  | 55 | 2 | 2 | 54  | 42 | 140 | 108 |
| 30,839 | 14 | 9 | 107 | 54 | 2 | 2 | 81  | 41 | 204 | 106 |
| 30,840 | 14 | 9 | 107 | 54 | 2 | 2 | 80  | 42 | 203 | 107 |
| 30,841 | 14 | 9 | 107 | 54 | 2 | 2 | 80  | 42 | 203 | 107 |
| 30,842 | 14 | 9 | 107 | 54 | 2 | 2 | 80  | 42 | 203 | 107 |
| 30,843 | 14 | 9 | 107 | 54 | 2 | 2 | 80  | 42 | 203 | 107 |
| 30,844 | 14 | 9 | 107 | 54 | 2 | 2 | 80  | 42 | 203 | 107 |
| 30,845 | 14 | 9 | 107 | 54 | 2 | 2 | 80  | 42 | 203 | 107 |
| 30,846 | 14 | 9 | 108 | 54 | 2 | 2 | 81  | 42 | 205 | 107 |
| 30,847 | 14 | 9 | 108 | 54 | 3 | 2 | 82  | 42 | 207 | 107 |
| 30,848 | 14 | 9 | 108 | 54 | 3 | 2 | 82  | 42 | 207 | 107 |
| 30,849 | 14 | 9 | 109 | 54 | 3 | 2 | 82  | 42 | 208 | 107 |
| 30,850 | 14 | 9 | 108 | 54 | 3 | 2 | 82  | 42 | 207 | 107 |
| 30,851 | 14 | 9 | 108 | 54 | 3 | 2 | 82  | 42 | 207 | 107 |
| 30,852 | 14 | 9 | 108 | 54 | 3 | 2 | 84  | 41 | 209 | 106 |
| 30,853 | 14 | 9 | 108 | 54 | 3 | 2 | 84  | 41 | 209 | 106 |
| 30,854 | 14 | 9 | 107 | 54 | 3 | 2 | 83  | 41 | 207 | 106 |
| 30,855 | 14 | 9 | 107 | 54 | 3 | 2 | 83  | 41 | 207 | 106 |
| 30,856 | 14 | 9 | 107 | 54 | 3 | 2 | 83  | 41 | 207 | 106 |
| 30,857 | 14 | 9 | 107 | 54 | 3 | 2 | 83  | 41 | 207 | 106 |
| 30,858 | 13 | 9 | 110 | 54 | 3 | 2 | 84  | 41 | 210 | 106 |
| 30,859 | 13 | 9 | 110 | 54 | 3 | 2 | 84  | 41 | 210 | 106 |
| 30,860 | 13 | 9 | 112 | 54 | 3 | 2 | 84  | 40 | 212 | 105 |
| 30,861 | 13 | 9 | 116 | 54 | 3 | 2 | 84  | 40 | 216 | 105 |

|        |    |    |     |    |   |   |     |    |     |     |
|--------|----|----|-----|----|---|---|-----|----|-----|-----|
| 30,862 | 13 | 9  | 121 | 56 | 3 | 2 | 85  | 40 | 222 | 107 |
| 30,863 | 15 | 9  | 126 | 56 | 3 | 2 | 86  | 40 | 230 | 107 |
| 30,864 | 15 | 9  | 123 | 61 | 3 | 2 | 87  | 43 | 228 | 115 |
| 30,865 | 15 | 9  | 127 | 62 | 3 | 2 | 98  | 44 | 243 | 117 |
| 30,866 | 15 | 9  | 125 | 62 | 3 | 2 | 96  | 46 | 239 | 119 |
| 30,867 | 14 | 9  | 108 | 63 | 3 | 2 | 91  | 49 | 216 | 123 |
| 30,868 | 13 | 9  | 104 | 63 | 3 | 2 | 80  | 50 | 200 | 124 |
| 30,869 | 15 | 12 | 111 | 79 | 3 | 8 | 88  | 78 | 217 | 177 |
| 30,870 | 14 | 12 | 110 | 79 | 3 | 8 | 87  | 78 | 214 | 177 |
| 30,871 | 14 | 12 | 117 | 85 | 3 | 8 | 88  | 78 | 222 | 183 |
| 30,872 | 14 | 12 | 117 | 94 | 3 | 9 | 85  | 85 | 219 | 200 |
| 30,873 | 14 | 12 | 113 | 96 | 3 | 9 | 81  | 85 | 211 | 202 |
| 30,874 | 14 | 12 | 112 | 97 | 3 | 9 | 80  | 85 | 209 | 203 |
| 30,875 | 14 | 12 | 112 | 96 | 3 | 9 | 80  | 85 | 209 | 202 |
| 30,876 | 15 | 11 | 113 | 94 | 3 | 9 | 81  | 85 | 212 | 199 |
| 30,877 | 16 | 11 | 116 | 93 | 3 | 9 | 81  | 83 | 216 | 196 |
| 30,878 | 20 | 12 | 129 | 93 | 3 | 9 | 90  | 81 | 242 | 195 |
| 30,879 | 20 | 12 | 129 | 93 | 3 | 9 | 90  | 81 | 242 | 195 |
| 30,880 | 19 | 12 | 134 | 86 | 3 | 9 | 90  | 79 | 246 | 186 |
| 30,881 | 19 | 12 | 137 | 87 | 4 | 9 | 100 | 79 | 260 | 187 |
| 30,882 | 19 | 12 | 141 | 74 | 4 | 7 | 100 | 73 | 264 | 166 |
| 30,883 | 20 | 6  | 180 | 50 | 6 | 7 | 147 | 47 | 353 | 110 |
| 30,884 | 20 | 6  | 182 | 50 | 6 | 7 | 148 | 47 | 356 | 110 |
| 30,885 | 20 | 6  | 177 | 50 | 4 | 7 | 144 | 49 | 345 | 112 |
| 30,886 | 20 | 6  | 175 | 50 | 4 | 7 | 143 | 49 | 342 | 112 |
| 30,887 | 19 | 6  | 172 | 47 | 5 | 7 | 142 | 49 | 338 | 109 |
| 30,888 | 19 | 6  | 169 | 46 | 5 | 7 | 138 | 48 | 331 | 107 |
| 30,889 | 19 | 6  | 166 | 46 | 5 | 7 | 138 | 48 | 328 | 107 |
| 30,890 | 12 | 6  | 134 | 46 | 5 | 7 | 109 | 48 | 260 | 107 |
| 30,891 | 12 | 6  | 133 | 46 | 5 | 7 | 108 | 48 | 258 | 107 |
| 30,892 | 12 | 6  | 133 | 46 | 5 | 7 | 109 | 48 | 259 | 107 |
| 30,893 | 12 | 6  | 133 | 46 | 5 | 7 | 109 | 49 | 259 | 108 |
| 30,894 | 14 | 6  | 135 | 48 | 5 | 7 | 111 | 49 | 265 | 110 |
| 30,895 | 14 | 6  | 142 | 48 | 6 | 7 | 121 | 49 | 283 | 110 |
| 30,896 | 14 | 6  | 143 | 48 | 7 | 7 | 120 | 49 | 284 | 110 |
| 30,897 | 14 | 6  | 146 | 50 | 7 | 7 | 122 | 49 | 289 | 112 |
| 30,898 | 14 | 6  | 146 | 50 | 6 | 7 | 122 | 51 | 288 | 114 |
| 30,899 | 14 | 6  | 145 | 52 | 6 | 7 | 122 | 51 | 287 | 116 |
| 30,900 | 14 | 6  | 145 | 53 | 6 | 7 | 122 | 51 | 287 | 117 |
| 30,901 | 14 | 6  | 146 | 54 | 6 | 7 | 123 | 55 | 289 | 122 |
| 30,902 | 14 | 6  | 146 | 55 | 6 | 7 | 121 | 55 | 287 | 123 |

|        |    |   |     |    |    |   |     |    |     |     |
|--------|----|---|-----|----|----|---|-----|----|-----|-----|
| 30,903 | 14 | 6 | 152 | 55 | 6  | 7 | 122 | 55 | 294 | 123 |
| 30,904 | 17 | 7 | 153 | 61 | 6  | 9 | 123 | 56 | 299 | 133 |
| 30,905 | 17 | 7 | 155 | 61 | 6  | 9 | 123 | 56 | 301 | 133 |
| 30,906 | 17 | 7 | 155 | 61 | 6  | 9 | 123 | 56 | 301 | 133 |
| 30,907 | 17 | 7 | 155 | 61 | 6  | 9 | 124 | 57 | 302 | 134 |
| 30,908 | 17 | 7 | 155 | 61 | 6  | 9 | 124 | 57 | 302 | 134 |
| 30,909 | 17 | 7 | 152 | 63 | 6  | 9 | 124 | 61 | 299 | 140 |
| 30,910 | 17 | 7 | 150 | 63 | 6  | 9 | 124 | 61 | 297 | 140 |
| 30,911 | 17 | 7 | 148 | 63 | 6  | 9 | 127 | 61 | 298 | 140 |
| 30,912 | 17 | 7 | 143 | 63 | 6  | 9 | 126 | 61 | 292 | 140 |
| 30,913 | 15 | 7 | 135 | 61 | 6  | 9 | 124 | 61 | 280 | 138 |
| 30,914 | 15 | 7 | 136 | 56 | 6  | 9 | 123 | 58 | 280 | 130 |
| 30,915 | 15 | 7 | 135 | 56 | 6  | 9 | 124 | 58 | 280 | 130 |
| 30,916 | 15 | 7 | 121 | 55 | 6  | 9 | 110 | 57 | 252 | 128 |
| 30,917 | 15 | 7 | 120 | 56 | 6  | 9 | 109 | 55 | 250 | 127 |
| 30,918 | 15 | 7 | 129 | 55 | 6  | 9 | 110 | 51 | 260 | 122 |
| 30,919 | 16 | 4 | 130 | 39 | 7  | 3 | 107 | 23 | 260 | 69  |
| 30,920 | 14 | 4 | 137 | 32 | 7  | 3 | 105 | 23 | 263 | 62  |
| 30,921 | 14 | 4 | 133 | 32 | 7  | 3 | 106 | 23 | 260 | 62  |
| 30,922 | 14 | 4 | 136 | 32 | 8  | 3 | 112 | 23 | 270 | 62  |
| 30,923 | 14 | 3 | 135 | 23 | 8  | 2 | 112 | 16 | 269 | 44  |
| 30,924 | 14 | 3 | 138 | 21 | 8  | 2 | 112 | 15 | 272 | 41  |
| 30,925 | 14 | 3 | 171 | 20 | 9  | 2 | 148 | 15 | 342 | 40  |
| 30,926 | 13 | 3 | 176 | 20 | 10 | 2 | 154 | 15 | 353 | 40  |
| 30,927 | 12 | 3 | 186 | 20 | 10 | 2 | 167 | 15 | 375 | 40  |
| 30,928 | 12 | 3 | 193 | 21 | 10 | 2 | 177 | 15 | 392 | 41  |
| 30,929 | 9  | 2 | 183 | 22 | 10 | 2 | 179 | 15 | 381 | 41  |
| 30,930 | 9  | 2 | 182 | 23 | 10 | 2 | 182 | 16 | 383 | 43  |
| 30,931 | 9  | 2 | 181 | 23 | 10 | 2 | 182 | 16 | 382 | 43  |
| 30,932 | 9  | 2 | 180 | 22 | 9  | 2 | 177 | 16 | 375 | 42  |
| 30,933 | 9  | 2 | 174 | 22 | 9  | 2 | 177 | 16 | 369 | 42  |
| 30,934 | 11 | 1 | 143 | 23 | 7  | 2 | 133 | 16 | 294 | 42  |
| 30,935 | 11 | 1 | 142 | 22 | 7  | 2 | 133 | 14 | 293 | 39  |
| 30,936 | 11 | 1 | 143 | 22 | 7  | 2 | 134 | 14 | 295 | 39  |
| 30,937 | 11 | 1 | 148 | 22 | 7  | 2 | 136 | 14 | 302 | 39  |
| 30,938 | 11 | 1 | 148 | 22 | 6  | 2 | 136 | 14 | 301 | 39  |
| 30,939 | 10 | 1 | 149 | 22 | 6  | 2 | 136 | 14 | 301 | 39  |
| 30,940 | 10 | 1 | 149 | 22 | 6  | 2 | 136 | 14 | 301 | 39  |
| 30,941 | 12 | 1 | 175 | 22 | 6  | 2 | 151 | 15 | 344 | 40  |
| 30,942 | 19 | 1 | 235 | 26 | 9  | 2 | 227 | 17 | 490 | 46  |
| 30,943 | 26 | 1 | 251 | 34 | 11 | 2 | 273 | 17 | 561 | 54  |

|        |    |    |     |    |    |   |     |    |     |     |
|--------|----|----|-----|----|----|---|-----|----|-----|-----|
| 30,944 | 24 | 1  | 255 | 37 | 11 | 2 | 272 | 16 | 562 | 56  |
| 30,945 | 24 | 1  | 261 | 35 | 12 | 2 | 272 | 16 | 569 | 54  |
| 30,946 | 24 | 1  | 260 | 37 | 12 | 2 | 274 | 17 | 570 | 57  |
| 30,947 | 24 | 1  | 259 | 37 | 11 | 2 | 274 | 19 | 568 | 59  |
| 30,948 | 24 | 1  | 255 | 38 | 11 | 2 | 272 | 21 | 562 | 62  |
| 30,949 | 24 | 1  | 255 | 41 | 11 | 4 | 271 | 23 | 561 | 69  |
| 30,950 | 24 | 2  | 260 | 49 | 11 | 4 | 271 | 27 | 566 | 82  |
| 30,951 | 24 | 2  | 260 | 50 | 11 | 4 | 271 | 28 | 566 | 84  |
| 30,952 | 24 | 2  | 261 | 50 | 11 | 4 | 275 | 25 | 571 | 81  |
| 30,953 | 25 | 7  | 259 | 72 | 11 | 5 | 282 | 33 | 577 | 117 |
| 30,954 | 24 | 7  | 258 | 72 | 11 | 5 | 281 | 33 | 574 | 117 |
| 30,955 | 22 | 8  | 261 | 66 | 11 | 3 | 284 | 32 | 578 | 109 |
| 30,956 | 22 | 8  | 260 | 66 | 11 | 3 | 286 | 32 | 579 | 109 |
| 30,957 | 22 | 8  | 262 | 69 | 11 | 3 | 288 | 35 | 583 | 115 |
| 30,958 | 22 | 8  | 263 | 69 | 12 | 3 | 293 | 35 | 590 | 115 |
| 30,959 | 23 | 8  | 262 | 67 | 12 | 3 | 293 | 31 | 590 | 109 |
| 30,960 | 23 | 8  | 262 | 67 | 12 | 3 | 292 | 32 | 589 | 110 |
| 30,961 | 23 | 8  | 261 | 67 | 12 | 3 | 290 | 32 | 586 | 110 |
| 30,962 | 23 | 8  | 261 | 67 | 12 | 3 | 290 | 32 | 586 | 110 |
| 30,963 | 23 | 8  | 261 | 67 | 12 | 3 | 290 | 32 | 586 | 110 |
| 30,964 | 23 | 8  | 261 | 67 | 12 | 3 | 290 | 32 | 586 | 110 |
| 30,965 | 23 | 8  | 260 | 67 | 12 | 3 | 289 | 32 | 584 | 110 |
| 30,966 | 25 | 8  | 322 | 67 | 12 | 3 | 320 | 32 | 679 | 110 |
| 30,967 | 27 | 8  | 330 | 67 | 12 | 3 | 324 | 32 | 693 | 110 |
| 30,968 | 27 | 8  | 330 | 66 | 12 | 3 | 324 | 32 | 693 | 109 |
| 30,969 | 27 | 8  | 321 | 66 | 12 | 3 | 322 | 32 | 682 | 109 |
| 30,970 | 26 | 8  | 318 | 66 | 11 | 3 | 323 | 32 | 678 | 109 |
| 30,971 | 26 | 8  | 309 | 68 | 11 | 3 | 322 | 32 | 668 | 111 |
| 30,972 | 26 | 8  | 309 | 71 | 11 | 4 | 321 | 33 | 667 | 116 |
| 30,973 | 28 | 8  | 307 | 76 | 10 | 4 | 324 | 35 | 669 | 123 |
| 30,974 | 33 | 8  | 317 | 79 | 10 | 4 | 339 | 36 | 699 | 127 |
| 30,975 | 33 | 8  | 306 | 86 | 10 | 4 | 332 | 39 | 681 | 137 |
| 30,976 | 33 | 8  | 286 | 89 | 9  | 4 | 303 | 39 | 631 | 140 |
| 30,977 | 33 | 9  | 280 | 89 | 8  | 4 | 296 | 40 | 617 | 142 |
| 30,978 | 35 | 10 | 283 | 92 | 8  | 4 | 291 | 40 | 617 | 146 |
| 30,979 | 40 | 12 | 353 | 93 | 15 | 4 | 328 | 40 | 736 | 149 |
| 30,980 | 40 | 15 | 356 | 97 | 17 | 4 | 321 | 42 | 734 | 158 |
| 30,981 | 40 | 15 | 355 | 96 | 17 | 4 | 317 | 42 | 729 | 157 |
| 30,982 | 41 | 15 | 358 | 96 | 17 | 4 | 321 | 42 | 737 | 157 |
| 30,983 | 41 | 15 | 353 | 99 | 17 | 4 | 315 | 42 | 726 | 160 |
| 30,984 | 40 | 15 | 348 | 99 | 17 | 4 | 312 | 43 | 717 | 161 |

|        |    |    |     |     |    |   |     |    |     |     |
|--------|----|----|-----|-----|----|---|-----|----|-----|-----|
| 30,985 | 40 | 15 | 356 | 98  | 17 | 4 | 319 | 43 | 732 | 160 |
| 30,986 | 40 | 15 | 355 | 98  | 17 | 4 | 318 | 43 | 730 | 160 |
| 30,987 | 42 | 15 | 375 | 99  | 17 | 5 | 325 | 43 | 759 | 162 |
| 30,988 | 53 | 15 | 451 | 100 | 24 | 5 | 418 | 44 | 946 | 164 |
| 30,989 | 53 | 15 | 451 | 100 | 24 | 5 | 418 | 44 | 946 | 164 |
| 30,990 | 53 | 15 | 458 | 102 | 24 | 5 | 418 | 47 | 953 | 169 |
| 30,991 | 51 | 15 | 446 | 103 | 25 | 5 | 417 | 47 | 939 | 170 |
| 30,992 | 44 | 19 | 441 | 108 | 23 | 6 | 352 | 51 | 860 | 184 |
| 30,993 | 37 | 19 | 459 | 105 | 24 | 6 | 359 | 50 | 879 | 180 |
| 30,994 | 37 | 19 | 482 | 94  | 22 | 6 | 335 | 50 | 876 | 169 |
| 30,995 | 37 | 19 | 481 | 94  | 22 | 6 | 338 | 50 | 878 | 169 |
| 30,996 | 37 | 19 | 481 | 92  | 21 | 6 | 334 | 49 | 873 | 166 |
| 30,997 | 37 | 19 | 477 | 92  | 21 | 6 | 331 | 47 | 866 | 164 |
| 30,998 | 37 | 19 | 477 | 92  | 21 | 6 | 331 | 47 | 866 | 164 |
| 30,999 | 37 | 19 | 477 | 87  | 21 | 4 | 332 | 41 | 867 | 151 |
| 31,000 | 38 | 19 | 476 | 87  | 21 | 4 | 332 | 41 | 867 | 151 |
| 31,001 | 38 | 18 | 472 | 75  | 21 | 4 | 332 | 38 | 863 | 135 |
| 31,002 | 39 | 14 | 472 | 52  | 21 | 3 | 332 | 29 | 864 | 98  |
| 31,003 | 39 | 14 | 472 | 52  | 21 | 3 | 327 | 29 | 859 | 98  |
| 31,004 | 38 | 14 | 468 | 52  | 21 | 3 | 322 | 29 | 849 | 98  |
| 31,005 | 38 | 12 | 465 | 52  | 21 | 3 | 319 | 29 | 843 | 96  |
| 31,006 | 39 | 12 | 464 | 52  | 21 | 3 | 316 | 29 | 840 | 96  |
| 31,007 | 39 | 12 | 464 | 52  | 21 | 3 | 315 | 29 | 839 | 96  |
| 31,008 | 39 | 12 | 463 | 50  | 21 | 3 | 314 | 25 | 837 | 90  |
| 31,009 | 39 | 12 | 464 | 50  | 20 | 3 | 310 | 25 | 833 | 90  |
| 31,010 | 38 | 12 | 464 | 50  | 20 | 3 | 310 | 25 | 832 | 90  |
| 31,011 | 38 | 12 | 457 | 50  | 20 | 3 | 303 | 24 | 818 | 89  |
| 31,012 | 38 | 12 | 446 | 50  | 20 | 3 | 299 | 24 | 803 | 89  |
| 31,013 | 37 | 12 | 431 | 50  | 20 | 3 | 293 | 24 | 781 | 89  |
| 31,014 | 36 | 12 | 407 | 50  | 20 | 3 | 279 | 24 | 742 | 89  |
| 31,015 | 37 | 12 | 410 | 50  | 18 | 3 | 279 | 24 | 744 | 89  |
| 31,016 | 37 | 12 | 410 | 50  | 18 | 3 | 281 | 24 | 746 | 89  |
| 31,017 | 37 | 12 | 409 | 50  | 18 | 3 | 282 | 24 | 746 | 89  |
| 31,018 | 36 | 12 | 405 | 50  | 18 | 3 | 278 | 24 | 737 | 89  |
| 31,019 | 36 | 12 | 404 | 50  | 18 | 3 | 277 | 24 | 735 | 89  |
| 31,020 | 36 | 12 | 409 | 50  | 18 | 3 | 280 | 23 | 743 | 88  |
| 31,021 | 36 | 12 | 411 | 41  | 18 | 2 | 284 | 21 | 749 | 76  |
| 31,022 | 36 | 12 | 416 | 41  | 18 | 2 | 285 | 21 | 755 | 76  |
| 31,023 | 34 | 12 | 414 | 37  | 18 | 2 | 276 | 20 | 742 | 71  |
| 31,024 | 34 | 13 | 412 | 37  | 18 | 2 | 274 | 21 | 738 | 73  |
| 31,025 | 29 | 13 | 399 | 37  | 18 | 2 | 258 | 22 | 704 | 74  |

|        |    |    |     |    |    |   |     |    |     |    |
|--------|----|----|-----|----|----|---|-----|----|-----|----|
| 31,026 | 29 | 13 | 400 | 31 | 18 | 2 | 266 | 20 | 713 | 66 |
| 31,027 | 30 | 13 | 403 | 31 | 18 | 2 | 269 | 20 | 720 | 66 |
| 31,028 | 28 | 12 | 389 | 31 | 18 | 2 | 261 | 19 | 696 | 64 |
| 31,029 | 25 | 9  | 337 | 26 | 12 | 2 | 231 | 19 | 605 | 56 |
| 31,030 | 22 | 7  | 317 | 21 | 11 | 2 | 216 | 18 | 566 | 48 |
| 31,031 | 22 | 7  | 311 | 21 | 11 | 2 | 212 | 19 | 556 | 49 |
| 31,032 | 22 | 7  | 311 | 21 | 11 | 2 | 208 | 17 | 552 | 47 |
| 31,033 | 22 | 7  | 310 | 21 | 11 | 2 | 208 | 17 | 551 | 47 |
| 31,034 | 22 | 7  | 314 | 18 | 11 | 2 | 211 | 17 | 558 | 44 |
| 31,035 | 23 | 7  | 315 | 19 | 11 | 2 | 209 | 16 | 558 | 44 |
| 31,036 | 21 | 7  | 309 | 18 | 11 | 1 | 205 | 16 | 546 | 42 |
| 31,037 | 19 | 7  | 288 | 18 | 11 | 1 | 197 | 17 | 515 | 43 |
| 31,038 | 12 | 7  | 259 | 18 | 7  | 1 | 147 | 16 | 425 | 42 |
| 31,039 | 8  | 7  | 208 | 17 | 4  | 1 | 100 | 16 | 320 | 41 |
| 31,040 | 8  | 7  | 200 | 17 | 4  | 1 | 100 | 16 | 312 | 41 |
| 31,041 | 8  | 7  | 196 | 16 | 4  | 1 | 88  | 13 | 296 | 37 |
| 31,042 | 8  | 7  | 188 | 16 | 3  | 3 | 86  | 12 | 285 | 38 |
| 31,043 | 8  | 3  | 133 | 13 | 2  | 2 | 76  | 8  | 219 | 26 |
| 31,044 | 11 | 3  | 113 | 12 | 1  | 2 | 57  | 8  | 182 | 25 |
| 31,045 | 11 | 3  | 79  | 12 | 1  | 2 | 48  | 8  | 139 | 25 |
| 31,046 | 11 | 3  | 75  | 12 | 1  | 2 | 45  | 8  | 132 | 25 |
| 31,047 | 12 | 3  | 68  | 12 | 0  | 2 | 42  | 8  | 122 | 25 |
| 31,048 | 13 | 3  | 70  | 12 | 0  | 2 | 42  | 8  | 125 | 25 |
| 31,049 | 13 | 3  | 70  | 12 | 0  | 2 | 42  | 8  | 125 | 25 |
| 31,050 | 13 | 3  | 74  | 11 | 0  | 2 | 41  | 8  | 128 | 24 |
| 31,051 | 12 | 3  | 91  | 11 | 0  | 2 | 42  | 8  | 145 | 24 |
| 31,052 | 12 | 3  | 90  | 12 | 0  | 2 | 42  | 8  | 144 | 25 |
| 31,053 | 19 | 2  | 110 | 13 | 4  | 2 | 60  | 11 | 193 | 28 |
| 31,054 | 23 | 2  | 116 | 14 | 4  | 2 | 63  | 12 | 206 | 30 |
| 31,055 | 23 | 2  | 116 | 14 | 4  | 2 | 62  | 15 | 205 | 33 |
| 31,056 | 23 | 2  | 116 | 14 | 4  | 2 | 63  | 17 | 206 | 35 |
| 31,057 | 30 | 2  | 170 | 14 | 8  | 2 | 105 | 17 | 313 | 35 |
| 31,058 | 30 | 2  | 171 | 13 | 8  | 2 | 106 | 17 | 315 | 34 |
| 31,059 | 30 | 2  | 171 | 13 | 8  | 2 | 106 | 17 | 315 | 34 |
| 31,060 | 30 | 2  | 170 | 14 | 8  | 2 | 107 | 18 | 315 | 36 |
| 31,061 | 30 | 2  | 170 | 14 | 8  | 2 | 107 | 18 | 315 | 36 |
| 31,062 | 30 | 2  | 170 | 14 | 8  | 2 | 107 | 18 | 315 | 36 |
| 31,063 | 30 | 2  | 169 | 14 | 8  | 2 | 107 | 18 | 314 | 36 |
| 31,064 | 30 | 2  | 171 | 14 | 8  | 2 | 107 | 18 | 316 | 36 |
| 31,065 | 30 | 3  | 169 | 14 | 8  | 2 | 107 | 18 | 314 | 37 |
| 31,066 | 29 | 3  | 164 | 14 | 8  | 2 | 106 | 18 | 307 | 37 |

|        |    |   |     |    |    |   |     |    |     |    |
|--------|----|---|-----|----|----|---|-----|----|-----|----|
| 31,067 | 31 | 3 | 169 | 14 | 8  | 2 | 106 | 18 | 314 | 37 |
| 31,068 | 31 | 3 | 169 | 14 | 8  | 2 | 105 | 18 | 313 | 37 |
| 31,069 | 31 | 3 | 167 | 14 | 8  | 2 | 106 | 18 | 312 | 37 |
| 31,070 | 31 | 3 | 173 | 14 | 9  | 2 | 111 | 20 | 324 | 39 |
| 31,071 | 31 | 3 | 171 | 14 | 10 | 2 | 112 | 20 | 324 | 39 |
| 31,072 | 31 | 3 | 168 | 14 | 10 | 2 | 107 | 20 | 316 | 39 |
| 31,073 | 31 | 3 | 163 | 15 | 10 | 2 | 106 | 20 | 310 | 40 |
| 31,074 | 31 | 3 | 167 | 15 | 11 | 2 | 114 | 20 | 323 | 40 |
| 31,075 | 31 | 3 | 171 | 14 | 11 | 2 | 115 | 17 | 328 | 36 |
| 31,076 | 31 | 3 | 171 | 16 | 11 | 2 | 114 | 17 | 327 | 38 |
| 31,077 | 31 | 3 | 168 | 19 | 11 | 2 | 107 | 17 | 317 | 41 |
| 31,078 | 30 | 3 | 165 | 16 | 11 | 2 | 104 | 17 | 310 | 38 |
| 31,079 | 30 | 3 | 163 | 16 | 11 | 2 | 104 | 17 | 308 | 38 |
| 31,080 | 30 | 2 | 162 | 16 | 11 | 2 | 104 | 17 | 307 | 37 |
| 31,081 | 30 | 2 | 158 | 16 | 11 | 2 | 102 | 17 | 301 | 37 |
| 31,082 | 29 | 2 | 155 | 16 | 11 | 2 | 103 | 16 | 298 | 36 |
| 31,083 | 29 | 2 | 155 | 17 | 11 | 2 | 102 | 16 | 297 | 37 |
| 31,084 | 29 | 2 | 159 | 17 | 11 | 2 | 104 | 16 | 303 | 37 |
| 31,085 | 29 | 2 | 155 | 16 | 11 | 2 | 101 | 16 | 296 | 36 |
| 31,086 | 28 | 2 | 158 | 16 | 11 | 2 | 104 | 16 | 301 | 36 |
| 31,087 | 28 | 2 | 156 | 16 | 11 | 2 | 103 | 15 | 298 | 35 |
| 31,088 | 28 | 2 | 156 | 16 | 11 | 2 | 103 | 14 | 298 | 34 |
| 31,089 | 28 | 2 | 155 | 16 | 11 | 2 | 103 | 14 | 297 | 34 |
| 31,090 | 28 | 2 | 155 | 16 | 11 | 2 | 103 | 13 | 297 | 33 |
| 31,091 | 30 | 2 | 157 | 16 | 11 | 2 | 108 | 13 | 306 | 33 |
| 31,092 | 30 | 2 | 166 | 14 | 11 | 0 | 115 | 13 | 322 | 29 |
| 31,093 | 30 | 2 | 167 | 12 | 11 | 1 | 116 | 13 | 324 | 28 |
| 31,094 | 30 | 2 | 167 | 12 | 11 | 1 | 116 | 13 | 324 | 28 |
| 31,095 | 27 | 2 | 166 | 12 | 11 | 1 | 115 | 12 | 319 | 27 |
| 31,096 | 28 | 2 | 169 | 12 | 11 | 2 | 115 | 12 | 323 | 28 |
| 31,097 | 28 | 2 | 169 | 12 | 11 | 2 | 115 | 12 | 323 | 28 |
| 31,098 | 27 | 2 | 168 | 12 | 11 | 2 | 114 | 12 | 320 | 28 |
| 31,099 | 30 | 2 | 205 | 12 | 14 | 2 | 139 | 12 | 388 | 28 |
| 31,100 | 30 | 2 | 204 | 12 | 14 | 2 | 139 | 12 | 387 | 28 |
| 31,101 | 30 | 2 | 201 | 12 | 14 | 2 | 140 | 12 | 385 | 28 |
| 31,102 | 30 | 2 | 196 | 11 | 14 | 2 | 141 | 12 | 381 | 27 |
| 31,103 | 30 | 3 | 194 | 13 | 14 | 2 | 141 | 13 | 379 | 31 |
| 31,104 | 22 | 5 | 177 | 14 | 10 | 4 | 123 | 22 | 332 | 45 |
| 31,105 | 18 | 5 | 170 | 14 | 10 | 4 | 120 | 21 | 318 | 44 |
| 31,106 | 21 | 5 | 191 | 14 | 10 | 5 | 138 | 18 | 360 | 42 |
| 31,107 | 20 | 5 | 196 | 14 | 10 | 5 | 141 | 16 | 367 | 40 |

|        |    |    |     |    |    |   |     |    |     |     |
|--------|----|----|-----|----|----|---|-----|----|-----|-----|
| 31,108 | 15 | 7  | 165 | 14 | 7  | 5 | 110 | 16 | 297 | 42  |
| 31,109 | 15 | 7  | 163 | 14 | 7  | 5 | 109 | 16 | 294 | 42  |
| 31,110 | 15 | 7  | 162 | 14 | 7  | 5 | 108 | 17 | 292 | 43  |
| 31,111 | 15 | 7  | 178 | 13 | 7  | 5 | 117 | 16 | 317 | 41  |
| 31,112 | 15 | 7  | 178 | 14 | 7  | 5 | 117 | 16 | 317 | 42  |
| 31,113 | 15 | 7  | 178 | 14 | 7  | 5 | 117 | 16 | 317 | 42  |
| 31,114 | 17 | 7  | 227 | 14 | 9  | 5 | 133 | 16 | 386 | 42  |
| 31,115 | 17 | 7  | 225 | 14 | 11 | 5 | 133 | 16 | 386 | 42  |
| 31,116 | 17 | 6  | 222 | 14 | 11 | 5 | 132 | 16 | 382 | 41  |
| 31,117 | 19 | 6  | 261 | 14 | 19 | 5 | 173 | 16 | 472 | 41  |
| 31,118 | 19 | 6  | 260 | 15 | 19 | 5 | 172 | 17 | 470 | 43  |
| 31,119 | 25 | 6  | 297 | 18 | 26 | 6 | 195 | 20 | 543 | 50  |
| 31,120 | 25 | 7  | 309 | 18 | 26 | 6 | 207 | 20 | 567 | 51  |
| 31,121 | 25 | 7  | 303 | 19 | 25 | 6 | 201 | 20 | 554 | 52  |
| 31,122 | 25 | 7  | 301 | 19 | 24 | 6 | 198 | 22 | 548 | 54  |
| 31,123 | 25 | 9  | 300 | 24 | 23 | 6 | 194 | 25 | 542 | 64  |
| 31,124 | 25 | 9  | 294 | 26 | 23 | 6 | 190 | 29 | 532 | 70  |
| 31,125 | 25 | 9  | 291 | 26 | 23 | 8 | 190 | 29 | 529 | 72  |
| 31,126 | 25 | 10 | 291 | 39 | 23 | 8 | 190 | 36 | 529 | 93  |
| 31,127 | 25 | 10 | 291 | 37 | 23 | 8 | 191 | 36 | 530 | 91  |
| 31,128 | 32 | 10 | 326 | 34 | 23 | 8 | 206 | 36 | 587 | 88  |
| 31,129 | 32 | 10 | 332 | 34 | 23 | 8 | 206 | 36 | 593 | 88  |
| 31,130 | 35 | 10 | 375 | 34 | 26 | 8 | 231 | 36 | 667 | 88  |
| 31,131 | 35 | 10 | 377 | 34 | 26 | 8 | 234 | 36 | 672 | 88  |
| 31,132 | 35 | 10 | 377 | 34 | 26 | 8 | 234 | 36 | 672 | 88  |
| 31,133 | 35 | 10 | 377 | 34 | 26 | 8 | 233 | 36 | 671 | 88  |
| 31,134 | 35 | 10 | 375 | 33 | 26 | 8 | 232 | 36 | 668 | 87  |
| 31,135 | 35 | 10 | 374 | 33 | 26 | 8 | 231 | 36 | 666 | 87  |
| 31,136 | 35 | 10 | 376 | 33 | 26 | 8 | 231 | 36 | 668 | 87  |
| 31,137 | 36 | 10 | 374 | 33 | 26 | 8 | 228 | 38 | 664 | 89  |
| 31,138 | 36 | 10 | 372 | 35 | 26 | 8 | 227 | 38 | 661 | 91  |
| 31,139 | 36 | 11 | 372 | 35 | 26 | 8 | 227 | 39 | 661 | 93  |
| 31,140 | 36 | 11 | 371 | 36 | 26 | 8 | 227 | 39 | 660 | 94  |
| 31,141 | 34 | 11 | 369 | 37 | 26 | 8 | 222 | 39 | 651 | 95  |
| 31,142 | 34 | 11 | 361 | 37 | 26 | 8 | 215 | 39 | 636 | 95  |
| 31,143 | 34 | 11 | 360 | 38 | 26 | 8 | 215 | 39 | 635 | 96  |
| 31,144 | 35 | 11 | 373 | 38 | 26 | 7 | 223 | 39 | 657 | 95  |
| 31,145 | 35 | 11 | 371 | 39 | 26 | 8 | 222 | 39 | 654 | 97  |
| 31,146 | 35 | 11 | 371 | 41 | 26 | 8 | 221 | 40 | 653 | 100 |
| 31,147 | 35 | 11 | 371 | 41 | 26 | 7 | 223 | 40 | 655 | 99  |
| 31,148 | 35 | 11 | 364 | 41 | 26 | 7 | 219 | 40 | 644 | 99  |



|        |    |    |     |    |    |   |     |    |     |     |
|--------|----|----|-----|----|----|---|-----|----|-----|-----|
| 31,149 | 31 | 11 | 344 | 41 | 25 | 7 | 207 | 40 | 607 | 99  |
| 31,150 | 31 | 11 | 333 | 41 | 22 | 7 | 197 | 40 | 583 | 99  |
| 31,151 | 31 | 11 | 332 | 41 | 22 | 7 | 198 | 40 | 583 | 99  |
| 31,152 | 31 | 11 | 329 | 41 | 22 | 7 | 197 | 40 | 579 | 99  |
| 31,153 | 31 | 11 | 324 | 48 | 22 | 8 | 195 | 46 | 572 | 113 |
| 31,154 | 31 | 10 | 323 | 50 | 22 | 8 | 195 | 45 | 571 | 113 |
| 31,155 | 35 | 8  | 331 | 46 | 23 | 6 | 198 | 33 | 587 | 93  |
| 31,156 | 35 | 8  | 333 | 46 | 23 | 6 | 201 | 33 | 592 | 93  |
| 31,157 | 32 | 8  | 311 | 46 | 23 | 5 | 182 | 33 | 548 | 92  |
| 31,158 | 32 | 8  | 299 | 47 | 23 | 5 | 176 | 33 | 530 | 93  |
| 31,159 | 30 | 6  | 290 | 47 | 23 | 5 | 172 | 32 | 515 | 90  |
| 31,160 | 30 | 6  | 279 | 48 | 23 | 5 | 164 | 32 | 496 | 91  |
| 31,161 | 30 | 6  | 285 | 48 | 23 | 5 | 166 | 31 | 504 | 90  |
| 31,162 | 34 | 6  | 307 | 48 | 23 | 5 | 183 | 31 | 547 | 90  |
| 31,163 | 51 | 6  | 377 | 49 | 30 | 5 | 259 | 31 | 717 | 91  |
| 31,164 | 51 | 6  | 360 | 49 | 30 | 5 | 257 | 31 | 698 | 91  |
| 31,165 | 51 | 6  | 354 | 49 | 29 | 5 | 251 | 31 | 685 | 91  |
| 31,166 | 48 | 6  | 326 | 49 | 21 | 5 | 219 | 31 | 614 | 91  |
| 31,167 | 48 | 6  | 323 | 49 | 21 | 5 | 217 | 31 | 609 | 91  |
| 31,168 | 49 | 6  | 341 | 49 | 21 | 5 | 221 | 31 | 632 | 91  |
| 31,169 | 43 | 6  | 306 | 45 | 14 | 4 | 198 | 27 | 561 | 82  |
| 31,170 | 43 | 6  | 301 | 45 | 14 | 4 | 193 | 27 | 551 | 82  |
| 31,171 | 44 | 5  | 305 | 45 | 16 | 4 | 186 | 27 | 551 | 81  |
| 31,172 | 48 | 5  | 319 | 44 | 16 | 4 | 190 | 23 | 573 | 76  |
| 31,173 | 50 | 3  | 328 | 40 | 16 | 4 | 193 | 20 | 587 | 67  |
| 31,174 | 52 | 3  | 337 | 37 | 16 | 4 | 194 | 17 | 599 | 61  |
| 31,175 | 52 | 3  | 337 | 37 | 16 | 4 | 194 | 17 | 599 | 61  |
| 31,176 | 54 | 3  | 393 | 38 | 25 | 2 | 241 | 18 | 713 | 61  |
| 31,177 | 56 | 1  | 432 | 25 | 26 | 2 | 248 | 11 | 762 | 39  |
| 31,178 | 56 | 1  | 434 | 26 | 26 | 2 | 250 | 11 | 766 | 40  |
| 31,179 | 56 | 1  | 430 | 26 | 26 | 2 | 250 | 11 | 762 | 40  |
| 31,180 | 53 | 1  | 388 | 26 | 23 | 2 | 225 | 11 | 689 | 40  |
| 31,181 | 53 | 1  | 386 | 26 | 23 | 2 | 222 | 11 | 684 | 40  |
| 31,182 | 53 | 1  | 385 | 26 | 23 | 2 | 222 | 11 | 683 | 40  |
| 31,183 | 53 | 1  | 385 | 26 | 23 | 2 | 222 | 11 | 683 | 40  |
| 31,184 | 53 | 1  | 385 | 26 | 23 | 2 | 222 | 11 | 683 | 40  |
| 31,185 | 53 | 1  | 388 | 26 | 23 | 2 | 224 | 11 | 688 | 40  |
| 31,186 | 53 | 1  | 389 | 26 | 23 | 2 | 224 | 11 | 689 | 40  |
| 31,187 | 53 | 1  | 387 | 28 | 23 | 2 | 224 | 11 | 687 | 42  |
| 31,188 | 53 | 1  | 384 | 30 | 23 | 2 | 224 | 9  | 684 | 42  |
| 31,189 | 53 | 1  | 385 | 29 | 23 | 2 | 224 | 9  | 685 | 41  |

|        |    |   |     |    |    |   |     |    |     |    |
|--------|----|---|-----|----|----|---|-----|----|-----|----|
| 31,190 | 53 | 0 | 387 | 30 | 23 | 2 | 229 | 8  | 692 | 40 |
| 31,191 | 53 | 0 | 387 | 29 | 23 | 2 | 229 | 8  | 692 | 39 |
| 31,192 | 54 | 0 | 393 | 31 | 23 | 2 | 241 | 9  | 711 | 42 |
| 31,193 | 53 | 0 | 381 | 31 | 23 | 2 | 233 | 9  | 690 | 42 |
| 31,194 | 53 | 1 | 378 | 33 | 23 | 2 | 232 | 13 | 686 | 49 |
| 31,195 | 53 | 1 | 378 | 35 | 23 | 2 | 232 | 14 | 686 | 52 |
| 31,196 | 54 | 1 | 378 | 33 | 23 | 1 | 233 | 13 | 688 | 48 |
| 31,197 | 54 | 2 | 378 | 34 | 23 | 1 | 233 | 13 | 688 | 50 |
| 31,198 | 53 | 2 | 374 | 35 | 23 | 1 | 231 | 13 | 681 | 51 |
| 31,199 | 53 | 2 | 375 | 35 | 23 | 2 | 232 | 13 | 683 | 52 |
| 31,200 | 53 | 2 | 379 | 35 | 23 | 2 | 232 | 13 | 687 | 52 |
| 31,201 | 53 | 2 | 378 | 35 | 23 | 2 | 231 | 13 | 685 | 52 |
| 31,202 | 53 | 2 | 377 | 35 | 23 | 2 | 231 | 13 | 684 | 52 |
| 31,203 | 53 | 2 | 382 | 28 | 24 | 1 | 232 | 7  | 691 | 38 |
| 31,204 | 54 | 2 | 383 | 24 | 24 | 1 | 231 | 7  | 692 | 34 |
| 31,205 | 54 | 2 | 385 | 24 | 24 | 1 | 232 | 7  | 695 | 34 |
| 31,206 | 50 | 2 | 382 | 25 | 23 | 1 | 230 | 7  | 685 | 35 |
| 31,207 | 50 | 2 | 387 | 25 | 23 | 1 | 230 | 7  | 690 | 35 |
| 31,208 | 50 | 2 | 393 | 25 | 23 | 1 | 234 | 7  | 700 | 35 |
| 31,209 | 51 | 2 | 408 | 23 | 23 | 1 | 244 | 7  | 726 | 33 |
| 31,210 | 54 | 2 | 411 | 23 | 25 | 1 | 250 | 7  | 740 | 33 |
| 31,211 | 55 | 2 | 419 | 23 | 25 | 1 | 265 | 7  | 764 | 33 |
| 31,212 | 50 | 2 | 409 | 21 | 25 | 1 | 256 | 7  | 740 | 31 |
| 31,213 | 51 | 2 | 396 | 21 | 25 | 1 | 249 | 7  | 721 | 31 |
| 31,214 | 35 | 2 | 335 | 21 | 18 | 1 | 178 | 7  | 566 | 31 |
| 31,215 | 34 | 2 | 328 | 21 | 17 | 1 | 172 | 7  | 551 | 31 |
| 31,216 | 34 | 2 | 321 | 21 | 17 | 1 | 172 | 7  | 544 | 31 |
| 31,217 | 34 | 2 | 319 | 21 | 17 | 1 | 171 | 7  | 541 | 31 |
| 31,218 | 34 | 2 | 319 | 21 | 17 | 1 | 171 | 7  | 541 | 31 |
| 31,219 | 33 | 2 | 300 | 21 | 17 | 1 | 162 | 7  | 512 | 31 |
| 31,220 | 33 | 2 | 300 | 21 | 17 | 1 | 162 | 7  | 512 | 31 |
| 31,221 | 34 | 2 | 300 | 23 | 16 | 1 | 164 | 7  | 514 | 33 |
| 31,222 | 33 | 2 | 296 | 25 | 16 | 2 | 166 | 9  | 511 | 38 |
| 31,223 | 29 | 2 | 283 | 28 | 16 | 2 | 163 | 10 | 491 | 42 |
| 31,224 | 28 | 2 | 274 | 29 | 16 | 2 | 161 | 11 | 479 | 44 |
| 31,225 | 27 | 2 | 265 | 29 | 16 | 2 | 162 | 11 | 470 | 44 |
| 31,226 | 23 | 2 | 228 | 29 | 10 | 2 | 132 | 12 | 393 | 45 |
| 31,227 | 18 | 2 | 179 | 28 | 7  | 2 | 101 | 11 | 305 | 43 |
| 31,228 | 16 | 2 | 138 | 28 | 6  | 2 | 93  | 11 | 253 | 43 |
| 31,229 | 16 | 2 | 132 | 27 | 6  | 2 | 89  | 11 | 243 | 42 |
| 31,230 | 17 | 2 | 131 | 27 | 6  | 2 | 89  | 11 | 243 | 42 |

|        |    |   |     |    |    |   |     |    |     |    |
|--------|----|---|-----|----|----|---|-----|----|-----|----|
| 31,231 | 17 | 2 | 135 | 27 | 6  | 2 | 91  | 12 | 249 | 43 |
| 31,232 | 17 | 2 | 135 | 28 | 6  | 2 | 91  | 13 | 249 | 45 |
| 31,233 | 20 | 2 | 146 | 28 | 8  | 2 | 100 | 13 | 274 | 45 |
| 31,234 | 20 | 2 | 150 | 28 | 8  | 2 | 100 | 13 | 278 | 45 |
| 31,235 | 21 | 2 | 149 | 28 | 8  | 2 | 98  | 13 | 276 | 45 |
| 31,236 | 21 | 2 | 148 | 28 | 8  | 2 | 98  | 13 | 275 | 45 |
| 31,237 | 21 | 2 | 154 | 28 | 8  | 2 | 98  | 13 | 281 | 45 |
| 31,238 | 20 | 2 | 154 | 26 | 8  | 2 | 98  | 13 | 280 | 43 |
| 31,239 | 21 | 2 | 154 | 22 | 8  | 2 | 99  | 13 | 282 | 39 |
| 31,240 | 21 | 2 | 157 | 22 | 8  | 2 | 104 | 13 | 290 | 39 |
| 31,241 | 21 | 1 | 156 | 16 | 8  | 2 | 99  | 8  | 284 | 27 |
| 31,242 | 21 | 1 | 156 | 16 | 8  | 2 | 98  | 8  | 283 | 27 |
| 31,243 | 20 | 1 | 155 | 16 | 8  | 2 | 90  | 9  | 273 | 28 |
| 31,244 | 20 | 1 | 153 | 16 | 8  | 2 | 90  | 9  | 271 | 28 |
| 31,245 | 21 | 1 | 162 | 16 | 8  | 2 | 90  | 9  | 281 | 28 |
| 31,246 | 21 | 1 | 177 | 14 | 8  | 2 | 93  | 8  | 299 | 25 |
| 31,247 | 20 | 1 | 178 | 13 | 8  | 2 | 93  | 8  | 299 | 24 |
| 31,248 | 20 | 0 | 182 | 12 | 9  | 2 | 97  | 8  | 308 | 22 |
| 31,249 | 20 | 0 | 182 | 11 | 9  | 2 | 96  | 8  | 307 | 21 |
| 31,250 | 20 | 0 | 181 | 11 | 9  | 1 | 96  | 8  | 306 | 20 |
| 31,251 | 20 | 0 | 177 | 11 | 9  | 1 | 96  | 8  | 302 | 20 |
| 31,252 | 20 | 0 | 180 | 11 | 9  | 1 | 99  | 8  | 308 | 20 |
| 31,253 | 20 | 0 | 181 | 11 | 8  | 1 | 99  | 8  | 308 | 20 |
| 31,254 | 20 | 0 | 180 | 11 | 8  | 1 | 98  | 8  | 306 | 20 |
| 31,255 | 19 | 0 | 201 | 11 | 8  | 1 | 104 | 8  | 332 | 20 |
| 31,256 | 19 | 0 | 199 | 11 | 8  | 1 | 103 | 8  | 329 | 20 |
| 31,257 | 19 | 0 | 208 | 13 | 9  | 1 | 109 | 13 | 345 | 27 |
| 31,258 | 19 | 0 | 199 | 13 | 9  | 1 | 106 | 13 | 333 | 27 |
| 31,259 | 19 | 0 | 212 | 14 | 10 | 1 | 114 | 14 | 355 | 29 |
| 31,260 | 18 | 1 | 200 | 18 | 9  | 4 | 102 | 18 | 329 | 41 |
| 31,261 | 15 | 1 | 196 | 18 | 7  | 4 | 97  | 18 | 315 | 41 |
| 31,262 | 14 | 2 | 179 | 19 | 7  | 4 | 77  | 18 | 277 | 43 |
| 31,263 | 14 | 2 | 169 | 19 | 7  | 4 | 74  | 18 | 264 | 43 |
| 31,264 | 13 | 2 | 169 | 20 | 7  | 4 | 74  | 18 | 263 | 44 |
| 31,265 | 12 | 2 | 160 | 21 | 7  | 4 | 69  | 18 | 248 | 45 |
| 31,266 | 12 | 2 | 160 | 22 | 7  | 4 | 70  | 18 | 249 | 46 |
| 31,267 | 12 | 2 | 161 | 22 | 7  | 4 | 71  | 18 | 251 | 46 |
| 31,268 | 12 | 2 | 159 | 22 | 7  | 4 | 71  | 18 | 249 | 46 |
| 31,269 | 12 | 2 | 154 | 22 | 6  | 4 | 72  | 18 | 244 | 46 |
| 31,270 | 11 | 2 | 153 | 22 | 6  | 4 | 72  | 18 | 242 | 46 |
| 31,271 | 10 | 2 | 152 | 23 | 6  | 5 | 72  | 18 | 240 | 48 |

|        |    |   |     |    |    |   |    |    |     |    |
|--------|----|---|-----|----|----|---|----|----|-----|----|
| 31,272 | 9  | 2 | 146 | 19 | 5  | 4 | 74 | 16 | 234 | 41 |
| 31,273 | 9  | 3 | 145 | 16 | 5  | 4 | 74 | 15 | 233 | 38 |
| 31,274 | 9  | 3 | 143 | 16 | 5  | 4 | 74 | 15 | 231 | 38 |
| 31,275 | 8  | 3 | 142 | 14 | 5  | 4 | 72 | 13 | 227 | 34 |
| 31,276 | 7  | 3 | 143 | 15 | 5  | 4 | 71 | 13 | 226 | 35 |
| 31,277 | 7  | 3 | 143 | 15 | 5  | 4 | 71 | 13 | 226 | 35 |
| 31,278 | 7  | 3 | 142 | 16 | 5  | 4 | 71 | 14 | 225 | 37 |
| 31,279 | 6  | 3 | 143 | 16 | 5  | 4 | 71 | 14 | 225 | 37 |
| 31,280 | 6  | 3 | 143 | 16 | 5  | 4 | 71 | 14 | 225 | 37 |
| 31,281 | 6  | 3 | 143 | 16 | 5  | 4 | 70 | 14 | 224 | 37 |
| 31,282 | 6  | 3 | 141 | 16 | 5  | 4 | 69 | 12 | 221 | 35 |
| 31,283 | 6  | 3 | 141 | 16 | 5  | 4 | 69 | 12 | 221 | 35 |
| 31,284 | 3  | 3 | 131 | 16 | 3  | 4 | 60 | 12 | 197 | 35 |
| 31,285 | 3  | 3 | 127 | 16 | 4  | 4 | 60 | 12 | 194 | 35 |
| 31,286 | 2  | 3 | 128 | 16 | 4  | 4 | 61 | 12 | 195 | 35 |
| 31,287 | 2  | 3 | 128 | 16 | 4  | 4 | 60 | 12 | 194 | 35 |
| 31,288 | 2  | 3 | 124 | 17 | 4  | 4 | 60 | 12 | 190 | 36 |
| 31,289 | 1  | 3 | 125 | 17 | 4  | 4 | 59 | 12 | 189 | 36 |
| 31,290 | 4  | 4 | 135 | 17 | 5  | 4 | 68 | 13 | 212 | 38 |
| 31,291 | 9  | 4 | 156 | 17 | 7  | 4 | 72 | 13 | 244 | 38 |
| 31,292 | 9  | 4 | 160 | 17 | 7  | 4 | 77 | 13 | 253 | 38 |
| 31,293 | 12 | 4 | 181 | 17 | 9  | 4 | 90 | 13 | 292 | 38 |
| 31,294 | 12 | 4 | 184 | 17 | 9  | 4 | 89 | 12 | 294 | 37 |
| 31,295 | 13 | 4 | 195 | 17 | 10 | 4 | 94 | 12 | 312 | 37 |
| 31,296 | 13 | 4 | 197 | 17 | 12 | 4 | 95 | 12 | 317 | 37 |
| 31,297 | 13 | 4 | 198 | 17 | 12 | 4 | 95 | 12 | 318 | 37 |
| 31,298 | 13 | 4 | 194 | 17 | 11 | 4 | 91 | 12 | 309 | 37 |
| 31,299 | 13 | 4 | 194 | 17 | 11 | 4 | 91 | 12 | 309 | 37 |
| 31,300 | 13 | 4 | 193 | 18 | 11 | 4 | 91 | 12 | 308 | 38 |
| 31,301 | 13 | 4 | 193 | 24 | 11 | 4 | 91 | 13 | 308 | 45 |
| 31,302 | 13 | 4 | 193 | 26 | 11 | 4 | 91 | 13 | 308 | 47 |
| 31,303 | 13 | 4 | 187 | 26 | 11 | 4 | 88 | 13 | 299 | 47 |
| 31,304 | 13 | 4 | 186 | 27 | 11 | 4 | 88 | 13 | 298 | 48 |
| 31,305 | 13 | 4 | 177 | 28 | 11 | 4 | 88 | 13 | 289 | 49 |
| 31,306 | 13 | 4 | 163 | 28 | 11 | 4 | 82 | 13 | 269 | 49 |
| 31,307 | 13 | 4 | 163 | 28 | 11 | 4 | 82 | 13 | 269 | 49 |
| 31,308 | 13 | 4 | 151 | 28 | 10 | 4 | 75 | 8  | 249 | 44 |
| 31,309 | 13 | 4 | 146 | 28 | 10 | 4 | 70 | 8  | 239 | 44 |
| 31,310 | 13 | 3 | 133 | 23 | 9  | 1 | 63 | 3  | 218 | 30 |
| 31,311 | 13 | 3 | 126 | 23 | 9  | 1 | 61 | 3  | 209 | 30 |
| 31,312 | 13 | 3 | 126 | 23 | 9  | 1 | 61 | 3  | 209 | 30 |

|        |    |   |     |    |    |   |     |   |     |    |
|--------|----|---|-----|----|----|---|-----|---|-----|----|
| 31,313 | 13 | 2 | 125 | 22 | 9  | 1 | 61  | 3 | 208 | 28 |
| 31,314 | 13 | 2 | 125 | 22 | 9  | 1 | 61  | 3 | 208 | 28 |
| 31,315 | 22 | 2 | 140 | 20 | 10 | 1 | 77  | 3 | 249 | 26 |
| 31,316 | 22 | 2 | 140 | 20 | 10 | 1 | 77  | 3 | 249 | 26 |
| 31,317 | 22 | 2 | 143 | 19 | 10 | 1 | 78  | 3 | 253 | 25 |
| 31,318 | 22 | 2 | 148 | 19 | 10 | 2 | 82  | 3 | 262 | 26 |
| 31,319 | 22 | 2 | 148 | 19 | 10 | 2 | 82  | 3 | 262 | 26 |
| 31,320 | 22 | 2 | 149 | 19 | 10 | 2 | 82  | 3 | 263 | 26 |
| 31,321 | 22 | 2 | 150 | 18 | 10 | 1 | 82  | 3 | 264 | 24 |
| 31,322 | 22 | 2 | 153 | 19 | 10 | 1 | 84  | 3 | 269 | 25 |
| 31,323 | 24 | 3 | 161 | 19 | 10 | 1 | 84  | 3 | 279 | 26 |
| 31,324 | 24 | 2 | 162 | 19 | 10 | 1 | 83  | 4 | 279 | 26 |
| 31,325 | 24 | 2 | 162 | 19 | 10 | 1 | 83  | 4 | 279 | 26 |
| 31,326 | 25 | 2 | 177 | 19 | 10 | 2 | 86  | 4 | 298 | 27 |
| 31,327 | 25 | 2 | 176 | 18 | 10 | 2 | 85  | 4 | 296 | 26 |
| 31,328 | 29 | 2 | 203 | 18 | 10 | 2 | 89  | 4 | 331 | 26 |
| 31,329 | 29 | 2 | 202 | 17 | 10 | 2 | 89  | 3 | 330 | 24 |
| 31,330 | 40 | 2 | 299 | 18 | 11 | 3 | 128 | 3 | 478 | 26 |
| 31,331 | 40 | 2 | 324 | 18 | 12 | 3 | 131 | 3 | 507 | 26 |
| 31,332 | 40 | 2 | 322 | 18 | 12 | 3 | 131 | 3 | 505 | 26 |
| 31,333 | 46 | 2 | 383 | 17 | 14 | 3 | 166 | 3 | 609 | 25 |
| 31,334 | 46 | 2 | 384 | 19 | 14 | 3 | 167 | 3 | 611 | 27 |
| 31,335 | 46 | 2 | 384 | 19 | 14 | 3 | 167 | 3 | 611 | 27 |
| 31,336 | 46 | 2 | 384 | 19 | 13 | 3 | 167 | 3 | 610 | 27 |
| 31,337 | 46 | 2 | 383 | 19 | 14 | 3 | 166 | 3 | 609 | 27 |
| 31,338 | 46 | 2 | 380 | 19 | 14 | 3 | 166 | 3 | 606 | 27 |
| 31,339 | 46 | 1 | 379 | 19 | 14 | 3 | 166 | 2 | 605 | 25 |
| 31,340 | 46 | 1 | 378 | 19 | 14 | 3 | 167 | 2 | 605 | 25 |
| 31,341 | 43 | 2 | 368 | 23 | 13 | 3 | 158 | 2 | 582 | 30 |
| 31,342 | 38 | 2 | 343 | 27 | 11 | 3 | 149 | 2 | 541 | 34 |
| 31,343 | 38 | 2 | 338 | 31 | 11 | 3 | 144 | 3 | 531 | 39 |
| 31,344 | 35 | 2 | 316 | 31 | 9  | 3 | 132 | 3 | 492 | 39 |
| 31,345 | 35 | 3 | 311 | 31 | 9  | 3 | 130 | 3 | 485 | 40 |
| 31,346 | 33 | 3 | 294 | 31 | 8  | 3 | 125 | 3 | 460 | 40 |
| 31,347 | 33 | 3 | 277 | 31 | 6  | 5 | 121 | 3 | 437 | 42 |
| 31,348 | 34 | 3 | 277 | 32 | 7  | 5 | 120 | 3 | 438 | 43 |
| 31,349 | 34 | 3 | 279 | 33 | 7  | 5 | 122 | 3 | 442 | 44 |
| 31,350 | 34 | 3 | 283 | 32 | 7  | 5 | 123 | 3 | 447 | 43 |
| 31,351 | 36 | 4 | 288 | 26 | 7  | 5 | 127 | 2 | 458 | 37 |
| 31,352 | 37 | 4 | 295 | 24 | 7  | 5 | 135 | 2 | 474 | 35 |
| 31,353 | 38 | 4 | 308 | 24 | 7  | 5 | 138 | 2 | 491 | 35 |

|        |    |   |     |    |    |   |     |    |     |    |
|--------|----|---|-----|----|----|---|-----|----|-----|----|
| 31,354 | 39 | 4 | 321 | 23 | 7  | 5 | 142 | 2  | 509 | 34 |
| 31,355 | 39 | 4 | 324 | 22 | 7  | 5 | 142 | 2  | 512 | 33 |
| 31,356 | 39 | 4 | 324 | 22 | 7  | 5 | 142 | 2  | 512 | 33 |
| 31,357 | 41 | 4 | 336 | 21 | 7  | 5 | 146 | 2  | 530 | 32 |
| 31,358 | 41 | 4 | 336 | 21 | 7  | 5 | 146 | 2  | 530 | 32 |
| 31,359 | 42 | 4 | 335 | 19 | 7  | 5 | 146 | 2  | 530 | 30 |
| 31,360 | 42 | 4 | 334 | 19 | 7  | 5 | 146 | 2  | 529 | 30 |
| 31,361 | 42 | 4 | 333 | 19 | 7  | 5 | 145 | 2  | 527 | 30 |
| 31,362 | 42 | 4 | 333 | 19 | 7  | 5 | 145 | 2  | 527 | 30 |
| 31,363 | 42 | 4 | 334 | 19 | 7  | 5 | 146 | 2  | 529 | 30 |
| 31,364 | 40 | 4 | 330 | 19 | 7  | 5 | 143 | 2  | 520 | 30 |
| 31,365 | 40 | 4 | 330 | 20 | 7  | 5 | 144 | 2  | 521 | 31 |
| 31,366 | 35 | 4 | 320 | 20 | 6  | 5 | 133 | 3  | 494 | 32 |
| 31,367 | 35 | 4 | 321 | 20 | 7  | 5 | 136 | 3  | 499 | 32 |
| 31,368 | 35 | 4 | 321 | 20 | 7  | 5 | 135 | 3  | 498 | 32 |
| 31,369 | 35 | 4 | 316 | 20 | 7  | 4 | 132 | 3  | 490 | 31 |
| 31,370 | 36 | 4 | 322 | 20 | 7  | 4 | 132 | 3  | 497 | 31 |
| 31,371 | 36 | 4 | 320 | 20 | 7  | 4 | 130 | 3  | 493 | 31 |
| 31,372 | 37 | 4 | 342 | 22 | 7  | 4 | 142 | 5  | 528 | 35 |
| 31,373 | 37 | 4 | 339 | 21 | 7  | 4 | 139 | 5  | 522 | 34 |
| 31,374 | 36 | 3 | 354 | 22 | 9  | 4 | 147 | 5  | 546 | 34 |
| 31,375 | 44 | 3 | 365 | 23 | 11 | 4 | 160 | 5  | 580 | 35 |
| 31,376 | 43 | 3 | 359 | 23 | 11 | 3 | 162 | 5  | 575 | 34 |
| 31,377 | 43 | 3 | 353 | 24 | 11 | 5 | 160 | 7  | 567 | 39 |
| 31,378 | 39 | 3 | 352 | 28 | 12 | 5 | 170 | 11 | 573 | 47 |
| 31,379 | 43 | 3 | 367 | 29 | 14 | 5 | 203 | 17 | 627 | 54 |
| 31,380 | 46 | 4 | 372 | 30 | 15 | 5 | 214 | 24 | 647 | 63 |
| 31,381 | 35 | 5 | 302 | 29 | 14 | 4 | 182 | 24 | 533 | 62 |
| 31,382 | 35 | 5 | 285 | 29 | 14 | 4 | 185 | 24 | 519 | 62 |
| 31,383 | 33 | 5 | 248 | 29 | 13 | 4 | 162 | 24 | 456 | 62 |
| 31,384 | 29 | 5 | 223 | 27 | 12 | 4 | 150 | 24 | 414 | 60 |
| 31,385 | 29 | 5 | 222 | 27 | 12 | 4 | 150 | 24 | 413 | 60 |
| 31,386 | 29 | 5 | 221 | 27 | 12 | 4 | 150 | 24 | 412 | 60 |
| 31,387 | 29 | 5 | 220 | 27 | 11 | 4 | 151 | 24 | 411 | 60 |
| 31,388 | 29 | 5 | 221 | 27 | 11 | 4 | 151 | 24 | 412 | 60 |
| 31,389 | 29 | 5 | 221 | 27 | 11 | 4 | 151 | 24 | 412 | 60 |
| 31,390 | 29 | 5 | 221 | 27 | 11 | 4 | 151 | 24 | 412 | 60 |
| 31,391 | 30 | 4 | 228 | 23 | 11 | 4 | 152 | 24 | 421 | 55 |
| 31,392 | 30 | 4 | 228 | 23 | 11 | 4 | 152 | 24 | 421 | 55 |
| 31,393 | 30 | 4 | 230 | 15 | 12 | 4 | 152 | 23 | 424 | 46 |
| 31,394 | 30 | 5 | 230 | 15 | 12 | 4 | 152 | 23 | 424 | 47 |

|        |    |   |     |    |    |   |     |    |     |    |
|--------|----|---|-----|----|----|---|-----|----|-----|----|
| 31,395 | 32 | 5 | 238 | 15 | 12 | 4 | 154 | 23 | 436 | 47 |
| 31,396 | 32 | 4 | 237 | 15 | 12 | 2 | 154 | 23 | 435 | 44 |
| 31,397 | 34 | 4 | 238 | 15 | 12 | 2 | 155 | 23 | 439 | 44 |
| 31,398 | 33 | 4 | 237 | 15 | 11 | 2 | 155 | 23 | 436 | 44 |
| 31,399 | 34 | 4 | 249 | 14 | 11 | 2 | 156 | 24 | 450 | 44 |
| 31,400 | 34 | 4 | 247 | 13 | 11 | 2 | 155 | 24 | 447 | 43 |
| 31,401 | 34 | 4 | 250 | 13 | 11 | 2 | 155 | 24 | 450 | 43 |
| 31,402 | 35 | 4 | 275 | 13 | 12 | 2 | 154 | 24 | 476 | 43 |
| 31,403 | 34 | 4 | 275 | 13 | 12 | 2 | 150 | 25 | 471 | 44 |
| 31,404 | 56 | 4 | 404 | 13 | 25 | 2 | 228 | 26 | 713 | 45 |
| 31,405 | 58 | 4 | 417 | 13 | 28 | 2 | 234 | 26 | 737 | 45 |
| 31,406 | 65 | 4 | 481 | 13 | 31 | 2 | 270 | 27 | 847 | 46 |
| 31,407 | 64 | 4 | 475 | 13 | 32 | 2 | 274 | 27 | 845 | 46 |
| 31,408 | 64 | 4 | 474 | 14 | 32 | 2 | 275 | 27 | 845 | 47 |
| 31,409 | 63 | 4 | 474 | 14 | 32 | 2 | 275 | 27 | 844 | 47 |
| 31,410 | 63 | 4 | 474 | 14 | 32 | 2 | 275 | 27 | 844 | 47 |
| 31,411 | 63 | 4 | 474 | 15 | 32 | 2 | 277 | 27 | 846 | 48 |
| 31,412 | 63 | 4 | 474 | 15 | 32 | 2 | 277 | 27 | 846 | 48 |
| 31,413 | 63 | 4 | 476 | 18 | 32 | 2 | 278 | 27 | 849 | 51 |
| 31,414 | 63 | 4 | 475 | 18 | 32 | 2 | 278 | 27 | 848 | 51 |
| 31,415 | 61 | 4 | 475 | 17 | 32 | 2 | 279 | 27 | 847 | 50 |
| 31,416 | 61 | 4 | 476 | 17 | 32 | 3 | 278 | 26 | 847 | 50 |
| 31,417 | 62 | 4 | 475 | 17 | 32 | 3 | 277 | 26 | 846 | 50 |
| 31,418 | 62 | 4 | 471 | 17 | 31 | 3 | 273 | 26 | 837 | 50 |
| 31,419 | 62 | 4 | 470 | 17 | 31 | 3 | 274 | 26 | 837 | 50 |
| 31,420 | 62 | 4 | 470 | 17 | 31 | 3 | 275 | 26 | 838 | 50 |
| 31,421 | 61 | 4 | 467 | 17 | 31 | 3 | 275 | 26 | 834 | 50 |
| 31,422 | 61 | 4 | 463 | 17 | 31 | 3 | 275 | 26 | 830 | 50 |
| 31,423 | 60 | 4 | 446 | 16 | 31 | 3 | 263 | 24 | 800 | 47 |
| 31,424 | 60 | 4 | 445 | 14 | 31 | 3 | 261 | 23 | 797 | 44 |
| 31,425 | 60 | 4 | 423 | 18 | 29 | 3 | 252 | 23 | 764 | 48 |
| 31,426 | 52 | 4 | 412 | 19 | 27 | 3 | 237 | 23 | 728 | 49 |
| 31,427 | 52 | 4 | 412 | 21 | 27 | 4 | 233 | 24 | 724 | 53 |
| 31,428 | 53 | 5 | 417 | 20 | 27 | 2 | 238 | 16 | 735 | 43 |
| 31,429 | 53 | 5 | 413 | 24 | 27 | 2 | 231 | 18 | 724 | 49 |
| 31,430 | 49 | 5 | 394 | 27 | 25 | 2 | 200 | 19 | 668 | 53 |
| 31,431 | 46 | 3 | 374 | 26 | 24 | 2 | 188 | 12 | 632 | 43 |
| 31,432 | 46 | 4 | 363 | 30 | 24 | 2 | 181 | 12 | 614 | 48 |
| 31,433 | 46 | 4 | 355 | 30 | 23 | 2 | 175 | 12 | 599 | 48 |
| 31,434 | 46 | 4 | 356 | 30 | 23 | 2 | 175 | 12 | 600 | 48 |
| 31,435 | 46 | 4 | 357 | 30 | 23 | 2 | 175 | 12 | 601 | 48 |

|        |    |   |     |    |    |   |     |    |     |    |
|--------|----|---|-----|----|----|---|-----|----|-----|----|
| 31,436 | 47 | 4 | 365 | 30 | 23 | 2 | 178 | 12 | 613 | 48 |
| 31,437 | 47 | 4 | 369 | 31 | 23 | 2 | 182 | 13 | 621 | 50 |
| 31,438 | 47 | 4 | 369 | 31 | 23 | 2 | 182 | 13 | 621 | 50 |
| 31,439 | 47 | 4 | 370 | 31 | 23 | 2 | 182 | 13 | 622 | 50 |
| 31,440 | 48 | 4 | 379 | 30 | 24 | 2 | 195 | 13 | 646 | 49 |
| 31,441 | 55 | 5 | 420 | 33 | 27 | 2 | 225 | 14 | 727 | 54 |
| 31,442 | 55 | 5 | 419 | 33 | 27 | 2 | 224 | 14 | 725 | 54 |
| 31,443 | 58 | 5 | 466 | 34 | 32 | 2 | 261 | 14 | 817 | 55 |
| 31,444 | 60 | 4 | 484 | 35 | 32 | 2 | 272 | 14 | 848 | 55 |
| 31,445 | 60 | 4 | 478 | 35 | 32 | 2 | 270 | 14 | 840 | 55 |
| 31,446 | 58 | 4 | 485 | 35 | 32 | 2 | 281 | 14 | 856 | 55 |
| 31,447 | 58 | 4 | 484 | 35 | 32 | 2 | 281 | 14 | 855 | 55 |
| 31,448 | 56 | 4 | 481 | 35 | 32 | 2 | 280 | 14 | 849 | 55 |
| 31,449 | 56 | 4 | 481 | 36 | 32 | 2 | 280 | 14 | 849 | 56 |
| 31,450 | 55 | 4 | 467 | 36 | 32 | 2 | 277 | 13 | 831 | 55 |
| 31,451 | 55 | 4 | 465 | 36 | 32 | 4 | 277 | 14 | 829 | 58 |
| 31,452 | 55 | 4 | 464 | 39 | 32 | 4 | 277 | 15 | 828 | 62 |
| 31,453 | 52 | 4 | 435 | 39 | 31 | 4 | 274 | 13 | 792 | 60 |
| 31,454 | 52 | 4 | 428 | 39 | 31 | 4 | 270 | 15 | 781 | 62 |
| 31,455 | 29 | 4 | 287 | 39 | 18 | 4 | 185 | 16 | 519 | 63 |
| 31,456 | 26 | 4 | 262 | 39 | 15 | 4 | 176 | 17 | 479 | 64 |
| 31,457 | 20 | 4 | 199 | 39 | 13 | 4 | 140 | 16 | 372 | 63 |
| 31,458 | 19 | 4 | 194 | 38 | 12 | 4 | 132 | 16 | 357 | 62 |
| 31,459 | 19 | 4 | 193 | 38 | 12 | 4 | 134 | 16 | 358 | 62 |
| 31,460 | 19 | 4 | 194 | 37 | 12 | 4 | 134 | 16 | 359 | 61 |
| 31,461 | 19 | 4 | 194 | 37 | 12 | 4 | 134 | 16 | 359 | 61 |
| 31,462 | 19 | 4 | 194 | 37 | 12 | 4 | 134 | 16 | 359 | 61 |
| 31,463 | 19 | 4 | 195 | 37 | 12 | 4 | 135 | 16 | 361 | 61 |
| 31,464 | 19 | 4 | 198 | 34 | 12 | 4 | 136 | 16 | 365 | 58 |
| 31,465 | 21 | 4 | 210 | 34 | 12 | 4 | 141 | 16 | 384 | 58 |
| 31,466 | 21 | 4 | 210 | 36 | 12 | 4 | 141 | 16 | 384 | 60 |
| 31,467 | 21 | 4 | 209 | 36 | 12 | 3 | 141 | 16 | 383 | 59 |
| 31,468 | 21 | 4 | 211 | 36 | 12 | 3 | 140 | 16 | 384 | 59 |
| 31,469 | 21 | 4 | 211 | 36 | 12 | 3 | 138 | 16 | 382 | 59 |
| 31,470 | 29 | 4 | 233 | 36 | 12 | 3 | 152 | 16 | 426 | 59 |
| 31,471 | 30 | 4 | 235 | 36 | 12 | 3 | 151 | 16 | 428 | 59 |
| 31,472 | 31 | 4 | 235 | 36 | 12 | 3 | 158 | 16 | 436 | 59 |
| 31,473 | 31 | 4 | 235 | 36 | 12 | 3 | 157 | 16 | 435 | 59 |
| 31,474 | 32 | 4 | 240 | 35 | 13 | 3 | 160 | 16 | 445 | 58 |
| 31,475 | 32 | 4 | 240 | 36 | 13 | 3 | 160 | 20 | 445 | 63 |
| 31,476 | 31 | 4 | 241 | 32 | 13 | 3 | 160 | 20 | 445 | 59 |



|        |    |   |     |    |    |   |     |    |     |    |
|--------|----|---|-----|----|----|---|-----|----|-----|----|
| 31,477 | 35 | 4 | 261 | 31 | 13 | 3 | 173 | 20 | 482 | 58 |
| 31,478 | 38 | 4 | 281 | 29 | 13 | 2 | 190 | 19 | 522 | 54 |
| 31,479 | 38 | 3 | 271 | 20 | 13 | 2 | 191 | 13 | 513 | 38 |
| 31,480 | 54 | 3 | 337 | 20 | 18 | 2 | 259 | 13 | 668 | 38 |
| 31,481 | 54 | 5 | 331 | 20 | 18 | 2 | 257 | 16 | 660 | 43 |
| 31,482 | 54 | 5 | 331 | 20 | 18 | 2 | 257 | 16 | 660 | 43 |
| 31,483 | 54 | 4 | 334 | 16 | 18 | 2 | 259 | 16 | 665 | 38 |
| 31,484 | 54 | 5 | 333 | 15 | 18 | 2 | 260 | 15 | 665 | 37 |
| 31,485 | 54 | 5 | 332 | 15 | 18 | 2 | 260 | 15 | 664 | 37 |
| 31,486 | 53 | 5 | 324 | 15 | 18 | 2 | 257 | 15 | 652 | 37 |
| 31,487 | 53 | 5 | 324 | 15 | 18 | 2 | 257 | 15 | 652 | 37 |
| 31,488 | 53 | 5 | 326 | 15 | 18 | 2 | 254 | 17 | 651 | 39 |
| 31,489 | 53 | 5 | 333 | 17 | 19 | 2 | 254 | 18 | 659 | 42 |
| 31,490 | 54 | 5 | 333 | 17 | 19 | 2 | 252 | 20 | 658 | 44 |
| 31,491 | 53 | 5 | 326 | 28 | 18 | 2 | 242 | 33 | 639 | 68 |
| 31,492 | 45 | 4 | 284 | 26 | 15 | 2 | 213 | 32 | 557 | 64 |
| 31,493 | 42 | 4 | 239 | 26 | 10 | 2 | 176 | 32 | 467 | 64 |
| 31,494 | 40 | 5 | 232 | 25 | 9  | 2 | 179 | 32 | 460 | 64 |
| 31,495 | 40 | 5 | 224 | 25 | 9  | 2 | 174 | 34 | 447 | 66 |
| 31,496 | 40 | 5 | 217 | 25 | 9  | 2 | 165 | 34 | 431 | 66 |
| 31,497 | 40 | 5 | 215 | 25 | 9  | 2 | 162 | 34 | 426 | 66 |
| 31,498 | 40 | 5 | 215 | 25 | 9  | 2 | 162 | 34 | 426 | 66 |
| 31,499 | 40 | 5 | 215 | 25 | 9  | 2 | 162 | 34 | 426 | 66 |
| 31,500 | 41 | 5 | 218 | 24 | 9  | 2 | 162 | 34 | 430 | 65 |
| 31,501 | 41 | 5 | 220 | 24 | 9  | 0 | 163 | 33 | 433 | 62 |
| 31,502 | 41 | 6 | 220 | 24 | 9  | 0 | 163 | 33 | 433 | 63 |
| 31,503 | 41 | 6 | 218 | 21 | 9  | 0 | 163 | 32 | 431 | 59 |
| 31,504 | 43 | 5 | 219 | 21 | 9  | 0 | 165 | 32 | 436 | 58 |
| 31,505 | 43 | 5 | 219 | 21 | 9  | 0 | 165 | 30 | 436 | 56 |
| 31,506 | 43 | 5 | 218 | 21 | 9  | 0 | 165 | 28 | 435 | 54 |
| 31,507 | 43 | 5 | 217 | 21 | 9  | 0 | 165 | 28 | 434 | 54 |
| 31,508 | 42 | 5 | 212 | 21 | 8  | 0 | 164 | 28 | 426 | 54 |
| 31,509 | 42 | 5 | 212 | 21 | 8  | 0 | 164 | 28 | 426 | 54 |
| 31,510 | 42 | 5 | 212 | 21 | 8  | 0 | 161 | 28 | 423 | 54 |
| 31,511 | 42 | 5 | 210 | 21 | 8  | 0 | 161 | 28 | 421 | 54 |
| 31,512 | 42 | 5 | 209 | 21 | 8  | 0 | 161 | 28 | 420 | 54 |
| 31,513 | 42 | 5 | 208 | 21 | 8  | 0 | 160 | 28 | 418 | 54 |
| 31,514 | 42 | 5 | 208 | 21 | 8  | 0 | 159 | 27 | 417 | 53 |
| 31,515 | 42 | 5 | 207 | 21 | 8  | 0 | 159 | 27 | 416 | 53 |
| 31,516 | 41 | 5 | 200 | 19 | 8  | 0 | 154 | 28 | 403 | 52 |
| 31,517 | 41 | 5 | 200 | 19 | 8  | 0 | 154 | 28 | 403 | 52 |

|        |    |   |     |    |    |   |     |    |     |    |
|--------|----|---|-----|----|----|---|-----|----|-----|----|
| 31,518 | 47 | 5 | 220 | 19 | 8  | 0 | 159 | 28 | 434 | 52 |
| 31,519 | 47 | 5 | 223 | 19 | 9  | 0 | 159 | 28 | 438 | 52 |
| 31,520 | 39 | 5 | 210 | 19 | 9  | 0 | 149 | 28 | 407 | 52 |
| 31,521 | 43 | 5 | 234 | 20 | 12 | 0 | 155 | 28 | 444 | 53 |
| 31,522 | 49 | 5 | 279 | 20 | 13 | 0 | 181 | 29 | 522 | 54 |
| 31,523 | 48 | 5 | 276 | 20 | 13 | 0 | 174 | 29 | 511 | 54 |
| 31,524 | 48 | 5 | 275 | 22 | 12 | 0 | 181 | 29 | 516 | 56 |
| 31,525 | 48 | 5 | 273 | 22 | 12 | 0 | 180 | 30 | 513 | 57 |
| 31,526 | 48 | 7 | 277 | 22 | 12 | 0 | 182 | 28 | 519 | 57 |
| 31,527 | 48 | 7 | 281 | 31 | 12 | 0 | 183 | 30 | 524 | 68 |
| 31,528 | 44 | 8 | 271 | 31 | 12 | 0 | 178 | 30 | 505 | 69 |
| 31,529 | 41 | 6 | 255 | 28 | 12 | 0 | 163 | 26 | 471 | 60 |
| 31,530 | 40 | 7 | 249 | 28 | 11 | 0 | 151 | 26 | 451 | 61 |
| 31,531 | 24 | 7 | 188 | 28 | 6  | 0 | 87  | 26 | 305 | 61 |
| 31,532 | 24 | 7 | 190 | 28 | 7  | 0 | 86  | 26 | 307 | 61 |
| 31,533 | 24 | 7 | 188 | 28 | 7  | 0 | 86  | 26 | 305 | 61 |
| 31,534 | 28 | 7 | 198 | 28 | 7  | 0 | 91  | 26 | 324 | 61 |
| 31,535 | 28 | 6 | 198 | 28 | 7  | 0 | 90  | 26 | 323 | 60 |
| 31,536 | 28 | 6 | 205 | 28 | 7  | 0 | 99  | 26 | 339 | 60 |
| 31,537 | 28 | 6 | 205 | 28 | 7  | 0 | 100 | 26 | 340 | 60 |
| 31,538 | 28 | 6 | 205 | 28 | 7  | 0 | 101 | 24 | 341 | 58 |
| 31,539 | 28 | 6 | 201 | 28 | 7  | 0 | 101 | 24 | 337 | 58 |
| 31,540 | 28 | 6 | 195 | 26 | 6  | 0 | 101 | 23 | 330 | 55 |
| 31,541 | 27 | 7 | 195 | 26 | 6  | 0 | 101 | 22 | 329 | 55 |
| 31,542 | 27 | 7 | 195 | 14 | 6  | 0 | 100 | 11 | 328 | 32 |
| 31,543 | 29 | 7 | 190 | 14 | 6  | 0 | 98  | 10 | 323 | 31 |
| 31,544 | 29 | 7 | 188 | 14 | 6  | 0 | 98  | 11 | 321 | 32 |
| 31,545 | 29 | 6 | 186 | 15 | 6  | 0 | 89  | 12 | 310 | 33 |
| 31,546 | 29 | 6 | 185 | 14 | 6  | 0 | 89  | 10 | 309 | 30 |
| 31,547 | 29 | 6 | 188 | 14 | 6  | 0 | 90  | 10 | 313 | 30 |
| 31,548 | 31 | 6 | 206 | 14 | 7  | 0 | 101 | 11 | 345 | 31 |
| 31,549 | 31 | 6 | 210 | 14 | 7  | 0 | 103 | 11 | 351 | 31 |
| 31,550 | 35 | 6 | 212 | 14 | 7  | 0 | 106 | 11 | 360 | 31 |
| 31,551 | 34 | 6 | 212 | 15 | 7  | 0 | 106 | 12 | 359 | 33 |
| 31,552 | 34 | 6 | 212 | 17 | 8  | 0 | 105 | 13 | 359 | 36 |
| 31,553 | 32 | 5 | 216 | 17 | 9  | 0 | 103 | 13 | 360 | 35 |
| 31,554 | 34 | 5 | 230 | 18 | 9  | 0 | 106 | 14 | 379 | 37 |
| 31,555 | 36 | 5 | 245 | 18 | 9  | 0 | 110 | 14 | 400 | 37 |
| 31,556 | 36 | 5 | 246 | 18 | 9  | 0 | 110 | 14 | 401 | 37 |
| 31,557 | 36 | 5 | 246 | 18 | 9  | 0 | 110 | 14 | 401 | 37 |
| 31,558 | 36 | 5 | 277 | 18 | 10 | 0 | 126 | 14 | 449 | 37 |

|        |    |   |     |    |    |   |     |    |     |    |
|--------|----|---|-----|----|----|---|-----|----|-----|----|
| 31,559 | 36 | 5 | 278 | 18 | 10 | 0 | 126 | 14 | 450 | 37 |
| 31,560 | 36 | 5 | 278 | 18 | 10 | 0 | 126 | 14 | 450 | 37 |
| 31,561 | 36 | 5 | 281 | 18 | 10 | 0 | 126 | 14 | 453 | 37 |
| 31,562 | 36 | 5 | 281 | 18 | 10 | 0 | 126 | 14 | 453 | 37 |
| 31,563 | 36 | 5 | 284 | 18 | 10 | 0 | 127 | 14 | 457 | 37 |
| 31,564 | 36 | 5 | 297 | 18 | 11 | 0 | 130 | 14 | 474 | 37 |
| 31,565 | 36 | 5 | 294 | 18 | 11 | 0 | 130 | 14 | 471 | 37 |
| 31,566 | 36 | 5 | 295 | 19 | 11 | 0 | 133 | 14 | 475 | 38 |
| 31,567 | 36 | 5 | 296 | 19 | 11 | 0 | 133 | 14 | 476 | 38 |
| 31,568 | 36 | 5 | 288 | 19 | 11 | 0 | 132 | 14 | 467 | 38 |
| 31,569 | 43 | 5 | 310 | 19 | 14 | 0 | 155 | 14 | 522 | 38 |
| 31,570 | 43 | 5 | 307 | 19 | 13 | 0 | 157 | 14 | 520 | 38 |
| 31,571 | 43 | 5 | 324 | 19 | 13 | 0 | 175 | 14 | 555 | 38 |
| 31,572 | 39 | 5 | 297 | 18 | 10 | 0 | 165 | 14 | 511 | 37 |
| 31,573 | 32 | 5 | 250 | 18 | 9  | 0 | 139 | 13 | 430 | 36 |
| 31,574 | 32 | 5 | 250 | 18 | 9  | 0 | 139 | 13 | 430 | 36 |
| 31,575 | 31 | 5 | 248 | 16 | 9  | 0 | 132 | 12 | 420 | 33 |
| 31,576 | 31 | 3 | 245 | 15 | 9  | 0 | 130 | 10 | 415 | 28 |
| 31,577 | 31 | 3 | 244 | 15 | 9  | 0 | 132 | 10 | 416 | 28 |
| 31,578 | 31 | 3 | 235 | 6  | 9  | 0 | 133 | 8  | 408 | 17 |
| 31,579 | 32 | 2 | 234 | 6  | 9  | 0 | 126 | 8  | 401 | 16 |
| 31,580 | 32 | 3 | 228 | 6  | 9  | 0 | 125 | 8  | 394 | 17 |
| 31,581 | 35 | 2 | 231 | 7  | 10 | 0 | 128 | 9  | 404 | 18 |
| 31,582 | 35 | 2 | 226 | 7  | 10 | 0 | 124 | 9  | 395 | 18 |
| 31,583 | 36 | 2 | 223 | 7  | 9  | 0 | 123 | 9  | 391 | 18 |
| 31,584 | 32 | 2 | 218 | 7  | 9  | 0 | 119 | 9  | 378 | 18 |
| 31,585 | 32 | 2 | 213 | 7  | 9  | 0 | 118 | 9  | 372 | 18 |
| 31,586 | 32 | 2 | 209 | 7  | 9  | 0 | 110 | 9  | 360 | 18 |
| 31,587 | 32 | 2 | 207 | 7  | 9  | 0 | 110 | 9  | 358 | 18 |
| 31,588 | 32 | 2 | 207 | 7  | 9  | 0 | 109 | 9  | 357 | 18 |
| 31,589 | 32 | 2 | 203 | 7  | 9  | 0 | 107 | 10 | 351 | 19 |
| 31,590 | 32 | 2 | 203 | 7  | 9  | 0 | 107 | 10 | 351 | 19 |
| 31,591 | 32 | 1 | 203 | 7  | 9  | 0 | 108 | 9  | 352 | 17 |
| 31,592 | 32 | 1 | 203 | 7  | 9  | 0 | 108 | 9  | 352 | 17 |
| 31,593 | 32 | 1 | 201 | 8  | 9  | 0 | 108 | 8  | 350 | 17 |
| 31,594 | 30 | 1 | 201 | 8  | 9  | 0 | 108 | 8  | 348 | 17 |
| 31,595 | 30 | 1 | 202 | 8  | 9  | 0 | 110 | 7  | 351 | 16 |
| 31,596 | 30 | 1 | 199 | 7  | 9  | 0 | 110 | 5  | 348 | 13 |
| 31,597 | 30 | 1 | 196 | 8  | 9  | 0 | 109 | 5  | 344 | 14 |
| 31,598 | 28 | 1 | 179 | 8  | 8  | 0 | 98  | 5  | 313 | 14 |
| 31,599 | 28 | 1 | 175 | 8  | 8  | 0 | 96  | 5  | 307 | 14 |

|        |    |   |     |    |    |   |     |   |     |    |
|--------|----|---|-----|----|----|---|-----|---|-----|----|
| 31,600 | 24 | 1 | 172 | 8  | 8  | 0 | 93  | 5 | 297 | 14 |
| 31,601 | 24 | 1 | 172 | 12 | 8  | 0 | 93  | 5 | 297 | 18 |
| 31,602 | 24 | 1 | 170 | 11 | 8  | 0 | 93  | 4 | 295 | 16 |
| 31,603 | 24 | 1 | 168 | 9  | 7  | 0 | 93  | 3 | 292 | 13 |
| 31,604 | 24 | 1 | 162 | 9  | 6  | 0 | 93  | 3 | 285 | 13 |
| 31,605 | 22 | 1 | 148 | 8  | 6  | 0 | 90  | 2 | 266 | 11 |
| 31,606 | 20 | 1 | 133 | 8  | 6  | 0 | 86  | 2 | 245 | 11 |
| 31,607 | 20 | 1 | 132 | 8  | 6  | 0 | 86  | 2 | 244 | 11 |
| 31,608 | 20 | 1 | 101 | 8  | 5  | 0 | 72  | 2 | 198 | 11 |
| 31,609 | 20 | 1 | 101 | 8  | 5  | 0 | 70  | 2 | 196 | 11 |
| 31,610 | 20 | 1 | 100 | 8  | 5  | 0 | 70  | 2 | 195 | 11 |
| 31,611 | 20 | 1 | 100 | 8  | 5  | 0 | 70  | 2 | 195 | 11 |
| 31,612 | 20 | 1 | 97  | 8  | 5  | 0 | 70  | 2 | 192 | 11 |
| 31,613 | 20 | 2 | 94  | 8  | 5  | 0 | 69  | 2 | 188 | 12 |
| 31,614 | 20 | 2 | 88  | 8  | 4  | 0 | 66  | 2 | 178 | 12 |
| 31,615 | 20 | 2 | 81  | 8  | 4  | 0 | 66  | 2 | 171 | 12 |
| 31,616 | 20 | 2 | 81  | 8  | 4  | 0 | 66  | 2 | 171 | 12 |
| 31,617 | 19 | 2 | 81  | 7  | 4  | 0 | 66  | 2 | 170 | 11 |
| 31,618 | 19 | 2 | 77  | 7  | 4  | 0 | 65  | 2 | 165 | 11 |
| 31,619 | 5  | 2 | 48  | 7  | 2  | 0 | 40  | 2 | 95  | 11 |
| 31,620 | 6  | 2 | 43  | 7  | 1  | 0 | 39  | 2 | 89  | 11 |
| 31,621 | 6  | 2 | 43  | 7  | 1  | 0 | 37  | 3 | 87  | 12 |
| 31,622 | 6  | 2 | 25  | 7  | 1  | 0 | 19  | 3 | 51  | 12 |
| 31,623 | 6  | 2 | 19  | 7  | 1  | 0 | 18  | 3 | 44  | 12 |
| 31,624 | 6  | 2 | 22  | 7  | 1  | 0 | 20  | 3 | 49  | 12 |
| 31,625 | 6  | 2 | 24  | 7  | 3  | 0 | 20  | 3 | 53  | 12 |
| 31,626 | 6  | 2 | 21  | 7  | 3  | 0 | 17  | 3 | 47  | 12 |
| 31,627 | 6  | 2 | 20  | 8  | 3  | 0 | 17  | 3 | 46  | 13 |
| 31,628 | 6  | 2 | 21  | 8  | 3  | 0 | 19  | 3 | 49  | 13 |
| 31,629 | 6  | 2 | 23  | 9  | 3  | 0 | 18  | 3 | 50  | 14 |
| 31,630 | 5  | 2 | 20  | 9  | 3  | 0 | 18  | 3 | 46  | 14 |
| 31,631 | 2  | 1 | 16  | 9  | 2  | 0 | 17  | 3 | 37  | 13 |
| 31,632 | 4  | 1 | 39  | 9  | 2  | 0 | 24  | 2 | 69  | 12 |
| 31,633 | 9  | 1 | 202 | 9  | 18 | 0 | 111 | 2 | 340 | 12 |
| 31,634 | 8  | 3 | 221 | 10 | 20 | 0 | 118 | 3 | 367 | 16 |
| 31,635 | 8  | 3 | 221 | 10 | 20 | 0 | 118 | 3 | 367 | 16 |
| 31,636 | 9  | 3 | 223 | 11 | 20 | 0 | 121 | 3 | 373 | 17 |
| 31,637 | 9  | 4 | 222 | 11 | 20 | 0 | 121 | 3 | 372 | 18 |
| 31,638 | 9  | 4 | 222 | 12 | 20 | 0 | 120 | 2 | 371 | 18 |
| 31,639 | 9  | 4 | 222 | 12 | 20 | 0 | 120 | 2 | 371 | 18 |
| 31,640 | 9  | 4 | 221 | 12 | 20 | 0 | 120 | 2 | 370 | 18 |

|        |    |   |     |    |    |   |     |    |     |    |
|--------|----|---|-----|----|----|---|-----|----|-----|----|
| 31,641 | 9  | 4 | 221 | 12 | 20 | 0 | 121 | 2  | 371 | 18 |
| 31,642 | 9  | 4 | 228 | 12 | 20 | 0 | 121 | 2  | 378 | 18 |
| 31,643 | 9  | 4 | 229 | 11 | 20 | 0 | 124 | 2  | 382 | 17 |
| 31,644 | 9  | 4 | 229 | 11 | 20 | 0 | 124 | 2  | 382 | 17 |
| 31,645 | 10 | 4 | 253 | 11 | 21 | 0 | 139 | 2  | 423 | 17 |
| 31,646 | 10 | 4 | 254 | 11 | 21 | 0 | 137 | 2  | 422 | 17 |
| 31,647 | 10 | 4 | 262 | 11 | 22 | 0 | 143 | 2  | 437 | 17 |
| 31,648 | 12 | 4 | 287 | 10 | 24 | 0 | 174 | 2  | 497 | 16 |
| 31,649 | 12 | 4 | 289 | 10 | 24 | 0 | 177 | 2  | 502 | 16 |
| 31,650 | 12 | 4 | 291 | 10 | 24 | 0 | 179 | 2  | 506 | 16 |
| 31,651 | 12 | 4 | 291 | 10 | 24 | 0 | 179 | 2  | 506 | 16 |
| 31,652 | 12 | 4 | 291 | 6  | 24 | 0 | 179 | 2  | 506 | 12 |
| 31,653 | 12 | 4 | 291 | 6  | 24 | 0 | 179 | 2  | 506 | 12 |
| 31,654 | 15 | 4 | 308 | 6  | 24 | 0 | 188 | 2  | 535 | 12 |
| 31,655 | 15 | 4 | 308 | 6  | 24 | 0 | 188 | 3  | 535 | 13 |
| 31,656 | 15 | 4 | 308 | 6  | 24 | 0 | 188 | 4  | 535 | 14 |
| 31,657 | 15 | 4 | 309 | 6  | 24 | 0 | 189 | 4  | 537 | 14 |
| 31,658 | 15 | 4 | 309 | 6  | 24 | 0 | 189 | 4  | 537 | 14 |
| 31,659 | 19 | 4 | 314 | 6  | 24 | 0 | 189 | 4  | 546 | 14 |
| 31,660 | 20 | 4 | 315 | 6  | 24 | 0 | 189 | 4  | 548 | 14 |
| 31,661 | 20 | 4 | 315 | 6  | 24 | 0 | 189 | 5  | 548 | 15 |
| 31,662 | 20 | 4 | 315 | 6  | 24 | 1 | 189 | 5  | 548 | 16 |
| 31,663 | 20 | 4 | 315 | 7  | 24 | 1 | 189 | 5  | 548 | 17 |
| 31,664 | 20 | 4 | 329 | 11 | 25 | 1 | 191 | 5  | 565 | 21 |
| 31,665 | 38 | 4 | 415 | 12 | 28 | 2 | 247 | 6  | 728 | 24 |
| 31,666 | 39 | 4 | 416 | 12 | 28 | 2 | 247 | 6  | 730 | 24 |
| 31,667 | 46 | 4 | 431 | 20 | 28 | 2 | 255 | 10 | 760 | 36 |
| 31,668 | 46 | 4 | 430 | 21 | 28 | 2 | 252 | 11 | 756 | 38 |
| 31,669 | 46 | 4 | 431 | 26 | 28 | 2 | 252 | 14 | 757 | 46 |
| 31,670 | 46 | 4 | 431 | 27 | 28 | 2 | 252 | 15 | 757 | 48 |
| 31,671 | 65 | 4 | 544 | 31 | 36 | 2 | 314 | 15 | 959 | 52 |
| 31,672 | 65 | 4 | 550 | 31 | 36 | 2 | 319 | 14 | 970 | 51 |
| 31,673 | 67 | 4 | 551 | 31 | 36 | 2 | 321 | 14 | 975 | 51 |
| 31,674 | 67 | 4 | 551 | 31 | 36 | 2 | 321 | 14 | 975 | 51 |
| 31,675 | 67 | 4 | 550 | 31 | 36 | 2 | 319 | 14 | 972 | 51 |
| 31,676 | 67 | 4 | 548 | 31 | 34 | 2 | 319 | 14 | 968 | 51 |
| 31,677 | 67 | 4 | 550 | 30 | 34 | 2 | 319 | 14 | 970 | 50 |
| 31,678 | 67 | 5 | 551 | 34 | 34 | 2 | 317 | 15 | 969 | 56 |
| 31,679 | 67 | 5 | 550 | 34 | 34 | 2 | 315 | 16 | 966 | 57 |
| 31,680 | 67 | 6 | 548 | 36 | 34 | 2 | 314 | 16 | 963 | 60 |
| 31,681 | 65 | 6 | 535 | 36 | 34 | 2 | 308 | 16 | 942 | 60 |

|        |    |   |     |    |    |   |     |    |     |    |
|--------|----|---|-----|----|----|---|-----|----|-----|----|
| 31,682 | 65 | 6 | 524 | 36 | 34 | 2 | 307 | 16 | 930 | 60 |
| 31,683 | 62 | 6 | 505 | 35 | 32 | 2 | 293 | 16 | 892 | 59 |
| 31,684 | 60 | 4 | 361 | 34 | 18 | 2 | 214 | 15 | 653 | 55 |
| 31,685 | 60 | 4 | 342 | 34 | 16 | 2 | 209 | 15 | 627 | 55 |
| 31,686 | 60 | 4 | 341 | 34 | 16 | 2 | 208 | 15 | 625 | 55 |
| 31,687 | 59 | 3 | 340 | 33 | 16 | 2 | 206 | 15 | 621 | 53 |
| 31,688 | 59 | 3 | 340 | 33 | 17 | 2 | 206 | 15 | 622 | 53 |
| 31,689 | 59 | 3 | 340 | 32 | 17 | 2 | 206 | 15 | 622 | 52 |
| 31,690 | 59 | 3 | 340 | 32 | 17 | 2 | 206 | 15 | 622 | 52 |
| 31,691 | 59 | 3 | 340 | 32 | 17 | 2 | 206 | 19 | 622 | 56 |
| 31,692 | 59 | 3 | 335 | 32 | 17 | 2 | 206 | 19 | 617 | 56 |
| 31,693 | 59 | 3 | 335 | 33 | 17 | 2 | 206 | 19 | 617 | 57 |
| 31,694 | 59 | 3 | 335 | 33 | 17 | 2 | 204 | 19 | 615 | 57 |
| 31,695 | 59 | 3 | 336 | 33 | 17 | 2 | 204 | 19 | 616 | 57 |
| 31,696 | 58 | 3 | 314 | 33 | 16 | 2 | 187 | 19 | 575 | 57 |
| 31,697 | 58 | 3 | 305 | 34 | 15 | 2 | 183 | 19 | 561 | 58 |
| 31,698 | 56 | 3 | 280 | 34 | 13 | 2 | 154 | 19 | 503 | 58 |
| 31,699 | 56 | 3 | 283 | 34 | 13 | 2 | 154 | 19 | 506 | 58 |
| 31,700 | 56 | 3 | 281 | 34 | 13 | 2 | 152 | 19 | 502 | 58 |
| 31,701 | 56 | 3 | 281 | 34 | 13 | 2 | 152 | 19 | 502 | 58 |
| 31,702 | 55 | 3 | 280 | 34 | 13 | 2 | 150 | 19 | 498 | 58 |
| 31,703 | 55 | 6 | 273 | 34 | 13 | 2 | 146 | 19 | 487 | 61 |
| 31,704 | 55 | 6 | 271 | 35 | 13 | 2 | 144 | 19 | 483 | 62 |
| 31,705 | 53 | 6 | 269 | 35 | 13 | 2 | 146 | 19 | 481 | 62 |
| 31,706 | 54 | 6 | 272 | 35 | 13 | 2 | 146 | 17 | 485 | 60 |
| 31,707 | 55 | 6 | 272 | 35 | 13 | 2 | 146 | 17 | 486 | 60 |
| 31,708 | 55 | 6 | 271 | 35 | 13 | 2 | 145 | 17 | 484 | 60 |
| 31,709 | 52 | 6 | 268 | 35 | 15 | 2 | 148 | 16 | 483 | 59 |
| 31,710 | 52 | 6 | 268 | 35 | 15 | 2 | 148 | 16 | 483 | 59 |
| 31,711 | 53 | 7 | 274 | 35 | 15 | 2 | 156 | 15 | 498 | 59 |
| 31,712 | 53 | 7 | 277 | 35 | 15 | 1 | 157 | 15 | 502 | 58 |
| 31,713 | 53 | 7 | 288 | 34 | 15 | 1 | 163 | 15 | 519 | 57 |
| 31,714 | 53 | 6 | 285 | 30 | 14 | 1 | 166 | 15 | 518 | 52 |
| 31,715 | 52 | 6 | 281 | 30 | 14 | 1 | 165 | 17 | 512 | 54 |
| 31,716 | 35 | 6 | 199 | 21 | 11 | 0 | 110 | 13 | 355 | 40 |
| 31,717 | 34 | 6 | 198 | 22 | 11 | 1 | 110 | 16 | 353 | 45 |
| 31,718 | 27 | 6 | 182 | 26 | 11 | 1 | 102 | 21 | 322 | 54 |
| 31,719 | 23 | 6 | 166 | 26 | 11 | 2 | 98  | 20 | 298 | 54 |
| 31,720 | 10 | 7 | 110 | 24 | 8  | 2 | 68  | 19 | 196 | 52 |
| 31,721 | 7  | 7 | 67  | 25 | 3  | 2 | 39  | 19 | 116 | 53 |
| 31,722 | 7  | 7 | 67  | 23 | 3  | 2 | 37  | 21 | 114 | 53 |

|        |   |   |    |    |   |   |    |    |     |     |
|--------|---|---|----|----|---|---|----|----|-----|-----|
| 31,723 | 7 | 7 | 61 | 23 | 3 | 2 | 34 | 21 | 105 | 53  |
| 31,724 | 5 | 7 | 60 | 24 | 3 | 2 | 32 | 21 | 100 | 54  |
| 31,725 | 5 | 7 | 61 | 24 | 3 | 2 | 32 | 21 | 101 | 54  |
| 31,726 | 5 | 7 | 59 | 24 | 3 | 2 | 33 | 21 | 100 | 54  |
| 31,727 | 5 | 7 | 58 | 24 | 3 | 2 | 33 | 22 | 99  | 55  |
| 31,728 | 5 | 7 | 57 | 24 | 3 | 2 | 33 | 23 | 98  | 56  |
| 31,729 | 5 | 6 | 56 | 20 | 3 | 3 | 33 | 22 | 97  | 51  |
| 31,730 | 5 | 6 | 56 | 17 | 3 | 3 | 33 | 21 | 97  | 47  |
| 31,731 | 5 | 6 | 56 | 17 | 3 | 3 | 33 | 21 | 97  | 47  |
| 31,732 | 5 | 6 | 55 | 17 | 3 | 3 | 33 | 21 | 96  | 47  |
| 31,733 | 5 | 6 | 55 | 17 | 3 | 3 | 33 | 21 | 96  | 47  |
| 31,734 | 5 | 6 | 55 | 17 | 3 | 3 | 34 | 21 | 97  | 47  |
| 31,735 | 6 | 6 | 55 | 17 | 3 | 3 | 34 | 21 | 98  | 47  |
| 31,736 | 6 | 6 | 55 | 17 | 3 | 3 | 34 | 21 | 98  | 47  |
| 31,737 | 6 | 6 | 55 | 17 | 3 | 3 | 34 | 21 | 98  | 47  |
| 31,738 | 6 | 6 | 55 | 17 | 3 | 3 | 34 | 21 | 98  | 47  |
| 31,739 | 6 | 6 | 55 | 17 | 2 | 3 | 34 | 21 | 97  | 47  |
| 31,740 | 6 | 6 | 56 | 18 | 2 | 3 | 35 | 21 | 99  | 48  |
| 31,741 | 6 | 6 | 56 | 18 | 2 | 3 | 35 | 21 | 99  | 48  |
| 31,742 | 6 | 6 | 57 | 18 | 2 | 3 | 35 | 17 | 100 | 44  |
| 31,743 | 6 | 6 | 57 | 19 | 2 | 3 | 35 | 18 | 100 | 46  |
| 31,744 | 6 | 6 | 57 | 20 | 2 | 3 | 34 | 21 | 99  | 50  |
| 31,745 | 6 | 6 | 55 | 20 | 2 | 3 | 33 | 21 | 96  | 50  |
| 31,746 | 6 | 6 | 55 | 22 | 2 | 3 | 33 | 23 | 96  | 54  |
| 31,747 | 6 | 8 | 52 | 34 | 2 | 4 | 33 | 40 | 93  | 86  |
| 31,748 | 6 | 8 | 52 | 33 | 2 | 4 | 32 | 41 | 92  | 86  |
| 31,749 | 6 | 8 | 47 | 34 | 2 | 4 | 29 | 42 | 84  | 88  |
| 31,750 | 6 | 8 | 47 | 34 | 2 | 4 | 29 | 42 | 84  | 88  |
| 31,751 | 6 | 8 | 49 | 35 | 2 | 4 | 29 | 43 | 86  | 90  |
| 31,752 | 6 | 8 | 49 | 35 | 2 | 4 | 31 | 43 | 88  | 90  |
| 31,753 | 6 | 5 | 46 | 35 | 2 | 4 | 31 | 43 | 85  | 87  |
| 31,754 | 6 | 5 | 46 | 35 | 2 | 4 | 31 | 43 | 85  | 87  |
| 31,755 | 7 | 5 | 44 | 34 | 2 | 4 | 28 | 43 | 81  | 86  |
| 31,756 | 8 | 5 | 44 | 34 | 2 | 4 | 28 | 43 | 82  | 86  |
| 31,757 | 7 | 5 | 44 | 34 | 2 | 4 | 29 | 43 | 82  | 86  |
| 31,758 | 6 | 5 | 44 | 38 | 2 | 4 | 29 | 48 | 81  | 95  |
| 31,759 | 6 | 5 | 43 | 48 | 0 | 4 | 28 | 51 | 77  | 108 |
| 31,760 | 5 | 7 | 42 | 58 | 0 | 4 | 27 | 58 | 74  | 127 |
| 31,761 | 5 | 8 | 41 | 63 | 0 | 4 | 27 | 60 | 73  | 135 |
| 31,762 | 3 | 7 | 37 | 68 | 0 | 4 | 19 | 60 | 59  | 139 |
| 31,763 | 3 | 7 | 34 | 68 | 0 | 4 | 18 | 62 | 55  | 141 |

|        |   |    |    |    |   |   |    |    |    |     |
|--------|---|----|----|----|---|---|----|----|----|-----|
| 31,764 | 3 | 7  | 22 | 70 | 0 | 4 | 12 | 64 | 37 | 145 |
| 31,765 | 3 | 7  | 12 | 70 | 0 | 4 | 7  | 64 | 22 | 145 |
| 31,766 | 3 | 7  | 12 | 70 | 0 | 4 | 7  | 62 | 22 | 143 |
| 31,767 | 3 | 7  | 12 | 70 | 0 | 4 | 7  | 62 | 22 | 143 |
| 31,768 | 3 | 7  | 12 | 69 | 0 | 3 | 7  | 59 | 22 | 138 |
| 31,769 | 3 | 7  | 12 | 66 | 0 | 3 | 8  | 54 | 23 | 130 |
| 31,770 | 3 | 7  | 12 | 65 | 0 | 2 | 8  | 54 | 23 | 128 |
| 31,771 | 3 | 6  | 12 | 62 | 0 | 2 | 8  | 52 | 23 | 122 |
| 31,772 | 3 | 6  | 12 | 60 | 0 | 2 | 8  | 51 | 23 | 119 |
| 31,773 | 3 | 6  | 12 | 58 | 0 | 2 | 9  | 49 | 24 | 115 |
| 31,774 | 3 | 6  | 12 | 58 | 0 | 2 | 9  | 49 | 24 | 115 |
| 31,775 | 3 | 6  | 11 | 57 | 0 | 2 | 9  | 49 | 23 | 114 |
| 31,776 | 3 | 6  | 11 | 57 | 0 | 2 | 9  | 49 | 23 | 114 |
| 31,777 | 5 | 7  | 14 | 57 | 0 | 2 | 11 | 48 | 30 | 114 |
| 31,778 | 6 | 7  | 14 | 57 | 0 | 2 | 11 | 47 | 31 | 113 |
| 31,779 | 6 | 7  | 15 | 59 | 0 | 2 | 12 | 48 | 33 | 116 |
| 31,780 | 6 | 7  | 15 | 59 | 0 | 1 | 12 | 48 | 33 | 115 |
| 31,781 | 6 | 6  | 15 | 59 | 0 | 1 | 12 | 48 | 33 | 114 |
| 31,782 | 6 | 6  | 15 | 59 | 0 | 1 | 12 | 49 | 33 | 115 |
| 31,783 | 6 | 6  | 16 | 59 | 0 | 1 | 16 | 49 | 38 | 115 |
| 31,784 | 6 | 6  | 16 | 59 | 0 | 1 | 15 | 49 | 37 | 115 |
| 31,785 | 5 | 6  | 18 | 61 | 0 | 1 | 15 | 49 | 38 | 117 |
| 31,786 | 5 | 6  | 18 | 61 | 0 | 1 | 15 | 50 | 38 | 118 |
| 31,787 | 5 | 6  | 18 | 61 | 0 | 1 | 15 | 50 | 38 | 118 |
| 31,788 | 5 | 6  | 18 | 61 | 0 | 1 | 15 | 50 | 38 | 118 |
| 31,789 | 5 | 6  | 18 | 61 | 0 | 1 | 15 | 52 | 38 | 120 |
| 31,790 | 5 | 8  | 18 | 66 | 0 | 1 | 15 | 55 | 38 | 130 |
| 31,791 | 5 | 8  | 17 | 65 | 0 | 2 | 14 | 55 | 36 | 130 |
| 31,792 | 5 | 8  | 16 | 66 | 0 | 2 | 16 | 54 | 37 | 130 |
| 31,793 | 5 | 8  | 16 | 68 | 0 | 2 | 16 | 58 | 37 | 136 |
| 31,794 | 5 | 8  | 14 | 68 | 0 | 2 | 16 | 59 | 35 | 137 |
| 31,795 | 5 | 10 | 14 | 74 | 0 | 2 | 16 | 56 | 35 | 142 |
| 31,796 | 5 | 10 | 14 | 75 | 0 | 2 | 16 | 56 | 35 | 143 |
| 31,797 | 5 | 10 | 14 | 73 | 0 | 3 | 16 | 54 | 35 | 140 |
| 31,798 | 5 | 8  | 14 | 61 | 0 | 2 | 16 | 38 | 35 | 109 |
| 31,799 | 5 | 8  | 15 | 61 | 0 | 2 | 16 | 37 | 36 | 108 |
| 31,800 | 5 | 8  | 16 | 60 | 0 | 2 | 16 | 36 | 37 | 106 |
| 31,801 | 5 | 8  | 14 | 59 | 0 | 2 | 16 | 35 | 35 | 104 |
| 31,802 | 5 | 8  | 14 | 59 | 0 | 2 | 14 | 35 | 33 | 104 |
| 31,803 | 5 | 8  | 14 | 59 | 0 | 2 | 15 | 35 | 34 | 104 |
| 31,804 | 5 | 8  | 14 | 59 | 0 | 2 | 15 | 35 | 34 | 104 |



|        |    |    |    |    |   |   |    |    |     |     |
|--------|----|----|----|----|---|---|----|----|-----|-----|
| 31,805 | 4  | 8  | 14 | 62 | 0 | 2 | 15 | 35 | 33  | 107 |
| 31,806 | 3  | 8  | 13 | 62 | 0 | 2 | 15 | 35 | 31  | 107 |
| 31,807 | 3  | 8  | 11 | 63 | 0 | 2 | 15 | 35 | 29  | 108 |
| 31,808 | 3  | 8  | 11 | 64 | 0 | 2 | 14 | 35 | 28  | 109 |
| 31,809 | 3  | 11 | 11 | 61 | 0 | 2 | 13 | 31 | 27  | 105 |
| 31,810 | 3  | 11 | 11 | 51 | 0 | 2 | 13 | 28 | 27  | 92  |
| 31,811 | 3  | 8  | 12 | 31 | 1 | 2 | 14 | 19 | 30  | 60  |
| 31,812 | 3  | 8  | 12 | 31 | 1 | 2 | 14 | 19 | 30  | 60  |
| 31,813 | 3  | 8  | 10 | 31 | 1 | 2 | 14 | 19 | 28  | 60  |
| 31,814 | 3  | 8  | 10 | 31 | 1 | 2 | 14 | 17 | 28  | 58  |
| 31,815 | 3  | 8  | 11 | 29 | 1 | 2 | 14 | 15 | 29  | 54  |
| 31,816 | 3  | 8  | 11 | 29 | 1 | 2 | 14 | 15 | 29  | 54  |
| 31,817 | 3  | 8  | 12 | 29 | 1 | 2 | 14 | 15 | 30  | 54  |
| 31,818 | 3  | 8  | 15 | 29 | 1 | 2 | 14 | 15 | 33  | 54  |
| 31,819 | 6  | 8  | 25 | 30 | 1 | 2 | 19 | 15 | 51  | 55  |
| 31,820 | 6  | 8  | 26 | 29 | 1 | 2 | 18 | 15 | 51  | 54  |
| 31,821 | 6  | 8  | 27 | 29 | 1 | 2 | 19 | 15 | 53  | 54  |
| 31,822 | 6  | 8  | 29 | 30 | 1 | 2 | 19 | 16 | 55  | 56  |
| 31,823 | 6  | 8  | 29 | 31 | 1 | 2 | 18 | 17 | 54  | 58  |
| 31,824 | 6  | 8  | 29 | 31 | 1 | 2 | 18 | 17 | 54  | 58  |
| 31,825 | 9  | 8  | 38 | 31 | 2 | 2 | 30 | 17 | 79  | 58  |
| 31,826 | 9  | 8  | 38 | 32 | 2 | 2 | 30 | 17 | 79  | 59  |
| 31,827 | 9  | 8  | 37 | 32 | 2 | 2 | 29 | 17 | 77  | 59  |
| 31,828 | 7  | 7  | 38 | 32 | 2 | 2 | 29 | 17 | 76  | 58  |
| 31,829 | 6  | 7  | 40 | 33 | 2 | 2 | 32 | 17 | 80  | 59  |
| 31,830 | 6  | 7  | 39 | 31 | 2 | 2 | 31 | 16 | 78  | 56  |
| 31,831 | 6  | 7  | 40 | 31 | 2 | 2 | 33 | 16 | 81  | 56  |
| 31,832 | 6  | 7  | 40 | 31 | 2 | 2 | 30 | 17 | 78  | 57  |
| 31,833 | 6  | 7  | 39 | 32 | 2 | 2 | 29 | 16 | 76  | 57  |
| 31,834 | 6  | 7  | 46 | 32 | 2 | 2 | 30 | 15 | 84  | 56  |
| 31,835 | 6  | 7  | 47 | 30 | 2 | 2 | 30 | 15 | 85  | 54  |
| 31,836 | 6  | 7  | 47 | 30 | 2 | 2 | 30 | 15 | 85  | 54  |
| 31,837 | 6  | 7  | 48 | 30 | 3 | 2 | 30 | 14 | 87  | 53  |
| 31,838 | 6  | 7  | 49 | 30 | 3 | 2 | 31 | 14 | 89  | 53  |
| 31,839 | 6  | 7  | 49 | 30 | 3 | 2 | 31 | 12 | 89  | 51  |
| 31,840 | 9  | 5  | 57 | 25 | 3 | 2 | 42 | 9  | 111 | 41  |
| 31,841 | 9  | 5  | 61 | 26 | 3 | 2 | 44 | 9  | 117 | 42  |
| 31,842 | 10 | 5  | 69 | 26 | 4 | 1 | 52 | 9  | 135 | 41  |
| 31,843 | 10 | 5  | 69 | 24 | 4 | 1 | 51 | 9  | 134 | 39  |
| 31,844 | 10 | 5  | 69 | 22 | 4 | 1 | 51 | 6  | 134 | 34  |
| 31,845 | 10 | 5  | 81 | 22 | 4 | 1 | 52 | 6  | 147 | 34  |

|        |    |   |     |    |   |   |    |   |     |    |
|--------|----|---|-----|----|---|---|----|---|-----|----|
| 31,846 | 10 | 3 | 81  | 14 | 4 | 1 | 52 | 6 | 147 | 24 |
| 31,847 | 10 | 3 | 92  | 15 | 5 | 1 | 56 | 6 | 163 | 25 |
| 31,848 | 10 | 3 | 92  | 15 | 5 | 0 | 56 | 6 | 163 | 24 |
| 31,849 | 10 | 3 | 91  | 15 | 5 | 0 | 56 | 5 | 162 | 23 |
| 31,850 | 10 | 3 | 90  | 15 | 5 | 0 | 56 | 5 | 161 | 23 |
| 31,851 | 10 | 3 | 90  | 16 | 5 | 0 | 56 | 5 | 161 | 24 |
| 31,852 | 10 | 3 | 91  | 16 | 5 | 0 | 56 | 6 | 162 | 25 |
| 31,853 | 10 | 3 | 91  | 16 | 5 | 0 | 55 | 6 | 161 | 25 |
| 31,854 | 10 | 3 | 93  | 16 | 5 | 0 | 58 | 6 | 166 | 25 |
| 31,855 | 11 | 3 | 93  | 16 | 5 | 0 | 59 | 6 | 168 | 25 |
| 31,856 | 12 | 3 | 94  | 13 | 5 | 0 | 59 | 6 | 170 | 22 |
| 31,857 | 12 | 3 | 94  | 12 | 5 | 0 | 59 | 6 | 170 | 21 |
| 31,858 | 12 | 3 | 94  | 11 | 5 | 0 | 59 | 6 | 170 | 20 |
| 31,859 | 12 | 3 | 94  | 11 | 5 | 0 | 59 | 7 | 170 | 21 |
| 31,860 | 13 | 0 | 93  | 10 | 5 | 0 | 58 | 6 | 169 | 16 |
| 31,861 | 13 | 0 | 94  | 10 | 4 | 0 | 58 | 6 | 169 | 16 |
| 31,862 | 13 | 0 | 94  | 10 | 4 | 0 | 58 | 6 | 169 | 16 |
| 31,863 | 13 | 0 | 94  | 10 | 4 | 0 | 58 | 6 | 169 | 16 |
| 31,864 | 13 | 0 | 95  | 10 | 4 | 0 | 58 | 6 | 170 | 16 |
| 31,865 | 13 | 0 | 94  | 10 | 4 | 0 | 58 | 6 | 169 | 16 |
| 31,866 | 13 | 0 | 95  | 10 | 4 | 0 | 59 | 6 | 171 | 16 |
| 31,867 | 13 | 0 | 95  | 10 | 4 | 0 | 59 | 6 | 171 | 16 |
| 31,868 | 13 | 0 | 92  | 10 | 4 | 0 | 59 | 6 | 168 | 16 |
| 31,869 | 13 | 0 | 92  | 10 | 4 | 0 | 59 | 6 | 168 | 16 |
| 31,870 | 10 | 0 | 82  | 12 | 4 | 0 | 54 | 6 | 150 | 18 |
| 31,871 | 10 | 0 | 81  | 12 | 4 | 0 | 54 | 6 | 149 | 18 |
| 31,872 | 10 | 0 | 81  | 11 | 4 | 0 | 53 | 4 | 148 | 15 |
| 31,873 | 10 | 0 | 79  | 11 | 4 | 0 | 53 | 4 | 146 | 15 |
| 31,874 | 10 | 0 | 75  | 13 | 4 | 0 | 48 | 4 | 137 | 17 |
| 31,875 | 10 | 0 | 71  | 13 | 3 | 1 | 43 | 6 | 127 | 20 |
| 31,876 | 9  | 0 | 70  | 13 | 3 | 1 | 42 | 7 | 124 | 21 |
| 31,877 | 9  | 0 | 71  | 12 | 3 | 1 | 42 | 7 | 125 | 20 |
| 31,878 | 9  | 0 | 73  | 14 | 3 | 1 | 42 | 7 | 127 | 22 |
| 31,879 | 9  | 0 | 70  | 14 | 3 | 1 | 40 | 7 | 122 | 22 |
| 31,880 | 9  | 0 | 68  | 14 | 3 | 1 | 37 | 7 | 117 | 22 |
| 31,881 | 10 | 0 | 119 | 14 | 3 | 1 | 52 | 7 | 184 | 22 |
| 31,882 | 10 | 0 | 120 | 14 | 3 | 1 | 52 | 7 | 185 | 22 |
| 31,883 | 10 | 0 | 117 | 16 | 3 | 1 | 52 | 6 | 182 | 23 |
| 31,884 | 10 | 1 | 114 | 16 | 3 | 1 | 51 | 6 | 178 | 24 |
| 31,885 | 10 | 1 | 115 | 16 | 3 | 1 | 51 | 6 | 179 | 24 |
| 31,886 | 10 | 1 | 112 | 16 | 3 | 1 | 51 | 6 | 176 | 24 |

|        |    |   |     |    |   |   |    |    |     |    |
|--------|----|---|-----|----|---|---|----|----|-----|----|
| 31,887 | 10 | 1 | 112 | 16 | 2 | 1 | 53 | 6  | 177 | 24 |
| 31,888 | 10 | 1 | 113 | 17 | 2 | 1 | 55 | 6  | 180 | 25 |
| 31,889 | 10 | 1 | 118 | 17 | 3 | 1 | 57 | 6  | 188 | 25 |
| 31,890 | 10 | 1 | 121 | 18 | 3 | 1 | 57 | 6  | 191 | 26 |
| 31,891 | 7  | 1 | 115 | 18 | 3 | 1 | 50 | 8  | 175 | 28 |
| 31,892 | 7  | 1 | 111 | 22 | 3 | 1 | 49 | 9  | 170 | 33 |
| 31,893 | 6  | 1 | 103 | 22 | 2 | 1 | 40 | 9  | 151 | 33 |
| 31,894 | 6  | 1 | 91  | 27 | 2 | 1 | 39 | 11 | 138 | 40 |
| 31,895 | 6  | 1 | 86  | 27 | 1 | 1 | 36 | 11 | 129 | 40 |
| 31,896 | 6  | 1 | 80  | 30 | 1 | 2 | 36 | 10 | 123 | 43 |
| 31,897 | 6  | 1 | 80  | 28 | 1 | 2 | 36 | 10 | 123 | 41 |
| 31,898 | 6  | 1 | 80  | 28 | 1 | 2 | 36 | 10 | 123 | 41 |
| 31,899 | 6  | 1 | 80  | 28 | 1 | 2 | 36 | 10 | 123 | 41 |
| 31,900 | 6  | 1 | 81  | 29 | 1 | 2 | 37 | 11 | 125 | 43 |
| 31,901 | 6  | 2 | 83  | 29 | 1 | 2 | 37 | 11 | 127 | 44 |
| 31,902 | 6  | 2 | 97  | 28 | 1 | 2 | 41 | 11 | 145 | 43 |
| 31,903 | 6  | 2 | 100 | 29 | 1 | 2 | 41 | 10 | 148 | 43 |
| 31,904 | 6  | 2 | 98  | 29 | 1 | 2 | 38 | 10 | 143 | 43 |
| 31,905 | 5  | 2 | 99  | 29 | 1 | 2 | 41 | 10 | 146 | 43 |
| 31,906 | 4  | 2 | 98  | 30 | 1 | 2 | 41 | 10 | 144 | 44 |
| 31,907 | 4  | 2 | 98  | 30 | 1 | 2 | 41 | 10 | 144 | 44 |
| 31,908 | 4  | 2 | 98  | 30 | 1 | 2 | 41 | 10 | 144 | 44 |
| 31,909 | 4  | 2 | 98  | 30 | 1 | 2 | 42 | 9  | 145 | 43 |
| 31,910 | 4  | 2 | 100 | 30 | 1 | 2 | 43 | 9  | 148 | 43 |
| 31,911 | 3  | 2 | 100 | 30 | 1 | 2 | 43 | 9  | 147 | 43 |
| 31,912 | 3  | 2 | 103 | 30 | 1 | 2 | 49 | 9  | 156 | 43 |
| 31,913 | 3  | 2 | 104 | 30 | 1 | 2 | 49 | 9  | 157 | 43 |
| 31,914 | 3  | 2 | 106 | 30 | 1 | 2 | 50 | 9  | 160 | 43 |
| 31,915 | 3  | 2 | 113 | 30 | 1 | 2 | 51 | 9  | 168 | 43 |
| 31,916 | 3  | 2 | 113 | 30 | 1 | 2 | 51 | 10 | 168 | 44 |
| 31,917 | 3  | 2 | 112 | 30 | 1 | 2 | 51 | 10 | 167 | 44 |
| 31,918 | 3  | 2 | 111 | 30 | 1 | 2 | 51 | 10 | 166 | 44 |
| 31,919 | 3  | 2 | 111 | 30 | 1 | 2 | 51 | 11 | 166 | 45 |
| 31,920 | 3  | 2 | 111 | 30 | 1 | 2 | 51 | 11 | 166 | 45 |
| 31,921 | 3  | 2 | 111 | 27 | 1 | 2 | 51 | 11 | 166 | 42 |
| 31,922 | 3  | 2 | 110 | 27 | 1 | 2 | 51 | 11 | 165 | 42 |
| 31,923 | 3  | 2 | 113 | 26 | 1 | 2 | 51 | 11 | 168 | 41 |
| 31,924 | 3  | 3 | 114 | 24 | 1 | 2 | 52 | 11 | 170 | 40 |
| 31,925 | 2  | 3 | 114 | 26 | 1 | 2 | 52 | 13 | 169 | 44 |
| 31,926 | 1  | 3 | 115 | 30 | 1 | 1 | 52 | 12 | 169 | 46 |
| 31,927 | 2  | 3 | 118 | 31 | 1 | 2 | 57 | 13 | 178 | 49 |

|        |   |   |     |    |   |   |    |    |     |    |
|--------|---|---|-----|----|---|---|----|----|-----|----|
| 31,928 | 2 | 3 | 117 | 32 | 1 | 2 | 57 | 13 | 177 | 50 |
| 31,929 | 2 | 3 | 115 | 32 | 1 | 2 | 57 | 14 | 175 | 51 |
| 31,930 | 2 | 3 | 108 | 32 | 1 | 2 | 50 | 14 | 161 | 51 |
| 31,931 | 2 | 4 | 81  | 31 | 1 | 2 | 48 | 14 | 132 | 51 |
| 31,932 | 1 | 5 | 63  | 31 | 1 | 2 | 41 | 14 | 106 | 52 |
| 31,933 | 1 | 5 | 68  | 29 | 1 | 2 | 42 | 14 | 112 | 50 |
| 31,934 | 1 | 5 | 68  | 30 | 1 | 2 | 42 | 14 | 112 | 51 |
| 31,935 | 1 | 4 | 69  | 30 | 1 | 2 | 42 | 14 | 113 | 50 |
| 31,936 | 1 | 4 | 70  | 31 | 1 | 2 | 44 | 14 | 116 | 51 |
| 31,937 | 1 | 4 | 69  | 31 | 1 | 2 | 42 | 16 | 113 | 53 |
| 31,938 | 1 | 4 | 68  | 31 | 1 | 2 | 40 | 17 | 110 | 54 |
| 31,939 | 2 | 6 | 79  | 36 | 1 | 3 | 45 | 19 | 127 | 64 |
| 31,940 | 2 | 6 | 73  | 36 | 0 | 3 | 42 | 19 | 117 | 64 |
| 31,941 | 3 | 6 | 76  | 35 | 1 | 3 | 44 | 20 | 124 | 64 |
| 31,942 | 3 | 6 | 77  | 31 | 1 | 3 | 40 | 17 | 121 | 57 |
| 31,943 | 3 | 6 | 77  | 31 | 1 | 3 | 39 | 18 | 120 | 58 |
| 31,944 | 3 | 7 | 77  | 32 | 1 | 4 | 39 | 18 | 120 | 61 |
| 31,945 | 5 | 7 | 101 | 27 | 2 | 4 | 64 | 17 | 172 | 55 |
| 31,946 | 5 | 7 | 101 | 27 | 2 | 4 | 64 | 18 | 172 | 56 |
| 31,947 | 5 | 7 | 101 | 25 | 2 | 3 | 63 | 18 | 171 | 53 |
| 31,948 | 5 | 7 | 104 | 33 | 2 | 3 | 63 | 18 | 174 | 61 |
| 31,949 | 5 | 7 | 109 | 34 | 2 | 3 | 66 | 18 | 182 | 62 |
| 31,950 | 5 | 7 | 109 | 35 | 2 | 3 | 66 | 18 | 182 | 63 |
| 31,951 | 5 | 7 | 110 | 37 | 3 | 3 | 66 | 19 | 184 | 66 |
| 31,952 | 5 | 6 | 103 | 37 | 3 | 3 | 66 | 19 | 177 | 65 |
| 31,953 | 5 | 6 | 96  | 36 | 4 | 3 | 62 | 19 | 167 | 64 |
| 31,954 | 6 | 6 | 92  | 37 | 4 | 3 | 62 | 20 | 164 | 66 |
| 31,955 | 6 | 6 | 91  | 37 | 4 | 3 | 58 | 20 | 159 | 66 |
| 31,956 | 7 | 6 | 92  | 37 | 4 | 3 | 58 | 20 | 161 | 66 |
| 31,957 | 7 | 6 | 93  | 38 | 4 | 3 | 59 | 20 | 163 | 67 |
| 31,958 | 7 | 6 | 94  | 38 | 4 | 3 | 59 | 20 | 164 | 67 |
| 31,959 | 7 | 6 | 94  | 38 | 4 | 3 | 59 | 20 | 164 | 67 |
| 31,960 | 7 | 6 | 96  | 38 | 4 | 3 | 58 | 20 | 165 | 67 |
| 31,961 | 7 | 6 | 94  | 39 | 4 | 3 | 57 | 21 | 162 | 69 |
| 31,962 | 7 | 7 | 91  | 39 | 4 | 3 | 51 | 21 | 153 | 70 |
| 31,963 | 7 | 7 | 90  | 39 | 4 | 3 | 51 | 21 | 152 | 70 |
| 31,964 | 7 | 7 | 91  | 39 | 4 | 3 | 51 | 21 | 153 | 70 |
| 31,965 | 7 | 7 | 89  | 39 | 4 | 3 | 50 | 21 | 150 | 70 |
| 31,966 | 7 | 7 | 85  | 40 | 4 | 3 | 53 | 20 | 149 | 70 |
| 31,967 | 7 | 7 | 85  | 41 | 4 | 3 | 52 | 20 | 148 | 71 |
| 31,968 | 7 | 7 | 85  | 41 | 4 | 3 | 52 | 20 | 148 | 71 |

|        |   |   |    |    |   |   |    |    |     |    |
|--------|---|---|----|----|---|---|----|----|-----|----|
| 31,969 | 7 | 7 | 85 | 41 | 4 | 3 | 52 | 20 | 148 | 71 |
| 31,970 | 7 | 7 | 85 | 41 | 4 | 3 | 52 | 19 | 148 | 70 |
| 31,971 | 7 | 7 | 85 | 41 | 4 | 3 | 52 | 19 | 148 | 70 |
| 31,972 | 7 | 7 | 85 | 41 | 4 | 3 | 52 | 19 | 148 | 70 |
| 31,973 | 7 | 7 | 85 | 41 | 4 | 3 | 52 | 19 | 148 | 70 |
| 31,974 | 7 | 7 | 83 | 41 | 4 | 3 | 52 | 19 | 146 | 70 |
| 31,975 | 7 | 6 | 82 | 41 | 4 | 3 | 51 | 19 | 144 | 69 |
| 31,976 | 7 | 6 | 81 | 36 | 4 | 3 | 50 | 17 | 142 | 62 |
| 31,977 | 7 | 6 | 81 | 37 | 4 | 3 | 50 | 17 | 142 | 63 |
| 31,978 | 6 | 6 | 78 | 36 | 4 | 2 | 45 | 15 | 133 | 59 |
| 31,979 | 6 | 6 | 78 | 36 | 4 | 2 | 45 | 16 | 133 | 60 |
| 31,980 | 6 | 6 | 78 | 34 | 4 | 2 | 45 | 15 | 133 | 57 |
| 31,981 | 6 | 6 | 78 | 34 | 4 | 2 | 45 | 15 | 133 | 57 |
| 31,982 | 6 | 5 | 78 | 35 | 4 | 2 | 45 | 15 | 133 | 57 |
| 31,983 | 6 | 4 | 77 | 36 | 4 | 3 | 44 | 17 | 131 | 60 |
| 31,984 | 6 | 4 | 72 | 42 | 4 | 3 | 43 | 20 | 125 | 69 |
| 31,985 | 6 | 4 | 72 | 41 | 4 | 3 | 43 | 20 | 125 | 68 |
| 31,986 | 6 | 4 | 70 | 42 | 4 | 3 | 43 | 20 | 123 | 69 |
| 31,987 | 6 | 4 | 68 | 41 | 4 | 3 | 41 | 21 | 119 | 69 |
| 31,988 | 6 | 4 | 63 | 41 | 4 | 3 | 39 | 20 | 112 | 68 |
| 31,989 | 5 | 2 | 57 | 36 | 4 | 2 | 36 | 17 | 102 | 57 |
| 31,990 | 5 | 2 | 57 | 39 | 4 | 2 | 36 | 21 | 102 | 64 |
| 31,991 | 4 | 2 | 51 | 39 | 4 | 2 | 35 | 21 | 94  | 64 |
| 31,992 | 4 | 2 | 51 | 39 | 3 | 2 | 37 | 20 | 95  | 63 |
| 31,993 | 4 | 2 | 48 | 38 | 3 | 2 | 37 | 20 | 92  | 62 |
| 31,994 | 4 | 2 | 47 | 38 | 3 | 2 | 35 | 19 | 89  | 61 |
| 31,995 | 2 | 1 | 34 | 38 | 3 | 1 | 21 | 24 | 60  | 64 |
| 31,996 | 2 | 1 | 24 | 38 | 1 | 1 | 11 | 23 | 38  | 63 |
| 31,997 | 2 | 2 | 24 | 40 | 1 | 1 | 12 | 23 | 39  | 66 |
| 31,998 | 2 | 2 | 24 | 30 | 1 | 1 | 12 | 23 | 39  | 56 |
| 31,999 | 2 | 2 | 26 | 30 | 1 | 1 | 16 | 26 | 45  | 59 |
| 32,000 | 2 | 2 | 25 | 30 | 1 | 1 | 15 | 28 | 43  | 61 |
| 32,001 | 2 | 2 | 24 | 30 | 1 | 1 | 14 | 28 | 41  | 61 |
| 32,002 | 2 | 2 | 21 | 29 | 1 | 1 | 14 | 29 | 38  | 61 |
| 32,003 | 2 | 2 | 21 | 29 | 1 | 1 | 14 | 29 | 38  | 61 |
| 32,004 | 4 | 4 | 36 | 34 | 1 | 1 | 22 | 33 | 63  | 72 |
| 32,005 | 3 | 4 | 36 | 33 | 1 | 1 | 22 | 32 | 62  | 70 |
| 32,006 | 3 | 4 | 41 | 33 | 1 | 1 | 23 | 32 | 68  | 70 |
| 32,007 | 2 | 4 | 43 | 34 | 1 | 1 | 23 | 32 | 69  | 71 |
| 32,008 | 2 | 4 | 42 | 34 | 1 | 1 | 23 | 32 | 68  | 71 |
| 32,009 | 2 | 4 | 46 | 35 | 1 | 1 | 24 | 33 | 73  | 73 |

|        |   |   |     |    |   |   |    |    |     |    |
|--------|---|---|-----|----|---|---|----|----|-----|----|
| 32,010 | 2 | 4 | 46  | 35 | 1 | 1 | 24 | 33 | 73  | 73 |
| 32,011 | 2 | 4 | 46  | 35 | 1 | 1 | 24 | 33 | 73  | 73 |
| 32,012 | 4 | 4 | 67  | 34 | 3 | 1 | 32 | 32 | 106 | 71 |
| 32,013 | 6 | 3 | 77  | 34 | 3 | 1 | 37 | 32 | 123 | 70 |
| 32,014 | 6 | 3 | 81  | 33 | 3 | 1 | 38 | 32 | 128 | 69 |
| 32,015 | 6 | 3 | 79  | 33 | 3 | 1 | 38 | 32 | 126 | 69 |
| 32,016 | 8 | 3 | 88  | 33 | 4 | 1 | 37 | 33 | 137 | 70 |
| 32,017 | 8 | 3 | 99  | 32 | 4 | 1 | 41 | 33 | 152 | 69 |
| 32,018 | 8 | 3 | 101 | 32 | 4 | 1 | 41 | 33 | 154 | 69 |
| 32,019 | 8 | 3 | 101 | 32 | 4 | 1 | 41 | 33 | 154 | 69 |
| 32,020 | 8 | 3 | 101 | 32 | 4 | 1 | 41 | 33 | 154 | 69 |
| 32,021 | 8 | 3 | 101 | 32 | 4 | 1 | 41 | 34 | 154 | 70 |
| 32,022 | 8 | 3 | 101 | 32 | 4 | 1 | 41 | 35 | 154 | 71 |
| 32,023 | 8 | 3 | 104 | 32 | 4 | 1 | 46 | 35 | 162 | 71 |
| 32,024 | 8 | 3 | 105 | 32 | 4 | 1 | 46 | 35 | 163 | 71 |
| 32,025 | 8 | 3 | 105 | 33 | 4 | 1 | 46 | 35 | 163 | 72 |
| 32,026 | 8 | 3 | 105 | 33 | 4 | 1 | 46 | 35 | 163 | 72 |
| 32,027 | 8 | 3 | 106 | 32 | 4 | 1 | 48 | 34 | 166 | 70 |
| 32,028 | 8 | 3 | 107 | 35 | 4 | 1 | 48 | 34 | 167 | 73 |
| 32,029 | 8 | 3 | 106 | 36 | 4 | 1 | 48 | 34 | 166 | 74 |
| 32,030 | 8 | 3 | 107 | 35 | 4 | 1 | 48 | 33 | 167 | 72 |
| 32,031 | 8 | 3 | 107 | 36 | 4 | 1 | 48 | 33 | 167 | 73 |
| 32,032 | 8 | 3 | 108 | 36 | 4 | 1 | 48 | 33 | 168 | 73 |
| 32,033 | 8 | 3 | 110 | 35 | 4 | 1 | 48 | 33 | 170 | 72 |
| 32,034 | 8 | 3 | 110 | 34 | 4 | 0 | 48 | 31 | 170 | 68 |
| 32,035 | 8 | 3 | 110 | 28 | 4 | 0 | 48 | 28 | 170 | 59 |
| 32,036 | 8 | 3 | 111 | 26 | 4 | 0 | 48 | 28 | 171 | 57 |
| 32,037 | 8 | 3 | 111 | 26 | 4 | 0 | 48 | 28 | 171 | 57 |
| 32,038 | 8 | 3 | 111 | 26 | 4 | 0 | 48 | 26 | 171 | 55 |
| 32,039 | 8 | 3 | 111 | 26 | 4 | 0 | 48 | 26 | 171 | 55 |
| 32,040 | 8 | 3 | 112 | 25 | 4 | 0 | 48 | 26 | 172 | 54 |
| 32,041 | 8 | 3 | 112 | 22 | 4 | 0 | 48 | 22 | 172 | 47 |
| 32,042 | 8 | 3 | 112 | 22 | 4 | 0 | 48 | 22 | 172 | 47 |
| 32,043 | 8 | 3 | 112 | 22 | 4 | 0 | 45 | 22 | 169 | 47 |
| 32,044 | 8 | 3 | 112 | 22 | 4 | 0 | 45 | 22 | 169 | 47 |
| 32,045 | 8 | 3 | 114 | 21 | 4 | 0 | 45 | 17 | 171 | 41 |
| 32,046 | 8 | 3 | 114 | 21 | 4 | 0 | 45 | 17 | 171 | 41 |
| 32,047 | 8 | 3 | 116 | 21 | 5 | 0 | 44 | 17 | 173 | 41 |
| 32,048 | 9 | 2 | 116 | 19 | 5 | 0 | 48 | 16 | 178 | 37 |
| 32,049 | 9 | 2 | 118 | 19 | 5 | 0 | 48 | 17 | 180 | 38 |
| 32,050 | 9 | 2 | 117 | 19 | 5 | 0 | 45 | 14 | 176 | 35 |

|        |    |   |     |    |    |   |     |    |     |    |
|--------|----|---|-----|----|----|---|-----|----|-----|----|
| 32,051 | 11 | 3 | 130 | 18 | 6  | 0 | 55  | 13 | 202 | 34 |
| 32,052 | 11 | 3 | 124 | 20 | 5  | 0 | 51  | 13 | 191 | 36 |
| 32,053 | 14 | 6 | 136 | 20 | 5  | 0 | 58  | 11 | 213 | 37 |
| 32,054 | 13 | 6 | 141 | 22 | 5  | 0 | 61  | 11 | 220 | 39 |
| 32,055 | 16 | 4 | 157 | 20 | 5  | 0 | 76  | 7  | 254 | 31 |
| 32,056 | 16 | 4 | 160 | 21 | 5  | 0 | 81  | 7  | 262 | 32 |
| 32,057 | 16 | 4 | 158 | 21 | 5  | 0 | 80  | 7  | 259 | 32 |
| 32,058 | 17 | 4 | 157 | 18 | 6  | 0 | 84  | 7  | 264 | 29 |
| 32,059 | 18 | 4 | 207 | 17 | 11 | 0 | 93  | 6  | 329 | 27 |
| 32,060 | 18 | 4 | 206 | 17 | 11 | 0 | 97  | 6  | 332 | 27 |
| 32,061 | 18 | 4 | 204 | 17 | 11 | 0 | 97  | 7  | 330 | 28 |
| 32,062 | 17 | 4 | 187 | 17 | 9  | 0 | 90  | 7  | 303 | 28 |
| 32,063 | 17 | 4 | 184 | 17 | 9  | 0 | 88  | 7  | 298 | 28 |
| 32,064 | 15 | 4 | 178 | 17 | 9  | 0 | 85  | 7  | 287 | 28 |
| 32,065 | 15 | 4 | 179 | 17 | 9  | 0 | 87  | 7  | 290 | 28 |
| 32,066 | 15 | 4 | 180 | 17 | 9  | 0 | 87  | 7  | 291 | 28 |
| 32,067 | 13 | 4 | 171 | 17 | 8  | 0 | 86  | 6  | 278 | 27 |
| 32,068 | 13 | 4 | 159 | 17 | 8  | 0 | 82  | 6  | 262 | 27 |
| 32,069 | 13 | 4 | 157 | 17 | 8  | 0 | 82  | 6  | 260 | 27 |
| 32,070 | 13 | 4 | 159 | 18 | 8  | 0 | 82  | 7  | 262 | 29 |
| 32,071 | 13 | 4 | 159 | 18 | 8  | 0 | 79  | 7  | 259 | 29 |
| 32,072 | 17 | 5 | 188 | 18 | 9  | 0 | 86  | 6  | 300 | 29 |
| 32,073 | 17 | 5 | 190 | 18 | 9  | 0 | 87  | 5  | 303 | 28 |
| 32,074 | 17 | 5 | 189 | 18 | 9  | 0 | 87  | 5  | 302 | 28 |
| 32,075 | 17 | 5 | 191 | 18 | 9  | 0 | 88  | 5  | 305 | 28 |
| 32,076 | 17 | 5 | 192 | 13 | 9  | 0 | 88  | 5  | 306 | 23 |
| 32,077 | 17 | 5 | 193 | 13 | 9  | 0 | 88  | 5  | 307 | 23 |
| 32,078 | 17 | 5 | 192 | 13 | 9  | 0 | 86  | 5  | 304 | 23 |
| 32,079 | 17 | 5 | 194 | 13 | 9  | 0 | 87  | 5  | 307 | 23 |
| 32,080 | 17 | 5 | 196 | 12 | 9  | 0 | 89  | 5  | 311 | 22 |
| 32,081 | 17 | 5 | 196 | 12 | 9  | 0 | 89  | 5  | 311 | 22 |
| 32,082 | 17 | 5 | 195 | 11 | 9  | 0 | 89  | 5  | 310 | 21 |
| 32,083 | 18 | 5 | 194 | 11 | 9  | 0 | 89  | 5  | 310 | 21 |
| 32,084 | 18 | 5 | 194 | 11 | 9  | 0 | 89  | 5  | 310 | 21 |
| 32,085 | 18 | 5 | 194 | 11 | 9  | 0 | 89  | 5  | 310 | 21 |
| 32,086 | 18 | 5 | 196 | 11 | 9  | 0 | 91  | 5  | 314 | 21 |
| 32,087 | 18 | 5 | 200 | 11 | 9  | 0 | 91  | 5  | 318 | 21 |
| 32,088 | 18 | 5 | 200 | 13 | 9  | 0 | 92  | 5  | 319 | 23 |
| 32,089 | 20 | 5 | 206 | 14 | 12 | 0 | 94  | 5  | 332 | 24 |
| 32,090 | 20 | 5 | 207 | 14 | 12 | 0 | 94  | 5  | 333 | 24 |
| 32,091 | 21 | 5 | 210 | 14 | 12 | 0 | 101 | 5  | 344 | 24 |

|        |    |   |     |    |    |   |     |   |     |    |
|--------|----|---|-----|----|----|---|-----|---|-----|----|
| 32,092 | 21 | 5 | 210 | 15 | 12 | 0 | 101 | 5 | 344 | 25 |
| 32,093 | 21 | 6 | 217 | 18 | 13 | 0 | 103 | 6 | 354 | 30 |
| 32,094 | 21 | 6 | 217 | 18 | 13 | 0 | 103 | 6 | 354 | 30 |
| 32,095 | 21 | 6 | 219 | 18 | 13 | 0 | 104 | 8 | 357 | 32 |
| 32,096 | 21 | 6 | 218 | 18 | 13 | 0 | 104 | 8 | 356 | 32 |
| 32,097 | 21 | 7 | 218 | 18 | 13 | 0 | 104 | 8 | 356 | 33 |
| 32,098 | 21 | 7 | 217 | 18 | 12 | 0 | 104 | 8 | 354 | 33 |
| 32,099 | 20 | 7 | 218 | 18 | 12 | 0 | 100 | 7 | 350 | 32 |
| 32,100 | 20 | 6 | 217 | 16 | 12 | 0 | 100 | 6 | 349 | 28 |
| 32,101 | 20 | 6 | 213 | 16 | 12 | 0 | 99  | 6 | 344 | 28 |
| 32,102 | 19 | 3 | 196 | 14 | 11 | 0 | 92  | 5 | 318 | 22 |
| 32,103 | 19 | 3 | 196 | 15 | 11 | 0 | 92  | 5 | 318 | 23 |
| 32,104 | 15 | 3 | 182 | 14 | 11 | 0 | 84  | 5 | 292 | 22 |
| 32,105 | 15 | 3 | 176 | 12 | 11 | 0 | 80  | 5 | 282 | 20 |
| 32,106 | 12 | 3 | 155 | 12 | 11 | 0 | 65  | 5 | 243 | 20 |
| 32,107 | 12 | 3 | 149 | 11 | 11 | 0 | 60  | 5 | 232 | 19 |
| 32,108 | 11 | 3 | 147 | 11 | 10 | 0 | 57  | 5 | 225 | 19 |
| 32,109 | 13 | 3 | 104 | 11 | 5  | 0 | 50  | 5 | 172 | 19 |
| 32,110 | 12 | 3 | 105 | 15 | 5  | 0 | 50  | 6 | 172 | 24 |
| 32,111 | 12 | 3 | 102 | 15 | 5  | 0 | 51  | 6 | 170 | 24 |
| 32,112 | 13 | 3 | 104 | 15 | 5  | 0 | 50  | 7 | 172 | 25 |
| 32,113 | 12 | 3 | 101 | 15 | 5  | 0 | 50  | 7 | 168 | 25 |
| 32,114 | 12 | 3 | 104 | 17 | 5  | 0 | 51  | 7 | 172 | 27 |
| 32,115 | 12 | 3 | 104 | 17 | 5  | 0 | 53  | 7 | 174 | 27 |
| 32,116 | 12 | 3 | 99  | 17 | 5  | 0 | 51  | 7 | 167 | 27 |
| 32,117 | 12 | 3 | 98  | 17 | 5  | 0 | 51  | 7 | 166 | 27 |
| 32,118 | 12 | 3 | 95  | 17 | 5  | 0 | 49  | 7 | 161 | 27 |
| 32,119 | 12 | 4 | 96  | 17 | 5  | 0 | 50  | 8 | 163 | 29 |
| 32,120 | 12 | 4 | 97  | 17 | 5  | 0 | 50  | 8 | 164 | 29 |
| 32,121 | 12 | 4 | 95  | 16 | 5  | 0 | 50  | 7 | 162 | 27 |
| 32,122 | 12 | 4 | 93  | 16 | 5  | 0 | 50  | 8 | 160 | 28 |
| 32,123 | 8  | 3 | 65  | 17 | 4  | 0 | 41  | 8 | 118 | 28 |
| 32,124 | 8  | 3 | 62  | 17 | 4  | 0 | 40  | 8 | 114 | 28 |
| 32,125 | 8  | 3 | 60  | 17 | 4  | 0 | 39  | 8 | 111 | 28 |
| 32,126 | 8  | 3 | 60  | 17 | 4  | 0 | 39  | 8 | 111 | 28 |
| 32,127 | 14 | 3 | 87  | 18 | 5  | 1 | 52  | 8 | 158 | 30 |
| 32,128 | 14 | 3 | 86  | 18 | 5  | 1 | 52  | 8 | 157 | 30 |
| 32,129 | 14 | 3 | 86  | 20 | 5  | 1 | 52  | 9 | 157 | 33 |
| 32,130 | 14 | 3 | 83  | 20 | 5  | 1 | 51  | 9 | 153 | 33 |
| 32,131 | 15 | 3 | 101 | 20 | 6  | 1 | 61  | 9 | 183 | 33 |
| 32,132 | 15 | 3 | 101 | 20 | 6  | 1 | 61  | 9 | 183 | 33 |



|        |    |    |     |    |   |   |    |    |     |    |
|--------|----|----|-----|----|---|---|----|----|-----|----|
| 32,133 | 15 | 3  | 101 | 20 | 6 | 1 | 61 | 9  | 183 | 33 |
| 32,134 | 14 | 3  | 100 | 20 | 6 | 1 | 61 | 9  | 181 | 33 |
| 32,135 | 14 | 3  | 100 | 20 | 6 | 1 | 61 | 9  | 181 | 33 |
| 32,136 | 14 | 3  | 99  | 20 | 6 | 1 | 59 | 9  | 178 | 33 |
| 32,137 | 14 | 3  | 98  | 23 | 6 | 2 | 59 | 9  | 177 | 37 |
| 32,138 | 14 | 3  | 93  | 23 | 6 | 2 | 59 | 11 | 172 | 39 |
| 32,139 | 13 | 3  | 89  | 22 | 6 | 3 | 58 | 11 | 166 | 39 |
| 32,140 | 12 | 3  | 89  | 21 | 3 | 3 | 57 | 11 | 161 | 38 |
| 32,141 | 12 | 3  | 88  | 21 | 3 | 4 | 57 | 12 | 160 | 40 |
| 32,142 | 11 | 3  | 85  | 22 | 3 | 4 | 50 | 12 | 149 | 41 |
| 32,143 | 12 | 3  | 84  | 22 | 2 | 4 | 48 | 12 | 146 | 41 |
| 32,144 | 12 | 2  | 79  | 20 | 2 | 4 | 48 | 11 | 141 | 37 |
| 32,145 | 12 | 2  | 76  | 20 | 2 | 4 | 47 | 11 | 137 | 37 |
| 32,146 | 12 | 2  | 76  | 23 | 2 | 4 | 47 | 10 | 137 | 39 |
| 32,147 | 12 | 2  | 76  | 23 | 2 | 4 | 47 | 10 | 137 | 39 |
| 32,148 | 13 | 2  | 79  | 26 | 2 | 5 | 47 | 10 | 141 | 43 |
| 32,149 | 13 | 2  | 78  | 26 | 2 | 5 | 47 | 10 | 140 | 43 |
| 32,150 | 16 | 2  | 94  | 27 | 2 | 5 | 53 | 10 | 165 | 44 |
| 32,151 | 16 | 2  | 93  | 26 | 2 | 5 | 54 | 10 | 165 | 43 |
| 32,152 | 16 | 2  | 93  | 26 | 2 | 5 | 56 | 10 | 167 | 43 |
| 32,153 | 16 | 2  | 102 | 26 | 2 | 5 | 55 | 10 | 175 | 43 |
| 32,154 | 16 | 2  | 102 | 27 | 2 | 5 | 55 | 10 | 175 | 44 |
| 32,155 | 32 | 2  | 162 | 27 | 5 | 5 | 91 | 10 | 290 | 44 |
| 32,156 | 32 | 2  | 162 | 28 | 5 | 5 | 91 | 10 | 290 | 45 |
| 32,157 | 33 | 2  | 165 | 26 | 5 | 5 | 92 | 11 | 295 | 44 |
| 32,158 | 33 | 2  | 165 | 26 | 5 | 6 | 92 | 11 | 295 | 45 |
| 32,159 | 33 | 2  | 166 | 37 | 5 | 6 | 91 | 15 | 295 | 60 |
| 32,160 | 31 | 2  | 160 | 37 | 5 | 7 | 88 | 16 | 284 | 62 |
| 32,161 | 31 | 2  | 158 | 33 | 5 | 7 | 88 | 15 | 282 | 57 |
| 32,162 | 31 | 8  | 157 | 40 | 5 | 8 | 82 | 25 | 275 | 81 |
| 32,163 | 30 | 8  | 154 | 42 | 5 | 8 | 82 | 23 | 271 | 81 |
| 32,164 | 30 | 10 | 150 | 46 | 5 | 8 | 82 | 25 | 267 | 89 |
| 32,165 | 30 | 10 | 150 | 44 | 5 | 8 | 82 | 25 | 267 | 87 |
| 32,166 | 30 | 10 | 150 | 46 | 5 | 9 | 80 | 26 | 265 | 91 |
| 32,167 | 30 | 10 | 153 | 47 | 5 | 9 | 81 | 26 | 269 | 92 |
| 32,168 | 30 | 10 | 153 | 47 | 5 | 9 | 81 | 26 | 269 | 92 |
| 32,169 | 30 | 10 | 153 | 48 | 5 | 9 | 80 | 26 | 268 | 93 |
| 32,170 | 30 | 9  | 155 | 49 | 5 | 9 | 82 | 25 | 272 | 92 |
| 32,171 | 30 | 9  | 152 | 49 | 5 | 9 | 82 | 25 | 269 | 92 |
| 32,172 | 30 | 9  | 152 | 49 | 5 | 9 | 81 | 25 | 268 | 92 |
| 32,173 | 28 | 9  | 147 | 50 | 5 | 9 | 81 | 24 | 261 | 92 |

|        |    |    |     |    |   |   |    |    |     |    |
|--------|----|----|-----|----|---|---|----|----|-----|----|
| 32,174 | 28 | 9  | 143 | 49 | 5 | 9 | 81 | 24 | 257 | 91 |
| 32,175 | 28 | 9  | 150 | 49 | 6 | 9 | 88 | 25 | 272 | 92 |
| 32,176 | 28 | 9  | 150 | 49 | 6 | 9 | 89 | 25 | 273 | 92 |
| 32,177 | 26 | 9  | 147 | 49 | 6 | 9 | 88 | 25 | 267 | 92 |
| 32,178 | 24 | 9  | 135 | 48 | 5 | 8 | 78 | 26 | 242 | 91 |
| 32,179 | 24 | 9  | 118 | 46 | 5 | 8 | 70 | 25 | 217 | 88 |
| 32,180 | 24 | 9  | 116 | 46 | 5 | 8 | 66 | 25 | 211 | 88 |
| 32,181 | 23 | 9  | 115 | 46 | 4 | 8 | 66 | 26 | 208 | 89 |
| 32,182 | 23 | 9  | 115 | 46 | 4 | 8 | 66 | 26 | 208 | 89 |
| 32,183 | 23 | 9  | 116 | 46 | 4 | 8 | 66 | 26 | 209 | 89 |
| 32,184 | 23 | 9  | 116 | 46 | 4 | 8 | 66 | 26 | 209 | 89 |
| 32,185 | 23 | 9  | 116 | 46 | 4 | 8 | 66 | 26 | 209 | 89 |
| 32,186 | 23 | 9  | 116 | 46 | 4 | 8 | 66 | 26 | 209 | 89 |
| 32,187 | 23 | 9  | 116 | 46 | 4 | 8 | 66 | 26 | 209 | 89 |
| 32,188 | 23 | 9  | 118 | 43 | 4 | 7 | 66 | 26 | 211 | 85 |
| 32,189 | 23 | 9  | 120 | 43 | 4 | 7 | 66 | 24 | 213 | 83 |
| 32,190 | 23 | 9  | 122 | 42 | 4 | 6 | 66 | 24 | 215 | 81 |
| 32,191 | 23 | 9  | 120 | 42 | 4 | 6 | 66 | 24 | 213 | 81 |
| 32,192 | 23 | 9  | 121 | 41 | 4 | 5 | 66 | 23 | 214 | 78 |
| 32,193 | 23 | 9  | 121 | 41 | 4 | 5 | 66 | 23 | 214 | 78 |
| 32,194 | 27 | 9  | 126 | 39 | 4 | 5 | 68 | 23 | 225 | 76 |
| 32,195 | 27 | 9  | 126 | 40 | 4 | 5 | 68 | 23 | 225 | 77 |
| 32,196 | 27 | 9  | 130 | 40 | 4 | 5 | 74 | 23 | 235 | 77 |
| 32,197 | 28 | 9  | 144 | 37 | 4 | 5 | 84 | 22 | 260 | 73 |
| 32,198 | 28 | 8  | 149 | 35 | 5 | 4 | 91 | 22 | 273 | 69 |
| 32,199 | 28 | 8  | 148 | 35 | 5 | 4 | 92 | 22 | 273 | 69 |
| 32,200 | 28 | 8  | 148 | 38 | 5 | 4 | 92 | 25 | 273 | 75 |
| 32,201 | 25 | 9  | 131 | 38 | 5 | 4 | 86 | 25 | 247 | 76 |
| 32,202 | 25 | 10 | 133 | 39 | 5 | 4 | 87 | 26 | 250 | 79 |
| 32,203 | 25 | 10 | 133 | 45 | 5 | 4 | 85 | 27 | 248 | 86 |
| 32,204 | 24 | 12 | 125 | 48 | 5 | 4 | 81 | 28 | 235 | 92 |
| 32,205 | 20 | 12 | 101 | 48 | 3 | 4 | 68 | 31 | 192 | 95 |
| 32,206 | 9  | 12 | 65  | 48 | 2 | 4 | 44 | 34 | 120 | 98 |
| 32,207 | 8  | 12 | 62  | 47 | 2 | 4 | 43 | 33 | 115 | 96 |
| 32,208 | 8  | 12 | 62  | 47 | 2 | 4 | 43 | 33 | 115 | 96 |
| 32,209 | 8  | 13 | 62  | 37 | 2 | 3 | 43 | 29 | 115 | 82 |
| 32,210 | 8  | 13 | 61  | 37 | 2 | 3 | 43 | 29 | 114 | 82 |
| 32,211 | 8  | 14 | 61  | 37 | 2 | 2 | 43 | 29 | 114 | 82 |
| 32,212 | 10 | 8  | 62  | 31 | 2 | 1 | 43 | 19 | 117 | 59 |
| 32,213 | 10 | 8  | 62  | 31 | 2 | 1 | 44 | 19 | 118 | 59 |
| 32,214 | 10 | 8  | 63  | 29 | 2 | 1 | 44 | 19 | 119 | 57 |

|        |    |    |     |    |   |   |    |    |     |     |
|--------|----|----|-----|----|---|---|----|----|-----|-----|
| 32,215 | 10 | 6  | 63  | 24 | 2 | 0 | 44 | 16 | 119 | 46  |
| 32,216 | 11 | 6  | 63  | 24 | 2 | 0 | 44 | 16 | 120 | 46  |
| 32,217 | 11 | 6  | 61  | 24 | 2 | 0 | 43 | 16 | 117 | 46  |
| 32,218 | 11 | 6  | 60  | 25 | 2 | 0 | 42 | 16 | 115 | 47  |
| 32,219 | 11 | 6  | 62  | 25 | 2 | 0 | 42 | 17 | 117 | 48  |
| 32,220 | 11 | 6  | 63  | 24 | 2 | 0 | 42 | 18 | 118 | 48  |
| 32,221 | 11 | 7  | 62  | 23 | 2 | 0 | 42 | 18 | 117 | 48  |
| 32,222 | 11 | 7  | 75  | 24 | 2 | 0 | 51 | 20 | 139 | 51  |
| 32,223 | 11 | 10 | 75  | 38 | 2 | 1 | 45 | 33 | 133 | 82  |
| 32,224 | 11 | 10 | 73  | 43 | 2 | 1 | 45 | 33 | 131 | 87  |
| 32,225 | 12 | 10 | 78  | 47 | 1 | 1 | 47 | 34 | 138 | 92  |
| 32,226 | 12 | 10 | 77  | 47 | 1 | 1 | 47 | 34 | 137 | 92  |
| 32,227 | 19 | 10 | 93  | 52 | 1 | 1 | 70 | 38 | 183 | 101 |
| 32,228 | 19 | 10 | 93  | 52 | 1 | 1 | 69 | 38 | 182 | 101 |
| 32,229 | 20 | 10 | 97  | 53 | 1 | 1 | 69 | 37 | 187 | 101 |
| 32,230 | 21 | 10 | 104 | 53 | 1 | 1 | 69 | 37 | 195 | 101 |
| 32,231 | 22 | 10 | 107 | 53 | 1 | 1 | 69 | 37 | 199 | 101 |
| 32,232 | 23 | 10 | 108 | 53 | 1 | 1 | 69 | 36 | 201 | 100 |
| 32,233 | 23 | 10 | 108 | 53 | 1 | 1 | 69 | 36 | 201 | 100 |
| 32,234 | 23 | 11 | 107 | 60 | 1 | 1 | 69 | 42 | 200 | 114 |
| 32,235 | 23 | 11 | 107 | 60 | 1 | 1 | 69 | 42 | 200 | 114 |
| 32,236 | 28 | 11 | 122 | 60 | 1 | 1 | 77 | 42 | 228 | 114 |
| 32,237 | 28 | 11 | 123 | 60 | 1 | 1 | 77 | 42 | 229 | 114 |
| 32,238 | 29 | 11 | 121 | 60 | 1 | 1 | 77 | 42 | 228 | 114 |
| 32,239 | 29 | 11 | 124 | 60 | 2 | 1 | 80 | 42 | 235 | 114 |
| 32,240 | 29 | 11 | 124 | 60 | 2 | 1 | 80 | 42 | 235 | 114 |
| 32,241 | 32 | 11 | 136 | 60 | 3 | 1 | 87 | 43 | 258 | 115 |
| 32,242 | 32 | 11 | 136 | 60 | 3 | 1 | 87 | 43 | 258 | 115 |
| 32,243 | 32 | 11 | 135 | 60 | 3 | 1 | 88 | 44 | 258 | 116 |
| 32,244 | 32 | 11 | 135 | 62 | 3 | 1 | 88 | 44 | 258 | 118 |
| 32,245 | 28 | 11 | 129 | 62 | 3 | 1 | 86 | 44 | 246 | 118 |
| 32,246 | 28 | 11 | 127 | 61 | 3 | 1 | 80 | 44 | 238 | 117 |
| 32,247 | 28 | 11 | 127 | 61 | 3 | 1 | 80 | 44 | 238 | 117 |
| 32,248 | 27 | 11 | 113 | 61 | 3 | 1 | 70 | 44 | 213 | 117 |
| 32,249 | 27 | 11 | 107 | 60 | 3 | 1 | 64 | 44 | 201 | 116 |
| 32,250 | 26 | 11 | 106 | 60 | 3 | 1 | 63 | 44 | 198 | 116 |
| 32,251 | 26 | 9  | 124 | 55 | 4 | 1 | 67 | 40 | 221 | 105 |
| 32,252 | 28 | 9  | 146 | 55 | 4 | 1 | 75 | 42 | 253 | 107 |
| 32,253 | 29 | 9  | 165 | 55 | 6 | 1 | 88 | 42 | 288 | 107 |
| 32,254 | 29 | 9  | 172 | 49 | 6 | 1 | 90 | 42 | 297 | 101 |
| 32,255 | 29 | 7  | 172 | 48 | 6 | 1 | 90 | 38 | 297 | 94  |

|        |    |   |     |    |   |   |     |    |     |    |
|--------|----|---|-----|----|---|---|-----|----|-----|----|
| 32,256 | 28 | 7 | 172 | 48 | 6 | 1 | 89  | 38 | 295 | 94 |
| 32,257 | 28 | 7 | 171 | 48 | 6 | 1 | 94  | 35 | 299 | 91 |
| 32,258 | 28 | 7 | 171 | 48 | 6 | 1 | 94  | 35 | 299 | 91 |
| 32,259 | 28 | 7 | 171 | 48 | 6 | 1 | 94  | 35 | 299 | 91 |
| 32,260 | 28 | 6 | 171 | 47 | 6 | 1 | 94  | 35 | 299 | 89 |
| 32,261 | 27 | 6 | 172 | 47 | 6 | 1 | 94  | 35 | 299 | 89 |
| 32,262 | 26 | 5 | 172 | 48 | 6 | 1 | 94  | 34 | 298 | 88 |
| 32,263 | 26 | 5 | 171 | 47 | 6 | 1 | 94  | 34 | 297 | 87 |
| 32,264 | 26 | 5 | 171 | 47 | 6 | 1 | 94  | 34 | 297 | 87 |
| 32,265 | 26 | 5 | 170 | 47 | 6 | 1 | 94  | 34 | 296 | 87 |
| 32,266 | 26 | 6 | 171 | 46 | 6 | 1 | 94  | 34 | 297 | 87 |
| 32,267 | 25 | 6 | 171 | 46 | 6 | 1 | 94  | 34 | 296 | 87 |
| 32,268 | 25 | 6 | 171 | 46 | 6 | 1 | 98  | 34 | 300 | 87 |
| 32,269 | 25 | 6 | 171 | 44 | 6 | 1 | 99  | 34 | 301 | 85 |
| 32,270 | 25 | 6 | 169 | 44 | 6 | 1 | 99  | 33 | 299 | 84 |
| 32,271 | 25 | 2 | 165 | 29 | 6 | 0 | 97  | 17 | 293 | 48 |
| 32,272 | 25 | 2 | 163 | 29 | 6 | 0 | 93  | 17 | 287 | 48 |
| 32,273 | 25 | 2 | 153 | 29 | 6 | 0 | 90  | 17 | 274 | 48 |
| 32,274 | 25 | 2 | 154 | 29 | 6 | 0 | 90  | 17 | 275 | 48 |
| 32,275 | 24 | 2 | 149 | 23 | 6 | 0 | 87  | 17 | 266 | 42 |
| 32,276 | 24 | 2 | 150 | 16 | 6 | 0 | 89  | 11 | 269 | 29 |
| 32,277 | 24 | 2 | 163 | 17 | 6 | 0 | 94  | 11 | 287 | 30 |
| 32,278 | 18 | 3 | 146 | 17 | 6 | 0 | 79  | 11 | 249 | 31 |
| 32,279 | 17 | 3 | 143 | 22 | 6 | 0 | 81  | 19 | 247 | 44 |
| 32,280 | 16 | 4 | 136 | 21 | 6 | 0 | 81  | 19 | 239 | 44 |
| 32,281 | 15 | 4 | 137 | 22 | 7 | 0 | 87  | 19 | 246 | 45 |
| 32,282 | 14 | 4 | 138 | 22 | 7 | 0 | 89  | 19 | 248 | 45 |
| 32,283 | 14 | 4 | 138 | 22 | 7 | 0 | 89  | 19 | 248 | 45 |
| 32,284 | 16 | 3 | 149 | 15 | 8 | 0 | 98  | 13 | 271 | 31 |
| 32,285 | 16 | 3 | 149 | 15 | 8 | 0 | 98  | 13 | 271 | 31 |
| 32,286 | 15 | 3 | 153 | 18 | 9 | 0 | 122 | 15 | 299 | 36 |
| 32,287 | 14 | 3 | 149 | 18 | 9 | 0 | 120 | 15 | 292 | 36 |
| 32,288 | 14 | 3 | 149 | 20 | 9 | 0 | 120 | 15 | 292 | 38 |
| 32,289 | 13 | 3 | 149 | 20 | 9 | 0 | 121 | 16 | 292 | 39 |
| 32,290 | 13 | 3 | 144 | 21 | 8 | 0 | 120 | 16 | 285 | 40 |
| 32,291 | 13 | 3 | 147 | 23 | 8 | 0 | 122 | 18 | 290 | 44 |
| 32,292 | 10 | 3 | 136 | 23 | 7 | 0 | 117 | 17 | 270 | 43 |
| 32,293 | 10 | 3 | 135 | 23 | 7 | 0 | 118 | 17 | 270 | 43 |
| 32,294 | 10 | 3 | 135 | 21 | 7 | 0 | 116 | 16 | 268 | 40 |
| 32,295 | 10 | 3 | 136 | 22 | 7 | 0 | 116 | 16 | 269 | 41 |
| 32,296 | 10 | 3 | 137 | 22 | 8 | 0 | 116 | 16 | 271 | 41 |

|        |    |   |     |    |   |   |     |    |     |    |
|--------|----|---|-----|----|---|---|-----|----|-----|----|
| 32,297 | 10 | 3 | 135 | 22 | 8 | 0 | 116 | 17 | 269 | 42 |
| 32,298 | 10 | 3 | 135 | 22 | 8 | 0 | 118 | 17 | 271 | 42 |
| 32,299 | 10 | 3 | 137 | 23 | 8 | 0 | 118 | 17 | 273 | 43 |
| 32,300 | 10 | 3 | 137 | 25 | 7 | 0 | 118 | 17 | 272 | 45 |
| 32,301 | 11 | 3 | 136 | 25 | 7 | 0 | 118 | 17 | 272 | 45 |
| 32,302 | 11 | 3 | 117 | 25 | 6 | 0 | 113 | 17 | 247 | 45 |
| 32,303 | 9  | 3 | 95  | 25 | 6 | 0 | 104 | 15 | 214 | 43 |
| 32,304 | 8  | 3 | 75  | 25 | 4 | 0 | 91  | 15 | 178 | 43 |
| 32,305 | 8  | 3 | 69  | 22 | 4 | 0 | 89  | 14 | 170 | 39 |
| 32,306 | 8  | 3 | 68  | 22 | 4 | 0 | 89  | 14 | 169 | 39 |
| 32,307 | 8  | 3 | 68  | 22 | 4 | 0 | 85  | 15 | 165 | 40 |
| 32,308 | 8  | 3 | 68  | 22 | 4 | 0 | 85  | 15 | 165 | 40 |
| 32,309 | 8  | 3 | 68  | 22 | 4 | 0 | 85  | 16 | 165 | 41 |
| 32,310 | 8  | 3 | 68  | 22 | 4 | 0 | 85  | 16 | 165 | 41 |
| 32,311 | 8  | 3 | 67  | 22 | 4 | 0 | 85  | 16 | 164 | 41 |
| 32,312 | 8  | 3 | 67  | 22 | 4 | 0 | 85  | 16 | 164 | 41 |
| 32,313 | 8  | 3 | 67  | 21 | 4 | 0 | 85  | 16 | 164 | 40 |
| 32,314 | 8  | 3 | 67  | 21 | 4 | 0 | 85  | 16 | 164 | 40 |
| 32,315 | 8  | 3 | 68  | 21 | 4 | 0 | 85  | 16 | 165 | 40 |
| 32,316 | 8  | 3 | 68  | 21 | 5 | 0 | 85  | 16 | 166 | 40 |
| 32,317 | 8  | 2 | 67  | 21 | 5 | 0 | 86  | 16 | 166 | 39 |
| 32,318 | 8  | 2 | 67  | 21 | 5 | 0 | 82  | 16 | 162 | 39 |
| 32,319 | 8  | 2 | 67  | 21 | 5 | 0 | 82  | 16 | 162 | 39 |
| 32,320 | 8  | 2 | 68  | 21 | 6 | 0 | 81  | 16 | 163 | 39 |
| 32,321 | 8  | 2 | 68  | 21 | 6 | 0 | 81  | 16 | 163 | 39 |
| 32,322 | 8  | 2 | 68  | 21 | 6 | 0 | 81  | 16 | 163 | 39 |
| 32,323 | 8  | 2 | 64  | 21 | 6 | 0 | 81  | 17 | 159 | 40 |
| 32,324 | 8  | 2 | 64  | 21 | 6 | 0 | 79  | 17 | 157 | 40 |
| 32,325 | 8  | 2 | 65  | 22 | 6 | 0 | 79  | 18 | 158 | 42 |
| 32,326 | 8  | 2 | 65  | 21 | 6 | 0 | 79  | 18 | 158 | 41 |
| 32,327 | 8  | 3 | 65  | 24 | 6 | 1 | 78  | 18 | 157 | 46 |
| 32,328 | 8  | 3 | 53  | 25 | 6 | 1 | 73  | 18 | 140 | 47 |
| 32,329 | 7  | 2 | 50  | 21 | 6 | 1 | 63  | 10 | 126 | 34 |
| 32,330 | 7  | 2 | 49  | 24 | 6 | 1 | 61  | 10 | 123 | 37 |
| 32,331 | 7  | 2 | 47  | 27 | 5 | 1 | 56  | 12 | 115 | 42 |
| 32,332 | 7  | 2 | 51  | 26 | 5 | 1 | 59  | 13 | 122 | 42 |
| 32,333 | 7  | 2 | 53  | 26 | 5 | 1 | 60  | 13 | 125 | 42 |
| 32,334 | 5  | 2 | 41  | 27 | 4 | 1 | 49  | 13 | 99  | 43 |
| 32,335 | 5  | 2 | 41  | 27 | 4 | 1 | 48  | 13 | 98  | 43 |
| 32,336 | 2  | 2 | 27  | 31 | 3 | 1 | 23  | 13 | 55  | 47 |
| 32,337 | 2  | 2 | 27  | 28 | 3 | 1 | 20  | 11 | 52  | 42 |

|        |    |   |     |    |   |   |    |    |     |    |
|--------|----|---|-----|----|---|---|----|----|-----|----|
| 32,338 | 2  | 2 | 26  | 35 | 3 | 1 | 20 | 12 | 51  | 50 |
| 32,339 | 2  | 2 | 26  | 33 | 3 | 1 | 20 | 11 | 51  | 47 |
| 32,340 | 2  | 3 | 27  | 30 | 3 | 1 | 19 | 9  | 51  | 43 |
| 32,341 | 2  | 3 | 27  | 30 | 3 | 1 | 17 | 9  | 49  | 43 |
| 32,342 | 2  | 3 | 24  | 31 | 3 | 1 | 15 | 9  | 44  | 44 |
| 32,343 | 2  | 3 | 24  | 32 | 3 | 1 | 15 | 9  | 44  | 45 |
| 32,344 | 2  | 3 | 24  | 32 | 3 | 1 | 15 | 9  | 44  | 45 |
| 32,345 | 2  | 3 | 31  | 32 | 3 | 1 | 17 | 9  | 53  | 45 |
| 32,346 | 2  | 3 | 31  | 31 | 3 | 1 | 18 | 9  | 54  | 44 |
| 32,347 | 1  | 3 | 30  | 32 | 2 | 1 | 18 | 9  | 51  | 45 |
| 32,348 | 1  | 3 | 31  | 32 | 2 | 1 | 17 | 8  | 51  | 44 |
| 32,349 | 1  | 3 | 30  | 32 | 2 | 1 | 17 | 8  | 50  | 44 |
| 32,350 | 2  | 3 | 34  | 29 | 2 | 1 | 18 | 8  | 56  | 41 |
| 32,351 | 2  | 3 | 34  | 29 | 2 | 1 | 17 | 8  | 55  | 41 |
| 32,352 | 1  | 3 | 32  | 29 | 2 | 1 | 17 | 8  | 52  | 41 |
| 32,353 | 1  | 3 | 32  | 29 | 2 | 1 | 17 | 8  | 52  | 41 |
| 32,354 | 1  | 3 | 32  | 29 | 2 | 1 | 17 | 8  | 52  | 41 |
| 32,355 | 1  | 3 | 32  | 29 | 2 | 1 | 17 | 8  | 52  | 41 |
| 32,356 | 1  | 3 | 32  | 29 | 2 | 1 | 17 | 9  | 52  | 42 |
| 32,357 | 1  | 3 | 32  | 29 | 2 | 1 | 17 | 9  | 52  | 42 |
| 32,358 | 1  | 3 | 34  | 29 | 2 | 1 | 16 | 8  | 53  | 41 |
| 32,359 | 1  | 3 | 36  | 29 | 2 | 1 | 16 | 7  | 55  | 40 |
| 32,360 | 1  | 3 | 36  | 29 | 2 | 1 | 16 | 7  | 55  | 40 |
| 32,361 | 1  | 3 | 36  | 29 | 2 | 1 | 16 | 7  | 55  | 40 |
| 32,362 | 1  | 3 | 38  | 29 | 2 | 1 | 16 | 8  | 57  | 41 |
| 32,363 | 1  | 3 | 38  | 29 | 2 | 1 | 16 | 8  | 57  | 41 |
| 32,364 | 1  | 3 | 41  | 29 | 2 | 1 | 16 | 10 | 60  | 43 |
| 32,365 | 1  | 3 | 45  | 29 | 2 | 1 | 17 | 10 | 65  | 43 |
| 32,366 | 1  | 3 | 52  | 29 | 1 | 1 | 26 | 10 | 80  | 43 |
| 32,367 | 1  | 3 | 52  | 29 | 1 | 1 | 26 | 10 | 80  | 43 |
| 32,368 | 1  | 3 | 52  | 29 | 1 | 1 | 25 | 10 | 79  | 43 |
| 32,369 | 5  | 3 | 67  | 30 | 1 | 1 | 38 | 10 | 111 | 44 |
| 32,370 | 5  | 3 | 71  | 31 | 1 | 1 | 39 | 11 | 116 | 46 |
| 32,371 | 5  | 3 | 71  | 32 | 0 | 1 | 39 | 11 | 115 | 47 |
| 32,372 | 5  | 3 | 76  | 32 | 0 | 1 | 41 | 12 | 122 | 48 |
| 32,373 | 6  | 3 | 89  | 32 | 0 | 1 | 47 | 12 | 142 | 48 |
| 32,374 | 8  | 3 | 94  | 32 | 0 | 1 | 50 | 12 | 152 | 48 |
| 32,375 | 8  | 3 | 96  | 32 | 0 | 1 | 50 | 12 | 154 | 48 |
| 32,376 | 8  | 3 | 97  | 31 | 0 | 1 | 52 | 11 | 157 | 46 |
| 32,377 | 13 | 3 | 104 | 28 | 0 | 0 | 56 | 11 | 173 | 42 |
| 32,378 | 13 | 3 | 103 | 28 | 0 | 0 | 55 | 11 | 171 | 42 |

|        |    |   |     |    |   |   |    |    |     |    |
|--------|----|---|-----|----|---|---|----|----|-----|----|
| 32,379 | 15 | 5 | 113 | 28 | 0 | 0 | 59 | 11 | 187 | 44 |
| 32,380 | 15 | 5 | 115 | 28 | 1 | 0 | 61 | 11 | 192 | 44 |
| 32,381 | 16 | 5 | 114 | 25 | 1 | 0 | 61 | 11 | 192 | 41 |
| 32,382 | 16 | 4 | 117 | 22 | 1 | 0 | 61 | 9  | 195 | 35 |
| 32,383 | 16 | 4 | 112 | 24 | 1 | 0 | 56 | 8  | 185 | 36 |
| 32,384 | 16 | 4 | 109 | 24 | 1 | 0 | 55 | 8  | 181 | 36 |
| 32,385 | 16 | 4 | 109 | 24 | 1 | 0 | 55 | 8  | 181 | 36 |
| 32,386 | 16 | 4 | 109 | 24 | 1 | 0 | 55 | 8  | 181 | 36 |
| 32,387 | 17 | 4 | 116 | 21 | 4 | 0 | 61 | 8  | 198 | 33 |
| 32,388 | 17 | 4 | 116 | 21 | 4 | 0 | 61 | 8  | 198 | 33 |
| 32,389 | 17 | 6 | 116 | 15 | 4 | 0 | 61 | 8  | 198 | 29 |
| 32,390 | 20 | 6 | 118 | 17 | 4 | 0 | 62 | 10 | 204 | 33 |
| 32,391 | 20 | 5 | 117 | 17 | 4 | 0 | 62 | 10 | 203 | 32 |
| 32,392 | 21 | 5 | 120 | 17 | 4 | 0 | 62 | 11 | 207 | 33 |
| 32,393 | 22 | 5 | 136 | 17 | 4 | 0 | 68 | 11 | 230 | 33 |
| 32,394 | 22 | 5 | 136 | 22 | 4 | 0 | 67 | 15 | 229 | 42 |
| 32,395 | 24 | 5 | 151 | 24 | 4 | 0 | 77 | 16 | 256 | 45 |
| 32,396 | 25 | 5 | 153 | 26 | 4 | 0 | 81 | 17 | 263 | 48 |
| 32,397 | 26 | 5 | 159 | 25 | 4 | 0 | 86 | 17 | 275 | 47 |
| 32,398 | 27 | 5 | 159 | 25 | 4 | 0 | 89 | 18 | 279 | 48 |
| 32,399 | 27 | 5 | 159 | 25 | 4 | 0 | 90 | 18 | 280 | 48 |
| 32,400 | 27 | 5 | 160 | 25 | 4 | 0 | 90 | 18 | 281 | 48 |
| 32,401 | 26 | 5 | 155 | 25 | 4 | 0 | 89 | 18 | 274 | 48 |
| 32,402 | 26 | 5 | 155 | 25 | 4 | 0 | 89 | 18 | 274 | 48 |
| 32,403 | 27 | 5 | 155 | 25 | 4 | 0 | 89 | 18 | 275 | 48 |
| 32,404 | 27 | 5 | 155 | 25 | 4 | 0 | 89 | 18 | 275 | 48 |
| 32,405 | 27 | 5 | 155 | 25 | 4 | 0 | 89 | 20 | 275 | 50 |
| 32,406 | 27 | 5 | 155 | 25 | 4 | 0 | 89 | 20 | 275 | 50 |
| 32,407 | 27 | 5 | 156 | 26 | 4 | 0 | 89 | 19 | 276 | 50 |
| 32,408 | 27 | 5 | 159 | 28 | 4 | 0 | 89 | 19 | 279 | 52 |
| 32,409 | 27 | 5 | 159 | 28 | 4 | 0 | 89 | 19 | 279 | 52 |
| 32,410 | 27 | 5 | 163 | 28 | 4 | 0 | 90 | 19 | 284 | 52 |
| 32,411 | 27 | 5 | 163 | 28 | 4 | 0 | 90 | 19 | 284 | 52 |
| 32,412 | 27 | 5 | 162 | 28 | 4 | 0 | 91 | 19 | 284 | 52 |
| 32,413 | 28 | 5 | 161 | 28 | 4 | 0 | 91 | 18 | 284 | 51 |
| 32,414 | 28 | 5 | 159 | 28 | 6 | 0 | 96 | 18 | 289 | 51 |
| 32,415 | 28 | 5 | 159 | 28 | 6 | 0 | 96 | 16 | 289 | 49 |
| 32,416 | 30 | 5 | 155 | 28 | 6 | 0 | 98 | 16 | 289 | 49 |
| 32,417 | 30 | 5 | 148 | 28 | 6 | 0 | 89 | 16 | 273 | 49 |
| 32,418 | 30 | 5 | 147 | 28 | 6 | 0 | 89 | 16 | 272 | 49 |
| 32,419 | 28 | 5 | 143 | 28 | 6 | 0 | 79 | 16 | 256 | 49 |

|        |    |   |     |    |   |   |    |    |     |     |
|--------|----|---|-----|----|---|---|----|----|-----|-----|
| 32,420 | 28 | 5 | 141 | 27 | 6 | 0 | 79 | 16 | 254 | 48  |
| 32,421 | 30 | 5 | 145 | 25 | 6 | 0 | 80 | 15 | 261 | 45  |
| 32,422 | 31 | 5 | 145 | 25 | 6 | 0 | 80 | 15 | 262 | 45  |
| 32,423 | 31 | 5 | 146 | 25 | 6 | 0 | 82 | 14 | 265 | 44  |
| 32,424 | 30 | 5 | 133 | 26 | 6 | 0 | 76 | 14 | 245 | 45  |
| 32,425 | 28 | 5 | 130 | 26 | 6 | 0 | 73 | 14 | 237 | 45  |
| 32,426 | 28 | 5 | 128 | 28 | 6 | 0 | 73 | 15 | 235 | 48  |
| 32,427 | 28 | 5 | 127 | 28 | 6 | 0 | 71 | 15 | 232 | 48  |
| 32,428 | 23 | 4 | 120 | 27 | 6 | 0 | 67 | 15 | 216 | 46  |
| 32,429 | 22 | 2 | 112 | 27 | 6 | 0 | 63 | 17 | 203 | 46  |
| 32,430 | 21 | 2 | 109 | 27 | 6 | 0 | 63 | 17 | 199 | 46  |
| 32,431 | 21 | 2 | 108 | 26 | 5 | 0 | 62 | 18 | 196 | 46  |
| 32,432 | 20 | 2 | 106 | 31 | 5 | 0 | 62 | 19 | 193 | 52  |
| 32,433 | 20 | 2 | 102 | 31 | 5 | 0 | 61 | 20 | 188 | 53  |
| 32,434 | 19 | 2 | 96  | 29 | 2 | 0 | 57 | 19 | 174 | 50  |
| 32,435 | 19 | 2 | 95  | 30 | 2 | 0 | 57 | 19 | 173 | 51  |
| 32,436 | 19 | 2 | 95  | 29 | 2 | 0 | 55 | 19 | 171 | 50  |
| 32,437 | 19 | 2 | 95  | 28 | 2 | 0 | 55 | 19 | 171 | 49  |
| 32,438 | 19 | 2 | 95  | 28 | 2 | 0 | 55 | 19 | 171 | 49  |
| 32,439 | 19 | 0 | 95  | 26 | 2 | 0 | 55 | 16 | 171 | 42  |
| 32,440 | 19 | 0 | 95  | 29 | 2 | 0 | 55 | 17 | 171 | 46  |
| 32,441 | 16 | 0 | 93  | 34 | 2 | 0 | 53 | 19 | 164 | 53  |
| 32,442 | 15 | 0 | 93  | 37 | 2 | 0 | 53 | 22 | 163 | 59  |
| 32,443 | 15 | 2 | 92  | 37 | 3 | 0 | 53 | 22 | 163 | 61  |
| 32,444 | 14 | 2 | 76  | 30 | 3 | 0 | 46 | 20 | 139 | 52  |
| 32,445 | 14 | 3 | 73  | 32 | 3 | 1 | 46 | 25 | 136 | 61  |
| 32,446 | 12 | 3 | 55  | 32 | 3 | 1 | 34 | 28 | 104 | 64  |
| 32,447 | 11 | 3 | 50  | 34 | 3 | 1 | 30 | 31 | 94  | 69  |
| 32,448 | 10 | 3 | 43  | 42 | 3 | 2 | 25 | 32 | 81  | 79  |
| 32,449 | 9  | 3 | 42  | 50 | 3 | 2 | 21 | 37 | 75  | 92  |
| 32,450 | 9  | 3 | 42  | 51 | 3 | 2 | 20 | 37 | 74  | 93  |
| 32,451 | 9  | 4 | 41  | 56 | 3 | 2 | 20 | 38 | 73  | 100 |
| 32,452 | 9  | 4 | 41  | 59 | 3 | 2 | 20 | 38 | 73  | 103 |
| 32,453 | 8  | 4 | 41  | 60 | 3 | 2 | 20 | 38 | 72  | 104 |
| 32,454 | 8  | 4 | 41  | 61 | 3 | 2 | 20 | 38 | 72  | 105 |
| 32,455 | 8  | 4 | 44  | 74 | 3 | 3 | 22 | 54 | 77  | 135 |
| 32,456 | 8  | 4 | 44  | 74 | 3 | 3 | 22 | 54 | 77  | 135 |
| 32,457 | 8  | 4 | 52  | 74 | 3 | 3 | 25 | 54 | 88  | 135 |
| 32,458 | 9  | 5 | 59  | 77 | 3 | 3 | 25 | 63 | 96  | 148 |
| 32,459 | 9  | 5 | 68  | 81 | 3 | 4 | 29 | 65 | 109 | 155 |
| 32,460 | 9  | 5 | 67  | 81 | 4 | 4 | 30 | 65 | 110 | 155 |



|        |    |   |     |    |   |   |    |    |     |     |
|--------|----|---|-----|----|---|---|----|----|-----|-----|
| 32,461 | 10 | 5 | 83  | 82 | 4 | 4 | 30 | 67 | 127 | 158 |
| 32,462 | 10 | 5 | 83  | 82 | 4 | 4 | 29 | 67 | 126 | 158 |
| 32,463 | 9  | 5 | 92  | 82 | 4 | 4 | 30 | 67 | 135 | 158 |
| 32,464 | 9  | 5 | 98  | 82 | 3 | 4 | 27 | 67 | 137 | 158 |
| 32,465 | 9  | 5 | 98  | 82 | 3 | 4 | 30 | 68 | 140 | 159 |
| 32,466 | 8  | 5 | 98  | 82 | 3 | 4 | 30 | 68 | 139 | 159 |
| 32,467 | 7  | 5 | 98  | 82 | 3 | 4 | 27 | 68 | 135 | 159 |
| 32,468 | 7  | 5 | 98  | 82 | 3 | 5 | 27 | 70 | 135 | 162 |
| 32,469 | 6  | 5 | 98  | 83 | 3 | 5 | 24 | 72 | 131 | 165 |
| 32,470 | 5  | 5 | 91  | 83 | 3 | 5 | 24 | 72 | 123 | 165 |
| 32,471 | 5  | 5 | 91  | 84 | 3 | 5 | 24 | 72 | 123 | 166 |
| 32,472 | 3  | 5 | 83  | 84 | 3 | 5 | 23 | 72 | 112 | 166 |
| 32,473 | 2  | 5 | 82  | 84 | 3 | 5 | 23 | 72 | 110 | 166 |
| 32,474 | 2  | 5 | 80  | 83 | 3 | 5 | 21 | 72 | 106 | 165 |
| 32,475 | 2  | 5 | 78  | 83 | 3 | 5 | 21 | 72 | 104 | 165 |
| 32,476 | 2  | 5 | 78  | 83 | 3 | 5 | 22 | 72 | 105 | 165 |
| 32,477 | 2  | 5 | 78  | 82 | 3 | 5 | 22 | 71 | 105 | 163 |
| 32,478 | 2  | 6 | 80  | 83 | 3 | 5 | 22 | 72 | 107 | 166 |
| 32,479 | 2  | 6 | 78  | 83 | 3 | 5 | 22 | 72 | 105 | 166 |
| 32,480 | 2  | 6 | 87  | 81 | 3 | 5 | 25 | 70 | 117 | 162 |
| 32,481 | 2  | 6 | 87  | 85 | 3 | 5 | 24 | 73 | 116 | 169 |
| 32,482 | 2  | 6 | 86  | 85 | 3 | 5 | 24 | 72 | 115 | 168 |
| 32,483 | 2  | 6 | 98  | 80 | 3 | 5 | 31 | 73 | 134 | 164 |
| 32,484 | 2  | 6 | 98  | 80 | 3 | 5 | 31 | 72 | 134 | 163 |
| 32,485 | 3  | 6 | 111 | 80 | 3 | 5 | 45 | 72 | 162 | 163 |
| 32,486 | 4  | 6 | 117 | 79 | 3 | 5 | 45 | 72 | 169 | 162 |
| 32,487 | 5  | 6 | 118 | 79 | 3 | 5 | 45 | 72 | 171 | 162 |
| 32,488 | 6  | 7 | 155 | 79 | 5 | 5 | 58 | 74 | 224 | 165 |
| 32,489 | 6  | 7 | 155 | 79 | 5 | 5 | 58 | 74 | 224 | 165 |
| 32,490 | 7  | 7 | 176 | 78 | 6 | 5 | 66 | 75 | 255 | 165 |
| 32,491 | 9  | 7 | 181 | 75 | 6 | 5 | 67 | 75 | 263 | 162 |
| 32,492 | 9  | 7 | 205 | 70 | 8 | 5 | 75 | 73 | 297 | 155 |
| 32,493 | 9  | 5 | 208 | 70 | 8 | 5 | 77 | 71 | 302 | 151 |
| 32,494 | 9  | 5 | 208 | 70 | 7 | 5 | 77 | 71 | 301 | 151 |
| 32,495 | 9  | 5 | 211 | 69 | 7 | 5 | 78 | 69 | 305 | 148 |
| 32,496 | 9  | 4 | 211 | 67 | 7 | 4 | 79 | 64 | 306 | 139 |
| 32,497 | 9  | 5 | 210 | 68 | 7 | 5 | 80 | 61 | 306 | 139 |
| 32,498 | 9  | 5 | 210 | 48 | 7 | 4 | 80 | 50 | 306 | 107 |
| 32,499 | 9  | 5 | 210 | 48 | 8 | 4 | 80 | 50 | 307 | 107 |
| 32,500 | 9  | 5 | 210 | 48 | 8 | 4 | 80 | 50 | 307 | 107 |
| 32,501 | 9  | 4 | 210 | 42 | 8 | 4 | 80 | 49 | 307 | 99  |

|        |    |   |     |    |    |   |     |    |     |    |
|--------|----|---|-----|----|----|---|-----|----|-----|----|
| 32,502 | 9  | 4 | 210 | 42 | 8  | 4 | 80  | 49 | 307 | 99 |
| 32,503 | 9  | 4 | 211 | 38 | 8  | 4 | 80  | 49 | 308 | 95 |
| 32,504 | 9  | 4 | 211 | 38 | 8  | 4 | 80  | 49 | 308 | 95 |
| 32,505 | 9  | 4 | 212 | 37 | 8  | 4 | 82  | 49 | 311 | 94 |
| 32,506 | 9  | 4 | 213 | 25 | 8  | 3 | 82  | 33 | 312 | 65 |
| 32,507 | 12 | 4 | 204 | 25 | 8  | 3 | 80  | 31 | 304 | 63 |
| 32,508 | 11 | 4 | 203 | 25 | 8  | 3 | 81  | 31 | 303 | 63 |
| 32,509 | 11 | 3 | 210 | 21 | 8  | 3 | 84  | 23 | 313 | 50 |
| 32,510 | 12 | 3 | 207 | 16 | 8  | 2 | 81  | 21 | 308 | 42 |
| 32,511 | 14 | 3 | 217 | 16 | 7  | 2 | 81  | 23 | 319 | 44 |
| 32,512 | 15 | 3 | 216 | 17 | 7  | 2 | 85  | 21 | 323 | 43 |
| 32,513 | 15 | 3 | 228 | 18 | 8  | 2 | 88  | 22 | 339 | 45 |
| 32,514 | 14 | 3 | 250 | 19 | 8  | 2 | 93  | 23 | 365 | 47 |
| 32,515 | 14 | 3 | 252 | 19 | 7  | 2 | 92  | 24 | 365 | 48 |
| 32,516 | 14 | 3 | 254 | 19 | 7  | 2 | 89  | 23 | 364 | 47 |
| 32,517 | 14 | 3 | 253 | 19 | 7  | 2 | 89  | 23 | 363 | 47 |
| 32,518 | 14 | 3 | 265 | 19 | 7  | 1 | 90  | 21 | 376 | 44 |
| 32,519 | 14 | 3 | 271 | 18 | 8  | 1 | 96  | 19 | 389 | 41 |
| 32,520 | 14 | 3 | 271 | 18 | 8  | 1 | 96  | 19 | 389 | 41 |
| 32,521 | 17 | 3 | 284 | 18 | 8  | 1 | 109 | 19 | 418 | 41 |
| 32,522 | 17 | 3 | 284 | 17 | 8  | 1 | 110 | 19 | 419 | 40 |
| 32,523 | 20 | 3 | 312 | 17 | 10 | 1 | 134 | 19 | 476 | 40 |
| 32,524 | 20 | 3 | 323 | 17 | 10 | 1 | 136 | 19 | 489 | 40 |
| 32,525 | 20 | 3 | 326 | 18 | 10 | 1 | 137 | 19 | 493 | 41 |
| 32,526 | 20 | 3 | 340 | 18 | 11 | 1 | 139 | 18 | 510 | 40 |
| 32,527 | 20 | 3 | 340 | 18 | 11 | 1 | 139 | 18 | 510 | 40 |
| 32,528 | 24 | 3 | 366 | 17 | 11 | 1 | 160 | 18 | 561 | 39 |
| 32,529 | 24 | 2 | 366 | 16 | 11 | 1 | 160 | 17 | 561 | 36 |
| 32,530 | 24 | 2 | 364 | 16 | 11 | 1 | 159 | 17 | 558 | 36 |
| 32,531 | 24 | 2 | 360 | 12 | 11 | 1 | 159 | 14 | 554 | 29 |
| 32,532 | 24 | 2 | 348 | 12 | 11 | 1 | 152 | 14 | 535 | 29 |
| 32,533 | 24 | 2 | 344 | 12 | 11 | 1 | 147 | 14 | 526 | 29 |
| 32,534 | 22 | 2 | 340 | 12 | 10 | 1 | 142 | 12 | 514 | 27 |
| 32,535 | 22 | 2 | 341 | 16 | 10 | 1 | 138 | 15 | 511 | 34 |
| 32,536 | 21 | 2 | 342 | 16 | 10 | 1 | 141 | 15 | 514 | 34 |
| 32,537 | 26 | 2 | 354 | 20 | 14 | 1 | 159 | 15 | 553 | 38 |
| 32,538 | 26 | 2 | 345 | 24 | 14 | 1 | 156 | 20 | 541 | 47 |
| 32,539 | 25 | 1 | 317 | 28 | 12 | 1 | 146 | 19 | 500 | 49 |
| 32,540 | 25 | 1 | 314 | 28 | 11 | 1 | 142 | 19 | 492 | 49 |
| 32,541 | 24 | 1 | 298 | 28 | 11 | 1 | 137 | 18 | 470 | 48 |
| 32,542 | 22 | 1 | 298 | 29 | 11 | 1 | 138 | 17 | 469 | 48 |

|        |    |   |     |    |    |   |     |    |     |    |
|--------|----|---|-----|----|----|---|-----|----|-----|----|
| 32,543 | 22 | 1 | 279 | 29 | 9  | 1 | 132 | 17 | 442 | 48 |
| 32,544 | 22 | 1 | 278 | 26 | 10 | 1 | 131 | 15 | 441 | 43 |
| 32,545 | 22 | 1 | 275 | 26 | 10 | 1 | 131 | 15 | 438 | 43 |
| 32,546 | 22 | 1 | 275 | 25 | 10 | 1 | 131 | 15 | 438 | 42 |
| 32,547 | 22 | 0 | 275 | 24 | 10 | 0 | 131 | 15 | 438 | 39 |
| 32,548 | 22 | 0 | 275 | 25 | 10 | 0 | 130 | 15 | 437 | 40 |
| 32,549 | 22 | 0 | 271 | 24 | 10 | 0 | 129 | 15 | 432 | 39 |
| 32,550 | 22 | 0 | 275 | 25 | 10 | 0 | 130 | 16 | 437 | 41 |
| 32,551 | 22 | 0 | 276 | 25 | 10 | 0 | 130 | 16 | 438 | 41 |
| 32,552 | 22 | 0 | 277 | 25 | 10 | 0 | 130 | 16 | 439 | 41 |
| 32,553 | 22 | 0 | 280 | 25 | 10 | 0 | 132 | 16 | 444 | 41 |
| 32,554 | 22 | 0 | 305 | 25 | 10 | 0 | 149 | 16 | 486 | 41 |
| 32,555 | 22 | 0 | 308 | 25 | 10 | 0 | 149 | 16 | 489 | 41 |
| 32,556 | 22 | 0 | 321 | 25 | 10 | 0 | 153 | 16 | 506 | 41 |
| 32,557 | 22 | 0 | 318 | 24 | 10 | 0 | 152 | 16 | 502 | 40 |
| 32,558 | 19 | 0 | 317 | 24 | 10 | 0 | 150 | 16 | 496 | 40 |
| 32,559 | 19 | 0 | 317 | 24 | 10 | 0 | 154 | 16 | 500 | 40 |
| 32,560 | 19 | 0 | 309 | 23 | 10 | 0 | 152 | 15 | 490 | 38 |
| 32,561 | 18 | 0 | 304 | 25 | 10 | 0 | 151 | 18 | 483 | 43 |
| 32,562 | 16 | 0 | 295 | 25 | 10 | 0 | 149 | 16 | 470 | 41 |
| 32,563 | 15 | 0 | 279 | 23 | 10 | 0 | 146 | 16 | 450 | 39 |
| 32,564 | 15 | 0 | 265 | 22 | 9  | 0 | 142 | 15 | 431 | 37 |
| 32,565 | 16 | 0 | 237 | 21 | 9  | 0 | 136 | 13 | 398 | 34 |
| 32,566 | 16 | 0 | 228 | 21 | 9  | 0 | 135 | 13 | 388 | 34 |
| 32,567 | 17 | 0 | 226 | 21 | 9  | 0 | 135 | 13 | 387 | 34 |
| 32,568 | 17 | 0 | 225 | 21 | 9  | 0 | 136 | 13 | 387 | 34 |
| 32,569 | 17 | 0 | 215 | 21 | 9  | 0 | 135 | 13 | 376 | 34 |
| 32,570 | 17 | 0 | 210 | 21 | 8  | 0 | 129 | 13 | 364 | 34 |
| 32,571 | 18 | 0 | 213 | 21 | 8  | 0 | 131 | 13 | 370 | 34 |
| 32,572 | 15 | 0 | 207 | 21 | 8  | 0 | 122 | 13 | 352 | 34 |
| 32,573 | 14 | 0 | 204 | 21 | 7  | 0 | 116 | 13 | 341 | 34 |
| 32,574 | 12 | 0 | 182 | 21 | 6  | 0 | 99  | 13 | 299 | 34 |
| 32,575 | 12 | 0 | 189 | 22 | 7  | 0 | 113 | 15 | 321 | 37 |
| 32,576 | 12 | 0 | 183 | 22 | 7  | 1 | 110 | 15 | 312 | 38 |
| 32,577 | 12 | 0 | 169 | 22 | 6  | 1 | 107 | 15 | 294 | 38 |
| 32,578 | 9  | 0 | 157 | 23 | 6  | 1 | 90  | 15 | 262 | 39 |
| 32,579 | 8  | 0 | 146 | 24 | 6  | 1 | 86  | 16 | 246 | 41 |
| 32,580 | 8  | 0 | 149 | 24 | 6  | 1 | 87  | 16 | 250 | 41 |
| 32,581 | 8  | 0 | 149 | 24 | 6  | 1 | 85  | 16 | 248 | 41 |
| 32,582 | 8  | 0 | 149 | 24 | 6  | 1 | 85  | 16 | 248 | 41 |
| 32,583 | 8  | 0 | 149 | 23 | 6  | 1 | 85  | 18 | 248 | 42 |

|        |   |   |     |    |   |   |    |    |     |    |
|--------|---|---|-----|----|---|---|----|----|-----|----|
| 32,584 | 8 | 0 | 147 | 23 | 6 | 1 | 85 | 18 | 246 | 42 |
| 32,585 | 8 | 0 | 147 | 20 | 6 | 1 | 85 | 15 | 246 | 36 |
| 32,586 | 8 | 0 | 145 | 12 | 6 | 1 | 85 | 11 | 244 | 24 |
| 32,587 | 8 | 0 | 143 | 12 | 6 | 1 | 83 | 11 | 240 | 24 |
| 32,588 | 4 | 0 | 125 | 12 | 2 | 1 | 64 | 11 | 195 | 24 |
| 32,589 | 4 | 0 | 125 | 8  | 2 | 1 | 65 | 9  | 196 | 18 |
| 32,590 | 4 | 0 | 131 | 8  | 2 | 1 | 65 | 9  | 202 | 18 |
| 32,591 | 4 | 0 | 130 | 8  | 2 | 1 | 65 | 9  | 201 | 18 |
| 32,592 | 4 | 0 | 130 | 8  | 2 | 1 | 68 | 9  | 204 | 18 |
| 32,593 | 4 | 0 | 126 | 7  | 2 | 2 | 66 | 9  | 198 | 18 |
| 32,594 | 4 | 0 | 121 | 7  | 2 | 2 | 64 | 9  | 191 | 18 |
| 32,595 | 4 | 0 | 117 | 7  | 1 | 2 | 63 | 9  | 185 | 18 |
| 32,596 | 4 | 0 | 117 | 7  | 1 | 2 | 63 | 9  | 185 | 18 |
| 32,597 | 4 | 0 | 117 | 8  | 1 | 2 | 63 | 9  | 185 | 19 |
| 32,598 | 4 | 0 | 117 | 8  | 1 | 2 | 63 | 9  | 185 | 19 |
| 32,599 | 4 | 0 | 119 | 7  | 1 | 2 | 63 | 9  | 187 | 18 |
| 32,600 | 5 | 0 | 122 | 7  | 1 | 2 | 67 | 9  | 195 | 18 |
| 32,601 | 5 | 0 | 123 | 8  | 1 | 2 | 67 | 9  | 196 | 19 |
| 32,602 | 5 | 0 | 122 | 8  | 1 | 2 | 68 | 9  | 196 | 19 |
| 32,603 | 6 | 0 | 118 | 8  | 1 | 2 | 66 | 9  | 191 | 19 |
| 32,604 | 6 | 0 | 93  | 9  | 1 | 2 | 49 | 9  | 149 | 20 |
| 32,605 | 6 | 0 | 90  | 9  | 1 | 2 | 49 | 9  | 146 | 20 |
| 32,606 | 6 | 0 | 76  | 9  | 1 | 2 | 42 | 9  | 125 | 20 |
| 32,607 | 6 | 0 | 75  | 9  | 1 | 2 | 43 | 9  | 125 | 20 |
| 32,608 | 6 | 0 | 75  | 9  | 1 | 2 | 43 | 9  | 125 | 20 |
| 32,609 | 6 | 0 | 75  | 9  | 1 | 2 | 39 | 9  | 121 | 20 |
| 32,610 | 6 | 0 | 75  | 9  | 1 | 2 | 39 | 10 | 121 | 21 |
| 32,611 | 6 | 0 | 71  | 9  | 1 | 2 | 38 | 10 | 116 | 21 |
| 32,612 | 6 | 0 | 70  | 9  | 1 | 2 | 38 | 7  | 115 | 18 |
| 32,613 | 6 | 0 | 69  | 9  | 1 | 2 | 39 | 7  | 115 | 18 |
| 32,614 | 6 | 0 | 69  | 9  | 1 | 2 | 38 | 7  | 114 | 18 |
| 32,615 | 6 | 0 | 69  | 9  | 1 | 2 | 38 | 7  | 114 | 18 |
| 32,616 | 6 | 0 | 68  | 9  | 1 | 2 | 38 | 7  | 113 | 18 |
| 32,617 | 6 | 0 | 68  | 9  | 1 | 2 | 38 | 7  | 113 | 18 |
| 32,618 | 5 | 1 | 69  | 9  | 1 | 2 | 38 | 7  | 113 | 19 |
| 32,619 | 5 | 1 | 69  | 9  | 1 | 2 | 38 | 7  | 113 | 19 |
| 32,620 | 5 | 1 | 68  | 9  | 1 | 2 | 38 | 7  | 112 | 19 |
| 32,621 | 5 | 1 | 67  | 9  | 1 | 2 | 38 | 7  | 111 | 19 |
| 32,622 | 4 | 1 | 65  | 9  | 1 | 2 | 36 | 7  | 106 | 19 |
| 32,623 | 4 | 1 | 57  | 9  | 1 | 2 | 31 | 7  | 93  | 19 |
| 32,624 | 6 | 1 | 57  | 9  | 1 | 2 | 31 | 7  | 95  | 19 |

|        |    |   |     |    |    |   |     |   |     |    |
|--------|----|---|-----|----|----|---|-----|---|-----|----|
| 32,625 | 6  | 1 | 39  | 10 | 0  | 2 | 15  | 7 | 60  | 20 |
| 32,626 | 6  | 1 | 39  | 9  | 0  | 2 | 15  | 5 | 60  | 17 |
| 32,627 | 7  | 1 | 44  | 12 | 2  | 1 | 16  | 5 | 69  | 19 |
| 32,628 | 7  | 1 | 44  | 12 | 2  | 1 | 16  | 5 | 69  | 19 |
| 32,629 | 7  | 1 | 44  | 11 | 2  | 1 | 16  | 7 | 69  | 20 |
| 32,630 | 7  | 1 | 43  | 10 | 3  | 1 | 15  | 6 | 68  | 18 |
| 32,631 | 7  | 1 | 41  | 10 | 3  | 1 | 15  | 6 | 66  | 18 |
| 32,632 | 7  | 1 | 38  | 10 | 3  | 1 | 15  | 6 | 63  | 18 |
| 32,633 | 7  | 1 | 38  | 10 | 3  | 1 | 15  | 6 | 63  | 18 |
| 32,634 | 7  | 1 | 38  | 10 | 3  | 1 | 15  | 4 | 63  | 16 |
| 32,635 | 7  | 1 | 38  | 10 | 3  | 1 | 15  | 4 | 63  | 16 |
| 32,636 | 8  | 1 | 41  | 10 | 3  | 1 | 15  | 4 | 67  | 16 |
| 32,637 | 8  | 1 | 41  | 10 | 3  | 1 | 15  | 4 | 67  | 16 |
| 32,638 | 8  | 1 | 41  | 11 | 3  | 1 | 15  | 4 | 67  | 17 |
| 32,639 | 8  | 1 | 42  | 11 | 3  | 1 | 15  | 4 | 68  | 17 |
| 32,640 | 8  | 1 | 44  | 11 | 3  | 1 | 15  | 4 | 70  | 17 |
| 32,641 | 8  | 1 | 42  | 11 | 3  | 1 | 14  | 4 | 67  | 17 |
| 32,642 | 8  | 1 | 47  | 11 | 3  | 1 | 18  | 4 | 76  | 17 |
| 32,643 | 11 | 1 | 47  | 11 | 3  | 0 | 16  | 4 | 77  | 16 |
| 32,644 | 11 | 1 | 60  | 11 | 3  | 0 | 17  | 4 | 91  | 16 |
| 32,645 | 12 | 1 | 67  | 11 | 3  | 0 | 21  | 4 | 103 | 16 |
| 32,646 | 12 | 1 | 67  | 11 | 3  | 0 | 21  | 4 | 103 | 16 |
| 32,647 | 19 | 1 | 126 | 12 | 3  | 0 | 42  | 4 | 190 | 17 |
| 32,648 | 19 | 1 | 136 | 11 | 3  | 0 | 45  | 4 | 203 | 16 |
| 32,649 | 21 | 1 | 149 | 11 | 4  | 0 | 49  | 4 | 223 | 16 |
| 32,650 | 21 | 1 | 153 | 11 | 4  | 0 | 49  | 4 | 227 | 16 |
| 32,651 | 20 | 1 | 151 | 10 | 4  | 0 | 46  | 3 | 221 | 14 |
| 32,652 | 20 | 1 | 153 | 10 | 4  | 0 | 47  | 3 | 224 | 14 |
| 32,653 | 20 | 1 | 153 | 10 | 4  | 0 | 46  | 3 | 223 | 14 |
| 32,654 | 19 | 1 | 168 | 10 | 4  | 0 | 50  | 3 | 241 | 14 |
| 32,655 | 19 | 1 | 168 | 10 | 4  | 0 | 50  | 3 | 241 | 14 |
| 32,656 | 19 | 1 | 168 | 10 | 4  | 0 | 50  | 3 | 241 | 14 |
| 32,657 | 21 | 1 | 179 | 11 | 4  | 0 | 53  | 3 | 257 | 15 |
| 32,658 | 21 | 1 | 185 | 11 | 5  | 0 | 54  | 3 | 265 | 15 |
| 32,659 | 27 | 1 | 242 | 11 | 6  | 0 | 69  | 3 | 344 | 15 |
| 32,660 | 27 | 1 | 247 | 11 | 6  | 0 | 75  | 3 | 355 | 15 |
| 32,661 | 33 | 2 | 350 | 11 | 16 | 0 | 132 | 2 | 531 | 15 |
| 32,662 | 34 | 2 | 359 | 9  | 20 | 0 | 146 | 2 | 559 | 13 |
| 32,663 | 34 | 2 | 361 | 9  | 20 | 0 | 147 | 2 | 562 | 13 |
| 32,664 | 34 | 3 | 363 | 9  | 20 | 0 | 149 | 2 | 566 | 14 |
| 32,665 | 34 | 3 | 363 | 9  | 20 | 0 | 149 | 3 | 566 | 15 |

|        |    |   |     |    |    |   |     |    |     |    |
|--------|----|---|-----|----|----|---|-----|----|-----|----|
| 32,666 | 33 | 3 | 362 | 10 | 20 | 0 | 149 | 3  | 564 | 16 |
| 32,667 | 33 | 3 | 362 | 10 | 20 | 0 | 150 | 3  | 565 | 16 |
| 32,668 | 33 | 3 | 361 | 10 | 20 | 0 | 150 | 3  | 564 | 16 |
| 32,669 | 33 | 2 | 361 | 10 | 20 | 0 | 150 | 3  | 564 | 15 |
| 32,670 | 33 | 2 | 363 | 10 | 20 | 0 | 151 | 3  | 567 | 15 |
| 32,671 | 33 | 2 | 366 | 10 | 20 | 0 | 151 | 3  | 570 | 15 |
| 32,672 | 33 | 2 | 369 | 10 | 20 | 0 | 152 | 3  | 574 | 15 |
| 32,673 | 33 | 2 | 368 | 10 | 20 | 0 | 153 | 3  | 574 | 15 |
| 32,674 | 33 | 2 | 369 | 13 | 20 | 0 | 153 | 3  | 575 | 18 |
| 32,675 | 31 | 2 | 366 | 14 | 20 | 0 | 152 | 3  | 569 | 19 |
| 32,676 | 30 | 2 | 359 | 13 | 18 | 0 | 151 | 4  | 558 | 19 |
| 32,677 | 30 | 2 | 361 | 13 | 18 | 0 | 152 | 5  | 561 | 20 |
| 32,678 | 30 | 2 | 361 | 9  | 18 | 0 | 152 | 5  | 561 | 16 |
| 32,679 | 30 | 2 | 361 | 9  | 18 | 0 | 152 | 3  | 561 | 14 |
| 32,680 | 30 | 2 | 361 | 9  | 18 | 0 | 152 | 3  | 561 | 14 |
| 32,681 | 30 | 2 | 360 | 9  | 17 | 0 | 155 | 3  | 562 | 14 |
| 32,682 | 30 | 2 | 360 | 9  | 17 | 0 | 155 | 3  | 562 | 14 |
| 32,683 | 31 | 2 | 364 | 9  | 17 | 0 | 159 | 3  | 571 | 14 |
| 32,684 | 31 | 2 | 364 | 9  | 17 | 0 | 159 | 3  | 571 | 14 |
| 32,685 | 31 | 3 | 368 | 10 | 17 | 0 | 159 | 3  | 575 | 16 |
| 32,686 | 30 | 3 | 365 | 10 | 17 | 0 | 159 | 3  | 571 | 16 |
| 32,687 | 31 | 3 | 370 | 10 | 17 | 0 | 163 | 3  | 581 | 16 |
| 32,688 | 31 | 3 | 373 | 10 | 17 | 0 | 164 | 3  | 585 | 16 |
| 32,689 | 30 | 3 | 372 | 9  | 17 | 0 | 164 | 3  | 583 | 15 |
| 32,690 | 30 | 3 | 370 | 9  | 17 | 0 | 163 | 3  | 580 | 15 |
| 32,691 | 31 | 3 | 369 | 9  | 17 | 0 | 167 | 3  | 584 | 15 |
| 32,692 | 31 | 3 | 367 | 9  | 17 | 0 | 167 | 3  | 582 | 15 |
| 32,693 | 31 | 3 | 362 | 9  | 17 | 0 | 163 | 3  | 573 | 15 |
| 32,694 | 28 | 3 | 363 | 9  | 17 | 0 | 163 | 3  | 571 | 15 |
| 32,695 | 28 | 3 | 350 | 9  | 17 | 0 | 162 | 5  | 557 | 17 |
| 32,696 | 27 | 3 | 346 | 12 | 17 | 0 | 160 | 5  | 550 | 20 |
| 32,697 | 20 | 3 | 288 | 11 | 17 | 0 | 141 | 5  | 466 | 19 |
| 32,698 | 20 | 3 | 287 | 16 | 17 | 0 | 140 | 8  | 464 | 27 |
| 32,699 | 20 | 5 | 276 | 25 | 17 | 2 | 137 | 12 | 450 | 44 |
| 32,700 | 18 | 5 | 263 | 27 | 16 | 2 | 133 | 14 | 430 | 48 |
| 32,701 | 19 | 5 | 264 | 38 | 17 | 2 | 134 | 26 | 434 | 71 |
| 32,702 | 19 | 6 | 263 | 42 | 17 | 2 | 134 | 28 | 433 | 78 |
| 32,703 | 19 | 6 | 259 | 44 | 17 | 2 | 133 | 28 | 428 | 80 |
| 32,704 | 19 | 6 | 252 | 44 | 17 | 2 | 133 | 28 | 421 | 80 |
| 32,705 | 19 | 6 | 245 | 45 | 17 | 2 | 130 | 28 | 411 | 81 |
| 32,706 | 19 | 6 | 245 | 47 | 17 | 2 | 130 | 29 | 411 | 84 |

|        |    |   |     |    |    |   |     |    |     |     |
|--------|----|---|-----|----|----|---|-----|----|-----|-----|
| 32,707 | 17 | 6 | 239 | 47 | 17 | 2 | 128 | 29 | 401 | 84  |
| 32,708 | 17 | 6 | 234 | 46 | 17 | 2 | 128 | 29 | 396 | 83  |
| 32,709 | 17 | 6 | 228 | 46 | 16 | 2 | 126 | 31 | 387 | 85  |
| 32,710 | 11 | 6 | 170 | 46 | 15 | 2 | 111 | 31 | 307 | 85  |
| 32,711 | 11 | 6 | 166 | 46 | 15 | 2 | 105 | 31 | 297 | 85  |
| 32,712 | 5  | 5 | 63  | 46 | 5  | 2 | 49  | 32 | 122 | 85  |
| 32,713 | 4  | 5 | 52  | 46 | 1  | 2 | 33  | 32 | 90  | 85  |
| 32,714 | 4  | 5 | 48  | 46 | 1  | 2 | 32  | 32 | 85  | 85  |
| 32,715 | 4  | 4 | 46  | 46 | 1  | 2 | 31  | 31 | 82  | 83  |
| 32,716 | 4  | 4 | 46  | 46 | 1  | 2 | 30  | 31 | 81  | 83  |
| 32,717 | 4  | 4 | 46  | 46 | 1  | 2 | 30  | 32 | 81  | 84  |
| 32,718 | 4  | 4 | 47  | 48 | 1  | 2 | 30  | 32 | 82  | 86  |
| 32,719 | 4  | 4 | 48  | 48 | 2  | 2 | 31  | 32 | 85  | 86  |
| 32,720 | 4  | 4 | 46  | 48 | 2  | 2 | 30  | 32 | 82  | 86  |
| 32,721 | 4  | 4 | 46  | 48 | 2  | 2 | 30  | 33 | 82  | 87  |
| 32,722 | 4  | 4 | 43  | 48 | 2  | 2 | 30  | 33 | 79  | 87  |
| 32,723 | 4  | 4 | 40  | 49 | 2  | 2 | 29  | 34 | 75  | 89  |
| 32,724 | 4  | 4 | 42  | 51 | 2  | 2 | 29  | 34 | 77  | 91  |
| 32,725 | 4  | 4 | 43  | 48 | 2  | 2 | 29  | 34 | 78  | 88  |
| 32,726 | 4  | 4 | 45  | 48 | 2  | 2 | 30  | 33 | 81  | 87  |
| 32,727 | 4  | 4 | 45  | 48 | 2  | 2 | 30  | 33 | 81  | 87  |
| 32,728 | 10 | 4 | 66  | 49 | 3  | 2 | 38  | 32 | 117 | 87  |
| 32,729 | 10 | 4 | 79  | 49 | 4  | 2 | 53  | 32 | 146 | 87  |
| 32,730 | 10 | 4 | 87  | 49 | 4  | 2 | 60  | 32 | 161 | 87  |
| 32,731 | 10 | 4 | 87  | 51 | 4  | 2 | 60  | 32 | 161 | 89  |
| 32,732 | 11 | 4 | 113 | 55 | 6  | 2 | 67  | 33 | 197 | 94  |
| 32,733 | 10 | 4 | 117 | 59 | 6  | 2 | 68  | 37 | 201 | 102 |
| 32,734 | 10 | 4 | 115 | 59 | 6  | 2 | 65  | 37 | 196 | 102 |
| 32,735 | 10 | 6 | 115 | 61 | 6  | 2 | 65  | 38 | 196 | 107 |
| 32,736 | 10 | 5 | 111 | 60 | 6  | 3 | 65  | 39 | 192 | 107 |
| 32,737 | 21 | 5 | 224 | 60 | 9  | 3 | 121 | 39 | 375 | 107 |
| 32,738 | 21 | 5 | 223 | 60 | 9  | 3 | 121 | 39 | 374 | 107 |
| 32,739 | 22 | 5 | 243 | 60 | 9  | 3 | 131 | 39 | 405 | 107 |
| 32,740 | 21 | 5 | 246 | 61 | 9  | 3 | 132 | 39 | 408 | 108 |
| 32,741 | 21 | 5 | 245 | 62 | 9  | 3 | 129 | 39 | 404 | 109 |
| 32,742 | 24 | 5 | 267 | 62 | 11 | 3 | 139 | 39 | 441 | 109 |
| 32,743 | 24 | 5 | 267 | 62 | 13 | 3 | 139 | 39 | 443 | 109 |
| 32,744 | 24 | 5 | 264 | 62 | 13 | 3 | 138 | 39 | 439 | 109 |
| 32,745 | 24 | 5 | 264 | 62 | 13 | 3 | 138 | 39 | 439 | 109 |
| 32,746 | 24 | 5 | 262 | 63 | 13 | 3 | 137 | 37 | 436 | 108 |
| 32,747 | 24 | 5 | 261 | 60 | 13 | 3 | 137 | 37 | 435 | 105 |

|        |    |   |     |    |    |   |     |    |       |     |
|--------|----|---|-----|----|----|---|-----|----|-------|-----|
| 32,748 | 24 | 5 | 265 | 60 | 13 | 3 | 136 | 37 | 438   | 105 |
| 32,749 | 25 | 5 | 280 | 55 | 14 | 3 | 138 | 34 | 457   | 97  |
| 32,750 | 25 | 4 | 279 | 45 | 15 | 1 | 138 | 28 | 457   | 78  |
| 32,751 | 25 | 4 | 281 | 45 | 14 | 1 | 138 | 28 | 458   | 78  |
| 32,752 | 24 | 4 | 286 | 34 | 14 | 1 | 141 | 16 | 465   | 55  |
| 32,753 | 24 | 3 | 301 | 28 | 15 | 1 | 145 | 15 | 485   | 47  |
| 32,754 | 31 | 3 | 322 | 27 | 16 | 1 | 154 | 15 | 523   | 46  |
| 32,755 | 33 | 3 | 345 | 26 | 16 | 1 | 166 | 15 | 560   | 45  |
| 32,756 | 33 | 3 | 347 | 25 | 16 | 1 | 166 | 14 | 562   | 43  |
| 32,757 | 33 | 3 | 347 | 25 | 16 | 1 | 166 | 14 | 562   | 43  |
| 32,758 | 33 | 3 | 348 | 25 | 17 | 1 | 169 | 14 | 567   | 43  |
| 32,759 | 33 | 3 | 348 | 25 | 17 | 1 | 169 | 14 | 567   | 43  |
| 32,760 | 33 | 3 | 352 | 25 | 17 | 1 | 172 | 12 | 574   | 41  |
| 32,761 | 34 | 3 | 354 | 26 | 17 | 1 | 174 | 12 | 579   | 42  |
| 32,762 | 34 | 3 | 353 | 31 | 17 | 1 | 174 | 13 | 578   | 48  |
| 32,763 | 34 | 3 | 352 | 31 | 17 | 1 | 173 | 12 | 576   | 47  |
| 32,764 | 35 | 3 | 357 | 32 | 17 | 1 | 176 | 12 | 585   | 48  |
| 32,765 | 35 | 3 | 358 | 32 | 17 | 1 | 180 | 12 | 590   | 48  |
| 32,766 | 35 | 3 | 363 | 32 | 18 | 1 | 179 | 12 | 595   | 48  |
| 32,767 | 35 | 3 | 363 | 30 | 18 | 1 | 179 | 11 | 595   | 45  |
| 32,768 | 35 | 3 | 416 | 30 | 18 | 1 | 191 | 11 | 660   | 45  |
| 32,769 | 35 | 3 | 415 | 31 | 17 | 1 | 190 | 11 | 657   | 46  |
| 32,770 | 35 | 4 | 425 | 31 | 17 | 1 | 191 | 11 | 668   | 47  |
| 32,771 | 35 | 4 | 425 | 32 | 17 | 1 | 191 | 11 | 668   | 48  |
| 32,772 | 35 | 4 | 445 | 32 | 18 | 1 | 196 | 10 | 694   | 47  |
| 32,773 | 35 | 4 | 445 | 32 | 18 | 1 | 197 | 10 | 695   | 47  |
| 32,774 | 54 | 4 | 605 | 31 | 27 | 1 | 295 | 10 | 981   | 46  |
| 32,775 | 54 | 5 | 605 | 36 | 27 | 1 | 295 | 17 | 981   | 59  |
| 32,776 | 54 | 5 | 603 | 36 | 27 | 1 | 295 | 17 | 979   | 59  |
| 32,777 | 55 | 5 | 628 | 36 | 27 | 1 | 299 | 17 | 1,009 | 59  |
| 32,778 | 58 | 5 | 655 | 36 | 27 | 1 | 312 | 17 | 1,052 | 59  |
| 32,779 | 52 | 5 | 632 | 35 | 26 | 1 | 303 | 17 | 1,013 | 58  |
| 32,780 | 52 | 5 | 620 | 35 | 25 | 1 | 289 | 17 | 986   | 58  |
| 32,781 | 52 | 5 | 609 | 29 | 25 | 1 | 282 | 16 | 968   | 51  |
| 32,782 | 51 | 5 | 601 | 29 | 24 | 1 | 281 | 16 | 957   | 51  |
| 32,783 | 51 | 5 | 583 | 31 | 23 | 1 | 272 | 16 | 929   | 53  |
| 32,784 | 51 | 5 | 578 | 27 | 23 | 1 | 270 | 12 | 922   | 45  |
| 32,785 | 51 | 3 | 572 | 26 | 23 | 1 | 269 | 11 | 915   | 41  |
| 32,786 | 51 | 3 | 571 | 27 | 23 | 1 | 267 | 11 | 912   | 42  |
| 32,787 | 39 | 4 | 467 | 34 | 20 | 0 | 207 | 13 | 733   | 51  |
| 32,788 | 39 | 6 | 461 | 36 | 20 | 0 | 207 | 15 | 727   | 57  |



|        |    |   |     |    |    |   |     |    |     |     |
|--------|----|---|-----|----|----|---|-----|----|-----|-----|
| 32,789 | 38 | 6 | 452 | 37 | 20 | 0 | 207 | 16 | 717 | 59  |
| 32,790 | 38 | 6 | 444 | 36 | 20 | 0 | 198 | 16 | 700 | 58  |
| 32,791 | 38 | 6 | 447 | 36 | 20 | 0 | 200 | 16 | 705 | 58  |
| 32,792 | 35 | 6 | 430 | 35 | 20 | 0 | 192 | 16 | 677 | 57  |
| 32,793 | 35 | 6 | 429 | 35 | 18 | 0 | 191 | 16 | 673 | 57  |
| 32,794 | 35 | 6 | 429 | 35 | 16 | 0 | 191 | 17 | 671 | 58  |
| 32,795 | 35 | 6 | 437 | 35 | 16 | 0 | 204 | 17 | 692 | 58  |
| 32,796 | 35 | 6 | 437 | 34 | 16 | 0 | 204 | 18 | 692 | 58  |
| 32,797 | 35 | 6 | 433 | 34 | 16 | 0 | 204 | 18 | 688 | 58  |
| 32,798 | 35 | 6 | 433 | 34 | 16 | 0 | 204 | 18 | 688 | 58  |
| 32,799 | 34 | 6 | 417 | 34 | 15 | 0 | 202 | 18 | 668 | 58  |
| 32,800 | 34 | 6 | 417 | 34 | 15 | 0 | 202 | 18 | 668 | 58  |
| 32,801 | 34 | 5 | 417 | 33 | 14 | 0 | 202 | 18 | 667 | 56  |
| 32,802 | 34 | 5 | 414 | 33 | 14 | 0 | 203 | 18 | 665 | 56  |
| 32,803 | 34 | 5 | 406 | 33 | 14 | 0 | 199 | 17 | 653 | 55  |
| 32,804 | 35 | 5 | 391 | 33 | 13 | 0 | 196 | 17 | 635 | 55  |
| 32,805 | 29 | 5 | 373 | 33 | 12 | 0 | 188 | 17 | 602 | 55  |
| 32,806 | 28 | 5 | 350 | 32 | 12 | 0 | 176 | 17 | 566 | 54  |
| 32,807 | 29 | 5 | 355 | 32 | 12 | 0 | 179 | 19 | 575 | 56  |
| 32,808 | 29 | 5 | 355 | 43 | 12 | 0 | 179 | 21 | 575 | 69  |
| 32,809 | 29 | 5 | 355 | 43 | 11 | 0 | 176 | 21 | 571 | 69  |
| 32,810 | 29 | 5 | 351 | 46 | 11 | 0 | 173 | 21 | 564 | 72  |
| 32,811 | 28 | 5 | 353 | 46 | 11 | 0 | 172 | 24 | 564 | 75  |
| 32,812 | 28 | 5 | 358 | 62 | 11 | 0 | 176 | 25 | 573 | 92  |
| 32,813 | 28 | 6 | 358 | 57 | 11 | 0 | 176 | 25 | 573 | 88  |
| 32,814 | 30 | 6 | 368 | 57 | 11 | 0 | 187 | 25 | 596 | 88  |
| 32,815 | 30 | 6 | 375 | 60 | 11 | 0 | 190 | 26 | 606 | 92  |
| 32,816 | 30 | 6 | 374 | 60 | 11 | 1 | 186 | 26 | 601 | 93  |
| 32,817 | 30 | 6 | 369 | 63 | 10 | 1 | 186 | 29 | 595 | 99  |
| 32,818 | 30 | 6 | 369 | 63 | 10 | 1 | 186 | 33 | 595 | 103 |
| 32,819 | 30 | 6 | 315 | 64 | 10 | 1 | 173 | 34 | 528 | 105 |
| 32,820 | 30 | 6 | 315 | 65 | 10 | 2 | 173 | 36 | 528 | 109 |
| 32,821 | 30 | 5 | 310 | 65 | 10 | 2 | 172 | 36 | 522 | 108 |
| 32,822 | 30 | 5 | 292 | 65 | 9  | 2 | 168 | 36 | 499 | 108 |
| 32,823 | 30 | 5 | 292 | 66 | 9  | 2 | 167 | 37 | 498 | 110 |
| 32,824 | 11 | 6 | 132 | 76 | 1  | 2 | 68  | 43 | 212 | 127 |
| 32,825 | 11 | 6 | 130 | 77 | 0  | 2 | 68  | 42 | 209 | 127 |
| 32,826 | 11 | 5 | 124 | 70 | 0  | 2 | 68  | 35 | 203 | 112 |
| 32,827 | 10 | 5 | 106 | 69 | 0  | 2 | 63  | 35 | 179 | 111 |
| 32,828 | 10 | 5 | 100 | 69 | 0  | 2 | 59  | 35 | 169 | 111 |
| 32,829 | 7  | 5 | 79  | 69 | 0  | 2 | 52  | 35 | 138 | 111 |

|        |   |   |     |    |   |   |    |    |     |     |
|--------|---|---|-----|----|---|---|----|----|-----|-----|
| 32,830 | 7 | 5 | 79  | 69 | 0 | 2 | 52 | 35 | 138 | 111 |
| 32,831 | 7 | 5 | 82  | 69 | 0 | 2 | 53 | 35 | 142 | 111 |
| 32,832 | 7 | 5 | 82  | 69 | 0 | 2 | 53 | 35 | 142 | 111 |
| 32,833 | 7 | 5 | 83  | 67 | 0 | 2 | 54 | 35 | 144 | 109 |
| 32,834 | 7 | 5 | 83  | 70 | 0 | 2 | 54 | 35 | 144 | 112 |
| 32,835 | 7 | 5 | 82  | 70 | 0 | 2 | 54 | 35 | 143 | 112 |
| 32,836 | 7 | 5 | 81  | 69 | 0 | 2 | 55 | 35 | 143 | 111 |
| 32,837 | 7 | 4 | 81  | 61 | 0 | 2 | 56 | 32 | 144 | 99  |
| 32,838 | 7 | 4 | 81  | 61 | 0 | 2 | 56 | 32 | 144 | 99  |
| 32,839 | 7 | 2 | 79  | 58 | 0 | 2 | 56 | 30 | 142 | 92  |
| 32,840 | 7 | 2 | 77  | 61 | 0 | 2 | 56 | 31 | 140 | 96  |
| 32,841 | 7 | 2 | 76  | 61 | 0 | 2 | 54 | 31 | 137 | 96  |
| 32,842 | 7 | 2 | 80  | 61 | 0 | 2 | 51 | 31 | 138 | 96  |
| 32,843 | 7 | 2 | 76  | 61 | 0 | 2 | 52 | 30 | 135 | 95  |
| 32,844 | 7 | 2 | 76  | 61 | 0 | 2 | 52 | 30 | 135 | 95  |
| 32,845 | 7 | 2 | 75  | 61 | 0 | 2 | 47 | 30 | 129 | 95  |
| 32,846 | 7 | 2 | 70  | 61 | 0 | 2 | 39 | 30 | 116 | 95  |
| 32,847 | 7 | 3 | 70  | 61 | 0 | 2 | 39 | 29 | 116 | 95  |
| 32,848 | 7 | 3 | 72  | 61 | 0 | 2 | 39 | 29 | 118 | 95  |
| 32,849 | 7 | 3 | 72  | 61 | 0 | 2 | 39 | 29 | 118 | 95  |
| 32,850 | 7 | 3 | 72  | 61 | 0 | 2 | 39 | 30 | 118 | 96  |
| 32,851 | 7 | 3 | 72  | 61 | 0 | 2 | 39 | 30 | 118 | 96  |
| 32,852 | 7 | 3 | 72  | 61 | 0 | 3 | 38 | 30 | 117 | 97  |
| 32,853 | 7 | 3 | 72  | 61 | 0 | 3 | 38 | 30 | 117 | 97  |
| 32,854 | 7 | 3 | 72  | 63 | 0 | 3 | 38 | 30 | 117 | 99  |
| 32,855 | 6 | 3 | 73  | 65 | 0 | 3 | 40 | 30 | 119 | 101 |
| 32,856 | 6 | 3 | 76  | 65 | 0 | 3 | 42 | 30 | 124 | 101 |
| 32,857 | 5 | 3 | 76  | 65 | 0 | 3 | 41 | 30 | 122 | 101 |
| 32,858 | 4 | 3 | 69  | 56 | 0 | 3 | 39 | 26 | 112 | 88  |
| 32,859 | 4 | 3 | 69  | 59 | 0 | 3 | 39 | 27 | 112 | 92  |
| 32,860 | 4 | 3 | 81  | 62 | 0 | 3 | 44 | 28 | 129 | 96  |
| 32,861 | 4 | 3 | 85  | 62 | 0 | 3 | 46 | 28 | 135 | 96  |
| 32,862 | 4 | 3 | 86  | 62 | 0 | 3 | 46 | 25 | 136 | 93  |
| 32,863 | 4 | 3 | 82  | 45 | 0 | 3 | 44 | 24 | 130 | 75  |
| 32,864 | 1 | 2 | 68  | 46 | 0 | 3 | 32 | 23 | 101 | 74  |
| 32,865 | 2 | 2 | 75  | 46 | 0 | 3 | 46 | 23 | 123 | 74  |
| 32,866 | 2 | 3 | 74  | 43 | 0 | 3 | 46 | 24 | 122 | 73  |
| 32,867 | 2 | 3 | 74  | 43 | 0 | 2 | 46 | 24 | 122 | 72  |
| 32,868 | 2 | 3 | 104 | 36 | 1 | 1 | 57 | 14 | 164 | 54  |
| 32,869 | 3 | 3 | 105 | 36 | 1 | 1 | 58 | 15 | 167 | 55  |
| 32,870 | 3 | 3 | 107 | 36 | 1 | 1 | 60 | 15 | 171 | 55  |

|        |   |   |     |    |   |   |    |    |     |     |
|--------|---|---|-----|----|---|---|----|----|-----|-----|
| 32,871 | 3 | 3 | 107 | 36 | 1 | 1 | 61 | 15 | 172 | 55  |
| 32,872 | 3 | 3 | 109 | 35 | 1 | 1 | 61 | 15 | 174 | 54  |
| 32,873 | 3 | 3 | 109 | 35 | 1 | 1 | 61 | 15 | 174 | 54  |
| 32,874 | 3 | 2 | 108 | 24 | 1 | 2 | 63 | 8  | 175 | 36  |
| 32,875 | 3 | 2 | 112 | 23 | 1 | 2 | 67 | 8  | 183 | 35  |
| 32,876 | 3 | 2 | 115 | 23 | 1 | 2 | 68 | 8  | 187 | 35  |
| 32,877 | 3 | 2 | 114 | 23 | 1 | 2 | 68 | 8  | 186 | 35  |
| 32,878 | 3 | 2 | 112 | 23 | 1 | 2 | 68 | 8  | 184 | 35  |
| 32,879 | 4 | 2 | 117 | 24 | 1 | 2 | 74 | 8  | 196 | 36  |
| 32,880 | 4 | 2 | 119 | 24 | 1 | 2 | 73 | 8  | 197 | 36  |
| 32,881 | 4 | 2 | 115 | 27 | 1 | 2 | 71 | 10 | 191 | 41  |
| 32,882 | 4 | 2 | 115 | 29 | 1 | 2 | 71 | 14 | 191 | 47  |
| 32,883 | 4 | 2 | 114 | 29 | 1 | 2 | 70 | 14 | 189 | 47  |
| 32,884 | 4 | 2 | 118 | 29 | 1 | 2 | 71 | 14 | 194 | 47  |
| 32,885 | 4 | 2 | 120 | 26 | 1 | 2 | 73 | 14 | 198 | 44  |
| 32,886 | 5 | 2 | 123 | 26 | 1 | 2 | 76 | 15 | 205 | 45  |
| 32,887 | 5 | 2 | 123 | 26 | 1 | 2 | 75 | 15 | 204 | 45  |
| 32,888 | 5 | 4 | 123 | 36 | 1 | 4 | 75 | 27 | 204 | 71  |
| 32,889 | 5 | 4 | 123 | 38 | 1 | 4 | 76 | 27 | 205 | 73  |
| 32,890 | 5 | 4 | 128 | 53 | 1 | 5 | 77 | 35 | 211 | 97  |
| 32,891 | 5 | 4 | 128 | 53 | 1 | 5 | 77 | 34 | 211 | 96  |
| 32,892 | 5 | 4 | 128 | 53 | 1 | 5 | 77 | 34 | 211 | 96  |
| 32,893 | 5 | 6 | 119 | 57 | 1 | 5 | 76 | 37 | 201 | 105 |
| 32,894 | 5 | 6 | 119 | 57 | 1 | 5 | 74 | 37 | 199 | 105 |
| 32,895 | 5 | 6 | 120 | 60 | 1 | 5 | 74 | 38 | 200 | 109 |
| 32,896 | 5 | 6 | 118 | 60 | 1 | 5 | 73 | 38 | 197 | 109 |
| 32,897 | 5 | 6 | 122 | 60 | 1 | 5 | 74 | 38 | 202 | 109 |
| 32,898 | 5 | 5 | 122 | 60 | 1 | 5 | 76 | 38 | 204 | 108 |
| 32,899 | 5 | 5 | 120 | 60 | 1 | 5 | 76 | 38 | 202 | 108 |
| 32,900 | 5 | 5 | 120 | 60 | 1 | 5 | 76 | 37 | 202 | 107 |
| 32,901 | 5 | 5 | 120 | 60 | 1 | 5 | 76 | 37 | 202 | 107 |
| 32,902 | 5 | 5 | 120 | 60 | 1 | 5 | 76 | 37 | 202 | 107 |
| 32,903 | 5 | 5 | 120 | 60 | 1 | 4 | 76 | 37 | 202 | 106 |
| 32,904 | 5 | 5 | 120 | 60 | 1 | 4 | 76 | 37 | 202 | 106 |
| 32,905 | 5 | 5 | 120 | 58 | 1 | 4 | 76 | 37 | 202 | 104 |
| 32,906 | 6 | 5 | 119 | 58 | 1 | 4 | 74 | 37 | 200 | 104 |
| 32,907 | 5 | 5 | 112 | 58 | 1 | 4 | 71 | 37 | 189 | 104 |
| 32,908 | 5 | 5 | 114 | 59 | 1 | 4 | 71 | 37 | 191 | 105 |
| 32,909 | 5 | 5 | 114 | 58 | 1 | 4 | 70 | 37 | 190 | 104 |
| 32,910 | 5 | 5 | 105 | 54 | 1 | 4 | 64 | 36 | 175 | 99  |
| 32,911 | 5 | 5 | 104 | 48 | 1 | 4 | 64 | 35 | 174 | 92  |

|        |    |   |     |    |    |   |     |    |     |    |
|--------|----|---|-----|----|----|---|-----|----|-----|----|
| 32,912 | 5  | 5 | 101 | 48 | 1  | 4 | 63  | 35 | 170 | 92 |
| 32,913 | 6  | 6 | 100 | 48 | 1  | 4 | 65  | 35 | 172 | 93 |
| 32,914 | 6  | 6 | 99  | 49 | 1  | 4 | 63  | 36 | 169 | 95 |
| 32,915 | 5  | 6 | 88  | 49 | 1  | 4 | 45  | 36 | 139 | 95 |
| 32,916 | 5  | 6 | 86  | 50 | 1  | 4 | 44  | 36 | 136 | 96 |
| 32,917 | 6  | 5 | 92  | 49 | 3  | 4 | 68  | 34 | 169 | 92 |
| 32,918 | 6  | 6 | 120 | 52 | 3  | 4 | 78  | 34 | 207 | 96 |
| 32,919 | 6  | 6 | 117 | 52 | 3  | 4 | 78  | 34 | 204 | 96 |
| 32,920 | 5  | 6 | 118 | 52 | 3  | 4 | 83  | 33 | 209 | 95 |
| 32,921 | 5  | 6 | 115 | 52 | 3  | 4 | 81  | 33 | 204 | 95 |
| 32,922 | 5  | 6 | 113 | 52 | 3  | 4 | 81  | 33 | 202 | 95 |
| 32,923 | 8  | 6 | 117 | 52 | 4  | 4 | 95  | 33 | 224 | 95 |
| 32,924 | 8  | 6 | 130 | 52 | 4  | 4 | 102 | 33 | 244 | 95 |
| 32,925 | 10 | 6 | 132 | 53 | 4  | 3 | 102 | 33 | 248 | 95 |
| 32,926 | 10 | 6 | 128 | 53 | 4  | 3 | 98  | 33 | 240 | 95 |
| 32,927 | 11 | 6 | 131 | 53 | 4  | 3 | 100 | 33 | 246 | 95 |
| 32,928 | 11 | 6 | 129 | 53 | 4  | 3 | 99  | 33 | 243 | 95 |
| 32,929 | 10 | 6 | 130 | 52 | 4  | 3 | 96  | 33 | 240 | 94 |
| 32,930 | 10 | 6 | 130 | 52 | 4  | 3 | 96  | 33 | 240 | 94 |
| 32,931 | 10 | 6 | 128 | 52 | 4  | 3 | 95  | 33 | 237 | 94 |
| 32,932 | 11 | 6 | 136 | 50 | 4  | 3 | 96  | 31 | 247 | 90 |
| 32,933 | 11 | 6 | 136 | 48 | 4  | 3 | 96  | 27 | 247 | 84 |
| 32,934 | 11 | 6 | 133 | 48 | 4  | 3 | 95  | 27 | 243 | 84 |
| 32,935 | 12 | 6 | 145 | 48 | 4  | 3 | 105 | 27 | 266 | 84 |
| 32,936 | 12 | 6 | 143 | 48 | 4  | 3 | 103 | 27 | 262 | 84 |
| 32,937 | 11 | 6 | 140 | 48 | 4  | 3 | 99  | 26 | 254 | 83 |
| 32,938 | 13 | 6 | 143 | 48 | 8  | 3 | 101 | 26 | 265 | 83 |
| 32,939 | 13 | 4 | 147 | 38 | 8  | 1 | 101 | 14 | 269 | 57 |
| 32,940 | 13 | 4 | 147 | 21 | 8  | 1 | 101 | 5  | 269 | 31 |
| 32,941 | 15 | 4 | 148 | 18 | 8  | 1 | 102 | 5  | 273 | 28 |
| 32,942 | 15 | 4 | 152 | 18 | 8  | 1 | 102 | 5  | 277 | 28 |
| 32,943 | 15 | 4 | 152 | 18 | 8  | 1 | 105 | 5  | 280 | 28 |
| 32,944 | 16 | 2 | 195 | 14 | 11 | 1 | 122 | 2  | 344 | 19 |
| 32,945 | 16 | 2 | 194 | 11 | 11 | 1 | 125 | 1  | 346 | 15 |
| 32,946 | 16 | 2 | 213 | 11 | 13 | 1 | 146 | 1  | 388 | 15 |
| 32,947 | 16 | 2 | 219 | 11 | 14 | 1 | 163 | 1  | 412 | 15 |
| 32,948 | 17 | 2 | 238 | 11 | 14 | 1 | 171 | 1  | 440 | 15 |
| 32,949 | 17 | 2 | 243 | 11 | 14 | 1 | 170 | 1  | 444 | 15 |
| 32,950 | 17 | 2 | 243 | 11 | 14 | 1 | 170 | 1  | 444 | 15 |
| 32,951 | 17 | 2 | 243 | 11 | 14 | 1 | 170 | 1  | 444 | 15 |
| 32,952 | 17 | 2 | 243 | 11 | 14 | 1 | 170 | 1  | 444 | 15 |

|        |    |   |     |    |    |   |     |    |     |    |
|--------|----|---|-----|----|----|---|-----|----|-----|----|
| 32,953 | 17 | 2 | 243 | 11 | 14 | 1 | 170 | 1  | 444 | 15 |
| 32,954 | 17 | 2 | 243 | 11 | 14 | 1 | 170 | 1  | 444 | 15 |
| 32,955 | 17 | 2 | 244 | 9  | 14 | 1 | 170 | 1  | 445 | 13 |
| 32,956 | 17 | 2 | 244 | 9  | 14 | 1 | 170 | 1  | 445 | 13 |
| 32,957 | 16 | 3 | 244 | 14 | 14 | 1 | 170 | 6  | 444 | 24 |
| 32,958 | 16 | 3 | 242 | 14 | 14 | 1 | 170 | 6  | 442 | 24 |
| 32,959 | 16 | 3 | 248 | 13 | 14 | 1 | 171 | 6  | 449 | 23 |
| 32,960 | 16 | 4 | 249 | 13 | 14 | 1 | 171 | 6  | 450 | 24 |
| 32,961 | 16 | 4 | 247 | 13 | 14 | 1 | 171 | 6  | 448 | 24 |
| 32,962 | 16 | 4 | 247 | 14 | 15 | 1 | 171 | 6  | 449 | 25 |
| 32,963 | 16 | 4 | 246 | 14 | 15 | 1 | 171 | 6  | 448 | 25 |
| 32,964 | 25 | 3 | 293 | 17 | 17 | 1 | 188 | 6  | 523 | 27 |
| 32,965 | 26 | 3 | 306 | 16 | 17 | 1 | 190 | 5  | 539 | 25 |
| 32,966 | 26 | 3 | 328 | 14 | 18 | 1 | 205 | 5  | 577 | 23 |
| 32,967 | 30 | 3 | 474 | 14 | 21 | 1 | 238 | 5  | 763 | 23 |
| 32,968 | 35 | 3 | 498 | 14 | 21 | 1 | 230 | 5  | 784 | 23 |
| 32,969 | 36 | 2 | 461 | 11 | 20 | 1 | 213 | 5  | 730 | 19 |
| 32,970 | 36 | 2 | 461 | 13 | 20 | 1 | 213 | 5  | 730 | 21 |
| 32,971 | 36 | 3 | 458 | 13 | 20 | 1 | 207 | 6  | 721 | 23 |
| 32,972 | 36 | 3 | 457 | 14 | 20 | 1 | 205 | 6  | 718 | 24 |
| 32,973 | 33 | 3 | 451 | 14 | 19 | 1 | 193 | 8  | 696 | 26 |
| 32,974 | 33 | 3 | 444 | 15 | 19 | 1 | 190 | 8  | 686 | 27 |
| 32,975 | 34 | 3 | 439 | 16 | 19 | 1 | 186 | 8  | 678 | 28 |
| 32,976 | 32 | 3 | 436 | 19 | 19 | 1 | 184 | 10 | 671 | 33 |
| 32,977 | 31 | 3 | 431 | 21 | 19 | 1 | 182 | 11 | 663 | 36 |
| 32,978 | 31 | 3 | 430 | 22 | 19 | 1 | 181 | 11 | 661 | 37 |
| 32,979 | 31 | 4 | 430 | 24 | 19 | 1 | 181 | 11 | 661 | 40 |
| 32,980 | 31 | 4 | 426 | 25 | 19 | 1 | 179 | 11 | 655 | 41 |
| 32,981 | 31 | 4 | 423 | 25 | 19 | 1 | 178 | 11 | 651 | 41 |
| 32,982 | 31 | 4 | 422 | 25 | 19 | 1 | 178 | 11 | 650 | 41 |
| 32,983 | 31 | 4 | 419 | 24 | 19 | 1 | 178 | 11 | 647 | 40 |
| 32,984 | 31 | 4 | 412 | 24 | 19 | 1 | 178 | 11 | 640 | 40 |
| 32,985 | 31 | 4 | 410 | 25 | 19 | 1 | 176 | 11 | 636 | 41 |
| 32,986 | 32 | 4 | 408 | 25 | 19 | 1 | 167 | 11 | 626 | 41 |
| 32,987 | 31 | 4 | 408 | 25 | 20 | 1 | 169 | 11 | 628 | 41 |
| 32,988 | 30 | 4 | 408 | 25 | 16 | 1 | 168 | 11 | 622 | 41 |
| 32,989 | 30 | 4 | 410 | 25 | 16 | 1 | 170 | 11 | 626 | 41 |
| 32,990 | 31 | 4 | 415 | 25 | 17 | 1 | 173 | 11 | 636 | 41 |
| 32,991 | 31 | 4 | 415 | 25 | 17 | 1 | 173 | 11 | 636 | 41 |
| 32,992 | 29 | 4 | 413 | 26 | 17 | 1 | 172 | 11 | 631 | 42 |
| 32,993 | 29 | 4 | 409 | 29 | 17 | 1 | 172 | 12 | 627 | 46 |

|        |    |   |     |    |    |   |     |    |     |    |
|--------|----|---|-----|----|----|---|-----|----|-----|----|
| 32,994 | 30 | 5 | 415 | 29 | 18 | 1 | 171 | 14 | 634 | 49 |
| 32,995 | 29 | 5 | 372 | 31 | 15 | 1 | 155 | 14 | 571 | 51 |
| 32,996 | 29 | 5 | 372 | 31 | 15 | 1 | 152 | 15 | 568 | 52 |
| 32,997 | 29 | 5 | 353 | 33 | 13 | 1 | 131 | 16 | 526 | 55 |
| 32,998 | 29 | 5 | 343 | 33 | 12 | 1 | 113 | 16 | 497 | 55 |
| 32,999 | 32 | 5 | 335 | 33 | 12 | 1 | 110 | 16 | 489 | 55 |
| 33,000 | 32 | 5 | 330 | 33 | 12 | 1 | 109 | 16 | 483 | 55 |
| 33,001 | 32 | 5 | 332 | 33 | 12 | 1 | 109 | 16 | 485 | 55 |
| 33,002 | 32 | 5 | 333 | 33 | 12 | 1 | 109 | 16 | 486 | 55 |
| 33,003 | 32 | 5 | 333 | 34 | 12 | 1 | 109 | 16 | 486 | 56 |
| 33,004 | 32 | 5 | 335 | 34 | 12 | 1 | 109 | 16 | 488 | 56 |
| 33,005 | 32 | 5 | 342 | 34 | 13 | 1 | 114 | 16 | 501 | 56 |
| 33,006 | 32 | 5 | 349 | 34 | 13 | 1 | 116 | 16 | 510 | 56 |
| 33,007 | 33 | 5 | 353 | 34 | 13 | 1 | 117 | 16 | 516 | 56 |
| 33,008 | 33 | 4 | 354 | 29 | 13 | 1 | 117 | 11 | 517 | 45 |
| 33,009 | 33 | 4 | 354 | 29 | 13 | 1 | 117 | 11 | 517 | 45 |
| 33,010 | 33 | 3 | 357 | 29 | 13 | 1 | 118 | 11 | 521 | 44 |
| 33,011 | 33 | 3 | 357 | 29 | 13 | 1 | 118 | 11 | 521 | 44 |
| 33,012 | 33 | 3 | 356 | 29 | 12 | 2 | 118 | 11 | 519 | 45 |
| 33,013 | 33 | 3 | 356 | 30 | 12 | 2 | 118 | 11 | 519 | 46 |
| 33,014 | 30 | 3 | 348 | 30 | 12 | 2 | 111 | 11 | 501 | 46 |
| 33,015 | 23 | 3 | 305 | 27 | 10 | 2 | 99  | 11 | 437 | 43 |
| 33,016 | 22 | 3 | 292 | 27 | 10 | 2 | 97  | 11 | 421 | 43 |
| 33,017 | 22 | 3 | 267 | 27 | 9  | 2 | 80  | 13 | 378 | 45 |
| 33,018 | 18 | 3 | 121 | 27 | 6  | 2 | 47  | 13 | 192 | 45 |
| 33,019 | 14 | 3 | 78  | 26 | 4  | 2 | 29  | 14 | 125 | 45 |
| 33,020 | 14 | 3 | 76  | 24 | 4  | 2 | 30  | 14 | 124 | 43 |
| 33,021 | 14 | 2 | 76  | 25 | 4  | 2 | 30  | 13 | 124 | 42 |
| 33,022 | 14 | 2 | 76  | 26 | 4  | 2 | 32  | 13 | 126 | 43 |
| 33,023 | 14 | 2 | 76  | 26 | 4  | 2 | 33  | 11 | 127 | 41 |
| 33,024 | 14 | 2 | 82  | 26 | 4  | 2 | 39  | 11 | 139 | 41 |
| 33,025 | 13 | 2 | 82  | 25 | 4  | 2 | 41  | 11 | 140 | 40 |
| 33,026 | 13 | 2 | 82  | 24 | 4  | 2 | 41  | 11 | 140 | 39 |
| 33,027 | 13 | 2 | 87  | 21 | 6  | 2 | 43  | 10 | 149 | 35 |
| 33,028 | 13 | 2 | 87  | 23 | 6  | 2 | 43  | 11 | 149 | 38 |
| 33,029 | 13 | 3 | 87  | 21 | 6  | 2 | 43  | 11 | 149 | 37 |
| 33,030 | 14 | 2 | 91  | 19 | 6  | 2 | 44  | 12 | 155 | 35 |
| 33,031 | 14 | 2 | 91  | 18 | 6  | 2 | 45  | 12 | 156 | 34 |
| 33,032 | 14 | 2 | 92  | 18 | 6  | 2 | 45  | 12 | 157 | 34 |
| 33,033 | 14 | 2 | 92  | 18 | 8  | 2 | 46  | 12 | 160 | 34 |
| 33,034 | 13 | 2 | 91  | 18 | 8  | 2 | 45  | 12 | 157 | 34 |

|        |    |   |     |    |    |   |     |    |     |    |
|--------|----|---|-----|----|----|---|-----|----|-----|----|
| 33,035 | 13 | 2 | 91  | 18 | 8  | 2 | 45  | 12 | 157 | 34 |
| 33,036 | 13 | 2 | 94  | 17 | 8  | 2 | 46  | 12 | 161 | 33 |
| 33,037 | 11 | 2 | 120 | 17 | 9  | 2 | 53  | 12 | 193 | 33 |
| 33,038 | 11 | 2 | 127 | 17 | 8  | 2 | 53  | 12 | 199 | 33 |
| 33,039 | 13 | 2 | 139 | 17 | 9  | 2 | 60  | 12 | 221 | 33 |
| 33,040 | 13 | 2 | 157 | 17 | 9  | 2 | 59  | 12 | 238 | 33 |
| 33,041 | 12 | 2 | 153 | 17 | 8  | 1 | 58  | 12 | 231 | 32 |
| 33,042 | 12 | 2 | 158 | 16 | 8  | 1 | 58  | 12 | 236 | 31 |
| 33,043 | 12 | 2 | 158 | 13 | 8  | 1 | 58  | 11 | 236 | 27 |
| 33,044 | 12 | 2 | 158 | 13 | 8  | 1 | 58  | 11 | 236 | 27 |
| 33,045 | 11 | 1 | 152 | 13 | 7  | 1 | 56  | 9  | 226 | 24 |
| 33,046 | 11 | 1 | 152 | 11 | 7  | 1 | 55  | 9  | 225 | 22 |
| 33,047 | 11 | 1 | 152 | 11 | 7  | 1 | 55  | 8  | 225 | 21 |
| 33,048 | 11 | 1 | 153 | 9  | 7  | 1 | 55  | 7  | 226 | 18 |
| 33,049 | 11 | 1 | 155 | 9  | 7  | 1 | 55  | 7  | 228 | 18 |
| 33,050 | 7  | 1 | 146 | 9  | 7  | 1 | 51  | 7  | 211 | 18 |
| 33,051 | 7  | 1 | 147 | 9  | 7  | 1 | 51  | 7  | 212 | 18 |
| 33,052 | 7  | 1 | 149 | 9  | 7  | 1 | 51  | 7  | 214 | 18 |
| 33,053 | 7  | 1 | 148 | 9  | 7  | 1 | 52  | 8  | 214 | 19 |
| 33,054 | 7  | 1 | 177 | 12 | 8  | 1 | 58  | 10 | 250 | 24 |
| 33,055 | 11 | 1 | 207 | 12 | 8  | 2 | 67  | 11 | 293 | 26 |
| 33,056 | 11 | 1 | 204 | 12 | 8  | 2 | 68  | 12 | 291 | 27 |
| 33,057 | 11 | 1 | 205 | 15 | 8  | 2 | 66  | 12 | 290 | 30 |
| 33,058 | 14 | 1 | 243 | 15 | 10 | 2 | 95  | 12 | 362 | 30 |
| 33,059 | 14 | 1 | 237 | 16 | 11 | 2 | 94  | 13 | 356 | 32 |
| 33,060 | 14 | 1 | 234 | 16 | 11 | 2 | 94  | 14 | 353 | 33 |
| 33,061 | 16 | 2 | 239 | 16 | 11 | 2 | 103 | 14 | 369 | 34 |
| 33,062 | 17 | 2 | 246 | 16 | 11 | 1 | 105 | 14 | 379 | 33 |
| 33,063 | 17 | 2 | 266 | 15 | 12 | 1 | 110 | 14 | 405 | 32 |
| 33,064 | 18 | 2 | 282 | 15 | 12 | 1 | 119 | 14 | 431 | 32 |
| 33,065 | 20 | 3 | 330 | 15 | 13 | 1 | 157 | 14 | 520 | 33 |
| 33,066 | 20 | 3 | 331 | 15 | 13 | 1 | 157 | 14 | 521 | 33 |
| 33,067 | 21 | 3 | 331 | 15 | 13 | 1 | 157 | 15 | 522 | 34 |
| 33,068 | 19 | 3 | 331 | 15 | 13 | 1 | 156 | 13 | 519 | 32 |
| 33,069 | 19 | 3 | 330 | 15 | 13 | 1 | 156 | 12 | 518 | 31 |
| 33,070 | 19 | 3 | 330 | 15 | 13 | 1 | 156 | 13 | 518 | 32 |
| 33,071 | 18 | 3 | 330 | 15 | 13 | 1 | 154 | 13 | 515 | 32 |
| 33,072 | 18 | 3 | 330 | 15 | 13 | 1 | 155 | 15 | 516 | 34 |
| 33,073 | 18 | 3 | 330 | 13 | 13 | 1 | 153 | 15 | 514 | 32 |
| 33,074 | 18 | 3 | 330 | 14 | 13 | 1 | 152 | 16 | 513 | 34 |
| 33,075 | 18 | 3 | 324 | 14 | 13 | 1 | 146 | 16 | 501 | 34 |

|        |    |   |     |    |    |   |     |    |     |    |
|--------|----|---|-----|----|----|---|-----|----|-----|----|
| 33,076 | 18 | 3 | 323 | 14 | 13 | 1 | 144 | 16 | 498 | 34 |
| 33,077 | 18 | 3 | 318 | 15 | 11 | 1 | 142 | 15 | 489 | 34 |
| 33,078 | 18 | 3 | 316 | 15 | 11 | 1 | 142 | 15 | 487 | 34 |
| 33,079 | 17 | 4 | 316 | 11 | 11 | 1 | 142 | 13 | 486 | 29 |
| 33,080 | 17 | 3 | 316 | 11 | 11 | 1 | 142 | 13 | 486 | 28 |
| 33,081 | 18 | 3 | 314 | 11 | 11 | 1 | 141 | 12 | 484 | 27 |
| 33,082 | 18 | 3 | 314 | 11 | 11 | 1 | 140 | 12 | 483 | 27 |
| 33,083 | 18 | 3 | 313 | 11 | 11 | 1 | 140 | 13 | 482 | 28 |
| 33,084 | 18 | 3 | 314 | 12 | 9  | 1 | 139 | 13 | 480 | 29 |
| 33,085 | 18 | 3 | 313 | 12 | 9  | 1 | 140 | 13 | 480 | 29 |
| 33,086 | 18 | 3 | 310 | 16 | 9  | 1 | 139 | 15 | 476 | 35 |
| 33,087 | 18 | 4 | 306 | 18 | 9  | 1 | 134 | 16 | 467 | 39 |
| 33,088 | 18 | 4 | 283 | 18 | 8  | 1 | 133 | 16 | 442 | 39 |
| 33,089 | 18 | 4 | 276 | 20 | 8  | 1 | 131 | 16 | 433 | 41 |
| 33,090 | 16 | 5 | 258 | 20 | 7  | 1 | 123 | 16 | 404 | 42 |
| 33,091 | 16 | 6 | 238 | 22 | 7  | 1 | 122 | 16 | 383 | 45 |
| 33,092 | 16 | 6 | 233 | 25 | 7  | 1 | 120 | 16 | 376 | 48 |
| 33,093 | 18 | 6 | 229 | 25 | 7  | 1 | 120 | 16 | 374 | 48 |
| 33,094 | 18 | 7 | 229 | 26 | 8  | 1 | 120 | 16 | 375 | 50 |
| 33,095 | 18 | 7 | 228 | 28 | 8  | 1 | 120 | 16 | 374 | 52 |
| 33,096 | 18 | 7 | 229 | 28 | 8  | 1 | 120 | 16 | 375 | 52 |
| 33,097 | 19 | 7 | 230 | 28 | 8  | 1 | 121 | 16 | 378 | 52 |
| 33,098 | 19 | 7 | 229 | 28 | 8  | 1 | 121 | 16 | 377 | 52 |
| 33,099 | 21 | 7 | 235 | 28 | 8  | 1 | 126 | 16 | 390 | 52 |
| 33,100 | 21 | 7 | 234 | 29 | 8  | 1 | 126 | 18 | 389 | 55 |
| 33,101 | 21 | 7 | 232 | 29 | 8  | 1 | 125 | 18 | 386 | 55 |
| 33,102 | 21 | 7 | 236 | 29 | 8  | 1 | 127 | 18 | 392 | 55 |
| 33,103 | 21 | 7 | 232 | 30 | 8  | 1 | 129 | 18 | 390 | 56 |
| 33,104 | 21 | 7 | 230 | 30 | 8  | 1 | 128 | 17 | 387 | 55 |
| 33,105 | 21 | 7 | 200 | 26 | 7  | 1 | 123 | 15 | 351 | 49 |
| 33,106 | 18 | 7 | 181 | 26 | 7  | 0 | 110 | 13 | 316 | 46 |
| 33,107 | 18 | 7 | 187 | 23 | 7  | 0 | 109 | 13 | 321 | 43 |
| 33,108 | 34 | 7 | 238 | 23 | 9  | 0 | 187 | 13 | 468 | 43 |
| 33,109 | 33 | 7 | 226 | 22 | 7  | 0 | 169 | 12 | 435 | 41 |
| 33,110 | 34 | 7 | 232 | 22 | 7  | 0 | 172 | 13 | 445 | 42 |
| 33,111 | 34 | 7 | 245 | 23 | 10 | 1 | 171 | 12 | 460 | 43 |
| 33,112 | 33 | 6 | 246 | 23 | 10 | 1 | 168 | 12 | 457 | 42 |
| 33,113 | 32 | 7 | 249 | 22 | 11 | 1 | 171 | 15 | 463 | 45 |
| 33,114 | 35 | 6 | 245 | 22 | 10 | 1 | 178 | 15 | 468 | 44 |
| 33,115 | 34 | 6 | 230 | 22 | 10 | 1 | 170 | 15 | 444 | 44 |
| 33,116 | 32 | 6 | 182 | 22 | 9  | 1 | 132 | 15 | 355 | 44 |



|        |    |   |     |    |    |   |     |    |     |    |
|--------|----|---|-----|----|----|---|-----|----|-----|----|
| 33,117 | 32 | 6 | 181 | 22 | 9  | 1 | 132 | 17 | 354 | 46 |
| 33,118 | 31 | 6 | 182 | 22 | 9  | 1 | 132 | 16 | 354 | 45 |
| 33,119 | 31 | 6 | 182 | 22 | 9  | 1 | 132 | 16 | 354 | 45 |
| 33,120 | 31 | 6 | 184 | 22 | 9  | 1 | 133 | 16 | 357 | 45 |
| 33,121 | 33 | 6 | 208 | 22 | 10 | 1 | 152 | 15 | 403 | 44 |
| 33,122 | 33 | 6 | 208 | 22 | 10 | 1 | 151 | 15 | 402 | 44 |
| 33,123 | 45 | 7 | 231 | 24 | 11 | 1 | 173 | 13 | 460 | 45 |
| 33,124 | 45 | 7 | 231 | 24 | 11 | 1 | 173 | 13 | 460 | 45 |
| 33,125 | 45 | 7 | 238 | 23 | 11 | 1 | 178 | 12 | 472 | 43 |
| 33,126 | 45 | 7 | 242 | 23 | 11 | 1 | 181 | 12 | 479 | 43 |
| 33,127 | 45 | 7 | 246 | 22 | 12 | 1 | 187 | 13 | 490 | 43 |
| 33,128 | 45 | 7 | 246 | 22 | 12 | 1 | 187 | 13 | 490 | 43 |
| 33,129 | 45 | 7 | 246 | 22 | 12 | 1 | 187 | 13 | 490 | 43 |
| 33,130 | 45 | 6 | 246 | 22 | 12 | 1 | 187 | 13 | 490 | 42 |
| 33,131 | 45 | 6 | 246 | 22 | 12 | 1 | 186 | 13 | 489 | 42 |
| 33,132 | 44 | 6 | 246 | 22 | 12 | 1 | 188 | 14 | 490 | 43 |
| 33,133 | 44 | 6 | 246 | 22 | 12 | 1 | 189 | 14 | 491 | 43 |
| 33,134 | 44 | 6 | 253 | 22 | 12 | 1 | 189 | 13 | 498 | 42 |
| 33,135 | 44 | 6 | 253 | 21 | 12 | 1 | 191 | 13 | 500 | 41 |
| 33,136 | 44 | 6 | 253 | 18 | 12 | 1 | 190 | 11 | 499 | 36 |
| 33,137 | 46 | 5 | 267 | 16 | 12 | 1 | 214 | 10 | 539 | 32 |
| 33,138 | 46 | 5 | 267 | 20 | 12 | 1 | 214 | 10 | 539 | 36 |
| 33,139 | 55 | 5 | 321 | 20 | 12 | 1 | 234 | 10 | 622 | 36 |
| 33,140 | 55 | 5 | 321 | 19 | 12 | 1 | 234 | 10 | 622 | 35 |
| 33,141 | 61 | 2 | 350 | 13 | 14 | 1 | 272 | 10 | 697 | 26 |
| 33,142 | 62 | 2 | 382 | 13 | 14 | 1 | 291 | 10 | 749 | 26 |
| 33,143 | 62 | 2 | 391 | 13 | 14 | 1 | 300 | 10 | 767 | 26 |
| 33,144 | 62 | 2 | 390 | 13 | 14 | 1 | 300 | 10 | 766 | 26 |
| 33,145 | 65 | 2 | 405 | 11 | 15 | 1 | 326 | 10 | 811 | 24 |
| 33,146 | 65 | 2 | 406 | 11 | 15 | 2 | 327 | 14 | 813 | 29 |
| 33,147 | 65 | 2 | 405 | 12 | 15 | 2 | 327 | 15 | 812 | 31 |
| 33,148 | 64 | 3 | 404 | 22 | 15 | 2 | 326 | 30 | 809 | 57 |
| 33,149 | 64 | 5 | 404 | 22 | 15 | 2 | 327 | 30 | 810 | 59 |
| 33,150 | 62 | 5 | 398 | 22 | 15 | 2 | 322 | 31 | 797 | 60 |
| 33,151 | 62 | 5 | 401 | 21 | 15 | 2 | 322 | 29 | 800 | 57 |
| 33,152 | 63 | 5 | 399 | 21 | 16 | 2 | 322 | 29 | 800 | 57 |
| 33,153 | 63 | 5 | 399 | 21 | 16 | 2 | 322 | 29 | 800 | 57 |
| 33,154 | 63 | 5 | 399 | 21 | 16 | 2 | 320 | 29 | 798 | 57 |
| 33,155 | 63 | 5 | 395 | 21 | 17 | 2 | 323 | 29 | 798 | 57 |
| 33,156 | 65 | 5 | 423 | 21 | 17 | 2 | 335 | 29 | 840 | 57 |
| 33,157 | 66 | 5 | 452 | 21 | 19 | 2 | 364 | 29 | 901 | 57 |

|        |    |    |     |    |    |   |     |    |     |    |
|--------|----|----|-----|----|----|---|-----|----|-----|----|
| 33,158 | 66 | 5  | 467 | 21 | 19 | 2 | 375 | 29 | 927 | 57 |
| 33,159 | 50 | 5  | 411 | 21 | 17 | 2 | 298 | 29 | 776 | 57 |
| 33,160 | 55 | 7  | 458 | 21 | 18 | 2 | 361 | 29 | 892 | 59 |
| 33,161 | 54 | 7  | 465 | 21 | 20 | 2 | 362 | 29 | 901 | 59 |
| 33,162 | 53 | 7  | 456 | 20 | 18 | 1 | 360 | 30 | 887 | 58 |
| 33,163 | 54 | 6  | 457 | 20 | 19 | 1 | 370 | 27 | 900 | 54 |
| 33,164 | 54 | 6  | 447 | 20 | 18 | 1 | 366 | 29 | 885 | 56 |
| 33,165 | 51 | 6  | 431 | 20 | 18 | 1 | 351 | 29 | 851 | 56 |
| 33,166 | 52 | 7  | 440 | 20 | 18 | 1 | 359 | 29 | 869 | 57 |
| 33,167 | 52 | 7  | 440 | 20 | 19 | 1 | 361 | 29 | 872 | 57 |
| 33,168 | 52 | 7  | 440 | 20 | 19 | 1 | 361 | 27 | 872 | 55 |
| 33,169 | 52 | 7  | 439 | 20 | 19 | 1 | 361 | 28 | 871 | 56 |
| 33,170 | 52 | 8  | 437 | 20 | 19 | 1 | 360 | 28 | 868 | 57 |
| 33,171 | 50 | 8  | 419 | 20 | 19 | 1 | 350 | 28 | 838 | 57 |
| 33,172 | 50 | 9  | 413 | 21 | 18 | 1 | 343 | 28 | 824 | 59 |
| 33,173 | 39 | 9  | 391 | 21 | 17 | 1 | 323 | 28 | 770 | 59 |
| 33,174 | 38 | 8  | 390 | 19 | 17 | 1 | 320 | 28 | 765 | 56 |
| 33,175 | 38 | 8  | 383 | 19 | 17 | 1 | 316 | 28 | 754 | 56 |
| 33,176 | 38 | 8  | 384 | 19 | 17 | 1 | 315 | 28 | 754 | 56 |
| 33,177 | 38 | 8  | 383 | 19 | 17 | 1 | 314 | 28 | 752 | 56 |
| 33,178 | 38 | 8  | 379 | 19 | 16 | 1 | 307 | 27 | 740 | 55 |
| 33,179 | 38 | 8  | 379 | 19 | 16 | 1 | 307 | 27 | 740 | 55 |
| 33,180 | 39 | 8  | 379 | 19 | 16 | 1 | 310 | 27 | 744 | 55 |
| 33,181 | 39 | 9  | 379 | 20 | 16 | 1 | 311 | 27 | 745 | 57 |
| 33,182 | 39 | 9  | 379 | 20 | 16 | 1 | 309 | 26 | 743 | 56 |
| 33,183 | 39 | 9  | 379 | 20 | 16 | 1 | 309 | 26 | 743 | 56 |
| 33,184 | 39 | 9  | 375 | 20 | 16 | 1 | 310 | 26 | 740 | 56 |
| 33,185 | 39 | 9  | 375 | 20 | 16 | 1 | 310 | 26 | 740 | 56 |
| 33,186 | 40 | 9  | 378 | 20 | 16 | 1 | 309 | 26 | 743 | 56 |
| 33,187 | 40 | 9  | 380 | 21 | 16 | 1 | 309 | 26 | 745 | 57 |
| 33,188 | 38 | 9  | 366 | 21 | 17 | 1 | 286 | 27 | 707 | 58 |
| 33,189 | 29 | 9  | 315 | 17 | 17 | 1 | 269 | 29 | 630 | 56 |
| 33,190 | 29 | 9  | 312 | 16 | 17 | 1 | 263 | 29 | 621 | 55 |
| 33,191 | 28 | 9  | 305 | 18 | 17 | 1 | 254 | 29 | 604 | 57 |
| 33,192 | 23 | 9  | 284 | 18 | 15 | 1 | 226 | 29 | 548 | 57 |
| 33,193 | 22 | 9  | 264 | 18 | 15 | 1 | 215 | 29 | 516 | 57 |
| 33,194 | 20 | 9  | 255 | 18 | 15 | 1 | 210 | 29 | 500 | 57 |
| 33,195 | 18 | 10 | 248 | 18 | 14 | 1 | 191 | 29 | 471 | 58 |
| 33,196 | 17 | 10 | 241 | 18 | 13 | 1 | 183 | 29 | 454 | 58 |
| 33,197 | 17 | 10 | 240 | 18 | 13 | 0 | 183 | 25 | 453 | 53 |
| 33,198 | 17 | 10 | 244 | 17 | 13 | 0 | 187 | 24 | 461 | 51 |

|        |    |   |     |    |    |   |     |    |     |    |
|--------|----|---|-----|----|----|---|-----|----|-----|----|
| 33,199 | 17 | 7 | 245 | 7  | 13 | 0 | 187 | 9  | 462 | 23 |
| 33,200 | 17 | 7 | 246 | 7  | 13 | 0 | 187 | 8  | 463 | 22 |
| 33,201 | 17 | 5 | 244 | 6  | 13 | 0 | 187 | 6  | 461 | 17 |
| 33,202 | 17 | 5 | 242 | 6  | 13 | 0 | 187 | 6  | 459 | 17 |
| 33,203 | 16 | 5 | 241 | 8  | 12 | 0 | 185 | 6  | 454 | 19 |
| 33,204 | 16 | 5 | 240 | 8  | 12 | 0 | 185 | 6  | 453 | 19 |
| 33,205 | 16 | 5 | 241 | 12 | 12 | 0 | 184 | 7  | 453 | 24 |
| 33,206 | 16 | 5 | 236 | 13 | 11 | 0 | 181 | 9  | 444 | 27 |
| 33,207 | 14 | 5 | 204 | 13 | 11 | 0 | 170 | 9  | 399 | 27 |
| 33,208 | 12 | 5 | 170 | 13 | 8  | 0 | 140 | 9  | 330 | 27 |
| 33,209 | 12 | 5 | 153 | 14 | 8  | 0 | 133 | 9  | 306 | 28 |
| 33,210 | 10 | 5 | 106 | 15 | 6  | 1 | 84  | 10 | 206 | 31 |
| 33,211 | 4  | 5 | 79  | 15 | 5  | 1 | 56  | 10 | 144 | 31 |
| 33,212 | 4  | 5 | 71  | 17 | 3  | 1 | 56  | 10 | 134 | 33 |
| 33,213 | 5  | 5 | 65  | 17 | 2  | 1 | 53  | 10 | 125 | 33 |
| 33,214 | 4  | 5 | 61  | 17 | 1  | 1 | 43  | 10 | 109 | 33 |
| 33,215 | 4  | 5 | 52  | 17 | 1  | 1 | 36  | 8  | 93  | 31 |
| 33,216 | 4  | 5 | 53  | 17 | 1  | 1 | 36  | 8  | 94  | 31 |
| 33,217 | 4  | 4 | 53  | 17 | 1  | 1 | 36  | 8  | 94  | 30 |
| 33,218 | 4  | 4 | 53  | 17 | 1  | 1 | 36  | 8  | 94  | 30 |
| 33,219 | 7  | 5 | 70  | 17 | 2  | 1 | 57  | 7  | 136 | 30 |
| 33,220 | 7  | 5 | 70  | 17 | 2  | 1 | 57  | 7  | 136 | 30 |
| 33,221 | 7  | 4 | 76  | 17 | 2  | 1 | 62  | 7  | 147 | 29 |
| 33,222 | 7  | 4 | 80  | 17 | 2  | 1 | 64  | 7  | 153 | 29 |
| 33,223 | 17 | 3 | 161 | 16 | 17 | 1 | 232 | 7  | 427 | 27 |
| 33,224 | 18 | 3 | 174 | 16 | 17 | 1 | 251 | 7  | 460 | 27 |
| 33,225 | 19 | 3 | 188 | 16 | 17 | 1 | 269 | 7  | 493 | 27 |
| 33,226 | 19 | 3 | 188 | 16 | 17 | 1 | 271 | 7  | 495 | 27 |
| 33,227 | 19 | 3 | 184 | 16 | 17 | 1 | 270 | 7  | 490 | 27 |
| 33,228 | 19 | 3 | 185 | 16 | 17 | 1 | 270 | 7  | 491 | 27 |
| 33,229 | 19 | 3 | 186 | 16 | 17 | 1 | 270 | 7  | 492 | 27 |
| 33,230 | 19 | 3 | 186 | 18 | 18 | 1 | 270 | 7  | 493 | 29 |
| 33,231 | 18 | 3 | 186 | 21 | 18 | 1 | 267 | 7  | 489 | 32 |
| 33,232 | 18 | 3 | 186 | 29 | 18 | 2 | 268 | 9  | 490 | 43 |
| 33,233 | 18 | 3 | 186 | 32 | 18 | 2 | 269 | 13 | 491 | 50 |
| 33,234 | 18 | 3 | 183 | 32 | 18 | 2 | 268 | 15 | 487 | 52 |
| 33,235 | 23 | 3 | 202 | 33 | 18 | 2 | 286 | 15 | 529 | 53 |
| 33,236 | 22 | 3 | 201 | 32 | 18 | 2 | 291 | 16 | 532 | 53 |
| 33,237 | 22 | 3 | 201 | 34 | 18 | 2 | 291 | 16 | 532 | 55 |
| 33,238 | 22 | 3 | 206 | 42 | 18 | 2 | 294 | 18 | 540 | 65 |
| 33,239 | 22 | 3 | 206 | 42 | 17 | 2 | 293 | 17 | 538 | 64 |

|        |    |   |     |    |    |   |     |    |     |     |
|--------|----|---|-----|----|----|---|-----|----|-----|-----|
| 33,240 | 22 | 3 | 211 | 44 | 18 | 2 | 307 | 16 | 558 | 65  |
| 33,241 | 22 | 3 | 217 | 42 | 18 | 2 | 316 | 16 | 573 | 63  |
| 33,242 | 25 | 3 | 243 | 42 | 19 | 2 | 347 | 16 | 634 | 63  |
| 33,243 | 25 | 3 | 244 | 42 | 19 | 2 | 348 | 16 | 636 | 63  |
| 33,244 | 26 | 3 | 236 | 42 | 19 | 2 | 343 | 16 | 624 | 63  |
| 33,245 | 26 | 3 | 236 | 42 | 19 | 2 | 340 | 16 | 621 | 63  |
| 33,246 | 26 | 2 | 245 | 42 | 19 | 2 | 349 | 16 | 639 | 62  |
| 33,247 | 26 | 2 | 246 | 42 | 20 | 2 | 355 | 19 | 647 | 65  |
| 33,248 | 26 | 2 | 246 | 42 | 20 | 2 | 352 | 19 | 644 | 65  |
| 33,249 | 27 | 2 | 245 | 42 | 21 | 2 | 363 | 19 | 656 | 65  |
| 33,250 | 27 | 2 | 248 | 42 | 21 | 2 | 367 | 19 | 663 | 65  |
| 33,251 | 27 | 2 | 247 | 42 | 21 | 2 | 367 | 19 | 662 | 65  |
| 33,252 | 27 | 2 | 247 | 44 | 21 | 2 | 367 | 20 | 662 | 68  |
| 33,253 | 27 | 2 | 248 | 44 | 21 | 2 | 369 | 20 | 665 | 68  |
| 33,254 | 27 | 2 | 247 | 42 | 21 | 2 | 369 | 20 | 664 | 66  |
| 33,255 | 27 | 2 | 258 | 38 | 21 | 2 | 374 | 19 | 680 | 61  |
| 33,256 | 28 | 2 | 278 | 37 | 25 | 2 | 394 | 17 | 725 | 58  |
| 33,257 | 30 | 2 | 293 | 37 | 25 | 2 | 411 | 17 | 759 | 58  |
| 33,258 | 30 | 2 | 296 | 37 | 25 | 2 | 428 | 17 | 779 | 58  |
| 33,259 | 30 | 2 | 296 | 37 | 25 | 2 | 428 | 17 | 779 | 58  |
| 33,260 | 30 | 2 | 290 | 36 | 25 | 2 | 425 | 17 | 770 | 57  |
| 33,261 | 30 | 2 | 299 | 35 | 26 | 1 | 447 | 16 | 802 | 54  |
| 33,262 | 30 | 2 | 298 | 35 | 26 | 1 | 447 | 16 | 801 | 54  |
| 33,263 | 30 | 2 | 293 | 33 | 26 | 1 | 442 | 16 | 791 | 52  |
| 33,264 | 30 | 2 | 294 | 33 | 27 | 1 | 443 | 16 | 794 | 52  |
| 33,265 | 30 | 2 | 294 | 33 | 27 | 1 | 443 | 16 | 794 | 52  |
| 33,266 | 29 | 2 | 293 | 33 | 27 | 1 | 441 | 16 | 790 | 52  |
| 33,267 | 29 | 2 | 290 | 33 | 27 | 1 | 440 | 16 | 786 | 52  |
| 33,268 | 29 | 2 | 290 | 34 | 27 | 1 | 440 | 17 | 786 | 54  |
| 33,269 | 27 | 1 | 282 | 39 | 27 | 1 | 429 | 18 | 765 | 59  |
| 33,270 | 26 | 1 | 276 | 44 | 26 | 1 | 421 | 19 | 749 | 65  |
| 33,271 | 26 | 1 | 275 | 44 | 26 | 1 | 417 | 20 | 744 | 66  |
| 33,272 | 26 | 1 | 272 | 48 | 26 | 1 | 415 | 21 | 739 | 71  |
| 33,273 | 21 | 1 | 229 | 49 | 20 | 1 | 314 | 23 | 584 | 74  |
| 33,274 | 16 | 1 | 192 | 51 | 11 | 2 | 247 | 28 | 466 | 82  |
| 33,275 | 15 | 1 | 180 | 54 | 11 | 2 | 227 | 34 | 433 | 91  |
| 33,276 | 14 | 1 | 166 | 55 | 11 | 2 | 210 | 34 | 401 | 92  |
| 33,277 | 15 | 4 | 175 | 65 | 11 | 2 | 211 | 38 | 412 | 109 |
| 33,278 | 15 | 4 | 179 | 65 | 11 | 2 | 213 | 38 | 418 | 109 |
| 33,279 | 16 | 4 | 186 | 66 | 11 | 2 | 216 | 38 | 429 | 110 |
| 33,280 | 20 | 4 | 201 | 65 | 13 | 2 | 225 | 38 | 459 | 109 |

|        |    |    |     |    |    |   |     |    |     |     |
|--------|----|----|-----|----|----|---|-----|----|-----|-----|
| 33,281 | 20 | 4  | 201 | 65 | 12 | 2 | 225 | 38 | 458 | 109 |
| 33,282 | 21 | 4  | 209 | 63 | 12 | 2 | 230 | 38 | 472 | 107 |
| 33,283 | 35 | 3  | 305 | 51 | 15 | 1 | 272 | 30 | 627 | 85  |
| 33,284 | 42 | 3  | 342 | 53 | 15 | 1 | 289 | 31 | 688 | 88  |
| 33,285 | 47 | 3  | 377 | 53 | 17 | 1 | 311 | 32 | 752 | 89  |
| 33,286 | 46 | 3  | 387 | 53 | 17 | 1 | 308 | 32 | 758 | 89  |
| 33,287 | 46 | 3  | 390 | 52 | 18 | 1 | 308 | 33 | 762 | 89  |
| 33,288 | 46 | 3  | 390 | 52 | 18 | 1 | 307 | 33 | 761 | 89  |
| 33,289 | 47 | 3  | 385 | 44 | 18 | 1 | 312 | 32 | 762 | 80  |
| 33,290 | 47 | 3  | 385 | 45 | 18 | 1 | 311 | 33 | 761 | 82  |
| 33,291 | 47 | 3  | 381 | 43 | 17 | 1 | 299 | 32 | 744 | 79  |
| 33,292 | 47 | 3  | 375 | 43 | 17 | 1 | 290 | 32 | 729 | 79  |
| 33,293 | 44 | 3  | 347 | 43 | 16 | 1 | 259 | 32 | 666 | 79  |
| 33,294 | 44 | 3  | 346 | 43 | 16 | 1 | 258 | 32 | 664 | 79  |
| 33,295 | 43 | 3  | 342 | 43 | 16 | 1 | 256 | 33 | 657 | 80  |
| 33,296 | 43 | 3  | 334 | 43 | 16 | 1 | 247 | 33 | 640 | 80  |
| 33,297 | 43 | 3  | 332 | 43 | 16 | 1 | 247 | 30 | 638 | 77  |
| 33,298 | 43 | 4  | 331 | 43 | 15 | 1 | 241 | 30 | 630 | 78  |
| 33,299 | 42 | 4  | 328 | 43 | 14 | 1 | 229 | 30 | 613 | 78  |
| 33,300 | 42 | 4  | 324 | 44 | 14 | 1 | 226 | 30 | 606 | 79  |
| 33,301 | 42 | 4  | 324 | 44 | 14 | 1 | 226 | 30 | 606 | 79  |
| 33,302 | 42 | 4  | 324 | 42 | 14 | 1 | 226 | 30 | 606 | 77  |
| 33,303 | 42 | 4  | 324 | 44 | 14 | 1 | 226 | 31 | 606 | 80  |
| 33,304 | 42 | 7  | 324 | 54 | 14 | 1 | 224 | 33 | 604 | 95  |
| 33,305 | 42 | 7  | 324 | 56 | 14 | 1 | 224 | 34 | 604 | 98  |
| 33,306 | 42 | 7  | 316 | 59 | 14 | 1 | 219 | 35 | 591 | 102 |
| 33,307 | 41 | 7  | 297 | 65 | 10 | 1 | 200 | 35 | 548 | 108 |
| 33,308 | 39 | 7  | 282 | 65 | 10 | 2 | 183 | 37 | 514 | 111 |
| 33,309 | 39 | 7  | 282 | 71 | 10 | 2 | 167 | 38 | 498 | 118 |
| 33,310 | 39 | 8  | 281 | 75 | 10 | 2 | 161 | 40 | 491 | 125 |
| 33,311 | 39 | 8  | 272 | 78 | 9  | 2 | 149 | 43 | 469 | 131 |
| 33,312 | 39 | 8  | 271 | 78 | 9  | 2 | 144 | 44 | 463 | 132 |
| 33,313 | 39 | 8  | 272 | 78 | 8  | 2 | 145 | 44 | 464 | 132 |
| 33,314 | 39 | 8  | 275 | 78 | 8  | 2 | 145 | 44 | 467 | 132 |
| 33,315 | 38 | 8  | 293 | 86 | 8  | 2 | 149 | 47 | 488 | 143 |
| 33,316 | 38 | 8  | 292 | 86 | 8  | 2 | 149 | 47 | 487 | 143 |
| 33,317 | 38 | 8  | 314 | 88 | 8  | 2 | 153 | 48 | 513 | 146 |
| 33,318 | 54 | 10 | 420 | 88 | 13 | 2 | 230 | 48 | 717 | 148 |
| 33,319 | 55 | 10 | 466 | 87 | 13 | 2 | 240 | 47 | 774 | 146 |
| 33,320 | 58 | 10 | 478 | 77 | 13 | 2 | 249 | 45 | 798 | 134 |
| 33,321 | 58 | 10 | 478 | 77 | 13 | 2 | 249 | 45 | 798 | 134 |

|        |    |    |     |    |    |   |     |    |       |     |
|--------|----|----|-----|----|----|---|-----|----|-------|-----|
| 33,322 | 59 | 10 | 473 | 73 | 13 | 2 | 253 | 43 | 798   | 128 |
| 33,323 | 59 | 10 | 473 | 74 | 13 | 2 | 253 | 43 | 798   | 129 |
| 33,324 | 59 | 10 | 471 | 73 | 13 | 2 | 252 | 41 | 795   | 126 |
| 33,325 | 59 | 11 | 474 | 71 | 13 | 1 | 254 | 36 | 800   | 119 |
| 33,326 | 59 | 11 | 473 | 68 | 13 | 1 | 254 | 30 | 799   | 110 |
| 33,327 | 58 | 11 | 467 | 67 | 13 | 1 | 252 | 30 | 790   | 109 |
| 33,328 | 60 | 8  | 480 | 57 | 13 | 1 | 254 | 26 | 807   | 92  |
| 33,329 | 60 | 8  | 476 | 57 | 13 | 1 | 252 | 26 | 801   | 92  |
| 33,330 | 60 | 8  | 499 | 56 | 13 | 1 | 252 | 27 | 824   | 92  |
| 33,331 | 61 | 9  | 569 | 58 | 13 | 1 | 280 | 28 | 923   | 96  |
| 33,332 | 66 | 10 | 607 | 60 | 19 | 1 | 312 | 32 | 1,004 | 103 |
| 33,333 | 59 | 10 | 576 | 64 | 20 | 1 | 295 | 36 | 950   | 111 |
| 33,334 | 52 | 10 | 541 | 66 | 17 | 1 | 284 | 37 | 894   | 114 |
| 33,335 | 45 | 10 | 516 | 65 | 17 | 1 | 271 | 36 | 849   | 112 |
| 33,336 | 36 | 10 | 475 | 65 | 15 | 1 | 244 | 35 | 770   | 111 |
| 33,337 | 36 | 10 | 452 | 64 | 15 | 1 | 235 | 34 | 738   | 109 |
| 33,338 | 36 | 10 | 448 | 64 | 14 | 1 | 231 | 33 | 729   | 108 |
| 33,339 | 35 | 10 | 445 | 64 | 14 | 1 | 225 | 33 | 719   | 108 |
| 33,340 | 37 | 10 | 457 | 64 | 14 | 1 | 227 | 31 | 735   | 106 |
| 33,341 | 37 | 10 | 457 | 64 | 14 | 1 | 230 | 31 | 738   | 106 |
| 33,342 | 37 | 10 | 458 | 64 | 14 | 1 | 230 | 31 | 739   | 106 |
| 33,343 | 38 | 10 | 462 | 64 | 15 | 1 | 231 | 31 | 746   | 106 |
| 33,344 | 38 | 10 | 462 | 65 | 15 | 1 | 231 | 31 | 746   | 107 |
| 33,345 | 38 | 10 | 462 | 65 | 15 | 1 | 231 | 31 | 746   | 107 |
| 33,346 | 38 | 10 | 463 | 65 | 15 | 1 | 231 | 30 | 747   | 106 |
| 33,347 | 38 | 10 | 464 | 65 | 15 | 1 | 231 | 30 | 748   | 106 |
| 33,348 | 38 | 10 | 464 | 66 | 15 | 1 | 231 | 30 | 748   | 107 |
| 33,349 | 38 | 9  | 470 | 66 | 15 | 1 | 231 | 30 | 754   | 106 |
| 33,350 | 38 | 9  | 471 | 66 | 15 | 1 | 231 | 30 | 755   | 106 |
| 33,351 | 38 | 9  | 472 | 65 | 15 | 1 | 230 | 30 | 755   | 105 |
| 33,352 | 39 | 9  | 477 | 66 | 15 | 1 | 235 | 29 | 766   | 105 |
| 33,353 | 39 | 9  | 477 | 66 | 15 | 1 | 235 | 29 | 766   | 105 |
| 33,354 | 39 | 9  | 477 | 64 | 15 | 1 | 235 | 28 | 766   | 102 |
| 33,355 | 39 | 6  | 476 | 55 | 16 | 1 | 235 | 26 | 766   | 88  |
| 33,356 | 39 | 6  | 476 | 53 | 16 | 1 | 236 | 25 | 767   | 85  |
| 33,357 | 39 | 6  | 474 | 50 | 16 | 1 | 236 | 24 | 765   | 81  |
| 33,358 | 40 | 6  | 478 | 44 | 16 | 1 | 235 | 24 | 769   | 75  |
| 33,359 | 40 | 6  | 476 | 44 | 16 | 0 | 234 | 22 | 766   | 72  |
| 33,360 | 41 | 5  | 497 | 34 | 17 | 0 | 239 | 19 | 794   | 58  |
| 33,361 | 42 | 5  | 499 | 31 | 17 | 0 | 241 | 16 | 799   | 52  |
| 33,362 | 43 | 5  | 500 | 31 | 17 | 0 | 241 | 16 | 801   | 52  |

|        |    |   |     |    |    |   |     |    |     |     |
|--------|----|---|-----|----|----|---|-----|----|-----|-----|
| 33,363 | 43 | 5 | 502 | 31 | 17 | 0 | 239 | 15 | 801 | 51  |
| 33,364 | 44 | 6 | 508 | 26 | 18 | 0 | 246 | 15 | 816 | 47  |
| 33,365 | 44 | 6 | 521 | 31 | 19 | 0 | 256 | 19 | 840 | 56  |
| 33,366 | 44 | 6 | 509 | 35 | 19 | 0 | 254 | 26 | 826 | 67  |
| 33,367 | 44 | 7 | 499 | 38 | 20 | 0 | 258 | 26 | 821 | 71  |
| 33,368 | 41 | 7 | 479 | 38 | 19 | 0 | 240 | 29 | 779 | 74  |
| 33,369 | 28 | 7 | 401 | 48 | 15 | 1 | 186 | 44 | 630 | 100 |
| 33,370 | 27 | 7 | 355 | 49 | 15 | 1 | 175 | 44 | 572 | 101 |
| 33,371 | 24 | 7 | 356 | 49 | 15 | 1 | 177 | 44 | 572 | 101 |
| 33,372 | 23 | 7 | 361 | 50 | 15 | 1 | 177 | 44 | 576 | 102 |
| 33,373 | 23 | 7 | 361 | 50 | 15 | 1 | 173 | 44 | 572 | 102 |
| 33,374 | 23 | 7 | 361 | 49 | 15 | 1 | 172 | 44 | 571 | 101 |
| 33,375 | 23 | 7 | 361 | 49 | 15 | 1 | 172 | 44 | 571 | 101 |
| 33,376 | 23 | 6 | 358 | 49 | 15 | 1 | 171 | 44 | 567 | 100 |
| 33,377 | 23 | 6 | 357 | 53 | 15 | 1 | 171 | 45 | 566 | 105 |
| 33,378 | 21 | 6 | 354 | 55 | 15 | 1 | 170 | 50 | 560 | 112 |
| 33,379 | 21 | 7 | 347 | 56 | 15 | 1 | 168 | 50 | 551 | 114 |
| 33,380 | 20 | 7 | 316 | 56 | 15 | 1 | 165 | 50 | 516 | 114 |
| 33,381 | 15 | 5 | 230 | 46 | 13 | 1 | 130 | 40 | 388 | 92  |
| 33,382 | 15 | 5 | 235 | 47 | 13 | 1 | 130 | 40 | 393 | 93  |
| 33,383 | 9  | 5 | 190 | 50 | 7  | 1 | 91  | 41 | 297 | 97  |
| 33,384 | 9  | 5 | 230 | 50 | 9  | 1 | 112 | 41 | 360 | 97  |
| 33,385 | 9  | 5 | 208 | 48 | 9  | 1 | 101 | 40 | 327 | 94  |
| 33,386 | 9  | 5 | 197 | 47 | 9  | 1 | 101 | 40 | 316 | 93  |
| 33,387 | 9  | 5 | 204 | 48 | 9  | 1 | 109 | 41 | 331 | 95  |
| 33,388 | 12 | 5 | 210 | 47 | 10 | 1 | 112 | 41 | 344 | 94  |
| 33,389 | 12 | 5 | 213 | 45 | 10 | 1 | 115 | 41 | 350 | 92  |
| 33,390 | 12 | 5 | 209 | 45 | 10 | 1 | 115 | 41 | 346 | 92  |
| 33,391 | 10 | 5 | 203 | 45 | 10 | 1 | 113 | 41 | 336 | 92  |
| 33,392 | 10 | 5 | 202 | 45 | 10 | 1 | 110 | 41 | 332 | 92  |
| 33,393 | 10 | 5 | 201 | 45 | 10 | 1 | 109 | 41 | 330 | 92  |
| 33,394 | 9  | 5 | 199 | 45 | 9  | 1 | 109 | 41 | 326 | 92  |
| 33,395 | 9  | 5 | 200 | 45 | 9  | 1 | 109 | 41 | 327 | 92  |
| 33,396 | 9  | 5 | 199 | 45 | 9  | 1 | 107 | 41 | 324 | 92  |
| 33,397 | 9  | 5 | 198 | 45 | 9  | 1 | 107 | 41 | 323 | 92  |
| 33,398 | 9  | 5 | 198 | 46 | 9  | 1 | 107 | 42 | 323 | 94  |
| 33,399 | 9  | 5 | 198 | 48 | 9  | 1 | 109 | 45 | 325 | 99  |
| 33,400 | 10 | 5 | 196 | 49 | 9  | 1 | 109 | 45 | 324 | 100 |
| 33,401 | 10 | 5 | 198 | 49 | 9  | 1 | 109 | 45 | 326 | 100 |
| 33,402 | 10 | 6 | 198 | 49 | 9  | 1 | 109 | 45 | 326 | 101 |
| 33,403 | 9  | 6 | 193 | 51 | 9  | 1 | 103 | 46 | 314 | 104 |

|        |    |   |     |    |    |   |     |    |     |     |
|--------|----|---|-----|----|----|---|-----|----|-----|-----|
| 33,404 | 9  | 6 | 193 | 51 | 9  | 1 | 103 | 46 | 314 | 104 |
| 33,405 | 13 | 6 | 216 | 51 | 8  | 1 | 110 | 46 | 347 | 104 |
| 33,406 | 18 | 6 | 253 | 50 | 10 | 1 | 131 | 46 | 412 | 103 |
| 33,407 | 18 | 6 | 264 | 50 | 10 | 1 | 135 | 46 | 427 | 103 |
| 33,408 | 21 | 6 | 273 | 50 | 11 | 1 | 143 | 47 | 448 | 104 |
| 33,409 | 30 | 7 | 334 | 50 | 15 | 1 | 185 | 47 | 564 | 105 |
| 33,410 | 30 | 7 | 331 | 50 | 15 | 1 | 184 | 47 | 560 | 105 |
| 33,411 | 29 | 7 | 320 | 50 | 14 | 1 | 181 | 47 | 544 | 105 |
| 33,412 | 33 | 7 | 396 | 50 | 15 | 1 | 202 | 46 | 646 | 104 |
| 33,413 | 32 | 7 | 405 | 50 | 16 | 1 | 206 | 46 | 659 | 104 |
| 33,414 | 39 | 7 | 419 | 50 | 16 | 1 | 216 | 47 | 690 | 105 |
| 33,415 | 38 | 6 | 412 | 49 | 15 | 1 | 209 | 44 | 674 | 100 |
| 33,416 | 38 | 6 | 394 | 44 | 14 | 1 | 199 | 40 | 645 | 91  |
| 33,417 | 39 | 6 | 393 | 41 | 15 | 1 | 203 | 34 | 650 | 82  |
| 33,418 | 39 | 5 | 383 | 36 | 14 | 1 | 196 | 30 | 632 | 72  |
| 33,419 | 39 | 5 | 374 | 37 | 14 | 1 | 192 | 30 | 619 | 73  |
| 33,420 | 39 | 3 | 367 | 27 | 14 | 0 | 184 | 16 | 604 | 46  |
| 33,421 | 39 | 3 | 373 | 26 | 15 | 0 | 185 | 16 | 612 | 45  |
| 33,422 | 39 | 3 | 369 | 26 | 15 | 0 | 185 | 16 | 608 | 45  |
| 33,423 | 39 | 3 | 370 | 26 | 15 | 0 | 184 | 16 | 608 | 45  |
| 33,424 | 39 | 3 | 375 | 26 | 15 | 0 | 190 | 16 | 619 | 45  |
| 33,425 | 39 | 4 | 378 | 26 | 15 | 0 | 193 | 16 | 625 | 46  |
| 33,426 | 39 | 4 | 383 | 26 | 15 | 0 | 199 | 16 | 636 | 46  |
| 33,427 | 39 | 4 | 384 | 26 | 15 | 0 | 200 | 16 | 638 | 46  |
| 33,428 | 39 | 4 | 383 | 24 | 15 | 0 | 200 | 15 | 637 | 43  |
| 33,429 | 39 | 4 | 379 | 22 | 15 | 0 | 200 | 11 | 633 | 37  |
| 33,430 | 39 | 3 | 381 | 21 | 15 | 0 | 201 | 11 | 636 | 35  |
| 33,431 | 40 | 3 | 382 | 22 | 15 | 0 | 203 | 11 | 640 | 36  |
| 33,432 | 42 | 3 | 383 | 21 | 15 | 0 | 207 | 12 | 647 | 36  |
| 33,433 | 43 | 3 | 399 | 18 | 15 | 0 | 209 | 12 | 666 | 33  |
| 33,434 | 43 | 5 | 403 | 24 | 15 | 1 | 213 | 13 | 674 | 43  |
| 33,435 | 43 | 5 | 358 | 25 | 12 | 1 | 192 | 14 | 605 | 45  |
| 33,436 | 43 | 5 | 359 | 25 | 12 | 1 | 189 | 14 | 603 | 45  |
| 33,437 | 43 | 5 | 359 | 25 | 12 | 1 | 185 | 14 | 599 | 45  |
| 33,438 | 43 | 5 | 352 | 24 | 12 | 1 | 177 | 14 | 584 | 44  |
| 33,439 | 40 | 5 | 347 | 24 | 11 | 1 | 173 | 14 | 571 | 44  |
| 33,440 | 40 | 5 | 344 | 25 | 11 | 1 | 169 | 14 | 564 | 45  |
| 33,441 | 40 | 5 | 344 | 25 | 11 | 1 | 170 | 14 | 565 | 45  |
| 33,442 | 40 | 5 | 353 | 25 | 11 | 1 | 173 | 14 | 577 | 45  |
| 33,443 | 40 | 5 | 354 | 25 | 11 | 1 | 173 | 14 | 578 | 45  |
| 33,444 | 42 | 5 | 364 | 26 | 11 | 1 | 182 | 14 | 599 | 46  |



|        |    |   |     |    |    |   |     |    |     |    |
|--------|----|---|-----|----|----|---|-----|----|-----|----|
| 33,445 | 42 | 6 | 382 | 27 | 12 | 1 | 194 | 15 | 630 | 49 |
| 33,446 | 42 | 6 | 381 | 27 | 12 | 1 | 194 | 15 | 629 | 49 |
| 33,447 | 42 | 8 | 381 | 60 | 12 | 2 | 194 | 20 | 629 | 90 |
| 33,448 | 42 | 8 | 382 | 60 | 12 | 2 | 196 | 21 | 632 | 91 |
| 33,449 | 42 | 8 | 381 | 56 | 12 | 2 | 196 | 17 | 631 | 83 |
| 33,450 | 42 | 8 | 398 | 55 | 12 | 2 | 206 | 17 | 658 | 82 |
| 33,451 | 41 | 8 | 400 | 55 | 12 | 2 | 207 | 17 | 660 | 82 |
| 33,452 | 46 | 7 | 411 | 55 | 13 | 2 | 213 | 17 | 683 | 81 |
| 33,453 | 46 | 7 | 410 | 56 | 13 | 2 | 213 | 17 | 682 | 82 |
| 33,454 | 42 | 7 | 396 | 54 | 13 | 2 | 210 | 16 | 661 | 79 |
| 33,455 | 42 | 7 | 390 | 55 | 13 | 2 | 210 | 16 | 655 | 80 |
| 33,456 | 37 | 7 | 358 | 55 | 11 | 2 | 195 | 16 | 601 | 80 |
| 33,457 | 41 | 7 | 402 | 55 | 13 | 2 | 210 | 16 | 666 | 80 |
| 33,458 | 39 | 7 | 408 | 55 | 12 | 2 | 206 | 16 | 665 | 80 |
| 33,459 | 29 | 6 | 351 | 55 | 8  | 2 | 165 | 15 | 553 | 78 |
| 33,460 | 29 | 6 | 352 | 55 | 8  | 2 | 166 | 15 | 555 | 78 |
| 33,461 | 29 | 6 | 347 | 55 | 8  | 2 | 167 | 16 | 551 | 79 |
| 33,462 | 28 | 6 | 330 | 56 | 8  | 2 | 161 | 16 | 527 | 80 |
| 33,463 | 24 | 6 | 271 | 56 | 7  | 2 | 144 | 16 | 446 | 80 |
| 33,464 | 24 | 6 | 260 | 56 | 6  | 2 | 140 | 16 | 430 | 80 |
| 33,465 | 17 | 6 | 244 | 54 | 6  | 2 | 130 | 15 | 397 | 77 |
| 33,466 | 17 | 6 | 241 | 54 | 6  | 2 | 129 | 15 | 393 | 77 |
| 33,467 | 16 | 6 | 240 | 53 | 6  | 2 | 125 | 14 | 387 | 75 |
| 33,468 | 16 | 6 | 239 | 53 | 5  | 2 | 123 | 14 | 383 | 75 |
| 33,469 | 16 | 7 | 238 | 53 | 5  | 2 | 122 | 14 | 381 | 76 |
| 33,470 | 16 | 7 | 239 | 52 | 5  | 2 | 122 | 14 | 382 | 75 |
| 33,471 | 16 | 7 | 239 | 53 | 5  | 2 | 122 | 14 | 382 | 76 |
| 33,472 | 16 | 7 | 228 | 53 | 4  | 2 | 118 | 14 | 366 | 76 |
| 33,473 | 18 | 7 | 226 | 55 | 4  | 2 | 118 | 14 | 366 | 78 |
| 33,474 | 18 | 7 | 221 | 54 | 4  | 3 | 112 | 14 | 355 | 78 |
| 33,475 | 18 | 7 | 224 | 54 | 4  | 3 | 112 | 14 | 358 | 78 |
| 33,476 | 18 | 6 | 224 | 54 | 4  | 3 | 110 | 15 | 356 | 78 |
| 33,477 | 18 | 6 | 219 | 54 | 4  | 3 | 106 | 15 | 347 | 78 |
| 33,478 | 18 | 6 | 218 | 52 | 4  | 3 | 106 | 15 | 346 | 76 |
| 33,479 | 18 | 6 | 218 | 52 | 4  | 3 | 107 | 15 | 347 | 76 |
| 33,480 | 18 | 6 | 217 | 53 | 4  | 3 | 106 | 14 | 345 | 76 |
| 33,481 | 17 | 6 | 216 | 52 | 4  | 3 | 104 | 14 | 341 | 75 |
| 33,482 | 17 | 6 | 216 | 52 | 4  | 3 | 104 | 14 | 341 | 75 |
| 33,483 | 15 | 7 | 213 | 52 | 4  | 3 | 97  | 14 | 329 | 76 |
| 33,484 | 14 | 7 | 204 | 53 | 5  | 3 | 96  | 17 | 319 | 80 |
| 33,485 | 14 | 5 | 199 | 47 | 5  | 2 | 93  | 16 | 311 | 70 |

|        |    |   |     |    |    |   |     |    |     |    |
|--------|----|---|-----|----|----|---|-----|----|-----|----|
| 33,486 | 14 | 5 | 199 | 46 | 5  | 2 | 94  | 15 | 312 | 68 |
| 33,487 | 14 | 5 | 200 | 46 | 7  | 2 | 94  | 15 | 315 | 68 |
| 33,488 | 14 | 5 | 199 | 46 | 7  | 2 | 93  | 15 | 313 | 68 |
| 33,489 | 14 | 6 | 197 | 46 | 7  | 3 | 94  | 15 | 312 | 70 |
| 33,490 | 14 | 6 | 198 | 46 | 7  | 3 | 94  | 15 | 313 | 70 |
| 33,491 | 15 | 6 | 226 | 45 | 8  | 3 | 99  | 15 | 348 | 69 |
| 33,492 | 15 | 8 | 231 | 45 | 8  | 3 | 98  | 15 | 352 | 71 |
| 33,493 | 15 | 8 | 227 | 45 | 8  | 3 | 100 | 15 | 350 | 71 |
| 33,494 | 15 | 8 | 238 | 45 | 10 | 3 | 102 | 15 | 365 | 71 |
| 33,495 | 13 | 8 | 238 | 46 | 10 | 3 | 102 | 15 | 363 | 72 |
| 33,496 | 13 | 7 | 219 | 45 | 9  | 3 | 88  | 14 | 329 | 69 |
| 33,497 | 13 | 7 | 221 | 44 | 9  | 3 | 91  | 14 | 334 | 68 |
| 33,498 | 13 | 5 | 221 | 11 | 9  | 2 | 91  | 9  | 334 | 27 |
| 33,499 | 13 | 5 | 221 | 11 | 9  | 2 | 89  | 8  | 332 | 26 |
| 33,500 | 13 | 5 | 221 | 11 | 9  | 2 | 88  | 8  | 331 | 26 |
| 33,501 | 13 | 5 | 211 | 10 | 10 | 2 | 83  | 8  | 317 | 25 |
| 33,502 | 13 | 5 | 207 | 10 | 10 | 2 | 83  | 8  | 313 | 25 |
| 33,503 | 9  | 5 | 202 | 10 | 9  | 2 | 87  | 10 | 307 | 27 |
| 33,504 | 9  | 5 | 201 | 9  | 9  | 2 | 85  | 10 | 304 | 26 |
| 33,505 | 10 | 5 | 205 | 9  | 9  | 2 | 87  | 10 | 311 | 26 |
| 33,506 | 11 | 5 | 210 | 8  | 11 | 2 | 92  | 11 | 324 | 26 |
| 33,507 | 11 | 5 | 209 | 10 | 11 | 2 | 87  | 12 | 318 | 29 |
| 33,508 | 7  | 5 | 154 | 11 | 9  | 2 | 68  | 12 | 238 | 30 |
| 33,509 | 6  | 5 | 137 | 11 | 9  | 2 | 64  | 12 | 216 | 30 |
| 33,510 | 7  | 5 | 132 | 11 | 9  | 2 | 67  | 12 | 215 | 30 |
| 33,511 | 7  | 5 | 132 | 11 | 9  | 2 | 66  | 12 | 214 | 30 |
| 33,512 | 7  | 5 | 129 | 14 | 10 | 2 | 64  | 11 | 210 | 32 |
| 33,513 | 7  | 5 | 128 | 14 | 10 | 2 | 66  | 11 | 211 | 32 |
| 33,514 | 7  | 5 | 128 | 14 | 10 | 2 | 66  | 12 | 211 | 33 |
| 33,515 | 7  | 5 | 128 | 14 | 10 | 2 | 66  | 12 | 211 | 33 |
| 33,516 | 7  | 5 | 128 | 14 | 10 | 2 | 66  | 12 | 211 | 33 |
| 33,517 | 7  | 5 | 128 | 15 | 10 | 2 | 66  | 12 | 211 | 34 |
| 33,518 | 7  | 5 | 128 | 15 | 10 | 2 | 66  | 12 | 211 | 34 |
| 33,519 | 7  | 5 | 128 | 15 | 10 | 2 | 65  | 12 | 210 | 34 |
| 33,520 | 7  | 4 | 128 | 15 | 10 | 2 | 65  | 12 | 210 | 33 |
| 33,521 | 7  | 4 | 127 | 15 | 10 | 2 | 65  | 12 | 209 | 33 |
| 33,522 | 7  | 4 | 126 | 14 | 10 | 2 | 65  | 12 | 208 | 32 |
| 33,523 | 7  | 4 | 127 | 12 | 10 | 2 | 65  | 12 | 209 | 30 |
| 33,524 | 5  | 4 | 127 | 12 | 10 | 2 | 65  | 12 | 207 | 30 |
| 33,525 | 5  | 4 | 127 | 12 | 10 | 1 | 62  | 11 | 204 | 28 |
| 33,526 | 5  | 4 | 127 | 12 | 10 | 1 | 62  | 11 | 204 | 28 |

|        |    |   |     |    |    |   |     |    |     |    |
|--------|----|---|-----|----|----|---|-----|----|-----|----|
| 33,527 | 5  | 4 | 127 | 12 | 10 | 1 | 62  | 11 | 204 | 28 |
| 33,528 | 6  | 4 | 127 | 12 | 10 | 1 | 63  | 11 | 206 | 28 |
| 33,529 | 6  | 4 | 127 | 12 | 10 | 1 | 62  | 11 | 205 | 28 |
| 33,530 | 6  | 4 | 132 | 12 | 10 | 1 | 64  | 11 | 212 | 28 |
| 33,531 | 6  | 4 | 131 | 11 | 10 | 1 | 64  | 11 | 211 | 27 |
| 33,532 | 7  | 4 | 135 | 11 | 11 | 1 | 70  | 10 | 223 | 26 |
| 33,533 | 8  | 4 | 135 | 11 | 11 | 1 | 70  | 10 | 224 | 26 |
| 33,534 | 8  | 3 | 135 | 11 | 11 | 1 | 70  | 11 | 224 | 26 |
| 33,535 | 8  | 4 | 125 | 11 | 10 | 1 | 69  | 7  | 212 | 23 |
| 33,536 | 12 | 4 | 203 | 11 | 17 | 1 | 116 | 7  | 348 | 23 |
| 33,537 | 16 | 4 | 238 | 11 | 19 | 1 | 143 | 7  | 416 | 23 |
| 33,538 | 17 | 4 | 248 | 11 | 21 | 1 | 166 | 7  | 452 | 23 |
| 33,539 | 18 | 4 | 260 | 11 | 21 | 1 | 170 | 8  | 469 | 24 |
| 33,540 | 18 | 3 | 267 | 11 | 21 | 0 | 170 | 7  | 476 | 21 |
| 33,541 | 17 | 3 | 246 | 12 | 20 | 0 | 166 | 9  | 449 | 24 |
| 33,542 | 17 | 3 | 245 | 13 | 20 | 0 | 167 | 9  | 449 | 25 |
| 33,543 | 17 | 1 | 242 | 12 | 20 | 0 | 169 | 9  | 448 | 22 |
| 33,544 | 17 | 1 | 237 | 12 | 20 | 0 | 165 | 9  | 439 | 22 |
| 33,545 | 17 | 1 | 216 | 11 | 18 | 0 | 155 | 9  | 406 | 21 |
| 33,546 | 17 | 1 | 213 | 11 | 19 | 0 | 153 | 9  | 402 | 21 |
| 33,547 | 17 | 1 | 213 | 11 | 19 | 0 | 152 | 9  | 401 | 21 |
| 33,548 | 17 | 1 | 213 | 11 | 19 | 0 | 152 | 9  | 401 | 21 |
| 33,549 | 17 | 1 | 212 | 11 | 19 | 0 | 152 | 9  | 400 | 21 |
| 33,550 | 17 | 1 | 213 | 11 | 19 | 0 | 152 | 9  | 401 | 21 |
| 33,551 | 17 | 1 | 213 | 11 | 19 | 0 | 152 | 9  | 401 | 21 |
| 33,552 | 17 | 1 | 206 | 12 | 18 | 0 | 146 | 9  | 387 | 22 |
| 33,553 | 17 | 1 | 205 | 17 | 18 | 0 | 145 | 10 | 385 | 28 |
| 33,554 | 16 | 1 | 196 | 18 | 18 | 0 | 135 | 8  | 365 | 27 |
| 33,555 | 16 | 1 | 196 | 19 | 18 | 1 | 134 | 8  | 364 | 29 |
| 33,556 | 15 | 1 | 192 | 20 | 18 | 1 | 133 | 8  | 358 | 30 |
| 33,557 | 14 | 1 | 185 | 20 | 16 | 1 | 126 | 7  | 341 | 29 |
| 33,558 | 14 | 1 | 181 | 18 | 16 | 1 | 125 | 6  | 336 | 26 |
| 33,559 | 13 | 1 | 178 | 17 | 16 | 1 | 121 | 6  | 328 | 25 |
| 33,560 | 13 | 1 | 178 | 17 | 16 | 1 | 120 | 6  | 327 | 25 |
| 33,561 | 13 | 1 | 177 | 17 | 16 | 1 | 120 | 6  | 326 | 25 |
| 33,562 | 13 | 1 | 177 | 13 | 16 | 1 | 121 | 6  | 327 | 21 |
| 33,563 | 13 | 1 | 177 | 18 | 15 | 1 | 121 | 6  | 326 | 26 |
| 33,564 | 13 | 1 | 177 | 18 | 15 | 1 | 120 | 6  | 325 | 26 |
| 33,565 | 13 | 1 | 177 | 18 | 15 | 1 | 120 | 5  | 325 | 25 |
| 33,566 | 13 | 1 | 177 | 18 | 15 | 1 | 120 | 5  | 325 | 25 |
| 33,567 | 14 | 1 | 193 | 18 | 15 | 1 | 127 | 5  | 349 | 25 |

|        |    |   |     |    |    |   |     |    |     |    |
|--------|----|---|-----|----|----|---|-----|----|-----|----|
| 33,568 | 14 | 1 | 212 | 17 | 18 | 1 | 145 | 5  | 389 | 24 |
| 33,569 | 14 | 1 | 212 | 17 | 18 | 1 | 145 | 5  | 389 | 24 |
| 33,570 | 14 | 1 | 217 | 17 | 18 | 1 | 153 | 5  | 402 | 24 |
| 33,571 | 14 | 1 | 217 | 17 | 18 | 1 | 153 | 5  | 402 | 24 |
| 33,572 | 14 | 1 | 217 | 17 | 18 | 1 | 153 | 5  | 402 | 24 |
| 33,573 | 14 | 1 | 219 | 17 | 18 | 1 | 153 | 5  | 404 | 24 |
| 33,574 | 14 | 1 | 218 | 17 | 18 | 1 | 153 | 5  | 403 | 24 |
| 33,575 | 14 | 1 | 219 | 17 | 18 | 1 | 154 | 6  | 405 | 25 |
| 33,576 | 14 | 1 | 214 | 17 | 18 | 1 | 154 | 6  | 400 | 25 |
| 33,577 | 14 | 1 | 214 | 17 | 18 | 1 | 154 | 6  | 400 | 25 |
| 33,578 | 14 | 1 | 214 | 17 | 18 | 1 | 154 | 6  | 400 | 25 |
| 33,579 | 13 | 1 | 216 | 17 | 18 | 1 | 155 | 6  | 402 | 25 |
| 33,580 | 13 | 1 | 211 | 17 | 18 | 1 | 152 | 6  | 394 | 25 |
| 33,581 | 13 | 1 | 211 | 17 | 18 | 1 | 152 | 6  | 394 | 25 |
| 33,582 | 12 | 1 | 208 | 17 | 18 | 1 | 147 | 6  | 385 | 25 |
| 33,583 | 12 | 1 | 208 | 17 | 17 | 2 | 146 | 6  | 383 | 26 |
| 33,584 | 11 | 1 | 212 | 19 | 18 | 2 | 147 | 6  | 388 | 28 |
| 33,585 | 11 | 1 | 207 | 19 | 18 | 2 | 145 | 5  | 381 | 27 |
| 33,586 | 10 | 0 | 251 | 18 | 17 | 2 | 161 | 5  | 439 | 25 |
| 33,587 | 10 | 0 | 219 | 20 | 16 | 2 | 146 | 5  | 391 | 27 |
| 33,588 | 6  | 3 | 189 | 25 | 14 | 2 | 120 | 9  | 329 | 39 |
| 33,589 | 5  | 6 | 176 | 34 | 10 | 2 | 99  | 10 | 290 | 52 |
| 33,590 | 6  | 6 | 165 | 35 | 10 | 2 | 95  | 9  | 276 | 52 |
| 33,591 | 6  | 6 | 157 | 36 | 10 | 2 | 95  | 9  | 268 | 53 |
| 33,592 | 6  | 6 | 161 | 36 | 10 | 2 | 95  | 7  | 272 | 51 |
| 33,593 | 6  | 6 | 159 | 35 | 10 | 2 | 92  | 7  | 267 | 50 |
| 33,594 | 6  | 6 | 157 | 35 | 10 | 2 | 90  | 7  | 263 | 50 |
| 33,595 | 6  | 6 | 155 | 35 | 10 | 2 | 90  | 7  | 261 | 50 |
| 33,596 | 6  | 6 | 157 | 35 | 10 | 2 | 89  | 8  | 262 | 51 |
| 33,597 | 6  | 6 | 157 | 35 | 9  | 2 | 89  | 8  | 261 | 51 |
| 33,598 | 6  | 6 | 157 | 35 | 9  | 2 | 89  | 9  | 261 | 52 |
| 33,599 | 6  | 6 | 157 | 35 | 9  | 2 | 89  | 9  | 261 | 52 |
| 33,600 | 6  | 6 | 157 | 35 | 9  | 2 | 89  | 9  | 261 | 52 |
| 33,601 | 6  | 6 | 165 | 35 | 9  | 2 | 94  | 9  | 274 | 52 |
| 33,602 | 6  | 6 | 165 | 35 | 9  | 2 | 94  | 9  | 274 | 52 |
| 33,603 | 6  | 6 | 166 | 34 | 9  | 2 | 94  | 9  | 275 | 51 |
| 33,604 | 6  | 6 | 167 | 28 | 9  | 2 | 94  | 8  | 276 | 44 |
| 33,605 | 6  | 6 | 168 | 27 | 9  | 1 | 94  | 8  | 277 | 42 |
| 33,606 | 6  | 6 | 168 | 26 | 9  | 1 | 95  | 8  | 278 | 41 |
| 33,607 | 6  | 6 | 168 | 26 | 9  | 1 | 95  | 8  | 278 | 41 |
| 33,608 | 6  | 6 | 168 | 26 | 9  | 1 | 95  | 8  | 278 | 41 |

|        |   |    |     |    |   |   |    |    |     |    |
|--------|---|----|-----|----|---|---|----|----|-----|----|
| 33,609 | 6 | 6  | 167 | 26 | 9 | 1 | 95 | 8  | 277 | 41 |
| 33,610 | 6 | 6  | 169 | 26 | 9 | 1 | 96 | 8  | 280 | 41 |
| 33,611 | 6 | 6  | 169 | 26 | 9 | 1 | 96 | 8  | 280 | 41 |
| 33,612 | 6 | 6  | 169 | 26 | 9 | 1 | 97 | 9  | 281 | 42 |
| 33,613 | 6 | 8  | 169 | 40 | 9 | 4 | 96 | 18 | 280 | 70 |
| 33,614 | 6 | 8  | 169 | 35 | 9 | 4 | 96 | 20 | 280 | 67 |
| 33,615 | 6 | 9  | 169 | 35 | 9 | 4 | 96 | 22 | 280 | 70 |
| 33,616 | 6 | 9  | 172 | 39 | 9 | 4 | 96 | 23 | 283 | 75 |
| 33,617 | 5 | 9  | 167 | 45 | 9 | 4 | 96 | 24 | 277 | 82 |
| 33,618 | 5 | 9  | 156 | 47 | 9 | 4 | 89 | 24 | 259 | 84 |
| 33,619 | 6 | 9  | 140 | 47 | 6 | 4 | 72 | 24 | 224 | 84 |
| 33,620 | 6 | 9  | 140 | 47 | 6 | 4 | 70 | 24 | 222 | 84 |
| 33,621 | 6 | 9  | 137 | 47 | 6 | 4 | 67 | 24 | 216 | 84 |
| 33,622 | 6 | 9  | 137 | 47 | 6 | 4 | 67 | 24 | 216 | 84 |
| 33,623 | 6 | 9  | 138 | 47 | 6 | 4 | 67 | 24 | 217 | 84 |
| 33,624 | 6 | 9  | 139 | 47 | 6 | 4 | 68 | 24 | 219 | 84 |
| 33,625 | 6 | 9  | 139 | 47 | 6 | 4 | 69 | 24 | 220 | 84 |
| 33,626 | 6 | 9  | 150 | 47 | 6 | 4 | 73 | 24 | 235 | 84 |
| 33,627 | 6 | 9  | 149 | 47 | 6 | 4 | 73 | 24 | 234 | 84 |
| 33,628 | 6 | 9  | 151 | 47 | 6 | 4 | 75 | 24 | 238 | 84 |
| 33,629 | 6 | 9  | 151 | 47 | 6 | 4 | 75 | 24 | 238 | 84 |
| 33,630 | 6 | 9  | 151 | 47 | 6 | 4 | 73 | 24 | 236 | 84 |
| 33,631 | 6 | 9  | 156 | 47 | 6 | 4 | 73 | 24 | 241 | 84 |
| 33,632 | 6 | 9  | 155 | 47 | 6 | 4 | 73 | 24 | 240 | 84 |
| 33,633 | 6 | 9  | 164 | 47 | 6 | 4 | 79 | 28 | 255 | 88 |
| 33,634 | 8 | 9  | 171 | 48 | 8 | 3 | 84 | 29 | 271 | 89 |
| 33,635 | 8 | 9  | 167 | 48 | 7 | 3 | 83 | 29 | 265 | 89 |
| 33,636 | 8 | 9  | 169 | 49 | 7 | 3 | 83 | 29 | 267 | 90 |
| 33,637 | 6 | 9  | 97  | 48 | 3 | 3 | 55 | 30 | 161 | 90 |
| 33,638 | 5 | 10 | 86  | 49 | 2 | 3 | 36 | 30 | 129 | 92 |
| 33,639 | 5 | 7  | 86  | 49 | 3 | 4 | 37 | 32 | 131 | 92 |
| 33,640 | 5 | 4  | 85  | 42 | 3 | 4 | 35 | 34 | 128 | 84 |
| 33,641 | 3 | 4  | 84  | 41 | 3 | 4 | 35 | 34 | 125 | 83 |
| 33,642 | 3 | 4  | 93  | 41 | 4 | 4 | 36 | 34 | 136 | 83 |
| 33,643 | 3 | 4  | 127 | 40 | 7 | 4 | 49 | 35 | 186 | 83 |
| 33,644 | 3 | 4  | 123 | 40 | 7 | 4 | 49 | 35 | 182 | 83 |
| 33,645 | 3 | 4  | 136 | 40 | 7 | 4 | 59 | 35 | 205 | 83 |
| 33,646 | 3 | 5  | 136 | 42 | 7 | 4 | 60 | 34 | 206 | 85 |
| 33,647 | 3 | 5  | 135 | 42 | 7 | 4 | 60 | 34 | 205 | 85 |
| 33,648 | 3 | 5  | 137 | 43 | 7 | 4 | 61 | 36 | 208 | 88 |
| 33,649 | 3 | 5  | 137 | 43 | 7 | 4 | 61 | 35 | 208 | 87 |

|        |   |   |     |    |    |   |    |    |     |     |
|--------|---|---|-----|----|----|---|----|----|-----|-----|
| 33,650 | 3 | 5 | 135 | 45 | 7  | 6 | 60 | 35 | 205 | 91  |
| 33,651 | 3 | 5 | 129 | 45 | 7  | 6 | 56 | 35 | 195 | 91  |
| 33,652 | 3 | 5 | 127 | 45 | 7  | 6 | 56 | 35 | 193 | 91  |
| 33,653 | 3 | 5 | 127 | 45 | 7  | 6 | 56 | 35 | 193 | 91  |
| 33,654 | 3 | 5 | 127 | 46 | 7  | 6 | 57 | 35 | 194 | 92  |
| 33,655 | 3 | 5 | 126 | 46 | 7  | 6 | 57 | 35 | 193 | 92  |
| 33,656 | 3 | 5 | 127 | 47 | 7  | 6 | 57 | 35 | 194 | 93  |
| 33,657 | 3 | 5 | 130 | 48 | 7  | 6 | 56 | 35 | 196 | 94  |
| 33,658 | 3 | 5 | 131 | 49 | 7  | 6 | 56 | 36 | 197 | 96  |
| 33,659 | 3 | 5 | 130 | 50 | 7  | 6 | 56 | 36 | 196 | 97  |
| 33,660 | 3 | 5 | 129 | 50 | 7  | 6 | 56 | 36 | 195 | 97  |
| 33,661 | 3 | 5 | 129 | 52 | 7  | 6 | 55 | 36 | 194 | 99  |
| 33,662 | 3 | 6 | 129 | 52 | 7  | 6 | 54 | 36 | 193 | 100 |
| 33,663 | 3 | 4 | 129 | 39 | 7  | 3 | 54 | 24 | 193 | 70  |
| 33,664 | 3 | 5 | 129 | 40 | 7  | 3 | 54 | 24 | 193 | 72  |
| 33,665 | 3 | 5 | 129 | 41 | 7  | 3 | 54 | 24 | 193 | 73  |
| 33,666 | 4 | 4 | 129 | 41 | 7  | 3 | 54 | 23 | 194 | 71  |
| 33,667 | 4 | 4 | 126 | 38 | 7  | 3 | 54 | 23 | 191 | 68  |
| 33,668 | 4 | 4 | 127 | 32 | 7  | 3 | 54 | 22 | 192 | 61  |
| 33,669 | 5 | 4 | 127 | 30 | 7  | 3 | 54 | 22 | 193 | 59  |
| 33,670 | 4 | 4 | 125 | 31 | 8  | 3 | 52 | 25 | 189 | 63  |
| 33,671 | 4 | 4 | 123 | 33 | 8  | 3 | 51 | 25 | 186 | 65  |
| 33,672 | 4 | 4 | 123 | 39 | 8  | 3 | 50 | 26 | 185 | 72  |
| 33,673 | 4 | 4 | 123 | 44 | 8  | 3 | 50 | 27 | 185 | 78  |
| 33,674 | 4 | 4 | 122 | 44 | 8  | 3 | 51 | 27 | 185 | 78  |
| 33,675 | 4 | 4 | 122 | 44 | 8  | 3 | 50 | 27 | 184 | 78  |
| 33,676 | 4 | 4 | 116 | 45 | 8  | 3 | 48 | 28 | 176 | 80  |
| 33,677 | 4 | 4 | 115 | 45 | 8  | 3 | 46 | 28 | 173 | 80  |
| 33,678 | 4 | 4 | 124 | 45 | 9  | 3 | 49 | 28 | 186 | 80  |
| 33,679 | 8 | 4 | 136 | 45 | 10 | 3 | 55 | 28 | 209 | 80  |
| 33,680 | 8 | 4 | 136 | 45 | 10 | 3 | 55 | 28 | 209 | 80  |
| 33,681 | 8 | 4 | 134 | 45 | 10 | 3 | 55 | 28 | 207 | 80  |
| 33,682 | 8 | 4 | 129 | 45 | 10 | 3 | 55 | 28 | 202 | 80  |
| 33,683 | 8 | 5 | 120 | 45 | 10 | 3 | 50 | 24 | 188 | 77  |
| 33,684 | 8 | 5 | 116 | 45 | 8  | 3 | 49 | 24 | 181 | 77  |
| 33,685 | 6 | 5 | 114 | 42 | 8  | 3 | 46 | 23 | 174 | 73  |
| 33,686 | 6 | 5 | 114 | 43 | 8  | 3 | 46 | 23 | 174 | 74  |
| 33,687 | 6 | 5 | 112 | 41 | 8  | 3 | 46 | 22 | 172 | 71  |
| 33,688 | 6 | 4 | 109 | 40 | 8  | 3 | 45 | 22 | 168 | 69  |
| 33,689 | 6 | 4 | 109 | 40 | 8  | 3 | 45 | 25 | 168 | 72  |
| 33,690 | 6 | 4 | 106 | 37 | 7  | 2 | 43 | 20 | 162 | 63  |

|        |    |   |     |    |    |   |     |    |     |    |
|--------|----|---|-----|----|----|---|-----|----|-----|----|
| 33,691 | 6  | 4 | 106 | 35 | 7  | 2 | 45  | 17 | 164 | 58 |
| 33,692 | 6  | 4 | 105 | 36 | 7  | 2 | 44  | 17 | 162 | 59 |
| 33,693 | 6  | 4 | 102 | 35 | 6  | 2 | 45  | 17 | 159 | 58 |
| 33,694 | 9  | 4 | 100 | 36 | 4  | 2 | 54  | 16 | 167 | 58 |
| 33,695 | 9  | 4 | 87  | 36 | 4  | 2 | 44  | 16 | 144 | 58 |
| 33,696 | 9  | 4 | 86  | 36 | 4  | 2 | 44  | 16 | 143 | 58 |
| 33,697 | 11 | 3 | 121 | 34 | 4  | 2 | 51  | 16 | 187 | 55 |
| 33,698 | 13 | 3 | 160 | 34 | 6  | 2 | 62  | 16 | 241 | 55 |
| 33,699 | 15 | 3 | 190 | 33 | 6  | 2 | 74  | 14 | 285 | 52 |
| 33,700 | 15 | 3 | 190 | 33 | 6  | 2 | 74  | 14 | 285 | 52 |
| 33,701 | 15 | 3 | 193 | 31 | 6  | 0 | 78  | 14 | 292 | 48 |
| 33,702 | 15 | 3 | 193 | 31 | 6  | 0 | 78  | 14 | 292 | 48 |
| 33,703 | 15 | 3 | 193 | 31 | 6  | 0 | 79  | 14 | 293 | 48 |
| 33,704 | 16 | 3 | 193 | 31 | 7  | 0 | 79  | 14 | 295 | 48 |
| 33,705 | 16 | 3 | 193 | 31 | 7  | 0 | 79  | 14 | 295 | 48 |
| 33,706 | 16 | 3 | 191 | 31 | 7  | 0 | 79  | 15 | 293 | 49 |
| 33,707 | 16 | 3 | 188 | 29 | 7  | 0 | 79  | 15 | 290 | 47 |
| 33,708 | 16 | 3 | 188 | 28 | 7  | 0 | 79  | 14 | 290 | 45 |
| 33,709 | 16 | 3 | 187 | 28 | 7  | 0 | 79  | 14 | 289 | 45 |
| 33,710 | 16 | 3 | 187 | 27 | 7  | 0 | 79  | 14 | 289 | 44 |
| 33,711 | 16 | 1 | 192 | 23 | 7  | 0 | 79  | 14 | 294 | 38 |
| 33,712 | 16 | 1 | 192 | 24 | 7  | 0 | 79  | 14 | 294 | 39 |
| 33,713 | 16 | 1 | 192 | 24 | 7  | 0 | 80  | 14 | 295 | 39 |
| 33,714 | 16 | 1 | 192 | 24 | 7  | 0 | 80  | 14 | 295 | 39 |
| 33,715 | 16 | 1 | 198 | 24 | 7  | 0 | 82  | 14 | 303 | 39 |
| 33,716 | 15 | 1 | 198 | 23 | 7  | 0 | 82  | 14 | 302 | 38 |
| 33,717 | 16 | 1 | 198 | 25 | 7  | 0 | 85  | 13 | 306 | 39 |
| 33,718 | 16 | 1 | 198 | 24 | 7  | 0 | 85  | 12 | 306 | 37 |
| 33,719 | 16 | 1 | 197 | 24 | 7  | 0 | 85  | 12 | 305 | 37 |
| 33,720 | 15 | 1 | 201 | 15 | 7  | 0 | 88  | 8  | 311 | 24 |
| 33,721 | 27 | 1 | 275 | 16 | 9  | 0 | 122 | 8  | 433 | 25 |
| 33,722 | 27 | 1 | 276 | 16 | 9  | 0 | 122 | 8  | 434 | 25 |
| 33,723 | 28 | 1 | 310 | 13 | 11 | 0 | 154 | 7  | 503 | 21 |
| 33,724 | 28 | 1 | 310 | 13 | 11 | 0 | 155 | 7  | 504 | 21 |
| 33,725 | 28 | 1 | 310 | 13 | 11 | 0 | 157 | 7  | 506 | 21 |
| 33,726 | 28 | 1 | 309 | 13 | 11 | 0 | 159 | 7  | 507 | 21 |
| 33,727 | 28 | 1 | 304 | 12 | 11 | 0 | 157 | 6  | 500 | 19 |
| 33,728 | 28 | 1 | 293 | 12 | 10 | 0 | 153 | 5  | 484 | 18 |
| 33,729 | 26 | 1 | 286 | 12 | 9  | 0 | 148 | 5  | 469 | 18 |
| 33,730 | 24 | 1 | 281 | 12 | 9  | 0 | 145 | 5  | 459 | 18 |
| 33,731 | 24 | 1 | 281 | 12 | 9  | 0 | 145 | 6  | 459 | 19 |

|        |    |   |     |    |   |   |     |   |     |    |
|--------|----|---|-----|----|---|---|-----|---|-----|----|
| 33,732 | 24 | 0 | 282 | 12 | 9 | 1 | 145 | 6 | 460 | 19 |
| 33,733 | 24 | 0 | 282 | 12 | 9 | 1 | 145 | 7 | 460 | 20 |
| 33,734 | 24 | 0 | 283 | 12 | 9 | 1 | 145 | 7 | 461 | 20 |
| 33,735 | 24 | 0 | 283 | 11 | 9 | 1 | 145 | 7 | 461 | 19 |
| 33,736 | 24 | 0 | 282 | 12 | 9 | 1 | 144 | 7 | 459 | 20 |
| 33,737 | 24 | 0 | 282 | 13 | 9 | 1 | 145 | 7 | 460 | 21 |
| 33,738 | 24 | 0 | 282 | 13 | 9 | 1 | 145 | 7 | 460 | 21 |
| 33,739 | 24 | 0 | 282 | 13 | 9 | 1 | 145 | 7 | 460 | 21 |
| 33,740 | 24 | 0 | 282 | 13 | 9 | 1 | 145 | 5 | 460 | 19 |
| 33,741 | 24 | 0 | 281 | 12 | 9 | 1 | 145 | 5 | 459 | 18 |
| 33,742 | 24 | 0 | 279 | 12 | 9 | 1 | 143 | 5 | 455 | 18 |
| 33,743 | 24 | 0 | 279 | 11 | 9 | 1 | 143 | 5 | 455 | 17 |
| 33,744 | 24 | 0 | 276 | 12 | 9 | 1 | 142 | 5 | 451 | 18 |
| 33,745 | 21 | 0 | 240 | 11 | 8 | 1 | 118 | 5 | 387 | 17 |
| 33,746 | 21 | 0 | 224 | 11 | 8 | 1 | 114 | 5 | 367 | 17 |
| 33,747 | 19 | 0 | 205 | 11 | 8 | 1 | 110 | 5 | 342 | 17 |
| 33,748 | 17 | 0 | 171 | 12 | 6 | 1 | 98  | 5 | 292 | 18 |
| 33,749 | 15 | 1 | 143 | 12 | 6 | 1 | 88  | 5 | 252 | 19 |
| 33,750 | 19 | 1 | 172 | 12 | 6 | 1 | 95  | 5 | 292 | 19 |
| 33,751 | 19 | 1 | 173 | 12 | 6 | 1 | 95  | 5 | 293 | 19 |
| 33,752 | 19 | 1 | 170 | 12 | 6 | 1 | 91  | 5 | 286 | 19 |
| 33,753 | 19 | 1 | 170 | 13 | 6 | 1 | 90  | 5 | 285 | 20 |
| 33,754 | 19 | 1 | 170 | 13 | 6 | 1 | 90  | 5 | 285 | 20 |
| 33,755 | 18 | 1 | 170 | 13 | 5 | 1 | 90  | 5 | 283 | 20 |
| 33,756 | 18 | 1 | 171 | 12 | 5 | 1 | 90  | 5 | 284 | 19 |
| 33,757 | 18 | 2 | 171 | 12 | 5 | 1 | 90  | 4 | 284 | 19 |
| 33,758 | 20 | 2 | 173 | 12 | 5 | 1 | 90  | 4 | 288 | 19 |
| 33,759 | 20 | 2 | 173 | 12 | 5 | 1 | 90  | 4 | 288 | 19 |
| 33,760 | 22 | 2 | 173 | 12 | 6 | 1 | 92  | 4 | 293 | 19 |
| 33,761 | 22 | 2 | 173 | 12 | 6 | 1 | 92  | 4 | 293 | 19 |
| 33,762 | 22 | 2 | 170 | 12 | 6 | 1 | 92  | 4 | 290 | 19 |
| 33,763 | 22 | 2 | 176 | 11 | 6 | 1 | 93  | 4 | 297 | 18 |
| 33,764 | 22 | 2 | 176 | 11 | 6 | 1 | 93  | 4 | 297 | 18 |
| 33,765 | 22 | 2 | 172 | 11 | 6 | 1 | 91  | 4 | 291 | 18 |
| 33,766 | 22 | 2 | 172 | 11 | 6 | 1 | 91  | 4 | 291 | 18 |
| 33,767 | 21 | 2 | 172 | 12 | 6 | 1 | 88  | 4 | 287 | 19 |
| 33,768 | 25 | 2 | 215 | 11 | 7 | 1 | 100 | 4 | 347 | 18 |
| 33,769 | 25 | 2 | 215 | 14 | 7 | 1 | 100 | 4 | 347 | 21 |
| 33,770 | 25 | 2 | 231 | 16 | 7 | 1 | 107 | 4 | 370 | 23 |
| 33,771 | 25 | 2 | 229 | 18 | 7 | 1 | 107 | 4 | 368 | 25 |
| 33,772 | 13 | 2 | 154 | 17 | 4 | 1 | 72  | 4 | 243 | 24 |



|        |    |    |     |    |   |   |    |    |     |    |
|--------|----|----|-----|----|---|---|----|----|-----|----|
| 33,773 | 13 | 2  | 153 | 17 | 4 | 1 | 72 | 4  | 242 | 24 |
| 33,774 | 12 | 3  | 119 | 15 | 2 | 1 | 40 | 4  | 173 | 23 |
| 33,775 | 12 | 3  | 122 | 15 | 2 | 1 | 39 | 4  | 175 | 23 |
| 33,776 | 13 | 3  | 122 | 15 | 2 | 1 | 36 | 4  | 173 | 23 |
| 33,777 | 13 | 3  | 120 | 15 | 2 | 1 | 34 | 4  | 169 | 23 |
| 33,778 | 13 | 4  | 120 | 15 | 2 | 1 | 34 | 4  | 169 | 24 |
| 33,779 | 13 | 4  | 120 | 15 | 2 | 1 | 34 | 4  | 169 | 24 |
| 33,780 | 13 | 4  | 130 | 15 | 2 | 1 | 37 | 5  | 182 | 25 |
| 33,781 | 15 | 4  | 138 | 15 | 4 | 1 | 48 | 4  | 205 | 24 |
| 33,782 | 15 | 4  | 138 | 16 | 4 | 1 | 48 | 4  | 205 | 25 |
| 33,783 | 15 | 4  | 144 | 17 | 4 | 0 | 49 | 3  | 212 | 24 |
| 33,784 | 15 | 4  | 144 | 17 | 4 | 0 | 49 | 3  | 212 | 24 |
| 33,785 | 15 | 5  | 144 | 17 | 4 | 0 | 49 | 3  | 212 | 25 |
| 33,786 | 15 | 5  | 144 | 17 | 4 | 0 | 49 | 3  | 212 | 25 |
| 33,787 | 16 | 5  | 144 | 15 | 4 | 0 | 49 | 3  | 213 | 23 |
| 33,788 | 16 | 5  | 144 | 15 | 4 | 0 | 49 | 3  | 213 | 23 |
| 33,789 | 17 | 5  | 151 | 15 | 4 | 0 | 52 | 3  | 224 | 23 |
| 33,790 | 17 | 5  | 151 | 15 | 4 | 0 | 52 | 3  | 224 | 23 |
| 33,791 | 17 | 5  | 151 | 15 | 4 | 0 | 52 | 2  | 224 | 22 |
| 33,792 | 17 | 5  | 163 | 14 | 5 | 0 | 60 | 1  | 245 | 20 |
| 33,793 | 17 | 5  | 165 | 14 | 5 | 0 | 63 | 1  | 250 | 20 |
| 33,794 | 17 | 5  | 165 | 13 | 5 | 0 | 64 | 1  | 251 | 19 |
| 33,795 | 17 | 5  | 165 | 13 | 5 | 0 | 64 | 4  | 251 | 22 |
| 33,796 | 17 | 5  | 165 | 15 | 5 | 0 | 64 | 7  | 251 | 27 |
| 33,797 | 17 | 5  | 165 | 17 | 5 | 0 | 66 | 15 | 253 | 37 |
| 33,798 | 17 | 6  | 169 | 21 | 6 | 0 | 66 | 17 | 258 | 44 |
| 33,799 | 17 | 6  | 164 | 20 | 6 | 0 | 66 | 17 | 253 | 43 |
| 33,800 | 17 | 6  | 159 | 25 | 6 | 0 | 66 | 19 | 248 | 50 |
| 33,801 | 13 | 6  | 131 | 29 | 6 | 0 | 57 | 19 | 207 | 54 |
| 33,802 | 14 | 9  | 130 | 34 | 6 | 0 | 59 | 22 | 209 | 65 |
| 33,803 | 14 | 9  | 130 | 34 | 6 | 0 | 59 | 22 | 209 | 65 |
| 33,804 | 14 | 9  | 130 | 33 | 6 | 0 | 59 | 22 | 209 | 64 |
| 33,805 | 14 | 11 | 130 | 33 | 6 | 0 | 60 | 23 | 210 | 67 |
| 33,806 | 14 | 11 | 130 | 33 | 6 | 0 | 60 | 23 | 210 | 67 |
| 33,807 | 14 | 11 | 130 | 33 | 6 | 0 | 60 | 23 | 210 | 67 |
| 33,808 | 12 | 10 | 131 | 33 | 6 | 0 | 60 | 23 | 209 | 66 |
| 33,809 | 12 | 10 | 129 | 34 | 6 | 0 | 61 | 23 | 208 | 67 |
| 33,810 | 10 | 10 | 127 | 34 | 5 | 0 | 59 | 23 | 201 | 67 |
| 33,811 | 11 | 10 | 126 | 34 | 6 | 0 | 60 | 23 | 203 | 67 |
| 33,812 | 11 | 10 | 127 | 34 | 6 | 0 | 60 | 23 | 204 | 67 |
| 33,813 | 11 | 10 | 127 | 35 | 6 | 0 | 60 | 23 | 204 | 68 |

|        |    |    |     |    |   |   |    |    |     |    |
|--------|----|----|-----|----|---|---|----|----|-----|----|
| 33,814 | 11 | 10 | 128 | 36 | 6 | 0 | 62 | 23 | 207 | 69 |
| 33,815 | 11 | 10 | 135 | 36 | 6 | 0 | 64 | 23 | 216 | 69 |
| 33,816 | 11 | 10 | 135 | 36 | 6 | 0 | 64 | 24 | 216 | 70 |
| 33,817 | 9  | 10 | 127 | 36 | 6 | 0 | 64 | 24 | 206 | 70 |
| 33,818 | 7  | 10 | 119 | 35 | 6 | 0 | 62 | 24 | 194 | 69 |
| 33,819 | 8  | 10 | 99  | 32 | 5 | 0 | 58 | 24 | 170 | 66 |
| 33,820 | 8  | 10 | 86  | 32 | 5 | 0 | 55 | 24 | 154 | 66 |
| 33,821 | 8  | 9  | 81  | 31 | 5 | 0 | 48 | 24 | 142 | 64 |
| 33,822 | 8  | 9  | 81  | 29 | 5 | 0 | 48 | 24 | 142 | 62 |
| 33,823 | 8  | 10 | 81  | 29 | 5 | 0 | 48 | 24 | 142 | 63 |
| 33,824 | 8  | 10 | 82  | 29 | 5 | 0 | 48 | 24 | 143 | 63 |
| 33,825 | 8  | 9  | 82  | 29 | 5 | 0 | 48 | 24 | 143 | 62 |
| 33,826 | 8  | 9  | 80  | 29 | 5 | 0 | 48 | 24 | 141 | 62 |
| 33,827 | 7  | 10 | 80  | 29 | 5 | 0 | 48 | 25 | 140 | 64 |
| 33,828 | 7  | 10 | 76  | 31 | 5 | 0 | 47 | 25 | 135 | 66 |
| 33,829 | 7  | 9  | 72  | 31 | 5 | 0 | 45 | 25 | 129 | 65 |
| 33,830 | 8  | 9  | 69  | 31 | 5 | 0 | 45 | 24 | 127 | 64 |
| 33,831 | 8  | 9  | 68  | 31 | 5 | 0 | 45 | 24 | 126 | 64 |
| 33,832 | 6  | 9  | 61  | 31 | 3 | 0 | 34 | 24 | 104 | 64 |
| 33,833 | 6  | 9  | 56  | 30 | 3 | 0 | 33 | 24 | 98  | 63 |
| 33,834 | 6  | 9  | 55  | 29 | 3 | 0 | 33 | 24 | 97  | 62 |
| 33,835 | 6  | 8  | 55  | 29 | 3 | 0 | 33 | 24 | 97  | 61 |
| 33,836 | 6  | 8  | 54  | 29 | 3 | 0 | 33 | 24 | 96  | 61 |
| 33,837 | 6  | 9  | 54  | 29 | 3 | 0 | 33 | 24 | 96  | 62 |
| 33,838 | 5  | 9  | 54  | 29 | 3 | 0 | 33 | 24 | 95  | 62 |
| 33,839 | 5  | 9  | 53  | 30 | 3 | 0 | 32 | 24 | 93  | 63 |
| 33,840 | 4  | 9  | 48  | 30 | 3 | 0 | 30 | 24 | 85  | 63 |
| 33,841 | 4  | 9  | 48  | 30 | 3 | 0 | 31 | 24 | 86  | 63 |
| 33,842 | 4  | 9  | 48  | 30 | 3 | 0 | 31 | 24 | 86  | 63 |
| 33,843 | 4  | 9  | 36  | 30 | 2 | 0 | 23 | 24 | 65  | 63 |
| 33,844 | 4  | 9  | 34  | 30 | 2 | 0 | 20 | 24 | 60  | 63 |
| 33,845 | 4  | 9  | 34  | 30 | 2 | 0 | 19 | 24 | 59  | 63 |
| 33,846 | 4  | 9  | 32  | 30 | 2 | 0 | 19 | 21 | 57  | 60 |
| 33,847 | 4  | 9  | 35  | 26 | 2 | 0 | 20 | 10 | 61  | 45 |
| 33,848 | 4  | 9  | 36  | 26 | 3 | 0 | 19 | 10 | 62  | 45 |
| 33,849 | 4  | 7  | 34  | 17 | 2 | 0 | 20 | 7  | 60  | 31 |
| 33,850 | 4  | 7  | 36  | 17 | 2 | 0 | 20 | 7  | 62  | 31 |
| 33,851 | 4  | 7  | 39  | 17 | 2 | 0 | 23 | 7  | 68  | 31 |
| 33,852 | 4  | 7  | 40  | 13 | 2 | 0 | 22 | 7  | 68  | 27 |
| 33,853 | 3  | 5  | 40  | 9  | 2 | 0 | 21 | 5  | 66  | 19 |
| 33,854 | 3  | 5  | 40  | 18 | 2 | 0 | 22 | 8  | 67  | 31 |

|        |    |   |     |    |    |   |     |    |     |    |
|--------|----|---|-----|----|----|---|-----|----|-----|----|
| 33,855 | 3  | 5 | 39  | 28 | 2  | 0 | 21  | 12 | 65  | 45 |
| 33,856 | 3  | 3 | 39  | 28 | 2  | 0 | 21  | 11 | 65  | 42 |
| 33,857 | 3  | 3 | 39  | 28 | 2  | 0 | 21  | 11 | 65  | 42 |
| 33,858 | 3  | 3 | 39  | 32 | 2  | 0 | 22  | 14 | 66  | 49 |
| 33,859 | 3  | 3 | 38  | 32 | 1  | 0 | 20  | 14 | 62  | 49 |
| 33,860 | 2  | 3 | 38  | 31 | 1  | 0 | 20  | 15 | 61  | 49 |
| 33,861 | 2  | 3 | 38  | 33 | 1  | 0 | 19  | 15 | 60  | 51 |
| 33,862 | 2  | 3 | 38  | 35 | 1  | 0 | 20  | 15 | 61  | 53 |
| 33,863 | 2  | 3 | 34  | 34 | 1  | 0 | 20  | 15 | 57  | 52 |
| 33,864 | 2  | 3 | 34  | 33 | 1  | 0 | 20  | 15 | 57  | 51 |
| 33,865 | 2  | 3 | 32  | 33 | 1  | 0 | 18  | 15 | 53  | 51 |
| 33,866 | 2  | 3 | 25  | 33 | 1  | 0 | 16  | 15 | 44  | 51 |
| 33,867 | 2  | 3 | 23  | 33 | 1  | 0 | 17  | 14 | 43  | 50 |
| 33,868 | 3  | 3 | 24  | 33 | 1  | 0 | 17  | 14 | 45  | 50 |
| 33,869 | 3  | 3 | 23  | 33 | 1  | 0 | 16  | 15 | 43  | 51 |
| 33,870 | 2  | 3 | 21  | 32 | 1  | 0 | 15  | 15 | 39  | 50 |
| 33,871 | 2  | 3 | 27  | 32 | 2  | 0 | 17  | 15 | 48  | 50 |
| 33,872 | 8  | 3 | 70  | 32 | 2  | 0 | 25  | 15 | 105 | 50 |
| 33,873 | 8  | 3 | 70  | 32 | 2  | 0 | 25  | 15 | 105 | 50 |
| 33,874 | 8  | 4 | 69  | 32 | 2  | 0 | 25  | 16 | 104 | 52 |
| 33,875 | 8  | 4 | 69  | 32 | 2  | 0 | 25  | 16 | 104 | 52 |
| 33,876 | 8  | 4 | 84  | 32 | 3  | 0 | 34  | 16 | 129 | 52 |
| 33,877 | 8  | 4 | 84  | 34 | 3  | 0 | 34  | 16 | 129 | 54 |
| 33,878 | 8  | 3 | 84  | 36 | 3  | 0 | 34  | 15 | 129 | 54 |
| 33,879 | 15 | 3 | 159 | 34 | 7  | 0 | 64  | 15 | 245 | 52 |
| 33,880 | 15 | 3 | 229 | 34 | 10 | 0 | 85  | 15 | 339 | 52 |
| 33,881 | 17 | 3 | 277 | 35 | 10 | 0 | 105 | 15 | 409 | 53 |
| 33,882 | 17 | 3 | 277 | 35 | 10 | 0 | 105 | 15 | 409 | 53 |
| 33,883 | 17 | 3 | 280 | 36 | 11 | 0 | 108 | 15 | 416 | 54 |
| 33,884 | 17 | 3 | 280 | 36 | 11 | 0 | 108 | 15 | 416 | 54 |
| 33,885 | 17 | 3 | 280 | 37 | 11 | 0 | 108 | 15 | 416 | 55 |
| 33,886 | 17 | 3 | 280 | 37 | 11 | 0 | 108 | 15 | 416 | 55 |
| 33,887 | 17 | 3 | 280 | 37 | 11 | 0 | 108 | 15 | 416 | 55 |
| 33,888 | 17 | 2 | 280 | 36 | 11 | 0 | 108 | 15 | 416 | 53 |
| 33,889 | 17 | 2 | 281 | 36 | 11 | 0 | 108 | 15 | 417 | 53 |
| 33,890 | 17 | 2 | 281 | 36 | 11 | 0 | 108 | 15 | 417 | 53 |
| 33,891 | 17 | 2 | 280 | 36 | 11 | 0 | 108 | 15 | 416 | 53 |
| 33,892 | 17 | 2 | 280 | 36 | 11 | 0 | 107 | 14 | 415 | 52 |
| 33,893 | 17 | 2 | 284 | 36 | 11 | 0 | 110 | 14 | 422 | 52 |
| 33,894 | 17 | 2 | 284 | 36 | 11 | 0 | 110 | 14 | 422 | 52 |
| 33,895 | 17 | 2 | 284 | 36 | 11 | 0 | 110 | 14 | 422 | 52 |

|        |    |   |     |    |    |   |     |    |     |    |
|--------|----|---|-----|----|----|---|-----|----|-----|----|
| 33,896 | 17 | 2 | 287 | 36 | 11 | 0 | 113 | 14 | 428 | 52 |
| 33,897 | 17 | 2 | 288 | 38 | 11 | 0 | 113 | 14 | 429 | 54 |
| 33,898 | 20 | 2 | 308 | 38 | 11 | 0 | 135 | 14 | 474 | 54 |
| 33,899 | 20 | 2 | 308 | 38 | 10 | 0 | 136 | 14 | 474 | 54 |
| 33,900 | 22 | 2 | 308 | 38 | 11 | 0 | 138 | 13 | 479 | 53 |
| 33,901 | 23 | 2 | 309 | 38 | 12 | 0 | 151 | 13 | 495 | 53 |
| 33,902 | 23 | 2 | 309 | 28 | 12 | 0 | 149 | 10 | 493 | 40 |
| 33,903 | 23 | 2 | 309 | 28 | 12 | 0 | 149 | 10 | 493 | 40 |
| 33,904 | 23 | 2 | 309 | 28 | 12 | 0 | 148 | 10 | 492 | 40 |
| 33,905 | 23 | 2 | 311 | 28 | 12 | 0 | 148 | 10 | 494 | 40 |
| 33,906 | 23 | 1 | 312 | 18 | 12 | 0 | 148 | 6  | 495 | 25 |
| 33,907 | 24 | 1 | 312 | 18 | 12 | 0 | 148 | 6  | 496 | 25 |
| 33,908 | 24 | 1 | 313 | 18 | 12 | 0 | 148 | 7  | 497 | 26 |
| 33,909 | 24 | 1 | 312 | 14 | 12 | 0 | 147 | 4  | 495 | 19 |
| 33,910 | 24 | 1 | 312 | 14 | 12 | 0 | 147 | 4  | 495 | 19 |
| 33,911 | 24 | 1 | 316 | 12 | 13 | 0 | 151 | 3  | 504 | 16 |
| 33,912 | 24 | 1 | 316 | 12 | 13 | 0 | 151 | 3  | 504 | 16 |
| 33,913 | 24 | 1 | 322 | 10 | 14 | 0 | 159 | 3  | 519 | 14 |
| 33,914 | 24 | 1 | 322 | 10 | 14 | 0 | 159 | 3  | 519 | 14 |
| 33,915 | 24 | 1 | 325 | 10 | 15 | 0 | 160 | 3  | 524 | 14 |
| 33,916 | 24 | 1 | 325 | 10 | 15 | 0 | 160 | 3  | 524 | 14 |
| 33,917 | 24 | 1 | 327 | 10 | 15 | 0 | 163 | 3  | 529 | 14 |
| 33,918 | 24 | 1 | 327 | 10 | 15 | 0 | 162 | 3  | 528 | 14 |
| 33,919 | 24 | 1 | 335 | 10 | 16 | 0 | 171 | 2  | 546 | 13 |
| 33,920 | 24 | 1 | 335 | 11 | 16 | 0 | 167 | 2  | 542 | 14 |
| 33,921 | 24 | 1 | 338 | 11 | 16 | 0 | 172 | 2  | 550 | 14 |
| 33,922 | 24 | 1 | 342 | 11 | 15 | 0 | 173 | 2  | 554 | 14 |
| 33,923 | 18 | 1 | 299 | 10 | 15 | 0 | 167 | 2  | 499 | 13 |
| 33,924 | 19 | 1 | 313 | 10 | 15 | 0 | 182 | 2  | 529 | 13 |
| 33,925 | 24 | 0 | 333 | 10 | 16 | 0 | 187 | 1  | 560 | 11 |
| 33,926 | 26 | 0 | 380 | 12 | 18 | 0 | 198 | 6  | 622 | 18 |
| 33,927 | 26 | 0 | 407 | 16 | 19 | 1 | 205 | 6  | 657 | 23 |
| 33,928 | 24 | 0 | 384 | 15 | 18 | 1 | 199 | 6  | 625 | 22 |
| 33,929 | 22 | 0 | 397 | 13 | 16 | 1 | 193 | 8  | 628 | 22 |
| 33,930 | 22 | 0 | 327 | 15 | 13 | 1 | 173 | 9  | 535 | 25 |
| 33,931 | 20 | 1 | 302 | 17 | 13 | 1 | 156 | 12 | 491 | 31 |
| 33,932 | 19 | 1 | 279 | 16 | 13 | 1 | 154 | 12 | 465 | 30 |
| 33,933 | 19 | 1 | 277 | 17 | 12 | 1 | 151 | 12 | 459 | 31 |
| 33,934 | 19 | 1 | 278 | 18 | 12 | 1 | 152 | 12 | 461 | 32 |
| 33,935 | 19 | 1 | 278 | 18 | 12 | 1 | 152 | 12 | 461 | 32 |
| 33,936 | 19 | 2 | 278 | 17 | 12 | 1 | 153 | 12 | 462 | 32 |

|        |    |   |     |    |    |   |     |    |     |    |
|--------|----|---|-----|----|----|---|-----|----|-----|----|
| 33,937 | 20 | 2 | 283 | 17 | 12 | 1 | 157 | 12 | 472 | 32 |
| 33,938 | 20 | 2 | 283 | 18 | 12 | 1 | 157 | 12 | 472 | 33 |
| 33,939 | 20 | 2 | 283 | 18 | 12 | 1 | 157 | 12 | 472 | 33 |
| 33,940 | 20 | 3 | 289 | 18 | 13 | 1 | 161 | 12 | 483 | 34 |
| 33,941 | 20 | 3 | 291 | 18 | 13 | 1 | 161 | 14 | 485 | 36 |
| 33,942 | 20 | 3 | 287 | 18 | 13 | 1 | 158 | 14 | 478 | 36 |
| 33,943 | 20 | 3 | 288 | 18 | 13 | 1 | 159 | 15 | 480 | 37 |
| 33,944 | 20 | 3 | 288 | 18 | 13 | 1 | 159 | 15 | 480 | 37 |
| 33,945 | 20 | 3 | 289 | 19 | 13 | 1 | 163 | 16 | 485 | 39 |
| 33,946 | 20 | 3 | 289 | 19 | 13 | 1 | 164 | 16 | 486 | 39 |
| 33,947 | 20 | 3 | 287 | 17 | 13 | 1 | 161 | 17 | 481 | 38 |
| 33,948 | 20 | 3 | 283 | 17 | 13 | 1 | 159 | 17 | 475 | 38 |
| 33,949 | 17 | 3 | 264 | 18 | 13 | 1 | 137 | 17 | 431 | 39 |
| 33,950 | 17 | 3 | 263 | 21 | 13 | 1 | 136 | 17 | 429 | 42 |
| 33,951 | 15 | 3 | 261 | 22 | 12 | 1 | 132 | 18 | 420 | 44 |
| 33,952 | 15 | 3 | 262 | 24 | 11 | 1 | 120 | 18 | 408 | 46 |
| 33,953 | 15 | 3 | 259 | 24 | 11 | 1 | 119 | 18 | 404 | 46 |
| 33,954 | 15 | 3 | 259 | 24 | 11 | 1 | 120 | 18 | 405 | 46 |
| 33,955 | 15 | 3 | 261 | 24 | 11 | 1 | 121 | 18 | 408 | 46 |
| 33,956 | 15 | 3 | 271 | 24 | 12 | 1 | 128 | 18 | 426 | 46 |
| 33,957 | 15 | 3 | 271 | 24 | 12 | 1 | 130 | 18 | 428 | 46 |
| 33,958 | 14 | 3 | 271 | 24 | 12 | 1 | 130 | 18 | 427 | 46 |
| 33,959 | 14 | 3 | 272 | 24 | 12 | 1 | 132 | 18 | 430 | 46 |
| 33,960 | 14 | 4 | 272 | 24 | 12 | 1 | 130 | 18 | 428 | 47 |
| 33,961 | 14 | 4 | 268 | 24 | 11 | 1 | 127 | 18 | 420 | 47 |
| 33,962 | 14 | 4 | 269 | 24 | 11 | 1 | 127 | 18 | 421 | 47 |
| 33,963 | 14 | 4 | 267 | 24 | 10 | 1 | 121 | 18 | 412 | 47 |
| 33,964 | 14 | 4 | 267 | 24 | 10 | 1 | 120 | 18 | 411 | 47 |
| 33,965 | 14 | 4 | 279 | 24 | 10 | 1 | 123 | 18 | 426 | 47 |
| 33,966 | 18 | 4 | 302 | 24 | 12 | 1 | 133 | 18 | 465 | 47 |
| 33,967 | 18 | 4 | 317 | 24 | 12 | 1 | 139 | 18 | 486 | 47 |
| 33,968 | 18 | 4 | 318 | 24 | 14 | 1 | 138 | 18 | 488 | 47 |
| 33,969 | 18 | 4 | 317 | 24 | 14 | 1 | 138 | 18 | 487 | 47 |
| 33,970 | 17 | 4 | 309 | 24 | 13 | 1 | 129 | 18 | 468 | 47 |
| 33,971 | 17 | 4 | 306 | 23 | 13 | 1 | 129 | 18 | 465 | 46 |
| 33,972 | 17 | 4 | 302 | 23 | 13 | 1 | 123 | 18 | 455 | 46 |
| 33,973 | 18 | 4 | 300 | 24 | 15 | 1 | 125 | 18 | 458 | 47 |
| 33,974 | 18 | 4 | 306 | 25 | 15 | 1 | 124 | 18 | 463 | 48 |
| 33,975 | 18 | 4 | 306 | 26 | 15 | 1 | 109 | 18 | 448 | 49 |
| 33,976 | 14 | 4 | 287 | 26 | 13 | 1 | 102 | 18 | 416 | 49 |
| 33,977 | 12 | 4 | 261 | 24 | 13 | 1 | 100 | 13 | 386 | 42 |

|        |    |   |     |    |    |   |     |    |     |    |
|--------|----|---|-----|----|----|---|-----|----|-----|----|
| 33,978 | 10 | 4 | 221 | 20 | 11 | 0 | 84  | 13 | 326 | 37 |
| 33,979 | 10 | 4 | 191 | 19 | 11 | 0 | 79  | 11 | 291 | 34 |
| 33,980 | 11 | 4 | 172 | 18 | 11 | 1 | 83  | 10 | 277 | 33 |
| 33,981 | 11 | 4 | 172 | 18 | 11 | 1 | 82  | 10 | 276 | 33 |
| 33,982 | 12 | 3 | 172 | 16 | 11 | 1 | 82  | 7  | 277 | 27 |
| 33,983 | 12 | 3 | 172 | 15 | 11 | 1 | 83  | 7  | 278 | 26 |
| 33,984 | 14 | 3 | 181 | 14 | 11 | 1 | 86  | 7  | 292 | 25 |
| 33,985 | 15 | 3 | 193 | 14 | 11 | 1 | 86  | 7  | 305 | 25 |
| 33,986 | 15 | 3 | 193 | 14 | 11 | 1 | 85  | 7  | 304 | 25 |
| 33,987 | 14 | 2 | 200 | 14 | 12 | 1 | 87  | 7  | 313 | 24 |
| 33,988 | 26 | 2 | 317 | 14 | 14 | 1 | 134 | 7  | 491 | 24 |
| 33,989 | 27 | 3 | 320 | 13 | 14 | 1 | 135 | 8  | 496 | 25 |
| 33,990 | 27 | 3 | 321 | 18 | 14 | 1 | 135 | 9  | 497 | 31 |
| 33,991 | 27 | 2 | 323 | 20 | 15 | 1 | 134 | 10 | 499 | 33 |
| 33,992 | 27 | 2 | 322 | 20 | 15 | 1 | 134 | 8  | 498 | 31 |
| 33,993 | 33 | 2 | 362 | 20 | 17 | 1 | 143 | 11 | 555 | 34 |
| 33,994 | 33 | 2 | 361 | 26 | 17 | 1 | 142 | 12 | 553 | 41 |
| 33,995 | 33 | 2 | 361 | 26 | 17 | 1 | 140 | 12 | 551 | 41 |
| 33,996 | 37 | 2 | 373 | 25 | 17 | 1 | 147 | 11 | 574 | 39 |
| 33,997 | 37 | 2 | 389 | 25 | 19 | 1 | 151 | 11 | 596 | 39 |
| 33,998 | 37 | 2 | 394 | 26 | 19 | 1 | 153 | 10 | 603 | 39 |
| 33,999 | 37 | 2 | 395 | 25 | 19 | 1 | 153 | 10 | 604 | 38 |
| 34,000 | 37 | 2 | 394 | 22 | 19 | 1 | 153 | 10 | 603 | 35 |
| 34,001 | 37 | 2 | 394 | 23 | 19 | 1 | 153 | 10 | 603 | 36 |
| 34,002 | 36 | 2 | 396 | 20 | 19 | 1 | 157 | 9  | 608 | 32 |
| 34,003 | 36 | 2 | 396 | 20 | 19 | 1 | 157 | 9  | 608 | 32 |
| 34,004 | 36 | 2 | 396 | 20 | 19 | 1 | 157 | 9  | 608 | 32 |
| 34,005 | 36 | 2 | 395 | 20 | 19 | 1 | 157 | 8  | 607 | 31 |
| 34,006 | 36 | 2 | 392 | 20 | 19 | 1 | 156 | 8  | 603 | 31 |
| 34,007 | 36 | 2 | 380 | 20 | 18 | 1 | 149 | 8  | 583 | 31 |
| 34,008 | 36 | 2 | 380 | 20 | 18 | 1 | 147 | 8  | 581 | 31 |
| 34,009 | 36 | 2 | 379 | 20 | 18 | 1 | 147 | 8  | 580 | 31 |
| 34,010 | 36 | 2 | 378 | 21 | 18 | 1 | 145 | 8  | 577 | 32 |
| 34,011 | 36 | 1 | 378 | 21 | 18 | 1 | 145 | 8  | 577 | 31 |
| 34,012 | 36 | 1 | 378 | 21 | 18 | 1 | 145 | 8  | 577 | 31 |
| 34,013 | 36 | 1 | 380 | 21 | 18 | 1 | 145 | 8  | 579 | 31 |
| 34,014 | 36 | 1 | 378 | 21 | 18 | 1 | 144 | 8  | 576 | 31 |
| 34,015 | 36 | 1 | 364 | 21 | 18 | 1 | 140 | 8  | 558 | 31 |
| 34,016 | 33 | 1 | 348 | 21 | 18 | 1 | 131 | 8  | 530 | 31 |
| 34,017 | 32 | 1 | 340 | 22 | 15 | 1 | 130 | 8  | 517 | 32 |
| 34,018 | 32 | 1 | 325 | 22 | 15 | 1 | 124 | 8  | 496 | 32 |

|        |    |   |     |    |    |   |     |    |     |    |
|--------|----|---|-----|----|----|---|-----|----|-----|----|
| 34,019 | 32 | 1 | 322 | 22 | 13 | 1 | 122 | 10 | 489 | 34 |
| 34,020 | 32 | 1 | 322 | 22 | 13 | 1 | 122 | 10 | 489 | 34 |
| 34,021 | 32 | 1 | 320 | 22 | 13 | 1 | 119 | 10 | 484 | 34 |
| 34,022 | 32 | 1 | 317 | 22 | 11 | 1 | 117 | 10 | 477 | 34 |
| 34,023 | 31 | 1 | 314 | 22 | 11 | 1 | 117 | 10 | 473 | 34 |
| 34,024 | 32 | 1 | 321 | 22 | 11 | 1 | 121 | 11 | 485 | 35 |
| 34,025 | 32 | 1 | 315 | 21 | 11 | 1 | 121 | 12 | 479 | 35 |
| 34,026 | 31 | 1 | 300 | 20 | 11 | 1 | 118 | 12 | 460 | 34 |
| 34,027 | 30 | 1 | 292 | 20 | 11 | 1 | 114 | 12 | 447 | 34 |
| 34,028 | 30 | 1 | 266 | 20 | 9  | 1 | 109 | 12 | 414 | 34 |
| 34,029 | 29 | 1 | 265 | 19 | 9  | 0 | 113 | 12 | 416 | 32 |
| 34,030 | 29 | 1 | 267 | 19 | 9  | 0 | 113 | 12 | 418 | 32 |
| 34,031 | 30 | 1 | 271 | 19 | 9  | 0 | 108 | 12 | 418 | 32 |
| 34,032 | 29 | 1 | 273 | 19 | 9  | 0 | 108 | 12 | 419 | 32 |
| 34,033 | 29 | 1 | 273 | 19 | 9  | 0 | 109 | 12 | 420 | 32 |
| 34,034 | 29 | 1 | 276 | 20 | 9  | 0 | 108 | 12 | 422 | 33 |
| 34,035 | 27 | 1 | 267 | 19 | 9  | 0 | 105 | 12 | 408 | 32 |
| 34,036 | 26 | 1 | 254 | 19 | 9  | 0 | 105 | 12 | 394 | 32 |
| 34,037 | 27 | 0 | 241 | 19 | 8  | 0 | 100 | 12 | 376 | 31 |
| 34,038 | 27 | 0 | 236 | 19 | 8  | 0 | 97  | 12 | 368 | 31 |
| 34,039 | 15 | 0 | 123 | 19 | 6  | 0 | 52  | 11 | 196 | 30 |
| 34,040 | 14 | 0 | 118 | 19 | 5  | 0 | 49  | 11 | 186 | 30 |
| 34,041 | 14 | 0 | 116 | 14 | 4  | 0 | 49  | 10 | 183 | 24 |
| 34,042 | 14 | 0 | 118 | 12 | 4  | 0 | 50  | 9  | 186 | 21 |
| 34,043 | 14 | 1 | 117 | 12 | 4  | 0 | 50  | 9  | 185 | 22 |
| 34,044 | 9  | 1 | 77  | 6  | 2  | 0 | 41  | 4  | 129 | 11 |
| 34,045 | 9  | 1 | 78  | 6  | 2  | 0 | 41  | 4  | 130 | 11 |
| 34,046 | 5  | 1 | 65  | 6  | 2  | 0 | 32  | 4  | 104 | 11 |
| 34,047 | 5  | 1 | 58  | 7  | 0  | 0 | 27  | 4  | 90  | 12 |
| 34,048 | 5  | 1 | 49  | 7  | 0  | 0 | 28  | 4  | 82  | 12 |
| 34,049 | 6  | 1 | 44  | 6  | 0  | 0 | 27  | 4  | 77  | 11 |
| 34,050 | 6  | 1 | 43  | 5  | 0  | 0 | 27  | 4  | 76  | 10 |
| 34,051 | 6  | 1 | 43  | 5  | 1  | 0 | 29  | 4  | 79  | 10 |
| 34,052 | 6  | 1 | 37  | 5  | 1  | 0 | 25  | 4  | 69  | 10 |
| 34,053 | 6  | 1 | 39  | 5  | 4  | 0 | 26  | 4  | 75  | 10 |
| 34,054 | 6  | 1 | 39  | 5  | 4  | 0 | 26  | 4  | 75  | 10 |
| 34,055 | 6  | 1 | 41  | 5  | 4  | 0 | 28  | 4  | 79  | 10 |
| 34,056 | 6  | 1 | 41  | 5  | 4  | 0 | 28  | 4  | 79  | 10 |
| 34,057 | 6  | 1 | 42  | 5  | 5  | 0 | 30  | 4  | 83  | 10 |
| 34,058 | 6  | 1 | 42  | 5  | 5  | 0 | 30  | 4  | 83  | 10 |
| 34,059 | 6  | 1 | 45  | 6  | 5  | 0 | 32  | 5  | 88  | 12 |

|        |    |   |     |    |    |   |    |    |     |    |
|--------|----|---|-----|----|----|---|----|----|-----|----|
| 34,060 | 7  | 1 | 58  | 7  | 5  | 0 | 38 | 6  | 108 | 14 |
| 34,061 | 7  | 1 | 60  | 10 | 5  | 0 | 38 | 7  | 110 | 18 |
| 34,062 | 7  | 1 | 61  | 10 | 5  | 1 | 38 | 7  | 111 | 19 |
| 34,063 | 7  | 1 | 61  | 11 | 5  | 1 | 38 | 9  | 111 | 22 |
| 34,064 | 7  | 1 | 59  | 11 | 5  | 1 | 39 | 12 | 110 | 25 |
| 34,065 | 7  | 1 | 57  | 11 | 5  | 1 | 39 | 12 | 108 | 25 |
| 34,066 | 7  | 1 | 58  | 11 | 5  | 1 | 39 | 12 | 109 | 25 |
| 34,067 | 7  | 1 | 58  | 11 | 5  | 1 | 39 | 12 | 109 | 25 |
| 34,068 | 7  | 1 | 63  | 11 | 5  | 1 | 41 | 13 | 116 | 26 |
| 34,069 | 7  | 1 | 63  | 11 | 5  | 1 | 41 | 13 | 116 | 26 |
| 34,070 | 7  | 1 | 67  | 14 | 5  | 1 | 47 | 13 | 126 | 29 |
| 34,071 | 7  | 1 | 67  | 15 | 5  | 1 | 47 | 13 | 126 | 30 |
| 34,072 | 7  | 1 | 74  | 15 | 5  | 1 | 48 | 13 | 134 | 30 |
| 34,073 | 7  | 2 | 74  | 15 | 5  | 1 | 48 | 11 | 134 | 29 |
| 34,074 | 7  | 2 | 75  | 16 | 5  | 1 | 49 | 11 | 136 | 30 |
| 34,075 | 6  | 2 | 78  | 16 | 5  | 1 | 48 | 11 | 137 | 30 |
| 34,076 | 6  | 2 | 78  | 16 | 5  | 1 | 48 | 11 | 137 | 30 |
| 34,077 | 7  | 2 | 88  | 16 | 9  | 1 | 62 | 11 | 166 | 30 |
| 34,078 | 7  | 2 | 89  | 16 | 9  | 1 | 63 | 11 | 168 | 30 |
| 34,079 | 9  | 2 | 102 | 16 | 9  | 1 | 68 | 11 | 188 | 30 |
| 34,080 | 9  | 2 | 109 | 16 | 10 | 1 | 68 | 12 | 196 | 31 |
| 34,081 | 9  | 2 | 107 | 16 | 10 | 1 | 68 | 12 | 194 | 31 |
| 34,082 | 7  | 2 | 108 | 16 | 11 | 1 | 71 | 12 | 197 | 31 |
| 34,083 | 8  | 2 | 117 | 16 | 11 | 1 | 74 | 12 | 210 | 31 |
| 34,084 | 8  | 2 | 118 | 16 | 11 | 1 | 73 | 12 | 210 | 31 |
| 34,085 | 8  | 2 | 115 | 15 | 11 | 1 | 74 | 12 | 208 | 30 |
| 34,086 | 8  | 2 | 115 | 15 | 11 | 1 | 74 | 12 | 208 | 30 |
| 34,087 | 8  | 2 | 114 | 15 | 11 | 1 | 74 | 12 | 207 | 30 |
| 34,088 | 7  | 2 | 114 | 15 | 11 | 1 | 73 | 12 | 205 | 30 |
| 34,089 | 7  | 2 | 112 | 15 | 11 | 1 | 73 | 12 | 203 | 30 |
| 34,090 | 7  | 2 | 114 | 15 | 11 | 1 | 73 | 12 | 205 | 30 |
| 34,091 | 7  | 2 | 115 | 15 | 11 | 1 | 73 | 12 | 206 | 30 |
| 34,092 | 7  | 2 | 116 | 15 | 11 | 1 | 73 | 12 | 207 | 30 |
| 34,093 | 7  | 1 | 116 | 17 | 11 | 1 | 73 | 12 | 207 | 31 |
| 34,094 | 7  | 1 | 116 | 17 | 11 | 1 | 73 | 12 | 207 | 31 |
| 34,095 | 6  | 1 | 121 | 18 | 11 | 1 | 73 | 13 | 211 | 33 |
| 34,096 | 6  | 1 | 120 | 18 | 11 | 1 | 73 | 13 | 210 | 33 |
| 34,097 | 6  | 1 | 120 | 18 | 11 | 1 | 73 | 13 | 210 | 33 |
| 34,098 | 11 | 1 | 142 | 17 | 12 | 1 | 87 | 13 | 252 | 32 |
| 34,099 | 11 | 1 | 142 | 17 | 12 | 1 | 86 | 13 | 251 | 32 |
| 34,100 | 10 | 1 | 141 | 17 | 12 | 1 | 86 | 13 | 249 | 32 |



|        |    |   |     |    |    |   |     |    |     |    |
|--------|----|---|-----|----|----|---|-----|----|-----|----|
| 34,101 | 11 | 1 | 146 | 17 | 13 | 1 | 93  | 14 | 263 | 33 |
| 34,102 | 11 | 1 | 151 | 17 | 13 | 1 | 96  | 14 | 271 | 33 |
| 34,103 | 16 | 1 | 172 | 17 | 14 | 1 | 135 | 14 | 337 | 33 |
| 34,104 | 16 | 2 | 170 | 26 | 11 | 1 | 134 | 18 | 331 | 47 |
| 34,105 | 16 | 2 | 168 | 26 | 11 | 1 | 132 | 18 | 327 | 47 |
| 34,106 | 16 | 2 | 181 | 28 | 13 | 1 | 141 | 20 | 351 | 51 |
| 34,107 | 16 | 2 | 183 | 30 | 13 | 1 | 143 | 20 | 355 | 53 |
| 34,108 | 16 | 2 | 182 | 30 | 12 | 1 | 141 | 20 | 351 | 53 |
| 34,109 | 16 | 3 | 179 | 30 | 12 | 1 | 139 | 21 | 346 | 55 |
| 34,110 | 16 | 3 | 167 | 29 | 12 | 1 | 134 | 20 | 329 | 53 |
| 34,111 | 16 | 3 | 168 | 28 | 12 | 4 | 135 | 19 | 331 | 54 |
| 34,112 | 16 | 3 | 166 | 27 | 12 | 4 | 135 | 20 | 329 | 54 |
| 34,113 | 16 | 3 | 165 | 27 | 12 | 3 | 135 | 20 | 328 | 53 |
| 34,114 | 16 | 4 | 169 | 26 | 12 | 3 | 135 | 15 | 332 | 48 |
| 34,115 | 16 | 4 | 176 | 26 | 12 | 3 | 137 | 15 | 341 | 48 |
| 34,116 | 16 | 4 | 179 | 25 | 12 | 3 | 138 | 14 | 345 | 46 |
| 34,117 | 16 | 4 | 178 | 25 | 12 | 3 | 138 | 14 | 344 | 46 |
| 34,118 | 16 | 4 | 184 | 25 | 12 | 3 | 138 | 14 | 350 | 46 |
| 34,119 | 16 | 4 | 183 | 25 | 12 | 3 | 139 | 13 | 350 | 45 |
| 34,120 | 16 | 4 | 183 | 25 | 12 | 3 | 138 | 13 | 349 | 45 |
| 34,121 | 16 | 4 | 180 | 21 | 12 | 3 | 134 | 12 | 342 | 40 |
| 34,122 | 16 | 4 | 180 | 21 | 12 | 3 | 134 | 12 | 342 | 40 |
| 34,123 | 16 | 4 | 173 | 21 | 12 | 3 | 133 | 12 | 334 | 40 |
| 34,124 | 20 | 3 | 233 | 20 | 14 | 3 | 149 | 12 | 416 | 38 |
| 34,125 | 22 | 4 | 285 | 20 | 15 | 3 | 172 | 12 | 494 | 39 |
| 34,126 | 22 | 4 | 286 | 20 | 17 | 3 | 175 | 13 | 500 | 40 |
| 34,127 | 22 | 4 | 287 | 20 | 17 | 3 | 174 | 13 | 500 | 40 |
| 34,128 | 22 | 5 | 278 | 20 | 13 | 3 | 165 | 13 | 478 | 41 |
| 34,129 | 22 | 5 | 277 | 21 | 13 | 3 | 164 | 14 | 476 | 43 |
| 34,130 | 20 | 5 | 264 | 22 | 13 | 3 | 155 | 14 | 452 | 44 |
| 34,131 | 20 | 5 | 257 | 22 | 12 | 3 | 151 | 13 | 440 | 43 |
| 34,132 | 20 | 5 | 256 | 22 | 12 | 3 | 151 | 13 | 439 | 43 |
| 34,133 | 20 | 5 | 249 | 22 | 11 | 3 | 144 | 13 | 424 | 43 |
| 34,134 | 19 | 5 | 238 | 22 | 11 | 3 | 140 | 13 | 408 | 43 |
| 34,135 | 19 | 5 | 237 | 22 | 11 | 3 | 140 | 13 | 407 | 43 |
| 34,136 | 19 | 5 | 237 | 22 | 11 | 3 | 140 | 13 | 407 | 43 |
| 34,137 | 19 | 5 | 237 | 22 | 11 | 3 | 140 | 13 | 407 | 43 |
| 34,138 | 19 | 5 | 237 | 22 | 11 | 3 | 140 | 13 | 407 | 43 |
| 34,139 | 19 | 5 | 240 | 22 | 11 | 3 | 142 | 13 | 412 | 43 |
| 34,140 | 19 | 5 | 246 | 22 | 11 | 3 | 143 | 13 | 419 | 43 |
| 34,141 | 19 | 5 | 244 | 22 | 11 | 3 | 142 | 13 | 416 | 43 |

|        |    |   |     |    |    |   |     |    |     |    |
|--------|----|---|-----|----|----|---|-----|----|-----|----|
| 34,142 | 19 | 5 | 244 | 22 | 11 | 3 | 142 | 13 | 416 | 43 |
| 34,143 | 19 | 5 | 242 | 22 | 11 | 3 | 142 | 13 | 414 | 43 |
| 34,144 | 19 | 5 | 247 | 19 | 11 | 3 | 142 | 12 | 419 | 39 |
| 34,145 | 19 | 5 | 246 | 19 | 11 | 3 | 142 | 12 | 418 | 39 |
| 34,146 | 21 | 5 | 247 | 19 | 11 | 3 | 155 | 12 | 434 | 39 |
| 34,147 | 20 | 6 | 249 | 19 | 11 | 3 | 156 | 12 | 436 | 40 |
| 34,148 | 20 | 6 | 251 | 19 | 11 | 3 | 156 | 13 | 438 | 41 |
| 34,149 | 16 | 6 | 255 | 19 | 11 | 3 | 148 | 14 | 430 | 42 |
| 34,150 | 16 | 7 | 257 | 22 | 11 | 3 | 148 | 18 | 432 | 50 |
| 34,151 | 15 | 7 | 254 | 23 | 10 | 3 | 142 | 19 | 421 | 52 |
| 34,152 | 15 | 8 | 259 | 23 | 10 | 3 | 143 | 20 | 427 | 54 |
| 34,153 | 15 | 8 | 256 | 27 | 9  | 3 | 138 | 24 | 418 | 62 |
| 34,154 | 10 | 8 | 237 | 30 | 8  | 3 | 99  | 25 | 354 | 66 |
| 34,155 | 10 | 7 | 236 | 22 | 8  | 3 | 98  | 23 | 352 | 55 |
| 34,156 | 10 | 8 | 225 | 22 | 6  | 3 | 91  | 23 | 332 | 56 |
| 34,157 | 11 | 8 | 249 | 20 | 9  | 3 | 99  | 21 | 368 | 52 |
| 34,158 | 17 | 8 | 395 | 18 | 12 | 3 | 159 | 20 | 583 | 49 |
| 34,159 | 18 | 7 | 403 | 18 | 13 | 3 | 169 | 20 | 603 | 48 |
| 34,160 | 18 | 7 | 403 | 18 | 13 | 3 | 169 | 20 | 603 | 48 |
| 34,161 | 19 | 7 | 416 | 19 | 14 | 3 | 177 | 21 | 626 | 50 |
| 34,162 | 18 | 8 | 425 | 19 | 14 | 0 | 187 | 22 | 644 | 49 |
| 34,163 | 18 | 8 | 426 | 19 | 14 | 0 | 187 | 23 | 645 | 50 |
| 34,164 | 18 | 8 | 424 | 19 | 14 | 0 | 187 | 22 | 643 | 49 |
| 34,165 | 18 | 7 | 428 | 21 | 14 | 0 | 195 | 22 | 655 | 50 |
| 34,166 | 18 | 7 | 425 | 21 | 14 | 0 | 193 | 22 | 650 | 50 |
| 34,167 | 18 | 7 | 438 | 21 | 15 | 0 | 197 | 22 | 668 | 50 |
| 34,168 | 18 | 7 | 438 | 21 | 15 | 0 | 197 | 22 | 668 | 50 |
| 34,169 | 20 | 7 | 450 | 21 | 16 | 0 | 205 | 22 | 691 | 50 |
| 34,170 | 25 | 7 | 457 | 21 | 16 | 0 | 213 | 22 | 711 | 50 |
| 34,171 | 25 | 7 | 457 | 23 | 16 | 0 | 213 | 22 | 711 | 52 |
| 34,172 | 25 | 7 | 465 | 24 | 17 | 1 | 219 | 24 | 726 | 56 |
| 34,173 | 25 | 7 | 469 | 24 | 17 | 4 | 216 | 24 | 727 | 59 |
| 34,174 | 21 | 7 | 418 | 24 | 16 | 4 | 203 | 28 | 658 | 63 |
| 34,175 | 21 | 8 | 410 | 24 | 16 | 4 | 195 | 28 | 642 | 64 |
| 34,176 | 19 | 7 | 365 | 26 | 15 | 4 | 179 | 28 | 578 | 65 |
| 34,177 | 19 | 6 | 354 | 27 | 13 | 4 | 173 | 27 | 559 | 64 |
| 34,178 | 19 | 7 | 353 | 31 | 13 | 4 | 171 | 30 | 556 | 72 |
| 34,179 | 18 | 7 | 351 | 32 | 13 | 4 | 168 | 31 | 550 | 74 |
| 34,180 | 18 | 7 | 351 | 31 | 13 | 4 | 168 | 30 | 550 | 72 |
| 34,181 | 18 | 7 | 350 | 30 | 13 | 4 | 168 | 30 | 549 | 71 |
| 34,182 | 18 | 7 | 350 | 30 | 13 | 4 | 168 | 30 | 549 | 71 |

|        |    |   |     |    |    |   |     |    |     |    |
|--------|----|---|-----|----|----|---|-----|----|-----|----|
| 34,183 | 18 | 7 | 350 | 30 | 13 | 5 | 168 | 30 | 549 | 72 |
| 34,184 | 18 | 7 | 350 | 30 | 13 | 5 | 168 | 30 | 549 | 72 |
| 34,185 | 18 | 7 | 350 | 30 | 13 | 5 | 168 | 30 | 549 | 72 |
| 34,186 | 18 | 7 | 353 | 30 | 13 | 5 | 168 | 30 | 552 | 72 |
| 34,187 | 18 | 7 | 353 | 30 | 13 | 5 | 168 | 30 | 552 | 72 |
| 34,188 | 18 | 7 | 355 | 30 | 13 | 5 | 168 | 30 | 554 | 72 |
| 34,189 | 18 | 7 | 352 | 30 | 13 | 5 | 168 | 30 | 551 | 72 |
| 34,190 | 18 | 7 | 346 | 30 | 13 | 5 | 167 | 30 | 544 | 72 |
| 34,191 | 18 | 7 | 348 | 32 | 13 | 5 | 168 | 31 | 547 | 75 |
| 34,192 | 18 | 7 | 347 | 32 | 13 | 5 | 169 | 31 | 547 | 75 |
| 34,193 | 18 | 7 | 347 | 32 | 13 | 5 | 169 | 31 | 547 | 75 |
| 34,194 | 18 | 7 | 345 | 32 | 13 | 5 | 169 | 31 | 545 | 75 |
| 34,195 | 18 | 7 | 340 | 33 | 13 | 5 | 168 | 31 | 539 | 76 |
| 34,196 | 19 | 7 | 351 | 33 | 13 | 5 | 169 | 31 | 552 | 76 |
| 34,197 | 17 | 7 | 347 | 33 | 13 | 5 | 157 | 31 | 534 | 76 |
| 34,198 | 32 | 6 | 447 | 33 | 16 | 5 | 214 | 31 | 709 | 75 |
| 34,199 | 33 | 6 | 449 | 33 | 16 | 5 | 225 | 30 | 723 | 74 |
| 34,200 | 34 | 5 | 434 | 30 | 15 | 5 | 225 | 25 | 708 | 65 |
| 34,201 | 34 | 6 | 434 | 29 | 15 | 5 | 225 | 22 | 708 | 62 |
| 34,202 | 34 | 6 | 434 | 29 | 15 | 5 | 224 | 22 | 707 | 62 |
| 34,203 | 34 | 6 | 429 | 29 | 15 | 5 | 222 | 22 | 700 | 62 |
| 34,204 | 34 | 6 | 437 | 23 | 15 | 5 | 224 | 17 | 710 | 51 |
| 34,205 | 35 | 6 | 439 | 23 | 15 | 5 | 225 | 17 | 714 | 51 |
| 34,206 | 36 | 6 | 430 | 24 | 15 | 5 | 223 | 15 | 704 | 50 |
| 34,207 | 35 | 5 | 423 | 24 | 12 | 5 | 216 | 15 | 686 | 49 |
| 34,208 | 35 | 5 | 417 | 24 | 12 | 5 | 209 | 16 | 673 | 50 |
| 34,209 | 35 | 5 | 328 | 26 | 12 | 5 | 191 | 17 | 566 | 53 |
| 34,210 | 45 | 5 | 357 | 26 | 16 | 5 | 221 | 17 | 639 | 53 |
| 34,211 | 44 | 5 | 349 | 26 | 15 | 5 | 217 | 17 | 625 | 53 |
| 34,212 | 45 | 5 | 357 | 24 | 17 | 5 | 232 | 17 | 651 | 51 |
| 34,213 | 45 | 4 | 350 | 22 | 17 | 5 | 230 | 14 | 642 | 45 |
| 34,214 | 45 | 4 | 346 | 22 | 17 | 5 | 224 | 14 | 632 | 45 |
| 34,215 | 45 | 4 | 348 | 22 | 18 | 5 | 224 | 14 | 635 | 45 |
| 34,216 | 46 | 4 | 350 | 21 | 18 | 5 | 225 | 15 | 639 | 45 |
| 34,217 | 46 | 4 | 344 | 21 | 18 | 5 | 223 | 15 | 631 | 45 |
| 34,218 | 46 | 4 | 332 | 21 | 17 | 5 | 219 | 15 | 614 | 45 |
| 34,219 | 46 | 4 | 334 | 21 | 17 | 5 | 219 | 15 | 616 | 45 |
| 34,220 | 48 | 4 | 320 | 21 | 16 | 5 | 210 | 15 | 594 | 45 |
| 34,221 | 43 | 4 | 313 | 21 | 16 | 5 | 202 | 15 | 574 | 45 |
| 34,222 | 43 | 4 | 311 | 19 | 15 | 5 | 200 | 15 | 569 | 43 |
| 34,223 | 43 | 4 | 302 | 18 | 15 | 4 | 194 | 13 | 554 | 39 |

|        |    |   |     |    |    |   |     |    |     |    |
|--------|----|---|-----|----|----|---|-----|----|-----|----|
| 34,224 | 44 | 4 | 296 | 18 | 15 | 1 | 195 | 13 | 550 | 36 |
| 34,225 | 44 | 4 | 302 | 18 | 14 | 1 | 200 | 9  | 560 | 32 |
| 34,226 | 50 | 3 | 327 | 18 | 16 | 1 | 212 | 9  | 605 | 31 |
| 34,227 | 53 | 2 | 339 | 9  | 16 | 1 | 216 | 5  | 624 | 17 |
| 34,228 | 53 | 2 | 341 | 9  | 16 | 1 | 217 | 5  | 627 | 17 |
| 34,229 | 53 | 2 | 342 | 9  | 16 | 1 | 219 | 5  | 630 | 17 |
| 34,230 | 53 | 2 | 342 | 9  | 16 | 1 | 219 | 5  | 630 | 17 |
| 34,231 | 53 | 2 | 346 | 9  | 16 | 1 | 221 | 5  | 636 | 17 |
| 34,232 | 53 | 4 | 346 | 9  | 17 | 1 | 222 | 5  | 638 | 19 |
| 34,233 | 53 | 4 | 346 | 9  | 17 | 1 | 222 | 5  | 638 | 19 |
| 34,234 | 53 | 5 | 358 | 10 | 18 | 0 | 228 | 6  | 657 | 21 |
| 34,235 | 53 | 5 | 358 | 10 | 18 | 0 | 228 | 6  | 657 | 21 |
| 34,236 | 56 | 5 | 381 | 10 | 20 | 0 | 233 | 7  | 690 | 22 |
| 34,237 | 57 | 6 | 383 | 12 | 20 | 0 | 235 | 8  | 695 | 26 |
| 34,238 | 57 | 6 | 395 | 13 | 20 | 0 | 238 | 10 | 710 | 29 |
| 34,239 | 57 | 6 | 393 | 13 | 20 | 0 | 238 | 10 | 708 | 29 |
| 34,240 | 59 | 6 | 399 | 13 | 20 | 0 | 239 | 10 | 717 | 29 |
| 34,241 | 59 | 6 | 398 | 11 | 20 | 0 | 239 | 9  | 716 | 26 |
| 34,242 | 62 | 6 | 404 | 11 | 20 | 0 | 239 | 9  | 725 | 26 |
| 34,243 | 62 | 6 | 404 | 11 | 20 | 0 | 238 | 9  | 724 | 26 |
| 34,244 | 63 | 6 | 405 | 12 | 20 | 0 | 239 | 9  | 727 | 27 |
| 34,245 | 63 | 6 | 413 | 12 | 20 | 0 | 241 | 9  | 737 | 27 |
| 34,246 | 63 | 6 | 414 | 11 | 20 | 0 | 241 | 9  | 738 | 26 |
| 34,247 | 62 | 6 | 408 | 11 | 20 | 0 | 240 | 9  | 730 | 26 |
| 34,248 | 62 | 6 | 408 | 13 | 20 | 0 | 240 | 9  | 730 | 28 |
| 34,249 | 48 | 6 | 320 | 13 | 17 | 0 | 190 | 9  | 575 | 28 |
| 34,250 | 47 | 6 | 316 | 13 | 17 | 0 | 178 | 9  | 558 | 28 |
| 34,251 | 46 | 6 | 310 | 13 | 17 | 0 | 174 | 9  | 547 | 28 |
| 34,252 | 46 | 4 | 310 | 13 | 17 | 0 | 174 | 9  | 547 | 26 |
| 34,253 | 46 | 4 | 308 | 13 | 17 | 0 | 174 | 9  | 545 | 26 |
| 34,254 | 46 | 4 | 303 | 13 | 17 | 0 | 172 | 9  | 538 | 26 |
| 34,255 | 46 | 4 | 300 | 13 | 17 | 0 | 172 | 9  | 535 | 26 |
| 34,256 | 45 | 4 | 297 | 13 | 17 | 0 | 171 | 9  | 530 | 26 |
| 34,257 | 44 | 4 | 293 | 12 | 17 | 0 | 171 | 9  | 525 | 25 |
| 34,258 | 44 | 4 | 288 | 13 | 17 | 0 | 171 | 8  | 520 | 25 |
| 34,259 | 44 | 4 | 286 | 13 | 17 | 1 | 171 | 11 | 518 | 29 |
| 34,260 | 38 | 4 | 233 | 14 | 14 | 1 | 136 | 11 | 421 | 30 |
| 34,261 | 28 | 4 | 202 | 14 | 9  | 1 | 95  | 11 | 334 | 30 |
| 34,262 | 29 | 4 | 200 | 15 | 9  | 1 | 92  | 11 | 330 | 31 |
| 34,263 | 29 | 4 | 193 | 15 | 7  | 1 | 75  | 11 | 304 | 31 |
| 34,264 | 29 | 4 | 209 | 15 | 7  | 1 | 73  | 11 | 318 | 31 |

|        |    |   |     |    |   |   |     |    |     |    |
|--------|----|---|-----|----|---|---|-----|----|-----|----|
| 34,265 | 29 | 4 | 206 | 15 | 6 | 1 | 72  | 11 | 313 | 31 |
| 34,266 | 42 | 5 | 277 | 15 | 7 | 1 | 107 | 11 | 433 | 32 |
| 34,267 | 42 | 5 | 279 | 15 | 7 | 1 | 107 | 11 | 435 | 32 |
| 34,268 | 42 | 5 | 279 | 15 | 7 | 1 | 107 | 11 | 435 | 32 |
| 34,269 | 43 | 5 | 286 | 15 | 8 | 1 | 115 | 11 | 452 | 32 |
| 34,270 | 43 | 5 | 284 | 15 | 8 | 1 | 115 | 11 | 450 | 32 |
| 34,271 | 39 | 5 | 279 | 16 | 8 | 1 | 117 | 11 | 443 | 33 |
| 34,272 | 39 | 5 | 278 | 18 | 8 | 1 | 116 | 12 | 441 | 36 |
| 34,273 | 38 | 5 | 275 | 18 | 8 | 1 | 116 | 12 | 437 | 36 |
| 34,274 | 38 | 5 | 273 | 21 | 8 | 1 | 116 | 13 | 435 | 40 |
| 34,275 | 38 | 6 | 268 | 27 | 8 | 2 | 111 | 15 | 425 | 50 |
| 34,276 | 32 | 6 | 242 | 27 | 6 | 2 | 97  | 15 | 377 | 50 |
| 34,277 | 29 | 6 | 236 | 27 | 6 | 2 | 95  | 16 | 366 | 51 |
| 34,278 | 29 | 7 | 231 | 27 | 6 | 2 | 94  | 17 | 360 | 53 |
| 34,279 | 29 | 7 | 229 | 27 | 6 | 2 | 93  | 17 | 357 | 53 |
| 34,280 | 29 | 7 | 228 | 27 | 6 | 2 | 91  | 17 | 354 | 53 |
| 34,281 | 29 | 7 | 224 | 27 | 6 | 2 | 89  | 17 | 348 | 53 |
| 34,282 | 29 | 5 | 216 | 27 | 5 | 2 | 84  | 17 | 334 | 51 |
| 34,283 | 29 | 5 | 212 | 27 | 4 | 2 | 83  | 17 | 328 | 51 |
| 34,284 | 27 | 4 | 196 | 26 | 3 | 2 | 79  | 16 | 305 | 48 |
| 34,285 | 28 | 4 | 196 | 26 | 3 | 2 | 79  | 16 | 306 | 48 |
| 34,286 | 28 | 4 | 186 | 26 | 2 | 2 | 78  | 15 | 294 | 47 |
| 34,287 | 28 | 4 | 185 | 26 | 2 | 2 | 77  | 14 | 292 | 46 |
| 34,288 | 27 | 3 | 184 | 25 | 2 | 2 | 76  | 13 | 289 | 43 |
| 34,289 | 27 | 3 | 172 | 25 | 2 | 2 | 73  | 12 | 274 | 42 |
| 34,290 | 27 | 3 | 172 | 25 | 2 | 2 | 73  | 12 | 274 | 42 |
| 34,291 | 25 | 3 | 167 | 25 | 2 | 2 | 70  | 12 | 264 | 42 |
| 34,292 | 25 | 3 | 166 | 26 | 2 | 2 | 70  | 12 | 263 | 43 |
| 34,293 | 22 | 3 | 160 | 26 | 2 | 2 | 69  | 13 | 253 | 44 |
| 34,294 | 21 | 3 | 159 | 27 | 2 | 2 | 68  | 13 | 250 | 45 |
| 34,295 | 21 | 3 | 159 | 26 | 2 | 2 | 68  | 13 | 250 | 44 |
| 34,296 | 21 | 3 | 151 | 26 | 2 | 2 | 66  | 13 | 240 | 44 |
| 34,297 | 21 | 3 | 149 | 26 | 2 | 2 | 66  | 14 | 238 | 45 |
| 34,298 | 22 | 3 | 145 | 24 | 2 | 2 | 66  | 14 | 235 | 43 |
| 34,299 | 22 | 3 | 144 | 24 | 2 | 2 | 66  | 14 | 234 | 43 |
| 34,300 | 21 | 3 | 125 | 24 | 2 | 2 | 56  | 14 | 204 | 43 |
| 34,301 | 21 | 3 | 124 | 24 | 2 | 2 | 56  | 14 | 203 | 43 |
| 34,302 | 21 | 3 | 124 | 24 | 2 | 2 | 55  | 14 | 202 | 43 |
| 34,303 | 21 | 3 | 123 | 24 | 2 | 2 | 55  | 14 | 201 | 43 |
| 34,304 | 21 | 4 | 123 | 24 | 2 | 2 | 55  | 14 | 201 | 44 |
| 34,305 | 21 | 4 | 122 | 23 | 2 | 2 | 57  | 14 | 202 | 43 |

|        |    |   |     |    |   |   |    |    |     |    |
|--------|----|---|-----|----|---|---|----|----|-----|----|
| 34,306 | 21 | 4 | 121 | 23 | 2 | 2 | 57 | 14 | 201 | 43 |
| 34,307 | 21 | 4 | 121 | 22 | 2 | 2 | 56 | 14 | 200 | 42 |
| 34,308 | 21 | 4 | 121 | 21 | 2 | 2 | 58 | 14 | 202 | 41 |
| 34,309 | 21 | 4 | 121 | 21 | 2 | 1 | 58 | 11 | 202 | 37 |
| 34,310 | 21 | 4 | 121 | 18 | 2 | 1 | 58 | 10 | 202 | 33 |
| 34,311 | 21 | 4 | 121 | 18 | 2 | 1 | 58 | 10 | 202 | 33 |
| 34,312 | 20 | 4 | 116 | 18 | 2 | 1 | 57 | 10 | 195 | 33 |
| 34,313 | 19 | 4 | 114 | 17 | 2 | 1 | 57 | 10 | 192 | 32 |
| 34,314 | 18 | 4 | 116 | 17 | 2 | 1 | 57 | 9  | 193 | 31 |
| 34,315 | 21 | 4 | 109 | 18 | 2 | 1 | 59 | 9  | 191 | 32 |
| 34,316 | 17 | 4 | 90  | 18 | 2 | 1 | 51 | 8  | 160 | 31 |
| 34,317 | 7  | 4 | 38  | 18 | 1 | 1 | 23 | 8  | 69  | 31 |
| 34,318 | 7  | 4 | 35  | 17 | 1 | 1 | 23 | 7  | 66  | 29 |
| 34,319 | 6  | 4 | 28  | 17 | 0 | 1 | 15 | 7  | 49  | 29 |
| 34,320 | 8  | 4 | 37  | 17 | 0 | 1 | 21 | 8  | 66  | 30 |
| 34,321 | 9  | 4 | 40  | 17 | 1 | 1 | 28 | 8  | 78  | 30 |
| 34,322 | 9  | 4 | 39  | 16 | 1 | 1 | 27 | 8  | 76  | 29 |
| 34,323 | 9  | 4 | 39  | 14 | 1 | 1 | 28 | 7  | 77  | 26 |
| 34,324 | 9  | 4 | 39  | 14 | 1 | 1 | 28 | 7  | 77  | 26 |
| 34,325 | 9  | 4 | 39  | 11 | 1 | 1 | 28 | 6  | 77  | 22 |
| 34,326 | 9  | 3 | 39  | 5  | 1 | 1 | 28 | 4  | 77  | 13 |
| 34,327 | 11 | 3 | 45  | 5  | 1 | 1 | 28 | 5  | 85  | 14 |
| 34,328 | 11 | 3 | 45  | 6  | 1 | 1 | 28 | 5  | 85  | 15 |
| 34,329 | 11 | 2 | 62  | 6  | 1 | 1 | 39 | 4  | 113 | 13 |
| 34,330 | 11 | 2 | 62  | 6  | 1 | 1 | 39 | 4  | 113 | 13 |
| 34,331 | 11 | 2 | 62  | 6  | 1 | 1 | 39 | 4  | 113 | 13 |
| 34,332 | 11 | 2 | 62  | 6  | 1 | 1 | 39 | 4  | 113 | 13 |
| 34,333 | 11 | 2 | 62  | 6  | 1 | 1 | 39 | 4  | 113 | 13 |
| 34,334 | 11 | 2 | 62  | 6  | 1 | 1 | 39 | 4  | 113 | 13 |
| 34,335 | 11 | 2 | 62  | 6  | 1 | 1 | 39 | 4  | 113 | 13 |
| 34,336 | 10 | 2 | 62  | 6  | 1 | 1 | 39 | 4  | 112 | 13 |
| 34,337 | 9  | 2 | 62  | 5  | 1 | 1 | 39 | 4  | 111 | 12 |
| 34,338 | 9  | 2 | 62  | 5  | 1 | 1 | 39 | 4  | 111 | 12 |
| 34,339 | 9  | 2 | 62  | 5  | 1 | 1 | 39 | 4  | 111 | 12 |
| 34,340 | 9  | 2 | 61  | 4  | 1 | 1 | 39 | 4  | 110 | 11 |
| 34,341 | 9  | 2 | 61  | 4  | 1 | 1 | 39 | 4  | 110 | 11 |
| 34,342 | 9  | 2 | 61  | 3  | 1 | 1 | 39 | 4  | 110 | 10 |
| 34,343 | 9  | 2 | 61  | 3  | 1 | 1 | 39 | 4  | 110 | 10 |
| 34,344 | 9  | 2 | 61  | 3  | 1 | 1 | 39 | 3  | 110 | 9  |
| 34,345 | 9  | 2 | 61  | 3  | 1 | 1 | 40 | 3  | 111 | 9  |
| 34,346 | 9  | 2 | 61  | 3  | 1 | 1 | 40 | 3  | 111 | 9  |

|        |    |   |     |    |   |   |    |    |     |    |
|--------|----|---|-----|----|---|---|----|----|-----|----|
| 34,347 | 9  | 2 | 61  | 3  | 1 | 1 | 40 | 2  | 111 | 8  |
| 34,348 | 9  | 2 | 61  | 3  | 1 | 1 | 40 | 2  | 111 | 8  |
| 34,349 | 8  | 2 | 61  | 4  | 1 | 1 | 41 | 2  | 111 | 9  |
| 34,350 | 8  | 2 | 61  | 4  | 1 | 1 | 41 | 3  | 111 | 10 |
| 34,351 | 8  | 2 | 62  | 4  | 1 | 1 | 42 | 3  | 113 | 10 |
| 34,352 | 8  | 3 | 64  | 6  | 1 | 1 | 44 | 3  | 117 | 13 |
| 34,353 | 8  | 5 | 71  | 24 | 1 | 2 | 47 | 13 | 127 | 44 |
| 34,354 | 8  | 8 | 86  | 31 | 1 | 2 | 57 | 17 | 152 | 58 |
| 34,355 | 8  | 7 | 87  | 31 | 1 | 2 | 60 | 17 | 156 | 57 |
| 34,356 | 8  | 7 | 89  | 32 | 1 | 2 | 62 | 18 | 160 | 59 |
| 34,357 | 8  | 9 | 92  | 32 | 1 | 2 | 62 | 19 | 163 | 62 |
| 34,358 | 8  | 9 | 95  | 32 | 1 | 2 | 62 | 20 | 166 | 63 |
| 34,359 | 8  | 9 | 95  | 32 | 1 | 2 | 61 | 20 | 165 | 63 |
| 34,360 | 8  | 9 | 99  | 33 | 1 | 2 | 63 | 20 | 171 | 64 |
| 34,361 | 8  | 9 | 100 | 33 | 1 | 2 | 63 | 20 | 172 | 64 |
| 34,362 | 9  | 9 | 103 | 33 | 1 | 2 | 64 | 20 | 177 | 64 |
| 34,363 | 9  | 9 | 106 | 33 | 1 | 2 | 64 | 20 | 180 | 64 |
| 34,364 | 9  | 9 | 107 | 33 | 1 | 2 | 64 | 20 | 181 | 64 |
| 34,365 | 14 | 9 | 119 | 33 | 2 | 2 | 71 | 20 | 206 | 64 |
| 34,366 | 11 | 9 | 109 | 32 | 2 | 2 | 63 | 20 | 185 | 63 |
| 34,367 | 11 | 9 | 108 | 32 | 2 | 2 | 63 | 20 | 184 | 63 |
| 34,368 | 11 | 8 | 118 | 32 | 2 | 2 | 65 | 19 | 196 | 61 |
| 34,369 | 11 | 8 | 122 | 32 | 2 | 2 | 71 | 19 | 206 | 61 |
| 34,370 | 9  | 8 | 124 | 32 | 4 | 2 | 83 | 19 | 220 | 61 |
| 34,371 | 9  | 8 | 121 | 32 | 4 | 2 | 82 | 19 | 216 | 61 |
| 34,372 | 8  | 8 | 116 | 32 | 3 | 2 | 74 | 19 | 201 | 61 |
| 34,373 | 8  | 8 | 115 | 35 | 3 | 2 | 73 | 19 | 199 | 64 |
| 34,374 | 7  | 8 | 112 | 35 | 3 | 2 | 73 | 19 | 195 | 64 |
| 34,375 | 7  | 8 | 109 | 36 | 3 | 2 | 73 | 20 | 192 | 66 |
| 34,376 | 6  | 8 | 108 | 37 | 3 | 2 | 73 | 21 | 190 | 68 |
| 34,377 | 6  | 8 | 93  | 37 | 3 | 1 | 64 | 21 | 166 | 67 |
| 34,378 | 6  | 8 | 91  | 41 | 3 | 1 | 62 | 22 | 162 | 72 |
| 34,379 | 6  | 8 | 91  | 40 | 3 | 1 | 62 | 22 | 162 | 71 |
| 34,380 | 6  | 8 | 92  | 41 | 3 | 1 | 63 | 22 | 164 | 72 |
| 34,381 | 6  | 8 | 93  | 41 | 3 | 1 | 65 | 22 | 167 | 72 |
| 34,382 | 6  | 8 | 93  | 41 | 3 | 1 | 65 | 22 | 167 | 72 |
| 34,383 | 6  | 8 | 94  | 41 | 3 | 1 | 65 | 22 | 168 | 72 |
| 34,384 | 6  | 8 | 94  | 41 | 3 | 1 | 65 | 22 | 168 | 72 |
| 34,385 | 6  | 8 | 94  | 41 | 3 | 1 | 66 | 22 | 169 | 72 |
| 34,386 | 6  | 8 | 95  | 42 | 3 | 1 | 67 | 23 | 171 | 74 |
| 34,387 | 6  | 8 | 95  | 42 | 3 | 1 | 67 | 23 | 171 | 74 |

|        |    |    |     |    |    |   |     |    |     |     |
|--------|----|----|-----|----|----|---|-----|----|-----|-----|
| 34,388 | 6  | 8  | 97  | 43 | 3  | 1 | 70  | 23 | 176 | 75  |
| 34,389 | 6  | 9  | 97  | 44 | 3  | 1 | 71  | 23 | 177 | 77  |
| 34,390 | 6  | 9  | 97  | 44 | 3  | 1 | 71  | 23 | 177 | 77  |
| 34,391 | 6  | 9  | 97  | 44 | 3  | 1 | 71  | 23 | 177 | 77  |
| 34,392 | 6  | 9  | 97  | 44 | 3  | 1 | 71  | 23 | 177 | 77  |
| 34,393 | 6  | 9  | 97  | 44 | 3  | 1 | 71  | 23 | 177 | 77  |
| 34,394 | 6  | 9  | 97  | 45 | 3  | 1 | 71  | 24 | 177 | 79  |
| 34,395 | 6  | 9  | 97  | 45 | 3  | 1 | 71  | 24 | 177 | 79  |
| 34,396 | 7  | 9  | 108 | 44 | 3  | 1 | 71  | 24 | 189 | 78  |
| 34,397 | 7  | 9  | 108 | 44 | 3  | 1 | 71  | 24 | 189 | 78  |
| 34,398 | 7  | 9  | 119 | 44 | 3  | 1 | 73  | 24 | 202 | 78  |
| 34,399 | 7  | 9  | 119 | 46 | 3  | 3 | 73  | 24 | 202 | 82  |
| 34,400 | 7  | 9  | 118 | 48 | 3  | 4 | 72  | 25 | 200 | 86  |
| 34,401 | 13 | 9  | 142 | 51 | 5  | 4 | 81  | 31 | 241 | 95  |
| 34,402 | 13 | 11 | 141 | 59 | 5  | 4 | 81  | 33 | 240 | 107 |
| 34,403 | 13 | 11 | 147 | 59 | 5  | 4 | 82  | 35 | 247 | 109 |
| 34,404 | 14 | 9  | 175 | 49 | 6  | 3 | 94  | 25 | 289 | 86  |
| 34,405 | 17 | 6  | 205 | 42 | 10 | 3 | 113 | 21 | 345 | 72  |
| 34,406 | 24 | 6  | 255 | 41 | 16 | 3 | 169 | 20 | 464 | 70  |
| 34,407 | 24 | 4  | 254 | 41 | 18 | 3 | 171 | 18 | 467 | 66  |
| 34,408 | 24 | 4  | 255 | 41 | 19 | 3 | 177 | 18 | 475 | 66  |
| 34,409 | 24 | 4  | 252 | 43 | 19 | 3 | 177 | 18 | 472 | 68  |
| 34,410 | 24 | 4  | 248 | 43 | 19 | 3 | 175 | 18 | 466 | 68  |
| 34,411 | 24 | 4  | 253 | 42 | 19 | 3 | 180 | 18 | 476 | 67  |
| 34,412 | 24 | 4  | 253 | 42 | 20 | 3 | 180 | 18 | 477 | 67  |
| 34,413 | 24 | 4  | 250 | 42 | 20 | 3 | 179 | 18 | 473 | 67  |
| 34,414 | 24 | 4  | 248 | 42 | 20 | 3 | 179 | 18 | 471 | 67  |
| 34,415 | 24 | 4  | 246 | 42 | 20 | 3 | 180 | 18 | 470 | 67  |
| 34,416 | 19 | 4  | 231 | 42 | 19 | 3 | 173 | 18 | 442 | 67  |
| 34,417 | 21 | 4  | 233 | 44 | 19 | 3 | 173 | 18 | 446 | 69  |
| 34,418 | 21 | 4  | 238 | 44 | 20 | 3 | 175 | 18 | 454 | 69  |
| 34,419 | 25 | 4  | 245 | 47 | 20 | 3 | 177 | 18 | 467 | 72  |
| 34,420 | 25 | 4  | 257 | 48 | 21 | 3 | 174 | 18 | 477 | 73  |
| 34,421 | 25 | 4  | 249 | 48 | 19 | 3 | 158 | 18 | 451 | 73  |
| 34,422 | 25 | 4  | 248 | 49 | 19 | 3 | 157 | 18 | 449 | 74  |
| 34,423 | 25 | 4  | 251 | 49 | 19 | 3 | 159 | 18 | 454 | 74  |
| 34,424 | 31 | 4  | 269 | 46 | 19 | 3 | 166 | 18 | 485 | 71  |
| 34,425 | 31 | 4  | 269 | 46 | 19 | 3 | 166 | 18 | 485 | 71  |
| 34,426 | 31 | 4  | 269 | 45 | 19 | 3 | 166 | 17 | 485 | 69  |
| 34,427 | 33 | 4  | 276 | 44 | 20 | 3 | 169 | 16 | 498 | 67  |
| 34,428 | 37 | 4  | 304 | 41 | 22 | 3 | 193 | 14 | 556 | 62  |



|        |    |   |     |    |    |   |     |    |     |    |
|--------|----|---|-----|----|----|---|-----|----|-----|----|
| 34,429 | 37 | 4 | 304 | 41 | 22 | 3 | 193 | 14 | 556 | 62 |
| 34,430 | 39 | 4 | 312 | 41 | 22 | 3 | 201 | 14 | 574 | 62 |
| 34,431 | 43 | 4 | 325 | 41 | 22 | 3 | 208 | 14 | 598 | 62 |
| 34,432 | 45 | 4 | 364 | 41 | 23 | 3 | 223 | 14 | 655 | 62 |
| 34,433 | 46 | 4 | 380 | 41 | 27 | 3 | 250 | 15 | 703 | 63 |
| 34,434 | 46 | 4 | 382 | 41 | 27 | 3 | 250 | 15 | 705 | 63 |
| 34,435 | 47 | 7 | 383 | 43 | 27 | 3 | 251 | 15 | 708 | 68 |
| 34,436 | 47 | 7 | 383 | 43 | 27 | 3 | 250 | 15 | 707 | 68 |
| 34,437 | 47 | 6 | 382 | 40 | 27 | 3 | 251 | 14 | 707 | 63 |
| 34,438 | 47 | 6 | 384 | 40 | 27 | 3 | 252 | 14 | 710 | 63 |
| 34,439 | 47 | 6 | 382 | 40 | 27 | 3 | 249 | 14 | 705 | 63 |
| 34,440 | 47 | 6 | 383 | 40 | 27 | 3 | 250 | 14 | 707 | 63 |
| 34,441 | 47 | 6 | 383 | 40 | 27 | 3 | 250 | 14 | 707 | 63 |
| 34,442 | 47 | 6 | 384 | 40 | 27 | 3 | 250 | 14 | 708 | 63 |
| 34,443 | 47 | 7 | 387 | 40 | 28 | 3 | 251 | 14 | 713 | 64 |
| 34,444 | 47 | 7 | 389 | 40 | 28 | 3 | 251 | 14 | 715 | 64 |
| 34,445 | 47 | 7 | 389 | 39 | 28 | 3 | 251 | 13 | 715 | 62 |
| 34,446 | 47 | 7 | 388 | 39 | 28 | 3 | 251 | 13 | 714 | 62 |
| 34,447 | 46 | 7 | 382 | 39 | 28 | 3 | 251 | 13 | 707 | 62 |
| 34,448 | 46 | 7 | 372 | 38 | 28 | 3 | 249 | 13 | 695 | 61 |
| 34,449 | 46 | 7 | 371 | 37 | 28 | 1 | 249 | 13 | 694 | 58 |
| 34,450 | 46 | 7 | 371 | 38 | 28 | 1 | 249 | 13 | 694 | 59 |
| 34,451 | 46 | 8 | 368 | 36 | 28 | 0 | 249 | 12 | 691 | 56 |
| 34,452 | 40 | 6 | 347 | 26 | 26 | 0 | 240 | 3  | 653 | 35 |
| 34,453 | 40 | 6 | 347 | 26 | 26 | 0 | 239 | 3  | 652 | 35 |
| 34,454 | 40 | 5 | 339 | 24 | 26 | 0 | 236 | 1  | 641 | 30 |
| 34,455 | 39 | 5 | 303 | 16 | 25 | 0 | 221 | 1  | 588 | 22 |
| 34,456 | 36 | 5 | 259 | 16 | 21 | 0 | 191 | 3  | 507 | 24 |
| 34,457 | 28 | 6 | 207 | 16 | 15 | 0 | 130 | 3  | 380 | 25 |
| 34,458 | 28 | 6 | 206 | 16 | 13 | 0 | 126 | 3  | 373 | 25 |
| 34,459 | 28 | 6 | 202 | 14 | 12 | 0 | 120 | 3  | 362 | 23 |
| 34,460 | 28 | 7 | 200 | 14 | 12 | 0 | 120 | 3  | 360 | 24 |
| 34,461 | 28 | 7 | 199 | 14 | 12 | 0 | 117 | 3  | 356 | 24 |
| 34,462 | 28 | 7 | 197 | 14 | 12 | 0 | 115 | 3  | 352 | 24 |
| 34,463 | 28 | 7 | 197 | 14 | 11 | 0 | 115 | 3  | 351 | 24 |
| 34,464 | 28 | 7 | 197 | 14 | 11 | 0 | 115 | 3  | 351 | 24 |
| 34,465 | 28 | 7 | 196 | 14 | 11 | 0 | 115 | 3  | 350 | 24 |
| 34,466 | 28 | 7 | 197 | 14 | 11 | 0 | 114 | 3  | 350 | 24 |
| 34,467 | 28 | 7 | 197 | 12 | 11 | 0 | 114 | 3  | 350 | 22 |
| 34,468 | 26 | 7 | 192 | 12 | 11 | 0 | 113 | 3  | 342 | 22 |
| 34,469 | 26 | 7 | 187 | 12 | 10 | 0 | 111 | 3  | 334 | 22 |

|        |    |   |     |    |    |   |     |   |     |    |
|--------|----|---|-----|----|----|---|-----|---|-----|----|
| 34,470 | 22 | 7 | 170 | 9  | 10 | 0 | 107 | 3 | 309 | 19 |
| 34,471 | 22 | 7 | 153 | 8  | 9  | 0 | 104 | 3 | 288 | 18 |
| 34,472 | 22 | 7 | 153 | 8  | 9  | 0 | 104 | 3 | 288 | 18 |
| 34,473 | 22 | 7 | 152 | 8  | 9  | 0 | 102 | 3 | 285 | 18 |
| 34,474 | 18 | 7 | 143 | 8  | 9  | 0 | 96  | 3 | 266 | 18 |
| 34,475 | 16 | 7 | 137 | 8  | 9  | 0 | 96  | 3 | 258 | 18 |
| 34,476 | 16 | 7 | 137 | 8  | 9  | 0 | 96  | 3 | 258 | 18 |
| 34,477 | 15 | 7 | 134 | 8  | 8  | 0 | 95  | 3 | 252 | 18 |
| 34,478 | 15 | 7 | 127 | 8  | 8  | 0 | 92  | 3 | 242 | 18 |
| 34,479 | 11 | 8 | 109 | 7  | 6  | 0 | 71  | 3 | 197 | 18 |
| 34,480 | 11 | 9 | 110 | 8  | 6  | 0 | 73  | 3 | 200 | 20 |
| 34,481 | 9  | 9 | 111 | 10 | 6  | 0 | 66  | 3 | 192 | 22 |
| 34,482 | 5  | 9 | 105 | 10 | 6  | 0 | 61  | 3 | 177 | 22 |
| 34,483 | 3  | 9 | 69  | 10 | 5  | 0 | 44  | 3 | 121 | 22 |
| 34,484 | 2  | 9 | 56  | 10 | 1  | 0 | 19  | 2 | 78  | 21 |
| 34,485 | 3  | 6 | 58  | 8  | 1  | 0 | 24  | 2 | 86  | 16 |
| 34,486 | 4  | 6 | 83  | 8  | 1  | 0 | 30  | 2 | 118 | 16 |
| 34,487 | 4  | 6 | 86  | 8  | 2  | 0 | 54  | 2 | 146 | 16 |
| 34,488 | 5  | 6 | 91  | 8  | 2  | 0 | 58  | 2 | 156 | 16 |
| 34,489 | 5  | 6 | 111 | 8  | 2  | 0 | 63  | 2 | 181 | 16 |
| 34,490 | 5  | 6 | 144 | 8  | 4  | 0 | 71  | 2 | 224 | 16 |
| 34,491 | 8  | 6 | 201 | 8  | 5  | 0 | 86  | 2 | 300 | 16 |
| 34,492 | 8  | 6 | 203 | 8  | 5  | 0 | 91  | 2 | 307 | 16 |
| 34,493 | 8  | 6 | 206 | 8  | 4  | 0 | 92  | 2 | 310 | 16 |
| 34,494 | 8  | 5 | 209 | 8  | 4  | 0 | 91  | 2 | 312 | 15 |
| 34,495 | 8  | 5 | 209 | 8  | 4  | 0 | 92  | 2 | 313 | 15 |
| 34,496 | 8  | 5 | 208 | 8  | 4  | 0 | 92  | 2 | 312 | 15 |
| 34,497 | 8  | 5 | 207 | 8  | 4  | 0 | 91  | 2 | 310 | 15 |
| 34,498 | 9  | 5 | 213 | 8  | 4  | 0 | 102 | 2 | 328 | 15 |
| 34,499 | 10 | 5 | 218 | 7  | 4  | 0 | 104 | 2 | 336 | 14 |
| 34,500 | 10 | 5 | 220 | 6  | 4  | 0 | 105 | 2 | 339 | 13 |
| 34,501 | 11 | 5 | 225 | 6  | 4  | 0 | 106 | 2 | 346 | 13 |
| 34,502 | 12 | 4 | 226 | 6  | 4  | 0 | 106 | 2 | 348 | 12 |
| 34,503 | 14 | 4 | 238 | 6  | 5  | 0 | 114 | 2 | 371 | 12 |
| 34,504 | 14 | 4 | 241 | 6  | 5  | 0 | 114 | 2 | 374 | 12 |
| 34,505 | 14 | 4 | 244 | 6  | 5  | 0 | 114 | 2 | 377 | 12 |
| 34,506 | 14 | 3 | 248 | 6  | 5  | 0 | 117 | 0 | 384 | 9  |
| 34,507 | 14 | 3 | 251 | 6  | 5  | 0 | 117 | 1 | 387 | 10 |
| 34,508 | 14 | 3 | 252 | 6  | 5  | 0 | 118 | 1 | 389 | 10 |
| 34,509 | 14 | 2 | 253 | 6  | 5  | 0 | 119 | 1 | 391 | 9  |
| 34,510 | 14 | 2 | 255 | 6  | 5  | 0 | 123 | 1 | 397 | 9  |

|        |    |   |     |    |   |   |     |    |     |    |
|--------|----|---|-----|----|---|---|-----|----|-----|----|
| 34,511 | 15 | 2 | 255 | 6  | 5 | 0 | 123 | 1  | 398 | 9  |
| 34,512 | 15 | 2 | 255 | 6  | 5 | 0 | 123 | 1  | 398 | 9  |
| 34,513 | 15 | 2 | 254 | 6  | 5 | 0 | 123 | 1  | 397 | 9  |
| 34,514 | 16 | 2 | 260 | 6  | 5 | 0 | 127 | 1  | 408 | 9  |
| 34,515 | 16 | 2 | 261 | 6  | 5 | 0 | 127 | 1  | 409 | 9  |
| 34,516 | 16 | 2 | 261 | 6  | 5 | 0 | 127 | 1  | 409 | 9  |
| 34,517 | 16 | 2 | 260 | 9  | 5 | 0 | 127 | 2  | 408 | 13 |
| 34,518 | 16 | 2 | 260 | 9  | 5 | 0 | 127 | 2  | 408 | 13 |
| 34,519 | 18 | 2 | 263 | 10 | 5 | 0 | 127 | 2  | 413 | 14 |
| 34,520 | 18 | 2 | 266 | 11 | 5 | 0 | 129 | 2  | 418 | 15 |
| 34,521 | 18 | 2 | 266 | 13 | 5 | 0 | 129 | 3  | 418 | 18 |
| 34,522 | 18 | 2 | 266 | 13 | 5 | 0 | 129 | 3  | 418 | 18 |
| 34,523 | 18 | 2 | 270 | 13 | 5 | 0 | 131 | 3  | 424 | 18 |
| 34,524 | 18 | 2 | 269 | 12 | 5 | 0 | 131 | 3  | 423 | 17 |
| 34,525 | 19 | 2 | 270 | 12 | 5 | 0 | 130 | 3  | 424 | 17 |
| 34,526 | 19 | 2 | 268 | 12 | 5 | 0 | 130 | 3  | 422 | 17 |
| 34,527 | 19 | 2 | 268 | 12 | 5 | 0 | 130 | 3  | 422 | 17 |
| 34,528 | 18 | 2 | 264 | 12 | 5 | 0 | 129 | 3  | 416 | 17 |
| 34,529 | 18 | 3 | 262 | 12 | 5 | 0 | 129 | 3  | 414 | 18 |
| 34,530 | 18 | 2 | 260 | 12 | 5 | 0 | 129 | 3  | 412 | 17 |
| 34,531 | 18 | 1 | 259 | 11 | 5 | 0 | 127 | 3  | 409 | 15 |
| 34,532 | 18 | 1 | 250 | 9  | 5 | 0 | 126 | 3  | 399 | 13 |
| 34,533 | 18 | 1 | 244 | 8  | 5 | 0 | 122 | 4  | 389 | 13 |
| 34,534 | 18 | 1 | 240 | 8  | 5 | 0 | 122 | 4  | 385 | 13 |
| 34,535 | 20 | 1 | 237 | 8  | 5 | 0 | 122 | 4  | 384 | 13 |
| 34,536 | 19 | 1 | 233 | 8  | 5 | 0 | 117 | 4  | 374 | 13 |
| 34,537 | 18 | 1 | 208 | 9  | 6 | 0 | 115 | 4  | 347 | 14 |
| 34,538 | 20 | 2 | 210 | 18 | 5 | 0 | 96  | 10 | 331 | 30 |
| 34,539 | 19 | 2 | 206 | 19 | 5 | 0 | 90  | 11 | 320 | 32 |
| 34,540 | 19 | 2 | 185 | 20 | 5 | 0 | 84  | 11 | 293 | 33 |
| 34,541 | 19 | 2 | 152 | 29 | 3 | 0 | 76  | 15 | 250 | 46 |
| 34,542 | 16 | 2 | 94  | 32 | 2 | 1 | 59  | 17 | 171 | 52 |
| 34,543 | 16 | 2 | 91  | 34 | 2 | 2 | 55  | 22 | 164 | 60 |
| 34,544 | 16 | 4 | 85  | 34 | 2 | 2 | 54  | 22 | 157 | 62 |
| 34,545 | 16 | 4 | 82  | 34 | 2 | 2 | 54  | 23 | 154 | 63 |
| 34,546 | 16 | 4 | 80  | 35 | 2 | 2 | 53  | 23 | 151 | 64 |
| 34,547 | 15 | 4 | 74  | 35 | 3 | 2 | 45  | 23 | 137 | 64 |
| 34,548 | 15 | 4 | 74  | 36 | 3 | 2 | 42  | 23 | 134 | 65 |
| 34,549 | 15 | 4 | 71  | 36 | 3 | 2 | 40  | 23 | 129 | 65 |
| 34,550 | 15 | 4 | 69  | 36 | 3 | 2 | 40  | 23 | 127 | 65 |
| 34,551 | 15 | 4 | 70  | 35 | 3 | 2 | 40  | 23 | 128 | 64 |

|        |    |   |     |    |   |   |    |    |     |     |
|--------|----|---|-----|----|---|---|----|----|-----|-----|
| 34,552 | 14 | 4 | 67  | 35 | 4 | 2 | 39 | 23 | 124 | 64  |
| 34,553 | 13 | 4 | 69  | 35 | 4 | 2 | 39 | 23 | 125 | 64  |
| 34,554 | 11 | 4 | 57  | 35 | 3 | 2 | 32 | 23 | 103 | 64  |
| 34,555 | 11 | 4 | 54  | 36 | 3 | 2 | 32 | 24 | 100 | 66  |
| 34,556 | 11 | 4 | 51  | 36 | 3 | 2 | 32 | 24 | 97  | 66  |
| 34,557 | 11 | 4 | 51  | 36 | 4 | 2 | 29 | 23 | 95  | 65  |
| 34,558 | 11 | 4 | 49  | 36 | 4 | 2 | 29 | 23 | 93  | 65  |
| 34,559 | 11 | 4 | 53  | 37 | 4 | 2 | 29 | 23 | 97  | 66  |
| 34,560 | 11 | 4 | 52  | 37 | 4 | 2 | 28 | 23 | 95  | 66  |
| 34,561 | 12 | 4 | 53  | 37 | 5 | 2 | 24 | 23 | 94  | 66  |
| 34,562 | 12 | 4 | 56  | 37 | 6 | 2 | 29 | 23 | 103 | 66  |
| 34,563 | 12 | 4 | 56  | 37 | 6 | 2 | 29 | 23 | 103 | 66  |
| 34,564 | 11 | 4 | 50  | 38 | 6 | 2 | 25 | 24 | 92  | 68  |
| 34,565 | 11 | 4 | 54  | 38 | 6 | 2 | 27 | 24 | 98  | 68  |
| 34,566 | 11 | 4 | 54  | 38 | 6 | 2 | 27 | 24 | 98  | 68  |
| 34,567 | 9  | 4 | 57  | 39 | 6 | 2 | 27 | 25 | 99  | 70  |
| 34,568 | 9  | 4 | 58  | 36 | 6 | 2 | 27 | 24 | 100 | 66  |
| 34,569 | 10 | 4 | 62  | 35 | 6 | 2 | 29 | 24 | 107 | 65  |
| 34,570 | 10 | 4 | 61  | 35 | 6 | 2 | 29 | 24 | 106 | 65  |
| 34,571 | 10 | 4 | 64  | 35 | 6 | 2 | 29 | 24 | 109 | 65  |
| 34,572 | 13 | 4 | 82  | 33 | 7 | 2 | 33 | 23 | 135 | 62  |
| 34,573 | 13 | 4 | 82  | 33 | 7 | 2 | 32 | 23 | 134 | 62  |
| 34,574 | 15 | 4 | 86  | 33 | 8 | 2 | 42 | 23 | 151 | 62  |
| 34,575 | 15 | 4 | 86  | 33 | 8 | 2 | 42 | 23 | 151 | 62  |
| 34,576 | 14 | 4 | 92  | 33 | 8 | 2 | 42 | 23 | 156 | 62  |
| 34,577 | 14 | 4 | 92  | 33 | 8 | 2 | 42 | 23 | 156 | 62  |
| 34,578 | 14 | 4 | 93  | 33 | 9 | 2 | 44 | 23 | 160 | 62  |
| 34,579 | 14 | 3 | 94  | 33 | 9 | 2 | 46 | 23 | 163 | 61  |
| 34,580 | 14 | 3 | 94  | 33 | 9 | 2 | 46 | 23 | 163 | 61  |
| 34,581 | 14 | 3 | 94  | 33 | 9 | 2 | 46 | 23 | 163 | 61  |
| 34,582 | 14 | 3 | 95  | 37 | 9 | 2 | 46 | 27 | 164 | 69  |
| 34,583 | 14 | 3 | 95  | 41 | 9 | 4 | 47 | 29 | 165 | 77  |
| 34,584 | 14 | 3 | 94  | 42 | 9 | 4 | 47 | 30 | 164 | 79  |
| 34,585 | 14 | 3 | 94  | 43 | 9 | 4 | 48 | 31 | 165 | 81  |
| 34,586 | 12 | 3 | 96  | 42 | 9 | 4 | 47 | 31 | 164 | 80  |
| 34,587 | 12 | 3 | 96  | 46 | 9 | 4 | 47 | 31 | 164 | 84  |
| 34,588 | 11 | 6 | 95  | 64 | 8 | 7 | 42 | 47 | 156 | 124 |
| 34,589 | 9  | 5 | 90  | 55 | 8 | 7 | 37 | 41 | 144 | 108 |
| 34,590 | 9  | 5 | 93  | 61 | 8 | 7 | 40 | 41 | 150 | 114 |
| 34,591 | 10 | 5 | 100 | 52 | 8 | 7 | 44 | 37 | 162 | 101 |
| 34,592 | 10 | 5 | 101 | 47 | 8 | 5 | 44 | 31 | 163 | 88  |

|        |    |   |     |    |    |   |    |    |     |     |
|--------|----|---|-----|----|----|---|----|----|-----|-----|
| 34,593 | 10 | 5 | 103 | 47 | 8  | 5 | 45 | 31 | 166 | 88  |
| 34,594 | 10 | 5 | 103 | 47 | 8  | 5 | 45 | 31 | 166 | 88  |
| 34,595 | 10 | 3 | 104 | 49 | 8  | 5 | 46 | 30 | 168 | 87  |
| 34,596 | 10 | 3 | 104 | 49 | 8  | 5 | 46 | 30 | 168 | 87  |
| 34,597 | 10 | 3 | 108 | 48 | 9  | 5 | 46 | 30 | 173 | 86  |
| 34,598 | 10 | 3 | 108 | 48 | 8  | 5 | 46 | 32 | 172 | 88  |
| 34,599 | 10 | 3 | 106 | 47 | 8  | 5 | 46 | 32 | 170 | 87  |
| 34,600 | 10 | 3 | 108 | 47 | 8  | 5 | 48 | 32 | 174 | 87  |
| 34,601 | 9  | 3 | 108 | 47 | 8  | 5 | 49 | 32 | 174 | 87  |
| 34,602 | 9  | 3 | 106 | 47 | 9  | 5 | 48 | 32 | 172 | 87  |
| 34,603 | 9  | 3 | 113 | 47 | 8  | 5 | 50 | 32 | 180 | 87  |
| 34,604 | 9  | 3 | 110 | 47 | 8  | 5 | 50 | 32 | 177 | 87  |
| 34,605 | 10 | 3 | 131 | 46 | 9  | 5 | 58 | 31 | 208 | 85  |
| 34,606 | 11 | 3 | 135 | 47 | 9  | 5 | 59 | 31 | 214 | 86  |
| 34,607 | 11 | 3 | 147 | 48 | 8  | 5 | 63 | 33 | 229 | 89  |
| 34,608 | 11 | 3 | 146 | 49 | 9  | 5 | 64 | 33 | 230 | 90  |
| 34,609 | 11 | 3 | 146 | 50 | 9  | 5 | 64 | 36 | 230 | 94  |
| 34,610 | 11 | 3 | 152 | 50 | 10 | 5 | 65 | 36 | 238 | 94  |
| 34,611 | 13 | 4 | 163 | 60 | 11 | 7 | 65 | 39 | 252 | 110 |
| 34,612 | 13 | 4 | 164 | 61 | 10 | 7 | 65 | 39 | 252 | 111 |
| 34,613 | 12 | 4 | 165 | 62 | 9  | 7 | 60 | 39 | 246 | 112 |
| 34,614 | 12 | 5 | 164 | 62 | 9  | 7 | 59 | 39 | 244 | 113 |
| 34,615 | 12 | 5 | 163 | 63 | 9  | 8 | 58 | 38 | 242 | 114 |
| 34,616 | 12 | 5 | 162 | 63 | 9  | 8 | 58 | 38 | 241 | 114 |
| 34,617 | 12 | 5 | 162 | 63 | 9  | 8 | 58 | 38 | 241 | 114 |
| 34,618 | 12 | 5 | 159 | 62 | 9  | 8 | 58 | 37 | 238 | 112 |
| 34,619 | 12 | 5 | 158 | 62 | 9  | 8 | 58 | 38 | 237 | 113 |
| 34,620 | 11 | 5 | 151 | 62 | 9  | 9 | 56 | 38 | 227 | 114 |
| 34,621 | 11 | 5 | 151 | 62 | 9  | 9 | 56 | 38 | 227 | 114 |
| 34,622 | 12 | 5 | 146 | 62 | 9  | 9 | 54 | 38 | 221 | 114 |
| 34,623 | 9  | 5 | 123 | 62 | 8  | 9 | 50 | 38 | 190 | 114 |
| 34,624 | 8  | 5 | 121 | 62 | 7  | 9 | 47 | 38 | 183 | 114 |
| 34,625 | 7  | 5 | 120 | 62 | 7  | 9 | 40 | 39 | 174 | 115 |
| 34,626 | 7  | 5 | 118 | 63 | 7  | 9 | 40 | 39 | 172 | 116 |
| 34,627 | 7  | 5 | 114 | 63 | 7  | 9 | 40 | 39 | 168 | 116 |
| 34,628 | 7  | 5 | 114 | 63 | 7  | 9 | 40 | 39 | 168 | 116 |
| 34,629 | 7  | 5 | 113 | 63 | 6  | 9 | 38 | 39 | 164 | 116 |
| 34,630 | 7  | 5 | 113 | 63 | 6  | 9 | 35 | 39 | 161 | 116 |
| 34,631 | 7  | 5 | 113 | 63 | 6  | 9 | 35 | 39 | 161 | 116 |
| 34,632 | 7  | 5 | 114 | 63 | 6  | 9 | 35 | 39 | 162 | 116 |
| 34,633 | 8  | 6 | 120 | 59 | 7  | 9 | 35 | 35 | 170 | 109 |

|        |    |    |     |    |   |   |    |    |     |     |
|--------|----|----|-----|----|---|---|----|----|-----|-----|
| 34,634 | 8  | 6  | 120 | 55 | 7 | 7 | 34 | 33 | 169 | 101 |
| 34,635 | 9  | 6  | 121 | 53 | 7 | 7 | 34 | 30 | 171 | 96  |
| 34,636 | 9  | 6  | 121 | 53 | 7 | 7 | 34 | 30 | 171 | 96  |
| 34,637 | 9  | 5  | 118 | 54 | 7 | 8 | 33 | 30 | 167 | 97  |
| 34,638 | 9  | 5  | 118 | 50 | 7 | 8 | 33 | 30 | 167 | 93  |
| 34,639 | 9  | 4  | 119 | 32 | 7 | 5 | 33 | 14 | 168 | 55  |
| 34,640 | 9  | 4  | 118 | 35 | 7 | 5 | 30 | 15 | 164 | 59  |
| 34,641 | 9  | 4  | 115 | 28 | 7 | 5 | 30 | 14 | 161 | 51  |
| 34,642 | 8  | 4  | 108 | 27 | 7 | 5 | 26 | 13 | 149 | 49  |
| 34,643 | 8  | 4  | 107 | 27 | 7 | 5 | 29 | 13 | 151 | 49  |
| 34,644 | 8  | 4  | 105 | 26 | 7 | 5 | 27 | 14 | 147 | 49  |
| 34,645 | 8  | 4  | 110 | 26 | 7 | 5 | 27 | 14 | 152 | 49  |
| 34,646 | 8  | 4  | 110 | 27 | 7 | 5 | 27 | 14 | 152 | 50  |
| 34,647 | 8  | 4  | 119 | 27 | 7 | 5 | 33 | 14 | 167 | 50  |
| 34,648 | 10 | 4  | 122 | 27 | 6 | 5 | 36 | 14 | 174 | 50  |
| 34,649 | 10 | 4  | 122 | 27 | 7 | 5 | 39 | 12 | 178 | 48  |
| 34,650 | 10 | 4  | 122 | 27 | 7 | 5 | 39 | 12 | 178 | 48  |
| 34,651 | 10 | 4  | 120 | 27 | 7 | 5 | 37 | 12 | 174 | 48  |
| 34,652 | 10 | 4  | 120 | 29 | 7 | 5 | 36 | 13 | 173 | 51  |
| 34,653 | 10 | 4  | 121 | 31 | 6 | 5 | 37 | 13 | 174 | 53  |
| 34,654 | 10 | 4  | 112 | 31 | 6 | 5 | 35 | 14 | 163 | 54  |
| 34,655 | 10 | 4  | 109 | 31 | 5 | 5 | 33 | 14 | 157 | 54  |
| 34,656 | 9  | 5  | 91  | 44 | 5 | 7 | 26 | 17 | 131 | 73  |
| 34,657 | 8  | 9  | 87  | 49 | 5 | 8 | 25 | 25 | 125 | 91  |
| 34,658 | 8  | 9  | 76  | 48 | 5 | 8 | 22 | 24 | 111 | 89  |
| 34,659 | 8  | 9  | 73  | 46 | 4 | 8 | 21 | 21 | 106 | 84  |
| 34,660 | 8  | 10 | 72  | 46 | 4 | 8 | 21 | 21 | 105 | 85  |
| 34,661 | 8  | 8  | 61  | 33 | 3 | 6 | 19 | 18 | 91  | 65  |
| 34,662 | 6  | 8  | 50  | 33 | 2 | 6 | 19 | 18 | 77  | 65  |
| 34,663 | 5  | 8  | 46  | 33 | 2 | 6 | 19 | 18 | 72  | 65  |
| 34,664 | 5  | 8  | 42  | 34 | 2 | 6 | 19 | 19 | 68  | 67  |
| 34,665 | 5  | 8  | 42  | 32 | 2 | 5 | 20 | 20 | 69  | 65  |
| 34,666 | 5  | 8  | 41  | 32 | 2 | 5 | 20 | 20 | 68  | 65  |
| 34,667 | 5  | 8  | 45  | 32 | 2 | 5 | 26 | 20 | 78  | 65  |
| 34,668 | 6  | 8  | 45  | 32 | 2 | 5 | 27 | 20 | 80  | 65  |
| 34,669 | 6  | 8  | 46  | 32 | 2 | 5 | 27 | 19 | 81  | 64  |
| 34,670 | 6  | 8  | 46  | 32 | 2 | 5 | 27 | 19 | 81  | 64  |
| 34,671 | 6  | 8  | 47  | 31 | 2 | 4 | 29 | 19 | 84  | 62  |
| 34,672 | 5  | 8  | 47  | 31 | 2 | 4 | 30 | 19 | 84  | 62  |
| 34,673 | 5  | 8  | 47  | 31 | 2 | 4 | 29 | 19 | 83  | 62  |
| 34,674 | 5  | 8  | 46  | 31 | 2 | 4 | 31 | 19 | 84  | 62  |

|        |    |   |     |    |    |   |     |    |     |    |
|--------|----|---|-----|----|----|---|-----|----|-----|----|
| 34,675 | 5  | 8 | 46  | 30 | 2  | 4 | 31  | 18 | 84  | 60 |
| 34,676 | 5  | 8 | 45  | 30 | 2  | 4 | 31  | 18 | 83  | 60 |
| 34,677 | 5  | 8 | 44  | 30 | 2  | 4 | 31  | 18 | 82  | 60 |
| 34,678 | 5  | 8 | 47  | 30 | 2  | 4 | 31  | 18 | 85  | 60 |
| 34,679 | 5  | 8 | 47  | 30 | 2  | 4 | 31  | 18 | 85  | 60 |
| 34,680 | 5  | 8 | 47  | 30 | 2  | 4 | 31  | 18 | 85  | 60 |
| 34,681 | 5  | 8 | 47  | 30 | 2  | 4 | 34  | 18 | 88  | 60 |
| 34,682 | 5  | 8 | 45  | 30 | 2  | 4 | 34  | 18 | 86  | 60 |
| 34,683 | 4  | 7 | 52  | 30 | 2  | 4 | 47  | 18 | 105 | 59 |
| 34,684 | 4  | 7 | 52  | 30 | 1  | 4 | 48  | 18 | 105 | 59 |
| 34,685 | 4  | 7 | 52  | 30 | 1  | 4 | 48  | 18 | 105 | 59 |
| 34,686 | 3  | 7 | 51  | 31 | 1  | 4 | 55  | 18 | 110 | 60 |
| 34,687 | 3  | 7 | 53  | 31 | 1  | 3 | 55  | 19 | 112 | 60 |
| 34,688 | 3  | 7 | 53  | 31 | 1  | 3 | 55  | 19 | 112 | 60 |
| 34,689 | 3  | 7 | 53  | 31 | 1  | 3 | 55  | 19 | 112 | 60 |
| 34,690 | 3  | 6 | 52  | 31 | 1  | 3 | 55  | 19 | 111 | 59 |
| 34,691 | 3  | 6 | 53  | 28 | 1  | 3 | 55  | 18 | 112 | 55 |
| 34,692 | 3  | 6 | 53  | 28 | 1  | 3 | 55  | 18 | 112 | 55 |
| 34,693 | 3  | 6 | 53  | 28 | 1  | 3 | 55  | 18 | 112 | 55 |
| 34,694 | 3  | 6 | 59  | 28 | 1  | 3 | 59  | 18 | 122 | 55 |
| 34,695 | 3  | 6 | 61  | 27 | 1  | 3 | 60  | 17 | 125 | 53 |
| 34,696 | 3  | 6 | 56  | 27 | 1  | 3 | 65  | 17 | 125 | 53 |
| 34,697 | 3  | 6 | 56  | 26 | 1  | 3 | 68  | 17 | 128 | 52 |
| 34,698 | 3  | 6 | 47  | 26 | 1  | 3 | 62  | 17 | 113 | 52 |
| 34,699 | 2  | 6 | 43  | 26 | 1  | 3 | 61  | 17 | 107 | 52 |
| 34,700 | 2  | 6 | 54  | 26 | 1  | 3 | 66  | 17 | 123 | 52 |
| 34,701 | 3  | 6 | 92  | 26 | 4  | 3 | 86  | 17 | 185 | 52 |
| 34,702 | 3  | 6 | 92  | 26 | 4  | 3 | 90  | 17 | 189 | 52 |
| 34,703 | 3  | 6 | 90  | 22 | 4  | 3 | 90  | 16 | 187 | 47 |
| 34,704 | 3  | 6 | 90  | 22 | 4  | 3 | 91  | 15 | 188 | 46 |
| 34,705 | 3  | 6 | 91  | 23 | 4  | 3 | 93  | 15 | 191 | 47 |
| 34,706 | 3  | 6 | 91  | 23 | 4  | 3 | 93  | 15 | 191 | 47 |
| 34,707 | 3  | 5 | 91  | 10 | 4  | 1 | 93  | 12 | 191 | 28 |
| 34,708 | 3  | 1 | 91  | 4  | 4  | 0 | 93  | 4  | 191 | 9  |
| 34,709 | 3  | 1 | 92  | 4  | 4  | 0 | 94  | 3  | 193 | 8  |
| 34,710 | 3  | 1 | 93  | 4  | 4  | 0 | 94  | 3  | 194 | 8  |
| 34,711 | 3  | 1 | 105 | 4  | 6  | 0 | 97  | 3  | 211 | 8  |
| 34,712 | 3  | 1 | 105 | 4  | 6  | 0 | 97  | 3  | 211 | 8  |
| 34,713 | 4  | 1 | 119 | 4  | 7  | 0 | 103 | 3  | 233 | 8  |
| 34,714 | 27 | 1 | 187 | 3  | 11 | 0 | 162 | 2  | 387 | 6  |
| 34,715 | 28 | 1 | 195 | 3  | 12 | 0 | 175 | 1  | 410 | 5  |

|        |    |   |     |   |    |   |     |   |       |    |
|--------|----|---|-----|---|----|---|-----|---|-------|----|
| 34,716 | 34 | 1 | 240 | 3 | 17 | 0 | 226 | 1 | 517   | 5  |
| 34,717 | 36 | 1 | 267 | 3 | 19 | 0 | 246 | 1 | 568   | 5  |
| 34,718 | 37 | 2 | 266 | 3 | 19 | 0 | 241 | 1 | 563   | 6  |
| 34,719 | 44 | 2 | 288 | 3 | 23 | 0 | 257 | 1 | 612   | 6  |
| 34,720 | 44 | 2 | 292 | 3 | 23 | 0 | 262 | 1 | 621   | 6  |
| 34,721 | 45 | 2 | 291 | 3 | 23 | 0 | 260 | 1 | 619   | 6  |
| 34,722 | 48 | 2 | 340 | 4 | 23 | 1 | 277 | 1 | 688   | 8  |
| 34,723 | 48 | 2 | 340 | 5 | 23 | 1 | 277 | 1 | 688   | 9  |
| 34,724 | 50 | 2 | 352 | 5 | 24 | 1 | 276 | 1 | 702   | 9  |
| 34,725 | 50 | 2 | 375 | 5 | 26 | 1 | 282 | 1 | 733   | 9  |
| 34,726 | 54 | 2 | 388 | 5 | 27 | 1 | 306 | 1 | 775   | 9  |
| 34,727 | 61 | 2 | 422 | 5 | 29 | 1 | 314 | 1 | 826   | 9  |
| 34,728 | 61 | 2 | 426 | 6 | 29 | 1 | 315 | 1 | 831   | 10 |
| 34,729 | 67 | 2 | 443 | 6 | 30 | 1 | 334 | 1 | 874   | 10 |
| 34,730 | 67 | 2 | 450 | 6 | 31 | 1 | 340 | 1 | 888   | 10 |
| 34,731 | 67 | 2 | 449 | 6 | 32 | 1 | 339 | 1 | 887   | 10 |
| 34,732 | 68 | 2 | 456 | 6 | 32 | 1 | 356 | 1 | 912   | 10 |
| 34,733 | 68 | 2 | 460 | 6 | 33 | 1 | 357 | 1 | 918   | 10 |
| 34,734 | 68 | 2 | 447 | 7 | 33 | 1 | 344 | 1 | 892   | 11 |
| 34,735 | 68 | 2 | 447 | 7 | 33 | 1 | 344 | 1 | 892   | 11 |
| 34,736 | 68 | 2 | 447 | 7 | 33 | 1 | 340 | 1 | 888   | 11 |
| 34,737 | 68 | 2 | 447 | 6 | 33 | 1 | 342 | 1 | 890   | 10 |
| 34,738 | 68 | 2 | 445 | 5 | 33 | 1 | 342 | 0 | 888   | 8  |
| 34,739 | 68 | 2 | 445 | 5 | 33 | 1 | 342 | 0 | 888   | 8  |
| 34,740 | 68 | 2 | 445 | 5 | 33 | 1 | 342 | 0 | 888   | 8  |
| 34,741 | 68 | 2 | 448 | 5 | 33 | 1 | 346 | 0 | 895   | 8  |
| 34,742 | 68 | 2 | 446 | 5 | 33 | 1 | 347 | 0 | 894   | 8  |
| 34,743 | 68 | 2 | 446 | 5 | 33 | 1 | 348 | 0 | 895   | 8  |
| 34,744 | 68 | 2 | 441 | 7 | 33 | 1 | 345 | 0 | 887   | 10 |
| 34,745 | 68 | 2 | 440 | 7 | 33 | 1 | 341 | 0 | 882   | 10 |
| 34,746 | 68 | 2 | 438 | 7 | 33 | 1 | 338 | 0 | 877   | 10 |
| 34,747 | 68 | 2 | 439 | 7 | 33 | 1 | 338 | 0 | 878   | 10 |
| 34,748 | 68 | 3 | 440 | 7 | 33 | 1 | 335 | 0 | 876   | 11 |
| 34,749 | 67 | 3 | 442 | 8 | 33 | 1 | 334 | 0 | 876   | 12 |
| 34,750 | 67 | 3 | 433 | 8 | 32 | 1 | 326 | 0 | 858   | 12 |
| 34,751 | 71 | 3 | 446 | 8 | 33 | 1 | 334 | 0 | 884   | 12 |
| 34,752 | 71 | 3 | 416 | 8 | 30 | 1 | 315 | 0 | 832   | 12 |
| 34,753 | 71 | 3 | 416 | 8 | 30 | 1 | 312 | 0 | 829   | 12 |
| 34,754 | 87 | 3 | 475 | 8 | 35 | 1 | 345 | 0 | 942   | 12 |
| 34,755 | 87 | 3 | 475 | 8 | 35 | 1 | 343 | 0 | 940   | 12 |
| 34,756 | 98 | 3 | 546 | 8 | 42 | 1 | 393 | 0 | 1,079 | 12 |



|        |     |   |     |    |    |   |     |   |       |    |
|--------|-----|---|-----|----|----|---|-----|---|-------|----|
| 34,757 | 99  | 3 | 552 | 8  | 43 | 1 | 404 | 0 | 1,098 | 12 |
| 34,758 | 101 | 3 | 594 | 8  | 44 | 1 | 418 | 0 | 1,157 | 12 |
| 34,759 | 102 | 3 | 605 | 8  | 45 | 1 | 422 | 0 | 1,174 | 12 |
| 34,760 | 102 | 3 | 603 | 8  | 45 | 1 | 422 | 0 | 1,172 | 12 |
| 34,761 | 103 | 3 | 603 | 8  | 45 | 1 | 422 | 1 | 1,173 | 13 |
| 34,762 | 103 | 2 | 591 | 8  | 43 | 1 | 419 | 1 | 1,156 | 12 |
| 34,763 | 102 | 2 | 577 | 8  | 42 | 1 | 413 | 1 | 1,134 | 12 |
| 34,764 | 102 | 2 | 577 | 8  | 42 | 1 | 413 | 1 | 1,134 | 12 |
| 34,765 | 79  | 2 | 509 | 10 | 38 | 1 | 353 | 3 | 979   | 16 |
| 34,766 | 78  | 2 | 501 | 10 | 37 | 1 | 339 | 3 | 955   | 16 |
| 34,767 | 72  | 2 | 456 | 13 | 32 | 1 | 288 | 4 | 848   | 20 |
| 34,768 | 70  | 2 | 429 | 13 | 30 | 1 | 269 | 4 | 798   | 20 |
| 34,769 | 69  | 1 | 429 | 13 | 30 | 1 | 268 | 4 | 796   | 19 |
| 34,770 | 61  | 1 | 408 | 13 | 25 | 1 | 251 | 4 | 745   | 19 |
| 34,771 | 61  | 1 | 406 | 13 | 25 | 1 | 246 | 4 | 738   | 19 |
| 34,772 | 65  | 1 | 426 | 14 | 27 | 1 | 248 | 4 | 766   | 20 |
| 34,773 | 63  | 1 | 398 | 13 | 28 | 0 | 239 | 4 | 728   | 18 |
| 34,774 | 71  | 1 | 448 | 12 | 27 | 0 | 260 | 4 | 806   | 17 |
| 34,775 | 74  | 1 | 473 | 12 | 27 | 0 | 269 | 4 | 843   | 17 |
| 34,776 | 74  | 1 | 454 | 14 | 25 | 0 | 266 | 4 | 819   | 19 |
| 34,777 | 70  | 1 | 441 | 15 | 24 | 0 | 242 | 4 | 777   | 20 |
| 34,778 | 63  | 1 | 407 | 14 | 22 | 0 | 234 | 4 | 726   | 19 |
| 34,779 | 63  | 1 | 403 | 16 | 22 | 0 | 233 | 4 | 721   | 21 |
| 34,780 | 57  | 1 | 383 | 16 | 21 | 0 | 214 | 4 | 675   | 21 |
| 34,781 | 57  | 1 | 376 | 16 | 21 | 0 | 208 | 4 | 662   | 21 |
| 34,782 | 57  | 1 | 376 | 16 | 20 | 0 | 207 | 4 | 660   | 21 |
| 34,783 | 57  | 1 | 369 | 16 | 20 | 0 | 189 | 4 | 635   | 21 |
| 34,784 | 57  | 1 | 366 | 16 | 19 | 0 | 188 | 4 | 630   | 21 |
| 34,785 | 57  | 1 | 366 | 15 | 19 | 0 | 188 | 4 | 630   | 20 |
| 34,786 | 57  | 1 | 366 | 15 | 19 | 0 | 183 | 4 | 625   | 20 |
| 34,787 | 57  | 1 | 366 | 15 | 19 | 0 | 182 | 4 | 624   | 20 |
| 34,788 | 57  | 1 | 369 | 15 | 19 | 0 | 182 | 4 | 627   | 20 |
| 34,789 | 57  | 1 | 369 | 15 | 19 | 0 | 182 | 4 | 627   | 20 |
| 34,790 | 57  | 1 | 369 | 15 | 19 | 0 | 182 | 4 | 627   | 20 |
| 34,791 | 57  | 1 | 369 | 15 | 19 | 0 | 182 | 4 | 627   | 20 |
| 34,792 | 57  | 1 | 366 | 16 | 19 | 0 | 177 | 4 | 619   | 21 |
| 34,793 | 57  | 1 | 366 | 17 | 19 | 0 | 176 | 4 | 618   | 22 |
| 34,794 | 57  | 1 | 366 | 17 | 19 | 0 | 175 | 4 | 617   | 22 |
| 34,795 | 57  | 1 | 370 | 16 | 19 | 0 | 175 | 4 | 621   | 21 |
| 34,796 | 57  | 1 | 370 | 16 | 19 | 0 | 175 | 4 | 621   | 21 |
| 34,797 | 57  | 1 | 369 | 16 | 19 | 0 | 172 | 4 | 617   | 21 |

|        |    |    |     |     |    |   |     |    |     |     |
|--------|----|----|-----|-----|----|---|-----|----|-----|-----|
| 34,798 | 57 | 0  | 369 | 16  | 19 | 0 | 171 | 4  | 616 | 20  |
| 34,799 | 57 | 0  | 367 | 15  | 19 | 0 | 171 | 4  | 614 | 19  |
| 34,800 | 57 | 0  | 362 | 15  | 19 | 0 | 171 | 4  | 609 | 19  |
| 34,801 | 57 | 0  | 362 | 15  | 19 | 0 | 171 | 4  | 609 | 19  |
| 34,802 | 53 | 0  | 342 | 17  | 18 | 0 | 162 | 4  | 575 | 21  |
| 34,803 | 52 | 0  | 347 | 19  | 18 | 0 | 163 | 5  | 580 | 24  |
| 34,804 | 38 | 0  | 301 | 35  | 14 | 0 | 133 | 7  | 486 | 42  |
| 34,805 | 36 | 0  | 294 | 36  | 13 | 0 | 132 | 7  | 475 | 43  |
| 34,806 | 33 | 1  | 266 | 45  | 10 | 0 | 109 | 10 | 418 | 56  |
| 34,807 | 25 | 1  | 224 | 46  | 6  | 0 | 80  | 11 | 335 | 58  |
| 34,808 | 24 | 1  | 219 | 47  | 5  | 0 | 69  | 11 | 317 | 59  |
| 34,809 | 22 | 1  | 177 | 48  | 4  | 0 | 57  | 11 | 260 | 60  |
| 34,810 | 21 | 1  | 166 | 48  | 3  | 0 | 52  | 11 | 242 | 60  |
| 34,811 | 21 | 1  | 168 | 52  | 3  | 0 | 52  | 10 | 244 | 63  |
| 34,812 | 20 | 1  | 168 | 53  | 3  | 0 | 52  | 10 | 243 | 64  |
| 34,813 | 22 | 1  | 174 | 53  | 3  | 0 | 56  | 10 | 255 | 64  |
| 34,814 | 23 | 1  | 176 | 58  | 3  | 0 | 57  | 10 | 259 | 69  |
| 34,815 | 23 | 1  | 176 | 58  | 3  | 0 | 57  | 10 | 259 | 69  |
| 34,816 | 25 | 1  | 182 | 56  | 3  | 0 | 60  | 8  | 270 | 65  |
| 34,817 | 25 | 1  | 183 | 53  | 3  | 0 | 60  | 7  | 271 | 61  |
| 34,818 | 25 | 1  | 183 | 53  | 3  | 0 | 60  | 7  | 271 | 61  |
| 34,819 | 25 | 1  | 183 | 53  | 3  | 0 | 59  | 9  | 270 | 63  |
| 34,820 | 25 | 1  | 180 | 53  | 3  | 0 | 59  | 9  | 267 | 63  |
| 34,821 | 26 | 4  | 179 | 64  | 3  | 1 | 59  | 13 | 267 | 82  |
| 34,822 | 26 | 4  | 177 | 65  | 3  | 1 | 59  | 14 | 265 | 84  |
| 34,823 | 21 | 4  | 157 | 71  | 1  | 1 | 57  | 18 | 236 | 94  |
| 34,824 | 20 | 7  | 136 | 82  | 0  | 2 | 49  | 24 | 205 | 115 |
| 34,825 | 10 | 8  | 74  | 88  | 0  | 2 | 27  | 32 | 111 | 130 |
| 34,826 | 7  | 9  | 49  | 98  | 0  | 2 | 18  | 39 | 74  | 148 |
| 34,827 | 7  | 10 | 45  | 103 | 0  | 2 | 15  | 43 | 67  | 158 |
| 34,828 | 7  | 10 | 45  | 102 | 0  | 2 | 15  | 43 | 67  | 157 |
| 34,829 | 7  | 10 | 45  | 102 | 0  | 2 | 15  | 43 | 67  | 157 |
| 34,830 | 7  | 10 | 46  | 100 | 0  | 2 | 15  | 43 | 68  | 155 |
| 34,831 | 7  | 11 | 46  | 101 | 0  | 2 | 15  | 46 | 68  | 160 |
| 34,832 | 7  | 11 | 46  | 101 | 0  | 2 | 15  | 46 | 68  | 160 |
| 34,833 | 9  | 11 | 48  | 101 | 0  | 2 | 17  | 46 | 74  | 160 |
| 34,834 | 9  | 11 | 50  | 102 | 0  | 2 | 19  | 48 | 78  | 163 |
| 34,835 | 9  | 11 | 50  | 104 | 1  | 2 | 22  | 51 | 82  | 168 |
| 34,836 | 9  | 11 | 52  | 106 | 1  | 2 | 23  | 53 | 85  | 172 |
| 34,837 | 9  | 11 | 52  | 106 | 1  | 2 | 25  | 54 | 87  | 173 |
| 34,838 | 9  | 12 | 50  | 107 | 1  | 2 | 25  | 54 | 85  | 175 |

|        |    |    |    |     |   |   |    |    |     |     |
|--------|----|----|----|-----|---|---|----|----|-----|-----|
| 34,839 | 9  | 12 | 49 | 109 | 1 | 2 | 25 | 54 | 84  | 177 |
| 34,840 | 9  | 12 | 49 | 109 | 1 | 2 | 25 | 54 | 84  | 177 |
| 34,841 | 9  | 12 | 49 | 109 | 1 | 2 | 25 | 54 | 84  | 177 |
| 34,842 | 9  | 12 | 50 | 108 | 1 | 2 | 25 | 54 | 85  | 176 |
| 34,843 | 9  | 12 | 50 | 108 | 1 | 2 | 25 | 57 | 85  | 179 |
| 34,844 | 9  | 12 | 50 | 110 | 1 | 2 | 25 | 60 | 85  | 184 |
| 34,845 | 9  | 12 | 49 | 110 | 1 | 2 | 25 | 60 | 84  | 184 |
| 34,846 | 9  | 12 | 46 | 109 | 1 | 2 | 25 | 60 | 81  | 183 |
| 34,847 | 9  | 12 | 46 | 109 | 1 | 2 | 25 | 60 | 81  | 183 |
| 34,848 | 9  | 12 | 46 | 109 | 1 | 2 | 25 | 60 | 81  | 183 |
| 34,849 | 9  | 12 | 46 | 109 | 1 | 2 | 25 | 60 | 81  | 183 |
| 34,850 | 9  | 12 | 46 | 109 | 1 | 2 | 25 | 60 | 81  | 183 |
| 34,851 | 9  | 12 | 46 | 110 | 1 | 2 | 25 | 60 | 81  | 184 |
| 34,852 | 9  | 12 | 44 | 113 | 1 | 2 | 25 | 67 | 79  | 194 |
| 34,853 | 9  | 12 | 44 | 111 | 1 | 3 | 25 | 68 | 79  | 194 |
| 34,854 | 9  | 12 | 38 | 117 | 1 | 4 | 24 | 69 | 72  | 202 |
| 34,855 | 9  | 12 | 33 | 105 | 1 | 4 | 23 | 68 | 66  | 189 |
| 34,856 | 10 | 12 | 32 | 105 | 1 | 4 | 22 | 69 | 65  | 190 |
| 34,857 | 10 | 11 | 31 | 96  | 1 | 4 | 21 | 66 | 63  | 177 |
| 34,858 | 10 | 11 | 30 | 97  | 1 | 4 | 21 | 69 | 62  | 181 |
| 34,859 | 10 | 11 | 29 | 96  | 1 | 4 | 21 | 69 | 61  | 180 |
| 34,860 | 10 | 11 | 29 | 95  | 1 | 4 | 19 | 69 | 59  | 179 |
| 34,861 | 11 | 11 | 32 | 90  | 1 | 4 | 19 | 69 | 63  | 174 |
| 34,862 | 11 | 11 | 35 | 90  | 1 | 4 | 24 | 69 | 71  | 174 |
| 34,863 | 10 | 11 | 36 | 97  | 1 | 4 | 22 | 74 | 69  | 186 |
| 34,864 | 9  | 11 | 32 | 97  | 1 | 4 | 20 | 74 | 62  | 186 |
| 34,865 | 8  | 11 | 30 | 95  | 1 | 5 | 19 | 83 | 58  | 194 |
| 34,866 | 7  | 11 | 24 | 95  | 1 | 5 | 16 | 84 | 48  | 195 |
| 34,867 | 7  | 11 | 44 | 96  | 3 | 5 | 28 | 84 | 82  | 196 |
| 34,868 | 7  | 11 | 45 | 96  | 3 | 5 | 32 | 84 | 87  | 196 |
| 34,869 | 8  | 11 | 46 | 97  | 3 | 5 | 32 | 83 | 89  | 196 |
| 34,870 | 11 | 11 | 53 | 99  | 3 | 6 | 35 | 83 | 102 | 199 |
| 34,871 | 10 | 11 | 52 | 100 | 3 | 6 | 35 | 83 | 100 | 200 |
| 34,872 | 13 | 4  | 59 | 64  | 3 | 4 | 38 | 61 | 113 | 133 |
| 34,873 | 13 | 4  | 63 | 65  | 3 | 4 | 38 | 61 | 117 | 134 |
| 34,874 | 13 | 4  | 63 | 67  | 3 | 4 | 38 | 59 | 117 | 134 |
| 34,875 | 13 | 4  | 63 | 67  | 3 | 4 | 37 | 59 | 116 | 134 |
| 34,876 | 13 | 4  | 63 | 67  | 3 | 4 | 37 | 59 | 116 | 134 |
| 34,877 | 13 | 3  | 64 | 57  | 3 | 4 | 37 | 53 | 117 | 117 |
| 34,878 | 13 | 2  | 65 | 50  | 3 | 4 | 37 | 49 | 118 | 105 |
| 34,879 | 13 | 2  | 65 | 50  | 3 | 4 | 37 | 49 | 118 | 105 |

|        |    |   |    |    |   |   |    |    |     |     |
|--------|----|---|----|----|---|---|----|----|-----|-----|
| 34,880 | 13 | 2 | 66 | 50 | 3 | 4 | 37 | 49 | 119 | 105 |
| 34,881 | 13 | 1 | 70 | 49 | 4 | 4 | 55 | 49 | 142 | 103 |
| 34,882 | 13 | 1 | 70 | 50 | 4 | 4 | 55 | 53 | 142 | 108 |
| 34,883 | 11 | 1 | 68 | 51 | 4 | 4 | 54 | 53 | 137 | 109 |
| 34,884 | 11 | 1 | 68 | 51 | 4 | 4 | 54 | 53 | 137 | 109 |
| 34,885 | 10 | 1 | 66 | 50 | 4 | 4 | 52 | 52 | 132 | 107 |
| 34,886 | 10 | 1 | 65 | 46 | 3 | 4 | 49 | 47 | 127 | 98  |
| 34,887 | 10 | 1 | 63 | 46 | 3 | 4 | 49 | 46 | 125 | 97  |
| 34,888 | 10 | 2 | 63 | 46 | 3 | 4 | 47 | 46 | 123 | 98  |
| 34,889 | 10 | 1 | 63 | 45 | 3 | 4 | 47 | 46 | 123 | 96  |
| 34,890 | 10 | 1 | 63 | 43 | 3 | 4 | 47 | 46 | 123 | 94  |
| 34,891 | 10 | 1 | 63 | 43 | 3 | 4 | 48 | 46 | 124 | 94  |
| 34,892 | 10 | 1 | 62 | 43 | 3 | 4 | 48 | 47 | 123 | 95  |
| 34,893 | 10 | 1 | 62 | 44 | 3 | 4 | 48 | 47 | 123 | 96  |
| 34,894 | 10 | 1 | 62 | 44 | 3 | 4 | 49 | 44 | 124 | 93  |
| 34,895 | 10 | 1 | 62 | 42 | 3 | 4 | 49 | 43 | 124 | 90  |
| 34,896 | 10 | 1 | 62 | 42 | 3 | 4 | 49 | 43 | 124 | 90  |
| 34,897 | 10 | 2 | 64 | 43 | 3 | 4 | 53 | 43 | 130 | 92  |
| 34,898 | 10 | 2 | 64 | 43 | 3 | 4 | 53 | 43 | 130 | 92  |
| 34,899 | 10 | 2 | 64 | 43 | 3 | 4 | 53 | 43 | 130 | 92  |
| 34,900 | 10 | 2 | 64 | 43 | 3 | 4 | 53 | 43 | 130 | 92  |
| 34,901 | 10 | 2 | 65 | 43 | 3 | 4 | 54 | 43 | 132 | 92  |
| 34,902 | 10 | 2 | 71 | 27 | 3 | 2 | 55 | 32 | 139 | 63  |
| 34,903 | 10 | 3 | 71 | 27 | 3 | 2 | 59 | 32 | 143 | 64  |
| 34,904 | 10 | 3 | 72 | 27 | 3 | 2 | 59 | 32 | 144 | 64  |
| 34,905 | 10 | 3 | 72 | 27 | 3 | 2 | 59 | 32 | 144 | 64  |
| 34,906 | 10 | 3 | 73 | 27 | 3 | 2 | 59 | 33 | 145 | 65  |
| 34,907 | 9  | 3 | 73 | 27 | 3 | 2 | 59 | 32 | 144 | 64  |
| 34,908 | 9  | 3 | 74 | 25 | 3 | 2 | 59 | 32 | 145 | 62  |
| 34,909 | 9  | 3 | 74 | 24 | 3 | 2 | 59 | 29 | 145 | 58  |
| 34,910 | 9  | 3 | 73 | 24 | 3 | 2 | 59 | 29 | 144 | 58  |
| 34,911 | 8  | 3 | 70 | 25 | 3 | 2 | 59 | 29 | 140 | 59  |
| 34,912 | 8  | 3 | 70 | 25 | 3 | 2 | 59 | 30 | 140 | 60  |
| 34,913 | 8  | 3 | 65 | 25 | 3 | 2 | 54 | 30 | 130 | 60  |
| 34,914 | 8  | 3 | 62 | 15 | 3 | 1 | 54 | 16 | 127 | 35  |
| 34,915 | 8  | 3 | 62 | 17 | 3 | 1 | 54 | 16 | 127 | 37  |
| 34,916 | 8  | 3 | 61 | 19 | 3 | 1 | 53 | 16 | 125 | 39  |
| 34,917 | 7  | 3 | 55 | 20 | 3 | 1 | 50 | 15 | 115 | 39  |
| 34,918 | 7  | 3 | 43 | 19 | 1 | 1 | 42 | 15 | 93  | 38  |
| 34,919 | 7  | 3 | 41 | 19 | 1 | 1 | 38 | 15 | 87  | 38  |
| 34,920 | 6  | 3 | 42 | 19 | 1 | 1 | 39 | 15 | 88  | 38  |

|        |   |   |     |    |    |   |     |    |     |    |
|--------|---|---|-----|----|----|---|-----|----|-----|----|
| 34,921 | 3 | 3 | 37  | 18 | 1  | 0 | 37  | 15 | 78  | 36 |
| 34,922 | 3 | 3 | 35  | 17 | 1  | 0 | 36  | 15 | 75  | 35 |
| 34,923 | 0 | 3 | 32  | 19 | 1  | 0 | 37  | 15 | 70  | 37 |
| 34,924 | 0 | 3 | 28  | 17 | 1  | 0 | 37  | 15 | 66  | 35 |
| 34,925 | 0 | 3 | 28  | 17 | 1  | 0 | 37  | 15 | 66  | 35 |
| 34,926 | 0 | 3 | 28  | 17 | 1  | 0 | 37  | 15 | 66  | 35 |
| 34,927 | 0 | 3 | 27  | 17 | 1  | 0 | 37  | 18 | 65  | 38 |
| 34,928 | 0 | 3 | 27  | 17 | 1  | 0 | 37  | 18 | 65  | 38 |
| 34,929 | 1 | 3 | 56  | 17 | 3  | 0 | 64  | 18 | 124 | 38 |
| 34,930 | 1 | 3 | 56  | 17 | 3  | 0 | 64  | 15 | 124 | 35 |
| 34,931 | 1 | 3 | 57  | 17 | 3  | 0 | 65  | 15 | 126 | 35 |
| 34,932 | 1 | 3 | 53  | 17 | 2  | 0 | 48  | 15 | 104 | 35 |
| 34,933 | 1 | 3 | 53  | 15 | 2  | 0 | 48  | 11 | 104 | 29 |
| 34,934 | 1 | 3 | 53  | 15 | 2  | 0 | 49  | 11 | 105 | 29 |
| 34,935 | 1 | 3 | 53  | 16 | 2  | 0 | 49  | 11 | 105 | 30 |
| 34,936 | 1 | 3 | 55  | 16 | 2  | 0 | 49  | 10 | 107 | 29 |
| 34,937 | 1 | 3 | 58  | 16 | 2  | 0 | 51  | 10 | 112 | 29 |
| 34,938 | 2 | 2 | 73  | 16 | 3  | 0 | 72  | 10 | 150 | 28 |
| 34,939 | 5 | 2 | 95  | 16 | 8  | 0 | 107 | 10 | 215 | 28 |
| 34,940 | 5 | 2 | 95  | 16 | 8  | 0 | 107 | 10 | 215 | 28 |
| 34,941 | 5 | 2 | 95  | 16 | 8  | 0 | 108 | 10 | 216 | 28 |
| 34,942 | 5 | 2 | 95  | 16 | 8  | 0 | 107 | 10 | 215 | 28 |
| 34,943 | 6 | 2 | 105 | 16 | 11 | 0 | 129 | 9  | 251 | 27 |
| 34,944 | 6 | 2 | 106 | 14 | 11 | 0 | 129 | 7  | 252 | 23 |
| 34,945 | 7 | 2 | 105 | 14 | 11 | 0 | 129 | 7  | 252 | 23 |
| 34,946 | 7 | 1 | 105 | 14 | 11 | 0 | 127 | 7  | 250 | 22 |
| 34,947 | 7 | 1 | 105 | 14 | 11 | 0 | 127 | 7  | 250 | 22 |
| 34,948 | 7 | 1 | 105 | 18 | 11 | 0 | 127 | 7  | 250 | 26 |
| 34,949 | 7 | 1 | 107 | 27 | 11 | 0 | 127 | 16 | 252 | 44 |
| 34,950 | 7 | 1 | 107 | 32 | 11 | 0 | 127 | 17 | 252 | 50 |
| 34,951 | 7 | 1 | 107 | 33 | 11 | 0 | 127 | 17 | 252 | 51 |
| 34,952 | 7 | 1 | 109 | 38 | 11 | 0 | 127 | 18 | 254 | 57 |
| 34,953 | 7 | 1 | 108 | 41 | 11 | 0 | 129 | 21 | 255 | 63 |
| 34,954 | 7 | 0 | 110 | 45 | 11 | 0 | 125 | 24 | 253 | 69 |
| 34,955 | 7 | 0 | 109 | 46 | 11 | 0 | 125 | 25 | 252 | 71 |
| 34,956 | 7 | 0 | 113 | 45 | 11 | 0 | 125 | 23 | 256 | 68 |
| 34,957 | 9 | 0 | 115 | 46 | 11 | 0 | 126 | 23 | 261 | 69 |
| 34,958 | 9 | 0 | 117 | 45 | 11 | 0 | 126 | 22 | 263 | 67 |
| 34,959 | 9 | 0 | 122 | 45 | 11 | 0 | 131 | 22 | 273 | 67 |
| 34,960 | 9 | 0 | 140 | 47 | 11 | 0 | 138 | 25 | 298 | 72 |
| 34,961 | 9 | 0 | 140 | 49 | 11 | 0 | 138 | 26 | 298 | 75 |

|        |    |   |     |    |    |   |     |    |     |     |
|--------|----|---|-----|----|----|---|-----|----|-----|-----|
| 34,962 | 39 | 1 | 249 | 51 | 19 | 0 | 274 | 27 | 581 | 79  |
| 34,963 | 39 | 1 | 251 | 51 | 19 | 0 | 278 | 27 | 587 | 79  |
| 34,964 | 39 | 1 | 253 | 52 | 19 | 0 | 282 | 27 | 593 | 80  |
| 34,965 | 39 | 1 | 253 | 52 | 19 | 0 | 282 | 27 | 593 | 80  |
| 34,966 | 39 | 1 | 253 | 50 | 19 | 0 | 282 | 28 | 593 | 79  |
| 34,967 | 39 | 1 | 252 | 48 | 19 | 0 | 282 | 28 | 592 | 77  |
| 34,968 | 39 | 1 | 252 | 47 | 19 | 0 | 282 | 28 | 592 | 76  |
| 34,969 | 41 | 1 | 250 | 47 | 19 | 0 | 281 | 28 | 591 | 76  |
| 34,970 | 41 | 1 | 252 | 46 | 19 | 0 | 283 | 27 | 595 | 74  |
| 34,971 | 41 | 1 | 252 | 45 | 19 | 0 | 283 | 27 | 595 | 73  |
| 34,972 | 41 | 1 | 250 | 45 | 19 | 0 | 282 | 27 | 592 | 73  |
| 34,973 | 41 | 1 | 248 | 45 | 19 | 0 | 279 | 27 | 587 | 73  |
| 34,974 | 43 | 1 | 249 | 42 | 19 | 0 | 279 | 27 | 590 | 70  |
| 34,975 | 43 | 1 | 249 | 42 | 19 | 0 | 279 | 27 | 590 | 70  |
| 34,976 | 43 | 2 | 249 | 43 | 19 | 0 | 279 | 27 | 590 | 72  |
| 34,977 | 49 | 2 | 253 | 44 | 18 | 0 | 274 | 27 | 594 | 73  |
| 34,978 | 48 | 3 | 244 | 47 | 17 | 0 | 266 | 25 | 575 | 75  |
| 34,979 | 48 | 3 | 244 | 53 | 17 | 0 | 259 | 26 | 568 | 82  |
| 34,980 | 48 | 3 | 242 | 53 | 17 | 0 | 255 | 26 | 562 | 82  |
| 34,981 | 49 | 3 | 273 | 53 | 20 | 0 | 270 | 26 | 612 | 82  |
| 34,982 | 49 | 3 | 273 | 53 | 20 | 0 | 267 | 26 | 609 | 82  |
| 34,983 | 49 | 3 | 273 | 53 | 20 | 0 | 267 | 26 | 609 | 82  |
| 34,984 | 49 | 3 | 274 | 53 | 20 | 0 | 267 | 26 | 610 | 82  |
| 34,985 | 50 | 3 | 287 | 53 | 20 | 0 | 267 | 26 | 624 | 82  |
| 34,986 | 50 | 3 | 287 | 52 | 20 | 0 | 267 | 30 | 624 | 85  |
| 34,987 | 50 | 3 | 285 | 52 | 20 | 0 | 267 | 32 | 622 | 87  |
| 34,988 | 64 | 3 | 360 | 52 | 21 | 0 | 285 | 32 | 730 | 87  |
| 34,989 | 65 | 4 | 349 | 53 | 21 | 0 | 268 | 34 | 703 | 91  |
| 34,990 | 62 | 4 | 335 | 60 | 16 | 2 | 234 | 39 | 647 | 105 |
| 34,991 | 61 | 4 | 331 | 61 | 15 | 2 | 220 | 40 | 627 | 107 |
| 34,992 | 61 | 4 | 330 | 62 | 14 | 2 | 220 | 40 | 625 | 108 |
| 34,993 | 61 | 5 | 328 | 62 | 13 | 2 | 214 | 40 | 616 | 109 |
| 34,994 | 61 | 5 | 329 | 63 | 13 | 2 | 214 | 40 | 617 | 110 |
| 34,995 | 61 | 7 | 328 | 63 | 13 | 2 | 213 | 40 | 615 | 112 |
| 34,996 | 60 | 7 | 328 | 63 | 13 | 2 | 213 | 40 | 614 | 112 |
| 34,997 | 60 | 7 | 327 | 64 | 13 | 2 | 211 | 40 | 611 | 113 |
| 34,998 | 60 | 7 | 328 | 64 | 13 | 2 | 211 | 40 | 612 | 113 |
| 34,999 | 60 | 7 | 333 | 51 | 13 | 2 | 213 | 31 | 619 | 91  |
| 35,000 | 60 | 7 | 332 | 46 | 13 | 2 | 213 | 30 | 618 | 85  |
| 35,001 | 60 | 7 | 333 | 46 | 13 | 2 | 213 | 30 | 619 | 85  |
| 35,002 | 60 | 7 | 333 | 45 | 13 | 2 | 213 | 30 | 619 | 84  |

|        |    |    |     |    |    |   |     |    |     |    |
|--------|----|----|-----|----|----|---|-----|----|-----|----|
| 35,003 | 62 | 7  | 339 | 37 | 13 | 2 | 220 | 26 | 634 | 72 |
| 35,004 | 63 | 7  | 338 | 33 | 15 | 2 | 220 | 23 | 636 | 65 |
| 35,005 | 63 | 7  | 336 | 33 | 15 | 2 | 220 | 23 | 634 | 65 |
| 35,006 | 63 | 7  | 342 | 32 | 15 | 2 | 224 | 22 | 644 | 63 |
| 35,007 | 63 | 7  | 338 | 32 | 15 | 2 | 224 | 22 | 640 | 63 |
| 35,008 | 61 | 7  | 339 | 31 | 16 | 2 | 226 | 22 | 642 | 62 |
| 35,009 | 61 | 7  | 340 | 32 | 16 | 2 | 227 | 22 | 644 | 63 |
| 35,010 | 61 | 7  | 336 | 26 | 16 | 2 | 221 | 17 | 634 | 52 |
| 35,011 | 61 | 7  | 320 | 26 | 16 | 2 | 216 | 17 | 613 | 52 |
| 35,012 | 30 | 7  | 231 | 26 | 10 | 2 | 106 | 17 | 377 | 52 |
| 35,013 | 38 | 8  | 247 | 26 | 8  | 2 | 110 | 17 | 403 | 53 |
| 35,014 | 38 | 8  | 258 | 25 | 8  | 2 | 110 | 17 | 414 | 52 |
| 35,015 | 38 | 9  | 256 | 25 | 8  | 2 | 107 | 17 | 409 | 53 |
| 35,016 | 40 | 9  | 272 | 25 | 9  | 2 | 112 | 17 | 433 | 53 |
| 35,017 | 39 | 9  | 277 | 25 | 9  | 2 | 113 | 16 | 438 | 52 |
| 35,018 | 39 | 9  | 277 | 25 | 9  | 2 | 113 | 16 | 438 | 52 |
| 35,019 | 39 | 9  | 277 | 25 | 9  | 2 | 113 | 16 | 438 | 52 |
| 35,020 | 39 | 9  | 277 | 25 | 9  | 2 | 113 | 16 | 438 | 52 |
| 35,021 | 39 | 9  | 275 | 25 | 9  | 2 | 111 | 16 | 434 | 52 |
| 35,022 | 39 | 9  | 276 | 25 | 9  | 2 | 111 | 16 | 435 | 52 |
| 35,023 | 39 | 9  | 276 | 25 | 9  | 2 | 111 | 16 | 435 | 52 |
| 35,024 | 37 | 9  | 275 | 25 | 9  | 2 | 111 | 16 | 432 | 52 |
| 35,025 | 37 | 9  | 275 | 26 | 9  | 2 | 111 | 16 | 432 | 53 |
| 35,026 | 37 | 9  | 279 | 26 | 10 | 2 | 112 | 17 | 438 | 54 |
| 35,027 | 37 | 8  | 282 | 30 | 10 | 2 | 112 | 19 | 441 | 59 |
| 35,028 | 31 | 8  | 267 | 35 | 10 | 2 | 111 | 21 | 419 | 66 |
| 35,029 | 31 | 8  | 261 | 32 | 10 | 2 | 110 | 20 | 412 | 62 |
| 35,030 | 31 | 8  | 259 | 26 | 10 | 2 | 110 | 19 | 410 | 55 |
| 35,031 | 30 | 8  | 230 | 27 | 8  | 2 | 99  | 19 | 367 | 56 |
| 35,032 | 30 | 8  | 227 | 27 | 7  | 2 | 95  | 19 | 359 | 56 |
| 35,033 | 30 | 8  | 225 | 27 | 7  | 2 | 95  | 19 | 357 | 56 |
| 35,034 | 30 | 8  | 224 | 27 | 7  | 2 | 95  | 19 | 356 | 56 |
| 35,035 | 29 | 9  | 211 | 30 | 7  | 2 | 94  | 20 | 341 | 61 |
| 35,036 | 29 | 10 | 212 | 33 | 7  | 2 | 96  | 23 | 344 | 68 |
| 35,037 | 26 | 10 | 200 | 34 | 7  | 2 | 93  | 17 | 326 | 63 |
| 35,038 | 25 | 10 | 179 | 38 | 7  | 2 | 91  | 18 | 302 | 68 |
| 35,039 | 15 | 10 | 135 | 39 | 6  | 2 | 78  | 18 | 234 | 69 |
| 35,040 | 14 | 9  | 131 | 38 | 5  | 2 | 74  | 16 | 224 | 65 |
| 35,041 | 14 | 9  | 123 | 30 | 5  | 0 | 72  | 10 | 214 | 49 |
| 35,042 | 14 | 9  | 120 | 30 | 5  | 0 | 71  | 10 | 210 | 49 |
| 35,043 | 14 | 8  | 120 | 29 | 5  | 0 | 70  | 10 | 209 | 47 |

|        |    |    |     |    |   |   |    |    |     |    |
|--------|----|----|-----|----|---|---|----|----|-----|----|
| 35,044 | 14 | 8  | 119 | 29 | 5 | 0 | 70 | 10 | 208 | 47 |
| 35,045 | 14 | 8  | 119 | 28 | 5 | 0 | 70 | 10 | 208 | 46 |
| 35,046 | 14 | 6  | 119 | 30 | 5 | 0 | 70 | 10 | 208 | 46 |
| 35,047 | 19 | 6  | 153 | 30 | 8 | 0 | 87 | 10 | 267 | 46 |
| 35,048 | 19 | 6  | 152 | 28 | 8 | 0 | 87 | 10 | 266 | 44 |
| 35,049 | 19 | 6  | 152 | 28 | 8 | 0 | 86 | 12 | 265 | 46 |
| 35,050 | 19 | 6  | 147 | 28 | 8 | 0 | 85 | 12 | 259 | 46 |
| 35,051 | 19 | 6  | 150 | 28 | 8 | 0 | 87 | 12 | 264 | 46 |
| 35,052 | 19 | 6  | 150 | 28 | 8 | 0 | 87 | 12 | 264 | 46 |
| 35,053 | 19 | 6  | 149 | 28 | 8 | 0 | 86 | 12 | 262 | 46 |
| 35,054 | 17 | 6  | 140 | 29 | 8 | 0 | 80 | 12 | 245 | 47 |
| 35,055 | 16 | 6  | 140 | 29 | 6 | 0 | 79 | 12 | 241 | 47 |
| 35,056 | 16 | 6  | 137 | 31 | 7 | 0 | 79 | 14 | 239 | 51 |
| 35,057 | 16 | 6  | 137 | 31 | 7 | 0 | 78 | 14 | 238 | 51 |
| 35,058 | 16 | 6  | 135 | 31 | 6 | 0 | 75 | 14 | 232 | 51 |
| 35,059 | 16 | 7  | 134 | 36 | 6 | 0 | 75 | 20 | 231 | 63 |
| 35,060 | 16 | 8  | 130 | 35 | 6 | 1 | 74 | 20 | 226 | 64 |
| 35,061 | 17 | 8  | 141 | 38 | 6 | 1 | 78 | 20 | 242 | 67 |
| 35,062 | 17 | 8  | 142 | 41 | 6 | 2 | 79 | 21 | 244 | 72 |
| 35,063 | 18 | 8  | 139 | 41 | 6 | 2 | 73 | 22 | 236 | 73 |
| 35,064 | 16 | 7  | 119 | 42 | 7 | 2 | 52 | 22 | 194 | 73 |
| 35,065 | 16 | 8  | 106 | 43 | 7 | 2 | 48 | 23 | 177 | 76 |
| 35,066 | 14 | 8  | 90  | 45 | 6 | 2 | 43 | 24 | 153 | 79 |
| 35,067 | 14 | 8  | 85  | 46 | 6 | 2 | 42 | 24 | 147 | 80 |
| 35,068 | 15 | 8  | 97  | 46 | 7 | 2 | 49 | 24 | 168 | 80 |
| 35,069 | 15 | 8  | 98  | 47 | 7 | 2 | 52 | 24 | 172 | 81 |
| 35,070 | 15 | 8  | 98  | 47 | 7 | 2 | 52 | 24 | 172 | 81 |
| 35,071 | 15 | 8  | 98  | 47 | 7 | 2 | 53 | 24 | 173 | 81 |
| 35,072 | 15 | 8  | 101 | 47 | 7 | 2 | 53 | 24 | 176 | 81 |
| 35,073 | 15 | 8  | 100 | 47 | 7 | 2 | 53 | 24 | 175 | 81 |
| 35,074 | 15 | 8  | 101 | 47 | 7 | 2 | 53 | 24 | 176 | 81 |
| 35,075 | 15 | 8  | 101 | 48 | 7 | 2 | 53 | 24 | 176 | 82 |
| 35,076 | 15 | 8  | 99  | 42 | 7 | 2 | 53 | 21 | 174 | 73 |
| 35,077 | 15 | 8  | 98  | 42 | 7 | 2 | 52 | 21 | 172 | 73 |
| 35,078 | 15 | 10 | 95  | 44 | 7 | 2 | 52 | 23 | 169 | 79 |
| 35,079 | 15 | 10 | 94  | 38 | 7 | 2 | 52 | 21 | 168 | 71 |
| 35,080 | 15 | 9  | 95  | 38 | 7 | 2 | 53 | 21 | 170 | 70 |
| 35,081 | 15 | 9  | 96  | 38 | 7 | 2 | 53 | 21 | 171 | 70 |
| 35,082 | 15 | 9  | 96  | 37 | 7 | 2 | 53 | 21 | 171 | 69 |
| 35,083 | 15 | 9  | 96  | 37 | 7 | 2 | 53 | 21 | 171 | 69 |
| 35,084 | 15 | 9  | 96  | 37 | 7 | 2 | 53 | 21 | 171 | 69 |



|        |    |    |     |    |   |   |     |    |     |     |
|--------|----|----|-----|----|---|---|-----|----|-----|-----|
| 35,085 | 15 | 9  | 96  | 37 | 7 | 2 | 53  | 21 | 171 | 69  |
| 35,086 | 15 | 8  | 98  | 34 | 7 | 2 | 53  | 20 | 173 | 64  |
| 35,087 | 15 | 7  | 98  | 30 | 7 | 2 | 50  | 17 | 170 | 56  |
| 35,088 | 15 | 7  | 98  | 26 | 7 | 2 | 50  | 16 | 170 | 51  |
| 35,089 | 15 | 7  | 98  | 25 | 7 | 2 | 51  | 16 | 171 | 50  |
| 35,090 | 15 | 8  | 97  | 25 | 7 | 3 | 50  | 16 | 169 | 52  |
| 35,091 | 14 | 8  | 97  | 25 | 7 | 3 | 49  | 16 | 167 | 52  |
| 35,092 | 15 | 8  | 97  | 28 | 7 | 3 | 49  | 16 | 168 | 55  |
| 35,093 | 15 | 8  | 97  | 28 | 7 | 3 | 49  | 17 | 168 | 56  |
| 35,094 | 15 | 11 | 97  | 50 | 5 | 3 | 49  | 22 | 166 | 86  |
| 35,095 | 15 | 12 | 96  | 54 | 5 | 3 | 47  | 26 | 163 | 95  |
| 35,096 | 14 | 12 | 84  | 54 | 5 | 3 | 42  | 26 | 145 | 95  |
| 35,097 | 12 | 12 | 81  | 52 | 4 | 3 | 40  | 26 | 137 | 93  |
| 35,098 | 11 | 12 | 66  | 52 | 4 | 3 | 35  | 26 | 116 | 93  |
| 35,099 | 11 | 12 | 64  | 53 | 4 | 3 | 35  | 27 | 114 | 95  |
| 35,100 | 11 | 12 | 62  | 53 | 4 | 3 | 35  | 25 | 112 | 93  |
| 35,101 | 11 | 12 | 62  | 53 | 4 | 3 | 35  | 25 | 112 | 93  |
| 35,102 | 11 | 15 | 61  | 54 | 4 | 3 | 35  | 25 | 111 | 97  |
| 35,103 | 11 | 15 | 61  | 54 | 4 | 3 | 35  | 25 | 111 | 97  |
| 35,104 | 11 | 16 | 61  | 55 | 4 | 3 | 36  | 25 | 112 | 99  |
| 35,105 | 11 | 16 | 60  | 55 | 4 | 3 | 35  | 25 | 110 | 99  |
| 35,106 | 11 | 16 | 58  | 57 | 4 | 3 | 33  | 25 | 106 | 101 |
| 35,107 | 12 | 16 | 56  | 55 | 3 | 3 | 32  | 23 | 103 | 97  |
| 35,108 | 12 | 15 | 54  | 50 | 3 | 3 | 31  | 17 | 100 | 85  |
| 35,109 | 12 | 15 | 54  | 50 | 3 | 3 | 31  | 17 | 100 | 85  |
| 35,110 | 11 | 15 | 43  | 50 | 3 | 3 | 29  | 17 | 86  | 85  |
| 35,111 | 11 | 13 | 43  | 48 | 3 | 2 | 27  | 17 | 84  | 80  |
| 35,112 | 11 | 13 | 43  | 48 | 3 | 2 | 27  | 17 | 84  | 80  |
| 35,113 | 13 | 11 | 40  | 44 | 3 | 1 | 24  | 15 | 80  | 71  |
| 35,114 | 12 | 11 | 39  | 44 | 3 | 1 | 24  | 15 | 78  | 71  |
| 35,115 | 6  | 11 | 27  | 45 | 2 | 1 | 20  | 16 | 55  | 73  |
| 35,116 | 7  | 11 | 39  | 45 | 2 | 1 | 26  | 16 | 74  | 73  |
| 35,117 | 6  | 11 | 31  | 43 | 1 | 1 | 19  | 15 | 57  | 70  |
| 35,118 | 6  | 11 | 30  | 43 | 1 | 1 | 19  | 16 | 56  | 71  |
| 35,119 | 6  | 11 | 30  | 43 | 1 | 1 | 19  | 16 | 56  | 71  |
| 35,120 | 6  | 11 | 31  | 45 | 1 | 1 | 19  | 16 | 57  | 73  |
| 35,121 | 6  | 11 | 70  | 45 | 1 | 1 | 22  | 16 | 99  | 73  |
| 35,122 | 6  | 11 | 66  | 45 | 1 | 1 | 22  | 16 | 95  | 73  |
| 35,123 | 10 | 11 | 93  | 45 | 3 | 1 | 36  | 16 | 142 | 73  |
| 35,124 | 16 | 11 | 219 | 45 | 9 | 1 | 151 | 16 | 395 | 73  |
| 35,125 | 16 | 11 | 218 | 47 | 9 | 1 | 151 | 17 | 394 | 76  |

|        |    |    |     |    |    |   |     |    |       |    |
|--------|----|----|-----|----|----|---|-----|----|-------|----|
| 35,126 | 16 | 11 | 218 | 48 | 9  | 1 | 151 | 18 | 394   | 78 |
| 35,127 | 16 | 11 | 223 | 53 | 9  | 1 | 154 | 19 | 402   | 84 |
| 35,128 | 16 | 11 | 228 | 60 | 8  | 1 | 155 | 21 | 407   | 93 |
| 35,129 | 16 | 9  | 232 | 58 | 8  | 1 | 155 | 20 | 411   | 88 |
| 35,130 | 16 | 9  | 231 | 61 | 9  | 1 | 157 | 20 | 413   | 91 |
| 35,131 | 16 | 9  | 231 | 61 | 9  | 1 | 157 | 20 | 413   | 91 |
| 35,132 | 16 | 9  | 238 | 61 | 9  | 1 | 158 | 20 | 421   | 91 |
| 35,133 | 16 | 9  | 238 | 61 | 9  | 1 | 158 | 21 | 421   | 92 |
| 35,134 | 16 | 9  | 240 | 61 | 9  | 1 | 161 | 21 | 426   | 92 |
| 35,135 | 16 | 9  | 248 | 61 | 9  | 1 | 163 | 21 | 436   | 92 |
| 35,136 | 17 | 9  | 248 | 61 | 9  | 1 | 163 | 21 | 437   | 92 |
| 35,137 | 17 | 9  | 251 | 61 | 10 | 1 | 167 | 21 | 445   | 92 |
| 35,138 | 18 | 9  | 253 | 61 | 11 | 1 | 167 | 21 | 449   | 92 |
| 35,139 | 18 | 9  | 253 | 61 | 11 | 1 | 168 | 21 | 450   | 92 |
| 35,140 | 21 | 9  | 287 | 62 | 13 | 1 | 187 | 21 | 508   | 93 |
| 35,141 | 21 | 8  | 348 | 63 | 19 | 0 | 236 | 21 | 624   | 92 |
| 35,142 | 21 | 8  | 365 | 63 | 22 | 0 | 244 | 21 | 652   | 92 |
| 35,143 | 20 | 8  | 370 | 60 | 23 | 0 | 246 | 21 | 659   | 89 |
| 35,144 | 20 | 8  | 369 | 60 | 23 | 0 | 245 | 20 | 657   | 88 |
| 35,145 | 20 | 6  | 369 | 42 | 24 | 0 | 248 | 17 | 661   | 65 |
| 35,146 | 20 | 5  | 368 | 38 | 24 | 0 | 246 | 13 | 658   | 56 |
| 35,147 | 20 | 5  | 372 | 37 | 24 | 0 | 248 | 13 | 664   | 55 |
| 35,148 | 20 | 5  | 373 | 37 | 24 | 0 | 248 | 12 | 665   | 54 |
| 35,149 | 19 | 5  | 384 | 37 | 24 | 0 | 254 | 12 | 681   | 54 |
| 35,150 | 19 | 5  | 385 | 37 | 24 | 0 | 253 | 13 | 681   | 55 |
| 35,151 | 19 | 5  | 385 | 37 | 24 | 0 | 252 | 15 | 680   | 57 |
| 35,152 | 23 | 5  | 399 | 37 | 24 | 0 | 256 | 15 | 702   | 57 |
| 35,153 | 23 | 2  | 399 | 36 | 24 | 0 | 256 | 15 | 702   | 53 |
| 35,154 | 24 | 2  | 442 | 36 | 24 | 0 | 265 | 17 | 755   | 55 |
| 35,155 | 24 | 1  | 442 | 41 | 25 | 0 | 264 | 23 | 755   | 65 |
| 35,156 | 24 | 1  | 442 | 41 | 25 | 0 | 264 | 23 | 755   | 65 |
| 35,157 | 30 | 1  | 639 | 39 | 41 | 0 | 351 | 24 | 1,061 | 64 |
| 35,158 | 29 | 1  | 643 | 39 | 44 | 0 | 353 | 24 | 1,069 | 64 |
| 35,159 | 29 | 1  | 643 | 39 | 44 | 0 | 353 | 24 | 1,069 | 64 |
| 35,160 | 29 | 1  | 643 | 39 | 44 | 0 | 353 | 25 | 1,069 | 65 |
| 35,161 | 29 | 1  | 643 | 39 | 44 | 0 | 353 | 25 | 1,069 | 65 |
| 35,162 | 29 | 1  | 648 | 39 | 44 | 0 | 354 | 25 | 1,075 | 65 |
| 35,163 | 29 | 1  | 650 | 39 | 44 | 0 | 356 | 25 | 1,079 | 65 |
| 35,164 | 27 | 1  | 653 | 38 | 44 | 0 | 359 | 24 | 1,083 | 63 |
| 35,165 | 27 | 1  | 653 | 37 | 44 | 0 | 359 | 23 | 1,083 | 61 |
| 35,166 | 27 | 1  | 653 | 37 | 44 | 0 | 359 | 23 | 1,083 | 61 |

|        |    |   |     |    |    |   |     |    |       |    |
|--------|----|---|-----|----|----|---|-----|----|-------|----|
| 35,167 | 26 | 1 | 642 | 37 | 44 | 0 | 353 | 23 | 1,065 | 61 |
| 35,168 | 26 | 1 | 641 | 37 | 44 | 0 | 353 | 23 | 1,064 | 61 |
| 35,169 | 26 | 1 | 640 | 37 | 44 | 0 | 354 | 23 | 1,064 | 61 |
| 35,170 | 26 | 1 | 640 | 39 | 44 | 0 | 354 | 23 | 1,064 | 63 |
| 35,171 | 26 | 1 | 639 | 38 | 44 | 0 | 353 | 24 | 1,062 | 63 |
| 35,172 | 26 | 1 | 602 | 39 | 44 | 0 | 349 | 24 | 1,021 | 64 |
| 35,173 | 22 | 1 | 578 | 40 | 44 | 1 | 335 | 25 | 979   | 67 |
| 35,174 | 23 | 1 | 564 | 40 | 44 | 1 | 328 | 25 | 959   | 67 |
| 35,175 | 17 | 1 | 450 | 40 | 38 | 1 | 220 | 25 | 725   | 67 |
| 35,176 | 17 | 1 | 449 | 38 | 38 | 1 | 221 | 24 | 725   | 64 |
| 35,177 | 17 | 1 | 447 | 37 | 38 | 1 | 218 | 23 | 720   | 62 |
| 35,178 | 17 | 2 | 442 | 25 | 38 | 1 | 217 | 20 | 714   | 48 |
| 35,179 | 17 | 2 | 441 | 25 | 38 | 1 | 217 | 20 | 713   | 48 |
| 35,180 | 17 | 2 | 437 | 26 | 38 | 1 | 216 | 19 | 708   | 48 |
| 35,181 | 17 | 2 | 437 | 24 | 37 | 1 | 214 | 19 | 705   | 46 |
| 35,182 | 18 | 2 | 437 | 24 | 37 | 1 | 216 | 19 | 708   | 46 |
| 35,183 | 18 | 2 | 437 | 24 | 37 | 1 | 216 | 19 | 708   | 46 |
| 35,184 | 18 | 2 | 435 | 24 | 37 | 1 | 213 | 18 | 703   | 45 |
| 35,185 | 18 | 2 | 434 | 24 | 37 | 1 | 210 | 18 | 699   | 45 |
| 35,186 | 17 | 2 | 446 | 24 | 37 | 1 | 214 | 18 | 714   | 45 |
| 35,187 | 17 | 2 | 458 | 24 | 36 | 1 | 218 | 18 | 729   | 45 |
| 35,188 | 20 | 3 | 476 | 28 | 38 | 1 | 242 | 18 | 776   | 50 |
| 35,189 | 19 | 3 | 475 | 31 | 37 | 1 | 243 | 20 | 774   | 55 |
| 35,190 | 19 | 3 | 491 | 31 | 38 | 1 | 260 | 20 | 808   | 55 |
| 35,191 | 18 | 3 | 483 | 30 | 37 | 1 | 270 | 20 | 808   | 54 |
| 35,192 | 18 | 3 | 422 | 29 | 31 | 1 | 220 | 20 | 691   | 53 |
| 35,193 | 18 | 3 | 405 | 29 | 28 | 1 | 212 | 20 | 663   | 53 |
| 35,194 | 18 | 2 | 400 | 25 | 27 | 1 | 212 | 18 | 657   | 46 |
| 35,195 | 18 | 2 | 400 | 25 | 27 | 1 | 211 | 18 | 656   | 46 |
| 35,196 | 18 | 2 | 400 | 25 | 26 | 1 | 209 | 18 | 653   | 46 |
| 35,197 | 18 | 2 | 400 | 25 | 26 | 1 | 209 | 18 | 653   | 46 |
| 35,198 | 18 | 2 | 398 | 25 | 26 | 1 | 207 | 18 | 649   | 46 |
| 35,199 | 18 | 2 | 398 | 28 | 26 | 1 | 206 | 20 | 648   | 51 |
| 35,200 | 18 | 2 | 387 | 28 | 26 | 1 | 200 | 20 | 631   | 51 |
| 35,201 | 18 | 2 | 399 | 29 | 26 | 2 | 202 | 24 | 645   | 57 |
| 35,202 | 19 | 2 | 412 | 31 | 26 | 2 | 204 | 23 | 661   | 58 |
| 35,203 | 16 | 2 | 402 | 34 | 26 | 2 | 201 | 26 | 645   | 64 |
| 35,204 | 16 | 3 | 394 | 35 | 26 | 2 | 199 | 26 | 635   | 66 |
| 35,205 | 16 | 3 | 364 | 35 | 26 | 2 | 193 | 24 | 599   | 64 |
| 35,206 | 12 | 3 | 202 | 28 | 13 | 2 | 129 | 19 | 356   | 52 |
| 35,207 | 10 | 3 | 172 | 28 | 9  | 2 | 108 | 20 | 299   | 53 |

|        |    |   |     |    |    |   |     |    |     |    |
|--------|----|---|-----|----|----|---|-----|----|-----|----|
| 35,208 | 14 | 3 | 179 | 28 | 6  | 2 | 119 | 19 | 318 | 52 |
| 35,209 | 15 | 3 | 181 | 28 | 6  | 2 | 122 | 19 | 324 | 52 |
| 35,210 | 15 | 3 | 208 | 28 | 6  | 2 | 127 | 18 | 356 | 51 |
| 35,211 | 15 | 3 | 229 | 32 | 6  | 2 | 132 | 20 | 382 | 57 |
| 35,212 | 16 | 3 | 309 | 32 | 8  | 2 | 147 | 20 | 480 | 57 |
| 35,213 | 16 | 3 | 309 | 31 | 8  | 2 | 147 | 20 | 480 | 56 |
| 35,214 | 16 | 3 | 308 | 32 | 8  | 2 | 145 | 20 | 477 | 57 |
| 35,215 | 37 | 3 | 420 | 32 | 15 | 2 | 219 | 20 | 691 | 57 |
| 35,216 | 37 | 3 | 419 | 32 | 15 | 2 | 219 | 20 | 690 | 57 |
| 35,217 | 38 | 3 | 422 | 33 | 15 | 2 | 220 | 21 | 695 | 59 |
| 35,218 | 38 | 3 | 421 | 34 | 15 | 2 | 220 | 21 | 694 | 60 |
| 35,219 | 38 | 3 | 420 | 34 | 15 | 2 | 219 | 21 | 692 | 60 |
| 35,220 | 38 | 4 | 420 | 33 | 15 | 3 | 219 | 21 | 692 | 61 |
| 35,221 | 38 | 4 | 420 | 31 | 15 | 3 | 219 | 22 | 692 | 60 |
| 35,222 | 38 | 4 | 420 | 30 | 15 | 3 | 217 | 21 | 690 | 58 |
| 35,223 | 38 | 4 | 418 | 29 | 15 | 2 | 217 | 20 | 688 | 55 |
| 35,224 | 38 | 4 | 416 | 29 | 13 | 2 | 217 | 20 | 684 | 55 |
| 35,225 | 37 | 4 | 416 | 29 | 13 | 2 | 218 | 20 | 684 | 55 |
| 35,226 | 37 | 4 | 416 | 29 | 13 | 2 | 218 | 20 | 684 | 55 |
| 35,227 | 37 | 4 | 416 | 30 | 13 | 2 | 217 | 20 | 683 | 56 |
| 35,228 | 37 | 4 | 416 | 29 | 13 | 2 | 217 | 20 | 683 | 55 |
| 35,229 | 37 | 3 | 416 | 29 | 13 | 2 | 217 | 20 | 683 | 54 |
| 35,230 | 37 | 3 | 417 | 27 | 13 | 2 | 216 | 20 | 683 | 52 |
| 35,231 | 37 | 3 | 417 | 27 | 13 | 2 | 216 | 20 | 683 | 52 |
| 35,232 | 36 | 3 | 413 | 27 | 13 | 2 | 214 | 20 | 676 | 52 |
| 35,233 | 36 | 3 | 417 | 27 | 13 | 2 | 219 | 20 | 685 | 52 |
| 35,234 | 36 | 3 | 418 | 27 | 13 | 2 | 219 | 20 | 686 | 52 |
| 35,235 | 36 | 3 | 419 | 27 | 13 | 2 | 219 | 20 | 687 | 52 |
| 35,236 | 37 | 3 | 412 | 28 | 13 | 2 | 219 | 20 | 681 | 53 |
| 35,237 | 37 | 3 | 400 | 28 | 13 | 2 | 215 | 22 | 665 | 55 |
| 35,238 | 37 | 3 | 386 | 28 | 13 | 2 | 212 | 22 | 648 | 55 |
| 35,239 | 34 | 2 | 366 | 21 | 11 | 2 | 184 | 20 | 595 | 45 |
| 35,240 | 35 | 2 | 364 | 21 | 11 | 2 | 183 | 20 | 593 | 45 |
| 35,241 | 35 | 2 | 346 | 22 | 10 | 2 | 164 | 21 | 555 | 47 |
| 35,242 | 33 | 2 | 320 | 22 | 9  | 2 | 135 | 21 | 497 | 47 |
| 35,243 | 33 | 2 | 320 | 22 | 9  | 2 | 135 | 21 | 497 | 47 |
| 35,244 | 34 | 2 | 329 | 22 | 9  | 2 | 135 | 21 | 507 | 47 |
| 35,245 | 34 | 2 | 329 | 22 | 9  | 2 | 135 | 21 | 507 | 47 |
| 35,246 | 34 | 2 | 329 | 22 | 9  | 2 | 135 | 21 | 507 | 47 |
| 35,247 | 42 | 2 | 338 | 22 | 10 | 2 | 142 | 21 | 532 | 47 |
| 35,248 | 44 | 2 | 338 | 22 | 10 | 2 | 142 | 21 | 534 | 47 |

|        |    |   |     |    |    |   |     |    |     |    |
|--------|----|---|-----|----|----|---|-----|----|-----|----|
| 35,249 | 49 | 2 | 348 | 22 | 11 | 2 | 151 | 21 | 559 | 47 |
| 35,250 | 49 | 2 | 349 | 19 | 11 | 2 | 151 | 19 | 560 | 42 |
| 35,251 | 49 | 2 | 340 | 19 | 11 | 2 | 149 | 19 | 549 | 42 |
| 35,252 | 49 | 2 | 336 | 18 | 11 | 1 | 149 | 14 | 545 | 35 |
| 35,253 | 47 | 2 | 322 | 16 | 11 | 1 | 146 | 13 | 526 | 32 |
| 35,254 | 57 | 1 | 363 | 12 | 11 | 1 | 181 | 10 | 612 | 24 |
| 35,255 | 57 | 1 | 363 | 12 | 11 | 1 | 181 | 10 | 612 | 24 |
| 35,256 | 56 | 1 | 358 | 12 | 11 | 1 | 180 | 8  | 605 | 22 |
| 35,257 | 56 | 1 | 353 | 12 | 11 | 1 | 178 | 8  | 598 | 22 |
| 35,258 | 52 | 1 | 342 | 12 | 11 | 1 | 165 | 10 | 570 | 24 |
| 35,259 | 52 | 2 | 343 | 15 | 11 | 1 | 166 | 11 | 572 | 29 |
| 35,260 | 51 | 2 | 341 | 16 | 11 | 1 | 163 | 12 | 566 | 31 |
| 35,261 | 51 | 2 | 314 | 19 | 11 | 1 | 158 | 13 | 534 | 35 |
| 35,262 | 51 | 2 | 293 | 15 | 11 | 1 | 153 | 11 | 508 | 29 |
| 35,263 | 50 | 2 | 209 | 14 | 9  | 1 | 137 | 13 | 405 | 30 |
| 35,264 | 33 | 2 | 115 | 14 | 2  | 1 | 67  | 13 | 217 | 30 |
| 35,265 | 30 | 2 | 99  | 15 | 2  | 1 | 65  | 17 | 196 | 35 |
| 35,266 | 30 | 3 | 94  | 15 | 2  | 1 | 60  | 17 | 186 | 36 |
| 35,267 | 29 | 3 | 93  | 15 | 2  | 1 | 59  | 17 | 183 | 36 |
| 35,268 | 30 | 3 | 97  | 13 | 2  | 1 | 59  | 16 | 188 | 33 |
| 35,269 | 30 | 3 | 97  | 13 | 2  | 1 | 59  | 16 | 188 | 33 |
| 35,270 | 30 | 3 | 99  | 13 | 3  | 1 | 59  | 16 | 191 | 33 |
| 35,271 | 30 | 2 | 99  | 13 | 3  | 0 | 59  | 17 | 191 | 32 |
| 35,272 | 30 | 2 | 98  | 13 | 3  | 0 | 59  | 16 | 190 | 31 |
| 35,273 | 33 | 2 | 120 | 12 | 3  | 0 | 70  | 16 | 226 | 30 |
| 35,274 | 33 | 2 | 120 | 12 | 3  | 0 | 70  | 16 | 226 | 30 |
| 35,275 | 35 | 2 | 128 | 12 | 4  | 0 | 75  | 16 | 242 | 30 |
| 35,276 | 35 | 2 | 128 | 13 | 4  | 0 | 75  | 16 | 242 | 31 |
| 35,277 | 37 | 2 | 138 | 13 | 4  | 0 | 76  | 19 | 255 | 34 |
| 35,278 | 37 | 2 | 138 | 12 | 4  | 0 | 76  | 19 | 255 | 33 |
| 35,279 | 43 | 2 | 196 | 12 | 5  | 0 | 85  | 19 | 329 | 33 |
| 35,280 | 55 | 2 | 309 | 13 | 10 | 0 | 130 | 30 | 504 | 45 |
| 35,281 | 55 | 2 | 309 | 13 | 10 | 0 | 130 | 30 | 504 | 45 |
| 35,282 | 55 | 2 | 321 | 17 | 10 | 0 | 131 | 31 | 517 | 50 |
| 35,283 | 55 | 4 | 319 | 21 | 10 | 0 | 131 | 31 | 515 | 56 |
| 35,284 | 55 | 4 | 314 | 23 | 10 | 1 | 126 | 31 | 505 | 59 |
| 35,285 | 55 | 5 | 313 | 23 | 10 | 1 | 127 | 31 | 505 | 60 |
| 35,286 | 55 | 5 | 312 | 24 | 10 | 1 | 127 | 31 | 504 | 61 |
| 35,287 | 54 | 5 | 312 | 24 | 10 | 1 | 127 | 31 | 503 | 61 |
| 35,288 | 54 | 5 | 314 | 25 | 10 | 1 | 128 | 30 | 506 | 61 |
| 35,289 | 54 | 5 | 313 | 25 | 10 | 1 | 127 | 30 | 504 | 61 |

|        |    |   |     |    |    |   |     |    |     |     |
|--------|----|---|-----|----|----|---|-----|----|-----|-----|
| 35,290 | 55 | 5 | 314 | 26 | 10 | 1 | 127 | 30 | 506 | 62  |
| 35,291 | 54 | 5 | 314 | 26 | 10 | 1 | 127 | 29 | 505 | 61  |
| 35,292 | 54 | 5 | 315 | 27 | 10 | 1 | 127 | 29 | 506 | 62  |
| 35,293 | 54 | 5 | 315 | 27 | 10 | 1 | 127 | 29 | 506 | 62  |
| 35,294 | 54 | 5 | 314 | 27 | 10 | 1 | 127 | 29 | 505 | 62  |
| 35,295 | 53 | 5 | 306 | 27 | 10 | 1 | 127 | 29 | 496 | 62  |
| 35,296 | 53 | 5 | 306 | 28 | 10 | 1 | 127 | 29 | 496 | 63  |
| 35,297 | 45 | 5 | 298 | 29 | 9  | 2 | 120 | 33 | 472 | 69  |
| 35,298 | 43 | 5 | 298 | 29 | 9  | 2 | 120 | 37 | 470 | 73  |
| 35,299 | 40 | 5 | 294 | 31 | 9  | 4 | 119 | 46 | 462 | 86  |
| 35,300 | 38 | 5 | 286 | 34 | 8  | 4 | 111 | 52 | 443 | 95  |
| 35,301 | 38 | 5 | 285 | 36 | 8  | 4 | 110 | 52 | 441 | 97  |
| 35,302 | 33 | 5 | 268 | 36 | 8  | 4 | 102 | 52 | 411 | 97  |
| 35,303 | 30 | 5 | 268 | 37 | 8  | 5 | 100 | 55 | 406 | 102 |
| 35,304 | 28 | 5 | 250 | 37 | 8  | 5 | 79  | 56 | 365 | 103 |
| 35,305 | 28 | 5 | 243 | 37 | 8  | 5 | 76  | 57 | 355 | 104 |
| 35,306 | 28 | 5 | 243 | 37 | 8  | 5 | 76  | 57 | 355 | 104 |
| 35,307 | 28 | 5 | 243 | 37 | 8  | 5 | 76  | 57 | 355 | 104 |
| 35,308 | 28 | 5 | 243 | 38 | 8  | 5 | 76  | 57 | 355 | 105 |
| 35,309 | 28 | 4 | 243 | 35 | 8  | 5 | 76  | 54 | 355 | 98  |
| 35,310 | 28 | 4 | 243 | 34 | 8  | 5 | 76  | 53 | 355 | 96  |
| 35,311 | 28 | 4 | 243 | 34 | 8  | 5 | 76  | 53 | 355 | 96  |
| 35,312 | 28 | 4 | 244 | 31 | 8  | 5 | 78  | 52 | 358 | 92  |
| 35,313 | 28 | 4 | 244 | 29 | 8  | 5 | 78  | 46 | 358 | 84  |
| 35,314 | 28 | 4 | 243 | 29 | 8  | 5 | 78  | 46 | 357 | 84  |
| 35,315 | 28 | 4 | 242 | 29 | 8  | 5 | 77  | 46 | 355 | 84  |
| 35,316 | 27 | 3 | 242 | 29 | 8  | 5 | 77  | 46 | 354 | 83  |
| 35,317 | 27 | 3 | 242 | 29 | 8  | 5 | 78  | 46 | 355 | 83  |
| 35,318 | 27 | 3 | 241 | 29 | 8  | 5 | 78  | 46 | 354 | 83  |
| 35,319 | 26 | 3 | 238 | 29 | 8  | 5 | 78  | 46 | 350 | 83  |
| 35,320 | 26 | 3 | 236 | 29 | 7  | 5 | 78  | 46 | 347 | 83  |
| 35,321 | 26 | 3 | 236 | 30 | 7  | 5 | 78  | 46 | 347 | 84  |
| 35,322 | 24 | 3 | 218 | 30 | 7  | 5 | 70  | 44 | 319 | 82  |
| 35,323 | 23 | 3 | 234 | 30 | 7  | 5 | 70  | 44 | 334 | 82  |
| 35,324 | 23 | 3 | 236 | 30 | 7  | 5 | 73  | 44 | 339 | 82  |
| 35,325 | 22 | 3 | 234 | 30 | 7  | 5 | 73  | 44 | 336 | 82  |
| 35,326 | 22 | 3 | 232 | 29 | 7  | 5 | 69  | 44 | 330 | 81  |
| 35,327 | 23 | 3 | 242 | 29 | 7  | 5 | 69  | 44 | 341 | 81  |
| 35,328 | 21 | 3 | 234 | 30 | 7  | 5 | 68  | 41 | 330 | 79  |
| 35,329 | 16 | 3 | 176 | 31 | 6  | 5 | 60  | 43 | 258 | 82  |
| 35,330 | 8  | 3 | 83  | 30 | 1  | 5 | 36  | 32 | 128 | 70  |

|        |    |   |    |    |   |   |    |    |     |    |
|--------|----|---|----|----|---|---|----|----|-----|----|
| 35,331 | 7  | 3 | 70 | 30 | 1 | 5 | 19 | 32 | 97  | 70 |
| 35,332 | 7  | 3 | 65 | 26 | 1 | 5 | 19 | 31 | 92  | 65 |
| 35,333 | 7  | 1 | 63 | 21 | 1 | 4 | 19 | 31 | 90  | 57 |
| 35,334 | 7  | 1 | 63 | 21 | 1 | 4 | 19 | 31 | 90  | 57 |
| 35,335 | 7  | 1 | 63 | 21 | 1 | 4 | 18 | 31 | 89  | 57 |
| 35,336 | 7  | 0 | 63 | 24 | 1 | 4 | 19 | 32 | 90  | 60 |
| 35,337 | 7  | 0 | 63 | 24 | 1 | 4 | 19 | 32 | 90  | 60 |
| 35,338 | 7  | 0 | 63 | 23 | 1 | 4 | 20 | 32 | 91  | 59 |
| 35,339 | 7  | 0 | 62 | 24 | 1 | 4 | 20 | 36 | 90  | 64 |
| 35,340 | 6  | 0 | 61 | 24 | 1 | 4 | 20 | 36 | 88  | 64 |
| 35,341 | 9  | 0 | 65 | 26 | 1 | 4 | 20 | 36 | 95  | 66 |
| 35,342 | 10 | 0 | 66 | 24 | 1 | 4 | 20 | 36 | 97  | 64 |
| 35,343 | 10 | 0 | 69 | 24 | 1 | 4 | 21 | 36 | 101 | 64 |
| 35,344 | 10 | 0 | 69 | 24 | 1 | 4 | 21 | 37 | 101 | 65 |
| 35,345 | 10 | 0 | 70 | 24 | 1 | 4 | 21 | 37 | 102 | 65 |
| 35,346 | 12 | 0 | 81 | 23 | 2 | 4 | 27 | 37 | 122 | 64 |
| 35,347 | 12 | 0 | 80 | 23 | 2 | 4 | 27 | 37 | 121 | 64 |
| 35,348 | 12 | 0 | 80 | 22 | 2 | 3 | 27 | 29 | 121 | 54 |
| 35,349 | 12 | 0 | 80 | 20 | 2 | 1 | 27 | 20 | 121 | 41 |
| 35,350 | 12 | 0 | 80 | 17 | 2 | 1 | 27 | 14 | 121 | 32 |
| 35,351 | 12 | 0 | 79 | 15 | 2 | 1 | 27 | 14 | 120 | 30 |
| 35,352 | 12 | 0 | 79 | 15 | 2 | 1 | 27 | 14 | 120 | 30 |
| 35,353 | 12 | 0 | 79 | 15 | 2 | 1 | 27 | 14 | 120 | 30 |
| 35,354 | 12 | 0 | 78 | 14 | 2 | 0 | 27 | 10 | 119 | 24 |
| 35,355 | 12 | 0 | 78 | 14 | 2 | 0 | 27 | 9  | 119 | 23 |
| 35,356 | 12 | 0 | 78 | 14 | 2 | 0 | 27 | 9  | 119 | 23 |
| 35,357 | 12 | 0 | 78 | 15 | 2 | 0 | 27 | 9  | 119 | 24 |
| 35,358 | 12 | 0 | 78 | 15 | 2 | 0 | 27 | 9  | 119 | 24 |
| 35,359 | 12 | 0 | 78 | 14 | 2 | 0 | 27 | 9  | 119 | 23 |
| 35,360 | 12 | 0 | 78 | 14 | 2 | 0 | 26 | 9  | 118 | 23 |
| 35,361 | 12 | 0 | 77 | 14 | 2 | 0 | 26 | 9  | 117 | 23 |
| 35,362 | 12 | 0 | 77 | 14 | 2 | 0 | 26 | 9  | 117 | 23 |
| 35,363 | 12 | 0 | 77 | 14 | 2 | 0 | 24 | 9  | 115 | 23 |
| 35,364 | 12 | 0 | 77 | 14 | 2 | 0 | 24 | 9  | 115 | 23 |
| 35,365 | 12 | 0 | 77 | 15 | 2 | 0 | 24 | 9  | 115 | 24 |
| 35,366 | 12 | 0 | 77 | 15 | 2 | 0 | 24 | 9  | 115 | 24 |
| 35,367 | 12 | 0 | 77 | 15 | 2 | 0 | 24 | 9  | 115 | 24 |
| 35,368 | 12 | 0 | 75 | 15 | 2 | 0 | 23 | 9  | 112 | 24 |
| 35,369 | 12 | 0 | 76 | 15 | 2 | 0 | 23 | 9  | 113 | 24 |
| 35,370 | 12 | 0 | 76 | 16 | 2 | 0 | 23 | 9  | 113 | 25 |
| 35,371 | 12 | 0 | 76 | 16 | 2 | 0 | 23 | 9  | 113 | 25 |

|        |    |   |     |    |    |   |     |    |     |    |
|--------|----|---|-----|----|----|---|-----|----|-----|----|
| 35,372 | 12 | 0 | 77  | 15 | 2  | 0 | 23  | 9  | 114 | 24 |
| 35,373 | 12 | 0 | 76  | 15 | 2  | 0 | 22  | 10 | 112 | 25 |
| 35,374 | 12 | 0 | 57  | 15 | 2  | 0 | 20  | 10 | 91  | 25 |
| 35,375 | 12 | 0 | 55  | 16 | 2  | 0 | 17  | 13 | 86  | 29 |
| 35,376 | 11 | 1 | 50  | 18 | 1  | 0 | 16  | 20 | 78  | 39 |
| 35,377 | 11 | 1 | 50  | 23 | 1  | 0 | 16  | 24 | 78  | 48 |
| 35,378 | 10 | 1 | 40  | 24 | 1  | 0 | 15  | 24 | 66  | 49 |
| 35,379 | 10 | 1 | 38  | 25 | 1  | 0 | 16  | 23 | 65  | 49 |
| 35,380 | 9  | 1 | 38  | 25 | 1  | 0 | 16  | 23 | 64  | 49 |
| 35,381 | 6  | 1 | 28  | 25 | 1  | 0 | 12  | 24 | 47  | 50 |
| 35,382 | 6  | 1 | 25  | 25 | 1  | 0 | 11  | 24 | 43  | 50 |
| 35,383 | 6  | 1 | 25  | 26 | 1  | 0 | 12  | 24 | 44  | 51 |
| 35,384 | 6  | 1 | 25  | 25 | 1  | 0 | 12  | 24 | 44  | 50 |
| 35,385 | 6  | 1 | 25  | 26 | 1  | 0 | 12  | 25 | 44  | 52 |
| 35,386 | 6  | 1 | 25  | 26 | 1  | 0 | 11  | 25 | 43  | 52 |
| 35,387 | 6  | 1 | 26  | 23 | 1  | 0 | 11  | 24 | 44  | 48 |
| 35,388 | 6  | 1 | 26  | 22 | 1  | 0 | 11  | 23 | 44  | 46 |
| 35,389 | 6  | 1 | 25  | 22 | 1  | 0 | 9   | 23 | 41  | 46 |
| 35,390 | 6  | 1 | 25  | 22 | 1  | 0 | 9   | 19 | 41  | 42 |
| 35,391 | 6  | 1 | 24  | 22 | 1  | 0 | 9   | 20 | 40  | 43 |
| 35,392 | 9  | 1 | 73  | 19 | 8  | 0 | 46  | 20 | 136 | 40 |
| 35,393 | 11 | 1 | 78  | 19 | 10 | 0 | 62  | 20 | 161 | 40 |
| 35,394 | 11 | 1 | 74  | 19 | 10 | 0 | 62  | 19 | 157 | 39 |
| 35,395 | 12 | 1 | 78  | 19 | 13 | 0 | 73  | 19 | 176 | 39 |
| 35,396 | 10 | 1 | 68  | 19 | 12 | 0 | 68  | 19 | 158 | 39 |
| 35,397 | 10 | 1 | 68  | 19 | 12 | 0 | 68  | 19 | 158 | 39 |
| 35,398 | 10 | 1 | 68  | 19 | 12 | 0 | 68  | 19 | 158 | 39 |
| 35,399 | 12 | 1 | 81  | 19 | 15 | 0 | 92  | 19 | 200 | 39 |
| 35,400 | 12 | 1 | 91  | 19 | 15 | 0 | 110 | 19 | 228 | 39 |
| 35,401 | 12 | 1 | 92  | 19 | 15 | 0 | 112 | 19 | 231 | 39 |
| 35,402 | 12 | 1 | 92  | 19 | 15 | 0 | 112 | 19 | 231 | 39 |
| 35,403 | 12 | 1 | 92  | 19 | 16 | 0 | 112 | 19 | 232 | 39 |
| 35,404 | 12 | 1 | 92  | 19 | 16 | 0 | 112 | 19 | 232 | 39 |
| 35,405 | 12 | 1 | 92  | 19 | 16 | 0 | 112 | 19 | 232 | 39 |
| 35,406 | 12 | 1 | 95  | 19 | 16 | 0 | 112 | 19 | 235 | 39 |
| 35,407 | 13 | 1 | 97  | 18 | 16 | 0 | 114 | 19 | 240 | 38 |
| 35,408 | 13 | 1 | 97  | 18 | 16 | 0 | 114 | 19 | 240 | 38 |
| 35,409 | 13 | 1 | 98  | 18 | 16 | 0 | 116 | 19 | 243 | 38 |
| 35,410 | 13 | 1 | 98  | 18 | 16 | 0 | 116 | 19 | 243 | 38 |
| 35,411 | 13 | 1 | 100 | 18 | 16 | 0 | 118 | 19 | 247 | 38 |
| 35,412 | 13 | 1 | 100 | 18 | 16 | 0 | 118 | 19 | 247 | 38 |



|        |    |   |     |    |    |   |     |    |     |    |
|--------|----|---|-----|----|----|---|-----|----|-----|----|
| 35,413 | 13 | 1 | 100 | 18 | 16 | 0 | 118 | 19 | 247 | 38 |
| 35,414 | 13 | 1 | 99  | 18 | 16 | 0 | 118 | 19 | 246 | 38 |
| 35,415 | 13 | 1 | 99  | 18 | 16 | 0 | 118 | 19 | 246 | 38 |
| 35,416 | 14 | 1 | 102 | 17 | 16 | 0 | 122 | 19 | 254 | 37 |
| 35,417 | 14 | 1 | 103 | 17 | 16 | 0 | 122 | 19 | 255 | 37 |
| 35,418 | 14 | 1 | 102 | 17 | 16 | 0 | 122 | 19 | 254 | 37 |
| 35,419 | 18 | 1 | 121 | 17 | 16 | 0 | 126 | 19 | 281 | 37 |
| 35,420 | 18 | 1 | 122 | 16 | 16 | 0 | 126 | 19 | 282 | 36 |
| 35,421 | 18 | 1 | 121 | 16 | 16 | 0 | 126 | 19 | 281 | 36 |
| 35,422 | 21 | 1 | 134 | 16 | 16 | 0 | 130 | 19 | 301 | 36 |
| 35,423 | 21 | 1 | 134 | 16 | 16 | 0 | 130 | 19 | 301 | 36 |
| 35,424 | 22 | 0 | 163 | 8  | 19 | 0 | 155 | 5  | 359 | 13 |
| 35,425 | 29 | 0 | 202 | 8  | 24 | 0 | 188 | 5  | 443 | 13 |
| 35,426 | 30 | 0 | 210 | 8  | 26 | 0 | 189 | 5  | 455 | 13 |
| 35,427 | 30 | 0 | 210 | 8  | 26 | 0 | 189 | 5  | 455 | 13 |
| 35,428 | 31 | 0 | 225 | 8  | 27 | 0 | 203 | 5  | 486 | 13 |
| 35,429 | 32 | 0 | 230 | 4  | 27 | 0 | 203 | 4  | 492 | 8  |
| 35,430 | 32 | 0 | 230 | 4  | 27 | 0 | 202 | 4  | 491 | 8  |
| 35,431 | 32 | 0 | 242 | 4  | 28 | 0 | 206 | 4  | 508 | 8  |
| 35,432 | 32 | 0 | 247 | 4  | 28 | 0 | 208 | 3  | 515 | 7  |
| 35,433 | 32 | 0 | 247 | 4  | 28 | 0 | 207 | 3  | 514 | 7  |
| 35,434 | 33 | 0 | 248 | 3  | 29 | 0 | 208 | 3  | 518 | 6  |
| 35,435 | 33 | 0 | 248 | 2  | 29 | 0 | 208 | 2  | 518 | 4  |
| 35,436 | 34 | 0 | 248 | 2  | 29 | 0 | 208 | 2  | 519 | 4  |
| 35,437 | 34 | 0 | 247 | 2  | 29 | 0 | 210 | 2  | 520 | 4  |
| 35,438 | 34 | 0 | 247 | 2  | 29 | 0 | 210 | 2  | 520 | 4  |
| 35,439 | 34 | 0 | 245 | 1  | 29 | 0 | 210 | 2  | 518 | 3  |
| 35,440 | 34 | 0 | 247 | 0  | 29 | 0 | 210 | 2  | 520 | 2  |
| 35,441 | 34 | 0 | 246 | 0  | 29 | 0 | 211 | 1  | 520 | 1  |
| 35,442 | 33 | 0 | 245 | 1  | 28 | 0 | 210 | 3  | 516 | 4  |
| 35,443 | 28 | 0 | 198 | 1  | 22 | 0 | 175 | 3  | 423 | 4  |
| 35,444 | 25 | 0 | 192 | 2  | 20 | 0 | 160 | 3  | 397 | 5  |
| 35,445 | 25 | 0 | 192 | 4  | 20 | 0 | 159 | 4  | 396 | 8  |
| 35,446 | 24 | 2 | 187 | 6  | 17 | 2 | 148 | 9  | 376 | 19 |
| 35,447 | 24 | 2 | 186 | 6  | 17 | 2 | 147 | 10 | 374 | 20 |
| 35,448 | 23 | 2 | 180 | 6  | 15 | 2 | 136 | 14 | 354 | 24 |
| 35,449 | 22 | 2 | 173 | 6  | 14 | 2 | 123 | 14 | 332 | 24 |
| 35,450 | 22 | 2 | 172 | 6  | 14 | 2 | 120 | 14 | 328 | 24 |
| 35,451 | 22 | 3 | 163 | 8  | 15 | 2 | 103 | 14 | 303 | 27 |
| 35,452 | 22 | 3 | 162 | 8  | 15 | 2 | 103 | 14 | 302 | 27 |
| 35,453 | 22 | 3 | 162 | 8  | 15 | 2 | 103 | 14 | 302 | 27 |

|        |    |   |     |    |    |   |     |    |     |    |
|--------|----|---|-----|----|----|---|-----|----|-----|----|
| 35,454 | 22 | 4 | 162 | 9  | 14 | 2 | 103 | 14 | 301 | 29 |
| 35,455 | 22 | 4 | 162 | 9  | 14 | 2 | 103 | 14 | 301 | 29 |
| 35,456 | 22 | 4 | 160 | 9  | 14 | 2 | 103 | 14 | 299 | 29 |
| 35,457 | 22 | 4 | 160 | 9  | 14 | 2 | 103 | 14 | 299 | 29 |
| 35,458 | 21 | 4 | 158 | 9  | 14 | 2 | 101 | 14 | 294 | 29 |
| 35,459 | 21 | 4 | 158 | 9  | 14 | 2 | 100 | 14 | 293 | 29 |
| 35,460 | 21 | 4 | 158 | 9  | 14 | 2 | 99  | 14 | 292 | 29 |
| 35,461 | 21 | 4 | 155 | 9  | 14 | 2 | 99  | 14 | 289 | 29 |
| 35,462 | 21 | 4 | 156 | 9  | 14 | 2 | 97  | 14 | 288 | 29 |
| 35,463 | 21 | 4 | 155 | 9  | 15 | 2 | 97  | 14 | 288 | 29 |
| 35,464 | 21 | 4 | 155 | 9  | 15 | 2 | 97  | 14 | 288 | 29 |
| 35,465 | 21 | 4 | 153 | 9  | 15 | 2 | 96  | 14 | 285 | 29 |
| 35,466 | 20 | 4 | 154 | 9  | 15 | 2 | 94  | 14 | 283 | 29 |
| 35,467 | 20 | 4 | 154 | 9  | 15 | 2 | 94  | 14 | 283 | 29 |
| 35,468 | 21 | 4 | 153 | 9  | 15 | 2 | 94  | 15 | 283 | 30 |
| 35,469 | 21 | 4 | 153 | 10 | 15 | 2 | 94  | 16 | 283 | 32 |
| 35,470 | 17 | 4 | 153 | 10 | 17 | 2 | 92  | 16 | 279 | 32 |
| 35,471 | 17 | 4 | 152 | 11 | 17 | 3 | 92  | 16 | 278 | 34 |
| 35,472 | 20 | 5 | 189 | 19 | 20 | 4 | 108 | 19 | 337 | 47 |
| 35,473 | 18 | 5 | 182 | 19 | 20 | 4 | 105 | 20 | 325 | 48 |
| 35,474 | 24 | 5 | 238 | 22 | 27 | 5 | 121 | 19 | 410 | 51 |
| 35,475 | 30 | 5 | 289 | 26 | 31 | 5 | 137 | 23 | 487 | 59 |
| 35,476 | 23 | 5 | 267 | 32 | 27 | 6 | 106 | 28 | 423 | 71 |
| 35,477 | 22 | 6 | 273 | 33 | 25 | 7 | 112 | 30 | 432 | 76 |
| 35,478 | 25 | 6 | 298 | 33 | 25 | 7 | 118 | 30 | 466 | 76 |
| 35,479 | 24 | 7 | 286 | 40 | 24 | 7 | 106 | 33 | 440 | 87 |
| 35,480 | 23 | 7 | 281 | 40 | 24 | 7 | 106 | 33 | 434 | 87 |
| 35,481 | 30 | 7 | 331 | 42 | 25 | 7 | 128 | 33 | 514 | 89 |
| 35,482 | 31 | 7 | 327 | 42 | 25 | 7 | 126 | 33 | 509 | 89 |
| 35,483 | 31 | 7 | 327 | 42 | 25 | 7 | 126 | 33 | 509 | 89 |
| 35,484 | 30 | 7 | 326 | 42 | 24 | 7 | 125 | 34 | 505 | 90 |
| 35,485 | 30 | 7 | 326 | 42 | 24 | 7 | 127 | 35 | 507 | 91 |
| 35,486 | 30 | 7 | 326 | 43 | 24 | 7 | 127 | 35 | 507 | 92 |
| 35,487 | 29 | 7 | 326 | 43 | 24 | 7 | 127 | 35 | 506 | 92 |
| 35,488 | 29 | 7 | 328 | 43 | 24 | 7 | 126 | 35 | 507 | 92 |
| 35,489 | 29 | 7 | 330 | 43 | 24 | 7 | 125 | 35 | 508 | 92 |
| 35,490 | 29 | 7 | 341 | 45 | 24 | 7 | 126 | 36 | 520 | 95 |
| 35,491 | 32 | 7 | 350 | 46 | 24 | 7 | 127 | 36 | 533 | 96 |
| 35,492 | 32 | 7 | 350 | 46 | 24 | 7 | 126 | 36 | 532 | 96 |
| 35,493 | 36 | 7 | 386 | 45 | 31 | 7 | 145 | 34 | 598 | 93 |
| 35,494 | 38 | 7 | 435 | 44 | 36 | 7 | 179 | 34 | 688 | 92 |

|        |    |   |     |    |    |   |     |    |     |    |
|--------|----|---|-----|----|----|---|-----|----|-----|----|
| 35,495 | 38 | 7 | 436 | 42 | 36 | 7 | 179 | 33 | 689 | 89 |
| 35,496 | 38 | 5 | 437 | 40 | 36 | 5 | 182 | 29 | 693 | 79 |
| 35,497 | 38 | 5 | 437 | 40 | 36 | 5 | 183 | 29 | 694 | 79 |
| 35,498 | 38 | 5 | 437 | 40 | 36 | 5 | 183 | 28 | 694 | 78 |
| 35,499 | 38 | 5 | 442 | 40 | 36 | 5 | 183 | 24 | 699 | 74 |
| 35,500 | 38 | 5 | 443 | 40 | 36 | 5 | 185 | 26 | 702 | 76 |
| 35,501 | 38 | 5 | 443 | 40 | 35 | 5 | 185 | 26 | 701 | 76 |
| 35,502 | 38 | 4 | 443 | 38 | 35 | 5 | 185 | 26 | 701 | 73 |
| 35,503 | 39 | 4 | 444 | 38 | 35 | 5 | 186 | 26 | 704 | 73 |
| 35,504 | 39 | 3 | 444 | 37 | 35 | 5 | 186 | 26 | 704 | 71 |
| 35,505 | 39 | 3 | 444 | 37 | 35 | 5 | 187 | 26 | 705 | 71 |
| 35,506 | 39 | 3 | 444 | 37 | 35 | 5 | 187 | 26 | 705 | 71 |
| 35,507 | 39 | 3 | 443 | 37 | 35 | 5 | 187 | 26 | 704 | 71 |
| 35,508 | 39 | 3 | 443 | 37 | 35 | 5 | 188 | 26 | 705 | 71 |
| 35,509 | 39 | 3 | 444 | 37 | 35 | 5 | 188 | 26 | 706 | 71 |
| 35,510 | 39 | 3 | 444 | 37 | 35 | 5 | 188 | 26 | 706 | 71 |
| 35,511 | 39 | 3 | 444 | 37 | 35 | 5 | 188 | 26 | 706 | 71 |
| 35,512 | 39 | 3 | 444 | 39 | 35 | 5 | 188 | 26 | 706 | 73 |
| 35,513 | 39 | 3 | 443 | 40 | 35 | 5 | 188 | 26 | 705 | 74 |
| 35,514 | 39 | 3 | 445 | 40 | 34 | 5 | 192 | 26 | 710 | 74 |
| 35,515 | 39 | 3 | 446 | 41 | 34 | 5 | 192 | 26 | 711 | 75 |
| 35,516 | 39 | 3 | 447 | 41 | 34 | 5 | 192 | 26 | 712 | 75 |
| 35,517 | 39 | 3 | 446 | 41 | 34 | 5 | 191 | 26 | 710 | 75 |
| 35,518 | 39 | 3 | 447 | 41 | 34 | 5 | 191 | 25 | 711 | 74 |
| 35,519 | 38 | 3 | 447 | 40 | 34 | 5 | 191 | 24 | 710 | 72 |
| 35,520 | 38 | 3 | 437 | 40 | 33 | 5 | 190 | 24 | 698 | 72 |
| 35,521 | 38 | 3 | 428 | 40 | 32 | 5 | 189 | 23 | 687 | 71 |
| 35,522 | 37 | 3 | 421 | 39 | 32 | 4 | 185 | 23 | 675 | 69 |
| 35,523 | 35 | 2 | 395 | 31 | 29 | 3 | 178 | 19 | 637 | 55 |
| 35,524 | 35 | 2 | 391 | 35 | 29 | 3 | 181 | 20 | 636 | 60 |
| 35,525 | 28 | 2 | 318 | 32 | 21 | 2 | 152 | 20 | 519 | 56 |
| 35,526 | 22 | 2 | 256 | 34 | 15 | 2 | 123 | 18 | 416 | 56 |
| 35,527 | 23 | 3 | 239 | 35 | 14 | 1 | 121 | 22 | 397 | 61 |
| 35,528 | 23 | 2 | 226 | 34 | 14 | 0 | 114 | 20 | 377 | 56 |
| 35,529 | 20 | 2 | 198 | 34 | 14 | 0 | 106 | 21 | 338 | 57 |
| 35,530 | 18 | 1 | 163 | 27 | 12 | 0 | 95  | 19 | 288 | 47 |
| 35,531 | 17 | 2 | 144 | 28 | 12 | 0 | 84  | 19 | 257 | 49 |
| 35,532 | 13 | 2 | 136 | 28 | 12 | 0 | 79  | 19 | 240 | 49 |
| 35,533 | 12 | 2 | 136 | 28 | 12 | 0 | 79  | 19 | 239 | 49 |
| 35,534 | 12 | 2 | 138 | 29 | 12 | 0 | 81  | 19 | 243 | 50 |
| 35,535 | 12 | 2 | 138 | 29 | 12 | 0 | 81  | 18 | 243 | 49 |

|        |    |   |     |    |    |   |     |    |     |     |
|--------|----|---|-----|----|----|---|-----|----|-----|-----|
| 35,536 | 12 | 2 | 139 | 28 | 12 | 0 | 81  | 17 | 244 | 47  |
| 35,537 | 12 | 2 | 139 | 28 | 12 | 0 | 81  | 17 | 244 | 47  |
| 35,538 | 12 | 2 | 143 | 28 | 13 | 0 | 86  | 17 | 254 | 47  |
| 35,539 | 13 | 2 | 158 | 29 | 14 | 0 | 89  | 18 | 274 | 49  |
| 35,540 | 13 | 3 | 156 | 35 | 14 | 3 | 89  | 33 | 272 | 74  |
| 35,541 | 13 | 3 | 145 | 37 | 14 | 3 | 88  | 36 | 260 | 79  |
| 35,542 | 10 | 3 | 144 | 48 | 14 | 3 | 90  | 42 | 258 | 96  |
| 35,543 | 6  | 3 | 107 | 48 | 7  | 3 | 71  | 43 | 191 | 97  |
| 35,544 | 6  | 3 | 101 | 48 | 4  | 3 | 67  | 43 | 178 | 97  |
| 35,545 | 4  | 3 | 68  | 48 | 2  | 3 | 40  | 43 | 114 | 97  |
| 35,546 | 4  | 3 | 67  | 48 | 2  | 3 | 39  | 43 | 112 | 97  |
| 35,547 | 4  | 3 | 67  | 48 | 2  | 3 | 36  | 42 | 109 | 96  |
| 35,548 | 4  | 3 | 62  | 48 | 2  | 3 | 36  | 42 | 104 | 96  |
| 35,549 | 4  | 3 | 62  | 48 | 2  | 3 | 36  | 42 | 104 | 96  |
| 35,550 | 4  | 3 | 61  | 48 | 2  | 3 | 36  | 42 | 103 | 96  |
| 35,551 | 13 | 3 | 114 | 48 | 7  | 3 | 74  | 40 | 208 | 94  |
| 35,552 | 13 | 3 | 114 | 49 | 7  | 3 | 74  | 40 | 208 | 95  |
| 35,553 | 13 | 3 | 114 | 49 | 7  | 3 | 74  | 42 | 208 | 97  |
| 35,554 | 12 | 3 | 113 | 49 | 7  | 3 | 73  | 42 | 205 | 97  |
| 35,555 | 12 | 3 | 114 | 49 | 7  | 3 | 74  | 42 | 207 | 97  |
| 35,556 | 12 | 3 | 114 | 49 | 7  | 3 | 73  | 42 | 206 | 97  |
| 35,557 | 12 | 3 | 114 | 49 | 7  | 3 | 73  | 42 | 206 | 97  |
| 35,558 | 12 | 3 | 114 | 49 | 7  | 3 | 72  | 44 | 205 | 99  |
| 35,559 | 12 | 3 | 114 | 49 | 7  | 3 | 72  | 44 | 205 | 99  |
| 35,560 | 19 | 3 | 131 | 49 | 7  | 3 | 92  | 44 | 249 | 99  |
| 35,561 | 27 | 3 | 142 | 49 | 8  | 3 | 99  | 44 | 276 | 99  |
| 35,562 | 28 | 3 | 152 | 46 | 8  | 3 | 105 | 44 | 293 | 96  |
| 35,563 | 28 | 3 | 156 | 46 | 8  | 3 | 114 | 44 | 306 | 96  |
| 35,564 | 28 | 3 | 154 | 46 | 8  | 3 | 112 | 44 | 302 | 96  |
| 35,565 | 45 | 3 | 224 | 45 | 17 | 3 | 166 | 44 | 452 | 95  |
| 35,566 | 52 | 3 | 248 | 45 | 17 | 3 | 187 | 44 | 504 | 95  |
| 35,567 | 52 | 3 | 246 | 46 | 17 | 3 | 187 | 44 | 502 | 96  |
| 35,568 | 72 | 3 | 393 | 46 | 25 | 3 | 275 | 44 | 765 | 96  |
| 35,569 | 79 | 3 | 421 | 46 | 29 | 3 | 288 | 46 | 817 | 98  |
| 35,570 | 79 | 3 | 428 | 47 | 29 | 3 | 295 | 46 | 831 | 99  |
| 35,571 | 79 | 4 | 428 | 47 | 29 | 3 | 295 | 47 | 831 | 101 |
| 35,572 | 78 | 4 | 422 | 47 | 29 | 3 | 291 | 48 | 820 | 102 |
| 35,573 | 78 | 4 | 422 | 47 | 29 | 3 | 291 | 48 | 820 | 102 |
| 35,574 | 78 | 4 | 422 | 47 | 29 | 3 | 291 | 48 | 820 | 102 |
| 35,575 | 78 | 4 | 423 | 43 | 29 | 3 | 287 | 48 | 817 | 98  |
| 35,576 | 78 | 4 | 423 | 43 | 29 | 3 | 287 | 48 | 817 | 98  |

|        |    |   |     |    |    |   |     |    |     |    |
|--------|----|---|-----|----|----|---|-----|----|-----|----|
| 35,577 | 78 | 4 | 424 | 37 | 29 | 3 | 287 | 47 | 818 | 91 |
| 35,578 | 77 | 3 | 424 | 30 | 29 | 3 | 287 | 39 | 817 | 75 |
| 35,579 | 78 | 3 | 424 | 30 | 29 | 3 | 287 | 38 | 818 | 74 |
| 35,580 | 78 | 3 | 424 | 30 | 29 | 3 | 287 | 38 | 818 | 74 |
| 35,581 | 78 | 2 | 431 | 27 | 29 | 3 | 289 | 38 | 827 | 70 |
| 35,582 | 78 | 2 | 431 | 27 | 29 | 3 | 289 | 38 | 827 | 70 |
| 35,583 | 81 | 2 | 437 | 27 | 29 | 3 | 292 | 39 | 839 | 71 |
| 35,584 | 81 | 2 | 437 | 29 | 29 | 3 | 292 | 39 | 839 | 73 |
| 35,585 | 81 | 2 | 435 | 28 | 29 | 3 | 290 | 39 | 835 | 72 |
| 35,586 | 82 | 2 | 452 | 29 | 32 | 3 | 302 | 41 | 868 | 75 |
| 35,587 | 84 | 2 | 465 | 29 | 33 | 3 | 312 | 41 | 894 | 75 |
| 35,588 | 85 | 2 | 460 | 29 | 32 | 3 | 306 | 41 | 883 | 75 |
| 35,589 | 85 | 2 | 456 | 29 | 32 | 3 | 305 | 42 | 878 | 76 |
| 35,590 | 84 | 1 | 444 | 22 | 31 | 0 | 303 | 27 | 862 | 50 |
| 35,591 | 84 | 1 | 442 | 22 | 31 | 0 | 303 | 27 | 860 | 50 |
| 35,592 | 84 | 1 | 438 | 6  | 31 | 0 | 302 | 17 | 855 | 24 |
| 35,593 | 84 | 1 | 440 | 6  | 31 | 0 | 301 | 16 | 856 | 23 |
| 35,594 | 84 | 1 | 440 | 6  | 31 | 0 | 301 | 17 | 856 | 24 |
| 35,595 | 86 | 1 | 461 | 6  | 31 | 0 | 304 | 17 | 882 | 24 |
| 35,596 | 86 | 1 | 462 | 7  | 31 | 0 | 303 | 17 | 882 | 25 |
| 35,597 | 88 | 1 | 485 | 7  | 31 | 0 | 316 | 17 | 920 | 25 |
| 35,598 | 83 | 1 | 477 | 7  | 30 | 0 | 311 | 17 | 901 | 25 |
| 35,599 | 82 | 1 | 490 | 7  | 32 | 0 | 320 | 17 | 924 | 25 |
| 35,600 | 84 | 1 | 508 | 7  | 29 | 0 | 308 | 18 | 929 | 26 |
| 35,601 | 84 | 1 | 506 | 7  | 29 | 0 | 308 | 18 | 927 | 26 |
| 35,602 | 84 | 1 | 509 | 7  | 29 | 0 | 308 | 18 | 930 | 26 |
| 35,603 | 84 | 1 | 510 | 6  | 29 | 0 | 308 | 16 | 931 | 23 |
| 35,604 | 84 | 1 | 509 | 6  | 29 | 0 | 308 | 16 | 930 | 23 |
| 35,605 | 84 | 1 | 509 | 6  | 29 | 0 | 309 | 16 | 931 | 23 |
| 35,606 | 84 | 1 | 517 | 7  | 30 | 0 | 312 | 14 | 943 | 22 |
| 35,607 | 84 | 1 | 515 | 7  | 30 | 0 | 312 | 14 | 941 | 22 |
| 35,608 | 83 | 1 | 513 | 7  | 30 | 0 | 310 | 14 | 936 | 22 |
| 35,609 | 85 | 1 | 514 | 7  | 30 | 0 | 313 | 14 | 942 | 22 |
| 35,610 | 86 | 1 | 515 | 7  | 30 | 0 | 311 | 14 | 942 | 22 |
| 35,611 | 80 | 1 | 505 | 7  | 30 | 0 | 297 | 14 | 912 | 22 |
| 35,612 | 72 | 1 | 495 | 7  | 29 | 0 | 292 | 14 | 888 | 22 |
| 35,613 | 71 | 1 | 499 | 7  | 29 | 0 | 300 | 14 | 899 | 22 |
| 35,614 | 71 | 1 | 495 | 7  | 29 | 0 | 291 | 14 | 886 | 22 |
| 35,615 | 54 | 1 | 428 | 8  | 21 | 0 | 246 | 14 | 749 | 23 |
| 35,616 | 58 | 3 | 435 | 10 | 20 | 0 | 247 | 15 | 760 | 28 |
| 35,617 | 51 | 3 | 412 | 11 | 20 | 0 | 226 | 15 | 709 | 29 |

|        |    |   |     |    |    |   |     |    |     |    |
|--------|----|---|-----|----|----|---|-----|----|-----|----|
| 35,618 | 41 | 3 | 377 | 10 | 15 | 0 | 196 | 16 | 629 | 29 |
| 35,619 | 32 | 3 | 275 | 10 | 12 | 0 | 141 | 14 | 460 | 27 |
| 35,620 | 25 | 3 | 254 | 9  | 8  | 0 | 138 | 14 | 425 | 26 |
| 35,621 | 25 | 2 | 256 | 9  | 8  | 0 | 146 | 13 | 435 | 24 |
| 35,622 | 25 | 2 | 257 | 9  | 8  | 0 | 148 | 12 | 438 | 23 |
| 35,623 | 25 | 2 | 257 | 9  | 8  | 0 | 152 | 12 | 442 | 23 |
| 35,624 | 25 | 2 | 255 | 9  | 8  | 0 | 152 | 11 | 440 | 22 |
| 35,625 | 25 | 2 | 255 | 9  | 8  | 0 | 152 | 11 | 440 | 22 |
| 35,626 | 25 | 2 | 255 | 9  | 8  | 0 | 152 | 10 | 440 | 21 |
| 35,627 | 25 | 2 | 255 | 9  | 8  | 0 | 152 | 10 | 440 | 21 |
| 35,628 | 25 | 2 | 256 | 10 | 8  | 0 | 152 | 8  | 441 | 20 |
| 35,629 | 25 | 2 | 256 | 10 | 8  | 0 | 152 | 8  | 441 | 20 |
| 35,630 | 24 | 2 | 256 | 10 | 8  | 0 | 152 | 8  | 440 | 20 |
| 35,631 | 24 | 2 | 252 | 10 | 8  | 0 | 152 | 8  | 436 | 20 |
| 35,632 | 24 | 2 | 249 | 11 | 8  | 0 | 150 | 8  | 431 | 21 |
| 35,633 | 25 | 2 | 249 | 11 | 8  | 0 | 150 | 8  | 432 | 21 |
| 35,634 | 22 | 2 | 244 | 12 | 8  | 0 | 148 | 7  | 422 | 21 |
| 35,635 | 22 | 2 | 239 | 10 | 7  | 0 | 144 | 7  | 412 | 19 |
| 35,636 | 20 | 2 | 229 | 9  | 5  | 0 | 138 | 5  | 392 | 16 |
| 35,637 | 20 | 2 | 228 | 9  | 5  | 0 | 136 | 5  | 389 | 16 |
| 35,638 | 18 | 2 | 219 | 9  | 4  | 0 | 129 | 5  | 370 | 16 |
| 35,639 | 19 | 2 | 221 | 9  | 4  | 0 | 129 | 5  | 373 | 16 |
| 35,640 | 19 | 2 | 221 | 9  | 4  | 0 | 129 | 5  | 373 | 16 |
| 35,641 | 20 | 2 | 234 | 9  | 5  | 0 | 133 | 4  | 392 | 15 |
| 35,642 | 20 | 2 | 233 | 9  | 5  | 0 | 133 | 4  | 391 | 15 |
| 35,643 | 20 | 2 | 232 | 9  | 5  | 0 | 133 | 4  | 390 | 15 |
| 35,644 | 20 | 2 | 230 | 9  | 5  | 0 | 132 | 4  | 387 | 15 |
| 35,645 | 18 | 2 | 221 | 9  | 6  | 0 | 137 | 3  | 382 | 14 |
| 35,646 | 18 | 2 | 215 | 9  | 6  | 0 | 137 | 3  | 376 | 14 |
| 35,647 | 18 | 2 | 212 | 8  | 6  | 0 | 137 | 3  | 373 | 13 |
| 35,648 | 16 | 2 | 190 | 8  | 6  | 0 | 124 | 3  | 336 | 13 |
| 35,649 | 16 | 2 | 158 | 8  | 5  | 0 | 108 | 3  | 287 | 13 |
| 35,650 | 16 | 2 | 144 | 8  | 3  | 0 | 99  | 4  | 262 | 14 |
| 35,651 | 13 | 2 | 115 | 8  | 3  | 0 | 93  | 3  | 224 | 13 |
| 35,652 | 13 | 2 | 112 | 8  | 3  | 0 | 93  | 3  | 221 | 13 |
| 35,653 | 13 | 2 | 112 | 8  | 3  | 0 | 93  | 3  | 221 | 13 |
| 35,654 | 15 | 2 | 111 | 8  | 3  | 0 | 94  | 3  | 223 | 13 |
| 35,655 | 15 | 2 | 111 | 8  | 3  | 0 | 94  | 3  | 223 | 13 |
| 35,656 | 15 | 2 | 111 | 8  | 3  | 0 | 92  | 3  | 221 | 13 |
| 35,657 | 15 | 2 | 104 | 7  | 2  | 0 | 89  | 3  | 210 | 12 |
| 35,658 | 15 | 2 | 103 | 7  | 2  | 0 | 90  | 3  | 210 | 12 |

|        |    |   |     |    |    |   |     |    |     |    |
|--------|----|---|-----|----|----|---|-----|----|-----|----|
| 35,659 | 16 | 2 | 104 | 7  | 2  | 0 | 91  | 3  | 213 | 12 |
| 35,660 | 14 | 2 | 103 | 7  | 2  | 0 | 89  | 3  | 208 | 12 |
| 35,661 | 13 | 2 | 102 | 7  | 2  | 0 | 88  | 3  | 205 | 12 |
| 35,662 | 13 | 2 | 120 | 7  | 3  | 0 | 95  | 3  | 231 | 12 |
| 35,663 | 15 | 2 | 127 | 7  | 3  | 0 | 100 | 3  | 245 | 12 |
| 35,664 | 15 | 2 | 119 | 7  | 3  | 0 | 89  | 3  | 226 | 12 |
| 35,665 | 28 | 2 | 145 | 7  | 4  | 0 | 117 | 3  | 294 | 12 |
| 35,666 | 28 | 4 | 145 | 8  | 4  | 0 | 117 | 9  | 294 | 21 |
| 35,667 | 24 | 3 | 135 | 9  | 4  | 0 | 106 | 9  | 269 | 21 |
| 35,668 | 26 | 3 | 139 | 13 | 5  | 0 | 113 | 10 | 283 | 26 |
| 35,669 | 26 | 3 | 138 | 15 | 5  | 0 | 114 | 9  | 283 | 27 |
| 35,670 | 25 | 3 | 135 | 15 | 5  | 0 | 110 | 9  | 275 | 27 |
| 35,671 | 25 | 3 | 127 | 16 | 6  | 0 | 100 | 9  | 258 | 28 |
| 35,672 | 25 | 3 | 118 | 16 | 6  | 0 | 86  | 9  | 235 | 28 |
| 35,673 | 25 | 3 | 116 | 16 | 6  | 0 | 84  | 9  | 231 | 28 |
| 35,674 | 25 | 3 | 116 | 16 | 6  | 0 | 80  | 9  | 227 | 28 |
| 35,675 | 25 | 3 | 117 | 16 | 6  | 0 | 81  | 9  | 229 | 28 |
| 35,676 | 29 | 3 | 128 | 16 | 6  | 0 | 89  | 9  | 252 | 28 |
| 35,677 | 29 | 3 | 128 | 16 | 6  | 0 | 89  | 9  | 252 | 28 |
| 35,678 | 29 | 3 | 136 | 15 | 6  | 0 | 93  | 9  | 264 | 27 |
| 35,679 | 29 | 3 | 136 | 17 | 6  | 0 | 93  | 9  | 264 | 29 |
| 35,680 | 39 | 3 | 260 | 17 | 12 | 0 | 165 | 9  | 476 | 29 |
| 35,681 | 43 | 3 | 284 | 17 | 13 | 0 | 187 | 9  | 527 | 29 |
| 35,682 | 44 | 3 | 291 | 17 | 13 | 0 | 193 | 9  | 541 | 29 |
| 35,683 | 45 | 3 | 298 | 20 | 13 | 0 | 194 | 11 | 550 | 34 |
| 35,684 | 44 | 3 | 299 | 21 | 13 | 0 | 194 | 12 | 550 | 36 |
| 35,685 | 44 | 3 | 297 | 20 | 13 | 0 | 193 | 12 | 547 | 35 |
| 35,686 | 44 | 3 | 306 | 20 | 13 | 0 | 193 | 12 | 556 | 35 |
| 35,687 | 47 | 3 | 310 | 22 | 13 | 0 | 193 | 12 | 563 | 37 |
| 35,688 | 48 | 3 | 308 | 23 | 13 | 0 | 190 | 12 | 559 | 38 |
| 35,689 | 50 | 3 | 325 | 23 | 13 | 0 | 196 | 12 | 584 | 38 |
| 35,690 | 50 | 3 | 335 | 24 | 15 | 0 | 198 | 12 | 598 | 39 |
| 35,691 | 51 | 3 | 323 | 24 | 14 | 0 | 195 | 12 | 583 | 39 |
| 35,692 | 61 | 3 | 402 | 25 | 22 | 0 | 235 | 12 | 720 | 40 |
| 35,693 | 63 | 3 | 408 | 26 | 22 | 0 | 242 | 14 | 735 | 43 |
| 35,694 | 63 | 3 | 406 | 27 | 22 | 0 | 242 | 14 | 733 | 44 |
| 35,695 | 68 | 3 | 419 | 27 | 24 | 0 | 250 | 14 | 761 | 44 |
| 35,696 | 68 | 3 | 407 | 27 | 23 | 0 | 241 | 14 | 739 | 44 |
| 35,697 | 68 | 3 | 407 | 27 | 23 | 0 | 241 | 14 | 739 | 44 |
| 35,698 | 68 | 3 | 417 | 27 | 23 | 0 | 248 | 14 | 756 | 44 |
| 35,699 | 68 | 3 | 416 | 27 | 23 | 0 | 248 | 14 | 755 | 44 |

|        |    |   |     |    |    |   |     |    |     |    |
|--------|----|---|-----|----|----|---|-----|----|-----|----|
| 35,700 | 66 | 3 | 417 | 27 | 23 | 0 | 248 | 14 | 754 | 44 |
| 35,701 | 66 | 3 | 417 | 27 | 23 | 0 | 248 | 13 | 754 | 43 |
| 35,702 | 66 | 3 | 417 | 27 | 23 | 0 | 248 | 13 | 754 | 43 |
| 35,703 | 66 | 3 | 422 | 27 | 23 | 0 | 250 | 13 | 761 | 43 |
| 35,704 | 66 | 3 | 428 | 27 | 23 | 0 | 252 | 14 | 769 | 44 |
| 35,705 | 65 | 3 | 430 | 27 | 23 | 0 | 252 | 14 | 770 | 44 |
| 35,706 | 73 | 3 | 466 | 27 | 26 | 0 | 262 | 14 | 827 | 44 |
| 35,707 | 73 | 3 | 466 | 27 | 26 | 0 | 262 | 14 | 827 | 44 |
| 35,708 | 75 | 3 | 477 | 27 | 27 | 0 | 266 | 14 | 845 | 44 |
| 35,709 | 75 | 3 | 477 | 27 | 27 | 0 | 264 | 14 | 843 | 44 |
| 35,710 | 74 | 5 | 476 | 30 | 27 | 0 | 263 | 15 | 840 | 50 |
| 35,711 | 74 | 5 | 476 | 32 | 27 | 0 | 262 | 15 | 839 | 52 |
| 35,712 | 74 | 5 | 477 | 36 | 28 | 0 | 264 | 20 | 843 | 61 |
| 35,713 | 74 | 6 | 457 | 36 | 27 | 1 | 259 | 20 | 817 | 63 |
| 35,714 | 72 | 6 | 450 | 37 | 27 | 1 | 252 | 21 | 801 | 65 |
| 35,715 | 72 | 6 | 445 | 40 | 27 | 1 | 249 | 21 | 793 | 68 |
| 35,716 | 59 | 6 | 420 | 41 | 26 | 1 | 220 | 21 | 725 | 69 |
| 35,717 | 60 | 4 | 429 | 41 | 25 | 1 | 224 | 16 | 738 | 62 |
| 35,718 | 59 | 3 | 429 | 34 | 25 | 1 | 224 | 14 | 737 | 52 |
| 35,719 | 59 | 3 | 426 | 33 | 25 | 1 | 219 | 14 | 729 | 51 |
| 35,720 | 59 | 3 | 425 | 33 | 25 | 1 | 218 | 14 | 727 | 51 |
| 35,721 | 60 | 3 | 422 | 33 | 25 | 1 | 217 | 14 | 724 | 51 |
| 35,722 | 60 | 3 | 422 | 32 | 24 | 1 | 217 | 14 | 723 | 50 |
| 35,723 | 61 | 3 | 424 | 32 | 24 | 1 | 217 | 14 | 726 | 50 |
| 35,724 | 63 | 3 | 436 | 32 | 25 | 1 | 226 | 14 | 750 | 50 |
| 35,725 | 63 | 3 | 439 | 32 | 25 | 1 | 226 | 14 | 753 | 50 |
| 35,726 | 63 | 3 | 453 | 32 | 25 | 1 | 232 | 15 | 773 | 51 |
| 35,727 | 59 | 3 | 449 | 34 | 25 | 1 | 225 | 15 | 758 | 53 |
| 35,728 | 59 | 3 | 447 | 34 | 25 | 1 | 225 | 15 | 756 | 53 |
| 35,729 | 59 | 3 | 443 | 36 | 25 | 1 | 225 | 16 | 752 | 56 |
| 35,730 | 51 | 3 | 353 | 34 | 19 | 1 | 168 | 16 | 591 | 54 |
| 35,731 | 49 | 3 | 320 | 34 | 19 | 1 | 155 | 17 | 543 | 55 |
| 35,732 | 45 | 3 | 300 | 33 | 19 | 1 | 134 | 17 | 498 | 54 |
| 35,733 | 43 | 3 | 293 | 33 | 19 | 1 | 128 | 17 | 483 | 54 |
| 35,734 | 45 | 3 | 304 | 29 | 19 | 1 | 135 | 14 | 503 | 47 |
| 35,735 | 45 | 3 | 303 | 29 | 19 | 1 | 135 | 14 | 502 | 47 |
| 35,736 | 46 | 3 | 302 | 30 | 19 | 1 | 143 | 14 | 510 | 48 |
| 35,737 | 46 | 3 | 300 | 30 | 19 | 1 | 143 | 14 | 508 | 48 |
| 35,738 | 44 | 3 | 305 | 28 | 19 | 1 | 145 | 14 | 513 | 46 |
| 35,739 | 43 | 3 | 302 | 27 | 19 | 1 | 145 | 14 | 509 | 45 |
| 35,740 | 41 | 3 | 286 | 27 | 19 | 1 | 138 | 14 | 484 | 45 |



|        |    |   |     |    |    |   |     |    |     |    |
|--------|----|---|-----|----|----|---|-----|----|-----|----|
| 35,741 | 41 | 3 | 283 | 28 | 17 | 1 | 137 | 14 | 478 | 46 |
| 35,742 | 40 | 3 | 282 | 37 | 17 | 1 | 136 | 15 | 475 | 56 |
| 35,743 | 32 | 4 | 220 | 36 | 9  | 1 | 100 | 15 | 361 | 56 |
| 35,744 | 30 | 4 | 218 | 37 | 9  | 1 | 95  | 13 | 352 | 55 |
| 35,745 | 29 | 4 | 220 | 40 | 9  | 1 | 91  | 17 | 349 | 62 |
| 35,746 | 25 | 4 | 214 | 40 | 8  | 1 | 89  | 17 | 336 | 62 |
| 35,747 | 25 | 4 | 222 | 41 | 9  | 1 | 88  | 17 | 344 | 63 |
| 35,748 | 25 | 4 | 224 | 43 | 9  | 1 | 85  | 17 | 343 | 65 |
| 35,749 | 27 | 4 | 238 | 43 | 9  | 1 | 92  | 17 | 366 | 65 |
| 35,750 | 27 | 4 | 241 | 43 | 10 | 1 | 93  | 17 | 371 | 65 |
| 35,751 | 27 | 4 | 245 | 43 | 10 | 1 | 96  | 17 | 378 | 65 |
| 35,752 | 27 | 4 | 245 | 43 | 10 | 1 | 97  | 17 | 379 | 65 |
| 35,753 | 27 | 4 | 240 | 43 | 10 | 1 | 96  | 17 | 373 | 65 |
| 35,754 | 31 | 4 | 259 | 43 | 11 | 1 | 110 | 17 | 411 | 65 |
| 35,755 | 31 | 4 | 254 | 46 | 11 | 1 | 108 | 16 | 404 | 67 |
| 35,756 | 30 | 4 | 260 | 46 | 11 | 1 | 107 | 16 | 408 | 67 |
| 35,757 | 22 | 4 | 225 | 46 | 8  | 1 | 97  | 16 | 352 | 67 |
| 35,758 | 22 | 4 | 230 | 46 | 7  | 1 | 98  | 16 | 357 | 67 |
| 35,759 | 22 | 4 | 243 | 47 | 7  | 1 | 102 | 16 | 374 | 68 |
| 35,760 | 22 | 4 | 272 | 47 | 7  | 1 | 111 | 16 | 412 | 68 |
| 35,761 | 22 | 2 | 271 | 44 | 6  | 1 | 111 | 15 | 410 | 62 |
| 35,762 | 22 | 2 | 271 | 42 | 6  | 1 | 112 | 15 | 411 | 60 |
| 35,763 | 22 | 2 | 274 | 46 | 6  | 2 | 112 | 10 | 414 | 60 |
| 35,764 | 22 | 1 | 275 | 47 | 6  | 1 | 111 | 10 | 414 | 59 |
| 35,765 | 26 | 1 | 289 | 45 | 6  | 1 | 118 | 9  | 439 | 56 |
| 35,766 | 26 | 1 | 288 | 38 | 6  | 1 | 118 | 8  | 438 | 48 |
| 35,767 | 26 | 1 | 287 | 38 | 6  | 1 | 118 | 8  | 437 | 48 |
| 35,768 | 26 | 1 | 282 | 38 | 7  | 1 | 112 | 8  | 427 | 48 |
| 35,769 | 26 | 1 | 281 | 38 | 7  | 1 | 112 | 8  | 426 | 48 |
| 35,770 | 26 | 1 | 288 | 38 | 7  | 1 | 114 | 9  | 435 | 49 |
| 35,771 | 26 | 1 | 288 | 38 | 7  | 1 | 114 | 9  | 435 | 49 |
| 35,772 | 25 | 1 | 287 | 42 | 7  | 1 | 114 | 11 | 433 | 55 |
| 35,773 | 26 | 1 | 289 | 47 | 8  | 1 | 117 | 12 | 440 | 61 |
| 35,774 | 25 | 1 | 287 | 49 | 8  | 1 | 117 | 13 | 437 | 64 |
| 35,775 | 23 | 1 | 277 | 55 | 7  | 1 | 108 | 14 | 415 | 71 |
| 35,776 | 23 | 1 | 273 | 57 | 7  | 1 | 107 | 15 | 410 | 74 |
| 35,777 | 23 | 1 | 257 | 60 | 7  | 1 | 101 | 15 | 388 | 77 |
| 35,778 | 23 | 1 | 252 | 58 | 7  | 1 | 100 | 15 | 382 | 75 |
| 35,779 | 23 | 1 | 251 | 62 | 7  | 1 | 98  | 15 | 379 | 79 |
| 35,780 | 23 | 1 | 260 | 62 | 7  | 1 | 99  | 14 | 389 | 78 |
| 35,781 | 23 | 1 | 259 | 66 | 7  | 1 | 99  | 17 | 388 | 85 |

|        |    |   |     |     |   |   |    |    |     |     |
|--------|----|---|-----|-----|---|---|----|----|-----|-----|
| 35,782 | 23 | 2 | 259 | 73  | 7 | 1 | 97 | 17 | 386 | 93  |
| 35,783 | 23 | 2 | 255 | 78  | 6 | 1 | 96 | 20 | 380 | 101 |
| 35,784 | 21 | 2 | 248 | 79  | 6 | 1 | 90 | 20 | 365 | 102 |
| 35,785 | 21 | 2 | 250 | 80  | 6 | 1 | 91 | 20 | 368 | 103 |
| 35,786 | 21 | 2 | 248 | 81  | 6 | 1 | 84 | 20 | 359 | 104 |
| 35,787 | 20 | 2 | 243 | 95  | 6 | 1 | 82 | 26 | 351 | 124 |
| 35,788 | 19 | 2 | 236 | 97  | 6 | 1 | 80 | 26 | 341 | 126 |
| 35,789 | 19 | 3 | 235 | 100 | 6 | 1 | 80 | 26 | 340 | 130 |
| 35,790 | 18 | 3 | 235 | 100 | 6 | 1 | 80 | 26 | 339 | 130 |
| 35,791 | 18 | 3 | 232 | 99  | 6 | 1 | 80 | 26 | 336 | 129 |
| 35,792 | 18 | 3 | 225 | 89  | 6 | 1 | 80 | 25 | 329 | 118 |
| 35,793 | 18 | 3 | 225 | 89  | 6 | 1 | 80 | 25 | 329 | 118 |
| 35,794 | 15 | 2 | 210 | 87  | 6 | 1 | 76 | 25 | 307 | 115 |
| 35,795 | 15 | 2 | 206 | 87  | 6 | 1 | 74 | 25 | 301 | 115 |
| 35,796 | 15 | 3 | 198 | 83  | 5 | 1 | 73 | 21 | 291 | 108 |
| 35,797 | 15 | 3 | 197 | 84  | 5 | 1 | 72 | 21 | 289 | 109 |
| 35,798 | 15 | 3 | 187 | 83  | 4 | 1 | 70 | 21 | 276 | 108 |
| 35,799 | 15 | 3 | 182 | 83  | 4 | 1 | 69 | 21 | 270 | 108 |
| 35,800 | 13 | 3 | 161 | 83  | 4 | 1 | 59 | 21 | 237 | 108 |
| 35,801 | 13 | 3 | 157 | 83  | 3 | 1 | 57 | 21 | 230 | 108 |
| 35,802 | 13 | 3 | 153 | 83  | 3 | 1 | 55 | 21 | 224 | 108 |
| 35,803 | 13 | 3 | 148 | 83  | 2 | 1 | 50 | 21 | 213 | 108 |
| 35,804 | 9  | 3 | 134 | 83  | 2 | 1 | 39 | 21 | 184 | 108 |
| 35,805 | 9  | 3 | 134 | 83  | 2 | 1 | 39 | 21 | 184 | 108 |
| 35,806 | 9  | 3 | 133 | 80  | 2 | 1 | 39 | 21 | 183 | 105 |
| 35,807 | 9  | 3 | 125 | 80  | 2 | 1 | 39 | 21 | 175 | 105 |
| 35,808 | 9  | 3 | 124 | 80  | 2 | 1 | 39 | 21 | 174 | 105 |
| 35,809 | 9  | 3 | 112 | 80  | 2 | 1 | 35 | 21 | 158 | 105 |
| 35,810 | 7  | 3 | 94  | 79  | 2 | 1 | 30 | 21 | 133 | 104 |
| 35,811 | 7  | 3 | 64  | 79  | 2 | 1 | 21 | 21 | 94  | 104 |
| 35,812 | 7  | 3 | 64  | 79  | 2 | 1 | 20 | 21 | 93  | 104 |
| 35,813 | 7  | 3 | 62  | 71  | 2 | 0 | 19 | 21 | 90  | 95  |
| 35,814 | 7  | 3 | 61  | 72  | 2 | 0 | 19 | 21 | 89  | 96  |
| 35,815 | 7  | 3 | 60  | 73  | 2 | 0 | 18 | 22 | 87  | 98  |
| 35,816 | 3  | 3 | 45  | 73  | 2 | 0 | 11 | 22 | 61  | 98  |
| 35,817 | 3  | 3 | 45  | 73  | 2 | 0 | 11 | 22 | 61  | 98  |
| 35,818 | 3  | 3 | 45  | 74  | 2 | 0 | 11 | 22 | 61  | 99  |
| 35,819 | 2  | 5 | 40  | 79  | 1 | 1 | 11 | 27 | 54  | 112 |
| 35,820 | 2  | 5 | 37  | 81  | 1 | 1 | 9  | 27 | 49  | 114 |
| 35,821 | 1  | 5 | 33  | 81  | 1 | 1 | 10 | 26 | 45  | 113 |
| 35,822 | 1  | 5 | 32  | 72  | 1 | 1 | 10 | 23 | 44  | 101 |

|        |    |   |     |    |    |   |     |    |     |     |
|--------|----|---|-----|----|----|---|-----|----|-----|-----|
| 35,823 | 1  | 5 | 32  | 72 | 1  | 1 | 10  | 23 | 44  | 101 |
| 35,824 | 0  | 5 | 34  | 73 | 0  | 1 | 7   | 22 | 41  | 101 |
| 35,825 | 0  | 5 | 34  | 71 | 0  | 1 | 7   | 21 | 41  | 98  |
| 35,826 | 0  | 5 | 33  | 65 | 0  | 1 | 7   | 20 | 40  | 91  |
| 35,827 | 2  | 5 | 80  | 63 | 1  | 1 | 15  | 19 | 98  | 88  |
| 35,828 | 2  | 5 | 80  | 60 | 1  | 1 | 15  | 18 | 98  | 84  |
| 35,829 | 5  | 5 | 129 | 54 | 4  | 1 | 32  | 18 | 170 | 78  |
| 35,830 | 6  | 5 | 131 | 56 | 5  | 1 | 37  | 18 | 179 | 80  |
| 35,831 | 6  | 5 | 123 | 56 | 5  | 1 | 37  | 18 | 171 | 80  |
| 35,832 | 6  | 5 | 123 | 53 | 5  | 1 | 37  | 16 | 171 | 75  |
| 35,833 | 7  | 4 | 128 | 48 | 5  | 1 | 38  | 15 | 178 | 68  |
| 35,834 | 8  | 4 | 128 | 43 | 5  | 1 | 38  | 12 | 179 | 60  |
| 35,835 | 8  | 4 | 120 | 41 | 5  | 1 | 38  | 12 | 171 | 58  |
| 35,836 | 8  | 4 | 117 | 41 | 5  | 1 | 36  | 12 | 166 | 58  |
| 35,837 | 9  | 4 | 140 | 42 | 7  | 1 | 44  | 13 | 200 | 60  |
| 35,838 | 9  | 4 | 139 | 28 | 7  | 1 | 44  | 8  | 199 | 41  |
| 35,839 | 13 | 5 | 148 | 26 | 10 | 1 | 50  | 8  | 221 | 40  |
| 35,840 | 13 | 4 | 154 | 23 | 10 | 1 | 52  | 8  | 229 | 36  |
| 35,841 | 13 | 4 | 158 | 23 | 10 | 1 | 52  | 8  | 233 | 36  |
| 35,842 | 13 | 4 | 176 | 23 | 10 | 1 | 64  | 8  | 263 | 36  |
| 35,843 | 13 | 4 | 176 | 23 | 10 | 1 | 64  | 8  | 263 | 36  |
| 35,844 | 13 | 4 | 174 | 24 | 10 | 1 | 64  | 8  | 261 | 37  |
| 35,845 | 23 | 4 | 316 | 24 | 20 | 1 | 110 | 8  | 469 | 37  |
| 35,846 | 27 | 4 | 388 | 24 | 24 | 1 | 142 | 8  | 581 | 37  |
| 35,847 | 27 | 3 | 397 | 21 | 24 | 1 | 144 | 8  | 592 | 33  |
| 35,848 | 27 | 3 | 397 | 21 | 24 | 1 | 144 | 8  | 592 | 33  |
| 35,849 | 27 | 3 | 397 | 21 | 24 | 1 | 144 | 8  | 592 | 33  |
| 35,850 | 27 | 3 | 397 | 21 | 24 | 1 | 144 | 8  | 592 | 33  |
| 35,851 | 27 | 3 | 398 | 21 | 24 | 1 | 145 | 8  | 594 | 33  |
| 35,852 | 27 | 3 | 398 | 21 | 24 | 1 | 145 | 8  | 594 | 33  |
| 35,853 | 27 | 3 | 398 | 24 | 24 | 1 | 145 | 8  | 594 | 36  |
| 35,854 | 29 | 3 | 401 | 24 | 25 | 2 | 145 | 8  | 600 | 37  |
| 35,855 | 29 | 3 | 404 | 24 | 25 | 2 | 145 | 8  | 603 | 37  |
| 35,856 | 29 | 3 | 409 | 24 | 25 | 2 | 146 | 8  | 609 | 37  |
| 35,857 | 32 | 3 | 419 | 24 | 25 | 2 | 148 | 8  | 624 | 37  |
| 35,858 | 32 | 3 | 420 | 24 | 25 | 2 | 148 | 8  | 625 | 37  |
| 35,859 | 32 | 3 | 420 | 24 | 25 | 2 | 148 | 8  | 625 | 37  |
| 35,860 | 32 | 3 | 420 | 24 | 25 | 2 | 148 | 8  | 625 | 37  |
| 35,861 | 32 | 3 | 428 | 24 | 26 | 2 | 149 | 8  | 635 | 37  |
| 35,862 | 35 | 3 | 557 | 22 | 29 | 2 | 181 | 7  | 802 | 34  |
| 35,863 | 35 | 3 | 561 | 22 | 29 | 2 | 183 | 7  | 808 | 34  |

|        |    |   |     |    |    |   |     |   |     |    |
|--------|----|---|-----|----|----|---|-----|---|-----|----|
| 35,864 | 41 | 3 | 618 | 22 | 36 | 2 | 220 | 7 | 915 | 34 |
| 35,865 | 41 | 3 | 618 | 22 | 36 | 2 | 220 | 7 | 915 | 34 |
| 35,866 | 42 | 3 | 623 | 22 | 36 | 2 | 224 | 7 | 925 | 34 |
| 35,867 | 42 | 4 | 623 | 25 | 36 | 2 | 224 | 8 | 925 | 39 |
| 35,868 | 42 | 4 | 623 | 26 | 36 | 2 | 224 | 8 | 925 | 40 |
| 35,869 | 42 | 4 | 628 | 25 | 36 | 3 | 224 | 8 | 930 | 40 |
| 35,870 | 42 | 2 | 628 | 22 | 36 | 2 | 224 | 3 | 930 | 29 |
| 35,871 | 42 | 2 | 628 | 24 | 36 | 2 | 224 | 4 | 930 | 32 |
| 35,872 | 42 | 2 | 628 | 29 | 36 | 2 | 223 | 4 | 929 | 37 |
| 35,873 | 42 | 2 | 628 | 31 | 36 | 2 | 223 | 4 | 929 | 39 |
| 35,874 | 42 | 2 | 628 | 31 | 36 | 2 | 224 | 4 | 930 | 39 |
| 35,875 | 42 | 2 | 625 | 33 | 36 | 4 | 224 | 7 | 927 | 46 |
| 35,876 | 42 | 2 | 625 | 35 | 36 | 4 | 224 | 7 | 927 | 48 |
| 35,877 | 41 | 2 | 623 | 35 | 36 | 4 | 224 | 7 | 924 | 48 |
| 35,878 | 40 | 2 | 579 | 35 | 35 | 4 | 216 | 7 | 870 | 48 |
| 35,879 | 37 | 2 | 537 | 36 | 32 | 4 | 201 | 7 | 807 | 49 |
| 35,880 | 37 | 2 | 532 | 36 | 32 | 4 | 199 | 7 | 800 | 49 |
| 35,881 | 36 | 2 | 529 | 34 | 31 | 4 | 194 | 7 | 790 | 47 |
| 35,882 | 36 | 2 | 529 | 33 | 31 | 4 | 192 | 6 | 788 | 45 |
| 35,883 | 36 | 2 | 529 | 33 | 31 | 4 | 192 | 6 | 788 | 45 |
| 35,884 | 38 | 2 | 528 | 31 | 32 | 4 | 200 | 6 | 798 | 43 |
| 35,885 | 38 | 2 | 530 | 31 | 33 | 4 | 212 | 6 | 813 | 43 |
| 35,886 | 38 | 2 | 529 | 31 | 33 | 4 | 212 | 6 | 812 | 43 |
| 35,887 | 38 | 2 | 525 | 31 | 33 | 4 | 209 | 6 | 805 | 43 |
| 35,888 | 37 | 2 | 512 | 28 | 31 | 4 | 208 | 5 | 788 | 39 |
| 35,889 | 37 | 2 | 508 | 28 | 29 | 4 | 204 | 5 | 778 | 39 |
| 35,890 | 33 | 1 | 503 | 28 | 28 | 4 | 203 | 5 | 767 | 38 |
| 35,891 | 33 | 1 | 497 | 28 | 28 | 4 | 201 | 5 | 759 | 38 |
| 35,892 | 33 | 1 | 493 | 28 | 28 | 4 | 201 | 5 | 755 | 38 |
| 35,893 | 33 | 1 | 475 | 28 | 28 | 4 | 189 | 6 | 725 | 39 |
| 35,894 | 27 | 1 | 443 | 28 | 24 | 4 | 183 | 6 | 677 | 39 |
| 35,895 | 23 | 1 | 347 | 27 | 18 | 4 | 149 | 7 | 537 | 39 |
| 35,896 | 24 | 1 | 334 | 27 | 18 | 4 | 143 | 8 | 519 | 40 |
| 35,897 | 20 | 1 | 262 | 26 | 14 | 4 | 111 | 8 | 407 | 39 |
| 35,898 | 20 | 1 | 253 | 27 | 14 | 4 | 109 | 8 | 396 | 40 |
| 35,899 | 20 | 1 | 253 | 27 | 14 | 4 | 109 | 8 | 396 | 40 |
| 35,900 | 20 | 1 | 253 | 27 | 14 | 4 | 109 | 8 | 396 | 40 |
| 35,901 | 20 | 1 | 253 | 27 | 14 | 4 | 109 | 8 | 396 | 40 |
| 35,902 | 20 | 1 | 253 | 27 | 14 | 4 | 109 | 9 | 396 | 41 |
| 35,903 | 20 | 1 | 253 | 27 | 14 | 4 | 109 | 9 | 396 | 41 |
| 35,904 | 19 | 1 | 251 | 24 | 13 | 3 | 109 | 9 | 392 | 37 |

|        |    |   |     |    |    |   |     |    |     |    |
|--------|----|---|-----|----|----|---|-----|----|-----|----|
| 35,905 | 18 | 1 | 250 | 24 | 13 | 3 | 109 | 9  | 390 | 37 |
| 35,906 | 18 | 1 | 247 | 25 | 13 | 3 | 109 | 9  | 387 | 38 |
| 35,907 | 18 | 1 | 242 | 25 | 13 | 3 | 108 | 9  | 381 | 38 |
| 35,908 | 15 | 1 | 232 | 25 | 13 | 3 | 106 | 9  | 366 | 38 |
| 35,909 | 15 | 1 | 231 | 25 | 13 | 3 | 106 | 9  | 365 | 38 |
| 35,910 | 15 | 1 | 231 | 26 | 13 | 3 | 106 | 9  | 365 | 39 |
| 35,911 | 15 | 1 | 230 | 26 | 12 | 3 | 106 | 10 | 363 | 40 |
| 35,912 | 14 | 1 | 195 | 26 | 11 | 3 | 99  | 10 | 319 | 40 |
| 35,913 | 12 | 1 | 100 | 25 | 9  | 3 | 74  | 10 | 195 | 39 |
| 35,914 | 12 | 1 | 100 | 27 | 9  | 4 | 72  | 10 | 193 | 42 |
| 35,915 | 6  | 1 | 43  | 27 | 2  | 4 | 35  | 10 | 86  | 42 |
| 35,916 | 6  | 1 | 49  | 27 | 2  | 4 | 34  | 10 | 91  | 42 |
| 35,917 | 5  | 1 | 55  | 27 | 2  | 4 | 36  | 10 | 98  | 42 |
| 35,918 | 5  | 0 | 55  | 24 | 2  | 4 | 36  | 10 | 98  | 38 |
| 35,919 | 5  | 0 | 52  | 25 | 2  | 4 | 36  | 10 | 95  | 39 |
| 35,920 | 5  | 0 | 149 | 25 | 5  | 3 | 72  | 13 | 231 | 41 |
| 35,921 | 5  | 0 | 159 | 23 | 6  | 3 | 73  | 13 | 243 | 39 |
| 35,922 | 6  | 0 | 170 | 19 | 6  | 3 | 77  | 12 | 259 | 34 |
| 35,923 | 7  | 0 | 202 | 14 | 9  | 3 | 88  | 12 | 306 | 29 |
| 35,924 | 7  | 0 | 202 | 12 | 9  | 3 | 87  | 13 | 305 | 28 |
| 35,925 | 7  | 0 | 202 | 12 | 9  | 3 | 87  | 13 | 305 | 28 |
| 35,926 | 7  | 0 | 208 | 9  | 9  | 1 | 96  | 10 | 320 | 20 |
| 35,927 | 7  | 0 | 207 | 8  | 9  | 1 | 97  | 10 | 320 | 19 |
| 35,928 | 7  | 0 | 208 | 7  | 9  | 1 | 99  | 10 | 323 | 18 |
| 35,929 | 7  | 0 | 207 | 7  | 9  | 1 | 99  | 10 | 322 | 18 |
| 35,930 | 7  | 0 | 207 | 6  | 9  | 1 | 99  | 10 | 322 | 17 |
| 35,931 | 7  | 0 | 207 | 6  | 9  | 2 | 101 | 10 | 324 | 18 |
| 35,932 | 7  | 0 | 211 | 7  | 9  | 2 | 103 | 12 | 330 | 21 |
| 35,933 | 7  | 0 | 211 | 7  | 9  | 2 | 102 | 12 | 329 | 21 |
| 35,934 | 4  | 0 | 209 | 8  | 8  | 2 | 95  | 12 | 316 | 22 |
| 35,935 | 4  | 0 | 206 | 9  | 8  | 2 | 93  | 12 | 311 | 23 |
| 35,936 | 3  | 0 | 204 | 14 | 7  | 3 | 82  | 13 | 296 | 30 |
| 35,937 | 3  | 1 | 203 | 15 | 7  | 3 | 81  | 13 | 294 | 32 |
| 35,938 | 3  | 1 | 203 | 15 | 7  | 3 | 79  | 13 | 292 | 32 |
| 35,939 | 3  | 1 | 199 | 15 | 7  | 3 | 77  | 13 | 286 | 32 |
| 35,940 | 3  | 1 | 201 | 15 | 7  | 3 | 76  | 13 | 287 | 32 |
| 35,941 | 3  | 1 | 202 | 15 | 7  | 3 | 76  | 13 | 288 | 32 |
| 35,942 | 3  | 1 | 203 | 15 | 7  | 3 | 76  | 14 | 289 | 33 |
| 35,943 | 4  | 1 | 209 | 15 | 7  | 3 | 79  | 13 | 299 | 32 |
| 35,944 | 4  | 1 | 209 | 16 | 7  | 3 | 79  | 13 | 299 | 33 |
| 35,945 | 9  | 1 | 236 | 16 | 8  | 3 | 101 | 16 | 354 | 36 |

|        |    |   |     |    |    |   |     |    |     |    |
|--------|----|---|-----|----|----|---|-----|----|-----|----|
| 35,946 | 10 | 1 | 238 | 18 | 8  | 3 | 101 | 18 | 357 | 40 |
| 35,947 | 9  | 1 | 237 | 18 | 8  | 3 | 101 | 17 | 355 | 39 |
| 35,948 | 9  | 1 | 237 | 18 | 8  | 3 | 102 | 17 | 356 | 39 |
| 35,949 | 9  | 1 | 237 | 19 | 8  | 3 | 102 | 17 | 356 | 40 |
| 35,950 | 9  | 1 | 239 | 19 | 8  | 3 | 102 | 18 | 358 | 41 |
| 35,951 | 9  | 1 | 239 | 19 | 8  | 3 | 102 | 19 | 358 | 42 |
| 35,952 | 9  | 1 | 239 | 19 | 8  | 3 | 102 | 20 | 358 | 43 |
| 35,953 | 9  | 1 | 239 | 21 | 8  | 3 | 102 | 19 | 358 | 44 |
| 35,954 | 9  | 1 | 239 | 21 | 8  | 3 | 102 | 19 | 358 | 44 |
| 35,955 | 9  | 1 | 239 | 21 | 8  | 3 | 102 | 19 | 358 | 44 |
| 35,956 | 9  | 1 | 241 | 21 | 8  | 3 | 102 | 19 | 360 | 44 |
| 35,957 | 10 | 1 | 247 | 20 | 8  | 3 | 104 | 19 | 369 | 43 |
| 35,958 | 11 | 1 | 248 | 20 | 9  | 3 | 104 | 19 | 372 | 43 |
| 35,959 | 11 | 1 | 249 | 20 | 9  | 3 | 105 | 19 | 374 | 43 |
| 35,960 | 23 | 1 | 327 | 20 | 17 | 3 | 170 | 19 | 537 | 43 |
| 35,961 | 23 | 1 | 328 | 19 | 17 | 3 | 171 | 19 | 539 | 42 |
| 35,962 | 23 | 1 | 330 | 19 | 17 | 3 | 178 | 18 | 548 | 41 |
| 35,963 | 23 | 1 | 330 | 19 | 17 | 3 | 178 | 18 | 548 | 41 |
| 35,964 | 23 | 1 | 335 | 20 | 17 | 3 | 179 | 18 | 554 | 42 |
| 35,965 | 24 | 1 | 332 | 19 | 17 | 2 | 179 | 18 | 552 | 40 |
| 35,966 | 24 | 1 | 335 | 19 | 17 | 2 | 179 | 18 | 555 | 40 |
| 35,967 | 24 | 1 | 330 | 20 | 17 | 2 | 179 | 18 | 550 | 41 |
| 35,968 | 24 | 1 | 319 | 20 | 17 | 2 | 174 | 18 | 534 | 41 |
| 35,969 | 24 | 1 | 242 | 24 | 14 | 2 | 143 | 18 | 423 | 45 |
| 35,970 | 24 | 1 | 220 | 23 | 14 | 2 | 137 | 19 | 395 | 45 |
| 35,971 | 24 | 4 | 212 | 32 | 13 | 2 | 136 | 20 | 385 | 58 |
| 35,972 | 23 | 4 | 209 | 36 | 13 | 2 | 135 | 20 | 380 | 62 |
| 35,973 | 23 | 4 | 202 | 36 | 13 | 2 | 131 | 20 | 369 | 62 |
| 35,974 | 22 | 4 | 170 | 36 | 10 | 2 | 120 | 20 | 322 | 62 |
| 35,975 | 22 | 4 | 163 | 36 | 10 | 2 | 112 | 19 | 307 | 61 |
| 35,976 | 22 | 4 | 166 | 36 | 10 | 2 | 111 | 19 | 309 | 61 |
| 35,977 | 22 | 4 | 166 | 36 | 10 | 2 | 111 | 19 | 309 | 61 |
| 35,978 | 22 | 4 | 165 | 36 | 10 | 2 | 109 | 19 | 306 | 61 |
| 35,979 | 22 | 4 | 167 | 36 | 10 | 2 | 109 | 19 | 308 | 61 |
| 35,980 | 22 | 4 | 167 | 39 | 10 | 2 | 109 | 19 | 308 | 64 |
| 35,981 | 22 | 4 | 166 | 39 | 10 | 2 | 109 | 19 | 307 | 64 |
| 35,982 | 22 | 4 | 165 | 39 | 10 | 1 | 107 | 19 | 304 | 63 |
| 35,983 | 22 | 4 | 161 | 38 | 10 | 1 | 106 | 17 | 299 | 60 |
| 35,984 | 22 | 4 | 160 | 38 | 10 | 1 | 106 | 17 | 298 | 60 |
| 35,985 | 22 | 4 | 159 | 37 | 10 | 1 | 106 | 18 | 297 | 60 |
| 35,986 | 23 | 4 | 161 | 31 | 10 | 0 | 107 | 17 | 301 | 52 |

|        |    |   |     |    |    |   |     |    |     |    |
|--------|----|---|-----|----|----|---|-----|----|-----|----|
| 35,987 | 23 | 4 | 161 | 31 | 10 | 0 | 107 | 17 | 301 | 52 |
| 35,988 | 23 | 3 | 174 | 30 | 10 | 0 | 113 | 18 | 320 | 51 |
| 35,989 | 23 | 3 | 173 | 30 | 10 | 0 | 113 | 18 | 319 | 51 |
| 35,990 | 23 | 3 | 182 | 31 | 13 | 0 | 125 | 19 | 343 | 53 |
| 35,991 | 23 | 3 | 181 | 33 | 13 | 0 | 127 | 20 | 344 | 56 |
| 35,992 | 23 | 5 | 180 | 36 | 13 | 1 | 127 | 21 | 343 | 63 |
| 35,993 | 23 | 5 | 179 | 37 | 13 | 1 | 127 | 20 | 342 | 63 |
| 35,994 | 22 | 5 | 173 | 36 | 13 | 1 | 124 | 17 | 332 | 59 |
| 35,995 | 22 | 5 | 160 | 36 | 12 | 1 | 120 | 17 | 314 | 59 |
| 35,996 | 17 | 5 | 147 | 36 | 12 | 2 | 101 | 17 | 277 | 60 |
| 35,997 | 16 | 5 | 145 | 34 | 12 | 2 | 101 | 14 | 274 | 55 |
| 35,998 | 16 | 5 | 145 | 35 | 12 | 2 | 100 | 14 | 273 | 56 |
| 35,999 | 16 | 5 | 145 | 37 | 12 | 2 | 100 | 14 | 273 | 58 |
| 36,000 | 16 | 5 | 144 | 37 | 12 | 2 | 100 | 14 | 272 | 58 |
| 36,001 | 16 | 6 | 143 | 37 | 12 | 2 | 100 | 11 | 271 | 56 |
| 36,002 | 16 | 6 | 143 | 37 | 12 | 2 | 100 | 11 | 271 | 56 |
| 36,003 | 16 | 6 | 143 | 38 | 12 | 2 | 100 | 11 | 271 | 57 |
| 36,004 | 16 | 6 | 143 | 36 | 12 | 2 | 100 | 11 | 271 | 55 |
| 36,005 | 16 | 6 | 143 | 36 | 12 | 2 | 100 | 11 | 271 | 55 |
| 36,006 | 16 | 6 | 141 | 39 | 12 | 2 | 100 | 11 | 269 | 58 |
| 36,007 | 15 | 6 | 136 | 40 | 12 | 2 | 98  | 11 | 261 | 59 |
| 36,008 | 15 | 6 | 135 | 40 | 11 | 2 | 98  | 11 | 259 | 59 |
| 36,009 | 15 | 6 | 134 | 40 | 11 | 2 | 97  | 11 | 257 | 59 |
| 36,010 | 4  | 6 | 70  | 40 | 5  | 2 | 46  | 13 | 125 | 61 |
| 36,011 | 3  | 6 | 56  | 40 | 3  | 2 | 32  | 13 | 94  | 61 |
| 36,012 | 3  | 6 | 54  | 42 | 3  | 2 | 30  | 13 | 90  | 63 |
| 36,013 | 3  | 6 | 46  | 42 | 3  | 2 | 23  | 14 | 75  | 64 |
| 36,014 | 3  | 6 | 42  | 42 | 3  | 2 | 22  | 14 | 70  | 64 |
| 36,015 | 3  | 6 | 45  | 41 | 3  | 2 | 22  | 14 | 73  | 63 |
| 36,016 | 2  | 6 | 44  | 40 | 3  | 2 | 22  | 14 | 71  | 62 |
| 36,017 | 2  | 6 | 41  | 40 | 3  | 2 | 22  | 16 | 68  | 64 |
| 36,018 | 2  | 6 | 40  | 39 | 3  | 2 | 22  | 16 | 67  | 63 |
| 36,019 | 2  | 6 | 40  | 39 | 3  | 2 | 22  | 16 | 67  | 63 |
| 36,020 | 2  | 6 | 40  | 35 | 3  | 2 | 22  | 15 | 67  | 58 |
| 36,021 | 2  | 6 | 41  | 35 | 3  | 2 | 22  | 14 | 68  | 57 |
| 36,022 | 2  | 3 | 41  | 26 | 3  | 2 | 21  | 10 | 67  | 41 |
| 36,023 | 2  | 3 | 41  | 23 | 3  | 2 | 21  | 10 | 67  | 38 |
| 36,024 | 2  | 3 | 40  | 23 | 3  | 2 | 24  | 10 | 69  | 38 |
| 36,025 | 2  | 3 | 41  | 23 | 3  | 2 | 24  | 10 | 70  | 38 |
| 36,026 | 2  | 3 | 41  | 23 | 3  | 2 | 24  | 10 | 70  | 38 |
| 36,027 | 2  | 3 | 38  | 23 | 3  | 2 | 25  | 10 | 68  | 38 |

|        |    |   |     |    |   |   |    |    |     |    |
|--------|----|---|-----|----|---|---|----|----|-----|----|
| 36,028 | 2  | 3 | 38  | 23 | 3 | 2 | 25 | 10 | 68  | 38 |
| 36,029 | 3  | 3 | 39  | 23 | 3 | 2 | 25 | 10 | 70  | 38 |
| 36,030 | 3  | 3 | 37  | 23 | 3 | 2 | 25 | 10 | 68  | 38 |
| 36,031 | 5  | 3 | 39  | 20 | 3 | 2 | 26 | 10 | 73  | 35 |
| 36,032 | 5  | 3 | 39  | 20 | 3 | 2 | 26 | 10 | 73  | 35 |
| 36,033 | 6  | 3 | 41  | 20 | 3 | 2 | 27 | 10 | 77  | 35 |
| 36,034 | 6  | 3 | 44  | 20 | 3 | 2 | 34 | 10 | 87  | 35 |
| 36,035 | 6  | 3 | 44  | 20 | 3 | 2 | 34 | 11 | 87  | 36 |
| 36,036 | 6  | 3 | 45  | 20 | 3 | 2 | 33 | 10 | 87  | 35 |
| 36,037 | 5  | 3 | 44  | 20 | 3 | 2 | 33 | 10 | 85  | 35 |
| 36,038 | 5  | 3 | 37  | 20 | 3 | 2 | 28 | 10 | 73  | 35 |
| 36,039 | 5  | 3 | 34  | 21 | 3 | 2 | 29 | 9  | 71  | 35 |
| 36,040 | 5  | 3 | 25  | 21 | 0 | 2 | 18 | 9  | 48  | 35 |
| 36,041 | 5  | 3 | 25  | 20 | 0 | 2 | 16 | 8  | 46  | 33 |
| 36,042 | 9  | 3 | 61  | 18 | 4 | 2 | 55 | 8  | 129 | 31 |
| 36,043 | 9  | 1 | 63  | 15 | 4 | 1 | 55 | 7  | 131 | 24 |
| 36,044 | 9  | 1 | 63  | 14 | 4 | 1 | 55 | 7  | 131 | 23 |
| 36,045 | 9  | 1 | 65  | 14 | 4 | 1 | 55 | 7  | 133 | 23 |
| 36,046 | 9  | 1 | 65  | 14 | 4 | 1 | 55 | 7  | 133 | 23 |
| 36,047 | 9  | 1 | 64  | 14 | 4 | 0 | 55 | 7  | 132 | 22 |
| 36,048 | 9  | 1 | 64  | 13 | 4 | 0 | 55 | 7  | 132 | 21 |
| 36,049 | 9  | 1 | 64  | 13 | 4 | 0 | 55 | 7  | 132 | 21 |
| 36,050 | 9  | 1 | 64  | 11 | 4 | 0 | 55 | 7  | 132 | 19 |
| 36,051 | 9  | 0 | 64  | 10 | 4 | 0 | 55 | 7  | 132 | 17 |
| 36,052 | 9  | 0 | 64  | 10 | 4 | 0 | 55 | 7  | 132 | 17 |
| 36,053 | 12 | 0 | 70  | 10 | 4 | 0 | 57 | 9  | 143 | 19 |
| 36,054 | 12 | 1 | 70  | 11 | 4 | 0 | 57 | 9  | 143 | 21 |
| 36,055 | 12 | 1 | 70  | 13 | 5 | 0 | 57 | 9  | 144 | 23 |
| 36,056 | 12 | 1 | 70  | 14 | 5 | 0 | 57 | 9  | 144 | 24 |
| 36,057 | 14 | 1 | 72  | 11 | 5 | 0 | 60 | 9  | 151 | 21 |
| 36,058 | 14 | 1 | 72  | 10 | 5 | 0 | 60 | 9  | 151 | 20 |
| 36,059 | 13 | 1 | 72  | 10 | 5 | 0 | 60 | 9  | 150 | 20 |
| 36,060 | 13 | 1 | 72  | 10 | 5 | 0 | 60 | 9  | 150 | 20 |
| 36,061 | 14 | 1 | 78  | 10 | 5 | 0 | 61 | 7  | 158 | 18 |
| 36,062 | 14 | 1 | 87  | 10 | 5 | 0 | 63 | 7  | 169 | 18 |
| 36,063 | 19 | 1 | 99  | 8  | 7 | 0 | 72 | 7  | 197 | 16 |
| 36,064 | 19 | 1 | 99  | 9  | 7 | 0 | 72 | 6  | 197 | 16 |
| 36,065 | 19 | 1 | 99  | 9  | 7 | 0 | 72 | 6  | 197 | 16 |
| 36,066 | 19 | 1 | 96  | 9  | 7 | 0 | 72 | 7  | 194 | 17 |
| 36,067 | 19 | 1 | 102 | 9  | 7 | 0 | 76 | 5  | 204 | 15 |
| 36,068 | 19 | 1 | 102 | 9  | 7 | 0 | 76 | 5  | 204 | 15 |



|        |    |   |     |   |   |   |    |   |     |    |
|--------|----|---|-----|---|---|---|----|---|-----|----|
| 36,069 | 19 | 1 | 101 | 9 | 7 | 0 | 76 | 5 | 203 | 15 |
| 36,070 | 19 | 1 | 99  | 8 | 7 | 0 | 76 | 5 | 201 | 14 |
| 36,071 | 19 | 1 | 99  | 8 | 7 | 0 | 76 | 6 | 201 | 15 |
| 36,072 | 19 | 1 | 99  | 8 | 7 | 0 | 76 | 6 | 201 | 15 |
| 36,073 | 19 | 1 | 99  | 8 | 7 | 0 | 73 | 6 | 198 | 15 |
| 36,074 | 20 | 1 | 100 | 7 | 7 | 0 | 74 | 6 | 201 | 14 |
| 36,075 | 20 | 1 | 100 | 7 | 7 | 0 | 74 | 6 | 201 | 14 |
| 36,076 | 20 | 1 | 100 | 7 | 7 | 0 | 74 | 6 | 201 | 14 |
| 36,077 | 20 | 1 | 100 | 7 | 7 | 0 | 73 | 6 | 200 | 14 |
| 36,078 | 20 | 1 | 103 | 7 | 7 | 0 | 73 | 6 | 203 | 14 |
| 36,079 | 20 | 1 | 104 | 7 | 7 | 1 | 73 | 6 | 204 | 15 |
| 36,080 | 19 | 1 | 103 | 7 | 7 | 1 | 73 | 6 | 202 | 15 |
| 36,081 | 18 | 1 | 102 | 7 | 7 | 1 | 73 | 6 | 200 | 15 |
| 36,082 | 18 | 1 | 116 | 7 | 9 | 1 | 73 | 6 | 216 | 15 |
| 36,083 | 17 | 1 | 116 | 7 | 9 | 1 | 74 | 6 | 216 | 15 |
| 36,084 | 17 | 1 | 116 | 7 | 9 | 1 | 74 | 6 | 216 | 15 |
| 36,085 | 17 | 1 | 113 | 7 | 9 | 1 | 67 | 6 | 206 | 15 |
| 36,086 | 18 | 1 | 120 | 8 | 9 | 1 | 71 | 5 | 218 | 15 |
| 36,087 | 18 | 1 | 119 | 8 | 9 | 2 | 71 | 5 | 217 | 16 |
| 36,088 | 18 | 1 | 118 | 8 | 9 | 2 | 71 | 5 | 216 | 16 |
| 36,089 | 18 | 1 | 117 | 8 | 9 | 2 | 71 | 5 | 215 | 16 |
| 36,090 | 18 | 1 | 114 | 7 | 9 | 2 | 69 | 4 | 210 | 14 |
| 36,091 | 18 | 1 | 113 | 7 | 9 | 2 | 68 | 4 | 208 | 14 |
| 36,092 | 15 | 1 | 77  | 7 | 5 | 2 | 30 | 4 | 127 | 14 |
| 36,093 | 15 | 1 | 76  | 7 | 5 | 2 | 30 | 4 | 126 | 14 |
| 36,094 | 15 | 1 | 76  | 7 | 6 | 2 | 30 | 5 | 127 | 15 |
| 36,095 | 15 | 1 | 74  | 7 | 6 | 2 | 30 | 5 | 125 | 15 |
| 36,096 | 15 | 1 | 74  | 7 | 6 | 2 | 30 | 5 | 125 | 15 |
| 36,097 | 15 | 1 | 74  | 7 | 6 | 2 | 30 | 5 | 125 | 15 |
| 36,098 | 15 | 1 | 74  | 7 | 6 | 2 | 30 | 5 | 125 | 15 |
| 36,099 | 15 | 1 | 74  | 7 | 6 | 2 | 30 | 5 | 125 | 15 |
| 36,100 | 15 | 1 | 74  | 7 | 6 | 2 | 30 | 5 | 125 | 15 |
| 36,101 | 15 | 1 | 74  | 7 | 6 | 2 | 30 | 5 | 125 | 15 |
| 36,102 | 15 | 1 | 74  | 7 | 6 | 2 | 30 | 5 | 125 | 15 |
| 36,103 | 15 | 1 | 74  | 7 | 6 | 2 | 30 | 5 | 125 | 15 |
| 36,104 | 12 | 1 | 68  | 7 | 6 | 2 | 28 | 3 | 114 | 13 |
| 36,105 | 13 | 0 | 70  | 3 | 6 | 2 | 28 | 3 | 117 | 8  |
| 36,106 | 13 | 0 | 69  | 2 | 5 | 2 | 28 | 3 | 115 | 7  |
| 36,107 | 14 | 0 | 72  | 2 | 5 | 2 | 29 | 3 | 120 | 7  |
| 36,108 | 12 | 1 | 69  | 2 | 5 | 2 | 26 | 5 | 112 | 10 |
| 36,109 | 12 | 2 | 69  | 2 | 5 | 2 | 26 | 6 | 112 | 12 |

|        |    |    |     |    |   |   |    |    |     |    |
|--------|----|----|-----|----|---|---|----|----|-----|----|
| 36,110 | 16 | 3  | 118 | 4  | 7 | 2 | 42 | 12 | 183 | 21 |
| 36,111 | 16 | 4  | 120 | 11 | 7 | 2 | 42 | 15 | 185 | 32 |
| 36,112 | 15 | 4  | 114 | 12 | 7 | 2 | 43 | 15 | 179 | 33 |
| 36,113 | 15 | 6  | 106 | 19 | 7 | 2 | 41 | 18 | 169 | 45 |
| 36,114 | 10 | 6  | 99  | 20 | 6 | 2 | 36 | 20 | 151 | 48 |
| 36,115 | 10 | 7  | 95  | 19 | 6 | 2 | 33 | 21 | 144 | 49 |
| 36,116 | 10 | 9  | 93  | 20 | 6 | 2 | 32 | 24 | 141 | 55 |
| 36,117 | 10 | 9  | 93  | 20 | 6 | 2 | 32 | 24 | 141 | 55 |
| 36,118 | 10 | 9  | 93  | 22 | 6 | 2 | 32 | 25 | 141 | 58 |
| 36,119 | 10 | 9  | 93  | 22 | 6 | 2 | 32 | 25 | 141 | 58 |
| 36,120 | 10 | 9  | 108 | 26 | 6 | 4 | 41 | 26 | 165 | 65 |
| 36,121 | 10 | 9  | 108 | 27 | 6 | 4 | 41 | 26 | 165 | 66 |
| 36,122 | 10 | 9  | 108 | 27 | 6 | 4 | 41 | 26 | 165 | 66 |
| 36,123 | 10 | 9  | 108 | 28 | 7 | 4 | 41 | 27 | 166 | 68 |
| 36,124 | 10 | 9  | 108 | 28 | 7 | 4 | 41 | 29 | 166 | 70 |
| 36,125 | 9  | 9  | 107 | 29 | 7 | 4 | 41 | 29 | 164 | 71 |
| 36,126 | 10 | 9  | 108 | 29 | 7 | 4 | 41 | 29 | 166 | 71 |
| 36,127 | 10 | 9  | 107 | 29 | 7 | 4 | 41 | 29 | 165 | 71 |
| 36,128 | 10 | 9  | 107 | 29 | 7 | 4 | 41 | 29 | 165 | 71 |
| 36,129 | 10 | 9  | 104 | 29 | 7 | 3 | 41 | 29 | 162 | 70 |
| 36,130 | 10 | 9  | 103 | 29 | 7 | 3 | 41 | 30 | 161 | 71 |
| 36,131 | 10 | 9  | 103 | 29 | 6 | 3 | 41 | 30 | 160 | 71 |
| 36,132 | 10 | 9  | 100 | 29 | 6 | 3 | 40 | 30 | 156 | 71 |
| 36,133 | 9  | 9  | 91  | 29 | 5 | 3 | 40 | 30 | 145 | 71 |
| 36,134 | 9  | 9  | 89  | 29 | 5 | 3 | 38 | 30 | 141 | 71 |
| 36,135 | 9  | 9  | 82  | 29 | 5 | 3 | 34 | 30 | 130 | 71 |
| 36,136 | 9  | 9  | 82  | 29 | 5 | 3 | 34 | 30 | 130 | 71 |
| 36,137 | 8  | 9  | 83  | 28 | 5 | 3 | 34 | 30 | 130 | 70 |
| 36,138 | 8  | 9  | 83  | 28 | 5 | 2 | 34 | 30 | 130 | 69 |
| 36,139 | 8  | 9  | 85  | 30 | 5 | 3 | 34 | 30 | 132 | 72 |
| 36,140 | 8  | 9  | 85  | 30 | 5 | 3 | 34 | 31 | 132 | 73 |
| 36,141 | 8  | 9  | 85  | 31 | 5 | 3 | 34 | 31 | 132 | 74 |
| 36,142 | 8  | 9  | 88  | 32 | 5 | 3 | 34 | 32 | 135 | 76 |
| 36,143 | 8  | 9  | 88  | 38 | 5 | 3 | 33 | 35 | 134 | 85 |
| 36,144 | 8  | 10 | 88  | 38 | 4 | 3 | 34 | 36 | 134 | 87 |
| 36,145 | 8  | 10 | 87  | 39 | 4 | 3 | 34 | 35 | 133 | 87 |
| 36,146 | 8  | 10 | 87  | 39 | 4 | 3 | 35 | 35 | 134 | 87 |
| 36,147 | 8  | 10 | 87  | 39 | 4 | 3 | 35 | 35 | 134 | 87 |
| 36,148 | 8  | 10 | 87  | 46 | 4 | 3 | 35 | 35 | 134 | 94 |
| 36,149 | 8  | 10 | 87  | 46 | 4 | 3 | 35 | 35 | 134 | 94 |
| 36,150 | 8  | 10 | 87  | 46 | 4 | 3 | 35 | 35 | 134 | 94 |

|        |    |    |     |    |   |   |     |    |     |    |
|--------|----|----|-----|----|---|---|-----|----|-----|----|
| 36,151 | 8  | 10 | 88  | 47 | 4 | 3 | 35  | 35 | 135 | 95 |
| 36,152 | 8  | 10 | 88  | 47 | 4 | 3 | 35  | 35 | 135 | 95 |
| 36,153 | 8  | 10 | 88  | 47 | 4 | 3 | 35  | 35 | 135 | 95 |
| 36,154 | 8  | 10 | 89  | 47 | 4 | 3 | 36  | 35 | 137 | 95 |
| 36,155 | 8  | 10 | 89  | 47 | 4 | 3 | 36  | 35 | 137 | 95 |
| 36,156 | 7  | 10 | 87  | 47 | 4 | 3 | 36  | 35 | 134 | 95 |
| 36,157 | 7  | 10 | 87  | 47 | 4 | 3 | 36  | 35 | 134 | 95 |
| 36,158 | 6  | 9  | 92  | 47 | 4 | 3 | 37  | 33 | 139 | 92 |
| 36,159 | 6  | 9  | 91  | 47 | 4 | 3 | 36  | 33 | 137 | 92 |
| 36,160 | 2  | 7  | 45  | 47 | 2 | 3 | 21  | 27 | 70  | 84 |
| 36,161 | 2  | 7  | 45  | 47 | 2 | 3 | 21  | 30 | 70  | 87 |
| 36,162 | 2  | 6  | 50  | 39 | 2 | 3 | 26  | 27 | 80  | 75 |
| 36,163 | 2  | 6  | 57  | 40 | 2 | 3 | 32  | 29 | 93  | 78 |
| 36,164 | 6  | 4  | 70  | 34 | 2 | 3 | 56  | 28 | 134 | 69 |
| 36,165 | 6  | 4  | 83  | 36 | 2 | 3 | 58  | 26 | 149 | 69 |
| 36,166 | 6  | 3  | 79  | 36 | 2 | 3 | 55  | 25 | 142 | 67 |
| 36,167 | 6  | 2  | 72  | 38 | 2 | 3 | 49  | 21 | 129 | 64 |
| 36,168 | 6  | 2  | 69  | 39 | 2 | 4 | 49  | 21 | 126 | 66 |
| 36,169 | 15 | 2  | 87  | 37 | 3 | 4 | 62  | 20 | 167 | 63 |
| 36,170 | 23 | 2  | 118 | 33 | 5 | 2 | 93  | 19 | 239 | 56 |
| 36,171 | 23 | 2  | 118 | 33 | 5 | 2 | 93  | 19 | 239 | 56 |
| 36,172 | 23 | 2  | 119 | 32 | 5 | 2 | 93  | 19 | 240 | 55 |
| 36,173 | 23 | 2  | 119 | 31 | 4 | 2 | 94  | 17 | 240 | 52 |
| 36,174 | 23 | 2  | 119 | 31 | 4 | 2 | 94  | 17 | 240 | 52 |
| 36,175 | 23 | 2  | 128 | 31 | 6 | 2 | 98  | 15 | 255 | 50 |
| 36,176 | 26 | 2  | 140 | 30 | 6 | 2 | 105 | 15 | 277 | 49 |
| 36,177 | 25 | 2  | 140 | 30 | 6 | 2 | 105 | 15 | 276 | 49 |
| 36,178 | 25 | 2  | 140 | 30 | 6 | 2 | 105 | 15 | 276 | 49 |
| 36,179 | 25 | 2  | 141 | 30 | 6 | 2 | 106 | 15 | 278 | 49 |
| 36,180 | 25 | 2  | 145 | 30 | 6 | 2 | 107 | 15 | 283 | 49 |
| 36,181 | 25 | 2  | 151 | 30 | 6 | 2 | 110 | 14 | 292 | 48 |
| 36,182 | 25 | 2  | 151 | 30 | 6 | 2 | 110 | 14 | 292 | 48 |
| 36,183 | 25 | 2  | 149 | 30 | 6 | 2 | 110 | 14 | 290 | 48 |
| 36,184 | 25 | 2  | 150 | 30 | 6 | 2 | 110 | 14 | 291 | 48 |
| 36,185 | 26 | 2  | 158 | 31 | 6 | 2 | 112 | 14 | 302 | 49 |
| 36,186 | 26 | 2  | 180 | 31 | 6 | 2 | 118 | 14 | 330 | 49 |
| 36,187 | 26 | 2  | 186 | 31 | 6 | 2 | 123 | 14 | 341 | 49 |
| 36,188 | 26 | 2  | 187 | 31 | 6 | 2 | 123 | 15 | 342 | 50 |
| 36,189 | 26 | 2  | 197 | 29 | 6 | 1 | 126 | 16 | 355 | 48 |
| 36,190 | 26 | 2  | 199 | 28 | 6 | 1 | 126 | 16 | 357 | 47 |
| 36,191 | 26 | 2  | 199 | 28 | 6 | 1 | 126 | 16 | 357 | 47 |

|        |    |   |     |    |   |   |     |    |     |    |
|--------|----|---|-----|----|---|---|-----|----|-----|----|
| 36,192 | 26 | 2 | 196 | 28 | 6 | 1 | 126 | 16 | 354 | 47 |
| 36,193 | 26 | 2 | 196 | 28 | 6 | 1 | 126 | 15 | 354 | 46 |
| 36,194 | 25 | 2 | 196 | 22 | 6 | 1 | 126 | 12 | 353 | 37 |
| 36,195 | 25 | 1 | 196 | 21 | 6 | 1 | 127 | 11 | 354 | 34 |
| 36,196 | 25 | 1 | 196 | 21 | 6 | 1 | 127 | 11 | 354 | 34 |
| 36,197 | 25 | 1 | 196 | 21 | 6 | 2 | 126 | 12 | 353 | 36 |
| 36,198 | 25 | 1 | 201 | 21 | 6 | 2 | 129 | 12 | 361 | 36 |
| 36,199 | 25 | 1 | 201 | 14 | 6 | 2 | 129 | 12 | 361 | 29 |
| 36,200 | 25 | 1 | 203 | 14 | 7 | 2 | 130 | 12 | 365 | 29 |
| 36,201 | 25 | 1 | 203 | 13 | 7 | 2 | 135 | 12 | 370 | 28 |
| 36,202 | 25 | 1 | 203 | 13 | 7 | 2 | 135 | 13 | 370 | 29 |
| 36,203 | 25 | 1 | 211 | 13 | 7 | 2 | 138 | 14 | 381 | 30 |
| 36,204 | 25 | 1 | 210 | 14 | 7 | 2 | 138 | 14 | 380 | 31 |
| 36,205 | 25 | 1 | 222 | 14 | 7 | 2 | 141 | 14 | 395 | 31 |
| 36,206 | 25 | 1 | 227 | 14 | 7 | 2 | 141 | 14 | 400 | 31 |
| 36,207 | 25 | 1 | 227 | 14 | 7 | 2 | 141 | 14 | 400 | 31 |
| 36,208 | 25 | 1 | 227 | 14 | 7 | 2 | 139 | 14 | 398 | 31 |
| 36,209 | 25 | 1 | 219 | 14 | 7 | 2 | 139 | 14 | 390 | 31 |
| 36,210 | 25 | 1 | 220 | 14 | 7 | 2 | 140 | 14 | 392 | 31 |
| 36,211 | 25 | 1 | 219 | 11 | 7 | 2 | 140 | 8  | 391 | 22 |
| 36,212 | 25 | 1 | 219 | 11 | 7 | 2 | 140 | 8  | 391 | 22 |
| 36,213 | 25 | 1 | 212 | 10 | 7 | 2 | 135 | 6  | 379 | 19 |
| 36,214 | 25 | 1 | 206 | 12 | 7 | 2 | 127 | 8  | 365 | 23 |
| 36,215 | 21 | 1 | 192 | 12 | 7 | 2 | 103 | 9  | 323 | 24 |
| 36,216 | 21 | 0 | 174 | 7  | 6 | 1 | 97  | 9  | 298 | 17 |
| 36,217 | 21 | 0 | 174 | 7  | 6 | 1 | 97  | 9  | 298 | 17 |
| 36,218 | 12 | 0 | 163 | 7  | 6 | 1 | 86  | 9  | 267 | 17 |
| 36,219 | 12 | 0 | 156 | 7  | 5 | 1 | 84  | 9  | 257 | 17 |
| 36,220 | 6  | 0 | 125 | 7  | 3 | 1 | 52  | 9  | 186 | 17 |
| 36,221 | 6  | 0 | 125 | 7  | 3 | 1 | 52  | 9  | 186 | 17 |
| 36,222 | 7  | 0 | 126 | 7  | 3 | 1 | 53  | 9  | 189 | 17 |
| 36,223 | 7  | 0 | 125 | 7  | 3 | 1 | 54  | 9  | 189 | 17 |
| 36,224 | 7  | 0 | 126 | 7  | 3 | 1 | 58  | 9  | 194 | 17 |
| 36,225 | 7  | 0 | 118 | 7  | 1 | 1 | 54  | 9  | 180 | 17 |
| 36,226 | 7  | 0 | 118 | 7  | 1 | 1 | 54  | 9  | 180 | 17 |
| 36,227 | 4  | 0 | 106 | 7  | 1 | 1 | 46  | 9  | 157 | 17 |
| 36,228 | 4  | 0 | 105 | 7  | 1 | 1 | 47  | 9  | 157 | 17 |
| 36,229 | 4  | 0 | 104 | 7  | 1 | 1 | 46  | 9  | 155 | 17 |
| 36,230 | 4  | 0 | 100 | 9  | 1 | 1 | 45  | 9  | 150 | 19 |
| 36,231 | 4  | 0 | 94  | 11 | 1 | 1 | 43  | 11 | 142 | 23 |
| 36,232 | 4  | 0 | 94  | 15 | 1 | 1 | 43  | 15 | 142 | 31 |

|        |    |   |     |    |   |   |     |    |     |     |
|--------|----|---|-----|----|---|---|-----|----|-----|-----|
| 36,233 | 4  | 0 | 94  | 18 | 1 | 1 | 43  | 17 | 142 | 36  |
| 36,234 | 4  | 2 | 95  | 28 | 1 | 2 | 43  | 23 | 143 | 55  |
| 36,235 | 4  | 2 | 93  | 28 | 1 | 2 | 43  | 23 | 141 | 55  |
| 36,236 | 3  | 2 | 85  | 28 | 1 | 2 | 41  | 23 | 130 | 55  |
| 36,237 | 5  | 2 | 72  | 37 | 1 | 2 | 35  | 24 | 113 | 65  |
| 36,238 | 6  | 2 | 96  | 48 | 6 | 2 | 53  | 29 | 161 | 81  |
| 36,239 | 6  | 3 | 95  | 52 | 6 | 2 | 53  | 31 | 160 | 88  |
| 36,240 | 6  | 3 | 85  | 52 | 6 | 2 | 50  | 30 | 147 | 87  |
| 36,241 | 8  | 3 | 137 | 54 | 7 | 2 | 89  | 30 | 241 | 89  |
| 36,242 | 8  | 3 | 138 | 54 | 7 | 2 | 89  | 30 | 242 | 89  |
| 36,243 | 8  | 3 | 140 | 53 | 7 | 2 | 92  | 30 | 247 | 88  |
| 36,244 | 8  | 3 | 140 | 53 | 7 | 2 | 92  | 30 | 247 | 88  |
| 36,245 | 8  | 3 | 140 | 53 | 7 | 2 | 90  | 30 | 245 | 88  |
| 36,246 | 8  | 3 | 144 | 53 | 8 | 2 | 93  | 30 | 253 | 88  |
| 36,247 | 8  | 3 | 151 | 54 | 8 | 1 | 93  | 29 | 260 | 87  |
| 36,248 | 8  | 3 | 151 | 54 | 8 | 1 | 93  | 29 | 260 | 87  |
| 36,249 | 10 | 3 | 161 | 54 | 8 | 1 | 97  | 29 | 276 | 87  |
| 36,250 | 11 | 4 | 166 | 54 | 7 | 1 | 99  | 29 | 283 | 88  |
| 36,251 | 11 | 4 | 173 | 55 | 7 | 1 | 97  | 29 | 288 | 89  |
| 36,252 | 16 | 4 | 304 | 55 | 9 | 1 | 146 | 27 | 475 | 87  |
| 36,253 | 16 | 4 | 331 | 55 | 9 | 1 | 159 | 27 | 515 | 87  |
| 36,254 | 17 | 4 | 332 | 56 | 9 | 1 | 157 | 27 | 515 | 88  |
| 36,255 | 17 | 4 | 326 | 56 | 9 | 1 | 156 | 27 | 508 | 88  |
| 36,256 | 17 | 4 | 321 | 56 | 9 | 1 | 154 | 27 | 501 | 88  |
| 36,257 | 17 | 4 | 316 | 56 | 9 | 1 | 154 | 27 | 496 | 88  |
| 36,258 | 17 | 4 | 316 | 56 | 9 | 1 | 154 | 27 | 496 | 88  |
| 36,259 | 17 | 4 | 315 | 56 | 9 | 1 | 153 | 27 | 494 | 88  |
| 36,260 | 17 | 4 | 316 | 56 | 9 | 1 | 153 | 28 | 495 | 89  |
| 36,261 | 18 | 4 | 318 | 56 | 9 | 1 | 154 | 28 | 499 | 89  |
| 36,262 | 18 | 4 | 319 | 56 | 9 | 1 | 155 | 28 | 501 | 89  |
| 36,263 | 18 | 4 | 319 | 59 | 9 | 1 | 155 | 28 | 501 | 92  |
| 36,264 | 18 | 4 | 319 | 59 | 9 | 1 | 155 | 28 | 501 | 92  |
| 36,265 | 18 | 4 | 320 | 57 | 9 | 1 | 155 | 26 | 502 | 88  |
| 36,266 | 18 | 4 | 320 | 57 | 9 | 1 | 155 | 25 | 502 | 87  |
| 36,267 | 18 | 4 | 320 | 62 | 9 | 3 | 155 | 32 | 502 | 101 |
| 36,268 | 18 | 4 | 320 | 62 | 9 | 3 | 155 | 32 | 502 | 101 |
| 36,269 | 18 | 4 | 320 | 62 | 9 | 3 | 156 | 33 | 503 | 102 |
| 36,270 | 18 | 6 | 320 | 65 | 9 | 3 | 157 | 34 | 504 | 108 |
| 36,271 | 16 | 6 | 319 | 66 | 9 | 4 | 157 | 34 | 501 | 110 |
| 36,272 | 16 | 7 | 319 | 68 | 9 | 4 | 157 | 34 | 501 | 113 |
| 36,273 | 15 | 7 | 319 | 70 | 9 | 5 | 160 | 34 | 503 | 116 |

|        |    |   |     |    |   |   |     |    |     |     |
|--------|----|---|-----|----|---|---|-----|----|-----|-----|
| 36,274 | 15 | 7 | 319 | 70 | 9 | 5 | 159 | 34 | 502 | 116 |
| 36,275 | 15 | 7 | 318 | 70 | 9 | 5 | 155 | 34 | 497 | 116 |
| 36,276 | 15 | 7 | 318 | 70 | 9 | 5 | 156 | 34 | 498 | 116 |
| 36,277 | 15 | 7 | 318 | 70 | 9 | 5 | 156 | 34 | 498 | 116 |
| 36,278 | 15 | 8 | 318 | 70 | 9 | 5 | 156 | 36 | 498 | 119 |
| 36,279 | 15 | 8 | 318 | 70 | 9 | 5 | 155 | 36 | 497 | 119 |
| 36,280 | 15 | 8 | 320 | 70 | 9 | 5 | 155 | 36 | 499 | 119 |
| 36,281 | 15 | 8 | 321 | 66 | 9 | 5 | 156 | 34 | 501 | 113 |
| 36,282 | 15 | 8 | 321 | 66 | 9 | 5 | 156 | 34 | 501 | 113 |
| 36,283 | 15 | 8 | 327 | 67 | 9 | 5 | 158 | 31 | 509 | 111 |
| 36,284 | 15 | 8 | 327 | 64 | 9 | 5 | 158 | 29 | 509 | 106 |
| 36,285 | 15 | 6 | 326 | 55 | 9 | 4 | 159 | 26 | 509 | 91  |
| 36,286 | 16 | 6 | 330 | 61 | 9 | 4 | 160 | 29 | 515 | 100 |
| 36,287 | 16 | 6 | 332 | 65 | 9 | 5 | 160 | 31 | 517 | 107 |
| 36,288 | 15 | 6 | 330 | 57 | 9 | 5 | 160 | 30 | 514 | 98  |
| 36,289 | 14 | 6 | 300 | 46 | 4 | 5 | 137 | 25 | 455 | 82  |
| 36,290 | 15 | 5 | 273 | 43 | 4 | 5 | 117 | 22 | 409 | 75  |
| 36,291 | 15 | 5 | 253 | 42 | 3 | 5 | 99  | 21 | 370 | 73  |
| 36,292 | 15 | 5 | 263 | 48 | 5 | 5 | 104 | 21 | 387 | 79  |
| 36,293 | 15 | 5 | 267 | 48 | 5 | 5 | 107 | 21 | 394 | 79  |
| 36,294 | 19 | 5 | 276 | 48 | 6 | 5 | 121 | 21 | 422 | 79  |
| 36,295 | 19 | 5 | 289 | 48 | 6 | 5 | 125 | 21 | 439 | 79  |
| 36,296 | 19 | 5 | 296 | 48 | 5 | 5 | 131 | 21 | 451 | 79  |
| 36,297 | 19 | 5 | 297 | 47 | 5 | 5 | 131 | 21 | 452 | 78  |
| 36,298 | 19 | 5 | 292 | 47 | 5 | 5 | 132 | 21 | 448 | 78  |
| 36,299 | 22 | 5 | 299 | 47 | 5 | 5 | 140 | 22 | 466 | 79  |
| 36,300 | 20 | 5 | 284 | 48 | 5 | 5 | 135 | 23 | 444 | 81  |
| 36,301 | 19 | 4 | 277 | 49 | 5 | 5 | 134 | 24 | 435 | 82  |
| 36,302 | 19 | 4 | 269 | 48 | 5 | 5 | 131 | 24 | 424 | 81  |
| 36,303 | 14 | 4 | 136 | 48 | 3 | 5 | 82  | 24 | 235 | 81  |
| 36,304 | 14 | 4 | 109 | 48 | 3 | 5 | 69  | 24 | 195 | 81  |
| 36,305 | 13 | 4 | 103 | 47 | 3 | 5 | 67  | 24 | 186 | 80  |
| 36,306 | 13 | 4 | 102 | 47 | 3 | 5 | 67  | 24 | 185 | 80  |
| 36,307 | 13 | 4 | 102 | 47 | 3 | 5 | 67  | 24 | 185 | 80  |
| 36,308 | 13 | 4 | 102 | 47 | 3 | 5 | 67  | 24 | 185 | 80  |
| 36,309 | 13 | 4 | 103 | 47 | 3 | 5 | 67  | 24 | 186 | 80  |
| 36,310 | 13 | 4 | 105 | 47 | 3 | 5 | 70  | 24 | 191 | 80  |
| 36,311 | 13 | 4 | 111 | 47 | 3 | 5 | 70  | 23 | 197 | 79  |
| 36,312 | 16 | 4 | 119 | 47 | 3 | 5 | 80  | 22 | 218 | 78  |
| 36,313 | 16 | 4 | 117 | 48 | 3 | 5 | 79  | 22 | 215 | 79  |
| 36,314 | 16 | 4 | 115 | 45 | 3 | 5 | 79  | 22 | 213 | 76  |

|        |    |   |     |    |    |   |     |    |     |    |
|--------|----|---|-----|----|----|---|-----|----|-----|----|
| 36,315 | 20 | 4 | 156 | 45 | 7  | 5 | 122 | 22 | 305 | 76 |
| 36,316 | 20 | 4 | 238 | 45 | 9  | 5 | 190 | 22 | 457 | 76 |
| 36,317 | 20 | 4 | 238 | 40 | 9  | 3 | 190 | 16 | 457 | 63 |
| 36,318 | 20 | 2 | 238 | 37 | 9  | 3 | 190 | 14 | 457 | 56 |
| 36,319 | 20 | 2 | 239 | 37 | 9  | 3 | 190 | 14 | 458 | 56 |
| 36,320 | 20 | 2 | 239 | 38 | 9  | 3 | 189 | 14 | 457 | 57 |
| 36,321 | 20 | 1 | 239 | 35 | 9  | 2 | 188 | 14 | 456 | 52 |
| 36,322 | 20 | 1 | 239 | 37 | 9  | 2 | 188 | 15 | 456 | 55 |
| 36,323 | 20 | 1 | 238 | 38 | 9  | 3 | 187 | 15 | 454 | 57 |
| 36,324 | 20 | 1 | 238 | 36 | 9  | 2 | 184 | 16 | 451 | 55 |
| 36,325 | 20 | 1 | 238 | 37 | 9  | 2 | 185 | 20 | 452 | 60 |
| 36,326 | 20 | 1 | 237 | 38 | 9  | 2 | 184 | 20 | 450 | 61 |
| 36,327 | 20 | 2 | 237 | 42 | 9  | 2 | 183 | 23 | 449 | 69 |
| 36,328 | 20 | 2 | 237 | 42 | 9  | 2 | 183 | 24 | 449 | 70 |
| 36,329 | 20 | 1 | 237 | 42 | 9  | 2 | 183 | 22 | 449 | 67 |
| 36,330 | 20 | 1 | 236 | 42 | 9  | 2 | 183 | 23 | 448 | 68 |
| 36,331 | 20 | 1 | 235 | 43 | 9  | 2 | 183 | 24 | 447 | 70 |
| 36,332 | 20 | 1 | 234 | 43 | 9  | 2 | 182 | 25 | 445 | 71 |
| 36,333 | 20 | 1 | 232 | 43 | 9  | 2 | 182 | 25 | 443 | 71 |
| 36,334 | 20 | 1 | 228 | 38 | 9  | 2 | 180 | 24 | 437 | 65 |
| 36,335 | 20 | 1 | 228 | 38 | 9  | 2 | 179 | 24 | 436 | 65 |
| 36,336 | 19 | 1 | 224 | 31 | 9  | 2 | 178 | 18 | 430 | 52 |
| 36,337 | 19 | 1 | 224 | 31 | 9  | 2 | 178 | 18 | 430 | 52 |
| 36,338 | 19 | 1 | 222 | 27 | 9  | 1 | 178 | 16 | 428 | 45 |
| 36,339 | 18 | 1 | 215 | 26 | 10 | 1 | 178 | 16 | 421 | 44 |
| 36,340 | 19 | 1 | 215 | 26 | 10 | 1 | 180 | 16 | 424 | 44 |
| 36,341 | 17 | 1 | 211 | 25 | 10 | 1 | 179 | 16 | 417 | 43 |
| 36,342 | 16 | 1 | 209 | 18 | 10 | 1 | 179 | 17 | 414 | 37 |
| 36,343 | 16 | 1 | 196 | 18 | 8  | 1 | 173 | 17 | 393 | 37 |
| 36,344 | 16 | 1 | 191 | 18 | 8  | 1 | 170 | 17 | 385 | 37 |
| 36,345 | 12 | 1 | 181 | 18 | 7  | 1 | 153 | 17 | 353 | 37 |
| 36,346 | 12 | 1 | 164 | 18 | 7  | 1 | 147 | 17 | 330 | 37 |
| 36,347 | 12 | 1 | 157 | 18 | 7  | 1 | 140 | 17 | 316 | 37 |
| 36,348 | 12 | 1 | 159 | 18 | 7  | 1 | 140 | 16 | 318 | 36 |
| 36,349 | 12 | 1 | 157 | 18 | 7  | 1 | 139 | 16 | 315 | 36 |
| 36,350 | 9  | 1 | 151 | 18 | 7  | 1 | 131 | 16 | 298 | 36 |
| 36,351 | 9  | 1 | 151 | 17 | 7  | 1 | 129 | 15 | 296 | 34 |
| 36,352 | 9  | 1 | 152 | 16 | 7  | 1 | 128 | 14 | 296 | 32 |
| 36,353 | 10 | 1 | 156 | 16 | 8  | 1 | 129 | 14 | 303 | 32 |
| 36,354 | 11 | 1 | 157 | 15 | 8  | 1 | 131 | 14 | 307 | 31 |
| 36,355 | 11 | 1 | 157 | 15 | 8  | 1 | 131 | 14 | 307 | 31 |

|        |    |    |     |    |    |   |     |    |     |     |
|--------|----|----|-----|----|----|---|-----|----|-----|-----|
| 36,356 | 11 | 1  | 160 | 15 | 10 | 1 | 131 | 14 | 312 | 31  |
| 36,357 | 16 | 1  | 164 | 15 | 10 | 1 | 135 | 14 | 325 | 31  |
| 36,358 | 16 | 2  | 164 | 15 | 10 | 1 | 135 | 14 | 325 | 32  |
| 36,359 | 16 | 2  | 164 | 16 | 10 | 1 | 135 | 14 | 325 | 33  |
| 36,360 | 16 | 2  | 166 | 24 | 10 | 1 | 134 | 16 | 326 | 43  |
| 36,361 | 22 | 10 | 194 | 34 | 14 | 1 | 147 | 28 | 377 | 73  |
| 36,362 | 22 | 11 | 187 | 44 | 14 | 2 | 149 | 31 | 372 | 88  |
| 36,363 | 21 | 11 | 212 | 45 | 16 | 2 | 155 | 31 | 404 | 89  |
| 36,364 | 23 | 11 | 228 | 46 | 17 | 2 | 169 | 31 | 437 | 90  |
| 36,365 | 19 | 14 | 191 | 49 | 13 | 2 | 132 | 34 | 355 | 99  |
| 36,366 | 19 | 14 | 111 | 49 | 11 | 2 | 69  | 34 | 210 | 99  |
| 36,367 | 19 | 14 | 113 | 47 | 11 | 2 | 69  | 34 | 212 | 97  |
| 36,368 | 19 | 14 | 113 | 50 | 11 | 2 | 69  | 34 | 212 | 100 |
| 36,369 | 19 | 14 | 113 | 49 | 11 | 2 | 70  | 36 | 213 | 101 |
| 36,370 | 19 | 15 | 112 | 49 | 11 | 2 | 70  | 36 | 212 | 102 |
| 36,371 | 19 | 15 | 112 | 47 | 11 | 2 | 69  | 35 | 211 | 99  |
| 36,372 | 19 | 15 | 113 | 51 | 11 | 2 | 71  | 35 | 214 | 103 |
| 36,373 | 19 | 15 | 113 | 51 | 11 | 2 | 71  | 35 | 214 | 103 |
| 36,374 | 22 | 15 | 113 | 50 | 11 | 1 | 72  | 35 | 218 | 101 |
| 36,375 | 22 | 15 | 113 | 50 | 11 | 1 | 72  | 35 | 218 | 101 |
| 36,376 | 22 | 15 | 113 | 52 | 11 | 1 | 72  | 31 | 218 | 99  |
| 36,377 | 22 | 16 | 113 | 51 | 11 | 1 | 72  | 31 | 218 | 99  |
| 36,378 | 22 | 15 | 113 | 47 | 11 | 1 | 72  | 28 | 218 | 91  |
| 36,379 | 22 | 15 | 113 | 47 | 11 | 1 | 72  | 27 | 218 | 90  |
| 36,380 | 22 | 15 | 113 | 47 | 11 | 1 | 72  | 27 | 218 | 90  |
| 36,381 | 22 | 15 | 113 | 46 | 11 | 1 | 73  | 25 | 219 | 87  |
| 36,382 | 22 | 15 | 116 | 46 | 11 | 1 | 73  | 24 | 222 | 86  |
| 36,383 | 22 | 15 | 116 | 46 | 11 | 1 | 73  | 24 | 222 | 86  |
| 36,384 | 22 | 15 | 116 | 46 | 11 | 1 | 73  | 24 | 222 | 86  |
| 36,385 | 22 | 15 | 117 | 46 | 11 | 1 | 73  | 24 | 223 | 86  |
| 36,386 | 22 | 15 | 118 | 46 | 11 | 1 | 74  | 24 | 225 | 86  |
| 36,387 | 22 | 15 | 119 | 46 | 12 | 2 | 74  | 24 | 227 | 87  |
| 36,388 | 24 | 15 | 119 | 46 | 12 | 2 | 76  | 24 | 231 | 87  |
| 36,389 | 24 | 15 | 120 | 45 | 11 | 2 | 77  | 24 | 232 | 86  |
| 36,390 | 24 | 15 | 120 | 45 | 11 | 2 | 77  | 24 | 232 | 86  |
| 36,391 | 23 | 15 | 121 | 45 | 11 | 2 | 75  | 25 | 230 | 87  |
| 36,392 | 25 | 15 | 129 | 45 | 11 | 2 | 84  | 24 | 249 | 86  |
| 36,393 | 25 | 16 | 129 | 45 | 11 | 2 | 84  | 24 | 249 | 87  |
| 36,394 | 25 | 16 | 130 | 45 | 11 | 2 | 87  | 24 | 253 | 87  |
| 36,395 | 25 | 16 | 131 | 45 | 11 | 2 | 87  | 24 | 254 | 87  |
| 36,396 | 25 | 16 | 135 | 46 | 13 | 2 | 93  | 24 | 266 | 88  |



|        |    |    |     |    |    |   |     |    |     |    |
|--------|----|----|-----|----|----|---|-----|----|-----|----|
| 36,397 | 26 | 16 | 143 | 46 | 15 | 2 | 95  | 24 | 279 | 88 |
| 36,398 | 26 | 16 | 158 | 46 | 16 | 2 | 108 | 24 | 308 | 88 |
| 36,399 | 26 | 16 | 156 | 46 | 16 | 2 | 108 | 24 | 306 | 88 |
| 36,400 | 26 | 16 | 156 | 46 | 16 | 2 | 108 | 24 | 306 | 88 |
| 36,401 | 26 | 16 | 167 | 46 | 17 | 2 | 108 | 24 | 318 | 88 |
| 36,402 | 26 | 16 | 166 | 46 | 17 | 2 | 108 | 24 | 317 | 88 |
| 36,403 | 25 | 17 | 162 | 46 | 16 | 2 | 107 | 24 | 310 | 89 |
| 36,404 | 25 | 17 | 162 | 46 | 16 | 2 | 107 | 24 | 310 | 89 |
| 36,405 | 24 | 17 | 163 | 46 | 16 | 2 | 105 | 24 | 308 | 89 |
| 36,406 | 27 | 17 | 173 | 46 | 15 | 2 | 110 | 25 | 325 | 90 |
| 36,407 | 23 | 17 | 176 | 47 | 15 | 2 | 106 | 25 | 320 | 91 |
| 36,408 | 22 | 16 | 174 | 47 | 15 | 2 | 107 | 26 | 318 | 91 |
| 36,409 | 25 | 16 | 193 | 46 | 19 | 2 | 127 | 26 | 364 | 90 |
| 36,410 | 25 | 16 | 193 | 50 | 21 | 2 | 130 | 30 | 369 | 98 |
| 36,411 | 28 | 16 | 208 | 44 | 22 | 2 | 142 | 29 | 400 | 91 |
| 36,412 | 28 | 8  | 197 | 34 | 20 | 2 | 143 | 17 | 388 | 61 |
| 36,413 | 29 | 7  | 204 | 25 | 20 | 1 | 148 | 15 | 401 | 48 |
| 36,414 | 26 | 7  | 170 | 25 | 18 | 1 | 131 | 15 | 345 | 48 |
| 36,415 | 24 | 7  | 150 | 26 | 17 | 1 | 111 | 16 | 302 | 50 |
| 36,416 | 24 | 4  | 155 | 23 | 17 | 1 | 113 | 14 | 309 | 42 |
| 36,417 | 24 | 4  | 154 | 23 | 17 | 1 | 113 | 13 | 308 | 41 |
| 36,418 | 24 | 4  | 155 | 26 | 17 | 1 | 114 | 13 | 310 | 44 |
| 36,419 | 24 | 5  | 160 | 23 | 17 | 1 | 120 | 12 | 321 | 41 |
| 36,420 | 24 | 4  | 163 | 23 | 17 | 1 | 122 | 12 | 326 | 40 |
| 36,421 | 25 | 4  | 165 | 19 | 17 | 1 | 123 | 12 | 330 | 36 |
| 36,422 | 25 | 4  | 165 | 19 | 17 | 1 | 125 | 12 | 332 | 36 |
| 36,423 | 25 | 4  | 164 | 19 | 17 | 1 | 123 | 11 | 329 | 35 |
| 36,424 | 25 | 4  | 164 | 19 | 17 | 1 | 123 | 11 | 329 | 35 |
| 36,425 | 22 | 4  | 164 | 19 | 17 | 1 | 122 | 11 | 325 | 35 |
| 36,426 | 22 | 4  | 165 | 20 | 17 | 1 | 122 | 11 | 326 | 36 |
| 36,427 | 23 | 4  | 174 | 17 | 17 | 1 | 127 | 11 | 341 | 33 |
| 36,428 | 23 | 4  | 174 | 17 | 17 | 1 | 128 | 11 | 342 | 33 |
| 36,429 | 23 | 4  | 176 | 17 | 17 | 1 | 130 | 11 | 346 | 33 |
| 36,430 | 24 | 4  | 176 | 17 | 17 | 1 | 131 | 11 | 348 | 33 |
| 36,431 | 24 | 4  | 176 | 17 | 17 | 1 | 131 | 11 | 348 | 33 |
| 36,432 | 24 | 4  | 176 | 17 | 17 | 1 | 130 | 11 | 347 | 33 |
| 36,433 | 24 | 4  | 173 | 17 | 17 | 1 | 130 | 11 | 344 | 33 |
| 36,434 | 24 | 4  | 173 | 17 | 18 | 1 | 130 | 11 | 345 | 33 |
| 36,435 | 24 | 4  | 172 | 17 | 18 | 1 | 130 | 11 | 344 | 33 |
| 36,436 | 24 | 4  | 171 | 17 | 18 | 1 | 129 | 11 | 342 | 33 |
| 36,437 | 24 | 4  | 171 | 17 | 18 | 1 | 129 | 12 | 342 | 34 |

|        |    |   |     |    |    |   |     |    |     |    |
|--------|----|---|-----|----|----|---|-----|----|-----|----|
| 36,438 | 24 | 4 | 172 | 17 | 17 | 0 | 130 | 12 | 343 | 33 |
| 36,439 | 22 | 4 | 172 | 17 | 17 | 0 | 128 | 12 | 339 | 33 |
| 36,440 | 22 | 4 | 171 | 17 | 17 | 0 | 127 | 12 | 337 | 33 |
| 36,441 | 22 | 3 | 170 | 18 | 17 | 0 | 128 | 11 | 337 | 32 |
| 36,442 | 22 | 3 | 169 | 18 | 17 | 0 | 128 | 11 | 336 | 32 |
| 36,443 | 20 | 3 | 161 | 18 | 17 | 0 | 119 | 11 | 317 | 32 |
| 36,444 | 20 | 3 | 161 | 21 | 17 | 0 | 121 | 14 | 319 | 38 |
| 36,445 | 20 | 3 | 160 | 21 | 17 | 0 | 119 | 14 | 316 | 38 |
| 36,446 | 20 | 3 | 159 | 21 | 17 | 0 | 119 | 14 | 315 | 38 |
| 36,447 | 20 | 3 | 154 | 20 | 15 | 0 | 113 | 14 | 302 | 37 |
| 36,448 | 19 | 3 | 146 | 20 | 13 | 0 | 111 | 14 | 289 | 37 |
| 36,449 | 19 | 3 | 131 | 21 | 12 | 0 | 98  | 14 | 260 | 38 |
| 36,450 | 19 | 3 | 130 | 22 | 12 | 0 | 98  | 14 | 259 | 39 |
| 36,451 | 19 | 3 | 118 | 23 | 11 | 0 | 99  | 14 | 247 | 40 |
| 36,452 | 19 | 3 | 118 | 25 | 11 | 0 | 99  | 14 | 247 | 42 |
| 36,453 | 21 | 2 | 136 | 25 | 14 | 0 | 112 | 14 | 283 | 41 |
| 36,454 | 21 | 2 | 138 | 27 | 14 | 0 | 112 | 14 | 285 | 43 |
| 36,455 | 21 | 2 | 138 | 27 | 14 | 0 | 112 | 13 | 285 | 42 |
| 36,456 | 21 | 2 | 136 | 29 | 14 | 0 | 113 | 13 | 284 | 44 |
| 36,457 | 18 | 2 | 128 | 29 | 13 | 0 | 109 | 13 | 268 | 44 |
| 36,458 | 18 | 2 | 124 | 31 | 13 | 0 | 109 | 12 | 264 | 45 |
| 36,459 | 18 | 3 | 125 | 37 | 13 | 0 | 108 | 15 | 264 | 55 |
| 36,460 | 17 | 3 | 123 | 42 | 9  | 0 | 93  | 17 | 242 | 62 |
| 36,461 | 17 | 3 | 127 | 41 | 7  | 0 | 94  | 13 | 245 | 57 |
| 36,462 | 11 | 3 | 112 | 40 | 6  | 0 | 79  | 12 | 208 | 55 |
| 36,463 | 9  | 3 | 116 | 40 | 5  | 0 | 74  | 11 | 204 | 54 |
| 36,464 | 14 | 3 | 140 | 37 | 9  | 0 | 80  | 11 | 243 | 51 |
| 36,465 | 15 | 3 | 186 | 38 | 9  | 0 | 96  | 14 | 306 | 55 |
| 36,466 | 15 | 3 | 184 | 37 | 9  | 0 | 97  | 13 | 305 | 53 |
| 36,467 | 15 | 3 | 181 | 37 | 9  | 0 | 94  | 12 | 299 | 52 |
| 36,468 | 15 | 2 | 180 | 34 | 9  | 0 | 93  | 12 | 297 | 48 |
| 36,469 | 15 | 2 | 180 | 34 | 9  | 0 | 93  | 12 | 297 | 48 |
| 36,470 | 15 | 2 | 175 | 34 | 9  | 0 | 87  | 12 | 286 | 48 |
| 36,471 | 15 | 2 | 174 | 34 | 10 | 0 | 84  | 12 | 283 | 48 |
| 36,472 | 14 | 2 | 172 | 34 | 10 | 0 | 83  | 12 | 279 | 48 |
| 36,473 | 14 | 2 | 172 | 34 | 10 | 0 | 81  | 12 | 277 | 48 |
| 36,474 | 14 | 2 | 172 | 34 | 10 | 0 | 81  | 12 | 277 | 48 |
| 36,475 | 14 | 2 | 172 | 35 | 10 | 0 | 81  | 13 | 277 | 50 |
| 36,476 | 14 | 2 | 172 | 36 | 10 | 0 | 81  | 14 | 277 | 52 |
| 36,477 | 13 | 2 | 163 | 35 | 10 | 0 | 76  | 14 | 262 | 51 |
| 36,478 | 13 | 2 | 164 | 35 | 10 | 0 | 75  | 17 | 262 | 54 |

|        |    |   |     |    |    |   |     |    |     |    |
|--------|----|---|-----|----|----|---|-----|----|-----|----|
| 36,479 | 13 | 1 | 164 | 35 | 10 | 0 | 76  | 17 | 263 | 53 |
| 36,480 | 13 | 1 | 164 | 35 | 10 | 0 | 75  | 17 | 262 | 53 |
| 36,481 | 12 | 1 | 164 | 35 | 10 | 0 | 74  | 17 | 260 | 53 |
| 36,482 | 12 | 1 | 165 | 36 | 10 | 0 | 74  | 17 | 261 | 54 |
| 36,483 | 12 | 1 | 165 | 36 | 10 | 0 | 74  | 17 | 261 | 54 |
| 36,484 | 12 | 1 | 165 | 36 | 10 | 0 | 75  | 17 | 262 | 54 |
| 36,485 | 12 | 2 | 166 | 36 | 9  | 0 | 75  | 17 | 262 | 55 |
| 36,486 | 12 | 2 | 166 | 36 | 9  | 0 | 75  | 18 | 262 | 56 |
| 36,487 | 12 | 2 | 166 | 36 | 9  | 0 | 76  | 17 | 263 | 55 |
| 36,488 | 12 | 2 | 166 | 36 | 9  | 0 | 76  | 17 | 263 | 55 |
| 36,489 | 12 | 2 | 164 | 39 | 9  | 0 | 78  | 17 | 263 | 58 |
| 36,490 | 13 | 2 | 165 | 39 | 9  | 0 | 79  | 18 | 266 | 59 |
| 36,491 | 13 | 2 | 165 | 41 | 9  | 0 | 79  | 18 | 266 | 61 |
| 36,492 | 17 | 2 | 178 | 40 | 9  | 0 | 84  | 20 | 288 | 62 |
| 36,493 | 17 | 3 | 178 | 43 | 9  | 0 | 84  | 20 | 288 | 66 |
| 36,494 | 17 | 3 | 193 | 44 | 9  | 0 | 92  | 21 | 311 | 68 |
| 36,495 | 17 | 3 | 193 | 41 | 9  | 0 | 89  | 19 | 308 | 63 |
| 36,496 | 19 | 3 | 207 | 46 | 10 | 0 | 95  | 21 | 331 | 70 |
| 36,497 | 20 | 3 | 209 | 48 | 11 | 0 | 95  | 22 | 335 | 73 |
| 36,498 | 22 | 4 | 246 | 49 | 11 | 0 | 112 | 22 | 391 | 75 |
| 36,499 | 21 | 4 | 273 | 51 | 13 | 0 | 132 | 22 | 439 | 77 |
| 36,500 | 21 | 4 | 280 | 54 | 14 | 0 | 135 | 23 | 450 | 81 |
| 36,501 | 20 | 4 | 273 | 53 | 11 | 0 | 128 | 23 | 432 | 80 |
| 36,502 | 20 | 4 | 275 | 51 | 11 | 0 | 129 | 23 | 435 | 78 |
| 36,503 | 20 | 4 | 276 | 51 | 11 | 0 | 129 | 23 | 436 | 78 |
| 36,504 | 20 | 4 | 275 | 49 | 11 | 0 | 129 | 23 | 435 | 76 |
| 36,505 | 20 | 4 | 275 | 50 | 11 | 0 | 129 | 23 | 435 | 77 |
| 36,506 | 20 | 4 | 275 | 45 | 11 | 0 | 129 | 23 | 435 | 72 |
| 36,507 | 20 | 4 | 281 | 46 | 11 | 0 | 135 | 23 | 447 | 73 |
| 36,508 | 21 | 4 | 275 | 46 | 12 | 0 | 134 | 23 | 442 | 73 |
| 36,509 | 22 | 3 | 274 | 40 | 12 | 0 | 134 | 20 | 442 | 63 |
| 36,510 | 22 | 3 | 273 | 41 | 12 | 0 | 134 | 20 | 441 | 64 |
| 36,511 | 20 | 3 | 263 | 36 | 12 | 0 | 135 | 19 | 430 | 58 |
| 36,512 | 21 | 3 | 258 | 34 | 12 | 0 | 136 | 19 | 427 | 56 |
| 36,513 | 21 | 3 | 251 | 33 | 12 | 0 | 133 | 19 | 417 | 55 |
| 36,514 | 20 | 3 | 236 | 32 | 12 | 0 | 128 | 20 | 396 | 55 |
| 36,515 | 14 | 3 | 204 | 32 | 9  | 0 | 114 | 20 | 341 | 55 |
| 36,516 | 13 | 3 | 159 | 31 | 9  | 1 | 98  | 17 | 279 | 52 |
| 36,517 | 13 | 3 | 156 | 31 | 9  | 1 | 94  | 18 | 272 | 53 |
| 36,518 | 13 | 3 | 156 | 31 | 9  | 1 | 94  | 18 | 272 | 53 |
| 36,519 | 13 | 3 | 160 | 31 | 12 | 1 | 95  | 18 | 280 | 53 |

|        |    |   |     |    |    |   |     |    |     |    |
|--------|----|---|-----|----|----|---|-----|----|-----|----|
| 36,520 | 13 | 3 | 161 | 31 | 12 | 1 | 95  | 18 | 281 | 53 |
| 36,521 | 15 | 3 | 165 | 31 | 12 | 1 | 96  | 18 | 288 | 53 |
| 36,522 | 15 | 3 | 164 | 31 | 11 | 1 | 96  | 18 | 286 | 53 |
| 36,523 | 17 | 3 | 172 | 31 | 11 | 1 | 103 | 18 | 303 | 53 |
| 36,524 | 17 | 3 | 172 | 31 | 11 | 1 | 103 | 18 | 303 | 53 |
| 36,525 | 17 | 3 | 173 | 31 | 11 | 1 | 104 | 18 | 305 | 53 |
| 36,526 | 17 | 3 | 174 | 30 | 12 | 1 | 107 | 17 | 310 | 51 |
| 36,527 | 17 | 3 | 184 | 29 | 17 | 1 | 115 | 16 | 333 | 49 |
| 36,528 | 17 | 3 | 201 | 29 | 17 | 1 | 134 | 13 | 369 | 46 |
| 36,529 | 17 | 3 | 203 | 29 | 17 | 1 | 137 | 13 | 374 | 46 |
| 36,530 | 17 | 3 | 201 | 29 | 17 | 1 | 135 | 13 | 370 | 46 |
| 36,531 | 17 | 3 | 201 | 29 | 17 | 1 | 135 | 13 | 370 | 46 |
| 36,532 | 17 | 3 | 200 | 28 | 17 | 1 | 135 | 13 | 369 | 45 |
| 36,533 | 17 | 3 | 200 | 28 | 17 | 1 | 135 | 13 | 369 | 45 |
| 36,534 | 17 | 3 | 207 | 28 | 17 | 1 | 136 | 13 | 377 | 45 |
| 36,535 | 17 | 2 | 208 | 28 | 17 | 1 | 135 | 14 | 377 | 45 |
| 36,536 | 17 | 2 | 207 | 28 | 17 | 1 | 135 | 14 | 376 | 45 |
| 36,537 | 17 | 2 | 208 | 28 | 17 | 1 | 135 | 13 | 377 | 44 |
| 36,538 | 17 | 2 | 210 | 28 | 17 | 1 | 135 | 13 | 379 | 44 |
| 36,539 | 17 | 2 | 210 | 28 | 17 | 1 | 134 | 13 | 378 | 44 |
| 36,540 | 17 | 2 | 217 | 26 | 17 | 1 | 133 | 13 | 384 | 42 |
| 36,541 | 16 | 2 | 223 | 26 | 17 | 1 | 133 | 12 | 389 | 41 |
| 36,542 | 13 | 2 | 214 | 24 | 17 | 1 | 129 | 10 | 373 | 37 |
| 36,543 | 13 | 2 | 214 | 24 | 17 | 1 | 129 | 10 | 373 | 37 |
| 36,544 | 16 | 1 | 228 | 20 | 18 | 1 | 149 | 9  | 411 | 31 |
| 36,545 | 16 | 1 | 226 | 20 | 18 | 1 | 147 | 9  | 407 | 31 |
| 36,546 | 15 | 1 | 218 | 20 | 17 | 1 | 146 | 8  | 396 | 30 |
| 36,547 | 14 | 1 | 213 | 15 | 17 | 1 | 143 | 6  | 387 | 23 |
| 36,548 | 13 | 1 | 216 | 13 | 16 | 1 | 143 | 5  | 388 | 20 |
| 36,549 | 11 | 0 | 178 | 12 | 16 | 1 | 126 | 5  | 331 | 18 |
| 36,550 | 11 | 0 | 150 | 6  | 14 | 1 | 103 | 4  | 278 | 11 |
| 36,551 | 11 | 0 | 142 | 5  | 13 | 1 | 98  | 4  | 264 | 10 |
| 36,552 | 11 | 0 | 140 | 5  | 13 | 1 | 98  | 4  | 262 | 10 |
| 36,553 | 11 | 0 | 139 | 5  | 13 | 1 | 96  | 4  | 259 | 10 |
| 36,554 | 12 | 0 | 141 | 5  | 13 | 1 | 96  | 4  | 262 | 10 |
| 36,555 | 12 | 0 | 148 | 5  | 13 | 1 | 97  | 4  | 270 | 10 |
| 36,556 | 12 | 0 | 148 | 4  | 13 | 1 | 97  | 4  | 270 | 9  |
| 36,557 | 12 | 0 | 148 | 4  | 13 | 1 | 97  | 4  | 270 | 9  |
| 36,558 | 12 | 0 | 142 | 3  | 13 | 1 | 90  | 4  | 257 | 8  |
| 36,559 | 25 | 0 | 191 | 3  | 15 | 1 | 93  | 4  | 324 | 8  |
| 36,560 | 24 | 0 | 191 | 2  | 15 | 1 | 94  | 3  | 324 | 6  |

|        |    |   |     |    |    |   |     |   |     |    |
|--------|----|---|-----|----|----|---|-----|---|-----|----|
| 36,561 | 46 | 0 | 272 | 4  | 22 | 1 | 145 | 3 | 485 | 8  |
| 36,562 | 49 | 0 | 280 | 4  | 23 | 1 | 144 | 3 | 496 | 8  |
| 36,563 | 49 | 0 | 280 | 3  | 24 | 1 | 140 | 3 | 493 | 7  |
| 36,564 | 51 | 0 | 308 | 3  | 26 | 1 | 151 | 2 | 536 | 6  |
| 36,565 | 54 | 0 | 348 | 3  | 26 | 1 | 163 | 2 | 591 | 6  |
| 36,566 | 57 | 0 | 386 | 3  | 27 | 0 | 172 | 2 | 642 | 5  |
| 36,567 | 64 | 0 | 431 | 3  | 29 | 0 | 189 | 1 | 713 | 4  |
| 36,568 | 65 | 0 | 442 | 3  | 29 | 0 | 190 | 1 | 726 | 4  |
| 36,569 | 65 | 0 | 440 | 3  | 26 | 0 | 189 | 1 | 720 | 4  |
| 36,570 | 65 | 0 | 441 | 4  | 26 | 0 | 190 | 1 | 722 | 5  |
| 36,571 | 65 | 0 | 443 | 4  | 26 | 0 | 190 | 1 | 724 | 5  |
| 36,572 | 63 | 0 | 439 | 4  | 26 | 0 | 190 | 1 | 718 | 5  |
| 36,573 | 63 | 0 | 438 | 6  | 26 | 0 | 190 | 3 | 717 | 9  |
| 36,574 | 61 | 0 | 430 | 10 | 26 | 1 | 183 | 4 | 700 | 15 |
| 36,575 | 61 | 0 | 429 | 10 | 26 | 1 | 182 | 5 | 698 | 16 |
| 36,576 | 62 | 0 | 429 | 12 | 26 | 1 | 179 | 6 | 696 | 19 |
| 36,577 | 62 | 0 | 418 | 13 | 21 | 2 | 171 | 6 | 672 | 21 |
| 36,578 | 62 | 0 | 404 | 14 | 21 | 2 | 156 | 6 | 643 | 22 |
| 36,579 | 62 | 0 | 400 | 15 | 21 | 2 | 152 | 6 | 635 | 23 |
| 36,580 | 62 | 0 | 398 | 15 | 21 | 2 | 149 | 6 | 630 | 23 |
| 36,581 | 64 | 0 | 399 | 15 | 21 | 2 | 149 | 6 | 633 | 23 |
| 36,582 | 64 | 0 | 401 | 15 | 21 | 2 | 149 | 6 | 635 | 23 |
| 36,583 | 64 | 0 | 401 | 15 | 21 | 2 | 150 | 6 | 636 | 23 |
| 36,584 | 64 | 0 | 401 | 16 | 21 | 2 | 150 | 6 | 636 | 24 |
| 36,585 | 64 | 0 | 394 | 16 | 21 | 2 | 149 | 6 | 628 | 24 |
| 36,586 | 65 | 0 | 399 | 16 | 21 | 2 | 150 | 5 | 635 | 23 |
| 36,587 | 65 | 0 | 398 | 16 | 21 | 2 | 151 | 5 | 635 | 23 |
| 36,588 | 65 | 0 | 406 | 16 | 21 | 2 | 152 | 5 | 644 | 23 |
| 36,589 | 65 | 0 | 404 | 16 | 21 | 2 | 151 | 5 | 641 | 23 |
| 36,590 | 65 | 0 | 397 | 16 | 21 | 2 | 150 | 5 | 633 | 23 |
| 36,591 | 68 | 0 | 422 | 15 | 21 | 2 | 175 | 5 | 686 | 22 |
| 36,592 | 68 | 0 | 420 | 15 | 21 | 2 | 174 | 5 | 683 | 22 |
| 36,593 | 67 | 0 | 416 | 16 | 21 | 2 | 172 | 5 | 676 | 23 |
| 36,594 | 67 | 0 | 414 | 16 | 21 | 2 | 170 | 5 | 672 | 23 |
| 36,595 | 64 | 0 | 391 | 16 | 20 | 2 | 146 | 5 | 621 | 23 |
| 36,596 | 64 | 0 | 390 | 16 | 20 | 2 | 149 | 5 | 623 | 23 |
| 36,597 | 64 | 0 | 391 | 16 | 20 | 2 | 150 | 5 | 625 | 23 |
| 36,598 | 64 | 0 | 390 | 16 | 20 | 2 | 148 | 5 | 622 | 23 |
| 36,599 | 64 | 0 | 385 | 16 | 20 | 2 | 148 | 5 | 617 | 23 |
| 36,600 | 64 | 0 | 385 | 18 | 20 | 2 | 147 | 5 | 616 | 25 |
| 36,601 | 64 | 0 | 385 | 18 | 20 | 2 | 147 | 5 | 616 | 25 |

|        |    |   |     |    |    |   |     |    |     |    |
|--------|----|---|-----|----|----|---|-----|----|-----|----|
| 36,602 | 64 | 0 | 382 | 18 | 20 | 2 | 148 | 5  | 614 | 25 |
| 36,603 | 64 | 0 | 382 | 18 | 20 | 2 | 148 | 5  | 614 | 25 |
| 36,604 | 64 | 0 | 383 | 18 | 20 | 2 | 153 | 5  | 620 | 25 |
| 36,605 | 63 | 0 | 380 | 18 | 20 | 2 | 155 | 5  | 618 | 25 |
| 36,606 | 63 | 0 | 373 | 18 | 20 | 2 | 154 | 5  | 610 | 25 |
| 36,607 | 63 | 0 | 371 | 18 | 20 | 2 | 154 | 5  | 608 | 25 |
| 36,608 | 50 | 0 | 327 | 18 | 17 | 3 | 152 | 5  | 546 | 26 |
| 36,609 | 49 | 0 | 327 | 18 | 17 | 3 | 155 | 5  | 548 | 26 |
| 36,610 | 50 | 0 | 332 | 19 | 17 | 3 | 159 | 5  | 558 | 27 |
| 36,611 | 50 | 0 | 336 | 19 | 17 | 3 | 163 | 5  | 566 | 27 |
| 36,612 | 28 | 0 | 255 | 18 | 10 | 3 | 112 | 5  | 405 | 26 |
| 36,613 | 27 | 0 | 249 | 19 | 9  | 3 | 121 | 7  | 406 | 29 |
| 36,614 | 26 | 0 | 255 | 19 | 9  | 3 | 127 | 8  | 417 | 30 |
| 36,615 | 24 | 0 | 229 | 19 | 7  | 3 | 116 | 8  | 376 | 30 |
| 36,616 | 22 | 0 | 189 | 19 | 6  | 3 | 107 | 9  | 324 | 31 |
| 36,617 | 19 | 0 | 151 | 19 | 3  | 3 | 98  | 9  | 271 | 31 |
| 36,618 | 12 | 0 | 105 | 19 | 1  | 3 | 81  | 9  | 199 | 31 |
| 36,619 | 11 | 0 | 95  | 21 | 1  | 3 | 82  | 9  | 189 | 33 |
| 36,620 | 11 | 0 | 94  | 21 | 1  | 3 | 82  | 9  | 188 | 33 |
| 36,621 | 11 | 0 | 93  | 21 | 1  | 3 | 82  | 9  | 187 | 33 |
| 36,622 | 11 | 0 | 95  | 21 | 1  | 3 | 83  | 10 | 190 | 34 |
| 36,623 | 11 | 1 | 109 | 17 | 2  | 3 | 85  | 8  | 207 | 29 |
| 36,624 | 13 | 1 | 134 | 15 | 2  | 2 | 96  | 6  | 245 | 24 |
| 36,625 | 13 | 1 | 140 | 15 | 2  | 2 | 98  | 6  | 253 | 24 |
| 36,626 | 13 | 1 | 145 | 15 | 2  | 2 | 101 | 6  | 261 | 24 |
| 36,627 | 12 | 1 | 148 | 12 | 2  | 1 | 105 | 5  | 267 | 19 |
| 36,628 | 12 | 1 | 151 | 11 | 2  | 1 | 107 | 5  | 272 | 18 |
| 36,629 | 12 | 2 | 151 | 11 | 2  | 1 | 107 | 5  | 272 | 19 |
| 36,630 | 12 | 2 | 151 | 10 | 2  | 1 | 107 | 5  | 272 | 18 |
| 36,631 | 10 | 2 | 150 | 10 | 2  | 1 | 108 | 5  | 270 | 18 |
| 36,632 | 10 | 2 | 149 | 10 | 2  | 1 | 108 | 5  | 269 | 18 |
| 36,633 | 10 | 2 | 150 | 11 | 2  | 1 | 108 | 5  | 270 | 19 |
| 36,634 | 10 | 3 | 150 | 12 | 2  | 1 | 107 | 7  | 269 | 23 |
| 36,635 | 10 | 4 | 147 | 13 | 2  | 1 | 106 | 10 | 265 | 28 |
| 36,636 | 11 | 4 | 145 | 22 | 2  | 1 | 106 | 11 | 264 | 38 |
| 36,637 | 10 | 4 | 144 | 30 | 2  | 2 | 106 | 21 | 262 | 57 |
| 36,638 | 10 | 5 | 145 | 30 | 2  | 2 | 105 | 23 | 262 | 60 |
| 36,639 | 11 | 5 | 138 | 30 | 2  | 2 | 104 | 27 | 255 | 64 |
| 36,640 | 9  | 5 | 111 | 32 | 2  | 2 | 79  | 28 | 201 | 67 |
| 36,641 | 8  | 5 | 109 | 32 | 2  | 2 | 78  | 29 | 197 | 68 |
| 36,642 | 8  | 5 | 109 | 35 | 2  | 2 | 78  | 32 | 197 | 74 |

|        |    |   |     |    |   |   |    |    |     |     |
|--------|----|---|-----|----|---|---|----|----|-----|-----|
| 36,643 | 8  | 7 | 113 | 38 | 2 | 2 | 80 | 33 | 203 | 80  |
| 36,644 | 10 | 7 | 118 | 37 | 2 | 2 | 89 | 33 | 219 | 79  |
| 36,645 | 10 | 7 | 117 | 37 | 2 | 2 | 89 | 33 | 218 | 79  |
| 36,646 | 12 | 7 | 125 | 35 | 4 | 2 | 97 | 34 | 238 | 78  |
| 36,647 | 12 | 7 | 125 | 36 | 4 | 2 | 94 | 34 | 235 | 79  |
| 36,648 | 12 | 7 | 124 | 38 | 4 | 2 | 93 | 34 | 233 | 81  |
| 36,649 | 12 | 7 | 124 | 39 | 4 | 2 | 93 | 34 | 233 | 82  |
| 36,650 | 12 | 7 | 124 | 39 | 4 | 2 | 93 | 34 | 233 | 82  |
| 36,651 | 12 | 7 | 124 | 40 | 4 | 2 | 93 | 34 | 233 | 83  |
| 36,652 | 12 | 7 | 139 | 40 | 4 | 2 | 99 | 34 | 254 | 83  |
| 36,653 | 12 | 7 | 139 | 41 | 4 | 2 | 99 | 37 | 254 | 87  |
| 36,654 | 12 | 7 | 139 | 41 | 4 | 2 | 99 | 40 | 254 | 90  |
| 36,655 | 12 | 7 | 137 | 41 | 4 | 2 | 95 | 41 | 248 | 91  |
| 36,656 | 12 | 7 | 137 | 42 | 4 | 2 | 93 | 41 | 246 | 92  |
| 36,657 | 12 | 7 | 137 | 42 | 4 | 2 | 93 | 41 | 246 | 92  |
| 36,658 | 12 | 7 | 137 | 43 | 4 | 2 | 92 | 42 | 245 | 94  |
| 36,659 | 12 | 7 | 132 | 43 | 4 | 1 | 89 | 42 | 237 | 93  |
| 36,660 | 12 | 7 | 132 | 44 | 4 | 1 | 89 | 42 | 237 | 94  |
| 36,661 | 13 | 7 | 128 | 48 | 6 | 1 | 86 | 44 | 233 | 100 |
| 36,662 | 13 | 7 | 125 | 47 | 6 | 1 | 81 | 42 | 225 | 97  |
| 36,663 | 14 | 7 | 134 | 48 | 6 | 1 | 89 | 42 | 243 | 98  |
| 36,664 | 13 | 7 | 124 | 49 | 6 | 1 | 75 | 42 | 218 | 99  |
| 36,665 | 13 | 7 | 122 | 49 | 6 | 1 | 68 | 41 | 209 | 98  |
| 36,666 | 15 | 7 | 134 | 49 | 7 | 1 | 82 | 41 | 238 | 98  |
| 36,667 | 14 | 7 | 144 | 49 | 7 | 1 | 86 | 40 | 251 | 97  |
| 36,668 | 14 | 7 | 144 | 49 | 7 | 1 | 86 | 40 | 251 | 97  |
| 36,669 | 14 | 7 | 144 | 51 | 7 | 1 | 91 | 41 | 256 | 100 |
| 36,670 | 14 | 7 | 146 | 49 | 7 | 1 | 90 | 41 | 257 | 98  |
| 36,671 | 14 | 7 | 146 | 49 | 7 | 1 | 90 | 41 | 257 | 98  |
| 36,672 | 14 | 7 | 145 | 48 | 7 | 2 | 89 | 44 | 255 | 101 |
| 36,673 | 14 | 6 | 153 | 48 | 7 | 2 | 89 | 44 | 263 | 100 |
| 36,674 | 14 | 6 | 148 | 49 | 6 | 2 | 87 | 49 | 255 | 106 |
| 36,675 | 12 | 6 | 123 | 50 | 6 | 2 | 76 | 49 | 217 | 107 |
| 36,676 | 14 | 6 | 126 | 50 | 6 | 2 | 76 | 50 | 222 | 108 |
| 36,677 | 14 | 6 | 121 | 50 | 6 | 2 | 74 | 50 | 215 | 108 |
| 36,678 | 14 | 6 | 117 | 50 | 6 | 2 | 70 | 50 | 207 | 108 |
| 36,679 | 14 | 6 | 114 | 51 | 6 | 2 | 68 | 50 | 202 | 109 |
| 36,680 | 14 | 5 | 114 | 51 | 6 | 2 | 68 | 51 | 202 | 109 |
| 36,681 | 14 | 5 | 114 | 51 | 6 | 2 | 67 | 52 | 201 | 110 |
| 36,682 | 15 | 5 | 119 | 52 | 6 | 2 | 67 | 52 | 207 | 111 |
| 36,683 | 17 | 5 | 126 | 53 | 6 | 2 | 70 | 52 | 219 | 112 |

|        |    |   |     |    |    |   |     |    |     |     |
|--------|----|---|-----|----|----|---|-----|----|-----|-----|
| 36,684 | 17 | 4 | 137 | 52 | 6  | 2 | 78  | 50 | 238 | 108 |
| 36,685 | 17 | 4 | 137 | 52 | 6  | 2 | 78  | 50 | 238 | 108 |
| 36,686 | 16 | 4 | 142 | 50 | 6  | 2 | 87  | 47 | 251 | 103 |
| 36,687 | 16 | 4 | 142 | 45 | 7  | 2 | 90  | 47 | 255 | 98  |
| 36,688 | 16 | 4 | 142 | 37 | 7  | 1 | 90  | 37 | 255 | 79  |
| 36,689 | 16 | 3 | 141 | 41 | 7  | 1 | 90  | 35 | 254 | 80  |
| 36,690 | 16 | 3 | 141 | 45 | 7  | 2 | 90  | 32 | 254 | 82  |
| 36,691 | 16 | 3 | 140 | 43 | 7  | 2 | 90  | 31 | 253 | 79  |
| 36,692 | 16 | 3 | 140 | 44 | 7  | 2 | 90  | 30 | 253 | 79  |
| 36,693 | 17 | 1 | 141 | 41 | 7  | 2 | 89  | 28 | 254 | 72  |
| 36,694 | 18 | 1 | 139 | 41 | 7  | 3 | 88  | 28 | 252 | 73  |
| 36,695 | 16 | 2 | 134 | 56 | 7  | 3 | 79  | 35 | 236 | 96  |
| 36,696 | 14 | 2 | 126 | 57 | 5  | 3 | 72  | 35 | 217 | 97  |
| 36,697 | 14 | 2 | 126 | 57 | 5  | 3 | 71  | 34 | 216 | 96  |
| 36,698 | 14 | 3 | 120 | 61 | 5  | 3 | 71  | 42 | 210 | 109 |
| 36,699 | 14 | 3 | 112 | 64 | 5  | 3 | 64  | 42 | 195 | 112 |
| 36,700 | 14 | 5 | 112 | 65 | 5  | 3 | 64  | 44 | 195 | 117 |
| 36,701 | 14 | 6 | 112 | 68 | 5  | 3 | 64  | 46 | 195 | 123 |
| 36,702 | 14 | 6 | 115 | 78 | 5  | 5 | 66  | 50 | 200 | 139 |
| 36,703 | 14 | 6 | 113 | 79 | 5  | 5 | 66  | 50 | 198 | 140 |
| 36,704 | 15 | 6 | 113 | 78 | 5  | 5 | 68  | 44 | 201 | 133 |
| 36,705 | 15 | 6 | 117 | 80 | 5  | 5 | 70  | 43 | 207 | 134 |
| 36,706 | 15 | 7 | 118 | 81 | 5  | 5 | 70  | 43 | 208 | 136 |
| 36,707 | 15 | 7 | 119 | 81 | 5  | 5 | 71  | 43 | 210 | 136 |
| 36,708 | 15 | 7 | 128 | 80 | 5  | 5 | 76  | 42 | 224 | 134 |
| 36,709 | 16 | 7 | 173 | 81 | 6  | 5 | 89  | 42 | 284 | 135 |
| 36,710 | 16 | 7 | 187 | 81 | 8  | 5 | 102 | 42 | 313 | 135 |
| 36,711 | 16 | 7 | 187 | 76 | 7  | 5 | 106 | 40 | 316 | 128 |
| 36,712 | 16 | 7 | 189 | 75 | 8  | 5 | 109 | 40 | 322 | 127 |
| 36,713 | 16 | 7 | 188 | 75 | 8  | 5 | 109 | 40 | 321 | 127 |
| 36,714 | 15 | 7 | 179 | 74 | 8  | 5 | 101 | 40 | 303 | 126 |
| 36,715 | 16 | 7 | 183 | 75 | 8  | 5 | 100 | 40 | 307 | 127 |
| 36,716 | 16 | 7 | 180 | 75 | 7  | 5 | 99  | 40 | 302 | 127 |
| 36,717 | 14 | 7 | 165 | 75 | 6  | 5 | 86  | 40 | 271 | 127 |
| 36,718 | 16 | 7 | 168 | 75 | 6  | 5 | 81  | 40 | 271 | 127 |
| 36,719 | 22 | 7 | 195 | 75 | 8  | 5 | 90  | 40 | 315 | 127 |
| 36,720 | 22 | 7 | 194 | 73 | 8  | 5 | 90  | 39 | 314 | 124 |
| 36,721 | 22 | 7 | 194 | 74 | 8  | 5 | 90  | 39 | 314 | 125 |
| 36,722 | 23 | 8 | 218 | 75 | 8  | 5 | 102 | 39 | 351 | 127 |
| 36,723 | 24 | 8 | 241 | 75 | 8  | 4 | 106 | 37 | 379 | 124 |
| 36,724 | 34 | 8 | 333 | 75 | 19 | 4 | 140 | 36 | 526 | 123 |



|        |    |   |     |    |    |   |     |    |       |     |
|--------|----|---|-----|----|----|---|-----|----|-------|-----|
| 36,725 | 35 | 8 | 372 | 73 | 21 | 4 | 145 | 31 | 573   | 116 |
| 36,726 | 37 | 8 | 395 | 73 | 21 | 4 | 155 | 31 | 608   | 116 |
| 36,727 | 38 | 8 | 403 | 73 | 23 | 4 | 171 | 30 | 635   | 115 |
| 36,728 | 38 | 8 | 403 | 73 | 23 | 4 | 170 | 30 | 634   | 115 |
| 36,729 | 38 | 8 | 405 | 73 | 23 | 4 | 171 | 30 | 637   | 115 |
| 36,730 | 38 | 8 | 406 | 72 | 23 | 4 | 172 | 30 | 639   | 114 |
| 36,731 | 38 | 8 | 406 | 71 | 23 | 4 | 172 | 28 | 639   | 111 |
| 36,732 | 37 | 8 | 405 | 74 | 23 | 4 | 173 | 28 | 638   | 114 |
| 36,733 | 37 | 8 | 401 | 75 | 23 | 4 | 173 | 28 | 634   | 115 |
| 36,734 | 35 | 8 | 394 | 74 | 23 | 4 | 170 | 28 | 622   | 114 |
| 36,735 | 35 | 8 | 381 | 77 | 23 | 4 | 162 | 28 | 601   | 117 |
| 36,736 | 35 | 8 | 376 | 79 | 23 | 4 | 153 | 30 | 587   | 121 |
| 36,737 | 35 | 7 | 376 | 79 | 23 | 4 | 151 | 30 | 585   | 120 |
| 36,738 | 35 | 7 | 376 | 75 | 22 | 4 | 151 | 29 | 584   | 115 |
| 36,739 | 36 | 7 | 377 | 75 | 22 | 4 | 152 | 29 | 587   | 115 |
| 36,740 | 35 | 7 | 380 | 70 | 23 | 3 | 153 | 28 | 591   | 108 |
| 36,741 | 35 | 7 | 380 | 71 | 23 | 3 | 153 | 28 | 591   | 109 |
| 36,742 | 35 | 7 | 380 | 71 | 23 | 3 | 153 | 29 | 591   | 110 |
| 36,743 | 36 | 7 | 389 | 70 | 23 | 3 | 168 | 29 | 616   | 109 |
| 36,744 | 36 | 7 | 391 | 67 | 23 | 2 | 169 | 27 | 619   | 103 |
| 36,745 | 35 | 6 | 391 | 52 | 23 | 2 | 169 | 20 | 618   | 80  |
| 36,746 | 35 | 6 | 391 | 52 | 23 | 2 | 169 | 20 | 618   | 80  |
| 36,747 | 36 | 6 | 400 | 53 | 23 | 2 | 170 | 20 | 629   | 81  |
| 36,748 | 36 | 6 | 400 | 53 | 23 | 2 | 170 | 20 | 629   | 81  |
| 36,749 | 39 | 5 | 420 | 43 | 23 | 2 | 189 | 12 | 671   | 62  |
| 36,750 | 41 | 5 | 427 | 43 | 23 | 2 | 193 | 12 | 684   | 62  |
| 36,751 | 43 | 3 | 454 | 41 | 24 | 2 | 205 | 10 | 726   | 56  |
| 36,752 | 43 | 2 | 453 | 27 | 24 | 0 | 203 | 4  | 723   | 33  |
| 36,753 | 45 | 2 | 465 | 26 | 24 | 0 | 206 | 4  | 740   | 32  |
| 36,754 | 47 | 2 | 481 | 27 | 24 | 0 | 211 | 5  | 763   | 34  |
| 36,755 | 46 | 2 | 481 | 28 | 24 | 0 | 209 | 6  | 760   | 36  |
| 36,756 | 46 | 2 | 476 | 26 | 24 | 0 | 207 | 6  | 753   | 34  |
| 36,757 | 54 | 1 | 768 | 25 | 35 | 0 | 273 | 7  | 1,130 | 33  |
| 36,758 | 56 | 1 | 863 | 26 | 40 | 0 | 293 | 7  | 1,252 | 34  |
| 36,759 | 57 | 1 | 860 | 25 | 39 | 0 | 290 | 7  | 1,246 | 33  |
| 36,760 | 58 | 1 | 850 | 24 | 39 | 0 | 286 | 7  | 1,233 | 32  |
| 36,761 | 58 | 1 | 840 | 24 | 38 | 0 | 275 | 7  | 1,211 | 32  |
| 36,762 | 58 | 1 | 839 | 24 | 37 | 0 | 270 | 7  | 1,204 | 32  |
| 36,763 | 56 | 1 | 842 | 24 | 37 | 0 | 267 | 7  | 1,202 | 32  |
| 36,764 | 54 | 2 | 842 | 24 | 37 | 0 | 267 | 7  | 1,200 | 33  |
| 36,765 | 54 | 2 | 845 | 24 | 37 | 0 | 267 | 7  | 1,203 | 33  |

|        |    |   |     |    |    |   |     |    |       |    |
|--------|----|---|-----|----|----|---|-----|----|-------|----|
| 36,766 | 54 | 2 | 843 | 22 | 37 | 0 | 267 | 7  | 1,201 | 31 |
| 36,767 | 54 | 2 | 841 | 22 | 37 | 0 | 267 | 7  | 1,199 | 31 |
| 36,768 | 52 | 2 | 837 | 22 | 37 | 0 | 267 | 7  | 1,193 | 31 |
| 36,769 | 52 | 2 | 829 | 23 | 37 | 0 | 265 | 7  | 1,183 | 32 |
| 36,770 | 46 | 2 | 802 | 23 | 35 | 0 | 251 | 7  | 1,134 | 32 |
| 36,771 | 46 | 3 | 801 | 23 | 35 | 0 | 251 | 10 | 1,133 | 36 |
| 36,772 | 45 | 3 | 777 | 22 | 35 | 0 | 239 | 10 | 1,096 | 35 |
| 36,773 | 46 | 2 | 766 | 21 | 35 | 0 | 239 | 10 | 1,086 | 33 |
| 36,774 | 45 | 2 | 756 | 21 | 35 | 0 | 237 | 9  | 1,073 | 32 |
| 36,775 | 35 | 2 | 652 | 21 | 24 | 0 | 202 | 9  | 913   | 32 |
| 36,776 | 37 | 2 | 608 | 21 | 22 | 0 | 196 | 9  | 863   | 32 |
| 36,777 | 35 | 2 | 585 | 21 | 22 | 0 | 186 | 9  | 828   | 32 |
| 36,778 | 32 | 2 | 570 | 21 | 20 | 0 | 168 | 9  | 790   | 32 |
| 36,779 | 32 | 2 | 572 | 21 | 20 | 0 | 168 | 9  | 792   | 32 |
| 36,780 | 32 | 2 | 572 | 21 | 20 | 0 | 168 | 9  | 792   | 32 |
| 36,781 | 32 | 2 | 572 | 21 | 20 | 0 | 168 | 10 | 792   | 33 |
| 36,782 | 32 | 2 | 572 | 21 | 20 | 0 | 168 | 10 | 792   | 33 |
| 36,783 | 34 | 2 | 587 | 17 | 20 | 0 | 172 | 10 | 813   | 29 |
| 36,784 | 37 | 2 | 588 | 13 | 20 | 0 | 175 | 10 | 820   | 25 |
| 36,785 | 38 | 2 | 598 | 13 | 20 | 1 | 185 | 10 | 841   | 26 |
| 36,786 | 38 | 2 | 598 | 13 | 20 | 1 | 185 | 10 | 841   | 26 |
| 36,787 | 41 | 2 | 603 | 11 | 20 | 1 | 191 | 11 | 855   | 25 |
| 36,788 | 41 | 2 | 603 | 11 | 20 | 1 | 190 | 11 | 854   | 25 |
| 36,789 | 41 | 2 | 602 | 11 | 20 | 1 | 190 | 11 | 853   | 25 |
| 36,790 | 40 | 2 | 601 | 11 | 20 | 1 | 189 | 11 | 850   | 25 |
| 36,791 | 40 | 2 | 601 | 9  | 19 | 1 | 189 | 12 | 849   | 24 |
| 36,792 | 38 | 2 | 596 | 8  | 19 | 1 | 174 | 14 | 827   | 25 |
| 36,793 | 40 | 2 | 598 | 9  | 19 | 1 | 176 | 13 | 833   | 25 |
| 36,794 | 40 | 2 | 596 | 9  | 19 | 1 | 176 | 13 | 831   | 25 |
| 36,795 | 40 | 2 | 598 | 7  | 19 | 1 | 178 | 13 | 835   | 23 |
| 36,796 | 40 | 2 | 612 | 7  | 19 | 1 | 181 | 13 | 852   | 23 |
| 36,797 | 39 | 2 | 610 | 7  | 19 | 1 | 180 | 13 | 848   | 23 |
| 36,798 | 40 | 2 | 613 | 7  | 19 | 1 | 180 | 13 | 852   | 23 |
| 36,799 | 37 | 2 | 604 | 7  | 19 | 1 | 171 | 13 | 831   | 23 |
| 36,800 | 37 | 2 | 594 | 9  | 19 | 1 | 163 | 13 | 813   | 25 |
| 36,801 | 35 | 2 | 587 | 9  | 19 | 1 | 159 | 14 | 800   | 26 |
| 36,802 | 33 | 2 | 561 | 10 | 18 | 1 | 157 | 14 | 769   | 27 |
| 36,803 | 37 | 2 | 578 | 11 | 18 | 1 | 162 | 15 | 795   | 29 |
| 36,804 | 36 | 2 | 568 | 13 | 18 | 1 | 159 | 15 | 781   | 31 |
| 36,805 | 34 | 2 | 554 | 12 | 18 | 1 | 155 | 14 | 761   | 29 |
| 36,806 | 34 | 2 | 525 | 12 | 15 | 1 | 149 | 13 | 723   | 28 |

|        |    |   |     |    |    |   |     |    |     |    |
|--------|----|---|-----|----|----|---|-----|----|-----|----|
| 36,807 | 32 | 2 | 463 | 11 | 9  | 1 | 141 | 13 | 645 | 27 |
| 36,808 | 28 | 2 | 279 | 14 | 7  | 1 | 96  | 14 | 410 | 31 |
| 36,809 | 26 | 2 | 184 | 16 | 2  | 1 | 75  | 14 | 287 | 33 |
| 36,810 | 25 | 2 | 181 | 18 | 2  | 1 | 73  | 15 | 281 | 36 |
| 36,811 | 23 | 3 | 146 | 19 | 1  | 1 | 64  | 16 | 234 | 39 |
| 36,812 | 23 | 3 | 142 | 19 | 1  | 1 | 62  | 16 | 228 | 39 |
| 36,813 | 24 | 3 | 140 | 19 | 1  | 1 | 62  | 16 | 227 | 39 |
| 36,814 | 24 | 3 | 139 | 19 | 0  | 1 | 62  | 16 | 225 | 39 |
| 36,815 | 24 | 2 | 137 | 20 | 0  | 1 | 63  | 17 | 224 | 40 |
| 36,816 | 24 | 2 | 136 | 21 | 0  | 1 | 63  | 17 | 223 | 41 |
| 36,817 | 27 | 2 | 144 | 21 | 0  | 1 | 65  | 17 | 236 | 41 |
| 36,818 | 27 | 2 | 144 | 21 | 0  | 1 | 65  | 17 | 236 | 41 |
| 36,819 | 27 | 2 | 143 | 21 | 0  | 1 | 65  | 17 | 235 | 41 |
| 36,820 | 27 | 2 | 145 | 20 | 0  | 1 | 65  | 17 | 237 | 40 |
| 36,821 | 28 | 1 | 168 | 20 | 0  | 1 | 68  | 14 | 264 | 36 |
| 36,822 | 27 | 1 | 168 | 21 | 0  | 1 | 68  | 14 | 263 | 37 |
| 36,823 | 43 | 1 | 257 | 21 | 2  | 1 | 108 | 14 | 410 | 37 |
| 36,824 | 45 | 1 | 268 | 22 | 2  | 1 | 117 | 14 | 432 | 38 |
| 36,825 | 47 | 1 | 280 | 22 | 3  | 1 | 121 | 14 | 451 | 38 |
| 36,826 | 47 | 1 | 280 | 22 | 3  | 1 | 121 | 14 | 451 | 38 |
| 36,827 | 44 | 1 | 290 | 22 | 4  | 1 | 129 | 14 | 467 | 38 |
| 36,828 | 44 | 1 | 288 | 22 | 4  | 1 | 129 | 14 | 465 | 38 |
| 36,829 | 45 | 1 | 299 | 23 | 4  | 1 | 132 | 15 | 480 | 40 |
| 36,830 | 45 | 1 | 302 | 24 | 4  | 1 | 133 | 16 | 484 | 42 |
| 36,831 | 49 | 1 | 319 | 30 | 5  | 1 | 138 | 18 | 511 | 50 |
| 36,832 | 49 | 2 | 312 | 30 | 5  | 1 | 136 | 20 | 502 | 53 |
| 36,833 | 48 | 2 | 307 | 30 | 5  | 1 | 133 | 22 | 493 | 55 |
| 36,834 | 47 | 3 | 307 | 34 | 6  | 1 | 134 | 23 | 494 | 61 |
| 36,835 | 44 | 3 | 306 | 40 | 6  | 2 | 130 | 23 | 486 | 68 |
| 36,836 | 43 | 5 | 299 | 43 | 6  | 1 | 120 | 25 | 468 | 74 |
| 36,837 | 41 | 5 | 299 | 46 | 6  | 2 | 117 | 25 | 463 | 78 |
| 36,838 | 41 | 5 | 297 | 50 | 6  | 2 | 115 | 23 | 459 | 80 |
| 36,839 | 41 | 5 | 299 | 50 | 6  | 2 | 115 | 23 | 461 | 80 |
| 36,840 | 41 | 5 | 302 | 50 | 6  | 2 | 122 | 23 | 471 | 80 |
| 36,841 | 41 | 6 | 302 | 50 | 6  | 2 | 122 | 23 | 471 | 81 |
| 36,842 | 41 | 6 | 299 | 49 | 6  | 2 | 121 | 22 | 467 | 79 |
| 36,843 | 39 | 6 | 297 | 49 | 6  | 2 | 123 | 20 | 465 | 77 |
| 36,844 | 43 | 6 | 340 | 49 | 8  | 2 | 134 | 20 | 525 | 77 |
| 36,845 | 46 | 6 | 369 | 50 | 11 | 3 | 148 | 20 | 574 | 79 |
| 36,846 | 46 | 6 | 368 | 52 | 11 | 3 | 146 | 23 | 571 | 84 |
| 36,847 | 46 | 6 | 354 | 53 | 11 | 3 | 143 | 23 | 554 | 85 |

|        |    |   |     |    |    |   |     |    |     |    |
|--------|----|---|-----|----|----|---|-----|----|-----|----|
| 36,848 | 46 | 6 | 352 | 53 | 11 | 3 | 143 | 23 | 552 | 85 |
| 36,849 | 45 | 6 | 349 | 54 | 11 | 3 | 145 | 27 | 550 | 90 |
| 36,850 | 45 | 6 | 348 | 59 | 11 | 3 | 143 | 27 | 547 | 95 |
| 36,851 | 45 | 6 | 349 | 57 | 11 | 3 | 143 | 27 | 548 | 93 |
| 36,852 | 45 | 6 | 348 | 57 | 11 | 3 | 138 | 26 | 542 | 92 |
| 36,853 | 46 | 6 | 356 | 57 | 11 | 3 | 136 | 26 | 549 | 92 |
| 36,854 | 44 | 6 | 339 | 56 | 11 | 3 | 132 | 26 | 526 | 91 |
| 36,855 | 43 | 6 | 351 | 54 | 11 | 3 | 137 | 26 | 542 | 89 |
| 36,856 | 44 | 6 | 352 | 53 | 11 | 3 | 137 | 26 | 544 | 88 |
| 36,857 | 44 | 6 | 352 | 54 | 11 | 3 | 137 | 26 | 544 | 89 |
| 36,858 | 42 | 6 | 336 | 54 | 11 | 3 | 130 | 26 | 519 | 89 |
| 36,859 | 45 | 6 | 366 | 48 | 12 | 3 | 152 | 24 | 575 | 81 |
| 36,860 | 45 | 6 | 372 | 46 | 12 | 3 | 152 | 23 | 581 | 78 |
| 36,861 | 45 | 5 | 369 | 45 | 12 | 3 | 152 | 22 | 578 | 75 |
| 36,862 | 45 | 5 | 368 | 45 | 12 | 3 | 152 | 22 | 577 | 75 |
| 36,863 | 44 | 5 | 368 | 45 | 12 | 3 | 153 | 22 | 577 | 75 |
| 36,864 | 49 | 6 | 399 | 43 | 14 | 3 | 165 | 21 | 627 | 73 |
| 36,865 | 49 | 6 | 398 | 43 | 14 | 3 | 165 | 22 | 626 | 74 |
| 36,866 | 50 | 6 | 397 | 43 | 14 | 3 | 164 | 22 | 625 | 74 |
| 36,867 | 49 | 7 | 397 | 43 | 14 | 3 | 164 | 22 | 624 | 75 |
| 36,868 | 47 | 7 | 388 | 44 | 14 | 3 | 162 | 23 | 611 | 77 |
| 36,869 | 47 | 7 | 388 | 44 | 14 | 3 | 162 | 23 | 611 | 77 |
| 36,870 | 61 | 7 | 486 | 44 | 20 | 3 | 232 | 25 | 799 | 79 |
| 36,871 | 61 | 7 | 483 | 44 | 20 | 3 | 231 | 25 | 795 | 79 |
| 36,872 | 60 | 7 | 462 | 44 | 20 | 3 | 229 | 25 | 771 | 79 |
| 36,873 | 45 | 7 | 389 | 43 | 18 | 3 | 198 | 26 | 650 | 79 |
| 36,874 | 45 | 7 | 388 | 43 | 18 | 3 | 197 | 26 | 648 | 79 |
| 36,875 | 43 | 7 | 377 | 42 | 18 | 3 | 189 | 26 | 627 | 78 |
| 36,876 | 41 | 7 | 365 | 42 | 17 | 3 | 185 | 26 | 608 | 78 |
| 36,877 | 41 | 7 | 364 | 43 | 17 | 3 | 186 | 26 | 608 | 79 |
| 36,878 | 41 | 7 | 350 | 43 | 16 | 3 | 178 | 26 | 585 | 79 |
| 36,879 | 40 | 7 | 341 | 42 | 16 | 3 | 175 | 25 | 572 | 77 |
| 36,880 | 40 | 7 | 339 | 42 | 16 | 3 | 177 | 25 | 572 | 77 |
| 36,881 | 40 | 7 | 332 | 42 | 16 | 3 | 175 | 24 | 563 | 76 |
| 36,882 | 37 | 6 | 316 | 36 | 15 | 3 | 170 | 19 | 538 | 64 |
| 36,883 | 37 | 6 | 314 | 36 | 15 | 3 | 170 | 17 | 536 | 62 |
| 36,884 | 37 | 6 | 313 | 36 | 15 | 3 | 169 | 17 | 534 | 62 |
| 36,885 | 38 | 3 | 316 | 20 | 14 | 1 | 173 | 14 | 541 | 38 |
| 36,886 | 39 | 3 | 321 | 20 | 14 | 1 | 180 | 14 | 554 | 38 |
| 36,887 | 39 | 3 | 322 | 20 | 14 | 1 | 182 | 14 | 557 | 38 |
| 36,888 | 42 | 3 | 329 | 16 | 14 | 1 | 183 | 13 | 568 | 33 |

|        |    |   |     |    |    |   |     |    |     |    |
|--------|----|---|-----|----|----|---|-----|----|-----|----|
| 36,889 | 44 | 3 | 337 | 16 | 16 | 1 | 186 | 13 | 583 | 33 |
| 36,890 | 44 | 3 | 344 | 19 | 16 | 1 | 188 | 13 | 592 | 36 |
| 36,891 | 62 | 3 | 427 | 19 | 17 | 1 | 217 | 13 | 723 | 36 |
| 36,892 | 84 | 2 | 490 | 21 | 18 | 1 | 259 | 13 | 851 | 37 |
| 36,893 | 95 | 2 | 535 | 24 | 19 | 1 | 279 | 13 | 928 | 40 |
| 36,894 | 91 | 2 | 492 | 25 | 17 | 1 | 268 | 13 | 868 | 41 |
| 36,895 | 88 | 2 | 479 | 26 | 15 | 1 | 258 | 13 | 840 | 42 |
| 36,896 | 88 | 2 | 466 | 22 | 14 | 0 | 255 | 10 | 823 | 34 |
| 36,897 | 88 | 2 | 466 | 22 | 14 | 0 | 255 | 10 | 823 | 34 |
| 36,898 | 88 | 2 | 466 | 22 | 14 | 0 | 254 | 15 | 822 | 39 |
| 36,899 | 88 | 2 | 463 | 22 | 14 | 0 | 255 | 15 | 820 | 39 |
| 36,900 | 88 | 2 | 461 | 21 | 14 | 0 | 253 | 11 | 816 | 34 |
| 36,901 | 88 | 2 | 461 | 16 | 14 | 0 | 254 | 13 | 817 | 31 |
| 36,902 | 88 | 2 | 462 | 16 | 14 | 0 | 254 | 13 | 818 | 31 |
| 36,903 | 88 | 2 | 462 | 15 | 14 | 0 | 253 | 13 | 817 | 30 |
| 36,904 | 87 | 2 | 454 | 15 | 14 | 0 | 252 | 14 | 807 | 31 |
| 36,905 | 85 | 2 | 453 | 19 | 14 | 0 | 252 | 13 | 804 | 34 |
| 36,906 | 85 | 3 | 441 | 30 | 14 | 0 | 247 | 16 | 787 | 49 |
| 36,907 | 84 | 3 | 438 | 30 | 14 | 0 | 246 | 16 | 782 | 49 |
| 36,908 | 84 | 3 | 433 | 29 | 14 | 0 | 239 | 16 | 770 | 48 |
| 36,909 | 89 | 3 | 442 | 29 | 14 | 0 | 242 | 17 | 787 | 49 |
| 36,910 | 86 | 3 | 430 | 30 | 13 | 0 | 233 | 17 | 762 | 50 |
| 36,911 | 87 | 3 | 425 | 30 | 13 | 0 | 234 | 17 | 759 | 50 |
| 36,912 | 87 | 3 | 425 | 30 | 13 | 0 | 234 | 18 | 759 | 51 |
| 36,913 | 87 | 3 | 427 | 31 | 13 | 0 | 235 | 18 | 762 | 52 |
| 36,914 | 84 | 3 | 416 | 31 | 12 | 0 | 227 | 18 | 739 | 52 |
| 36,915 | 82 | 2 | 397 | 32 | 11 | 0 | 223 | 17 | 713 | 51 |
| 36,916 | 82 | 2 | 390 | 32 | 11 | 0 | 223 | 17 | 706 | 51 |
| 36,917 | 78 | 3 | 371 | 35 | 10 | 0 | 203 | 18 | 662 | 56 |
| 36,918 | 75 | 2 | 355 | 35 | 9  | 0 | 189 | 18 | 628 | 55 |
| 36,919 | 74 | 3 | 343 | 34 | 8  | 0 | 185 | 17 | 610 | 54 |
| 36,920 | 74 | 3 | 338 | 34 | 7  | 0 | 184 | 18 | 603 | 55 |
| 36,921 | 69 | 3 | 306 | 34 | 5  | 0 | 156 | 16 | 536 | 53 |
| 36,922 | 68 | 3 | 293 | 34 | 5  | 0 | 146 | 16 | 512 | 53 |
| 36,923 | 68 | 3 | 292 | 34 | 5  | 0 | 147 | 16 | 512 | 53 |
| 36,924 | 68 | 4 | 291 | 34 | 5  | 0 | 147 | 15 | 511 | 53 |
| 36,925 | 68 | 4 | 290 | 34 | 5  | 0 | 147 | 15 | 510 | 53 |
| 36,926 | 68 | 4 | 289 | 34 | 5  | 0 | 147 | 15 | 509 | 53 |
| 36,927 | 68 | 4 | 289 | 34 | 5  | 0 | 147 | 15 | 509 | 53 |
| 36,928 | 69 | 4 | 291 | 33 | 5  | 0 | 148 | 15 | 513 | 52 |
| 36,929 | 70 | 4 | 292 | 33 | 5  | 0 | 148 | 15 | 515 | 52 |

|        |    |    |     |     |   |   |     |    |     |     |
|--------|----|----|-----|-----|---|---|-----|----|-----|-----|
| 36,930 | 70 | 4  | 294 | 33  | 5 | 0 | 151 | 15 | 520 | 52  |
| 36,931 | 70 | 4  | 294 | 33  | 5 | 0 | 151 | 15 | 520 | 52  |
| 36,932 | 70 | 4  | 296 | 33  | 5 | 0 | 152 | 16 | 523 | 53  |
| 36,933 | 69 | 4  | 294 | 33  | 5 | 0 | 151 | 16 | 519 | 53  |
| 36,934 | 69 | 4  | 294 | 34  | 5 | 0 | 151 | 16 | 519 | 54  |
| 36,935 | 68 | 4  | 292 | 34  | 5 | 0 | 149 | 16 | 514 | 54  |
| 36,936 | 69 | 4  | 291 | 34  | 5 | 0 | 148 | 16 | 513 | 54  |
| 36,937 | 68 | 4  | 286 | 34  | 5 | 0 | 141 | 16 | 500 | 54  |
| 36,938 | 68 | 6  | 282 | 49  | 5 | 0 | 139 | 25 | 494 | 80  |
| 36,939 | 67 | 7  | 281 | 59  | 5 | 0 | 142 | 27 | 495 | 93  |
| 36,940 | 64 | 7  | 270 | 62  | 3 | 0 | 139 | 27 | 476 | 96  |
| 36,941 | 64 | 10 | 263 | 85  | 3 | 1 | 137 | 42 | 467 | 138 |
| 36,942 | 46 | 10 | 185 | 87  | 2 | 1 | 101 | 43 | 334 | 141 |
| 36,943 | 34 | 11 | 144 | 87  | 2 | 1 | 75  | 45 | 255 | 144 |
| 36,944 | 23 | 11 | 103 | 84  | 1 | 1 | 56  | 45 | 183 | 141 |
| 36,945 | 23 | 11 | 99  | 84  | 1 | 1 | 54  | 45 | 177 | 141 |
| 36,946 | 24 | 11 | 122 | 82  | 1 | 1 | 69  | 45 | 216 | 139 |
| 36,947 | 24 | 11 | 122 | 82  | 1 | 1 | 70  | 45 | 217 | 139 |
| 36,948 | 33 | 12 | 167 | 86  | 2 | 1 | 104 | 46 | 306 | 145 |
| 36,949 | 33 | 12 | 166 | 87  | 2 | 1 | 104 | 41 | 305 | 141 |
| 36,950 | 33 | 12 | 167 | 87  | 2 | 1 | 105 | 41 | 307 | 141 |
| 36,951 | 33 | 12 | 168 | 87  | 2 | 1 | 105 | 43 | 308 | 143 |
| 36,952 | 36 | 12 | 176 | 87  | 2 | 1 | 111 | 41 | 325 | 141 |
| 36,953 | 36 | 12 | 183 | 87  | 2 | 1 | 111 | 41 | 332 | 141 |
| 36,954 | 36 | 12 | 199 | 87  | 2 | 1 | 117 | 40 | 354 | 140 |
| 36,955 | 36 | 12 | 199 | 88  | 2 | 2 | 117 | 40 | 354 | 142 |
| 36,956 | 36 | 12 | 200 | 91  | 3 | 4 | 116 | 44 | 355 | 151 |
| 36,957 | 36 | 12 | 198 | 81  | 3 | 4 | 116 | 43 | 353 | 140 |
| 36,958 | 36 | 12 | 199 | 90  | 3 | 4 | 118 | 44 | 356 | 150 |
| 36,959 | 36 | 13 | 198 | 105 | 4 | 4 | 119 | 48 | 357 | 170 |
| 36,960 | 31 | 13 | 200 | 107 | 5 | 5 | 118 | 48 | 354 | 173 |
| 36,961 | 31 | 13 | 202 | 106 | 5 | 5 | 127 | 48 | 365 | 172 |
| 36,962 | 30 | 13 | 200 | 106 | 6 | 5 | 126 | 47 | 362 | 171 |
| 36,963 | 30 | 13 | 200 | 106 | 6 | 5 | 127 | 47 | 363 | 171 |
| 36,964 | 30 | 13 | 200 | 105 | 6 | 5 | 125 | 47 | 361 | 170 |
| 36,965 | 30 | 13 | 199 | 105 | 6 | 5 | 125 | 47 | 360 | 170 |
| 36,966 | 30 | 13 | 198 | 104 | 6 | 5 | 125 | 48 | 359 | 170 |
| 36,967 | 30 | 13 | 195 | 104 | 6 | 5 | 125 | 48 | 356 | 170 |
| 36,968 | 30 | 12 | 196 | 101 | 6 | 5 | 125 | 47 | 357 | 165 |
| 36,969 | 30 | 12 | 195 | 103 | 6 | 5 | 125 | 46 | 356 | 166 |
| 36,970 | 28 | 11 | 194 | 103 | 6 | 5 | 122 | 47 | 350 | 166 |

|        |    |    |     |     |   |   |     |    |     |     |
|--------|----|----|-----|-----|---|---|-----|----|-----|-----|
| 36,971 | 28 | 11 | 191 | 103 | 6 | 5 | 120 | 47 | 345 | 166 |
| 36,972 | 28 | 11 | 191 | 103 | 6 | 5 | 120 | 47 | 345 | 166 |
| 36,973 | 29 | 11 | 195 | 103 | 6 | 5 | 128 | 47 | 358 | 166 |
| 36,974 | 29 | 11 | 195 | 103 | 6 | 5 | 127 | 47 | 357 | 166 |
| 36,975 | 29 | 10 | 195 | 103 | 6 | 5 | 127 | 47 | 357 | 165 |
| 36,976 | 29 | 10 | 195 | 104 | 6 | 5 | 127 | 47 | 357 | 166 |
| 36,977 | 29 | 10 | 195 | 108 | 6 | 5 | 127 | 47 | 357 | 170 |
| 36,978 | 29 | 10 | 196 | 108 | 6 | 5 | 126 | 47 | 357 | 170 |
| 36,979 | 28 | 10 | 194 | 108 | 6 | 5 | 125 | 47 | 353 | 170 |
| 36,980 | 27 | 10 | 193 | 108 | 6 | 5 | 125 | 47 | 351 | 170 |
| 36,981 | 27 | 10 | 191 | 106 | 6 | 5 | 122 | 46 | 346 | 167 |
| 36,982 | 27 | 10 | 191 | 106 | 6 | 5 | 122 | 46 | 346 | 167 |
| 36,983 | 27 | 10 | 190 | 106 | 6 | 5 | 120 | 46 | 343 | 167 |
| 36,984 | 27 | 10 | 190 | 106 | 6 | 5 | 120 | 46 | 343 | 167 |
| 36,985 | 27 | 10 | 199 | 106 | 6 | 5 | 125 | 46 | 357 | 167 |
| 36,986 | 27 | 10 | 204 | 106 | 6 | 5 | 128 | 47 | 365 | 168 |
| 36,987 | 26 | 10 | 204 | 106 | 6 | 5 | 128 | 47 | 364 | 168 |
| 36,988 | 27 | 8  | 213 | 91  | 6 | 5 | 133 | 39 | 379 | 143 |
| 36,989 | 27 | 8  | 213 | 91  | 6 | 5 | 133 | 39 | 379 | 143 |
| 36,990 | 26 | 7  | 246 | 78  | 6 | 5 | 144 | 37 | 422 | 127 |
| 36,991 | 26 | 4  | 246 | 52  | 6 | 4 | 145 | 22 | 423 | 82  |
| 36,992 | 28 | 3  | 264 | 51  | 6 | 4 | 155 | 20 | 453 | 78  |
| 36,993 | 29 | 3  | 274 | 52  | 6 | 4 | 164 | 24 | 473 | 83  |
| 36,994 | 19 | 3  | 255 | 53  | 5 | 4 | 156 | 24 | 435 | 84  |
| 36,995 | 20 | 3  | 257 | 54  | 5 | 4 | 156 | 24 | 438 | 85  |
| 36,996 | 20 | 3  | 254 | 54  | 5 | 4 | 154 | 24 | 433 | 85  |
| 36,997 | 19 | 3  | 232 | 56  | 5 | 4 | 142 | 28 | 398 | 91  |
| 36,998 | 11 | 3  | 195 | 57  | 4 | 4 | 108 | 29 | 318 | 93  |
| 36,999 | 10 | 2  | 187 | 57  | 4 | 4 | 107 | 32 | 308 | 95  |
| 37,000 | 10 | 2  | 187 | 57  | 4 | 4 | 106 | 33 | 307 | 96  |
| 37,001 | 10 | 3  | 189 | 58  | 4 | 4 | 106 | 31 | 309 | 96  |
| 37,002 | 10 | 3  | 189 | 59  | 4 | 4 | 106 | 31 | 309 | 97  |
| 37,003 | 7  | 3  | 180 | 59  | 4 | 4 | 100 | 31 | 291 | 97  |
| 37,004 | 7  | 3  | 172 | 59  | 4 | 4 | 99  | 31 | 282 | 97  |
| 37,005 | 7  | 3  | 156 | 60  | 4 | 3 | 93  | 31 | 260 | 97  |
| 37,006 | 7  | 3  | 154 | 60  | 3 | 3 | 93  | 31 | 257 | 97  |
| 37,007 | 7  | 3  | 160 | 56  | 4 | 1 | 95  | 28 | 266 | 88  |
| 37,008 | 7  | 2  | 168 | 60  | 4 | 1 | 98  | 26 | 277 | 89  |
| 37,009 | 8  | 2  | 172 | 51  | 4 | 1 | 98  | 25 | 282 | 79  |
| 37,010 | 9  | 1  | 180 | 37  | 3 | 1 | 101 | 23 | 293 | 62  |
| 37,011 | 9  | 1  | 174 | 36  | 2 | 0 | 98  | 24 | 283 | 61  |

|        |   |   |     |    |   |   |    |    |     |     |
|--------|---|---|-----|----|---|---|----|----|-----|-----|
| 37,012 | 9 | 1 | 166 | 36 | 2 | 0 | 87 | 24 | 264 | 61  |
| 37,013 | 9 | 2 | 166 | 45 | 1 | 1 | 87 | 37 | 263 | 85  |
| 37,014 | 9 | 2 | 166 | 48 | 1 | 1 | 86 | 37 | 262 | 88  |
| 37,015 | 9 | 3 | 171 | 51 | 1 | 1 | 91 | 38 | 272 | 93  |
| 37,016 | 9 | 3 | 171 | 56 | 1 | 1 | 91 | 38 | 272 | 98  |
| 37,017 | 9 | 3 | 172 | 67 | 1 | 1 | 91 | 44 | 273 | 115 |
| 37,018 | 9 | 3 | 174 | 73 | 1 | 3 | 91 | 49 | 275 | 128 |
| 37,019 | 9 | 3 | 173 | 73 | 1 | 3 | 91 | 49 | 274 | 128 |
| 37,020 | 9 | 3 | 173 | 75 | 1 | 3 | 91 | 49 | 274 | 130 |
| 37,021 | 9 | 3 | 175 | 75 | 1 | 3 | 91 | 48 | 276 | 129 |
| 37,022 | 8 | 3 | 173 | 75 | 1 | 3 | 89 | 48 | 271 | 129 |
| 37,023 | 8 | 3 | 173 | 75 | 1 | 3 | 89 | 48 | 271 | 129 |
| 37,024 | 8 | 5 | 171 | 80 | 1 | 3 | 83 | 48 | 263 | 136 |
| 37,025 | 8 | 5 | 171 | 81 | 1 | 3 | 83 | 48 | 263 | 137 |
| 37,026 | 8 | 5 | 173 | 81 | 1 | 3 | 83 | 48 | 265 | 137 |
| 37,027 | 8 | 6 | 173 | 87 | 1 | 4 | 83 | 51 | 265 | 148 |
| 37,028 | 8 | 6 | 173 | 83 | 1 | 4 | 83 | 52 | 265 | 145 |
| 37,029 | 8 | 6 | 176 | 83 | 2 | 4 | 85 | 52 | 271 | 145 |
| 37,030 | 8 | 6 | 178 | 83 | 2 | 4 | 88 | 52 | 276 | 145 |
| 37,031 | 8 | 6 | 178 | 84 | 2 | 4 | 88 | 53 | 276 | 147 |
| 37,032 | 8 | 6 | 178 | 84 | 2 | 4 | 88 | 54 | 276 | 148 |
| 37,033 | 8 | 6 | 178 | 84 | 2 | 4 | 88 | 54 | 276 | 148 |
| 37,034 | 8 | 6 | 177 | 84 | 2 | 4 | 88 | 55 | 275 | 149 |
| 37,035 | 8 | 6 | 172 | 84 | 2 | 4 | 85 | 55 | 267 | 149 |
| 37,036 | 8 | 6 | 168 | 84 | 2 | 4 | 83 | 55 | 261 | 149 |
| 37,037 | 8 | 6 | 163 | 84 | 2 | 4 | 79 | 54 | 252 | 148 |
| 37,038 | 8 | 6 | 162 | 84 | 2 | 4 | 78 | 55 | 250 | 149 |
| 37,039 | 7 | 6 | 158 | 87 | 2 | 4 | 80 | 56 | 247 | 153 |
| 37,040 | 6 | 6 | 124 | 88 | 2 | 4 | 65 | 59 | 197 | 157 |
| 37,041 | 6 | 7 | 127 | 90 | 2 | 4 | 65 | 60 | 200 | 161 |
| 37,042 | 6 | 7 | 127 | 90 | 2 | 4 | 65 | 60 | 200 | 161 |
| 37,043 | 5 | 7 | 110 | 86 | 2 | 4 | 60 | 55 | 177 | 152 |
| 37,044 | 5 | 7 | 94  | 86 | 2 | 4 | 52 | 55 | 153 | 152 |
| 37,045 | 5 | 7 | 85  | 86 | 2 | 4 | 40 | 52 | 132 | 149 |
| 37,046 | 4 | 7 | 84  | 84 | 2 | 4 | 43 | 55 | 133 | 150 |
| 37,047 | 5 | 7 | 90  | 84 | 2 | 4 | 49 | 55 | 146 | 150 |
| 37,048 | 6 | 7 | 100 | 82 | 2 | 4 | 53 | 51 | 161 | 144 |
| 37,049 | 6 | 7 | 103 | 81 | 2 | 4 | 57 | 50 | 168 | 142 |
| 37,050 | 6 | 7 | 107 | 77 | 2 | 4 | 63 | 46 | 178 | 134 |
| 37,051 | 6 | 7 | 111 | 76 | 2 | 4 | 65 | 45 | 184 | 132 |
| 37,052 | 6 | 6 | 109 | 75 | 2 | 4 | 68 | 45 | 185 | 130 |



|        |    |   |     |    |   |   |     |    |     |     |
|--------|----|---|-----|----|---|---|-----|----|-----|-----|
| 37,053 | 6  | 6 | 108 | 74 | 2 | 4 | 68  | 45 | 184 | 129 |
| 37,054 | 6  | 6 | 108 | 74 | 2 | 4 | 68  | 46 | 184 | 130 |
| 37,055 | 6  | 6 | 108 | 75 | 2 | 4 | 68  | 47 | 184 | 132 |
| 37,056 | 6  | 7 | 118 | 73 | 2 | 4 | 74  | 47 | 200 | 131 |
| 37,057 | 6  | 7 | 117 | 73 | 1 | 4 | 74  | 47 | 198 | 131 |
| 37,058 | 6  | 7 | 113 | 70 | 1 | 4 | 73  | 46 | 193 | 127 |
| 37,059 | 6  | 7 | 105 | 65 | 1 | 4 | 70  | 46 | 182 | 122 |
| 37,060 | 7  | 7 | 154 | 66 | 2 | 4 | 94  | 47 | 257 | 124 |
| 37,061 | 6  | 7 | 140 | 65 | 2 | 4 | 88  | 45 | 236 | 121 |
| 37,062 | 7  | 7 | 139 | 64 | 2 | 4 | 95  | 44 | 243 | 119 |
| 37,063 | 7  | 7 | 138 | 64 | 2 | 4 | 95  | 44 | 242 | 119 |
| 37,064 | 7  | 6 | 135 | 53 | 2 | 3 | 93  | 32 | 237 | 94  |
| 37,065 | 7  | 5 | 134 | 50 | 2 | 3 | 92  | 31 | 235 | 89  |
| 37,066 | 7  | 5 | 133 | 44 | 2 | 3 | 92  | 31 | 234 | 83  |
| 37,067 | 7  | 5 | 133 | 44 | 2 | 3 | 93  | 32 | 235 | 84  |
| 37,068 | 7  | 5 | 132 | 34 | 2 | 3 | 95  | 25 | 236 | 67  |
| 37,069 | 7  | 5 | 130 | 28 | 2 | 1 | 93  | 20 | 232 | 54  |
| 37,070 | 7  | 5 | 130 | 24 | 2 | 1 | 95  | 20 | 234 | 50  |
| 37,071 | 7  | 5 | 132 | 24 | 2 | 1 | 95  | 20 | 236 | 50  |
| 37,072 | 7  | 5 | 133 | 24 | 2 | 1 | 96  | 20 | 238 | 50  |
| 37,073 | 7  | 5 | 133 | 24 | 2 | 1 | 96  | 21 | 238 | 51  |
| 37,074 | 7  | 5 | 133 | 26 | 2 | 1 | 97  | 21 | 239 | 53  |
| 37,075 | 7  | 3 | 135 | 21 | 2 | 1 | 97  | 22 | 241 | 47  |
| 37,076 | 8  | 3 | 136 | 21 | 2 | 1 | 97  | 22 | 243 | 47  |
| 37,077 | 8  | 3 | 135 | 21 | 2 | 1 | 97  | 22 | 242 | 47  |
| 37,078 | 8  | 2 | 135 | 14 | 1 | 0 | 97  | 22 | 241 | 38  |
| 37,079 | 8  | 2 | 130 | 14 | 1 | 0 | 95  | 20 | 234 | 36  |
| 37,080 | 8  | 2 | 129 | 14 | 1 | 0 | 93  | 20 | 231 | 36  |
| 37,081 | 8  | 2 | 129 | 14 | 1 | 0 | 93  | 20 | 231 | 36  |
| 37,082 | 8  | 3 | 142 | 13 | 1 | 0 | 98  | 17 | 249 | 33  |
| 37,083 | 8  | 3 | 145 | 13 | 1 | 0 | 100 | 18 | 254 | 34  |
| 37,084 | 8  | 3 | 145 | 13 | 1 | 0 | 100 | 17 | 254 | 33  |
| 37,085 | 9  | 3 | 150 | 14 | 2 | 0 | 105 | 17 | 266 | 34  |
| 37,086 | 17 | 3 | 176 | 14 | 2 | 0 | 133 | 17 | 328 | 34  |
| 37,087 | 17 | 3 | 176 | 14 | 2 | 0 | 133 | 17 | 328 | 34  |
| 37,088 | 17 | 3 | 177 | 11 | 2 | 0 | 134 | 15 | 330 | 29  |
| 37,089 | 17 | 3 | 178 | 11 | 2 | 0 | 136 | 14 | 333 | 28  |
| 37,090 | 17 | 3 | 174 | 11 | 2 | 0 | 133 | 14 | 326 | 28  |
| 37,091 | 18 | 2 | 176 | 8  | 2 | 0 | 140 | 11 | 336 | 21  |
| 37,092 | 18 | 2 | 171 | 10 | 2 | 0 | 140 | 10 | 331 | 22  |
| 37,093 | 18 | 2 | 173 | 10 | 2 | 0 | 141 | 10 | 334 | 22  |

|        |    |   |     |    |    |   |     |    |       |     |
|--------|----|---|-----|----|----|---|-----|----|-------|-----|
| 37,094 | 16 | 2 | 174 | 10 | 2  | 0 | 136 | 10 | 328   | 22  |
| 37,095 | 16 | 2 | 175 | 10 | 2  | 0 | 137 | 10 | 330   | 22  |
| 37,096 | 16 | 2 | 185 | 10 | 2  | 0 | 139 | 10 | 342   | 22  |
| 37,097 | 26 | 2 | 242 | 10 | 10 | 0 | 200 | 10 | 478   | 22  |
| 37,098 | 25 | 2 | 239 | 10 | 10 | 0 | 199 | 11 | 473   | 23  |
| 37,099 | 26 | 2 | 247 | 11 | 12 | 0 | 214 | 11 | 499   | 24  |
| 37,100 | 26 | 2 | 245 | 11 | 12 | 0 | 207 | 11 | 490   | 24  |
| 37,101 | 26 | 2 | 240 | 11 | 12 | 0 | 203 | 11 | 481   | 24  |
| 37,102 | 35 | 2 | 319 | 11 | 14 | 0 | 270 | 11 | 638   | 24  |
| 37,103 | 35 | 2 | 329 | 11 | 14 | 0 | 279 | 11 | 657   | 24  |
| 37,104 | 35 | 2 | 400 | 11 | 16 | 0 | 308 | 10 | 759   | 23  |
| 37,105 | 35 | 2 | 429 | 11 | 16 | 0 | 355 | 10 | 835   | 23  |
| 37,106 | 35 | 2 | 457 | 19 | 17 | 0 | 366 | 16 | 875   | 37  |
| 37,107 | 35 | 1 | 448 | 22 | 17 | 0 | 363 | 16 | 863   | 39  |
| 37,108 | 35 | 1 | 449 | 22 | 17 | 0 | 363 | 16 | 864   | 39  |
| 37,109 | 35 | 2 | 442 | 22 | 17 | 0 | 360 | 17 | 854   | 41  |
| 37,110 | 34 | 4 | 422 | 47 | 20 | 2 | 354 | 36 | 830   | 89  |
| 37,111 | 32 | 4 | 400 | 48 | 19 | 2 | 333 | 33 | 784   | 87  |
| 37,112 | 32 | 4 | 412 | 55 | 19 | 2 | 332 | 35 | 795   | 96  |
| 37,113 | 32 | 4 | 436 | 60 | 19 | 2 | 341 | 36 | 828   | 102 |
| 37,114 | 32 | 4 | 439 | 60 | 19 | 2 | 341 | 36 | 831   | 102 |
| 37,115 | 33 | 4 | 479 | 61 | 20 | 2 | 358 | 36 | 890   | 103 |
| 37,116 | 33 | 4 | 479 | 61 | 20 | 2 | 358 | 36 | 890   | 103 |
| 37,117 | 33 | 4 | 504 | 64 | 20 | 2 | 369 | 41 | 926   | 111 |
| 37,118 | 33 | 4 | 504 | 65 | 20 | 2 | 369 | 45 | 926   | 116 |
| 37,119 | 34 | 5 | 528 | 65 | 23 | 2 | 409 | 45 | 994   | 117 |
| 37,120 | 34 | 5 | 536 | 65 | 24 | 2 | 412 | 45 | 1,006 | 117 |
| 37,121 | 34 | 5 | 536 | 67 | 24 | 2 | 411 | 45 | 1,005 | 119 |
| 37,122 | 34 | 5 | 535 | 67 | 24 | 2 | 411 | 46 | 1,004 | 120 |
| 37,123 | 34 | 5 | 532 | 69 | 24 | 2 | 410 | 46 | 1,000 | 122 |
| 37,124 | 34 | 5 | 532 | 71 | 24 | 2 | 411 | 48 | 1,001 | 126 |
| 37,125 | 34 | 5 | 531 | 81 | 24 | 3 | 411 | 54 | 1,000 | 143 |
| 37,126 | 35 | 5 | 530 | 82 | 24 | 3 | 411 | 54 | 1,000 | 144 |
| 37,127 | 34 | 5 | 527 | 81 | 24 | 3 | 411 | 54 | 996   | 143 |
| 37,128 | 34 | 5 | 528 | 82 | 24 | 3 | 411 | 52 | 997   | 142 |
| 37,129 | 34 | 5 | 528 | 82 | 24 | 3 | 411 | 52 | 997   | 142 |
| 37,130 | 34 | 6 | 535 | 82 | 26 | 3 | 420 | 52 | 1,015 | 143 |
| 37,131 | 34 | 6 | 535 | 82 | 26 | 3 | 420 | 52 | 1,015 | 143 |
| 37,132 | 34 | 6 | 535 | 82 | 26 | 3 | 420 | 53 | 1,015 | 144 |
| 37,133 | 34 | 5 | 522 | 82 | 26 | 3 | 416 | 53 | 998   | 143 |
| 37,134 | 34 | 5 | 519 | 82 | 26 | 3 | 415 | 53 | 994   | 143 |

|        |    |   |     |    |    |   |     |    |       |     |
|--------|----|---|-----|----|----|---|-----|----|-------|-----|
| 37,135 | 34 | 5 | 520 | 81 | 26 | 3 | 414 | 53 | 994   | 142 |
| 37,136 | 33 | 5 | 517 | 81 | 26 | 3 | 410 | 54 | 986   | 143 |
| 37,137 | 25 | 5 | 491 | 81 | 26 | 3 | 381 | 54 | 923   | 143 |
| 37,138 | 25 | 5 | 492 | 81 | 26 | 3 | 381 | 54 | 924   | 143 |
| 37,139 | 25 | 6 | 491 | 81 | 26 | 3 | 381 | 54 | 923   | 144 |
| 37,140 | 25 | 6 | 496 | 82 | 27 | 3 | 387 | 54 | 935   | 145 |
| 37,141 | 25 | 6 | 495 | 82 | 27 | 3 | 383 | 54 | 930   | 145 |
| 37,142 | 24 | 6 | 497 | 82 | 27 | 3 | 381 | 54 | 929   | 145 |
| 37,143 | 24 | 6 | 498 | 80 | 28 | 3 | 383 | 54 | 933   | 143 |
| 37,144 | 24 | 6 | 514 | 80 | 30 | 3 | 413 | 54 | 981   | 143 |
| 37,145 | 24 | 6 | 512 | 79 | 30 | 3 | 415 | 54 | 981   | 142 |
| 37,146 | 24 | 6 | 514 | 79 | 30 | 3 | 417 | 53 | 985   | 141 |
| 37,147 | 24 | 6 | 505 | 79 | 30 | 3 | 413 | 53 | 972   | 141 |
| 37,148 | 13 | 6 | 447 | 78 | 23 | 4 | 344 | 53 | 827   | 141 |
| 37,149 | 14 | 6 | 450 | 78 | 23 | 4 | 352 | 53 | 839   | 141 |
| 37,150 | 15 | 6 | 495 | 80 | 23 | 5 | 406 | 55 | 939   | 146 |
| 37,151 | 21 | 7 | 655 | 80 | 27 | 7 | 518 | 62 | 1,221 | 156 |
| 37,152 | 19 | 9 | 645 | 83 | 29 | 7 | 491 | 67 | 1,184 | 166 |
| 37,153 | 13 | 9 | 603 | 83 | 28 | 7 | 478 | 67 | 1,122 | 166 |
| 37,154 | 17 | 9 | 617 | 85 | 30 | 7 | 530 | 67 | 1,194 | 168 |
| 37,155 | 17 | 9 | 554 | 85 | 28 | 7 | 506 | 68 | 1,105 | 169 |
| 37,156 | 17 | 9 | 525 | 84 | 28 | 7 | 459 | 68 | 1,029 | 168 |
| 37,157 | 17 | 9 | 497 | 80 | 27 | 7 | 447 | 66 | 988   | 162 |
| 37,158 | 17 | 9 | 494 | 77 | 27 | 7 | 444 | 67 | 982   | 160 |
| 37,159 | 17 | 9 | 495 | 77 | 29 | 7 | 450 | 67 | 991   | 160 |
| 37,160 | 17 | 8 | 495 | 77 | 29 | 7 | 450 | 66 | 991   | 158 |
| 37,161 | 17 | 6 | 489 | 52 | 26 | 5 | 447 | 49 | 979   | 112 |
| 37,162 | 17 | 6 | 474 | 50 | 26 | 5 | 446 | 49 | 963   | 110 |
| 37,163 | 17 | 6 | 463 | 43 | 27 | 5 | 438 | 47 | 945   | 101 |
| 37,164 | 18 | 6 | 449 | 39 | 27 | 5 | 435 | 47 | 929   | 97  |
| 37,165 | 18 | 6 | 447 | 39 | 27 | 5 | 435 | 48 | 927   | 98  |
| 37,166 | 17 | 6 | 407 | 37 | 26 | 5 | 417 | 46 | 867   | 94  |
| 37,167 | 17 | 6 | 395 | 33 | 26 | 5 | 409 | 37 | 847   | 81  |
| 37,168 | 17 | 6 | 382 | 33 | 26 | 5 | 406 | 37 | 831   | 81  |
| 37,169 | 16 | 7 | 358 | 33 | 23 | 5 | 366 | 38 | 763   | 83  |
| 37,170 | 16 | 6 | 357 | 33 | 23 | 5 | 366 | 38 | 762   | 82  |
| 37,171 | 16 | 6 | 351 | 33 | 22 | 5 | 363 | 38 | 752   | 82  |
| 37,172 | 16 | 6 | 351 | 31 | 22 | 5 | 363 | 38 | 752   | 80  |
| 37,173 | 16 | 6 | 350 | 29 | 22 | 5 | 363 | 37 | 751   | 77  |
| 37,174 | 16 | 6 | 350 | 27 | 22 | 5 | 362 | 34 | 750   | 72  |
| 37,175 | 16 | 6 | 350 | 27 | 22 | 5 | 362 | 34 | 750   | 72  |

|        |    |   |     |    |    |   |     |    |     |    |
|--------|----|---|-----|----|----|---|-----|----|-----|----|
| 37,176 | 16 | 6 | 351 | 15 | 22 | 4 | 364 | 28 | 753 | 53 |
| 37,177 | 15 | 6 | 351 | 15 | 22 | 4 | 364 | 28 | 752 | 53 |
| 37,178 | 15 | 6 | 352 | 14 | 22 | 4 | 365 | 28 | 754 | 52 |
| 37,179 | 15 | 6 | 352 | 14 | 22 | 4 | 365 | 28 | 754 | 52 |
| 37,180 | 15 | 6 | 352 | 14 | 22 | 4 | 365 | 28 | 754 | 52 |
| 37,181 | 15 | 5 | 346 | 14 | 20 | 4 | 355 | 28 | 736 | 51 |
| 37,182 | 15 | 5 | 346 | 14 | 20 | 4 | 355 | 28 | 736 | 51 |
| 37,183 | 15 | 5 | 348 | 14 | 20 | 4 | 355 | 27 | 738 | 50 |
| 37,184 | 15 | 5 | 348 | 14 | 20 | 4 | 354 | 27 | 737 | 50 |
| 37,185 | 15 | 5 | 351 | 14 | 20 | 4 | 354 | 27 | 740 | 50 |
| 37,186 | 16 | 5 | 368 | 14 | 20 | 4 | 371 | 27 | 775 | 50 |
| 37,187 | 17 | 5 | 367 | 15 | 19 | 4 | 373 | 27 | 776 | 51 |
| 37,188 | 17 | 5 | 368 | 15 | 19 | 4 | 373 | 27 | 777 | 51 |
| 37,189 | 17 | 4 | 367 | 15 | 19 | 4 | 373 | 27 | 776 | 50 |
| 37,190 | 17 | 4 | 367 | 18 | 19 | 4 | 372 | 27 | 775 | 53 |
| 37,191 | 17 | 4 | 369 | 17 | 18 | 5 | 364 | 27 | 768 | 53 |
| 37,192 | 17 | 4 | 365 | 17 | 18 | 5 | 359 | 27 | 759 | 53 |
| 37,193 | 17 | 4 | 364 | 17 | 17 | 5 | 357 | 27 | 755 | 53 |
| 37,194 | 17 | 4 | 380 | 17 | 18 | 5 | 364 | 27 | 779 | 53 |
| 37,195 | 17 | 4 | 364 | 17 | 16 | 5 | 337 | 27 | 734 | 53 |
| 37,196 | 18 | 4 | 367 | 18 | 16 | 5 | 336 | 28 | 737 | 55 |
| 37,197 | 18 | 4 | 362 | 19 | 16 | 5 | 331 | 28 | 727 | 56 |
| 37,198 | 18 | 4 | 359 | 19 | 16 | 5 | 331 | 28 | 724 | 56 |
| 37,199 | 18 | 4 | 353 | 19 | 15 | 4 | 330 | 28 | 716 | 55 |
| 37,200 | 17 | 4 | 345 | 20 | 15 | 4 | 321 | 28 | 698 | 56 |
| 37,201 | 15 | 4 | 294 | 18 | 13 | 3 | 252 | 26 | 574 | 51 |
| 37,202 | 9  | 1 | 135 | 15 | 9  | 1 | 142 | 14 | 295 | 31 |
| 37,203 | 9  | 1 | 117 | 15 | 6  | 1 | 130 | 14 | 262 | 31 |
| 37,204 | 11 | 1 | 142 | 15 | 6  | 1 | 130 | 14 | 289 | 31 |
| 37,205 | 8  | 1 | 123 | 13 | 4  | 1 | 71  | 13 | 206 | 28 |
| 37,206 | 9  | 1 | 120 | 14 | 4  | 1 | 66  | 13 | 199 | 29 |
| 37,207 | 9  | 1 | 119 | 14 | 3  | 1 | 61  | 12 | 192 | 28 |
| 37,208 | 9  | 1 | 118 | 10 | 2  | 1 | 60  | 8  | 189 | 20 |
| 37,209 | 9  | 1 | 119 | 10 | 2  | 1 | 60  | 7  | 190 | 19 |
| 37,210 | 9  | 1 | 119 | 11 | 2  | 1 | 60  | 7  | 190 | 20 |
| 37,211 | 9  | 2 | 119 | 11 | 2  | 1 | 60  | 7  | 190 | 21 |
| 37,212 | 9  | 2 | 119 | 11 | 1  | 1 | 60  | 5  | 189 | 19 |
| 37,213 | 9  | 2 | 119 | 11 | 1  | 1 | 64  | 5  | 193 | 19 |
| 37,214 | 8  | 2 | 119 | 11 | 1  | 1 | 64  | 5  | 192 | 19 |
| 37,215 | 8  | 2 | 119 | 10 | 1  | 1 | 64  | 4  | 192 | 17 |
| 37,216 | 8  | 2 | 120 | 10 | 1  | 1 | 65  | 3  | 194 | 16 |

|        |    |   |     |    |   |   |    |   |     |    |
|--------|----|---|-----|----|---|---|----|---|-----|----|
| 37,217 | 8  | 2 | 120 | 10 | 1 | 1 | 65 | 3 | 194 | 16 |
| 37,218 | 8  | 2 | 142 | 11 | 1 | 1 | 76 | 3 | 227 | 17 |
| 37,219 | 8  | 2 | 142 | 11 | 1 | 1 | 76 | 3 | 227 | 17 |
| 37,220 | 8  | 1 | 143 | 12 | 1 | 1 | 77 | 2 | 229 | 16 |
| 37,221 | 8  | 1 | 156 | 12 | 1 | 1 | 84 | 2 | 249 | 16 |
| 37,222 | 8  | 1 | 156 | 12 | 1 | 1 | 84 | 2 | 249 | 16 |
| 37,223 | 11 | 1 | 162 | 13 | 1 | 1 | 89 | 2 | 263 | 17 |
| 37,224 | 11 | 1 | 162 | 13 | 1 | 1 | 89 | 3 | 263 | 18 |
| 37,225 | 11 | 1 | 163 | 14 | 1 | 1 | 91 | 3 | 266 | 19 |
| 37,226 | 11 | 1 | 162 | 15 | 1 | 1 | 89 | 7 | 263 | 24 |
| 37,227 | 11 | 1 | 162 | 15 | 1 | 1 | 89 | 7 | 263 | 24 |
| 37,228 | 11 | 1 | 166 | 14 | 1 | 1 | 89 | 7 | 267 | 23 |
| 37,229 | 11 | 3 | 166 | 15 | 1 | 1 | 88 | 7 | 266 | 26 |
| 37,230 | 11 | 3 | 166 | 15 | 1 | 1 | 88 | 7 | 266 | 26 |
| 37,231 | 11 | 3 | 167 | 15 | 1 | 1 | 89 | 7 | 268 | 26 |
| 37,232 | 11 | 3 | 166 | 15 | 1 | 1 | 89 | 7 | 267 | 26 |
| 37,233 | 11 | 3 | 165 | 15 | 1 | 1 | 89 | 7 | 266 | 26 |
| 37,234 | 11 | 3 | 164 | 15 | 1 | 1 | 89 | 7 | 265 | 26 |
| 37,235 | 11 | 3 | 161 | 15 | 1 | 1 | 88 | 7 | 261 | 26 |
| 37,236 | 11 | 3 | 160 | 15 | 1 | 1 | 88 | 7 | 260 | 26 |
| 37,237 | 11 | 3 | 143 | 15 | 1 | 1 | 71 | 7 | 226 | 26 |
| 37,238 | 10 | 3 | 142 | 14 | 1 | 1 | 69 | 6 | 222 | 24 |
| 37,239 | 10 | 3 | 141 | 14 | 2 | 1 | 69 | 6 | 222 | 24 |
| 37,240 | 10 | 3 | 141 | 14 | 2 | 1 | 69 | 6 | 222 | 24 |
| 37,241 | 10 | 3 | 143 | 11 | 2 | 1 | 69 | 6 | 224 | 21 |
| 37,242 | 10 | 3 | 135 | 11 | 2 | 0 | 68 | 6 | 215 | 20 |
| 37,243 | 10 | 3 | 134 | 11 | 2 | 0 | 68 | 6 | 214 | 20 |
| 37,244 | 10 | 3 | 137 | 11 | 2 | 0 | 72 | 6 | 221 | 20 |
| 37,245 | 10 | 3 | 122 | 11 | 1 | 0 | 68 | 6 | 201 | 20 |
| 37,246 | 10 | 3 | 120 | 11 | 1 | 0 | 68 | 6 | 199 | 20 |
| 37,247 | 9  | 3 | 115 | 9  | 1 | 1 | 66 | 5 | 191 | 18 |
| 37,248 | 9  | 3 | 115 | 9  | 1 | 1 | 66 | 5 | 191 | 18 |
| 37,249 | 9  | 3 | 113 | 10 | 1 | 1 | 65 | 6 | 188 | 20 |
| 37,250 | 9  | 3 | 114 | 10 | 1 | 1 | 68 | 6 | 192 | 20 |
| 37,251 | 9  | 3 | 117 | 9  | 1 | 1 | 75 | 6 | 202 | 19 |
| 37,252 | 9  | 3 | 112 | 10 | 1 | 1 | 74 | 6 | 196 | 20 |
| 37,253 | 9  | 3 | 110 | 10 | 1 | 1 | 72 | 7 | 192 | 21 |
| 37,254 | 9  | 3 | 83  | 10 | 1 | 1 | 64 | 7 | 157 | 21 |
| 37,255 | 8  | 3 | 81  | 12 | 1 | 1 | 64 | 7 | 154 | 23 |
| 37,256 | 7  | 4 | 77  | 12 | 1 | 1 | 63 | 7 | 148 | 24 |
| 37,257 | 6  | 4 | 72  | 11 | 1 | 1 | 64 | 7 | 143 | 23 |

|        |    |   |     |    |    |   |     |   |     |    |
|--------|----|---|-----|----|----|---|-----|---|-----|----|
| 37,258 | 6  | 4 | 72  | 11 | 1  | 1 | 64  | 7 | 143 | 23 |
| 37,259 | 6  | 5 | 71  | 11 | 1  | 1 | 67  | 7 | 145 | 24 |
| 37,260 | 6  | 5 | 74  | 11 | 1  | 1 | 68  | 7 | 149 | 24 |
| 37,261 | 6  | 4 | 78  | 11 | 1  | 1 | 69  | 7 | 154 | 23 |
| 37,262 | 6  | 4 | 78  | 11 | 1  | 1 | 69  | 7 | 154 | 23 |
| 37,263 | 6  | 4 | 78  | 11 | 1  | 1 | 67  | 7 | 152 | 23 |
| 37,264 | 6  | 4 | 78  | 11 | 1  | 1 | 65  | 7 | 150 | 23 |
| 37,265 | 6  | 4 | 79  | 11 | 1  | 1 | 65  | 7 | 151 | 23 |
| 37,266 | 6  | 4 | 78  | 11 | 1  | 1 | 65  | 7 | 150 | 23 |
| 37,267 | 6  | 4 | 77  | 11 | 1  | 1 | 63  | 7 | 147 | 23 |
| 37,268 | 6  | 4 | 74  | 13 | 1  | 1 | 62  | 7 | 143 | 25 |
| 37,269 | 6  | 4 | 54  | 12 | 1  | 1 | 52  | 7 | 113 | 24 |
| 37,270 | 6  | 4 | 53  | 12 | 1  | 1 | 51  | 7 | 111 | 24 |
| 37,271 | 6  | 4 | 42  | 11 | 1  | 1 | 46  | 7 | 95  | 23 |
| 37,272 | 6  | 4 | 39  | 11 | 1  | 1 | 45  | 7 | 91  | 23 |
| 37,273 | 3  | 4 | 33  | 11 | 1  | 1 | 40  | 7 | 77  | 23 |
| 37,274 | 3  | 4 | 33  | 10 | 1  | 1 | 40  | 6 | 77  | 21 |
| 37,275 | 3  | 4 | 33  | 10 | 1  | 1 | 40  | 6 | 77  | 21 |
| 37,276 | 4  | 4 | 35  | 8  | 1  | 1 | 38  | 2 | 78  | 15 |
| 37,277 | 4  | 4 | 35  | 8  | 1  | 1 | 38  | 3 | 78  | 16 |
| 37,278 | 5  | 4 | 41  | 8  | 1  | 1 | 41  | 5 | 88  | 18 |
| 37,279 | 5  | 2 | 42  | 7  | 2  | 1 | 41  | 5 | 90  | 15 |
| 37,280 | 5  | 2 | 41  | 7  | 2  | 1 | 42  | 5 | 90  | 15 |
| 37,281 | 5  | 3 | 41  | 7  | 2  | 1 | 41  | 5 | 89  | 16 |
| 37,282 | 5  | 4 | 41  | 7  | 2  | 1 | 41  | 5 | 89  | 17 |
| 37,283 | 9  | 4 | 48  | 7  | 3  | 1 | 58  | 5 | 118 | 17 |
| 37,284 | 9  | 4 | 50  | 7  | 3  | 1 | 61  | 5 | 123 | 17 |
| 37,285 | 10 | 4 | 50  | 7  | 3  | 1 | 61  | 5 | 124 | 17 |
| 37,286 | 10 | 4 | 51  | 7  | 3  | 1 | 61  | 5 | 125 | 17 |
| 37,287 | 10 | 4 | 51  | 8  | 3  | 1 | 62  | 5 | 126 | 18 |
| 37,288 | 10 | 4 | 53  | 8  | 3  | 1 | 63  | 5 | 129 | 18 |
| 37,289 | 12 | 4 | 107 | 8  | 6  | 1 | 84  | 5 | 209 | 18 |
| 37,290 | 12 | 4 | 107 | 8  | 5  | 1 | 84  | 5 | 208 | 18 |
| 37,291 | 19 | 4 | 166 | 8  | 6  | 1 | 100 | 5 | 291 | 18 |
| 37,292 | 19 | 4 | 172 | 8  | 8  | 1 | 108 | 5 | 307 | 18 |
| 37,293 | 20 | 4 | 188 | 8  | 8  | 1 | 113 | 5 | 329 | 18 |
| 37,294 | 20 | 4 | 187 | 8  | 8  | 1 | 113 | 5 | 328 | 18 |
| 37,295 | 20 | 4 | 184 | 9  | 8  | 1 | 109 | 5 | 321 | 19 |
| 37,296 | 22 | 4 | 283 | 9  | 13 | 1 | 132 | 5 | 450 | 19 |
| 37,297 | 22 | 4 | 329 | 9  | 15 | 0 | 147 | 5 | 513 | 18 |
| 37,298 | 22 | 4 | 329 | 9  | 15 | 0 | 147 | 5 | 513 | 18 |

|        |    |    |     |    |    |   |     |    |     |    |
|--------|----|----|-----|----|----|---|-----|----|-----|----|
| 37,299 | 22 | 4  | 331 | 10 | 15 | 0 | 149 | 5  | 517 | 19 |
| 37,300 | 22 | 4  | 330 | 17 | 15 | 0 | 146 | 6  | 513 | 27 |
| 37,301 | 22 | 4  | 329 | 18 | 15 | 0 | 142 | 6  | 508 | 28 |
| 37,302 | 22 | 4  | 327 | 18 | 15 | 0 | 138 | 6  | 502 | 28 |
| 37,303 | 22 | 4  | 328 | 19 | 15 | 0 | 136 | 7  | 501 | 30 |
| 37,304 | 22 | 5  | 327 | 21 | 15 | 0 | 138 | 8  | 502 | 34 |
| 37,305 | 20 | 5  | 322 | 21 | 15 | 0 | 133 | 12 | 490 | 38 |
| 37,306 | 20 | 5  | 322 | 24 | 15 | 0 | 133 | 14 | 490 | 43 |
| 37,307 | 20 | 4  | 322 | 24 | 15 | 0 | 133 | 14 | 490 | 42 |
| 37,308 | 20 | 3  | 322 | 25 | 15 | 0 | 133 | 14 | 490 | 42 |
| 37,309 | 20 | 3  | 322 | 33 | 15 | 0 | 133 | 15 | 490 | 51 |
| 37,310 | 20 | 3  | 323 | 33 | 15 | 0 | 132 | 15 | 490 | 51 |
| 37,311 | 20 | 8  | 319 | 44 | 15 | 1 | 131 | 25 | 485 | 78 |
| 37,312 | 20 | 8  | 316 | 43 | 15 | 1 | 130 | 25 | 481 | 77 |
| 37,313 | 20 | 8  | 316 | 43 | 15 | 1 | 130 | 25 | 481 | 77 |
| 37,314 | 20 | 10 | 316 | 44 | 15 | 1 | 130 | 25 | 481 | 80 |
| 37,315 | 20 | 10 | 316 | 44 | 15 | 1 | 130 | 25 | 481 | 80 |
| 37,316 | 20 | 10 | 315 | 46 | 15 | 1 | 130 | 25 | 480 | 82 |
| 37,317 | 20 | 10 | 315 | 46 | 15 | 1 | 130 | 25 | 480 | 82 |
| 37,318 | 20 | 11 | 319 | 48 | 15 | 1 | 133 | 26 | 487 | 86 |
| 37,319 | 20 | 11 | 320 | 47 | 15 | 1 | 133 | 26 | 488 | 85 |
| 37,320 | 20 | 11 | 323 | 47 | 15 | 1 | 133 | 26 | 491 | 85 |
| 37,321 | 20 | 11 | 323 | 47 | 15 | 1 | 133 | 26 | 491 | 85 |
| 37,322 | 20 | 11 | 324 | 48 | 15 | 1 | 135 | 26 | 494 | 86 |
| 37,323 | 20 | 11 | 324 | 49 | 15 | 1 | 134 | 26 | 493 | 87 |
| 37,324 | 20 | 11 | 324 | 49 | 15 | 1 | 135 | 26 | 494 | 87 |
| 37,325 | 20 | 11 | 338 | 50 | 15 | 1 | 140 | 26 | 513 | 88 |
| 37,326 | 20 | 11 | 338 | 50 | 15 | 1 | 140 | 26 | 513 | 88 |
| 37,327 | 24 | 11 | 392 | 51 | 17 | 1 | 146 | 26 | 579 | 89 |
| 37,328 | 24 | 11 | 390 | 51 | 17 | 1 | 146 | 28 | 577 | 91 |
| 37,329 | 23 | 11 | 382 | 51 | 17 | 1 | 143 | 26 | 565 | 89 |
| 37,330 | 32 | 11 | 544 | 52 | 25 | 1 | 197 | 26 | 798 | 90 |
| 37,331 | 32 | 9  | 546 | 52 | 25 | 1 | 199 | 26 | 802 | 88 |
| 37,332 | 32 | 9  | 545 | 52 | 25 | 1 | 200 | 26 | 802 | 88 |
| 37,333 | 28 | 9  | 538 | 52 | 24 | 1 | 183 | 26 | 773 | 88 |
| 37,334 | 28 | 9  | 536 | 52 | 24 | 1 | 180 | 26 | 768 | 88 |
| 37,335 | 27 | 9  | 536 | 52 | 24 | 1 | 180 | 26 | 767 | 88 |
| 37,336 | 27 | 9  | 537 | 53 | 24 | 1 | 180 | 26 | 768 | 89 |
| 37,337 | 27 | 9  | 536 | 53 | 24 | 1 | 180 | 26 | 767 | 89 |
| 37,338 | 27 | 9  | 538 | 52 | 24 | 1 | 180 | 26 | 769 | 88 |
| 37,339 | 26 | 9  | 537 | 52 | 24 | 1 | 179 | 26 | 766 | 88 |

|        |    |   |     |    |    |   |     |    |     |    |
|--------|----|---|-----|----|----|---|-----|----|-----|----|
| 37,340 | 24 | 9 | 483 | 52 | 21 | 1 | 158 | 26 | 686 | 88 |
| 37,341 | 17 | 9 | 422 | 53 | 20 | 1 | 142 | 26 | 601 | 89 |
| 37,342 | 17 | 9 | 416 | 56 | 18 | 1 | 134 | 27 | 585 | 93 |
| 37,343 | 16 | 9 | 410 | 56 | 18 | 1 | 129 | 28 | 573 | 94 |
| 37,344 | 16 | 9 | 400 | 57 | 18 | 1 | 129 | 28 | 563 | 95 |
| 37,345 | 15 | 9 | 382 | 57 | 17 | 1 | 126 | 28 | 540 | 95 |
| 37,346 | 14 | 9 | 350 | 56 | 14 | 1 | 114 | 28 | 492 | 94 |
| 37,347 | 14 | 9 | 300 | 56 | 13 | 1 | 103 | 28 | 430 | 94 |
| 37,348 | 14 | 9 | 254 | 56 | 11 | 1 | 84  | 28 | 363 | 94 |
| 37,349 | 14 | 9 | 252 | 58 | 11 | 1 | 83  | 28 | 360 | 96 |
| 37,350 | 14 | 9 | 252 | 57 | 11 | 1 | 82  | 28 | 359 | 95 |
| 37,351 | 14 | 9 | 252 | 49 | 11 | 1 | 84  | 26 | 361 | 85 |
| 37,352 | 14 | 9 | 254 | 48 | 11 | 1 | 84  | 26 | 363 | 84 |
| 37,353 | 14 | 9 | 254 | 46 | 11 | 1 | 84  | 25 | 363 | 81 |
| 37,354 | 14 | 8 | 252 | 44 | 11 | 1 | 84  | 23 | 361 | 76 |
| 37,355 | 14 | 8 | 253 | 44 | 11 | 1 | 82  | 19 | 360 | 72 |
| 37,356 | 14 | 8 | 254 | 44 | 11 | 1 | 82  | 19 | 361 | 72 |
| 37,357 | 14 | 8 | 256 | 39 | 11 | 1 | 82  | 17 | 363 | 65 |
| 37,358 | 14 | 8 | 257 | 39 | 11 | 1 | 81  | 18 | 363 | 66 |
| 37,359 | 14 | 8 | 257 | 30 | 11 | 1 | 81  | 17 | 363 | 56 |
| 37,360 | 14 | 8 | 257 | 31 | 11 | 1 | 80  | 17 | 362 | 57 |
| 37,361 | 14 | 8 | 256 | 31 | 11 | 1 | 79  | 17 | 360 | 57 |
| 37,362 | 15 | 3 | 257 | 20 | 11 | 0 | 79  | 7  | 362 | 30 |
| 37,363 | 15 | 3 | 257 | 20 | 11 | 0 | 79  | 7  | 362 | 30 |
| 37,364 | 15 | 3 | 261 | 20 | 11 | 0 | 79  | 7  | 366 | 30 |
| 37,365 | 15 | 1 | 262 | 20 | 11 | 0 | 79  | 7  | 367 | 28 |
| 37,366 | 15 | 1 | 262 | 20 | 11 | 0 | 79  | 8  | 367 | 29 |
| 37,367 | 15 | 4 | 262 | 26 | 11 | 0 | 79  | 14 | 367 | 44 |
| 37,368 | 15 | 4 | 261 | 27 | 11 | 0 | 79  | 15 | 366 | 46 |
| 37,369 | 15 | 3 | 258 | 29 | 11 | 0 | 76  | 14 | 360 | 46 |
| 37,370 | 15 | 3 | 257 | 29 | 11 | 0 | 76  | 15 | 359 | 47 |
| 37,371 | 15 | 3 | 254 | 29 | 11 | 0 | 76  | 15 | 356 | 47 |
| 37,372 | 15 | 3 | 254 | 29 | 11 | 0 | 79  | 16 | 359 | 48 |
| 37,373 | 15 | 3 | 253 | 29 | 11 | 0 | 77  | 16 | 356 | 48 |
| 37,374 | 17 | 3 | 261 | 29 | 12 | 0 | 84  | 17 | 374 | 49 |
| 37,375 | 17 | 3 | 261 | 29 | 12 | 0 | 90  | 18 | 380 | 50 |
| 37,376 | 17 | 3 | 266 | 29 | 12 | 0 | 90  | 19 | 385 | 51 |
| 37,377 | 17 | 3 | 261 | 29 | 12 | 0 | 91  | 19 | 381 | 51 |
| 37,378 | 14 | 3 | 226 | 28 | 10 | 0 | 89  | 19 | 339 | 50 |
| 37,379 | 11 | 3 | 171 | 28 | 8  | 0 | 60  | 16 | 250 | 47 |
| 37,380 | 10 | 3 | 115 | 28 | 5  | 0 | 44  | 16 | 174 | 47 |



|        |    |   |     |    |   |   |     |    |     |    |
|--------|----|---|-----|----|---|---|-----|----|-----|----|
| 37,381 | 7  | 3 | 69  | 27 | 2 | 0 | 39  | 15 | 117 | 45 |
| 37,382 | 7  | 3 | 67  | 27 | 2 | 0 | 36  | 15 | 112 | 45 |
| 37,383 | 7  | 3 | 73  | 27 | 2 | 0 | 36  | 15 | 118 | 45 |
| 37,384 | 7  | 3 | 73  | 27 | 2 | 0 | 36  | 15 | 118 | 45 |
| 37,385 | 7  | 3 | 81  | 27 | 2 | 0 | 36  | 15 | 126 | 45 |
| 37,386 | 7  | 3 | 85  | 28 | 2 | 0 | 37  | 15 | 131 | 46 |
| 37,387 | 7  | 3 | 90  | 27 | 2 | 0 | 38  | 15 | 137 | 45 |
| 37,388 | 7  | 3 | 88  | 27 | 2 | 0 | 38  | 15 | 135 | 45 |
| 37,389 | 7  | 3 | 87  | 27 | 2 | 0 | 37  | 15 | 133 | 45 |
| 37,390 | 9  | 3 | 88  | 27 | 2 | 0 | 37  | 15 | 136 | 45 |
| 37,391 | 9  | 3 | 88  | 27 | 2 | 0 | 37  | 15 | 136 | 45 |
| 37,392 | 12 | 3 | 97  | 23 | 2 | 0 | 40  | 14 | 151 | 40 |
| 37,393 | 12 | 3 | 97  | 23 | 2 | 0 | 40  | 14 | 151 | 40 |
| 37,394 | 12 | 3 | 110 | 24 | 2 | 0 | 50  | 14 | 174 | 41 |
| 37,395 | 12 | 3 | 110 | 23 | 2 | 0 | 50  | 14 | 174 | 40 |
| 37,396 | 12 | 3 | 110 | 23 | 2 | 0 | 50  | 15 | 174 | 41 |
| 37,397 | 12 | 3 | 110 | 23 | 2 | 0 | 50  | 15 | 174 | 41 |
| 37,398 | 14 | 3 | 133 | 21 | 3 | 0 | 58  | 15 | 208 | 39 |
| 37,399 | 16 | 3 | 147 | 21 | 4 | 0 | 66  | 15 | 233 | 39 |
| 37,400 | 16 | 3 | 149 | 21 | 4 | 0 | 66  | 15 | 235 | 39 |
| 37,401 | 16 | 3 | 149 | 21 | 4 | 0 | 66  | 15 | 235 | 39 |
| 37,402 | 16 | 3 | 153 | 21 | 4 | 0 | 67  | 15 | 240 | 39 |
| 37,403 | 16 | 3 | 151 | 21 | 4 | 0 | 68  | 15 | 239 | 39 |
| 37,404 | 16 | 3 | 151 | 21 | 4 | 0 | 69  | 15 | 240 | 39 |
| 37,405 | 16 | 4 | 152 | 21 | 4 | 0 | 69  | 15 | 241 | 40 |
| 37,406 | 16 | 4 | 152 | 21 | 4 | 0 | 69  | 15 | 241 | 40 |
| 37,407 | 18 | 4 | 152 | 21 | 4 | 0 | 70  | 15 | 244 | 40 |
| 37,408 | 18 | 4 | 150 | 21 | 4 | 0 | 70  | 15 | 242 | 40 |
| 37,409 | 18 | 4 | 169 | 21 | 4 | 0 | 79  | 15 | 270 | 40 |
| 37,410 | 20 | 4 | 170 | 21 | 4 | 0 | 82  | 15 | 276 | 40 |
| 37,411 | 20 | 5 | 175 | 20 | 4 | 0 | 82  | 16 | 281 | 41 |
| 37,412 | 20 | 7 | 193 | 20 | 4 | 0 | 93  | 17 | 310 | 44 |
| 37,413 | 19 | 7 | 193 | 21 | 4 | 0 | 102 | 18 | 318 | 46 |
| 37,414 | 19 | 7 | 189 | 21 | 4 | 0 | 102 | 18 | 314 | 46 |
| 37,415 | 19 | 7 | 196 | 21 | 4 | 0 | 103 | 18 | 322 | 46 |
| 37,416 | 21 | 7 | 205 | 20 | 6 | 0 | 108 | 18 | 340 | 45 |
| 37,417 | 21 | 4 | 205 | 12 | 6 | 0 | 109 | 11 | 341 | 27 |
| 37,418 | 21 | 4 | 205 | 12 | 6 | 0 | 109 | 11 | 341 | 27 |
| 37,419 | 21 | 4 | 205 | 11 | 6 | 0 | 109 | 10 | 341 | 25 |
| 37,420 | 21 | 4 | 214 | 8  | 6 | 0 | 118 | 10 | 359 | 22 |
| 37,421 | 21 | 4 | 220 | 7  | 6 | 0 | 120 | 9  | 367 | 20 |

|        |    |   |     |    |   |   |     |    |     |    |
|--------|----|---|-----|----|---|---|-----|----|-----|----|
| 37,422 | 24 | 5 | 241 | 8  | 6 | 0 | 132 | 9  | 403 | 22 |
| 37,423 | 24 | 5 | 253 | 7  | 6 | 0 | 138 | 8  | 421 | 20 |
| 37,424 | 24 | 5 | 252 | 7  | 5 | 0 | 133 | 9  | 414 | 21 |
| 37,425 | 24 | 5 | 244 | 7  | 5 | 0 | 138 | 8  | 411 | 20 |
| 37,426 | 24 | 6 | 243 | 9  | 5 | 0 | 136 | 9  | 408 | 24 |
| 37,427 | 27 | 6 | 260 | 8  | 6 | 0 | 165 | 8  | 458 | 22 |
| 37,428 | 28 | 6 | 270 | 9  | 6 | 0 | 168 | 8  | 472 | 23 |
| 37,429 | 29 | 6 | 270 | 9  | 6 | 0 | 177 | 8  | 482 | 23 |
| 37,430 | 27 | 6 | 266 | 9  | 6 | 0 | 177 | 8  | 476 | 23 |
| 37,431 | 28 | 6 | 295 | 9  | 6 | 0 | 206 | 8  | 535 | 23 |
| 37,432 | 28 | 6 | 299 | 9  | 6 | 1 | 204 | 9  | 537 | 25 |
| 37,433 | 28 | 6 | 297 | 14 | 6 | 1 | 205 | 11 | 536 | 32 |
| 37,434 | 28 | 6 | 293 | 14 | 6 | 1 | 205 | 12 | 532 | 33 |
| 37,435 | 28 | 6 | 288 | 15 | 6 | 1 | 207 | 12 | 529 | 34 |
| 37,436 | 28 | 6 | 286 | 15 | 6 | 1 | 208 | 12 | 528 | 34 |
| 37,437 | 29 | 6 | 283 | 15 | 6 | 1 | 210 | 12 | 528 | 34 |
| 37,438 | 29 | 6 | 278 | 15 | 6 | 1 | 208 | 12 | 521 | 34 |
| 37,439 | 35 | 6 | 288 | 15 | 6 | 1 | 218 | 12 | 547 | 34 |
| 37,440 | 33 | 6 | 289 | 15 | 6 | 1 | 218 | 12 | 546 | 34 |
| 37,441 | 33 | 6 | 291 | 15 | 6 | 1 | 220 | 12 | 550 | 34 |
| 37,442 | 33 | 6 | 291 | 15 | 6 | 1 | 220 | 12 | 550 | 34 |
| 37,443 | 30 | 6 | 289 | 20 | 6 | 1 | 218 | 13 | 543 | 40 |
| 37,444 | 30 | 6 | 284 | 22 | 6 | 1 | 212 | 13 | 532 | 42 |
| 37,445 | 30 | 8 | 282 | 25 | 7 | 1 | 211 | 13 | 530 | 47 |
| 37,446 | 28 | 8 | 277 | 34 | 6 | 1 | 210 | 14 | 521 | 57 |
| 37,447 | 28 | 8 | 277 | 36 | 6 | 1 | 210 | 13 | 521 | 58 |
| 37,448 | 28 | 8 | 266 | 36 | 6 | 1 | 205 | 13 | 505 | 58 |
| 37,449 | 28 | 8 | 263 | 37 | 6 | 1 | 205 | 14 | 502 | 60 |
| 37,450 | 26 | 8 | 249 | 38 | 5 | 1 | 197 | 14 | 477 | 61 |
| 37,451 | 26 | 9 | 247 | 38 | 5 | 1 | 197 | 14 | 475 | 62 |
| 37,452 | 26 | 9 | 247 | 41 | 5 | 1 | 195 | 14 | 473 | 65 |
| 37,453 | 26 | 9 | 243 | 41 | 5 | 1 | 193 | 15 | 467 | 66 |
| 37,454 | 26 | 9 | 243 | 43 | 5 | 1 | 194 | 18 | 468 | 71 |
| 37,455 | 26 | 9 | 243 | 44 | 5 | 1 | 193 | 18 | 467 | 72 |
| 37,456 | 26 | 8 | 244 | 44 | 6 | 1 | 193 | 18 | 469 | 71 |
| 37,457 | 26 | 8 | 243 | 44 | 6 | 1 | 193 | 18 | 468 | 71 |
| 37,458 | 24 | 8 | 242 | 44 | 6 | 1 | 193 | 17 | 465 | 70 |
| 37,459 | 24 | 8 | 233 | 46 | 6 | 1 | 190 | 17 | 453 | 72 |
| 37,460 | 24 | 8 | 222 | 46 | 6 | 1 | 184 | 19 | 436 | 74 |
| 37,461 | 22 | 8 | 221 | 48 | 6 | 1 | 181 | 20 | 430 | 77 |
| 37,462 | 22 | 8 | 216 | 49 | 6 | 1 | 181 | 21 | 425 | 79 |

|        |    |   |     |    |    |   |     |    |     |    |
|--------|----|---|-----|----|----|---|-----|----|-----|----|
| 37,463 | 22 | 6 | 198 | 48 | 6  | 1 | 170 | 19 | 396 | 74 |
| 37,464 | 22 | 6 | 198 | 48 | 6  | 1 | 162 | 19 | 388 | 74 |
| 37,465 | 22 | 6 | 192 | 48 | 6  | 1 | 161 | 19 | 381 | 74 |
| 37,466 | 22 | 6 | 191 | 48 | 6  | 1 | 161 | 19 | 380 | 74 |
| 37,467 | 20 | 7 | 182 | 49 | 4  | 1 | 157 | 20 | 363 | 77 |
| 37,468 | 20 | 7 | 182 | 49 | 4  | 1 | 156 | 20 | 362 | 77 |
| 37,469 | 20 | 7 | 182 | 49 | 4  | 1 | 157 | 20 | 363 | 77 |
| 37,470 | 20 | 7 | 179 | 49 | 4  | 1 | 156 | 20 | 359 | 77 |
| 37,471 | 20 | 6 | 174 | 47 | 4  | 1 | 148 | 20 | 346 | 74 |
| 37,472 | 20 | 6 | 170 | 47 | 4  | 1 | 147 | 21 | 341 | 75 |
| 37,473 | 18 | 6 | 149 | 48 | 6  | 1 | 135 | 21 | 308 | 76 |
| 37,474 | 20 | 6 | 150 | 48 | 6  | 1 | 142 | 21 | 318 | 76 |
| 37,475 | 18 | 6 | 144 | 47 | 6  | 1 | 139 | 20 | 307 | 74 |
| 37,476 | 18 | 5 | 142 | 45 | 6  | 1 | 133 | 18 | 299 | 69 |
| 37,477 | 19 | 5 | 142 | 46 | 6  | 1 | 132 | 20 | 299 | 72 |
| 37,478 | 16 | 5 | 124 | 46 | 5  | 1 | 105 | 20 | 250 | 72 |
| 37,479 | 15 | 5 | 114 | 45 | 5  | 1 | 102 | 21 | 236 | 72 |
| 37,480 | 12 | 5 | 102 | 40 | 5  | 0 | 91  | 17 | 210 | 62 |
| 37,481 | 12 | 5 | 98  | 40 | 5  | 0 | 90  | 17 | 205 | 62 |
| 37,482 | 11 | 5 | 72  | 41 | 5  | 0 | 62  | 17 | 150 | 63 |
| 37,483 | 11 | 5 | 67  | 44 | 4  | 0 | 59  | 17 | 141 | 66 |
| 37,484 | 11 | 5 | 67  | 44 | 4  | 0 | 59  | 18 | 141 | 67 |
| 37,485 | 11 | 5 | 67  | 45 | 4  | 0 | 59  | 18 | 141 | 68 |
| 37,486 | 13 | 5 | 101 | 44 | 5  | 0 | 64  | 18 | 183 | 67 |
| 37,487 | 13 | 5 | 104 | 44 | 5  | 0 | 63  | 18 | 185 | 67 |
| 37,488 | 12 | 5 | 102 | 43 | 5  | 0 | 60  | 18 | 179 | 66 |
| 37,489 | 34 | 5 | 176 | 43 | 9  | 0 | 94  | 18 | 313 | 66 |
| 37,490 | 34 | 5 | 175 | 43 | 9  | 0 | 94  | 18 | 312 | 66 |
| 37,491 | 36 | 5 | 191 | 38 | 12 | 0 | 113 | 19 | 352 | 62 |
| 37,492 | 36 | 5 | 195 | 38 | 12 | 0 | 113 | 19 | 356 | 62 |
| 37,493 | 36 | 5 | 191 | 40 | 12 | 0 | 115 | 19 | 354 | 64 |
| 37,494 | 36 | 6 | 192 | 42 | 12 | 0 | 115 | 20 | 355 | 68 |
| 37,495 | 36 | 6 | 190 | 41 | 12 | 0 | 116 | 20 | 354 | 67 |
| 37,496 | 36 | 4 | 185 | 39 | 11 | 0 | 113 | 23 | 345 | 66 |
| 37,497 | 36 | 4 | 185 | 31 | 11 | 0 | 112 | 22 | 344 | 57 |
| 37,498 | 36 | 4 | 184 | 29 | 11 | 0 | 111 | 22 | 342 | 55 |
| 37,499 | 36 | 4 | 184 | 29 | 11 | 0 | 111 | 22 | 342 | 55 |
| 37,500 | 36 | 4 | 185 | 28 | 11 | 0 | 111 | 23 | 343 | 55 |
| 37,501 | 36 | 4 | 185 | 27 | 11 | 0 | 111 | 23 | 343 | 54 |
| 37,502 | 36 | 3 | 185 | 27 | 11 | 0 | 111 | 23 | 343 | 53 |
| 37,503 | 36 | 3 | 185 | 24 | 11 | 0 | 111 | 23 | 343 | 50 |

|        |    |   |     |    |    |   |     |    |     |    |
|--------|----|---|-----|----|----|---|-----|----|-----|----|
| 37,504 | 36 | 3 | 185 | 24 | 10 | 0 | 111 | 22 | 342 | 49 |
| 37,505 | 36 | 4 | 185 | 22 | 10 | 0 | 111 | 20 | 342 | 46 |
| 37,506 | 35 | 4 | 185 | 22 | 10 | 0 | 112 | 23 | 342 | 49 |
| 37,507 | 35 | 4 | 185 | 22 | 10 | 0 | 112 | 23 | 342 | 49 |
| 37,508 | 36 | 4 | 185 | 22 | 10 | 0 | 113 | 23 | 344 | 49 |
| 37,509 | 36 | 4 | 186 | 20 | 10 | 0 | 112 | 23 | 344 | 47 |
| 37,510 | 36 | 4 | 186 | 20 | 10 | 0 | 113 | 21 | 345 | 45 |
| 37,511 | 36 | 4 | 188 | 18 | 10 | 0 | 113 | 20 | 347 | 42 |
| 37,512 | 36 | 4 | 188 | 18 | 10 | 0 | 113 | 20 | 347 | 42 |
| 37,513 | 36 | 3 | 189 | 17 | 10 | 0 | 113 | 18 | 348 | 38 |
| 37,514 | 36 | 3 | 190 | 17 | 10 | 0 | 113 | 18 | 349 | 38 |
| 37,515 | 36 | 3 | 189 | 17 | 10 | 0 | 113 | 18 | 348 | 38 |
| 37,516 | 36 | 3 | 191 | 17 | 10 | 0 | 113 | 18 | 350 | 38 |
| 37,517 | 36 | 3 | 190 | 17 | 10 | 0 | 114 | 18 | 350 | 38 |
| 37,518 | 36 | 3 | 190 | 16 | 10 | 0 | 112 | 17 | 348 | 36 |
| 37,519 | 36 | 3 | 190 | 16 | 10 | 0 | 111 | 17 | 347 | 36 |
| 37,520 | 36 | 3 | 191 | 16 | 10 | 0 | 111 | 17 | 348 | 36 |
| 37,521 | 36 | 3 | 191 | 16 | 10 | 0 | 111 | 17 | 348 | 36 |
| 37,522 | 36 | 3 | 191 | 16 | 10 | 0 | 113 | 17 | 350 | 36 |
| 37,523 | 36 | 3 | 193 | 15 | 10 | 0 | 114 | 17 | 353 | 35 |
| 37,524 | 35 | 3 | 193 | 15 | 8  | 0 | 111 | 17 | 347 | 35 |
| 37,525 | 33 | 3 | 180 | 15 | 8  | 0 | 98  | 17 | 319 | 35 |
| 37,526 | 33 | 3 | 183 | 15 | 8  | 0 | 99  | 17 | 323 | 35 |
| 37,527 | 34 | 3 | 188 | 15 | 8  | 0 | 100 | 17 | 330 | 35 |
| 37,528 | 33 | 3 | 188 | 14 | 8  | 0 | 100 | 15 | 329 | 32 |
| 37,529 | 34 | 3 | 185 | 14 | 8  | 0 | 110 | 14 | 337 | 31 |
| 37,530 | 34 | 3 | 181 | 14 | 8  | 0 | 109 | 14 | 332 | 31 |
| 37,531 | 34 | 3 | 183 | 14 | 8  | 0 | 109 | 15 | 334 | 32 |
| 37,532 | 33 | 3 | 179 | 14 | 8  | 0 | 109 | 15 | 329 | 32 |
| 37,533 | 33 | 3 | 178 | 13 | 8  | 0 | 109 | 15 | 328 | 31 |
| 37,534 | 33 | 3 | 176 | 10 | 8  | 0 | 108 | 15 | 325 | 28 |
| 37,535 | 34 | 4 | 165 | 10 | 8  | 0 | 105 | 15 | 312 | 29 |
| 37,536 | 33 | 4 | 148 | 14 | 7  | 0 | 103 | 19 | 291 | 37 |
| 37,537 | 23 | 4 | 123 | 14 | 5  | 0 | 92  | 20 | 243 | 38 |
| 37,538 | 15 | 4 | 106 | 14 | 5  | 0 | 73  | 21 | 199 | 39 |
| 37,539 | 15 | 4 | 104 | 14 | 5  | 0 | 74  | 21 | 198 | 39 |
| 37,540 | 5  | 4 | 77  | 17 | 3  | 0 | 64  | 24 | 149 | 45 |
| 37,541 | 3  | 4 | 70  | 17 | 2  | 0 | 51  | 24 | 126 | 45 |
| 37,542 | 3  | 4 | 59  | 23 | 0  | 0 | 44  | 23 | 106 | 50 |
| 37,543 | 3  | 4 | 60  | 23 | 1  | 0 | 49  | 23 | 113 | 50 |
| 37,544 | 3  | 4 | 57  | 21 | 1  | 0 | 46  | 23 | 107 | 48 |

|        |    |   |     |    |    |   |     |    |     |     |
|--------|----|---|-----|----|----|---|-----|----|-----|-----|
| 37,545 | 3  | 3 | 60  | 18 | 1  | 0 | 47  | 22 | 111 | 43  |
| 37,546 | 3  | 3 | 60  | 19 | 1  | 0 | 46  | 22 | 110 | 44  |
| 37,547 | 3  | 3 | 58  | 17 | 1  | 0 | 46  | 19 | 108 | 39  |
| 37,548 | 3  | 3 | 66  | 16 | 2  | 0 | 56  | 19 | 127 | 38  |
| 37,549 | 3  | 3 | 69  | 16 | 2  | 0 | 58  | 19 | 132 | 38  |
| 37,550 | 3  | 3 | 73  | 16 | 3  | 0 | 58  | 19 | 137 | 38  |
| 37,551 | 3  | 3 | 72  | 16 | 3  | 0 | 59  | 17 | 137 | 36  |
| 37,552 | 3  | 3 | 72  | 16 | 3  | 0 | 59  | 17 | 137 | 36  |
| 37,553 | 3  | 3 | 77  | 16 | 3  | 0 | 60  | 17 | 143 | 36  |
| 37,554 | 3  | 3 | 77  | 16 | 3  | 0 | 60  | 17 | 143 | 36  |
| 37,555 | 4  | 2 | 79  | 15 | 3  | 0 | 66  | 13 | 152 | 30  |
| 37,556 | 4  | 2 | 80  | 15 | 3  | 0 | 67  | 13 | 154 | 30  |
| 37,557 | 4  | 2 | 82  | 15 | 3  | 0 | 68  | 13 | 157 | 30  |
| 37,558 | 4  | 2 | 92  | 15 | 3  | 0 | 75  | 13 | 174 | 30  |
| 37,559 | 4  | 2 | 92  | 15 | 3  | 0 | 74  | 13 | 173 | 30  |
| 37,560 | 4  | 2 | 110 | 15 | 4  | 0 | 79  | 13 | 197 | 30  |
| 37,561 | 4  | 2 | 110 | 15 | 4  | 0 | 78  | 13 | 196 | 30  |
| 37,562 | 6  | 2 | 122 | 16 | 5  | 0 | 84  | 15 | 217 | 33  |
| 37,563 | 6  | 2 | 121 | 16 | 5  | 0 | 84  | 15 | 216 | 33  |
| 37,564 | 7  | 2 | 126 | 16 | 8  | 0 | 90  | 15 | 231 | 33  |
| 37,565 | 7  | 2 | 127 | 16 | 8  | 0 | 91  | 15 | 233 | 33  |
| 37,566 | 7  | 2 | 127 | 16 | 8  | 0 | 91  | 15 | 233 | 33  |
| 37,567 | 7  | 2 | 125 | 18 | 8  | 0 | 92  | 15 | 232 | 35  |
| 37,568 | 7  | 1 | 125 | 18 | 8  | 0 | 91  | 15 | 231 | 34  |
| 37,569 | 7  | 2 | 124 | 18 | 8  | 0 | 91  | 15 | 230 | 35  |
| 37,570 | 7  | 2 | 124 | 18 | 8  | 0 | 91  | 15 | 230 | 35  |
| 37,571 | 11 | 2 | 133 | 18 | 8  | 0 | 92  | 15 | 244 | 35  |
| 37,572 | 11 | 2 | 137 | 18 | 8  | 0 | 91  | 14 | 247 | 34  |
| 37,573 | 11 | 4 | 140 | 20 | 8  | 0 | 92  | 15 | 251 | 39  |
| 37,574 | 11 | 4 | 137 | 20 | 8  | 0 | 89  | 15 | 245 | 39  |
| 37,575 | 16 | 4 | 153 | 24 | 9  | 1 | 94  | 17 | 272 | 46  |
| 37,576 | 17 | 4 | 161 | 26 | 11 | 1 | 105 | 17 | 294 | 48  |
| 37,577 | 20 | 4 | 167 | 26 | 11 | 1 | 108 | 17 | 306 | 48  |
| 37,578 | 19 | 5 | 170 | 30 | 11 | 2 | 107 | 24 | 307 | 61  |
| 37,579 | 21 | 7 | 190 | 45 | 11 | 2 | 108 | 37 | 330 | 91  |
| 37,580 | 20 | 7 | 188 | 46 | 11 | 2 | 95  | 37 | 314 | 92  |
| 37,581 | 23 | 8 | 214 | 51 | 12 | 3 | 99  | 39 | 348 | 101 |
| 37,582 | 26 | 8 | 361 | 53 | 18 | 3 | 142 | 40 | 547 | 104 |
| 37,583 | 26 | 8 | 363 | 53 | 18 | 3 | 142 | 41 | 549 | 105 |
| 37,584 | 26 | 8 | 363 | 54 | 18 | 3 | 142 | 41 | 549 | 106 |
| 37,585 | 26 | 8 | 363 | 57 | 18 | 3 | 142 | 41 | 549 | 109 |

|        |    |    |     |    |    |   |     |    |     |     |
|--------|----|----|-----|----|----|---|-----|----|-----|-----|
| 37,586 | 25 | 7  | 363 | 57 | 18 | 3 | 142 | 40 | 548 | 107 |
| 37,587 | 25 | 7  | 363 | 53 | 18 | 3 | 142 | 36 | 548 | 99  |
| 37,588 | 25 | 7  | 362 | 54 | 18 | 3 | 143 | 35 | 548 | 99  |
| 37,589 | 25 | 7  | 358 | 54 | 18 | 3 | 143 | 34 | 544 | 98  |
| 37,590 | 25 | 7  | 351 | 51 | 18 | 3 | 139 | 31 | 533 | 92  |
| 37,591 | 25 | 7  | 347 | 51 | 18 | 3 | 136 | 31 | 526 | 92  |
| 37,592 | 25 | 7  | 346 | 52 | 18 | 3 | 136 | 31 | 525 | 93  |
| 37,593 | 25 | 7  | 341 | 46 | 17 | 3 | 130 | 30 | 513 | 86  |
| 37,594 | 25 | 7  | 341 | 46 | 17 | 3 | 130 | 30 | 513 | 86  |
| 37,595 | 25 | 7  | 341 | 46 | 17 | 3 | 130 | 30 | 513 | 86  |
| 37,596 | 25 | 7  | 338 | 46 | 17 | 3 | 129 | 31 | 509 | 87  |
| 37,597 | 25 | 8  | 333 | 46 | 16 | 3 | 120 | 31 | 494 | 88  |
| 37,598 | 25 | 9  | 330 | 46 | 16 | 3 | 119 | 32 | 490 | 90  |
| 37,599 | 25 | 9  | 327 | 47 | 16 | 3 | 117 | 32 | 485 | 91  |
| 37,600 | 25 | 9  | 327 | 47 | 16 | 3 | 117 | 32 | 485 | 91  |
| 37,601 | 25 | 10 | 323 | 47 | 15 | 3 | 117 | 32 | 480 | 92  |
| 37,602 | 25 | 10 | 323 | 47 | 15 | 3 | 116 | 32 | 479 | 92  |
| 37,603 | 25 | 10 | 322 | 47 | 15 | 3 | 115 | 32 | 477 | 92  |
| 37,604 | 25 | 10 | 318 | 54 | 15 | 3 | 115 | 35 | 473 | 102 |
| 37,605 | 24 | 10 | 316 | 54 | 15 | 3 | 111 | 35 | 466 | 102 |
| 37,606 | 27 | 10 | 317 | 58 | 15 | 3 | 109 | 35 | 468 | 106 |
| 37,607 | 27 | 10 | 321 | 58 | 15 | 3 | 108 | 35 | 471 | 106 |
| 37,608 | 27 | 10 | 318 | 59 | 15 | 3 | 106 | 36 | 466 | 108 |
| 37,609 | 27 | 10 | 307 | 60 | 15 | 3 | 99  | 36 | 448 | 109 |
| 37,610 | 27 | 10 | 295 | 63 | 14 | 3 | 96  | 40 | 432 | 116 |
| 37,611 | 27 | 10 | 288 | 63 | 14 | 3 | 94  | 40 | 423 | 116 |
| 37,612 | 27 | 11 | 281 | 76 | 14 | 4 | 92  | 41 | 414 | 132 |
| 37,613 | 25 | 11 | 275 | 75 | 13 | 4 | 89  | 40 | 402 | 130 |
| 37,614 | 24 | 13 | 274 | 82 | 10 | 4 | 85  | 40 | 393 | 139 |
| 37,615 | 24 | 13 | 273 | 82 | 10 | 4 | 85  | 40 | 392 | 139 |
| 37,616 | 24 | 13 | 273 | 83 | 10 | 4 | 84  | 40 | 391 | 140 |
| 37,617 | 24 | 13 | 274 | 85 | 10 | 5 | 84  | 40 | 392 | 143 |
| 37,618 | 24 | 13 | 274 | 85 | 10 | 5 | 84  | 40 | 392 | 143 |
| 37,619 | 24 | 14 | 274 | 91 | 10 | 5 | 84  | 40 | 392 | 150 |
| 37,620 | 24 | 13 | 274 | 91 | 10 | 5 | 84  | 40 | 392 | 149 |
| 37,621 | 21 | 13 | 265 | 91 | 10 | 5 | 85  | 40 | 381 | 149 |
| 37,622 | 22 | 13 | 298 | 91 | 11 | 5 | 97  | 40 | 428 | 149 |
| 37,623 | 22 | 11 | 340 | 90 | 12 | 5 | 120 | 39 | 494 | 145 |
| 37,624 | 22 | 11 | 350 | 90 | 12 | 5 | 125 | 39 | 509 | 145 |
| 37,625 | 18 | 11 | 333 | 91 | 11 | 5 | 121 | 39 | 483 | 146 |
| 37,626 | 17 | 11 | 322 | 86 | 9  | 4 | 110 | 38 | 458 | 139 |

|        |    |    |     |    |   |   |     |    |     |     |
|--------|----|----|-----|----|---|---|-----|----|-----|-----|
| 37,627 | 17 | 11 | 322 | 92 | 9 | 4 | 109 | 40 | 457 | 147 |
| 37,628 | 14 | 11 | 312 | 93 | 9 | 4 | 106 | 40 | 441 | 148 |
| 37,629 | 14 | 10 | 308 | 89 | 9 | 3 | 106 | 33 | 437 | 135 |
| 37,630 | 12 | 8  | 289 | 74 | 9 | 3 | 104 | 20 | 414 | 105 |
| 37,631 | 9  | 8  | 261 | 73 | 8 | 3 | 108 | 20 | 386 | 104 |
| 37,632 | 6  | 7  | 154 | 66 | 2 | 2 | 90  | 16 | 252 | 91  |
| 37,633 | 6  | 7  | 116 | 66 | 2 | 2 | 70  | 16 | 194 | 91  |
| 37,634 | 6  | 7  | 114 | 67 | 2 | 2 | 71  | 15 | 193 | 91  |
| 37,635 | 7  | 7  | 114 | 67 | 3 | 2 | 75  | 15 | 199 | 91  |
| 37,636 | 7  | 7  | 118 | 64 | 3 | 2 | 77  | 15 | 205 | 88  |
| 37,637 | 7  | 7  | 119 | 63 | 3 | 2 | 77  | 15 | 206 | 87  |
| 37,638 | 7  | 9  | 119 | 65 | 3 | 2 | 77  | 15 | 206 | 91  |
| 37,639 | 8  | 9  | 120 | 65 | 3 | 2 | 77  | 15 | 208 | 91  |
| 37,640 | 8  | 9  | 120 | 65 | 3 | 2 | 77  | 15 | 208 | 91  |
| 37,641 | 8  | 9  | 120 | 65 | 3 | 2 | 77  | 15 | 208 | 91  |
| 37,642 | 8  | 9  | 122 | 67 | 4 | 2 | 78  | 15 | 212 | 93  |
| 37,643 | 8  | 9  | 122 | 66 | 4 | 2 | 78  | 15 | 212 | 92  |
| 37,644 | 8  | 9  | 123 | 66 | 4 | 2 | 78  | 16 | 213 | 93  |
| 37,645 | 8  | 9  | 123 | 66 | 4 | 2 | 79  | 16 | 214 | 93  |
| 37,646 | 8  | 9  | 123 | 66 | 4 | 2 | 80  | 16 | 215 | 93  |
| 37,647 | 8  | 9  | 122 | 66 | 4 | 2 | 80  | 15 | 214 | 92  |
| 37,648 | 8  | 7  | 123 | 65 | 4 | 2 | 80  | 14 | 215 | 88  |
| 37,649 | 8  | 7  | 123 | 65 | 4 | 2 | 80  | 14 | 215 | 88  |
| 37,650 | 9  | 7  | 123 | 64 | 4 | 2 | 80  | 14 | 216 | 87  |
| 37,651 | 9  | 7  | 125 | 64 | 4 | 2 | 83  | 14 | 221 | 87  |
| 37,652 | 9  | 6  | 125 | 64 | 4 | 2 | 83  | 14 | 221 | 86  |
| 37,653 | 13 | 6  | 128 | 69 | 5 | 2 | 85  | 16 | 231 | 93  |
| 37,654 | 13 | 6  | 128 | 70 | 5 | 2 | 85  | 17 | 231 | 95  |
| 37,655 | 13 | 6  | 128 | 64 | 5 | 2 | 85  | 14 | 231 | 86  |
| 37,656 | 13 | 6  | 128 | 64 | 5 | 2 | 85  | 13 | 231 | 85  |
| 37,657 | 10 | 6  | 127 | 64 | 5 | 2 | 85  | 13 | 227 | 85  |
| 37,658 | 10 | 6  | 122 | 66 | 5 | 2 | 85  | 14 | 222 | 88  |
| 37,659 | 10 | 6  | 122 | 65 | 5 | 2 | 85  | 14 | 222 | 87  |
| 37,660 | 10 | 6  | 122 | 62 | 5 | 2 | 85  | 10 | 222 | 80  |
| 37,661 | 10 | 6  | 122 | 63 | 5 | 2 | 85  | 10 | 222 | 81  |
| 37,662 | 10 | 6  | 121 | 63 | 5 | 2 | 84  | 10 | 220 | 81  |
| 37,663 | 10 | 6  | 121 | 52 | 5 | 1 | 85  | 8  | 221 | 67  |
| 37,664 | 10 | 6  | 123 | 52 | 5 | 1 | 85  | 8  | 223 | 67  |
| 37,665 | 10 | 4  | 118 | 45 | 5 | 1 | 83  | 8  | 216 | 58  |
| 37,666 | 10 | 4  | 118 | 45 | 5 | 1 | 83  | 9  | 216 | 59  |
| 37,667 | 10 | 4  | 117 | 44 | 5 | 1 | 82  | 9  | 214 | 58  |

|        |    |   |     |    |   |   |     |    |     |    |
|--------|----|---|-----|----|---|---|-----|----|-----|----|
| 37,668 | 13 | 4 | 117 | 44 | 5 | 0 | 85  | 11 | 220 | 59 |
| 37,669 | 13 | 6 | 117 | 45 | 5 | 0 | 84  | 12 | 219 | 63 |
| 37,670 | 15 | 5 | 142 | 42 | 5 | 0 | 92  | 14 | 254 | 61 |
| 37,671 | 14 | 5 | 144 | 42 | 5 | 0 | 93  | 14 | 256 | 61 |
| 37,672 | 14 | 5 | 111 | 42 | 4 | 0 | 79  | 14 | 208 | 61 |
| 37,673 | 14 | 5 | 108 | 42 | 3 | 0 | 71  | 14 | 196 | 61 |
| 37,674 | 16 | 5 | 175 | 41 | 3 | 0 | 85  | 14 | 279 | 60 |
| 37,675 | 16 | 5 | 163 | 41 | 3 | 0 | 79  | 14 | 261 | 60 |
| 37,676 | 17 | 5 | 193 | 40 | 3 | 0 | 92  | 14 | 305 | 59 |
| 37,677 | 18 | 5 | 195 | 33 | 3 | 0 | 97  | 11 | 313 | 49 |
| 37,678 | 18 | 5 | 195 | 33 | 3 | 0 | 97  | 11 | 313 | 49 |
| 37,679 | 18 | 5 | 195 | 32 | 3 | 0 | 95  | 11 | 311 | 48 |
| 37,680 | 18 | 5 | 196 | 32 | 3 | 0 | 97  | 11 | 314 | 48 |
| 37,681 | 18 | 5 | 194 | 32 | 3 | 0 | 96  | 13 | 311 | 50 |
| 37,682 | 18 | 5 | 193 | 33 | 3 | 0 | 87  | 13 | 301 | 51 |
| 37,683 | 18 | 5 | 191 | 37 | 3 | 0 | 81  | 15 | 293 | 57 |
| 37,684 | 17 | 5 | 194 | 37 | 3 | 0 | 78  | 16 | 292 | 58 |
| 37,685 | 17 | 5 | 197 | 37 | 4 | 0 | 80  | 16 | 298 | 58 |
| 37,686 | 17 | 5 | 203 | 36 | 6 | 0 | 92  | 16 | 318 | 57 |
| 37,687 | 18 | 5 | 213 | 40 | 6 | 1 | 104 | 16 | 341 | 62 |
| 37,688 | 18 | 3 | 212 | 38 | 6 | 1 | 104 | 16 | 340 | 58 |
| 37,689 | 18 | 3 | 212 | 38 | 6 | 1 | 104 | 16 | 340 | 58 |
| 37,690 | 17 | 3 | 211 | 37 | 6 | 1 | 104 | 16 | 338 | 57 |
| 37,691 | 17 | 3 | 211 | 35 | 6 | 1 | 104 | 16 | 338 | 55 |
| 37,692 | 17 | 4 | 209 | 36 | 5 | 1 | 105 | 16 | 336 | 57 |
| 37,693 | 17 | 4 | 209 | 36 | 5 | 1 | 104 | 16 | 335 | 57 |
| 37,694 | 17 | 4 | 209 | 38 | 5 | 1 | 104 | 16 | 335 | 59 |
| 37,695 | 17 | 4 | 208 | 38 | 5 | 1 | 105 | 16 | 335 | 59 |
| 37,696 | 17 | 4 | 208 | 38 | 5 | 1 | 104 | 16 | 334 | 59 |
| 37,697 | 17 | 4 | 208 | 38 | 5 | 1 | 103 | 17 | 333 | 60 |
| 37,698 | 17 | 4 | 208 | 38 | 5 | 1 | 103 | 17 | 333 | 60 |
| 37,699 | 17 | 4 | 207 | 38 | 5 | 1 | 103 | 17 | 332 | 60 |
| 37,700 | 16 | 4 | 207 | 39 | 5 | 1 | 107 | 17 | 335 | 61 |
| 37,701 | 16 | 4 | 209 | 39 | 5 | 1 | 109 | 17 | 339 | 61 |
| 37,702 | 16 | 5 | 207 | 39 | 5 | 1 | 107 | 17 | 335 | 62 |
| 37,703 | 14 | 5 | 206 | 39 | 4 | 1 | 107 | 17 | 331 | 62 |
| 37,704 | 15 | 5 | 232 | 33 | 4 | 1 | 129 | 14 | 380 | 53 |
| 37,705 | 15 | 5 | 232 | 33 | 4 | 1 | 129 | 14 | 380 | 53 |
| 37,706 | 15 | 5 | 233 | 32 | 4 | 1 | 129 | 14 | 381 | 52 |
| 37,707 | 15 | 5 | 233 | 27 | 4 | 1 | 129 | 14 | 381 | 47 |
| 37,708 | 15 | 5 | 233 | 25 | 4 | 1 | 129 | 13 | 381 | 44 |



|        |    |   |     |    |    |   |     |    |     |    |
|--------|----|---|-----|----|----|---|-----|----|-----|----|
| 37,709 | 15 | 5 | 233 | 25 | 4  | 1 | 129 | 13 | 381 | 44 |
| 37,710 | 15 | 5 | 232 | 25 | 4  | 1 | 129 | 13 | 380 | 44 |
| 37,711 | 15 | 5 | 233 | 25 | 4  | 1 | 129 | 13 | 381 | 44 |
| 37,712 | 15 | 5 | 234 | 24 | 4  | 1 | 128 | 13 | 381 | 43 |
| 37,713 | 15 | 4 | 234 | 22 | 4  | 1 | 130 | 13 | 383 | 40 |
| 37,714 | 15 | 4 | 235 | 22 | 4  | 1 | 130 | 13 | 384 | 40 |
| 37,715 | 16 | 4 | 241 | 23 | 5  | 1 | 133 | 13 | 395 | 41 |
| 37,716 | 16 | 4 | 241 | 23 | 5  | 1 | 134 | 13 | 396 | 41 |
| 37,717 | 14 | 4 | 242 | 23 | 5  | 1 | 134 | 12 | 395 | 40 |
| 37,718 | 15 | 4 | 247 | 19 | 5  | 1 | 134 | 10 | 401 | 34 |
| 37,719 | 16 | 2 | 251 | 20 | 5  | 1 | 137 | 11 | 409 | 34 |
| 37,720 | 16 | 2 | 234 | 21 | 5  | 1 | 132 | 13 | 387 | 37 |
| 37,721 | 20 | 2 | 331 | 20 | 6  | 1 | 156 | 11 | 513 | 34 |
| 37,722 | 20 | 2 | 330 | 20 | 6  | 1 | 157 | 13 | 513 | 36 |
| 37,723 | 19 | 2 | 346 | 20 | 6  | 1 | 174 | 13 | 545 | 36 |
| 37,724 | 19 | 2 | 336 | 20 | 6  | 1 | 168 | 13 | 529 | 36 |
| 37,725 | 17 | 2 | 235 | 20 | 6  | 1 | 141 | 13 | 399 | 36 |
| 37,726 | 18 | 2 | 247 | 20 | 8  | 1 | 143 | 13 | 416 | 36 |
| 37,727 | 17 | 2 | 245 | 20 | 8  | 1 | 138 | 13 | 408 | 36 |
| 37,728 | 17 | 2 | 252 | 20 | 8  | 1 | 142 | 13 | 419 | 36 |
| 37,729 | 17 | 2 | 258 | 20 | 9  | 1 | 143 | 13 | 427 | 36 |
| 37,730 | 17 | 2 | 266 | 20 | 9  | 1 | 148 | 13 | 440 | 36 |
| 37,731 | 18 | 2 | 267 | 20 | 9  | 1 | 148 | 12 | 442 | 35 |
| 37,732 | 18 | 2 | 267 | 22 | 9  | 2 | 148 | 15 | 442 | 41 |
| 37,733 | 18 | 2 | 277 | 32 | 9  | 3 | 154 | 31 | 458 | 68 |
| 37,734 | 18 | 3 | 302 | 32 | 12 | 3 | 190 | 30 | 522 | 68 |
| 37,735 | 18 | 3 | 307 | 35 | 11 | 3 | 192 | 29 | 528 | 70 |
| 37,736 | 18 | 3 | 305 | 34 | 10 | 3 | 192 | 29 | 525 | 69 |
| 37,737 | 18 | 3 | 296 | 37 | 8  | 3 | 178 | 29 | 500 | 72 |
| 37,738 | 17 | 3 | 284 | 33 | 8  | 2 | 166 | 29 | 475 | 67 |
| 37,739 | 17 | 3 | 285 | 33 | 8  | 2 | 166 | 29 | 476 | 67 |
| 37,740 | 17 | 3 | 285 | 33 | 8  | 2 | 166 | 29 | 476 | 67 |
| 37,741 | 19 | 3 | 306 | 34 | 11 | 2 | 170 | 30 | 506 | 69 |
| 37,742 | 19 | 3 | 306 | 35 | 11 | 2 | 171 | 35 | 507 | 75 |
| 37,743 | 19 | 2 | 306 | 34 | 11 | 2 | 170 | 35 | 506 | 73 |
| 37,744 | 45 | 2 | 516 | 38 | 20 | 2 | 283 | 37 | 864 | 79 |
| 37,745 | 46 | 2 | 528 | 37 | 22 | 2 | 293 | 38 | 889 | 79 |
| 37,746 | 46 | 2 | 528 | 37 | 22 | 2 | 292 | 37 | 888 | 78 |
| 37,747 | 46 | 2 | 528 | 37 | 22 | 2 | 290 | 37 | 886 | 78 |
| 37,748 | 49 | 2 | 548 | 37 | 22 | 2 | 297 | 36 | 916 | 77 |
| 37,749 | 52 | 2 | 586 | 37 | 23 | 2 | 309 | 36 | 970 | 77 |

|        |    |   |     |    |    |   |     |    |       |    |
|--------|----|---|-----|----|----|---|-----|----|-------|----|
| 37,750 | 52 | 2 | 619 | 37 | 27 | 2 | 339 | 36 | 1,037 | 77 |
| 37,751 | 52 | 2 | 653 | 36 | 27 | 2 | 344 | 36 | 1,076 | 76 |
| 37,752 | 55 | 2 | 674 | 37 | 29 | 2 | 350 | 38 | 1,108 | 79 |
| 37,753 | 54 | 1 | 669 | 37 | 29 | 2 | 339 | 38 | 1,091 | 78 |
| 37,754 | 58 | 1 | 685 | 37 | 30 | 2 | 341 | 38 | 1,114 | 78 |
| 37,755 | 56 | 1 | 677 | 37 | 30 | 2 | 337 | 39 | 1,100 | 79 |
| 37,756 | 56 | 1 | 677 | 37 | 30 | 2 | 337 | 39 | 1,100 | 79 |
| 37,757 | 58 | 1 | 698 | 37 | 30 | 2 | 346 | 39 | 1,132 | 79 |
| 37,758 | 59 | 1 | 706 | 37 | 30 | 2 | 350 | 39 | 1,145 | 79 |
| 37,759 | 59 | 1 | 713 | 37 | 30 | 2 | 350 | 40 | 1,152 | 80 |
| 37,760 | 59 | 1 | 713 | 37 | 30 | 2 | 350 | 40 | 1,152 | 80 |
| 37,761 | 60 | 1 | 713 | 37 | 30 | 2 | 350 | 40 | 1,153 | 80 |
| 37,762 | 60 | 1 | 716 | 37 | 30 | 2 | 351 | 40 | 1,157 | 80 |
| 37,763 | 62 | 1 | 724 | 37 | 30 | 2 | 352 | 40 | 1,168 | 80 |
| 37,764 | 62 | 1 | 724 | 37 | 30 | 2 | 350 | 40 | 1,166 | 80 |
| 37,765 | 63 | 1 | 735 | 37 | 30 | 2 | 360 | 40 | 1,188 | 80 |
| 37,766 | 62 | 1 | 728 | 36 | 29 | 2 | 358 | 40 | 1,177 | 79 |
| 37,767 | 62 | 1 | 728 | 36 | 30 | 2 | 357 | 40 | 1,177 | 79 |
| 37,768 | 63 | 1 | 729 | 36 | 30 | 2 | 357 | 40 | 1,179 | 79 |
| 37,769 | 61 | 1 | 724 | 36 | 30 | 2 | 356 | 40 | 1,171 | 79 |
| 37,770 | 60 | 1 | 723 | 34 | 30 | 2 | 352 | 37 | 1,165 | 74 |
| 37,771 | 62 | 1 | 667 | 34 | 29 | 2 | 345 | 35 | 1,103 | 72 |
| 37,772 | 57 | 1 | 635 | 32 | 28 | 2 | 327 | 33 | 1,047 | 68 |
| 37,773 | 57 | 1 | 638 | 33 | 30 | 2 | 326 | 33 | 1,051 | 69 |
| 37,774 | 56 | 1 | 647 | 34 | 32 | 2 | 321 | 33 | 1,056 | 70 |
| 37,775 | 54 | 1 | 644 | 34 | 32 | 2 | 314 | 33 | 1,044 | 70 |
| 37,776 | 56 | 1 | 696 | 34 | 37 | 2 | 331 | 33 | 1,120 | 70 |
| 37,777 | 57 | 1 | 721 | 34 | 37 | 2 | 333 | 33 | 1,148 | 70 |
| 37,778 | 57 | 1 | 727 | 34 | 37 | 2 | 341 | 33 | 1,162 | 70 |
| 37,779 | 57 | 1 | 726 | 34 | 39 | 2 | 340 | 33 | 1,162 | 70 |
| 37,780 | 57 | 1 | 720 | 34 | 38 | 2 | 339 | 33 | 1,154 | 70 |
| 37,781 | 57 | 1 | 715 | 34 | 38 | 2 | 334 | 33 | 1,144 | 70 |
| 37,782 | 57 | 1 | 718 | 34 | 38 | 2 | 334 | 32 | 1,147 | 69 |
| 37,783 | 57 | 1 | 720 | 33 | 38 | 1 | 335 | 29 | 1,150 | 64 |
| 37,784 | 57 | 1 | 711 | 24 | 38 | 0 | 329 | 14 | 1,135 | 39 |
| 37,785 | 57 | 0 | 686 | 20 | 35 | 0 | 293 | 13 | 1,071 | 33 |
| 37,786 | 57 | 0 | 682 | 17 | 35 | 0 | 290 | 13 | 1,064 | 30 |
| 37,787 | 57 | 0 | 680 | 14 | 35 | 0 | 288 | 13 | 1,060 | 27 |
| 37,788 | 58 | 0 | 681 | 14 | 35 | 0 | 287 | 13 | 1,061 | 27 |
| 37,789 | 58 | 1 | 682 | 14 | 35 | 0 | 289 | 13 | 1,064 | 28 |
| 37,790 | 58 | 1 | 684 | 14 | 35 | 0 | 289 | 13 | 1,066 | 28 |

|        |    |   |     |    |    |   |     |    |       |    |
|--------|----|---|-----|----|----|---|-----|----|-------|----|
| 37,791 | 56 | 1 | 665 | 14 | 33 | 0 | 284 | 13 | 1,038 | 28 |
| 37,792 | 56 | 1 | 654 | 12 | 33 | 0 | 281 | 7  | 1,024 | 20 |
| 37,793 | 56 | 1 | 638 | 12 | 33 | 0 | 279 | 7  | 1,006 | 20 |
| 37,794 | 55 | 1 | 642 | 12 | 33 | 0 | 277 | 7  | 1,007 | 20 |
| 37,795 | 33 | 1 | 481 | 10 | 24 | 0 | 178 | 5  | 716   | 16 |
| 37,796 | 32 | 1 | 472 | 9  | 22 | 0 | 168 | 4  | 694   | 14 |
| 37,797 | 34 | 1 | 491 | 9  | 28 | 0 | 190 | 4  | 743   | 14 |
| 37,798 | 35 | 1 | 512 | 13 | 30 | 0 | 195 | 5  | 772   | 19 |
| 37,799 | 35 | 1 | 489 | 13 | 29 | 0 | 191 | 5  | 744   | 19 |
| 37,800 | 37 | 1 | 472 | 13 | 25 | 0 | 173 | 5  | 707   | 19 |
| 37,801 | 37 | 1 | 450 | 12 | 25 | 0 | 169 | 3  | 681   | 16 |
| 37,802 | 40 | 1 | 457 | 12 | 26 | 0 | 169 | 3  | 692   | 16 |
| 37,803 | 39 | 1 | 443 | 12 | 24 | 0 | 163 | 3  | 669   | 16 |
| 37,804 | 39 | 1 | 430 | 12 | 24 | 0 | 163 | 3  | 656   | 16 |
| 37,805 | 36 | 1 | 418 | 12 | 23 | 0 | 154 | 3  | 631   | 16 |
| 37,806 | 34 | 1 | 400 | 12 | 23 | 0 | 146 | 2  | 603   | 15 |
| 37,807 | 37 | 1 | 400 | 12 | 23 | 0 | 146 | 2  | 606   | 15 |
| 37,808 | 36 | 1 | 392 | 12 | 23 | 0 | 143 | 2  | 594   | 15 |
| 37,809 | 36 | 1 | 394 | 12 | 23 | 0 | 143 | 2  | 596   | 15 |
| 37,810 | 47 | 1 | 438 | 12 | 24 | 0 | 169 | 1  | 678   | 14 |
| 37,811 | 47 | 1 | 446 | 14 | 25 | 0 | 170 | 2  | 688   | 17 |
| 37,812 | 48 | 1 | 450 | 14 | 26 | 0 | 170 | 2  | 694   | 17 |
| 37,813 | 48 | 1 | 449 | 14 | 26 | 0 | 169 | 2  | 692   | 17 |
| 37,814 | 46 | 1 | 440 | 14 | 26 | 0 | 168 | 2  | 680   | 17 |
| 37,815 | 46 | 1 | 441 | 14 | 26 | 0 | 168 | 2  | 681   | 17 |
| 37,816 | 45 | 1 | 427 | 14 | 25 | 0 | 158 | 2  | 655   | 17 |
| 37,817 | 45 | 1 | 427 | 14 | 25 | 0 | 158 | 3  | 655   | 18 |
| 37,818 | 44 | 1 | 441 | 14 | 25 | 0 | 158 | 3  | 668   | 18 |
| 37,819 | 44 | 1 | 439 | 14 | 25 | 0 | 157 | 3  | 665   | 18 |
| 37,820 | 44 | 1 | 442 | 14 | 25 | 0 | 157 | 3  | 668   | 18 |
| 37,821 | 44 | 1 | 444 | 15 | 25 | 0 | 157 | 4  | 670   | 20 |
| 37,822 | 43 | 1 | 447 | 18 | 26 | 0 | 160 | 6  | 676   | 25 |
| 37,823 | 42 | 1 | 439 | 19 | 26 | 0 | 160 | 7  | 667   | 27 |
| 37,824 | 42 | 1 | 435 | 24 | 24 | 1 | 159 | 7  | 660   | 33 |
| 37,825 | 42 | 1 | 412 | 24 | 22 | 1 | 148 | 7  | 624   | 33 |
| 37,826 | 42 | 1 | 391 | 24 | 22 | 1 | 142 | 7  | 597   | 33 |
| 37,827 | 40 | 1 | 333 | 24 | 17 | 1 | 125 | 7  | 515   | 33 |
| 37,828 | 39 | 1 | 297 | 25 | 16 | 1 | 119 | 7  | 471   | 34 |
| 37,829 | 39 | 1 | 286 | 25 | 16 | 1 | 108 | 7  | 449   | 34 |
| 37,830 | 39 | 1 | 284 | 25 | 14 | 1 | 108 | 7  | 445   | 34 |
| 37,831 | 40 | 1 | 282 | 25 | 14 | 1 | 108 | 7  | 444   | 34 |

|        |    |   |     |    |    |   |     |    |     |    |
|--------|----|---|-----|----|----|---|-----|----|-----|----|
| 37,832 | 40 | 1 | 281 | 25 | 14 | 2 | 108 | 7  | 443 | 35 |
| 37,833 | 39 | 1 | 276 | 24 | 14 | 2 | 108 | 7  | 437 | 34 |
| 37,834 | 39 | 1 | 273 | 23 | 14 | 2 | 107 | 7  | 433 | 33 |
| 37,835 | 39 | 1 | 273 | 24 | 14 | 2 | 107 | 7  | 433 | 34 |
| 37,836 | 39 | 1 | 270 | 24 | 14 | 2 | 107 | 7  | 430 | 34 |
| 37,837 | 39 | 1 | 270 | 24 | 14 | 2 | 107 | 7  | 430 | 34 |
| 37,838 | 39 | 1 | 270 | 24 | 14 | 2 | 107 | 7  | 430 | 34 |
| 37,839 | 38 | 0 | 269 | 24 | 14 | 2 | 107 | 7  | 428 | 33 |
| 37,840 | 38 | 0 | 268 | 24 | 14 | 2 | 105 | 7  | 425 | 33 |
| 37,841 | 39 | 0 | 267 | 25 | 14 | 2 | 106 | 7  | 426 | 34 |
| 37,842 | 39 | 0 | 266 | 25 | 13 | 3 | 107 | 7  | 425 | 35 |
| 37,843 | 39 | 0 | 264 | 25 | 13 | 3 | 107 | 7  | 423 | 35 |
| 37,844 | 39 | 0 | 266 | 25 | 13 | 3 | 107 | 7  | 425 | 35 |
| 37,845 | 39 | 0 | 270 | 25 | 13 | 3 | 108 | 7  | 430 | 35 |
| 37,846 | 36 | 0 | 251 | 23 | 13 | 3 | 100 | 7  | 400 | 33 |
| 37,847 | 40 | 0 | 280 | 23 | 13 | 4 | 104 | 8  | 437 | 35 |
| 37,848 | 35 | 0 | 250 | 19 | 7  | 4 | 78  | 7  | 370 | 30 |
| 37,849 | 34 | 0 | 230 | 20 | 6  | 4 | 79  | 9  | 349 | 33 |
| 37,850 | 32 | 0 | 215 | 20 | 6  | 4 | 71  | 9  | 324 | 33 |
| 37,851 | 30 | 0 | 199 | 20 | 6  | 4 | 59  | 9  | 294 | 33 |
| 37,852 | 31 | 0 | 201 | 20 | 6  | 4 | 60  | 9  | 298 | 33 |
| 37,853 | 28 | 0 | 183 | 20 | 5  | 4 | 56  | 9  | 272 | 33 |
| 37,854 | 27 | 0 | 176 | 20 | 5  | 4 | 54  | 9  | 262 | 33 |
| 37,855 | 27 | 0 | 175 | 20 | 5  | 4 | 53  | 9  | 260 | 33 |
| 37,856 | 26 | 0 | 171 | 22 | 5  | 4 | 56  | 10 | 258 | 36 |
| 37,857 | 26 | 0 | 171 | 28 | 5  | 4 | 56  | 13 | 258 | 45 |
| 37,858 | 23 | 0 | 167 | 29 | 5  | 4 | 55  | 16 | 250 | 49 |
| 37,859 | 23 | 0 | 165 | 29 | 5  | 4 | 55  | 16 | 248 | 49 |
| 37,860 | 21 | 0 | 138 | 30 | 4  | 4 | 47  | 18 | 210 | 52 |
| 37,861 | 12 | 1 | 114 | 34 | 4  | 4 | 28  | 21 | 158 | 60 |
| 37,862 | 11 | 1 | 106 | 32 | 3  | 4 | 27  | 20 | 147 | 57 |
| 37,863 | 10 | 1 | 100 | 32 | 2  | 4 | 28  | 20 | 140 | 57 |
| 37,864 | 10 | 1 | 103 | 33 | 2  | 4 | 28  | 22 | 143 | 60 |
| 37,865 | 10 | 1 | 103 | 34 | 2  | 4 | 28  | 24 | 143 | 63 |
| 37,866 | 10 | 1 | 102 | 34 | 2  | 4 | 28  | 24 | 142 | 63 |
| 37,867 | 10 | 1 | 101 | 38 | 2  | 4 | 27  | 26 | 140 | 69 |
| 37,868 | 10 | 1 | 106 | 39 | 2  | 4 | 29  | 26 | 147 | 70 |
| 37,869 | 11 | 1 | 101 | 44 | 2  | 5 | 30  | 32 | 144 | 82 |
| 37,870 | 11 | 1 | 106 | 46 | 2  | 5 | 31  | 32 | 150 | 84 |
| 37,871 | 11 | 2 | 111 | 45 | 2  | 5 | 34  | 31 | 158 | 83 |
| 37,872 | 11 | 2 | 107 | 47 | 2  | 5 | 35  | 31 | 155 | 85 |

|        |    |   |     |    |   |   |    |    |     |    |
|--------|----|---|-----|----|---|---|----|----|-----|----|
| 37,873 | 10 | 2 | 94  | 42 | 1 | 5 | 29 | 28 | 134 | 77 |
| 37,874 | 10 | 2 | 94  | 35 | 1 | 4 | 29 | 28 | 134 | 69 |
| 37,875 | 10 | 2 | 96  | 36 | 1 | 4 | 29 | 29 | 136 | 71 |
| 37,876 | 10 | 2 | 94  | 36 | 1 | 4 | 29 | 29 | 134 | 71 |
| 37,877 | 10 | 2 | 93  | 36 | 1 | 4 | 29 | 29 | 133 | 71 |
| 37,878 | 10 | 2 | 94  | 36 | 1 | 4 | 29 | 29 | 134 | 71 |
| 37,879 | 10 | 3 | 95  | 35 | 2 | 4 | 29 | 30 | 136 | 72 |
| 37,880 | 10 | 3 | 95  | 35 | 2 | 4 | 29 | 30 | 136 | 72 |
| 37,881 | 10 | 3 | 95  | 35 | 2 | 4 | 29 | 30 | 136 | 72 |
| 37,882 | 9  | 3 | 96  | 35 | 2 | 4 | 29 | 30 | 136 | 72 |
| 37,883 | 9  | 3 | 97  | 35 | 2 | 3 | 29 | 30 | 137 | 71 |
| 37,884 | 9  | 3 | 97  | 35 | 2 | 3 | 29 | 30 | 137 | 71 |
| 37,885 | 9  | 3 | 97  | 34 | 2 | 3 | 29 | 30 | 137 | 70 |
| 37,886 | 9  | 3 | 97  | 33 | 2 | 3 | 29 | 30 | 137 | 69 |
| 37,887 | 9  | 3 | 97  | 33 | 2 | 3 | 29 | 30 | 137 | 69 |
| 37,888 | 9  | 3 | 99  | 33 | 2 | 3 | 29 | 30 | 139 | 69 |
| 37,889 | 9  | 3 | 99  | 33 | 2 | 3 | 29 | 30 | 139 | 69 |
| 37,890 | 9  | 3 | 99  | 33 | 2 | 3 | 29 | 30 | 139 | 69 |
| 37,891 | 9  | 3 | 100 | 33 | 2 | 3 | 29 | 30 | 140 | 69 |
| 37,892 | 8  | 3 | 98  | 32 | 2 | 2 | 28 | 30 | 136 | 67 |
| 37,893 | 8  | 3 | 99  | 32 | 2 | 2 | 27 | 30 | 136 | 67 |
| 37,894 | 8  | 3 | 98  | 32 | 2 | 2 | 27 | 30 | 135 | 67 |
| 37,895 | 8  | 3 | 89  | 32 | 2 | 2 | 27 | 30 | 126 | 67 |
| 37,896 | 8  | 3 | 89  | 32 | 2 | 2 | 27 | 30 | 126 | 67 |
| 37,897 | 8  | 3 | 89  | 32 | 2 | 2 | 27 | 31 | 126 | 68 |
| 37,898 | 4  | 3 | 60  | 32 | 1 | 1 | 23 | 30 | 88  | 66 |
| 37,899 | 4  | 3 | 57  | 32 | 1 | 1 | 23 | 30 | 85  | 66 |
| 37,900 | 4  | 3 | 47  | 31 | 1 | 1 | 14 | 28 | 66  | 63 |
| 37,901 | 3  | 3 | 47  | 31 | 1 | 1 | 14 | 28 | 65  | 63 |
| 37,902 | 3  | 3 | 47  | 32 | 1 | 1 | 14 | 28 | 65  | 64 |
| 37,903 | 2  | 3 | 44  | 34 | 1 | 1 | 12 | 28 | 59  | 66 |
| 37,904 | 2  | 3 | 44  | 34 | 1 | 1 | 12 | 28 | 59  | 66 |
| 37,905 | 1  | 3 | 42  | 34 | 1 | 1 | 12 | 28 | 56  | 66 |
| 37,906 | 1  | 3 | 41  | 32 | 1 | 1 | 11 | 27 | 54  | 63 |
| 37,907 | 1  | 3 | 41  | 32 | 1 | 1 | 11 | 27 | 54  | 63 |
| 37,908 | 1  | 3 | 41  | 26 | 1 | 1 | 11 | 24 | 54  | 54 |
| 37,909 | 1  | 3 | 41  | 25 | 1 | 1 | 11 | 21 | 54  | 50 |
| 37,910 | 1  | 3 | 41  | 25 | 1 | 1 | 11 | 20 | 54  | 49 |
| 37,911 | 1  | 3 | 41  | 24 | 1 | 1 | 11 | 19 | 54  | 47 |
| 37,912 | 1  | 2 | 44  | 20 | 1 | 1 | 11 | 16 | 57  | 39 |
| 37,913 | 1  | 2 | 44  | 20 | 1 | 1 | 10 | 16 | 56  | 39 |

|        |   |   |    |    |   |   |    |    |     |    |
|--------|---|---|----|----|---|---|----|----|-----|----|
| 37,914 | 1 | 2 | 44 | 19 | 1 | 1 | 14 | 14 | 60  | 36 |
| 37,915 | 1 | 2 | 41 | 19 | 1 | 1 | 14 | 12 | 57  | 34 |
| 37,916 | 1 | 2 | 41 | 26 | 1 | 1 | 14 | 14 | 57  | 43 |
| 37,917 | 1 | 2 | 41 | 27 | 1 | 1 | 15 | 14 | 58  | 44 |
| 37,918 | 1 | 2 | 42 | 23 | 1 | 1 | 16 | 13 | 60  | 39 |
| 37,919 | 2 | 2 | 38 | 22 | 1 | 1 | 14 | 12 | 55  | 37 |
| 37,920 | 1 | 2 | 35 | 18 | 1 | 0 | 13 | 8  | 50  | 28 |
| 37,921 | 5 | 1 | 39 | 16 | 1 | 0 | 21 | 8  | 66  | 25 |
| 37,922 | 5 | 1 | 32 | 14 | 1 | 0 | 18 | 8  | 56  | 23 |
| 37,923 | 5 | 1 | 32 | 14 | 1 | 0 | 17 | 8  | 55  | 23 |
| 37,924 | 5 | 1 | 43 | 15 | 1 | 0 | 16 | 9  | 65  | 25 |
| 37,925 | 5 | 1 | 44 | 15 | 1 | 0 | 16 | 9  | 66  | 25 |
| 37,926 | 5 | 1 | 68 | 14 | 2 | 0 | 48 | 8  | 123 | 23 |
| 37,927 | 5 | 1 | 68 | 14 | 2 | 0 | 48 | 8  | 123 | 23 |
| 37,928 | 5 | 1 | 67 | 14 | 2 | 0 | 48 | 8  | 122 | 23 |
| 37,929 | 5 | 0 | 80 | 14 | 3 | 0 | 61 | 7  | 149 | 21 |
| 37,930 | 5 | 0 | 82 | 14 | 3 | 0 | 62 | 7  | 152 | 21 |
| 37,931 | 5 | 0 | 82 | 14 | 3 | 0 | 62 | 7  | 152 | 21 |
| 37,932 | 5 | 0 | 81 | 14 | 3 | 0 | 62 | 7  | 151 | 21 |
| 37,933 | 5 | 0 | 83 | 14 | 3 | 0 | 62 | 7  | 153 | 21 |
| 37,934 | 5 | 0 | 83 | 14 | 3 | 0 | 62 | 7  | 153 | 21 |
| 37,935 | 5 | 0 | 83 | 14 | 3 | 0 | 62 | 7  | 153 | 21 |
| 37,936 | 5 | 0 | 80 | 15 | 3 | 0 | 62 | 7  | 150 | 22 |
| 37,937 | 5 | 0 | 80 | 15 | 3 | 0 | 62 | 7  | 150 | 22 |
| 37,938 | 5 | 0 | 80 | 15 | 3 | 0 | 62 | 7  | 150 | 22 |
| 37,939 | 5 | 0 | 80 | 15 | 3 | 0 | 62 | 7  | 150 | 22 |
| 37,940 | 5 | 0 | 80 | 15 | 3 | 0 | 62 | 7  | 150 | 22 |
| 37,941 | 5 | 0 | 80 | 15 | 3 | 0 | 62 | 7  | 150 | 22 |
| 37,942 | 5 | 0 | 79 | 15 | 3 | 0 | 62 | 7  | 149 | 22 |
| 37,943 | 5 | 0 | 79 | 15 | 3 | 0 | 62 | 7  | 149 | 22 |
| 37,944 | 5 | 0 | 79 | 15 | 3 | 0 | 62 | 7  | 149 | 22 |
| 37,945 | 5 | 0 | 78 | 15 | 3 | 0 | 62 | 6  | 148 | 21 |
| 37,946 | 5 | 0 | 78 | 15 | 3 | 0 | 62 | 6  | 148 | 21 |
| 37,947 | 5 | 0 | 78 | 15 | 3 | 0 | 61 | 6  | 147 | 21 |
| 37,948 | 5 | 0 | 78 | 15 | 3 | 0 | 62 | 6  | 148 | 21 |
| 37,949 | 5 | 0 | 78 | 15 | 3 | 0 | 62 | 6  | 148 | 21 |
| 37,950 | 5 | 0 | 79 | 16 | 3 | 0 | 62 | 6  | 149 | 22 |
| 37,951 | 5 | 0 | 79 | 16 | 3 | 0 | 65 | 6  | 152 | 22 |
| 37,952 | 5 | 0 | 79 | 17 | 3 | 0 | 67 | 6  | 154 | 23 |
| 37,953 | 5 | 0 | 79 | 16 | 3 | 0 | 67 | 6  | 154 | 22 |
| 37,954 | 5 | 0 | 83 | 14 | 3 | 0 | 68 | 6  | 159 | 20 |

|        |    |   |     |    |   |   |     |   |     |    |
|--------|----|---|-----|----|---|---|-----|---|-----|----|
| 37,955 | 5  | 0 | 86  | 14 | 3 | 0 | 69  | 6 | 163 | 20 |
| 37,956 | 5  | 0 | 86  | 14 | 3 | 0 | 69  | 6 | 163 | 20 |
| 37,957 | 5  | 0 | 99  | 15 | 3 | 0 | 73  | 6 | 180 | 21 |
| 37,958 | 5  | 0 | 99  | 15 | 3 | 0 | 73  | 6 | 180 | 21 |
| 37,959 | 8  | 0 | 145 | 15 | 3 | 0 | 104 | 7 | 260 | 22 |
| 37,960 | 8  | 0 | 145 | 17 | 3 | 0 | 104 | 8 | 260 | 25 |
| 37,961 | 8  | 0 | 145 | 18 | 3 | 0 | 104 | 8 | 260 | 26 |
| 37,962 | 10 | 0 | 144 | 18 | 3 | 0 | 105 | 8 | 262 | 26 |
| 37,963 | 10 | 0 | 146 | 18 | 4 | 0 | 107 | 8 | 267 | 26 |
| 37,964 | 10 | 1 | 145 | 18 | 4 | 0 | 103 | 8 | 262 | 27 |
| 37,965 | 12 | 2 | 149 | 18 | 4 | 0 | 107 | 8 | 272 | 28 |
| 37,966 | 12 | 2 | 149 | 18 | 4 | 0 | 107 | 9 | 272 | 29 |
| 37,967 | 13 | 2 | 176 | 11 | 6 | 0 | 129 | 7 | 324 | 20 |
| 37,968 | 14 | 2 | 188 | 9  | 7 | 0 | 151 | 4 | 360 | 15 |
| 37,969 | 14 | 2 | 186 | 9  | 7 | 0 | 150 | 4 | 357 | 15 |
| 37,970 | 13 | 2 | 184 | 9  | 7 | 0 | 151 | 4 | 355 | 15 |
| 37,971 | 13 | 2 | 184 | 9  | 7 | 0 | 151 | 4 | 355 | 15 |
| 37,972 | 9  | 2 | 174 | 9  | 7 | 0 | 142 | 4 | 332 | 15 |
| 37,973 | 9  | 2 | 174 | 9  | 7 | 0 | 142 | 4 | 332 | 15 |
| 37,974 | 9  | 2 | 168 | 8  | 7 | 0 | 142 | 3 | 326 | 13 |
| 37,975 | 9  | 2 | 162 | 9  | 7 | 0 | 142 | 3 | 320 | 14 |
| 37,976 | 9  | 2 | 161 | 9  | 7 | 0 | 142 | 3 | 319 | 14 |
| 37,977 | 9  | 2 | 135 | 9  | 6 | 0 | 110 | 3 | 260 | 14 |
| 37,978 | 9  | 2 | 125 | 9  | 4 | 0 | 104 | 3 | 242 | 14 |
| 37,979 | 9  | 2 | 123 | 9  | 4 | 0 | 103 | 3 | 239 | 14 |
| 37,980 | 9  | 2 | 121 | 9  | 4 | 0 | 97  | 5 | 231 | 16 |
| 37,981 | 9  | 2 | 119 | 9  | 4 | 0 | 96  | 5 | 228 | 16 |
| 37,982 | 9  | 2 | 117 | 11 | 4 | 1 | 96  | 6 | 226 | 20 |
| 37,983 | 9  | 2 | 116 | 12 | 4 | 1 | 96  | 6 | 225 | 21 |
| 37,984 | 9  | 2 | 116 | 12 | 4 | 1 | 97  | 6 | 226 | 21 |
| 37,985 | 9  | 2 | 116 | 12 | 4 | 1 | 97  | 6 | 226 | 21 |
| 37,986 | 9  | 2 | 116 | 12 | 4 | 1 | 97  | 6 | 226 | 21 |
| 37,987 | 9  | 2 | 117 | 11 | 4 | 1 | 97  | 6 | 227 | 20 |
| 37,988 | 9  | 2 | 117 | 11 | 4 | 1 | 97  | 6 | 227 | 20 |
| 37,989 | 9  | 2 | 117 | 11 | 4 | 1 | 97  | 6 | 227 | 20 |
| 37,990 | 9  | 2 | 117 | 11 | 4 | 1 | 97  | 6 | 227 | 20 |
| 37,991 | 9  | 2 | 117 | 11 | 4 | 1 | 97  | 6 | 227 | 20 |
| 37,992 | 9  | 2 | 118 | 11 | 4 | 1 | 97  | 6 | 228 | 20 |
| 37,993 | 9  | 2 | 118 | 11 | 4 | 1 | 97  | 6 | 228 | 20 |
| 37,994 | 9  | 2 | 118 | 11 | 4 | 1 | 97  | 6 | 228 | 20 |
| 37,995 | 9  | 2 | 117 | 11 | 4 | 1 | 97  | 6 | 227 | 20 |

|        |    |   |     |    |   |   |     |    |     |    |
|--------|----|---|-----|----|---|---|-----|----|-----|----|
| 37,996 | 10 | 2 | 121 | 11 | 4 | 1 | 98  | 6  | 233 | 20 |
| 37,997 | 10 | 2 | 121 | 11 | 4 | 1 | 98  | 6  | 233 | 20 |
| 37,998 | 10 | 2 | 121 | 11 | 4 | 1 | 98  | 6  | 233 | 20 |
| 37,999 | 10 | 2 | 122 | 11 | 4 | 1 | 97  | 6  | 233 | 20 |
| 38,000 | 10 | 2 | 122 | 11 | 4 | 1 | 98  | 6  | 234 | 20 |
| 38,001 | 11 | 2 | 127 | 10 | 4 | 1 | 100 | 7  | 242 | 20 |
| 38,002 | 11 | 2 | 128 | 12 | 4 | 1 | 97  | 7  | 240 | 22 |
| 38,003 | 11 | 2 | 128 | 11 | 4 | 1 | 95  | 7  | 238 | 21 |
| 38,004 | 12 | 2 | 128 | 11 | 4 | 1 | 95  | 8  | 239 | 22 |
| 38,005 | 12 | 2 | 124 | 12 | 4 | 1 | 95  | 11 | 235 | 26 |
| 38,006 | 15 | 2 | 157 | 13 | 5 | 2 | 117 | 12 | 294 | 29 |
| 38,007 | 15 | 2 | 157 | 13 | 5 | 2 | 118 | 12 | 295 | 29 |
| 38,008 | 15 | 2 | 145 | 12 | 5 | 2 | 115 | 12 | 280 | 28 |
| 38,009 | 15 | 2 | 146 | 12 | 5 | 2 | 116 | 12 | 282 | 28 |
| 38,010 | 12 | 2 | 105 | 10 | 5 | 2 | 88  | 10 | 210 | 24 |
| 38,011 | 12 | 2 | 108 | 10 | 5 | 2 | 91  | 10 | 216 | 24 |
| 38,012 | 12 | 2 | 108 | 13 | 5 | 4 | 93  | 14 | 218 | 33 |
| 38,013 | 10 | 2 | 108 | 14 | 5 | 5 | 95  | 19 | 218 | 40 |
| 38,014 | 10 | 2 | 105 | 16 | 5 | 5 | 98  | 20 | 218 | 43 |
| 38,015 | 10 | 1 | 103 | 18 | 5 | 5 | 98  | 20 | 216 | 44 |
| 38,016 | 8  | 0 | 101 | 20 | 5 | 5 | 97  | 20 | 211 | 45 |
| 38,017 | 7  | 0 | 73  | 20 | 3 | 5 | 74  | 20 | 157 | 45 |
| 38,018 | 6  | 0 | 61  | 20 | 2 | 4 | 57  | 20 | 126 | 44 |
| 38,019 | 8  | 0 | 64  | 20 | 2 | 5 | 53  | 20 | 127 | 45 |
| 38,020 | 8  | 0 | 67  | 22 | 2 | 5 | 54  | 20 | 131 | 47 |
| 38,021 | 8  | 0 | 67  | 23 | 2 | 5 | 53  | 20 | 130 | 48 |
| 38,022 | 8  | 0 | 67  | 23 | 2 | 5 | 53  | 20 | 130 | 48 |
| 38,023 | 8  | 0 | 67  | 24 | 2 | 5 | 53  | 20 | 130 | 49 |
| 38,024 | 8  | 0 | 67  | 24 | 2 | 5 | 53  | 20 | 130 | 49 |
| 38,025 | 10 | 0 | 114 | 24 | 4 | 5 | 62  | 20 | 190 | 49 |
| 38,026 | 10 | 0 | 114 | 23 | 4 | 5 | 62  | 20 | 190 | 48 |
| 38,027 | 10 | 0 | 114 | 23 | 4 | 5 | 62  | 20 | 190 | 48 |
| 38,028 | 10 | 0 | 133 | 23 | 4 | 5 | 69  | 21 | 216 | 49 |
| 38,029 | 10 | 0 | 136 | 23 | 4 | 5 | 70  | 21 | 220 | 49 |
| 38,030 | 10 | 0 | 137 | 23 | 4 | 5 | 70  | 19 | 221 | 47 |
| 38,031 | 10 | 0 | 137 | 23 | 4 | 5 | 70  | 20 | 221 | 48 |
| 38,032 | 11 | 0 | 140 | 23 | 4 | 5 | 70  | 20 | 225 | 48 |
| 38,033 | 11 | 0 | 143 | 21 | 4 | 4 | 72  | 20 | 230 | 45 |
| 38,034 | 11 | 0 | 147 | 22 | 4 | 4 | 73  | 20 | 235 | 46 |
| 38,035 | 12 | 0 | 165 | 26 | 4 | 4 | 82  | 22 | 263 | 52 |
| 38,036 | 12 | 0 | 165 | 27 | 4 | 5 | 82  | 22 | 263 | 54 |



|        |    |   |     |    |   |   |     |    |     |    |
|--------|----|---|-----|----|---|---|-----|----|-----|----|
| 38,037 | 12 | 0 | 164 | 27 | 4 | 5 | 82  | 22 | 262 | 54 |
| 38,038 | 12 | 0 | 193 | 27 | 4 | 5 | 102 | 23 | 311 | 55 |
| 38,039 | 13 | 0 | 214 | 27 | 5 | 5 | 105 | 23 | 337 | 55 |
| 38,040 | 14 | 1 | 238 | 28 | 5 | 5 | 107 | 23 | 364 | 57 |
| 38,041 | 14 | 1 | 238 | 28 | 5 | 5 | 107 | 23 | 364 | 57 |
| 38,042 | 14 | 1 | 248 | 28 | 5 | 5 | 109 | 23 | 376 | 57 |
| 38,043 | 14 | 1 | 249 | 29 | 5 | 5 | 109 | 23 | 377 | 58 |
| 38,044 | 14 | 1 | 249 | 29 | 5 | 5 | 109 | 23 | 377 | 58 |
| 38,045 | 14 | 1 | 249 | 30 | 5 | 5 | 110 | 25 | 378 | 61 |
| 38,046 | 14 | 1 | 249 | 30 | 5 | 5 | 108 | 25 | 376 | 61 |
| 38,047 | 13 | 1 | 250 | 30 | 5 | 5 | 109 | 25 | 377 | 61 |
| 38,048 | 16 | 1 | 277 | 30 | 8 | 5 | 128 | 25 | 429 | 61 |
| 38,049 | 18 | 2 | 308 | 31 | 8 | 5 | 150 | 25 | 484 | 63 |
| 38,050 | 18 | 2 | 320 | 32 | 8 | 5 | 157 | 25 | 503 | 64 |
| 38,051 | 18 | 2 | 320 | 32 | 8 | 5 | 157 | 25 | 503 | 64 |
| 38,052 | 17 | 2 | 317 | 32 | 8 | 5 | 156 | 24 | 498 | 63 |
| 38,053 | 20 | 2 | 352 | 30 | 8 | 5 | 163 | 24 | 543 | 61 |
| 38,054 | 19 | 2 | 352 | 31 | 8 | 5 | 163 | 23 | 542 | 61 |
| 38,055 | 19 | 2 | 352 | 30 | 8 | 5 | 162 | 20 | 541 | 57 |
| 38,056 | 19 | 2 | 352 | 30 | 8 | 5 | 162 | 20 | 541 | 57 |
| 38,057 | 16 | 2 | 317 | 29 | 7 | 4 | 140 | 19 | 480 | 54 |
| 38,058 | 16 | 2 | 318 | 29 | 7 | 4 | 139 | 19 | 480 | 54 |
| 38,059 | 16 | 2 | 317 | 29 | 7 | 4 | 139 | 19 | 479 | 54 |
| 38,060 | 16 | 2 | 315 | 30 | 7 | 4 | 138 | 21 | 476 | 57 |
| 38,061 | 16 | 2 | 311 | 30 | 7 | 4 | 136 | 21 | 470 | 57 |
| 38,062 | 16 | 2 | 308 | 29 | 7 | 4 | 133 | 21 | 464 | 56 |
| 38,063 | 16 | 2 | 308 | 25 | 7 | 1 | 131 | 11 | 462 | 39 |
| 38,064 | 16 | 2 | 307 | 26 | 7 | 1 | 128 | 11 | 458 | 40 |
| 38,065 | 16 | 2 | 307 | 26 | 6 | 1 | 123 | 11 | 452 | 40 |
| 38,066 | 16 | 2 | 308 | 21 | 6 | 1 | 121 | 11 | 451 | 35 |
| 38,067 | 16 | 2 | 308 | 22 | 6 | 1 | 120 | 11 | 450 | 36 |
| 38,068 | 16 | 2 | 308 | 24 | 6 | 1 | 120 | 10 | 450 | 37 |
| 38,069 | 16 | 2 | 308 | 24 | 6 | 2 | 120 | 10 | 450 | 38 |
| 38,070 | 14 | 3 | 305 | 30 | 6 | 2 | 119 | 13 | 444 | 48 |
| 38,071 | 14 | 3 | 303 | 35 | 6 | 2 | 118 | 16 | 441 | 56 |
| 38,072 | 14 | 5 | 302 | 43 | 5 | 3 | 118 | 25 | 439 | 76 |
| 38,073 | 14 | 5 | 280 | 46 | 4 | 3 | 115 | 27 | 413 | 81 |
| 38,074 | 14 | 5 | 279 | 47 | 4 | 3 | 115 | 29 | 412 | 84 |
| 38,075 | 12 | 5 | 256 | 54 | 4 | 3 | 109 | 30 | 381 | 92 |
| 38,076 | 12 | 5 | 245 | 54 | 4 | 3 | 105 | 30 | 366 | 92 |
| 38,077 | 12 | 5 | 248 | 54 | 4 | 3 | 105 | 30 | 369 | 92 |

|        |    |   |     |    |   |   |     |    |     |     |
|--------|----|---|-----|----|---|---|-----|----|-----|-----|
| 38,078 | 12 | 5 | 247 | 54 | 4 | 3 | 106 | 30 | 369 | 92  |
| 38,079 | 12 | 5 | 251 | 56 | 4 | 3 | 104 | 30 | 371 | 94  |
| 38,080 | 12 | 5 | 248 | 57 | 4 | 3 | 103 | 32 | 367 | 97  |
| 38,081 | 12 | 5 | 247 | 57 | 4 | 3 | 103 | 32 | 366 | 97  |
| 38,082 | 11 | 5 | 245 | 57 | 5 | 3 | 103 | 31 | 364 | 96  |
| 38,083 | 12 | 5 | 247 | 52 | 5 | 3 | 104 | 28 | 368 | 88  |
| 38,084 | 12 | 5 | 243 | 52 | 5 | 3 | 104 | 28 | 364 | 88  |
| 38,085 | 11 | 5 | 232 | 51 | 5 | 3 | 97  | 28 | 345 | 87  |
| 38,086 | 12 | 5 | 233 | 51 | 5 | 3 | 99  | 29 | 349 | 88  |
| 38,087 | 12 | 5 | 212 | 53 | 8 | 2 | 86  | 30 | 318 | 90  |
| 38,088 | 12 | 5 | 212 | 53 | 8 | 2 | 88  | 30 | 320 | 90  |
| 38,089 | 12 | 5 | 209 | 53 | 8 | 2 | 87  | 29 | 316 | 89  |
| 38,090 | 11 | 5 | 185 | 53 | 7 | 2 | 84  | 29 | 287 | 89  |
| 38,091 | 15 | 4 | 190 | 52 | 7 | 2 | 104 | 29 | 316 | 87  |
| 38,092 | 16 | 4 | 186 | 52 | 9 | 2 | 109 | 29 | 320 | 87  |
| 38,093 | 16 | 4 | 185 | 52 | 9 | 2 | 109 | 29 | 319 | 87  |
| 38,094 | 17 | 4 | 186 | 51 | 9 | 2 | 112 | 29 | 324 | 86  |
| 38,095 | 18 | 4 | 195 | 51 | 9 | 2 | 124 | 29 | 346 | 86  |
| 38,096 | 18 | 4 | 195 | 50 | 9 | 2 | 125 | 27 | 347 | 83  |
| 38,097 | 18 | 4 | 195 | 50 | 9 | 2 | 126 | 27 | 348 | 83  |
| 38,098 | 15 | 4 | 170 | 58 | 6 | 3 | 107 | 29 | 298 | 94  |
| 38,099 | 14 | 4 | 161 | 59 | 6 | 4 | 99  | 29 | 280 | 96  |
| 38,100 | 13 | 4 | 139 | 58 | 6 | 4 | 87  | 29 | 245 | 95  |
| 38,101 | 13 | 5 | 127 | 57 | 6 | 4 | 79  | 29 | 225 | 95  |
| 38,102 | 13 | 5 | 124 | 57 | 6 | 4 | 79  | 29 | 222 | 95  |
| 38,103 | 11 | 5 | 92  | 57 | 6 | 4 | 76  | 29 | 185 | 95  |
| 38,104 | 10 | 5 | 89  | 57 | 6 | 4 | 73  | 29 | 178 | 95  |
| 38,105 | 10 | 5 | 89  | 56 | 6 | 4 | 75  | 29 | 180 | 94  |
| 38,106 | 10 | 5 | 89  | 56 | 6 | 4 | 75  | 30 | 180 | 95  |
| 38,107 | 10 | 5 | 89  | 57 | 6 | 4 | 77  | 30 | 182 | 96  |
| 38,108 | 10 | 5 | 89  | 57 | 7 | 4 | 79  | 30 | 185 | 96  |
| 38,109 | 11 | 5 | 107 | 57 | 8 | 4 | 89  | 29 | 215 | 95  |
| 38,110 | 14 | 5 | 126 | 58 | 8 | 4 | 102 | 29 | 250 | 96  |
| 38,111 | 14 | 6 | 132 | 67 | 9 | 5 | 104 | 44 | 259 | 122 |
| 38,112 | 14 | 6 | 132 | 67 | 9 | 5 | 104 | 44 | 259 | 122 |
| 38,113 | 15 | 6 | 137 | 66 | 9 | 5 | 104 | 44 | 265 | 121 |
| 38,114 | 15 | 7 | 137 | 68 | 9 | 5 | 104 | 50 | 265 | 130 |
| 38,115 | 15 | 7 | 137 | 67 | 9 | 5 | 104 | 50 | 265 | 129 |
| 38,116 | 15 | 7 | 136 | 68 | 9 | 5 | 104 | 50 | 264 | 130 |
| 38,117 | 15 | 7 | 137 | 68 | 9 | 5 | 104 | 50 | 265 | 130 |
| 38,118 | 17 | 7 | 137 | 66 | 9 | 5 | 104 | 50 | 267 | 128 |

|        |    |   |     |    |    |   |     |    |     |     |
|--------|----|---|-----|----|----|---|-----|----|-----|-----|
| 38,119 | 17 | 8 | 137 | 69 | 9  | 5 | 104 | 55 | 267 | 137 |
| 38,120 | 17 | 8 | 138 | 69 | 9  | 4 | 104 | 56 | 268 | 137 |
| 38,121 | 18 | 7 | 140 | 65 | 9  | 4 | 105 | 53 | 272 | 129 |
| 38,122 | 18 | 8 | 143 | 69 | 9  | 4 | 105 | 57 | 275 | 138 |
| 38,123 | 18 | 6 | 143 | 63 | 9  | 3 | 105 | 49 | 275 | 121 |
| 38,124 | 18 | 6 | 144 | 61 | 9  | 3 | 106 | 47 | 277 | 117 |
| 38,125 | 18 | 6 | 154 | 61 | 9  | 4 | 107 | 49 | 288 | 120 |
| 38,126 | 21 | 6 | 178 | 55 | 10 | 4 | 112 | 49 | 321 | 114 |
| 38,127 | 21 | 6 | 176 | 56 | 10 | 4 | 112 | 49 | 319 | 115 |
| 38,128 | 21 | 6 | 171 | 56 | 10 | 4 | 112 | 49 | 314 | 115 |
| 38,129 | 31 | 6 | 337 | 56 | 12 | 4 | 142 | 49 | 522 | 115 |
| 38,130 | 32 | 6 | 331 | 53 | 12 | 4 | 141 | 46 | 516 | 109 |
| 38,131 | 32 | 6 | 331 | 55 | 12 | 4 | 141 | 46 | 516 | 111 |
| 38,132 | 32 | 6 | 330 | 56 | 12 | 4 | 143 | 46 | 517 | 112 |
| 38,133 | 32 | 6 | 332 | 56 | 11 | 4 | 143 | 46 | 518 | 112 |
| 38,134 | 31 | 7 | 327 | 58 | 11 | 4 | 140 | 47 | 509 | 116 |
| 38,135 | 31 | 7 | 327 | 58 | 11 | 4 | 139 | 47 | 508 | 116 |
| 38,136 | 31 | 7 | 327 | 58 | 11 | 4 | 139 | 47 | 508 | 116 |
| 38,137 | 30 | 7 | 319 | 59 | 11 | 4 | 135 | 46 | 495 | 116 |
| 38,138 | 30 | 7 | 320 | 57 | 8  | 4 | 128 | 45 | 486 | 113 |
| 38,139 | 30 | 7 | 320 | 57 | 8  | 4 | 126 | 45 | 484 | 113 |
| 38,140 | 30 | 7 | 320 | 57 | 8  | 4 | 126 | 45 | 484 | 113 |
| 38,141 | 25 | 7 | 309 | 58 | 8  | 4 | 115 | 45 | 457 | 114 |
| 38,142 | 25 | 7 | 295 | 58 | 8  | 4 | 103 | 45 | 431 | 114 |
| 38,143 | 24 | 7 | 289 | 58 | 6  | 4 | 96  | 45 | 415 | 114 |
| 38,144 | 26 | 7 | 294 | 58 | 6  | 4 | 100 | 45 | 426 | 114 |
| 38,145 | 26 | 7 | 297 | 58 | 6  | 4 | 100 | 45 | 429 | 114 |
| 38,146 | 25 | 7 | 289 | 58 | 6  | 4 | 89  | 45 | 409 | 114 |
| 38,147 | 26 | 7 | 295 | 58 | 6  | 4 | 90  | 45 | 417 | 114 |
| 38,148 | 27 | 7 | 312 | 49 | 6  | 2 | 98  | 43 | 443 | 101 |
| 38,149 | 27 | 7 | 330 | 49 | 6  | 2 | 110 | 43 | 473 | 101 |
| 38,150 | 27 | 7 | 333 | 49 | 6  | 2 | 109 | 43 | 475 | 101 |
| 38,151 | 27 | 6 | 334 | 49 | 6  | 2 | 109 | 43 | 476 | 100 |
| 38,152 | 27 | 5 | 334 | 49 | 6  | 2 | 109 | 43 | 476 | 99  |
| 38,153 | 27 | 5 | 336 | 49 | 6  | 2 | 108 | 43 | 477 | 99  |
| 38,154 | 27 | 5 | 335 | 50 | 6  | 2 | 107 | 43 | 475 | 100 |
| 38,155 | 27 | 5 | 336 | 54 | 6  | 2 | 106 | 47 | 475 | 108 |
| 38,156 | 27 | 5 | 337 | 56 | 6  | 2 | 106 | 47 | 476 | 110 |
| 38,157 | 27 | 5 | 337 | 57 | 6  | 2 | 106 | 47 | 476 | 111 |
| 38,158 | 27 | 5 | 337 | 58 | 6  | 2 | 104 | 49 | 474 | 114 |
| 38,159 | 27 | 5 | 336 | 58 | 5  | 2 | 101 | 49 | 469 | 114 |

|        |    |   |     |    |   |   |    |    |     |     |
|--------|----|---|-----|----|---|---|----|----|-----|-----|
| 38,160 | 26 | 5 | 321 | 57 | 3 | 2 | 92 | 49 | 442 | 113 |
| 38,161 | 23 | 5 | 302 | 59 | 3 | 2 | 78 | 50 | 406 | 116 |
| 38,162 | 23 | 4 | 295 | 50 | 3 | 1 | 75 | 34 | 396 | 89  |
| 38,163 | 22 | 4 | 293 | 54 | 3 | 1 | 75 | 34 | 393 | 93  |
| 38,164 | 22 | 4 | 288 | 54 | 3 | 1 | 75 | 34 | 388 | 93  |
| 38,165 | 22 | 3 | 291 | 52 | 3 | 1 | 75 | 28 | 391 | 84  |
| 38,166 | 22 | 3 | 291 | 52 | 3 | 1 | 75 | 28 | 391 | 84  |
| 38,167 | 22 | 3 | 290 | 51 | 3 | 1 | 75 | 28 | 390 | 83  |
| 38,168 | 20 | 3 | 290 | 51 | 3 | 1 | 75 | 28 | 388 | 83  |
| 38,169 | 20 | 3 | 290 | 50 | 3 | 1 | 75 | 28 | 388 | 82  |
| 38,170 | 19 | 2 | 289 | 47 | 3 | 1 | 75 | 22 | 386 | 72  |
| 38,171 | 19 | 2 | 287 | 45 | 3 | 1 | 74 | 23 | 383 | 71  |
| 38,172 | 19 | 2 | 287 | 52 | 3 | 1 | 74 | 24 | 383 | 79  |
| 38,173 | 19 | 1 | 283 | 44 | 3 | 1 | 74 | 19 | 379 | 65  |
| 38,174 | 19 | 1 | 282 | 41 | 3 | 1 | 73 | 20 | 377 | 63  |
| 38,175 | 19 | 1 | 281 | 41 | 3 | 1 | 73 | 20 | 376 | 63  |
| 38,176 | 19 | 1 | 275 | 40 | 3 | 1 | 72 | 17 | 369 | 59  |
| 38,177 | 16 | 1 | 250 | 39 | 2 | 1 | 67 | 16 | 335 | 57  |
| 38,178 | 12 | 1 | 131 | 38 | 0 | 1 | 54 | 16 | 197 | 56  |
| 38,179 | 6  | 1 | 86  | 38 | 0 | 1 | 36 | 17 | 128 | 57  |
| 38,180 | 6  | 1 | 82  | 38 | 0 | 1 | 36 | 17 | 124 | 57  |
| 38,181 | 5  | 1 | 82  | 36 | 0 | 1 | 36 | 17 | 123 | 55  |
| 38,182 | 5  | 1 | 82  | 36 | 0 | 1 | 34 | 17 | 121 | 55  |
| 38,183 | 5  | 1 | 82  | 35 | 0 | 1 | 34 | 17 | 121 | 54  |
| 38,184 | 5  | 1 | 81  | 36 | 0 | 1 | 34 | 17 | 120 | 55  |
| 38,185 | 5  | 0 | 81  | 34 | 0 | 1 | 34 | 16 | 120 | 51  |
| 38,186 | 5  | 0 | 81  | 34 | 0 | 1 | 34 | 16 | 120 | 51  |
| 38,187 | 5  | 0 | 82  | 33 | 0 | 1 | 35 | 16 | 122 | 50  |
| 38,188 | 5  | 0 | 82  | 33 | 0 | 1 | 35 | 16 | 122 | 50  |
| 38,189 | 5  | 0 | 77  | 32 | 0 | 1 | 35 | 16 | 117 | 49  |
| 38,190 | 5  | 0 | 76  | 32 | 0 | 1 | 35 | 16 | 116 | 49  |
| 38,191 | 5  | 0 | 76  | 31 | 0 | 1 | 35 | 16 | 116 | 48  |
| 38,192 | 5  | 0 | 76  | 31 | 0 | 1 | 35 | 16 | 116 | 48  |
| 38,193 | 5  | 0 | 76  | 31 | 0 | 1 | 35 | 16 | 116 | 48  |
| 38,194 | 5  | 0 | 76  | 36 | 0 | 1 | 35 | 16 | 116 | 53  |
| 38,195 | 2  | 0 | 69  | 38 | 0 | 1 | 28 | 16 | 99  | 55  |
| 38,196 | 2  | 0 | 67  | 39 | 0 | 1 | 28 | 16 | 97  | 56  |
| 38,197 | 2  | 0 | 66  | 39 | 0 | 1 | 27 | 16 | 95  | 56  |
| 38,198 | 1  | 0 | 58  | 40 | 0 | 1 | 24 | 16 | 83  | 57  |
| 38,199 | 0  | 0 | 38  | 41 | 0 | 1 | 14 | 16 | 52  | 58  |
| 38,200 | 0  | 0 | 18  | 41 | 0 | 1 | 3  | 16 | 21  | 58  |

|        |    |   |     |    |    |   |     |    |     |    |
|--------|----|---|-----|----|----|---|-----|----|-----|----|
| 38,201 | 0  | 0 | 14  | 41 | 0  | 1 | 3   | 17 | 17  | 59 |
| 38,202 | 1  | 0 | 15  | 41 | 0  | 1 | 6   | 17 | 22  | 59 |
| 38,203 | 1  | 0 | 21  | 41 | 0  | 2 | 16  | 17 | 38  | 60 |
| 38,204 | 1  | 0 | 19  | 41 | 0  | 2 | 16  | 17 | 36  | 60 |
| 38,205 | 1  | 0 | 18  | 40 | 0  | 2 | 15  | 17 | 34  | 59 |
| 38,206 | 1  | 0 | 19  | 37 | 0  | 2 | 16  | 13 | 36  | 52 |
| 38,207 | 1  | 0 | 18  | 35 | 0  | 2 | 16  | 13 | 35  | 50 |
| 38,208 | 2  | 0 | 19  | 34 | 1  | 2 | 20  | 12 | 42  | 48 |
| 38,209 | 3  | 0 | 20  | 32 | 1  | 2 | 23  | 10 | 47  | 44 |
| 38,210 | 3  | 0 | 26  | 32 | 1  | 2 | 28  | 10 | 58  | 44 |
| 38,211 | 3  | 0 | 24  | 29 | 1  | 2 | 27  | 8  | 55  | 39 |
| 38,212 | 3  | 0 | 24  | 29 | 1  | 2 | 27  | 8  | 55  | 39 |
| 38,213 | 3  | 0 | 24  | 29 | 1  | 2 | 27  | 8  | 55  | 39 |
| 38,214 | 3  | 0 | 24  | 24 | 1  | 2 | 27  | 8  | 55  | 34 |
| 38,215 | 4  | 0 | 24  | 24 | 1  | 2 | 27  | 8  | 56  | 34 |
| 38,216 | 4  | 0 | 24  | 24 | 1  | 2 | 27  | 8  | 56  | 34 |
| 38,217 | 4  | 0 | 29  | 24 | 1  | 2 | 33  | 8  | 67  | 34 |
| 38,218 | 4  | 0 | 33  | 24 | 1  | 2 | 34  | 8  | 72  | 34 |
| 38,219 | 4  | 0 | 35  | 24 | 1  | 2 | 34  | 7  | 74  | 33 |
| 38,220 | 4  | 0 | 36  | 14 | 1  | 2 | 35  | 4  | 76  | 20 |
| 38,221 | 4  | 0 | 37  | 14 | 1  | 2 | 35  | 4  | 77  | 20 |
| 38,222 | 4  | 0 | 39  | 14 | 1  | 2 | 35  | 4  | 79  | 20 |
| 38,223 | 4  | 0 | 39  | 14 | 1  | 2 | 35  | 4  | 79  | 20 |
| 38,224 | 4  | 0 | 43  | 14 | 1  | 2 | 36  | 4  | 84  | 20 |
| 38,225 | 4  | 0 | 43  | 14 | 1  | 2 | 36  | 4  | 84  | 20 |
| 38,226 | 4  | 0 | 42  | 13 | 1  | 2 | 36  | 3  | 83  | 18 |
| 38,227 | 4  | 0 | 55  | 13 | 1  | 1 | 36  | 2  | 96  | 16 |
| 38,228 | 4  | 0 | 56  | 13 | 1  | 1 | 36  | 3  | 97  | 17 |
| 38,229 | 15 | 0 | 88  | 14 | 2  | 1 | 57  | 3  | 162 | 18 |
| 38,230 | 16 | 0 | 90  | 14 | 2  | 1 | 59  | 2  | 167 | 17 |
| 38,231 | 16 | 0 | 101 | 14 | 2  | 1 | 61  | 2  | 180 | 17 |
| 38,232 | 24 | 1 | 198 | 14 | 5  | 1 | 93  | 2  | 320 | 18 |
| 38,233 | 28 | 1 | 231 | 15 | 6  | 1 | 114 | 2  | 379 | 19 |
| 38,234 | 33 | 2 | 286 | 17 | 9  | 1 | 151 | 2  | 479 | 22 |
| 38,235 | 34 | 2 | 288 | 17 | 9  | 1 | 158 | 3  | 489 | 23 |
| 38,236 | 35 | 2 | 290 | 17 | 9  | 1 | 159 | 3  | 493 | 23 |
| 38,237 | 36 | 2 | 291 | 17 | 9  | 1 | 159 | 3  | 495 | 23 |
| 38,238 | 36 | 2 | 290 | 17 | 9  | 1 | 160 | 3  | 495 | 23 |
| 38,239 | 36 | 2 | 296 | 17 | 9  | 1 | 160 | 3  | 501 | 23 |
| 38,240 | 36 | 2 | 296 | 17 | 9  | 1 | 160 | 3  | 501 | 23 |
| 38,241 | 43 | 2 | 311 | 17 | 10 | 1 | 167 | 3  | 531 | 23 |

|        |    |   |     |    |    |   |     |   |     |    |
|--------|----|---|-----|----|----|---|-----|---|-----|----|
| 38,242 | 43 | 2 | 311 | 17 | 10 | 1 | 167 | 3 | 531 | 23 |
| 38,243 | 44 | 2 | 312 | 17 | 10 | 1 | 169 | 3 | 535 | 23 |
| 38,244 | 44 | 2 | 314 | 18 | 10 | 1 | 169 | 3 | 537 | 24 |
| 38,245 | 52 | 2 | 357 | 13 | 16 | 1 | 194 | 3 | 619 | 19 |
| 38,246 | 52 | 2 | 367 | 11 | 16 | 1 | 206 | 3 | 641 | 17 |
| 38,247 | 52 | 2 | 369 | 10 | 17 | 1 | 208 | 3 | 646 | 16 |
| 38,248 | 52 | 2 | 369 | 10 | 17 | 1 | 208 | 3 | 646 | 16 |
| 38,249 | 53 | 2 | 369 | 9  | 17 | 1 | 218 | 3 | 657 | 15 |
| 38,250 | 53 | 2 | 371 | 8  | 17 | 1 | 219 | 3 | 660 | 14 |
| 38,251 | 53 | 2 | 373 | 8  | 17 | 1 | 222 | 3 | 665 | 14 |
| 38,252 | 53 | 2 | 373 | 8  | 17 | 1 | 221 | 2 | 664 | 13 |
| 38,253 | 52 | 2 | 372 | 8  | 17 | 1 | 219 | 2 | 660 | 13 |
| 38,254 | 52 | 2 | 368 | 8  | 17 | 0 | 209 | 2 | 646 | 12 |
| 38,255 | 52 | 2 | 367 | 8  | 17 | 0 | 208 | 2 | 644 | 12 |
| 38,256 | 52 | 2 | 380 | 9  | 16 | 0 | 207 | 4 | 655 | 15 |
| 38,257 | 51 | 2 | 392 | 12 | 16 | 0 | 221 | 4 | 680 | 18 |
| 38,258 | 51 | 2 | 399 | 12 | 16 | 0 | 221 | 4 | 687 | 18 |
| 38,259 | 53 | 2 | 401 | 15 | 16 | 0 | 220 | 4 | 690 | 21 |
| 38,260 | 54 | 2 | 405 | 15 | 16 | 0 | 221 | 4 | 696 | 21 |
| 38,261 | 54 | 2 | 399 | 16 | 16 | 0 | 216 | 4 | 685 | 22 |
| 38,262 | 54 | 2 | 397 | 16 | 16 | 0 | 216 | 4 | 683 | 22 |
| 38,263 | 54 | 2 | 398 | 16 | 16 | 0 | 216 | 5 | 684 | 23 |
| 38,264 | 54 | 2 | 400 | 16 | 16 | 0 | 220 | 5 | 690 | 23 |
| 38,265 | 54 | 2 | 400 | 16 | 16 | 0 | 221 | 5 | 691 | 23 |
| 38,266 | 53 | 2 | 400 | 16 | 16 | 0 | 221 | 5 | 690 | 23 |
| 38,267 | 53 | 2 | 403 | 16 | 16 | 0 | 222 | 5 | 694 | 23 |
| 38,268 | 53 | 2 | 399 | 16 | 16 | 0 | 216 | 5 | 684 | 23 |
| 38,269 | 53 | 2 | 395 | 16 | 16 | 0 | 215 | 5 | 679 | 23 |
| 38,270 | 53 | 2 | 393 | 16 | 16 | 0 | 215 | 5 | 677 | 23 |
| 38,271 | 53 | 2 | 392 | 16 | 16 | 0 | 214 | 5 | 675 | 23 |
| 38,272 | 53 | 2 | 402 | 16 | 16 | 0 | 218 | 5 | 689 | 23 |
| 38,273 | 53 | 2 | 400 | 16 | 16 | 0 | 218 | 5 | 687 | 23 |
| 38,274 | 57 | 2 | 438 | 16 | 16 | 0 | 250 | 5 | 761 | 23 |
| 38,275 | 62 | 2 | 497 | 16 | 18 | 0 | 277 | 5 | 854 | 23 |
| 38,276 | 63 | 2 | 497 | 16 | 18 | 0 | 277 | 5 | 855 | 23 |
| 38,277 | 65 | 2 | 509 | 15 | 20 | 0 | 283 | 5 | 877 | 22 |
| 38,278 | 65 | 2 | 512 | 15 | 20 | 0 | 288 | 4 | 885 | 21 |
| 38,279 | 65 | 2 | 511 | 15 | 20 | 0 | 288 | 4 | 884 | 21 |
| 38,280 | 54 | 2 | 482 | 14 | 19 | 0 | 271 | 4 | 826 | 20 |
| 38,281 | 53 | 2 | 482 | 14 | 19 | 0 | 269 | 4 | 823 | 20 |
| 38,282 | 53 | 2 | 475 | 14 | 19 | 0 | 270 | 4 | 817 | 20 |

|        |    |   |     |    |    |   |     |   |     |    |
|--------|----|---|-----|----|----|---|-----|---|-----|----|
| 38,283 | 45 | 1 | 379 | 14 | 16 | 0 | 239 | 4 | 679 | 19 |
| 38,284 | 41 | 1 | 345 | 14 | 15 | 0 | 218 | 4 | 619 | 19 |
| 38,285 | 36 | 0 | 290 | 11 | 12 | 0 | 181 | 3 | 519 | 14 |
| 38,286 | 35 | 0 | 288 | 11 | 12 | 0 | 174 | 3 | 509 | 14 |
| 38,287 | 34 | 0 | 285 | 12 | 12 | 0 | 173 | 3 | 504 | 15 |
| 38,288 | 33 | 0 | 284 | 12 | 12 | 0 | 173 | 3 | 502 | 15 |
| 38,289 | 33 | 0 | 285 | 13 | 12 | 0 | 171 | 3 | 501 | 16 |
| 38,290 | 33 | 0 | 280 | 13 | 12 | 0 | 172 | 3 | 497 | 16 |
| 38,291 | 33 | 0 | 280 | 13 | 12 | 0 | 172 | 3 | 497 | 16 |
| 38,292 | 28 | 0 | 265 | 13 | 11 | 0 | 168 | 3 | 472 | 16 |
| 38,293 | 27 | 0 | 264 | 13 | 11 | 0 | 166 | 3 | 468 | 16 |
| 38,294 | 27 | 0 | 261 | 13 | 11 | 0 | 166 | 3 | 465 | 16 |
| 38,295 | 20 | 0 | 218 | 13 | 5  | 0 | 143 | 3 | 386 | 16 |
| 38,296 | 19 | 0 | 217 | 15 | 5  | 0 | 143 | 4 | 384 | 19 |
| 38,297 | 19 | 0 | 207 | 15 | 5  | 0 | 131 | 4 | 362 | 19 |
| 38,298 | 19 | 0 | 205 | 15 | 4  | 0 | 129 | 4 | 357 | 19 |
| 38,299 | 18 | 0 | 206 | 15 | 4  | 0 | 119 | 4 | 347 | 19 |
| 38,300 | 18 | 0 | 204 | 17 | 4  | 0 | 118 | 7 | 344 | 24 |
| 38,301 | 18 | 0 | 203 | 17 | 4  | 0 | 115 | 7 | 340 | 24 |
| 38,302 | 19 | 0 | 211 | 18 | 4  | 0 | 117 | 7 | 351 | 25 |
| 38,303 | 20 | 0 | 218 | 18 | 5  | 0 | 123 | 7 | 366 | 25 |
| 38,304 | 20 | 0 | 219 | 18 | 5  | 0 | 125 | 7 | 369 | 25 |
| 38,305 | 20 | 0 | 222 | 19 | 5  | 0 | 128 | 7 | 375 | 26 |
| 38,306 | 21 | 0 | 222 | 22 | 5  | 0 | 127 | 8 | 375 | 30 |
| 38,307 | 22 | 1 | 217 | 22 | 5  | 0 | 127 | 6 | 371 | 29 |
| 38,308 | 26 | 1 | 207 | 18 | 5  | 0 | 113 | 6 | 351 | 25 |
| 38,309 | 26 | 1 | 203 | 18 | 8  | 0 | 114 | 6 | 351 | 25 |
| 38,310 | 23 | 1 | 211 | 16 | 9  | 0 | 119 | 6 | 362 | 23 |
| 38,311 | 22 | 1 | 206 | 16 | 9  | 0 | 119 | 6 | 356 | 23 |
| 38,312 | 26 | 1 | 260 | 18 | 10 | 0 | 143 | 7 | 439 | 26 |
| 38,313 | 29 | 1 | 287 | 18 | 11 | 0 | 172 | 7 | 499 | 26 |
| 38,314 | 34 | 1 | 302 | 18 | 11 | 0 | 179 | 6 | 526 | 25 |
| 38,315 | 35 | 1 | 304 | 18 | 12 | 0 | 181 | 6 | 532 | 25 |
| 38,316 | 36 | 1 | 312 | 18 | 12 | 0 | 183 | 6 | 543 | 25 |
| 38,317 | 36 | 1 | 312 | 18 | 12 | 0 | 184 | 6 | 544 | 25 |
| 38,318 | 36 | 1 | 314 | 18 | 12 | 0 | 184 | 6 | 546 | 25 |
| 38,319 | 36 | 1 | 315 | 18 | 12 | 0 | 184 | 6 | 547 | 25 |
| 38,320 | 36 | 1 | 318 | 18 | 12 | 0 | 186 | 6 | 552 | 25 |
| 38,321 | 36 | 1 | 298 | 15 | 13 | 0 | 185 | 5 | 532 | 21 |
| 38,322 | 38 | 1 | 349 | 18 | 15 | 0 | 215 | 6 | 617 | 25 |
| 38,323 | 39 | 1 | 374 | 19 | 16 | 0 | 228 | 6 | 657 | 26 |

|        |    |   |     |    |    |   |     |   |     |    |
|--------|----|---|-----|----|----|---|-----|---|-----|----|
| 38,324 | 35 | 1 | 342 | 20 | 16 | 0 | 198 | 6 | 591 | 27 |
| 38,325 | 30 | 1 | 286 | 21 | 14 | 0 | 182 | 6 | 512 | 28 |
| 38,326 | 30 | 1 | 286 | 23 | 14 | 0 | 183 | 6 | 513 | 30 |
| 38,327 | 29 | 2 | 286 | 23 | 14 | 0 | 185 | 6 | 514 | 31 |
| 38,328 | 27 | 2 | 276 | 23 | 12 | 0 | 181 | 6 | 496 | 31 |
| 38,329 | 28 | 2 | 268 | 23 | 13 | 0 | 177 | 7 | 486 | 32 |
| 38,330 | 28 | 2 | 269 | 23 | 13 | 0 | 174 | 7 | 484 | 32 |
| 38,331 | 28 | 2 | 272 | 23 | 13 | 0 | 176 | 7 | 489 | 32 |
| 38,332 | 28 | 2 | 275 | 26 | 13 | 0 | 178 | 7 | 494 | 35 |
| 38,333 | 28 | 2 | 279 | 26 | 13 | 0 | 181 | 7 | 501 | 35 |
| 38,334 | 31 | 2 | 286 | 25 | 14 | 0 | 189 | 7 | 520 | 34 |
| 38,335 | 32 | 2 | 292 | 25 | 14 | 0 | 193 | 7 | 531 | 34 |
| 38,336 | 32 | 2 | 292 | 25 | 14 | 0 | 193 | 7 | 531 | 34 |
| 38,337 | 32 | 2 | 321 | 24 | 14 | 0 | 195 | 7 | 562 | 33 |
| 38,338 | 34 | 2 | 359 | 24 | 21 | 0 | 243 | 7 | 657 | 33 |
| 38,339 | 34 | 2 | 359 | 23 | 21 | 0 | 244 | 7 | 658 | 32 |
| 38,340 | 34 | 2 | 366 | 23 | 21 | 0 | 252 | 7 | 673 | 32 |
| 38,341 | 34 | 2 | 367 | 23 | 21 | 0 | 252 | 7 | 674 | 32 |
| 38,342 | 34 | 2 | 370 | 23 | 22 | 0 | 252 | 7 | 678 | 32 |
| 38,343 | 32 | 2 | 370 | 23 | 22 | 0 | 249 | 7 | 673 | 32 |
| 38,344 | 32 | 2 | 371 | 23 | 22 | 0 | 249 | 7 | 674 | 32 |
| 38,345 | 32 | 2 | 371 | 22 | 22 | 0 | 249 | 6 | 674 | 30 |
| 38,346 | 32 | 2 | 371 | 22 | 22 | 0 | 249 | 6 | 674 | 30 |
| 38,347 | 32 | 2 | 371 | 20 | 22 | 0 | 247 | 6 | 672 | 28 |
| 38,348 | 32 | 2 | 370 | 20 | 22 | 0 | 247 | 6 | 671 | 28 |
| 38,349 | 32 | 2 | 372 | 20 | 22 | 0 | 247 | 6 | 673 | 28 |
| 38,350 | 32 | 2 | 372 | 20 | 22 | 0 | 247 | 6 | 673 | 28 |
| 38,351 | 31 | 2 | 371 | 18 | 22 | 0 | 247 | 3 | 671 | 23 |
| 38,352 | 31 | 2 | 364 | 18 | 22 | 0 | 246 | 3 | 663 | 23 |
| 38,353 | 30 | 2 | 356 | 18 | 21 | 0 | 239 | 3 | 646 | 23 |
| 38,354 | 30 | 2 | 355 | 17 | 21 | 0 | 236 | 3 | 642 | 22 |
| 38,355 | 30 | 2 | 355 | 14 | 21 | 0 | 237 | 2 | 643 | 18 |
| 38,356 | 30 | 2 | 367 | 14 | 21 | 0 | 245 | 2 | 663 | 18 |
| 38,357 | 29 | 2 | 362 | 14 | 21 | 0 | 243 | 2 | 655 | 18 |
| 38,358 | 28 | 1 | 364 | 12 | 22 | 0 | 245 | 2 | 659 | 15 |
| 38,359 | 24 | 1 | 382 | 12 | 22 | 0 | 268 | 2 | 696 | 15 |
| 38,360 | 24 | 1 | 381 | 12 | 19 | 0 | 268 | 2 | 692 | 15 |
| 38,361 | 24 | 1 | 371 | 11 | 18 | 0 | 264 | 2 | 677 | 14 |
| 38,362 | 23 | 1 | 342 | 11 | 17 | 0 | 243 | 3 | 625 | 15 |
| 38,363 | 21 | 1 | 316 | 9  | 17 | 0 | 239 | 3 | 593 | 13 |
| 38,364 | 14 | 1 | 287 | 8  | 16 | 0 | 202 | 3 | 519 | 12 |



|        |    |   |     |    |    |   |     |    |     |    |
|--------|----|---|-----|----|----|---|-----|----|-----|----|
| 38,365 | 11 | 1 | 275 | 8  | 15 | 0 | 196 | 3  | 497 | 12 |
| 38,366 | 11 | 1 | 272 | 8  | 15 | 0 | 194 | 3  | 492 | 12 |
| 38,367 | 10 | 1 | 266 | 8  | 15 | 0 | 192 | 3  | 483 | 12 |
| 38,368 | 10 | 1 | 268 | 8  | 16 | 0 | 193 | 3  | 487 | 12 |
| 38,369 | 10 | 1 | 268 | 8  | 16 | 0 | 193 | 4  | 487 | 13 |
| 38,370 | 14 | 1 | 378 | 9  | 19 | 0 | 221 | 4  | 632 | 14 |
| 38,371 | 15 | 1 | 405 | 9  | 21 | 0 | 237 | 4  | 678 | 14 |
| 38,372 | 17 | 1 | 522 | 9  | 23 | 0 | 240 | 4  | 802 | 14 |
| 38,373 | 18 | 1 | 505 | 8  | 21 | 0 | 220 | 4  | 764 | 13 |
| 38,374 | 17 | 1 | 492 | 7  | 22 | 0 | 207 | 4  | 738 | 12 |
| 38,375 | 17 | 1 | 485 | 7  | 22 | 0 | 204 | 4  | 728 | 12 |
| 38,376 | 17 | 0 | 481 | 4  | 22 | 0 | 195 | 3  | 715 | 7  |
| 38,377 | 17 | 0 | 477 | 4  | 22 | 0 | 192 | 3  | 708 | 7  |
| 38,378 | 17 | 0 | 473 | 4  | 22 | 0 | 190 | 3  | 702 | 7  |
| 38,379 | 17 | 0 | 469 | 4  | 22 | 0 | 189 | 3  | 697 | 7  |
| 38,380 | 16 | 0 | 476 | 4  | 21 | 0 | 188 | 3  | 701 | 7  |
| 38,381 | 18 | 0 | 473 | 4  | 21 | 0 | 187 | 3  | 699 | 7  |
| 38,382 | 18 | 0 | 469 | 4  | 21 | 0 | 185 | 3  | 693 | 7  |
| 38,383 | 18 | 0 | 465 | 1  | 21 | 0 | 184 | 3  | 688 | 4  |
| 38,384 | 18 | 0 | 457 | 1  | 21 | 0 | 178 | 3  | 674 | 4  |
| 38,385 | 15 | 0 | 451 | 1  | 20 | 0 | 170 | 3  | 656 | 4  |
| 38,386 | 14 | 0 | 445 | 1  | 20 | 0 | 168 | 3  | 647 | 4  |
| 38,387 | 14 | 0 | 441 | 1  | 20 | 0 | 168 | 3  | 643 | 4  |
| 38,388 | 15 | 0 | 418 | 1  | 20 | 0 | 166 | 3  | 619 | 4  |
| 38,389 | 13 | 0 | 382 | 1  | 13 | 0 | 118 | 3  | 526 | 4  |
| 38,390 | 13 | 0 | 382 | 1  | 13 | 0 | 116 | 3  | 524 | 4  |
| 38,391 | 13 | 0 | 375 | 1  | 13 | 0 | 109 | 3  | 510 | 4  |
| 38,392 | 13 | 0 | 373 | 1  | 13 | 0 | 108 | 3  | 507 | 4  |
| 38,393 | 13 | 0 | 370 | 1  | 12 | 0 | 108 | 5  | 503 | 6  |
| 38,394 | 13 | 0 | 370 | 1  | 12 | 0 | 108 | 5  | 503 | 6  |
| 38,395 | 13 | 0 | 376 | 2  | 12 | 0 | 110 | 5  | 511 | 7  |
| 38,396 | 13 | 1 | 376 | 2  | 12 | 0 | 110 | 5  | 511 | 8  |
| 38,397 | 13 | 1 | 375 | 2  | 12 | 0 | 110 | 5  | 510 | 8  |
| 38,398 | 13 | 1 | 380 | 2  | 13 | 0 | 111 | 5  | 517 | 8  |
| 38,399 | 13 | 1 | 378 | 2  | 13 | 0 | 111 | 5  | 515 | 8  |
| 38,400 | 13 | 1 | 379 | 2  | 13 | 0 | 111 | 5  | 516 | 8  |
| 38,401 | 13 | 1 | 379 | 2  | 13 | 0 | 111 | 5  | 516 | 8  |
| 38,402 | 13 | 1 | 379 | 3  | 13 | 0 | 111 | 6  | 516 | 10 |
| 38,403 | 13 | 1 | 420 | 6  | 14 | 0 | 114 | 6  | 561 | 13 |
| 38,404 | 17 | 2 | 447 | 10 | 14 | 0 | 126 | 8  | 604 | 20 |
| 38,405 | 18 | 4 | 486 | 22 | 16 | 2 | 127 | 20 | 647 | 48 |

|        |    |   |     |    |    |   |     |    |     |     |
|--------|----|---|-----|----|----|---|-----|----|-----|-----|
| 38,406 | 18 | 4 | 489 | 24 | 16 | 3 | 126 | 20 | 649 | 51  |
| 38,407 | 18 | 4 | 479 | 27 | 16 | 3 | 117 | 23 | 630 | 57  |
| 38,408 | 19 | 4 | 486 | 27 | 15 | 3 | 124 | 23 | 644 | 57  |
| 38,409 | 20 | 5 | 473 | 30 | 15 | 3 | 102 | 24 | 610 | 62  |
| 38,410 | 20 | 5 | 472 | 30 | 16 | 3 | 100 | 24 | 608 | 62  |
| 38,411 | 20 | 5 | 471 | 31 | 16 | 3 | 100 | 24 | 607 | 63  |
| 38,412 | 23 | 5 | 519 | 32 | 18 | 3 | 118 | 24 | 678 | 64  |
| 38,413 | 23 | 5 | 518 | 33 | 18 | 3 | 118 | 23 | 677 | 64  |
| 38,414 | 31 | 5 | 562 | 33 | 22 | 3 | 146 | 23 | 761 | 64  |
| 38,415 | 31 | 5 | 560 | 33 | 22 | 3 | 146 | 23 | 759 | 64  |
| 38,416 | 31 | 5 | 559 | 40 | 22 | 3 | 146 | 26 | 758 | 74  |
| 38,417 | 31 | 5 | 556 | 40 | 22 | 3 | 145 | 26 | 754 | 74  |
| 38,418 | 32 | 6 | 556 | 41 | 22 | 3 | 148 | 29 | 758 | 79  |
| 38,419 | 33 | 6 | 548 | 43 | 21 | 3 | 146 | 32 | 748 | 84  |
| 38,420 | 33 | 6 | 536 | 48 | 20 | 4 | 140 | 36 | 729 | 94  |
| 38,421 | 31 | 6 | 463 | 47 | 18 | 4 | 118 | 37 | 630 | 94  |
| 38,422 | 30 | 7 | 440 | 47 | 15 | 4 | 102 | 37 | 587 | 95  |
| 38,423 | 28 | 7 | 330 | 47 | 13 | 4 | 101 | 37 | 472 | 95  |
| 38,424 | 26 | 7 | 323 | 48 | 13 | 4 | 99  | 37 | 461 | 96  |
| 38,425 | 26 | 7 | 318 | 48 | 11 | 4 | 99  | 37 | 454 | 96  |
| 38,426 | 26 | 7 | 318 | 48 | 11 | 4 | 100 | 37 | 455 | 96  |
| 38,427 | 26 | 7 | 320 | 49 | 11 | 4 | 100 | 37 | 457 | 97  |
| 38,428 | 33 | 7 | 346 | 49 | 13 | 4 | 120 | 37 | 512 | 97  |
| 38,429 | 33 | 7 | 348 | 51 | 13 | 4 | 126 | 39 | 520 | 101 |
| 38,430 | 33 | 7 | 348 | 54 | 13 | 4 | 126 | 39 | 520 | 104 |
| 38,431 | 33 | 8 | 340 | 56 | 13 | 4 | 126 | 39 | 512 | 107 |
| 38,432 | 32 | 8 | 364 | 56 | 14 | 4 | 141 | 39 | 551 | 107 |
| 38,433 | 32 | 8 | 364 | 56 | 15 | 4 | 142 | 39 | 553 | 107 |
| 38,434 | 32 | 8 | 366 | 57 | 15 | 4 | 142 | 40 | 555 | 109 |
| 38,435 | 32 | 8 | 365 | 57 | 15 | 4 | 142 | 41 | 554 | 110 |
| 38,436 | 35 | 9 | 380 | 59 | 16 | 5 | 151 | 44 | 582 | 117 |
| 38,437 | 35 | 9 | 380 | 59 | 16 | 5 | 149 | 44 | 580 | 117 |
| 38,438 | 35 | 9 | 379 | 60 | 16 | 5 | 149 | 44 | 579 | 118 |
| 38,439 | 34 | 9 | 379 | 60 | 16 | 5 | 149 | 44 | 578 | 118 |
| 38,440 | 34 | 9 | 381 | 60 | 16 | 5 | 152 | 44 | 583 | 118 |
| 38,441 | 34 | 9 | 381 | 60 | 16 | 5 | 152 | 44 | 583 | 118 |
| 38,442 | 35 | 9 | 386 | 60 | 16 | 5 | 157 | 44 | 594 | 118 |
| 38,443 | 35 | 9 | 386 | 60 | 16 | 5 | 157 | 44 | 594 | 118 |
| 38,444 | 36 | 9 | 393 | 62 | 18 | 5 | 164 | 42 | 611 | 118 |
| 38,445 | 36 | 9 | 397 | 62 | 18 | 5 | 166 | 42 | 617 | 118 |
| 38,446 | 37 | 8 | 403 | 61 | 19 | 5 | 203 | 42 | 662 | 116 |

|        |    |   |     |    |    |   |     |    |     |     |
|--------|----|---|-----|----|----|---|-----|----|-----|-----|
| 38,447 | 38 | 8 | 400 | 61 | 19 | 5 | 204 | 42 | 661 | 116 |
| 38,448 | 38 | 8 | 399 | 61 | 19 | 5 | 204 | 42 | 660 | 116 |
| 38,449 | 39 | 8 | 398 | 61 | 18 | 5 | 204 | 42 | 659 | 116 |
| 38,450 | 39 | 8 | 397 | 61 | 18 | 5 | 205 | 43 | 659 | 117 |
| 38,451 | 39 | 8 | 397 | 61 | 19 | 5 | 205 | 43 | 660 | 117 |
| 38,452 | 39 | 8 | 396 | 63 | 19 | 5 | 205 | 43 | 659 | 119 |
| 38,453 | 39 | 8 | 356 | 61 | 18 | 5 | 202 | 42 | 615 | 116 |
| 38,454 | 38 | 8 | 336 | 58 | 18 | 5 | 196 | 42 | 588 | 113 |
| 38,455 | 37 | 8 | 332 | 56 | 18 | 5 | 191 | 42 | 578 | 111 |
| 38,456 | 36 | 6 | 298 | 43 | 16 | 2 | 192 | 30 | 542 | 81  |
| 38,457 | 36 | 6 | 295 | 40 | 16 | 2 | 191 | 27 | 538 | 75  |
| 38,458 | 38 | 6 | 300 | 40 | 16 | 2 | 195 | 27 | 549 | 75  |
| 38,459 | 37 | 6 | 286 | 44 | 16 | 2 | 188 | 28 | 527 | 80  |
| 38,460 | 36 | 6 | 288 | 44 | 16 | 3 | 189 | 28 | 529 | 81  |
| 38,461 | 36 | 6 | 287 | 46 | 15 | 3 | 192 | 28 | 530 | 83  |
| 38,462 | 33 | 6 | 262 | 43 | 14 | 3 | 179 | 28 | 488 | 80  |
| 38,463 | 43 | 6 | 292 | 43 | 16 | 3 | 228 | 29 | 579 | 81  |
| 38,464 | 38 | 6 | 266 | 44 | 12 | 3 | 210 | 29 | 526 | 82  |
| 38,465 | 38 | 6 | 262 | 45 | 13 | 3 | 206 | 29 | 519 | 83  |
| 38,466 | 38 | 6 | 263 | 38 | 13 | 3 | 204 | 26 | 518 | 73  |
| 38,467 | 38 | 6 | 263 | 38 | 13 | 3 | 205 | 26 | 519 | 73  |
| 38,468 | 37 | 6 | 263 | 38 | 13 | 3 | 205 | 26 | 518 | 73  |
| 38,469 | 37 | 5 | 264 | 38 | 13 | 3 | 205 | 23 | 519 | 69  |
| 38,470 | 36 | 5 | 265 | 36 | 13 | 3 | 206 | 20 | 520 | 64  |
| 38,471 | 36 | 5 | 262 | 31 | 13 | 2 | 206 | 15 | 517 | 53  |
| 38,472 | 34 | 4 | 239 | 33 | 13 | 2 | 204 | 14 | 490 | 53  |
| 38,473 | 34 | 4 | 227 | 33 | 13 | 2 | 201 | 14 | 475 | 53  |
| 38,474 | 33 | 4 | 215 | 32 | 13 | 2 | 193 | 14 | 454 | 52  |
| 38,475 | 33 | 4 | 226 | 32 | 13 | 2 | 200 | 14 | 472 | 52  |
| 38,476 | 33 | 4 | 215 | 31 | 13 | 2 | 198 | 14 | 459 | 51  |
| 38,477 | 34 | 4 | 215 | 31 | 13 | 2 | 200 | 14 | 462 | 51  |
| 38,478 | 27 | 4 | 190 | 31 | 11 | 2 | 183 | 14 | 411 | 51  |
| 38,479 | 27 | 4 | 206 | 29 | 11 | 2 | 187 | 12 | 431 | 47  |
| 38,480 | 27 | 4 | 209 | 29 | 11 | 2 | 184 | 12 | 431 | 47  |
| 38,481 | 26 | 3 | 196 | 24 | 10 | 2 | 178 | 12 | 410 | 41  |
| 38,482 | 26 | 3 | 198 | 24 | 10 | 2 | 182 | 12 | 416 | 41  |
| 38,483 | 26 | 3 | 202 | 24 | 10 | 2 | 185 | 12 | 423 | 41  |
| 38,484 | 26 | 2 | 207 | 21 | 9  | 1 | 186 | 7  | 428 | 31  |
| 38,485 | 26 | 2 | 204 | 21 | 9  | 1 | 185 | 7  | 424 | 31  |
| 38,486 | 23 | 2 | 190 | 21 | 8  | 1 | 177 | 7  | 398 | 31  |
| 38,487 | 23 | 2 | 190 | 21 | 8  | 1 | 177 | 7  | 398 | 31  |

|        |    |   |     |    |    |   |     |    |       |    |
|--------|----|---|-----|----|----|---|-----|----|-------|----|
| 38,488 | 23 | 2 | 189 | 21 | 8  | 1 | 177 | 7  | 397   | 31 |
| 38,489 | 23 | 3 | 189 | 20 | 8  | 1 | 177 | 7  | 397   | 31 |
| 38,490 | 23 | 3 | 189 | 21 | 8  | 1 | 177 | 7  | 397   | 32 |
| 38,491 | 23 | 3 | 186 | 23 | 8  | 1 | 174 | 7  | 391   | 34 |
| 38,492 | 22 | 3 | 183 | 24 | 8  | 1 | 169 | 7  | 382   | 35 |
| 38,493 | 23 | 6 | 189 | 34 | 8  | 1 | 175 | 11 | 395   | 52 |
| 38,494 | 23 | 6 | 188 | 34 | 7  | 1 | 175 | 11 | 393   | 52 |
| 38,495 | 22 | 6 | 185 | 32 | 6  | 1 | 170 | 11 | 383   | 50 |
| 38,496 | 22 | 6 | 181 | 35 | 6  | 1 | 166 | 11 | 375   | 53 |
| 38,497 | 22 | 7 | 170 | 35 | 4  | 1 | 129 | 11 | 325   | 54 |
| 38,498 | 21 | 7 | 170 | 36 | 4  | 1 | 128 | 11 | 323   | 55 |
| 38,499 | 23 | 7 | 176 | 36 | 4  | 1 | 128 | 11 | 331   | 55 |
| 38,500 | 35 | 7 | 217 | 36 | 7  | 1 | 153 | 10 | 412   | 54 |
| 38,501 | 35 | 7 | 217 | 36 | 7  | 1 | 153 | 10 | 412   | 54 |
| 38,502 | 35 | 7 | 228 | 34 | 7  | 1 | 157 | 10 | 427   | 52 |
| 38,503 | 35 | 7 | 238 | 34 | 7  | 1 | 158 | 11 | 438   | 53 |
| 38,504 | 34 | 7 | 233 | 34 | 7  | 1 | 157 | 11 | 431   | 53 |
| 38,505 | 34 | 7 | 244 | 34 | 7  | 1 | 158 | 11 | 443   | 53 |
| 38,506 | 39 | 6 | 438 | 32 | 10 | 1 | 202 | 9  | 689   | 48 |
| 38,507 | 42 | 7 | 460 | 32 | 10 | 1 | 204 | 9  | 716   | 49 |
| 38,508 | 42 | 7 | 460 | 32 | 10 | 1 | 204 | 9  | 716   | 49 |
| 38,509 | 52 | 7 | 569 | 35 | 16 | 0 | 243 | 11 | 880   | 53 |
| 38,510 | 52 | 7 | 580 | 32 | 16 | 1 | 246 | 10 | 894   | 50 |
| 38,511 | 57 | 6 | 622 | 29 | 26 | 1 | 276 | 9  | 981   | 45 |
| 38,512 | 57 | 6 | 641 | 26 | 27 | 1 | 280 | 8  | 1,005 | 41 |
| 38,513 | 57 | 6 | 642 | 26 | 27 | 1 | 285 | 8  | 1,011 | 41 |
| 38,514 | 47 | 6 | 592 | 26 | 24 | 1 | 229 | 8  | 892   | 41 |
| 38,515 | 44 | 6 | 582 | 28 | 24 | 1 | 224 | 10 | 874   | 45 |
| 38,516 | 44 | 6 | 579 | 31 | 23 | 1 | 224 | 9  | 870   | 47 |
| 38,517 | 44 | 6 | 582 | 31 | 23 | 1 | 224 | 10 | 873   | 48 |
| 38,518 | 44 | 6 | 584 | 31 | 23 | 1 | 225 | 10 | 876   | 48 |
| 38,519 | 44 | 6 | 585 | 30 | 23 | 1 | 225 | 10 | 877   | 47 |
| 38,520 | 44 | 6 | 585 | 30 | 23 | 1 | 225 | 10 | 877   | 47 |
| 38,521 | 44 | 6 | 586 | 30 | 23 | 1 | 226 | 10 | 879   | 47 |
| 38,522 | 45 | 6 | 587 | 30 | 23 | 1 | 231 | 10 | 886   | 47 |
| 38,523 | 45 | 6 | 588 | 28 | 24 | 1 | 232 | 10 | 889   | 45 |
| 38,524 | 45 | 6 | 588 | 28 | 24 | 1 | 232 | 10 | 889   | 45 |
| 38,525 | 45 | 6 | 588 | 29 | 24 | 1 | 233 | 10 | 890   | 46 |
| 38,526 | 45 | 6 | 575 | 29 | 24 | 1 | 224 | 10 | 868   | 46 |
| 38,527 | 45 | 6 | 575 | 29 | 24 | 1 | 224 | 10 | 868   | 46 |
| 38,528 | 44 | 6 | 577 | 33 | 24 | 1 | 222 | 10 | 867   | 50 |

|        |    |   |     |    |    |   |     |    |       |    |
|--------|----|---|-----|----|----|---|-----|----|-------|----|
| 38,529 | 44 | 6 | 576 | 33 | 24 | 1 | 219 | 11 | 863   | 51 |
| 38,530 | 45 | 6 | 559 | 34 | 24 | 1 | 216 | 11 | 844   | 52 |
| 38,531 | 45 | 6 | 561 | 34 | 24 | 1 | 214 | 12 | 844   | 53 |
| 38,532 | 47 | 8 | 562 | 34 | 24 | 1 | 212 | 12 | 845   | 55 |
| 38,533 | 47 | 8 | 559 | 36 | 24 | 1 | 208 | 12 | 838   | 57 |
| 38,534 | 47 | 8 | 554 | 36 | 24 | 1 | 204 | 12 | 829   | 57 |
| 38,535 | 51 | 8 | 568 | 36 | 24 | 1 | 207 | 12 | 850   | 57 |
| 38,536 | 51 | 8 | 584 | 36 | 25 | 1 | 210 | 12 | 870   | 57 |
| 38,537 | 89 | 8 | 718 | 36 | 30 | 1 | 291 | 12 | 1,128 | 57 |
| 38,538 | 89 | 8 | 718 | 36 | 30 | 1 | 291 | 12 | 1,128 | 57 |
| 38,539 | 93 | 8 | 750 | 36 | 36 | 1 | 331 | 13 | 1,210 | 58 |
| 38,540 | 96 | 7 | 776 | 38 | 36 | 1 | 336 | 13 | 1,244 | 59 |
| 38,541 | 96 | 7 | 777 | 35 | 36 | 2 | 338 | 13 | 1,247 | 57 |
| 38,542 | 97 | 4 | 792 | 24 | 37 | 2 | 338 | 9  | 1,264 | 39 |
| 38,543 | 97 | 4 | 797 | 24 | 38 | 2 | 343 | 9  | 1,275 | 39 |
| 38,544 | 96 | 4 | 792 | 24 | 38 | 2 | 338 | 9  | 1,264 | 39 |
| 38,545 | 96 | 4 | 791 | 24 | 38 | 2 | 336 | 9  | 1,261 | 39 |
| 38,546 | 96 | 4 | 789 | 24 | 38 | 2 | 336 | 9  | 1,259 | 39 |
| 38,547 | 97 | 4 | 791 | 21 | 38 | 2 | 337 | 9  | 1,263 | 36 |
| 38,548 | 96 | 3 | 790 | 21 | 38 | 2 | 337 | 9  | 1,261 | 35 |
| 38,549 | 95 | 3 | 785 | 20 | 38 | 2 | 338 | 9  | 1,256 | 34 |
| 38,550 | 95 | 3 | 784 | 21 | 38 | 2 | 338 | 9  | 1,255 | 35 |
| 38,551 | 84 | 3 | 752 | 23 | 35 | 2 | 319 | 9  | 1,190 | 37 |
| 38,552 | 84 | 3 | 750 | 23 | 35 | 2 | 318 | 9  | 1,187 | 37 |
| 38,553 | 85 | 3 | 748 | 24 | 35 | 2 | 319 | 9  | 1,187 | 38 |
| 38,554 | 85 | 3 | 740 | 27 | 35 | 2 | 318 | 8  | 1,178 | 40 |
| 38,555 | 85 | 3 | 729 | 28 | 35 | 2 | 317 | 8  | 1,166 | 41 |
| 38,556 | 84 | 3 | 602 | 28 | 35 | 2 | 301 | 8  | 1,022 | 41 |
| 38,557 | 81 | 3 | 542 | 32 | 32 | 2 | 279 | 10 | 934   | 47 |
| 38,558 | 79 | 2 | 515 | 33 | 32 | 2 | 275 | 11 | 901   | 48 |
| 38,559 | 77 | 2 | 486 | 35 | 32 | 2 | 263 | 12 | 858   | 51 |
| 38,560 | 67 | 2 | 398 | 32 | 26 | 1 | 232 | 10 | 723   | 45 |
| 38,561 | 67 | 2 | 386 | 32 | 26 | 1 | 227 | 10 | 706   | 45 |
| 38,562 | 62 | 2 | 342 | 33 | 16 | 1 | 195 | 10 | 615   | 46 |
| 38,563 | 64 | 2 | 320 | 33 | 15 | 1 | 189 | 10 | 588   | 46 |
| 38,564 | 64 | 2 | 318 | 33 | 15 | 1 | 184 | 10 | 581   | 46 |
| 38,565 | 64 | 2 | 317 | 33 | 15 | 1 | 183 | 10 | 579   | 46 |
| 38,566 | 64 | 3 | 316 | 27 | 15 | 1 | 183 | 8  | 578   | 39 |
| 38,567 | 64 | 3 | 315 | 29 | 15 | 1 | 183 | 8  | 577   | 41 |
| 38,568 | 64 | 3 | 313 | 29 | 15 | 1 | 183 | 7  | 575   | 40 |
| 38,569 | 64 | 3 | 312 | 29 | 15 | 1 | 182 | 7  | 573   | 40 |

|        |    |   |     |    |    |   |     |   |     |    |
|--------|----|---|-----|----|----|---|-----|---|-----|----|
| 38,570 | 64 | 4 | 312 | 29 | 16 | 1 | 183 | 7 | 575 | 41 |
| 38,571 | 67 | 4 | 319 | 30 | 16 | 1 | 186 | 7 | 588 | 42 |
| 38,572 | 66 | 4 | 318 | 31 | 16 | 1 | 181 | 7 | 581 | 43 |
| 38,573 | 66 | 4 | 319 | 31 | 16 | 1 | 180 | 7 | 581 | 43 |
| 38,574 | 68 | 4 | 345 | 30 | 18 | 1 | 188 | 7 | 619 | 42 |
| 38,575 | 89 | 4 | 471 | 30 | 28 | 1 | 234 | 7 | 822 | 42 |
| 38,576 | 89 | 4 | 488 | 30 | 29 | 1 | 237 | 7 | 843 | 42 |
| 38,577 | 89 | 4 | 489 | 32 | 29 | 1 | 238 | 8 | 845 | 45 |
| 38,578 | 89 | 4 | 485 | 32 | 29 | 1 | 238 | 8 | 841 | 45 |
| 38,579 | 89 | 4 | 489 | 31 | 29 | 1 | 243 | 8 | 850 | 44 |
| 38,580 | 89 | 4 | 489 | 31 | 29 | 1 | 244 | 7 | 851 | 43 |
| 38,581 | 88 | 4 | 491 | 31 | 30 | 1 | 244 | 6 | 853 | 42 |
| 38,582 | 88 | 2 | 485 | 31 | 30 | 1 | 244 | 6 | 847 | 40 |
| 38,583 | 86 | 2 | 475 | 31 | 30 | 1 | 237 | 6 | 828 | 40 |
| 38,584 | 82 | 2 | 458 | 29 | 30 | 1 | 234 | 6 | 804 | 38 |
| 38,585 | 83 | 2 | 458 | 29 | 30 | 1 | 237 | 6 | 808 | 38 |
| 38,586 | 83 | 2 | 445 | 29 | 29 | 1 | 236 | 6 | 793 | 38 |
| 38,587 | 83 | 2 | 442 | 29 | 29 | 1 | 234 | 6 | 788 | 38 |
| 38,588 | 45 | 2 | 307 | 29 | 24 | 1 | 151 | 6 | 527 | 38 |
| 38,589 | 45 | 2 | 301 | 29 | 24 | 1 | 148 | 6 | 518 | 38 |
| 38,590 | 41 | 2 | 276 | 29 | 18 | 1 | 111 | 5 | 446 | 37 |
| 38,591 | 38 | 2 | 251 | 27 | 18 | 1 | 106 | 5 | 413 | 35 |
| 38,592 | 38 | 2 | 249 | 27 | 18 | 0 | 104 | 5 | 409 | 34 |
| 38,593 | 37 | 2 | 237 | 27 | 17 | 0 | 103 | 5 | 394 | 34 |
| 38,594 | 37 | 2 | 231 | 27 | 16 | 0 | 98  | 5 | 382 | 34 |
| 38,595 | 37 | 2 | 229 | 27 | 16 | 0 | 97  | 5 | 379 | 34 |
| 38,596 | 37 | 2 | 229 | 27 | 16 | 0 | 97  | 5 | 379 | 34 |
| 38,597 | 36 | 2 | 227 | 27 | 16 | 0 | 96  | 5 | 375 | 34 |
| 38,598 | 37 | 2 | 228 | 27 | 16 | 0 | 98  | 5 | 379 | 34 |
| 38,599 | 38 | 2 | 238 | 27 | 17 | 0 | 107 | 5 | 400 | 34 |
| 38,600 | 37 | 2 | 237 | 27 | 17 | 0 | 106 | 5 | 397 | 34 |
| 38,601 | 38 | 2 | 239 | 26 | 17 | 0 | 107 | 5 | 401 | 33 |
| 38,602 | 40 | 2 | 258 | 24 | 17 | 0 | 130 | 5 | 445 | 31 |
| 38,603 | 41 | 2 | 261 | 24 | 17 | 0 | 131 | 5 | 450 | 31 |
| 38,604 | 41 | 2 | 257 | 15 | 17 | 0 | 133 | 3 | 448 | 20 |
| 38,605 | 41 | 2 | 264 | 15 | 17 | 0 | 142 | 3 | 464 | 20 |
| 38,606 | 39 | 2 | 263 | 15 | 17 | 0 | 139 | 3 | 458 | 20 |
| 38,607 | 39 | 2 | 259 | 15 | 17 | 0 | 139 | 3 | 454 | 20 |
| 38,608 | 39 | 2 | 281 | 16 | 18 | 0 | 148 | 3 | 486 | 21 |
| 38,609 | 38 | 2 | 281 | 16 | 18 | 0 | 148 | 4 | 485 | 22 |
| 38,610 | 38 | 2 | 281 | 14 | 18 | 0 | 148 | 3 | 485 | 19 |

|        |    |   |     |    |    |   |     |    |     |    |
|--------|----|---|-----|----|----|---|-----|----|-----|----|
| 38,611 | 39 | 2 | 286 | 13 | 18 | 0 | 147 | 3  | 490 | 18 |
| 38,612 | 39 | 2 | 287 | 12 | 18 | 0 | 147 | 3  | 491 | 17 |
| 38,613 | 39 | 2 | 287 | 12 | 18 | 0 | 147 | 3  | 491 | 17 |
| 38,614 | 37 | 2 | 287 | 12 | 19 | 0 | 145 | 4  | 488 | 18 |
| 38,615 | 37 | 2 | 286 | 13 | 19 | 0 | 145 | 4  | 487 | 19 |
| 38,616 | 37 | 2 | 286 | 13 | 19 | 0 | 145 | 4  | 487 | 19 |
| 38,617 | 37 | 1 | 286 | 13 | 19 | 0 | 145 | 4  | 487 | 18 |
| 38,618 | 37 | 1 | 286 | 11 | 19 | 0 | 145 | 4  | 487 | 16 |
| 38,619 | 37 | 1 | 286 | 11 | 19 | 0 | 145 | 4  | 487 | 16 |
| 38,620 | 37 | 0 | 285 | 12 | 19 | 0 | 145 | 6  | 486 | 18 |
| 38,621 | 37 | 0 | 283 | 13 | 18 | 1 | 144 | 6  | 482 | 20 |
| 38,622 | 34 | 0 | 274 | 17 | 18 | 1 | 139 | 10 | 465 | 28 |
| 38,623 | 34 | 1 | 272 | 26 | 18 | 1 | 140 | 11 | 464 | 39 |
| 38,624 | 34 | 1 | 267 | 28 | 18 | 2 | 139 | 11 | 458 | 42 |
| 38,625 | 32 | 1 | 248 | 36 | 15 | 4 | 133 | 15 | 428 | 56 |
| 38,626 | 11 | 1 | 126 | 36 | 5  | 4 | 87  | 16 | 229 | 57 |
| 38,627 | 13 | 1 | 109 | 36 | 4  | 4 | 84  | 16 | 210 | 57 |
| 38,628 | 13 | 1 | 108 | 34 | 4  | 4 | 83  | 15 | 208 | 54 |
| 38,629 | 13 | 1 | 104 | 31 | 4  | 4 | 81  | 15 | 202 | 51 |
| 38,630 | 13 | 1 | 105 | 32 | 4  | 5 | 79  | 15 | 201 | 53 |
| 38,631 | 14 | 1 | 117 | 32 | 4  | 5 | 83  | 15 | 218 | 53 |
| 38,632 | 15 | 1 | 115 | 31 | 3  | 5 | 81  | 15 | 214 | 52 |
| 38,633 | 15 | 1 | 119 | 31 | 3  | 5 | 82  | 15 | 219 | 52 |
| 38,634 | 15 | 1 | 118 | 32 | 3  | 5 | 82  | 15 | 218 | 53 |
| 38,635 | 15 | 1 | 119 | 32 | 3  | 5 | 86  | 16 | 223 | 54 |
| 38,636 | 14 | 1 | 119 | 32 | 3  | 5 | 83  | 16 | 219 | 54 |
| 38,637 | 15 | 1 | 124 | 32 | 3  | 5 | 84  | 16 | 226 | 54 |
| 38,638 | 15 | 1 | 124 | 32 | 3  | 5 | 85  | 16 | 227 | 54 |
| 38,639 | 15 | 1 | 126 | 32 | 3  | 5 | 87  | 16 | 231 | 54 |
| 38,640 | 15 | 1 | 128 | 32 | 3  | 6 | 87  | 16 | 233 | 55 |
| 38,641 | 15 | 1 | 130 | 32 | 3  | 6 | 88  | 16 | 236 | 55 |
| 38,642 | 15 | 1 | 130 | 32 | 3  | 6 | 88  | 16 | 236 | 55 |
| 38,643 | 15 | 1 | 130 | 32 | 3  | 6 | 88  | 16 | 236 | 55 |
| 38,644 | 15 | 1 | 130 | 32 | 3  | 6 | 88  | 16 | 236 | 55 |
| 38,645 | 15 | 1 | 130 | 32 | 3  | 6 | 88  | 16 | 236 | 55 |
| 38,646 | 16 | 2 | 134 | 32 | 3  | 6 | 90  | 16 | 243 | 56 |
| 38,647 | 16 | 2 | 136 | 32 | 3  | 6 | 91  | 16 | 246 | 56 |
| 38,648 | 16 | 2 | 140 | 32 | 3  | 6 | 90  | 16 | 249 | 56 |
| 38,649 | 15 | 4 | 141 | 37 | 3  | 6 | 91  | 17 | 250 | 64 |
| 38,650 | 14 | 4 | 136 | 37 | 2  | 6 | 84  | 19 | 236 | 66 |
| 38,651 | 13 | 4 | 133 | 38 | 2  | 6 | 80  | 20 | 228 | 68 |

|        |    |   |     |    |   |   |    |    |     |    |
|--------|----|---|-----|----|---|---|----|----|-----|----|
| 38,652 | 11 | 4 | 130 | 44 | 2 | 6 | 68 | 21 | 211 | 75 |
| 38,653 | 10 | 4 | 117 | 46 | 2 | 6 | 55 | 21 | 184 | 77 |
| 38,654 | 9  | 4 | 115 | 46 | 2 | 6 | 54 | 21 | 180 | 77 |
| 38,655 | 8  | 4 | 123 | 47 | 3 | 6 | 53 | 22 | 187 | 79 |
| 38,656 | 8  | 4 | 117 | 48 | 3 | 6 | 44 | 22 | 172 | 80 |
| 38,657 | 8  | 4 | 115 | 49 | 3 | 6 | 43 | 24 | 169 | 83 |
| 38,658 | 8  | 4 | 96  | 48 | 3 | 6 | 34 | 24 | 141 | 82 |
| 38,659 | 8  | 4 | 93  | 48 | 2 | 6 | 33 | 24 | 136 | 82 |
| 38,660 | 7  | 4 | 87  | 47 | 2 | 6 | 33 | 22 | 129 | 79 |
| 38,661 | 7  | 4 | 89  | 48 | 2 | 6 | 33 | 22 | 131 | 80 |
| 38,662 | 7  | 4 | 88  | 49 | 2 | 6 | 33 | 22 | 130 | 81 |
| 38,663 | 7  | 4 | 88  | 50 | 2 | 6 | 33 | 25 | 130 | 85 |
| 38,664 | 7  | 4 | 88  | 51 | 2 | 6 | 33 | 25 | 130 | 86 |
| 38,665 | 9  | 4 | 111 | 51 | 2 | 6 | 40 | 26 | 162 | 87 |
| 38,666 | 9  | 4 | 113 | 50 | 2 | 6 | 42 | 26 | 166 | 86 |
| 38,667 | 9  | 4 | 114 | 50 | 2 | 6 | 42 | 27 | 167 | 87 |
| 38,668 | 14 | 4 | 137 | 50 | 2 | 6 | 47 | 27 | 200 | 87 |
| 38,669 | 14 | 4 | 137 | 50 | 2 | 6 | 47 | 27 | 200 | 87 |
| 38,670 | 15 | 4 | 145 | 51 | 2 | 6 | 50 | 27 | 212 | 88 |
| 38,671 | 15 | 4 | 162 | 50 | 2 | 6 | 66 | 25 | 245 | 85 |
| 38,672 | 15 | 4 | 162 | 49 | 2 | 5 | 66 | 25 | 245 | 83 |
| 38,673 | 15 | 4 | 162 | 44 | 2 | 5 | 66 | 21 | 245 | 74 |
| 38,674 | 16 | 3 | 164 | 32 | 2 | 4 | 67 | 20 | 249 | 59 |
| 38,675 | 16 | 3 | 164 | 24 | 2 | 2 | 67 | 16 | 249 | 45 |
| 38,676 | 16 | 3 | 162 | 24 | 2 | 2 | 66 | 16 | 246 | 45 |
| 38,677 | 16 | 3 | 158 | 24 | 2 | 2 | 66 | 15 | 242 | 44 |
| 38,678 | 14 | 3 | 158 | 24 | 2 | 2 | 66 | 15 | 240 | 44 |
| 38,679 | 14 | 3 | 158 | 24 | 2 | 2 | 66 | 15 | 240 | 44 |
| 38,680 | 14 | 3 | 158 | 24 | 2 | 1 | 65 | 16 | 239 | 44 |
| 38,681 | 14 | 3 | 157 | 24 | 2 | 1 | 65 | 16 | 238 | 44 |
| 38,682 | 13 | 3 | 145 | 25 | 2 | 1 | 60 | 16 | 220 | 45 |
| 38,683 | 12 | 3 | 144 | 25 | 2 | 1 | 60 | 16 | 218 | 45 |
| 38,684 | 12 | 3 | 140 | 25 | 2 | 1 | 59 | 16 | 213 | 45 |
| 38,685 | 12 | 4 | 141 | 32 | 2 | 1 | 59 | 25 | 214 | 62 |
| 38,686 | 12 | 4 | 139 | 32 | 2 | 1 | 54 | 24 | 207 | 61 |
| 38,687 | 11 | 4 | 136 | 32 | 2 | 1 | 54 | 24 | 203 | 61 |
| 38,688 | 11 | 4 | 136 | 33 | 2 | 1 | 53 | 24 | 202 | 62 |
| 38,689 | 11 | 4 | 134 | 33 | 2 | 1 | 51 | 24 | 198 | 62 |
| 38,690 | 11 | 4 | 132 | 33 | 2 | 0 | 51 | 24 | 196 | 61 |
| 38,691 | 12 | 4 | 132 | 33 | 2 | 0 | 51 | 24 | 197 | 61 |
| 38,692 | 12 | 4 | 130 | 33 | 3 | 0 | 49 | 24 | 194 | 61 |



|        |    |   |     |    |   |   |    |    |     |     |
|--------|----|---|-----|----|---|---|----|----|-----|-----|
| 38,693 | 12 | 4 | 129 | 33 | 3 | 0 | 49 | 24 | 193 | 61  |
| 38,694 | 12 | 4 | 126 | 33 | 3 | 0 | 49 | 24 | 190 | 61  |
| 38,695 | 12 | 4 | 126 | 33 | 3 | 0 | 49 | 24 | 190 | 61  |
| 38,696 | 12 | 4 | 126 | 33 | 3 | 0 | 49 | 24 | 190 | 61  |
| 38,697 | 12 | 3 | 124 | 33 | 4 | 0 | 48 | 24 | 188 | 60  |
| 38,698 | 12 | 3 | 123 | 33 | 4 | 0 | 47 | 24 | 186 | 60  |
| 38,699 | 12 | 3 | 119 | 33 | 4 | 0 | 47 | 25 | 182 | 61  |
| 38,700 | 12 | 1 | 117 | 29 | 4 | 0 | 45 | 24 | 178 | 54  |
| 38,701 | 12 | 1 | 114 | 29 | 4 | 0 | 45 | 21 | 175 | 51  |
| 38,702 | 12 | 1 | 120 | 29 | 4 | 1 | 45 | 23 | 181 | 54  |
| 38,703 | 12 | 2 | 118 | 23 | 4 | 1 | 45 | 22 | 179 | 48  |
| 38,704 | 11 | 2 | 114 | 21 | 4 | 1 | 44 | 22 | 173 | 46  |
| 38,705 | 11 | 2 | 113 | 21 | 4 | 1 | 43 | 22 | 171 | 46  |
| 38,706 | 11 | 2 | 102 | 20 | 3 | 1 | 40 | 21 | 156 | 44  |
| 38,707 | 11 | 2 | 99  | 21 | 3 | 1 | 40 | 20 | 153 | 44  |
| 38,708 | 11 | 3 | 99  | 21 | 3 | 1 | 40 | 23 | 153 | 48  |
| 38,709 | 11 | 3 | 99  | 21 | 3 | 1 | 40 | 23 | 153 | 48  |
| 38,710 | 11 | 3 | 100 | 21 | 3 | 1 | 40 | 23 | 154 | 48  |
| 38,711 | 11 | 3 | 100 | 21 | 3 | 1 | 41 | 23 | 155 | 48  |
| 38,712 | 11 | 3 | 98  | 19 | 3 | 1 | 41 | 23 | 153 | 46  |
| 38,713 | 11 | 3 | 98  | 19 | 3 | 1 | 41 | 22 | 153 | 45  |
| 38,714 | 11 | 3 | 96  | 19 | 3 | 1 | 39 | 20 | 149 | 43  |
| 38,715 | 11 | 3 | 88  | 21 | 3 | 2 | 38 | 27 | 140 | 53  |
| 38,716 | 9  | 3 | 76  | 22 | 2 | 2 | 34 | 27 | 121 | 54  |
| 38,717 | 9  | 3 | 74  | 38 | 2 | 3 | 32 | 30 | 117 | 74  |
| 38,718 | 9  | 3 | 73  | 43 | 2 | 4 | 33 | 31 | 117 | 81  |
| 38,719 | 4  | 4 | 65  | 57 | 2 | 4 | 31 | 37 | 102 | 102 |
| 38,720 | 3  | 4 | 57  | 62 | 2 | 4 | 28 | 38 | 90  | 108 |
| 38,721 | 3  | 4 | 40  | 61 | 2 | 4 | 12 | 38 | 57  | 107 |
| 38,722 | 8  | 4 | 98  | 61 | 3 | 4 | 57 | 38 | 166 | 107 |
| 38,723 | 8  | 4 | 98  | 64 | 3 | 6 | 57 | 39 | 166 | 113 |
| 38,724 | 8  | 4 | 97  | 65 | 3 | 6 | 56 | 39 | 164 | 114 |
| 38,725 | 7  | 4 | 98  | 65 | 3 | 6 | 55 | 39 | 163 | 114 |
| 38,726 | 7  | 4 | 98  | 65 | 3 | 6 | 55 | 39 | 163 | 114 |
| 38,727 | 7  | 4 | 99  | 66 | 3 | 6 | 56 | 39 | 165 | 115 |
| 38,728 | 7  | 5 | 101 | 66 | 3 | 6 | 56 | 39 | 167 | 116 |
| 38,729 | 7  | 5 | 101 | 66 | 3 | 6 | 56 | 39 | 167 | 116 |
| 38,730 | 7  | 5 | 101 | 66 | 3 | 6 | 59 | 39 | 170 | 116 |
| 38,731 | 7  | 5 | 106 | 65 | 4 | 6 | 59 | 38 | 176 | 114 |
| 38,732 | 7  | 5 | 106 | 65 | 4 | 6 | 59 | 38 | 176 | 114 |
| 38,733 | 8  | 5 | 114 | 64 | 4 | 6 | 61 | 38 | 187 | 113 |

|        |    |   |     |    |    |   |     |    |     |     |
|--------|----|---|-----|----|----|---|-----|----|-----|-----|
| 38,734 | 11 | 5 | 163 | 64 | 5  | 7 | 86  | 39 | 265 | 115 |
| 38,735 | 11 | 5 | 163 | 64 | 5  | 7 | 86  | 39 | 265 | 115 |
| 38,736 | 11 | 4 | 162 | 56 | 5  | 7 | 86  | 32 | 264 | 99  |
| 38,737 | 11 | 4 | 160 | 56 | 5  | 7 | 85  | 35 | 261 | 102 |
| 38,738 | 11 | 4 | 160 | 56 | 5  | 7 | 85  | 35 | 261 | 102 |
| 38,739 | 11 | 4 | 161 | 59 | 5  | 7 | 85  | 36 | 262 | 106 |
| 38,740 | 11 | 4 | 161 | 59 | 5  | 7 | 85  | 36 | 262 | 106 |
| 38,741 | 11 | 4 | 161 | 59 | 5  | 7 | 85  | 36 | 262 | 106 |
| 38,742 | 10 | 4 | 161 | 59 | 5  | 7 | 85  | 36 | 261 | 106 |
| 38,743 | 10 | 5 | 160 | 60 | 4  | 7 | 85  | 36 | 259 | 108 |
| 38,744 | 10 | 5 | 160 | 60 | 4  | 7 | 85  | 36 | 259 | 108 |
| 38,745 | 10 | 5 | 160 | 60 | 4  | 7 | 85  | 36 | 259 | 108 |
| 38,746 | 10 | 5 | 161 | 60 | 4  | 7 | 85  | 36 | 260 | 108 |
| 38,747 | 10 | 5 | 161 | 60 | 4  | 7 | 84  | 36 | 259 | 108 |
| 38,748 | 9  | 5 | 159 | 60 | 3  | 7 | 84  | 36 | 255 | 108 |
| 38,749 | 9  | 5 | 158 | 60 | 3  | 7 | 84  | 36 | 254 | 108 |
| 38,750 | 9  | 5 | 160 | 60 | 3  | 7 | 82  | 35 | 254 | 107 |
| 38,751 | 9  | 5 | 159 | 59 | 3  | 7 | 82  | 35 | 253 | 106 |
| 38,752 | 9  | 5 | 161 | 58 | 3  | 7 | 82  | 35 | 255 | 105 |
| 38,753 | 9  | 5 | 155 | 58 | 3  | 6 | 81  | 33 | 248 | 102 |
| 38,754 | 9  | 4 | 155 | 58 | 3  | 6 | 84  | 33 | 251 | 101 |
| 38,755 | 14 | 4 | 211 | 58 | 9  | 6 | 113 | 33 | 347 | 101 |
| 38,756 | 14 | 4 | 216 | 58 | 9  | 6 | 119 | 33 | 358 | 101 |
| 38,757 | 14 | 4 | 228 | 58 | 9  | 6 | 125 | 33 | 376 | 101 |
| 38,758 | 14 | 4 | 229 | 55 | 9  | 6 | 126 | 32 | 378 | 97  |
| 38,759 | 14 | 3 | 229 | 55 | 9  | 6 | 126 | 29 | 378 | 93  |
| 38,760 | 15 | 3 | 230 | 55 | 9  | 6 | 126 | 29 | 380 | 93  |
| 38,761 | 15 | 3 | 231 | 55 | 9  | 6 | 126 | 29 | 381 | 93  |
| 38,762 | 15 | 3 | 231 | 55 | 10 | 6 | 126 | 28 | 382 | 92  |
| 38,763 | 15 | 3 | 241 | 55 | 11 | 6 | 127 | 29 | 394 | 93  |
| 38,764 | 17 | 3 | 240 | 54 | 11 | 6 | 128 | 29 | 396 | 92  |
| 38,765 | 17 | 3 | 240 | 51 | 11 | 5 | 128 | 22 | 396 | 81  |
| 38,766 | 17 | 3 | 239 | 53 | 11 | 5 | 128 | 23 | 395 | 84  |
| 38,767 | 17 | 3 | 243 | 53 | 11 | 5 | 128 | 21 | 399 | 82  |
| 38,768 | 17 | 3 | 244 | 38 | 11 | 4 | 128 | 19 | 400 | 64  |
| 38,769 | 17 | 3 | 244 | 33 | 11 | 3 | 127 | 17 | 399 | 56  |
| 38,770 | 17 | 2 | 229 | 19 | 11 | 3 | 124 | 12 | 381 | 36  |
| 38,771 | 13 | 2 | 217 | 14 | 11 | 3 | 114 | 10 | 355 | 29  |
| 38,772 | 12 | 2 | 174 | 14 | 10 | 3 | 79  | 10 | 275 | 29  |
| 38,773 | 12 | 2 | 170 | 14 | 10 | 3 | 78  | 10 | 270 | 29  |
| 38,774 | 12 | 2 | 169 | 11 | 10 | 1 | 78  | 9  | 269 | 23  |

|        |    |    |     |    |    |   |    |    |     |     |
|--------|----|----|-----|----|----|---|----|----|-----|-----|
| 38,775 | 12 | 2  | 170 | 10 | 10 | 1 | 78 | 9  | 270 | 22  |
| 38,776 | 12 | 2  | 173 | 10 | 10 | 1 | 79 | 9  | 274 | 22  |
| 38,777 | 12 | 2  | 173 | 11 | 10 | 1 | 79 | 9  | 274 | 23  |
| 38,778 | 12 | 2  | 172 | 10 | 10 | 1 | 79 | 10 | 273 | 23  |
| 38,779 | 12 | 1  | 170 | 15 | 10 | 1 | 79 | 12 | 271 | 29  |
| 38,780 | 12 | 1  | 170 | 16 | 10 | 1 | 76 | 15 | 268 | 33  |
| 38,781 | 12 | 1  | 170 | 16 | 10 | 1 | 76 | 16 | 268 | 34  |
| 38,782 | 12 | 1  | 172 | 16 | 9  | 1 | 76 | 16 | 269 | 34  |
| 38,783 | 12 | 1  | 164 | 16 | 9  | 1 | 74 | 16 | 259 | 34  |
| 38,784 | 10 | 2  | 134 | 20 | 8  | 2 | 61 | 25 | 213 | 49  |
| 38,785 | 9  | 2  | 115 | 21 | 8  | 2 | 51 | 24 | 183 | 49  |
| 38,786 | 9  | 2  | 121 | 23 | 8  | 2 | 56 | 27 | 194 | 54  |
| 38,787 | 9  | 5  | 122 | 29 | 9  | 3 | 62 | 23 | 202 | 60  |
| 38,788 | 9  | 6  | 122 | 30 | 9  | 3 | 64 | 23 | 204 | 62  |
| 38,789 | 11 | 7  | 126 | 26 | 9  | 3 | 64 | 22 | 210 | 58  |
| 38,790 | 11 | 8  | 125 | 27 | 9  | 3 | 64 | 22 | 209 | 60  |
| 38,791 | 11 | 8  | 125 | 27 | 9  | 3 | 64 | 22 | 209 | 60  |
| 38,792 | 11 | 8  | 125 | 27 | 9  | 3 | 64 | 22 | 209 | 60  |
| 38,793 | 11 | 7  | 125 | 29 | 9  | 3 | 64 | 22 | 209 | 61  |
| 38,794 | 11 | 7  | 125 | 30 | 9  | 3 | 64 | 22 | 209 | 62  |
| 38,795 | 11 | 7  | 125 | 30 | 9  | 3 | 66 | 22 | 211 | 62  |
| 38,796 | 12 | 7  | 125 | 30 | 9  | 3 | 67 | 22 | 213 | 62  |
| 38,797 | 12 | 7  | 127 | 30 | 9  | 3 | 67 | 22 | 215 | 62  |
| 38,798 | 12 | 7  | 131 | 30 | 9  | 3 | 72 | 22 | 224 | 62  |
| 38,799 | 12 | 7  | 131 | 31 | 9  | 3 | 72 | 22 | 224 | 63  |
| 38,800 | 12 | 7  | 131 | 35 | 9  | 4 | 74 | 23 | 226 | 69  |
| 38,801 | 12 | 9  | 133 | 43 | 9  | 4 | 75 | 29 | 229 | 85  |
| 38,802 | 12 | 9  | 133 | 50 | 9  | 4 | 75 | 32 | 229 | 95  |
| 38,803 | 12 | 9  | 130 | 56 | 9  | 4 | 75 | 32 | 226 | 101 |
| 38,804 | 12 | 9  | 126 | 57 | 9  | 4 | 73 | 32 | 220 | 102 |
| 38,805 | 7  | 9  | 70  | 57 | 3  | 4 | 43 | 32 | 123 | 102 |
| 38,806 | 7  | 10 | 64  | 58 | 3  | 4 | 37 | 32 | 111 | 104 |
| 38,807 | 7  | 10 | 52  | 58 | 3  | 4 | 31 | 32 | 93  | 104 |
| 38,808 | 7  | 10 | 51  | 58 | 3  | 4 | 30 | 32 | 91  | 104 |
| 38,809 | 7  | 10 | 51  | 59 | 3  | 4 | 30 | 32 | 91  | 105 |
| 38,810 | 7  | 10 | 51  | 59 | 3  | 4 | 30 | 32 | 91  | 105 |
| 38,811 | 6  | 10 | 49  | 59 | 3  | 4 | 30 | 32 | 88  | 105 |
| 38,812 | 6  | 10 | 48  | 59 | 3  | 4 | 29 | 32 | 86  | 105 |
| 38,813 | 6  | 10 | 48  | 59 | 2  | 4 | 29 | 33 | 85  | 106 |
| 38,814 | 6  | 10 | 38  | 59 | 1  | 4 | 28 | 34 | 73  | 107 |
| 38,815 | 4  | 10 | 38  | 61 | 1  | 4 | 27 | 36 | 70  | 111 |

|        |   |    |    |    |   |   |    |    |     |     |
|--------|---|----|----|----|---|---|----|----|-----|-----|
| 38,816 | 4 | 10 | 38 | 61 | 1 | 4 | 27 | 36 | 70  | 111 |
| 38,817 | 4 | 10 | 34 | 59 | 1 | 4 | 27 | 34 | 66  | 107 |
| 38,818 | 4 | 10 | 33 | 59 | 1 | 4 | 27 | 34 | 65  | 107 |
| 38,819 | 4 | 10 | 33 | 59 | 1 | 4 | 27 | 34 | 65  | 107 |
| 38,820 | 4 | 10 | 33 | 60 | 1 | 4 | 27 | 34 | 65  | 108 |
| 38,821 | 4 | 10 | 33 | 60 | 1 | 4 | 27 | 34 | 65  | 108 |
| 38,822 | 4 | 10 | 33 | 60 | 1 | 4 | 27 | 34 | 65  | 108 |
| 38,823 | 4 | 10 | 33 | 60 | 1 | 4 | 28 | 34 | 66  | 108 |
| 38,824 | 5 | 10 | 32 | 60 | 1 | 4 | 28 | 36 | 66  | 110 |
| 38,825 | 5 | 10 | 33 | 60 | 1 | 4 | 31 | 36 | 70  | 110 |
| 38,826 | 5 | 10 | 31 | 60 | 1 | 4 | 30 | 36 | 67  | 110 |
| 38,827 | 5 | 10 | 32 | 59 | 1 | 4 | 31 | 36 | 69  | 109 |
| 38,828 | 5 | 10 | 32 | 59 | 1 | 4 | 31 | 36 | 69  | 109 |
| 38,829 | 5 | 10 | 32 | 54 | 1 | 4 | 31 | 33 | 69  | 101 |
| 38,830 | 5 | 10 | 32 | 54 | 1 | 4 | 31 | 33 | 69  | 101 |
| 38,831 | 5 | 10 | 33 | 54 | 1 | 4 | 33 | 30 | 72  | 98  |
| 38,832 | 5 | 10 | 31 | 54 | 1 | 4 | 33 | 29 | 70  | 97  |
| 38,833 | 5 | 10 | 26 | 54 | 1 | 4 | 33 | 29 | 65  | 97  |
| 38,834 | 4 | 10 | 36 | 54 | 1 | 4 | 35 | 29 | 76  | 97  |
| 38,835 | 4 | 9  | 36 | 47 | 1 | 2 | 33 | 17 | 74  | 75  |
| 38,836 | 4 | 9  | 30 | 47 | 1 | 2 | 28 | 17 | 63  | 75  |
| 38,837 | 4 | 9  | 33 | 47 | 1 | 2 | 23 | 17 | 61  | 75  |
| 38,838 | 4 | 6  | 36 | 42 | 1 | 1 | 24 | 16 | 65  | 65  |
| 38,839 | 4 | 5  | 38 | 41 | 1 | 1 | 22 | 16 | 65  | 63  |
| 38,840 | 2 | 4  | 34 | 41 | 1 | 1 | 22 | 16 | 59  | 62  |
| 38,841 | 2 | 3  | 42 | 40 | 1 | 1 | 22 | 16 | 67  | 60  |
| 38,842 | 2 | 3  | 42 | 41 | 1 | 1 | 22 | 16 | 67  | 61  |
| 38,843 | 2 | 3  | 42 | 41 | 1 | 1 | 22 | 18 | 67  | 63  |
| 38,844 | 2 | 3  | 42 | 38 | 1 | 1 | 22 | 19 | 67  | 61  |
| 38,845 | 4 | 3  | 92 | 38 | 2 | 1 | 40 | 20 | 138 | 62  |
| 38,846 | 4 | 3  | 92 | 40 | 2 | 1 | 40 | 21 | 138 | 65  |
| 38,847 | 3 | 4  | 92 | 40 | 2 | 1 | 39 | 21 | 136 | 66  |
| 38,848 | 3 | 4  | 90 | 40 | 2 | 1 | 39 | 21 | 134 | 66  |
| 38,849 | 3 | 4  | 86 | 39 | 2 | 1 | 34 | 21 | 125 | 65  |
| 38,850 | 3 | 4  | 84 | 39 | 2 | 1 | 32 | 21 | 121 | 65  |
| 38,851 | 3 | 2  | 83 | 27 | 2 | 0 | 31 | 14 | 119 | 43  |
| 38,852 | 3 | 2  | 83 | 27 | 2 | 0 | 31 | 14 | 119 | 43  |
| 38,853 | 3 | 3  | 89 | 20 | 2 | 0 | 32 | 11 | 126 | 34  |
| 38,854 | 3 | 3  | 90 | 14 | 2 | 0 | 36 | 11 | 131 | 28  |
| 38,855 | 3 | 3  | 90 | 13 | 2 | 0 | 36 | 11 | 131 | 27  |
| 38,856 | 3 | 3  | 91 | 13 | 2 | 0 | 36 | 11 | 132 | 27  |

|        |    |   |     |    |   |   |     |    |     |    |
|--------|----|---|-----|----|---|---|-----|----|-----|----|
| 38,857 | 3  | 2 | 91  | 12 | 2 | 0 | 37  | 11 | 133 | 25 |
| 38,858 | 3  | 2 | 91  | 12 | 2 | 0 | 37  | 11 | 133 | 25 |
| 38,859 | 3  | 2 | 91  | 12 | 2 | 0 | 37  | 11 | 133 | 25 |
| 38,860 | 3  | 2 | 91  | 12 | 2 | 1 | 40  | 13 | 136 | 28 |
| 38,861 | 3  | 2 | 92  | 12 | 2 | 1 | 40  | 13 | 137 | 28 |
| 38,862 | 3  | 2 | 93  | 12 | 2 | 1 | 41  | 14 | 139 | 29 |
| 38,863 | 3  | 2 | 93  | 13 | 2 | 2 | 41  | 15 | 139 | 32 |
| 38,864 | 3  | 2 | 93  | 14 | 2 | 2 | 41  | 14 | 139 | 32 |
| 38,865 | 3  | 4 | 94  | 18 | 2 | 2 | 43  | 14 | 142 | 38 |
| 38,866 | 3  | 4 | 94  | 16 | 2 | 2 | 43  | 12 | 142 | 34 |
| 38,867 | 4  | 4 | 100 | 20 | 2 | 2 | 44  | 12 | 150 | 38 |
| 38,868 | 4  | 4 | 100 | 18 | 3 | 2 | 45  | 12 | 152 | 36 |
| 38,869 | 4  | 4 | 102 | 18 | 3 | 2 | 46  | 14 | 155 | 38 |
| 38,870 | 12 | 4 | 134 | 20 | 3 | 2 | 70  | 15 | 219 | 41 |
| 38,871 | 12 | 4 | 134 | 19 | 3 | 2 | 70  | 15 | 219 | 40 |
| 38,872 | 12 | 4 | 137 | 19 | 3 | 2 | 72  | 15 | 224 | 40 |
| 38,873 | 12 | 4 | 142 | 19 | 3 | 2 | 74  | 15 | 231 | 40 |
| 38,874 | 12 | 4 | 144 | 19 | 3 | 2 | 75  | 13 | 234 | 38 |
| 38,875 | 11 | 4 | 144 | 19 | 3 | 3 | 75  | 14 | 233 | 40 |
| 38,876 | 11 | 4 | 143 | 19 | 3 | 3 | 73  | 14 | 230 | 40 |
| 38,877 | 11 | 5 | 143 | 19 | 3 | 3 | 73  | 14 | 230 | 41 |
| 38,878 | 11 | 5 | 144 | 19 | 3 | 3 | 74  | 14 | 232 | 41 |
| 38,879 | 11 | 5 | 144 | 19 | 3 | 3 | 75  | 14 | 233 | 41 |
| 38,880 | 11 | 5 | 144 | 19 | 3 | 3 | 75  | 14 | 233 | 41 |
| 38,881 | 12 | 5 | 145 | 18 | 3 | 3 | 73  | 14 | 233 | 40 |
| 38,882 | 12 | 5 | 145 | 18 | 3 | 3 | 73  | 14 | 233 | 40 |
| 38,883 | 14 | 5 | 165 | 18 | 3 | 3 | 75  | 14 | 257 | 40 |
| 38,884 | 14 | 5 | 169 | 18 | 3 | 3 | 76  | 14 | 262 | 40 |
| 38,885 | 14 | 5 | 165 | 18 | 3 | 3 | 77  | 14 | 259 | 40 |
| 38,886 | 14 | 5 | 165 | 19 | 3 | 3 | 78  | 14 | 260 | 41 |
| 38,887 | 16 | 5 | 193 | 19 | 4 | 3 | 88  | 16 | 301 | 43 |
| 38,888 | 16 | 5 | 190 | 20 | 3 | 3 | 87  | 16 | 296 | 44 |
| 38,889 | 16 | 5 | 186 | 19 | 3 | 3 | 86  | 16 | 291 | 43 |
| 38,890 | 20 | 5 | 248 | 19 | 4 | 3 | 98  | 16 | 370 | 43 |
| 38,891 | 20 | 6 | 332 | 19 | 6 | 3 | 102 | 17 | 460 | 45 |
| 38,892 | 19 | 6 | 317 | 19 | 7 | 3 | 102 | 17 | 445 | 45 |
| 38,893 | 19 | 6 | 295 | 18 | 6 | 3 | 92  | 17 | 412 | 44 |
| 38,894 | 18 | 6 | 292 | 18 | 6 | 3 | 92  | 16 | 408 | 43 |
| 38,895 | 18 | 6 | 291 | 17 | 6 | 3 | 92  | 14 | 407 | 40 |
| 38,896 | 18 | 6 | 289 | 15 | 6 | 3 | 88  | 13 | 401 | 37 |
| 38,897 | 18 | 6 | 289 | 15 | 6 | 3 | 88  | 13 | 401 | 37 |

|        |    |   |     |    |    |   |     |    |     |    |
|--------|----|---|-----|----|----|---|-----|----|-----|----|
| 38,898 | 18 | 5 | 289 | 15 | 6  | 3 | 88  | 13 | 401 | 36 |
| 38,899 | 18 | 5 | 289 | 15 | 6  | 3 | 88  | 13 | 401 | 36 |
| 38,900 | 18 | 5 | 290 | 15 | 6  | 3 | 89  | 13 | 403 | 36 |
| 38,901 | 18 | 5 | 292 | 15 | 6  | 3 | 90  | 13 | 406 | 36 |
| 38,902 | 22 | 5 | 311 | 15 | 7  | 3 | 100 | 13 | 440 | 36 |
| 38,903 | 22 | 4 | 305 | 15 | 7  | 3 | 99  | 13 | 433 | 35 |
| 38,904 | 22 | 4 | 305 | 15 | 7  | 3 | 99  | 13 | 433 | 35 |
| 38,905 | 22 | 4 | 308 | 16 | 7  | 4 | 97  | 13 | 434 | 37 |
| 38,906 | 25 | 4 | 328 | 16 | 7  | 4 | 107 | 13 | 467 | 37 |
| 38,907 | 25 | 4 | 331 | 16 | 8  | 4 | 108 | 13 | 472 | 37 |
| 38,908 | 25 | 4 | 331 | 16 | 8  | 4 | 107 | 13 | 471 | 37 |
| 38,909 | 25 | 4 | 335 | 25 | 8  | 4 | 107 | 16 | 475 | 49 |
| 38,910 | 25 | 4 | 335 | 26 | 8  | 4 | 105 | 16 | 473 | 50 |
| 38,911 | 25 | 4 | 336 | 25 | 8  | 3 | 108 | 15 | 477 | 47 |
| 38,912 | 25 | 4 | 338 | 25 | 8  | 3 | 108 | 15 | 479 | 47 |
| 38,913 | 28 | 4 | 342 | 24 | 8  | 2 | 111 | 13 | 489 | 43 |
| 38,914 | 28 | 4 | 345 | 23 | 8  | 2 | 111 | 13 | 492 | 42 |
| 38,915 | 28 | 4 | 345 | 23 | 8  | 2 | 111 | 13 | 492 | 42 |
| 38,916 | 28 | 2 | 352 | 19 | 8  | 2 | 109 | 12 | 497 | 35 |
| 38,917 | 28 | 2 | 390 | 22 | 8  | 2 | 118 | 15 | 544 | 41 |
| 38,918 | 28 | 3 | 390 | 18 | 7  | 2 | 117 | 16 | 542 | 39 |
| 38,919 | 28 | 3 | 391 | 18 | 7  | 2 | 118 | 16 | 544 | 39 |
| 38,920 | 28 | 3 | 397 | 19 | 8  | 2 | 124 | 16 | 557 | 40 |
| 38,921 | 20 | 3 | 375 | 17 | 8  | 2 | 103 | 15 | 506 | 37 |
| 38,922 | 24 | 3 | 388 | 17 | 8  | 2 | 102 | 15 | 522 | 37 |
| 38,923 | 24 | 4 | 383 | 17 | 8  | 2 | 100 | 15 | 515 | 38 |
| 38,924 | 24 | 4 | 383 | 17 | 8  | 2 | 100 | 15 | 515 | 38 |
| 38,925 | 44 | 3 | 517 | 17 | 14 | 1 | 147 | 14 | 722 | 35 |
| 38,926 | 47 | 3 | 561 | 17 | 15 | 1 | 174 | 14 | 797 | 35 |
| 38,927 | 47 | 3 | 572 | 17 | 15 | 1 | 177 | 14 | 811 | 35 |
| 38,928 | 47 | 3 | 571 | 17 | 15 | 1 | 177 | 14 | 810 | 35 |
| 38,929 | 47 | 3 | 570 | 17 | 15 | 1 | 177 | 14 | 809 | 35 |
| 38,930 | 47 | 3 | 571 | 17 | 15 | 1 | 176 | 14 | 809 | 35 |
| 38,931 | 47 | 3 | 569 | 17 | 15 | 1 | 176 | 14 | 807 | 35 |
| 38,932 | 46 | 3 | 569 | 17 | 15 | 1 | 176 | 14 | 806 | 35 |
| 38,933 | 46 | 3 | 564 | 17 | 15 | 1 | 175 | 14 | 800 | 35 |
| 38,934 | 44 | 3 | 554 | 19 | 15 | 2 | 173 | 17 | 786 | 41 |
| 38,935 | 44 | 3 | 547 | 19 | 15 | 2 | 172 | 18 | 778 | 42 |
| 38,936 | 44 | 3 | 552 | 19 | 15 | 2 | 170 | 18 | 781 | 42 |
| 38,937 | 43 | 3 | 545 | 18 | 15 | 2 | 165 | 18 | 768 | 41 |
| 38,938 | 42 | 3 | 524 | 18 | 14 | 2 | 160 | 16 | 740 | 39 |

|        |    |   |     |    |    |   |     |    |     |    |
|--------|----|---|-----|----|----|---|-----|----|-----|----|
| 38,939 | 41 | 3 | 521 | 17 | 16 | 2 | 157 | 16 | 735 | 38 |
| 38,940 | 40 | 3 | 490 | 18 | 16 | 2 | 157 | 17 | 703 | 40 |
| 38,941 | 39 | 3 | 464 | 18 | 15 | 2 | 149 | 17 | 667 | 40 |
| 38,942 | 39 | 2 | 372 | 18 | 13 | 2 | 145 | 16 | 569 | 38 |
| 38,943 | 43 | 2 | 376 | 18 | 12 | 2 | 146 | 16 | 577 | 38 |
| 38,944 | 46 | 2 | 425 | 18 | 16 | 2 | 171 | 15 | 658 | 37 |
| 38,945 | 46 | 2 | 425 | 19 | 16 | 2 | 171 | 15 | 658 | 38 |
| 38,946 | 47 | 2 | 434 | 20 | 16 | 2 | 182 | 15 | 679 | 39 |
| 38,947 | 48 | 2 | 447 | 20 | 16 | 2 | 183 | 15 | 694 | 39 |
| 38,948 | 48 | 2 | 452 | 20 | 16 | 2 | 185 | 15 | 701 | 39 |
| 38,949 | 48 | 2 | 452 | 20 | 16 | 2 | 185 | 15 | 701 | 39 |
| 38,950 | 48 | 2 | 453 | 20 | 16 | 2 | 185 | 15 | 702 | 39 |
| 38,951 | 48 | 2 | 452 | 20 | 16 | 2 | 184 | 15 | 700 | 39 |
| 38,952 | 50 | 2 | 450 | 20 | 16 | 3 | 184 | 15 | 700 | 40 |
| 38,953 | 46 | 2 | 433 | 20 | 15 | 3 | 174 | 15 | 668 | 40 |
| 38,954 | 46 | 2 | 433 | 20 | 15 | 3 | 174 | 15 | 668 | 40 |
| 38,955 | 46 | 2 | 435 | 19 | 15 | 2 | 173 | 15 | 669 | 38 |
| 38,956 | 47 | 2 | 433 | 19 | 15 | 2 | 174 | 16 | 669 | 39 |
| 38,957 | 44 | 2 | 412 | 19 | 15 | 2 | 164 | 17 | 635 | 40 |
| 38,958 | 44 | 2 | 409 | 19 | 14 | 2 | 162 | 17 | 629 | 40 |
| 38,959 | 44 | 2 | 414 | 20 | 14 | 2 | 164 | 18 | 636 | 42 |
| 38,960 | 44 | 2 | 410 | 12 | 14 | 2 | 164 | 16 | 632 | 32 |
| 38,961 | 48 | 2 | 444 | 11 | 17 | 2 | 184 | 15 | 693 | 30 |
| 38,962 | 49 | 2 | 453 | 12 | 17 | 2 | 195 | 15 | 714 | 31 |
| 38,963 | 49 | 2 | 453 | 12 | 17 | 2 | 196 | 15 | 715 | 31 |
| 38,964 | 46 | 2 | 448 | 12 | 17 | 2 | 192 | 16 | 703 | 32 |
| 38,965 | 46 | 2 | 445 | 12 | 17 | 2 | 193 | 16 | 701 | 32 |
| 38,966 | 46 | 2 | 440 | 12 | 17 | 2 | 193 | 16 | 696 | 32 |
| 38,967 | 46 | 2 | 439 | 13 | 17 | 2 | 193 | 16 | 695 | 33 |
| 38,968 | 45 | 1 | 397 | 10 | 17 | 2 | 183 | 12 | 642 | 25 |
| 38,969 | 45 | 1 | 399 | 10 | 17 | 2 | 182 | 12 | 643 | 25 |
| 38,970 | 45 | 1 | 398 | 10 | 17 | 2 | 182 | 12 | 642 | 25 |
| 38,971 | 46 | 1 | 399 | 13 | 16 | 3 | 176 | 12 | 637 | 29 |
| 38,972 | 47 | 1 | 405 | 20 | 17 | 3 | 184 | 14 | 653 | 38 |
| 38,973 | 43 | 8 | 389 | 36 | 17 | 4 | 184 | 24 | 633 | 72 |
| 38,974 | 40 | 7 | 357 | 36 | 17 | 6 | 174 | 25 | 588 | 74 |
| 38,975 | 26 | 7 | 278 | 38 | 12 | 6 | 148 | 25 | 464 | 76 |
| 38,976 | 24 | 7 | 253 | 39 | 11 | 6 | 133 | 26 | 421 | 78 |
| 38,977 | 21 | 7 | 208 | 39 | 10 | 6 | 107 | 26 | 346 | 78 |
| 38,978 | 24 | 7 | 203 | 44 | 10 | 6 | 104 | 26 | 341 | 83 |
| 38,979 | 24 | 7 | 202 | 44 | 10 | 6 | 104 | 26 | 340 | 83 |

|        |    |   |     |    |    |   |     |    |     |    |
|--------|----|---|-----|----|----|---|-----|----|-----|----|
| 38,980 | 25 | 7 | 210 | 44 | 10 | 6 | 107 | 26 | 352 | 83 |
| 38,981 | 25 | 7 | 210 | 44 | 10 | 6 | 107 | 26 | 352 | 83 |
| 38,982 | 25 | 7 | 213 | 45 | 10 | 6 | 109 | 26 | 357 | 84 |
| 38,983 | 25 | 7 | 213 | 45 | 10 | 6 | 109 | 26 | 357 | 84 |
| 38,984 | 25 | 7 | 207 | 45 | 10 | 6 | 108 | 26 | 350 | 84 |
| 38,985 | 26 | 7 | 211 | 43 | 11 | 5 | 112 | 23 | 360 | 78 |
| 38,986 | 26 | 7 | 211 | 44 | 11 | 5 | 112 | 22 | 360 | 78 |
| 38,987 | 26 | 7 | 205 | 44 | 11 | 5 | 112 | 22 | 354 | 78 |
| 38,988 | 26 | 7 | 205 | 44 | 11 | 5 | 113 | 22 | 355 | 78 |
| 38,989 | 26 | 7 | 205 | 44 | 11 | 5 | 113 | 22 | 355 | 78 |
| 38,990 | 27 | 7 | 204 | 44 | 9  | 5 | 116 | 22 | 356 | 78 |
| 38,991 | 26 | 7 | 202 | 44 | 9  | 5 | 115 | 22 | 352 | 78 |
| 38,992 | 23 | 7 | 200 | 44 | 9  | 5 | 113 | 22 | 345 | 78 |
| 38,993 | 22 | 7 | 197 | 44 | 9  | 5 | 112 | 22 | 340 | 78 |
| 38,994 | 22 | 7 | 193 | 44 | 9  | 5 | 110 | 22 | 334 | 78 |
| 38,995 | 19 | 7 | 143 | 44 | 5  | 5 | 84  | 22 | 251 | 78 |
| 38,996 | 19 | 7 | 150 | 42 | 6  | 5 | 87  | 22 | 262 | 76 |
| 38,997 | 18 | 7 | 145 | 42 | 6  | 5 | 88  | 22 | 257 | 76 |
| 38,998 | 18 | 7 | 138 | 43 | 6  | 5 | 87  | 22 | 249 | 77 |
| 38,999 | 18 | 7 | 133 | 43 | 6  | 5 | 85  | 22 | 242 | 77 |
| 39,000 | 18 | 7 | 132 | 43 | 6  | 5 | 85  | 22 | 241 | 77 |
| 39,001 | 19 | 7 | 141 | 43 | 6  | 5 | 101 | 22 | 267 | 77 |
| 39,002 | 19 | 7 | 141 | 43 | 6  | 5 | 101 | 22 | 267 | 77 |
| 39,003 | 17 | 7 | 150 | 43 | 6  | 4 | 105 | 22 | 278 | 76 |
| 39,004 | 17 | 7 | 150 | 44 | 6  | 4 | 106 | 22 | 279 | 77 |
| 39,005 | 17 | 7 | 150 | 44 | 6  | 4 | 107 | 22 | 280 | 77 |
| 39,006 | 17 | 7 | 147 | 45 | 6  | 4 | 107 | 25 | 277 | 81 |
| 39,007 | 16 | 8 | 146 | 46 | 6  | 4 | 105 | 24 | 273 | 82 |
| 39,008 | 16 | 8 | 141 | 47 | 6  | 4 | 103 | 24 | 266 | 83 |
| 39,009 | 16 | 9 | 137 | 51 | 5  | 4 | 99  | 25 | 257 | 89 |
| 39,010 | 12 | 9 | 108 | 50 | 3  | 4 | 88  | 24 | 211 | 87 |
| 39,011 | 12 | 9 | 105 | 51 | 3  | 4 | 80  | 26 | 200 | 90 |
| 39,012 | 11 | 9 | 102 | 51 | 3  | 5 | 73  | 26 | 189 | 91 |
| 39,013 | 11 | 9 | 94  | 50 | 3  | 5 | 69  | 26 | 177 | 90 |
| 39,014 | 11 | 9 | 95  | 50 | 3  | 5 | 68  | 25 | 177 | 89 |
| 39,015 | 11 | 9 | 95  | 50 | 3  | 5 | 68  | 25 | 177 | 89 |
| 39,016 | 11 | 9 | 94  | 50 | 3  | 5 | 67  | 25 | 175 | 89 |
| 39,017 | 11 | 9 | 90  | 50 | 3  | 5 | 67  | 25 | 171 | 89 |
| 39,018 | 11 | 9 | 93  | 49 | 3  | 5 | 68  | 25 | 175 | 88 |
| 39,019 | 13 | 9 | 104 | 49 | 4  | 5 | 72  | 25 | 193 | 88 |
| 39,020 | 14 | 9 | 109 | 49 | 4  | 5 | 79  | 25 | 206 | 88 |



|        |    |   |     |    |   |   |     |    |     |    |
|--------|----|---|-----|----|---|---|-----|----|-----|----|
| 39,021 | 14 | 9 | 115 | 45 | 5 | 4 | 90  | 25 | 224 | 83 |
| 39,022 | 13 | 9 | 115 | 45 | 5 | 4 | 90  | 25 | 223 | 83 |
| 39,023 | 13 | 9 | 100 | 39 | 4 | 4 | 79  | 23 | 196 | 75 |
| 39,024 | 13 | 2 | 106 | 23 | 4 | 3 | 79  | 13 | 202 | 41 |
| 39,025 | 12 | 2 | 110 | 23 | 4 | 1 | 85  | 12 | 211 | 38 |
| 39,026 | 13 | 2 | 116 | 21 | 4 | 1 | 97  | 11 | 230 | 35 |
| 39,027 | 13 | 2 | 116 | 20 | 4 | 1 | 97  | 11 | 230 | 34 |
| 39,028 | 12 | 2 | 116 | 21 | 4 | 1 | 96  | 11 | 228 | 35 |
| 39,029 | 10 | 2 | 111 | 16 | 4 | 1 | 96  | 11 | 221 | 30 |
| 39,030 | 9  | 2 | 103 | 16 | 4 | 1 | 93  | 11 | 209 | 30 |
| 39,031 | 9  | 2 | 102 | 16 | 4 | 1 | 94  | 11 | 209 | 30 |
| 39,032 | 9  | 2 | 100 | 15 | 4 | 1 | 93  | 11 | 206 | 29 |
| 39,033 | 9  | 2 | 99  | 15 | 4 | 1 | 92  | 11 | 204 | 29 |
| 39,034 | 10 | 2 | 98  | 15 | 4 | 1 | 92  | 11 | 204 | 29 |
| 39,035 | 9  | 3 | 94  | 15 | 3 | 1 | 88  | 11 | 194 | 30 |
| 39,036 | 9  | 3 | 94  | 15 | 3 | 1 | 88  | 11 | 194 | 30 |
| 39,037 | 9  | 3 | 94  | 14 | 3 | 1 | 87  | 11 | 193 | 29 |
| 39,038 | 9  | 3 | 97  | 14 | 3 | 1 | 87  | 11 | 196 | 29 |
| 39,039 | 9  | 3 | 97  | 14 | 4 | 1 | 87  | 11 | 197 | 29 |
| 39,040 | 8  | 4 | 96  | 14 | 4 | 1 | 84  | 11 | 192 | 30 |
| 39,041 | 8  | 4 | 96  | 14 | 4 | 1 | 84  | 11 | 192 | 30 |
| 39,042 | 8  | 5 | 96  | 13 | 4 | 1 | 84  | 10 | 192 | 29 |
| 39,043 | 11 | 5 | 100 | 13 | 4 | 1 | 84  | 10 | 199 | 29 |
| 39,044 | 11 | 5 | 106 | 13 | 4 | 1 | 85  | 10 | 206 | 29 |
| 39,045 | 13 | 5 | 145 | 13 | 4 | 1 | 91  | 10 | 253 | 29 |
| 39,046 | 14 | 5 | 191 | 13 | 5 | 1 | 118 | 10 | 328 | 29 |
| 39,047 | 13 | 5 | 175 | 13 | 4 | 1 | 103 | 11 | 295 | 30 |
| 39,048 | 13 | 5 | 174 | 15 | 4 | 1 | 102 | 11 | 293 | 32 |
| 39,049 | 13 | 5 | 187 | 17 | 4 | 1 | 104 | 12 | 308 | 35 |
| 39,050 | 13 | 5 | 187 | 18 | 4 | 1 | 104 | 13 | 308 | 37 |
| 39,051 | 13 | 5 | 187 | 18 | 4 | 1 | 101 | 13 | 305 | 37 |
| 39,052 | 12 | 5 | 180 | 18 | 4 | 1 | 88  | 13 | 284 | 37 |
| 39,053 | 12 | 5 | 176 | 18 | 4 | 1 | 84  | 13 | 276 | 37 |
| 39,054 | 12 | 5 | 174 | 18 | 4 | 1 | 83  | 13 | 273 | 37 |
| 39,055 | 12 | 5 | 171 | 17 | 4 | 1 | 84  | 13 | 271 | 36 |
| 39,056 | 16 | 5 | 182 | 16 | 4 | 1 | 88  | 10 | 290 | 32 |
| 39,057 | 16 | 5 | 182 | 16 | 4 | 1 | 88  | 11 | 290 | 33 |
| 39,058 | 16 | 4 | 185 | 16 | 4 | 1 | 89  | 13 | 294 | 34 |
| 39,059 | 16 | 4 | 185 | 15 | 4 | 1 | 89  | 12 | 294 | 32 |
| 39,060 | 16 | 3 | 188 | 11 | 5 | 1 | 91  | 12 | 300 | 27 |
| 39,061 | 18 | 3 | 191 | 11 | 5 | 1 | 91  | 12 | 305 | 27 |

|        |    |   |     |    |   |   |    |    |     |    |
|--------|----|---|-----|----|---|---|----|----|-----|----|
| 39,062 | 18 | 3 | 191 | 9  | 5 | 1 | 91 | 9  | 305 | 22 |
| 39,063 | 18 | 5 | 191 | 10 | 5 | 0 | 91 | 12 | 305 | 27 |
| 39,064 | 18 | 5 | 191 | 11 | 5 | 0 | 91 | 13 | 305 | 29 |
| 39,065 | 18 | 5 | 190 | 11 | 5 | 0 | 93 | 13 | 306 | 29 |
| 39,066 | 18 | 5 | 194 | 11 | 5 | 0 | 95 | 13 | 312 | 29 |
| 39,067 | 18 | 5 | 194 | 11 | 6 | 0 | 96 | 14 | 314 | 30 |
| 39,068 | 18 | 5 | 191 | 11 | 6 | 0 | 94 | 14 | 309 | 30 |
| 39,069 | 16 | 5 | 180 | 11 | 5 | 0 | 90 | 14 | 291 | 30 |
| 39,070 | 15 | 5 | 174 | 11 | 5 | 0 | 83 | 14 | 277 | 30 |
| 39,071 | 15 | 5 | 167 | 12 | 4 | 0 | 74 | 14 | 260 | 31 |
| 39,072 | 15 | 5 | 161 | 20 | 4 | 0 | 71 | 15 | 251 | 40 |
| 39,073 | 16 | 5 | 161 | 22 | 4 | 0 | 70 | 16 | 251 | 43 |
| 39,074 | 15 | 5 | 166 | 22 | 5 | 0 | 77 | 16 | 263 | 43 |
| 39,075 | 15 | 5 | 168 | 23 | 8 | 0 | 79 | 16 | 270 | 44 |
| 39,076 | 15 | 5 | 167 | 23 | 9 | 0 | 75 | 16 | 266 | 44 |
| 39,077 | 14 | 5 | 161 | 23 | 9 | 0 | 64 | 16 | 248 | 44 |
| 39,078 | 14 | 5 | 161 | 22 | 9 | 0 | 64 | 16 | 248 | 43 |
| 39,079 | 14 | 6 | 161 | 22 | 9 | 0 | 64 | 16 | 248 | 44 |
| 39,080 | 14 | 6 | 161 | 24 | 9 | 0 | 64 | 17 | 248 | 47 |
| 39,081 | 14 | 6 | 161 | 24 | 9 | 0 | 64 | 18 | 248 | 48 |
| 39,082 | 15 | 6 | 163 | 24 | 9 | 0 | 67 | 18 | 254 | 48 |
| 39,083 | 15 | 8 | 163 | 24 | 9 | 0 | 67 | 18 | 254 | 50 |
| 39,084 | 15 | 8 | 169 | 24 | 9 | 0 | 67 | 18 | 260 | 50 |
| 39,085 | 14 | 7 | 179 | 25 | 9 | 0 | 68 | 18 | 270 | 50 |
| 39,086 | 14 | 7 | 179 | 25 | 9 | 0 | 68 | 18 | 270 | 50 |
| 39,087 | 14 | 7 | 187 | 25 | 9 | 0 | 76 | 18 | 286 | 50 |
| 39,088 | 14 | 7 | 190 | 25 | 9 | 0 | 78 | 18 | 291 | 50 |
| 39,089 | 15 | 7 | 187 | 25 | 9 | 0 | 79 | 18 | 290 | 50 |
| 39,090 | 15 | 7 | 187 | 25 | 8 | 0 | 79 | 19 | 289 | 51 |
| 39,091 | 15 | 6 | 187 | 27 | 8 | 0 | 79 | 22 | 289 | 55 |
| 39,092 | 16 | 6 | 187 | 31 | 8 | 0 | 79 | 24 | 290 | 61 |
| 39,093 | 16 | 5 | 193 | 36 | 9 | 0 | 79 | 26 | 297 | 67 |
| 39,094 | 16 | 6 | 190 | 36 | 9 | 0 | 79 | 26 | 294 | 68 |
| 39,095 | 16 | 7 | 187 | 36 | 9 | 0 | 79 | 27 | 291 | 70 |
| 39,096 | 14 | 7 | 150 | 37 | 9 | 0 | 74 | 27 | 247 | 71 |
| 39,097 | 13 | 7 | 104 | 37 | 8 | 0 | 47 | 27 | 172 | 71 |
| 39,098 | 13 | 7 | 108 | 35 | 8 | 0 | 56 | 26 | 185 | 68 |
| 39,099 | 13 | 7 | 109 | 35 | 8 | 0 | 57 | 27 | 187 | 69 |
| 39,100 | 14 | 7 | 122 | 31 | 9 | 0 | 74 | 26 | 219 | 64 |
| 39,101 | 14 | 7 | 122 | 31 | 9 | 0 | 74 | 26 | 219 | 64 |
| 39,102 | 14 | 7 | 126 | 31 | 9 | 0 | 79 | 26 | 228 | 64 |

|        |    |   |     |    |    |   |     |    |     |    |
|--------|----|---|-----|----|----|---|-----|----|-----|----|
| 39,103 | 14 | 7 | 129 | 31 | 9  | 0 | 81  | 27 | 233 | 65 |
| 39,104 | 14 | 7 | 131 | 31 | 9  | 0 | 81  | 27 | 235 | 65 |
| 39,105 | 14 | 7 | 131 | 31 | 9  | 0 | 79  | 27 | 233 | 65 |
| 39,106 | 10 | 7 | 123 | 31 | 9  | 0 | 76  | 27 | 218 | 65 |
| 39,107 | 10 | 7 | 127 | 31 | 9  | 0 | 74  | 27 | 220 | 65 |
| 39,108 | 10 | 7 | 127 | 31 | 9  | 0 | 74  | 26 | 220 | 64 |
| 39,109 | 10 | 7 | 124 | 30 | 9  | 0 | 73  | 24 | 216 | 61 |
| 39,110 | 10 | 7 | 124 | 30 | 9  | 0 | 72  | 23 | 215 | 60 |
| 39,111 | 10 | 7 | 121 | 30 | 8  | 0 | 71  | 23 | 210 | 60 |
| 39,112 | 8  | 7 | 120 | 30 | 8  | 0 | 71  | 23 | 207 | 60 |
| 39,113 | 11 | 5 | 126 | 28 | 8  | 0 | 74  | 19 | 219 | 52 |
| 39,114 | 11 | 5 | 128 | 28 | 8  | 0 | 79  | 19 | 226 | 52 |
| 39,115 | 11 | 5 | 135 | 28 | 8  | 0 | 82  | 19 | 236 | 52 |
| 39,116 | 13 | 5 | 138 | 28 | 8  | 0 | 81  | 19 | 240 | 52 |
| 39,117 | 13 | 5 | 138 | 28 | 7  | 0 | 80  | 19 | 238 | 52 |
| 39,118 | 13 | 5 | 138 | 28 | 7  | 0 | 80  | 18 | 238 | 51 |
| 39,119 | 13 | 5 | 144 | 28 | 7  | 0 | 82  | 18 | 246 | 51 |
| 39,120 | 13 | 5 | 144 | 28 | 7  | 0 | 82  | 18 | 246 | 51 |
| 39,121 | 14 | 5 | 161 | 28 | 7  | 0 | 86  | 19 | 268 | 52 |
| 39,122 | 22 | 5 | 206 | 27 | 8  | 0 | 96  | 19 | 332 | 51 |
| 39,123 | 29 | 5 | 275 | 19 | 11 | 0 | 102 | 16 | 417 | 40 |
| 39,124 | 31 | 5 | 343 | 17 | 21 | 0 | 146 | 15 | 541 | 37 |
| 39,125 | 33 | 5 | 380 | 16 | 20 | 0 | 147 | 15 | 580 | 36 |
| 39,126 | 33 | 6 | 372 | 15 | 17 | 0 | 144 | 16 | 566 | 37 |
| 39,127 | 33 | 6 | 370 | 15 | 16 | 0 | 142 | 16 | 561 | 37 |
| 39,128 | 43 | 7 | 521 | 15 | 25 | 0 | 199 | 16 | 788 | 38 |
| 39,129 | 42 | 7 | 530 | 15 | 25 | 0 | 207 | 16 | 804 | 38 |
| 39,130 | 42 | 6 | 529 | 15 | 25 | 0 | 204 | 16 | 800 | 37 |
| 39,131 | 42 | 6 | 532 | 13 | 26 | 0 | 209 | 17 | 809 | 36 |
| 39,132 | 42 | 6 | 530 | 13 | 26 | 0 | 209 | 16 | 807 | 35 |
| 39,133 | 42 | 6 | 537 | 15 | 27 | 0 | 217 | 16 | 823 | 37 |
| 39,134 | 43 | 4 | 541 | 15 | 27 | 0 | 217 | 16 | 828 | 35 |
| 39,135 | 43 | 4 | 541 | 19 | 27 | 0 | 221 | 18 | 832 | 41 |
| 39,136 | 48 | 4 | 567 | 18 | 27 | 0 | 230 | 18 | 872 | 40 |
| 39,137 | 49 | 4 | 571 | 18 | 27 | 0 | 223 | 18 | 870 | 40 |
| 39,138 | 49 | 4 | 571 | 18 | 27 | 0 | 223 | 18 | 870 | 40 |
| 39,139 | 49 | 4 | 583 | 18 | 29 | 0 | 221 | 18 | 882 | 40 |
| 39,140 | 48 | 4 | 585 | 18 | 29 | 0 | 220 | 17 | 882 | 39 |
| 39,141 | 48 | 4 | 585 | 18 | 29 | 0 | 220 | 17 | 882 | 39 |
| 39,142 | 47 | 4 | 596 | 16 | 30 | 0 | 225 | 14 | 898 | 34 |
| 39,143 | 48 | 4 | 602 | 12 | 30 | 0 | 225 | 12 | 905 | 28 |

|        |    |   |     |    |    |   |     |    |       |    |
|--------|----|---|-----|----|----|---|-----|----|-------|----|
| 39,144 | 46 | 3 | 597 | 7  | 29 | 0 | 225 | 11 | 897   | 21 |
| 39,145 | 45 | 3 | 596 | 7  | 29 | 0 | 225 | 11 | 895   | 21 |
| 39,146 | 45 | 2 | 602 | 7  | 29 | 0 | 225 | 10 | 901   | 19 |
| 39,147 | 58 | 2 | 649 | 6  | 35 | 0 | 248 | 10 | 990   | 18 |
| 39,148 | 58 | 2 | 646 | 6  | 35 | 0 | 245 | 10 | 984   | 18 |
| 39,149 | 69 | 2 | 710 | 6  | 39 | 0 | 294 | 9  | 1,112 | 17 |
| 39,150 | 69 | 2 | 708 | 7  | 39 | 0 | 293 | 10 | 1,109 | 19 |
| 39,151 | 68 | 2 | 695 | 8  | 38 | 0 | 274 | 9  | 1,075 | 19 |
| 39,152 | 68 | 2 | 689 | 8  | 38 | 0 | 271 | 9  | 1,066 | 19 |
| 39,153 | 68 | 2 | 690 | 9  | 38 | 0 | 274 | 9  | 1,070 | 20 |
| 39,154 | 68 | 2 | 687 | 9  | 38 | 0 | 272 | 8  | 1,065 | 19 |
| 39,155 | 68 | 2 | 682 | 9  | 38 | 0 | 272 | 8  | 1,060 | 19 |
| 39,156 | 68 | 2 | 679 | 9  | 38 | 0 | 272 | 8  | 1,057 | 19 |
| 39,157 | 68 | 2 | 678 | 9  | 38 | 0 | 272 | 8  | 1,056 | 19 |
| 39,158 | 68 | 2 | 675 | 9  | 38 | 0 | 272 | 8  | 1,053 | 19 |
| 39,159 | 68 | 2 | 675 | 9  | 38 | 0 | 273 | 8  | 1,054 | 19 |
| 39,160 | 68 | 2 | 676 | 9  | 38 | 0 | 274 | 8  | 1,056 | 19 |
| 39,161 | 68 | 2 | 676 | 9  | 38 | 0 | 274 | 8  | 1,056 | 19 |
| 39,162 | 68 | 2 | 682 | 9  | 38 | 0 | 274 | 8  | 1,062 | 19 |
| 39,163 | 74 | 2 | 729 | 16 | 39 | 0 | 293 | 12 | 1,135 | 30 |
| 39,164 | 71 | 2 | 729 | 17 | 39 | 0 | 292 | 12 | 1,131 | 31 |
| 39,165 | 72 | 2 | 727 | 18 | 39 | 0 | 287 | 12 | 1,125 | 32 |
| 39,166 | 73 | 2 | 723 | 18 | 39 | 0 | 283 | 12 | 1,118 | 32 |
| 39,167 | 71 | 2 | 716 | 18 | 40 | 0 | 284 | 12 | 1,111 | 32 |
| 39,168 | 71 | 2 | 710 | 18 | 40 | 0 | 281 | 12 | 1,102 | 32 |
| 39,169 | 71 | 2 | 704 | 18 | 40 | 0 | 285 | 12 | 1,100 | 32 |
| 39,170 | 73 | 2 | 710 | 18 | 42 | 0 | 289 | 12 | 1,114 | 32 |
| 39,171 | 73 | 2 | 709 | 18 | 42 | 0 | 288 | 12 | 1,112 | 32 |
| 39,172 | 69 | 2 | 671 | 18 | 42 | 0 | 283 | 11 | 1,065 | 31 |
| 39,173 | 68 | 2 | 680 | 18 | 43 | 0 | 285 | 11 | 1,076 | 31 |
| 39,174 | 62 | 2 | 612 | 18 | 40 | 0 | 281 | 11 | 995   | 31 |
| 39,175 | 59 | 2 | 549 | 18 | 30 | 0 | 240 | 11 | 878   | 31 |
| 39,176 | 57 | 2 | 506 | 20 | 30 | 0 | 233 | 11 | 826   | 33 |
| 39,177 | 53 | 1 | 421 | 20 | 27 | 0 | 208 | 10 | 709   | 31 |
| 39,178 | 52 | 1 | 370 | 20 | 22 | 0 | 188 | 10 | 632   | 31 |
| 39,179 | 47 | 0 | 355 | 20 | 21 | 0 | 178 | 10 | 601   | 30 |
| 39,180 | 47 | 0 | 346 | 20 | 21 | 0 | 170 | 8  | 584   | 28 |
| 39,181 | 47 | 0 | 345 | 20 | 21 | 0 | 169 | 8  | 582   | 28 |
| 39,182 | 47 | 0 | 342 | 21 | 20 | 0 | 165 | 8  | 574   | 29 |
| 39,183 | 47 | 0 | 337 | 21 | 20 | 0 | 163 | 8  | 567   | 29 |
| 39,184 | 47 | 0 | 333 | 19 | 19 | 0 | 158 | 8  | 557   | 27 |

|        |    |   |     |    |    |   |     |   |     |    |
|--------|----|---|-----|----|----|---|-----|---|-----|----|
| 39,185 | 46 | 0 | 327 | 20 | 19 | 0 | 158 | 8 | 550 | 28 |
| 39,186 | 46 | 0 | 325 | 18 | 19 | 0 | 154 | 7 | 544 | 25 |
| 39,187 | 41 | 0 | 291 | 18 | 19 | 0 | 144 | 7 | 495 | 25 |
| 39,188 | 40 | 0 | 279 | 19 | 19 | 0 | 143 | 7 | 481 | 26 |
| 39,189 | 40 | 1 | 273 | 19 | 18 | 0 | 143 | 7 | 474 | 27 |
| 39,190 | 40 | 1 | 268 | 19 | 17 | 0 | 146 | 7 | 471 | 27 |
| 39,191 | 41 | 1 | 268 | 19 | 17 | 0 | 148 | 7 | 474 | 27 |
| 39,192 | 41 | 1 | 268 | 19 | 17 | 0 | 148 | 7 | 474 | 27 |
| 39,193 | 41 | 1 | 257 | 18 | 16 | 0 | 143 | 7 | 457 | 26 |
| 39,194 | 40 | 1 | 250 | 18 | 16 | 0 | 143 | 7 | 449 | 26 |
| 39,195 | 40 | 1 | 250 | 18 | 16 | 0 | 143 | 6 | 449 | 25 |
| 39,196 | 40 | 1 | 241 | 18 | 16 | 0 | 142 | 6 | 439 | 25 |
| 39,197 | 27 | 1 | 191 | 18 | 10 | 0 | 118 | 7 | 346 | 26 |
| 39,198 | 27 | 1 | 189 | 18 | 10 | 0 | 118 | 7 | 344 | 26 |
| 39,199 | 16 | 1 | 115 | 18 | 6  | 0 | 64  | 7 | 201 | 26 |
| 39,200 | 16 | 1 | 114 | 18 | 6  | 0 | 63  | 7 | 199 | 26 |
| 39,201 | 16 | 1 | 114 | 17 | 6  | 0 | 63  | 6 | 199 | 24 |
| 39,202 | 16 | 1 | 115 | 17 | 6  | 0 | 61  | 6 | 198 | 24 |
| 39,203 | 16 | 1 | 115 | 17 | 6  | 0 | 61  | 6 | 198 | 24 |
| 39,204 | 16 | 1 | 113 | 16 | 6  | 0 | 58  | 6 | 193 | 23 |
| 39,205 | 16 | 1 | 113 | 16 | 6  | 0 | 59  | 6 | 194 | 23 |
| 39,206 | 16 | 1 | 113 | 16 | 6  | 0 | 59  | 6 | 194 | 23 |
| 39,207 | 16 | 1 | 113 | 16 | 6  | 0 | 59  | 6 | 194 | 23 |
| 39,208 | 17 | 1 | 115 | 16 | 6  | 0 | 59  | 6 | 197 | 23 |
| 39,209 | 17 | 1 | 116 | 16 | 6  | 0 | 58  | 6 | 197 | 23 |
| 39,210 | 17 | 1 | 116 | 16 | 6  | 0 | 58  | 6 | 197 | 23 |
| 39,211 | 17 | 1 | 115 | 16 | 6  | 0 | 57  | 6 | 195 | 23 |
| 39,212 | 17 | 1 | 113 | 16 | 6  | 0 | 59  | 6 | 195 | 23 |
| 39,213 | 17 | 1 | 111 | 16 | 6  | 0 | 58  | 6 | 192 | 23 |
| 39,214 | 11 | 1 | 66  | 9  | 5  | 0 | 40  | 2 | 122 | 12 |
| 39,215 | 11 | 1 | 60  | 8  | 5  | 0 | 37  | 2 | 113 | 11 |
| 39,216 | 10 | 1 | 60  | 7  | 5  | 0 | 37  | 2 | 112 | 10 |
| 39,217 | 9  | 1 | 57  | 7  | 5  | 0 | 37  | 2 | 108 | 10 |
| 39,218 | 10 | 1 | 56  | 7  | 4  | 0 | 35  | 2 | 105 | 10 |
| 39,219 | 9  | 1 | 52  | 8  | 4  | 0 | 30  | 2 | 95  | 11 |
| 39,220 | 8  | 1 | 43  | 8  | 2  | 0 | 29  | 2 | 82  | 11 |
| 39,221 | 7  | 1 | 40  | 8  | 2  | 0 | 24  | 2 | 73  | 11 |
| 39,222 | 7  | 1 | 39  | 8  | 2  | 0 | 24  | 2 | 72  | 11 |
| 39,223 | 4  | 1 | 32  | 8  | 1  | 0 | 20  | 2 | 57  | 11 |
| 39,224 | 4  | 1 | 23  | 8  | 0  | 0 | 17  | 2 | 44  | 11 |
| 39,225 | 6  | 1 | 35  | 8  | 0  | 0 | 18  | 2 | 59  | 11 |

|        |    |   |     |    |   |   |    |   |     |    |
|--------|----|---|-----|----|---|---|----|---|-----|----|
| 39,226 | 6  | 1 | 30  | 8  | 0 | 0 | 17 | 2 | 53  | 11 |
| 39,227 | 6  | 1 | 30  | 6  | 0 | 0 | 15 | 2 | 51  | 9  |
| 39,228 | 13 | 1 | 60  | 6  | 0 | 0 | 20 | 2 | 93  | 9  |
| 39,229 | 13 | 1 | 60  | 6  | 0 | 0 | 20 | 2 | 93  | 9  |
| 39,230 | 13 | 1 | 60  | 6  | 0 | 0 | 20 | 2 | 93  | 9  |
| 39,231 | 14 | 1 | 67  | 6  | 0 | 0 | 27 | 2 | 108 | 9  |
| 39,232 | 14 | 1 | 67  | 5  | 0 | 0 | 27 | 2 | 108 | 8  |
| 39,233 | 15 | 1 | 71  | 5  | 1 | 0 | 27 | 2 | 114 | 8  |
| 39,234 | 15 | 1 | 72  | 5  | 1 | 0 | 29 | 2 | 117 | 8  |
| 39,235 | 15 | 1 | 72  | 6  | 1 | 0 | 28 | 2 | 116 | 9  |
| 39,236 | 15 | 1 | 72  | 12 | 1 | 0 | 28 | 6 | 116 | 19 |
| 39,237 | 15 | 1 | 72  | 11 | 1 | 0 | 28 | 5 | 116 | 17 |
| 39,238 | 15 | 1 | 78  | 11 | 1 | 0 | 30 | 5 | 124 | 17 |
| 39,239 | 15 | 2 | 78  | 10 | 1 | 0 | 30 | 5 | 124 | 17 |
| 39,240 | 15 | 1 | 77  | 10 | 1 | 0 | 30 | 5 | 123 | 16 |
| 39,241 | 15 | 1 | 74  | 11 | 2 | 0 | 28 | 6 | 119 | 18 |
| 39,242 | 14 | 1 | 72  | 11 | 2 | 0 | 26 | 6 | 114 | 18 |
| 39,243 | 14 | 1 | 73  | 11 | 2 | 0 | 26 | 6 | 115 | 18 |
| 39,244 | 14 | 2 | 75  | 11 | 2 | 0 | 26 | 6 | 117 | 19 |
| 39,245 | 14 | 2 | 75  | 11 | 2 | 0 | 26 | 6 | 117 | 19 |
| 39,246 | 14 | 2 | 75  | 11 | 2 | 0 | 27 | 5 | 118 | 18 |
| 39,247 | 14 | 2 | 75  | 11 | 2 | 0 | 27 | 5 | 118 | 18 |
| 39,248 | 14 | 2 | 75  | 11 | 2 | 0 | 27 | 5 | 118 | 18 |
| 39,249 | 14 | 2 | 76  | 11 | 2 | 0 | 27 | 5 | 119 | 18 |
| 39,250 | 14 | 2 | 77  | 11 | 2 | 0 | 27 | 5 | 120 | 18 |
| 39,251 | 14 | 2 | 77  | 11 | 2 | 0 | 27 | 5 | 120 | 18 |
| 39,252 | 14 | 2 | 80  | 11 | 2 | 0 | 27 | 5 | 123 | 18 |
| 39,253 | 14 | 2 | 80  | 11 | 2 | 0 | 28 | 5 | 124 | 18 |
| 39,254 | 14 | 2 | 80  | 12 | 2 | 0 | 28 | 5 | 124 | 19 |
| 39,255 | 15 | 2 | 81  | 12 | 2 | 0 | 27 | 5 | 125 | 19 |
| 39,256 | 15 | 2 | 82  | 12 | 2 | 0 | 27 | 5 | 126 | 19 |
| 39,257 | 15 | 2 | 82  | 12 | 2 | 0 | 27 | 5 | 126 | 19 |
| 39,258 | 14 | 2 | 80  | 14 | 2 | 0 | 27 | 5 | 123 | 21 |
| 39,259 | 14 | 2 | 88  | 14 | 2 | 0 | 28 | 5 | 132 | 21 |
| 39,260 | 15 | 2 | 95  | 14 | 2 | 0 | 28 | 5 | 140 | 21 |
| 39,261 | 15 | 2 | 97  | 14 | 2 | 0 | 28 | 5 | 142 | 21 |
| 39,262 | 15 | 2 | 96  | 14 | 2 | 0 | 27 | 5 | 140 | 21 |
| 39,263 | 15 | 2 | 101 | 14 | 2 | 0 | 27 | 5 | 145 | 21 |
| 39,264 | 15 | 2 | 99  | 14 | 2 | 0 | 27 | 5 | 143 | 21 |
| 39,265 | 15 | 2 | 99  | 14 | 2 | 0 | 27 | 5 | 143 | 21 |
| 39,266 | 15 | 2 | 99  | 14 | 2 | 0 | 27 | 5 | 143 | 21 |

|        |    |   |     |    |    |   |     |    |     |    |
|--------|----|---|-----|----|----|---|-----|----|-----|----|
| 39,267 | 15 | 2 | 99  | 14 | 2  | 0 | 28  | 5  | 144 | 21 |
| 39,268 | 15 | 2 | 104 | 14 | 2  | 0 | 30  | 5  | 151 | 21 |
| 39,269 | 14 | 2 | 111 | 13 | 2  | 0 | 30  | 5  | 157 | 20 |
| 39,270 | 14 | 2 | 111 | 13 | 2  | 0 | 29  | 5  | 156 | 20 |
| 39,271 | 14 | 2 | 112 | 13 | 2  | 0 | 29  | 5  | 157 | 20 |
| 39,272 | 14 | 2 | 114 | 13 | 2  | 0 | 29  | 5  | 159 | 20 |
| 39,273 | 14 | 2 | 117 | 13 | 2  | 0 | 29  | 5  | 162 | 20 |
| 39,274 | 13 | 2 | 120 | 14 | 2  | 0 | 29  | 5  | 164 | 21 |
| 39,275 | 13 | 2 | 120 | 15 | 2  | 0 | 30  | 5  | 165 | 22 |
| 39,276 | 11 | 2 | 125 | 15 | 2  | 0 | 32  | 6  | 170 | 23 |
| 39,277 | 10 | 2 | 122 | 15 | 2  | 0 | 35  | 8  | 169 | 25 |
| 39,278 | 5  | 2 | 125 | 15 | 2  | 0 | 32  | 9  | 164 | 26 |
| 39,279 | 4  | 2 | 112 | 15 | 2  | 0 | 30  | 9  | 148 | 26 |
| 39,280 | 4  | 2 | 113 | 16 | 2  | 0 | 31  | 9  | 150 | 27 |
| 39,281 | 3  | 2 | 107 | 16 | 2  | 0 | 24  | 9  | 136 | 27 |
| 39,282 | 5  | 2 | 116 | 17 | 3  | 0 | 34  | 9  | 158 | 28 |
| 39,283 | 7  | 2 | 123 | 17 | 3  | 0 | 35  | 9  | 168 | 28 |
| 39,284 | 7  | 2 | 123 | 18 | 4  | 0 | 38  | 9  | 172 | 29 |
| 39,285 | 7  | 2 | 132 | 21 | 6  | 0 | 39  | 11 | 184 | 34 |
| 39,286 | 7  | 2 | 132 | 23 | 6  | 0 | 46  | 12 | 191 | 37 |
| 39,287 | 7  | 2 | 151 | 16 | 6  | 0 | 67  | 8  | 231 | 26 |
| 39,288 | 8  | 2 | 161 | 16 | 7  | 1 | 67  | 9  | 243 | 28 |
| 39,289 | 9  | 2 | 166 | 18 | 7  | 1 | 74  | 9  | 256 | 30 |
| 39,290 | 9  | 1 | 171 | 18 | 8  | 1 | 78  | 9  | 266 | 29 |
| 39,291 | 9  | 1 | 181 | 18 | 8  | 1 | 83  | 9  | 281 | 29 |
| 39,292 | 9  | 1 | 182 | 17 | 7  | 1 | 83  | 8  | 281 | 27 |
| 39,293 | 10 | 0 | 183 | 17 | 7  | 1 | 84  | 8  | 284 | 26 |
| 39,294 | 11 | 0 | 217 | 17 | 7  | 1 | 88  | 9  | 323 | 27 |
| 39,295 | 12 | 0 | 219 | 17 | 7  | 1 | 98  | 10 | 336 | 28 |
| 39,296 | 13 | 0 | 227 | 17 | 7  | 1 | 98  | 12 | 345 | 30 |
| 39,297 | 13 | 0 | 228 | 17 | 7  | 1 | 99  | 12 | 347 | 30 |
| 39,298 | 13 | 0 | 228 | 18 | 7  | 1 | 102 | 13 | 350 | 32 |
| 39,299 | 13 | 0 | 227 | 18 | 7  | 1 | 103 | 14 | 350 | 33 |
| 39,300 | 13 | 0 | 234 | 18 | 7  | 1 | 108 | 15 | 362 | 34 |
| 39,301 | 13 | 1 | 236 | 18 | 7  | 1 | 108 | 15 | 364 | 35 |
| 39,302 | 14 | 1 | 235 | 18 | 8  | 1 | 110 | 15 | 367 | 35 |
| 39,303 | 15 | 1 | 251 | 21 | 8  | 1 | 111 | 16 | 385 | 39 |
| 39,304 | 16 | 1 | 254 | 21 | 9  | 1 | 116 | 19 | 395 | 42 |
| 39,305 | 17 | 1 | 296 | 24 | 15 | 1 | 134 | 19 | 462 | 45 |
| 39,306 | 16 | 1 | 303 | 26 | 16 | 1 | 136 | 21 | 471 | 49 |
| 39,307 | 17 | 1 | 312 | 27 | 18 | 1 | 145 | 23 | 492 | 52 |

|        |    |   |     |    |    |   |     |    |     |    |
|--------|----|---|-----|----|----|---|-----|----|-----|----|
| 39,308 | 18 | 1 | 325 | 27 | 18 | 2 | 148 | 23 | 509 | 53 |
| 39,309 | 18 | 1 | 326 | 25 | 19 | 2 | 159 | 23 | 522 | 51 |
| 39,310 | 19 | 2 | 330 | 25 | 19 | 2 | 159 | 23 | 527 | 52 |
| 39,311 | 18 | 2 | 333 | 26 | 19 | 4 | 161 | 23 | 531 | 55 |
| 39,312 | 18 | 2 | 371 | 26 | 21 | 4 | 166 | 24 | 576 | 56 |
| 39,313 | 18 | 2 | 376 | 29 | 22 | 4 | 172 | 24 | 588 | 59 |
| 39,314 | 18 | 2 | 386 | 29 | 24 | 4 | 178 | 26 | 606 | 61 |
| 39,315 | 18 | 2 | 389 | 30 | 25 | 5 | 179 | 26 | 611 | 63 |
| 39,316 | 18 | 2 | 391 | 30 | 25 | 5 | 183 | 27 | 617 | 64 |
| 39,317 | 18 | 2 | 395 | 30 | 25 | 5 | 183 | 27 | 621 | 64 |
| 39,318 | 18 | 2 | 400 | 30 | 26 | 5 | 186 | 27 | 630 | 64 |
| 39,319 | 18 | 2 | 407 | 30 | 27 | 5 | 188 | 27 | 640 | 64 |
| 39,320 | 18 | 2 | 407 | 30 | 28 | 5 | 190 | 27 | 643 | 64 |
| 39,321 | 19 | 2 | 439 | 32 | 28 | 5 | 193 | 28 | 679 | 67 |
| 39,322 | 19 | 3 | 443 | 33 | 28 | 5 | 196 | 29 | 686 | 70 |
| 39,323 | 19 | 3 | 454 | 34 | 29 | 5 | 202 | 30 | 704 | 72 |
| 39,324 | 19 | 3 | 456 | 34 | 29 | 5 | 203 | 31 | 707 | 73 |
| 39,325 | 19 | 3 | 456 | 33 | 29 | 5 | 206 | 31 | 710 | 72 |
| 39,326 | 20 | 3 | 453 | 32 | 29 | 5 | 204 | 31 | 706 | 71 |
| 39,327 | 22 | 3 | 454 | 34 | 29 | 5 | 207 | 30 | 712 | 72 |
| 39,328 | 23 | 3 | 456 | 34 | 29 | 5 | 205 | 28 | 713 | 70 |
| 39,329 | 23 | 3 | 453 | 34 | 30 | 5 | 213 | 27 | 719 | 69 |
| 39,330 | 23 | 4 | 469 | 35 | 30 | 6 | 216 | 28 | 738 | 73 |
| 39,331 | 23 | 4 | 469 | 35 | 30 | 6 | 216 | 28 | 738 | 73 |
| 39,332 | 25 | 4 | 500 | 37 | 32 | 6 | 227 | 29 | 784 | 76 |
| 39,333 | 24 | 4 | 498 | 36 | 33 | 6 | 222 | 29 | 777 | 75 |
| 39,334 | 23 | 4 | 496 | 36 | 34 | 6 | 230 | 32 | 783 | 78 |
| 39,335 | 22 | 4 | 492 | 36 | 32 | 6 | 228 | 32 | 774 | 78 |
| 39,336 | 22 | 4 | 513 | 33 | 30 | 6 | 237 | 30 | 802 | 73 |
| 39,337 | 22 | 5 | 516 | 30 | 30 | 6 | 231 | 30 | 799 | 71 |
| 39,338 | 22 | 5 | 498 | 28 | 31 | 5 | 210 | 29 | 761 | 67 |
| 39,339 | 21 | 5 | 530 | 28 | 30 | 5 | 213 | 29 | 794 | 67 |
| 39,340 | 21 | 5 | 528 | 30 | 30 | 5 | 218 | 29 | 797 | 69 |
| 39,341 | 21 | 5 | 544 | 31 | 30 | 7 | 218 | 29 | 813 | 72 |
| 39,342 | 21 | 5 | 536 | 31 | 31 | 7 | 214 | 29 | 802 | 72 |
| 39,343 | 21 | 5 | 537 | 32 | 31 | 7 | 213 | 30 | 802 | 74 |
| 39,344 | 20 | 5 | 536 | 32 | 31 | 7 | 212 | 30 | 799 | 74 |
| 39,345 | 20 | 5 | 519 | 32 | 30 | 7 | 218 | 29 | 787 | 73 |
| 39,346 | 20 | 5 | 527 | 32 | 31 | 7 | 210 | 28 | 788 | 72 |
| 39,347 | 20 | 5 | 522 | 31 | 31 | 7 | 212 | 25 | 785 | 68 |
| 39,348 | 20 | 5 | 533 | 31 | 32 | 7 | 213 | 25 | 798 | 68 |



|        |    |   |     |    |    |   |     |    |     |    |
|--------|----|---|-----|----|----|---|-----|----|-----|----|
| 39,349 | 20 | 5 | 533 | 31 | 32 | 7 | 213 | 26 | 798 | 69 |
| 39,350 | 20 | 5 | 546 | 31 | 33 | 7 | 214 | 25 | 813 | 68 |
| 39,351 | 22 | 6 | 539 | 31 | 33 | 7 | 211 | 24 | 805 | 68 |
| 39,352 | 22 | 5 | 537 | 31 | 32 | 8 | 212 | 24 | 803 | 68 |
| 39,353 | 21 | 5 | 535 | 31 | 32 | 8 | 209 | 25 | 797 | 69 |
| 39,354 | 20 | 5 | 517 | 28 | 34 | 8 | 207 | 24 | 778 | 65 |
| 39,355 | 19 | 5 | 515 | 28 | 33 | 8 | 203 | 21 | 770 | 62 |
| 39,356 | 18 | 6 | 474 | 21 | 28 | 8 | 186 | 17 | 706 | 52 |
| 39,357 | 21 | 6 | 483 | 22 | 29 | 8 | 199 | 17 | 732 | 53 |
| 39,358 | 22 | 6 | 484 | 22 | 27 | 8 | 201 | 17 | 734 | 53 |
| 39,359 | 21 | 6 | 467 | 22 | 27 | 8 | 197 | 18 | 712 | 54 |
| 39,360 | 20 | 6 | 460 | 22 | 26 | 8 | 188 | 18 | 694 | 54 |
| 39,361 | 19 | 5 | 455 | 22 | 26 | 8 | 187 | 18 | 687 | 53 |
| 39,362 | 19 | 5 | 447 | 21 | 26 | 6 | 185 | 18 | 677 | 50 |
| 39,363 | 19 | 6 | 409 | 21 | 24 | 6 | 180 | 17 | 632 | 50 |
| 39,364 | 19 | 6 | 402 | 18 | 23 | 6 | 173 | 17 | 617 | 47 |
| 39,365 | 19 | 6 | 389 | 18 | 21 | 5 | 169 | 14 | 598 | 43 |
| 39,366 | 19 | 6 | 391 | 18 | 20 | 6 | 171 | 14 | 601 | 44 |
| 39,367 | 18 | 6 | 393 | 18 | 20 | 6 | 167 | 14 | 598 | 44 |
| 39,368 | 19 | 6 | 392 | 18 | 20 | 6 | 167 | 14 | 598 | 44 |
| 39,369 | 20 | 6 | 386 | 18 | 19 | 6 | 164 | 14 | 589 | 44 |
| 39,370 | 23 | 6 | 387 | 18 | 19 | 6 | 165 | 14 | 594 | 44 |
| 39,371 | 24 | 6 | 388 | 18 | 19 | 6 | 171 | 15 | 602 | 45 |
| 39,372 | 24 | 6 | 356 | 16 | 19 | 6 | 170 | 14 | 569 | 42 |
| 39,373 | 25 | 5 | 351 | 15 | 19 | 6 | 167 | 13 | 562 | 39 |
| 39,374 | 25 | 5 | 336 | 14 | 18 | 6 | 161 | 11 | 540 | 36 |
| 39,375 | 25 | 5 | 338 | 14 | 19 | 6 | 160 | 11 | 542 | 36 |
| 39,376 | 25 | 5 | 335 | 14 | 19 | 6 | 157 | 11 | 536 | 36 |
| 39,377 | 24 | 5 | 333 | 14 | 19 | 6 | 156 | 11 | 532 | 36 |
| 39,378 | 22 | 5 | 320 | 12 | 19 | 6 | 152 | 11 | 513 | 34 |
| 39,379 | 22 | 5 | 315 | 12 | 19 | 6 | 150 | 11 | 506 | 34 |
| 39,380 | 22 | 5 | 304 | 11 | 18 | 6 | 140 | 11 | 484 | 33 |
| 39,381 | 22 | 4 | 288 | 10 | 18 | 5 | 136 | 10 | 464 | 29 |
| 39,382 | 22 | 4 | 290 | 10 | 18 | 5 | 135 | 11 | 465 | 30 |
| 39,383 | 19 | 4 | 257 | 8  | 16 | 5 | 122 | 7  | 414 | 24 |
| 39,384 | 19 | 4 | 258 | 8  | 14 | 5 | 118 | 7  | 409 | 24 |
| 39,385 | 18 | 4 | 263 | 8  | 13 | 5 | 110 | 7  | 404 | 24 |
| 39,386 | 18 | 5 | 247 | 7  | 13 | 5 | 104 | 8  | 382 | 25 |
| 39,387 | 18 | 5 | 231 | 7  | 13 | 5 | 100 | 8  | 362 | 25 |
| 39,388 | 18 | 4 | 227 | 7  | 13 | 5 | 99  | 7  | 357 | 23 |
| 39,389 | 19 | 4 | 240 | 6  | 12 | 5 | 107 | 7  | 378 | 22 |

|        |    |   |     |    |    |   |     |    |     |    |
|--------|----|---|-----|----|----|---|-----|----|-----|----|
| 39,390 | 20 | 4 | 214 | 6  | 14 | 5 | 107 | 7  | 355 | 22 |
| 39,391 | 22 | 4 | 234 | 4  | 14 | 5 | 98  | 7  | 368 | 20 |
| 39,392 | 25 | 5 | 254 | 2  | 14 | 3 | 104 | 6  | 397 | 16 |
| 39,393 | 28 | 5 | 270 | 2  | 14 | 3 | 111 | 6  | 423 | 16 |
| 39,394 | 28 | 5 | 273 | 2  | 14 | 3 | 110 | 6  | 425 | 16 |
| 39,395 | 28 | 5 | 273 | 2  | 14 | 3 | 109 | 6  | 424 | 16 |
| 39,396 | 29 | 5 | 259 | 2  | 14 | 3 | 102 | 6  | 404 | 16 |
| 39,397 | 28 | 5 | 249 | 2  | 14 | 3 | 100 | 7  | 391 | 17 |
| 39,398 | 27 | 5 | 245 | 2  | 14 | 3 | 98  | 7  | 384 | 17 |
| 39,399 | 25 | 5 | 233 | 2  | 13 | 3 | 96  | 6  | 367 | 16 |
| 39,400 | 25 | 4 | 232 | 2  | 13 | 3 | 93  | 6  | 363 | 15 |
| 39,401 | 25 | 3 | 220 | 2  | 12 | 2 | 91  | 6  | 348 | 13 |
| 39,402 | 25 | 3 | 220 | 2  | 12 | 2 | 89  | 6  | 346 | 13 |
| 39,403 | 25 | 3 | 223 | 4  | 12 | 2 | 88  | 7  | 348 | 16 |
| 39,404 | 25 | 3 | 226 | 7  | 12 | 3 | 88  | 6  | 351 | 19 |
| 39,405 | 26 | 3 | 249 | 8  | 10 | 3 | 91  | 8  | 376 | 22 |
| 39,406 | 26 | 4 | 254 | 9  | 10 | 3 | 90  | 9  | 380 | 25 |
| 39,407 | 26 | 3 | 253 | 9  | 9  | 3 | 89  | 9  | 377 | 24 |
| 39,408 | 22 | 3 | 260 | 8  | 7  | 3 | 78  | 10 | 367 | 24 |
| 39,409 | 23 | 3 | 254 | 8  | 7  | 2 | 67  | 9  | 351 | 22 |
| 39,410 | 23 | 3 | 255 | 8  | 7  | 2 | 66  | 9  | 351 | 22 |
| 39,411 | 23 | 3 | 255 | 8  | 7  | 2 | 67  | 9  | 352 | 22 |
| 39,412 | 24 | 3 | 256 | 8  | 7  | 2 | 67  | 9  | 354 | 22 |
| 39,413 | 24 | 4 | 259 | 8  | 7  | 2 | 69  | 9  | 359 | 23 |
| 39,414 | 24 | 4 | 263 | 8  | 7  | 2 | 70  | 9  | 364 | 23 |
| 39,415 | 24 | 4 | 271 | 7  | 7  | 2 | 70  | 9  | 372 | 22 |
| 39,416 | 24 | 4 | 269 | 8  | 7  | 2 | 69  | 9  | 369 | 23 |
| 39,417 | 24 | 4 | 267 | 8  | 7  | 2 | 68  | 10 | 366 | 24 |
| 39,418 | 24 | 4 | 264 | 8  | 7  | 2 | 68  | 10 | 363 | 24 |
| 39,419 | 23 | 4 | 259 | 8  | 7  | 2 | 66  | 10 | 355 | 24 |
| 39,420 | 22 | 6 | 256 | 8  | 7  | 2 | 66  | 10 | 351 | 26 |
| 39,421 | 19 | 6 | 247 | 12 | 6  | 2 | 63  | 11 | 335 | 31 |
| 39,422 | 18 | 6 | 241 | 12 | 5  | 2 | 55  | 10 | 319 | 30 |
| 39,423 | 18 | 6 | 240 | 12 | 5  | 2 | 53  | 12 | 316 | 32 |
| 39,424 | 18 | 6 | 240 | 14 | 5  | 2 | 53  | 18 | 316 | 40 |
| 39,425 | 19 | 6 | 238 | 14 | 5  | 2 | 53  | 18 | 315 | 40 |
| 39,426 | 19 | 6 | 232 | 14 | 4  | 2 | 53  | 18 | 308 | 40 |
| 39,427 | 19 | 6 | 234 | 14 | 4  | 2 | 53  | 18 | 310 | 40 |
| 39,428 | 19 | 6 | 235 | 14 | 4  | 2 | 53  | 18 | 311 | 40 |
| 39,429 | 19 | 6 | 234 | 14 | 4  | 2 | 53  | 18 | 310 | 40 |
| 39,430 | 19 | 6 | 234 | 14 | 5  | 2 | 55  | 18 | 313 | 40 |

|        |    |   |     |    |   |   |    |    |     |    |
|--------|----|---|-----|----|---|---|----|----|-----|----|
| 39,431 | 19 | 6 | 235 | 14 | 5 | 2 | 56 | 18 | 315 | 40 |
| 39,432 | 19 | 6 | 236 | 14 | 5 | 2 | 56 | 18 | 316 | 40 |
| 39,433 | 19 | 6 | 233 | 14 | 5 | 2 | 56 | 17 | 313 | 39 |
| 39,434 | 19 | 5 | 233 | 14 | 5 | 2 | 56 | 16 | 313 | 37 |
| 39,435 | 19 | 5 | 226 | 14 | 5 | 2 | 56 | 16 | 306 | 37 |
| 39,436 | 19 | 5 | 218 | 14 | 5 | 2 | 55 | 16 | 297 | 37 |
| 39,437 | 19 | 5 | 218 | 14 | 5 | 2 | 55 | 16 | 297 | 37 |
| 39,438 | 20 | 5 | 218 | 14 | 5 | 2 | 53 | 16 | 296 | 37 |
| 39,439 | 20 | 5 | 218 | 15 | 5 | 2 | 53 | 19 | 296 | 41 |
| 39,440 | 19 | 5 | 203 | 18 | 5 | 4 | 44 | 23 | 271 | 50 |
| 39,441 | 18 | 5 | 186 | 19 | 4 | 4 | 40 | 26 | 248 | 54 |
| 39,442 | 15 | 5 | 161 | 24 | 3 | 4 | 37 | 28 | 216 | 61 |
| 39,443 | 12 | 4 | 120 | 25 | 3 | 4 | 27 | 28 | 162 | 61 |
| 39,444 | 9  | 4 | 103 | 26 | 2 | 4 | 19 | 28 | 133 | 62 |
| 39,445 | 9  | 4 | 100 | 26 | 2 | 4 | 19 | 28 | 130 | 62 |
| 39,446 | 9  | 4 | 98  | 26 | 2 | 4 | 19 | 29 | 128 | 63 |
| 39,447 | 7  | 4 | 99  | 26 | 2 | 4 | 18 | 29 | 126 | 63 |
| 39,448 | 7  | 4 | 99  | 26 | 2 | 4 | 18 | 28 | 126 | 62 |
| 39,449 | 7  | 4 | 97  | 26 | 2 | 4 | 17 | 28 | 123 | 62 |
| 39,450 | 7  | 4 | 98  | 26 | 2 | 4 | 19 | 28 | 126 | 62 |
| 39,451 | 7  | 4 | 98  | 26 | 2 | 4 | 19 | 28 | 126 | 62 |
| 39,452 | 7  | 4 | 97  | 26 | 2 | 4 | 19 | 28 | 125 | 62 |
| 39,453 | 7  | 4 | 97  | 24 | 2 | 4 | 19 | 27 | 125 | 59 |
| 39,454 | 7  | 4 | 95  | 21 | 2 | 3 | 20 | 27 | 124 | 55 |
| 39,455 | 7  | 4 | 93  | 21 | 2 | 3 | 20 | 27 | 122 | 55 |
| 39,456 | 6  | 3 | 73  | 19 | 2 | 3 | 18 | 24 | 99  | 49 |
| 39,457 | 6  | 3 | 67  | 19 | 2 | 3 | 18 | 24 | 93  | 49 |
| 39,458 | 6  | 3 | 67  | 20 | 2 | 3 | 18 | 25 | 93  | 51 |
| 39,459 | 9  | 4 | 54  | 20 | 2 | 3 | 16 | 26 | 81  | 53 |
| 39,460 | 6  | 5 | 50  | 20 | 2 | 4 | 16 | 30 | 74  | 59 |
| 39,461 | 6  | 5 | 49  | 21 | 2 | 4 | 16 | 31 | 73  | 61 |
| 39,462 | 7  | 5 | 51  | 21 | 2 | 4 | 17 | 31 | 77  | 61 |
| 39,463 | 7  | 4 | 52  | 21 | 2 | 4 | 17 | 31 | 78  | 60 |
| 39,464 | 7  | 4 | 48  | 22 | 2 | 4 | 15 | 31 | 72  | 61 |
| 39,465 | 7  | 4 | 44  | 22 | 2 | 4 | 14 | 31 | 67  | 61 |
| 39,466 | 7  | 4 | 35  | 23 | 2 | 4 | 14 | 31 | 58  | 62 |
| 39,467 | 7  | 4 | 35  | 22 | 2 | 3 | 13 | 30 | 57  | 59 |
| 39,468 | 7  | 4 | 32  | 23 | 2 | 3 | 12 | 30 | 53  | 60 |
| 39,469 | 7  | 4 | 32  | 23 | 2 | 3 | 12 | 30 | 53  | 60 |
| 39,470 | 7  | 2 | 32  | 24 | 2 | 3 | 12 | 31 | 53  | 60 |
| 39,471 | 7  | 2 | 34  | 18 | 2 | 3 | 12 | 22 | 55  | 45 |

|        |    |   |     |    |   |   |    |    |     |    |
|--------|----|---|-----|----|---|---|----|----|-----|----|
| 39,472 | 7  | 2 | 35  | 18 | 2 | 3 | 12 | 22 | 56  | 45 |
| 39,473 | 7  | 2 | 35  | 18 | 2 | 3 | 12 | 22 | 56  | 45 |
| 39,474 | 7  | 2 | 35  | 18 | 2 | 3 | 12 | 22 | 56  | 45 |
| 39,475 | 7  | 2 | 35  | 18 | 2 | 3 | 13 | 25 | 57  | 48 |
| 39,476 | 6  | 2 | 35  | 19 | 2 | 5 | 13 | 27 | 56  | 53 |
| 39,477 | 6  | 2 | 36  | 19 | 2 | 5 | 13 | 27 | 57  | 53 |
| 39,478 | 6  | 5 | 36  | 20 | 2 | 5 | 13 | 32 | 57  | 62 |
| 39,479 | 7  | 5 | 36  | 21 | 2 | 6 | 13 | 34 | 58  | 66 |
| 39,480 | 7  | 5 | 35  | 25 | 1 | 8 | 11 | 37 | 54  | 75 |
| 39,481 | 7  | 5 | 34  | 25 | 1 | 9 | 10 | 37 | 52  | 76 |
| 39,482 | 8  | 5 | 43  | 25 | 1 | 9 | 11 | 37 | 63  | 76 |
| 39,483 | 12 | 5 | 68  | 25 | 3 | 9 | 16 | 38 | 99  | 77 |
| 39,484 | 12 | 5 | 68  | 25 | 3 | 9 | 16 | 38 | 99  | 77 |
| 39,485 | 15 | 5 | 97  | 25 | 3 | 9 | 21 | 39 | 136 | 78 |
| 39,486 | 15 | 5 | 97  | 25 | 3 | 9 | 21 | 39 | 136 | 78 |
| 39,487 | 15 | 6 | 107 | 27 | 4 | 9 | 28 | 42 | 154 | 84 |
| 39,488 | 15 | 6 | 107 | 27 | 4 | 9 | 28 | 42 | 154 | 84 |
| 39,489 | 15 | 6 | 113 | 28 | 5 | 9 | 31 | 42 | 164 | 85 |
| 39,490 | 15 | 6 | 119 | 27 | 5 | 9 | 34 | 39 | 173 | 81 |
| 39,491 | 15 | 6 | 122 | 23 | 5 | 7 | 34 | 33 | 176 | 69 |
| 39,492 | 15 | 6 | 122 | 18 | 4 | 7 | 34 | 32 | 175 | 63 |
| 39,493 | 15 | 6 | 122 | 17 | 4 | 7 | 34 | 32 | 175 | 62 |
| 39,494 | 15 | 6 | 122 | 17 | 4 | 7 | 34 | 32 | 175 | 62 |
| 39,495 | 15 | 6 | 121 | 16 | 4 | 7 | 34 | 32 | 174 | 61 |
| 39,496 | 15 | 6 | 120 | 16 | 4 | 7 | 34 | 32 | 173 | 61 |
| 39,497 | 15 | 6 | 120 | 16 | 4 | 7 | 34 | 31 | 173 | 60 |
| 39,498 | 16 | 6 | 131 | 16 | 4 | 7 | 36 | 31 | 187 | 60 |
| 39,499 | 16 | 6 | 129 | 16 | 4 | 7 | 36 | 31 | 185 | 60 |
| 39,500 | 16 | 6 | 128 | 16 | 4 | 7 | 34 | 31 | 182 | 60 |
| 39,501 | 16 | 6 | 129 | 16 | 4 | 7 | 38 | 31 | 187 | 60 |
| 39,502 | 16 | 6 | 131 | 16 | 4 | 7 | 41 | 31 | 192 | 60 |
| 39,503 | 16 | 6 | 131 | 16 | 4 | 7 | 43 | 31 | 194 | 60 |
| 39,504 | 16 | 6 | 131 | 16 | 4 | 7 | 43 | 31 | 194 | 60 |
| 39,505 | 16 | 6 | 130 | 18 | 4 | 7 | 43 | 31 | 193 | 62 |
| 39,506 | 16 | 6 | 131 | 18 | 4 | 7 | 43 | 31 | 194 | 62 |
| 39,507 | 16 | 6 | 128 | 18 | 4 | 7 | 42 | 31 | 190 | 62 |
| 39,508 | 16 | 6 | 128 | 18 | 4 | 7 | 42 | 31 | 190 | 62 |
| 39,509 | 16 | 6 | 128 | 17 | 4 | 8 | 42 | 30 | 190 | 61 |
| 39,510 | 13 | 5 | 119 | 18 | 4 | 8 | 40 | 28 | 176 | 59 |
| 39,511 | 12 | 4 | 118 | 19 | 4 | 7 | 37 | 24 | 171 | 54 |
| 39,512 | 12 | 4 | 118 | 18 | 4 | 7 | 37 | 23 | 171 | 52 |

|        |    |   |     |    |    |   |     |    |     |     |
|--------|----|---|-----|----|----|---|-----|----|-----|-----|
| 39,513 | 11 | 4 | 130 | 18 | 8  | 7 | 43  | 23 | 192 | 52  |
| 39,514 | 11 | 4 | 130 | 18 | 8  | 7 | 43  | 23 | 192 | 52  |
| 39,515 | 11 | 4 | 130 | 17 | 8  | 7 | 43  | 23 | 192 | 51  |
| 39,516 | 11 | 4 | 135 | 17 | 8  | 7 | 43  | 23 | 197 | 51  |
| 39,517 | 11 | 4 | 141 | 16 | 10 | 7 | 44  | 23 | 206 | 50  |
| 39,518 | 11 | 4 | 141 | 17 | 10 | 7 | 44  | 23 | 206 | 51  |
| 39,519 | 16 | 4 | 161 | 16 | 11 | 7 | 60  | 23 | 248 | 50  |
| 39,520 | 19 | 4 | 173 | 16 | 11 | 7 | 64  | 23 | 267 | 50  |
| 39,521 | 19 | 4 | 174 | 15 | 11 | 7 | 64  | 22 | 268 | 48  |
| 39,522 | 19 | 4 | 172 | 15 | 11 | 7 | 64  | 22 | 266 | 48  |
| 39,523 | 31 | 4 | 350 | 15 | 17 | 7 | 144 | 22 | 542 | 48  |
| 39,524 | 32 | 4 | 365 | 16 | 18 | 7 | 152 | 19 | 567 | 46  |
| 39,525 | 32 | 4 | 365 | 16 | 18 | 7 | 152 | 20 | 567 | 47  |
| 39,526 | 32 | 4 | 367 | 16 | 18 | 7 | 152 | 20 | 569 | 47  |
| 39,527 | 32 | 4 | 366 | 15 | 18 | 5 | 152 | 18 | 568 | 42  |
| 39,528 | 32 | 1 | 366 | 14 | 18 | 5 | 152 | 14 | 568 | 34  |
| 39,529 | 32 | 1 | 366 | 14 | 18 | 5 | 152 | 14 | 568 | 34  |
| 39,530 | 31 | 1 | 365 | 13 | 18 | 4 | 153 | 12 | 567 | 30  |
| 39,531 | 30 | 1 | 361 | 10 | 18 | 1 | 153 | 9  | 562 | 21  |
| 39,532 | 30 | 3 | 355 | 11 | 18 | 1 | 152 | 10 | 555 | 25  |
| 39,533 | 30 | 4 | 350 | 23 | 18 | 2 | 152 | 31 | 550 | 60  |
| 39,534 | 26 | 4 | 329 | 28 | 16 | 3 | 147 | 44 | 518 | 79  |
| 39,535 | 23 | 4 | 300 | 32 | 16 | 3 | 142 | 43 | 481 | 82  |
| 39,536 | 23 | 5 | 300 | 36 | 16 | 3 | 142 | 49 | 481 | 93  |
| 39,537 | 23 | 7 | 291 | 41 | 15 | 4 | 135 | 58 | 464 | 110 |
| 39,538 | 23 | 6 | 289 | 41 | 15 | 4 | 135 | 55 | 462 | 106 |
| 39,539 | 23 | 6 | 290 | 41 | 15 | 4 | 135 | 56 | 463 | 107 |
| 39,540 | 22 | 6 | 285 | 42 | 14 | 4 | 132 | 57 | 453 | 109 |
| 39,541 | 22 | 6 | 280 | 48 | 14 | 5 | 129 | 60 | 445 | 119 |
| 39,542 | 22 | 6 | 278 | 48 | 14 | 5 | 129 | 61 | 443 | 120 |
| 39,543 | 22 | 6 | 277 | 48 | 14 | 5 | 129 | 60 | 442 | 119 |
| 39,544 | 24 | 6 | 277 | 48 | 14 | 5 | 130 | 61 | 445 | 120 |
| 39,545 | 24 | 6 | 277 | 48 | 14 | 5 | 130 | 61 | 445 | 120 |
| 39,546 | 24 | 6 | 277 | 48 | 14 | 5 | 130 | 61 | 445 | 120 |
| 39,547 | 24 | 6 | 276 | 48 | 14 | 5 | 131 | 61 | 445 | 120 |
| 39,548 | 24 | 6 | 276 | 49 | 14 | 5 | 131 | 61 | 445 | 121 |
| 39,549 | 24 | 6 | 265 | 49 | 14 | 5 | 129 | 62 | 432 | 122 |
| 39,550 | 24 | 6 | 266 | 51 | 14 | 5 | 129 | 65 | 433 | 127 |
| 39,551 | 24 | 6 | 269 | 52 | 14 | 5 | 129 | 65 | 436 | 128 |
| 39,552 | 24 | 6 | 268 | 52 | 14 | 5 | 125 | 68 | 431 | 131 |
| 39,553 | 24 | 6 | 270 | 53 | 15 | 5 | 123 | 71 | 432 | 135 |

|        |    |    |     |    |    |    |     |     |     |     |
|--------|----|----|-----|----|----|----|-----|-----|-----|-----|
| 39,554 | 24 | 6  | 270 | 53 | 15 | 5  | 121 | 71  | 430 | 135 |
| 39,555 | 24 | 6  | 274 | 54 | 15 | 5  | 125 | 71  | 438 | 136 |
| 39,556 | 24 | 6  | 274 | 52 | 15 | 5  | 124 | 72  | 437 | 135 |
| 39,557 | 25 | 6  | 289 | 52 | 17 | 5  | 133 | 73  | 464 | 136 |
| 39,558 | 25 | 6  | 288 | 52 | 17 | 5  | 133 | 73  | 463 | 136 |
| 39,559 | 35 | 6  | 305 | 52 | 20 | 4  | 147 | 73  | 507 | 135 |
| 39,560 | 36 | 6  | 318 | 52 | 23 | 4  | 166 | 73  | 543 | 135 |
| 39,561 | 36 | 6  | 325 | 51 | 23 | 4  | 174 | 73  | 558 | 134 |
| 39,562 | 36 | 6  | 328 | 51 | 23 | 4  | 182 | 73  | 569 | 134 |
| 39,563 | 36 | 6  | 330 | 51 | 22 | 4  | 183 | 73  | 571 | 134 |
| 39,564 | 36 | 6  | 318 | 51 | 19 | 4  | 177 | 73  | 550 | 134 |
| 39,565 | 36 | 6  | 320 | 51 | 19 | 4  | 178 | 73  | 553 | 134 |
| 39,566 | 36 | 6  | 317 | 51 | 19 | 4  | 178 | 73  | 550 | 134 |
| 39,567 | 36 | 6  | 321 | 52 | 19 | 4  | 177 | 81  | 553 | 143 |
| 39,568 | 37 | 6  | 320 | 54 | 19 | 4  | 180 | 82  | 556 | 146 |
| 39,569 | 36 | 6  | 314 | 57 | 19 | 5  | 179 | 89  | 548 | 157 |
| 39,570 | 32 | 6  | 303 | 61 | 18 | 5  | 168 | 94  | 521 | 166 |
| 39,571 | 30 | 8  | 290 | 65 | 18 | 6  | 165 | 107 | 503 | 186 |
| 39,572 | 25 | 9  | 197 | 76 | 15 | 11 | 129 | 132 | 366 | 228 |
| 39,573 | 19 | 10 | 147 | 84 | 14 | 11 | 119 | 135 | 299 | 240 |
| 39,574 | 18 | 10 | 120 | 84 | 12 | 11 | 97  | 139 | 247 | 244 |
| 39,575 | 17 | 13 | 105 | 93 | 11 | 12 | 90  | 154 | 223 | 272 |
| 39,576 | 17 | 13 | 105 | 96 | 11 | 12 | 90  | 155 | 223 | 276 |
| 39,577 | 17 | 13 | 105 | 96 | 11 | 12 | 91  | 155 | 224 | 276 |
| 39,578 | 17 | 14 | 108 | 98 | 11 | 12 | 91  | 155 | 227 | 279 |
| 39,579 | 17 | 14 | 108 | 98 | 11 | 12 | 91  | 155 | 227 | 279 |
| 39,580 | 17 | 14 | 113 | 99 | 12 | 12 | 92  | 155 | 234 | 280 |
| 39,581 | 18 | 14 | 114 | 98 | 12 | 12 | 93  | 155 | 237 | 279 |
| 39,582 | 18 | 14 | 114 | 98 | 12 | 12 | 93  | 155 | 237 | 279 |
| 39,583 | 18 | 12 | 116 | 97 | 12 | 12 | 93  | 154 | 239 | 275 |
| 39,584 | 18 | 11 | 128 | 80 | 12 | 10 | 98  | 119 | 256 | 220 |
| 39,585 | 19 | 11 | 145 | 76 | 13 | 10 | 100 | 119 | 277 | 216 |
| 39,586 | 19 | 11 | 145 | 76 | 13 | 10 | 100 | 119 | 277 | 216 |
| 39,587 | 19 | 10 | 145 | 72 | 13 | 10 | 101 | 114 | 278 | 206 |
| 39,588 | 19 | 8  | 145 | 67 | 13 | 9  | 101 | 105 | 278 | 189 |
| 39,589 | 19 | 8  | 145 | 65 | 13 | 9  | 101 | 105 | 278 | 187 |
| 39,590 | 19 | 9  | 146 | 65 | 13 | 9  | 102 | 104 | 280 | 187 |
| 39,591 | 20 | 9  | 146 | 63 | 13 | 9  | 103 | 103 | 282 | 184 |
| 39,592 | 20 | 9  | 145 | 57 | 13 | 8  | 103 | 99  | 281 | 173 |
| 39,593 | 20 | 9  | 145 | 57 | 13 | 8  | 103 | 98  | 281 | 172 |
| 39,594 | 20 | 9  | 145 | 57 | 13 | 8  | 103 | 98  | 281 | 172 |

|        |    |   |     |    |    |   |     |    |     |     |
|--------|----|---|-----|----|----|---|-----|----|-----|-----|
| 39,595 | 18 | 9 | 150 | 57 | 14 | 8 | 102 | 97 | 284 | 171 |
| 39,596 | 18 | 9 | 168 | 58 | 17 | 8 | 109 | 97 | 312 | 172 |
| 39,597 | 20 | 9 | 170 | 58 | 17 | 8 | 111 | 97 | 318 | 172 |
| 39,598 | 20 | 9 | 170 | 57 | 17 | 8 | 110 | 97 | 317 | 171 |
| 39,599 | 20 | 9 | 170 | 57 | 17 | 8 | 110 | 96 | 317 | 170 |
| 39,600 | 21 | 9 | 173 | 55 | 18 | 8 | 112 | 94 | 324 | 166 |
| 39,601 | 21 | 9 | 179 | 54 | 18 | 8 | 116 | 94 | 334 | 165 |
| 39,602 | 21 | 9 | 177 | 55 | 18 | 8 | 116 | 91 | 332 | 163 |
| 39,603 | 21 | 9 | 177 | 55 | 18 | 8 | 116 | 91 | 332 | 163 |
| 39,604 | 21 | 9 | 173 | 54 | 17 | 8 | 115 | 89 | 326 | 160 |
| 39,605 | 21 | 9 | 169 | 54 | 17 | 8 | 111 | 89 | 318 | 160 |
| 39,606 | 21 | 9 | 169 | 54 | 17 | 8 | 111 | 89 | 318 | 160 |
| 39,607 | 22 | 9 | 167 | 54 | 17 | 8 | 113 | 88 | 319 | 159 |
| 39,608 | 21 | 9 | 154 | 55 | 15 | 8 | 105 | 87 | 295 | 159 |
| 39,609 | 11 | 9 | 138 | 55 | 12 | 8 | 92  | 87 | 253 | 159 |
| 39,610 | 11 | 9 | 140 | 55 | 12 | 8 | 93  | 87 | 256 | 159 |
| 39,611 | 10 | 9 | 127 | 54 | 9  | 8 | 74  | 87 | 220 | 158 |
| 39,612 | 10 | 9 | 130 | 54 | 9  | 8 | 68  | 87 | 217 | 158 |
| 39,613 | 11 | 9 | 132 | 54 | 11 | 8 | 68  | 87 | 222 | 158 |
| 39,614 | 11 | 9 | 129 | 54 | 11 | 8 | 67  | 87 | 218 | 158 |
| 39,615 | 11 | 9 | 128 | 54 | 11 | 8 | 67  | 87 | 217 | 158 |
| 39,616 | 11 | 9 | 126 | 54 | 11 | 8 | 68  | 87 | 216 | 158 |
| 39,617 | 11 | 9 | 126 | 55 | 11 | 8 | 69  | 79 | 217 | 151 |
| 39,618 | 11 | 9 | 123 | 55 | 11 | 8 | 68  | 79 | 213 | 151 |
| 39,619 | 10 | 9 | 121 | 52 | 9  | 8 | 65  | 78 | 205 | 147 |
| 39,620 | 10 | 9 | 121 | 45 | 9  | 7 | 67  | 66 | 207 | 127 |
| 39,621 | 10 | 7 | 121 | 41 | 9  | 6 | 65  | 53 | 205 | 107 |
| 39,622 | 9  | 6 | 121 | 31 | 9  | 1 | 64  | 28 | 203 | 66  |
| 39,623 | 9  | 6 | 119 | 30 | 9  | 1 | 62  | 28 | 199 | 65  |
| 39,624 | 15 | 5 | 136 | 22 | 11 | 1 | 82  | 25 | 244 | 53  |
| 39,625 | 15 | 5 | 136 | 22 | 11 | 1 | 82  | 21 | 244 | 49  |
| 39,626 | 15 | 2 | 138 | 12 | 11 | 0 | 83  | 6  | 247 | 20  |
| 39,627 | 15 | 2 | 141 | 9  | 11 | 0 | 83  | 4  | 250 | 15  |
| 39,628 | 15 | 1 | 142 | 7  | 11 | 0 | 82  | 3  | 250 | 11  |
| 39,629 | 15 | 1 | 140 | 7  | 11 | 0 | 82  | 3  | 248 | 11  |
| 39,630 | 16 | 1 | 140 | 7  | 11 | 0 | 82  | 3  | 249 | 11  |
| 39,631 | 16 | 1 | 138 | 6  | 10 | 0 | 81  | 3  | 245 | 10  |
| 39,632 | 15 | 1 | 137 | 6  | 10 | 0 | 80  | 3  | 242 | 10  |
| 39,633 | 15 | 1 | 139 | 6  | 10 | 0 | 83  | 3  | 247 | 10  |
| 39,634 | 17 | 1 | 150 | 7  | 10 | 0 | 99  | 3  | 276 | 11  |
| 39,635 | 17 | 1 | 139 | 7  | 10 | 0 | 94  | 3  | 260 | 11  |

|        |    |   |     |   |    |   |     |   |     |    |
|--------|----|---|-----|---|----|---|-----|---|-----|----|
| 39,636 | 21 | 1 | 142 | 7 | 11 | 0 | 107 | 3 | 281 | 11 |
| 39,637 | 21 | 1 | 142 | 7 | 11 | 0 | 106 | 4 | 280 | 12 |
| 39,638 | 21 | 1 | 147 | 7 | 11 | 0 | 106 | 3 | 285 | 11 |
| 39,639 | 23 | 1 | 170 | 9 | 11 | 0 | 112 | 3 | 316 | 13 |
| 39,640 | 23 | 0 | 170 | 9 | 11 | 0 | 111 | 3 | 315 | 12 |
| 39,641 | 26 | 0 | 251 | 9 | 17 | 0 | 146 | 3 | 440 | 12 |
| 39,642 | 25 | 0 | 251 | 9 | 17 | 0 | 145 | 3 | 438 | 12 |
| 39,643 | 39 | 0 | 316 | 9 | 23 | 0 | 251 | 3 | 629 | 12 |
| 39,644 | 47 | 0 | 355 | 9 | 26 | 0 | 271 | 3 | 699 | 12 |
| 39,645 | 54 | 0 | 421 | 9 | 37 | 0 | 342 | 3 | 854 | 12 |
| 39,646 | 54 | 0 | 453 | 9 | 42 | 0 | 363 | 3 | 912 | 12 |
| 39,647 | 54 | 0 | 446 | 8 | 39 | 0 | 363 | 3 | 902 | 11 |
| 39,648 | 53 | 0 | 445 | 8 | 41 | 0 | 370 | 3 | 909 | 11 |
| 39,649 | 53 | 0 | 447 | 8 | 41 | 0 | 372 | 3 | 913 | 11 |
| 39,650 | 53 | 0 | 447 | 8 | 41 | 0 | 372 | 3 | 913 | 11 |
| 39,651 | 51 | 0 | 444 | 8 | 40 | 0 | 370 | 2 | 905 | 10 |
| 39,652 | 51 | 1 | 437 | 9 | 40 | 0 | 368 | 2 | 896 | 12 |
| 39,653 | 51 | 1 | 436 | 8 | 40 | 0 | 368 | 2 | 895 | 11 |
| 39,654 | 51 | 1 | 437 | 8 | 40 | 0 | 370 | 2 | 898 | 11 |
| 39,655 | 51 | 1 | 437 | 8 | 40 | 0 | 370 | 1 | 898 | 10 |
| 39,656 | 51 | 1 | 437 | 6 | 40 | 0 | 369 | 1 | 897 | 8  |
| 39,657 | 51 | 1 | 437 | 6 | 40 | 0 | 369 | 1 | 897 | 8  |
| 39,658 | 51 | 1 | 435 | 6 | 40 | 0 | 366 | 1 | 892 | 8  |
| 39,659 | 51 | 1 | 435 | 6 | 40 | 0 | 366 | 1 | 892 | 8  |
| 39,660 | 51 | 1 | 434 | 6 | 40 | 0 | 366 | 1 | 891 | 8  |
| 39,661 | 51 | 1 | 432 | 6 | 41 | 0 | 364 | 1 | 888 | 8  |
| 39,662 | 51 | 1 | 432 | 7 | 41 | 0 | 364 | 1 | 888 | 9  |
| 39,663 | 51 | 1 | 422 | 7 | 41 | 0 | 362 | 2 | 876 | 10 |
| 39,664 | 50 | 1 | 416 | 7 | 39 | 0 | 354 | 2 | 859 | 10 |
| 39,665 | 50 | 1 | 417 | 7 | 39 | 0 | 354 | 2 | 860 | 10 |
| 39,666 | 50 | 1 | 421 | 7 | 39 | 0 | 355 | 2 | 865 | 10 |
| 39,667 | 53 | 1 | 420 | 5 | 39 | 0 | 354 | 2 | 866 | 8  |
| 39,668 | 53 | 1 | 416 | 5 | 39 | 0 | 353 | 2 | 861 | 8  |
| 39,669 | 53 | 1 | 417 | 5 | 39 | 0 | 353 | 2 | 862 | 8  |
| 39,670 | 53 | 1 | 418 | 5 | 39 | 0 | 352 | 2 | 862 | 8  |
| 39,671 | 53 | 1 | 426 | 5 | 40 | 0 | 356 | 2 | 875 | 8  |
| 39,672 | 60 | 1 | 456 | 5 | 44 | 0 | 385 | 2 | 945 | 8  |
| 39,673 | 60 | 1 | 456 | 5 | 44 | 0 | 385 | 2 | 945 | 8  |
| 39,674 | 60 | 1 | 456 | 5 | 44 | 0 | 386 | 2 | 946 | 8  |
| 39,675 | 54 | 1 | 432 | 5 | 42 | 0 | 354 | 2 | 882 | 8  |
| 39,676 | 54 | 1 | 431 | 5 | 42 | 0 | 355 | 2 | 882 | 8  |



|        |    |   |     |    |    |   |     |   |       |    |
|--------|----|---|-----|----|----|---|-----|---|-------|----|
| 39,677 | 54 | 1 | 429 | 5  | 42 | 0 | 357 | 2 | 882   | 8  |
| 39,678 | 54 | 1 | 428 | 5  | 42 | 0 | 358 | 2 | 882   | 8  |
| 39,679 | 54 | 1 | 428 | 5  | 42 | 0 | 359 | 2 | 883   | 8  |
| 39,680 | 56 | 1 | 437 | 6  | 45 | 0 | 361 | 2 | 899   | 9  |
| 39,681 | 55 | 1 | 437 | 7  | 45 | 0 | 361 | 3 | 898   | 11 |
| 39,682 | 55 | 1 | 434 | 7  | 45 | 0 | 360 | 3 | 894   | 11 |
| 39,683 | 64 | 1 | 597 | 8  | 52 | 0 | 455 | 3 | 1,168 | 12 |
| 39,684 | 67 | 1 | 623 | 8  | 54 | 0 | 475 | 4 | 1,219 | 13 |
| 39,685 | 65 | 1 | 614 | 10 | 54 | 0 | 460 | 4 | 1,193 | 15 |
| 39,686 | 65 | 1 | 613 | 10 | 54 | 0 | 460 | 5 | 1,192 | 16 |
| 39,687 | 60 | 1 | 594 | 10 | 52 | 0 | 445 | 4 | 1,151 | 15 |
| 39,688 | 60 | 1 | 589 | 10 | 52 | 0 | 445 | 4 | 1,146 | 15 |
| 39,689 | 58 | 1 | 579 | 10 | 52 | 0 | 439 | 4 | 1,128 | 15 |
| 39,690 | 58 | 1 | 566 | 8  | 52 | 0 | 439 | 4 | 1,115 | 13 |
| 39,691 | 59 | 1 | 586 | 9  | 52 | 0 | 445 | 4 | 1,142 | 14 |
| 39,692 | 76 | 1 | 564 | 9  | 49 | 0 | 428 | 4 | 1,117 | 14 |
| 39,693 | 76 | 1 | 563 | 10 | 48 | 0 | 426 | 5 | 1,113 | 16 |
| 39,694 | 69 | 1 | 551 | 10 | 47 | 0 | 373 | 5 | 1,040 | 16 |
| 39,695 | 64 | 1 | 520 | 10 | 45 | 0 | 356 | 5 | 985   | 16 |
| 39,696 | 57 | 1 | 451 | 10 | 33 | 0 | 284 | 5 | 825   | 16 |
| 39,697 | 57 | 1 | 423 | 10 | 28 | 0 | 268 | 5 | 776   | 16 |
| 39,698 | 57 | 1 | 412 | 11 | 28 | 0 | 261 | 5 | 758   | 17 |
| 39,699 | 56 | 1 | 411 | 11 | 26 | 0 | 252 | 5 | 745   | 17 |
| 39,700 | 60 | 1 | 429 | 11 | 28 | 0 | 264 | 5 | 781   | 17 |
| 39,701 | 60 | 1 | 433 | 11 | 28 | 0 | 266 | 5 | 787   | 17 |
| 39,702 | 60 | 1 | 436 | 11 | 28 | 0 | 269 | 5 | 793   | 17 |
| 39,703 | 60 | 0 | 436 | 10 | 28 | 0 | 267 | 6 | 791   | 16 |
| 39,704 | 60 | 0 | 435 | 10 | 28 | 0 | 267 | 6 | 790   | 16 |
| 39,705 | 60 | 0 | 435 | 10 | 28 | 0 | 267 | 6 | 790   | 16 |
| 39,706 | 65 | 0 | 446 | 10 | 28 | 0 | 271 | 6 | 810   | 16 |
| 39,707 | 65 | 0 | 446 | 10 | 28 | 0 | 272 | 6 | 811   | 16 |
| 39,708 | 65 | 0 | 446 | 10 | 28 | 0 | 272 | 6 | 811   | 16 |
| 39,709 | 65 | 0 | 450 | 10 | 28 | 0 | 276 | 6 | 819   | 16 |
| 39,710 | 65 | 0 | 450 | 10 | 28 | 0 | 276 | 6 | 819   | 16 |
| 39,711 | 65 | 0 | 451 | 10 | 27 | 0 | 276 | 6 | 819   | 16 |
| 39,712 | 65 | 0 | 451 | 10 | 27 | 0 | 276 | 6 | 819   | 16 |
| 39,713 | 67 | 0 | 464 | 9  | 28 | 0 | 287 | 6 | 846   | 15 |
| 39,714 | 67 | 0 | 467 | 9  | 28 | 0 | 290 | 5 | 852   | 14 |
| 39,715 | 67 | 0 | 469 | 9  | 28 | 0 | 290 | 5 | 854   | 14 |
| 39,716 | 67 | 0 | 469 | 9  | 28 | 0 | 291 | 5 | 855   | 14 |
| 39,717 | 67 | 0 | 465 | 9  | 28 | 0 | 290 | 5 | 850   | 14 |

|        |    |   |     |    |    |   |     |    |       |    |
|--------|----|---|-----|----|----|---|-----|----|-------|----|
| 39,718 | 64 | 0 | 469 | 9  | 28 | 0 | 291 | 5  | 852   | 14 |
| 39,719 | 66 | 0 | 476 | 9  | 28 | 0 | 295 | 5  | 865   | 14 |
| 39,720 | 67 | 0 | 479 | 9  | 28 | 0 | 296 | 5  | 870   | 14 |
| 39,721 | 67 | 0 | 479 | 9  | 28 | 0 | 296 | 5  | 870   | 14 |
| 39,722 | 68 | 0 | 473 | 9  | 27 | 0 | 293 | 5  | 861   | 14 |
| 39,723 | 61 | 0 | 440 | 9  | 23 | 0 | 264 | 5  | 788   | 14 |
| 39,724 | 61 | 0 | 444 | 9  | 23 | 0 | 266 | 5  | 794   | 14 |
| 39,725 | 65 | 0 | 498 | 9  | 24 | 0 | 283 | 5  | 870   | 14 |
| 39,726 | 65 | 0 | 503 | 9  | 26 | 0 | 294 | 5  | 888   | 14 |
| 39,727 | 81 | 0 | 653 | 9  | 35 | 0 | 407 | 5  | 1,176 | 14 |
| 39,728 | 81 | 1 | 655 | 9  | 35 | 0 | 406 | 6  | 1,177 | 16 |
| 39,729 | 82 | 1 | 668 | 9  | 35 | 0 | 427 | 6  | 1,212 | 16 |
| 39,730 | 82 | 2 | 670 | 9  | 36 | 0 | 431 | 6  | 1,219 | 17 |
| 39,731 | 80 | 2 | 661 | 8  | 33 | 0 | 430 | 6  | 1,204 | 16 |
| 39,732 | 77 | 2 | 644 | 7  | 33 | 0 | 428 | 5  | 1,182 | 14 |
| 39,733 | 76 | 2 | 629 | 8  | 30 | 0 | 415 | 5  | 1,150 | 15 |
| 39,734 | 71 | 2 | 499 | 7  | 25 | 0 | 336 | 5  | 931   | 14 |
| 39,735 | 68 | 2 | 471 | 7  | 24 | 0 | 313 | 5  | 876   | 14 |
| 39,736 | 68 | 2 | 467 | 4  | 24 | 0 | 312 | 5  | 871   | 11 |
| 39,737 | 68 | 2 | 466 | 4  | 24 | 0 | 312 | 4  | 870   | 10 |
| 39,738 | 68 | 2 | 465 | 4  | 24 | 0 | 309 | 4  | 866   | 10 |
| 39,739 | 68 | 2 | 465 | 4  | 24 | 0 | 309 | 4  | 866   | 10 |
| 39,740 | 67 | 2 | 460 | 4  | 24 | 0 | 308 | 4  | 859   | 10 |
| 39,741 | 67 | 2 | 444 | 5  | 24 | 0 | 306 | 4  | 841   | 11 |
| 39,742 | 53 | 2 | 407 | 4  | 22 | 0 | 293 | 4  | 775   | 10 |
| 39,743 | 47 | 2 | 385 | 3  | 21 | 0 | 288 | 3  | 741   | 8  |
| 39,744 | 47 | 2 | 385 | 3  | 21 | 0 | 288 | 3  | 741   | 8  |
| 39,745 | 40 | 2 | 333 | 3  | 17 | 0 | 237 | 4  | 627   | 9  |
| 39,746 | 37 | 7 | 325 | 15 | 16 | 0 | 234 | 11 | 612   | 33 |
| 39,747 | 37 | 7 | 323 | 15 | 16 | 0 | 233 | 11 | 609   | 33 |
| 39,748 | 37 | 7 | 325 | 19 | 16 | 0 | 232 | 12 | 610   | 38 |
| 39,749 | 39 | 7 | 325 | 18 | 16 | 0 | 232 | 12 | 612   | 37 |
| 39,750 | 35 | 7 | 305 | 18 | 14 | 0 | 218 | 12 | 572   | 37 |
| 39,751 | 35 | 7 | 301 | 18 | 14 | 0 | 216 | 12 | 566   | 37 |
| 39,752 | 35 | 7 | 300 | 18 | 14 | 0 | 216 | 12 | 565   | 37 |
| 39,753 | 35 | 7 | 300 | 18 | 14 | 0 | 214 | 12 | 563   | 37 |
| 39,754 | 35 | 7 | 300 | 18 | 14 | 0 | 214 | 11 | 563   | 36 |
| 39,755 | 35 | 7 | 301 | 18 | 14 | 0 | 214 | 11 | 564   | 36 |
| 39,756 | 35 | 7 | 301 | 18 | 14 | 0 | 214 | 11 | 564   | 36 |
| 39,757 | 30 | 7 | 290 | 18 | 14 | 0 | 210 | 11 | 544   | 36 |
| 39,758 | 30 | 7 | 289 | 18 | 14 | 0 | 209 | 11 | 542   | 36 |

|        |    |    |     |    |    |   |     |    |     |    |
|--------|----|----|-----|----|----|---|-----|----|-----|----|
| 39,759 | 30 | 7  | 289 | 18 | 14 | 0 | 209 | 11 | 542 | 36 |
| 39,760 | 29 | 7  | 287 | 18 | 14 | 0 | 205 | 11 | 535 | 36 |
| 39,761 | 29 | 7  | 304 | 18 | 14 | 0 | 209 | 12 | 556 | 37 |
| 39,762 | 30 | 7  | 312 | 18 | 14 | 0 | 211 | 12 | 567 | 37 |
| 39,763 | 29 | 7  | 315 | 18 | 14 | 0 | 216 | 12 | 574 | 37 |
| 39,764 | 30 | 7  | 307 | 18 | 13 | 0 | 208 | 12 | 558 | 37 |
| 39,765 | 32 | 7  | 368 | 18 | 16 | 0 | 224 | 12 | 640 | 37 |
| 39,766 | 34 | 7  | 373 | 18 | 17 | 0 | 231 | 12 | 655 | 37 |
| 39,767 | 36 | 7  | 398 | 18 | 21 | 0 | 244 | 12 | 699 | 37 |
| 39,768 | 36 | 7  | 401 | 18 | 22 | 0 | 243 | 12 | 702 | 37 |
| 39,769 | 36 | 7  | 409 | 18 | 22 | 0 | 246 | 12 | 713 | 37 |
| 39,770 | 34 | 7  | 401 | 18 | 22 | 0 | 242 | 12 | 699 | 37 |
| 39,771 | 35 | 7  | 398 | 18 | 22 | 0 | 243 | 12 | 698 | 37 |
| 39,772 | 35 | 7  | 398 | 19 | 22 | 0 | 243 | 12 | 698 | 38 |
| 39,773 | 34 | 7  | 401 | 19 | 22 | 0 | 247 | 12 | 704 | 38 |
| 39,774 | 38 | 8  | 412 | 28 | 22 | 0 | 248 | 16 | 720 | 52 |
| 39,775 | 41 | 8  | 429 | 30 | 22 | 0 | 251 | 19 | 743 | 57 |
| 39,776 | 41 | 8  | 382 | 30 | 21 | 0 | 233 | 19 | 677 | 57 |
| 39,777 | 57 | 10 | 464 | 30 | 20 | 0 | 256 | 19 | 797 | 59 |
| 39,778 | 44 | 11 | 326 | 31 | 11 | 0 | 145 | 19 | 526 | 61 |
| 39,779 | 44 | 10 | 324 | 32 | 11 | 1 | 144 | 20 | 523 | 63 |
| 39,780 | 43 | 10 | 309 | 35 | 11 | 1 | 123 | 20 | 486 | 66 |
| 39,781 | 44 | 9  | 334 | 40 | 11 | 1 | 121 | 23 | 510 | 73 |
| 39,782 | 44 | 9  | 333 | 42 | 11 | 1 | 120 | 23 | 508 | 75 |
| 39,783 | 48 | 9  | 365 | 42 | 13 | 1 | 139 | 23 | 565 | 75 |
| 39,784 | 48 | 9  | 373 | 42 | 13 | 1 | 142 | 22 | 576 | 74 |
| 39,785 | 48 | 9  | 378 | 44 | 13 | 1 | 146 | 22 | 585 | 76 |
| 39,786 | 48 | 9  | 378 | 44 | 13 | 1 | 147 | 22 | 586 | 76 |
| 39,787 | 64 | 10 | 455 | 44 | 20 | 1 | 202 | 22 | 741 | 77 |
| 39,788 | 65 | 10 | 455 | 44 | 20 | 1 | 203 | 22 | 743 | 77 |
| 39,789 | 65 | 10 | 455 | 44 | 20 | 1 | 203 | 22 | 743 | 77 |
| 39,790 | 65 | 10 | 455 | 44 | 20 | 1 | 204 | 22 | 744 | 77 |
| 39,791 | 65 | 10 | 455 | 43 | 20 | 1 | 204 | 22 | 744 | 76 |
| 39,792 | 65 | 10 | 455 | 44 | 20 | 1 | 205 | 22 | 745 | 77 |
| 39,793 | 65 | 10 | 455 | 44 | 20 | 1 | 205 | 22 | 745 | 77 |
| 39,794 | 65 | 10 | 456 | 44 | 20 | 1 | 205 | 22 | 746 | 77 |
| 39,795 | 67 | 10 | 459 | 45 | 20 | 1 | 206 | 21 | 752 | 77 |
| 39,796 | 67 | 10 | 459 | 45 | 20 | 1 | 206 | 21 | 752 | 77 |
| 39,797 | 67 | 5  | 456 | 34 | 20 | 1 | 206 | 14 | 749 | 54 |
| 39,798 | 67 | 5  | 455 | 34 | 20 | 1 | 205 | 14 | 747 | 54 |
| 39,799 | 67 | 5  | 454 | 30 | 20 | 1 | 202 | 13 | 743 | 49 |

|        |    |   |     |    |    |   |     |    |     |    |
|--------|----|---|-----|----|----|---|-----|----|-----|----|
| 39,800 | 65 | 7 | 454 | 31 | 20 | 1 | 202 | 16 | 741 | 55 |
| 39,801 | 65 | 7 | 454 | 31 | 20 | 1 | 202 | 16 | 741 | 55 |
| 39,802 | 66 | 7 | 454 | 31 | 20 | 1 | 205 | 16 | 745 | 55 |
| 39,803 | 66 | 7 | 455 | 31 | 21 | 1 | 205 | 16 | 747 | 55 |
| 39,804 | 66 | 7 | 453 | 31 | 21 | 1 | 204 | 16 | 744 | 55 |
| 39,805 | 67 | 7 | 453 | 31 | 21 | 1 | 204 | 16 | 745 | 55 |
| 39,806 | 67 | 7 | 453 | 31 | 21 | 1 | 204 | 16 | 745 | 55 |
| 39,807 | 67 | 9 | 454 | 32 | 21 | 1 | 205 | 16 | 747 | 58 |
| 39,808 | 70 | 9 | 475 | 32 | 22 | 1 | 213 | 16 | 780 | 58 |
| 39,809 | 70 | 9 | 482 | 32 | 22 | 1 | 215 | 16 | 789 | 58 |
| 39,810 | 78 | 9 | 508 | 32 | 25 | 1 | 231 | 16 | 842 | 58 |
| 39,811 | 78 | 9 | 499 | 33 | 25 | 1 | 230 | 15 | 832 | 58 |
| 39,812 | 81 | 9 | 511 | 33 | 27 | 1 | 239 | 16 | 858 | 59 |
| 39,813 | 80 | 9 | 502 | 35 | 27 | 1 | 239 | 16 | 848 | 61 |
| 39,814 | 79 | 9 | 502 | 36 | 27 | 1 | 247 | 16 | 855 | 62 |
| 39,815 | 79 | 9 | 509 | 36 | 27 | 1 | 249 | 16 | 864 | 62 |
| 39,816 | 78 | 9 | 448 | 37 | 24 | 1 | 232 | 16 | 782 | 63 |
| 39,817 | 81 | 9 | 471 | 41 | 23 | 1 | 237 | 17 | 812 | 68 |
| 39,818 | 79 | 9 | 448 | 41 | 19 | 1 | 223 | 18 | 769 | 69 |
| 39,819 | 79 | 9 | 445 | 41 | 18 | 1 | 222 | 18 | 764 | 69 |
| 39,820 | 79 | 9 | 438 | 41 | 18 | 1 | 219 | 18 | 754 | 69 |
| 39,821 | 77 | 9 | 446 | 40 | 19 | 1 | 218 | 18 | 760 | 68 |
| 39,822 | 77 | 9 | 446 | 40 | 19 | 1 | 218 | 18 | 760 | 68 |
| 39,823 | 77 | 9 | 449 | 40 | 19 | 1 | 213 | 18 | 758 | 68 |
| 39,824 | 77 | 9 | 448 | 40 | 19 | 1 | 213 | 18 | 757 | 68 |
| 39,825 | 73 | 8 | 438 | 31 | 19 | 1 | 210 | 14 | 740 | 54 |
| 39,826 | 70 | 8 | 419 | 29 | 19 | 1 | 205 | 13 | 713 | 51 |
| 39,827 | 66 | 8 | 412 | 30 | 19 | 1 | 204 | 13 | 701 | 52 |
| 39,828 | 50 | 6 | 324 | 30 | 18 | 1 | 169 | 13 | 561 | 50 |
| 39,829 | 47 | 5 | 311 | 29 | 18 | 1 | 165 | 13 | 541 | 48 |
| 39,830 | 47 | 5 | 313 | 25 | 18 | 0 | 166 | 11 | 544 | 41 |
| 39,831 | 47 | 5 | 314 | 20 | 17 | 0 | 169 | 8  | 547 | 33 |
| 39,832 | 47 | 5 | 320 | 19 | 19 | 0 | 175 | 8  | 561 | 32 |
| 39,833 | 50 | 5 | 369 | 20 | 20 | 1 | 181 | 8  | 620 | 34 |
| 39,834 | 46 | 5 | 348 | 20 | 19 | 1 | 172 | 8  | 585 | 34 |
| 39,835 | 48 | 5 | 354 | 21 | 20 | 1 | 173 | 8  | 595 | 35 |
| 39,836 | 48 | 5 | 362 | 19 | 22 | 1 | 171 | 8  | 603 | 33 |
| 39,837 | 48 | 5 | 359 | 19 | 22 | 1 | 173 | 8  | 602 | 33 |
| 39,838 | 32 | 4 | 286 | 19 | 15 | 2 | 118 | 9  | 451 | 34 |
| 39,839 | 31 | 4 | 286 | 19 | 15 | 2 | 118 | 9  | 450 | 34 |
| 39,840 | 32 | 4 | 292 | 19 | 15 | 2 | 121 | 10 | 460 | 35 |

|        |    |   |     |    |    |   |     |    |     |    |
|--------|----|---|-----|----|----|---|-----|----|-----|----|
| 39,841 | 32 | 4 | 292 | 19 | 15 | 2 | 121 | 10 | 460 | 35 |
| 39,842 | 32 | 4 | 294 | 19 | 15 | 2 | 121 | 12 | 462 | 37 |
| 39,843 | 36 | 4 | 306 | 19 | 15 | 2 | 132 | 12 | 489 | 37 |
| 39,844 | 36 | 4 | 308 | 22 | 17 | 3 | 134 | 12 | 495 | 41 |
| 39,845 | 36 | 4 | 308 | 22 | 17 | 3 | 135 | 12 | 496 | 41 |
| 39,846 | 34 | 4 | 306 | 21 | 17 | 3 | 134 | 12 | 491 | 40 |
| 39,847 | 34 | 4 | 307 | 20 | 17 | 3 | 134 | 12 | 492 | 39 |
| 39,848 | 34 | 4 | 309 | 20 | 17 | 3 | 135 | 12 | 495 | 39 |
| 39,849 | 34 | 4 | 308 | 20 | 17 | 3 | 135 | 12 | 494 | 39 |
| 39,850 | 33 | 5 | 306 | 20 | 17 | 3 | 133 | 12 | 489 | 40 |
| 39,851 | 41 | 3 | 347 | 19 | 20 | 3 | 150 | 9  | 558 | 34 |
| 39,852 | 41 | 3 | 349 | 19 | 20 | 3 | 150 | 9  | 560 | 34 |
| 39,853 | 54 | 3 | 374 | 19 | 19 | 3 | 160 | 9  | 607 | 34 |
| 39,854 | 58 | 3 | 379 | 19 | 19 | 3 | 166 | 9  | 622 | 34 |
| 39,855 | 58 | 3 | 381 | 19 | 19 | 3 | 167 | 9  | 625 | 34 |
| 39,856 | 57 | 3 | 380 | 19 | 19 | 3 | 167 | 10 | 623 | 35 |
| 39,857 | 57 | 3 | 380 | 19 | 19 | 3 | 166 | 10 | 622 | 35 |
| 39,858 | 54 | 2 | 360 | 18 | 18 | 3 | 159 | 10 | 591 | 33 |
| 39,859 | 54 | 2 | 359 | 17 | 18 | 3 | 157 | 10 | 588 | 32 |
| 39,860 | 54 | 2 | 351 | 17 | 18 | 3 | 155 | 10 | 578 | 32 |
| 39,861 | 46 | 2 | 327 | 17 | 15 | 3 | 141 | 10 | 529 | 32 |
| 39,862 | 46 | 2 | 332 | 18 | 15 | 3 | 143 | 10 | 536 | 33 |
| 39,863 | 43 | 2 | 316 | 15 | 13 | 3 | 132 | 9  | 504 | 29 |
| 39,864 | 43 | 2 | 320 | 22 | 13 | 3 | 132 | 9  | 508 | 36 |
| 39,865 | 44 | 2 | 321 | 22 | 13 | 3 | 121 | 10 | 499 | 37 |
| 39,866 | 44 | 2 | 316 | 22 | 13 | 3 | 117 | 10 | 490 | 37 |
| 39,867 | 43 | 2 | 313 | 21 | 13 | 3 | 117 | 10 | 486 | 36 |
| 39,868 | 38 | 2 | 282 | 17 | 13 | 3 | 105 | 9  | 438 | 31 |
| 39,869 | 39 | 2 | 302 | 17 | 13 | 3 | 113 | 9  | 467 | 31 |
| 39,870 | 41 | 2 | 305 | 18 | 13 | 3 | 115 | 10 | 474 | 33 |
| 39,871 | 44 | 2 | 311 | 18 | 13 | 3 | 119 | 10 | 487 | 33 |
| 39,872 | 44 | 2 | 304 | 18 | 12 | 3 | 119 | 10 | 479 | 33 |
| 39,873 | 44 | 2 | 295 | 18 | 12 | 3 | 119 | 10 | 470 | 33 |
| 39,874 | 44 | 2 | 305 | 18 | 12 | 3 | 124 | 10 | 485 | 33 |
| 39,875 | 46 | 2 | 316 | 18 | 12 | 3 | 128 | 10 | 502 | 33 |
| 39,876 | 46 | 2 | 316 | 19 | 12 | 3 | 128 | 10 | 502 | 34 |
| 39,877 | 46 | 2 | 315 | 19 | 12 | 3 | 128 | 8  | 501 | 32 |
| 39,878 | 46 | 2 | 323 | 18 | 12 | 3 | 130 | 8  | 511 | 31 |
| 39,879 | 49 | 2 | 344 | 18 | 12 | 3 | 131 | 8  | 536 | 31 |
| 39,880 | 54 | 2 | 402 | 19 | 14 | 3 | 147 | 9  | 617 | 33 |
| 39,881 | 54 | 2 | 408 | 19 | 14 | 3 | 149 | 12 | 625 | 36 |

|        |    |   |     |    |    |   |     |    |     |    |
|--------|----|---|-----|----|----|---|-----|----|-----|----|
| 39,882 | 53 | 2 | 396 | 30 | 14 | 3 | 144 | 12 | 607 | 47 |
| 39,883 | 53 | 2 | 380 | 29 | 12 | 3 | 141 | 12 | 586 | 46 |
| 39,884 | 50 | 2 | 339 | 31 | 11 | 2 | 138 | 12 | 538 | 47 |
| 39,885 | 53 | 2 | 332 | 30 | 11 | 2 | 132 | 13 | 528 | 47 |
| 39,886 | 51 | 2 | 320 | 31 | 10 | 2 | 128 | 13 | 509 | 48 |
| 39,887 | 62 | 2 | 339 | 31 | 9  | 2 | 149 | 13 | 559 | 48 |
| 39,888 | 62 | 2 | 342 | 31 | 9  | 2 | 149 | 13 | 562 | 48 |
| 39,889 | 61 | 2 | 343 | 31 | 10 | 1 | 146 | 12 | 560 | 46 |
| 39,890 | 61 | 2 | 342 | 31 | 10 | 1 | 146 | 12 | 559 | 46 |
| 39,891 | 65 | 2 | 352 | 31 | 11 | 1 | 151 | 11 | 579 | 45 |
| 39,892 | 65 | 2 | 353 | 31 | 11 | 1 | 152 | 11 | 581 | 45 |
| 39,893 | 61 | 2 | 346 | 30 | 12 | 1 | 141 | 9  | 560 | 42 |
| 39,894 | 61 | 2 | 342 | 31 | 12 | 1 | 141 | 9  | 556 | 43 |
| 39,895 | 62 | 2 | 340 | 28 | 10 | 0 | 139 | 9  | 551 | 39 |
| 39,896 | 62 | 2 | 340 | 28 | 10 | 0 | 138 | 9  | 550 | 39 |
| 39,897 | 62 | 2 | 339 | 28 | 10 | 0 | 138 | 9  | 549 | 39 |
| 39,898 | 62 | 3 | 339 | 29 | 10 | 0 | 138 | 10 | 549 | 42 |
| 39,899 | 62 | 3 | 337 | 30 | 10 | 0 | 137 | 10 | 546 | 43 |
| 39,900 | 60 | 3 | 327 | 30 | 9  | 0 | 131 | 11 | 527 | 44 |
| 39,901 | 59 | 3 | 321 | 43 | 7  | 1 | 128 | 22 | 515 | 69 |
| 39,902 | 54 | 3 | 296 | 44 | 7  | 1 | 120 | 24 | 477 | 72 |
| 39,903 | 46 | 4 | 288 | 46 | 7  | 1 | 117 | 24 | 458 | 75 |
| 39,904 | 41 | 6 | 271 | 46 | 7  | 1 | 108 | 24 | 427 | 77 |
| 39,905 | 37 | 6 | 264 | 46 | 7  | 1 | 101 | 24 | 409 | 77 |
| 39,906 | 37 | 6 | 262 | 47 | 7  | 1 | 101 | 24 | 407 | 78 |
| 39,907 | 37 | 6 | 262 | 47 | 7  | 1 | 101 | 24 | 407 | 78 |
| 39,908 | 37 | 7 | 261 | 49 | 7  | 1 | 101 | 25 | 406 | 82 |
| 39,909 | 37 | 7 | 261 | 50 | 7  | 1 | 101 | 25 | 406 | 83 |
| 39,910 | 38 | 8 | 264 | 50 | 7  | 1 | 102 | 25 | 411 | 84 |
| 39,911 | 38 | 8 | 264 | 50 | 7  | 1 | 102 | 25 | 411 | 84 |
| 39,912 | 38 | 8 | 262 | 50 | 7  | 1 | 100 | 25 | 407 | 84 |
| 39,913 | 38 | 8 | 257 | 48 | 8  | 1 | 98  | 25 | 401 | 82 |
| 39,914 | 39 | 8 | 256 | 43 | 8  | 1 | 97  | 26 | 400 | 78 |
| 39,915 | 39 | 8 | 252 | 45 | 8  | 1 | 95  | 27 | 394 | 81 |
| 39,916 | 38 | 8 | 245 | 45 | 8  | 1 | 94  | 27 | 385 | 81 |
| 39,917 | 37 | 8 | 242 | 45 | 8  | 1 | 93  | 27 | 380 | 81 |
| 39,918 | 37 | 8 | 244 | 50 | 8  | 2 | 93  | 29 | 382 | 89 |
| 39,919 | 36 | 8 | 242 | 53 | 8  | 2 | 86  | 29 | 372 | 92 |
| 39,920 | 38 | 8 | 230 | 53 | 8  | 2 | 88  | 28 | 364 | 91 |
| 39,921 | 36 | 8 | 235 | 52 | 8  | 2 | 91  | 27 | 370 | 89 |
| 39,922 | 35 | 8 | 245 | 52 | 9  | 2 | 102 | 27 | 391 | 89 |

|        |    |    |     |    |    |   |     |    |     |    |
|--------|----|----|-----|----|----|---|-----|----|-----|----|
| 39,923 | 35 | 8  | 245 | 52 | 9  | 2 | 104 | 27 | 393 | 89 |
| 39,924 | 35 | 8  | 245 | 52 | 9  | 2 | 104 | 27 | 393 | 89 |
| 39,925 | 35 | 8  | 235 | 53 | 9  | 2 | 99  | 27 | 378 | 90 |
| 39,926 | 34 | 8  | 251 | 53 | 11 | 2 | 104 | 27 | 400 | 90 |
| 39,927 | 34 | 8  | 247 | 52 | 11 | 2 | 103 | 27 | 395 | 89 |
| 39,928 | 34 | 8  | 245 | 52 | 11 | 2 | 102 | 27 | 392 | 89 |
| 39,929 | 31 | 8  | 225 | 52 | 11 | 2 | 101 | 27 | 368 | 89 |
| 39,930 | 31 | 8  | 205 | 52 | 10 | 2 | 98  | 27 | 344 | 89 |
| 39,931 | 27 | 8  | 173 | 51 | 9  | 2 | 87  | 23 | 296 | 84 |
| 39,932 | 27 | 8  | 164 | 40 | 9  | 2 | 84  | 23 | 284 | 73 |
| 39,933 | 27 | 9  | 170 | 40 | 11 | 2 | 88  | 23 | 296 | 74 |
| 39,934 | 27 | 9  | 169 | 36 | 11 | 2 | 84  | 22 | 291 | 69 |
| 39,935 | 28 | 9  | 177 | 36 | 12 | 2 | 93  | 22 | 310 | 69 |
| 39,936 | 25 | 9  | 173 | 36 | 11 | 2 | 88  | 22 | 297 | 69 |
| 39,937 | 26 | 9  | 173 | 36 | 13 | 2 | 93  | 22 | 305 | 69 |
| 39,938 | 15 | 9  | 142 | 36 | 12 | 2 | 71  | 22 | 240 | 69 |
| 39,939 | 17 | 9  | 139 | 36 | 12 | 2 | 69  | 22 | 237 | 69 |
| 39,940 | 17 | 9  | 134 | 37 | 11 | 2 | 69  | 22 | 231 | 70 |
| 39,941 | 13 | 10 | 123 | 37 | 10 | 2 | 66  | 22 | 212 | 71 |
| 39,942 | 13 | 10 | 123 | 37 | 11 | 2 | 66  | 22 | 213 | 71 |
| 39,943 | 13 | 10 | 120 | 37 | 11 | 2 | 65  | 22 | 209 | 71 |
| 39,944 | 13 | 10 | 119 | 36 | 10 | 2 | 66  | 22 | 208 | 70 |
| 39,945 | 13 | 10 | 119 | 36 | 10 | 2 | 65  | 22 | 207 | 70 |
| 39,946 | 12 | 10 | 118 | 38 | 10 | 2 | 65  | 22 | 205 | 72 |
| 39,947 | 12 | 10 | 119 | 38 | 10 | 2 | 65  | 22 | 206 | 72 |
| 39,948 | 12 | 9  | 119 | 37 | 10 | 2 | 65  | 21 | 206 | 69 |
| 39,949 | 12 | 9  | 120 | 36 | 10 | 2 | 65  | 20 | 207 | 67 |
| 39,950 | 12 | 9  | 120 | 36 | 10 | 2 | 65  | 20 | 207 | 67 |
| 39,951 | 12 | 9  | 119 | 36 | 10 | 2 | 64  | 20 | 205 | 67 |
| 39,952 | 12 | 8  | 120 | 23 | 10 | 1 | 64  | 9  | 206 | 41 |
| 39,953 | 12 | 7  | 120 | 20 | 10 | 1 | 64  | 8  | 206 | 36 |
| 39,954 | 12 | 7  | 120 | 20 | 10 | 1 | 64  | 8  | 206 | 36 |
| 39,955 | 12 | 5  | 120 | 21 | 10 | 1 | 64  | 8  | 206 | 35 |
| 39,956 | 12 | 6  | 120 | 21 | 10 | 1 | 63  | 8  | 205 | 36 |
| 39,957 | 13 | 6  | 124 | 20 | 10 | 1 | 70  | 7  | 217 | 34 |
| 39,958 | 13 | 4  | 126 | 17 | 10 | 1 | 69  | 6  | 218 | 28 |
| 39,959 | 13 | 4  | 126 | 18 | 10 | 1 | 69  | 6  | 218 | 29 |
| 39,960 | 12 | 4  | 123 | 18 | 10 | 1 | 69  | 6  | 214 | 29 |
| 39,961 | 13 | 3  | 122 | 18 | 10 | 1 | 70  | 7  | 215 | 29 |
| 39,962 | 13 | 3  | 122 | 18 | 10 | 1 | 70  | 7  | 215 | 29 |
| 39,963 | 13 | 3  | 122 | 18 | 10 | 1 | 70  | 7  | 215 | 29 |

|        |    |   |     |    |    |   |     |    |     |    |
|--------|----|---|-----|----|----|---|-----|----|-----|----|
| 39,964 | 13 | 3 | 124 | 18 | 9  | 1 | 70  | 7  | 216 | 29 |
| 39,965 | 12 | 3 | 123 | 17 | 9  | 1 | 70  | 6  | 214 | 27 |
| 39,966 | 12 | 3 | 122 | 15 | 9  | 1 | 70  | 5  | 213 | 24 |
| 39,967 | 13 | 3 | 128 | 15 | 9  | 1 | 71  | 4  | 221 | 23 |
| 39,968 | 13 | 3 | 127 | 15 | 9  | 1 | 71  | 4  | 220 | 23 |
| 39,969 | 13 | 3 | 124 | 10 | 9  | 0 | 71  | 2  | 217 | 15 |
| 39,970 | 11 | 3 | 140 | 8  | 10 | 0 | 80  | 3  | 241 | 14 |
| 39,971 | 11 | 3 | 130 | 8  | 10 | 0 | 80  | 3  | 231 | 14 |
| 39,972 | 11 | 4 | 130 | 8  | 10 | 1 | 81  | 8  | 232 | 21 |
| 39,973 | 9  | 4 | 112 | 8  | 9  | 1 | 67  | 10 | 197 | 23 |
| 39,974 | 9  | 4 | 109 | 9  | 9  | 1 | 64  | 10 | 191 | 24 |
| 39,975 | 9  | 4 | 107 | 9  | 9  | 1 | 64  | 11 | 189 | 25 |
| 39,976 | 9  | 4 | 88  | 8  | 7  | 1 | 56  | 11 | 160 | 24 |
| 39,977 | 10 | 4 | 93  | 9  | 7  | 1 | 63  | 12 | 173 | 26 |
| 39,978 | 10 | 4 | 92  | 9  | 7  | 1 | 63  | 12 | 172 | 26 |
| 39,979 | 10 | 4 | 97  | 10 | 7  | 1 | 70  | 14 | 184 | 29 |
| 39,980 | 10 | 4 | 97  | 11 | 7  | 1 | 70  | 14 | 184 | 30 |
| 39,981 | 9  | 4 | 93  | 11 | 7  | 1 | 69  | 15 | 178 | 31 |
| 39,982 | 9  | 3 | 92  | 11 | 7  | 1 | 70  | 15 | 178 | 30 |
| 39,983 | 9  | 3 | 90  | 17 | 7  | 1 | 70  | 23 | 176 | 44 |
| 39,984 | 9  | 3 | 83  | 19 | 5  | 1 | 66  | 23 | 163 | 46 |
| 39,985 | 9  | 3 | 83  | 20 | 5  | 1 | 66  | 23 | 163 | 47 |
| 39,986 | 9  | 3 | 71  | 20 | 4  | 1 | 55  | 23 | 139 | 47 |
| 39,987 | 9  | 3 | 70  | 20 | 4  | 1 | 55  | 23 | 138 | 47 |
| 39,988 | 8  | 3 | 70  | 20 | 3  | 1 | 50  | 23 | 131 | 47 |
| 39,989 | 8  | 3 | 80  | 22 | 3  | 1 | 49  | 23 | 140 | 49 |
| 39,990 | 6  | 3 | 79  | 22 | 3  | 1 | 49  | 23 | 137 | 49 |
| 39,991 | 8  | 3 | 114 | 23 | 4  | 1 | 60  | 23 | 186 | 50 |
| 39,992 | 8  | 2 | 134 | 23 | 4  | 1 | 75  | 24 | 221 | 50 |
| 39,993 | 17 | 2 | 173 | 23 | 4  | 1 | 116 | 24 | 310 | 50 |
| 39,994 | 18 | 2 | 193 | 23 | 5  | 1 | 128 | 24 | 344 | 50 |
| 39,995 | 18 | 2 | 204 | 24 | 5  | 1 | 130 | 24 | 357 | 51 |
| 39,996 | 18 | 2 | 204 | 24 | 5  | 1 | 130 | 24 | 357 | 51 |
| 39,997 | 18 | 2 | 206 | 22 | 5  | 1 | 131 | 24 | 360 | 49 |
| 39,998 | 18 | 2 | 205 | 23 | 5  | 1 | 131 | 27 | 359 | 53 |
| 39,999 | 18 | 2 | 205 | 23 | 5  | 1 | 131 | 28 | 359 | 54 |
| 40,000 | 19 | 2 | 218 | 23 | 5  | 1 | 140 | 30 | 382 | 56 |
| 40,001 | 19 | 2 | 218 | 23 | 5  | 1 | 140 | 30 | 382 | 56 |
| 40,002 | 19 | 2 | 220 | 23 | 5  | 1 | 142 | 30 | 386 | 56 |
| 40,003 | 19 | 2 | 221 | 26 | 5  | 1 | 142 | 30 | 387 | 59 |
| 40,004 | 19 | 2 | 221 | 26 | 5  | 1 | 142 | 29 | 387 | 58 |



|        |    |   |     |    |    |   |     |    |     |    |
|--------|----|---|-----|----|----|---|-----|----|-----|----|
| 40,005 | 19 | 3 | 221 | 26 | 5  | 2 | 142 | 29 | 387 | 60 |
| 40,006 | 19 | 3 | 221 | 26 | 5  | 2 | 142 | 31 | 387 | 62 |
| 40,007 | 18 | 2 | 217 | 26 | 5  | 2 | 135 | 31 | 375 | 61 |
| 40,008 | 18 | 2 | 216 | 26 | 5  | 2 | 135 | 31 | 374 | 61 |
| 40,009 | 18 | 2 | 216 | 25 | 5  | 2 | 135 | 31 | 374 | 60 |
| 40,010 | 18 | 2 | 216 | 30 | 5  | 3 | 136 | 33 | 375 | 68 |
| 40,011 | 17 | 2 | 216 | 30 | 5  | 3 | 136 | 33 | 374 | 68 |
| 40,012 | 17 | 2 | 216 | 30 | 5  | 3 | 135 | 32 | 373 | 67 |
| 40,013 | 17 | 2 | 216 | 30 | 5  | 3 | 135 | 32 | 373 | 67 |
| 40,014 | 17 | 2 | 217 | 30 | 5  | 3 | 136 | 32 | 375 | 67 |
| 40,015 | 17 | 2 | 217 | 30 | 5  | 3 | 137 | 32 | 376 | 67 |
| 40,016 | 16 | 2 | 215 | 30 | 5  | 3 | 137 | 32 | 373 | 67 |
| 40,017 | 16 | 2 | 213 | 30 | 5  | 3 | 134 | 32 | 368 | 67 |
| 40,018 | 16 | 2 | 192 | 30 | 5  | 3 | 124 | 32 | 337 | 67 |
| 40,019 | 16 | 2 | 192 | 30 | 5  | 3 | 124 | 32 | 337 | 67 |
| 40,020 | 16 | 2 | 192 | 29 | 4  | 3 | 124 | 31 | 336 | 65 |
| 40,021 | 16 | 2 | 190 | 29 | 4  | 3 | 125 | 31 | 335 | 65 |
| 40,022 | 16 | 1 | 189 | 29 | 4  | 3 | 121 | 26 | 330 | 59 |
| 40,023 | 16 | 1 | 189 | 29 | 4  | 3 | 119 | 26 | 328 | 59 |
| 40,024 | 16 | 1 | 190 | 29 | 4  | 3 | 121 | 24 | 331 | 57 |
| 40,025 | 16 | 1 | 190 | 28 | 4  | 3 | 121 | 24 | 331 | 56 |
| 40,026 | 16 | 1 | 194 | 28 | 4  | 3 | 122 | 23 | 336 | 55 |
| 40,027 | 15 | 1 | 186 | 28 | 4  | 3 | 118 | 23 | 323 | 55 |
| 40,028 | 14 | 1 | 199 | 27 | 5  | 3 | 124 | 22 | 342 | 53 |
| 40,029 | 14 | 1 | 215 | 26 | 7  | 3 | 139 | 20 | 375 | 50 |
| 40,030 | 14 | 1 | 214 | 26 | 7  | 3 | 139 | 20 | 374 | 50 |
| 40,031 | 14 | 1 | 218 | 25 | 7  | 3 | 143 | 22 | 382 | 51 |
| 40,032 | 14 | 1 | 217 | 25 | 7  | 3 | 143 | 21 | 381 | 50 |
| 40,033 | 16 | 1 | 233 | 26 | 11 | 3 | 155 | 22 | 415 | 52 |
| 40,034 | 17 | 1 | 236 | 20 | 11 | 3 | 155 | 14 | 419 | 38 |
| 40,035 | 17 | 1 | 237 | 18 | 11 | 3 | 156 | 14 | 421 | 36 |
| 40,036 | 17 | 1 | 235 | 16 | 11 | 3 | 156 | 14 | 419 | 34 |
| 40,037 | 16 | 1 | 231 | 16 | 11 | 3 | 155 | 14 | 413 | 34 |
| 40,038 | 16 | 1 | 231 | 16 | 11 | 3 | 155 | 14 | 413 | 34 |
| 40,039 | 16 | 1 | 230 | 17 | 10 | 4 | 155 | 16 | 411 | 38 |
| 40,040 | 16 | 1 | 219 | 15 | 10 | 4 | 155 | 16 | 400 | 36 |
| 40,041 | 15 | 1 | 197 | 15 | 10 | 4 | 151 | 16 | 373 | 36 |
| 40,042 | 14 | 1 | 188 | 13 | 9  | 4 | 143 | 15 | 354 | 33 |
| 40,043 | 15 | 1 | 172 | 13 | 9  | 4 | 127 | 15 | 323 | 33 |
| 40,044 | 6  | 1 | 138 | 13 | 8  | 4 | 91  | 15 | 243 | 33 |
| 40,045 | 5  | 1 | 125 | 14 | 7  | 4 | 80  | 15 | 217 | 34 |

|        |    |   |     |    |    |   |     |    |     |    |
|--------|----|---|-----|----|----|---|-----|----|-----|----|
| 40,046 | 11 | 1 | 185 | 13 | 8  | 4 | 161 | 15 | 365 | 33 |
| 40,047 | 11 | 1 | 197 | 13 | 9  | 4 | 167 | 15 | 384 | 33 |
| 40,048 | 10 | 1 | 194 | 13 | 9  | 4 | 163 | 15 | 376 | 33 |
| 40,049 | 10 | 1 | 188 | 12 | 9  | 4 | 160 | 12 | 367 | 29 |
| 40,050 | 13 | 1 | 189 | 12 | 9  | 4 | 169 | 9  | 380 | 26 |
| 40,051 | 17 | 1 | 232 | 12 | 10 | 4 | 177 | 10 | 436 | 27 |
| 40,052 | 17 | 1 | 229 | 12 | 10 | 4 | 176 | 10 | 432 | 27 |
| 40,053 | 17 | 1 | 251 | 12 | 10 | 5 | 191 | 10 | 469 | 28 |
| 40,054 | 18 | 1 | 284 | 9  | 11 | 5 | 202 | 11 | 515 | 26 |
| 40,055 | 18 | 1 | 284 | 9  | 11 | 5 | 203 | 11 | 516 | 26 |
| 40,056 | 20 | 0 | 294 | 8  | 11 | 4 | 208 | 11 | 533 | 23 |
| 40,057 | 23 | 0 | 305 | 8  | 11 | 4 | 214 | 9  | 553 | 21 |
| 40,058 | 23 | 0 | 304 | 8  | 11 | 4 | 214 | 10 | 552 | 22 |
| 40,059 | 23 | 0 | 313 | 10 | 11 | 4 | 217 | 10 | 564 | 24 |
| 40,060 | 29 | 0 | 347 | 5  | 12 | 3 | 239 | 8  | 627 | 16 |
| 40,061 | 31 | 0 | 356 | 6  | 15 | 3 | 257 | 8  | 659 | 17 |
| 40,062 | 31 | 0 | 356 | 6  | 15 | 3 | 257 | 8  | 659 | 17 |
| 40,063 | 33 | 0 | 362 | 6  | 15 | 3 | 261 | 9  | 671 | 18 |
| 40,064 | 33 | 0 | 363 | 6  | 15 | 4 | 267 | 9  | 678 | 19 |
| 40,065 | 33 | 0 | 364 | 6  | 15 | 4 | 267 | 9  | 679 | 19 |
| 40,066 | 33 | 0 | 363 | 6  | 15 | 4 | 266 | 9  | 677 | 19 |
| 40,067 | 35 | 0 | 362 | 6  | 16 | 4 | 270 | 9  | 683 | 19 |
| 40,068 | 35 | 0 | 362 | 6  | 16 | 4 | 270 | 9  | 683 | 19 |
| 40,069 | 36 | 0 | 397 | 7  | 16 | 4 | 294 | 9  | 743 | 20 |
| 40,070 | 36 | 0 | 397 | 7  | 16 | 4 | 295 | 9  | 744 | 20 |
| 40,071 | 36 | 0 | 400 | 7  | 16 | 3 | 296 | 9  | 748 | 19 |
| 40,072 | 36 | 0 | 402 | 8  | 16 | 3 | 299 | 9  | 753 | 20 |
| 40,073 | 36 | 1 | 402 | 8  | 16 | 3 | 299 | 9  | 753 | 21 |
| 40,074 | 36 | 1 | 401 | 10 | 16 | 3 | 298 | 12 | 751 | 26 |
| 40,075 | 36 | 1 | 401 | 11 | 16 | 3 | 297 | 12 | 750 | 27 |
| 40,076 | 36 | 1 | 401 | 13 | 16 | 3 | 297 | 12 | 750 | 29 |
| 40,077 | 36 | 1 | 395 | 13 | 16 | 4 | 293 | 13 | 740 | 31 |
| 40,078 | 36 | 2 | 385 | 13 | 16 | 4 | 290 | 13 | 727 | 32 |
| 40,079 | 37 | 2 | 381 | 14 | 15 | 4 | 289 | 13 | 722 | 33 |
| 40,080 | 37 | 2 | 361 | 14 | 13 | 4 | 267 | 13 | 678 | 33 |
| 40,081 | 37 | 2 | 360 | 14 | 13 | 5 | 266 | 14 | 676 | 35 |
| 40,082 | 38 | 2 | 364 | 15 | 13 | 5 | 269 | 12 | 684 | 34 |
| 40,083 | 36 | 2 | 353 | 14 | 9  | 5 | 257 | 11 | 655 | 32 |
| 40,084 | 36 | 2 | 355 | 14 | 9  | 5 | 257 | 11 | 657 | 32 |
| 40,085 | 35 | 2 | 352 | 14 | 9  | 5 | 257 | 11 | 653 | 32 |
| 40,086 | 35 | 3 | 351 | 14 | 9  | 5 | 256 | 11 | 651 | 33 |

|        |    |   |     |    |   |   |     |    |     |    |
|--------|----|---|-----|----|---|---|-----|----|-----|----|
| 40,087 | 35 | 3 | 351 | 14 | 9 | 5 | 256 | 11 | 651 | 33 |
| 40,088 | 35 | 3 | 351 | 14 | 9 | 5 | 256 | 11 | 651 | 33 |
| 40,089 | 35 | 3 | 350 | 15 | 9 | 5 | 256 | 11 | 650 | 34 |
| 40,090 | 35 | 3 | 351 | 14 | 9 | 4 | 256 | 10 | 651 | 31 |
| 40,091 | 35 | 3 | 351 | 14 | 9 | 4 | 256 | 10 | 651 | 31 |
| 40,092 | 35 | 3 | 355 | 14 | 9 | 4 | 259 | 10 | 658 | 31 |
| 40,093 | 35 | 3 | 351 | 15 | 9 | 4 | 259 | 10 | 654 | 32 |
| 40,094 | 34 | 3 | 347 | 15 | 9 | 5 | 259 | 10 | 649 | 33 |
| 40,095 | 34 | 3 | 342 | 14 | 9 | 5 | 255 | 10 | 640 | 32 |
| 40,096 | 34 | 3 | 336 | 14 | 9 | 5 | 256 | 10 | 635 | 32 |
| 40,097 | 28 | 3 | 264 | 14 | 8 | 5 | 172 | 10 | 472 | 32 |
| 40,098 | 28 | 3 | 252 | 14 | 7 | 5 | 165 | 10 | 452 | 32 |
| 40,099 | 28 | 3 | 251 | 14 | 7 | 5 | 163 | 10 | 449 | 32 |
| 40,100 | 28 | 3 | 258 | 14 | 7 | 5 | 164 | 10 | 457 | 32 |
| 40,101 | 25 | 3 | 256 | 14 | 7 | 5 | 155 | 11 | 443 | 33 |
| 40,102 | 22 | 3 | 222 | 14 | 6 | 5 | 157 | 10 | 407 | 32 |
| 40,103 | 22 | 3 | 224 | 14 | 6 | 5 | 158 | 10 | 410 | 32 |
| 40,104 | 22 | 3 | 202 | 14 | 6 | 4 | 142 | 10 | 372 | 31 |
| 40,105 | 21 | 3 | 168 | 15 | 5 | 4 | 131 | 9  | 325 | 31 |
| 40,106 | 19 | 3 | 160 | 15 | 5 | 4 | 128 | 9  | 312 | 31 |
| 40,107 | 19 | 3 | 158 | 15 | 5 | 4 | 128 | 9  | 310 | 31 |
| 40,108 | 16 | 3 | 150 | 15 | 5 | 4 | 121 | 9  | 292 | 31 |
| 40,109 | 16 | 3 | 141 | 15 | 5 | 4 | 122 | 8  | 284 | 30 |
| 40,110 | 14 | 3 | 123 | 12 | 4 | 4 | 110 | 8  | 251 | 27 |
| 40,111 | 13 | 3 | 123 | 12 | 4 | 4 | 109 | 8  | 249 | 27 |
| 40,112 | 12 | 3 | 122 | 12 | 2 | 4 | 96  | 8  | 232 | 27 |
| 40,113 | 10 | 3 | 118 | 12 | 2 | 4 | 92  | 7  | 222 | 26 |
| 40,114 | 10 | 3 | 116 | 12 | 2 | 4 | 92  | 7  | 220 | 26 |
| 40,115 | 10 | 3 | 115 | 12 | 2 | 3 | 86  | 7  | 213 | 25 |
| 40,116 | 11 | 3 | 129 | 12 | 3 | 3 | 97  | 7  | 240 | 25 |
| 40,117 | 14 | 3 | 148 | 12 | 7 | 3 | 112 | 7  | 281 | 25 |
| 40,118 | 12 | 3 | 158 | 12 | 6 | 3 | 112 | 7  | 288 | 25 |
| 40,119 | 14 | 3 | 141 | 12 | 6 | 3 | 103 | 7  | 264 | 25 |
| 40,120 | 13 | 3 | 123 | 11 | 6 | 4 | 88  | 7  | 230 | 25 |
| 40,121 | 13 | 3 | 121 | 11 | 6 | 4 | 87  | 8  | 227 | 26 |
| 40,122 | 13 | 3 | 123 | 11 | 6 | 4 | 89  | 9  | 231 | 27 |
| 40,123 | 13 | 3 | 121 | 10 | 6 | 4 | 86  | 9  | 226 | 26 |
| 40,124 | 13 | 2 | 121 | 10 | 6 | 4 | 86  | 9  | 226 | 25 |
| 40,125 | 13 | 2 | 125 | 7  | 6 | 5 | 86  | 6  | 230 | 20 |
| 40,126 | 13 | 2 | 126 | 5  | 6 | 4 | 86  | 6  | 231 | 17 |
| 40,127 | 13 | 2 | 131 | 5  | 6 | 4 | 88  | 6  | 238 | 17 |

|        |    |   |     |   |    |   |     |   |     |    |
|--------|----|---|-----|---|----|---|-----|---|-----|----|
| 40,128 | 15 | 2 | 147 | 5 | 6  | 4 | 94  | 6 | 262 | 17 |
| 40,129 | 16 | 1 | 189 | 5 | 6  | 4 | 100 | 7 | 311 | 17 |
| 40,130 | 17 | 2 | 210 | 4 | 7  | 3 | 104 | 6 | 338 | 15 |
| 40,131 | 32 | 2 | 271 | 4 | 10 | 3 | 118 | 6 | 431 | 15 |
| 40,132 | 32 | 2 | 276 | 4 | 10 | 3 | 117 | 6 | 435 | 15 |
| 40,133 | 33 | 2 | 280 | 3 | 10 | 3 | 118 | 6 | 441 | 14 |
| 40,134 | 33 | 2 | 282 | 3 | 10 | 3 | 127 | 6 | 452 | 14 |
| 40,135 | 33 | 2 | 280 | 3 | 10 | 3 | 127 | 6 | 450 | 14 |
| 40,136 | 50 | 2 | 445 | 3 | 27 | 3 | 248 | 8 | 770 | 16 |
| 40,137 | 50 | 1 | 445 | 3 | 27 | 4 | 248 | 8 | 770 | 16 |
| 40,138 | 52 | 1 | 459 | 3 | 27 | 4 | 262 | 8 | 800 | 16 |
| 40,139 | 53 | 1 | 459 | 3 | 27 | 4 | 263 | 8 | 802 | 16 |
| 40,140 | 54 | 1 | 464 | 2 | 27 | 4 | 269 | 9 | 814 | 16 |
| 40,141 | 55 | 1 | 467 | 2 | 28 | 4 | 270 | 8 | 820 | 15 |
| 40,142 | 55 | 1 | 469 | 2 | 29 | 4 | 270 | 8 | 823 | 15 |
| 40,143 | 55 | 1 | 469 | 2 | 29 | 4 | 267 | 8 | 820 | 15 |
| 40,144 | 55 | 1 | 481 | 1 | 29 | 3 | 272 | 8 | 837 | 13 |
| 40,145 | 55 | 1 | 481 | 1 | 29 | 3 | 272 | 8 | 837 | 13 |
| 40,146 | 58 | 1 | 496 | 1 | 29 | 3 | 288 | 8 | 871 | 13 |
| 40,147 | 58 | 1 | 495 | 1 | 29 | 3 | 286 | 8 | 868 | 13 |
| 40,148 | 58 | 1 | 495 | 1 | 29 | 3 | 286 | 8 | 868 | 13 |
| 40,149 | 58 | 1 | 494 | 1 | 29 | 3 | 286 | 8 | 867 | 13 |
| 40,150 | 58 | 1 | 492 | 1 | 29 | 3 | 286 | 8 | 865 | 13 |
| 40,151 | 58 | 1 | 484 | 1 | 29 | 3 | 285 | 7 | 856 | 12 |
| 40,152 | 58 | 1 | 484 | 1 | 29 | 3 | 285 | 7 | 856 | 12 |
| 40,153 | 57 | 1 | 475 | 1 | 29 | 3 | 275 | 7 | 836 | 12 |
| 40,154 | 57 | 1 | 475 | 2 | 29 | 3 | 274 | 7 | 835 | 13 |
| 40,155 | 58 | 1 | 476 | 2 | 29 | 3 | 275 | 7 | 838 | 13 |
| 40,156 | 58 | 1 | 481 | 1 | 29 | 3 | 273 | 7 | 841 | 12 |
| 40,157 | 58 | 1 | 480 | 1 | 29 | 3 | 273 | 7 | 840 | 12 |
| 40,158 | 62 | 1 | 490 | 1 | 29 | 3 | 284 | 7 | 865 | 12 |
| 40,159 | 62 | 1 | 496 | 1 | 29 | 3 | 285 | 7 | 872 | 12 |
| 40,160 | 62 | 1 | 498 | 1 | 30 | 3 | 281 | 7 | 871 | 12 |
| 40,161 | 59 | 1 | 488 | 1 | 30 | 3 | 273 | 7 | 850 | 12 |
| 40,162 | 59 | 1 | 486 | 1 | 30 | 3 | 273 | 7 | 848 | 12 |
| 40,163 | 59 | 1 | 505 | 1 | 30 | 3 | 280 | 7 | 874 | 12 |
| 40,164 | 59 | 1 | 504 | 1 | 30 | 3 | 280 | 7 | 873 | 12 |
| 40,165 | 63 | 1 | 536 | 1 | 32 | 3 | 299 | 7 | 930 | 12 |
| 40,166 | 63 | 1 | 537 | 1 | 32 | 3 | 299 | 7 | 931 | 12 |
| 40,167 | 62 | 1 | 524 | 1 | 31 | 3 | 294 | 7 | 911 | 12 |
| 40,168 | 59 | 1 | 504 | 1 | 27 | 3 | 279 | 7 | 869 | 12 |

|        |    |   |     |   |    |   |     |   |     |    |
|--------|----|---|-----|---|----|---|-----|---|-----|----|
| 40,169 | 59 | 1 | 493 | 1 | 27 | 3 | 275 | 7 | 854 | 12 |
| 40,170 | 57 | 1 | 492 | 1 | 27 | 3 | 272 | 7 | 848 | 12 |
| 40,171 | 57 | 1 | 492 | 1 | 27 | 2 | 271 | 6 | 847 | 10 |
| 40,172 | 57 | 1 | 490 | 1 | 27 | 2 | 270 | 5 | 844 | 9  |
| 40,173 | 57 | 1 | 489 | 1 | 27 | 2 | 270 | 5 | 843 | 9  |
| 40,174 | 57 | 1 | 489 | 1 | 27 | 2 | 270 | 5 | 843 | 9  |
| 40,175 | 57 | 1 | 485 | 1 | 27 | 2 | 270 | 5 | 839 | 9  |
| 40,176 | 57 | 1 | 485 | 1 | 27 | 1 | 270 | 5 | 839 | 8  |
| 40,177 | 57 | 1 | 484 | 1 | 27 | 1 | 270 | 4 | 838 | 7  |
| 40,178 | 57 | 1 | 480 | 1 | 27 | 1 | 268 | 4 | 832 | 7  |
| 40,179 | 55 | 1 | 467 | 1 | 27 | 1 | 262 | 3 | 811 | 6  |
| 40,180 | 54 | 0 | 429 | 1 | 27 | 1 | 259 | 3 | 769 | 5  |
| 40,181 | 52 | 0 | 408 | 1 | 26 | 1 | 251 | 3 | 737 | 5  |
| 40,182 | 39 | 0 | 351 | 2 | 23 | 1 | 238 | 3 | 651 | 6  |
| 40,183 | 39 | 0 | 346 | 2 | 23 | 1 | 236 | 3 | 644 | 6  |
| 40,184 | 39 | 0 | 353 | 2 | 23 | 1 | 238 | 3 | 653 | 6  |
| 40,185 | 39 | 0 | 346 | 2 | 23 | 1 | 228 | 3 | 636 | 6  |
| 40,186 | 27 | 0 | 213 | 2 | 8  | 1 | 125 | 3 | 373 | 6  |
| 40,187 | 26 | 0 | 194 | 2 | 6  | 0 | 109 | 1 | 335 | 3  |
| 40,188 | 26 | 0 | 199 | 2 | 7  | 0 | 119 | 1 | 351 | 3  |
| 40,189 | 26 | 0 | 195 | 2 | 7  | 0 | 108 | 1 | 336 | 3  |
| 40,190 | 25 | 0 | 195 | 2 | 7  | 0 | 108 | 1 | 335 | 3  |
| 40,191 | 24 | 0 | 197 | 2 | 7  | 0 | 107 | 0 | 335 | 2  |
| 40,192 | 23 | 0 | 193 | 2 | 6  | 0 | 106 | 0 | 328 | 2  |
| 40,193 | 23 | 0 | 187 | 2 | 5  | 0 | 106 | 0 | 321 | 2  |
| 40,194 | 24 | 0 | 179 | 2 | 5  | 0 | 103 | 0 | 311 | 2  |
| 40,195 | 24 | 0 | 175 | 2 | 5  | 0 | 101 | 0 | 305 | 2  |
| 40,196 | 21 | 0 | 159 | 2 | 5  | 0 | 86  | 0 | 271 | 2  |
| 40,197 | 21 | 0 | 159 | 3 | 5  | 0 | 85  | 0 | 270 | 3  |
| 40,198 | 21 | 0 | 160 | 3 | 5  | 0 | 85  | 0 | 271 | 3  |
| 40,199 | 21 | 0 | 160 | 3 | 5  | 0 | 85  | 0 | 271 | 3  |
| 40,200 | 21 | 0 | 162 | 3 | 5  | 0 | 85  | 0 | 273 | 3  |
| 40,201 | 21 | 0 | 162 | 3 | 5  | 0 | 85  | 0 | 273 | 3  |
| 40,202 | 21 | 0 | 162 | 3 | 5  | 0 | 85  | 0 | 273 | 3  |
| 40,203 | 21 | 0 | 162 | 3 | 5  | 0 | 86  | 0 | 274 | 3  |
| 40,204 | 22 | 0 | 165 | 3 | 5  | 0 | 86  | 0 | 278 | 3  |
| 40,205 | 22 | 0 | 164 | 2 | 5  | 0 | 85  | 0 | 276 | 2  |
| 40,206 | 22 | 0 | 166 | 2 | 5  | 0 | 87  | 0 | 280 | 2  |
| 40,207 | 26 | 0 | 169 | 2 | 5  | 0 | 88  | 0 | 288 | 2  |
| 40,208 | 25 | 0 | 182 | 3 | 7  | 0 | 85  | 1 | 299 | 4  |
| 40,209 | 25 | 0 | 196 | 3 | 8  | 0 | 88  | 1 | 317 | 4  |

|        |    |   |     |   |   |   |    |   |     |   |
|--------|----|---|-----|---|---|---|----|---|-----|---|
| 40,210 | 25 | 0 | 194 | 3 | 8 | 0 | 88 | 1 | 315 | 4 |
| 40,211 | 25 | 0 | 192 | 3 | 7 | 0 | 88 | 1 | 312 | 4 |
| 40,212 | 27 | 0 | 199 | 4 | 9 | 0 | 91 | 1 | 326 | 5 |
| 40,213 | 26 | 0 | 188 | 4 | 9 | 0 | 82 | 1 | 305 | 5 |
| 40,214 | 26 | 0 | 172 | 4 | 8 | 0 | 78 | 1 | 284 | 5 |
| 40,215 | 25 | 0 | 144 | 4 | 6 | 0 | 58 | 1 | 233 | 5 |
| 40,216 | 24 | 0 | 138 | 4 | 6 | 0 | 53 | 1 | 221 | 5 |
| 40,217 | 24 | 0 | 137 | 4 | 6 | 0 | 53 | 1 | 220 | 5 |
| 40,218 | 24 | 0 | 137 | 5 | 6 | 0 | 52 | 1 | 219 | 6 |
| 40,219 | 24 | 0 | 137 | 5 | 6 | 0 | 52 | 1 | 219 | 6 |
| 40,220 | 24 | 0 | 137 | 5 | 6 | 0 | 52 | 1 | 219 | 6 |
| 40,221 | 24 | 0 | 137 | 5 | 6 | 0 | 52 | 1 | 219 | 6 |
| 40,222 | 24 | 0 | 138 | 5 | 6 | 0 | 52 | 1 | 220 | 6 |
| 40,223 | 24 | 0 | 138 | 5 | 6 | 0 | 52 | 1 | 220 | 6 |
| 40,224 | 24 | 0 | 138 | 5 | 6 | 0 | 52 | 1 | 220 | 6 |
| 40,225 | 24 | 0 | 138 | 5 | 6 | 0 | 52 | 1 | 220 | 6 |
| 40,226 | 24 | 0 | 138 | 5 | 6 | 0 | 52 | 1 | 220 | 6 |
| 40,227 | 24 | 0 | 138 | 5 | 6 | 0 | 52 | 1 | 220 | 6 |
| 40,228 | 25 | 0 | 137 | 5 | 6 | 0 | 52 | 1 | 220 | 6 |
| 40,229 | 25 | 0 | 136 | 5 | 6 | 0 | 52 | 1 | 219 | 6 |
| 40,230 | 26 | 0 | 136 | 5 | 6 | 0 | 52 | 1 | 220 | 6 |
| 40,231 | 26 | 0 | 130 | 5 | 6 | 0 | 49 | 1 | 211 | 6 |
| 40,232 | 25 | 0 | 127 | 5 | 6 | 0 | 48 | 1 | 206 | 6 |
| 40,233 | 24 | 0 | 125 | 4 | 6 | 0 | 49 | 1 | 204 | 5 |
| 40,234 | 24 | 0 | 124 | 4 | 6 | 0 | 49 | 1 | 203 | 5 |
| 40,235 | 22 | 0 | 108 | 4 | 6 | 0 | 43 | 1 | 179 | 5 |
| 40,236 | 22 | 0 | 108 | 4 | 6 | 0 | 43 | 1 | 179 | 5 |
| 40,237 | 19 | 0 | 101 | 5 | 6 | 0 | 39 | 2 | 165 | 7 |
| 40,238 | 18 | 0 | 95  | 5 | 6 | 0 | 39 | 2 | 158 | 7 |
| 40,239 | 16 | 0 | 85  | 6 | 5 | 0 | 27 | 2 | 133 | 8 |
| 40,240 | 16 | 0 | 80  | 6 | 5 | 0 | 27 | 2 | 128 | 8 |
| 40,241 | 16 | 0 | 80  | 6 | 5 | 0 | 26 | 2 | 127 | 8 |
| 40,242 | 16 | 0 | 73  | 6 | 5 | 0 | 22 | 2 | 116 | 8 |
| 40,243 | 16 | 0 | 73  | 6 | 5 | 0 | 22 | 2 | 116 | 8 |
| 40,244 | 16 | 0 | 73  | 6 | 5 | 0 | 22 | 2 | 116 | 8 |
| 40,245 | 15 | 0 | 73  | 7 | 5 | 0 | 22 | 2 | 115 | 9 |
| 40,246 | 15 | 0 | 73  | 7 | 5 | 0 | 22 | 2 | 115 | 9 |
| 40,247 | 15 | 0 | 73  | 7 | 5 | 0 | 22 | 2 | 115 | 9 |
| 40,248 | 15 | 0 | 73  | 6 | 5 | 0 | 22 | 2 | 115 | 8 |
| 40,249 | 15 | 0 | 73  | 6 | 5 | 0 | 22 | 2 | 115 | 8 |
| 40,250 | 15 | 0 | 73  | 6 | 5 | 0 | 22 | 2 | 115 | 8 |

|        |    |   |    |    |   |   |    |    |     |    |
|--------|----|---|----|----|---|---|----|----|-----|----|
| 40,251 | 15 | 0 | 71 | 6  | 5 | 0 | 22 | 2  | 113 | 8  |
| 40,252 | 15 | 0 | 71 | 6  | 5 | 0 | 22 | 2  | 113 | 8  |
| 40,253 | 15 | 0 | 71 | 6  | 5 | 0 | 21 | 2  | 112 | 8  |
| 40,254 | 14 | 0 | 69 | 6  | 5 | 0 | 21 | 2  | 109 | 8  |
| 40,255 | 14 | 0 | 69 | 9  | 5 | 0 | 22 | 2  | 110 | 11 |
| 40,256 | 14 | 1 | 68 | 15 | 5 | 0 | 22 | 7  | 109 | 23 |
| 40,257 | 13 | 4 | 68 | 25 | 5 | 1 | 19 | 8  | 105 | 38 |
| 40,258 | 9  | 4 | 57 | 30 | 5 | 1 | 18 | 8  | 89  | 43 |
| 40,259 | 6  | 4 | 35 | 29 | 3 | 1 | 10 | 7  | 54  | 41 |
| 40,260 | 6  | 4 | 18 | 32 | 2 | 1 | 6  | 8  | 32  | 45 |
| 40,261 | 5  | 5 | 15 | 36 | 0 | 1 | 6  | 9  | 26  | 51 |
| 40,262 | 5  | 5 | 14 | 37 | 1 | 2 | 3  | 10 | 23  | 54 |
| 40,263 | 5  | 5 | 13 | 37 | 1 | 2 | 3  | 10 | 22  | 54 |
| 40,264 | 5  | 5 | 13 | 38 | 1 | 2 | 3  | 11 | 22  | 56 |
| 40,265 | 5  | 5 | 14 | 41 | 2 | 2 | 3  | 11 | 24  | 59 |
| 40,266 | 3  | 5 | 14 | 41 | 2 | 2 | 3  | 11 | 22  | 59 |
| 40,267 | 3  | 5 | 14 | 40 | 2 | 2 | 3  | 11 | 22  | 58 |
| 40,268 | 3  | 5 | 14 | 40 | 1 | 3 | 4  | 11 | 22  | 59 |
| 40,269 | 2  | 1 | 11 | 12 | 2 | 1 | 1  | 2  | 16  | 16 |
| 40,270 | 2  | 4 | 12 | 23 | 2 | 2 | 2  | 4  | 18  | 33 |
| 40,271 | 3  | 5 | 15 | 38 | 2 | 3 | 4  | 9  | 24  | 55 |
| 40,272 | 3  | 5 | 15 | 42 | 2 | 3 | 4  | 11 | 24  | 61 |
| 40,273 | 3  | 5 | 14 | 42 | 2 | 3 | 4  | 11 | 23  | 61 |
| 40,274 | 3  | 5 | 14 | 42 | 2 | 3 | 4  | 11 | 23  | 61 |
| 40,275 | 3  | 5 | 14 | 42 | 2 | 3 | 4  | 11 | 23  | 61 |
| 40,276 | 3  | 5 | 15 | 42 | 2 | 3 | 4  | 11 | 24  | 61 |
| 40,277 | 3  | 5 | 15 | 42 | 2 | 3 | 4  | 11 | 24  | 61 |
| 40,278 | 2  | 5 | 15 | 42 | 2 | 3 | 4  | 11 | 23  | 61 |
| 40,279 | 2  | 5 | 15 | 42 | 2 | 3 | 4  | 11 | 23  | 61 |
| 40,280 | 2  | 5 | 15 | 42 | 2 | 3 | 4  | 11 | 23  | 61 |
| 40,281 | 1  | 5 | 14 | 42 | 2 | 3 | 4  | 11 | 21  | 61 |
| 40,282 | 1  | 5 | 14 | 42 | 2 | 3 | 4  | 11 | 21  | 61 |
| 40,283 | 1  | 5 | 14 | 42 | 2 | 3 | 4  | 11 | 21  | 61 |
| 40,284 | 1  | 5 | 14 | 42 | 2 | 3 | 4  | 11 | 21  | 61 |
| 40,285 | 1  | 5 | 14 | 42 | 2 | 3 | 3  | 11 | 20  | 61 |
| 40,286 | 1  | 5 | 14 | 42 | 2 | 3 | 3  | 11 | 20  | 61 |
| 40,287 | 1  | 5 | 14 | 42 | 2 | 3 | 3  | 11 | 20  | 61 |
| 40,288 | 1  | 5 | 14 | 42 | 2 | 3 | 3  | 12 | 20  | 62 |
| 40,289 | 1  | 5 | 14 | 41 | 3 | 3 | 3  | 12 | 21  | 61 |
| 40,290 | 1  | 5 | 14 | 42 | 3 | 3 | 3  | 12 | 21  | 62 |
| 40,291 | 1  | 5 | 14 | 44 | 3 | 3 | 3  | 12 | 21  | 64 |

|        |   |     |    |     |   |    |   |     |    |       |
|--------|---|-----|----|-----|---|----|---|-----|----|-------|
| 40,292 | 1 | 6   | 14 | 52  | 3 | 4  | 3 | 15  | 21 | 77    |
| 40,293 | 1 | 11  | 14 | 82  | 3 | 10 | 3 | 27  | 21 | 130   |
| 40,294 | 1 | 18  | 14 | 99  | 3 | 12 | 3 | 36  | 21 | 165   |
| 40,295 | 1 | 18  | 14 | 98  | 3 | 12 | 3 | 38  | 21 | 166   |
| 40,296 | 1 | 24  | 14 | 113 | 3 | 14 | 4 | 47  | 22 | 198   |
| 40,297 | 1 | 25  | 14 | 115 | 3 | 14 | 4 | 49  | 22 | 203   |
| 40,298 | 1 | 27  | 14 | 125 | 3 | 14 | 4 | 59  | 22 | 225   |
| 40,299 | 1 | 27  | 14 | 125 | 3 | 14 | 4 | 61  | 22 | 227   |
| 40,300 | 1 | 66  | 15 | 233 | 3 | 18 | 4 | 112 | 23 | 429   |
| 40,301 | 1 | 69  | 15 | 271 | 3 | 18 | 4 | 116 | 23 | 474   |
| 40,302 | 1 | 73  | 15 | 299 | 3 | 18 | 4 | 118 | 23 | 508   |
| 40,303 | 1 | 75  | 15 | 310 | 3 | 18 | 4 | 119 | 23 | 522   |
| 40,304 | 1 | 75  | 15 | 310 | 3 | 18 | 4 | 119 | 23 | 522   |
| 40,305 | 1 | 75  | 14 | 309 | 3 | 18 | 4 | 119 | 22 | 521   |
| 40,306 | 1 | 75  | 13 | 309 | 3 | 18 | 4 | 119 | 21 | 521   |
| 40,307 | 1 | 75  | 12 | 310 | 3 | 18 | 3 | 119 | 19 | 522   |
| 40,308 | 1 | 74  | 11 | 306 | 3 | 18 | 3 | 118 | 18 | 516   |
| 40,309 | 1 | 72  | 11 | 298 | 3 | 17 | 3 | 115 | 18 | 502   |
| 40,310 | 1 | 71  | 12 | 304 | 3 | 19 | 3 | 119 | 19 | 513   |
| 40,311 | 1 | 75  | 12 | 340 | 3 | 24 | 3 | 153 | 19 | 592   |
| 40,312 | 1 | 74  | 10 | 337 | 3 | 24 | 3 | 152 | 17 | 587   |
| 40,313 | 1 | 74  | 9  | 338 | 3 | 24 | 3 | 154 | 16 | 590   |
| 40,314 | 0 | 80  | 8  | 388 | 1 | 24 | 2 | 187 | 11 | 679   |
| 40,315 | 0 | 96  | 7  | 434 | 1 | 31 | 2 | 226 | 10 | 787   |
| 40,316 | 0 | 97  | 7  | 447 | 1 | 31 | 2 | 233 | 10 | 808   |
| 40,317 | 0 | 99  | 10 | 484 | 1 | 31 | 3 | 250 | 14 | 864   |
| 40,318 | 1 | 100 | 8  | 509 | 1 | 33 | 3 | 264 | 13 | 906   |
| 40,319 | 1 | 103 | 8  | 525 | 1 | 32 | 2 | 268 | 12 | 928   |
| 40,320 | 1 | 103 | 8  | 527 | 1 | 32 | 2 | 268 | 12 | 930   |
| 40,321 | 1 | 105 | 8  | 536 | 1 | 33 | 2 | 270 | 12 | 944   |
| 40,322 | 1 | 105 | 8  | 541 | 1 | 33 | 2 | 271 | 12 | 950   |
| 40,323 | 1 | 105 | 8  | 545 | 1 | 33 | 4 | 271 | 14 | 954   |
| 40,324 | 1 | 106 | 8  | 558 | 1 | 33 | 4 | 275 | 14 | 972   |
| 40,325 | 1 | 106 | 8  | 559 | 1 | 33 | 4 | 275 | 14 | 973   |
| 40,326 | 1 | 106 | 10 | 560 | 1 | 33 | 6 | 275 | 18 | 974   |
| 40,327 | 2 | 106 | 9  | 561 | 2 | 33 | 6 | 276 | 19 | 976   |
| 40,328 | 2 | 106 | 9  | 563 | 2 | 33 | 6 | 278 | 19 | 980   |
| 40,329 | 2 | 108 | 9  | 597 | 2 | 37 | 6 | 325 | 19 | 1,067 |
| 40,330 | 2 | 108 | 9  | 609 | 2 | 37 | 6 | 331 | 19 | 1,085 |
| 40,331 | 2 | 108 | 9  | 620 | 2 | 37 | 6 | 337 | 19 | 1,102 |
| 40,332 | 2 | 108 | 9  | 628 | 2 | 37 | 6 | 342 | 19 | 1,115 |



|        |   |     |    |       |   |    |    |     |    |       |
|--------|---|-----|----|-------|---|----|----|-----|----|-------|
| 40,333 | 2 | 108 | 9  | 632   | 2 | 37 | 6  | 346 | 19 | 1,123 |
| 40,334 | 2 | 108 | 9  | 641   | 2 | 39 | 7  | 360 | 20 | 1,148 |
| 40,335 | 2 | 108 | 9  | 650   | 2 | 41 | 7  | 369 | 20 | 1,168 |
| 40,336 | 2 | 112 | 9  | 662   | 2 | 41 | 7  | 382 | 20 | 1,197 |
| 40,337 | 2 | 112 | 9  | 664   | 2 | 41 | 7  | 382 | 20 | 1,199 |
| 40,338 | 2 | 113 | 9  | 662   | 2 | 41 | 7  | 381 | 20 | 1,197 |
| 40,339 | 2 | 113 | 9  | 662   | 1 | 41 | 7  | 381 | 19 | 1,197 |
| 40,340 | 2 | 113 | 9  | 664   | 1 | 40 | 7  | 385 | 19 | 1,202 |
| 40,341 | 2 | 113 | 9  | 664   | 1 | 40 | 7  | 385 | 19 | 1,202 |
| 40,342 | 2 | 113 | 9  | 669   | 1 | 40 | 7  | 388 | 19 | 1,210 |
| 40,343 | 2 | 112 | 10 | 665   | 1 | 41 | 7  | 397 | 20 | 1,215 |
| 40,344 | 2 | 107 | 10 | 647   | 1 | 37 | 7  | 392 | 20 | 1,183 |
| 40,345 | 2 | 119 | 10 | 807   | 1 | 62 | 8  | 624 | 21 | 1,612 |
| 40,346 | 2 | 129 | 10 | 880   | 1 | 74 | 8  | 700 | 21 | 1,783 |
| 40,347 | 2 | 126 | 10 | 883   | 1 | 78 | 7  | 704 | 20 | 1,791 |
| 40,348 | 2 | 134 | 10 | 938   | 1 | 80 | 7  | 709 | 20 | 1,861 |
| 40,349 | 2 | 133 | 10 | 933   | 1 | 79 | 7  | 708 | 20 | 1,853 |
| 40,350 | 2 | 141 | 12 | 957   | 1 | 82 | 7  | 725 | 22 | 1,905 |
| 40,351 | 2 | 102 | 11 | 850   | 1 | 79 | 7  | 676 | 21 | 1,707 |
| 40,352 | 2 | 107 | 11 | 910   | 1 | 83 | 7  | 718 | 21 | 1,818 |
| 40,353 | 2 | 104 | 11 | 898   | 1 | 83 | 7  | 724 | 21 | 1,809 |
| 40,354 | 2 | 113 | 11 | 988   | 1 | 90 | 7  | 750 | 21 | 1,941 |
| 40,355 | 2 | 115 | 11 | 996   | 1 | 91 | 7  | 756 | 21 | 1,958 |
| 40,356 | 2 | 115 | 11 | 1,005 | 1 | 91 | 7  | 761 | 21 | 1,972 |
| 40,357 | 2 | 116 | 11 | 1,006 | 1 | 91 | 7  | 761 | 21 | 1,974 |
| 40,358 | 2 | 116 | 11 | 1,005 | 1 | 91 | 7  | 762 | 21 | 1,974 |
| 40,359 | 2 | 116 | 10 | 1,017 | 1 | 91 | 7  | 763 | 20 | 1,987 |
| 40,360 | 2 | 117 | 8  | 1,020 | 1 | 92 | 7  | 774 | 18 | 2,003 |
| 40,361 | 2 | 117 | 8  | 1,010 | 1 | 90 | 7  | 772 | 18 | 1,989 |
| 40,362 | 2 | 117 | 8  | 988   | 1 | 88 | 7  | 753 | 18 | 1,946 |
| 40,363 | 2 | 117 | 8  | 991   | 1 | 88 | 7  | 756 | 18 | 1,952 |
| 40,364 | 2 | 118 | 8  | 999   | 1 | 89 | 7  | 764 | 18 | 1,970 |
| 40,365 | 2 | 112 | 8  | 947   | 1 | 89 | 7  | 732 | 18 | 1,880 |
| 40,366 | 2 | 96  | 9  | 905   | 1 | 82 | 13 | 694 | 25 | 1,777 |
| 40,367 | 3 | 95  | 8  | 898   | 1 | 82 | 13 | 695 | 25 | 1,770 |
| 40,368 | 3 | 94  | 6  | 861   | 1 | 82 | 13 | 678 | 23 | 1,715 |
| 40,369 | 2 | 93  | 6  | 835   | 1 | 80 | 13 | 662 | 22 | 1,670 |
| 40,370 | 2 | 90  | 7  | 818   | 1 | 80 | 13 | 660 | 23 | 1,648 |
| 40,371 | 2 | 88  | 8  | 805   | 1 | 79 | 14 | 658 | 25 | 1,630 |
| 40,372 | 2 | 89  | 8  | 805   | 1 | 79 | 14 | 657 | 25 | 1,630 |
| 40,373 | 2 | 89  | 8  | 801   | 1 | 79 | 12 | 658 | 23 | 1,627 |

|        |   |     |    |       |   |    |    |     |    |       |
|--------|---|-----|----|-------|---|----|----|-----|----|-------|
| 40,374 | 2 | 89  | 7  | 797   | 1 | 79 | 11 | 659 | 21 | 1,624 |
| 40,375 | 2 | 88  | 7  | 784   | 1 | 79 | 11 | 656 | 21 | 1,607 |
| 40,376 | 2 | 88  | 7  | 786   | 2 | 79 | 10 | 657 | 21 | 1,610 |
| 40,377 | 1 | 88  | 7  | 805   | 1 | 81 | 10 | 672 | 19 | 1,646 |
| 40,378 | 1 | 88  | 7  | 820   | 1 | 81 | 10 | 677 | 19 | 1,666 |
| 40,379 | 1 | 92  | 9  | 851   | 1 | 81 | 10 | 689 | 21 | 1,713 |
| 40,380 | 1 | 90  | 10 | 828   | 1 | 77 | 10 | 646 | 22 | 1,641 |
| 40,381 | 1 | 100 | 10 | 886   | 1 | 84 | 10 | 693 | 22 | 1,763 |
| 40,382 | 1 | 105 | 10 | 917   | 1 | 87 | 10 | 702 | 22 | 1,811 |
| 40,383 | 1 | 112 | 10 | 990   | 1 | 89 | 10 | 745 | 22 | 1,936 |
| 40,384 | 1 | 112 | 10 | 991   | 1 | 89 | 10 | 746 | 22 | 1,938 |
| 40,385 | 1 | 112 | 10 | 983   | 1 | 87 | 10 | 732 | 22 | 1,914 |
| 40,386 | 1 | 115 | 11 | 1,010 | 1 | 89 | 10 | 770 | 23 | 1,984 |
| 40,387 | 1 | 115 | 11 | 1,011 | 1 | 89 | 10 | 771 | 23 | 1,986 |
| 40,388 | 1 | 115 | 11 | 1,033 | 1 | 89 | 10 | 771 | 23 | 2,008 |
| 40,389 | 1 | 114 | 11 | 1,032 | 1 | 89 | 10 | 771 | 23 | 2,006 |
| 40,390 | 1 | 114 | 11 | 1,032 | 1 | 89 | 10 | 771 | 23 | 2,006 |
| 40,391 | 1 | 115 | 11 | 1,035 | 1 | 89 | 10 | 768 | 23 | 2,007 |
| 40,392 | 1 | 116 | 11 | 1,037 | 1 | 89 | 9  | 768 | 22 | 2,010 |
| 40,393 | 1 | 118 | 10 | 1,036 | 1 | 89 | 9  | 766 | 21 | 2,009 |
| 40,394 | 1 | 118 | 10 | 1,037 | 1 | 87 | 9  | 756 | 21 | 1,998 |
| 40,395 | 1 | 118 | 10 | 1,027 | 1 | 86 | 9  | 751 | 21 | 1,982 |
| 40,396 | 1 | 99  | 11 | 853   | 1 | 59 | 9  | 512 | 22 | 1,523 |
| 40,397 | 1 | 89  | 11 | 793   | 1 | 47 | 9  | 437 | 22 | 1,366 |
| 40,398 | 1 | 86  | 11 | 819   | 1 | 47 | 9  | 433 | 22 | 1,385 |
| 40,399 | 1 | 79  | 11 | 808   | 1 | 52 | 9  | 449 | 22 | 1,388 |
| 40,400 | 1 | 79  | 9  | 916   | 1 | 53 | 10 | 451 | 21 | 1,499 |
| 40,401 | 1 | 72  | 9  | 904   | 1 | 51 | 10 | 435 | 21 | 1,462 |
| 40,402 | 1 | 74  | 9  | 979   | 1 | 51 | 11 | 445 | 22 | 1,549 |
| 40,403 | 1 | 68  | 9  | 908   | 1 | 50 | 12 | 409 | 23 | 1,435 |
| 40,404 | 1 | 71  | 10 | 928   | 1 | 54 | 15 | 413 | 27 | 1,466 |
| 40,405 | 1 | 63  | 10 | 866   | 1 | 53 | 15 | 413 | 27 | 1,395 |
| 40,406 | 1 | 61  | 10 | 858   | 1 | 52 | 15 | 407 | 27 | 1,378 |
| 40,407 | 1 | 62  | 10 | 853   | 2 | 52 | 15 | 402 | 28 | 1,369 |
| 40,408 | 1 | 62  | 10 | 858   | 2 | 52 | 15 | 404 | 28 | 1,376 |
| 40,409 | 1 | 62  | 10 | 859   | 2 | 52 | 15 | 404 | 28 | 1,377 |
| 40,410 | 1 | 63  | 10 | 870   | 2 | 52 | 15 | 409 | 28 | 1,394 |
| 40,411 | 1 | 63  | 10 | 873   | 2 | 52 | 15 | 399 | 28 | 1,387 |
| 40,412 | 1 | 63  | 11 | 873   | 2 | 52 | 15 | 398 | 29 | 1,386 |
| 40,413 | 1 | 59  | 11 | 861   | 2 | 50 | 15 | 384 | 29 | 1,354 |
| 40,414 | 1 | 60  | 11 | 883   | 2 | 52 | 17 | 390 | 31 | 1,385 |

|        |   |    |    |       |   |    |    |     |    |       |
|--------|---|----|----|-------|---|----|----|-----|----|-------|
| 40,415 | 1 | 59 | 11 | 892   | 2 | 51 | 17 | 386 | 31 | 1,388 |
| 40,416 | 1 | 62 | 11 | 907   | 2 | 52 | 13 | 402 | 27 | 1,423 |
| 40,417 | 1 | 62 | 10 | 906   | 2 | 51 | 13 | 396 | 26 | 1,415 |
| 40,418 | 0 | 62 | 10 | 910   | 2 | 51 | 13 | 399 | 25 | 1,422 |
| 40,419 | 0 | 63 | 10 | 918   | 2 | 51 | 14 | 400 | 26 | 1,432 |
| 40,420 | 0 | 63 | 9  | 928   | 2 | 51 | 14 | 406 | 25 | 1,448 |
| 40,421 | 0 | 63 | 8  | 932   | 2 | 52 | 13 | 416 | 23 | 1,463 |
| 40,422 | 0 | 63 | 8  | 933   | 2 | 52 | 13 | 416 | 23 | 1,464 |
| 40,423 | 0 | 62 | 10 | 936   | 2 | 53 | 16 | 416 | 28 | 1,467 |
| 40,424 | 1 | 62 | 11 | 939   | 2 | 52 | 18 | 416 | 32 | 1,469 |
| 40,425 | 1 | 62 | 12 | 944   | 2 | 53 | 18 | 415 | 33 | 1,474 |
| 40,426 | 1 | 63 | 12 | 955   | 2 | 54 | 18 | 417 | 33 | 1,489 |
| 40,427 | 1 | 63 | 12 | 967   | 1 | 56 | 19 | 420 | 33 | 1,506 |
| 40,428 | 1 | 63 | 12 | 953   | 1 | 54 | 21 | 413 | 35 | 1,483 |
| 40,429 | 1 | 63 | 11 | 949   | 1 | 54 | 21 | 410 | 34 | 1,476 |
| 40,430 | 1 | 60 | 11 | 943   | 1 | 55 | 21 | 408 | 34 | 1,466 |
| 40,431 | 1 | 60 | 10 | 952   | 1 | 55 | 21 | 407 | 33 | 1,474 |
| 40,432 | 1 | 51 | 10 | 918   | 1 | 50 | 22 | 378 | 34 | 1,397 |
| 40,433 | 1 | 48 | 10 | 921   | 1 | 50 | 22 | 378 | 34 | 1,397 |
| 40,434 | 1 | 45 | 10 | 915   | 1 | 55 | 23 | 357 | 35 | 1,372 |
| 40,435 | 1 | 46 | 10 | 928   | 1 | 55 | 22 | 358 | 34 | 1,387 |
| 40,436 | 2 | 46 | 9  | 944   | 1 | 55 | 22 | 360 | 34 | 1,405 |
| 40,437 | 2 | 39 | 9  | 898   | 1 | 52 | 22 | 301 | 34 | 1,290 |
| 40,438 | 3 | 41 | 9  | 900   | 1 | 52 | 23 | 304 | 36 | 1,297 |
| 40,439 | 3 | 49 | 9  | 908   | 1 | 55 | 23 | 329 | 36 | 1,341 |
| 40,440 | 3 | 50 | 9  | 952   | 1 | 56 | 23 | 349 | 36 | 1,407 |
| 40,441 | 3 | 56 | 9  | 1,023 | 1 | 58 | 25 | 404 | 38 | 1,541 |
| 40,442 | 3 | 61 | 9  | 1,054 | 1 | 59 | 25 | 429 | 38 | 1,603 |
| 40,443 | 3 | 60 | 9  | 1,077 | 1 | 59 | 28 | 435 | 41 | 1,631 |
| 40,444 | 3 | 59 | 9  | 1,080 | 1 | 59 | 29 | 440 | 42 | 1,638 |
| 40,445 | 3 | 59 | 8  | 1,075 | 1 | 59 | 29 | 438 | 41 | 1,631 |
| 40,446 | 3 | 59 | 8  | 1,077 | 1 | 59 | 30 | 437 | 42 | 1,632 |
| 40,447 | 3 | 61 | 8  | 1,088 | 1 | 59 | 31 | 445 | 43 | 1,653 |
| 40,448 | 3 | 61 | 8  | 1,075 | 1 | 59 | 31 | 441 | 43 | 1,636 |
| 40,449 | 3 | 61 | 8  | 1,045 | 1 | 56 | 35 | 443 | 47 | 1,605 |
| 40,450 | 3 | 65 | 8  | 1,028 | 2 | 49 | 35 | 435 | 48 | 1,577 |
| 40,451 | 3 | 64 | 8  | 1,030 | 2 | 54 | 34 | 459 | 47 | 1,607 |
| 40,452 | 3 | 89 | 8  | 1,180 | 2 | 70 | 34 | 625 | 47 | 1,964 |
| 40,453 | 3 | 87 | 8  | 1,120 | 2 | 69 | 33 | 617 | 46 | 1,893 |
| 40,454 | 5 | 86 | 12 | 1,151 | 2 | 68 | 38 | 618 | 57 | 1,923 |
| 40,455 | 5 | 82 | 12 | 1,116 | 2 | 64 | 37 | 609 | 56 | 1,871 |

|        |   |     |    |       |   |     |    |       |     |       |
|--------|---|-----|----|-------|---|-----|----|-------|-----|-------|
| 40,456 | 6 | 79  | 15 | 1,077 | 3 | 58  | 41 | 582   | 65  | 1,796 |
| 40,457 | 6 | 79  | 15 | 1,083 | 3 | 58  | 41 | 585   | 65  | 1,805 |
| 40,458 | 6 | 77  | 15 | 1,058 | 2 | 58  | 41 | 580   | 64  | 1,773 |
| 40,459 | 6 | 77  | 16 | 1,065 | 2 | 59  | 41 | 584   | 65  | 1,785 |
| 40,460 | 6 | 77  | 16 | 1,068 | 2 | 59  | 42 | 584   | 66  | 1,788 |
| 40,461 | 6 | 76  | 16 | 1,071 | 2 | 59  | 43 | 586   | 67  | 1,792 |
| 40,462 | 6 | 77  | 16 | 1,090 | 2 | 60  | 43 | 599   | 67  | 1,826 |
| 40,463 | 6 | 77  | 15 | 1,087 | 2 | 60  | 43 | 597   | 66  | 1,821 |
| 40,464 | 6 | 80  | 15 | 1,086 | 2 | 61  | 44 | 597   | 67  | 1,824 |
| 40,465 | 6 | 79  | 15 | 1,061 | 2 | 59  | 44 | 588   | 67  | 1,787 |
| 40,466 | 6 | 76  | 15 | 1,027 | 2 | 58  | 44 | 561   | 67  | 1,722 |
| 40,467 | 6 | 78  | 15 | 1,041 | 2 | 58  | 44 | 576   | 67  | 1,753 |
| 40,468 | 6 | 78  | 15 | 1,030 | 2 | 58  | 42 | 574   | 65  | 1,740 |
| 40,469 | 6 | 78  | 16 | 1,041 | 2 | 59  | 43 | 579   | 67  | 1,757 |
| 40,470 | 6 | 76  | 16 | 1,046 | 2 | 61  | 42 | 584   | 66  | 1,767 |
| 40,471 | 6 | 93  | 16 | 1,241 | 2 | 69  | 42 | 659   | 66  | 2,062 |
| 40,472 | 6 | 142 | 15 | 1,431 | 2 | 93  | 42 | 843   | 65  | 2,509 |
| 40,473 | 6 | 144 | 14 | 1,480 | 2 | 99  | 39 | 876   | 61  | 2,599 |
| 40,474 | 5 | 156 | 14 | 1,570 | 2 | 110 | 37 | 960   | 58  | 2,796 |
| 40,475 | 5 | 165 | 15 | 1,647 | 2 | 116 | 39 | 1,003 | 61  | 2,931 |
| 40,476 | 5 | 169 | 14 | 1,667 | 2 | 117 | 39 | 1,015 | 60  | 2,968 |
| 40,477 | 5 | 171 | 13 | 1,678 | 2 | 116 | 39 | 1,025 | 59  | 2,990 |
| 40,478 | 5 | 172 | 16 | 1,700 | 2 | 117 | 41 | 1,045 | 64  | 3,034 |
| 40,479 | 5 | 174 | 16 | 1,714 | 2 | 117 | 39 | 1,052 | 62  | 3,057 |
| 40,480 | 5 | 179 | 16 | 1,830 | 2 | 122 | 41 | 1,108 | 64  | 3,239 |
| 40,481 | 5 | 183 | 18 | 2,021 | 4 | 130 | 43 | 1,135 | 70  | 3,469 |
| 40,482 | 5 | 191 | 18 | 2,055 | 4 | 136 | 43 | 1,181 | 70  | 3,563 |
| 40,483 | 5 | 210 | 18 | 2,204 | 4 | 140 | 42 | 1,227 | 69  | 3,781 |
| 40,484 | 5 | 215 | 19 | 2,233 | 4 | 139 | 43 | 1,257 | 71  | 3,844 |
| 40,485 | 5 | 211 | 19 | 2,164 | 4 | 132 | 42 | 1,235 | 70  | 3,742 |
| 40,486 | 5 | 212 | 19 | 2,151 | 4 | 133 | 42 | 1,231 | 70  | 3,727 |
| 40,487 | 4 | 214 | 24 | 2,213 | 4 | 135 | 45 | 1,259 | 77  | 3,821 |
| 40,488 | 3 | 214 | 24 | 2,211 | 4 | 134 | 44 | 1,257 | 75  | 3,816 |
| 40,489 | 3 | 212 | 24 | 2,217 | 4 | 135 | 45 | 1,255 | 76  | 3,819 |
| 40,490 | 5 | 212 | 45 | 2,300 | 5 | 135 | 68 | 1,285 | 123 | 3,932 |
| 40,491 | 5 | 211 | 45 | 2,259 | 5 | 134 | 67 | 1,267 | 122 | 3,871 |
| 40,492 | 5 | 206 | 45 | 2,211 | 5 | 135 | 67 | 1,234 | 122 | 3,786 |
| 40,493 | 5 | 205 | 45 | 2,217 | 5 | 134 | 67 | 1,236 | 122 | 3,792 |
| 40,494 | 5 | 211 | 45 | 2,204 | 5 | 137 | 65 | 1,238 | 120 | 3,790 |
| 40,495 | 5 | 211 | 45 | 2,210 | 5 | 137 | 64 | 1,240 | 119 | 3,798 |
| 40,496 | 5 | 211 | 44 | 2,212 | 5 | 137 | 63 | 1,239 | 117 | 3,799 |

|        |   |     |    |       |   |     |    |       |     |       |
|--------|---|-----|----|-------|---|-----|----|-------|-----|-------|
| 40,497 | 5 | 209 | 44 | 2,185 | 5 | 134 | 62 | 1,219 | 116 | 3,747 |
| 40,498 | 5 | 209 | 44 | 2,185 | 5 | 134 | 62 | 1,219 | 116 | 3,747 |
| 40,499 | 5 | 209 | 45 | 2,185 | 5 | 134 | 59 | 1,217 | 114 | 3,745 |
| 40,500 | 5 | 209 | 45 | 2,187 | 5 | 134 | 60 | 1,218 | 115 | 3,748 |
| 40,501 | 5 | 204 | 45 | 2,161 | 4 | 134 | 60 | 1,208 | 114 | 3,707 |
| 40,502 | 6 | 204 | 45 | 2,054 | 4 | 128 | 60 | 1,173 | 115 | 3,559 |
| 40,503 | 5 | 178 | 46 | 1,896 | 4 | 111 | 61 | 1,013 | 116 | 3,198 |
| 40,504 | 5 | 178 | 50 | 1,879 | 5 | 111 | 64 | 1,009 | 124 | 3,177 |
| 40,505 | 4 | 177 | 57 | 1,821 | 6 | 109 | 63 | 998   | 130 | 3,105 |
| 40,506 | 4 | 177 | 58 | 1,821 | 6 | 109 | 65 | 997   | 133 | 3,104 |
| 40,507 | 3 | 177 | 55 | 1,814 | 5 | 109 | 62 | 994   | 125 | 3,094 |
| 40,508 | 3 | 178 | 55 | 1,816 | 5 | 109 | 63 | 997   | 126 | 3,100 |
| 40,509 | 3 | 178 | 55 | 1,818 | 5 | 109 | 64 | 999   | 127 | 3,104 |
| 40,510 | 3 | 178 | 55 | 1,810 | 5 | 108 | 64 | 995   | 127 | 3,091 |
| 40,511 | 3 | 178 | 55 | 1,815 | 5 | 108 | 64 | 995   | 127 | 3,096 |
| 40,512 | 3 | 178 | 55 | 1,803 | 5 | 108 | 63 | 986   | 126 | 3,075 |
| 40,513 | 3 | 177 | 55 | 1,780 | 5 | 106 | 62 | 975   | 125 | 3,038 |
| 40,514 | 3 | 177 | 55 | 1,784 | 5 | 106 | 62 | 977   | 125 | 3,044 |
| 40,515 | 3 | 174 | 55 | 1,785 | 5 | 105 | 60 | 982   | 123 | 3,046 |
| 40,516 | 3 | 174 | 55 | 1,787 | 5 | 105 | 60 | 983   | 123 | 3,049 |
| 40,517 | 3 | 175 | 58 | 1,788 | 5 | 105 | 60 | 983   | 126 | 3,051 |
| 40,518 | 3 | 178 | 58 | 1,806 | 5 | 106 | 60 | 1,008 | 126 | 3,098 |
| 40,519 | 3 | 178 | 57 | 1,806 | 5 | 107 | 58 | 1,005 | 123 | 3,096 |
| 40,520 | 3 | 178 | 57 | 1,794 | 5 | 107 | 58 | 1,002 | 123 | 3,081 |
| 40,521 | 3 | 178 | 57 | 1,781 | 5 | 105 | 58 | 993   | 123 | 3,057 |
| 40,522 | 3 | 162 | 57 | 1,577 | 5 | 97  | 58 | 916   | 123 | 2,752 |
| 40,523 | 3 | 115 | 57 | 1,391 | 5 | 72  | 58 | 727   | 123 | 2,305 |
| 40,524 | 3 | 113 | 57 | 1,342 | 5 | 66  | 58 | 694   | 123 | 2,215 |
| 40,525 | 3 | 101 | 57 | 1,261 | 5 | 54  | 58 | 616   | 123 | 2,032 |
| 40,526 | 3 | 92  | 55 | 1,198 | 6 | 48  | 56 | 576   | 120 | 1,914 |
| 40,527 | 3 | 86  | 54 | 1,150 | 6 | 47  | 56 | 556   | 119 | 1,839 |
| 40,528 | 3 | 85  | 53 | 1,116 | 6 | 44  | 53 | 532   | 115 | 1,777 |
| 40,529 | 3 | 85  | 52 | 1,125 | 6 | 45  | 53 | 537   | 114 | 1,792 |
| 40,530 | 3 | 83  | 51 | 1,103 | 6 | 45  | 51 | 520   | 111 | 1,751 |
| 40,531 | 3 | 78  | 53 | 974   | 5 | 40  | 51 | 463   | 112 | 1,555 |
| 40,532 | 3 | 65  | 51 | 706   | 4 | 25  | 50 | 379   | 108 | 1,175 |
| 40,533 | 3 | 65  | 51 | 716   | 4 | 25  | 50 | 392   | 108 | 1,198 |
| 40,534 | 3 | 49  | 63 | 606   | 4 | 21  | 55 | 355   | 125 | 1,031 |
| 40,535 | 3 | 44  | 62 | 568   | 4 | 18  | 55 | 330   | 124 | 960   |
| 40,536 | 3 | 44  | 62 | 582   | 4 | 19  | 56 | 334   | 125 | 979   |
| 40,537 | 3 | 43  | 60 | 586   | 4 | 18  | 58 | 334   | 125 | 981   |

|        |   |    |    |       |   |    |    |     |     |       |
|--------|---|----|----|-------|---|----|----|-----|-----|-------|
| 40,538 | 3 | 41 | 57 | 507   | 4 | 16 | 56 | 306 | 120 | 870   |
| 40,539 | 3 | 43 | 58 | 523   | 4 | 16 | 55 | 318 | 120 | 900   |
| 40,540 | 1 | 43 | 37 | 522   | 3 | 15 | 32 | 320 | 73  | 900   |
| 40,541 | 1 | 35 | 37 | 409   | 3 | 12 | 32 | 264 | 73  | 720   |
| 40,542 | 1 | 36 | 54 | 407   | 4 | 12 | 38 | 262 | 97  | 717   |
| 40,543 | 1 | 39 | 58 | 405   | 4 | 9  | 40 | 247 | 103 | 700   |
| 40,544 | 1 | 34 | 58 | 364   | 4 | 9  | 40 | 220 | 103 | 627   |
| 40,545 | 1 | 27 | 58 | 342   | 4 | 6  | 42 | 206 | 105 | 581   |
| 40,546 | 1 | 27 | 60 | 336   | 4 | 6  | 42 | 202 | 107 | 571   |
| 40,547 | 1 | 27 | 61 | 336   | 4 | 6  | 44 | 201 | 110 | 570   |
| 40,548 | 1 | 28 | 61 | 337   | 4 | 6  | 44 | 201 | 110 | 572   |
| 40,549 | 1 | 28 | 61 | 342   | 4 | 6  | 44 | 201 | 110 | 577   |
| 40,550 | 1 | 28 | 60 | 343   | 4 | 6  | 43 | 203 | 108 | 580   |
| 40,551 | 1 | 28 | 60 | 358   | 4 | 8  | 42 | 207 | 107 | 601   |
| 40,552 | 1 | 37 | 60 | 546   | 4 | 15 | 42 | 256 | 107 | 854   |
| 40,553 | 0 | 48 | 60 | 738   | 4 | 24 | 42 | 325 | 106 | 1,135 |
| 40,554 | 0 | 64 | 59 | 906   | 4 | 28 | 41 | 372 | 104 | 1,370 |
| 40,555 | 0 | 79 | 52 | 1,006 | 3 | 30 | 34 | 400 | 89  | 1,515 |
| 40,556 | 0 | 83 | 44 | 1,056 | 2 | 30 | 32 | 412 | 78  | 1,581 |
| 40,557 | 0 | 85 | 43 | 1,068 | 2 | 30 | 29 | 412 | 74  | 1,595 |
| 40,558 | 0 | 85 | 43 | 1,068 | 2 | 30 | 27 | 413 | 72  | 1,596 |
| 40,559 | 0 | 84 | 51 | 1,092 | 2 | 32 | 31 | 417 | 84  | 1,625 |
| 40,560 | 0 | 84 | 51 | 1,090 | 2 | 32 | 30 | 416 | 83  | 1,622 |
| 40,561 | 0 | 84 | 50 | 1,091 | 2 | 32 | 30 | 417 | 82  | 1,624 |
| 40,562 | 0 | 85 | 51 | 1,163 | 2 | 33 | 31 | 436 | 84  | 1,717 |
| 40,563 | 0 | 87 | 51 | 1,196 | 2 | 33 | 31 | 442 | 84  | 1,758 |
| 40,564 | 0 | 92 | 51 | 1,226 | 2 | 35 | 31 | 445 | 84  | 1,798 |
| 40,565 | 0 | 93 | 51 | 1,229 | 2 | 36 | 31 | 445 | 84  | 1,803 |
| 40,566 | 0 | 93 | 53 | 1,240 | 2 | 36 | 31 | 448 | 86  | 1,817 |
| 40,567 | 0 | 93 | 53 | 1,238 | 2 | 36 | 33 | 447 | 88  | 1,814 |
| 40,568 | 0 | 87 | 52 | 1,205 | 2 | 35 | 33 | 411 | 87  | 1,738 |
| 40,569 | 0 | 87 | 52 | 1,205 | 2 | 36 | 33 | 411 | 87  | 1,739 |
| 40,570 | 2 | 87 | 65 | 1,201 | 4 | 35 | 37 | 409 | 108 | 1,732 |
| 40,571 | 2 | 87 | 74 | 1,198 | 4 | 34 | 39 | 404 | 119 | 1,723 |
| 40,572 | 2 | 87 | 74 | 1,199 | 4 | 34 | 39 | 404 | 119 | 1,724 |
| 40,573 | 2 | 86 | 74 | 1,204 | 4 | 34 | 40 | 412 | 120 | 1,736 |
| 40,574 | 2 | 84 | 74 | 1,201 | 4 | 34 | 40 | 417 | 120 | 1,736 |
| 40,575 | 4 | 84 | 74 | 1,208 | 4 | 34 | 40 | 419 | 122 | 1,745 |
| 40,576 | 4 | 84 | 74 | 1,196 | 4 | 34 | 40 | 413 | 122 | 1,727 |
| 40,577 | 4 | 83 | 74 | 1,179 | 3 | 35 | 40 | 402 | 121 | 1,699 |
| 40,578 | 4 | 83 | 74 | 1,178 | 3 | 35 | 41 | 402 | 122 | 1,698 |

|        |   |    |    |       |   |    |    |     |     |       |
|--------|---|----|----|-------|---|----|----|-----|-----|-------|
| 40,579 | 4 | 83 | 74 | 1,171 | 3 | 34 | 41 | 397 | 122 | 1,685 |
| 40,580 | 4 | 83 | 74 | 1,169 | 3 | 34 | 41 | 396 | 122 | 1,682 |
| 40,581 | 4 | 83 | 76 | 1,170 | 3 | 34 | 41 | 396 | 124 | 1,683 |
| 40,582 | 4 | 83 | 74 | 1,174 | 3 | 34 | 40 | 396 | 121 | 1,687 |
| 40,583 | 4 | 83 | 75 | 1,174 | 3 | 34 | 41 | 392 | 123 | 1,683 |
| 40,584 | 6 | 83 | 72 | 1,164 | 3 | 34 | 45 | 379 | 126 | 1,660 |
| 40,585 | 6 | 77 | 80 | 1,055 | 3 | 33 | 44 | 330 | 133 | 1,495 |
| 40,586 | 6 | 77 | 83 | 1,035 | 3 | 32 | 52 | 320 | 144 | 1,464 |
| 40,587 | 6 | 78 | 83 | 1,045 | 3 | 35 | 53 | 323 | 145 | 1,481 |
| 40,588 | 6 | 77 | 87 | 1,084 | 3 | 34 | 50 | 327 | 146 | 1,522 |
| 40,589 | 6 | 77 | 94 | 1,122 | 3 | 36 | 52 | 341 | 155 | 1,576 |
| 40,590 | 6 | 75 | 93 | 1,116 | 3 | 36 | 52 | 330 | 154 | 1,557 |
| 40,591 | 6 | 75 | 94 | 1,175 | 3 | 38 | 54 | 333 | 157 | 1,621 |
| 40,592 | 6 | 75 | 91 | 1,179 | 3 | 38 | 52 | 337 | 152 | 1,629 |
| 40,593 | 6 | 75 | 78 | 1,196 | 2 | 38 | 48 | 337 | 134 | 1,646 |
| 40,594 | 6 | 73 | 74 | 1,209 | 2 | 44 | 46 | 356 | 128 | 1,682 |
| 40,595 | 6 | 74 | 75 | 1,220 | 2 | 45 | 44 | 357 | 127 | 1,696 |
| 40,596 | 6 | 75 | 73 | 1,226 | 2 | 45 | 44 | 366 | 125 | 1,712 |
| 40,597 | 6 | 75 | 72 | 1,228 | 2 | 46 | 42 | 365 | 122 | 1,714 |
| 40,598 | 8 | 76 | 77 | 1,244 | 2 | 47 | 44 | 376 | 131 | 1,743 |
| 40,599 | 8 | 75 | 77 | 1,249 | 2 | 47 | 44 | 381 | 131 | 1,752 |
| 40,600 | 8 | 75 | 77 | 1,251 | 2 | 47 | 44 | 383 | 131 | 1,756 |
| 40,601 | 9 | 77 | 83 | 1,262 | 2 | 49 | 47 | 385 | 141 | 1,773 |
| 40,602 | 9 | 77 | 84 | 1,246 | 2 | 48 | 47 | 380 | 142 | 1,751 |
| 40,603 | 9 | 59 | 88 | 858   | 2 | 33 | 48 | 258 | 147 | 1,208 |
| 40,604 | 9 | 44 | 90 | 691   | 2 | 29 | 48 | 209 | 149 | 973   |
| 40,605 | 9 | 25 | 90 | 546   | 2 | 27 | 49 | 171 | 150 | 769   |
| 40,606 | 9 | 25 | 91 | 550   | 2 | 27 | 50 | 172 | 152 | 774   |
| 40,607 | 9 | 24 | 91 | 551   | 2 | 27 | 49 | 172 | 151 | 774   |
| 40,608 | 9 | 23 | 92 | 511   | 2 | 25 | 49 | 163 | 152 | 722   |
| 40,609 | 9 | 23 | 92 | 515   | 2 | 25 | 49 | 164 | 152 | 727   |
| 40,610 | 9 | 23 | 84 | 516   | 2 | 25 | 45 | 164 | 140 | 728   |
| 40,611 | 9 | 23 | 84 | 516   | 2 | 25 | 45 | 164 | 140 | 728   |
| 40,612 | 9 | 23 | 83 | 512   | 2 | 25 | 44 | 163 | 138 | 723   |
| 40,613 | 9 | 22 | 83 | 439   | 2 | 24 | 44 | 146 | 138 | 631   |
| 40,614 | 9 | 14 | 83 | 375   | 2 | 22 | 44 | 137 | 138 | 548   |
| 40,615 | 9 | 14 | 83 | 381   | 2 | 22 | 44 | 138 | 138 | 555   |
| 40,616 | 9 | 16 | 83 | 469   | 2 | 21 | 44 | 175 | 138 | 681   |
| 40,617 | 9 | 18 | 81 | 512   | 2 | 26 | 44 | 183 | 136 | 739   |
| 40,618 | 9 | 19 | 80 | 569   | 2 | 29 | 42 | 189 | 133 | 806   |
| 40,619 | 9 | 20 | 79 | 574   | 2 | 30 | 42 | 188 | 132 | 812   |

|        |   |    |    |     |   |    |    |     |     |       |
|--------|---|----|----|-----|---|----|----|-----|-----|-------|
| 40,620 | 9 | 22 | 75 | 593 | 2 | 29 | 41 | 192 | 127 | 836   |
| 40,621 | 5 | 24 | 66 | 595 | 0 | 29 | 38 | 196 | 109 | 844   |
| 40,622 | 5 | 24 | 57 | 598 | 0 | 29 | 36 | 196 | 98  | 847   |
| 40,623 | 5 | 29 | 57 | 599 | 0 | 29 | 35 | 206 | 97  | 863   |
| 40,624 | 5 | 29 | 57 | 593 | 0 | 29 | 35 | 199 | 97  | 850   |
| 40,625 | 5 | 29 | 57 | 596 | 0 | 29 | 36 | 194 | 98  | 848   |
| 40,626 | 5 | 29 | 57 | 589 | 0 | 29 | 36 | 192 | 98  | 839   |
| 40,627 | 5 | 29 | 57 | 611 | 1 | 30 | 36 | 197 | 99  | 867   |
| 40,628 | 5 | 29 | 57 | 609 | 1 | 29 | 36 | 197 | 99  | 864   |
| 40,629 | 5 | 29 | 57 | 610 | 1 | 29 | 35 | 197 | 98  | 865   |
| 40,630 | 5 | 30 | 57 | 611 | 1 | 29 | 35 | 197 | 98  | 867   |
| 40,631 | 5 | 30 | 57 | 612 | 1 | 29 | 36 | 197 | 99  | 868   |
| 40,632 | 6 | 30 | 55 | 616 | 1 | 29 | 36 | 198 | 98  | 873   |
| 40,633 | 6 | 30 | 55 | 636 | 1 | 29 | 36 | 205 | 98  | 900   |
| 40,634 | 6 | 31 | 56 | 721 | 2 | 34 | 35 | 234 | 99  | 1,020 |
| 40,635 | 4 | 39 | 53 | 887 | 2 | 53 | 31 | 334 | 90  | 1,313 |
| 40,636 | 4 | 39 | 38 | 899 | 2 | 53 | 27 | 341 | 71  | 1,332 |
| 40,637 | 4 | 39 | 35 | 907 | 2 | 52 | 18 | 342 | 59  | 1,340 |
| 40,638 | 4 | 39 | 35 | 900 | 2 | 50 | 16 | 342 | 57  | 1,331 |
| 40,639 | 4 | 39 | 31 | 815 | 2 | 48 | 16 | 322 | 53  | 1,224 |
| 40,640 | 4 | 39 | 24 | 807 | 2 | 48 | 14 | 321 | 44  | 1,215 |
| 40,641 | 4 | 39 | 24 | 807 | 2 | 48 | 14 | 321 | 44  | 1,215 |
| 40,642 | 4 | 39 | 24 | 736 | 2 | 46 | 12 | 312 | 42  | 1,133 |
| 40,643 | 4 | 39 | 23 | 736 | 2 | 46 | 12 | 310 | 41  | 1,131 |
| 40,644 | 4 | 35 | 24 | 673 | 2 | 39 | 12 | 285 | 42  | 1,032 |
| 40,645 | 4 | 35 | 24 | 679 | 2 | 39 | 11 | 287 | 41  | 1,040 |
| 40,646 | 4 | 35 | 23 | 681 | 2 | 39 | 10 | 289 | 39  | 1,044 |
| 40,647 | 4 | 33 | 23 | 654 | 2 | 38 | 10 | 273 | 39  | 998   |
| 40,648 | 4 | 33 | 19 | 657 | 2 | 38 | 10 | 276 | 35  | 1,004 |
| 40,649 | 2 | 33 | 18 | 662 | 2 | 38 | 8  | 278 | 30  | 1,011 |
| 40,650 | 2 | 34 | 17 | 672 | 2 | 39 | 8  | 286 | 29  | 1,031 |
| 40,651 | 1 | 38 | 12 | 737 | 2 | 44 | 8  | 355 | 23  | 1,174 |
| 40,652 | 1 | 52 | 13 | 879 | 2 | 54 | 5  | 480 | 21  | 1,465 |
| 40,653 | 1 | 56 | 11 | 917 | 2 | 56 | 5  | 502 | 19  | 1,531 |
| 40,654 | 1 | 53 | 12 | 932 | 2 | 56 | 4  | 504 | 19  | 1,545 |
| 40,655 | 1 | 52 | 12 | 920 | 2 | 56 | 7  | 501 | 22  | 1,529 |
| 40,656 | 2 | 52 | 16 | 920 | 3 | 56 | 7  | 501 | 28  | 1,529 |
| 40,657 | 2 | 52 | 17 | 920 | 3 | 56 | 14 | 501 | 36  | 1,529 |
| 40,658 | 2 | 52 | 17 | 921 | 3 | 56 | 14 | 501 | 36  | 1,530 |
| 40,659 | 2 | 52 | 16 | 922 | 3 | 56 | 15 | 502 | 36  | 1,532 |
| 40,660 | 2 | 52 | 16 | 919 | 3 | 56 | 15 | 501 | 36  | 1,528 |



|        |   |     |    |       |   |    |    |     |    |       |
|--------|---|-----|----|-------|---|----|----|-----|----|-------|
| 40,661 | 2 | 52  | 16 | 919   | 3 | 56 | 15 | 501 | 36 | 1,528 |
| 40,662 | 2 | 52  | 16 | 921   | 3 | 56 | 15 | 501 | 36 | 1,530 |
| 40,663 | 2 | 52  | 16 | 918   | 3 | 56 | 15 | 501 | 36 | 1,527 |
| 40,664 | 2 | 52  | 16 | 916   | 3 | 56 | 15 | 498 | 36 | 1,522 |
| 40,665 | 2 | 52  | 16 | 908   | 3 | 56 | 15 | 496 | 36 | 1,512 |
| 40,666 | 2 | 53  | 16 | 913   | 3 | 56 | 15 | 502 | 36 | 1,524 |
| 40,667 | 2 | 50  | 16 | 824   | 3 | 56 | 15 | 465 | 36 | 1,395 |
| 40,668 | 2 | 49  | 16 | 771   | 3 | 52 | 16 | 454 | 37 | 1,326 |
| 40,669 | 2 | 48  | 16 | 715   | 3 | 48 | 16 | 448 | 37 | 1,259 |
| 40,670 | 2 | 47  | 16 | 713   | 3 | 48 | 16 | 447 | 37 | 1,255 |
| 40,671 | 2 | 45  | 16 | 695   | 3 | 48 | 16 | 442 | 37 | 1,230 |
| 40,672 | 2 | 43  | 16 | 694   | 3 | 48 | 16 | 439 | 37 | 1,224 |
| 40,673 | 2 | 39  | 16 | 693   | 3 | 48 | 15 | 436 | 36 | 1,216 |
| 40,674 | 2 | 39  | 16 | 699   | 3 | 48 | 15 | 436 | 36 | 1,222 |
| 40,675 | 2 | 39  | 16 | 699   | 3 | 48 | 16 | 434 | 37 | 1,220 |
| 40,676 | 2 | 39  | 18 | 690   | 3 | 48 | 16 | 430 | 39 | 1,207 |
| 40,677 | 2 | 39  | 19 | 671   | 2 | 47 | 17 | 426 | 40 | 1,183 |
| 40,678 | 2 | 39  | 19 | 671   | 2 | 47 | 17 | 426 | 40 | 1,183 |
| 40,679 | 2 | 39  | 19 | 682   | 2 | 47 | 17 | 427 | 40 | 1,195 |
| 40,680 | 2 | 43  | 20 | 733   | 2 | 49 | 17 | 441 | 41 | 1,266 |
| 40,681 | 2 | 43  | 23 | 770   | 2 | 52 | 18 | 455 | 45 | 1,320 |
| 40,682 | 1 | 46  | 23 | 848   | 2 | 54 | 18 | 469 | 44 | 1,417 |
| 40,683 | 1 | 47  | 23 | 939   | 2 | 55 | 18 | 492 | 44 | 1,533 |
| 40,684 | 1 | 47  | 22 | 960   | 2 | 59 | 18 | 501 | 43 | 1,567 |
| 40,685 | 1 | 55  | 22 | 934   | 1 | 56 | 18 | 500 | 42 | 1,545 |
| 40,686 | 1 | 48  | 22 | 798   | 1 | 39 | 18 | 403 | 42 | 1,288 |
| 40,687 | 1 | 49  | 22 | 811   | 1 | 40 | 18 | 406 | 42 | 1,306 |
| 40,688 | 1 | 63  | 22 | 928   | 1 | 45 | 18 | 425 | 42 | 1,461 |
| 40,689 | 1 | 62  | 22 | 947   | 1 | 46 | 18 | 427 | 42 | 1,482 |
| 40,690 | 1 | 65  | 22 | 957   | 1 | 46 | 18 | 435 | 42 | 1,503 |
| 40,691 | 1 | 83  | 22 | 1,246 | 1 | 57 | 18 | 526 | 42 | 1,912 |
| 40,692 | 1 | 83  | 21 | 1,257 | 1 | 57 | 18 | 527 | 41 | 1,924 |
| 40,693 | 2 | 86  | 23 | 1,285 | 1 | 57 | 19 | 529 | 45 | 1,957 |
| 40,694 | 2 | 111 | 23 | 1,462 | 1 | 61 | 20 | 558 | 46 | 2,192 |
| 40,695 | 2 | 111 | 22 | 1,474 | 1 | 61 | 20 | 559 | 45 | 2,205 |
| 40,696 | 2 | 124 | 22 | 1,584 | 1 | 63 | 21 | 574 | 46 | 2,345 |
| 40,697 | 2 | 125 | 22 | 1,591 | 1 | 64 | 21 | 576 | 46 | 2,356 |
| 40,698 | 2 | 125 | 23 | 1,596 | 1 | 63 | 21 | 571 | 47 | 2,355 |
| 40,699 | 2 | 125 | 23 | 1,599 | 1 | 63 | 21 | 572 | 47 | 2,359 |
| 40,700 | 2 | 125 | 23 | 1,602 | 1 | 63 | 21 | 572 | 47 | 2,362 |
| 40,701 | 2 | 120 | 25 | 1,537 | 1 | 57 | 21 | 494 | 49 | 2,208 |

|        |   |     |    |       |   |    |    |     |    |       |
|--------|---|-----|----|-------|---|----|----|-----|----|-------|
| 40,702 | 2 | 123 | 25 | 1,603 | 1 | 59 | 21 | 530 | 49 | 2,315 |
| 40,703 | 4 | 107 | 23 | 1,569 | 1 | 49 | 22 | 415 | 50 | 2,140 |
| 40,704 | 4 | 104 | 24 | 1,555 | 1 | 47 | 22 | 403 | 51 | 2,109 |
| 40,705 | 4 | 104 | 21 | 1,542 | 1 | 46 | 22 | 402 | 48 | 2,094 |
| 40,706 | 4 | 105 | 19 | 1,574 | 1 | 53 | 19 | 409 | 43 | 2,141 |
| 40,707 | 3 | 115 | 16 | 1,651 | 0 | 54 | 18 | 441 | 37 | 2,261 |
| 40,708 | 3 | 116 | 14 | 1,651 | 0 | 54 | 10 | 441 | 27 | 2,262 |
| 40,709 | 3 | 116 | 14 | 1,663 | 0 | 54 | 9  | 442 | 26 | 2,275 |
| 40,710 | 3 | 117 | 14 | 1,665 | 0 | 54 | 9  | 446 | 26 | 2,282 |
| 40,711 | 3 | 117 | 14 | 1,666 | 0 | 54 | 9  | 446 | 26 | 2,283 |
| 40,712 | 3 | 117 | 14 | 1,664 | 0 | 54 | 9  | 446 | 26 | 2,281 |
| 40,713 | 3 | 117 | 14 | 1,664 | 0 | 54 | 9  | 448 | 26 | 2,283 |
| 40,714 | 3 | 119 | 15 | 1,683 | 0 | 54 | 9  | 451 | 27 | 2,307 |
| 40,715 | 3 | 119 | 15 | 1,687 | 0 | 54 | 9  | 452 | 27 | 2,312 |
| 40,716 | 3 | 118 | 17 | 1,682 | 0 | 54 | 13 | 446 | 33 | 2,300 |
| 40,717 | 3 | 118 | 17 | 1,683 | 0 | 54 | 13 | 446 | 33 | 2,301 |
| 40,718 | 3 | 120 | 17 | 1,685 | 0 | 55 | 12 | 450 | 32 | 2,310 |
| 40,719 | 3 | 119 | 17 | 1,679 | 0 | 54 | 12 | 446 | 32 | 2,298 |
| 40,720 | 3 | 119 | 17 | 1,678 | 0 | 54 | 12 | 446 | 32 | 2,297 |
| 40,721 | 3 | 119 | 17 | 1,679 | 0 | 54 | 12 | 446 | 32 | 2,298 |
| 40,722 | 3 | 119 | 17 | 1,678 | 0 | 54 | 12 | 446 | 32 | 2,297 |
| 40,723 | 3 | 118 | 17 | 1,673 | 0 | 54 | 12 | 439 | 32 | 2,284 |
| 40,724 | 3 | 117 | 18 | 1,669 | 0 | 54 | 12 | 441 | 33 | 2,281 |
| 40,725 | 3 | 117 | 18 | 1,680 | 0 | 55 | 12 | 447 | 33 | 2,299 |
| 40,726 | 3 | 117 | 18 | 1,681 | 0 | 55 | 11 | 448 | 32 | 2,301 |
| 40,727 | 3 | 117 | 16 | 1,685 | 0 | 55 | 11 | 457 | 30 | 2,314 |
| 40,728 | 3 | 117 | 15 | 1,681 | 1 | 55 | 10 | 457 | 29 | 2,310 |
| 40,729 | 3 | 117 | 15 | 1,670 | 1 | 55 | 10 | 456 | 29 | 2,298 |
| 40,730 | 3 | 117 | 15 | 1,671 | 1 | 55 | 10 | 457 | 29 | 2,300 |
| 40,731 | 3 | 113 | 13 | 1,634 | 1 | 54 | 8  | 460 | 25 | 2,261 |
| 40,732 | 3 | 116 | 13 | 1,624 | 1 | 52 | 8  | 477 | 25 | 2,269 |
| 40,733 | 3 | 113 | 13 | 1,549 | 1 | 50 | 8  | 465 | 25 | 2,177 |
| 40,734 | 3 | 112 | 13 | 1,453 | 1 | 49 | 9  | 440 | 26 | 2,054 |
| 40,735 | 3 | 113 | 14 | 1,411 | 1 | 45 | 9  | 423 | 27 | 1,992 |
| 40,736 | 3 | 104 | 14 | 1,359 | 1 | 45 | 9  | 415 | 27 | 1,923 |
| 40,737 | 3 | 103 | 14 | 1,332 | 1 | 43 | 9  | 413 | 27 | 1,891 |
| 40,738 | 3 | 104 | 14 | 1,329 | 1 | 42 | 9  | 411 | 27 | 1,886 |
| 40,739 | 3 | 91  | 14 | 1,206 | 1 | 37 | 9  | 391 | 27 | 1,725 |
| 40,740 | 3 | 91  | 14 | 1,183 | 1 | 36 | 9  | 386 | 27 | 1,696 |
| 40,741 | 3 | 70  | 14 | 881   | 1 | 25 | 9  | 287 | 27 | 1,263 |
| 40,742 | 3 | 70  | 14 | 870   | 1 | 26 | 10 | 287 | 28 | 1,253 |

|        |   |     |    |       |   |    |    |     |    |       |
|--------|---|-----|----|-------|---|----|----|-----|----|-------|
| 40,743 | 2 | 70  | 14 | 877   | 1 | 26 | 10 | 290 | 27 | 1,263 |
| 40,744 | 2 | 67  | 12 | 852   | 1 | 26 | 9  | 289 | 24 | 1,234 |
| 40,745 | 2 | 43  | 12 | 664   | 1 | 22 | 8  | 260 | 23 | 989   |
| 40,746 | 2 | 43  | 12 | 664   | 1 | 22 | 8  | 260 | 23 | 989   |
| 40,747 | 2 | 30  | 12 | 551   | 1 | 20 | 7  | 245 | 22 | 846   |
| 40,748 | 2 | 29  | 11 | 544   | 1 | 19 | 7  | 244 | 21 | 836   |
| 40,749 | 2 | 33  | 11 | 548   | 1 | 19 | 7  | 250 | 21 | 850   |
| 40,750 | 2 | 35  | 11 | 544   | 1 | 21 | 7  | 250 | 21 | 850   |
| 40,751 | 2 | 35  | 11 | 554   | 1 | 22 | 7  | 260 | 21 | 871   |
| 40,752 | 2 | 36  | 9  | 394   | 1 | 21 | 7  | 228 | 19 | 679   |
| 40,753 | 2 | 36  | 9  | 426   | 1 | 23 | 7  | 235 | 19 | 720   |
| 40,754 | 0 | 59  | 9  | 665   | 1 | 38 | 6  | 335 | 16 | 1,097 |
| 40,755 | 0 | 99  | 9  | 1,011 | 1 | 68 | 6  | 630 | 16 | 1,808 |
| 40,756 | 0 | 101 | 9  | 1,038 | 1 | 68 | 6  | 635 | 16 | 1,842 |
| 40,757 | 0 | 100 | 10 | 1,020 | 1 | 61 | 7  | 635 | 18 | 1,816 |
| 40,758 | 0 | 91  | 9  | 952   | 1 | 60 | 7  | 606 | 17 | 1,709 |
| 40,759 | 1 | 96  | 11 | 1,019 | 1 | 61 | 7  | 628 | 20 | 1,804 |
| 40,760 | 1 | 96  | 12 | 1,027 | 1 | 61 | 7  | 628 | 21 | 1,812 |
| 40,761 | 1 | 111 | 12 | 1,095 | 1 | 64 | 7  | 681 | 21 | 1,951 |
| 40,762 | 1 | 111 | 12 | 1,107 | 1 | 64 | 7  | 682 | 21 | 1,964 |
| 40,763 | 2 | 113 | 16 | 1,147 | 1 | 66 | 11 | 699 | 30 | 2,025 |
| 40,764 | 4 | 115 | 19 | 1,163 | 1 | 67 | 12 | 700 | 36 | 2,045 |
| 40,765 | 4 | 113 | 19 | 1,151 | 1 | 67 | 12 | 695 | 36 | 2,026 |
| 40,766 | 4 | 113 | 22 | 1,150 | 1 | 68 | 9  | 695 | 36 | 2,026 |
| 40,767 | 4 | 113 | 20 | 1,150 | 1 | 68 | 8  | 697 | 33 | 2,028 |
| 40,768 | 4 | 111 | 20 | 1,146 | 1 | 67 | 8  | 692 | 33 | 2,016 |
| 40,769 | 4 | 111 | 20 | 1,145 | 1 | 67 | 8  | 691 | 33 | 2,014 |
| 40,770 | 4 | 111 | 20 | 1,145 | 1 | 67 | 8  | 691 | 33 | 2,014 |
| 40,771 | 4 | 111 | 20 | 1,144 | 1 | 67 | 8  | 691 | 33 | 2,013 |
| 40,772 | 4 | 112 | 20 | 1,149 | 1 | 67 | 8  | 692 | 33 | 2,020 |
| 40,773 | 4 | 112 | 22 | 1,186 | 1 | 68 | 9  | 723 | 36 | 2,089 |
| 40,774 | 4 | 113 | 22 | 1,194 | 1 | 69 | 9  | 726 | 36 | 2,102 |
| 40,775 | 4 | 113 | 22 | 1,192 | 1 | 69 | 9  | 723 | 36 | 2,097 |
| 40,776 | 4 | 113 | 22 | 1,184 | 1 | 68 | 9  | 719 | 36 | 2,084 |
| 40,777 | 4 | 115 | 22 | 1,219 | 1 | 71 | 9  | 735 | 36 | 2,140 |
| 40,778 | 4 | 116 | 22 | 1,245 | 1 | 72 | 9  | 734 | 36 | 2,167 |
| 40,779 | 4 | 116 | 22 | 1,284 | 0 | 76 | 9  | 745 | 35 | 2,221 |
| 40,780 | 4 | 121 | 26 | 1,354 | 0 | 79 | 9  | 808 | 39 | 2,362 |
| 40,781 | 4 | 144 | 25 | 1,742 | 0 | 99 | 9  | 951 | 38 | 2,936 |
| 40,782 | 4 | 146 | 24 | 1,784 | 0 | 99 | 9  | 950 | 37 | 2,979 |
| 40,783 | 4 | 144 | 24 | 1,757 | 0 | 98 | 9  | 922 | 37 | 2,921 |

|        |   |     |    |       |   |     |    |       |    |       |
|--------|---|-----|----|-------|---|-----|----|-------|----|-------|
| 40,784 | 4 | 144 | 25 | 1,768 | 0 | 99  | 8  | 926   | 37 | 2,937 |
| 40,785 | 4 | 144 | 24 | 1,768 | 0 | 99  | 8  | 928   | 36 | 2,939 |
| 40,786 | 4 | 151 | 28 | 1,799 | 0 | 100 | 8  | 957   | 40 | 3,007 |
| 40,787 | 4 | 151 | 28 | 1,800 | 0 | 100 | 8  | 957   | 40 | 3,008 |
| 40,788 | 5 | 153 | 29 | 1,844 | 0 | 102 | 9  | 979   | 43 | 3,078 |
| 40,789 | 5 | 156 | 31 | 1,836 | 0 | 103 | 9  | 984   | 45 | 3,079 |
| 40,790 | 5 | 155 | 31 | 1,836 | 0 | 103 | 9  | 986   | 45 | 3,080 |
| 40,791 | 5 | 166 | 32 | 1,864 | 1 | 106 | 12 | 1,001 | 50 | 3,137 |
| 40,792 | 5 | 166 | 32 | 1,881 | 1 | 106 | 12 | 1,007 | 50 | 3,160 |
| 40,793 | 5 | 166 | 32 | 1,889 | 1 | 105 | 11 | 1,010 | 49 | 3,170 |
| 40,794 | 5 | 166 | 32 | 1,891 | 1 | 105 | 12 | 1,008 | 50 | 3,170 |
| 40,795 | 5 | 168 | 32 | 1,892 | 1 | 105 | 13 | 1,007 | 51 | 3,172 |
| 40,796 | 5 | 167 | 32 | 1,891 | 1 | 105 | 13 | 1,007 | 51 | 3,170 |
| 40,797 | 5 | 167 | 32 | 1,889 | 1 | 105 | 13 | 1,007 | 51 | 3,168 |
| 40,798 | 5 | 167 | 32 | 1,893 | 1 | 105 | 13 | 1,008 | 51 | 3,173 |
| 40,799 | 5 | 168 | 32 | 1,895 | 1 | 105 | 13 | 1,009 | 51 | 3,177 |
| 40,800 | 5 | 162 | 32 | 1,875 | 1 | 103 | 13 | 998   | 51 | 3,138 |
| 40,801 | 5 | 162 | 32 | 1,877 | 1 | 103 | 13 | 998   | 51 | 3,140 |
| 40,802 | 5 | 162 | 32 | 1,870 | 1 | 102 | 13 | 989   | 51 | 3,123 |
| 40,803 | 5 | 162 | 33 | 1,843 | 1 | 101 | 13 | 979   | 52 | 3,085 |
| 40,804 | 5 | 162 | 33 | 1,811 | 1 | 99  | 13 | 973   | 52 | 3,045 |
| 40,805 | 5 | 139 | 33 | 1,579 | 1 | 84  | 13 | 877   | 52 | 2,679 |
| 40,806 | 5 | 96  | 32 | 1,215 | 1 | 55  | 13 | 585   | 51 | 1,951 |
| 40,807 | 5 | 96  | 32 | 1,254 | 1 | 55  | 13 | 591   | 51 | 1,996 |
| 40,808 | 5 | 96  | 31 | 1,306 | 1 | 58  | 12 | 652   | 49 | 2,112 |
| 40,809 | 5 | 95  | 31 | 1,310 | 1 | 58  | 13 | 650   | 50 | 2,113 |
| 40,810 | 4 | 92  | 30 | 1,268 | 1 | 57  | 13 | 643   | 48 | 2,060 |
| 40,811 | 4 | 94  | 27 | 1,299 | 1 | 57  | 10 | 648   | 42 | 2,098 |
| 40,812 | 3 | 78  | 25 | 1,228 | 1 | 54  | 10 | 591   | 39 | 1,951 |
| 40,813 | 4 | 78  | 26 | 1,229 | 1 | 55  | 10 | 596   | 41 | 1,958 |
| 40,814 | 4 | 76  | 26 | 1,195 | 1 | 53  | 9  | 580   | 40 | 1,904 |
| 40,815 | 2 | 74  | 23 | 1,175 | 1 | 52  | 8  | 577   | 34 | 1,878 |
| 40,816 | 2 | 74  | 22 | 1,178 | 1 | 52  | 9  | 578   | 34 | 1,882 |
| 40,817 | 2 | 74  | 20 | 1,178 | 1 | 51  | 9  | 577   | 32 | 1,880 |
| 40,818 | 5 | 74  | 22 | 1,178 | 1 | 52  | 11 | 577   | 39 | 1,881 |
| 40,819 | 5 | 74  | 22 | 1,184 | 1 | 52  | 11 | 578   | 39 | 1,888 |
| 40,820 | 6 | 75  | 23 | 1,186 | 1 | 52  | 11 | 579   | 41 | 1,892 |
| 40,821 | 6 | 75  | 23 | 1,189 | 1 | 52  | 13 | 580   | 43 | 1,896 |
| 40,822 | 6 | 75  | 30 | 1,191 | 2 | 52  | 17 | 581   | 55 | 1,899 |
| 40,823 | 8 | 75  | 31 | 1,186 | 4 | 52  | 17 | 580   | 60 | 1,893 |
| 40,824 | 8 | 74  | 30 | 1,143 | 4 | 50  | 20 | 546   | 62 | 1,813 |

|        |    |    |    |       |   |    |    |     |     |       |
|--------|----|----|----|-------|---|----|----|-----|-----|-------|
| 40,825 | 8  | 77 | 30 | 1,152 | 4 | 50 | 20 | 550 | 62  | 1,829 |
| 40,826 | 8  | 77 | 29 | 1,152 | 4 | 50 | 20 | 550 | 61  | 1,829 |
| 40,827 | 10 | 77 | 31 | 1,153 | 4 | 50 | 21 | 548 | 66  | 1,828 |
| 40,828 | 10 | 75 | 31 | 1,124 | 4 | 47 | 21 | 533 | 66  | 1,779 |
| 40,829 | 10 | 74 | 32 | 1,100 | 4 | 47 | 21 | 522 | 67  | 1,743 |
| 40,830 | 10 | 74 | 29 | 1,070 | 4 | 43 | 22 | 518 | 65  | 1,705 |
| 40,831 | 10 | 70 | 28 | 1,013 | 4 | 40 | 22 | 459 | 64  | 1,582 |
| 40,832 | 10 | 48 | 31 | 628   | 4 | 20 | 21 | 323 | 66  | 1,019 |
| 40,833 | 10 | 47 | 31 | 576   | 4 | 19 | 21 | 312 | 66  | 954   |
| 40,834 | 10 | 46 | 31 | 586   | 4 | 19 | 21 | 314 | 66  | 965   |
| 40,835 | 10 | 49 | 30 | 637   | 4 | 24 | 21 | 366 | 65  | 1,076 |
| 40,836 | 10 | 49 | 26 | 641   | 4 | 24 | 21 | 366 | 61  | 1,080 |
| 40,837 | 10 | 46 | 29 | 675   | 4 | 25 | 22 | 374 | 65  | 1,120 |
| 40,838 | 10 | 57 | 29 | 855   | 4 | 29 | 22 | 478 | 65  | 1,419 |
| 40,839 | 9  | 57 | 28 | 832   | 4 | 29 | 21 | 472 | 62  | 1,390 |
| 40,840 | 9  | 53 | 27 | 827   | 4 | 28 | 21 | 460 | 61  | 1,368 |
| 40,841 | 9  | 53 | 28 | 833   | 4 | 28 | 21 | 464 | 62  | 1,378 |
| 40,842 | 9  | 45 | 29 | 825   | 3 | 25 | 21 | 452 | 62  | 1,347 |
| 40,843 | 9  | 49 | 30 | 823   | 3 | 26 | 21 | 454 | 63  | 1,352 |
| 40,844 | 9  | 49 | 30 | 820   | 3 | 27 | 20 | 454 | 62  | 1,350 |
| 40,845 | 11 | 52 | 38 | 847   | 3 | 28 | 23 | 479 | 75  | 1,406 |
| 40,846 | 11 | 50 | 38 | 846   | 3 | 28 | 23 | 478 | 75  | 1,402 |
| 40,847 | 12 | 51 | 48 | 871   | 3 | 29 | 35 | 483 | 98  | 1,434 |
| 40,848 | 12 | 51 | 50 | 871   | 4 | 29 | 35 | 486 | 101 | 1,437 |
| 40,849 | 12 | 50 | 51 | 874   | 4 | 29 | 35 | 486 | 102 | 1,439 |
| 40,850 | 12 | 50 | 51 | 877   | 4 | 29 | 35 | 487 | 102 | 1,443 |
| 40,851 | 13 | 50 | 61 | 880   | 4 | 29 | 41 | 488 | 119 | 1,447 |
| 40,852 | 13 | 50 | 61 | 887   | 4 | 29 | 41 | 500 | 119 | 1,466 |
| 40,853 | 13 | 50 | 61 | 888   | 4 | 29 | 41 | 501 | 119 | 1,468 |
| 40,854 | 14 | 46 | 64 | 893   | 4 | 28 | 42 | 498 | 124 | 1,465 |
| 40,855 | 14 | 63 | 65 | 979   | 4 | 31 | 42 | 577 | 125 | 1,650 |
| 40,856 | 14 | 64 | 65 | 981   | 4 | 31 | 42 | 574 | 125 | 1,650 |
| 40,857 | 15 | 65 | 75 | 936   | 4 | 31 | 46 | 548 | 140 | 1,580 |
| 40,858 | 15 | 65 | 75 | 908   | 4 | 31 | 46 | 549 | 140 | 1,553 |
| 40,859 | 15 | 65 | 75 | 857   | 4 | 28 | 46 | 489 | 140 | 1,439 |
| 40,860 | 15 | 65 | 75 | 821   | 4 | 29 | 45 | 486 | 139 | 1,401 |
| 40,861 | 15 | 66 | 74 | 826   | 4 | 30 | 45 | 487 | 138 | 1,409 |
| 40,862 | 15 | 65 | 74 | 829   | 4 | 32 | 45 | 492 | 138 | 1,418 |
| 40,863 | 15 | 65 | 74 | 816   | 4 | 31 | 45 | 485 | 138 | 1,397 |
| 40,864 | 14 | 65 | 74 | 848   | 4 | 31 | 45 | 493 | 137 | 1,437 |
| 40,865 | 14 | 65 | 74 | 850   | 4 | 31 | 45 | 493 | 137 | 1,439 |

|        |    |    |    |       |   |    |    |     |     |       |
|--------|----|----|----|-------|---|----|----|-----|-----|-------|
| 40,866 | 14 | 67 | 74 | 851   | 4 | 31 | 45 | 493 | 137 | 1,442 |
| 40,867 | 14 | 67 | 76 | 846   | 4 | 31 | 44 | 492 | 138 | 1,436 |
| 40,868 | 14 | 67 | 75 | 849   | 4 | 31 | 44 | 492 | 137 | 1,439 |
| 40,869 | 11 | 69 | 74 | 897   | 4 | 34 | 42 | 531 | 131 | 1,531 |
| 40,870 | 11 | 69 | 74 | 892   | 4 | 34 | 42 | 532 | 131 | 1,527 |
| 40,871 | 10 | 68 | 73 | 899   | 4 | 35 | 42 | 541 | 129 | 1,543 |
| 40,872 | 10 | 71 | 73 | 928   | 4 | 35 | 40 | 563 | 127 | 1,597 |
| 40,873 | 10 | 70 | 66 | 934   | 3 | 35 | 36 | 563 | 115 | 1,602 |
| 40,874 | 10 | 68 | 66 | 951   | 1 | 35 | 37 | 567 | 114 | 1,621 |
| 40,875 | 10 | 67 | 66 | 957   | 1 | 35 | 33 | 566 | 110 | 1,625 |
| 40,876 | 10 | 67 | 65 | 985   | 1 | 36 | 32 | 583 | 108 | 1,671 |
| 40,877 | 9  | 67 | 64 | 991   | 1 | 38 | 32 | 584 | 106 | 1,680 |
| 40,878 | 8  | 67 | 68 | 990   | 1 | 39 | 32 | 582 | 109 | 1,678 |
| 40,879 | 8  | 67 | 68 | 984   | 1 | 39 | 32 | 582 | 109 | 1,672 |
| 40,880 | 8  | 67 | 76 | 986   | 1 | 38 | 34 | 585 | 119 | 1,676 |
| 40,881 | 10 | 67 | 78 | 972   | 1 | 38 | 34 | 582 | 123 | 1,659 |
| 40,882 | 13 | 70 | 81 | 999   | 2 | 41 | 36 | 597 | 132 | 1,707 |
| 40,883 | 13 | 69 | 78 | 1,001 | 2 | 41 | 37 | 589 | 130 | 1,700 |
| 40,884 | 13 | 65 | 78 | 919   | 2 | 35 | 37 | 531 | 130 | 1,550 |
| 40,885 | 13 | 65 | 78 | 921   | 2 | 35 | 37 | 532 | 130 | 1,553 |
| 40,886 | 13 | 66 | 76 | 928   | 2 | 36 | 36 | 538 | 127 | 1,568 |
| 40,887 | 13 | 66 | 76 | 933   | 2 | 36 | 36 | 535 | 127 | 1,570 |
| 40,888 | 13 | 61 | 75 | 860   | 2 | 32 | 36 | 483 | 126 | 1,436 |
| 40,889 | 13 | 50 | 75 | 694   | 2 | 28 | 37 | 381 | 127 | 1,153 |
| 40,890 | 13 | 48 | 75 | 678   | 2 | 26 | 37 | 366 | 127 | 1,118 |
| 40,891 | 13 | 47 | 74 | 654   | 2 | 25 | 37 | 355 | 126 | 1,081 |
| 40,892 | 13 | 44 | 73 | 639   | 2 | 25 | 37 | 353 | 125 | 1,061 |
| 40,893 | 13 | 40 | 72 | 623   | 2 | 24 | 35 | 345 | 122 | 1,032 |
| 40,894 | 13 | 41 | 71 | 626   | 2 | 24 | 35 | 345 | 121 | 1,036 |
| 40,895 | 11 | 43 | 63 | 647   | 2 | 27 | 32 | 356 | 108 | 1,073 |
| 40,896 | 11 | 40 | 63 | 615   | 2 | 26 | 32 | 330 | 108 | 1,011 |
| 40,897 | 11 | 42 | 63 | 630   | 2 | 27 | 31 | 347 | 107 | 1,046 |
| 40,898 | 10 | 41 | 53 | 606   | 2 | 27 | 20 | 343 | 85  | 1,017 |
| 40,899 | 10 | 43 | 53 | 604   | 1 | 27 | 20 | 338 | 84  | 1,012 |
| 40,900 | 10 | 60 | 52 | 717   | 1 | 32 | 20 | 484 | 83  | 1,293 |
| 40,901 | 9  | 61 | 44 | 735   | 1 | 32 | 15 | 514 | 69  | 1,342 |
| 40,902 | 9  | 63 | 45 | 812   | 1 | 33 | 19 | 552 | 74  | 1,460 |
| 40,903 | 9  | 64 | 42 | 814   | 1 | 33 | 20 | 542 | 72  | 1,453 |
| 40,904 | 8  | 64 | 41 | 815   | 1 | 33 | 19 | 545 | 69  | 1,457 |
| 40,905 | 7  | 75 | 41 | 896   | 1 | 37 | 18 | 597 | 67  | 1,605 |
| 40,906 | 7  | 58 | 33 | 817   | 1 | 35 | 17 | 529 | 58  | 1,439 |

|        |   |    |    |     |   |    |    |     |     |       |
|--------|---|----|----|-----|---|----|----|-----|-----|-------|
| 40,907 | 7 | 58 | 31 | 818 | 1 | 35 | 20 | 530 | 59  | 1,441 |
| 40,908 | 7 | 57 | 31 | 810 | 1 | 34 | 18 | 529 | 57  | 1,430 |
| 40,909 | 7 | 57 | 31 | 801 | 1 | 34 | 18 | 523 | 57  | 1,415 |
| 40,910 | 7 | 54 | 31 | 787 | 1 | 33 | 18 | 509 | 57  | 1,383 |
| 40,911 | 7 | 53 | 31 | 781 | 1 | 32 | 18 | 508 | 57  | 1,374 |
| 40,912 | 7 | 52 | 31 | 734 | 1 | 30 | 18 | 498 | 57  | 1,314 |
| 40,913 | 7 | 53 | 31 | 756 | 1 | 32 | 18 | 510 | 57  | 1,351 |
| 40,914 | 7 | 53 | 31 | 758 | 1 | 32 | 18 | 510 | 57  | 1,353 |
| 40,915 | 7 | 53 | 30 | 730 | 1 | 32 | 18 | 502 | 56  | 1,317 |
| 40,916 | 7 | 54 | 30 | 731 | 1 | 32 | 18 | 502 | 56  | 1,319 |
| 40,917 | 7 | 52 | 30 | 731 | 1 | 32 | 18 | 504 | 56  | 1,319 |
| 40,918 | 7 | 53 | 29 | 734 | 1 | 34 | 18 | 511 | 55  | 1,332 |
| 40,919 | 7 | 53 | 28 | 736 | 1 | 34 | 18 | 511 | 54  | 1,334 |
| 40,920 | 7 | 51 | 28 | 691 | 1 | 30 | 19 | 471 | 55  | 1,243 |
| 40,921 | 7 | 51 | 29 | 689 | 1 | 29 | 19 | 463 | 56  | 1,232 |
| 40,922 | 7 | 48 | 29 | 661 | 1 | 29 | 19 | 440 | 56  | 1,178 |
| 40,923 | 7 | 48 | 30 | 635 | 1 | 29 | 19 | 435 | 57  | 1,147 |
| 40,924 | 7 | 48 | 30 | 636 | 1 | 29 | 19 | 436 | 57  | 1,149 |
| 40,925 | 5 | 48 | 30 | 637 | 1 | 29 | 18 | 436 | 54  | 1,150 |
| 40,926 | 5 | 48 | 31 | 592 | 1 | 28 | 18 | 414 | 55  | 1,082 |
| 40,927 | 5 | 48 | 33 | 587 | 1 | 26 | 20 | 413 | 59  | 1,074 |
| 40,928 | 5 | 48 | 40 | 598 | 1 | 27 | 20 | 423 | 66  | 1,096 |
| 40,929 | 5 | 48 | 37 | 597 | 2 | 26 | 21 | 424 | 65  | 1,095 |
| 40,930 | 5 | 49 | 30 | 614 | 2 | 26 | 20 | 429 | 57  | 1,118 |
| 40,931 | 5 | 49 | 29 | 609 | 2 | 27 | 19 | 426 | 55  | 1,111 |
| 40,932 | 3 | 48 | 27 | 611 | 2 | 27 | 18 | 423 | 50  | 1,109 |
| 40,933 | 0 | 45 | 26 | 587 | 1 | 25 | 16 | 415 | 43  | 1,072 |
| 40,934 | 0 | 45 | 26 | 581 | 1 | 25 | 15 | 416 | 42  | 1,067 |
| 40,935 | 0 | 47 | 28 | 610 | 1 | 25 | 15 | 428 | 44  | 1,110 |
| 40,936 | 0 | 47 | 28 | 608 | 1 | 25 | 15 | 429 | 44  | 1,109 |
| 40,937 | 0 | 46 | 36 | 593 | 1 | 24 | 20 | 423 | 57  | 1,086 |
| 40,938 | 1 | 46 | 36 | 582 | 1 | 24 | 20 | 428 | 58  | 1,080 |
| 40,939 | 1 | 49 | 36 | 613 | 1 | 26 | 20 | 454 | 58  | 1,142 |
| 40,940 | 1 | 49 | 37 | 619 | 1 | 27 | 20 | 466 | 59  | 1,161 |
| 40,941 | 3 | 49 | 46 | 618 | 1 | 27 | 23 | 467 | 73  | 1,161 |
| 40,942 | 3 | 49 | 46 | 620 | 1 | 27 | 24 | 467 | 74  | 1,163 |
| 40,943 | 3 | 49 | 49 | 620 | 1 | 27 | 25 | 466 | 78  | 1,162 |
| 40,944 | 3 | 48 | 48 | 618 | 1 | 27 | 26 | 466 | 78  | 1,159 |
| 40,945 | 3 | 46 | 48 | 597 | 1 | 24 | 26 | 454 | 78  | 1,121 |
| 40,946 | 3 | 46 | 48 | 597 | 1 | 24 | 25 | 454 | 77  | 1,121 |
| 40,947 | 4 | 46 | 55 | 595 | 2 | 24 | 42 | 453 | 103 | 1,118 |

|        |   |    |    |     |   |    |    |     |     |       |
|--------|---|----|----|-----|---|----|----|-----|-----|-------|
| 40,948 | 4 | 44 | 55 | 577 | 2 | 23 | 43 | 436 | 104 | 1,080 |
| 40,949 | 4 | 44 | 55 | 574 | 2 | 22 | 43 | 433 | 104 | 1,073 |
| 40,950 | 4 | 42 | 53 | 567 | 2 | 22 | 43 | 431 | 102 | 1,062 |
| 40,951 | 4 | 25 | 52 | 456 | 2 | 17 | 41 | 286 | 99  | 784   |
| 40,952 | 4 | 24 | 52 | 433 | 2 | 17 | 41 | 256 | 99  | 730   |
| 40,953 | 4 | 22 | 51 | 351 | 2 | 16 | 39 | 216 | 96  | 605   |
| 40,954 | 4 | 21 | 53 | 336 | 2 | 16 | 38 | 210 | 97  | 583   |
| 40,955 | 4 | 21 | 53 | 338 | 2 | 16 | 39 | 213 | 98  | 588   |
| 40,956 | 4 | 10 | 55 | 234 | 2 | 11 | 39 | 158 | 100 | 413   |
| 40,957 | 4 | 11 | 54 | 226 | 2 | 10 | 36 | 147 | 96  | 394   |
| 40,958 | 4 | 10 | 54 | 212 | 2 | 10 | 36 | 145 | 96  | 377   |
| 40,959 | 4 | 10 | 54 | 209 | 2 | 10 | 36 | 144 | 96  | 373   |
| 40,960 | 4 | 10 | 54 | 209 | 2 | 10 | 37 | 144 | 97  | 373   |
| 40,961 | 4 | 10 | 54 | 210 | 2 | 10 | 37 | 144 | 97  | 374   |
| 40,962 | 4 | 10 | 54 | 210 | 2 | 10 | 37 | 144 | 97  | 374   |
| 40,963 | 4 | 10 | 54 | 207 | 2 | 10 | 37 | 143 | 97  | 370   |
| 40,964 | 4 | 9  | 54 | 190 | 2 | 8  | 37 | 131 | 97  | 338   |
| 40,965 | 4 | 9  | 54 | 188 | 2 | 8  | 37 | 135 | 97  | 340   |
| 40,966 | 4 | 10 | 54 | 202 | 2 | 8  | 37 | 148 | 97  | 368   |
| 40,967 | 4 | 9  | 54 | 219 | 2 | 9  | 37 | 154 | 97  | 391   |
| 40,968 | 4 | 9  | 54 | 250 | 2 | 9  | 37 | 157 | 97  | 425   |
| 40,969 | 4 | 8  | 53 | 260 | 2 | 7  | 37 | 151 | 96  | 426   |
| 40,970 | 4 | 9  | 53 | 282 | 2 | 7  | 36 | 157 | 95  | 455   |
| 40,971 | 4 | 10 | 53 | 295 | 2 | 9  | 36 | 164 | 95  | 478   |
| 40,972 | 4 | 10 | 52 | 285 | 2 | 9  | 36 | 160 | 94  | 464   |
| 40,973 | 4 | 10 | 53 | 291 | 2 | 9  | 36 | 161 | 95  | 471   |
| 40,974 | 4 | 13 | 54 | 409 | 2 | 11 | 36 | 195 | 96  | 628   |
| 40,975 | 4 | 28 | 54 | 546 | 2 | 24 | 36 | 257 | 96  | 855   |
| 40,976 | 4 | 29 | 53 | 573 | 2 | 25 | 36 | 263 | 95  | 890   |
| 40,977 | 4 | 31 | 56 | 589 | 2 | 25 | 36 | 264 | 98  | 909   |
| 40,978 | 4 | 35 | 62 | 614 | 2 | 25 | 35 | 276 | 103 | 950   |
| 40,979 | 4 | 35 | 55 | 604 | 2 | 24 | 35 | 267 | 96  | 930   |
| 40,980 | 6 | 36 | 66 | 604 | 1 | 27 | 38 | 265 | 111 | 932   |
| 40,981 | 6 | 36 | 65 | 607 | 1 | 27 | 38 | 268 | 110 | 938   |
| 40,982 | 8 | 36 | 88 | 612 | 3 | 27 | 52 | 274 | 151 | 949   |
| 40,983 | 8 | 36 | 88 | 601 | 3 | 26 | 54 | 263 | 153 | 926   |
| 40,984 | 8 | 36 | 86 | 601 | 3 | 26 | 54 | 262 | 151 | 925   |
| 40,985 | 8 | 34 | 87 | 570 | 4 | 26 | 54 | 247 | 153 | 877   |
| 40,986 | 8 | 35 | 85 | 570 | 4 | 26 | 54 | 247 | 151 | 878   |
| 40,987 | 8 | 35 | 77 | 570 | 4 | 26 | 49 | 247 | 138 | 878   |
| 40,988 | 8 | 35 | 77 | 571 | 4 | 26 | 49 | 248 | 138 | 880   |



|        |   |    |    |       |   |    |    |     |     |       |
|--------|---|----|----|-------|---|----|----|-----|-----|-------|
| 40,989 | 7 | 35 | 77 | 564   | 4 | 26 | 49 | 240 | 137 | 865   |
| 40,990 | 7 | 33 | 81 | 527   | 4 | 23 | 49 | 203 | 141 | 786   |
| 40,991 | 7 | 33 | 80 | 532   | 4 | 23 | 48 | 203 | 139 | 791   |
| 40,992 | 5 | 33 | 77 | 520   | 5 | 23 | 45 | 201 | 132 | 777   |
| 40,993 | 5 | 33 | 79 | 522   | 5 | 25 | 44 | 201 | 133 | 781   |
| 40,994 | 5 | 33 | 76 | 522   | 5 | 25 | 43 | 201 | 129 | 781   |
| 40,995 | 5 | 33 | 76 | 521   | 5 | 25 | 42 | 202 | 128 | 781   |
| 40,996 | 5 | 33 | 76 | 521   | 5 | 25 | 42 | 202 | 128 | 781   |
| 40,997 | 5 | 33 | 69 | 521   | 4 | 25 | 29 | 202 | 107 | 781   |
| 40,998 | 5 | 33 | 69 | 521   | 4 | 25 | 28 | 202 | 106 | 781   |
| 40,999 | 5 | 33 | 69 | 521   | 4 | 25 | 28 | 203 | 106 | 782   |
| 41,000 | 5 | 33 | 72 | 531   | 5 | 25 | 27 | 206 | 109 | 795   |
| 41,001 | 5 | 34 | 72 | 621   | 5 | 26 | 27 | 245 | 109 | 926   |
| 41,002 | 5 | 38 | 73 | 965   | 5 | 29 | 27 | 286 | 110 | 1,318 |
| 41,003 | 5 | 41 | 73 | 1,001 | 5 | 31 | 27 | 302 | 110 | 1,375 |
| 41,004 | 5 | 46 | 72 | 1,057 | 5 | 32 | 27 | 312 | 109 | 1,447 |
| 41,005 | 5 | 49 | 70 | 1,083 | 5 | 33 | 27 | 319 | 107 | 1,484 |
| 41,006 | 5 | 54 | 72 | 1,135 | 5 | 34 | 26 | 328 | 108 | 1,551 |
| 41,007 | 5 | 55 | 70 | 1,137 | 5 | 34 | 26 | 324 | 106 | 1,550 |
| 41,008 | 5 | 54 | 70 | 1,148 | 5 | 35 | 26 | 329 | 106 | 1,566 |
| 41,009 | 5 | 59 | 71 | 1,173 | 5 | 35 | 26 | 337 | 107 | 1,604 |
| 41,010 | 5 | 59 | 71 | 1,172 | 5 | 35 | 26 | 335 | 107 | 1,601 |
| 41,011 | 5 | 62 | 71 | 1,216 | 5 | 35 | 25 | 356 | 106 | 1,669 |
| 41,012 | 5 | 63 | 71 | 1,216 | 5 | 35 | 25 | 356 | 106 | 1,670 |
| 41,013 | 5 | 63 | 71 | 1,220 | 5 | 35 | 25 | 356 | 106 | 1,674 |
| 41,014 | 5 | 72 | 72 | 1,250 | 5 | 37 | 25 | 373 | 107 | 1,732 |
| 41,015 | 5 | 72 | 72 | 1,251 | 5 | 37 | 25 | 374 | 107 | 1,734 |
| 41,016 | 6 | 73 | 75 | 1,268 | 5 | 38 | 27 | 375 | 113 | 1,754 |
| 41,017 | 6 | 72 | 75 | 1,272 | 5 | 38 | 27 | 368 | 113 | 1,750 |
| 41,018 | 6 | 72 | 75 | 1,252 | 5 | 36 | 27 | 361 | 113 | 1,721 |
| 41,019 | 6 | 73 | 75 | 1,222 | 5 | 36 | 27 | 358 | 113 | 1,689 |
| 41,020 | 7 | 73 | 75 | 1,208 | 5 | 36 | 27 | 359 | 114 | 1,676 |
| 41,021 | 7 | 71 | 75 | 1,171 | 5 | 34 | 27 | 349 | 114 | 1,625 |
| 41,022 | 7 | 72 | 75 | 1,171 | 5 | 34 | 27 | 349 | 114 | 1,626 |
| 41,023 | 7 | 72 | 74 | 1,171 | 5 | 34 | 27 | 349 | 113 | 1,626 |
| 41,024 | 7 | 54 | 74 | 908   | 5 | 20 | 27 | 250 | 113 | 1,232 |
| 41,025 | 7 | 54 | 72 | 910   | 5 | 20 | 27 | 250 | 111 | 1,234 |
| 41,026 | 7 | 54 | 67 | 910   | 5 | 20 | 27 | 250 | 106 | 1,234 |
| 41,027 | 7 | 53 | 67 | 891   | 5 | 19 | 27 | 248 | 106 | 1,211 |
| 41,028 | 7 | 53 | 67 | 898   | 5 | 19 | 27 | 257 | 106 | 1,227 |
| 41,029 | 7 | 49 | 59 | 907   | 5 | 19 | 26 | 251 | 97  | 1,226 |

|        |   |    |    |       |   |    |    |     |    |       |
|--------|---|----|----|-------|---|----|----|-----|----|-------|
| 41,030 | 7 | 57 | 59 | 1,003 | 5 | 31 | 26 | 323 | 97 | 1,414 |
| 41,031 | 5 | 63 | 47 | 1,066 | 5 | 31 | 22 | 330 | 79 | 1,490 |
| 41,032 | 5 | 80 | 38 | 1,273 | 4 | 40 | 17 | 397 | 64 | 1,790 |
| 41,033 | 3 | 80 | 24 | 1,286 | 3 | 39 | 8  | 394 | 38 | 1,799 |
| 41,034 | 3 | 80 | 25 | 1,290 | 3 | 39 | 7  | 395 | 38 | 1,804 |
| 41,035 | 3 | 80 | 26 | 1,301 | 3 | 39 | 7  | 397 | 39 | 1,817 |
| 41,036 | 3 | 82 | 25 | 1,305 | 2 | 39 | 7  | 397 | 37 | 1,823 |
| 41,037 | 3 | 83 | 25 | 1,320 | 2 | 39 | 7  | 403 | 37 | 1,845 |
| 41,038 | 3 | 83 | 25 | 1,323 | 2 | 39 | 7  | 405 | 37 | 1,850 |
| 41,039 | 3 | 84 | 24 | 1,330 | 2 | 39 | 7  | 406 | 36 | 1,859 |
| 41,040 | 3 | 84 | 24 | 1,335 | 2 | 39 | 7  | 406 | 36 | 1,864 |
| 41,041 | 3 | 83 | 21 | 1,332 | 2 | 39 | 7  | 406 | 33 | 1,860 |
| 41,042 | 3 | 84 | 21 | 1,331 | 2 | 39 | 7  | 406 | 33 | 1,860 |
| 41,043 | 3 | 84 | 15 | 1,330 | 1 | 37 | 7  | 405 | 26 | 1,856 |
| 41,044 | 3 | 84 | 13 | 1,335 | 1 | 37 | 7  | 411 | 24 | 1,867 |
| 41,045 | 3 | 84 | 13 | 1,336 | 1 | 37 | 7  | 411 | 24 | 1,868 |
| 41,046 | 3 | 84 | 13 | 1,337 | 1 | 37 | 8  | 409 | 25 | 1,867 |
| 41,047 | 3 | 84 | 13 | 1,337 | 1 | 37 | 8  | 409 | 25 | 1,867 |
| 41,048 | 3 | 84 | 14 | 1,338 | 1 | 38 | 5  | 410 | 23 | 1,870 |
| 41,049 | 3 | 84 | 15 | 1,338 | 1 | 38 | 6  | 409 | 25 | 1,869 |
| 41,050 | 3 | 84 | 15 | 1,339 | 1 | 38 | 6  | 409 | 25 | 1,870 |
| 41,051 | 3 | 83 | 12 | 1,237 | 0 | 37 | 7  | 365 | 22 | 1,722 |
| 41,052 | 3 | 83 | 12 | 1,238 | 0 | 37 | 7  | 367 | 22 | 1,725 |
| 41,053 | 3 | 76 | 20 | 858   | 1 | 32 | 11 | 311 | 35 | 1,277 |
| 41,054 | 3 | 76 | 21 | 862   | 1 | 33 | 12 | 312 | 37 | 1,283 |
| 41,055 | 4 | 72 | 22 | 810   | 1 | 32 | 12 | 303 | 39 | 1,217 |
| 41,056 | 4 | 69 | 22 | 783   | 1 | 31 | 12 | 296 | 39 | 1,179 |
| 41,057 | 4 | 63 | 31 | 725   | 1 | 30 | 18 | 280 | 54 | 1,098 |
| 41,058 | 4 | 63 | 32 | 725   | 1 | 31 | 22 | 280 | 59 | 1,099 |
| 41,059 | 4 | 58 | 32 | 689   | 1 | 30 | 22 | 266 | 59 | 1,043 |
| 41,060 | 4 | 58 | 31 | 693   | 1 | 30 | 22 | 267 | 58 | 1,048 |
| 41,061 | 4 | 78 | 31 | 907   | 1 | 47 | 22 | 429 | 58 | 1,461 |
| 41,062 | 4 | 75 | 31 | 884   | 1 | 47 | 22 | 414 | 58 | 1,420 |
| 41,063 | 6 | 74 | 44 | 1,062 | 1 | 49 | 24 | 431 | 75 | 1,616 |
| 41,064 | 6 | 78 | 44 | 1,144 | 1 | 57 | 24 | 504 | 75 | 1,783 |
| 41,065 | 6 | 72 | 43 | 1,249 | 1 | 58 | 24 | 525 | 74 | 1,904 |
| 41,066 | 5 | 75 | 42 | 1,284 | 1 | 58 | 24 | 546 | 72 | 1,963 |
| 41,067 | 5 | 83 | 41 | 1,305 | 1 | 59 | 22 | 556 | 69 | 2,003 |
| 41,068 | 5 | 83 | 41 | 1,323 | 1 | 59 | 22 | 559 | 69 | 2,024 |
| 41,069 | 5 | 83 | 41 | 1,326 | 1 | 59 | 22 | 561 | 69 | 2,029 |
| 41,070 | 4 | 85 | 42 | 1,320 | 1 | 59 | 22 | 559 | 69 | 2,023 |

|        |   |    |    |       |   |    |    |     |     |       |
|--------|---|----|----|-------|---|----|----|-----|-----|-------|
| 41,071 | 4 | 85 | 42 | 1,322 | 1 | 59 | 22 | 559 | 69  | 2,025 |
| 41,072 | 4 | 84 | 46 | 1,320 | 1 | 59 | 25 | 558 | 76  | 2,021 |
| 41,073 | 4 | 84 | 46 | 1,320 | 1 | 59 | 25 | 558 | 76  | 2,021 |
| 41,074 | 4 | 89 | 46 | 1,331 | 1 | 59 | 26 | 562 | 77  | 2,041 |
| 41,075 | 4 | 89 | 46 | 1,335 | 1 | 59 | 26 | 562 | 77  | 2,045 |
| 41,076 | 4 | 89 | 49 | 1,338 | 1 | 59 | 31 | 565 | 85  | 2,051 |
| 41,077 | 4 | 91 | 49 | 1,410 | 1 | 61 | 33 | 602 | 87  | 2,164 |
| 41,078 | 4 | 91 | 50 | 1,428 | 1 | 61 | 33 | 607 | 88  | 2,187 |
| 41,079 | 4 | 89 | 50 | 1,406 | 1 | 61 | 33 | 599 | 88  | 2,155 |
| 41,080 | 4 | 81 | 50 | 1,277 | 1 | 48 | 33 | 519 | 88  | 1,925 |
| 41,081 | 4 | 73 | 50 | 1,195 | 1 | 45 | 33 | 504 | 88  | 1,817 |
| 41,082 | 4 | 57 | 50 | 967   | 1 | 37 | 33 | 435 | 88  | 1,496 |
| 41,083 | 4 | 57 | 50 | 970   | 1 | 37 | 33 | 440 | 88  | 1,504 |
| 41,084 | 4 | 57 | 50 | 973   | 1 | 37 | 32 | 442 | 87  | 1,509 |
| 41,085 | 4 | 57 | 49 | 967   | 1 | 37 | 32 | 440 | 86  | 1,501 |
| 41,086 | 4 | 55 | 48 | 952   | 1 | 37 | 32 | 438 | 85  | 1,482 |
| 41,087 | 4 | 55 | 49 | 941   | 1 | 37 | 34 | 435 | 88  | 1,468 |
| 41,088 | 4 | 55 | 49 | 942   | 1 | 37 | 34 | 435 | 88  | 1,469 |
| 41,089 | 4 | 55 | 49 | 940   | 3 | 37 | 34 | 433 | 90  | 1,465 |
| 41,090 | 4 | 54 | 50 | 932   | 3 | 37 | 34 | 431 | 91  | 1,454 |
| 41,091 | 4 | 54 | 50 | 926   | 4 | 37 | 34 | 431 | 92  | 1,448 |
| 41,092 | 4 | 54 | 50 | 927   | 4 | 37 | 34 | 431 | 92  | 1,449 |
| 41,093 | 4 | 53 | 50 | 929   | 4 | 37 | 34 | 432 | 92  | 1,451 |
| 41,094 | 5 | 53 | 53 | 931   | 5 | 37 | 36 | 432 | 99  | 1,453 |
| 41,095 | 5 | 53 | 54 | 926   | 5 | 37 | 38 | 426 | 102 | 1,442 |
| 41,096 | 5 | 53 | 61 | 925   | 5 | 38 | 42 | 427 | 113 | 1,443 |
| 41,097 | 5 | 53 | 61 | 924   | 5 | 37 | 42 | 425 | 113 | 1,439 |
| 41,098 | 6 | 53 | 70 | 924   | 6 | 37 | 45 | 426 | 127 | 1,440 |
| 41,099 | 5 | 53 | 69 | 924   | 7 | 37 | 45 | 426 | 126 | 1,440 |
| 41,100 | 5 | 53 | 68 | 923   | 7 | 37 | 44 | 426 | 124 | 1,439 |
| 41,101 | 5 | 53 | 68 | 923   | 7 | 37 | 44 | 426 | 124 | 1,439 |
| 41,102 | 5 | 53 | 68 | 922   | 7 | 37 | 43 | 425 | 123 | 1,437 |
| 41,103 | 5 | 53 | 68 | 927   | 7 | 37 | 43 | 426 | 123 | 1,443 |
| 41,104 | 5 | 53 | 59 | 935   | 6 | 37 | 39 | 430 | 109 | 1,455 |
| 41,105 | 5 | 54 | 58 | 964   | 6 | 37 | 38 | 440 | 107 | 1,495 |
| 41,106 | 4 | 54 | 57 | 981   | 6 | 38 | 38 | 451 | 105 | 1,524 |
| 41,107 | 4 | 54 | 47 | 1,022 | 6 | 42 | 33 | 481 | 90  | 1,599 |
| 41,108 | 4 | 54 | 46 | 1,042 | 6 | 45 | 32 | 490 | 88  | 1,631 |
| 41,109 | 4 | 55 | 45 | 1,044 | 6 | 44 | 28 | 492 | 83  | 1,635 |
| 41,110 | 4 | 75 | 43 | 1,143 | 6 | 57 | 28 | 607 | 81  | 1,882 |
| 41,111 | 4 | 86 | 42 | 1,183 | 6 | 58 | 28 | 634 | 80  | 1,961 |

|        |   |    |    |     |   |    |    |     |    |       |
|--------|---|----|----|-----|---|----|----|-----|----|-------|
| 41,112 | 3 | 67 | 36 | 996 | 6 | 41 | 27 | 490 | 72 | 1,594 |
| 41,113 | 3 | 67 | 33 | 982 | 6 | 41 | 27 | 491 | 69 | 1,581 |
| 41,114 | 2 | 63 | 32 | 728 | 6 | 31 | 26 | 405 | 66 | 1,227 |
| 41,115 | 2 | 62 | 32 | 596 | 6 | 28 | 27 | 374 | 67 | 1,060 |
| 41,116 | 2 | 63 | 32 | 598 | 6 | 28 | 27 | 375 | 67 | 1,064 |
| 41,117 | 2 | 51 | 32 | 507 | 6 | 26 | 27 | 333 | 67 | 917   |
| 41,118 | 2 | 51 | 32 | 510 | 6 | 26 | 27 | 336 | 67 | 923   |
| 41,119 | 2 | 51 | 32 | 490 | 6 | 27 | 29 | 334 | 69 | 902   |
| 41,120 | 2 | 48 | 32 | 489 | 6 | 27 | 29 | 333 | 69 | 897   |
| 41,121 | 2 | 49 | 31 | 495 | 6 | 27 | 29 | 337 | 68 | 908   |
| 41,122 | 2 | 49 | 27 | 494 | 6 | 27 | 27 | 338 | 62 | 908   |
| 41,123 | 2 | 49 | 29 | 492 | 6 | 30 | 26 | 342 | 63 | 913   |
| 41,124 | 2 | 49 | 29 | 493 | 6 | 30 | 27 | 342 | 64 | 914   |
| 41,125 | 2 | 44 | 29 | 482 | 6 | 30 | 26 | 339 | 63 | 895   |
| 41,126 | 2 | 42 | 27 | 399 | 6 | 29 | 21 | 301 | 56 | 771   |
| 41,127 | 2 | 43 | 26 | 410 | 6 | 29 | 21 | 310 | 55 | 792   |
| 41,128 | 2 | 43 | 26 | 414 | 6 | 29 | 19 | 312 | 53 | 798   |
| 41,129 | 2 | 43 | 26 | 388 | 6 | 29 | 19 | 303 | 53 | 763   |
| 41,130 | 2 | 43 | 26 | 388 | 6 | 29 | 19 | 308 | 53 | 768   |
| 41,131 | 2 | 43 | 26 | 387 | 6 | 29 | 19 | 307 | 53 | 766   |
| 41,132 | 2 | 46 | 27 | 393 | 6 | 29 | 19 | 307 | 54 | 775   |
| 41,133 | 2 | 46 | 27 | 393 | 6 | 29 | 19 | 307 | 54 | 775   |
| 41,134 | 2 | 46 | 29 | 392 | 6 | 29 | 21 | 302 | 58 | 769   |
| 41,135 | 3 | 46 | 35 | 389 | 9 | 29 | 26 | 300 | 73 | 764   |
| 41,136 | 3 | 46 | 35 | 391 | 9 | 29 | 26 | 300 | 73 | 766   |
| 41,137 | 3 | 44 | 35 | 388 | 9 | 29 | 26 | 298 | 73 | 759   |
| 41,138 | 3 | 44 | 34 | 387 | 9 | 29 | 24 | 298 | 70 | 758   |
| 41,139 | 3 | 44 | 34 | 387 | 7 | 29 | 24 | 298 | 68 | 758   |
| 41,140 | 3 | 44 | 35 | 388 | 7 | 29 | 25 | 299 | 70 | 760   |
| 41,141 | 3 | 44 | 35 | 387 | 6 | 29 | 25 | 299 | 69 | 759   |
| 41,142 | 3 | 44 | 35 | 395 | 6 | 29 | 27 | 303 | 71 | 771   |
| 41,143 | 3 | 48 | 35 | 438 | 6 | 32 | 27 | 360 | 71 | 878   |
| 41,144 | 2 | 52 | 32 | 498 | 5 | 38 | 25 | 426 | 64 | 1,014 |
| 41,145 | 2 | 54 | 32 | 530 | 5 | 41 | 25 | 447 | 64 | 1,072 |
| 41,146 | 2 | 67 | 31 | 769 | 5 | 54 | 23 | 604 | 61 | 1,494 |
| 41,147 | 2 | 68 | 25 | 809 | 5 | 54 | 19 | 628 | 51 | 1,559 |
| 41,148 | 2 | 75 | 25 | 820 | 5 | 54 | 18 | 638 | 50 | 1,587 |
| 41,149 | 2 | 75 | 16 | 825 | 4 | 54 | 15 | 639 | 37 | 1,593 |
| 41,150 | 2 | 75 | 16 | 829 | 3 | 54 | 14 | 639 | 35 | 1,597 |
| 41,151 | 2 | 78 | 16 | 843 | 3 | 56 | 15 | 642 | 36 | 1,619 |
| 41,152 | 2 | 78 | 16 | 858 | 3 | 58 | 15 | 659 | 36 | 1,653 |

|        |   |    |    |       |   |    |    |     |    |       |
|--------|---|----|----|-------|---|----|----|-----|----|-------|
| 41,153 | 2 | 79 | 16 | 878   | 3 | 59 | 15 | 689 | 36 | 1,705 |
| 41,154 | 2 | 79 | 16 | 876   | 3 | 60 | 15 | 689 | 36 | 1,704 |
| 41,155 | 3 | 80 | 16 | 896   | 3 | 62 | 15 | 744 | 37 | 1,782 |
| 41,156 | 3 | 81 | 18 | 857   | 3 | 60 | 15 | 736 | 39 | 1,734 |
| 41,157 | 3 | 82 | 24 | 872   | 3 | 62 | 19 | 755 | 49 | 1,771 |
| 41,158 | 3 | 94 | 30 | 974   | 3 | 65 | 21 | 822 | 57 | 1,955 |
| 41,159 | 3 | 94 | 30 | 964   | 3 | 63 | 21 | 813 | 57 | 1,934 |
| 41,160 | 3 | 93 | 36 | 963   | 3 | 63 | 23 | 813 | 65 | 1,932 |
| 41,161 | 4 | 65 | 39 | 804   | 3 | 49 | 23 | 657 | 69 | 1,575 |
| 41,162 | 4 | 68 | 40 | 824   | 3 | 51 | 23 | 662 | 70 | 1,605 |
| 41,163 | 4 | 70 | 40 | 833   | 3 | 52 | 23 | 679 | 70 | 1,634 |
| 41,164 | 4 | 70 | 40 | 844   | 3 | 53 | 23 | 679 | 70 | 1,646 |
| 41,165 | 5 | 68 | 41 | 833   | 5 | 53 | 30 | 674 | 81 | 1,628 |
| 41,166 | 5 | 70 | 42 | 847   | 5 | 53 | 36 | 686 | 88 | 1,656 |
| 41,167 | 5 | 75 | 43 | 1,043 | 5 | 60 | 37 | 754 | 90 | 1,932 |
| 41,168 | 5 | 83 | 44 | 1,109 | 5 | 62 | 37 | 789 | 91 | 2,043 |
| 41,169 | 5 | 83 | 44 | 1,110 | 5 | 62 | 38 | 791 | 92 | 2,046 |
| 41,170 | 5 | 83 | 44 | 1,109 | 5 | 61 | 36 | 788 | 90 | 2,041 |
| 41,171 | 5 | 84 | 44 | 1,107 | 5 | 59 | 36 | 784 | 90 | 2,034 |
| 41,172 | 5 | 84 | 44 | 1,119 | 5 | 59 | 36 | 786 | 90 | 2,048 |
| 41,173 | 5 | 86 | 44 | 1,130 | 5 | 60 | 36 | 791 | 90 | 2,067 |
| 41,174 | 5 | 88 | 42 | 1,147 | 5 | 60 | 36 | 795 | 88 | 2,090 |
| 41,175 | 5 | 88 | 42 | 1,150 | 5 | 60 | 35 | 802 | 87 | 2,100 |
| 41,176 | 5 | 88 | 42 | 1,150 | 5 | 59 | 35 | 798 | 87 | 2,095 |
| 41,177 | 5 | 87 | 42 | 1,135 | 5 | 59 | 35 | 787 | 87 | 2,068 |
| 41,178 | 5 | 87 | 43 | 1,136 | 5 | 59 | 35 | 787 | 88 | 2,069 |
| 41,179 | 5 | 87 | 43 | 1,137 | 5 | 59 | 35 | 787 | 88 | 2,070 |
| 41,180 | 5 | 87 | 42 | 1,144 | 5 | 60 | 35 | 794 | 87 | 2,085 |
| 41,181 | 5 | 87 | 42 | 1,145 | 5 | 60 | 35 | 790 | 87 | 2,082 |
| 41,182 | 6 | 87 | 42 | 1,143 | 5 | 60 | 35 | 796 | 88 | 2,086 |
| 41,183 | 6 | 83 | 41 | 1,134 | 5 | 60 | 35 | 794 | 87 | 2,071 |
| 41,184 | 6 | 83 | 39 | 1,134 | 5 | 60 | 33 | 796 | 83 | 2,073 |
| 41,185 | 6 | 83 | 38 | 1,136 | 2 | 60 | 30 | 801 | 76 | 2,080 |
| 41,186 | 5 | 83 | 33 | 1,138 | 2 | 60 | 28 | 800 | 68 | 2,081 |
| 41,187 | 5 | 83 | 33 | 1,141 | 2 | 60 | 28 | 811 | 68 | 2,095 |
| 41,188 | 5 | 83 | 33 | 1,141 | 2 | 60 | 28 | 810 | 68 | 2,094 |
| 41,189 | 5 | 86 | 33 | 1,155 | 2 | 60 | 29 | 824 | 69 | 2,125 |
| 41,190 | 6 | 86 | 33 | 1,167 | 2 | 60 | 28 | 829 | 69 | 2,142 |
| 41,191 | 6 | 88 | 32 | 1,173 | 2 | 61 | 28 | 835 | 68 | 2,157 |
| 41,192 | 6 | 88 | 32 | 1,176 | 2 | 60 | 28 | 833 | 68 | 2,157 |
| 41,193 | 6 | 88 | 32 | 1,168 | 2 | 60 | 26 | 829 | 66 | 2,145 |

|        |   |    |    |       |   |    |    |     |    |       |
|--------|---|----|----|-------|---|----|----|-----|----|-------|
| 41,194 | 6 | 79 | 32 | 1,034 | 2 | 48 | 26 | 691 | 66 | 1,852 |
| 41,195 | 6 | 81 | 32 | 1,045 | 2 | 49 | 26 | 695 | 66 | 1,870 |
| 41,196 | 6 | 81 | 32 | 1,054 | 2 | 49 | 26 | 699 | 66 | 1,883 |
| 41,197 | 6 | 68 | 32 | 844   | 2 | 37 | 27 | 560 | 67 | 1,509 |
| 41,198 | 6 | 68 | 31 | 860   | 2 | 37 | 27 | 564 | 66 | 1,529 |
| 41,199 | 6 | 61 | 31 | 853   | 2 | 37 | 27 | 554 | 66 | 1,505 |
| 41,200 | 5 | 61 | 31 | 853   | 2 | 37 | 27 | 553 | 65 | 1,504 |
| 41,201 | 5 | 63 | 31 | 857   | 2 | 37 | 28 | 554 | 66 | 1,511 |
| 41,202 | 5 | 60 | 31 | 844   | 2 | 35 | 27 | 552 | 65 | 1,491 |
| 41,203 | 5 | 59 | 31 | 835   | 2 | 35 | 28 | 516 | 66 | 1,445 |
| 41,204 | 5 | 59 | 31 | 840   | 2 | 35 | 28 | 519 | 66 | 1,453 |
| 41,205 | 5 | 62 | 31 | 873   | 2 | 36 | 29 | 541 | 67 | 1,512 |
| 41,206 | 4 | 72 | 31 | 1,031 | 2 | 36 | 29 | 497 | 66 | 1,636 |
| 41,207 | 4 | 69 | 29 | 1,043 | 2 | 37 | 29 | 489 | 64 | 1,638 |
| 41,208 | 4 | 68 | 23 | 1,041 | 2 | 35 | 25 | 472 | 54 | 1,616 |
| 41,209 | 4 | 56 | 17 | 899   | 2 | 28 | 23 | 377 | 46 | 1,360 |
| 41,210 | 4 | 56 | 11 | 888   | 2 | 27 | 21 | 374 | 38 | 1,345 |
| 41,211 | 3 | 52 | 9  | 878   | 2 | 27 | 21 | 372 | 35 | 1,329 |
| 41,212 | 3 | 52 | 8  | 892   | 2 | 29 | 21 | 384 | 34 | 1,357 |
| 41,213 | 3 | 49 | 7  | 932   | 2 | 27 | 21 | 393 | 33 | 1,401 |
| 41,214 | 3 | 48 | 7  | 928   | 2 | 26 | 18 | 379 | 30 | 1,381 |
| 41,215 | 2 | 46 | 6  | 889   | 2 | 25 | 16 | 358 | 26 | 1,318 |
| 41,216 | 2 | 46 | 7  | 891   | 0 | 25 | 14 | 358 | 23 | 1,320 |
| 41,217 | 2 | 50 | 9  | 920   | 0 | 26 | 7  | 363 | 18 | 1,359 |
| 41,218 | 2 | 44 | 7  | 723   | 0 | 20 | 6  | 295 | 15 | 1,082 |
| 41,219 | 2 | 36 | 6  | 653   | 0 | 18 | 6  | 260 | 14 | 967   |
| 41,220 | 2 | 36 | 6  | 649   | 0 | 18 | 5  | 256 | 13 | 959   |
| 41,221 | 2 | 34 | 7  | 643   | 0 | 17 | 5  | 252 | 14 | 946   |
| 41,222 | 2 | 34 | 7  | 633   | 0 | 17 | 5  | 249 | 14 | 933   |
| 41,223 | 2 | 36 | 7  | 640   | 0 | 17 | 5  | 262 | 14 | 955   |
| 41,224 | 2 | 38 | 7  | 676   | 0 | 20 | 7  | 322 | 16 | 1,056 |
| 41,225 | 2 | 36 | 7  | 660   | 0 | 20 | 7  | 320 | 16 | 1,036 |
| 41,226 | 2 | 37 | 7  | 661   | 0 | 20 | 8  | 316 | 17 | 1,034 |
| 41,227 | 2 | 37 | 7  | 661   | 0 | 20 | 8  | 318 | 17 | 1,036 |
| 41,228 | 2 | 45 | 7  | 689   | 0 | 21 | 8  | 332 | 17 | 1,087 |
| 41,229 | 2 | 48 | 6  | 700   | 0 | 21 | 8  | 338 | 16 | 1,107 |
| 41,230 | 2 | 48 | 6  | 711   | 0 | 21 | 8  | 342 | 16 | 1,122 |
| 41,231 | 2 | 48 | 6  | 705   | 0 | 20 | 8  | 335 | 16 | 1,108 |
| 41,232 | 1 | 48 | 7  | 705   | 0 | 20 | 8  | 333 | 16 | 1,106 |
| 41,233 | 1 | 48 | 7  | 705   | 0 | 20 | 9  | 329 | 17 | 1,102 |
| 41,234 | 1 | 50 | 8  | 705   | 0 | 20 | 9  | 326 | 18 | 1,101 |

|        |   |    |     |     |   |    |    |     |     |       |
|--------|---|----|-----|-----|---|----|----|-----|-----|-------|
| 41,235 | 1 | 50 | 8   | 705 | 0 | 20 | 9  | 326 | 18  | 1,101 |
| 41,236 | 3 | 50 | 17  | 705 | 1 | 20 | 15 | 321 | 36  | 1,096 |
| 41,237 | 3 | 50 | 24  | 703 | 1 | 20 | 18 | 322 | 46  | 1,095 |
| 41,238 | 3 | 50 | 27  | 701 | 1 | 20 | 23 | 312 | 54  | 1,083 |
| 41,239 | 5 | 47 | 37  | 686 | 1 | 20 | 27 | 297 | 70  | 1,050 |
| 41,240 | 5 | 47 | 74  | 674 | 1 | 20 | 29 | 293 | 109 | 1,034 |
| 41,241 | 4 | 47 | 94  | 674 | 2 | 20 | 37 | 292 | 137 | 1,033 |
| 41,242 | 4 | 44 | 95  | 657 | 2 | 19 | 39 | 280 | 140 | 1,000 |
| 41,243 | 4 | 44 | 98  | 661 | 2 | 19 | 42 | 280 | 146 | 1,004 |
| 41,244 | 4 | 44 | 100 | 662 | 2 | 19 | 42 | 280 | 148 | 1,005 |
| 41,245 | 4 | 45 | 100 | 672 | 2 | 21 | 42 | 291 | 148 | 1,029 |
| 41,246 | 4 | 43 | 100 | 661 | 2 | 20 | 42 | 287 | 148 | 1,011 |
| 41,247 | 4 | 43 | 100 | 653 | 2 | 20 | 41 | 283 | 147 | 999   |
| 41,248 | 4 | 50 | 100 | 656 | 2 | 20 | 42 | 296 | 148 | 1,022 |
| 41,249 | 4 | 49 | 100 | 601 | 2 | 19 | 42 | 270 | 148 | 939   |
| 41,250 | 4 | 50 | 100 | 602 | 2 | 20 | 42 | 271 | 148 | 943   |
| 41,251 | 4 | 50 | 100 | 603 | 2 | 20 | 42 | 270 | 148 | 943   |
| 41,252 | 4 | 48 | 100 | 596 | 2 | 20 | 42 | 269 | 148 | 933   |
| 41,253 | 4 | 48 | 100 | 595 | 2 | 20 | 42 | 267 | 148 | 930   |
| 41,254 | 4 | 48 | 100 | 564 | 2 | 17 | 43 | 253 | 149 | 882   |
| 41,255 | 4 | 50 | 100 | 572 | 2 | 18 | 43 | 267 | 149 | 907   |
| 41,256 | 4 | 47 | 100 | 541 | 2 | 16 | 43 | 254 | 149 | 858   |
| 41,257 | 4 | 36 | 100 | 360 | 2 | 14 | 44 | 238 | 150 | 648   |
| 41,258 | 4 | 36 | 100 | 336 | 2 | 13 | 44 | 229 | 150 | 614   |
| 41,259 | 4 | 36 | 102 | 324 | 2 | 13 | 45 | 224 | 153 | 597   |
| 41,260 | 4 | 36 | 104 | 323 | 2 | 13 | 45 | 225 | 155 | 597   |
| 41,261 | 4 | 36 | 104 | 323 | 2 | 13 | 45 | 222 | 155 | 594   |
| 41,262 | 4 | 36 | 104 | 322 | 2 | 13 | 45 | 223 | 155 | 594   |
| 41,263 | 4 | 37 | 104 | 321 | 2 | 11 | 45 | 216 | 155 | 585   |
| 41,264 | 4 | 37 | 105 | 266 | 2 | 11 | 45 | 205 | 156 | 519   |
| 41,265 | 5 | 36 | 105 | 269 | 2 | 11 | 45 | 202 | 157 | 518   |
| 41,266 | 5 | 36 | 107 | 268 | 2 | 11 | 45 | 201 | 159 | 516   |
| 41,267 | 5 | 38 | 107 | 272 | 2 | 11 | 45 | 201 | 159 | 522   |
| 41,268 | 5 | 37 | 107 | 251 | 2 | 11 | 45 | 203 | 159 | 502   |
| 41,269 | 5 | 40 | 107 | 282 | 2 | 12 | 45 | 213 | 159 | 547   |
| 41,270 | 6 | 52 | 107 | 441 | 2 | 17 | 49 | 248 | 164 | 758   |
| 41,271 | 7 | 58 | 108 | 492 | 2 | 18 | 49 | 259 | 166 | 827   |
| 41,272 | 7 | 59 | 111 | 496 | 2 | 18 | 49 | 259 | 169 | 832   |
| 41,273 | 7 | 59 | 111 | 498 | 2 | 18 | 49 | 260 | 169 | 835   |
| 41,274 | 7 | 61 | 111 | 487 | 2 | 16 | 47 | 192 | 167 | 756   |
| 41,275 | 7 | 61 | 111 | 497 | 2 | 16 | 47 | 194 | 167 | 768   |

|        |   |    |     |     |   |    |    |     |     |     |
|--------|---|----|-----|-----|---|----|----|-----|-----|-----|
| 41,276 | 7 | 63 | 111 | 502 | 2 | 16 | 46 | 192 | 166 | 773 |
| 41,277 | 7 | 62 | 111 | 500 | 2 | 16 | 46 | 190 | 166 | 768 |
| 41,278 | 7 | 64 | 111 | 503 | 2 | 16 | 46 | 189 | 166 | 772 |
| 41,279 | 7 | 53 | 111 | 463 | 2 | 15 | 47 | 169 | 167 | 700 |
| 41,280 | 7 | 53 | 111 | 460 | 2 | 16 | 47 | 165 | 167 | 694 |
| 41,281 | 7 | 53 | 111 | 462 | 2 | 16 | 47 | 166 | 167 | 697 |
| 41,282 | 7 | 53 | 110 | 463 | 2 | 16 | 47 | 165 | 166 | 697 |
| 41,283 | 7 | 53 | 110 | 461 | 2 | 16 | 47 | 165 | 166 | 695 |
| 41,284 | 7 | 51 | 110 | 464 | 2 | 16 | 46 | 163 | 165 | 694 |
| 41,285 | 7 | 51 | 109 | 475 | 2 | 16 | 46 | 164 | 164 | 706 |
| 41,286 | 5 | 51 | 100 | 496 | 1 | 16 | 40 | 165 | 146 | 728 |
| 41,287 | 5 | 51 | 93  | 515 | 1 | 17 | 37 | 176 | 136 | 759 |
| 41,288 | 5 | 51 | 92  | 549 | 1 | 20 | 37 | 197 | 135 | 817 |
| 41,289 | 5 | 53 | 90  | 585 | 1 | 20 | 32 | 207 | 128 | 865 |
| 41,290 | 3 | 54 | 80  | 597 | 1 | 20 | 28 | 215 | 112 | 886 |
| 41,291 | 3 | 56 | 43  | 602 | 1 | 21 | 23 | 216 | 70  | 895 |
| 41,292 | 3 | 56 | 23  | 608 | 0 | 21 | 16 | 221 | 42  | 906 |
| 41,293 | 3 | 56 | 23  | 610 | 0 | 21 | 14 | 223 | 40  | 910 |
| 41,294 | 3 | 56 | 20  | 620 | 0 | 22 | 11 | 228 | 34  | 926 |
| 41,295 | 3 | 61 | 19  | 629 | 0 | 22 | 11 | 230 | 33  | 942 |
| 41,296 | 3 | 60 | 19  | 625 | 0 | 20 | 11 | 220 | 33  | 925 |
| 41,297 | 3 | 62 | 19  | 632 | 0 | 20 | 11 | 222 | 33  | 936 |
| 41,298 | 3 | 62 | 19  | 633 | 0 | 20 | 11 | 222 | 33  | 937 |
| 41,299 | 3 | 55 | 18  | 600 | 0 | 20 | 12 | 195 | 33  | 870 |
| 41,300 | 3 | 58 | 18  | 608 | 0 | 21 | 12 | 198 | 33  | 885 |
| 41,301 | 3 | 57 | 19  | 601 | 0 | 20 | 12 | 195 | 34  | 873 |
| 41,302 | 3 | 57 | 19  | 601 | 0 | 20 | 11 | 195 | 33  | 873 |
| 41,303 | 3 | 57 | 26  | 600 | 0 | 20 | 12 | 195 | 41  | 872 |
| 41,304 | 3 | 57 | 34  | 601 | 0 | 20 | 11 | 200 | 48  | 878 |
| 41,305 | 3 | 56 | 39  | 595 | 0 | 19 | 11 | 188 | 53  | 858 |
| 41,306 | 3 | 56 | 39  | 595 | 0 | 19 | 11 | 187 | 53  | 857 |
| 41,307 | 3 | 56 | 39  | 591 | 0 | 19 | 10 | 179 | 52  | 845 |
| 41,308 | 3 | 57 | 39  | 593 | 0 | 20 | 10 | 187 | 52  | 857 |
| 41,309 | 3 | 58 | 39  | 592 | 0 | 20 | 10 | 184 | 52  | 854 |
| 41,310 | 3 | 58 | 37  | 593 | 0 | 20 | 9  | 183 | 49  | 854 |
| 41,311 | 3 | 58 | 36  | 593 | 0 | 20 | 9  | 183 | 48  | 854 |
| 41,312 | 3 | 58 | 36  | 593 | 0 | 20 | 9  | 184 | 48  | 855 |
| 41,313 | 3 | 58 | 36  | 590 | 0 | 20 | 9  | 182 | 48  | 850 |
| 41,314 | 2 | 57 | 36  | 574 | 0 | 20 | 9  | 178 | 47  | 829 |
| 41,315 | 2 | 57 | 36  | 582 | 0 | 20 | 9  | 180 | 47  | 839 |
| 41,316 | 2 | 58 | 36  | 650 | 0 | 26 | 9  | 233 | 47  | 967 |



|        |   |    |    |     |   |    |   |     |    |       |
|--------|---|----|----|-----|---|----|---|-----|----|-------|
| 41,317 | 2 | 66 | 34 | 828 | 0 | 35 | 9 | 390 | 45 | 1,319 |
| 41,318 | 2 | 69 | 33 | 853 | 0 | 37 | 9 | 415 | 44 | 1,374 |
| 41,319 | 2 | 67 | 30 | 867 | 0 | 41 | 9 | 419 | 41 | 1,394 |
| 41,320 | 2 | 49 | 30 | 633 | 0 | 33 | 6 | 365 | 38 | 1,080 |
| 41,321 | 1 | 57 | 31 | 684 | 0 | 33 | 5 | 396 | 37 | 1,170 |
| 41,322 | 0 | 57 | 30 | 689 | 0 | 34 | 5 | 399 | 35 | 1,179 |
| 41,323 | 0 | 56 | 27 | 689 | 1 | 37 | 6 | 405 | 34 | 1,187 |
| 41,324 | 0 | 56 | 28 | 691 | 1 | 37 | 6 | 407 | 35 | 1,191 |
| 41,325 | 0 | 48 | 28 | 658 | 1 | 35 | 6 | 402 | 35 | 1,143 |
| 41,326 | 0 | 51 | 28 | 657 | 1 | 35 | 6 | 405 | 35 | 1,148 |
| 41,327 | 0 | 49 | 28 | 651 | 1 | 35 | 6 | 405 | 35 | 1,140 |
| 41,328 | 0 | 49 | 28 | 650 | 1 | 35 | 6 | 405 | 35 | 1,139 |
| 41,329 | 0 | 47 | 28 | 649 | 1 | 35 | 6 | 405 | 35 | 1,136 |
| 41,330 | 0 | 47 | 28 | 649 | 1 | 35 | 5 | 405 | 34 | 1,136 |
| 41,331 | 0 | 47 | 28 | 638 | 1 | 34 | 5 | 406 | 34 | 1,125 |
| 41,332 | 0 | 47 | 28 | 640 | 1 | 34 | 5 | 406 | 34 | 1,127 |
| 41,333 | 0 | 47 | 28 | 637 | 1 | 34 | 5 | 404 | 34 | 1,122 |
| 41,334 | 0 | 48 | 28 | 637 | 1 | 34 | 5 | 404 | 34 | 1,123 |
| 41,335 | 0 | 48 | 29 | 634 | 1 | 34 | 5 | 409 | 35 | 1,125 |
| 41,336 | 0 | 48 | 29 | 631 | 1 | 34 | 5 | 410 | 35 | 1,123 |
| 41,337 | 0 | 48 | 34 | 596 | 1 | 33 | 7 | 412 | 42 | 1,089 |
| 41,338 | 0 | 48 | 34 | 600 | 1 | 33 | 7 | 413 | 42 | 1,094 |
| 41,339 | 1 | 48 | 39 | 576 | 1 | 30 | 9 | 393 | 50 | 1,047 |
| 41,340 | 1 | 46 | 39 | 540 | 1 | 30 | 9 | 384 | 50 | 1,000 |
| 41,341 | 1 | 44 | 42 | 537 | 1 | 30 | 9 | 387 | 53 | 998   |
| 41,342 | 1 | 45 | 42 | 539 | 1 | 30 | 9 | 387 | 53 | 1,001 |
| 41,343 | 1 | 45 | 46 | 545 | 1 | 31 | 9 | 385 | 57 | 1,006 |
| 41,344 | 1 | 47 | 45 | 558 | 1 | 31 | 9 | 395 | 56 | 1,031 |
| 41,345 | 1 | 48 | 45 | 565 | 1 | 30 | 9 | 392 | 56 | 1,035 |
| 41,346 | 1 | 43 | 44 | 558 | 1 | 30 | 9 | 390 | 55 | 1,021 |
| 41,347 | 1 | 47 | 44 | 591 | 1 | 32 | 9 | 400 | 55 | 1,070 |
| 41,348 | 1 | 47 | 44 | 623 | 1 | 32 | 9 | 402 | 55 | 1,104 |
| 41,349 | 1 | 47 | 46 | 647 | 1 | 33 | 9 | 412 | 57 | 1,139 |
| 41,350 | 1 | 47 | 46 | 752 | 1 | 34 | 8 | 418 | 56 | 1,251 |
| 41,351 | 1 | 45 | 46 | 764 | 1 | 33 | 8 | 427 | 56 | 1,269 |
| 41,352 | 1 | 50 | 45 | 768 | 1 | 34 | 9 | 429 | 56 | 1,281 |
| 41,353 | 1 | 50 | 38 | 776 | 1 | 34 | 8 | 430 | 48 | 1,290 |
| 41,354 | 1 | 50 | 35 | 782 | 1 | 34 | 8 | 432 | 45 | 1,298 |
| 41,355 | 1 | 50 | 30 | 781 | 1 | 34 | 8 | 428 | 40 | 1,293 |
| 41,356 | 1 | 53 | 25 | 791 | 1 | 35 | 7 | 436 | 34 | 1,315 |
| 41,357 | 1 | 63 | 25 | 822 | 1 | 37 | 8 | 442 | 35 | 1,364 |

|        |   |    |    |       |   |    |    |     |    |       |
|--------|---|----|----|-------|---|----|----|-----|----|-------|
| 41,358 | 1 | 63 | 25 | 822   | 1 | 37 | 8  | 442 | 35 | 1,364 |
| 41,359 | 1 | 61 | 25 | 815   | 1 | 37 | 8  | 433 | 35 | 1,346 |
| 41,360 | 1 | 61 | 25 | 815   | 1 | 37 | 8  | 433 | 35 | 1,346 |
| 41,361 | 1 | 62 | 25 | 844   | 1 | 37 | 8  | 439 | 35 | 1,382 |
| 41,362 | 1 | 62 | 24 | 844   | 1 | 37 | 8  | 436 | 34 | 1,379 |
| 41,363 | 1 | 62 | 24 | 849   | 1 | 37 | 8  | 435 | 34 | 1,383 |
| 41,364 | 2 | 62 | 24 | 849   | 1 | 37 | 8  | 435 | 35 | 1,383 |
| 41,365 | 2 | 62 | 26 | 841   | 1 | 37 | 8  | 431 | 37 | 1,371 |
| 41,366 | 2 | 61 | 26 | 768   | 1 | 31 | 8  | 378 | 37 | 1,238 |
| 41,367 | 2 | 61 | 26 | 780   | 1 | 31 | 8  | 381 | 37 | 1,253 |
| 41,368 | 2 | 53 | 26 | 605   | 1 | 22 | 8  | 227 | 37 | 907   |
| 41,369 | 2 | 48 | 27 | 596   | 1 | 22 | 8  | 214 | 38 | 880   |
| 41,370 | 2 | 47 | 27 | 620   | 1 | 18 | 8  | 217 | 38 | 902   |
| 41,371 | 3 | 49 | 27 | 896   | 1 | 20 | 9  | 247 | 40 | 1,212 |
| 41,372 | 3 | 42 | 26 | 867   | 1 | 20 | 10 | 226 | 40 | 1,155 |
| 41,373 | 3 | 42 | 25 | 870   | 0 | 19 | 9  | 224 | 37 | 1,155 |
| 41,374 | 3 | 39 | 25 | 841   | 0 | 16 | 9  | 208 | 37 | 1,104 |
| 41,375 | 3 | 41 | 25 | 873   | 0 | 19 | 9  | 219 | 37 | 1,152 |
| 41,376 | 3 | 42 | 25 | 886   | 0 | 20 | 9  | 230 | 37 | 1,178 |
| 41,377 | 3 | 43 | 25 | 894   | 0 | 20 | 9  | 235 | 37 | 1,192 |
| 41,378 | 3 | 44 | 25 | 913   | 0 | 20 | 9  | 242 | 37 | 1,219 |
| 41,379 | 3 | 44 | 25 | 916   | 0 | 20 | 9  | 243 | 37 | 1,223 |
| 41,380 | 3 | 44 | 25 | 915   | 0 | 20 | 9  | 241 | 37 | 1,220 |
| 41,381 | 3 | 44 | 25 | 916   | 0 | 20 | 9  | 242 | 37 | 1,222 |
| 41,382 | 3 | 52 | 25 | 956   | 0 | 23 | 9  | 262 | 37 | 1,293 |
| 41,383 | 3 | 56 | 25 | 1,002 | 0 | 24 | 9  | 271 | 37 | 1,353 |
| 41,384 | 5 | 57 | 27 | 1,024 | 2 | 24 | 10 | 283 | 44 | 1,388 |
| 41,385 | 5 | 56 | 31 | 1,046 | 2 | 26 | 10 | 293 | 48 | 1,421 |
| 41,386 | 5 | 56 | 31 | 1,055 | 2 | 26 | 10 | 296 | 48 | 1,433 |
| 41,387 | 7 | 56 | 35 | 1,053 | 2 | 26 | 10 | 294 | 54 | 1,429 |
| 41,388 | 8 | 56 | 34 | 1,057 | 2 | 28 | 8  | 292 | 52 | 1,433 |
| 41,389 | 7 | 56 | 31 | 1,055 | 2 | 29 | 7  | 292 | 47 | 1,432 |
| 41,390 | 8 | 56 | 33 | 1,051 | 2 | 31 | 9  | 291 | 52 | 1,429 |
| 41,391 | 8 | 56 | 33 | 1,050 | 2 | 31 | 10 | 290 | 53 | 1,427 |
| 41,392 | 8 | 61 | 37 | 1,080 | 2 | 31 | 13 | 316 | 60 | 1,488 |
| 41,393 | 8 | 67 | 43 | 1,119 | 2 | 31 | 15 | 333 | 68 | 1,550 |
| 41,394 | 8 | 68 | 39 | 1,121 | 2 | 31 | 15 | 336 | 64 | 1,556 |
| 41,395 | 9 | 68 | 57 | 1,104 | 3 | 32 | 25 | 325 | 94 | 1,529 |
| 41,396 | 9 | 68 | 57 | 1,117 | 3 | 32 | 25 | 327 | 94 | 1,544 |
| 41,397 | 9 | 64 | 58 | 1,085 | 3 | 31 | 25 | 319 | 95 | 1,499 |
| 41,398 | 9 | 62 | 58 | 1,045 | 3 | 31 | 26 | 316 | 96 | 1,454 |

|        |    |    |    |       |   |    |    |     |     |       |
|--------|----|----|----|-------|---|----|----|-----|-----|-------|
| 41,399 | 9  | 63 | 58 | 1,060 | 3 | 31 | 26 | 323 | 96  | 1,477 |
| 41,400 | 9  | 63 | 56 | 1,041 | 3 | 30 | 25 | 313 | 93  | 1,447 |
| 41,401 | 9  | 62 | 56 | 915   | 3 | 30 | 25 | 295 | 93  | 1,302 |
| 41,402 | 9  | 57 | 56 | 907   | 3 | 29 | 25 | 292 | 93  | 1,285 |
| 41,403 | 10 | 57 | 56 | 893   | 3 | 29 | 24 | 289 | 93  | 1,268 |
| 41,404 | 10 | 57 | 56 | 894   | 3 | 29 | 24 | 291 | 93  | 1,271 |
| 41,405 | 10 | 57 | 56 | 894   | 3 | 29 | 24 | 291 | 93  | 1,271 |
| 41,406 | 10 | 53 | 56 | 882   | 3 | 28 | 24 | 281 | 93  | 1,244 |
| 41,407 | 10 | 53 | 56 | 882   | 3 | 28 | 24 | 281 | 93  | 1,244 |
| 41,408 | 10 | 45 | 59 | 851   | 3 | 26 | 27 | 272 | 99  | 1,194 |
| 41,409 | 10 | 45 | 60 | 848   | 3 | 25 | 29 | 273 | 102 | 1,191 |
| 41,410 | 10 | 45 | 60 | 848   | 3 | 25 | 29 | 275 | 102 | 1,193 |
| 41,411 | 10 | 46 | 60 | 849   | 3 | 25 | 29 | 275 | 102 | 1,195 |
| 41,412 | 10 | 46 | 64 | 820   | 3 | 25 | 29 | 269 | 106 | 1,160 |
| 41,413 | 10 | 46 | 64 | 814   | 3 | 25 | 29 | 269 | 106 | 1,154 |
| 41,414 | 9  | 46 | 64 | 814   | 3 | 25 | 29 | 269 | 105 | 1,154 |
| 41,415 | 9  | 46 | 64 | 814   | 3 | 25 | 29 | 269 | 105 | 1,154 |
| 41,416 | 9  | 46 | 62 | 814   | 3 | 25 | 29 | 269 | 103 | 1,154 |
| 41,417 | 9  | 46 | 62 | 816   | 3 | 25 | 29 | 269 | 103 | 1,156 |
| 41,418 | 9  | 51 | 65 | 820   | 3 | 25 | 29 | 281 | 106 | 1,177 |
| 41,419 | 9  | 51 | 65 | 832   | 3 | 25 | 29 | 289 | 106 | 1,197 |
| 41,420 | 9  | 53 | 65 | 821   | 3 | 24 | 31 | 283 | 108 | 1,181 |
| 41,421 | 8  | 54 | 65 | 775   | 3 | 23 | 31 | 269 | 107 | 1,121 |
| 41,422 | 8  | 49 | 65 | 494   | 3 | 22 | 30 | 241 | 106 | 806   |
| 41,423 | 8  | 50 | 65 | 476   | 3 | 22 | 29 | 254 | 105 | 802   |
| 41,424 | 8  | 51 | 65 | 477   | 3 | 22 | 29 | 254 | 105 | 804   |
| 41,425 | 8  | 51 | 64 | 477   | 3 | 22 | 29 | 250 | 104 | 800   |
| 41,426 | 8  | 49 | 64 | 446   | 3 | 19 | 29 | 241 | 104 | 755   |
| 41,427 | 8  | 48 | 64 | 449   | 3 | 18 | 29 | 236 | 104 | 751   |
| 41,428 | 8  | 48 | 64 | 441   | 3 | 18 | 29 | 233 | 104 | 740   |
| 41,429 | 8  | 47 | 64 | 418   | 3 | 18 | 30 | 224 | 105 | 707   |
| 41,430 | 8  | 47 | 67 | 418   | 2 | 18 | 30 | 224 | 107 | 707   |
| 41,431 | 6  | 47 | 67 | 417   | 2 | 18 | 29 | 223 | 104 | 705   |
| 41,432 | 6  | 39 | 66 | 377   | 1 | 15 | 29 | 202 | 102 | 633   |
| 41,433 | 6  | 34 | 66 | 306   | 1 | 14 | 29 | 181 | 102 | 535   |
| 41,434 | 6  | 34 | 66 | 306   | 1 | 14 | 29 | 181 | 102 | 535   |
| 41,435 | 6  | 34 | 62 | 306   | 1 | 14 | 29 | 180 | 98  | 534   |
| 41,436 | 6  | 34 | 62 | 268   | 1 | 12 | 29 | 161 | 98  | 475   |
| 41,437 | 6  | 34 | 62 | 269   | 1 | 12 | 30 | 163 | 99  | 478   |
| 41,438 | 4  | 34 | 55 | 269   | 1 | 12 | 30 | 158 | 90  | 473   |
| 41,439 | 3  | 34 | 54 | 260   | 1 | 10 | 30 | 147 | 88  | 451   |

|        |   |    |    |     |   |   |    |     |    |     |
|--------|---|----|----|-----|---|---|----|-----|----|-----|
| 41,440 | 3 | 35 | 54 | 270 | 1 | 9 | 30 | 158 | 88 | 472 |
| 41,441 | 2 | 36 | 50 | 265 | 1 | 7 | 27 | 156 | 80 | 464 |
| 41,442 | 2 | 39 | 50 | 278 | 1 | 8 | 26 | 167 | 79 | 492 |
| 41,443 | 2 | 33 | 43 | 239 | 1 | 7 | 23 | 139 | 69 | 418 |
| 41,444 | 2 | 26 | 37 | 185 | 1 | 6 | 21 | 119 | 61 | 336 |
| 41,445 | 1 | 22 | 20 | 167 | 0 | 5 | 11 | 114 | 32 | 308 |
| 41,446 | 1 | 22 | 18 | 168 | 0 | 5 | 11 | 114 | 30 | 309 |
| 41,447 | 1 | 22 | 18 | 147 | 0 | 4 | 11 | 111 | 30 | 284 |
| 41,448 | 1 | 22 | 17 | 148 | 0 | 4 | 11 | 111 | 29 | 285 |
| 41,449 | 1 | 22 | 18 | 149 | 0 | 4 | 10 | 110 | 29 | 285 |
| 41,450 | 1 | 21 | 19 | 129 | 0 | 5 | 12 | 103 | 32 | 258 |
| 41,451 | 1 | 21 | 20 | 129 | 0 | 4 | 12 | 103 | 33 | 257 |
| 41,452 | 1 | 21 | 20 | 136 | 0 | 4 | 12 | 104 | 33 | 265 |
| 41,453 | 1 | 21 | 22 | 139 | 0 | 5 | 12 | 106 | 35 | 271 |
| 41,454 | 2 | 21 | 26 | 146 | 0 | 5 | 15 | 108 | 43 | 280 |
| 41,455 | 2 | 22 | 26 | 164 | 0 | 5 | 15 | 114 | 43 | 305 |
| 41,456 | 2 | 22 | 26 | 171 | 0 | 5 | 15 | 116 | 43 | 314 |
| 41,457 | 4 | 24 | 28 | 200 | 0 | 5 | 20 | 118 | 52 | 347 |
| 41,458 | 4 | 24 | 28 | 209 | 0 | 5 | 22 | 121 | 54 | 359 |
| 41,459 | 4 | 21 | 26 | 208 | 0 | 5 | 18 | 118 | 48 | 352 |
| 41,460 | 4 | 21 | 25 | 210 | 0 | 5 | 16 | 118 | 45 | 354 |
| 41,461 | 4 | 20 | 21 | 210 | 0 | 5 | 16 | 118 | 41 | 353 |
| 41,462 | 4 | 20 | 21 | 211 | 0 | 5 | 16 | 118 | 41 | 354 |
| 41,463 | 4 | 20 | 21 | 215 | 0 | 5 | 16 | 118 | 41 | 358 |
| 41,464 | 4 | 20 | 21 | 217 | 0 | 5 | 16 | 119 | 41 | 361 |
| 41,465 | 4 | 20 | 21 | 226 | 0 | 5 | 17 | 122 | 42 | 373 |
| 41,466 | 4 | 20 | 21 | 227 | 0 | 5 | 17 | 122 | 42 | 374 |
| 41,467 | 4 | 20 | 22 | 231 | 0 | 5 | 17 | 122 | 43 | 378 |
| 41,468 | 4 | 20 | 21 | 230 | 0 | 5 | 17 | 122 | 42 | 377 |
| 41,469 | 4 | 15 | 19 | 212 | 0 | 5 | 17 | 108 | 40 | 340 |
| 41,470 | 4 | 15 | 19 | 200 | 0 | 5 | 15 | 100 | 38 | 320 |
| 41,471 | 4 | 13 | 18 | 189 | 0 | 4 | 15 | 94  | 37 | 300 |
| 41,472 | 4 | 12 | 23 | 189 | 0 | 4 | 18 | 94  | 45 | 299 |
| 41,473 | 4 | 10 | 26 | 174 | 1 | 3 | 20 | 69  | 51 | 256 |
| 41,474 | 4 | 9  | 26 | 173 | 1 | 3 | 20 | 69  | 51 | 254 |
| 41,475 | 4 | 9  | 26 | 173 | 1 | 3 | 20 | 70  | 51 | 255 |
| 41,476 | 4 | 9  | 26 | 172 | 1 | 3 | 20 | 68  | 51 | 252 |
| 41,477 | 4 | 9  | 26 | 175 | 1 | 3 | 20 | 68  | 51 | 255 |
| 41,478 | 4 | 9  | 26 | 168 | 1 | 3 | 20 | 66  | 51 | 246 |
| 41,479 | 4 | 9  | 26 | 171 | 1 | 3 | 20 | 69  | 51 | 252 |
| 41,480 | 4 | 10 | 26 | 171 | 1 | 3 | 19 | 71  | 50 | 255 |

|        |   |    |    |     |   |    |    |     |    |     |
|--------|---|----|----|-----|---|----|----|-----|----|-----|
| 41,481 | 4 | 10 | 22 | 172 | 1 | 3  | 19 | 71  | 46 | 256 |
| 41,482 | 4 | 10 | 22 | 174 | 1 | 3  | 19 | 71  | 46 | 258 |
| 41,483 | 4 | 10 | 22 | 175 | 1 | 4  | 19 | 74  | 46 | 263 |
| 41,484 | 4 | 11 | 22 | 176 | 1 | 5  | 19 | 75  | 46 | 267 |
| 41,485 | 4 | 11 | 22 | 176 | 1 | 5  | 19 | 75  | 46 | 267 |
| 41,486 | 4 | 11 | 22 | 176 | 1 | 6  | 19 | 76  | 46 | 269 |
| 41,487 | 4 | 12 | 21 | 181 | 1 | 6  | 19 | 81  | 45 | 280 |
| 41,488 | 4 | 12 | 21 | 180 | 1 | 6  | 18 | 79  | 44 | 277 |
| 41,489 | 4 | 12 | 21 | 181 | 1 | 6  | 18 | 79  | 44 | 278 |
| 41,490 | 4 | 13 | 21 | 180 | 1 | 6  | 18 | 79  | 44 | 278 |
| 41,491 | 4 | 11 | 21 | 167 | 1 | 6  | 18 | 69  | 44 | 253 |
| 41,492 | 4 | 8  | 21 | 154 | 1 | 5  | 18 | 59  | 44 | 226 |
| 41,493 | 4 | 8  | 21 | 154 | 1 | 5  | 18 | 59  | 44 | 226 |
| 41,494 | 4 | 8  | 21 | 150 | 1 | 5  | 18 | 55  | 44 | 218 |
| 41,495 | 4 | 8  | 22 | 147 | 1 | 5  | 18 | 55  | 45 | 215 |
| 41,496 | 4 | 8  | 22 | 146 | 1 | 5  | 18 | 55  | 45 | 214 |
| 41,497 | 4 | 9  | 22 | 147 | 1 | 5  | 18 | 55  | 45 | 216 |
| 41,498 | 4 | 9  | 22 | 146 | 1 | 5  | 18 | 53  | 45 | 213 |
| 41,499 | 4 | 9  | 21 | 145 | 1 | 5  | 19 | 54  | 45 | 213 |
| 41,500 | 4 | 9  | 21 | 145 | 1 | 5  | 17 | 55  | 43 | 214 |
| 41,501 | 4 | 9  | 20 | 145 | 1 | 4  | 17 | 56  | 42 | 214 |
| 41,502 | 4 | 9  | 19 | 138 | 1 | 4  | 18 | 56  | 42 | 207 |
| 41,503 | 4 | 9  | 19 | 129 | 1 | 3  | 18 | 51  | 42 | 192 |
| 41,504 | 4 | 9  | 17 | 129 | 1 | 3  | 18 | 52  | 40 | 193 |
| 41,505 | 2 | 9  | 13 | 132 | 1 | 3  | 14 | 54  | 30 | 198 |
| 41,506 | 2 | 6  | 13 | 66  | 1 | 3  | 14 | 39  | 30 | 114 |
| 41,507 | 2 | 6  | 13 | 66  | 1 | 3  | 14 | 40  | 30 | 115 |
| 41,508 | 0 | 6  | 11 | 69  | 1 | 3  | 9  | 40  | 21 | 118 |
| 41,509 | 0 | 6  | 11 | 70  | 1 | 3  | 7  | 40  | 19 | 119 |
| 41,510 | 0 | 7  | 11 | 69  | 1 | 3  | 7  | 40  | 19 | 119 |
| 41,511 | 0 | 8  | 11 | 79  | 1 | 3  | 7  | 43  | 19 | 133 |
| 41,512 | 0 | 8  | 11 | 83  | 1 | 3  | 8  | 50  | 20 | 144 |
| 41,513 | 0 | 8  | 11 | 82  | 1 | 3  | 8  | 50  | 20 | 143 |
| 41,514 | 0 | 8  | 11 | 80  | 1 | 3  | 8  | 52  | 20 | 143 |
| 41,515 | 0 | 8  | 11 | 78  | 1 | 3  | 8  | 51  | 20 | 140 |
| 41,516 | 0 | 8  | 11 | 69  | 1 | 3  | 10 | 48  | 22 | 128 |
| 41,517 | 0 | 8  | 11 | 76  | 1 | 3  | 10 | 53  | 22 | 140 |
| 41,518 | 1 | 8  | 10 | 106 | 1 | 4  | 11 | 75  | 23 | 193 |
| 41,519 | 1 | 16 | 10 | 196 | 1 | 11 | 11 | 140 | 23 | 363 |
| 41,520 | 1 | 16 | 10 | 225 | 1 | 11 | 11 | 149 | 23 | 401 |
| 41,521 | 1 | 18 | 10 | 232 | 1 | 11 | 11 | 151 | 23 | 412 |

|        |   |    |    |     |   |    |    |     |    |     |
|--------|---|----|----|-----|---|----|----|-----|----|-----|
| 41,522 | 1 | 18 | 9  | 233 | 1 | 12 | 11 | 153 | 22 | 416 |
| 41,523 | 1 | 18 | 5  | 233 | 1 | 12 | 8  | 154 | 15 | 417 |
| 41,524 | 1 | 18 | 7  | 238 | 0 | 12 | 10 | 154 | 18 | 422 |
| 41,525 | 1 | 18 | 7  | 243 | 0 | 12 | 10 | 154 | 18 | 427 |
| 41,526 | 1 | 18 | 7  | 249 | 0 | 13 | 10 | 153 | 18 | 433 |
| 41,527 | 1 | 18 | 7  | 249 | 0 | 13 | 12 | 153 | 20 | 433 |
| 41,528 | 1 | 18 | 7  | 237 | 0 | 13 | 12 | 149 | 20 | 417 |
| 41,529 | 1 | 17 | 7  | 234 | 0 | 13 | 12 | 144 | 20 | 408 |
| 41,530 | 1 | 17 | 7  | 234 | 0 | 13 | 12 | 144 | 20 | 408 |
| 41,531 | 1 | 16 | 7  | 235 | 0 | 13 | 12 | 144 | 20 | 408 |
| 41,532 | 1 | 16 | 7  | 234 | 0 | 13 | 12 | 143 | 20 | 406 |
| 41,533 | 1 | 16 | 7  | 231 | 0 | 13 | 12 | 142 | 20 | 402 |
| 41,534 | 1 | 16 | 9  | 230 | 1 | 12 | 12 | 139 | 23 | 397 |
| 41,535 | 1 | 15 | 9  | 229 | 1 | 11 | 12 | 138 | 23 | 393 |
| 41,536 | 1 | 15 | 10 | 229 | 1 | 10 | 12 | 137 | 24 | 391 |
| 41,537 | 1 | 15 | 10 | 230 | 1 | 10 | 12 | 137 | 24 | 392 |
| 41,538 | 1 | 14 | 10 | 222 | 1 | 10 | 12 | 130 | 24 | 376 |
| 41,539 | 1 | 14 | 10 | 221 | 1 | 10 | 12 | 130 | 24 | 375 |
| 41,540 | 1 | 13 | 10 | 221 | 1 | 10 | 13 | 129 | 25 | 373 |
| 41,541 | 4 | 13 | 12 | 221 | 1 | 10 | 18 | 129 | 35 | 373 |
| 41,542 | 4 | 13 | 18 | 221 | 1 | 10 | 22 | 129 | 45 | 373 |
| 41,543 | 4 | 13 | 19 | 225 | 1 | 10 | 22 | 130 | 46 | 378 |
| 41,544 | 4 | 14 | 19 | 229 | 1 | 10 | 22 | 138 | 46 | 391 |
| 41,545 | 5 | 20 | 45 | 260 | 2 | 10 | 35 | 178 | 87 | 468 |
| 41,546 | 5 | 21 | 44 | 262 | 2 | 10 | 35 | 178 | 86 | 471 |
| 41,547 | 5 | 23 | 45 | 271 | 2 | 10 | 35 | 189 | 87 | 493 |
| 41,548 | 5 | 24 | 45 | 278 | 3 | 10 | 35 | 191 | 88 | 503 |
| 41,549 | 5 | 24 | 45 | 277 | 3 | 10 | 34 | 192 | 87 | 503 |
| 41,550 | 5 | 24 | 45 | 281 | 3 | 10 | 34 | 193 | 87 | 508 |
| 41,551 | 5 | 24 | 46 | 287 | 3 | 10 | 34 | 193 | 88 | 514 |
| 41,552 | 5 | 24 | 46 | 290 | 3 | 10 | 34 | 194 | 88 | 518 |
| 41,553 | 5 | 24 | 47 | 290 | 3 | 10 | 33 | 193 | 88 | 517 |
| 41,554 | 5 | 24 | 47 | 289 | 3 | 10 | 33 | 193 | 88 | 516 |
| 41,555 | 5 | 24 | 47 | 290 | 3 | 11 | 33 | 193 | 88 | 518 |
| 41,556 | 5 | 24 | 47 | 290 | 3 | 11 | 33 | 193 | 88 | 518 |
| 41,557 | 5 | 25 | 47 | 295 | 3 | 11 | 33 | 194 | 88 | 525 |
| 41,558 | 5 | 25 | 47 | 296 | 3 | 11 | 33 | 193 | 88 | 525 |
| 41,559 | 5 | 25 | 47 | 294 | 3 | 11 | 34 | 193 | 89 | 523 |
| 41,560 | 5 | 24 | 47 | 292 | 3 | 11 | 34 | 193 | 89 | 520 |
| 41,561 | 5 | 23 | 47 | 284 | 3 | 11 | 35 | 190 | 90 | 508 |
| 41,562 | 5 | 23 | 47 | 284 | 3 | 11 | 35 | 192 | 90 | 510 |

|        |    |    |     |     |    |    |    |     |     |     |
|--------|----|----|-----|-----|----|----|----|-----|-----|-----|
| 41,563 | 5  | 23 | 48  | 283 | 3  | 11 | 34 | 187 | 90  | 504 |
| 41,564 | 5  | 23 | 48  | 283 | 3  | 11 | 34 | 187 | 90  | 504 |
| 41,565 | 5  | 23 | 48  | 280 | 3  | 11 | 35 | 185 | 91  | 499 |
| 41,566 | 5  | 23 | 49  | 281 | 3  | 11 | 35 | 185 | 92  | 500 |
| 41,567 | 6  | 23 | 63  | 273 | 3  | 11 | 35 | 180 | 107 | 487 |
| 41,568 | 5  | 23 | 63  | 274 | 3  | 11 | 34 | 181 | 105 | 489 |
| 41,569 | 5  | 23 | 63  | 238 | 3  | 10 | 34 | 159 | 105 | 430 |
| 41,570 | 8  | 17 | 75  | 149 | 5  | 3  | 41 | 95  | 129 | 264 |
| 41,571 | 8  | 17 | 78  | 119 | 6  | 3  | 46 | 86  | 138 | 225 |
| 41,572 | 8  | 16 | 78  | 120 | 6  | 2  | 46 | 85  | 138 | 223 |
| 41,573 | 8  | 17 | 81  | 133 | 7  | 2  | 50 | 88  | 146 | 240 |
| 41,574 | 8  | 17 | 82  | 135 | 8  | 2  | 49 | 89  | 147 | 243 |
| 41,575 | 8  | 18 | 82  | 132 | 8  | 2  | 47 | 91  | 145 | 243 |
| 41,576 | 9  | 18 | 87  | 121 | 8  | 1  | 51 | 91  | 155 | 231 |
| 41,577 | 9  | 19 | 87  | 128 | 8  | 1  | 51 | 95  | 155 | 243 |
| 41,578 | 9  | 20 | 87  | 128 | 8  | 1  | 51 | 98  | 155 | 247 |
| 41,579 | 10 | 20 | 125 | 130 | 11 | 1  | 70 | 98  | 216 | 249 |
| 41,580 | 10 | 21 | 130 | 161 | 11 | 1  | 75 | 108 | 226 | 291 |
| 41,581 | 10 | 21 | 130 | 166 | 11 | 1  | 75 | 110 | 226 | 298 |
| 41,582 | 10 | 21 | 132 | 171 | 11 | 1  | 75 | 109 | 228 | 302 |
| 41,583 | 10 | 24 | 132 | 179 | 11 | 1  | 75 | 120 | 228 | 324 |
| 41,584 | 10 | 24 | 131 | 189 | 10 | 1  | 75 | 121 | 226 | 335 |
| 41,585 | 10 | 24 | 130 | 189 | 10 | 1  | 75 | 120 | 225 | 334 |
| 41,586 | 10 | 24 | 130 | 189 | 10 | 1  | 75 | 120 | 225 | 334 |
| 41,587 | 10 | 26 | 129 | 198 | 10 | 6  | 75 | 127 | 224 | 357 |
| 41,588 | 10 | 28 | 129 | 237 | 10 | 7  | 75 | 143 | 224 | 415 |
| 41,589 | 10 | 28 | 129 | 241 | 10 | 7  | 75 | 143 | 224 | 419 |
| 41,590 | 10 | 28 | 129 | 278 | 10 | 8  | 75 | 154 | 224 | 468 |
| 41,591 | 10 | 29 | 129 | 306 | 10 | 8  | 74 | 171 | 223 | 514 |
| 41,592 | 7  | 30 | 127 | 310 | 10 | 8  | 69 | 174 | 213 | 522 |
| 41,593 | 7  | 30 | 121 | 309 | 10 | 9  | 65 | 173 | 203 | 521 |
| 41,594 | 7  | 30 | 120 | 319 | 10 | 9  | 65 | 178 | 202 | 536 |
| 41,595 | 6  | 30 | 98  | 320 | 9  | 9  | 57 | 170 | 170 | 529 |
| 41,596 | 6  | 21 | 94  | 262 | 6  | 9  | 50 | 125 | 156 | 417 |
| 41,597 | 6  | 21 | 97  | 275 | 8  | 9  | 52 | 120 | 163 | 425 |
| 41,598 | 6  | 19 | 96  | 268 | 9  | 9  | 52 | 117 | 163 | 413 |
| 41,599 | 6  | 20 | 96  | 269 | 8  | 9  | 53 | 116 | 163 | 414 |
| 41,600 | 6  | 20 | 96  | 266 | 8  | 9  | 53 | 114 | 163 | 409 |
| 41,601 | 6  | 20 | 100 | 259 | 8  | 9  | 58 | 112 | 172 | 400 |
| 41,602 | 6  | 20 | 102 | 257 | 8  | 9  | 64 | 111 | 180 | 397 |
| 41,603 | 6  | 20 | 104 | 257 | 9  | 9  | 67 | 112 | 186 | 398 |

|        |   |    |     |     |   |    |    |     |     |     |
|--------|---|----|-----|-----|---|----|----|-----|-----|-----|
| 41,604 | 6 | 20 | 105 | 257 | 9 | 9  | 67 | 111 | 187 | 397 |
| 41,605 | 6 | 20 | 107 | 256 | 9 | 8  | 69 | 111 | 191 | 395 |
| 41,606 | 6 | 21 | 107 | 260 | 9 | 8  | 69 | 113 | 191 | 402 |
| 41,607 | 6 | 23 | 107 | 263 | 9 | 8  | 69 | 122 | 191 | 416 |
| 41,608 | 6 | 23 | 107 | 258 | 9 | 8  | 69 | 121 | 191 | 410 |
| 41,609 | 6 | 23 | 107 | 258 | 9 | 8  | 68 | 122 | 190 | 411 |
| 41,610 | 6 | 23 | 107 | 257 | 9 | 8  | 68 | 122 | 190 | 410 |
| 41,611 | 6 | 23 | 107 | 255 | 9 | 8  | 68 | 122 | 190 | 408 |
| 41,612 | 6 | 23 | 105 | 255 | 9 | 8  | 67 | 120 | 187 | 406 |
| 41,613 | 6 | 23 | 105 | 254 | 9 | 8  | 67 | 119 | 187 | 404 |
| 41,614 | 6 | 23 | 105 | 254 | 9 | 8  | 67 | 119 | 187 | 404 |
| 41,615 | 6 | 23 | 105 | 254 | 9 | 8  | 67 | 119 | 187 | 404 |
| 41,616 | 6 | 23 | 105 | 255 | 9 | 8  | 66 | 121 | 186 | 407 |
| 41,617 | 6 | 23 | 102 | 255 | 9 | 8  | 66 | 121 | 183 | 407 |
| 41,618 | 5 | 23 | 89  | 256 | 9 | 8  | 64 | 120 | 167 | 407 |
| 41,619 | 5 | 24 | 87  | 256 | 9 | 8  | 63 | 122 | 164 | 410 |
| 41,620 | 2 | 21 | 80  | 247 | 7 | 8  | 61 | 116 | 150 | 392 |
| 41,621 | 5 | 21 | 85  | 247 | 7 | 8  | 64 | 116 | 161 | 392 |
| 41,622 | 5 | 21 | 84  | 249 | 6 | 8  | 60 | 116 | 155 | 394 |
| 41,623 | 5 | 24 | 87  | 253 | 6 | 9  | 60 | 124 | 158 | 410 |
| 41,624 | 5 | 23 | 83  | 237 | 5 | 9  | 56 | 121 | 149 | 390 |
| 41,625 | 5 | 25 | 79  | 249 | 5 | 9  | 56 | 126 | 145 | 409 |
| 41,626 | 6 | 29 | 79  | 259 | 5 | 9  | 56 | 134 | 146 | 431 |
| 41,627 | 5 | 38 | 72  | 292 | 4 | 12 | 46 | 170 | 127 | 512 |
| 41,628 | 5 | 40 | 67  | 305 | 4 | 14 | 44 | 182 | 120 | 541 |
| 41,629 | 4 | 44 | 44  | 358 | 2 | 19 | 31 | 208 | 81  | 629 |
| 41,630 | 4 | 43 | 62  | 378 | 1 | 20 | 33 | 212 | 100 | 653 |
| 41,631 | 4 | 42 | 58  | 351 | 1 | 20 | 30 | 206 | 93  | 619 |
| 41,632 | 4 | 46 | 56  | 358 | 1 | 21 | 31 | 204 | 92  | 629 |
| 41,633 | 4 | 48 | 56  | 360 | 1 | 21 | 31 | 206 | 92  | 635 |
| 41,634 | 4 | 46 | 56  | 366 | 1 | 21 | 31 | 197 | 92  | 630 |
| 41,635 | 4 | 46 | 57  | 360 | 1 | 21 | 31 | 196 | 93  | 623 |
| 41,636 | 4 | 46 | 61  | 366 | 1 | 21 | 32 | 196 | 98  | 629 |
| 41,637 | 4 | 45 | 62  | 368 | 2 | 21 | 34 | 198 | 102 | 632 |
| 41,638 | 4 | 42 | 63  | 325 | 2 | 15 | 34 | 176 | 103 | 558 |
| 41,639 | 4 | 42 | 65  | 314 | 2 | 15 | 37 | 175 | 108 | 546 |
| 41,640 | 4 | 42 | 65  | 315 | 2 | 15 | 37 | 175 | 108 | 547 |
| 41,641 | 4 | 42 | 65  | 282 | 2 | 14 | 37 | 159 | 108 | 497 |
| 41,642 | 4 | 42 | 66  | 255 | 2 | 14 | 37 | 146 | 109 | 457 |
| 41,643 | 4 | 40 | 68  | 250 | 2 | 14 | 37 | 144 | 111 | 448 |
| 41,644 | 4 | 40 | 68  | 245 | 2 | 13 | 37 | 144 | 111 | 442 |



|        |   |    |    |     |   |    |    |     |     |     |
|--------|---|----|----|-----|---|----|----|-----|-----|-----|
| 41,645 | 4 | 39 | 68 | 232 | 2 | 13 | 37 | 139 | 111 | 423 |
| 41,646 | 4 | 39 | 68 | 232 | 2 | 13 | 37 | 139 | 111 | 423 |
| 41,647 | 5 | 39 | 65 | 232 | 2 | 13 | 38 | 140 | 110 | 424 |
| 41,648 | 5 | 39 | 65 | 232 | 2 | 13 | 38 | 140 | 110 | 424 |
| 41,649 | 6 | 38 | 67 | 234 | 2 | 13 | 38 | 140 | 113 | 425 |
| 41,650 | 6 | 38 | 67 | 237 | 2 | 13 | 37 | 141 | 112 | 429 |
| 41,651 | 6 | 38 | 67 | 237 | 2 | 13 | 39 | 141 | 114 | 429 |
| 41,652 | 6 | 38 | 63 | 238 | 2 | 13 | 34 | 142 | 105 | 431 |
| 41,653 | 6 | 40 | 60 | 253 | 2 | 15 | 28 | 146 | 96  | 454 |
| 41,654 | 6 | 42 | 57 | 263 | 1 | 15 | 25 | 147 | 89  | 467 |
| 41,655 | 6 | 42 | 59 | 263 | 1 | 15 | 25 | 147 | 91  | 467 |
| 41,656 | 6 | 41 | 57 | 259 | 1 | 15 | 23 | 145 | 87  | 460 |
| 41,657 | 6 | 41 | 57 | 259 | 1 | 15 | 23 | 145 | 87  | 460 |
| 41,658 | 6 | 38 | 57 | 255 | 1 | 15 | 23 | 135 | 87  | 443 |
| 41,659 | 6 | 38 | 57 | 255 | 1 | 15 | 23 | 133 | 87  | 441 |
| 41,660 | 6 | 38 | 57 | 255 | 1 | 15 | 24 | 133 | 88  | 441 |
| 41,661 | 6 | 38 | 57 | 257 | 1 | 15 | 24 | 133 | 88  | 443 |
| 41,662 | 6 | 38 | 57 | 257 | 1 | 15 | 24 | 133 | 88  | 443 |
| 41,663 | 7 | 38 | 57 | 256 | 1 | 15 | 25 | 133 | 90  | 442 |
| 41,664 | 7 | 38 | 57 | 256 | 1 | 15 | 25 | 133 | 90  | 442 |
| 41,665 | 7 | 38 | 57 | 257 | 1 | 15 | 25 | 132 | 90  | 442 |
| 41,666 | 8 | 38 | 57 | 255 | 1 | 15 | 26 | 134 | 92  | 442 |
| 41,667 | 8 | 38 | 57 | 257 | 1 | 15 | 26 | 133 | 92  | 443 |
| 41,668 | 8 | 38 | 57 | 259 | 1 | 15 | 26 | 132 | 92  | 444 |
| 41,669 | 8 | 42 | 58 | 281 | 1 | 15 | 26 | 136 | 93  | 474 |
| 41,670 | 8 | 41 | 56 | 286 | 1 | 15 | 24 | 135 | 89  | 477 |
| 41,671 | 8 | 41 | 55 | 285 | 1 | 15 | 22 | 135 | 86  | 476 |
| 41,672 | 5 | 42 | 50 | 288 | 1 | 15 | 19 | 134 | 75  | 479 |
| 41,673 | 5 | 39 | 49 | 282 | 1 | 14 | 18 | 127 | 73  | 462 |
| 41,674 | 5 | 39 | 46 | 282 | 1 | 14 | 18 | 131 | 70  | 466 |
| 41,675 | 5 | 39 | 46 | 294 | 1 | 14 | 18 | 135 | 70  | 482 |
| 41,676 | 5 | 37 | 45 | 330 | 1 | 15 | 18 | 138 | 69  | 520 |
| 41,677 | 4 | 36 | 45 | 388 | 1 | 16 | 18 | 164 | 68  | 604 |
| 41,678 | 4 | 27 | 45 | 364 | 1 | 13 | 18 | 136 | 68  | 540 |
| 41,679 | 4 | 24 | 45 | 348 | 1 | 12 | 18 | 125 | 68  | 509 |
| 41,680 | 4 | 21 | 40 | 291 | 1 | 7  | 18 | 99  | 63  | 418 |
| 41,681 | 4 | 25 | 18 | 291 | 1 | 6  | 13 | 111 | 36  | 433 |
| 41,682 | 4 | 26 | 18 | 293 | 1 | 6  | 13 | 113 | 36  | 438 |
| 41,683 | 4 | 22 | 18 | 282 | 1 | 5  | 12 | 113 | 35  | 422 |
| 41,684 | 4 | 20 | 18 | 268 | 1 | 5  | 12 | 111 | 35  | 404 |
| 41,685 | 4 | 20 | 17 | 268 | 1 | 5  | 12 | 111 | 34  | 404 |

|        |   |    |    |     |   |   |    |     |    |     |
|--------|---|----|----|-----|---|---|----|-----|----|-----|
| 41,686 | 4 | 20 | 13 | 262 | 1 | 5 | 11 | 111 | 29 | 398 |
| 41,687 | 4 | 20 | 13 | 265 | 1 | 5 | 11 | 114 | 29 | 404 |
| 41,688 | 4 | 20 | 12 | 271 | 0 | 5 | 9  | 118 | 25 | 414 |
| 41,689 | 4 | 20 | 11 | 271 | 0 | 5 | 9  | 118 | 24 | 414 |
| 41,690 | 4 | 20 | 9  | 271 | 0 | 5 | 6  | 118 | 19 | 414 |
| 41,691 | 4 | 20 | 9  | 271 | 0 | 5 | 6  | 118 | 19 | 414 |
| 41,692 | 4 | 20 | 8  | 271 | 0 | 5 | 6  | 118 | 18 | 414 |
| 41,693 | 4 | 20 | 6  | 271 | 0 | 5 | 6  | 119 | 16 | 415 |
| 41,694 | 4 | 20 | 6  | 271 | 0 | 6 | 6  | 119 | 16 | 416 |
| 41,695 | 4 | 20 | 8  | 273 | 0 | 6 | 6  | 119 | 18 | 418 |
| 41,696 | 4 | 20 | 8  | 273 | 0 | 6 | 6  | 119 | 18 | 418 |
| 41,697 | 3 | 20 | 8  | 274 | 0 | 6 | 6  | 118 | 17 | 418 |
| 41,698 | 3 | 20 | 8  | 274 | 0 | 6 | 5  | 120 | 16 | 420 |
| 41,699 | 2 | 20 | 7  | 275 | 0 | 6 | 5  | 120 | 14 | 421 |
| 41,700 | 2 | 22 | 15 | 281 | 0 | 7 | 8  | 131 | 25 | 441 |
| 41,701 | 2 | 22 | 15 | 281 | 0 | 9 | 8  | 131 | 25 | 443 |
| 41,702 | 2 | 22 | 22 | 294 | 0 | 9 | 10 | 132 | 34 | 457 |
| 41,703 | 2 | 22 | 22 | 308 | 0 | 9 | 10 | 139 | 34 | 478 |
| 41,704 | 2 | 20 | 22 | 308 | 0 | 8 | 10 | 149 | 34 | 485 |
| 41,705 | 2 | 19 | 22 | 322 | 0 | 8 | 10 | 152 | 34 | 501 |
| 41,706 | 2 | 19 | 21 | 323 | 0 | 8 | 10 | 156 | 33 | 506 |
| 41,707 | 2 | 20 | 22 | 322 | 0 | 8 | 9  | 156 | 33 | 506 |
| 41,708 | 2 | 20 | 22 | 321 | 0 | 8 | 9  | 159 | 33 | 508 |
| 41,709 | 2 | 20 | 23 | 322 | 0 | 8 | 9  | 161 | 34 | 511 |
| 41,710 | 2 | 20 | 26 | 325 | 0 | 8 | 8  | 161 | 36 | 514 |
| 41,711 | 1 | 20 | 27 | 344 | 0 | 8 | 8  | 165 | 36 | 537 |
| 41,712 | 1 | 25 | 27 | 374 | 0 | 8 | 8  | 205 | 36 | 612 |
| 41,713 | 1 | 26 | 27 | 387 | 0 | 8 | 8  | 213 | 36 | 634 |
| 41,714 | 1 | 26 | 29 | 390 | 0 | 8 | 8  | 216 | 38 | 640 |
| 41,715 | 1 | 26 | 29 | 391 | 0 | 9 | 8  | 218 | 38 | 644 |
| 41,716 | 0 | 26 | 30 | 390 | 0 | 9 | 8  | 219 | 38 | 644 |
| 41,717 | 0 | 26 | 30 | 390 | 0 | 9 | 8  | 216 | 38 | 641 |
| 41,718 | 0 | 26 | 30 | 385 | 0 | 9 | 8  | 214 | 38 | 634 |
| 41,719 | 0 | 26 | 30 | 385 | 0 | 9 | 8  | 215 | 38 | 635 |
| 41,720 | 0 | 22 | 29 | 359 | 0 | 9 | 8  | 211 | 37 | 601 |
| 41,721 | 0 | 22 | 29 | 360 | 0 | 9 | 8  | 212 | 37 | 603 |
| 41,722 | 0 | 24 | 29 | 374 | 0 | 9 | 8  | 223 | 37 | 630 |
| 41,723 | 0 | 23 | 29 | 373 | 0 | 9 | 8  | 223 | 37 | 628 |
| 41,724 | 0 | 23 | 29 | 373 | 0 | 9 | 8  | 224 | 37 | 629 |
| 41,725 | 0 | 23 | 29 | 373 | 0 | 9 | 9  | 219 | 38 | 624 |
| 41,726 | 0 | 23 | 29 | 363 | 0 | 9 | 9  | 215 | 38 | 610 |

|        |   |    |    |     |   |    |    |     |    |       |
|--------|---|----|----|-----|---|----|----|-----|----|-------|
| 41,727 | 0 | 28 | 29 | 330 | 0 | 12 | 9  | 218 | 38 | 588   |
| 41,728 | 0 | 25 | 29 | 272 | 0 | 11 | 9  | 193 | 38 | 501   |
| 41,729 | 0 | 25 | 29 | 293 | 0 | 14 | 9  | 200 | 38 | 532   |
| 41,730 | 0 | 26 | 29 | 423 | 0 | 21 | 9  | 260 | 38 | 730   |
| 41,731 | 0 | 26 | 29 | 430 | 0 | 21 | 9  | 270 | 38 | 747   |
| 41,732 | 0 | 22 | 29 | 414 | 0 | 21 | 9  | 261 | 38 | 718   |
| 41,733 | 0 | 21 | 29 | 419 | 0 | 21 | 9  | 272 | 38 | 733   |
| 41,734 | 0 | 35 | 29 | 513 | 0 | 27 | 9  | 304 | 38 | 879   |
| 41,735 | 0 | 34 | 29 | 516 | 0 | 27 | 9  | 302 | 38 | 879   |
| 41,736 | 0 | 34 | 29 | 514 | 0 | 27 | 9  | 302 | 38 | 877   |
| 41,737 | 2 | 34 | 29 | 511 | 1 | 27 | 11 | 299 | 43 | 871   |
| 41,738 | 2 | 34 | 29 | 506 | 1 | 27 | 11 | 293 | 43 | 860   |
| 41,739 | 2 | 34 | 29 | 507 | 1 | 27 | 11 | 293 | 43 | 861   |
| 41,740 | 2 | 35 | 29 | 509 | 1 | 28 | 11 | 295 | 43 | 867   |
| 41,741 | 2 | 35 | 29 | 508 | 1 | 28 | 11 | 295 | 43 | 866   |
| 41,742 | 4 | 35 | 38 | 508 | 1 | 28 | 11 | 295 | 54 | 866   |
| 41,743 | 4 | 36 | 38 | 508 | 1 | 28 | 12 | 294 | 55 | 866   |
| 41,744 | 4 | 36 | 39 | 508 | 1 | 27 | 13 | 294 | 57 | 865   |
| 41,745 | 4 | 36 | 38 | 506 | 1 | 27 | 14 | 294 | 57 | 863   |
| 41,746 | 4 | 36 | 37 | 506 | 1 | 27 | 14 | 294 | 56 | 863   |
| 41,747 | 4 | 36 | 37 | 506 | 1 | 27 | 15 | 295 | 57 | 864   |
| 41,748 | 4 | 36 | 37 | 506 | 1 | 27 | 15 | 295 | 57 | 864   |
| 41,749 | 4 | 36 | 28 | 506 | 1 | 27 | 12 | 293 | 45 | 862   |
| 41,750 | 5 | 37 | 28 | 506 | 1 | 27 | 11 | 293 | 45 | 863   |
| 41,751 | 5 | 36 | 21 | 494 | 1 | 24 | 9  | 282 | 36 | 836   |
| 41,752 | 5 | 36 | 21 | 481 | 1 | 24 | 9  | 279 | 36 | 820   |
| 41,753 | 5 | 36 | 21 | 494 | 1 | 25 | 9  | 283 | 36 | 838   |
| 41,754 | 5 | 37 | 21 | 488 | 1 | 25 | 9  | 276 | 36 | 826   |
| 41,755 | 5 | 39 | 21 | 515 | 1 | 24 | 9  | 268 | 36 | 846   |
| 41,756 | 5 | 38 | 20 | 565 | 1 | 25 | 9  | 271 | 35 | 899   |
| 41,757 | 5 | 40 | 19 | 593 | 1 | 26 | 9  | 281 | 34 | 940   |
| 41,758 | 6 | 40 | 19 | 615 | 1 | 26 | 13 | 277 | 39 | 958   |
| 41,759 | 6 | 42 | 20 | 659 | 1 | 27 | 13 | 285 | 40 | 1,013 |
| 41,760 | 6 | 42 | 19 | 681 | 1 | 27 | 13 | 292 | 39 | 1,042 |
| 41,761 | 6 | 45 | 17 | 713 | 1 | 30 | 14 | 301 | 38 | 1,089 |
| 41,762 | 6 | 45 | 16 | 713 | 1 | 31 | 17 | 305 | 40 | 1,094 |
| 41,763 | 6 | 40 | 22 | 699 | 1 | 31 | 21 | 269 | 50 | 1,039 |
| 41,764 | 6 | 39 | 20 | 702 | 1 | 31 | 24 | 264 | 51 | 1,036 |
| 41,765 | 7 | 39 | 20 | 699 | 1 | 31 | 23 | 262 | 51 | 1,031 |
| 41,766 | 7 | 41 | 22 | 700 | 2 | 30 | 23 | 263 | 54 | 1,034 |
| 41,767 | 7 | 42 | 21 | 705 | 2 | 30 | 23 | 268 | 53 | 1,045 |

|        |   |    |    |     |   |    |    |     |    |       |
|--------|---|----|----|-----|---|----|----|-----|----|-------|
| 41,768 | 7 | 44 | 22 | 714 | 2 | 32 | 23 | 282 | 54 | 1,072 |
| 41,769 | 7 | 44 | 25 | 716 | 2 | 32 | 23 | 283 | 57 | 1,075 |
| 41,770 | 7 | 44 | 25 | 718 | 2 | 32 | 23 | 282 | 57 | 1,076 |
| 41,771 | 7 | 44 | 29 | 716 | 2 | 33 | 24 | 283 | 62 | 1,076 |
| 41,772 | 7 | 44 | 29 | 716 | 2 | 34 | 24 | 282 | 62 | 1,076 |
| 41,773 | 7 | 42 | 32 | 711 | 2 | 35 | 24 | 297 | 65 | 1,085 |
| 41,774 | 7 | 42 | 32 | 712 | 2 | 35 | 24 | 297 | 65 | 1,086 |
| 41,775 | 7 | 42 | 34 | 729 | 2 | 36 | 23 | 305 | 66 | 1,112 |
| 41,776 | 7 | 42 | 34 | 729 | 2 | 36 | 23 | 307 | 66 | 1,114 |
| 41,777 | 7 | 37 | 34 | 713 | 2 | 32 | 23 | 295 | 66 | 1,077 |
| 41,778 | 8 | 36 | 34 | 704 | 2 | 32 | 23 | 286 | 67 | 1,058 |
| 41,779 | 8 | 36 | 34 | 703 | 2 | 32 | 23 | 286 | 67 | 1,057 |
| 41,780 | 8 | 36 | 34 | 548 | 2 | 21 | 23 | 207 | 67 | 812   |
| 41,781 | 8 | 36 | 34 | 549 | 2 | 21 | 23 | 207 | 67 | 813   |
| 41,782 | 8 | 35 | 34 | 541 | 2 | 21 | 23 | 195 | 67 | 792   |
| 41,783 | 8 | 35 | 35 | 531 | 2 | 21 | 23 | 188 | 68 | 775   |
| 41,784 | 8 | 35 | 35 | 525 | 2 | 21 | 23 | 177 | 68 | 758   |
| 41,785 | 8 | 21 | 35 | 417 | 2 | 15 | 23 | 138 | 68 | 591   |
| 41,786 | 8 | 20 | 35 | 408 | 2 | 14 | 23 | 136 | 68 | 578   |
| 41,787 | 8 | 20 | 35 | 408 | 1 | 14 | 23 | 136 | 67 | 578   |
| 41,788 | 6 | 20 | 35 | 408 | 1 | 14 | 23 | 137 | 65 | 579   |
| 41,789 | 6 | 20 | 35 | 415 | 1 | 14 | 23 | 145 | 65 | 594   |
| 41,790 | 6 | 22 | 35 | 424 | 1 | 14 | 23 | 160 | 65 | 620   |
| 41,791 | 6 | 25 | 35 | 435 | 1 | 14 | 23 | 170 | 65 | 644   |
| 41,792 | 4 | 25 | 30 | 437 | 1 | 14 | 23 | 173 | 58 | 649   |
| 41,793 | 4 | 25 | 26 | 439 | 1 | 14 | 23 | 177 | 54 | 655   |
| 41,794 | 4 | 25 | 26 | 449 | 1 | 14 | 22 | 181 | 53 | 669   |
| 41,795 | 4 | 25 | 25 | 453 | 1 | 14 | 21 | 182 | 51 | 674   |
| 41,796 | 4 | 25 | 25 | 459 | 1 | 14 | 20 | 187 | 50 | 685   |
| 41,797 | 4 | 25 | 26 | 465 | 1 | 14 | 20 | 188 | 51 | 692   |
| 41,798 | 4 | 25 | 27 | 465 | 2 | 14 | 19 | 187 | 52 | 691   |
| 41,799 | 4 | 25 | 27 | 464 | 3 | 14 | 20 | 187 | 54 | 690   |
| 41,800 | 4 | 24 | 27 | 463 | 3 | 14 | 20 | 187 | 54 | 688   |
| 41,801 | 3 | 24 | 31 | 463 | 3 | 14 | 20 | 187 | 57 | 688   |
| 41,802 | 3 | 23 | 32 | 462 | 3 | 14 | 19 | 187 | 57 | 686   |
| 41,803 | 3 | 23 | 32 | 462 | 3 | 14 | 19 | 187 | 57 | 686   |
| 41,804 | 3 | 23 | 33 | 448 | 3 | 13 | 20 | 183 | 59 | 667   |
| 41,805 | 3 | 22 | 40 | 440 | 3 | 12 | 21 | 183 | 67 | 657   |
| 41,806 | 4 | 20 | 41 | 325 | 3 | 12 | 21 | 169 | 69 | 526   |
| 41,807 | 5 | 15 | 43 | 231 | 3 | 10 | 21 | 149 | 72 | 405   |
| 41,808 | 5 | 15 | 45 | 232 | 3 | 10 | 21 | 149 | 74 | 406   |

|        |   |    |    |     |   |    |    |     |    |     |
|--------|---|----|----|-----|---|----|----|-----|----|-----|
| 41,809 | 4 | 15 | 43 | 212 | 3 | 10 | 17 | 140 | 67 | 377 |
| 41,810 | 4 | 15 | 46 | 221 | 3 | 10 | 17 | 143 | 70 | 389 |
| 41,811 | 4 | 15 | 47 | 222 | 3 | 10 | 17 | 143 | 71 | 390 |
| 41,812 | 4 | 12 | 46 | 190 | 4 | 7  | 16 | 137 | 70 | 346 |
| 41,813 | 4 | 12 | 46 | 180 | 4 | 6  | 13 | 145 | 67 | 343 |
| 41,814 | 4 | 12 | 40 | 162 | 4 | 6  | 9  | 141 | 57 | 321 |
| 41,815 | 4 | 12 | 42 | 146 | 4 | 6  | 6  | 138 | 56 | 302 |
| 41,816 | 3 | 13 | 42 | 148 | 4 | 7  | 6  | 137 | 55 | 305 |
| 41,817 | 3 | 12 | 41 | 152 | 3 | 7  | 7  | 134 | 54 | 305 |
| 41,818 | 3 | 11 | 40 | 147 | 3 | 7  | 7  | 128 | 53 | 293 |
| 41,819 | 3 | 9  | 38 | 134 | 3 | 5  | 7  | 113 | 51 | 261 |
| 41,820 | 3 | 9  | 37 | 135 | 3 | 5  | 7  | 116 | 50 | 265 |
| 41,821 | 3 | 9  | 38 | 137 | 3 | 5  | 6  | 120 | 50 | 271 |
| 41,822 | 3 | 9  | 35 | 135 | 3 | 3  | 6  | 119 | 47 | 266 |
| 41,823 | 3 | 9  | 35 | 135 | 3 | 3  | 6  | 119 | 47 | 266 |
| 41,824 | 3 | 9  | 33 | 125 | 3 | 2  | 7  | 95  | 46 | 231 |
| 41,825 | 3 | 9  | 34 | 107 | 3 | 1  | 7  | 86  | 47 | 203 |
| 41,826 | 3 | 9  | 36 | 105 | 3 | 1  | 7  | 85  | 49 | 200 |
| 41,827 | 3 | 9  | 37 | 107 | 3 | 1  | 7  | 85  | 50 | 202 |
| 41,828 | 3 | 9  | 38 | 108 | 3 | 1  | 7  | 85  | 51 | 203 |
| 41,829 | 2 | 9  | 39 | 108 | 3 | 1  | 7  | 85  | 51 | 203 |
| 41,830 | 3 | 8  | 40 | 106 | 3 | 1  | 8  | 85  | 54 | 200 |
| 41,831 | 3 | 9  | 40 | 105 | 3 | 1  | 8  | 85  | 54 | 200 |
| 41,832 | 3 | 9  | 40 | 105 | 3 | 1  | 8  | 89  | 54 | 204 |
| 41,833 | 3 | 9  | 39 | 104 | 3 | 1  | 8  | 89  | 53 | 203 |
| 41,834 | 3 | 9  | 40 | 107 | 3 | 1  | 8  | 89  | 54 | 206 |
| 41,835 | 3 | 9  | 40 | 108 | 3 | 1  | 8  | 92  | 54 | 210 |
| 41,836 | 3 | 10 | 40 | 108 | 3 | 1  | 8  | 92  | 54 | 211 |
| 41,837 | 3 | 10 | 40 | 109 | 3 | 1  | 8  | 92  | 54 | 212 |
| 41,838 | 4 | 10 | 41 | 119 | 3 | 1  | 8  | 97  | 56 | 227 |
| 41,839 | 4 | 11 | 41 | 120 | 3 | 1  | 6  | 96  | 54 | 228 |
| 41,840 | 4 | 9  | 41 | 111 | 3 | 1  | 6  | 76  | 54 | 197 |
| 41,841 | 5 | 6  | 45 | 104 | 3 | 1  | 8  | 67  | 61 | 178 |
| 41,842 | 5 | 6  | 45 | 102 | 3 | 1  | 10 | 64  | 63 | 173 |
| 41,843 | 6 | 5  | 45 | 83  | 3 | 1  | 10 | 51  | 64 | 140 |
| 41,844 | 6 | 5  | 46 | 84  | 3 | 1  | 10 | 52  | 65 | 142 |
| 41,845 | 8 | 5  | 48 | 85  | 3 | 1  | 10 | 52  | 69 | 143 |
| 41,846 | 8 | 6  | 48 | 85  | 3 | 1  | 10 | 52  | 69 | 144 |
| 41,847 | 9 | 8  | 49 | 87  | 3 | 1  | 10 | 52  | 71 | 148 |
| 41,848 | 9 | 8  | 48 | 80  | 3 | 1  | 10 | 51  | 70 | 140 |
| 41,849 | 9 | 9  | 47 | 80  | 2 | 1  | 10 | 51  | 68 | 141 |

|        |   |    |    |     |   |    |    |     |    |     |
|--------|---|----|----|-----|---|----|----|-----|----|-----|
| 41,850 | 9 | 10 | 47 | 82  | 1 | 1  | 9  | 57  | 66 | 150 |
| 41,851 | 9 | 11 | 47 | 82  | 1 | 1  | 9  | 57  | 66 | 151 |
| 41,852 | 9 | 11 | 43 | 82  | 1 | 1  | 9  | 57  | 62 | 151 |
| 41,853 | 9 | 11 | 42 | 82  | 1 | 1  | 9  | 57  | 61 | 151 |
| 41,854 | 9 | 11 | 41 | 82  | 1 | 1  | 8  | 57  | 59 | 151 |
| 41,855 | 9 | 11 | 37 | 82  | 1 | 1  | 8  | 57  | 55 | 151 |
| 41,856 | 9 | 12 | 34 | 83  | 1 | 1  | 7  | 58  | 51 | 154 |
| 41,857 | 8 | 12 | 33 | 84  | 1 | 1  | 7  | 64  | 49 | 161 |
| 41,858 | 7 | 12 | 31 | 86  | 1 | 2  | 7  | 68  | 46 | 168 |
| 41,859 | 7 | 13 | 30 | 88  | 1 | 2  | 8  | 74  | 46 | 177 |
| 41,860 | 7 | 13 | 31 | 85  | 1 | 3  | 8  | 74  | 47 | 175 |
| 41,861 | 7 | 13 | 28 | 84  | 1 | 3  | 8  | 80  | 44 | 180 |
| 41,862 | 7 | 13 | 27 | 83  | 1 | 3  | 8  | 80  | 43 | 179 |
| 41,863 | 8 | 14 | 27 | 87  | 0 | 3  | 9  | 81  | 44 | 185 |
| 41,864 | 8 | 14 | 25 | 82  | 0 | 3  | 9  | 68  | 42 | 167 |
| 41,865 | 8 | 14 | 25 | 85  | 0 | 3  | 9  | 69  | 42 | 171 |
| 41,866 | 9 | 16 | 26 | 94  | 0 | 4  | 9  | 80  | 44 | 194 |
| 41,867 | 9 | 15 | 26 | 102 | 0 | 3  | 9  | 90  | 44 | 210 |
| 41,868 | 9 | 17 | 28 | 143 | 0 | 3  | 8  | 103 | 45 | 266 |
| 41,869 | 9 | 18 | 28 | 147 | 0 | 3  | 8  | 110 | 45 | 278 |
| 41,870 | 9 | 18 | 29 | 151 | 0 | 3  | 8  | 113 | 46 | 285 |
| 41,871 | 9 | 18 | 35 | 152 | 0 | 4  | 8  | 112 | 52 | 286 |
| 41,872 | 9 | 18 | 35 | 156 | 1 | 4  | 12 | 110 | 57 | 288 |
| 41,873 | 9 | 20 | 35 | 192 | 1 | 8  | 12 | 142 | 57 | 362 |
| 41,874 | 9 | 20 | 35 | 205 | 1 | 8  | 12 | 144 | 57 | 377 |
| 41,875 | 9 | 21 | 37 | 209 | 2 | 8  | 17 | 148 | 65 | 386 |
| 41,876 | 9 | 23 | 35 | 214 | 2 | 8  | 17 | 153 | 63 | 398 |
| 41,877 | 9 | 24 | 35 | 220 | 2 | 9  | 17 | 157 | 63 | 410 |
| 41,878 | 9 | 24 | 34 | 219 | 2 | 9  | 17 | 157 | 62 | 409 |
| 41,879 | 9 | 24 | 36 | 219 | 2 | 9  | 20 | 157 | 67 | 409 |
| 41,880 | 9 | 24 | 36 | 220 | 2 | 9  | 20 | 157 | 67 | 410 |
| 41,881 | 8 | 25 | 36 | 221 | 2 | 9  | 21 | 158 | 67 | 413 |
| 41,882 | 8 | 25 | 36 | 222 | 2 | 9  | 21 | 158 | 67 | 414 |
| 41,883 | 8 | 25 | 37 | 222 | 2 | 9  | 25 | 155 | 72 | 411 |
| 41,884 | 8 | 25 | 37 | 222 | 2 | 9  | 25 | 155 | 72 | 411 |
| 41,885 | 8 | 25 | 36 | 223 | 2 | 9  | 25 | 158 | 71 | 415 |
| 41,886 | 8 | 25 | 36 | 222 | 2 | 9  | 25 | 155 | 71 | 411 |
| 41,887 | 8 | 24 | 36 | 226 | 2 | 10 | 25 | 159 | 71 | 419 |
| 41,888 | 7 | 33 | 36 | 264 | 2 | 13 | 25 | 204 | 70 | 514 |
| 41,889 | 7 | 33 | 35 | 259 | 2 | 13 | 25 | 202 | 69 | 507 |
| 41,890 | 7 | 32 | 36 | 263 | 2 | 13 | 27 | 210 | 72 | 518 |

|        |   |    |    |     |   |    |    |     |    |     |
|--------|---|----|----|-----|---|----|----|-----|----|-----|
| 41,891 | 7 | 32 | 37 | 257 | 2 | 13 | 28 | 207 | 74 | 509 |
| 41,892 | 6 | 32 | 34 | 260 | 2 | 17 | 26 | 217 | 68 | 526 |
| 41,893 | 6 | 32 | 34 | 259 | 2 | 17 | 24 | 216 | 66 | 524 |
| 41,894 | 5 | 32 | 36 | 260 | 2 | 17 | 26 | 217 | 69 | 526 |
| 41,895 | 5 | 32 | 35 | 258 | 2 | 17 | 26 | 217 | 68 | 524 |
| 41,896 | 3 | 32 | 34 | 261 | 2 | 17 | 26 | 217 | 65 | 527 |
| 41,897 | 2 | 29 | 33 | 260 | 2 | 17 | 26 | 217 | 63 | 523 |
| 41,898 | 2 | 29 | 33 | 260 | 2 | 17 | 26 | 218 | 63 | 524 |
| 41,899 | 2 | 28 | 33 | 262 | 2 | 17 | 26 | 218 | 63 | 525 |
| 41,900 | 2 | 28 | 33 | 262 | 2 | 17 | 26 | 218 | 63 | 525 |
| 41,901 | 2 | 27 | 36 | 260 | 2 | 17 | 26 | 212 | 66 | 516 |
| 41,902 | 2 | 26 | 36 | 261 | 2 | 17 | 26 | 212 | 66 | 516 |
| 41,903 | 2 | 26 | 36 | 261 | 2 | 17 | 26 | 212 | 66 | 516 |
| 41,904 | 2 | 26 | 36 | 261 | 2 | 17 | 26 | 213 | 66 | 517 |
| 41,905 | 2 | 26 | 36 | 261 | 2 | 17 | 26 | 213 | 66 | 517 |
| 41,906 | 2 | 26 | 36 | 261 | 2 | 17 | 26 | 213 | 66 | 517 |
| 41,907 | 4 | 25 | 36 | 259 | 2 | 17 | 26 | 206 | 68 | 507 |
| 41,908 | 4 | 25 | 36 | 254 | 2 | 16 | 26 | 196 | 68 | 491 |
| 41,909 | 4 | 25 | 36 | 254 | 2 | 16 | 26 | 196 | 68 | 491 |
| 41,910 | 4 | 25 | 35 | 254 | 2 | 16 | 25 | 196 | 66 | 491 |
| 41,911 | 4 | 25 | 34 | 255 | 2 | 15 | 25 | 199 | 65 | 494 |
| 41,912 | 3 | 25 | 34 | 245 | 2 | 15 | 25 | 190 | 64 | 475 |
| 41,913 | 3 | 25 | 34 | 247 | 2 | 15 | 25 | 190 | 64 | 477 |
| 41,914 | 3 | 24 | 36 | 240 | 2 | 15 | 24 | 186 | 65 | 465 |
| 41,915 | 2 | 24 | 38 | 233 | 2 | 15 | 24 | 182 | 66 | 454 |
| 41,916 | 2 | 22 | 38 | 226 | 2 | 14 | 24 | 171 | 66 | 433 |
| 41,917 | 2 | 22 | 37 | 216 | 2 | 14 | 26 | 162 | 67 | 414 |
| 41,918 | 2 | 22 | 37 | 218 | 2 | 14 | 26 | 162 | 67 | 416 |
| 41,919 | 2 | 19 | 36 | 172 | 3 | 14 | 26 | 149 | 67 | 354 |
| 41,920 | 2 | 18 | 36 | 164 | 3 | 14 | 26 | 139 | 67 | 335 |
| 41,921 | 2 | 18 | 36 | 156 | 3 | 13 | 26 | 136 | 67 | 323 |
| 41,922 | 2 | 18 | 30 | 158 | 3 | 13 | 26 | 136 | 61 | 325 |
| 41,923 | 2 | 18 | 28 | 161 | 2 | 13 | 22 | 136 | 54 | 328 |
| 41,924 | 2 | 16 | 28 | 128 | 1 | 9  | 22 | 105 | 53 | 258 |
| 41,925 | 2 | 16 | 25 | 110 | 1 | 9  | 16 | 98  | 44 | 233 |
| 41,926 | 2 | 16 | 25 | 118 | 1 | 9  | 16 | 102 | 44 | 245 |
| 41,927 | 2 | 13 | 26 | 106 | 1 | 8  | 16 | 91  | 45 | 218 |
| 41,928 | 2 | 13 | 23 | 110 | 1 | 8  | 16 | 95  | 42 | 226 |
| 41,929 | 2 | 13 | 23 | 118 | 1 | 8  | 13 | 100 | 39 | 239 |
| 41,930 | 2 | 13 | 20 | 119 | 1 | 8  | 13 | 101 | 36 | 241 |
| 41,931 | 2 | 16 | 19 | 122 | 1 | 8  | 13 | 105 | 35 | 251 |

|        |    |    |    |     |   |   |    |     |     |     |
|--------|----|----|----|-----|---|---|----|-----|-----|-----|
| 41,932 | 2  | 14 | 18 | 122 | 1 | 8 | 11 | 104 | 32  | 248 |
| 41,933 | 2  | 15 | 26 | 127 | 1 | 8 | 12 | 107 | 41  | 257 |
| 41,934 | 2  | 15 | 26 | 127 | 1 | 8 | 8  | 107 | 37  | 257 |
| 41,935 | 4  | 16 | 34 | 126 | 1 | 8 | 11 | 104 | 50  | 254 |
| 41,936 | 4  | 16 | 39 | 126 | 1 | 8 | 13 | 104 | 57  | 254 |
| 41,937 | 4  | 16 | 39 | 126 | 1 | 8 | 13 | 105 | 57  | 255 |
| 41,938 | 9  | 8  | 67 | 89  | 1 | 4 | 18 | 59  | 95  | 160 |
| 41,939 | 9  | 8  | 67 | 89  | 1 | 4 | 18 | 59  | 95  | 160 |
| 41,940 | 9  | 8  | 68 | 84  | 1 | 4 | 19 | 57  | 97  | 153 |
| 41,941 | 9  | 8  | 73 | 79  | 1 | 4 | 17 | 49  | 100 | 140 |
| 41,942 | 11 | 8  | 74 | 71  | 1 | 0 | 16 | 41  | 102 | 120 |
| 41,943 | 12 | 10 | 73 | 76  | 1 | 0 | 17 | 42  | 103 | 128 |
| 41,944 | 12 | 11 | 73 | 76  | 1 | 0 | 15 | 42  | 101 | 129 |
| 41,945 | 12 | 11 | 72 | 76  | 1 | 0 | 15 | 42  | 100 | 129 |
| 41,946 | 12 | 11 | 72 | 79  | 1 | 0 | 15 | 41  | 100 | 131 |
| 41,947 | 12 | 12 | 71 | 76  | 1 | 0 | 16 | 42  | 100 | 130 |
| 41,948 | 12 | 13 | 71 | 76  | 1 | 0 | 16 | 42  | 100 | 131 |
| 41,949 | 12 | 13 | 71 | 76  | 1 | 1 | 16 | 41  | 100 | 131 |
| 41,950 | 12 | 13 | 72 | 74  | 1 | 1 | 16 | 41  | 101 | 129 |
| 41,951 | 12 | 13 | 69 | 75  | 1 | 1 | 16 | 42  | 98  | 131 |
| 41,952 | 12 | 13 | 69 | 75  | 1 | 1 | 16 | 44  | 98  | 133 |
| 41,953 | 12 | 13 | 71 | 77  | 1 | 1 | 16 | 46  | 100 | 137 |
| 41,954 | 12 | 17 | 71 | 89  | 1 | 1 | 16 | 61  | 100 | 168 |
| 41,955 | 12 | 17 | 71 | 93  | 1 | 1 | 16 | 61  | 100 | 172 |
| 41,956 | 13 | 18 | 71 | 126 | 1 | 1 | 16 | 70  | 101 | 215 |
| 41,957 | 11 | 18 | 72 | 137 | 1 | 1 | 16 | 74  | 100 | 230 |
| 41,958 | 11 | 18 | 72 | 139 | 1 | 1 | 16 | 74  | 100 | 232 |
| 41,959 | 11 | 19 | 72 | 139 | 1 | 1 | 16 | 74  | 100 | 233 |
| 41,960 | 11 | 19 | 72 | 145 | 1 | 1 | 16 | 77  | 100 | 242 |
| 41,961 | 11 | 19 | 73 | 146 | 1 | 1 | 16 | 74  | 101 | 240 |
| 41,962 | 11 | 19 | 73 | 147 | 1 | 1 | 16 | 74  | 101 | 241 |
| 41,963 | 11 | 19 | 73 | 150 | 1 | 2 | 16 | 74  | 101 | 245 |
| 41,964 | 12 | 20 | 73 | 156 | 1 | 2 | 16 | 76  | 102 | 254 |
| 41,965 | 12 | 20 | 72 | 157 | 1 | 2 | 16 | 78  | 101 | 257 |
| 41,966 | 12 | 20 | 73 | 154 | 1 | 2 | 16 | 78  | 102 | 254 |
| 41,967 | 13 | 20 | 78 | 157 | 1 | 2 | 19 | 80  | 111 | 259 |
| 41,968 | 13 | 20 | 86 | 158 | 1 | 2 | 18 | 80  | 118 | 260 |
| 41,969 | 13 | 20 | 89 | 155 | 3 | 2 | 19 | 80  | 124 | 257 |
| 41,970 | 13 | 20 | 87 | 155 | 2 | 4 | 19 | 81  | 121 | 260 |
| 41,971 | 13 | 20 | 86 | 155 | 2 | 4 | 19 | 81  | 120 | 260 |
| 41,972 | 13 | 20 | 87 | 155 | 2 | 4 | 19 | 80  | 121 | 259 |



|        |    |    |    |     |   |   |    |    |     |     |
|--------|----|----|----|-----|---|---|----|----|-----|-----|
| 41,973 | 13 | 20 | 87 | 153 | 2 | 4 | 19 | 80 | 121 | 257 |
| 41,974 | 13 | 20 | 87 | 150 | 3 | 4 | 20 | 80 | 123 | 254 |
| 41,975 | 13 | 20 | 87 | 150 | 3 | 4 | 20 | 80 | 123 | 254 |
| 41,976 | 13 | 19 | 87 | 142 | 3 | 4 | 20 | 74 | 123 | 239 |
| 41,977 | 13 | 19 | 89 | 142 | 3 | 4 | 20 | 74 | 125 | 239 |
| 41,978 | 13 | 19 | 88 | 142 | 3 | 4 | 20 | 72 | 124 | 237 |
| 41,979 | 14 | 19 | 89 | 138 | 3 | 4 | 20 | 68 | 126 | 229 |
| 41,980 | 14 | 19 | 92 | 128 | 3 | 4 | 20 | 64 | 129 | 215 |
| 41,981 | 14 | 19 | 92 | 129 | 3 | 4 | 20 | 64 | 129 | 216 |
| 41,982 | 14 | 16 | 93 | 125 | 3 | 4 | 22 | 61 | 132 | 206 |
| 41,983 | 15 | 18 | 89 | 125 | 3 | 4 | 22 | 61 | 129 | 208 |
| 41,984 | 15 | 17 | 86 | 119 | 3 | 4 | 21 | 58 | 125 | 198 |
| 41,985 | 15 | 18 | 86 | 119 | 3 | 4 | 21 | 59 | 125 | 200 |
| 41,986 | 13 | 18 | 78 | 126 | 3 | 4 | 18 | 63 | 112 | 211 |
| 41,987 | 13 | 18 | 73 | 130 | 3 | 4 | 16 | 63 | 105 | 215 |
| 41,988 | 8  | 18 | 54 | 133 | 3 | 4 | 14 | 63 | 79  | 218 |
| 41,989 | 8  | 19 | 44 | 134 | 3 | 4 | 11 | 62 | 66  | 219 |
| 41,990 | 8  | 19 | 43 | 136 | 3 | 4 | 10 | 63 | 64  | 222 |
| 41,991 | 8  | 20 | 38 | 145 | 3 | 4 | 11 | 64 | 60  | 233 |
| 41,992 | 6  | 21 | 37 | 143 | 3 | 4 | 11 | 59 | 57  | 227 |
| 41,993 | 6  | 22 | 36 | 147 | 3 | 6 | 11 | 62 | 56  | 237 |
| 41,994 | 5  | 20 | 36 | 143 | 3 | 6 | 10 | 60 | 54  | 229 |
| 41,995 | 6  | 20 | 37 | 143 | 3 | 6 | 10 | 60 | 56  | 229 |
| 41,996 | 6  | 24 | 37 | 148 | 3 | 6 | 10 | 60 | 56  | 238 |
| 41,997 | 6  | 24 | 37 | 145 | 3 | 6 | 10 | 60 | 56  | 235 |
| 41,998 | 6  | 23 | 37 | 144 | 3 | 6 | 9  | 59 | 55  | 232 |
| 41,999 | 6  | 22 | 37 | 145 | 3 | 5 | 9  | 58 | 55  | 230 |
| 42,000 | 6  | 22 | 36 | 145 | 3 | 5 | 9  | 58 | 54  | 230 |
| 42,001 | 6  | 22 | 36 | 146 | 3 | 6 | 9  | 58 | 54  | 232 |
| 42,002 | 6  | 22 | 37 | 146 | 3 | 6 | 9  | 55 | 55  | 229 |
| 42,003 | 6  | 22 | 36 | 143 | 3 | 6 | 9  | 53 | 54  | 224 |
| 42,004 | 6  | 22 | 35 | 147 | 3 | 6 | 9  | 54 | 53  | 229 |
| 42,005 | 6  | 18 | 35 | 136 | 3 | 6 | 9  | 39 | 53  | 199 |
| 42,006 | 5  | 19 | 35 | 132 | 3 | 7 | 9  | 41 | 52  | 199 |
| 42,007 | 5  | 20 | 35 | 118 | 3 | 8 | 9  | 37 | 52  | 183 |
| 42,008 | 5  | 21 | 34 | 107 | 3 | 8 | 9  | 34 | 51  | 170 |
| 42,009 | 5  | 21 | 35 | 109 | 3 | 8 | 9  | 35 | 52  | 173 |
| 42,010 | 5  | 19 | 35 | 108 | 3 | 8 | 9  | 35 | 52  | 170 |
| 42,011 | 5  | 19 | 34 | 102 | 3 | 8 | 9  | 32 | 51  | 161 |
| 42,012 | 5  | 19 | 34 | 102 | 3 | 8 | 9  | 32 | 51  | 161 |
| 42,013 | 5  | 19 | 34 | 103 | 3 | 8 | 9  | 32 | 51  | 162 |

|        |   |    |    |     |   |    |    |     |    |     |
|--------|---|----|----|-----|---|----|----|-----|----|-----|
| 42,014 | 5 | 20 | 34 | 107 | 3 | 9  | 9  | 39  | 51 | 175 |
| 42,015 | 4 | 23 | 37 | 122 | 3 | 17 | 11 | 55  | 55 | 217 |
| 42,016 | 4 | 29 | 42 | 131 | 3 | 17 | 14 | 59  | 63 | 236 |
| 42,017 | 5 | 34 | 39 | 191 | 3 | 20 | 15 | 102 | 62 | 347 |
| 42,018 | 4 | 40 | 34 | 205 | 3 | 22 | 12 | 118 | 53 | 385 |
| 42,019 | 4 | 43 | 26 | 225 | 3 | 26 | 11 | 142 | 44 | 436 |
| 42,020 | 4 | 46 | 23 | 232 | 1 | 26 | 10 | 146 | 38 | 450 |
| 42,021 | 4 | 46 | 23 | 232 | 1 | 26 | 10 | 146 | 38 | 450 |
| 42,022 | 4 | 52 | 23 | 254 | 2 | 31 | 10 | 159 | 39 | 496 |
| 42,023 | 4 | 53 | 23 | 258 | 2 | 31 | 10 | 161 | 39 | 503 |
| 42,024 | 4 | 57 | 25 | 275 | 1 | 32 | 9  | 166 | 39 | 530 |
| 42,025 | 4 | 57 | 25 | 275 | 1 | 32 | 9  | 166 | 39 | 530 |
| 42,026 | 4 | 58 | 25 | 281 | 1 | 32 | 9  | 166 | 39 | 537 |
| 42,027 | 5 | 58 | 27 | 283 | 1 | 32 | 9  | 166 | 42 | 539 |
| 42,028 | 5 | 60 | 29 | 288 | 1 | 32 | 9  | 171 | 44 | 551 |
| 42,029 | 5 | 62 | 31 | 323 | 1 | 33 | 10 | 190 | 47 | 608 |
| 42,030 | 4 | 64 | 30 | 327 | 1 | 34 | 10 | 197 | 45 | 622 |
| 42,031 | 4 | 65 | 27 | 331 | 1 | 34 | 10 | 200 | 42 | 630 |
| 42,032 | 4 | 65 | 27 | 332 | 1 | 34 | 10 | 200 | 42 | 631 |
| 42,033 | 4 | 67 | 26 | 333 | 1 | 34 | 8  | 200 | 39 | 634 |
| 42,034 | 3 | 72 | 26 | 356 | 1 | 35 | 8  | 230 | 38 | 693 |
| 42,035 | 3 | 74 | 25 | 364 | 1 | 36 | 8  | 232 | 37 | 706 |
| 42,036 | 3 | 73 | 24 | 364 | 1 | 36 | 8  | 234 | 36 | 707 |
| 42,037 | 3 | 72 | 24 | 357 | 1 | 37 | 9  | 234 | 37 | 700 |
| 42,038 | 3 | 72 | 24 | 354 | 1 | 37 | 9  | 234 | 37 | 697 |
| 42,039 | 3 | 70 | 25 | 347 | 1 | 37 | 9  | 232 | 38 | 686 |
| 42,040 | 3 | 70 | 25 | 347 | 1 | 37 | 8  | 232 | 37 | 686 |
| 42,041 | 3 | 70 | 25 | 343 | 1 | 37 | 8  | 231 | 37 | 681 |
| 42,042 | 3 | 70 | 25 | 343 | 1 | 37 | 8  | 231 | 37 | 681 |
| 42,043 | 3 | 69 | 27 | 340 | 1 | 37 | 8  | 231 | 39 | 677 |
| 42,044 | 3 | 68 | 27 | 337 | 1 | 35 | 8  | 228 | 39 | 668 |
| 42,045 | 3 | 68 | 31 | 336 | 2 | 35 | 8  | 228 | 44 | 667 |
| 42,046 | 2 | 63 | 29 | 332 | 2 | 35 | 8  | 231 | 41 | 661 |
| 42,047 | 2 | 63 | 29 | 333 | 2 | 35 | 8  | 233 | 41 | 664 |
| 42,048 | 2 | 63 | 29 | 334 | 2 | 35 | 8  | 233 | 41 | 665 |
| 42,049 | 2 | 63 | 29 | 334 | 2 | 35 | 8  | 233 | 41 | 665 |
| 42,050 | 2 | 63 | 29 | 333 | 2 | 35 | 8  | 233 | 41 | 664 |
| 42,051 | 2 | 63 | 29 | 332 | 2 | 34 | 8  | 233 | 41 | 662 |
| 42,052 | 2 | 63 | 28 | 331 | 2 | 34 | 8  | 233 | 40 | 661 |
| 42,053 | 2 | 63 | 28 | 332 | 2 | 34 | 8  | 233 | 40 | 662 |
| 42,054 | 2 | 63 | 28 | 332 | 2 | 34 | 8  | 233 | 40 | 662 |

|        |   |    |    |     |   |    |   |     |    |     |
|--------|---|----|----|-----|---|----|---|-----|----|-----|
| 42,055 | 2 | 63 | 28 | 328 | 2 | 34 | 8 | 232 | 40 | 657 |
| 42,056 | 2 | 59 | 28 | 308 | 2 | 32 | 8 | 225 | 40 | 624 |
| 42,057 | 2 | 59 | 29 | 308 | 2 | 32 | 8 | 225 | 41 | 624 |
| 42,058 | 2 | 59 | 33 | 308 | 2 | 32 | 9 | 225 | 46 | 624 |
| 42,059 | 2 | 59 | 32 | 304 | 2 | 32 | 9 | 224 | 45 | 619 |
| 42,060 | 2 | 59 | 34 | 304 | 2 | 32 | 9 | 224 | 47 | 619 |
| 42,061 | 2 | 59 | 34 | 304 | 2 | 32 | 9 | 224 | 47 | 619 |
| 42,062 | 2 | 59 | 34 | 303 | 2 | 32 | 9 | 225 | 47 | 619 |
| 42,063 | 2 | 59 | 34 | 303 | 2 | 33 | 9 | 226 | 47 | 621 |
| 42,064 | 2 | 59 | 34 | 301 | 2 | 33 | 9 | 227 | 47 | 620 |
| 42,065 | 2 | 58 | 31 | 294 | 2 | 32 | 7 | 225 | 42 | 609 |
| 42,066 | 2 | 54 | 32 | 273 | 2 | 24 | 6 | 209 | 42 | 560 |
| 42,067 | 2 | 48 | 26 | 266 | 2 | 24 | 5 | 204 | 35 | 542 |
| 42,068 | 1 | 37 | 26 | 193 | 2 | 19 | 4 | 142 | 33 | 391 |
| 42,069 | 1 | 37 | 26 | 193 | 2 | 19 | 4 | 142 | 33 | 391 |
| 42,070 | 1 | 34 | 26 | 172 | 2 | 17 | 4 | 118 | 33 | 341 |
| 42,071 | 1 | 31 | 28 | 165 | 2 | 15 | 4 | 113 | 35 | 324 |
| 42,072 | 1 | 31 | 28 | 167 | 2 | 15 | 4 | 120 | 35 | 333 |
| 42,073 | 1 | 25 | 27 | 147 | 1 | 10 | 4 | 107 | 33 | 289 |
| 42,074 | 1 | 24 | 29 | 147 | 1 | 10 | 5 | 108 | 36 | 289 |
| 42,075 | 1 | 20 | 28 | 131 | 1 | 9  | 6 | 103 | 36 | 263 |
| 42,076 | 1 | 21 | 29 | 133 | 1 | 9  | 6 | 103 | 37 | 266 |
| 42,077 | 1 | 20 | 28 | 127 | 1 | 9  | 6 | 102 | 36 | 258 |
| 42,078 | 0 | 20 | 27 | 125 | 1 | 9  | 6 | 102 | 34 | 256 |
| 42,079 | 0 | 16 | 24 | 86  | 1 | 8  | 6 | 78  | 31 | 188 |
| 42,080 | 0 | 14 | 22 | 82  | 1 | 8  | 5 | 71  | 28 | 175 |
| 42,081 | 0 | 13 | 22 | 76  | 1 | 8  | 5 | 68  | 28 | 165 |
| 42,082 | 0 | 13 | 22 | 76  | 1 | 8  | 5 | 68  | 28 | 165 |
| 42,083 | 0 | 13 | 22 | 76  | 1 | 8  | 5 | 68  | 28 | 165 |
| 42,084 | 0 | 11 | 22 | 75  | 1 | 8  | 5 | 67  | 28 | 161 |
| 42,085 | 0 | 4  | 22 | 52  | 1 | 7  | 5 | 37  | 28 | 100 |
| 42,086 | 0 | 2  | 23 | 45  | 1 | 6  | 5 | 35  | 29 | 88  |
| 42,087 | 0 | 2  | 24 | 48  | 1 | 6  | 6 | 32  | 31 | 88  |
| 42,088 | 0 | 2  | 26 | 41  | 1 | 5  | 6 | 27  | 33 | 75  |
| 42,089 | 0 | 2  | 26 | 42  | 1 | 5  | 6 | 28  | 33 | 77  |
| 42,090 | 0 | 2  | 25 | 43  | 1 | 5  | 6 | 29  | 32 | 79  |
| 42,091 | 0 | 2  | 25 | 48  | 1 | 5  | 6 | 29  | 32 | 84  |
| 42,092 | 0 | 1  | 25 | 42  | 1 | 5  | 6 | 30  | 32 | 78  |
| 42,093 | 0 | 1  | 23 | 44  | 1 | 5  | 6 | 30  | 30 | 80  |
| 42,094 | 1 | 1  | 23 | 43  | 1 | 5  | 6 | 30  | 31 | 79  |
| 42,095 | 1 | 2  | 23 | 44  | 1 | 5  | 6 | 30  | 31 | 81  |

|        |    |   |    |    |   |   |    |    |     |     |
|--------|----|---|----|----|---|---|----|----|-----|-----|
| 42,096 | 1  | 3 | 19 | 45 | 0 | 5 | 6  | 31 | 26  | 84  |
| 42,097 | 1  | 3 | 19 | 45 | 0 | 5 | 6  | 28 | 26  | 81  |
| 42,098 | 1  | 3 | 19 | 46 | 0 | 5 | 6  | 27 | 26  | 81  |
| 42,099 | 1  | 4 | 19 | 45 | 0 | 5 | 6  | 27 | 26  | 81  |
| 42,100 | 1  | 4 | 19 | 47 | 0 | 5 | 6  | 27 | 26  | 83  |
| 42,101 | 1  | 4 | 19 | 47 | 0 | 5 | 6  | 28 | 26  | 84  |
| 42,102 | 1  | 4 | 19 | 48 | 0 | 5 | 6  | 28 | 26  | 85  |
| 42,103 | 1  | 4 | 19 | 55 | 0 | 5 | 6  | 30 | 26  | 94  |
| 42,104 | 1  | 6 | 19 | 59 | 0 | 5 | 6  | 41 | 26  | 111 |
| 42,105 | 1  | 6 | 19 | 63 | 0 | 5 | 6  | 43 | 26  | 117 |
| 42,106 | 1  | 6 | 19 | 65 | 0 | 5 | 7  | 43 | 27  | 119 |
| 42,107 | 2  | 6 | 19 | 66 | 0 | 6 | 7  | 43 | 28  | 121 |
| 42,108 | 2  | 6 | 18 | 66 | 0 | 6 | 8  | 43 | 28  | 121 |
| 42,109 | 2  | 6 | 14 | 66 | 0 | 6 | 7  | 45 | 23  | 123 |
| 42,110 | 2  | 6 | 14 | 67 | 0 | 6 | 7  | 45 | 23  | 124 |
| 42,111 | 2  | 6 | 12 | 67 | 0 | 6 | 7  | 45 | 21  | 124 |
| 42,112 | 2  | 6 | 12 | 67 | 0 | 6 | 7  | 44 | 21  | 123 |
| 42,113 | 2  | 6 | 12 | 67 | 0 | 6 | 7  | 44 | 21  | 123 |
| 42,114 | 2  | 6 | 12 | 68 | 0 | 5 | 7  | 43 | 21  | 122 |
| 42,115 | 2  | 6 | 12 | 68 | 0 | 5 | 7  | 42 | 21  | 121 |
| 42,116 | 2  | 6 | 12 | 66 | 0 | 4 | 7  | 37 | 21  | 113 |
| 42,117 | 2  | 6 | 11 | 66 | 0 | 4 | 7  | 35 | 20  | 111 |
| 42,118 | 2  | 7 | 11 | 59 | 0 | 4 | 6  | 34 | 19  | 104 |
| 42,119 | 2  | 7 | 12 | 59 | 0 | 4 | 6  | 35 | 20  | 105 |
| 42,120 | 2  | 7 | 12 | 59 | 0 | 2 | 6  | 35 | 20  | 103 |
| 42,121 | 2  | 7 | 12 | 59 | 0 | 2 | 6  | 35 | 20  | 103 |
| 42,122 | 2  | 7 | 13 | 62 | 0 | 2 | 6  | 35 | 21  | 106 |
| 42,123 | 2  | 7 | 14 | 60 | 0 | 2 | 6  | 28 | 22  | 97  |
| 42,124 | 2  | 7 | 22 | 54 | 1 | 2 | 12 | 25 | 37  | 88  |
| 42,125 | 2  | 7 | 19 | 53 | 1 | 2 | 11 | 26 | 33  | 88  |
| 42,126 | 5  | 7 | 25 | 53 | 1 | 2 | 10 | 26 | 41  | 88  |
| 42,127 | 5  | 6 | 24 | 50 | 2 | 2 | 10 | 26 | 41  | 84  |
| 42,128 | 12 | 6 | 61 | 50 | 4 | 2 | 49 | 26 | 126 | 84  |
| 42,129 | 13 | 6 | 61 | 50 | 4 | 2 | 49 | 26 | 127 | 84  |
| 42,130 | 13 | 6 | 60 | 49 | 4 | 1 | 49 | 26 | 126 | 82  |
| 42,131 | 13 | 6 | 60 | 49 | 4 | 1 | 49 | 26 | 126 | 82  |
| 42,132 | 13 | 6 | 60 | 49 | 4 | 1 | 50 | 26 | 127 | 82  |
| 42,133 | 15 | 6 | 60 | 48 | 4 | 1 | 53 | 26 | 132 | 81  |
| 42,134 | 15 | 6 | 60 | 48 | 4 | 1 | 53 | 27 | 132 | 82  |
| 42,135 | 15 | 6 | 61 | 48 | 4 | 1 | 53 | 27 | 133 | 82  |
| 42,136 | 15 | 6 | 60 | 43 | 4 | 1 | 54 | 26 | 133 | 76  |

|        |    |   |    |    |   |   |    |    |     |    |
|--------|----|---|----|----|---|---|----|----|-----|----|
| 42,137 | 15 | 6 | 60 | 43 | 4 | 1 | 54 | 26 | 133 | 76 |
| 42,138 | 15 | 6 | 61 | 43 | 4 | 1 | 53 | 26 | 133 | 76 |
| 42,139 | 15 | 6 | 59 | 43 | 4 | 1 | 53 | 26 | 131 | 76 |
| 42,140 | 15 | 6 | 59 | 44 | 4 | 1 | 55 | 26 | 133 | 77 |
| 42,141 | 15 | 6 | 59 | 44 | 4 | 1 | 56 | 25 | 134 | 76 |
| 42,142 | 15 | 6 | 59 | 39 | 4 | 1 | 56 | 27 | 134 | 73 |
| 42,143 | 15 | 6 | 60 | 38 | 4 | 1 | 56 | 25 | 135 | 70 |
| 42,144 | 15 | 6 | 60 | 36 | 4 | 1 | 56 | 25 | 135 | 68 |
| 42,145 | 14 | 6 | 60 | 36 | 4 | 1 | 56 | 25 | 134 | 68 |
| 42,146 | 14 | 5 | 62 | 35 | 4 | 1 | 56 | 25 | 136 | 66 |
| 42,147 | 14 | 4 | 62 | 33 | 4 | 1 | 56 | 24 | 136 | 62 |
| 42,148 | 14 | 4 | 62 | 31 | 4 | 1 | 56 | 23 | 136 | 59 |
| 42,149 | 14 | 4 | 62 | 31 | 4 | 1 | 56 | 23 | 136 | 59 |
| 42,150 | 14 | 3 | 62 | 32 | 4 | 1 | 56 | 24 | 136 | 60 |
| 42,151 | 15 | 3 | 62 | 31 | 4 | 1 | 56 | 26 | 137 | 61 |
| 42,152 | 15 | 3 | 62 | 31 | 4 | 1 | 56 | 26 | 137 | 61 |
| 42,153 | 15 | 3 | 62 | 30 | 4 | 1 | 56 | 26 | 137 | 60 |
| 42,154 | 15 | 1 | 62 | 19 | 4 | 1 | 56 | 13 | 137 | 34 |
| 42,155 | 15 | 1 | 62 | 22 | 4 | 2 | 56 | 14 | 137 | 39 |
| 42,156 | 15 | 2 | 62 | 18 | 4 | 2 | 55 | 13 | 136 | 35 |
| 42,157 | 15 | 2 | 62 | 16 | 4 | 2 | 55 | 13 | 136 | 33 |
| 42,158 | 14 | 2 | 62 | 16 | 4 | 1 | 55 | 13 | 135 | 32 |
| 42,159 | 14 | 2 | 62 | 16 | 4 | 1 | 54 | 13 | 134 | 32 |
| 42,160 | 14 | 2 | 62 | 16 | 4 | 1 | 54 | 12 | 134 | 31 |
| 42,161 | 14 | 2 | 63 | 15 | 4 | 1 | 55 | 12 | 136 | 30 |
| 42,162 | 14 | 2 | 64 | 15 | 4 | 1 | 55 | 12 | 137 | 30 |
| 42,163 | 14 | 2 | 65 | 15 | 4 | 1 | 55 | 12 | 138 | 30 |
| 42,164 | 14 | 2 | 65 | 15 | 4 | 1 | 55 | 12 | 138 | 30 |
| 42,165 | 14 | 2 | 66 | 14 | 4 | 1 | 57 | 12 | 141 | 29 |
| 42,166 | 14 | 2 | 66 | 14 | 4 | 1 | 57 | 12 | 141 | 29 |
| 42,167 | 14 | 2 | 73 | 14 | 4 | 1 | 58 | 12 | 149 | 29 |
| 42,168 | 14 | 2 | 75 | 14 | 4 | 1 | 60 | 12 | 153 | 29 |
| 42,169 | 14 | 1 | 75 | 14 | 4 | 1 | 60 | 12 | 153 | 28 |
| 42,170 | 14 | 1 | 75 | 14 | 4 | 1 | 60 | 11 | 153 | 27 |
| 42,171 | 14 | 1 | 76 | 14 | 4 | 1 | 61 | 11 | 155 | 27 |
| 42,172 | 14 | 1 | 75 | 11 | 4 | 1 | 61 | 11 | 154 | 24 |
| 42,173 | 14 | 1 | 73 | 11 | 4 | 1 | 62 | 11 | 153 | 24 |
| 42,174 | 14 | 1 | 72 | 11 | 4 | 1 | 62 | 12 | 152 | 25 |
| 42,175 | 14 | 1 | 64 | 14 | 3 | 1 | 56 | 13 | 137 | 29 |
| 42,176 | 14 | 1 | 64 | 14 | 3 | 1 | 56 | 12 | 137 | 28 |
| 42,177 | 11 | 1 | 59 | 13 | 4 | 1 | 57 | 12 | 131 | 27 |

|        |    |    |    |     |   |    |    |     |     |     |
|--------|----|----|----|-----|---|----|----|-----|-----|-----|
| 42,178 | 11 | 1  | 59 | 19  | 3 | 2  | 57 | 16  | 130 | 38  |
| 42,179 | 4  | 1  | 22 | 22  | 1 | 2  | 18 | 16  | 45  | 41  |
| 42,180 | 3  | 2  | 23 | 22  | 1 | 2  | 18 | 17  | 45  | 43  |
| 42,181 | 3  | 2  | 23 | 23  | 1 | 3  | 19 | 17  | 46  | 45  |
| 42,182 | 3  | 2  | 23 | 24  | 3 | 4  | 18 | 19  | 47  | 49  |
| 42,183 | 3  | 5  | 23 | 49  | 3 | 6  | 18 | 32  | 47  | 92  |
| 42,184 | 1  | 5  | 23 | 65  | 3 | 6  | 15 | 42  | 42  | 118 |
| 42,185 | 1  | 8  | 24 | 74  | 3 | 6  | 15 | 47  | 43  | 135 |
| 42,186 | 1  | 8  | 23 | 76  | 3 | 6  | 15 | 47  | 42  | 137 |
| 42,187 | 1  | 8  | 23 | 76  | 3 | 6  | 14 | 47  | 41  | 137 |
| 42,188 | 1  | 9  | 23 | 79  | 3 | 6  | 14 | 50  | 41  | 144 |
| 42,189 | 1  | 9  | 21 | 80  | 3 | 6  | 13 | 52  | 38  | 147 |
| 42,190 | 1  | 9  | 21 | 90  | 3 | 7  | 11 | 57  | 36  | 163 |
| 42,191 | 1  | 10 | 21 | 91  | 3 | 9  | 10 | 58  | 35  | 168 |
| 42,192 | 1  | 10 | 21 | 90  | 3 | 9  | 10 | 59  | 35  | 168 |
| 42,193 | 2  | 10 | 20 | 92  | 4 | 9  | 10 | 60  | 36  | 171 |
| 42,194 | 2  | 10 | 19 | 92  | 4 | 9  | 10 | 61  | 35  | 172 |
| 42,195 | 2  | 10 | 19 | 94  | 4 | 9  | 11 | 61  | 36  | 174 |
| 42,196 | 2  | 10 | 18 | 96  | 4 | 9  | 11 | 61  | 35  | 176 |
| 42,197 | 2  | 10 | 22 | 96  | 4 | 9  | 11 | 61  | 39  | 176 |
| 42,198 | 2  | 10 | 33 | 96  | 4 | 9  | 14 | 61  | 53  | 176 |
| 42,199 | 2  | 10 | 33 | 96  | 4 | 9  | 14 | 61  | 53  | 176 |
| 42,200 | 2  | 11 | 40 | 100 | 5 | 9  | 22 | 61  | 69  | 181 |
| 42,201 | 2  | 11 | 40 | 100 | 5 | 9  | 22 | 61  | 69  | 181 |
| 42,202 | 1  | 11 | 40 | 99  | 5 | 9  | 23 | 58  | 69  | 177 |
| 42,203 | 1  | 11 | 40 | 99  | 5 | 9  | 23 | 58  | 69  | 177 |
| 42,204 | 1  | 11 | 40 | 98  | 5 | 9  | 23 | 58  | 69  | 176 |
| 42,205 | 1  | 11 | 40 | 96  | 5 | 8  | 23 | 57  | 69  | 172 |
| 42,206 | 1  | 11 | 40 | 96  | 5 | 8  | 23 | 57  | 69  | 172 |
| 42,207 | 1  | 10 | 40 | 96  | 5 | 8  | 23 | 56  | 69  | 170 |
| 42,208 | 1  | 11 | 41 | 96  | 5 | 8  | 23 | 56  | 70  | 171 |
| 42,209 | 2  | 11 | 41 | 95  | 5 | 8  | 23 | 56  | 71  | 170 |
| 42,210 | 2  | 11 | 40 | 95  | 5 | 8  | 23 | 55  | 70  | 169 |
| 42,211 | 2  | 11 | 40 | 97  | 5 | 8  | 22 | 55  | 69  | 171 |
| 42,212 | 2  | 11 | 39 | 101 | 5 | 8  | 22 | 57  | 68  | 177 |
| 42,213 | 3  | 11 | 39 | 102 | 5 | 8  | 22 | 58  | 69  | 179 |
| 42,214 | 3  | 11 | 39 | 104 | 5 | 8  | 22 | 60  | 69  | 183 |
| 42,215 | 3  | 11 | 39 | 105 | 5 | 8  | 22 | 60  | 69  | 184 |
| 42,216 | 3  | 11 | 38 | 112 | 5 | 11 | 20 | 70  | 66  | 204 |
| 42,217 | 3  | 18 | 31 | 172 | 5 | 14 | 19 | 104 | 58  | 308 |
| 42,218 | 3  | 18 | 29 | 172 | 5 | 14 | 17 | 104 | 54  | 308 |

|        |    |    |    |     |   |    |    |     |    |     |
|--------|----|----|----|-----|---|----|----|-----|----|-----|
| 42,219 | 3  | 18 | 29 | 173 | 5 | 14 | 17 | 105 | 54 | 310 |
| 42,220 | 3  | 19 | 28 | 176 | 5 | 14 | 17 | 105 | 53 | 314 |
| 42,221 | 3  | 20 | 28 | 185 | 5 | 14 | 17 | 108 | 53 | 327 |
| 42,222 | 3  | 20 | 27 | 185 | 5 | 14 | 16 | 108 | 51 | 327 |
| 42,223 | 3  | 20 | 27 | 187 | 5 | 14 | 16 | 111 | 51 | 332 |
| 42,224 | 4  | 20 | 29 | 189 | 5 | 14 | 17 | 112 | 55 | 335 |
| 42,225 | 4  | 21 | 29 | 189 | 5 | 14 | 17 | 111 | 55 | 335 |
| 42,226 | 4  | 21 | 30 | 189 | 5 | 14 | 17 | 110 | 56 | 334 |
| 42,227 | 4  | 22 | 30 | 196 | 5 | 14 | 17 | 114 | 56 | 346 |
| 42,228 | 4  | 24 | 29 | 202 | 4 | 15 | 17 | 122 | 54 | 363 |
| 42,229 | 4  | 24 | 29 | 196 | 4 | 14 | 17 | 118 | 54 | 352 |
| 42,230 | 4  | 23 | 29 | 192 | 4 | 12 | 17 | 115 | 54 | 342 |
| 42,231 | 4  | 23 | 28 | 193 | 4 | 12 | 17 | 115 | 53 | 343 |
| 42,232 | 4  | 23 | 29 | 195 | 4 | 12 | 16 | 115 | 53 | 345 |
| 42,233 | 4  | 20 | 29 | 171 | 2 | 10 | 16 | 103 | 51 | 304 |
| 42,234 | 4  | 20 | 29 | 171 | 2 | 10 | 16 | 103 | 51 | 304 |
| 42,235 | 5  | 20 | 29 | 155 | 2 | 10 | 16 | 94  | 52 | 279 |
| 42,236 | 8  | 17 | 30 | 146 | 2 | 10 | 18 | 88  | 58 | 261 |
| 42,237 | 8  | 17 | 30 | 147 | 2 | 10 | 18 | 89  | 58 | 263 |
| 42,238 | 8  | 17 | 30 | 146 | 2 | 10 | 18 | 89  | 58 | 262 |
| 42,239 | 8  | 16 | 31 | 143 | 2 | 10 | 18 | 86  | 59 | 255 |
| 42,240 | 8  | 17 | 31 | 143 | 2 | 10 | 18 | 84  | 59 | 254 |
| 42,241 | 8  | 17 | 31 | 133 | 2 | 9  | 18 | 79  | 59 | 238 |
| 42,242 | 8  | 16 | 31 | 131 | 2 | 7  | 22 | 77  | 63 | 231 |
| 42,243 | 8  | 16 | 31 | 132 | 2 | 7  | 22 | 78  | 63 | 233 |
| 42,244 | 7  | 16 | 31 | 130 | 1 | 7  | 22 | 76  | 61 | 229 |
| 42,245 | 7  | 16 | 31 | 130 | 1 | 7  | 22 | 76  | 61 | 229 |
| 42,246 | 7  | 16 | 33 | 132 | 1 | 7  | 23 | 78  | 64 | 233 |
| 42,247 | 7  | 17 | 38 | 147 | 1 | 10 | 27 | 88  | 73 | 262 |
| 42,248 | 7  | 23 | 35 | 185 | 1 | 12 | 28 | 112 | 71 | 332 |
| 42,249 | 8  | 30 | 26 | 221 | 2 | 14 | 30 | 130 | 66 | 395 |
| 42,250 | 9  | 31 | 23 | 229 | 2 | 15 | 28 | 134 | 62 | 409 |
| 42,251 | 9  | 30 | 23 | 228 | 2 | 15 | 24 | 133 | 58 | 406 |
| 42,252 | 9  | 30 | 23 | 229 | 2 | 15 | 23 | 133 | 57 | 407 |
| 42,253 | 9  | 30 | 23 | 229 | 2 | 15 | 23 | 133 | 57 | 407 |
| 42,254 | 9  | 31 | 23 | 231 | 2 | 15 | 23 | 133 | 57 | 410 |
| 42,255 | 9  | 31 | 23 | 232 | 2 | 15 | 23 | 133 | 57 | 411 |
| 42,256 | 9  | 31 | 25 | 232 | 2 | 15 | 24 | 133 | 60 | 411 |
| 42,257 | 9  | 31 | 26 | 233 | 2 | 15 | 26 | 133 | 63 | 412 |
| 42,258 | 10 | 30 | 25 | 233 | 2 | 15 | 26 | 132 | 63 | 410 |
| 42,259 | 10 | 30 | 25 | 233 | 2 | 15 | 27 | 132 | 64 | 410 |

|        |    |    |    |     |   |    |    |     |     |     |
|--------|----|----|----|-----|---|----|----|-----|-----|-----|
| 42,260 | 9  | 30 | 25 | 233 | 2 | 15 | 27 | 132 | 63  | 410 |
| 42,261 | 11 | 30 | 27 | 233 | 2 | 15 | 28 | 132 | 68  | 410 |
| 42,262 | 12 | 30 | 28 | 231 | 2 | 15 | 30 | 132 | 72  | 408 |
| 42,263 | 12 | 30 | 28 | 227 | 2 | 15 | 30 | 130 | 72  | 402 |
| 42,264 | 13 | 30 | 33 | 226 | 2 | 15 | 38 | 129 | 86  | 400 |
| 42,265 | 13 | 30 | 34 | 223 | 2 | 15 | 38 | 127 | 87  | 395 |
| 42,266 | 13 | 30 | 39 | 216 | 2 | 12 | 41 | 117 | 95  | 375 |
| 42,267 | 13 | 23 | 44 | 156 | 3 | 9  | 41 | 84  | 101 | 272 |
| 42,268 | 13 | 23 | 53 | 156 | 4 | 9  | 59 | 84  | 129 | 272 |
| 42,269 | 13 | 23 | 54 | 156 | 4 | 9  | 61 | 84  | 132 | 272 |
| 42,270 | 13 | 22 | 56 | 152 | 4 | 9  | 63 | 82  | 136 | 265 |
| 42,271 | 13 | 21 | 61 | 143 | 4 | 9  | 63 | 80  | 141 | 253 |
| 42,272 | 13 | 21 | 62 | 143 | 4 | 9  | 63 | 80  | 142 | 253 |
| 42,273 | 13 | 21 | 64 | 143 | 4 | 10 | 64 | 80  | 145 | 254 |
| 42,274 | 12 | 21 | 62 | 141 | 4 | 10 | 62 | 77  | 140 | 249 |
| 42,275 | 13 | 21 | 64 | 139 | 4 | 10 | 64 | 76  | 145 | 246 |
| 42,276 | 13 | 20 | 63 | 136 | 4 | 10 | 64 | 76  | 144 | 242 |
| 42,277 | 13 | 19 | 63 | 129 | 4 | 10 | 64 | 72  | 144 | 230 |
| 42,278 | 13 | 17 | 63 | 122 | 4 | 9  | 64 | 64  | 144 | 212 |
| 42,279 | 13 | 17 | 63 | 122 | 4 | 9  | 63 | 64  | 143 | 212 |
| 42,280 | 13 | 17 | 63 | 121 | 4 | 9  | 63 | 64  | 143 | 211 |
| 42,281 | 13 | 17 | 63 | 121 | 4 | 9  | 63 | 64  | 143 | 211 |
| 42,282 | 13 | 17 | 63 | 121 | 4 | 9  | 63 | 64  | 143 | 211 |
| 42,283 | 13 | 17 | 62 | 118 | 4 | 9  | 63 | 63  | 142 | 207 |
| 42,284 | 13 | 17 | 62 | 119 | 4 | 9  | 63 | 63  | 142 | 208 |
| 42,285 | 12 | 18 | 62 | 121 | 4 | 9  | 63 | 64  | 141 | 212 |
| 42,286 | 10 | 18 | 62 | 121 | 4 | 9  | 63 | 64  | 139 | 212 |
| 42,287 | 9  | 18 | 60 | 129 | 4 | 9  | 61 | 71  | 134 | 227 |
| 42,288 | 9  | 18 | 59 | 126 | 4 | 9  | 61 | 72  | 133 | 225 |
| 42,289 | 9  | 19 | 60 | 141 | 4 | 9  | 61 | 76  | 134 | 245 |
| 42,290 | 9  | 21 | 60 | 145 | 4 | 9  | 60 | 81  | 133 | 256 |
| 42,291 | 9  | 20 | 60 | 145 | 4 | 9  | 58 | 81  | 131 | 255 |
| 42,292 | 9  | 23 | 60 | 157 | 4 | 10 | 57 | 99  | 130 | 289 |
| 42,293 | 9  | 23 | 60 | 158 | 4 | 10 | 57 | 99  | 130 | 290 |
| 42,294 | 9  | 23 | 60 | 162 | 4 | 10 | 57 | 100 | 130 | 295 |
| 42,295 | 9  | 23 | 60 | 162 | 4 | 10 | 57 | 97  | 130 | 292 |
| 42,296 | 9  | 23 | 60 | 167 | 4 | 10 | 57 | 99  | 130 | 299 |
| 42,297 | 9  | 25 | 58 | 191 | 5 | 11 | 55 | 107 | 127 | 334 |
| 42,298 | 9  | 11 | 52 | 104 | 5 | 4  | 51 | 57  | 117 | 176 |
| 42,299 | 9  | 12 | 52 | 115 | 5 | 4  | 50 | 61  | 116 | 192 |
| 42,300 | 8  | 13 | 51 | 117 | 4 | 4  | 45 | 61  | 108 | 195 |



|        |    |    |    |     |   |   |    |    |     |     |
|--------|----|----|----|-----|---|---|----|----|-----|-----|
| 42,301 | 7  | 12 | 49 | 105 | 3 | 3 | 43 | 56 | 102 | 176 |
| 42,302 | 8  | 12 | 47 | 104 | 3 | 3 | 43 | 57 | 101 | 176 |
| 42,303 | 8  | 12 | 47 | 106 | 3 | 3 | 43 | 57 | 101 | 178 |
| 42,304 | 8  | 11 | 47 | 104 | 3 | 3 | 43 | 57 | 101 | 175 |
| 42,305 | 8  | 11 | 47 | 105 | 3 | 3 | 43 | 57 | 101 | 176 |
| 42,306 | 8  | 11 | 45 | 103 | 3 | 3 | 42 | 57 | 98  | 174 |
| 42,307 | 8  | 11 | 45 | 103 | 3 | 3 | 41 | 57 | 97  | 174 |
| 42,308 | 8  | 11 | 44 | 102 | 3 | 3 | 40 | 57 | 95  | 173 |
| 42,309 | 7  | 11 | 44 | 102 | 3 | 3 | 40 | 57 | 94  | 173 |
| 42,310 | 8  | 11 | 44 | 102 | 3 | 3 | 40 | 58 | 95  | 174 |
| 42,311 | 6  | 11 | 42 | 102 | 3 | 3 | 39 | 58 | 90  | 174 |
| 42,312 | 5  | 11 | 41 | 102 | 3 | 3 | 37 | 58 | 86  | 174 |
| 42,313 | 5  | 11 | 41 | 108 | 3 | 3 | 37 | 60 | 86  | 182 |
| 42,314 | 4  | 11 | 39 | 108 | 3 | 3 | 29 | 60 | 75  | 182 |
| 42,315 | 6  | 13 | 39 | 111 | 3 | 3 | 30 | 60 | 78  | 187 |
| 42,316 | 8  | 13 | 44 | 111 | 4 | 3 | 31 | 61 | 87  | 188 |
| 42,317 | 14 | 13 | 75 | 111 | 6 | 3 | 55 | 61 | 150 | 188 |
| 42,318 | 14 | 13 | 77 | 111 | 5 | 3 | 64 | 61 | 160 | 188 |
| 42,319 | 14 | 13 | 68 | 111 | 4 | 3 | 46 | 61 | 132 | 188 |
| 42,320 | 15 | 13 | 69 | 111 | 4 | 3 | 44 | 61 | 132 | 188 |
| 42,321 | 15 | 13 | 67 | 111 | 4 | 3 | 42 | 61 | 128 | 188 |
| 42,322 | 15 | 13 | 62 | 114 | 4 | 3 | 42 | 61 | 123 | 191 |
| 42,323 | 15 | 13 | 61 | 114 | 4 | 3 | 42 | 61 | 122 | 191 |
| 42,324 | 15 | 13 | 59 | 114 | 4 | 2 | 41 | 62 | 119 | 191 |
| 42,325 | 15 | 13 | 59 | 114 | 5 | 2 | 42 | 62 | 121 | 191 |
| 42,326 | 14 | 13 | 57 | 114 | 5 | 2 | 40 | 63 | 116 | 192 |
| 42,327 | 14 | 13 | 57 | 114 | 5 | 2 | 40 | 63 | 116 | 192 |
| 42,328 | 14 | 13 | 57 | 114 | 5 | 2 | 40 | 63 | 116 | 192 |
| 42,329 | 14 | 13 | 57 | 114 | 5 | 2 | 40 | 63 | 116 | 192 |
| 42,330 | 14 | 13 | 57 | 114 | 5 | 2 | 40 | 63 | 116 | 192 |
| 42,331 | 14 | 13 | 57 | 114 | 5 | 2 | 41 | 63 | 117 | 192 |
| 42,332 | 14 | 13 | 58 | 114 | 5 | 2 | 41 | 63 | 118 | 192 |
| 42,333 | 14 | 13 | 58 | 115 | 5 | 2 | 41 | 62 | 118 | 192 |
| 42,334 | 14 | 13 | 58 | 115 | 5 | 2 | 41 | 62 | 118 | 192 |
| 42,335 | 14 | 12 | 58 | 104 | 5 | 2 | 41 | 52 | 118 | 170 |
| 42,336 | 14 | 12 | 58 | 104 | 5 | 2 | 41 | 52 | 118 | 170 |
| 42,337 | 14 | 12 | 58 | 104 | 5 | 2 | 42 | 52 | 119 | 170 |
| 42,338 | 14 | 12 | 58 | 105 | 5 | 2 | 42 | 52 | 119 | 171 |
| 42,339 | 14 | 12 | 58 | 105 | 5 | 2 | 42 | 51 | 119 | 170 |
| 42,340 | 14 | 9  | 58 | 86  | 5 | 2 | 42 | 42 | 119 | 139 |
| 42,341 | 14 | 9  | 58 | 85  | 5 | 2 | 42 | 42 | 119 | 138 |

|        |    |    |    |     |   |    |    |     |     |     |
|--------|----|----|----|-----|---|----|----|-----|-----|-----|
| 42,342 | 14 | 9  | 58 | 86  | 5 | 2  | 42 | 44  | 119 | 141 |
| 42,343 | 14 | 6  | 60 | 78  | 5 | 3  | 43 | 29  | 122 | 116 |
| 42,344 | 14 | 7  | 60 | 87  | 5 | 5  | 43 | 32  | 122 | 131 |
| 42,345 | 14 | 8  | 61 | 89  | 5 | 5  | 43 | 41  | 123 | 143 |
| 42,346 | 14 | 9  | 61 | 116 | 5 | 6  | 43 | 60  | 123 | 191 |
| 42,347 | 14 | 9  | 61 | 113 | 5 | 6  | 43 | 59  | 123 | 187 |
| 42,348 | 14 | 7  | 61 | 91  | 4 | 5  | 43 | 51  | 122 | 154 |
| 42,349 | 14 | 7  | 61 | 94  | 4 | 6  | 43 | 64  | 122 | 171 |
| 42,350 | 14 | 6  | 61 | 86  | 4 | 6  | 43 | 62  | 122 | 160 |
| 42,351 | 14 | 15 | 60 | 127 | 4 | 10 | 43 | 100 | 121 | 252 |
| 42,352 | 14 | 15 | 60 | 130 | 4 | 11 | 43 | 102 | 121 | 258 |
| 42,353 | 14 | 15 | 65 | 140 | 4 | 11 | 45 | 124 | 128 | 290 |
| 42,354 | 14 | 15 | 65 | 139 | 4 | 11 | 45 | 129 | 128 | 294 |
| 42,355 | 14 | 18 | 69 | 163 | 4 | 11 | 45 | 136 | 132 | 328 |
| 42,356 | 14 | 23 | 69 | 197 | 4 | 11 | 45 | 154 | 132 | 385 |
| 42,357 | 14 | 23 | 69 | 200 | 4 | 11 | 45 | 156 | 132 | 390 |
| 42,358 | 14 | 24 | 71 | 211 | 5 | 11 | 46 | 158 | 136 | 404 |
| 42,359 | 15 | 25 | 74 | 212 | 5 | 11 | 48 | 158 | 142 | 406 |
| 42,360 | 14 | 25 | 75 | 212 | 5 | 11 | 47 | 157 | 141 | 405 |
| 42,361 | 14 | 25 | 75 | 215 | 5 | 11 | 52 | 158 | 146 | 409 |
| 42,362 | 14 | 25 | 75 | 221 | 5 | 11 | 52 | 162 | 146 | 419 |
| 42,363 | 14 | 25 | 76 | 247 | 5 | 13 | 53 | 187 | 148 | 472 |
| 42,364 | 13 | 25 | 76 | 287 | 5 | 13 | 53 | 199 | 147 | 524 |
| 42,365 | 11 | 30 | 77 | 309 | 5 | 15 | 53 | 214 | 146 | 568 |
| 42,366 | 11 | 28 | 74 | 335 | 5 | 17 | 52 | 223 | 142 | 603 |
| 42,367 | 9  | 29 | 67 | 353 | 4 | 20 | 51 | 232 | 131 | 634 |
| 42,368 | 3  | 30 | 31 | 370 | 2 | 20 | 24 | 244 | 60  | 664 |
| 42,369 | 3  | 32 | 25 | 382 | 2 | 23 | 15 | 266 | 45  | 703 |
| 42,370 | 3  | 32 | 23 | 404 | 2 | 26 | 15 | 287 | 43  | 749 |
| 42,371 | 2  | 33 | 23 | 423 | 2 | 26 | 15 | 299 | 42  | 781 |
| 42,372 | 2  | 33 | 23 | 424 | 2 | 26 | 15 | 300 | 42  | 783 |
| 42,373 | 2  | 33 | 23 | 422 | 2 | 26 | 15 | 300 | 42  | 781 |
| 42,374 | 2  | 33 | 23 | 422 | 2 | 26 | 15 | 300 | 42  | 781 |
| 42,375 | 2  | 33 | 23 | 423 | 2 | 26 | 15 | 300 | 42  | 782 |
| 42,376 | 2  | 33 | 23 | 424 | 1 | 27 | 14 | 301 | 40  | 785 |
| 42,377 | 2  | 33 | 23 | 424 | 1 | 27 | 14 | 300 | 40  | 784 |
| 42,378 | 2  | 33 | 24 | 424 | 1 | 27 | 15 | 305 | 42  | 789 |
| 42,379 | 4  | 33 | 52 | 424 | 2 | 27 | 33 | 305 | 91  | 789 |
| 42,380 | 4  | 33 | 58 | 425 | 3 | 27 | 33 | 305 | 98  | 790 |
| 42,381 | 4  | 33 | 59 | 426 | 3 | 27 | 35 | 305 | 101 | 791 |
| 42,382 | 4  | 33 | 58 | 426 | 3 | 28 | 36 | 305 | 101 | 792 |

|        |   |    |    |     |   |    |    |     |     |     |
|--------|---|----|----|-----|---|----|----|-----|-----|-----|
| 42,383 | 4 | 33 | 58 | 426 | 3 | 28 | 36 | 305 | 101 | 792 |
| 42,384 | 4 | 33 | 58 | 427 | 3 | 28 | 36 | 306 | 101 | 794 |
| 42,385 | 4 | 33 | 58 | 427 | 3 | 28 | 36 | 307 | 101 | 795 |
| 42,386 | 4 | 33 | 58 | 427 | 3 | 28 | 36 | 307 | 101 | 795 |
| 42,387 | 5 | 33 | 58 | 430 | 3 | 29 | 36 | 308 | 102 | 800 |
| 42,388 | 5 | 33 | 58 | 431 | 3 | 29 | 35 | 308 | 101 | 801 |
| 42,389 | 5 | 33 | 59 | 431 | 3 | 29 | 35 | 313 | 102 | 806 |
| 42,390 | 5 | 33 | 59 | 439 | 3 | 30 | 36 | 314 | 103 | 816 |
| 42,391 | 5 | 33 | 58 | 443 | 3 | 30 | 36 | 317 | 102 | 823 |
| 42,392 | 5 | 33 | 58 | 458 | 3 | 31 | 36 | 323 | 102 | 845 |
| 42,393 | 5 | 33 | 58 | 457 | 3 | 31 | 36 | 321 | 102 | 842 |
| 42,394 | 5 | 31 | 56 | 407 | 3 | 26 | 35 | 285 | 99  | 749 |
| 42,395 | 5 | 31 | 56 | 407 | 3 | 26 | 36 | 285 | 100 | 749 |
| 42,396 | 5 | 31 | 55 | 409 | 3 | 26 | 36 | 285 | 99  | 751 |
| 42,397 | 5 | 31 | 55 | 410 | 3 | 26 | 38 | 285 | 101 | 752 |
| 42,398 | 5 | 31 | 55 | 410 | 3 | 26 | 38 | 285 | 101 | 752 |
| 42,399 | 5 | 31 | 56 | 408 | 3 | 26 | 38 | 286 | 102 | 751 |
| 42,400 | 5 | 21 | 56 | 352 | 3 | 20 | 38 | 232 | 102 | 625 |
| 42,401 | 5 | 21 | 56 | 352 | 3 | 20 | 38 | 233 | 102 | 626 |
| 42,402 | 5 | 21 | 56 | 352 | 3 | 20 | 38 | 233 | 102 | 626 |
| 42,403 | 5 | 18 | 53 | 316 | 3 | 20 | 38 | 198 | 99  | 552 |
| 42,404 | 4 | 18 | 51 | 316 | 3 | 20 | 36 | 198 | 94  | 552 |
| 42,405 | 4 | 18 | 47 | 316 | 3 | 20 | 36 | 198 | 90  | 552 |
| 42,406 | 4 | 13 | 47 | 282 | 3 | 20 | 36 | 180 | 90  | 495 |
| 42,407 | 4 | 13 | 47 | 283 | 3 | 20 | 36 | 180 | 90  | 496 |
| 42,408 | 4 | 13 | 45 | 280 | 2 | 20 | 35 | 178 | 86  | 491 |
| 42,409 | 3 | 12 | 45 | 269 | 2 | 20 | 34 | 176 | 84  | 477 |
| 42,410 | 3 | 11 | 43 | 268 | 2 | 20 | 33 | 176 | 81  | 475 |
| 42,411 | 3 | 11 | 42 | 268 | 2 | 20 | 33 | 176 | 80  | 475 |
| 42,412 | 3 | 11 | 45 | 265 | 2 | 20 | 31 | 175 | 81  | 471 |
| 42,413 | 3 | 11 | 44 | 259 | 2 | 20 | 31 | 171 | 80  | 461 |
| 42,414 | 3 | 11 | 45 | 187 | 2 | 18 | 31 | 134 | 81  | 350 |
| 42,415 | 3 | 11 | 45 | 187 | 2 | 18 | 31 | 134 | 81  | 350 |
| 42,416 | 3 | 6  | 44 | 165 | 2 | 16 | 31 | 119 | 80  | 306 |
| 42,417 | 3 | 6  | 44 | 136 | 2 | 14 | 31 | 110 | 80  | 266 |
| 42,418 | 3 | 4  | 44 | 103 | 2 | 11 | 32 | 88  | 81  | 206 |
| 42,419 | 3 | 4  | 43 | 103 | 2 | 11 | 32 | 88  | 80  | 206 |
| 42,420 | 3 | 2  | 43 | 91  | 3 | 8  | 32 | 66  | 81  | 167 |
| 42,421 | 3 | 2  | 44 | 69  | 3 | 5  | 32 | 45  | 82  | 121 |
| 42,422 | 3 | 1  | 47 | 50  | 3 | 5  | 34 | 33  | 87  | 89  |
| 42,423 | 5 | 1  | 65 | 48  | 3 | 5  | 38 | 32  | 111 | 86  |

|        |    |    |     |     |    |    |     |     |     |     |
|--------|----|----|-----|-----|----|----|-----|-----|-----|-----|
| 42,424 | 6  | 1  | 67  | 49  | 3  | 5  | 38  | 31  | 114 | 86  |
| 42,425 | 6  | 1  | 67  | 49  | 3  | 5  | 38  | 31  | 114 | 86  |
| 42,426 | 11 | 1  | 117 | 56  | 5  | 6  | 97  | 54  | 230 | 117 |
| 42,427 | 11 | 1  | 117 | 68  | 5  | 5  | 98  | 64  | 231 | 138 |
| 42,428 | 11 | 10 | 118 | 116 | 5  | 10 | 98  | 103 | 232 | 239 |
| 42,429 | 11 | 15 | 117 | 155 | 5  | 11 | 97  | 119 | 230 | 300 |
| 42,430 | 9  | 15 | 89  | 161 | 4  | 11 | 79  | 123 | 181 | 310 |
| 42,431 | 9  | 15 | 83  | 165 | 3  | 12 | 79  | 130 | 174 | 322 |
| 42,432 | 9  | 15 | 82  | 164 | 3  | 12 | 76  | 130 | 170 | 321 |
| 42,433 | 9  | 15 | 82  | 165 | 3  | 11 | 75  | 130 | 169 | 321 |
| 42,434 | 9  | 15 | 82  | 165 | 3  | 11 | 75  | 130 | 169 | 321 |
| 42,435 | 9  | 15 | 82  | 164 | 3  | 11 | 75  | 129 | 169 | 319 |
| 42,436 | 9  | 15 | 82  | 169 | 3  | 11 | 75  | 128 | 169 | 323 |
| 42,437 | 9  | 15 | 82  | 169 | 3  | 11 | 75  | 128 | 169 | 323 |
| 42,438 | 8  | 15 | 84  | 167 | 3  | 10 | 79  | 127 | 174 | 319 |
| 42,439 | 8  | 15 | 84  | 166 | 3  | 10 | 79  | 127 | 174 | 318 |
| 42,440 | 8  | 15 | 83  | 165 | 4  | 10 | 82  | 122 | 177 | 312 |
| 42,441 | 8  | 15 | 84  | 154 | 4  | 9  | 84  | 118 | 180 | 296 |
| 42,442 | 8  | 15 | 84  | 139 | 4  | 9  | 87  | 112 | 183 | 275 |
| 42,443 | 9  | 15 | 86  | 139 | 4  | 9  | 90  | 112 | 189 | 275 |
| 42,444 | 9  | 14 | 88  | 137 | 4  | 9  | 90  | 112 | 191 | 272 |
| 42,445 | 9  | 14 | 88  | 137 | 4  | 9  | 90  | 112 | 191 | 272 |
| 42,446 | 9  | 16 | 88  | 137 | 4  | 9  | 91  | 113 | 192 | 275 |
| 42,447 | 11 | 16 | 95  | 137 | 4  | 9  | 96  | 113 | 206 | 275 |
| 42,448 | 11 | 16 | 96  | 134 | 4  | 9  | 94  | 112 | 205 | 271 |
| 42,449 | 11 | 16 | 96  | 134 | 4  | 9  | 94  | 112 | 205 | 271 |
| 42,450 | 11 | 16 | 95  | 134 | 4  | 10 | 94  | 111 | 204 | 271 |
| 42,451 | 11 | 16 | 95  | 134 | 4  | 10 | 94  | 109 | 204 | 269 |
| 42,452 | 12 | 16 | 104 | 134 | 4  | 10 | 106 | 108 | 226 | 268 |
| 42,453 | 12 | 16 | 104 | 134 | 4  | 11 | 106 | 108 | 226 | 269 |
| 42,454 | 12 | 16 | 104 | 134 | 4  | 11 | 106 | 108 | 226 | 269 |
| 42,455 | 12 | 16 | 111 | 134 | 4  | 11 | 111 | 108 | 238 | 269 |
| 42,456 | 12 | 16 | 111 | 134 | 4  | 11 | 111 | 108 | 238 | 269 |
| 42,457 | 12 | 16 | 111 | 140 | 4  | 11 | 111 | 109 | 238 | 276 |
| 42,458 | 12 | 16 | 122 | 144 | 4  | 11 | 113 | 109 | 251 | 280 |
| 42,459 | 30 | 16 | 202 | 148 | 9  | 11 | 164 | 111 | 405 | 286 |
| 42,460 | 31 | 16 | 218 | 150 | 9  | 11 | 170 | 113 | 428 | 290 |
| 42,461 | 31 | 16 | 221 | 152 | 9  | 11 | 170 | 117 | 431 | 296 |
| 42,462 | 31 | 16 | 227 | 152 | 9  | 11 | 170 | 117 | 437 | 296 |
| 42,463 | 32 | 16 | 224 | 153 | 10 | 11 | 167 | 117 | 433 | 297 |
| 42,464 | 32 | 16 | 224 | 154 | 10 | 11 | 166 | 119 | 432 | 300 |

|        |    |    |     |     |    |    |     |     |     |     |
|--------|----|----|-----|-----|----|----|-----|-----|-----|-----|
| 42,465 | 32 | 16 | 223 | 155 | 11 | 11 | 165 | 120 | 431 | 302 |
| 42,466 | 32 | 16 | 223 | 155 | 11 | 11 | 165 | 121 | 431 | 303 |
| 42,467 | 32 | 16 | 223 | 156 | 11 | 11 | 166 | 121 | 432 | 304 |
| 42,468 | 32 | 16 | 224 | 164 | 11 | 11 | 166 | 122 | 433 | 313 |
| 42,469 | 32 | 16 | 224 | 165 | 11 | 11 | 165 | 122 | 432 | 314 |
| 42,470 | 32 | 16 | 224 | 166 | 10 | 11 | 165 | 123 | 431 | 316 |
| 42,471 | 32 | 16 | 224 | 169 | 10 | 11 | 165 | 127 | 431 | 323 |
| 42,472 | 33 | 18 | 224 | 169 | 10 | 11 | 165 | 128 | 432 | 326 |
| 42,473 | 33 | 19 | 221 | 170 | 10 | 11 | 164 | 130 | 428 | 330 |
| 42,474 | 31 | 19 | 203 | 171 | 10 | 11 | 160 | 131 | 404 | 332 |
| 42,475 | 30 | 19 | 201 | 175 | 10 | 11 | 160 | 132 | 401 | 337 |
| 42,476 | 25 | 19 | 160 | 175 | 8  | 11 | 116 | 130 | 309 | 335 |
| 42,477 | 25 | 19 | 152 | 167 | 8  | 10 | 100 | 106 | 285 | 302 |
| 42,478 | 25 | 10 | 152 | 105 | 8  | 5  | 99  | 58  | 284 | 178 |
| 42,479 | 25 | 10 | 150 | 105 | 8  | 5  | 99  | 59  | 282 | 179 |
| 42,480 | 25 | 5  | 151 | 68  | 8  | 4  | 99  | 41  | 283 | 118 |
| 42,481 | 25 | 5  | 151 | 62  | 8  | 4  | 99  | 37  | 283 | 108 |
| 42,482 | 25 | 5  | 151 | 58  | 8  | 3  | 99  | 31  | 283 | 97  |
| 42,483 | 25 | 5  | 151 | 58  | 8  | 3  | 99  | 31  | 283 | 97  |
| 42,484 | 25 | 5  | 151 | 57  | 8  | 3  | 99  | 31  | 283 | 96  |
| 42,485 | 25 | 5  | 151 | 57  | 8  | 3  | 100 | 31  | 284 | 96  |
| 42,486 | 25 | 5  | 151 | 52  | 8  | 3  | 99  | 31  | 283 | 91  |
| 42,487 | 25 | 5  | 151 | 52  | 8  | 3  | 99  | 31  | 283 | 91  |
| 42,488 | 25 | 5  | 150 | 52  | 8  | 3  | 96  | 32  | 279 | 92  |
| 42,489 | 25 | 5  | 149 | 51  | 8  | 3  | 96  | 33  | 278 | 92  |
| 42,490 | 25 | 5  | 149 | 51  | 8  | 3  | 96  | 33  | 278 | 92  |
| 42,491 | 25 | 5  | 149 | 51  | 7  | 3  | 93  | 33  | 274 | 92  |
| 42,492 | 25 | 5  | 148 | 50  | 7  | 2  | 90  | 33  | 270 | 90  |
| 42,493 | 25 | 5  | 148 | 50  | 7  | 2  | 87  | 34  | 267 | 91  |
| 42,494 | 24 | 5  | 146 | 50  | 8  | 2  | 83  | 35  | 261 | 92  |
| 42,495 | 24 | 5  | 144 | 50  | 8  | 2  | 83  | 35  | 259 | 92  |
| 42,496 | 24 | 5  | 144 | 50  | 8  | 2  | 83  | 35  | 259 | 92  |
| 42,497 | 24 | 3  | 145 | 49  | 8  | 2  | 82  | 34  | 259 | 88  |
| 42,498 | 22 | 3  | 138 | 49  | 8  | 2  | 77  | 34  | 245 | 88  |
| 42,499 | 22 | 3  | 134 | 49  | 8  | 2  | 73  | 34  | 237 | 88  |
| 42,500 | 22 | 3  | 132 | 49  | 8  | 2  | 67  | 35  | 229 | 89  |
| 42,501 | 22 | 3  | 133 | 49  | 8  | 1  | 65  | 35  | 228 | 88  |
| 42,502 | 21 | 3  | 133 | 49  | 8  | 1  | 65  | 35  | 227 | 88  |
| 42,503 | 21 | 3  | 135 | 49  | 8  | 0  | 65  | 35  | 229 | 87  |
| 42,504 | 21 | 3  | 140 | 51  | 8  | 0  | 66  | 36  | 235 | 90  |
| 42,505 | 21 | 3  | 139 | 52  | 8  | 0  | 65  | 37  | 233 | 92  |

|        |    |   |     |    |    |   |    |    |     |     |
|--------|----|---|-----|----|----|---|----|----|-----|-----|
| 42,506 | 22 | 3 | 187 | 55 | 12 | 1 | 78 | 40 | 299 | 99  |
| 42,507 | 22 | 3 | 191 | 55 | 12 | 1 | 79 | 42 | 304 | 101 |
| 42,508 | 22 | 3 | 190 | 43 | 12 | 1 | 79 | 43 | 303 | 90  |
| 42,509 | 22 | 4 | 192 | 45 | 11 | 1 | 77 | 43 | 302 | 93  |
| 42,510 | 4  | 4 | 128 | 46 | 8  | 1 | 29 | 44 | 169 | 95  |
| 42,511 | 3  | 5 | 113 | 48 | 8  | 1 | 27 | 43 | 151 | 97  |
| 42,512 | 3  | 6 | 109 | 49 | 8  | 1 | 27 | 42 | 147 | 98  |
| 42,513 | 3  | 6 | 103 | 50 | 8  | 1 | 27 | 42 | 141 | 99  |
| 42,514 | 3  | 6 | 110 | 50 | 7  | 1 | 29 | 42 | 149 | 99  |
| 42,515 | 3  | 8 | 110 | 49 | 7  | 1 | 29 | 40 | 149 | 98  |
| 42,516 | 3  | 8 | 110 | 48 | 6  | 1 | 29 | 37 | 148 | 94  |
| 42,517 | 3  | 8 | 110 | 48 | 6  | 1 | 30 | 36 | 149 | 93  |
| 42,518 | 3  | 8 | 109 | 48 | 6  | 1 | 30 | 37 | 148 | 94  |
| 42,519 | 3  | 8 | 109 | 40 | 6  | 1 | 30 | 36 | 148 | 85  |
| 42,520 | 3  | 8 | 109 | 36 | 6  | 1 | 30 | 34 | 148 | 79  |
| 42,521 | 3  | 8 | 109 | 34 | 6  | 1 | 30 | 33 | 148 | 76  |
| 42,522 | 3  | 6 | 110 | 33 | 6  | 1 | 30 | 32 | 149 | 72  |
| 42,523 | 2  | 5 | 111 | 32 | 6  | 1 | 30 | 31 | 149 | 69  |
| 42,524 | 2  | 5 | 112 | 30 | 6  | 1 | 30 | 30 | 150 | 66  |
| 42,525 | 2  | 5 | 113 | 26 | 6  | 1 | 31 | 28 | 152 | 60  |
| 42,526 | 3  | 6 | 125 | 26 | 7  | 1 | 34 | 28 | 169 | 61  |
| 42,527 | 4  | 6 | 128 | 27 | 7  | 1 | 36 | 28 | 175 | 62  |
| 42,528 | 7  | 6 | 142 | 27 | 7  | 1 | 43 | 28 | 199 | 62  |
| 42,529 | 7  | 6 | 142 | 27 | 7  | 1 | 43 | 28 | 199 | 62  |
| 42,530 | 7  | 6 | 147 | 27 | 7  | 1 | 45 | 27 | 206 | 61  |
| 42,531 | 8  | 6 | 156 | 26 | 7  | 1 | 45 | 25 | 216 | 58  |
| 42,532 | 8  | 7 | 166 | 26 | 7  | 1 | 49 | 25 | 230 | 59  |
| 42,533 | 8  | 7 | 166 | 25 | 7  | 1 | 49 | 24 | 230 | 57  |
| 42,534 | 8  | 7 | 166 | 25 | 7  | 1 | 49 | 24 | 230 | 57  |
| 42,535 | 8  | 7 | 166 | 25 | 7  | 1 | 50 | 24 | 231 | 57  |
| 42,536 | 8  | 7 | 166 | 25 | 7  | 1 | 49 | 24 | 230 | 57  |
| 42,537 | 8  | 7 | 166 | 26 | 7  | 1 | 49 | 24 | 230 | 58  |
| 42,538 | 8  | 7 | 166 | 26 | 7  | 1 | 49 | 24 | 230 | 58  |
| 42,539 | 8  | 7 | 166 | 26 | 7  | 1 | 49 | 23 | 230 | 57  |
| 42,540 | 8  | 7 | 174 | 26 | 7  | 1 | 50 | 22 | 239 | 56  |
| 42,541 | 8  | 7 | 174 | 26 | 7  | 1 | 50 | 21 | 239 | 55  |
| 42,542 | 9  | 7 | 184 | 26 | 8  | 1 | 53 | 21 | 254 | 55  |
| 42,543 | 9  | 7 | 184 | 26 | 8  | 1 | 55 | 21 | 256 | 55  |
| 42,544 | 9  | 7 | 185 | 26 | 8  | 1 | 55 | 20 | 257 | 54  |
| 42,545 | 9  | 7 | 185 | 26 | 7  | 1 | 55 | 20 | 256 | 54  |
| 42,546 | 12 | 7 | 197 | 26 | 7  | 1 | 61 | 20 | 277 | 54  |

|        |    |   |     |    |   |   |    |    |     |    |
|--------|----|---|-----|----|---|---|----|----|-----|----|
| 42,547 | 12 | 7 | 201 | 26 | 7 | 1 | 61 | 20 | 281 | 54 |
| 42,548 | 12 | 7 | 200 | 25 | 7 | 1 | 61 | 20 | 280 | 53 |
| 42,549 | 12 | 7 | 201 | 25 | 7 | 1 | 61 | 20 | 281 | 53 |
| 42,550 | 12 | 7 | 203 | 25 | 7 | 1 | 62 | 19 | 284 | 52 |
| 42,551 | 12 | 7 | 200 | 25 | 7 | 1 | 62 | 19 | 281 | 52 |
| 42,552 | 12 | 7 | 200 | 25 | 7 | 1 | 62 | 20 | 281 | 53 |
| 42,553 | 12 | 7 | 201 | 25 | 7 | 1 | 62 | 20 | 282 | 53 |
| 42,554 | 12 | 7 | 199 | 25 | 7 | 1 | 62 | 20 | 280 | 53 |
| 42,555 | 12 | 8 | 196 | 24 | 7 | 1 | 62 | 20 | 277 | 53 |
| 42,556 | 12 | 9 | 177 | 32 | 6 | 1 | 59 | 24 | 254 | 66 |
| 42,557 | 11 | 9 | 145 | 31 | 3 | 0 | 45 | 21 | 204 | 61 |
| 42,558 | 12 | 9 | 151 | 31 | 4 | 0 | 55 | 20 | 222 | 60 |
| 42,559 | 12 | 9 | 142 | 27 | 4 | 0 | 54 | 16 | 212 | 52 |
| 42,560 | 12 | 8 | 142 | 28 | 4 | 0 | 56 | 17 | 214 | 53 |
| 42,561 | 12 | 7 | 133 | 23 | 4 | 0 | 56 | 15 | 205 | 45 |
| 42,562 | 12 | 7 | 131 | 24 | 4 | 0 | 52 | 15 | 199 | 46 |
| 42,563 | 11 | 6 | 124 | 21 | 4 | 0 | 50 | 12 | 189 | 39 |
| 42,564 | 11 | 6 | 124 | 20 | 4 | 0 | 50 | 12 | 189 | 38 |
| 42,565 | 11 | 4 | 124 | 19 | 4 | 0 | 49 | 12 | 188 | 35 |
| 42,566 | 11 | 4 | 124 | 19 | 4 | 0 | 49 | 12 | 188 | 35 |
| 42,567 | 11 | 4 | 124 | 19 | 4 | 0 | 49 | 12 | 188 | 35 |
| 42,568 | 11 | 4 | 124 | 18 | 4 | 0 | 49 | 11 | 188 | 33 |
| 42,569 | 11 | 4 | 125 | 18 | 4 | 0 | 50 | 11 | 190 | 33 |
| 42,570 | 11 | 4 | 125 | 18 | 4 | 0 | 50 | 11 | 190 | 33 |
| 42,571 | 11 | 4 | 125 | 18 | 4 | 0 | 50 | 11 | 190 | 33 |
| 42,572 | 11 | 4 | 125 | 18 | 4 | 0 | 50 | 11 | 190 | 33 |
| 42,573 | 11 | 4 | 124 | 18 | 4 | 0 | 50 | 10 | 189 | 32 |
| 42,574 | 11 | 4 | 123 | 19 | 4 | 0 | 50 | 12 | 188 | 35 |
| 42,575 | 11 | 4 | 122 | 22 | 4 | 0 | 50 | 14 | 187 | 40 |
| 42,576 | 11 | 4 | 121 | 25 | 4 | 0 | 49 | 17 | 185 | 46 |
| 42,577 | 10 | 3 | 110 | 27 | 3 | 0 | 46 | 17 | 169 | 47 |
| 42,578 | 9  | 3 | 106 | 26 | 3 | 0 | 44 | 17 | 162 | 46 |
| 42,579 | 7  | 3 | 93  | 38 | 3 | 0 | 37 | 22 | 140 | 63 |
| 42,580 | 7  | 3 | 88  | 39 | 3 | 0 | 35 | 22 | 133 | 64 |
| 42,581 | 6  | 3 | 82  | 40 | 3 | 0 | 36 | 23 | 127 | 66 |
| 42,582 | 6  | 3 | 79  | 41 | 3 | 0 | 33 | 24 | 121 | 68 |
| 42,583 | 6  | 3 | 72  | 41 | 3 | 0 | 32 | 24 | 113 | 68 |
| 42,584 | 6  | 4 | 73  | 41 | 3 | 0 | 32 | 24 | 114 | 69 |
| 42,585 | 6  | 4 | 73  | 43 | 3 | 0 | 31 | 25 | 113 | 72 |
| 42,586 | 6  | 4 | 73  | 42 | 3 | 0 | 31 | 25 | 113 | 71 |
| 42,587 | 6  | 4 | 73  | 42 | 3 | 0 | 31 | 25 | 113 | 71 |

|        |    |   |    |    |   |   |    |    |     |     |
|--------|----|---|----|----|---|---|----|----|-----|-----|
| 42,588 | 6  | 4 | 74 | 42 | 3 | 0 | 31 | 25 | 114 | 71  |
| 42,589 | 7  | 4 | 82 | 43 | 3 | 0 | 31 | 25 | 123 | 72  |
| 42,590 | 7  | 4 | 82 | 43 | 3 | 0 | 31 | 25 | 123 | 72  |
| 42,591 | 7  | 4 | 74 | 43 | 3 | 0 | 31 | 25 | 115 | 72  |
| 42,592 | 9  | 4 | 77 | 43 | 3 | 0 | 38 | 25 | 127 | 72  |
| 42,593 | 9  | 4 | 80 | 43 | 3 | 0 | 39 | 25 | 131 | 72  |
| 42,594 | 9  | 4 | 82 | 43 | 3 | 0 | 38 | 25 | 132 | 72  |
| 42,595 | 9  | 4 | 81 | 43 | 3 | 0 | 39 | 25 | 132 | 72  |
| 42,596 | 6  | 4 | 69 | 43 | 3 | 0 | 33 | 25 | 111 | 72  |
| 42,597 | 6  | 4 | 67 | 43 | 3 | 0 | 33 | 25 | 109 | 72  |
| 42,598 | 7  | 4 | 65 | 43 | 3 | 0 | 39 | 25 | 114 | 72  |
| 42,599 | 7  | 4 | 64 | 43 | 3 | 0 | 40 | 25 | 114 | 72  |
| 42,600 | 7  | 4 | 62 | 43 | 3 | 0 | 39 | 26 | 111 | 73  |
| 42,601 | 7  | 4 | 61 | 43 | 3 | 0 | 39 | 26 | 110 | 73  |
| 42,602 | 7  | 4 | 61 | 45 | 3 | 0 | 39 | 27 | 110 | 76  |
| 42,603 | 7  | 4 | 66 | 45 | 3 | 0 | 40 | 26 | 116 | 75  |
| 42,604 | 7  | 4 | 66 | 47 | 3 | 0 | 40 | 26 | 116 | 77  |
| 42,605 | 8  | 4 | 65 | 47 | 4 | 0 | 43 | 26 | 120 | 77  |
| 42,606 | 8  | 2 | 62 | 35 | 4 | 0 | 42 | 20 | 116 | 57  |
| 42,607 | 8  | 2 | 61 | 37 | 4 | 0 | 41 | 20 | 114 | 59  |
| 42,608 | 7  | 2 | 53 | 38 | 3 | 1 | 32 | 21 | 95  | 62  |
| 42,609 | 7  | 2 | 54 | 38 | 3 | 1 | 31 | 21 | 95  | 62  |
| 42,610 | 7  | 2 | 54 | 39 | 3 | 1 | 30 | 20 | 94  | 62  |
| 42,611 | 7  | 2 | 48 | 37 | 3 | 1 | 27 | 19 | 85  | 59  |
| 42,612 | 7  | 2 | 46 | 38 | 2 | 1 | 27 | 19 | 82  | 60  |
| 42,613 | 7  | 2 | 46 | 37 | 2 | 1 | 27 | 20 | 82  | 60  |
| 42,614 | 7  | 2 | 46 | 38 | 2 | 1 | 27 | 20 | 82  | 61  |
| 42,615 | 7  | 2 | 46 | 47 | 2 | 1 | 30 | 24 | 85  | 74  |
| 42,616 | 7  | 3 | 46 | 51 | 2 | 1 | 30 | 25 | 85  | 80  |
| 42,617 | 7  | 3 | 46 | 53 | 2 | 1 | 30 | 25 | 85  | 82  |
| 42,618 | 7  | 3 | 47 | 57 | 2 | 1 | 30 | 25 | 86  | 86  |
| 42,619 | 7  | 3 | 47 | 67 | 2 | 3 | 30 | 26 | 86  | 99  |
| 42,620 | 7  | 4 | 48 | 69 | 3 | 3 | 30 | 29 | 88  | 105 |
| 42,621 | 7  | 4 | 48 | 69 | 3 | 3 | 30 | 29 | 88  | 105 |
| 42,622 | 8  | 4 | 49 | 70 | 3 | 3 | 35 | 29 | 95  | 106 |
| 42,623 | 8  | 4 | 52 | 72 | 3 | 3 | 36 | 29 | 99  | 108 |
| 42,624 | 9  | 5 | 52 | 73 | 3 | 3 | 42 | 29 | 106 | 110 |
| 42,625 | 9  | 5 | 53 | 72 | 3 | 3 | 42 | 27 | 107 | 107 |
| 42,626 | 12 | 5 | 67 | 74 | 6 | 3 | 51 | 29 | 136 | 111 |
| 42,627 | 12 | 5 | 67 | 72 | 6 | 3 | 51 | 28 | 136 | 108 |
| 42,628 | 18 | 6 | 94 | 78 | 9 | 3 | 81 | 28 | 202 | 115 |



|        |    |   |    |    |   |   |    |    |     |     |
|--------|----|---|----|----|---|---|----|----|-----|-----|
| 42,629 | 18 | 6 | 95 | 78 | 9 | 3 | 81 | 28 | 203 | 115 |
| 42,630 | 17 | 6 | 94 | 67 | 9 | 3 | 81 | 25 | 201 | 101 |
| 42,631 | 17 | 6 | 94 | 67 | 9 | 3 | 81 | 25 | 201 | 101 |
| 42,632 | 17 | 6 | 91 | 66 | 9 | 3 | 82 | 23 | 199 | 98  |
| 42,633 | 17 | 5 | 91 | 66 | 9 | 3 | 82 | 24 | 199 | 98  |
| 42,634 | 17 | 5 | 91 | 66 | 9 | 3 | 82 | 24 | 199 | 98  |
| 42,635 | 17 | 4 | 90 | 65 | 9 | 3 | 83 | 24 | 199 | 96  |
| 42,636 | 17 | 4 | 90 | 63 | 9 | 3 | 83 | 23 | 199 | 93  |
| 42,637 | 17 | 4 | 90 | 63 | 9 | 3 | 84 | 23 | 200 | 93  |
| 42,638 | 17 | 4 | 90 | 63 | 9 | 3 | 84 | 23 | 200 | 93  |
| 42,639 | 17 | 4 | 89 | 63 | 9 | 3 | 84 | 23 | 199 | 93  |
| 42,640 | 16 | 4 | 81 | 62 | 9 | 3 | 84 | 23 | 190 | 92  |
| 42,641 | 16 | 4 | 81 | 63 | 9 | 3 | 83 | 23 | 189 | 93  |
| 42,642 | 16 | 4 | 83 | 63 | 9 | 3 | 83 | 23 | 191 | 93  |
| 42,643 | 14 | 5 | 79 | 69 | 9 | 3 | 76 | 24 | 178 | 101 |
| 42,644 | 13 | 5 | 66 | 70 | 8 | 3 | 71 | 24 | 158 | 102 |
| 42,645 | 13 | 5 | 65 | 70 | 8 | 3 | 70 | 24 | 156 | 102 |
| 42,646 | 13 | 5 | 66 | 70 | 8 | 3 | 72 | 24 | 159 | 102 |
| 42,647 | 13 | 5 | 67 | 70 | 8 | 3 | 73 | 24 | 161 | 102 |
| 42,648 | 13 | 5 | 69 | 70 | 8 | 3 | 77 | 26 | 167 | 104 |
| 42,649 | 12 | 5 | 69 | 70 | 8 | 3 | 71 | 26 | 160 | 104 |
| 42,650 | 12 | 5 | 75 | 70 | 8 | 3 | 72 | 25 | 167 | 103 |
| 42,651 | 13 | 6 | 76 | 71 | 8 | 3 | 72 | 25 | 169 | 105 |
| 42,652 | 13 | 6 | 76 | 71 | 8 | 3 | 73 | 26 | 170 | 106 |
| 42,653 | 13 | 6 | 73 | 69 | 8 | 3 | 72 | 25 | 166 | 103 |
| 42,654 | 13 | 6 | 70 | 71 | 8 | 4 | 72 | 26 | 163 | 107 |
| 42,655 | 12 | 6 | 68 | 72 | 7 | 4 | 69 | 26 | 156 | 108 |
| 42,656 | 12 | 6 | 69 | 72 | 7 | 4 | 69 | 26 | 157 | 108 |
| 42,657 | 13 | 6 | 69 | 72 | 7 | 4 | 69 | 27 | 158 | 109 |
| 42,658 | 13 | 6 | 69 | 71 | 7 | 3 | 69 | 26 | 158 | 106 |
| 42,659 | 13 | 6 | 69 | 71 | 7 | 3 | 69 | 26 | 158 | 106 |
| 42,660 | 13 | 6 | 68 | 71 | 7 | 3 | 69 | 25 | 157 | 105 |
| 42,661 | 13 | 6 | 68 | 70 | 7 | 3 | 69 | 25 | 157 | 104 |
| 42,662 | 13 | 6 | 68 | 69 | 7 | 3 | 69 | 25 | 157 | 103 |
| 42,663 | 13 | 6 | 68 | 69 | 7 | 3 | 69 | 25 | 157 | 103 |
| 42,664 | 13 | 5 | 69 | 55 | 7 | 3 | 69 | 18 | 158 | 81  |
| 42,665 | 13 | 5 | 69 | 55 | 7 | 3 | 68 | 17 | 157 | 80  |
| 42,666 | 13 | 5 | 69 | 55 | 7 | 4 | 66 | 17 | 155 | 81  |
| 42,667 | 13 | 5 | 69 | 39 | 7 | 2 | 66 | 16 | 155 | 62  |
| 42,668 | 13 | 5 | 69 | 39 | 7 | 2 | 66 | 16 | 155 | 62  |
| 42,669 | 13 | 5 | 68 | 39 | 7 | 2 | 66 | 17 | 154 | 63  |

|        |    |   |    |    |   |   |    |    |     |    |
|--------|----|---|----|----|---|---|----|----|-----|----|
| 42,670 | 13 | 4 | 68 | 37 | 7 | 2 | 66 | 15 | 154 | 58 |
| 42,671 | 13 | 4 | 66 | 38 | 6 | 2 | 65 | 15 | 150 | 59 |
| 42,672 | 13 | 4 | 65 | 38 | 6 | 2 | 65 | 15 | 149 | 59 |
| 42,673 | 12 | 4 | 65 | 37 | 6 | 2 | 60 | 15 | 143 | 58 |
| 42,674 | 12 | 4 | 61 | 38 | 6 | 2 | 59 | 17 | 138 | 61 |
| 42,675 | 11 | 3 | 61 | 37 | 6 | 2 | 53 | 18 | 131 | 60 |
| 42,676 | 8  | 2 | 51 | 23 | 4 | 2 | 46 | 12 | 109 | 39 |
| 42,677 | 9  | 3 | 46 | 29 | 3 | 2 | 44 | 17 | 102 | 51 |
| 42,678 | 3  | 4 | 21 | 30 | 0 | 2 | 16 | 18 | 40  | 54 |
| 42,679 | 3  | 4 | 18 | 30 | 0 | 2 | 14 | 18 | 35  | 54 |
| 42,680 | 3  | 4 | 18 | 34 | 0 | 2 | 14 | 19 | 35  | 59 |
| 42,681 | 3  | 4 | 18 | 33 | 0 | 2 | 14 | 19 | 35  | 58 |
| 42,682 | 3  | 4 | 19 | 33 | 0 | 2 | 14 | 19 | 36  | 58 |
| 42,683 | 3  | 4 | 19 | 32 | 0 | 2 | 12 | 19 | 34  | 57 |
| 42,684 | 3  | 4 | 20 | 32 | 0 | 2 | 12 | 18 | 35  | 56 |
| 42,685 | 3  | 4 | 23 | 32 | 0 | 2 | 11 | 18 | 37  | 56 |
| 42,686 | 3  | 4 | 23 | 32 | 0 | 2 | 11 | 18 | 37  | 56 |
| 42,687 | 3  | 4 | 23 | 33 | 0 | 2 | 11 | 18 | 37  | 57 |
| 42,688 | 3  | 4 | 23 | 34 | 0 | 2 | 11 | 19 | 37  | 59 |
| 42,689 | 3  | 4 | 23 | 34 | 0 | 2 | 11 | 19 | 37  | 59 |
| 42,690 | 3  | 4 | 23 | 34 | 0 | 2 | 11 | 19 | 37  | 59 |
| 42,691 | 3  | 3 | 23 | 27 | 0 | 2 | 11 | 18 | 37  | 50 |
| 42,692 | 3  | 3 | 24 | 27 | 0 | 2 | 11 | 18 | 38  | 50 |
| 42,693 | 3  | 3 | 25 | 27 | 0 | 2 | 11 | 18 | 39  | 50 |
| 42,694 | 3  | 3 | 29 | 27 | 0 | 2 | 15 | 18 | 47  | 50 |
| 42,695 | 3  | 3 | 29 | 26 | 0 | 2 | 16 | 18 | 48  | 49 |
| 42,696 | 6  | 3 | 33 | 26 | 1 | 2 | 29 | 18 | 69  | 49 |
| 42,697 | 6  | 3 | 32 | 26 | 1 | 2 | 27 | 16 | 66  | 47 |
| 42,698 | 6  | 3 | 31 | 27 | 1 | 2 | 26 | 17 | 64  | 49 |
| 42,699 | 6  | 3 | 29 | 27 | 1 | 2 | 22 | 17 | 58  | 49 |
| 42,700 | 6  | 3 | 22 | 27 | 1 | 2 | 20 | 17 | 49  | 49 |
| 42,701 | 6  | 3 | 23 | 27 | 1 | 2 | 20 | 17 | 50  | 49 |
| 42,702 | 5  | 2 | 40 | 26 | 2 | 2 | 33 | 18 | 80  | 48 |
| 42,703 | 5  | 2 | 40 | 26 | 2 | 2 | 32 | 17 | 79  | 47 |
| 42,704 | 5  | 2 | 41 | 27 | 2 | 2 | 33 | 17 | 81  | 48 |
| 42,705 | 7  | 2 | 44 | 25 | 2 | 1 | 36 | 16 | 89  | 44 |
| 42,706 | 11 | 2 | 68 | 22 | 5 | 1 | 48 | 16 | 132 | 41 |
| 42,707 | 11 | 2 | 71 | 22 | 6 | 1 | 52 | 16 | 140 | 41 |
| 42,708 | 10 | 2 | 71 | 20 | 6 | 1 | 52 | 15 | 139 | 38 |
| 42,709 | 10 | 2 | 71 | 22 | 6 | 1 | 52 | 16 | 139 | 41 |
| 42,710 | 10 | 2 | 71 | 23 | 6 | 1 | 52 | 17 | 139 | 43 |

|        |    |   |     |    |   |   |    |    |     |    |
|--------|----|---|-----|----|---|---|----|----|-----|----|
| 42,711 | 10 | 3 | 72  | 28 | 6 | 1 | 52 | 17 | 140 | 49 |
| 42,712 | 10 | 3 | 75  | 28 | 6 | 1 | 52 | 17 | 143 | 49 |
| 42,713 | 10 | 3 | 75  | 29 | 6 | 1 | 52 | 17 | 143 | 50 |
| 42,714 | 10 | 3 | 76  | 32 | 6 | 1 | 52 | 17 | 144 | 53 |
| 42,715 | 10 | 3 | 79  | 32 | 6 | 1 | 52 | 17 | 147 | 53 |
| 42,716 | 10 | 3 | 83  | 33 | 6 | 0 | 53 | 17 | 152 | 53 |
| 42,717 | 10 | 3 | 93  | 33 | 6 | 0 | 58 | 17 | 167 | 53 |
| 42,718 | 10 | 3 | 93  | 33 | 6 | 0 | 58 | 17 | 167 | 53 |
| 42,719 | 10 | 3 | 93  | 33 | 6 | 0 | 58 | 18 | 167 | 54 |
| 42,720 | 10 | 4 | 93  | 33 | 6 | 0 | 58 | 17 | 167 | 54 |
| 42,721 | 12 | 4 | 98  | 33 | 6 | 0 | 64 | 16 | 180 | 53 |
| 42,722 | 12 | 4 | 105 | 32 | 6 | 0 | 68 | 16 | 191 | 52 |
| 42,723 | 12 | 4 | 105 | 32 | 6 | 0 | 69 | 16 | 192 | 52 |
| 42,724 | 12 | 4 | 105 | 32 | 6 | 0 | 69 | 16 | 192 | 52 |
| 42,725 | 12 | 4 | 113 | 29 | 7 | 0 | 72 | 14 | 204 | 47 |
| 42,726 | 13 | 4 | 117 | 29 | 7 | 0 | 73 | 13 | 210 | 46 |
| 42,727 | 13 | 4 | 122 | 29 | 7 | 0 | 79 | 13 | 221 | 46 |
| 42,728 | 12 | 3 | 122 | 23 | 7 | 0 | 79 | 8  | 220 | 34 |
| 42,729 | 12 | 2 | 123 | 23 | 7 | 0 | 79 | 7  | 221 | 32 |
| 42,730 | 12 | 2 | 123 | 24 | 7 | 0 | 79 | 7  | 221 | 33 |
| 42,731 | 12 | 2 | 122 | 19 | 7 | 0 | 79 | 6  | 220 | 27 |
| 42,732 | 12 | 2 | 121 | 19 | 7 | 0 | 79 | 6  | 219 | 27 |
| 42,733 | 12 | 2 | 121 | 19 | 7 | 0 | 79 | 6  | 219 | 27 |
| 42,734 | 12 | 2 | 120 | 19 | 7 | 0 | 79 | 6  | 218 | 27 |
| 42,735 | 12 | 2 | 118 | 20 | 7 | 0 | 80 | 6  | 217 | 28 |
| 42,736 | 12 | 2 | 117 | 20 | 7 | 0 | 80 | 6  | 216 | 28 |
| 42,737 | 12 | 2 | 117 | 19 | 7 | 0 | 81 | 6  | 217 | 27 |
| 42,738 | 12 | 2 | 117 | 19 | 7 | 0 | 81 | 5  | 217 | 26 |
| 42,739 | 12 | 2 | 117 | 20 | 7 | 0 | 80 | 5  | 216 | 27 |
| 42,740 | 12 | 2 | 117 | 20 | 7 | 0 | 80 | 5  | 216 | 27 |
| 42,741 | 12 | 2 | 117 | 20 | 7 | 0 | 80 | 5  | 216 | 27 |
| 42,742 | 12 | 2 | 117 | 20 | 7 | 0 | 80 | 5  | 216 | 27 |
| 42,743 | 12 | 2 | 116 | 20 | 7 | 0 | 80 | 5  | 215 | 27 |
| 42,744 | 12 | 2 | 113 | 20 | 7 | 0 | 80 | 5  | 212 | 27 |
| 42,745 | 12 | 2 | 109 | 20 | 7 | 0 | 76 | 5  | 204 | 27 |
| 42,746 | 12 | 2 | 108 | 22 | 7 | 1 | 75 | 7  | 202 | 32 |
| 42,747 | 9  | 2 | 104 | 24 | 6 | 1 | 62 | 8  | 181 | 35 |
| 42,748 | 9  | 2 | 104 | 26 | 7 | 1 | 63 | 8  | 183 | 37 |
| 42,749 | 9  | 2 | 104 | 25 | 7 | 1 | 63 | 7  | 183 | 35 |
| 42,750 | 9  | 2 | 104 | 25 | 7 | 1 | 63 | 9  | 183 | 37 |
| 42,751 | 9  | 2 | 96  | 26 | 7 | 1 | 60 | 10 | 172 | 39 |

|        |    |   |     |    |    |   |    |    |     |    |
|--------|----|---|-----|----|----|---|----|----|-----|----|
| 42,752 | 9  | 2 | 86  | 26 | 6  | 1 | 52 | 10 | 153 | 39 |
| 42,753 | 9  | 2 | 87  | 27 | 6  | 1 | 50 | 9  | 152 | 39 |
| 42,754 | 9  | 2 | 86  | 27 | 7  | 1 | 49 | 9  | 151 | 39 |
| 42,755 | 7  | 2 | 85  | 26 | 8  | 1 | 46 | 9  | 146 | 38 |
| 42,756 | 4  | 2 | 67  | 26 | 5  | 1 | 38 | 9  | 114 | 38 |
| 42,757 | 3  | 2 | 63  | 26 | 5  | 1 | 34 | 9  | 105 | 38 |
| 42,758 | 3  | 2 | 59  | 27 | 4  | 1 | 30 | 9  | 96  | 39 |
| 42,759 | 3  | 2 | 58  | 27 | 4  | 1 | 30 | 9  | 95  | 39 |
| 42,760 | 3  | 3 | 58  | 25 | 4  | 1 | 30 | 8  | 95  | 37 |
| 42,761 | 3  | 3 | 58  | 24 | 4  | 1 | 30 | 8  | 95  | 36 |
| 42,762 | 3  | 2 | 58  | 19 | 4  | 1 | 30 | 10 | 95  | 32 |
| 42,763 | 3  | 2 | 55  | 19 | 4  | 1 | 30 | 10 | 92  | 32 |
| 42,764 | 3  | 2 | 55  | 20 | 4  | 1 | 30 | 10 | 92  | 33 |
| 42,765 | 3  | 2 | 53  | 17 | 4  | 1 | 30 | 12 | 90  | 32 |
| 42,766 | 3  | 2 | 50  | 18 | 4  | 1 | 30 | 13 | 87  | 34 |
| 42,767 | 3  | 2 | 46  | 17 | 4  | 1 | 29 | 13 | 82  | 33 |
| 42,768 | 3  | 2 | 37  | 17 | 4  | 1 | 24 | 13 | 68  | 33 |
| 42,769 | 3  | 2 | 37  | 17 | 4  | 1 | 24 | 13 | 68  | 33 |
| 42,770 | 1  | 2 | 33  | 17 | 4  | 1 | 18 | 12 | 56  | 32 |
| 42,771 | 1  | 1 | 33  | 17 | 4  | 1 | 18 | 12 | 56  | 31 |
| 42,772 | 1  | 1 | 35  | 17 | 4  | 1 | 17 | 12 | 57  | 31 |
| 42,773 | 1  | 1 | 28  | 18 | 4  | 1 | 14 | 13 | 47  | 33 |
| 42,774 | 1  | 1 | 29  | 18 | 4  | 1 | 14 | 13 | 48  | 33 |
| 42,775 | 1  | 1 | 21  | 18 | 3  | 1 | 11 | 14 | 36  | 34 |
| 42,776 | 0  | 1 | 23  | 18 | 3  | 1 | 11 | 14 | 37  | 34 |
| 42,777 | 0  | 1 | 19  | 18 | 3  | 1 | 8  | 14 | 30  | 34 |
| 42,778 | 12 | 1 | 67  | 19 | 4  | 1 | 17 | 14 | 100 | 35 |
| 42,779 | 12 | 1 | 66  | 19 | 4  | 1 | 17 | 14 | 99  | 35 |
| 42,780 | 18 | 1 | 132 | 19 | 6  | 1 | 34 | 15 | 190 | 36 |
| 42,781 | 22 | 1 | 161 | 18 | 7  | 1 | 41 | 15 | 231 | 35 |
| 42,782 | 22 | 1 | 161 | 18 | 7  | 1 | 41 | 15 | 231 | 35 |
| 42,783 | 23 | 1 | 193 | 19 | 8  | 1 | 59 | 15 | 283 | 36 |
| 42,784 | 23 | 1 | 193 | 19 | 8  | 1 | 59 | 15 | 283 | 36 |
| 42,785 | 23 | 1 | 265 | 18 | 10 | 1 | 84 | 17 | 382 | 37 |
| 42,786 | 23 | 1 | 265 | 18 | 10 | 1 | 83 | 17 | 381 | 37 |
| 42,787 | 23 | 1 | 267 | 18 | 10 | 1 | 88 | 18 | 388 | 38 |
| 42,788 | 23 | 1 | 267 | 17 | 10 | 1 | 87 | 18 | 387 | 37 |
| 42,789 | 23 | 3 | 267 | 17 | 10 | 1 | 87 | 18 | 387 | 39 |
| 42,790 | 23 | 3 | 267 | 17 | 10 | 1 | 87 | 18 | 387 | 39 |
| 42,791 | 23 | 3 | 267 | 17 | 10 | 1 | 87 | 18 | 387 | 39 |
| 42,792 | 23 | 3 | 267 | 18 | 10 | 1 | 87 | 18 | 387 | 40 |

|        |    |    |     |    |    |   |     |    |     |     |
|--------|----|----|-----|----|----|---|-----|----|-----|-----|
| 42,793 | 23 | 3  | 267 | 19 | 10 | 1 | 87  | 18 | 387 | 41  |
| 42,794 | 23 | 3  | 267 | 22 | 10 | 1 | 87  | 18 | 387 | 44  |
| 42,795 | 23 | 3  | 267 | 22 | 10 | 1 | 87  | 18 | 387 | 44  |
| 42,796 | 23 | 3  | 268 | 23 | 10 | 1 | 87  | 18 | 388 | 45  |
| 42,797 | 23 | 4  | 270 | 21 | 10 | 0 | 87  | 16 | 390 | 41  |
| 42,798 | 23 | 4  | 270 | 19 | 10 | 0 | 87  | 15 | 390 | 38  |
| 42,799 | 23 | 4  | 271 | 17 | 9  | 0 | 87  | 15 | 390 | 36  |
| 42,800 | 23 | 4  | 271 | 17 | 9  | 0 | 87  | 15 | 390 | 36  |
| 42,801 | 23 | 5  | 271 | 19 | 9  | 1 | 89  | 15 | 392 | 40  |
| 42,802 | 23 | 5  | 272 | 21 | 9  | 1 | 89  | 15 | 393 | 42  |
| 42,803 | 23 | 5  | 272 | 21 | 10 | 1 | 90  | 15 | 395 | 42  |
| 42,804 | 23 | 5  | 271 | 21 | 10 | 1 | 90  | 18 | 394 | 45  |
| 42,805 | 23 | 5  | 273 | 25 | 9  | 1 | 91  | 21 | 396 | 52  |
| 42,806 | 23 | 5  | 271 | 27 | 8  | 1 | 91  | 21 | 393 | 54  |
| 42,807 | 23 | 5  | 272 | 27 | 8  | 1 | 93  | 21 | 396 | 54  |
| 42,808 | 23 | 5  | 270 | 27 | 8  | 1 | 93  | 22 | 394 | 55  |
| 42,809 | 23 | 5  | 270 | 26 | 8  | 1 | 93  | 22 | 394 | 54  |
| 42,810 | 24 | 5  | 270 | 32 | 8  | 1 | 93  | 25 | 395 | 63  |
| 42,811 | 24 | 4  | 270 | 35 | 8  | 2 | 93  | 27 | 395 | 68  |
| 42,812 | 24 | 4  | 271 | 38 | 8  | 2 | 93  | 29 | 396 | 73  |
| 42,813 | 24 | 4  | 272 | 38 | 8  | 2 | 95  | 27 | 399 | 71  |
| 42,814 | 24 | 4  | 278 | 36 | 8  | 2 | 95  | 26 | 405 | 68  |
| 42,815 | 27 | 4  | 282 | 36 | 8  | 2 | 99  | 26 | 416 | 68  |
| 42,816 | 27 | 4  | 282 | 36 | 8  | 2 | 99  | 26 | 416 | 68  |
| 42,817 | 27 | 4  | 286 | 35 | 8  | 2 | 100 | 25 | 421 | 66  |
| 42,818 | 27 | 5  | 290 | 39 | 8  | 2 | 103 | 27 | 428 | 73  |
| 42,819 | 27 | 5  | 289 | 39 | 8  | 2 | 103 | 28 | 427 | 74  |
| 42,820 | 27 | 5  | 293 | 39 | 8  | 2 | 103 | 28 | 431 | 74  |
| 42,821 | 27 | 5  | 300 | 39 | 8  | 2 | 109 | 28 | 444 | 74  |
| 42,822 | 27 | 5  | 300 | 40 | 8  | 2 | 109 | 29 | 444 | 76  |
| 42,823 | 27 | 5  | 298 | 42 | 8  | 2 | 109 | 29 | 442 | 78  |
| 42,824 | 28 | 5  | 319 | 41 | 8  | 2 | 120 | 28 | 475 | 76  |
| 42,825 | 28 | 5  | 322 | 41 | 8  | 2 | 120 | 28 | 478 | 76  |
| 42,826 | 28 | 5  | 332 | 41 | 8  | 2 | 123 | 28 | 491 | 76  |
| 42,827 | 28 | 5  | 334 | 40 | 8  | 2 | 124 | 30 | 494 | 77  |
| 42,828 | 28 | 5  | 331 | 44 | 8  | 2 | 124 | 30 | 491 | 81  |
| 42,829 | 16 | 5  | 285 | 48 | 7  | 2 | 112 | 32 | 420 | 87  |
| 42,830 | 10 | 6  | 220 | 53 | 5  | 4 | 95  | 36 | 330 | 99  |
| 42,831 | 6  | 15 | 207 | 75 | 4  | 5 | 89  | 69 | 306 | 164 |
| 42,832 | 6  | 15 | 191 | 75 | 4  | 5 | 87  | 70 | 288 | 165 |
| 42,833 | 6  | 15 | 177 | 77 | 3  | 5 | 82  | 71 | 268 | 168 |

|        |   |    |     |     |   |   |    |    |     |     |
|--------|---|----|-----|-----|---|---|----|----|-----|-----|
| 42,834 | 5 | 15 | 160 | 77  | 3 | 5 | 69 | 71 | 237 | 168 |
| 42,835 | 5 | 18 | 125 | 84  | 3 | 7 | 63 | 75 | 196 | 184 |
| 42,836 | 5 | 18 | 88  | 88  | 1 | 7 | 42 | 73 | 136 | 186 |
| 42,837 | 5 | 18 | 87  | 90  | 1 | 7 | 39 | 73 | 132 | 188 |
| 42,838 | 5 | 18 | 87  | 90  | 1 | 7 | 38 | 72 | 131 | 187 |
| 42,839 | 5 | 18 | 87  | 90  | 1 | 7 | 38 | 72 | 131 | 187 |
| 42,840 | 5 | 16 | 87  | 89  | 1 | 7 | 38 | 72 | 131 | 184 |
| 42,841 | 5 | 16 | 87  | 89  | 1 | 7 | 38 | 72 | 131 | 184 |
| 42,842 | 5 | 16 | 87  | 89  | 1 | 7 | 38 | 72 | 131 | 184 |
| 42,843 | 5 | 16 | 88  | 88  | 1 | 7 | 38 | 72 | 132 | 183 |
| 42,844 | 5 | 16 | 90  | 87  | 1 | 7 | 39 | 73 | 135 | 183 |
| 42,845 | 5 | 16 | 92  | 84  | 1 | 7 | 43 | 74 | 141 | 181 |
| 42,846 | 5 | 16 | 92  | 85  | 1 | 7 | 43 | 74 | 141 | 182 |
| 42,847 | 5 | 16 | 93  | 84  | 1 | 7 | 44 | 74 | 143 | 181 |
| 42,848 | 5 | 15 | 91  | 84  | 1 | 7 | 44 | 74 | 141 | 180 |
| 42,849 | 6 | 15 | 92  | 84  | 1 | 7 | 44 | 75 | 143 | 181 |
| 42,850 | 6 | 15 | 91  | 84  | 1 | 7 | 44 | 75 | 142 | 181 |
| 42,851 | 6 | 16 | 91  | 86  | 1 | 7 | 44 | 75 | 142 | 184 |
| 42,852 | 6 | 15 | 91  | 84  | 1 | 6 | 44 | 74 | 142 | 179 |
| 42,853 | 7 | 15 | 93  | 81  | 1 | 6 | 46 | 74 | 147 | 176 |
| 42,854 | 7 | 16 | 94  | 81  | 0 | 6 | 45 | 72 | 146 | 175 |
| 42,855 | 7 | 16 | 93  | 81  | 0 | 6 | 45 | 72 | 145 | 175 |
| 42,856 | 7 | 16 | 93  | 79  | 0 | 6 | 44 | 69 | 144 | 170 |
| 42,857 | 7 | 16 | 105 | 79  | 0 | 6 | 46 | 70 | 158 | 171 |
| 42,858 | 8 | 16 | 112 | 81  | 0 | 6 | 51 | 74 | 171 | 177 |
| 42,859 | 8 | 16 | 112 | 81  | 0 | 6 | 51 | 74 | 171 | 177 |
| 42,860 | 9 | 16 | 128 | 81  | 0 | 6 | 59 | 74 | 196 | 177 |
| 42,861 | 8 | 16 | 138 | 76  | 0 | 6 | 59 | 71 | 205 | 169 |
| 42,862 | 8 | 16 | 138 | 75  | 0 | 5 | 59 | 69 | 205 | 165 |
| 42,863 | 8 | 16 | 145 | 72  | 0 | 5 | 62 | 66 | 215 | 159 |
| 42,864 | 8 | 16 | 145 | 72  | 0 | 5 | 62 | 65 | 215 | 158 |
| 42,865 | 8 | 16 | 139 | 72  | 0 | 5 | 62 | 65 | 209 | 158 |
| 42,866 | 5 | 16 | 135 | 72  | 0 | 5 | 58 | 65 | 198 | 158 |
| 42,867 | 5 | 16 | 136 | 72  | 0 | 5 | 57 | 65 | 198 | 158 |
| 42,868 | 5 | 16 | 136 | 72  | 0 | 5 | 57 | 66 | 198 | 159 |
| 42,869 | 5 | 15 | 133 | 69  | 0 | 5 | 54 | 66 | 192 | 155 |
| 42,870 | 5 | 15 | 131 | 69  | 0 | 5 | 54 | 66 | 190 | 155 |
| 42,871 | 6 | 15 | 129 | 75  | 0 | 5 | 54 | 72 | 189 | 167 |
| 42,872 | 6 | 15 | 121 | 80  | 0 | 5 | 48 | 81 | 175 | 181 |
| 42,873 | 7 | 16 | 121 | 100 | 0 | 5 | 50 | 88 | 178 | 209 |
| 42,874 | 7 | 16 | 115 | 103 | 0 | 5 | 43 | 91 | 165 | 215 |

|        |    |    |     |     |   |   |    |    |     |     |
|--------|----|----|-----|-----|---|---|----|----|-----|-----|
| 42,875 | 7  | 16 | 112 | 104 | 0 | 5 | 43 | 91 | 162 | 216 |
| 42,876 | 7  | 17 | 102 | 108 | 0 | 5 | 41 | 92 | 150 | 222 |
| 42,877 | 7  | 17 | 94  | 110 | 0 | 5 | 39 | 91 | 140 | 223 |
| 42,878 | 7  | 17 | 98  | 114 | 0 | 5 | 40 | 90 | 145 | 226 |
| 42,879 | 7  | 17 | 99  | 106 | 0 | 5 | 40 | 88 | 146 | 216 |
| 42,880 | 7  | 17 | 99  | 106 | 0 | 5 | 40 | 88 | 146 | 216 |
| 42,881 | 7  | 7  | 98  | 78  | 0 | 2 | 40 | 50 | 145 | 137 |
| 42,882 | 7  | 7  | 98  | 78  | 0 | 2 | 40 | 49 | 145 | 136 |
| 42,883 | 7  | 7  | 98  | 78  | 0 | 2 | 41 | 49 | 146 | 136 |
| 42,884 | 7  | 7  | 97  | 76  | 0 | 2 | 41 | 49 | 145 | 134 |
| 42,885 | 7  | 7  | 97  | 75  | 0 | 2 | 41 | 49 | 145 | 133 |
| 42,886 | 7  | 4  | 96  | 68  | 0 | 0 | 41 | 45 | 144 | 117 |
| 42,887 | 8  | 4  | 98  | 62  | 0 | 0 | 43 | 45 | 149 | 111 |
| 42,888 | 8  | 4  | 98  | 62  | 0 | 0 | 43 | 45 | 149 | 111 |
| 42,889 | 8  | 4  | 98  | 63  | 0 | 0 | 43 | 45 | 149 | 112 |
| 42,890 | 10 | 4  | 101 | 63  | 0 | 0 | 43 | 45 | 154 | 112 |
| 42,891 | 10 | 4  | 101 | 63  | 0 | 0 | 43 | 45 | 154 | 112 |
| 42,892 | 10 | 4  | 102 | 63  | 0 | 0 | 44 | 45 | 156 | 112 |
| 42,893 | 10 | 4  | 101 | 68  | 0 | 3 | 44 | 49 | 155 | 124 |
| 42,894 | 10 | 4  | 99  | 68  | 0 | 3 | 43 | 50 | 152 | 125 |
| 42,895 | 10 | 4  | 99  | 72  | 0 | 3 | 43 | 52 | 152 | 131 |
| 42,896 | 10 | 4  | 97  | 83  | 0 | 3 | 39 | 55 | 146 | 145 |
| 42,897 | 10 | 4  | 97  | 84  | 0 | 4 | 38 | 57 | 145 | 149 |
| 42,898 | 10 | 5  | 96  | 91  | 0 | 5 | 38 | 69 | 144 | 170 |
| 42,899 | 9  | 5  | 95  | 91  | 0 | 5 | 37 | 69 | 141 | 170 |
| 42,900 | 9  | 5  | 92  | 91  | 0 | 5 | 37 | 69 | 138 | 170 |
| 42,901 | 8  | 5  | 92  | 98  | 0 | 5 | 36 | 76 | 136 | 184 |
| 42,902 | 8  | 4  | 92  | 97  | 0 | 5 | 36 | 76 | 136 | 182 |
| 42,903 | 9  | 4  | 92  | 99  | 0 | 5 | 37 | 75 | 138 | 183 |
| 42,904 | 9  | 4  | 93  | 100 | 0 | 5 | 37 | 74 | 139 | 183 |
| 42,905 | 9  | 3  | 92  | 99  | 0 | 5 | 37 | 73 | 138 | 180 |
| 42,906 | 9  | 3  | 91  | 100 | 0 | 5 | 37 | 74 | 137 | 182 |
| 42,907 | 9  | 3  | 90  | 101 | 0 | 5 | 37 | 74 | 136 | 183 |
| 42,908 | 9  | 3  | 78  | 97  | 0 | 5 | 35 | 68 | 122 | 173 |
| 42,909 | 8  | 3  | 70  | 98  | 0 | 5 | 28 | 68 | 106 | 174 |
| 42,910 | 7  | 3  | 58  | 98  | 0 | 5 | 23 | 70 | 88  | 176 |
| 42,911 | 7  | 3  | 54  | 98  | 0 | 5 | 20 | 70 | 81  | 176 |
| 42,912 | 8  | 3  | 44  | 102 | 0 | 5 | 20 | 71 | 72  | 181 |
| 42,913 | 8  | 3  | 36  | 102 | 0 | 5 | 17 | 71 | 61  | 181 |
| 42,914 | 8  | 3  | 35  | 105 | 0 | 5 | 16 | 72 | 59  | 185 |
| 42,915 | 8  | 3  | 35  | 106 | 0 | 5 | 15 | 71 | 58  | 185 |

|        |    |   |    |     |   |   |    |    |     |     |
|--------|----|---|----|-----|---|---|----|----|-----|-----|
| 42,916 | 8  | 4 | 35 | 106 | 0 | 5 | 16 | 72 | 59  | 187 |
| 42,917 | 8  | 4 | 35 | 106 | 0 | 5 | 16 | 72 | 59  | 187 |
| 42,918 | 8  | 4 | 35 | 107 | 0 | 5 | 16 | 72 | 59  | 188 |
| 42,919 | 8  | 4 | 39 | 107 | 0 | 5 | 18 | 75 | 65  | 191 |
| 42,920 | 7  | 4 | 39 | 108 | 0 | 6 | 20 | 75 | 66  | 193 |
| 42,921 | 7  | 5 | 48 | 109 | 0 | 6 | 22 | 75 | 77  | 195 |
| 42,922 | 7  | 5 | 51 | 103 | 0 | 6 | 23 | 70 | 81  | 184 |
| 42,923 | 6  | 5 | 49 | 98  | 0 | 6 | 22 | 62 | 77  | 171 |
| 42,924 | 5  | 4 | 41 | 77  | 0 | 6 | 18 | 54 | 64  | 141 |
| 42,925 | 8  | 4 | 46 | 74  | 1 | 6 | 28 | 51 | 83  | 135 |
| 42,926 | 8  | 4 | 45 | 73  | 1 | 6 | 27 | 51 | 81  | 134 |
| 42,927 | 8  | 4 | 50 | 69  | 1 | 6 | 27 | 50 | 86  | 129 |
| 42,928 | 12 | 4 | 61 | 63  | 1 | 6 | 42 | 49 | 116 | 122 |
| 42,929 | 12 | 4 | 61 | 63  | 1 | 6 | 42 | 49 | 116 | 122 |
| 42,930 | 12 | 4 | 62 | 63  | 1 | 6 | 42 | 49 | 117 | 122 |
| 42,931 | 12 | 4 | 62 | 64  | 1 | 6 | 42 | 50 | 117 | 124 |
| 42,932 | 12 | 4 | 62 | 64  | 1 | 6 | 42 | 50 | 117 | 124 |
| 42,933 | 12 | 4 | 62 | 64  | 1 | 6 | 42 | 50 | 117 | 124 |
| 42,934 | 12 | 4 | 62 | 64  | 1 | 6 | 41 | 49 | 116 | 123 |
| 42,935 | 12 | 4 | 63 | 66  | 1 | 7 | 41 | 50 | 117 | 127 |
| 42,936 | 13 | 4 | 67 | 66  | 1 | 7 | 41 | 50 | 122 | 127 |
| 42,937 | 12 | 4 | 67 | 66  | 1 | 7 | 39 | 50 | 119 | 127 |
| 42,938 | 12 | 4 | 67 | 65  | 1 | 7 | 42 | 50 | 122 | 126 |
| 42,939 | 12 | 4 | 66 | 65  | 1 | 7 | 42 | 50 | 121 | 126 |
| 42,940 | 10 | 4 | 65 | 65  | 1 | 7 | 44 | 49 | 120 | 125 |
| 42,941 | 10 | 4 | 65 | 65  | 1 | 7 | 44 | 49 | 120 | 125 |
| 42,942 | 10 | 4 | 65 | 65  | 1 | 7 | 44 | 49 | 120 | 125 |
| 42,943 | 10 | 4 | 61 | 61  | 1 | 7 | 42 | 50 | 114 | 122 |
| 42,944 | 11 | 4 | 66 | 60  | 2 | 4 | 48 | 47 | 127 | 115 |
| 42,945 | 11 | 4 | 66 | 60  | 2 | 4 | 48 | 46 | 127 | 114 |
| 42,946 | 11 | 4 | 75 | 55  | 3 | 4 | 56 | 43 | 145 | 106 |
| 42,947 | 11 | 4 | 76 | 44  | 3 | 4 | 56 | 39 | 146 | 91  |
| 42,948 | 11 | 4 | 78 | 43  | 3 | 3 | 56 | 37 | 148 | 87  |
| 42,949 | 11 | 3 | 82 | 38  | 3 | 2 | 56 | 26 | 152 | 69  |
| 42,950 | 12 | 3 | 86 | 38  | 3 | 2 | 57 | 26 | 158 | 69  |
| 42,951 | 12 | 3 | 89 | 43  | 3 | 2 | 58 | 29 | 162 | 77  |
| 42,952 | 12 | 3 | 97 | 36  | 4 | 2 | 58 | 23 | 171 | 64  |
| 42,953 | 11 | 3 | 98 | 36  | 4 | 2 | 57 | 24 | 170 | 65  |
| 42,954 | 11 | 3 | 98 | 36  | 4 | 2 | 57 | 24 | 170 | 65  |
| 42,955 | 11 | 3 | 98 | 36  | 4 | 2 | 57 | 24 | 170 | 65  |
| 42,956 | 11 | 3 | 99 | 38  | 4 | 2 | 57 | 26 | 171 | 69  |



|        |    |   |     |    |   |   |     |    |     |     |
|--------|----|---|-----|----|---|---|-----|----|-----|-----|
| 42,957 | 11 | 3 | 99  | 38 | 4 | 2 | 57  | 25 | 171 | 68  |
| 42,958 | 11 | 3 | 99  | 40 | 4 | 2 | 57  | 27 | 171 | 72  |
| 42,959 | 11 | 3 | 99  | 43 | 4 | 2 | 57  | 28 | 171 | 76  |
| 42,960 | 11 | 3 | 100 | 47 | 4 | 3 | 57  | 31 | 172 | 84  |
| 42,961 | 11 | 3 | 100 | 47 | 4 | 3 | 57  | 30 | 172 | 83  |
| 42,962 | 11 | 3 | 100 | 47 | 4 | 3 | 57  | 30 | 172 | 83  |
| 42,963 | 10 | 3 | 101 | 42 | 4 | 3 | 57  | 29 | 172 | 77  |
| 42,964 | 10 | 3 | 102 | 41 | 4 | 3 | 57  | 29 | 173 | 76  |
| 42,965 | 12 | 3 | 114 | 39 | 4 | 3 | 64  | 29 | 194 | 74  |
| 42,966 | 12 | 3 | 114 | 40 | 4 | 3 | 65  | 30 | 195 | 76  |
| 42,967 | 12 | 2 | 108 | 40 | 4 | 3 | 64  | 29 | 188 | 74  |
| 42,968 | 16 | 2 | 162 | 39 | 4 | 3 | 84  | 32 | 266 | 76  |
| 42,969 | 17 | 2 | 185 | 40 | 4 | 3 | 92  | 34 | 298 | 79  |
| 42,970 | 17 | 3 | 189 | 41 | 4 | 3 | 92  | 31 | 302 | 78  |
| 42,971 | 18 | 3 | 199 | 40 | 5 | 2 | 100 | 29 | 322 | 74  |
| 42,972 | 18 | 2 | 196 | 40 | 5 | 2 | 100 | 28 | 319 | 72  |
| 42,973 | 18 | 2 | 193 | 42 | 5 | 2 | 100 | 28 | 316 | 74  |
| 42,974 | 16 | 2 | 187 | 45 | 5 | 2 | 90  | 30 | 298 | 79  |
| 42,975 | 16 | 2 | 185 | 46 | 5 | 2 | 91  | 32 | 297 | 82  |
| 42,976 | 16 | 1 | 182 | 49 | 4 | 2 | 91  | 34 | 293 | 86  |
| 42,977 | 16 | 1 | 179 | 53 | 4 | 2 | 89  | 35 | 288 | 91  |
| 42,978 | 15 | 1 | 168 | 53 | 4 | 2 | 86  | 35 | 273 | 91  |
| 42,979 | 12 | 1 | 163 | 54 | 4 | 2 | 74  | 35 | 253 | 92  |
| 42,980 | 12 | 1 | 162 | 55 | 4 | 2 | 75  | 35 | 253 | 93  |
| 42,981 | 12 | 1 | 161 | 55 | 4 | 3 | 75  | 36 | 252 | 95  |
| 42,982 | 12 | 1 | 161 | 60 | 4 | 3 | 75  | 36 | 252 | 100 |
| 42,983 | 12 | 1 | 161 | 60 | 4 | 4 | 75  | 36 | 252 | 101 |
| 42,984 | 12 | 1 | 161 | 60 | 4 | 4 | 75  | 38 | 252 | 103 |
| 42,985 | 12 | 1 | 162 | 59 | 4 | 3 | 75  | 37 | 253 | 100 |
| 42,986 | 12 | 1 | 165 | 59 | 4 | 3 | 76  | 37 | 257 | 100 |
| 42,987 | 11 | 1 | 161 | 60 | 4 | 4 | 76  | 39 | 252 | 104 |
| 42,988 | 11 | 2 | 161 | 60 | 4 | 4 | 76  | 39 | 252 | 105 |
| 42,989 | 12 | 2 | 160 | 60 | 4 | 4 | 75  | 40 | 251 | 106 |
| 42,990 | 12 | 2 | 160 | 60 | 4 | 4 | 75  | 40 | 251 | 106 |
| 42,991 | 12 | 2 | 160 | 60 | 4 | 4 | 75  | 40 | 251 | 106 |
| 42,992 | 12 | 2 | 161 | 60 | 4 | 4 | 75  | 40 | 252 | 106 |
| 42,993 | 12 | 2 | 162 | 60 | 4 | 4 | 76  | 39 | 254 | 105 |
| 42,994 | 11 | 2 | 161 | 60 | 3 | 4 | 72  | 38 | 247 | 104 |
| 42,995 | 11 | 2 | 161 | 60 | 3 | 4 | 73  | 38 | 248 | 104 |
| 42,996 | 11 | 2 | 152 | 61 | 2 | 4 | 65  | 38 | 230 | 105 |
| 42,997 | 11 | 2 | 151 | 61 | 2 | 4 | 65  | 38 | 229 | 105 |

|        |    |   |     |    |   |   |    |    |     |     |
|--------|----|---|-----|----|---|---|----|----|-----|-----|
| 42,998 | 11 | 2 | 150 | 61 | 2 | 4 | 65 | 38 | 228 | 105 |
| 42,999 | 11 | 2 | 145 | 61 | 2 | 4 | 65 | 38 | 223 | 105 |
| 43,000 | 11 | 2 | 142 | 61 | 2 | 4 | 64 | 38 | 219 | 105 |
| 43,001 | 11 | 2 | 139 | 62 | 2 | 4 | 62 | 38 | 214 | 106 |
| 43,002 | 11 | 2 | 136 | 65 | 1 | 4 | 63 | 35 | 211 | 106 |
| 43,003 | 11 | 4 | 132 | 67 | 1 | 4 | 63 | 35 | 207 | 110 |
| 43,004 | 11 | 5 | 131 | 66 | 1 | 4 | 63 | 34 | 206 | 109 |
| 43,005 | 11 | 5 | 133 | 67 | 2 | 4 | 63 | 35 | 209 | 111 |
| 43,006 | 11 | 5 | 132 | 67 | 2 | 4 | 63 | 35 | 208 | 111 |
| 43,007 | 11 | 5 | 133 | 63 | 2 | 4 | 65 | 35 | 211 | 107 |
| 43,008 | 11 | 5 | 137 | 56 | 2 | 4 | 66 | 32 | 216 | 97  |
| 43,009 | 11 | 5 | 142 | 58 | 2 | 4 | 66 | 32 | 221 | 99  |
| 43,010 | 11 | 5 | 148 | 58 | 2 | 4 | 73 | 32 | 234 | 99  |
| 43,011 | 11 | 5 | 149 | 54 | 2 | 3 | 74 | 28 | 236 | 90  |
| 43,012 | 11 | 5 | 151 | 54 | 2 | 3 | 74 | 28 | 238 | 90  |
| 43,013 | 11 | 5 | 150 | 55 | 2 | 3 | 76 | 28 | 239 | 91  |
| 43,014 | 11 | 5 | 149 | 64 | 2 | 3 | 76 | 35 | 238 | 107 |
| 43,015 | 10 | 7 | 142 | 75 | 2 | 3 | 72 | 37 | 226 | 122 |
| 43,016 | 9  | 7 | 137 | 80 | 2 | 3 | 68 | 37 | 216 | 127 |
| 43,017 | 9  | 7 | 137 | 77 | 2 | 3 | 67 | 37 | 215 | 124 |
| 43,018 | 9  | 7 | 102 | 96 | 2 | 4 | 58 | 49 | 171 | 156 |
| 43,019 | 5  | 7 | 84  | 97 | 2 | 4 | 44 | 45 | 135 | 153 |
| 43,020 | 5  | 6 | 63  | 96 | 3 | 4 | 36 | 45 | 107 | 151 |
| 43,021 | 5  | 6 | 67  | 99 | 3 | 4 | 35 | 45 | 110 | 154 |
| 43,022 | 5  | 7 | 53  | 98 | 2 | 4 | 27 | 45 | 87  | 154 |
| 43,023 | 5  | 7 | 52  | 96 | 2 | 5 | 26 | 45 | 85  | 153 |
| 43,024 | 4  | 7 | 54  | 91 | 2 | 5 | 26 | 41 | 86  | 144 |
| 43,025 | 4  | 7 | 54  | 96 | 2 | 5 | 27 | 41 | 87  | 149 |
| 43,026 | 4  | 7 | 54  | 96 | 2 | 5 | 25 | 42 | 85  | 150 |
| 43,027 | 4  | 7 | 54  | 87 | 2 | 5 | 25 | 39 | 85  | 138 |
| 43,028 | 4  | 7 | 54  | 87 | 2 | 4 | 25 | 38 | 85  | 136 |
| 43,029 | 4  | 7 | 55  | 87 | 2 | 4 | 25 | 38 | 86  | 136 |
| 43,030 | 4  | 7 | 55  | 87 | 2 | 4 | 24 | 38 | 85  | 136 |
| 43,031 | 4  | 7 | 55  | 87 | 2 | 4 | 24 | 38 | 85  | 136 |
| 43,032 | 4  | 7 | 57  | 81 | 2 | 4 | 24 | 37 | 87  | 129 |
| 43,033 | 4  | 7 | 57  | 81 | 2 | 4 | 24 | 37 | 87  | 129 |
| 43,034 | 4  | 7 | 57  | 81 | 2 | 3 | 24 | 37 | 87  | 128 |
| 43,035 | 5  | 7 | 60  | 81 | 2 | 3 | 24 | 37 | 91  | 128 |
| 43,036 | 6  | 7 | 66  | 80 | 2 | 3 | 28 | 37 | 102 | 127 |
| 43,037 | 6  | 7 | 74  | 79 | 2 | 2 | 28 | 35 | 110 | 123 |
| 43,038 | 6  | 6 | 74  | 79 | 2 | 2 | 28 | 35 | 110 | 122 |

|        |    |   |     |     |   |   |    |     |     |     |
|--------|----|---|-----|-----|---|---|----|-----|-----|-----|
| 43,039 | 5  | 6 | 74  | 79  | 2 | 2 | 27 | 35  | 108 | 122 |
| 43,040 | 7  | 6 | 89  | 79  | 3 | 2 | 36 | 34  | 135 | 121 |
| 43,041 | 7  | 6 | 95  | 79  | 3 | 3 | 38 | 34  | 143 | 122 |
| 43,042 | 7  | 7 | 97  | 85  | 3 | 3 | 38 | 40  | 145 | 135 |
| 43,043 | 7  | 7 | 96  | 85  | 3 | 3 | 38 | 40  | 144 | 135 |
| 43,044 | 7  | 7 | 98  | 87  | 3 | 3 | 39 | 40  | 147 | 137 |
| 43,045 | 7  | 9 | 97  | 97  | 3 | 3 | 39 | 51  | 146 | 160 |
| 43,046 | 7  | 9 | 96  | 97  | 3 | 3 | 38 | 51  | 144 | 160 |
| 43,047 | 7  | 9 | 97  | 98  | 3 | 3 | 38 | 51  | 145 | 161 |
| 43,048 | 7  | 9 | 98  | 98  | 3 | 3 | 38 | 51  | 146 | 161 |
| 43,049 | 7  | 9 | 98  | 98  | 3 | 3 | 38 | 51  | 146 | 161 |
| 43,050 | 8  | 9 | 98  | 98  | 3 | 3 | 38 | 51  | 147 | 161 |
| 43,051 | 7  | 9 | 99  | 96  | 3 | 3 | 38 | 51  | 147 | 159 |
| 43,052 | 7  | 9 | 99  | 95  | 3 | 3 | 39 | 52  | 148 | 159 |
| 43,053 | 7  | 9 | 98  | 87  | 3 | 3 | 38 | 51  | 146 | 150 |
| 43,054 | 9  | 6 | 98  | 86  | 3 | 3 | 38 | 50  | 148 | 145 |
| 43,055 | 9  | 6 | 99  | 86  | 4 | 3 | 39 | 51  | 151 | 146 |
| 43,056 | 9  | 6 | 96  | 85  | 3 | 3 | 39 | 50  | 147 | 144 |
| 43,057 | 9  | 7 | 96  | 92  | 3 | 3 | 39 | 54  | 147 | 156 |
| 43,058 | 9  | 7 | 96  | 98  | 3 | 3 | 37 | 61  | 145 | 169 |
| 43,059 | 9  | 8 | 92  | 98  | 3 | 3 | 36 | 65  | 140 | 174 |
| 43,060 | 9  | 8 | 90  | 99  | 3 | 3 | 36 | 65  | 138 | 175 |
| 43,061 | 9  | 8 | 83  | 99  | 3 | 3 | 29 | 65  | 124 | 175 |
| 43,062 | 9  | 8 | 82  | 98  | 3 | 3 | 28 | 65  | 122 | 174 |
| 43,063 | 9  | 8 | 84  | 89  | 3 | 3 | 29 | 63  | 125 | 163 |
| 43,064 | 9  | 8 | 96  | 91  | 6 | 3 | 34 | 66  | 145 | 168 |
| 43,065 | 9  | 8 | 96  | 91  | 6 | 3 | 34 | 64  | 145 | 166 |
| 43,066 | 10 | 6 | 102 | 82  | 6 | 3 | 37 | 63  | 155 | 154 |
| 43,067 | 10 | 6 | 109 | 58  | 6 | 2 | 47 | 50  | 172 | 116 |
| 43,068 | 10 | 6 | 110 | 66  | 6 | 2 | 47 | 52  | 173 | 126 |
| 43,069 | 10 | 6 | 128 | 78  | 7 | 2 | 58 | 69  | 203 | 155 |
| 43,070 | 10 | 6 | 132 | 80  | 9 | 2 | 58 | 69  | 209 | 157 |
| 43,071 | 9  | 7 | 129 | 94  | 8 | 3 | 58 | 92  | 204 | 196 |
| 43,072 | 8  | 7 | 120 | 94  | 8 | 4 | 57 | 96  | 193 | 201 |
| 43,073 | 9  | 7 | 126 | 99  | 8 | 4 | 58 | 98  | 201 | 208 |
| 43,074 | 9  | 7 | 125 | 103 | 8 | 3 | 58 | 99  | 200 | 212 |
| 43,075 | 9  | 9 | 123 | 103 | 8 | 3 | 58 | 101 | 198 | 216 |
| 43,076 | 9  | 9 | 123 | 104 | 8 | 3 | 57 | 102 | 197 | 218 |
| 43,077 | 9  | 9 | 123 | 104 | 8 | 3 | 57 | 101 | 197 | 217 |
| 43,078 | 9  | 9 | 123 | 102 | 8 | 3 | 57 | 101 | 197 | 215 |
| 43,079 | 9  | 9 | 123 | 103 | 8 | 3 | 57 | 101 | 197 | 216 |

|        |   |   |     |     |    |   |     |     |     |     |
|--------|---|---|-----|-----|----|---|-----|-----|-----|-----|
| 43,080 | 9 | 9 | 122 | 101 | 8  | 3 | 57  | 101 | 196 | 214 |
| 43,081 | 9 | 9 | 122 | 101 | 8  | 3 | 57  | 101 | 196 | 214 |
| 43,082 | 9 | 9 | 119 | 101 | 8  | 3 | 57  | 101 | 193 | 214 |
| 43,083 | 9 | 9 | 119 | 101 | 8  | 3 | 57  | 101 | 193 | 214 |
| 43,084 | 9 | 9 | 119 | 101 | 8  | 3 | 57  | 101 | 193 | 214 |
| 43,085 | 8 | 9 | 116 | 101 | 8  | 3 | 57  | 100 | 189 | 213 |
| 43,086 | 8 | 9 | 116 | 101 | 8  | 3 | 57  | 100 | 189 | 213 |
| 43,087 | 7 | 9 | 108 | 103 | 8  | 3 | 53  | 100 | 176 | 215 |
| 43,088 | 7 | 9 | 99  | 103 | 8  | 3 | 54  | 100 | 168 | 215 |
| 43,089 | 7 | 9 | 102 | 103 | 8  | 3 | 55  | 100 | 172 | 215 |
| 43,090 | 5 | 9 | 87  | 103 | 7  | 3 | 45  | 100 | 144 | 215 |
| 43,091 | 5 | 9 | 88  | 103 | 7  | 2 | 44  | 100 | 144 | 214 |
| 43,092 | 6 | 9 | 86  | 103 | 7  | 2 | 46  | 100 | 145 | 214 |
| 43,093 | 6 | 8 | 86  | 97  | 7  | 2 | 44  | 94  | 143 | 201 |
| 43,094 | 6 | 8 | 87  | 97  | 7  | 2 | 44  | 94  | 144 | 201 |
| 43,095 | 6 | 8 | 86  | 97  | 7  | 2 | 44  | 94  | 143 | 201 |
| 43,096 | 6 | 6 | 85  | 87  | 7  | 2 | 44  | 83  | 142 | 178 |
| 43,097 | 7 | 6 | 95  | 87  | 8  | 2 | 58  | 83  | 168 | 178 |
| 43,098 | 7 | 6 | 96  | 85  | 8  | 2 | 60  | 83  | 171 | 176 |
| 43,099 | 7 | 6 | 95  | 85  | 8  | 2 | 60  | 83  | 170 | 176 |
| 43,100 | 6 | 6 | 96  | 85  | 8  | 2 | 60  | 83  | 170 | 176 |
| 43,101 | 6 | 6 | 94  | 85  | 8  | 2 | 60  | 83  | 168 | 176 |
| 43,102 | 6 | 6 | 94  | 81  | 8  | 2 | 60  | 82  | 168 | 171 |
| 43,103 | 6 | 6 | 94  | 81  | 8  | 2 | 60  | 82  | 168 | 171 |
| 43,104 | 4 | 6 | 94  | 81  | 8  | 2 | 60  | 83  | 166 | 172 |
| 43,105 | 4 | 6 | 96  | 81  | 8  | 2 | 61  | 83  | 169 | 172 |
| 43,106 | 4 | 6 | 96  | 81  | 7  | 2 | 61  | 82  | 168 | 171 |
| 43,107 | 7 | 5 | 106 | 73  | 8  | 2 | 80  | 76  | 201 | 156 |
| 43,108 | 7 | 5 | 113 | 67  | 8  | 2 | 91  | 69  | 219 | 143 |
| 43,109 | 7 | 4 | 114 | 66  | 9  | 2 | 93  | 66  | 223 | 138 |
| 43,110 | 7 | 5 | 131 | 66  | 9  | 2 | 98  | 66  | 245 | 139 |
| 43,111 | 7 | 5 | 129 | 65  | 9  | 2 | 98  | 66  | 243 | 138 |
| 43,112 | 7 | 5 | 140 | 65  | 13 | 2 | 110 | 66  | 270 | 138 |
| 43,113 | 7 | 5 | 138 | 64  | 13 | 2 | 109 | 63  | 267 | 134 |
| 43,114 | 7 | 5 | 137 | 62  | 13 | 2 | 109 | 60  | 266 | 129 |
| 43,115 | 7 | 5 | 125 | 62  | 10 | 2 | 102 | 60  | 244 | 129 |
| 43,116 | 6 | 5 | 119 | 63  | 10 | 2 | 99  | 62  | 234 | 132 |
| 43,117 | 6 | 5 | 113 | 62  | 10 | 2 | 89  | 61  | 218 | 130 |
| 43,118 | 6 | 5 | 112 | 62  | 10 | 2 | 90  | 60  | 218 | 129 |
| 43,119 | 7 | 5 | 111 | 54  | 10 | 2 | 90  | 60  | 218 | 121 |
| 43,120 | 7 | 5 | 93  | 42  | 9  | 2 | 79  | 43  | 188 | 92  |

|        |   |   |     |    |    |   |     |    |     |    |
|--------|---|---|-----|----|----|---|-----|----|-----|----|
| 43,121 | 7 | 5 | 87  | 24 | 7  | 1 | 80  | 18 | 181 | 48 |
| 43,122 | 6 | 4 | 84  | 16 | 7  | 0 | 81  | 12 | 178 | 32 |
| 43,123 | 6 | 4 | 86  | 16 | 7  | 0 | 82  | 12 | 181 | 32 |
| 43,124 | 6 | 5 | 85  | 16 | 7  | 0 | 82  | 12 | 180 | 33 |
| 43,125 | 6 | 5 | 89  | 13 | 7  | 0 | 82  | 11 | 184 | 29 |
| 43,126 | 6 | 4 | 91  | 7  | 7  | 0 | 85  | 8  | 189 | 19 |
| 43,127 | 6 | 4 | 91  | 8  | 7  | 0 | 85  | 9  | 189 | 21 |
| 43,128 | 6 | 4 | 94  | 9  | 7  | 0 | 90  | 9  | 197 | 22 |
| 43,129 | 6 | 4 | 94  | 9  | 7  | 0 | 90  | 9  | 197 | 22 |
| 43,130 | 6 | 4 | 97  | 8  | 7  | 0 | 90  | 9  | 200 | 21 |
| 43,131 | 6 | 4 | 100 | 8  | 7  | 0 | 90  | 9  | 203 | 21 |
| 43,132 | 6 | 4 | 100 | 8  | 7  | 0 | 90  | 9  | 203 | 21 |
| 43,133 | 6 | 4 | 99  | 8  | 7  | 0 | 90  | 9  | 202 | 21 |
| 43,134 | 6 | 4 | 100 | 8  | 7  | 0 | 90  | 9  | 203 | 21 |
| 43,135 | 6 | 4 | 100 | 8  | 7  | 0 | 90  | 9  | 203 | 21 |
| 43,136 | 6 | 4 | 100 | 8  | 7  | 0 | 90  | 8  | 203 | 20 |
| 43,137 | 6 | 4 | 102 | 8  | 7  | 0 | 90  | 8  | 205 | 20 |
| 43,138 | 6 | 4 | 102 | 8  | 7  | 0 | 90  | 8  | 205 | 20 |
| 43,139 | 6 | 4 | 101 | 8  | 7  | 0 | 90  | 8  | 204 | 20 |
| 43,140 | 6 | 4 | 97  | 8  | 7  | 0 | 89  | 8  | 199 | 20 |
| 43,141 | 6 | 4 | 96  | 11 | 7  | 0 | 89  | 9  | 198 | 24 |
| 43,142 | 6 | 4 | 93  | 18 | 7  | 0 | 89  | 11 | 195 | 33 |
| 43,143 | 5 | 4 | 89  | 24 | 7  | 0 | 85  | 11 | 186 | 39 |
| 43,144 | 5 | 4 | 87  | 26 | 7  | 0 | 84  | 13 | 183 | 43 |
| 43,145 | 4 | 4 | 78  | 26 | 6  | 0 | 74  | 13 | 162 | 43 |
| 43,146 | 4 | 4 | 78  | 26 | 6  | 0 | 78  | 14 | 166 | 44 |
| 43,147 | 4 | 4 | 78  | 27 | 6  | 0 | 77  | 14 | 165 | 45 |
| 43,148 | 4 | 4 | 78  | 27 | 6  | 1 | 75  | 14 | 163 | 46 |
| 43,149 | 4 | 4 | 77  | 27 | 6  | 1 | 73  | 14 | 160 | 46 |
| 43,150 | 4 | 4 | 77  | 27 | 6  | 1 | 75  | 15 | 162 | 47 |
| 43,151 | 6 | 4 | 90  | 27 | 6  | 1 | 76  | 15 | 178 | 47 |
| 43,152 | 6 | 4 | 90  | 27 | 6  | 1 | 76  | 15 | 178 | 47 |
| 43,153 | 6 | 4 | 90  | 28 | 6  | 1 | 75  | 16 | 177 | 49 |
| 43,154 | 8 | 4 | 186 | 29 | 15 | 1 | 102 | 17 | 311 | 51 |
| 43,155 | 8 | 4 | 209 | 30 | 15 | 1 | 104 | 17 | 336 | 52 |
| 43,156 | 8 | 4 | 217 | 32 | 16 | 1 | 121 | 19 | 362 | 56 |
| 43,157 | 9 | 4 | 233 | 35 | 18 | 1 | 135 | 19 | 395 | 59 |
| 43,158 | 6 | 4 | 231 | 35 | 17 | 1 | 118 | 19 | 372 | 59 |
| 43,159 | 6 | 4 | 232 | 35 | 17 | 1 | 111 | 19 | 366 | 59 |
| 43,160 | 6 | 4 | 231 | 36 | 16 | 1 | 110 | 19 | 363 | 60 |
| 43,161 | 6 | 3 | 214 | 37 | 16 | 1 | 105 | 21 | 341 | 62 |

|        |    |   |     |    |    |   |     |    |     |    |
|--------|----|---|-----|----|----|---|-----|----|-----|----|
| 43,162 | 6  | 3 | 214 | 36 | 16 | 1 | 105 | 21 | 341 | 61 |
| 43,163 | 6  | 3 | 202 | 37 | 12 | 1 | 93  | 21 | 313 | 62 |
| 43,164 | 6  | 3 | 201 | 37 | 12 | 1 | 94  | 21 | 313 | 62 |
| 43,165 | 6  | 3 | 201 | 37 | 12 | 1 | 94  | 21 | 313 | 62 |
| 43,166 | 6  | 3 | 203 | 37 | 12 | 1 | 95  | 21 | 316 | 62 |
| 43,167 | 6  | 3 | 203 | 36 | 12 | 1 | 97  | 19 | 318 | 59 |
| 43,168 | 6  | 3 | 203 | 34 | 12 | 1 | 97  | 19 | 318 | 57 |
| 43,169 | 6  | 3 | 204 | 34 | 12 | 1 | 96  | 19 | 318 | 57 |
| 43,170 | 5  | 3 | 204 | 34 | 12 | 1 | 96  | 18 | 317 | 56 |
| 43,171 | 5  | 2 | 206 | 34 | 12 | 1 | 96  | 17 | 319 | 54 |
| 43,172 | 5  | 2 | 207 | 34 | 12 | 1 | 98  | 19 | 322 | 56 |
| 43,173 | 5  | 2 | 205 | 34 | 12 | 1 | 98  | 21 | 320 | 58 |
| 43,174 | 5  | 4 | 207 | 35 | 12 | 1 | 98  | 21 | 322 | 61 |
| 43,175 | 6  | 3 | 207 | 37 | 12 | 1 | 102 | 25 | 327 | 66 |
| 43,176 | 8  | 3 | 211 | 39 | 12 | 1 | 107 | 25 | 338 | 68 |
| 43,177 | 8  | 2 | 210 | 40 | 12 | 1 | 105 | 25 | 335 | 68 |
| 43,178 | 11 | 2 | 243 | 41 | 13 | 1 | 141 | 24 | 408 | 68 |
| 43,179 | 15 | 3 | 295 | 40 | 17 | 1 | 203 | 24 | 530 | 68 |
| 43,180 | 15 | 3 | 292 | 42 | 17 | 1 | 203 | 26 | 527 | 72 |
| 43,181 | 15 | 3 | 289 | 42 | 17 | 1 | 203 | 26 | 524 | 72 |
| 43,182 | 15 | 3 | 295 | 42 | 17 | 1 | 214 | 26 | 541 | 72 |
| 43,183 | 16 | 3 | 326 | 42 | 19 | 1 | 261 | 27 | 622 | 73 |
| 43,184 | 16 | 3 | 326 | 44 | 19 | 1 | 261 | 27 | 622 | 75 |
| 43,185 | 16 | 3 | 326 | 44 | 19 | 1 | 261 | 28 | 622 | 76 |
| 43,186 | 16 | 3 | 326 | 44 | 19 | 1 | 261 | 28 | 622 | 76 |
| 43,187 | 16 | 3 | 337 | 44 | 19 | 1 | 264 | 28 | 636 | 76 |
| 43,188 | 16 | 3 | 336 | 44 | 20 | 1 | 265 | 28 | 637 | 76 |
| 43,189 | 16 | 3 | 336 | 44 | 20 | 1 | 265 | 28 | 637 | 76 |
| 43,190 | 18 | 3 | 351 | 44 | 20 | 1 | 279 | 28 | 668 | 76 |
| 43,191 | 18 | 3 | 354 | 44 | 20 | 1 | 282 | 29 | 674 | 77 |
| 43,192 | 18 | 3 | 354 | 41 | 20 | 1 | 285 | 28 | 677 | 73 |
| 43,193 | 18 | 3 | 356 | 28 | 20 | 1 | 284 | 26 | 678 | 58 |
| 43,194 | 18 | 3 | 364 | 26 | 21 | 1 | 290 | 24 | 693 | 54 |
| 43,195 | 18 | 3 | 366 | 25 | 21 | 0 | 292 | 23 | 697 | 51 |
| 43,196 | 21 | 3 | 392 | 25 | 24 | 0 | 317 | 23 | 754 | 51 |
| 43,197 | 22 | 3 | 400 | 26 | 26 | 0 | 323 | 23 | 771 | 52 |
| 43,198 | 22 | 3 | 400 | 26 | 26 | 0 | 323 | 23 | 771 | 52 |
| 43,199 | 22 | 3 | 403 | 26 | 27 | 0 | 330 | 23 | 782 | 52 |
| 43,200 | 22 | 3 | 404 | 26 | 27 | 0 | 330 | 23 | 783 | 52 |
| 43,201 | 22 | 3 | 404 | 26 | 27 | 0 | 331 | 25 | 784 | 54 |
| 43,202 | 20 | 3 | 391 | 37 | 27 | 1 | 330 | 25 | 768 | 66 |

|        |    |   |     |    |    |   |     |    |     |    |
|--------|----|---|-----|----|----|---|-----|----|-----|----|
| 43,203 | 19 | 3 | 377 | 40 | 24 | 1 | 323 | 27 | 743 | 71 |
| 43,204 | 18 | 3 | 316 | 47 | 24 | 1 | 311 | 26 | 669 | 77 |
| 43,205 | 20 | 3 | 297 | 48 | 19 | 1 | 302 | 25 | 638 | 77 |
| 43,206 | 20 | 5 | 277 | 50 | 19 | 1 | 300 | 24 | 616 | 80 |
| 43,207 | 20 | 5 | 274 | 48 | 18 | 1 | 282 | 22 | 594 | 76 |
| 43,208 | 19 | 6 | 257 | 48 | 16 | 1 | 268 | 22 | 560 | 77 |
| 43,209 | 19 | 6 | 247 | 48 | 16 | 1 | 266 | 22 | 548 | 77 |
| 43,210 | 20 | 6 | 248 | 49 | 16 | 1 | 264 | 22 | 548 | 78 |
| 43,211 | 20 | 7 | 260 | 50 | 16 | 1 | 276 | 23 | 572 | 81 |
| 43,212 | 20 | 7 | 260 | 49 | 16 | 1 | 276 | 21 | 572 | 78 |
| 43,213 | 20 | 8 | 268 | 48 | 17 | 1 | 279 | 22 | 584 | 79 |
| 43,214 | 20 | 8 | 270 | 48 | 17 | 1 | 280 | 22 | 587 | 79 |
| 43,215 | 21 | 8 | 287 | 48 | 17 | 1 | 294 | 22 | 619 | 79 |
| 43,216 | 21 | 8 | 287 | 48 | 17 | 1 | 294 | 22 | 619 | 79 |
| 43,217 | 21 | 8 | 285 | 48 | 17 | 1 | 293 | 22 | 616 | 79 |
| 43,218 | 21 | 8 | 287 | 48 | 17 | 1 | 295 | 22 | 620 | 79 |
| 43,219 | 21 | 8 | 287 | 48 | 17 | 1 | 295 | 22 | 620 | 79 |
| 43,220 | 23 | 8 | 302 | 48 | 17 | 1 | 298 | 22 | 640 | 79 |
| 43,221 | 23 | 8 | 302 | 48 | 17 | 1 | 299 | 21 | 641 | 78 |
| 43,222 | 23 | 8 | 301 | 48 | 17 | 1 | 299 | 19 | 640 | 76 |
| 43,223 | 23 | 8 | 299 | 48 | 17 | 1 | 296 | 19 | 635 | 76 |
| 43,224 | 23 | 8 | 300 | 48 | 17 | 1 | 294 | 17 | 634 | 74 |
| 43,225 | 23 | 6 | 296 | 45 | 17 | 1 | 294 | 16 | 630 | 68 |
| 43,226 | 22 | 6 | 294 | 45 | 17 | 1 | 290 | 16 | 623 | 68 |
| 43,227 | 23 | 6 | 344 | 42 | 17 | 3 | 317 | 16 | 701 | 67 |
| 43,228 | 23 | 6 | 344 | 41 | 17 | 3 | 317 | 16 | 701 | 66 |
| 43,229 | 23 | 6 | 335 | 39 | 17 | 4 | 305 | 16 | 680 | 65 |
| 43,230 | 20 | 5 | 297 | 37 | 14 | 4 | 250 | 14 | 581 | 60 |
| 43,231 | 23 | 5 | 309 | 37 | 14 | 4 | 270 | 14 | 616 | 60 |
| 43,232 | 27 | 5 | 325 | 37 | 15 | 4 | 286 | 14 | 653 | 60 |
| 43,233 | 26 | 5 | 294 | 37 | 13 | 4 | 240 | 13 | 573 | 59 |
| 43,234 | 26 | 5 | 294 | 37 | 13 | 4 | 240 | 13 | 573 | 59 |
| 43,235 | 26 | 5 | 294 | 35 | 13 | 4 | 241 | 13 | 574 | 57 |
| 43,236 | 26 | 5 | 295 | 35 | 13 | 4 | 241 | 12 | 575 | 56 |
| 43,237 | 26 | 5 | 297 | 35 | 13 | 4 | 242 | 12 | 578 | 56 |
| 43,238 | 26 | 5 | 289 | 36 | 13 | 4 | 239 | 12 | 567 | 57 |
| 43,239 | 27 | 5 | 288 | 36 | 12 | 4 | 238 | 12 | 565 | 57 |
| 43,240 | 25 | 5 | 273 | 36 | 12 | 4 | 222 | 12 | 532 | 57 |
| 43,241 | 26 | 5 | 273 | 36 | 12 | 4 | 220 | 11 | 531 | 56 |
| 43,242 | 26 | 5 | 270 | 36 | 12 | 4 | 219 | 11 | 527 | 56 |
| 43,243 | 26 | 5 | 270 | 36 | 12 | 4 | 216 | 11 | 524 | 56 |

|        |    |   |     |    |    |   |     |    |     |    |
|--------|----|---|-----|----|----|---|-----|----|-----|----|
| 43,244 | 26 | 7 | 267 | 39 | 12 | 4 | 216 | 12 | 521 | 62 |
| 43,245 | 26 | 7 | 263 | 41 | 11 | 4 | 215 | 12 | 515 | 64 |
| 43,246 | 26 | 7 | 261 | 41 | 11 | 4 | 213 | 12 | 511 | 64 |
| 43,247 | 23 | 7 | 235 | 40 | 8  | 4 | 187 | 12 | 453 | 63 |
| 43,248 | 22 | 7 | 226 | 40 | 6  | 4 | 177 | 12 | 431 | 63 |
| 43,249 | 22 | 7 | 223 | 40 | 5  | 4 | 170 | 13 | 420 | 64 |
| 43,250 | 22 | 7 | 221 | 40 | 5  | 4 | 170 | 13 | 418 | 64 |
| 43,251 | 22 | 7 | 221 | 40 | 5  | 4 | 169 | 13 | 417 | 64 |
| 43,252 | 22 | 7 | 221 | 40 | 5  | 4 | 168 | 10 | 416 | 61 |
| 43,253 | 22 | 7 | 221 | 26 | 5  | 3 | 168 | 8  | 416 | 44 |
| 43,254 | 22 | 7 | 221 | 26 | 5  | 3 | 168 | 8  | 416 | 44 |
| 43,255 | 22 | 7 | 221 | 18 | 4  | 3 | 167 | 8  | 414 | 36 |
| 43,256 | 20 | 7 | 219 | 16 | 4  | 3 | 167 | 8  | 410 | 34 |
| 43,257 | 20 | 5 | 218 | 13 | 4  | 3 | 167 | 8  | 409 | 29 |
| 43,258 | 20 | 6 | 212 | 21 | 4  | 4 | 167 | 8  | 403 | 39 |
| 43,259 | 20 | 5 | 212 | 19 | 4  | 4 | 167 | 11 | 403 | 39 |
| 43,260 | 20 | 5 | 210 | 20 | 4  | 4 | 165 | 12 | 399 | 41 |
| 43,261 | 19 | 5 | 203 | 21 | 4  | 4 | 165 | 12 | 391 | 42 |
| 43,262 | 19 | 4 | 191 | 19 | 4  | 4 | 152 | 10 | 366 | 37 |
| 43,263 | 19 | 3 | 183 | 19 | 3  | 4 | 149 | 9  | 354 | 35 |
| 43,264 | 19 | 3 | 183 | 18 | 3  | 4 | 149 | 9  | 354 | 34 |
| 43,265 | 20 | 3 | 181 | 18 | 3  | 4 | 148 | 9  | 352 | 34 |
| 43,266 | 19 | 3 | 164 | 18 | 3  | 4 | 133 | 9  | 319 | 34 |
| 43,267 | 19 | 3 | 163 | 18 | 3  | 4 | 133 | 9  | 318 | 34 |
| 43,268 | 19 | 3 | 163 | 18 | 3  | 4 | 133 | 9  | 318 | 34 |
| 43,269 | 19 | 3 | 161 | 18 | 3  | 4 | 131 | 9  | 314 | 34 |
| 43,270 | 17 | 3 | 146 | 19 | 3  | 4 | 128 | 9  | 294 | 35 |
| 43,271 | 17 | 3 | 146 | 19 | 3  | 4 | 128 | 9  | 294 | 35 |
| 43,272 | 17 | 3 | 146 | 19 | 3  | 4 | 127 | 9  | 293 | 35 |
| 43,273 | 18 | 3 | 145 | 20 | 3  | 4 | 127 | 9  | 293 | 36 |
| 43,274 | 18 | 3 | 146 | 20 | 3  | 4 | 127 | 9  | 294 | 36 |
| 43,275 | 18 | 3 | 145 | 20 | 3  | 4 | 127 | 6  | 293 | 33 |
| 43,276 | 18 | 3 | 145 | 20 | 3  | 2 | 128 | 6  | 294 | 31 |
| 43,277 | 18 | 3 | 121 | 21 | 3  | 2 | 117 | 6  | 259 | 32 |
| 43,278 | 15 | 3 | 89  | 21 | 3  | 1 | 96  | 6  | 203 | 31 |
| 43,279 | 15 | 3 | 88  | 21 | 3  | 1 | 95  | 6  | 201 | 31 |
| 43,280 | 12 | 3 | 63  | 21 | 2  | 1 | 67  | 6  | 144 | 31 |
| 43,281 | 11 | 3 | 52  | 21 | 1  | 1 | 60  | 6  | 124 | 31 |
| 43,282 | 8  | 3 | 37  | 21 | 1  | 1 | 38  | 6  | 84  | 31 |
| 43,283 | 4  | 3 | 18  | 21 | 0  | 1 | 13  | 7  | 35  | 32 |
| 43,284 | 4  | 3 | 17  | 21 | 0  | 1 | 12  | 7  | 33  | 32 |



|        |   |   |    |    |   |   |    |   |     |    |
|--------|---|---|----|----|---|---|----|---|-----|----|
| 43,285 | 4 | 3 | 19 | 21 | 0 | 1 | 11 | 7 | 34  | 32 |
| 43,286 | 4 | 3 | 22 | 21 | 0 | 1 | 11 | 7 | 37  | 32 |
| 43,287 | 6 | 3 | 33 | 22 | 2 | 1 | 23 | 8 | 64  | 34 |
| 43,288 | 6 | 3 | 31 | 22 | 2 | 1 | 22 | 8 | 61  | 34 |
| 43,289 | 6 | 3 | 30 | 22 | 2 | 1 | 22 | 8 | 60  | 34 |
| 43,290 | 5 | 3 | 30 | 22 | 2 | 1 | 23 | 8 | 60  | 34 |
| 43,291 | 5 | 3 | 31 | 22 | 3 | 1 | 24 | 8 | 63  | 34 |
| 43,292 | 5 | 3 | 51 | 22 | 3 | 1 | 27 | 8 | 86  | 34 |
| 43,293 | 5 | 3 | 51 | 22 | 3 | 1 | 28 | 8 | 87  | 34 |
| 43,294 | 5 | 1 | 53 | 17 | 3 | 1 | 28 | 7 | 89  | 26 |
| 43,295 | 5 | 1 | 55 | 17 | 3 | 1 | 29 | 7 | 92  | 26 |
| 43,296 | 6 | 1 | 52 | 17 | 3 | 1 | 24 | 7 | 85  | 26 |
| 43,297 | 6 | 1 | 51 | 17 | 3 | 1 | 24 | 7 | 84  | 26 |
| 43,298 | 7 | 1 | 58 | 17 | 3 | 1 | 29 | 7 | 97  | 26 |
| 43,299 | 7 | 1 | 58 | 17 | 3 | 1 | 29 | 7 | 97  | 26 |
| 43,300 | 7 | 1 | 58 | 17 | 3 | 1 | 29 | 6 | 97  | 25 |
| 43,301 | 7 | 1 | 58 | 17 | 3 | 1 | 29 | 6 | 97  | 25 |
| 43,302 | 7 | 1 | 61 | 17 | 3 | 1 | 29 | 6 | 100 | 25 |
| 43,303 | 7 | 1 | 72 | 17 | 3 | 1 | 31 | 6 | 113 | 25 |
| 43,304 | 7 | 1 | 72 | 17 | 3 | 1 | 31 | 6 | 113 | 25 |
| 43,305 | 7 | 1 | 72 | 17 | 3 | 1 | 31 | 6 | 113 | 25 |
| 43,306 | 7 | 0 | 90 | 11 | 6 | 0 | 40 | 6 | 143 | 17 |
| 43,307 | 7 | 0 | 89 | 11 | 6 | 0 | 40 | 6 | 142 | 17 |
| 43,308 | 7 | 0 | 89 | 11 | 6 | 0 | 40 | 6 | 142 | 17 |
| 43,309 | 7 | 0 | 89 | 11 | 6 | 0 | 40 | 7 | 142 | 18 |
| 43,310 | 7 | 0 | 89 | 9  | 6 | 0 | 39 | 3 | 141 | 12 |
| 43,311 | 7 | 0 | 90 | 7  | 6 | 0 | 39 | 3 | 142 | 10 |
| 43,312 | 7 | 0 | 93 | 7  | 6 | 0 | 39 | 3 | 145 | 10 |
| 43,313 | 7 | 0 | 93 | 7  | 6 | 0 | 39 | 3 | 145 | 10 |
| 43,314 | 7 | 0 | 93 | 7  | 6 | 0 | 39 | 3 | 145 | 10 |
| 43,315 | 7 | 0 | 93 | 7  | 6 | 0 | 39 | 3 | 145 | 10 |
| 43,316 | 6 | 0 | 93 | 7  | 6 | 0 | 39 | 3 | 144 | 10 |
| 43,317 | 6 | 0 | 93 | 7  | 6 | 0 | 39 | 3 | 144 | 10 |
| 43,318 | 6 | 0 | 93 | 7  | 6 | 0 | 39 | 3 | 144 | 10 |
| 43,319 | 6 | 0 | 93 | 7  | 6 | 0 | 39 | 3 | 144 | 10 |
| 43,320 | 6 | 0 | 94 | 6  | 6 | 0 | 39 | 3 | 145 | 9  |
| 43,321 | 7 | 0 | 95 | 7  | 6 | 0 | 40 | 3 | 148 | 10 |
| 43,322 | 7 | 0 | 95 | 7  | 6 | 0 | 40 | 3 | 148 | 10 |
| 43,323 | 6 | 0 | 96 | 7  | 6 | 0 | 41 | 3 | 149 | 10 |
| 43,324 | 6 | 0 | 97 | 8  | 6 | 0 | 41 | 3 | 150 | 11 |
| 43,325 | 6 | 0 | 96 | 8  | 6 | 0 | 41 | 3 | 149 | 11 |

|        |    |   |    |    |   |   |    |    |     |    |
|--------|----|---|----|----|---|---|----|----|-----|----|
| 43,326 | 6  | 0 | 96 | 8  | 6 | 0 | 41 | 3  | 149 | 11 |
| 43,327 | 6  | 0 | 96 | 8  | 6 | 0 | 39 | 3  | 147 | 11 |
| 43,328 | 6  | 0 | 96 | 7  | 6 | 0 | 39 | 3  | 147 | 10 |
| 43,329 | 6  | 0 | 96 | 7  | 6 | 1 | 39 | 3  | 147 | 11 |
| 43,330 | 6  | 0 | 98 | 8  | 6 | 1 | 40 | 3  | 150 | 12 |
| 43,331 | 6  | 0 | 97 | 10 | 6 | 1 | 40 | 3  | 149 | 14 |
| 43,332 | 6  | 1 | 94 | 10 | 6 | 1 | 40 | 3  | 146 | 15 |
| 43,333 | 6  | 1 | 95 | 10 | 6 | 1 | 40 | 2  | 147 | 14 |
| 43,334 | 6  | 1 | 95 | 10 | 6 | 1 | 40 | 2  | 147 | 14 |
| 43,335 | 6  | 1 | 93 | 10 | 6 | 1 | 40 | 2  | 145 | 14 |
| 43,336 | 6  | 1 | 93 | 9  | 6 | 1 | 40 | 1  | 145 | 12 |
| 43,337 | 6  | 1 | 91 | 12 | 6 | 1 | 40 | 1  | 143 | 15 |
| 43,338 | 4  | 1 | 78 | 12 | 4 | 1 | 28 | 1  | 114 | 15 |
| 43,339 | 4  | 1 | 77 | 12 | 4 | 1 | 28 | 1  | 113 | 15 |
| 43,340 | 4  | 1 | 77 | 14 | 4 | 1 | 27 | 2  | 112 | 18 |
| 43,341 | 4  | 1 | 76 | 15 | 4 | 1 | 26 | 5  | 110 | 22 |
| 43,342 | 3  | 1 | 57 | 18 | 3 | 1 | 23 | 5  | 86  | 25 |
| 43,343 | 3  | 1 | 55 | 22 | 3 | 1 | 23 | 9  | 84  | 33 |
| 43,344 | 3  | 1 | 55 | 24 | 3 | 1 | 23 | 9  | 84  | 35 |
| 43,345 | 3  | 1 | 53 | 30 | 3 | 2 | 23 | 12 | 82  | 45 |
| 43,346 | 4  | 1 | 52 | 33 | 3 | 2 | 21 | 16 | 80  | 52 |
| 43,347 | 3  | 1 | 52 | 37 | 3 | 2 | 19 | 16 | 77  | 56 |
| 43,348 | 2  | 1 | 45 | 37 | 3 | 2 | 15 | 16 | 65  | 56 |
| 43,349 | 2  | 1 | 46 | 37 | 3 | 2 | 15 | 16 | 66  | 56 |
| 43,350 | 2  | 1 | 49 | 39 | 6 | 2 | 16 | 16 | 73  | 58 |
| 43,351 | 3  | 1 | 50 | 42 | 6 | 2 | 16 | 18 | 75  | 63 |
| 43,352 | 4  | 1 | 52 | 48 | 6 | 2 | 19 | 20 | 81  | 71 |
| 43,353 | 4  | 2 | 50 | 48 | 6 | 2 | 17 | 20 | 77  | 72 |
| 43,354 | 4  | 2 | 44 | 46 | 6 | 2 | 17 | 20 | 71  | 70 |
| 43,355 | 11 | 2 | 54 | 46 | 6 | 2 | 30 | 20 | 101 | 70 |
| 43,356 | 12 | 2 | 39 | 46 | 3 | 2 | 21 | 20 | 75  | 70 |
| 43,357 | 12 | 2 | 36 | 46 | 3 | 2 | 21 | 20 | 72  | 70 |
| 43,358 | 12 | 2 | 36 | 46 | 3 | 2 | 21 | 20 | 72  | 70 |
| 43,359 | 12 | 2 | 47 | 46 | 3 | 2 | 24 | 20 | 86  | 70 |
| 43,360 | 12 | 2 | 47 | 46 | 3 | 2 | 26 | 19 | 88  | 69 |
| 43,361 | 12 | 2 | 47 | 46 | 3 | 2 | 26 | 20 | 88  | 70 |
| 43,362 | 12 | 4 | 46 | 52 | 3 | 2 | 26 | 21 | 87  | 79 |
| 43,363 | 12 | 4 | 43 | 54 | 3 | 2 | 26 | 21 | 84  | 81 |
| 43,364 | 12 | 4 | 43 | 56 | 3 | 2 | 25 | 21 | 83  | 83 |
| 43,365 | 12 | 4 | 43 | 56 | 3 | 2 | 25 | 21 | 83  | 83 |
| 43,366 | 12 | 4 | 43 | 57 | 3 | 3 | 25 | 21 | 83  | 85 |

|        |    |   |    |    |   |   |    |    |     |     |
|--------|----|---|----|----|---|---|----|----|-----|-----|
| 43,367 | 12 | 4 | 43 | 59 | 3 | 3 | 25 | 21 | 83  | 87  |
| 43,368 | 12 | 4 | 45 | 59 | 4 | 3 | 25 | 21 | 86  | 87  |
| 43,369 | 12 | 4 | 47 | 59 | 4 | 3 | 28 | 21 | 91  | 87  |
| 43,370 | 12 | 4 | 47 | 59 | 4 | 3 | 28 | 21 | 91  | 87  |
| 43,371 | 12 | 4 | 46 | 59 | 4 | 3 | 28 | 21 | 90  | 87  |
| 43,372 | 11 | 4 | 45 | 59 | 4 | 3 | 28 | 21 | 88  | 87  |
| 43,373 | 11 | 4 | 45 | 59 | 4 | 3 | 28 | 21 | 88  | 87  |
| 43,374 | 11 | 4 | 44 | 59 | 4 | 3 | 28 | 21 | 87  | 87  |
| 43,375 | 11 | 4 | 48 | 57 | 4 | 3 | 29 | 21 | 92  | 85  |
| 43,376 | 11 | 4 | 48 | 61 | 4 | 3 | 29 | 22 | 92  | 90  |
| 43,377 | 11 | 6 | 48 | 65 | 4 | 3 | 29 | 29 | 92  | 103 |
| 43,378 | 11 | 6 | 48 | 72 | 4 | 5 | 29 | 31 | 92  | 114 |
| 43,379 | 11 | 6 | 48 | 83 | 4 | 6 | 29 | 34 | 92  | 129 |
| 43,380 | 11 | 6 | 48 | 85 | 4 | 5 | 30 | 34 | 93  | 130 |
| 43,381 | 11 | 6 | 46 | 88 | 4 | 5 | 30 | 40 | 91  | 139 |
| 43,382 | 13 | 7 | 56 | 89 | 4 | 5 | 31 | 44 | 104 | 145 |
| 43,383 | 13 | 6 | 55 | 89 | 4 | 5 | 31 | 45 | 103 | 145 |
| 43,384 | 14 | 6 | 59 | 90 | 4 | 5 | 33 | 50 | 110 | 151 |
| 43,385 | 14 | 7 | 59 | 93 | 4 | 5 | 35 | 53 | 112 | 158 |
| 43,386 | 14 | 7 | 61 | 94 | 4 | 5 | 35 | 53 | 114 | 159 |
| 43,387 | 14 | 7 | 61 | 93 | 4 | 5 | 35 | 53 | 114 | 158 |
| 43,388 | 14 | 7 | 64 | 90 | 4 | 5 | 36 | 53 | 118 | 155 |
| 43,389 | 14 | 7 | 64 | 91 | 4 | 5 | 36 | 53 | 118 | 156 |
| 43,390 | 14 | 7 | 64 | 92 | 4 | 5 | 36 | 53 | 118 | 157 |
| 43,391 | 14 | 7 | 64 | 90 | 4 | 5 | 36 | 52 | 118 | 154 |
| 43,392 | 14 | 7 | 64 | 89 | 4 | 5 | 36 | 49 | 118 | 150 |
| 43,393 | 14 | 7 | 64 | 86 | 4 | 5 | 36 | 49 | 118 | 147 |
| 43,394 | 14 | 7 | 64 | 80 | 4 | 5 | 36 | 45 | 118 | 137 |
| 43,395 | 14 | 7 | 64 | 74 | 4 | 4 | 36 | 42 | 118 | 127 |
| 43,396 | 14 | 7 | 64 | 74 | 4 | 4 | 36 | 42 | 118 | 127 |
| 43,397 | 13 | 7 | 63 | 71 | 4 | 4 | 36 | 38 | 116 | 120 |
| 43,398 | 13 | 7 | 63 | 67 | 4 | 4 | 36 | 38 | 116 | 116 |
| 43,399 | 13 | 7 | 64 | 62 | 4 | 4 | 37 | 36 | 118 | 109 |
| 43,400 | 13 | 7 | 64 | 62 | 4 | 4 | 38 | 36 | 119 | 109 |
| 43,401 | 13 | 7 | 62 | 62 | 1 | 4 | 38 | 36 | 114 | 109 |
| 43,402 | 12 | 7 | 61 | 62 | 1 | 4 | 39 | 37 | 113 | 110 |
| 43,403 | 15 | 7 | 66 | 56 | 1 | 4 | 41 | 35 | 123 | 102 |
| 43,404 | 16 | 6 | 64 | 56 | 1 | 4 | 42 | 35 | 123 | 101 |
| 43,405 | 16 | 6 | 67 | 57 | 1 | 4 | 42 | 35 | 126 | 102 |
| 43,406 | 10 | 6 | 60 | 59 | 2 | 4 | 31 | 35 | 103 | 104 |
| 43,407 | 10 | 6 | 89 | 59 | 2 | 4 | 39 | 35 | 140 | 104 |

|        |    |   |     |    |   |   |    |    |     |     |
|--------|----|---|-----|----|---|---|----|----|-----|-----|
| 43,408 | 10 | 6 | 80  | 60 | 2 | 5 | 35 | 36 | 127 | 107 |
| 43,409 | 13 | 6 | 98  | 61 | 3 | 5 | 43 | 36 | 157 | 108 |
| 43,410 | 14 | 6 | 102 | 61 | 3 | 5 | 48 | 36 | 167 | 108 |
| 43,411 | 14 | 6 | 103 | 61 | 3 | 5 | 50 | 36 | 170 | 108 |
| 43,412 | 14 | 4 | 107 | 55 | 6 | 5 | 51 | 35 | 178 | 99  |
| 43,413 | 14 | 4 | 111 | 53 | 6 | 5 | 51 | 35 | 182 | 97  |
| 43,414 | 14 | 4 | 111 | 53 | 6 | 5 | 51 | 35 | 182 | 97  |
| 43,415 | 14 | 4 | 111 | 51 | 6 | 5 | 51 | 35 | 182 | 95  |
| 43,416 | 15 | 4 | 112 | 56 | 6 | 5 | 51 | 37 | 184 | 102 |
| 43,417 | 15 | 4 | 112 | 55 | 6 | 4 | 51 | 38 | 184 | 101 |
| 43,418 | 15 | 4 | 112 | 54 | 5 | 4 | 52 | 38 | 184 | 100 |
| 43,419 | 15 | 4 | 110 | 54 | 5 | 4 | 49 | 39 | 179 | 101 |
| 43,420 | 15 | 4 | 110 | 55 | 5 | 4 | 49 | 39 | 179 | 102 |
| 43,421 | 15 | 7 | 117 | 60 | 5 | 4 | 53 | 43 | 190 | 114 |
| 43,422 | 15 | 7 | 117 | 61 | 5 | 4 | 53 | 43 | 190 | 115 |
| 43,423 | 15 | 7 | 117 | 64 | 5 | 4 | 53 | 43 | 190 | 118 |
| 43,424 | 15 | 7 | 116 | 64 | 5 | 4 | 53 | 43 | 189 | 118 |
| 43,425 | 15 | 7 | 113 | 64 | 5 | 4 | 52 | 43 | 185 | 118 |
| 43,426 | 15 | 7 | 113 | 61 | 5 | 4 | 52 | 42 | 185 | 114 |
| 43,427 | 15 | 5 | 115 | 57 | 5 | 4 | 54 | 35 | 189 | 101 |
| 43,428 | 15 | 5 | 115 | 58 | 5 | 4 | 54 | 35 | 189 | 102 |
| 43,429 | 15 | 5 | 115 | 51 | 5 | 2 | 54 | 33 | 189 | 91  |
| 43,430 | 18 | 6 | 129 | 40 | 5 | 1 | 60 | 31 | 212 | 78  |
| 43,431 | 18 | 6 | 133 | 39 | 5 | 1 | 65 | 31 | 221 | 77  |
| 43,432 | 18 | 6 | 148 | 35 | 5 | 1 | 90 | 26 | 261 | 68  |
| 43,433 | 16 | 6 | 138 | 35 | 5 | 1 | 92 | 23 | 251 | 65  |
| 43,434 | 15 | 6 | 132 | 37 | 5 | 1 | 91 | 22 | 243 | 66  |
| 43,435 | 15 | 6 | 134 | 36 | 5 | 1 | 95 | 17 | 249 | 60  |
| 43,436 | 15 | 6 | 134 | 38 | 5 | 2 | 95 | 15 | 249 | 61  |
| 43,437 | 15 | 6 | 131 | 38 | 5 | 2 | 96 | 16 | 247 | 62  |
| 43,438 | 15 | 6 | 132 | 38 | 5 | 2 | 96 | 16 | 248 | 62  |
| 43,439 | 15 | 6 | 132 | 38 | 5 | 2 | 95 | 16 | 247 | 62  |
| 43,440 | 15 | 6 | 132 | 38 | 5 | 2 | 96 | 17 | 248 | 63  |
| 43,441 | 15 | 6 | 132 | 37 | 5 | 2 | 96 | 17 | 248 | 62  |
| 43,442 | 15 | 8 | 132 | 40 | 5 | 2 | 98 | 17 | 250 | 67  |
| 43,443 | 15 | 8 | 132 | 40 | 5 | 2 | 98 | 17 | 250 | 67  |
| 43,444 | 15 | 8 | 133 | 40 | 5 | 2 | 98 | 17 | 251 | 67  |
| 43,445 | 15 | 8 | 133 | 40 | 5 | 2 | 98 | 17 | 251 | 67  |
| 43,446 | 15 | 8 | 133 | 40 | 5 | 2 | 98 | 17 | 251 | 67  |
| 43,447 | 15 | 8 | 133 | 41 | 5 | 2 | 98 | 17 | 251 | 68  |
| 43,448 | 15 | 8 | 133 | 41 | 5 | 2 | 98 | 17 | 251 | 68  |

|        |    |   |     |    |   |   |     |    |     |     |
|--------|----|---|-----|----|---|---|-----|----|-----|-----|
| 43,449 | 15 | 8 | 134 | 41 | 5 | 2 | 98  | 17 | 252 | 68  |
| 43,450 | 15 | 8 | 132 | 41 | 5 | 2 | 98  | 17 | 250 | 68  |
| 43,451 | 15 | 8 | 132 | 41 | 5 | 2 | 97  | 17 | 249 | 68  |
| 43,452 | 15 | 8 | 131 | 41 | 5 | 2 | 96  | 17 | 247 | 68  |
| 43,453 | 15 | 8 | 131 | 41 | 5 | 3 | 95  | 18 | 246 | 70  |
| 43,454 | 11 | 8 | 122 | 43 | 5 | 3 | 90  | 20 | 228 | 74  |
| 43,455 | 11 | 8 | 122 | 48 | 5 | 3 | 90  | 20 | 228 | 79  |
| 43,456 | 11 | 8 | 122 | 51 | 5 | 3 | 90  | 20 | 228 | 82  |
| 43,457 | 10 | 8 | 119 | 50 | 4 | 4 | 88  | 21 | 221 | 83  |
| 43,458 | 9  | 8 | 90  | 50 | 4 | 3 | 79  | 20 | 182 | 81  |
| 43,459 | 10 | 8 | 84  | 60 | 4 | 3 | 74  | 22 | 172 | 93  |
| 43,460 | 7  | 8 | 72  | 62 | 3 | 3 | 71  | 22 | 153 | 95  |
| 43,461 | 6  | 8 | 69  | 62 | 3 | 3 | 66  | 22 | 144 | 95  |
| 43,462 | 6  | 8 | 80  | 62 | 5 | 3 | 69  | 21 | 160 | 94  |
| 43,463 | 6  | 8 | 83  | 62 | 3 | 3 | 72  | 21 | 164 | 94  |
| 43,464 | 6  | 8 | 79  | 64 | 3 | 3 | 73  | 24 | 161 | 99  |
| 43,465 | 6  | 8 | 83  | 64 | 3 | 3 | 79  | 25 | 171 | 100 |
| 43,466 | 6  | 8 | 83  | 64 | 3 | 3 | 80  | 25 | 172 | 100 |
| 43,467 | 5  | 8 | 84  | 59 | 3 | 3 | 85  | 23 | 177 | 93  |
| 43,468 | 5  | 8 | 84  | 59 | 4 | 3 | 85  | 22 | 178 | 92  |
| 43,469 | 7  | 9 | 92  | 58 | 4 | 3 | 94  | 22 | 197 | 92  |
| 43,470 | 7  | 9 | 89  | 59 | 4 | 3 | 94  | 22 | 194 | 93  |
| 43,471 | 7  | 9 | 100 | 59 | 4 | 3 | 100 | 22 | 211 | 93  |
| 43,472 | 7  | 6 | 100 | 52 | 4 | 3 | 101 | 18 | 212 | 79  |
| 43,473 | 7  | 6 | 100 | 48 | 4 | 3 | 102 | 18 | 213 | 75  |
| 43,474 | 7  | 7 | 101 | 48 | 4 | 3 | 102 | 18 | 214 | 76  |
| 43,475 | 8  | 7 | 104 | 48 | 4 | 3 | 102 | 18 | 218 | 76  |
| 43,476 | 8  | 7 | 107 | 48 | 5 | 3 | 103 | 18 | 223 | 76  |
| 43,477 | 8  | 7 | 107 | 48 | 5 | 3 | 103 | 19 | 223 | 77  |
| 43,478 | 8  | 7 | 105 | 47 | 5 | 3 | 101 | 19 | 219 | 76  |
| 43,479 | 8  | 7 | 112 | 47 | 6 | 3 | 107 | 19 | 233 | 76  |
| 43,480 | 8  | 7 | 116 | 50 | 6 | 3 | 106 | 19 | 236 | 79  |
| 43,481 | 5  | 6 | 114 | 50 | 7 | 3 | 101 | 17 | 227 | 76  |
| 43,482 | 5  | 6 | 111 | 50 | 8 | 3 | 98  | 17 | 222 | 76  |
| 43,483 | 5  | 6 | 97  | 57 | 8 | 3 | 72  | 22 | 182 | 88  |
| 43,484 | 5  | 5 | 98  | 54 | 8 | 3 | 70  | 21 | 181 | 83  |
| 43,485 | 5  | 5 | 98  | 53 | 8 | 3 | 64  | 21 | 175 | 82  |
| 43,486 | 5  | 5 | 98  | 53 | 8 | 3 | 64  | 21 | 175 | 82  |
| 43,487 | 5  | 4 | 98  | 49 | 8 | 2 | 63  | 22 | 174 | 77  |
| 43,488 | 5  | 4 | 98  | 48 | 8 | 2 | 62  | 21 | 173 | 75  |
| 43,489 | 5  | 4 | 97  | 48 | 8 | 2 | 62  | 21 | 172 | 75  |

|        |   |   |     |    |    |   |     |    |     |    |
|--------|---|---|-----|----|----|---|-----|----|-----|----|
| 43,490 | 5 | 4 | 97  | 48 | 8  | 2 | 61  | 21 | 171 | 75 |
| 43,491 | 5 | 4 | 97  | 48 | 8  | 3 | 61  | 20 | 171 | 75 |
| 43,492 | 5 | 2 | 97  | 45 | 8  | 3 | 60  | 20 | 170 | 70 |
| 43,493 | 5 | 2 | 98  | 45 | 8  | 3 | 60  | 20 | 171 | 70 |
| 43,494 | 5 | 3 | 98  | 45 | 8  | 3 | 60  | 20 | 171 | 71 |
| 43,495 | 8 | 3 | 103 | 45 | 10 | 3 | 61  | 20 | 182 | 71 |
| 43,496 | 8 | 3 | 117 | 45 | 12 | 3 | 80  | 20 | 217 | 71 |
| 43,497 | 8 | 3 | 117 | 44 | 12 | 3 | 80  | 20 | 217 | 70 |
| 43,498 | 8 | 3 | 118 | 44 | 12 | 3 | 82  | 20 | 220 | 70 |
| 43,499 | 8 | 3 | 117 | 44 | 12 | 3 | 81  | 20 | 218 | 70 |
| 43,500 | 8 | 3 | 118 | 45 | 12 | 3 | 81  | 20 | 219 | 71 |
| 43,501 | 8 | 3 | 118 | 46 | 12 | 3 | 81  | 20 | 219 | 72 |
| 43,502 | 8 | 3 | 118 | 46 | 12 | 3 | 81  | 20 | 219 | 72 |
| 43,503 | 8 | 3 | 118 | 46 | 12 | 3 | 81  | 19 | 219 | 71 |
| 43,504 | 7 | 3 | 120 | 46 | 12 | 2 | 81  | 18 | 220 | 69 |
| 43,505 | 7 | 3 | 120 | 39 | 12 | 2 | 81  | 16 | 220 | 60 |
| 43,506 | 7 | 3 | 121 | 35 | 12 | 2 | 82  | 16 | 222 | 56 |
| 43,507 | 7 | 3 | 123 | 34 | 12 | 1 | 89  | 15 | 231 | 53 |
| 43,508 | 7 | 3 | 123 | 34 | 12 | 1 | 89  | 15 | 231 | 53 |
| 43,509 | 7 | 3 | 135 | 32 | 12 | 1 | 93  | 15 | 247 | 51 |
| 43,510 | 6 | 3 | 135 | 22 | 12 | 1 | 94  | 13 | 247 | 39 |
| 43,511 | 7 | 3 | 133 | 20 | 13 | 1 | 99  | 14 | 252 | 38 |
| 43,512 | 7 | 3 | 132 | 21 | 13 | 1 | 100 | 14 | 252 | 39 |
| 43,513 | 8 | 3 | 124 | 21 | 12 | 1 | 99  | 14 | 243 | 39 |
| 43,514 | 8 | 3 | 117 | 21 | 11 | 1 | 96  | 11 | 232 | 36 |
| 43,515 | 8 | 3 | 118 | 23 | 11 | 1 | 98  | 11 | 235 | 38 |
| 43,516 | 8 | 3 | 115 | 25 | 11 | 1 | 91  | 16 | 225 | 45 |
| 43,517 | 8 | 3 | 114 | 25 | 11 | 1 | 91  | 17 | 224 | 46 |
| 43,518 | 8 | 2 | 113 | 25 | 11 | 1 | 86  | 16 | 218 | 44 |
| 43,519 | 8 | 2 | 111 | 26 | 10 | 1 | 85  | 16 | 214 | 45 |
| 43,520 | 6 | 2 | 104 | 26 | 10 | 1 | 77  | 16 | 197 | 45 |
| 43,521 | 6 | 2 | 91  | 24 | 10 | 1 | 69  | 16 | 176 | 43 |
| 43,522 | 6 | 2 | 91  | 24 | 10 | 1 | 68  | 16 | 175 | 43 |
| 43,523 | 6 | 2 | 94  | 24 | 10 | 1 | 69  | 16 | 179 | 43 |
| 43,524 | 6 | 2 | 97  | 26 | 10 | 1 | 71  | 17 | 184 | 46 |
| 43,525 | 6 | 1 | 96  | 26 | 10 | 1 | 71  | 17 | 183 | 45 |
| 43,526 | 5 | 1 | 93  | 26 | 10 | 1 | 71  | 17 | 179 | 45 |
| 43,527 | 5 | 2 | 115 | 28 | 9  | 2 | 85  | 19 | 214 | 51 |
| 43,528 | 5 | 2 | 108 | 30 | 8  | 3 | 84  | 18 | 205 | 53 |
| 43,529 | 6 | 2 | 110 | 32 | 8  | 3 | 86  | 19 | 210 | 56 |
| 43,530 | 6 | 2 | 109 | 31 | 8  | 3 | 82  | 20 | 205 | 56 |

|        |    |    |     |    |   |   |     |    |     |     |
|--------|----|----|-----|----|---|---|-----|----|-----|-----|
| 43,531 | 6  | 2  | 105 | 29 | 8 | 3 | 82  | 21 | 201 | 55  |
| 43,532 | 7  | 2  | 100 | 29 | 8 | 3 | 83  | 21 | 198 | 55  |
| 43,533 | 8  | 2  | 102 | 23 | 8 | 3 | 84  | 16 | 202 | 44  |
| 43,534 | 9  | 2  | 111 | 22 | 8 | 3 | 87  | 16 | 215 | 43  |
| 43,535 | 9  | 2  | 111 | 22 | 8 | 3 | 88  | 16 | 216 | 43  |
| 43,536 | 9  | 2  | 109 | 22 | 8 | 3 | 88  | 16 | 214 | 43  |
| 43,537 | 9  | 2  | 113 | 21 | 8 | 3 | 90  | 15 | 220 | 41  |
| 43,538 | 9  | 2  | 113 | 21 | 8 | 3 | 90  | 15 | 220 | 41  |
| 43,539 | 9  | 2  | 114 | 21 | 8 | 3 | 90  | 15 | 221 | 41  |
| 43,540 | 9  | 2  | 114 | 21 | 8 | 3 | 91  | 15 | 222 | 41  |
| 43,541 | 9  | 2  | 114 | 21 | 8 | 3 | 91  | 15 | 222 | 41  |
| 43,542 | 9  | 2  | 119 | 21 | 8 | 2 | 91  | 17 | 227 | 42  |
| 43,543 | 9  | 2  | 119 | 27 | 8 | 2 | 91  | 21 | 227 | 52  |
| 43,544 | 9  | 2  | 120 | 28 | 8 | 2 | 92  | 21 | 229 | 53  |
| 43,545 | 9  | 5  | 119 | 42 | 8 | 6 | 92  | 33 | 228 | 86  |
| 43,546 | 6  | 9  | 114 | 50 | 6 | 7 | 91  | 39 | 217 | 105 |
| 43,547 | 6  | 9  | 103 | 53 | 4 | 8 | 72  | 39 | 185 | 109 |
| 43,548 | 6  | 10 | 103 | 63 | 4 | 9 | 72  | 39 | 185 | 121 |
| 43,549 | 6  | 11 | 102 | 67 | 4 | 9 | 70  | 39 | 182 | 126 |
| 43,550 | 6  | 13 | 105 | 74 | 4 | 9 | 73  | 42 | 188 | 138 |
| 43,551 | 6  | 13 | 105 | 74 | 4 | 9 | 73  | 43 | 188 | 139 |
| 43,552 | 7  | 13 | 127 | 78 | 4 | 9 | 80  | 43 | 218 | 143 |
| 43,553 | 7  | 13 | 135 | 80 | 4 | 9 | 81  | 43 | 227 | 145 |
| 43,554 | 7  | 13 | 142 | 81 | 4 | 9 | 85  | 44 | 238 | 147 |
| 43,555 | 10 | 13 | 157 | 81 | 4 | 9 | 105 | 44 | 276 | 147 |
| 43,556 | 10 | 13 | 156 | 81 | 4 | 9 | 104 | 44 | 274 | 147 |
| 43,557 | 10 | 14 | 156 | 81 | 4 | 9 | 103 | 44 | 273 | 148 |
| 43,558 | 11 | 15 | 152 | 81 | 4 | 9 | 98  | 44 | 265 | 149 |
| 43,559 | 11 | 15 | 140 | 84 | 4 | 9 | 95  | 44 | 250 | 152 |
| 43,560 | 11 | 15 | 140 | 85 | 4 | 9 | 94  | 47 | 249 | 156 |
| 43,561 | 10 | 15 | 140 | 85 | 4 | 9 | 92  | 47 | 246 | 156 |
| 43,562 | 11 | 15 | 140 | 84 | 3 | 9 | 89  | 46 | 243 | 154 |
| 43,563 | 11 | 15 | 140 | 84 | 3 | 9 | 88  | 47 | 242 | 155 |
| 43,564 | 10 | 15 | 136 | 84 | 2 | 9 | 82  | 47 | 230 | 155 |
| 43,565 | 10 | 15 | 136 | 83 | 2 | 9 | 81  | 46 | 229 | 153 |
| 43,566 | 10 | 15 | 135 | 81 | 2 | 9 | 78  | 47 | 225 | 152 |
| 43,567 | 10 | 15 | 134 | 79 | 2 | 9 | 78  | 41 | 224 | 144 |
| 43,568 | 10 | 15 | 134 | 79 | 2 | 9 | 78  | 41 | 224 | 144 |
| 43,569 | 10 | 16 | 135 | 78 | 2 | 9 | 78  | 42 | 225 | 145 |
| 43,570 | 10 | 16 | 135 | 78 | 2 | 9 | 78  | 42 | 225 | 145 |
| 43,571 | 12 | 16 | 135 | 78 | 2 | 9 | 78  | 42 | 227 | 145 |

|        |    |    |     |    |   |   |    |    |     |     |
|--------|----|----|-----|----|---|---|----|----|-----|-----|
| 43,572 | 12 | 16 | 133 | 79 | 2 | 9 | 77 | 42 | 224 | 146 |
| 43,573 | 12 | 16 | 133 | 79 | 2 | 9 | 77 | 42 | 224 | 146 |
| 43,574 | 12 | 16 | 133 | 79 | 2 | 9 | 77 | 42 | 224 | 146 |
| 43,575 | 12 | 16 | 132 | 77 | 2 | 9 | 74 | 41 | 220 | 143 |
| 43,576 | 12 | 16 | 120 | 78 | 2 | 9 | 69 | 41 | 203 | 144 |
| 43,577 | 12 | 15 | 117 | 76 | 2 | 8 | 62 | 39 | 193 | 138 |
| 43,578 | 12 | 15 | 118 | 72 | 2 | 7 | 62 | 38 | 194 | 132 |
| 43,579 | 14 | 15 | 120 | 72 | 2 | 7 | 62 | 38 | 198 | 132 |
| 43,580 | 13 | 15 | 118 | 72 | 2 | 7 | 62 | 39 | 195 | 133 |
| 43,581 | 15 | 15 | 124 | 72 | 2 | 7 | 65 | 39 | 206 | 133 |
| 43,582 | 16 | 15 | 135 | 74 | 2 | 7 | 70 | 40 | 223 | 136 |
| 43,583 | 15 | 15 | 133 | 75 | 1 | 7 | 69 | 40 | 218 | 137 |
| 43,584 | 15 | 15 | 135 | 74 | 0 | 7 | 70 | 40 | 220 | 136 |
| 43,585 | 14 | 15 | 125 | 74 | 0 | 7 | 66 | 40 | 205 | 136 |
| 43,586 | 14 | 15 | 132 | 77 | 0 | 7 | 70 | 41 | 216 | 140 |
| 43,587 | 14 | 15 | 128 | 78 | 0 | 7 | 69 | 42 | 211 | 142 |
| 43,588 | 14 | 15 | 128 | 78 | 0 | 7 | 68 | 41 | 210 | 141 |
| 43,589 | 14 | 15 | 128 | 80 | 0 | 8 | 68 | 55 | 210 | 158 |
| 43,590 | 14 | 15 | 127 | 81 | 0 | 8 | 67 | 56 | 208 | 160 |
| 43,591 | 14 | 15 | 127 | 83 | 0 | 8 | 67 | 58 | 208 | 164 |
| 43,592 | 14 | 17 | 122 | 82 | 0 | 8 | 67 | 56 | 203 | 163 |
| 43,593 | 14 | 17 | 122 | 82 | 0 | 8 | 67 | 57 | 203 | 164 |
| 43,594 | 14 | 17 | 122 | 76 | 0 | 8 | 69 | 53 | 205 | 154 |
| 43,595 | 15 | 13 | 120 | 61 | 0 | 4 | 68 | 41 | 203 | 119 |
| 43,596 | 15 | 9  | 120 | 53 | 0 | 3 | 68 | 35 | 203 | 100 |
| 43,597 | 15 | 9  | 120 | 53 | 0 | 3 | 68 | 35 | 203 | 100 |
| 43,598 | 15 | 8  | 117 | 40 | 0 | 1 | 68 | 36 | 200 | 85  |
| 43,599 | 15 | 8  | 117 | 40 | 0 | 1 | 68 | 36 | 200 | 85  |
| 43,600 | 15 | 7  | 117 | 36 | 0 | 1 | 67 | 36 | 199 | 80  |
| 43,601 | 15 | 5  | 114 | 28 | 0 | 1 | 65 | 33 | 194 | 67  |
| 43,602 | 14 | 5  | 92  | 23 | 0 | 1 | 58 | 32 | 164 | 61  |
| 43,603 | 14 | 5  | 90  | 21 | 0 | 1 | 59 | 32 | 163 | 59  |
| 43,604 | 14 | 5  | 83  | 21 | 0 | 1 | 55 | 33 | 152 | 60  |
| 43,605 | 11 | 5  | 68  | 20 | 0 | 1 | 36 | 32 | 115 | 58  |
| 43,606 | 11 | 5  | 68  | 20 | 1 | 1 | 36 | 32 | 116 | 58  |
| 43,607 | 11 | 4  | 67  | 20 | 1 | 1 | 38 | 33 | 117 | 58  |
| 43,608 | 11 | 4  | 66  | 20 | 1 | 1 | 37 | 33 | 115 | 58  |
| 43,609 | 10 | 3  | 66  | 20 | 1 | 1 | 36 | 38 | 113 | 62  |
| 43,610 | 10 | 3  | 66  | 18 | 1 | 1 | 35 | 38 | 112 | 60  |
| 43,611 | 9  | 3  | 65  | 17 | 1 | 1 | 35 | 36 | 110 | 57  |
| 43,612 | 10 | 3  | 66  | 17 | 1 | 1 | 36 | 36 | 113 | 57  |



|        |    |    |    |    |   |   |    |    |     |     |
|--------|----|----|----|----|---|---|----|----|-----|-----|
| 43,613 | 10 | 3  | 66 | 17 | 1 | 1 | 36 | 36 | 113 | 57  |
| 43,614 | 11 | 3  | 73 | 18 | 1 | 1 | 37 | 38 | 122 | 60  |
| 43,615 | 11 | 3  | 73 | 18 | 1 | 2 | 37 | 38 | 122 | 61  |
| 43,616 | 11 | 3  | 79 | 18 | 1 | 2 | 47 | 40 | 138 | 63  |
| 43,617 | 11 | 3  | 82 | 21 | 2 | 2 | 56 | 40 | 151 | 66  |
| 43,618 | 11 | 3  | 82 | 21 | 2 | 2 | 56 | 40 | 151 | 66  |
| 43,619 | 11 | 3  | 83 | 22 | 2 | 2 | 57 | 41 | 153 | 68  |
| 43,620 | 11 | 2  | 88 | 22 | 3 | 2 | 70 | 40 | 172 | 66  |
| 43,621 | 11 | 2  | 88 | 24 | 3 | 2 | 72 | 41 | 174 | 69  |
| 43,622 | 9  | 2  | 87 | 24 | 3 | 2 | 71 | 41 | 170 | 69  |
| 43,623 | 9  | 2  | 87 | 23 | 3 | 2 | 71 | 41 | 170 | 68  |
| 43,624 | 10 | 2  | 88 | 24 | 3 | 2 | 71 | 41 | 172 | 69  |
| 43,625 | 10 | 2  | 86 | 24 | 3 | 2 | 70 | 41 | 169 | 69  |
| 43,626 | 11 | 2  | 89 | 24 | 3 | 2 | 72 | 41 | 175 | 69  |
| 43,627 | 11 | 2  | 84 | 23 | 3 | 2 | 70 | 41 | 168 | 68  |
| 43,628 | 11 | 2  | 81 | 23 | 3 | 2 | 69 | 41 | 164 | 68  |
| 43,629 | 11 | 2  | 80 | 28 | 3 | 2 | 69 | 43 | 163 | 75  |
| 43,630 | 9  | 2  | 78 | 29 | 3 | 3 | 66 | 42 | 156 | 76  |
| 43,631 | 9  | 3  | 79 | 46 | 3 | 4 | 68 | 56 | 159 | 109 |
| 43,632 | 7  | 5  | 73 | 51 | 3 | 5 | 65 | 64 | 148 | 125 |
| 43,633 | 6  | 5  | 62 | 54 | 3 | 5 | 62 | 68 | 133 | 132 |
| 43,634 | 6  | 5  | 63 | 54 | 3 | 5 | 62 | 68 | 134 | 132 |
| 43,635 | 6  | 5  | 59 | 57 | 3 | 5 | 58 | 68 | 126 | 135 |
| 43,636 | 6  | 5  | 55 | 59 | 3 | 5 | 55 | 68 | 119 | 137 |
| 43,637 | 6  | 5  | 51 | 56 | 3 | 5 | 51 | 67 | 111 | 133 |
| 43,638 | 6  | 5  | 68 | 56 | 3 | 5 | 57 | 66 | 134 | 132 |
| 43,639 | 6  | 5  | 68 | 56 | 3 | 5 | 57 | 66 | 134 | 132 |
| 43,640 | 6  | 5  | 68 | 54 | 3 | 4 | 57 | 53 | 134 | 116 |
| 43,641 | 6  | 5  | 68 | 53 | 3 | 4 | 57 | 52 | 134 | 114 |
| 43,642 | 6  | 5  | 68 | 56 | 3 | 6 | 57 | 51 | 134 | 118 |
| 43,643 | 6  | 3  | 68 | 56 | 3 | 7 | 58 | 51 | 135 | 117 |
| 43,644 | 6  | 3  | 68 | 57 | 3 | 7 | 58 | 51 | 135 | 118 |
| 43,645 | 6  | 3  | 68 | 57 | 3 | 7 | 56 | 55 | 133 | 122 |
| 43,646 | 5  | 3  | 68 | 57 | 3 | 7 | 56 | 55 | 132 | 122 |
| 43,647 | 5  | 4  | 68 | 61 | 3 | 7 | 56 | 62 | 132 | 134 |
| 43,648 | 5  | 4  | 68 | 61 | 3 | 7 | 56 | 62 | 132 | 134 |
| 43,649 | 5  | 4  | 68 | 61 | 3 | 7 | 56 | 61 | 132 | 133 |
| 43,650 | 5  | 4  | 68 | 63 | 3 | 8 | 56 | 63 | 132 | 138 |
| 43,651 | 5  | 4  | 68 | 67 | 3 | 8 | 56 | 65 | 132 | 144 |
| 43,652 | 6  | 11 | 67 | 88 | 3 | 8 | 56 | 75 | 132 | 182 |
| 43,653 | 6  | 11 | 67 | 97 | 3 | 8 | 56 | 80 | 132 | 196 |

|        |   |    |    |     |   |   |    |    |     |     |
|--------|---|----|----|-----|---|---|----|----|-----|-----|
| 43,654 | 6 | 11 | 62 | 98  | 3 | 8 | 54 | 81 | 125 | 198 |
| 43,655 | 6 | 11 | 62 | 98  | 3 | 8 | 53 | 80 | 124 | 197 |
| 43,656 | 6 | 11 | 60 | 98  | 3 | 8 | 53 | 79 | 122 | 196 |
| 43,657 | 6 | 13 | 60 | 99  | 2 | 8 | 53 | 79 | 121 | 199 |
| 43,658 | 6 | 13 | 60 | 99  | 2 | 8 | 51 | 79 | 119 | 199 |
| 43,659 | 6 | 13 | 60 | 99  | 2 | 8 | 51 | 79 | 119 | 199 |
| 43,660 | 6 | 13 | 60 | 99  | 2 | 8 | 51 | 74 | 119 | 194 |
| 43,661 | 6 | 13 | 60 | 98  | 2 | 8 | 51 | 73 | 119 | 192 |
| 43,662 | 6 | 13 | 60 | 99  | 2 | 8 | 51 | 73 | 119 | 193 |
| 43,663 | 5 | 13 | 60 | 99  | 2 | 8 | 51 | 73 | 118 | 193 |
| 43,664 | 5 | 13 | 59 | 100 | 2 | 7 | 51 | 70 | 117 | 190 |
| 43,665 | 4 | 14 | 54 | 105 | 2 | 7 | 51 | 71 | 111 | 197 |
| 43,666 | 4 | 15 | 50 | 107 | 2 | 8 | 41 | 71 | 97  | 201 |
| 43,667 | 4 | 15 | 51 | 106 | 2 | 8 | 40 | 70 | 97  | 199 |
| 43,668 | 4 | 15 | 61 | 103 | 2 | 8 | 36 | 69 | 103 | 195 |
| 43,669 | 4 | 15 | 60 | 103 | 2 | 8 | 35 | 69 | 101 | 195 |
| 43,670 | 4 | 15 | 56 | 102 | 1 | 8 | 21 | 68 | 82  | 193 |
| 43,671 | 4 | 15 | 56 | 102 | 1 | 8 | 19 | 68 | 80  | 193 |
| 43,672 | 4 | 15 | 67 | 100 | 1 | 8 | 20 | 68 | 92  | 191 |
| 43,673 | 4 | 15 | 67 | 100 | 1 | 8 | 20 | 68 | 92  | 191 |
| 43,674 | 3 | 15 | 66 | 100 | 1 | 8 | 21 | 68 | 91  | 191 |
| 43,675 | 3 | 15 | 66 | 99  | 1 | 8 | 21 | 69 | 91  | 191 |
| 43,676 | 3 | 15 | 65 | 99  | 1 | 8 | 21 | 69 | 90  | 191 |
| 43,677 | 2 | 15 | 60 | 99  | 1 | 9 | 19 | 69 | 82  | 192 |
| 43,678 | 3 | 15 | 58 | 100 | 1 | 9 | 19 | 71 | 81  | 195 |
| 43,679 | 3 | 15 | 57 | 100 | 1 | 9 | 19 | 71 | 80  | 195 |
| 43,680 | 3 | 15 | 59 | 94  | 1 | 8 | 24 | 68 | 87  | 185 |
| 43,681 | 3 | 17 | 59 | 94  | 1 | 8 | 24 | 68 | 87  | 187 |
| 43,682 | 3 | 15 | 58 | 77  | 1 | 7 | 23 | 54 | 85  | 153 |
| 43,683 | 3 | 14 | 65 | 72  | 2 | 6 | 25 | 46 | 95  | 138 |
| 43,684 | 3 | 14 | 68 | 62  | 2 | 6 | 25 | 40 | 98  | 122 |
| 43,685 | 3 | 14 | 68 | 62  | 2 | 6 | 29 | 40 | 102 | 122 |
| 43,686 | 2 | 14 | 69 | 62  | 2 | 6 | 33 | 40 | 106 | 122 |
| 43,687 | 3 | 14 | 54 | 60  | 2 | 6 | 30 | 40 | 89  | 120 |
| 43,688 | 4 | 14 | 58 | 59  | 2 | 6 | 33 | 39 | 97  | 118 |
| 43,689 | 4 | 14 | 58 | 59  | 2 | 6 | 35 | 39 | 99  | 118 |
| 43,690 | 4 | 14 | 58 | 59  | 2 | 6 | 35 | 39 | 99  | 118 |
| 43,691 | 4 | 14 | 64 | 60  | 3 | 6 | 38 | 39 | 109 | 119 |
| 43,692 | 4 | 14 | 66 | 56  | 3 | 4 | 44 | 38 | 117 | 112 |
| 43,693 | 4 | 15 | 66 | 56  | 3 | 4 | 44 | 38 | 117 | 113 |
| 43,694 | 4 | 15 | 70 | 55  | 3 | 3 | 43 | 37 | 120 | 110 |

|        |    |    |     |    |   |   |    |    |     |     |
|--------|----|----|-----|----|---|---|----|----|-----|-----|
| 43,695 | 4  | 15 | 70  | 55 | 3 | 3 | 44 | 37 | 121 | 110 |
| 43,696 | 4  | 15 | 70  | 55 | 3 | 3 | 45 | 33 | 122 | 106 |
| 43,697 | 4  | 14 | 72  | 51 | 3 | 3 | 45 | 26 | 124 | 94  |
| 43,698 | 5  | 14 | 81  | 51 | 4 | 3 | 47 | 26 | 137 | 94  |
| 43,699 | 5  | 14 | 81  | 51 | 4 | 3 | 47 | 26 | 137 | 94  |
| 43,700 | 8  | 14 | 99  | 51 | 7 | 3 | 62 | 26 | 176 | 94  |
| 43,701 | 9  | 14 | 100 | 49 | 7 | 2 | 65 | 24 | 181 | 89  |
| 43,702 | 9  | 7  | 103 | 24 | 7 | 2 | 71 | 12 | 190 | 45  |
| 43,703 | 8  | 7  | 103 | 24 | 7 | 2 | 71 | 12 | 189 | 45  |
| 43,704 | 8  | 8  | 103 | 15 | 7 | 2 | 71 | 7  | 189 | 32  |
| 43,705 | 8  | 8  | 102 | 14 | 7 | 2 | 71 | 6  | 188 | 30  |
| 43,706 | 8  | 8  | 102 | 14 | 7 | 2 | 71 | 6  | 188 | 30  |
| 43,707 | 8  | 6  | 102 | 13 | 7 | 2 | 71 | 6  | 188 | 27  |
| 43,708 | 8  | 6  | 102 | 13 | 7 | 2 | 71 | 9  | 188 | 30  |
| 43,709 | 8  | 6  | 102 | 13 | 7 | 2 | 71 | 9  | 188 | 30  |
| 43,710 | 8  | 6  | 102 | 13 | 7 | 2 | 71 | 9  | 188 | 30  |
| 43,711 | 8  | 6  | 102 | 13 | 7 | 2 | 71 | 9  | 188 | 30  |
| 43,712 | 8  | 6  | 102 | 12 | 7 | 2 | 71 | 9  | 188 | 29  |
| 43,713 | 8  | 6  | 102 | 12 | 7 | 2 | 71 | 9  | 188 | 29  |
| 43,714 | 9  | 6  | 101 | 13 | 7 | 4 | 70 | 9  | 187 | 32  |
| 43,715 | 9  | 6  | 101 | 11 | 7 | 4 | 70 | 9  | 187 | 30  |
| 43,716 | 9  | 4  | 100 | 4  | 7 | 3 | 69 | 8  | 185 | 19  |
| 43,717 | 9  | 4  | 98  | 4  | 7 | 3 | 69 | 7  | 183 | 18  |
| 43,718 | 9  | 4  | 97  | 4  | 7 | 5 | 69 | 7  | 182 | 20  |
| 43,719 | 9  | 4  | 84  | 5  | 6 | 5 | 65 | 8  | 164 | 22  |
| 43,720 | 9  | 4  | 83  | 5  | 6 | 5 | 65 | 8  | 163 | 22  |
| 43,721 | 9  | 4  | 82  | 7  | 6 | 5 | 65 | 8  | 162 | 24  |
| 43,722 | 9  | 4  | 80  | 7  | 6 | 5 | 64 | 8  | 159 | 24  |
| 43,723 | 9  | 4  | 71  | 7  | 6 | 5 | 64 | 8  | 150 | 24  |
| 43,724 | 9  | 4  | 75  | 7  | 6 | 5 | 65 | 8  | 155 | 24  |
| 43,725 | 9  | 4  | 75  | 7  | 6 | 5 | 65 | 8  | 155 | 24  |
| 43,726 | 9  | 4  | 75  | 7  | 6 | 5 | 66 | 7  | 156 | 23  |
| 43,727 | 9  | 4  | 76  | 8  | 6 | 4 | 67 | 7  | 158 | 23  |
| 43,728 | 9  | 4  | 79  | 7  | 6 | 4 | 67 | 5  | 161 | 20  |
| 43,729 | 8  | 4  | 79  | 7  | 6 | 4 | 67 | 5  | 160 | 20  |
| 43,730 | 10 | 4  | 83  | 8  | 6 | 4 | 76 | 5  | 175 | 21  |
| 43,731 | 10 | 4  | 84  | 8  | 6 | 4 | 75 | 5  | 175 | 21  |
| 43,732 | 11 | 2  | 83  | 8  | 6 | 4 | 76 | 5  | 176 | 19  |
| 43,733 | 11 | 2  | 82  | 8  | 6 | 4 | 76 | 5  | 175 | 19  |
| 43,734 | 11 | 2  | 79  | 9  | 5 | 4 | 78 | 5  | 173 | 20  |
| 43,735 | 11 | 3  | 83  | 10 | 5 | 4 | 82 | 5  | 181 | 22  |

|        |    |   |     |    |    |   |     |   |     |    |
|--------|----|---|-----|----|----|---|-----|---|-----|----|
| 43,736 | 12 | 3 | 81  | 11 | 5  | 4 | 79  | 5 | 177 | 23 |
| 43,737 | 12 | 3 | 78  | 11 | 5  | 4 | 74  | 5 | 169 | 23 |
| 43,738 | 11 | 3 | 79  | 11 | 5  | 4 | 71  | 5 | 166 | 23 |
| 43,739 | 10 | 3 | 74  | 11 | 5  | 4 | 68  | 6 | 157 | 24 |
| 43,740 | 10 | 3 | 73  | 11 | 5  | 4 | 66  | 6 | 154 | 24 |
| 43,741 | 10 | 2 | 71  | 9  | 4  | 4 | 63  | 6 | 148 | 21 |
| 43,742 | 10 | 2 | 69  | 9  | 4  | 4 | 63  | 6 | 146 | 21 |
| 43,743 | 10 | 2 | 67  | 9  | 4  | 4 | 57  | 6 | 138 | 21 |
| 43,744 | 10 | 2 | 67  | 9  | 4  | 4 | 57  | 6 | 138 | 21 |
| 43,745 | 10 | 2 | 63  | 9  | 4  | 4 | 57  | 6 | 134 | 21 |
| 43,746 | 10 | 2 | 63  | 9  | 4  | 4 | 56  | 7 | 133 | 22 |
| 43,747 | 10 | 2 | 63  | 9  | 4  | 4 | 55  | 7 | 132 | 22 |
| 43,748 | 10 | 2 | 61  | 9  | 4  | 4 | 55  | 7 | 130 | 22 |
| 43,749 | 9  | 2 | 52  | 9  | 3  | 4 | 53  | 7 | 117 | 22 |
| 43,750 | 6  | 2 | 34  | 9  | 0  | 4 | 38  | 7 | 78  | 22 |
| 43,751 | 5  | 2 | 33  | 9  | 0  | 4 | 35  | 7 | 73  | 22 |
| 43,752 | 5  | 2 | 30  | 9  | 0  | 4 | 29  | 7 | 64  | 22 |
| 43,753 | 5  | 2 | 30  | 9  | 0  | 4 | 29  | 7 | 64  | 22 |
| 43,754 | 5  | 1 | 31  | 10 | 0  | 4 | 31  | 7 | 67  | 22 |
| 43,755 | 5  | 1 | 35  | 10 | 0  | 4 | 33  | 7 | 73  | 22 |
| 43,756 | 5  | 1 | 36  | 10 | 0  | 4 | 35  | 8 | 76  | 23 |
| 43,757 | 5  | 1 | 36  | 10 | 0  | 4 | 35  | 9 | 76  | 24 |
| 43,758 | 5  | 1 | 36  | 10 | 0  | 4 | 35  | 9 | 76  | 24 |
| 43,759 | 6  | 1 | 39  | 10 | 1  | 4 | 47  | 6 | 93  | 21 |
| 43,760 | 6  | 1 | 46  | 10 | 3  | 4 | 62  | 6 | 117 | 21 |
| 43,761 | 6  | 1 | 46  | 10 | 3  | 4 | 63  | 6 | 118 | 21 |
| 43,762 | 6  | 1 | 47  | 10 | 3  | 4 | 64  | 6 | 120 | 21 |
| 43,763 | 6  | 1 | 47  | 10 | 3  | 4 | 64  | 6 | 120 | 21 |
| 43,764 | 5  | 1 | 47  | 10 | 3  | 4 | 64  | 6 | 119 | 21 |
| 43,765 | 5  | 1 | 47  | 9  | 3  | 2 | 64  | 6 | 119 | 18 |
| 43,766 | 5  | 1 | 48  | 9  | 3  | 2 | 64  | 6 | 120 | 18 |
| 43,767 | 5  | 1 | 48  | 9  | 3  | 2 | 64  | 6 | 120 | 18 |
| 43,768 | 5  | 1 | 49  | 9  | 3  | 0 | 65  | 6 | 122 | 16 |
| 43,769 | 5  | 1 | 49  | 9  | 3  | 0 | 65  | 6 | 122 | 16 |
| 43,770 | 6  | 1 | 67  | 8  | 7  | 0 | 103 | 4 | 183 | 13 |
| 43,771 | 6  | 1 | 67  | 8  | 7  | 0 | 106 | 4 | 186 | 13 |
| 43,772 | 10 | 1 | 79  | 6  | 9  | 0 | 111 | 4 | 209 | 11 |
| 43,773 | 10 | 1 | 85  | 6  | 11 | 0 | 116 | 4 | 222 | 11 |
| 43,774 | 10 | 1 | 85  | 6  | 11 | 0 | 116 | 5 | 222 | 12 |
| 43,775 | 10 | 1 | 100 | 6  | 11 | 0 | 123 | 5 | 244 | 12 |
| 43,776 | 10 | 1 | 101 | 7  | 11 | 0 | 122 | 5 | 244 | 13 |

|        |    |   |     |    |    |   |     |    |     |    |
|--------|----|---|-----|----|----|---|-----|----|-----|----|
| 43,777 | 10 | 1 | 101 | 8  | 11 | 0 | 122 | 5  | 244 | 14 |
| 43,778 | 10 | 1 | 100 | 7  | 11 | 0 | 121 | 6  | 242 | 14 |
| 43,779 | 10 | 1 | 97  | 6  | 11 | 0 | 121 | 6  | 239 | 13 |
| 43,780 | 10 | 1 | 96  | 7  | 11 | 0 | 120 | 6  | 237 | 14 |
| 43,781 | 8  | 1 | 90  | 10 | 11 | 0 | 109 | 7  | 218 | 18 |
| 43,782 | 8  | 1 | 89  | 40 | 11 | 1 | 108 | 29 | 216 | 71 |
| 43,783 | 7  | 1 | 89  | 41 | 11 | 1 | 107 | 29 | 214 | 72 |
| 43,784 | 7  | 1 | 87  | 45 | 11 | 1 | 105 | 30 | 210 | 77 |
| 43,785 | 7  | 1 | 87  | 44 | 11 | 1 | 103 | 30 | 208 | 76 |
| 43,786 | 7  | 1 | 80  | 43 | 11 | 1 | 97  | 30 | 195 | 75 |
| 43,787 | 6  | 1 | 78  | 43 | 11 | 1 | 96  | 30 | 191 | 75 |
| 43,788 | 6  | 1 | 78  | 44 | 11 | 1 | 96  | 30 | 191 | 76 |
| 43,789 | 6  | 1 | 77  | 44 | 11 | 1 | 96  | 30 | 190 | 76 |
| 43,790 | 6  | 1 | 76  | 45 | 11 | 1 | 96  | 29 | 189 | 76 |
| 43,791 | 6  | 1 | 76  | 45 | 11 | 1 | 96  | 29 | 189 | 76 |
| 43,792 | 6  | 1 | 75  | 45 | 11 | 1 | 97  | 29 | 189 | 76 |
| 43,793 | 6  | 1 | 77  | 45 | 11 | 1 | 97  | 30 | 191 | 77 |
| 43,794 | 6  | 1 | 78  | 45 | 11 | 1 | 101 | 30 | 196 | 77 |
| 43,795 | 6  | 1 | 82  | 45 | 11 | 1 | 101 | 30 | 200 | 77 |
| 43,796 | 6  | 1 | 82  | 45 | 11 | 1 | 101 | 29 | 200 | 76 |
| 43,797 | 6  | 1 | 82  | 45 | 11 | 1 | 101 | 29 | 200 | 76 |
| 43,798 | 6  | 2 | 82  | 45 | 11 | 1 | 101 | 29 | 200 | 77 |
| 43,799 | 6  | 2 | 82  | 45 | 11 | 1 | 103 | 29 | 202 | 77 |
| 43,800 | 6  | 2 | 82  | 48 | 11 | 1 | 103 | 29 | 202 | 80 |
| 43,801 | 6  | 2 | 90  | 48 | 11 | 1 | 106 | 29 | 213 | 80 |
| 43,802 | 6  | 2 | 90  | 48 | 11 | 1 | 106 | 29 | 213 | 80 |
| 43,803 | 7  | 2 | 90  | 48 | 12 | 1 | 107 | 29 | 216 | 80 |
| 43,804 | 7  | 2 | 90  | 47 | 12 | 1 | 107 | 29 | 216 | 79 |
| 43,805 | 7  | 2 | 89  | 47 | 12 | 1 | 105 | 29 | 213 | 79 |
| 43,806 | 7  | 2 | 85  | 48 | 12 | 1 | 103 | 29 | 207 | 80 |
| 43,807 | 7  | 2 | 85  | 48 | 12 | 1 | 102 | 27 | 206 | 78 |
| 43,808 | 7  | 2 | 84  | 49 | 12 | 1 | 100 | 27 | 203 | 79 |
| 43,809 | 6  | 2 | 82  | 50 | 11 | 1 | 91  | 27 | 190 | 80 |
| 43,810 | 6  | 2 | 75  | 50 | 9  | 1 | 81  | 27 | 171 | 80 |
| 43,811 | 6  | 2 | 75  | 50 | 9  | 1 | 76  | 27 | 166 | 80 |
| 43,812 | 6  | 2 | 76  | 50 | 9  | 1 | 75  | 27 | 166 | 80 |
| 43,813 | 6  | 2 | 75  | 50 | 9  | 1 | 74  | 27 | 164 | 80 |
| 43,814 | 6  | 2 | 75  | 50 | 9  | 1 | 74  | 28 | 164 | 81 |
| 43,815 | 8  | 2 | 86  | 50 | 9  | 1 | 78  | 28 | 181 | 81 |
| 43,816 | 8  | 2 | 87  | 50 | 9  | 1 | 78  | 28 | 182 | 81 |
| 43,817 | 9  | 2 | 90  | 50 | 9  | 1 | 78  | 28 | 186 | 81 |

|        |    |   |     |    |   |   |    |    |     |    |
|--------|----|---|-----|----|---|---|----|----|-----|----|
| 43,818 | 10 | 2 | 97  | 51 | 9 | 1 | 79 | 28 | 195 | 82 |
| 43,819 | 10 | 2 | 100 | 52 | 9 | 1 | 78 | 28 | 197 | 83 |
| 43,820 | 9  | 2 | 82  | 58 | 5 | 1 | 40 | 29 | 136 | 90 |
| 43,821 | 9  | 2 | 90  | 60 | 7 | 1 | 41 | 29 | 147 | 92 |
| 43,822 | 9  | 2 | 87  | 63 | 7 | 1 | 37 | 29 | 140 | 95 |
| 43,823 | 6  | 2 | 80  | 63 | 5 | 1 | 37 | 29 | 128 | 95 |
| 43,824 | 6  | 2 | 74  | 63 | 3 | 1 | 32 | 29 | 115 | 95 |
| 43,825 | 6  | 2 | 59  | 63 | 3 | 1 | 26 | 28 | 94  | 94 |
| 43,826 | 6  | 2 | 59  | 63 | 3 | 1 | 24 | 28 | 92  | 94 |
| 43,827 | 6  | 2 | 58  | 62 | 3 | 1 | 24 | 28 | 91  | 93 |
| 43,828 | 6  | 3 | 58  | 63 | 3 | 1 | 24 | 28 | 91  | 95 |
| 43,829 | 7  | 3 | 72  | 63 | 3 | 1 | 31 | 28 | 113 | 95 |
| 43,830 | 7  | 3 | 75  | 62 | 3 | 1 | 33 | 28 | 118 | 94 |
| 43,831 | 8  | 3 | 75  | 59 | 3 | 1 | 33 | 27 | 119 | 90 |
| 43,832 | 10 | 3 | 79  | 60 | 3 | 1 | 36 | 27 | 128 | 91 |
| 43,833 | 10 | 4 | 84  | 29 | 3 | 0 | 37 | 5  | 134 | 38 |
| 43,834 | 10 | 4 | 84  | 29 | 3 | 0 | 37 | 5  | 134 | 38 |
| 43,835 | 13 | 4 | 84  | 26 | 3 | 0 | 38 | 4  | 138 | 34 |
| 43,836 | 13 | 4 | 85  | 26 | 3 | 0 | 38 | 4  | 139 | 34 |
| 43,837 | 13 | 3 | 85  | 25 | 3 | 0 | 38 | 4  | 139 | 32 |
| 43,838 | 13 | 3 | 85  | 25 | 3 | 0 | 38 | 4  | 139 | 32 |
| 43,839 | 13 | 3 | 85  | 26 | 3 | 0 | 38 | 4  | 139 | 33 |
| 43,840 | 13 | 3 | 85  | 27 | 3 | 0 | 38 | 4  | 139 | 34 |
| 43,841 | 13 | 3 | 86  | 27 | 3 | 0 | 38 | 5  | 140 | 35 |
| 43,842 | 13 | 3 | 86  | 29 | 3 | 0 | 38 | 5  | 140 | 37 |
| 43,843 | 13 | 3 | 86  | 29 | 3 | 0 | 37 | 5  | 139 | 37 |
| 43,844 | 13 | 3 | 84  | 29 | 3 | 0 | 37 | 4  | 137 | 36 |
| 43,845 | 13 | 3 | 83  | 30 | 3 | 0 | 33 | 5  | 132 | 38 |
| 43,846 | 13 | 3 | 79  | 30 | 3 | 0 | 33 | 5  | 128 | 38 |
| 43,847 | 13 | 4 | 79  | 30 | 3 | 0 | 33 | 7  | 128 | 41 |
| 43,848 | 13 | 4 | 80  | 31 | 3 | 0 | 33 | 7  | 129 | 42 |
| 43,849 | 14 | 3 | 94  | 31 | 4 | 0 | 33 | 7  | 145 | 41 |
| 43,850 | 14 | 3 | 94  | 31 | 4 | 0 | 32 | 7  | 144 | 41 |
| 43,851 | 14 | 3 | 88  | 28 | 4 | 0 | 30 | 7  | 136 | 38 |
| 43,852 | 14 | 3 | 86  | 28 | 4 | 0 | 32 | 8  | 136 | 39 |
| 43,853 | 14 | 4 | 86  | 30 | 4 | 0 | 32 | 8  | 136 | 42 |
| 43,854 | 14 | 4 | 87  | 40 | 3 | 0 | 31 | 9  | 135 | 53 |
| 43,855 | 14 | 4 | 87  | 41 | 4 | 0 | 31 | 13 | 136 | 58 |
| 43,856 | 14 | 4 | 87  | 43 | 4 | 0 | 32 | 13 | 137 | 60 |
| 43,857 | 14 | 4 | 87  | 43 | 4 | 0 | 32 | 17 | 137 | 64 |
| 43,858 | 14 | 4 | 86  | 43 | 4 | 0 | 31 | 17 | 135 | 64 |

|        |    |   |     |    |   |   |    |    |     |    |
|--------|----|---|-----|----|---|---|----|----|-----|----|
| 43,859 | 14 | 4 | 86  | 42 | 4 | 0 | 30 | 17 | 134 | 63 |
| 43,860 | 14 | 4 | 86  | 41 | 4 | 0 | 30 | 17 | 134 | 62 |
| 43,861 | 15 | 4 | 88  | 43 | 4 | 0 | 30 | 19 | 137 | 66 |
| 43,862 | 15 | 4 | 88  | 44 | 4 | 0 | 30 | 19 | 137 | 67 |
| 43,863 | 15 | 4 | 105 | 45 | 4 | 0 | 37 | 19 | 161 | 68 |
| 43,864 | 15 | 4 | 106 | 46 | 4 | 0 | 39 | 19 | 164 | 69 |
| 43,865 | 13 | 4 | 101 | 46 | 4 | 0 | 38 | 18 | 156 | 68 |
| 43,866 | 13 | 4 | 95  | 46 | 4 | 0 | 35 | 18 | 147 | 68 |
| 43,867 | 13 | 4 | 94  | 46 | 4 | 0 | 35 | 18 | 146 | 68 |
| 43,868 | 12 | 4 | 90  | 45 | 4 | 0 | 35 | 18 | 141 | 67 |
| 43,869 | 11 | 4 | 83  | 45 | 4 | 0 | 34 | 18 | 132 | 67 |
| 43,870 | 11 | 4 | 79  | 38 | 4 | 0 | 35 | 18 | 129 | 60 |
| 43,871 | 12 | 4 | 79  | 39 | 4 | 0 | 35 | 18 | 130 | 61 |
| 43,872 | 15 | 4 | 71  | 34 | 2 | 0 | 31 | 18 | 119 | 56 |
| 43,873 | 15 | 4 | 70  | 34 | 2 | 0 | 31 | 18 | 118 | 56 |
| 43,874 | 14 | 4 | 70  | 34 | 2 | 0 | 30 | 18 | 116 | 56 |
| 43,875 | 14 | 4 | 69  | 34 | 2 | 0 | 30 | 18 | 115 | 56 |
| 43,876 | 14 | 4 | 66  | 34 | 2 | 0 | 29 | 18 | 111 | 56 |
| 43,877 | 14 | 4 | 67  | 33 | 2 | 0 | 30 | 18 | 113 | 55 |
| 43,878 | 14 | 3 | 69  | 32 | 2 | 0 | 32 | 18 | 117 | 53 |
| 43,879 | 14 | 3 | 65  | 32 | 2 | 0 | 29 | 18 | 110 | 53 |
| 43,880 | 13 | 3 | 59  | 32 | 2 | 0 | 26 | 17 | 100 | 52 |
| 43,881 | 13 | 3 | 56  | 32 | 2 | 0 | 24 | 17 | 95  | 52 |
| 43,882 | 12 | 3 | 56  | 32 | 2 | 0 | 24 | 17 | 94  | 52 |
| 43,883 | 10 | 2 | 52  | 31 | 2 | 0 | 21 | 17 | 85  | 50 |
| 43,884 | 10 | 2 | 47  | 31 | 2 | 0 | 20 | 17 | 79  | 50 |
| 43,885 | 7  | 2 | 47  | 30 | 2 | 0 | 19 | 17 | 75  | 49 |
| 43,886 | 7  | 3 | 47  | 30 | 2 | 0 | 19 | 17 | 75  | 50 |
| 43,887 | 7  | 3 | 47  | 30 | 2 | 0 | 19 | 17 | 75  | 50 |
| 43,888 | 7  | 3 | 50  | 30 | 2 | 0 | 19 | 17 | 78  | 50 |
| 43,889 | 7  | 3 | 50  | 30 | 2 | 0 | 19 | 17 | 78  | 50 |
| 43,890 | 7  | 3 | 50  | 28 | 2 | 0 | 19 | 17 | 78  | 48 |
| 43,891 | 8  | 3 | 56  | 26 | 2 | 0 | 22 | 16 | 88  | 45 |
| 43,892 | 8  | 3 | 56  | 26 | 2 | 0 | 22 | 16 | 88  | 45 |
| 43,893 | 9  | 3 | 56  | 24 | 2 | 0 | 22 | 16 | 89  | 43 |
| 43,894 | 10 | 3 | 57  | 25 | 3 | 0 | 22 | 17 | 92  | 45 |
| 43,895 | 10 | 3 | 59  | 29 | 3 | 0 | 23 | 17 | 95  | 49 |
| 43,896 | 10 | 3 | 59  | 30 | 3 | 0 | 24 | 17 | 96  | 50 |
| 43,897 | 9  | 3 | 59  | 31 | 2 | 0 | 24 | 17 | 94  | 51 |
| 43,898 | 9  | 2 | 57  | 33 | 2 | 0 | 24 | 15 | 92  | 50 |
| 43,899 | 9  | 3 | 49  | 32 | 2 | 0 | 23 | 15 | 83  | 50 |

|        |    |   |    |    |   |   |    |    |    |    |
|--------|----|---|----|----|---|---|----|----|----|----|
| 43,900 | 9  | 3 | 46 | 32 | 2 | 0 | 23 | 15 | 80 | 50 |
| 43,901 | 10 | 3 | 51 | 32 | 2 | 0 | 23 | 15 | 86 | 50 |
| 43,902 | 10 | 3 | 51 | 34 | 2 | 0 | 23 | 15 | 86 | 52 |
| 43,903 | 10 | 3 | 51 | 34 | 2 | 0 | 23 | 14 | 86 | 51 |
| 43,904 | 9  | 2 | 54 | 22 | 4 | 0 | 23 | 13 | 90 | 37 |
| 43,905 | 9  | 2 | 55 | 22 | 5 | 0 | 23 | 13 | 92 | 37 |
| 43,906 | 9  | 2 | 55 | 19 | 4 | 0 | 23 | 10 | 91 | 31 |
| 43,907 | 9  | 2 | 55 | 18 | 4 | 0 | 22 | 6  | 90 | 26 |
| 43,908 | 9  | 2 | 56 | 19 | 4 | 0 | 22 | 10 | 91 | 31 |
| 43,909 | 9  | 2 | 55 | 21 | 4 | 0 | 22 | 11 | 90 | 34 |
| 43,910 | 8  | 2 | 54 | 25 | 4 | 0 | 22 | 12 | 88 | 39 |
| 43,911 | 8  | 2 | 51 | 30 | 4 | 0 | 22 | 14 | 85 | 46 |
| 43,912 | 8  | 2 | 46 | 28 | 4 | 0 | 22 | 13 | 80 | 43 |
| 43,913 | 8  | 2 | 41 | 27 | 4 | 0 | 17 | 13 | 70 | 42 |
| 43,914 | 8  | 2 | 36 | 26 | 4 | 0 | 15 | 13 | 63 | 41 |
| 43,915 | 8  | 2 | 35 | 26 | 4 | 0 | 13 | 13 | 60 | 41 |
| 43,916 | 8  | 2 | 35 | 25 | 4 | 0 | 13 | 13 | 60 | 40 |
| 43,917 | 8  | 2 | 35 | 25 | 4 | 0 | 13 | 13 | 60 | 40 |
| 43,918 | 8  | 2 | 35 | 25 | 4 | 0 | 13 | 14 | 60 | 41 |
| 43,919 | 8  | 2 | 35 | 25 | 4 | 0 | 13 | 14 | 60 | 41 |
| 43,920 | 8  | 2 | 36 | 25 | 4 | 0 | 12 | 13 | 60 | 40 |
| 43,921 | 8  | 2 | 36 | 24 | 4 | 0 | 12 | 14 | 60 | 40 |
| 43,922 | 7  | 2 | 36 | 24 | 4 | 0 | 12 | 14 | 59 | 40 |
| 43,923 | 4  | 2 | 36 | 24 | 4 | 1 | 12 | 14 | 56 | 41 |
| 43,924 | 4  | 2 | 36 | 28 | 4 | 1 | 12 | 16 | 56 | 47 |
| 43,925 | 4  | 2 | 35 | 31 | 4 | 1 | 12 | 16 | 55 | 50 |
| 43,926 | 4  | 2 | 35 | 31 | 4 | 1 | 12 | 19 | 55 | 53 |
| 43,927 | 4  | 4 | 35 | 33 | 4 | 2 | 12 | 19 | 55 | 58 |
| 43,928 | 4  | 4 | 34 | 36 | 4 | 2 | 11 | 19 | 53 | 61 |
| 43,929 | 4  | 4 | 32 | 36 | 4 | 2 | 9  | 19 | 49 | 61 |
| 43,930 | 4  | 4 | 31 | 37 | 4 | 3 | 9  | 21 | 48 | 65 |
| 43,931 | 4  | 4 | 28 | 37 | 4 | 3 | 8  | 21 | 44 | 65 |
| 43,932 | 4  | 4 | 29 | 37 | 4 | 3 | 8  | 21 | 45 | 65 |
| 43,933 | 4  | 4 | 29 | 41 | 4 | 3 | 8  | 21 | 45 | 69 |
| 43,934 | 4  | 4 | 29 | 41 | 4 | 3 | 8  | 21 | 45 | 69 |
| 43,935 | 4  | 4 | 29 | 44 | 4 | 3 | 8  | 22 | 45 | 73 |
| 43,936 | 4  | 4 | 29 | 44 | 4 | 3 | 8  | 22 | 45 | 73 |
| 43,937 | 4  | 3 | 30 | 44 | 4 | 3 | 8  | 22 | 46 | 72 |
| 43,938 | 4  | 3 | 27 | 44 | 4 | 3 | 8  | 22 | 43 | 72 |
| 43,939 | 4  | 3 | 29 | 44 | 4 | 3 | 8  | 25 | 45 | 75 |
| 43,940 | 4  | 3 | 29 | 47 | 4 | 4 | 8  | 26 | 45 | 80 |



|        |   |   |    |    |    |   |    |    |     |    |
|--------|---|---|----|----|----|---|----|----|-----|----|
| 43,941 | 3 | 4 | 28 | 48 | 4  | 4 | 6  | 26 | 41  | 82 |
| 43,942 | 3 | 4 | 23 | 48 | 4  | 4 | 5  | 26 | 35  | 82 |
| 43,943 | 2 | 4 | 23 | 48 | 4  | 4 | 6  | 26 | 35  | 82 |
| 43,944 | 1 | 4 | 22 | 47 | 3  | 4 | 6  | 25 | 32  | 80 |
| 43,945 | 1 | 4 | 20 | 44 | 3  | 4 | 5  | 25 | 29  | 77 |
| 43,946 | 1 | 4 | 20 | 44 | 3  | 4 | 5  | 27 | 29  | 79 |
| 43,947 | 1 | 4 | 20 | 42 | 3  | 4 | 4  | 26 | 28  | 76 |
| 43,948 | 1 | 4 | 18 | 42 | 3  | 4 | 4  | 26 | 26  | 76 |
| 43,949 | 1 | 5 | 18 | 40 | 3  | 4 | 4  | 26 | 26  | 75 |
| 43,950 | 1 | 4 | 18 | 41 | 3  | 4 | 4  | 26 | 26  | 75 |
| 43,951 | 0 | 4 | 14 | 41 | 3  | 4 | 2  | 26 | 19  | 75 |
| 43,952 | 3 | 4 | 21 | 42 | 5  | 4 | 16 | 27 | 45  | 77 |
| 43,953 | 4 | 4 | 25 | 41 | 4  | 4 | 16 | 28 | 49  | 77 |
| 43,954 | 4 | 4 | 24 | 41 | 3  | 4 | 17 | 29 | 48  | 78 |
| 43,955 | 4 | 4 | 24 | 41 | 3  | 4 | 19 | 29 | 50  | 78 |
| 43,956 | 4 | 4 | 23 | 41 | 2  | 4 | 19 | 28 | 48  | 77 |
| 43,957 | 4 | 4 | 25 | 41 | 2  | 4 | 19 | 28 | 50  | 77 |
| 43,958 | 4 | 4 | 26 | 40 | 2  | 4 | 19 | 24 | 51  | 72 |
| 43,959 | 4 | 4 | 25 | 38 | 2  | 4 | 19 | 23 | 50  | 69 |
| 43,960 | 4 | 4 | 25 | 38 | 2  | 4 | 19 | 22 | 50  | 68 |
| 43,961 | 4 | 4 | 25 | 29 | 2  | 4 | 19 | 19 | 50  | 56 |
| 43,962 | 4 | 4 | 26 | 29 | 2  | 4 | 19 | 19 | 51  | 56 |
| 43,963 | 4 | 4 | 26 | 29 | 2  | 4 | 19 | 19 | 51  | 56 |
| 43,964 | 4 | 4 | 26 | 29 | 2  | 4 | 19 | 19 | 51  | 56 |
| 43,965 | 4 | 4 | 26 | 29 | 3  | 4 | 19 | 19 | 52  | 56 |
| 43,966 | 4 | 4 | 27 | 29 | 3  | 4 | 20 | 19 | 54  | 56 |
| 43,967 | 4 | 4 | 32 | 31 | 4  | 4 | 21 | 19 | 61  | 58 |
| 43,968 | 4 | 4 | 33 | 31 | 4  | 4 | 21 | 18 | 62  | 57 |
| 43,969 | 4 | 4 | 33 | 32 | 4  | 4 | 21 | 18 | 62  | 58 |
| 43,970 | 4 | 4 | 34 | 32 | 8  | 4 | 27 | 18 | 73  | 58 |
| 43,971 | 4 | 4 | 33 | 33 | 8  | 4 | 27 | 28 | 72  | 69 |
| 43,972 | 4 | 4 | 33 | 33 | 8  | 4 | 27 | 27 | 72  | 68 |
| 43,973 | 6 | 5 | 33 | 35 | 8  | 4 | 27 | 37 | 74  | 81 |
| 43,974 | 6 | 5 | 33 | 36 | 8  | 3 | 27 | 38 | 74  | 82 |
| 43,975 | 6 | 5 | 33 | 33 | 8  | 3 | 27 | 36 | 74  | 77 |
| 43,976 | 7 | 6 | 33 | 31 | 9  | 3 | 27 | 36 | 76  | 76 |
| 43,977 | 7 | 6 | 33 | 31 | 9  | 3 | 27 | 33 | 76  | 73 |
| 43,978 | 7 | 4 | 34 | 27 | 9  | 2 | 27 | 33 | 77  | 66 |
| 43,979 | 7 | 4 | 34 | 27 | 9  | 2 | 27 | 33 | 77  | 66 |
| 43,980 | 9 | 4 | 64 | 28 | 10 | 2 | 40 | 33 | 123 | 67 |
| 43,981 | 9 | 4 | 64 | 27 | 10 | 2 | 40 | 34 | 123 | 67 |

|        |    |    |     |    |    |   |     |    |     |     |
|--------|----|----|-----|----|----|---|-----|----|-----|-----|
| 43,982 | 12 | 5  | 123 | 36 | 14 | 2 | 77  | 38 | 226 | 81  |
| 43,983 | 12 | 6  | 123 | 43 | 14 | 3 | 77  | 44 | 226 | 96  |
| 43,984 | 12 | 6  | 123 | 42 | 14 | 3 | 77  | 45 | 226 | 96  |
| 43,985 | 13 | 6  | 130 | 48 | 14 | 5 | 82  | 52 | 239 | 111 |
| 43,986 | 13 | 6  | 131 | 46 | 15 | 5 | 85  | 52 | 244 | 109 |
| 43,987 | 13 | 6  | 132 | 47 | 15 | 5 | 85  | 53 | 245 | 111 |
| 43,988 | 13 | 6  | 130 | 48 | 15 | 5 | 85  | 53 | 243 | 112 |
| 43,989 | 13 | 6  | 130 | 49 | 15 | 5 | 85  | 53 | 243 | 113 |
| 43,990 | 15 | 9  | 139 | 52 | 16 | 5 | 91  | 50 | 261 | 116 |
| 43,991 | 15 | 9  | 139 | 52 | 16 | 4 | 93  | 49 | 263 | 114 |
| 43,992 | 15 | 8  | 139 | 51 | 16 | 4 | 93  | 49 | 263 | 112 |
| 43,993 | 17 | 8  | 165 | 51 | 17 | 4 | 108 | 49 | 307 | 112 |
| 43,994 | 19 | 8  | 176 | 51 | 18 | 4 | 111 | 49 | 324 | 112 |
| 43,995 | 21 | 8  | 182 | 51 | 18 | 4 | 114 | 49 | 335 | 112 |
| 43,996 | 22 | 8  | 193 | 50 | 18 | 4 | 116 | 47 | 349 | 109 |
| 43,997 | 22 | 8  | 193 | 50 | 18 | 4 | 116 | 47 | 349 | 109 |
| 43,998 | 22 | 8  | 197 | 50 | 18 | 4 | 122 | 47 | 359 | 109 |
| 43,999 | 24 | 8  | 207 | 50 | 18 | 4 | 128 | 47 | 377 | 109 |
| 44,000 | 25 | 7  | 207 | 50 | 18 | 4 | 129 | 47 | 379 | 108 |
| 44,001 | 24 | 7  | 206 | 49 | 18 | 4 | 130 | 47 | 378 | 107 |
| 44,002 | 24 | 7  | 204 | 49 | 18 | 4 | 126 | 47 | 372 | 107 |
| 44,003 | 22 | 7  | 199 | 48 | 16 | 4 | 115 | 46 | 352 | 105 |
| 44,004 | 21 | 7  | 196 | 48 | 16 | 4 | 118 | 45 | 351 | 104 |
| 44,005 | 21 | 7  | 194 | 48 | 16 | 4 | 117 | 45 | 348 | 104 |
| 44,006 | 21 | 7  | 228 | 48 | 16 | 4 | 121 | 45 | 386 | 104 |
| 44,007 | 21 | 7  | 228 | 48 | 16 | 4 | 121 | 45 | 386 | 104 |
| 44,008 | 21 | 7  | 226 | 48 | 16 | 4 | 121 | 45 | 384 | 104 |
| 44,009 | 21 | 7  | 225 | 48 | 16 | 4 | 121 | 45 | 383 | 104 |
| 44,010 | 21 | 7  | 226 | 48 | 16 | 4 | 121 | 45 | 384 | 104 |
| 44,011 | 21 | 7  | 226 | 48 | 16 | 4 | 121 | 45 | 384 | 104 |
| 44,012 | 21 | 7  | 228 | 48 | 16 | 4 | 121 | 45 | 386 | 104 |
| 44,013 | 21 | 9  | 228 | 48 | 16 | 4 | 123 | 46 | 388 | 107 |
| 44,014 | 21 | 9  | 229 | 51 | 16 | 4 | 123 | 46 | 389 | 110 |
| 44,015 | 21 | 10 | 229 | 51 | 15 | 4 | 123 | 52 | 388 | 117 |
| 44,016 | 22 | 10 | 238 | 54 | 16 | 4 | 133 | 53 | 409 | 121 |
| 44,017 | 22 | 10 | 233 | 59 | 15 | 4 | 132 | 56 | 402 | 129 |
| 44,018 | 22 | 11 | 233 | 57 | 15 | 4 | 132 | 56 | 402 | 128 |
| 44,019 | 22 | 11 | 233 | 61 | 15 | 4 | 138 | 57 | 408 | 133 |
| 44,020 | 23 | 13 | 235 | 66 | 15 | 4 | 139 | 62 | 412 | 145 |
| 44,021 | 23 | 13 | 235 | 68 | 11 | 4 | 136 | 64 | 405 | 149 |
| 44,022 | 24 | 12 | 249 | 63 | 11 | 4 | 150 | 43 | 434 | 122 |

|        |    |    |     |    |    |   |     |    |     |     |
|--------|----|----|-----|----|----|---|-----|----|-----|-----|
| 44,023 | 26 | 12 | 288 | 63 | 17 | 4 | 194 | 44 | 525 | 123 |
| 44,024 | 25 | 12 | 291 | 65 | 17 | 4 | 195 | 44 | 528 | 125 |
| 44,025 | 25 | 12 | 291 | 66 | 17 | 4 | 195 | 44 | 528 | 126 |
| 44,026 | 24 | 12 | 291 | 66 | 16 | 4 | 195 | 44 | 526 | 126 |
| 44,027 | 24 | 11 | 292 | 65 | 16 | 4 | 195 | 44 | 527 | 124 |
| 44,028 | 25 | 11 | 292 | 66 | 16 | 4 | 196 | 46 | 529 | 127 |
| 44,029 | 25 | 11 | 291 | 66 | 16 | 4 | 196 | 47 | 528 | 128 |
| 44,030 | 26 | 11 | 294 | 71 | 16 | 4 | 196 | 50 | 532 | 136 |
| 44,031 | 24 | 11 | 266 | 72 | 15 | 4 | 181 | 51 | 486 | 138 |
| 44,032 | 21 | 10 | 212 | 64 | 11 | 3 | 154 | 44 | 398 | 121 |
| 44,033 | 21 | 10 | 207 | 65 | 11 | 3 | 145 | 48 | 384 | 126 |
| 44,034 | 20 | 9  | 204 | 58 | 11 | 2 | 143 | 42 | 378 | 111 |
| 44,035 | 21 | 9  | 208 | 55 | 11 | 2 | 147 | 41 | 387 | 107 |
| 44,036 | 21 | 9  | 208 | 48 | 11 | 0 | 146 | 33 | 386 | 90  |
| 44,037 | 24 | 9  | 268 | 47 | 13 | 0 | 183 | 32 | 488 | 88  |
| 44,038 | 24 | 9  | 277 | 46 | 14 | 0 | 199 | 32 | 514 | 87  |
| 44,039 | 24 | 9  | 274 | 47 | 14 | 0 | 197 | 32 | 509 | 88  |
| 44,040 | 25 | 9  | 272 | 47 | 15 | 0 | 201 | 32 | 513 | 88  |
| 44,041 | 24 | 6  | 273 | 41 | 14 | 0 | 202 | 32 | 513 | 79  |
| 44,042 | 24 | 6  | 274 | 41 | 14 | 0 | 204 | 32 | 516 | 79  |
| 44,043 | 24 | 6  | 276 | 42 | 14 | 0 | 204 | 33 | 518 | 81  |
| 44,044 | 22 | 6  | 251 | 43 | 13 | 1 | 190 | 38 | 476 | 88  |
| 44,045 | 20 | 6  | 242 | 44 | 12 | 1 | 190 | 38 | 464 | 89  |
| 44,046 | 18 | 6  | 236 | 44 | 12 | 1 | 187 | 38 | 453 | 89  |
| 44,047 | 17 | 6  | 225 | 44 | 12 | 1 | 185 | 38 | 439 | 89  |
| 44,048 | 17 | 6  | 221 | 44 | 12 | 1 | 179 | 38 | 429 | 89  |
| 44,049 | 15 | 6  | 211 | 44 | 12 | 1 | 175 | 38 | 413 | 89  |
| 44,050 | 15 | 6  | 211 | 49 | 12 | 1 | 173 | 39 | 411 | 95  |
| 44,051 | 14 | 6  | 211 | 65 | 12 | 1 | 173 | 42 | 410 | 114 |
| 44,052 | 14 | 6  | 213 | 70 | 12 | 1 | 173 | 51 | 412 | 128 |
| 44,053 | 14 | 6  | 215 | 74 | 12 | 2 | 175 | 53 | 416 | 135 |
| 44,054 | 14 | 6  | 218 | 76 | 12 | 2 | 182 | 53 | 426 | 137 |
| 44,055 | 14 | 6  | 219 | 75 | 12 | 2 | 180 | 52 | 425 | 135 |
| 44,056 | 14 | 6  | 190 | 76 | 13 | 2 | 175 | 52 | 392 | 136 |
| 44,057 | 14 | 6  | 186 | 76 | 13 | 2 | 174 | 52 | 387 | 136 |
| 44,058 | 14 | 6  | 187 | 76 | 13 | 2 | 174 | 52 | 388 | 136 |
| 44,059 | 14 | 7  | 187 | 77 | 13 | 2 | 174 | 52 | 388 | 138 |
| 44,060 | 14 | 7  | 196 | 77 | 13 | 2 | 176 | 52 | 399 | 138 |
| 44,061 | 14 | 7  | 196 | 78 | 13 | 2 | 176 | 52 | 399 | 139 |
| 44,062 | 14 | 7  | 218 | 76 | 13 | 2 | 180 | 52 | 425 | 137 |
| 44,063 | 15 | 7  | 219 | 76 | 13 | 2 | 180 | 52 | 427 | 137 |

|        |    |   |     |    |    |   |     |    |     |     |
|--------|----|---|-----|----|----|---|-----|----|-----|-----|
| 44,064 | 16 | 5 | 233 | 76 | 14 | 2 | 183 | 49 | 446 | 132 |
| 44,065 | 16 | 3 | 241 | 68 | 14 | 2 | 185 | 41 | 456 | 114 |
| 44,066 | 17 | 3 | 246 | 68 | 14 | 2 | 185 | 41 | 462 | 114 |
| 44,067 | 19 | 3 | 276 | 68 | 16 | 2 | 201 | 41 | 512 | 114 |
| 44,068 | 19 | 3 | 276 | 74 | 16 | 2 | 198 | 45 | 509 | 124 |
| 44,069 | 19 | 5 | 275 | 80 | 16 | 2 | 199 | 55 | 509 | 142 |
| 44,070 | 19 | 5 | 276 | 79 | 16 | 2 | 200 | 54 | 511 | 140 |
| 44,071 | 20 | 3 | 294 | 76 | 17 | 3 | 212 | 48 | 543 | 130 |
| 44,072 | 20 | 3 | 296 | 78 | 17 | 3 | 210 | 48 | 543 | 132 |
| 44,073 | 20 | 3 | 287 | 86 | 17 | 3 | 196 | 49 | 520 | 141 |
| 44,074 | 17 | 3 | 262 | 86 | 11 | 3 | 156 | 48 | 446 | 140 |
| 44,075 | 17 | 3 | 259 | 89 | 11 | 3 | 156 | 48 | 443 | 143 |
| 44,076 | 17 | 3 | 259 | 88 | 11 | 3 | 156 | 49 | 443 | 143 |
| 44,077 | 17 | 3 | 259 | 89 | 11 | 3 | 159 | 49 | 446 | 144 |
| 44,078 | 16 | 3 | 260 | 88 | 11 | 3 | 158 | 47 | 445 | 141 |
| 44,079 | 16 | 3 | 260 | 88 | 11 | 3 | 158 | 47 | 445 | 141 |
| 44,080 | 16 | 3 | 260 | 90 | 11 | 3 | 158 | 48 | 445 | 144 |
| 44,081 | 15 | 3 | 256 | 85 | 11 | 3 | 158 | 46 | 440 | 137 |
| 44,082 | 15 | 3 | 256 | 83 | 11 | 3 | 158 | 45 | 440 | 134 |
| 44,083 | 15 | 3 | 256 | 83 | 11 | 3 | 159 | 45 | 441 | 134 |
| 44,084 | 16 | 3 | 255 | 83 | 11 | 3 | 160 | 43 | 442 | 132 |
| 44,085 | 16 | 3 | 254 | 83 | 11 | 3 | 159 | 43 | 440 | 132 |
| 44,086 | 15 | 3 | 250 | 84 | 11 | 3 | 154 | 43 | 430 | 133 |
| 44,087 | 15 | 3 | 248 | 85 | 11 | 3 | 156 | 43 | 430 | 134 |
| 44,088 | 12 | 3 | 187 | 85 | 8  | 3 | 115 | 43 | 322 | 134 |
| 44,089 | 12 | 3 | 178 | 84 | 7  | 3 | 100 | 43 | 297 | 133 |
| 44,090 | 12 | 3 | 183 | 84 | 7  | 3 | 102 | 43 | 304 | 133 |
| 44,091 | 10 | 3 | 184 | 83 | 6  | 3 | 110 | 43 | 310 | 132 |
| 44,092 | 10 | 3 | 182 | 83 | 6  | 3 | 108 | 44 | 306 | 133 |
| 44,093 | 10 | 3 | 189 | 83 | 6  | 3 | 116 | 44 | 321 | 133 |
| 44,094 | 10 | 3 | 187 | 82 | 6  | 3 | 116 | 43 | 319 | 131 |
| 44,095 | 10 | 3 | 186 | 80 | 6  | 2 | 116 | 38 | 318 | 123 |
| 44,096 | 10 | 3 | 184 | 80 | 6  | 2 | 112 | 38 | 312 | 123 |
| 44,097 | 10 | 3 | 184 | 80 | 6  | 2 | 112 | 38 | 312 | 123 |
| 44,098 | 10 | 3 | 184 | 80 | 6  | 2 | 112 | 39 | 312 | 124 |
| 44,099 | 10 | 3 | 184 | 80 | 6  | 2 | 112 | 39 | 312 | 124 |
| 44,100 | 10 | 3 | 185 | 82 | 6  | 2 | 114 | 41 | 315 | 128 |
| 44,101 | 10 | 3 | 185 | 79 | 6  | 2 | 114 | 41 | 315 | 125 |
| 44,102 | 10 | 5 | 185 | 82 | 6  | 4 | 114 | 61 | 315 | 152 |
| 44,103 | 10 | 5 | 183 | 80 | 6  | 4 | 113 | 54 | 312 | 143 |
| 44,104 | 10 | 5 | 189 | 79 | 6  | 3 | 111 | 52 | 316 | 139 |

|        |    |   |     |    |    |   |     |    |     |     |
|--------|----|---|-----|----|----|---|-----|----|-----|-----|
| 44,105 | 10 | 5 | 189 | 79 | 6  | 5 | 106 | 58 | 311 | 147 |
| 44,106 | 10 | 5 | 187 | 81 | 6  | 5 | 105 | 61 | 308 | 152 |
| 44,107 | 10 | 5 | 186 | 84 | 5  | 5 | 105 | 65 | 306 | 159 |
| 44,108 | 10 | 5 | 185 | 84 | 5  | 5 | 105 | 65 | 305 | 159 |
| 44,109 | 10 | 5 | 187 | 85 | 5  | 5 | 107 | 65 | 309 | 160 |
| 44,110 | 10 | 4 | 187 | 85 | 5  | 5 | 107 | 66 | 309 | 160 |
| 44,111 | 10 | 4 | 177 | 85 | 5  | 5 | 105 | 68 | 297 | 162 |
| 44,112 | 10 | 4 | 161 | 84 | 5  | 5 | 101 | 68 | 277 | 161 |
| 44,113 | 10 | 4 | 161 | 84 | 5  | 5 | 103 | 69 | 279 | 162 |
| 44,114 | 11 | 4 | 164 | 84 | 6  | 5 | 110 | 69 | 291 | 162 |
| 44,115 | 10 | 4 | 149 | 83 | 5  | 5 | 105 | 69 | 269 | 161 |
| 44,116 | 10 | 4 | 142 | 83 | 5  | 5 | 103 | 69 | 260 | 161 |
| 44,117 | 9  | 4 | 139 | 83 | 5  | 5 | 107 | 69 | 260 | 161 |
| 44,118 | 9  | 4 | 118 | 77 | 6  | 5 | 90  | 65 | 223 | 151 |
| 44,119 | 11 | 4 | 129 | 77 | 7  | 5 | 97  | 66 | 244 | 152 |
| 44,120 | 11 | 2 | 129 | 68 | 7  | 5 | 94  | 60 | 241 | 135 |
| 44,121 | 11 | 2 | 128 | 69 | 7  | 5 | 94  | 60 | 240 | 136 |
| 44,122 | 9  | 2 | 108 | 65 | 6  | 4 | 81  | 59 | 204 | 130 |
| 44,123 | 9  | 2 | 105 | 63 | 6  | 4 | 80  | 59 | 200 | 128 |
| 44,124 | 8  | 2 | 100 | 55 | 6  | 4 | 80  | 58 | 194 | 119 |
| 44,125 | 8  | 2 | 87  | 51 | 6  | 4 | 76  | 59 | 177 | 116 |
| 44,126 | 8  | 2 | 87  | 51 | 6  | 4 | 73  | 59 | 174 | 116 |
| 44,127 | 8  | 2 | 86  | 52 | 6  | 4 | 74  | 59 | 174 | 117 |
| 44,128 | 8  | 2 | 86  | 51 | 6  | 4 | 74  | 59 | 174 | 116 |
| 44,129 | 8  | 2 | 85  | 51 | 6  | 4 | 74  | 59 | 173 | 116 |
| 44,130 | 8  | 2 | 85  | 48 | 6  | 4 | 74  | 56 | 173 | 110 |
| 44,131 | 8  | 2 | 86  | 49 | 7  | 4 | 85  | 56 | 186 | 111 |
| 44,132 | 8  | 2 | 85  | 49 | 7  | 4 | 84  | 56 | 184 | 111 |
| 44,133 | 8  | 2 | 86  | 48 | 7  | 4 | 84  | 56 | 185 | 110 |
| 44,134 | 8  | 2 | 86  | 48 | 7  | 4 | 84  | 56 | 185 | 110 |
| 44,135 | 9  | 2 | 94  | 47 | 7  | 4 | 88  | 54 | 198 | 107 |
| 44,136 | 9  | 2 | 94  | 47 | 7  | 4 | 88  | 54 | 198 | 107 |
| 44,137 | 9  | 2 | 94  | 47 | 7  | 4 | 88  | 56 | 198 | 109 |
| 44,138 | 9  | 2 | 94  | 46 | 7  | 4 | 86  | 56 | 196 | 108 |
| 44,139 | 10 | 2 | 109 | 50 | 8  | 4 | 99  | 57 | 226 | 113 |
| 44,140 | 11 | 2 | 108 | 53 | 8  | 4 | 98  | 57 | 225 | 116 |
| 44,141 | 11 | 2 | 105 | 53 | 8  | 4 | 99  | 57 | 223 | 116 |
| 44,142 | 11 | 2 | 100 | 53 | 8  | 4 | 83  | 57 | 202 | 116 |
| 44,143 | 11 | 2 | 94  | 53 | 8  | 4 | 81  | 56 | 194 | 115 |
| 44,144 | 11 | 2 | 100 | 53 | 10 | 4 | 79  | 56 | 200 | 115 |
| 44,145 | 11 | 2 | 99  | 53 | 10 | 4 | 79  | 56 | 199 | 115 |

|        |    |   |     |    |    |   |     |    |       |     |
|--------|----|---|-----|----|----|---|-----|----|-------|-----|
| 44,146 | 11 | 2 | 110 | 54 | 11 | 4 | 82  | 56 | 214   | 116 |
| 44,147 | 11 | 2 | 110 | 54 | 11 | 4 | 81  | 56 | 213   | 116 |
| 44,148 | 15 | 2 | 137 | 54 | 12 | 4 | 93  | 55 | 257   | 115 |
| 44,149 | 17 | 2 | 143 | 54 | 13 | 4 | 98  | 55 | 271   | 115 |
| 44,150 | 18 | 2 | 146 | 53 | 13 | 4 | 98  | 53 | 275   | 112 |
| 44,151 | 18 | 2 | 145 | 53 | 13 | 4 | 97  | 53 | 273   | 112 |
| 44,152 | 19 | 2 | 193 | 51 | 14 | 4 | 106 | 52 | 332   | 109 |
| 44,153 | 21 | 0 | 208 | 33 | 16 | 2 | 111 | 30 | 356   | 65  |
| 44,154 | 21 | 0 | 300 | 30 | 16 | 2 | 117 | 29 | 454   | 61  |
| 44,155 | 21 | 0 | 294 | 27 | 16 | 2 | 117 | 29 | 448   | 58  |
| 44,156 | 22 | 0 | 403 | 23 | 18 | 0 | 149 | 21 | 592   | 44  |
| 44,157 | 22 | 0 | 401 | 23 | 18 | 0 | 147 | 21 | 588   | 44  |
| 44,158 | 22 | 0 | 401 | 19 | 18 | 0 | 147 | 18 | 588   | 37  |
| 44,159 | 22 | 0 | 401 | 19 | 18 | 0 | 147 | 18 | 588   | 37  |
| 44,160 | 23 | 0 | 448 | 18 | 21 | 0 | 165 | 18 | 657   | 36  |
| 44,161 | 23 | 0 | 448 | 17 | 21 | 0 | 165 | 17 | 657   | 34  |
| 44,162 | 26 | 0 | 459 | 17 | 22 | 0 | 169 | 15 | 676   | 32  |
| 44,163 | 26 | 0 | 459 | 17 | 23 | 0 | 168 | 14 | 676   | 31  |
| 44,164 | 27 | 0 | 458 | 18 | 23 | 0 | 168 | 14 | 676   | 32  |
| 44,165 | 25 | 0 | 453 | 19 | 22 | 0 | 161 | 15 | 661   | 34  |
| 44,166 | 25 | 0 | 458 | 25 | 23 | 0 | 163 | 16 | 669   | 41  |
| 44,167 | 27 | 0 | 469 | 27 | 24 | 0 | 165 | 16 | 685   | 43  |
| 44,168 | 31 | 1 | 491 | 43 | 26 | 1 | 174 | 22 | 722   | 67  |
| 44,169 | 28 | 1 | 474 | 45 | 22 | 1 | 163 | 22 | 687   | 69  |
| 44,170 | 26 | 2 | 463 | 58 | 21 | 1 | 157 | 34 | 667   | 95  |
| 44,171 | 26 | 2 | 464 | 57 | 21 | 1 | 156 | 31 | 667   | 91  |
| 44,172 | 50 | 2 | 686 | 56 | 47 | 1 | 386 | 31 | 1,169 | 90  |
| 44,173 | 55 | 2 | 722 | 57 | 49 | 1 | 437 | 31 | 1,263 | 91  |
| 44,174 | 55 | 2 | 727 | 57 | 49 | 1 | 439 | 31 | 1,270 | 91  |
| 44,175 | 55 | 2 | 728 | 57 | 50 | 1 | 440 | 30 | 1,273 | 90  |
| 44,176 | 55 | 2 | 728 | 57 | 50 | 1 | 440 | 30 | 1,273 | 90  |
| 44,177 | 55 | 2 | 735 | 57 | 51 | 1 | 442 | 30 | 1,283 | 90  |
| 44,178 | 55 | 2 | 736 | 56 | 51 | 1 | 444 | 29 | 1,286 | 88  |
| 44,179 | 55 | 2 | 737 | 56 | 51 | 1 | 445 | 30 | 1,288 | 89  |
| 44,180 | 55 | 2 | 737 | 56 | 51 | 1 | 445 | 30 | 1,288 | 89  |
| 44,181 | 55 | 2 | 743 | 60 | 51 | 1 | 448 | 31 | 1,297 | 94  |
| 44,182 | 55 | 2 | 741 | 59 | 50 | 1 | 437 | 31 | 1,283 | 93  |
| 44,183 | 56 | 2 | 742 | 60 | 50 | 1 | 437 | 31 | 1,285 | 94  |
| 44,184 | 56 | 2 | 743 | 60 | 50 | 1 | 442 | 31 | 1,291 | 94  |
| 44,185 | 55 | 2 | 737 | 61 | 50 | 1 | 441 | 31 | 1,283 | 95  |
| 44,186 | 54 | 4 | 736 | 61 | 50 | 2 | 437 | 34 | 1,277 | 101 |

|        |    |   |     |    |    |   |     |    |       |     |
|--------|----|---|-----|----|----|---|-----|----|-------|-----|
| 44,187 | 54 | 4 | 734 | 64 | 49 | 2 | 437 | 34 | 1,274 | 104 |
| 44,188 | 55 | 4 | 787 | 63 | 51 | 2 | 471 | 31 | 1,364 | 100 |
| 44,189 | 55 | 4 | 785 | 63 | 51 | 2 | 472 | 31 | 1,363 | 100 |
| 44,190 | 55 | 4 | 799 | 56 | 55 | 2 | 488 | 30 | 1,397 | 92  |
| 44,191 | 56 | 4 | 855 | 56 | 57 | 2 | 506 | 30 | 1,474 | 92  |
| 44,192 | 60 | 4 | 867 | 57 | 57 | 2 | 505 | 30 | 1,489 | 93  |
| 44,193 | 60 | 4 | 877 | 58 | 57 | 2 | 520 | 29 | 1,514 | 93  |
| 44,194 | 60 | 4 | 886 | 58 | 57 | 2 | 522 | 29 | 1,525 | 93  |
| 44,195 | 60 | 4 | 884 | 58 | 55 | 2 | 517 | 29 | 1,516 | 93  |
| 44,196 | 60 | 4 | 884 | 58 | 55 | 2 | 517 | 29 | 1,516 | 93  |
| 44,197 | 60 | 4 | 875 | 57 | 54 | 2 | 515 | 29 | 1,504 | 92  |
| 44,198 | 56 | 4 | 849 | 58 | 53 | 2 | 506 | 29 | 1,464 | 93  |
| 44,199 | 56 | 4 | 849 | 59 | 53 | 2 | 503 | 29 | 1,461 | 94  |
| 44,200 | 54 | 4 | 845 | 63 | 53 | 2 | 498 | 29 | 1,450 | 98  |
| 44,201 | 53 | 4 | 842 | 65 | 53 | 3 | 498 | 35 | 1,446 | 107 |
| 44,202 | 54 | 4 | 823 | 68 | 53 | 3 | 494 | 36 | 1,424 | 111 |
| 44,203 | 54 | 4 | 802 | 69 | 52 | 3 | 489 | 36 | 1,397 | 112 |
| 44,204 | 52 | 4 | 786 | 68 | 50 | 3 | 484 | 36 | 1,372 | 111 |
| 44,205 | 52 | 5 | 703 | 70 | 50 | 3 | 478 | 37 | 1,283 | 115 |
| 44,206 | 51 | 5 | 591 | 72 | 49 | 3 | 444 | 37 | 1,135 | 117 |
| 44,207 | 51 | 6 | 562 | 72 | 46 | 3 | 433 | 36 | 1,092 | 117 |
| 44,208 | 51 | 6 | 557 | 72 | 46 | 3 | 432 | 36 | 1,086 | 117 |
| 44,209 | 50 | 6 | 552 | 72 | 46 | 3 | 429 | 35 | 1,077 | 116 |
| 44,210 | 50 | 6 | 550 | 72 | 46 | 3 | 426 | 35 | 1,072 | 116 |
| 44,211 | 50 | 6 | 547 | 72 | 46 | 3 | 426 | 35 | 1,069 | 116 |
| 44,212 | 50 | 6 | 547 | 73 | 46 | 3 | 426 | 35 | 1,069 | 117 |
| 44,213 | 47 | 6 | 538 | 73 | 45 | 3 | 422 | 35 | 1,052 | 117 |
| 44,214 | 47 | 6 | 540 | 72 | 44 | 3 | 425 | 35 | 1,056 | 116 |
| 44,215 | 46 | 6 | 540 | 72 | 44 | 3 | 425 | 35 | 1,055 | 116 |
| 44,216 | 46 | 6 | 539 | 71 | 44 | 3 | 425 | 34 | 1,054 | 114 |
| 44,217 | 46 | 6 | 537 | 66 | 43 | 3 | 424 | 33 | 1,050 | 108 |
| 44,218 | 44 | 6 | 526 | 64 | 42 | 3 | 422 | 33 | 1,034 | 106 |
| 44,219 | 40 | 4 | 502 | 33 | 40 | 2 | 409 | 13 | 991   | 52  |
| 44,220 | 40 | 5 | 504 | 33 | 40 | 2 | 413 | 14 | 997   | 54  |
| 44,221 | 34 | 5 | 406 | 34 | 27 | 2 | 306 | 14 | 773   | 55  |
| 44,222 | 20 | 5 | 283 | 34 | 16 | 1 | 192 | 14 | 511   | 54  |
| 44,223 | 18 | 5 | 271 | 32 | 16 | 2 | 170 | 14 | 475   | 53  |
| 44,224 | 15 | 5 | 251 | 32 | 14 | 2 | 142 | 14 | 422   | 53  |
| 44,225 | 15 | 5 | 247 | 32 | 14 | 2 | 142 | 14 | 418   | 53  |
| 44,226 | 15 | 5 | 245 | 32 | 13 | 2 | 141 | 14 | 414   | 53  |
| 44,227 | 15 | 5 | 239 | 32 | 12 | 2 | 139 | 14 | 405   | 53  |

|        |    |   |     |    |    |   |     |    |     |    |
|--------|----|---|-----|----|----|---|-----|----|-----|----|
| 44,228 | 16 | 5 | 242 | 32 | 12 | 2 | 138 | 14 | 408 | 53 |
| 44,229 | 20 | 5 | 253 | 32 | 14 | 2 | 146 | 13 | 433 | 52 |
| 44,230 | 20 | 5 | 252 | 32 | 14 | 2 | 145 | 13 | 431 | 52 |
| 44,231 | 20 | 5 | 253 | 32 | 14 | 2 | 142 | 13 | 429 | 52 |
| 44,232 | 20 | 5 | 248 | 28 | 14 | 2 | 142 | 12 | 424 | 47 |
| 44,233 | 24 | 5 | 272 | 28 | 14 | 2 | 144 | 12 | 454 | 47 |
| 44,234 | 26 | 5 | 321 | 27 | 18 | 2 | 156 | 12 | 521 | 46 |
| 44,235 | 33 | 5 | 426 | 26 | 24 | 2 | 169 | 12 | 652 | 45 |
| 44,236 | 33 | 3 | 435 | 23 | 24 | 1 | 171 | 9  | 663 | 36 |
| 44,237 | 33 | 3 | 437 | 23 | 24 | 1 | 175 | 9  | 669 | 36 |
| 44,238 | 32 | 3 | 399 | 23 | 22 | 1 | 143 | 9  | 596 | 36 |
| 44,239 | 32 | 3 | 403 | 23 | 23 | 1 | 142 | 9  | 600 | 36 |
| 44,240 | 32 | 3 | 407 | 25 | 23 | 1 | 141 | 9  | 603 | 38 |
| 44,241 | 31 | 3 | 384 | 25 | 19 | 1 | 115 | 9  | 549 | 38 |
| 44,242 | 32 | 3 | 330 | 27 | 17 | 1 | 97  | 9  | 476 | 40 |
| 44,243 | 28 | 3 | 317 | 26 | 17 | 1 | 94  | 9  | 456 | 39 |
| 44,244 | 28 | 3 | 305 | 25 | 17 | 1 | 79  | 9  | 429 | 38 |
| 44,245 | 28 | 3 | 296 | 25 | 17 | 1 | 78  | 9  | 419 | 38 |
| 44,246 | 28 | 3 | 291 | 25 | 17 | 1 | 77  | 9  | 413 | 38 |
| 44,247 | 29 | 3 | 296 | 25 | 17 | 1 | 80  | 9  | 422 | 38 |
| 44,248 | 29 | 3 | 294 | 25 | 17 | 1 | 80  | 10 | 420 | 39 |
| 44,249 | 34 | 3 | 318 | 24 | 19 | 1 | 93  | 10 | 464 | 38 |
| 44,250 | 34 | 3 | 317 | 23 | 18 | 1 | 93  | 10 | 462 | 37 |
| 44,251 | 35 | 3 | 317 | 16 | 18 | 1 | 94  | 4  | 464 | 24 |
| 44,252 | 35 | 3 | 319 | 21 | 18 | 1 | 95  | 4  | 467 | 29 |
| 44,253 | 33 | 3 | 320 | 20 | 18 | 0 | 95  | 4  | 466 | 27 |
| 44,254 | 33 | 4 | 316 | 19 | 18 | 0 | 95  | 4  | 462 | 27 |
| 44,255 | 33 | 4 | 319 | 19 | 18 | 0 | 95  | 4  | 465 | 27 |
| 44,256 | 33 | 3 | 311 | 17 | 18 | 0 | 95  | 4  | 457 | 24 |
| 44,257 | 33 | 2 | 313 | 15 | 17 | 0 | 95  | 4  | 458 | 21 |
| 44,258 | 33 | 2 | 311 | 15 | 17 | 0 | 95  | 4  | 456 | 21 |
| 44,259 | 34 | 2 | 315 | 15 | 17 | 0 | 103 | 4  | 469 | 21 |
| 44,260 | 34 | 2 | 325 | 16 | 17 | 0 | 109 | 4  | 485 | 22 |
| 44,261 | 34 | 2 | 325 | 16 | 17 | 0 | 109 | 4  | 485 | 22 |
| 44,262 | 34 | 2 | 325 | 17 | 17 | 0 | 109 | 5  | 485 | 24 |
| 44,263 | 34 | 2 | 325 | 16 | 17 | 0 | 110 | 5  | 486 | 23 |
| 44,264 | 34 | 2 | 323 | 16 | 17 | 0 | 109 | 5  | 483 | 23 |
| 44,265 | 34 | 2 | 317 | 16 | 17 | 0 | 105 | 5  | 473 | 23 |
| 44,266 | 34 | 2 | 317 | 16 | 17 | 0 | 105 | 5  | 473 | 23 |
| 44,267 | 34 | 2 | 315 | 16 | 17 | 0 | 105 | 5  | 471 | 23 |
| 44,268 | 34 | 2 | 314 | 15 | 17 | 0 | 104 | 5  | 469 | 22 |



|        |    |   |     |    |    |   |     |    |     |     |
|--------|----|---|-----|----|----|---|-----|----|-----|-----|
| 44,269 | 34 | 2 | 316 | 15 | 17 | 0 | 105 | 5  | 472 | 22  |
| 44,270 | 34 | 2 | 316 | 15 | 17 | 0 | 105 | 6  | 472 | 23  |
| 44,271 | 35 | 1 | 325 | 16 | 17 | 0 | 106 | 5  | 483 | 22  |
| 44,272 | 35 | 1 | 324 | 18 | 17 | 0 | 102 | 5  | 478 | 24  |
| 44,273 | 31 | 1 | 385 | 20 | 16 | 0 | 106 | 6  | 538 | 27  |
| 44,274 | 31 | 1 | 388 | 21 | 17 | 0 | 109 | 6  | 545 | 28  |
| 44,275 | 31 | 1 | 385 | 21 | 17 | 0 | 107 | 6  | 540 | 28  |
| 44,276 | 31 | 1 | 385 | 21 | 17 | 0 | 106 | 6  | 539 | 28  |
| 44,277 | 31 | 1 | 384 | 21 | 17 | 0 | 106 | 6  | 538 | 28  |
| 44,278 | 30 | 1 | 381 | 21 | 17 | 0 | 106 | 6  | 534 | 28  |
| 44,279 | 26 | 1 | 371 | 22 | 15 | 0 | 98  | 6  | 510 | 29  |
| 44,280 | 26 | 1 | 370 | 22 | 15 | 1 | 97  | 7  | 508 | 31  |
| 44,281 | 26 | 1 | 376 | 22 | 15 | 1 | 98  | 7  | 515 | 31  |
| 44,282 | 27 | 1 | 378 | 23 | 15 | 1 | 99  | 8  | 519 | 33  |
| 44,283 | 33 | 1 | 395 | 23 | 15 | 1 | 112 | 8  | 555 | 33  |
| 44,284 | 29 | 2 | 377 | 25 | 15 | 1 | 110 | 8  | 531 | 36  |
| 44,285 | 28 | 2 | 333 | 38 | 11 | 1 | 103 | 15 | 475 | 56  |
| 44,286 | 21 | 2 | 245 | 40 | 5  | 1 | 100 | 16 | 371 | 59  |
| 44,287 | 21 | 2 | 235 | 42 | 5  | 1 | 98  | 17 | 359 | 62  |
| 44,288 | 22 | 2 | 260 | 46 | 7  | 1 | 115 | 26 | 404 | 75  |
| 44,289 | 23 | 2 | 267 | 47 | 8  | 1 | 119 | 26 | 417 | 76  |
| 44,290 | 25 | 2 | 264 | 47 | 7  | 1 | 119 | 26 | 415 | 76  |
| 44,291 | 25 | 2 | 272 | 46 | 7  | 1 | 124 | 26 | 428 | 75  |
| 44,292 | 25 | 2 | 272 | 46 | 7  | 1 | 127 | 26 | 431 | 75  |
| 44,293 | 22 | 2 | 275 | 46 | 7  | 1 | 129 | 26 | 433 | 75  |
| 44,294 | 22 | 2 | 276 | 46 | 7  | 1 | 130 | 26 | 435 | 75  |
| 44,295 | 22 | 2 | 276 | 46 | 7  | 1 | 130 | 26 | 435 | 75  |
| 44,296 | 21 | 2 | 274 | 47 | 7  | 1 | 127 | 26 | 429 | 76  |
| 44,297 | 22 | 2 | 274 | 47 | 7  | 1 | 127 | 25 | 430 | 75  |
| 44,298 | 22 | 2 | 272 | 49 | 7  | 1 | 127 | 25 | 428 | 77  |
| 44,299 | 20 | 4 | 268 | 54 | 5  | 1 | 122 | 29 | 415 | 88  |
| 44,300 | 17 | 4 | 247 | 54 | 5  | 1 | 114 | 29 | 383 | 88  |
| 44,301 | 17 | 4 | 248 | 54 | 5  | 1 | 113 | 31 | 383 | 90  |
| 44,302 | 16 | 4 | 248 | 55 | 5  | 1 | 113 | 33 | 382 | 93  |
| 44,303 | 16 | 4 | 247 | 53 | 5  | 1 | 112 | 36 | 380 | 94  |
| 44,304 | 16 | 4 | 244 | 55 | 5  | 1 | 112 | 36 | 377 | 96  |
| 44,305 | 16 | 3 | 243 | 55 | 5  | 1 | 112 | 36 | 376 | 95  |
| 44,306 | 16 | 3 | 241 | 58 | 5  | 1 | 112 | 36 | 374 | 98  |
| 44,307 | 16 | 3 | 240 | 58 | 5  | 1 | 112 | 37 | 373 | 99  |
| 44,308 | 16 | 3 | 236 | 58 | 5  | 1 | 112 | 37 | 369 | 99  |
| 44,309 | 15 | 3 | 232 | 59 | 5  | 1 | 104 | 37 | 356 | 100 |

|        |    |    |     |     |   |   |     |    |     |     |
|--------|----|----|-----|-----|---|---|-----|----|-----|-----|
| 44,310 | 15 | 3  | 226 | 60  | 5 | 1 | 103 | 38 | 349 | 102 |
| 44,311 | 15 | 3  | 223 | 62  | 5 | 1 | 98  | 39 | 341 | 105 |
| 44,312 | 15 | 3  | 223 | 63  | 5 | 1 | 98  | 39 | 341 | 106 |
| 44,313 | 15 | 3  | 223 | 62  | 5 | 1 | 97  | 38 | 340 | 104 |
| 44,314 | 15 | 3  | 222 | 62  | 5 | 1 | 97  | 38 | 339 | 104 |
| 44,315 | 15 | 3  | 222 | 62  | 5 | 1 | 97  | 38 | 339 | 104 |
| 44,316 | 15 | 3  | 222 | 64  | 5 | 1 | 97  | 38 | 339 | 106 |
| 44,317 | 15 | 3  | 222 | 64  | 5 | 1 | 97  | 38 | 339 | 106 |
| 44,318 | 15 | 3  | 222 | 71  | 5 | 1 | 97  | 42 | 339 | 117 |
| 44,319 | 15 | 3  | 221 | 75  | 5 | 2 | 97  | 45 | 338 | 125 |
| 44,320 | 15 | 3  | 218 | 75  | 5 | 3 | 95  | 45 | 333 | 126 |
| 44,321 | 15 | 9  | 218 | 113 | 5 | 5 | 96  | 68 | 334 | 195 |
| 44,322 | 14 | 10 | 205 | 118 | 5 | 6 | 90  | 77 | 314 | 211 |
| 44,323 | 14 | 15 | 159 | 122 | 4 | 6 | 85  | 82 | 262 | 225 |
| 44,324 | 14 | 16 | 144 | 120 | 4 | 6 | 80  | 82 | 242 | 224 |
| 44,325 | 14 | 16 | 141 | 121 | 3 | 6 | 76  | 82 | 234 | 225 |
| 44,326 | 14 | 16 | 141 | 121 | 3 | 6 | 76  | 83 | 234 | 226 |
| 44,327 | 14 | 16 | 141 | 122 | 3 | 6 | 76  | 83 | 234 | 227 |
| 44,328 | 14 | 17 | 142 | 130 | 3 | 6 | 77  | 86 | 236 | 239 |
| 44,329 | 14 | 17 | 142 | 131 | 3 | 6 | 77  | 86 | 236 | 240 |
| 44,330 | 14 | 17 | 141 | 130 | 3 | 6 | 76  | 87 | 234 | 240 |
| 44,331 | 14 | 17 | 144 | 130 | 3 | 5 | 79  | 86 | 240 | 238 |
| 44,332 | 14 | 16 | 140 | 127 | 3 | 5 | 79  | 85 | 236 | 233 |
| 44,333 | 13 | 17 | 137 | 127 | 3 | 5 | 78  | 85 | 231 | 234 |
| 44,334 | 8  | 18 | 113 | 127 | 3 | 5 | 63  | 85 | 187 | 235 |
| 44,335 | 8  | 18 | 113 | 127 | 3 | 5 | 65  | 85 | 189 | 235 |
| 44,336 | 6  | 18 | 110 | 114 | 3 | 5 | 64  | 78 | 183 | 215 |
| 44,337 | 6  | 18 | 91  | 111 | 3 | 5 | 49  | 76 | 149 | 210 |
| 44,338 | 6  | 18 | 95  | 111 | 3 | 5 | 49  | 78 | 153 | 212 |
| 44,339 | 5  | 18 | 61  | 105 | 1 | 5 | 28  | 69 | 95  | 197 |
| 44,340 | 4  | 18 | 49  | 104 | 0 | 5 | 24  | 69 | 77  | 196 |
| 44,341 | 2  | 18 | 42  | 104 | 0 | 5 | 20  | 69 | 64  | 196 |
| 44,342 | 2  | 18 | 30  | 103 | 0 | 5 | 16  | 69 | 48  | 195 |
| 44,343 | 2  | 18 | 30  | 103 | 1 | 5 | 14  | 69 | 47  | 195 |
| 44,344 | 2  | 18 | 26  | 103 | 1 | 5 | 12  | 69 | 41  | 195 |
| 44,345 | 2  | 18 | 25  | 103 | 1 | 5 | 12  | 69 | 40  | 195 |
| 44,346 | 1  | 18 | 25  | 102 | 1 | 5 | 12  | 69 | 39  | 194 |
| 44,347 | 1  | 18 | 25  | 102 | 1 | 5 | 12  | 69 | 39  | 194 |
| 44,348 | 1  | 18 | 24  | 103 | 1 | 5 | 12  | 69 | 38  | 195 |
| 44,349 | 1  | 18 | 24  | 101 | 1 | 5 | 13  | 69 | 39  | 193 |
| 44,350 | 1  | 16 | 23  | 96  | 1 | 5 | 13  | 65 | 38  | 182 |

|        |    |    |     |    |   |   |     |    |     |     |
|--------|----|----|-----|----|---|---|-----|----|-----|-----|
| 44,351 | 1  | 16 | 23  | 96 | 1 | 5 | 14  | 65 | 39  | 182 |
| 44,352 | 1  | 16 | 24  | 95 | 1 | 5 | 14  | 63 | 40  | 179 |
| 44,353 | 1  | 16 | 26  | 94 | 1 | 5 | 14  | 61 | 42  | 176 |
| 44,354 | 1  | 16 | 25  | 91 | 1 | 5 | 14  | 58 | 41  | 170 |
| 44,355 | 1  | 16 | 24  | 87 | 1 | 5 | 14  | 57 | 40  | 165 |
| 44,356 | 1  | 16 | 22  | 87 | 1 | 5 | 14  | 57 | 38  | 165 |
| 44,357 | 1  | 16 | 22  | 84 | 1 | 5 | 14  | 57 | 38  | 162 |
| 44,358 | 2  | 16 | 23  | 84 | 1 | 5 | 15  | 55 | 41  | 160 |
| 44,359 | 2  | 16 | 23  | 83 | 1 | 5 | 16  | 55 | 42  | 159 |
| 44,360 | 2  | 16 | 23  | 83 | 1 | 5 | 16  | 55 | 42  | 159 |
| 44,361 | 2  | 16 | 22  | 82 | 1 | 5 | 16  | 54 | 41  | 157 |
| 44,362 | 2  | 16 | 22  | 80 | 1 | 5 | 16  | 53 | 41  | 154 |
| 44,363 | 2  | 17 | 22  | 79 | 2 | 5 | 19  | 53 | 45  | 154 |
| 44,364 | 2  | 17 | 23  | 80 | 2 | 5 | 21  | 54 | 48  | 156 |
| 44,365 | 2  | 17 | 23  | 82 | 2 | 5 | 21  | 58 | 48  | 162 |
| 44,366 | 2  | 17 | 23  | 82 | 2 | 5 | 21  | 58 | 48  | 162 |
| 44,367 | 2  | 17 | 23  | 84 | 2 | 5 | 24  | 60 | 51  | 166 |
| 44,368 | 2  | 17 | 28  | 76 | 2 | 5 | 31  | 53 | 63  | 151 |
| 44,369 | 2  | 17 | 29  | 77 | 2 | 5 | 31  | 53 | 64  | 152 |
| 44,370 | 2  | 17 | 29  | 77 | 2 | 5 | 31  | 53 | 64  | 152 |
| 44,371 | 2  | 17 | 29  | 77 | 2 | 5 | 31  | 53 | 64  | 152 |
| 44,372 | 2  | 5  | 29  | 27 | 2 | 2 | 30  | 15 | 63  | 49  |
| 44,373 | 2  | 5  | 29  | 27 | 2 | 2 | 30  | 16 | 63  | 50  |
| 44,374 | 2  | 5  | 29  | 26 | 2 | 2 | 30  | 16 | 63  | 49  |
| 44,375 | 3  | 4  | 41  | 25 | 4 | 2 | 51  | 15 | 99  | 46  |
| 44,376 | 3  | 4  | 41  | 25 | 4 | 2 | 51  | 15 | 99  | 46  |
| 44,377 | 4  | 4  | 57  | 27 | 4 | 2 | 65  | 14 | 130 | 47  |
| 44,378 | 4  | 4  | 61  | 26 | 4 | 2 | 67  | 14 | 136 | 46  |
| 44,379 | 4  | 3  | 60  | 18 | 4 | 2 | 65  | 11 | 133 | 34  |
| 44,380 | 4  | 3  | 60  | 17 | 4 | 2 | 66  | 10 | 134 | 32  |
| 44,381 | 4  | 3  | 54  | 17 | 4 | 2 | 65  | 10 | 127 | 32  |
| 44,382 | 4  | 3  | 57  | 17 | 4 | 2 | 63  | 10 | 128 | 32  |
| 44,383 | 4  | 2  | 57  | 17 | 4 | 2 | 62  | 10 | 127 | 31  |
| 44,384 | 4  | 2  | 57  | 18 | 4 | 2 | 62  | 10 | 127 | 32  |
| 44,385 | 3  | 1  | 57  | 22 | 4 | 2 | 61  | 12 | 125 | 37  |
| 44,386 | 3  | 1  | 61  | 23 | 4 | 2 | 66  | 13 | 134 | 39  |
| 44,387 | 3  | 2  | 68  | 29 | 4 | 2 | 67  | 13 | 142 | 46  |
| 44,388 | 3  | 3  | 68  | 29 | 4 | 2 | 67  | 14 | 142 | 48  |
| 44,389 | 3  | 3  | 64  | 29 | 4 | 2 | 67  | 16 | 138 | 50  |
| 44,390 | 10 | 3  | 142 | 34 | 6 | 3 | 106 | 17 | 264 | 57  |
| 44,391 | 10 | 3  | 142 | 34 | 6 | 3 | 103 | 17 | 261 | 57  |

|        |    |    |     |     |    |   |     |    |       |     |
|--------|----|----|-----|-----|----|---|-----|----|-------|-----|
| 44,392 | 11 | 3  | 143 | 34  | 6  | 4 | 111 | 17 | 271   | 58  |
| 44,393 | 11 | 3  | 143 | 34  | 6  | 4 | 112 | 17 | 272   | 58  |
| 44,394 | 11 | 3  | 143 | 34  | 5  | 4 | 112 | 17 | 271   | 58  |
| 44,395 | 11 | 3  | 152 | 34  | 5  | 4 | 114 | 17 | 282   | 58  |
| 44,396 | 11 | 3  | 175 | 35  | 6  | 5 | 125 | 18 | 317   | 61  |
| 44,397 | 11 | 3  | 175 | 36  | 6  | 5 | 125 | 20 | 317   | 64  |
| 44,398 | 11 | 3  | 183 | 43  | 6  | 5 | 131 | 23 | 331   | 74  |
| 44,399 | 11 | 3  | 196 | 43  | 6  | 5 | 135 | 23 | 348   | 74  |
| 44,400 | 11 | 3  | 201 | 43  | 6  | 5 | 136 | 23 | 354   | 74  |
| 44,401 | 14 | 3  | 202 | 43  | 7  | 5 | 138 | 23 | 361   | 74  |
| 44,402 | 14 | 3  | 201 | 43  | 7  | 5 | 138 | 23 | 360   | 74  |
| 44,403 | 14 | 3  | 207 | 44  | 7  | 5 | 139 | 24 | 367   | 76  |
| 44,404 | 14 | 4  | 205 | 48  | 7  | 5 | 139 | 29 | 365   | 86  |
| 44,405 | 14 | 4  | 212 | 51  | 7  | 5 | 144 | 31 | 377   | 91  |
| 44,406 | 14 | 4  | 218 | 51  | 7  | 5 | 161 | 32 | 400   | 92  |
| 44,407 | 23 | 4  | 254 | 56  | 8  | 7 | 213 | 38 | 498   | 105 |
| 44,408 | 22 | 6  | 254 | 57  | 8  | 8 | 212 | 39 | 496   | 110 |
| 44,409 | 22 | 6  | 254 | 61  | 8  | 8 | 215 | 39 | 499   | 114 |
| 44,410 | 24 | 6  | 263 | 65  | 8  | 8 | 220 | 41 | 515   | 120 |
| 44,411 | 24 | 6  | 263 | 65  | 8  | 8 | 220 | 41 | 515   | 120 |
| 44,412 | 30 | 6  | 314 | 65  | 12 | 8 | 247 | 41 | 603   | 120 |
| 44,413 | 32 | 7  | 358 | 76  | 14 | 8 | 262 | 43 | 666   | 134 |
| 44,414 | 32 | 7  | 358 | 77  | 13 | 8 | 259 | 43 | 662   | 135 |
| 44,415 | 35 | 7  | 444 | 79  | 15 | 8 | 358 | 42 | 852   | 136 |
| 44,416 | 36 | 7  | 465 | 77  | 15 | 8 | 364 | 39 | 880   | 131 |
| 44,417 | 36 | 7  | 472 | 70  | 15 | 6 | 371 | 37 | 894   | 120 |
| 44,418 | 38 | 7  | 472 | 71  | 15 | 6 | 370 | 37 | 895   | 121 |
| 44,419 | 39 | 7  | 470 | 72  | 15 | 6 | 364 | 38 | 888   | 123 |
| 44,420 | 39 | 7  | 469 | 71  | 15 | 6 | 364 | 38 | 887   | 122 |
| 44,421 | 39 | 9  | 469 | 95  | 15 | 8 | 364 | 68 | 887   | 180 |
| 44,422 | 39 | 9  | 469 | 103 | 15 | 8 | 364 | 69 | 887   | 189 |
| 44,423 | 39 | 11 | 486 | 113 | 15 | 9 | 371 | 73 | 911   | 206 |
| 44,424 | 39 | 14 | 494 | 123 | 15 | 9 | 371 | 79 | 919   | 225 |
| 44,425 | 39 | 14 | 494 | 124 | 15 | 9 | 372 | 79 | 920   | 226 |
| 44,426 | 43 | 14 | 511 | 124 | 15 | 9 | 390 | 80 | 959   | 227 |
| 44,427 | 43 | 15 | 519 | 140 | 15 | 9 | 393 | 82 | 970   | 246 |
| 44,428 | 45 | 15 | 511 | 142 | 15 | 9 | 385 | 83 | 956   | 249 |
| 44,429 | 45 | 15 | 507 | 144 | 15 | 9 | 383 | 84 | 950   | 252 |
| 44,430 | 45 | 15 | 511 | 146 | 15 | 9 | 386 | 84 | 957   | 254 |
| 44,431 | 53 | 15 | 561 | 147 | 19 | 9 | 406 | 84 | 1,039 | 255 |
| 44,432 | 53 | 15 | 561 | 148 | 19 | 9 | 406 | 84 | 1,039 | 256 |

|        |    |    |     |     |    |    |     |    |       |     |
|--------|----|----|-----|-----|----|----|-----|----|-------|-----|
| 44,433 | 58 | 15 | 571 | 149 | 19 | 9  | 416 | 84 | 1,064 | 257 |
| 44,434 | 60 | 15 | 617 | 150 | 20 | 10 | 437 | 85 | 1,134 | 260 |
| 44,435 | 60 | 15 | 613 | 150 | 20 | 10 | 433 | 85 | 1,126 | 260 |
| 44,436 | 66 | 15 | 811 | 154 | 35 | 10 | 537 | 83 | 1,449 | 262 |
| 44,437 | 66 | 15 | 825 | 153 | 36 | 10 | 548 | 82 | 1,475 | 260 |
| 44,438 | 66 | 14 | 831 | 148 | 36 | 10 | 551 | 82 | 1,484 | 254 |
| 44,439 | 63 | 13 | 802 | 147 | 35 | 10 | 546 | 77 | 1,446 | 247 |
| 44,440 | 63 | 13 | 797 | 147 | 35 | 10 | 543 | 77 | 1,438 | 247 |
| 44,441 | 59 | 13 | 759 | 142 | 34 | 9  | 523 | 76 | 1,375 | 240 |
| 44,442 | 59 | 13 | 759 | 143 | 34 | 9  | 517 | 76 | 1,369 | 241 |
| 44,443 | 58 | 13 | 762 | 143 | 34 | 8  | 517 | 76 | 1,371 | 240 |
| 44,444 | 61 | 13 | 768 | 143 | 34 | 8  | 520 | 77 | 1,383 | 241 |
| 44,445 | 61 | 13 | 760 | 145 | 34 | 8  | 518 | 77 | 1,373 | 243 |
| 44,446 | 61 | 13 | 750 | 145 | 34 | 8  | 512 | 79 | 1,357 | 245 |
| 44,447 | 61 | 13 | 736 | 144 | 33 | 7  | 507 | 78 | 1,337 | 242 |
| 44,448 | 62 | 13 | 742 | 143 | 33 | 7  | 503 | 76 | 1,340 | 239 |
| 44,449 | 63 | 13 | 750 | 137 | 33 | 7  | 512 | 74 | 1,358 | 231 |
| 44,450 | 63 | 13 | 737 | 137 | 33 | 7  | 508 | 74 | 1,341 | 231 |
| 44,451 | 63 | 13 | 732 | 137 | 33 | 7  | 507 | 74 | 1,335 | 231 |
| 44,452 | 60 | 13 | 730 | 140 | 32 | 7  | 504 | 75 | 1,326 | 235 |
| 44,453 | 60 | 13 | 730 | 143 | 32 | 7  | 504 | 76 | 1,326 | 239 |
| 44,454 | 60 | 14 | 735 | 145 | 33 | 7  | 518 | 75 | 1,346 | 241 |
| 44,455 | 60 | 13 | 732 | 141 | 33 | 7  | 517 | 71 | 1,342 | 232 |
| 44,456 | 60 | 11 | 728 | 132 | 33 | 4  | 513 | 61 | 1,334 | 208 |
| 44,457 | 60 | 11 | 727 | 132 | 33 | 4  | 496 | 61 | 1,316 | 208 |
| 44,458 | 52 | 11 | 692 | 132 | 32 | 4  | 447 | 61 | 1,223 | 208 |
| 44,459 | 52 | 11 | 721 | 130 | 36 | 4  | 452 | 64 | 1,261 | 209 |
| 44,460 | 54 | 11 | 745 | 132 | 36 | 5  | 479 | 64 | 1,314 | 212 |
| 44,461 | 55 | 11 | 793 | 135 | 37 | 5  | 498 | 62 | 1,383 | 213 |
| 44,462 | 54 | 11 | 791 | 136 | 37 | 5  | 499 | 63 | 1,381 | 215 |
| 44,463 | 50 | 12 | 754 | 137 | 33 | 5  | 480 | 65 | 1,317 | 219 |
| 44,464 | 48 | 10 | 710 | 125 | 32 | 5  | 463 | 63 | 1,253 | 203 |
| 44,465 | 45 | 10 | 623 | 126 | 30 | 5  | 363 | 63 | 1,061 | 204 |
| 44,466 | 44 | 10 | 602 | 128 | 30 | 5  | 357 | 63 | 1,033 | 206 |
| 44,467 | 44 | 10 | 598 | 129 | 30 | 5  | 353 | 62 | 1,025 | 206 |
| 44,468 | 44 | 10 | 602 | 128 | 30 | 5  | 357 | 62 | 1,033 | 205 |
| 44,469 | 42 | 10 | 602 | 128 | 30 | 5  | 357 | 62 | 1,031 | 205 |
| 44,470 | 41 | 10 | 602 | 129 | 31 | 5  | 359 | 63 | 1,033 | 207 |
| 44,471 | 41 | 10 | 599 | 129 | 31 | 5  | 359 | 63 | 1,030 | 207 |
| 44,472 | 41 | 8  | 599 | 106 | 31 | 3  | 359 | 33 | 1,030 | 150 |
| 44,473 | 41 | 8  | 599 | 98  | 31 | 3  | 357 | 32 | 1,028 | 141 |

|        |    |   |     |    |    |   |     |    |       |     |
|--------|----|---|-----|----|----|---|-----|----|-------|-----|
| 44,474 | 41 | 3 | 585 | 78 | 31 | 2 | 353 | 21 | 1,010 | 104 |
| 44,475 | 41 | 3 | 577 | 78 | 31 | 2 | 353 | 21 | 1,002 | 104 |
| 44,476 | 41 | 3 | 576 | 78 | 31 | 2 | 353 | 21 | 1,001 | 104 |
| 44,477 | 36 | 3 | 547 | 76 | 29 | 2 | 314 | 20 | 926   | 101 |
| 44,478 | 36 | 2 | 539 | 60 | 29 | 2 | 311 | 18 | 915   | 82  |
| 44,479 | 33 | 2 | 532 | 56 | 29 | 2 | 307 | 17 | 901   | 77  |
| 44,480 | 33 | 2 | 528 | 57 | 29 | 2 | 304 | 17 | 894   | 78  |
| 44,481 | 28 | 2 | 491 | 60 | 27 | 2 | 284 | 18 | 830   | 82  |
| 44,482 | 26 | 2 | 478 | 59 | 25 | 2 | 284 | 20 | 813   | 83  |
| 44,483 | 21 | 3 | 465 | 73 | 25 | 3 | 274 | 21 | 785   | 100 |
| 44,484 | 20 | 3 | 430 | 80 | 24 | 3 | 259 | 23 | 733   | 109 |
| 44,485 | 19 | 3 | 419 | 88 | 24 | 2 | 253 | 22 | 715   | 115 |
| 44,486 | 15 | 3 | 271 | 88 | 16 | 2 | 197 | 24 | 499   | 117 |
| 44,487 | 13 | 3 | 222 | 80 | 9  | 2 | 148 | 24 | 392   | 109 |
| 44,488 | 13 | 4 | 208 | 81 | 8  | 2 | 137 | 27 | 366   | 114 |
| 44,489 | 13 | 4 | 193 | 80 | 8  | 2 | 132 | 27 | 346   | 113 |
| 44,490 | 13 | 4 | 189 | 80 | 8  | 2 | 124 | 28 | 334   | 114 |
| 44,491 | 13 | 4 | 189 | 81 | 8  | 2 | 121 | 28 | 331   | 115 |
| 44,492 | 13 | 4 | 191 | 81 | 8  | 2 | 121 | 28 | 333   | 115 |
| 44,493 | 13 | 4 | 187 | 80 | 8  | 2 | 120 | 28 | 328   | 114 |
| 44,494 | 13 | 4 | 187 | 80 | 8  | 2 | 119 | 28 | 327   | 114 |
| 44,495 | 11 | 4 | 182 | 78 | 8  | 2 | 116 | 27 | 317   | 111 |
| 44,496 | 11 | 4 | 181 | 78 | 8  | 2 | 116 | 27 | 316   | 111 |
| 44,497 | 10 | 4 | 175 | 78 | 8  | 2 | 116 | 25 | 309   | 109 |
| 44,498 | 11 | 4 | 187 | 77 | 8  | 2 | 129 | 24 | 335   | 107 |
| 44,499 | 11 | 4 | 181 | 77 | 8  | 2 | 128 | 24 | 328   | 107 |
| 44,500 | 10 | 4 | 171 | 77 | 8  | 3 | 119 | 24 | 308   | 108 |
| 44,501 | 10 | 4 | 169 | 76 | 7  | 3 | 110 | 24 | 296   | 107 |
| 44,502 | 10 | 4 | 167 | 76 | 7  | 3 | 106 | 24 | 290   | 107 |
| 44,503 | 10 | 4 | 167 | 70 | 8  | 3 | 106 | 22 | 291   | 99  |
| 44,504 | 10 | 4 | 166 | 70 | 8  | 3 | 106 | 22 | 290   | 99  |
| 44,505 | 10 | 3 | 166 | 68 | 8  | 3 | 106 | 22 | 290   | 96  |
| 44,506 | 10 | 3 | 166 | 68 | 8  | 3 | 106 | 22 | 290   | 96  |
| 44,507 | 10 | 3 | 167 | 68 | 8  | 3 | 106 | 22 | 291   | 96  |
| 44,508 | 10 | 3 | 164 | 70 | 8  | 3 | 107 | 22 | 289   | 98  |
| 44,509 | 9  | 3 | 168 | 66 | 8  | 2 | 105 | 21 | 290   | 92  |
| 44,510 | 9  | 3 | 163 | 66 | 4  | 2 | 105 | 21 | 281   | 92  |
| 44,511 | 7  | 3 | 143 | 66 | 4  | 2 | 85  | 21 | 239   | 92  |
| 44,512 | 5  | 2 | 91  | 57 | 3  | 2 | 62  | 18 | 161   | 79  |
| 44,513 | 5  | 2 | 85  | 57 | 4  | 2 | 60  | 18 | 154   | 79  |
| 44,514 | 4  | 2 | 79  | 57 | 4  | 2 | 53  | 18 | 140   | 79  |

|        |    |   |     |    |    |   |     |    |     |    |
|--------|----|---|-----|----|----|---|-----|----|-----|----|
| 44,515 | 4  | 2 | 79  | 58 | 3  | 2 | 53  | 18 | 139 | 80 |
| 44,516 | 4  | 2 | 75  | 56 | 4  | 2 | 49  | 18 | 132 | 78 |
| 44,517 | 4  | 2 | 76  | 50 | 5  | 2 | 45  | 18 | 130 | 72 |
| 44,518 | 6  | 2 | 82  | 50 | 5  | 2 | 58  | 18 | 151 | 72 |
| 44,519 | 6  | 2 | 82  | 50 | 4  | 2 | 60  | 18 | 152 | 72 |
| 44,520 | 6  | 2 | 93  | 48 | 4  | 2 | 80  | 16 | 183 | 68 |
| 44,521 | 6  | 2 | 96  | 48 | 4  | 2 | 77  | 16 | 183 | 68 |
| 44,522 | 7  | 2 | 97  | 48 | 5  | 2 | 84  | 16 | 193 | 68 |
| 44,523 | 7  | 2 | 100 | 47 | 5  | 2 | 86  | 16 | 198 | 67 |
| 44,524 | 7  | 2 | 100 | 47 | 5  | 2 | 85  | 16 | 197 | 67 |
| 44,525 | 8  | 2 | 118 | 46 | 6  | 2 | 109 | 16 | 241 | 66 |
| 44,526 | 8  | 2 | 118 | 46 | 6  | 2 | 109 | 16 | 241 | 66 |
| 44,527 | 8  | 2 | 118 | 45 | 6  | 2 | 111 | 16 | 243 | 65 |
| 44,528 | 8  | 2 | 119 | 46 | 6  | 2 | 111 | 16 | 244 | 66 |
| 44,529 | 9  | 2 | 122 | 46 | 6  | 2 | 114 | 16 | 251 | 66 |
| 44,530 | 9  | 2 | 120 | 45 | 6  | 2 | 112 | 14 | 247 | 63 |
| 44,531 | 10 | 2 | 120 | 40 | 6  | 2 | 112 | 13 | 248 | 57 |
| 44,532 | 10 | 2 | 120 | 40 | 6  | 2 | 112 | 13 | 248 | 57 |
| 44,533 | 9  | 1 | 121 | 25 | 6  | 1 | 112 | 10 | 248 | 37 |
| 44,534 | 9  | 1 | 121 | 25 | 6  | 1 | 112 | 10 | 248 | 37 |
| 44,535 | 9  | 1 | 123 | 17 | 6  | 1 | 114 | 8  | 252 | 27 |
| 44,536 | 9  | 1 | 134 | 8  | 7  | 1 | 118 | 10 | 268 | 20 |
| 44,537 | 9  | 1 | 134 | 8  | 7  | 1 | 118 | 9  | 268 | 19 |
| 44,538 | 9  | 1 | 134 | 8  | 7  | 1 | 118 | 10 | 268 | 20 |
| 44,539 | 9  | 0 | 133 | 7  | 7  | 1 | 118 | 7  | 267 | 15 |
| 44,540 | 11 | 0 | 136 | 9  | 8  | 1 | 127 | 7  | 282 | 17 |
| 44,541 | 11 | 0 | 135 | 9  | 8  | 1 | 127 | 6  | 281 | 16 |
| 44,542 | 11 | 0 | 138 | 8  | 8  | 2 | 131 | 6  | 288 | 16 |
| 44,543 | 11 | 0 | 138 | 8  | 8  | 2 | 131 | 6  | 288 | 16 |
| 44,544 | 11 | 1 | 138 | 10 | 8  | 2 | 131 | 9  | 288 | 22 |
| 44,545 | 11 | 1 | 137 | 10 | 8  | 2 | 131 | 9  | 287 | 22 |
| 44,546 | 11 | 1 | 147 | 10 | 9  | 2 | 140 | 9  | 307 | 22 |
| 44,547 | 12 | 1 | 151 | 10 | 9  | 2 | 141 | 9  | 313 | 22 |
| 44,548 | 12 | 1 | 158 | 12 | 9  | 2 | 141 | 9  | 320 | 24 |
| 44,549 | 12 | 1 | 157 | 12 | 9  | 2 | 132 | 9  | 310 | 24 |
| 44,550 | 12 | 1 | 157 | 12 | 9  | 2 | 132 | 9  | 310 | 24 |
| 44,551 | 12 | 1 | 178 | 13 | 10 | 1 | 140 | 9  | 340 | 24 |
| 44,552 | 12 | 1 | 180 | 13 | 10 | 1 | 141 | 9  | 343 | 24 |
| 44,553 | 12 | 1 | 178 | 15 | 9  | 1 | 139 | 9  | 338 | 26 |
| 44,554 | 12 | 1 | 178 | 15 | 9  | 1 | 139 | 9  | 338 | 26 |
| 44,555 | 12 | 1 | 182 | 15 | 9  | 1 | 141 | 9  | 344 | 26 |

|        |    |   |     |    |    |   |     |   |       |    |
|--------|----|---|-----|----|----|---|-----|---|-------|----|
| 44,556 | 15 | 1 | 195 | 14 | 9  | 1 | 151 | 9 | 370   | 25 |
| 44,557 | 15 | 1 | 197 | 14 | 9  | 1 | 153 | 9 | 374   | 25 |
| 44,558 | 16 | 2 | 195 | 15 | 9  | 1 | 152 | 9 | 372   | 27 |
| 44,559 | 16 | 2 | 196 | 18 | 9  | 1 | 153 | 9 | 374   | 30 |
| 44,560 | 16 | 2 | 191 | 19 | 9  | 1 | 152 | 7 | 368   | 29 |
| 44,561 | 16 | 2 | 166 | 19 | 9  | 1 | 144 | 7 | 335   | 29 |
| 44,562 | 16 | 2 | 161 | 19 | 9  | 1 | 137 | 7 | 323   | 29 |
| 44,563 | 15 | 3 | 157 | 19 | 9  | 2 | 135 | 7 | 316   | 31 |
| 44,564 | 16 | 4 | 185 | 19 | 14 | 2 | 171 | 7 | 386   | 32 |
| 44,565 | 16 | 4 | 185 | 19 | 13 | 2 | 171 | 7 | 385   | 32 |
| 44,566 | 16 | 4 | 190 | 19 | 13 | 2 | 179 | 7 | 398   | 32 |
| 44,567 | 16 | 4 | 195 | 19 | 12 | 2 | 179 | 7 | 402   | 32 |
| 44,568 | 16 | 4 | 195 | 19 | 12 | 2 | 179 | 7 | 402   | 32 |
| 44,569 | 16 | 4 | 207 | 19 | 14 | 2 | 178 | 7 | 415   | 32 |
| 44,570 | 17 | 4 | 214 | 19 | 14 | 2 | 177 | 7 | 422   | 32 |
| 44,571 | 18 | 4 | 221 | 20 | 15 | 2 | 166 | 7 | 420   | 33 |
| 44,572 | 21 | 4 | 253 | 20 | 15 | 2 | 179 | 7 | 468   | 33 |
| 44,573 | 20 | 4 | 324 | 20 | 18 | 2 | 201 | 7 | 563   | 33 |
| 44,574 | 21 | 4 | 338 | 20 | 18 | 2 | 210 | 7 | 587   | 33 |
| 44,575 | 25 | 4 | 381 | 21 | 18 | 2 | 231 | 7 | 655   | 34 |
| 44,576 | 25 | 4 | 395 | 21 | 19 | 2 | 236 | 7 | 675   | 34 |
| 44,577 | 25 | 4 | 399 | 21 | 19 | 2 | 236 | 7 | 679   | 34 |
| 44,578 | 25 | 4 | 408 | 21 | 21 | 2 | 240 | 7 | 694   | 34 |
| 44,579 | 30 | 4 | 441 | 21 | 21 | 2 | 250 | 7 | 742   | 34 |
| 44,580 | 31 | 4 | 443 | 21 | 21 | 2 | 259 | 7 | 754   | 34 |
| 44,581 | 31 | 4 | 444 | 21 | 21 | 2 | 259 | 7 | 755   | 34 |
| 44,582 | 32 | 4 | 575 | 21 | 25 | 2 | 317 | 7 | 949   | 34 |
| 44,583 | 34 | 4 | 604 | 21 | 28 | 2 | 330 | 7 | 996   | 34 |
| 44,584 | 34 | 4 | 606 | 21 | 28 | 2 | 333 | 7 | 1,001 | 34 |
| 44,585 | 34 | 4 | 604 | 21 | 28 | 2 | 333 | 5 | 999   | 32 |
| 44,586 | 34 | 4 | 605 | 21 | 28 | 2 | 332 | 5 | 999   | 32 |
| 44,587 | 34 | 4 | 594 | 21 | 27 | 2 | 328 | 5 | 983   | 32 |
| 44,588 | 34 | 4 | 595 | 20 | 27 | 2 | 328 | 3 | 984   | 29 |
| 44,589 | 34 | 4 | 594 | 20 | 27 | 2 | 328 | 3 | 983   | 29 |
| 44,590 | 33 | 4 | 592 | 20 | 27 | 2 | 324 | 3 | 976   | 29 |
| 44,591 | 32 | 5 | 589 | 18 | 26 | 2 | 318 | 3 | 965   | 28 |
| 44,592 | 32 | 5 | 586 | 18 | 26 | 2 | 314 | 3 | 958   | 28 |
| 44,593 | 32 | 5 | 589 | 19 | 26 | 1 | 314 | 3 | 961   | 28 |
| 44,594 | 32 | 5 | 587 | 21 | 26 | 1 | 311 | 3 | 956   | 30 |
| 44,595 | 31 | 4 | 579 | 20 | 25 | 1 | 304 | 1 | 939   | 26 |
| 44,596 | 31 | 4 | 579 | 20 | 25 | 1 | 304 | 1 | 939   | 26 |



|        |    |   |     |    |    |   |     |    |     |    |
|--------|----|---|-----|----|----|---|-----|----|-----|----|
| 44,597 | 31 | 4 | 573 | 20 | 25 | 1 | 302 | 1  | 931 | 26 |
| 44,598 | 29 | 4 | 568 | 20 | 25 | 1 | 300 | 1  | 922 | 26 |
| 44,599 | 29 | 4 | 560 | 18 | 25 | 1 | 299 | 1  | 913 | 24 |
| 44,600 | 29 | 4 | 558 | 20 | 25 | 1 | 299 | 1  | 911 | 26 |
| 44,601 | 29 | 4 | 555 | 21 | 25 | 1 | 299 | 1  | 908 | 27 |
| 44,602 | 29 | 4 | 537 | 23 | 24 | 1 | 289 | 2  | 879 | 30 |
| 44,603 | 29 | 4 | 533 | 23 | 24 | 1 | 290 | 2  | 876 | 30 |
| 44,604 | 29 | 4 | 532 | 22 | 24 | 1 | 290 | 3  | 875 | 30 |
| 44,605 | 29 | 4 | 527 | 22 | 24 | 1 | 288 | 3  | 868 | 30 |
| 44,606 | 26 | 4 | 514 | 22 | 24 | 1 | 279 | 3  | 843 | 30 |
| 44,607 | 26 | 4 | 512 | 22 | 24 | 1 | 277 | 3  | 839 | 30 |
| 44,608 | 26 | 4 | 513 | 22 | 24 | 1 | 277 | 3  | 840 | 30 |
| 44,609 | 26 | 3 | 515 | 21 | 24 | 1 | 278 | 4  | 843 | 29 |
| 44,610 | 26 | 3 | 514 | 16 | 24 | 1 | 277 | 4  | 841 | 24 |
| 44,611 | 28 | 4 | 518 | 16 | 24 | 1 | 279 | 4  | 849 | 25 |
| 44,612 | 28 | 4 | 518 | 17 | 24 | 1 | 279 | 4  | 849 | 26 |
| 44,613 | 29 | 2 | 518 | 19 | 27 | 0 | 278 | 5  | 852 | 26 |
| 44,614 | 30 | 2 | 519 | 20 | 27 | 0 | 278 | 5  | 854 | 27 |
| 44,615 | 29 | 2 | 498 | 20 | 22 | 0 | 244 | 5  | 793 | 27 |
| 44,616 | 29 | 2 | 495 | 20 | 22 | 0 | 243 | 5  | 789 | 27 |
| 44,617 | 29 | 2 | 494 | 19 | 22 | 0 | 237 | 5  | 782 | 26 |
| 44,618 | 33 | 2 | 489 | 19 | 22 | 0 | 236 | 5  | 780 | 26 |
| 44,619 | 33 | 2 | 489 | 19 | 22 | 0 | 236 | 5  | 780 | 26 |
| 44,620 | 31 | 2 | 472 | 19 | 20 | 0 | 224 | 5  | 747 | 26 |
| 44,621 | 30 | 2 | 468 | 19 | 20 | 0 | 223 | 5  | 741 | 26 |
| 44,622 | 29 | 2 | 450 | 19 | 19 | 0 | 215 | 6  | 713 | 27 |
| 44,623 | 26 | 2 | 413 | 19 | 19 | 0 | 202 | 6  | 660 | 27 |
| 44,624 | 26 | 2 | 341 | 21 | 15 | 0 | 173 | 6  | 555 | 29 |
| 44,625 | 25 | 2 | 324 | 21 | 15 | 0 | 162 | 6  | 526 | 29 |
| 44,626 | 20 | 2 | 272 | 20 | 14 | 0 | 123 | 6  | 429 | 28 |
| 44,627 | 20 | 2 | 250 | 22 | 13 | 0 | 112 | 6  | 395 | 30 |
| 44,628 | 20 | 2 | 246 | 23 | 13 | 0 | 111 | 9  | 390 | 34 |
| 44,629 | 20 | 2 | 237 | 23 | 11 | 0 | 106 | 10 | 374 | 35 |
| 44,630 | 15 | 2 | 203 | 23 | 11 | 0 | 97  | 10 | 326 | 35 |
| 44,631 | 13 | 2 | 197 | 24 | 11 | 0 | 85  | 10 | 306 | 36 |
| 44,632 | 13 | 2 | 152 | 24 | 9  | 0 | 64  | 10 | 238 | 36 |
| 44,633 | 12 | 2 | 71  | 24 | 7  | 0 | 30  | 10 | 120 | 36 |
| 44,634 | 10 | 2 | 42  | 24 | 4  | 0 | 16  | 10 | 72  | 36 |
| 44,635 | 10 | 2 | 46  | 24 | 4  | 0 | 14  | 10 | 74  | 36 |
| 44,636 | 10 | 2 | 53  | 24 | 5  | 0 | 22  | 10 | 90  | 36 |
| 44,637 | 10 | 2 | 53  | 24 | 5  | 0 | 22  | 10 | 90  | 36 |

|        |    |   |    |    |   |   |    |    |     |    |
|--------|----|---|----|----|---|---|----|----|-----|----|
| 44,638 | 10 | 2 | 54 | 24 | 5 | 0 | 23 | 10 | 92  | 36 |
| 44,639 | 10 | 2 | 53 | 24 | 5 | 0 | 23 | 10 | 91  | 36 |
| 44,640 | 10 | 2 | 53 | 24 | 5 | 0 | 23 | 10 | 91  | 36 |
| 44,641 | 10 | 2 | 53 | 24 | 5 | 0 | 23 | 10 | 91  | 36 |
| 44,642 | 10 | 1 | 53 | 24 | 5 | 0 | 23 | 10 | 91  | 35 |
| 44,643 | 10 | 1 | 50 | 23 | 5 | 0 | 23 | 10 | 88  | 34 |
| 44,644 | 10 | 1 | 50 | 23 | 5 | 0 | 23 | 10 | 88  | 34 |
| 44,645 | 10 | 1 | 54 | 21 | 6 | 0 | 24 | 10 | 94  | 32 |
| 44,646 | 10 | 1 | 54 | 21 | 6 | 0 | 24 | 9  | 94  | 31 |
| 44,647 | 10 | 1 | 54 | 21 | 6 | 0 | 24 | 9  | 94  | 31 |
| 44,648 | 10 | 1 | 54 | 21 | 6 | 1 | 24 | 9  | 94  | 32 |
| 44,649 | 10 | 1 | 55 | 21 | 6 | 1 | 26 | 9  | 97  | 32 |
| 44,650 | 10 | 1 | 55 | 19 | 6 | 1 | 26 | 9  | 97  | 30 |
| 44,651 | 10 | 1 | 54 | 20 | 6 | 1 | 26 | 9  | 96  | 31 |
| 44,652 | 10 | 1 | 59 | 16 | 6 | 1 | 29 | 8  | 104 | 26 |
| 44,653 | 10 | 1 | 59 | 18 | 6 | 1 | 29 | 8  | 104 | 28 |
| 44,654 | 10 | 1 | 59 | 18 | 6 | 1 | 29 | 8  | 104 | 28 |
| 44,655 | 10 | 1 | 61 | 17 | 6 | 1 | 31 | 7  | 108 | 26 |
| 44,656 | 10 | 1 | 61 | 17 | 6 | 2 | 31 | 7  | 108 | 27 |
| 44,657 | 12 | 1 | 67 | 18 | 6 | 2 | 33 | 7  | 118 | 28 |
| 44,658 | 12 | 1 | 66 | 19 | 6 | 2 | 33 | 7  | 117 | 29 |
| 44,659 | 12 | 1 | 65 | 19 | 6 | 2 | 33 | 7  | 116 | 29 |
| 44,660 | 11 | 1 | 64 | 20 | 6 | 2 | 32 | 7  | 113 | 30 |
| 44,661 | 10 | 2 | 62 | 21 | 6 | 2 | 32 | 7  | 110 | 32 |
| 44,662 | 10 | 3 | 61 | 19 | 6 | 2 | 31 | 6  | 108 | 30 |
| 44,663 | 10 | 3 | 65 | 21 | 7 | 2 | 34 | 6  | 116 | 32 |
| 44,664 | 9  | 3 | 64 | 23 | 3 | 2 | 33 | 6  | 109 | 34 |
| 44,665 | 8  | 5 | 62 | 30 | 5 | 3 | 40 | 8  | 115 | 46 |
| 44,666 | 9  | 5 | 62 | 38 | 5 | 4 | 42 | 10 | 118 | 57 |
| 44,667 | 9  | 5 | 58 | 40 | 5 | 4 | 42 | 10 | 114 | 59 |
| 44,668 | 5  | 5 | 57 | 40 | 5 | 4 | 42 | 10 | 109 | 59 |
| 44,669 | 5  | 5 | 59 | 41 | 5 | 4 | 42 | 10 | 111 | 60 |
| 44,670 | 5  | 5 | 58 | 41 | 5 | 4 | 42 | 10 | 110 | 60 |
| 44,671 | 5  | 5 | 56 | 41 | 5 | 4 | 42 | 10 | 108 | 60 |
| 44,672 | 5  | 5 | 55 | 47 | 5 | 4 | 42 | 11 | 107 | 67 |
| 44,673 | 5  | 5 | 54 | 46 | 5 | 4 | 42 | 10 | 106 | 65 |
| 44,674 | 5  | 5 | 54 | 46 | 5 | 4 | 42 | 11 | 106 | 66 |
| 44,675 | 5  | 5 | 54 | 41 | 5 | 4 | 42 | 8  | 106 | 58 |
| 44,676 | 5  | 5 | 54 | 41 | 5 | 4 | 42 | 8  | 106 | 58 |
| 44,677 | 5  | 5 | 53 | 41 | 5 | 4 | 42 | 8  | 105 | 58 |
| 44,678 | 5  | 5 | 53 | 41 | 5 | 4 | 42 | 8  | 105 | 58 |

|        |   |    |    |    |   |   |    |    |     |     |
|--------|---|----|----|----|---|---|----|----|-----|-----|
| 44,679 | 5 | 5  | 53 | 40 | 5 | 4 | 41 | 7  | 104 | 56  |
| 44,680 | 5 | 5  | 53 | 40 | 5 | 4 | 41 | 7  | 104 | 56  |
| 44,681 | 5 | 5  | 53 | 40 | 5 | 4 | 40 | 7  | 103 | 56  |
| 44,682 | 5 | 5  | 53 | 43 | 5 | 4 | 40 | 10 | 103 | 62  |
| 44,683 | 5 | 5  | 48 | 43 | 6 | 4 | 38 | 11 | 97  | 63  |
| 44,684 | 4 | 5  | 46 | 43 | 6 | 4 | 37 | 12 | 93  | 64  |
| 44,685 | 4 | 9  | 39 | 51 | 6 | 4 | 36 | 13 | 85  | 77  |
| 44,686 | 4 | 9  | 32 | 51 | 6 | 4 | 28 | 13 | 70  | 77  |
| 44,687 | 4 | 9  | 33 | 51 | 5 | 4 | 27 | 13 | 69  | 77  |
| 44,688 | 4 | 11 | 32 | 56 | 5 | 4 | 26 | 17 | 67  | 88  |
| 44,689 | 4 | 11 | 32 | 56 | 5 | 4 | 26 | 17 | 67  | 88  |
| 44,690 | 4 | 11 | 34 | 56 | 5 | 4 | 26 | 17 | 69  | 88  |
| 44,691 | 4 | 11 | 34 | 56 | 5 | 4 | 26 | 17 | 69  | 88  |
| 44,692 | 5 | 11 | 43 | 56 | 5 | 4 | 31 | 17 | 84  | 88  |
| 44,693 | 5 | 11 | 47 | 56 | 5 | 4 | 33 | 17 | 90  | 88  |
| 44,694 | 6 | 11 | 53 | 56 | 5 | 4 | 35 | 18 | 99  | 89  |
| 44,695 | 6 | 11 | 52 | 57 | 5 | 4 | 36 | 19 | 99  | 91  |
| 44,696 | 6 | 11 | 51 | 57 | 4 | 4 | 36 | 19 | 97  | 91  |
| 44,697 | 6 | 11 | 51 | 56 | 4 | 4 | 36 | 20 | 97  | 91  |
| 44,698 | 6 | 11 | 51 | 57 | 4 | 4 | 36 | 21 | 97  | 93  |
| 44,699 | 6 | 11 | 50 | 57 | 4 | 3 | 34 | 21 | 94  | 92  |
| 44,700 | 6 | 11 | 50 | 57 | 4 | 3 | 34 | 21 | 94  | 92  |
| 44,701 | 6 | 11 | 50 | 56 | 4 | 3 | 34 | 21 | 94  | 91  |
| 44,702 | 6 | 11 | 50 | 57 | 4 | 3 | 34 | 21 | 94  | 92  |
| 44,703 | 7 | 11 | 47 | 57 | 4 | 3 | 31 | 21 | 89  | 92  |
| 44,704 | 7 | 11 | 47 | 55 | 4 | 3 | 30 | 21 | 88  | 90  |
| 44,705 | 7 | 11 | 46 | 53 | 4 | 2 | 28 | 20 | 85  | 86  |
| 44,706 | 7 | 11 | 47 | 53 | 4 | 2 | 29 | 20 | 87  | 86  |
| 44,707 | 6 | 11 | 43 | 53 | 4 | 2 | 26 | 20 | 79  | 86  |
| 44,708 | 5 | 11 | 42 | 53 | 4 | 2 | 26 | 21 | 77  | 87  |
| 44,709 | 5 | 11 | 42 | 56 | 4 | 2 | 27 | 21 | 78  | 90  |
| 44,710 | 5 | 11 | 42 | 61 | 4 | 2 | 27 | 21 | 78  | 95  |
| 44,711 | 5 | 11 | 42 | 65 | 4 | 2 | 27 | 24 | 78  | 102 |
| 44,712 | 4 | 11 | 42 | 70 | 4 | 2 | 27 | 24 | 77  | 107 |
| 44,713 | 4 | 9  | 42 | 69 | 4 | 2 | 27 | 25 | 77  | 105 |
| 44,714 | 4 | 7  | 38 | 60 | 3 | 1 | 23 | 23 | 68  | 91  |
| 44,715 | 4 | 8  | 34 | 61 | 3 | 1 | 23 | 23 | 64  | 93  |
| 44,716 | 4 | 8  | 33 | 63 | 1 | 1 | 16 | 24 | 54  | 96  |
| 44,717 | 3 | 8  | 35 | 58 | 1 | 0 | 16 | 25 | 55  | 91  |
| 44,718 | 3 | 8  | 34 | 58 | 1 | 0 | 16 | 25 | 54  | 91  |
| 44,719 | 3 | 8  | 35 | 63 | 1 | 0 | 16 | 27 | 55  | 98  |

|        |    |    |     |     |   |   |    |     |     |     |
|--------|----|----|-----|-----|---|---|----|-----|-----|-----|
| 44,720 | 3  | 8  | 34  | 62  | 1 | 0 | 16 | 27  | 54  | 97  |
| 44,721 | 3  | 8  | 34  | 62  | 1 | 0 | 17 | 27  | 55  | 97  |
| 44,722 | 3  | 8  | 34  | 62  | 1 | 0 | 17 | 27  | 55  | 97  |
| 44,723 | 4  | 8  | 41  | 56  | 1 | 0 | 17 | 26  | 63  | 90  |
| 44,724 | 4  | 8  | 42  | 56  | 1 | 0 | 18 | 25  | 65  | 89  |
| 44,725 | 4  | 8  | 42  | 56  | 1 | 0 | 18 | 25  | 65  | 89  |
| 44,726 | 5  | 8  | 57  | 57  | 1 | 1 | 22 | 25  | 85  | 91  |
| 44,727 | 5  | 8  | 57  | 57  | 1 | 1 | 22 | 25  | 85  | 91  |
| 44,728 | 8  | 8  | 79  | 57  | 3 | 1 | 34 | 25  | 124 | 91  |
| 44,729 | 8  | 8  | 79  | 57  | 3 | 1 | 34 | 25  | 124 | 91  |
| 44,730 | 9  | 8  | 90  | 57  | 3 | 1 | 39 | 25  | 141 | 91  |
| 44,731 | 9  | 8  | 90  | 57  | 3 | 1 | 39 | 25  | 141 | 91  |
| 44,732 | 9  | 10 | 90  | 58  | 3 | 1 | 39 | 26  | 141 | 95  |
| 44,733 | 10 | 10 | 96  | 56  | 4 | 1 | 45 | 22  | 155 | 89  |
| 44,734 | 10 | 10 | 96  | 58  | 3 | 1 | 45 | 22  | 154 | 91  |
| 44,735 | 11 | 6  | 102 | 50  | 4 | 1 | 46 | 20  | 163 | 77  |
| 44,736 | 11 | 6  | 102 | 51  | 4 | 1 | 46 | 21  | 163 | 79  |
| 44,737 | 14 | 6  | 107 | 52  | 4 | 1 | 54 | 23  | 179 | 82  |
| 44,738 | 14 | 6  | 112 | 55  | 4 | 1 | 63 | 24  | 193 | 86  |
| 44,739 | 14 | 5  | 133 | 63  | 6 | 1 | 72 | 26  | 225 | 95  |
| 44,740 | 14 | 6  | 133 | 74  | 6 | 1 | 72 | 35  | 225 | 116 |
| 44,741 | 14 | 7  | 138 | 100 | 6 | 1 | 73 | 47  | 231 | 155 |
| 44,742 | 13 | 13 | 130 | 136 | 6 | 1 | 68 | 75  | 217 | 225 |
| 44,743 | 13 | 13 | 127 | 138 | 6 | 1 | 66 | 77  | 212 | 229 |
| 44,744 | 12 | 15 | 121 | 141 | 6 | 1 | 65 | 77  | 204 | 234 |
| 44,745 | 12 | 15 | 119 | 140 | 6 | 1 | 63 | 75  | 200 | 231 |
| 44,746 | 12 | 15 | 119 | 142 | 6 | 1 | 63 | 75  | 200 | 233 |
| 44,747 | 12 | 15 | 119 | 142 | 6 | 1 | 63 | 74  | 200 | 232 |
| 44,748 | 12 | 15 | 119 | 142 | 6 | 1 | 63 | 74  | 200 | 232 |
| 44,749 | 12 | 15 | 119 | 141 | 6 | 1 | 63 | 73  | 200 | 230 |
| 44,750 | 12 | 15 | 119 | 141 | 6 | 1 | 63 | 73  | 200 | 230 |
| 44,751 | 13 | 15 | 128 | 141 | 6 | 1 | 68 | 73  | 215 | 230 |
| 44,752 | 13 | 15 | 128 | 141 | 6 | 1 | 68 | 73  | 215 | 230 |
| 44,753 | 13 | 15 | 128 | 142 | 6 | 1 | 68 | 74  | 215 | 232 |
| 44,754 | 12 | 15 | 127 | 146 | 6 | 1 | 68 | 82  | 213 | 244 |
| 44,755 | 12 | 15 | 127 | 146 | 6 | 1 | 68 | 82  | 213 | 244 |
| 44,756 | 12 | 15 | 127 | 149 | 6 | 1 | 68 | 83  | 213 | 248 |
| 44,757 | 12 | 16 | 125 | 159 | 6 | 1 | 67 | 101 | 210 | 277 |
| 44,758 | 12 | 16 | 123 | 159 | 6 | 1 | 67 | 100 | 208 | 276 |
| 44,759 | 12 | 16 | 123 | 162 | 6 | 1 | 66 | 103 | 207 | 282 |
| 44,760 | 12 | 16 | 123 | 161 | 6 | 1 | 66 | 103 | 207 | 281 |

|        |    |    |     |     |   |   |    |     |     |     |
|--------|----|----|-----|-----|---|---|----|-----|-----|-----|
| 44,761 | 12 | 16 | 124 | 153 | 6 | 1 | 66 | 101 | 208 | 271 |
| 44,762 | 12 | 16 | 124 | 154 | 6 | 1 | 66 | 103 | 208 | 274 |
| 44,763 | 12 | 15 | 123 | 148 | 6 | 1 | 65 | 103 | 206 | 267 |
| 44,764 | 12 | 15 | 127 | 144 | 6 | 1 | 68 | 102 | 213 | 262 |
| 44,765 | 12 | 15 | 137 | 144 | 6 | 1 | 69 | 103 | 224 | 263 |
| 44,766 | 12 | 14 | 138 | 136 | 6 | 1 | 71 | 100 | 227 | 251 |
| 44,767 | 15 | 14 | 140 | 136 | 6 | 1 | 73 | 100 | 234 | 251 |
| 44,768 | 15 | 14 | 138 | 136 | 6 | 1 | 71 | 100 | 230 | 251 |
| 44,769 | 15 | 14 | 137 | 136 | 6 | 1 | 71 | 100 | 229 | 251 |
| 44,770 | 15 | 14 | 137 | 131 | 6 | 1 | 71 | 98  | 229 | 244 |
| 44,771 | 15 | 14 | 139 | 131 | 6 | 1 | 70 | 98  | 230 | 244 |
| 44,772 | 15 | 14 | 139 | 131 | 6 | 1 | 71 | 98  | 231 | 244 |
| 44,773 | 14 | 14 | 136 | 131 | 6 | 1 | 71 | 98  | 227 | 244 |
| 44,774 | 14 | 14 | 135 | 131 | 6 | 1 | 75 | 98  | 230 | 244 |
| 44,775 | 14 | 14 | 135 | 131 | 6 | 1 | 76 | 99  | 231 | 245 |
| 44,776 | 13 | 14 | 132 | 130 | 6 | 0 | 75 | 100 | 226 | 244 |
| 44,777 | 13 | 14 | 132 | 130 | 6 | 0 | 75 | 100 | 226 | 244 |
| 44,778 | 11 | 14 | 123 | 130 | 5 | 0 | 73 | 100 | 212 | 244 |
| 44,779 | 11 | 14 | 115 | 130 | 4 | 0 | 67 | 100 | 197 | 244 |
| 44,780 | 10 | 14 | 108 | 130 | 4 | 0 | 63 | 100 | 185 | 244 |
| 44,781 | 10 | 14 | 105 | 130 | 4 | 0 | 62 | 101 | 181 | 245 |
| 44,782 | 10 | 14 | 105 | 130 | 4 | 0 | 62 | 101 | 181 | 245 |
| 44,783 | 10 | 12 | 100 | 127 | 3 | 0 | 56 | 100 | 169 | 239 |
| 44,784 | 10 | 12 | 100 | 128 | 3 | 0 | 56 | 100 | 169 | 240 |
| 44,785 | 9  | 12 | 95  | 125 | 2 | 1 | 55 | 102 | 161 | 240 |
| 44,786 | 9  | 12 | 94  | 128 | 2 | 1 | 55 | 105 | 160 | 246 |
| 44,787 | 6  | 12 | 89  | 147 | 2 | 1 | 47 | 109 | 144 | 269 |
| 44,788 | 6  | 12 | 83  | 146 | 2 | 2 | 38 | 107 | 129 | 267 |
| 44,789 | 6  | 13 | 79  | 154 | 2 | 2 | 33 | 113 | 120 | 282 |
| 44,790 | 6  | 12 | 61  | 141 | 0 | 2 | 29 | 107 | 96  | 262 |
| 44,791 | 6  | 11 | 61  | 130 | 0 | 2 | 29 | 98  | 96  | 241 |
| 44,792 | 6  | 10 | 56  | 105 | 0 | 2 | 28 | 86  | 90  | 203 |
| 44,793 | 6  | 4  | 55  | 69  | 0 | 2 | 28 | 59  | 89  | 134 |
| 44,794 | 7  | 4  | 54  | 72  | 0 | 3 | 28 | 61  | 89  | 140 |
| 44,795 | 7  | 2  | 54  | 71  | 0 | 3 | 27 | 61  | 88  | 137 |
| 44,796 | 7  | 3  | 55  | 95  | 0 | 3 | 27 | 78  | 89  | 179 |
| 44,797 | 7  | 4  | 58  | 99  | 0 | 3 | 28 | 80  | 93  | 186 |
| 44,798 | 7  | 5  | 57  | 104 | 0 | 3 | 27 | 82  | 91  | 194 |
| 44,799 | 6  | 5  | 57  | 104 | 0 | 3 | 26 | 82  | 89  | 194 |
| 44,800 | 6  | 5  | 53  | 104 | 0 | 3 | 25 | 82  | 84  | 194 |
| 44,801 | 6  | 5  | 52  | 106 | 0 | 4 | 23 | 84  | 81  | 199 |

|        |    |    |     |     |    |    |     |     |     |     |
|--------|----|----|-----|-----|----|----|-----|-----|-----|-----|
| 44,802 | 6  | 5  | 52  | 106 | 0  | 4  | 23  | 85  | 81  | 200 |
| 44,803 | 6  | 10 | 51  | 117 | 0  | 7  | 23  | 85  | 80  | 219 |
| 44,804 | 6  | 10 | 51  | 118 | 0  | 7  | 23  | 89  | 80  | 224 |
| 44,805 | 6  | 10 | 63  | 120 | 1  | 7  | 28  | 84  | 98  | 221 |
| 44,806 | 6  | 10 | 65  | 117 | 1  | 7  | 28  | 84  | 100 | 218 |
| 44,807 | 6  | 9  | 68  | 108 | 1  | 7  | 30  | 65  | 105 | 189 |
| 44,808 | 9  | 9  | 88  | 108 | 2  | 7  | 39  | 65  | 138 | 189 |
| 44,809 | 9  | 9  | 88  | 109 | 2  | 7  | 39  | 66  | 138 | 191 |
| 44,810 | 10 | 9  | 99  | 107 | 5  | 7  | 45  | 62  | 159 | 185 |
| 44,811 | 12 | 9  | 110 | 111 | 5  | 7  | 51  | 65  | 178 | 192 |
| 44,812 | 12 | 9  | 109 | 111 | 5  | 7  | 51  | 66  | 177 | 193 |
| 44,813 | 18 | 9  | 211 | 113 | 7  | 7  | 116 | 66  | 352 | 195 |
| 44,814 | 18 | 9  | 216 | 115 | 7  | 7  | 117 | 66  | 358 | 197 |
| 44,815 | 21 | 9  | 230 | 116 | 8  | 7  | 118 | 68  | 377 | 200 |
| 44,816 | 21 | 9  | 220 | 117 | 8  | 8  | 117 | 68  | 366 | 202 |
| 44,817 | 21 | 9  | 219 | 120 | 8  | 8  | 116 | 69  | 364 | 206 |
| 44,818 | 20 | 9  | 220 | 120 | 8  | 8  | 118 | 69  | 366 | 206 |
| 44,819 | 20 | 9  | 224 | 121 | 9  | 8  | 119 | 69  | 372 | 207 |
| 44,820 | 20 | 9  | 225 | 122 | 9  | 8  | 119 | 70  | 373 | 209 |
| 44,821 | 20 | 9  | 225 | 123 | 9  | 8  | 119 | 71  | 373 | 211 |
| 44,822 | 20 | 10 | 226 | 132 | 9  | 8  | 119 | 71  | 374 | 221 |
| 44,823 | 20 | 10 | 231 | 145 | 9  | 9  | 123 | 75  | 383 | 239 |
| 44,824 | 21 | 11 | 230 | 165 | 9  | 9  | 124 | 83  | 384 | 268 |
| 44,825 | 23 | 11 | 236 | 173 | 9  | 9  | 123 | 96  | 391 | 289 |
| 44,826 | 27 | 11 | 260 | 178 | 10 | 9  | 136 | 99  | 433 | 297 |
| 44,827 | 27 | 12 | 255 | 187 | 10 | 10 | 141 | 106 | 433 | 315 |
| 44,828 | 27 | 12 | 253 | 189 | 10 | 10 | 140 | 113 | 430 | 324 |
| 44,829 | 27 | 12 | 251 | 189 | 10 | 11 | 137 | 113 | 425 | 325 |
| 44,830 | 26 | 12 | 252 | 193 | 10 | 12 | 138 | 115 | 426 | 332 |
| 44,831 | 26 | 12 | 251 | 196 | 10 | 13 | 138 | 114 | 425 | 335 |
| 44,832 | 28 | 12 | 254 | 196 | 10 | 13 | 141 | 114 | 433 | 335 |
| 44,833 | 29 | 12 | 262 | 196 | 10 | 13 | 144 | 114 | 445 | 335 |
| 44,834 | 28 | 14 | 262 | 197 | 10 | 13 | 145 | 114 | 445 | 338 |
| 44,835 | 28 | 14 | 262 | 197 | 10 | 13 | 145 | 114 | 445 | 338 |
| 44,836 | 28 | 14 | 265 | 197 | 10 | 12 | 147 | 111 | 450 | 334 |
| 44,837 | 28 | 14 | 266 | 194 | 10 | 12 | 149 | 108 | 453 | 328 |
| 44,838 | 28 | 14 | 273 | 175 | 10 | 12 | 151 | 104 | 462 | 305 |
| 44,839 | 28 | 14 | 279 | 175 | 11 | 11 | 151 | 104 | 469 | 304 |
| 44,840 | 28 | 13 | 280 | 165 | 11 | 11 | 151 | 97  | 470 | 286 |
| 44,841 | 28 | 13 | 280 | 166 | 11 | 11 | 151 | 97  | 470 | 287 |
| 44,842 | 28 | 13 | 279 | 169 | 11 | 11 | 151 | 99  | 469 | 292 |

|        |    |    |     |     |    |    |     |     |     |     |
|--------|----|----|-----|-----|----|----|-----|-----|-----|-----|
| 44,843 | 29 | 18 | 287 | 210 | 12 | 14 | 152 | 126 | 480 | 368 |
| 44,844 | 28 | 18 | 287 | 215 | 12 | 14 | 152 | 125 | 479 | 372 |
| 44,845 | 28 | 18 | 292 | 213 | 12 | 13 | 153 | 123 | 485 | 367 |
| 44,846 | 28 | 18 | 293 | 214 | 13 | 13 | 154 | 124 | 488 | 369 |
| 44,847 | 28 | 17 | 292 | 192 | 13 | 15 | 154 | 108 | 487 | 332 |
| 44,848 | 28 | 16 | 289 | 186 | 13 | 15 | 153 | 106 | 483 | 323 |
| 44,849 | 32 | 15 | 296 | 183 | 13 | 15 | 158 | 104 | 499 | 317 |
| 44,850 | 32 | 15 | 294 | 184 | 13 | 15 | 158 | 104 | 497 | 318 |
| 44,851 | 32 | 16 | 294 | 191 | 13 | 16 | 159 | 111 | 498 | 334 |
| 44,852 | 32 | 16 | 293 | 191 | 13 | 16 | 159 | 110 | 497 | 333 |
| 44,853 | 39 | 16 | 318 | 196 | 13 | 16 | 181 | 111 | 551 | 339 |
| 44,854 | 40 | 11 | 349 | 187 | 15 | 13 | 204 | 110 | 608 | 321 |
| 44,855 | 40 | 11 | 349 | 186 | 15 | 13 | 202 | 106 | 606 | 316 |
| 44,856 | 47 | 11 | 430 | 180 | 22 | 13 | 270 | 102 | 769 | 306 |
| 44,857 | 47 | 11 | 428 | 180 | 22 | 13 | 273 | 102 | 770 | 306 |
| 44,858 | 47 | 11 | 425 | 181 | 22 | 13 | 271 | 106 | 765 | 311 |
| 44,859 | 44 | 11 | 405 | 181 | 21 | 13 | 262 | 107 | 732 | 312 |
| 44,860 | 43 | 11 | 399 | 182 | 19 | 13 | 260 | 107 | 721 | 313 |
| 44,861 | 43 | 11 | 394 | 171 | 18 | 13 | 256 | 101 | 711 | 296 |
| 44,862 | 41 | 11 | 384 | 171 | 18 | 13 | 250 | 101 | 693 | 296 |
| 44,863 | 35 | 11 | 308 | 171 | 16 | 13 | 188 | 101 | 547 | 296 |
| 44,864 | 35 | 11 | 284 | 169 | 16 | 13 | 183 | 101 | 518 | 294 |
| 44,865 | 35 | 11 | 279 | 169 | 16 | 13 | 182 | 101 | 512 | 294 |
| 44,866 | 32 | 11 | 262 | 167 | 15 | 12 | 179 | 99  | 488 | 289 |
| 44,867 | 32 | 11 | 262 | 165 | 15 | 12 | 179 | 98  | 488 | 286 |
| 44,868 | 32 | 11 | 262 | 165 | 15 | 12 | 181 | 98  | 490 | 286 |
| 44,869 | 30 | 11 | 261 | 164 | 15 | 12 | 178 | 98  | 484 | 285 |
| 44,870 | 30 | 11 | 268 | 163 | 14 | 12 | 184 | 97  | 496 | 283 |
| 44,871 | 30 | 11 | 268 | 162 | 14 | 12 | 185 | 96  | 497 | 281 |
| 44,872 | 30 | 11 | 277 | 162 | 14 | 12 | 187 | 97  | 508 | 282 |
| 44,873 | 31 | 9  | 277 | 112 | 14 | 11 | 185 | 72  | 507 | 204 |
| 44,874 | 35 | 9  | 302 | 112 | 14 | 11 | 192 | 72  | 543 | 204 |
| 44,875 | 38 | 8  | 331 | 99  | 16 | 10 | 243 | 60  | 628 | 177 |
| 44,876 | 36 | 8  | 325 | 99  | 16 | 10 | 241 | 60  | 618 | 177 |
| 44,877 | 32 | 8  | 306 | 99  | 15 | 10 | 238 | 60  | 591 | 177 |
| 44,878 | 32 | 9  | 299 | 101 | 15 | 10 | 231 | 60  | 577 | 180 |
| 44,879 | 32 | 9  | 299 | 103 | 15 | 10 | 231 | 53  | 577 | 175 |
| 44,880 | 33 | 9  | 318 | 104 | 15 | 9  | 240 | 54  | 606 | 176 |
| 44,881 | 33 | 9  | 317 | 102 | 15 | 9  | 240 | 53  | 605 | 173 |
| 44,882 | 33 | 9  | 322 | 100 | 15 | 8  | 241 | 53  | 611 | 170 |
| 44,883 | 31 | 11 | 322 | 120 | 15 | 8  | 239 | 60  | 607 | 199 |

|        |    |    |     |     |    |   |     |    |     |     |
|--------|----|----|-----|-----|----|---|-----|----|-----|-----|
| 44,884 | 30 | 11 | 314 | 120 | 15 | 8 | 236 | 63 | 595 | 202 |
| 44,885 | 30 | 10 | 313 | 137 | 15 | 9 | 236 | 74 | 594 | 230 |
| 44,886 | 30 | 10 | 310 | 137 | 15 | 9 | 234 | 74 | 589 | 230 |
| 44,887 | 30 | 11 | 314 | 140 | 15 | 9 | 233 | 75 | 592 | 235 |
| 44,888 | 30 | 12 | 308 | 149 | 15 | 9 | 234 | 85 | 587 | 255 |
| 44,889 | 30 | 12 | 302 | 149 | 14 | 9 | 234 | 84 | 580 | 254 |
| 44,890 | 35 | 12 | 337 | 149 | 20 | 9 | 267 | 84 | 659 | 254 |
| 44,891 | 35 | 13 | 338 | 149 | 20 | 9 | 267 | 84 | 660 | 255 |
| 44,892 | 35 | 15 | 332 | 149 | 20 | 9 | 267 | 83 | 654 | 256 |
| 44,893 | 35 | 15 | 332 | 149 | 19 | 9 | 266 | 83 | 652 | 256 |
| 44,894 | 38 | 10 | 361 | 108 | 20 | 6 | 314 | 58 | 733 | 182 |
| 44,895 | 39 | 12 | 386 | 108 | 20 | 6 | 328 | 62 | 773 | 188 |
| 44,896 | 39 | 12 | 383 | 105 | 20 | 6 | 327 | 60 | 769 | 183 |
| 44,897 | 39 | 12 | 382 | 100 | 19 | 4 | 326 | 58 | 766 | 174 |
| 44,898 | 39 | 12 | 382 | 99  | 19 | 4 | 326 | 58 | 766 | 173 |
| 44,899 | 39 | 12 | 383 | 99  | 19 | 4 | 327 | 58 | 768 | 173 |
| 44,900 | 35 | 12 | 377 | 97  | 19 | 4 | 322 | 58 | 753 | 171 |
| 44,901 | 35 | 12 | 377 | 98  | 19 | 4 | 322 | 59 | 753 | 173 |
| 44,902 | 35 | 12 | 377 | 103 | 19 | 3 | 321 | 68 | 752 | 186 |
| 44,903 | 35 | 12 | 377 | 104 | 19 | 2 | 321 | 71 | 752 | 189 |
| 44,904 | 28 | 12 | 353 | 100 | 19 | 2 | 298 | 71 | 698 | 185 |
| 44,905 | 27 | 12 | 322 | 97  | 17 | 2 | 274 | 71 | 640 | 182 |
| 44,906 | 27 | 12 | 318 | 98  | 17 | 2 | 274 | 72 | 636 | 184 |
| 44,907 | 20 | 13 | 229 | 106 | 9  | 2 | 202 | 83 | 460 | 204 |
| 44,908 | 20 | 13 | 229 | 105 | 9  | 2 | 199 | 83 | 457 | 203 |
| 44,909 | 20 | 13 | 229 | 106 | 9  | 2 | 199 | 79 | 457 | 200 |
| 44,910 | 20 | 13 | 229 | 106 | 9  | 2 | 199 | 78 | 457 | 199 |
| 44,911 | 20 | 13 | 229 | 103 | 9  | 2 | 199 | 77 | 457 | 195 |
| 44,912 | 20 | 13 | 229 | 104 | 9  | 2 | 199 | 77 | 457 | 196 |
| 44,913 | 20 | 13 | 228 | 105 | 9  | 2 | 199 | 77 | 456 | 197 |
| 44,914 | 20 | 14 | 228 | 108 | 9  | 2 | 200 | 77 | 457 | 201 |
| 44,915 | 20 | 14 | 227 | 108 | 9  | 2 | 200 | 77 | 456 | 201 |
| 44,916 | 22 | 14 | 231 | 107 | 10 | 2 | 201 | 76 | 464 | 199 |
| 44,917 | 22 | 14 | 230 | 107 | 10 | 2 | 202 | 76 | 464 | 199 |
| 44,918 | 22 | 14 | 230 | 107 | 10 | 2 | 202 | 76 | 464 | 199 |
| 44,919 | 22 | 14 | 230 | 107 | 10 | 2 | 201 | 76 | 463 | 199 |
| 44,920 | 22 | 13 | 228 | 107 | 10 | 2 | 200 | 76 | 460 | 198 |
| 44,921 | 24 | 13 | 218 | 109 | 11 | 2 | 193 | 83 | 446 | 207 |
| 44,922 | 24 | 14 | 215 | 112 | 11 | 2 | 192 | 91 | 442 | 219 |
| 44,923 | 25 | 14 | 209 | 121 | 12 | 2 | 194 | 98 | 440 | 235 |
| 44,924 | 24 | 14 | 204 | 123 | 12 | 2 | 190 | 99 | 430 | 238 |



|        |    |    |     |     |    |   |     |     |     |     |
|--------|----|----|-----|-----|----|---|-----|-----|-----|-----|
| 44,925 | 21 | 15 | 182 | 124 | 12 | 2 | 185 | 101 | 400 | 242 |
| 44,926 | 17 | 17 | 154 | 123 | 10 | 2 | 134 | 102 | 315 | 244 |
| 44,927 | 17 | 20 | 152 | 132 | 10 | 2 | 133 | 113 | 312 | 267 |
| 44,928 | 17 | 35 | 146 | 162 | 10 | 5 | 120 | 148 | 293 | 350 |
| 44,929 | 16 | 34 | 137 | 169 | 10 | 5 | 116 | 154 | 279 | 362 |
| 44,930 | 16 | 34 | 128 | 168 | 10 | 5 | 113 | 156 | 267 | 363 |
| 44,931 | 16 | 34 | 126 | 167 | 10 | 4 | 112 | 155 | 264 | 360 |
| 44,932 | 16 | 34 | 123 | 166 | 10 | 4 | 114 | 155 | 263 | 359 |
| 44,933 | 16 | 35 | 123 | 173 | 10 | 6 | 114 | 159 | 263 | 373 |
| 44,934 | 16 | 33 | 120 | 153 | 10 | 6 | 113 | 151 | 259 | 343 |
| 44,935 | 16 | 33 | 121 | 153 | 10 | 6 | 116 | 148 | 263 | 340 |
| 44,936 | 16 | 32 | 121 | 134 | 10 | 5 | 116 | 138 | 263 | 309 |
| 44,937 | 16 | 32 | 121 | 134 | 10 | 5 | 117 | 138 | 264 | 309 |
| 44,938 | 16 | 31 | 117 | 123 | 10 | 5 | 117 | 130 | 260 | 289 |
| 44,939 | 16 | 31 | 116 | 125 | 10 | 5 | 115 | 130 | 257 | 291 |
| 44,940 | 11 | 31 | 83  | 136 | 4  | 6 | 86  | 132 | 184 | 305 |
| 44,941 | 11 | 30 | 80  | 138 | 4  | 6 | 82  | 132 | 177 | 306 |
| 44,942 | 11 | 27 | 80  | 132 | 4  | 6 | 82  | 130 | 177 | 295 |
| 44,943 | 11 | 28 | 82  | 132 | 4  | 6 | 84  | 130 | 181 | 296 |
| 44,944 | 7  | 28 | 62  | 132 | 3  | 6 | 38  | 130 | 110 | 296 |
| 44,945 | 8  | 27 | 49  | 127 | 3  | 6 | 28  | 126 | 88  | 286 |
| 44,946 | 7  | 27 | 48  | 128 | 3  | 6 | 27  | 127 | 85  | 288 |
| 44,947 | 7  | 27 | 48  | 128 | 3  | 6 | 27  | 128 | 85  | 289 |
| 44,948 | 7  | 27 | 58  | 128 | 5  | 6 | 43  | 128 | 113 | 289 |
| 44,949 | 7  | 27 | 58  | 128 | 5  | 6 | 43  | 128 | 113 | 289 |
| 44,950 | 7  | 27 | 56  | 128 | 5  | 6 | 42  | 128 | 110 | 289 |
| 44,951 | 7  | 27 | 69  | 128 | 5  | 6 | 52  | 128 | 133 | 289 |
| 44,952 | 7  | 27 | 81  | 127 | 5  | 6 | 59  | 127 | 152 | 287 |
| 44,953 | 7  | 26 | 98  | 115 | 5  | 6 | 72  | 111 | 182 | 258 |
| 44,954 | 7  | 26 | 109 | 112 | 5  | 6 | 77  | 107 | 198 | 251 |
| 44,955 | 7  | 26 | 110 | 111 | 5  | 6 | 78  | 105 | 200 | 248 |
| 44,956 | 7  | 26 | 110 | 109 | 5  | 6 | 78  | 104 | 200 | 245 |
| 44,957 | 7  | 25 | 110 | 101 | 5  | 6 | 78  | 93  | 200 | 225 |
| 44,958 | 7  | 25 | 110 | 101 | 5  | 6 | 78  | 93  | 200 | 225 |
| 44,959 | 7  | 25 | 110 | 99  | 5  | 6 | 78  | 93  | 200 | 223 |
| 44,960 | 7  | 25 | 110 | 99  | 5  | 6 | 78  | 93  | 200 | 223 |
| 44,961 | 8  | 25 | 110 | 99  | 5  | 6 | 83  | 92  | 206 | 222 |
| 44,962 | 8  | 25 | 113 | 98  | 5  | 6 | 83  | 93  | 209 | 222 |
| 44,963 | 8  | 25 | 112 | 97  | 5  | 6 | 82  | 93  | 207 | 221 |
| 44,964 | 8  | 24 | 112 | 94  | 5  | 6 | 82  | 93  | 207 | 217 |
| 44,965 | 8  | 24 | 112 | 94  | 5  | 6 | 82  | 93  | 207 | 217 |

|        |    |    |     |     |    |    |     |     |     |     |
|--------|----|----|-----|-----|----|----|-----|-----|-----|-----|
| 44,966 | 6  | 24 | 111 | 94  | 4  | 6  | 84  | 93  | 205 | 217 |
| 44,967 | 6  | 25 | 111 | 94  | 4  | 6  | 84  | 93  | 205 | 218 |
| 44,968 | 6  | 25 | 111 | 94  | 4  | 6  | 83  | 93  | 204 | 218 |
| 44,969 | 6  | 27 | 113 | 98  | 4  | 6  | 84  | 97  | 207 | 228 |
| 44,970 | 6  | 27 | 113 | 100 | 4  | 6  | 84  | 97  | 207 | 230 |
| 44,971 | 6  | 27 | 114 | 99  | 3  | 6  | 90  | 91  | 213 | 223 |
| 44,972 | 6  | 27 | 114 | 100 | 3  | 6  | 91  | 96  | 214 | 229 |
| 44,973 | 5  | 27 | 112 | 100 | 3  | 6  | 89  | 89  | 209 | 222 |
| 44,974 | 5  | 27 | 111 | 92  | 2  | 6  | 89  | 82  | 207 | 207 |
| 44,975 | 5  | 27 | 108 | 91  | 2  | 6  | 88  | 79  | 203 | 203 |
| 44,976 | 4  | 27 | 108 | 92  | 2  | 6  | 87  | 79  | 201 | 204 |
| 44,977 | 5  | 25 | 109 | 94  | 2  | 6  | 88  | 79  | 204 | 204 |
| 44,978 | 5  | 7  | 117 | 55  | 2  | 3  | 88  | 33  | 212 | 98  |
| 44,979 | 5  | 7  | 117 | 55  | 2  | 3  | 87  | 33  | 211 | 98  |
| 44,980 | 5  | 7  | 120 | 46  | 2  | 3  | 89  | 28  | 216 | 84  |
| 44,981 | 7  | 8  | 136 | 43  | 2  | 3  | 94  | 25  | 239 | 79  |
| 44,982 | 7  | 8  | 135 | 41  | 2  | 3  | 92  | 24  | 236 | 76  |
| 44,983 | 7  | 7  | 134 | 36  | 2  | 2  | 89  | 20  | 232 | 65  |
| 44,984 | 7  | 7  | 134 | 43  | 2  | 2  | 89  | 22  | 232 | 74  |
| 44,985 | 13 | 7  | 236 | 43  | 5  | 2  | 123 | 21  | 377 | 73  |
| 44,986 | 14 | 7  | 257 | 43  | 6  | 2  | 140 | 21  | 417 | 73  |
| 44,987 | 14 | 8  | 257 | 44  | 6  | 2  | 140 | 25  | 417 | 79  |
| 44,988 | 14 | 8  | 257 | 44  | 6  | 2  | 139 | 25  | 416 | 79  |
| 44,989 | 18 | 8  | 310 | 44  | 13 | 2  | 210 | 23  | 551 | 77  |
| 44,990 | 18 | 8  | 317 | 42  | 14 | 2  | 217 | 24  | 566 | 76  |
| 44,991 | 19 | 8  | 324 | 34  | 14 | 1  | 219 | 24  | 576 | 67  |
| 44,992 | 19 | 8  | 324 | 33  | 14 | 1  | 219 | 28  | 576 | 70  |
| 44,993 | 19 | 8  | 336 | 47  | 14 | 1  | 227 | 35  | 596 | 91  |
| 44,994 | 20 | 10 | 346 | 64  | 16 | 4  | 244 | 46  | 626 | 124 |
| 44,995 | 20 | 13 | 335 | 79  | 16 | 7  | 242 | 69  | 613 | 168 |
| 44,996 | 19 | 12 | 322 | 81  | 16 | 7  | 239 | 75  | 596 | 175 |
| 44,997 | 20 | 12 | 341 | 91  | 16 | 8  | 256 | 86  | 633 | 197 |
| 44,998 | 20 | 27 | 339 | 159 | 15 | 11 | 255 | 158 | 629 | 355 |
| 44,999 | 20 | 27 | 331 | 163 | 14 | 11 | 240 | 158 | 605 | 359 |
| 45,000 | 20 | 30 | 326 | 181 | 14 | 15 | 232 | 184 | 592 | 410 |
| 45,001 | 20 | 40 | 325 | 229 | 14 | 17 | 231 | 203 | 590 | 489 |
| 45,002 | 20 | 41 | 314 | 241 | 14 | 18 | 225 | 213 | 573 | 513 |
| 45,003 | 20 | 42 | 297 | 242 | 14 | 18 | 212 | 213 | 543 | 515 |
| 45,004 | 21 | 42 | 292 | 245 | 14 | 18 | 211 | 214 | 538 | 519 |
| 45,005 | 21 | 43 | 288 | 245 | 14 | 18 | 209 | 215 | 532 | 521 |
| 45,006 | 21 | 43 | 286 | 246 | 14 | 18 | 207 | 215 | 528 | 522 |

|        |    |    |     |     |    |    |     |     |     |     |
|--------|----|----|-----|-----|----|----|-----|-----|-----|-----|
| 45,007 | 21 | 43 | 290 | 249 | 14 | 18 | 208 | 215 | 533 | 525 |
| 45,008 | 21 | 43 | 301 | 250 | 14 | 18 | 215 | 216 | 551 | 527 |
| 45,009 | 21 | 43 | 307 | 252 | 14 | 18 | 216 | 218 | 558 | 531 |
| 45,010 | 21 | 43 | 310 | 253 | 14 | 18 | 216 | 218 | 561 | 532 |
| 45,011 | 25 | 43 | 328 | 253 | 16 | 18 | 227 | 218 | 596 | 532 |
| 45,012 | 24 | 44 | 328 | 261 | 16 | 18 | 222 | 230 | 590 | 553 |
| 45,013 | 24 | 44 | 325 | 263 | 16 | 18 | 222 | 231 | 587 | 556 |
| 45,014 | 25 | 47 | 329 | 267 | 16 | 18 | 224 | 234 | 594 | 566 |
| 45,015 | 25 | 48 | 334 | 273 | 17 | 19 | 231 | 241 | 607 | 581 |
| 45,016 | 26 | 47 | 350 | 273 | 17 | 19 | 240 | 241 | 633 | 580 |
| 45,017 | 26 | 47 | 352 | 274 | 17 | 19 | 237 | 241 | 632 | 581 |
| 45,018 | 26 | 47 | 350 | 274 | 17 | 19 | 236 | 242 | 629 | 582 |
| 45,019 | 26 | 49 | 356 | 287 | 17 | 19 | 240 | 247 | 639 | 602 |
| 45,020 | 25 | 47 | 355 | 285 | 17 | 19 | 237 | 243 | 634 | 594 |
| 45,021 | 25 | 47 | 354 | 284 | 17 | 19 | 236 | 243 | 632 | 593 |
| 45,022 | 25 | 47 | 355 | 283 | 17 | 19 | 236 | 242 | 633 | 591 |
| 45,023 | 25 | 53 | 355 | 289 | 17 | 19 | 235 | 239 | 632 | 600 |
| 45,024 | 25 | 53 | 354 | 290 | 17 | 19 | 234 | 240 | 630 | 602 |
| 45,025 | 25 | 53 | 354 | 291 | 17 | 19 | 234 | 239 | 630 | 602 |
| 45,026 | 25 | 52 | 354 | 289 | 17 | 19 | 234 | 239 | 630 | 599 |
| 45,027 | 24 | 52 | 353 | 288 | 17 | 20 | 233 | 239 | 627 | 599 |
| 45,028 | 24 | 52 | 345 | 286 | 17 | 20 | 235 | 238 | 621 | 596 |
| 45,029 | 24 | 52 | 344 | 286 | 17 | 20 | 235 | 238 | 620 | 596 |
| 45,030 | 24 | 52 | 341 | 286 | 17 | 20 | 234 | 238 | 616 | 596 |
| 45,031 | 22 | 51 | 325 | 287 | 17 | 20 | 229 | 238 | 593 | 596 |
| 45,032 | 22 | 51 | 325 | 287 | 17 | 20 | 229 | 238 | 593 | 596 |
| 45,033 | 22 | 51 | 325 | 289 | 17 | 21 | 229 | 239 | 593 | 600 |
| 45,034 | 22 | 51 | 325 | 288 | 17 | 20 | 229 | 241 | 593 | 600 |
| 45,035 | 18 | 51 | 288 | 281 | 15 | 20 | 217 | 239 | 538 | 591 |
| 45,036 | 16 | 50 | 223 | 281 | 14 | 20 | 192 | 235 | 445 | 586 |
| 45,037 | 15 | 50 | 202 | 281 | 13 | 20 | 174 | 236 | 404 | 587 |
| 45,038 | 11 | 50 | 160 | 288 | 6  | 21 | 105 | 239 | 282 | 598 |
| 45,039 | 11 | 50 | 148 | 288 | 6  | 21 | 102 | 239 | 267 | 598 |
| 45,040 | 11 | 50 | 141 | 294 | 5  | 21 | 95  | 241 | 252 | 606 |
| 45,041 | 10 | 50 | 135 | 301 | 5  | 21 | 93  | 242 | 243 | 614 |
| 45,042 | 10 | 50 | 134 | 299 | 5  | 21 | 93  | 240 | 242 | 610 |
| 45,043 | 10 | 51 | 121 | 330 | 5  | 26 | 85  | 265 | 221 | 672 |
| 45,044 | 9  | 52 | 114 | 317 | 3  | 26 | 71  | 260 | 197 | 655 |
| 45,045 | 9  | 51 | 109 | 319 | 3  | 26 | 66  | 276 | 187 | 672 |
| 45,046 | 8  | 49 | 95  | 321 | 3  | 23 | 55  | 265 | 161 | 658 |
| 45,047 | 8  | 49 | 91  | 320 | 3  | 23 | 48  | 259 | 150 | 651 |

|        |    |    |     |     |    |    |     |     |     |     |
|--------|----|----|-----|-----|----|----|-----|-----|-----|-----|
| 45,048 | 8  | 49 | 92  | 319 | 3  | 22 | 49  | 247 | 152 | 637 |
| 45,049 | 8  | 37 | 89  | 252 | 3  | 19 | 48  | 174 | 148 | 482 |
| 45,050 | 8  | 40 | 87  | 280 | 3  | 19 | 49  | 167 | 147 | 506 |
| 45,051 | 8  | 40 | 87  | 283 | 3  | 19 | 49  | 169 | 147 | 511 |
| 45,052 | 8  | 31 | 85  | 224 | 3  | 16 | 48  | 140 | 144 | 411 |
| 45,053 | 8  | 31 | 84  | 227 | 3  | 16 | 48  | 143 | 143 | 417 |
| 45,054 | 7  | 30 | 85  | 232 | 3  | 17 | 48  | 144 | 143 | 423 |
| 45,055 | 7  | 29 | 87  | 232 | 3  | 17 | 48  | 144 | 145 | 422 |
| 45,056 | 7  | 29 | 88  | 231 | 3  | 17 | 47  | 144 | 145 | 421 |
| 45,057 | 7  | 29 | 86  | 231 | 3  | 17 | 48  | 144 | 144 | 421 |
| 45,058 | 7  | 30 | 75  | 227 | 3  | 17 | 41  | 143 | 126 | 417 |
| 45,059 | 7  | 30 | 70  | 225 | 3  | 17 | 40  | 141 | 120 | 413 |
| 45,060 | 7  | 30 | 70  | 224 | 3  | 17 | 41  | 141 | 121 | 412 |
| 45,061 | 7  | 30 | 67  | 224 | 3  | 17 | 41  | 141 | 118 | 412 |
| 45,062 | 3  | 30 | 51  | 227 | 1  | 17 | 31  | 141 | 86  | 415 |
| 45,063 | 3  | 29 | 50  | 219 | 1  | 17 | 30  | 129 | 84  | 394 |
| 45,064 | 2  | 29 | 47  | 217 | 1  | 17 | 29  | 127 | 79  | 390 |
| 45,065 | 2  | 26 | 45  | 217 | 1  | 17 | 29  | 124 | 77  | 384 |
| 45,066 | 2  | 25 | 45  | 213 | 0  | 16 | 25  | 118 | 72  | 372 |
| 45,067 | 1  | 25 | 29  | 214 | 0  | 16 | 16  | 118 | 46  | 373 |
| 45,068 | 1  | 25 | 24  | 213 | 0  | 16 | 16  | 118 | 41  | 372 |
| 45,069 | 1  | 25 | 20  | 214 | 0  | 16 | 13  | 118 | 34  | 373 |
| 45,070 | 1  | 23 | 18  | 201 | 0  | 16 | 14  | 114 | 33  | 354 |
| 45,071 | 0  | 23 | 18  | 199 | 0  | 16 | 13  | 114 | 31  | 352 |
| 45,072 | 0  | 23 | 20  | 198 | 0  | 16 | 14  | 115 | 34  | 352 |
| 45,073 | 0  | 23 | 22  | 198 | 0  | 16 | 13  | 118 | 35  | 355 |
| 45,074 | 0  | 17 | 22  | 189 | 0  | 16 | 13  | 115 | 35  | 337 |
| 45,075 | 0  | 17 | 23  | 190 | 0  | 16 | 13  | 116 | 36  | 339 |
| 45,076 | 0  | 17 | 26  | 191 | 0  | 16 | 16  | 117 | 42  | 341 |
| 45,077 | 1  | 17 | 30  | 193 | 0  | 16 | 16  | 117 | 47  | 343 |
| 45,078 | 1  | 17 | 30  | 193 | 0  | 15 | 15  | 117 | 46  | 342 |
| 45,079 | 1  | 17 | 35  | 193 | 0  | 15 | 14  | 118 | 50  | 343 |
| 45,080 | 1  | 17 | 35  | 193 | 0  | 15 | 14  | 118 | 50  | 343 |
| 45,081 | 1  | 17 | 50  | 194 | 0  | 15 | 20  | 118 | 71  | 344 |
| 45,082 | 4  | 17 | 105 | 194 | 3  | 15 | 51  | 118 | 163 | 344 |
| 45,083 | 21 | 17 | 175 | 192 | 8  | 14 | 100 | 115 | 304 | 338 |
| 45,084 | 24 | 17 | 207 | 194 | 9  | 14 | 111 | 116 | 351 | 341 |
| 45,085 | 27 | 17 | 233 | 194 | 10 | 14 | 134 | 116 | 404 | 341 |
| 45,086 | 33 | 17 | 282 | 194 | 12 | 14 | 180 | 116 | 507 | 341 |
| 45,087 | 33 | 17 | 281 | 194 | 12 | 14 | 180 | 116 | 506 | 341 |
| 45,088 | 34 | 17 | 310 | 194 | 13 | 14 | 207 | 115 | 564 | 340 |

|        |    |    |     |     |    |    |     |     |     |     |
|--------|----|----|-----|-----|----|----|-----|-----|-----|-----|
| 45,089 | 34 | 17 | 311 | 187 | 13 | 13 | 208 | 112 | 566 | 329 |
| 45,090 | 34 | 17 | 311 | 186 | 13 | 13 | 208 | 112 | 566 | 328 |
| 45,091 | 34 | 17 | 312 | 175 | 13 | 13 | 208 | 108 | 567 | 313 |
| 45,092 | 34 | 17 | 312 | 174 | 13 | 13 | 208 | 108 | 567 | 312 |
| 45,093 | 34 | 17 | 312 | 174 | 13 | 13 | 208 | 108 | 567 | 312 |
| 45,094 | 34 | 16 | 312 | 142 | 13 | 8  | 208 | 79  | 567 | 245 |
| 45,095 | 34 | 15 | 312 | 141 | 13 | 8  | 208 | 77  | 567 | 241 |
| 45,096 | 34 | 13 | 312 | 122 | 13 | 5  | 209 | 50  | 568 | 190 |
| 45,097 | 34 | 12 | 312 | 104 | 13 | 5  | 209 | 38  | 568 | 159 |
| 45,098 | 34 | 10 | 312 | 94  | 13 | 5  | 209 | 38  | 568 | 147 |
| 45,099 | 34 | 10 | 310 | 94  | 13 | 5  | 209 | 38  | 566 | 147 |
| 45,100 | 34 | 3  | 310 | 43  | 13 | 1  | 208 | 19  | 565 | 66  |
| 45,101 | 34 | 3  | 310 | 40  | 13 | 1  | 208 | 17  | 565 | 61  |
| 45,102 | 34 | 4  | 310 | 41  | 13 | 1  | 208 | 22  | 565 | 68  |
| 45,103 | 34 | 2  | 310 | 41  | 13 | 1  | 208 | 22  | 565 | 66  |
| 45,104 | 34 | 2  | 310 | 42  | 13 | 1  | 208 | 20  | 565 | 65  |
| 45,105 | 34 | 2  | 309 | 36  | 13 | 0  | 208 | 18  | 564 | 56  |
| 45,106 | 34 | 2  | 305 | 37  | 13 | 0  | 208 | 19  | 560 | 58  |
| 45,107 | 34 | 2  | 304 | 38  | 13 | 0  | 208 | 20  | 559 | 60  |
| 45,108 | 34 | 2  | 302 | 38  | 13 | 0  | 204 | 20  | 553 | 60  |
| 45,109 | 34 | 4  | 302 | 58  | 13 | 0  | 204 | 48  | 553 | 110 |
| 45,110 | 34 | 4  | 301 | 60  | 13 | 2  | 204 | 49  | 552 | 115 |
| 45,111 | 34 | 7  | 301 | 75  | 13 | 2  | 203 | 63  | 551 | 147 |
| 45,112 | 34 | 7  | 301 | 77  | 13 | 2  | 203 | 63  | 551 | 149 |
| 45,113 | 34 | 7  | 301 | 80  | 13 | 3  | 205 | 67  | 553 | 157 |
| 45,114 | 34 | 7  | 301 | 82  | 13 | 3  | 204 | 68  | 552 | 160 |
| 45,115 | 34 | 7  | 301 | 78  | 13 | 4  | 202 | 68  | 550 | 157 |
| 45,116 | 34 | 7  | 301 | 77  | 13 | 4  | 203 | 68  | 551 | 156 |
| 45,117 | 34 | 7  | 299 | 77  | 13 | 4  | 203 | 68  | 549 | 156 |
| 45,118 | 34 | 7  | 302 | 77  | 13 | 4  | 203 | 68  | 552 | 156 |
| 45,119 | 34 | 8  | 305 | 76  | 13 | 4  | 203 | 69  | 555 | 157 |
| 45,120 | 34 | 8  | 305 | 76  | 13 | 4  | 204 | 68  | 556 | 156 |
| 45,121 | 34 | 8  | 306 | 76  | 13 | 4  | 204 | 68  | 557 | 156 |
| 45,122 | 34 | 8  | 307 | 78  | 13 | 4  | 204 | 68  | 558 | 158 |
| 45,123 | 35 | 8  | 304 | 80  | 13 | 4  | 203 | 68  | 555 | 160 |
| 45,124 | 35 | 8  | 302 | 80  | 13 | 4  | 203 | 65  | 553 | 157 |
| 45,125 | 35 | 8  | 302 | 78  | 13 | 4  | 203 | 65  | 553 | 155 |
| 45,126 | 35 | 8  | 301 | 75  | 13 | 4  | 203 | 64  | 552 | 151 |
| 45,127 | 35 | 8  | 298 | 75  | 13 | 4  | 200 | 63  | 546 | 150 |
| 45,128 | 34 | 8  | 294 | 73  | 13 | 4  | 200 | 63  | 541 | 148 |
| 45,129 | 34 | 8  | 294 | 73  | 13 | 4  | 200 | 62  | 541 | 147 |

|        |    |    |     |     |    |   |     |     |     |     |
|--------|----|----|-----|-----|----|---|-----|-----|-----|-----|
| 45,130 | 34 | 8  | 290 | 77  | 13 | 4 | 202 | 62  | 539 | 151 |
| 45,131 | 34 | 10 | 275 | 90  | 13 | 4 | 196 | 70  | 518 | 174 |
| 45,132 | 31 | 15 | 220 | 117 | 10 | 4 | 165 | 73  | 426 | 209 |
| 45,133 | 17 | 16 | 166 | 121 | 6  | 4 | 123 | 73  | 312 | 214 |
| 45,134 | 15 | 20 | 150 | 128 | 5  | 6 | 116 | 75  | 286 | 229 |
| 45,135 | 12 | 20 | 118 | 131 | 4  | 6 | 105 | 76  | 239 | 233 |
| 45,136 | 9  | 20 | 92  | 131 | 3  | 6 | 82  | 76  | 186 | 233 |
| 45,137 | 3  | 20 | 45  | 132 | 1  | 6 | 36  | 76  | 85  | 234 |
| 45,138 | 2  | 28 | 16  | 144 | 0  | 6 | 9   | 77  | 27  | 255 |
| 45,139 | 2  | 28 | 15  | 151 | 0  | 6 | 8   | 78  | 25  | 263 |
| 45,140 | 2  | 29 | 23  | 160 | 1  | 6 | 10  | 84  | 36  | 279 |
| 45,141 | 2  | 29 | 23  | 160 | 1  | 6 | 10  | 84  | 36  | 279 |
| 45,142 | 3  | 29 | 24  | 159 | 1  | 6 | 12  | 85  | 40  | 279 |
| 45,143 | 3  | 29 | 24  | 159 | 1  | 6 | 12  | 85  | 40  | 279 |
| 45,144 | 3  | 30 | 24  | 168 | 1  | 6 | 12  | 88  | 40  | 292 |
| 45,145 | 3  | 30 | 24  | 169 | 1  | 6 | 12  | 88  | 40  | 293 |
| 45,146 | 3  | 30 | 27  | 169 | 1  | 6 | 11  | 88  | 42  | 293 |
| 45,147 | 3  | 30 | 27  | 169 | 1  | 6 | 11  | 88  | 42  | 293 |
| 45,148 | 3  | 30 | 28  | 169 | 2  | 6 | 13  | 89  | 46  | 294 |
| 45,149 | 4  | 30 | 28  | 170 | 2  | 6 | 13  | 90  | 47  | 296 |
| 45,150 | 4  | 30 | 28  | 172 | 2  | 6 | 13  | 90  | 47  | 298 |
| 45,151 | 4  | 33 | 29  | 195 | 2  | 7 | 15  | 116 | 50  | 351 |
| 45,152 | 4  | 33 | 29  | 195 | 2  | 7 | 15  | 116 | 50  | 351 |
| 45,153 | 6  | 32 | 31  | 195 | 2  | 7 | 18  | 112 | 57  | 346 |
| 45,154 | 7  | 34 | 31  | 201 | 2  | 7 | 19  | 112 | 59  | 354 |
| 45,155 | 7  | 34 | 31  | 200 | 2  | 7 | 19  | 112 | 59  | 353 |
| 45,156 | 7  | 34 | 33  | 197 | 2  | 7 | 20  | 114 | 62  | 352 |
| 45,157 | 7  | 34 | 33  | 196 | 2  | 7 | 20  | 113 | 62  | 350 |
| 45,158 | 7  | 34 | 33  | 195 | 2  | 7 | 20  | 112 | 62  | 348 |
| 45,159 | 7  | 34 | 33  | 196 | 2  | 7 | 20  | 113 | 62  | 350 |
| 45,160 | 7  | 31 | 33  | 174 | 2  | 5 | 20  | 84  | 62  | 294 |
| 45,161 | 7  | 28 | 33  | 159 | 2  | 5 | 20  | 71  | 62  | 263 |
| 45,162 | 7  | 28 | 32  | 157 | 2  | 5 | 20  | 71  | 61  | 261 |
| 45,163 | 7  | 28 | 31  | 157 | 2  | 5 | 19  | 71  | 59  | 261 |
| 45,164 | 7  | 28 | 31  | 150 | 2  | 4 | 17  | 66  | 57  | 248 |
| 45,165 | 7  | 28 | 31  | 153 | 2  | 3 | 17  | 68  | 57  | 252 |
| 45,166 | 7  | 29 | 31  | 157 | 2  | 3 | 17  | 74  | 57  | 263 |
| 45,167 | 7  | 30 | 30  | 157 | 2  | 3 | 17  | 74  | 56  | 264 |
| 45,168 | 7  | 30 | 30  | 157 | 2  | 3 | 17  | 74  | 56  | 264 |
| 45,169 | 7  | 31 | 27  | 166 | 2  | 3 | 17  | 82  | 53  | 282 |
| 45,170 | 7  | 30 | 24  | 168 | 2  | 3 | 17  | 80  | 50  | 281 |

|        |    |    |    |     |   |   |    |    |     |     |
|--------|----|----|----|-----|---|---|----|----|-----|-----|
| 45,171 | 7  | 30 | 25 | 168 | 3 | 3 | 17 | 80 | 52  | 281 |
| 45,172 | 7  | 30 | 24 | 166 | 3 | 3 | 17 | 80 | 51  | 279 |
| 45,173 | 7  | 30 | 23 | 164 | 3 | 3 | 17 | 79 | 50  | 276 |
| 45,174 | 6  | 30 | 23 | 164 | 3 | 3 | 17 | 79 | 49  | 276 |
| 45,175 | 7  | 30 | 23 | 165 | 3 | 3 | 17 | 79 | 50  | 277 |
| 45,176 | 7  | 30 | 24 | 165 | 3 | 3 | 20 | 79 | 54  | 277 |
| 45,177 | 7  | 30 | 24 | 164 | 3 | 3 | 20 | 79 | 54  | 276 |
| 45,178 | 10 | 30 | 25 | 163 | 3 | 3 | 21 | 79 | 59  | 275 |
| 45,179 | 10 | 30 | 25 | 164 | 3 | 3 | 25 | 79 | 63  | 276 |
| 45,180 | 10 | 30 | 25 | 164 | 3 | 3 | 25 | 79 | 63  | 276 |
| 45,181 | 11 | 28 | 32 | 145 | 3 | 3 | 33 | 72 | 79  | 248 |
| 45,182 | 11 | 31 | 32 | 145 | 3 | 3 | 33 | 73 | 79  | 252 |
| 45,183 | 11 | 26 | 32 | 120 | 3 | 3 | 33 | 70 | 79  | 219 |
| 45,184 | 10 | 25 | 45 | 118 | 3 | 4 | 43 | 73 | 101 | 220 |
| 45,185 | 10 | 21 | 51 | 112 | 3 | 2 | 45 | 72 | 109 | 207 |
| 45,186 | 10 | 21 | 52 | 107 | 3 | 2 | 45 | 70 | 110 | 200 |
| 45,187 | 10 | 21 | 50 | 108 | 3 | 2 | 45 | 70 | 108 | 201 |
| 45,188 | 10 | 21 | 44 | 109 | 2 | 2 | 43 | 73 | 99  | 205 |
| 45,189 | 10 | 13 | 42 | 98  | 2 | 2 | 43 | 71 | 97  | 184 |
| 45,190 | 10 | 13 | 42 | 91  | 2 | 2 | 43 | 71 | 97  | 177 |
| 45,191 | 10 | 12 | 42 | 83  | 2 | 2 | 43 | 67 | 97  | 164 |
| 45,192 | 10 | 12 | 41 | 85  | 2 | 2 | 43 | 67 | 96  | 166 |
| 45,193 | 9  | 12 | 40 | 84  | 2 | 2 | 41 | 66 | 92  | 164 |
| 45,194 | 9  | 11 | 40 | 75  | 2 | 2 | 41 | 63 | 92  | 151 |
| 45,195 | 9  | 11 | 40 | 76  | 2 | 2 | 41 | 63 | 92  | 152 |
| 45,196 | 9  | 11 | 37 | 75  | 2 | 2 | 41 | 63 | 89  | 151 |
| 45,197 | 9  | 11 | 37 | 73  | 2 | 2 | 41 | 61 | 89  | 147 |
| 45,198 | 9  | 12 | 37 | 73  | 2 | 2 | 41 | 61 | 89  | 148 |
| 45,199 | 9  | 12 | 36 | 73  | 1 | 2 | 39 | 62 | 85  | 149 |
| 45,200 | 8  | 12 | 36 | 72  | 1 | 2 | 39 | 62 | 84  | 148 |
| 45,201 | 8  | 12 | 36 | 72  | 1 | 2 | 38 | 62 | 83  | 148 |
| 45,202 | 8  | 7  | 37 | 41  | 1 | 1 | 37 | 36 | 83  | 85  |
| 45,203 | 8  | 7  | 36 | 43  | 1 | 1 | 39 | 38 | 84  | 89  |
| 45,204 | 6  | 7  | 35 | 43  | 1 | 1 | 37 | 38 | 79  | 89  |
| 45,205 | 5  | 7  | 35 | 40  | 1 | 1 | 38 | 36 | 79  | 84  |
| 45,206 | 5  | 7  | 33 | 40  | 1 | 1 | 38 | 34 | 77  | 82  |
| 45,207 | 5  | 7  | 33 | 40  | 1 | 1 | 43 | 33 | 82  | 81  |
| 45,208 | 5  | 7  | 33 | 40  | 1 | 1 | 43 | 33 | 82  | 81  |
| 45,209 | 5  | 7  | 33 | 40  | 1 | 1 | 43 | 33 | 82  | 81  |
| 45,210 | 5  | 7  | 33 | 39  | 1 | 1 | 43 | 32 | 82  | 79  |
| 45,211 | 5  | 7  | 33 | 39  | 1 | 1 | 43 | 32 | 82  | 79  |

|        |   |    |    |     |   |    |    |     |    |     |
|--------|---|----|----|-----|---|----|----|-----|----|-----|
| 45,212 | 5 | 7  | 33 | 39  | 1 | 1  | 43 | 32  | 82 | 79  |
| 45,213 | 5 | 7  | 33 | 39  | 1 | 1  | 43 | 32  | 82 | 79  |
| 45,214 | 5 | 7  | 36 | 40  | 1 | 1  | 44 | 34  | 86 | 82  |
| 45,215 | 5 | 7  | 36 | 40  | 1 | 1  | 44 | 34  | 86 | 82  |
| 45,216 | 5 | 7  | 37 | 37  | 1 | 1  | 44 | 32  | 87 | 77  |
| 45,217 | 5 | 5  | 37 | 32  | 1 | 1  | 44 | 25  | 87 | 63  |
| 45,218 | 5 | 5  | 37 | 32  | 1 | 1  | 45 | 25  | 88 | 63  |
| 45,219 | 5 | 5  | 37 | 32  | 1 | 1  | 45 | 25  | 88 | 63  |
| 45,220 | 5 | 4  | 36 | 23  | 0 | 1  | 45 | 17  | 86 | 45  |
| 45,221 | 5 | 4  | 36 | 21  | 0 | 1  | 44 | 17  | 85 | 43  |
| 45,222 | 5 | 4  | 36 | 22  | 0 | 1  | 44 | 17  | 85 | 44  |
| 45,223 | 5 | 4  | 38 | 22  | 0 | 1  | 45 | 17  | 88 | 44  |
| 45,224 | 5 | 4  | 40 | 22  | 0 | 1  | 45 | 17  | 90 | 44  |
| 45,225 | 5 | 4  | 40 | 21  | 0 | 1  | 45 | 17  | 90 | 43  |
| 45,226 | 4 | 4  | 40 | 21  | 0 | 1  | 45 | 17  | 89 | 43  |
| 45,227 | 4 | 4  | 39 | 21  | 0 | 1  | 42 | 17  | 85 | 43  |
| 45,228 | 1 | 4  | 38 | 22  | 0 | 1  | 41 | 17  | 80 | 44  |
| 45,229 | 1 | 4  | 38 | 22  | 0 | 1  | 41 | 17  | 80 | 44  |
| 45,230 | 1 | 4  | 38 | 33  | 0 | 2  | 37 | 23  | 76 | 62  |
| 45,231 | 1 | 6  | 38 | 53  | 0 | 3  | 37 | 42  | 76 | 104 |
| 45,232 | 0 | 7  | 30 | 108 | 0 | 8  | 27 | 81  | 57 | 204 |
| 45,233 | 0 | 4  | 25 | 113 | 0 | 9  | 23 | 91  | 48 | 217 |
| 45,234 | 0 | 5  | 23 | 113 | 0 | 9  | 19 | 94  | 42 | 221 |
| 45,235 | 0 | 15 | 17 | 172 | 0 | 13 | 17 | 144 | 34 | 344 |
| 45,236 | 0 | 15 | 11 | 176 | 0 | 13 | 15 | 147 | 26 | 351 |
| 45,237 | 0 | 17 | 12 | 205 | 0 | 15 | 15 | 165 | 27 | 402 |
| 45,238 | 0 | 17 | 12 | 206 | 0 | 15 | 15 | 165 | 27 | 403 |
| 45,239 | 0 | 17 | 12 | 209 | 0 | 15 | 16 | 162 | 28 | 403 |
| 45,240 | 0 | 17 | 12 | 210 | 0 | 15 | 16 | 161 | 28 | 403 |
| 45,241 | 0 | 17 | 12 | 216 | 0 | 15 | 16 | 161 | 28 | 409 |
| 45,242 | 0 | 18 | 12 | 225 | 0 | 15 | 16 | 160 | 28 | 418 |
| 45,243 | 0 | 18 | 12 | 223 | 0 | 15 | 16 | 162 | 28 | 418 |
| 45,244 | 0 | 18 | 12 | 226 | 0 | 15 | 16 | 162 | 28 | 421 |
| 45,245 | 0 | 18 | 12 | 226 | 0 | 15 | 16 | 163 | 28 | 422 |
| 45,246 | 0 | 19 | 12 | 228 | 0 | 15 | 16 | 165 | 28 | 427 |
| 45,247 | 0 | 19 | 12 | 233 | 0 | 15 | 16 | 165 | 28 | 432 |
| 45,248 | 0 | 19 | 12 | 233 | 0 | 15 | 16 | 165 | 28 | 432 |
| 45,249 | 0 | 18 | 22 | 233 | 0 | 15 | 17 | 166 | 39 | 432 |
| 45,250 | 0 | 18 | 31 | 233 | 1 | 15 | 21 | 165 | 53 | 431 |
| 45,251 | 0 | 18 | 33 | 234 | 2 | 16 | 22 | 166 | 57 | 434 |
| 45,252 | 0 | 18 | 33 | 234 | 2 | 16 | 22 | 167 | 57 | 435 |



|        |   |    |    |     |   |    |    |     |    |     |
|--------|---|----|----|-----|---|----|----|-----|----|-----|
| 45,253 | 0 | 19 | 32 | 235 | 2 | 16 | 22 | 166 | 56 | 436 |
| 45,254 | 0 | 19 | 32 | 235 | 2 | 16 | 20 | 164 | 54 | 434 |
| 45,255 | 0 | 19 | 32 | 235 | 2 | 16 | 19 | 164 | 53 | 434 |
| 45,256 | 0 | 19 | 32 | 235 | 2 | 16 | 17 | 164 | 51 | 434 |
| 45,257 | 0 | 19 | 32 | 235 | 2 | 16 | 16 | 164 | 50 | 434 |
| 45,258 | 0 | 19 | 32 | 235 | 2 | 16 | 11 | 165 | 45 | 435 |
| 45,259 | 0 | 19 | 32 | 235 | 2 | 16 | 11 | 165 | 45 | 435 |
| 45,260 | 0 | 19 | 33 | 235 | 2 | 16 | 11 | 165 | 46 | 435 |
| 45,261 | 0 | 19 | 33 | 235 | 2 | 16 | 11 | 166 | 46 | 436 |
| 45,262 | 0 | 20 | 33 | 237 | 2 | 16 | 12 | 166 | 47 | 439 |
| 45,263 | 0 | 20 | 33 | 240 | 2 | 16 | 12 | 167 | 47 | 443 |
| 45,264 | 0 | 20 | 33 | 239 | 2 | 16 | 12 | 167 | 47 | 442 |
| 45,265 | 0 | 20 | 30 | 238 | 2 | 16 | 11 | 165 | 43 | 439 |
| 45,266 | 0 | 20 | 29 | 238 | 2 | 16 | 11 | 165 | 42 | 439 |
| 45,267 | 1 | 20 | 29 | 238 | 2 | 16 | 11 | 165 | 43 | 439 |
| 45,268 | 1 | 20 | 29 | 239 | 2 | 16 | 11 | 166 | 43 | 441 |
| 45,269 | 1 | 20 | 29 | 239 | 2 | 16 | 9  | 166 | 41 | 441 |
| 45,270 | 1 | 20 | 29 | 239 | 2 | 16 | 9  | 167 | 41 | 442 |
| 45,271 | 1 | 20 | 29 | 237 | 2 | 16 | 9  | 167 | 41 | 440 |
| 45,272 | 1 | 20 | 29 | 237 | 2 | 16 | 9  | 167 | 41 | 440 |
| 45,273 | 1 | 20 | 27 | 237 | 2 | 16 | 8  | 167 | 38 | 440 |
| 45,274 | 1 | 20 | 26 | 237 | 2 | 16 | 8  | 167 | 37 | 440 |
| 45,275 | 2 | 20 | 25 | 237 | 2 | 16 | 8  | 167 | 37 | 440 |
| 45,276 | 2 | 20 | 25 | 237 | 2 | 16 | 8  | 169 | 37 | 442 |
| 45,277 | 2 | 20 | 25 | 237 | 2 | 16 | 8  | 169 | 37 | 442 |
| 45,278 | 2 | 20 | 25 | 236 | 2 | 16 | 8  | 169 | 37 | 441 |
| 45,279 | 2 | 20 | 25 | 236 | 2 | 16 | 8  | 169 | 37 | 441 |
| 45,280 | 2 | 20 | 25 | 236 | 2 | 16 | 8  | 169 | 37 | 441 |
| 45,281 | 2 | 18 | 25 | 205 | 2 | 14 | 8  | 143 | 37 | 380 |
| 45,282 | 2 | 17 | 26 | 150 | 2 | 9  | 9  | 104 | 39 | 280 |
| 45,283 | 2 | 17 | 26 | 150 | 2 | 9  | 9  | 104 | 39 | 280 |
| 45,284 | 2 | 17 | 26 | 145 | 2 | 8  | 9  | 94  | 39 | 264 |
| 45,285 | 2 | 16 | 28 | 144 | 2 | 8  | 10 | 92  | 42 | 260 |
| 45,286 | 2 | 6  | 28 | 77  | 2 | 3  | 13 | 36  | 45 | 122 |
| 45,287 | 2 | 6  | 28 | 77  | 2 | 3  | 14 | 40  | 46 | 126 |
| 45,288 | 3 | 4  | 33 | 51  | 2 | 1  | 15 | 22  | 53 | 78  |
| 45,289 | 3 | 4  | 33 | 51  | 2 | 1  | 14 | 23  | 52 | 79  |
| 45,290 | 3 | 4  | 33 | 46  | 2 | 1  | 14 | 23  | 52 | 74  |
| 45,291 | 3 | 4  | 33 | 44  | 2 | 1  | 16 | 23  | 54 | 72  |
| 45,292 | 3 | 4  | 33 | 39  | 2 | 1  | 16 | 23  | 54 | 67  |
| 45,293 | 3 | 3  | 33 | 32  | 2 | 1  | 16 | 23  | 54 | 59  |

|        |   |    |    |     |   |    |    |     |    |     |
|--------|---|----|----|-----|---|----|----|-----|----|-----|
| 45,294 | 3 | 4  | 33 | 38  | 2 | 1  | 16 | 31  | 54 | 74  |
| 45,295 | 3 | 4  | 33 | 39  | 2 | 1  | 16 | 33  | 54 | 77  |
| 45,296 | 3 | 4  | 33 | 43  | 2 | 1  | 16 | 34  | 54 | 82  |
| 45,297 | 3 | 7  | 33 | 55  | 2 | 2  | 16 | 44  | 54 | 108 |
| 45,298 | 3 | 7  | 34 | 53  | 2 | 2  | 16 | 48  | 55 | 110 |
| 45,299 | 3 | 8  | 31 | 53  | 2 | 2  | 16 | 51  | 52 | 114 |
| 45,300 | 3 | 9  | 24 | 57  | 2 | 2  | 15 | 51  | 44 | 119 |
| 45,301 | 3 | 9  | 15 | 57  | 1 | 1  | 11 | 53  | 30 | 120 |
| 45,302 | 3 | 9  | 12 | 57  | 0 | 2  | 10 | 56  | 25 | 124 |
| 45,303 | 3 | 8  | 12 | 60  | 0 | 2  | 10 | 55  | 25 | 125 |
| 45,304 | 3 | 8  | 13 | 60  | 0 | 2  | 10 | 55  | 26 | 125 |
| 45,305 | 3 | 8  | 13 | 60  | 0 | 3  | 10 | 55  | 26 | 126 |
| 45,306 | 3 | 8  | 12 | 60  | 0 | 3  | 10 | 55  | 25 | 126 |
| 45,307 | 3 | 8  | 12 | 60  | 0 | 3  | 10 | 55  | 25 | 126 |
| 45,308 | 3 | 8  | 12 | 60  | 0 | 3  | 10 | 55  | 25 | 126 |
| 45,309 | 3 | 8  | 12 | 60  | 0 | 3  | 10 | 54  | 25 | 125 |
| 45,310 | 3 | 8  | 13 | 62  | 0 | 3  | 10 | 54  | 26 | 127 |
| 45,311 | 3 | 8  | 13 | 63  | 0 | 3  | 11 | 54  | 27 | 128 |
| 45,312 | 3 | 8  | 13 | 80  | 0 | 8  | 11 | 85  | 27 | 181 |
| 45,313 | 3 | 7  | 13 | 80  | 0 | 9  | 10 | 99  | 26 | 195 |
| 45,314 | 3 | 10 | 13 | 126 | 0 | 9  | 10 | 101 | 26 | 246 |
| 45,315 | 3 | 10 | 14 | 131 | 0 | 9  | 10 | 104 | 27 | 254 |
| 45,316 | 3 | 10 | 15 | 132 | 0 | 9  | 10 | 104 | 28 | 255 |
| 45,317 | 3 | 10 | 17 | 136 | 0 | 9  | 12 | 104 | 32 | 259 |
| 45,318 | 2 | 10 | 17 | 136 | 0 | 9  | 12 | 104 | 31 | 259 |
| 45,319 | 2 | 10 | 17 | 138 | 0 | 9  | 13 | 103 | 32 | 260 |
| 45,320 | 2 | 10 | 17 | 138 | 0 | 9  | 13 | 103 | 32 | 260 |
| 45,321 | 2 | 10 | 18 | 138 | 0 | 9  | 13 | 102 | 33 | 259 |
| 45,322 | 2 | 11 | 18 | 140 | 0 | 10 | 13 | 103 | 33 | 264 |
| 45,323 | 2 | 11 | 18 | 144 | 0 | 10 | 13 | 103 | 33 | 268 |
| 45,324 | 2 | 12 | 18 | 147 | 0 | 10 | 14 | 108 | 34 | 277 |
| 45,325 | 2 | 12 | 18 | 147 | 0 | 10 | 14 | 108 | 34 | 277 |
| 45,326 | 1 | 12 | 18 | 148 | 0 | 10 | 14 | 108 | 33 | 278 |
| 45,327 | 1 | 12 | 18 | 148 | 0 | 10 | 14 | 108 | 33 | 278 |
| 45,328 | 1 | 13 | 18 | 151 | 0 | 10 | 14 | 113 | 33 | 287 |
| 45,329 | 1 | 13 | 18 | 153 | 0 | 10 | 14 | 113 | 33 | 289 |
| 45,330 | 1 | 13 | 18 | 153 | 0 | 10 | 14 | 113 | 33 | 289 |
| 45,331 | 1 | 13 | 18 | 155 | 0 | 10 | 14 | 113 | 33 | 291 |
| 45,332 | 1 | 13 | 18 | 158 | 0 | 10 | 14 | 113 | 33 | 294 |
| 45,333 | 1 | 15 | 17 | 166 | 0 | 11 | 13 | 119 | 31 | 311 |
| 45,334 | 1 | 15 | 16 | 167 | 0 | 11 | 13 | 119 | 30 | 312 |

|        |   |    |    |     |   |    |    |     |    |     |
|--------|---|----|----|-----|---|----|----|-----|----|-----|
| 45,335 | 1 | 15 | 15 | 168 | 0 | 11 | 12 | 119 | 28 | 313 |
| 45,336 | 1 | 15 | 15 | 170 | 0 | 11 | 10 | 118 | 26 | 314 |
| 45,337 | 1 | 15 | 16 | 169 | 0 | 11 | 9  | 113 | 26 | 308 |
| 45,338 | 1 | 15 | 15 | 170 | 0 | 11 | 8  | 113 | 24 | 309 |
| 45,339 | 0 | 15 | 9  | 167 | 0 | 11 | 7  | 113 | 16 | 306 |
| 45,340 | 0 | 15 | 9  | 165 | 0 | 11 | 5  | 112 | 14 | 303 |
| 45,341 | 0 | 15 | 9  | 168 | 0 | 11 | 5  | 112 | 14 | 306 |
| 45,342 | 0 | 15 | 9  | 171 | 0 | 11 | 5  | 112 | 14 | 309 |
| 45,343 | 0 | 15 | 9  | 171 | 0 | 11 | 6  | 112 | 15 | 309 |
| 45,344 | 0 | 14 | 9  | 163 | 0 | 10 | 6  | 102 | 15 | 289 |
| 45,345 | 0 | 14 | 9  | 159 | 0 | 11 | 6  | 100 | 15 | 284 |
| 45,346 | 0 | 10 | 9  | 140 | 0 | 10 | 6  | 86  | 15 | 246 |
| 45,347 | 0 | 10 | 9  | 140 | 0 | 10 | 6  | 86  | 15 | 246 |
| 45,348 | 0 | 10 | 9  | 140 | 0 | 10 | 6  | 86  | 15 | 246 |
| 45,349 | 0 | 11 | 8  | 137 | 0 | 10 | 6  | 82  | 14 | 240 |
| 45,350 | 0 | 10 | 9  | 133 | 0 | 10 | 6  | 78  | 15 | 231 |
| 45,351 | 1 | 10 | 12 | 133 | 0 | 10 | 7  | 78  | 20 | 231 |
| 45,352 | 1 | 10 | 13 | 134 | 0 | 9  | 8  | 70  | 22 | 223 |
| 45,353 | 1 | 10 | 13 | 134 | 0 | 9  | 8  | 70  | 22 | 223 |
| 45,354 | 1 | 10 | 13 | 130 | 0 | 9  | 8  | 70  | 22 | 219 |
| 45,355 | 2 | 10 | 13 | 130 | 0 | 9  | 12 | 70  | 27 | 219 |
| 45,356 | 2 | 10 | 13 | 128 | 0 | 8  | 12 | 70  | 27 | 216 |
| 45,357 | 2 | 10 | 13 | 128 | 1 | 8  | 12 | 70  | 28 | 216 |
| 45,358 | 2 | 10 | 13 | 128 | 1 | 8  | 12 | 70  | 28 | 216 |
| 45,359 | 2 | 10 | 13 | 128 | 1 | 8  | 12 | 70  | 28 | 216 |
| 45,360 | 2 | 10 | 13 | 128 | 1 | 8  | 12 | 70  | 28 | 216 |
| 45,361 | 2 | 10 | 12 | 125 | 1 | 8  | 12 | 71  | 27 | 214 |
| 45,362 | 2 | 10 | 12 | 125 | 1 | 8  | 11 | 71  | 26 | 214 |
| 45,363 | 2 | 10 | 12 | 109 | 1 | 4  | 11 | 39  | 26 | 162 |
| 45,364 | 2 | 7  | 12 | 53  | 1 | 2  | 11 | 21  | 26 | 83  |
| 45,365 | 2 | 7  | 12 | 53  | 1 | 2  | 11 | 21  | 26 | 83  |
| 45,366 | 2 | 7  | 11 | 53  | 1 | 2  | 11 | 21  | 25 | 83  |
| 45,367 | 2 | 7  | 10 | 52  | 1 | 2  | 11 | 21  | 24 | 82  |
| 45,368 | 2 | 7  | 8  | 48  | 1 | 2  | 9  | 21  | 20 | 78  |
| 45,369 | 2 | 7  | 8  | 48  | 1 | 2  | 8  | 21  | 19 | 78  |
| 45,370 | 2 | 7  | 8  | 45  | 1 | 2  | 8  | 21  | 19 | 75  |
| 45,371 | 2 | 7  | 7  | 45  | 1 | 2  | 8  | 21  | 18 | 75  |
| 45,372 | 2 | 7  | 7  | 45  | 1 | 2  | 7  | 21  | 17 | 75  |
| 45,373 | 2 | 6  | 7  | 43  | 1 | 1  | 7  | 20  | 17 | 70  |
| 45,374 | 2 | 6  | 7  | 39  | 1 | 1  | 7  | 20  | 17 | 66  |
| 45,375 | 2 | 5  | 7  | 36  | 1 | 1  | 7  | 15  | 17 | 57  |

|        |   |    |    |    |   |   |   |    |    |     |
|--------|---|----|----|----|---|---|---|----|----|-----|
| 45,376 | 2 | 5  | 7  | 36 | 1 | 1 | 7 | 15 | 17 | 57  |
| 45,377 | 2 | 5  | 7  | 35 | 1 | 1 | 7 | 13 | 17 | 54  |
| 45,378 | 2 | 5  | 7  | 35 | 1 | 1 | 7 | 13 | 17 | 54  |
| 45,379 | 2 | 4  | 7  | 32 | 1 | 1 | 7 | 8  | 17 | 45  |
| 45,380 | 3 | 4  | 7  | 31 | 1 | 1 | 7 | 8  | 18 | 44  |
| 45,381 | 3 | 4  | 7  | 32 | 1 | 1 | 7 | 8  | 18 | 45  |
| 45,382 | 3 | 4  | 8  | 32 | 1 | 1 | 7 | 9  | 19 | 46  |
| 45,383 | 3 | 4  | 9  | 29 | 1 | 1 | 8 | 9  | 21 | 43  |
| 45,384 | 3 | 2  | 10 | 23 | 1 | 1 | 8 | 3  | 22 | 29  |
| 45,385 | 3 | 2  | 10 | 30 | 1 | 1 | 8 | 7  | 22 | 40  |
| 45,386 | 3 | 3  | 10 | 31 | 1 | 3 | 8 | 6  | 22 | 43  |
| 45,387 | 3 | 3  | 10 | 29 | 1 | 3 | 8 | 7  | 22 | 42  |
| 45,388 | 3 | 3  | 9  | 29 | 1 | 3 | 8 | 7  | 21 | 42  |
| 45,389 | 3 | 3  | 9  | 28 | 1 | 3 | 8 | 7  | 21 | 41  |
| 45,390 | 3 | 3  | 9  | 31 | 2 | 4 | 8 | 7  | 22 | 45  |
| 45,391 | 3 | 3  | 9  | 25 | 2 | 4 | 8 | 7  | 22 | 39  |
| 45,392 | 3 | 3  | 9  | 22 | 2 | 4 | 8 | 7  | 22 | 36  |
| 45,393 | 3 | 3  | 9  | 22 | 2 | 4 | 8 | 7  | 22 | 36  |
| 45,394 | 3 | 3  | 9  | 23 | 2 | 4 | 7 | 7  | 21 | 37  |
| 45,395 | 3 | 3  | 9  | 23 | 2 | 4 | 7 | 7  | 21 | 37  |
| 45,396 | 3 | 3  | 9  | 23 | 2 | 4 | 7 | 7  | 21 | 37  |
| 45,397 | 3 | 3  | 10 | 24 | 2 | 4 | 7 | 7  | 22 | 38  |
| 45,398 | 3 | 3  | 10 | 25 | 2 | 4 | 7 | 7  | 22 | 39  |
| 45,399 | 3 | 2  | 9  | 25 | 2 | 4 | 7 | 7  | 21 | 38  |
| 45,400 | 3 | 1  | 9  | 26 | 2 | 5 | 7 | 8  | 21 | 40  |
| 45,401 | 3 | 2  | 9  | 27 | 2 | 5 | 7 | 9  | 21 | 43  |
| 45,402 | 2 | 2  | 6  | 34 | 2 | 5 | 6 | 9  | 16 | 50  |
| 45,403 | 2 | 2  | 5  | 32 | 2 | 5 | 5 | 10 | 14 | 49  |
| 45,404 | 1 | 3  | 4  | 32 | 2 | 5 | 2 | 11 | 9  | 51  |
| 45,405 | 1 | 4  | 4  | 37 | 2 | 5 | 1 | 13 | 8  | 59  |
| 45,406 | 1 | 4  | 4  | 64 | 2 | 6 | 1 | 21 | 8  | 95  |
| 45,407 | 1 | 7  | 4  | 67 | 1 | 6 | 1 | 25 | 7  | 105 |
| 45,408 | 1 | 10 | 5  | 74 | 1 | 6 | 1 | 27 | 8  | 117 |
| 45,409 | 1 | 10 | 5  | 74 | 1 | 6 | 1 | 27 | 8  | 117 |
| 45,410 | 1 | 10 | 5  | 75 | 1 | 6 | 1 | 28 | 8  | 119 |
| 45,411 | 1 | 11 | 5  | 80 | 1 | 6 | 1 | 31 | 8  | 128 |
| 45,412 | 1 | 11 | 5  | 80 | 1 | 6 | 1 | 30 | 8  | 127 |
| 45,413 | 1 | 12 | 5  | 81 | 1 | 6 | 1 | 30 | 8  | 129 |
| 45,414 | 1 | 12 | 5  | 82 | 1 | 6 | 1 | 30 | 8  | 130 |
| 45,415 | 1 | 12 | 5  | 82 | 1 | 6 | 1 | 30 | 8  | 130 |
| 45,416 | 1 | 12 | 6  | 82 | 1 | 6 | 1 | 30 | 9  | 130 |

|        |   |    |    |     |   |   |   |    |    |     |
|--------|---|----|----|-----|---|---|---|----|----|-----|
| 45,417 | 1 | 12 | 6  | 82  | 1 | 6 | 2 | 30 | 10 | 130 |
| 45,418 | 1 | 12 | 6  | 82  | 1 | 6 | 4 | 31 | 12 | 131 |
| 45,419 | 1 | 12 | 6  | 84  | 1 | 6 | 4 | 31 | 12 | 133 |
| 45,420 | 1 | 13 | 6  | 84  | 1 | 6 | 4 | 31 | 12 | 134 |
| 45,421 | 1 | 13 | 7  | 86  | 1 | 6 | 4 | 32 | 13 | 137 |
| 45,422 | 1 | 13 | 9  | 86  | 1 | 6 | 4 | 33 | 15 | 138 |
| 45,423 | 1 | 13 | 10 | 86  | 1 | 6 | 4 | 33 | 16 | 138 |
| 45,424 | 1 | 13 | 10 | 86  | 1 | 6 | 4 | 33 | 16 | 138 |
| 45,425 | 1 | 13 | 12 | 87  | 1 | 6 | 5 | 33 | 19 | 139 |
| 45,426 | 1 | 13 | 12 | 87  | 1 | 6 | 5 | 33 | 19 | 139 |
| 45,427 | 1 | 13 | 14 | 88  | 1 | 6 | 5 | 33 | 21 | 140 |
| 45,428 | 1 | 13 | 15 | 88  | 1 | 6 | 5 | 33 | 22 | 140 |
| 45,429 | 1 | 13 | 15 | 88  | 1 | 6 | 5 | 33 | 22 | 140 |
| 45,430 | 1 | 13 | 15 | 88  | 1 | 6 | 5 | 33 | 22 | 140 |
| 45,431 | 0 | 13 | 15 | 91  | 1 | 6 | 5 | 35 | 21 | 145 |
| 45,432 | 0 | 13 | 14 | 92  | 1 | 8 | 5 | 39 | 20 | 152 |
| 45,433 | 0 | 13 | 14 | 94  | 1 | 8 | 5 | 39 | 20 | 154 |
| 45,434 | 0 | 13 | 13 | 95  | 1 | 8 | 4 | 41 | 18 | 157 |
| 45,435 | 0 | 15 | 12 | 94  | 1 | 7 | 4 | 42 | 17 | 158 |
| 45,436 | 0 | 15 | 12 | 86  | 1 | 7 | 4 | 38 | 17 | 146 |
| 45,437 | 0 | 15 | 12 | 104 | 1 | 5 | 4 | 46 | 17 | 170 |
| 45,438 | 0 | 15 | 12 | 104 | 1 | 5 | 4 | 45 | 17 | 169 |
| 45,439 | 0 | 15 | 12 | 104 | 2 | 5 | 4 | 46 | 18 | 170 |
| 45,440 | 0 | 15 | 12 | 101 | 2 | 4 | 4 | 46 | 18 | 166 |
| 45,441 | 0 | 15 | 12 | 101 | 1 | 4 | 4 | 46 | 17 | 166 |
| 45,442 | 0 | 15 | 12 | 102 | 1 | 4 | 4 | 46 | 17 | 167 |
| 45,443 | 0 | 15 | 13 | 102 | 1 | 4 | 4 | 46 | 18 | 167 |
| 45,444 | 0 | 16 | 13 | 109 | 1 | 4 | 4 | 48 | 18 | 177 |
| 45,445 | 0 | 16 | 13 | 108 | 1 | 4 | 4 | 48 | 18 | 176 |
| 45,446 | 0 | 16 | 16 | 109 | 1 | 4 | 6 | 48 | 23 | 177 |
| 45,447 | 0 | 16 | 17 | 108 | 1 | 4 | 6 | 48 | 24 | 176 |
| 45,448 | 0 | 16 | 16 | 108 | 1 | 4 | 6 | 48 | 23 | 176 |
| 45,449 | 0 | 16 | 16 | 109 | 1 | 4 | 6 | 48 | 23 | 177 |
| 45,450 | 0 | 16 | 16 | 109 | 1 | 4 | 6 | 48 | 23 | 177 |
| 45,451 | 0 | 15 | 17 | 107 | 1 | 3 | 6 | 46 | 24 | 171 |
| 45,452 | 0 | 15 | 17 | 107 | 1 | 3 | 6 | 46 | 24 | 171 |
| 45,453 | 0 | 15 | 17 | 100 | 1 | 3 | 6 | 45 | 24 | 163 |
| 45,454 | 0 | 14 | 17 | 99  | 1 | 3 | 6 | 44 | 24 | 160 |
| 45,455 | 0 | 14 | 17 | 99  | 1 | 3 | 6 | 44 | 24 | 160 |
| 45,456 | 0 | 13 | 17 | 69  | 1 | 2 | 6 | 35 | 24 | 119 |
| 45,457 | 0 | 13 | 17 | 69  | 1 | 2 | 6 | 35 | 24 | 119 |

|        |   |    |    |     |   |   |   |    |    |     |
|--------|---|----|----|-----|---|---|---|----|----|-----|
| 45,458 | 0 | 7  | 17 | 59  | 1 | 2 | 6 | 29 | 24 | 97  |
| 45,459 | 0 | 7  | 16 | 59  | 1 | 2 | 6 | 29 | 23 | 97  |
| 45,460 | 0 | 7  | 16 | 59  | 1 | 2 | 6 | 30 | 23 | 98  |
| 45,461 | 0 | 7  | 16 | 59  | 1 | 2 | 6 | 29 | 23 | 97  |
| 45,462 | 0 | 6  | 16 | 54  | 1 | 2 | 6 | 26 | 23 | 88  |
| 45,463 | 0 | 6  | 16 | 54  | 1 | 2 | 6 | 26 | 23 | 88  |
| 45,464 | 0 | 5  | 16 | 53  | 1 | 2 | 6 | 27 | 23 | 87  |
| 45,465 | 0 | 5  | 16 | 54  | 1 | 2 | 6 | 28 | 23 | 89  |
| 45,466 | 0 | 5  | 17 | 56  | 1 | 2 | 6 | 28 | 24 | 91  |
| 45,467 | 0 | 5  | 16 | 56  | 1 | 2 | 6 | 28 | 23 | 91  |
| 45,468 | 1 | 5  | 18 | 56  | 1 | 2 | 5 | 29 | 25 | 92  |
| 45,469 | 1 | 5  | 18 | 56  | 1 | 2 | 3 | 30 | 23 | 93  |
| 45,470 | 1 | 5  | 18 | 69  | 1 | 2 | 3 | 31 | 23 | 107 |
| 45,471 | 1 | 5  | 17 | 70  | 1 | 2 | 3 | 32 | 22 | 109 |
| 45,472 | 1 | 5  | 16 | 70  | 2 | 2 | 3 | 32 | 22 | 109 |
| 45,473 | 1 | 5  | 16 | 70  | 2 | 2 | 3 | 31 | 22 | 108 |
| 45,474 | 1 | 6  | 15 | 69  | 2 | 2 | 3 | 32 | 21 | 109 |
| 45,475 | 1 | 6  | 16 | 82  | 2 | 2 | 3 | 32 | 22 | 122 |
| 45,476 | 1 | 8  | 14 | 102 | 2 | 4 | 2 | 42 | 19 | 156 |
| 45,477 | 1 | 9  | 12 | 116 | 2 | 4 | 2 | 46 | 17 | 175 |
| 45,478 | 1 | 9  | 11 | 124 | 2 | 4 | 2 | 48 | 16 | 185 |
| 45,479 | 1 | 9  | 12 | 127 | 2 | 5 | 2 | 49 | 17 | 190 |
| 45,480 | 1 | 10 | 12 | 154 | 2 | 6 | 2 | 58 | 17 | 228 |
| 45,481 | 1 | 10 | 12 | 164 | 2 | 7 | 2 | 62 | 17 | 243 |
| 45,482 | 1 | 10 | 12 | 162 | 2 | 7 | 2 | 60 | 17 | 239 |
| 45,483 | 1 | 10 | 12 | 161 | 2 | 5 | 2 | 57 | 17 | 233 |
| 45,484 | 1 | 10 | 12 | 157 | 2 | 5 | 2 | 56 | 17 | 228 |
| 45,485 | 1 | 8  | 12 | 158 | 2 | 5 | 2 | 53 | 17 | 224 |
| 45,486 | 1 | 8  | 12 | 158 | 2 | 5 | 2 | 53 | 17 | 224 |
| 45,487 | 1 | 8  | 12 | 159 | 2 | 5 | 2 | 53 | 17 | 225 |
| 45,488 | 1 | 7  | 12 | 139 | 2 | 5 | 2 | 45 | 17 | 196 |
| 45,489 | 1 | 8  | 12 | 143 | 1 | 5 | 2 | 45 | 16 | 201 |
| 45,490 | 1 | 11 | 12 | 184 | 1 | 6 | 2 | 52 | 16 | 253 |
| 45,491 | 1 | 11 | 12 | 198 | 1 | 6 | 2 | 55 | 16 | 270 |
| 45,492 | 1 | 14 | 12 | 205 | 1 | 6 | 2 | 60 | 16 | 285 |
| 45,493 | 1 | 14 | 12 | 218 | 1 | 7 | 2 | 61 | 16 | 300 |
| 45,494 | 1 | 14 | 11 | 218 | 1 | 7 | 2 | 61 | 15 | 300 |
| 45,495 | 1 | 13 | 9  | 215 | 1 | 7 | 0 | 59 | 11 | 294 |
| 45,496 | 1 | 13 | 8  | 218 | 1 | 7 | 0 | 59 | 10 | 297 |
| 45,497 | 1 | 13 | 8  | 216 | 1 | 7 | 0 | 59 | 10 | 295 |
| 45,498 | 1 | 13 | 7  | 227 | 1 | 7 | 0 | 59 | 9  | 306 |

|        |   |    |   |     |   |   |   |    |    |     |
|--------|---|----|---|-----|---|---|---|----|----|-----|
| 45,499 | 1 | 13 | 7 | 232 | 1 | 7 | 0 | 61 | 9  | 313 |
| 45,500 | 1 | 14 | 7 | 243 | 1 | 7 | 0 | 64 | 9  | 328 |
| 45,501 | 1 | 14 | 7 | 244 | 1 | 7 | 0 | 64 | 9  | 329 |
| 45,502 | 1 | 14 | 6 | 244 | 1 | 7 | 0 | 64 | 8  | 329 |
| 45,503 | 1 | 14 | 6 | 245 | 1 | 7 | 0 | 65 | 8  | 331 |
| 45,504 | 1 | 14 | 6 | 245 | 1 | 7 | 0 | 65 | 8  | 331 |
| 45,505 | 1 | 14 | 6 | 245 | 1 | 7 | 1 | 65 | 9  | 331 |
| 45,506 | 1 | 14 | 6 | 245 | 1 | 7 | 1 | 65 | 9  | 331 |
| 45,507 | 1 | 14 | 6 | 244 | 1 | 7 | 1 | 64 | 9  | 329 |
| 45,508 | 1 | 14 | 6 | 244 | 1 | 7 | 2 | 64 | 10 | 329 |
| 45,509 | 1 | 14 | 6 | 244 | 1 | 7 | 2 | 63 | 10 | 328 |
| 45,510 | 1 | 14 | 6 | 245 | 1 | 7 | 2 | 63 | 10 | 329 |
| 45,511 | 1 | 14 | 6 | 248 | 1 | 7 | 2 | 64 | 10 | 333 |
| 45,512 | 1 | 14 | 6 | 251 | 1 | 7 | 2 | 65 | 10 | 337 |
| 45,513 | 1 | 15 | 7 | 267 | 1 | 7 | 3 | 69 | 12 | 358 |
| 45,514 | 2 | 18 | 9 | 276 | 1 | 7 | 3 | 76 | 15 | 377 |
| 45,515 | 2 | 20 | 9 | 284 | 1 | 7 | 3 | 77 | 15 | 388 |
| 45,516 | 2 | 20 | 9 | 284 | 1 | 7 | 3 | 76 | 15 | 387 |
| 45,517 | 2 | 23 | 8 | 285 | 1 | 7 | 3 | 79 | 14 | 394 |
| 45,518 | 1 | 30 | 7 | 305 | 1 | 7 | 3 | 85 | 12 | 427 |
| 45,519 | 1 | 30 | 6 | 305 | 1 | 7 | 3 | 84 | 11 | 426 |
| 45,520 | 1 | 29 | 6 | 303 | 1 | 7 | 3 | 82 | 11 | 421 |
| 45,521 | 1 | 32 | 6 | 295 | 1 | 7 | 3 | 81 | 11 | 415 |
| 45,522 | 1 | 32 | 6 | 299 | 1 | 7 | 3 | 84 | 11 | 422 |
| 45,523 | 1 | 33 | 6 | 303 | 0 | 7 | 3 | 84 | 10 | 427 |
| 45,524 | 1 | 32 | 5 | 303 | 0 | 7 | 3 | 83 | 9  | 425 |
| 45,525 | 1 | 32 | 5 | 304 | 0 | 7 | 3 | 83 | 9  | 426 |
| 45,526 | 1 | 30 | 4 | 273 | 0 | 5 | 3 | 73 | 8  | 381 |
| 45,527 | 1 | 29 | 4 | 259 | 0 | 5 | 3 | 69 | 8  | 362 |
| 45,528 | 1 | 29 | 4 | 250 | 0 | 5 | 3 | 67 | 8  | 351 |
| 45,529 | 1 | 29 | 4 | 251 | 0 | 5 | 3 | 67 | 8  | 352 |
| 45,530 | 1 | 29 | 3 | 248 | 0 | 4 | 3 | 65 | 7  | 346 |
| 45,531 | 1 | 28 | 3 | 221 | 0 | 3 | 3 | 57 | 7  | 309 |
| 45,532 | 1 | 28 | 3 | 209 | 0 | 2 | 3 | 53 | 7  | 292 |
| 45,533 | 1 | 28 | 3 | 209 | 0 | 2 | 3 | 53 | 7  | 292 |
| 45,534 | 1 | 28 | 3 | 208 | 0 | 2 | 3 | 52 | 7  | 290 |
| 45,535 | 1 | 28 | 3 | 205 | 0 | 2 | 4 | 52 | 8  | 287 |
| 45,536 | 1 | 28 | 3 | 205 | 0 | 2 | 4 | 52 | 8  | 287 |
| 45,537 | 1 | 28 | 3 | 206 | 0 | 2 | 4 | 52 | 8  | 288 |
| 45,538 | 1 | 28 | 3 | 205 | 0 | 2 | 6 | 52 | 10 | 287 |
| 45,539 | 1 | 28 | 3 | 205 | 0 | 2 | 6 | 52 | 10 | 287 |

|        |   |    |   |     |   |    |    |     |    |     |
|--------|---|----|---|-----|---|----|----|-----|----|-----|
| 45,540 | 1 | 27 | 3 | 200 | 0 | 2  | 6  | 51  | 10 | 280 |
| 45,541 | 1 | 24 | 3 | 162 | 0 | 1  | 6  | 45  | 10 | 232 |
| 45,542 | 1 | 21 | 3 | 141 | 0 | 1  | 7  | 37  | 11 | 200 |
| 45,543 | 1 | 23 | 4 | 127 | 0 | 0  | 7  | 36  | 12 | 186 |
| 45,544 | 1 | 23 | 4 | 129 | 0 | 0  | 7  | 37  | 12 | 189 |
| 45,545 | 1 | 24 | 4 | 135 | 0 | 0  | 7  | 37  | 12 | 196 |
| 45,546 | 1 | 24 | 6 | 154 | 0 | 4  | 8  | 55  | 15 | 237 |
| 45,547 | 3 | 29 | 8 | 265 | 0 | 9  | 11 | 100 | 22 | 403 |
| 45,548 | 3 | 29 | 8 | 272 | 0 | 9  | 11 | 101 | 22 | 411 |
| 45,549 | 3 | 31 | 8 | 264 | 0 | 10 | 11 | 115 | 22 | 420 |
| 45,550 | 3 | 31 | 8 | 260 | 0 | 10 | 11 | 114 | 22 | 415 |
| 45,551 | 3 | 32 | 8 | 254 | 0 | 10 | 11 | 116 | 22 | 412 |
| 45,552 | 3 | 43 | 9 | 278 | 0 | 12 | 11 | 136 | 23 | 469 |
| 45,553 | 3 | 44 | 9 | 285 | 0 | 12 | 11 | 140 | 23 | 481 |
| 45,554 | 3 | 44 | 9 | 296 | 0 | 13 | 11 | 147 | 23 | 500 |
| 45,555 | 3 | 44 | 9 | 296 | 0 | 13 | 11 | 147 | 23 | 500 |
| 45,556 | 3 | 45 | 9 | 306 | 0 | 13 | 10 | 150 | 22 | 514 |
| 45,557 | 3 | 45 | 9 | 312 | 0 | 13 | 10 | 156 | 22 | 526 |
| 45,558 | 3 | 45 | 9 | 323 | 0 | 14 | 10 | 160 | 22 | 542 |
| 45,559 | 3 | 64 | 9 | 412 | 0 | 23 | 9  | 238 | 21 | 737 |
| 45,560 | 3 | 64 | 9 | 440 | 0 | 24 | 9  | 251 | 21 | 779 |
| 45,561 | 3 | 65 | 9 | 465 | 0 | 25 | 9  | 262 | 21 | 817 |
| 45,562 | 3 | 66 | 9 | 503 | 0 | 25 | 10 | 273 | 22 | 867 |
| 45,563 | 3 | 66 | 8 | 503 | 0 | 28 | 10 | 273 | 21 | 870 |
| 45,564 | 3 | 65 | 8 | 489 | 0 | 28 | 9  | 272 | 20 | 854 |
| 45,565 | 2 | 62 | 6 | 470 | 0 | 28 | 9  | 262 | 17 | 822 |
| 45,566 | 2 | 62 | 6 | 477 | 0 | 28 | 9  | 267 | 17 | 834 |
| 45,567 | 2 | 64 | 6 | 499 | 0 | 29 | 9  | 277 | 17 | 869 |
| 45,568 | 2 | 61 | 6 | 504 | 0 | 33 | 9  | 277 | 17 | 875 |
| 45,569 | 2 | 54 | 6 | 493 | 0 | 33 | 9  | 272 | 17 | 852 |
| 45,570 | 2 | 54 | 6 | 494 | 0 | 33 | 9  | 274 | 17 | 855 |
| 45,571 | 2 | 57 | 6 | 496 | 0 | 33 | 9  | 279 | 17 | 865 |
| 45,572 | 2 | 57 | 6 | 496 | 0 | 33 | 9  | 279 | 17 | 865 |
| 45,573 | 2 | 64 | 6 | 509 | 0 | 34 | 9  | 281 | 17 | 888 |
| 45,574 | 2 | 63 | 6 | 512 | 0 | 34 | 9  | 286 | 17 | 895 |
| 45,575 | 2 | 63 | 6 | 513 | 0 | 34 | 9  | 286 | 17 | 896 |
| 45,576 | 2 | 63 | 6 | 513 | 0 | 34 | 9  | 288 | 17 | 898 |
| 45,577 | 2 | 63 | 6 | 512 | 0 | 34 | 9  | 288 | 17 | 897 |
| 45,578 | 2 | 63 | 6 | 512 | 0 | 34 | 9  | 288 | 17 | 897 |
| 45,579 | 2 | 63 | 6 | 512 | 0 | 34 | 9  | 288 | 17 | 897 |
| 45,580 | 2 | 63 | 6 | 511 | 0 | 34 | 9  | 288 | 17 | 896 |



|        |   |    |   |     |   |    |   |     |    |       |
|--------|---|----|---|-----|---|----|---|-----|----|-------|
| 45,581 | 2 | 63 | 6 | 513 | 0 | 34 | 9 | 290 | 17 | 900   |
| 45,582 | 2 | 63 | 6 | 515 | 0 | 35 | 9 | 293 | 17 | 906   |
| 45,583 | 2 | 63 | 6 | 515 | 0 | 35 | 9 | 294 | 17 | 907   |
| 45,584 | 2 | 63 | 6 | 515 | 0 | 35 | 9 | 295 | 17 | 908   |
| 45,585 | 2 | 66 | 6 | 563 | 0 | 40 | 9 | 385 | 17 | 1,054 |
| 45,586 | 2 | 66 | 6 | 564 | 0 | 40 | 8 | 392 | 16 | 1,062 |
| 45,587 | 2 | 68 | 6 | 581 | 0 | 41 | 8 | 402 | 16 | 1,092 |
| 45,588 | 2 | 68 | 6 | 587 | 0 | 42 | 8 | 405 | 16 | 1,102 |
| 45,589 | 2 | 68 | 6 | 588 | 0 | 42 | 6 | 405 | 14 | 1,103 |
| 45,590 | 2 | 68 | 7 | 589 | 0 | 42 | 6 | 407 | 15 | 1,106 |
| 45,591 | 2 | 68 | 7 | 589 | 0 | 42 | 6 | 407 | 15 | 1,106 |
| 45,592 | 2 | 68 | 7 | 591 | 0 | 42 | 7 | 407 | 16 | 1,108 |
| 45,593 | 2 | 68 | 7 | 591 | 0 | 42 | 6 | 407 | 15 | 1,108 |
| 45,594 | 2 | 66 | 6 | 591 | 0 | 42 | 6 | 407 | 14 | 1,106 |
| 45,595 | 2 | 66 | 6 | 589 | 0 | 42 | 6 | 406 | 14 | 1,103 |
| 45,596 | 2 | 65 | 4 | 583 | 0 | 42 | 5 | 406 | 11 | 1,096 |
| 45,597 | 1 | 65 | 2 | 561 | 0 | 38 | 3 | 388 | 6  | 1,052 |
| 45,598 | 1 | 60 | 3 | 447 | 0 | 33 | 2 | 343 | 6  | 883   |
| 45,599 | 1 | 58 | 4 | 437 | 0 | 32 | 2 | 329 | 7  | 856   |
| 45,600 | 1 | 58 | 4 | 437 | 0 | 32 | 2 | 329 | 7  | 856   |
| 45,601 | 1 | 58 | 4 | 436 | 0 | 32 | 2 | 328 | 7  | 854   |
| 45,602 | 1 | 56 | 4 | 430 | 0 | 32 | 4 | 323 | 9  | 841   |
| 45,603 | 1 | 45 | 3 | 405 | 0 | 30 | 4 | 304 | 8  | 784   |
| 45,604 | 1 | 43 | 3 | 376 | 0 | 29 | 4 | 289 | 8  | 737   |
| 45,605 | 1 | 43 | 3 | 376 | 0 | 29 | 4 | 289 | 8  | 737   |
| 45,606 | 1 | 43 | 3 | 376 | 0 | 29 | 4 | 289 | 8  | 737   |
| 45,607 | 1 | 43 | 3 | 376 | 0 | 29 | 4 | 289 | 8  | 737   |
| 45,608 | 1 | 43 | 3 | 371 | 0 | 29 | 4 | 281 | 8  | 724   |
| 45,609 | 1 | 43 | 3 | 360 | 0 | 28 | 4 | 278 | 8  | 709   |
| 45,610 | 1 | 24 | 3 | 272 | 0 | 19 | 4 | 201 | 8  | 516   |
| 45,611 | 1 | 23 | 3 | 218 | 0 | 17 | 4 | 177 | 8  | 435   |
| 45,612 | 1 | 23 | 3 | 218 | 0 | 17 | 4 | 178 | 8  | 436   |
| 45,613 | 1 | 22 | 3 | 180 | 0 | 17 | 3 | 168 | 7  | 387   |
| 45,614 | 1 | 23 | 3 | 176 | 0 | 14 | 3 | 169 | 7  | 382   |
| 45,615 | 1 | 23 | 3 | 178 | 0 | 16 | 3 | 177 | 7  | 394   |
| 45,616 | 2 | 23 | 3 | 179 | 0 | 16 | 3 | 182 | 8  | 400   |
| 45,617 | 2 | 23 | 3 | 174 | 0 | 16 | 3 | 178 | 8  | 391   |
| 45,618 | 2 | 22 | 3 | 153 | 0 | 16 | 3 | 175 | 8  | 366   |
| 45,619 | 2 | 22 | 3 | 145 | 0 | 12 | 3 | 172 | 8  | 351   |
| 45,620 | 2 | 22 | 3 | 139 | 0 | 12 | 3 | 173 | 8  | 346   |
| 45,621 | 2 | 22 | 3 | 138 | 0 | 12 | 3 | 171 | 8  | 343   |

|        |   |    |    |     |   |    |    |     |    |     |
|--------|---|----|----|-----|---|----|----|-----|----|-----|
| 45,622 | 2 | 16 | 3  | 134 | 0 | 12 | 3  | 168 | 8  | 330 |
| 45,623 | 2 | 16 | 3  | 134 | 0 | 12 | 3  | 168 | 8  | 330 |
| 45,624 | 2 | 9  | 3  | 117 | 0 | 11 | 3  | 163 | 8  | 300 |
| 45,625 | 2 | 9  | 3  | 108 | 0 | 11 | 3  | 157 | 8  | 285 |
| 45,626 | 2 | 9  | 3  | 107 | 0 | 11 | 3  | 157 | 8  | 284 |
| 45,627 | 2 | 10 | 3  | 105 | 0 | 11 | 3  | 154 | 8  | 280 |
| 45,628 | 2 | 10 | 3  | 105 | 0 | 12 | 3  | 154 | 8  | 281 |
| 45,629 | 3 | 10 | 4  | 105 | 0 | 12 | 3  | 154 | 10 | 281 |
| 45,630 | 3 | 10 | 4  | 105 | 0 | 12 | 3  | 154 | 10 | 281 |
| 45,631 | 3 | 10 | 4  | 101 | 0 | 11 | 3  | 149 | 10 | 271 |
| 45,632 | 3 | 10 | 4  | 101 | 0 | 11 | 3  | 149 | 10 | 271 |
| 45,633 | 4 | 10 | 5  | 101 | 0 | 11 | 3  | 149 | 12 | 271 |
| 45,634 | 4 | 10 | 5  | 101 | 0 | 11 | 3  | 147 | 12 | 269 |
| 45,635 | 4 | 7  | 5  | 53  | 0 | 6  | 3  | 58  | 12 | 124 |
| 45,636 | 4 | 7  | 5  | 53  | 0 | 6  | 3  | 58  | 12 | 124 |
| 45,637 | 4 | 7  | 5  | 54  | 0 | 6  | 3  | 51  | 12 | 118 |
| 45,638 | 4 | 5  | 5  | 37  | 0 | 5  | 3  | 41  | 12 | 88  |
| 45,639 | 4 | 5  | 5  | 29  | 0 | 4  | 3  | 38  | 12 | 76  |
| 45,640 | 4 | 5  | 5  | 28  | 0 | 4  | 3  | 36  | 12 | 73  |
| 45,641 | 4 | 5  | 4  | 26  | 0 | 4  | 3  | 36  | 11 | 71  |
| 45,642 | 4 | 5  | 4  | 26  | 0 | 4  | 3  | 36  | 11 | 71  |
| 45,643 | 4 | 5  | 4  | 24  | 0 | 4  | 3  | 36  | 11 | 69  |
| 45,644 | 4 | 5  | 4  | 24  | 0 | 4  | 3  | 36  | 11 | 69  |
| 45,645 | 4 | 5  | 4  | 24  | 0 | 4  | 3  | 36  | 11 | 69  |
| 45,646 | 4 | 5  | 4  | 24  | 0 | 4  | 3  | 36  | 11 | 69  |
| 45,647 | 4 | 5  | 4  | 24  | 0 | 4  | 3  | 37  | 11 | 70  |
| 45,648 | 3 | 5  | 4  | 24  | 0 | 4  | 3  | 37  | 10 | 70  |
| 45,649 | 3 | 5  | 3  | 25  | 0 | 4  | 3  | 37  | 9  | 71  |
| 45,650 | 3 | 5  | 2  | 25  | 0 | 4  | 3  | 36  | 8  | 70  |
| 45,651 | 3 | 5  | 2  | 25  | 0 | 4  | 4  | 36  | 9  | 70  |
| 45,652 | 3 | 6  | 2  | 27  | 0 | 4  | 4  | 39  | 9  | 76  |
| 45,653 | 3 | 6  | 2  | 26  | 0 | 4  | 2  | 39  | 7  | 75  |
| 45,654 | 3 | 6  | 2  | 26  | 0 | 4  | 2  | 38  | 7  | 74  |
| 45,655 | 3 | 6  | 2  | 27  | 0 | 4  | 2  | 38  | 7  | 75  |
| 45,656 | 3 | 6  | 2  | 29  | 0 | 4  | 2  | 38  | 7  | 77  |
| 45,657 | 4 | 6  | 6  | 30  | 0 | 4  | 3  | 38  | 13 | 78  |
| 45,658 | 5 | 6  | 11 | 30  | 0 | 4  | 5  | 38  | 21 | 78  |
| 45,659 | 6 | 6  | 24 | 29  | 0 | 4  | 12 | 38  | 42 | 77  |
| 45,660 | 6 | 6  | 24 | 29  | 0 | 4  | 12 | 38  | 42 | 77  |
| 45,661 | 6 | 6  | 24 | 30  | 0 | 4  | 12 | 37  | 42 | 77  |
| 45,662 | 6 | 6  | 24 | 30  | 0 | 4  | 12 | 37  | 42 | 77  |

|        |   |   |    |    |   |   |    |    |    |    |
|--------|---|---|----|----|---|---|----|----|----|----|
| 45,663 | 6 | 6 | 24 | 30 | 0 | 4 | 12 | 38 | 42 | 78 |
| 45,664 | 6 | 5 | 24 | 27 | 0 | 4 | 12 | 34 | 42 | 70 |
| 45,665 | 6 | 5 | 24 | 30 | 0 | 4 | 12 | 36 | 42 | 75 |
| 45,666 | 6 | 5 | 24 | 27 | 0 | 2 | 12 | 26 | 42 | 60 |
| 45,667 | 5 | 3 | 24 | 26 | 0 | 2 | 12 | 20 | 41 | 51 |
| 45,668 | 5 | 3 | 24 | 24 | 0 | 2 | 12 | 19 | 41 | 48 |
| 45,669 | 5 | 2 | 24 | 21 | 0 | 1 | 12 | 11 | 41 | 35 |
| 45,670 | 5 | 2 | 24 | 21 | 0 | 1 | 12 | 11 | 41 | 35 |
| 45,671 | 5 | 2 | 24 | 21 | 0 | 1 | 12 | 11 | 41 | 35 |
| 45,672 | 5 | 2 | 24 | 21 | 0 | 1 | 12 | 11 | 41 | 35 |
| 45,673 | 5 | 2 | 24 | 18 | 0 | 1 | 12 | 8  | 41 | 29 |
| 45,674 | 5 | 2 | 24 | 18 | 0 | 1 | 12 | 8  | 41 | 29 |
| 45,675 | 5 | 2 | 24 | 18 | 0 | 1 | 12 | 8  | 41 | 29 |
| 45,676 | 5 | 3 | 25 | 21 | 0 | 1 | 12 | 14 | 42 | 39 |
| 45,677 | 5 | 3 | 25 | 22 | 0 | 1 | 12 | 14 | 42 | 40 |
| 45,678 | 5 | 3 | 26 | 22 | 0 | 1 | 12 | 14 | 43 | 40 |
| 45,679 | 4 | 3 | 25 | 22 | 0 | 0 | 12 | 17 | 41 | 42 |
| 45,680 | 4 | 3 | 25 | 23 | 0 | 0 | 12 | 17 | 41 | 43 |
| 45,681 | 4 | 3 | 26 | 23 | 0 | 0 | 12 | 17 | 42 | 43 |
| 45,682 | 4 | 3 | 26 | 23 | 0 | 0 | 12 | 17 | 42 | 43 |
| 45,683 | 4 | 3 | 26 | 24 | 0 | 0 | 12 | 17 | 42 | 44 |
| 45,684 | 3 | 3 | 25 | 25 | 0 | 0 | 12 | 17 | 40 | 45 |
| 45,685 | 3 | 3 | 25 | 25 | 0 | 0 | 12 | 17 | 40 | 45 |
| 45,686 | 3 | 3 | 25 | 25 | 0 | 0 | 12 | 17 | 40 | 45 |
| 45,687 | 3 | 3 | 25 | 23 | 0 | 0 | 12 | 17 | 40 | 43 |
| 45,688 | 3 | 4 | 25 | 23 | 0 | 0 | 12 | 17 | 40 | 44 |
| 45,689 | 3 | 4 | 25 | 23 | 0 | 0 | 12 | 17 | 40 | 44 |
| 45,690 | 3 | 4 | 25 | 23 | 0 | 0 | 12 | 17 | 40 | 44 |
| 45,691 | 3 | 4 | 25 | 23 | 0 | 2 | 13 | 17 | 41 | 46 |
| 45,692 | 3 | 4 | 25 | 24 | 0 | 2 | 13 | 17 | 41 | 47 |
| 45,693 | 3 | 4 | 25 | 24 | 0 | 2 | 13 | 17 | 41 | 47 |
| 45,694 | 3 | 4 | 25 | 24 | 0 | 2 | 12 | 18 | 40 | 48 |
| 45,695 | 3 | 4 | 25 | 24 | 0 | 2 | 12 | 18 | 40 | 48 |
| 45,696 | 3 | 5 | 25 | 24 | 0 | 2 | 12 | 19 | 40 | 50 |
| 45,697 | 3 | 5 | 25 | 24 | 0 | 2 | 12 | 19 | 40 | 50 |
| 45,698 | 3 | 5 | 27 | 24 | 0 | 2 | 12 | 18 | 42 | 49 |
| 45,699 | 3 | 5 | 27 | 25 | 0 | 2 | 12 | 19 | 42 | 51 |
| 45,700 | 3 | 5 | 27 | 24 | 0 | 2 | 12 | 19 | 42 | 50 |
| 45,701 | 3 | 4 | 27 | 22 | 0 | 2 | 12 | 16 | 42 | 44 |
| 45,702 | 3 | 4 | 27 | 22 | 0 | 2 | 11 | 16 | 41 | 44 |
| 45,703 | 3 | 4 | 27 | 22 | 0 | 2 | 11 | 16 | 41 | 44 |

|        |   |   |    |     |   |    |    |    |    |     |
|--------|---|---|----|-----|---|----|----|----|----|-----|
| 45,704 | 3 | 4 | 27 | 25  | 0 | 2  | 11 | 19 | 41 | 50  |
| 45,705 | 3 | 4 | 27 | 33  | 0 | 2  | 11 | 24 | 41 | 63  |
| 45,706 | 3 | 4 | 31 | 51  | 0 | 2  | 11 | 26 | 45 | 83  |
| 45,707 | 3 | 4 | 31 | 70  | 0 | 4  | 11 | 47 | 45 | 125 |
| 45,708 | 2 | 5 | 27 | 104 | 0 | 6  | 10 | 61 | 39 | 176 |
| 45,709 | 1 | 6 | 22 | 115 | 0 | 9  | 8  | 72 | 31 | 202 |
| 45,710 | 1 | 6 | 9  | 121 | 0 | 9  | 1  | 75 | 11 | 211 |
| 45,711 | 1 | 6 | 11 | 124 | 0 | 9  | 1  | 76 | 13 | 215 |
| 45,712 | 1 | 6 | 11 | 128 | 0 | 9  | 1  | 78 | 13 | 221 |
| 45,713 | 1 | 6 | 11 | 128 | 0 | 9  | 1  | 78 | 13 | 221 |
| 45,714 | 1 | 6 | 11 | 130 | 0 | 10 | 1  | 77 | 13 | 223 |
| 45,715 | 1 | 6 | 11 | 129 | 0 | 10 | 1  | 75 | 13 | 220 |
| 45,716 | 1 | 6 | 11 | 128 | 0 | 10 | 1  | 75 | 13 | 219 |
| 45,717 | 1 | 6 | 11 | 129 | 0 | 10 | 1  | 75 | 13 | 220 |
| 45,718 | 1 | 6 | 11 | 130 | 0 | 10 | 1  | 75 | 13 | 221 |
| 45,719 | 1 | 6 | 11 | 130 | 0 | 10 | 1  | 75 | 13 | 221 |
| 45,720 | 1 | 7 | 11 | 129 | 0 | 10 | 1  | 76 | 13 | 222 |
| 45,721 | 1 | 7 | 12 | 129 | 0 | 10 | 1  | 76 | 14 | 222 |
| 45,722 | 1 | 7 | 14 | 131 | 0 | 10 | 1  | 76 | 16 | 224 |
| 45,723 | 1 | 7 | 14 | 132 | 0 | 10 | 1  | 76 | 16 | 225 |
| 45,724 | 1 | 7 | 14 | 131 | 0 | 10 | 1  | 76 | 16 | 224 |
| 45,725 | 1 | 7 | 15 | 131 | 0 | 10 | 2  | 76 | 18 | 224 |
| 45,726 | 1 | 6 | 15 | 128 | 0 | 10 | 3  | 70 | 19 | 214 |
| 45,727 | 1 | 6 | 14 | 129 | 0 | 10 | 3  | 70 | 18 | 215 |
| 45,728 | 1 | 6 | 15 | 129 | 0 | 10 | 4  | 72 | 20 | 217 |
| 45,729 | 1 | 5 | 21 | 129 | 0 | 10 | 5  | 73 | 27 | 217 |
| 45,730 | 1 | 5 | 21 | 129 | 0 | 10 | 8  | 70 | 30 | 214 |
| 45,731 | 1 | 5 | 21 | 129 | 0 | 10 | 8  | 70 | 30 | 214 |
| 45,732 | 1 | 5 | 20 | 128 | 0 | 10 | 8  | 70 | 29 | 213 |
| 45,733 | 1 | 5 | 20 | 130 | 0 | 10 | 8  | 71 | 29 | 216 |
| 45,734 | 1 | 5 | 20 | 130 | 0 | 10 | 8  | 71 | 29 | 216 |
| 45,735 | 1 | 5 | 20 | 129 | 0 | 10 | 8  | 71 | 29 | 215 |
| 45,736 | 1 | 8 | 21 | 135 | 0 | 10 | 8  | 79 | 30 | 232 |
| 45,737 | 1 | 8 | 21 | 135 | 0 | 10 | 8  | 79 | 30 | 232 |
| 45,738 | 1 | 8 | 22 | 136 | 0 | 10 | 8  | 79 | 31 | 233 |
| 45,739 | 1 | 7 | 22 | 136 | 0 | 10 | 8  | 79 | 31 | 232 |
| 45,740 | 1 | 7 | 26 | 136 | 0 | 10 | 8  | 79 | 35 | 232 |
| 45,741 | 2 | 7 | 27 | 137 | 0 | 10 | 9  | 79 | 38 | 233 |
| 45,742 | 2 | 7 | 27 | 137 | 0 | 8  | 9  | 79 | 38 | 231 |
| 45,743 | 2 | 7 | 27 | 136 | 0 | 8  | 9  | 79 | 38 | 230 |
| 45,744 | 2 | 7 | 27 | 136 | 0 | 8  | 9  | 79 | 38 | 230 |

|        |   |    |    |     |   |   |   |    |    |     |
|--------|---|----|----|-----|---|---|---|----|----|-----|
| 45,745 | 2 | 7  | 30 | 136 | 0 | 8 | 9 | 78 | 41 | 229 |
| 45,746 | 2 | 6  | 30 | 136 | 0 | 8 | 9 | 77 | 41 | 227 |
| 45,747 | 2 | 6  | 30 | 136 | 0 | 8 | 9 | 77 | 41 | 227 |
| 45,748 | 2 | 6  | 30 | 136 | 0 | 8 | 9 | 77 | 41 | 227 |
| 45,749 | 2 | 6  | 28 | 135 | 0 | 8 | 9 | 76 | 39 | 225 |
| 45,750 | 2 | 6  | 28 | 136 | 0 | 8 | 9 | 74 | 39 | 224 |
| 45,751 | 2 | 6  | 29 | 138 | 0 | 8 | 9 | 75 | 40 | 227 |
| 45,752 | 2 | 6  | 29 | 138 | 0 | 8 | 9 | 75 | 40 | 227 |
| 45,753 | 2 | 7  | 29 | 140 | 0 | 8 | 9 | 77 | 40 | 232 |
| 45,754 | 2 | 7  | 29 | 140 | 0 | 8 | 9 | 78 | 40 | 233 |
| 45,755 | 2 | 7  | 29 | 133 | 0 | 8 | 9 | 73 | 40 | 221 |
| 45,756 | 2 | 12 | 29 | 141 | 0 | 8 | 9 | 85 | 40 | 246 |
| 45,757 | 2 | 12 | 25 | 122 | 0 | 8 | 9 | 84 | 36 | 226 |
| 45,758 | 2 | 12 | 26 | 104 | 0 | 6 | 9 | 67 | 37 | 189 |
| 45,759 | 2 | 11 | 26 | 72  | 0 | 4 | 9 | 57 | 37 | 144 |
| 45,760 | 2 | 14 | 26 | 75  | 0 | 1 | 9 | 58 | 37 | 148 |
| 45,761 | 1 | 15 | 26 | 69  | 0 | 1 | 9 | 56 | 36 | 141 |
| 45,762 | 1 | 15 | 24 | 66  | 0 | 1 | 9 | 55 | 34 | 137 |
| 45,763 | 1 | 15 | 24 | 62  | 0 | 1 | 9 | 53 | 34 | 131 |
| 45,764 | 1 | 15 | 24 | 63  | 0 | 0 | 9 | 54 | 34 | 132 |
| 45,765 | 1 | 15 | 24 | 63  | 0 | 0 | 9 | 54 | 34 | 132 |
| 45,766 | 1 | 15 | 24 | 62  | 0 | 0 | 9 | 54 | 34 | 131 |
| 45,767 | 1 | 15 | 25 | 63  | 0 | 0 | 9 | 53 | 35 | 131 |
| 45,768 | 1 | 15 | 25 | 62  | 0 | 0 | 9 | 54 | 35 | 131 |
| 45,769 | 1 | 15 | 25 | 62  | 0 | 0 | 9 | 54 | 35 | 131 |
| 45,770 | 1 | 14 | 25 | 61  | 0 | 0 | 9 | 53 | 35 | 128 |
| 45,771 | 1 | 14 | 25 | 63  | 0 | 0 | 9 | 53 | 35 | 130 |
| 45,772 | 1 | 14 | 24 | 63  | 0 | 0 | 9 | 53 | 34 | 130 |
| 45,773 | 1 | 14 | 22 | 61  | 0 | 0 | 9 | 54 | 32 | 129 |
| 45,774 | 1 | 14 | 22 | 67  | 0 | 1 | 9 | 55 | 32 | 137 |
| 45,775 | 1 | 14 | 22 | 70  | 0 | 1 | 9 | 59 | 32 | 144 |
| 45,776 | 1 | 14 | 21 | 76  | 1 | 2 | 8 | 65 | 31 | 157 |
| 45,777 | 1 | 14 | 21 | 81  | 1 | 2 | 7 | 68 | 30 | 165 |
| 45,778 | 1 | 23 | 20 | 110 | 1 | 4 | 6 | 79 | 28 | 216 |
| 45,779 | 1 | 28 | 19 | 121 | 1 | 7 | 5 | 83 | 26 | 239 |
| 45,780 | 1 | 31 | 13 | 132 | 1 | 8 | 5 | 85 | 20 | 256 |
| 45,781 | 1 | 31 | 13 | 138 | 1 | 8 | 2 | 85 | 17 | 262 |
| 45,782 | 1 | 31 | 13 | 138 | 1 | 8 | 2 | 85 | 17 | 262 |
| 45,783 | 1 | 31 | 13 | 137 | 1 | 8 | 2 | 84 | 17 | 260 |
| 45,784 | 1 | 31 | 13 | 138 | 1 | 8 | 2 | 84 | 17 | 261 |
| 45,785 | 1 | 32 | 14 | 139 | 1 | 8 | 2 | 84 | 18 | 263 |

|        |   |    |    |     |   |    |    |     |    |     |
|--------|---|----|----|-----|---|----|----|-----|----|-----|
| 45,786 | 1 | 32 | 14 | 139 | 1 | 8  | 2  | 84  | 18 | 263 |
| 45,787 | 1 | 29 | 13 | 134 | 1 | 8  | 2  | 77  | 17 | 248 |
| 45,788 | 1 | 29 | 12 | 140 | 1 | 8  | 2  | 84  | 16 | 261 |
| 45,789 | 1 | 40 | 13 | 199 | 1 | 12 | 2  | 116 | 17 | 367 |
| 45,790 | 1 | 42 | 10 | 206 | 1 | 14 | 2  | 118 | 14 | 380 |
| 45,791 | 0 | 42 | 9  | 209 | 1 | 14 | 1  | 119 | 11 | 384 |
| 45,792 | 0 | 42 | 9  | 209 | 1 | 14 | 1  | 119 | 11 | 384 |
| 45,793 | 0 | 42 | 9  | 209 | 1 | 14 | 1  | 119 | 11 | 384 |
| 45,794 | 0 | 42 | 8  | 209 | 1 | 14 | 1  | 119 | 10 | 384 |
| 45,795 | 0 | 42 | 6  | 209 | 1 | 14 | 1  | 119 | 8  | 384 |
| 45,796 | 0 | 44 | 7  | 210 | 1 | 15 | 1  | 119 | 9  | 388 |
| 45,797 | 0 | 44 | 7  | 210 | 1 | 15 | 1  | 119 | 9  | 388 |
| 45,798 | 0 | 44 | 8  | 210 | 1 | 15 | 3  | 119 | 12 | 388 |
| 45,799 | 0 | 44 | 8  | 215 | 1 | 16 | 3  | 120 | 12 | 395 |
| 45,800 | 0 | 44 | 8  | 216 | 1 | 16 | 3  | 119 | 12 | 395 |
| 45,801 | 0 | 44 | 8  | 215 | 1 | 16 | 3  | 119 | 12 | 394 |
| 45,802 | 0 | 44 | 7  | 215 | 1 | 16 | 3  | 118 | 11 | 393 |
| 45,803 | 0 | 44 | 7  | 215 | 1 | 16 | 3  | 118 | 11 | 393 |
| 45,804 | 0 | 43 | 7  | 214 | 1 | 16 | 3  | 116 | 11 | 389 |
| 45,805 | 0 | 43 | 7  | 215 | 1 | 16 | 3  | 116 | 11 | 390 |
| 45,806 | 0 | 43 | 7  | 211 | 1 | 16 | 3  | 113 | 11 | 383 |
| 45,807 | 0 | 38 | 6  | 203 | 1 | 16 | 3  | 100 | 10 | 357 |
| 45,808 | 0 | 38 | 6  | 202 | 1 | 16 | 3  | 99  | 10 | 355 |
| 45,809 | 0 | 38 | 6  | 202 | 1 | 16 | 3  | 97  | 10 | 353 |
| 45,810 | 0 | 38 | 6  | 199 | 1 | 16 | 3  | 93  | 10 | 346 |
| 45,811 | 0 | 34 | 6  | 185 | 1 | 16 | 3  | 83  | 10 | 318 |
| 45,812 | 0 | 33 | 6  | 184 | 1 | 16 | 7  | 82  | 14 | 315 |
| 45,813 | 0 | 33 | 6  | 184 | 1 | 16 | 7  | 82  | 14 | 315 |
| 45,814 | 0 | 33 | 7  | 180 | 1 | 16 | 8  | 83  | 16 | 312 |
| 45,815 | 0 | 33 | 7  | 181 | 1 | 16 | 8  | 83  | 16 | 313 |
| 45,816 | 0 | 33 | 7  | 181 | 1 | 16 | 8  | 83  | 16 | 313 |
| 45,817 | 0 | 33 | 6  | 181 | 1 | 16 | 8  | 84  | 15 | 314 |
| 45,818 | 0 | 33 | 8  | 178 | 1 | 16 | 10 | 83  | 19 | 310 |
| 45,819 | 0 | 33 | 8  | 178 | 1 | 16 | 10 | 83  | 19 | 310 |
| 45,820 | 1 | 33 | 10 | 178 | 2 | 16 | 14 | 83  | 27 | 310 |
| 45,821 | 2 | 33 | 10 | 176 | 2 | 16 | 14 | 83  | 28 | 308 |
| 45,822 | 2 | 33 | 13 | 177 | 2 | 16 | 15 | 85  | 32 | 311 |
| 45,823 | 2 | 33 | 13 | 177 | 2 | 16 | 15 | 85  | 32 | 311 |
| 45,824 | 2 | 34 | 13 | 177 | 2 | 16 | 15 | 84  | 32 | 311 |
| 45,825 | 2 | 34 | 13 | 170 | 2 | 15 | 15 | 83  | 32 | 302 |
| 45,826 | 2 | 34 | 15 | 167 | 3 | 15 | 19 | 80  | 39 | 296 |

|        |   |    |    |     |   |    |    |    |    |     |
|--------|---|----|----|-----|---|----|----|----|----|-----|
| 45,827 | 3 | 34 | 15 | 156 | 2 | 14 | 20 | 71 | 40 | 275 |
| 45,828 | 3 | 34 | 15 | 156 | 2 | 14 | 20 | 71 | 40 | 275 |
| 45,829 | 3 | 20 | 15 | 114 | 2 | 9  | 20 | 54 | 40 | 197 |
| 45,830 | 3 | 17 | 15 | 103 | 2 | 8  | 20 | 51 | 40 | 179 |
| 45,831 | 3 | 17 | 15 | 96  | 2 | 8  | 20 | 51 | 40 | 172 |
| 45,832 | 3 | 17 | 15 | 95  | 2 | 8  | 20 | 51 | 40 | 171 |
| 45,833 | 3 | 17 | 15 | 95  | 2 | 8  | 20 | 53 | 40 | 173 |
| 45,834 | 3 | 17 | 15 | 95  | 2 | 8  | 20 | 53 | 40 | 173 |
| 45,835 | 3 | 17 | 15 | 94  | 2 | 8  | 20 | 53 | 40 | 172 |
| 45,836 | 3 | 16 | 14 | 93  | 2 | 8  | 20 | 53 | 39 | 170 |
| 45,837 | 4 | 16 | 15 | 93  | 2 | 8  | 21 | 53 | 42 | 170 |
| 45,838 | 4 | 16 | 15 | 92  | 2 | 8  | 21 | 52 | 42 | 168 |
| 45,839 | 4 | 16 | 15 | 85  | 2 | 8  | 22 | 44 | 43 | 153 |
| 45,840 | 4 | 5  | 14 | 26  | 2 | 4  | 23 | 14 | 43 | 49  |
| 45,841 | 4 | 3  | 13 | 17  | 2 | 2  | 24 | 11 | 43 | 33  |
| 45,842 | 4 | 3  | 14 | 17  | 2 | 2  | 28 | 11 | 48 | 33  |
| 45,843 | 4 | 3  | 14 | 16  | 2 | 2  | 27 | 11 | 47 | 32  |
| 45,844 | 4 | 3  | 14 | 18  | 2 | 2  | 27 | 12 | 47 | 35  |
| 45,845 | 4 | 3  | 14 | 18  | 2 | 2  | 27 | 12 | 47 | 35  |
| 45,846 | 4 | 3  | 14 | 18  | 3 | 2  | 27 | 12 | 48 | 35  |
| 45,847 | 4 | 1  | 13 | 18  | 3 | 1  | 27 | 12 | 47 | 32  |
| 45,848 | 4 | 1  | 13 | 18  | 3 | 1  | 26 | 12 | 46 | 32  |
| 45,849 | 4 | 1  | 13 | 13  | 3 | 0  | 25 | 11 | 45 | 25  |
| 45,850 | 4 | 1  | 13 | 13  | 3 | 0  | 25 | 11 | 45 | 25  |
| 45,851 | 4 | 1  | 13 | 12  | 3 | 0  | 25 | 11 | 45 | 24  |
| 45,852 | 4 | 1  | 14 | 12  | 4 | 0  | 28 | 11 | 50 | 24  |
| 45,853 | 4 | 1  | 14 | 9   | 4 | 0  | 29 | 11 | 51 | 21  |
| 45,854 | 4 | 1  | 14 | 8   | 4 | 0  | 33 | 12 | 55 | 21  |
| 45,855 | 4 | 1  | 14 | 10  | 4 | 0  | 33 | 12 | 55 | 23  |
| 45,856 | 4 | 1  | 14 | 10  | 4 | 0  | 34 | 12 | 56 | 23  |
| 45,857 | 4 | 1  | 14 | 13  | 4 | 0  | 34 | 12 | 56 | 26  |
| 45,858 | 4 | 1  | 15 | 13  | 4 | 0  | 34 | 12 | 57 | 26  |
| 45,859 | 4 | 1  | 15 | 11  | 4 | 0  | 34 | 12 | 57 | 24  |
| 45,860 | 4 | 1  | 15 | 12  | 4 | 0  | 34 | 15 | 57 | 28  |
| 45,861 | 5 | 1  | 19 | 14  | 4 | 1  | 34 | 16 | 62 | 32  |
| 45,862 | 5 | 1  | 19 | 14  | 4 | 1  | 31 | 16 | 59 | 32  |
| 45,863 | 5 | 1  | 19 | 14  | 4 | 1  | 30 | 16 | 58 | 32  |
| 45,864 | 5 | 1  | 19 | 15  | 4 | 1  | 29 | 14 | 57 | 31  |
| 45,865 | 5 | 1  | 19 | 15  | 4 | 1  | 29 | 14 | 57 | 31  |
| 45,866 | 5 | 1  | 19 | 15  | 4 | 1  | 29 | 14 | 57 | 31  |
| 45,867 | 5 | 1  | 22 | 18  | 4 | 1  | 32 | 13 | 63 | 33  |

|        |   |    |    |     |    |    |    |     |    |     |
|--------|---|----|----|-----|----|----|----|-----|----|-----|
| 45,868 | 5 | 1  | 30 | 18  | 7  | 1  | 39 | 13  | 81 | 33  |
| 45,869 | 5 | 1  | 32 | 19  | 7  | 1  | 38 | 14  | 82 | 35  |
| 45,870 | 5 | 2  | 32 | 33  | 7  | 2  | 38 | 33  | 82 | 70  |
| 45,871 | 4 | 3  | 30 | 43  | 6  | 2  | 34 | 38  | 74 | 86  |
| 45,872 | 3 | 3  | 30 | 52  | 6  | 2  | 37 | 46  | 76 | 103 |
| 45,873 | 3 | 3  | 27 | 52  | 6  | 2  | 36 | 46  | 72 | 103 |
| 45,874 | 3 | 3  | 27 | 61  | 6  | 5  | 36 | 61  | 72 | 130 |
| 45,875 | 3 | 8  | 27 | 109 | 6  | 6  | 36 | 96  | 72 | 219 |
| 45,876 | 3 | 8  | 25 | 114 | 5  | 6  | 32 | 99  | 65 | 227 |
| 45,877 | 2 | 8  | 30 | 127 | 5  | 6  | 32 | 103 | 69 | 244 |
| 45,878 | 2 | 9  | 30 | 134 | 5  | 6  | 31 | 103 | 68 | 252 |
| 45,879 | 2 | 9  | 30 | 135 | 5  | 6  | 31 | 103 | 68 | 253 |
| 45,880 | 2 | 9  | 31 | 135 | 8  | 6  | 32 | 103 | 73 | 253 |
| 45,881 | 3 | 9  | 31 | 137 | 9  | 6  | 33 | 104 | 76 | 256 |
| 45,882 | 3 | 9  | 31 | 138 | 9  | 6  | 33 | 104 | 76 | 257 |
| 45,883 | 3 | 9  | 31 | 138 | 10 | 6  | 33 | 104 | 77 | 257 |
| 45,884 | 4 | 9  | 33 | 138 | 10 | 6  | 33 | 102 | 80 | 255 |
| 45,885 | 4 | 9  | 33 | 138 | 10 | 6  | 33 | 102 | 80 | 255 |
| 45,886 | 4 | 9  | 36 | 138 | 11 | 6  | 36 | 103 | 87 | 256 |
| 45,887 | 3 | 9  | 35 | 138 | 11 | 6  | 35 | 105 | 84 | 258 |
| 45,888 | 3 | 10 | 35 | 149 | 11 | 11 | 35 | 114 | 84 | 284 |
| 45,889 | 3 | 10 | 35 | 154 | 11 | 11 | 34 | 126 | 83 | 301 |
| 45,890 | 3 | 18 | 35 | 259 | 11 | 16 | 34 | 177 | 83 | 470 |
| 45,891 | 3 | 19 | 35 | 270 | 11 | 17 | 34 | 183 | 83 | 489 |
| 45,892 | 3 | 23 | 35 | 280 | 11 | 18 | 33 | 192 | 82 | 513 |
| 45,893 | 3 | 32 | 34 | 296 | 11 | 18 | 29 | 202 | 77 | 548 |
| 45,894 | 3 | 32 | 34 | 296 | 11 | 18 | 29 | 202 | 77 | 548 |
| 45,895 | 3 | 32 | 34 | 303 | 11 | 18 | 29 | 201 | 77 | 554 |
| 45,896 | 4 | 32 | 36 | 303 | 11 | 18 | 29 | 201 | 80 | 554 |
| 45,897 | 4 | 33 | 36 | 304 | 10 | 18 | 29 | 202 | 79 | 557 |
| 45,898 | 4 | 39 | 36 | 341 | 10 | 25 | 29 | 242 | 79 | 647 |
| 45,899 | 4 | 39 | 35 | 342 | 10 | 26 | 29 | 248 | 78 | 655 |
| 45,900 | 4 | 41 | 35 | 373 | 10 | 33 | 30 | 297 | 79 | 744 |
| 45,901 | 4 | 44 | 34 | 422 | 10 | 35 | 30 | 322 | 78 | 823 |
| 45,902 | 4 | 45 | 34 | 424 | 9  | 35 | 28 | 322 | 75 | 826 |
| 45,903 | 4 | 46 | 34 | 425 | 9  | 35 | 28 | 322 | 75 | 828 |
| 45,904 | 4 | 46 | 34 | 426 | 9  | 35 | 28 | 322 | 75 | 829 |
| 45,905 | 4 | 46 | 34 | 425 | 9  | 35 | 24 | 321 | 71 | 827 |
| 45,906 | 4 | 46 | 34 | 425 | 9  | 35 | 24 | 321 | 71 | 827 |
| 45,907 | 4 | 46 | 34 | 424 | 9  | 35 | 23 | 320 | 70 | 825 |
| 45,908 | 4 | 46 | 34 | 421 | 9  | 35 | 23 | 320 | 70 | 822 |



|        |   |    |    |     |   |    |    |     |    |     |
|--------|---|----|----|-----|---|----|----|-----|----|-----|
| 45,909 | 4 | 46 | 34 | 421 | 9 | 35 | 23 | 320 | 70 | 822 |
| 45,910 | 4 | 46 | 34 | 418 | 9 | 34 | 23 | 316 | 70 | 814 |
| 45,911 | 4 | 46 | 34 | 419 | 9 | 34 | 23 | 316 | 70 | 815 |
| 45,912 | 3 | 46 | 30 | 419 | 9 | 34 | 23 | 315 | 65 | 814 |
| 45,913 | 3 | 46 | 30 | 420 | 9 | 34 | 23 | 315 | 65 | 815 |
| 45,914 | 3 | 47 | 30 | 421 | 9 | 34 | 24 | 317 | 66 | 819 |
| 45,915 | 3 | 47 | 30 | 421 | 9 | 35 | 24 | 318 | 66 | 821 |
| 45,916 | 3 | 48 | 32 | 436 | 9 | 37 | 24 | 344 | 68 | 865 |
| 45,917 | 3 | 50 | 32 | 439 | 9 | 40 | 24 | 349 | 68 | 878 |
| 45,918 | 3 | 51 | 29 | 439 | 9 | 41 | 21 | 358 | 62 | 889 |
| 45,919 | 3 | 57 | 21 | 466 | 6 | 43 | 14 | 383 | 44 | 949 |
| 45,920 | 3 | 57 | 17 | 466 | 6 | 43 | 13 | 382 | 39 | 948 |
| 45,921 | 3 | 56 | 17 | 455 | 6 | 42 | 13 | 365 | 39 | 918 |
| 45,922 | 3 | 55 | 17 | 437 | 6 | 42 | 13 | 350 | 39 | 884 |
| 45,923 | 3 | 55 | 18 | 436 | 6 | 42 | 10 | 351 | 37 | 884 |
| 45,924 | 3 | 55 | 18 | 436 | 6 | 42 | 10 | 351 | 37 | 884 |
| 45,925 | 3 | 49 | 18 | 378 | 6 | 38 | 10 | 302 | 37 | 767 |
| 45,926 | 3 | 49 | 18 | 378 | 6 | 38 | 10 | 302 | 37 | 767 |
| 45,927 | 3 | 49 | 13 | 373 | 6 | 38 | 10 | 298 | 32 | 758 |
| 45,928 | 3 | 48 | 15 | 353 | 6 | 38 | 11 | 293 | 35 | 732 |
| 45,929 | 3 | 48 | 16 | 357 | 6 | 38 | 11 | 294 | 36 | 737 |
| 45,930 | 3 | 48 | 16 | 361 | 6 | 38 | 11 | 299 | 36 | 746 |
| 45,931 | 2 | 48 | 15 | 359 | 3 | 38 | 10 | 297 | 30 | 742 |
| 45,932 | 2 | 49 | 18 | 359 | 2 | 38 | 9  | 298 | 31 | 744 |
| 45,933 | 2 | 49 | 18 | 359 | 1 | 38 | 9  | 301 | 30 | 747 |
| 45,934 | 2 | 52 | 18 | 377 | 1 | 38 | 9  | 320 | 30 | 787 |
| 45,935 | 1 | 52 | 16 | 379 | 1 | 38 | 9  | 320 | 27 | 789 |
| 45,936 | 1 | 52 | 14 | 379 | 0 | 38 | 7  | 320 | 22 | 789 |
| 45,937 | 2 | 52 | 15 | 382 | 0 | 38 | 6  | 319 | 23 | 791 |
| 45,938 | 3 | 51 | 18 | 371 | 0 | 33 | 8  | 308 | 29 | 763 |
| 45,939 | 3 | 51 | 18 | 366 | 0 | 33 | 8  | 296 | 29 | 746 |
| 45,940 | 3 | 51 | 18 | 366 | 0 | 33 | 8  | 295 | 29 | 745 |
| 45,941 | 3 | 43 | 18 | 261 | 0 | 28 | 8  | 246 | 29 | 578 |
| 45,942 | 3 | 42 | 18 | 252 | 0 | 27 | 7  | 239 | 28 | 560 |
| 45,943 | 3 | 38 | 18 | 242 | 0 | 26 | 7  | 230 | 28 | 536 |
| 45,944 | 3 | 29 | 18 | 226 | 0 | 26 | 7  | 220 | 28 | 501 |
| 45,945 | 3 | 29 | 18 | 226 | 0 | 26 | 7  | 220 | 28 | 501 |
| 45,946 | 2 | 29 | 17 | 217 | 0 | 26 | 8  | 220 | 27 | 492 |
| 45,947 | 2 | 28 | 19 | 216 | 0 | 26 | 8  | 219 | 29 | 489 |
| 45,948 | 2 | 22 | 19 | 178 | 0 | 19 | 9  | 179 | 30 | 398 |
| 45,949 | 2 | 22 | 19 | 178 | 0 | 19 | 9  | 179 | 30 | 398 |

|        |   |    |    |     |   |    |    |     |    |     |
|--------|---|----|----|-----|---|----|----|-----|----|-----|
| 45,950 | 3 | 20 | 21 | 146 | 0 | 11 | 13 | 124 | 37 | 301 |
| 45,951 | 3 | 20 | 21 | 146 | 0 | 11 | 14 | 124 | 38 | 301 |
| 45,952 | 3 | 15 | 21 | 93  | 0 | 9  | 14 | 99  | 38 | 216 |
| 45,953 | 3 | 15 | 21 | 93  | 0 | 9  | 13 | 99  | 37 | 216 |
| 45,954 | 3 | 15 | 21 | 93  | 0 | 9  | 12 | 99  | 36 | 216 |
| 45,955 | 3 | 15 | 22 | 96  | 0 | 9  | 12 | 104 | 37 | 224 |
| 45,956 | 3 | 15 | 22 | 97  | 0 | 9  | 12 | 104 | 37 | 225 |
| 45,957 | 5 | 15 | 26 | 98  | 0 | 9  | 12 | 105 | 43 | 227 |
| 45,958 | 5 | 15 | 26 | 98  | 0 | 9  | 12 | 105 | 43 | 227 |
| 45,959 | 5 | 15 | 26 | 98  | 0 | 9  | 12 | 105 | 43 | 227 |
| 45,960 | 5 | 15 | 26 | 98  | 0 | 7  | 12 | 105 | 43 | 225 |
| 45,961 | 5 | 15 | 26 | 97  | 0 | 7  | 12 | 105 | 43 | 224 |
| 45,962 | 5 | 16 | 26 | 99  | 0 | 7  | 12 | 105 | 43 | 227 |
| 45,963 | 5 | 24 | 26 | 108 | 0 | 9  | 12 | 122 | 43 | 263 |
| 45,964 | 5 | 24 | 26 | 111 | 0 | 9  | 11 | 125 | 42 | 269 |
| 45,965 | 5 | 24 | 28 | 110 | 0 | 9  | 11 | 124 | 44 | 267 |
| 45,966 | 5 | 24 | 28 | 111 | 0 | 8  | 11 | 123 | 44 | 266 |
| 45,967 | 5 | 21 | 25 | 92  | 0 | 5  | 11 | 92  | 41 | 210 |
| 45,968 | 5 | 21 | 25 | 92  | 0 | 5  | 11 | 93  | 41 | 211 |
| 45,969 | 5 | 14 | 26 | 65  | 0 | 2  | 11 | 61  | 42 | 142 |
| 45,970 | 5 | 14 | 26 | 65  | 0 | 2  | 11 | 62  | 42 | 143 |
| 45,971 | 5 | 14 | 26 | 61  | 0 | 2  | 11 | 62  | 42 | 139 |
| 45,972 | 5 | 14 | 26 | 62  | 0 | 2  | 11 | 62  | 42 | 140 |
| 45,973 | 6 | 15 | 27 | 63  | 0 | 2  | 13 | 62  | 46 | 142 |
| 45,974 | 6 | 15 | 26 | 63  | 0 | 2  | 15 | 62  | 47 | 142 |
| 45,975 | 6 | 15 | 26 | 64  | 0 | 2  | 15 | 62  | 47 | 143 |
| 45,976 | 6 | 15 | 26 | 64  | 0 | 2  | 15 | 62  | 47 | 143 |
| 45,977 | 6 | 15 | 24 | 65  | 0 | 2  | 15 | 62  | 45 | 144 |
| 45,978 | 6 | 15 | 25 | 66  | 0 | 2  | 17 | 62  | 48 | 145 |
| 45,979 | 7 | 15 | 25 | 66  | 0 | 2  | 17 | 65  | 49 | 148 |
| 45,980 | 7 | 16 | 26 | 60  | 1 | 4  | 21 | 62  | 55 | 142 |
| 45,981 | 7 | 17 | 28 | 67  | 1 | 4  | 22 | 73  | 58 | 161 |
| 45,982 | 7 | 17 | 27 | 82  | 1 | 5  | 22 | 90  | 57 | 194 |
| 45,983 | 7 | 16 | 25 | 82  | 1 | 5  | 22 | 89  | 55 | 192 |
| 45,984 | 7 | 16 | 25 | 82  | 1 | 5  | 22 | 86  | 55 | 189 |
| 45,985 | 7 | 15 | 25 | 69  | 1 | 5  | 22 | 68  | 55 | 157 |
| 45,986 | 7 | 15 | 24 | 67  | 1 | 5  | 22 | 69  | 54 | 156 |
| 45,987 | 6 | 15 | 23 | 68  | 1 | 5  | 22 | 74  | 52 | 162 |
| 45,988 | 6 | 15 | 23 | 76  | 1 | 5  | 22 | 80  | 52 | 176 |
| 45,989 | 5 | 15 | 20 | 78  | 1 | 5  | 20 | 81  | 46 | 179 |
| 45,990 | 5 | 15 | 20 | 78  | 1 | 6  | 20 | 85  | 46 | 184 |

|        |    |    |    |     |   |   |    |     |    |     |
|--------|----|----|----|-----|---|---|----|-----|----|-----|
| 45,991 | 5  | 15 | 20 | 78  | 1 | 6 | 20 | 85  | 46 | 184 |
| 45,992 | 7  | 15 | 20 | 78  | 1 | 6 | 20 | 85  | 48 | 184 |
| 45,993 | 7  | 15 | 20 | 77  | 1 | 6 | 20 | 85  | 48 | 183 |
| 45,994 | 7  | 15 | 20 | 81  | 1 | 6 | 20 | 85  | 48 | 187 |
| 45,995 | 7  | 15 | 20 | 87  | 1 | 6 | 20 | 87  | 48 | 195 |
| 45,996 | 7  | 15 | 19 | 87  | 1 | 6 | 21 | 87  | 48 | 195 |
| 45,997 | 7  | 17 | 19 | 98  | 1 | 6 | 20 | 91  | 47 | 212 |
| 45,998 | 8  | 17 | 18 | 100 | 1 | 6 | 20 | 94  | 47 | 217 |
| 45,999 | 8  | 19 | 18 | 104 | 1 | 6 | 18 | 100 | 45 | 229 |
| 46,000 | 8  | 19 | 18 | 110 | 1 | 6 | 18 | 103 | 45 | 238 |
| 46,001 | 7  | 19 | 17 | 110 | 1 | 6 | 16 | 103 | 41 | 238 |
| 46,002 | 9  | 19 | 25 | 113 | 3 | 6 | 31 | 105 | 68 | 243 |
| 46,003 | 10 | 19 | 38 | 115 | 3 | 6 | 35 | 105 | 86 | 245 |
| 46,004 | 10 | 19 | 38 | 115 | 3 | 6 | 37 | 106 | 88 | 246 |
| 46,005 | 10 | 19 | 38 | 118 | 4 | 6 | 37 | 108 | 89 | 251 |
| 46,006 | 10 | 19 | 37 | 121 | 4 | 6 | 38 | 105 | 89 | 251 |
| 46,007 | 9  | 19 | 36 | 120 | 4 | 6 | 38 | 107 | 87 | 252 |
| 46,008 | 8  | 20 | 33 | 119 | 4 | 6 | 38 | 106 | 83 | 251 |
| 46,009 | 8  | 20 | 33 | 119 | 4 | 6 | 39 | 106 | 84 | 251 |
| 46,010 | 8  | 20 | 32 | 120 | 4 | 6 | 39 | 106 | 83 | 252 |
| 46,011 | 8  | 20 | 32 | 120 | 4 | 7 | 39 | 106 | 83 | 253 |
| 46,012 | 8  | 20 | 32 | 121 | 4 | 7 | 39 | 106 | 83 | 254 |
| 46,013 | 8  | 19 | 32 | 120 | 4 | 7 | 39 | 106 | 83 | 252 |
| 46,014 | 8  | 11 | 32 | 111 | 5 | 5 | 39 | 88  | 84 | 215 |
| 46,015 | 8  | 10 | 31 | 106 | 5 | 5 | 39 | 85  | 83 | 206 |
| 46,016 | 8  | 10 | 30 | 105 | 5 | 5 | 39 | 85  | 82 | 205 |
| 46,017 | 8  | 10 | 30 | 105 | 5 | 5 | 39 | 85  | 82 | 205 |
| 46,018 | 8  | 10 | 30 | 106 | 5 | 5 | 39 | 84  | 82 | 205 |
| 46,019 | 8  | 10 | 30 | 107 | 5 | 6 | 39 | 83  | 82 | 206 |
| 46,020 | 8  | 11 | 29 | 114 | 5 | 6 | 39 | 86  | 81 | 217 |
| 46,021 | 8  | 11 | 29 | 126 | 5 | 6 | 39 | 90  | 81 | 233 |
| 46,022 | 8  | 12 | 30 | 130 | 5 | 7 | 39 | 91  | 82 | 240 |
| 46,023 | 8  | 12 | 29 | 131 | 5 | 7 | 37 | 92  | 79 | 242 |
| 46,024 | 8  | 11 | 29 | 133 | 5 | 7 | 37 | 92  | 79 | 243 |
| 46,025 | 8  | 11 | 29 | 132 | 5 | 7 | 36 | 93  | 78 | 243 |
| 46,026 | 8  | 12 | 29 | 132 | 5 | 7 | 36 | 93  | 78 | 244 |
| 46,027 | 8  | 13 | 29 | 136 | 5 | 7 | 36 | 96  | 78 | 252 |
| 46,028 | 8  | 13 | 28 | 136 | 5 | 7 | 34 | 96  | 75 | 252 |
| 46,029 | 7  | 16 | 28 | 139 | 5 | 7 | 34 | 98  | 74 | 260 |
| 46,030 | 7  | 16 | 27 | 139 | 5 | 7 | 33 | 94  | 72 | 256 |
| 46,031 | 7  | 15 | 26 | 136 | 4 | 5 | 30 | 92  | 67 | 248 |

|        |   |    |    |     |   |   |    |    |    |     |
|--------|---|----|----|-----|---|---|----|----|----|-----|
| 46,032 | 7 | 14 | 24 | 129 | 4 | 6 | 29 | 83 | 64 | 232 |
| 46,033 | 7 | 14 | 24 | 115 | 4 | 5 | 29 | 67 | 64 | 201 |
| 46,034 | 7 | 15 | 24 | 117 | 4 | 5 | 29 | 71 | 64 | 208 |
| 46,035 | 7 | 15 | 24 | 117 | 4 | 5 | 29 | 71 | 64 | 208 |
| 46,036 | 7 | 13 | 24 | 114 | 4 | 5 | 29 | 70 | 64 | 202 |
| 46,037 | 7 | 13 | 24 | 110 | 4 | 5 | 29 | 65 | 64 | 193 |
| 46,038 | 7 | 13 | 24 | 102 | 4 | 5 | 29 | 59 | 64 | 179 |
| 46,039 | 7 | 13 | 24 | 100 | 4 | 5 | 29 | 58 | 64 | 176 |
| 46,040 | 7 | 13 | 24 | 100 | 4 | 5 | 29 | 58 | 64 | 176 |
| 46,041 | 7 | 13 | 24 | 100 | 4 | 4 | 29 | 55 | 64 | 172 |
| 46,042 | 5 | 13 | 24 | 100 | 4 | 4 | 29 | 55 | 62 | 172 |
| 46,043 | 5 | 13 | 24 | 100 | 4 | 4 | 29 | 56 | 62 | 173 |
| 46,044 | 5 | 13 | 24 | 99  | 4 | 4 | 29 | 56 | 62 | 172 |
| 46,045 | 5 | 13 | 24 | 89  | 4 | 4 | 29 | 54 | 62 | 160 |
| 46,046 | 5 | 13 | 24 | 89  | 4 | 4 | 29 | 54 | 62 | 160 |
| 46,047 | 5 | 11 | 25 | 78  | 4 | 4 | 31 | 50 | 65 | 143 |
| 46,048 | 5 | 11 | 25 | 79  | 4 | 4 | 31 | 50 | 65 | 144 |
| 46,049 | 4 | 11 | 24 | 83  | 4 | 4 | 32 | 47 | 64 | 145 |
| 46,050 | 4 | 9  | 24 | 82  | 4 | 6 | 33 | 44 | 65 | 141 |
| 46,051 | 4 | 9  | 24 | 78  | 4 | 6 | 33 | 42 | 65 | 135 |
| 46,052 | 4 | 9  | 23 | 80  | 4 | 7 | 34 | 41 | 65 | 137 |
| 46,053 | 2 | 10 | 15 | 89  | 2 | 9 | 19 | 45 | 38 | 153 |
| 46,054 | 1 | 10 | 2  | 90  | 2 | 9 | 15 | 48 | 20 | 157 |
| 46,055 | 1 | 10 | 2  | 94  | 2 | 9 | 13 | 48 | 18 | 161 |
| 46,056 | 1 | 10 | 2  | 85  | 1 | 9 | 13 | 43 | 17 | 147 |
| 46,057 | 1 | 10 | 2  | 87  | 1 | 9 | 12 | 45 | 16 | 151 |
| 46,058 | 1 | 10 | 2  | 87  | 1 | 9 | 11 | 45 | 15 | 151 |
| 46,059 | 1 | 9  | 2  | 87  | 1 | 9 | 11 | 45 | 15 | 150 |
| 46,060 | 1 | 9  | 2  | 87  | 1 | 9 | 13 | 45 | 17 | 150 |
| 46,061 | 1 | 9  | 2  | 87  | 1 | 9 | 13 | 45 | 17 | 150 |
| 46,062 | 1 | 9  | 2  | 89  | 1 | 9 | 13 | 45 | 17 | 152 |
| 46,063 | 1 | 9  | 2  | 89  | 1 | 9 | 13 | 45 | 17 | 152 |
| 46,064 | 1 | 9  | 2  | 89  | 1 | 9 | 13 | 45 | 17 | 152 |
| 46,065 | 1 | 9  | 2  | 89  | 0 | 9 | 13 | 45 | 16 | 152 |
| 46,066 | 1 | 9  | 2  | 89  | 0 | 9 | 13 | 45 | 16 | 152 |
| 46,067 | 1 | 9  | 2  | 88  | 0 | 9 | 13 | 45 | 16 | 151 |
| 46,068 | 1 | 9  | 2  | 88  | 0 | 9 | 13 | 45 | 16 | 151 |
| 46,069 | 1 | 9  | 3  | 86  | 0 | 8 | 14 | 45 | 18 | 148 |
| 46,070 | 1 | 9  | 2  | 86  | 0 | 8 | 14 | 45 | 17 | 148 |
| 46,071 | 1 | 8  | 3  | 65  | 0 | 8 | 14 | 34 | 18 | 115 |
| 46,072 | 1 | 7  | 3  | 61  | 0 | 7 | 14 | 33 | 18 | 108 |

|        |   |   |    |    |   |   |    |    |    |     |
|--------|---|---|----|----|---|---|----|----|----|-----|
| 46,073 | 1 | 7 | 3  | 61 | 0 | 7 | 14 | 33 | 18 | 108 |
| 46,074 | 0 | 9 | 3  | 67 | 0 | 8 | 14 | 42 | 17 | 126 |
| 46,075 | 0 | 9 | 3  | 64 | 0 | 8 | 14 | 43 | 17 | 124 |
| 46,076 | 0 | 9 | 3  | 71 | 0 | 9 | 13 | 61 | 16 | 150 |
| 46,077 | 0 | 8 | 3  | 72 | 0 | 9 | 13 | 62 | 16 | 151 |
| 46,078 | 0 | 7 | 4  | 68 | 0 | 9 | 13 | 59 | 17 | 143 |
| 46,079 | 0 | 8 | 4  | 72 | 0 | 9 | 12 | 59 | 16 | 148 |
| 46,080 | 0 | 6 | 4  | 69 | 0 | 9 | 12 | 57 | 16 | 141 |
| 46,081 | 0 | 6 | 4  | 71 | 0 | 9 | 12 | 58 | 16 | 144 |
| 46,082 | 0 | 6 | 4  | 72 | 0 | 9 | 12 | 61 | 16 | 148 |
| 46,083 | 0 | 6 | 4  | 72 | 0 | 8 | 12 | 61 | 16 | 147 |
| 46,084 | 0 | 6 | 4  | 71 | 0 | 8 | 13 | 61 | 17 | 146 |
| 46,085 | 0 | 5 | 4  | 69 | 0 | 8 | 13 | 57 | 17 | 139 |
| 46,086 | 0 | 5 | 7  | 70 | 0 | 8 | 13 | 58 | 20 | 141 |
| 46,087 | 0 | 5 | 7  | 71 | 0 | 8 | 13 | 58 | 20 | 142 |
| 46,088 | 0 | 6 | 8  | 71 | 0 | 8 | 14 | 58 | 22 | 143 |
| 46,089 | 0 | 6 | 8  | 71 | 0 | 8 | 14 | 58 | 22 | 143 |
| 46,090 | 0 | 6 | 9  | 71 | 1 | 8 | 16 | 58 | 26 | 143 |
| 46,091 | 0 | 6 | 9  | 71 | 1 | 8 | 16 | 58 | 26 | 143 |
| 46,092 | 0 | 6 | 9  | 71 | 1 | 8 | 16 | 58 | 26 | 143 |
| 46,093 | 0 | 6 | 9  | 71 | 1 | 8 | 16 | 58 | 26 | 143 |
| 46,094 | 0 | 6 | 9  | 71 | 1 | 8 | 16 | 57 | 26 | 142 |
| 46,095 | 0 | 6 | 9  | 71 | 1 | 8 | 16 | 57 | 26 | 142 |
| 46,096 | 0 | 6 | 9  | 70 | 1 | 8 | 16 | 57 | 26 | 141 |
| 46,097 | 2 | 6 | 13 | 70 | 1 | 8 | 19 | 57 | 35 | 141 |
| 46,098 | 3 | 6 | 12 | 73 | 1 | 8 | 18 | 58 | 34 | 145 |
| 46,099 | 4 | 6 | 12 | 77 | 1 | 8 | 22 | 60 | 39 | 151 |
| 46,100 | 4 | 6 | 15 | 71 | 1 | 8 | 21 | 60 | 41 | 145 |
| 46,101 | 4 | 6 | 15 | 68 | 2 | 6 | 21 | 58 | 42 | 138 |
| 46,102 | 4 | 6 | 15 | 64 | 2 | 5 | 21 | 57 | 42 | 132 |
| 46,103 | 4 | 5 | 15 | 52 | 2 | 3 | 18 | 52 | 39 | 112 |
| 46,104 | 4 | 5 | 15 | 52 | 2 | 3 | 17 | 52 | 38 | 112 |
| 46,105 | 4 | 5 | 15 | 49 | 2 | 3 | 17 | 49 | 38 | 106 |
| 46,106 | 4 | 5 | 15 | 45 | 2 | 3 | 17 | 48 | 38 | 101 |
| 46,107 | 4 | 5 | 15 | 45 | 2 | 3 | 17 | 47 | 38 | 100 |
| 46,108 | 4 | 5 | 15 | 43 | 2 | 3 | 17 | 45 | 38 | 96  |
| 46,109 | 4 | 5 | 15 | 43 | 2 | 3 | 17 | 47 | 38 | 98  |
| 46,110 | 4 | 5 | 15 | 43 | 2 | 3 | 15 | 47 | 36 | 98  |
| 46,111 | 4 | 5 | 15 | 42 | 3 | 3 | 18 | 47 | 40 | 97  |
| 46,112 | 4 | 5 | 15 | 40 | 3 | 2 | 18 | 47 | 40 | 94  |
| 46,113 | 4 | 5 | 15 | 40 | 3 | 2 | 18 | 47 | 40 | 94  |

|        |   |   |    |    |   |   |    |    |    |     |
|--------|---|---|----|----|---|---|----|----|----|-----|
| 46,114 | 4 | 5 | 15 | 38 | 3 | 2 | 18 | 47 | 40 | 92  |
| 46,115 | 4 | 5 | 15 | 38 | 3 | 2 | 18 | 47 | 40 | 92  |
| 46,116 | 4 | 5 | 15 | 41 | 3 | 2 | 18 | 49 | 40 | 97  |
| 46,117 | 4 | 5 | 15 | 41 | 3 | 2 | 20 | 49 | 42 | 97  |
| 46,118 | 4 | 5 | 15 | 46 | 3 | 4 | 21 | 57 | 43 | 112 |
| 46,119 | 4 | 5 | 15 | 51 | 3 | 4 | 20 | 60 | 42 | 120 |
| 46,120 | 4 | 5 | 14 | 52 | 3 | 4 | 21 | 60 | 42 | 121 |
| 46,121 | 4 | 5 | 14 | 53 | 3 | 4 | 23 | 60 | 44 | 122 |
| 46,122 | 4 | 5 | 14 | 56 | 3 | 4 | 23 | 63 | 44 | 128 |
| 46,123 | 4 | 5 | 14 | 56 | 3 | 5 | 23 | 62 | 44 | 128 |
| 46,124 | 4 | 4 | 14 | 48 | 4 | 4 | 23 | 51 | 45 | 107 |
| 46,125 | 4 | 4 | 15 | 48 | 4 | 4 | 27 | 52 | 50 | 108 |
| 46,126 | 4 | 4 | 16 | 49 | 4 | 4 | 28 | 54 | 52 | 111 |
| 46,127 | 4 | 4 | 15 | 42 | 4 | 4 | 28 | 35 | 51 | 85  |
| 46,128 | 4 | 6 | 15 | 43 | 4 | 4 | 28 | 34 | 51 | 87  |
| 46,129 | 4 | 6 | 15 | 43 | 4 | 4 | 28 | 35 | 51 | 88  |
| 46,130 | 4 | 4 | 15 | 37 | 4 | 4 | 28 | 35 | 51 | 80  |
| 46,131 | 4 | 4 | 16 | 35 | 4 | 4 | 28 | 33 | 52 | 76  |
| 46,132 | 4 | 4 | 16 | 34 | 4 | 4 | 28 | 30 | 52 | 72  |
| 46,133 | 4 | 4 | 16 | 34 | 4 | 4 | 28 | 30 | 52 | 72  |
| 46,134 | 4 | 4 | 16 | 35 | 4 | 4 | 27 | 29 | 51 | 72  |
| 46,135 | 4 | 4 | 16 | 35 | 4 | 4 | 27 | 29 | 51 | 72  |
| 46,136 | 4 | 4 | 16 | 39 | 4 | 4 | 28 | 31 | 52 | 78  |
| 46,137 | 4 | 5 | 13 | 38 | 4 | 4 | 28 | 29 | 49 | 76  |
| 46,138 | 4 | 5 | 14 | 38 | 4 | 4 | 28 | 29 | 50 | 76  |
| 46,139 | 4 | 4 | 13 | 39 | 4 | 4 | 27 | 29 | 48 | 76  |
| 46,140 | 4 | 4 | 13 | 40 | 4 | 4 | 27 | 29 | 48 | 77  |
| 46,141 | 4 | 4 | 13 | 39 | 3 | 4 | 25 | 29 | 45 | 76  |
| 46,142 | 4 | 4 | 13 | 40 | 3 | 4 | 25 | 29 | 45 | 77  |
| 46,143 | 4 | 4 | 13 | 40 | 3 | 4 | 25 | 31 | 45 | 79  |
| 46,144 | 4 | 5 | 13 | 46 | 3 | 4 | 25 | 36 | 45 | 91  |
| 46,145 | 4 | 5 | 19 | 58 | 3 | 5 | 27 | 40 | 53 | 108 |
| 46,146 | 4 | 5 | 19 | 58 | 3 | 5 | 27 | 42 | 53 | 110 |
| 46,147 | 4 | 6 | 19 | 65 | 3 | 6 | 27 | 54 | 53 | 131 |
| 46,148 | 2 | 6 | 15 | 65 | 3 | 8 | 24 | 57 | 44 | 136 |
| 46,149 | 2 | 6 | 26 | 72 | 3 | 8 | 26 | 58 | 57 | 144 |
| 46,150 | 1 | 6 | 30 | 79 | 3 | 8 | 23 | 60 | 57 | 153 |
| 46,151 | 1 | 6 | 27 | 82 | 3 | 8 | 23 | 60 | 54 | 156 |
| 46,152 | 1 | 6 | 27 | 83 | 2 | 8 | 22 | 59 | 52 | 156 |
| 46,153 | 1 | 6 | 27 | 83 | 2 | 8 | 22 | 60 | 52 | 157 |
| 46,154 | 1 | 6 | 27 | 83 | 2 | 8 | 22 | 60 | 52 | 157 |

|        |   |   |    |     |   |    |    |    |    |     |
|--------|---|---|----|-----|---|----|----|----|----|-----|
| 46,155 | 1 | 7 | 27 | 84  | 2 | 8  | 22 | 62 | 52 | 161 |
| 46,156 | 1 | 7 | 27 | 84  | 2 | 8  | 22 | 62 | 52 | 161 |
| 46,157 | 1 | 7 | 27 | 85  | 2 | 8  | 23 | 62 | 53 | 162 |
| 46,158 | 1 | 7 | 27 | 86  | 2 | 8  | 23 | 62 | 53 | 163 |
| 46,159 | 1 | 7 | 27 | 87  | 2 | 8  | 23 | 60 | 53 | 162 |
| 46,160 | 1 | 7 | 27 | 91  | 2 | 8  | 23 | 61 | 53 | 167 |
| 46,161 | 1 | 7 | 27 | 91  | 1 | 8  | 20 | 61 | 49 | 167 |
| 46,162 | 2 | 7 | 27 | 91  | 1 | 8  | 20 | 60 | 50 | 166 |
| 46,163 | 2 | 7 | 28 | 91  | 1 | 8  | 20 | 61 | 51 | 167 |
| 46,164 | 2 | 7 | 28 | 91  | 1 | 8  | 20 | 61 | 51 | 167 |
| 46,165 | 2 | 7 | 28 | 91  | 1 | 8  | 20 | 61 | 51 | 167 |
| 46,166 | 2 | 7 | 28 | 91  | 1 | 8  | 20 | 61 | 51 | 167 |
| 46,167 | 2 | 7 | 28 | 88  | 1 | 8  | 18 | 59 | 49 | 162 |
| 46,168 | 2 | 7 | 28 | 89  | 1 | 8  | 18 | 58 | 49 | 162 |
| 46,169 | 2 | 7 | 28 | 84  | 1 | 6  | 17 | 52 | 48 | 149 |
| 46,170 | 2 | 7 | 28 | 80  | 1 | 6  | 17 | 49 | 48 | 142 |
| 46,171 | 2 | 7 | 28 | 83  | 1 | 6  | 16 | 49 | 47 | 145 |
| 46,172 | 2 | 7 | 27 | 79  | 1 | 6  | 14 | 47 | 44 | 139 |
| 46,173 | 2 | 7 | 27 | 79  | 1 | 6  | 14 | 48 | 44 | 140 |
| 46,174 | 2 | 7 | 27 | 80  | 0 | 5  | 14 | 48 | 43 | 140 |
| 46,175 | 2 | 6 | 27 | 80  | 0 | 5  | 14 | 48 | 43 | 139 |
| 46,176 | 2 | 6 | 27 | 79  | 0 | 5  | 10 | 44 | 39 | 134 |
| 46,177 | 2 | 6 | 26 | 79  | 0 | 4  | 9  | 44 | 37 | 133 |
| 46,178 | 2 | 6 | 26 | 81  | 0 | 4  | 9  | 44 | 37 | 135 |
| 46,179 | 2 | 4 | 26 | 79  | 0 | 4  | 9  | 44 | 37 | 131 |
| 46,180 | 2 | 4 | 26 | 79  | 0 | 4  | 9  | 43 | 37 | 130 |
| 46,181 | 2 | 4 | 26 | 79  | 0 | 4  | 9  | 43 | 37 | 130 |
| 46,182 | 2 | 4 | 25 | 79  | 0 | 4  | 9  | 43 | 36 | 130 |
| 46,183 | 2 | 4 | 25 | 79  | 0 | 4  | 9  | 43 | 36 | 130 |
| 46,184 | 2 | 4 | 26 | 78  | 0 | 4  | 9  | 43 | 37 | 129 |
| 46,185 | 2 | 4 | 26 | 78  | 0 | 4  | 9  | 44 | 37 | 130 |
| 46,186 | 2 | 4 | 26 | 79  | 0 | 4  | 8  | 44 | 36 | 131 |
| 46,187 | 2 | 3 | 26 | 73  | 0 | 4  | 8  | 42 | 36 | 122 |
| 46,188 | 2 | 3 | 26 | 74  | 0 | 4  | 8  | 42 | 36 | 123 |
| 46,189 | 2 | 3 | 25 | 73  | 0 | 4  | 8  | 42 | 35 | 122 |
| 46,190 | 2 | 3 | 25 | 72  | 0 | 4  | 8  | 42 | 35 | 121 |
| 46,191 | 2 | 3 | 25 | 71  | 0 | 4  | 8  | 42 | 35 | 120 |
| 46,192 | 2 | 3 | 24 | 71  | 0 | 4  | 8  | 42 | 34 | 120 |
| 46,193 | 2 | 3 | 25 | 77  | 0 | 4  | 8  | 45 | 35 | 129 |
| 46,194 | 2 | 3 | 25 | 88  | 0 | 4  | 8  | 46 | 35 | 141 |
| 46,195 | 2 | 9 | 27 | 179 | 0 | 15 | 9  | 91 | 38 | 294 |

|        |   |    |    |     |   |    |   |     |    |       |
|--------|---|----|----|-----|---|----|---|-----|----|-------|
| 46,196 | 2 | 12 | 22 | 378 | 0 | 21 | 7 | 122 | 31 | 533   |
| 46,197 | 2 | 19 | 22 | 394 | 0 | 23 | 7 | 137 | 31 | 573   |
| 46,198 | 1 | 20 | 22 | 418 | 0 | 26 | 7 | 132 | 30 | 596   |
| 46,199 | 1 | 22 | 20 | 445 | 0 | 29 | 4 | 139 | 25 | 635   |
| 46,200 | 1 | 23 | 11 | 459 | 0 | 32 | 3 | 170 | 15 | 684   |
| 46,201 | 1 | 23 | 7  | 456 | 0 | 32 | 2 | 170 | 10 | 681   |
| 46,202 | 1 | 23 | 7  | 455 | 0 | 32 | 3 | 174 | 11 | 684   |
| 46,203 | 1 | 25 | 7  | 459 | 0 | 33 | 4 | 177 | 12 | 694   |
| 46,204 | 1 | 25 | 7  | 459 | 0 | 33 | 4 | 176 | 12 | 693   |
| 46,205 | 1 | 28 | 7  | 466 | 0 | 33 | 4 | 182 | 12 | 709   |
| 46,206 | 1 | 28 | 7  | 470 | 0 | 34 | 4 | 187 | 12 | 719   |
| 46,207 | 1 | 28 | 7  | 473 | 0 | 34 | 4 | 187 | 12 | 722   |
| 46,208 | 1 | 28 | 9  | 477 | 0 | 34 | 4 | 187 | 14 | 726   |
| 46,209 | 1 | 28 | 9  | 476 | 0 | 34 | 4 | 188 | 14 | 726   |
| 46,210 | 1 | 31 | 9  | 484 | 0 | 35 | 4 | 192 | 14 | 742   |
| 46,211 | 1 | 31 | 9  | 481 | 0 | 35 | 4 | 192 | 14 | 739   |
| 46,212 | 0 | 34 | 9  | 495 | 0 | 35 | 4 | 195 | 13 | 759   |
| 46,213 | 0 | 34 | 9  | 499 | 0 | 37 | 4 | 200 | 13 | 770   |
| 46,214 | 0 | 35 | 8  | 503 | 0 | 37 | 4 | 201 | 12 | 776   |
| 46,215 | 0 | 35 | 8  | 505 | 0 | 37 | 4 | 203 | 12 | 780   |
| 46,216 | 0 | 35 | 8  | 508 | 0 | 37 | 4 | 206 | 12 | 786   |
| 46,217 | 0 | 35 | 8  | 509 | 0 | 37 | 4 | 207 | 12 | 788   |
| 46,218 | 0 | 35 | 8  | 510 | 0 | 37 | 4 | 211 | 12 | 793   |
| 46,219 | 0 | 37 | 8  | 517 | 0 | 38 | 4 | 227 | 12 | 819   |
| 46,220 | 0 | 38 | 8  | 524 | 0 | 38 | 4 | 229 | 12 | 829   |
| 46,221 | 0 | 39 | 8  | 541 | 0 | 39 | 4 | 254 | 12 | 873   |
| 46,222 | 0 | 40 | 8  | 541 | 0 | 39 | 4 | 257 | 12 | 877   |
| 46,223 | 0 | 41 | 8  | 563 | 1 | 41 | 4 | 281 | 13 | 926   |
| 46,224 | 0 | 41 | 8  | 578 | 1 | 41 | 4 | 316 | 13 | 976   |
| 46,225 | 0 | 41 | 8  | 579 | 1 | 41 | 4 | 316 | 13 | 977   |
| 46,226 | 0 | 41 | 8  | 579 | 1 | 41 | 4 | 316 | 13 | 977   |
| 46,227 | 0 | 42 | 7  | 581 | 1 | 42 | 4 | 318 | 12 | 983   |
| 46,228 | 0 | 43 | 7  | 581 | 1 | 42 | 4 | 322 | 12 | 988   |
| 46,229 | 0 | 43 | 7  | 581 | 1 | 42 | 4 | 323 | 12 | 989   |
| 46,230 | 0 | 48 | 7  | 586 | 1 | 44 | 4 | 326 | 12 | 1,004 |
| 46,231 | 0 | 49 | 7  | 599 | 1 | 45 | 4 | 332 | 12 | 1,025 |
| 46,232 | 0 | 50 | 8  | 608 | 1 | 45 | 4 | 341 | 13 | 1,044 |
| 46,233 | 0 | 50 | 8  | 609 | 1 | 45 | 4 | 341 | 13 | 1,045 |
| 46,234 | 0 | 50 | 8  | 613 | 1 | 45 | 4 | 340 | 13 | 1,048 |
| 46,235 | 0 | 50 | 7  | 614 | 1 | 45 | 4 | 340 | 12 | 1,049 |
| 46,236 | 0 | 50 | 7  | 614 | 1 | 45 | 4 | 340 | 12 | 1,049 |



|        |   |    |    |     |   |    |    |     |    |       |
|--------|---|----|----|-----|---|----|----|-----|----|-------|
| 46,237 | 0 | 50 | 7  | 613 | 1 | 45 | 4  | 340 | 12 | 1,048 |
| 46,238 | 0 | 50 | 7  | 624 | 1 | 45 | 4  | 349 | 12 | 1,068 |
| 46,239 | 0 | 51 | 7  | 627 | 1 | 46 | 4  | 354 | 12 | 1,078 |
| 46,240 | 0 | 52 | 8  | 630 | 1 | 46 | 4  | 357 | 13 | 1,085 |
| 46,241 | 0 | 55 | 9  | 639 | 1 | 48 | 4  | 360 | 14 | 1,102 |
| 46,242 | 0 | 55 | 11 | 644 | 1 | 48 | 4  | 367 | 16 | 1,114 |
| 46,243 | 0 | 55 | 11 | 644 | 1 | 48 | 4  | 368 | 16 | 1,115 |
| 46,244 | 0 | 58 | 10 | 638 | 1 | 48 | 4  | 364 | 15 | 1,108 |
| 46,245 | 0 | 58 | 8  | 627 | 1 | 48 | 6  | 363 | 15 | 1,096 |
| 46,246 | 0 | 51 | 7  | 530 | 1 | 37 | 6  | 313 | 14 | 931   |
| 46,247 | 3 | 41 | 8  | 305 | 1 | 28 | 8  | 261 | 20 | 635   |
| 46,248 | 3 | 41 | 8  | 305 | 1 | 28 | 8  | 262 | 20 | 636   |
| 46,249 | 3 | 39 | 8  | 277 | 1 | 24 | 8  | 256 | 20 | 596   |
| 46,250 | 3 | 37 | 9  | 252 | 1 | 19 | 11 | 246 | 24 | 554   |
| 46,251 | 3 | 36 | 12 | 228 | 1 | 16 | 11 | 213 | 27 | 493   |
| 46,252 | 3 | 36 | 12 | 219 | 3 | 16 | 11 | 209 | 29 | 480   |
| 46,253 | 3 | 36 | 14 | 218 | 3 | 16 | 11 | 206 | 31 | 476   |
| 46,254 | 3 | 34 | 14 | 213 | 3 | 16 | 11 | 203 | 31 | 466   |
| 46,255 | 3 | 34 | 14 | 213 | 3 | 16 | 11 | 203 | 31 | 466   |
| 46,256 | 3 | 31 | 14 | 206 | 3 | 16 | 10 | 197 | 30 | 450   |
| 46,257 | 3 | 30 | 14 | 201 | 3 | 15 | 10 | 190 | 30 | 436   |
| 46,258 | 3 | 30 | 12 | 193 | 3 | 15 | 10 | 189 | 28 | 427   |
| 46,259 | 5 | 32 | 12 | 193 | 3 | 15 | 10 | 189 | 30 | 429   |
| 46,260 | 5 | 32 | 12 | 194 | 3 | 15 | 10 | 191 | 30 | 432   |
| 46,261 | 6 | 26 | 12 | 174 | 3 | 14 | 10 | 192 | 31 | 406   |
| 46,262 | 6 | 27 | 12 | 188 | 3 | 15 | 10 | 199 | 31 | 429   |
| 46,263 | 6 | 27 | 12 | 192 | 3 | 15 | 11 | 206 | 32 | 440   |
| 46,264 | 6 | 30 | 12 | 246 | 3 | 15 | 11 | 254 | 32 | 545   |
| 46,265 | 6 | 29 | 12 | 258 | 3 | 15 | 11 | 260 | 32 | 562   |
| 46,266 | 7 | 29 | 12 | 262 | 3 | 15 | 12 | 262 | 34 | 568   |
| 46,267 | 7 | 29 | 12 | 273 | 3 | 15 | 12 | 259 | 34 | 576   |
| 46,268 | 7 | 31 | 12 | 287 | 3 | 15 | 12 | 268 | 34 | 601   |
| 46,269 | 7 | 31 | 12 | 287 | 3 | 15 | 12 | 267 | 34 | 600   |
| 46,270 | 7 | 30 | 12 | 280 | 3 | 14 | 12 | 250 | 34 | 574   |
| 46,271 | 7 | 28 | 13 | 256 | 3 | 13 | 12 | 223 | 35 | 520   |
| 46,272 | 7 | 28 | 13 | 256 | 3 | 13 | 12 | 225 | 35 | 522   |
| 46,273 | 7 | 26 | 15 | 216 | 3 | 11 | 13 | 163 | 38 | 416   |
| 46,274 | 8 | 26 | 17 | 216 | 2 | 11 | 14 | 163 | 41 | 416   |
| 46,275 | 8 | 26 | 23 | 216 | 2 | 11 | 14 | 166 | 47 | 419   |
| 46,276 | 8 | 26 | 23 | 214 | 2 | 11 | 14 | 167 | 47 | 418   |
| 46,277 | 8 | 25 | 28 | 212 | 2 | 10 | 14 | 165 | 52 | 412   |

|        |   |    |    |     |   |    |    |     |    |     |
|--------|---|----|----|-----|---|----|----|-----|----|-----|
| 46,278 | 8 | 24 | 29 | 210 | 2 | 10 | 16 | 161 | 55 | 405 |
| 46,279 | 9 | 24 | 39 | 212 | 2 | 10 | 20 | 161 | 70 | 407 |
| 46,280 | 9 | 24 | 38 | 213 | 2 | 10 | 20 | 160 | 69 | 407 |
| 46,281 | 9 | 17 | 38 | 186 | 2 | 7  | 20 | 142 | 69 | 352 |
| 46,282 | 9 | 17 | 38 | 186 | 2 | 7  | 20 | 143 | 69 | 353 |
| 46,283 | 9 | 17 | 38 | 186 | 2 | 7  | 20 | 143 | 69 | 353 |
| 46,284 | 9 | 17 | 38 | 187 | 2 | 7  | 20 | 144 | 69 | 355 |
| 46,285 | 9 | 17 | 38 | 182 | 2 | 7  | 20 | 144 | 69 | 350 |
| 46,286 | 9 | 17 | 39 | 181 | 2 | 7  | 21 | 144 | 71 | 349 |
| 46,287 | 9 | 17 | 40 | 181 | 2 | 7  | 21 | 144 | 72 | 349 |
| 46,288 | 9 | 17 | 40 | 181 | 2 | 7  | 21 | 144 | 72 | 349 |
| 46,289 | 9 | 16 | 39 | 166 | 2 | 6  | 21 | 130 | 71 | 318 |
| 46,290 | 9 | 15 | 39 | 163 | 2 | 6  | 21 | 127 | 71 | 311 |
| 46,291 | 9 | 12 | 38 | 155 | 2 | 4  | 21 | 124 | 70 | 295 |
| 46,292 | 9 | 9  | 38 | 150 | 2 | 4  | 21 | 117 | 70 | 280 |
| 46,293 | 9 | 9  | 36 | 150 | 2 | 4  | 21 | 116 | 68 | 279 |
| 46,294 | 9 | 9  | 36 | 150 | 2 | 4  | 21 | 115 | 68 | 278 |
| 46,295 | 9 | 9  | 36 | 150 | 2 | 4  | 21 | 115 | 68 | 278 |
| 46,296 | 9 | 9  | 37 | 158 | 2 | 4  | 18 | 129 | 66 | 300 |
| 46,297 | 7 | 9  | 38 | 166 | 2 | 4  | 17 | 134 | 64 | 313 |
| 46,298 | 6 | 9  | 39 | 177 | 2 | 4  | 16 | 147 | 63 | 337 |
| 46,299 | 6 | 9  | 39 | 193 | 2 | 4  | 16 | 157 | 63 | 363 |
| 46,300 | 6 | 10 | 39 | 200 | 2 | 6  | 17 | 177 | 64 | 393 |
| 46,301 | 6 | 10 | 38 | 221 | 2 | 8  | 14 | 191 | 60 | 430 |
| 46,302 | 6 | 11 | 36 | 257 | 3 | 11 | 14 | 208 | 59 | 487 |
| 46,303 | 6 | 12 | 36 | 266 | 1 | 12 | 13 | 221 | 56 | 511 |
| 46,304 | 6 | 13 | 34 | 267 | 1 | 11 | 13 | 221 | 54 | 512 |
| 46,305 | 6 | 13 | 34 | 269 | 1 | 11 | 13 | 222 | 54 | 515 |
| 46,306 | 6 | 13 | 34 | 270 | 1 | 11 | 13 | 222 | 54 | 516 |
| 46,307 | 6 | 13 | 34 | 272 | 1 | 11 | 13 | 230 | 54 | 526 |
| 46,308 | 6 | 13 | 34 | 272 | 1 | 11 | 13 | 230 | 54 | 526 |
| 46,309 | 6 | 13 | 34 | 273 | 1 | 11 | 13 | 231 | 54 | 528 |
| 46,310 | 4 | 11 | 34 | 273 | 1 | 11 | 13 | 230 | 52 | 525 |
| 46,311 | 3 | 11 | 34 | 272 | 1 | 11 | 13 | 232 | 51 | 526 |
| 46,312 | 3 | 11 | 34 | 268 | 1 | 11 | 13 | 221 | 51 | 511 |
| 46,313 | 3 | 10 | 44 | 254 | 2 | 10 | 17 | 214 | 66 | 488 |
| 46,314 | 3 | 10 | 46 | 250 | 2 | 10 | 17 | 207 | 68 | 477 |
| 46,315 | 3 | 7  | 53 | 176 | 4 | 8  | 25 | 149 | 85 | 340 |
| 46,316 | 2 | 7  | 54 | 170 | 5 | 8  | 27 | 145 | 88 | 330 |
| 46,317 | 2 | 7  | 54 | 170 | 5 | 8  | 27 | 145 | 88 | 330 |
| 46,318 | 2 | 7  | 54 | 156 | 5 | 8  | 27 | 145 | 88 | 316 |

|        |   |   |    |     |   |    |    |     |    |     |
|--------|---|---|----|-----|---|----|----|-----|----|-----|
| 46,319 | 2 | 5 | 54 | 141 | 5 | 8  | 27 | 135 | 88 | 289 |
| 46,320 | 2 | 5 | 54 | 139 | 5 | 8  | 27 | 132 | 88 | 284 |
| 46,321 | 2 | 4 | 54 | 137 | 5 | 8  | 27 | 131 | 88 | 280 |
| 46,322 | 2 | 4 | 53 | 140 | 5 | 8  | 27 | 133 | 87 | 285 |
| 46,323 | 2 | 4 | 52 | 140 | 5 | 8  | 27 | 134 | 86 | 286 |
| 46,324 | 2 | 4 | 51 | 143 | 5 | 8  | 26 | 136 | 84 | 291 |
| 46,325 | 1 | 4 | 49 | 144 | 5 | 9  | 25 | 137 | 80 | 294 |
| 46,326 | 1 | 4 | 43 | 144 | 5 | 9  | 26 | 134 | 75 | 291 |
| 46,327 | 1 | 4 | 43 | 144 | 5 | 9  | 26 | 134 | 75 | 291 |
| 46,328 | 1 | 4 | 38 | 145 | 5 | 9  | 26 | 134 | 70 | 292 |
| 46,329 | 1 | 5 | 37 | 147 | 5 | 9  | 24 | 136 | 67 | 297 |
| 46,330 | 0 | 5 | 27 | 140 | 5 | 9  | 20 | 135 | 52 | 289 |
| 46,331 | 0 | 5 | 27 | 145 | 5 | 10 | 20 | 137 | 52 | 297 |
| 46,332 | 0 | 5 | 27 | 145 | 5 | 10 | 20 | 136 | 52 | 296 |
| 46,333 | 0 | 5 | 27 | 145 | 5 | 10 | 20 | 136 | 52 | 296 |
| 46,334 | 0 | 5 | 28 | 143 | 5 | 10 | 20 | 135 | 53 | 293 |
| 46,335 | 0 | 5 | 27 | 143 | 5 | 10 | 20 | 135 | 52 | 293 |
| 46,336 | 0 | 5 | 27 | 143 | 5 | 10 | 19 | 135 | 51 | 293 |
| 46,337 | 0 | 5 | 26 | 143 | 5 | 10 | 19 | 135 | 50 | 293 |
| 46,338 | 0 | 5 | 26 | 143 | 5 | 10 | 19 | 135 | 50 | 293 |
| 46,339 | 0 | 5 | 27 | 143 | 5 | 10 | 21 | 134 | 53 | 292 |
| 46,340 | 0 | 5 | 28 | 143 | 5 | 10 | 21 | 134 | 54 | 292 |
| 46,341 | 0 | 5 | 28 | 145 | 5 | 10 | 21 | 135 | 54 | 295 |
| 46,342 | 0 | 6 | 28 | 145 | 5 | 10 | 21 | 135 | 54 | 296 |
| 46,343 | 1 | 6 | 28 | 146 | 6 | 10 | 21 | 136 | 56 | 298 |
| 46,344 | 1 | 6 | 28 | 146 | 6 | 10 | 21 | 139 | 56 | 301 |
| 46,345 | 1 | 6 | 28 | 146 | 6 | 10 | 21 | 140 | 56 | 302 |
| 46,346 | 1 | 6 | 28 | 149 | 6 | 10 | 21 | 144 | 56 | 309 |
| 46,347 | 1 | 7 | 27 | 157 | 6 | 12 | 21 | 143 | 55 | 319 |
| 46,348 | 1 | 7 | 25 | 149 | 6 | 12 | 21 | 138 | 53 | 306 |
| 46,349 | 1 | 8 | 25 | 142 | 6 | 12 | 21 | 127 | 53 | 289 |
| 46,350 | 1 | 8 | 25 | 129 | 6 | 13 | 21 | 117 | 53 | 267 |
| 46,351 | 1 | 7 | 25 | 94  | 6 | 9  | 20 | 84  | 52 | 194 |
| 46,352 | 1 | 6 | 24 | 58  | 6 | 6  | 20 | 65  | 51 | 135 |
| 46,353 | 1 | 6 | 24 | 59  | 5 | 6  | 20 | 66  | 50 | 137 |
| 46,354 | 1 | 5 | 24 | 50  | 5 | 5  | 20 | 54  | 50 | 114 |
| 46,355 | 1 | 4 | 24 | 48  | 5 | 5  | 19 | 53  | 49 | 110 |
| 46,356 | 1 | 4 | 24 | 47  | 5 | 5  | 19 | 52  | 49 | 108 |
| 46,357 | 1 | 4 | 24 | 43  | 5 | 5  | 19 | 44  | 49 | 96  |
| 46,358 | 1 | 4 | 24 | 44  | 5 | 5  | 19 | 44  | 49 | 97  |
| 46,359 | 1 | 4 | 24 | 45  | 5 | 5  | 19 | 46  | 49 | 100 |

|        |   |    |    |     |   |    |    |     |     |     |
|--------|---|----|----|-----|---|----|----|-----|-----|-----|
| 46,360 | 1 | 4  | 24 | 45  | 5 | 5  | 19 | 47  | 49  | 101 |
| 46,361 | 1 | 4  | 20 | 59  | 5 | 8  | 19 | 59  | 45  | 130 |
| 46,362 | 1 | 4  | 20 | 63  | 5 | 8  | 18 | 56  | 44  | 131 |
| 46,363 | 1 | 5  | 23 | 82  | 6 | 10 | 18 | 72  | 48  | 169 |
| 46,364 | 1 | 10 | 18 | 174 | 5 | 12 | 16 | 95  | 40  | 291 |
| 46,365 | 1 | 10 | 16 | 188 | 5 | 12 | 15 | 99  | 37  | 309 |
| 46,366 | 1 | 12 | 9  | 200 | 3 | 13 | 6  | 108 | 19  | 333 |
| 46,367 | 1 | 12 | 8  | 200 | 2 | 13 | 4  | 108 | 15  | 333 |
| 46,368 | 1 | 14 | 11 | 204 | 2 | 13 | 5  | 112 | 19  | 343 |
| 46,369 | 1 | 15 | 12 | 208 | 2 | 13 | 5  | 115 | 20  | 351 |
| 46,370 | 1 | 15 | 12 | 209 | 2 | 13 | 5  | 115 | 20  | 352 |
| 46,371 | 1 | 15 | 12 | 221 | 2 | 16 | 5  | 120 | 20  | 372 |
| 46,372 | 1 | 15 | 12 | 224 | 2 | 16 | 5  | 118 | 20  | 373 |
| 46,373 | 1 | 16 | 12 | 234 | 2 | 16 | 5  | 124 | 20  | 390 |
| 46,374 | 1 | 16 | 12 | 238 | 2 | 16 | 5  | 124 | 20  | 394 |
| 46,375 | 1 | 16 | 12 | 239 | 2 | 16 | 5  | 125 | 20  | 396 |
| 46,376 | 1 | 16 | 12 | 247 | 2 | 15 | 5  | 125 | 20  | 403 |
| 46,377 | 1 | 16 | 12 | 247 | 2 | 15 | 4  | 125 | 19  | 403 |
| 46,378 | 1 | 17 | 12 | 253 | 2 | 15 | 5  | 125 | 20  | 410 |
| 46,379 | 1 | 17 | 12 | 253 | 2 | 15 | 5  | 129 | 20  | 414 |
| 46,380 | 1 | 16 | 15 | 251 | 2 | 15 | 6  | 127 | 24  | 409 |
| 46,381 | 1 | 16 | 16 | 251 | 3 | 15 | 8  | 126 | 28  | 408 |
| 46,382 | 1 | 16 | 16 | 253 | 3 | 14 | 8  | 126 | 28  | 409 |
| 46,383 | 1 | 16 | 23 | 253 | 3 | 14 | 17 | 126 | 44  | 409 |
| 46,384 | 2 | 16 | 27 | 253 | 4 | 14 | 27 | 126 | 60  | 409 |
| 46,385 | 2 | 16 | 32 | 253 | 5 | 14 | 41 | 126 | 80  | 409 |
| 46,386 | 3 | 16 | 35 | 253 | 5 | 14 | 48 | 127 | 91  | 410 |
| 46,387 | 3 | 16 | 35 | 253 | 5 | 14 | 48 | 127 | 91  | 410 |
| 46,388 | 3 | 16 | 36 | 253 | 5 | 14 | 50 | 127 | 94  | 410 |
| 46,389 | 3 | 17 | 38 | 253 | 5 | 14 | 51 | 126 | 97  | 410 |
| 46,390 | 3 | 17 | 41 | 253 | 5 | 14 | 52 | 126 | 101 | 410 |
| 46,391 | 3 | 17 | 41 | 256 | 5 | 14 | 52 | 128 | 101 | 415 |
| 46,392 | 3 | 17 | 41 | 257 | 5 | 14 | 52 | 130 | 101 | 418 |
| 46,393 | 2 | 16 | 41 | 257 | 4 | 14 | 52 | 128 | 99  | 415 |
| 46,394 | 2 | 16 | 41 | 257 | 4 | 14 | 52 | 128 | 99  | 415 |
| 46,395 | 2 | 16 | 41 | 257 | 4 | 14 | 52 | 125 | 99  | 412 |
| 46,396 | 2 | 17 | 41 | 259 | 4 | 14 | 52 | 124 | 99  | 414 |
| 46,397 | 2 | 17 | 41 | 257 | 4 | 14 | 52 | 121 | 99  | 409 |
| 46,398 | 3 | 16 | 40 | 243 | 5 | 12 | 52 | 111 | 100 | 382 |
| 46,399 | 3 | 15 | 41 | 237 | 5 | 12 | 52 | 109 | 101 | 373 |
| 46,400 | 3 | 15 | 41 | 236 | 5 | 11 | 52 | 108 | 101 | 370 |

|        |   |    |    |     |   |    |    |     |     |     |
|--------|---|----|----|-----|---|----|----|-----|-----|-----|
| 46,401 | 3 | 15 | 41 | 236 | 5 | 11 | 52 | 108 | 101 | 370 |
| 46,402 | 3 | 15 | 41 | 236 | 5 | 11 | 52 | 108 | 101 | 370 |
| 46,403 | 3 | 15 | 41 | 234 | 5 | 11 | 52 | 107 | 101 | 367 |
| 46,404 | 3 | 15 | 41 | 235 | 5 | 11 | 53 | 106 | 102 | 367 |
| 46,405 | 3 | 15 | 41 | 235 | 5 | 11 | 53 | 106 | 102 | 367 |
| 46,406 | 3 | 15 | 41 | 235 | 5 | 11 | 53 | 106 | 102 | 367 |
| 46,407 | 3 | 15 | 41 | 235 | 5 | 11 | 53 | 105 | 102 | 366 |
| 46,408 | 3 | 15 | 42 | 235 | 5 | 11 | 53 | 105 | 103 | 366 |
| 46,409 | 3 | 15 | 42 | 234 | 5 | 11 | 53 | 103 | 103 | 363 |
| 46,410 | 3 | 15 | 42 | 232 | 5 | 11 | 53 | 101 | 103 | 359 |
| 46,411 | 3 | 15 | 42 | 233 | 5 | 11 | 53 | 101 | 103 | 360 |
| 46,412 | 3 | 14 | 42 | 202 | 5 | 6  | 53 | 76  | 103 | 298 |
| 46,413 | 3 | 14 | 41 | 210 | 5 | 6  | 53 | 77  | 102 | 307 |
| 46,414 | 3 | 14 | 40 | 215 | 4 | 6  | 53 | 77  | 100 | 312 |
| 46,415 | 3 | 9  | 40 | 124 | 4 | 4  | 52 | 57  | 99  | 194 |
| 46,416 | 3 | 9  | 40 | 111 | 4 | 4  | 52 | 54  | 99  | 178 |
| 46,417 | 3 | 8  | 40 | 124 | 4 | 6  | 52 | 62  | 99  | 200 |
| 46,418 | 3 | 16 | 40 | 210 | 4 | 17 | 51 | 108 | 98  | 351 |
| 46,419 | 3 | 14 | 37 | 209 | 4 | 17 | 51 | 104 | 95  | 344 |
| 46,420 | 3 | 15 | 36 | 214 | 4 | 17 | 51 | 103 | 94  | 349 |
| 46,421 | 3 | 15 | 37 | 202 | 4 | 14 | 52 | 99  | 96  | 330 |
| 46,422 | 3 | 15 | 38 | 201 | 4 | 14 | 52 | 99  | 97  | 329 |
| 46,423 | 3 | 14 | 40 | 189 | 4 | 14 | 52 | 91  | 99  | 308 |
| 46,424 | 4 | 14 | 43 | 189 | 4 | 14 | 52 | 91  | 103 | 308 |
| 46,425 | 4 | 15 | 43 | 184 | 4 | 14 | 52 | 87  | 103 | 300 |
| 46,426 | 4 | 15 | 43 | 184 | 4 | 14 | 52 | 87  | 103 | 300 |
| 46,427 | 4 | 15 | 45 | 176 | 4 | 14 | 52 | 87  | 105 | 292 |
| 46,428 | 4 | 14 | 45 | 169 | 4 | 14 | 52 | 82  | 105 | 279 |
| 46,429 | 5 | 14 | 53 | 169 | 5 | 14 | 59 | 82  | 122 | 279 |
| 46,430 | 5 | 14 | 50 | 169 | 5 | 14 | 58 | 82  | 118 | 279 |
| 46,431 | 5 | 14 | 50 | 171 | 4 | 14 | 56 | 82  | 115 | 281 |
| 46,432 | 6 | 16 | 49 | 174 | 4 | 14 | 56 | 86  | 115 | 290 |
| 46,433 | 6 | 16 | 49 | 184 | 4 | 14 | 56 | 89  | 115 | 303 |
| 46,434 | 6 | 16 | 44 | 184 | 4 | 15 | 51 | 89  | 105 | 304 |
| 46,435 | 5 | 21 | 41 | 192 | 3 | 19 | 42 | 107 | 91  | 339 |
| 46,436 | 5 | 22 | 36 | 215 | 2 | 21 | 28 | 115 | 71  | 373 |
| 46,437 | 4 | 25 | 33 | 237 | 3 | 26 | 24 | 133 | 64  | 421 |
| 46,438 | 4 | 46 | 32 | 363 | 3 | 36 | 22 | 208 | 61  | 653 |
| 46,439 | 4 | 46 | 30 | 366 | 3 | 36 | 21 | 208 | 58  | 656 |
| 46,440 | 4 | 45 | 28 | 379 | 3 | 36 | 20 | 210 | 55  | 670 |
| 46,441 | 4 | 45 | 26 | 378 | 3 | 36 | 18 | 207 | 51  | 666 |

|        |   |    |    |     |   |    |    |     |    |     |
|--------|---|----|----|-----|---|----|----|-----|----|-----|
| 46,442 | 4 | 46 | 25 | 383 | 3 | 36 | 18 | 206 | 50 | 671 |
| 46,443 | 4 | 46 | 25 | 387 | 3 | 36 | 18 | 206 | 50 | 675 |
| 46,444 | 4 | 46 | 25 | 388 | 3 | 36 | 18 | 206 | 50 | 676 |
| 46,445 | 4 | 46 | 25 | 387 | 3 | 36 | 18 | 206 | 50 | 675 |
| 46,446 | 4 | 46 | 25 | 388 | 3 | 36 | 18 | 206 | 50 | 676 |
| 46,447 | 4 | 45 | 26 | 385 | 3 | 36 | 18 | 207 | 51 | 673 |
| 46,448 | 3 | 45 | 26 | 388 | 3 | 36 | 18 | 208 | 50 | 677 |
| 46,449 | 3 | 45 | 26 | 387 | 2 | 36 | 18 | 207 | 49 | 675 |
| 46,450 | 3 | 45 | 25 | 387 | 2 | 37 | 18 | 207 | 48 | 676 |
| 46,451 | 3 | 45 | 26 | 387 | 2 | 37 | 19 | 207 | 50 | 676 |
| 46,452 | 3 | 45 | 27 | 387 | 2 | 37 | 22 | 207 | 54 | 676 |
| 46,453 | 4 | 45 | 27 | 387 | 2 | 37 | 26 | 208 | 59 | 677 |
| 46,454 | 4 | 45 | 27 | 387 | 2 | 37 | 25 | 208 | 58 | 677 |
| 46,455 | 4 | 45 | 27 | 388 | 3 | 37 | 26 | 209 | 60 | 679 |
| 46,456 | 4 | 45 | 27 | 390 | 3 | 37 | 26 | 209 | 60 | 681 |
| 46,457 | 4 | 45 | 27 | 390 | 3 | 37 | 26 | 210 | 60 | 682 |
| 46,458 | 4 | 45 | 27 | 390 | 3 | 37 | 26 | 210 | 60 | 682 |
| 46,459 | 4 | 45 | 26 | 390 | 3 | 37 | 26 | 209 | 59 | 681 |
| 46,460 | 4 | 46 | 26 | 390 | 3 | 37 | 26 | 210 | 59 | 683 |
| 46,461 | 4 | 46 | 26 | 390 | 3 | 37 | 26 | 210 | 59 | 683 |
| 46,462 | 4 | 46 | 26 | 389 | 3 | 37 | 26 | 209 | 59 | 681 |
| 46,463 | 4 | 46 | 26 | 385 | 3 | 37 | 26 | 207 | 59 | 675 |
| 46,464 | 4 | 46 | 26 | 377 | 3 | 37 | 26 | 206 | 59 | 666 |
| 46,465 | 4 | 46 | 25 | 371 | 3 | 37 | 26 | 204 | 58 | 658 |
| 46,466 | 4 | 46 | 24 | 370 | 3 | 37 | 26 | 204 | 57 | 657 |
| 46,467 | 4 | 45 | 24 | 346 | 3 | 34 | 26 | 188 | 57 | 613 |
| 46,468 | 4 | 37 | 24 | 260 | 3 | 23 | 26 | 141 | 57 | 461 |
| 46,469 | 4 | 37 | 24 | 261 | 3 | 23 | 26 | 141 | 57 | 462 |
| 46,470 | 4 | 37 | 25 | 258 | 3 | 23 | 26 | 141 | 58 | 459 |
| 46,471 | 4 | 35 | 25 | 248 | 3 | 23 | 26 | 139 | 58 | 445 |
| 46,472 | 4 | 35 | 24 | 247 | 3 | 23 | 25 | 138 | 56 | 443 |
| 46,473 | 4 | 35 | 23 | 247 | 3 | 23 | 25 | 138 | 55 | 443 |
| 46,474 | 4 | 35 | 21 | 247 | 3 | 23 | 25 | 138 | 53 | 443 |
| 46,475 | 3 | 34 | 18 | 243 | 3 | 23 | 25 | 138 | 49 | 438 |
| 46,476 | 3 | 34 | 18 | 243 | 3 | 25 | 25 | 139 | 49 | 441 |
| 46,477 | 3 | 34 | 16 | 243 | 3 | 25 | 25 | 139 | 47 | 441 |
| 46,478 | 3 | 34 | 16 | 243 | 3 | 25 | 25 | 138 | 47 | 440 |
| 46,479 | 3 | 35 | 16 | 247 | 3 | 26 | 25 | 149 | 47 | 457 |
| 46,480 | 2 | 35 | 8  | 250 | 2 | 26 | 18 | 159 | 30 | 470 |
| 46,481 | 2 | 35 | 8  | 258 | 2 | 26 | 18 | 171 | 30 | 490 |
| 46,482 | 2 | 35 | 8  | 259 | 2 | 27 | 18 | 175 | 30 | 496 |

|        |   |    |    |     |   |    |    |     |    |     |
|--------|---|----|----|-----|---|----|----|-----|----|-----|
| 46,483 | 1 | 34 | 8  | 262 | 2 | 27 | 18 | 171 | 29 | 494 |
| 46,484 | 1 | 34 | 7  | 252 | 2 | 27 | 18 | 168 | 28 | 481 |
| 46,485 | 1 | 34 | 6  | 252 | 2 | 26 | 14 | 170 | 23 | 482 |
| 46,486 | 1 | 28 | 5  | 222 | 2 | 20 | 11 | 144 | 19 | 414 |
| 46,487 | 1 | 28 | 4  | 222 | 2 | 20 | 11 | 144 | 18 | 414 |
| 46,488 | 1 | 25 | 4  | 200 | 1 | 15 | 11 | 125 | 17 | 365 |
| 46,489 | 3 | 4  | 4  | 74  | 1 | 6  | 13 | 50  | 21 | 134 |
| 46,490 | 3 | 4  | 4  | 58  | 1 | 6  | 13 | 48  | 21 | 116 |
| 46,491 | 3 | 4  | 4  | 58  | 1 | 6  | 13 | 49  | 21 | 117 |
| 46,492 | 3 | 3  | 4  | 49  | 1 | 6  | 13 | 48  | 21 | 106 |
| 46,493 | 3 | 3  | 4  | 49  | 1 | 6  | 13 | 48  | 21 | 106 |
| 46,494 | 3 | 3  | 5  | 43  | 1 | 6  | 13 | 48  | 22 | 100 |
| 46,495 | 3 | 3  | 5  | 43  | 1 | 6  | 13 | 48  | 22 | 100 |
| 46,496 | 3 | 3  | 10 | 42  | 1 | 6  | 13 | 48  | 27 | 99  |
| 46,497 | 3 | 3  | 13 | 43  | 2 | 6  | 13 | 47  | 31 | 99  |
| 46,498 | 3 | 4  | 13 | 49  | 2 | 6  | 13 | 47  | 31 | 106 |
| 46,499 | 3 | 6  | 14 | 61  | 2 | 7  | 14 | 54  | 33 | 128 |
| 46,500 | 3 | 6  | 14 | 61  | 2 | 7  | 14 | 54  | 33 | 128 |
| 46,501 | 3 | 6  | 14 | 62  | 2 | 6  | 13 | 54  | 32 | 128 |
| 46,502 | 3 | 6  | 13 | 62  | 2 | 6  | 13 | 54  | 31 | 128 |
| 46,503 | 3 | 6  | 12 | 62  | 2 | 6  | 10 | 54  | 27 | 128 |
| 46,504 | 3 | 6  | 12 | 68  | 2 | 6  | 6  | 54  | 23 | 134 |
| 46,505 | 3 | 6  | 12 | 69  | 1 | 6  | 5  | 54  | 21 | 135 |
| 46,506 | 3 | 6  | 12 | 70  | 1 | 6  | 5  | 53  | 21 | 135 |
| 46,507 | 3 | 6  | 12 | 68  | 1 | 6  | 5  | 52  | 21 | 132 |
| 46,508 | 3 | 6  | 12 | 68  | 1 | 6  | 5  | 52  | 21 | 132 |
| 46,509 | 3 | 6  | 12 | 68  | 1 | 6  | 5  | 52  | 21 | 132 |
| 46,510 | 3 | 6  | 12 | 69  | 1 | 6  | 5  | 52  | 21 | 133 |
| 46,511 | 3 | 5  | 12 | 69  | 1 | 6  | 5  | 51  | 21 | 131 |
| 46,512 | 3 | 5  | 13 | 69  | 1 | 6  | 5  | 51  | 22 | 131 |
| 46,513 | 3 | 5  | 13 | 67  | 1 | 6  | 5  | 50  | 22 | 128 |
| 46,514 | 3 | 5  | 13 | 67  | 1 | 6  | 5  | 50  | 22 | 128 |
| 46,515 | 3 | 5  | 13 | 67  | 1 | 6  | 5  | 50  | 22 | 128 |
| 46,516 | 3 | 6  | 13 | 67  | 1 | 7  | 5  | 50  | 22 | 130 |
| 46,517 | 3 | 6  | 13 | 68  | 1 | 7  | 5  | 51  | 22 | 132 |
| 46,518 | 3 | 6  | 14 | 68  | 1 | 7  | 5  | 55  | 23 | 136 |
| 46,519 | 3 | 7  | 14 | 75  | 1 | 8  | 5  | 58  | 23 | 148 |
| 46,520 | 3 | 8  | 14 | 77  | 1 | 8  | 5  | 58  | 23 | 151 |
| 46,521 | 3 | 8  | 13 | 78  | 1 | 8  | 5  | 59  | 22 | 153 |
| 46,522 | 3 | 8  | 13 | 80  | 1 | 9  | 5  | 62  | 22 | 159 |
| 46,523 | 3 | 11 | 13 | 88  | 1 | 9  | 5  | 76  | 22 | 184 |

|        |   |    |    |     |   |    |    |     |    |     |
|--------|---|----|----|-----|---|----|----|-----|----|-----|
| 46,524 | 3 | 37 | 13 | 190 | 1 | 16 | 5  | 197 | 22 | 440 |
| 46,525 | 3 | 37 | 13 | 194 | 1 | 16 | 5  | 198 | 22 | 445 |
| 46,526 | 3 | 43 | 13 | 220 | 1 | 18 | 5  | 220 | 22 | 501 |
| 46,527 | 3 | 53 | 13 | 242 | 1 | 18 | 5  | 246 | 22 | 559 |
| 46,528 | 3 | 55 | 13 | 254 | 1 | 18 | 5  | 256 | 22 | 583 |
| 46,529 | 3 | 56 | 13 | 254 | 1 | 18 | 5  | 258 | 22 | 586 |
| 46,530 | 3 | 55 | 13 | 253 | 1 | 17 | 5  | 248 | 22 | 573 |
| 46,531 | 3 | 55 | 13 | 244 | 1 | 17 | 4  | 227 | 21 | 543 |
| 46,532 | 3 | 55 | 13 | 244 | 1 | 17 | 4  | 227 | 21 | 543 |
| 46,533 | 3 | 55 | 13 | 235 | 1 | 16 | 4  | 223 | 21 | 529 |
| 46,534 | 3 | 54 | 13 | 235 | 1 | 16 | 4  | 223 | 21 | 528 |
| 46,535 | 3 | 54 | 13 | 238 | 1 | 16 | 4  | 224 | 21 | 532 |
| 46,536 | 3 | 54 | 13 | 239 | 1 | 16 | 4  | 222 | 21 | 531 |
| 46,537 | 3 | 54 | 13 | 238 | 1 | 16 | 4  | 222 | 21 | 530 |
| 46,538 | 3 | 54 | 13 | 238 | 1 | 16 | 3  | 222 | 20 | 530 |
| 46,539 | 3 | 54 | 13 | 238 | 1 | 16 | 3  | 222 | 20 | 530 |
| 46,540 | 1 | 54 | 13 | 238 | 1 | 15 | 1  | 223 | 16 | 530 |
| 46,541 | 1 | 54 | 13 | 238 | 1 | 15 | 1  | 223 | 16 | 530 |
| 46,542 | 2 | 54 | 13 | 238 | 1 | 15 | 1  | 222 | 17 | 529 |
| 46,543 | 2 | 54 | 13 | 238 | 1 | 15 | 1  | 222 | 17 | 529 |
| 46,544 | 2 | 54 | 13 | 238 | 1 | 15 | 1  | 223 | 17 | 530 |
| 46,545 | 2 | 54 | 12 | 238 | 1 | 15 | 1  | 223 | 16 | 530 |
| 46,546 | 2 | 54 | 12 | 238 | 1 | 15 | 1  | 223 | 16 | 530 |
| 46,547 | 2 | 54 | 11 | 238 | 1 | 15 | 1  | 223 | 15 | 530 |
| 46,548 | 2 | 54 | 7  | 237 | 0 | 15 | 1  | 223 | 10 | 529 |
| 46,549 | 2 | 51 | 7  | 217 | 0 | 14 | 0  | 215 | 9  | 497 |
| 46,550 | 2 | 51 | 7  | 217 | 0 | 14 | 0  | 215 | 9  | 497 |
| 46,551 | 2 | 51 | 7  | 216 | 0 | 14 | 0  | 215 | 9  | 496 |
| 46,552 | 2 | 52 | 7  | 215 | 0 | 14 | 0  | 215 | 9  | 496 |
| 46,553 | 2 | 52 | 8  | 215 | 0 | 14 | 0  | 214 | 10 | 495 |
| 46,554 | 2 | 52 | 8  | 209 | 0 | 14 | 1  | 214 | 11 | 489 |
| 46,555 | 1 | 52 | 8  | 209 | 0 | 14 | 1  | 214 | 10 | 489 |
| 46,556 | 1 | 52 | 8  | 209 | 0 | 14 | 1  | 216 | 10 | 491 |
| 46,557 | 1 | 52 | 8  | 207 | 0 | 14 | 1  | 217 | 10 | 490 |
| 46,558 | 1 | 52 | 12 | 208 | 0 | 14 | 4  | 217 | 17 | 491 |
| 46,559 | 1 | 52 | 20 | 208 | 0 | 14 | 15 | 217 | 36 | 491 |
| 46,560 | 1 | 52 | 20 | 208 | 0 | 14 | 16 | 218 | 37 | 492 |
| 46,561 | 1 | 52 | 20 | 207 | 0 | 14 | 16 | 220 | 37 | 493 |
| 46,562 | 1 | 52 | 19 | 209 | 0 | 14 | 16 | 223 | 36 | 498 |
| 46,563 | 1 | 53 | 19 | 211 | 0 | 14 | 16 | 223 | 36 | 501 |
| 46,564 | 1 | 56 | 19 | 226 | 0 | 15 | 16 | 234 | 36 | 531 |



|        |   |    |    |     |   |    |    |     |    |     |
|--------|---|----|----|-----|---|----|----|-----|----|-----|
| 46,565 | 1 | 56 | 19 | 240 | 0 | 15 | 17 | 242 | 37 | 553 |
| 46,566 | 1 | 56 | 19 | 240 | 0 | 15 | 17 | 248 | 37 | 559 |
| 46,567 | 1 | 55 | 20 | 231 | 0 | 13 | 18 | 241 | 39 | 540 |
| 46,568 | 1 | 56 | 20 | 233 | 0 | 13 | 18 | 241 | 39 | 543 |
| 46,569 | 1 | 56 | 19 | 236 | 0 | 13 | 18 | 241 | 38 | 546 |
| 46,570 | 1 | 55 | 19 | 233 | 0 | 13 | 18 | 242 | 38 | 543 |
| 46,571 | 1 | 55 | 19 | 237 | 0 | 13 | 18 | 245 | 38 | 550 |
| 46,572 | 1 | 55 | 19 | 239 | 0 | 13 | 18 | 246 | 38 | 553 |
| 46,573 | 1 | 55 | 19 | 238 | 0 | 13 | 18 | 246 | 38 | 552 |
| 46,574 | 1 | 64 | 19 | 287 | 0 | 15 | 18 | 303 | 38 | 669 |
| 46,575 | 1 | 39 | 19 | 187 | 0 | 9  | 18 | 189 | 38 | 424 |
| 46,576 | 1 | 56 | 19 | 259 | 0 | 16 | 19 | 258 | 39 | 589 |
| 46,577 | 1 | 50 | 19 | 237 | 0 | 14 | 19 | 237 | 39 | 538 |
| 46,578 | 1 | 43 | 19 | 223 | 0 | 12 | 20 | 214 | 40 | 492 |
| 46,579 | 1 | 41 | 19 | 214 | 0 | 13 | 20 | 208 | 40 | 476 |
| 46,580 | 1 | 40 | 19 | 216 | 0 | 13 | 20 | 208 | 40 | 477 |
| 46,581 | 1 | 40 | 19 | 213 | 0 | 13 | 20 | 208 | 40 | 474 |
| 46,582 | 1 | 40 | 19 | 211 | 0 | 13 | 20 | 207 | 40 | 471 |
| 46,583 | 1 | 40 | 19 | 212 | 0 | 13 | 20 | 209 | 40 | 474 |
| 46,584 | 1 | 40 | 19 | 212 | 0 | 13 | 20 | 211 | 40 | 476 |
| 46,585 | 1 | 41 | 19 | 211 | 0 | 13 | 20 | 213 | 40 | 478 |
| 46,586 | 1 | 41 | 19 | 214 | 0 | 13 | 20 | 213 | 40 | 481 |
| 46,587 | 1 | 42 | 20 | 215 | 0 | 13 | 20 | 215 | 41 | 485 |
| 46,588 | 1 | 42 | 21 | 216 | 0 | 14 | 20 | 215 | 42 | 487 |
| 46,589 | 1 | 42 | 21 | 217 | 0 | 14 | 20 | 216 | 42 | 489 |
| 46,590 | 1 | 42 | 21 | 219 | 0 | 14 | 20 | 216 | 42 | 491 |
| 46,591 | 1 | 43 | 21 | 221 | 0 | 14 | 20 | 220 | 42 | 498 |
| 46,592 | 0 | 43 | 21 | 222 | 0 | 14 | 20 | 220 | 41 | 499 |
| 46,593 | 0 | 44 | 21 | 229 | 0 | 14 | 20 | 228 | 41 | 515 |
| 46,594 | 0 | 44 | 21 | 234 | 0 | 15 | 20 | 230 | 41 | 523 |
| 46,595 | 0 | 44 | 21 | 235 | 0 | 15 | 21 | 233 | 42 | 527 |
| 46,596 | 0 | 45 | 21 | 237 | 0 | 16 | 21 | 233 | 42 | 531 |
| 46,597 | 0 | 45 | 21 | 239 | 0 | 16 | 21 | 236 | 42 | 536 |
| 46,598 | 0 | 45 | 17 | 239 | 0 | 16 | 21 | 236 | 38 | 536 |
| 46,599 | 0 | 45 | 21 | 240 | 0 | 16 | 22 | 236 | 43 | 537 |
| 46,600 | 0 | 45 | 20 | 239 | 0 | 16 | 22 | 236 | 42 | 536 |
| 46,601 | 0 | 45 | 20 | 239 | 0 | 17 | 22 | 236 | 42 | 537 |
| 46,602 | 0 | 45 | 20 | 239 | 0 | 17 | 22 | 236 | 42 | 537 |
| 46,603 | 0 | 44 | 19 | 239 | 0 | 17 | 22 | 236 | 41 | 536 |
| 46,604 | 0 | 44 | 19 | 239 | 0 | 17 | 22 | 236 | 41 | 536 |
| 46,605 | 1 | 44 | 20 | 238 | 0 | 17 | 21 | 236 | 42 | 535 |

|        |   |    |    |     |   |    |    |     |    |     |
|--------|---|----|----|-----|---|----|----|-----|----|-----|
| 46,606 | 1 | 44 | 20 | 240 | 0 | 17 | 21 | 236 | 42 | 537 |
| 46,607 | 2 | 44 | 20 | 240 | 0 | 17 | 21 | 234 | 43 | 535 |
| 46,608 | 2 | 44 | 17 | 240 | 0 | 17 | 19 | 233 | 38 | 534 |
| 46,609 | 2 | 44 | 16 | 239 | 0 | 17 | 18 | 233 | 36 | 533 |
| 46,610 | 2 | 44 | 8  | 239 | 0 | 17 | 7  | 232 | 17 | 532 |
| 46,611 | 2 | 44 | 8  | 238 | 0 | 17 | 6  | 229 | 16 | 528 |
| 46,612 | 2 | 44 | 8  | 236 | 0 | 17 | 6  | 224 | 16 | 521 |
| 46,613 | 2 | 44 | 8  | 237 | 0 | 17 | 6  | 224 | 16 | 522 |
| 46,614 | 2 | 43 | 8  | 234 | 0 | 17 | 7  | 225 | 17 | 519 |
| 46,615 | 2 | 40 | 9  | 219 | 0 | 16 | 7  | 214 | 18 | 489 |
| 46,616 | 2 | 40 | 9  | 206 | 0 | 16 | 6  | 206 | 17 | 468 |
| 46,617 | 2 | 40 | 9  | 206 | 0 | 16 | 6  | 199 | 17 | 461 |
| 46,618 | 2 | 38 | 8  | 204 | 0 | 16 | 5  | 198 | 15 | 456 |
| 46,619 | 2 | 38 | 8  | 201 | 0 | 16 | 5  | 198 | 15 | 453 |
| 46,620 | 2 | 38 | 8  | 201 | 0 | 16 | 5  | 198 | 15 | 453 |
| 46,621 | 2 | 38 | 8  | 197 | 0 | 16 | 5  | 193 | 15 | 444 |
| 46,622 | 2 | 38 | 9  | 195 | 0 | 16 | 5  | 192 | 16 | 441 |
| 46,623 | 2 | 38 | 9  | 195 | 0 | 16 | 5  | 192 | 16 | 441 |
| 46,624 | 2 | 26 | 9  | 136 | 0 | 13 | 5  | 118 | 16 | 293 |
| 46,625 | 2 | 26 | 9  | 137 | 0 | 13 | 4  | 117 | 15 | 293 |
| 46,626 | 2 | 25 | 10 | 135 | 0 | 12 | 4  | 109 | 16 | 281 |
| 46,627 | 2 | 8  | 10 | 62  | 0 | 5  | 4  | 48  | 16 | 123 |
| 46,628 | 2 | 8  | 10 | 59  | 0 | 5  | 3  | 47  | 15 | 119 |
| 46,629 | 2 | 5  | 14 | 51  | 0 | 5  | 8  | 44  | 24 | 105 |
| 46,630 | 2 | 5  | 15 | 45  | 1 | 4  | 13 | 37  | 31 | 91  |
| 46,631 | 2 | 5  | 15 | 45  | 1 | 4  | 13 | 37  | 31 | 91  |
| 46,632 | 2 | 5  | 15 | 43  | 1 | 4  | 13 | 36  | 31 | 88  |
| 46,633 | 2 | 5  | 15 | 43  | 1 | 4  | 13 | 36  | 31 | 88  |
| 46,634 | 2 | 5  | 15 | 42  | 1 | 4  | 13 | 34  | 31 | 85  |
| 46,635 | 2 | 5  | 16 | 42  | 1 | 4  | 14 | 32  | 33 | 83  |
| 46,636 | 2 | 4  | 16 | 37  | 1 | 4  | 14 | 29  | 33 | 74  |
| 46,637 | 2 | 3  | 15 | 35  | 1 | 4  | 14 | 27  | 32 | 69  |
| 46,638 | 2 | 3  | 15 | 34  | 1 | 3  | 14 | 27  | 32 | 67  |
| 46,639 | 5 | 3  | 16 | 31  | 1 | 3  | 15 | 26  | 37 | 63  |
| 46,640 | 5 | 3  | 16 | 32  | 1 | 3  | 16 | 26  | 38 | 64  |
| 46,641 | 5 | 3  | 16 | 33  | 1 | 3  | 16 | 26  | 38 | 65  |
| 46,642 | 5 | 1  | 17 | 25  | 1 | 3  | 16 | 14  | 39 | 43  |
| 46,643 | 5 | 2  | 17 | 47  | 1 | 5  | 16 | 19  | 39 | 73  |
| 46,644 | 5 | 5  | 17 | 57  | 1 | 6  | 15 | 27  | 38 | 95  |
| 46,645 | 5 | 5  | 17 | 60  | 1 | 5  | 15 | 29  | 38 | 99  |
| 46,646 | 6 | 5  | 19 | 61  | 1 | 5  | 15 | 27  | 41 | 98  |

|        |   |    |    |     |   |   |    |    |    |     |
|--------|---|----|----|-----|---|---|----|----|----|-----|
| 46,647 | 7 | 4  | 19 | 60  | 1 | 4 | 15 | 27 | 42 | 95  |
| 46,648 | 7 | 4  | 19 | 59  | 1 | 4 | 15 | 24 | 42 | 91  |
| 46,649 | 7 | 4  | 15 | 59  | 1 | 4 | 15 | 24 | 38 | 91  |
| 46,650 | 7 | 4  | 15 | 58  | 1 | 4 | 14 | 24 | 37 | 90  |
| 46,651 | 7 | 4  | 15 | 58  | 1 | 4 | 14 | 24 | 37 | 90  |
| 46,652 | 9 | 4  | 16 | 60  | 1 | 3 | 14 | 26 | 40 | 93  |
| 46,653 | 9 | 4  | 16 | 61  | 1 | 3 | 14 | 26 | 40 | 94  |
| 46,654 | 9 | 4  | 16 | 61  | 1 | 3 | 14 | 26 | 40 | 94  |
| 46,655 | 8 | 4  | 15 | 62  | 1 | 3 | 14 | 27 | 38 | 96  |
| 46,656 | 8 | 6  | 15 | 62  | 1 | 3 | 14 | 27 | 38 | 98  |
| 46,657 | 8 | 6  | 15 | 60  | 1 | 4 | 14 | 27 | 38 | 97  |
| 46,658 | 7 | 6  | 15 | 60  | 1 | 4 | 14 | 27 | 37 | 97  |
| 46,659 | 7 | 6  | 15 | 60  | 1 | 4 | 14 | 27 | 37 | 97  |
| 46,660 | 8 | 6  | 15 | 64  | 1 | 4 | 14 | 29 | 38 | 103 |
| 46,661 | 8 | 6  | 15 | 66  | 1 | 4 | 14 | 32 | 38 | 108 |
| 46,662 | 8 | 6  | 15 | 67  | 1 | 5 | 14 | 35 | 38 | 113 |
| 46,663 | 8 | 6  | 15 | 67  | 1 | 5 | 14 | 35 | 38 | 113 |
| 46,664 | 8 | 5  | 15 | 67  | 1 | 5 | 14 | 36 | 38 | 113 |
| 46,665 | 8 | 7  | 16 | 67  | 1 | 5 | 13 | 36 | 38 | 115 |
| 46,666 | 8 | 7  | 16 | 68  | 1 | 5 | 13 | 36 | 38 | 116 |
| 46,667 | 8 | 7  | 16 | 68  | 1 | 5 | 13 | 36 | 38 | 116 |
| 46,668 | 8 | 7  | 16 | 68  | 1 | 5 | 13 | 36 | 38 | 116 |
| 46,669 | 8 | 7  | 16 | 68  | 1 | 5 | 13 | 36 | 38 | 116 |
| 46,670 | 8 | 7  | 18 | 68  | 1 | 5 | 13 | 36 | 40 | 116 |
| 46,671 | 8 | 7  | 20 | 67  | 2 | 5 | 13 | 36 | 43 | 115 |
| 46,672 | 8 | 7  | 20 | 67  | 2 | 5 | 13 | 36 | 43 | 115 |
| 46,673 | 8 | 7  | 19 | 67  | 2 | 5 | 13 | 37 | 42 | 116 |
| 46,674 | 8 | 8  | 19 | 84  | 2 | 6 | 13 | 48 | 42 | 146 |
| 46,675 | 8 | 8  | 19 | 84  | 2 | 6 | 13 | 48 | 42 | 146 |
| 46,676 | 8 | 9  | 19 | 83  | 2 | 7 | 13 | 50 | 42 | 149 |
| 46,677 | 8 | 9  | 18 | 84  | 2 | 7 | 13 | 52 | 41 | 152 |
| 46,678 | 8 | 9  | 14 | 81  | 2 | 7 | 10 | 49 | 34 | 146 |
| 46,679 | 8 | 9  | 15 | 82  | 2 | 7 | 9  | 49 | 34 | 147 |
| 46,680 | 8 | 9  | 14 | 82  | 1 | 7 | 4  | 49 | 27 | 147 |
| 46,681 | 8 | 10 | 15 | 82  | 1 | 7 | 4  | 49 | 28 | 148 |
| 46,682 | 8 | 10 | 15 | 83  | 1 | 7 | 4  | 50 | 28 | 150 |
| 46,683 | 8 | 10 | 15 | 84  | 1 | 7 | 4  | 50 | 28 | 151 |
| 46,684 | 8 | 11 | 16 | 88  | 1 | 7 | 5  | 56 | 30 | 162 |
| 46,685 | 8 | 13 | 15 | 111 | 1 | 7 | 4  | 63 | 28 | 194 |
| 46,686 | 8 | 13 | 15 | 113 | 1 | 7 | 4  | 69 | 28 | 202 |
| 46,687 | 8 | 13 | 15 | 113 | 1 | 7 | 4  | 69 | 28 | 202 |

|        |   |    |    |     |   |    |   |     |    |     |
|--------|---|----|----|-----|---|----|---|-----|----|-----|
| 46,688 | 8 | 13 | 16 | 114 | 1 | 7  | 4 | 69  | 29 | 203 |
| 46,689 | 8 | 13 | 16 | 117 | 1 | 9  | 4 | 72  | 29 | 211 |
| 46,690 | 5 | 13 | 14 | 117 | 1 | 9  | 3 | 72  | 23 | 211 |
| 46,691 | 5 | 13 | 14 | 118 | 1 | 9  | 2 | 73  | 22 | 213 |
| 46,692 | 5 | 14 | 14 | 122 | 1 | 9  | 2 | 77  | 22 | 222 |
| 46,693 | 5 | 14 | 13 | 123 | 1 | 10 | 2 | 76  | 21 | 223 |
| 46,694 | 5 | 11 | 13 | 91  | 1 | 7  | 2 | 63  | 21 | 172 |
| 46,695 | 5 | 10 | 13 | 83  | 1 | 7  | 2 | 59  | 21 | 159 |
| 46,696 | 5 | 10 | 11 | 83  | 1 | 7  | 2 | 59  | 19 | 159 |
| 46,697 | 4 | 10 | 11 | 83  | 1 | 7  | 2 | 57  | 18 | 157 |
| 46,698 | 3 | 10 | 11 | 82  | 1 | 7  | 2 | 57  | 17 | 156 |
| 46,699 | 3 | 10 | 11 | 82  | 1 | 7  | 2 | 57  | 17 | 156 |
| 46,700 | 3 | 10 | 11 | 83  | 1 | 7  | 2 | 57  | 17 | 157 |
| 46,701 | 3 | 10 | 12 | 81  | 1 | 7  | 2 | 55  | 18 | 153 |
| 46,702 | 1 | 10 | 12 | 82  | 1 | 7  | 2 | 55  | 16 | 154 |
| 46,703 | 1 | 10 | 11 | 82  | 1 | 7  | 2 | 56  | 15 | 155 |
| 46,704 | 1 | 10 | 11 | 81  | 1 | 7  | 2 | 57  | 15 | 155 |
| 46,705 | 2 | 10 | 11 | 82  | 1 | 7  | 2 | 57  | 16 | 156 |
| 46,706 | 2 | 10 | 11 | 81  | 1 | 7  | 2 | 56  | 16 | 154 |
| 46,707 | 2 | 8  | 11 | 81  | 1 | 6  | 2 | 56  | 16 | 151 |
| 46,708 | 2 | 8  | 11 | 81  | 1 | 6  | 2 | 56  | 16 | 151 |
| 46,709 | 2 | 8  | 11 | 81  | 1 | 6  | 2 | 56  | 16 | 151 |
| 46,710 | 2 | 9  | 11 | 81  | 1 | 6  | 2 | 56  | 16 | 152 |
| 46,711 | 1 | 9  | 11 | 77  | 1 | 6  | 2 | 54  | 15 | 146 |
| 46,712 | 1 | 9  | 11 | 75  | 1 | 7  | 2 | 51  | 15 | 142 |
| 46,713 | 1 | 9  | 11 | 74  | 1 | 6  | 2 | 48  | 15 | 137 |
| 46,714 | 1 | 9  | 12 | 73  | 1 | 6  | 2 | 46  | 16 | 134 |
| 46,715 | 1 | 8  | 12 | 73  | 1 | 6  | 2 | 46  | 16 | 133 |
| 46,716 | 1 | 8  | 11 | 73  | 1 | 6  | 2 | 46  | 15 | 133 |
| 46,717 | 1 | 8  | 10 | 73  | 1 | 6  | 2 | 48  | 14 | 135 |
| 46,718 | 1 | 8  | 10 | 73  | 1 | 6  | 2 | 48  | 14 | 135 |
| 46,719 | 1 | 8  | 11 | 74  | 1 | 6  | 2 | 50  | 15 | 138 |
| 46,720 | 1 | 9  | 11 | 75  | 1 | 6  | 2 | 51  | 15 | 141 |
| 46,721 | 1 | 10 | 9  | 83  | 1 | 6  | 2 | 54  | 13 | 153 |
| 46,722 | 2 | 17 | 7  | 120 | 0 | 9  | 2 | 93  | 11 | 239 |
| 46,723 | 2 | 17 | 7  | 124 | 0 | 9  | 2 | 96  | 11 | 246 |
| 46,724 | 2 | 17 | 8  | 142 | 1 | 10 | 3 | 99  | 14 | 268 |
| 46,725 | 2 | 18 | 8  | 129 | 1 | 9  | 6 | 92  | 17 | 248 |
| 46,726 | 2 | 34 | 8  | 286 | 1 | 15 | 6 | 195 | 17 | 530 |
| 46,727 | 2 | 33 | 8  | 295 | 1 | 15 | 6 | 194 | 17 | 537 |
| 46,728 | 2 | 39 | 8  | 322 | 1 | 15 | 7 | 196 | 18 | 572 |

|        |   |    |    |     |   |    |    |     |    |     |
|--------|---|----|----|-----|---|----|----|-----|----|-----|
| 46,729 | 2 | 41 | 8  | 335 | 1 | 15 | 6  | 198 | 17 | 589 |
| 46,730 | 2 | 41 | 7  | 333 | 1 | 15 | 6  | 198 | 16 | 587 |
| 46,731 | 2 | 41 | 7  | 341 | 1 | 15 | 6  | 198 | 16 | 595 |
| 46,732 | 2 | 41 | 6  | 340 | 1 | 15 | 6  | 197 | 15 | 593 |
| 46,733 | 2 | 41 | 6  | 340 | 1 | 15 | 6  | 198 | 15 | 594 |
| 46,734 | 2 | 41 | 6  | 341 | 1 | 15 | 6  | 198 | 15 | 595 |
| 46,735 | 2 | 38 | 6  | 315 | 1 | 15 | 6  | 180 | 15 | 548 |
| 46,736 | 2 | 38 | 6  | 326 | 1 | 16 | 6  | 192 | 15 | 572 |
| 46,737 | 2 | 42 | 6  | 358 | 1 | 17 | 6  | 206 | 15 | 623 |
| 46,738 | 2 | 47 | 6  | 404 | 1 | 19 | 6  | 242 | 15 | 712 |
| 46,739 | 2 | 47 | 5  | 404 | 1 | 19 | 6  | 242 | 14 | 712 |
| 46,740 | 2 | 47 | 5  | 401 | 1 | 17 | 6  | 239 | 14 | 704 |
| 46,741 | 2 | 47 | 6  | 447 | 1 | 18 | 7  | 248 | 16 | 760 |
| 46,742 | 2 | 48 | 7  | 450 | 1 | 19 | 7  | 254 | 17 | 771 |
| 46,743 | 2 | 47 | 7  | 446 | 1 | 19 | 7  | 252 | 17 | 764 |
| 46,744 | 2 | 47 | 7  | 444 | 1 | 18 | 7  | 252 | 17 | 761 |
| 46,745 | 2 | 47 | 7  | 444 | 1 | 18 | 7  | 253 | 17 | 762 |
| 46,746 | 2 | 47 | 7  | 448 | 1 | 18 | 7  | 253 | 17 | 766 |
| 46,747 | 2 | 47 | 7  | 450 | 1 | 18 | 7  | 255 | 17 | 770 |
| 46,748 | 2 | 47 | 7  | 451 | 1 | 18 | 7  | 255 | 17 | 771 |
| 46,749 | 2 | 47 | 7  | 451 | 1 | 18 | 7  | 255 | 17 | 771 |
| 46,750 | 2 | 47 | 7  | 450 | 1 | 18 | 7  | 255 | 17 | 770 |
| 46,751 | 2 | 48 | 7  | 452 | 1 | 18 | 7  | 255 | 17 | 773 |
| 46,752 | 2 | 48 | 6  | 452 | 1 | 18 | 7  | 255 | 16 | 773 |
| 46,753 | 2 | 48 | 7  | 451 | 1 | 18 | 7  | 255 | 17 | 772 |
| 46,754 | 2 | 48 | 7  | 451 | 1 | 18 | 7  | 254 | 17 | 771 |
| 46,755 | 2 | 48 | 7  | 451 | 1 | 18 | 7  | 253 | 17 | 770 |
| 46,756 | 1 | 48 | 7  | 450 | 1 | 18 | 7  | 253 | 16 | 769 |
| 46,757 | 1 | 48 | 7  | 451 | 1 | 18 | 7  | 253 | 16 | 770 |
| 46,758 | 1 | 48 | 7  | 452 | 1 | 18 | 7  | 257 | 16 | 775 |
| 46,759 | 1 | 48 | 7  | 452 | 1 | 18 | 7  | 257 | 16 | 775 |
| 46,760 | 1 | 47 | 8  | 452 | 1 | 18 | 7  | 258 | 17 | 775 |
| 46,761 | 1 | 47 | 8  | 452 | 1 | 18 | 7  | 258 | 17 | 775 |
| 46,762 | 2 | 47 | 8  | 452 | 1 | 18 | 8  | 258 | 19 | 775 |
| 46,763 | 2 | 47 | 7  | 455 | 1 | 17 | 8  | 264 | 18 | 783 |
| 46,764 | 2 | 47 | 7  | 456 | 1 | 17 | 8  | 264 | 18 | 784 |
| 46,765 | 2 | 47 | 12 | 456 | 1 | 17 | 8  | 264 | 23 | 784 |
| 46,766 | 4 | 47 | 31 | 456 | 1 | 17 | 16 | 264 | 52 | 784 |
| 46,767 | 4 | 47 | 31 | 456 | 1 | 17 | 16 | 264 | 52 | 784 |
| 46,768 | 4 | 47 | 33 | 457 | 1 | 17 | 16 | 262 | 54 | 783 |
| 46,769 | 4 | 47 | 32 | 459 | 1 | 17 | 16 | 261 | 53 | 784 |

|        |   |    |    |     |   |    |    |     |    |     |
|--------|---|----|----|-----|---|----|----|-----|----|-----|
| 46,770 | 4 | 47 | 32 | 464 | 1 | 17 | 16 | 262 | 53 | 790 |
| 46,771 | 3 | 46 | 32 | 465 | 1 | 17 | 17 | 264 | 53 | 792 |
| 46,772 | 3 | 46 | 32 | 463 | 1 | 17 | 17 | 262 | 53 | 788 |
| 46,773 | 3 | 39 | 32 | 426 | 1 | 14 | 17 | 223 | 53 | 702 |
| 46,774 | 3 | 39 | 32 | 425 | 1 | 14 | 17 | 222 | 53 | 700 |
| 46,775 | 3 | 39 | 31 | 409 | 0 | 12 | 16 | 218 | 50 | 678 |
| 46,776 | 3 | 21 | 31 | 248 | 0 | 7  | 13 | 110 | 47 | 386 |
| 46,777 | 3 | 22 | 31 | 248 | 0 | 7  | 13 | 110 | 47 | 387 |
| 46,778 | 3 | 16 | 32 | 210 | 0 | 6  | 16 | 106 | 51 | 338 |
| 46,779 | 3 | 14 | 32 | 197 | 0 | 6  | 16 | 104 | 51 | 321 |
| 46,780 | 3 | 14 | 32 | 197 | 0 | 6  | 16 | 103 | 51 | 320 |
| 46,781 | 3 | 14 | 32 | 197 | 0 | 6  | 16 | 103 | 51 | 320 |
| 46,782 | 4 | 13 | 32 | 189 | 0 | 6  | 16 | 103 | 52 | 311 |
| 46,783 | 4 | 13 | 32 | 188 | 0 | 6  | 16 | 102 | 52 | 309 |
| 46,784 | 4 | 13 | 32 | 185 | 0 | 6  | 16 | 101 | 52 | 305 |
| 46,785 | 4 | 13 | 32 | 185 | 0 | 6  | 16 | 101 | 52 | 305 |
| 46,786 | 4 | 13 | 31 | 185 | 0 | 6  | 15 | 101 | 50 | 305 |
| 46,787 | 4 | 13 | 31 | 173 | 0 | 5  | 15 | 89  | 50 | 280 |
| 46,788 | 4 | 10 | 32 | 142 | 0 | 4  | 15 | 75  | 51 | 231 |
| 46,789 | 4 | 5  | 32 | 96  | 0 | 2  | 15 | 39  | 51 | 142 |
| 46,790 | 4 | 5  | 32 | 96  | 0 | 3  | 15 | 41  | 51 | 145 |
| 46,791 | 4 | 5  | 31 | 97  | 0 | 4  | 14 | 45  | 49 | 151 |
| 46,792 | 4 | 5  | 31 | 51  | 0 | 3  | 14 | 38  | 49 | 97  |
| 46,793 | 4 | 4  | 30 | 47  | 0 | 2  | 14 | 30  | 48 | 83  |
| 46,794 | 4 | 4  | 31 | 47  | 0 | 2  | 14 | 30  | 49 | 83  |
| 46,795 | 4 | 4  | 31 | 46  | 0 | 2  | 15 | 30  | 50 | 82  |
| 46,796 | 4 | 4  | 31 | 46  | 0 | 2  | 15 | 31  | 50 | 83  |
| 46,797 | 6 | 4  | 31 | 37  | 0 | 2  | 16 | 29  | 53 | 72  |
| 46,798 | 6 | 4  | 31 | 37  | 0 | 2  | 16 | 30  | 53 | 73  |
| 46,799 | 6 | 4  | 31 | 36  | 0 | 2  | 16 | 30  | 53 | 72  |
| 46,800 | 6 | 4  | 31 | 36  | 0 | 2  | 16 | 30  | 53 | 72  |
| 46,801 | 6 | 3  | 31 | 34  | 0 | 2  | 17 | 30  | 54 | 69  |
| 46,802 | 6 | 3  | 31 | 34  | 0 | 2  | 17 | 30  | 54 | 69  |
| 46,803 | 6 | 3  | 30 | 34  | 0 | 2  | 17 | 30  | 53 | 69  |
| 46,804 | 6 | 3  | 30 | 34  | 0 | 2  | 17 | 30  | 53 | 69  |
| 46,805 | 6 | 3  | 30 | 34  | 0 | 2  | 18 | 30  | 54 | 69  |
| 46,806 | 6 | 3  | 30 | 35  | 0 | 2  | 19 | 30  | 55 | 70  |
| 46,807 | 6 | 3  | 31 | 35  | 0 | 2  | 19 | 30  | 56 | 70  |
| 46,808 | 6 | 3  | 31 | 33  | 1 | 2  | 19 | 26  | 57 | 64  |
| 46,809 | 6 | 3  | 31 | 38  | 1 | 2  | 19 | 29  | 57 | 72  |
| 46,810 | 6 | 3  | 31 | 38  | 1 | 2  | 19 | 29  | 57 | 72  |

|        |   |    |    |    |   |   |    |    |    |     |
|--------|---|----|----|----|---|---|----|----|----|-----|
| 46,811 | 6 | 3  | 31 | 41 | 1 | 2 | 19 | 30 | 57 | 76  |
| 46,812 | 6 | 3  | 31 | 42 | 1 | 2 | 19 | 31 | 57 | 78  |
| 46,813 | 5 | 5  | 31 | 46 | 1 | 2 | 19 | 33 | 56 | 86  |
| 46,814 | 5 | 8  | 31 | 50 | 1 | 3 | 19 | 27 | 56 | 88  |
| 46,815 | 5 | 10 | 26 | 49 | 1 | 3 | 19 | 30 | 51 | 92  |
| 46,816 | 5 | 10 | 16 | 55 | 1 | 3 | 16 | 32 | 38 | 100 |
| 46,817 | 3 | 10 | 7  | 56 | 1 | 3 | 11 | 32 | 22 | 101 |
| 46,818 | 3 | 11 | 7  | 60 | 1 | 3 | 11 | 33 | 22 | 107 |
| 46,819 | 3 | 11 | 5  | 55 | 1 | 3 | 11 | 32 | 20 | 101 |
| 46,820 | 3 | 10 | 9  | 42 | 2 | 3 | 14 | 27 | 28 | 82  |
| 46,821 | 3 | 10 | 9  | 42 | 2 | 3 | 14 | 27 | 28 | 82  |
| 46,822 | 3 | 10 | 9  | 42 | 2 | 3 | 14 | 27 | 28 | 82  |
| 46,823 | 4 | 10 | 9  | 62 | 2 | 3 | 14 | 45 | 29 | 120 |
| 46,824 | 4 | 10 | 9  | 62 | 2 | 3 | 14 | 46 | 29 | 121 |
| 46,825 | 4 | 10 | 11 | 60 | 2 | 3 | 14 | 44 | 31 | 117 |
| 46,826 | 4 | 10 | 11 | 60 | 2 | 3 | 14 | 44 | 31 | 117 |
| 46,827 | 4 | 9  | 12 | 60 | 2 | 3 | 14 | 44 | 32 | 116 |
| 46,828 | 4 | 9  | 12 | 60 | 2 | 3 | 13 | 44 | 31 | 116 |
| 46,829 | 4 | 9  | 11 | 62 | 2 | 3 | 10 | 44 | 27 | 118 |
| 46,830 | 4 | 10 | 11 | 66 | 2 | 3 | 10 | 53 | 27 | 132 |
| 46,831 | 4 | 10 | 11 | 66 | 2 | 3 | 10 | 53 | 27 | 132 |
| 46,832 | 3 | 10 | 11 | 66 | 2 | 3 | 10 | 53 | 26 | 132 |
| 46,833 | 3 | 10 | 12 | 67 | 2 | 3 | 10 | 53 | 27 | 133 |
| 46,834 | 3 | 10 | 12 | 67 | 2 | 3 | 10 | 53 | 27 | 133 |
| 46,835 | 3 | 10 | 12 | 67 | 2 | 3 | 10 | 53 | 27 | 133 |
| 46,836 | 3 | 10 | 12 | 67 | 2 | 3 | 10 | 53 | 27 | 133 |
| 46,837 | 3 | 10 | 13 | 66 | 2 | 3 | 10 | 53 | 28 | 132 |
| 46,838 | 5 | 10 | 16 | 66 | 2 | 3 | 12 | 53 | 35 | 132 |
| 46,839 | 6 | 9  | 18 | 66 | 2 | 3 | 13 | 53 | 39 | 131 |
| 46,840 | 6 | 9  | 30 | 65 | 2 | 2 | 19 | 51 | 57 | 127 |
| 46,841 | 6 | 9  | 30 | 65 | 2 | 2 | 19 | 51 | 57 | 127 |
| 46,842 | 6 | 9  | 32 | 64 | 2 | 1 | 20 | 46 | 60 | 120 |
| 46,843 | 6 | 9  | 32 | 64 | 2 | 1 | 20 | 47 | 60 | 121 |
| 46,844 | 6 | 9  | 32 | 61 | 2 | 1 | 20 | 47 | 60 | 118 |
| 46,845 | 6 | 10 | 31 | 61 | 2 | 1 | 20 | 49 | 59 | 121 |
| 46,846 | 6 | 11 | 31 | 62 | 2 | 1 | 19 | 48 | 58 | 122 |
| 46,847 | 6 | 11 | 31 | 62 | 2 | 1 | 19 | 49 | 58 | 123 |
| 46,848 | 4 | 12 | 31 | 62 | 2 | 1 | 18 | 50 | 55 | 125 |
| 46,849 | 4 | 12 | 33 | 64 | 2 | 1 | 18 | 49 | 57 | 126 |
| 46,850 | 4 | 12 | 34 | 64 | 2 | 1 | 19 | 49 | 59 | 126 |
| 46,851 | 4 | 12 | 34 | 64 | 2 | 1 | 19 | 50 | 59 | 127 |

|        |   |    |    |     |   |    |    |     |    |     |
|--------|---|----|----|-----|---|----|----|-----|----|-----|
| 46,852 | 4 | 12 | 34 | 64  | 2 | 1  | 18 | 50  | 58 | 127 |
| 46,853 | 5 | 15 | 35 | 64  | 2 | 1  | 21 | 51  | 63 | 131 |
| 46,854 | 5 | 15 | 35 | 66  | 2 | 1  | 21 | 51  | 63 | 133 |
| 46,855 | 5 | 15 | 36 | 71  | 2 | 1  | 21 | 60  | 64 | 147 |
| 46,856 | 5 | 15 | 39 | 72  | 2 | 1  | 20 | 63  | 66 | 151 |
| 46,857 | 5 | 30 | 39 | 152 | 2 | 6  | 19 | 142 | 65 | 330 |
| 46,858 | 5 | 30 | 38 | 156 | 2 | 6  | 19 | 142 | 64 | 334 |
| 46,859 | 5 | 31 | 40 | 166 | 1 | 6  | 21 | 148 | 67 | 351 |
| 46,860 | 5 | 32 | 39 | 184 | 1 | 9  | 21 | 154 | 66 | 379 |
| 46,861 | 5 | 32 | 39 | 185 | 1 | 9  | 21 | 154 | 66 | 380 |
| 46,862 | 5 | 33 | 39 | 183 | 1 | 9  | 21 | 152 | 66 | 377 |
| 46,863 | 5 | 33 | 39 | 182 | 1 | 9  | 20 | 151 | 65 | 375 |
| 46,864 | 5 | 30 | 39 | 189 | 1 | 8  | 20 | 155 | 65 | 382 |
| 46,865 | 5 | 30 | 39 | 190 | 1 | 8  | 20 | 155 | 65 | 383 |
| 46,866 | 5 | 28 | 39 | 191 | 1 | 8  | 21 | 153 | 66 | 380 |
| 46,867 | 5 | 28 | 39 | 193 | 2 | 12 | 21 | 162 | 67 | 395 |
| 46,868 | 5 | 28 | 39 | 198 | 2 | 13 | 21 | 163 | 67 | 402 |
| 46,869 | 5 | 30 | 39 | 203 | 2 | 15 | 21 | 165 | 67 | 413 |
| 46,870 | 5 | 30 | 39 | 204 | 2 | 15 | 21 | 165 | 67 | 414 |
| 46,871 | 5 | 30 | 35 | 206 | 1 | 16 | 18 | 172 | 59 | 424 |
| 46,872 | 5 | 30 | 35 | 219 | 1 | 16 | 18 | 181 | 59 | 446 |
| 46,873 | 5 | 30 | 35 | 201 | 1 | 16 | 17 | 164 | 58 | 411 |
| 46,874 | 4 | 30 | 35 | 212 | 1 | 16 | 17 | 167 | 57 | 425 |
| 46,875 | 4 | 30 | 35 | 214 | 1 | 16 | 17 | 166 | 57 | 426 |
| 46,876 | 4 | 32 | 33 | 216 | 1 | 16 | 17 | 171 | 55 | 435 |
| 46,877 | 4 | 32 | 33 | 231 | 1 | 16 | 18 | 174 | 56 | 453 |
| 46,878 | 4 | 32 | 32 | 231 | 1 | 16 | 18 | 176 | 55 | 455 |
| 46,879 | 4 | 32 | 32 | 236 | 1 | 16 | 19 | 176 | 56 | 460 |
| 46,880 | 4 | 32 | 32 | 233 | 1 | 16 | 19 | 176 | 56 | 457 |
| 46,881 | 4 | 31 | 32 | 228 | 1 | 16 | 19 | 167 | 56 | 442 |
| 46,882 | 4 | 31 | 32 | 230 | 1 | 16 | 19 | 167 | 56 | 444 |
| 46,883 | 4 | 31 | 31 | 231 | 1 | 16 | 19 | 167 | 55 | 445 |
| 46,884 | 4 | 31 | 31 | 234 | 1 | 16 | 19 | 168 | 55 | 449 |
| 46,885 | 4 | 31 | 31 | 243 | 1 | 17 | 19 | 185 | 55 | 476 |
| 46,886 | 4 | 33 | 31 | 308 | 1 | 23 | 19 | 236 | 55 | 600 |
| 46,887 | 4 | 36 | 31 | 353 | 1 | 27 | 20 | 258 | 56 | 674 |
| 46,888 | 4 | 36 | 34 | 359 | 1 | 27 | 22 | 261 | 61 | 683 |
| 46,889 | 2 | 36 | 32 | 364 | 1 | 27 | 20 | 262 | 55 | 689 |
| 46,890 | 1 | 36 | 29 | 366 | 1 | 27 | 19 | 262 | 50 | 691 |
| 46,891 | 1 | 36 | 22 | 366 | 1 | 27 | 14 | 262 | 38 | 691 |
| 46,892 | 1 | 36 | 21 | 366 | 1 | 27 | 14 | 261 | 37 | 690 |



|        |   |    |    |     |   |    |    |     |    |     |
|--------|---|----|----|-----|---|----|----|-----|----|-----|
| 46,893 | 1 | 36 | 21 | 366 | 1 | 27 | 14 | 261 | 37 | 690 |
| 46,894 | 2 | 36 | 21 | 367 | 1 | 27 | 15 | 260 | 39 | 690 |
| 46,895 | 2 | 36 | 21 | 368 | 1 | 27 | 15 | 259 | 39 | 690 |
| 46,896 | 2 | 35 | 21 | 371 | 1 | 27 | 15 | 259 | 39 | 692 |
| 46,897 | 2 | 34 | 21 | 370 | 1 | 27 | 15 | 259 | 39 | 690 |
| 46,898 | 2 | 34 | 22 | 371 | 2 | 27 | 17 | 258 | 43 | 690 |
| 46,899 | 2 | 33 | 22 | 372 | 2 | 27 | 18 | 257 | 44 | 689 |
| 46,900 | 2 | 33 | 22 | 370 | 2 | 27 | 18 | 257 | 44 | 687 |
| 46,901 | 2 | 33 | 21 | 372 | 2 | 27 | 17 | 257 | 42 | 689 |
| 46,902 | 2 | 31 | 22 | 374 | 2 | 27 | 17 | 255 | 43 | 687 |
| 46,903 | 2 | 31 | 22 | 378 | 2 | 27 | 17 | 257 | 43 | 693 |
| 46,904 | 1 | 36 | 21 | 461 | 2 | 28 | 14 | 293 | 38 | 818 |
| 46,905 | 1 | 36 | 20 | 464 | 2 | 28 | 14 | 293 | 37 | 821 |
| 46,906 | 1 | 36 | 19 | 459 | 2 | 28 | 14 | 284 | 36 | 807 |
| 46,907 | 1 | 21 | 18 | 379 | 2 | 23 | 14 | 203 | 35 | 626 |
| 46,908 | 1 | 21 | 16 | 375 | 2 | 23 | 14 | 204 | 33 | 623 |
| 46,909 | 1 | 20 | 16 | 365 | 2 | 23 | 14 | 198 | 33 | 606 |
| 46,910 | 1 | 20 | 16 | 366 | 2 | 23 | 12 | 200 | 31 | 609 |
| 46,911 | 1 | 19 | 16 | 345 | 2 | 20 | 12 | 193 | 31 | 577 |
| 46,912 | 1 | 19 | 16 | 344 | 2 | 20 | 12 | 193 | 31 | 576 |
| 46,913 | 1 | 22 | 16 | 345 | 2 | 20 | 13 | 196 | 32 | 583 |
| 46,914 | 1 | 22 | 16 | 347 | 2 | 20 | 13 | 196 | 32 | 585 |
| 46,915 | 1 | 21 | 16 | 341 | 2 | 20 | 13 | 200 | 32 | 582 |
| 46,916 | 1 | 21 | 16 | 344 | 2 | 20 | 12 | 201 | 31 | 586 |
| 46,917 | 2 | 21 | 16 | 344 | 1 | 20 | 12 | 200 | 31 | 585 |
| 46,918 | 4 | 21 | 16 | 337 | 1 | 16 | 13 | 193 | 34 | 567 |
| 46,919 | 4 | 21 | 16 | 331 | 1 | 15 | 13 | 192 | 34 | 559 |
| 46,920 | 4 | 18 | 16 | 321 | 1 | 13 | 13 | 190 | 34 | 542 |
| 46,921 | 4 | 22 | 16 | 327 | 1 | 15 | 13 | 193 | 34 | 557 |
| 46,922 | 4 | 22 | 16 | 325 | 1 | 14 | 13 | 186 | 34 | 547 |
| 46,923 | 4 | 22 | 16 | 313 | 1 | 14 | 13 | 176 | 34 | 525 |
| 46,924 | 4 | 22 | 16 | 300 | 1 | 14 | 13 | 172 | 34 | 508 |
| 46,925 | 4 | 22 | 16 | 300 | 1 | 14 | 13 | 172 | 34 | 508 |
| 46,926 | 4 | 22 | 16 | 299 | 1 | 14 | 13 | 172 | 34 | 507 |
| 46,927 | 4 | 20 | 16 | 296 | 1 | 14 | 13 | 168 | 34 | 498 |
| 46,928 | 4 | 20 | 16 | 279 | 1 | 14 | 12 | 165 | 33 | 478 |
| 46,929 | 4 | 20 | 16 | 279 | 1 | 14 | 12 | 165 | 33 | 478 |
| 46,930 | 4 | 20 | 16 | 279 | 1 | 14 | 11 | 166 | 32 | 479 |
| 46,931 | 5 | 20 | 16 | 279 | 1 | 14 | 11 | 167 | 33 | 480 |
| 46,932 | 5 | 20 | 16 | 281 | 1 | 14 | 11 | 167 | 33 | 482 |
| 46,933 | 5 | 20 | 16 | 282 | 1 | 14 | 11 | 168 | 33 | 484 |

|        |   |    |    |     |   |    |    |     |    |     |
|--------|---|----|----|-----|---|----|----|-----|----|-----|
| 46,934 | 5 | 20 | 16 | 282 | 1 | 14 | 11 | 168 | 33 | 484 |
| 46,935 | 5 | 20 | 16 | 279 | 1 | 14 | 11 | 167 | 33 | 480 |
| 46,936 | 5 | 19 | 16 | 211 | 1 | 7  | 11 | 103 | 33 | 340 |
| 46,937 | 5 | 18 | 16 | 205 | 1 | 7  | 11 | 99  | 33 | 329 |
| 46,938 | 5 | 15 | 15 | 160 | 1 | 3  | 10 | 77  | 31 | 255 |
| 46,939 | 5 | 15 | 12 | 154 | 1 | 3  | 8  | 75  | 26 | 247 |
| 46,940 | 5 | 15 | 12 | 149 | 1 | 3  | 8  | 74  | 26 | 241 |
| 46,941 | 5 | 15 | 12 | 147 | 1 | 3  | 8  | 74  | 26 | 239 |
| 46,942 | 5 | 15 | 8  | 147 | 1 | 3  | 7  | 74  | 21 | 239 |
| 46,943 | 5 | 15 | 7  | 147 | 1 | 3  | 7  | 74  | 20 | 239 |
| 46,944 | 6 | 15 | 7  | 146 | 1 | 3  | 6  | 74  | 20 | 238 |
| 46,945 | 5 | 15 | 7  | 146 | 1 | 3  | 6  | 74  | 19 | 238 |
| 46,946 | 5 | 15 | 7  | 145 | 1 | 3  | 6  | 74  | 19 | 237 |
| 46,947 | 5 | 15 | 6  | 142 | 1 | 3  | 4  | 72  | 16 | 232 |
| 46,948 | 5 | 15 | 6  | 141 | 0 | 3  | 4  | 72  | 15 | 231 |
| 46,949 | 5 | 15 | 6  | 141 | 0 | 3  | 3  | 72  | 14 | 231 |
| 46,950 | 5 | 15 | 5  | 141 | 0 | 3  | 3  | 72  | 13 | 231 |
| 46,951 | 5 | 15 | 4  | 141 | 0 | 3  | 3  | 72  | 12 | 231 |
| 46,952 | 5 | 14 | 4  | 137 | 0 | 3  | 3  | 72  | 12 | 226 |
| 46,953 | 5 | 14 | 3  | 133 | 0 | 3  | 3  | 70  | 11 | 220 |
| 46,954 | 5 | 14 | 3  | 133 | 0 | 3  | 3  | 70  | 11 | 220 |
| 46,955 | 5 | 9  | 4  | 50  | 0 | 2  | 4  | 34  | 13 | 95  |
| 46,956 | 5 | 9  | 5  | 45  | 1 | 2  | 4  | 33  | 15 | 89  |
| 46,957 | 5 | 9  | 6  | 44  | 1 | 2  | 8  | 33  | 20 | 88  |
| 46,958 | 5 | 9  | 5  | 44  | 1 | 2  | 8  | 33  | 19 | 88  |
| 46,959 | 5 | 9  | 5  | 44  | 1 | 2  | 8  | 32  | 19 | 87  |
| 46,960 | 5 | 9  | 5  | 43  | 1 | 2  | 7  | 30  | 18 | 84  |
| 46,961 | 5 | 9  | 5  | 44  | 1 | 2  | 7  | 33  | 18 | 88  |
| 46,962 | 5 | 9  | 5  | 42  | 1 | 2  | 7  | 31  | 18 | 84  |
| 46,963 | 6 | 9  | 5  | 43  | 1 | 2  | 9  | 34  | 21 | 88  |
| 46,964 | 6 | 5  | 5  | 43  | 1 | 2  | 9  | 32  | 21 | 82  |
| 46,965 | 6 | 4  | 5  | 25  | 1 | 2  | 9  | 22  | 21 | 53  |
| 46,966 | 5 | 4  | 5  | 25  | 1 | 2  | 9  | 23  | 20 | 54  |
| 46,967 | 5 | 4  | 6  | 24  | 1 | 2  | 9  | 19  | 21 | 49  |
| 46,968 | 5 | 6  | 6  | 25  | 2 | 2  | 9  | 19  | 22 | 52  |
| 46,969 | 3 | 6  | 6  | 25  | 2 | 2  | 8  | 19  | 19 | 52  |
| 46,970 | 3 | 6  | 6  | 25  | 2 | 2  | 8  | 19  | 19 | 52  |
| 46,971 | 3 | 6  | 6  | 25  | 2 | 2  | 8  | 18  | 19 | 51  |
| 46,972 | 3 | 2  | 6  | 19  | 2 | 0  | 8  | 15  | 19 | 36  |
| 46,973 | 3 | 2  | 6  | 19  | 2 | 0  | 8  | 15  | 19 | 36  |
| 46,974 | 3 | 2  | 6  | 18  | 2 | 0  | 8  | 15  | 19 | 35  |

|        |   |   |   |    |   |   |    |    |    |    |
|--------|---|---|---|----|---|---|----|----|----|----|
| 46,975 | 3 | 2 | 6 | 18 | 2 | 0 | 8  | 16 | 19 | 36 |
| 46,976 | 3 | 2 | 6 | 18 | 2 | 0 | 8  | 17 | 19 | 37 |
| 46,977 | 3 | 2 | 6 | 20 | 2 | 0 | 8  | 18 | 19 | 40 |
| 46,978 | 3 | 2 | 6 | 21 | 2 | 0 | 8  | 17 | 19 | 40 |
| 46,979 | 3 | 2 | 6 | 18 | 2 | 0 | 8  | 15 | 19 | 35 |
| 46,980 | 3 | 2 | 6 | 18 | 2 | 0 | 8  | 15 | 19 | 35 |
| 46,981 | 3 | 2 | 7 | 19 | 2 | 0 | 8  | 14 | 20 | 35 |
| 46,982 | 2 | 2 | 7 | 22 | 2 | 0 | 8  | 22 | 19 | 46 |
| 46,983 | 2 | 2 | 7 | 22 | 2 | 0 | 8  | 25 | 19 | 49 |
| 46,984 | 2 | 2 | 7 | 21 | 2 | 0 | 8  | 26 | 19 | 49 |
| 46,985 | 2 | 2 | 7 | 23 | 2 | 1 | 8  | 27 | 19 | 53 |
| 46,986 | 2 | 2 | 7 | 24 | 2 | 1 | 8  | 28 | 19 | 55 |
| 46,987 | 2 | 2 | 7 | 24 | 2 | 1 | 8  | 28 | 19 | 55 |
| 46,988 | 2 | 3 | 7 | 25 | 2 | 1 | 8  | 28 | 19 | 57 |
| 46,989 | 2 | 3 | 7 | 26 | 2 | 1 | 8  | 29 | 19 | 59 |
| 46,990 | 2 | 3 | 6 | 28 | 2 | 1 | 8  | 30 | 18 | 62 |
| 46,991 | 2 | 3 | 6 | 28 | 2 | 1 | 9  | 30 | 19 | 62 |
| 46,992 | 2 | 3 | 6 | 28 | 2 | 1 | 9  | 31 | 19 | 63 |
| 46,993 | 2 | 3 | 5 | 29 | 2 | 1 | 10 | 34 | 19 | 67 |
| 46,994 | 2 | 3 | 5 | 31 | 2 | 1 | 9  | 35 | 18 | 70 |
| 46,995 | 1 | 3 | 5 | 31 | 2 | 1 | 9  | 36 | 17 | 71 |
| 46,996 | 1 | 3 | 5 | 33 | 2 | 1 | 9  | 36 | 17 | 73 |
| 46,997 | 1 | 3 | 5 | 33 | 2 | 1 | 9  | 36 | 17 | 73 |
| 46,998 | 1 | 3 | 5 | 33 | 2 | 1 | 9  | 36 | 17 | 73 |
| 46,999 | 1 | 3 | 5 | 34 | 2 | 1 | 9  | 37 | 17 | 75 |
| 47,000 | 1 | 3 | 5 | 34 | 2 | 1 | 9  | 37 | 17 | 75 |
| 47,001 | 1 | 4 | 6 | 34 | 2 | 2 | 10 | 38 | 19 | 78 |
| 47,002 | 1 | 4 | 6 | 35 | 2 | 2 | 10 | 38 | 19 | 79 |
| 47,003 | 1 | 4 | 6 | 37 | 2 | 2 | 10 | 39 | 19 | 82 |
| 47,004 | 1 | 4 | 6 | 38 | 2 | 2 | 10 | 39 | 19 | 83 |
| 47,005 | 1 | 4 | 5 | 38 | 2 | 2 | 9  | 39 | 17 | 83 |
| 47,006 | 1 | 4 | 4 | 38 | 1 | 2 | 9  | 40 | 15 | 84 |
| 47,007 | 1 | 4 | 3 | 38 | 1 | 2 | 5  | 40 | 10 | 84 |
| 47,008 | 1 | 4 | 3 | 38 | 1 | 2 | 5  | 40 | 10 | 84 |
| 47,009 | 1 | 4 | 4 | 39 | 1 | 3 | 7  | 40 | 13 | 86 |
| 47,010 | 1 | 4 | 4 | 39 | 1 | 3 | 7  | 40 | 13 | 86 |
| 47,011 | 1 | 4 | 4 | 39 | 1 | 3 | 8  | 40 | 14 | 86 |
| 47,012 | 1 | 5 | 4 | 36 | 1 | 4 | 7  | 34 | 13 | 79 |
| 47,013 | 1 | 5 | 4 | 37 | 1 | 4 | 7  | 36 | 13 | 82 |
| 47,014 | 0 | 5 | 5 | 37 | 1 | 4 | 6  | 36 | 12 | 82 |
| 47,015 | 0 | 5 | 7 | 37 | 1 | 4 | 6  | 37 | 14 | 83 |

|        |   |    |    |    |   |   |    |    |    |     |
|--------|---|----|----|----|---|---|----|----|----|-----|
| 47,016 | 0 | 8  | 8  | 39 | 1 | 5 | 7  | 36 | 16 | 88  |
| 47,017 | 0 | 8  | 8  | 41 | 1 | 5 | 7  | 35 | 16 | 89  |
| 47,018 | 0 | 8  | 7  | 42 | 1 | 5 | 7  | 35 | 15 | 90  |
| 47,019 | 0 | 6  | 8  | 42 | 0 | 5 | 7  | 35 | 15 | 88  |
| 47,020 | 0 | 6  | 8  | 42 | 0 | 5 | 7  | 35 | 15 | 88  |
| 47,021 | 0 | 6  | 8  | 42 | 0 | 5 | 7  | 35 | 15 | 88  |
| 47,022 | 0 | 6  | 8  | 42 | 0 | 5 | 7  | 35 | 15 | 88  |
| 47,023 | 0 | 6  | 8  | 42 | 0 | 5 | 7  | 35 | 15 | 88  |
| 47,024 | 0 | 6  | 8  | 42 | 0 | 5 | 7  | 35 | 15 | 88  |
| 47,025 | 0 | 6  | 9  | 42 | 0 | 5 | 7  | 35 | 16 | 88  |
| 47,026 | 0 | 6  | 9  | 42 | 0 | 5 | 7  | 34 | 16 | 87  |
| 47,027 | 4 | 6  | 14 | 39 | 3 | 5 | 15 | 33 | 36 | 83  |
| 47,028 | 4 | 7  | 14 | 45 | 3 | 6 | 15 | 35 | 36 | 93  |
| 47,029 | 4 | 9  | 14 | 45 | 3 | 6 | 15 | 38 | 36 | 98  |
| 47,030 | 4 | 9  | 14 | 45 | 3 | 6 | 15 | 38 | 36 | 98  |
| 47,031 | 4 | 9  | 15 | 45 | 3 | 6 | 16 | 39 | 38 | 99  |
| 47,032 | 5 | 9  | 25 | 42 | 5 | 6 | 26 | 38 | 61 | 95  |
| 47,033 | 5 | 9  | 25 | 40 | 5 | 7 | 26 | 33 | 61 | 89  |
| 47,034 | 5 | 9  | 25 | 41 | 5 | 7 | 26 | 30 | 61 | 87  |
| 47,035 | 5 | 9  | 30 | 40 | 6 | 7 | 28 | 29 | 69 | 85  |
| 47,036 | 5 | 10 | 32 | 44 | 6 | 6 | 31 | 31 | 74 | 91  |
| 47,037 | 5 | 10 | 34 | 42 | 6 | 6 | 35 | 31 | 80 | 89  |
| 47,038 | 5 | 10 | 34 | 42 | 6 | 6 | 35 | 31 | 80 | 89  |
| 47,039 | 5 | 9  | 34 | 43 | 6 | 7 | 35 | 33 | 80 | 92  |
| 47,040 | 5 | 9  | 34 | 46 | 6 | 7 | 35 | 34 | 80 | 96  |
| 47,041 | 5 | 9  | 34 | 50 | 6 | 8 | 34 | 35 | 79 | 102 |
| 47,042 | 5 | 9  | 34 | 50 | 6 | 9 | 34 | 35 | 79 | 103 |
| 47,043 | 5 | 9  | 36 | 50 | 6 | 9 | 34 | 34 | 81 | 102 |
| 47,044 | 5 | 9  | 36 | 48 | 6 | 9 | 33 | 30 | 80 | 96  |
| 47,045 | 5 | 9  | 37 | 48 | 6 | 9 | 33 | 29 | 81 | 95  |
| 47,046 | 5 | 9  | 37 | 48 | 6 | 9 | 33 | 31 | 81 | 97  |
| 47,047 | 5 | 9  | 37 | 53 | 6 | 9 | 33 | 32 | 81 | 103 |
| 47,048 | 5 | 9  | 37 | 53 | 6 | 9 | 34 | 34 | 82 | 105 |
| 47,049 | 5 | 9  | 37 | 54 | 6 | 9 | 34 | 34 | 82 | 106 |
| 47,050 | 5 | 9  | 40 | 53 | 6 | 9 | 34 | 33 | 85 | 104 |
| 47,051 | 5 | 9  | 40 | 53 | 6 | 9 | 34 | 33 | 85 | 104 |
| 47,052 | 6 | 8  | 40 | 51 | 6 | 8 | 34 | 32 | 86 | 99  |
| 47,053 | 6 | 8  | 40 | 51 | 6 | 8 | 34 | 32 | 86 | 99  |
| 47,054 | 6 | 8  | 41 | 49 | 6 | 8 | 34 | 31 | 87 | 96  |
| 47,055 | 6 | 8  | 41 | 50 | 6 | 8 | 34 | 31 | 87 | 97  |
| 47,056 | 6 | 8  | 43 | 51 | 6 | 8 | 34 | 32 | 89 | 99  |

|        |   |   |    |    |   |   |    |    |    |     |
|--------|---|---|----|----|---|---|----|----|----|-----|
| 47,057 | 6 | 8 | 43 | 51 | 6 | 8 | 35 | 31 | 90 | 98  |
| 47,058 | 6 | 8 | 43 | 52 | 6 | 8 | 35 | 31 | 90 | 99  |
| 47,059 | 6 | 8 | 42 | 51 | 6 | 7 | 34 | 31 | 88 | 97  |
| 47,060 | 6 | 8 | 42 | 51 | 6 | 7 | 34 | 31 | 88 | 97  |
| 47,061 | 6 | 8 | 42 | 51 | 6 | 7 | 34 | 31 | 88 | 97  |
| 47,062 | 6 | 8 | 43 | 49 | 6 | 6 | 33 | 31 | 88 | 94  |
| 47,063 | 6 | 8 | 43 | 49 | 6 | 6 | 33 | 31 | 88 | 94  |
| 47,064 | 6 | 8 | 45 | 51 | 6 | 6 | 33 | 32 | 90 | 97  |
| 47,065 | 6 | 8 | 44 | 51 | 6 | 6 | 33 | 32 | 89 | 97  |
| 47,066 | 6 | 8 | 42 | 53 | 6 | 6 | 33 | 31 | 87 | 98  |
| 47,067 | 6 | 5 | 41 | 48 | 6 | 5 | 32 | 32 | 85 | 90  |
| 47,068 | 6 | 5 | 41 | 48 | 6 | 5 | 32 | 32 | 85 | 90  |
| 47,069 | 6 | 5 | 40 | 46 | 6 | 5 | 34 | 33 | 86 | 89  |
| 47,070 | 6 | 5 | 40 | 46 | 6 | 5 | 34 | 33 | 86 | 89  |
| 47,071 | 6 | 5 | 40 | 46 | 6 | 5 | 34 | 33 | 86 | 89  |
| 47,072 | 6 | 5 | 40 | 46 | 6 | 5 | 34 | 33 | 86 | 89  |
| 47,073 | 6 | 5 | 40 | 46 | 6 | 5 | 34 | 33 | 86 | 89  |
| 47,074 | 6 | 5 | 40 | 46 | 6 | 5 | 36 | 34 | 88 | 90  |
| 47,075 | 6 | 5 | 39 | 46 | 6 | 5 | 36 | 34 | 87 | 90  |
| 47,076 | 6 | 5 | 39 | 46 | 6 | 5 | 36 | 34 | 87 | 90  |
| 47,077 | 6 | 5 | 39 | 46 | 6 | 5 | 36 | 34 | 87 | 90  |
| 47,078 | 2 | 2 | 34 | 38 | 3 | 4 | 28 | 29 | 67 | 73  |
| 47,079 | 2 | 2 | 34 | 38 | 3 | 4 | 28 | 29 | 67 | 73  |
| 47,080 | 2 | 2 | 34 | 38 | 3 | 4 | 27 | 30 | 66 | 74  |
| 47,081 | 2 | 2 | 33 | 38 | 3 | 4 | 27 | 32 | 65 | 76  |
| 47,082 | 2 | 2 | 30 | 40 | 1 | 6 | 22 | 31 | 55 | 79  |
| 47,083 | 1 | 3 | 22 | 43 | 1 | 6 | 17 | 33 | 41 | 85  |
| 47,084 | 1 | 3 | 21 | 47 | 0 | 6 | 17 | 37 | 39 | 93  |
| 47,085 | 1 | 6 | 17 | 50 | 1 | 8 | 15 | 44 | 34 | 108 |
| 47,086 | 1 | 5 | 17 | 46 | 1 | 8 | 15 | 41 | 34 | 100 |
| 47,087 | 1 | 5 | 15 | 46 | 1 | 8 | 12 | 41 | 29 | 100 |
| 47,088 | 1 | 5 | 13 | 47 | 1 | 8 | 8  | 40 | 23 | 100 |
| 47,089 | 1 | 5 | 13 | 48 | 1 | 8 | 8  | 40 | 23 | 101 |
| 47,090 | 1 | 5 | 13 | 46 | 1 | 7 | 8  | 38 | 23 | 96  |
| 47,091 | 1 | 5 | 13 | 42 | 1 | 7 | 8  | 36 | 23 | 90  |
| 47,092 | 1 | 5 | 13 | 36 | 1 | 6 | 8  | 34 | 23 | 81  |
| 47,093 | 1 | 5 | 14 | 36 | 1 | 5 | 10 | 34 | 26 | 80  |
| 47,094 | 1 | 5 | 14 | 36 | 1 | 5 | 10 | 34 | 26 | 80  |
| 47,095 | 1 | 5 | 14 | 35 | 1 | 5 | 10 | 34 | 26 | 79  |
| 47,096 | 1 | 5 | 13 | 39 | 1 | 5 | 10 | 35 | 25 | 84  |
| 47,097 | 1 | 5 | 13 | 37 | 1 | 5 | 10 | 33 | 25 | 80  |

|        |   |   |    |    |   |   |    |    |    |    |
|--------|---|---|----|----|---|---|----|----|----|----|
| 47,098 | 1 | 5 | 15 | 35 | 1 | 5 | 9  | 39 | 26 | 84 |
| 47,099 | 1 | 5 | 15 | 36 | 1 | 5 | 9  | 39 | 26 | 85 |
| 47,100 | 1 | 5 | 15 | 35 | 1 | 5 | 10 | 39 | 27 | 84 |
| 47,101 | 1 | 5 | 13 | 37 | 1 | 5 | 10 | 39 | 25 | 86 |
| 47,102 | 1 | 5 | 13 | 37 | 1 | 5 | 10 | 39 | 25 | 86 |
| 47,103 | 4 | 5 | 19 | 38 | 2 | 5 | 15 | 39 | 40 | 87 |
| 47,104 | 4 | 5 | 20 | 38 | 2 | 5 | 15 | 39 | 41 | 87 |
| 47,105 | 6 | 5 | 33 | 38 | 2 | 5 | 23 | 39 | 64 | 87 |
| 47,106 | 6 | 5 | 33 | 36 | 2 | 5 | 23 | 40 | 64 | 86 |
| 47,107 | 6 | 5 | 31 | 36 | 2 | 5 | 23 | 39 | 62 | 85 |
| 47,108 | 6 | 5 | 31 | 36 | 2 | 5 | 22 | 39 | 61 | 85 |
| 47,109 | 6 | 5 | 31 | 35 | 2 | 5 | 22 | 39 | 61 | 84 |
| 47,110 | 6 | 5 | 31 | 35 | 2 | 6 | 21 | 39 | 60 | 85 |
| 47,111 | 6 | 4 | 31 | 35 | 2 | 6 | 21 | 38 | 60 | 83 |
| 47,112 | 6 | 4 | 31 | 36 | 2 | 6 | 21 | 38 | 60 | 84 |
| 47,113 | 6 | 4 | 30 | 36 | 2 | 6 | 21 | 38 | 59 | 84 |
| 47,114 | 6 | 4 | 29 | 36 | 2 | 6 | 21 | 38 | 58 | 84 |
| 47,115 | 6 | 4 | 28 | 33 | 2 | 6 | 21 | 34 | 57 | 77 |
| 47,116 | 6 | 4 | 28 | 34 | 2 | 6 | 21 | 34 | 57 | 78 |
| 47,117 | 6 | 4 | 28 | 32 | 2 | 6 | 21 | 32 | 57 | 74 |
| 47,118 | 6 | 4 | 28 | 32 | 2 | 6 | 21 | 32 | 57 | 74 |
| 47,119 | 6 | 4 | 28 | 32 | 2 | 6 | 19 | 32 | 55 | 74 |
| 47,120 | 6 | 4 | 28 | 32 | 2 | 6 | 19 | 32 | 55 | 74 |
| 47,121 | 6 | 4 | 28 | 32 | 2 | 6 | 19 | 32 | 55 | 74 |
| 47,122 | 6 | 4 | 28 | 32 | 2 | 6 | 19 | 32 | 55 | 74 |
| 47,123 | 6 | 4 | 28 | 33 | 2 | 6 | 19 | 32 | 55 | 75 |
| 47,124 | 6 | 4 | 28 | 33 | 2 | 6 | 18 | 31 | 54 | 74 |
| 47,125 | 6 | 4 | 28 | 33 | 2 | 6 | 17 | 31 | 53 | 74 |
| 47,126 | 6 | 4 | 28 | 34 | 2 | 6 | 17 | 31 | 53 | 75 |
| 47,127 | 6 | 4 | 28 | 34 | 2 | 6 | 17 | 31 | 53 | 75 |
| 47,128 | 6 | 4 | 28 | 34 | 2 | 6 | 17 | 30 | 53 | 74 |
| 47,129 | 6 | 4 | 28 | 34 | 2 | 6 | 17 | 30 | 53 | 74 |
| 47,130 | 6 | 4 | 28 | 34 | 2 | 6 | 17 | 30 | 53 | 74 |
| 47,131 | 6 | 4 | 28 | 34 | 2 | 6 | 17 | 28 | 53 | 72 |
| 47,132 | 6 | 4 | 28 | 34 | 2 | 6 | 17 | 28 | 53 | 72 |
| 47,133 | 6 | 4 | 28 | 32 | 2 | 4 | 17 | 28 | 53 | 68 |
| 47,134 | 6 | 3 | 28 | 24 | 2 | 3 | 17 | 19 | 53 | 49 |
| 47,135 | 7 | 0 | 29 | 18 | 2 | 1 | 18 | 11 | 56 | 30 |
| 47,136 | 7 | 0 | 29 | 18 | 1 | 1 | 18 | 11 | 55 | 30 |
| 47,137 | 7 | 0 | 29 | 18 | 1 | 1 | 18 | 12 | 55 | 31 |
| 47,138 | 7 | 0 | 29 | 19 | 1 | 1 | 20 | 12 | 57 | 32 |

|        |   |    |    |     |   |   |    |    |    |     |
|--------|---|----|----|-----|---|---|----|----|----|-----|
| 47,139 | 7 | 0  | 29 | 20  | 1 | 1 | 20 | 14 | 57 | 35  |
| 47,140 | 7 | 8  | 29 | 29  | 1 | 1 | 20 | 23 | 57 | 61  |
| 47,141 | 7 | 9  | 29 | 29  | 1 | 1 | 20 | 23 | 57 | 62  |
| 47,142 | 7 | 9  | 29 | 29  | 2 | 2 | 20 | 23 | 58 | 63  |
| 47,143 | 7 | 9  | 27 | 29  | 2 | 2 | 20 | 23 | 56 | 63  |
| 47,144 | 7 | 10 | 26 | 31  | 2 | 2 | 18 | 23 | 53 | 66  |
| 47,145 | 7 | 10 | 26 | 32  | 2 | 2 | 18 | 23 | 53 | 67  |
| 47,146 | 7 | 10 | 28 | 28  | 2 | 2 | 19 | 23 | 56 | 63  |
| 47,147 | 7 | 10 | 28 | 28  | 2 | 2 | 19 | 23 | 56 | 63  |
| 47,148 | 7 | 10 | 28 | 29  | 2 | 2 | 19 | 23 | 56 | 64  |
| 47,149 | 7 | 10 | 26 | 25  | 2 | 2 | 19 | 14 | 54 | 51  |
| 47,150 | 7 | 10 | 26 | 26  | 2 | 2 | 19 | 14 | 54 | 52  |
| 47,151 | 7 | 10 | 26 | 24  | 2 | 2 | 18 | 14 | 53 | 50  |
| 47,152 | 7 | 17 | 25 | 59  | 2 | 4 | 18 | 50 | 52 | 130 |
| 47,153 | 4 | 19 | 20 | 128 | 1 | 6 | 14 | 78 | 39 | 231 |
| 47,154 | 3 | 19 | 18 | 131 | 1 | 6 | 12 | 84 | 34 | 240 |
| 47,155 | 3 | 19 | 16 | 137 | 1 | 6 | 12 | 84 | 32 | 246 |
| 47,156 | 1 | 19 | 3  | 139 | 1 | 6 | 4  | 84 | 9  | 248 |
| 47,157 | 1 | 19 | 3  | 139 | 1 | 6 | 4  | 85 | 9  | 249 |
| 47,158 | 1 | 25 | 3  | 146 | 1 | 6 | 4  | 92 | 9  | 269 |
| 47,159 | 1 | 26 | 3  | 146 | 1 | 6 | 4  | 92 | 9  | 270 |
| 47,160 | 1 | 26 | 3  | 147 | 1 | 6 | 4  | 92 | 9  | 271 |
| 47,161 | 1 | 26 | 4  | 147 | 1 | 5 | 4  | 92 | 10 | 270 |
| 47,162 | 1 | 26 | 5  | 146 | 1 | 5 | 4  | 92 | 11 | 269 |
| 47,163 | 1 | 26 | 5  | 147 | 2 | 5 | 4  | 92 | 12 | 270 |
| 47,164 | 1 | 26 | 5  | 147 | 2 | 5 | 4  | 92 | 12 | 270 |
| 47,165 | 1 | 26 | 5  | 147 | 2 | 5 | 4  | 92 | 12 | 270 |
| 47,166 | 1 | 26 | 5  | 147 | 2 | 5 | 4  | 92 | 12 | 270 |
| 47,167 | 1 | 26 | 5  | 146 | 2 | 5 | 5  | 92 | 13 | 269 |
| 47,168 | 1 | 26 | 5  | 146 | 2 | 5 | 5  | 92 | 13 | 269 |
| 47,169 | 1 | 26 | 5  | 146 | 2 | 5 | 5  | 92 | 13 | 269 |
| 47,170 | 1 | 26 | 5  | 146 | 2 | 5 | 5  | 92 | 13 | 269 |
| 47,171 | 1 | 26 | 5  | 146 | 2 | 5 | 5  | 92 | 13 | 269 |
| 47,172 | 1 | 26 | 5  | 146 | 2 | 5 | 5  | 92 | 13 | 269 |
| 47,173 | 1 | 26 | 5  | 146 | 2 | 5 | 5  | 92 | 13 | 269 |
| 47,174 | 1 | 26 | 5  | 145 | 2 | 5 | 5  | 92 | 13 | 268 |
| 47,175 | 1 | 26 | 5  | 145 | 2 | 5 | 5  | 92 | 13 | 268 |
| 47,176 | 1 | 26 | 5  | 145 | 2 | 5 | 5  | 92 | 13 | 268 |
| 47,177 | 1 | 26 | 5  | 145 | 2 | 5 | 5  | 92 | 13 | 268 |
| 47,178 | 2 | 26 | 5  | 145 | 2 | 5 | 5  | 92 | 14 | 268 |
| 47,179 | 2 | 26 | 5  | 145 | 2 | 5 | 5  | 92 | 14 | 268 |

|        |   |    |    |     |   |    |    |     |    |     |
|--------|---|----|----|-----|---|----|----|-----|----|-----|
| 47,180 | 2 | 26 | 5  | 150 | 2 | 6  | 5  | 92  | 14 | 274 |
| 47,181 | 2 | 26 | 5  | 150 | 2 | 7  | 5  | 93  | 14 | 276 |
| 47,182 | 2 | 26 | 5  | 151 | 2 | 7  | 5  | 93  | 14 | 277 |
| 47,183 | 2 | 29 | 5  | 160 | 2 | 8  | 5  | 106 | 14 | 303 |
| 47,184 | 2 | 30 | 5  | 170 | 2 | 8  | 5  | 109 | 14 | 317 |
| 47,185 | 3 | 36 | 5  | 242 | 2 | 12 | 6  | 131 | 16 | 421 |
| 47,186 | 2 | 36 | 5  | 254 | 2 | 13 | 5  | 132 | 14 | 435 |
| 47,187 | 2 | 37 | 5  | 256 | 2 | 13 | 5  | 132 | 14 | 438 |
| 47,188 | 2 | 37 | 5  | 258 | 2 | 13 | 3  | 133 | 12 | 441 |
| 47,189 | 3 | 37 | 8  | 257 | 2 | 13 | 8  | 131 | 21 | 438 |
| 47,190 | 3 | 29 | 8  | 249 | 1 | 13 | 8  | 122 | 20 | 413 |
| 47,191 | 3 | 30 | 8  | 263 | 1 | 14 | 8  | 128 | 20 | 435 |
| 47,192 | 3 | 29 | 8  | 268 | 1 | 14 | 8  | 129 | 20 | 440 |
| 47,193 | 3 | 30 | 8  | 281 | 1 | 13 | 8  | 136 | 20 | 460 |
| 47,194 | 3 | 31 | 8  | 282 | 1 | 13 | 8  | 137 | 20 | 463 |
| 47,195 | 3 | 31 | 8  | 295 | 1 | 13 | 8  | 144 | 20 | 483 |
| 47,196 | 3 | 34 | 7  | 296 | 1 | 13 | 8  | 146 | 19 | 489 |
| 47,197 | 3 | 35 | 6  | 299 | 1 | 14 | 7  | 146 | 17 | 494 |
| 47,198 | 3 | 35 | 6  | 304 | 1 | 14 | 7  | 146 | 17 | 499 |
| 47,199 | 3 | 35 | 6  | 307 | 1 | 14 | 7  | 146 | 17 | 502 |
| 47,200 | 3 | 35 | 6  | 315 | 1 | 15 | 7  | 149 | 17 | 514 |
| 47,201 | 3 | 35 | 6  | 315 | 1 | 15 | 7  | 149 | 17 | 514 |
| 47,202 | 3 | 28 | 6  | 280 | 1 | 13 | 7  | 114 | 17 | 435 |
| 47,203 | 3 | 28 | 6  | 280 | 1 | 13 | 7  | 116 | 17 | 437 |
| 47,204 | 3 | 26 | 6  | 213 | 1 | 11 | 7  | 89  | 17 | 339 |
| 47,205 | 3 | 27 | 8  | 215 | 1 | 11 | 8  | 87  | 20 | 340 |
| 47,206 | 3 | 27 | 8  | 209 | 1 | 11 | 8  | 87  | 20 | 334 |
| 47,207 | 3 | 27 | 8  | 208 | 1 | 11 | 8  | 87  | 20 | 333 |
| 47,208 | 4 | 27 | 10 | 207 | 1 | 11 | 9  | 85  | 24 | 330 |
| 47,209 | 4 | 21 | 12 | 200 | 1 | 11 | 9  | 78  | 26 | 310 |
| 47,210 | 4 | 20 | 14 | 201 | 1 | 11 | 14 | 79  | 33 | 311 |
| 47,211 | 4 | 22 | 14 | 210 | 1 | 11 | 14 | 96  | 33 | 339 |
| 47,212 | 4 | 22 | 13 | 213 | 1 | 12 | 14 | 96  | 32 | 343 |
| 47,213 | 4 | 22 | 12 | 216 | 1 | 12 | 14 | 98  | 31 | 348 |
| 47,214 | 4 | 22 | 12 | 219 | 1 | 12 | 14 | 98  | 31 | 351 |
| 47,215 | 4 | 22 | 12 | 219 | 1 | 12 | 14 | 99  | 31 | 352 |
| 47,216 | 4 | 22 | 12 | 223 | 1 | 13 | 14 | 112 | 31 | 370 |
| 47,217 | 4 | 22 | 12 | 224 | 1 | 13 | 13 | 112 | 30 | 371 |
| 47,218 | 4 | 23 | 12 | 265 | 1 | 18 | 13 | 148 | 30 | 454 |
| 47,219 | 4 | 26 | 12 | 271 | 1 | 18 | 13 | 151 | 30 | 466 |
| 47,220 | 4 | 26 | 12 | 271 | 1 | 18 | 13 | 151 | 30 | 466 |



|        |   |    |    |     |   |    |    |     |    |     |
|--------|---|----|----|-----|---|----|----|-----|----|-----|
| 47,221 | 4 | 27 | 13 | 275 | 1 | 19 | 13 | 154 | 31 | 475 |
| 47,222 | 4 | 27 | 13 | 278 | 1 | 19 | 13 | 154 | 31 | 478 |
| 47,223 | 4 | 28 | 13 | 281 | 1 | 19 | 13 | 156 | 31 | 484 |
| 47,224 | 4 | 29 | 13 | 282 | 1 | 19 | 13 | 156 | 31 | 486 |
| 47,225 | 4 | 29 | 13 | 288 | 1 | 19 | 14 | 157 | 32 | 493 |
| 47,226 | 4 | 29 | 13 | 288 | 1 | 19 | 14 | 157 | 32 | 493 |
| 47,227 | 4 | 29 | 13 | 287 | 1 | 19 | 14 | 157 | 32 | 492 |
| 47,228 | 3 | 29 | 13 | 287 | 1 | 19 | 14 | 157 | 31 | 492 |
| 47,229 | 3 | 29 | 13 | 287 | 1 | 19 | 14 | 157 | 31 | 492 |
| 47,230 | 3 | 29 | 14 | 287 | 1 | 19 | 14 | 157 | 32 | 492 |
| 47,231 | 3 | 29 | 14 | 282 | 2 | 17 | 15 | 156 | 34 | 484 |
| 47,232 | 3 | 29 | 17 | 281 | 2 | 17 | 15 | 156 | 37 | 483 |
| 47,233 | 3 | 29 | 17 | 281 | 2 | 17 | 15 | 156 | 37 | 483 |
| 47,234 | 3 | 19 | 24 | 190 | 2 | 13 | 16 | 118 | 45 | 340 |
| 47,235 | 2 | 19 | 24 | 196 | 2 | 14 | 15 | 120 | 43 | 349 |
| 47,236 | 2 | 22 | 24 | 202 | 2 | 14 | 15 | 143 | 43 | 381 |
| 47,237 | 2 | 22 | 23 | 190 | 2 | 13 | 15 | 142 | 42 | 367 |
| 47,238 | 2 | 21 | 23 | 189 | 2 | 13 | 15 | 142 | 42 | 365 |
| 47,239 | 2 | 21 | 23 | 186 | 2 | 13 | 15 | 140 | 42 | 360 |
| 47,240 | 1 | 21 | 20 | 183 | 2 | 13 | 10 | 140 | 33 | 357 |
| 47,241 | 1 | 20 | 20 | 169 | 2 | 12 | 10 | 134 | 33 | 335 |
| 47,242 | 1 | 20 | 20 | 169 | 2 | 12 | 10 | 134 | 33 | 335 |
| 47,243 | 1 | 20 | 20 | 164 | 2 | 12 | 10 | 132 | 33 | 328 |
| 47,244 | 1 | 19 | 20 | 152 | 2 | 12 | 10 | 126 | 33 | 309 |
| 47,245 | 1 | 17 | 20 | 136 | 2 | 12 | 11 | 118 | 34 | 283 |
| 47,246 | 1 | 18 | 20 | 136 | 2 | 13 | 11 | 118 | 34 | 285 |
| 47,247 | 1 | 15 | 20 | 134 | 2 | 13 | 11 | 116 | 34 | 278 |
| 47,248 | 1 | 14 | 20 | 125 | 2 | 12 | 11 | 116 | 34 | 267 |
| 47,249 | 1 | 14 | 20 | 125 | 2 | 12 | 11 | 116 | 34 | 267 |
| 47,250 | 1 | 14 | 20 | 122 | 2 | 12 | 11 | 117 | 34 | 265 |
| 47,251 | 1 | 14 | 20 | 113 | 2 | 11 | 11 | 114 | 34 | 252 |
| 47,252 | 1 | 14 | 21 | 113 | 2 | 11 | 11 | 114 | 35 | 252 |
| 47,253 | 1 | 15 | 21 | 113 | 2 | 11 | 11 | 111 | 35 | 250 |
| 47,254 | 1 | 15 | 21 | 119 | 2 | 11 | 11 | 114 | 35 | 259 |
| 47,255 | 1 | 15 | 19 | 118 | 2 | 11 | 10 | 113 | 32 | 257 |
| 47,256 | 1 | 14 | 19 | 116 | 2 | 11 | 10 | 116 | 32 | 257 |
| 47,257 | 1 | 15 | 19 | 117 | 2 | 11 | 10 | 116 | 32 | 259 |
| 47,258 | 0 | 15 | 17 | 116 | 2 | 11 | 9  | 116 | 28 | 258 |
| 47,259 | 0 | 15 | 15 | 118 | 2 | 11 | 9  | 116 | 26 | 260 |
| 47,260 | 0 | 15 | 13 | 118 | 2 | 11 | 4  | 116 | 19 | 260 |
| 47,261 | 0 | 13 | 13 | 107 | 2 | 11 | 4  | 98  | 19 | 229 |

|        |   |    |    |     |   |    |   |     |    |     |
|--------|---|----|----|-----|---|----|---|-----|----|-----|
| 47,262 | 0 | 13 | 13 | 107 | 2 | 11 | 4 | 98  | 19 | 229 |
| 47,263 | 0 | 14 | 13 | 97  | 2 | 10 | 4 | 96  | 19 | 217 |
| 47,264 | 0 | 16 | 13 | 109 | 2 | 12 | 4 | 106 | 19 | 243 |
| 47,265 | 0 | 16 | 13 | 110 | 1 | 12 | 4 | 106 | 18 | 244 |
| 47,266 | 0 | 16 | 13 | 120 | 1 | 12 | 4 | 111 | 18 | 259 |
| 47,267 | 0 | 17 | 13 | 137 | 1 | 11 | 4 | 109 | 18 | 274 |
| 47,268 | 0 | 19 | 13 | 153 | 1 | 11 | 4 | 112 | 18 | 295 |
| 47,269 | 0 | 25 | 13 | 157 | 1 | 8  | 4 | 110 | 18 | 300 |
| 47,270 | 0 | 22 | 13 | 159 | 1 | 8  | 4 | 113 | 18 | 302 |
| 47,271 | 0 | 23 | 12 | 192 | 1 | 8  | 4 | 127 | 17 | 350 |
| 47,272 | 0 | 23 | 12 | 220 | 1 | 7  | 4 | 133 | 17 | 383 |
| 47,273 | 0 | 23 | 12 | 230 | 1 | 7  | 4 | 135 | 17 | 395 |
| 47,274 | 0 | 22 | 12 | 227 | 1 | 7  | 4 | 133 | 17 | 389 |
| 47,275 | 0 | 21 | 12 | 228 | 1 | 7  | 4 | 133 | 17 | 389 |
| 47,276 | 0 | 21 | 12 | 223 | 1 | 7  | 3 | 132 | 16 | 383 |
| 47,277 | 0 | 21 | 13 | 225 | 1 | 7  | 3 | 134 | 17 | 387 |
| 47,278 | 0 | 22 | 13 | 232 | 1 | 7  | 3 | 138 | 17 | 399 |
| 47,279 | 0 | 24 | 13 | 244 | 1 | 7  | 3 | 147 | 17 | 422 |
| 47,280 | 0 | 24 | 12 | 256 | 2 | 7  | 3 | 155 | 17 | 442 |
| 47,281 | 1 | 25 | 15 | 270 | 3 | 8  | 3 | 164 | 22 | 467 |
| 47,282 | 1 | 25 | 15 | 279 | 2 | 8  | 2 | 165 | 20 | 477 |
| 47,283 | 1 | 26 | 12 | 281 | 2 | 8  | 4 | 168 | 19 | 483 |
| 47,284 | 1 | 26 | 5  | 283 | 2 | 8  | 4 | 170 | 12 | 487 |
| 47,285 | 1 | 26 | 5  | 283 | 2 | 7  | 3 | 170 | 11 | 486 |
| 47,286 | 1 | 26 | 5  | 277 | 2 | 6  | 4 | 168 | 12 | 477 |
| 47,287 | 1 | 24 | 5  | 276 | 2 | 6  | 4 | 148 | 12 | 454 |
| 47,288 | 1 | 24 | 5  | 278 | 2 | 6  | 4 | 150 | 12 | 458 |
| 47,289 | 1 | 24 | 5  | 277 | 2 | 6  | 4 | 151 | 12 | 458 |
| 47,290 | 1 | 25 | 5  | 279 | 2 | 6  | 4 | 151 | 12 | 461 |
| 47,291 | 1 | 25 | 6  | 283 | 3 | 6  | 4 | 154 | 14 | 468 |
| 47,292 | 1 | 25 | 6  | 283 | 3 | 6  | 4 | 154 | 14 | 468 |
| 47,293 | 1 | 25 | 7  | 283 | 3 | 6  | 4 | 155 | 15 | 469 |
| 47,294 | 1 | 25 | 7  | 283 | 3 | 6  | 4 | 155 | 15 | 469 |
| 47,295 | 1 | 25 | 7  | 284 | 3 | 6  | 5 | 156 | 16 | 471 |
| 47,296 | 1 | 25 | 7  | 284 | 3 | 6  | 4 | 156 | 15 | 471 |
| 47,297 | 1 | 24 | 8  | 284 | 3 | 5  | 4 | 156 | 16 | 469 |
| 47,298 | 1 | 24 | 8  | 286 | 3 | 5  | 4 | 156 | 16 | 471 |
| 47,299 | 1 | 24 | 8  | 286 | 3 | 5  | 4 | 154 | 16 | 469 |
| 47,300 | 3 | 24 | 9  | 286 | 3 | 5  | 4 | 153 | 19 | 468 |
| 47,301 | 3 | 24 | 9  | 286 | 3 | 5  | 4 | 154 | 19 | 469 |
| 47,302 | 3 | 24 | 9  | 286 | 3 | 5  | 4 | 154 | 19 | 469 |

|        |   |    |    |     |   |   |    |     |    |     |
|--------|---|----|----|-----|---|---|----|-----|----|-----|
| 47,303 | 3 | 24 | 8  | 286 | 3 | 5 | 4  | 154 | 18 | 469 |
| 47,304 | 4 | 23 | 8  | 280 | 3 | 5 | 4  | 152 | 19 | 460 |
| 47,305 | 4 | 23 | 8  | 280 | 3 | 5 | 4  | 152 | 19 | 460 |
| 47,306 | 4 | 23 | 8  | 280 | 3 | 6 | 4  | 153 | 19 | 462 |
| 47,307 | 4 | 23 | 8  | 277 | 3 | 6 | 4  | 147 | 19 | 453 |
| 47,308 | 4 | 22 | 9  | 276 | 3 | 6 | 4  | 147 | 20 | 451 |
| 47,309 | 4 | 22 | 9  | 276 | 3 | 6 | 4  | 147 | 20 | 451 |
| 47,310 | 4 | 22 | 9  | 274 | 3 | 7 | 4  | 147 | 20 | 450 |
| 47,311 | 4 | 22 | 9  | 274 | 3 | 7 | 4  | 147 | 20 | 450 |
| 47,312 | 4 | 23 | 9  | 274 | 3 | 7 | 4  | 147 | 20 | 451 |
| 47,313 | 4 | 23 | 14 | 275 | 3 | 7 | 6  | 149 | 27 | 454 |
| 47,314 | 4 | 22 | 14 | 275 | 3 | 7 | 6  | 149 | 27 | 453 |
| 47,315 | 5 | 21 | 15 | 262 | 3 | 5 | 10 | 139 | 33 | 427 |
| 47,316 | 8 | 20 | 22 | 232 | 3 | 5 | 14 | 123 | 47 | 380 |
| 47,317 | 8 | 20 | 24 | 233 | 3 | 5 | 17 | 123 | 52 | 381 |
| 47,318 | 8 | 20 | 24 | 234 | 3 | 5 | 17 | 122 | 52 | 381 |
| 47,319 | 8 | 18 | 29 | 217 | 3 | 5 | 28 | 119 | 68 | 359 |
| 47,320 | 8 | 11 | 31 | 165 | 3 | 3 | 28 | 80  | 70 | 259 |
| 47,321 | 8 | 11 | 31 | 166 | 3 | 3 | 28 | 80  | 70 | 260 |
| 47,322 | 8 | 9  | 32 | 101 | 3 | 3 | 28 | 58  | 71 | 171 |
| 47,323 | 8 | 9  | 32 | 86  | 3 | 3 | 28 | 56  | 71 | 154 |
| 47,324 | 9 | 9  | 32 | 87  | 3 | 3 | 28 | 56  | 72 | 155 |
| 47,325 | 9 | 9  | 33 | 86  | 4 | 3 | 29 | 57  | 75 | 155 |
| 47,326 | 9 | 9  | 33 | 92  | 4 | 3 | 29 | 60  | 75 | 164 |
| 47,327 | 9 | 9  | 34 | 97  | 5 | 3 | 29 | 61  | 77 | 170 |
| 47,328 | 9 | 9  | 34 | 97  | 5 | 3 | 29 | 59  | 77 | 168 |
| 47,329 | 9 | 6  | 34 | 79  | 5 | 3 | 29 | 45  | 77 | 133 |
| 47,330 | 9 | 5  | 36 | 58  | 5 | 2 | 29 | 28  | 79 | 93  |
| 47,331 | 9 | 8  | 38 | 72  | 4 | 2 | 29 | 32  | 80 | 114 |
| 47,332 | 8 | 9  | 35 | 82  | 3 | 2 | 29 | 33  | 75 | 126 |
| 47,333 | 8 | 9  | 35 | 75  | 3 | 2 | 29 | 32  | 75 | 118 |
| 47,334 | 8 | 8  | 36 | 72  | 3 | 2 | 27 | 27  | 74 | 109 |
| 47,335 | 8 | 8  | 36 | 72  | 3 | 2 | 26 | 27  | 73 | 109 |
| 47,336 | 8 | 8  | 36 | 72  | 3 | 2 | 25 | 27  | 72 | 109 |
| 47,337 | 9 | 7  | 36 | 67  | 3 | 2 | 27 | 25  | 75 | 101 |
| 47,338 | 9 | 7  | 36 | 67  | 3 | 2 | 27 | 25  | 75 | 101 |
| 47,339 | 9 | 6  | 36 | 63  | 3 | 2 | 27 | 22  | 75 | 93  |
| 47,340 | 9 | 6  | 36 | 63  | 3 | 2 | 27 | 22  | 75 | 93  |
| 47,341 | 9 | 6  | 36 | 63  | 3 | 2 | 27 | 22  | 75 | 93  |
| 47,342 | 9 | 6  | 35 | 60  | 2 | 2 | 27 | 19  | 73 | 87  |
| 47,343 | 9 | 6  | 34 | 61  | 2 | 2 | 27 | 18  | 72 | 87  |

|        |   |    |    |     |   |    |    |     |    |     |
|--------|---|----|----|-----|---|----|----|-----|----|-----|
| 47,344 | 9 | 6  | 34 | 61  | 2 | 2  | 27 | 19  | 72 | 88  |
| 47,345 | 9 | 6  | 34 | 61  | 2 | 2  | 27 | 18  | 72 | 87  |
| 47,346 | 9 | 6  | 34 | 63  | 2 | 2  | 27 | 19  | 72 | 90  |
| 47,347 | 9 | 6  | 33 | 64  | 2 | 2  | 27 | 19  | 71 | 91  |
| 47,348 | 9 | 7  | 33 | 64  | 2 | 2  | 27 | 19  | 71 | 92  |
| 47,349 | 9 | 8  | 33 | 67  | 2 | 2  | 27 | 27  | 71 | 104 |
| 47,350 | 9 | 8  | 33 | 68  | 2 | 2  | 27 | 27  | 71 | 105 |
| 47,351 | 7 | 8  | 32 | 70  | 2 | 2  | 27 | 28  | 68 | 108 |
| 47,352 | 7 | 20 | 32 | 89  | 2 | 3  | 27 | 38  | 68 | 150 |
| 47,353 | 7 | 20 | 32 | 101 | 2 | 3  | 27 | 39  | 68 | 163 |
| 47,354 | 8 | 20 | 32 | 102 | 2 | 3  | 27 | 40  | 69 | 165 |
| 47,355 | 7 | 20 | 32 | 102 | 2 | 3  | 27 | 40  | 68 | 165 |
| 47,356 | 7 | 20 | 32 | 104 | 2 | 2  | 27 | 42  | 68 | 168 |
| 47,357 | 7 | 20 | 32 | 104 | 2 | 2  | 27 | 42  | 68 | 168 |
| 47,358 | 8 | 20 | 31 | 104 | 2 | 2  | 27 | 42  | 68 | 168 |
| 47,359 | 8 | 20 | 31 | 104 | 2 | 3  | 27 | 43  | 68 | 170 |
| 47,360 | 8 | 20 | 31 | 105 | 2 | 3  | 27 | 43  | 68 | 171 |
| 47,361 | 9 | 22 | 33 | 113 | 2 | 3  | 29 | 50  | 73 | 188 |
| 47,362 | 9 | 22 | 33 | 114 | 2 | 4  | 29 | 54  | 73 | 194 |
| 47,363 | 9 | 24 | 33 | 154 | 2 | 5  | 29 | 103 | 73 | 286 |
| 47,364 | 9 | 27 | 28 | 201 | 2 | 7  | 27 | 129 | 66 | 364 |
| 47,365 | 8 | 26 | 27 | 205 | 2 | 7  | 22 | 130 | 59 | 368 |
| 47,366 | 8 | 28 | 27 | 222 | 2 | 7  | 22 | 132 | 59 | 389 |
| 47,367 | 5 | 31 | 20 | 237 | 2 | 7  | 18 | 143 | 45 | 418 |
| 47,368 | 5 | 31 | 18 | 248 | 2 | 8  | 16 | 147 | 41 | 434 |
| 47,369 | 5 | 35 | 14 | 257 | 2 | 9  | 9  | 154 | 30 | 455 |
| 47,370 | 5 | 35 | 13 | 257 | 2 | 9  | 5  | 155 | 25 | 456 |
| 47,371 | 5 | 35 | 11 | 261 | 2 | 9  | 5  | 158 | 23 | 463 |
| 47,372 | 5 | 37 | 11 | 270 | 3 | 10 | 5  | 159 | 24 | 476 |
| 47,373 | 5 | 39 | 10 | 270 | 3 | 10 | 5  | 160 | 23 | 479 |
| 47,374 | 5 | 39 | 10 | 274 | 3 | 11 | 5  | 161 | 23 | 485 |
| 47,375 | 4 | 39 | 10 | 273 | 3 | 11 | 5  | 162 | 22 | 485 |
| 47,376 | 4 | 42 | 10 | 275 | 2 | 11 | 4  | 160 | 20 | 488 |
| 47,377 | 4 | 42 | 10 | 275 | 2 | 11 | 4  | 160 | 20 | 488 |
| 47,378 | 4 | 42 | 10 | 272 | 1 | 12 | 6  | 159 | 21 | 485 |
| 47,379 | 4 | 43 | 9  | 274 | 1 | 12 | 6  | 159 | 20 | 488 |
| 47,380 | 4 | 43 | 9  | 274 | 1 | 12 | 6  | 159 | 20 | 488 |
| 47,381 | 4 | 39 | 10 | 243 | 1 | 12 | 6  | 154 | 21 | 448 |
| 47,382 | 4 | 39 | 9  | 246 | 2 | 12 | 6  | 154 | 21 | 451 |
| 47,383 | 4 | 39 | 9  | 247 | 2 | 12 | 6  | 154 | 21 | 452 |
| 47,384 | 4 | 39 | 21 | 248 | 2 | 12 | 7  | 155 | 34 | 454 |

|        |    |    |    |     |   |    |    |     |    |     |
|--------|----|----|----|-----|---|----|----|-----|----|-----|
| 47,385 | 6  | 39 | 20 | 248 | 2 | 12 | 7  | 155 | 35 | 454 |
| 47,386 | 11 | 39 | 28 | 249 | 2 | 12 | 12 | 156 | 53 | 456 |
| 47,387 | 11 | 39 | 29 | 249 | 2 | 12 | 12 | 156 | 54 | 456 |
| 47,388 | 10 | 39 | 30 | 249 | 2 | 13 | 10 | 156 | 52 | 457 |
| 47,389 | 10 | 39 | 30 | 249 | 2 | 13 | 11 | 156 | 53 | 457 |
| 47,390 | 10 | 39 | 30 | 249 | 2 | 13 | 11 | 157 | 53 | 458 |
| 47,391 | 10 | 39 | 30 | 248 | 2 | 13 | 11 | 157 | 53 | 457 |
| 47,392 | 10 | 39 | 30 | 250 | 2 | 13 | 11 | 157 | 53 | 459 |
| 47,393 | 10 | 39 | 30 | 250 | 2 | 13 | 11 | 157 | 53 | 459 |
| 47,394 | 10 | 39 | 31 | 249 | 2 | 13 | 11 | 157 | 54 | 458 |
| 47,395 | 10 | 39 | 31 | 249 | 2 | 13 | 11 | 156 | 54 | 457 |
| 47,396 | 10 | 39 | 31 | 245 | 2 | 13 | 11 | 155 | 54 | 452 |
| 47,397 | 10 | 39 | 31 | 245 | 2 | 13 | 11 | 155 | 54 | 452 |
| 47,398 | 10 | 39 | 31 | 244 | 2 | 13 | 11 | 155 | 54 | 451 |
| 47,399 | 10 | 37 | 31 | 239 | 2 | 13 | 11 | 147 | 54 | 436 |
| 47,400 | 10 | 37 | 31 | 239 | 2 | 13 | 11 | 147 | 54 | 436 |
| 47,401 | 10 | 37 | 36 | 236 | 2 | 13 | 12 | 146 | 60 | 432 |
| 47,402 | 10 | 25 | 36 | 200 | 2 | 12 | 12 | 129 | 60 | 366 |
| 47,403 | 10 | 25 | 36 | 200 | 2 | 12 | 12 | 130 | 60 | 367 |
| 47,404 | 10 | 25 | 36 | 200 | 2 | 12 | 12 | 130 | 60 | 367 |
| 47,405 | 9  | 25 | 36 | 200 | 2 | 12 | 12 | 130 | 59 | 367 |
| 47,406 | 9  | 25 | 36 | 207 | 2 | 12 | 12 | 131 | 59 | 375 |
| 47,407 | 9  | 28 | 36 | 224 | 2 | 14 | 12 | 138 | 59 | 404 |
| 47,408 | 9  | 29 | 36 | 233 | 2 | 14 | 12 | 143 | 59 | 419 |
| 47,409 | 9  | 29 | 36 | 237 | 2 | 14 | 12 | 145 | 59 | 425 |
| 47,410 | 9  | 29 | 37 | 242 | 2 | 13 | 12 | 145 | 60 | 429 |
| 47,411 | 8  | 21 | 35 | 148 | 2 | 8  | 11 | 56  | 56 | 233 |
| 47,412 | 8  | 21 | 35 | 149 | 2 | 8  | 10 | 56  | 55 | 234 |
| 47,413 | 8  | 21 | 35 | 150 | 2 | 8  | 10 | 56  | 55 | 235 |
| 47,414 | 8  | 21 | 35 | 150 | 2 | 8  | 10 | 56  | 55 | 235 |
| 47,415 | 8  | 21 | 36 | 150 | 2 | 8  | 11 | 56  | 57 | 235 |
| 47,416 | 8  | 21 | 36 | 144 | 2 | 8  | 11 | 56  | 57 | 229 |
| 47,417 | 10 | 19 | 37 | 130 | 2 | 8  | 12 | 57  | 61 | 214 |
| 47,418 | 10 | 16 | 37 | 116 | 2 | 8  | 12 | 46  | 61 | 186 |
| 47,419 | 10 | 16 | 37 | 104 | 2 | 7  | 12 | 43  | 61 | 170 |
| 47,420 | 11 | 12 | 38 | 95  | 2 | 6  | 12 | 36  | 63 | 149 |
| 47,421 | 11 | 12 | 38 | 95  | 2 | 6  | 13 | 35  | 64 | 148 |
| 47,422 | 11 | 11 | 38 | 82  | 2 | 5  | 13 | 35  | 64 | 133 |
| 47,423 | 11 | 11 | 38 | 86  | 1 | 5  | 13 | 35  | 63 | 137 |
| 47,424 | 11 | 9  | 40 | 95  | 1 | 5  | 15 | 38  | 67 | 147 |
| 47,425 | 11 | 9  | 40 | 99  | 1 | 4  | 15 | 43  | 67 | 155 |

|        |    |    |    |     |   |    |    |     |    |     |
|--------|----|----|----|-----|---|----|----|-----|----|-----|
| 47,426 | 11 | 10 | 39 | 102 | 1 | 4  | 15 | 43  | 66 | 159 |
| 47,427 | 11 | 7  | 39 | 97  | 1 | 4  | 15 | 41  | 66 | 149 |
| 47,428 | 11 | 7  | 40 | 93  | 1 | 3  | 14 | 42  | 66 | 145 |
| 47,429 | 11 | 6  | 40 | 91  | 1 | 3  | 13 | 42  | 65 | 142 |
| 47,430 | 11 | 6  | 40 | 91  | 1 | 3  | 13 | 42  | 65 | 142 |
| 47,431 | 11 | 7  | 39 | 98  | 1 | 4  | 13 | 46  | 64 | 155 |
| 47,432 | 11 | 7  | 37 | 125 | 1 | 5  | 14 | 52  | 63 | 189 |
| 47,433 | 11 | 7  | 36 | 126 | 0 | 5  | 14 | 58  | 61 | 196 |
| 47,434 | 11 | 7  | 36 | 139 | 0 | 5  | 14 | 66  | 61 | 217 |
| 47,435 | 11 | 8  | 24 | 145 | 0 | 5  | 13 | 68  | 48 | 226 |
| 47,436 | 9  | 8  | 24 | 147 | 0 | 5  | 13 | 71  | 46 | 231 |
| 47,437 | 4  | 9  | 16 | 152 | 0 | 5  | 8  | 74  | 28 | 240 |
| 47,438 | 4  | 9  | 15 | 153 | 0 | 5  | 8  | 74  | 27 | 241 |
| 47,439 | 4  | 9  | 14 | 155 | 0 | 4  | 8  | 74  | 26 | 242 |
| 47,440 | 4  | 9  | 14 | 163 | 0 | 4  | 7  | 74  | 25 | 250 |
| 47,441 | 4  | 9  | 14 | 163 | 0 | 4  | 7  | 75  | 25 | 251 |
| 47,442 | 4  | 9  | 14 | 163 | 0 | 4  | 7  | 75  | 25 | 251 |
| 47,443 | 4  | 9  | 15 | 161 | 0 | 4  | 12 | 76  | 31 | 250 |
| 47,444 | 4  | 9  | 15 | 161 | 0 | 4  | 12 | 76  | 31 | 250 |
| 47,445 | 4  | 10 | 14 | 161 | 0 | 4  | 12 | 84  | 30 | 259 |
| 47,446 | 4  | 10 | 14 | 163 | 0 | 4  | 12 | 90  | 30 | 267 |
| 47,447 | 4  | 10 | 14 | 170 | 0 | 4  | 12 | 94  | 30 | 278 |
| 47,448 | 4  | 27 | 14 | 234 | 0 | 7  | 12 | 139 | 30 | 407 |
| 47,449 | 4  | 35 | 14 | 272 | 0 | 11 | 12 | 164 | 30 | 482 |
| 47,450 | 4  | 42 | 14 | 309 | 0 | 14 | 12 | 184 | 30 | 549 |
| 47,451 | 4  | 54 | 14 | 357 | 0 | 15 | 12 | 228 | 30 | 654 |
| 47,452 | 4  | 55 | 9  | 361 | 0 | 15 | 11 | 228 | 24 | 659 |
| 47,453 | 4  | 56 | 9  | 369 | 0 | 16 | 11 | 234 | 24 | 675 |
| 47,454 | 4  | 56 | 9  | 373 | 0 | 16 | 11 | 236 | 24 | 681 |
| 47,455 | 4  | 56 | 9  | 394 | 0 | 16 | 11 | 237 | 24 | 703 |
| 47,456 | 4  | 57 | 9  | 396 | 0 | 16 | 11 | 237 | 24 | 706 |
| 47,457 | 4  | 57 | 9  | 389 | 0 | 16 | 12 | 236 | 25 | 698 |
| 47,458 | 4  | 53 | 9  | 363 | 0 | 14 | 12 | 224 | 25 | 654 |
| 47,459 | 4  | 53 | 9  | 363 | 0 | 14 | 12 | 224 | 25 | 654 |
| 47,460 | 3  | 53 | 9  | 355 | 0 | 14 | 12 | 221 | 24 | 643 |
| 47,461 | 3  | 53 | 8  | 355 | 0 | 14 | 12 | 221 | 23 | 643 |
| 47,462 | 3  | 53 | 8  | 354 | 0 | 14 | 12 | 221 | 23 | 642 |
| 47,463 | 3  | 53 | 8  | 354 | 0 | 14 | 12 | 221 | 23 | 642 |
| 47,464 | 3  | 53 | 8  | 353 | 0 | 14 | 12 | 220 | 23 | 640 |
| 47,465 | 3  | 53 | 7  | 352 | 0 | 14 | 11 | 220 | 21 | 639 |
| 47,466 | 3  | 53 | 7  | 352 | 0 | 14 | 11 | 220 | 21 | 639 |

|        |   |    |    |     |   |    |    |     |    |     |
|--------|---|----|----|-----|---|----|----|-----|----|-----|
| 47,467 | 3 | 53 | 9  | 349 | 0 | 14 | 10 | 216 | 22 | 632 |
| 47,468 | 1 | 53 | 8  | 349 | 0 | 14 | 10 | 217 | 19 | 633 |
| 47,469 | 1 | 53 | 11 | 348 | 0 | 14 | 11 | 217 | 23 | 632 |
| 47,470 | 0 | 53 | 12 | 348 | 0 | 14 | 11 | 216 | 23 | 631 |
| 47,471 | 0 | 53 | 16 | 347 | 0 | 14 | 13 | 216 | 29 | 630 |
| 47,472 | 0 | 52 | 16 | 345 | 0 | 14 | 12 | 212 | 28 | 623 |
| 47,473 | 0 | 52 | 17 | 341 | 0 | 14 | 13 | 212 | 30 | 619 |
| 47,474 | 0 | 52 | 16 | 341 | 0 | 14 | 12 | 212 | 28 | 619 |
| 47,475 | 0 | 52 | 15 | 322 | 0 | 14 | 11 | 202 | 26 | 590 |
| 47,476 | 0 | 52 | 15 | 322 | 0 | 14 | 11 | 202 | 26 | 590 |
| 47,477 | 0 | 51 | 15 | 318 | 0 | 14 | 11 | 201 | 26 | 584 |
| 47,478 | 0 | 51 | 16 | 318 | 0 | 14 | 12 | 200 | 28 | 583 |
| 47,479 | 1 | 51 | 14 | 318 | 0 | 14 | 12 | 200 | 27 | 583 |
| 47,480 | 2 | 51 | 20 | 318 | 1 | 14 | 13 | 199 | 36 | 582 |
| 47,481 | 4 | 50 | 22 | 315 | 1 | 13 | 17 | 196 | 44 | 574 |
| 47,482 | 4 | 50 | 22 | 316 | 1 | 13 | 17 | 197 | 44 | 576 |
| 47,483 | 4 | 50 | 22 | 289 | 1 | 12 | 16 | 191 | 43 | 542 |
| 47,484 | 4 | 50 | 25 | 285 | 1 | 12 | 18 | 185 | 48 | 532 |
| 47,485 | 4 | 50 | 25 | 272 | 1 | 12 | 18 | 177 | 48 | 511 |
| 47,486 | 4 | 49 | 25 | 263 | 1 | 12 | 18 | 173 | 48 | 497 |
| 47,487 | 4 | 48 | 25 | 255 | 1 | 12 | 18 | 169 | 48 | 484 |
| 47,488 | 4 | 48 | 26 | 257 | 1 | 12 | 18 | 170 | 49 | 487 |
| 47,489 | 4 | 48 | 26 | 260 | 1 | 12 | 18 | 170 | 49 | 490 |
| 47,490 | 4 | 48 | 26 | 272 | 1 | 12 | 18 | 181 | 49 | 513 |
| 47,491 | 4 | 48 | 26 | 268 | 1 | 12 | 18 | 181 | 49 | 509 |
| 47,492 | 4 | 48 | 26 | 271 | 1 | 12 | 18 | 181 | 49 | 512 |
| 47,493 | 4 | 48 | 25 | 280 | 1 | 14 | 16 | 194 | 46 | 536 |
| 47,494 | 4 | 49 | 25 | 285 | 1 | 14 | 13 | 199 | 43 | 547 |
| 47,495 | 4 | 50 | 25 | 290 | 1 | 14 | 13 | 204 | 43 | 558 |
| 47,496 | 4 | 49 | 25 | 294 | 1 | 14 | 13 | 193 | 43 | 550 |
| 47,497 | 4 | 49 | 25 | 300 | 1 | 14 | 13 | 201 | 43 | 564 |
| 47,498 | 4 | 49 | 25 | 301 | 1 | 14 | 13 | 198 | 43 | 562 |
| 47,499 | 4 | 17 | 25 | 165 | 1 | 4  | 14 | 109 | 44 | 295 |
| 47,500 | 4 | 18 | 25 | 170 | 1 | 4  | 14 | 142 | 44 | 334 |
| 47,501 | 4 | 18 | 25 | 173 | 1 | 5  | 14 | 146 | 44 | 342 |
| 47,502 | 4 | 10 | 25 | 136 | 2 | 7  | 14 | 130 | 45 | 283 |
| 47,503 | 4 | 9  | 25 | 130 | 2 | 7  | 14 | 152 | 45 | 298 |
| 47,504 | 4 | 9  | 25 | 130 | 2 | 7  | 14 | 152 | 45 | 298 |
| 47,505 | 4 | 9  | 26 | 133 | 2 | 7  | 16 | 156 | 48 | 305 |
| 47,506 | 4 | 17 | 26 | 213 | 2 | 13 | 16 | 229 | 48 | 472 |
| 47,507 | 4 | 17 | 26 | 211 | 2 | 13 | 15 | 230 | 47 | 471 |

|        |   |    |    |     |   |    |    |     |    |       |
|--------|---|----|----|-----|---|----|----|-----|----|-------|
| 47,508 | 4 | 17 | 26 | 213 | 2 | 13 | 15 | 233 | 47 | 476   |
| 47,509 | 4 | 17 | 26 | 213 | 2 | 13 | 15 | 233 | 47 | 476   |
| 47,510 | 4 | 17 | 26 | 216 | 2 | 13 | 15 | 235 | 47 | 481   |
| 47,511 | 4 | 17 | 26 | 216 | 2 | 13 | 15 | 236 | 47 | 482   |
| 47,512 | 4 | 17 | 26 | 216 | 2 | 13 | 15 | 236 | 47 | 482   |
| 47,513 | 4 | 19 | 26 | 222 | 2 | 13 | 15 | 247 | 47 | 501   |
| 47,514 | 4 | 19 | 26 | 225 | 2 | 13 | 15 | 249 | 47 | 506   |
| 47,515 | 4 | 19 | 26 | 233 | 2 | 16 | 15 | 275 | 47 | 543   |
| 47,516 | 4 | 20 | 26 | 239 | 2 | 16 | 15 | 280 | 47 | 555   |
| 47,517 | 4 | 20 | 26 | 245 | 2 | 17 | 15 | 289 | 47 | 571   |
| 47,518 | 4 | 23 | 24 | 270 | 2 | 24 | 15 | 356 | 45 | 673   |
| 47,519 | 4 | 24 | 24 | 298 | 2 | 27 | 14 | 404 | 44 | 753   |
| 47,520 | 4 | 29 | 21 | 471 | 2 | 33 | 14 | 483 | 41 | 1,016 |
| 47,521 | 4 | 29 | 20 | 479 | 2 | 34 | 14 | 496 | 40 | 1,038 |
| 47,522 | 4 | 31 | 15 | 507 | 2 | 35 | 12 | 506 | 33 | 1,079 |
| 47,523 | 4 | 31 | 15 | 517 | 2 | 35 | 12 | 513 | 33 | 1,096 |
| 47,524 | 4 | 32 | 14 | 517 | 2 | 35 | 11 | 514 | 31 | 1,098 |
| 47,525 | 4 | 32 | 14 | 519 | 2 | 35 | 11 | 514 | 31 | 1,100 |
| 47,526 | 4 | 32 | 14 | 519 | 2 | 35 | 11 | 517 | 31 | 1,103 |
| 47,527 | 4 | 32 | 14 | 524 | 2 | 35 | 11 | 519 | 31 | 1,110 |
| 47,528 | 4 | 32 | 14 | 524 | 2 | 35 | 11 | 519 | 31 | 1,110 |
| 47,529 | 4 | 32 | 14 | 530 | 2 | 36 | 12 | 525 | 32 | 1,123 |
| 47,530 | 3 | 32 | 14 | 530 | 2 | 36 | 12 | 525 | 31 | 1,123 |
| 47,531 | 2 | 32 | 8  | 530 | 1 | 36 | 13 | 525 | 24 | 1,123 |
| 47,532 | 0 | 32 | 6  | 525 | 1 | 36 | 9  | 524 | 16 | 1,117 |
| 47,533 | 0 | 32 | 6  | 525 | 1 | 36 | 9  | 524 | 16 | 1,117 |
| 47,534 | 0 | 32 | 3  | 525 | 1 | 36 | 7  | 524 | 11 | 1,117 |
| 47,535 | 0 | 32 | 3  | 525 | 1 | 36 | 7  | 524 | 11 | 1,117 |
| 47,536 | 0 | 32 | 3  | 525 | 1 | 36 | 7  | 524 | 11 | 1,117 |
| 47,537 | 0 | 32 | 3  | 525 | 1 | 36 | 7  | 524 | 11 | 1,117 |
| 47,538 | 0 | 32 | 3  | 520 | 1 | 36 | 7  | 521 | 11 | 1,109 |
| 47,539 | 0 | 32 | 2  | 523 | 1 | 37 | 7  | 526 | 10 | 1,118 |
| 47,540 | 0 | 32 | 2  | 523 | 1 | 37 | 7  | 526 | 10 | 1,118 |
| 47,541 | 0 | 32 | 3  | 509 | 1 | 37 | 7  | 515 | 11 | 1,093 |
| 47,542 | 0 | 32 | 4  | 502 | 2 | 37 | 8  | 513 | 14 | 1,084 |
| 47,543 | 0 | 32 | 4  | 493 | 2 | 35 | 9  | 500 | 15 | 1,060 |
| 47,544 | 0 | 32 | 4  | 493 | 2 | 35 | 9  | 500 | 15 | 1,060 |
| 47,545 | 0 | 31 | 4  | 488 | 2 | 35 | 9  | 492 | 15 | 1,046 |
| 47,546 | 0 | 30 | 4  | 483 | 2 | 35 | 9  | 487 | 15 | 1,035 |
| 47,547 | 0 | 30 | 8  | 477 | 2 | 35 | 9  | 485 | 19 | 1,027 |
| 47,548 | 0 | 30 | 9  | 463 | 2 | 35 | 9  | 476 | 20 | 1,004 |



|        |   |    |    |     |   |    |    |     |    |       |
|--------|---|----|----|-----|---|----|----|-----|----|-------|
| 47,549 | 0 | 30 | 16 | 460 | 2 | 35 | 9  | 475 | 27 | 1,000 |
| 47,550 | 0 | 30 | 16 | 462 | 2 | 35 | 8  | 475 | 26 | 1,002 |
| 47,551 | 0 | 29 | 21 | 457 | 2 | 35 | 8  | 442 | 31 | 963   |
| 47,552 | 0 | 29 | 21 | 453 | 2 | 34 | 8  | 438 | 31 | 954   |
| 47,553 | 0 | 25 | 23 | 443 | 1 | 31 | 8  | 412 | 32 | 911   |
| 47,554 | 0 | 24 | 23 | 440 | 1 | 30 | 8  | 387 | 32 | 881   |
| 47,555 | 0 | 24 | 23 | 440 | 1 | 30 | 7  | 389 | 31 | 883   |
| 47,556 | 0 | 24 | 22 | 433 | 1 | 30 | 6  | 382 | 29 | 869   |
| 47,557 | 0 | 16 | 22 | 332 | 1 | 24 | 7  | 308 | 30 | 680   |
| 47,558 | 0 | 15 | 22 | 330 | 1 | 24 | 7  | 304 | 30 | 673   |
| 47,559 | 0 | 15 | 22 | 330 | 1 | 24 | 7  | 304 | 30 | 673   |
| 47,560 | 0 | 15 | 22 | 330 | 1 | 24 | 7  | 305 | 30 | 674   |
| 47,561 | 0 | 15 | 22 | 327 | 1 | 24 | 7  | 303 | 30 | 669   |
| 47,562 | 0 | 15 | 22 | 327 | 1 | 24 | 7  | 302 | 30 | 668   |
| 47,563 | 0 | 15 | 26 | 327 | 1 | 24 | 10 | 302 | 37 | 668   |
| 47,564 | 2 | 13 | 26 | 317 | 1 | 24 | 11 | 289 | 40 | 643   |
| 47,565 | 2 | 13 | 26 | 310 | 1 | 21 | 11 | 263 | 40 | 607   |
| 47,566 | 2 | 14 | 26 | 310 | 1 | 21 | 11 | 267 | 40 | 612   |
| 47,567 | 2 | 13 | 27 | 309 | 1 | 21 | 11 | 267 | 41 | 610   |
| 47,568 | 2 | 15 | 27 | 329 | 1 | 20 | 11 | 272 | 41 | 636   |
| 47,569 | 2 | 12 | 28 | 315 | 1 | 13 | 12 | 205 | 43 | 545   |
| 47,570 | 2 | 11 | 28 | 289 | 1 | 11 | 12 | 157 | 43 | 468   |
| 47,571 | 2 | 7  | 28 | 117 | 1 | 5  | 12 | 79  | 43 | 208   |
| 47,572 | 2 | 5  | 28 | 81  | 1 | 3  | 12 | 56  | 43 | 145   |
| 47,573 | 2 | 5  | 28 | 83  | 1 | 3  | 12 | 56  | 43 | 147   |
| 47,574 | 2 | 5  | 28 | 75  | 1 | 3  | 12 | 50  | 43 | 133   |
| 47,575 | 2 | 4  | 30 | 90  | 1 | 5  | 12 | 57  | 45 | 156   |
| 47,576 | 2 | 4  | 30 | 107 | 1 | 5  | 12 | 65  | 45 | 181   |
| 47,577 | 2 | 4  | 30 | 110 | 1 | 6  | 12 | 64  | 45 | 184   |
| 47,578 | 2 | 7  | 30 | 111 | 1 | 6  | 12 | 76  | 45 | 200   |
| 47,579 | 2 | 8  | 30 | 133 | 1 | 7  | 11 | 81  | 44 | 229   |
| 47,580 | 2 | 9  | 34 | 164 | 1 | 9  | 11 | 105 | 48 | 287   |
| 47,581 | 2 | 9  | 34 | 167 | 1 | 9  | 11 | 107 | 48 | 292   |
| 47,582 | 2 | 9  | 34 | 169 | 1 | 9  | 9  | 108 | 46 | 295   |
| 47,583 | 2 | 9  | 34 | 169 | 1 | 9  | 9  | 109 | 46 | 296   |
| 47,584 | 2 | 9  | 35 | 169 | 1 | 9  | 9  | 109 | 47 | 296   |
| 47,585 | 2 | 9  | 35 | 169 | 1 | 9  | 9  | 109 | 47 | 296   |
| 47,586 | 2 | 9  | 35 | 170 | 1 | 9  | 9  | 110 | 47 | 298   |
| 47,587 | 2 | 9  | 35 | 169 | 1 | 9  | 9  | 110 | 47 | 297   |
| 47,588 | 2 | 9  | 35 | 169 | 1 | 9  | 9  | 110 | 47 | 297   |
| 47,589 | 2 | 9  | 35 | 170 | 1 | 9  | 9  | 110 | 47 | 298   |

|        |   |    |    |     |   |    |    |     |     |     |
|--------|---|----|----|-----|---|----|----|-----|-----|-----|
| 47,590 | 2 | 9  | 35 | 167 | 1 | 8  | 10 | 105 | 48  | 289 |
| 47,591 | 2 | 9  | 34 | 167 | 1 | 8  | 10 | 105 | 47  | 289 |
| 47,592 | 2 | 9  | 34 | 167 | 1 | 8  | 10 | 105 | 47  | 289 |
| 47,593 | 2 | 9  | 33 | 167 | 0 | 8  | 9  | 106 | 44  | 290 |
| 47,594 | 2 | 9  | 33 | 167 | 0 | 8  | 9  | 106 | 44  | 290 |
| 47,595 | 2 | 9  | 34 | 169 | 0 | 8  | 10 | 107 | 46  | 293 |
| 47,596 | 2 | 10 | 34 | 173 | 0 | 8  | 10 | 115 | 46  | 306 |
| 47,597 | 2 | 12 | 34 | 189 | 0 | 8  | 12 | 122 | 48  | 331 |
| 47,598 | 2 | 13 | 48 | 198 | 1 | 9  | 19 | 132 | 70  | 352 |
| 47,599 | 7 | 15 | 65 | 205 | 4 | 9  | 43 | 142 | 119 | 371 |
| 47,600 | 7 | 15 | 62 | 205 | 6 | 10 | 47 | 144 | 122 | 374 |
| 47,601 | 7 | 15 | 62 | 214 | 6 | 10 | 47 | 150 | 122 | 389 |
| 47,602 | 7 | 21 | 57 | 251 | 6 | 12 | 47 | 171 | 117 | 455 |
| 47,603 | 7 | 21 | 55 | 252 | 6 | 12 | 47 | 171 | 115 | 456 |
| 47,604 | 7 | 21 | 55 | 256 | 6 | 13 | 47 | 173 | 115 | 463 |
| 47,605 | 7 | 21 | 55 | 253 | 6 | 13 | 47 | 169 | 115 | 456 |
| 47,606 | 7 | 21 | 55 | 253 | 6 | 13 | 46 | 169 | 114 | 456 |
| 47,607 | 7 | 21 | 55 | 254 | 6 | 13 | 46 | 171 | 114 | 459 |
| 47,608 | 7 | 21 | 55 | 255 | 6 | 13 | 46 | 171 | 114 | 460 |
| 47,609 | 7 | 22 | 55 | 259 | 6 | 14 | 47 | 177 | 115 | 472 |
| 47,610 | 7 | 22 | 56 | 260 | 6 | 14 | 47 | 177 | 116 | 473 |
| 47,611 | 8 | 22 | 56 | 259 | 6 | 14 | 47 | 176 | 117 | 471 |
| 47,612 | 8 | 22 | 56 | 259 | 6 | 14 | 47 | 176 | 117 | 471 |
| 47,613 | 8 | 22 | 52 | 259 | 6 | 14 | 44 | 176 | 110 | 471 |
| 47,614 | 7 | 22 | 52 | 259 | 6 | 14 | 42 | 176 | 107 | 471 |
| 47,615 | 6 | 22 | 53 | 258 | 6 | 14 | 43 | 176 | 108 | 470 |
| 47,616 | 6 | 22 | 53 | 257 | 6 | 14 | 43 | 176 | 108 | 469 |
| 47,617 | 6 | 21 | 52 | 257 | 6 | 14 | 43 | 172 | 107 | 464 |
| 47,618 | 6 | 19 | 52 | 215 | 6 | 14 | 43 | 152 | 107 | 400 |
| 47,619 | 7 | 19 | 54 | 216 | 6 | 15 | 43 | 153 | 110 | 403 |
| 47,620 | 7 | 19 | 53 | 216 | 6 | 15 | 42 | 152 | 108 | 402 |
| 47,621 | 7 | 19 | 53 | 214 | 6 | 14 | 42 | 152 | 108 | 399 |
| 47,622 | 7 | 18 | 53 | 213 | 6 | 14 | 42 | 152 | 108 | 397 |
| 47,623 | 7 | 18 | 53 | 211 | 6 | 14 | 42 | 152 | 108 | 395 |
| 47,624 | 7 | 18 | 53 | 211 | 6 | 14 | 42 | 152 | 108 | 395 |
| 47,625 | 7 | 18 | 51 | 194 | 6 | 12 | 42 | 143 | 106 | 367 |
| 47,626 | 8 | 18 | 52 | 194 | 6 | 12 | 42 | 144 | 108 | 368 |
| 47,627 | 8 | 18 | 52 | 175 | 6 | 12 | 42 | 136 | 108 | 341 |
| 47,628 | 8 | 15 | 52 | 166 | 6 | 11 | 42 | 120 | 108 | 312 |
| 47,629 | 8 | 14 | 52 | 144 | 6 | 10 | 42 | 115 | 108 | 283 |
| 47,630 | 9 | 14 | 52 | 144 | 6 | 10 | 42 | 115 | 109 | 283 |

|        |   |    |    |     |   |    |    |     |     |     |
|--------|---|----|----|-----|---|----|----|-----|-----|-----|
| 47,631 | 9 | 13 | 47 | 107 | 6 | 7  | 41 | 86  | 103 | 213 |
| 47,632 | 9 | 13 | 48 | 101 | 6 | 7  | 41 | 83  | 104 | 204 |
| 47,633 | 9 | 13 | 48 | 101 | 7 | 7  | 41 | 82  | 105 | 203 |
| 47,634 | 9 | 13 | 48 | 101 | 7 | 7  | 41 | 82  | 105 | 203 |
| 47,635 | 9 | 13 | 50 | 101 | 7 | 7  | 42 | 82  | 108 | 203 |
| 47,636 | 9 | 13 | 50 | 101 | 7 | 7  | 42 | 82  | 108 | 203 |
| 47,637 | 9 | 13 | 50 | 100 | 7 | 7  | 42 | 81  | 108 | 201 |
| 47,638 | 9 | 13 | 54 | 100 | 7 | 8  | 42 | 81  | 112 | 202 |
| 47,639 | 9 | 13 | 54 | 99  | 7 | 8  | 42 | 81  | 112 | 201 |
| 47,640 | 9 | 13 | 54 | 99  | 7 | 8  | 42 | 81  | 112 | 201 |
| 47,641 | 9 | 13 | 54 | 99  | 7 | 8  | 41 | 83  | 111 | 203 |
| 47,642 | 9 | 13 | 54 | 99  | 7 | 8  | 41 | 83  | 111 | 203 |
| 47,643 | 9 | 13 | 54 | 102 | 7 | 9  | 41 | 85  | 111 | 209 |
| 47,644 | 9 | 13 | 54 | 113 | 7 | 9  | 41 | 92  | 111 | 227 |
| 47,645 | 9 | 16 | 54 | 127 | 8 | 10 | 40 | 103 | 111 | 256 |
| 47,646 | 9 | 17 | 53 | 136 | 8 | 12 | 39 | 109 | 109 | 274 |
| 47,647 | 9 | 16 | 52 | 135 | 8 | 12 | 37 | 103 | 106 | 266 |
| 47,648 | 9 | 14 | 48 | 123 | 7 | 12 | 35 | 98  | 99  | 247 |
| 47,649 | 9 | 13 | 35 | 114 | 7 | 11 | 31 | 88  | 82  | 226 |
| 47,650 | 4 | 11 | 17 | 107 | 4 | 10 | 4  | 77  | 29  | 205 |
| 47,651 | 4 | 11 | 13 | 107 | 2 | 10 | 1  | 77  | 20  | 205 |
| 47,652 | 4 | 11 | 13 | 96  | 2 | 10 | 1  | 71  | 20  | 188 |
| 47,653 | 4 | 6  | 13 | 59  | 2 | 8  | 1  | 53  | 20  | 126 |
| 47,654 | 4 | 6  | 13 | 59  | 2 | 8  | 1  | 53  | 20  | 126 |
| 47,655 | 4 | 7  | 13 | 57  | 2 | 7  | 1  | 49  | 20  | 120 |
| 47,656 | 4 | 7  | 13 | 57  | 3 | 7  | 1  | 49  | 21  | 120 |
| 47,657 | 4 | 7  | 13 | 57  | 3 | 7  | 1  | 47  | 21  | 118 |
| 47,658 | 4 | 7  | 13 | 57  | 3 | 7  | 1  | 49  | 21  | 120 |
| 47,659 | 4 | 7  | 13 | 59  | 3 | 7  | 1  | 50  | 21  | 123 |
| 47,660 | 4 | 6  | 17 | 55  | 4 | 6  | 5  | 45  | 30  | 112 |
| 47,661 | 4 | 6  | 16 | 57  | 4 | 6  | 5  | 47  | 29  | 116 |
| 47,662 | 3 | 6  | 16 | 57  | 4 | 6  | 5  | 47  | 28  | 116 |
| 47,663 | 3 | 6  | 16 | 57  | 4 | 6  | 5  | 47  | 28  | 116 |
| 47,664 | 3 | 6  | 16 | 57  | 4 | 6  | 5  | 47  | 28  | 116 |
| 47,665 | 3 | 6  | 15 | 57  | 4 | 6  | 5  | 47  | 27  | 116 |
| 47,666 | 3 | 6  | 15 | 57  | 4 | 6  | 5  | 47  | 27  | 116 |
| 47,667 | 3 | 6  | 15 | 58  | 4 | 6  | 5  | 48  | 27  | 118 |
| 47,668 | 3 | 6  | 15 | 58  | 4 | 5  | 5  | 50  | 27  | 119 |
| 47,669 | 3 | 6  | 15 | 59  | 4 | 5  | 5  | 50  | 27  | 120 |
| 47,670 | 2 | 6  | 13 | 59  | 4 | 5  | 5  | 50  | 24  | 120 |
| 47,671 | 2 | 7  | 14 | 62  | 4 | 5  | 5  | 50  | 25  | 124 |

|        |   |    |    |     |   |    |   |     |    |     |
|--------|---|----|----|-----|---|----|---|-----|----|-----|
| 47,672 | 2 | 7  | 14 | 77  | 4 | 5  | 5 | 54  | 25 | 143 |
| 47,673 | 2 | 7  | 14 | 79  | 4 | 5  | 5 | 54  | 25 | 145 |
| 47,674 | 2 | 7  | 14 | 88  | 4 | 5  | 5 | 59  | 25 | 159 |
| 47,675 | 2 | 7  | 14 | 97  | 4 | 5  | 5 | 59  | 25 | 168 |
| 47,676 | 2 | 7  | 14 | 99  | 4 | 5  | 5 | 62  | 25 | 173 |
| 47,677 | 1 | 9  | 13 | 109 | 4 | 5  | 5 | 67  | 23 | 190 |
| 47,678 | 1 | 9  | 13 | 109 | 4 | 5  | 5 | 67  | 23 | 190 |
| 47,679 | 1 | 9  | 13 | 110 | 4 | 5  | 5 | 67  | 23 | 191 |
| 47,680 | 1 | 9  | 13 | 110 | 4 | 5  | 5 | 67  | 23 | 191 |
| 47,681 | 0 | 9  | 13 | 112 | 4 | 5  | 5 | 67  | 22 | 193 |
| 47,682 | 0 | 10 | 13 | 113 | 4 | 5  | 5 | 69  | 22 | 197 |
| 47,683 | 0 | 11 | 12 | 114 | 4 | 5  | 5 | 71  | 21 | 201 |
| 47,684 | 0 | 13 | 13 | 118 | 3 | 5  | 5 | 80  | 21 | 216 |
| 47,685 | 0 | 13 | 13 | 122 | 3 | 5  | 5 | 82  | 21 | 222 |
| 47,686 | 0 | 14 | 10 | 122 | 3 | 5  | 4 | 82  | 17 | 223 |
| 47,687 | 0 | 14 | 10 | 128 | 3 | 5  | 4 | 89  | 17 | 236 |
| 47,688 | 0 | 15 | 6  | 136 | 3 | 5  | 4 | 95  | 13 | 251 |
| 47,689 | 0 | 15 | 6  | 138 | 3 | 4  | 4 | 95  | 13 | 252 |
| 47,690 | 0 | 15 | 6  | 138 | 3 | 4  | 4 | 97  | 13 | 254 |
| 47,691 | 0 | 15 | 6  | 139 | 3 | 4  | 4 | 98  | 13 | 256 |
| 47,692 | 0 | 15 | 6  | 140 | 3 | 4  | 5 | 97  | 14 | 256 |
| 47,693 | 0 | 15 | 6  | 141 | 3 | 4  | 5 | 98  | 14 | 258 |
| 47,694 | 1 | 15 | 6  | 130 | 3 | 3  | 5 | 88  | 15 | 236 |
| 47,695 | 1 | 15 | 6  | 130 | 3 | 3  | 5 | 88  | 15 | 236 |
| 47,696 | 1 | 12 | 6  | 116 | 2 | 2  | 5 | 77  | 14 | 207 |
| 47,697 | 2 | 11 | 6  | 105 | 2 | 0  | 5 | 70  | 15 | 186 |
| 47,698 | 2 | 11 | 6  | 102 | 2 | 0  | 5 | 67  | 15 | 180 |
| 47,699 | 3 | 11 | 6  | 98  | 2 | 0  | 5 | 67  | 16 | 176 |
| 47,700 | 3 | 11 | 9  | 98  | 2 | 0  | 5 | 67  | 19 | 176 |
| 47,701 | 3 | 11 | 11 | 98  | 2 | 0  | 8 | 66  | 24 | 175 |
| 47,702 | 3 | 11 | 12 | 98  | 2 | 0  | 8 | 66  | 25 | 175 |
| 47,703 | 3 | 10 | 12 | 97  | 2 | 0  | 9 | 63  | 26 | 170 |
| 47,704 | 3 | 10 | 12 | 120 | 2 | 2  | 9 | 87  | 26 | 219 |
| 47,705 | 3 | 10 | 12 | 127 | 2 | 2  | 9 | 93  | 26 | 232 |
| 47,706 | 3 | 12 | 13 | 175 | 3 | 7  | 9 | 118 | 28 | 312 |
| 47,707 | 3 | 13 | 13 | 185 | 2 | 8  | 9 | 121 | 27 | 327 |
| 47,708 | 3 | 13 | 13 | 187 | 2 | 8  | 9 | 121 | 27 | 329 |
| 47,709 | 3 | 13 | 14 | 207 | 2 | 8  | 9 | 127 | 28 | 355 |
| 47,710 | 6 | 20 | 14 | 228 | 2 | 9  | 7 | 150 | 29 | 407 |
| 47,711 | 6 | 20 | 11 | 228 | 1 | 11 | 5 | 149 | 23 | 408 |
| 47,712 | 6 | 22 | 11 | 233 | 1 | 11 | 5 | 156 | 23 | 422 |

|        |   |    |    |     |   |    |   |     |    |     |
|--------|---|----|----|-----|---|----|---|-----|----|-----|
| 47,713 | 6 | 23 | 11 | 233 | 1 | 11 | 6 | 157 | 24 | 424 |
| 47,714 | 6 | 23 | 11 | 235 | 1 | 11 | 7 | 157 | 25 | 426 |
| 47,715 | 6 | 23 | 11 | 236 | 1 | 11 | 7 | 157 | 25 | 427 |
| 47,716 | 6 | 25 | 11 | 240 | 1 | 11 | 7 | 157 | 25 | 433 |
| 47,717 | 6 | 25 | 11 | 240 | 1 | 11 | 7 | 157 | 25 | 433 |
| 47,718 | 6 | 26 | 11 | 239 | 1 | 11 | 7 | 156 | 25 | 432 |
| 47,719 | 6 | 26 | 11 | 239 | 1 | 11 | 7 | 154 | 25 | 430 |
| 47,720 | 6 | 26 | 11 | 239 | 1 | 11 | 7 | 154 | 25 | 430 |
| 47,721 | 6 | 26 | 10 | 240 | 1 | 11 | 7 | 155 | 24 | 432 |
| 47,722 | 6 | 25 | 10 | 222 | 1 | 11 | 8 | 150 | 25 | 408 |
| 47,723 | 6 | 25 | 10 | 222 | 1 | 12 | 8 | 150 | 25 | 409 |
| 47,724 | 6 | 25 | 12 | 213 | 1 | 12 | 8 | 145 | 27 | 395 |
| 47,725 | 6 | 25 | 12 | 204 | 1 | 12 | 8 | 146 | 27 | 387 |
| 47,726 | 6 | 23 | 12 | 191 | 1 | 12 | 8 | 137 | 27 | 363 |
| 47,727 | 6 | 24 | 12 | 191 | 1 | 12 | 8 | 137 | 27 | 364 |
| 47,728 | 7 | 25 | 12 | 192 | 1 | 12 | 8 | 137 | 28 | 366 |
| 47,729 | 7 | 25 | 12 | 192 | 1 | 12 | 8 | 137 | 28 | 366 |
| 47,730 | 7 | 25 | 12 | 192 | 1 | 12 | 9 | 137 | 29 | 366 |
| 47,731 | 7 | 25 | 12 | 190 | 1 | 12 | 9 | 137 | 29 | 364 |
| 47,732 | 7 | 25 | 12 | 190 | 1 | 12 | 9 | 137 | 29 | 364 |
| 47,733 | 7 | 24 | 12 | 189 | 1 | 12 | 9 | 135 | 29 | 360 |
| 47,734 | 7 | 23 | 12 | 188 | 1 | 12 | 9 | 133 | 29 | 356 |
| 47,735 | 7 | 21 | 11 | 185 | 2 | 12 | 9 | 125 | 29 | 343 |
| 47,736 | 7 | 21 | 11 | 181 | 2 | 12 | 9 | 123 | 29 | 337 |
| 47,737 | 7 | 20 | 11 | 175 | 2 | 12 | 9 | 116 | 29 | 323 |
| 47,738 | 7 | 19 | 11 | 167 | 2 | 12 | 9 | 110 | 29 | 308 |
| 47,739 | 7 | 19 | 11 | 165 | 2 | 12 | 9 | 110 | 29 | 306 |
| 47,740 | 7 | 19 | 11 | 165 | 2 | 12 | 9 | 110 | 29 | 306 |
| 47,741 | 7 | 19 | 11 | 165 | 2 | 12 | 9 | 108 | 29 | 304 |
| 47,742 | 7 | 19 | 11 | 164 | 2 | 12 | 9 | 107 | 29 | 302 |
| 47,743 | 7 | 19 | 11 | 159 | 2 | 12 | 8 | 105 | 28 | 295 |
| 47,744 | 6 | 19 | 11 | 159 | 2 | 12 | 8 | 105 | 27 | 295 |
| 47,745 | 6 | 19 | 11 | 159 | 2 | 12 | 9 | 105 | 28 | 295 |
| 47,746 | 5 | 19 | 11 | 159 | 2 | 12 | 9 | 105 | 27 | 295 |
| 47,747 | 5 | 19 | 11 | 159 | 2 | 12 | 9 | 106 | 27 | 296 |
| 47,748 | 5 | 19 | 11 | 160 | 2 | 12 | 9 | 105 | 27 | 296 |
| 47,749 | 4 | 19 | 12 | 163 | 2 | 14 | 9 | 108 | 27 | 304 |
| 47,750 | 4 | 21 | 9  | 177 | 2 | 15 | 9 | 117 | 24 | 330 |
| 47,751 | 4 | 21 | 9  | 178 | 2 | 15 | 9 | 117 | 24 | 331 |
| 47,752 | 4 | 21 | 7  | 158 | 2 | 13 | 6 | 93  | 19 | 285 |
| 47,753 | 4 | 21 | 6  | 158 | 2 | 13 | 6 | 93  | 18 | 285 |

|        |   |    |    |     |   |    |   |    |    |     |
|--------|---|----|----|-----|---|----|---|----|----|-----|
| 47,754 | 4 | 21 | 6  | 157 | 2 | 13 | 5 | 95 | 17 | 286 |
| 47,755 | 4 | 21 | 5  | 150 | 1 | 13 | 5 | 89 | 15 | 273 |
| 47,756 | 4 | 21 | 5  | 150 | 1 | 13 | 5 | 89 | 15 | 273 |
| 47,757 | 4 | 17 | 5  | 93  | 1 | 7  | 5 | 62 | 15 | 179 |
| 47,758 | 4 | 17 | 7  | 93  | 1 | 7  | 5 | 64 | 17 | 181 |
| 47,759 | 4 | 17 | 7  | 71  | 1 | 7  | 5 | 56 | 17 | 151 |
| 47,760 | 4 | 17 | 6  | 72  | 1 | 7  | 6 | 56 | 17 | 152 |
| 47,761 | 1 | 10 | 5  | 48  | 1 | 6  | 6 | 32 | 13 | 96  |
| 47,762 | 1 | 10 | 5  | 48  | 1 | 4  | 6 | 33 | 13 | 95  |
| 47,763 | 1 | 8  | 5  | 43  | 1 | 4  | 6 | 25 | 13 | 80  |
| 47,764 | 1 | 7  | 7  | 49  | 1 | 4  | 5 | 25 | 14 | 85  |
| 47,765 | 1 | 7  | 7  | 48  | 1 | 4  | 4 | 25 | 13 | 84  |
| 47,766 | 1 | 5  | 7  | 43  | 1 | 4  | 4 | 25 | 13 | 77  |
| 47,767 | 1 | 5  | 7  | 43  | 1 | 4  | 4 | 25 | 13 | 77  |
| 47,768 | 1 | 4  | 7  | 43  | 1 | 4  | 4 | 26 | 13 | 77  |
| 47,769 | 1 | 4  | 9  | 41  | 1 | 4  | 4 | 25 | 15 | 74  |
| 47,770 | 1 | 4  | 9  | 41  | 1 | 4  | 4 | 25 | 15 | 74  |
| 47,771 | 1 | 4  | 9  | 41  | 1 | 4  | 4 | 25 | 15 | 74  |
| 47,772 | 1 | 4  | 9  | 40  | 1 | 4  | 4 | 24 | 15 | 72  |
| 47,773 | 1 | 4  | 9  | 40  | 1 | 3  | 7 | 24 | 18 | 71  |
| 47,774 | 1 | 4  | 9  | 40  | 1 | 3  | 7 | 24 | 18 | 71  |
| 47,775 | 1 | 4  | 7  | 38  | 1 | 4  | 7 | 23 | 16 | 69  |
| 47,776 | 1 | 4  | 7  | 46  | 1 | 4  | 7 | 33 | 16 | 87  |
| 47,777 | 1 | 4  | 8  | 46  | 1 | 4  | 7 | 37 | 17 | 91  |
| 47,778 | 1 | 3  | 8  | 50  | 1 | 5  | 7 | 46 | 17 | 104 |
| 47,779 | 0 | 2  | 8  | 49  | 1 | 5  | 7 | 47 | 16 | 103 |
| 47,780 | 0 | 2  | 8  | 53  | 1 | 6  | 6 | 50 | 15 | 111 |
| 47,781 | 0 | 3  | 8  | 60  | 1 | 7  | 7 | 57 | 16 | 127 |
| 47,782 | 0 | 3  | 8  | 62  | 1 | 7  | 7 | 57 | 16 | 129 |
| 47,783 | 0 | 3  | 8  | 71  | 1 | 10 | 7 | 62 | 16 | 146 |
| 47,784 | 0 | 3  | 8  | 73  | 1 | 10 | 7 | 65 | 16 | 151 |
| 47,785 | 0 | 3  | 9  | 76  | 1 | 10 | 7 | 68 | 17 | 157 |
| 47,786 | 0 | 3  | 9  | 76  | 0 | 10 | 7 | 68 | 16 | 157 |
| 47,787 | 0 | 3  | 10 | 83  | 0 | 10 | 7 | 72 | 17 | 168 |
| 47,788 | 0 | 3  | 10 | 87  | 0 | 10 | 7 | 73 | 17 | 173 |
| 47,789 | 0 | 3  | 10 | 88  | 0 | 10 | 7 | 73 | 17 | 174 |
| 47,790 | 1 | 3  | 10 | 89  | 0 | 10 | 7 | 73 | 18 | 175 |
| 47,791 | 1 | 3  | 10 | 97  | 0 | 11 | 7 | 75 | 18 | 186 |
| 47,792 | 1 | 3  | 10 | 99  | 0 | 11 | 7 | 75 | 18 | 188 |
| 47,793 | 1 | 3  | 10 | 101 | 0 | 11 | 7 | 75 | 18 | 190 |
| 47,794 | 1 | 3  | 10 | 101 | 0 | 11 | 7 | 75 | 18 | 190 |

|        |   |    |    |     |   |    |    |     |    |     |
|--------|---|----|----|-----|---|----|----|-----|----|-----|
| 47,795 | 1 | 3  | 10 | 103 | 0 | 12 | 7  | 76  | 18 | 194 |
| 47,796 | 1 | 3  | 11 | 103 | 0 | 12 | 10 | 76  | 22 | 194 |
| 47,797 | 1 | 3  | 11 | 103 | 0 | 12 | 10 | 75  | 22 | 193 |
| 47,798 | 1 | 3  | 11 | 102 | 0 | 12 | 10 | 75  | 22 | 192 |
| 47,799 | 1 | 3  | 11 | 101 | 0 | 12 | 10 | 75  | 22 | 191 |
| 47,800 | 1 | 1  | 10 | 85  | 0 | 9  | 10 | 63  | 21 | 158 |
| 47,801 | 1 | 1  | 10 | 85  | 0 | 9  | 10 | 63  | 21 | 158 |
| 47,802 | 1 | 1  | 10 | 88  | 0 | 9  | 10 | 70  | 21 | 168 |
| 47,803 | 1 | 1  | 10 | 89  | 0 | 10 | 10 | 74  | 21 | 174 |
| 47,804 | 1 | 1  | 11 | 114 | 0 | 10 | 11 | 95  | 23 | 220 |
| 47,805 | 1 | 1  | 11 | 120 | 0 | 10 | 11 | 93  | 23 | 224 |
| 47,806 | 1 | 4  | 11 | 187 | 0 | 20 | 11 | 112 | 23 | 323 |
| 47,807 | 1 | 5  | 13 | 219 | 0 | 22 | 12 | 136 | 26 | 382 |
| 47,808 | 1 | 5  | 15 | 231 | 0 | 24 | 12 | 146 | 28 | 406 |
| 47,809 | 1 | 7  | 13 | 254 | 0 | 24 | 12 | 154 | 26 | 439 |
| 47,810 | 1 | 7  | 13 | 253 | 0 | 24 | 12 | 155 | 26 | 439 |
| 47,811 | 1 | 7  | 16 | 260 | 0 | 25 | 12 | 156 | 29 | 448 |
| 47,812 | 1 | 7  | 19 | 263 | 0 | 25 | 12 | 156 | 32 | 451 |
| 47,813 | 1 | 7  | 17 | 261 | 0 | 25 | 12 | 155 | 30 | 448 |
| 47,814 | 1 | 7  | 17 | 261 | 0 | 25 | 12 | 155 | 30 | 448 |
| 47,815 | 1 | 7  | 18 | 257 | 1 | 25 | 12 | 154 | 32 | 443 |
| 47,816 | 1 | 7  | 18 | 257 | 1 | 25 | 12 | 154 | 32 | 443 |
| 47,817 | 1 | 7  | 18 | 257 | 1 | 25 | 12 | 154 | 32 | 443 |
| 47,818 | 1 | 10 | 18 | 258 | 1 | 25 | 12 | 155 | 32 | 448 |
| 47,819 | 1 | 10 | 18 | 259 | 1 | 25 | 12 | 154 | 32 | 448 |
| 47,820 | 1 | 10 | 17 | 260 | 1 | 25 | 12 | 154 | 31 | 449 |
| 47,821 | 1 | 10 | 17 | 260 | 1 | 26 | 12 | 155 | 31 | 451 |
| 47,822 | 1 | 10 | 17 | 260 | 1 | 26 | 12 | 155 | 31 | 451 |
| 47,823 | 1 | 10 | 17 | 262 | 1 | 26 | 12 | 155 | 31 | 453 |
| 47,824 | 1 | 10 | 17 | 263 | 1 | 26 | 9  | 155 | 28 | 454 |
| 47,825 | 1 | 10 | 17 | 263 | 1 | 26 | 9  | 155 | 28 | 454 |
| 47,826 | 1 | 10 | 17 | 263 | 1 | 25 | 9  | 155 | 28 | 453 |
| 47,827 | 1 | 9  | 16 | 256 | 1 | 25 | 9  | 140 | 27 | 430 |
| 47,828 | 1 | 10 | 17 | 252 | 1 | 24 | 9  | 132 | 28 | 418 |
| 47,829 | 1 | 10 | 17 | 248 | 1 | 23 | 9  | 128 | 28 | 409 |
| 47,830 | 1 | 10 | 17 | 248 | 1 | 23 | 9  | 128 | 28 | 409 |
| 47,831 | 1 | 10 | 17 | 248 | 1 | 23 | 8  | 128 | 27 | 409 |
| 47,832 | 1 | 9  | 17 | 241 | 1 | 22 | 8  | 121 | 27 | 393 |
| 47,833 | 1 | 9  | 17 | 241 | 1 | 22 | 8  | 121 | 27 | 393 |
| 47,834 | 1 | 9  | 17 | 232 | 1 | 19 | 8  | 115 | 27 | 375 |
| 47,835 | 1 | 9  | 16 | 230 | 1 | 19 | 8  | 114 | 26 | 372 |

|        |   |   |    |     |   |    |   |     |    |     |
|--------|---|---|----|-----|---|----|---|-----|----|-----|
| 47,836 | 1 | 9 | 16 | 223 | 1 | 19 | 8 | 112 | 26 | 363 |
| 47,837 | 1 | 9 | 15 | 223 | 1 | 19 | 8 | 111 | 25 | 362 |
| 47,838 | 1 | 9 | 17 | 216 | 1 | 19 | 8 | 107 | 27 | 351 |
| 47,839 | 1 | 9 | 17 | 201 | 1 | 18 | 8 | 104 | 27 | 332 |
| 47,840 | 1 | 9 | 17 | 201 | 1 | 18 | 8 | 104 | 27 | 332 |
| 47,841 | 0 | 9 | 18 | 201 | 1 | 18 | 9 | 104 | 28 | 332 |
| 47,842 | 0 | 9 | 18 | 201 | 1 | 18 | 9 | 105 | 28 | 333 |
| 47,843 | 0 | 9 | 18 | 203 | 1 | 18 | 9 | 105 | 28 | 335 |
| 47,844 | 0 | 9 | 20 | 201 | 1 | 18 | 9 | 105 | 30 | 333 |
| 47,845 | 0 | 9 | 24 | 201 | 1 | 18 | 9 | 105 | 34 | 333 |
| 47,846 | 0 | 9 | 23 | 199 | 1 | 17 | 5 | 104 | 29 | 329 |
| 47,847 | 0 | 9 | 23 | 201 | 1 | 17 | 5 | 104 | 29 | 331 |
| 47,848 | 0 | 9 | 23 | 201 | 1 | 17 | 5 | 104 | 29 | 331 |
| 47,849 | 1 | 9 | 23 | 201 | 1 | 17 | 5 | 104 | 30 | 331 |
| 47,850 | 1 | 9 | 24 | 201 | 1 | 17 | 6 | 104 | 32 | 331 |
| 47,851 | 1 | 9 | 24 | 201 | 1 | 17 | 6 | 104 | 32 | 331 |
| 47,852 | 1 | 9 | 24 | 197 | 1 | 17 | 6 | 98  | 32 | 321 |
| 47,853 | 2 | 9 | 24 | 196 | 1 | 16 | 6 | 94  | 33 | 315 |
| 47,854 | 2 | 9 | 24 | 210 | 1 | 16 | 6 | 101 | 33 | 336 |
| 47,855 | 2 | 9 | 23 | 186 | 1 | 16 | 5 | 81  | 31 | 292 |
| 47,856 | 2 | 6 | 23 | 81  | 1 | 4  | 5 | 38  | 31 | 129 |
| 47,857 | 2 | 6 | 23 | 85  | 1 | 4  | 5 | 39  | 31 | 134 |
| 47,858 | 2 | 6 | 21 | 85  | 1 | 4  | 4 | 40  | 28 | 135 |
| 47,859 | 2 | 5 | 19 | 70  | 1 | 2  | 4 | 29  | 26 | 106 |
| 47,860 | 2 | 3 | 19 | 47  | 1 | 2  | 4 | 17  | 26 | 69  |
| 47,861 | 2 | 5 | 19 | 49  | 1 | 2  | 4 | 17  | 26 | 73  |
| 47,862 | 2 | 5 | 16 | 42  | 3 | 1  | 3 | 16  | 24 | 64  |
| 47,863 | 2 | 7 | 13 | 37  | 3 | 1  | 3 | 17  | 21 | 62  |
| 47,864 | 2 | 7 | 13 | 37  | 3 | 1  | 3 | 19  | 21 | 64  |
| 47,865 | 2 | 7 | 14 | 39  | 3 | 1  | 3 | 19  | 22 | 66  |
| 47,866 | 2 | 7 | 14 | 38  | 2 | 1  | 3 | 20  | 21 | 66  |
| 47,867 | 2 | 7 | 14 | 38  | 2 | 1  | 3 | 21  | 21 | 67  |
| 47,868 | 2 | 4 | 15 | 38  | 2 | 1  | 4 | 20  | 23 | 63  |
| 47,869 | 2 | 4 | 15 | 36  | 2 | 1  | 4 | 21  | 23 | 62  |
| 47,870 | 2 | 4 | 15 | 41  | 2 | 1  | 4 | 21  | 23 | 67  |
| 47,871 | 2 | 4 | 14 | 41  | 2 | 1  | 6 | 22  | 24 | 68  |
| 47,872 | 2 | 5 | 16 | 46  | 2 | 0  | 6 | 24  | 26 | 75  |
| 47,873 | 2 | 5 | 16 | 46  | 2 | 0  | 6 | 24  | 26 | 75  |
| 47,874 | 2 | 5 | 18 | 46  | 2 | 1  | 6 | 24  | 28 | 76  |
| 47,875 | 2 | 6 | 18 | 48  | 2 | 1  | 5 | 27  | 27 | 82  |
| 47,876 | 2 | 6 | 18 | 48  | 2 | 1  | 5 | 27  | 27 | 82  |



|        |   |    |    |     |   |   |    |     |     |     |
|--------|---|----|----|-----|---|---|----|-----|-----|-----|
| 47,877 | 2 | 6  | 18 | 52  | 2 | 1 | 5  | 27  | 27  | 86  |
| 47,878 | 2 | 7  | 19 | 56  | 2 | 1 | 6  | 29  | 29  | 93  |
| 47,879 | 2 | 7  | 18 | 62  | 2 | 1 | 6  | 36  | 28  | 106 |
| 47,880 | 2 | 12 | 18 | 95  | 2 | 2 | 6  | 62  | 28  | 171 |
| 47,881 | 2 | 14 | 18 | 96  | 2 | 2 | 6  | 62  | 28  | 174 |
| 47,882 | 4 | 14 | 24 | 96  | 4 | 2 | 11 | 63  | 43  | 175 |
| 47,883 | 5 | 14 | 28 | 96  | 4 | 2 | 15 | 63  | 52  | 175 |
| 47,884 | 5 | 17 | 41 | 107 | 4 | 2 | 18 | 72  | 68  | 198 |
| 47,885 | 5 | 17 | 41 | 108 | 4 | 2 | 18 | 73  | 68  | 200 |
| 47,886 | 5 | 17 | 45 | 111 | 4 | 2 | 20 | 71  | 74  | 201 |
| 47,887 | 5 | 17 | 45 | 111 | 4 | 2 | 20 | 70  | 74  | 200 |
| 47,888 | 5 | 17 | 45 | 112 | 4 | 2 | 22 | 70  | 76  | 201 |
| 47,889 | 5 | 17 | 43 | 112 | 4 | 2 | 22 | 70  | 74  | 201 |
| 47,890 | 5 | 19 | 43 | 124 | 4 | 4 | 22 | 75  | 74  | 222 |
| 47,891 | 5 | 19 | 43 | 130 | 4 | 4 | 22 | 80  | 74  | 233 |
| 47,892 | 5 | 19 | 42 | 131 | 4 | 4 | 21 | 81  | 72  | 235 |
| 47,893 | 5 | 20 | 42 | 132 | 4 | 4 | 21 | 82  | 72  | 238 |
| 47,894 | 5 | 24 | 42 | 139 | 4 | 5 | 23 | 86  | 74  | 254 |
| 47,895 | 5 | 24 | 40 | 143 | 4 | 5 | 23 | 87  | 72  | 259 |
| 47,896 | 5 | 31 | 36 | 161 | 4 | 5 | 23 | 105 | 68  | 302 |
| 47,897 | 5 | 31 | 36 | 162 | 4 | 5 | 23 | 105 | 68  | 303 |
| 47,898 | 5 | 31 | 36 | 160 | 4 | 5 | 23 | 105 | 68  | 301 |
| 47,899 | 4 | 36 | 36 | 177 | 4 | 5 | 23 | 109 | 67  | 327 |
| 47,900 | 4 | 36 | 35 | 179 | 4 | 5 | 22 | 108 | 65  | 328 |
| 47,901 | 4 | 36 | 35 | 183 | 4 | 5 | 22 | 109 | 65  | 333 |
| 47,902 | 5 | 36 | 35 | 184 | 4 | 5 | 22 | 109 | 66  | 334 |
| 47,903 | 5 | 36 | 35 | 184 | 4 | 5 | 22 | 109 | 66  | 334 |
| 47,904 | 6 | 36 | 36 | 185 | 4 | 5 | 25 | 109 | 71  | 335 |
| 47,905 | 6 | 36 | 36 | 171 | 4 | 5 | 25 | 103 | 71  | 315 |
| 47,906 | 6 | 38 | 36 | 174 | 4 | 5 | 25 | 106 | 71  | 323 |
| 47,907 | 6 | 38 | 36 | 175 | 4 | 5 | 25 | 106 | 71  | 324 |
| 47,908 | 6 | 38 | 38 | 171 | 4 | 6 | 26 | 105 | 74  | 320 |
| 47,909 | 6 | 38 | 39 | 172 | 4 | 6 | 26 | 105 | 75  | 321 |
| 47,910 | 6 | 38 | 39 | 173 | 4 | 6 | 26 | 105 | 75  | 322 |
| 47,911 | 6 | 38 | 51 | 178 | 4 | 6 | 35 | 107 | 96  | 329 |
| 47,912 | 6 | 36 | 51 | 180 | 4 | 6 | 35 | 108 | 96  | 330 |
| 47,913 | 6 | 36 | 51 | 180 | 2 | 6 | 35 | 108 | 94  | 330 |
| 47,914 | 6 | 34 | 52 | 177 | 2 | 6 | 35 | 103 | 95  | 320 |
| 47,915 | 6 | 34 | 53 | 178 | 2 | 6 | 35 | 103 | 96  | 321 |
| 47,916 | 6 | 34 | 51 | 178 | 2 | 6 | 35 | 103 | 94  | 321 |
| 47,917 | 7 | 34 | 53 | 178 | 5 | 6 | 37 | 104 | 102 | 322 |

|        |   |    |    |     |   |   |    |     |     |     |
|--------|---|----|----|-----|---|---|----|-----|-----|-----|
| 47,918 | 7 | 34 | 53 | 180 | 5 | 6 | 37 | 111 | 102 | 331 |
| 47,919 | 7 | 34 | 52 | 180 | 5 | 6 | 36 | 110 | 100 | 330 |
| 47,920 | 7 | 34 | 56 | 185 | 6 | 6 | 38 | 109 | 107 | 334 |
| 47,921 | 7 | 34 | 56 | 184 | 6 | 6 | 38 | 109 | 107 | 333 |
| 47,922 | 7 | 34 | 56 | 187 | 6 | 6 | 36 | 111 | 105 | 338 |
| 47,923 | 7 | 33 | 54 | 182 | 6 | 6 | 36 | 108 | 103 | 329 |
| 47,924 | 8 | 33 | 55 | 181 | 6 | 5 | 36 | 110 | 105 | 329 |
| 47,925 | 8 | 32 | 55 | 178 | 6 | 5 | 36 | 107 | 105 | 322 |
| 47,926 | 8 | 32 | 56 | 178 | 6 | 5 | 37 | 107 | 107 | 322 |
| 47,927 | 8 | 32 | 57 | 179 | 6 | 5 | 37 | 107 | 108 | 323 |
| 47,928 | 8 | 31 | 56 | 170 | 6 | 5 | 37 | 105 | 107 | 311 |
| 47,929 | 8 | 32 | 56 | 185 | 6 | 6 | 36 | 112 | 106 | 335 |
| 47,930 | 8 | 32 | 54 | 184 | 6 | 6 | 36 | 106 | 104 | 328 |
| 47,931 | 8 | 27 | 55 | 154 | 6 | 5 | 36 | 84  | 105 | 270 |
| 47,932 | 8 | 25 | 56 | 162 | 6 | 6 | 34 | 87  | 104 | 280 |
| 47,933 | 6 | 25 | 55 | 163 | 4 | 6 | 31 | 87  | 96  | 281 |
| 47,934 | 5 | 25 | 51 | 164 | 4 | 6 | 27 | 87  | 87  | 282 |
| 47,935 | 5 | 22 | 38 | 154 | 5 | 6 | 26 | 77  | 74  | 259 |
| 47,936 | 7 | 22 | 34 | 151 | 5 | 6 | 25 | 77  | 71  | 256 |
| 47,937 | 7 | 22 | 34 | 151 | 5 | 6 | 26 | 77  | 72  | 256 |
| 47,938 | 7 | 22 | 34 | 151 | 5 | 6 | 24 | 77  | 70  | 256 |
| 47,939 | 7 | 22 | 34 | 150 | 5 | 6 | 25 | 77  | 71  | 255 |
| 47,940 | 7 | 20 | 37 | 138 | 5 | 4 | 25 | 72  | 74  | 234 |
| 47,941 | 7 | 20 | 37 | 138 | 5 | 4 | 25 | 72  | 74  | 234 |
| 47,942 | 7 | 20 | 38 | 131 | 5 | 4 | 28 | 66  | 78  | 221 |
| 47,943 | 7 | 20 | 38 | 131 | 5 | 4 | 28 | 66  | 78  | 221 |
| 47,944 | 7 | 8  | 38 | 101 | 5 | 3 | 26 | 41  | 76  | 153 |
| 47,945 | 7 | 8  | 38 | 101 | 5 | 3 | 26 | 41  | 76  | 153 |
| 47,946 | 7 | 8  | 38 | 100 | 5 | 3 | 26 | 41  | 76  | 152 |
| 47,947 | 7 | 8  | 38 | 100 | 5 | 3 | 26 | 41  | 76  | 152 |
| 47,948 | 7 | 8  | 38 | 100 | 5 | 3 | 26 | 41  | 76  | 152 |
| 47,949 | 7 | 3  | 38 | 83  | 5 | 3 | 26 | 38  | 76  | 127 |
| 47,950 | 7 | 3  | 38 | 84  | 5 | 3 | 26 | 39  | 76  | 129 |
| 47,951 | 7 | 3  | 38 | 86  | 5 | 3 | 26 | 39  | 76  | 131 |
| 47,952 | 6 | 4  | 38 | 84  | 5 | 3 | 26 | 39  | 75  | 130 |
| 47,953 | 6 | 4  | 38 | 86  | 5 | 3 | 26 | 39  | 75  | 132 |
| 47,954 | 6 | 5  | 37 | 86  | 5 | 3 | 25 | 39  | 73  | 133 |
| 47,955 | 4 | 5  | 37 | 84  | 5 | 3 | 23 | 40  | 69  | 132 |
| 47,956 | 4 | 4  | 37 | 95  | 5 | 3 | 23 | 41  | 69  | 143 |
| 47,957 | 4 | 5  | 37 | 107 | 5 | 4 | 23 | 45  | 69  | 161 |
| 47,958 | 4 | 5  | 35 | 110 | 5 | 5 | 22 | 46  | 66  | 166 |

|        |   |    |    |     |   |    |    |    |    |     |
|--------|---|----|----|-----|---|----|----|----|----|-----|
| 47,959 | 4 | 5  | 35 | 115 | 5 | 4  | 22 | 46 | 66 | 170 |
| 47,960 | 4 | 5  | 34 | 115 | 5 | 4  | 22 | 46 | 65 | 170 |
| 47,961 | 4 | 5  | 22 | 109 | 5 | 4  | 15 | 44 | 46 | 162 |
| 47,962 | 4 | 5  | 22 | 105 | 5 | 4  | 13 | 43 | 44 | 157 |
| 47,963 | 4 | 5  | 22 | 105 | 5 | 4  | 13 | 44 | 44 | 158 |
| 47,964 | 4 | 5  | 21 | 105 | 5 | 4  | 14 | 44 | 44 | 158 |
| 47,965 | 4 | 5  | 21 | 105 | 5 | 4  | 14 | 45 | 44 | 159 |
| 47,966 | 4 | 5  | 20 | 107 | 5 | 4  | 14 | 46 | 43 | 162 |
| 47,967 | 4 | 5  | 20 | 108 | 5 | 4  | 14 | 46 | 43 | 163 |
| 47,968 | 3 | 5  | 18 | 109 | 2 | 4  | 12 | 45 | 35 | 163 |
| 47,969 | 3 | 5  | 17 | 107 | 2 | 4  | 12 | 38 | 34 | 154 |
| 47,970 | 3 | 5  | 17 | 107 | 2 | 4  | 12 | 40 | 34 | 156 |
| 47,971 | 3 | 5  | 15 | 99  | 1 | 4  | 10 | 40 | 29 | 148 |
| 47,972 | 3 | 5  | 15 | 99  | 1 | 4  | 10 | 41 | 29 | 149 |
| 47,973 | 3 | 5  | 15 | 97  | 1 | 4  | 10 | 38 | 29 | 144 |
| 47,974 | 2 | 5  | 12 | 96  | 1 | 4  | 10 | 40 | 25 | 145 |
| 47,975 | 2 | 5  | 12 | 97  | 1 | 4  | 10 | 40 | 25 | 146 |
| 47,976 | 2 | 5  | 12 | 97  | 1 | 4  | 10 | 40 | 25 | 146 |
| 47,977 | 2 | 5  | 11 | 97  | 1 | 4  | 9  | 40 | 23 | 146 |
| 47,978 | 2 | 5  | 10 | 96  | 1 | 4  | 9  | 40 | 22 | 145 |
| 47,979 | 2 | 5  | 10 | 97  | 1 | 4  | 9  | 40 | 22 | 146 |
| 47,980 | 2 | 5  | 10 | 77  | 1 | 3  | 9  | 34 | 22 | 119 |
| 47,981 | 2 | 6  | 9  | 78  | 1 | 3  | 9  | 35 | 21 | 122 |
| 47,982 | 2 | 6  | 8  | 76  | 1 | 3  | 9  | 34 | 20 | 119 |
| 47,983 | 2 | 6  | 9  | 67  | 1 | 2  | 9  | 31 | 21 | 106 |
| 47,984 | 2 | 6  | 8  | 65  | 1 | 2  | 9  | 31 | 20 | 104 |
| 47,985 | 2 | 9  | 8  | 77  | 1 | 3  | 9  | 37 | 20 | 126 |
| 47,986 | 2 | 23 | 8  | 119 | 0 | 9  | 7  | 69 | 17 | 220 |
| 47,987 | 0 | 23 | 8  | 131 | 0 | 9  | 6  | 69 | 14 | 232 |
| 47,988 | 2 | 24 | 18 | 140 | 1 | 9  | 7  | 75 | 28 | 248 |
| 47,989 | 2 | 24 | 20 | 142 | 1 | 9  | 10 | 75 | 33 | 250 |
| 47,990 | 2 | 24 | 22 | 147 | 1 | 9  | 10 | 77 | 35 | 257 |
| 47,991 | 2 | 25 | 19 | 155 | 1 | 9  | 10 | 84 | 32 | 273 |
| 47,992 | 2 | 25 | 19 | 158 | 1 | 9  | 7  | 84 | 29 | 276 |
| 47,993 | 2 | 25 | 18 | 159 | 1 | 9  | 7  | 84 | 28 | 277 |
| 47,994 | 2 | 25 | 18 | 159 | 1 | 10 | 7  | 84 | 28 | 278 |
| 47,995 | 2 | 25 | 18 | 159 | 1 | 11 | 7  | 86 | 28 | 281 |
| 47,996 | 2 | 25 | 18 | 159 | 1 | 11 | 7  | 86 | 28 | 281 |
| 47,997 | 2 | 25 | 18 | 159 | 1 | 12 | 7  | 86 | 28 | 282 |
| 47,998 | 2 | 25 | 18 | 159 | 1 | 12 | 7  | 86 | 28 | 282 |
| 47,999 | 2 | 25 | 19 | 159 | 1 | 12 | 7  | 85 | 29 | 281 |

|        |   |    |    |     |   |    |    |    |    |     |
|--------|---|----|----|-----|---|----|----|----|----|-----|
| 48,000 | 2 | 25 | 19 | 159 | 1 | 12 | 7  | 85 | 29 | 281 |
| 48,001 | 2 | 25 | 19 | 154 | 1 | 12 | 8  | 84 | 30 | 275 |
| 48,002 | 2 | 26 | 19 | 154 | 1 | 12 | 8  | 84 | 30 | 276 |
| 48,003 | 2 | 25 | 19 | 148 | 1 | 12 | 8  | 84 | 30 | 269 |
| 48,004 | 2 | 24 | 19 | 149 | 1 | 12 | 8  | 84 | 30 | 269 |
| 48,005 | 2 | 24 | 20 | 148 | 1 | 12 | 10 | 83 | 33 | 267 |
| 48,006 | 2 | 23 | 21 | 133 | 1 | 12 | 12 | 78 | 36 | 246 |
| 48,007 | 2 | 22 | 21 | 121 | 1 | 11 | 12 | 74 | 36 | 228 |
| 48,008 | 2 | 22 | 21 | 121 | 1 | 11 | 12 | 74 | 36 | 228 |
| 48,009 | 2 | 22 | 23 | 112 | 1 | 10 | 15 | 73 | 41 | 217 |
| 48,010 | 2 | 22 | 23 | 112 | 1 | 10 | 15 | 73 | 41 | 217 |
| 48,011 | 2 | 22 | 23 | 112 | 1 | 10 | 15 | 72 | 41 | 216 |
| 48,012 | 2 | 22 | 24 | 112 | 1 | 10 | 15 | 72 | 42 | 216 |
| 48,013 | 2 | 22 | 24 | 111 | 1 | 10 | 15 | 71 | 42 | 214 |
| 48,014 | 2 | 22 | 24 | 111 | 1 | 10 | 16 | 71 | 43 | 214 |
| 48,015 | 2 | 22 | 24 | 106 | 1 | 10 | 15 | 69 | 42 | 207 |
| 48,016 | 2 | 22 | 24 | 107 | 1 | 10 | 15 | 69 | 42 | 208 |
| 48,017 | 2 | 23 | 24 | 108 | 1 | 10 | 15 | 69 | 42 | 210 |
| 48,018 | 2 | 23 | 24 | 114 | 1 | 10 | 15 | 72 | 42 | 219 |
| 48,019 | 2 | 25 | 24 | 145 | 1 | 11 | 15 | 84 | 42 | 265 |
| 48,020 | 2 | 25 | 24 | 146 | 1 | 11 | 15 | 85 | 42 | 267 |
| 48,021 | 2 | 25 | 24 | 146 | 1 | 11 | 15 | 84 | 42 | 266 |
| 48,022 | 2 | 26 | 23 | 150 | 1 | 11 | 15 | 89 | 41 | 276 |
| 48,023 | 2 | 26 | 23 | 150 | 1 | 11 | 15 | 89 | 41 | 276 |
| 48,024 | 2 | 26 | 23 | 151 | 1 | 11 | 15 | 85 | 41 | 273 |
| 48,025 | 2 | 26 | 23 | 152 | 1 | 11 | 15 | 86 | 41 | 275 |
| 48,026 | 2 | 26 | 24 | 152 | 1 | 11 | 16 | 87 | 43 | 276 |
| 48,027 | 2 | 28 | 25 | 154 | 1 | 11 | 16 | 88 | 44 | 281 |
| 48,028 | 2 | 29 | 25 | 154 | 1 | 11 | 16 | 92 | 44 | 286 |
| 48,029 | 2 | 29 | 25 | 155 | 1 | 11 | 16 | 92 | 44 | 287 |
| 48,030 | 2 | 29 | 26 | 154 | 1 | 11 | 16 | 92 | 45 | 286 |
| 48,031 | 2 | 27 | 26 | 154 | 1 | 11 | 16 | 89 | 45 | 281 |
| 48,032 | 2 | 27 | 26 | 154 | 1 | 11 | 16 | 86 | 45 | 278 |
| 48,033 | 2 | 27 | 26 | 155 | 1 | 11 | 16 | 88 | 45 | 281 |
| 48,034 | 2 | 27 | 24 | 156 | 1 | 11 | 16 | 88 | 43 | 282 |
| 48,035 | 2 | 27 | 24 | 156 | 1 | 13 | 16 | 91 | 43 | 287 |
| 48,036 | 2 | 25 | 24 | 146 | 1 | 12 | 16 | 89 | 43 | 272 |
| 48,037 | 2 | 13 | 24 | 113 | 1 | 6  | 16 | 70 | 43 | 202 |
| 48,038 | 0 | 12 | 15 | 93  | 0 | 6  | 15 | 65 | 30 | 176 |
| 48,039 | 0 | 12 | 14 | 95  | 0 | 6  | 16 | 65 | 30 | 178 |
| 48,040 | 0 | 12 | 15 | 98  | 0 | 6  | 13 | 70 | 28 | 186 |

|        |   |    |    |     |   |   |    |    |    |     |
|--------|---|----|----|-----|---|---|----|----|----|-----|
| 48,041 | 0 | 12 | 13 | 95  | 0 | 6 | 13 | 69 | 26 | 182 |
| 48,042 | 0 | 11 | 13 | 88  | 0 | 5 | 13 | 62 | 26 | 166 |
| 48,043 | 0 | 11 | 16 | 85  | 0 | 5 | 13 | 61 | 29 | 162 |
| 48,044 | 0 | 11 | 16 | 84  | 0 | 5 | 13 | 61 | 29 | 161 |
| 48,045 | 0 | 11 | 16 | 85  | 0 | 5 | 13 | 61 | 29 | 162 |
| 48,046 | 0 | 11 | 16 | 84  | 0 | 4 | 13 | 60 | 29 | 159 |
| 48,047 | 0 | 11 | 16 | 84  | 0 | 4 | 13 | 60 | 29 | 159 |
| 48,048 | 0 | 11 | 16 | 84  | 0 | 3 | 13 | 60 | 29 | 158 |
| 48,049 | 0 | 11 | 15 | 84  | 0 | 3 | 13 | 60 | 28 | 158 |
| 48,050 | 0 | 11 | 15 | 84  | 0 | 3 | 13 | 60 | 28 | 158 |
| 48,051 | 0 | 11 | 15 | 84  | 0 | 3 | 12 | 60 | 27 | 158 |
| 48,052 | 0 | 11 | 15 | 85  | 0 | 3 | 12 | 60 | 27 | 159 |
| 48,053 | 0 | 10 | 15 | 87  | 0 | 3 | 13 | 62 | 28 | 162 |
| 48,054 | 0 | 10 | 15 | 92  | 0 | 3 | 13 | 62 | 28 | 167 |
| 48,055 | 0 | 10 | 15 | 93  | 0 | 3 | 13 | 62 | 28 | 168 |
| 48,056 | 0 | 10 | 14 | 93  | 0 | 3 | 11 | 62 | 25 | 168 |
| 48,057 | 0 | 10 | 13 | 93  | 0 | 3 | 9  | 62 | 22 | 168 |
| 48,058 | 0 | 10 | 13 | 93  | 0 | 3 | 9  | 62 | 22 | 168 |
| 48,059 | 0 | 10 | 12 | 93  | 0 | 3 | 9  | 62 | 21 | 168 |
| 48,060 | 0 | 10 | 12 | 94  | 0 | 3 | 8  | 63 | 20 | 170 |
| 48,061 | 0 | 10 | 12 | 99  | 0 | 4 | 8  | 64 | 20 | 177 |
| 48,062 | 0 | 10 | 15 | 98  | 1 | 4 | 8  | 64 | 24 | 176 |
| 48,063 | 1 | 10 | 14 | 98  | 1 | 4 | 12 | 64 | 28 | 176 |
| 48,064 | 1 | 10 | 14 | 100 | 1 | 4 | 13 | 64 | 29 | 178 |
| 48,065 | 2 | 10 | 16 | 100 | 1 | 4 | 12 | 65 | 31 | 179 |
| 48,066 | 2 | 10 | 16 | 105 | 1 | 4 | 12 | 66 | 31 | 185 |
| 48,067 | 2 | 10 | 16 | 105 | 1 | 4 | 12 | 67 | 31 | 186 |
| 48,068 | 2 | 9  | 16 | 99  | 1 | 5 | 13 | 64 | 32 | 177 |
| 48,069 | 2 | 7  | 16 | 68  | 1 | 4 | 13 | 52 | 32 | 131 |
| 48,070 | 2 | 7  | 16 | 66  | 1 | 4 | 13 | 50 | 32 | 127 |
| 48,071 | 2 | 8  | 16 | 66  | 1 | 4 | 14 | 50 | 33 | 128 |
| 48,072 | 2 | 8  | 16 | 66  | 1 | 4 | 14 | 50 | 33 | 128 |
| 48,073 | 2 | 7  | 16 | 62  | 1 | 4 | 14 | 44 | 33 | 117 |
| 48,074 | 2 | 7  | 18 | 60  | 1 | 4 | 14 | 44 | 35 | 115 |
| 48,075 | 2 | 7  | 18 | 60  | 1 | 4 | 14 | 44 | 35 | 115 |
| 48,076 | 2 | 7  | 18 | 58  | 1 | 4 | 13 | 44 | 34 | 113 |
| 48,077 | 2 | 5  | 17 | 56  | 1 | 4 | 13 | 43 | 33 | 108 |
| 48,078 | 3 | 5  | 19 | 56  | 1 | 4 | 13 | 44 | 36 | 109 |
| 48,079 | 3 | 4  | 19 | 57  | 1 | 4 | 13 | 41 | 36 | 106 |
| 48,080 | 3 | 4  | 21 | 56  | 1 | 4 | 14 | 40 | 39 | 104 |
| 48,081 | 3 | 4  | 21 | 57  | 1 | 4 | 14 | 40 | 39 | 105 |

|        |   |    |    |     |   |   |    |     |    |     |
|--------|---|----|----|-----|---|---|----|-----|----|-----|
| 48,082 | 3 | 4  | 21 | 55  | 1 | 4 | 14 | 40  | 39 | 103 |
| 48,083 | 3 | 4  | 26 | 56  | 1 | 4 | 15 | 41  | 45 | 105 |
| 48,084 | 3 | 4  | 27 | 55  | 1 | 5 | 16 | 41  | 47 | 105 |
| 48,085 | 3 | 4  | 38 | 56  | 1 | 3 | 18 | 39  | 60 | 102 |
| 48,086 | 3 | 1  | 37 | 47  | 1 | 3 | 19 | 30  | 60 | 81  |
| 48,087 | 3 | 1  | 37 | 55  | 1 | 3 | 19 | 32  | 60 | 91  |
| 48,088 | 3 | 2  | 37 | 75  | 1 | 4 | 19 | 40  | 60 | 121 |
| 48,089 | 3 | 2  | 37 | 75  | 1 | 4 | 19 | 41  | 60 | 122 |
| 48,090 | 3 | 6  | 37 | 101 | 1 | 4 | 17 | 58  | 58 | 169 |
| 48,091 | 3 | 6  | 34 | 101 | 1 | 4 | 16 | 54  | 54 | 165 |
| 48,092 | 3 | 6  | 31 | 104 | 1 | 4 | 16 | 56  | 51 | 170 |
| 48,093 | 3 | 6  | 31 | 105 | 1 | 4 | 16 | 56  | 51 | 171 |
| 48,094 | 3 | 6  | 31 | 106 | 1 | 4 | 16 | 56  | 51 | 172 |
| 48,095 | 3 | 7  | 31 | 111 | 1 | 4 | 16 | 58  | 51 | 180 |
| 48,096 | 3 | 7  | 31 | 112 | 1 | 4 | 16 | 58  | 51 | 181 |
| 48,097 | 3 | 8  | 31 | 116 | 1 | 4 | 16 | 59  | 51 | 187 |
| 48,098 | 3 | 8  | 31 | 119 | 1 | 4 | 16 | 59  | 51 | 190 |
| 48,099 | 3 | 8  | 31 | 120 | 1 | 4 | 16 | 59  | 51 | 191 |
| 48,100 | 3 | 8  | 31 | 121 | 1 | 4 | 16 | 59  | 51 | 192 |
| 48,101 | 3 | 9  | 31 | 123 | 1 | 4 | 17 | 60  | 52 | 196 |
| 48,102 | 3 | 9  | 31 | 123 | 1 | 4 | 17 | 60  | 52 | 196 |
| 48,103 | 3 | 10 | 31 | 122 | 1 | 4 | 16 | 60  | 51 | 196 |
| 48,104 | 3 | 10 | 31 | 120 | 1 | 4 | 16 | 58  | 51 | 192 |
| 48,105 | 3 | 10 | 31 | 115 | 1 | 4 | 16 | 58  | 51 | 187 |
| 48,106 | 3 | 10 | 31 | 115 | 1 | 4 | 16 | 58  | 51 | 187 |
| 48,107 | 3 | 10 | 31 | 118 | 1 | 4 | 16 | 60  | 51 | 192 |
| 48,108 | 3 | 10 | 31 | 128 | 1 | 4 | 16 | 66  | 51 | 208 |
| 48,109 | 3 | 11 | 31 | 175 | 1 | 7 | 16 | 90  | 51 | 283 |
| 48,110 | 4 | 11 | 30 | 187 | 1 | 7 | 15 | 92  | 50 | 297 |
| 48,111 | 4 | 11 | 30 | 196 | 1 | 7 | 16 | 93  | 51 | 307 |
| 48,112 | 4 | 11 | 30 | 192 | 1 | 6 | 17 | 94  | 52 | 303 |
| 48,113 | 4 | 11 | 27 | 195 | 0 | 6 | 17 | 95  | 48 | 307 |
| 48,114 | 3 | 11 | 27 | 194 | 0 | 6 | 13 | 96  | 43 | 307 |
| 48,115 | 3 | 11 | 27 | 196 | 0 | 6 | 12 | 97  | 42 | 310 |
| 48,116 | 2 | 11 | 25 | 190 | 0 | 6 | 13 | 95  | 40 | 302 |
| 48,117 | 2 | 11 | 25 | 191 | 0 | 6 | 13 | 95  | 40 | 303 |
| 48,118 | 2 | 11 | 25 | 190 | 0 | 5 | 12 | 94  | 39 | 300 |
| 48,119 | 2 | 11 | 25 | 190 | 0 | 5 | 12 | 95  | 39 | 301 |
| 48,120 | 2 | 12 | 25 | 191 | 0 | 5 | 12 | 100 | 39 | 308 |
| 48,121 | 2 | 12 | 25 | 191 | 0 | 5 | 12 | 100 | 39 | 308 |
| 48,122 | 2 | 11 | 26 | 194 | 0 | 5 | 11 | 101 | 39 | 311 |

|        |   |    |    |     |   |    |    |     |    |     |
|--------|---|----|----|-----|---|----|----|-----|----|-----|
| 48,123 | 2 | 11 | 26 | 194 | 0 | 5  | 11 | 102 | 39 | 312 |
| 48,124 | 2 | 11 | 26 | 195 | 0 | 5  | 11 | 102 | 39 | 313 |
| 48,125 | 2 | 11 | 24 | 196 | 0 | 5  | 11 | 101 | 37 | 313 |
| 48,126 | 4 | 11 | 24 | 196 | 0 | 5  | 11 | 101 | 39 | 313 |
| 48,127 | 4 | 12 | 24 | 196 | 0 | 5  | 11 | 97  | 39 | 310 |
| 48,128 | 4 | 12 | 24 | 197 | 0 | 5  | 11 | 97  | 39 | 311 |
| 48,129 | 3 | 12 | 21 | 203 | 0 | 5  | 11 | 97  | 35 | 317 |
| 48,130 | 3 | 16 | 22 | 226 | 0 | 7  | 11 | 108 | 36 | 357 |
| 48,131 | 3 | 19 | 19 | 284 | 0 | 10 | 11 | 117 | 33 | 430 |
| 48,132 | 3 | 22 | 20 | 294 | 0 | 10 | 13 | 125 | 36 | 451 |
| 48,133 | 4 | 23 | 21 | 342 | 0 | 11 | 13 | 140 | 38 | 516 |
| 48,134 | 4 | 24 | 16 | 348 | 0 | 11 | 12 | 143 | 32 | 526 |
| 48,135 | 4 | 27 | 15 | 368 | 0 | 15 | 11 | 154 | 30 | 564 |
| 48,136 | 4 | 27 | 4  | 369 | 0 | 16 | 9  | 155 | 17 | 567 |
| 48,137 | 4 | 27 | 4  | 369 | 0 | 16 | 8  | 150 | 16 | 562 |
| 48,138 | 4 | 29 | 4  | 370 | 0 | 16 | 8  | 159 | 16 | 574 |
| 48,139 | 4 | 28 | 4  | 354 | 0 | 15 | 8  | 155 | 16 | 552 |
| 48,140 | 4 | 29 | 4  | 362 | 0 | 16 | 8  | 160 | 16 | 567 |
| 48,141 | 4 | 25 | 4  | 334 | 0 | 16 | 8  | 143 | 16 | 518 |
| 48,142 | 4 | 25 | 4  | 332 | 0 | 16 | 8  | 142 | 16 | 515 |
| 48,143 | 4 | 26 | 5  | 335 | 0 | 17 | 8  | 144 | 17 | 522 |
| 48,144 | 4 | 26 | 5  | 334 | 0 | 17 | 8  | 144 | 17 | 521 |
| 48,145 | 4 | 27 | 5  | 339 | 0 | 17 | 9  | 148 | 18 | 531 |
| 48,146 | 4 | 26 | 5  | 335 | 0 | 17 | 9  | 148 | 18 | 526 |
| 48,147 | 4 | 28 | 8  | 345 | 0 | 17 | 9  | 153 | 21 | 543 |
| 48,148 | 4 | 27 | 8  | 343 | 0 | 17 | 9  | 152 | 21 | 539 |
| 48,149 | 4 | 27 | 9  | 340 | 0 | 17 | 9  | 152 | 22 | 536 |
| 48,150 | 4 | 28 | 9  | 341 | 0 | 17 | 9  | 153 | 22 | 539 |
| 48,151 | 4 | 27 | 10 | 338 | 0 | 17 | 9  | 152 | 23 | 534 |
| 48,152 | 4 | 27 | 10 | 338 | 0 | 17 | 8  | 152 | 22 | 534 |
| 48,153 | 4 | 27 | 10 | 338 | 0 | 17 | 8  | 152 | 22 | 534 |
| 48,154 | 4 | 26 | 10 | 338 | 0 | 17 | 8  | 152 | 22 | 533 |
| 48,155 | 4 | 26 | 10 | 338 | 0 | 17 | 8  | 152 | 22 | 533 |
| 48,156 | 4 | 26 | 10 | 338 | 0 | 17 | 8  | 152 | 22 | 533 |
| 48,157 | 4 | 26 | 10 | 334 | 0 | 17 | 8  | 150 | 22 | 527 |
| 48,158 | 4 | 26 | 10 | 334 | 0 | 17 | 8  | 150 | 22 | 527 |
| 48,159 | 4 | 25 | 10 | 277 | 0 | 14 | 8  | 120 | 22 | 436 |
| 48,160 | 4 | 25 | 10 | 277 | 0 | 14 | 8  | 120 | 22 | 436 |
| 48,161 | 3 | 25 | 10 | 256 | 0 | 14 | 7  | 116 | 20 | 411 |
| 48,162 | 3 | 26 | 10 | 257 | 0 | 14 | 6  | 116 | 19 | 413 |
| 48,163 | 3 | 26 | 10 | 253 | 0 | 14 | 5  | 114 | 18 | 407 |

|        |   |    |    |     |   |    |    |     |    |     |
|--------|---|----|----|-----|---|----|----|-----|----|-----|
| 48,164 | 3 | 26 | 10 | 253 | 0 | 14 | 5  | 114 | 18 | 407 |
| 48,165 | 6 | 27 | 21 | 260 | 1 | 14 | 11 | 117 | 39 | 418 |
| 48,166 | 6 | 28 | 22 | 259 | 1 | 14 | 11 | 116 | 40 | 417 |
| 48,167 | 6 | 28 | 22 | 258 | 1 | 14 | 11 | 116 | 40 | 416 |
| 48,168 | 6 | 28 | 22 | 258 | 1 | 14 | 11 | 117 | 40 | 417 |
| 48,169 | 6 | 28 | 21 | 258 | 1 | 14 | 11 | 117 | 39 | 417 |
| 48,170 | 6 | 28 | 22 | 258 | 1 | 14 | 12 | 116 | 41 | 416 |
| 48,171 | 6 | 27 | 22 | 257 | 1 | 14 | 12 | 111 | 41 | 409 |
| 48,172 | 6 | 27 | 22 | 258 | 1 | 14 | 12 | 111 | 41 | 410 |
| 48,173 | 6 | 27 | 22 | 255 | 1 | 14 | 12 | 110 | 41 | 406 |
| 48,174 | 6 | 27 | 22 | 255 | 1 | 14 | 12 | 109 | 41 | 405 |
| 48,175 | 6 | 28 | 22 | 252 | 1 | 14 | 12 | 109 | 41 | 403 |
| 48,176 | 5 | 28 | 22 | 252 | 1 | 14 | 12 | 109 | 40 | 403 |
| 48,177 | 5 | 27 | 22 | 250 | 1 | 14 | 12 | 110 | 40 | 401 |
| 48,178 | 7 | 28 | 22 | 270 | 1 | 14 | 12 | 112 | 42 | 424 |
| 48,179 | 7 | 28 | 22 | 290 | 1 | 15 | 12 | 125 | 42 | 458 |
| 48,180 | 7 | 29 | 22 | 288 | 1 | 15 | 12 | 125 | 42 | 457 |
| 48,181 | 7 | 26 | 21 | 268 | 1 | 13 | 12 | 114 | 41 | 421 |
| 48,182 | 7 | 23 | 21 | 212 | 1 | 10 | 11 | 104 | 40 | 349 |
| 48,183 | 7 | 20 | 20 | 209 | 1 | 11 | 9  | 104 | 37 | 344 |
| 48,184 | 6 | 20 | 19 | 184 | 1 | 10 | 9  | 104 | 35 | 318 |
| 48,185 | 6 | 19 | 19 | 178 | 1 | 10 | 9  | 100 | 35 | 307 |
| 48,186 | 6 | 16 | 21 | 164 | 1 | 6  | 9  | 89  | 37 | 275 |
| 48,187 | 6 | 16 | 23 | 159 | 1 | 5  | 9  | 85  | 39 | 265 |
| 48,188 | 6 | 14 | 25 | 151 | 1 | 5  | 9  | 74  | 41 | 244 |
| 48,189 | 6 | 14 | 27 | 147 | 1 | 5  | 9  | 69  | 43 | 235 |
| 48,190 | 6 | 14 | 27 | 148 | 1 | 5  | 9  | 69  | 43 | 236 |
| 48,191 | 6 | 13 | 27 | 139 | 1 | 4  | 9  | 63  | 43 | 219 |
| 48,192 | 6 | 13 | 30 | 139 | 1 | 4  | 11 | 63  | 48 | 219 |
| 48,193 | 6 | 12 | 29 | 132 | 1 | 3  | 14 | 63  | 50 | 210 |
| 48,194 | 6 | 12 | 29 | 132 | 1 | 3  | 14 | 65  | 50 | 212 |
| 48,195 | 6 | 12 | 29 | 132 | 1 | 3  | 14 | 70  | 50 | 217 |
| 48,196 | 6 | 11 | 29 | 128 | 1 | 3  | 14 | 71  | 50 | 213 |
| 48,197 | 6 | 13 | 29 | 134 | 1 | 3  | 14 | 82  | 50 | 232 |
| 48,198 | 6 | 11 | 26 | 139 | 1 | 5  | 14 | 111 | 47 | 266 |
| 48,199 | 6 | 11 | 26 | 141 | 1 | 5  | 14 | 113 | 47 | 270 |
| 48,200 | 6 | 11 | 25 | 152 | 1 | 5  | 14 | 115 | 46 | 283 |
| 48,201 | 6 | 10 | 25 | 152 | 1 | 5  | 14 | 114 | 46 | 281 |
| 48,202 | 6 | 10 | 24 | 153 | 1 | 5  | 14 | 114 | 45 | 282 |
| 48,203 | 6 | 10 | 24 | 153 | 1 | 5  | 14 | 114 | 45 | 282 |
| 48,204 | 6 | 10 | 24 | 155 | 1 | 5  | 14 | 114 | 45 | 284 |



|        |   |    |    |     |   |    |    |     |    |     |
|--------|---|----|----|-----|---|----|----|-----|----|-----|
| 48,205 | 6 | 12 | 24 | 161 | 1 | 5  | 14 | 116 | 45 | 294 |
| 48,206 | 6 | 12 | 24 | 161 | 1 | 5  | 14 | 116 | 45 | 294 |
| 48,207 | 6 | 12 | 24 | 161 | 1 | 5  | 15 | 116 | 46 | 294 |
| 48,208 | 6 | 12 | 24 | 161 | 1 | 5  | 16 | 116 | 47 | 294 |
| 48,209 | 6 | 12 | 24 | 161 | 1 | 5  | 16 | 116 | 47 | 294 |
| 48,210 | 6 | 12 | 24 | 161 | 1 | 5  | 16 | 116 | 47 | 294 |
| 48,211 | 6 | 12 | 24 | 166 | 1 | 5  | 16 | 118 | 47 | 301 |
| 48,212 | 6 | 12 | 24 | 169 | 1 | 5  | 16 | 119 | 47 | 305 |
| 48,213 | 6 | 12 | 24 | 171 | 1 | 5  | 16 | 130 | 47 | 318 |
| 48,214 | 6 | 14 | 24 | 171 | 1 | 5  | 16 | 136 | 47 | 326 |
| 48,215 | 5 | 14 | 24 | 172 | 1 | 5  | 16 | 141 | 46 | 332 |
| 48,216 | 3 | 15 | 13 | 199 | 0 | 7  | 10 | 201 | 26 | 422 |
| 48,217 | 3 | 17 | 12 | 217 | 1 | 8  | 10 | 220 | 26 | 462 |
| 48,218 | 3 | 20 | 12 | 242 | 1 | 8  | 9  | 236 | 25 | 506 |
| 48,219 | 3 | 20 | 13 | 246 | 1 | 8  | 9  | 236 | 26 | 510 |
| 48,220 | 3 | 20 | 12 | 247 | 1 | 8  | 8  | 236 | 24 | 511 |
| 48,221 | 3 | 20 | 12 | 248 | 1 | 8  | 8  | 236 | 24 | 512 |
| 48,222 | 3 | 20 | 12 | 248 | 1 | 8  | 8  | 236 | 24 | 512 |
| 48,223 | 3 | 20 | 12 | 247 | 1 | 8  | 8  | 236 | 24 | 511 |
| 48,224 | 3 | 20 | 12 | 247 | 1 | 8  | 8  | 237 | 24 | 512 |
| 48,225 | 3 | 20 | 12 | 253 | 1 | 8  | 8  | 241 | 24 | 522 |
| 48,226 | 3 | 21 | 12 | 273 | 1 | 9  | 8  | 272 | 24 | 575 |
| 48,227 | 2 | 23 | 12 | 276 | 1 | 10 | 8  | 272 | 23 | 581 |
| 48,228 | 2 | 24 | 12 | 304 | 1 | 11 | 8  | 290 | 23 | 629 |
| 48,229 | 0 | 23 | 12 | 285 | 1 | 11 | 8  | 288 | 21 | 607 |
| 48,230 | 0 | 23 | 12 | 266 | 1 | 10 | 8  | 275 | 21 | 574 |
| 48,231 | 0 | 22 | 12 | 272 | 1 | 11 | 8  | 295 | 21 | 600 |
| 48,232 | 0 | 21 | 12 | 268 | 1 | 11 | 8  | 297 | 21 | 597 |
| 48,233 | 0 | 25 | 12 | 316 | 1 | 12 | 8  | 329 | 21 | 682 |
| 48,234 | 0 | 26 | 12 | 317 | 1 | 11 | 8  | 328 | 21 | 682 |
| 48,235 | 0 | 25 | 12 | 303 | 1 | 11 | 8  | 318 | 21 | 657 |
| 48,236 | 0 | 27 | 12 | 310 | 1 | 11 | 8  | 320 | 21 | 668 |
| 48,237 | 0 | 29 | 10 | 364 | 1 | 13 | 8  | 352 | 19 | 758 |
| 48,238 | 0 | 29 | 8  | 375 | 1 | 18 | 8  | 364 | 17 | 786 |
| 48,239 | 0 | 29 | 6  | 380 | 1 | 18 | 8  | 368 | 15 | 795 |
| 48,240 | 0 | 30 | 5  | 389 | 1 | 18 | 8  | 375 | 14 | 812 |
| 48,241 | 0 | 30 | 5  | 391 | 1 | 18 | 8  | 375 | 14 | 814 |
| 48,242 | 0 | 30 | 2  | 391 | 1 | 18 | 6  | 375 | 9  | 814 |
| 48,243 | 1 | 34 | 2  | 400 | 1 | 20 | 5  | 385 | 9  | 839 |
| 48,244 | 1 | 35 | 2  | 404 | 1 | 21 | 3  | 390 | 7  | 850 |
| 48,245 | 1 | 35 | 2  | 415 | 1 | 21 | 2  | 398 | 6  | 869 |

|        |   |    |    |     |   |    |    |     |    |     |
|--------|---|----|----|-----|---|----|----|-----|----|-----|
| 48,246 | 1 | 35 | 2  | 416 | 1 | 21 | 2  | 394 | 6  | 866 |
| 48,247 | 1 | 35 | 2  | 433 | 1 | 21 | 2  | 397 | 6  | 886 |
| 48,248 | 1 | 33 | 2  | 427 | 1 | 21 | 2  | 384 | 6  | 865 |
| 48,249 | 1 | 33 | 4  | 404 | 1 | 19 | 3  | 350 | 9  | 806 |
| 48,250 | 1 | 33 | 4  | 393 | 1 | 19 | 3  | 348 | 9  | 793 |
| 48,251 | 1 | 33 | 4  | 395 | 1 | 19 | 4  | 348 | 10 | 795 |
| 48,252 | 2 | 33 | 4  | 393 | 1 | 19 | 5  | 348 | 12 | 793 |
| 48,253 | 2 | 33 | 5  | 393 | 1 | 19 | 6  | 348 | 14 | 793 |
| 48,254 | 2 | 33 | 5  | 393 | 1 | 19 | 6  | 348 | 14 | 793 |
| 48,255 | 2 | 33 | 5  | 391 | 1 | 19 | 8  | 348 | 16 | 791 |
| 48,256 | 2 | 31 | 5  | 385 | 1 | 19 | 10 | 346 | 18 | 781 |
| 48,257 | 2 | 31 | 5  | 385 | 1 | 19 | 9  | 346 | 17 | 781 |
| 48,258 | 2 | 31 | 5  | 385 | 1 | 19 | 9  | 346 | 17 | 781 |
| 48,259 | 2 | 31 | 5  | 385 | 1 | 19 | 8  | 346 | 16 | 781 |
| 48,260 | 2 | 31 | 5  | 386 | 1 | 19 | 8  | 346 | 16 | 782 |
| 48,261 | 2 | 31 | 5  | 387 | 1 | 19 | 8  | 346 | 16 | 783 |
| 48,262 | 2 | 31 | 5  | 382 | 1 | 19 | 8  | 344 | 16 | 776 |
| 48,263 | 2 | 28 | 6  | 375 | 1 | 19 | 8  | 321 | 17 | 743 |
| 48,264 | 2 | 28 | 6  | 375 | 1 | 19 | 8  | 321 | 17 | 743 |
| 48,265 | 2 | 28 | 6  | 375 | 1 | 19 | 8  | 321 | 17 | 743 |
| 48,266 | 2 | 26 | 6  | 340 | 1 | 17 | 8  | 257 | 17 | 640 |
| 48,267 | 2 | 26 | 6  | 340 | 1 | 17 | 8  | 257 | 17 | 640 |
| 48,268 | 2 | 23 | 9  | 321 | 0 | 16 | 9  | 238 | 20 | 598 |
| 48,269 | 2 | 20 | 9  | 296 | 1 | 16 | 9  | 223 | 21 | 555 |
| 48,270 | 2 | 20 | 10 | 293 | 1 | 16 | 9  | 222 | 22 | 551 |
| 48,271 | 2 | 20 | 10 | 292 | 1 | 16 | 9  | 223 | 22 | 551 |
| 48,272 | 3 | 20 | 10 | 292 | 2 | 16 | 10 | 223 | 25 | 551 |
| 48,273 | 3 | 20 | 10 | 293 | 2 | 16 | 10 | 222 | 25 | 551 |
| 48,274 | 3 | 20 | 10 | 293 | 2 | 16 | 10 | 222 | 25 | 551 |
| 48,275 | 3 | 20 | 13 | 293 | 2 | 16 | 10 | 221 | 28 | 550 |
| 48,276 | 3 | 21 | 13 | 287 | 2 | 16 | 10 | 218 | 28 | 542 |
| 48,277 | 3 | 19 | 13 | 265 | 2 | 15 | 10 | 187 | 28 | 486 |
| 48,278 | 3 | 17 | 18 | 262 | 2 | 14 | 10 | 186 | 33 | 479 |
| 48,279 | 3 | 16 | 24 | 236 | 2 | 13 | 13 | 170 | 42 | 435 |
| 48,280 | 3 | 16 | 27 | 236 | 2 | 13 | 13 | 170 | 45 | 435 |
| 48,281 | 3 | 16 | 30 | 235 | 3 | 13 | 18 | 171 | 54 | 435 |
| 48,282 | 3 | 16 | 30 | 225 | 3 | 12 | 19 | 152 | 55 | 405 |
| 48,283 | 3 | 12 | 31 | 178 | 3 | 11 | 19 | 117 | 56 | 318 |
| 48,284 | 3 | 12 | 31 | 178 | 3 | 11 | 19 | 116 | 56 | 317 |
| 48,285 | 3 | 11 | 31 | 170 | 3 | 11 | 19 | 109 | 56 | 301 |
| 48,286 | 4 | 9  | 31 | 151 | 3 | 11 | 19 | 102 | 57 | 273 |

|        |   |    |    |     |   |    |    |     |    |     |
|--------|---|----|----|-----|---|----|----|-----|----|-----|
| 48,287 | 4 | 9  | 31 | 151 | 3 | 11 | 19 | 102 | 57 | 273 |
| 48,288 | 4 | 7  | 31 | 74  | 3 | 3  | 19 | 53  | 57 | 137 |
| 48,289 | 4 | 7  | 31 | 75  | 3 | 3  | 19 | 55  | 57 | 140 |
| 48,290 | 4 | 7  | 31 | 75  | 3 | 3  | 19 | 55  | 57 | 140 |
| 48,291 | 4 | 6  | 31 | 64  | 3 | 3  | 19 | 49  | 57 | 122 |
| 48,292 | 4 | 6  | 31 | 64  | 3 | 3  | 19 | 49  | 57 | 122 |
| 48,293 | 4 | 2  | 36 | 55  | 3 | 1  | 22 | 39  | 65 | 97  |
| 48,294 | 3 | 2  | 36 | 55  | 3 | 1  | 22 | 40  | 64 | 98  |
| 48,295 | 3 | 1  | 36 | 46  | 3 | 0  | 22 | 31  | 64 | 78  |
| 48,296 | 3 | 1  | 36 | 35  | 3 | 0  | 22 | 21  | 64 | 57  |
| 48,297 | 3 | 1  | 36 | 38  | 3 | 0  | 23 | 23  | 65 | 62  |
| 48,298 | 3 | 1  | 37 | 31  | 3 | 2  | 23 | 26  | 66 | 60  |
| 48,299 | 3 | 1  | 37 | 36  | 3 | 2  | 23 | 27  | 66 | 66  |
| 48,300 | 3 | 1  | 35 | 71  | 3 | 2  | 22 | 37  | 63 | 111 |
| 48,301 | 3 | 2  | 35 | 104 | 3 | 5  | 22 | 58  | 63 | 169 |
| 48,302 | 3 | 5  | 35 | 141 | 3 | 7  | 21 | 77  | 62 | 230 |
| 48,303 | 2 | 5  | 35 | 160 | 3 | 9  | 23 | 103 | 63 | 277 |
| 48,304 | 2 | 5  | 34 | 161 | 3 | 9  | 22 | 103 | 61 | 278 |
| 48,305 | 2 | 7  | 34 | 172 | 3 | 10 | 22 | 106 | 61 | 295 |
| 48,306 | 2 | 7  | 34 | 177 | 3 | 10 | 20 | 107 | 59 | 301 |
| 48,307 | 2 | 8  | 34 | 181 | 3 | 10 | 18 | 108 | 57 | 307 |
| 48,308 | 2 | 8  | 34 | 182 | 3 | 11 | 18 | 109 | 57 | 310 |
| 48,309 | 2 | 8  | 34 | 182 | 3 | 11 | 18 | 109 | 57 | 310 |
| 48,310 | 2 | 8  | 36 | 181 | 3 | 11 | 19 | 109 | 60 | 309 |
| 48,311 | 2 | 8  | 36 | 180 | 3 | 11 | 19 | 109 | 60 | 308 |
| 48,312 | 3 | 8  | 36 | 181 | 3 | 11 | 19 | 109 | 61 | 309 |
| 48,313 | 3 | 8  | 36 | 181 | 3 | 11 | 19 | 109 | 61 | 309 |
| 48,314 | 3 | 8  | 35 | 180 | 3 | 11 | 19 | 108 | 60 | 307 |
| 48,315 | 3 | 8  | 35 | 180 | 3 | 11 | 19 | 108 | 60 | 307 |
| 48,316 | 3 | 8  | 38 | 181 | 3 | 11 | 19 | 108 | 63 | 308 |
| 48,317 | 3 | 8  | 38 | 183 | 3 | 11 | 19 | 112 | 63 | 314 |
| 48,318 | 3 | 8  | 36 | 183 | 3 | 11 | 19 | 113 | 61 | 315 |
| 48,319 | 4 | 8  | 35 | 185 | 3 | 11 | 18 | 113 | 60 | 317 |
| 48,320 | 4 | 8  | 39 | 185 | 2 | 11 | 19 | 112 | 64 | 316 |
| 48,321 | 8 | 8  | 39 | 188 | 2 | 11 | 20 | 113 | 69 | 320 |
| 48,322 | 8 | 8  | 42 | 188 | 3 | 11 | 25 | 112 | 78 | 319 |
| 48,323 | 7 | 8  | 42 | 188 | 2 | 11 | 24 | 112 | 75 | 319 |
| 48,324 | 8 | 8  | 42 | 187 | 2 | 11 | 24 | 112 | 76 | 318 |
| 48,325 | 8 | 8  | 39 | 187 | 2 | 11 | 24 | 114 | 73 | 320 |
| 48,326 | 8 | 7  | 39 | 192 | 2 | 11 | 26 | 116 | 75 | 326 |
| 48,327 | 8 | 12 | 37 | 222 | 2 | 14 | 27 | 150 | 74 | 398 |

|        |   |    |    |     |   |    |    |     |    |     |
|--------|---|----|----|-----|---|----|----|-----|----|-----|
| 48,328 | 8 | 18 | 34 | 248 | 2 | 16 | 27 | 172 | 71 | 454 |
| 48,329 | 8 | 20 | 28 | 264 | 2 | 18 | 24 | 184 | 62 | 486 |
| 48,330 | 8 | 21 | 25 | 267 | 2 | 18 | 24 | 184 | 59 | 490 |
| 48,331 | 8 | 23 | 25 | 275 | 1 | 19 | 22 | 195 | 56 | 512 |
| 48,332 | 8 | 23 | 22 | 283 | 1 | 19 | 19 | 200 | 50 | 525 |
| 48,333 | 8 | 23 | 22 | 284 | 1 | 19 | 18 | 199 | 49 | 525 |
| 48,334 | 8 | 23 | 21 | 281 | 1 | 19 | 18 | 199 | 48 | 522 |
| 48,335 | 8 | 23 | 21 | 282 | 1 | 19 | 18 | 201 | 48 | 525 |
| 48,336 | 7 | 23 | 21 | 284 | 1 | 19 | 18 | 200 | 47 | 526 |
| 48,337 | 7 | 23 | 21 | 284 | 1 | 19 | 18 | 199 | 47 | 525 |
| 48,338 | 7 | 23 | 21 | 284 | 1 | 19 | 18 | 199 | 47 | 525 |
| 48,339 | 7 | 23 | 21 | 289 | 1 | 19 | 18 | 203 | 47 | 534 |
| 48,340 | 7 | 23 | 21 | 288 | 1 | 19 | 18 | 201 | 47 | 531 |
| 48,341 | 7 | 23 | 21 | 288 | 2 | 19 | 18 | 201 | 48 | 531 |
| 48,342 | 7 | 23 | 21 | 287 | 2 | 19 | 24 | 203 | 54 | 532 |
| 48,343 | 7 | 23 | 21 | 289 | 2 | 19 | 24 | 203 | 54 | 534 |
| 48,344 | 7 | 23 | 15 | 290 | 2 | 19 | 19 | 202 | 43 | 534 |
| 48,345 | 7 | 23 | 15 | 293 | 2 | 20 | 19 | 205 | 43 | 541 |
| 48,346 | 7 | 25 | 16 | 303 | 2 | 22 | 19 | 208 | 44 | 558 |
| 48,347 | 7 | 36 | 16 | 350 | 2 | 23 | 19 | 221 | 44 | 630 |
| 48,348 | 7 | 36 | 16 | 352 | 2 | 24 | 19 | 221 | 44 | 633 |
| 48,349 | 7 | 38 | 17 | 349 | 2 | 24 | 20 | 219 | 46 | 630 |
| 48,350 | 7 | 38 | 16 | 310 | 2 | 24 | 20 | 208 | 45 | 580 |
| 48,351 | 7 | 38 | 16 | 310 | 2 | 24 | 20 | 207 | 45 | 579 |
| 48,352 | 7 | 34 | 16 | 239 | 2 | 19 | 20 | 176 | 45 | 468 |
| 48,353 | 7 | 34 | 16 | 239 | 2 | 19 | 20 | 177 | 45 | 469 |
| 48,354 | 7 | 35 | 16 | 222 | 2 | 17 | 20 | 151 | 45 | 425 |
| 48,355 | 7 | 35 | 16 | 221 | 2 | 17 | 20 | 151 | 45 | 424 |
| 48,356 | 7 | 33 | 16 | 210 | 2 | 16 | 21 | 148 | 46 | 407 |
| 48,357 | 7 | 33 | 16 | 205 | 2 | 16 | 21 | 147 | 46 | 401 |
| 48,358 | 7 | 32 | 16 | 200 | 2 | 15 | 21 | 145 | 46 | 392 |
| 48,359 | 7 | 32 | 16 | 200 | 2 | 15 | 21 | 145 | 46 | 392 |
| 48,360 | 7 | 32 | 16 | 200 | 2 | 15 | 21 | 145 | 46 | 392 |
| 48,361 | 7 | 33 | 14 | 201 | 2 | 15 | 20 | 145 | 43 | 394 |
| 48,362 | 7 | 33 | 14 | 201 | 2 | 15 | 20 | 145 | 43 | 394 |
| 48,363 | 6 | 33 | 14 | 201 | 2 | 15 | 20 | 145 | 42 | 394 |
| 48,364 | 6 | 33 | 14 | 201 | 2 | 15 | 20 | 145 | 42 | 394 |
| 48,365 | 6 | 34 | 14 | 201 | 2 | 15 | 20 | 144 | 42 | 394 |
| 48,366 | 6 | 34 | 12 | 200 | 2 | 15 | 20 | 142 | 40 | 391 |
| 48,367 | 6 | 34 | 11 | 200 | 2 | 15 | 20 | 142 | 39 | 391 |
| 48,368 | 6 | 34 | 11 | 198 | 2 | 15 | 20 | 139 | 39 | 386 |

|        |   |    |    |     |   |    |    |     |    |     |
|--------|---|----|----|-----|---|----|----|-----|----|-----|
| 48,369 | 6 | 34 | 11 | 199 | 2 | 15 | 20 | 139 | 39 | 387 |
| 48,370 | 5 | 36 | 11 | 207 | 2 | 16 | 20 | 147 | 38 | 406 |
| 48,371 | 5 | 37 | 7  | 208 | 2 | 16 | 19 | 152 | 33 | 413 |
| 48,372 | 1 | 37 | 5  | 210 | 2 | 16 | 18 | 152 | 26 | 415 |
| 48,373 | 1 | 37 | 2  | 211 | 1 | 16 | 13 | 155 | 17 | 419 |
| 48,374 | 1 | 39 | 2  | 249 | 1 | 20 | 13 | 177 | 17 | 485 |
| 48,375 | 0 | 39 | 2  | 253 | 1 | 20 | 13 | 184 | 16 | 496 |
| 48,376 | 0 | 44 | 2  | 284 | 1 | 24 | 13 | 200 | 16 | 552 |
| 48,377 | 0 | 39 | 2  | 250 | 1 | 21 | 11 | 164 | 14 | 474 |
| 48,378 | 0 | 33 | 2  | 226 | 1 | 19 | 10 | 143 | 13 | 421 |
| 48,379 | 0 | 31 | 2  | 211 | 1 | 17 | 10 | 130 | 13 | 389 |
| 48,380 | 0 | 30 | 2  | 209 | 1 | 17 | 10 | 128 | 13 | 384 |
| 48,381 | 0 | 28 | 3  | 200 | 1 | 16 | 11 | 118 | 15 | 362 |
| 48,382 | 0 | 28 | 3  | 200 | 1 | 16 | 11 | 118 | 15 | 362 |
| 48,383 | 0 | 28 | 3  | 192 | 1 | 16 | 11 | 112 | 15 | 348 |
| 48,384 | 0 | 28 | 3  | 190 | 1 | 16 | 11 | 112 | 15 | 346 |
| 48,385 | 0 | 28 | 3  | 189 | 1 | 16 | 11 | 110 | 15 | 343 |
| 48,386 | 0 | 28 | 3  | 187 | 1 | 16 | 11 | 109 | 15 | 340 |
| 48,387 | 0 | 28 | 4  | 187 | 1 | 16 | 11 | 109 | 16 | 340 |
| 48,388 | 0 | 28 | 4  | 187 | 1 | 16 | 13 | 109 | 18 | 340 |
| 48,389 | 0 | 28 | 5  | 187 | 0 | 16 | 13 | 109 | 18 | 340 |
| 48,390 | 0 | 28 | 5  | 183 | 0 | 16 | 13 | 105 | 18 | 332 |
| 48,391 | 0 | 28 | 5  | 183 | 0 | 16 | 13 | 105 | 18 | 332 |
| 48,392 | 0 | 28 | 13 | 183 | 0 | 16 | 14 | 104 | 27 | 331 |
| 48,393 | 0 | 29 | 13 | 181 | 1 | 16 | 9  | 102 | 23 | 328 |
| 48,394 | 0 | 29 | 13 | 181 | 1 | 16 | 10 | 102 | 24 | 328 |
| 48,395 | 0 | 30 | 13 | 177 | 1 | 15 | 9  | 99  | 23 | 321 |
| 48,396 | 0 | 30 | 13 | 177 | 1 | 15 | 9  | 99  | 23 | 321 |
| 48,397 | 0 | 28 | 13 | 167 | 1 | 13 | 9  | 95  | 23 | 303 |
| 48,398 | 0 | 17 | 13 | 124 | 1 | 12 | 8  | 81  | 22 | 234 |
| 48,399 | 0 | 17 | 13 | 117 | 1 | 11 | 8  | 79  | 22 | 224 |
| 48,400 | 0 | 15 | 12 | 106 | 1 | 9  | 7  | 70  | 20 | 200 |
| 48,401 | 0 | 15 | 12 | 106 | 1 | 9  | 7  | 70  | 20 | 200 |
| 48,402 | 0 | 15 | 12 | 107 | 1 | 9  | 7  | 70  | 20 | 201 |
| 48,403 | 0 | 15 | 12 | 106 | 1 | 9  | 6  | 67  | 19 | 197 |
| 48,404 | 0 | 15 | 12 | 106 | 1 | 9  | 6  | 66  | 19 | 196 |
| 48,405 | 0 | 14 | 12 | 105 | 1 | 9  | 6  | 66  | 19 | 194 |
| 48,406 | 0 | 14 | 12 | 104 | 1 | 9  | 6  | 66  | 19 | 193 |
| 48,407 | 0 | 14 | 12 | 104 | 1 | 9  | 6  | 66  | 19 | 193 |
| 48,408 | 0 | 14 | 12 | 104 | 1 | 9  | 6  | 66  | 19 | 193 |
| 48,409 | 0 | 14 | 12 | 104 | 1 | 9  | 6  | 66  | 19 | 193 |

|        |   |    |    |     |   |   |   |    |    |     |
|--------|---|----|----|-----|---|---|---|----|----|-----|
| 48,410 | 0 | 14 | 12 | 104 | 1 | 9 | 6 | 66 | 19 | 193 |
| 48,411 | 0 | 14 | 12 | 104 | 1 | 9 | 6 | 66 | 19 | 193 |
| 48,412 | 0 | 13 | 12 | 102 | 1 | 9 | 6 | 66 | 19 | 190 |
| 48,413 | 0 | 13 | 12 | 102 | 1 | 9 | 6 | 66 | 19 | 190 |
| 48,414 | 0 | 13 | 12 | 102 | 1 | 9 | 6 | 66 | 19 | 190 |
| 48,415 | 0 | 12 | 12 | 102 | 1 | 9 | 6 | 66 | 19 | 189 |
| 48,416 | 0 | 12 | 12 | 102 | 1 | 9 | 6 | 66 | 19 | 189 |
| 48,417 | 0 | 12 | 12 | 102 | 1 | 9 | 6 | 66 | 19 | 189 |
| 48,418 | 0 | 12 | 12 | 102 | 1 | 9 | 6 | 66 | 19 | 189 |
| 48,419 | 0 | 12 | 12 | 101 | 1 | 9 | 6 | 65 | 19 | 187 |
| 48,420 | 0 | 10 | 12 | 88  | 1 | 8 | 6 | 57 | 19 | 163 |
| 48,421 | 0 | 10 | 12 | 88  | 1 | 8 | 6 | 57 | 19 | 163 |
| 48,422 | 0 | 9  | 12 | 89  | 1 | 8 | 6 | 52 | 19 | 158 |
| 48,423 | 0 | 9  | 12 | 88  | 1 | 8 | 6 | 57 | 19 | 162 |
| 48,424 | 0 | 9  | 12 | 86  | 1 | 8 | 6 | 54 | 19 | 157 |
| 48,425 | 0 | 7  | 12 | 49  | 1 | 4 | 6 | 32 | 19 | 92  |
| 48,426 | 0 | 7  | 12 | 45  | 1 | 4 | 6 | 24 | 19 | 80  |
| 48,427 | 0 | 3  | 12 | 14  | 1 | 0 | 6 | 7  | 19 | 24  |
| 48,428 | 0 | 3  | 12 | 11  | 1 | 0 | 6 | 7  | 19 | 21  |
| 48,429 | 0 | 3  | 12 | 12  | 1 | 0 | 6 | 7  | 19 | 22  |
| 48,430 | 0 | 3  | 12 | 10  | 1 | 0 | 7 | 7  | 20 | 20  |
| 48,431 | 0 | 3  | 12 | 10  | 1 | 0 | 7 | 7  | 20 | 20  |
| 48,432 | 0 | 3  | 11 | 10  | 1 | 0 | 6 | 7  | 18 | 20  |
| 48,433 | 0 | 3  | 12 | 10  | 1 | 0 | 6 | 7  | 19 | 20  |
| 48,434 | 0 | 3  | 13 | 10  | 1 | 0 | 6 | 7  | 20 | 20  |
| 48,435 | 0 | 3  | 13 | 11  | 1 | 0 | 6 | 7  | 20 | 21  |
| 48,436 | 0 | 4  | 13 | 14  | 1 | 0 | 6 | 8  | 20 | 26  |
| 48,437 | 0 | 4  | 13 | 16  | 1 | 0 | 6 | 10 | 20 | 30  |
| 48,438 | 0 | 4  | 12 | 24  | 1 | 0 | 6 | 18 | 19 | 46  |
| 48,439 | 0 | 8  | 12 | 37  | 1 | 2 | 4 | 34 | 17 | 81  |
| 48,440 | 0 | 8  | 11 | 41  | 1 | 2 | 4 | 35 | 16 | 86  |
| 48,441 | 0 | 9  | 11 | 44  | 1 | 2 | 4 | 37 | 16 | 92  |
| 48,442 | 0 | 9  | 5  | 44  | 1 | 2 | 3 | 37 | 9  | 92  |
| 48,443 | 0 | 9  | 3  | 45  | 1 | 2 | 3 | 37 | 7  | 93  |
| 48,444 | 0 | 8  | 2  | 45  | 0 | 2 | 2 | 37 | 4  | 92  |
| 48,445 | 0 | 8  | 2  | 45  | 0 | 2 | 1 | 37 | 3  | 92  |
| 48,446 | 0 | 7  | 2  | 45  | 0 | 2 | 1 | 37 | 3  | 91  |
| 48,447 | 0 | 7  | 2  | 45  | 0 | 2 | 1 | 37 | 3  | 91  |
| 48,448 | 0 | 7  | 6  | 45  | 0 | 2 | 1 | 37 | 7  | 91  |
| 48,449 | 0 | 7  | 7  | 44  | 0 | 2 | 2 | 36 | 9  | 89  |
| 48,450 | 0 | 7  | 7  | 44  | 0 | 2 | 3 | 36 | 10 | 89  |

|        |   |   |    |    |   |   |    |    |    |     |
|--------|---|---|----|----|---|---|----|----|----|-----|
| 48,451 | 0 | 7 | 7  | 44 | 0 | 2 | 4  | 36 | 11 | 89  |
| 48,452 | 0 | 7 | 7  | 44 | 0 | 2 | 4  | 36 | 11 | 89  |
| 48,453 | 0 | 7 | 9  | 43 | 0 | 2 | 4  | 36 | 13 | 88  |
| 48,454 | 0 | 7 | 10 | 43 | 0 | 2 | 4  | 36 | 14 | 88  |
| 48,455 | 0 | 7 | 10 | 43 | 0 | 2 | 4  | 36 | 14 | 88  |
| 48,456 | 0 | 7 | 12 | 43 | 0 | 2 | 4  | 37 | 16 | 89  |
| 48,457 | 0 | 7 | 12 | 43 | 0 | 2 | 4  | 37 | 16 | 89  |
| 48,458 | 2 | 7 | 12 | 43 | 0 | 2 | 7  | 37 | 21 | 89  |
| 48,459 | 2 | 7 | 13 | 43 | 0 | 2 | 7  | 37 | 22 | 89  |
| 48,460 | 2 | 7 | 18 | 43 | 1 | 2 | 10 | 37 | 31 | 89  |
| 48,461 | 2 | 7 | 29 | 43 | 1 | 2 | 17 | 37 | 49 | 89  |
| 48,462 | 2 | 7 | 29 | 43 | 1 | 2 | 17 | 37 | 49 | 89  |
| 48,463 | 2 | 7 | 30 | 43 | 1 | 2 | 22 | 37 | 55 | 89  |
| 48,464 | 2 | 7 | 31 | 43 | 1 | 2 | 22 | 37 | 56 | 89  |
| 48,465 | 2 | 7 | 31 | 44 | 1 | 2 | 22 | 37 | 56 | 90  |
| 48,466 | 2 | 8 | 31 | 44 | 1 | 2 | 22 | 37 | 56 | 91  |
| 48,467 | 2 | 8 | 31 | 44 | 1 | 2 | 22 | 37 | 56 | 91  |
| 48,468 | 2 | 8 | 31 | 44 | 1 | 2 | 22 | 37 | 56 | 91  |
| 48,469 | 2 | 8 | 31 | 44 | 1 | 2 | 22 | 37 | 56 | 91  |
| 48,470 | 2 | 8 | 31 | 47 | 1 | 2 | 23 | 40 | 57 | 97  |
| 48,471 | 2 | 8 | 31 | 49 | 1 | 2 | 23 | 42 | 57 | 101 |
| 48,472 | 2 | 8 | 31 | 49 | 1 | 2 | 23 | 42 | 57 | 101 |
| 48,473 | 2 | 8 | 31 | 47 | 1 | 2 | 23 | 42 | 57 | 99  |
| 48,474 | 2 | 8 | 32 | 47 | 1 | 2 | 23 | 37 | 58 | 94  |
| 48,475 | 2 | 8 | 32 | 47 | 1 | 2 | 23 | 38 | 58 | 95  |
| 48,476 | 2 | 8 | 32 | 46 | 1 | 2 | 23 | 38 | 58 | 94  |
| 48,477 | 2 | 8 | 32 | 46 | 1 | 2 | 23 | 38 | 58 | 94  |
| 48,478 | 2 | 7 | 32 | 46 | 1 | 2 | 23 | 38 | 58 | 93  |
| 48,479 | 2 | 7 | 33 | 46 | 1 | 2 | 23 | 38 | 59 | 93  |
| 48,480 | 2 | 7 | 33 | 46 | 1 | 2 | 22 | 39 | 58 | 94  |
| 48,481 | 2 | 7 | 33 | 46 | 1 | 2 | 22 | 39 | 58 | 94  |
| 48,482 | 2 | 7 | 33 | 46 | 1 | 2 | 22 | 39 | 58 | 94  |
| 48,483 | 2 | 7 | 33 | 46 | 1 | 2 | 22 | 39 | 58 | 94  |
| 48,484 | 2 | 7 | 32 | 46 | 1 | 2 | 22 | 39 | 57 | 94  |
| 48,485 | 2 | 7 | 31 | 46 | 1 | 2 | 22 | 39 | 56 | 94  |
| 48,486 | 2 | 7 | 31 | 45 | 1 | 2 | 22 | 39 | 56 | 93  |
| 48,487 | 2 | 6 | 31 | 40 | 1 | 2 | 22 | 36 | 56 | 84  |
| 48,488 | 2 | 6 | 31 | 40 | 1 | 2 | 22 | 36 | 56 | 84  |
| 48,489 | 2 | 6 | 31 | 32 | 1 | 2 | 22 | 28 | 56 | 68  |
| 48,490 | 2 | 2 | 31 | 15 | 1 | 0 | 22 | 11 | 56 | 28  |
| 48,491 | 2 | 2 | 31 | 15 | 1 | 0 | 22 | 11 | 56 | 28  |

|        |   |   |    |    |   |   |    |    |     |    |
|--------|---|---|----|----|---|---|----|----|-----|----|
| 48,492 | 2 | 1 | 31 | 11 | 1 | 0 | 22 | 9  | 56  | 21 |
| 48,493 | 2 | 1 | 31 | 10 | 1 | 0 | 22 | 9  | 56  | 20 |
| 48,494 | 2 | 1 | 32 | 10 | 1 | 0 | 22 | 9  | 57  | 20 |
| 48,495 | 2 | 1 | 36 | 14 | 2 | 0 | 22 | 11 | 62  | 26 |
| 48,496 | 2 | 2 | 42 | 15 | 2 | 0 | 23 | 12 | 69  | 29 |
| 48,497 | 2 | 3 | 40 | 17 | 2 | 0 | 23 | 13 | 67  | 33 |
| 48,498 | 2 | 3 | 42 | 17 | 3 | 0 | 25 | 13 | 72  | 33 |
| 48,499 | 2 | 3 | 45 | 17 | 3 | 0 | 28 | 13 | 78  | 33 |
| 48,500 | 2 | 3 | 45 | 19 | 3 | 0 | 28 | 14 | 78  | 36 |
| 48,501 | 2 | 3 | 45 | 19 | 3 | 0 | 27 | 14 | 77  | 36 |
| 48,502 | 2 | 3 | 45 | 19 | 3 | 0 | 27 | 14 | 77  | 36 |
| 48,503 | 2 | 3 | 43 | 20 | 3 | 0 | 27 | 14 | 75  | 37 |
| 48,504 | 2 | 3 | 43 | 20 | 3 | 0 | 27 | 14 | 75  | 37 |
| 48,505 | 2 | 3 | 42 | 20 | 3 | 0 | 28 | 14 | 75  | 37 |
| 48,506 | 2 | 3 | 40 | 20 | 3 | 0 | 28 | 13 | 73  | 36 |
| 48,507 | 2 | 3 | 40 | 20 | 3 | 0 | 28 | 13 | 73  | 36 |
| 48,508 | 0 | 4 | 40 | 21 | 3 | 0 | 25 | 15 | 68  | 40 |
| 48,509 | 0 | 4 | 41 | 24 | 3 | 0 | 25 | 16 | 69  | 44 |
| 48,510 | 0 | 4 | 41 | 24 | 2 | 0 | 24 | 16 | 67  | 44 |
| 48,511 | 0 | 4 | 36 | 24 | 2 | 0 | 22 | 16 | 60  | 44 |
| 48,512 | 0 | 4 | 25 | 24 | 2 | 0 | 15 | 16 | 42  | 44 |
| 48,513 | 0 | 4 | 24 | 25 | 2 | 0 | 12 | 16 | 38  | 45 |
| 48,514 | 1 | 4 | 24 | 25 | 2 | 0 | 10 | 16 | 37  | 45 |
| 48,515 | 1 | 4 | 24 | 25 | 2 | 0 | 10 | 16 | 37  | 45 |
| 48,516 | 1 | 4 | 26 | 24 | 2 | 0 | 10 | 16 | 39  | 44 |
| 48,517 | 1 | 3 | 28 | 24 | 2 | 0 | 11 | 17 | 42  | 44 |
| 48,518 | 1 | 3 | 28 | 24 | 2 | 0 | 11 | 17 | 42  | 44 |
| 48,519 | 2 | 3 | 36 | 24 | 2 | 0 | 15 | 17 | 55  | 44 |
| 48,520 | 2 | 3 | 36 | 24 | 2 | 0 | 15 | 17 | 55  | 44 |
| 48,521 | 2 | 3 | 44 | 21 | 3 | 0 | 16 | 14 | 65  | 38 |
| 48,522 | 2 | 3 | 60 | 18 | 3 | 0 | 20 | 11 | 85  | 32 |
| 48,523 | 5 | 3 | 74 | 18 | 6 | 0 | 29 | 11 | 114 | 32 |
| 48,524 | 5 | 3 | 77 | 18 | 8 | 0 | 31 | 11 | 121 | 32 |
| 48,525 | 5 | 3 | 78 | 17 | 8 | 0 | 32 | 11 | 123 | 31 |
| 48,526 | 5 | 3 | 78 | 17 | 8 | 0 | 32 | 12 | 123 | 32 |
| 48,527 | 5 | 3 | 78 | 18 | 8 | 0 | 32 | 12 | 123 | 33 |
| 48,528 | 5 | 3 | 78 | 18 | 8 | 0 | 32 | 12 | 123 | 33 |
| 48,529 | 5 | 3 | 80 | 18 | 8 | 0 | 32 | 12 | 125 | 33 |
| 48,530 | 5 | 3 | 80 | 17 | 8 | 0 | 32 | 11 | 125 | 31 |
| 48,531 | 5 | 3 | 80 | 17 | 8 | 0 | 32 | 11 | 125 | 31 |
| 48,532 | 5 | 3 | 80 | 17 | 8 | 0 | 32 | 11 | 125 | 31 |



|        |   |   |    |    |   |   |    |    |     |    |
|--------|---|---|----|----|---|---|----|----|-----|----|
| 48,533 | 5 | 3 | 80 | 17 | 8 | 0 | 32 | 11 | 125 | 31 |
| 48,534 | 5 | 3 | 80 | 17 | 8 | 0 | 32 | 11 | 125 | 31 |
| 48,535 | 5 | 3 | 80 | 17 | 8 | 0 | 31 | 11 | 124 | 31 |
| 48,536 | 5 | 3 | 80 | 17 | 8 | 0 | 32 | 11 | 125 | 31 |
| 48,537 | 5 | 3 | 82 | 18 | 8 | 0 | 32 | 11 | 127 | 32 |
| 48,538 | 5 | 3 | 82 | 20 | 8 | 0 | 32 | 12 | 127 | 35 |
| 48,539 | 5 | 3 | 82 | 20 | 8 | 0 | 32 | 12 | 127 | 35 |
| 48,540 | 5 | 3 | 82 | 20 | 8 | 0 | 32 | 12 | 127 | 35 |
| 48,541 | 5 | 3 | 82 | 20 | 8 | 0 | 32 | 12 | 127 | 35 |
| 48,542 | 5 | 3 | 82 | 20 | 8 | 0 | 32 | 12 | 127 | 35 |
| 48,543 | 5 | 3 | 82 | 20 | 8 | 0 | 32 | 12 | 127 | 35 |
| 48,544 | 5 | 3 | 82 | 16 | 8 | 0 | 32 | 10 | 127 | 29 |
| 48,545 | 5 | 4 | 82 | 18 | 8 | 0 | 32 | 10 | 127 | 32 |
| 48,546 | 5 | 4 | 78 | 19 | 7 | 0 | 32 | 10 | 122 | 33 |
| 48,547 | 5 | 3 | 72 | 18 | 7 | 0 | 31 | 9  | 115 | 30 |
| 48,548 | 5 | 2 | 70 | 16 | 7 | 0 | 32 | 8  | 114 | 26 |
| 48,549 | 5 | 2 | 68 | 16 | 6 | 0 | 31 | 8  | 110 | 26 |
| 48,550 | 5 | 2 | 65 | 16 | 6 | 0 | 26 | 8  | 102 | 26 |
| 48,551 | 5 | 2 | 64 | 14 | 6 | 0 | 26 | 7  | 101 | 23 |
| 48,552 | 5 | 2 | 64 | 14 | 6 | 0 | 25 | 7  | 100 | 23 |
| 48,553 | 5 | 2 | 66 | 14 | 6 | 0 | 24 | 7  | 101 | 23 |
| 48,554 | 5 | 2 | 69 | 13 | 6 | 0 | 27 | 7  | 107 | 22 |
| 48,555 | 5 | 2 | 69 | 13 | 6 | 0 | 27 | 7  | 107 | 22 |
| 48,556 | 5 | 2 | 69 | 13 | 6 | 0 | 27 | 7  | 107 | 22 |
| 48,557 | 5 | 2 | 69 | 14 | 6 | 0 | 27 | 7  | 107 | 23 |
| 48,558 | 5 | 1 | 69 | 10 | 6 | 0 | 27 | 4  | 107 | 15 |
| 48,559 | 5 | 1 | 69 | 10 | 6 | 0 | 27 | 4  | 107 | 15 |
| 48,560 | 5 | 1 | 67 | 10 | 6 | 0 | 27 | 4  | 105 | 15 |
| 48,561 | 5 | 1 | 68 | 10 | 6 | 0 | 27 | 4  | 106 | 15 |
| 48,562 | 5 | 1 | 68 | 10 | 6 | 0 | 27 | 4  | 106 | 15 |
| 48,563 | 5 | 1 | 68 | 10 | 6 | 0 | 27 | 4  | 106 | 15 |
| 48,564 | 5 | 1 | 67 | 9  | 6 | 0 | 28 | 4  | 106 | 14 |
| 48,565 | 5 | 1 | 67 | 9  | 6 | 0 | 28 | 4  | 106 | 14 |
| 48,566 | 5 | 1 | 65 | 9  | 6 | 0 | 28 | 4  | 104 | 14 |
| 48,567 | 5 | 1 | 64 | 9  | 6 | 0 | 28 | 4  | 103 | 14 |
| 48,568 | 5 | 1 | 63 | 9  | 6 | 0 | 27 | 4  | 101 | 14 |
| 48,569 | 5 | 1 | 61 | 11 | 6 | 0 | 25 | 4  | 97  | 16 |
| 48,570 | 4 | 1 | 55 | 11 | 6 | 0 | 23 | 4  | 88  | 16 |
| 48,571 | 4 | 1 | 47 | 11 | 5 | 0 | 21 | 4  | 77  | 16 |
| 48,572 | 4 | 1 | 34 | 11 | 5 | 0 | 17 | 4  | 60  | 16 |
| 48,573 | 4 | 3 | 31 | 11 | 5 | 0 | 17 | 5  | 57  | 19 |

|        |   |   |    |    |   |   |    |    |    |    |
|--------|---|---|----|----|---|---|----|----|----|----|
| 48,574 | 1 | 3 | 17 | 11 | 2 | 0 | 8  | 5  | 28 | 19 |
| 48,575 | 1 | 3 | 15 | 13 | 0 | 0 | 6  | 6  | 22 | 22 |
| 48,576 | 1 | 4 | 13 | 13 | 0 | 0 | 5  | 7  | 19 | 24 |
| 48,577 | 1 | 6 | 13 | 13 | 0 | 0 | 5  | 5  | 19 | 24 |
| 48,578 | 1 | 7 | 13 | 12 | 0 | 0 | 5  | 6  | 19 | 25 |
| 48,579 | 1 | 7 | 10 | 12 | 0 | 0 | 6  | 6  | 17 | 25 |
| 48,580 | 1 | 7 | 10 | 15 | 0 | 0 | 6  | 8  | 17 | 30 |
| 48,581 | 1 | 7 | 10 | 15 | 0 | 0 | 6  | 8  | 17 | 30 |
| 48,582 | 1 | 7 | 12 | 15 | 0 | 0 | 7  | 8  | 20 | 30 |
| 48,583 | 1 | 7 | 12 | 15 | 0 | 0 | 7  | 8  | 20 | 30 |
| 48,584 | 1 | 7 | 11 | 15 | 0 | 0 | 7  | 8  | 19 | 30 |
| 48,585 | 3 | 7 | 14 | 15 | 0 | 0 | 8  | 8  | 25 | 30 |
| 48,586 | 3 | 7 | 15 | 15 | 0 | 0 | 9  | 8  | 27 | 30 |
| 48,587 | 3 | 7 | 17 | 14 | 0 | 0 | 15 | 8  | 35 | 29 |
| 48,588 | 3 | 7 | 17 | 14 | 0 | 0 | 15 | 8  | 35 | 29 |
| 48,589 | 3 | 7 | 17 | 13 | 0 | 0 | 17 | 7  | 37 | 27 |
| 48,590 | 3 | 7 | 17 | 13 | 0 | 0 | 17 | 7  | 37 | 27 |
| 48,591 | 3 | 7 | 17 | 13 | 0 | 0 | 17 | 7  | 37 | 27 |
| 48,592 | 3 | 7 | 17 | 13 | 0 | 0 | 17 | 7  | 37 | 27 |
| 48,593 | 3 | 7 | 17 | 13 | 0 | 0 | 17 | 7  | 37 | 27 |
| 48,594 | 3 | 7 | 19 | 13 | 0 | 0 | 17 | 7  | 39 | 27 |
| 48,595 | 3 | 7 | 19 | 13 | 0 | 0 | 17 | 7  | 39 | 27 |
| 48,596 | 3 | 6 | 19 | 12 | 0 | 0 | 17 | 7  | 39 | 25 |
| 48,597 | 3 | 6 | 20 | 12 | 1 | 0 | 19 | 7  | 43 | 25 |
| 48,598 | 3 | 6 | 20 | 12 | 1 | 0 | 19 | 7  | 43 | 25 |
| 48,599 | 3 | 6 | 22 | 14 | 1 | 0 | 20 | 8  | 46 | 28 |
| 48,600 | 3 | 6 | 24 | 14 | 1 | 0 | 22 | 8  | 50 | 28 |
| 48,601 | 3 | 6 | 24 | 14 | 1 | 0 | 22 | 8  | 50 | 28 |
| 48,602 | 3 | 6 | 24 | 14 | 1 | 0 | 22 | 10 | 50 | 30 |
| 48,603 | 3 | 6 | 22 | 14 | 1 | 0 | 22 | 10 | 48 | 30 |
| 48,604 | 3 | 7 | 22 | 15 | 1 | 1 | 22 | 10 | 48 | 33 |
| 48,605 | 3 | 7 | 19 | 17 | 1 | 1 | 19 | 10 | 42 | 35 |
| 48,606 | 3 | 7 | 19 | 17 | 1 | 1 | 19 | 10 | 42 | 35 |
| 48,607 | 3 | 7 | 20 | 18 | 1 | 1 | 19 | 10 | 43 | 36 |
| 48,608 | 3 | 7 | 20 | 17 | 1 | 1 | 19 | 10 | 43 | 35 |
| 48,609 | 5 | 7 | 21 | 17 | 1 | 1 | 19 | 10 | 46 | 35 |
| 48,610 | 5 | 7 | 21 | 18 | 1 | 1 | 19 | 10 | 46 | 36 |
| 48,611 | 5 | 7 | 21 | 19 | 1 | 1 | 19 | 11 | 46 | 38 |
| 48,612 | 5 | 7 | 20 | 23 | 1 | 1 | 19 | 12 | 45 | 43 |
| 48,613 | 5 | 7 | 20 | 23 | 1 | 1 | 19 | 12 | 45 | 43 |
| 48,614 | 5 | 7 | 21 | 32 | 1 | 1 | 20 | 13 | 47 | 53 |

|        |   |    |    |    |   |   |    |    |    |    |
|--------|---|----|----|----|---|---|----|----|----|----|
| 48,615 | 4 | 10 | 21 | 41 | 1 | 1 | 19 | 14 | 45 | 66 |
| 48,616 | 4 | 10 | 21 | 42 | 1 | 1 | 19 | 14 | 45 | 67 |
| 48,617 | 4 | 10 | 28 | 49 | 1 | 3 | 21 | 16 | 54 | 78 |
| 48,618 | 5 | 10 | 28 | 49 | 2 | 3 | 23 | 15 | 58 | 77 |
| 48,619 | 5 | 10 | 30 | 55 | 2 | 3 | 29 | 17 | 66 | 85 |
| 48,620 | 5 | 10 | 30 | 55 | 2 | 3 | 29 | 20 | 66 | 88 |
| 48,621 | 5 | 10 | 31 | 55 | 2 | 3 | 29 | 20 | 67 | 88 |
| 48,622 | 5 | 10 | 31 | 55 | 2 | 3 | 29 | 20 | 67 | 88 |
| 48,623 | 5 | 8  | 31 | 56 | 2 | 3 | 30 | 19 | 68 | 86 |
| 48,624 | 5 | 8  | 31 | 56 | 2 | 3 | 30 | 19 | 68 | 86 |
| 48,625 | 6 | 8  | 31 | 54 | 2 | 3 | 31 | 18 | 70 | 83 |
| 48,626 | 6 | 8  | 30 | 54 | 2 | 3 | 31 | 18 | 69 | 83 |
| 48,627 | 6 | 8  | 30 | 54 | 2 | 3 | 31 | 17 | 69 | 82 |
| 48,628 | 6 | 6  | 30 | 54 | 2 | 3 | 30 | 17 | 68 | 80 |
| 48,629 | 6 | 5  | 31 | 54 | 2 | 3 | 30 | 16 | 69 | 78 |
| 48,630 | 6 | 5  | 31 | 51 | 2 | 3 | 30 | 14 | 69 | 73 |
| 48,631 | 6 | 5  | 31 | 51 | 2 | 3 | 30 | 14 | 69 | 73 |
| 48,632 | 6 | 5  | 29 | 51 | 2 | 3 | 29 | 15 | 66 | 74 |
| 48,633 | 6 | 5  | 29 | 51 | 2 | 3 | 30 | 15 | 67 | 74 |
| 48,634 | 6 | 5  | 29 | 51 | 2 | 3 | 30 | 16 | 67 | 75 |
| 48,635 | 6 | 5  | 29 | 51 | 2 | 3 | 30 | 17 | 67 | 76 |
| 48,636 | 4 | 6  | 26 | 53 | 2 | 3 | 29 | 18 | 61 | 80 |
| 48,637 | 4 | 6  | 24 | 53 | 2 | 3 | 28 | 18 | 58 | 80 |
| 48,638 | 4 | 6  | 22 | 53 | 2 | 3 | 22 | 18 | 50 | 80 |
| 48,639 | 4 | 6  | 22 | 53 | 2 | 3 | 20 | 18 | 48 | 80 |
| 48,640 | 4 | 6  | 22 | 52 | 2 | 3 | 20 | 18 | 48 | 79 |
| 48,641 | 4 | 6  | 22 | 52 | 2 | 3 | 20 | 18 | 48 | 79 |
| 48,642 | 4 | 6  | 23 | 52 | 2 | 3 | 20 | 18 | 49 | 79 |
| 48,643 | 4 | 7  | 23 | 52 | 2 | 4 | 20 | 19 | 49 | 82 |
| 48,644 | 4 | 7  | 23 | 52 | 2 | 4 | 22 | 19 | 51 | 82 |
| 48,645 | 4 | 7  | 23 | 52 | 2 | 4 | 22 | 19 | 51 | 82 |
| 48,646 | 4 | 8  | 23 | 56 | 2 | 4 | 22 | 21 | 51 | 89 |
| 48,647 | 4 | 8  | 22 | 54 | 2 | 4 | 22 | 21 | 50 | 87 |
| 48,648 | 4 | 9  | 21 | 54 | 1 | 4 | 20 | 23 | 46 | 90 |
| 48,649 | 4 | 9  | 21 | 55 | 1 | 4 | 20 | 23 | 46 | 91 |
| 48,650 | 4 | 9  | 19 | 55 | 1 | 4 | 18 | 23 | 42 | 91 |
| 48,651 | 4 | 9  | 17 | 55 | 1 | 5 | 16 | 23 | 38 | 92 |
| 48,652 | 4 | 9  | 25 | 55 | 1 | 5 | 17 | 23 | 47 | 92 |
| 48,653 | 4 | 9  | 25 | 54 | 1 | 5 | 17 | 21 | 47 | 89 |
| 48,654 | 4 | 9  | 25 | 54 | 1 | 5 | 17 | 21 | 47 | 89 |
| 48,655 | 4 | 8  | 26 | 53 | 1 | 4 | 18 | 21 | 49 | 86 |

|        |   |   |    |    |   |   |    |    |    |    |
|--------|---|---|----|----|---|---|----|----|----|----|
| 48,656 | 4 | 8 | 31 | 51 | 2 | 4 | 19 | 21 | 56 | 84 |
| 48,657 | 4 | 8 | 30 | 50 | 2 | 4 | 19 | 21 | 55 | 83 |
| 48,658 | 4 | 8 | 30 | 50 | 2 | 4 | 19 | 21 | 55 | 83 |
| 48,659 | 3 | 8 | 36 | 50 | 2 | 4 | 20 | 21 | 61 | 83 |
| 48,660 | 3 | 8 | 36 | 50 | 2 | 4 | 20 | 21 | 61 | 83 |
| 48,661 | 3 | 8 | 37 | 48 | 3 | 4 | 20 | 21 | 63 | 81 |
| 48,662 | 3 | 8 | 37 | 48 | 3 | 4 | 20 | 21 | 63 | 81 |
| 48,663 | 3 | 8 | 37 | 44 | 3 | 4 | 23 | 22 | 66 | 78 |
| 48,664 | 3 | 8 | 37 | 45 | 3 | 4 | 23 | 23 | 66 | 80 |
| 48,665 | 3 | 5 | 37 | 27 | 3 | 4 | 22 | 21 | 65 | 57 |
| 48,666 | 3 | 5 | 37 | 27 | 3 | 4 | 22 | 22 | 65 | 58 |
| 48,667 | 3 | 5 | 30 | 13 | 3 | 2 | 20 | 18 | 56 | 38 |
| 48,668 | 2 | 5 | 30 | 13 | 2 | 2 | 18 | 18 | 52 | 38 |
| 48,669 | 2 | 5 | 29 | 13 | 2 | 2 | 14 | 18 | 47 | 38 |
| 48,670 | 2 | 7 | 28 | 13 | 2 | 2 | 12 | 20 | 44 | 42 |
| 48,671 | 2 | 8 | 28 | 14 | 2 | 2 | 12 | 17 | 44 | 41 |
| 48,672 | 2 | 8 | 28 | 14 | 2 | 2 | 12 | 17 | 44 | 41 |
| 48,673 | 2 | 9 | 28 | 16 | 2 | 2 | 12 | 17 | 44 | 44 |
| 48,674 | 2 | 9 | 28 | 17 | 2 | 2 | 11 | 19 | 43 | 47 |
| 48,675 | 2 | 9 | 28 | 17 | 2 | 2 | 11 | 19 | 43 | 47 |
| 48,676 | 1 | 9 | 28 | 17 | 2 | 2 | 10 | 20 | 41 | 48 |
| 48,677 | 1 | 9 | 28 | 18 | 2 | 2 | 10 | 21 | 41 | 50 |
| 48,678 | 1 | 8 | 28 | 19 | 2 | 2 | 10 | 22 | 41 | 51 |
| 48,679 | 1 | 8 | 27 | 20 | 2 | 2 | 10 | 22 | 40 | 52 |
| 48,680 | 1 | 8 | 27 | 20 | 2 | 2 | 10 | 22 | 40 | 52 |
| 48,681 | 1 | 8 | 27 | 21 | 2 | 2 | 10 | 23 | 40 | 54 |
| 48,682 | 1 | 8 | 27 | 21 | 2 | 2 | 10 | 24 | 40 | 55 |
| 48,683 | 1 | 8 | 28 | 38 | 2 | 2 | 10 | 26 | 41 | 74 |
| 48,684 | 1 | 8 | 28 | 40 | 2 | 2 | 10 | 27 | 41 | 77 |
| 48,685 | 1 | 8 | 28 | 40 | 2 | 2 | 10 | 26 | 41 | 76 |
| 48,686 | 3 | 8 | 28 | 40 | 2 | 2 | 13 | 25 | 46 | 75 |
| 48,687 | 3 | 7 | 28 | 44 | 2 | 2 | 13 | 24 | 46 | 77 |
| 48,688 | 3 | 7 | 28 | 44 | 2 | 3 | 13 | 24 | 46 | 78 |
| 48,689 | 4 | 7 | 28 | 44 | 2 | 3 | 13 | 24 | 47 | 78 |
| 48,690 | 4 | 7 | 28 | 44 | 2 | 3 | 13 | 25 | 47 | 79 |
| 48,691 | 4 | 7 | 28 | 44 | 2 | 3 | 13 | 25 | 47 | 79 |
| 48,692 | 4 | 7 | 28 | 44 | 2 | 3 | 13 | 25 | 47 | 79 |
| 48,693 | 4 | 7 | 28 | 44 | 2 | 3 | 13 | 25 | 47 | 79 |
| 48,694 | 4 | 6 | 28 | 44 | 2 | 2 | 13 | 24 | 47 | 76 |
| 48,695 | 4 | 6 | 26 | 44 | 2 | 2 | 11 | 24 | 43 | 76 |
| 48,696 | 4 | 6 | 26 | 44 | 2 | 2 | 11 | 24 | 43 | 76 |

|        |    |   |    |    |   |   |     |    |     |    |
|--------|----|---|----|----|---|---|-----|----|-----|----|
| 48,697 | 4  | 5 | 26 | 40 | 2 | 2 | 11  | 22 | 43  | 69 |
| 48,698 | 4  | 5 | 27 | 40 | 2 | 2 | 13  | 22 | 46  | 69 |
| 48,699 | 4  | 4 | 27 | 40 | 2 | 2 | 13  | 20 | 46  | 66 |
| 48,700 | 4  | 4 | 21 | 37 | 2 | 2 | 12  | 19 | 39  | 62 |
| 48,701 | 4  | 4 | 21 | 37 | 2 | 1 | 15  | 19 | 42  | 61 |
| 48,702 | 4  | 4 | 21 | 39 | 2 | 1 | 16  | 19 | 43  | 63 |
| 48,703 | 4  | 4 | 20 | 39 | 2 | 1 | 16  | 19 | 42  | 63 |
| 48,704 | 4  | 4 | 20 | 39 | 2 | 1 | 16  | 19 | 42  | 63 |
| 48,705 | 4  | 4 | 20 | 39 | 2 | 1 | 16  | 19 | 42  | 63 |
| 48,706 | 4  | 4 | 18 | 39 | 2 | 1 | 17  | 20 | 41  | 64 |
| 48,707 | 7  | 4 | 21 | 40 | 1 | 1 | 24  | 21 | 53  | 66 |
| 48,708 | 7  | 4 | 24 | 41 | 1 | 1 | 26  | 22 | 58  | 68 |
| 48,709 | 8  | 4 | 29 | 41 | 1 | 1 | 32  | 22 | 70  | 68 |
| 48,710 | 7  | 4 | 24 | 41 | 1 | 1 | 31  | 22 | 63  | 68 |
| 48,711 | 7  | 4 | 25 | 42 | 1 | 1 | 32  | 21 | 65  | 68 |
| 48,712 | 7  | 4 | 25 | 43 | 0 | 1 | 32  | 21 | 64  | 69 |
| 48,713 | 7  | 4 | 27 | 43 | 0 | 1 | 30  | 21 | 64  | 69 |
| 48,714 | 7  | 4 | 30 | 42 | 0 | 1 | 35  | 20 | 72  | 67 |
| 48,715 | 7  | 4 | 30 | 42 | 0 | 1 | 35  | 20 | 72  | 67 |
| 48,716 | 7  | 4 | 31 | 42 | 2 | 1 | 43  | 20 | 83  | 67 |
| 48,717 | 8  | 4 | 59 | 42 | 2 | 1 | 56  | 19 | 125 | 66 |
| 48,718 | 8  | 5 | 59 | 42 | 2 | 2 | 57  | 19 | 126 | 68 |
| 48,719 | 8  | 5 | 60 | 42 | 2 | 2 | 58  | 19 | 128 | 68 |
| 48,720 | 8  | 2 | 65 | 39 | 2 | 2 | 60  | 17 | 135 | 60 |
| 48,721 | 10 | 2 | 75 | 39 | 2 | 2 | 74  | 17 | 161 | 60 |
| 48,722 | 10 | 2 | 74 | 39 | 2 | 2 | 74  | 17 | 160 | 60 |
| 48,723 | 10 | 1 | 84 | 37 | 3 | 2 | 87  | 17 | 184 | 57 |
| 48,724 | 10 | 1 | 84 | 37 | 3 | 2 | 88  | 17 | 185 | 57 |
| 48,725 | 10 | 1 | 84 | 35 | 3 | 2 | 88  | 15 | 185 | 53 |
| 48,726 | 11 | 1 | 91 | 35 | 4 | 2 | 98  | 15 | 204 | 53 |
| 48,727 | 11 | 1 | 95 | 35 | 4 | 2 | 103 | 14 | 213 | 52 |
| 48,728 | 11 | 1 | 96 | 33 | 4 | 2 | 103 | 12 | 214 | 48 |
| 48,729 | 11 | 1 | 96 | 33 | 4 | 2 | 105 | 12 | 216 | 48 |
| 48,730 | 11 | 1 | 96 | 33 | 4 | 2 | 108 | 12 | 219 | 48 |
| 48,731 | 11 | 1 | 96 | 32 | 4 | 2 | 108 | 11 | 219 | 46 |
| 48,732 | 11 | 1 | 96 | 32 | 4 | 2 | 108 | 10 | 219 | 45 |
| 48,733 | 11 | 1 | 96 | 16 | 4 | 2 | 108 | 7  | 219 | 26 |
| 48,734 | 11 | 1 | 96 | 14 | 4 | 2 | 108 | 6  | 219 | 23 |
| 48,735 | 11 | 1 | 96 | 14 | 4 | 2 | 108 | 6  | 219 | 23 |
| 48,736 | 9  | 1 | 96 | 14 | 4 | 2 | 106 | 6  | 215 | 23 |
| 48,737 | 9  | 1 | 96 | 14 | 4 | 2 | 107 | 6  | 216 | 23 |

|        |    |   |     |    |    |   |     |    |     |     |
|--------|----|---|-----|----|----|---|-----|----|-----|-----|
| 48,738 | 9  | 1 | 96  | 8  | 4  | 1 | 106 | 6  | 215 | 16  |
| 48,739 | 8  | 1 | 96  | 8  | 4  | 1 | 106 | 6  | 214 | 16  |
| 48,740 | 8  | 1 | 97  | 8  | 4  | 1 | 108 | 5  | 217 | 15  |
| 48,741 | 8  | 1 | 98  | 8  | 4  | 1 | 110 | 5  | 220 | 15  |
| 48,742 | 8  | 1 | 98  | 8  | 4  | 1 | 110 | 5  | 220 | 15  |
| 48,743 | 8  | 1 | 100 | 9  | 4  | 1 | 110 | 5  | 222 | 16  |
| 48,744 | 8  | 1 | 99  | 9  | 4  | 1 | 110 | 5  | 221 | 16  |
| 48,745 | 8  | 1 | 99  | 9  | 4  | 1 | 110 | 5  | 221 | 16  |
| 48,746 | 8  | 1 | 100 | 9  | 4  | 1 | 111 | 5  | 223 | 16  |
| 48,747 | 8  | 1 | 100 | 11 | 4  | 1 | 111 | 5  | 223 | 18  |
| 48,748 | 8  | 1 | 103 | 11 | 4  | 1 | 112 | 5  | 227 | 18  |
| 48,749 | 8  | 1 | 102 | 11 | 4  | 1 | 113 | 5  | 227 | 18  |
| 48,750 | 8  | 1 | 105 | 9  | 5  | 1 | 113 | 5  | 231 | 16  |
| 48,751 | 8  | 1 | 104 | 9  | 5  | 1 | 114 | 5  | 231 | 16  |
| 48,752 | 8  | 1 | 104 | 9  | 5  | 1 | 110 | 5  | 227 | 16  |
| 48,753 | 8  | 1 | 104 | 9  | 5  | 1 | 110 | 5  | 227 | 16  |
| 48,754 | 8  | 1 | 104 | 10 | 5  | 1 | 109 | 5  | 226 | 17  |
| 48,755 | 8  | 1 | 104 | 14 | 5  | 1 | 109 | 5  | 226 | 21  |
| 48,756 | 8  | 1 | 104 | 15 | 5  | 1 | 109 | 5  | 226 | 22  |
| 48,757 | 8  | 1 | 102 | 17 | 5  | 1 | 108 | 4  | 223 | 23  |
| 48,758 | 5  | 1 | 98  | 15 | 5  | 1 | 100 | 2  | 208 | 19  |
| 48,759 | 5  | 1 | 95  | 15 | 5  | 1 | 98  | 2  | 203 | 19  |
| 48,760 | 4  | 1 | 88  | 14 | 5  | 1 | 92  | 2  | 189 | 18  |
| 48,761 | 4  | 1 | 93  | 16 | 5  | 1 | 94  | 2  | 196 | 20  |
| 48,762 | 4  | 1 | 91  | 16 | 5  | 1 | 93  | 2  | 193 | 20  |
| 48,763 | 4  | 1 | 93  | 17 | 5  | 1 | 97  | 2  | 199 | 21  |
| 48,764 | 4  | 1 | 94  | 18 | 5  | 1 | 96  | 3  | 199 | 23  |
| 48,765 | 4  | 1 | 91  | 18 | 5  | 1 | 97  | 1  | 197 | 21  |
| 48,766 | 5  | 1 | 91  | 18 | 3  | 1 | 88  | 1  | 187 | 21  |
| 48,767 | 4  | 1 | 67  | 18 | 3  | 1 | 78  | 1  | 152 | 21  |
| 48,768 | 6  | 1 | 81  | 22 | 5  | 1 | 82  | 1  | 174 | 25  |
| 48,769 | 7  | 0 | 160 | 27 | 14 | 0 | 142 | 1  | 323 | 28  |
| 48,770 | 19 | 0 | 246 | 27 | 22 | 0 | 306 | 1  | 593 | 28  |
| 48,771 | 27 | 0 | 293 | 27 | 28 | 0 | 378 | 1  | 726 | 28  |
| 48,772 | 25 | 0 | 286 | 27 | 28 | 0 | 371 | 1  | 710 | 28  |
| 48,773 | 25 | 0 | 286 | 29 | 28 | 0 | 373 | 2  | 712 | 31  |
| 48,774 | 26 | 2 | 278 | 39 | 27 | 0 | 361 | 7  | 692 | 48  |
| 48,775 | 26 | 2 | 272 | 49 | 26 | 1 | 350 | 12 | 674 | 64  |
| 48,776 | 25 | 2 | 272 | 61 | 26 | 3 | 352 | 29 | 675 | 95  |
| 48,777 | 25 | 2 | 272 | 62 | 26 | 3 | 348 | 31 | 671 | 98  |
| 48,778 | 25 | 2 | 268 | 64 | 26 | 3 | 346 | 31 | 665 | 100 |

|        |    |   |     |     |    |   |     |    |       |     |
|--------|----|---|-----|-----|----|---|-----|----|-------|-----|
| 48,779 | 25 | 2 | 267 | 67  | 26 | 3 | 346 | 31 | 664   | 103 |
| 48,780 | 25 | 2 | 267 | 70  | 26 | 4 | 346 | 35 | 664   | 111 |
| 48,781 | 25 | 2 | 267 | 69  | 26 | 4 | 344 | 35 | 662   | 110 |
| 48,782 | 25 | 2 | 267 | 70  | 26 | 4 | 344 | 35 | 662   | 111 |
| 48,783 | 25 | 2 | 267 | 69  | 26 | 4 | 344 | 35 | 662   | 110 |
| 48,784 | 25 | 2 | 267 | 70  | 26 | 4 | 344 | 35 | 662   | 111 |
| 48,785 | 25 | 3 | 266 | 71  | 26 | 4 | 347 | 35 | 664   | 113 |
| 48,786 | 25 | 3 | 266 | 71  | 26 | 4 | 347 | 35 | 664   | 113 |
| 48,787 | 25 | 3 | 287 | 72  | 26 | 4 | 357 | 35 | 695   | 114 |
| 48,788 | 26 | 3 | 308 | 72  | 26 | 4 | 373 | 35 | 733   | 114 |
| 48,789 | 26 | 3 | 313 | 72  | 26 | 4 | 386 | 35 | 751   | 114 |
| 48,790 | 26 | 3 | 313 | 72  | 26 | 4 | 386 | 35 | 751   | 114 |
| 48,791 | 26 | 3 | 326 | 74  | 27 | 4 | 394 | 35 | 773   | 116 |
| 48,792 | 26 | 3 | 330 | 74  | 27 | 4 | 395 | 35 | 778   | 116 |
| 48,793 | 27 | 3 | 374 | 74  | 27 | 4 | 412 | 35 | 840   | 116 |
| 48,794 | 27 | 3 | 374 | 73  | 27 | 4 | 412 | 36 | 840   | 116 |
| 48,795 | 28 | 3 | 377 | 114 | 28 | 4 | 413 | 58 | 846   | 179 |
| 48,796 | 53 | 3 | 475 | 130 | 30 | 4 | 495 | 64 | 1,053 | 201 |
| 48,797 | 57 | 3 | 514 | 135 | 31 | 4 | 508 | 65 | 1,110 | 207 |
| 48,798 | 57 | 3 | 519 | 134 | 31 | 4 | 511 | 65 | 1,118 | 206 |
| 48,799 | 58 | 3 | 564 | 134 | 33 | 4 | 534 | 65 | 1,189 | 206 |
| 48,800 | 62 | 4 | 599 | 134 | 33 | 4 | 568 | 66 | 1,262 | 208 |
| 48,801 | 62 | 4 | 596 | 134 | 32 | 4 | 568 | 66 | 1,258 | 208 |
| 48,802 | 64 | 4 | 644 | 135 | 35 | 4 | 609 | 67 | 1,352 | 210 |
| 48,803 | 65 | 4 | 680 | 135 | 36 | 4 | 653 | 68 | 1,434 | 211 |
| 48,804 | 65 | 4 | 692 | 134 | 37 | 4 | 666 | 68 | 1,460 | 210 |
| 48,805 | 65 | 4 | 692 | 128 | 37 | 4 | 667 | 68 | 1,461 | 204 |
| 48,806 | 65 | 4 | 692 | 128 | 38 | 4 | 667 | 68 | 1,462 | 204 |
| 48,807 | 65 | 4 | 693 | 128 | 38 | 4 | 669 | 68 | 1,465 | 204 |
| 48,808 | 65 | 4 | 693 | 128 | 38 | 4 | 669 | 68 | 1,465 | 204 |
| 48,809 | 65 | 4 | 694 | 128 | 38 | 4 | 672 | 68 | 1,469 | 204 |
| 48,810 | 66 | 5 | 695 | 128 | 38 | 4 | 674 | 68 | 1,473 | 205 |
| 48,811 | 66 | 5 | 699 | 128 | 38 | 4 | 674 | 68 | 1,477 | 205 |
| 48,812 | 66 | 5 | 694 | 126 | 38 | 4 | 672 | 68 | 1,470 | 203 |
| 48,813 | 66 | 5 | 691 | 125 | 38 | 4 | 669 | 68 | 1,464 | 202 |
| 48,814 | 66 | 5 | 690 | 125 | 38 | 4 | 667 | 68 | 1,461 | 202 |
| 48,815 | 66 | 5 | 689 | 124 | 38 | 4 | 665 | 67 | 1,458 | 200 |
| 48,816 | 66 | 5 | 689 | 124 | 38 | 4 | 663 | 67 | 1,456 | 200 |
| 48,817 | 65 | 5 | 726 | 129 | 40 | 6 | 682 | 70 | 1,513 | 210 |
| 48,818 | 65 | 5 | 724 | 130 | 40 | 6 | 681 | 72 | 1,510 | 213 |
| 48,819 | 64 | 5 | 708 | 123 | 38 | 6 | 674 | 74 | 1,484 | 208 |

|        |    |   |     |     |    |   |     |    |       |     |
|--------|----|---|-----|-----|----|---|-----|----|-------|-----|
| 48,820 | 63 | 7 | 630 | 143 | 29 | 7 | 612 | 75 | 1,334 | 232 |
| 48,821 | 51 | 7 | 542 | 146 | 21 | 7 | 445 | 75 | 1,059 | 235 |
| 48,822 | 43 | 7 | 491 | 145 | 15 | 7 | 371 | 75 | 920   | 234 |
| 48,823 | 43 | 7 | 489 | 144 | 15 | 7 | 364 | 74 | 911   | 232 |
| 48,824 | 43 | 5 | 488 | 134 | 15 | 7 | 362 | 69 | 908   | 215 |
| 48,825 | 42 | 5 | 487 | 134 | 15 | 7 | 362 | 69 | 906   | 215 |
| 48,826 | 42 | 5 | 487 | 124 | 15 | 6 | 362 | 64 | 906   | 199 |
| 48,827 | 42 | 5 | 489 | 112 | 15 | 4 | 363 | 47 | 909   | 168 |
| 48,828 | 42 | 5 | 493 | 111 | 15 | 4 | 369 | 45 | 919   | 165 |
| 48,829 | 42 | 5 | 494 | 106 | 15 | 4 | 372 | 45 | 923   | 160 |
| 48,830 | 42 | 5 | 493 | 106 | 15 | 4 | 372 | 44 | 922   | 159 |
| 48,831 | 43 | 5 | 493 | 103 | 15 | 3 | 372 | 40 | 923   | 151 |
| 48,832 | 43 | 5 | 494 | 103 | 15 | 3 | 372 | 40 | 924   | 151 |
| 48,833 | 43 | 5 | 495 | 102 | 15 | 3 | 373 | 40 | 926   | 150 |
| 48,834 | 43 | 5 | 497 | 102 | 15 | 3 | 373 | 40 | 928   | 150 |
| 48,835 | 43 | 5 | 498 | 102 | 15 | 4 | 373 | 40 | 929   | 151 |
| 48,836 | 43 | 5 | 498 | 107 | 15 | 4 | 371 | 41 | 927   | 157 |
| 48,837 | 43 | 5 | 477 | 107 | 15 | 4 | 360 | 41 | 895   | 157 |
| 48,838 | 42 | 5 | 457 | 106 | 15 | 4 | 344 | 42 | 858   | 157 |
| 48,839 | 42 | 5 | 455 | 107 | 15 | 4 | 339 | 42 | 851   | 158 |
| 48,840 | 42 | 5 | 452 | 107 | 15 | 4 | 332 | 43 | 841   | 159 |
| 48,841 | 42 | 5 | 442 | 107 | 15 | 4 | 328 | 43 | 827   | 159 |
| 48,842 | 45 | 5 | 476 | 106 | 14 | 4 | 348 | 43 | 883   | 158 |
| 48,843 | 45 | 5 | 475 | 107 | 14 | 4 | 346 | 42 | 880   | 158 |
| 48,844 | 44 | 5 | 429 | 107 | 14 | 4 | 328 | 42 | 815   | 158 |
| 48,845 | 43 | 5 | 442 | 52  | 14 | 4 | 335 | 16 | 834   | 77  |
| 48,846 | 49 | 5 | 536 | 55  | 20 | 4 | 404 | 17 | 1,009 | 81  |
| 48,847 | 24 | 5 | 457 | 56  | 18 | 4 | 333 | 18 | 832   | 83  |
| 48,848 | 20 | 5 | 419 | 50  | 17 | 4 | 323 | 17 | 779   | 76  |
| 48,849 | 20 | 5 | 414 | 51  | 17 | 4 | 320 | 20 | 771   | 80  |
| 48,850 | 19 | 5 | 366 | 51  | 15 | 4 | 296 | 20 | 696   | 80  |
| 48,851 | 15 | 4 | 331 | 51  | 15 | 4 | 259 | 19 | 620   | 78  |
| 48,852 | 13 | 4 | 283 | 50  | 12 | 4 | 218 | 18 | 526   | 76  |
| 48,853 | 13 | 4 | 279 | 50  | 12 | 4 | 214 | 19 | 518   | 77  |
| 48,854 | 12 | 4 | 246 | 51  | 11 | 4 | 174 | 18 | 443   | 77  |
| 48,855 | 14 | 4 | 237 | 53  | 10 | 4 | 161 | 18 | 422   | 79  |
| 48,856 | 14 | 4 | 237 | 52  | 10 | 4 | 160 | 18 | 421   | 78  |
| 48,857 | 16 | 4 | 248 | 52  | 9  | 4 | 163 | 18 | 436   | 78  |
| 48,858 | 16 | 4 | 248 | 52  | 9  | 4 | 161 | 18 | 434   | 78  |
| 48,859 | 16 | 4 | 247 | 52  | 9  | 4 | 159 | 18 | 431   | 78  |
| 48,860 | 19 | 4 | 249 | 52  | 9  | 4 | 166 | 19 | 443   | 79  |



|        |    |   |     |    |    |   |     |    |       |     |
|--------|----|---|-----|----|----|---|-----|----|-------|-----|
| 48,861 | 19 | 3 | 251 | 53 | 9  | 4 | 170 | 19 | 449   | 79  |
| 48,862 | 20 | 3 | 250 | 56 | 9  | 4 | 171 | 21 | 450   | 84  |
| 48,863 | 22 | 3 | 257 | 59 | 10 | 4 | 173 | 21 | 462   | 87  |
| 48,864 | 22 | 4 | 257 | 58 | 10 | 4 | 172 | 21 | 461   | 87  |
| 48,865 | 22 | 4 | 233 | 58 | 8  | 4 | 162 | 21 | 425   | 87  |
| 48,866 | 28 | 4 | 242 | 58 | 9  | 4 | 166 | 21 | 445   | 87  |
| 48,867 | 30 | 4 | 331 | 58 | 9  | 4 | 200 | 21 | 570   | 87  |
| 48,868 | 30 | 4 | 340 | 52 | 9  | 2 | 203 | 16 | 582   | 74  |
| 48,869 | 30 | 4 | 340 | 52 | 9  | 2 | 203 | 16 | 582   | 74  |
| 48,870 | 34 | 4 | 343 | 50 | 9  | 2 | 204 | 14 | 590   | 70  |
| 48,871 | 36 | 2 | 382 | 28 | 12 | 1 | 221 | 13 | 651   | 44  |
| 48,872 | 36 | 2 | 400 | 28 | 12 | 1 | 230 | 13 | 678   | 44  |
| 48,873 | 36 | 2 | 399 | 28 | 12 | 1 | 228 | 14 | 675   | 45  |
| 48,874 | 36 | 2 | 398 | 28 | 12 | 1 | 228 | 14 | 674   | 45  |
| 48,875 | 36 | 2 | 407 | 28 | 12 | 1 | 230 | 14 | 685   | 45  |
| 48,876 | 36 | 2 | 410 | 28 | 12 | 1 | 236 | 14 | 694   | 45  |
| 48,877 | 36 | 2 | 412 | 28 | 12 | 1 | 238 | 14 | 698   | 45  |
| 48,878 | 36 | 2 | 408 | 28 | 12 | 1 | 232 | 14 | 688   | 45  |
| 48,879 | 36 | 2 | 408 | 28 | 12 | 1 | 232 | 14 | 688   | 45  |
| 48,880 | 36 | 2 | 407 | 29 | 12 | 2 | 229 | 14 | 684   | 47  |
| 48,881 | 35 | 3 | 409 | 37 | 12 | 3 | 230 | 17 | 686   | 60  |
| 48,882 | 35 | 3 | 416 | 40 | 12 | 3 | 235 | 18 | 698   | 64  |
| 48,883 | 35 | 3 | 415 | 40 | 12 | 3 | 234 | 18 | 696   | 64  |
| 48,884 | 40 | 3 | 462 | 40 | 16 | 3 | 264 | 18 | 782   | 64  |
| 48,885 | 43 | 4 | 482 | 41 | 16 | 2 | 276 | 17 | 817   | 64  |
| 48,886 | 43 | 4 | 482 | 41 | 16 | 2 | 276 | 17 | 817   | 64  |
| 48,887 | 43 | 3 | 501 | 35 | 16 | 2 | 276 | 16 | 836   | 56  |
| 48,888 | 43 | 3 | 505 | 37 | 16 | 2 | 277 | 16 | 841   | 58  |
| 48,889 | 47 | 3 | 579 | 37 | 18 | 2 | 301 | 15 | 945   | 57  |
| 48,890 | 47 | 3 | 677 | 38 | 19 | 2 | 323 | 15 | 1,066 | 58  |
| 48,891 | 48 | 3 | 693 | 39 | 20 | 2 | 335 | 15 | 1,096 | 59  |
| 48,892 | 45 | 3 | 671 | 40 | 21 | 2 | 317 | 17 | 1,054 | 62  |
| 48,893 | 45 | 3 | 669 | 43 | 21 | 4 | 317 | 18 | 1,052 | 68  |
| 48,894 | 45 | 3 | 665 | 42 | 21 | 4 | 316 | 20 | 1,047 | 69  |
| 48,895 | 45 | 8 | 671 | 49 | 21 | 4 | 320 | 25 | 1,057 | 86  |
| 48,896 | 45 | 8 | 661 | 57 | 21 | 5 | 319 | 27 | 1,046 | 97  |
| 48,897 | 40 | 8 | 573 | 58 | 14 | 5 | 256 | 25 | 883   | 96  |
| 48,898 | 42 | 8 | 558 | 63 | 14 | 5 | 256 | 27 | 870   | 103 |
| 48,899 | 43 | 8 | 564 | 63 | 14 | 5 | 258 | 24 | 879   | 100 |
| 48,900 | 43 | 8 | 565 | 64 | 14 | 6 | 259 | 24 | 881   | 102 |
| 48,901 | 43 | 8 | 566 | 64 | 14 | 6 | 261 | 24 | 884   | 102 |

|        |    |    |     |     |    |   |     |    |     |     |
|--------|----|----|-----|-----|----|---|-----|----|-----|-----|
| 48,902 | 43 | 8  | 566 | 64  | 14 | 6 | 261 | 24 | 884 | 102 |
| 48,903 | 43 | 8  | 565 | 64  | 14 | 6 | 261 | 24 | 883 | 102 |
| 48,904 | 41 | 8  | 561 | 64  | 14 | 6 | 261 | 23 | 877 | 101 |
| 48,905 | 41 | 8  | 562 | 63  | 14 | 6 | 261 | 23 | 878 | 100 |
| 48,906 | 41 | 8  | 564 | 62  | 14 | 6 | 262 | 23 | 881 | 99  |
| 48,907 | 41 | 8  | 561 | 62  | 14 | 6 | 262 | 23 | 878 | 99  |
| 48,908 | 39 | 8  | 560 | 62  | 14 | 6 | 261 | 23 | 874 | 99  |
| 48,909 | 39 | 8  | 566 | 62  | 14 | 6 | 265 | 23 | 884 | 99  |
| 48,910 | 35 | 8  | 563 | 63  | 14 | 6 | 256 | 22 | 868 | 99  |
| 48,911 | 35 | 8  | 560 | 65  | 14 | 6 | 252 | 22 | 861 | 101 |
| 48,912 | 35 | 8  | 560 | 65  | 14 | 6 | 252 | 25 | 861 | 104 |
| 48,913 | 34 | 9  | 559 | 62  | 14 | 6 | 251 | 23 | 858 | 100 |
| 48,914 | 32 | 8  | 551 | 60  | 13 | 6 | 249 | 23 | 845 | 97  |
| 48,915 | 31 | 8  | 539 | 60  | 12 | 6 | 244 | 23 | 826 | 97  |
| 48,916 | 26 | 8  | 529 | 60  | 12 | 6 | 237 | 25 | 804 | 99  |
| 48,917 | 24 | 8  | 440 | 63  | 12 | 6 | 203 | 32 | 679 | 109 |
| 48,918 | 24 | 8  | 431 | 67  | 12 | 6 | 201 | 34 | 668 | 115 |
| 48,919 | 24 | 8  | 430 | 69  | 12 | 6 | 200 | 34 | 666 | 117 |
| 48,920 | 19 | 8  | 427 | 71  | 12 | 6 | 199 | 34 | 657 | 119 |
| 48,921 | 18 | 8  | 411 | 78  | 11 | 6 | 191 | 35 | 631 | 127 |
| 48,922 | 17 | 8  | 387 | 83  | 9  | 7 | 182 | 42 | 595 | 140 |
| 48,923 | 17 | 10 | 369 | 87  | 9  | 8 | 173 | 47 | 568 | 152 |
| 48,924 | 17 | 10 | 363 | 87  | 9  | 8 | 171 | 46 | 560 | 151 |
| 48,925 | 17 | 10 | 361 | 103 | 9  | 8 | 170 | 48 | 557 | 169 |
| 48,926 | 17 | 10 | 358 | 105 | 9  | 8 | 164 | 50 | 548 | 173 |
| 48,927 | 17 | 10 | 354 | 105 | 9  | 8 | 161 | 50 | 541 | 173 |
| 48,928 | 18 | 10 | 375 | 107 | 11 | 8 | 166 | 52 | 570 | 177 |
| 48,929 | 18 | 10 | 375 | 109 | 11 | 8 | 166 | 52 | 570 | 179 |
| 48,930 | 18 | 10 | 375 | 112 | 11 | 9 | 166 | 53 | 570 | 184 |
| 48,931 | 18 | 10 | 375 | 111 | 11 | 8 | 166 | 52 | 570 | 181 |
| 48,932 | 27 | 9  | 504 | 103 | 15 | 7 | 238 | 51 | 784 | 170 |
| 48,933 | 27 | 9  | 497 | 100 | 15 | 7 | 233 | 50 | 772 | 166 |
| 48,934 | 22 | 8  | 455 | 98  | 11 | 7 | 205 | 50 | 693 | 163 |
| 48,935 | 22 | 8  | 454 | 102 | 11 | 7 | 203 | 51 | 690 | 168 |
| 48,936 | 19 | 8  | 449 | 103 | 11 | 7 | 192 | 51 | 671 | 169 |
| 48,937 | 28 | 8  | 476 | 103 | 12 | 7 | 220 | 51 | 736 | 169 |
| 48,938 | 28 | 8  | 475 | 104 | 12 | 7 | 219 | 53 | 734 | 172 |
| 48,939 | 24 | 8  | 410 | 102 | 11 | 7 | 198 | 53 | 643 | 170 |
| 48,940 | 24 | 8  | 400 | 102 | 10 | 7 | 197 | 53 | 631 | 170 |
| 48,941 | 24 | 8  | 304 | 99  | 9  | 7 | 173 | 52 | 510 | 166 |
| 48,942 | 23 | 8  | 288 | 100 | 8  | 7 | 162 | 52 | 481 | 167 |

|        |    |   |     |     |   |   |     |    |     |     |
|--------|----|---|-----|-----|---|---|-----|----|-----|-----|
| 48,943 | 23 | 8 | 278 | 103 | 7 | 7 | 157 | 52 | 465 | 170 |
| 48,944 | 23 | 8 | 274 | 108 | 7 | 5 | 155 | 51 | 459 | 172 |
| 48,945 | 24 | 8 | 275 | 118 | 7 | 5 | 153 | 54 | 459 | 185 |
| 48,946 | 24 | 3 | 271 | 113 | 7 | 5 | 151 | 49 | 453 | 170 |
| 48,947 | 27 | 3 | 279 | 105 | 7 | 4 | 148 | 47 | 461 | 159 |
| 48,948 | 26 | 4 | 268 | 103 | 7 | 4 | 142 | 52 | 443 | 163 |
| 48,949 | 24 | 4 | 266 | 97  | 7 | 4 | 130 | 50 | 427 | 155 |
| 48,950 | 23 | 5 | 260 | 101 | 7 | 4 | 127 | 51 | 417 | 161 |
| 48,951 | 23 | 5 | 259 | 100 | 7 | 3 | 127 | 51 | 416 | 159 |
| 48,952 | 23 | 5 | 261 | 102 | 7 | 3 | 126 | 53 | 417 | 163 |
| 48,953 | 23 | 5 | 265 | 108 | 7 | 3 | 127 | 53 | 422 | 169 |
| 48,954 | 23 | 5 | 267 | 108 | 7 | 4 | 126 | 53 | 423 | 170 |
| 48,955 | 23 | 5 | 266 | 108 | 7 | 4 | 126 | 53 | 422 | 170 |
| 48,956 | 23 | 5 | 264 | 109 | 7 | 4 | 125 | 53 | 419 | 171 |
| 48,957 | 23 | 5 | 264 | 108 | 7 | 4 | 125 | 53 | 419 | 170 |
| 48,958 | 23 | 5 | 260 | 108 | 7 | 4 | 124 | 53 | 414 | 170 |
| 48,959 | 23 | 5 | 259 | 109 | 7 | 5 | 125 | 56 | 414 | 175 |
| 48,960 | 23 | 5 | 252 | 109 | 7 | 5 | 121 | 58 | 403 | 177 |
| 48,961 | 23 | 5 | 252 | 108 | 7 | 5 | 121 | 58 | 403 | 176 |
| 48,962 | 23 | 5 | 253 | 106 | 7 | 5 | 121 | 58 | 404 | 174 |
| 48,963 | 23 | 5 | 254 | 105 | 7 | 5 | 121 | 55 | 405 | 170 |
| 48,964 | 23 | 4 | 253 | 105 | 7 | 5 | 121 | 55 | 404 | 169 |
| 48,965 | 23 | 4 | 255 | 106 | 7 | 5 | 122 | 55 | 407 | 170 |
| 48,966 | 23 | 4 | 255 | 106 | 7 | 5 | 122 | 55 | 407 | 170 |
| 48,967 | 23 | 4 | 257 | 106 | 7 | 5 | 122 | 53 | 409 | 168 |
| 48,968 | 23 | 4 | 270 | 99  | 7 | 5 | 133 | 44 | 433 | 152 |
| 48,969 | 23 | 4 | 271 | 99  | 7 | 5 | 133 | 44 | 434 | 152 |
| 48,970 | 23 | 4 | 271 | 97  | 7 | 5 | 133 | 44 | 434 | 150 |
| 48,971 | 23 | 4 | 271 | 95  | 7 | 5 | 133 | 44 | 434 | 148 |
| 48,972 | 23 | 4 | 275 | 88  | 9 | 5 | 136 | 43 | 443 | 140 |
| 48,973 | 24 | 2 | 277 | 78  | 9 | 3 | 141 | 31 | 451 | 114 |
| 48,974 | 24 | 2 | 283 | 78  | 9 | 3 | 141 | 31 | 457 | 114 |
| 48,975 | 24 | 2 | 285 | 62  | 9 | 3 | 141 | 29 | 459 | 96  |
| 48,976 | 24 | 2 | 284 | 60  | 9 | 3 | 142 | 28 | 459 | 93  |
| 48,977 | 24 | 2 | 284 | 60  | 9 | 4 | 142 | 31 | 459 | 97  |
| 48,978 | 23 | 2 | 263 | 60  | 7 | 4 | 137 | 31 | 430 | 97  |
| 48,979 | 23 | 2 | 269 | 58  | 7 | 4 | 140 | 29 | 439 | 93  |
| 48,980 | 23 | 2 | 269 | 53  | 7 | 3 | 140 | 28 | 439 | 86  |
| 48,981 | 23 | 2 | 254 | 53  | 7 | 3 | 139 | 34 | 423 | 92  |
| 48,982 | 14 | 2 | 144 | 53  | 3 | 3 | 68  | 35 | 229 | 93  |
| 48,983 | 14 | 2 | 144 | 54  | 3 | 3 | 68  | 34 | 229 | 93  |

|        |    |    |     |    |    |   |     |     |     |     |
|--------|----|----|-----|----|----|---|-----|-----|-----|-----|
| 48,984 | 14 | 2  | 146 | 54 | 3  | 3 | 68  | 35  | 231 | 94  |
| 48,985 | 14 | 2  | 146 | 54 | 3  | 3 | 69  | 35  | 232 | 94  |
| 48,986 | 14 | 3  | 146 | 49 | 3  | 3 | 68  | 34  | 231 | 89  |
| 48,987 | 14 | 3  | 135 | 50 | 5  | 3 | 73  | 39  | 227 | 95  |
| 48,988 | 5  | 3  | 89  | 50 | 4  | 3 | 45  | 39  | 143 | 95  |
| 48,989 | 8  | 3  | 119 | 52 | 6  | 3 | 65  | 38  | 198 | 96  |
| 48,990 | 8  | 3  | 119 | 52 | 6  | 3 | 65  | 42  | 198 | 100 |
| 48,991 | 8  | 3  | 117 | 52 | 6  | 3 | 62  | 42  | 193 | 100 |
| 48,992 | 9  | 3  | 120 | 52 | 6  | 3 | 65  | 42  | 200 | 100 |
| 48,993 | 9  | 3  | 131 | 51 | 6  | 3 | 66  | 42  | 212 | 99  |
| 48,994 | 9  | 4  | 131 | 50 | 6  | 3 | 66  | 42  | 212 | 99  |
| 48,995 | 9  | 6  | 130 | 42 | 6  | 3 | 66  | 42  | 211 | 93  |
| 48,996 | 8  | 8  | 136 | 31 | 6  | 3 | 68  | 46  | 218 | 88  |
| 48,997 | 8  | 8  | 136 | 35 | 6  | 3 | 68  | 48  | 218 | 94  |
| 48,998 | 6  | 8  | 156 | 36 | 8  | 3 | 71  | 49  | 241 | 96  |
| 48,999 | 6  | 7  | 168 | 33 | 8  | 3 | 78  | 49  | 260 | 92  |
| 49,000 | 6  | 7  | 165 | 32 | 8  | 3 | 78  | 52  | 257 | 94  |
| 49,001 | 6  | 8  | 165 | 33 | 8  | 3 | 78  | 54  | 257 | 98  |
| 49,002 | 6  | 15 | 165 | 48 | 8  | 4 | 78  | 75  | 257 | 142 |
| 49,003 | 6  | 15 | 163 | 48 | 8  | 4 | 78  | 81  | 255 | 148 |
| 49,004 | 7  | 16 | 186 | 45 | 9  | 5 | 87  | 90  | 289 | 156 |
| 49,005 | 7  | 16 | 184 | 47 | 9  | 4 | 87  | 90  | 287 | 157 |
| 49,006 | 7  | 21 | 184 | 56 | 9  | 5 | 87  | 98  | 287 | 180 |
| 49,007 | 7  | 22 | 184 | 61 | 9  | 5 | 87  | 105 | 287 | 193 |
| 49,008 | 9  | 22 | 188 | 61 | 9  | 5 | 89  | 106 | 295 | 194 |
| 49,009 | 10 | 22 | 191 | 61 | 9  | 5 | 90  | 106 | 300 | 194 |
| 49,010 | 11 | 23 | 196 | 60 | 9  | 4 | 90  | 103 | 306 | 190 |
| 49,011 | 11 | 23 | 196 | 61 | 9  | 4 | 90  | 101 | 306 | 189 |
| 49,012 | 11 | 23 | 196 | 63 | 9  | 6 | 90  | 105 | 306 | 197 |
| 49,013 | 11 | 23 | 195 | 63 | 9  | 6 | 90  | 105 | 305 | 197 |
| 49,014 | 21 | 23 | 240 | 63 | 10 | 6 | 139 | 106 | 410 | 198 |
| 49,015 | 21 | 23 | 242 | 63 | 10 | 6 | 139 | 106 | 412 | 198 |
| 49,016 | 21 | 23 | 240 | 61 | 10 | 6 | 140 | 106 | 411 | 196 |
| 49,017 | 21 | 23 | 251 | 61 | 10 | 6 | 154 | 106 | 436 | 196 |
| 49,018 | 21 | 23 | 285 | 61 | 11 | 6 | 157 | 106 | 474 | 196 |
| 49,019 | 21 | 23 | 281 | 64 | 11 | 6 | 154 | 106 | 467 | 199 |
| 49,020 | 21 | 23 | 281 | 67 | 11 | 6 | 154 | 106 | 467 | 202 |
| 49,021 | 21 | 23 | 278 | 67 | 9  | 6 | 151 | 106 | 459 | 202 |
| 49,022 | 21 | 23 | 277 | 67 | 9  | 7 | 151 | 106 | 458 | 203 |
| 49,023 | 20 | 23 | 275 | 67 | 9  | 7 | 149 | 106 | 453 | 203 |
| 49,024 | 20 | 23 | 275 | 67 | 9  | 7 | 146 | 106 | 450 | 203 |

|        |    |    |     |    |    |   |     |     |     |     |
|--------|----|----|-----|----|----|---|-----|-----|-----|-----|
| 49,025 | 20 | 23 | 270 | 67 | 9  | 7 | 146 | 106 | 445 | 203 |
| 49,026 | 20 | 23 | 268 | 67 | 9  | 7 | 147 | 105 | 444 | 202 |
| 49,027 | 20 | 23 | 268 | 68 | 10 | 6 | 146 | 102 | 444 | 199 |
| 49,028 | 21 | 23 | 270 | 68 | 10 | 6 | 146 | 102 | 447 | 199 |
| 49,029 | 21 | 23 | 271 | 68 | 11 | 6 | 146 | 102 | 449 | 199 |
| 49,030 | 21 | 23 | 275 | 68 | 11 | 6 | 148 | 102 | 455 | 199 |
| 49,031 | 21 | 23 | 271 | 68 | 11 | 6 | 150 | 102 | 453 | 199 |
| 49,032 | 21 | 23 | 270 | 69 | 11 | 6 | 149 | 96  | 451 | 194 |
| 49,033 | 21 | 23 | 270 | 69 | 11 | 6 | 149 | 95  | 451 | 193 |
| 49,034 | 21 | 23 | 269 | 69 | 11 | 6 | 149 | 95  | 450 | 193 |
| 49,035 | 21 | 23 | 267 | 69 | 11 | 6 | 149 | 94  | 448 | 192 |
| 49,036 | 21 | 22 | 267 | 69 | 11 | 6 | 150 | 94  | 449 | 191 |
| 49,037 | 21 | 22 | 266 | 69 | 11 | 7 | 150 | 94  | 448 | 192 |
| 49,038 | 21 | 22 | 260 | 68 | 9  | 7 | 144 | 89  | 434 | 186 |
| 49,039 | 19 | 22 | 234 | 68 | 7  | 7 | 125 | 89  | 385 | 186 |
| 49,040 | 18 | 22 | 229 | 65 | 7  | 7 | 124 | 84  | 378 | 178 |
| 49,041 | 18 | 22 | 228 | 65 | 7  | 7 | 125 | 84  | 378 | 178 |
| 49,042 | 17 | 22 | 225 | 68 | 7  | 7 | 122 | 85  | 371 | 182 |
| 49,043 | 17 | 22 | 214 | 69 | 7  | 7 | 120 | 86  | 358 | 184 |
| 49,044 | 17 | 22 | 213 | 69 | 7  | 7 | 119 | 90  | 356 | 188 |
| 49,045 | 17 | 21 | 213 | 68 | 7  | 7 | 119 | 88  | 356 | 184 |
| 49,046 | 17 | 19 | 212 | 69 | 7  | 7 | 119 | 86  | 355 | 181 |
| 49,047 | 17 | 17 | 207 | 69 | 7  | 7 | 118 | 79  | 349 | 172 |
| 49,048 | 17 | 17 | 198 | 65 | 7  | 7 | 118 | 77  | 340 | 166 |
| 49,049 | 16 | 17 | 176 | 64 | 5  | 7 | 111 | 78  | 308 | 166 |
| 49,050 | 16 | 17 | 162 | 63 | 5  | 7 | 103 | 73  | 286 | 160 |
| 49,051 | 16 | 18 | 158 | 72 | 4  | 7 | 102 | 74  | 280 | 171 |
| 49,052 | 16 | 17 | 154 | 73 | 4  | 7 | 101 | 74  | 275 | 171 |
| 49,053 | 15 | 10 | 165 | 58 | 4  | 6 | 108 | 53  | 292 | 127 |
| 49,054 | 15 | 9  | 162 | 53 | 4  | 5 | 112 | 36  | 293 | 103 |
| 49,055 | 15 | 9  | 163 | 52 | 4  | 5 | 113 | 36  | 295 | 102 |
| 49,056 | 15 | 4  | 162 | 44 | 4  | 4 | 112 | 28  | 293 | 80  |
| 49,057 | 15 | 4  | 162 | 44 | 4  | 4 | 112 | 28  | 293 | 80  |
| 49,058 | 13 | 3  | 160 | 38 | 4  | 4 | 111 | 21  | 288 | 66  |
| 49,059 | 12 | 3  | 157 | 38 | 4  | 4 | 110 | 20  | 283 | 65  |
| 49,060 | 13 | 3  | 198 | 38 | 5  | 4 | 128 | 20  | 344 | 65  |
| 49,061 | 12 | 2  | 196 | 37 | 5  | 4 | 129 | 20  | 342 | 63  |
| 49,062 | 16 | 2  | 220 | 37 | 7  | 4 | 158 | 20  | 401 | 63  |
| 49,063 | 7  | 2  | 208 | 35 | 6  | 2 | 123 | 17  | 344 | 56  |
| 49,064 | 8  | 2  | 220 | 36 | 6  | 2 | 139 | 17  | 373 | 57  |
| 49,065 | 8  | 2  | 251 | 36 | 10 | 2 | 149 | 16  | 418 | 56  |

|        |    |   |     |    |    |   |     |    |       |    |
|--------|----|---|-----|----|----|---|-----|----|-------|----|
| 49,066 | 8  | 2 | 253 | 36 | 11 | 2 | 153 | 16 | 425   | 56 |
| 49,067 | 8  | 2 | 263 | 36 | 11 | 2 | 156 | 16 | 438   | 56 |
| 49,068 | 8  | 2 | 251 | 36 | 11 | 2 | 142 | 16 | 412   | 56 |
| 49,069 | 8  | 2 | 220 | 37 | 10 | 2 | 138 | 16 | 376   | 57 |
| 49,070 | 8  | 2 | 211 | 34 | 10 | 2 | 131 | 16 | 360   | 54 |
| 49,071 | 9  | 2 | 213 | 31 | 10 | 2 | 132 | 16 | 364   | 51 |
| 49,072 | 9  | 2 | 213 | 31 | 10 | 2 | 132 | 16 | 364   | 51 |
| 49,073 | 9  | 2 | 213 | 31 | 10 | 1 | 132 | 16 | 364   | 50 |
| 49,074 | 9  | 2 | 220 | 31 | 10 | 1 | 138 | 16 | 377   | 50 |
| 49,075 | 9  | 2 | 220 | 34 | 10 | 1 | 138 | 17 | 377   | 54 |
| 49,076 | 12 | 2 | 233 | 37 | 15 | 1 | 154 | 17 | 414   | 57 |
| 49,077 | 13 | 2 | 239 | 39 | 16 | 1 | 160 | 18 | 428   | 60 |
| 49,078 | 13 | 3 | 240 | 38 | 15 | 1 | 163 | 19 | 431   | 61 |
| 49,079 | 13 | 3 | 239 | 41 | 15 | 1 | 168 | 19 | 435   | 64 |
| 49,080 | 13 | 4 | 234 | 44 | 14 | 1 | 165 | 22 | 426   | 71 |
| 49,081 | 13 | 4 | 229 | 44 | 14 | 1 | 164 | 22 | 420   | 71 |
| 49,082 | 13 | 4 | 247 | 51 | 14 | 1 | 176 | 23 | 450   | 79 |
| 49,083 | 13 | 4 | 247 | 50 | 14 | 1 | 176 | 23 | 450   | 78 |
| 49,084 | 13 | 4 | 247 | 50 | 14 | 1 | 176 | 23 | 450   | 78 |
| 49,085 | 14 | 4 | 251 | 50 | 14 | 1 | 178 | 23 | 457   | 78 |
| 49,086 | 14 | 4 | 263 | 50 | 14 | 1 | 180 | 23 | 471   | 78 |
| 49,087 | 14 | 4 | 260 | 50 | 14 | 0 | 179 | 23 | 467   | 77 |
| 49,088 | 18 | 4 | 313 | 50 | 17 | 0 | 255 | 23 | 603   | 77 |
| 49,089 | 18 | 4 | 317 | 50 | 17 | 0 | 255 | 23 | 607   | 77 |
| 49,090 | 20 | 7 | 326 | 50 | 18 | 0 | 288 | 23 | 652   | 80 |
| 49,091 | 20 | 7 | 326 | 51 | 18 | 0 | 287 | 24 | 651   | 82 |
| 49,092 | 26 | 7 | 355 | 52 | 19 | 0 | 316 | 25 | 716   | 84 |
| 49,093 | 26 | 7 | 355 | 49 | 20 | 0 | 316 | 25 | 717   | 81 |
| 49,094 | 27 | 7 | 391 | 48 | 24 | 0 | 372 | 24 | 814   | 79 |
| 49,095 | 31 | 7 | 412 | 48 | 26 | 0 | 400 | 20 | 869   | 75 |
| 49,096 | 35 | 7 | 453 | 47 | 30 | 0 | 444 | 21 | 962   | 75 |
| 49,097 | 35 | 7 | 453 | 45 | 30 | 0 | 444 | 21 | 962   | 73 |
| 49,098 | 36 | 7 | 612 | 44 | 35 | 0 | 511 | 21 | 1,194 | 72 |
| 49,099 | 40 | 7 | 691 | 44 | 47 | 0 | 605 | 21 | 1,383 | 72 |
| 49,100 | 40 | 7 | 717 | 44 | 47 | 0 | 615 | 19 | 1,419 | 70 |
| 49,101 | 40 | 7 | 725 | 44 | 47 | 0 | 618 | 19 | 1,430 | 70 |
| 49,102 | 40 | 5 | 726 | 29 | 47 | 0 | 616 | 12 | 1,429 | 46 |
| 49,103 | 40 | 5 | 738 | 29 | 48 | 0 | 624 | 13 | 1,450 | 47 |
| 49,104 | 40 | 5 | 723 | 30 | 48 | 0 | 615 | 13 | 1,426 | 48 |
| 49,105 | 40 | 5 | 720 | 30 | 48 | 0 | 611 | 13 | 1,419 | 48 |
| 49,106 | 40 | 6 | 715 | 29 | 48 | 0 | 610 | 13 | 1,413 | 48 |

|        |     |    |       |    |    |   |       |    |       |    |
|--------|-----|----|-------|----|----|---|-------|----|-------|----|
| 49,107 | 44  | 6  | 747   | 29 | 48 | 0 | 625   | 14 | 1,464 | 49 |
| 49,108 | 45  | 6  | 772   | 29 | 49 | 0 | 634   | 14 | 1,500 | 49 |
| 49,109 | 54  | 6  | 903   | 29 | 55 | 0 | 696   | 14 | 1,708 | 49 |
| 49,110 | 53  | 6  | 920   | 29 | 62 | 0 | 735   | 14 | 1,770 | 49 |
| 49,111 | 65  | 6  | 965   | 29 | 67 | 0 | 806   | 16 | 1,903 | 51 |
| 49,112 | 74  | 6  | 998   | 30 | 71 | 0 | 815   | 16 | 1,958 | 52 |
| 49,113 | 72  | 6  | 990   | 30 | 71 | 0 | 790   | 16 | 1,923 | 52 |
| 49,114 | 71  | 9  | 1,055 | 30 | 78 | 0 | 844   | 15 | 2,048 | 54 |
| 49,115 | 70  | 9  | 1,122 | 29 | 79 | 0 | 846   | 15 | 2,117 | 53 |
| 49,116 | 70  | 11 | 1,090 | 35 | 75 | 0 | 835   | 21 | 2,070 | 67 |
| 49,117 | 70  | 11 | 1,088 | 36 | 74 | 0 | 830   | 21 | 2,062 | 68 |
| 49,118 | 70  | 11 | 1,193 | 37 | 79 | 0 | 881   | 21 | 2,223 | 69 |
| 49,119 | 70  | 11 | 1,192 | 37 | 79 | 1 | 881   | 21 | 2,222 | 70 |
| 49,120 | 70  | 11 | 1,189 | 36 | 79 | 1 | 879   | 21 | 2,217 | 69 |
| 49,121 | 70  | 11 | 1,190 | 37 | 79 | 1 | 881   | 22 | 2,220 | 71 |
| 49,122 | 69  | 11 | 1,187 | 37 | 79 | 1 | 881   | 22 | 2,216 | 71 |
| 49,123 | 69  | 11 | 1,195 | 37 | 80 | 1 | 883   | 23 | 2,227 | 72 |
| 49,124 | 69  | 11 | 1,198 | 37 | 80 | 1 | 884   | 23 | 2,231 | 72 |
| 49,125 | 73  | 11 | 1,219 | 34 | 80 | 1 | 890   | 22 | 2,262 | 68 |
| 49,126 | 73  | 11 | 1,223 | 35 | 80 | 1 | 891   | 22 | 2,267 | 69 |
| 49,127 | 119 | 11 | 1,372 | 32 | 84 | 1 | 1,064 | 22 | 2,639 | 66 |
| 49,128 | 119 | 12 | 1,366 | 31 | 83 | 1 | 1,058 | 21 | 2,626 | 65 |
| 49,129 | 119 | 11 | 1,365 | 31 | 83 | 1 | 1,055 | 20 | 2,622 | 63 |
| 49,130 | 123 | 11 | 1,388 | 29 | 84 | 1 | 1,065 | 21 | 2,660 | 62 |
| 49,131 | 123 | 10 | 1,385 | 26 | 84 | 1 | 1,062 | 18 | 2,654 | 55 |
| 49,132 | 123 | 10 | 1,377 | 26 | 84 | 1 | 1,056 | 18 | 2,640 | 55 |
| 49,133 | 141 | 13 | 1,542 | 27 | 95 | 1 | 1,226 | 20 | 3,004 | 61 |
| 49,134 | 141 | 13 | 1,542 | 28 | 95 | 1 | 1,226 | 20 | 3,004 | 62 |
| 49,135 | 141 | 13 | 1,542 | 28 | 95 | 1 | 1,226 | 20 | 3,004 | 62 |
| 49,136 | 140 | 13 | 1,540 | 28 | 96 | 1 | 1,224 | 20 | 3,000 | 62 |
| 49,137 | 140 | 13 | 1,528 | 28 | 96 | 1 | 1,221 | 20 | 2,985 | 62 |
| 49,138 | 141 | 13 | 1,531 | 28 | 96 | 1 | 1,224 | 20 | 2,992 | 62 |
| 49,139 | 138 | 13 | 1,479 | 28 | 93 | 1 | 1,147 | 20 | 2,857 | 62 |
| 49,140 | 138 | 13 | 1,475 | 28 | 93 | 1 | 1,147 | 20 | 2,853 | 62 |
| 49,141 | 136 | 10 | 1,466 | 28 | 92 | 1 | 1,114 | 20 | 2,808 | 59 |
| 49,142 | 130 | 10 | 1,437 | 26 | 91 | 1 | 1,083 | 18 | 2,741 | 55 |
| 49,143 | 130 | 10 | 1,437 | 26 | 90 | 1 | 1,084 | 18 | 2,741 | 55 |
| 49,144 | 130 | 10 | 1,417 | 26 | 89 | 1 | 1,057 | 17 | 2,693 | 54 |
| 49,145 | 129 | 10 | 1,401 | 28 | 87 | 1 | 1,029 | 18 | 2,646 | 57 |
| 49,146 | 126 | 10 | 1,385 | 28 | 85 | 1 | 1,004 | 18 | 2,600 | 57 |
| 49,147 | 122 | 12 | 1,344 | 28 | 81 | 1 | 961   | 17 | 2,508 | 58 |

|        |     |    |       |    |    |   |     |    |       |    |
|--------|-----|----|-------|----|----|---|-----|----|-------|----|
| 49,148 | 128 | 12 | 1,194 | 28 | 77 | 1 | 895 | 17 | 2,294 | 58 |
| 49,149 | 124 | 12 | 1,115 | 28 | 65 | 1 | 801 | 17 | 2,105 | 58 |
| 49,150 | 124 | 12 | 1,089 | 28 | 65 | 1 | 791 | 17 | 2,069 | 58 |
| 49,151 | 124 | 12 | 1,096 | 28 | 65 | 1 | 789 | 17 | 2,074 | 58 |
| 49,152 | 127 | 12 | 1,094 | 28 | 65 | 1 | 806 | 16 | 2,092 | 57 |
| 49,153 | 128 | 12 | 1,131 | 28 | 65 | 1 | 830 | 17 | 2,154 | 58 |
| 49,154 | 129 | 12 | 1,129 | 28 | 64 | 1 | 835 | 17 | 2,157 | 58 |
| 49,155 | 129 | 12 | 1,128 | 28 | 64 | 1 | 835 | 17 | 2,156 | 58 |
| 49,156 | 130 | 11 | 1,135 | 28 | 65 | 1 | 835 | 17 | 2,165 | 57 |
| 49,157 | 130 | 11 | 1,127 | 28 | 65 | 1 | 832 | 17 | 2,154 | 57 |
| 49,158 | 126 | 11 | 1,122 | 27 | 65 | 1 | 828 | 16 | 2,141 | 55 |
| 49,159 | 125 | 11 | 1,128 | 27 | 65 | 1 | 828 | 16 | 2,146 | 55 |
| 49,160 | 116 | 11 | 985   | 27 | 58 | 1 | 762 | 16 | 1,921 | 55 |
| 49,161 | 116 | 14 | 954   | 30 | 51 | 2 | 720 | 16 | 1,841 | 62 |
| 49,162 | 106 | 14 | 968   | 31 | 47 | 2 | 675 | 16 | 1,796 | 63 |
| 49,163 | 97  | 14 | 937   | 31 | 43 | 2 | 665 | 16 | 1,742 | 63 |
| 49,164 | 95  | 14 | 916   | 31 | 41 | 2 | 656 | 16 | 1,708 | 63 |
| 49,165 | 95  | 11 | 825   | 31 | 34 | 2 | 595 | 16 | 1,549 | 60 |
| 49,166 | 95  | 11 | 745   | 33 | 33 | 3 | 577 | 16 | 1,450 | 63 |
| 49,167 | 95  | 9  | 636   | 27 | 28 | 3 | 532 | 12 | 1,291 | 51 |
| 49,168 | 95  | 9  | 630   | 26 | 28 | 3 | 523 | 12 | 1,276 | 50 |
| 49,169 | 95  | 9  | 629   | 25 | 28 | 3 | 522 | 12 | 1,274 | 49 |
| 49,170 | 95  | 9  | 628   | 25 | 28 | 2 | 521 | 12 | 1,272 | 48 |
| 49,171 | 95  | 9  | 628   | 25 | 28 | 2 | 520 | 11 | 1,271 | 47 |
| 49,172 | 95  | 9  | 628   | 25 | 28 | 2 | 519 | 11 | 1,270 | 47 |
| 49,173 | 95  | 9  | 622   | 25 | 27 | 2 | 517 | 11 | 1,261 | 47 |
| 49,174 | 95  | 9  | 621   | 24 | 27 | 2 | 519 | 10 | 1,262 | 45 |
| 49,175 | 95  | 9  | 619   | 24 | 27 | 2 | 519 | 10 | 1,260 | 45 |
| 49,176 | 91  | 9  | 593   | 24 | 27 | 2 | 508 | 10 | 1,219 | 45 |
| 49,177 | 93  | 9  | 592   | 26 | 28 | 2 | 508 | 11 | 1,221 | 48 |
| 49,178 | 44  | 9  | 429   | 29 | 19 | 2 | 320 | 12 | 812   | 52 |
| 49,179 | 43  | 8  | 431   | 30 | 19 | 2 | 320 | 15 | 813   | 55 |
| 49,180 | 41  | 12 | 426   | 33 | 18 | 2 | 314 | 16 | 799   | 63 |
| 49,181 | 38  | 12 | 407   | 33 | 18 | 2 | 306 | 16 | 769   | 63 |
| 49,182 | 26  | 12 | 320   | 33 | 8  | 2 | 176 | 16 | 530   | 63 |
| 49,183 | 22  | 9  | 248   | 25 | 7  | 2 | 138 | 13 | 415   | 49 |
| 49,184 | 20  | 9  | 236   | 24 | 7  | 2 | 134 | 13 | 397   | 48 |
| 49,185 | 20  | 9  | 236   | 25 | 7  | 2 | 134 | 13 | 397   | 49 |
| 49,186 | 20  | 9  | 236   | 25 | 7  | 2 | 134 | 13 | 397   | 49 |
| 49,187 | 20  | 9  | 241   | 25 | 6  | 2 | 134 | 13 | 401   | 49 |
| 49,188 | 20  | 9  | 242   | 25 | 6  | 2 | 134 | 13 | 402   | 49 |



|        |    |    |     |    |   |   |     |    |     |    |
|--------|----|----|-----|----|---|---|-----|----|-----|----|
| 49,189 | 19 | 9  | 240 | 26 | 6 | 2 | 134 | 13 | 399 | 50 |
| 49,190 | 18 | 9  | 239 | 26 | 6 | 2 | 134 | 13 | 397 | 50 |
| 49,191 | 18 | 9  | 239 | 26 | 6 | 2 | 134 | 13 | 397 | 50 |
| 49,192 | 18 | 9  | 240 | 26 | 6 | 2 | 135 | 14 | 399 | 51 |
| 49,193 | 18 | 9  | 240 | 26 | 6 | 2 | 135 | 14 | 399 | 51 |
| 49,194 | 18 | 9  | 242 | 26 | 6 | 2 | 135 | 14 | 401 | 51 |
| 49,195 | 18 | 9  | 242 | 24 | 6 | 2 | 134 | 13 | 400 | 48 |
| 49,196 | 18 | 10 | 242 | 24 | 5 | 2 | 134 | 13 | 399 | 49 |
| 49,197 | 17 | 8  | 236 | 23 | 5 | 2 | 131 | 13 | 389 | 46 |
| 49,198 | 17 | 9  | 236 | 23 | 5 | 2 | 131 | 14 | 389 | 48 |
| 49,199 | 10 | 9  | 227 | 23 | 4 | 2 | 129 | 16 | 370 | 50 |
| 49,200 | 10 | 9  | 227 | 23 | 4 | 2 | 129 | 16 | 370 | 50 |
| 49,201 | 10 | 9  | 227 | 24 | 4 | 2 | 129 | 16 | 370 | 51 |
| 49,202 | 10 | 9  | 217 | 24 | 4 | 2 | 129 | 17 | 360 | 52 |
| 49,203 | 7  | 9  | 214 | 23 | 4 | 2 | 112 | 17 | 337 | 51 |
| 49,204 | 6  | 9  | 186 | 26 | 4 | 2 | 88  | 17 | 284 | 54 |
| 49,205 | 5  | 9  | 175 | 29 | 4 | 3 | 71  | 22 | 255 | 63 |
| 49,206 | 5  | 9  | 167 | 30 | 3 | 3 | 63  | 23 | 238 | 65 |
| 49,207 | 4  | 9  | 157 | 30 | 4 | 4 | 64  | 24 | 229 | 67 |
| 49,208 | 4  | 9  | 160 | 31 | 5 | 4 | 67  | 24 | 236 | 68 |
| 49,209 | 5  | 9  | 159 | 33 | 5 | 4 | 69  | 24 | 238 | 70 |
| 49,210 | 6  | 9  | 150 | 33 | 5 | 4 | 72  | 24 | 233 | 70 |
| 49,211 | 6  | 9  | 148 | 33 | 6 | 4 | 71  | 24 | 231 | 70 |
| 49,212 | 17 | 6  | 157 | 30 | 9 | 3 | 101 | 24 | 284 | 63 |
| 49,213 | 19 | 6  | 118 | 28 | 8 | 3 | 88  | 22 | 233 | 59 |
| 49,214 | 19 | 6  | 115 | 28 | 8 | 3 | 87  | 22 | 229 | 59 |
| 49,215 | 19 | 6  | 113 | 28 | 8 | 3 | 88  | 22 | 228 | 59 |
| 49,216 | 19 | 6  | 116 | 28 | 8 | 3 | 94  | 22 | 237 | 59 |
| 49,217 | 19 | 6  | 116 | 26 | 8 | 2 | 94  | 21 | 237 | 55 |
| 49,218 | 19 | 6  | 116 | 26 | 8 | 2 | 94  | 20 | 237 | 54 |
| 49,219 | 20 | 6  | 116 | 26 | 8 | 2 | 95  | 20 | 239 | 54 |
| 49,220 | 20 | 6  | 118 | 26 | 8 | 2 | 95  | 20 | 241 | 54 |
| 49,221 | 20 | 6  | 118 | 25 | 8 | 2 | 95  | 20 | 241 | 53 |
| 49,222 | 20 | 6  | 118 | 25 | 8 | 2 | 96  | 20 | 242 | 53 |
| 49,223 | 20 | 6  | 117 | 25 | 8 | 2 | 96  | 20 | 241 | 53 |
| 49,224 | 20 | 6  | 117 | 25 | 8 | 2 | 94  | 20 | 239 | 53 |
| 49,225 | 20 | 6  | 119 | 25 | 8 | 2 | 94  | 20 | 241 | 53 |
| 49,226 | 20 | 6  | 119 | 32 | 8 | 2 | 95  | 26 | 242 | 66 |
| 49,227 | 20 | 6  | 119 | 34 | 8 | 2 | 94  | 26 | 241 | 68 |
| 49,228 | 18 | 7  | 116 | 33 | 7 | 2 | 93  | 25 | 234 | 67 |
| 49,229 | 18 | 7  | 118 | 30 | 7 | 2 | 91  | 24 | 234 | 63 |

|        |    |    |     |    |    |   |     |    |     |     |
|--------|----|----|-----|----|----|---|-----|----|-----|-----|
| 49,230 | 18 | 7  | 116 | 28 | 7  | 2 | 90  | 21 | 231 | 58  |
| 49,231 | 18 | 3  | 116 | 27 | 7  | 2 | 91  | 19 | 232 | 51  |
| 49,232 | 18 | 3  | 116 | 30 | 7  | 2 | 90  | 19 | 231 | 54  |
| 49,233 | 18 | 3  | 116 | 30 | 7  | 2 | 90  | 19 | 231 | 54  |
| 49,234 | 19 | 3  | 116 | 30 | 7  | 2 | 90  | 19 | 232 | 54  |
| 49,235 | 23 | 3  | 141 | 28 | 7  | 2 | 95  | 19 | 266 | 52  |
| 49,236 | 23 | 4  | 141 | 28 | 7  | 2 | 95  | 19 | 266 | 53  |
| 49,237 | 24 | 4  | 156 | 28 | 7  | 2 | 106 | 19 | 293 | 53  |
| 49,238 | 24 | 4  | 153 | 28 | 7  | 2 | 106 | 19 | 290 | 53  |
| 49,239 | 26 | 4  | 159 | 33 | 8  | 2 | 112 | 19 | 305 | 58  |
| 49,240 | 30 | 4  | 163 | 33 | 8  | 2 | 113 | 22 | 314 | 61  |
| 49,241 | 34 | 4  | 215 | 33 | 10 | 2 | 129 | 23 | 388 | 62  |
| 49,242 | 36 | 4  | 224 | 39 | 10 | 3 | 135 | 23 | 405 | 69  |
| 49,243 | 36 | 6  | 227 | 48 | 11 | 3 | 138 | 29 | 412 | 86  |
| 49,244 | 36 | 7  | 227 | 49 | 11 | 3 | 139 | 30 | 413 | 89  |
| 49,245 | 36 | 7  | 227 | 49 | 11 | 3 | 139 | 30 | 413 | 89  |
| 49,246 | 36 | 9  | 227 | 50 | 12 | 3 | 142 | 30 | 417 | 92  |
| 49,247 | 36 | 8  | 226 | 51 | 12 | 3 | 142 | 30 | 416 | 92  |
| 49,248 | 36 | 8  | 228 | 52 | 12 | 3 | 142 | 30 | 418 | 93  |
| 49,249 | 36 | 7  | 228 | 52 | 12 | 3 | 142 | 30 | 418 | 92  |
| 49,250 | 36 | 8  | 228 | 53 | 12 | 3 | 142 | 29 | 418 | 93  |
| 49,251 | 36 | 8  | 228 | 53 | 12 | 3 | 142 | 29 | 418 | 93  |
| 49,252 | 36 | 8  | 229 | 52 | 12 | 3 | 142 | 29 | 419 | 92  |
| 49,253 | 36 | 8  | 229 | 52 | 12 | 3 | 141 | 28 | 418 | 91  |
| 49,254 | 36 | 8  | 221 | 49 | 12 | 3 | 142 | 27 | 411 | 87  |
| 49,255 | 36 | 8  | 219 | 49 | 12 | 3 | 142 | 27 | 409 | 87  |
| 49,256 | 36 | 8  | 219 | 46 | 12 | 2 | 143 | 23 | 410 | 79  |
| 49,257 | 36 | 8  | 221 | 45 | 12 | 1 | 141 | 21 | 410 | 75  |
| 49,258 | 36 | 8  | 221 | 51 | 11 | 2 | 141 | 21 | 409 | 82  |
| 49,259 | 36 | 9  | 217 | 52 | 10 | 2 | 137 | 22 | 400 | 85  |
| 49,260 | 35 | 9  | 214 | 53 | 10 | 2 | 135 | 23 | 394 | 87  |
| 49,261 | 34 | 10 | 192 | 54 | 9  | 2 | 121 | 23 | 356 | 89  |
| 49,262 | 34 | 10 | 191 | 61 | 8  | 2 | 120 | 29 | 353 | 102 |
| 49,263 | 23 | 10 | 170 | 62 | 5  | 2 | 84  | 29 | 282 | 103 |
| 49,264 | 20 | 10 | 148 | 64 | 5  | 2 | 68  | 35 | 241 | 111 |
| 49,265 | 20 | 13 | 148 | 69 | 5  | 3 | 66  | 39 | 239 | 124 |
| 49,266 | 20 | 13 | 145 | 71 | 5  | 3 | 61  | 40 | 231 | 127 |
| 49,267 | 20 | 13 | 147 | 71 | 5  | 3 | 61  | 40 | 233 | 127 |
| 49,268 | 20 | 13 | 147 | 71 | 5  | 3 | 61  | 40 | 233 | 127 |
| 49,269 | 19 | 13 | 149 | 71 | 5  | 3 | 61  | 40 | 234 | 127 |
| 49,270 | 19 | 13 | 149 | 72 | 5  | 3 | 61  | 40 | 234 | 128 |

|        |    |    |     |    |    |   |     |    |     |     |
|--------|----|----|-----|----|----|---|-----|----|-----|-----|
| 49,271 | 19 | 13 | 148 | 72 | 5  | 3 | 61  | 40 | 233 | 128 |
| 49,272 | 19 | 13 | 148 | 72 | 5  | 3 | 61  | 40 | 233 | 128 |
| 49,273 | 19 | 13 | 148 | 72 | 5  | 3 | 61  | 40 | 233 | 128 |
| 49,274 | 19 | 13 | 148 | 72 | 5  | 3 | 61  | 41 | 233 | 129 |
| 49,275 | 19 | 13 | 148 | 72 | 5  | 3 | 61  | 41 | 233 | 129 |
| 49,276 | 19 | 13 | 146 | 72 | 5  | 3 | 60  | 41 | 230 | 129 |
| 49,277 | 19 | 13 | 146 | 65 | 5  | 3 | 59  | 35 | 229 | 116 |
| 49,278 | 19 | 12 | 145 | 62 | 5  | 3 | 59  | 35 | 228 | 112 |
| 49,279 | 19 | 12 | 145 | 62 | 5  | 3 | 59  | 35 | 228 | 112 |
| 49,280 | 19 | 12 | 143 | 62 | 5  | 3 | 61  | 36 | 228 | 113 |
| 49,281 | 19 | 12 | 143 | 62 | 5  | 3 | 61  | 36 | 228 | 113 |
| 49,282 | 19 | 12 | 142 | 59 | 5  | 3 | 60  | 36 | 226 | 110 |
| 49,283 | 19 | 12 | 142 | 56 | 5  | 3 | 62  | 36 | 228 | 107 |
| 49,284 | 18 | 12 | 142 | 56 | 5  | 3 | 62  | 36 | 227 | 107 |
| 49,285 | 19 | 12 | 137 | 56 | 5  | 3 | 63  | 38 | 224 | 109 |
| 49,286 | 15 | 12 | 116 | 56 | 5  | 3 | 58  | 39 | 194 | 110 |
| 49,287 | 14 | 11 | 103 | 60 | 5  | 3 | 54  | 40 | 176 | 114 |
| 49,288 | 14 | 11 | 101 | 62 | 5  | 3 | 53  | 42 | 173 | 118 |
| 49,289 | 12 | 11 | 98  | 65 | 4  | 3 | 49  | 43 | 163 | 122 |
| 49,290 | 12 | 11 | 94  | 70 | 4  | 3 | 47  | 46 | 157 | 130 |
| 49,291 | 8  | 13 | 88  | 83 | 4  | 3 | 43  | 56 | 143 | 155 |
| 49,292 | 4  | 13 | 36  | 85 | 2  | 3 | 27  | 55 | 69  | 156 |
| 49,293 | 2  | 11 | 29  | 74 | 2  | 2 | 21  | 48 | 54  | 135 |
| 49,294 | 2  | 11 | 25  | 74 | 1  | 2 | 17  | 48 | 45  | 135 |
| 49,295 | 2  | 10 | 34  | 74 | 1  | 2 | 18  | 47 | 55  | 133 |
| 49,296 | 2  | 10 | 33  | 74 | 0  | 2 | 16  | 47 | 51  | 133 |
| 49,297 | 5  | 8  | 40  | 73 | 0  | 2 | 21  | 47 | 66  | 130 |
| 49,298 | 5  | 8  | 42  | 71 | 0  | 2 | 22  | 48 | 69  | 129 |
| 49,299 | 5  | 8  | 42  | 71 | 0  | 2 | 22  | 48 | 69  | 129 |
| 49,300 | 7  | 8  | 55  | 71 | 0  | 2 | 29  | 47 | 91  | 128 |
| 49,301 | 7  | 8  | 72  | 71 | 0  | 2 | 34  | 47 | 113 | 128 |
| 49,302 | 8  | 8  | 76  | 71 | 1  | 2 | 35  | 47 | 120 | 128 |
| 49,303 | 8  | 8  | 76  | 71 | 1  | 2 | 35  | 47 | 120 | 128 |
| 49,304 | 9  | 8  | 80  | 71 | 3  | 2 | 37  | 47 | 129 | 128 |
| 49,305 | 9  | 8  | 79  | 71 | 3  | 2 | 36  | 47 | 127 | 128 |
| 49,306 | 10 | 8  | 100 | 72 | 3  | 2 | 38  | 46 | 151 | 128 |
| 49,307 | 13 | 8  | 175 | 72 | 5  | 2 | 47  | 46 | 240 | 128 |
| 49,308 | 14 | 8  | 231 | 72 | 6  | 2 | 63  | 46 | 314 | 128 |
| 49,309 | 14 | 8  | 251 | 66 | 6  | 1 | 66  | 46 | 337 | 121 |
| 49,310 | 14 | 7  | 250 | 64 | 6  | 1 | 66  | 45 | 336 | 117 |
| 49,311 | 17 | 7  | 469 | 61 | 10 | 1 | 131 | 44 | 627 | 113 |

|        |    |   |     |    |    |   |     |    |     |     |
|--------|----|---|-----|----|----|---|-----|----|-----|-----|
| 49,312 | 17 | 6 | 481 | 53 | 10 | 1 | 134 | 38 | 642 | 98  |
| 49,313 | 17 | 6 | 481 | 53 | 10 | 1 | 134 | 38 | 642 | 98  |
| 49,314 | 17 | 6 | 488 | 55 | 10 | 1 | 135 | 39 | 650 | 101 |
| 49,315 | 16 | 6 | 488 | 59 | 10 | 1 | 136 | 34 | 650 | 100 |
| 49,316 | 16 | 3 | 502 | 54 | 10 | 0 | 138 | 30 | 666 | 87  |
| 49,317 | 16 | 3 | 518 | 52 | 10 | 0 | 140 | 29 | 684 | 84  |
| 49,318 | 16 | 3 | 516 | 52 | 10 | 0 | 140 | 29 | 682 | 84  |
| 49,319 | 16 | 3 | 522 | 52 | 10 | 0 | 143 | 30 | 691 | 85  |
| 49,320 | 16 | 3 | 520 | 53 | 10 | 0 | 143 | 30 | 689 | 86  |
| 49,321 | 17 | 3 | 520 | 52 | 10 | 0 | 144 | 30 | 691 | 85  |
| 49,322 | 17 | 3 | 522 | 52 | 10 | 0 | 144 | 33 | 693 | 88  |
| 49,323 | 18 | 3 | 529 | 52 | 10 | 0 | 144 | 33 | 701 | 88  |
| 49,324 | 20 | 3 | 544 | 52 | 10 | 0 | 148 | 32 | 722 | 87  |
| 49,325 | 20 | 3 | 544 | 52 | 10 | 0 | 148 | 32 | 722 | 87  |
| 49,326 | 20 | 3 | 544 | 52 | 10 | 0 | 148 | 32 | 722 | 87  |
| 49,327 | 20 | 3 | 552 | 52 | 10 | 0 | 149 | 32 | 731 | 87  |
| 49,328 | 20 | 3 | 552 | 52 | 10 | 0 | 149 | 32 | 731 | 87  |
| 49,329 | 21 | 3 | 564 | 52 | 10 | 0 | 152 | 32 | 747 | 87  |
| 49,330 | 26 | 3 | 583 | 52 | 10 | 0 | 164 | 32 | 783 | 87  |
| 49,331 | 29 | 3 | 589 | 52 | 11 | 0 | 166 | 31 | 795 | 86  |
| 49,332 | 29 | 3 | 589 | 52 | 11 | 0 | 166 | 31 | 795 | 86  |
| 49,333 | 29 | 3 | 593 | 53 | 11 | 0 | 165 | 34 | 798 | 90  |
| 49,334 | 29 | 3 | 594 | 53 | 11 | 0 | 165 | 36 | 799 | 92  |
| 49,335 | 29 | 3 | 594 | 54 | 11 | 0 | 165 | 36 | 799 | 93  |
| 49,336 | 28 | 3 | 594 | 54 | 11 | 0 | 165 | 34 | 798 | 91  |
| 49,337 | 28 | 3 | 596 | 54 | 11 | 0 | 165 | 33 | 800 | 90  |
| 49,338 | 29 | 3 | 599 | 48 | 11 | 0 | 164 | 30 | 803 | 81  |
| 49,339 | 29 | 3 | 599 | 48 | 11 | 0 | 164 | 30 | 803 | 81  |
| 49,340 | 29 | 3 | 599 | 45 | 11 | 0 | 166 | 29 | 805 | 77  |
| 49,341 | 29 | 3 | 599 | 35 | 11 | 0 | 166 | 26 | 805 | 64  |
| 49,342 | 32 | 1 | 633 | 21 | 13 | 0 | 213 | 13 | 891 | 35  |
| 49,343 | 32 | 1 | 637 | 15 | 13 | 0 | 221 | 13 | 903 | 29  |
| 49,344 | 32 | 1 | 636 | 18 | 13 | 0 | 221 | 13 | 902 | 32  |
| 49,345 | 32 | 1 | 636 | 19 | 14 | 0 | 224 | 13 | 906 | 33  |
| 49,346 | 32 | 1 | 631 | 18 | 14 | 0 | 229 | 13 | 906 | 32  |
| 49,347 | 29 | 1 | 624 | 22 | 14 | 0 | 225 | 16 | 892 | 39  |
| 49,348 | 29 | 1 | 622 | 22 | 14 | 0 | 224 | 16 | 889 | 39  |
| 49,349 | 29 | 1 | 621 | 25 | 14 | 0 | 224 | 20 | 888 | 46  |
| 49,350 | 28 | 1 | 618 | 29 | 14 | 0 | 221 | 20 | 881 | 50  |
| 49,351 | 28 | 0 | 611 | 30 | 15 | 0 | 217 | 20 | 871 | 50  |
| 49,352 | 28 | 1 | 594 | 33 | 15 | 0 | 213 | 20 | 850 | 54  |

|        |    |   |     |    |    |   |     |    |     |    |
|--------|----|---|-----|----|----|---|-----|----|-----|----|
| 49,353 | 27 | 2 | 590 | 34 | 14 | 0 | 212 | 20 | 843 | 56 |
| 49,354 | 28 | 2 | 594 | 34 | 14 | 0 | 213 | 20 | 849 | 56 |
| 49,355 | 28 | 2 | 594 | 34 | 12 | 0 | 214 | 20 | 848 | 56 |
| 49,356 | 28 | 2 | 587 | 34 | 12 | 0 | 213 | 20 | 840 | 56 |
| 49,357 | 27 | 2 | 590 | 33 | 12 | 0 | 213 | 20 | 842 | 55 |
| 49,358 | 27 | 2 | 523 | 33 | 11 | 0 | 205 | 20 | 766 | 55 |
| 49,359 | 26 | 2 | 467 | 33 | 10 | 0 | 188 | 20 | 691 | 55 |
| 49,360 | 27 | 2 | 448 | 33 | 11 | 0 | 185 | 20 | 671 | 55 |
| 49,361 | 24 | 2 | 229 | 33 | 7  | 0 | 121 | 20 | 381 | 55 |
| 49,362 | 24 | 2 | 226 | 33 | 7  | 0 | 121 | 20 | 378 | 55 |
| 49,363 | 24 | 2 | 217 | 33 | 7  | 0 | 118 | 21 | 366 | 56 |
| 49,364 | 24 | 2 | 210 | 33 | 7  | 0 | 118 | 21 | 359 | 56 |
| 49,365 | 24 | 2 | 212 | 30 | 7  | 0 | 116 | 20 | 359 | 52 |
| 49,366 | 24 | 2 | 208 | 24 | 7  | 0 | 115 | 19 | 354 | 45 |
| 49,367 | 24 | 2 | 201 | 24 | 7  | 0 | 115 | 19 | 347 | 45 |
| 49,368 | 24 | 2 | 186 | 24 | 7  | 0 | 113 | 19 | 330 | 45 |
| 49,369 | 24 | 2 | 186 | 24 | 7  | 0 | 115 | 19 | 332 | 45 |
| 49,370 | 27 | 2 | 190 | 23 | 7  | 0 | 117 | 18 | 341 | 43 |
| 49,371 | 27 | 2 | 190 | 23 | 7  | 0 | 116 | 20 | 340 | 45 |
| 49,372 | 26 | 2 | 189 | 23 | 7  | 0 | 116 | 20 | 338 | 45 |
| 49,373 | 27 | 2 | 192 | 23 | 7  | 0 | 119 | 17 | 345 | 42 |
| 49,374 | 26 | 2 | 185 | 23 | 7  | 0 | 119 | 17 | 337 | 42 |
| 49,375 | 24 | 2 | 170 | 23 | 7  | 0 | 116 | 17 | 317 | 42 |
| 49,376 | 27 | 2 | 172 | 23 | 7  | 0 | 120 | 18 | 326 | 43 |
| 49,377 | 29 | 2 | 184 | 23 | 7  | 0 | 144 | 18 | 364 | 43 |
| 49,378 | 29 | 2 | 209 | 23 | 11 | 0 | 173 | 18 | 422 | 43 |
| 49,379 | 28 | 2 | 210 | 23 | 13 | 0 | 205 | 18 | 456 | 43 |
| 49,380 | 30 | 2 | 218 | 23 | 14 | 0 | 223 | 18 | 485 | 43 |
| 49,381 | 25 | 2 | 202 | 23 | 14 | 0 | 211 | 17 | 452 | 42 |
| 49,382 | 22 | 2 | 195 | 23 | 13 | 0 | 207 | 17 | 437 | 42 |
| 49,383 | 22 | 2 | 194 | 23 | 13 | 0 | 207 | 17 | 436 | 42 |
| 49,384 | 22 | 2 | 191 | 22 | 13 | 0 | 206 | 15 | 432 | 39 |
| 49,385 | 22 | 2 | 204 | 24 | 13 | 0 | 211 | 13 | 450 | 39 |
| 49,386 | 22 | 2 | 204 | 24 | 13 | 0 | 211 | 13 | 450 | 39 |
| 49,387 | 22 | 2 | 212 | 24 | 14 | 0 | 212 | 14 | 460 | 40 |
| 49,388 | 22 | 2 | 211 | 24 | 14 | 0 | 212 | 14 | 459 | 40 |
| 49,389 | 21 | 2 | 204 | 25 | 14 | 0 | 207 | 14 | 446 | 41 |
| 49,390 | 21 | 2 | 204 | 25 | 14 | 0 | 205 | 14 | 444 | 41 |
| 49,391 | 21 | 2 | 204 | 25 | 14 | 0 | 205 | 15 | 444 | 42 |
| 49,392 | 18 | 2 | 171 | 25 | 12 | 0 | 155 | 15 | 356 | 42 |
| 49,393 | 19 | 2 | 172 | 25 | 12 | 0 | 154 | 15 | 357 | 42 |

|        |    |   |     |    |    |   |     |    |     |    |
|--------|----|---|-----|----|----|---|-----|----|-----|----|
| 49,394 | 19 | 2 | 169 | 25 | 12 | 0 | 148 | 15 | 348 | 42 |
| 49,395 | 19 | 2 | 168 | 22 | 12 | 0 | 149 | 15 | 348 | 39 |
| 49,396 | 19 | 2 | 165 | 21 | 11 | 0 | 147 | 15 | 342 | 38 |
| 49,397 | 19 | 2 | 162 | 21 | 11 | 0 | 140 | 15 | 332 | 38 |
| 49,398 | 20 | 2 | 162 | 17 | 11 | 0 | 140 | 12 | 333 | 31 |
| 49,399 | 19 | 2 | 162 | 17 | 11 | 0 | 141 | 12 | 333 | 31 |
| 49,400 | 19 | 2 | 164 | 15 | 11 | 0 | 142 | 7  | 336 | 24 |
| 49,401 | 19 | 2 | 164 | 11 | 11 | 0 | 142 | 7  | 336 | 20 |
| 49,402 | 19 | 1 | 161 | 6  | 10 | 0 | 142 | 6  | 332 | 13 |
| 49,403 | 19 | 3 | 161 | 6  | 10 | 0 | 141 | 6  | 331 | 15 |
| 49,404 | 17 | 2 | 155 | 6  | 10 | 0 | 138 | 6  | 320 | 14 |
| 49,405 | 17 | 2 | 157 | 6  | 10 | 0 | 138 | 6  | 322 | 14 |
| 49,406 | 17 | 2 | 155 | 6  | 10 | 1 | 137 | 6  | 319 | 15 |
| 49,407 | 17 | 2 | 148 | 6  | 10 | 1 | 137 | 6  | 312 | 15 |
| 49,408 | 17 | 2 | 138 | 6  | 10 | 1 | 135 | 6  | 300 | 15 |
| 49,409 | 15 | 2 | 136 | 6  | 9  | 1 | 137 | 6  | 297 | 15 |
| 49,410 | 15 | 2 | 145 | 8  | 10 | 1 | 142 | 8  | 312 | 19 |
| 49,411 | 15 | 2 | 160 | 8  | 9  | 1 | 142 | 8  | 326 | 19 |
| 49,412 | 16 | 2 | 165 | 8  | 9  | 1 | 143 | 8  | 333 | 19 |
| 49,413 | 16 | 2 | 175 | 8  | 9  | 1 | 155 | 8  | 355 | 19 |
| 49,414 | 16 | 2 | 175 | 9  | 9  | 1 | 155 | 8  | 355 | 20 |
| 49,415 | 16 | 2 | 173 | 9  | 9  | 1 | 153 | 8  | 351 | 20 |
| 49,416 | 16 | 2 | 205 | 9  | 10 | 1 | 172 | 8  | 403 | 20 |
| 49,417 | 16 | 2 | 205 | 9  | 10 | 1 | 173 | 8  | 404 | 20 |
| 49,418 | 16 | 2 | 204 | 9  | 10 | 1 | 173 | 8  | 403 | 20 |
| 49,419 | 16 | 2 | 204 | 9  | 10 | 1 | 174 | 8  | 404 | 20 |
| 49,420 | 16 | 2 | 204 | 9  | 10 | 1 | 174 | 8  | 404 | 20 |
| 49,421 | 13 | 3 | 195 | 9  | 10 | 1 | 168 | 6  | 386 | 19 |
| 49,422 | 13 | 3 | 195 | 9  | 10 | 1 | 167 | 6  | 385 | 19 |
| 49,423 | 13 | 3 | 194 | 11 | 10 | 1 | 166 | 6  | 383 | 21 |
| 49,424 | 12 | 3 | 193 | 15 | 10 | 1 | 166 | 6  | 381 | 25 |
| 49,425 | 12 | 3 | 195 | 17 | 10 | 2 | 166 | 8  | 383 | 30 |
| 49,426 | 10 | 3 | 192 | 25 | 10 | 2 | 165 | 13 | 377 | 43 |
| 49,427 | 9  | 3 | 192 | 27 | 10 | 2 | 162 | 12 | 373 | 44 |
| 49,428 | 7  | 3 | 177 | 31 | 10 | 2 | 137 | 13 | 331 | 49 |
| 49,429 | 7  | 3 | 157 | 32 | 6  | 2 | 108 | 13 | 278 | 50 |
| 49,430 | 7  | 3 | 143 | 32 | 4  | 2 | 73  | 13 | 227 | 50 |
| 49,431 | 5  | 3 | 137 | 32 | 3  | 2 | 55  | 13 | 200 | 50 |
| 49,432 | 6  | 3 | 153 | 34 | 3  | 2 | 60  | 14 | 222 | 53 |
| 49,433 | 6  | 3 | 152 | 34 | 3  | 2 | 60  | 14 | 221 | 53 |
| 49,434 | 6  | 3 | 175 | 40 | 4  | 2 | 65  | 14 | 250 | 59 |

|        |   |   |     |    |   |   |    |    |     |     |
|--------|---|---|-----|----|---|---|----|----|-----|-----|
| 49,435 | 6 | 4 | 177 | 40 | 4 | 2 | 63 | 14 | 250 | 60  |
| 49,436 | 6 | 4 | 168 | 37 | 4 | 2 | 61 | 14 | 239 | 57  |
| 49,437 | 7 | 4 | 168 | 41 | 4 | 2 | 63 | 17 | 242 | 64  |
| 49,438 | 7 | 4 | 164 | 41 | 3 | 2 | 62 | 17 | 236 | 64  |
| 49,439 | 7 | 4 | 168 | 41 | 3 | 2 | 62 | 17 | 240 | 64  |
| 49,440 | 7 | 4 | 169 | 40 | 3 | 2 | 62 | 17 | 241 | 63  |
| 49,441 | 7 | 4 | 169 | 41 | 3 | 2 | 62 | 16 | 241 | 63  |
| 49,442 | 7 | 4 | 169 | 42 | 3 | 2 | 62 | 16 | 241 | 64  |
| 49,443 | 7 | 4 | 168 | 42 | 3 | 2 | 62 | 16 | 240 | 64  |
| 49,444 | 6 | 4 | 166 | 42 | 4 | 2 | 64 | 16 | 240 | 64  |
| 49,445 | 6 | 4 | 169 | 42 | 4 | 2 | 64 | 16 | 243 | 64  |
| 49,446 | 6 | 4 | 169 | 42 | 4 | 2 | 63 | 16 | 242 | 64  |
| 49,447 | 6 | 4 | 169 | 42 | 4 | 2 | 63 | 18 | 242 | 66  |
| 49,448 | 5 | 4 | 172 | 42 | 4 | 2 | 63 | 18 | 244 | 66  |
| 49,449 | 5 | 4 | 172 | 42 | 4 | 2 | 62 | 19 | 243 | 67  |
| 49,450 | 5 | 4 | 172 | 44 | 4 | 2 | 62 | 23 | 243 | 73  |
| 49,451 | 5 | 4 | 170 | 43 | 4 | 2 | 61 | 23 | 240 | 72  |
| 49,452 | 6 | 4 | 186 | 43 | 4 | 2 | 74 | 23 | 270 | 72  |
| 49,453 | 6 | 3 | 185 | 43 | 4 | 2 | 74 | 25 | 269 | 73  |
| 49,454 | 6 | 2 | 188 | 45 | 4 | 2 | 75 | 26 | 273 | 75  |
| 49,455 | 6 | 2 | 188 | 44 | 4 | 2 | 75 | 26 | 273 | 74  |
| 49,456 | 6 | 2 | 186 | 47 | 6 | 2 | 75 | 26 | 273 | 77  |
| 49,457 | 6 | 2 | 194 | 48 | 6 | 1 | 76 | 26 | 282 | 77  |
| 49,458 | 6 | 2 | 193 | 48 | 6 | 1 | 76 | 26 | 281 | 77  |
| 49,459 | 6 | 2 | 192 | 48 | 6 | 1 | 76 | 26 | 280 | 77  |
| 49,460 | 5 | 2 | 190 | 50 | 6 | 1 | 74 | 28 | 275 | 81  |
| 49,461 | 5 | 4 | 181 | 50 | 5 | 1 | 69 | 33 | 260 | 88  |
| 49,462 | 4 | 4 | 164 | 50 | 5 | 1 | 68 | 33 | 241 | 88  |
| 49,463 | 3 | 4 | 160 | 56 | 5 | 2 | 70 | 36 | 238 | 98  |
| 49,464 | 3 | 4 | 150 | 58 | 5 | 2 | 58 | 37 | 216 | 101 |
| 49,465 | 3 | 4 | 144 | 60 | 5 | 2 | 52 | 37 | 204 | 103 |
| 49,466 | 4 | 4 | 120 | 62 | 4 | 3 | 43 | 37 | 171 | 106 |
| 49,467 | 4 | 4 | 119 | 62 | 4 | 3 | 42 | 37 | 169 | 106 |
| 49,468 | 5 | 4 | 119 | 65 | 4 | 3 | 43 | 38 | 171 | 110 |
| 49,469 | 5 | 4 | 123 | 71 | 5 | 3 | 49 | 39 | 182 | 117 |
| 49,470 | 5 | 4 | 123 | 74 | 5 | 3 | 48 | 41 | 181 | 122 |
| 49,471 | 5 | 5 | 122 | 77 | 5 | 3 | 48 | 47 | 180 | 132 |
| 49,472 | 5 | 5 | 123 | 83 | 5 | 3 | 47 | 49 | 180 | 140 |
| 49,473 | 5 | 5 | 120 | 84 | 5 | 3 | 46 | 49 | 176 | 141 |
| 49,474 | 5 | 5 | 120 | 83 | 5 | 3 | 46 | 49 | 176 | 140 |
| 49,475 | 5 | 5 | 121 | 79 | 5 | 3 | 46 | 51 | 177 | 138 |

|        |    |    |     |    |    |   |     |    |     |     |
|--------|----|----|-----|----|----|---|-----|----|-----|-----|
| 49,476 | 5  | 5  | 119 | 77 | 5  | 2 | 46  | 50 | 175 | 134 |
| 49,477 | 5  | 6  | 119 | 70 | 5  | 2 | 46  | 45 | 175 | 123 |
| 49,478 | 5  | 6  | 118 | 71 | 5  | 2 | 45  | 45 | 173 | 124 |
| 49,479 | 5  | 6  | 115 | 68 | 5  | 2 | 47  | 44 | 172 | 120 |
| 49,480 | 6  | 6  | 110 | 72 | 5  | 2 | 47  | 44 | 168 | 124 |
| 49,481 | 6  | 7  | 108 | 74 | 5  | 2 | 47  | 47 | 166 | 130 |
| 49,482 | 6  | 7  | 103 | 76 | 5  | 2 | 47  | 47 | 161 | 132 |
| 49,483 | 5  | 7  | 90  | 74 | 5  | 2 | 42  | 47 | 142 | 130 |
| 49,484 | 5  | 7  | 70  | 76 | 5  | 2 | 38  | 47 | 118 | 132 |
| 49,485 | 5  | 7  | 69  | 71 | 4  | 2 | 36  | 47 | 114 | 127 |
| 49,486 | 5  | 6  | 66  | 73 | 4  | 3 | 36  | 50 | 111 | 132 |
| 49,487 | 5  | 6  | 66  | 69 | 4  | 3 | 37  | 46 | 112 | 124 |
| 49,488 | 4  | 6  | 62  | 69 | 4  | 3 | 35  | 46 | 105 | 124 |
| 49,489 | 4  | 6  | 59  | 69 | 4  | 3 | 33  | 46 | 100 | 124 |
| 49,490 | 5  | 6  | 58  | 69 | 4  | 3 | 33  | 46 | 100 | 124 |
| 49,491 | 5  | 6  | 60  | 68 | 4  | 3 | 33  | 46 | 102 | 123 |
| 49,492 | 5  | 6  | 60  | 68 | 4  | 3 | 33  | 46 | 102 | 123 |
| 49,493 | 8  | 6  | 89  | 69 | 4  | 3 | 38  | 46 | 139 | 124 |
| 49,494 | 8  | 6  | 89  | 69 | 4  | 3 | 38  | 46 | 139 | 124 |
| 49,495 | 10 | 7  | 99  | 69 | 3  | 3 | 46  | 46 | 158 | 125 |
| 49,496 | 12 | 7  | 103 | 69 | 3  | 3 | 49  | 46 | 167 | 125 |
| 49,497 | 12 | 7  | 103 | 71 | 3  | 3 | 49  | 52 | 167 | 133 |
| 49,498 | 12 | 7  | 100 | 72 | 3  | 3 | 49  | 51 | 164 | 133 |
| 49,499 | 15 | 7  | 108 | 76 | 3  | 3 | 57  | 51 | 183 | 137 |
| 49,500 | 15 | 7  | 109 | 76 | 3  | 3 | 57  | 50 | 184 | 136 |
| 49,501 | 16 | 8  | 116 | 80 | 3  | 6 | 63  | 55 | 198 | 149 |
| 49,502 | 15 | 8  | 107 | 82 | 3  | 6 | 55  | 55 | 180 | 151 |
| 49,503 | 15 | 8  | 101 | 83 | 3  | 6 | 51  | 55 | 170 | 152 |
| 49,504 | 16 | 8  | 103 | 91 | 3  | 8 | 51  | 59 | 173 | 166 |
| 49,505 | 16 | 8  | 101 | 93 | 3  | 8 | 50  | 60 | 170 | 169 |
| 49,506 | 16 | 9  | 104 | 93 | 1  | 8 | 50  | 60 | 171 | 170 |
| 49,507 | 16 | 10 | 103 | 91 | 1  | 8 | 50  | 63 | 170 | 172 |
| 49,508 | 16 | 10 | 97  | 92 | 1  | 8 | 50  | 66 | 164 | 176 |
| 49,509 | 19 | 10 | 121 | 92 | 2  | 8 | 57  | 66 | 199 | 176 |
| 49,510 | 23 | 8  | 182 | 88 | 4  | 8 | 94  | 57 | 303 | 161 |
| 49,511 | 29 | 8  | 384 | 88 | 15 | 8 | 172 | 57 | 600 | 161 |
| 49,512 | 29 | 8  | 421 | 88 | 15 | 8 | 196 | 57 | 661 | 161 |
| 49,513 | 31 | 8  | 516 | 80 | 21 | 7 | 263 | 53 | 831 | 148 |
| 49,514 | 32 | 8  | 524 | 80 | 22 | 7 | 270 | 53 | 848 | 148 |
| 49,515 | 32 | 9  | 529 | 80 | 22 | 7 | 275 | 53 | 858 | 149 |
| 49,516 | 32 | 9  | 531 | 78 | 22 | 7 | 274 | 52 | 859 | 146 |



|        |    |   |     |    |    |   |     |    |       |     |
|--------|----|---|-----|----|----|---|-----|----|-------|-----|
| 49,517 | 34 | 9 | 557 | 76 | 22 | 6 | 283 | 52 | 896   | 143 |
| 49,518 | 34 | 9 | 557 | 77 | 22 | 6 | 284 | 52 | 897   | 144 |
| 49,519 | 33 | 9 | 560 | 74 | 22 | 6 | 285 | 51 | 900   | 140 |
| 49,520 | 33 | 9 | 559 | 68 | 21 | 6 | 279 | 50 | 892   | 133 |
| 49,521 | 33 | 8 | 559 | 62 | 21 | 6 | 279 | 42 | 892   | 118 |
| 49,522 | 35 | 8 | 579 | 62 | 22 | 6 | 299 | 43 | 935   | 119 |
| 49,523 | 35 | 7 | 578 | 56 | 22 | 6 | 299 | 41 | 934   | 110 |
| 49,524 | 35 | 7 | 578 | 55 | 22 | 6 | 299 | 41 | 934   | 109 |
| 49,525 | 39 | 7 | 605 | 54 | 24 | 6 | 327 | 41 | 995   | 108 |
| 49,526 | 41 | 7 | 614 | 54 | 24 | 6 | 336 | 39 | 1,015 | 106 |
| 49,527 | 41 | 7 | 614 | 55 | 24 | 6 | 336 | 38 | 1,015 | 106 |
| 49,528 | 41 | 6 | 614 | 54 | 24 | 6 | 335 | 38 | 1,014 | 104 |
| 49,529 | 42 | 6 | 621 | 51 | 24 | 6 | 335 | 38 | 1,022 | 101 |
| 49,530 | 43 | 6 | 636 | 50 | 25 | 6 | 343 | 38 | 1,047 | 100 |
| 49,531 | 43 | 6 | 638 | 45 | 25 | 6 | 344 | 38 | 1,050 | 95  |
| 49,532 | 43 | 5 | 639 | 43 | 25 | 6 | 344 | 35 | 1,051 | 89  |
| 49,533 | 43 | 5 | 639 | 41 | 25 | 6 | 344 | 34 | 1,051 | 86  |
| 49,534 | 43 | 5 | 639 | 41 | 25 | 6 | 344 | 34 | 1,051 | 86  |
| 49,535 | 43 | 5 | 634 | 38 | 25 | 6 | 344 | 34 | 1,046 | 83  |
| 49,536 | 45 | 5 | 641 | 36 | 25 | 5 | 344 | 31 | 1,055 | 77  |
| 49,537 | 45 | 5 | 646 | 36 | 25 | 5 | 347 | 31 | 1,063 | 77  |
| 49,538 | 46 | 5 | 652 | 36 | 25 | 5 | 353 | 31 | 1,076 | 77  |
| 49,539 | 46 | 5 | 653 | 36 | 25 | 5 | 354 | 31 | 1,078 | 77  |
| 49,540 | 46 | 5 | 651 | 36 | 25 | 5 | 354 | 31 | 1,076 | 77  |
| 49,541 | 45 | 5 | 651 | 36 | 25 | 5 | 355 | 31 | 1,076 | 77  |
| 49,542 | 45 | 5 | 649 | 36 | 25 | 5 | 355 | 31 | 1,074 | 77  |
| 49,543 | 45 | 5 | 650 | 36 | 25 | 5 | 356 | 31 | 1,076 | 77  |
| 49,544 | 42 | 5 | 623 | 34 | 25 | 5 | 355 | 31 | 1,045 | 75  |
| 49,545 | 40 | 4 | 617 | 34 | 25 | 5 | 350 | 31 | 1,032 | 74  |
| 49,546 | 40 | 4 | 614 | 36 | 25 | 5 | 350 | 32 | 1,029 | 77  |
| 49,547 | 38 | 4 | 609 | 36 | 26 | 5 | 347 | 32 | 1,020 | 77  |
| 49,548 | 38 | 4 | 612 | 35 | 26 | 5 | 348 | 26 | 1,024 | 70  |
| 49,549 | 40 | 4 | 613 | 34 | 26 | 5 | 352 | 25 | 1,031 | 68  |
| 49,550 | 37 | 4 | 612 | 30 | 26 | 5 | 347 | 26 | 1,022 | 65  |
| 49,551 | 37 | 4 | 613 | 30 | 26 | 5 | 348 | 26 | 1,024 | 65  |
| 49,552 | 36 | 3 | 613 | 20 | 27 | 2 | 346 | 17 | 1,022 | 42  |
| 49,553 | 36 | 3 | 615 | 20 | 28 | 2 | 349 | 17 | 1,028 | 42  |
| 49,554 | 35 | 3 | 613 | 20 | 28 | 2 | 349 | 17 | 1,025 | 42  |
| 49,555 | 41 | 3 | 680 | 9  | 31 | 0 | 381 | 9  | 1,133 | 21  |
| 49,556 | 41 | 3 | 681 | 9  | 31 | 0 | 381 | 9  | 1,134 | 21  |
| 49,557 | 41 | 2 | 678 | 9  | 31 | 0 | 381 | 9  | 1,131 | 20  |

|        |    |   |       |    |    |   |     |    |       |     |
|--------|----|---|-------|----|----|---|-----|----|-------|-----|
| 49,558 | 44 | 1 | 734   | 8  | 34 | 0 | 393 | 6  | 1,205 | 15  |
| 49,559 | 63 | 1 | 847   | 7  | 39 | 0 | 430 | 3  | 1,379 | 11  |
| 49,560 | 60 | 1 | 828   | 7  | 38 | 0 | 424 | 3  | 1,350 | 11  |
| 49,561 | 63 | 1 | 803   | 10 | 39 | 0 | 408 | 5  | 1,313 | 16  |
| 49,562 | 67 | 1 | 669   | 10 | 30 | 0 | 347 | 8  | 1,113 | 19  |
| 49,563 | 67 | 1 | 633   | 15 | 30 | 0 | 322 | 10 | 1,052 | 26  |
| 49,564 | 65 | 1 | 538   | 15 | 24 | 0 | 253 | 10 | 880   | 26  |
| 49,565 | 76 | 1 | 964   | 15 | 38 | 0 | 356 | 10 | 1,434 | 26  |
| 49,566 | 80 | 0 | 1,023 | 14 | 40 | 0 | 358 | 10 | 1,501 | 24  |
| 49,567 | 80 | 0 | 1,031 | 14 | 40 | 0 | 365 | 11 | 1,516 | 25  |
| 49,568 | 78 | 0 | 1,008 | 13 | 40 | 0 | 355 | 11 | 1,481 | 24  |
| 49,569 | 78 | 0 | 1,008 | 13 | 40 | 0 | 354 | 11 | 1,480 | 24  |
| 49,570 | 78 | 0 | 1,006 | 13 | 40 | 0 | 355 | 11 | 1,479 | 24  |
| 49,571 | 78 | 0 | 1,005 | 13 | 40 | 0 | 356 | 11 | 1,479 | 24  |
| 49,572 | 78 | 0 | 1,008 | 13 | 40 | 0 | 357 | 11 | 1,483 | 24  |
| 49,573 | 76 | 0 | 990   | 13 | 39 | 0 | 337 | 10 | 1,442 | 23  |
| 49,574 | 75 | 0 | 979   | 13 | 38 | 0 | 318 | 10 | 1,410 | 23  |
| 49,575 | 72 | 0 | 968   | 13 | 38 | 0 | 310 | 10 | 1,388 | 23  |
| 49,576 | 72 | 0 | 968   | 13 | 38 | 0 | 311 | 14 | 1,389 | 27  |
| 49,577 | 71 | 0 | 962   | 12 | 38 | 0 | 303 | 15 | 1,374 | 27  |
| 49,578 | 72 | 0 | 961   | 13 | 38 | 0 | 304 | 16 | 1,375 | 29  |
| 49,579 | 71 | 0 | 960   | 13 | 38 | 0 | 304 | 17 | 1,373 | 30  |
| 49,580 | 69 | 0 | 945   | 13 | 37 | 0 | 296 | 17 | 1,347 | 30  |
| 49,581 | 69 | 0 | 943   | 13 | 37 | 0 | 295 | 19 | 1,344 | 32  |
| 49,582 | 69 | 0 | 941   | 13 | 37 | 0 | 295 | 19 | 1,342 | 32  |
| 49,583 | 69 | 0 | 943   | 15 | 37 | 0 | 295 | 19 | 1,344 | 34  |
| 49,584 | 69 | 0 | 943   | 15 | 37 | 0 | 296 | 19 | 1,345 | 34  |
| 49,585 | 69 | 0 | 943   | 15 | 37 | 0 | 296 | 20 | 1,345 | 35  |
| 49,586 | 69 | 0 | 944   | 15 | 37 | 0 | 296 | 20 | 1,346 | 35  |
| 49,587 | 67 | 0 | 938   | 15 | 37 | 0 | 296 | 20 | 1,338 | 35  |
| 49,588 | 67 | 2 | 933   | 44 | 37 | 2 | 293 | 51 | 1,330 | 99  |
| 49,589 | 66 | 4 | 927   | 47 | 37 | 2 | 286 | 52 | 1,316 | 105 |
| 49,590 | 66 | 4 | 926   | 48 | 37 | 2 | 285 | 55 | 1,314 | 109 |
| 49,591 | 66 | 5 | 926   | 53 | 37 | 2 | 285 | 58 | 1,314 | 118 |
| 49,592 | 66 | 5 | 926   | 53 | 37 | 2 | 284 | 58 | 1,313 | 118 |
| 49,593 | 66 | 6 | 926   | 56 | 37 | 2 | 284 | 62 | 1,313 | 126 |
| 49,594 | 66 | 6 | 924   | 57 | 37 | 2 | 283 | 65 | 1,310 | 130 |
| 49,595 | 66 | 6 | 928   | 58 | 37 | 2 | 281 | 65 | 1,312 | 131 |
| 49,596 | 66 | 7 | 931   | 58 | 37 | 2 | 281 | 65 | 1,315 | 132 |
| 49,597 | 66 | 7 | 931   | 56 | 37 | 3 | 286 | 64 | 1,320 | 130 |
| 49,598 | 66 | 7 | 931   | 56 | 36 | 3 | 287 | 65 | 1,320 | 131 |

|        |    |   |     |    |    |   |     |    |       |     |
|--------|----|---|-----|----|----|---|-----|----|-------|-----|
| 49,599 | 66 | 7 | 925 | 58 | 36 | 3 | 285 | 66 | 1,312 | 134 |
| 49,600 | 64 | 7 | 922 | 58 | 36 | 3 | 280 | 66 | 1,302 | 134 |
| 49,601 | 64 | 7 | 922 | 61 | 36 | 3 | 279 | 65 | 1,301 | 136 |
| 49,602 | 64 | 7 | 921 | 61 | 36 | 3 | 278 | 65 | 1,299 | 136 |
| 49,603 | 64 | 7 | 920 | 61 | 35 | 3 | 274 | 65 | 1,293 | 136 |
| 49,604 | 67 | 7 | 931 | 61 | 36 | 3 | 282 | 65 | 1,316 | 136 |
| 49,605 | 68 | 7 | 938 | 61 | 35 | 3 | 277 | 65 | 1,318 | 136 |
| 49,606 | 63 | 7 | 904 | 61 | 33 | 3 | 259 | 65 | 1,259 | 136 |
| 49,607 | 62 | 7 | 883 | 61 | 32 | 3 | 261 | 65 | 1,238 | 136 |
| 49,608 | 62 | 7 | 873 | 61 | 32 | 3 | 260 | 65 | 1,227 | 136 |
| 49,609 | 61 | 7 | 851 | 61 | 30 | 3 | 251 | 65 | 1,193 | 136 |
| 49,610 | 62 | 7 | 871 | 61 | 36 | 3 | 331 | 65 | 1,300 | 136 |
| 49,611 | 62 | 7 | 902 | 61 | 40 | 3 | 345 | 65 | 1,349 | 136 |
| 49,612 | 55 | 7 | 868 | 59 | 37 | 3 | 320 | 63 | 1,280 | 132 |
| 49,613 | 45 | 7 | 807 | 59 | 35 | 3 | 309 | 61 | 1,196 | 130 |
| 49,614 | 43 | 7 | 733 | 54 | 34 | 3 | 295 | 59 | 1,105 | 123 |
| 49,615 | 38 | 7 | 522 | 54 | 27 | 3 | 257 | 59 | 844   | 123 |
| 49,616 | 36 | 7 | 386 | 54 | 21 | 3 | 207 | 59 | 650   | 123 |
| 49,617 | 32 | 7 | 332 | 54 | 20 | 3 | 204 | 59 | 588   | 123 |
| 49,618 | 32 | 7 | 322 | 54 | 20 | 3 | 197 | 58 | 571   | 122 |
| 49,619 | 33 | 7 | 338 | 54 | 20 | 3 | 214 | 58 | 605   | 122 |
| 49,620 | 34 | 7 | 349 | 54 | 20 | 3 | 229 | 58 | 632   | 122 |
| 49,621 | 34 | 7 | 346 | 54 | 20 | 3 | 231 | 58 | 631   | 122 |
| 49,622 | 34 | 7 | 349 | 54 | 20 | 3 | 233 | 58 | 636   | 122 |
| 49,623 | 34 | 7 | 354 | 54 | 20 | 3 | 233 | 58 | 641   | 122 |
| 49,624 | 36 | 7 | 352 | 54 | 20 | 3 | 236 | 58 | 644   | 122 |
| 49,625 | 36 | 7 | 352 | 55 | 19 | 3 | 235 | 58 | 642   | 123 |
| 49,626 | 36 | 7 | 347 | 55 | 19 | 3 | 235 | 58 | 637   | 123 |
| 49,627 | 36 | 8 | 346 | 55 | 19 | 3 | 234 | 54 | 635   | 120 |
| 49,628 | 35 | 8 | 344 | 55 | 19 | 3 | 233 | 53 | 631   | 119 |
| 49,629 | 34 | 8 | 343 | 54 | 19 | 3 | 232 | 52 | 628   | 117 |
| 49,630 | 34 | 8 | 340 | 54 | 19 | 3 | 234 | 51 | 627   | 116 |
| 49,631 | 34 | 8 | 340 | 55 | 19 | 3 | 234 | 49 | 627   | 115 |
| 49,632 | 34 | 8 | 340 | 55 | 19 | 3 | 234 | 49 | 627   | 115 |
| 49,633 | 34 | 8 | 342 | 55 | 19 | 3 | 238 | 49 | 633   | 115 |
| 49,634 | 34 | 9 | 345 | 53 | 19 | 3 | 242 | 48 | 640   | 113 |
| 49,635 | 34 | 9 | 345 | 53 | 19 | 3 | 246 | 46 | 644   | 111 |
| 49,636 | 34 | 9 | 345 | 53 | 19 | 3 | 246 | 46 | 644   | 111 |
| 49,637 | 34 | 9 | 346 | 53 | 19 | 3 | 247 | 46 | 646   | 111 |
| 49,638 | 34 | 9 | 345 | 53 | 19 | 3 | 247 | 45 | 645   | 110 |
| 49,639 | 35 | 7 | 347 | 24 | 19 | 1 | 248 | 16 | 649   | 48  |

|        |    |   |     |    |    |   |     |    |       |    |
|--------|----|---|-----|----|----|---|-----|----|-------|----|
| 49,640 | 35 | 5 | 350 | 20 | 20 | 2 | 251 | 12 | 656   | 39 |
| 49,641 | 35 | 4 | 350 | 15 | 20 | 2 | 251 | 10 | 656   | 31 |
| 49,642 | 35 | 5 | 350 | 16 | 20 | 2 | 251 | 10 | 656   | 33 |
| 49,643 | 35 | 6 | 346 | 17 | 20 | 2 | 251 | 10 | 652   | 35 |
| 49,644 | 35 | 5 | 347 | 14 | 20 | 2 | 251 | 6  | 653   | 27 |
| 49,645 | 35 | 5 | 352 | 14 | 20 | 2 | 253 | 3  | 660   | 24 |
| 49,646 | 35 | 4 | 349 | 13 | 20 | 2 | 250 | 3  | 654   | 22 |
| 49,647 | 35 | 4 | 350 | 13 | 20 | 2 | 250 | 3  | 655   | 22 |
| 49,648 | 36 | 4 | 352 | 13 | 20 | 1 | 247 | 3  | 655   | 21 |
| 49,649 | 36 | 4 | 351 | 12 | 20 | 1 | 246 | 2  | 653   | 19 |
| 49,650 | 36 | 4 | 351 | 10 | 20 | 1 | 246 | 1  | 653   | 16 |
| 49,651 | 36 | 4 | 349 | 10 | 20 | 1 | 246 | 1  | 651   | 16 |
| 49,652 | 37 | 4 | 374 | 7  | 24 | 1 | 259 | 1  | 694   | 13 |
| 49,653 | 38 | 4 | 379 | 7  | 25 | 1 | 264 | 1  | 706   | 13 |
| 49,654 | 38 | 4 | 376 | 7  | 25 | 1 | 266 | 1  | 705   | 13 |
| 49,655 | 35 | 4 | 367 | 7  | 23 | 1 | 256 | 1  | 681   | 13 |
| 49,656 | 33 | 4 | 337 | 7  | 23 | 1 | 250 | 1  | 643   | 13 |
| 49,657 | 33 | 4 | 326 | 7  | 23 | 1 | 247 | 1  | 629   | 13 |
| 49,658 | 33 | 5 | 339 | 7  | 23 | 1 | 253 | 2  | 648   | 15 |
| 49,659 | 33 | 5 | 313 | 8  | 21 | 1 | 239 | 2  | 606   | 16 |
| 49,660 | 16 | 5 | 255 | 8  | 13 | 1 | 159 | 2  | 443   | 16 |
| 49,661 | 13 | 5 | 207 | 7  | 12 | 1 | 137 | 2  | 369   | 15 |
| 49,662 | 15 | 5 | 171 | 7  | 9  | 1 | 125 | 2  | 320   | 15 |
| 49,663 | 16 | 5 | 184 | 6  | 9  | 1 | 127 | 2  | 336   | 14 |
| 49,664 | 16 | 5 | 175 | 6  | 9  | 1 | 122 | 2  | 322   | 14 |
| 49,665 | 17 | 5 | 192 | 9  | 8  | 1 | 124 | 4  | 341   | 19 |
| 49,666 | 17 | 5 | 194 | 9  | 8  | 1 | 126 | 4  | 345   | 19 |
| 49,667 | 17 | 5 | 225 | 9  | 11 | 1 | 149 | 4  | 402   | 19 |
| 49,668 | 22 | 5 | 389 | 22 | 14 | 3 | 186 | 13 | 611   | 43 |
| 49,669 | 24 | 5 | 443 | 31 | 16 | 3 | 237 | 13 | 720   | 52 |
| 49,670 | 51 | 5 | 684 | 31 | 32 | 3 | 329 | 13 | 1,096 | 52 |
| 49,671 | 51 | 5 | 674 | 34 | 32 | 3 | 323 | 13 | 1,080 | 55 |
| 49,672 | 53 | 9 | 689 | 57 | 34 | 4 | 326 | 17 | 1,102 | 87 |
| 49,673 | 53 | 9 | 686 | 60 | 34 | 4 | 324 | 17 | 1,097 | 90 |
| 49,674 | 53 | 9 | 708 | 61 | 34 | 4 | 336 | 17 | 1,131 | 91 |
| 49,675 | 62 | 9 | 805 | 61 | 45 | 4 | 430 | 17 | 1,342 | 91 |
| 49,676 | 62 | 9 | 831 | 61 | 45 | 4 | 446 | 17 | 1,384 | 91 |
| 49,677 | 62 | 8 | 834 | 61 | 46 | 4 | 446 | 17 | 1,388 | 90 |
| 49,678 | 62 | 8 | 834 | 61 | 46 | 4 | 447 | 17 | 1,389 | 90 |
| 49,679 | 62 | 8 | 833 | 60 | 46 | 4 | 447 | 17 | 1,388 | 89 |
| 49,680 | 62 | 8 | 833 | 61 | 46 | 4 | 448 | 17 | 1,389 | 90 |

|        |    |   |     |    |    |   |     |    |       |     |
|--------|----|---|-----|----|----|---|-----|----|-------|-----|
| 49,681 | 62 | 8 | 838 | 62 | 46 | 4 | 448 | 17 | 1,394 | 91  |
| 49,682 | 62 | 8 | 841 | 62 | 46 | 4 | 449 | 18 | 1,398 | 92  |
| 49,683 | 62 | 8 | 843 | 62 | 46 | 4 | 450 | 18 | 1,401 | 92  |
| 49,684 | 62 | 9 | 842 | 63 | 46 | 4 | 447 | 18 | 1,397 | 94  |
| 49,685 | 62 | 8 | 839 | 63 | 46 | 4 | 442 | 18 | 1,389 | 93  |
| 49,686 | 62 | 8 | 840 | 63 | 46 | 4 | 438 | 18 | 1,386 | 93  |
| 49,687 | 62 | 8 | 841 | 65 | 46 | 4 | 438 | 19 | 1,387 | 96  |
| 49,688 | 67 | 8 | 874 | 67 | 48 | 4 | 456 | 19 | 1,445 | 98  |
| 49,689 | 67 | 9 | 873 | 67 | 48 | 4 | 455 | 19 | 1,443 | 99  |
| 49,690 | 66 | 9 | 873 | 70 | 48 | 4 | 455 | 24 | 1,442 | 107 |
| 49,691 | 66 | 9 | 870 | 71 | 47 | 3 | 452 | 24 | 1,435 | 107 |
| 49,692 | 66 | 9 | 870 | 73 | 47 | 4 | 452 | 24 | 1,435 | 110 |
| 49,693 | 66 | 8 | 869 | 72 | 47 | 4 | 450 | 24 | 1,432 | 108 |
| 49,694 | 69 | 7 | 903 | 74 | 51 | 4 | 478 | 24 | 1,501 | 109 |
| 49,695 | 69 | 7 | 902 | 74 | 51 | 4 | 478 | 24 | 1,500 | 109 |
| 49,696 | 70 | 7 | 902 | 74 | 51 | 4 | 479 | 24 | 1,502 | 109 |
| 49,697 | 72 | 7 | 903 | 74 | 51 | 4 | 478 | 24 | 1,504 | 109 |
| 49,698 | 72 | 8 | 902 | 75 | 51 | 4 | 478 | 24 | 1,503 | 111 |
| 49,699 | 71 | 8 | 898 | 76 | 51 | 4 | 476 | 25 | 1,496 | 113 |
| 49,700 | 70 | 8 | 906 | 76 | 51 | 4 | 478 | 25 | 1,505 | 113 |
| 49,701 | 70 | 8 | 900 | 78 | 49 | 4 | 474 | 26 | 1,493 | 116 |
| 49,702 | 70 | 8 | 889 | 80 | 47 | 4 | 471 | 27 | 1,477 | 119 |
| 49,703 | 70 | 8 | 884 | 81 | 47 | 4 | 467 | 27 | 1,468 | 120 |
| 49,704 | 69 | 8 | 879 | 82 | 46 | 4 | 462 | 27 | 1,456 | 121 |
| 49,705 | 69 | 8 | 876 | 82 | 46 | 4 | 460 | 27 | 1,451 | 121 |
| 49,706 | 70 | 8 | 886 | 82 | 47 | 4 | 469 | 27 | 1,472 | 121 |
| 49,707 | 70 | 8 | 886 | 82 | 47 | 4 | 468 | 27 | 1,471 | 121 |
| 49,708 | 74 | 8 | 910 | 82 | 47 | 4 | 477 | 27 | 1,508 | 121 |
| 49,709 | 73 | 7 | 893 | 81 | 47 | 4 | 468 | 26 | 1,481 | 118 |
| 49,710 | 73 | 7 | 898 | 81 | 47 | 4 | 468 | 26 | 1,486 | 118 |
| 49,711 | 76 | 7 | 942 | 81 | 48 | 4 | 482 | 26 | 1,548 | 118 |
| 49,712 | 76 | 7 | 951 | 81 | 48 | 4 | 490 | 26 | 1,565 | 118 |
| 49,713 | 74 | 7 | 951 | 82 | 47 | 4 | 489 | 26 | 1,561 | 119 |
| 49,714 | 73 | 7 | 932 | 84 | 47 | 4 | 487 | 25 | 1,539 | 120 |
| 49,715 | 72 | 7 | 913 | 84 | 47 | 4 | 485 | 25 | 1,517 | 120 |
| 49,716 | 73 | 7 | 917 | 81 | 49 | 4 | 487 | 24 | 1,526 | 116 |
| 49,717 | 73 | 7 | 913 | 84 | 49 | 4 | 484 | 26 | 1,519 | 121 |
| 49,718 | 71 | 7 | 876 | 85 | 46 | 4 | 457 | 28 | 1,450 | 124 |
| 49,719 | 66 | 7 | 703 | 63 | 42 | 2 | 416 | 19 | 1,227 | 91  |
| 49,720 | 64 | 7 | 646 | 64 | 40 | 2 | 363 | 24 | 1,113 | 97  |
| 49,721 | 35 | 7 | 388 | 68 | 24 | 2 | 254 | 24 | 701   | 101 |

|        |    |   |     |    |    |   |     |    |       |    |
|--------|----|---|-----|----|----|---|-----|----|-------|----|
| 49,722 | 34 | 7 | 386 | 65 | 24 | 2 | 244 | 24 | 688   | 98 |
| 49,723 | 32 | 3 | 372 | 38 | 22 | 1 | 238 | 21 | 664   | 63 |
| 49,724 | 32 | 4 | 347 | 38 | 22 | 1 | 227 | 21 | 628   | 64 |
| 49,725 | 29 | 4 | 284 | 38 | 11 | 1 | 142 | 21 | 466   | 64 |
| 49,726 | 29 | 4 | 262 | 37 | 11 | 1 | 129 | 21 | 431   | 63 |
| 49,727 | 29 | 4 | 262 | 37 | 11 | 1 | 129 | 21 | 431   | 63 |
| 49,728 | 29 | 4 | 259 | 37 | 10 | 1 | 129 | 21 | 427   | 63 |
| 49,729 | 37 | 4 | 285 | 37 | 11 | 1 | 135 | 21 | 468   | 63 |
| 49,730 | 40 | 4 | 301 | 36 | 11 | 1 | 149 | 21 | 501   | 62 |
| 49,731 | 40 | 4 | 301 | 36 | 11 | 1 | 149 | 21 | 501   | 62 |
| 49,732 | 63 | 4 | 493 | 36 | 19 | 1 | 230 | 21 | 805   | 62 |
| 49,733 | 63 | 4 | 490 | 36 | 19 | 1 | 229 | 21 | 801   | 62 |
| 49,734 | 65 | 4 | 513 | 36 | 20 | 1 | 243 | 21 | 841   | 62 |
| 49,735 | 65 | 3 | 514 | 35 | 20 | 1 | 243 | 21 | 842   | 60 |
| 49,736 | 65 | 3 | 514 | 35 | 20 | 1 | 244 | 21 | 843   | 60 |
| 49,737 | 65 | 3 | 513 | 33 | 20 | 1 | 244 | 20 | 842   | 57 |
| 49,738 | 65 | 3 | 513 | 33 | 20 | 1 | 244 | 20 | 842   | 57 |
| 49,739 | 61 | 2 | 481 | 31 | 18 | 1 | 226 | 20 | 786   | 54 |
| 49,740 | 61 | 2 | 481 | 31 | 18 | 1 | 226 | 20 | 786   | 54 |
| 49,741 | 61 | 2 | 479 | 28 | 18 | 1 | 226 | 15 | 784   | 46 |
| 49,742 | 62 | 2 | 494 | 27 | 19 | 1 | 231 | 15 | 806   | 45 |
| 49,743 | 61 | 2 | 493 | 25 | 19 | 0 | 232 | 15 | 805   | 42 |
| 49,744 | 60 | 2 | 463 | 22 | 17 | 0 | 208 | 15 | 748   | 39 |
| 49,745 | 60 | 2 | 465 | 22 | 15 | 0 | 205 | 15 | 745   | 39 |
| 49,746 | 59 | 2 | 461 | 22 | 15 | 0 | 202 | 15 | 737   | 39 |
| 49,747 | 57 | 2 | 466 | 21 | 15 | 0 | 203 | 15 | 741   | 38 |
| 49,748 | 60 | 2 | 471 | 21 | 15 | 0 | 207 | 15 | 753   | 38 |
| 49,749 | 65 | 1 | 498 | 19 | 19 | 0 | 217 | 14 | 799   | 34 |
| 49,750 | 66 | 1 | 505 | 19 | 19 | 0 | 218 | 14 | 808   | 34 |
| 49,751 | 77 | 1 | 539 | 19 | 19 | 0 | 242 | 14 | 877   | 34 |
| 49,752 | 80 | 1 | 559 | 15 | 22 | 0 | 251 | 13 | 912   | 29 |
| 49,753 | 81 | 1 | 562 | 13 | 22 | 0 | 263 | 13 | 928   | 27 |
| 49,754 | 87 | 1 | 629 | 13 | 23 | 0 | 283 | 13 | 1,022 | 27 |
| 49,755 | 87 | 1 | 640 | 13 | 23 | 0 | 278 | 13 | 1,028 | 27 |
| 49,756 | 88 | 1 | 655 | 13 | 23 | 0 | 280 | 13 | 1,046 | 27 |
| 49,757 | 88 | 1 | 655 | 13 | 24 | 0 | 280 | 13 | 1,047 | 27 |
| 49,758 | 88 | 1 | 655 | 13 | 24 | 0 | 280 | 13 | 1,047 | 27 |
| 49,759 | 84 | 1 | 631 | 13 | 24 | 0 | 272 | 13 | 1,011 | 27 |
| 49,760 | 86 | 1 | 631 | 13 | 24 | 0 | 273 | 13 | 1,014 | 27 |
| 49,761 | 86 | 1 | 626 | 13 | 24 | 0 | 273 | 14 | 1,009 | 28 |
| 49,762 | 83 | 1 | 580 | 13 | 23 | 0 | 259 | 14 | 945   | 28 |

|        |    |   |     |    |    |   |     |    |     |    |
|--------|----|---|-----|----|----|---|-----|----|-----|----|
| 49,763 | 83 | 1 | 571 | 12 | 23 | 0 | 250 | 14 | 927 | 27 |
| 49,764 | 83 | 1 | 570 | 12 | 23 | 0 | 250 | 14 | 926 | 27 |
| 49,765 | 84 | 1 | 569 | 6  | 22 | 0 | 246 | 9  | 921 | 16 |
| 49,766 | 83 | 1 | 566 | 6  | 21 | 0 | 247 | 9  | 917 | 16 |
| 49,767 | 83 | 1 | 566 | 6  | 21 | 0 | 251 | 9  | 921 | 16 |
| 49,768 | 83 | 1 | 566 | 6  | 21 | 0 | 251 | 9  | 921 | 16 |
| 49,769 | 82 | 1 | 564 | 6  | 21 | 0 | 253 | 9  | 920 | 16 |
| 49,770 | 82 | 1 | 563 | 6  | 21 | 0 | 253 | 9  | 919 | 16 |
| 49,771 | 82 | 1 | 563 | 5  | 21 | 0 | 253 | 4  | 919 | 10 |
| 49,772 | 84 | 1 | 566 | 1  | 21 | 0 | 256 | 4  | 927 | 6  |
| 49,773 | 84 | 1 | 566 | 1  | 21 | 0 | 255 | 3  | 926 | 5  |
| 49,774 | 84 | 0 | 565 | 1  | 21 | 0 | 255 | 3  | 925 | 4  |
| 49,775 | 84 | 0 | 564 | 1  | 21 | 0 | 253 | 3  | 922 | 4  |
| 49,776 | 76 | 0 | 534 | 1  | 21 | 0 | 244 | 3  | 875 | 4  |
| 49,777 | 76 | 0 | 539 | 2  | 21 | 0 | 244 | 3  | 880 | 5  |
| 49,778 | 76 | 1 | 535 | 3  | 21 | 0 | 241 | 3  | 873 | 7  |
| 49,779 | 69 | 1 | 514 | 9  | 22 | 0 | 242 | 12 | 847 | 22 |
| 49,780 | 68 | 2 | 514 | 11 | 22 | 0 | 238 | 12 | 842 | 25 |
| 49,781 | 67 | 2 | 511 | 11 | 22 | 0 | 239 | 12 | 839 | 25 |
| 49,782 | 58 | 2 | 433 | 11 | 20 | 0 | 198 | 13 | 709 | 26 |
| 49,783 | 44 | 2 | 316 | 10 | 14 | 1 | 157 | 12 | 531 | 25 |
| 49,784 | 42 | 2 | 293 | 10 | 13 | 1 | 143 | 12 | 491 | 25 |
| 49,785 | 42 | 2 | 290 | 10 | 13 | 1 | 142 | 12 | 487 | 25 |
| 49,786 | 42 | 2 | 291 | 11 | 13 | 1 | 142 | 13 | 488 | 27 |
| 49,787 | 42 | 2 | 290 | 11 | 13 | 1 | 141 | 14 | 486 | 28 |
| 49,788 | 42 | 2 | 292 | 11 | 13 | 1 | 143 | 14 | 490 | 28 |
| 49,789 | 42 | 2 | 292 | 11 | 13 | 1 | 143 | 14 | 490 | 28 |
| 49,790 | 41 | 2 | 300 | 11 | 15 | 1 | 143 | 14 | 499 | 28 |
| 49,791 | 41 | 2 | 293 | 11 | 14 | 1 | 142 | 14 | 490 | 28 |
| 49,792 | 42 | 2 | 327 | 11 | 14 | 1 | 154 | 14 | 537 | 28 |
| 49,793 | 41 | 2 | 328 | 12 | 14 | 1 | 154 | 14 | 537 | 29 |
| 49,794 | 40 | 2 | 329 | 13 | 14 | 1 | 155 | 14 | 538 | 30 |
| 49,795 | 41 | 2 | 332 | 13 | 14 | 1 | 156 | 14 | 543 | 30 |
| 49,796 | 41 | 2 | 329 | 13 | 14 | 1 | 155 | 15 | 539 | 31 |
| 49,797 | 41 | 2 | 326 | 13 | 14 | 1 | 154 | 16 | 535 | 32 |
| 49,798 | 38 | 2 | 320 | 13 | 14 | 1 | 150 | 16 | 522 | 32 |
| 49,799 | 34 | 2 | 304 | 15 | 10 | 2 | 145 | 16 | 493 | 35 |
| 49,800 | 33 | 2 | 295 | 16 | 10 | 2 | 142 | 17 | 480 | 37 |
| 49,801 | 32 | 2 | 292 | 20 | 10 | 2 | 142 | 21 | 476 | 45 |
| 49,802 | 21 | 2 | 263 | 22 | 11 | 2 | 117 | 22 | 412 | 48 |
| 49,803 | 18 | 2 | 244 | 22 | 8  | 2 | 108 | 21 | 378 | 47 |

|        |    |   |     |    |    |   |     |    |     |     |
|--------|----|---|-----|----|----|---|-----|----|-----|-----|
| 49,804 | 18 | 2 | 249 | 22 | 8  | 2 | 106 | 21 | 381 | 47  |
| 49,805 | 12 | 2 | 209 | 22 | 9  | 2 | 98  | 21 | 328 | 47  |
| 49,806 | 11 | 2 | 188 | 22 | 8  | 2 | 92  | 21 | 299 | 47  |
| 49,807 | 10 | 2 | 171 | 22 | 8  | 2 | 90  | 21 | 279 | 47  |
| 49,808 | 10 | 3 | 170 | 22 | 7  | 2 | 92  | 21 | 279 | 48  |
| 49,809 | 9  | 3 | 170 | 22 | 7  | 2 | 92  | 23 | 278 | 50  |
| 49,810 | 9  | 3 | 171 | 22 | 7  | 2 | 91  | 23 | 278 | 50  |
| 49,811 | 8  | 3 | 171 | 22 | 7  | 2 | 91  | 23 | 277 | 50  |
| 49,812 | 8  | 3 | 173 | 22 | 7  | 2 | 92  | 22 | 280 | 49  |
| 49,813 | 8  | 3 | 174 | 22 | 7  | 2 | 93  | 22 | 282 | 49  |
| 49,814 | 8  | 3 | 174 | 22 | 7  | 2 | 92  | 22 | 281 | 49  |
| 49,815 | 8  | 3 | 176 | 22 | 7  | 2 | 91  | 22 | 282 | 49  |
| 49,816 | 7  | 3 | 179 | 22 | 7  | 2 | 94  | 22 | 287 | 49  |
| 49,817 | 7  | 3 | 177 | 22 | 7  | 2 | 93  | 23 | 284 | 50  |
| 49,818 | 7  | 3 | 177 | 22 | 7  | 2 | 89  | 23 | 280 | 50  |
| 49,819 | 7  | 4 | 178 | 22 | 7  | 2 | 91  | 24 | 283 | 52  |
| 49,820 | 8  | 4 | 180 | 22 | 7  | 2 | 90  | 25 | 285 | 53  |
| 49,821 | 8  | 4 | 179 | 22 | 7  | 2 | 90  | 25 | 284 | 53  |
| 49,822 | 8  | 4 | 179 | 22 | 7  | 2 | 90  | 25 | 284 | 53  |
| 49,823 | 6  | 4 | 175 | 22 | 7  | 2 | 87  | 25 | 275 | 53  |
| 49,824 | 6  | 5 | 175 | 23 | 7  | 2 | 87  | 29 | 275 | 59  |
| 49,825 | 6  | 5 | 175 | 23 | 7  | 2 | 87  | 30 | 275 | 60  |
| 49,826 | 6  | 5 | 184 | 26 | 7  | 2 | 90  | 33 | 287 | 66  |
| 49,827 | 6  | 5 | 178 | 27 | 7  | 2 | 87  | 35 | 278 | 69  |
| 49,828 | 23 | 5 | 369 | 27 | 20 | 3 | 300 | 36 | 712 | 71  |
| 49,829 | 25 | 4 | 386 | 45 | 20 | 4 | 304 | 38 | 735 | 91  |
| 49,830 | 25 | 4 | 383 | 40 | 19 | 4 | 304 | 30 | 731 | 78  |
| 49,831 | 25 | 3 | 380 | 43 | 19 | 4 | 300 | 35 | 724 | 85  |
| 49,832 | 24 | 3 | 375 | 44 | 19 | 4 | 294 | 35 | 712 | 86  |
| 49,833 | 24 | 3 | 399 | 47 | 20 | 4 | 307 | 34 | 750 | 88  |
| 49,834 | 24 | 3 | 398 | 47 | 20 | 3 | 305 | 34 | 747 | 87  |
| 49,835 | 24 | 3 | 396 | 48 | 20 | 3 | 304 | 34 | 744 | 88  |
| 49,836 | 24 | 4 | 395 | 47 | 20 | 3 | 306 | 33 | 745 | 87  |
| 49,837 | 24 | 4 | 395 | 49 | 20 | 3 | 306 | 33 | 745 | 89  |
| 49,838 | 24 | 4 | 394 | 50 | 20 | 3 | 305 | 33 | 743 | 90  |
| 49,839 | 25 | 4 | 398 | 53 | 21 | 3 | 305 | 33 | 749 | 93  |
| 49,840 | 25 | 4 | 399 | 54 | 20 | 3 | 310 | 36 | 754 | 97  |
| 49,841 | 25 | 4 | 396 | 57 | 19 | 3 | 324 | 36 | 764 | 100 |
| 49,842 | 25 | 4 | 391 | 60 | 19 | 3 | 322 | 42 | 757 | 109 |
| 49,843 | 24 | 4 | 356 | 60 | 19 | 3 | 310 | 42 | 709 | 109 |
| 49,844 | 24 | 5 | 354 | 59 | 19 | 3 | 310 | 42 | 707 | 109 |



|        |    |   |     |     |    |   |     |    |     |     |
|--------|----|---|-----|-----|----|---|-----|----|-----|-----|
| 49,845 | 24 | 5 | 353 | 58  | 19 | 3 | 309 | 42 | 705 | 108 |
| 49,846 | 23 | 5 | 350 | 58  | 19 | 3 | 307 | 42 | 699 | 108 |
| 49,847 | 23 | 5 | 351 | 59  | 20 | 3 | 311 | 41 | 705 | 108 |
| 49,848 | 23 | 5 | 349 | 60  | 20 | 3 | 311 | 40 | 703 | 108 |
| 49,849 | 23 | 5 | 350 | 66  | 20 | 6 | 312 | 40 | 705 | 117 |
| 49,850 | 23 | 5 | 350 | 91  | 20 | 6 | 308 | 44 | 701 | 146 |
| 49,851 | 23 | 5 | 349 | 98  | 20 | 6 | 308 | 48 | 700 | 157 |
| 49,852 | 25 | 5 | 356 | 103 | 20 | 7 | 313 | 46 | 714 | 161 |
| 49,853 | 25 | 6 | 346 | 103 | 19 | 7 | 311 | 46 | 701 | 162 |
| 49,854 | 26 | 6 | 346 | 109 | 19 | 7 | 311 | 48 | 702 | 170 |
| 49,855 | 25 | 7 | 340 | 111 | 19 | 7 | 303 | 48 | 687 | 173 |
| 49,856 | 28 | 7 | 323 | 118 | 17 | 7 | 314 | 50 | 682 | 182 |
| 49,857 | 28 | 7 | 321 | 118 | 17 | 7 | 312 | 50 | 678 | 182 |
| 49,858 | 29 | 8 | 336 | 118 | 18 | 7 | 333 | 50 | 716 | 183 |
| 49,859 | 32 | 7 | 343 | 120 | 18 | 7 | 351 | 49 | 744 | 183 |
| 49,860 | 32 | 7 | 343 | 120 | 18 | 7 | 351 | 49 | 744 | 183 |
| 49,861 | 32 | 7 | 347 | 122 | 18 | 7 | 358 | 49 | 755 | 185 |
| 49,862 | 36 | 7 | 380 | 127 | 20 | 7 | 399 | 49 | 835 | 190 |
| 49,863 | 37 | 7 | 393 | 129 | 21 | 7 | 405 | 53 | 856 | 196 |
| 49,864 | 37 | 7 | 392 | 129 | 21 | 7 | 404 | 53 | 854 | 196 |
| 49,865 | 38 | 9 | 393 | 134 | 21 | 7 | 405 | 55 | 857 | 205 |
| 49,866 | 38 | 9 | 391 | 136 | 21 | 7 | 406 | 61 | 856 | 213 |
| 49,867 | 38 | 9 | 390 | 141 | 21 | 7 | 404 | 63 | 853 | 220 |
| 49,868 | 38 | 9 | 389 | 149 | 21 | 7 | 401 | 67 | 849 | 232 |
| 49,869 | 38 | 9 | 389 | 153 | 21 | 7 | 401 | 68 | 849 | 237 |
| 49,870 | 38 | 8 | 410 | 158 | 23 | 7 | 409 | 70 | 880 | 243 |
| 49,871 | 39 | 9 | 415 | 161 | 25 | 7 | 415 | 71 | 894 | 248 |
| 49,872 | 39 | 9 | 414 | 161 | 25 | 7 | 414 | 71 | 892 | 248 |
| 49,873 | 40 | 9 | 422 | 164 | 25 | 7 | 419 | 71 | 906 | 251 |
| 49,874 | 41 | 9 | 424 | 164 | 26 | 7 | 421 | 71 | 912 | 251 |
| 49,875 | 42 | 8 | 414 | 164 | 26 | 7 | 421 | 66 | 903 | 245 |
| 49,876 | 42 | 8 | 412 | 164 | 27 | 7 | 419 | 65 | 900 | 244 |
| 49,877 | 44 | 8 | 396 | 159 | 27 | 6 | 413 | 60 | 880 | 233 |
| 49,878 | 47 | 8 | 371 | 159 | 27 | 6 | 410 | 61 | 855 | 234 |
| 49,879 | 30 | 8 | 239 | 163 | 14 | 6 | 220 | 64 | 503 | 241 |
| 49,880 | 27 | 8 | 238 | 145 | 14 | 5 | 217 | 68 | 496 | 226 |
| 49,881 | 46 | 8 | 304 | 144 | 19 | 5 | 314 | 67 | 683 | 224 |
| 49,882 | 47 | 8 | 330 | 138 | 19 | 5 | 329 | 63 | 725 | 214 |
| 49,883 | 47 | 8 | 318 | 135 | 19 | 5 | 326 | 63 | 710 | 211 |
| 49,884 | 47 | 8 | 323 | 136 | 19 | 5 | 329 | 63 | 718 | 212 |
| 49,885 | 47 | 8 | 323 | 139 | 19 | 5 | 328 | 63 | 717 | 215 |

|        |    |    |     |     |    |    |     |    |       |     |
|--------|----|----|-----|-----|----|----|-----|----|-------|-----|
| 49,886 | 48 | 8  | 339 | 139 | 19 | 6  | 342 | 66 | 748   | 219 |
| 49,887 | 48 | 10 | 339 | 146 | 19 | 7  | 342 | 73 | 748   | 236 |
| 49,888 | 48 | 10 | 339 | 145 | 19 | 7  | 342 | 76 | 748   | 238 |
| 49,889 | 65 | 10 | 418 | 148 | 23 | 7  | 411 | 76 | 917   | 241 |
| 49,890 | 64 | 10 | 422 | 145 | 22 | 7  | 413 | 76 | 921   | 238 |
| 49,891 | 65 | 12 | 429 | 161 | 23 | 10 | 428 | 84 | 945   | 267 |
| 49,892 | 65 | 12 | 425 | 159 | 23 | 10 | 413 | 84 | 926   | 265 |
| 49,893 | 68 | 12 | 462 | 156 | 25 | 10 | 429 | 78 | 984   | 256 |
| 49,894 | 74 | 13 | 530 | 156 | 28 | 10 | 480 | 81 | 1,112 | 260 |
| 49,895 | 74 | 12 | 529 | 157 | 28 | 10 | 478 | 81 | 1,109 | 260 |
| 49,896 | 74 | 12 | 538 | 163 | 29 | 13 | 479 | 85 | 1,120 | 273 |
| 49,897 | 74 | 12 | 538 | 167 | 29 | 13 | 479 | 85 | 1,120 | 277 |
| 49,898 | 74 | 13 | 536 | 169 | 28 | 13 | 477 | 85 | 1,115 | 280 |
| 49,899 | 74 | 13 | 536 | 170 | 28 | 13 | 477 | 85 | 1,115 | 281 |
| 49,900 | 82 | 13 | 637 | 137 | 32 | 9  | 511 | 81 | 1,262 | 240 |
| 49,901 | 83 | 13 | 665 | 129 | 32 | 9  | 518 | 76 | 1,298 | 227 |
| 49,902 | 83 | 13 | 665 | 132 | 32 | 10 | 518 | 76 | 1,298 | 231 |
| 49,903 | 81 | 13 | 654 | 123 | 32 | 9  | 513 | 74 | 1,280 | 219 |
| 49,904 | 82 | 12 | 660 | 121 | 32 | 9  | 515 | 73 | 1,289 | 215 |
| 49,905 | 81 | 11 | 658 | 106 | 32 | 9  | 515 | 69 | 1,286 | 195 |
| 49,906 | 81 | 11 | 657 | 106 | 32 | 9  | 515 | 69 | 1,285 | 195 |
| 49,907 | 78 | 11 | 645 | 109 | 32 | 9  | 494 | 74 | 1,249 | 203 |
| 49,908 | 77 | 11 | 635 | 111 | 31 | 9  | 476 | 75 | 1,219 | 206 |
| 49,909 | 77 | 11 | 631 | 127 | 31 | 9  | 473 | 77 | 1,212 | 224 |
| 49,910 | 74 | 11 | 624 | 127 | 31 | 9  | 455 | 77 | 1,184 | 224 |
| 49,911 | 74 | 11 | 620 | 121 | 31 | 9  | 449 | 77 | 1,174 | 218 |
| 49,912 | 74 | 11 | 610 | 124 | 31 | 9  | 440 | 78 | 1,155 | 222 |
| 49,913 | 70 | 12 | 593 | 125 | 30 | 9  | 408 | 78 | 1,101 | 224 |
| 49,914 | 69 | 12 | 585 | 123 | 29 | 9  | 403 | 74 | 1,086 | 218 |
| 49,915 | 69 | 12 | 584 | 123 | 29 | 9  | 403 | 74 | 1,085 | 218 |
| 49,916 | 68 | 10 | 590 | 116 | 29 | 9  | 403 | 69 | 1,090 | 204 |
| 49,917 | 70 | 11 | 591 | 122 | 29 | 9  | 406 | 69 | 1,096 | 211 |
| 49,918 | 71 | 11 | 593 | 123 | 29 | 9  | 409 | 69 | 1,102 | 212 |
| 49,919 | 71 | 11 | 607 | 116 | 29 | 9  | 410 | 64 | 1,117 | 200 |
| 49,920 | 71 | 12 | 615 | 117 | 27 | 10 | 415 | 63 | 1,128 | 202 |
| 49,921 | 71 | 12 | 600 | 113 | 27 | 10 | 406 | 61 | 1,104 | 196 |
| 49,922 | 70 | 11 | 626 | 110 | 27 | 10 | 426 | 59 | 1,149 | 190 |
| 49,923 | 69 | 11 | 618 | 110 | 27 | 10 | 422 | 59 | 1,136 | 190 |
| 49,924 | 68 | 11 | 620 | 107 | 26 | 10 | 425 | 59 | 1,139 | 187 |
| 49,925 | 67 | 11 | 623 | 108 | 26 | 10 | 425 | 59 | 1,141 | 188 |
| 49,926 | 67 | 11 | 623 | 108 | 26 | 10 | 425 | 59 | 1,141 | 188 |

|        |    |    |     |     |    |    |     |    |       |     |
|--------|----|----|-----|-----|----|----|-----|----|-------|-----|
| 49,927 | 67 | 12 | 622 | 108 | 25 | 10 | 427 | 59 | 1,141 | 189 |
| 49,928 | 65 | 12 | 617 | 108 | 25 | 10 | 424 | 58 | 1,131 | 188 |
| 49,929 | 62 | 12 | 609 | 104 | 25 | 10 | 417 | 54 | 1,113 | 180 |
| 49,930 | 62 | 12 | 600 | 103 | 25 | 10 | 416 | 48 | 1,103 | 173 |
| 49,931 | 64 | 12 | 596 | 104 | 24 | 10 | 413 | 48 | 1,097 | 174 |
| 49,932 | 48 | 12 | 576 | 105 | 24 | 10 | 349 | 49 | 997   | 176 |
| 49,933 | 47 | 12 | 570 | 105 | 30 | 10 | 359 | 49 | 1,006 | 176 |
| 49,934 | 47 | 12 | 566 | 104 | 29 | 10 | 353 | 49 | 995   | 175 |
| 49,935 | 47 | 12 | 557 | 100 | 29 | 9  | 349 | 46 | 982   | 167 |
| 49,936 | 46 | 12 | 541 | 100 | 29 | 9  | 336 | 46 | 952   | 167 |
| 49,937 | 35 | 12 | 489 | 100 | 26 | 9  | 289 | 46 | 839   | 167 |
| 49,938 | 33 | 9  | 464 | 92  | 26 | 8  | 272 | 36 | 795   | 145 |
| 49,939 | 33 | 9  | 462 | 94  | 26 | 8  | 270 | 38 | 791   | 149 |
| 49,940 | 29 | 9  | 462 | 101 | 26 | 8  | 265 | 42 | 782   | 160 |
| 49,941 | 29 | 9  | 454 | 109 | 26 | 8  | 263 | 42 | 772   | 168 |
| 49,942 | 29 | 7  | 442 | 93  | 25 | 5  | 245 | 32 | 741   | 137 |
| 49,943 | 26 | 7  | 405 | 102 | 23 | 5  | 229 | 32 | 683   | 146 |
| 49,944 | 26 | 7  | 368 | 106 | 23 | 5  | 206 | 32 | 623   | 150 |
| 49,945 | 21 | 7  | 344 | 108 | 20 | 5  | 185 | 30 | 570   | 150 |
| 49,946 | 23 | 7  | 338 | 108 | 19 | 5  | 184 | 32 | 564   | 152 |
| 49,947 | 22 | 8  | 335 | 102 | 19 | 2  | 182 | 29 | 558   | 141 |
| 49,948 | 21 | 8  | 328 | 99  | 19 | 2  | 182 | 29 | 550   | 138 |
| 49,949 | 21 | 7  | 324 | 97  | 19 | 2  | 183 | 29 | 547   | 135 |
| 49,950 | 21 | 7  | 306 | 95  | 19 | 2  | 184 | 29 | 530   | 133 |
| 49,951 | 15 | 9  | 242 | 95  | 15 | 2  | 156 | 29 | 428   | 135 |
| 49,952 | 15 | 10 | 233 | 95  | 16 | 2  | 161 | 29 | 425   | 136 |
| 49,953 | 15 | 10 | 233 | 92  | 16 | 1  | 163 | 30 | 427   | 133 |
| 49,954 | 15 | 10 | 234 | 92  | 16 | 1  | 163 | 30 | 428   | 133 |
| 49,955 | 15 | 10 | 234 | 92  | 16 | 1  | 162 | 30 | 427   | 133 |
| 49,956 | 20 | 10 | 321 | 92  | 19 | 1  | 210 | 30 | 570   | 133 |
| 49,957 | 22 | 10 | 338 | 93  | 22 | 1  | 239 | 26 | 621   | 130 |
| 49,958 | 22 | 10 | 337 | 93  | 22 | 1  | 238 | 26 | 619   | 130 |
| 49,959 | 22 | 10 | 351 | 91  | 22 | 1  | 249 | 25 | 644   | 127 |
| 49,960 | 22 | 9  | 353 | 75  | 22 | 1  | 250 | 23 | 647   | 108 |
| 49,961 | 22 | 9  | 360 | 72  | 22 | 1  | 254 | 22 | 658   | 104 |
| 49,962 | 22 | 9  | 360 | 69  | 22 | 1  | 253 | 21 | 657   | 100 |
| 49,963 | 22 | 9  | 360 | 69  | 22 | 1  | 253 | 21 | 657   | 100 |
| 49,964 | 22 | 8  | 354 | 68  | 21 | 1  | 253 | 21 | 650   | 98  |
| 49,965 | 22 | 8  | 349 | 68  | 21 | 1  | 252 | 21 | 644   | 98  |
| 49,966 | 22 | 7  | 348 | 63  | 21 | 1  | 254 | 16 | 645   | 87  |
| 49,967 | 22 | 7  | 348 | 63  | 21 | 1  | 254 | 16 | 645   | 87  |

|        |    |   |     |    |    |   |     |    |       |     |
|--------|----|---|-----|----|----|---|-----|----|-------|-----|
| 49,968 | 20 | 7 | 349 | 57 | 21 | 1 | 250 | 16 | 640   | 81  |
| 49,969 | 23 | 7 | 373 | 56 | 22 | 1 | 266 | 16 | 684   | 80  |
| 49,970 | 23 | 7 | 384 | 54 | 23 | 1 | 275 | 16 | 705   | 78  |
| 49,971 | 30 | 6 | 397 | 50 | 23 | 0 | 287 | 15 | 737   | 71  |
| 49,972 | 30 | 7 | 401 | 50 | 24 | 0 | 290 | 16 | 745   | 73  |
| 49,973 | 34 | 7 | 468 | 50 | 28 | 0 | 309 | 16 | 839   | 73  |
| 49,974 | 40 | 7 | 510 | 49 | 28 | 0 | 331 | 16 | 909   | 72  |
| 49,975 | 41 | 7 | 541 | 50 | 30 | 0 | 352 | 16 | 964   | 73  |
| 49,976 | 41 | 7 | 537 | 50 | 30 | 0 | 350 | 16 | 958   | 73  |
| 49,977 | 43 | 7 | 554 | 51 | 33 | 0 | 361 | 16 | 991   | 74  |
| 49,978 | 43 | 6 | 562 | 55 | 33 | 0 | 364 | 18 | 1,002 | 79  |
| 49,979 | 43 | 6 | 563 | 71 | 33 | 0 | 362 | 23 | 1,001 | 100 |
| 49,980 | 43 | 6 | 563 | 75 | 33 | 0 | 362 | 23 | 1,001 | 104 |
| 49,981 | 43 | 6 | 564 | 75 | 33 | 0 | 361 | 25 | 1,001 | 106 |
| 49,982 | 42 | 6 | 557 | 74 | 33 | 0 | 359 | 26 | 991   | 106 |
| 49,983 | 39 | 6 | 517 | 73 | 28 | 0 | 324 | 25 | 908   | 104 |
| 49,984 | 42 | 6 | 499 | 75 | 22 | 0 | 303 | 26 | 866   | 107 |
| 49,985 | 43 | 6 | 508 | 76 | 22 | 0 | 306 | 28 | 879   | 110 |
| 49,986 | 43 | 7 | 504 | 77 | 22 | 0 | 304 | 29 | 873   | 113 |
| 49,987 | 43 | 7 | 504 | 77 | 22 | 0 | 302 | 29 | 871   | 113 |
| 49,988 | 43 | 7 | 522 | 78 | 22 | 0 | 312 | 29 | 899   | 114 |
| 49,989 | 43 | 7 | 525 | 76 | 22 | 0 | 312 | 27 | 902   | 110 |
| 49,990 | 43 | 7 | 525 | 76 | 21 | 0 | 312 | 27 | 901   | 110 |
| 49,991 | 43 | 7 | 529 | 65 | 21 | 0 | 313 | 22 | 906   | 94  |
| 49,992 | 43 | 7 | 532 | 57 | 21 | 0 | 314 | 22 | 910   | 86  |
| 49,993 | 42 | 7 | 537 | 42 | 21 | 0 | 315 | 21 | 915   | 70  |
| 49,994 | 43 | 7 | 546 | 42 | 21 | 0 | 320 | 21 | 930   | 70  |
| 49,995 | 42 | 7 | 544 | 43 | 21 | 0 | 319 | 22 | 926   | 72  |
| 49,996 | 42 | 6 | 539 | 40 | 21 | 0 | 313 | 21 | 915   | 67  |
| 49,997 | 41 | 6 | 587 | 40 | 21 | 0 | 326 | 19 | 975   | 65  |
| 49,998 | 41 | 5 | 588 | 40 | 21 | 0 | 332 | 18 | 982   | 63  |
| 49,999 | 41 | 5 | 595 | 39 | 21 | 0 | 335 | 18 | 992   | 62  |
| 50,000 | 41 | 5 | 595 | 38 | 21 | 0 | 331 | 18 | 988   | 61  |
| 50,001 | 41 | 3 | 593 | 38 | 21 | 0 | 329 | 18 | 984   | 59  |
| 50,002 | 41 | 3 | 588 | 38 | 20 | 0 | 326 | 18 | 975   | 59  |
| 50,003 | 40 | 2 | 577 | 40 | 21 | 0 | 318 | 18 | 956   | 60  |
| 50,004 | 41 | 2 | 575 | 40 | 21 | 0 | 317 | 17 | 954   | 59  |
| 50,005 | 40 | 2 | 571 | 40 | 21 | 0 | 318 | 17 | 950   | 59  |
| 50,006 | 37 | 3 | 523 | 40 | 20 | 0 | 298 | 17 | 878   | 60  |
| 50,007 | 36 | 3 | 489 | 36 | 19 | 0 | 274 | 17 | 818   | 56  |
| 50,008 | 34 | 3 | 472 | 36 | 16 | 0 | 245 | 17 | 767   | 56  |

|        |    |   |     |    |    |   |     |    |     |    |
|--------|----|---|-----|----|----|---|-----|----|-----|----|
| 50,009 | 35 | 3 | 472 | 36 | 16 | 0 | 243 | 17 | 766 | 56 |
| 50,010 | 35 | 3 | 471 | 36 | 16 | 0 | 244 | 17 | 766 | 56 |
| 50,011 | 35 | 3 | 467 | 36 | 16 | 0 | 243 | 17 | 761 | 56 |
| 50,012 | 35 | 3 | 465 | 36 | 16 | 0 | 245 | 17 | 761 | 56 |
| 50,013 | 43 | 3 | 471 | 36 | 20 | 0 | 269 | 17 | 803 | 56 |
| 50,014 | 43 | 3 | 471 | 36 | 20 | 0 | 269 | 16 | 803 | 55 |
| 50,015 | 44 | 3 | 480 | 36 | 20 | 0 | 279 | 16 | 823 | 55 |
| 50,016 | 44 | 3 | 478 | 36 | 20 | 0 | 278 | 16 | 820 | 55 |
| 50,017 | 44 | 3 | 473 | 36 | 20 | 0 | 275 | 16 | 812 | 55 |
| 50,018 | 44 | 3 | 471 | 36 | 20 | 0 | 275 | 16 | 810 | 55 |
| 50,019 | 40 | 3 | 442 | 36 | 19 | 0 | 256 | 16 | 757 | 55 |
| 50,020 | 40 | 3 | 417 | 39 | 18 | 0 | 246 | 17 | 721 | 59 |
| 50,021 | 34 | 3 | 415 | 39 | 19 | 0 | 242 | 18 | 710 | 60 |
| 50,022 | 34 | 3 | 406 | 43 | 19 | 1 | 239 | 23 | 698 | 70 |
| 50,023 | 33 | 6 | 402 | 47 | 18 | 1 | 236 | 26 | 689 | 80 |
| 50,024 | 29 | 6 | 303 | 48 | 13 | 1 | 194 | 27 | 539 | 82 |
| 50,025 | 25 | 6 | 279 | 47 | 14 | 1 | 179 | 27 | 497 | 81 |
| 50,026 | 24 | 6 | 249 | 47 | 13 | 1 | 158 | 27 | 444 | 81 |
| 50,027 | 22 | 6 | 232 | 48 | 10 | 1 | 147 | 27 | 411 | 82 |
| 50,028 | 22 | 6 | 224 | 47 | 10 | 1 | 142 | 27 | 398 | 81 |
| 50,029 | 22 | 6 | 223 | 43 | 10 | 1 | 142 | 25 | 397 | 75 |
| 50,030 | 22 | 6 | 223 | 28 | 10 | 1 | 142 | 21 | 397 | 56 |
| 50,031 | 22 | 6 | 223 | 24 | 10 | 1 | 142 | 21 | 397 | 52 |
| 50,032 | 23 | 6 | 229 | 29 | 10 | 1 | 148 | 18 | 410 | 54 |
| 50,033 | 22 | 6 | 227 | 29 | 10 | 1 | 148 | 18 | 407 | 54 |
| 50,034 | 25 | 6 | 225 | 29 | 12 | 1 | 147 | 18 | 409 | 54 |
| 50,035 | 22 | 6 | 237 | 27 | 13 | 1 | 153 | 17 | 425 | 51 |
| 50,036 | 21 | 5 | 226 | 25 | 13 | 1 | 152 | 14 | 412 | 45 |
| 50,037 | 21 | 5 | 225 | 25 | 13 | 1 | 157 | 14 | 416 | 45 |
| 50,038 | 21 | 5 | 213 | 25 | 13 | 1 | 148 | 14 | 395 | 45 |
| 50,039 | 21 | 5 | 209 | 24 | 13 | 1 | 148 | 14 | 391 | 44 |
| 50,040 | 21 | 5 | 207 | 26 | 13 | 1 | 148 | 14 | 389 | 46 |
| 50,041 | 21 | 5 | 202 | 26 | 13 | 1 | 147 | 14 | 383 | 46 |
| 50,042 | 21 | 5 | 199 | 26 | 13 | 1 | 146 | 14 | 379 | 46 |
| 50,043 | 21 | 5 | 197 | 26 | 13 | 1 | 146 | 16 | 377 | 48 |
| 50,044 | 21 | 5 | 194 | 26 | 13 | 1 | 144 | 17 | 372 | 49 |
| 50,045 | 22 | 5 | 185 | 25 | 13 | 1 | 139 | 16 | 359 | 47 |
| 50,046 | 22 | 5 | 187 | 25 | 14 | 1 | 140 | 16 | 363 | 47 |
| 50,047 | 22 | 5 | 168 | 27 | 14 | 1 | 136 | 17 | 340 | 50 |
| 50,048 | 21 | 5 | 137 | 27 | 14 | 2 | 127 | 18 | 299 | 52 |
| 50,049 | 21 | 5 | 135 | 28 | 14 | 2 | 121 | 19 | 291 | 54 |

|        |    |   |     |    |    |   |     |    |     |    |
|--------|----|---|-----|----|----|---|-----|----|-----|----|
| 50,050 | 21 | 6 | 128 | 28 | 14 | 2 | 118 | 19 | 281 | 55 |
| 50,051 | 21 | 6 | 127 | 29 | 14 | 2 | 118 | 19 | 280 | 56 |
| 50,052 | 21 | 6 | 131 | 30 | 14 | 2 | 121 | 20 | 287 | 58 |
| 50,053 | 21 | 6 | 131 | 29 | 13 | 2 | 120 | 21 | 285 | 58 |
| 50,054 | 21 | 6 | 130 | 29 | 13 | 2 | 121 | 21 | 285 | 58 |
| 50,055 | 24 | 6 | 154 | 30 | 13 | 2 | 132 | 22 | 323 | 60 |
| 50,056 | 24 | 5 | 154 | 30 | 13 | 2 | 134 | 22 | 325 | 59 |
| 50,057 | 23 | 5 | 151 | 30 | 12 | 2 | 130 | 21 | 316 | 58 |
| 50,058 | 23 | 5 | 149 | 30 | 12 | 2 | 129 | 21 | 313 | 58 |
| 50,059 | 23 | 5 | 149 | 30 | 12 | 2 | 130 | 21 | 314 | 58 |
| 50,060 | 23 | 5 | 157 | 30 | 13 | 2 | 141 | 21 | 334 | 58 |
| 50,061 | 23 | 5 | 156 | 30 | 13 | 2 | 140 | 21 | 332 | 58 |
| 50,062 | 23 | 5 | 156 | 30 | 13 | 2 | 138 | 21 | 330 | 58 |
| 50,063 | 23 | 5 | 161 | 30 | 13 | 2 | 148 | 21 | 345 | 58 |
| 50,064 | 15 | 5 | 158 | 30 | 9  | 2 | 124 | 21 | 306 | 58 |
| 50,065 | 15 | 5 | 156 | 30 | 9  | 2 | 123 | 21 | 303 | 58 |
| 50,066 | 14 | 5 | 150 | 30 | 9  | 2 | 117 | 21 | 290 | 58 |
| 50,067 | 14 | 5 | 165 | 30 | 9  | 2 | 125 | 21 | 313 | 58 |
| 50,068 | 14 | 5 | 169 | 30 | 9  | 2 | 129 | 21 | 321 | 58 |
| 50,069 | 17 | 5 | 242 | 27 | 19 | 2 | 163 | 21 | 441 | 55 |
| 50,070 | 19 | 5 | 331 | 27 | 20 | 2 | 191 | 21 | 561 | 55 |
| 50,071 | 20 | 5 | 378 | 28 | 24 | 2 | 249 | 21 | 671 | 56 |
| 50,072 | 20 | 7 | 372 | 29 | 24 | 2 | 245 | 23 | 661 | 61 |
| 50,073 | 19 | 7 | 372 | 24 | 24 | 1 | 243 | 18 | 658 | 50 |
| 50,074 | 22 | 4 | 413 | 25 | 24 | 2 | 276 | 16 | 735 | 47 |
| 50,075 | 21 | 5 | 412 | 29 | 23 | 2 | 274 | 18 | 730 | 54 |
| 50,076 | 20 | 5 | 400 | 32 | 22 | 2 | 263 | 18 | 705 | 57 |
| 50,077 | 20 | 5 | 397 | 33 | 21 | 2 | 259 | 19 | 697 | 59 |
| 50,078 | 20 | 5 | 398 | 32 | 21 | 2 | 262 | 19 | 701 | 58 |
| 50,079 | 21 | 5 | 399 | 32 | 21 | 2 | 262 | 19 | 703 | 58 |
| 50,080 | 21 | 5 | 399 | 32 | 21 | 2 | 262 | 19 | 703 | 58 |
| 50,081 | 21 | 5 | 399 | 32 | 21 | 2 | 261 | 19 | 702 | 58 |
| 50,082 | 21 | 5 | 397 | 35 | 21 | 2 | 262 | 19 | 701 | 61 |
| 50,083 | 20 | 5 | 403 | 30 | 21 | 2 | 258 | 19 | 702 | 56 |
| 50,084 | 19 | 5 | 407 | 31 | 19 | 2 | 258 | 19 | 703 | 57 |
| 50,085 | 17 | 5 | 405 | 31 | 19 | 2 | 257 | 19 | 698 | 57 |
| 50,086 | 18 | 5 | 391 | 32 | 18 | 2 | 246 | 20 | 673 | 59 |
| 50,087 | 18 | 9 | 391 | 34 | 18 | 2 | 245 | 20 | 672 | 65 |
| 50,088 | 18 | 9 | 390 | 34 | 18 | 2 | 239 | 20 | 665 | 65 |
| 50,089 | 22 | 9 | 417 | 34 | 21 | 2 | 250 | 20 | 710 | 65 |
| 50,090 | 22 | 9 | 424 | 32 | 21 | 2 | 253 | 20 | 720 | 63 |

|        |    |   |     |    |    |   |     |    |       |    |
|--------|----|---|-----|----|----|---|-----|----|-------|----|
| 50,091 | 22 | 9 | 423 | 32 | 21 | 2 | 254 | 20 | 720   | 63 |
| 50,092 | 26 | 9 | 465 | 32 | 22 | 2 | 285 | 21 | 798   | 64 |
| 50,093 | 26 | 9 | 466 | 32 | 22 | 2 | 288 | 21 | 802   | 64 |
| 50,094 | 29 | 9 | 491 | 41 | 22 | 2 | 297 | 21 | 839   | 73 |
| 50,095 | 29 | 9 | 491 | 41 | 22 | 2 | 297 | 20 | 839   | 72 |
| 50,096 | 39 | 9 | 562 | 42 | 24 | 2 | 365 | 21 | 990   | 74 |
| 50,097 | 42 | 9 | 570 | 42 | 23 | 2 | 380 | 21 | 1,015 | 74 |
| 50,098 | 42 | 9 | 574 | 40 | 23 | 1 | 380 | 19 | 1,019 | 69 |
| 50,099 | 42 | 9 | 573 | 40 | 23 | 1 | 380 | 19 | 1,018 | 69 |
| 50,100 | 44 | 9 | 598 | 38 | 23 | 1 | 387 | 18 | 1,052 | 66 |
| 50,101 | 44 | 8 | 606 | 38 | 25 | 1 | 395 | 18 | 1,070 | 65 |
| 50,102 | 45 | 8 | 632 | 38 | 25 | 1 | 405 | 18 | 1,107 | 65 |
| 50,103 | 46 | 8 | 640 | 37 | 25 | 1 | 410 | 17 | 1,121 | 63 |
| 50,104 | 48 | 8 | 660 | 36 | 25 | 1 | 422 | 15 | 1,155 | 60 |
| 50,105 | 48 | 8 | 662 | 36 | 27 | 1 | 423 | 15 | 1,160 | 60 |
| 50,106 | 45 | 8 | 649 | 36 | 27 | 1 | 414 | 15 | 1,135 | 60 |
| 50,107 | 45 | 8 | 645 | 36 | 27 | 1 | 411 | 15 | 1,128 | 60 |
| 50,108 | 45 | 8 | 646 | 36 | 27 | 1 | 413 | 15 | 1,131 | 60 |
| 50,109 | 45 | 8 | 645 | 36 | 27 | 1 | 413 | 16 | 1,130 | 61 |
| 50,110 | 45 | 8 | 645 | 36 | 27 | 1 | 412 | 16 | 1,129 | 61 |
| 50,111 | 44 | 8 | 622 | 36 | 26 | 1 | 392 | 16 | 1,084 | 61 |
| 50,112 | 44 | 8 | 622 | 36 | 26 | 1 | 391 | 16 | 1,083 | 61 |
| 50,113 | 47 | 8 | 631 | 36 | 26 | 1 | 396 | 16 | 1,100 | 61 |
| 50,114 | 47 | 8 | 626 | 36 | 26 | 1 | 384 | 16 | 1,083 | 61 |
| 50,115 | 47 | 8 | 635 | 36 | 26 | 1 | 389 | 17 | 1,097 | 62 |
| 50,116 | 49 | 8 | 655 | 36 | 26 | 1 | 405 | 17 | 1,135 | 62 |
| 50,117 | 49 | 8 | 641 | 37 | 26 | 1 | 399 | 17 | 1,115 | 63 |
| 50,118 | 52 | 8 | 642 | 40 | 26 | 1 | 398 | 17 | 1,118 | 66 |
| 50,119 | 50 | 8 | 620 | 40 | 21 | 1 | 392 | 17 | 1,083 | 66 |
| 50,120 | 50 | 8 | 580 | 40 | 18 | 1 | 370 | 16 | 1,018 | 65 |
| 50,121 | 48 | 8 | 496 | 41 | 17 | 1 | 344 | 16 | 905   | 66 |
| 50,122 | 47 | 6 | 445 | 39 | 13 | 1 | 282 | 13 | 787   | 59 |
| 50,123 | 47 | 6 | 441 | 39 | 12 | 1 | 281 | 13 | 781   | 59 |
| 50,124 | 46 | 6 | 419 | 38 | 12 | 1 | 263 | 13 | 740   | 58 |
| 50,125 | 44 | 5 | 433 | 34 | 13 | 0 | 274 | 11 | 764   | 50 |
| 50,126 | 44 | 4 | 433 | 29 | 13 | 0 | 274 | 8  | 764   | 41 |
| 50,127 | 44 | 4 | 425 | 26 | 13 | 0 | 274 | 9  | 756   | 39 |
| 50,128 | 48 | 4 | 461 | 27 | 14 | 0 | 302 | 8  | 825   | 39 |
| 50,129 | 49 | 4 | 464 | 27 | 15 | 0 | 302 | 8  | 830   | 39 |
| 50,130 | 48 | 4 | 471 | 27 | 16 | 0 | 305 | 8  | 840   | 39 |
| 50,131 | 48 | 4 | 472 | 27 | 16 | 0 | 306 | 8  | 842   | 39 |

|        |    |   |     |    |    |   |     |    |     |    |
|--------|----|---|-----|----|----|---|-----|----|-----|----|
| 50,132 | 48 | 4 | 473 | 26 | 16 | 0 | 307 | 8  | 844 | 38 |
| 50,133 | 48 | 4 | 468 | 24 | 16 | 0 | 309 | 8  | 841 | 36 |
| 50,134 | 48 | 4 | 462 | 24 | 16 | 0 | 308 | 8  | 834 | 36 |
| 50,135 | 48 | 4 | 454 | 23 | 16 | 0 | 307 | 8  | 825 | 35 |
| 50,136 | 48 | 4 | 453 | 23 | 16 | 0 | 306 | 8  | 823 | 35 |
| 50,137 | 47 | 0 | 455 | 20 | 16 | 0 | 308 | 7  | 826 | 27 |
| 50,138 | 47 | 0 | 452 | 20 | 16 | 0 | 308 | 7  | 823 | 27 |
| 50,139 | 47 | 0 | 452 | 20 | 15 | 0 | 304 | 7  | 818 | 27 |
| 50,140 | 46 | 0 | 438 | 20 | 13 | 0 | 299 | 7  | 796 | 27 |
| 50,141 | 47 | 0 | 436 | 21 | 13 | 0 | 296 | 7  | 792 | 28 |
| 50,142 | 44 | 1 | 411 | 22 | 12 | 0 | 271 | 7  | 738 | 30 |
| 50,143 | 44 | 1 | 410 | 23 | 12 | 0 | 268 | 8  | 734 | 32 |
| 50,144 | 44 | 1 | 395 | 23 | 12 | 0 | 267 | 8  | 718 | 32 |
| 50,145 | 46 | 1 | 403 | 14 | 12 | 0 | 268 | 6  | 729 | 21 |
| 50,146 | 35 | 1 | 353 | 14 | 10 | 0 | 205 | 6  | 603 | 21 |
| 50,147 | 42 | 1 | 381 | 13 | 12 | 0 | 226 | 5  | 661 | 19 |
| 50,148 | 49 | 1 | 439 | 14 | 19 | 0 | 265 | 5  | 772 | 20 |
| 50,149 | 57 | 1 | 485 | 14 | 25 | 0 | 309 | 5  | 876 | 20 |
| 50,150 | 55 | 1 | 483 | 16 | 32 | 0 | 331 | 5  | 901 | 22 |
| 50,151 | 55 | 1 | 475 | 16 | 30 | 0 | 324 | 5  | 884 | 22 |
| 50,152 | 55 | 1 | 465 | 16 | 30 | 0 | 320 | 7  | 870 | 24 |
| 50,153 | 55 | 1 | 461 | 15 | 33 | 0 | 328 | 7  | 877 | 23 |
| 50,154 | 54 | 2 | 449 | 17 | 33 | 0 | 320 | 8  | 856 | 27 |
| 50,155 | 52 | 2 | 429 | 18 | 33 | 0 | 304 | 9  | 818 | 29 |
| 50,156 | 52 | 2 | 416 | 23 | 31 | 0 | 301 | 9  | 800 | 34 |
| 50,157 | 52 | 2 | 417 | 25 | 31 | 0 | 301 | 9  | 801 | 36 |
| 50,158 | 52 | 2 | 417 | 29 | 31 | 0 | 302 | 9  | 802 | 40 |
| 50,159 | 52 | 2 | 416 | 29 | 31 | 0 | 301 | 9  | 800 | 40 |
| 50,160 | 52 | 2 | 416 | 30 | 31 | 0 | 301 | 8  | 800 | 40 |
| 50,161 | 52 | 2 | 416 | 30 | 31 | 0 | 301 | 8  | 800 | 40 |
| 50,162 | 50 | 2 | 412 | 31 | 31 | 0 | 298 | 8  | 791 | 41 |
| 50,163 | 50 | 2 | 411 | 31 | 31 | 0 | 298 | 8  | 790 | 41 |
| 50,164 | 49 | 2 | 406 | 31 | 31 | 0 | 295 | 9  | 781 | 42 |
| 50,165 | 49 | 2 | 394 | 32 | 31 | 0 | 290 | 9  | 764 | 43 |
| 50,166 | 49 | 2 | 380 | 36 | 31 | 0 | 273 | 9  | 733 | 47 |
| 50,167 | 47 | 2 | 374 | 37 | 31 | 0 | 273 | 9  | 725 | 48 |
| 50,168 | 47 | 2 | 371 | 36 | 31 | 0 | 271 | 9  | 720 | 47 |
| 50,169 | 44 | 2 | 366 | 33 | 31 | 0 | 268 | 10 | 709 | 45 |
| 50,170 | 44 | 2 | 362 | 33 | 29 | 0 | 265 | 10 | 700 | 45 |
| 50,171 | 43 | 2 | 365 | 38 | 29 | 0 | 267 | 10 | 704 | 50 |
| 50,172 | 43 | 2 | 364 | 37 | 29 | 0 | 265 | 10 | 701 | 49 |



|        |    |   |     |    |    |   |     |    |     |     |
|--------|----|---|-----|----|----|---|-----|----|-----|-----|
| 50,173 | 43 | 3 | 364 | 40 | 29 | 0 | 266 | 10 | 702 | 53  |
| 50,174 | 44 | 3 | 358 | 41 | 29 | 0 | 265 | 10 | 696 | 54  |
| 50,175 | 44 | 3 | 355 | 42 | 29 | 0 | 258 | 10 | 686 | 55  |
| 50,176 | 45 | 3 | 333 | 42 | 28 | 0 | 241 | 10 | 647 | 55  |
| 50,177 | 41 | 3 | 311 | 43 | 27 | 0 | 220 | 10 | 599 | 56  |
| 50,178 | 41 | 3 | 297 | 42 | 27 | 0 | 210 | 10 | 575 | 55  |
| 50,179 | 40 | 3 | 293 | 41 | 26 | 0 | 210 | 10 | 569 | 54  |
| 50,180 | 41 | 4 | 286 | 42 | 25 | 0 | 207 | 10 | 559 | 56  |
| 50,181 | 41 | 4 | 287 | 42 | 25 | 0 | 206 | 11 | 559 | 57  |
| 50,182 | 41 | 4 | 287 | 42 | 25 | 0 | 204 | 12 | 557 | 58  |
| 50,183 | 41 | 4 | 287 | 42 | 25 | 0 | 202 | 12 | 555 | 58  |
| 50,184 | 41 | 4 | 287 | 42 | 25 | 0 | 204 | 12 | 557 | 58  |
| 50,185 | 41 | 4 | 284 | 43 | 25 | 0 | 202 | 13 | 552 | 60  |
| 50,186 | 47 | 4 | 287 | 43 | 25 | 1 | 202 | 13 | 561 | 61  |
| 50,187 | 47 | 5 | 287 | 43 | 25 | 1 | 204 | 13 | 563 | 62  |
| 50,188 | 48 | 6 | 303 | 43 | 26 | 1 | 204 | 13 | 581 | 63  |
| 50,189 | 48 | 6 | 303 | 43 | 26 | 1 | 204 | 13 | 581 | 63  |
| 50,190 | 49 | 6 | 335 | 43 | 26 | 1 | 231 | 13 | 641 | 63  |
| 50,191 | 49 | 6 | 335 | 43 | 26 | 1 | 231 | 13 | 641 | 63  |
| 50,192 | 56 | 6 | 373 | 42 | 27 | 1 | 258 | 13 | 714 | 62  |
| 50,193 | 55 | 5 | 356 | 41 | 27 | 1 | 251 | 13 | 689 | 60  |
| 50,194 | 52 | 5 | 354 | 40 | 27 | 1 | 248 | 11 | 681 | 57  |
| 50,195 | 52 | 5 | 357 | 42 | 27 | 1 | 247 | 11 | 683 | 59  |
| 50,196 | 53 | 6 | 366 | 47 | 27 | 3 | 247 | 20 | 693 | 76  |
| 50,197 | 52 | 6 | 373 | 52 | 30 | 3 | 258 | 29 | 713 | 90  |
| 50,198 | 54 | 6 | 375 | 53 | 31 | 4 | 258 | 31 | 718 | 94  |
| 50,199 | 46 | 6 | 378 | 58 | 26 | 4 | 234 | 34 | 684 | 102 |
| 50,200 | 40 | 6 | 363 | 58 | 20 | 4 | 210 | 36 | 633 | 104 |
| 50,201 | 40 | 6 | 351 | 57 | 14 | 4 | 187 | 36 | 592 | 103 |
| 50,202 | 40 | 6 | 364 | 57 | 15 | 4 | 189 | 36 | 608 | 103 |
| 50,203 | 39 | 6 | 361 | 58 | 13 | 4 | 186 | 34 | 599 | 102 |
| 50,204 | 39 | 6 | 354 | 59 | 13 | 4 | 186 | 34 | 592 | 103 |
| 50,205 | 39 | 5 | 361 | 57 | 14 | 4 | 190 | 34 | 604 | 100 |
| 50,206 | 39 | 5 | 365 | 56 | 14 | 4 | 193 | 33 | 611 | 98  |
| 50,207 | 39 | 5 | 367 | 51 | 14 | 4 | 192 | 33 | 612 | 93  |
| 50,208 | 39 | 5 | 385 | 45 | 14 | 4 | 196 | 33 | 634 | 87  |
| 50,209 | 39 | 5 | 385 | 46 | 14 | 4 | 196 | 35 | 634 | 90  |
| 50,210 | 39 | 5 | 385 | 46 | 14 | 4 | 196 | 35 | 634 | 90  |
| 50,211 | 40 | 6 | 409 | 45 | 15 | 4 | 198 | 40 | 662 | 95  |
| 50,212 | 40 | 6 | 409 | 45 | 15 | 4 | 198 | 40 | 662 | 95  |
| 50,213 | 40 | 6 | 475 | 45 | 16 | 4 | 213 | 40 | 744 | 95  |

|        |    |   |     |    |    |   |     |    |       |    |
|--------|----|---|-----|----|----|---|-----|----|-------|----|
| 50,214 | 40 | 6 | 475 | 45 | 16 | 4 | 214 | 38 | 745   | 93 |
| 50,215 | 43 | 6 | 494 | 44 | 16 | 4 | 219 | 38 | 772   | 92 |
| 50,216 | 43 | 6 | 499 | 40 | 16 | 4 | 221 | 39 | 779   | 89 |
| 50,217 | 43 | 6 | 499 | 41 | 16 | 4 | 220 | 39 | 778   | 90 |
| 50,218 | 43 | 6 | 502 | 41 | 16 | 4 | 220 | 41 | 781   | 92 |
| 50,219 | 47 | 6 | 518 | 42 | 16 | 4 | 225 | 42 | 806   | 94 |
| 50,220 | 49 | 6 | 529 | 42 | 16 | 4 | 232 | 41 | 826   | 93 |
| 50,221 | 49 | 6 | 528 | 37 | 16 | 4 | 229 | 41 | 822   | 88 |
| 50,222 | 49 | 6 | 525 | 37 | 16 | 4 | 227 | 41 | 817   | 88 |
| 50,223 | 56 | 6 | 587 | 37 | 22 | 4 | 248 | 42 | 913   | 89 |
| 50,224 | 56 | 5 | 587 | 34 | 22 | 4 | 248 | 42 | 913   | 85 |
| 50,225 | 59 | 5 | 609 | 31 | 24 | 4 | 261 | 42 | 953   | 82 |
| 50,226 | 61 | 6 | 619 | 35 | 24 | 4 | 263 | 47 | 967   | 92 |
| 50,227 | 60 | 6 | 619 | 35 | 24 | 4 | 263 | 47 | 966   | 92 |
| 50,228 | 63 | 6 | 650 | 34 | 24 | 4 | 279 | 47 | 1,016 | 91 |
| 50,229 | 64 | 6 | 670 | 34 | 26 | 4 | 287 | 46 | 1,047 | 90 |
| 50,230 | 65 | 5 | 722 | 33 | 31 | 4 | 321 | 46 | 1,139 | 88 |
| 50,231 | 65 | 5 | 722 | 33 | 31 | 4 | 321 | 46 | 1,139 | 88 |
| 50,232 | 65 | 5 | 721 | 33 | 31 | 4 | 321 | 46 | 1,138 | 88 |
| 50,233 | 65 | 5 | 720 | 33 | 31 | 4 | 321 | 45 | 1,137 | 87 |
| 50,234 | 65 | 5 | 721 | 34 | 32 | 4 | 319 | 45 | 1,137 | 88 |
| 50,235 | 67 | 5 | 728 | 32 | 32 | 4 | 323 | 44 | 1,150 | 85 |
| 50,236 | 67 | 5 | 728 | 32 | 32 | 3 | 323 | 44 | 1,150 | 84 |
| 50,237 | 61 | 4 | 725 | 32 | 32 | 3 | 323 | 44 | 1,141 | 83 |
| 50,238 | 61 | 3 | 726 | 32 | 32 | 3 | 322 | 44 | 1,141 | 82 |
| 50,239 | 61 | 3 | 710 | 32 | 31 | 3 | 323 | 44 | 1,125 | 82 |
| 50,240 | 61 | 3 | 729 | 32 | 31 | 3 | 326 | 44 | 1,147 | 82 |
| 50,241 | 57 | 3 | 690 | 32 | 31 | 3 | 301 | 44 | 1,079 | 82 |
| 50,242 | 56 | 3 | 691 | 32 | 31 | 3 | 303 | 44 | 1,081 | 82 |
| 50,243 | 49 | 3 | 650 | 32 | 30 | 3 | 277 | 44 | 1,006 | 82 |
| 50,244 | 49 | 3 | 651 | 32 | 30 | 3 | 281 | 44 | 1,011 | 82 |
| 50,245 | 47 | 3 | 653 | 33 | 31 | 3 | 284 | 44 | 1,015 | 83 |
| 50,246 | 47 | 3 | 651 | 31 | 31 | 3 | 286 | 45 | 1,015 | 82 |
| 50,247 | 46 | 2 | 652 | 28 | 31 | 1 | 288 | 38 | 1,017 | 69 |
| 50,248 | 40 | 3 | 619 | 23 | 28 | 1 | 267 | 31 | 954   | 58 |
| 50,249 | 37 | 3 | 608 | 23 | 27 | 0 | 260 | 29 | 932   | 55 |
| 50,250 | 35 | 3 | 535 | 17 | 25 | 0 | 227 | 26 | 822   | 46 |
| 50,251 | 33 | 3 | 501 | 17 | 25 | 0 | 208 | 24 | 767   | 44 |
| 50,252 | 33 | 3 | 488 | 16 | 24 | 0 | 200 | 25 | 745   | 44 |
| 50,253 | 33 | 3 | 471 | 16 | 22 | 0 | 191 | 25 | 717   | 44 |
| 50,254 | 33 | 3 | 474 | 14 | 21 | 0 | 190 | 26 | 718   | 43 |

|        |    |   |     |    |    |   |     |    |       |    |
|--------|----|---|-----|----|----|---|-----|----|-------|----|
| 50,255 | 33 | 3 | 472 | 14 | 21 | 0 | 188 | 26 | 714   | 43 |
| 50,256 | 37 | 3 | 492 | 15 | 23 | 1 | 209 | 25 | 761   | 44 |
| 50,257 | 37 | 3 | 492 | 15 | 23 | 1 | 209 | 28 | 761   | 47 |
| 50,258 | 36 | 3 | 490 | 17 | 23 | 1 | 209 | 29 | 758   | 50 |
| 50,259 | 36 | 3 | 471 | 19 | 23 | 1 | 205 | 30 | 735   | 53 |
| 50,260 | 35 | 3 | 448 | 21 | 22 | 1 | 203 | 28 | 708   | 53 |
| 50,261 | 44 | 3 | 623 | 22 | 32 | 1 | 324 | 28 | 1,023 | 54 |
| 50,262 | 44 | 2 | 616 | 23 | 31 | 1 | 324 | 23 | 1,015 | 49 |
| 50,263 | 44 | 2 | 612 | 23 | 32 | 1 | 332 | 25 | 1,020 | 51 |
| 50,264 | 45 | 2 | 629 | 22 | 35 | 1 | 338 | 25 | 1,047 | 50 |
| 50,265 | 47 | 2 | 647 | 22 | 35 | 1 | 342 | 25 | 1,071 | 50 |
| 50,266 | 47 | 2 | 668 | 22 | 38 | 1 | 358 | 24 | 1,111 | 49 |
| 50,267 | 47 | 2 | 666 | 21 | 38 | 1 | 356 | 24 | 1,107 | 48 |
| 50,268 | 47 | 2 | 662 | 21 | 38 | 1 | 356 | 24 | 1,103 | 48 |
| 50,269 | 44 | 2 | 654 | 19 | 38 | 1 | 355 | 21 | 1,091 | 43 |
| 50,270 | 43 | 2 | 648 | 19 | 38 | 1 | 353 | 21 | 1,082 | 43 |
| 50,271 | 41 | 2 | 637 | 19 | 38 | 1 | 346 | 21 | 1,062 | 43 |
| 50,272 | 41 | 2 | 636 | 20 | 39 | 1 | 345 | 21 | 1,061 | 44 |
| 50,273 | 41 | 2 | 634 | 20 | 38 | 1 | 343 | 26 | 1,056 | 49 |
| 50,274 | 34 | 2 | 571 | 24 | 33 | 1 | 321 | 25 | 959   | 52 |
| 50,275 | 33 | 2 | 571 | 24 | 33 | 1 | 321 | 25 | 958   | 52 |
| 50,276 | 30 | 2 | 552 | 25 | 31 | 1 | 307 | 25 | 920   | 53 |
| 50,277 | 28 | 1 | 544 | 21 | 31 | 1 | 307 | 20 | 910   | 43 |
| 50,278 | 25 | 1 | 513 | 21 | 31 | 1 | 293 | 20 | 862   | 43 |
| 50,279 | 25 | 1 | 493 | 21 | 29 | 1 | 285 | 20 | 832   | 43 |
| 50,280 | 23 | 1 | 456 | 21 | 26 | 1 | 257 | 20 | 762   | 43 |
| 50,281 | 22 | 1 | 444 | 21 | 24 | 1 | 253 | 20 | 743   | 43 |
| 50,282 | 22 | 1 | 444 | 20 | 24 | 1 | 255 | 20 | 745   | 42 |
| 50,283 | 22 | 1 | 444 | 20 | 24 | 1 | 255 | 20 | 745   | 42 |
| 50,284 | 22 | 1 | 443 | 20 | 24 | 1 | 256 | 20 | 745   | 42 |
| 50,285 | 23 | 1 | 445 | 20 | 23 | 1 | 256 | 20 | 747   | 42 |
| 50,286 | 21 | 1 | 439 | 20 | 23 | 1 | 252 | 20 | 735   | 42 |
| 50,287 | 21 | 1 | 439 | 20 | 23 | 1 | 252 | 20 | 735   | 42 |
| 50,288 | 21 | 1 | 439 | 20 | 23 | 1 | 252 | 21 | 735   | 43 |
| 50,289 | 21 | 1 | 437 | 20 | 23 | 1 | 251 | 21 | 732   | 43 |
| 50,290 | 20 | 1 | 448 | 20 | 23 | 1 | 255 | 21 | 746   | 43 |
| 50,291 | 21 | 1 | 428 | 21 | 23 | 1 | 251 | 21 | 723   | 44 |
| 50,292 | 21 | 1 | 423 | 21 | 23 | 1 | 248 | 21 | 715   | 44 |
| 50,293 | 21 | 1 | 424 | 22 | 23 | 1 | 249 | 25 | 717   | 49 |
| 50,294 | 24 | 1 | 438 | 27 | 23 | 1 | 249 | 26 | 734   | 55 |
| 50,295 | 24 | 2 | 433 | 33 | 23 | 2 | 246 | 32 | 726   | 69 |

|        |    |   |     |    |    |   |     |    |     |     |
|--------|----|---|-----|----|----|---|-----|----|-----|-----|
| 50,296 | 24 | 2 | 422 | 33 | 22 | 2 | 241 | 32 | 709 | 69  |
| 50,297 | 32 | 2 | 482 | 34 | 26 | 2 | 288 | 31 | 828 | 69  |
| 50,298 | 32 | 2 | 474 | 32 | 26 | 2 | 288 | 29 | 820 | 65  |
| 50,299 | 34 | 1 | 468 | 31 | 24 | 2 | 283 | 25 | 809 | 59  |
| 50,300 | 34 | 1 | 467 | 31 | 24 | 2 | 283 | 25 | 808 | 59  |
| 50,301 | 38 | 1 | 497 | 31 | 26 | 2 | 299 | 25 | 860 | 59  |
| 50,302 | 40 | 1 | 507 | 31 | 26 | 2 | 303 | 25 | 876 | 59  |
| 50,303 | 40 | 1 | 528 | 31 | 27 | 3 | 325 | 24 | 920 | 59  |
| 50,304 | 40 | 1 | 527 | 31 | 27 | 3 | 327 | 24 | 921 | 59  |
| 50,305 | 40 | 1 | 523 | 31 | 27 | 3 | 326 | 23 | 916 | 58  |
| 50,306 | 40 | 1 | 523 | 31 | 27 | 3 | 326 | 23 | 916 | 58  |
| 50,307 | 36 | 1 | 501 | 30 | 25 | 2 | 302 | 22 | 864 | 55  |
| 50,308 | 37 | 1 | 506 | 26 | 25 | 2 | 303 | 20 | 871 | 49  |
| 50,309 | 39 | 1 | 527 | 26 | 25 | 2 | 306 | 20 | 897 | 49  |
| 50,310 | 38 | 1 | 517 | 26 | 22 | 3 | 288 | 20 | 865 | 50  |
| 50,311 | 37 | 2 | 502 | 23 | 22 | 3 | 281 | 21 | 842 | 49  |
| 50,312 | 37 | 2 | 362 | 21 | 15 | 3 | 204 | 21 | 618 | 47  |
| 50,313 | 38 | 2 | 369 | 21 | 16 | 3 | 210 | 21 | 633 | 47  |
| 50,314 | 38 | 2 | 362 | 21 | 15 | 3 | 198 | 19 | 613 | 45  |
| 50,315 | 38 | 2 | 330 | 23 | 12 | 4 | 190 | 21 | 570 | 50  |
| 50,316 | 37 | 3 | 314 | 23 | 12 | 4 | 193 | 21 | 556 | 51  |
| 50,317 | 34 | 3 | 274 | 23 | 9  | 4 | 172 | 21 | 489 | 51  |
| 50,318 | 34 | 3 | 276 | 23 | 9  | 4 | 177 | 21 | 496 | 51  |
| 50,319 | 34 | 3 | 279 | 23 | 10 | 4 | 179 | 21 | 502 | 51  |
| 50,320 | 34 | 3 | 281 | 23 | 10 | 4 | 178 | 21 | 503 | 51  |
| 50,321 | 34 | 3 | 283 | 23 | 10 | 4 | 178 | 21 | 505 | 51  |
| 50,322 | 34 | 3 | 280 | 23 | 9  | 4 | 178 | 21 | 501 | 51  |
| 50,323 | 34 | 3 | 278 | 22 | 9  | 4 | 178 | 21 | 499 | 50  |
| 50,324 | 35 | 3 | 289 | 18 | 9  | 4 | 181 | 16 | 514 | 41  |
| 50,325 | 35 | 3 | 288 | 18 | 9  | 4 | 181 | 16 | 513 | 41  |
| 50,326 | 35 | 3 | 293 | 18 | 10 | 4 | 185 | 20 | 523 | 45  |
| 50,327 | 38 | 3 | 296 | 18 | 10 | 4 | 189 | 21 | 533 | 46  |
| 50,328 | 38 | 3 | 296 | 19 | 10 | 4 | 192 | 22 | 536 | 48  |
| 50,329 | 38 | 3 | 296 | 26 | 10 | 4 | 190 | 22 | 534 | 55  |
| 50,330 | 38 | 3 | 321 | 26 | 10 | 4 | 199 | 23 | 568 | 56  |
| 50,331 | 38 | 3 | 319 | 26 | 10 | 4 | 197 | 23 | 564 | 56  |
| 50,332 | 38 | 7 | 321 | 60 | 10 | 4 | 197 | 29 | 566 | 100 |
| 50,333 | 38 | 7 | 320 | 62 | 10 | 4 | 197 | 29 | 565 | 102 |
| 50,334 | 44 | 7 | 347 | 64 | 10 | 4 | 215 | 29 | 616 | 104 |
| 50,335 | 44 | 7 | 352 | 64 | 10 | 4 | 216 | 30 | 622 | 105 |
| 50,336 | 44 | 9 | 403 | 71 | 10 | 4 | 232 | 31 | 689 | 115 |

|        |    |   |     |    |    |   |     |    |     |     |
|--------|----|---|-----|----|----|---|-----|----|-----|-----|
| 50,337 | 44 | 9 | 417 | 71 | 10 | 4 | 236 | 31 | 707 | 115 |
| 50,338 | 45 | 9 | 459 | 71 | 10 | 4 | 246 | 30 | 760 | 114 |
| 50,339 | 47 | 9 | 471 | 71 | 10 | 4 | 255 | 30 | 783 | 114 |
| 50,340 | 47 | 9 | 479 | 71 | 10 | 4 | 258 | 31 | 794 | 115 |
| 50,341 | 47 | 9 | 470 | 70 | 10 | 4 | 253 | 31 | 780 | 114 |
| 50,342 | 46 | 9 | 470 | 70 | 10 | 4 | 253 | 31 | 779 | 114 |
| 50,343 | 46 | 9 | 470 | 70 | 10 | 4 | 253 | 31 | 779 | 114 |
| 50,344 | 46 | 9 | 467 | 69 | 10 | 4 | 250 | 27 | 773 | 109 |
| 50,345 | 43 | 8 | 452 | 58 | 10 | 3 | 248 | 20 | 753 | 89  |
| 50,346 | 43 | 8 | 452 | 57 | 10 | 3 | 247 | 20 | 752 | 88  |
| 50,347 | 43 | 8 | 454 | 57 | 10 | 3 | 247 | 20 | 754 | 88  |
| 50,348 | 35 | 8 | 396 | 56 | 6  | 3 | 197 | 20 | 634 | 87  |
| 50,349 | 35 | 8 | 394 | 56 | 6  | 3 | 196 | 21 | 631 | 88  |
| 50,350 | 33 | 8 | 387 | 56 | 6  | 3 | 190 | 21 | 616 | 88  |
| 50,351 | 29 | 8 | 357 | 56 | 4  | 3 | 172 | 21 | 562 | 88  |
| 50,352 | 27 | 8 | 353 | 56 | 4  | 2 | 170 | 21 | 554 | 87  |
| 50,353 | 27 | 8 | 345 | 56 | 3  | 2 | 158 | 21 | 533 | 87  |
| 50,354 | 27 | 8 | 342 | 56 | 3  | 2 | 157 | 21 | 529 | 87  |
| 50,355 | 27 | 8 | 345 | 57 | 3  | 2 | 155 | 21 | 530 | 88  |
| 50,356 | 27 | 8 | 344 | 57 | 3  | 2 | 155 | 21 | 529 | 88  |
| 50,357 | 27 | 8 | 357 | 57 | 4  | 2 | 156 | 21 | 544 | 88  |
| 50,358 | 29 | 8 | 370 | 57 | 5  | 2 | 171 | 21 | 575 | 88  |
| 50,359 | 32 | 8 | 381 | 57 | 6  | 2 | 173 | 21 | 592 | 88  |
| 50,360 | 34 | 8 | 396 | 57 | 8  | 2 | 178 | 21 | 616 | 88  |
| 50,361 | 32 | 7 | 399 | 57 | 10 | 1 | 183 | 20 | 624 | 85  |
| 50,362 | 32 | 7 | 394 | 59 | 10 | 1 | 181 | 20 | 617 | 87  |
| 50,363 | 27 | 7 | 379 | 59 | 10 | 1 | 163 | 20 | 579 | 87  |
| 50,364 | 35 | 7 | 434 | 59 | 14 | 1 | 199 | 20 | 682 | 87  |
| 50,365 | 35 | 7 | 433 | 59 | 14 | 1 | 200 | 20 | 682 | 87  |
| 50,366 | 34 | 7 | 423 | 57 | 14 | 0 | 197 | 18 | 668 | 82  |
| 50,367 | 33 | 6 | 421 | 57 | 14 | 0 | 189 | 18 | 657 | 81  |
| 50,368 | 33 | 6 | 420 | 57 | 14 | 0 | 186 | 18 | 653 | 81  |
| 50,369 | 33 | 6 | 417 | 57 | 14 | 0 | 185 | 19 | 649 | 82  |
| 50,370 | 33 | 6 | 413 | 58 | 13 | 0 | 183 | 19 | 642 | 83  |
| 50,371 | 33 | 6 | 409 | 58 | 13 | 0 | 182 | 19 | 637 | 83  |
| 50,372 | 33 | 6 | 407 | 58 | 13 | 0 | 182 | 19 | 635 | 83  |
| 50,373 | 33 | 6 | 404 | 58 | 13 | 0 | 181 | 19 | 631 | 83  |
| 50,374 | 33 | 6 | 428 | 58 | 14 | 0 | 195 | 19 | 670 | 83  |
| 50,375 | 33 | 6 | 436 | 59 | 14 | 0 | 207 | 19 | 690 | 84  |
| 50,376 | 38 | 6 | 443 | 59 | 14 | 0 | 219 | 19 | 714 | 84  |
| 50,377 | 36 | 6 | 437 | 58 | 14 | 0 | 219 | 14 | 706 | 78  |

|        |     |   |     |    |    |   |     |    |       |    |
|--------|-----|---|-----|----|----|---|-----|----|-------|----|
| 50,378 | 36  | 6 | 436 | 57 | 14 | 0 | 219 | 13 | 705   | 76 |
| 50,379 | 36  | 6 | 435 | 50 | 14 | 0 | 219 | 13 | 704   | 69 |
| 50,380 | 36  | 6 | 435 | 51 | 14 | 0 | 220 | 13 | 705   | 70 |
| 50,381 | 36  | 6 | 409 | 51 | 14 | 0 | 211 | 12 | 670   | 69 |
| 50,382 | 39  | 2 | 449 | 17 | 17 | 0 | 231 | 6  | 736   | 25 |
| 50,383 | 39  | 2 | 448 | 17 | 17 | 0 | 230 | 6  | 734   | 25 |
| 50,384 | 42  | 2 | 470 | 15 | 17 | 1 | 254 | 6  | 783   | 24 |
| 50,385 | 42  | 2 | 465 | 13 | 17 | 1 | 252 | 6  | 776   | 22 |
| 50,386 | 41  | 2 | 421 | 15 | 17 | 1 | 242 | 6  | 721   | 24 |
| 50,387 | 45  | 0 | 484 | 9  | 19 | 1 | 282 | 6  | 830   | 16 |
| 50,388 | 45  | 0 | 483 | 9  | 19 | 1 | 286 | 6  | 833   | 16 |
| 50,389 | 55  | 0 | 508 | 10 | 23 | 1 | 322 | 6  | 908   | 17 |
| 50,390 | 53  | 0 | 496 | 10 | 23 | 1 | 313 | 6  | 885   | 17 |
| 50,391 | 54  | 2 | 522 | 10 | 25 | 1 | 322 | 5  | 923   | 18 |
| 50,392 | 54  | 2 | 520 | 10 | 25 | 1 | 322 | 5  | 921   | 18 |
| 50,393 | 54  | 2 | 530 | 10 | 26 | 1 | 327 | 5  | 937   | 18 |
| 50,394 | 57  | 2 | 541 | 10 | 27 | 1 | 330 | 5  | 955   | 18 |
| 50,395 | 63  | 2 | 647 | 10 | 36 | 1 | 389 | 5  | 1,135 | 18 |
| 50,396 | 69  | 2 | 693 | 11 | 39 | 1 | 442 | 5  | 1,243 | 19 |
| 50,397 | 69  | 2 | 693 | 11 | 39 | 1 | 443 | 5  | 1,244 | 19 |
| 50,398 | 73  | 2 | 732 | 11 | 39 | 1 | 464 | 5  | 1,308 | 19 |
| 50,399 | 73  | 2 | 729 | 11 | 39 | 1 | 464 | 5  | 1,305 | 19 |
| 50,400 | 73  | 2 | 728 | 11 | 39 | 1 | 462 | 4  | 1,302 | 18 |
| 50,401 | 75  | 2 | 746 | 11 | 39 | 1 | 488 | 4  | 1,348 | 18 |
| 50,402 | 76  | 2 | 763 | 11 | 39 | 1 | 494 | 4  | 1,372 | 18 |
| 50,403 | 76  | 2 | 766 | 11 | 39 | 1 | 497 | 4  | 1,378 | 18 |
| 50,404 | 75  | 2 | 774 | 11 | 39 | 1 | 495 | 4  | 1,383 | 18 |
| 50,405 | 81  | 2 | 785 | 10 | 40 | 1 | 507 | 4  | 1,413 | 17 |
| 50,406 | 83  | 2 | 818 | 10 | 44 | 1 | 537 | 4  | 1,482 | 17 |
| 50,407 | 125 | 2 | 888 | 10 | 47 | 1 | 577 | 4  | 1,637 | 17 |
| 50,408 | 128 | 2 | 913 | 14 | 48 | 1 | 589 | 8  | 1,678 | 25 |
| 50,409 | 129 | 3 | 912 | 26 | 47 | 1 | 579 | 18 | 1,667 | 48 |
| 50,410 | 125 | 3 | 932 | 31 | 50 | 1 | 597 | 19 | 1,704 | 54 |
| 50,411 | 123 | 5 | 941 | 32 | 49 | 1 | 615 | 19 | 1,728 | 57 |
| 50,412 | 123 | 5 | 938 | 32 | 47 | 1 | 609 | 19 | 1,717 | 57 |
| 50,413 | 119 | 5 | 923 | 30 | 43 | 1 | 589 | 19 | 1,674 | 55 |
| 50,414 | 116 | 6 | 898 | 30 | 43 | 1 | 575 | 19 | 1,632 | 56 |
| 50,415 | 116 | 6 | 896 | 31 | 42 | 1 | 575 | 19 | 1,629 | 57 |
| 50,416 | 116 | 6 | 896 | 31 | 42 | 1 | 574 | 19 | 1,628 | 57 |
| 50,417 | 116 | 6 | 896 | 31 | 42 | 1 | 575 | 19 | 1,629 | 57 |
| 50,418 | 118 | 6 | 902 | 31 | 43 | 1 | 579 | 19 | 1,642 | 57 |

|        |     |   |     |    |    |   |     |    |       |    |
|--------|-----|---|-----|----|----|---|-----|----|-------|----|
| 50,419 | 118 | 6 | 902 | 31 | 43 | 1 | 579 | 18 | 1,642 | 56 |
| 50,420 | 118 | 6 | 913 | 30 | 43 | 1 | 582 | 18 | 1,656 | 55 |
| 50,421 | 125 | 6 | 934 | 30 | 46 | 1 | 596 | 18 | 1,701 | 55 |
| 50,422 | 124 | 6 | 917 | 29 | 46 | 1 | 589 | 18 | 1,676 | 54 |
| 50,423 | 124 | 6 | 918 | 29 | 46 | 1 | 595 | 18 | 1,683 | 54 |
| 50,424 | 124 | 6 | 920 | 29 | 46 | 1 | 595 | 18 | 1,685 | 54 |
| 50,425 | 124 | 6 | 915 | 28 | 46 | 1 | 595 | 18 | 1,680 | 53 |
| 50,426 | 124 | 6 | 905 | 28 | 46 | 1 | 582 | 18 | 1,657 | 53 |
| 50,427 | 119 | 6 | 893 | 28 | 45 | 2 | 566 | 18 | 1,623 | 54 |
| 50,428 | 118 | 6 | 892 | 28 | 45 | 2 | 564 | 18 | 1,619 | 54 |
| 50,429 | 118 | 6 | 894 | 28 | 45 | 2 | 562 | 18 | 1,619 | 54 |
| 50,430 | 118 | 6 | 893 | 28 | 45 | 2 | 557 | 18 | 1,613 | 54 |
| 50,431 | 117 | 6 | 866 | 28 | 45 | 2 | 543 | 17 | 1,571 | 53 |
| 50,432 | 115 | 6 | 857 | 28 | 43 | 2 | 540 | 17 | 1,555 | 53 |
| 50,433 | 115 | 6 | 853 | 28 | 42 | 1 | 537 | 16 | 1,547 | 51 |
| 50,434 | 114 | 6 | 838 | 29 | 42 | 1 | 537 | 18 | 1,531 | 54 |
| 50,435 | 106 | 6 | 804 | 29 | 42 | 1 | 496 | 18 | 1,448 | 54 |
| 50,436 | 106 | 6 | 801 | 29 | 42 | 1 | 495 | 18 | 1,444 | 54 |
| 50,437 | 104 | 6 | 767 | 27 | 41 | 1 | 474 | 17 | 1,386 | 51 |
| 50,438 | 102 | 7 | 731 | 27 | 40 | 1 | 450 | 17 | 1,323 | 52 |
| 50,439 | 102 | 7 | 719 | 27 | 40 | 1 | 442 | 17 | 1,303 | 52 |
| 50,440 | 93  | 7 | 654 | 26 | 36 | 1 | 398 | 17 | 1,181 | 51 |
| 50,441 | 91  | 5 | 623 | 26 | 34 | 1 | 386 | 19 | 1,134 | 51 |
| 50,442 | 91  | 5 | 620 | 27 | 34 | 1 | 386 | 19 | 1,131 | 52 |
| 50,443 | 93  | 5 | 612 | 31 | 33 | 1 | 382 | 19 | 1,120 | 56 |
| 50,444 | 90  | 5 | 603 | 35 | 32 | 1 | 380 | 20 | 1,105 | 61 |
| 50,445 | 91  | 5 | 546 | 35 | 26 | 1 | 366 | 20 | 1,029 | 61 |
| 50,446 | 92  | 5 | 521 | 35 | 25 | 1 | 340 | 21 | 978   | 62 |
| 50,447 | 91  | 5 | 489 | 35 | 22 | 1 | 306 | 21 | 908   | 62 |
| 50,448 | 89  | 5 | 455 | 35 | 22 | 1 | 290 | 21 | 856   | 62 |
| 50,449 | 90  | 5 | 512 | 36 | 23 | 1 | 332 | 21 | 957   | 63 |
| 50,450 | 89  | 5 | 504 | 36 | 23 | 1 | 313 | 22 | 929   | 64 |
| 50,451 | 88  | 5 | 502 | 36 | 23 | 1 | 308 | 22 | 921   | 64 |
| 50,452 | 88  | 5 | 486 | 36 | 23 | 1 | 305 | 22 | 902   | 64 |
| 50,453 | 95  | 5 | 538 | 36 | 23 | 1 | 344 | 22 | 1,000 | 64 |
| 50,454 | 95  | 5 | 530 | 36 | 23 | 1 | 339 | 22 | 987   | 64 |
| 50,455 | 95  | 5 | 512 | 36 | 23 | 1 | 332 | 24 | 962   | 66 |
| 50,456 | 90  | 5 | 500 | 36 | 22 | 1 | 320 | 24 | 932   | 66 |
| 50,457 | 89  | 6 | 466 | 39 | 18 | 1 | 294 | 24 | 867   | 70 |
| 50,458 | 47  | 6 | 384 | 42 | 15 | 1 | 255 | 26 | 701   | 75 |
| 50,459 | 44  | 6 | 361 | 38 | 13 | 1 | 246 | 23 | 664   | 68 |

|        |    |   |     |    |    |   |     |    |       |    |
|--------|----|---|-----|----|----|---|-----|----|-------|----|
| 50,460 | 41 | 6 | 349 | 33 | 13 | 1 | 242 | 14 | 645   | 54 |
| 50,461 | 41 | 6 | 313 | 28 | 9  | 1 | 220 | 15 | 583   | 50 |
| 50,462 | 39 | 4 | 272 | 27 | 10 | 1 | 196 | 15 | 517   | 47 |
| 50,463 | 39 | 4 | 265 | 28 | 10 | 1 | 197 | 15 | 511   | 48 |
| 50,464 | 37 | 3 | 303 | 28 | 11 | 1 | 233 | 15 | 584   | 47 |
| 50,465 | 37 | 3 | 302 | 29 | 11 | 1 | 233 | 16 | 583   | 49 |
| 50,466 | 37 | 3 | 302 | 28 | 11 | 1 | 230 | 16 | 580   | 48 |
| 50,467 | 37 | 3 | 332 | 28 | 12 | 1 | 248 | 17 | 629   | 49 |
| 50,468 | 39 | 4 | 383 | 29 | 14 | 1 | 275 | 18 | 711   | 52 |
| 50,469 | 37 | 4 | 391 | 29 | 13 | 1 | 274 | 18 | 715   | 52 |
| 50,470 | 37 | 4 | 408 | 29 | 14 | 1 | 283 | 18 | 742   | 52 |
| 50,471 | 39 | 4 | 416 | 29 | 16 | 1 | 301 | 18 | 772   | 52 |
| 50,472 | 32 | 4 | 396 | 31 | 13 | 1 | 289 | 18 | 730   | 54 |
| 50,473 | 32 | 4 | 395 | 31 | 13 | 1 | 287 | 18 | 727   | 54 |
| 50,474 | 32 | 4 | 390 | 31 | 12 | 1 | 281 | 19 | 715   | 55 |
| 50,475 | 32 | 4 | 388 | 31 | 12 | 1 | 277 | 19 | 709   | 55 |
| 50,476 | 32 | 4 | 387 | 31 | 12 | 1 | 276 | 19 | 707   | 55 |
| 50,477 | 32 | 4 | 387 | 31 | 12 | 1 | 276 | 19 | 707   | 55 |
| 50,478 | 33 | 6 | 390 | 31 | 12 | 0 | 277 | 19 | 712   | 56 |
| 50,479 | 33 | 6 | 393 | 31 | 12 | 0 | 278 | 19 | 716   | 56 |
| 50,480 | 40 | 6 | 440 | 31 | 14 | 0 | 297 | 19 | 791   | 56 |
| 50,481 | 40 | 6 | 440 | 31 | 14 | 0 | 297 | 19 | 791   | 56 |
| 50,482 | 40 | 6 | 481 | 30 | 17 | 0 | 317 | 19 | 855   | 55 |
| 50,483 | 40 | 6 | 483 | 30 | 17 | 0 | 319 | 19 | 859   | 55 |
| 50,484 | 40 | 6 | 483 | 29 | 17 | 0 | 318 | 17 | 858   | 52 |
| 50,485 | 41 | 6 | 483 | 29 | 17 | 0 | 318 | 17 | 859   | 52 |
| 50,486 | 41 | 6 | 483 | 29 | 17 | 0 | 318 | 17 | 859   | 52 |
| 50,487 | 41 | 6 | 483 | 29 | 17 | 0 | 318 | 17 | 859   | 52 |
| 50,488 | 57 | 5 | 716 | 29 | 35 | 0 | 536 | 17 | 1,344 | 51 |
| 50,489 | 57 | 5 | 716 | 29 | 35 | 0 | 536 | 17 | 1,344 | 51 |
| 50,490 | 57 | 5 | 714 | 29 | 35 | 0 | 537 | 17 | 1,343 | 51 |
| 50,491 | 57 | 5 | 713 | 29 | 35 | 1 | 535 | 15 | 1,340 | 50 |
| 50,492 | 57 | 5 | 715 | 29 | 35 | 1 | 536 | 15 | 1,343 | 50 |
| 50,493 | 56 | 5 | 713 | 24 | 35 | 1 | 535 | 15 | 1,339 | 45 |
| 50,494 | 55 | 5 | 716 | 19 | 35 | 1 | 536 | 14 | 1,342 | 39 |
| 50,495 | 56 | 5 | 716 | 19 | 35 | 1 | 537 | 14 | 1,344 | 39 |
| 50,496 | 54 | 5 | 714 | 23 | 34 | 1 | 531 | 16 | 1,333 | 45 |
| 50,497 | 48 | 5 | 694 | 23 | 33 | 1 | 520 | 16 | 1,295 | 45 |
| 50,498 | 43 | 5 | 678 | 23 | 33 | 1 | 503 | 17 | 1,257 | 46 |
| 50,499 | 43 | 5 | 678 | 23 | 33 | 1 | 505 | 17 | 1,259 | 46 |
| 50,500 | 40 | 5 | 619 | 22 | 32 | 1 | 460 | 16 | 1,151 | 44 |



|        |    |   |     |    |    |   |     |    |       |    |
|--------|----|---|-----|----|----|---|-----|----|-------|----|
| 50,501 | 40 | 5 | 611 | 22 | 32 | 1 | 456 | 16 | 1,139 | 44 |
| 50,502 | 38 | 5 | 592 | 22 | 32 | 1 | 434 | 16 | 1,096 | 44 |
| 50,503 | 32 | 5 | 564 | 22 | 32 | 1 | 417 | 16 | 1,045 | 44 |
| 50,504 | 32 | 5 | 564 | 22 | 32 | 1 | 417 | 16 | 1,045 | 44 |
| 50,505 | 32 | 5 | 563 | 22 | 32 | 1 | 417 | 16 | 1,044 | 44 |
| 50,506 | 33 | 5 | 579 | 22 | 34 | 1 | 434 | 14 | 1,080 | 42 |
| 50,507 | 33 | 5 | 581 | 22 | 34 | 1 | 440 | 14 | 1,088 | 42 |
| 50,508 | 32 | 4 | 579 | 16 | 34 | 1 | 435 | 12 | 1,080 | 33 |
| 50,509 | 32 | 4 | 579 | 16 | 34 | 1 | 435 | 12 | 1,080 | 33 |
| 50,510 | 32 | 4 | 579 | 16 | 34 | 1 | 433 | 13 | 1,078 | 34 |
| 50,511 | 32 | 3 | 579 | 9  | 34 | 1 | 433 | 12 | 1,078 | 25 |
| 50,512 | 36 | 3 | 628 | 10 | 32 | 1 | 455 | 10 | 1,151 | 24 |
| 50,513 | 36 | 3 | 634 | 10 | 32 | 1 | 459 | 10 | 1,161 | 24 |
| 50,514 | 36 | 3 | 631 | 9  | 32 | 1 | 459 | 11 | 1,158 | 24 |
| 50,515 | 36 | 3 | 572 | 10 | 31 | 1 | 416 | 11 | 1,055 | 25 |
| 50,516 | 39 | 3 | 574 | 9  | 32 | 1 | 425 | 11 | 1,070 | 24 |
| 50,517 | 39 | 3 | 565 | 10 | 31 | 1 | 415 | 12 | 1,050 | 26 |
| 50,518 | 39 | 3 | 556 | 12 | 31 | 1 | 413 | 13 | 1,039 | 29 |
| 50,519 | 39 | 2 | 506 | 11 | 29 | 1 | 388 | 12 | 962   | 26 |
| 50,520 | 40 | 3 | 506 | 11 | 29 | 1 | 387 | 12 | 962   | 27 |
| 50,521 | 40 | 3 | 502 | 11 | 28 | 1 | 386 | 12 | 956   | 27 |
| 50,522 | 38 | 3 | 482 | 11 | 26 | 1 | 364 | 12 | 910   | 27 |
| 50,523 | 41 | 3 | 579 | 9  | 26 | 1 | 389 | 12 | 1,035 | 25 |
| 50,524 | 41 | 3 | 578 | 9  | 26 | 1 | 389 | 12 | 1,034 | 25 |
| 50,525 | 46 | 3 | 651 | 9  | 29 | 1 | 422 | 11 | 1,148 | 24 |
| 50,526 | 46 | 3 | 651 | 10 | 29 | 2 | 422 | 12 | 1,148 | 27 |
| 50,527 | 46 | 3 | 651 | 10 | 29 | 2 | 422 | 12 | 1,148 | 27 |
| 50,528 | 49 | 3 | 711 | 10 | 31 | 2 | 431 | 12 | 1,222 | 27 |
| 50,529 | 49 | 1 | 718 | 10 | 31 | 2 | 435 | 12 | 1,233 | 25 |
| 50,530 | 49 | 1 | 718 | 14 | 31 | 2 | 432 | 14 | 1,230 | 31 |
| 50,531 | 43 | 1 | 686 | 14 | 30 | 2 | 424 | 14 | 1,183 | 31 |
| 50,532 | 59 | 1 | 725 | 17 | 31 | 2 | 466 | 14 | 1,281 | 34 |
| 50,533 | 59 | 2 | 718 | 18 | 29 | 2 | 464 | 14 | 1,270 | 36 |
| 50,534 | 57 | 2 | 604 | 21 | 21 | 2 | 374 | 20 | 1,056 | 45 |
| 50,535 | 51 | 2 | 539 | 21 | 15 | 2 | 322 | 20 | 927   | 45 |
| 50,536 | 52 | 2 | 542 | 21 | 17 | 2 | 321 | 20 | 932   | 45 |
| 50,537 | 52 | 2 | 540 | 21 | 17 | 2 | 321 | 20 | 930   | 45 |
| 50,538 | 52 | 2 | 539 | 21 | 17 | 2 | 317 | 20 | 925   | 45 |
| 50,539 | 58 | 2 | 592 | 22 | 24 | 2 | 328 | 20 | 1,002 | 46 |
| 50,540 | 58 | 2 | 592 | 23 | 24 | 2 | 328 | 20 | 1,002 | 47 |
| 50,541 | 58 | 2 | 616 | 23 | 25 | 2 | 338 | 20 | 1,037 | 47 |

|        |    |   |     |    |    |   |     |    |       |    |
|--------|----|---|-----|----|----|---|-----|----|-------|----|
| 50,542 | 57 | 2 | 626 | 23 | 25 | 1 | 345 | 21 | 1,053 | 47 |
| 50,543 | 57 | 2 | 624 | 23 | 25 | 1 | 344 | 21 | 1,050 | 47 |
| 50,544 | 57 | 2 | 624 | 24 | 25 | 1 | 344 | 26 | 1,050 | 53 |
| 50,545 | 57 | 2 | 621 | 27 | 25 | 1 | 343 | 26 | 1,046 | 56 |
| 50,546 | 57 | 2 | 646 | 30 | 30 | 2 | 352 | 26 | 1,085 | 60 |
| 50,547 | 57 | 2 | 645 | 27 | 30 | 2 | 352 | 24 | 1,084 | 55 |
| 50,548 | 57 | 2 | 668 | 27 | 30 | 2 | 357 | 24 | 1,112 | 55 |
| 50,549 | 57 | 2 | 671 | 27 | 30 | 2 | 354 | 23 | 1,112 | 54 |
| 50,550 | 57 | 2 | 668 | 28 | 30 | 2 | 351 | 23 | 1,106 | 55 |
| 50,551 | 57 | 2 | 668 | 31 | 30 | 2 | 350 | 23 | 1,105 | 58 |
| 50,552 | 58 | 2 | 678 | 31 | 30 | 2 | 352 | 23 | 1,118 | 58 |
| 50,553 | 58 | 2 | 673 | 31 | 30 | 2 | 350 | 23 | 1,111 | 58 |
| 50,554 | 62 | 3 | 692 | 36 | 30 | 2 | 356 | 24 | 1,140 | 65 |
| 50,555 | 63 | 3 | 688 | 36 | 30 | 2 | 357 | 24 | 1,138 | 65 |
| 50,556 | 71 | 3 | 757 | 36 | 30 | 2 | 378 | 24 | 1,236 | 65 |
| 50,557 | 71 | 3 | 754 | 36 | 30 | 2 | 376 | 24 | 1,231 | 65 |
| 50,558 | 80 | 3 | 800 | 36 | 31 | 2 | 386 | 24 | 1,297 | 65 |
| 50,559 | 80 | 3 | 799 | 36 | 31 | 2 | 387 | 24 | 1,297 | 65 |
| 50,560 | 80 | 3 | 798 | 36 | 31 | 2 | 387 | 24 | 1,296 | 65 |
| 50,561 | 86 | 3 | 837 | 36 | 33 | 2 | 413 | 22 | 1,369 | 63 |
| 50,562 | 86 | 4 | 837 | 36 | 33 | 2 | 415 | 22 | 1,371 | 64 |
| 50,563 | 85 | 4 | 803 | 35 | 33 | 2 | 401 | 22 | 1,322 | 63 |
| 50,564 | 85 | 4 | 794 | 35 | 33 | 2 | 397 | 21 | 1,309 | 62 |
| 50,565 | 85 | 4 | 795 | 35 | 33 | 2 | 395 | 21 | 1,308 | 62 |
| 50,566 | 83 | 4 | 795 | 34 | 32 | 2 | 393 | 20 | 1,303 | 60 |
| 50,567 | 82 | 4 | 788 | 34 | 32 | 2 | 387 | 19 | 1,289 | 59 |
| 50,568 | 82 | 5 | 789 | 33 | 32 | 2 | 386 | 18 | 1,289 | 58 |
| 50,569 | 82 | 5 | 789 | 31 | 32 | 2 | 387 | 16 | 1,290 | 54 |
| 50,570 | 81 | 5 | 789 | 32 | 32 | 2 | 387 | 16 | 1,289 | 55 |
| 50,571 | 80 | 5 | 775 | 38 | 32 | 2 | 386 | 21 | 1,273 | 66 |
| 50,572 | 80 | 5 | 762 | 39 | 32 | 2 | 377 | 21 | 1,251 | 67 |
| 50,573 | 80 | 5 | 725 | 42 | 32 | 3 | 373 | 25 | 1,210 | 75 |
| 50,574 | 77 | 5 | 665 | 42 | 32 | 3 | 351 | 25 | 1,125 | 75 |
| 50,575 | 72 | 5 | 592 | 42 | 29 | 3 | 318 | 25 | 1,011 | 75 |
| 50,576 | 70 | 5 | 546 | 42 | 29 | 2 | 312 | 26 | 957   | 75 |
| 50,577 | 70 | 5 | 541 | 42 | 28 | 2 | 310 | 26 | 949   | 75 |
| 50,578 | 68 | 5 | 528 | 42 | 27 | 2 | 309 | 26 | 932   | 75 |
| 50,579 | 68 | 5 | 518 | 42 | 27 | 2 | 306 | 26 | 919   | 75 |
| 50,580 | 69 | 5 | 518 | 42 | 27 | 2 | 305 | 26 | 919   | 75 |
| 50,581 | 69 | 4 | 515 | 34 | 27 | 2 | 305 | 24 | 916   | 64 |
| 50,582 | 68 | 4 | 503 | 34 | 26 | 2 | 297 | 24 | 894   | 64 |

|        |    |   |     |    |    |   |     |    |     |    |
|--------|----|---|-----|----|----|---|-----|----|-----|----|
| 50,583 | 52 | 4 | 423 | 34 | 23 | 2 | 233 | 24 | 731 | 64 |
| 50,584 | 52 | 4 | 424 | 34 | 24 | 2 | 233 | 25 | 733 | 65 |
| 50,585 | 45 | 4 | 382 | 31 | 22 | 2 | 171 | 19 | 620 | 56 |
| 50,586 | 45 | 4 | 382 | 31 | 22 | 2 | 172 | 20 | 621 | 57 |
| 50,587 | 44 | 4 | 378 | 31 | 20 | 2 | 171 | 20 | 613 | 57 |
| 50,588 | 44 | 4 | 370 | 32 | 19 | 2 | 167 | 20 | 600 | 58 |
| 50,589 | 43 | 4 | 366 | 32 | 18 | 2 | 166 | 20 | 593 | 58 |
| 50,590 | 36 | 4 | 325 | 31 | 13 | 2 | 154 | 20 | 528 | 57 |
| 50,591 | 36 | 4 | 327 | 30 | 12 | 2 | 153 | 20 | 528 | 56 |
| 50,592 | 36 | 4 | 314 | 35 | 11 | 2 | 146 | 20 | 507 | 61 |
| 50,593 | 37 | 4 | 303 | 36 | 13 | 2 | 140 | 20 | 493 | 62 |
| 50,594 | 41 | 4 | 323 | 39 | 13 | 2 | 155 | 21 | 532 | 66 |
| 50,595 | 41 | 4 | 322 | 42 | 11 | 2 | 153 | 19 | 527 | 67 |
| 50,596 | 45 | 4 | 359 | 40 | 13 | 2 | 179 | 18 | 596 | 64 |
| 50,597 | 48 | 4 | 518 | 37 | 16 | 1 | 193 | 18 | 775 | 60 |
| 50,598 | 51 | 4 | 595 | 37 | 19 | 1 | 242 | 18 | 907 | 60 |
| 50,599 | 51 | 4 | 585 | 37 | 19 | 1 | 237 | 18 | 892 | 60 |
| 50,600 | 51 | 4 | 587 | 36 | 19 | 1 | 240 | 18 | 897 | 59 |
| 50,601 | 51 | 4 | 585 | 36 | 19 | 1 | 240 | 18 | 895 | 59 |
| 50,602 | 50 | 3 | 582 | 29 | 19 | 1 | 238 | 17 | 889 | 50 |
| 50,603 | 50 | 3 | 577 | 29 | 19 | 1 | 238 | 17 | 884 | 50 |
| 50,604 | 46 | 3 | 566 | 29 | 19 | 1 | 231 | 17 | 862 | 50 |
| 50,605 | 46 | 3 | 557 | 29 | 19 | 1 | 231 | 17 | 853 | 50 |
| 50,606 | 45 | 3 | 557 | 29 | 19 | 1 | 229 | 17 | 850 | 50 |
| 50,607 | 36 | 3 | 480 | 29 | 17 | 1 | 195 | 17 | 728 | 50 |
| 50,608 | 36 | 3 | 479 | 29 | 17 | 1 | 195 | 17 | 727 | 50 |
| 50,609 | 27 | 3 | 430 | 29 | 16 | 1 | 180 | 17 | 653 | 50 |
| 50,610 | 27 | 3 | 432 | 29 | 16 | 1 | 179 | 17 | 654 | 50 |
| 50,611 | 23 | 3 | 404 | 30 | 14 | 1 | 160 | 17 | 601 | 51 |
| 50,612 | 23 | 2 | 393 | 30 | 14 | 1 | 150 | 17 | 580 | 50 |
| 50,613 | 23 | 2 | 400 | 30 | 14 | 1 | 157 | 18 | 594 | 51 |
| 50,614 | 20 | 2 | 384 | 30 | 14 | 1 | 148 | 18 | 566 | 51 |
| 50,615 | 20 | 2 | 384 | 30 | 14 | 1 | 149 | 18 | 567 | 51 |
| 50,616 | 20 | 2 | 384 | 30 | 14 | 1 | 149 | 18 | 567 | 51 |
| 50,617 | 20 | 3 | 378 | 30 | 14 | 1 | 143 | 18 | 555 | 52 |
| 50,618 | 20 | 3 | 378 | 30 | 14 | 1 | 143 | 18 | 555 | 52 |
| 50,619 | 20 | 2 | 377 | 31 | 14 | 1 | 142 | 18 | 553 | 52 |
| 50,620 | 19 | 2 | 377 | 30 | 14 | 1 | 140 | 18 | 550 | 51 |
| 50,621 | 19 | 2 | 375 | 30 | 14 | 1 | 140 | 18 | 548 | 51 |
| 50,622 | 19 | 1 | 375 | 24 | 14 | 1 | 139 | 13 | 547 | 39 |
| 50,623 | 21 | 1 | 376 | 23 | 14 | 1 | 140 | 13 | 551 | 38 |

|        |     |   |       |    |    |   |     |    |       |    |
|--------|-----|---|-------|----|----|---|-----|----|-------|----|
| 50,624 | 32  | 1 | 438   | 20 | 15 | 0 | 153 | 9  | 638   | 30 |
| 50,625 | 32  | 1 | 438   | 20 | 15 | 0 | 153 | 9  | 638   | 30 |
| 50,626 | 35  | 1 | 500   | 20 | 17 | 0 | 164 | 9  | 716   | 30 |
| 50,627 | 35  | 1 | 591   | 19 | 19 | 0 | 173 | 8  | 818   | 28 |
| 50,628 | 62  | 1 | 728   | 19 | 23 | 0 | 241 | 8  | 1,054 | 28 |
| 50,629 | 70  | 1 | 863   | 19 | 27 | 0 | 272 | 8  | 1,232 | 28 |
| 50,630 | 75  | 1 | 896   | 19 | 28 | 0 | 283 | 8  | 1,282 | 28 |
| 50,631 | 75  | 1 | 896   | 19 | 28 | 0 | 283 | 8  | 1,282 | 28 |
| 50,632 | 99  | 1 | 1,051 | 19 | 38 | 0 | 355 | 8  | 1,543 | 28 |
| 50,633 | 99  | 1 | 1,051 | 19 | 38 | 0 | 355 | 8  | 1,543 | 28 |
| 50,634 | 102 | 1 | 1,086 | 19 | 37 | 0 | 356 | 8  | 1,581 | 28 |
| 50,635 | 102 | 1 | 1,109 | 19 | 37 | 0 | 361 | 7  | 1,609 | 27 |
| 50,636 | 102 | 1 | 1,110 | 20 | 37 | 0 | 360 | 7  | 1,609 | 28 |
| 50,637 | 102 | 1 | 1,110 | 20 | 37 | 0 | 360 | 6  | 1,609 | 27 |
| 50,638 | 102 | 1 | 1,110 | 22 | 37 | 0 | 360 | 6  | 1,609 | 29 |
| 50,639 | 102 | 1 | 1,110 | 21 | 37 | 0 | 358 | 6  | 1,607 | 28 |
| 50,640 | 102 | 1 | 1,109 | 16 | 37 | 0 | 357 | 6  | 1,605 | 23 |
| 50,641 | 102 | 1 | 1,112 | 16 | 37 | 0 | 357 | 6  | 1,608 | 23 |
| 50,642 | 102 | 1 | 1,100 | 16 | 37 | 0 | 354 | 6  | 1,593 | 23 |
| 50,643 | 102 | 1 | 1,099 | 18 | 37 | 0 | 355 | 12 | 1,593 | 31 |
| 50,644 | 96  | 2 | 1,075 | 30 | 36 | 0 | 341 | 24 | 1,548 | 56 |
| 50,645 | 96  | 2 | 1,079 | 37 | 36 | 1 | 343 | 28 | 1,554 | 68 |
| 50,646 | 96  | 2 | 1,077 | 34 | 36 | 1 | 343 | 25 | 1,552 | 62 |
| 50,647 | 92  | 2 | 1,033 | 33 | 34 | 1 | 318 | 25 | 1,477 | 61 |
| 50,648 | 89  | 2 | 868   | 33 | 29 | 1 | 299 | 25 | 1,285 | 61 |
| 50,649 | 86  | 2 | 776   | 32 | 27 | 1 | 250 | 25 | 1,139 | 60 |
| 50,650 | 86  | 2 | 772   | 32 | 27 | 1 | 247 | 25 | 1,132 | 60 |
| 50,651 | 86  | 2 | 773   | 32 | 27 | 1 | 250 | 25 | 1,136 | 60 |
| 50,652 | 86  | 2 | 775   | 31 | 27 | 1 | 254 | 25 | 1,142 | 59 |
| 50,653 | 86  | 2 | 774   | 31 | 27 | 1 | 254 | 25 | 1,141 | 59 |
| 50,654 | 87  | 2 | 776   | 31 | 27 | 1 | 255 | 25 | 1,145 | 59 |
| 50,655 | 87  | 2 | 779   | 31 | 27 | 1 | 257 | 25 | 1,150 | 59 |
| 50,656 | 87  | 2 | 780   | 31 | 27 | 1 | 257 | 25 | 1,151 | 59 |
| 50,657 | 88  | 2 | 783   | 31 | 27 | 1 | 259 | 25 | 1,157 | 59 |
| 50,658 | 88  | 2 | 783   | 31 | 27 | 1 | 259 | 25 | 1,157 | 59 |
| 50,659 | 94  | 2 | 788   | 31 | 27 | 1 | 263 | 26 | 1,172 | 60 |
| 50,660 | 94  | 2 | 788   | 31 | 27 | 1 | 264 | 26 | 1,173 | 60 |
| 50,661 | 95  | 3 | 789   | 31 | 27 | 1 | 264 | 26 | 1,175 | 61 |
| 50,662 | 95  | 3 | 787   | 30 | 27 | 1 | 264 | 26 | 1,173 | 60 |
| 50,663 | 93  | 3 | 795   | 30 | 27 | 1 | 266 | 27 | 1,181 | 61 |
| 50,664 | 93  | 3 | 788   | 31 | 27 | 1 | 257 | 27 | 1,165 | 62 |

|        |     |   |     |    |    |   |     |    |       |    |
|--------|-----|---|-----|----|----|---|-----|----|-------|----|
| 50,665 | 93  | 3 | 790 | 31 | 27 | 1 | 257 | 27 | 1,167 | 62 |
| 50,666 | 93  | 3 | 797 | 32 | 27 | 1 | 256 | 27 | 1,173 | 63 |
| 50,667 | 99  | 3 | 819 | 32 | 28 | 1 | 283 | 27 | 1,229 | 63 |
| 50,668 | 102 | 2 | 844 | 33 | 28 | 1 | 302 | 27 | 1,276 | 63 |
| 50,669 | 102 | 2 | 844 | 33 | 28 | 1 | 302 | 27 | 1,276 | 63 |
| 50,670 | 102 | 2 | 850 | 32 | 28 | 1 | 304 | 27 | 1,284 | 62 |
| 50,671 | 107 | 2 | 876 | 32 | 29 | 1 | 333 | 28 | 1,345 | 63 |
| 50,672 | 107 | 2 | 876 | 32 | 29 | 1 | 333 | 28 | 1,345 | 63 |
| 50,673 | 108 | 2 | 879 | 32 | 29 | 1 | 333 | 28 | 1,349 | 63 |
| 50,674 | 108 | 3 | 872 | 32 | 29 | 1 | 333 | 28 | 1,342 | 64 |
| 50,675 | 97  | 3 | 818 | 32 | 28 | 1 | 323 | 28 | 1,266 | 64 |
| 50,676 | 94  | 3 | 788 | 32 | 27 | 1 | 316 | 28 | 1,225 | 64 |
| 50,677 | 95  | 3 | 777 | 32 | 26 | 1 | 324 | 29 | 1,222 | 65 |
| 50,678 | 95  | 3 | 699 | 32 | 25 | 1 | 323 | 30 | 1,142 | 66 |
| 50,679 | 70  | 3 | 599 | 32 | 26 | 1 | 280 | 30 | 975   | 66 |
| 50,680 | 79  | 3 | 543 | 32 | 25 | 1 | 314 | 30 | 961   | 66 |
| 50,681 | 74  | 3 | 520 | 32 | 26 | 1 | 311 | 30 | 931   | 66 |
| 50,682 | 74  | 3 | 518 | 32 | 26 | 1 | 314 | 30 | 932   | 66 |
| 50,683 | 50  | 3 | 371 | 32 | 16 | 1 | 251 | 30 | 688   | 66 |
| 50,684 | 47  | 3 | 337 | 33 | 16 | 1 | 253 | 30 | 653   | 67 |
| 50,685 | 49  | 3 | 329 | 33 | 16 | 1 | 251 | 30 | 645   | 67 |
| 50,686 | 49  | 3 | 318 | 33 | 15 | 1 | 250 | 30 | 632   | 67 |
| 50,687 | 49  | 3 | 315 | 32 | 15 | 1 | 250 | 30 | 629   | 66 |
| 50,688 | 49  | 3 | 316 | 32 | 15 | 1 | 250 | 30 | 630   | 66 |
| 50,689 | 49  | 3 | 317 | 30 | 15 | 1 | 250 | 30 | 631   | 64 |
| 50,690 | 49  | 3 | 316 | 30 | 15 | 1 | 250 | 30 | 630   | 64 |
| 50,691 | 49  | 3 | 316 | 30 | 15 | 1 | 250 | 31 | 630   | 65 |
| 50,692 | 49  | 3 | 313 | 31 | 15 | 1 | 250 | 31 | 627   | 66 |
| 50,693 | 49  | 3 | 313 | 31 | 15 | 1 | 250 | 31 | 627   | 66 |
| 50,694 | 49  | 3 | 313 | 30 | 15 | 1 | 249 | 25 | 626   | 59 |
| 50,695 | 50  | 2 | 312 | 18 | 15 | 1 | 248 | 13 | 625   | 34 |
| 50,696 | 50  | 2 | 306 | 8  | 15 | 0 | 245 | 9  | 616   | 19 |
| 50,697 | 50  | 2 | 305 | 8  | 15 | 1 | 244 | 9  | 614   | 20 |
| 50,698 | 51  | 2 | 305 | 8  | 14 | 1 | 241 | 9  | 611   | 20 |
| 50,699 | 51  | 2 | 305 | 9  | 14 | 1 | 241 | 9  | 611   | 21 |
| 50,700 | 51  | 2 | 306 | 9  | 13 | 1 | 241 | 9  | 611   | 21 |
| 50,701 | 51  | 2 | 308 | 11 | 13 | 1 | 238 | 9  | 610   | 23 |
| 50,702 | 51  | 2 | 306 | 12 | 13 | 1 | 236 | 9  | 606   | 24 |
| 50,703 | 51  | 2 | 310 | 13 | 13 | 1 | 236 | 9  | 610   | 25 |
| 50,704 | 65  | 2 | 406 | 13 | 17 | 1 | 271 | 9  | 759   | 25 |
| 50,705 | 67  | 2 | 446 | 13 | 22 | 1 | 304 | 9  | 839   | 25 |

|        |    |   |     |    |    |   |     |    |     |    |
|--------|----|---|-----|----|----|---|-----|----|-----|----|
| 50,706 | 67 | 2 | 443 | 16 | 22 | 1 | 305 | 11 | 837 | 30 |
| 50,707 | 67 | 3 | 443 | 16 | 22 | 1 | 305 | 11 | 837 | 31 |
| 50,708 | 71 | 3 | 496 | 16 | 26 | 1 | 333 | 11 | 926 | 31 |
| 50,709 | 71 | 3 | 498 | 17 | 26 | 1 | 331 | 11 | 926 | 32 |
| 50,710 | 65 | 4 | 496 | 17 | 26 | 1 | 330 | 10 | 917 | 32 |
| 50,711 | 65 | 4 | 496 | 17 | 26 | 1 | 329 | 10 | 916 | 32 |
| 50,712 | 64 | 3 | 514 | 17 | 30 | 1 | 332 | 10 | 940 | 31 |
| 50,713 | 64 | 3 | 513 | 18 | 30 | 1 | 332 | 10 | 939 | 32 |
| 50,714 | 64 | 3 | 505 | 18 | 30 | 1 | 329 | 9  | 928 | 31 |
| 50,715 | 67 | 3 | 519 | 17 | 30 | 1 | 335 | 8  | 951 | 29 |
| 50,716 | 67 | 3 | 541 | 16 | 30 | 1 | 339 | 8  | 977 | 28 |
| 50,717 | 69 | 3 | 547 | 16 | 30 | 1 | 344 | 8  | 990 | 28 |
| 50,718 | 63 | 3 | 534 | 16 | 29 | 1 | 317 | 8  | 943 | 28 |
| 50,719 | 60 | 3 | 514 | 16 | 29 | 1 | 298 | 8  | 901 | 28 |
| 50,720 | 60 | 3 | 521 | 16 | 29 | 1 | 297 | 9  | 907 | 29 |
| 50,721 | 56 | 3 | 510 | 16 | 28 | 1 | 274 | 10 | 868 | 30 |
| 50,722 | 56 | 5 | 514 | 17 | 28 | 1 | 276 | 9  | 874 | 32 |
| 50,723 | 56 | 5 | 513 | 17 | 28 | 1 | 276 | 9  | 873 | 32 |
| 50,724 | 53 | 5 | 510 | 17 | 28 | 1 | 275 | 9  | 866 | 32 |
| 50,725 | 53 | 4 | 510 | 17 | 28 | 1 | 275 | 9  | 866 | 31 |
| 50,726 | 53 | 4 | 509 | 17 | 28 | 2 | 272 | 9  | 862 | 32 |
| 50,727 | 54 | 4 | 505 | 17 | 28 | 2 | 273 | 10 | 860 | 33 |
| 50,728 | 53 | 4 | 491 | 17 | 28 | 2 | 262 | 9  | 834 | 32 |
| 50,729 | 53 | 6 | 479 | 34 | 27 | 2 | 253 | 17 | 812 | 59 |
| 50,730 | 51 | 6 | 443 | 36 | 22 | 2 | 229 | 20 | 745 | 64 |
| 50,731 | 34 | 6 | 365 | 38 | 19 | 2 | 163 | 21 | 581 | 67 |
| 50,732 | 33 | 6 | 355 | 38 | 17 | 3 | 155 | 23 | 560 | 70 |
| 50,733 | 33 | 6 | 349 | 38 | 17 | 3 | 145 | 23 | 544 | 70 |
| 50,734 | 34 | 6 | 348 | 38 | 17 | 3 | 143 | 23 | 542 | 70 |
| 50,735 | 34 | 6 | 346 | 38 | 17 | 3 | 140 | 24 | 537 | 71 |
| 50,736 | 32 | 6 | 341 | 40 | 17 | 3 | 139 | 24 | 529 | 73 |
| 50,737 | 32 | 6 | 341 | 43 | 17 | 3 | 139 | 25 | 529 | 77 |
| 50,738 | 32 | 6 | 341 | 43 | 17 | 3 | 139 | 25 | 529 | 77 |
| 50,739 | 32 | 6 | 340 | 43 | 17 | 3 | 139 | 25 | 528 | 77 |
| 50,740 | 32 | 6 | 339 | 43 | 17 | 3 | 139 | 25 | 527 | 77 |
| 50,741 | 32 | 6 | 342 | 43 | 17 | 3 | 141 | 25 | 532 | 77 |
| 50,742 | 32 | 6 | 342 | 43 | 17 | 3 | 142 | 24 | 533 | 76 |
| 50,743 | 32 | 6 | 342 | 43 | 17 | 3 | 142 | 24 | 533 | 76 |
| 50,744 | 33 | 6 | 342 | 43 | 17 | 3 | 142 | 24 | 534 | 76 |
| 50,745 | 33 | 6 | 342 | 41 | 17 | 3 | 142 | 24 | 534 | 74 |
| 50,746 | 32 | 6 | 342 | 38 | 17 | 2 | 143 | 22 | 534 | 68 |

|        |    |   |     |    |    |   |     |    |     |    |
|--------|----|---|-----|----|----|---|-----|----|-----|----|
| 50,747 | 32 | 6 | 341 | 38 | 17 | 2 | 143 | 22 | 533 | 68 |
| 50,748 | 31 | 6 | 340 | 38 | 17 | 2 | 143 | 22 | 531 | 68 |
| 50,749 | 31 | 7 | 340 | 38 | 17 | 2 | 143 | 22 | 531 | 69 |
| 50,750 | 31 | 7 | 340 | 38 | 17 | 2 | 144 | 22 | 532 | 69 |
| 50,751 | 31 | 7 | 340 | 36 | 17 | 2 | 144 | 22 | 532 | 67 |
| 50,752 | 31 | 7 | 336 | 35 | 17 | 2 | 144 | 22 | 528 | 66 |
| 50,753 | 31 | 7 | 332 | 35 | 17 | 2 | 142 | 22 | 522 | 66 |
| 50,754 | 17 | 7 | 236 | 35 | 13 | 2 | 106 | 22 | 372 | 66 |
| 50,755 | 15 | 7 | 192 | 35 | 8  | 2 | 74  | 22 | 289 | 66 |
| 50,756 | 14 | 7 | 192 | 32 | 8  | 2 | 73  | 20 | 287 | 61 |
| 50,757 | 14 | 7 | 193 | 32 | 8  | 2 | 71  | 20 | 286 | 61 |
| 50,758 | 10 | 6 | 147 | 33 | 5  | 2 | 39  | 20 | 201 | 61 |
| 50,759 | 9  | 6 | 140 | 33 | 5  | 2 | 38  | 20 | 192 | 61 |
| 50,760 | 9  | 5 | 139 | 34 | 5  | 2 | 44  | 20 | 197 | 61 |
| 50,761 | 9  | 5 | 137 | 34 | 5  | 2 | 44  | 20 | 195 | 61 |
| 50,762 | 9  | 5 | 131 | 34 | 4  | 2 | 43  | 21 | 187 | 62 |
| 50,763 | 9  | 5 | 118 | 34 | 1  | 2 | 41  | 21 | 169 | 62 |
| 50,764 | 9  | 5 | 141 | 34 | 2  | 2 | 60  | 22 | 212 | 63 |
| 50,765 | 9  | 5 | 139 | 34 | 2  | 2 | 59  | 22 | 209 | 63 |
| 50,766 | 6  | 5 | 133 | 37 | 2  | 2 | 56  | 23 | 197 | 67 |
| 50,767 | 6  | 5 | 110 | 38 | 2  | 2 | 52  | 23 | 170 | 68 |
| 50,768 | 4  | 5 | 98  | 38 | 2  | 2 | 50  | 24 | 154 | 69 |
| 50,769 | 4  | 5 | 89  | 38 | 2  | 2 | 49  | 24 | 144 | 69 |
| 50,770 | 5  | 5 | 86  | 37 | 3  | 2 | 49  | 24 | 143 | 68 |
| 50,771 | 5  | 5 | 73  | 37 | 3  | 2 | 48  | 23 | 129 | 67 |
| 50,772 | 4  | 5 | 60  | 37 | 3  | 2 | 42  | 22 | 109 | 66 |
| 50,773 | 5  | 3 | 56  | 36 | 4  | 2 | 42  | 22 | 107 | 63 |
| 50,774 | 5  | 3 | 59  | 36 | 4  | 2 | 42  | 22 | 110 | 63 |
| 50,775 | 5  | 3 | 61  | 36 | 4  | 2 | 46  | 22 | 116 | 63 |
| 50,776 | 5  | 3 | 66  | 36 | 4  | 1 | 46  | 21 | 121 | 61 |
| 50,777 | 6  | 3 | 101 | 36 | 8  | 1 | 65  | 21 | 180 | 61 |
| 50,778 | 14 | 3 | 150 | 36 | 10 | 1 | 106 | 21 | 280 | 61 |
| 50,779 | 14 | 3 | 150 | 36 | 10 | 1 | 106 | 21 | 280 | 61 |
| 50,780 | 14 | 1 | 149 | 19 | 10 | 1 | 106 | 12 | 279 | 33 |
| 50,781 | 21 | 1 | 172 | 17 | 11 | 1 | 116 | 9  | 320 | 28 |
| 50,782 | 24 | 1 | 218 | 15 | 13 | 0 | 145 | 6  | 400 | 22 |
| 50,783 | 25 | 1 | 270 | 15 | 15 | 0 | 166 | 6  | 476 | 22 |
| 50,784 | 24 | 1 | 283 | 15 | 15 | 0 | 168 | 6  | 490 | 22 |
| 50,785 | 24 | 1 | 284 | 14 | 17 | 0 | 169 | 5  | 494 | 20 |
| 50,786 | 24 | 1 | 284 | 14 | 17 | 0 | 170 | 5  | 495 | 20 |
| 50,787 | 24 | 1 | 284 | 12 | 17 | 0 | 170 | 5  | 495 | 18 |

|        |    |   |     |    |    |   |     |   |     |    |
|--------|----|---|-----|----|----|---|-----|---|-----|----|
| 50,788 | 24 | 1 | 285 | 9  | 17 | 0 | 170 | 4 | 496 | 14 |
| 50,789 | 24 | 1 | 285 | 9  | 17 | 0 | 170 | 4 | 496 | 14 |
| 50,790 | 24 | 1 | 286 | 10 | 17 | 0 | 170 | 4 | 497 | 15 |
| 50,791 | 24 | 1 | 286 | 10 | 17 | 0 | 168 | 4 | 495 | 15 |
| 50,792 | 24 | 1 | 289 | 10 | 17 | 0 | 168 | 4 | 498 | 15 |
| 50,793 | 24 | 1 | 289 | 10 | 17 | 0 | 168 | 4 | 498 | 15 |
| 50,794 | 23 | 1 | 289 | 10 | 17 | 0 | 168 | 4 | 497 | 15 |
| 50,795 | 23 | 1 | 289 | 10 | 17 | 0 | 169 | 4 | 498 | 15 |
| 50,796 | 23 | 1 | 292 | 10 | 17 | 0 | 170 | 4 | 502 | 15 |
| 50,797 | 23 | 1 | 292 | 10 | 17 | 0 | 169 | 4 | 501 | 15 |
| 50,798 | 23 | 1 | 295 | 10 | 17 | 0 | 170 | 4 | 505 | 15 |
| 50,799 | 26 | 0 | 300 | 10 | 17 | 0 | 174 | 4 | 517 | 14 |
| 50,800 | 26 | 0 | 300 | 10 | 17 | 0 | 174 | 4 | 517 | 14 |
| 50,801 | 26 | 0 | 301 | 10 | 17 | 0 | 173 | 4 | 517 | 14 |
| 50,802 | 26 | 0 | 316 | 10 | 17 | 0 | 178 | 6 | 537 | 16 |
| 50,803 | 26 | 0 | 316 | 10 | 17 | 0 | 178 | 6 | 537 | 16 |
| 50,804 | 26 | 0 | 345 | 10 | 17 | 0 | 180 | 6 | 568 | 16 |
| 50,805 | 26 | 0 | 345 | 9  | 17 | 0 | 180 | 6 | 568 | 15 |
| 50,806 | 35 | 0 | 382 | 9  | 21 | 0 | 222 | 6 | 660 | 15 |
| 50,807 | 35 | 0 | 382 | 9  | 21 | 0 | 222 | 6 | 660 | 15 |
| 50,808 | 35 | 0 | 381 | 9  | 21 | 0 | 222 | 6 | 659 | 15 |
| 50,809 | 35 | 0 | 379 | 9  | 21 | 0 | 222 | 6 | 657 | 15 |
| 50,810 | 35 | 0 | 378 | 10 | 20 | 0 | 223 | 6 | 656 | 16 |
| 50,811 | 35 | 0 | 375 | 8  | 20 | 0 | 216 | 7 | 646 | 15 |
| 50,812 | 35 | 0 | 376 | 8  | 20 | 0 | 216 | 7 | 647 | 15 |
| 50,813 | 35 | 1 | 351 | 8  | 19 | 0 | 206 | 6 | 611 | 15 |
| 50,814 | 35 | 1 | 356 | 9  | 19 | 0 | 201 | 7 | 611 | 17 |
| 50,815 | 37 | 1 | 374 | 8  | 21 | 0 | 206 | 6 | 638 | 15 |
| 50,816 | 38 | 1 | 414 | 8  | 23 | 0 | 216 | 6 | 691 | 15 |
| 50,817 | 38 | 1 | 431 | 6  | 24 | 0 | 219 | 4 | 712 | 11 |
| 50,818 | 40 | 1 | 456 | 6  | 25 | 0 | 228 | 4 | 749 | 11 |
| 50,819 | 40 | 1 | 472 | 6  | 25 | 0 | 239 | 4 | 776 | 11 |
| 50,820 | 39 | 1 | 522 | 6  | 24 | 0 | 274 | 4 | 859 | 11 |
| 50,821 | 39 | 1 | 536 | 6  | 25 | 0 | 292 | 4 | 892 | 11 |
| 50,822 | 39 | 1 | 540 | 6  | 25 | 0 | 293 | 4 | 897 | 11 |
| 50,823 | 38 | 1 | 540 | 6  | 24 | 0 | 291 | 4 | 893 | 11 |
| 50,824 | 38 | 1 | 538 | 6  | 24 | 0 | 291 | 4 | 891 | 11 |
| 50,825 | 38 | 1 | 535 | 6  | 24 | 0 | 291 | 4 | 888 | 11 |
| 50,826 | 38 | 1 | 535 | 6  | 24 | 0 | 288 | 4 | 885 | 11 |
| 50,827 | 38 | 1 | 531 | 6  | 24 | 0 | 288 | 4 | 881 | 11 |
| 50,828 | 37 | 1 | 497 | 6  | 20 | 0 | 273 | 4 | 827 | 11 |



|        |    |   |     |    |    |   |     |   |     |    |
|--------|----|---|-----|----|----|---|-----|---|-----|----|
| 50,829 | 29 | 1 | 451 | 7  | 18 | 0 | 234 | 6 | 732 | 14 |
| 50,830 | 25 | 1 | 436 | 9  | 18 | 0 | 228 | 7 | 707 | 17 |
| 50,831 | 22 | 1 | 428 | 10 | 17 | 0 | 230 | 8 | 697 | 19 |
| 50,832 | 22 | 1 | 429 | 10 | 17 | 0 | 229 | 8 | 697 | 19 |
| 50,833 | 19 | 1 | 383 | 11 | 15 | 0 | 203 | 8 | 620 | 20 |
| 50,834 | 18 | 1 | 334 | 11 | 13 | 0 | 183 | 8 | 548 | 20 |
| 50,835 | 18 | 1 | 321 | 11 | 13 | 1 | 181 | 8 | 533 | 21 |
| 50,836 | 18 | 1 | 320 | 11 | 11 | 1 | 180 | 8 | 529 | 21 |
| 50,837 | 18 | 1 | 320 | 11 | 11 | 1 | 180 | 8 | 529 | 21 |
| 50,838 | 18 | 1 | 326 | 12 | 11 | 1 | 188 | 8 | 543 | 22 |
| 50,839 | 18 | 1 | 332 | 12 | 11 | 1 | 188 | 8 | 549 | 22 |
| 50,840 | 18 | 1 | 350 | 12 | 12 | 1 | 201 | 8 | 581 | 22 |
| 50,841 | 19 | 1 | 364 | 11 | 13 | 1 | 205 | 8 | 601 | 21 |
| 50,842 | 19 | 1 | 361 | 11 | 13 | 1 | 205 | 8 | 598 | 21 |
| 50,843 | 21 | 1 | 375 | 11 | 14 | 1 | 212 | 8 | 622 | 21 |
| 50,844 | 25 | 1 | 398 | 11 | 16 | 1 | 218 | 8 | 657 | 21 |
| 50,845 | 29 | 1 | 427 | 11 | 17 | 1 | 248 | 8 | 721 | 21 |
| 50,846 | 30 | 1 | 439 | 11 | 18 | 1 | 257 | 8 | 744 | 21 |
| 50,847 | 30 | 1 | 438 | 12 | 19 | 1 | 257 | 8 | 744 | 22 |
| 50,848 | 30 | 1 | 439 | 12 | 19 | 1 | 257 | 8 | 745 | 22 |
| 50,849 | 30 | 1 | 436 | 12 | 19 | 1 | 256 | 8 | 741 | 22 |
| 50,850 | 27 | 1 | 431 | 12 | 19 | 1 | 253 | 8 | 730 | 22 |
| 50,851 | 27 | 1 | 433 | 12 | 19 | 1 | 253 | 8 | 732 | 22 |
| 50,852 | 27 | 1 | 435 | 12 | 19 | 1 | 251 | 8 | 732 | 22 |
| 50,853 | 29 | 1 | 427 | 12 | 19 | 1 | 254 | 6 | 729 | 20 |
| 50,854 | 29 | 1 | 423 | 12 | 19 | 1 | 253 | 6 | 724 | 20 |
| 50,855 | 29 | 1 | 402 | 12 | 19 | 1 | 252 | 6 | 702 | 20 |
| 50,856 | 21 | 1 | 369 | 12 | 15 | 1 | 211 | 6 | 616 | 20 |
| 50,857 | 20 | 1 | 365 | 12 | 15 | 1 | 210 | 6 | 610 | 20 |
| 50,858 | 23 | 1 | 407 | 12 | 17 | 1 | 236 | 6 | 683 | 20 |
| 50,859 | 23 | 1 | 406 | 12 | 17 | 1 | 236 | 6 | 682 | 20 |
| 50,860 | 23 | 1 | 414 | 11 | 17 | 1 | 240 | 6 | 694 | 19 |
| 50,861 | 23 | 1 | 421 | 10 | 17 | 1 | 242 | 6 | 703 | 18 |
| 50,862 | 23 | 1 | 431 | 10 | 17 | 1 | 245 | 5 | 716 | 17 |
| 50,863 | 23 | 1 | 444 | 10 | 17 | 1 | 256 | 5 | 740 | 17 |
| 50,864 | 23 | 0 | 448 | 10 | 17 | 1 | 257 | 5 | 745 | 16 |
| 50,865 | 23 | 0 | 442 | 9  | 17 | 1 | 257 | 4 | 739 | 14 |
| 50,866 | 22 | 0 | 425 | 14 | 15 | 1 | 248 | 4 | 710 | 19 |
| 50,867 | 21 | 0 | 386 | 16 | 13 | 1 | 239 | 4 | 659 | 21 |
| 50,868 | 21 | 0 | 369 | 17 | 12 | 1 | 235 | 5 | 637 | 23 |
| 50,869 | 20 | 0 | 351 | 17 | 11 | 1 | 228 | 5 | 610 | 23 |

|        |    |    |     |    |    |   |     |    |     |     |
|--------|----|----|-----|----|----|---|-----|----|-----|-----|
| 50,870 | 21 | 0  | 337 | 17 | 11 | 1 | 215 | 5  | 584 | 23  |
| 50,871 | 21 | 0  | 294 | 17 | 14 | 1 | 181 | 5  | 510 | 23  |
| 50,872 | 21 | 0  | 278 | 17 | 13 | 1 | 162 | 5  | 474 | 23  |
| 50,873 | 22 | 0  | 276 | 17 | 13 | 1 | 162 | 5  | 473 | 23  |
| 50,874 | 23 | 0  | 279 | 17 | 13 | 1 | 165 | 5  | 480 | 23  |
| 50,875 | 23 | 0  | 279 | 17 | 13 | 1 | 165 | 5  | 480 | 23  |
| 50,876 | 23 | 1  | 283 | 17 | 13 | 1 | 165 | 5  | 484 | 24  |
| 50,877 | 23 | 2  | 281 | 17 | 13 | 1 | 164 | 5  | 481 | 25  |
| 50,878 | 23 | 2  | 281 | 18 | 13 | 1 | 164 | 5  | 481 | 26  |
| 50,879 | 23 | 2  | 280 | 21 | 13 | 1 | 161 | 5  | 477 | 29  |
| 50,880 | 24 | 2  | 280 | 18 | 14 | 1 | 157 | 2  | 475 | 23  |
| 50,881 | 24 | 2  | 289 | 18 | 14 | 1 | 158 | 2  | 485 | 23  |
| 50,882 | 24 | 2  | 288 | 17 | 14 | 1 | 154 | 1  | 480 | 21  |
| 50,883 | 24 | 2  | 286 | 17 | 14 | 1 | 152 | 1  | 476 | 21  |
| 50,884 | 33 | 2  | 322 | 16 | 14 | 1 | 166 | 2  | 535 | 21  |
| 50,885 | 33 | 2  | 319 | 16 | 14 | 1 | 164 | 2  | 530 | 21  |
| 50,886 | 36 | 2  | 334 | 16 | 15 | 0 | 176 | 2  | 561 | 20  |
| 50,887 | 44 | 2  | 379 | 16 | 15 | 0 | 211 | 2  | 649 | 20  |
| 50,888 | 47 | 2  | 383 | 15 | 15 | 0 | 216 | 2  | 661 | 19  |
| 50,889 | 47 | 2  | 388 | 15 | 15 | 0 | 221 | 2  | 671 | 19  |
| 50,890 | 47 | 2  | 386 | 17 | 15 | 0 | 219 | 2  | 667 | 21  |
| 50,891 | 55 | 3  | 427 | 17 | 17 | 0 | 231 | 2  | 730 | 22  |
| 50,892 | 55 | 4  | 417 | 23 | 16 | 1 | 230 | 2  | 718 | 30  |
| 50,893 | 53 | 9  | 413 | 43 | 15 | 1 | 225 | 9  | 706 | 62  |
| 50,894 | 53 | 9  | 403 | 43 | 15 | 1 | 222 | 9  | 693 | 62  |
| 50,895 | 48 | 9  | 380 | 52 | 13 | 2 | 216 | 13 | 657 | 76  |
| 50,896 | 44 | 12 | 351 | 68 | 12 | 3 | 186 | 18 | 593 | 101 |
| 50,897 | 43 | 12 | 338 | 68 | 11 | 3 | 176 | 18 | 568 | 101 |
| 50,898 | 43 | 12 | 340 | 68 | 10 | 3 | 177 | 18 | 570 | 101 |
| 50,899 | 43 | 12 | 341 | 69 | 10 | 3 | 178 | 19 | 572 | 103 |
| 50,900 | 45 | 12 | 369 | 70 | 10 | 3 | 182 | 19 | 606 | 104 |
| 50,901 | 45 | 12 | 369 | 70 | 10 | 3 | 182 | 19 | 606 | 104 |
| 50,902 | 45 | 12 | 368 | 70 | 10 | 3 | 184 | 19 | 607 | 104 |
| 50,903 | 45 | 12 | 363 | 70 | 10 | 3 | 184 | 19 | 602 | 104 |
| 50,904 | 43 | 12 | 362 | 70 | 11 | 3 | 178 | 19 | 594 | 104 |
| 50,905 | 43 | 12 | 361 | 70 | 11 | 3 | 179 | 19 | 594 | 104 |
| 50,906 | 43 | 12 | 358 | 70 | 11 | 3 | 179 | 19 | 591 | 104 |
| 50,907 | 43 | 12 | 356 | 71 | 11 | 3 | 179 | 19 | 589 | 105 |
| 50,908 | 40 | 12 | 330 | 73 | 9  | 3 | 167 | 19 | 546 | 107 |
| 50,909 | 40 | 12 | 319 | 73 | 9  | 4 | 153 | 20 | 521 | 109 |
| 50,910 | 40 | 12 | 310 | 73 | 9  | 4 | 148 | 20 | 507 | 109 |

|        |    |    |     |    |    |   |     |    |     |     |
|--------|----|----|-----|----|----|---|-----|----|-----|-----|
| 50,911 | 40 | 13 | 303 | 73 | 9  | 4 | 146 | 22 | 498 | 112 |
| 50,912 | 40 | 13 | 293 | 73 | 9  | 4 | 143 | 22 | 485 | 112 |
| 50,913 | 48 | 13 | 302 | 74 | 9  | 4 | 143 | 23 | 502 | 114 |
| 50,914 | 48 | 13 | 299 | 74 | 9  | 4 | 143 | 23 | 499 | 114 |
| 50,915 | 49 | 13 | 308 | 75 | 9  | 4 | 146 | 23 | 512 | 115 |
| 50,916 | 49 | 13 | 308 | 75 | 9  | 4 | 146 | 23 | 512 | 115 |
| 50,917 | 56 | 13 | 376 | 68 | 14 | 4 | 174 | 23 | 620 | 108 |
| 50,918 | 56 | 13 | 387 | 65 | 14 | 4 | 175 | 22 | 632 | 104 |
| 50,919 | 64 | 13 | 442 | 65 | 22 | 4 | 204 | 22 | 732 | 104 |
| 50,920 | 63 | 13 | 435 | 65 | 22 | 4 | 204 | 23 | 724 | 105 |
| 50,921 | 61 | 13 | 432 | 66 | 22 | 4 | 203 | 24 | 718 | 107 |
| 50,922 | 61 | 13 | 423 | 66 | 19 | 4 | 201 | 24 | 704 | 107 |
| 50,923 | 62 | 13 | 436 | 67 | 20 | 4 | 209 | 24 | 727 | 108 |
| 50,924 | 63 | 13 | 446 | 67 | 21 | 4 | 212 | 24 | 742 | 108 |
| 50,925 | 63 | 13 | 447 | 67 | 21 | 4 | 217 | 24 | 748 | 108 |
| 50,926 | 65 | 12 | 458 | 67 | 21 | 4 | 220 | 24 | 764 | 107 |
| 50,927 | 65 | 12 | 457 | 67 | 21 | 4 | 220 | 24 | 763 | 107 |
| 50,928 | 65 | 11 | 463 | 67 | 21 | 4 | 227 | 24 | 776 | 106 |
| 50,929 | 65 | 11 | 474 | 63 | 21 | 4 | 229 | 24 | 789 | 102 |
| 50,930 | 65 | 11 | 474 | 63 | 21 | 4 | 228 | 24 | 788 | 102 |
| 50,931 | 63 | 11 | 468 | 63 | 20 | 4 | 227 | 24 | 778 | 102 |
| 50,932 | 63 | 11 | 459 | 63 | 20 | 4 | 225 | 24 | 767 | 102 |
| 50,933 | 59 | 11 | 459 | 63 | 20 | 4 | 229 | 24 | 767 | 102 |
| 50,934 | 57 | 11 | 457 | 63 | 21 | 4 | 227 | 23 | 762 | 101 |
| 50,935 | 57 | 11 | 465 | 63 | 21 | 4 | 224 | 23 | 767 | 101 |
| 50,936 | 54 | 11 | 450 | 63 | 20 | 4 | 212 | 24 | 736 | 102 |
| 50,937 | 46 | 11 | 409 | 65 | 20 | 4 | 177 | 27 | 652 | 107 |
| 50,938 | 44 | 11 | 400 | 65 | 20 | 4 | 168 | 27 | 632 | 107 |
| 50,939 | 43 | 12 | 398 | 76 | 20 | 4 | 165 | 32 | 626 | 124 |
| 50,940 | 43 | 12 | 387 | 78 | 20 | 4 | 160 | 33 | 610 | 127 |
| 50,941 | 40 | 12 | 361 | 76 | 19 | 4 | 148 | 33 | 568 | 125 |
| 50,942 | 35 | 11 | 331 | 76 | 17 | 4 | 137 | 33 | 520 | 124 |
| 50,943 | 35 | 10 | 326 | 70 | 17 | 3 | 135 | 33 | 513 | 116 |
| 50,944 | 35 | 5  | 326 | 50 | 17 | 3 | 135 | 28 | 513 | 86  |
| 50,945 | 35 | 5  | 326 | 50 | 17 | 3 | 135 | 28 | 513 | 86  |
| 50,946 | 36 | 5  | 341 | 41 | 17 | 2 | 137 | 24 | 531 | 72  |
| 50,947 | 36 | 2  | 341 | 26 | 17 | 1 | 137 | 19 | 531 | 48  |
| 50,948 | 39 | 2  | 364 | 26 | 20 | 1 | 145 | 19 | 568 | 48  |
| 50,949 | 39 | 2  | 366 | 25 | 20 | 1 | 143 | 19 | 568 | 47  |
| 50,950 | 40 | 2  | 361 | 24 | 20 | 1 | 145 | 18 | 566 | 45  |
| 50,951 | 39 | 2  | 364 | 23 | 22 | 1 | 146 | 18 | 571 | 44  |

|        |    |   |     |    |    |   |     |    |     |    |
|--------|----|---|-----|----|----|---|-----|----|-----|----|
| 50,952 | 41 | 2 | 397 | 23 | 24 | 1 | 160 | 18 | 622 | 44 |
| 50,953 | 43 | 2 | 424 | 23 | 24 | 1 | 170 | 18 | 661 | 44 |
| 50,954 | 43 | 2 | 422 | 23 | 23 | 1 | 176 | 18 | 664 | 44 |
| 50,955 | 43 | 2 | 423 | 23 | 23 | 1 | 176 | 18 | 665 | 44 |
| 50,956 | 43 | 2 | 423 | 23 | 23 | 1 | 176 | 18 | 665 | 44 |
| 50,957 | 43 | 2 | 424 | 25 | 23 | 1 | 176 | 19 | 666 | 47 |
| 50,958 | 43 | 2 | 424 | 24 | 23 | 1 | 175 | 19 | 665 | 46 |
| 50,959 | 45 | 2 | 427 | 22 | 23 | 1 | 175 | 19 | 670 | 44 |
| 50,960 | 45 | 2 | 424 | 22 | 24 | 0 | 177 | 18 | 670 | 42 |
| 50,961 | 45 | 2 | 428 | 22 | 24 | 0 | 178 | 18 | 675 | 42 |
| 50,962 | 37 | 1 | 408 | 22 | 24 | 0 | 169 | 16 | 638 | 39 |
| 50,963 | 37 | 1 | 408 | 22 | 24 | 0 | 169 | 16 | 638 | 39 |
| 50,964 | 37 | 1 | 409 | 21 | 24 | 0 | 169 | 15 | 639 | 37 |
| 50,965 | 37 | 1 | 410 | 21 | 24 | 0 | 169 | 15 | 640 | 37 |
| 50,966 | 36 | 1 | 399 | 21 | 24 | 0 | 166 | 16 | 625 | 38 |
| 50,967 | 30 | 1 | 350 | 21 | 19 | 0 | 150 | 16 | 549 | 38 |
| 50,968 | 28 | 1 | 329 | 21 | 19 | 0 | 136 | 16 | 512 | 38 |
| 50,969 | 28 | 1 | 317 | 21 | 19 | 0 | 135 | 17 | 499 | 39 |
| 50,970 | 20 | 1 | 260 | 21 | 11 | 0 | 106 | 16 | 397 | 38 |
| 50,971 | 20 | 1 | 259 | 19 | 11 | 0 | 104 | 15 | 394 | 35 |
| 50,972 | 21 | 1 | 260 | 19 | 11 | 0 | 106 | 15 | 398 | 35 |
| 50,973 | 21 | 1 | 249 | 20 | 10 | 0 | 102 | 15 | 382 | 36 |
| 50,974 | 20 | 1 | 247 | 20 | 10 | 0 | 101 | 15 | 378 | 36 |
| 50,975 | 18 | 1 | 234 | 20 | 9  | 0 | 95  | 15 | 356 | 36 |
| 50,976 | 18 | 1 | 238 | 20 | 9  | 0 | 91  | 15 | 356 | 36 |
| 50,977 | 16 | 1 | 224 | 22 | 9  | 0 | 88  | 16 | 337 | 39 |
| 50,978 | 16 | 1 | 219 | 22 | 9  | 0 | 81  | 16 | 325 | 39 |
| 50,979 | 16 | 1 | 209 | 22 | 9  | 0 | 79  | 16 | 313 | 39 |
| 50,980 | 18 | 1 | 213 | 22 | 11 | 0 | 71  | 16 | 313 | 39 |
| 50,981 | 18 | 1 | 214 | 23 | 12 | 0 | 73  | 16 | 317 | 40 |
| 50,982 | 19 | 1 | 230 | 25 | 12 | 0 | 78  | 18 | 339 | 44 |
| 50,983 | 26 | 1 | 266 | 25 | 14 | 0 | 114 | 18 | 420 | 44 |
| 50,984 | 27 | 1 | 271 | 25 | 15 | 0 | 118 | 18 | 431 | 44 |
| 50,985 | 28 | 1 | 275 | 27 | 15 | 0 | 133 | 19 | 451 | 47 |
| 50,986 | 28 | 1 | 283 | 28 | 15 | 0 | 141 | 19 | 467 | 48 |
| 50,987 | 28 | 1 | 301 | 30 | 15 | 0 | 146 | 18 | 490 | 49 |
| 50,988 | 29 | 1 | 298 | 29 | 15 | 0 | 146 | 16 | 488 | 46 |
| 50,989 | 29 | 1 | 298 | 29 | 15 | 0 | 146 | 17 | 488 | 47 |
| 50,990 | 29 | 0 | 298 | 16 | 15 | 0 | 146 | 11 | 488 | 27 |
| 50,991 | 31 | 0 | 301 | 16 | 15 | 0 | 146 | 11 | 493 | 27 |
| 50,992 | 31 | 1 | 300 | 16 | 15 | 0 | 146 | 11 | 492 | 28 |

|        |    |   |     |    |    |   |     |    |     |    |
|--------|----|---|-----|----|----|---|-----|----|-----|----|
| 50,993 | 31 | 1 | 300 | 17 | 15 | 0 | 146 | 11 | 492 | 29 |
| 50,994 | 31 | 1 | 298 | 17 | 15 | 0 | 148 | 11 | 492 | 29 |
| 50,995 | 32 | 1 | 304 | 17 | 15 | 0 | 154 | 9  | 505 | 27 |
| 50,996 | 32 | 1 | 304 | 17 | 15 | 0 | 154 | 9  | 505 | 27 |
| 50,997 | 31 | 1 | 290 | 16 | 15 | 0 | 152 | 9  | 488 | 26 |
| 50,998 | 31 | 1 | 290 | 19 | 15 | 0 | 152 | 9  | 488 | 29 |
| 50,999 | 28 | 2 | 265 | 25 | 12 | 0 | 145 | 11 | 450 | 38 |
| 51,000 | 29 | 2 | 270 | 27 | 12 | 0 | 143 | 12 | 454 | 41 |
| 51,001 | 28 | 2 | 271 | 29 | 12 | 1 | 148 | 12 | 459 | 44 |
| 51,002 | 33 | 2 | 282 | 29 | 10 | 1 | 177 | 14 | 502 | 46 |
| 51,003 | 32 | 2 | 249 | 32 | 8  | 1 | 163 | 14 | 452 | 49 |
| 51,004 | 30 | 2 | 220 | 32 | 8  | 1 | 152 | 14 | 410 | 49 |
| 51,005 | 33 | 2 | 257 | 32 | 14 | 1 | 173 | 14 | 477 | 49 |
| 51,006 | 36 | 2 | 268 | 32 | 15 | 1 | 179 | 14 | 498 | 49 |
| 51,007 | 36 | 2 | 267 | 30 | 15 | 1 | 180 | 13 | 498 | 46 |
| 51,008 | 37 | 2 | 267 | 34 | 15 | 1 | 182 | 13 | 501 | 50 |
| 51,009 | 37 | 2 | 275 | 37 | 15 | 1 | 189 | 13 | 516 | 53 |
| 51,010 | 35 | 2 | 273 | 38 | 15 | 1 | 190 | 13 | 513 | 54 |
| 51,011 | 35 | 3 | 273 | 40 | 14 | 1 | 188 | 14 | 510 | 58 |
| 51,012 | 35 | 3 | 269 | 42 | 14 | 1 | 187 | 14 | 505 | 60 |
| 51,013 | 35 | 3 | 269 | 42 | 14 | 1 | 186 | 14 | 504 | 60 |
| 51,014 | 35 | 3 | 266 | 43 | 14 | 1 | 185 | 15 | 500 | 62 |
| 51,015 | 35 | 3 | 265 | 43 | 14 | 1 | 185 | 15 | 499 | 62 |
| 51,016 | 35 | 3 | 266 | 42 | 14 | 1 | 185 | 14 | 500 | 60 |
| 51,017 | 35 | 3 | 266 | 42 | 14 | 1 | 185 | 14 | 500 | 60 |
| 51,018 | 35 | 3 | 266 | 42 | 14 | 1 | 185 | 14 | 500 | 60 |
| 51,019 | 35 | 3 | 266 | 42 | 14 | 1 | 186 | 16 | 501 | 62 |
| 51,020 | 35 | 3 | 266 | 46 | 14 | 1 | 186 | 16 | 501 | 66 |
| 51,021 | 35 | 3 | 266 | 46 | 14 | 1 | 186 | 16 | 501 | 66 |
| 51,022 | 35 | 3 | 266 | 52 | 14 | 1 | 187 | 19 | 502 | 75 |
| 51,023 | 34 | 3 | 265 | 52 | 14 | 1 | 185 | 19 | 498 | 75 |
| 51,024 | 34 | 3 | 263 | 53 | 14 | 1 | 181 | 19 | 492 | 76 |
| 51,025 | 34 | 3 | 264 | 53 | 14 | 1 | 181 | 20 | 493 | 77 |
| 51,026 | 34 | 3 | 265 | 53 | 14 | 1 | 181 | 20 | 494 | 77 |
| 51,027 | 34 | 3 | 260 | 53 | 14 | 1 | 181 | 20 | 489 | 77 |
| 51,028 | 34 | 3 | 260 | 51 | 14 | 1 | 180 | 19 | 488 | 74 |
| 51,029 | 34 | 3 | 262 | 51 | 14 | 2 | 181 | 20 | 491 | 76 |
| 51,030 | 34 | 3 | 261 | 53 | 14 | 2 | 181 | 22 | 490 | 80 |
| 51,031 | 29 | 3 | 244 | 54 | 12 | 2 | 178 | 22 | 463 | 81 |
| 51,032 | 29 | 3 | 243 | 58 | 11 | 2 | 176 | 26 | 459 | 89 |
| 51,033 | 29 | 3 | 229 | 59 | 12 | 2 | 170 | 24 | 440 | 88 |

|        |    |    |     |     |    |   |     |    |     |     |
|--------|----|----|-----|-----|----|---|-----|----|-----|-----|
| 51,034 | 22 | 3  | 189 | 60  | 10 | 2 | 133 | 26 | 354 | 91  |
| 51,035 | 22 | 3  | 192 | 61  | 9  | 2 | 128 | 26 | 351 | 92  |
| 51,036 | 22 | 3  | 189 | 58  | 8  | 2 | 124 | 25 | 343 | 88  |
| 51,037 | 22 | 3  | 172 | 58  | 8  | 2 | 114 | 25 | 316 | 88  |
| 51,038 | 26 | 3  | 172 | 56  | 8  | 2 | 114 | 24 | 320 | 85  |
| 51,039 | 25 | 3  | 172 | 56  | 8  | 2 | 114 | 24 | 319 | 85  |
| 51,040 | 27 | 3  | 181 | 56  | 8  | 2 | 117 | 23 | 333 | 84  |
| 51,041 | 32 | 3  | 215 | 57  | 8  | 2 | 140 | 23 | 395 | 85  |
| 51,042 | 37 | 3  | 227 | 57  | 9  | 2 | 150 | 23 | 423 | 85  |
| 51,043 | 39 | 2  | 254 | 56  | 9  | 2 | 154 | 23 | 456 | 83  |
| 51,044 | 40 | 2  | 260 | 58  | 9  | 2 | 157 | 23 | 466 | 85  |
| 51,045 | 39 | 2  | 253 | 58  | 9  | 2 | 151 | 23 | 452 | 85  |
| 51,046 | 40 | 2  | 278 | 58  | 12 | 2 | 172 | 24 | 502 | 86  |
| 51,047 | 47 | 2  | 339 | 58  | 13 | 2 | 196 | 24 | 595 | 86  |
| 51,048 | 47 | 2  | 358 | 55  | 13 | 2 | 197 | 24 | 615 | 83  |
| 51,049 | 49 | 1  | 380 | 49  | 13 | 2 | 203 | 22 | 645 | 74  |
| 51,050 | 54 | 1  | 449 | 47  | 15 | 2 | 230 | 21 | 748 | 71  |
| 51,051 | 56 | 1  | 452 | 46  | 17 | 1 | 236 | 21 | 761 | 69  |
| 51,052 | 56 | 1  | 448 | 46  | 17 | 1 | 232 | 21 | 753 | 69  |
| 51,053 | 51 | 2  | 456 | 45  | 17 | 1 | 208 | 20 | 732 | 68  |
| 51,054 | 50 | 2  | 456 | 45  | 17 | 1 | 207 | 20 | 730 | 68  |
| 51,055 | 47 | 2  | 418 | 46  | 11 | 1 | 179 | 20 | 655 | 69  |
| 51,056 | 44 | 4  | 408 | 76  | 10 | 2 | 173 | 50 | 635 | 132 |
| 51,057 | 44 | 4  | 408 | 76  | 10 | 2 | 172 | 50 | 634 | 132 |
| 51,058 | 44 | 7  | 408 | 104 | 10 | 4 | 172 | 58 | 634 | 173 |
| 51,059 | 43 | 10 | 408 | 112 | 10 | 4 | 170 | 65 | 631 | 191 |
| 51,060 | 43 | 9  | 400 | 109 | 10 | 4 | 164 | 65 | 617 | 187 |
| 51,061 | 43 | 10 | 399 | 108 | 10 | 4 | 163 | 65 | 615 | 187 |
| 51,062 | 43 | 9  | 399 | 107 | 10 | 4 | 164 | 65 | 616 | 185 |
| 51,063 | 43 | 9  | 399 | 105 | 10 | 4 | 164 | 65 | 616 | 183 |
| 51,064 | 43 | 9  | 399 | 105 | 10 | 4 | 164 | 65 | 616 | 183 |
| 51,065 | 43 | 11 | 399 | 105 | 10 | 4 | 164 | 64 | 616 | 184 |
| 51,066 | 43 | 11 | 400 | 105 | 10 | 4 | 164 | 64 | 617 | 184 |
| 51,067 | 43 | 11 | 400 | 105 | 10 | 4 | 164 | 64 | 617 | 184 |
| 51,068 | 43 | 11 | 400 | 106 | 10 | 4 | 164 | 65 | 617 | 186 |
| 51,069 | 43 | 11 | 400 | 106 | 10 | 4 | 164 | 65 | 617 | 186 |
| 51,070 | 43 | 11 | 400 | 106 | 10 | 4 | 163 | 63 | 616 | 184 |
| 51,071 | 43 | 11 | 399 | 102 | 10 | 4 | 163 | 62 | 615 | 179 |
| 51,072 | 44 | 11 | 400 | 96  | 10 | 4 | 163 | 59 | 617 | 170 |
| 51,073 | 44 | 11 | 400 | 96  | 10 | 4 | 163 | 59 | 617 | 170 |
| 51,074 | 44 | 11 | 400 | 97  | 10 | 4 | 163 | 59 | 617 | 171 |

|        |    |    |     |    |    |   |     |    |     |     |
|--------|----|----|-----|----|----|---|-----|----|-----|-----|
| 51,075 | 44 | 11 | 400 | 95 | 10 | 4 | 163 | 60 | 617 | 170 |
| 51,076 | 44 | 11 | 399 | 95 | 10 | 4 | 163 | 59 | 616 | 169 |
| 51,077 | 44 | 11 | 401 | 95 | 10 | 4 | 165 | 60 | 620 | 170 |
| 51,078 | 44 | 11 | 401 | 95 | 10 | 4 | 165 | 60 | 620 | 170 |
| 51,079 | 44 | 11 | 404 | 96 | 10 | 3 | 164 | 59 | 622 | 169 |
| 51,080 | 45 | 11 | 414 | 94 | 10 | 3 | 168 | 57 | 637 | 165 |
| 51,081 | 45 | 11 | 412 | 93 | 10 | 3 | 168 | 57 | 635 | 164 |
| 51,082 | 45 | 11 | 411 | 93 | 10 | 3 | 168 | 57 | 634 | 164 |
| 51,083 | 45 | 11 | 410 | 88 | 10 | 3 | 168 | 53 | 633 | 155 |
| 51,084 | 44 | 11 | 403 | 85 | 9  | 3 | 168 | 53 | 624 | 152 |
| 51,085 | 44 | 11 | 407 | 84 | 10 | 3 | 168 | 51 | 629 | 149 |
| 51,086 | 43 | 11 | 398 | 83 | 10 | 3 | 168 | 51 | 619 | 148 |
| 51,087 | 44 | 11 | 412 | 83 | 12 | 3 | 165 | 51 | 633 | 148 |
| 51,088 | 43 | 11 | 402 | 83 | 12 | 3 | 162 | 51 | 619 | 148 |
| 51,089 | 41 | 11 | 408 | 82 | 13 | 3 | 164 | 51 | 626 | 147 |
| 51,090 | 40 | 11 | 414 | 81 | 13 | 3 | 175 | 51 | 642 | 146 |
| 51,091 | 40 | 11 | 414 | 82 | 13 | 3 | 175 | 51 | 642 | 147 |
| 51,092 | 35 | 11 | 380 | 82 | 13 | 3 | 151 | 51 | 579 | 147 |
| 51,093 | 28 | 11 | 365 | 82 | 12 | 3 | 141 | 51 | 546 | 147 |
| 51,094 | 26 | 11 | 337 | 81 | 12 | 3 | 134 | 51 | 509 | 146 |
| 51,095 | 25 | 11 | 334 | 81 | 12 | 3 | 136 | 51 | 507 | 146 |
| 51,096 | 24 | 11 | 308 | 81 | 9  | 3 | 114 | 51 | 455 | 146 |
| 51,097 | 19 | 11 | 300 | 81 | 9  | 3 | 125 | 50 | 453 | 145 |
| 51,098 | 17 | 11 | 268 | 81 | 8  | 3 | 111 | 50 | 404 | 145 |
| 51,099 | 18 | 11 | 256 | 81 | 8  | 3 | 112 | 50 | 394 | 145 |
| 51,100 | 16 | 11 | 238 | 81 | 8  | 3 | 107 | 50 | 369 | 145 |
| 51,101 | 11 | 11 | 165 | 81 | 7  | 3 | 84  | 50 | 267 | 145 |
| 51,102 | 10 | 11 | 176 | 80 | 7  | 3 | 105 | 50 | 298 | 144 |
| 51,103 | 10 | 11 | 141 | 78 | 7  | 3 | 104 | 49 | 262 | 141 |
| 51,104 | 16 | 10 | 155 | 77 | 9  | 3 | 128 | 48 | 308 | 138 |
| 51,105 | 16 | 10 | 155 | 78 | 9  | 3 | 129 | 48 | 309 | 139 |
| 51,106 | 16 | 10 | 158 | 78 | 9  | 3 | 129 | 48 | 312 | 139 |
| 51,107 | 16 | 8  | 156 | 48 | 9  | 2 | 128 | 19 | 309 | 77  |
| 51,108 | 16 | 8  | 156 | 49 | 9  | 2 | 128 | 19 | 309 | 78  |
| 51,109 | 16 | 5  | 164 | 19 | 9  | 0 | 128 | 10 | 317 | 34  |
| 51,110 | 18 | 2  | 168 | 10 | 10 | 0 | 134 | 4  | 330 | 16  |
| 51,111 | 18 | 3  | 168 | 10 | 10 | 0 | 134 | 4  | 330 | 17  |
| 51,112 | 25 | 3  | 196 | 11 | 12 | 0 | 158 | 3  | 391 | 17  |
| 51,113 | 28 | 4  | 207 | 17 | 13 | 0 | 166 | 4  | 414 | 25  |
| 51,114 | 30 | 4  | 210 | 20 | 14 | 0 | 175 | 4  | 429 | 28  |
| 51,115 | 30 | 4  | 222 | 20 | 14 | 0 | 181 | 4  | 447 | 28  |

|        |    |   |     |    |    |   |     |    |       |    |
|--------|----|---|-----|----|----|---|-----|----|-------|----|
| 51,116 | 30 | 2 | 222 | 23 | 14 | 0 | 181 | 7  | 447   | 32 |
| 51,117 | 30 | 2 | 220 | 24 | 14 | 0 | 181 | 7  | 445   | 33 |
| 51,118 | 36 | 2 | 263 | 24 | 20 | 0 | 221 | 7  | 540   | 33 |
| 51,119 | 37 | 2 | 319 | 23 | 26 | 0 | 267 | 6  | 649   | 31 |
| 51,120 | 37 | 2 | 321 | 23 | 26 | 0 | 267 | 6  | 651   | 31 |
| 51,121 | 37 | 2 | 325 | 23 | 26 | 1 | 272 | 6  | 660   | 32 |
| 51,122 | 37 | 2 | 326 | 23 | 26 | 1 | 272 | 7  | 661   | 33 |
| 51,123 | 36 | 2 | 326 | 24 | 26 | 2 | 275 | 7  | 663   | 35 |
| 51,124 | 36 | 2 | 326 | 24 | 26 | 2 | 275 | 7  | 663   | 35 |
| 51,125 | 36 | 2 | 327 | 24 | 26 | 2 | 277 | 7  | 666   | 35 |
| 51,126 | 36 | 2 | 327 | 24 | 26 | 2 | 277 | 6  | 666   | 34 |
| 51,127 | 36 | 2 | 327 | 24 | 26 | 3 | 277 | 6  | 666   | 35 |
| 51,128 | 36 | 2 | 324 | 24 | 26 | 3 | 275 | 5  | 661   | 34 |
| 51,129 | 36 | 2 | 324 | 24 | 26 | 3 | 275 | 5  | 661   | 34 |
| 51,130 | 36 | 2 | 322 | 24 | 26 | 3 | 276 | 5  | 660   | 34 |
| 51,131 | 35 | 3 | 311 | 24 | 26 | 3 | 272 | 5  | 644   | 35 |
| 51,132 | 35 | 3 | 309 | 24 | 26 | 3 | 273 | 5  | 643   | 35 |
| 51,133 | 35 | 3 | 309 | 24 | 26 | 3 | 273 | 5  | 643   | 35 |
| 51,134 | 35 | 4 | 308 | 26 | 25 | 3 | 273 | 5  | 641   | 38 |
| 51,135 | 34 | 4 | 292 | 29 | 23 | 3 | 272 | 7  | 621   | 43 |
| 51,136 | 33 | 4 | 289 | 31 | 23 | 3 | 266 | 7  | 611   | 45 |
| 51,137 | 33 | 4 | 288 | 32 | 23 | 3 | 266 | 7  | 610   | 46 |
| 51,138 | 34 | 4 | 281 | 32 | 22 | 3 | 268 | 7  | 605   | 46 |
| 51,139 | 34 | 4 | 279 | 31 | 23 | 3 | 269 | 8  | 605   | 46 |
| 51,140 | 34 | 4 | 281 | 31 | 23 | 3 | 267 | 8  | 605   | 46 |
| 51,141 | 33 | 4 | 265 | 31 | 25 | 3 | 252 | 8  | 575   | 46 |
| 51,142 | 33 | 4 | 270 | 31 | 25 | 3 | 256 | 8  | 584   | 46 |
| 51,143 | 36 | 4 | 290 | 31 | 25 | 3 | 259 | 8  | 610   | 46 |
| 51,144 | 42 | 4 | 324 | 30 | 25 | 3 | 270 | 8  | 661   | 45 |
| 51,145 | 42 | 4 | 336 | 31 | 25 | 3 | 272 | 8  | 675   | 46 |
| 51,146 | 48 | 4 | 458 | 31 | 30 | 3 | 323 | 8  | 859   | 46 |
| 51,147 | 52 | 4 | 510 | 31 | 33 | 3 | 390 | 8  | 985   | 46 |
| 51,148 | 53 | 4 | 505 | 31 | 33 | 3 | 386 | 9  | 977   | 47 |
| 51,149 | 53 | 4 | 514 | 35 | 33 | 3 | 397 | 10 | 997   | 52 |
| 51,150 | 52 | 4 | 504 | 37 | 33 | 3 | 395 | 11 | 984   | 55 |
| 51,151 | 54 | 6 | 518 | 40 | 33 | 3 | 404 | 11 | 1,009 | 60 |
| 51,152 | 55 | 6 | 519 | 40 | 32 | 3 | 403 | 11 | 1,009 | 60 |
| 51,153 | 53 | 6 | 500 | 42 | 30 | 3 | 372 | 12 | 955   | 63 |
| 51,154 | 52 | 6 | 495 | 42 | 30 | 3 | 365 | 12 | 942   | 63 |
| 51,155 | 46 | 6 | 479 | 41 | 28 | 3 | 342 | 12 | 895   | 62 |
| 51,156 | 46 | 6 | 479 | 42 | 28 | 3 | 342 | 13 | 895   | 64 |



|        |    |   |     |    |    |   |     |    |       |    |
|--------|----|---|-----|----|----|---|-----|----|-------|----|
| 51,157 | 46 | 6 | 476 | 42 | 28 | 3 | 342 | 15 | 892   | 66 |
| 51,158 | 46 | 6 | 469 | 42 | 28 | 3 | 342 | 15 | 885   | 66 |
| 51,159 | 46 | 6 | 470 | 41 | 28 | 3 | 344 | 15 | 888   | 65 |
| 51,160 | 44 | 6 | 476 | 40 | 27 | 3 | 346 | 16 | 893   | 65 |
| 51,161 | 44 | 6 | 479 | 40 | 27 | 3 | 346 | 16 | 896   | 65 |
| 51,162 | 38 | 5 | 461 | 40 | 25 | 3 | 325 | 16 | 849   | 64 |
| 51,163 | 42 | 5 | 493 | 43 | 26 | 3 | 370 | 17 | 931   | 68 |
| 51,164 | 39 | 4 | 489 | 40 | 26 | 3 | 367 | 18 | 921   | 65 |
| 51,165 | 37 | 4 | 495 | 37 | 25 | 6 | 363 | 18 | 920   | 65 |
| 51,166 | 37 | 5 | 496 | 39 | 25 | 6 | 366 | 18 | 924   | 68 |
| 51,167 | 32 | 5 | 469 | 41 | 23 | 6 | 338 | 15 | 862   | 67 |
| 51,168 | 31 | 5 | 460 | 41 | 20 | 6 | 327 | 15 | 838   | 67 |
| 51,169 | 31 | 5 | 406 | 42 | 15 | 6 | 280 | 16 | 732   | 69 |
| 51,170 | 31 | 6 | 406 | 42 | 14 | 6 | 279 | 19 | 730   | 73 |
| 51,171 | 31 | 8 | 404 | 45 | 14 | 6 | 279 | 19 | 728   | 78 |
| 51,172 | 38 | 8 | 469 | 45 | 17 | 4 | 306 | 20 | 830   | 77 |
| 51,173 | 39 | 8 | 481 | 45 | 17 | 4 | 312 | 20 | 849   | 77 |
| 51,174 | 43 | 8 | 552 | 50 | 22 | 4 | 344 | 21 | 961   | 83 |
| 51,175 | 43 | 8 | 552 | 53 | 22 | 5 | 345 | 23 | 962   | 89 |
| 51,176 | 43 | 8 | 551 | 54 | 22 | 5 | 344 | 23 | 960   | 90 |
| 51,177 | 43 | 8 | 554 | 57 | 22 | 5 | 349 | 24 | 968   | 94 |
| 51,178 | 43 | 8 | 556 | 58 | 22 | 4 | 349 | 24 | 970   | 94 |
| 51,179 | 43 | 8 | 558 | 58 | 22 | 4 | 349 | 24 | 972   | 94 |
| 51,180 | 43 | 8 | 560 | 57 | 22 | 4 | 351 | 24 | 976   | 93 |
| 51,181 | 43 | 8 | 557 | 57 | 22 | 4 | 350 | 24 | 972   | 93 |
| 51,182 | 43 | 7 | 557 | 57 | 22 | 4 | 350 | 24 | 972   | 92 |
| 51,183 | 43 | 8 | 557 | 57 | 22 | 4 | 350 | 24 | 972   | 93 |
| 51,184 | 43 | 8 | 560 | 57 | 22 | 4 | 350 | 24 | 975   | 93 |
| 51,185 | 44 | 7 | 573 | 52 | 22 | 2 | 351 | 22 | 990   | 83 |
| 51,186 | 44 | 7 | 595 | 50 | 24 | 4 | 361 | 22 | 1,024 | 83 |
| 51,187 | 45 | 7 | 602 | 49 | 26 | 4 | 363 | 23 | 1,036 | 83 |
| 51,188 | 46 | 7 | 621 | 49 | 26 | 4 | 370 | 23 | 1,063 | 83 |
| 51,189 | 54 | 7 | 720 | 49 | 30 | 4 | 400 | 22 | 1,204 | 82 |
| 51,190 | 56 | 7 | 759 | 49 | 30 | 4 | 409 | 22 | 1,254 | 82 |
| 51,191 | 56 | 7 | 757 | 49 | 30 | 4 | 410 | 22 | 1,253 | 82 |
| 51,192 | 64 | 7 | 865 | 49 | 34 | 4 | 471 | 22 | 1,434 | 82 |
| 51,193 | 67 | 7 | 880 | 49 | 37 | 4 | 482 | 22 | 1,466 | 82 |
| 51,194 | 64 | 8 | 864 | 50 | 37 | 5 | 484 | 22 | 1,449 | 85 |
| 51,195 | 59 | 8 | 836 | 53 | 37 | 5 | 475 | 22 | 1,407 | 88 |
| 51,196 | 59 | 8 | 827 | 53 | 37 | 5 | 473 | 23 | 1,396 | 89 |
| 51,197 | 53 | 8 | 707 | 54 | 33 | 5 | 419 | 24 | 1,212 | 91 |

|        |    |   |       |    |    |   |     |    |       |     |
|--------|----|---|-------|----|----|---|-----|----|-------|-----|
| 51,198 | 49 | 8 | 673   | 56 | 30 | 5 | 356 | 26 | 1,108 | 95  |
| 51,199 | 49 | 8 | 663   | 56 | 33 | 5 | 342 | 26 | 1,087 | 95  |
| 51,200 | 49 | 9 | 654   | 58 | 33 | 5 | 332 | 28 | 1,068 | 100 |
| 51,201 | 49 | 9 | 653   | 57 | 33 | 5 | 329 | 27 | 1,064 | 98  |
| 51,202 | 48 | 8 | 643   | 59 | 33 | 5 | 329 | 28 | 1,053 | 100 |
| 51,203 | 47 | 8 | 641   | 59 | 33 | 5 | 325 | 28 | 1,046 | 100 |
| 51,204 | 47 | 8 | 641   | 58 | 33 | 5 | 324 | 27 | 1,045 | 98  |
| 51,205 | 47 | 8 | 641   | 62 | 33 | 5 | 326 | 27 | 1,047 | 102 |
| 51,206 | 47 | 8 | 640   | 62 | 33 | 5 | 326 | 27 | 1,046 | 102 |
| 51,207 | 47 | 8 | 640   | 62 | 33 | 5 | 327 | 26 | 1,047 | 101 |
| 51,208 | 47 | 8 | 641   | 62 | 33 | 5 | 327 | 24 | 1,048 | 99  |
| 51,209 | 47 | 9 | 644   | 66 | 33 | 5 | 331 | 26 | 1,055 | 106 |
| 51,210 | 47 | 9 | 645   | 67 | 33 | 5 | 330 | 32 | 1,055 | 113 |
| 51,211 | 47 | 9 | 636   | 67 | 33 | 5 | 325 | 31 | 1,041 | 112 |
| 51,212 | 50 | 9 | 656   | 69 | 33 | 5 | 333 | 33 | 1,072 | 116 |
| 51,213 | 49 | 9 | 647   | 70 | 33 | 5 | 330 | 34 | 1,059 | 118 |
| 51,214 | 46 | 9 | 616   | 67 | 32 | 5 | 284 | 33 | 978   | 114 |
| 51,215 | 48 | 9 | 614   | 65 | 31 | 5 | 279 | 31 | 972   | 110 |
| 51,216 | 48 | 9 | 620   | 65 | 31 | 4 | 277 | 31 | 976   | 109 |
| 51,217 | 48 | 8 | 607   | 63 | 31 | 2 | 268 | 33 | 954   | 106 |
| 51,218 | 48 | 8 | 626   | 57 | 30 | 2 | 270 | 34 | 974   | 101 |
| 51,219 | 48 | 8 | 626   | 57 | 30 | 2 | 270 | 35 | 974   | 102 |
| 51,220 | 51 | 8 | 699   | 57 | 32 | 2 | 287 | 34 | 1,069 | 101 |
| 51,221 | 50 | 7 | 693   | 58 | 32 | 2 | 283 | 31 | 1,058 | 98  |
| 51,222 | 52 | 5 | 734   | 55 | 37 | 2 | 311 | 31 | 1,134 | 93  |
| 51,223 | 49 | 5 | 704   | 56 | 36 | 2 | 293 | 30 | 1,082 | 93  |
| 51,224 | 48 | 5 | 703   | 56 | 36 | 2 | 293 | 30 | 1,080 | 93  |
| 51,225 | 45 | 5 | 642   | 51 | 32 | 2 | 267 | 30 | 986   | 88  |
| 51,226 | 47 | 5 | 668   | 47 | 32 | 1 | 276 | 28 | 1,023 | 81  |
| 51,227 | 51 | 5 | 759   | 44 | 38 | 1 | 322 | 27 | 1,170 | 77  |
| 51,228 | 53 | 5 | 762   | 43 | 38 | 1 | 323 | 27 | 1,176 | 76  |
| 51,229 | 53 | 5 | 766   | 43 | 39 | 1 | 326 | 27 | 1,184 | 76  |
| 51,230 | 59 | 5 | 792   | 43 | 39 | 1 | 336 | 27 | 1,226 | 76  |
| 51,231 | 59 | 5 | 796   | 43 | 39 | 1 | 342 | 27 | 1,236 | 76  |
| 51,232 | 59 | 5 | 796   | 43 | 39 | 1 | 342 | 27 | 1,236 | 76  |
| 51,233 | 60 | 4 | 813   | 43 | 41 | 1 | 354 | 27 | 1,268 | 75  |
| 51,234 | 60 | 4 | 814   | 43 | 41 | 1 | 354 | 27 | 1,269 | 75  |
| 51,235 | 59 | 4 | 824   | 43 | 41 | 1 | 353 | 27 | 1,277 | 75  |
| 51,236 | 59 | 4 | 818   | 43 | 41 | 1 | 353 | 27 | 1,271 | 75  |
| 51,237 | 79 | 4 | 1,182 | 44 | 64 | 1 | 492 | 29 | 1,817 | 78  |
| 51,238 | 92 | 4 | 1,501 | 44 | 75 | 1 | 573 | 29 | 2,241 | 78  |

|        |     |   |       |    |    |   |     |    |       |    |
|--------|-----|---|-------|----|----|---|-----|----|-------|----|
| 51,239 | 92  | 4 | 1,512 | 47 | 77 | 1 | 578 | 29 | 2,259 | 81 |
| 51,240 | 85  | 4 | 1,509 | 49 | 77 | 1 | 582 | 29 | 2,253 | 83 |
| 51,241 | 83  | 4 | 1,473 | 49 | 76 | 1 | 571 | 29 | 2,203 | 83 |
| 51,242 | 75  | 4 | 1,366 | 49 | 70 | 1 | 508 | 29 | 2,019 | 83 |
| 51,243 | 72  | 4 | 1,348 | 49 | 68 | 1 | 494 | 29 | 1,982 | 83 |
| 51,244 | 72  | 4 | 1,350 | 51 | 68 | 1 | 493 | 30 | 1,983 | 86 |
| 51,245 | 72  | 3 | 1,354 | 50 | 68 | 0 | 492 | 30 | 1,986 | 83 |
| 51,246 | 77  | 3 | 1,407 | 46 | 72 | 0 | 512 | 30 | 2,068 | 79 |
| 51,247 | 79  | 3 | 1,447 | 46 | 74 | 0 | 527 | 29 | 2,127 | 78 |
| 51,248 | 79  | 3 | 1,455 | 45 | 73 | 0 | 527 | 28 | 2,134 | 76 |
| 51,249 | 79  | 2 | 1,445 | 37 | 73 | 0 | 525 | 22 | 2,122 | 61 |
| 51,250 | 92  | 2 | 1,558 | 37 | 74 | 0 | 607 | 23 | 2,331 | 62 |
| 51,251 | 91  | 2 | 1,554 | 37 | 74 | 0 | 602 | 23 | 2,321 | 62 |
| 51,252 | 99  | 2 | 1,586 | 36 | 74 | 0 | 626 | 23 | 2,385 | 61 |
| 51,253 | 99  | 2 | 1,586 | 31 | 74 | 0 | 627 | 22 | 2,386 | 55 |
| 51,254 | 99  | 2 | 1,583 | 31 | 74 | 0 | 628 | 22 | 2,384 | 55 |
| 51,255 | 99  | 2 | 1,593 | 30 | 74 | 0 | 627 | 22 | 2,393 | 54 |
| 51,256 | 104 | 2 | 1,629 | 26 | 76 | 0 | 646 | 22 | 2,455 | 50 |
| 51,257 | 106 | 2 | 1,657 | 26 | 76 | 0 | 650 | 22 | 2,489 | 50 |
| 51,258 | 122 | 2 | 1,740 | 26 | 80 | 1 | 693 | 22 | 2,635 | 51 |
| 51,259 | 122 | 2 | 1,745 | 26 | 80 | 1 | 695 | 22 | 2,642 | 51 |
| 51,260 | 127 | 1 | 1,772 | 21 | 80 | 1 | 709 | 14 | 2,688 | 37 |
| 51,261 | 127 | 2 | 1,764 | 25 | 80 | 1 | 707 | 14 | 2,678 | 42 |
| 51,262 | 127 | 4 | 1,765 | 29 | 80 | 1 | 715 | 16 | 2,687 | 50 |
| 51,263 | 127 | 5 | 1,764 | 27 | 80 | 1 | 715 | 14 | 2,686 | 47 |
| 51,264 | 127 | 5 | 1,763 | 24 | 80 | 1 | 715 | 13 | 2,685 | 43 |
| 51,265 | 132 | 5 | 1,846 | 27 | 83 | 1 | 757 | 14 | 2,818 | 47 |
| 51,266 | 130 | 5 | 1,841 | 26 | 83 | 1 | 756 | 14 | 2,810 | 46 |
| 51,267 | 131 | 5 | 1,841 | 28 | 84 | 1 | 760 | 14 | 2,816 | 48 |
| 51,268 | 135 | 5 | 1,851 | 27 | 86 | 1 | 776 | 11 | 2,848 | 44 |
| 51,269 | 135 | 5 | 1,838 | 27 | 86 | 1 | 775 | 11 | 2,834 | 44 |
| 51,270 | 131 | 5 | 1,767 | 26 | 84 | 1 | 758 | 10 | 2,740 | 42 |
| 51,271 | 131 | 5 | 1,763 | 25 | 84 | 1 | 758 | 10 | 2,736 | 41 |
| 51,272 | 131 | 5 | 1,760 | 25 | 84 | 1 | 759 | 10 | 2,734 | 41 |
| 51,273 | 129 | 5 | 1,713 | 25 | 79 | 1 | 728 | 10 | 2,649 | 41 |
| 51,274 | 126 | 5 | 1,710 | 23 | 78 | 1 | 726 | 9  | 2,640 | 38 |
| 51,275 | 126 | 5 | 1,702 | 23 | 78 | 1 | 721 | 8  | 2,627 | 37 |
| 51,276 | 127 | 5 | 1,709 | 22 | 78 | 1 | 729 | 8  | 2,643 | 36 |
| 51,277 | 125 | 5 | 1,686 | 22 | 78 | 1 | 719 | 8  | 2,608 | 36 |
| 51,278 | 121 | 5 | 1,596 | 22 | 72 | 1 | 668 | 8  | 2,457 | 36 |
| 51,279 | 119 | 5 | 1,591 | 22 | 72 | 1 | 667 | 8  | 2,449 | 36 |

|        |     |   |       |    |    |   |     |    |       |    |
|--------|-----|---|-------|----|----|---|-----|----|-------|----|
| 51,280 | 119 | 5 | 1,586 | 22 | 71 | 1 | 667 | 8  | 2,443 | 36 |
| 51,281 | 113 | 5 | 1,558 | 22 | 71 | 1 | 656 | 8  | 2,398 | 36 |
| 51,282 | 113 | 5 | 1,554 | 22 | 71 | 1 | 651 | 9  | 2,389 | 37 |
| 51,283 | 112 | 5 | 1,538 | 22 | 70 | 1 | 641 | 9  | 2,361 | 37 |
| 51,284 | 112 | 5 | 1,537 | 26 | 69 | 1 | 640 | 11 | 2,358 | 43 |
| 51,285 | 113 | 6 | 1,534 | 33 | 69 | 1 | 645 | 11 | 2,361 | 51 |
| 51,286 | 114 | 6 | 1,517 | 36 | 69 | 1 | 647 | 11 | 2,347 | 54 |
| 51,287 | 109 | 6 | 1,456 | 36 | 62 | 1 | 624 | 11 | 2,251 | 54 |
| 51,288 | 94  | 6 | 1,133 | 35 | 44 | 1 | 494 | 9  | 1,765 | 51 |
| 51,289 | 80  | 6 | 804   | 30 | 31 | 1 | 411 | 8  | 1,326 | 45 |
| 51,290 | 79  | 6 | 776   | 31 | 29 | 1 | 398 | 9  | 1,282 | 47 |
| 51,291 | 76  | 6 | 676   | 31 | 25 | 1 | 358 | 9  | 1,135 | 47 |
| 51,292 | 76  | 6 | 673   | 31 | 25 | 1 | 358 | 9  | 1,132 | 47 |
| 51,293 | 77  | 6 | 676   | 31 | 24 | 1 | 360 | 9  | 1,137 | 47 |
| 51,294 | 78  | 6 | 682   | 29 | 24 | 1 | 369 | 8  | 1,153 | 44 |
| 51,295 | 78  | 6 | 678   | 29 | 24 | 1 | 369 | 8  | 1,149 | 44 |
| 51,296 | 78  | 6 | 672   | 29 | 24 | 1 | 367 | 8  | 1,141 | 44 |
| 51,297 | 72  | 6 | 613   | 30 | 20 | 1 | 347 | 8  | 1,052 | 45 |
| 51,298 | 72  | 6 | 598   | 30 | 19 | 1 | 372 | 8  | 1,061 | 45 |
| 51,299 | 72  | 6 | 590   | 30 | 19 | 1 | 372 | 8  | 1,053 | 45 |
| 51,300 | 72  | 6 | 584   | 30 | 19 | 1 | 371 | 8  | 1,046 | 45 |
| 51,301 | 58  | 6 | 464   | 30 | 15 | 1 | 288 | 7  | 825   | 44 |
| 51,302 | 58  | 6 | 451   | 30 | 15 | 1 | 282 | 7  | 806   | 44 |
| 51,303 | 51  | 5 | 434   | 31 | 15 | 1 | 263 | 7  | 763   | 44 |
| 51,304 | 51  | 5 | 443   | 31 | 15 | 1 | 267 | 7  | 776   | 44 |
| 51,305 | 51  | 5 | 439   | 31 | 15 | 1 | 268 | 7  | 773   | 44 |
| 51,306 | 49  | 5 | 408   | 31 | 13 | 1 | 251 | 7  | 721   | 44 |
| 51,307 | 48  | 5 | 396   | 30 | 13 | 0 | 250 | 7  | 707   | 42 |
| 51,308 | 47  | 5 | 353   | 30 | 12 | 0 | 242 | 7  | 654   | 42 |
| 51,309 | 32  | 3 | 313   | 22 | 9  | 0 | 213 | 5  | 567   | 30 |
| 51,310 | 32  | 3 | 305   | 22 | 9  | 0 | 211 | 5  | 557   | 30 |
| 51,311 | 27  | 2 | 278   | 22 | 9  | 0 | 190 | 5  | 504   | 29 |
| 51,312 | 27  | 2 | 278   | 22 | 9  | 0 | 188 | 5  | 502   | 29 |
| 51,313 | 24  | 2 | 263   | 22 | 9  | 0 | 174 | 5  | 470   | 29 |
| 51,314 | 24  | 1 | 262   | 22 | 8  | 0 | 170 | 5  | 464   | 28 |
| 51,315 | 25  | 1 | 259   | 22 | 7  | 0 | 168 | 5  | 459   | 28 |
| 51,316 | 23  | 1 | 195   | 19 | 6  | 0 | 133 | 4  | 357   | 24 |
| 51,317 | 22  | 1 | 190   | 17 | 5  | 0 | 129 | 4  | 346   | 22 |
| 51,318 | 21  | 1 | 180   | 17 | 5  | 0 | 124 | 4  | 330   | 22 |
| 51,319 | 18  | 1 | 168   | 17 | 3  | 0 | 110 | 4  | 299   | 22 |
| 51,320 | 30  | 1 | 208   | 17 | 5  | 0 | 113 | 4  | 356   | 22 |

|        |     |   |     |    |    |   |     |    |       |    |
|--------|-----|---|-----|----|----|---|-----|----|-------|----|
| 51,321 | 30  | 1 | 209 | 17 | 5  | 0 | 113 | 4  | 357   | 22 |
| 51,322 | 31  | 1 | 215 | 17 | 5  | 0 | 113 | 4  | 364   | 22 |
| 51,323 | 33  | 2 | 228 | 21 | 5  | 0 | 112 | 6  | 378   | 29 |
| 51,324 | 41  | 2 | 283 | 22 | 8  | 0 | 122 | 6  | 454   | 30 |
| 51,325 | 48  | 2 | 311 | 23 | 11 | 0 | 133 | 6  | 503   | 31 |
| 51,326 | 48  | 2 | 320 | 23 | 13 | 0 | 137 | 7  | 518   | 32 |
| 51,327 | 46  | 2 | 303 | 23 | 12 | 0 | 124 | 7  | 485   | 32 |
| 51,328 | 46  | 2 | 301 | 23 | 12 | 0 | 124 | 8  | 483   | 33 |
| 51,329 | 73  | 2 | 540 | 23 | 31 | 0 | 211 | 8  | 855   | 33 |
| 51,330 | 73  | 2 | 540 | 23 | 31 | 0 | 211 | 8  | 855   | 33 |
| 51,331 | 80  | 3 | 564 | 25 | 33 | 0 | 220 | 8  | 897   | 36 |
| 51,332 | 83  | 3 | 587 | 25 | 35 | 0 | 224 | 8  | 929   | 36 |
| 51,333 | 84  | 3 | 589 | 25 | 35 | 0 | 226 | 8  | 934   | 36 |
| 51,334 | 84  | 3 | 591 | 21 | 36 | 0 | 228 | 6  | 939   | 30 |
| 51,335 | 84  | 3 | 591 | 21 | 36 | 0 | 228 | 6  | 939   | 30 |
| 51,336 | 83  | 2 | 591 | 15 | 36 | 0 | 223 | 7  | 933   | 24 |
| 51,337 | 82  | 2 | 591 | 12 | 36 | 0 | 221 | 7  | 930   | 21 |
| 51,338 | 82  | 2 | 591 | 13 | 36 | 0 | 219 | 7  | 928   | 22 |
| 51,339 | 82  | 2 | 596 | 13 | 37 | 0 | 220 | 7  | 935   | 22 |
| 51,340 | 82  | 2 | 596 | 13 | 37 | 0 | 221 | 7  | 936   | 22 |
| 51,341 | 82  | 2 | 595 | 12 | 38 | 0 | 222 | 6  | 937   | 20 |
| 51,342 | 83  | 2 | 596 | 13 | 38 | 0 | 222 | 7  | 939   | 22 |
| 51,343 | 83  | 2 | 598 | 13 | 39 | 0 | 222 | 8  | 942   | 23 |
| 51,344 | 82  | 2 | 595 | 14 | 39 | 0 | 223 | 8  | 939   | 24 |
| 51,345 | 85  | 2 | 619 | 14 | 41 | 0 | 232 | 8  | 977   | 24 |
| 51,346 | 85  | 2 | 622 | 15 | 41 | 0 | 231 | 9  | 979   | 26 |
| 51,347 | 84  | 2 | 618 | 15 | 41 | 0 | 214 | 9  | 957   | 26 |
| 51,348 | 85  | 2 | 605 | 14 | 40 | 0 | 194 | 9  | 924   | 25 |
| 51,349 | 86  | 2 | 605 | 14 | 40 | 0 | 193 | 9  | 924   | 25 |
| 51,350 | 86  | 2 | 605 | 14 | 40 | 0 | 193 | 9  | 924   | 25 |
| 51,351 | 87  | 2 | 614 | 14 | 41 | 0 | 198 | 9  | 940   | 25 |
| 51,352 | 87  | 2 | 614 | 14 | 41 | 0 | 198 | 9  | 940   | 25 |
| 51,353 | 113 | 2 | 887 | 15 | 49 | 0 | 319 | 9  | 1,368 | 26 |
| 51,354 | 113 | 3 | 890 | 14 | 49 | 0 | 323 | 10 | 1,375 | 27 |
| 51,355 | 119 | 3 | 903 | 16 | 51 | 0 | 329 | 10 | 1,402 | 29 |
| 51,356 | 121 | 3 | 905 | 16 | 53 | 0 | 335 | 10 | 1,414 | 29 |
| 51,357 | 118 | 3 | 901 | 16 | 53 | 0 | 333 | 10 | 1,405 | 29 |
| 51,358 | 117 | 3 | 886 | 16 | 53 | 0 | 330 | 10 | 1,386 | 29 |
| 51,359 | 117 | 4 | 885 | 16 | 53 | 0 | 326 | 10 | 1,381 | 30 |
| 51,360 | 117 | 4 | 885 | 16 | 53 | 0 | 325 | 10 | 1,380 | 30 |
| 51,361 | 118 | 4 | 886 | 16 | 53 | 0 | 327 | 10 | 1,384 | 30 |

|        |     |    |     |    |    |   |     |    |       |    |
|--------|-----|----|-----|----|----|---|-----|----|-------|----|
| 51,362 | 122 | 4  | 901 | 16 | 54 | 0 | 335 | 10 | 1,412 | 30 |
| 51,363 | 122 | 4  | 902 | 16 | 54 | 0 | 335 | 10 | 1,413 | 30 |
| 51,364 | 122 | 4  | 902 | 16 | 54 | 0 | 336 | 10 | 1,414 | 30 |
| 51,365 | 119 | 4  | 887 | 16 | 54 | 0 | 336 | 10 | 1,396 | 30 |
| 51,366 | 118 | 4  | 887 | 16 | 54 | 0 | 337 | 10 | 1,396 | 30 |
| 51,367 | 118 | 4  | 887 | 16 | 54 | 0 | 337 | 10 | 1,396 | 30 |
| 51,368 | 119 | 5  | 888 | 16 | 54 | 0 | 340 | 10 | 1,401 | 31 |
| 51,369 | 118 | 5  | 883 | 16 | 54 | 0 | 340 | 10 | 1,395 | 31 |
| 51,370 | 115 | 5  | 876 | 17 | 53 | 0 | 343 | 10 | 1,387 | 32 |
| 51,371 | 107 | 5  | 852 | 17 | 52 | 0 | 341 | 10 | 1,352 | 32 |
| 51,372 | 106 | 6  | 846 | 17 | 52 | 0 | 341 | 10 | 1,345 | 33 |
| 51,373 | 106 | 6  | 836 | 17 | 52 | 0 | 341 | 10 | 1,335 | 33 |
| 51,374 | 104 | 5  | 833 | 13 | 52 | 0 | 341 | 8  | 1,330 | 26 |
| 51,375 | 96  | 5  | 771 | 13 | 49 | 0 | 329 | 8  | 1,245 | 26 |
| 51,376 | 89  | 5  | 728 | 12 | 46 | 0 | 315 | 7  | 1,178 | 24 |
| 51,377 | 89  | 8  | 714 | 13 | 44 | 1 | 312 | 7  | 1,159 | 29 |
| 51,378 | 81  | 8  | 628 | 22 | 37 | 2 | 267 | 13 | 1,013 | 45 |
| 51,379 | 67  | 8  | 551 | 24 | 29 | 2 | 232 | 13 | 879   | 47 |
| 51,380 | 62  | 8  | 473 | 26 | 25 | 2 | 223 | 13 | 783   | 49 |
| 51,381 | 55  | 8  | 448 | 26 | 23 | 2 | 212 | 13 | 738   | 49 |
| 51,382 | 54  | 7  | 448 | 24 | 23 | 2 | 212 | 12 | 737   | 45 |
| 51,383 | 52  | 7  | 430 | 24 | 21 | 2 | 208 | 12 | 711   | 45 |
| 51,384 | 51  | 7  | 431 | 24 | 21 | 2 | 206 | 12 | 709   | 45 |
| 51,385 | 51  | 7  | 429 | 25 | 20 | 2 | 204 | 12 | 704   | 46 |
| 51,386 | 51  | 7  | 428 | 25 | 20 | 2 | 204 | 12 | 703   | 46 |
| 51,387 | 51  | 7  | 428 | 24 | 20 | 3 | 205 | 11 | 704   | 45 |
| 51,388 | 51  | 7  | 429 | 24 | 21 | 3 | 206 | 11 | 707   | 45 |
| 51,389 | 52  | 7  | 447 | 24 | 21 | 3 | 215 | 11 | 735   | 45 |
| 51,390 | 52  | 8  | 446 | 24 | 21 | 3 | 213 | 11 | 732   | 46 |
| 51,391 | 53  | 8  | 458 | 23 | 20 | 3 | 227 | 10 | 758   | 44 |
| 51,392 | 53  | 8  | 457 | 23 | 20 | 3 | 227 | 10 | 757   | 44 |
| 51,393 | 52  | 8  | 457 | 23 | 20 | 3 | 227 | 10 | 756   | 44 |
| 51,394 | 52  | 8  | 455 | 21 | 19 | 3 | 227 | 8  | 753   | 40 |
| 51,395 | 52  | 8  | 457 | 21 | 19 | 3 | 224 | 8  | 752   | 40 |
| 51,396 | 48  | 8  | 426 | 21 | 17 | 3 | 206 | 8  | 697   | 40 |
| 51,397 | 49  | 8  | 427 | 21 | 17 | 3 | 206 | 8  | 699   | 40 |
| 51,398 | 49  | 8  | 424 | 21 | 17 | 3 | 204 | 8  | 694   | 40 |
| 51,399 | 47  | 8  | 415 | 21 | 18 | 3 | 203 | 8  | 683   | 40 |
| 51,400 | 46  | 8  | 412 | 23 | 18 | 3 | 202 | 8  | 678   | 42 |
| 51,401 | 45  | 8  | 403 | 29 | 17 | 3 | 197 | 10 | 662   | 50 |
| 51,402 | 45  | 10 | 401 | 35 | 17 | 4 | 196 | 19 | 659   | 68 |

|        |    |    |     |    |    |   |     |    |     |    |
|--------|----|----|-----|----|----|---|-----|----|-----|----|
| 51,403 | 38 | 11 | 300 | 39 | 12 | 4 | 141 | 23 | 491 | 77 |
| 51,404 | 18 | 11 | 131 | 43 | 9  | 4 | 70  | 24 | 228 | 82 |
| 51,405 | 17 | 10 | 126 | 41 | 9  | 4 | 66  | 23 | 218 | 78 |
| 51,406 | 12 | 10 | 104 | 49 | 7  | 5 | 56  | 25 | 179 | 89 |
| 51,407 | 10 | 10 | 98  | 49 | 5  | 5 | 51  | 25 | 164 | 89 |
| 51,408 | 10 | 10 | 97  | 49 | 5  | 5 | 54  | 25 | 166 | 89 |
| 51,409 | 10 | 10 | 96  | 49 | 5  | 5 | 53  | 26 | 164 | 90 |
| 51,410 | 11 | 9  | 105 | 49 | 5  | 5 | 53  | 26 | 174 | 89 |
| 51,411 | 12 | 9  | 113 | 49 | 5  | 5 | 55  | 26 | 185 | 89 |
| 51,412 | 12 | 10 | 111 | 50 | 5  | 5 | 56  | 26 | 184 | 91 |
| 51,413 | 9  | 10 | 102 | 51 | 4  | 5 | 56  | 26 | 171 | 92 |
| 51,414 | 9  | 10 | 101 | 51 | 4  | 5 | 56  | 26 | 170 | 92 |
| 51,415 | 12 | 10 | 103 | 54 | 5  | 5 | 59  | 29 | 179 | 98 |
| 51,416 | 13 | 10 | 116 | 54 | 6  | 5 | 67  | 29 | 202 | 98 |
| 51,417 | 13 | 10 | 116 | 54 | 6  | 5 | 66  | 29 | 201 | 98 |
| 51,418 | 14 | 9  | 112 | 54 | 6  | 5 | 65  | 29 | 197 | 97 |
| 51,419 | 13 | 9  | 109 | 54 | 6  | 5 | 61  | 29 | 189 | 97 |
| 51,420 | 13 | 9  | 103 | 53 | 6  | 5 | 58  | 29 | 180 | 96 |
| 51,421 | 13 | 9  | 103 | 53 | 6  | 5 | 57  | 29 | 179 | 96 |
| 51,422 | 13 | 9  | 103 | 54 | 6  | 5 | 56  | 29 | 178 | 97 |
| 51,423 | 13 | 8  | 103 | 54 | 5  | 5 | 56  | 29 | 177 | 96 |
| 51,424 | 13 | 8  | 103 | 54 | 5  | 5 | 56  | 29 | 177 | 96 |
| 51,425 | 13 | 8  | 104 | 53 | 5  | 5 | 56  | 29 | 178 | 95 |
| 51,426 | 13 | 8  | 104 | 53 | 5  | 5 | 56  | 29 | 178 | 95 |
| 51,427 | 13 | 8  | 104 | 53 | 5  | 5 | 57  | 29 | 179 | 95 |
| 51,428 | 13 | 5  | 104 | 52 | 5  | 4 | 57  | 29 | 179 | 90 |
| 51,429 | 13 | 5  | 103 | 43 | 5  | 3 | 57  | 23 | 178 | 74 |
| 51,430 | 14 | 5  | 104 | 41 | 5  | 3 | 58  | 22 | 181 | 71 |
| 51,431 | 14 | 5  | 104 | 39 | 5  | 3 | 58  | 22 | 181 | 69 |
| 51,432 | 14 | 5  | 104 | 39 | 5  | 3 | 59  | 22 | 182 | 69 |
| 51,433 | 15 | 5  | 104 | 39 | 5  | 3 | 61  | 22 | 185 | 69 |
| 51,434 | 15 | 5  | 102 | 39 | 5  | 3 | 60  | 22 | 182 | 69 |
| 51,435 | 17 | 5  | 106 | 39 | 6  | 3 | 65  | 22 | 194 | 69 |
| 51,436 | 17 | 5  | 106 | 39 | 6  | 3 | 65  | 22 | 194 | 69 |
| 51,437 | 17 | 5  | 106 | 39 | 6  | 3 | 64  | 22 | 193 | 69 |
| 51,438 | 17 | 5  | 108 | 39 | 6  | 2 | 65  | 22 | 196 | 68 |
| 51,439 | 18 | 5  | 107 | 39 | 5  | 2 | 64  | 22 | 194 | 68 |
| 51,440 | 17 | 5  | 84  | 38 | 5  | 2 | 55  | 22 | 161 | 67 |
| 51,441 | 16 | 4  | 72  | 38 | 4  | 2 | 42  | 23 | 134 | 67 |
| 51,442 | 16 | 4  | 72  | 38 | 4  | 2 | 40  | 23 | 132 | 67 |
| 51,443 | 16 | 4  | 76  | 38 | 4  | 2 | 46  | 23 | 142 | 67 |

|        |    |   |     |    |   |   |    |    |     |    |
|--------|----|---|-----|----|---|---|----|----|-----|----|
| 51,444 | 16 | 4 | 76  | 38 | 4 | 2 | 47 | 23 | 143 | 67 |
| 51,445 | 16 | 4 | 75  | 38 | 4 | 2 | 47 | 23 | 142 | 67 |
| 51,446 | 16 | 4 | 73  | 38 | 4 | 2 | 48 | 23 | 141 | 67 |
| 51,447 | 16 | 4 | 74  | 38 | 4 | 2 | 48 | 23 | 142 | 67 |
| 51,448 | 15 | 4 | 70  | 38 | 4 | 2 | 49 | 23 | 138 | 67 |
| 51,449 | 15 | 4 | 71  | 38 | 4 | 2 | 50 | 23 | 140 | 67 |
| 51,450 | 15 | 4 | 75  | 30 | 4 | 2 | 51 | 21 | 145 | 57 |
| 51,451 | 15 | 4 | 80  | 30 | 4 | 2 | 53 | 21 | 152 | 57 |
| 51,452 | 15 | 4 | 80  | 30 | 4 | 2 | 53 | 21 | 152 | 57 |
| 51,453 | 17 | 1 | 110 | 20 | 4 | 1 | 63 | 8  | 194 | 30 |
| 51,454 | 17 | 1 | 110 | 20 | 4 | 1 | 63 | 8  | 194 | 30 |
| 51,455 | 17 | 1 | 108 | 18 | 4 | 1 | 63 | 9  | 192 | 29 |
| 51,456 | 17 | 1 | 108 | 18 | 4 | 1 | 63 | 9  | 192 | 29 |
| 51,457 | 22 | 1 | 164 | 10 | 4 | 0 | 79 | 7  | 269 | 18 |
| 51,458 | 23 | 1 | 175 | 10 | 4 | 0 | 78 | 7  | 280 | 18 |
| 51,459 | 23 | 1 | 175 | 10 | 4 | 0 | 78 | 7  | 280 | 18 |
| 51,460 | 22 | 1 | 170 | 11 | 4 | 0 | 81 | 6  | 277 | 18 |
| 51,461 | 23 | 1 | 171 | 11 | 5 | 0 | 85 | 6  | 284 | 18 |
| 51,462 | 21 | 0 | 163 | 10 | 5 | 0 | 83 | 6  | 272 | 16 |
| 51,463 | 21 | 0 | 161 | 10 | 5 | 0 | 81 | 6  | 268 | 16 |
| 51,464 | 20 | 0 | 156 | 9  | 5 | 0 | 74 | 6  | 255 | 15 |
| 51,465 | 20 | 0 | 157 | 9  | 5 | 0 | 74 | 6  | 256 | 15 |
| 51,466 | 16 | 1 | 154 | 7  | 4 | 0 | 71 | 3  | 245 | 11 |
| 51,467 | 15 | 1 | 141 | 8  | 3 | 0 | 63 | 3  | 222 | 12 |
| 51,468 | 15 | 1 | 141 | 9  | 3 | 0 | 63 | 3  | 222 | 13 |
| 51,469 | 14 | 1 | 140 | 9  | 3 | 0 | 63 | 3  | 220 | 13 |
| 51,470 | 14 | 1 | 137 | 9  | 3 | 0 | 62 | 3  | 216 | 13 |
| 51,471 | 14 | 1 | 137 | 9  | 3 | 0 | 62 | 3  | 216 | 13 |
| 51,472 | 14 | 1 | 137 | 9  | 3 | 0 | 62 | 3  | 216 | 13 |
| 51,473 | 14 | 1 | 138 | 8  | 3 | 0 | 62 | 3  | 217 | 12 |
| 51,474 | 14 | 1 | 138 | 8  | 3 | 0 | 62 | 3  | 217 | 12 |
| 51,475 | 14 | 1 | 137 | 8  | 3 | 0 | 62 | 3  | 216 | 12 |
| 51,476 | 14 | 1 | 138 | 8  | 3 | 0 | 62 | 3  | 217 | 12 |
| 51,477 | 14 | 1 | 138 | 8  | 3 | 0 | 61 | 3  | 216 | 12 |
| 51,478 | 13 | 1 | 139 | 8  | 3 | 0 | 60 | 3  | 215 | 12 |
| 51,479 | 13 | 1 | 138 | 8  | 3 | 0 | 60 | 3  | 214 | 12 |
| 51,480 | 13 | 1 | 138 | 8  | 3 | 0 | 60 | 3  | 214 | 12 |
| 51,481 | 13 | 1 | 138 | 8  | 3 | 0 | 60 | 3  | 214 | 12 |
| 51,482 | 13 | 1 | 139 | 8  | 3 | 0 | 60 | 3  | 215 | 12 |
| 51,483 | 13 | 1 | 139 | 8  | 3 | 0 | 59 | 4  | 214 | 13 |
| 51,484 | 12 | 1 | 137 | 9  | 3 | 0 | 57 | 4  | 209 | 14 |



|        |    |   |     |    |    |   |    |    |     |    |
|--------|----|---|-----|----|----|---|----|----|-----|----|
| 51,485 | 11 | 1 | 131 | 9  | 3  | 0 | 54 | 4  | 199 | 14 |
| 51,486 | 10 | 1 | 131 | 9  | 2  | 0 | 55 | 4  | 198 | 14 |
| 51,487 | 10 | 1 | 130 | 9  | 2  | 0 | 54 | 4  | 196 | 14 |
| 51,488 | 10 | 1 | 130 | 10 | 2  | 0 | 56 | 4  | 198 | 15 |
| 51,489 | 10 | 1 | 130 | 11 | 2  | 0 | 56 | 4  | 198 | 16 |
| 51,490 | 9  | 1 | 131 | 12 | 2  | 0 | 56 | 4  | 198 | 17 |
| 51,491 | 9  | 1 | 131 | 12 | 1  | 0 | 57 | 3  | 198 | 16 |
| 51,492 | 9  | 1 | 131 | 14 | 1  | 0 | 57 | 3  | 198 | 18 |
| 51,493 | 9  | 1 | 130 | 15 | 1  | 0 | 56 | 3  | 196 | 19 |
| 51,494 | 10 | 1 | 131 | 15 | 1  | 0 | 53 | 5  | 195 | 21 |
| 51,495 | 10 | 2 | 130 | 18 | 1  | 0 | 52 | 6  | 193 | 26 |
| 51,496 | 10 | 2 | 131 | 19 | 1  | 0 | 51 | 7  | 193 | 28 |
| 51,497 | 10 | 2 | 135 | 21 | 1  | 1 | 51 | 7  | 197 | 31 |
| 51,498 | 10 | 2 | 137 | 22 | 1  | 1 | 55 | 7  | 203 | 32 |
| 51,499 | 12 | 2 | 156 | 22 | 1  | 1 | 56 | 7  | 225 | 32 |
| 51,500 | 16 | 2 | 187 | 22 | 1  | 1 | 62 | 7  | 266 | 32 |
| 51,501 | 17 | 2 | 197 | 23 | 2  | 1 | 66 | 8  | 282 | 34 |
| 51,502 | 17 | 2 | 192 | 23 | 2  | 1 | 64 | 8  | 275 | 34 |
| 51,503 | 16 | 2 | 205 | 29 | 2  | 1 | 67 | 9  | 290 | 41 |
| 51,504 | 15 | 2 | 186 | 34 | 2  | 1 | 64 | 11 | 267 | 48 |
| 51,505 | 15 | 2 | 186 | 34 | 3  | 1 | 65 | 11 | 269 | 48 |
| 51,506 | 12 | 4 | 156 | 43 | 3  | 1 | 56 | 20 | 227 | 68 |
| 51,507 | 10 | 6 | 132 | 43 | 3  | 1 | 52 | 21 | 197 | 71 |
| 51,508 | 9  | 6 | 123 | 44 | 3  | 1 | 52 | 21 | 187 | 72 |
| 51,509 | 9  | 6 | 121 | 44 | 3  | 1 | 50 | 21 | 183 | 72 |
| 51,510 | 9  | 6 | 118 | 45 | 3  | 1 | 48 | 22 | 178 | 74 |
| 51,511 | 9  | 6 | 117 | 46 | 3  | 2 | 47 | 25 | 176 | 79 |
| 51,512 | 8  | 6 | 116 | 46 | 2  | 2 | 43 | 26 | 169 | 80 |
| 51,513 | 8  | 6 | 119 | 47 | 3  | 2 | 43 | 29 | 173 | 84 |
| 51,514 | 9  | 6 | 128 | 47 | 3  | 2 | 43 | 29 | 183 | 84 |
| 51,515 | 9  | 6 | 131 | 49 | 3  | 2 | 43 | 31 | 186 | 88 |
| 51,516 | 9  | 6 | 130 | 49 | 3  | 2 | 42 | 31 | 184 | 88 |
| 51,517 | 10 | 5 | 132 | 49 | 3  | 2 | 43 | 31 | 188 | 87 |
| 51,518 | 11 | 5 | 141 | 48 | 5  | 2 | 48 | 31 | 205 | 86 |
| 51,519 | 11 | 5 | 150 | 47 | 5  | 2 | 51 | 31 | 217 | 85 |
| 51,520 | 16 | 5 | 159 | 47 | 10 | 2 | 57 | 31 | 242 | 85 |
| 51,521 | 16 | 5 | 159 | 47 | 10 | 2 | 57 | 31 | 242 | 85 |
| 51,522 | 16 | 5 | 158 | 49 | 10 | 2 | 57 | 31 | 241 | 87 |
| 51,523 | 16 | 5 | 158 | 50 | 10 | 2 | 57 | 31 | 241 | 88 |
| 51,524 | 16 | 5 | 158 | 50 | 10 | 2 | 57 | 31 | 241 | 88 |
| 51,525 | 26 | 5 | 193 | 50 | 11 | 2 | 75 | 32 | 305 | 89 |

|        |     |   |     |    |    |   |     |    |       |    |
|--------|-----|---|-----|----|----|---|-----|----|-------|----|
| 51,526 | 30  | 5 | 218 | 50 | 14 | 2 | 94  | 32 | 356   | 89 |
| 51,527 | 36  | 5 | 252 | 50 | 16 | 2 | 116 | 32 | 420   | 89 |
| 51,528 | 36  | 5 | 252 | 50 | 16 | 2 | 116 | 32 | 420   | 89 |
| 51,529 | 48  | 5 | 346 | 50 | 18 | 2 | 136 | 32 | 548   | 89 |
| 51,530 | 54  | 5 | 396 | 50 | 21 | 2 | 168 | 32 | 639   | 89 |
| 51,531 | 54  | 5 | 397 | 50 | 21 | 2 | 170 | 32 | 642   | 89 |
| 51,532 | 54  | 5 | 397 | 50 | 21 | 2 | 170 | 32 | 642   | 89 |
| 51,533 | 55  | 5 | 396 | 50 | 21 | 2 | 171 | 31 | 643   | 88 |
| 51,534 | 55  | 5 | 396 | 49 | 21 | 2 | 171 | 31 | 643   | 87 |
| 51,535 | 55  | 5 | 395 | 47 | 21 | 2 | 171 | 31 | 642   | 85 |
| 51,536 | 55  | 6 | 395 | 47 | 21 | 2 | 170 | 32 | 641   | 87 |
| 51,537 | 55  | 6 | 394 | 47 | 21 | 2 | 167 | 32 | 637   | 87 |
| 51,538 | 55  | 6 | 393 | 47 | 21 | 2 | 167 | 32 | 636   | 87 |
| 51,539 | 55  | 6 | 396 | 48 | 21 | 2 | 167 | 32 | 639   | 88 |
| 51,540 | 55  | 6 | 396 | 47 | 21 | 2 | 167 | 32 | 639   | 87 |
| 51,541 | 57  | 6 | 407 | 46 | 21 | 2 | 170 | 32 | 655   | 86 |
| 51,542 | 58  | 6 | 414 | 44 | 21 | 2 | 175 | 32 | 668   | 84 |
| 51,543 | 60  | 6 | 425 | 44 | 21 | 2 | 179 | 32 | 685   | 84 |
| 51,544 | 62  | 6 | 438 | 43 | 23 | 2 | 186 | 32 | 709   | 83 |
| 51,545 | 61  | 6 | 436 | 43 | 23 | 2 | 186 | 30 | 706   | 81 |
| 51,546 | 64  | 5 | 458 | 40 | 24 | 2 | 220 | 29 | 766   | 76 |
| 51,547 | 64  | 5 | 458 | 39 | 24 | 2 | 221 | 28 | 767   | 74 |
| 51,548 | 65  | 5 | 466 | 37 | 24 | 1 | 223 | 28 | 778   | 71 |
| 51,549 | 65  | 5 | 464 | 37 | 24 | 1 | 219 | 28 | 772   | 71 |
| 51,550 | 64  | 5 | 451 | 37 | 25 | 1 | 220 | 28 | 760   | 71 |
| 51,551 | 60  | 5 | 423 | 37 | 25 | 1 | 215 | 28 | 723   | 71 |
| 51,552 | 72  | 5 | 455 | 36 | 27 | 1 | 276 | 27 | 830   | 69 |
| 51,553 | 86  | 5 | 502 | 36 | 30 | 1 | 302 | 27 | 920   | 69 |
| 51,554 | 86  | 5 | 495 | 30 | 30 | 1 | 312 | 26 | 923   | 62 |
| 51,555 | 88  | 5 | 536 | 25 | 33 | 1 | 343 | 24 | 1,000 | 55 |
| 51,556 | 90  | 5 | 563 | 25 | 32 | 1 | 363 | 24 | 1,048 | 55 |
| 51,557 | 90  | 1 | 572 | 13 | 32 | 1 | 368 | 12 | 1,062 | 27 |
| 51,558 | 90  | 1 | 572 | 13 | 32 | 1 | 368 | 12 | 1,062 | 27 |
| 51,559 | 92  | 1 | 591 | 9  | 33 | 0 | 374 | 9  | 1,090 | 19 |
| 51,560 | 92  | 1 | 591 | 9  | 33 | 0 | 374 | 9  | 1,090 | 19 |
| 51,561 | 93  | 1 | 599 | 9  | 33 | 0 | 378 | 9  | 1,103 | 19 |
| 51,562 | 100 | 1 | 632 | 9  | 34 | 0 | 402 | 8  | 1,168 | 18 |
| 51,563 | 103 | 1 | 645 | 8  | 34 | 0 | 405 | 5  | 1,187 | 14 |
| 51,564 | 103 | 1 | 646 | 8  | 34 | 0 | 405 | 5  | 1,188 | 14 |
| 51,565 | 106 | 1 | 670 | 8  | 35 | 0 | 427 | 5  | 1,238 | 14 |
| 51,566 | 106 | 1 | 667 | 6  | 36 | 0 | 429 | 3  | 1,238 | 10 |

|        |     |   |     |    |    |   |     |   |       |    |
|--------|-----|---|-----|----|----|---|-----|---|-------|----|
| 51,567 | 105 | 1 | 666 | 5  | 36 | 0 | 429 | 3 | 1,236 | 9  |
| 51,568 | 105 | 1 | 670 | 5  | 34 | 0 | 430 | 3 | 1,239 | 9  |
| 51,569 | 106 | 1 | 671 | 5  | 34 | 0 | 430 | 3 | 1,241 | 9  |
| 51,570 | 103 | 1 | 721 | 5  | 32 | 0 | 456 | 3 | 1,312 | 9  |
| 51,571 | 105 | 1 | 794 | 5  | 36 | 0 | 485 | 3 | 1,420 | 9  |
| 51,572 | 105 | 1 | 806 | 3  | 36 | 0 | 502 | 3 | 1,449 | 7  |
| 51,573 | 105 | 1 | 807 | 3  | 36 | 0 | 505 | 3 | 1,453 | 7  |
| 51,574 | 106 | 1 | 807 | 5  | 36 | 0 | 505 | 4 | 1,454 | 10 |
| 51,575 | 97  | 1 | 781 | 8  | 35 | 0 | 490 | 5 | 1,403 | 14 |
| 51,576 | 97  | 1 | 777 | 17 | 35 | 0 | 489 | 5 | 1,398 | 23 |
| 51,577 | 94  | 1 | 755 | 20 | 32 | 0 | 472 | 5 | 1,353 | 26 |
| 51,578 | 88  | 1 | 720 | 20 | 31 | 0 | 450 | 5 | 1,289 | 26 |
| 51,579 | 76  | 1 | 625 | 21 | 29 | 0 | 429 | 5 | 1,159 | 27 |
| 51,580 | 70  | 1 | 586 | 21 | 26 | 0 | 399 | 5 | 1,081 | 27 |
| 51,581 | 70  | 1 | 579 | 22 | 26 | 0 | 396 | 5 | 1,071 | 28 |
| 51,582 | 70  | 1 | 578 | 23 | 26 | 0 | 395 | 5 | 1,069 | 29 |
| 51,583 | 69  | 1 | 581 | 23 | 26 | 0 | 394 | 5 | 1,070 | 29 |
| 51,584 | 71  | 1 | 586 | 23 | 26 | 0 | 396 | 5 | 1,079 | 29 |
| 51,585 | 72  | 1 | 586 | 23 | 26 | 0 | 396 | 5 | 1,080 | 29 |
| 51,586 | 72  | 0 | 586 | 23 | 26 | 0 | 397 | 4 | 1,081 | 27 |
| 51,587 | 72  | 0 | 588 | 23 | 26 | 0 | 397 | 4 | 1,083 | 27 |
| 51,588 | 73  | 0 | 591 | 23 | 26 | 0 | 397 | 4 | 1,087 | 27 |
| 51,589 | 75  | 0 | 592 | 22 | 26 | 0 | 398 | 4 | 1,091 | 26 |
| 51,590 | 75  | 0 | 592 | 22 | 26 | 0 | 398 | 4 | 1,091 | 26 |
| 51,591 | 75  | 0 | 597 | 22 | 26 | 0 | 400 | 4 | 1,098 | 26 |
| 51,592 | 73  | 0 | 586 | 22 | 26 | 0 | 398 | 4 | 1,083 | 26 |
| 51,593 | 74  | 0 | 585 | 22 | 26 | 0 | 398 | 4 | 1,083 | 26 |
| 51,594 | 75  | 0 | 591 | 22 | 27 | 0 | 398 | 4 | 1,091 | 26 |
| 51,595 | 73  | 0 | 580 | 22 | 26 | 0 | 391 | 4 | 1,070 | 26 |
| 51,596 | 71  | 0 | 585 | 22 | 26 | 0 | 368 | 4 | 1,050 | 26 |
| 51,597 | 70  | 0 | 600 | 22 | 25 | 0 | 375 | 4 | 1,070 | 26 |
| 51,598 | 70  | 0 | 599 | 24 | 25 | 0 | 375 | 4 | 1,069 | 28 |
| 51,599 | 69  | 0 | 586 | 24 | 25 | 0 | 373 | 4 | 1,053 | 28 |
| 51,600 | 69  | 0 | 636 | 24 | 28 | 0 | 383 | 5 | 1,116 | 29 |
| 51,601 | 68  | 1 | 647 | 26 | 27 | 0 | 388 | 7 | 1,130 | 34 |
| 51,602 | 68  | 3 | 648 | 28 | 27 | 0 | 388 | 8 | 1,131 | 39 |
| 51,603 | 55  | 3 | 603 | 28 | 24 | 0 | 322 | 8 | 1,004 | 39 |
| 51,604 | 41  | 3 | 548 | 28 | 21 | 0 | 295 | 9 | 905   | 40 |
| 51,605 | 41  | 3 | 545 | 28 | 21 | 0 | 283 | 9 | 890   | 40 |
| 51,606 | 39  | 3 | 498 | 28 | 18 | 0 | 245 | 9 | 800   | 40 |
| 51,607 | 37  | 3 | 472 | 28 | 18 | 0 | 224 | 9 | 751   | 40 |

|        |    |   |     |    |    |   |     |    |     |    |
|--------|----|---|-----|----|----|---|-----|----|-----|----|
| 51,608 | 37 | 3 | 460 | 28 | 18 | 0 | 215 | 9  | 730 | 40 |
| 51,609 | 36 | 3 | 454 | 28 | 18 | 0 | 211 | 9  | 719 | 40 |
| 51,610 | 35 | 3 | 446 | 31 | 17 | 0 | 210 | 8  | 708 | 42 |
| 51,611 | 35 | 3 | 446 | 31 | 17 | 0 | 210 | 9  | 708 | 43 |
| 51,612 | 34 | 3 | 445 | 32 | 17 | 0 | 209 | 9  | 705 | 44 |
| 51,613 | 28 | 3 | 417 | 32 | 17 | 0 | 192 | 9  | 654 | 44 |
| 51,614 | 25 | 3 | 404 | 34 | 16 | 0 | 188 | 9  | 633 | 46 |
| 51,615 | 25 | 3 | 401 | 35 | 16 | 0 | 187 | 11 | 629 | 49 |
| 51,616 | 21 | 3 | 368 | 35 | 15 | 0 | 164 | 11 | 568 | 49 |
| 51,617 | 21 | 3 | 384 | 36 | 14 | 1 | 171 | 15 | 590 | 55 |
| 51,618 | 22 | 3 | 385 | 38 | 14 | 1 | 171 | 20 | 592 | 62 |
| 51,619 | 22 | 3 | 373 | 43 | 14 | 1 | 165 | 22 | 574 | 69 |
| 51,620 | 21 | 3 | 362 | 43 | 14 | 1 | 163 | 22 | 560 | 69 |
| 51,621 | 20 | 3 | 305 | 43 | 11 | 1 | 131 | 23 | 467 | 70 |
| 51,622 | 17 | 3 | 230 | 43 | 7  | 1 | 105 | 23 | 359 | 70 |
| 51,623 | 17 | 3 | 218 | 43 | 7  | 1 | 89  | 23 | 331 | 70 |
| 51,624 | 17 | 3 | 217 | 42 | 7  | 1 | 86  | 23 | 327 | 69 |
| 51,625 | 16 | 3 | 218 | 40 | 7  | 1 | 87  | 22 | 328 | 66 |
| 51,626 | 15 | 3 | 214 | 28 | 7  | 1 | 86  | 20 | 322 | 52 |
| 51,627 | 15 | 3 | 214 | 28 | 7  | 1 | 86  | 20 | 322 | 52 |
| 51,628 | 14 | 3 | 211 | 25 | 7  | 1 | 84  | 20 | 316 | 49 |
| 51,629 | 14 | 3 | 208 | 25 | 6  | 1 | 83  | 20 | 311 | 49 |
| 51,630 | 14 | 3 | 210 | 24 | 6  | 1 | 84  | 20 | 314 | 48 |
| 51,631 | 15 | 3 | 211 | 23 | 6  | 1 | 84  | 20 | 316 | 47 |
| 51,632 | 15 | 3 | 209 | 22 | 6  | 1 | 84  | 20 | 314 | 46 |
| 51,633 | 15 | 3 | 209 | 22 | 6  | 2 | 84  | 20 | 314 | 47 |
| 51,634 | 13 | 3 | 205 | 22 | 6  | 2 | 82  | 20 | 306 | 47 |
| 51,635 | 14 | 3 | 205 | 22 | 6  | 2 | 82  | 20 | 307 | 47 |
| 51,636 | 13 | 3 | 204 | 22 | 6  | 2 | 81  | 20 | 304 | 47 |
| 51,637 | 13 | 3 | 204 | 22 | 6  | 2 | 81  | 20 | 304 | 47 |
| 51,638 | 13 | 3 | 218 | 22 | 7  | 2 | 86  | 20 | 324 | 47 |
| 51,639 | 15 | 3 | 226 | 22 | 7  | 2 | 90  | 20 | 338 | 47 |
| 51,640 | 13 | 3 | 228 | 22 | 7  | 2 | 91  | 20 | 339 | 47 |
| 51,641 | 13 | 3 | 226 | 24 | 7  | 3 | 91  | 22 | 337 | 52 |
| 51,642 | 13 | 3 | 221 | 24 | 7  | 3 | 89  | 22 | 330 | 52 |
| 51,643 | 13 | 3 | 220 | 24 | 7  | 3 | 88  | 22 | 328 | 52 |
| 51,644 | 11 | 3 | 214 | 31 | 7  | 4 | 82  | 23 | 314 | 61 |
| 51,645 | 8  | 3 | 197 | 32 | 6  | 4 | 78  | 23 | 289 | 62 |
| 51,646 | 9  | 3 | 194 | 32 | 6  | 4 | 78  | 23 | 287 | 62 |
| 51,647 | 9  | 3 | 177 | 32 | 6  | 4 | 74  | 23 | 266 | 62 |
| 51,648 | 10 | 3 | 189 | 31 | 7  | 4 | 63  | 25 | 269 | 63 |

|        |    |   |     |    |    |   |     |    |     |    |
|--------|----|---|-----|----|----|---|-----|----|-----|----|
| 51,649 | 11 | 3 | 149 | 29 | 5  | 4 | 57  | 25 | 222 | 61 |
| 51,650 | 13 | 3 | 146 | 29 | 4  | 4 | 56  | 25 | 219 | 61 |
| 51,651 | 14 | 3 | 163 | 29 | 4  | 4 | 57  | 24 | 238 | 60 |
| 51,652 | 14 | 2 | 148 | 27 | 4  | 4 | 50  | 22 | 216 | 55 |
| 51,653 | 20 | 0 | 198 | 25 | 12 | 4 | 78  | 21 | 308 | 50 |
| 51,654 | 20 | 0 | 198 | 25 | 12 | 4 | 78  | 21 | 308 | 50 |
| 51,655 | 25 | 0 | 256 | 26 | 14 | 4 | 124 | 20 | 419 | 50 |
| 51,656 | 26 | 1 | 261 | 26 | 14 | 4 | 125 | 20 | 426 | 51 |
| 51,657 | 39 | 1 | 293 | 26 | 22 | 4 | 156 | 20 | 510 | 51 |
| 51,658 | 39 | 1 | 293 | 26 | 22 | 4 | 156 | 20 | 510 | 51 |
| 51,659 | 39 | 1 | 328 | 26 | 24 | 4 | 163 | 20 | 554 | 51 |
| 51,660 | 40 | 1 | 339 | 23 | 26 | 4 | 165 | 20 | 570 | 48 |
| 51,661 | 40 | 1 | 360 | 23 | 28 | 4 | 172 | 19 | 600 | 47 |
| 51,662 | 43 | 1 | 388 | 23 | 29 | 4 | 181 | 19 | 641 | 47 |
| 51,663 | 45 | 1 | 394 | 22 | 31 | 4 | 185 | 19 | 655 | 46 |
| 51,664 | 44 | 1 | 389 | 22 | 30 | 4 | 176 | 20 | 639 | 47 |
| 51,665 | 48 | 1 | 403 | 21 | 30 | 4 | 188 | 22 | 669 | 48 |
| 51,666 | 48 | 1 | 402 | 21 | 30 | 4 | 183 | 20 | 663 | 46 |
| 51,667 | 49 | 1 | 400 | 21 | 30 | 4 | 181 | 20 | 660 | 46 |
| 51,668 | 49 | 1 | 392 | 18 | 31 | 3 | 182 | 11 | 654 | 33 |
| 51,669 | 48 | 1 | 391 | 18 | 31 | 3 | 181 | 11 | 651 | 33 |
| 51,670 | 47 | 1 | 391 | 15 | 31 | 3 | 181 | 13 | 650 | 32 |
| 51,671 | 47 | 1 | 406 | 20 | 32 | 3 | 184 | 14 | 669 | 38 |
| 51,672 | 47 | 1 | 406 | 20 | 32 | 3 | 184 | 13 | 669 | 37 |
| 51,673 | 48 | 1 | 413 | 21 | 33 | 3 | 186 | 13 | 680 | 38 |
| 51,674 | 48 | 1 | 430 | 24 | 33 | 3 | 189 | 13 | 700 | 41 |
| 51,675 | 48 | 1 | 429 | 24 | 33 | 3 | 188 | 13 | 698 | 41 |
| 51,676 | 49 | 2 | 446 | 24 | 33 | 3 | 194 | 13 | 722 | 42 |
| 51,677 | 49 | 2 | 449 | 24 | 33 | 3 | 195 | 13 | 726 | 42 |
| 51,678 | 49 | 2 | 449 | 24 | 33 | 3 | 195 | 13 | 726 | 42 |
| 51,679 | 49 | 2 | 454 | 25 | 33 | 3 | 195 | 13 | 731 | 43 |
| 51,680 | 49 | 2 | 457 | 25 | 33 | 3 | 196 | 13 | 735 | 43 |
| 51,681 | 49 | 2 | 460 | 25 | 33 | 3 | 195 | 13 | 737 | 43 |
| 51,682 | 48 | 2 | 461 | 25 | 33 | 3 | 195 | 13 | 737 | 43 |
| 51,683 | 49 | 2 | 473 | 25 | 33 | 2 | 201 | 13 | 756 | 42 |
| 51,684 | 49 | 2 | 473 | 25 | 33 | 2 | 201 | 13 | 756 | 42 |
| 51,685 | 52 | 2 | 506 | 25 | 33 | 2 | 213 | 13 | 804 | 42 |
| 51,686 | 52 | 2 | 506 | 25 | 33 | 2 | 213 | 13 | 804 | 42 |
| 51,687 | 53 | 2 | 522 | 25 | 34 | 2 | 218 | 14 | 827 | 43 |
| 51,688 | 58 | 2 | 551 | 25 | 34 | 2 | 224 | 14 | 867 | 43 |
| 51,689 | 62 | 2 | 604 | 25 | 38 | 2 | 254 | 14 | 958 | 43 |

|        |    |   |     |    |    |   |     |    |       |    |
|--------|----|---|-----|----|----|---|-----|----|-------|----|
| 51,690 | 62 | 2 | 601 | 25 | 38 | 2 | 252 | 14 | 953   | 43 |
| 51,691 | 62 | 2 | 606 | 25 | 39 | 2 | 254 | 14 | 961   | 43 |
| 51,692 | 62 | 2 | 608 | 24 | 39 | 1 | 257 | 12 | 966   | 39 |
| 51,693 | 62 | 2 | 608 | 24 | 39 | 1 | 257 | 12 | 966   | 39 |
| 51,694 | 62 | 2 | 608 | 24 | 39 | 1 | 257 | 13 | 966   | 40 |
| 51,695 | 63 | 2 | 611 | 17 | 39 | 0 | 259 | 12 | 972   | 31 |
| 51,696 | 63 | 2 | 614 | 17 | 39 | 0 | 259 | 12 | 975   | 31 |
| 51,697 | 66 | 2 | 630 | 17 | 39 | 0 | 270 | 12 | 1,005 | 31 |
| 51,698 | 66 | 2 | 630 | 17 | 39 | 0 | 270 | 12 | 1,005 | 31 |
| 51,699 | 66 | 2 | 601 | 17 | 38 | 0 | 270 | 10 | 975   | 29 |
| 51,700 | 65 | 2 | 600 | 17 | 38 | 0 | 270 | 10 | 973   | 29 |
| 51,701 | 63 | 2 | 598 | 17 | 38 | 0 | 270 | 10 | 969   | 29 |
| 51,702 | 62 | 2 | 583 | 17 | 38 | 0 | 270 | 10 | 953   | 29 |
| 51,703 | 62 | 2 | 582 | 18 | 38 | 0 | 269 | 10 | 951   | 30 |
| 51,704 | 56 | 2 | 527 | 18 | 30 | 1 | 239 | 10 | 852   | 31 |
| 51,705 | 55 | 2 | 515 | 18 | 30 | 1 | 229 | 10 | 829   | 31 |
| 51,706 | 51 | 1 | 472 | 17 | 28 | 1 | 194 | 10 | 745   | 29 |
| 51,707 | 53 | 1 | 495 | 17 | 32 | 1 | 227 | 10 | 807   | 29 |
| 51,708 | 40 | 1 | 480 | 20 | 24 | 1 | 208 | 10 | 752   | 32 |
| 51,709 | 40 | 1 | 465 | 22 | 23 | 1 | 217 | 10 | 745   | 34 |
| 51,710 | 49 | 1 | 485 | 28 | 23 | 1 | 258 | 10 | 815   | 40 |
| 51,711 | 55 | 2 | 518 | 31 | 23 | 1 | 292 | 12 | 888   | 46 |
| 51,712 | 56 | 2 | 524 | 31 | 22 | 1 | 302 | 13 | 904   | 47 |
| 51,713 | 53 | 2 | 499 | 33 | 21 | 1 | 304 | 14 | 877   | 50 |
| 51,714 | 51 | 2 | 488 | 33 | 20 | 1 | 303 | 14 | 862   | 50 |
| 51,715 | 47 | 2 | 474 | 32 | 20 | 1 | 298 | 11 | 839   | 46 |
| 51,716 | 47 | 2 | 473 | 31 | 20 | 1 | 299 | 11 | 839   | 45 |
| 51,717 | 47 | 2 | 471 | 31 | 20 | 1 | 299 | 11 | 837   | 45 |
| 51,718 | 46 | 2 | 473 | 31 | 20 | 1 | 299 | 11 | 838   | 45 |
| 51,719 | 46 | 2 | 470 | 31 | 19 | 1 | 298 | 11 | 833   | 45 |
| 51,720 | 47 | 2 | 470 | 29 | 19 | 1 | 298 | 8  | 834   | 40 |
| 51,721 | 47 | 2 | 470 | 29 | 19 | 1 | 298 | 8  | 834   | 40 |
| 51,722 | 47 | 2 | 459 | 24 | 18 | 1 | 298 | 7  | 822   | 34 |
| 51,723 | 46 | 2 | 458 | 24 | 17 | 1 | 301 | 7  | 822   | 34 |
| 51,724 | 46 | 2 | 455 | 23 | 17 | 1 | 299 | 7  | 817   | 33 |
| 51,725 | 46 | 2 | 438 | 21 | 17 | 1 | 296 | 7  | 797   | 31 |
| 51,726 | 45 | 2 | 421 | 21 | 17 | 1 | 290 | 7  | 773   | 31 |
| 51,727 | 45 | 1 | 417 | 21 | 17 | 1 | 289 | 7  | 768   | 30 |
| 51,728 | 45 | 1 | 417 | 21 | 17 | 1 | 289 | 7  | 768   | 30 |
| 51,729 | 57 | 1 | 531 | 21 | 21 | 1 | 355 | 7  | 964   | 30 |
| 51,730 | 58 | 1 | 587 | 20 | 23 | 1 | 369 | 7  | 1,037 | 29 |

|        |    |   |     |    |    |   |     |    |       |    |
|--------|----|---|-----|----|----|---|-----|----|-------|----|
| 51,731 | 59 | 1 | 618 | 20 | 26 | 1 | 391 | 7  | 1,094 | 29 |
| 51,732 | 59 | 1 | 613 | 20 | 26 | 1 | 391 | 8  | 1,089 | 30 |
| 51,733 | 59 | 1 | 610 | 20 | 26 | 1 | 391 | 8  | 1,086 | 30 |
| 51,734 | 58 | 1 | 598 | 20 | 26 | 1 | 385 | 8  | 1,067 | 30 |
| 51,735 | 57 | 1 | 593 | 22 | 26 | 1 | 384 | 8  | 1,060 | 32 |
| 51,736 | 55 | 1 | 571 | 23 | 26 | 1 | 377 | 9  | 1,029 | 34 |
| 51,737 | 54 | 1 | 573 | 34 | 26 | 1 | 378 | 13 | 1,031 | 49 |
| 51,738 | 53 | 1 | 557 | 34 | 25 | 1 | 376 | 13 | 1,011 | 49 |
| 51,739 | 49 | 1 | 516 | 35 | 24 | 1 | 366 | 13 | 955   | 50 |
| 51,740 | 42 | 1 | 454 | 35 | 20 | 1 | 330 | 13 | 846   | 50 |
| 51,741 | 42 | 1 | 461 | 35 | 19 | 1 | 330 | 14 | 852   | 51 |
| 51,742 | 42 | 1 | 460 | 35 | 19 | 1 | 328 | 14 | 849   | 51 |
| 51,743 | 42 | 1 | 459 | 34 | 19 | 1 | 331 | 14 | 851   | 50 |
| 51,744 | 45 | 1 | 486 | 34 | 23 | 1 | 354 | 14 | 908   | 50 |
| 51,745 | 44 | 1 | 486 | 34 | 23 | 1 | 355 | 13 | 908   | 49 |
| 51,746 | 45 | 1 | 495 | 34 | 23 | 1 | 358 | 13 | 921   | 49 |
| 51,747 | 45 | 1 | 492 | 36 | 23 | 1 | 358 | 13 | 918   | 51 |
| 51,748 | 41 | 1 | 494 | 36 | 22 | 1 | 351 | 13 | 908   | 51 |
| 51,749 | 40 | 1 | 492 | 37 | 22 | 1 | 353 | 13 | 907   | 52 |
| 51,750 | 40 | 1 | 494 | 38 | 23 | 1 | 347 | 13 | 904   | 53 |
| 51,751 | 40 | 1 | 492 | 38 | 23 | 1 | 344 | 13 | 899   | 53 |
| 51,752 | 41 | 1 | 497 | 38 | 23 | 1 | 347 | 13 | 908   | 53 |
| 51,753 | 41 | 1 | 522 | 38 | 23 | 1 | 347 | 13 | 933   | 53 |
| 51,754 | 42 | 1 | 572 | 38 | 24 | 0 | 367 | 13 | 1,005 | 52 |
| 51,755 | 42 | 1 | 577 | 38 | 24 | 0 | 369 | 13 | 1,012 | 52 |
| 51,756 | 42 | 1 | 578 | 39 | 24 | 0 | 368 | 13 | 1,012 | 53 |
| 51,757 | 42 | 1 | 577 | 43 | 24 | 0 | 367 | 15 | 1,010 | 59 |
| 51,758 | 39 | 1 | 549 | 43 | 20 | 0 | 331 | 15 | 939   | 59 |
| 51,759 | 39 | 1 | 531 | 40 | 20 | 0 | 320 | 15 | 910   | 56 |
| 51,760 | 39 | 1 | 526 | 39 | 20 | 0 | 308 | 15 | 893   | 55 |
| 51,761 | 30 | 1 | 493 | 34 | 19 | 0 | 258 | 15 | 800   | 50 |
| 51,762 | 23 | 1 | 450 | 36 | 17 | 0 | 223 | 17 | 713   | 54 |
| 51,763 | 22 | 1 | 420 | 36 | 16 | 0 | 199 | 16 | 657   | 53 |
| 51,764 | 22 | 1 | 420 | 35 | 17 | 0 | 191 | 16 | 650   | 52 |
| 51,765 | 23 | 1 | 419 | 37 | 16 | 0 | 195 | 16 | 653   | 54 |
| 51,766 | 23 | 1 | 423 | 37 | 16 | 0 | 195 | 16 | 657   | 54 |
| 51,767 | 23 | 1 | 425 | 37 | 16 | 0 | 195 | 16 | 659   | 54 |
| 51,768 | 23 | 1 | 427 | 37 | 16 | 0 | 196 | 16 | 662   | 54 |
| 51,769 | 23 | 2 | 425 | 37 | 16 | 0 | 196 | 16 | 660   | 55 |
| 51,770 | 23 | 2 | 426 | 37 | 16 | 0 | 196 | 16 | 661   | 55 |
| 51,771 | 22 | 2 | 425 | 37 | 16 | 0 | 196 | 15 | 659   | 54 |

|        |    |   |     |    |    |   |     |    |     |     |
|--------|----|---|-----|----|----|---|-----|----|-----|-----|
| 51,772 | 25 | 2 | 428 | 37 | 17 | 0 | 198 | 15 | 668 | 54  |
| 51,773 | 25 | 2 | 424 | 37 | 17 | 2 | 196 | 16 | 662 | 57  |
| 51,774 | 26 | 2 | 429 | 41 | 17 | 2 | 198 | 18 | 670 | 63  |
| 51,775 | 27 | 2 | 434 | 43 | 19 | 3 | 208 | 25 | 688 | 73  |
| 51,776 | 27 | 2 | 440 | 64 | 19 | 4 | 209 | 30 | 695 | 100 |
| 51,777 | 28 | 2 | 453 | 66 | 19 | 4 | 224 | 31 | 724 | 103 |
| 51,778 | 28 | 2 | 423 | 71 | 18 | 4 | 218 | 33 | 687 | 110 |
| 51,779 | 18 | 2 | 336 | 71 | 15 | 4 | 162 | 33 | 531 | 110 |
| 51,780 | 17 | 2 | 279 | 72 | 13 | 4 | 148 | 33 | 457 | 111 |
| 51,781 | 24 | 2 | 290 | 75 | 13 | 4 | 162 | 33 | 489 | 114 |
| 51,782 | 23 | 2 | 284 | 75 | 12 | 4 | 159 | 33 | 478 | 114 |
| 51,783 | 24 | 2 | 287 | 78 | 12 | 4 | 161 | 32 | 484 | 116 |
| 51,784 | 24 | 2 | 288 | 78 | 12 | 4 | 161 | 32 | 485 | 116 |
| 51,785 | 26 | 2 | 288 | 76 | 12 | 4 | 161 | 32 | 487 | 114 |
| 51,786 | 26 | 2 | 289 | 76 | 12 | 4 | 161 | 32 | 488 | 114 |
| 51,787 | 26 | 2 | 289 | 64 | 12 | 4 | 160 | 26 | 487 | 96  |
| 51,788 | 26 | 2 | 287 | 64 | 12 | 4 | 159 | 26 | 484 | 96  |
| 51,789 | 29 | 2 | 296 | 64 | 14 | 4 | 158 | 26 | 497 | 96  |
| 51,790 | 30 | 2 | 294 | 63 | 14 | 4 | 159 | 26 | 497 | 95  |
| 51,791 | 30 | 2 | 304 | 63 | 14 | 4 | 164 | 26 | 512 | 95  |
| 51,792 | 31 | 2 | 353 | 64 | 15 | 4 | 185 | 28 | 584 | 98  |
| 51,793 | 31 | 2 | 353 | 66 | 15 | 4 | 183 | 28 | 582 | 100 |
| 51,794 | 32 | 2 | 371 | 66 | 12 | 4 | 178 | 28 | 593 | 100 |
| 51,795 | 33 | 2 | 379 | 66 | 12 | 4 | 186 | 28 | 610 | 100 |
| 51,796 | 33 | 2 | 379 | 66 | 12 | 4 | 184 | 28 | 608 | 100 |
| 51,797 | 32 | 2 | 367 | 63 | 12 | 4 | 180 | 28 | 591 | 97  |
| 51,798 | 32 | 2 | 367 | 65 | 12 | 4 | 180 | 28 | 591 | 99  |
| 51,799 | 32 | 2 | 348 | 68 | 12 | 4 | 172 | 28 | 564 | 102 |
| 51,800 | 35 | 3 | 360 | 72 | 12 | 4 | 173 | 33 | 580 | 112 |
| 51,801 | 36 | 3 | 362 | 75 | 11 | 4 | 181 | 35 | 590 | 117 |
| 51,802 | 36 | 3 | 356 | 76 | 12 | 4 | 179 | 35 | 583 | 118 |
| 51,803 | 36 | 4 | 330 | 77 | 12 | 4 | 177 | 35 | 555 | 120 |
| 51,804 | 35 | 4 | 298 | 80 | 11 | 6 | 168 | 35 | 512 | 125 |
| 51,805 | 35 | 4 | 282 | 79 | 11 | 6 | 157 | 35 | 485 | 124 |
| 51,806 | 36 | 4 | 285 | 79 | 11 | 6 | 159 | 35 | 491 | 124 |
| 51,807 | 39 | 4 | 307 | 78 | 11 | 6 | 168 | 35 | 525 | 123 |
| 51,808 | 39 | 4 | 310 | 74 | 11 | 6 | 170 | 33 | 530 | 117 |
| 51,809 | 42 | 4 | 320 | 74 | 12 | 6 | 169 | 33 | 543 | 117 |
| 51,810 | 42 | 4 | 320 | 74 | 12 | 6 | 169 | 33 | 543 | 117 |
| 51,811 | 42 | 4 | 317 | 72 | 12 | 6 | 169 | 33 | 540 | 115 |
| 51,812 | 42 | 3 | 316 | 67 | 12 | 6 | 169 | 29 | 539 | 105 |



|        |     |    |       |    |    |   |     |    |       |     |
|--------|-----|----|-------|----|----|---|-----|----|-------|-----|
| 51,813 | 42  | 3  | 316   | 67 | 12 | 6 | 169 | 29 | 539   | 105 |
| 51,814 | 42  | 3  | 315   | 65 | 11 | 6 | 169 | 28 | 537   | 102 |
| 51,815 | 42  | 3  | 314   | 65 | 11 | 6 | 170 | 28 | 537   | 102 |
| 51,816 | 41  | 3  | 315   | 65 | 11 | 6 | 168 | 28 | 535   | 102 |
| 51,817 | 41  | 3  | 311   | 65 | 11 | 6 | 168 | 28 | 531   | 102 |
| 51,818 | 41  | 3  | 309   | 65 | 11 | 7 | 168 | 28 | 529   | 103 |
| 51,819 | 41  | 3  | 311   | 65 | 11 | 7 | 167 | 30 | 530   | 105 |
| 51,820 | 41  | 2  | 310   | 65 | 11 | 7 | 166 | 30 | 528   | 104 |
| 51,821 | 41  | 2  | 321   | 65 | 11 | 7 | 166 | 31 | 539   | 105 |
| 51,822 | 41  | 3  | 321   | 72 | 11 | 7 | 166 | 31 | 539   | 113 |
| 51,823 | 38  | 3  | 318   | 72 | 10 | 7 | 164 | 31 | 530   | 113 |
| 51,824 | 71  | 3  | 457   | 45 | 14 | 3 | 202 | 17 | 744   | 68  |
| 51,825 | 73  | 3  | 479   | 45 | 14 | 3 | 207 | 18 | 773   | 69  |
| 51,826 | 80  | 4  | 520   | 45 | 13 | 3 | 214 | 17 | 827   | 69  |
| 51,827 | 105 | 4  | 825   | 53 | 27 | 5 | 284 | 19 | 1,241 | 81  |
| 51,828 | 104 | 4  | 813   | 54 | 28 | 5 | 269 | 20 | 1,214 | 83  |
| 51,829 | 108 | 4  | 867   | 48 | 35 | 5 | 308 | 18 | 1,318 | 75  |
| 51,830 | 124 | 4  | 951   | 48 | 47 | 5 | 346 | 19 | 1,468 | 76  |
| 51,831 | 117 | 8  | 935   | 53 | 47 | 5 | 333 | 20 | 1,432 | 86  |
| 51,832 | 117 | 8  | 932   | 50 | 47 | 5 | 329 | 20 | 1,425 | 83  |
| 51,833 | 118 | 8  | 942   | 52 | 47 | 5 | 332 | 21 | 1,439 | 86  |
| 51,834 | 118 | 8  | 944   | 49 | 47 | 5 | 333 | 21 | 1,442 | 83  |
| 51,835 | 118 | 8  | 956   | 49 | 47 | 5 | 337 | 21 | 1,458 | 83  |
| 51,836 | 116 | 8  | 965   | 49 | 47 | 5 | 341 | 21 | 1,469 | 83  |
| 51,837 | 116 | 8  | 964   | 49 | 47 | 5 | 341 | 22 | 1,468 | 84  |
| 51,838 | 116 | 8  | 957   | 50 | 47 | 5 | 344 | 26 | 1,464 | 89  |
| 51,839 | 113 | 8  | 948   | 50 | 45 | 5 | 344 | 27 | 1,450 | 90  |
| 51,840 | 129 | 8  | 1,163 | 50 | 51 | 5 | 411 | 27 | 1,754 | 90  |
| 51,841 | 129 | 8  | 1,167 | 52 | 51 | 5 | 411 | 30 | 1,758 | 95  |
| 51,842 | 129 | 10 | 1,157 | 55 | 51 | 7 | 410 | 37 | 1,747 | 109 |
| 51,843 | 128 | 10 | 1,095 | 57 | 50 | 8 | 389 | 38 | 1,662 | 113 |
| 51,844 | 127 | 10 | 1,079 | 58 | 50 | 8 | 384 | 38 | 1,640 | 114 |
| 51,845 | 124 | 10 | 1,056 | 62 | 49 | 8 | 373 | 42 | 1,602 | 122 |
| 51,846 | 123 | 10 | 1,044 | 62 | 49 | 8 | 363 | 42 | 1,579 | 122 |
| 51,847 | 123 | 10 | 1,044 | 63 | 50 | 8 | 365 | 43 | 1,582 | 124 |
| 51,848 | 123 | 10 | 1,073 | 62 | 50 | 8 | 369 | 43 | 1,615 | 123 |
| 51,849 | 124 | 10 | 1,110 | 63 | 54 | 8 | 386 | 43 | 1,674 | 124 |
| 51,850 | 121 | 9  | 1,123 | 50 | 54 | 8 | 411 | 36 | 1,709 | 103 |
| 51,851 | 121 | 9  | 1,129 | 50 | 54 | 8 | 413 | 36 | 1,717 | 103 |
| 51,852 | 120 | 9  | 1,122 | 50 | 54 | 8 | 406 | 37 | 1,702 | 104 |
| 51,853 | 119 | 10 | 1,119 | 50 | 53 | 8 | 403 | 37 | 1,694 | 105 |

|        |     |    |       |    |    |   |     |    |       |     |
|--------|-----|----|-------|----|----|---|-----|----|-------|-----|
| 51,854 | 119 | 9  | 1,117 | 50 | 53 | 8 | 403 | 37 | 1,692 | 104 |
| 51,855 | 119 | 9  | 1,115 | 47 | 53 | 6 | 402 | 37 | 1,689 | 99  |
| 51,856 | 118 | 10 | 1,107 | 47 | 53 | 7 | 399 | 37 | 1,677 | 101 |
| 51,857 | 115 | 10 | 1,083 | 47 | 53 | 7 | 389 | 37 | 1,640 | 101 |
| 51,858 | 115 | 10 | 1,085 | 48 | 53 | 7 | 388 | 37 | 1,641 | 102 |
| 51,859 | 115 | 11 | 1,084 | 48 | 54 | 7 | 388 | 37 | 1,641 | 103 |
| 51,860 | 112 | 11 | 1,074 | 48 | 53 | 7 | 388 | 37 | 1,627 | 103 |
| 51,861 | 113 | 11 | 1,077 | 52 | 53 | 7 | 390 | 37 | 1,633 | 107 |
| 51,862 | 113 | 11 | 1,081 | 53 | 53 | 7 | 392 | 37 | 1,639 | 108 |
| 51,863 | 113 | 11 | 1,081 | 53 | 53 | 7 | 392 | 37 | 1,639 | 108 |
| 51,864 | 113 | 11 | 1,080 | 53 | 53 | 7 | 393 | 37 | 1,639 | 108 |
| 51,865 | 112 | 12 | 1,087 | 52 | 53 | 7 | 397 | 38 | 1,649 | 109 |
| 51,866 | 115 | 12 | 1,101 | 52 | 55 | 7 | 402 | 38 | 1,673 | 109 |
| 51,867 | 116 | 13 | 1,109 | 52 | 56 | 7 | 409 | 38 | 1,690 | 110 |
| 51,868 | 116 | 13 | 1,109 | 52 | 56 | 7 | 409 | 38 | 1,690 | 110 |
| 51,869 | 118 | 13 | 1,170 | 52 | 60 | 6 | 468 | 38 | 1,816 | 109 |
| 51,870 | 119 | 13 | 1,182 | 52 | 60 | 6 | 479 | 36 | 1,840 | 107 |
| 51,871 | 119 | 12 | 1,177 | 45 | 60 | 6 | 480 | 35 | 1,836 | 98  |
| 51,872 | 120 | 12 | 1,188 | 45 | 61 | 6 | 491 | 35 | 1,860 | 98  |
| 51,873 | 92  | 12 | 1,086 | 45 | 56 | 6 | 468 | 35 | 1,702 | 98  |
| 51,874 | 88  | 12 | 1,064 | 45 | 56 | 6 | 456 | 34 | 1,664 | 97  |
| 51,875 | 87  | 12 | 1,044 | 45 | 56 | 6 | 446 | 33 | 1,633 | 96  |
| 51,876 | 85  | 12 | 1,021 | 45 | 56 | 6 | 441 | 34 | 1,603 | 97  |
| 51,877 | 77  | 11 | 975   | 44 | 55 | 6 | 425 | 34 | 1,532 | 95  |
| 51,878 | 52  | 12 | 664   | 35 | 41 | 4 | 347 | 32 | 1,104 | 83  |
| 51,879 | 50  | 12 | 664   | 35 | 40 | 4 | 345 | 33 | 1,099 | 84  |
| 51,880 | 46  | 12 | 609   | 36 | 33 | 4 | 304 | 34 | 992   | 86  |
| 51,881 | 30  | 12 | 524   | 36 | 21 | 4 | 261 | 33 | 836   | 85  |
| 51,882 | 30  | 8  | 504   | 31 | 20 | 4 | 251 | 33 | 805   | 76  |
| 51,883 | 28  | 8  | 492   | 30 | 20 | 4 | 250 | 33 | 790   | 75  |
| 51,884 | 28  | 8  | 489   | 31 | 20 | 4 | 249 | 33 | 786   | 76  |
| 51,885 | 28  | 8  | 477   | 31 | 20 | 4 | 247 | 33 | 772   | 76  |
| 51,886 | 28  | 8  | 470   | 31 | 20 | 4 | 243 | 33 | 761   | 76  |
| 51,887 | 23  | 8  | 443   | 34 | 20 | 4 | 242 | 33 | 728   | 79  |
| 51,888 | 20  | 8  | 388   | 33 | 19 | 4 | 225 | 28 | 652   | 73  |
| 51,889 | 20  | 8  | 388   | 33 | 20 | 4 | 225 | 28 | 653   | 73  |
| 51,890 | 12  | 8  | 283   | 33 | 16 | 4 | 175 | 26 | 486   | 71  |
| 51,891 | 11  | 8  | 276   | 31 | 16 | 4 | 176 | 22 | 479   | 65  |
| 51,892 | 11  | 6  | 274   | 25 | 16 | 1 | 174 | 12 | 475   | 44  |
| 51,893 | 13  | 7  | 281   | 26 | 16 | 2 | 175 | 13 | 485   | 48  |
| 51,894 | 13  | 7  | 281   | 28 | 16 | 2 | 173 | 13 | 483   | 50  |

|        |    |    |     |     |    |   |     |    |       |     |
|--------|----|----|-----|-----|----|---|-----|----|-------|-----|
| 51,895 | 13 | 7  | 284 | 29  | 16 | 2 | 175 | 14 | 488   | 52  |
| 51,896 | 15 | 8  | 358 | 31  | 17 | 2 | 200 | 22 | 590   | 63  |
| 51,897 | 15 | 11 | 359 | 37  | 16 | 2 | 202 | 24 | 592   | 74  |
| 51,898 | 21 | 12 | 365 | 40  | 16 | 2 | 208 | 26 | 610   | 80  |
| 51,899 | 22 | 12 | 343 | 44  | 17 | 2 | 212 | 26 | 594   | 84  |
| 51,900 | 22 | 12 | 305 | 51  | 13 | 2 | 197 | 28 | 537   | 93  |
| 51,901 | 21 | 12 | 279 | 52  | 13 | 2 | 170 | 28 | 483   | 94  |
| 51,902 | 21 | 13 | 273 | 60  | 13 | 2 | 167 | 28 | 474   | 103 |
| 51,903 | 21 | 13 | 273 | 60  | 13 | 2 | 166 | 28 | 473   | 103 |
| 51,904 | 21 | 12 | 276 | 59  | 13 | 2 | 166 | 29 | 476   | 102 |
| 51,905 | 21 | 12 | 276 | 59  | 13 | 2 | 166 | 29 | 476   | 102 |
| 51,906 | 21 | 12 | 276 | 59  | 13 | 2 | 166 | 29 | 476   | 102 |
| 51,907 | 21 | 11 | 282 | 59  | 13 | 1 | 166 | 29 | 482   | 100 |
| 51,908 | 22 | 11 | 283 | 59  | 13 | 1 | 173 | 29 | 491   | 100 |
| 51,909 | 22 | 11 | 279 | 59  | 13 | 1 | 172 | 29 | 486   | 100 |
| 51,910 | 23 | 10 | 301 | 59  | 12 | 1 | 176 | 29 | 512   | 99  |
| 51,911 | 22 | 10 | 305 | 54  | 13 | 1 | 179 | 29 | 519   | 94  |
| 51,912 | 23 | 10 | 314 | 55  | 13 | 1 | 186 | 29 | 536   | 95  |
| 51,913 | 23 | 10 | 310 | 55  | 13 | 1 | 184 | 29 | 530   | 95  |
| 51,914 | 23 | 11 | 325 | 65  | 13 | 3 | 192 | 29 | 553   | 108 |
| 51,915 | 23 | 11 | 355 | 68  | 14 | 3 | 198 | 29 | 590   | 111 |
| 51,916 | 23 | 10 | 368 | 75  | 15 | 3 | 212 | 29 | 618   | 117 |
| 51,917 | 35 | 11 | 632 | 78  | 17 | 3 | 314 | 29 | 998   | 121 |
| 51,918 | 36 | 10 | 705 | 79  | 23 | 3 | 429 | 30 | 1,193 | 122 |
| 51,919 | 39 | 11 | 798 | 83  | 22 | 3 | 441 | 32 | 1,300 | 129 |
| 51,920 | 38 | 11 | 826 | 91  | 22 | 4 | 449 | 33 | 1,335 | 139 |
| 51,921 | 38 | 11 | 817 | 100 | 22 | 4 | 442 | 35 | 1,319 | 150 |
| 51,922 | 38 | 11 | 822 | 100 | 22 | 4 | 450 | 35 | 1,332 | 150 |
| 51,923 | 37 | 11 | 805 | 101 | 21 | 4 | 439 | 35 | 1,302 | 151 |
| 51,924 | 36 | 11 | 803 | 101 | 21 | 4 | 439 | 35 | 1,299 | 151 |
| 51,925 | 37 | 11 | 810 | 103 | 21 | 4 | 454 | 35 | 1,322 | 153 |
| 51,926 | 37 | 11 | 810 | 111 | 21 | 4 | 455 | 37 | 1,323 | 163 |
| 51,927 | 37 | 12 | 810 | 111 | 21 | 4 | 454 | 36 | 1,322 | 163 |
| 51,928 | 37 | 12 | 811 | 109 | 21 | 4 | 453 | 36 | 1,322 | 161 |
| 51,929 | 37 | 12 | 816 | 109 | 21 | 4 | 454 | 35 | 1,328 | 160 |
| 51,930 | 37 | 12 | 821 | 108 | 21 | 4 | 460 | 33 | 1,339 | 157 |
| 51,931 | 37 | 12 | 823 | 108 | 21 | 4 | 460 | 33 | 1,341 | 157 |
| 51,932 | 37 | 12 | 823 | 108 | 21 | 4 | 459 | 33 | 1,340 | 157 |
| 51,933 | 37 | 12 | 827 | 108 | 21 | 4 | 459 | 32 | 1,344 | 156 |
| 51,934 | 39 | 12 | 828 | 106 | 21 | 4 | 460 | 31 | 1,348 | 153 |
| 51,935 | 39 | 12 | 830 | 106 | 21 | 4 | 461 | 31 | 1,351 | 153 |

|        |    |    |     |     |    |   |     |    |       |     |
|--------|----|----|-----|-----|----|---|-----|----|-------|-----|
| 51,936 | 39 | 12 | 830 | 106 | 21 | 4 | 460 | 31 | 1,350 | 153 |
| 51,937 | 42 | 12 | 873 | 106 | 22 | 4 | 473 | 31 | 1,410 | 153 |
| 51,938 | 42 | 12 | 858 | 103 | 21 | 4 | 475 | 31 | 1,396 | 150 |
| 51,939 | 42 | 12 | 858 | 103 | 21 | 4 | 475 | 31 | 1,396 | 150 |
| 51,940 | 42 | 12 | 861 | 103 | 20 | 4 | 475 | 31 | 1,398 | 150 |
| 51,941 | 42 | 12 | 861 | 104 | 20 | 4 | 474 | 31 | 1,397 | 151 |
| 51,942 | 43 | 12 | 865 | 104 | 20 | 4 | 474 | 31 | 1,402 | 151 |
| 51,943 | 43 | 12 | 861 | 104 | 20 | 4 | 474 | 31 | 1,398 | 151 |
| 51,944 | 43 | 11 | 873 | 107 | 22 | 3 | 489 | 30 | 1,427 | 151 |
| 51,945 | 44 | 11 | 877 | 105 | 22 | 3 | 496 | 30 | 1,439 | 149 |
| 51,946 | 44 | 11 | 862 | 101 | 21 | 3 | 492 | 29 | 1,419 | 144 |
| 51,947 | 43 | 7  | 815 | 89  | 21 | 3 | 472 | 16 | 1,351 | 115 |
| 51,948 | 44 | 7  | 813 | 89  | 21 | 3 | 470 | 16 | 1,348 | 115 |
| 51,949 | 39 | 7  | 806 | 85  | 21 | 3 | 464 | 13 | 1,330 | 108 |
| 51,950 | 38 | 7  | 802 | 80  | 20 | 3 | 464 | 13 | 1,324 | 103 |
| 51,951 | 38 | 7  | 801 | 72  | 20 | 3 | 463 | 11 | 1,322 | 93  |
| 51,952 | 38 | 7  | 803 | 71  | 20 | 3 | 465 | 11 | 1,326 | 92  |
| 51,953 | 38 | 6  | 803 | 63  | 20 | 3 | 467 | 10 | 1,328 | 82  |
| 51,954 | 38 | 6  | 802 | 63  | 20 | 3 | 467 | 10 | 1,327 | 82  |
| 51,955 | 38 | 6  | 804 | 64  | 20 | 3 | 470 | 9  | 1,332 | 82  |
| 51,956 | 38 | 6  | 804 | 64  | 20 | 3 | 470 | 9  | 1,332 | 82  |
| 51,957 | 38 | 6  | 802 | 64  | 21 | 3 | 473 | 9  | 1,334 | 82  |
| 51,958 | 37 | 6  | 801 | 64  | 21 | 3 | 468 | 9  | 1,327 | 82  |
| 51,959 | 39 | 6  | 807 | 64  | 21 | 3 | 470 | 9  | 1,337 | 82  |
| 51,960 | 39 | 6  | 808 | 64  | 21 | 3 | 471 | 9  | 1,339 | 82  |
| 51,961 | 44 | 6  | 837 | 63  | 25 | 3 | 548 | 9  | 1,454 | 81  |
| 51,962 | 44 | 6  | 836 | 63  | 24 | 3 | 547 | 9  | 1,451 | 81  |
| 51,963 | 43 | 6  | 825 | 63  | 24 | 4 | 542 | 10 | 1,434 | 83  |
| 51,964 | 44 | 6  | 820 | 77  | 26 | 4 | 543 | 17 | 1,433 | 104 |
| 51,965 | 44 | 5  | 822 | 75  | 26 | 3 | 547 | 17 | 1,439 | 100 |
| 51,966 | 44 | 5  | 800 | 73  | 25 | 3 | 546 | 17 | 1,415 | 98  |
| 51,967 | 45 | 5  | 782 | 69  | 24 | 3 | 528 | 18 | 1,379 | 95  |
| 51,968 | 31 | 4  | 504 | 67  | 20 | 3 | 425 | 19 | 980   | 93  |
| 51,969 | 29 | 4  | 421 | 67  | 13 | 3 | 302 | 20 | 765   | 94  |
| 51,970 | 26 | 3  | 294 | 63  | 12 | 3 | 264 | 18 | 596   | 87  |
| 51,971 | 26 | 3  | 251 | 55  | 14 | 2 | 227 | 17 | 518   | 77  |
| 51,972 | 25 | 3  | 246 | 46  | 14 | 2 | 226 | 15 | 511   | 66  |
| 51,973 | 26 | 3  | 240 | 45  | 14 | 2 | 220 | 15 | 500   | 65  |
| 51,974 | 26 | 3  | 240 | 45  | 14 | 2 | 220 | 15 | 500   | 65  |
| 51,975 | 25 | 3  | 235 | 45  | 14 | 2 | 209 | 15 | 483   | 65  |
| 51,976 | 25 | 3  | 234 | 36  | 15 | 2 | 205 | 13 | 479   | 54  |

|        |     |   |       |    |     |   |     |    |       |    |
|--------|-----|---|-------|----|-----|---|-----|----|-------|----|
| 51,977 | 25  | 3 | 234   | 36 | 16  | 2 | 205 | 14 | 480   | 55 |
| 51,978 | 25  | 2 | 250   | 36 | 18  | 2 | 216 | 14 | 509   | 54 |
| 51,979 | 25  | 1 | 258   | 36 | 19  | 2 | 217 | 14 | 519   | 53 |
| 51,980 | 25  | 1 | 254   | 36 | 19  | 2 | 217 | 14 | 515   | 53 |
| 51,981 | 25  | 1 | 248   | 36 | 19  | 2 | 212 | 14 | 504   | 53 |
| 51,982 | 25  | 1 | 247   | 36 | 19  | 2 | 212 | 14 | 503   | 53 |
| 51,983 | 25  | 2 | 258   | 37 | 19  | 2 | 225 | 15 | 527   | 56 |
| 51,984 | 25  | 2 | 258   | 38 | 19  | 2 | 225 | 16 | 527   | 58 |
| 51,985 | 23  | 2 | 263   | 38 | 22  | 2 | 234 | 16 | 542   | 58 |
| 51,986 | 23  | 2 | 263   | 38 | 22  | 2 | 235 | 16 | 543   | 58 |
| 51,987 | 23  | 2 | 263   | 38 | 22  | 2 | 235 | 16 | 543   | 58 |
| 51,988 | 20  | 2 | 218   | 38 | 21  | 2 | 222 | 16 | 481   | 58 |
| 51,989 | 19  | 2 | 210   | 38 | 21  | 2 | 215 | 16 | 465   | 58 |
| 51,990 | 21  | 2 | 212   | 39 | 21  | 2 | 217 | 16 | 471   | 59 |
| 51,991 | 21  | 2 | 224   | 39 | 21  | 2 | 226 | 17 | 492   | 60 |
| 51,992 | 34  | 2 | 276   | 38 | 28  | 2 | 313 | 17 | 651   | 59 |
| 51,993 | 36  | 2 | 290   | 38 | 30  | 2 | 354 | 18 | 710   | 60 |
| 51,994 | 36  | 2 | 293   | 42 | 30  | 2 | 358 | 19 | 717   | 65 |
| 51,995 | 40  | 2 | 318   | 38 | 30  | 2 | 370 | 20 | 758   | 62 |
| 51,996 | 40  | 2 | 322   | 38 | 31  | 2 | 369 | 20 | 762   | 62 |
| 51,997 | 40  | 2 | 319   | 43 | 31  | 2 | 369 | 22 | 759   | 69 |
| 51,998 | 39  | 2 | 310   | 43 | 31  | 2 | 367 | 22 | 747   | 69 |
| 51,999 | 56  | 2 | 544   | 43 | 46  | 2 | 424 | 22 | 1,070 | 69 |
| 52,000 | 61  | 1 | 681   | 50 | 49  | 2 | 492 | 24 | 1,283 | 77 |
| 52,001 | 61  | 1 | 678   | 50 | 49  | 2 | 484 | 24 | 1,272 | 77 |
| 52,002 | 95  | 1 | 976   | 51 | 71  | 2 | 607 | 24 | 1,749 | 78 |
| 52,003 | 111 | 1 | 1,058 | 51 | 81  | 2 | 666 | 24 | 1,916 | 78 |
| 52,004 | 118 | 1 | 1,148 | 51 | 95  | 2 | 739 | 24 | 2,100 | 78 |
| 52,005 | 118 | 1 | 1,161 | 51 | 96  | 2 | 747 | 25 | 2,122 | 79 |
| 52,006 | 118 | 1 | 1,157 | 51 | 96  | 2 | 745 | 25 | 2,116 | 79 |
| 52,007 | 118 | 1 | 1,158 | 51 | 96  | 2 | 746 | 25 | 2,118 | 79 |
| 52,008 | 118 | 1 | 1,154 | 51 | 95  | 2 | 743 | 25 | 2,110 | 79 |
| 52,009 | 138 | 1 | 1,294 | 51 | 112 | 2 | 835 | 25 | 2,379 | 79 |
| 52,010 | 138 | 1 | 1,293 | 50 | 112 | 2 | 833 | 25 | 2,376 | 78 |
| 52,011 | 138 | 1 | 1,288 | 52 | 112 | 2 | 832 | 25 | 2,370 | 80 |
| 52,012 | 132 | 1 | 1,245 | 38 | 108 | 1 | 752 | 17 | 2,237 | 57 |
| 52,013 | 132 | 1 | 1,244 | 38 | 108 | 1 | 750 | 17 | 2,234 | 57 |
| 52,014 | 140 | 1 | 1,257 | 38 | 107 | 1 | 751 | 17 | 2,255 | 57 |
| 52,015 | 139 | 1 | 1,263 | 38 | 107 | 1 | 754 | 17 | 2,263 | 57 |
| 52,016 | 139 | 1 | 1,262 | 30 | 107 | 0 | 747 | 17 | 2,255 | 48 |
| 52,017 | 139 | 1 | 1,265 | 26 | 108 | 0 | 740 | 15 | 2,252 | 42 |

|        |     |   |       |    |     |   |       |    |       |    |
|--------|-----|---|-------|----|-----|---|-------|----|-------|----|
| 52,018 | 138 | 1 | 1,263 | 26 | 108 | 0 | 740   | 15 | 2,249 | 42 |
| 52,019 | 143 | 1 | 1,298 | 25 | 111 | 0 | 760   | 14 | 2,312 | 40 |
| 52,020 | 143 | 1 | 1,297 | 24 | 111 | 0 | 760   | 12 | 2,311 | 37 |
| 52,021 | 143 | 1 | 1,300 | 25 | 111 | 0 | 760   | 12 | 2,314 | 38 |
| 52,022 | 143 | 1 | 1,296 | 25 | 108 | 0 | 757   | 12 | 2,304 | 38 |
| 52,023 | 143 | 1 | 1,319 | 25 | 111 | 0 | 771   | 12 | 2,344 | 38 |
| 52,024 | 150 | 1 | 1,375 | 25 | 114 | 0 | 806   | 12 | 2,445 | 38 |
| 52,025 | 150 | 1 | 1,387 | 25 | 114 | 0 | 814   | 12 | 2,465 | 38 |
| 52,026 | 150 | 1 | 1,391 | 25 | 114 | 0 | 816   | 12 | 2,471 | 38 |
| 52,027 | 151 | 1 | 1,399 | 24 | 114 | 0 | 827   | 11 | 2,491 | 36 |
| 52,028 | 151 | 1 | 1,417 | 27 | 114 | 0 | 829   | 11 | 2,511 | 39 |
| 52,029 | 151 | 1 | 1,417 | 28 | 112 | 0 | 820   | 12 | 2,500 | 41 |
| 52,030 | 169 | 1 | 1,737 | 30 | 123 | 0 | 914   | 14 | 2,943 | 45 |
| 52,031 | 170 | 2 | 1,767 | 31 | 124 | 0 | 919   | 13 | 2,980 | 46 |
| 52,032 | 174 | 2 | 1,778 | 31 | 126 | 0 | 927   | 14 | 3,005 | 47 |
| 52,033 | 177 | 2 | 1,794 | 30 | 128 | 0 | 929   | 13 | 3,028 | 45 |
| 52,034 | 178 | 2 | 1,819 | 30 | 128 | 0 | 943   | 13 | 3,068 | 45 |
| 52,035 | 178 | 2 | 1,818 | 32 | 127 | 0 | 935   | 13 | 3,058 | 47 |
| 52,036 | 178 | 2 | 1,818 | 32 | 127 | 0 | 936   | 13 | 3,059 | 47 |
| 52,037 | 178 | 2 | 1,816 | 32 | 127 | 0 | 934   | 13 | 3,055 | 47 |
| 52,038 | 182 | 3 | 1,861 | 32 | 130 | 0 | 955   | 13 | 3,128 | 48 |
| 52,039 | 182 | 3 | 1,883 | 34 | 131 | 0 | 958   | 13 | 3,154 | 50 |
| 52,040 | 180 | 4 | 1,887 | 34 | 131 | 0 | 957   | 13 | 3,155 | 51 |
| 52,041 | 199 | 4 | 2,001 | 35 | 137 | 0 | 1,029 | 12 | 3,366 | 51 |
| 52,042 | 198 | 4 | 1,994 | 35 | 136 | 0 | 1,026 | 12 | 3,354 | 51 |
| 52,043 | 186 | 4 | 1,982 | 35 | 130 | 0 | 950   | 12 | 3,248 | 51 |
| 52,044 | 195 | 4 | 2,020 | 32 | 131 | 0 | 939   | 10 | 3,285 | 46 |
| 52,045 | 197 | 4 | 2,034 | 32 | 137 | 0 | 949   | 10 | 3,317 | 46 |
| 52,046 | 191 | 4 | 1,989 | 32 | 135 | 0 | 919   | 10 | 3,234 | 46 |
| 52,047 | 197 | 4 | 2,044 | 33 | 138 | 0 | 928   | 10 | 3,307 | 47 |
| 52,048 | 206 | 4 | 2,392 | 28 | 147 | 0 | 1,008 | 9  | 3,753 | 41 |
| 52,049 | 212 | 4 | 2,417 | 30 | 148 | 0 | 1,020 | 11 | 3,797 | 45 |
| 52,050 | 198 | 4 | 2,260 | 23 | 135 | 0 | 985   | 9  | 3,578 | 36 |
| 52,051 | 192 | 4 | 2,124 | 23 | 133 | 0 | 920   | 9  | 3,369 | 36 |
| 52,052 | 158 | 4 | 1,823 | 23 | 111 | 0 | 794   | 9  | 2,886 | 36 |
| 52,053 | 142 | 4 | 1,752 | 22 | 101 | 0 | 736   | 9  | 2,731 | 35 |
| 52,054 | 142 | 4 | 1,748 | 22 | 101 | 0 | 734   | 10 | 2,725 | 36 |
| 52,055 | 135 | 4 | 1,665 | 21 | 87  | 0 | 662   | 10 | 2,549 | 35 |
| 52,056 | 135 | 4 | 1,654 | 21 | 86  | 0 | 655   | 9  | 2,530 | 34 |
| 52,057 | 135 | 4 | 1,611 | 21 | 79  | 0 | 636   | 9  | 2,461 | 34 |
| 52,058 | 114 | 4 | 1,524 | 21 | 69  | 0 | 561   | 9  | 2,268 | 34 |

|        |     |   |       |    |    |   |     |    |       |    |
|--------|-----|---|-------|----|----|---|-----|----|-------|----|
| 52,059 | 114 | 4 | 1,521 | 21 | 69 | 0 | 559 | 9  | 2,263 | 34 |
| 52,060 | 114 | 4 | 1,523 | 21 | 69 | 0 | 560 | 9  | 2,266 | 34 |
| 52,061 | 114 | 4 | 1,530 | 19 | 69 | 0 | 567 | 9  | 2,280 | 32 |
| 52,062 | 114 | 4 | 1,529 | 19 | 69 | 0 | 567 | 9  | 2,279 | 32 |
| 52,063 | 114 | 4 | 1,527 | 21 | 70 | 0 | 566 | 9  | 2,277 | 34 |
| 52,064 | 115 | 4 | 1,528 | 21 | 70 | 0 | 564 | 9  | 2,277 | 34 |
| 52,065 | 107 | 4 | 1,508 | 22 | 69 | 0 | 560 | 9  | 2,244 | 35 |
| 52,066 | 107 | 4 | 1,502 | 22 | 69 | 0 | 557 | 9  | 2,235 | 35 |
| 52,067 | 108 | 4 | 1,498 | 22 | 69 | 0 | 553 | 9  | 2,228 | 35 |
| 52,068 | 108 | 4 | 1,490 | 22 | 68 | 0 | 552 | 9  | 2,218 | 35 |
| 52,069 | 106 | 4 | 1,468 | 22 | 67 | 0 | 534 | 9  | 2,175 | 35 |
| 52,070 | 105 | 5 | 1,455 | 22 | 67 | 0 | 526 | 9  | 2,153 | 36 |
| 52,071 | 105 | 5 | 1,452 | 22 | 67 | 0 | 526 | 9  | 2,150 | 36 |
| 52,072 | 105 | 5 | 1,452 | 21 | 66 | 0 | 524 | 9  | 2,147 | 35 |
| 52,073 | 105 | 5 | 1,427 | 21 | 63 | 0 | 510 | 9  | 2,105 | 35 |
| 52,074 | 97  | 5 | 1,371 | 21 | 60 | 0 | 475 | 9  | 2,003 | 35 |
| 52,075 | 97  | 5 | 1,359 | 22 | 60 | 0 | 467 | 9  | 1,983 | 36 |
| 52,076 | 97  | 5 | 1,354 | 22 | 60 | 0 | 465 | 9  | 1,976 | 36 |
| 52,077 | 97  | 5 | 1,354 | 24 | 60 | 0 | 465 | 9  | 1,976 | 38 |
| 52,078 | 96  | 5 | 1,347 | 26 | 59 | 0 | 453 | 9  | 1,955 | 40 |
| 52,079 | 96  | 5 | 1,340 | 24 | 58 | 0 | 451 | 9  | 1,945 | 38 |
| 52,080 | 96  | 5 | 1,325 | 25 | 58 | 0 | 449 | 8  | 1,928 | 38 |
| 52,081 | 78  | 5 | 996   | 24 | 46 | 1 | 353 | 6  | 1,473 | 36 |
| 52,082 | 77  | 3 | 966   | 22 | 45 | 1 | 348 | 6  | 1,436 | 32 |
| 52,083 | 101 | 3 | 1,142 | 24 | 53 | 1 | 413 | 10 | 1,709 | 38 |
| 52,084 | 116 | 3 | 1,240 | 24 | 60 | 1 | 499 | 10 | 1,915 | 38 |
| 52,085 | 115 | 3 | 1,212 | 27 | 60 | 1 | 492 | 10 | 1,879 | 41 |
| 52,086 | 115 | 3 | 1,210 | 28 | 58 | 1 | 495 | 11 | 1,878 | 43 |
| 52,087 | 112 | 4 | 1,168 | 30 | 55 | 1 | 475 | 14 | 1,810 | 49 |
| 52,088 | 111 | 5 | 1,173 | 40 | 56 | 1 | 480 | 18 | 1,820 | 64 |
| 52,089 | 111 | 4 | 1,157 | 41 | 55 | 1 | 479 | 18 | 1,802 | 64 |
| 52,090 | 120 | 3 | 1,252 | 44 | 58 | 1 | 542 | 18 | 1,972 | 66 |
| 52,091 | 120 | 3 | 1,262 | 44 | 61 | 1 | 551 | 18 | 1,994 | 66 |
| 52,092 | 107 | 3 | 1,191 | 45 | 57 | 1 | 510 | 19 | 1,865 | 68 |
| 52,093 | 107 | 3 | 1,192 | 52 | 57 | 1 | 514 | 18 | 1,870 | 74 |
| 52,094 | 106 | 3 | 1,162 | 52 | 57 | 1 | 506 | 18 | 1,831 | 74 |
| 52,095 | 95  | 3 | 1,107 | 53 | 54 | 1 | 476 | 18 | 1,732 | 75 |
| 52,096 | 93  | 3 | 1,090 | 53 | 48 | 1 | 463 | 18 | 1,694 | 75 |
| 52,097 | 87  | 3 | 1,024 | 54 | 44 | 1 | 448 | 18 | 1,603 | 76 |
| 52,098 | 83  | 3 | 949   | 53 | 36 | 1 | 411 | 18 | 1,479 | 75 |
| 52,099 | 74  | 3 | 601   | 53 | 32 | 1 | 347 | 17 | 1,054 | 74 |

|        |    |   |     |    |    |   |     |    |       |    |
|--------|----|---|-----|----|----|---|-----|----|-------|----|
| 52,100 | 68 | 3 | 575 | 52 | 31 | 1 | 335 | 15 | 1,009 | 71 |
| 52,101 | 68 | 3 | 575 | 52 | 31 | 1 | 335 | 15 | 1,009 | 71 |
| 52,102 | 68 | 4 | 585 | 52 | 30 | 1 | 338 | 14 | 1,021 | 71 |
| 52,103 | 68 | 4 | 595 | 52 | 30 | 1 | 342 | 14 | 1,035 | 71 |
| 52,104 | 68 | 4 | 596 | 52 | 30 | 1 | 344 | 14 | 1,038 | 71 |
| 52,105 | 69 | 4 | 612 | 52 | 30 | 1 | 350 | 14 | 1,061 | 71 |
| 52,106 | 72 | 4 | 643 | 52 | 33 | 1 | 382 | 14 | 1,130 | 71 |
| 52,107 | 72 | 4 | 644 | 52 | 33 | 1 | 384 | 14 | 1,133 | 71 |
| 52,108 | 72 | 4 | 641 | 52 | 33 | 1 | 388 | 14 | 1,134 | 71 |
| 52,109 | 72 | 4 | 638 | 52 | 33 | 1 | 388 | 15 | 1,131 | 72 |
| 52,110 | 72 | 4 | 632 | 52 | 33 | 1 | 387 | 15 | 1,124 | 72 |
| 52,111 | 73 | 4 | 630 | 52 | 33 | 1 | 385 | 15 | 1,121 | 72 |
| 52,112 | 73 | 4 | 636 | 52 | 33 | 1 | 384 | 15 | 1,126 | 72 |
| 52,113 | 73 | 4 | 642 | 49 | 33 | 1 | 386 | 15 | 1,134 | 69 |
| 52,114 | 73 | 4 | 645 | 49 | 33 | 1 | 386 | 15 | 1,137 | 69 |
| 52,115 | 72 | 4 | 642 | 49 | 33 | 1 | 388 | 16 | 1,135 | 70 |
| 52,116 | 72 | 4 | 642 | 50 | 33 | 1 | 388 | 16 | 1,135 | 71 |
| 52,117 | 77 | 4 | 660 | 50 | 37 | 1 | 420 | 16 | 1,194 | 71 |
| 52,118 | 76 | 4 | 660 | 50 | 37 | 1 | 420 | 16 | 1,193 | 71 |
| 52,119 | 76 | 5 | 659 | 50 | 37 | 1 | 419 | 16 | 1,191 | 72 |
| 52,120 | 76 | 4 | 676 | 50 | 37 | 1 | 436 | 16 | 1,225 | 71 |
| 52,121 | 76 | 4 | 676 | 50 | 37 | 1 | 436 | 16 | 1,225 | 71 |
| 52,122 | 75 | 4 | 669 | 50 | 37 | 1 | 436 | 16 | 1,217 | 71 |
| 52,123 | 75 | 4 | 669 | 50 | 37 | 1 | 436 | 17 | 1,217 | 72 |
| 52,124 | 75 | 4 | 669 | 50 | 37 | 1 | 438 | 17 | 1,219 | 72 |
| 52,125 | 75 | 4 | 668 | 49 | 37 | 1 | 438 | 17 | 1,218 | 71 |
| 52,126 | 75 | 4 | 669 | 49 | 37 | 1 | 438 | 17 | 1,219 | 71 |
| 52,127 | 75 | 4 | 669 | 47 | 37 | 1 | 438 | 17 | 1,219 | 69 |
| 52,128 | 75 | 4 | 670 | 45 | 37 | 1 | 438 | 17 | 1,220 | 67 |
| 52,129 | 75 | 4 | 669 | 44 | 37 | 1 | 438 | 17 | 1,219 | 66 |
| 52,130 | 75 | 4 | 659 | 42 | 37 | 1 | 439 | 17 | 1,210 | 64 |
| 52,131 | 75 | 4 | 661 | 42 | 37 | 1 | 439 | 17 | 1,212 | 64 |
| 52,132 | 56 | 4 | 561 | 41 | 32 | 0 | 413 | 17 | 1,062 | 62 |
| 52,133 | 47 | 4 | 478 | 39 | 27 | 0 | 365 | 12 | 917   | 55 |
| 52,134 | 47 | 4 | 475 | 39 | 27 | 0 | 365 | 12 | 914   | 55 |
| 52,135 | 31 | 4 | 363 | 33 | 18 | 0 | 271 | 11 | 683   | 48 |
| 52,136 | 31 | 4 | 366 | 33 | 18 | 0 | 268 | 11 | 683   | 48 |
| 52,137 | 31 | 4 | 369 | 33 | 18 | 0 | 272 | 11 | 690   | 48 |
| 52,138 | 31 | 3 | 368 | 32 | 19 | 0 | 273 | 8  | 691   | 43 |
| 52,139 | 31 | 2 | 363 | 22 | 19 | 0 | 270 | 4  | 683   | 28 |
| 52,140 | 32 | 2 | 329 | 21 | 20 | 0 | 250 | 4  | 631   | 27 |



|        |     |   |       |   |    |   |     |   |       |    |
|--------|-----|---|-------|---|----|---|-----|---|-------|----|
| 52,141 | 27  | 2 | 305   | 5 | 18 | 0 | 217 | 3 | 567   | 10 |
| 52,142 | 27  | 2 | 289   | 5 | 15 | 0 | 211 | 3 | 542   | 10 |
| 52,143 | 22  | 2 | 256   | 5 | 13 | 0 | 173 | 3 | 464   | 10 |
| 52,144 | 22  | 2 | 252   | 5 | 13 | 0 | 168 | 3 | 455   | 10 |
| 52,145 | 37  | 2 | 471   | 5 | 25 | 0 | 292 | 3 | 825   | 10 |
| 52,146 | 51  | 2 | 609   | 4 | 33 | 0 | 340 | 3 | 1,033 | 9  |
| 52,147 | 51  | 2 | 629   | 4 | 34 | 0 | 344 | 3 | 1,058 | 9  |
| 52,148 | 61  | 2 | 723   | 3 | 36 | 0 | 371 | 3 | 1,191 | 8  |
| 52,149 | 73  | 2 | 812   | 3 | 46 | 0 | 439 | 3 | 1,370 | 8  |
| 52,150 | 73  | 2 | 811   | 2 | 46 | 0 | 440 | 3 | 1,370 | 7  |
| 52,151 | 90  | 2 | 903   | 2 | 65 | 0 | 596 | 4 | 1,654 | 8  |
| 52,152 | 90  | 2 | 906   | 2 | 66 | 0 | 599 | 4 | 1,661 | 8  |
| 52,153 | 91  | 1 | 917   | 2 | 66 | 0 | 611 | 4 | 1,685 | 7  |
| 52,154 | 98  | 1 | 995   | 2 | 70 | 0 | 632 | 5 | 1,795 | 8  |
| 52,155 | 98  | 1 | 1,000 | 2 | 72 | 0 | 638 | 5 | 1,808 | 8  |
| 52,156 | 97  | 1 | 1,005 | 2 | 73 | 0 | 640 | 5 | 1,815 | 8  |
| 52,157 | 94  | 1 | 977   | 2 | 71 | 0 | 612 | 5 | 1,754 | 8  |
| 52,158 | 94  | 1 | 978   | 2 | 71 | 0 | 613 | 5 | 1,756 | 8  |
| 52,159 | 93  | 1 | 975   | 2 | 71 | 0 | 609 | 4 | 1,748 | 7  |
| 52,160 | 93  | 1 | 975   | 2 | 71 | 1 | 609 | 4 | 1,748 | 8  |
| 52,161 | 92  | 1 | 975   | 2 | 71 | 1 | 609 | 4 | 1,747 | 8  |
| 52,162 | 92  | 1 | 973   | 3 | 71 | 1 | 609 | 4 | 1,745 | 9  |
| 52,163 | 92  | 2 | 964   | 8 | 71 | 1 | 605 | 4 | 1,732 | 15 |
| 52,164 | 92  | 2 | 957   | 8 | 71 | 1 | 602 | 4 | 1,722 | 15 |
| 52,165 | 92  | 2 | 959   | 7 | 71 | 1 | 604 | 3 | 1,726 | 13 |
| 52,166 | 92  | 2 | 957   | 7 | 71 | 1 | 603 | 3 | 1,723 | 13 |
| 52,167 | 87  | 4 | 942   | 7 | 67 | 1 | 570 | 3 | 1,666 | 15 |
| 52,168 | 85  | 4 | 922   | 7 | 65 | 1 | 557 | 3 | 1,629 | 15 |
| 52,169 | 85  | 4 | 922   | 7 | 65 | 1 | 554 | 3 | 1,626 | 15 |
| 52,170 | 85  | 3 | 923   | 7 | 65 | 1 | 554 | 3 | 1,627 | 14 |
| 52,171 | 85  | 3 | 928   | 7 | 65 | 1 | 553 | 3 | 1,631 | 14 |
| 52,172 | 89  | 3 | 951   | 7 | 65 | 1 | 555 | 3 | 1,660 | 14 |
| 52,173 | 89  | 3 | 951   | 7 | 65 | 1 | 556 | 2 | 1,661 | 13 |
| 52,174 | 89  | 3 | 951   | 7 | 65 | 1 | 556 | 2 | 1,661 | 13 |
| 52,175 | 90  | 3 | 956   | 7 | 65 | 1 | 560 | 2 | 1,671 | 13 |
| 52,176 | 90  | 3 | 963   | 7 | 66 | 1 | 560 | 2 | 1,679 | 13 |
| 52,177 | 90  | 3 | 967   | 8 | 66 | 1 | 563 | 2 | 1,686 | 14 |
| 52,178 | 98  | 3 | 1,042 | 8 | 68 | 1 | 613 | 2 | 1,821 | 14 |
| 52,179 | 107 | 3 | 1,144 | 8 | 78 | 1 | 769 | 2 | 2,098 | 14 |
| 52,180 | 107 | 3 | 1,144 | 8 | 78 | 1 | 769 | 2 | 2,098 | 14 |
| 52,181 | 108 | 3 | 1,149 | 8 | 78 | 1 | 771 | 2 | 2,106 | 14 |

|        |     |   |       |    |    |   |     |    |       |    |
|--------|-----|---|-------|----|----|---|-----|----|-------|----|
| 52,182 | 108 | 3 | 1,146 | 8  | 78 | 1 | 771 | 2  | 2,103 | 14 |
| 52,183 | 108 | 3 | 1,146 | 8  | 78 | 1 | 771 | 2  | 2,103 | 14 |
| 52,184 | 109 | 3 | 1,158 | 8  | 78 | 1 | 781 | 2  | 2,126 | 14 |
| 52,185 | 109 | 3 | 1,165 | 8  | 78 | 1 | 788 | 2  | 2,140 | 14 |
| 52,186 | 107 | 3 | 1,155 | 8  | 78 | 1 | 779 | 2  | 2,119 | 14 |
| 52,187 | 107 | 3 | 1,149 | 8  | 78 | 1 | 775 | 2  | 2,109 | 14 |
| 52,188 | 107 | 3 | 1,143 | 7  | 78 | 1 | 765 | 2  | 2,093 | 13 |
| 52,189 | 108 | 3 | 1,143 | 7  | 77 | 1 | 764 | 2  | 2,092 | 13 |
| 52,190 | 108 | 3 | 1,141 | 7  | 76 | 1 | 762 | 2  | 2,087 | 13 |
| 52,191 | 106 | 3 | 1,113 | 7  | 74 | 1 | 757 | 2  | 2,050 | 13 |
| 52,192 | 103 | 3 | 1,101 | 7  | 74 | 1 | 759 | 2  | 2,037 | 13 |
| 52,193 | 103 | 3 | 1,102 | 7  | 74 | 1 | 756 | 2  | 2,035 | 13 |
| 52,194 | 106 | 3 | 1,094 | 7  | 74 | 1 | 766 | 3  | 2,040 | 14 |
| 52,195 | 100 | 3 | 1,041 | 7  | 70 | 2 | 704 | 3  | 1,915 | 15 |
| 52,196 | 91  | 3 | 880   | 15 | 62 | 3 | 645 | 3  | 1,678 | 24 |
| 52,197 | 77  | 3 | 742   | 16 | 55 | 3 | 597 | 6  | 1,471 | 28 |
| 52,198 | 77  | 3 | 723   | 17 | 54 | 3 | 593 | 6  | 1,447 | 29 |
| 52,199 | 66  | 3 | 628   | 18 | 52 | 3 | 566 | 6  | 1,312 | 30 |
| 52,200 | 54  | 3 | 538   | 18 | 42 | 4 | 498 | 7  | 1,132 | 32 |
| 52,201 | 54  | 3 | 534   | 18 | 42 | 4 | 496 | 7  | 1,126 | 32 |
| 52,202 | 37  | 3 | 440   | 18 | 23 | 4 | 338 | 9  | 838   | 34 |
| 52,203 | 37  | 3 | 438   | 19 | 22 | 4 | 335 | 11 | 832   | 37 |
| 52,204 | 36  | 3 | 422   | 19 | 22 | 4 | 322 | 12 | 802   | 38 |
| 52,205 | 29  | 3 | 335   | 19 | 18 | 4 | 297 | 11 | 679   | 37 |
| 52,206 | 29  | 3 | 333   | 19 | 16 | 4 | 290 | 11 | 668   | 37 |
| 52,207 | 29  | 3 | 307   | 19 | 15 | 4 | 281 | 11 | 632   | 37 |
| 52,208 | 29  | 3 | 297   | 19 | 14 | 4 | 274 | 11 | 614   | 37 |
| 52,209 | 29  | 3 | 293   | 20 | 14 | 4 | 271 | 11 | 607   | 38 |
| 52,210 | 29  | 3 | 292   | 20 | 14 | 4 | 271 | 11 | 606   | 38 |
| 52,211 | 30  | 3 | 297   | 20 | 14 | 3 | 272 | 11 | 613   | 37 |
| 52,212 | 30  | 3 | 297   | 19 | 14 | 3 | 272 | 11 | 613   | 36 |
| 52,213 | 31  | 3 | 297   | 19 | 14 | 3 | 272 | 11 | 614   | 36 |
| 52,214 | 31  | 2 | 295   | 14 | 14 | 3 | 271 | 11 | 611   | 30 |
| 52,215 | 31  | 2 | 293   | 14 | 14 | 3 | 270 | 11 | 608   | 30 |
| 52,216 | 31  | 2 | 297   | 14 | 14 | 3 | 270 | 11 | 612   | 30 |
| 52,217 | 31  | 2 | 297   | 14 | 14 | 3 | 269 | 11 | 611   | 30 |
| 52,218 | 31  | 0 | 298   | 14 | 14 | 3 | 269 | 11 | 612   | 28 |
| 52,219 | 34  | 0 | 308   | 14 | 15 | 3 | 273 | 11 | 630   | 28 |
| 52,220 | 34  | 0 | 307   | 14 | 15 | 3 | 273 | 11 | 629   | 28 |
| 52,221 | 35  | 0 | 313   | 14 | 16 | 3 | 278 | 11 | 642   | 28 |
| 52,222 | 34  | 0 | 320   | 14 | 16 | 3 | 284 | 11 | 654   | 28 |

|        |    |   |     |    |    |   |     |    |     |    |
|--------|----|---|-----|----|----|---|-----|----|-----|----|
| 52,223 | 36 | 0 | 306 | 14 | 17 | 3 | 288 | 11 | 647 | 28 |
| 52,224 | 36 | 0 | 306 | 14 | 17 | 3 | 287 | 11 | 646 | 28 |
| 52,225 | 35 | 0 | 311 | 14 | 17 | 3 | 284 | 11 | 647 | 28 |
| 52,226 | 35 | 0 | 306 | 14 | 16 | 3 | 285 | 11 | 642 | 28 |
| 52,227 | 35 | 0 | 318 | 14 | 17 | 3 | 288 | 11 | 658 | 28 |
| 52,228 | 31 | 0 | 269 | 13 | 16 | 3 | 253 | 11 | 569 | 27 |
| 52,229 | 27 | 0 | 252 | 13 | 15 | 3 | 239 | 11 | 533 | 27 |
| 52,230 | 23 | 0 | 156 | 14 | 6  | 3 | 94  | 11 | 279 | 28 |
| 52,231 | 22 | 0 | 150 | 14 | 6  | 3 | 91  | 12 | 269 | 29 |
| 52,232 | 22 | 0 | 143 | 14 | 6  | 3 | 84  | 12 | 255 | 29 |
| 52,233 | 22 | 0 | 141 | 15 | 6  | 3 | 89  | 12 | 258 | 30 |
| 52,234 | 22 | 0 | 142 | 16 | 6  | 3 | 88  | 12 | 258 | 31 |
| 52,235 | 28 | 0 | 175 | 16 | 6  | 3 | 108 | 12 | 317 | 31 |
| 52,236 | 34 | 0 | 198 | 16 | 6  | 3 | 130 | 12 | 368 | 31 |
| 52,237 | 34 | 0 | 207 | 16 | 6  | 3 | 134 | 12 | 381 | 31 |
| 52,238 | 35 | 0 | 213 | 16 | 7  | 3 | 140 | 12 | 395 | 31 |
| 52,239 | 35 | 0 | 212 | 16 | 7  | 3 | 140 | 12 | 394 | 31 |
| 52,240 | 34 | 0 | 213 | 16 | 7  | 3 | 147 | 12 | 401 | 31 |
| 52,241 | 34 | 0 | 213 | 16 | 7  | 3 | 147 | 12 | 401 | 31 |
| 52,242 | 34 | 0 | 214 | 16 | 7  | 3 | 145 | 12 | 400 | 31 |
| 52,243 | 34 | 0 | 212 | 16 | 7  | 3 | 141 | 11 | 394 | 30 |
| 52,244 | 34 | 0 | 208 | 16 | 7  | 3 | 141 | 11 | 390 | 30 |
| 52,245 | 30 | 0 | 197 | 16 | 7  | 3 | 127 | 11 | 361 | 30 |
| 52,246 | 30 | 0 | 197 | 16 | 7  | 2 | 123 | 12 | 357 | 30 |
| 52,247 | 30 | 0 | 193 | 8  | 7  | 1 | 123 | 12 | 353 | 21 |
| 52,248 | 30 | 0 | 192 | 7  | 6  | 1 | 124 | 9  | 352 | 17 |
| 52,249 | 30 | 0 | 197 | 6  | 6  | 1 | 126 | 9  | 359 | 16 |
| 52,250 | 30 | 0 | 197 | 6  | 6  | 0 | 123 | 8  | 356 | 14 |
| 52,251 | 30 | 0 | 197 | 6  | 6  | 0 | 123 | 9  | 356 | 15 |
| 52,252 | 30 | 0 | 197 | 7  | 6  | 0 | 123 | 9  | 356 | 16 |
| 52,253 | 34 | 0 | 208 | 7  | 6  | 0 | 133 | 6  | 381 | 13 |
| 52,254 | 34 | 0 | 208 | 6  | 6  | 0 | 133 | 5  | 381 | 11 |
| 52,255 | 34 | 0 | 208 | 8  | 6  | 0 | 133 | 4  | 381 | 12 |
| 52,256 | 34 | 1 | 207 | 9  | 6  | 0 | 133 | 6  | 380 | 16 |
| 52,257 | 34 | 1 | 202 | 12 | 6  | 0 | 132 | 7  | 374 | 20 |
| 52,258 | 33 | 1 | 201 | 12 | 6  | 0 | 132 | 7  | 372 | 20 |
| 52,259 | 33 | 1 | 202 | 12 | 6  | 0 | 132 | 7  | 373 | 20 |
| 52,260 | 33 | 1 | 201 | 11 | 6  | 0 | 132 | 7  | 372 | 19 |
| 52,261 | 33 | 1 | 200 | 11 | 6  | 0 | 131 | 7  | 370 | 19 |
| 52,262 | 33 | 1 | 199 | 11 | 6  | 0 | 131 | 8  | 369 | 20 |
| 52,263 | 33 | 1 | 199 | 11 | 6  | 0 | 131 | 8  | 369 | 20 |

|        |    |   |     |    |    |   |     |    |       |    |
|--------|----|---|-----|----|----|---|-----|----|-------|----|
| 52,264 | 32 | 1 | 205 | 11 | 6  | 0 | 134 | 8  | 377   | 20 |
| 52,265 | 32 | 1 | 209 | 11 | 6  | 0 | 138 | 8  | 385   | 20 |
| 52,266 | 32 | 1 | 208 | 11 | 6  | 0 | 138 | 8  | 384   | 20 |
| 52,267 | 33 | 1 | 205 | 11 | 6  | 0 | 138 | 8  | 382   | 20 |
| 52,268 | 33 | 1 | 202 | 11 | 6  | 0 | 138 | 8  | 379   | 20 |
| 52,269 | 30 | 1 | 192 | 11 | 5  | 0 | 135 | 8  | 362   | 20 |
| 52,270 | 30 | 1 | 192 | 11 | 5  | 0 | 134 | 8  | 361   | 20 |
| 52,271 | 30 | 1 | 192 | 12 | 5  | 0 | 134 | 8  | 361   | 21 |
| 52,272 | 29 | 1 | 181 | 12 | 4  | 0 | 129 | 8  | 343   | 21 |
| 52,273 | 29 | 1 | 174 | 12 | 4  | 0 | 125 | 8  | 332   | 21 |
| 52,274 | 24 | 2 | 165 | 14 | 3  | 0 | 120 | 9  | 312   | 25 |
| 52,275 | 24 | 2 | 155 | 17 | 3  | 0 | 119 | 13 | 301   | 32 |
| 52,276 | 24 | 2 | 153 | 18 | 3  | 0 | 118 | 14 | 298   | 34 |
| 52,277 | 24 | 2 | 149 | 20 | 3  | 0 | 117 | 14 | 293   | 36 |
| 52,278 | 24 | 2 | 137 | 20 | 2  | 0 | 113 | 14 | 276   | 36 |
| 52,279 | 24 | 2 | 133 | 19 | 2  | 0 | 113 | 13 | 272   | 34 |
| 52,280 | 24 | 2 | 128 | 20 | 2  | 0 | 112 | 13 | 266   | 35 |
| 52,281 | 19 | 2 | 121 | 20 | 1  | 0 | 101 | 13 | 242   | 35 |
| 52,282 | 19 | 2 | 121 | 21 | 1  | 0 | 101 | 13 | 242   | 36 |
| 52,283 | 18 | 2 | 122 | 22 | 1  | 0 | 98  | 13 | 239   | 37 |
| 52,284 | 18 | 2 | 121 | 22 | 1  | 0 | 95  | 13 | 235   | 37 |
| 52,285 | 18 | 2 | 119 | 23 | 1  | 0 | 95  | 13 | 233   | 38 |
| 52,286 | 12 | 2 | 79  | 24 | 1  | 0 | 67  | 13 | 159   | 39 |
| 52,287 | 6  | 2 | 57  | 24 | 1  | 0 | 44  | 13 | 108   | 39 |
| 52,288 | 6  | 2 | 48  | 24 | 1  | 0 | 40  | 13 | 95    | 39 |
| 52,289 | 5  | 2 | 41  | 24 | 0  | 0 | 34  | 13 | 80    | 39 |
| 52,290 | 5  | 2 | 40  | 25 | 0  | 0 | 29  | 13 | 74    | 40 |
| 52,291 | 6  | 2 | 49  | 25 | 0  | 0 | 30  | 15 | 85    | 42 |
| 52,292 | 6  | 2 | 47  | 25 | 0  | 0 | 30  | 15 | 83    | 42 |
| 52,293 | 8  | 2 | 66  | 25 | 1  | 0 | 34  | 15 | 109   | 42 |
| 52,294 | 8  | 2 | 66  | 25 | 1  | 0 | 34  | 15 | 109   | 42 |
| 52,295 | 10 | 2 | 74  | 25 | 1  | 0 | 37  | 15 | 122   | 42 |
| 52,296 | 10 | 2 | 72  | 25 | 1  | 0 | 37  | 14 | 120   | 41 |
| 52,297 | 10 | 2 | 71  | 25 | 1  | 0 | 37  | 14 | 119   | 41 |
| 52,298 | 10 | 2 | 71  | 25 | 1  | 1 | 36  | 15 | 118   | 43 |
| 52,299 | 10 | 2 | 71  | 25 | 1  | 1 | 36  | 15 | 118   | 43 |
| 52,300 | 35 | 2 | 237 | 24 | 11 | 1 | 145 | 15 | 428   | 42 |
| 52,301 | 54 | 2 | 391 | 23 | 21 | 1 | 229 | 14 | 695   | 40 |
| 52,302 | 54 | 2 | 407 | 23 | 22 | 1 | 237 | 14 | 720   | 40 |
| 52,303 | 53 | 2 | 398 | 23 | 22 | 1 | 228 | 14 | 701   | 40 |
| 52,304 | 68 | 2 | 593 | 23 | 35 | 1 | 353 | 14 | 1,049 | 40 |

|        |     |   |       |    |    |   |     |    |       |    |
|--------|-----|---|-------|----|----|---|-----|----|-------|----|
| 52,305 | 79  | 2 | 633   | 23 | 42 | 1 | 419 | 13 | 1,173 | 39 |
| 52,306 | 79  | 2 | 633   | 21 | 42 | 1 | 419 | 13 | 1,173 | 37 |
| 52,307 | 80  | 1 | 642   | 17 | 42 | 1 | 430 | 10 | 1,194 | 29 |
| 52,308 | 80  | 1 | 641   | 17 | 42 | 1 | 430 | 10 | 1,193 | 29 |
| 52,309 | 80  | 1 | 641   | 17 | 42 | 1 | 430 | 10 | 1,193 | 29 |
| 52,310 | 80  | 1 | 642   | 17 | 42 | 1 | 433 | 10 | 1,197 | 29 |
| 52,311 | 83  | 1 | 643   | 17 | 42 | 1 | 433 | 10 | 1,201 | 29 |
| 52,312 | 83  | 1 | 643   | 17 | 42 | 1 | 433 | 10 | 1,201 | 29 |
| 52,313 | 84  | 1 | 645   | 17 | 42 | 1 | 431 | 9  | 1,202 | 28 |
| 52,314 | 84  | 1 | 644   | 17 | 42 | 1 | 431 | 9  | 1,201 | 28 |
| 52,315 | 84  | 1 | 646   | 18 | 42 | 1 | 430 | 9  | 1,202 | 29 |
| 52,316 | 85  | 1 | 648   | 18 | 43 | 1 | 432 | 9  | 1,208 | 29 |
| 52,317 | 86  | 1 | 661   | 18 | 43 | 1 | 433 | 9  | 1,223 | 29 |
| 52,318 | 85  | 1 | 669   | 18 | 43 | 1 | 433 | 9  | 1,230 | 29 |
| 52,319 | 85  | 1 | 669   | 18 | 43 | 1 | 433 | 9  | 1,230 | 29 |
| 52,320 | 87  | 1 | 682   | 18 | 43 | 1 | 438 | 9  | 1,250 | 29 |
| 52,321 | 87  | 1 | 682   | 18 | 43 | 1 | 438 | 9  | 1,250 | 29 |
| 52,322 | 162 | 1 | 874   | 17 | 61 | 1 | 588 | 9  | 1,685 | 28 |
| 52,323 | 170 | 1 | 914   | 18 | 66 | 1 | 643 | 9  | 1,793 | 29 |
| 52,324 | 171 | 2 | 935   | 18 | 67 | 1 | 646 | 9  | 1,819 | 30 |
| 52,325 | 171 | 1 | 943   | 13 | 71 | 1 | 653 | 4  | 1,838 | 19 |
| 52,326 | 189 | 1 | 1,028 | 12 | 79 | 1 | 720 | 3  | 2,016 | 17 |
| 52,327 | 190 | 1 | 1,030 | 12 | 79 | 1 | 721 | 3  | 2,020 | 17 |
| 52,328 | 192 | 1 | 1,036 | 10 | 79 | 1 | 723 | 3  | 2,030 | 15 |
| 52,329 | 192 | 1 | 1,036 | 10 | 79 | 1 | 723 | 3  | 2,030 | 15 |
| 52,330 | 192 | 1 | 1,039 | 10 | 80 | 1 | 727 | 3  | 2,038 | 15 |
| 52,331 | 194 | 1 | 1,067 | 9  | 81 | 1 | 755 | 3  | 2,097 | 14 |
| 52,332 | 195 | 1 | 1,077 | 9  | 81 | 1 | 762 | 3  | 2,115 | 14 |
| 52,333 | 197 | 1 | 1,086 | 7  | 81 | 1 | 776 | 3  | 2,140 | 12 |
| 52,334 | 197 | 1 | 1,089 | 5  | 81 | 1 | 776 | 3  | 2,143 | 10 |
| 52,335 | 197 | 1 | 1,089 | 5  | 81 | 1 | 776 | 3  | 2,143 | 10 |
| 52,336 | 197 | 1 | 1,094 | 4  | 81 | 1 | 784 | 3  | 2,156 | 9  |
| 52,337 | 197 | 1 | 1,099 | 3  | 81 | 1 | 788 | 3  | 2,165 | 8  |
| 52,338 | 197 | 1 | 1,097 | 3  | 81 | 1 | 787 | 3  | 2,162 | 8  |
| 52,339 | 197 | 1 | 1,103 | 3  | 81 | 1 | 791 | 3  | 2,172 | 8  |
| 52,340 | 197 | 1 | 1,095 | 2  | 81 | 1 | 791 | 3  | 2,164 | 7  |
| 52,341 | 197 | 1 | 1,091 | 2  | 81 | 1 | 790 | 3  | 2,159 | 7  |
| 52,342 | 197 | 1 | 1,118 | 2  | 81 | 1 | 797 | 1  | 2,193 | 5  |
| 52,343 | 196 | 1 | 1,128 | 2  | 81 | 1 | 818 | 1  | 2,223 | 5  |
| 52,344 | 196 | 1 | 1,128 | 2  | 81 | 1 | 817 | 1  | 2,222 | 5  |
| 52,345 | 194 | 1 | 1,124 | 2  | 81 | 1 | 815 | 1  | 2,214 | 5  |

|        |     |    |       |    |    |   |     |    |       |    |
|--------|-----|----|-------|----|----|---|-----|----|-------|----|
| 52,346 | 192 | 1  | 1,123 | 2  | 81 | 1 | 813 | 2  | 2,209 | 6  |
| 52,347 | 183 | 1  | 1,108 | 5  | 76 | 1 | 805 | 3  | 2,172 | 10 |
| 52,348 | 181 | 1  | 1,101 | 5  | 76 | 0 | 802 | 2  | 2,160 | 8  |
| 52,349 | 181 | 2  | 1,103 | 11 | 76 | 0 | 806 | 7  | 2,166 | 20 |
| 52,350 | 170 | 3  | 988   | 25 | 71 | 1 | 719 | 15 | 1,948 | 44 |
| 52,351 | 154 | 4  | 845   | 29 | 64 | 1 | 647 | 20 | 1,710 | 54 |
| 52,352 | 158 | 6  | 885   | 30 | 62 | 1 | 673 | 22 | 1,778 | 59 |
| 52,353 | 157 | 8  | 885   | 30 | 61 | 1 | 668 | 23 | 1,771 | 62 |
| 52,354 | 146 | 8  | 818   | 30 | 58 | 1 | 629 | 23 | 1,651 | 62 |
| 52,355 | 142 | 8  | 689   | 32 | 48 | 1 | 539 | 25 | 1,418 | 66 |
| 52,356 | 151 | 8  | 720   | 35 | 41 | 1 | 543 | 25 | 1,455 | 69 |
| 52,357 | 151 | 9  | 713   | 35 | 41 | 1 | 535 | 25 | 1,440 | 70 |
| 52,358 | 151 | 9  | 721   | 35 | 42 | 1 | 538 | 25 | 1,452 | 70 |
| 52,359 | 151 | 9  | 723   | 35 | 42 | 1 | 539 | 25 | 1,455 | 70 |
| 52,360 | 151 | 9  | 723   | 35 | 42 | 1 | 539 | 28 | 1,455 | 73 |
| 52,361 | 151 | 9  | 722   | 36 | 42 | 1 | 539 | 28 | 1,454 | 74 |
| 52,362 | 148 | 9  | 721   | 36 | 42 | 1 | 539 | 28 | 1,450 | 74 |
| 52,363 | 148 | 9  | 721   | 36 | 42 | 1 | 539 | 28 | 1,450 | 74 |
| 52,364 | 147 | 9  | 714   | 36 | 42 | 1 | 538 | 28 | 1,441 | 74 |
| 52,365 | 147 | 9  | 710   | 35 | 42 | 1 | 538 | 28 | 1,437 | 73 |
| 52,366 | 147 | 9  | 710   | 35 | 42 | 1 | 538 | 28 | 1,437 | 73 |
| 52,367 | 146 | 9  | 705   | 35 | 41 | 1 | 535 | 28 | 1,427 | 73 |
| 52,368 | 145 | 9  | 692   | 35 | 41 | 1 | 533 | 28 | 1,411 | 73 |
| 52,369 | 145 | 9  | 684   | 36 | 41 | 1 | 533 | 28 | 1,403 | 74 |
| 52,370 | 145 | 9  | 684   | 37 | 41 | 1 | 533 | 28 | 1,403 | 75 |
| 52,371 | 143 | 9  | 671   | 37 | 41 | 1 | 526 | 28 | 1,381 | 75 |
| 52,372 | 71  | 9  | 510   | 38 | 25 | 1 | 388 | 28 | 994   | 76 |
| 52,373 | 68  | 9  | 480   | 38 | 23 | 1 | 377 | 28 | 948   | 76 |
| 52,374 | 60  | 9  | 439   | 38 | 18 | 1 | 324 | 28 | 841   | 76 |
| 52,375 | 59  | 8  | 418   | 38 | 17 | 1 | 320 | 28 | 814   | 75 |
| 52,376 | 59  | 8  | 410   | 38 | 13 | 1 | 312 | 28 | 794   | 75 |
| 52,377 | 41  | 8  | 325   | 40 | 5  | 1 | 245 | 28 | 616   | 77 |
| 52,378 | 40  | 8  | 323   | 41 | 5  | 1 | 244 | 28 | 612   | 78 |
| 52,379 | 38  | 8  | 317   | 41 | 5  | 1 | 241 | 29 | 601   | 79 |
| 52,380 | 38  | 8  | 314   | 44 | 4  | 1 | 237 | 30 | 593   | 83 |
| 52,381 | 37  | 8  | 313   | 48 | 4  | 1 | 237 | 31 | 591   | 88 |
| 52,382 | 36  | 10 | 286   | 51 | 3  | 2 | 209 | 32 | 534   | 95 |
| 52,383 | 35  | 10 | 276   | 51 | 3  | 2 | 202 | 33 | 516   | 96 |
| 52,384 | 33  | 10 | 264   | 51 | 3  | 2 | 187 | 33 | 487   | 96 |
| 52,385 | 34  | 10 | 261   | 51 | 3  | 2 | 187 | 33 | 485   | 96 |
| 52,386 | 34  | 10 | 258   | 52 | 3  | 2 | 180 | 33 | 475   | 97 |

|        |    |    |     |    |   |   |     |    |     |     |
|--------|----|----|-----|----|---|---|-----|----|-----|-----|
| 52,387 | 34 | 10 | 256 | 53 | 3 | 2 | 179 | 33 | 472 | 98  |
| 52,388 | 34 | 10 | 251 | 53 | 3 | 2 | 175 | 33 | 463 | 98  |
| 52,389 | 34 | 10 | 251 | 55 | 3 | 2 | 175 | 33 | 463 | 100 |
| 52,390 | 34 | 10 | 246 | 55 | 3 | 2 | 171 | 33 | 454 | 100 |
| 52,391 | 33 | 10 | 246 | 55 | 4 | 2 | 170 | 33 | 453 | 100 |
| 52,392 | 33 | 10 | 245 | 55 | 4 | 2 | 170 | 33 | 452 | 100 |
| 52,393 | 32 | 10 | 217 | 58 | 4 | 2 | 159 | 35 | 412 | 105 |
| 52,394 | 32 | 10 | 196 | 58 | 3 | 2 | 137 | 35 | 368 | 105 |
| 52,395 | 32 | 10 | 192 | 59 | 3 | 2 | 136 | 35 | 363 | 106 |
| 52,396 | 32 | 10 | 190 | 60 | 3 | 2 | 136 | 34 | 361 | 106 |
| 52,397 | 32 | 10 | 185 | 60 | 3 | 2 | 135 | 34 | 355 | 106 |
| 52,398 | 31 | 10 | 166 | 57 | 3 | 2 | 129 | 33 | 329 | 102 |
| 52,399 | 31 | 9  | 164 | 51 | 3 | 2 | 128 | 28 | 326 | 90  |
| 52,400 | 31 | 8  | 156 | 37 | 4 | 1 | 121 | 20 | 312 | 66  |
| 52,401 | 31 | 8  | 154 | 37 | 4 | 1 | 119 | 20 | 308 | 66  |
| 52,402 | 24 | 6  | 114 | 32 | 3 | 1 | 85  | 13 | 226 | 52  |
| 52,403 | 24 | 4  | 105 | 32 | 3 | 1 | 83  | 13 | 215 | 50  |
| 52,404 | 22 | 4  | 89  | 32 | 3 | 1 | 80  | 13 | 194 | 50  |
| 52,405 | 2  | 4  | 19  | 32 | 3 | 1 | 11  | 13 | 35  | 50  |
| 52,406 | 1  | 4  | 16  | 30 | 3 | 1 | 11  | 11 | 31  | 46  |
| 52,407 | 1  | 3  | 16  | 27 | 3 | 1 | 10  | 11 | 30  | 42  |
| 52,408 | 1  | 3  | 9   | 27 | 2 | 1 | 5   | 11 | 17  | 42  |
| 52,409 | 1  | 3  | 6   | 27 | 2 | 1 | 3   | 11 | 12  | 42  |
| 52,410 | 3  | 3  | 6   | 27 | 2 | 1 | 2   | 8  | 13  | 39  |
| 52,411 | 3  | 3  | 6   | 27 | 2 | 1 | 2   | 8  | 13  | 39  |
| 52,412 | 3  | 3  | 6   | 26 | 2 | 1 | 3   | 8  | 14  | 38  |
| 52,413 | 3  | 3  | 6   | 26 | 2 | 1 | 4   | 8  | 15  | 38  |
| 52,414 | 3  | 3  | 7   | 26 | 2 | 1 | 4   | 8  | 16  | 38  |
| 52,415 | 3  | 3  | 7   | 26 | 2 | 1 | 4   | 8  | 16  | 38  |
| 52,416 | 3  | 3  | 7   | 26 | 2 | 1 | 4   | 8  | 16  | 38  |
| 52,417 | 4  | 3  | 9   | 26 | 2 | 1 | 4   | 8  | 19  | 38  |
| 52,418 | 4  | 3  | 9   | 26 | 2 | 1 | 4   | 9  | 19  | 39  |
| 52,419 | 4  | 3  | 9   | 26 | 2 | 1 | 4   | 9  | 19  | 39  |
| 52,420 | 4  | 3  | 9   | 28 | 2 | 1 | 4   | 9  | 19  | 41  |
| 52,421 | 4  | 3  | 9   | 27 | 2 | 1 | 4   | 9  | 19  | 40  |
| 52,422 | 4  | 3  | 9   | 29 | 2 | 1 | 4   | 9  | 19  | 42  |
| 52,423 | 4  | 3  | 9   | 28 | 2 | 1 | 4   | 9  | 19  | 41  |
| 52,424 | 4  | 4  | 9   | 28 | 2 | 2 | 4   | 9  | 19  | 43  |
| 52,425 | 4  | 4  | 10  | 27 | 2 | 2 | 3   | 12 | 19  | 45  |
| 52,426 | 4  | 4  | 10  | 27 | 2 | 2 | 3   | 12 | 19  | 45  |
| 52,427 | 4  | 8  | 10  | 34 | 2 | 3 | 3   | 24 | 19  | 69  |

|        |   |    |    |    |   |   |    |    |    |     |
|--------|---|----|----|----|---|---|----|----|----|-----|
| 52,428 | 4 | 8  | 10 | 33 | 2 | 3 | 3  | 26 | 19 | 70  |
| 52,429 | 4 | 9  | 11 | 34 | 2 | 3 | 4  | 27 | 21 | 73  |
| 52,430 | 4 | 9  | 11 | 41 | 2 | 3 | 4  | 26 | 21 | 79  |
| 52,431 | 4 | 9  | 12 | 38 | 2 | 3 | 4  | 25 | 22 | 75  |
| 52,432 | 4 | 12 | 12 | 41 | 2 | 3 | 4  | 28 | 22 | 84  |
| 52,433 | 4 | 10 | 11 | 40 | 2 | 2 | 4  | 28 | 21 | 80  |
| 52,434 | 4 | 10 | 19 | 40 | 3 | 2 | 10 | 28 | 36 | 80  |
| 52,435 | 3 | 10 | 23 | 40 | 3 | 2 | 13 | 28 | 42 | 80  |
| 52,436 | 3 | 10 | 23 | 40 | 3 | 2 | 14 | 28 | 43 | 80  |
| 52,437 | 3 | 10 | 26 | 39 | 4 | 2 | 15 | 28 | 48 | 79  |
| 52,438 | 3 | 10 | 27 | 38 | 4 | 2 | 15 | 29 | 49 | 79  |
| 52,439 | 3 | 10 | 27 | 41 | 4 | 2 | 15 | 33 | 49 | 86  |
| 52,440 | 3 | 10 | 26 | 44 | 4 | 3 | 15 | 33 | 48 | 90  |
| 52,441 | 3 | 10 | 26 | 44 | 3 | 3 | 15 | 33 | 47 | 90  |
| 52,442 | 3 | 10 | 25 | 52 | 3 | 4 | 15 | 35 | 46 | 101 |
| 52,443 | 3 | 10 | 24 | 52 | 3 | 4 | 15 | 35 | 45 | 101 |
| 52,444 | 3 | 12 | 23 | 62 | 3 | 4 | 15 | 36 | 44 | 114 |
| 52,445 | 3 | 12 | 23 | 62 | 3 | 4 | 15 | 36 | 44 | 114 |
| 52,446 | 3 | 12 | 24 | 64 | 3 | 4 | 15 | 36 | 45 | 116 |
| 52,447 | 3 | 12 | 25 | 68 | 3 | 5 | 15 | 39 | 46 | 124 |
| 52,448 | 3 | 12 | 25 | 68 | 3 | 5 | 15 | 39 | 46 | 124 |
| 52,449 | 3 | 12 | 25 | 68 | 3 | 5 | 15 | 40 | 46 | 125 |
| 52,450 | 3 | 13 | 25 | 68 | 3 | 5 | 15 | 42 | 46 | 128 |
| 52,451 | 3 | 13 | 25 | 68 | 2 | 5 | 15 | 42 | 45 | 128 |
| 52,452 | 3 | 13 | 25 | 68 | 2 | 5 | 15 | 42 | 45 | 128 |
| 52,453 | 3 | 12 | 26 | 68 | 2 | 5 | 15 | 41 | 46 | 126 |
| 52,454 | 3 | 12 | 26 | 68 | 2 | 5 | 15 | 41 | 46 | 126 |
| 52,455 | 3 | 12 | 30 | 68 | 2 | 5 | 15 | 41 | 50 | 126 |
| 52,456 | 3 | 12 | 30 | 68 | 2 | 5 | 14 | 41 | 49 | 126 |
| 52,457 | 3 | 12 | 32 | 68 | 2 | 5 | 14 | 41 | 51 | 126 |
| 52,458 | 3 | 12 | 32 | 68 | 2 | 5 | 14 | 41 | 51 | 126 |
| 52,459 | 3 | 12 | 32 | 68 | 2 | 5 | 14 | 41 | 51 | 126 |
| 52,460 | 3 | 12 | 32 | 68 | 2 | 5 | 14 | 41 | 51 | 126 |
| 52,461 | 1 | 12 | 32 | 70 | 2 | 5 | 14 | 42 | 49 | 129 |
| 52,462 | 1 | 12 | 32 | 70 | 2 | 5 | 13 | 42 | 48 | 129 |
| 52,463 | 1 | 12 | 33 | 70 | 2 | 5 | 13 | 42 | 49 | 129 |
| 52,464 | 1 | 13 | 33 | 75 | 2 | 5 | 12 | 48 | 48 | 141 |
| 52,465 | 1 | 13 | 32 | 75 | 2 | 5 | 12 | 48 | 47 | 141 |
| 52,466 | 1 | 13 | 36 | 75 | 2 | 5 | 12 | 50 | 51 | 143 |
| 52,467 | 0 | 13 | 36 | 75 | 2 | 5 | 12 | 50 | 50 | 143 |
| 52,468 | 0 | 13 | 36 | 76 | 2 | 5 | 17 | 49 | 55 | 143 |



|        |    |    |    |    |   |   |    |    |     |     |
|--------|----|----|----|----|---|---|----|----|-----|-----|
| 52,469 | 0  | 13 | 44 | 76 | 5 | 5 | 19 | 50 | 68  | 144 |
| 52,470 | 0  | 13 | 44 | 76 | 5 | 5 | 19 | 50 | 68  | 144 |
| 52,471 | 5  | 13 | 50 | 73 | 5 | 5 | 20 | 50 | 80  | 141 |
| 52,472 | 5  | 13 | 50 | 73 | 5 | 5 | 20 | 50 | 80  | 141 |
| 52,473 | 10 | 12 | 62 | 71 | 7 | 4 | 35 | 51 | 114 | 138 |
| 52,474 | 11 | 12 | 69 | 72 | 7 | 4 | 39 | 52 | 126 | 140 |
| 52,475 | 11 | 12 | 69 | 75 | 7 | 4 | 40 | 53 | 127 | 144 |
| 52,476 | 11 | 12 | 70 | 75 | 7 | 4 | 43 | 50 | 131 | 141 |
| 52,477 | 11 | 12 | 70 | 75 | 7 | 4 | 43 | 50 | 131 | 141 |
| 52,478 | 11 | 9  | 70 | 68 | 7 | 3 | 43 | 39 | 131 | 119 |
| 52,479 | 11 | 9  | 69 | 67 | 7 | 3 | 42 | 37 | 129 | 116 |
| 52,480 | 11 | 8  | 69 | 69 | 7 | 3 | 42 | 42 | 129 | 122 |
| 52,481 | 11 | 8  | 68 | 63 | 7 | 4 | 42 | 42 | 128 | 117 |
| 52,482 | 12 | 8  | 66 | 65 | 7 | 4 | 38 | 44 | 123 | 121 |
| 52,483 | 12 | 7  | 62 | 61 | 7 | 4 | 38 | 42 | 119 | 114 |
| 52,484 | 12 | 7  | 61 | 59 | 7 | 4 | 36 | 40 | 116 | 110 |
| 52,485 | 12 | 7  | 58 | 59 | 7 | 4 | 33 | 40 | 110 | 110 |
| 52,486 | 12 | 7  | 58 | 59 | 7 | 4 | 32 | 40 | 109 | 110 |
| 52,487 | 12 | 7  | 55 | 59 | 6 | 4 | 31 | 41 | 104 | 111 |
| 52,488 | 12 | 7  | 54 | 60 | 6 | 4 | 31 | 40 | 103 | 111 |
| 52,489 | 12 | 7  | 54 | 60 | 6 | 4 | 31 | 40 | 103 | 111 |
| 52,490 | 12 | 7  | 56 | 57 | 6 | 4 | 31 | 36 | 105 | 104 |
| 52,491 | 12 | 7  | 56 | 52 | 6 | 3 | 31 | 36 | 105 | 98  |
| 52,492 | 12 | 7  | 56 | 44 | 6 | 2 | 31 | 34 | 105 | 87  |
| 52,493 | 12 | 7  | 56 | 44 | 6 | 2 | 31 | 34 | 105 | 87  |
| 52,494 | 12 | 7  | 56 | 44 | 6 | 2 | 31 | 34 | 105 | 87  |
| 52,495 | 12 | 5  | 56 | 31 | 6 | 2 | 31 | 31 | 105 | 69  |
| 52,496 | 12 | 5  | 56 | 31 | 6 | 2 | 32 | 31 | 106 | 69  |
| 52,497 | 12 | 5  | 57 | 24 | 6 | 1 | 34 | 28 | 109 | 58  |
| 52,498 | 12 | 5  | 56 | 24 | 6 | 1 | 34 | 28 | 108 | 58  |
| 52,499 | 12 | 4  | 56 | 24 | 6 | 1 | 34 | 25 | 108 | 54  |
| 52,500 | 12 | 4  | 59 | 24 | 6 | 1 | 35 | 25 | 112 | 54  |
| 52,501 | 12 | 4  | 59 | 24 | 6 | 1 | 35 | 25 | 112 | 54  |
| 52,502 | 12 | 4  | 59 | 24 | 6 | 1 | 35 | 25 | 112 | 54  |
| 52,503 | 12 | 4  | 59 | 24 | 6 | 1 | 35 | 25 | 112 | 54  |
| 52,504 | 12 | 4  | 58 | 24 | 6 | 1 | 35 | 25 | 111 | 54  |
| 52,505 | 12 | 5  | 58 | 24 | 6 | 1 | 35 | 25 | 111 | 55  |
| 52,506 | 12 | 5  | 52 | 24 | 6 | 1 | 35 | 25 | 105 | 55  |
| 52,507 | 12 | 5  | 52 | 24 | 6 | 1 | 35 | 25 | 105 | 55  |
| 52,508 | 12 | 5  | 51 | 24 | 6 | 1 | 35 | 25 | 104 | 55  |
| 52,509 | 12 | 5  | 51 | 24 | 6 | 1 | 35 | 25 | 104 | 55  |

|        |    |   |    |    |   |   |    |    |     |    |
|--------|----|---|----|----|---|---|----|----|-----|----|
| 52,510 | 12 | 5 | 52 | 24 | 6 | 1 | 35 | 25 | 105 | 55 |
| 52,511 | 12 | 5 | 54 | 22 | 6 | 1 | 36 | 24 | 108 | 52 |
| 52,512 | 12 | 5 | 57 | 22 | 6 | 1 | 36 | 24 | 111 | 52 |
| 52,513 | 12 | 5 | 57 | 22 | 6 | 1 | 36 | 24 | 111 | 52 |
| 52,514 | 13 | 4 | 59 | 17 | 6 | 1 | 39 | 18 | 117 | 40 |
| 52,515 | 13 | 4 | 68 | 17 | 6 | 1 | 44 | 18 | 131 | 40 |
| 52,516 | 13 | 4 | 69 | 17 | 6 | 1 | 44 | 18 | 132 | 40 |
| 52,517 | 14 | 4 | 66 | 17 | 6 | 1 | 46 | 17 | 132 | 39 |
| 52,518 | 14 | 4 | 71 | 20 | 6 | 1 | 47 | 19 | 138 | 44 |
| 52,519 | 14 | 4 | 70 | 21 | 6 | 1 | 42 | 19 | 132 | 45 |
| 52,520 | 14 | 5 | 62 | 25 | 3 | 1 | 40 | 18 | 119 | 49 |
| 52,521 | 9  | 5 | 59 | 28 | 3 | 1 | 42 | 21 | 113 | 55 |
| 52,522 | 9  | 5 | 57 | 31 | 3 | 1 | 41 | 23 | 110 | 60 |
| 52,523 | 4  | 5 | 50 | 33 | 1 | 1 | 29 | 23 | 84  | 62 |
| 52,524 | 4  | 5 | 45 | 33 | 1 | 1 | 26 | 23 | 76  | 62 |
| 52,525 | 3  | 5 | 39 | 29 | 1 | 1 | 22 | 21 | 65  | 56 |
| 52,526 | 3  | 5 | 38 | 29 | 1 | 1 | 19 | 23 | 61  | 58 |
| 52,527 | 3  | 5 | 38 | 29 | 1 | 1 | 19 | 23 | 61  | 58 |
| 52,528 | 3  | 4 | 43 | 30 | 1 | 1 | 20 | 22 | 67  | 57 |
| 52,529 | 3  | 4 | 43 | 30 | 1 | 1 | 20 | 22 | 67  | 57 |
| 52,530 | 3  | 4 | 48 | 30 | 1 | 1 | 23 | 22 | 75  | 57 |
| 52,531 | 3  | 4 | 48 | 26 | 1 | 1 | 23 | 16 | 75  | 47 |
| 52,532 | 2  | 3 | 48 | 23 | 1 | 0 | 23 | 14 | 74  | 40 |
| 52,533 | 2  | 2 | 48 | 20 | 1 | 0 | 23 | 12 | 74  | 34 |
| 52,534 | 2  | 2 | 48 | 20 | 1 | 0 | 23 | 12 | 74  | 34 |
| 52,535 | 3  | 2 | 48 | 21 | 1 | 0 | 24 | 12 | 76  | 35 |
| 52,536 | 3  | 2 | 48 | 21 | 1 | 0 | 25 | 12 | 77  | 35 |
| 52,537 | 3  | 2 | 48 | 21 | 1 | 0 | 25 | 12 | 77  | 35 |
| 52,538 | 3  | 2 | 48 | 20 | 1 | 0 | 25 | 11 | 77  | 33 |
| 52,539 | 3  | 2 | 48 | 20 | 1 | 0 | 25 | 11 | 77  | 33 |
| 52,540 | 3  | 2 | 46 | 20 | 1 | 0 | 25 | 11 | 75  | 33 |
| 52,541 | 3  | 2 | 46 | 21 | 1 | 0 | 25 | 11 | 75  | 34 |
| 52,542 | 3  | 2 | 46 | 21 | 1 | 0 | 27 | 11 | 77  | 34 |
| 52,543 | 3  | 2 | 46 | 21 | 1 | 0 | 27 | 11 | 77  | 34 |
| 52,544 | 4  | 2 | 46 | 21 | 1 | 0 | 27 | 11 | 78  | 34 |
| 52,545 | 4  | 2 | 46 | 21 | 1 | 0 | 26 | 11 | 77  | 34 |
| 52,546 | 4  | 2 | 45 | 21 | 1 | 0 | 26 | 11 | 76  | 34 |
| 52,547 | 4  | 2 | 44 | 21 | 1 | 0 | 28 | 11 | 77  | 34 |
| 52,548 | 4  | 2 | 44 | 20 | 1 | 0 | 26 | 11 | 75  | 33 |
| 52,549 | 4  | 2 | 44 | 20 | 1 | 0 | 26 | 11 | 75  | 33 |
| 52,550 | 4  | 2 | 44 | 20 | 1 | 0 | 27 | 11 | 76  | 33 |

|        |   |   |    |    |   |   |    |    |     |    |
|--------|---|---|----|----|---|---|----|----|-----|----|
| 52,551 | 4 | 2 | 41 | 20 | 1 | 0 | 26 | 11 | 72  | 33 |
| 52,552 | 4 | 2 | 41 | 20 | 1 | 0 | 26 | 11 | 72  | 33 |
| 52,553 | 4 | 2 | 41 | 20 | 1 | 0 | 26 | 11 | 72  | 33 |
| 52,554 | 4 | 2 | 42 | 20 | 1 | 1 | 27 | 12 | 74  | 35 |
| 52,555 | 4 | 2 | 42 | 20 | 1 | 1 | 27 | 12 | 74  | 35 |
| 52,556 | 4 | 1 | 43 | 21 | 1 | 1 | 27 | 13 | 75  | 36 |
| 52,557 | 4 | 1 | 43 | 21 | 1 | 1 | 28 | 13 | 76  | 36 |
| 52,558 | 4 | 1 | 43 | 23 | 1 | 1 | 28 | 16 | 76  | 41 |
| 52,559 | 4 | 1 | 42 | 23 | 1 | 1 | 28 | 16 | 75  | 41 |
| 52,560 | 4 | 1 | 42 | 23 | 1 | 1 | 28 | 16 | 75  | 41 |
| 52,561 | 4 | 1 | 41 | 23 | 1 | 2 | 28 | 17 | 74  | 43 |
| 52,562 | 4 | 1 | 39 | 23 | 1 | 2 | 27 | 17 | 71  | 43 |
| 52,563 | 4 | 1 | 36 | 26 | 1 | 2 | 27 | 18 | 68  | 47 |
| 52,564 | 3 | 3 | 36 | 27 | 1 | 2 | 27 | 19 | 67  | 51 |
| 52,565 | 3 | 3 | 33 | 27 | 1 | 2 | 24 | 19 | 61  | 51 |
| 52,566 | 3 | 3 | 24 | 27 | 1 | 2 | 19 | 19 | 47  | 51 |
| 52,567 | 3 | 3 | 25 | 28 | 1 | 2 | 19 | 19 | 48  | 52 |
| 52,568 | 2 | 4 | 24 | 36 | 1 | 2 | 17 | 32 | 44  | 74 |
| 52,569 | 2 | 5 | 18 | 34 | 1 | 2 | 15 | 31 | 36  | 72 |
| 52,570 | 2 | 6 | 18 | 41 | 1 | 3 | 15 | 33 | 36  | 83 |
| 52,571 | 2 | 5 | 18 | 34 | 1 | 3 | 15 | 30 | 36  | 72 |
| 52,572 | 3 | 5 | 28 | 29 | 2 | 3 | 22 | 27 | 55  | 64 |
| 52,573 | 5 | 5 | 36 | 29 | 2 | 3 | 23 | 30 | 66  | 67 |
| 52,574 | 5 | 5 | 36 | 29 | 2 | 3 | 23 | 30 | 66  | 67 |
| 52,575 | 5 | 5 | 38 | 29 | 2 | 3 | 25 | 30 | 70  | 67 |
| 52,576 | 5 | 6 | 37 | 29 | 2 | 3 | 25 | 30 | 69  | 68 |
| 52,577 | 6 | 6 | 54 | 29 | 6 | 3 | 38 | 30 | 104 | 68 |
| 52,578 | 6 | 6 | 53 | 29 | 6 | 3 | 38 | 30 | 103 | 68 |
| 52,579 | 6 | 6 | 76 | 28 | 6 | 3 | 49 | 30 | 137 | 67 |
| 52,580 | 6 | 7 | 76 | 28 | 6 | 3 | 48 | 30 | 136 | 68 |
| 52,581 | 6 | 7 | 72 | 28 | 5 | 3 | 47 | 31 | 130 | 69 |
| 52,582 | 6 | 7 | 72 | 28 | 5 | 4 | 47 | 31 | 130 | 70 |
| 52,583 | 6 | 7 | 72 | 28 | 5 | 4 | 48 | 31 | 131 | 70 |
| 52,584 | 6 | 7 | 72 | 28 | 5 | 4 | 49 | 32 | 132 | 71 |
| 52,585 | 5 | 7 | 72 | 27 | 5 | 4 | 48 | 32 | 130 | 70 |
| 52,586 | 5 | 7 | 71 | 27 | 5 | 4 | 48 | 32 | 129 | 70 |
| 52,587 | 5 | 7 | 71 | 27 | 5 | 4 | 47 | 32 | 128 | 70 |
| 52,588 | 5 | 7 | 71 | 27 | 5 | 4 | 47 | 32 | 128 | 70 |
| 52,589 | 5 | 7 | 72 | 27 | 5 | 4 | 47 | 33 | 129 | 71 |
| 52,590 | 5 | 7 | 72 | 27 | 5 | 4 | 47 | 33 | 129 | 71 |
| 52,591 | 5 | 7 | 72 | 28 | 5 | 5 | 47 | 34 | 129 | 74 |

|        |   |   |     |    |    |   |    |    |     |    |
|--------|---|---|-----|----|----|---|----|----|-----|----|
| 52,592 | 5 | 7 | 74  | 27 | 5  | 5 | 46 | 34 | 130 | 73 |
| 52,593 | 5 | 7 | 74  | 29 | 5  | 5 | 46 | 35 | 130 | 76 |
| 52,594 | 6 | 7 | 76  | 29 | 5  | 5 | 46 | 35 | 133 | 76 |
| 52,595 | 5 | 7 | 76  | 29 | 5  | 5 | 46 | 35 | 132 | 76 |
| 52,596 | 5 | 7 | 76  | 29 | 5  | 5 | 46 | 35 | 132 | 76 |
| 52,597 | 5 | 7 | 79  | 29 | 5  | 5 | 46 | 35 | 135 | 76 |
| 52,598 | 5 | 7 | 79  | 29 | 5  | 5 | 45 | 35 | 134 | 76 |
| 52,599 | 5 | 7 | 81  | 29 | 5  | 5 | 46 | 35 | 137 | 76 |
| 52,600 | 5 | 7 | 81  | 30 | 5  | 5 | 46 | 35 | 137 | 77 |
| 52,601 | 5 | 7 | 81  | 30 | 5  | 5 | 45 | 36 | 136 | 78 |
| 52,602 | 5 | 8 | 91  | 32 | 5  | 5 | 49 | 36 | 150 | 81 |
| 52,603 | 5 | 8 | 91  | 36 | 5  | 5 | 49 | 39 | 150 | 88 |
| 52,604 | 5 | 8 | 91  | 36 | 5  | 5 | 49 | 40 | 150 | 89 |
| 52,605 | 6 | 8 | 109 | 36 | 9  | 4 | 69 | 39 | 193 | 87 |
| 52,606 | 6 | 8 | 113 | 37 | 9  | 5 | 70 | 40 | 198 | 90 |
| 52,607 | 6 | 8 | 115 | 37 | 10 | 5 | 70 | 40 | 201 | 90 |
| 52,608 | 6 | 8 | 115 | 37 | 10 | 5 | 69 | 40 | 200 | 90 |
| 52,609 | 6 | 8 | 116 | 37 | 10 | 5 | 69 | 37 | 201 | 87 |
| 52,610 | 6 | 8 | 116 | 37 | 10 | 5 | 69 | 37 | 201 | 87 |
| 52,611 | 6 | 8 | 116 | 38 | 10 | 4 | 69 | 36 | 201 | 86 |
| 52,612 | 6 | 8 | 116 | 38 | 10 | 4 | 69 | 36 | 201 | 86 |
| 52,613 | 7 | 8 | 116 | 38 | 10 | 4 | 69 | 36 | 202 | 86 |
| 52,614 | 7 | 8 | 116 | 35 | 10 | 4 | 69 | 35 | 202 | 82 |
| 52,615 | 7 | 6 | 118 | 34 | 10 | 4 | 69 | 34 | 204 | 78 |
| 52,616 | 7 | 6 | 118 | 34 | 10 | 4 | 69 | 34 | 204 | 78 |
| 52,617 | 7 | 6 | 118 | 34 | 10 | 4 | 69 | 34 | 204 | 78 |
| 52,618 | 7 | 6 | 116 | 35 | 10 | 4 | 69 | 34 | 202 | 79 |
| 52,619 | 8 | 5 | 116 | 26 | 10 | 4 | 69 | 21 | 203 | 56 |
| 52,620 | 8 | 3 | 116 | 17 | 10 | 3 | 69 | 18 | 203 | 41 |
| 52,621 | 8 | 3 | 116 | 17 | 10 | 3 | 69 | 18 | 203 | 41 |
| 52,622 | 8 | 3 | 116 | 18 | 10 | 3 | 69 | 18 | 203 | 42 |
| 52,623 | 7 | 3 | 105 | 18 | 9  | 3 | 60 | 18 | 181 | 42 |
| 52,624 | 6 | 4 | 97  | 20 | 9  | 3 | 59 | 16 | 171 | 43 |
| 52,625 | 6 | 4 | 95  | 21 | 9  | 3 | 57 | 16 | 167 | 44 |
| 52,626 | 6 | 5 | 95  | 35 | 9  | 4 | 57 | 18 | 167 | 62 |
| 52,627 | 6 | 5 | 85  | 38 | 6  | 5 | 50 | 18 | 147 | 66 |
| 52,628 | 5 | 5 | 78  | 39 | 5  | 6 | 44 | 18 | 132 | 68 |
| 52,629 | 5 | 5 | 60  | 40 | 5  | 6 | 35 | 18 | 105 | 69 |
| 52,630 | 5 | 5 | 50  | 40 | 5  | 6 | 32 | 18 | 92  | 69 |
| 52,631 | 5 | 5 | 49  | 46 | 5  | 7 | 34 | 21 | 93  | 79 |
| 52,632 | 5 | 5 | 49  | 46 | 5  | 7 | 33 | 21 | 92  | 79 |

|        |    |    |     |    |   |   |    |    |     |    |
|--------|----|----|-----|----|---|---|----|----|-----|----|
| 52,633 | 5  | 5  | 50  | 48 | 5 | 7 | 32 | 22 | 92  | 82 |
| 52,634 | 5  | 5  | 51  | 48 | 5 | 7 | 32 | 23 | 93  | 83 |
| 52,635 | 5  | 5  | 51  | 48 | 5 | 7 | 31 | 22 | 92  | 82 |
| 52,636 | 5  | 5  | 51  | 48 | 5 | 7 | 31 | 22 | 92  | 82 |
| 52,637 | 5  | 5  | 51  | 48 | 5 | 7 | 32 | 22 | 93  | 82 |
| 52,638 | 5  | 5  | 53  | 48 | 5 | 7 | 32 | 22 | 95  | 82 |
| 52,639 | 7  | 5  | 52  | 48 | 5 | 7 | 32 | 22 | 96  | 82 |
| 52,640 | 7  | 5  | 52  | 48 | 5 | 7 | 32 | 21 | 96  | 81 |
| 52,641 | 7  | 5  | 53  | 47 | 5 | 6 | 32 | 20 | 97  | 78 |
| 52,642 | 7  | 5  | 53  | 47 | 5 | 6 | 32 | 20 | 97  | 78 |
| 52,643 | 7  | 5  | 51  | 47 | 5 | 6 | 31 | 19 | 94  | 77 |
| 52,644 | 7  | 5  | 51  | 47 | 5 | 6 | 31 | 19 | 94  | 77 |
| 52,645 | 7  | 5  | 50  | 48 | 5 | 6 | 31 | 19 | 93  | 78 |
| 52,646 | 7  | 5  | 68  | 49 | 5 | 7 | 37 | 19 | 117 | 80 |
| 52,647 | 7  | 5  | 83  | 49 | 5 | 7 | 44 | 19 | 139 | 80 |
| 52,648 | 7  | 5  | 82  | 49 | 5 | 7 | 44 | 19 | 138 | 80 |
| 52,649 | 7  | 5  | 87  | 49 | 5 | 7 | 46 | 19 | 145 | 80 |
| 52,650 | 12 | 5  | 118 | 49 | 7 | 7 | 57 | 21 | 194 | 82 |
| 52,651 | 12 | 5  | 120 | 55 | 7 | 7 | 56 | 21 | 195 | 88 |
| 52,652 | 12 | 5  | 113 | 58 | 7 | 7 | 54 | 25 | 186 | 95 |
| 52,653 | 12 | 4  | 110 | 58 | 7 | 7 | 53 | 26 | 182 | 95 |
| 52,654 | 11 | 5  | 98  | 58 | 5 | 7 | 38 | 25 | 152 | 95 |
| 52,655 | 11 | 6  | 95  | 58 | 4 | 7 | 37 | 24 | 147 | 95 |
| 52,656 | 11 | 6  | 91  | 58 | 3 | 7 | 33 | 24 | 138 | 95 |
| 52,657 | 11 | 6  | 91  | 57 | 3 | 6 | 33 | 22 | 138 | 91 |
| 52,658 | 11 | 6  | 89  | 57 | 2 | 6 | 33 | 22 | 135 | 91 |
| 52,659 | 11 | 8  | 89  | 57 | 2 | 6 | 33 | 22 | 135 | 93 |
| 52,660 | 11 | 8  | 88  | 55 | 2 | 6 | 33 | 22 | 134 | 91 |
| 52,661 | 12 | 8  | 89  | 56 | 2 | 6 | 34 | 22 | 137 | 92 |
| 52,662 | 12 | 9  | 89  | 55 | 2 | 6 | 34 | 22 | 137 | 92 |
| 52,663 | 11 | 9  | 93  | 55 | 2 | 6 | 35 | 22 | 141 | 92 |
| 52,664 | 11 | 9  | 102 | 56 | 2 | 6 | 42 | 22 | 157 | 93 |
| 52,665 | 11 | 9  | 104 | 56 | 2 | 6 | 44 | 22 | 161 | 93 |
| 52,666 | 11 | 9  | 103 | 56 | 2 | 6 | 44 | 22 | 160 | 93 |
| 52,667 | 11 | 9  | 103 | 56 | 2 | 6 | 44 | 22 | 160 | 93 |
| 52,668 | 11 | 9  | 103 | 54 | 2 | 6 | 44 | 21 | 160 | 90 |
| 52,669 | 11 | 9  | 103 | 54 | 2 | 6 | 44 | 21 | 160 | 90 |
| 52,670 | 10 | 9  | 103 | 55 | 2 | 6 | 44 | 21 | 159 | 91 |
| 52,671 | 10 | 9  | 103 | 56 | 2 | 6 | 44 | 21 | 159 | 92 |
| 52,672 | 10 | 9  | 104 | 56 | 2 | 6 | 44 | 21 | 160 | 92 |
| 52,673 | 10 | 10 | 104 | 55 | 2 | 6 | 44 | 21 | 160 | 92 |

|        |    |    |     |    |   |   |    |    |     |    |
|--------|----|----|-----|----|---|---|----|----|-----|----|
| 52,674 | 10 | 10 | 104 | 55 | 2 | 6 | 44 | 21 | 160 | 92 |
| 52,675 | 9  | 9  | 104 | 54 | 3 | 6 | 45 | 20 | 161 | 89 |
| 52,676 | 9  | 9  | 107 | 39 | 3 | 5 | 45 | 18 | 164 | 71 |
| 52,677 | 9  | 9  | 107 | 39 | 3 | 5 | 45 | 18 | 164 | 71 |
| 52,678 | 9  | 8  | 107 | 36 | 3 | 4 | 45 | 19 | 164 | 67 |
| 52,679 | 9  | 9  | 107 | 35 | 3 | 3 | 46 | 17 | 165 | 64 |
| 52,680 | 9  | 9  | 108 | 34 | 3 | 3 | 48 | 18 | 168 | 64 |
| 52,681 | 9  | 9  | 108 | 34 | 3 | 3 | 48 | 18 | 168 | 64 |
| 52,682 | 10 | 8  | 112 | 28 | 3 | 2 | 50 | 15 | 175 | 53 |
| 52,683 | 10 | 8  | 117 | 26 | 3 | 1 | 50 | 13 | 180 | 48 |
| 52,684 | 12 | 8  | 128 | 26 | 3 | 1 | 56 | 12 | 199 | 47 |
| 52,685 | 12 | 8  | 129 | 26 | 3 | 1 | 59 | 13 | 203 | 48 |
| 52,686 | 13 | 8  | 129 | 29 | 3 | 1 | 63 | 14 | 208 | 52 |
| 52,687 | 13 | 8  | 129 | 29 | 3 | 1 | 62 | 14 | 207 | 52 |
| 52,688 | 13 | 8  | 127 | 30 | 3 | 1 | 62 | 14 | 205 | 53 |
| 52,689 | 11 | 8  | 136 | 31 | 4 | 1 | 68 | 14 | 219 | 54 |
| 52,690 | 11 | 8  | 136 | 32 | 4 | 1 | 68 | 14 | 219 | 55 |
| 52,691 | 11 | 8  | 135 | 32 | 4 | 1 | 68 | 14 | 218 | 55 |
| 52,692 | 11 | 8  | 135 | 33 | 4 | 1 | 68 | 14 | 218 | 56 |
| 52,693 | 11 | 8  | 135 | 33 | 4 | 1 | 68 | 17 | 218 | 59 |
| 52,694 | 11 | 8  | 135 | 31 | 4 | 1 | 68 | 17 | 218 | 57 |
| 52,695 | 10 | 8  | 138 | 34 | 4 | 1 | 69 | 18 | 221 | 61 |
| 52,696 | 10 | 9  | 138 | 34 | 4 | 1 | 70 | 20 | 222 | 64 |
| 52,697 | 10 | 9  | 121 | 35 | 4 | 0 | 66 | 20 | 201 | 64 |
| 52,698 | 11 | 9  | 105 | 37 | 4 | 1 | 59 | 20 | 179 | 67 |
| 52,699 | 11 | 9  | 101 | 37 | 4 | 1 | 57 | 21 | 173 | 68 |
| 52,700 | 8  | 9  | 95  | 38 | 3 | 1 | 55 | 21 | 161 | 69 |
| 52,701 | 6  | 10 | 71  | 31 | 2 | 1 | 46 | 18 | 125 | 60 |
| 52,702 | 6  | 10 | 70  | 31 | 2 | 1 | 46 | 18 | 124 | 60 |
| 52,703 | 7  | 10 | 70  | 28 | 2 | 1 | 46 | 14 | 125 | 53 |
| 52,704 | 8  | 10 | 71  | 26 | 2 | 1 | 46 | 13 | 127 | 50 |
| 52,705 | 8  | 8  | 72  | 22 | 2 | 1 | 45 | 11 | 127 | 42 |
| 52,706 | 8  | 8  | 74  | 22 | 2 | 1 | 45 | 11 | 129 | 42 |
| 52,707 | 8  | 8  | 74  | 22 | 2 | 1 | 45 | 11 | 129 | 42 |
| 52,708 | 8  | 8  | 92  | 22 | 2 | 1 | 51 | 11 | 153 | 42 |
| 52,709 | 8  | 8  | 92  | 23 | 2 | 1 | 51 | 11 | 153 | 43 |
| 52,710 | 7  | 6  | 91  | 23 | 2 | 1 | 51 | 12 | 151 | 42 |
| 52,711 | 7  | 6  | 91  | 24 | 2 | 2 | 51 | 12 | 151 | 44 |
| 52,712 | 7  | 5  | 91  | 23 | 2 | 2 | 50 | 12 | 150 | 42 |
| 52,713 | 7  | 5  | 87  | 23 | 2 | 2 | 49 | 12 | 145 | 42 |
| 52,714 | 7  | 5  | 78  | 24 | 2 | 2 | 42 | 12 | 129 | 43 |

|        |    |   |    |    |   |   |    |    |     |     |
|--------|----|---|----|----|---|---|----|----|-----|-----|
| 52,715 | 7  | 6 | 75 | 23 | 2 | 2 | 40 | 12 | 124 | 43  |
| 52,716 | 7  | 6 | 76 | 24 | 3 | 2 | 40 | 12 | 126 | 44  |
| 52,717 | 7  | 6 | 76 | 24 | 3 | 2 | 40 | 12 | 126 | 44  |
| 52,718 | 7  | 6 | 76 | 24 | 3 | 2 | 40 | 12 | 126 | 44  |
| 52,719 | 7  | 6 | 76 | 24 | 3 | 2 | 40 | 12 | 126 | 44  |
| 52,720 | 7  | 6 | 76 | 24 | 3 | 2 | 40 | 12 | 126 | 44  |
| 52,721 | 7  | 6 | 76 | 23 | 3 | 2 | 40 | 12 | 126 | 43  |
| 52,722 | 7  | 6 | 77 | 23 | 3 | 2 | 40 | 12 | 127 | 43  |
| 52,723 | 7  | 6 | 78 | 23 | 3 | 2 | 40 | 12 | 128 | 43  |
| 52,724 | 7  | 5 | 82 | 23 | 3 | 2 | 44 | 12 | 136 | 42  |
| 52,725 | 7  | 5 | 83 | 22 | 2 | 2 | 43 | 12 | 135 | 41  |
| 52,726 | 7  | 4 | 84 | 22 | 2 | 2 | 43 | 12 | 136 | 40  |
| 52,727 | 8  | 4 | 91 | 22 | 3 | 2 | 57 | 12 | 159 | 40  |
| 52,728 | 9  | 4 | 98 | 22 | 4 | 2 | 58 | 12 | 169 | 40  |
| 52,729 | 9  | 3 | 99 | 22 | 4 | 2 | 57 | 11 | 169 | 38  |
| 52,730 | 9  | 3 | 99 | 23 | 4 | 2 | 57 | 14 | 169 | 42  |
| 52,731 | 9  | 3 | 98 | 23 | 4 | 2 | 55 | 13 | 166 | 41  |
| 52,732 | 10 | 3 | 97 | 24 | 4 | 3 | 51 | 18 | 162 | 48  |
| 52,733 | 10 | 3 | 94 | 27 | 4 | 3 | 51 | 20 | 159 | 53  |
| 52,734 | 10 | 3 | 93 | 29 | 4 | 4 | 52 | 23 | 159 | 59  |
| 52,735 | 11 | 3 | 91 | 29 | 6 | 4 | 54 | 22 | 162 | 58  |
| 52,736 | 11 | 3 | 97 | 29 | 6 | 4 | 53 | 22 | 167 | 58  |
| 52,737 | 10 | 3 | 99 | 31 | 6 | 4 | 51 | 24 | 166 | 62  |
| 52,738 | 10 | 3 | 93 | 40 | 6 | 4 | 47 | 25 | 156 | 72  |
| 52,739 | 10 | 3 | 90 | 43 | 5 | 4 | 46 | 26 | 151 | 76  |
| 52,740 | 10 | 3 | 90 | 42 | 5 | 4 | 45 | 26 | 150 | 75  |
| 52,741 | 10 | 3 | 90 | 42 | 5 | 4 | 45 | 26 | 150 | 75  |
| 52,742 | 10 | 3 | 90 | 46 | 5 | 4 | 45 | 27 | 150 | 80  |
| 52,743 | 10 | 3 | 90 | 45 | 5 | 4 | 45 | 27 | 150 | 79  |
| 52,744 | 10 | 3 | 90 | 46 | 5 | 4 | 45 | 27 | 150 | 80  |
| 52,745 | 10 | 3 | 86 | 46 | 5 | 4 | 44 | 28 | 145 | 81  |
| 52,746 | 10 | 3 | 86 | 44 | 5 | 4 | 44 | 26 | 145 | 77  |
| 52,747 | 10 | 3 | 86 | 55 | 5 | 4 | 44 | 29 | 145 | 91  |
| 52,748 | 10 | 3 | 85 | 53 | 5 | 4 | 42 | 29 | 142 | 89  |
| 52,749 | 9  | 3 | 85 | 51 | 5 | 5 | 42 | 30 | 141 | 89  |
| 52,750 | 9  | 3 | 84 | 51 | 5 | 5 | 41 | 29 | 139 | 88  |
| 52,751 | 9  | 2 | 81 | 51 | 5 | 5 | 41 | 34 | 136 | 92  |
| 52,752 | 9  | 2 | 80 | 51 | 5 | 5 | 40 | 34 | 134 | 92  |
| 52,753 | 8  | 3 | 81 | 55 | 6 | 5 | 42 | 40 | 137 | 103 |
| 52,754 | 7  | 3 | 81 | 60 | 6 | 5 | 43 | 44 | 137 | 112 |
| 52,755 | 7  | 4 | 80 | 63 | 6 | 6 | 43 | 46 | 136 | 119 |

|        |   |   |    |    |   |   |    |    |     |     |
|--------|---|---|----|----|---|---|----|----|-----|-----|
| 52,756 | 7 | 5 | 80 | 69 | 6 | 6 | 43 | 47 | 136 | 127 |
| 52,757 | 7 | 5 | 78 | 69 | 6 | 6 | 43 | 47 | 134 | 127 |
| 52,758 | 7 | 5 | 56 | 68 | 6 | 6 | 36 | 47 | 105 | 126 |
| 52,759 | 7 | 5 | 55 | 68 | 6 | 6 | 36 | 47 | 104 | 126 |
| 52,760 | 7 | 5 | 55 | 67 | 6 | 6 | 36 | 47 | 104 | 125 |
| 52,761 | 7 | 5 | 55 | 66 | 6 | 5 | 36 | 46 | 104 | 122 |
| 52,762 | 7 | 5 | 55 | 66 | 6 | 5 | 36 | 46 | 104 | 122 |
| 52,763 | 7 | 5 | 55 | 66 | 6 | 5 | 36 | 47 | 104 | 123 |
| 52,764 | 7 | 5 | 55 | 66 | 6 | 5 | 36 | 47 | 104 | 123 |
| 52,765 | 7 | 5 | 54 | 65 | 5 | 5 | 37 | 47 | 103 | 122 |
| 52,766 | 7 | 4 | 54 | 64 | 5 | 5 | 37 | 47 | 103 | 120 |
| 52,767 | 7 | 4 | 54 | 64 | 5 | 5 | 37 | 47 | 103 | 120 |
| 52,768 | 7 | 5 | 55 | 66 | 5 | 5 | 38 | 47 | 105 | 123 |
| 52,769 | 7 | 5 | 55 | 66 | 5 | 5 | 38 | 47 | 105 | 123 |
| 52,770 | 7 | 5 | 55 | 67 | 5 | 5 | 40 | 47 | 107 | 124 |
| 52,771 | 7 | 5 | 55 | 67 | 5 | 5 | 40 | 47 | 107 | 124 |
| 52,772 | 7 | 5 | 54 | 66 | 5 | 5 | 41 | 47 | 107 | 123 |
| 52,773 | 7 | 5 | 54 | 66 | 5 | 5 | 41 | 48 | 107 | 124 |
| 52,774 | 7 | 5 | 52 | 74 | 5 | 5 | 42 | 48 | 106 | 132 |
| 52,775 | 7 | 5 | 48 | 75 | 5 | 5 | 39 | 51 | 99  | 136 |
| 52,776 | 7 | 5 | 47 | 76 | 5 | 5 | 39 | 51 | 98  | 137 |
| 52,777 | 7 | 5 | 46 | 76 | 5 | 5 | 39 | 51 | 97  | 137 |
| 52,778 | 6 | 5 | 36 | 76 | 5 | 5 | 25 | 51 | 72  | 137 |
| 52,779 | 5 | 5 | 29 | 75 | 4 | 5 | 24 | 48 | 62  | 133 |
| 52,780 | 5 | 5 | 28 | 75 | 4 | 5 | 24 | 48 | 61  | 133 |
| 52,781 | 7 | 6 | 26 | 77 | 5 | 5 | 26 | 48 | 64  | 136 |
| 52,782 | 5 | 6 | 25 | 77 | 5 | 5 | 26 | 50 | 61  | 138 |
| 52,783 | 5 | 6 | 25 | 80 | 5 | 4 | 28 | 45 | 63  | 135 |
| 52,784 | 5 | 6 | 26 | 80 | 5 | 3 | 30 | 41 | 66  | 130 |
| 52,785 | 5 | 6 | 24 | 80 | 5 | 3 | 29 | 41 | 63  | 130 |
| 52,786 | 2 | 6 | 18 | 80 | 4 | 3 | 24 | 41 | 48  | 130 |
| 52,787 | 2 | 6 | 11 | 84 | 4 | 3 | 22 | 45 | 39  | 138 |
| 52,788 | 2 | 6 | 9  | 79 | 4 | 3 | 20 | 42 | 35  | 130 |
| 52,789 | 2 | 6 | 9  | 70 | 4 | 3 | 20 | 41 | 35  | 120 |
| 52,790 | 2 | 7 | 11 | 66 | 4 | 3 | 21 | 40 | 38  | 116 |
| 52,791 | 2 | 7 | 11 | 67 | 4 | 3 | 22 | 41 | 39  | 118 |
| 52,792 | 2 | 7 | 11 | 66 | 4 | 3 | 22 | 41 | 39  | 117 |
| 52,793 | 2 | 7 | 11 | 62 | 4 | 3 | 22 | 40 | 39  | 112 |
| 52,794 | 2 | 7 | 11 | 62 | 4 | 3 | 24 | 40 | 41  | 112 |
| 52,795 | 2 | 7 | 11 | 61 | 4 | 3 | 24 | 37 | 41  | 108 |
| 52,796 | 2 | 6 | 12 | 49 | 4 | 3 | 24 | 32 | 42  | 90  |



|        |   |   |    |    |   |   |    |    |    |    |
|--------|---|---|----|----|---|---|----|----|----|----|
| 52,797 | 2 | 6 | 12 | 50 | 4 | 3 | 24 | 32 | 42 | 91 |
| 52,798 | 2 | 6 | 12 | 50 | 4 | 3 | 24 | 32 | 42 | 91 |
| 52,799 | 2 | 6 | 12 | 50 | 4 | 3 | 24 | 34 | 42 | 93 |
| 52,800 | 2 | 6 | 11 | 50 | 4 | 1 | 24 | 34 | 41 | 91 |
| 52,801 | 2 | 6 | 11 | 50 | 4 | 1 | 24 | 35 | 41 | 92 |
| 52,802 | 2 | 6 | 11 | 49 | 4 | 1 | 24 | 30 | 41 | 86 |
| 52,803 | 2 | 5 | 10 | 45 | 3 | 1 | 22 | 25 | 37 | 76 |
| 52,804 | 2 | 5 | 10 | 45 | 3 | 2 | 22 | 30 | 37 | 82 |
| 52,805 | 2 | 4 | 9  | 38 | 3 | 1 | 21 | 24 | 35 | 67 |
| 52,806 | 2 | 3 | 9  | 32 | 3 | 1 | 21 | 23 | 35 | 59 |
| 52,807 | 2 | 3 | 9  | 32 | 3 | 1 | 21 | 23 | 35 | 59 |
| 52,808 | 2 | 3 | 9  | 32 | 3 | 1 | 21 | 25 | 35 | 61 |
| 52,809 | 2 | 3 | 9  | 32 | 3 | 1 | 21 | 25 | 35 | 61 |
| 52,810 | 2 | 3 | 9  | 32 | 3 | 1 | 21 | 25 | 35 | 61 |
| 52,811 | 2 | 3 | 9  | 32 | 3 | 1 | 21 | 25 | 35 | 61 |
| 52,812 | 3 | 3 | 9  | 32 | 3 | 1 | 21 | 25 | 36 | 61 |
| 52,813 | 3 | 3 | 9  | 32 | 3 | 1 | 21 | 24 | 36 | 60 |
| 52,814 | 3 | 3 | 9  | 32 | 3 | 1 | 22 | 24 | 37 | 60 |
| 52,815 | 3 | 3 | 9  | 32 | 3 | 1 | 21 | 24 | 36 | 60 |
| 52,816 | 3 | 3 | 9  | 34 | 3 | 1 | 21 | 29 | 36 | 67 |
| 52,817 | 3 | 3 | 10 | 36 | 3 | 1 | 21 | 35 | 37 | 75 |
| 52,818 | 3 | 3 | 9  | 37 | 3 | 1 | 19 | 36 | 34 | 77 |
| 52,819 | 3 | 2 | 9  | 35 | 3 | 1 | 19 | 36 | 34 | 74 |
| 52,820 | 3 | 2 | 9  | 36 | 3 | 1 | 19 | 46 | 34 | 85 |
| 52,821 | 3 | 2 | 9  | 36 | 3 | 1 | 17 | 48 | 32 | 87 |
| 52,822 | 3 | 2 | 9  | 37 | 3 | 1 | 17 | 48 | 32 | 88 |
| 52,823 | 3 | 2 | 9  | 37 | 3 | 1 | 16 | 48 | 31 | 88 |
| 52,824 | 3 | 2 | 10 | 38 | 3 | 1 | 16 | 48 | 32 | 89 |
| 52,825 | 3 | 2 | 10 | 30 | 3 | 1 | 16 | 48 | 32 | 81 |
| 52,826 | 3 | 2 | 10 | 29 | 3 | 1 | 15 | 45 | 31 | 77 |
| 52,827 | 4 | 2 | 10 | 28 | 3 | 1 | 16 | 45 | 33 | 76 |
| 52,828 | 4 | 2 | 10 | 28 | 3 | 1 | 16 | 45 | 33 | 76 |
| 52,829 | 4 | 2 | 11 | 28 | 2 | 1 | 17 | 45 | 34 | 76 |
| 52,830 | 4 | 2 | 11 | 28 | 2 | 1 | 17 | 45 | 34 | 76 |
| 52,831 | 4 | 2 | 11 | 30 | 2 | 1 | 17 | 45 | 34 | 78 |
| 52,832 | 2 | 1 | 11 | 28 | 1 | 1 | 15 | 48 | 29 | 78 |
| 52,833 | 2 | 1 | 11 | 28 | 1 | 1 | 14 | 46 | 28 | 76 |
| 52,834 | 2 | 1 | 11 | 24 | 1 | 1 | 13 | 46 | 27 | 72 |
| 52,835 | 3 | 1 | 10 | 16 | 1 | 1 | 11 | 41 | 25 | 59 |
| 52,836 | 3 | 1 | 10 | 16 | 1 | 1 | 11 | 41 | 25 | 59 |
| 52,837 | 3 | 1 | 8  | 16 | 0 | 1 | 7  | 41 | 18 | 59 |

|        |    |   |     |    |   |   |    |    |     |    |
|--------|----|---|-----|----|---|---|----|----|-----|----|
| 52,838 | 3  | 1 | 7   | 16 | 0 | 1 | 7  | 42 | 17  | 60 |
| 52,839 | 3  | 1 | 7   | 16 | 0 | 1 | 7  | 44 | 17  | 62 |
| 52,840 | 3  | 0 | 6   | 16 | 1 | 1 | 6  | 44 | 16  | 61 |
| 52,841 | 3  | 0 | 6   | 15 | 1 | 1 | 6  | 43 | 16  | 59 |
| 52,842 | 4  | 0 | 9   | 15 | 1 | 1 | 7  | 43 | 21  | 59 |
| 52,843 | 4  | 0 | 13  | 15 | 1 | 1 | 7  | 43 | 25  | 59 |
| 52,844 | 4  | 0 | 19  | 15 | 1 | 1 | 6  | 43 | 30  | 59 |
| 52,845 | 4  | 0 | 19  | 15 | 1 | 1 | 6  | 43 | 30  | 59 |
| 52,846 | 4  | 0 | 19  | 15 | 1 | 1 | 6  | 43 | 30  | 59 |
| 52,847 | 10 | 0 | 70  | 14 | 6 | 1 | 62 | 44 | 148 | 59 |
| 52,848 | 10 | 0 | 72  | 13 | 6 | 1 | 64 | 42 | 152 | 56 |
| 52,849 | 10 | 0 | 72  | 13 | 6 | 1 | 64 | 42 | 152 | 56 |
| 52,850 | 10 | 0 | 74  | 13 | 6 | 1 | 64 | 41 | 154 | 55 |
| 52,851 | 10 | 0 | 74  | 13 | 6 | 1 | 64 | 42 | 154 | 56 |
| 52,852 | 10 | 0 | 74  | 13 | 6 | 1 | 64 | 41 | 154 | 55 |
| 52,853 | 11 | 0 | 77  | 13 | 6 | 1 | 66 | 41 | 160 | 55 |
| 52,854 | 11 | 0 | 77  | 13 | 6 | 1 | 66 | 40 | 160 | 54 |
| 52,855 | 14 | 0 | 90  | 12 | 8 | 0 | 77 | 35 | 189 | 47 |
| 52,856 | 14 | 0 | 90  | 12 | 8 | 0 | 77 | 35 | 189 | 47 |
| 52,857 | 15 | 0 | 96  | 12 | 8 | 0 | 81 | 35 | 200 | 47 |
| 52,858 | 15 | 0 | 97  | 12 | 8 | 0 | 81 | 33 | 201 | 45 |
| 52,859 | 15 | 0 | 99  | 12 | 8 | 0 | 81 | 33 | 203 | 45 |
| 52,860 | 15 | 0 | 99  | 12 | 8 | 0 | 82 | 33 | 204 | 45 |
| 52,861 | 15 | 0 | 101 | 12 | 8 | 0 | 90 | 33 | 214 | 45 |
| 52,862 | 14 | 0 | 101 | 12 | 8 | 0 | 90 | 33 | 213 | 45 |
| 52,863 | 14 | 0 | 101 | 12 | 8 | 0 | 90 | 33 | 213 | 45 |
| 52,864 | 14 | 0 | 102 | 12 | 8 | 0 | 91 | 33 | 215 | 45 |
| 52,865 | 14 | 0 | 102 | 12 | 8 | 0 | 93 | 33 | 217 | 45 |
| 52,866 | 14 | 0 | 102 | 12 | 8 | 0 | 93 | 33 | 217 | 45 |
| 52,867 | 14 | 0 | 102 | 10 | 8 | 0 | 93 | 28 | 217 | 38 |
| 52,868 | 14 | 0 | 104 | 8  | 8 | 0 | 94 | 24 | 220 | 32 |
| 52,869 | 14 | 0 | 104 | 7  | 8 | 0 | 94 | 21 | 220 | 28 |
| 52,870 | 14 | 0 | 104 | 7  | 8 | 0 | 94 | 21 | 220 | 28 |
| 52,871 | 14 | 0 | 104 | 6  | 8 | 0 | 94 | 11 | 220 | 17 |
| 52,872 | 14 | 0 | 104 | 9  | 8 | 0 | 94 | 14 | 220 | 23 |
| 52,873 | 14 | 0 | 104 | 11 | 8 | 0 | 94 | 14 | 220 | 25 |
| 52,874 | 14 | 0 | 110 | 12 | 8 | 0 | 97 | 17 | 229 | 29 |
| 52,875 | 14 | 0 | 114 | 11 | 8 | 0 | 98 | 17 | 234 | 28 |
| 52,876 | 14 | 0 | 114 | 11 | 8 | 0 | 99 | 18 | 235 | 29 |
| 52,877 | 13 | 0 | 114 | 11 | 9 | 0 | 98 | 18 | 234 | 29 |
| 52,878 | 13 | 0 | 114 | 13 | 9 | 0 | 98 | 19 | 234 | 32 |

|        |    |   |     |    |    |   |     |    |     |    |
|--------|----|---|-----|----|----|---|-----|----|-----|----|
| 52,879 | 13 | 0 | 113 | 13 | 9  | 0 | 97  | 19 | 232 | 32 |
| 52,880 | 13 | 0 | 118 | 13 | 9  | 0 | 100 | 19 | 240 | 32 |
| 52,881 | 13 | 0 | 120 | 13 | 9  | 0 | 102 | 19 | 244 | 32 |
| 52,882 | 14 | 0 | 127 | 11 | 10 | 0 | 107 | 16 | 258 | 27 |
| 52,883 | 14 | 0 | 138 | 11 | 10 | 0 | 122 | 16 | 284 | 27 |
| 52,884 | 14 | 0 | 138 | 11 | 10 | 1 | 122 | 16 | 284 | 28 |
| 52,885 | 14 | 0 | 138 | 11 | 10 | 1 | 122 | 16 | 284 | 28 |
| 52,886 | 16 | 0 | 144 | 10 | 10 | 1 | 128 | 16 | 298 | 27 |
| 52,887 | 16 | 0 | 144 | 10 | 10 | 1 | 128 | 16 | 298 | 27 |
| 52,888 | 16 | 0 | 143 | 10 | 10 | 1 | 128 | 15 | 297 | 26 |
| 52,889 | 16 | 0 | 143 | 10 | 10 | 1 | 128 | 13 | 297 | 24 |
| 52,890 | 16 | 0 | 143 | 10 | 9  | 1 | 128 | 13 | 296 | 24 |
| 52,891 | 16 | 0 | 142 | 10 | 9  | 1 | 127 | 13 | 294 | 24 |
| 52,892 | 16 | 0 | 142 | 15 | 9  | 1 | 127 | 16 | 294 | 32 |
| 52,893 | 15 | 1 | 139 | 20 | 9  | 3 | 126 | 22 | 289 | 46 |
| 52,894 | 15 | 1 | 135 | 23 | 9  | 4 | 126 | 23 | 285 | 51 |
| 52,895 | 17 | 2 | 129 | 35 | 9  | 4 | 125 | 27 | 280 | 68 |
| 52,896 | 13 | 2 | 104 | 35 | 6  | 4 | 105 | 27 | 228 | 68 |
| 52,897 | 12 | 2 | 87  | 35 | 4  | 4 | 76  | 27 | 179 | 68 |
| 52,898 | 11 | 2 | 77  | 35 | 4  | 4 | 73  | 26 | 165 | 67 |
| 52,899 | 11 | 2 | 76  | 35 | 4  | 4 | 71  | 26 | 162 | 67 |
| 52,900 | 11 | 2 | 76  | 35 | 4  | 4 | 71  | 26 | 162 | 67 |
| 52,901 | 11 | 2 | 74  | 35 | 4  | 4 | 71  | 25 | 160 | 66 |
| 52,902 | 11 | 2 | 74  | 36 | 4  | 4 | 71  | 25 | 160 | 67 |
| 52,903 | 10 | 2 | 74  | 37 | 4  | 4 | 69  | 26 | 157 | 69 |
| 52,904 | 10 | 2 | 72  | 39 | 4  | 4 | 69  | 26 | 155 | 71 |
| 52,905 | 10 | 3 | 72  | 40 | 4  | 4 | 69  | 26 | 155 | 73 |
| 52,906 | 7  | 3 | 62  | 40 | 2  | 4 | 62  | 26 | 133 | 73 |
| 52,907 | 8  | 3 | 60  | 40 | 2  | 4 | 61  | 27 | 131 | 74 |
| 52,908 | 7  | 3 | 56  | 40 | 2  | 4 | 59  | 27 | 124 | 74 |
| 52,909 | 7  | 3 | 55  | 40 | 2  | 4 | 63  | 27 | 127 | 74 |
| 52,910 | 7  | 3 | 53  | 40 | 2  | 4 | 63  | 27 | 125 | 74 |
| 52,911 | 7  | 3 | 53  | 41 | 2  | 5 | 64  | 28 | 126 | 77 |
| 52,912 | 7  | 3 | 51  | 41 | 2  | 5 | 56  | 30 | 116 | 79 |
| 52,913 | 7  | 3 | 51  | 41 | 2  | 5 | 56  | 30 | 116 | 79 |
| 52,914 | 9  | 3 | 76  | 45 | 4  | 5 | 92  | 32 | 181 | 85 |
| 52,915 | 9  | 3 | 76  | 45 | 4  | 5 | 89  | 32 | 178 | 85 |
| 52,916 | 9  | 3 | 77  | 50 | 4  | 5 | 90  | 33 | 180 | 91 |
| 52,917 | 9  | 3 | 75  | 50 | 4  | 5 | 90  | 33 | 178 | 91 |
| 52,918 | 9  | 3 | 74  | 50 | 4  | 5 | 89  | 34 | 176 | 92 |
| 52,919 | 9  | 3 | 74  | 51 | 4  | 5 | 92  | 35 | 179 | 94 |

|        |    |   |    |    |   |   |    |    |     |     |
|--------|----|---|----|----|---|---|----|----|-----|-----|
| 52,920 | 9  | 3 | 75 | 51 | 4 | 5 | 92 | 35 | 180 | 94  |
| 52,921 | 9  | 3 | 75 | 51 | 4 | 5 | 92 | 35 | 180 | 94  |
| 52,922 | 9  | 3 | 75 | 52 | 4 | 5 | 92 | 35 | 180 | 95  |
| 52,923 | 9  | 3 | 70 | 45 | 4 | 5 | 89 | 30 | 172 | 83  |
| 52,924 | 11 | 3 | 69 | 44 | 4 | 5 | 89 | 27 | 173 | 79  |
| 52,925 | 11 | 3 | 69 | 45 | 4 | 5 | 89 | 27 | 173 | 80  |
| 52,926 | 11 | 3 | 65 | 45 | 4 | 5 | 88 | 25 | 168 | 78  |
| 52,927 | 11 | 3 | 65 | 45 | 4 | 5 | 87 | 25 | 167 | 78  |
| 52,928 | 11 | 3 | 65 | 44 | 3 | 5 | 87 | 24 | 166 | 76  |
| 52,929 | 11 | 3 | 65 | 45 | 3 | 5 | 87 | 26 | 166 | 79  |
| 52,930 | 11 | 3 | 60 | 49 | 3 | 5 | 84 | 26 | 158 | 83  |
| 52,931 | 11 | 3 | 58 | 52 | 4 | 5 | 83 | 28 | 156 | 88  |
| 52,932 | 10 | 3 | 54 | 54 | 3 | 5 | 79 | 28 | 146 | 90  |
| 52,933 | 10 | 5 | 52 | 54 | 3 | 5 | 78 | 28 | 143 | 92  |
| 52,934 | 10 | 5 | 41 | 55 | 3 | 5 | 64 | 28 | 118 | 93  |
| 52,935 | 9  | 5 | 35 | 55 | 3 | 4 | 59 | 28 | 106 | 92  |
| 52,936 | 7  | 5 | 35 | 58 | 3 | 4 | 58 | 28 | 103 | 95  |
| 52,937 | 8  | 5 | 36 | 59 | 3 | 4 | 65 | 28 | 112 | 96  |
| 52,938 | 8  | 5 | 40 | 59 | 3 | 4 | 65 | 28 | 116 | 96  |
| 52,939 | 9  | 6 | 41 | 61 | 3 | 4 | 69 | 28 | 122 | 99  |
| 52,940 | 9  | 6 | 41 | 62 | 3 | 4 | 69 | 28 | 122 | 100 |
| 52,941 | 9  | 6 | 47 | 62 | 3 | 4 | 73 | 28 | 132 | 100 |
| 52,942 | 9  | 6 | 47 | 62 | 3 | 4 | 73 | 28 | 132 | 100 |
| 52,943 | 9  | 6 | 47 | 57 | 3 | 4 | 74 | 25 | 133 | 92  |
| 52,944 | 9  | 5 | 50 | 52 | 3 | 2 | 74 | 19 | 136 | 78  |
| 52,945 | 7  | 4 | 50 | 38 | 3 | 1 | 74 | 15 | 134 | 58  |
| 52,946 | 7  | 4 | 54 | 43 | 3 | 1 | 74 | 18 | 138 | 66  |
| 52,947 | 7  | 4 | 54 | 43 | 3 | 1 | 71 | 18 | 135 | 66  |
| 52,948 | 7  | 4 | 56 | 43 | 3 | 1 | 73 | 18 | 139 | 66  |
| 52,949 | 7  | 4 | 58 | 43 | 3 | 1 | 72 | 18 | 140 | 66  |
| 52,950 | 7  | 4 | 59 | 44 | 3 | 1 | 78 | 18 | 147 | 67  |
| 52,951 | 7  | 4 | 63 | 44 | 3 | 1 | 80 | 18 | 153 | 67  |
| 52,952 | 7  | 4 | 63 | 44 | 3 | 1 | 80 | 18 | 153 | 67  |
| 52,953 | 7  | 4 | 63 | 43 | 3 | 1 | 80 | 18 | 153 | 66  |
| 52,954 | 7  | 4 | 63 | 42 | 3 | 1 | 80 | 17 | 153 | 64  |
| 52,955 | 7  | 3 | 63 | 40 | 3 | 1 | 80 | 17 | 153 | 61  |
| 52,956 | 7  | 3 | 63 | 41 | 3 | 1 | 80 | 17 | 153 | 62  |
| 52,957 | 7  | 3 | 60 | 42 | 3 | 1 | 76 | 17 | 146 | 63  |
| 52,958 | 6  | 3 | 60 | 42 | 3 | 1 | 75 | 16 | 144 | 62  |
| 52,959 | 6  | 3 | 61 | 42 | 3 | 1 | 76 | 16 | 146 | 62  |
| 52,960 | 6  | 3 | 63 | 42 | 4 | 1 | 72 | 16 | 145 | 62  |

|        |   |   |    |    |   |   |    |    |     |    |
|--------|---|---|----|----|---|---|----|----|-----|----|
| 52,961 | 6 | 3 | 63 | 42 | 4 | 1 | 72 | 16 | 145 | 62 |
| 52,962 | 6 | 3 | 67 | 42 | 4 | 0 | 73 | 13 | 150 | 58 |
| 52,963 | 6 | 4 | 63 | 42 | 3 | 0 | 67 | 14 | 139 | 60 |
| 52,964 | 4 | 4 | 42 | 38 | 2 | 0 | 40 | 12 | 88  | 54 |
| 52,965 | 4 | 4 | 41 | 38 | 2 | 0 | 36 | 12 | 83  | 54 |
| 52,966 | 4 | 4 | 40 | 38 | 2 | 0 | 35 | 12 | 81  | 54 |
| 52,967 | 4 | 4 | 40 | 33 | 2 | 0 | 35 | 11 | 81  | 48 |
| 52,968 | 4 | 4 | 40 | 33 | 2 | 0 | 35 | 11 | 81  | 48 |
| 52,969 | 4 | 5 | 41 | 32 | 2 | 0 | 32 | 9  | 79  | 46 |
| 52,970 | 4 | 6 | 40 | 32 | 2 | 0 | 32 | 9  | 78  | 47 |
| 52,971 | 4 | 6 | 40 | 32 | 2 | 0 | 32 | 9  | 78  | 47 |
| 52,972 | 4 | 6 | 42 | 32 | 2 | 0 | 32 | 9  | 80  | 47 |
| 52,973 | 4 | 6 | 42 | 30 | 2 | 0 | 32 | 9  | 80  | 45 |
| 52,974 | 4 | 6 | 41 | 30 | 2 | 0 | 32 | 9  | 79  | 45 |
| 52,975 | 2 | 6 | 42 | 30 | 2 | 0 | 39 | 9  | 85  | 45 |
| 52,976 | 4 | 6 | 42 | 30 | 2 | 0 | 39 | 9  | 87  | 45 |
| 52,977 | 4 | 6 | 42 | 30 | 2 | 0 | 39 | 9  | 87  | 45 |
| 52,978 | 4 | 6 | 44 | 30 | 2 | 0 | 40 | 9  | 90  | 45 |
| 52,979 | 5 | 6 | 57 | 29 | 2 | 0 | 47 | 9  | 111 | 44 |
| 52,980 | 5 | 6 | 59 | 28 | 2 | 0 | 47 | 7  | 113 | 41 |
| 52,981 | 5 | 6 | 61 | 24 | 2 | 0 | 51 | 7  | 119 | 37 |
| 52,982 | 5 | 6 | 64 | 21 | 1 | 0 | 50 | 5  | 120 | 32 |
| 52,983 | 6 | 4 | 64 | 19 | 1 | 0 | 50 | 5  | 121 | 28 |
| 52,984 | 6 | 4 | 65 | 18 | 1 | 0 | 50 | 5  | 122 | 27 |
| 52,985 | 6 | 4 | 65 | 18 | 1 | 0 | 49 | 5  | 121 | 27 |
| 52,986 | 6 | 4 | 65 | 15 | 1 | 0 | 49 | 5  | 121 | 24 |
| 52,987 | 6 | 4 | 66 | 15 | 1 | 0 | 49 | 5  | 122 | 24 |
| 52,988 | 5 | 3 | 66 | 13 | 1 | 0 | 42 | 5  | 114 | 21 |
| 52,989 | 5 | 3 | 63 | 13 | 1 | 0 | 42 | 5  | 111 | 21 |
| 52,990 | 4 | 3 | 62 | 13 | 1 | 0 | 38 | 5  | 105 | 21 |
| 52,991 | 4 | 3 | 58 | 12 | 1 | 0 | 35 | 5  | 98  | 20 |
| 52,992 | 4 | 3 | 60 | 13 | 2 | 0 | 39 | 5  | 105 | 21 |
| 52,993 | 4 | 3 | 61 | 13 | 2 | 0 | 39 | 5  | 106 | 21 |
| 52,994 | 4 | 3 | 61 | 13 | 3 | 0 | 39 | 5  | 107 | 21 |
| 52,995 | 4 | 3 | 58 | 13 | 3 | 0 | 39 | 5  | 104 | 21 |
| 52,996 | 4 | 3 | 58 | 12 | 3 | 0 | 39 | 3  | 104 | 18 |
| 52,997 | 4 | 3 | 55 | 7  | 3 | 0 | 39 | 1  | 101 | 11 |
| 52,998 | 4 | 4 | 54 | 7  | 3 | 0 | 38 | 1  | 99  | 12 |
| 52,999 | 4 | 4 | 53 | 7  | 3 | 0 | 37 | 1  | 97  | 12 |
| 53,000 | 5 | 4 | 54 | 7  | 4 | 0 | 37 | 2  | 100 | 13 |
| 53,001 | 5 | 4 | 52 | 6  | 4 | 0 | 31 | 2  | 92  | 12 |

|        |   |   |    |    |   |   |    |    |     |    |
|--------|---|---|----|----|---|---|----|----|-----|----|
| 53,002 | 5 | 4 | 48 | 6  | 4 | 0 | 29 | 2  | 86  | 12 |
| 53,003 | 5 | 4 | 49 | 6  | 4 | 0 | 31 | 2  | 89  | 12 |
| 53,004 | 5 | 4 | 49 | 6  | 4 | 0 | 31 | 2  | 89  | 12 |
| 53,005 | 5 | 4 | 50 | 5  | 4 | 0 | 33 | 2  | 92  | 11 |
| 53,006 | 5 | 4 | 50 | 5  | 4 | 0 | 33 | 2  | 92  | 11 |
| 53,007 | 5 | 4 | 50 | 4  | 4 | 0 | 33 | 2  | 92  | 10 |
| 53,008 | 5 | 4 | 50 | 3  | 4 | 0 | 33 | 2  | 92  | 9  |
| 53,009 | 5 | 4 | 49 | 3  | 4 | 0 | 32 | 2  | 90  | 9  |
| 53,010 | 5 | 4 | 50 | 5  | 3 | 0 | 32 | 4  | 90  | 13 |
| 53,011 | 5 | 4 | 50 | 5  | 3 | 0 | 34 | 4  | 92  | 13 |
| 53,012 | 5 | 4 | 49 | 5  | 3 | 0 | 31 | 4  | 88  | 13 |
| 53,013 | 5 | 4 | 49 | 4  | 3 | 0 | 36 | 4  | 93  | 12 |
| 53,014 | 5 | 3 | 49 | 4  | 3 | 0 | 36 | 3  | 93  | 10 |
| 53,015 | 5 | 3 | 49 | 7  | 3 | 0 | 36 | 3  | 93  | 13 |
| 53,016 | 5 | 3 | 49 | 7  | 3 | 0 | 36 | 3  | 93  | 13 |
| 53,017 | 6 | 3 | 50 | 7  | 3 | 0 | 37 | 3  | 96  | 13 |
| 53,018 | 6 | 3 | 50 | 7  | 3 | 0 | 37 | 3  | 96  | 13 |
| 53,019 | 6 | 3 | 50 | 7  | 3 | 0 | 37 | 3  | 96  | 13 |
| 53,020 | 6 | 2 | 50 | 7  | 3 | 0 | 38 | 3  | 97  | 12 |
| 53,021 | 6 | 1 | 50 | 7  | 3 | 0 | 38 | 3  | 97  | 11 |
| 53,022 | 6 | 1 | 49 | 7  | 3 | 0 | 38 | 3  | 96  | 11 |
| 53,023 | 6 | 1 | 48 | 7  | 4 | 0 | 39 | 3  | 97  | 11 |
| 53,024 | 7 | 1 | 48 | 7  | 4 | 1 | 40 | 4  | 99  | 13 |
| 53,025 | 8 | 1 | 50 | 7  | 5 | 2 | 40 | 4  | 103 | 14 |
| 53,026 | 8 | 1 | 55 | 9  | 5 | 2 | 34 | 5  | 102 | 17 |
| 53,027 | 6 | 2 | 56 | 13 | 5 | 5 | 35 | 9  | 102 | 29 |
| 53,028 | 6 | 2 | 54 | 15 | 5 | 5 | 35 | 9  | 100 | 31 |
| 53,029 | 5 | 2 | 41 | 15 | 5 | 5 | 28 | 9  | 79  | 31 |
| 53,030 | 5 | 2 | 39 | 16 | 5 | 5 | 28 | 10 | 77  | 33 |
| 53,031 | 6 | 2 | 68 | 17 | 7 | 5 | 35 | 10 | 116 | 34 |
| 53,032 | 6 | 2 | 71 | 18 | 7 | 5 | 38 | 11 | 122 | 36 |
| 53,033 | 5 | 2 | 73 | 19 | 7 | 5 | 39 | 11 | 124 | 37 |
| 53,034 | 5 | 2 | 75 | 19 | 7 | 5 | 40 | 11 | 127 | 37 |
| 53,035 | 5 | 2 | 74 | 19 | 7 | 5 | 41 | 11 | 127 | 37 |
| 53,036 | 5 | 2 | 74 | 19 | 7 | 5 | 41 | 11 | 127 | 37 |
| 53,037 | 6 | 2 | 77 | 20 | 7 | 5 | 45 | 11 | 135 | 38 |
| 53,038 | 6 | 2 | 76 | 20 | 7 | 5 | 45 | 11 | 134 | 38 |
| 53,039 | 7 | 2 | 77 | 19 | 7 | 5 | 45 | 11 | 136 | 37 |
| 53,040 | 7 | 2 | 80 | 20 | 9 | 5 | 46 | 11 | 142 | 38 |
| 53,041 | 7 | 2 | 83 | 20 | 9 | 5 | 47 | 11 | 146 | 38 |
| 53,042 | 8 | 2 | 88 | 19 | 8 | 5 | 45 | 11 | 149 | 37 |

|        |    |   |     |    |   |   |    |    |     |    |
|--------|----|---|-----|----|---|---|----|----|-----|----|
| 53,043 | 8  | 2 | 91  | 19 | 8 | 5 | 44 | 11 | 151 | 37 |
| 53,044 | 8  | 2 | 98  | 19 | 8 | 5 | 45 | 11 | 159 | 37 |
| 53,045 | 9  | 2 | 98  | 19 | 7 | 5 | 45 | 11 | 159 | 37 |
| 53,046 | 9  | 2 | 98  | 19 | 7 | 5 | 46 | 11 | 160 | 37 |
| 53,047 | 9  | 2 | 103 | 19 | 7 | 5 | 48 | 11 | 167 | 37 |
| 53,048 | 9  | 2 | 102 | 19 | 7 | 5 | 48 | 11 | 166 | 37 |
| 53,049 | 8  | 1 | 101 | 19 | 7 | 5 | 49 | 11 | 165 | 36 |
| 53,050 | 8  | 1 | 101 | 19 | 7 | 5 | 49 | 11 | 165 | 36 |
| 53,051 | 8  | 1 | 102 | 22 | 7 | 5 | 49 | 15 | 166 | 43 |
| 53,052 | 9  | 2 | 100 | 24 | 7 | 5 | 47 | 16 | 163 | 47 |
| 53,053 | 9  | 2 | 100 | 24 | 7 | 5 | 47 | 16 | 163 | 47 |
| 53,054 | 9  | 2 | 100 | 24 | 7 | 5 | 47 | 16 | 163 | 47 |
| 53,055 | 9  | 2 | 99  | 27 | 7 | 5 | 45 | 16 | 160 | 50 |
| 53,056 | 9  | 2 | 99  | 27 | 7 | 5 | 45 | 16 | 160 | 50 |
| 53,057 | 9  | 2 | 99  | 28 | 7 | 5 | 45 | 16 | 160 | 51 |
| 53,058 | 9  | 2 | 99  | 28 | 7 | 5 | 45 | 16 | 160 | 51 |
| 53,059 | 9  | 2 | 105 | 28 | 7 | 5 | 45 | 16 | 166 | 51 |
| 53,060 | 9  | 2 | 105 | 28 | 7 | 5 | 45 | 16 | 166 | 51 |
| 53,061 | 9  | 2 | 111 | 28 | 7 | 5 | 47 | 15 | 174 | 50 |
| 53,062 | 9  | 2 | 111 | 28 | 7 | 5 | 47 | 15 | 174 | 50 |
| 53,063 | 9  | 2 | 114 | 28 | 7 | 5 | 47 | 15 | 177 | 50 |
| 53,064 | 11 | 3 | 146 | 26 | 7 | 5 | 47 | 15 | 211 | 49 |
| 53,065 | 11 | 3 | 148 | 26 | 7 | 5 | 51 | 15 | 217 | 49 |
| 53,066 | 10 | 3 | 147 | 26 | 7 | 5 | 50 | 15 | 214 | 49 |
| 53,067 | 10 | 3 | 147 | 26 | 7 | 5 | 50 | 15 | 214 | 49 |
| 53,068 | 10 | 3 | 149 | 26 | 7 | 5 | 50 | 15 | 216 | 49 |
| 53,069 | 10 | 3 | 149 | 26 | 7 | 5 | 50 | 15 | 216 | 49 |
| 53,070 | 10 | 3 | 149 | 27 | 7 | 5 | 50 | 15 | 216 | 50 |
| 53,071 | 10 | 3 | 149 | 29 | 7 | 5 | 49 | 15 | 215 | 52 |
| 53,072 | 10 | 3 | 149 | 29 | 7 | 5 | 49 | 15 | 215 | 52 |
| 53,073 | 10 | 3 | 150 | 29 | 6 | 4 | 48 | 14 | 214 | 50 |
| 53,074 | 10 | 3 | 150 | 29 | 6 | 4 | 48 | 15 | 214 | 51 |
| 53,075 | 9  | 3 | 150 | 29 | 6 | 4 | 48 | 15 | 213 | 51 |
| 53,076 | 8  | 3 | 148 | 27 | 5 | 3 | 48 | 14 | 209 | 47 |
| 53,077 | 8  | 2 | 142 | 21 | 5 | 0 | 48 | 11 | 203 | 34 |
| 53,078 | 8  | 2 | 141 | 23 | 5 | 0 | 47 | 11 | 201 | 36 |
| 53,079 | 8  | 2 | 141 | 24 | 5 | 0 | 46 | 11 | 200 | 37 |
| 53,080 | 7  | 2 | 130 | 24 | 4 | 0 | 42 | 11 | 183 | 37 |
| 53,081 | 7  | 2 | 126 | 23 | 4 | 0 | 40 | 10 | 177 | 35 |
| 53,082 | 7  | 2 | 110 | 22 | 3 | 0 | 34 | 10 | 154 | 34 |
| 53,083 | 7  | 2 | 104 | 21 | 3 | 0 | 32 | 10 | 146 | 33 |

|        |   |   |     |    |   |   |    |    |     |    |
|--------|---|---|-----|----|---|---|----|----|-----|----|
| 53,084 | 7 | 2 | 102 | 20 | 3 | 0 | 31 | 10 | 143 | 32 |
| 53,085 | 7 | 2 | 99  | 20 | 3 | 0 | 30 | 10 | 139 | 32 |
| 53,086 | 7 | 2 | 99  | 20 | 3 | 0 | 29 | 10 | 138 | 32 |
| 53,087 | 7 | 2 | 99  | 20 | 3 | 0 | 29 | 10 | 138 | 32 |
| 53,088 | 6 | 2 | 96  | 19 | 3 | 0 | 25 | 10 | 130 | 31 |
| 53,089 | 5 | 2 | 94  | 20 | 3 | 0 | 26 | 10 | 128 | 32 |
| 53,090 | 5 | 2 | 90  | 21 | 2 | 0 | 26 | 11 | 123 | 34 |
| 53,091 | 5 | 2 | 90  | 20 | 1 | 0 | 26 | 12 | 122 | 34 |
| 53,092 | 5 | 2 | 87  | 20 | 1 | 0 | 24 | 12 | 117 | 34 |
| 53,093 | 4 | 2 | 78  | 24 | 1 | 1 | 22 | 15 | 105 | 42 |
| 53,094 | 4 | 3 | 75  | 26 | 1 | 1 | 22 | 15 | 102 | 45 |
| 53,095 | 4 | 3 | 67  | 33 | 1 | 1 | 21 | 15 | 93  | 52 |
| 53,096 | 3 | 3 | 67  | 33 | 1 | 1 | 21 | 16 | 92  | 53 |
| 53,097 | 3 | 3 | 72  | 35 | 1 | 1 | 21 | 19 | 97  | 58 |
| 53,098 | 3 | 3 | 70  | 35 | 1 | 1 | 19 | 19 | 93  | 58 |
| 53,099 | 3 | 3 | 68  | 35 | 1 | 1 | 19 | 18 | 91  | 57 |
| 53,100 | 3 | 3 | 69  | 38 | 1 | 1 | 19 | 18 | 92  | 60 |
| 53,101 | 3 | 3 | 69  | 38 | 0 | 1 | 19 | 18 | 91  | 60 |
| 53,102 | 3 | 3 | 68  | 35 | 1 | 1 | 19 | 14 | 91  | 53 |
| 53,103 | 2 | 2 | 71  | 33 | 1 | 1 | 20 | 14 | 94  | 50 |
| 53,104 | 2 | 2 | 71  | 33 | 1 | 1 | 20 | 14 | 94  | 50 |
| 53,105 | 2 | 2 | 71  | 33 | 1 | 1 | 21 | 14 | 95  | 50 |
| 53,106 | 2 | 2 | 72  | 30 | 1 | 1 | 27 | 14 | 102 | 47 |
| 53,107 | 3 | 2 | 75  | 30 | 1 | 1 | 28 | 14 | 107 | 47 |
| 53,108 | 3 | 2 | 75  | 30 | 1 | 1 | 30 | 14 | 109 | 47 |
| 53,109 | 3 | 3 | 75  | 31 | 1 | 1 | 30 | 14 | 109 | 49 |
| 53,110 | 3 | 3 | 70  | 33 | 2 | 1 | 33 | 19 | 108 | 56 |
| 53,111 | 3 | 3 | 68  | 34 | 2 | 1 | 33 | 20 | 106 | 58 |
| 53,112 | 3 | 4 | 61  | 39 | 2 | 1 | 31 | 20 | 97  | 64 |
| 53,113 | 3 | 4 | 61  | 39 | 2 | 1 | 29 | 20 | 95  | 64 |
| 53,114 | 3 | 4 | 59  | 39 | 2 | 1 | 31 | 20 | 95  | 64 |
| 53,115 | 1 | 3 | 24  | 38 | 3 | 1 | 27 | 20 | 55  | 62 |
| 53,116 | 1 | 3 | 22  | 38 | 3 | 1 | 23 | 20 | 49  | 62 |
| 53,117 | 1 | 3 | 22  | 38 | 3 | 1 | 23 | 21 | 49  | 63 |
| 53,118 | 1 | 3 | 22  | 38 | 3 | 1 | 23 | 21 | 49  | 63 |
| 53,119 | 3 | 3 | 22  | 38 | 3 | 1 | 31 | 21 | 59  | 63 |
| 53,120 | 3 | 3 | 23  | 38 | 3 | 1 | 33 | 21 | 62  | 63 |
| 53,121 | 3 | 3 | 24  | 35 | 3 | 1 | 33 | 22 | 63  | 61 |
| 53,122 | 3 | 3 | 24  | 37 | 3 | 1 | 33 | 23 | 63  | 64 |
| 53,123 | 3 | 3 | 24  | 37 | 3 | 1 | 33 | 23 | 63  | 64 |
| 53,124 | 3 | 3 | 23  | 37 | 3 | 1 | 33 | 23 | 62  | 64 |



|        |   |   |    |    |   |   |    |    |    |    |
|--------|---|---|----|----|---|---|----|----|----|----|
| 53,125 | 3 | 3 | 23 | 37 | 3 | 1 | 33 | 22 | 62 | 63 |
| 53,126 | 3 | 3 | 23 | 37 | 3 | 1 | 32 | 22 | 61 | 63 |
| 53,127 | 3 | 3 | 23 | 37 | 3 | 1 | 32 | 22 | 61 | 63 |
| 53,128 | 3 | 3 | 25 | 36 | 3 | 1 | 34 | 21 | 65 | 61 |
| 53,129 | 3 | 3 | 25 | 36 | 3 | 1 | 34 | 21 | 65 | 61 |
| 53,130 | 3 | 3 | 25 | 35 | 3 | 1 | 34 | 21 | 65 | 60 |
| 53,131 | 3 | 3 | 25 | 35 | 3 | 1 | 34 | 21 | 65 | 60 |
| 53,132 | 3 | 3 | 25 | 36 | 3 | 1 | 34 | 22 | 65 | 62 |
| 53,133 | 3 | 3 | 25 | 36 | 3 | 1 | 34 | 22 | 65 | 62 |
| 53,134 | 4 | 3 | 26 | 36 | 3 | 1 | 34 | 21 | 67 | 61 |
| 53,135 | 4 | 3 | 26 | 36 | 3 | 1 | 34 | 21 | 67 | 61 |
| 53,136 | 4 | 3 | 26 | 36 | 3 | 1 | 34 | 21 | 67 | 61 |
| 53,137 | 4 | 3 | 26 | 36 | 3 | 1 | 34 | 21 | 67 | 61 |
| 53,138 | 4 | 3 | 26 | 36 | 3 | 1 | 34 | 21 | 67 | 61 |
| 53,139 | 4 | 3 | 26 | 34 | 3 | 1 | 34 | 20 | 67 | 58 |
| 53,140 | 4 | 3 | 26 | 34 | 3 | 1 | 33 | 20 | 66 | 58 |
| 53,141 | 4 | 3 | 26 | 34 | 3 | 1 | 32 | 20 | 65 | 58 |
| 53,142 | 4 | 3 | 26 | 34 | 3 | 1 | 32 | 20 | 65 | 58 |
| 53,143 | 4 | 3 | 26 | 34 | 3 | 1 | 32 | 20 | 65 | 58 |
| 53,144 | 4 | 3 | 26 | 30 | 3 | 0 | 32 | 17 | 65 | 50 |
| 53,145 | 4 | 2 | 26 | 21 | 3 | 0 | 32 | 17 | 65 | 40 |
| 53,146 | 4 | 2 | 26 | 21 | 3 | 0 | 32 | 17 | 65 | 40 |
| 53,147 | 4 | 2 | 27 | 21 | 4 | 0 | 32 | 16 | 67 | 39 |
| 53,148 | 4 | 3 | 22 | 19 | 4 | 0 | 31 | 13 | 61 | 35 |
| 53,149 | 4 | 4 | 19 | 20 | 4 | 0 | 31 | 13 | 58 | 37 |
| 53,150 | 4 | 4 | 19 | 20 | 4 | 0 | 30 | 13 | 57 | 37 |
| 53,151 | 4 | 4 | 18 | 18 | 4 | 0 | 30 | 13 | 56 | 35 |
| 53,152 | 4 | 5 | 18 | 18 | 4 | 0 | 30 | 13 | 56 | 36 |
| 53,153 | 4 | 5 | 18 | 18 | 4 | 0 | 32 | 14 | 58 | 37 |
| 53,154 | 4 | 5 | 15 | 18 | 4 | 0 | 31 | 13 | 54 | 36 |
| 53,155 | 4 | 5 | 17 | 18 | 4 | 0 | 30 | 13 | 55 | 36 |
| 53,156 | 4 | 5 | 16 | 19 | 4 | 0 | 24 | 13 | 48 | 37 |
| 53,157 | 4 | 5 | 16 | 19 | 4 | 0 | 24 | 14 | 48 | 38 |
| 53,158 | 3 | 5 | 14 | 18 | 4 | 0 | 23 | 14 | 44 | 37 |
| 53,159 | 3 | 4 | 14 | 17 | 4 | 0 | 21 | 14 | 42 | 35 |
| 53,160 | 3 | 4 | 13 | 17 | 4 | 0 | 20 | 15 | 40 | 36 |
| 53,161 | 3 | 4 | 13 | 15 | 3 | 0 | 18 | 11 | 37 | 30 |
| 53,162 | 3 | 3 | 13 | 7  | 3 | 0 | 18 | 9  | 37 | 19 |
| 53,163 | 3 | 3 | 13 | 8  | 3 | 0 | 18 | 9  | 37 | 20 |
| 53,164 | 3 | 3 | 13 | 8  | 3 | 0 | 18 | 9  | 37 | 20 |
| 53,165 | 3 | 3 | 12 | 8  | 3 | 0 | 17 | 9  | 35 | 20 |

|        |   |   |    |    |   |   |    |    |    |    |
|--------|---|---|----|----|---|---|----|----|----|----|
| 53,166 | 3 | 3 | 12 | 8  | 2 | 0 | 16 | 9  | 33 | 20 |
| 53,167 | 3 | 3 | 15 | 8  | 2 | 0 | 17 | 9  | 37 | 20 |
| 53,168 | 3 | 3 | 16 | 8  | 2 | 0 | 17 | 8  | 38 | 19 |
| 53,169 | 3 | 3 | 17 | 8  | 2 | 0 | 17 | 9  | 39 | 20 |
| 53,170 | 1 | 3 | 15 | 8  | 2 | 0 | 11 | 9  | 29 | 20 |
| 53,171 | 1 | 3 | 15 | 8  | 2 | 0 | 9  | 9  | 27 | 20 |
| 53,172 | 1 | 3 | 14 | 9  | 2 | 1 | 9  | 9  | 26 | 22 |
| 53,173 | 1 | 3 | 14 | 8  | 2 | 1 | 9  | 8  | 26 | 20 |
| 53,174 | 1 | 3 | 14 | 8  | 2 | 1 | 9  | 8  | 26 | 20 |
| 53,175 | 1 | 3 | 15 | 8  | 2 | 1 | 9  | 7  | 27 | 19 |
| 53,176 | 2 | 3 | 20 | 8  | 2 | 1 | 12 | 7  | 36 | 19 |
| 53,177 | 3 | 3 | 24 | 8  | 3 | 1 | 17 | 7  | 47 | 19 |
| 53,178 | 3 | 3 | 24 | 8  | 3 | 1 | 17 | 7  | 47 | 19 |
| 53,179 | 3 | 3 | 28 | 7  | 3 | 1 | 20 | 7  | 54 | 18 |
| 53,180 | 3 | 4 | 28 | 8  | 3 | 1 | 20 | 8  | 54 | 21 |
| 53,181 | 3 | 4 | 28 | 9  | 3 | 1 | 20 | 8  | 54 | 22 |
| 53,182 | 3 | 4 | 29 | 8  | 3 | 1 | 20 | 7  | 55 | 20 |
| 53,183 | 3 | 4 | 29 | 8  | 3 | 1 | 20 | 7  | 55 | 20 |
| 53,184 | 2 | 4 | 28 | 8  | 3 | 1 | 20 | 7  | 53 | 20 |
| 53,185 | 2 | 4 | 28 | 8  | 3 | 1 | 20 | 7  | 53 | 20 |
| 53,186 | 2 | 4 | 28 | 8  | 3 | 1 | 20 | 7  | 53 | 20 |
| 53,187 | 2 | 5 | 28 | 8  | 3 | 1 | 21 | 7  | 54 | 21 |
| 53,188 | 2 | 5 | 28 | 8  | 3 | 1 | 21 | 7  | 54 | 21 |
| 53,189 | 2 | 5 | 28 | 8  | 3 | 1 | 24 | 7  | 57 | 21 |
| 53,190 | 2 | 5 | 28 | 8  | 3 | 1 | 26 | 7  | 59 | 21 |
| 53,191 | 2 | 5 | 30 | 8  | 3 | 1 | 26 | 7  | 61 | 21 |
| 53,192 | 2 | 5 | 30 | 9  | 3 | 1 | 26 | 7  | 61 | 22 |
| 53,193 | 2 | 5 | 30 | 10 | 3 | 1 | 26 | 7  | 61 | 23 |
| 53,194 | 2 | 5 | 30 | 12 | 3 | 1 | 26 | 7  | 61 | 25 |
| 53,195 | 3 | 5 | 32 | 12 | 3 | 1 | 28 | 7  | 66 | 25 |
| 53,196 | 3 | 5 | 32 | 12 | 3 | 1 | 28 | 7  | 66 | 25 |
| 53,197 | 3 | 5 | 33 | 14 | 3 | 1 | 29 | 8  | 68 | 28 |
| 53,198 | 3 | 5 | 33 | 16 | 2 | 1 | 29 | 9  | 67 | 31 |
| 53,199 | 3 | 5 | 33 | 38 | 2 | 3 | 29 | 21 | 67 | 67 |
| 53,200 | 3 | 4 | 33 | 39 | 2 | 4 | 29 | 21 | 67 | 68 |
| 53,201 | 3 | 4 | 33 | 43 | 2 | 4 | 30 | 22 | 68 | 73 |
| 53,202 | 3 | 6 | 33 | 43 | 2 | 4 | 30 | 22 | 68 | 75 |
| 53,203 | 3 | 5 | 33 | 43 | 1 | 4 | 30 | 22 | 67 | 74 |
| 53,204 | 3 | 5 | 34 | 44 | 1 | 4 | 30 | 22 | 68 | 75 |
| 53,205 | 3 | 5 | 34 | 44 | 1 | 4 | 30 | 23 | 68 | 76 |
| 53,206 | 3 | 5 | 36 | 49 | 1 | 4 | 31 | 25 | 71 | 83 |

|        |   |    |    |     |   |   |    |    |     |     |
|--------|---|----|----|-----|---|---|----|----|-----|-----|
| 53,207 | 3 | 5  | 36 | 48  | 1 | 4 | 31 | 24 | 71  | 81  |
| 53,208 | 3 | 7  | 39 | 48  | 1 | 4 | 33 | 24 | 76  | 83  |
| 53,209 | 3 | 7  | 39 | 51  | 1 | 4 | 33 | 24 | 76  | 86  |
| 53,210 | 3 | 7  | 39 | 51  | 1 | 4 | 33 | 24 | 76  | 86  |
| 53,211 | 3 | 7  | 39 | 53  | 1 | 4 | 33 | 23 | 76  | 87  |
| 53,212 | 3 | 7  | 39 | 53  | 1 | 4 | 34 | 22 | 77  | 86  |
| 53,213 | 3 | 7  | 39 | 53  | 1 | 4 | 34 | 22 | 77  | 86  |
| 53,214 | 3 | 7  | 39 | 52  | 1 | 4 | 34 | 22 | 77  | 85  |
| 53,215 | 3 | 7  | 40 | 54  | 1 | 4 | 34 | 22 | 78  | 87  |
| 53,216 | 3 | 7  | 40 | 54  | 1 | 4 | 33 | 22 | 77  | 87  |
| 53,217 | 3 | 7  | 38 | 54  | 1 | 4 | 33 | 23 | 75  | 88  |
| 53,218 | 3 | 7  | 37 | 54  | 1 | 4 | 33 | 23 | 74  | 88  |
| 53,219 | 3 | 7  | 37 | 54  | 1 | 4 | 34 | 22 | 75  | 87  |
| 53,220 | 3 | 7  | 38 | 54  | 1 | 4 | 34 | 22 | 76  | 87  |
| 53,221 | 3 | 7  | 38 | 56  | 1 | 4 | 32 | 25 | 74  | 92  |
| 53,222 | 3 | 7  | 36 | 62  | 1 | 5 | 32 | 30 | 72  | 104 |
| 53,223 | 3 | 7  | 36 | 74  | 1 | 4 | 32 | 34 | 72  | 119 |
| 53,224 | 3 | 7  | 41 | 81  | 1 | 4 | 37 | 35 | 82  | 127 |
| 53,225 | 4 | 7  | 49 | 85  | 1 | 4 | 51 | 35 | 105 | 131 |
| 53,226 | 4 | 7  | 51 | 91  | 1 | 4 | 51 | 35 | 107 | 137 |
| 53,227 | 3 | 9  | 47 | 99  | 1 | 4 | 48 | 39 | 99  | 151 |
| 53,228 | 2 | 9  | 41 | 101 | 0 | 4 | 40 | 40 | 83  | 154 |
| 53,229 | 2 | 9  | 37 | 104 | 0 | 4 | 37 | 40 | 76  | 157 |
| 53,230 | 2 | 8  | 37 | 103 | 0 | 4 | 37 | 39 | 76  | 154 |
| 53,231 | 2 | 8  | 37 | 102 | 0 | 4 | 37 | 39 | 76  | 153 |
| 53,232 | 2 | 8  | 39 | 103 | 0 | 4 | 40 | 40 | 81  | 155 |
| 53,233 | 2 | 8  | 38 | 105 | 0 | 4 | 41 | 43 | 81  | 160 |
| 53,234 | 2 | 8  | 38 | 106 | 0 | 4 | 41 | 45 | 81  | 163 |
| 53,235 | 2 | 10 | 40 | 106 | 0 | 4 | 41 | 45 | 83  | 165 |
| 53,236 | 2 | 10 | 40 | 106 | 0 | 4 | 41 | 45 | 83  | 165 |
| 53,237 | 2 | 9  | 40 | 106 | 0 | 4 | 41 | 45 | 83  | 164 |
| 53,238 | 2 | 9  | 40 | 106 | 0 | 4 | 40 | 45 | 82  | 164 |
| 53,239 | 2 | 9  | 40 | 107 | 0 | 4 | 37 | 46 | 79  | 166 |
| 53,240 | 2 | 9  | 40 | 107 | 0 | 4 | 35 | 46 | 77  | 166 |
| 53,241 | 2 | 9  | 40 | 110 | 0 | 4 | 35 | 46 | 77  | 169 |
| 53,242 | 2 | 9  | 38 | 110 | 0 | 4 | 35 | 46 | 75  | 169 |
| 53,243 | 2 | 9  | 39 | 108 | 0 | 4 | 35 | 46 | 76  | 167 |
| 53,244 | 2 | 9  | 39 | 110 | 0 | 4 | 35 | 47 | 76  | 170 |
| 53,245 | 2 | 9  | 38 | 109 | 0 | 4 | 33 | 47 | 73  | 169 |
| 53,246 | 1 | 9  | 37 | 111 | 0 | 4 | 34 | 47 | 72  | 171 |
| 53,247 | 1 | 9  | 35 | 111 | 0 | 4 | 33 | 47 | 69  | 171 |

|        |   |    |    |     |   |   |    |    |     |     |
|--------|---|----|----|-----|---|---|----|----|-----|-----|
| 53,248 | 1 | 9  | 36 | 107 | 0 | 4 | 32 | 45 | 69  | 165 |
| 53,249 | 1 | 9  | 36 | 107 | 0 | 4 | 32 | 45 | 69  | 165 |
| 53,250 | 1 | 8  | 36 | 85  | 0 | 2 | 32 | 33 | 69  | 128 |
| 53,251 | 1 | 9  | 39 | 79  | 0 | 1 | 32 | 32 | 72  | 121 |
| 53,252 | 1 | 9  | 39 | 80  | 0 | 1 | 32 | 32 | 72  | 122 |
| 53,253 | 1 | 7  | 39 | 83  | 0 | 1 | 32 | 32 | 72  | 123 |
| 53,254 | 1 | 7  | 62 | 87  | 0 | 1 | 35 | 32 | 98  | 127 |
| 53,255 | 1 | 8  | 65 | 93  | 0 | 1 | 38 | 31 | 104 | 133 |
| 53,256 | 1 | 8  | 66 | 93  | 0 | 1 | 37 | 30 | 104 | 132 |
| 53,257 | 1 | 8  | 62 | 88  | 0 | 1 | 37 | 28 | 100 | 125 |
| 53,258 | 1 | 8  | 62 | 95  | 0 | 1 | 37 | 29 | 100 | 133 |
| 53,259 | 1 | 6  | 59 | 95  | 0 | 1 | 35 | 29 | 95  | 131 |
| 53,260 | 1 | 6  | 58 | 95  | 0 | 1 | 35 | 29 | 94  | 131 |
| 53,261 | 1 | 6  | 58 | 95  | 0 | 1 | 35 | 29 | 94  | 131 |
| 53,262 | 2 | 7  | 58 | 93  | 0 | 1 | 36 | 30 | 96  | 131 |
| 53,263 | 2 | 7  | 58 | 93  | 0 | 1 | 37 | 30 | 97  | 131 |
| 53,264 | 2 | 7  | 57 | 93  | 0 | 1 | 37 | 30 | 96  | 131 |
| 53,265 | 2 | 7  | 57 | 91  | 0 | 1 | 37 | 30 | 96  | 129 |
| 53,266 | 2 | 7  | 57 | 91  | 0 | 1 | 37 | 30 | 96  | 129 |
| 53,267 | 2 | 7  | 60 | 91  | 0 | 1 | 38 | 29 | 100 | 128 |
| 53,268 | 2 | 7  | 60 | 92  | 0 | 1 | 37 | 29 | 99  | 129 |
| 53,269 | 2 | 7  | 60 | 92  | 0 | 2 | 37 | 29 | 99  | 130 |
| 53,270 | 2 | 7  | 59 | 92  | 0 | 2 | 36 | 33 | 97  | 134 |
| 53,271 | 2 | 7  | 58 | 97  | 0 | 2 | 36 | 48 | 96  | 154 |
| 53,272 | 2 | 7  | 58 | 95  | 0 | 3 | 36 | 46 | 96  | 151 |
| 53,273 | 2 | 8  | 58 | 92  | 0 | 3 | 36 | 45 | 96  | 148 |
| 53,274 | 2 | 8  | 56 | 80  | 0 | 3 | 32 | 41 | 90  | 132 |
| 53,275 | 2 | 8  | 53 | 73  | 0 | 3 | 31 | 40 | 86  | 124 |
| 53,276 | 1 | 8  | 46 | 63  | 0 | 3 | 17 | 40 | 64  | 114 |
| 53,277 | 1 | 8  | 43 | 63  | 0 | 3 | 17 | 40 | 61  | 114 |
| 53,278 | 1 | 6  | 43 | 57  | 0 | 3 | 17 | 36 | 61  | 102 |
| 53,279 | 1 | 6  | 43 | 56  | 0 | 3 | 17 | 35 | 61  | 100 |
| 53,280 | 1 | 6  | 45 | 58  | 0 | 3 | 20 | 37 | 66  | 104 |
| 53,281 | 1 | 9  | 45 | 68  | 0 | 3 | 20 | 44 | 66  | 124 |
| 53,282 | 1 | 9  | 45 | 78  | 0 | 3 | 20 | 52 | 66  | 142 |
| 53,283 | 1 | 10 | 43 | 77  | 0 | 4 | 18 | 52 | 62  | 143 |
| 53,284 | 3 | 10 | 52 | 75  | 0 | 4 | 25 | 49 | 80  | 138 |
| 53,285 | 4 | 8  | 51 | 75  | 0 | 4 | 25 | 48 | 80  | 135 |
| 53,286 | 4 | 9  | 50 | 75  | 0 | 4 | 25 | 48 | 79  | 136 |
| 53,287 | 4 | 9  | 51 | 75  | 0 | 4 | 26 | 48 | 81  | 136 |
| 53,288 | 4 | 10 | 51 | 75  | 0 | 4 | 26 | 48 | 81  | 137 |

|        |    |    |     |    |   |   |     |    |     |     |
|--------|----|----|-----|----|---|---|-----|----|-----|-----|
| 53,289 | 5  | 10 | 59  | 75 | 0 | 5 | 35  | 48 | 99  | 138 |
| 53,290 | 5  | 10 | 61  | 74 | 0 | 5 | 38  | 47 | 104 | 136 |
| 53,291 | 5  | 10 | 61  | 71 | 0 | 5 | 39  | 47 | 105 | 133 |
| 53,292 | 5  | 10 | 61  | 71 | 0 | 5 | 39  | 47 | 105 | 133 |
| 53,293 | 5  | 10 | 61  | 71 | 0 | 5 | 39  | 47 | 105 | 133 |
| 53,294 | 5  | 10 | 63  | 71 | 0 | 5 | 39  | 49 | 107 | 135 |
| 53,295 | 5  | 10 | 63  | 69 | 0 | 5 | 39  | 48 | 107 | 132 |
| 53,296 | 5  | 10 | 67  | 68 | 0 | 5 | 41  | 48 | 113 | 131 |
| 53,297 | 5  | 10 | 70  | 66 | 0 | 6 | 41  | 48 | 116 | 130 |
| 53,298 | 5  | 10 | 78  | 66 | 3 | 6 | 47  | 48 | 133 | 130 |
| 53,299 | 5  | 10 | 77  | 66 | 3 | 6 | 47  | 48 | 132 | 130 |
| 53,300 | 5  | 10 | 100 | 67 | 3 | 6 | 52  | 48 | 160 | 131 |
| 53,301 | 8  | 10 | 122 | 67 | 3 | 6 | 79  | 48 | 212 | 131 |
| 53,302 | 9  | 9  | 123 | 67 | 3 | 6 | 84  | 48 | 219 | 130 |
| 53,303 | 10 | 9  | 130 | 66 | 3 | 6 | 88  | 49 | 231 | 130 |
| 53,304 | 10 | 9  | 125 | 62 | 3 | 6 | 91  | 49 | 229 | 126 |
| 53,305 | 10 | 9  | 108 | 58 | 3 | 6 | 88  | 49 | 209 | 122 |
| 53,306 | 10 | 8  | 104 | 51 | 3 | 6 | 83  | 49 | 200 | 114 |
| 53,307 | 14 | 8  | 124 | 51 | 6 | 6 | 112 | 49 | 256 | 114 |
| 53,308 | 14 | 8  | 131 | 51 | 6 | 6 | 114 | 49 | 265 | 114 |
| 53,309 | 14 | 8  | 131 | 44 | 6 | 6 | 114 | 48 | 265 | 106 |
| 53,310 | 14 | 8  | 131 | 41 | 6 | 6 | 115 | 48 | 266 | 103 |
| 53,311 | 15 | 8  | 132 | 43 | 6 | 6 | 115 | 48 | 268 | 105 |
| 53,312 | 15 | 8  | 132 | 43 | 6 | 6 | 113 | 48 | 266 | 105 |
| 53,313 | 14 | 7  | 132 | 43 | 6 | 6 | 113 | 47 | 265 | 103 |
| 53,314 | 14 | 7  | 132 | 43 | 6 | 6 | 112 | 47 | 264 | 103 |
| 53,315 | 14 | 7  | 136 | 43 | 6 | 6 | 116 | 47 | 272 | 103 |
| 53,316 | 14 | 7  | 137 | 43 | 6 | 6 | 117 | 47 | 274 | 103 |
| 53,317 | 15 | 7  | 136 | 43 | 6 | 6 | 118 | 47 | 275 | 103 |
| 53,318 | 15 | 7  | 136 | 43 | 6 | 6 | 117 | 47 | 274 | 103 |
| 53,319 | 15 | 7  | 136 | 42 | 6 | 5 | 117 | 47 | 274 | 101 |
| 53,320 | 15 | 7  | 137 | 42 | 6 | 5 | 117 | 43 | 275 | 97  |
| 53,321 | 15 | 7  | 136 | 42 | 6 | 5 | 118 | 43 | 275 | 97  |
| 53,322 | 16 | 7  | 137 | 37 | 6 | 4 | 119 | 27 | 278 | 75  |
| 53,323 | 16 | 7  | 137 | 37 | 6 | 4 | 119 | 27 | 278 | 75  |
| 53,324 | 16 | 6  | 137 | 34 | 6 | 3 | 119 | 23 | 278 | 66  |
| 53,325 | 19 | 6  | 138 | 33 | 6 | 3 | 124 | 22 | 287 | 64  |
| 53,326 | 19 | 6  | 153 | 32 | 7 | 3 | 138 | 22 | 317 | 63  |
| 53,327 | 19 | 6  | 154 | 32 | 7 | 3 | 140 | 22 | 320 | 63  |
| 53,328 | 19 | 6  | 154 | 30 | 7 | 3 | 141 | 22 | 321 | 61  |
| 53,329 | 19 | 6  | 153 | 29 | 7 | 3 | 143 | 22 | 322 | 60  |

|        |    |   |     |    |    |   |     |    |     |    |
|--------|----|---|-----|----|----|---|-----|----|-----|----|
| 53,330 | 19 | 6 | 153 | 29 | 7  | 3 | 143 | 22 | 322 | 60 |
| 53,331 | 19 | 6 | 156 | 24 | 7  | 3 | 143 | 20 | 325 | 53 |
| 53,332 | 19 | 3 | 156 | 4  | 7  | 3 | 143 | 5  | 325 | 15 |
| 53,333 | 19 | 2 | 156 | 3  | 7  | 2 | 143 | 3  | 325 | 10 |
| 53,334 | 19 | 2 | 156 | 4  | 7  | 2 | 142 | 3  | 324 | 11 |
| 53,335 | 17 | 2 | 147 | 6  | 7  | 2 | 135 | 3  | 306 | 13 |
| 53,336 | 16 | 2 | 150 | 10 | 8  | 2 | 135 | 3  | 309 | 17 |
| 53,337 | 16 | 1 | 149 | 11 | 8  | 2 | 134 | 4  | 307 | 18 |
| 53,338 | 16 | 1 | 149 | 11 | 8  | 2 | 135 | 5  | 308 | 19 |
| 53,339 | 15 | 0 | 149 | 11 | 8  | 3 | 131 | 5  | 303 | 19 |
| 53,340 | 15 | 0 | 141 | 11 | 8  | 2 | 127 | 5  | 291 | 18 |
| 53,341 | 15 | 0 | 139 | 14 | 8  | 2 | 124 | 5  | 286 | 21 |
| 53,342 | 15 | 0 | 139 | 14 | 8  | 2 | 123 | 5  | 285 | 21 |
| 53,343 | 15 | 0 | 147 | 14 | 8  | 2 | 123 | 5  | 293 | 21 |
| 53,344 | 16 | 1 | 168 | 14 | 10 | 2 | 132 | 3  | 326 | 20 |
| 53,345 | 17 | 1 | 172 | 14 | 10 | 2 | 135 | 3  | 334 | 20 |
| 53,346 | 17 | 1 | 172 | 14 | 10 | 2 | 135 | 3  | 334 | 20 |
| 53,347 | 18 | 1 | 181 | 14 | 10 | 2 | 160 | 3  | 369 | 20 |
| 53,348 | 18 | 1 | 178 | 14 | 10 | 1 | 159 | 3  | 365 | 19 |
| 53,349 | 18 | 1 | 171 | 14 | 7  | 1 | 156 | 3  | 352 | 19 |
| 53,350 | 18 | 1 | 149 | 13 | 7  | 1 | 152 | 3  | 326 | 18 |
| 53,351 | 18 | 1 | 149 | 13 | 7  | 1 | 152 | 3  | 326 | 18 |
| 53,352 | 15 | 1 | 128 | 13 | 7  | 1 | 126 | 3  | 276 | 18 |
| 53,353 | 14 | 1 | 127 | 15 | 7  | 1 | 121 | 5  | 269 | 22 |
| 53,354 | 13 | 1 | 120 | 19 | 7  | 1 | 117 | 4  | 257 | 25 |
| 53,355 | 13 | 1 | 119 | 19 | 7  | 1 | 114 | 4  | 253 | 25 |
| 53,356 | 13 | 1 | 119 | 19 | 7  | 1 | 114 | 4  | 253 | 25 |
| 53,357 | 10 | 1 | 98  | 19 | 4  | 1 | 85  | 4  | 197 | 25 |
| 53,358 | 10 | 1 | 91  | 20 | 4  | 1 | 84  | 4  | 189 | 26 |
| 53,359 | 10 | 1 | 91  | 20 | 4  | 1 | 83  | 4  | 188 | 26 |
| 53,360 | 10 | 1 | 91  | 18 | 4  | 1 | 83  | 4  | 188 | 24 |
| 53,361 | 10 | 1 | 91  | 18 | 4  | 1 | 82  | 4  | 187 | 24 |
| 53,362 | 9  | 2 | 92  | 18 | 4  | 1 | 82  | 4  | 187 | 25 |
| 53,363 | 9  | 2 | 92  | 18 | 4  | 1 | 82  | 4  | 187 | 25 |
| 53,364 | 9  | 2 | 92  | 18 | 4  | 1 | 82  | 4  | 187 | 25 |
| 53,365 | 9  | 2 | 88  | 18 | 4  | 1 | 78  | 4  | 179 | 25 |
| 53,366 | 9  | 2 | 87  | 18 | 4  | 1 | 77  | 4  | 177 | 25 |
| 53,367 | 9  | 2 | 87  | 18 | 4  | 1 | 77  | 4  | 177 | 25 |
| 53,368 | 8  | 2 | 85  | 18 | 4  | 1 | 76  | 4  | 173 | 25 |
| 53,369 | 8  | 2 | 87  | 18 | 4  | 1 | 76  | 4  | 175 | 25 |
| 53,370 | 8  | 2 | 87  | 18 | 4  | 1 | 76  | 4  | 175 | 25 |

|        |    |   |     |    |    |   |     |   |     |    |
|--------|----|---|-----|----|----|---|-----|---|-----|----|
| 53,371 | 8  | 2 | 86  | 18 | 4  | 1 | 76  | 4 | 174 | 25 |
| 53,372 | 8  | 2 | 86  | 19 | 4  | 1 | 75  | 4 | 173 | 26 |
| 53,373 | 7  | 2 | 86  | 19 | 4  | 1 | 74  | 4 | 171 | 26 |
| 53,374 | 7  | 2 | 86  | 19 | 4  | 1 | 73  | 4 | 170 | 26 |
| 53,375 | 4  | 2 | 89  | 19 | 4  | 1 | 69  | 4 | 166 | 26 |
| 53,376 | 4  | 2 | 89  | 19 | 4  | 1 | 69  | 4 | 166 | 26 |
| 53,377 | 4  | 2 | 76  | 19 | 3  | 1 | 55  | 4 | 138 | 26 |
| 53,378 | 7  | 2 | 81  | 19 | 3  | 1 | 54  | 4 | 145 | 26 |
| 53,379 | 7  | 3 | 85  | 19 | 3  | 1 | 53  | 4 | 148 | 27 |
| 53,380 | 7  | 3 | 87  | 19 | 3  | 1 | 52  | 4 | 149 | 27 |
| 53,381 | 8  | 3 | 93  | 19 | 3  | 1 | 53  | 4 | 157 | 27 |
| 53,382 | 13 | 3 | 123 | 19 | 5  | 1 | 68  | 4 | 209 | 27 |
| 53,383 | 13 | 3 | 123 | 19 | 5  | 1 | 68  | 4 | 209 | 27 |
| 53,384 | 22 | 3 | 220 | 18 | 11 | 1 | 123 | 4 | 376 | 26 |
| 53,385 | 22 | 3 | 221 | 18 | 11 | 1 | 123 | 4 | 377 | 26 |
| 53,386 | 22 | 3 | 222 | 16 | 11 | 1 | 123 | 4 | 378 | 24 |
| 53,387 | 22 | 3 | 220 | 11 | 10 | 1 | 123 | 3 | 375 | 18 |
| 53,388 | 22 | 3 | 221 | 11 | 10 | 1 | 124 | 2 | 377 | 17 |
| 53,389 | 22 | 3 | 222 | 11 | 10 | 0 | 123 | 2 | 377 | 16 |
| 53,390 | 22 | 3 | 222 | 12 | 10 | 0 | 122 | 2 | 376 | 17 |
| 53,391 | 22 | 3 | 222 | 12 | 10 | 0 | 122 | 2 | 376 | 17 |
| 53,392 | 22 | 3 | 222 | 11 | 10 | 0 | 122 | 3 | 376 | 17 |
| 53,393 | 22 | 3 | 219 | 14 | 10 | 0 | 122 | 3 | 373 | 20 |
| 53,394 | 22 | 4 | 214 | 15 | 10 | 0 | 122 | 4 | 368 | 23 |
| 53,395 | 21 | 3 | 193 | 15 | 8  | 0 | 113 | 4 | 335 | 22 |
| 53,396 | 20 | 3 | 186 | 15 | 8  | 0 | 110 | 4 | 324 | 22 |
| 53,397 | 19 | 3 | 178 | 17 | 8  | 0 | 83  | 4 | 288 | 24 |
| 53,398 | 19 | 3 | 173 | 17 | 8  | 0 | 83  | 4 | 283 | 24 |
| 53,399 | 19 | 3 | 177 | 17 | 8  | 0 | 83  | 5 | 287 | 25 |
| 53,400 | 19 | 3 | 176 | 17 | 8  | 0 | 80  | 5 | 283 | 25 |
| 53,401 | 19 | 3 | 176 | 17 | 9  | 0 | 80  | 5 | 284 | 25 |
| 53,402 | 19 | 4 | 173 | 17 | 9  | 0 | 79  | 5 | 280 | 26 |
| 53,403 | 19 | 4 | 173 | 17 | 9  | 0 | 80  | 5 | 281 | 26 |
| 53,404 | 19 | 7 | 172 | 16 | 9  | 0 | 80  | 6 | 280 | 29 |
| 53,405 | 19 | 7 | 171 | 12 | 9  | 0 | 80  | 6 | 279 | 25 |
| 53,406 | 19 | 7 | 174 | 13 | 9  | 0 | 80  | 6 | 282 | 26 |
| 53,407 | 19 | 7 | 177 | 13 | 9  | 0 | 81  | 6 | 286 | 26 |
| 53,408 | 18 | 8 | 181 | 12 | 10 | 0 | 85  | 6 | 294 | 26 |
| 53,409 | 18 | 8 | 181 | 12 | 10 | 0 | 85  | 6 | 294 | 26 |
| 53,410 | 19 | 8 | 182 | 12 | 10 | 0 | 85  | 6 | 296 | 26 |
| 53,411 | 19 | 8 | 182 | 12 | 10 | 0 | 85  | 6 | 296 | 26 |

|        |    |    |     |    |    |   |     |    |     |    |
|--------|----|----|-----|----|----|---|-----|----|-----|----|
| 53,412 | 19 | 8  | 182 | 12 | 10 | 0 | 85  | 6  | 296 | 26 |
| 53,413 | 21 | 7  | 186 | 12 | 10 | 0 | 94  | 7  | 311 | 26 |
| 53,414 | 21 | 7  | 186 | 12 | 10 | 0 | 94  | 7  | 311 | 26 |
| 53,415 | 21 | 7  | 186 | 12 | 10 | 0 | 94  | 8  | 311 | 27 |
| 53,416 | 21 | 7  | 186 | 12 | 10 | 0 | 94  | 8  | 311 | 27 |
| 53,417 | 21 | 7  | 186 | 12 | 10 | 0 | 94  | 9  | 311 | 28 |
| 53,418 | 21 | 7  | 186 | 12 | 10 | 0 | 94  | 9  | 311 | 28 |
| 53,419 | 21 | 7  | 186 | 12 | 10 | 0 | 95  | 9  | 312 | 28 |
| 53,420 | 21 | 7  | 184 | 12 | 10 | 0 | 95  | 9  | 310 | 28 |
| 53,421 | 21 | 7  | 184 | 12 | 10 | 0 | 95  | 9  | 310 | 28 |
| 53,422 | 21 | 7  | 185 | 13 | 10 | 0 | 96  | 9  | 312 | 29 |
| 53,423 | 21 | 7  | 186 | 12 | 10 | 0 | 97  | 9  | 314 | 28 |
| 53,424 | 21 | 7  | 185 | 12 | 10 | 0 | 97  | 9  | 313 | 28 |
| 53,425 | 21 | 7  | 186 | 12 | 10 | 0 | 97  | 10 | 314 | 29 |
| 53,426 | 21 | 7  | 183 | 12 | 10 | 0 | 97  | 10 | 311 | 29 |
| 53,427 | 21 | 7  | 186 | 12 | 10 | 0 | 97  | 10 | 314 | 29 |
| 53,428 | 21 | 7  | 184 | 12 | 10 | 0 | 98  | 10 | 313 | 29 |
| 53,429 | 18 | 8  | 177 | 15 | 10 | 0 | 97  | 12 | 302 | 35 |
| 53,430 | 18 | 7  | 173 | 19 | 10 | 0 | 97  | 16 | 298 | 42 |
| 53,431 | 18 | 7  | 171 | 19 | 10 | 0 | 97  | 16 | 296 | 42 |
| 53,432 | 17 | 7  | 165 | 19 | 10 | 0 | 96  | 17 | 288 | 43 |
| 53,433 | 12 | 7  | 131 | 20 | 8  | 0 | 78  | 17 | 229 | 44 |
| 53,434 | 3  | 8  | 39  | 30 | 2  | 3 | 25  | 20 | 69  | 61 |
| 53,435 | 3  | 10 | 34  | 38 | 2  | 4 | 24  | 22 | 63  | 74 |
| 53,436 | 3  | 10 | 33  | 38 | 2  | 4 | 24  | 22 | 62  | 74 |
| 53,437 | 3  | 10 | 36  | 40 | 2  | 4 | 23  | 22 | 64  | 76 |
| 53,438 | 3  | 10 | 36  | 43 | 2  | 4 | 24  | 22 | 65  | 79 |
| 53,439 | 5  | 10 | 46  | 43 | 2  | 4 | 27  | 22 | 80  | 79 |
| 53,440 | 5  | 10 | 45  | 44 | 2  | 4 | 27  | 22 | 79  | 80 |
| 53,441 | 5  | 10 | 48  | 43 | 2  | 4 | 29  | 22 | 84  | 79 |
| 53,442 | 5  | 10 | 48  | 43 | 2  | 4 | 29  | 22 | 84  | 79 |
| 53,443 | 5  | 10 | 48  | 39 | 2  | 5 | 29  | 22 | 84  | 76 |
| 53,444 | 5  | 10 | 48  | 39 | 2  | 5 | 29  | 22 | 84  | 76 |
| 53,445 | 9  | 9  | 90  | 39 | 3  | 6 | 58  | 21 | 160 | 75 |
| 53,446 | 9  | 9  | 90  | 39 | 3  | 6 | 58  | 21 | 160 | 75 |
| 53,447 | 13 | 9  | 98  | 37 | 5  | 6 | 73  | 22 | 189 | 74 |
| 53,448 | 19 | 9  | 107 | 38 | 5  | 6 | 78  | 22 | 209 | 75 |
| 53,449 | 24 | 9  | 155 | 39 | 6  | 6 | 87  | 22 | 272 | 76 |
| 53,450 | 25 | 9  | 179 | 39 | 7  | 6 | 101 | 21 | 312 | 75 |
| 53,451 | 25 | 9  | 194 | 39 | 8  | 6 | 108 | 21 | 335 | 75 |
| 53,452 | 25 | 8  | 197 | 39 | 7  | 6 | 108 | 21 | 337 | 74 |



|        |    |   |     |    |   |   |     |    |     |    |
|--------|----|---|-----|----|---|---|-----|----|-----|----|
| 53,453 | 25 | 8 | 197 | 39 | 7 | 6 | 107 | 21 | 336 | 74 |
| 53,454 | 26 | 8 | 204 | 39 | 7 | 6 | 113 | 21 | 350 | 74 |
| 53,455 | 26 | 5 | 204 | 38 | 7 | 6 | 113 | 18 | 350 | 67 |
| 53,456 | 26 | 5 | 202 | 38 | 7 | 6 | 113 | 18 | 348 | 67 |
| 53,457 | 26 | 5 | 201 | 38 | 7 | 6 | 113 | 18 | 347 | 67 |
| 53,458 | 27 | 5 | 200 | 38 | 7 | 6 | 113 | 18 | 347 | 67 |
| 53,459 | 27 | 4 | 196 | 38 | 6 | 6 | 109 | 18 | 338 | 66 |
| 53,460 | 26 | 4 | 195 | 38 | 6 | 6 | 109 | 18 | 336 | 66 |
| 53,461 | 25 | 4 | 191 | 38 | 6 | 6 | 102 | 19 | 324 | 67 |
| 53,462 | 25 | 4 | 189 | 38 | 6 | 6 | 101 | 19 | 321 | 67 |
| 53,463 | 24 | 4 | 190 | 38 | 6 | 6 | 100 | 19 | 320 | 67 |
| 53,464 | 24 | 4 | 191 | 38 | 7 | 6 | 104 | 18 | 326 | 66 |
| 53,465 | 24 | 4 | 191 | 38 | 7 | 6 | 104 | 17 | 326 | 65 |
| 53,466 | 24 | 4 | 191 | 38 | 7 | 6 | 104 | 17 | 326 | 65 |
| 53,467 | 24 | 4 | 191 | 38 | 7 | 6 | 104 | 17 | 326 | 65 |
| 53,468 | 24 | 4 | 191 | 38 | 7 | 6 | 104 | 16 | 326 | 64 |
| 53,469 | 24 | 4 | 191 | 38 | 7 | 6 | 104 | 19 | 326 | 67 |
| 53,470 | 24 | 4 | 191 | 38 | 7 | 6 | 103 | 19 | 325 | 67 |
| 53,471 | 24 | 4 | 191 | 38 | 7 | 6 | 103 | 19 | 325 | 67 |
| 53,472 | 24 | 4 | 190 | 38 | 7 | 6 | 102 | 19 | 323 | 67 |
| 53,473 | 24 | 4 | 188 | 37 | 7 | 6 | 101 | 19 | 320 | 66 |
| 53,474 | 24 | 4 | 188 | 37 | 7 | 6 | 101 | 19 | 320 | 66 |
| 53,475 | 24 | 4 | 187 | 37 | 7 | 6 | 101 | 18 | 319 | 65 |
| 53,476 | 24 | 4 | 187 | 37 | 7 | 6 | 101 | 18 | 319 | 65 |
| 53,477 | 24 | 4 | 187 | 37 | 7 | 6 | 101 | 18 | 319 | 65 |
| 53,478 | 24 | 4 | 184 | 39 | 7 | 6 | 101 | 18 | 316 | 67 |
| 53,479 | 24 | 4 | 184 | 39 | 7 | 6 | 100 | 19 | 315 | 68 |
| 53,480 | 24 | 3 | 184 | 36 | 7 | 6 | 100 | 17 | 315 | 62 |
| 53,481 | 24 | 3 | 184 | 32 | 7 | 6 | 100 | 13 | 315 | 54 |
| 53,482 | 24 | 3 | 185 | 32 | 7 | 6 | 99  | 12 | 315 | 53 |
| 53,483 | 25 | 3 | 185 | 31 | 7 | 6 | 99  | 12 | 316 | 52 |
| 53,484 | 25 | 3 | 185 | 31 | 7 | 6 | 99  | 12 | 316 | 52 |
| 53,485 | 25 | 2 | 184 | 21 | 7 | 3 | 98  | 9  | 314 | 35 |
| 53,486 | 25 | 0 | 184 | 13 | 7 | 2 | 99  | 7  | 315 | 22 |
| 53,487 | 25 | 0 | 184 | 13 | 7 | 2 | 99  | 7  | 315 | 22 |
| 53,488 | 25 | 0 | 181 | 9  | 7 | 2 | 98  | 7  | 311 | 18 |
| 53,489 | 25 | 0 | 180 | 9  | 7 | 2 | 98  | 7  | 310 | 18 |
| 53,490 | 23 | 0 | 169 | 9  | 7 | 2 | 94  | 7  | 293 | 18 |
| 53,491 | 23 | 0 | 167 | 8  | 8 | 2 | 93  | 7  | 291 | 17 |
| 53,492 | 23 | 0 | 166 | 8  | 8 | 2 | 92  | 7  | 289 | 17 |
| 53,493 | 23 | 0 | 166 | 7  | 8 | 1 | 92  | 6  | 289 | 14 |

|        |    |   |     |    |   |   |    |    |     |    |
|--------|----|---|-----|----|---|---|----|----|-----|----|
| 53,494 | 23 | 0 | 166 | 7  | 8 | 1 | 93 | 6  | 290 | 14 |
| 53,495 | 19 | 0 | 126 | 7  | 7 | 1 | 65 | 7  | 217 | 15 |
| 53,496 | 19 | 0 | 125 | 6  | 7 | 0 | 64 | 7  | 215 | 13 |
| 53,497 | 19 | 1 | 125 | 12 | 7 | 0 | 64 | 15 | 215 | 28 |
| 53,498 | 15 | 1 | 117 | 13 | 5 | 0 | 50 | 16 | 187 | 30 |
| 53,499 | 9  | 1 | 109 | 13 | 5 | 0 | 45 | 16 | 168 | 30 |
| 53,500 | 4  | 1 | 61  | 12 | 4 | 0 | 36 | 17 | 105 | 30 |
| 53,501 | 3  | 1 | 33  | 12 | 3 | 0 | 21 | 17 | 60  | 30 |
| 53,502 | 3  | 1 | 18  | 12 | 2 | 0 | 15 | 17 | 38  | 30 |
| 53,503 | 3  | 1 | 17  | 12 | 2 | 0 | 15 | 17 | 37  | 30 |
| 53,504 | 2  | 1 | 13  | 12 | 2 | 0 | 12 | 17 | 29  | 30 |
| 53,505 | 2  | 1 | 11  | 12 | 2 | 0 | 10 | 17 | 25  | 30 |
| 53,506 | 2  | 1 | 22  | 11 | 2 | 0 | 11 | 17 | 37  | 29 |
| 53,507 | 2  | 1 | 22  | 12 | 2 | 0 | 11 | 17 | 37  | 30 |
| 53,508 | 2  | 1 | 22  | 12 | 2 | 0 | 10 | 17 | 36  | 30 |
| 53,509 | 2  | 1 | 28  | 12 | 3 | 0 | 18 | 17 | 51  | 30 |
| 53,510 | 3  | 1 | 48  | 12 | 3 | 0 | 33 | 17 | 87  | 30 |
| 53,511 | 7  | 1 | 73  | 12 | 6 | 0 | 52 | 16 | 138 | 29 |
| 53,512 | 7  | 1 | 81  | 12 | 6 | 0 | 60 | 16 | 154 | 29 |
| 53,513 | 9  | 1 | 90  | 12 | 6 | 0 | 75 | 16 | 180 | 29 |
| 53,514 | 11 | 1 | 96  | 12 | 7 | 0 | 78 | 16 | 192 | 29 |
| 53,515 | 11 | 1 | 96  | 12 | 6 | 0 | 74 | 16 | 187 | 29 |
| 53,516 | 11 | 1 | 96  | 12 | 6 | 0 | 74 | 16 | 187 | 29 |
| 53,517 | 11 | 1 | 97  | 13 | 6 | 0 | 75 | 16 | 189 | 30 |
| 53,518 | 11 | 1 | 97  | 13 | 6 | 0 | 75 | 16 | 189 | 30 |
| 53,519 | 11 | 1 | 98  | 13 | 6 | 0 | 75 | 16 | 190 | 30 |
| 53,520 | 11 | 1 | 99  | 13 | 6 | 0 | 75 | 13 | 191 | 27 |
| 53,521 | 12 | 1 | 110 | 13 | 6 | 0 | 81 | 14 | 209 | 28 |
| 53,522 | 12 | 1 | 110 | 14 | 6 | 0 | 81 | 15 | 209 | 30 |
| 53,523 | 12 | 1 | 111 | 14 | 6 | 0 | 81 | 16 | 210 | 31 |
| 53,524 | 12 | 1 | 112 | 15 | 6 | 0 | 81 | 16 | 211 | 32 |
| 53,525 | 12 | 1 | 113 | 15 | 6 | 0 | 82 | 16 | 213 | 32 |
| 53,526 | 12 | 1 | 113 | 15 | 6 | 0 | 82 | 16 | 213 | 32 |
| 53,527 | 13 | 1 | 118 | 15 | 6 | 0 | 85 | 16 | 222 | 32 |
| 53,528 | 13 | 1 | 118 | 13 | 6 | 0 | 85 | 16 | 222 | 30 |
| 53,529 | 13 | 1 | 118 | 13 | 6 | 0 | 85 | 17 | 222 | 31 |
| 53,530 | 13 | 1 | 118 | 13 | 6 | 0 | 85 | 18 | 222 | 32 |
| 53,531 | 13 | 1 | 118 | 14 | 6 | 0 | 85 | 18 | 222 | 33 |
| 53,532 | 13 | 1 | 119 | 14 | 6 | 0 | 85 | 18 | 223 | 33 |
| 53,533 | 13 | 1 | 118 | 14 | 6 | 0 | 85 | 19 | 222 | 34 |
| 53,534 | 12 | 1 | 118 | 14 | 6 | 0 | 85 | 19 | 221 | 34 |

|        |    |   |     |    |   |   |     |    |     |    |
|--------|----|---|-----|----|---|---|-----|----|-----|----|
| 53,535 | 12 | 1 | 118 | 14 | 6 | 0 | 85  | 19 | 221 | 34 |
| 53,536 | 12 | 1 | 117 | 14 | 6 | 0 | 85  | 19 | 220 | 34 |
| 53,537 | 12 | 1 | 117 | 16 | 6 | 0 | 84  | 20 | 219 | 37 |
| 53,538 | 12 | 1 | 117 | 17 | 7 | 0 | 84  | 21 | 220 | 39 |
| 53,539 | 12 | 1 | 117 | 17 | 7 | 0 | 84  | 21 | 220 | 39 |
| 53,540 | 12 | 1 | 117 | 17 | 7 | 0 | 84  | 23 | 220 | 41 |
| 53,541 | 12 | 1 | 120 | 19 | 6 | 0 | 84  | 24 | 222 | 44 |
| 53,542 | 12 | 1 | 121 | 20 | 6 | 1 | 87  | 24 | 226 | 46 |
| 53,543 | 12 | 1 | 121 | 21 | 6 | 1 | 87  | 24 | 226 | 47 |
| 53,544 | 12 | 1 | 121 | 22 | 6 | 1 | 87  | 24 | 226 | 48 |
| 53,545 | 12 | 1 | 121 | 22 | 6 | 1 | 86  | 24 | 225 | 48 |
| 53,546 | 12 | 1 | 120 | 22 | 6 | 1 | 86  | 23 | 224 | 47 |
| 53,547 | 12 | 0 | 120 | 16 | 6 | 1 | 86  | 15 | 224 | 32 |
| 53,548 | 12 | 0 | 120 | 16 | 6 | 1 | 86  | 15 | 224 | 32 |
| 53,549 | 12 | 0 | 120 | 14 | 6 | 1 | 85  | 13 | 223 | 28 |
| 53,550 | 12 | 0 | 119 | 14 | 6 | 1 | 85  | 13 | 222 | 28 |
| 53,551 | 12 | 0 | 119 | 14 | 6 | 1 | 85  | 12 | 222 | 27 |
| 53,552 | 12 | 0 | 121 | 14 | 6 | 1 | 85  | 12 | 224 | 27 |
| 53,553 | 12 | 0 | 121 | 14 | 6 | 1 | 85  | 12 | 224 | 27 |
| 53,554 | 12 | 0 | 119 | 14 | 6 | 1 | 85  | 12 | 222 | 27 |
| 53,555 | 12 | 0 | 117 | 14 | 6 | 1 | 84  | 12 | 219 | 27 |
| 53,556 | 13 | 0 | 121 | 14 | 8 | 1 | 86  | 12 | 228 | 27 |
| 53,557 | 13 | 0 | 129 | 14 | 8 | 1 | 93  | 12 | 243 | 27 |
| 53,558 | 13 | 0 | 127 | 13 | 8 | 1 | 86  | 12 | 234 | 26 |
| 53,559 | 15 | 0 | 139 | 13 | 7 | 1 | 101 | 12 | 262 | 26 |
| 53,560 | 17 | 0 | 132 | 14 | 8 | 1 | 107 | 12 | 264 | 27 |
| 53,561 | 16 | 0 | 125 | 14 | 8 | 1 | 105 | 12 | 254 | 27 |
| 53,562 | 15 | 0 | 110 | 14 | 5 | 1 | 91  | 12 | 221 | 27 |
| 53,563 | 17 | 0 | 102 | 15 | 5 | 1 | 83  | 12 | 207 | 28 |
| 53,564 | 15 | 0 | 92  | 15 | 5 | 1 | 69  | 12 | 181 | 28 |
| 53,565 | 13 | 0 | 85  | 15 | 4 | 1 | 67  | 12 | 169 | 28 |
| 53,566 | 13 | 0 | 85  | 15 | 4 | 1 | 68  | 12 | 170 | 28 |
| 53,567 | 13 | 0 | 84  | 15 | 4 | 1 | 68  | 12 | 169 | 28 |
| 53,568 | 13 | 0 | 84  | 14 | 4 | 1 | 67  | 12 | 168 | 27 |
| 53,569 | 13 | 1 | 83  | 14 | 4 | 1 | 67  | 12 | 167 | 28 |
| 53,570 | 13 | 1 | 82  | 14 | 4 | 1 | 67  | 13 | 166 | 29 |
| 53,571 | 12 | 1 | 73  | 13 | 4 | 1 | 62  | 11 | 151 | 26 |
| 53,572 | 12 | 1 | 72  | 13 | 4 | 1 | 66  | 12 | 154 | 27 |
| 53,573 | 12 | 1 | 71  | 13 | 4 | 1 | 67  | 12 | 154 | 27 |
| 53,574 | 12 | 1 | 73  | 16 | 4 | 1 | 67  | 11 | 156 | 29 |
| 53,575 | 12 | 1 | 75  | 16 | 4 | 1 | 68  | 11 | 159 | 29 |

|        |    |   |     |    |   |   |     |    |     |    |
|--------|----|---|-----|----|---|---|-----|----|-----|----|
| 53,576 | 12 | 1 | 74  | 17 | 4 | 1 | 67  | 11 | 157 | 30 |
| 53,577 | 11 | 2 | 74  | 17 | 5 | 1 | 68  | 11 | 158 | 31 |
| 53,578 | 11 | 2 | 74  | 17 | 5 | 1 | 68  | 11 | 158 | 31 |
| 53,579 | 11 | 2 | 74  | 17 | 5 | 1 | 68  | 11 | 158 | 31 |
| 53,580 | 11 | 2 | 74  | 17 | 5 | 1 | 68  | 10 | 158 | 30 |
| 53,581 | 11 | 2 | 74  | 19 | 5 | 1 | 68  | 8  | 158 | 30 |
| 53,582 | 11 | 2 | 73  | 18 | 5 | 1 | 68  | 8  | 157 | 29 |
| 53,583 | 11 | 2 | 73  | 18 | 5 | 1 | 68  | 8  | 157 | 29 |
| 53,584 | 11 | 2 | 73  | 18 | 5 | 1 | 68  | 7  | 157 | 28 |
| 53,585 | 11 | 2 | 73  | 18 | 5 | 1 | 69  | 7  | 158 | 28 |
| 53,586 | 11 | 2 | 73  | 18 | 5 | 1 | 70  | 7  | 159 | 28 |
| 53,587 | 11 | 2 | 73  | 19 | 5 | 1 | 70  | 7  | 159 | 29 |
| 53,588 | 11 | 2 | 74  | 18 | 5 | 1 | 70  | 10 | 160 | 31 |
| 53,589 | 11 | 3 | 77  | 20 | 4 | 1 | 71  | 13 | 163 | 37 |
| 53,590 | 11 | 3 | 77  | 23 | 4 | 1 | 71  | 13 | 163 | 40 |
| 53,591 | 11 | 3 | 79  | 24 | 4 | 1 | 72  | 12 | 166 | 40 |
| 53,592 | 11 | 3 | 76  | 23 | 4 | 1 | 72  | 14 | 163 | 41 |
| 53,593 | 11 | 3 | 75  | 22 | 4 | 0 | 69  | 14 | 159 | 39 |
| 53,594 | 11 | 3 | 75  | 21 | 4 | 0 | 69  | 14 | 159 | 38 |
| 53,595 | 13 | 4 | 109 | 21 | 5 | 0 | 86  | 14 | 213 | 39 |
| 53,596 | 13 | 5 | 109 | 21 | 5 | 0 | 86  | 14 | 213 | 40 |
| 53,597 | 13 | 5 | 113 | 22 | 5 | 0 | 88  | 14 | 219 | 41 |
| 53,598 | 13 | 5 | 116 | 23 | 5 | 0 | 90  | 14 | 224 | 42 |
| 53,599 | 13 | 5 | 120 | 25 | 5 | 0 | 92  | 16 | 230 | 46 |
| 53,600 | 13 | 5 | 120 | 25 | 5 | 0 | 92  | 16 | 230 | 46 |
| 53,601 | 13 | 5 | 130 | 25 | 5 | 0 | 96  | 16 | 244 | 46 |
| 53,602 | 13 | 5 | 159 | 25 | 5 | 0 | 114 | 16 | 291 | 46 |
| 53,603 | 17 | 5 | 172 | 25 | 7 | 0 | 121 | 16 | 317 | 46 |
| 53,604 | 17 | 5 | 176 | 25 | 7 | 0 | 129 | 16 | 329 | 46 |
| 53,605 | 24 | 5 | 177 | 25 | 7 | 0 | 136 | 16 | 344 | 46 |
| 53,606 | 24 | 5 | 177 | 26 | 7 | 0 | 136 | 17 | 344 | 48 |
| 53,607 | 23 | 5 | 162 | 26 | 5 | 0 | 133 | 17 | 323 | 48 |
| 53,608 | 23 | 5 | 156 | 26 | 5 | 0 | 128 | 17 | 312 | 48 |
| 53,609 | 22 | 5 | 153 | 26 | 5 | 0 | 128 | 17 | 308 | 48 |
| 53,610 | 20 | 5 | 142 | 26 | 5 | 0 | 114 | 17 | 281 | 48 |
| 53,611 | 17 | 5 | 131 | 25 | 4 | 0 | 92  | 17 | 244 | 47 |
| 53,612 | 17 | 5 | 128 | 25 | 4 | 0 | 90  | 17 | 239 | 47 |
| 53,613 | 15 | 5 | 128 | 24 | 4 | 0 | 89  | 17 | 236 | 46 |
| 53,614 | 14 | 5 | 128 | 24 | 4 | 0 | 89  | 17 | 235 | 46 |
| 53,615 | 14 | 5 | 128 | 24 | 4 | 0 | 88  | 17 | 234 | 46 |
| 53,616 | 14 | 5 | 128 | 24 | 4 | 0 | 87  | 17 | 233 | 46 |

|        |    |   |     |    |   |   |     |    |     |    |
|--------|----|---|-----|----|---|---|-----|----|-----|----|
| 53,617 | 14 | 5 | 128 | 24 | 4 | 0 | 87  | 17 | 233 | 46 |
| 53,618 | 14 | 5 | 128 | 24 | 4 | 0 | 88  | 17 | 234 | 46 |
| 53,619 | 14 | 5 | 128 | 24 | 4 | 0 | 88  | 17 | 234 | 46 |
| 53,620 | 14 | 4 | 129 | 24 | 4 | 0 | 88  | 17 | 235 | 45 |
| 53,621 | 14 | 4 | 129 | 24 | 4 | 0 | 88  | 16 | 235 | 44 |
| 53,622 | 14 | 4 | 129 | 24 | 4 | 0 | 88  | 16 | 235 | 44 |
| 53,623 | 14 | 5 | 130 | 22 | 4 | 0 | 86  | 16 | 234 | 43 |
| 53,624 | 14 | 5 | 130 | 22 | 4 | 0 | 89  | 16 | 237 | 43 |
| 53,625 | 14 | 5 | 127 | 33 | 4 | 1 | 89  | 17 | 234 | 56 |
| 53,626 | 14 | 5 | 126 | 36 | 4 | 1 | 89  | 17 | 233 | 59 |
| 53,627 | 14 | 5 | 127 | 35 | 4 | 1 | 89  | 17 | 234 | 58 |
| 53,628 | 15 | 4 | 125 | 38 | 3 | 1 | 87  | 17 | 230 | 60 |
| 53,629 | 15 | 4 | 122 | 38 | 3 | 1 | 87  | 17 | 227 | 60 |
| 53,630 | 15 | 4 | 123 | 38 | 3 | 1 | 88  | 17 | 229 | 60 |
| 53,631 | 15 | 4 | 126 | 38 | 3 | 1 | 88  | 17 | 232 | 60 |
| 53,632 | 15 | 4 | 127 | 36 | 3 | 1 | 88  | 17 | 233 | 58 |
| 53,633 | 15 | 4 | 127 | 36 | 3 | 1 | 88  | 17 | 233 | 58 |
| 53,634 | 15 | 4 | 127 | 36 | 3 | 1 | 88  | 17 | 233 | 58 |
| 53,635 | 15 | 4 | 137 | 36 | 3 | 1 | 90  | 17 | 245 | 58 |
| 53,636 | 16 | 4 | 140 | 36 | 3 | 1 | 92  | 17 | 251 | 58 |
| 53,637 | 16 | 3 | 142 | 30 | 3 | 1 | 91  | 9  | 252 | 43 |
| 53,638 | 16 | 3 | 144 | 30 | 3 | 1 | 92  | 9  | 255 | 43 |
| 53,639 | 16 | 3 | 144 | 30 | 3 | 1 | 91  | 9  | 254 | 43 |
| 53,640 | 16 | 3 | 144 | 28 | 3 | 1 | 91  | 9  | 254 | 41 |
| 53,641 | 16 | 3 | 144 | 31 | 3 | 1 | 91  | 13 | 254 | 48 |
| 53,642 | 16 | 3 | 142 | 31 | 3 | 1 | 90  | 12 | 251 | 47 |
| 53,643 | 17 | 3 | 159 | 30 | 4 | 1 | 99  | 9  | 279 | 43 |
| 53,644 | 17 | 3 | 168 | 30 | 4 | 1 | 102 | 9  | 291 | 43 |
| 53,645 | 18 | 3 | 168 | 30 | 4 | 1 | 98  | 9  | 288 | 43 |
| 53,646 | 16 | 1 | 135 | 29 | 3 | 1 | 84  | 9  | 238 | 40 |
| 53,647 | 16 | 1 | 130 | 29 | 3 | 1 | 82  | 9  | 231 | 40 |
| 53,648 | 16 | 1 | 127 | 30 | 3 | 1 | 80  | 11 | 226 | 43 |
| 53,649 | 16 | 1 | 127 | 30 | 3 | 1 | 80  | 11 | 226 | 43 |
| 53,650 | 23 | 1 | 202 | 28 | 6 | 1 | 131 | 10 | 362 | 40 |
| 53,651 | 23 | 1 | 202 | 28 | 6 | 1 | 131 | 10 | 362 | 40 |
| 53,652 | 23 | 1 | 194 | 30 | 6 | 1 | 130 | 10 | 353 | 42 |
| 53,653 | 23 | 1 | 166 | 30 | 6 | 1 | 112 | 10 | 307 | 42 |
| 53,654 | 19 | 1 | 152 | 30 | 4 | 1 | 106 | 10 | 281 | 42 |
| 53,655 | 19 | 1 | 148 | 30 | 4 | 1 | 97  | 10 | 268 | 42 |
| 53,656 | 14 | 1 | 154 | 31 | 5 | 1 | 100 | 10 | 273 | 43 |
| 53,657 | 14 | 1 | 152 | 30 | 5 | 1 | 100 | 10 | 271 | 42 |

|        |    |   |     |    |   |   |     |    |     |    |
|--------|----|---|-----|----|---|---|-----|----|-----|----|
| 53,658 | 16 | 1 | 158 | 30 | 5 | 1 | 109 | 10 | 288 | 42 |
| 53,659 | 16 | 2 | 158 | 30 | 5 | 1 | 109 | 10 | 288 | 43 |
| 53,660 | 16 | 2 | 157 | 30 | 5 | 1 | 108 | 10 | 286 | 43 |
| 53,661 | 16 | 2 | 156 | 30 | 5 | 1 | 109 | 12 | 286 | 45 |
| 53,662 | 18 | 2 | 158 | 30 | 5 | 1 | 112 | 12 | 293 | 45 |
| 53,663 | 25 | 2 | 181 | 30 | 6 | 1 | 141 | 12 | 353 | 45 |
| 53,664 | 25 | 2 | 181 | 30 | 6 | 1 | 141 | 12 | 353 | 45 |
| 53,665 | 24 | 2 | 184 | 30 | 6 | 1 | 146 | 12 | 360 | 45 |
| 53,666 | 24 | 2 | 184 | 30 | 6 | 1 | 146 | 12 | 360 | 45 |
| 53,667 | 24 | 2 | 184 | 30 | 6 | 1 | 146 | 12 | 360 | 45 |
| 53,668 | 25 | 2 | 186 | 30 | 6 | 1 | 145 | 12 | 362 | 45 |
| 53,669 | 25 | 2 | 186 | 33 | 6 | 1 | 145 | 12 | 362 | 48 |
| 53,670 | 25 | 2 | 186 | 33 | 6 | 1 | 145 | 12 | 362 | 48 |
| 53,671 | 25 | 2 | 185 | 33 | 6 | 1 | 145 | 12 | 361 | 48 |
| 53,672 | 25 | 2 | 185 | 35 | 6 | 1 | 146 | 12 | 362 | 50 |
| 53,673 | 25 | 2 | 184 | 35 | 6 | 1 | 145 | 12 | 360 | 50 |
| 53,674 | 25 | 1 | 184 | 39 | 6 | 2 | 146 | 14 | 361 | 56 |
| 53,675 | 25 | 1 | 184 | 39 | 6 | 2 | 142 | 14 | 357 | 56 |
| 53,676 | 26 | 1 | 191 | 33 | 6 | 1 | 145 | 15 | 368 | 50 |
| 53,677 | 27 | 1 | 195 | 30 | 8 | 1 | 145 | 15 | 375 | 47 |
| 53,678 | 27 | 1 | 194 | 30 | 8 | 1 | 144 | 15 | 373 | 47 |
| 53,679 | 26 | 1 | 196 | 27 | 8 | 1 | 146 | 15 | 376 | 44 |
| 53,680 | 26 | 1 | 196 | 27 | 8 | 1 | 146 | 15 | 376 | 44 |
| 53,681 | 28 | 1 | 194 | 27 | 8 | 1 | 146 | 15 | 376 | 44 |
| 53,682 | 28 | 1 | 193 | 27 | 8 | 1 | 146 | 15 | 375 | 44 |
| 53,683 | 28 | 1 | 193 | 29 | 8 | 1 | 148 | 16 | 377 | 47 |
| 53,684 | 28 | 1 | 195 | 29 | 8 | 1 | 148 | 17 | 379 | 48 |
| 53,685 | 28 | 1 | 195 | 29 | 8 | 1 | 147 | 17 | 378 | 48 |
| 53,686 | 28 | 1 | 187 | 29 | 8 | 1 | 146 | 17 | 369 | 48 |
| 53,687 | 27 | 1 | 203 | 29 | 8 | 1 | 149 | 17 | 387 | 48 |
| 53,688 | 27 | 1 | 203 | 29 | 8 | 1 | 149 | 17 | 387 | 48 |
| 53,689 | 27 | 1 | 201 | 29 | 8 | 1 | 148 | 17 | 384 | 48 |
| 53,690 | 27 | 1 | 198 | 29 | 8 | 1 | 148 | 17 | 381 | 48 |
| 53,691 | 27 | 1 | 197 | 28 | 8 | 1 | 148 | 17 | 380 | 47 |
| 53,692 | 26 | 1 | 186 | 25 | 7 | 1 | 140 | 13 | 359 | 40 |
| 53,693 | 26 | 1 | 182 | 24 | 7 | 1 | 140 | 13 | 355 | 39 |
| 53,694 | 26 | 1 | 180 | 24 | 7 | 1 | 140 | 13 | 353 | 39 |
| 53,695 | 26 | 1 | 171 | 24 | 7 | 1 | 137 | 13 | 341 | 39 |
| 53,696 | 19 | 1 | 103 | 24 | 4 | 1 | 96  | 13 | 222 | 39 |
| 53,697 | 19 | 1 | 102 | 21 | 4 | 1 | 93  | 11 | 218 | 34 |
| 53,698 | 19 | 1 | 101 | 21 | 4 | 1 | 93  | 11 | 217 | 34 |

|        |    |   |     |    |   |   |    |    |     |    |
|--------|----|---|-----|----|---|---|----|----|-----|----|
| 53,699 | 18 | 1 | 93  | 21 | 4 | 1 | 85 | 12 | 200 | 35 |
| 53,700 | 18 | 1 | 92  | 21 | 4 | 1 | 85 | 12 | 199 | 35 |
| 53,701 | 18 | 1 | 95  | 20 | 4 | 1 | 86 | 11 | 203 | 33 |
| 53,702 | 18 | 1 | 96  | 20 | 4 | 1 | 88 | 12 | 206 | 34 |
| 53,703 | 18 | 1 | 97  | 20 | 4 | 1 | 88 | 12 | 207 | 34 |
| 53,704 | 18 | 1 | 104 | 20 | 4 | 1 | 90 | 12 | 216 | 34 |
| 53,705 | 18 | 1 | 103 | 19 | 4 | 1 | 89 | 11 | 214 | 32 |
| 53,706 | 18 | 1 | 100 | 20 | 4 | 1 | 89 | 11 | 211 | 33 |
| 53,707 | 16 | 1 | 95  | 20 | 3 | 1 | 79 | 11 | 193 | 33 |
| 53,708 | 16 | 1 | 95  | 20 | 3 | 1 | 79 | 11 | 193 | 33 |
| 53,709 | 14 | 0 | 95  | 20 | 3 | 1 | 71 | 10 | 183 | 31 |
| 53,710 | 14 | 0 | 95  | 21 | 3 | 1 | 70 | 10 | 182 | 32 |
| 53,711 | 14 | 0 | 96  | 21 | 3 | 1 | 68 | 10 | 181 | 32 |
| 53,712 | 15 | 0 | 99  | 21 | 3 | 1 | 68 | 10 | 185 | 32 |
| 53,713 | 13 | 0 | 98  | 21 | 3 | 1 | 65 | 10 | 179 | 32 |
| 53,714 | 6  | 0 | 78  | 21 | 2 | 1 | 36 | 11 | 122 | 33 |
| 53,715 | 6  | 0 | 75  | 21 | 2 | 1 | 35 | 11 | 118 | 33 |
| 53,716 | 6  | 0 | 75  | 21 | 2 | 1 | 31 | 11 | 114 | 33 |
| 53,717 | 6  | 0 | 75  | 21 | 2 | 1 | 31 | 11 | 114 | 33 |
| 53,718 | 6  | 0 | 75  | 21 | 2 | 1 | 31 | 11 | 114 | 33 |
| 53,719 | 5  | 0 | 75  | 18 | 2 | 1 | 31 | 11 | 113 | 30 |
| 53,720 | 5  | 0 | 75  | 18 | 2 | 1 | 31 | 11 | 113 | 30 |
| 53,721 | 5  | 0 | 75  | 18 | 2 | 1 | 31 | 11 | 113 | 30 |
| 53,722 | 6  | 0 | 76  | 17 | 2 | 1 | 30 | 12 | 114 | 30 |
| 53,723 | 6  | 0 | 76  | 17 | 2 | 1 | 30 | 12 | 114 | 30 |
| 53,724 | 6  | 0 | 77  | 12 | 2 | 1 | 30 | 9  | 115 | 22 |
| 53,725 | 7  | 1 | 83  | 16 | 2 | 1 | 27 | 14 | 119 | 32 |
| 53,726 | 6  | 2 | 77  | 16 | 2 | 1 | 27 | 14 | 112 | 33 |
| 53,727 | 6  | 2 | 75  | 13 | 0 | 1 | 26 | 14 | 107 | 30 |
| 53,728 | 5  | 3 | 72  | 13 | 0 | 1 | 26 | 14 | 103 | 31 |
| 53,729 | 5  | 3 | 82  | 16 | 1 | 1 | 30 | 15 | 118 | 35 |
| 53,730 | 5  | 3 | 79  | 16 | 1 | 1 | 27 | 15 | 112 | 35 |
| 53,731 | 5  | 3 | 91  | 16 | 2 | 1 | 44 | 15 | 142 | 35 |
| 53,732 | 3  | 3 | 91  | 17 | 2 | 1 | 44 | 16 | 140 | 37 |
| 53,733 | 3  | 3 | 91  | 18 | 2 | 1 | 44 | 20 | 140 | 42 |
| 53,734 | 3  | 3 | 90  | 18 | 2 | 1 | 42 | 22 | 137 | 44 |
| 53,735 | 3  | 3 | 88  | 18 | 2 | 1 | 42 | 21 | 135 | 43 |
| 53,736 | 3  | 3 | 85  | 20 | 2 | 1 | 42 | 23 | 132 | 47 |
| 53,737 | 3  | 3 | 73  | 22 | 2 | 1 | 38 | 23 | 116 | 49 |
| 53,738 | 3  | 3 | 71  | 22 | 2 | 1 | 38 | 24 | 114 | 50 |
| 53,739 | 3  | 3 | 69  | 22 | 2 | 1 | 38 | 24 | 112 | 50 |

|        |    |   |     |    |   |   |    |    |     |    |
|--------|----|---|-----|----|---|---|----|----|-----|----|
| 53,740 | 5  | 3 | 71  | 22 | 2 | 1 | 40 | 24 | 118 | 50 |
| 53,741 | 5  | 3 | 71  | 22 | 2 | 2 | 40 | 24 | 118 | 51 |
| 53,742 | 5  | 3 | 71  | 22 | 2 | 2 | 40 | 24 | 118 | 51 |
| 53,743 | 5  | 3 | 71  | 22 | 2 | 2 | 40 | 24 | 118 | 51 |
| 53,744 | 5  | 3 | 71  | 23 | 2 | 2 | 40 | 24 | 118 | 52 |
| 53,745 | 9  | 3 | 88  | 23 | 2 | 2 | 53 | 24 | 152 | 52 |
| 53,746 | 9  | 3 | 88  | 23 | 2 | 2 | 53 | 24 | 152 | 52 |
| 53,747 | 12 | 3 | 94  | 24 | 2 | 2 | 61 | 24 | 169 | 53 |
| 53,748 | 12 | 4 | 107 | 25 | 2 | 2 | 65 | 24 | 186 | 55 |
| 53,749 | 12 | 4 | 107 | 25 | 2 | 2 | 65 | 24 | 186 | 55 |
| 53,750 | 12 | 4 | 128 | 25 | 2 | 2 | 66 | 24 | 208 | 55 |
| 53,751 | 12 | 4 | 129 | 25 | 2 | 2 | 66 | 24 | 209 | 55 |
| 53,752 | 12 | 4 | 126 | 24 | 2 | 2 | 63 | 24 | 203 | 54 |
| 53,753 | 12 | 4 | 123 | 24 | 2 | 2 | 61 | 23 | 198 | 53 |
| 53,754 | 12 | 4 | 115 | 24 | 2 | 2 | 59 | 24 | 188 | 54 |
| 53,755 | 12 | 4 | 116 | 25 | 2 | 2 | 59 | 24 | 189 | 55 |
| 53,756 | 12 | 4 | 116 | 25 | 2 | 2 | 59 | 24 | 189 | 55 |
| 53,757 | 12 | 4 | 119 | 24 | 2 | 2 | 59 | 24 | 192 | 54 |
| 53,758 | 12 | 4 | 119 | 24 | 2 | 2 | 59 | 24 | 192 | 54 |
| 53,759 | 12 | 4 | 116 | 25 | 2 | 2 | 59 | 24 | 189 | 55 |
| 53,760 | 12 | 4 | 113 | 26 | 2 | 2 | 58 | 23 | 185 | 55 |
| 53,761 | 12 | 4 | 113 | 25 | 2 | 2 | 58 | 24 | 185 | 55 |
| 53,762 | 12 | 4 | 112 | 27 | 2 | 2 | 58 | 26 | 184 | 59 |
| 53,763 | 11 | 4 | 108 | 27 | 2 | 2 | 58 | 26 | 179 | 59 |
| 53,764 | 11 | 4 | 106 | 29 | 2 | 3 | 58 | 26 | 177 | 62 |
| 53,765 | 11 | 4 | 103 | 29 | 2 | 3 | 58 | 25 | 174 | 61 |
| 53,766 | 11 | 4 | 102 | 29 | 2 | 3 | 58 | 25 | 173 | 61 |
| 53,767 | 11 | 4 | 102 | 29 | 2 | 3 | 58 | 25 | 173 | 61 |
| 53,768 | 11 | 4 | 102 | 29 | 2 | 3 | 58 | 25 | 173 | 61 |
| 53,769 | 11 | 4 | 101 | 29 | 2 | 3 | 58 | 25 | 172 | 61 |
| 53,770 | 11 | 4 | 101 | 29 | 2 | 3 | 59 | 25 | 173 | 61 |
| 53,771 | 11 | 4 | 101 | 29 | 2 | 3 | 59 | 25 | 173 | 61 |
| 53,772 | 11 | 4 | 101 | 29 | 2 | 3 | 59 | 25 | 173 | 61 |
| 53,773 | 11 | 4 | 101 | 28 | 2 | 3 | 59 | 25 | 173 | 60 |
| 53,774 | 11 | 4 | 102 | 32 | 2 | 2 | 60 | 27 | 175 | 65 |
| 53,775 | 11 | 5 | 101 | 36 | 2 | 2 | 60 | 31 | 174 | 74 |
| 53,776 | 10 | 4 | 94  | 32 | 2 | 2 | 60 | 26 | 166 | 64 |
| 53,777 | 10 | 3 | 94  | 36 | 2 | 3 | 57 | 27 | 163 | 69 |
| 53,778 | 10 | 3 | 93  | 34 | 2 | 3 | 58 | 25 | 163 | 65 |
| 53,779 | 10 | 2 | 87  | 30 | 1 | 3 | 56 | 24 | 154 | 59 |
| 53,780 | 10 | 2 | 84  | 30 | 1 | 3 | 54 | 24 | 149 | 59 |



|        |    |   |     |    |   |   |     |    |     |    |
|--------|----|---|-----|----|---|---|-----|----|-----|----|
| 53,781 | 10 | 2 | 71  | 31 | 0 | 3 | 34  | 24 | 115 | 60 |
| 53,782 | 10 | 2 | 71  | 31 | 0 | 3 | 34  | 25 | 115 | 61 |
| 53,783 | 10 | 2 | 71  | 29 | 0 | 3 | 34  | 20 | 115 | 54 |
| 53,784 | 10 | 2 | 71  | 29 | 0 | 3 | 34  | 21 | 115 | 55 |
| 53,785 | 10 | 2 | 71  | 27 | 0 | 3 | 34  | 18 | 115 | 50 |
| 53,786 | 10 | 2 | 71  | 26 | 0 | 3 | 34  | 16 | 115 | 47 |
| 53,787 | 10 | 2 | 71  | 26 | 0 | 3 | 34  | 16 | 115 | 47 |
| 53,788 | 10 | 2 | 69  | 24 | 0 | 3 | 35  | 15 | 114 | 44 |
| 53,789 | 10 | 2 | 68  | 24 | 0 | 3 | 34  | 15 | 112 | 44 |
| 53,790 | 10 | 2 | 68  | 24 | 0 | 3 | 34  | 15 | 112 | 44 |
| 53,791 | 8  | 2 | 66  | 24 | 0 | 3 | 33  | 16 | 107 | 45 |
| 53,792 | 8  | 2 | 63  | 24 | 0 | 2 | 32  | 16 | 103 | 44 |
| 53,793 | 8  | 3 | 63  | 28 | 0 | 2 | 33  | 20 | 104 | 53 |
| 53,794 | 8  | 5 | 63  | 35 | 1 | 2 | 33  | 24 | 105 | 66 |
| 53,795 | 4  | 5 | 53  | 45 | 2 | 2 | 22  | 26 | 81  | 78 |
| 53,796 | 4  | 5 | 53  | 45 | 2 | 2 | 22  | 26 | 81  | 78 |
| 53,797 | 4  | 5 | 51  | 46 | 2 | 2 | 17  | 27 | 74  | 80 |
| 53,798 | 7  | 5 | 63  | 46 | 2 | 2 | 24  | 28 | 96  | 81 |
| 53,799 | 7  | 4 | 48  | 46 | 2 | 2 | 20  | 28 | 77  | 80 |
| 53,800 | 7  | 4 | 31  | 46 | 2 | 2 | 19  | 28 | 59  | 80 |
| 53,801 | 12 | 4 | 32  | 46 | 2 | 2 | 25  | 27 | 71  | 79 |
| 53,802 | 16 | 4 | 38  | 46 | 3 | 2 | 32  | 27 | 89  | 79 |
| 53,803 | 18 | 4 | 52  | 47 | 4 | 2 | 45  | 27 | 119 | 80 |
| 53,804 | 18 | 4 | 54  | 47 | 4 | 2 | 48  | 28 | 124 | 81 |
| 53,805 | 21 | 4 | 62  | 47 | 5 | 2 | 70  | 27 | 158 | 80 |
| 53,806 | 21 | 4 | 64  | 46 | 5 | 2 | 74  | 27 | 164 | 79 |
| 53,807 | 21 | 4 | 64  | 46 | 5 | 2 | 73  | 27 | 163 | 79 |
| 53,808 | 21 | 4 | 63  | 46 | 5 | 2 | 73  | 27 | 162 | 79 |
| 53,809 | 21 | 4 | 63  | 46 | 5 | 2 | 73  | 27 | 162 | 79 |
| 53,810 | 21 | 4 | 63  | 45 | 5 | 2 | 73  | 27 | 162 | 78 |
| 53,811 | 21 | 4 | 64  | 45 | 6 | 2 | 78  | 27 | 169 | 78 |
| 53,812 | 23 | 4 | 74  | 45 | 6 | 2 | 82  | 26 | 185 | 77 |
| 53,813 | 25 | 4 | 79  | 43 | 8 | 2 | 89  | 24 | 201 | 73 |
| 53,814 | 25 | 4 | 102 | 41 | 8 | 1 | 95  | 24 | 230 | 70 |
| 53,815 | 26 | 4 | 109 | 41 | 8 | 1 | 98  | 24 | 241 | 70 |
| 53,816 | 26 | 4 | 110 | 41 | 8 | 1 | 99  | 24 | 243 | 70 |
| 53,817 | 27 | 4 | 111 | 41 | 8 | 1 | 99  | 24 | 245 | 70 |
| 53,818 | 27 | 4 | 112 | 41 | 8 | 1 | 101 | 24 | 248 | 70 |
| 53,819 | 27 | 4 | 115 | 41 | 8 | 1 | 102 | 24 | 252 | 70 |
| 53,820 | 28 | 4 | 116 | 41 | 8 | 1 | 101 | 24 | 253 | 70 |
| 53,821 | 27 | 4 | 117 | 43 | 8 | 1 | 101 | 24 | 253 | 72 |

|        |    |    |     |     |   |   |     |    |     |     |
|--------|----|----|-----|-----|---|---|-----|----|-----|-----|
| 53,822 | 27 | 4  | 117 | 44  | 8 | 1 | 101 | 24 | 253 | 73  |
| 53,823 | 27 | 4  | 117 | 45  | 8 | 1 | 101 | 26 | 253 | 76  |
| 53,824 | 29 | 5  | 124 | 45  | 8 | 1 | 102 | 26 | 263 | 77  |
| 53,825 | 29 | 5  | 123 | 42  | 8 | 1 | 104 | 25 | 264 | 73  |
| 53,826 | 29 | 5  | 123 | 40  | 8 | 1 | 104 | 22 | 264 | 68  |
| 53,827 | 29 | 5  | 123 | 40  | 8 | 1 | 104 | 22 | 264 | 68  |
| 53,828 | 30 | 5  | 123 | 44  | 8 | 0 | 104 | 25 | 265 | 74  |
| 53,829 | 30 | 5  | 123 | 44  | 8 | 0 | 103 | 25 | 264 | 74  |
| 53,830 | 30 | 6  | 123 | 48  | 8 | 0 | 103 | 25 | 264 | 79  |
| 53,831 | 30 | 6  | 123 | 47  | 8 | 0 | 103 | 24 | 264 | 77  |
| 53,832 | 30 | 14 | 123 | 88  | 8 | 1 | 103 | 31 | 264 | 134 |
| 53,833 | 30 | 14 | 122 | 96  | 8 | 1 | 103 | 34 | 263 | 145 |
| 53,834 | 30 | 14 | 122 | 96  | 8 | 1 | 105 | 33 | 265 | 144 |
| 53,835 | 30 | 14 | 122 | 96  | 8 | 1 | 105 | 33 | 265 | 144 |
| 53,836 | 30 | 14 | 124 | 98  | 8 | 1 | 105 | 34 | 267 | 147 |
| 53,837 | 30 | 15 | 124 | 104 | 8 | 1 | 105 | 36 | 267 | 156 |
| 53,838 | 30 | 15 | 124 | 104 | 8 | 1 | 105 | 36 | 267 | 156 |
| 53,839 | 30 | 16 | 124 | 104 | 8 | 1 | 104 | 36 | 266 | 157 |
| 53,840 | 31 | 17 | 127 | 104 | 8 | 1 | 106 | 36 | 272 | 158 |
| 53,841 | 31 | 17 | 128 | 105 | 8 | 1 | 108 | 35 | 275 | 158 |
| 53,842 | 31 | 17 | 128 | 105 | 8 | 1 | 108 | 35 | 275 | 158 |
| 53,843 | 31 | 17 | 128 | 105 | 8 | 1 | 109 | 35 | 276 | 158 |
| 53,844 | 31 | 16 | 128 | 100 | 8 | 1 | 108 | 31 | 275 | 148 |
| 53,845 | 31 | 14 | 127 | 83  | 7 | 1 | 106 | 25 | 271 | 123 |
| 53,846 | 31 | 14 | 126 | 83  | 6 | 1 | 106 | 25 | 269 | 123 |
| 53,847 | 31 | 14 | 128 | 80  | 6 | 1 | 108 | 23 | 273 | 118 |
| 53,848 | 31 | 14 | 126 | 80  | 6 | 1 | 108 | 23 | 271 | 118 |
| 53,849 | 25 | 14 | 111 | 82  | 6 | 1 | 98  | 23 | 240 | 120 |
| 53,850 | 25 | 14 | 110 | 83  | 7 | 1 | 99  | 23 | 241 | 121 |
| 53,851 | 20 | 14 | 109 | 84  | 7 | 1 | 95  | 23 | 231 | 122 |
| 53,852 | 20 | 14 | 105 | 86  | 7 | 1 | 95  | 25 | 227 | 126 |
| 53,853 | 16 | 14 | 102 | 87  | 6 | 1 | 87  | 25 | 211 | 127 |
| 53,854 | 14 | 14 | 88  | 86  | 5 | 1 | 73  | 24 | 180 | 125 |
| 53,855 | 14 | 14 | 85  | 87  | 5 | 1 | 70  | 25 | 174 | 127 |
| 53,856 | 11 | 14 | 76  | 87  | 4 | 1 | 48  | 25 | 139 | 127 |
| 53,857 | 11 | 14 | 74  | 88  | 4 | 1 | 45  | 25 | 134 | 128 |
| 53,858 | 11 | 14 | 73  | 88  | 4 | 1 | 45  | 25 | 133 | 128 |
| 53,859 | 11 | 14 | 73  | 89  | 4 | 1 | 45  | 25 | 133 | 129 |
| 53,860 | 11 | 14 | 73  | 88  | 3 | 2 | 41  | 25 | 128 | 129 |
| 53,861 | 11 | 14 | 73  | 88  | 3 | 2 | 40  | 25 | 127 | 129 |
| 53,862 | 9  | 14 | 64  | 88  | 3 | 2 | 36  | 25 | 112 | 129 |

|        |   |    |    |    |   |   |    |    |    |     |
|--------|---|----|----|----|---|---|----|----|----|-----|
| 53,863 | 8 | 14 | 60 | 88 | 1 | 2 | 29 | 25 | 98 | 129 |
| 53,864 | 8 | 14 | 49 | 88 | 1 | 2 | 24 | 26 | 82 | 130 |
| 53,865 | 8 | 14 | 37 | 89 | 1 | 2 | 23 | 26 | 69 | 131 |
| 53,866 | 7 | 14 | 30 | 89 | 1 | 2 | 20 | 26 | 58 | 131 |
| 53,867 | 7 | 14 | 29 | 89 | 1 | 2 | 19 | 26 | 56 | 131 |
| 53,868 | 7 | 14 | 29 | 89 | 1 | 2 | 21 | 26 | 58 | 131 |
| 53,869 | 7 | 14 | 30 | 89 | 1 | 2 | 22 | 26 | 60 | 131 |
| 53,870 | 7 | 14 | 27 | 89 | 1 | 2 | 23 | 26 | 58 | 131 |
| 53,871 | 6 | 14 | 28 | 87 | 1 | 2 | 24 | 27 | 59 | 130 |
| 53,872 | 6 | 14 | 27 | 87 | 1 | 2 | 24 | 27 | 58 | 130 |
| 53,873 | 6 | 14 | 30 | 87 | 1 | 2 | 27 | 27 | 64 | 130 |
| 53,874 | 6 | 14 | 31 | 87 | 1 | 2 | 27 | 25 | 65 | 128 |
| 53,875 | 4 | 13 | 26 | 88 | 1 | 2 | 30 | 24 | 61 | 127 |
| 53,876 | 4 | 12 | 26 | 85 | 1 | 2 | 33 | 22 | 64 | 121 |
| 53,877 | 4 | 12 | 29 | 85 | 1 | 2 | 40 | 22 | 74 | 121 |
| 53,878 | 4 | 12 | 29 | 85 | 1 | 2 | 40 | 23 | 74 | 122 |
| 53,879 | 3 | 12 | 37 | 77 | 1 | 2 | 52 | 19 | 93 | 110 |
| 53,880 | 3 | 12 | 37 | 77 | 1 | 2 | 52 | 19 | 93 | 110 |
| 53,881 | 3 | 11 | 37 | 73 | 1 | 2 | 52 | 19 | 93 | 105 |
| 53,882 | 3 | 3  | 37 | 32 | 1 | 1 | 52 | 12 | 93 | 48  |
| 53,883 | 3 | 3  | 37 | 32 | 1 | 1 | 52 | 12 | 93 | 48  |
| 53,884 | 3 | 3  | 37 | 26 | 1 | 1 | 52 | 9  | 93 | 39  |
| 53,885 | 3 | 3  | 37 | 26 | 1 | 1 | 50 | 9  | 91 | 39  |
| 53,886 | 4 | 3  | 37 | 29 | 1 | 1 | 51 | 9  | 93 | 42  |
| 53,887 | 4 | 2  | 37 | 20 | 1 | 2 | 51 | 6  | 93 | 30  |
| 53,888 | 5 | 2  | 37 | 20 | 1 | 2 | 51 | 6  | 94 | 30  |
| 53,889 | 5 | 2  | 37 | 21 | 1 | 2 | 51 | 6  | 94 | 31  |
| 53,890 | 4 | 1  | 34 | 21 | 1 | 2 | 49 | 6  | 88 | 30  |
| 53,891 | 4 | 0  | 33 | 20 | 1 | 2 | 47 | 6  | 85 | 28  |
| 53,892 | 4 | 0  | 33 | 20 | 1 | 2 | 47 | 6  | 85 | 28  |
| 53,893 | 4 | 0  | 33 | 20 | 1 | 2 | 48 | 6  | 86 | 28  |
| 53,894 | 5 | 0  | 34 | 20 | 1 | 2 | 47 | 6  | 87 | 28  |
| 53,895 | 5 | 0  | 32 | 20 | 1 | 2 | 47 | 6  | 85 | 28  |
| 53,896 | 5 | 0  | 36 | 20 | 1 | 2 | 48 | 6  | 90 | 28  |
| 53,897 | 5 | 0  | 36 | 20 | 1 | 2 | 48 | 6  | 90 | 28  |
| 53,898 | 5 | 0  | 34 | 20 | 1 | 2 | 46 | 6  | 86 | 28  |
| 53,899 | 5 | 0  | 34 | 17 | 1 | 2 | 46 | 6  | 86 | 25  |
| 53,900 | 5 | 0  | 34 | 19 | 1 | 2 | 47 | 6  | 87 | 27  |
| 53,901 | 5 | 0  | 34 | 19 | 0 | 2 | 45 | 6  | 84 | 27  |
| 53,902 | 5 | 0  | 33 | 20 | 0 | 2 | 44 | 4  | 82 | 26  |
| 53,903 | 5 | 0  | 33 | 20 | 0 | 2 | 44 | 4  | 82 | 26  |

|        |    |   |    |    |   |   |    |   |     |    |
|--------|----|---|----|----|---|---|----|---|-----|----|
| 53,904 | 5  | 0 | 33 | 19 | 0 | 2 | 44 | 4 | 82  | 25 |
| 53,905 | 5  | 0 | 41 | 18 | 0 | 2 | 51 | 3 | 97  | 23 |
| 53,906 | 5  | 0 | 41 | 18 | 0 | 2 | 51 | 3 | 97  | 23 |
| 53,907 | 5  | 0 | 41 | 18 | 0 | 2 | 51 | 3 | 97  | 23 |
| 53,908 | 5  | 0 | 42 | 17 | 0 | 2 | 51 | 3 | 98  | 22 |
| 53,909 | 5  | 0 | 43 | 17 | 0 | 2 | 51 | 3 | 99  | 22 |
| 53,910 | 5  | 0 | 43 | 18 | 0 | 2 | 51 | 3 | 99  | 23 |
| 53,911 | 5  | 0 | 51 | 18 | 0 | 1 | 53 | 3 | 109 | 22 |
| 53,912 | 5  | 0 | 50 | 18 | 0 | 1 | 53 | 3 | 108 | 22 |
| 53,913 | 5  | 0 | 48 | 18 | 0 | 1 | 53 | 3 | 106 | 22 |
| 53,914 | 4  | 0 | 50 | 18 | 0 | 1 | 55 | 3 | 109 | 22 |
| 53,915 | 4  | 0 | 50 | 19 | 0 | 1 | 55 | 4 | 109 | 24 |
| 53,916 | 4  | 0 | 50 | 18 | 0 | 1 | 55 | 4 | 109 | 23 |
| 53,917 | 4  | 0 | 50 | 19 | 0 | 1 | 55 | 4 | 109 | 24 |
| 53,918 | 4  | 0 | 50 | 19 | 0 | 1 | 55 | 4 | 109 | 24 |
| 53,919 | 3  | 0 | 49 | 19 | 0 | 1 | 53 | 5 | 105 | 25 |
| 53,920 | 3  | 0 | 51 | 20 | 0 | 1 | 51 | 5 | 105 | 26 |
| 53,921 | 3  | 0 | 56 | 20 | 0 | 1 | 53 | 5 | 112 | 26 |
| 53,922 | 3  | 1 | 58 | 20 | 0 | 1 | 52 | 4 | 113 | 26 |
| 53,923 | 3  | 1 | 56 | 20 | 0 | 1 | 51 | 4 | 110 | 26 |
| 53,924 | 10 | 1 | 70 | 22 | 1 | 1 | 65 | 6 | 146 | 30 |
| 53,925 | 11 | 2 | 71 | 25 | 1 | 1 | 66 | 6 | 149 | 34 |
| 53,926 | 11 | 2 | 68 | 24 | 1 | 1 | 62 | 6 | 142 | 33 |
| 53,927 | 11 | 2 | 68 | 24 | 1 | 1 | 56 | 6 | 136 | 33 |
| 53,928 | 11 | 2 | 65 | 24 | 1 | 1 | 49 | 5 | 126 | 32 |
| 53,929 | 11 | 2 | 60 | 24 | 1 | 1 | 40 | 5 | 112 | 32 |
| 53,930 | 11 | 2 | 57 | 24 | 1 | 1 | 37 | 5 | 106 | 32 |
| 53,931 | 11 | 2 | 58 | 24 | 1 | 1 | 38 | 5 | 108 | 32 |
| 53,932 | 11 | 2 | 58 | 24 | 1 | 1 | 38 | 6 | 108 | 33 |
| 53,933 | 11 | 2 | 57 | 24 | 1 | 1 | 38 | 6 | 107 | 33 |
| 53,934 | 11 | 2 | 56 | 24 | 1 | 1 | 39 | 6 | 107 | 33 |
| 53,935 | 11 | 2 | 56 | 22 | 1 | 1 | 39 | 6 | 107 | 31 |
| 53,936 | 10 | 2 | 56 | 22 | 1 | 1 | 38 | 6 | 105 | 31 |
| 53,937 | 10 | 3 | 56 | 19 | 1 | 0 | 38 | 6 | 105 | 28 |
| 53,938 | 10 | 3 | 56 | 19 | 1 | 0 | 38 | 6 | 105 | 28 |
| 53,939 | 9  | 3 | 58 | 19 | 1 | 0 | 38 | 6 | 106 | 28 |
| 53,940 | 9  | 3 | 58 | 18 | 1 | 0 | 38 | 6 | 106 | 27 |
| 53,941 | 9  | 3 | 58 | 18 | 2 | 0 | 38 | 6 | 107 | 27 |
| 53,942 | 9  | 3 | 58 | 18 | 2 | 0 | 38 | 6 | 107 | 27 |
| 53,943 | 9  | 3 | 58 | 18 | 2 | 0 | 38 | 6 | 107 | 27 |
| 53,944 | 9  | 3 | 58 | 18 | 2 | 0 | 38 | 6 | 107 | 27 |

|        |    |   |    |    |   |   |    |   |     |    |
|--------|----|---|----|----|---|---|----|---|-----|----|
| 53,945 | 8  | 3 | 57 | 18 | 2 | 0 | 38 | 6 | 105 | 27 |
| 53,946 | 11 | 3 | 53 | 18 | 2 | 0 | 37 | 6 | 103 | 27 |
| 53,947 | 11 | 3 | 57 | 18 | 2 | 0 | 43 | 6 | 113 | 27 |
| 53,948 | 12 | 3 | 59 | 18 | 2 | 0 | 47 | 6 | 120 | 27 |
| 53,949 | 12 | 3 | 62 | 18 | 2 | 0 | 50 | 6 | 126 | 27 |
| 53,950 | 12 | 3 | 62 | 16 | 2 | 0 | 50 | 6 | 126 | 25 |
| 53,951 | 12 | 3 | 62 | 17 | 2 | 0 | 49 | 6 | 125 | 26 |
| 53,952 | 12 | 3 | 63 | 17 | 2 | 0 | 50 | 6 | 127 | 26 |
| 53,953 | 13 | 3 | 63 | 13 | 2 | 0 | 51 | 6 | 129 | 22 |
| 53,954 | 13 | 3 | 64 | 13 | 2 | 0 | 51 | 6 | 130 | 22 |
| 53,955 | 13 | 3 | 65 | 13 | 2 | 1 | 51 | 7 | 131 | 24 |
| 53,956 | 13 | 3 | 58 | 13 | 2 | 1 | 44 | 7 | 117 | 24 |
| 53,957 | 13 | 3 | 57 | 13 | 2 | 1 | 44 | 7 | 116 | 24 |
| 53,958 | 13 | 3 | 57 | 14 | 2 | 1 | 44 | 7 | 116 | 25 |
| 53,959 | 13 | 3 | 64 | 23 | 2 | 1 | 50 | 7 | 129 | 34 |
| 53,960 | 13 | 3 | 65 | 24 | 2 | 1 | 50 | 7 | 130 | 35 |
| 53,961 | 14 | 3 | 61 | 24 | 2 | 1 | 52 | 8 | 129 | 36 |
| 53,962 | 14 | 3 | 61 | 24 | 3 | 1 | 52 | 8 | 130 | 36 |
| 53,963 | 14 | 4 | 62 | 25 | 3 | 1 | 51 | 8 | 130 | 38 |
| 53,964 | 14 | 5 | 62 | 26 | 3 | 1 | 51 | 8 | 130 | 40 |
| 53,965 | 14 | 5 | 60 | 24 | 3 | 1 | 51 | 6 | 128 | 36 |
| 53,966 | 14 | 5 | 60 | 24 | 3 | 1 | 51 | 6 | 128 | 36 |
| 53,967 | 14 | 5 | 60 | 25 | 3 | 1 | 51 | 6 | 128 | 37 |
| 53,968 | 14 | 5 | 60 | 26 | 3 | 1 | 51 | 6 | 128 | 38 |
| 53,969 | 14 | 5 | 60 | 26 | 3 | 1 | 51 | 5 | 128 | 37 |
| 53,970 | 14 | 5 | 56 | 25 | 3 | 1 | 50 | 5 | 123 | 36 |
| 53,971 | 14 | 5 | 56 | 26 | 3 | 1 | 50 | 5 | 123 | 37 |
| 53,972 | 14 | 5 | 51 | 26 | 3 | 1 | 46 | 5 | 114 | 37 |
| 53,973 | 14 | 4 | 47 | 23 | 3 | 1 | 47 | 3 | 111 | 31 |
| 53,974 | 14 | 4 | 49 | 23 | 3 | 1 | 46 | 4 | 112 | 32 |
| 53,975 | 7  | 4 | 34 | 23 | 2 | 1 | 31 | 4 | 74  | 32 |
| 53,976 | 6  | 3 | 33 | 21 | 2 | 1 | 30 | 4 | 71  | 29 |
| 53,977 | 6  | 3 | 33 | 21 | 2 | 1 | 30 | 4 | 71  | 29 |
| 53,978 | 6  | 3 | 37 | 21 | 2 | 1 | 34 | 4 | 79  | 29 |
| 53,979 | 6  | 3 | 37 | 21 | 2 | 1 | 34 | 4 | 79  | 29 |
| 53,980 | 6  | 3 | 37 | 22 | 2 | 1 | 35 | 5 | 80  | 31 |
| 53,981 | 6  | 3 | 37 | 22 | 2 | 1 | 35 | 5 | 80  | 31 |
| 53,982 | 7  | 3 | 80 | 22 | 2 | 1 | 47 | 5 | 136 | 31 |
| 53,983 | 7  | 3 | 85 | 22 | 2 | 1 | 48 | 4 | 142 | 30 |
| 53,984 | 8  | 3 | 88 | 22 | 2 | 1 | 49 | 4 | 147 | 30 |
| 53,985 | 8  | 4 | 88 | 22 | 2 | 1 | 49 | 4 | 147 | 31 |

|        |    |   |     |    |    |   |     |    |     |    |
|--------|----|---|-----|----|----|---|-----|----|-----|----|
| 53,986 | 9  | 4 | 90  | 22 | 2  | 1 | 51  | 4  | 152 | 31 |
| 53,987 | 9  | 3 | 90  | 22 | 2  | 1 | 51  | 4  | 152 | 30 |
| 53,988 | 9  | 3 | 90  | 22 | 2  | 1 | 51  | 4  | 152 | 30 |
| 53,989 | 9  | 3 | 89  | 22 | 2  | 1 | 51  | 4  | 151 | 30 |
| 53,990 | 9  | 3 | 88  | 22 | 2  | 1 | 51  | 4  | 150 | 30 |
| 53,991 | 11 | 3 | 100 | 23 | 2  | 1 | 57  | 4  | 170 | 31 |
| 53,992 | 11 | 3 | 100 | 23 | 1  | 1 | 57  | 4  | 169 | 31 |
| 53,993 | 11 | 3 | 100 | 23 | 1  | 1 | 57  | 4  | 169 | 31 |
| 53,994 | 11 | 3 | 100 | 23 | 1  | 2 | 57  | 4  | 169 | 32 |
| 53,995 | 12 | 3 | 108 | 24 | 1  | 2 | 67  | 4  | 188 | 33 |
| 53,996 | 12 | 3 | 110 | 24 | 1  | 2 | 67  | 5  | 190 | 34 |
| 53,997 | 9  | 3 | 114 | 27 | 1  | 2 | 69  | 5  | 193 | 37 |
| 53,998 | 10 | 3 | 110 | 27 | 1  | 2 | 63  | 5  | 184 | 37 |
| 53,999 | 11 | 3 | 114 | 28 | 2  | 2 | 69  | 5  | 196 | 38 |
| 54,000 | 11 | 3 | 111 | 28 | 2  | 2 | 66  | 5  | 190 | 38 |
| 54,001 | 11 | 3 | 111 | 28 | 2  | 2 | 66  | 5  | 190 | 38 |
| 54,002 | 11 | 3 | 115 | 27 | 2  | 2 | 68  | 5  | 196 | 37 |
| 54,003 | 10 | 3 | 115 | 27 | 2  | 2 | 67  | 5  | 194 | 37 |
| 54,004 | 10 | 3 | 116 | 27 | 2  | 2 | 67  | 5  | 195 | 37 |
| 54,005 | 10 | 4 | 115 | 27 | 2  | 2 | 67  | 5  | 194 | 38 |
| 54,006 | 14 | 4 | 141 | 27 | 3  | 1 | 89  | 5  | 247 | 37 |
| 54,007 | 14 | 4 | 141 | 27 | 3  | 1 | 89  | 6  | 247 | 38 |
| 54,008 | 15 | 4 | 143 | 28 | 3  | 1 | 94  | 6  | 255 | 39 |
| 54,009 | 15 | 4 | 138 | 28 | 3  | 1 | 92  | 7  | 248 | 40 |
| 54,010 | 15 | 4 | 136 | 16 | 3  | 1 | 90  | 6  | 244 | 27 |
| 54,011 | 15 | 4 | 137 | 16 | 3  | 1 | 94  | 6  | 249 | 27 |
| 54,012 | 15 | 4 | 145 | 17 | 3  | 1 | 102 | 7  | 265 | 29 |
| 54,013 | 15 | 4 | 142 | 22 | 2  | 1 | 101 | 11 | 260 | 38 |
| 54,014 | 15 | 3 | 141 | 21 | 2  | 1 | 101 | 11 | 259 | 36 |
| 54,015 | 23 | 2 | 225 | 21 | 14 | 1 | 190 | 13 | 452 | 37 |
| 54,016 | 24 | 2 | 229 | 23 | 15 | 1 | 193 | 19 | 461 | 45 |
| 54,017 | 24 | 2 | 229 | 25 | 15 | 1 | 195 | 19 | 463 | 47 |
| 54,018 | 24 | 2 | 229 | 24 | 15 | 1 | 195 | 19 | 463 | 46 |
| 54,019 | 25 | 2 | 229 | 22 | 15 | 1 | 197 | 19 | 466 | 44 |
| 54,020 | 25 | 2 | 229 | 26 | 15 | 1 | 197 | 19 | 466 | 48 |
| 54,021 | 25 | 2 | 229 | 26 | 15 | 1 | 197 | 19 | 466 | 48 |
| 54,022 | 25 | 2 | 229 | 26 | 15 | 1 | 197 | 19 | 466 | 48 |
| 54,023 | 25 | 2 | 233 | 26 | 15 | 1 | 197 | 19 | 470 | 48 |
| 54,024 | 25 | 2 | 233 | 26 | 15 | 1 | 196 | 19 | 469 | 48 |
| 54,025 | 27 | 2 | 249 | 27 | 15 | 1 | 200 | 18 | 491 | 48 |
| 54,026 | 27 | 2 | 249 | 28 | 15 | 1 | 200 | 18 | 491 | 49 |

|        |    |   |     |    |    |   |     |    |     |    |
|--------|----|---|-----|----|----|---|-----|----|-----|----|
| 54,027 | 27 | 2 | 257 | 30 | 17 | 1 | 205 | 18 | 506 | 51 |
| 54,028 | 27 | 2 | 255 | 32 | 17 | 1 | 204 | 18 | 503 | 53 |
| 54,029 | 35 | 2 | 268 | 32 | 19 | 1 | 218 | 18 | 540 | 53 |
| 54,030 | 35 | 2 | 275 | 32 | 20 | 1 | 219 | 18 | 549 | 53 |
| 54,031 | 39 | 2 | 282 | 31 | 21 | 1 | 237 | 17 | 579 | 51 |
| 54,032 | 43 | 2 | 279 | 31 | 22 | 1 | 242 | 17 | 586 | 51 |
| 54,033 | 45 | 2 | 278 | 31 | 23 | 1 | 244 | 17 | 590 | 51 |
| 54,034 | 51 | 2 | 309 | 31 | 28 | 1 | 275 | 17 | 663 | 51 |
| 54,035 | 50 | 1 | 308 | 31 | 28 | 1 | 277 | 17 | 663 | 50 |
| 54,036 | 50 | 1 | 308 | 33 | 28 | 1 | 278 | 17 | 664 | 52 |
| 54,037 | 49 | 1 | 306 | 33 | 28 | 1 | 276 | 17 | 659 | 52 |
| 54,038 | 49 | 2 | 306 | 34 | 28 | 1 | 276 | 19 | 659 | 56 |
| 54,039 | 49 | 2 | 308 | 34 | 29 | 1 | 277 | 20 | 663 | 57 |
| 54,040 | 49 | 2 | 302 | 34 | 29 | 1 | 272 | 20 | 652 | 57 |
| 54,041 | 50 | 2 | 303 | 33 | 29 | 1 | 273 | 20 | 655 | 56 |
| 54,042 | 50 | 2 | 302 | 33 | 29 | 0 | 274 | 20 | 655 | 55 |
| 54,043 | 50 | 2 | 309 | 33 | 29 | 0 | 278 | 20 | 666 | 55 |
| 54,044 | 49 | 2 | 306 | 32 | 29 | 0 | 268 | 21 | 652 | 55 |
| 54,045 | 49 | 2 | 302 | 32 | 29 | 0 | 271 | 21 | 651 | 55 |
| 54,046 | 49 | 2 | 302 | 33 | 29 | 0 | 270 | 21 | 650 | 56 |
| 54,047 | 49 | 2 | 300 | 33 | 29 | 0 | 270 | 20 | 648 | 55 |
| 54,048 | 49 | 2 | 296 | 29 | 29 | 0 | 268 | 20 | 642 | 51 |
| 54,049 | 48 | 2 | 297 | 29 | 29 | 0 | 268 | 20 | 642 | 51 |
| 54,050 | 46 | 2 | 292 | 29 | 28 | 0 | 258 | 20 | 624 | 51 |
| 54,051 | 46 | 2 | 287 | 29 | 28 | 0 | 255 | 20 | 616 | 51 |
| 54,052 | 46 | 2 | 286 | 29 | 28 | 0 | 255 | 20 | 615 | 51 |
| 54,053 | 46 | 2 | 286 | 29 | 28 | 0 | 255 | 20 | 615 | 51 |
| 54,054 | 46 | 2 | 286 | 29 | 28 | 0 | 255 | 20 | 615 | 51 |
| 54,055 | 46 | 1 | 283 | 28 | 28 | 0 | 255 | 20 | 612 | 49 |
| 54,056 | 46 | 1 | 283 | 28 | 28 | 0 | 255 | 20 | 612 | 49 |
| 54,057 | 42 | 1 | 259 | 29 | 27 | 0 | 234 | 18 | 562 | 48 |
| 54,058 | 42 | 1 | 258 | 30 | 27 | 0 | 234 | 18 | 561 | 49 |
| 54,059 | 41 | 1 | 256 | 31 | 27 | 0 | 229 | 18 | 553 | 50 |
| 54,060 | 41 | 1 | 255 | 30 | 27 | 0 | 228 | 19 | 551 | 50 |
| 54,061 | 41 | 1 | 255 | 29 | 27 | 1 | 227 | 18 | 550 | 49 |
| 54,062 | 41 | 1 | 253 | 30 | 27 | 1 | 223 | 18 | 544 | 50 |
| 54,063 | 40 | 1 | 244 | 33 | 27 | 2 | 212 | 23 | 523 | 59 |
| 54,064 | 37 | 2 | 195 | 33 | 21 | 2 | 170 | 21 | 423 | 58 |
| 54,065 | 33 | 2 | 176 | 34 | 16 | 2 | 134 | 21 | 359 | 59 |
| 54,066 | 32 | 2 | 160 | 31 | 15 | 2 | 125 | 14 | 332 | 49 |
| 54,067 | 31 | 2 | 156 | 29 | 14 | 2 | 121 | 14 | 322 | 47 |

|        |    |   |     |    |    |   |     |    |     |    |
|--------|----|---|-----|----|----|---|-----|----|-----|----|
| 54,068 | 31 | 2 | 156 | 29 | 14 | 2 | 120 | 14 | 321 | 47 |
| 54,069 | 31 | 2 | 156 | 30 | 14 | 2 | 121 | 14 | 322 | 48 |
| 54,070 | 30 | 2 | 156 | 30 | 14 | 2 | 120 | 14 | 320 | 48 |
| 54,071 | 30 | 2 | 156 | 26 | 14 | 2 | 120 | 14 | 320 | 44 |
| 54,072 | 30 | 2 | 156 | 26 | 14 | 2 | 121 | 14 | 321 | 44 |
| 54,073 | 30 | 2 | 159 | 26 | 14 | 2 | 123 | 14 | 326 | 44 |
| 54,074 | 32 | 2 | 185 | 28 | 17 | 2 | 151 | 14 | 385 | 46 |
| 54,075 | 32 | 2 | 185 | 28 | 17 | 2 | 150 | 14 | 384 | 46 |
| 54,076 | 33 | 2 | 179 | 29 | 17 | 2 | 153 | 14 | 382 | 47 |
| 54,077 | 33 | 2 | 175 | 30 | 17 | 2 | 154 | 15 | 379 | 49 |
| 54,078 | 33 | 2 | 174 | 25 | 15 | 2 | 158 | 16 | 380 | 45 |
| 54,079 | 33 | 2 | 173 | 25 | 15 | 2 | 155 | 16 | 376 | 45 |
| 54,080 | 24 | 2 | 157 | 26 | 13 | 2 | 140 | 17 | 334 | 47 |
| 54,081 | 25 | 2 | 148 | 28 | 12 | 2 | 139 | 19 | 324 | 51 |
| 54,082 | 21 | 2 | 129 | 32 | 11 | 2 | 118 | 20 | 279 | 56 |
| 54,083 | 17 | 2 | 105 | 35 | 10 | 2 | 104 | 24 | 236 | 63 |
| 54,084 | 15 | 3 | 103 | 40 | 9  | 2 | 100 | 26 | 227 | 71 |
| 54,085 | 9  | 3 | 70  | 41 | 4  | 2 | 69  | 26 | 152 | 72 |
| 54,086 | 9  | 3 | 68  | 41 | 4  | 2 | 67  | 26 | 148 | 72 |
| 54,087 | 9  | 3 | 68  | 40 | 4  | 2 | 66  | 27 | 147 | 72 |
| 54,088 | 9  | 3 | 68  | 42 | 4  | 2 | 66  | 27 | 147 | 74 |
| 54,089 | 8  | 2 | 68  | 41 | 4  | 2 | 66  | 26 | 146 | 71 |
| 54,090 | 7  | 2 | 64  | 42 | 3  | 2 | 64  | 26 | 138 | 72 |
| 54,091 | 7  | 2 | 64  | 43 | 3  | 2 | 64  | 27 | 138 | 74 |
| 54,092 | 6  | 2 | 60  | 43 | 3  | 2 | 63  | 26 | 132 | 73 |
| 54,093 | 6  | 2 | 60  | 43 | 3  | 2 | 62  | 27 | 131 | 74 |
| 54,094 | 6  | 2 | 53  | 43 | 3  | 2 | 58  | 27 | 120 | 74 |
| 54,095 | 6  | 2 | 53  | 43 | 3  | 2 | 58  | 27 | 120 | 74 |
| 54,096 | 6  | 2 | 52  | 42 | 3  | 2 | 55  | 27 | 116 | 73 |
| 54,097 | 6  | 2 | 52  | 42 | 3  | 2 | 55  | 27 | 116 | 73 |
| 54,098 | 6  | 2 | 53  | 42 | 3  | 2 | 55  | 27 | 117 | 73 |
| 54,099 | 6  | 2 | 53  | 42 | 3  | 2 | 55  | 27 | 117 | 73 |
| 54,100 | 6  | 2 | 52  | 42 | 3  | 2 | 55  | 27 | 116 | 73 |
| 54,101 | 6  | 2 | 51  | 42 | 3  | 2 | 55  | 27 | 115 | 73 |
| 54,102 | 7  | 2 | 51  | 42 | 3  | 2 | 55  | 27 | 116 | 73 |
| 54,103 | 7  | 2 | 52  | 42 | 3  | 2 | 55  | 27 | 117 | 73 |
| 54,104 | 8  | 2 | 58  | 42 | 3  | 2 | 59  | 27 | 128 | 73 |
| 54,105 | 8  | 2 | 61  | 42 | 3  | 2 | 60  | 27 | 132 | 73 |
| 54,106 | 8  | 2 | 68  | 42 | 3  | 2 | 61  | 27 | 140 | 73 |
| 54,107 | 8  | 2 | 68  | 42 | 3  | 2 | 61  | 27 | 140 | 73 |
| 54,108 | 9  | 2 | 75  | 42 | 3  | 2 | 62  | 27 | 149 | 73 |



|        |    |   |     |    |    |   |     |    |     |     |
|--------|----|---|-----|----|----|---|-----|----|-----|-----|
| 54,109 | 9  | 2 | 76  | 41 | 3  | 2 | 62  | 27 | 150 | 72  |
| 54,110 | 10 | 2 | 83  | 39 | 4  | 2 | 65  | 25 | 162 | 68  |
| 54,111 | 12 | 2 | 102 | 39 | 4  | 1 | 70  | 25 | 188 | 67  |
| 54,112 | 12 | 2 | 107 | 39 | 5  | 1 | 78  | 25 | 202 | 67  |
| 54,113 | 14 | 3 | 109 | 41 | 5  | 0 | 80  | 25 | 208 | 69  |
| 54,114 | 14 | 3 | 109 | 43 | 5  | 0 | 80  | 25 | 208 | 71  |
| 54,115 | 14 | 2 | 115 | 38 | 5  | 0 | 83  | 23 | 217 | 63  |
| 54,116 | 14 | 2 | 115 | 37 | 5  | 0 | 82  | 23 | 216 | 62  |
| 54,117 | 15 | 2 | 115 | 45 | 5  | 0 | 81  | 23 | 216 | 70  |
| 54,118 | 15 | 2 | 115 | 45 | 5  | 1 | 81  | 23 | 216 | 71  |
| 54,119 | 15 | 2 | 116 | 45 | 5  | 1 | 80  | 23 | 216 | 71  |
| 54,120 | 15 | 2 | 116 | 45 | 5  | 1 | 79  | 29 | 215 | 77  |
| 54,121 | 15 | 3 | 116 | 53 | 5  | 1 | 79  | 29 | 215 | 86  |
| 54,122 | 15 | 4 | 119 | 55 | 5  | 1 | 83  | 29 | 222 | 89  |
| 54,123 | 15 | 4 | 116 | 58 | 5  | 1 | 82  | 29 | 218 | 92  |
| 54,124 | 14 | 4 | 98  | 61 | 3  | 1 | 68  | 30 | 183 | 96  |
| 54,125 | 13 | 4 | 88  | 64 | 2  | 1 | 67  | 33 | 170 | 102 |
| 54,126 | 10 | 4 | 79  | 63 | 2  | 1 | 63  | 35 | 154 | 103 |
| 54,127 | 10 | 4 | 76  | 64 | 2  | 1 | 61  | 37 | 149 | 106 |
| 54,128 | 11 | 4 | 74  | 62 | 2  | 1 | 59  | 36 | 146 | 103 |
| 54,129 | 11 | 4 | 79  | 61 | 3  | 1 | 55  | 35 | 148 | 101 |
| 54,130 | 12 | 4 | 84  | 60 | 3  | 1 | 55  | 34 | 154 | 99  |
| 54,131 | 12 | 4 | 85  | 58 | 3  | 1 | 55  | 32 | 155 | 95  |
| 54,132 | 12 | 4 | 86  | 59 | 3  | 1 | 59  | 32 | 160 | 96  |
| 54,133 | 12 | 4 | 86  | 55 | 3  | 1 | 58  | 31 | 159 | 91  |
| 54,134 | 12 | 4 | 86  | 52 | 3  | 1 | 58  | 27 | 159 | 84  |
| 54,135 | 13 | 3 | 89  | 47 | 3  | 1 | 59  | 25 | 164 | 76  |
| 54,136 | 13 | 3 | 89  | 46 | 3  | 1 | 58  | 25 | 163 | 75  |
| 54,137 | 13 | 3 | 94  | 46 | 3  | 1 | 58  | 26 | 168 | 76  |
| 54,138 | 13 | 3 | 99  | 45 | 3  | 1 | 62  | 25 | 177 | 74  |
| 54,139 | 13 | 3 | 103 | 43 | 3  | 1 | 66  | 25 | 185 | 72  |
| 54,140 | 13 | 3 | 111 | 43 | 4  | 1 | 72  | 24 | 200 | 71  |
| 54,141 | 14 | 3 | 126 | 41 | 4  | 1 | 75  | 22 | 219 | 67  |
| 54,142 | 14 | 3 | 157 | 41 | 9  | 1 | 82  | 22 | 262 | 67  |
| 54,143 | 14 | 3 | 157 | 41 | 9  | 1 | 82  | 22 | 262 | 67  |
| 54,144 | 14 | 3 | 157 | 41 | 9  | 1 | 82  | 21 | 262 | 66  |
| 54,145 | 21 | 3 | 273 | 41 | 16 | 1 | 146 | 21 | 456 | 66  |
| 54,146 | 21 | 3 | 278 | 41 | 16 | 1 | 148 | 21 | 463 | 66  |
| 54,147 | 21 | 3 | 279 | 41 | 16 | 1 | 148 | 21 | 464 | 66  |
| 54,148 | 21 | 3 | 279 | 41 | 16 | 1 | 148 | 21 | 464 | 66  |
| 54,149 | 21 | 3 | 278 | 41 | 16 | 1 | 147 | 21 | 462 | 66  |

|        |    |   |     |    |    |   |     |    |     |     |
|--------|----|---|-----|----|----|---|-----|----|-----|-----|
| 54,150 | 21 | 3 | 283 | 43 | 17 | 1 | 148 | 21 | 469 | 68  |
| 54,151 | 21 | 3 | 284 | 43 | 17 | 1 | 148 | 21 | 470 | 68  |
| 54,152 | 23 | 3 | 291 | 43 | 17 | 1 | 156 | 22 | 487 | 69  |
| 54,153 | 23 | 3 | 291 | 43 | 17 | 1 | 156 | 22 | 487 | 69  |
| 54,154 | 23 | 3 | 290 | 44 | 17 | 1 | 157 | 22 | 487 | 70  |
| 54,155 | 22 | 5 | 289 | 44 | 17 | 1 | 155 | 22 | 483 | 72  |
| 54,156 | 22 | 5 | 288 | 49 | 17 | 1 | 154 | 25 | 481 | 80  |
| 54,157 | 22 | 5 | 282 | 51 | 17 | 2 | 154 | 26 | 475 | 84  |
| 54,158 | 22 | 5 | 281 | 51 | 17 | 2 | 152 | 27 | 472 | 85  |
| 54,159 | 21 | 5 | 275 | 53 | 17 | 2 | 153 | 27 | 466 | 87  |
| 54,160 | 21 | 5 | 274 | 56 | 17 | 2 | 153 | 27 | 465 | 90  |
| 54,161 | 20 | 6 | 267 | 61 | 16 | 2 | 150 | 27 | 453 | 96  |
| 54,162 | 18 | 6 | 248 | 62 | 16 | 2 | 145 | 27 | 427 | 97  |
| 54,163 | 18 | 6 | 243 | 61 | 15 | 2 | 137 | 27 | 413 | 96  |
| 54,164 | 16 | 7 | 241 | 59 | 15 | 3 | 135 | 24 | 407 | 93  |
| 54,165 | 16 | 7 | 236 | 57 | 15 | 3 | 133 | 24 | 400 | 91  |
| 54,166 | 16 | 7 | 236 | 70 | 15 | 3 | 132 | 24 | 399 | 104 |
| 54,167 | 16 | 7 | 236 | 71 | 15 | 3 | 132 | 24 | 399 | 105 |
| 54,168 | 15 | 7 | 237 | 63 | 15 | 3 | 132 | 23 | 399 | 96  |
| 54,169 | 16 | 8 | 237 | 68 | 15 | 3 | 133 | 24 | 401 | 103 |
| 54,170 | 16 | 8 | 237 | 69 | 15 | 3 | 133 | 24 | 401 | 104 |
| 54,171 | 16 | 9 | 237 | 75 | 15 | 3 | 134 | 19 | 402 | 106 |
| 54,172 | 16 | 8 | 240 | 68 | 15 | 3 | 136 | 19 | 407 | 98  |
| 54,173 | 16 | 7 | 237 | 63 | 15 | 3 | 131 | 19 | 399 | 92  |
| 54,174 | 16 | 7 | 237 | 63 | 15 | 3 | 130 | 19 | 398 | 92  |
| 54,175 | 16 | 7 | 235 | 55 | 15 | 3 | 118 | 15 | 384 | 80  |
| 54,176 | 16 | 7 | 235 | 54 | 15 | 3 | 117 | 13 | 383 | 77  |
| 54,177 | 16 | 7 | 235 | 54 | 15 | 3 | 117 | 13 | 383 | 77  |
| 54,178 | 16 | 7 | 236 | 53 | 16 | 3 | 117 | 11 | 385 | 74  |
| 54,179 | 15 | 7 | 237 | 54 | 16 | 3 | 117 | 12 | 385 | 76  |
| 54,180 | 15 | 7 | 231 | 54 | 15 | 3 | 113 | 12 | 374 | 76  |
| 54,181 | 14 | 7 | 226 | 55 | 15 | 3 | 113 | 12 | 368 | 77  |
| 54,182 | 14 | 7 | 225 | 55 | 15 | 3 | 113 | 12 | 367 | 77  |
| 54,183 | 13 | 7 | 225 | 54 | 15 | 3 | 109 | 12 | 362 | 76  |
| 54,184 | 13 | 7 | 229 | 54 | 15 | 3 | 110 | 13 | 367 | 77  |
| 54,185 | 13 | 7 | 236 | 54 | 15 | 3 | 117 | 13 | 381 | 77  |
| 54,186 | 12 | 7 | 238 | 54 | 15 | 3 | 117 | 13 | 382 | 77  |
| 54,187 | 12 | 7 | 235 | 54 | 15 | 3 | 117 | 13 | 379 | 77  |
| 54,188 | 12 | 7 | 230 | 54 | 15 | 3 | 113 | 12 | 370 | 76  |
| 54,189 | 12 | 7 | 226 | 56 | 15 | 3 | 109 | 12 | 362 | 78  |
| 54,190 | 12 | 8 | 219 | 60 | 14 | 3 | 104 | 13 | 349 | 84  |

|        |    |   |     |    |    |   |     |    |     |     |
|--------|----|---|-----|----|----|---|-----|----|-----|-----|
| 54,191 | 12 | 8 | 218 | 65 | 14 | 3 | 103 | 14 | 347 | 90  |
| 54,192 | 11 | 8 | 205 | 65 | 14 | 3 | 101 | 16 | 331 | 92  |
| 54,193 | 11 | 8 | 174 | 65 | 9  | 3 | 94  | 17 | 288 | 93  |
| 54,194 | 11 | 8 | 167 | 65 | 9  | 3 | 89  | 17 | 276 | 93  |
| 54,195 | 7  | 8 | 75  | 71 | 6  | 3 | 42  | 19 | 130 | 101 |
| 54,196 | 4  | 8 | 59  | 71 | 2  | 3 | 34  | 19 | 99  | 101 |
| 54,197 | 4  | 8 | 55  | 71 | 2  | 3 | 33  | 19 | 94  | 101 |
| 54,198 | 4  | 8 | 54  | 71 | 2  | 3 | 33  | 19 | 93  | 101 |
| 54,199 | 5  | 8 | 62  | 71 | 3  | 3 | 38  | 19 | 108 | 101 |
| 54,200 | 5  | 8 | 63  | 69 | 3  | 3 | 39  | 19 | 110 | 99  |
| 54,201 | 5  | 8 | 62  | 69 | 3  | 3 | 39  | 19 | 109 | 99  |
| 54,202 | 5  | 8 | 81  | 71 | 4  | 3 | 50  | 19 | 140 | 101 |
| 54,203 | 4  | 8 | 79  | 71 | 4  | 3 | 49  | 18 | 136 | 100 |
| 54,204 | 4  | 8 | 78  | 70 | 4  | 3 | 49  | 18 | 135 | 99  |
| 54,205 | 4  | 8 | 77  | 70 | 4  | 3 | 49  | 18 | 134 | 99  |
| 54,206 | 4  | 6 | 74  | 65 | 4  | 3 | 47  | 15 | 129 | 89  |
| 54,207 | 4  | 6 | 72  | 65 | 4  | 3 | 47  | 15 | 127 | 89  |
| 54,208 | 4  | 5 | 71  | 53 | 4  | 2 | 45  | 14 | 124 | 74  |
| 54,209 | 5  | 5 | 75  | 53 | 4  | 2 | 47  | 14 | 131 | 74  |
| 54,210 | 5  | 5 | 78  | 53 | 4  | 2 | 48  | 14 | 135 | 74  |
| 54,211 | 5  | 5 | 78  | 53 | 4  | 2 | 48  | 14 | 135 | 74  |
| 54,212 | 5  | 5 | 83  | 53 | 4  | 2 | 49  | 14 | 141 | 74  |
| 54,213 | 5  | 5 | 84  | 52 | 4  | 2 | 50  | 14 | 143 | 73  |
| 54,214 | 5  | 4 | 85  | 52 | 4  | 1 | 51  | 12 | 145 | 69  |
| 54,215 | 5  | 4 | 85  | 52 | 4  | 1 | 51  | 12 | 145 | 69  |
| 54,216 | 5  | 4 | 85  | 39 | 4  | 1 | 51  | 12 | 145 | 56  |
| 54,217 | 5  | 4 | 85  | 38 | 4  | 1 | 51  | 12 | 145 | 55  |
| 54,218 | 5  | 4 | 84  | 38 | 4  | 1 | 51  | 13 | 144 | 56  |
| 54,219 | 4  | 4 | 83  | 38 | 4  | 1 | 50  | 13 | 141 | 56  |
| 54,220 | 4  | 3 | 83  | 32 | 4  | 0 | 50  | 12 | 141 | 47  |
| 54,221 | 4  | 2 | 83  | 25 | 4  | 0 | 49  | 11 | 140 | 38  |
| 54,222 | 4  | 2 | 83  | 25 | 4  | 0 | 48  | 11 | 139 | 38  |
| 54,223 | 4  | 2 | 80  | 24 | 4  | 0 | 46  | 12 | 134 | 38  |
| 54,224 | 4  | 2 | 80  | 24 | 4  | 0 | 46  | 12 | 134 | 38  |
| 54,225 | 4  | 2 | 80  | 26 | 4  | 0 | 46  | 12 | 134 | 40  |
| 54,226 | 4  | 3 | 80  | 26 | 4  | 0 | 46  | 12 | 134 | 41  |
| 54,227 | 4  | 3 | 80  | 26 | 4  | 0 | 46  | 12 | 134 | 41  |
| 54,228 | 4  | 3 | 80  | 25 | 4  | 0 | 46  | 11 | 134 | 39  |
| 54,229 | 4  | 3 | 79  | 34 | 3  | 1 | 46  | 14 | 132 | 52  |
| 54,230 | 4  | 3 | 78  | 34 | 3  | 1 | 46  | 14 | 131 | 52  |
| 54,231 | 4  | 3 | 77  | 40 | 3  | 1 | 46  | 14 | 130 | 58  |

|        |   |   |    |    |   |   |    |    |     |    |
|--------|---|---|----|----|---|---|----|----|-----|----|
| 54,232 | 4 | 4 | 76 | 44 | 3 | 1 | 46 | 15 | 129 | 64 |
| 54,233 | 4 | 4 | 75 | 44 | 3 | 1 | 46 | 15 | 128 | 64 |
| 54,234 | 4 | 4 | 72 | 44 | 3 | 1 | 45 | 14 | 124 | 63 |
| 54,235 | 4 | 4 | 71 | 45 | 3 | 1 | 45 | 14 | 123 | 64 |
| 54,236 | 4 | 4 | 62 | 45 | 3 | 1 | 38 | 14 | 107 | 64 |
| 54,237 | 4 | 4 | 60 | 45 | 3 | 1 | 38 | 14 | 105 | 64 |
| 54,238 | 4 | 4 | 58 | 45 | 3 | 1 | 38 | 14 | 103 | 64 |
| 54,239 | 4 | 4 | 59 | 45 | 3 | 1 | 39 | 14 | 105 | 64 |
| 54,240 | 4 | 3 | 59 | 34 | 3 | 1 | 39 | 12 | 105 | 50 |
| 54,241 | 4 | 3 | 63 | 34 | 3 | 1 | 38 | 12 | 108 | 50 |
| 54,242 | 4 | 3 | 62 | 34 | 3 | 1 | 38 | 12 | 107 | 50 |
| 54,243 | 4 | 3 | 62 | 30 | 3 | 1 | 39 | 7  | 108 | 41 |
| 54,244 | 4 | 3 | 65 | 30 | 3 | 1 | 41 | 7  | 113 | 41 |
| 54,245 | 4 | 3 | 69 | 29 | 3 | 1 | 35 | 7  | 111 | 40 |
| 54,246 | 4 | 3 | 69 | 29 | 4 | 1 | 35 | 8  | 112 | 41 |
| 54,247 | 4 | 3 | 80 | 30 | 4 | 1 | 39 | 8  | 127 | 42 |
| 54,248 | 5 | 3 | 84 | 33 | 4 | 2 | 45 | 9  | 138 | 47 |
| 54,249 | 5 | 3 | 89 | 34 | 4 | 2 | 46 | 11 | 144 | 50 |
| 54,250 | 4 | 3 | 82 | 34 | 3 | 2 | 42 | 11 | 131 | 50 |
| 54,251 | 4 | 3 | 77 | 34 | 2 | 2 | 41 | 11 | 124 | 50 |
| 54,252 | 2 | 3 | 54 | 34 | 1 | 2 | 24 | 11 | 81  | 50 |
| 54,253 | 2 | 3 | 54 | 32 | 1 | 2 | 23 | 11 | 80  | 48 |
| 54,254 | 2 | 3 | 54 | 32 | 1 | 2 | 23 | 11 | 80  | 48 |
| 54,255 | 2 | 3 | 54 | 32 | 1 | 2 | 23 | 11 | 80  | 48 |
| 54,256 | 2 | 3 | 54 | 32 | 1 | 2 | 23 | 11 | 80  | 48 |
| 54,257 | 2 | 3 | 55 | 32 | 1 | 2 | 23 | 11 | 81  | 48 |
| 54,258 | 2 | 3 | 55 | 32 | 1 | 2 | 24 | 10 | 82  | 47 |
| 54,259 | 2 | 3 | 55 | 33 | 1 | 2 | 24 | 18 | 82  | 56 |
| 54,260 | 1 | 3 | 51 | 34 | 1 | 2 | 22 | 19 | 75  | 58 |
| 54,261 | 1 | 3 | 48 | 36 | 1 | 2 | 21 | 19 | 71  | 60 |
| 54,262 | 4 | 3 | 45 | 37 | 1 | 2 | 20 | 20 | 70  | 62 |
| 54,263 | 4 | 3 | 44 | 37 | 1 | 2 | 19 | 20 | 68  | 62 |
| 54,264 | 4 | 2 | 43 | 35 | 1 | 2 | 19 | 20 | 67  | 59 |
| 54,265 | 4 | 2 | 43 | 35 | 1 | 2 | 19 | 22 | 67  | 61 |
| 54,266 | 4 | 2 | 43 | 35 | 1 | 2 | 19 | 23 | 67  | 62 |
| 54,267 | 5 | 2 | 47 | 35 | 1 | 2 | 21 | 23 | 74  | 62 |
| 54,268 | 5 | 2 | 46 | 35 | 1 | 2 | 21 | 22 | 73  | 61 |
| 54,269 | 5 | 2 | 48 | 35 | 1 | 2 | 21 | 23 | 75  | 62 |
| 54,270 | 5 | 2 | 50 | 35 | 1 | 2 | 22 | 23 | 78  | 62 |
| 54,271 | 5 | 2 | 51 | 35 | 1 | 2 | 23 | 23 | 80  | 62 |
| 54,272 | 5 | 2 | 52 | 35 | 1 | 2 | 23 | 24 | 81  | 63 |

|        |    |   |     |    |   |   |    |    |     |    |
|--------|----|---|-----|----|---|---|----|----|-----|----|
| 54,273 | 5  | 2 | 52  | 35 | 1 | 2 | 23 | 24 | 81  | 63 |
| 54,274 | 5  | 2 | 52  | 35 | 1 | 2 | 24 | 23 | 82  | 62 |
| 54,275 | 5  | 2 | 52  | 33 | 1 | 2 | 24 | 23 | 82  | 60 |
| 54,276 | 5  | 1 | 52  | 33 | 1 | 2 | 24 | 23 | 82  | 59 |
| 54,277 | 5  | 1 | 52  | 33 | 1 | 2 | 24 | 24 | 82  | 60 |
| 54,278 | 5  | 1 | 52  | 33 | 1 | 2 | 24 | 24 | 82  | 60 |
| 54,279 | 5  | 1 | 52  | 33 | 1 | 2 | 24 | 24 | 82  | 60 |
| 54,280 | 5  | 1 | 60  | 24 | 1 | 1 | 24 | 21 | 90  | 47 |
| 54,281 | 5  | 1 | 62  | 24 | 1 | 1 | 25 | 21 | 93  | 47 |
| 54,282 | 6  | 1 | 72  | 18 | 1 | 1 | 29 | 21 | 108 | 41 |
| 54,283 | 6  | 0 | 72  | 13 | 1 | 1 | 29 | 20 | 108 | 34 |
| 54,284 | 6  | 0 | 80  | 13 | 2 | 1 | 30 | 20 | 118 | 34 |
| 54,285 | 6  | 0 | 87  | 13 | 2 | 1 | 32 | 20 | 127 | 34 |
| 54,286 | 6  | 0 | 87  | 13 | 2 | 1 | 32 | 20 | 127 | 34 |
| 54,287 | 7  | 0 | 110 | 13 | 2 | 1 | 36 | 20 | 155 | 34 |
| 54,288 | 7  | 0 | 121 | 14 | 2 | 1 | 38 | 20 | 168 | 35 |
| 54,289 | 7  | 0 | 133 | 15 | 2 | 1 | 45 | 20 | 187 | 36 |
| 54,290 | 7  | 0 | 132 | 15 | 2 | 1 | 44 | 20 | 185 | 36 |
| 54,291 | 8  | 0 | 135 | 15 | 2 | 1 | 45 | 20 | 190 | 36 |
| 54,292 | 9  | 0 | 146 | 15 | 1 | 1 | 47 | 20 | 203 | 36 |
| 54,293 | 9  | 0 | 148 | 14 | 1 | 1 | 46 | 20 | 204 | 35 |
| 54,294 | 10 | 0 | 149 | 14 | 2 | 1 | 46 | 20 | 207 | 35 |
| 54,295 | 10 | 0 | 150 | 14 | 2 | 1 | 44 | 20 | 206 | 35 |
| 54,296 | 11 | 0 | 148 | 15 | 2 | 1 | 46 | 22 | 207 | 38 |
| 54,297 | 11 | 0 | 159 | 15 | 2 | 1 | 46 | 21 | 218 | 37 |
| 54,298 | 11 | 0 | 187 | 13 | 3 | 1 | 49 | 21 | 250 | 35 |
| 54,299 | 10 | 0 | 190 | 11 | 3 | 0 | 43 | 20 | 246 | 31 |
| 54,300 | 10 | 0 | 186 | 10 | 3 | 0 | 42 | 18 | 241 | 28 |
| 54,301 | 10 | 0 | 185 | 10 | 3 | 0 | 41 | 18 | 239 | 28 |
| 54,302 | 10 | 0 | 185 | 10 | 3 | 0 | 41 | 18 | 239 | 28 |
| 54,303 | 10 | 0 | 185 | 10 | 3 | 0 | 42 | 18 | 240 | 28 |
| 54,304 | 10 | 0 | 184 | 11 | 3 | 0 | 42 | 18 | 239 | 29 |
| 54,305 | 10 | 0 | 184 | 11 | 3 | 0 | 42 | 18 | 239 | 29 |
| 54,306 | 10 | 0 | 184 | 11 | 3 | 0 | 42 | 18 | 239 | 29 |
| 54,307 | 11 | 0 | 184 | 11 | 3 | 0 | 42 | 18 | 240 | 29 |
| 54,308 | 11 | 0 | 184 | 11 | 3 | 0 | 41 | 18 | 239 | 29 |
| 54,309 | 11 | 0 | 184 | 11 | 3 | 0 | 41 | 18 | 239 | 29 |
| 54,310 | 11 | 0 | 186 | 10 | 3 | 0 | 43 | 10 | 243 | 20 |
| 54,311 | 11 | 0 | 186 | 7  | 3 | 0 | 43 | 9  | 243 | 16 |
| 54,312 | 12 | 0 | 187 | 7  | 3 | 0 | 43 | 9  | 245 | 16 |
| 54,313 | 9  | 0 | 187 | 7  | 3 | 0 | 43 | 8  | 242 | 15 |

|        |    |   |     |    |   |   |    |    |     |    |
|--------|----|---|-----|----|---|---|----|----|-----|----|
| 54,314 | 10 | 0 | 191 | 6  | 3 | 0 | 44 | 8  | 248 | 14 |
| 54,315 | 10 | 0 | 191 | 6  | 3 | 0 | 43 | 8  | 247 | 14 |
| 54,316 | 10 | 0 | 191 | 6  | 3 | 0 | 41 | 6  | 245 | 12 |
| 54,317 | 9  | 0 | 191 | 6  | 3 | 0 | 41 | 5  | 244 | 11 |
| 54,318 | 9  | 0 | 191 | 6  | 3 | 0 | 41 | 5  | 244 | 11 |
| 54,319 | 9  | 1 | 192 | 6  | 3 | 0 | 41 | 10 | 245 | 17 |
| 54,320 | 9  | 1 | 193 | 6  | 3 | 0 | 41 | 9  | 246 | 16 |
| 54,321 | 9  | 1 | 193 | 7  | 3 | 0 | 40 | 9  | 245 | 17 |
| 54,322 | 9  | 1 | 193 | 7  | 3 | 0 | 41 | 9  | 246 | 17 |
| 54,323 | 10 | 1 | 196 | 7  | 3 | 0 | 51 | 8  | 260 | 16 |
| 54,324 | 10 | 1 | 196 | 7  | 3 | 0 | 51 | 8  | 260 | 16 |
| 54,325 | 10 | 1 | 198 | 7  | 4 | 0 | 53 | 8  | 265 | 16 |
| 54,326 | 10 | 1 | 204 | 7  | 4 | 0 | 56 | 8  | 274 | 16 |
| 54,327 | 10 | 1 | 210 | 8  | 4 | 0 | 59 | 8  | 283 | 17 |
| 54,328 | 10 | 1 | 214 | 8  | 4 | 0 | 62 | 7  | 290 | 16 |
| 54,329 | 10 | 1 | 214 | 8  | 4 | 0 | 62 | 7  | 290 | 16 |
| 54,330 | 10 | 1 | 206 | 8  | 4 | 0 | 62 | 7  | 282 | 16 |
| 54,331 | 10 | 1 | 204 | 8  | 4 | 0 | 61 | 7  | 279 | 16 |
| 54,332 | 9  | 1 | 194 | 8  | 4 | 0 | 57 | 7  | 264 | 16 |
| 54,333 | 9  | 1 | 196 | 8  | 4 | 0 | 57 | 7  | 266 | 16 |
| 54,334 | 9  | 1 | 196 | 9  | 4 | 0 | 57 | 7  | 266 | 17 |
| 54,335 | 9  | 1 | 189 | 8  | 3 | 0 | 59 | 9  | 260 | 18 |
| 54,336 | 9  | 1 | 182 | 9  | 3 | 0 | 57 | 9  | 251 | 19 |
| 54,337 | 8  | 2 | 158 | 13 | 3 | 0 | 53 | 11 | 222 | 26 |
| 54,338 | 8  | 3 | 156 | 14 | 3 | 0 | 53 | 12 | 220 | 29 |
| 54,339 | 8  | 3 | 147 | 13 | 3 | 0 | 51 | 12 | 209 | 28 |
| 54,340 | 8  | 3 | 135 | 12 | 3 | 0 | 44 | 12 | 190 | 27 |
| 54,341 | 8  | 3 | 133 | 12 | 3 | 0 | 44 | 12 | 188 | 27 |
| 54,342 | 7  | 3 | 132 | 12 | 3 | 0 | 43 | 17 | 185 | 32 |
| 54,343 | 6  | 3 | 116 | 12 | 3 | 0 | 40 | 20 | 165 | 35 |
| 54,344 | 6  | 3 | 114 | 12 | 3 | 0 | 40 | 22 | 163 | 37 |
| 54,345 | 5  | 3 | 113 | 13 | 2 | 0 | 40 | 24 | 160 | 40 |
| 54,346 | 5  | 3 | 109 | 14 | 2 | 0 | 40 | 25 | 156 | 42 |
| 54,347 | 4  | 3 | 106 | 13 | 2 | 0 | 38 | 23 | 150 | 39 |
| 54,348 | 4  | 5 | 86  | 14 | 2 | 0 | 34 | 23 | 126 | 42 |
| 54,349 | 4  | 5 | 55  | 15 | 1 | 0 | 30 | 23 | 90  | 43 |
| 54,350 | 4  | 5 | 49  | 15 | 1 | 1 | 31 | 23 | 85  | 44 |
| 54,351 | 4  | 5 | 47  | 15 | 1 | 1 | 31 | 23 | 83  | 44 |
| 54,352 | 4  | 5 | 47  | 15 | 1 | 1 | 31 | 23 | 83  | 44 |
| 54,353 | 4  | 5 | 47  | 16 | 1 | 1 | 31 | 23 | 83  | 45 |
| 54,354 | 4  | 5 | 47  | 16 | 1 | 1 | 31 | 23 | 83  | 45 |

|        |   |   |    |    |   |   |    |    |    |    |
|--------|---|---|----|----|---|---|----|----|----|----|
| 54,355 | 4 | 5 | 48 | 16 | 1 | 1 | 31 | 23 | 84 | 45 |
| 54,356 | 4 | 5 | 48 | 16 | 1 | 1 | 31 | 24 | 84 | 46 |
| 54,357 | 4 | 5 | 47 | 17 | 1 | 1 | 31 | 25 | 83 | 48 |
| 54,358 | 3 | 5 | 47 | 18 | 1 | 1 | 31 | 26 | 82 | 50 |
| 54,359 | 3 | 5 | 47 | 18 | 1 | 1 | 31 | 27 | 82 | 51 |
| 54,360 | 3 | 5 | 45 | 18 | 1 | 1 | 29 | 27 | 78 | 51 |
| 54,361 | 3 | 7 | 47 | 20 | 1 | 1 | 29 | 31 | 80 | 59 |
| 54,362 | 3 | 7 | 47 | 21 | 1 | 1 | 29 | 33 | 80 | 62 |
| 54,363 | 2 | 8 | 49 | 39 | 1 | 1 | 31 | 39 | 83 | 87 |
| 54,364 | 2 | 8 | 47 | 40 | 1 | 1 | 31 | 39 | 81 | 88 |
| 54,365 | 1 | 8 | 43 | 40 | 1 | 1 | 31 | 39 | 76 | 88 |
| 54,366 | 1 | 8 | 41 | 41 | 1 | 1 | 31 | 39 | 74 | 89 |
| 54,367 | 1 | 8 | 39 | 41 | 1 | 1 | 31 | 39 | 72 | 89 |
| 54,368 | 1 | 8 | 40 | 41 | 1 | 1 | 33 | 39 | 75 | 89 |
| 54,369 | 2 | 8 | 41 | 41 | 1 | 1 | 33 | 39 | 77 | 89 |
| 54,370 | 2 | 7 | 41 | 43 | 1 | 1 | 33 | 34 | 77 | 85 |
| 54,371 | 2 | 7 | 38 | 43 | 1 | 1 | 33 | 34 | 74 | 85 |
| 54,372 | 2 | 7 | 36 | 42 | 1 | 1 | 33 | 34 | 72 | 84 |
| 54,373 | 2 | 8 | 35 | 42 | 1 | 2 | 32 | 35 | 70 | 87 |
| 54,374 | 1 | 8 | 31 | 43 | 1 | 2 | 22 | 35 | 55 | 88 |
| 54,375 | 1 | 8 | 29 | 44 | 0 | 2 | 19 | 35 | 49 | 89 |
| 54,376 | 1 | 8 | 23 | 45 | 0 | 2 | 16 | 35 | 40 | 90 |
| 54,377 | 1 | 8 | 17 | 45 | 0 | 2 | 13 | 35 | 31 | 90 |
| 54,378 | 1 | 8 | 16 | 44 | 0 | 2 | 12 | 35 | 29 | 89 |
| 54,379 | 1 | 8 | 13 | 44 | 0 | 2 | 11 | 35 | 25 | 89 |
| 54,380 | 1 | 8 | 15 | 46 | 0 | 2 | 11 | 35 | 27 | 91 |
| 54,381 | 1 | 8 | 15 | 46 | 0 | 2 | 11 | 37 | 27 | 93 |
| 54,382 | 1 | 8 | 15 | 46 | 0 | 2 | 11 | 38 | 27 | 94 |
| 54,383 | 1 | 8 | 15 | 46 | 0 | 2 | 12 | 38 | 28 | 94 |
| 54,384 | 1 | 8 | 14 | 46 | 0 | 2 | 12 | 38 | 27 | 94 |
| 54,385 | 1 | 8 | 32 | 45 | 0 | 2 | 24 | 38 | 57 | 93 |
| 54,386 | 1 | 8 | 32 | 44 | 0 | 2 | 21 | 36 | 54 | 90 |
| 54,387 | 1 | 8 | 32 | 44 | 0 | 2 | 21 | 36 | 54 | 90 |
| 54,388 | 1 | 7 | 32 | 40 | 0 | 2 | 21 | 34 | 54 | 83 |
| 54,389 | 1 | 6 | 35 | 39 | 0 | 2 | 21 | 33 | 57 | 80 |
| 54,390 | 2 | 6 | 49 | 38 | 0 | 2 | 32 | 33 | 83 | 79 |
| 54,391 | 2 | 6 | 49 | 39 | 0 | 2 | 32 | 33 | 83 | 80 |
| 54,392 | 2 | 6 | 49 | 39 | 0 | 2 | 32 | 28 | 83 | 75 |
| 54,393 | 2 | 6 | 49 | 38 | 0 | 2 | 32 | 22 | 83 | 68 |
| 54,394 | 2 | 6 | 49 | 38 | 0 | 2 | 32 | 22 | 83 | 68 |
| 54,395 | 2 | 6 | 51 | 37 | 0 | 2 | 32 | 21 | 85 | 66 |

|        |   |   |    |    |   |   |    |    |     |    |
|--------|---|---|----|----|---|---|----|----|-----|----|
| 54,396 | 2 | 6 | 52 | 37 | 0 | 2 | 36 | 21 | 90  | 66 |
| 54,397 | 2 | 6 | 52 | 37 | 0 | 2 | 36 | 21 | 90  | 66 |
| 54,398 | 2 | 4 | 53 | 36 | 0 | 2 | 36 | 22 | 91  | 64 |
| 54,399 | 2 | 4 | 56 | 35 | 0 | 2 | 36 | 22 | 94  | 63 |
| 54,400 | 2 | 4 | 55 | 35 | 0 | 2 | 36 | 23 | 93  | 64 |
| 54,401 | 2 | 4 | 56 | 35 | 0 | 1 | 37 | 23 | 95  | 63 |
| 54,402 | 2 | 4 | 57 | 37 | 0 | 1 | 37 | 23 | 96  | 65 |
| 54,403 | 2 | 4 | 58 | 37 | 0 | 1 | 43 | 23 | 103 | 65 |
| 54,404 | 2 | 4 | 58 | 36 | 0 | 1 | 44 | 23 | 104 | 64 |
| 54,405 | 2 | 4 | 57 | 35 | 0 | 1 | 45 | 23 | 104 | 63 |
| 54,406 | 2 | 4 | 64 | 35 | 1 | 1 | 50 | 22 | 117 | 62 |
| 54,407 | 3 | 4 | 65 | 33 | 1 | 1 | 50 | 20 | 119 | 58 |
| 54,408 | 3 | 4 | 66 | 33 | 1 | 1 | 50 | 20 | 120 | 58 |
| 54,409 | 3 | 4 | 66 | 33 | 1 | 1 | 50 | 20 | 120 | 58 |
| 54,410 | 3 | 4 | 66 | 33 | 1 | 1 | 50 | 20 | 120 | 58 |
| 54,411 | 3 | 5 | 66 | 34 | 1 | 1 | 50 | 20 | 120 | 60 |
| 54,412 | 3 | 3 | 64 | 33 | 1 | 1 | 50 | 15 | 118 | 52 |
| 54,413 | 3 | 3 | 64 | 36 | 1 | 1 | 50 | 15 | 118 | 55 |
| 54,414 | 3 | 2 | 61 | 23 | 1 | 1 | 48 | 12 | 113 | 38 |
| 54,415 | 3 | 2 | 61 | 23 | 1 | 1 | 48 | 14 | 113 | 40 |
| 54,416 | 3 | 2 | 62 | 27 | 1 | 2 | 47 | 15 | 113 | 46 |
| 54,417 | 3 | 2 | 62 | 31 | 1 | 2 | 47 | 15 | 113 | 50 |
| 54,418 | 3 | 2 | 62 | 32 | 1 | 2 | 47 | 16 | 113 | 52 |
| 54,419 | 3 | 2 | 61 | 34 | 1 | 2 | 45 | 16 | 110 | 54 |
| 54,420 | 2 | 2 | 60 | 35 | 1 | 2 | 45 | 16 | 108 | 55 |
| 54,421 | 2 | 2 | 59 | 33 | 1 | 2 | 46 | 18 | 108 | 55 |
| 54,422 | 2 | 2 | 59 | 33 | 1 | 2 | 46 | 18 | 108 | 55 |
| 54,423 | 2 | 2 | 59 | 34 | 1 | 2 | 46 | 18 | 108 | 56 |
| 54,424 | 2 | 1 | 61 | 36 | 1 | 1 | 45 | 21 | 109 | 59 |
| 54,425 | 2 | 1 | 61 | 35 | 1 | 1 | 45 | 21 | 109 | 58 |
| 54,426 | 2 | 1 | 67 | 34 | 1 | 1 | 50 | 21 | 120 | 57 |
| 54,427 | 2 | 1 | 69 | 33 | 1 | 1 | 51 | 22 | 123 | 57 |
| 54,428 | 2 | 1 | 70 | 36 | 1 | 1 | 50 | 24 | 123 | 62 |
| 54,429 | 2 | 1 | 70 | 36 | 1 | 1 | 50 | 24 | 123 | 62 |
| 54,430 | 2 | 1 | 69 | 36 | 1 | 1 | 50 | 24 | 122 | 62 |
| 54,431 | 2 | 1 | 70 | 36 | 1 | 1 | 51 | 25 | 124 | 63 |
| 54,432 | 2 | 1 | 70 | 36 | 1 | 1 | 51 | 23 | 124 | 61 |
| 54,433 | 2 | 1 | 71 | 34 | 1 | 1 | 51 | 22 | 125 | 58 |
| 54,434 | 2 | 1 | 72 | 35 | 1 | 1 | 50 | 22 | 125 | 59 |
| 54,435 | 2 | 1 | 71 | 35 | 1 | 1 | 50 | 22 | 124 | 59 |
| 54,436 | 2 | 1 | 53 | 36 | 1 | 1 | 38 | 22 | 94  | 60 |



|        |   |   |    |    |   |   |    |    |     |    |
|--------|---|---|----|----|---|---|----|----|-----|----|
| 54,437 | 2 | 1 | 55 | 36 | 1 | 1 | 41 | 22 | 99  | 60 |
| 54,438 | 2 | 1 | 55 | 36 | 1 | 1 | 41 | 22 | 99  | 60 |
| 54,439 | 2 | 1 | 53 | 36 | 1 | 2 | 41 | 22 | 97  | 61 |
| 54,440 | 1 | 1 | 42 | 36 | 1 | 2 | 31 | 22 | 75  | 61 |
| 54,441 | 1 | 1 | 40 | 36 | 1 | 2 | 30 | 22 | 72  | 61 |
| 54,442 | 1 | 1 | 40 | 36 | 1 | 2 | 30 | 22 | 72  | 61 |
| 54,443 | 1 | 1 | 40 | 36 | 1 | 2 | 30 | 22 | 72  | 61 |
| 54,444 | 1 | 1 | 40 | 36 | 1 | 2 | 30 | 21 | 72  | 60 |
| 54,445 | 1 | 1 | 40 | 36 | 1 | 2 | 30 | 21 | 72  | 60 |
| 54,446 | 1 | 1 | 38 | 36 | 1 | 2 | 30 | 21 | 70  | 60 |
| 54,447 | 1 | 1 | 37 | 36 | 1 | 2 | 26 | 21 | 65  | 60 |
| 54,448 | 1 | 1 | 37 | 36 | 1 | 2 | 26 | 21 | 65  | 60 |
| 54,449 | 1 | 1 | 36 | 36 | 1 | 2 | 26 | 20 | 64  | 59 |
| 54,450 | 1 | 1 | 33 | 36 | 1 | 2 | 25 | 19 | 60  | 58 |
| 54,451 | 1 | 1 | 32 | 37 | 1 | 2 | 24 | 19 | 58  | 59 |
| 54,452 | 2 | 1 | 32 | 37 | 1 | 2 | 24 | 19 | 59  | 59 |
| 54,453 | 2 | 2 | 31 | 36 | 1 | 2 | 24 | 19 | 58  | 59 |
| 54,454 | 2 | 2 | 33 | 36 | 1 | 2 | 21 | 19 | 57  | 59 |
| 54,455 | 2 | 2 | 33 | 37 | 1 | 2 | 21 | 19 | 57  | 60 |
| 54,456 | 2 | 2 | 33 | 37 | 1 | 3 | 20 | 19 | 56  | 61 |
| 54,457 | 2 | 2 | 27 | 47 | 0 | 3 | 15 | 25 | 44  | 77 |
| 54,458 | 1 | 4 | 28 | 51 | 1 | 3 | 15 | 29 | 45  | 87 |
| 54,459 | 1 | 5 | 27 | 54 | 1 | 3 | 15 | 31 | 44  | 93 |
| 54,460 | 1 | 5 | 27 | 56 | 1 | 3 | 15 | 31 | 44  | 95 |
| 54,461 | 1 | 5 | 45 | 56 | 1 | 3 | 20 | 30 | 67  | 94 |
| 54,462 | 2 | 4 | 51 | 53 | 1 | 3 | 22 | 30 | 76  | 90 |
| 54,463 | 3 | 4 | 61 | 51 | 1 | 3 | 27 | 29 | 92  | 87 |
| 54,464 | 4 | 4 | 76 | 46 | 1 | 3 | 35 | 26 | 116 | 79 |
| 54,465 | 4 | 4 | 76 | 46 | 1 | 3 | 35 | 26 | 116 | 79 |
| 54,466 | 5 | 4 | 83 | 43 | 1 | 3 | 36 | 24 | 125 | 74 |
| 54,467 | 5 | 4 | 82 | 39 | 1 | 3 | 36 | 23 | 124 | 69 |
| 54,468 | 5 | 4 | 82 | 34 | 1 | 3 | 36 | 23 | 124 | 64 |
| 54,469 | 5 | 4 | 82 | 33 | 1 | 3 | 36 | 22 | 124 | 62 |
| 54,470 | 6 | 5 | 82 | 31 | 1 | 3 | 36 | 22 | 125 | 61 |
| 54,471 | 6 | 5 | 82 | 30 | 1 | 3 | 36 | 22 | 125 | 60 |
| 54,472 | 6 | 5 | 83 | 30 | 1 | 3 | 35 | 20 | 125 | 58 |
| 54,473 | 6 | 5 | 83 | 36 | 1 | 3 | 35 | 23 | 125 | 67 |
| 54,474 | 6 | 5 | 83 | 34 | 1 | 3 | 35 | 23 | 125 | 65 |
| 54,475 | 6 | 5 | 85 | 33 | 1 | 3 | 39 | 19 | 131 | 60 |
| 54,476 | 6 | 5 | 86 | 36 | 2 | 3 | 35 | 19 | 129 | 63 |
| 54,477 | 6 | 5 | 86 | 38 | 2 | 3 | 35 | 19 | 129 | 65 |

|        |    |   |     |    |   |   |    |    |     |    |
|--------|----|---|-----|----|---|---|----|----|-----|----|
| 54,478 | 8  | 5 | 89  | 39 | 2 | 3 | 35 | 18 | 134 | 65 |
| 54,479 | 8  | 5 | 88  | 36 | 2 | 3 | 35 | 16 | 133 | 60 |
| 54,480 | 8  | 5 | 89  | 36 | 2 | 3 | 37 | 15 | 136 | 59 |
| 54,481 | 8  | 6 | 89  | 36 | 2 | 3 | 37 | 17 | 136 | 62 |
| 54,482 | 8  | 6 | 88  | 36 | 2 | 3 | 36 | 17 | 134 | 62 |
| 54,483 | 8  | 6 | 88  | 35 | 2 | 3 | 36 | 17 | 134 | 61 |
| 54,484 | 8  | 6 | 87  | 35 | 2 | 3 | 36 | 17 | 133 | 61 |
| 54,485 | 8  | 6 | 86  | 35 | 2 | 3 | 36 | 17 | 132 | 61 |
| 54,486 | 8  | 6 | 86  | 35 | 2 | 3 | 36 | 18 | 132 | 62 |
| 54,487 | 8  | 6 | 86  | 37 | 2 | 3 | 34 | 18 | 130 | 64 |
| 54,488 | 8  | 6 | 84  | 37 | 2 | 3 | 33 | 19 | 127 | 65 |
| 54,489 | 8  | 6 | 83  | 37 | 2 | 3 | 34 | 19 | 127 | 65 |
| 54,490 | 8  | 6 | 90  | 37 | 2 | 2 | 39 | 20 | 139 | 65 |
| 54,491 | 8  | 7 | 90  | 40 | 2 | 2 | 39 | 20 | 139 | 69 |
| 54,492 | 8  | 7 | 90  | 40 | 2 | 2 | 39 | 20 | 139 | 69 |
| 54,493 | 9  | 7 | 91  | 40 | 2 | 2 | 41 | 20 | 143 | 69 |
| 54,494 | 9  | 7 | 91  | 40 | 2 | 2 | 41 | 20 | 143 | 69 |
| 54,495 | 9  | 7 | 92  | 40 | 2 | 2 | 41 | 20 | 144 | 69 |
| 54,496 | 9  | 7 | 94  | 41 | 2 | 2 | 41 | 20 | 146 | 70 |
| 54,497 | 9  | 7 | 94  | 41 | 2 | 2 | 41 | 20 | 146 | 70 |
| 54,498 | 9  | 7 | 94  | 42 | 2 | 3 | 41 | 20 | 146 | 72 |
| 54,499 | 9  | 7 | 94  | 42 | 2 | 3 | 41 | 20 | 146 | 72 |
| 54,500 | 9  | 7 | 94  | 41 | 2 | 3 | 41 | 20 | 146 | 71 |
| 54,501 | 9  | 8 | 95  | 41 | 2 | 3 | 41 | 20 | 147 | 72 |
| 54,502 | 10 | 7 | 99  | 40 | 2 | 3 | 41 | 20 | 152 | 70 |
| 54,503 | 10 | 7 | 99  | 40 | 2 | 3 | 41 | 20 | 152 | 70 |
| 54,504 | 11 | 7 | 98  | 40 | 2 | 3 | 42 | 20 | 153 | 70 |
| 54,505 | 11 | 7 | 97  | 40 | 2 | 3 | 42 | 21 | 152 | 71 |
| 54,506 | 11 | 7 | 97  | 39 | 2 | 3 | 41 | 21 | 151 | 70 |
| 54,507 | 11 | 7 | 100 | 39 | 2 | 2 | 42 | 21 | 155 | 69 |
| 54,508 | 11 | 7 | 99  | 29 | 2 | 2 | 43 | 16 | 155 | 54 |
| 54,509 | 11 | 5 | 97  | 25 | 1 | 2 | 43 | 12 | 152 | 44 |
| 54,510 | 11 | 7 | 92  | 24 | 1 | 2 | 42 | 15 | 146 | 48 |
| 54,511 | 11 | 7 | 79  | 22 | 1 | 2 | 39 | 15 | 130 | 46 |
| 54,512 | 10 | 7 | 73  | 25 | 1 | 2 | 38 | 15 | 122 | 49 |
| 54,513 | 9  | 8 | 63  | 27 | 1 | 2 | 33 | 15 | 106 | 52 |
| 54,514 | 8  | 8 | 56  | 27 | 1 | 2 | 25 | 15 | 90  | 52 |
| 54,515 | 8  | 8 | 49  | 27 | 1 | 2 | 25 | 15 | 83  | 52 |
| 54,516 | 7  | 8 | 42  | 27 | 1 | 2 | 24 | 15 | 74  | 52 |
| 54,517 | 7  | 8 | 42  | 27 | 1 | 2 | 24 | 15 | 74  | 52 |
| 54,518 | 8  | 8 | 42  | 28 | 1 | 1 | 24 | 15 | 75  | 52 |

|        |    |    |    |    |   |   |    |    |    |    |
|--------|----|----|----|----|---|---|----|----|----|----|
| 54,519 | 8  | 8  | 42 | 28 | 1 | 1 | 24 | 15 | 75 | 52 |
| 54,520 | 8  | 7  | 42 | 28 | 1 | 1 | 24 | 15 | 75 | 51 |
| 54,521 | 8  | 7  | 42 | 28 | 1 | 1 | 24 | 15 | 75 | 51 |
| 54,522 | 8  | 7  | 41 | 29 | 1 | 1 | 25 | 15 | 75 | 52 |
| 54,523 | 8  | 8  | 43 | 25 | 1 | 1 | 28 | 13 | 80 | 47 |
| 54,524 | 8  | 8  | 43 | 40 | 1 | 2 | 30 | 16 | 82 | 66 |
| 54,525 | 8  | 8  | 41 | 43 | 1 | 2 | 27 | 16 | 77 | 69 |
| 54,526 | 8  | 8  | 41 | 43 | 1 | 2 | 26 | 16 | 76 | 69 |
| 54,527 | 10 | 8  | 36 | 38 | 0 | 2 | 25 | 17 | 71 | 65 |
| 54,528 | 11 | 8  | 35 | 39 | 0 | 2 | 25 | 21 | 71 | 70 |
| 54,529 | 9  | 9  | 31 | 42 | 0 | 2 | 24 | 26 | 64 | 79 |
| 54,530 | 9  | 9  | 29 | 42 | 0 | 2 | 23 | 26 | 61 | 79 |
| 54,531 | 9  | 10 | 29 | 42 | 0 | 2 | 22 | 26 | 60 | 80 |
| 54,532 | 9  | 9  | 29 | 42 | 0 | 2 | 22 | 24 | 60 | 77 |
| 54,533 | 9  | 9  | 29 | 42 | 0 | 2 | 22 | 24 | 60 | 77 |
| 54,534 | 9  | 9  | 29 | 43 | 0 | 2 | 22 | 24 | 60 | 78 |
| 54,535 | 9  | 9  | 29 | 43 | 0 | 2 | 22 | 24 | 60 | 78 |
| 54,536 | 9  | 9  | 29 | 43 | 0 | 2 | 22 | 24 | 60 | 78 |
| 54,537 | 9  | 9  | 29 | 43 | 0 | 2 | 22 | 23 | 60 | 77 |
| 54,538 | 9  | 9  | 31 | 40 | 0 | 2 | 23 | 23 | 63 | 74 |
| 54,539 | 9  | 9  | 31 | 40 | 0 | 2 | 23 | 22 | 63 | 73 |
| 54,540 | 10 | 9  | 25 | 40 | 1 | 2 | 24 | 21 | 60 | 72 |
| 54,541 | 10 | 8  | 26 | 37 | 1 | 2 | 19 | 21 | 56 | 68 |
| 54,542 | 10 | 9  | 28 | 37 | 1 | 2 | 23 | 21 | 62 | 69 |
| 54,543 | 9  | 9  | 29 | 37 | 1 | 2 | 21 | 21 | 60 | 69 |
| 54,544 | 9  | 9  | 31 | 37 | 1 | 2 | 23 | 21 | 64 | 69 |
| 54,545 | 9  | 9  | 32 | 37 | 1 | 2 | 24 | 21 | 66 | 69 |
| 54,546 | 9  | 9  | 31 | 36 | 2 | 2 | 24 | 20 | 66 | 67 |
| 54,547 | 9  | 9  | 30 | 36 | 2 | 2 | 24 | 20 | 65 | 67 |
| 54,548 | 9  | 9  | 30 | 36 | 2 | 2 | 24 | 20 | 65 | 67 |
| 54,549 | 9  | 9  | 30 | 35 | 2 | 1 | 25 | 20 | 66 | 65 |
| 54,550 | 9  | 9  | 30 | 35 | 2 | 1 | 25 | 20 | 66 | 65 |
| 54,551 | 9  | 9  | 30 | 35 | 2 | 1 | 25 | 20 | 66 | 65 |
| 54,552 | 9  | 8  | 30 | 35 | 2 | 1 | 25 | 21 | 66 | 65 |
| 54,553 | 7  | 8  | 26 | 35 | 2 | 1 | 25 | 21 | 60 | 65 |
| 54,554 | 7  | 8  | 26 | 35 | 2 | 1 | 24 | 21 | 59 | 65 |
| 54,555 | 6  | 9  | 25 | 35 | 2 | 2 | 20 | 21 | 53 | 67 |
| 54,556 | 6  | 9  | 23 | 35 | 2 | 2 | 20 | 20 | 51 | 66 |
| 54,557 | 6  | 9  | 22 | 35 | 2 | 2 | 19 | 22 | 49 | 68 |
| 54,558 | 6  | 9  | 22 | 35 | 2 | 2 | 18 | 22 | 48 | 68 |
| 54,559 | 6  | 10 | 22 | 38 | 2 | 2 | 19 | 23 | 49 | 73 |

|        |   |    |    |    |   |   |    |    |    |    |
|--------|---|----|----|----|---|---|----|----|----|----|
| 54,560 | 6 | 10 | 22 | 38 | 2 | 2 | 19 | 23 | 49 | 73 |
| 54,561 | 6 | 7  | 22 | 36 | 2 | 2 | 19 | 18 | 49 | 63 |
| 54,562 | 6 | 7  | 23 | 36 | 2 | 2 | 19 | 18 | 50 | 63 |
| 54,563 | 6 | 7  | 23 | 33 | 2 | 2 | 19 | 18 | 50 | 60 |
| 54,564 | 6 | 6  | 25 | 31 | 2 | 2 | 19 | 18 | 52 | 57 |
| 54,565 | 6 | 6  | 25 | 31 | 2 | 2 | 19 | 18 | 52 | 57 |
| 54,566 | 6 | 6  | 29 | 31 | 2 | 2 | 20 | 18 | 57 | 57 |
| 54,567 | 6 | 6  | 29 | 31 | 2 | 2 | 20 | 18 | 57 | 57 |
| 54,568 | 6 | 6  | 30 | 31 | 2 | 2 | 22 | 18 | 60 | 57 |
| 54,569 | 5 | 6  | 35 | 30 | 2 | 2 | 28 | 18 | 70 | 56 |
| 54,570 | 5 | 6  | 35 | 30 | 2 | 2 | 28 | 18 | 70 | 56 |
| 54,571 | 4 | 6  | 41 | 31 | 2 | 2 | 30 | 18 | 77 | 57 |
| 54,572 | 4 | 6  | 41 | 31 | 2 | 2 | 29 | 18 | 76 | 57 |
| 54,573 | 4 | 6  | 40 | 30 | 2 | 2 | 26 | 18 | 72 | 56 |
| 54,574 | 4 | 5  | 40 | 28 | 2 | 2 | 27 | 17 | 73 | 52 |
| 54,575 | 4 | 5  | 40 | 10 | 2 | 1 | 25 | 14 | 71 | 30 |
| 54,576 | 4 | 5  | 41 | 10 | 2 | 1 | 25 | 14 | 72 | 30 |
| 54,577 | 4 | 5  | 40 | 14 | 2 | 1 | 25 | 15 | 71 | 35 |
| 54,578 | 2 | 6  | 38 | 15 | 2 | 2 | 25 | 15 | 67 | 38 |
| 54,579 | 1 | 7  | 39 | 20 | 2 | 2 | 25 | 12 | 67 | 41 |
| 54,580 | 1 | 6  | 39 | 19 | 2 | 2 | 26 | 10 | 68 | 37 |
| 54,581 | 1 | 6  | 39 | 19 | 2 | 2 | 26 | 10 | 68 | 37 |
| 54,582 | 1 | 5  | 39 | 19 | 2 | 2 | 26 | 10 | 68 | 36 |
| 54,583 | 1 | 5  | 39 | 19 | 2 | 2 | 26 | 10 | 68 | 36 |
| 54,584 | 1 | 5  | 39 | 19 | 2 | 2 | 26 | 10 | 68 | 36 |
| 54,585 | 1 | 5  | 39 | 18 | 2 | 2 | 26 | 10 | 68 | 35 |
| 54,586 | 1 | 5  | 39 | 18 | 2 | 2 | 26 | 10 | 68 | 35 |
| 54,587 | 1 | 5  | 39 | 20 | 2 | 2 | 26 | 10 | 68 | 37 |
| 54,588 | 1 | 5  | 37 | 20 | 2 | 2 | 25 | 10 | 65 | 37 |
| 54,589 | 1 | 5  | 37 | 20 | 2 | 2 | 25 | 10 | 65 | 37 |
| 54,590 | 0 | 5  | 36 | 20 | 2 | 2 | 25 | 10 | 63 | 37 |
| 54,591 | 0 | 5  | 36 | 21 | 1 | 2 | 23 | 10 | 60 | 38 |
| 54,592 | 0 | 5  | 33 | 21 | 1 | 2 | 23 | 10 | 57 | 38 |
| 54,593 | 0 | 4  | 30 | 21 | 1 | 2 | 19 | 10 | 50 | 37 |
| 54,594 | 0 | 4  | 29 | 21 | 1 | 2 | 19 | 10 | 49 | 37 |
| 54,595 | 0 | 4  | 27 | 21 | 1 | 2 | 17 | 10 | 45 | 37 |
| 54,596 | 0 | 4  | 26 | 21 | 1 | 2 | 17 | 10 | 44 | 37 |
| 54,597 | 0 | 4  | 26 | 21 | 0 | 2 | 17 | 10 | 43 | 37 |
| 54,598 | 0 | 4  | 26 | 21 | 0 | 2 | 19 | 10 | 45 | 37 |
| 54,599 | 0 | 5  | 26 | 21 | 0 | 2 | 18 | 10 | 44 | 38 |
| 54,600 | 0 | 5  | 26 | 21 | 0 | 2 | 18 | 10 | 44 | 38 |

|        |   |   |    |    |   |   |    |    |     |    |
|--------|---|---|----|----|---|---|----|----|-----|----|
| 54,601 | 0 | 5 | 26 | 21 | 0 | 2 | 18 | 10 | 44  | 38 |
| 54,602 | 0 | 5 | 26 | 21 | 0 | 2 | 18 | 10 | 44  | 38 |
| 54,603 | 0 | 5 | 26 | 21 | 0 | 2 | 18 | 10 | 44  | 38 |
| 54,604 | 0 | 5 | 26 | 21 | 0 | 2 | 19 | 10 | 45  | 38 |
| 54,605 | 0 | 5 | 29 | 21 | 0 | 2 | 22 | 10 | 51  | 38 |
| 54,606 | 0 | 4 | 29 | 21 | 0 | 1 | 22 | 10 | 51  | 36 |
| 54,607 | 1 | 4 | 40 | 21 | 1 | 1 | 25 | 8  | 67  | 34 |
| 54,608 | 1 | 3 | 45 | 18 | 1 | 1 | 26 | 7  | 73  | 29 |
| 54,609 | 1 | 3 | 46 | 18 | 1 | 1 | 26 | 7  | 74  | 29 |
| 54,610 | 1 | 3 | 46 | 18 | 1 | 1 | 25 | 7  | 73  | 29 |
| 54,611 | 1 | 3 | 46 | 18 | 1 | 1 | 25 | 7  | 73  | 29 |
| 54,612 | 1 | 3 | 45 | 18 | 1 | 1 | 24 | 7  | 71  | 29 |
| 54,613 | 1 | 3 | 46 | 19 | 1 | 1 | 23 | 7  | 71  | 30 |
| 54,614 | 1 | 3 | 45 | 19 | 1 | 1 | 23 | 7  | 70  | 30 |
| 54,615 | 2 | 3 | 44 | 19 | 1 | 1 | 23 | 7  | 70  | 30 |
| 54,616 | 2 | 3 | 44 | 19 | 2 | 1 | 23 | 7  | 71  | 30 |
| 54,617 | 2 | 3 | 41 | 19 | 2 | 1 | 22 | 7  | 67  | 30 |
| 54,618 | 2 | 3 | 40 | 19 | 2 | 1 | 20 | 7  | 64  | 30 |
| 54,619 | 2 | 3 | 40 | 19 | 2 | 1 | 21 | 7  | 65  | 30 |
| 54,620 | 2 | 3 | 36 | 19 | 2 | 1 | 16 | 7  | 56  | 30 |
| 54,621 | 2 | 3 | 34 | 19 | 2 | 1 | 15 | 7  | 53  | 30 |
| 54,622 | 2 | 3 | 30 | 19 | 2 | 1 | 14 | 8  | 48  | 31 |
| 54,623 | 2 | 3 | 33 | 24 | 2 | 1 | 14 | 9  | 51  | 37 |
| 54,624 | 2 | 3 | 33 | 24 | 2 | 1 | 14 | 10 | 51  | 38 |
| 54,625 | 2 | 3 | 32 | 24 | 2 | 1 | 14 | 10 | 50  | 38 |
| 54,626 | 2 | 3 | 32 | 24 | 2 | 1 | 15 | 10 | 51  | 38 |
| 54,627 | 2 | 3 | 31 | 24 | 2 | 1 | 16 | 10 | 51  | 38 |
| 54,628 | 2 | 3 | 31 | 20 | 2 | 1 | 19 | 9  | 54  | 33 |
| 54,629 | 2 | 2 | 31 | 18 | 2 | 0 | 21 | 8  | 56  | 28 |
| 54,630 | 2 | 1 | 30 | 12 | 2 | 0 | 21 | 7  | 55  | 20 |
| 54,631 | 3 | 1 | 34 | 10 | 2 | 0 | 24 | 4  | 63  | 15 |
| 54,632 | 4 | 1 | 34 | 10 | 2 | 0 | 25 | 4  | 65  | 15 |
| 54,633 | 4 | 1 | 35 | 10 | 2 | 0 | 27 | 4  | 68  | 15 |
| 54,634 | 4 | 1 | 35 | 10 | 2 | 0 | 28 | 4  | 69  | 15 |
| 54,635 | 4 | 1 | 35 | 10 | 2 | 0 | 28 | 4  | 69  | 15 |
| 54,636 | 4 | 1 | 35 | 10 | 2 | 0 | 28 | 5  | 69  | 16 |
| 54,637 | 5 | 1 | 38 | 8  | 2 | 0 | 31 | 5  | 76  | 14 |
| 54,638 | 5 | 1 | 41 | 8  | 3 | 0 | 31 | 5  | 80  | 14 |
| 54,639 | 5 | 1 | 45 | 8  | 3 | 0 | 32 | 5  | 85  | 14 |
| 54,640 | 5 | 1 | 47 | 8  | 3 | 0 | 32 | 5  | 87  | 14 |
| 54,641 | 7 | 1 | 60 | 8  | 3 | 0 | 49 | 5  | 119 | 14 |

|        |    |   |     |    |    |   |     |   |     |    |
|--------|----|---|-----|----|----|---|-----|---|-----|----|
| 54,642 | 7  | 1 | 60  | 7  | 3  | 0 | 49  | 5 | 119 | 13 |
| 54,643 | 7  | 1 | 68  | 7  | 3  | 0 | 58  | 5 | 136 | 13 |
| 54,644 | 7  | 1 | 68  | 7  | 3  | 0 | 58  | 5 | 136 | 13 |
| 54,645 | 9  | 1 | 78  | 8  | 4  | 1 | 75  | 5 | 166 | 15 |
| 54,646 | 9  | 1 | 78  | 10 | 4  | 1 | 75  | 5 | 166 | 17 |
| 54,647 | 9  | 1 | 79  | 13 | 4  | 1 | 77  | 5 | 169 | 20 |
| 54,648 | 9  | 1 | 82  | 13 | 4  | 1 | 84  | 5 | 179 | 20 |
| 54,649 | 9  | 1 | 83  | 13 | 4  | 1 | 83  | 5 | 179 | 20 |
| 54,650 | 9  | 1 | 89  | 13 | 4  | 1 | 86  | 5 | 188 | 20 |
| 54,651 | 9  | 1 | 89  | 13 | 4  | 1 | 86  | 5 | 188 | 20 |
| 54,652 | 13 | 1 | 98  | 13 | 5  | 1 | 96  | 5 | 212 | 20 |
| 54,653 | 13 | 1 | 145 | 13 | 6  | 1 | 125 | 5 | 289 | 20 |
| 54,654 | 13 | 1 | 150 | 13 | 6  | 1 | 132 | 4 | 301 | 19 |
| 54,655 | 13 | 1 | 154 | 13 | 7  | 1 | 133 | 4 | 307 | 19 |
| 54,656 | 13 | 1 | 152 | 13 | 7  | 1 | 131 | 4 | 303 | 19 |
| 54,657 | 13 | 1 | 151 | 13 | 7  | 1 | 132 | 4 | 303 | 19 |
| 54,658 | 12 | 1 | 146 | 13 | 6  | 1 | 135 | 4 | 299 | 19 |
| 54,659 | 12 | 1 | 144 | 14 | 6  | 1 | 134 | 4 | 296 | 20 |
| 54,660 | 12 | 1 | 144 | 14 | 6  | 1 | 134 | 4 | 296 | 20 |
| 54,661 | 12 | 1 | 146 | 14 | 6  | 1 | 134 | 4 | 298 | 20 |
| 54,662 | 12 | 2 | 146 | 14 | 6  | 1 | 134 | 4 | 298 | 21 |
| 54,663 | 12 | 2 | 146 | 14 | 6  | 1 | 134 | 4 | 298 | 21 |
| 54,664 | 12 | 2 | 145 | 13 | 6  | 1 | 134 | 4 | 297 | 20 |
| 54,665 | 12 | 2 | 145 | 13 | 6  | 1 | 134 | 4 | 297 | 20 |
| 54,666 | 11 | 2 | 145 | 13 | 6  | 1 | 134 | 4 | 296 | 20 |
| 54,667 | 11 | 2 | 145 | 13 | 5  | 1 | 134 | 4 | 295 | 20 |
| 54,668 | 11 | 2 | 142 | 13 | 5  | 1 | 132 | 4 | 290 | 20 |
| 54,669 | 11 | 3 | 142 | 14 | 5  | 1 | 132 | 4 | 290 | 22 |
| 54,670 | 11 | 4 | 141 | 16 | 5  | 1 | 129 | 5 | 286 | 26 |
| 54,671 | 11 | 4 | 142 | 18 | 5  | 1 | 129 | 5 | 287 | 28 |
| 54,672 | 11 | 4 | 142 | 20 | 5  | 1 | 130 | 7 | 288 | 32 |
| 54,673 | 11 | 4 | 141 | 18 | 4  | 1 | 130 | 5 | 286 | 28 |
| 54,674 | 11 | 4 | 141 | 19 | 4  | 1 | 130 | 5 | 286 | 29 |
| 54,675 | 11 | 4 | 141 | 19 | 4  | 1 | 128 | 4 | 284 | 28 |
| 54,676 | 12 | 4 | 145 | 19 | 4  | 1 | 132 | 4 | 293 | 28 |
| 54,677 | 16 | 5 | 198 | 19 | 7  | 1 | 190 | 4 | 411 | 29 |
| 54,678 | 16 | 5 | 197 | 19 | 7  | 1 | 190 | 4 | 410 | 29 |
| 54,679 | 18 | 5 | 202 | 19 | 8  | 1 | 195 | 4 | 423 | 29 |
| 54,680 | 18 | 7 | 205 | 19 | 10 | 1 | 201 | 4 | 434 | 31 |
| 54,681 | 18 | 7 | 206 | 19 | 10 | 1 | 201 | 4 | 435 | 31 |
| 54,682 | 17 | 7 | 211 | 19 | 10 | 1 | 200 | 4 | 438 | 31 |

|        |    |    |     |    |    |   |     |    |     |     |
|--------|----|----|-----|----|----|---|-----|----|-----|-----|
| 54,683 | 16 | 7  | 218 | 19 | 10 | 1 | 202 | 4  | 446 | 31  |
| 54,684 | 17 | 7  | 232 | 19 | 12 | 1 | 216 | 4  | 477 | 31  |
| 54,685 | 17 | 7  | 232 | 19 | 12 | 1 | 215 | 4  | 476 | 31  |
| 54,686 | 19 | 7  | 271 | 19 | 15 | 1 | 230 | 3  | 535 | 30  |
| 54,687 | 19 | 8  | 275 | 19 | 15 | 1 | 231 | 4  | 540 | 32  |
| 54,688 | 18 | 8  | 274 | 19 | 15 | 1 | 230 | 4  | 537 | 32  |
| 54,689 | 18 | 8  | 278 | 19 | 15 | 1 | 230 | 4  | 541 | 32  |
| 54,690 | 18 | 8  | 275 | 19 | 15 | 2 | 230 | 4  | 538 | 33  |
| 54,691 | 24 | 8  | 317 | 19 | 19 | 2 | 244 | 4  | 604 | 33  |
| 54,692 | 24 | 8  | 335 | 19 | 20 | 2 | 236 | 4  | 615 | 33  |
| 54,693 | 24 | 8  | 334 | 19 | 20 | 2 | 233 | 4  | 611 | 33  |
| 54,694 | 31 | 8  | 371 | 19 | 21 | 2 | 248 | 4  | 671 | 33  |
| 54,695 | 31 | 8  | 381 | 19 | 21 | 2 | 247 | 4  | 680 | 33  |
| 54,696 | 29 | 8  | 388 | 16 | 20 | 1 | 233 | 4  | 670 | 29  |
| 54,697 | 29 | 8  | 388 | 17 | 20 | 1 | 233 | 4  | 670 | 30  |
| 54,698 | 30 | 8  | 403 | 14 | 20 | 2 | 238 | 6  | 691 | 30  |
| 54,699 | 30 | 8  | 400 | 15 | 20 | 2 | 231 | 6  | 681 | 31  |
| 54,700 | 31 | 8  | 414 | 16 | 22 | 2 | 240 | 7  | 707 | 33  |
| 54,701 | 35 | 8  | 436 | 17 | 22 | 2 | 247 | 9  | 740 | 36  |
| 54,702 | 33 | 9  | 444 | 17 | 21 | 2 | 241 | 9  | 739 | 37  |
| 54,703 | 33 | 9  | 405 | 22 | 20 | 3 | 215 | 11 | 673 | 45  |
| 54,704 | 33 | 9  | 397 | 22 | 20 | 3 | 210 | 11 | 660 | 45  |
| 54,705 | 35 | 9  | 415 | 23 | 21 | 3 | 213 | 13 | 684 | 48  |
| 54,706 | 35 | 9  | 412 | 24 | 20 | 3 | 213 | 14 | 680 | 50  |
| 54,707 | 35 | 9  | 411 | 25 | 20 | 3 | 212 | 15 | 678 | 52  |
| 54,708 | 35 | 9  | 411 | 31 | 20 | 3 | 212 | 19 | 678 | 62  |
| 54,709 | 35 | 9  | 406 | 32 | 20 | 3 | 206 | 19 | 667 | 63  |
| 54,710 | 35 | 20 | 403 | 51 | 20 | 6 | 206 | 25 | 664 | 102 |
| 54,711 | 35 | 20 | 402 | 53 | 20 | 6 | 206 | 28 | 663 | 107 |
| 54,712 | 35 | 21 | 402 | 58 | 20 | 6 | 206 | 29 | 663 | 114 |
| 54,713 | 35 | 21 | 401 | 58 | 20 | 7 | 206 | 29 | 662 | 115 |
| 54,714 | 35 | 22 | 401 | 59 | 20 | 7 | 207 | 29 | 663 | 117 |
| 54,715 | 35 | 23 | 403 | 65 | 20 | 7 | 207 | 32 | 665 | 127 |
| 54,716 | 35 | 23 | 403 | 65 | 20 | 8 | 207 | 32 | 665 | 128 |
| 54,717 | 35 | 23 | 403 | 68 | 20 | 8 | 207 | 32 | 665 | 131 |
| 54,718 | 35 | 23 | 403 | 70 | 20 | 8 | 207 | 32 | 665 | 133 |
| 54,719 | 35 | 22 | 405 | 69 | 20 | 8 | 212 | 32 | 672 | 131 |
| 54,720 | 35 | 21 | 406 | 67 | 20 | 8 | 214 | 31 | 675 | 127 |
| 54,721 | 36 | 21 | 416 | 64 | 20 | 8 | 216 | 29 | 688 | 122 |
| 54,722 | 36 | 21 | 415 | 64 | 20 | 8 | 215 | 30 | 686 | 123 |
| 54,723 | 36 | 21 | 415 | 64 | 20 | 8 | 214 | 30 | 685 | 123 |

|        |    |    |     |    |    |   |     |    |       |     |
|--------|----|----|-----|----|----|---|-----|----|-------|-----|
| 54,724 | 36 | 22 | 413 | 62 | 20 | 9 | 213 | 33 | 682   | 126 |
| 54,725 | 36 | 22 | 413 | 62 | 20 | 9 | 214 | 33 | 683   | 126 |
| 54,726 | 35 | 21 | 410 | 62 | 20 | 9 | 210 | 33 | 675   | 125 |
| 54,727 | 35 | 21 | 403 | 62 | 19 | 9 | 204 | 33 | 661   | 125 |
| 54,728 | 31 | 21 | 358 | 62 | 17 | 9 | 153 | 33 | 559   | 125 |
| 54,729 | 32 | 21 | 422 | 62 | 16 | 9 | 148 | 33 | 618   | 125 |
| 54,730 | 38 | 19 | 457 | 63 | 14 | 9 | 152 | 33 | 661   | 124 |
| 54,731 | 41 | 19 | 499 | 65 | 14 | 9 | 166 | 33 | 720   | 126 |
| 54,732 | 43 | 19 | 530 | 65 | 14 | 9 | 178 | 33 | 765   | 126 |
| 54,733 | 43 | 19 | 549 | 65 | 15 | 9 | 189 | 33 | 796   | 126 |
| 54,734 | 44 | 19 | 595 | 65 | 18 | 9 | 195 | 34 | 852   | 127 |
| 54,735 | 56 | 19 | 668 | 65 | 21 | 9 | 221 | 34 | 966   | 127 |
| 54,736 | 55 | 19 | 679 | 65 | 20 | 9 | 237 | 34 | 991   | 127 |
| 54,737 | 54 | 19 | 676 | 65 | 20 | 9 | 231 | 34 | 981   | 127 |
| 54,738 | 78 | 18 | 840 | 65 | 34 | 9 | 335 | 33 | 1,287 | 125 |
| 54,739 | 82 | 18 | 869 | 67 | 35 | 9 | 348 | 33 | 1,334 | 127 |
| 54,740 | 83 | 18 | 869 | 68 | 35 | 8 | 348 | 34 | 1,335 | 128 |
| 54,741 | 85 | 18 | 879 | 68 | 36 | 8 | 350 | 34 | 1,350 | 128 |
| 54,742 | 82 | 18 | 893 | 69 | 32 | 8 | 351 | 34 | 1,358 | 129 |
| 54,743 | 80 | 18 | 864 | 69 | 31 | 8 | 342 | 34 | 1,317 | 129 |
| 54,744 | 82 | 18 | 881 | 69 | 31 | 8 | 353 | 34 | 1,347 | 129 |
| 54,745 | 75 | 18 | 849 | 69 | 31 | 8 | 342 | 34 | 1,297 | 129 |
| 54,746 | 75 | 18 | 841 | 69 | 31 | 8 | 341 | 34 | 1,288 | 129 |
| 54,747 | 75 | 18 | 825 | 69 | 31 | 8 | 340 | 34 | 1,271 | 129 |
| 54,748 | 76 | 18 | 830 | 68 | 31 | 7 | 342 | 32 | 1,279 | 125 |
| 54,749 | 76 | 18 | 840 | 69 | 31 | 7 | 347 | 32 | 1,294 | 126 |
| 54,750 | 76 | 18 | 842 | 68 | 29 | 7 | 344 | 32 | 1,291 | 125 |
| 54,751 | 79 | 17 | 850 | 67 | 30 | 7 | 359 | 31 | 1,318 | 122 |
| 54,752 | 75 | 17 | 822 | 66 | 30 | 7 | 348 | 29 | 1,275 | 119 |
| 54,753 | 78 | 16 | 894 | 66 | 33 | 7 | 397 | 29 | 1,402 | 118 |
| 54,754 | 76 | 16 | 897 | 61 | 33 | 6 | 393 | 27 | 1,399 | 110 |
| 54,755 | 76 | 16 | 880 | 61 | 32 | 6 | 389 | 27 | 1,377 | 110 |
| 54,756 | 76 | 16 | 886 | 59 | 32 | 6 | 391 | 24 | 1,385 | 105 |
| 54,757 | 76 | 16 | 886 | 58 | 32 | 6 | 391 | 23 | 1,385 | 103 |
| 54,758 | 76 | 16 | 886 | 58 | 32 | 6 | 391 | 23 | 1,385 | 103 |
| 54,759 | 76 | 16 | 886 | 52 | 32 | 6 | 392 | 19 | 1,386 | 93  |
| 54,760 | 76 | 16 | 886 | 51 | 32 | 6 | 392 | 19 | 1,386 | 92  |
| 54,761 | 76 | 5  | 898 | 29 | 33 | 3 | 397 | 10 | 1,404 | 47  |
| 54,762 | 76 | 5  | 898 | 29 | 33 | 3 | 397 | 10 | 1,404 | 47  |
| 54,763 | 76 | 3  | 897 | 25 | 33 | 3 | 397 | 9  | 1,403 | 40  |
| 54,764 | 76 | 2  | 898 | 24 | 33 | 2 | 398 | 10 | 1,405 | 38  |



|        |    |   |     |    |    |   |     |    |       |    |
|--------|----|---|-----|----|----|---|-----|----|-------|----|
| 54,765 | 76 | 2 | 898 | 24 | 33 | 2 | 398 | 10 | 1,405 | 38 |
| 54,766 | 76 | 1 | 900 | 18 | 33 | 2 | 399 | 7  | 1,408 | 28 |
| 54,767 | 76 | 1 | 903 | 18 | 33 | 1 | 399 | 7  | 1,411 | 27 |
| 54,768 | 76 | 1 | 903 | 13 | 33 | 1 | 399 | 7  | 1,411 | 22 |
| 54,769 | 76 | 1 | 904 | 13 | 33 | 1 | 400 | 8  | 1,413 | 23 |
| 54,770 | 76 | 1 | 902 | 13 | 33 | 1 | 396 | 8  | 1,407 | 23 |
| 54,771 | 77 | 1 | 905 | 13 | 33 | 1 | 398 | 9  | 1,413 | 24 |
| 54,772 | 76 | 1 | 895 | 12 | 33 | 1 | 397 | 9  | 1,401 | 23 |
| 54,773 | 76 | 1 | 892 | 12 | 33 | 1 | 397 | 9  | 1,398 | 23 |
| 54,774 | 76 | 1 | 895 | 12 | 33 | 1 | 397 | 9  | 1,401 | 23 |
| 54,775 | 76 | 0 | 895 | 10 | 33 | 0 | 397 | 6  | 1,401 | 16 |
| 54,776 | 76 | 0 | 895 | 11 | 33 | 0 | 398 | 6  | 1,402 | 17 |
| 54,777 | 76 | 0 | 894 | 12 | 33 | 0 | 398 | 9  | 1,401 | 21 |
| 54,778 | 76 | 0 | 893 | 12 | 33 | 0 | 398 | 9  | 1,400 | 21 |
| 54,779 | 76 | 0 | 893 | 15 | 33 | 0 | 396 | 12 | 1,398 | 27 |
| 54,780 | 73 | 0 | 825 | 15 | 33 | 0 | 393 | 12 | 1,324 | 27 |
| 54,781 | 67 | 0 | 789 | 16 | 33 | 0 | 387 | 13 | 1,276 | 29 |
| 54,782 | 64 | 0 | 745 | 14 | 33 | 0 | 371 | 13 | 1,213 | 27 |
| 54,783 | 62 | 0 | 719 | 14 | 33 | 0 | 361 | 13 | 1,175 | 27 |
| 54,784 | 62 | 0 | 694 | 14 | 32 | 0 | 349 | 13 | 1,137 | 27 |
| 54,785 | 61 | 0 | 638 | 14 | 29 | 0 | 340 | 12 | 1,068 | 26 |
| 54,786 | 48 | 0 | 558 | 15 | 24 | 0 | 298 | 12 | 928   | 27 |
| 54,787 | 48 | 0 | 513 | 15 | 22 | 0 | 272 | 12 | 855   | 27 |
| 54,788 | 25 | 0 | 377 | 15 | 8  | 0 | 182 | 12 | 592   | 27 |
| 54,789 | 25 | 0 | 359 | 17 | 8  | 0 | 171 | 13 | 563   | 30 |
| 54,790 | 20 | 1 | 330 | 14 | 7  | 0 | 157 | 12 | 514   | 27 |
| 54,791 | 20 | 1 | 326 | 15 | 7  | 0 | 157 | 12 | 510   | 28 |
| 54,792 | 18 | 1 | 319 | 17 | 6  | 0 | 157 | 12 | 500   | 30 |
| 54,793 | 15 | 1 | 261 | 16 | 6  | 0 | 141 | 14 | 423   | 31 |
| 54,794 | 15 | 1 | 259 | 16 | 6  | 0 | 140 | 14 | 420   | 31 |
| 54,795 | 15 | 1 | 248 | 16 | 6  | 0 | 134 | 14 | 403   | 31 |
| 54,796 | 15 | 1 | 245 | 16 | 5  | 0 | 136 | 14 | 401   | 31 |
| 54,797 | 15 | 1 | 242 | 16 | 5  | 0 | 136 | 14 | 398   | 31 |
| 54,798 | 14 | 1 | 230 | 18 | 5  | 0 | 126 | 15 | 375   | 34 |
| 54,799 | 14 | 1 | 222 | 18 | 5  | 0 | 126 | 15 | 367   | 34 |
| 54,800 | 14 | 1 | 213 | 17 | 5  | 0 | 122 | 15 | 354   | 33 |
| 54,801 | 14 | 2 | 209 | 20 | 5  | 0 | 121 | 15 | 349   | 37 |
| 54,802 | 10 | 2 | 191 | 20 | 4  | 0 | 102 | 16 | 307   | 38 |
| 54,803 | 8  | 2 | 167 | 20 | 3  | 0 | 88  | 16 | 266   | 38 |
| 54,804 | 5  | 3 | 106 | 25 | 1  | 0 | 52  | 16 | 164   | 44 |
| 54,805 | 5  | 4 | 97  | 26 | 1  | 0 | 50  | 17 | 153   | 47 |

|        |    |   |    |    |   |   |    |    |     |    |
|--------|----|---|----|----|---|---|----|----|-----|----|
| 54,806 | 5  | 4 | 95 | 26 | 1 | 0 | 50 | 17 | 151 | 47 |
| 54,807 | 5  | 4 | 91 | 26 | 1 | 0 | 48 | 17 | 145 | 47 |
| 54,808 | 5  | 4 | 88 | 26 | 0 | 0 | 48 | 17 | 141 | 47 |
| 54,809 | 5  | 4 | 87 | 26 | 0 | 0 | 44 | 17 | 136 | 47 |
| 54,810 | 5  | 4 | 79 | 26 | 0 | 0 | 42 | 17 | 126 | 47 |
| 54,811 | 6  | 4 | 79 | 26 | 0 | 0 | 42 | 17 | 127 | 47 |
| 54,812 | 6  | 4 | 79 | 26 | 0 | 0 | 42 | 17 | 127 | 47 |
| 54,813 | 6  | 4 | 79 | 26 | 0 | 0 | 42 | 17 | 127 | 47 |
| 54,814 | 6  | 4 | 80 | 25 | 0 | 0 | 43 | 17 | 129 | 46 |
| 54,815 | 6  | 4 | 82 | 26 | 0 | 0 | 41 | 16 | 129 | 46 |
| 54,816 | 6  | 4 | 78 | 26 | 0 | 0 | 40 | 16 | 124 | 46 |
| 54,817 | 6  | 4 | 77 | 26 | 0 | 0 | 40 | 16 | 123 | 46 |
| 54,818 | 6  | 4 | 75 | 26 | 0 | 0 | 40 | 16 | 121 | 46 |
| 54,819 | 6  | 4 | 75 | 26 | 0 | 0 | 40 | 15 | 121 | 45 |
| 54,820 | 6  | 4 | 74 | 26 | 0 | 0 | 39 | 15 | 119 | 45 |
| 54,821 | 6  | 4 | 74 | 26 | 0 | 0 | 39 | 15 | 119 | 45 |
| 54,822 | 5  | 4 | 70 | 26 | 0 | 0 | 35 | 14 | 110 | 44 |
| 54,823 | 5  | 4 | 71 | 26 | 0 | 0 | 33 | 14 | 109 | 44 |
| 54,824 | 5  | 4 | 71 | 26 | 0 | 0 | 33 | 13 | 109 | 43 |
| 54,825 | 5  | 4 | 71 | 26 | 0 | 0 | 33 | 14 | 109 | 44 |
| 54,826 | 5  | 4 | 71 | 27 | 0 | 0 | 31 | 15 | 107 | 46 |
| 54,827 | 5  | 4 | 71 | 27 | 0 | 1 | 31 | 15 | 107 | 47 |
| 54,828 | 5  | 4 | 71 | 27 | 0 | 2 | 31 | 12 | 107 | 45 |
| 54,829 | 5  | 4 | 70 | 27 | 0 | 2 | 28 | 12 | 103 | 45 |
| 54,830 | 5  | 4 | 69 | 24 | 0 | 2 | 28 | 9  | 102 | 39 |
| 54,831 | 5  | 4 | 65 | 24 | 0 | 2 | 26 | 9  | 96  | 39 |
| 54,832 | 5  | 4 | 62 | 22 | 0 | 2 | 26 | 8  | 93  | 36 |
| 54,833 | 5  | 4 | 62 | 22 | 0 | 2 | 26 | 8  | 93  | 36 |
| 54,834 | 5  | 4 | 62 | 22 | 0 | 2 | 26 | 8  | 93  | 36 |
| 54,835 | 5  | 4 | 64 | 22 | 0 | 2 | 26 | 8  | 95  | 36 |
| 54,836 | 5  | 4 | 57 | 22 | 0 | 2 | 26 | 8  | 88  | 36 |
| 54,837 | 5  | 4 | 53 | 21 | 0 | 2 | 26 | 8  | 84  | 35 |
| 54,838 | 5  | 4 | 49 | 21 | 0 | 2 | 26 | 8  | 80  | 35 |
| 54,839 | 4  | 4 | 39 | 19 | 0 | 2 | 23 | 7  | 66  | 32 |
| 54,840 | 4  | 3 | 41 | 19 | 0 | 2 | 22 | 7  | 67  | 31 |
| 54,841 | 5  | 3 | 51 | 20 | 0 | 2 | 25 | 7  | 81  | 32 |
| 54,842 | 5  | 3 | 51 | 19 | 0 | 2 | 25 | 7  | 81  | 31 |
| 54,843 | 5  | 3 | 47 | 17 | 0 | 2 | 23 | 7  | 75  | 29 |
| 54,844 | 6  | 3 | 55 | 17 | 0 | 2 | 26 | 5  | 87  | 27 |
| 54,845 | 8  | 3 | 67 | 17 | 0 | 2 | 28 | 5  | 103 | 27 |
| 54,846 | 10 | 3 | 67 | 17 | 0 | 2 | 26 | 5  | 103 | 27 |

|        |    |   |     |    |    |   |     |    |     |    |
|--------|----|---|-----|----|----|---|-----|----|-----|----|
| 54,847 | 10 | 3 | 64  | 17 | 0  | 2 | 18  | 5  | 92  | 27 |
| 54,848 | 10 | 3 | 79  | 16 | 0  | 2 | 28  | 5  | 117 | 26 |
| 54,849 | 15 | 3 | 202 | 15 | 6  | 2 | 94  | 4  | 317 | 24 |
| 54,850 | 15 | 3 | 211 | 18 | 8  | 2 | 101 | 5  | 335 | 28 |
| 54,851 | 16 | 3 | 213 | 19 | 8  | 2 | 100 | 5  | 337 | 29 |
| 54,852 | 16 | 2 | 217 | 18 | 8  | 3 | 101 | 5  | 342 | 28 |
| 54,853 | 16 | 2 | 214 | 19 | 8  | 3 | 102 | 4  | 340 | 28 |
| 54,854 | 16 | 2 | 210 | 19 | 8  | 3 | 101 | 4  | 335 | 28 |
| 54,855 | 16 | 2 | 209 | 16 | 8  | 3 | 101 | 6  | 334 | 27 |
| 54,856 | 16 | 1 | 209 | 17 | 8  | 3 | 101 | 5  | 334 | 26 |
| 54,857 | 16 | 1 | 209 | 25 | 8  | 3 | 101 | 6  | 334 | 35 |
| 54,858 | 16 | 1 | 209 | 25 | 8  | 3 | 101 | 7  | 334 | 36 |
| 54,859 | 16 | 1 | 214 | 26 | 9  | 3 | 104 | 7  | 343 | 37 |
| 54,860 | 16 | 1 | 220 | 26 | 9  | 3 | 105 | 7  | 350 | 37 |
| 54,861 | 15 | 1 | 220 | 28 | 9  | 3 | 105 | 8  | 349 | 40 |
| 54,862 | 15 | 1 | 224 | 30 | 9  | 3 | 106 | 8  | 354 | 42 |
| 54,863 | 16 | 1 | 227 | 31 | 9  | 3 | 107 | 9  | 359 | 44 |
| 54,864 | 16 | 1 | 227 | 32 | 9  | 3 | 107 | 9  | 359 | 45 |
| 54,865 | 17 | 1 | 238 | 33 | 9  | 3 | 108 | 9  | 372 | 46 |
| 54,866 | 17 | 1 | 236 | 32 | 9  | 3 | 108 | 9  | 370 | 45 |
| 54,867 | 17 | 1 | 235 | 32 | 9  | 3 | 108 | 9  | 369 | 45 |
| 54,868 | 22 | 1 | 269 | 32 | 9  | 3 | 116 | 9  | 416 | 45 |
| 54,869 | 22 | 1 | 278 | 32 | 9  | 3 | 120 | 9  | 429 | 45 |
| 54,870 | 29 | 1 | 321 | 32 | 9  | 3 | 149 | 9  | 508 | 45 |
| 54,871 | 29 | 1 | 333 | 33 | 11 | 3 | 150 | 9  | 523 | 46 |
| 54,872 | 29 | 1 | 334 | 33 | 11 | 3 | 150 | 9  | 524 | 46 |
| 54,873 | 29 | 1 | 334 | 33 | 11 | 3 | 150 | 9  | 524 | 46 |
| 54,874 | 30 | 1 | 339 | 33 | 11 | 3 | 152 | 9  | 532 | 46 |
| 54,875 | 30 | 1 | 339 | 33 | 11 | 3 | 152 | 9  | 532 | 46 |
| 54,876 | 30 | 1 | 339 | 32 | 11 | 3 | 152 | 8  | 532 | 44 |
| 54,877 | 30 | 1 | 339 | 32 | 11 | 3 | 152 | 8  | 532 | 44 |
| 54,878 | 30 | 1 | 339 | 30 | 11 | 1 | 152 | 8  | 532 | 40 |
| 54,879 | 30 | 1 | 339 | 30 | 11 | 1 | 152 | 8  | 532 | 40 |
| 54,880 | 30 | 1 | 339 | 30 | 11 | 1 | 152 | 8  | 532 | 40 |
| 54,881 | 30 | 1 | 339 | 30 | 11 | 1 | 152 | 8  | 532 | 40 |
| 54,882 | 30 | 1 | 339 | 30 | 11 | 1 | 152 | 9  | 532 | 41 |
| 54,883 | 30 | 2 | 339 | 30 | 11 | 1 | 152 | 9  | 532 | 42 |
| 54,884 | 30 | 2 | 339 | 30 | 11 | 1 | 152 | 10 | 532 | 43 |
| 54,885 | 30 | 2 | 337 | 30 | 11 | 1 | 152 | 10 | 530 | 43 |
| 54,886 | 30 | 2 | 337 | 30 | 11 | 1 | 152 | 10 | 530 | 43 |
| 54,887 | 30 | 2 | 337 | 30 | 11 | 1 | 152 | 11 | 530 | 44 |

|        |    |   |     |    |    |   |     |    |     |    |
|--------|----|---|-----|----|----|---|-----|----|-----|----|
| 54,888 | 30 | 2 | 337 | 30 | 11 | 1 | 152 | 11 | 530 | 44 |
| 54,889 | 30 | 2 | 337 | 30 | 11 | 1 | 152 | 11 | 530 | 44 |
| 54,890 | 31 | 2 | 337 | 30 | 11 | 1 | 153 | 11 | 532 | 44 |
| 54,891 | 31 | 2 | 335 | 30 | 11 | 1 | 154 | 11 | 531 | 44 |
| 54,892 | 30 | 2 | 325 | 29 | 11 | 1 | 151 | 11 | 517 | 43 |
| 54,893 | 32 | 2 | 334 | 29 | 11 | 1 | 154 | 11 | 531 | 43 |
| 54,894 | 32 | 2 | 331 | 29 | 11 | 1 | 152 | 11 | 526 | 43 |
| 54,895 | 31 | 2 | 338 | 34 | 12 | 1 | 155 | 17 | 536 | 54 |
| 54,896 | 30 | 3 | 340 | 41 | 12 | 1 | 151 | 19 | 533 | 64 |
| 54,897 | 48 | 3 | 361 | 42 | 14 | 1 | 161 | 19 | 584 | 65 |
| 54,898 | 50 | 4 | 350 | 43 | 14 | 1 | 151 | 19 | 565 | 67 |
| 54,899 | 54 | 4 | 275 | 43 | 13 | 1 | 127 | 19 | 469 | 67 |
| 54,900 | 58 | 4 | 304 | 43 | 11 | 1 | 104 | 19 | 477 | 67 |
| 54,901 | 58 | 4 | 295 | 40 | 9  | 1 | 97  | 18 | 459 | 63 |
| 54,902 | 58 | 4 | 296 | 39 | 10 | 1 | 98  | 18 | 462 | 62 |
| 54,903 | 60 | 4 | 303 | 40 | 10 | 0 | 101 | 18 | 474 | 62 |
| 54,904 | 60 | 4 | 303 | 39 | 10 | 0 | 99  | 18 | 472 | 61 |
| 54,905 | 60 | 4 | 303 | 39 | 10 | 0 | 99  | 18 | 472 | 61 |
| 54,906 | 60 | 3 | 303 | 37 | 10 | 0 | 99  | 16 | 472 | 56 |
| 54,907 | 60 | 3 | 303 | 36 | 11 | 0 | 99  | 16 | 473 | 55 |
| 54,908 | 60 | 3 | 303 | 28 | 11 | 0 | 99  | 17 | 473 | 48 |
| 54,909 | 60 | 3 | 300 | 28 | 10 | 0 | 97  | 16 | 467 | 47 |
| 54,910 | 60 | 3 | 298 | 27 | 10 | 0 | 96  | 16 | 464 | 46 |
| 54,911 | 60 | 3 | 292 | 27 | 10 | 0 | 95  | 16 | 457 | 46 |
| 54,912 | 60 | 3 | 288 | 25 | 10 | 0 | 94  | 15 | 452 | 43 |
| 54,913 | 60 | 3 | 288 | 24 | 10 | 0 | 94  | 15 | 452 | 42 |
| 54,914 | 59 | 3 | 285 | 23 | 10 | 0 | 93  | 14 | 447 | 40 |
| 54,915 | 60 | 3 | 291 | 22 | 10 | 0 | 95  | 14 | 456 | 39 |
| 54,916 | 59 | 3 | 282 | 21 | 10 | 0 | 93  | 14 | 444 | 38 |
| 54,917 | 58 | 3 | 257 | 21 | 10 | 0 | 91  | 14 | 416 | 38 |
| 54,918 | 57 | 3 | 258 | 22 | 10 | 0 | 89  | 14 | 414 | 39 |
| 54,919 | 57 | 3 | 249 | 25 | 10 | 0 | 85  | 16 | 401 | 44 |
| 54,920 | 50 | 3 | 206 | 27 | 10 | 0 | 56  | 19 | 322 | 49 |
| 54,921 | 50 | 3 | 194 | 27 | 8  | 0 | 55  | 19 | 307 | 49 |
| 54,922 | 54 | 3 | 221 | 26 | 9  | 0 | 68  | 19 | 352 | 48 |
| 54,923 | 61 | 3 | 247 | 26 | 10 | 0 | 85  | 19 | 403 | 48 |
| 54,924 | 60 | 3 | 245 | 26 | 10 | 0 | 84  | 19 | 399 | 48 |
| 54,925 | 68 | 3 | 333 | 26 | 13 | 0 | 140 | 19 | 554 | 48 |
| 54,926 | 71 | 3 | 357 | 26 | 14 | 0 | 146 | 19 | 588 | 48 |
| 54,927 | 71 | 3 | 359 | 26 | 14 | 0 | 147 | 18 | 591 | 47 |
| 54,928 | 71 | 3 | 360 | 25 | 14 | 0 | 148 | 18 | 593 | 46 |

|        |    |   |     |    |    |   |     |    |     |    |
|--------|----|---|-----|----|----|---|-----|----|-----|----|
| 54,929 | 71 | 3 | 360 | 25 | 14 | 1 | 148 | 18 | 593 | 47 |
| 54,930 | 71 | 3 | 363 | 25 | 14 | 1 | 149 | 18 | 597 | 47 |
| 54,931 | 71 | 3 | 363 | 26 | 14 | 1 | 149 | 17 | 597 | 47 |
| 54,932 | 71 | 3 | 363 | 26 | 14 | 1 | 149 | 17 | 597 | 47 |
| 54,933 | 71 | 3 | 363 | 26 | 14 | 1 | 149 | 16 | 597 | 46 |
| 54,934 | 71 | 3 | 363 | 26 | 14 | 1 | 150 | 16 | 598 | 46 |
| 54,935 | 71 | 3 | 363 | 26 | 14 | 1 | 150 | 16 | 598 | 46 |
| 54,936 | 71 | 3 | 365 | 26 | 14 | 1 | 150 | 16 | 600 | 46 |
| 54,937 | 71 | 3 | 365 | 26 | 14 | 1 | 150 | 16 | 600 | 46 |
| 54,938 | 71 | 3 | 367 | 26 | 15 | 1 | 156 | 15 | 609 | 45 |
| 54,939 | 71 | 3 | 382 | 26 | 15 | 1 | 159 | 15 | 627 | 45 |
| 54,940 | 71 | 3 | 389 | 26 | 15 | 1 | 160 | 15 | 635 | 45 |
| 54,941 | 71 | 3 | 389 | 26 | 15 | 1 | 158 | 15 | 633 | 45 |
| 54,942 | 71 | 3 | 388 | 26 | 16 | 1 | 159 | 15 | 634 | 45 |
| 54,943 | 69 | 3 | 379 | 26 | 16 | 1 | 156 | 15 | 620 | 45 |
| 54,944 | 69 | 2 | 383 | 14 | 16 | 1 | 157 | 7  | 625 | 24 |
| 54,945 | 69 | 2 | 382 | 14 | 16 | 1 | 157 | 7  | 624 | 24 |
| 54,946 | 69 | 3 | 372 | 18 | 15 | 1 | 154 | 7  | 610 | 29 |
| 54,947 | 68 | 4 | 354 | 25 | 16 | 1 | 152 | 7  | 590 | 37 |
| 54,948 | 46 | 4 | 326 | 25 | 14 | 1 | 146 | 7  | 532 | 37 |
| 54,949 | 44 | 4 | 321 | 29 | 14 | 1 | 147 | 9  | 526 | 43 |
| 54,950 | 35 | 4 | 304 | 35 | 12 | 1 | 136 | 10 | 487 | 50 |
| 54,951 | 30 | 4 | 242 | 36 | 11 | 1 | 128 | 12 | 411 | 53 |
| 54,952 | 29 | 4 | 241 | 38 | 10 | 1 | 127 | 17 | 407 | 60 |
| 54,953 | 28 | 4 | 232 | 37 | 10 | 1 | 123 | 17 | 393 | 59 |
| 54,954 | 28 | 4 | 233 | 37 | 10 | 1 | 123 | 17 | 394 | 59 |
| 54,955 | 28 | 4 | 234 | 37 | 10 | 1 | 123 | 17 | 395 | 59 |
| 54,956 | 31 | 4 | 251 | 37 | 11 | 1 | 133 | 18 | 426 | 60 |
| 54,957 | 31 | 4 | 251 | 37 | 10 | 1 | 133 | 18 | 425 | 60 |
| 54,958 | 35 | 4 | 312 | 36 | 13 | 1 | 183 | 18 | 543 | 59 |
| 54,959 | 35 | 4 | 313 | 36 | 13 | 1 | 186 | 16 | 547 | 57 |
| 54,960 | 35 | 4 | 315 | 36 | 13 | 1 | 188 | 16 | 551 | 57 |
| 54,961 | 35 | 4 | 321 | 36 | 13 | 1 | 198 | 16 | 567 | 57 |
| 54,962 | 36 | 4 | 348 | 35 | 15 | 1 | 207 | 16 | 606 | 56 |
| 54,963 | 36 | 4 | 352 | 35 | 15 | 1 | 216 | 16 | 619 | 56 |
| 54,964 | 35 | 4 | 349 | 35 | 15 | 1 | 216 | 16 | 615 | 56 |
| 54,965 | 35 | 4 | 349 | 35 | 15 | 1 | 216 | 16 | 615 | 56 |
| 54,966 | 35 | 4 | 355 | 35 | 15 | 1 | 222 | 16 | 627 | 56 |
| 54,967 | 35 | 4 | 354 | 35 | 15 | 1 | 222 | 16 | 626 | 56 |
| 54,968 | 32 | 4 | 351 | 35 | 15 | 1 | 220 | 18 | 618 | 58 |
| 54,969 | 32 | 5 | 346 | 40 | 15 | 2 | 220 | 22 | 613 | 69 |

|        |    |    |     |    |    |   |     |    |       |     |
|--------|----|----|-----|----|----|---|-----|----|-------|-----|
| 54,970 | 32 | 6  | 347 | 46 | 15 | 4 | 220 | 31 | 614   | 87  |
| 54,971 | 29 | 6  | 332 | 61 | 15 | 4 | 212 | 33 | 588   | 104 |
| 54,972 | 32 | 6  | 336 | 62 | 16 | 4 | 223 | 34 | 607   | 106 |
| 54,973 | 31 | 6  | 327 | 62 | 15 | 4 | 220 | 34 | 593   | 106 |
| 54,974 | 24 | 8  | 303 | 63 | 14 | 4 | 205 | 35 | 546   | 110 |
| 54,975 | 16 | 8  | 213 | 63 | 11 | 4 | 147 | 35 | 387   | 110 |
| 54,976 | 13 | 10 | 189 | 64 | 10 | 4 | 141 | 36 | 353   | 114 |
| 54,977 | 13 | 10 | 185 | 66 | 10 | 4 | 140 | 36 | 348   | 116 |
| 54,978 | 15 | 10 | 213 | 66 | 14 | 4 | 171 | 37 | 413   | 117 |
| 54,979 | 15 | 10 | 213 | 68 | 14 | 4 | 173 | 40 | 415   | 122 |
| 54,980 | 15 | 10 | 211 | 68 | 14 | 3 | 173 | 40 | 413   | 121 |
| 54,981 | 16 | 10 | 241 | 68 | 15 | 3 | 188 | 40 | 460   | 121 |
| 54,982 | 16 | 9  | 241 | 67 | 15 | 3 | 188 | 40 | 460   | 119 |
| 54,983 | 16 | 9  | 241 | 67 | 15 | 3 | 186 | 40 | 458   | 119 |
| 54,984 | 16 | 9  | 241 | 67 | 15 | 3 | 188 | 40 | 460   | 119 |
| 54,985 | 16 | 9  | 242 | 69 | 15 | 3 | 189 | 41 | 462   | 122 |
| 54,986 | 22 | 9  | 273 | 70 | 17 | 3 | 210 | 46 | 522   | 128 |
| 54,987 | 22 | 9  | 280 | 74 | 17 | 3 | 210 | 47 | 529   | 133 |
| 54,988 | 22 | 9  | 281 | 81 | 17 | 3 | 210 | 48 | 530   | 141 |
| 54,989 | 25 | 9  | 299 | 84 | 16 | 3 | 212 | 49 | 552   | 145 |
| 54,990 | 25 | 9  | 286 | 84 | 16 | 3 | 209 | 49 | 536   | 145 |
| 54,991 | 24 | 9  | 282 | 84 | 16 | 3 | 211 | 50 | 533   | 146 |
| 54,992 | 24 | 9  | 282 | 84 | 16 | 3 | 211 | 50 | 533   | 146 |
| 54,993 | 29 | 9  | 345 | 84 | 18 | 3 | 237 | 50 | 629   | 146 |
| 54,994 | 49 | 9  | 466 | 85 | 28 | 3 | 402 | 50 | 945   | 147 |
| 54,995 | 49 | 9  | 464 | 85 | 28 | 3 | 401 | 51 | 942   | 148 |
| 54,996 | 56 | 9  | 521 | 85 | 32 | 3 | 438 | 51 | 1,047 | 148 |
| 54,997 | 56 | 7  | 528 | 75 | 32 | 3 | 448 | 51 | 1,064 | 136 |
| 54,998 | 56 | 7  | 528 | 75 | 31 | 3 | 451 | 52 | 1,066 | 137 |
| 54,999 | 64 | 7  | 585 | 75 | 38 | 3 | 542 | 52 | 1,229 | 137 |
| 55,000 | 64 | 6  | 586 | 64 | 38 | 3 | 541 | 49 | 1,229 | 122 |
| 55,001 | 64 | 6  | 586 | 64 | 38 | 3 | 542 | 47 | 1,230 | 120 |
| 55,002 | 64 | 6  | 585 | 62 | 38 | 3 | 542 | 42 | 1,229 | 113 |
| 55,003 | 64 | 6  | 584 | 62 | 38 | 3 | 542 | 42 | 1,228 | 113 |
| 55,004 | 63 | 6  | 587 | 61 | 38 | 3 | 542 | 42 | 1,230 | 112 |
| 55,005 | 64 | 6  | 602 | 61 | 38 | 4 | 549 | 41 | 1,253 | 112 |
| 55,006 | 65 | 6  | 622 | 61 | 40 | 4 | 557 | 41 | 1,284 | 112 |
| 55,007 | 63 | 6  | 607 | 61 | 39 | 4 | 546 | 41 | 1,255 | 112 |
| 55,008 | 64 | 6  | 597 | 61 | 39 | 4 | 540 | 41 | 1,240 | 112 |
| 55,009 | 63 | 6  | 563 | 62 | 35 | 4 | 500 | 41 | 1,161 | 113 |
| 55,010 | 66 | 6  | 608 | 62 | 37 | 4 | 509 | 41 | 1,220 | 113 |

|        |     |   |       |    |    |   |     |    |       |     |
|--------|-----|---|-------|----|----|---|-----|----|-------|-----|
| 55,011 | 67  | 6 | 674   | 63 | 39 | 4 | 521 | 41 | 1,301 | 114 |
| 55,012 | 67  | 6 | 668   | 63 | 39 | 4 | 511 | 43 | 1,285 | 116 |
| 55,013 | 66  | 6 | 640   | 63 | 38 | 4 | 503 | 43 | 1,247 | 116 |
| 55,014 | 90  | 6 | 1,175 | 63 | 62 | 4 | 711 | 43 | 2,038 | 116 |
| 55,015 | 90  | 6 | 1,175 | 63 | 62 | 4 | 712 | 43 | 2,039 | 116 |
| 55,016 | 92  | 6 | 1,226 | 63 | 64 | 4 | 721 | 43 | 2,103 | 116 |
| 55,017 | 92  | 6 | 1,245 | 63 | 64 | 4 | 725 | 45 | 2,126 | 118 |
| 55,018 | 95  | 6 | 1,320 | 62 | 65 | 4 | 744 | 43 | 2,224 | 115 |
| 55,019 | 96  | 6 | 1,337 | 62 | 65 | 4 | 749 | 43 | 2,247 | 115 |
| 55,020 | 96  | 4 | 1,377 | 48 | 68 | 1 | 760 | 28 | 2,301 | 81  |
| 55,021 | 96  | 4 | 1,392 | 31 | 68 | 1 | 764 | 22 | 2,320 | 58  |
| 55,022 | 97  | 4 | 1,461 | 31 | 69 | 1 | 786 | 23 | 2,413 | 59  |
| 55,023 | 94  | 4 | 1,453 | 35 | 68 | 1 | 774 | 24 | 2,389 | 64  |
| 55,024 | 97  | 5 | 1,476 | 37 | 68 | 1 | 788 | 27 | 2,429 | 70  |
| 55,025 | 97  | 3 | 1,483 | 42 | 68 | 1 | 788 | 28 | 2,436 | 74  |
| 55,026 | 99  | 3 | 1,535 | 42 | 68 | 2 | 835 | 28 | 2,537 | 75  |
| 55,027 | 105 | 1 | 1,593 | 40 | 73 | 3 | 878 | 29 | 2,649 | 73  |
| 55,028 | 104 | 1 | 1,588 | 44 | 72 | 4 | 881 | 31 | 2,645 | 80  |
| 55,029 | 111 | 1 | 1,688 | 44 | 73 | 5 | 907 | 31 | 2,779 | 81  |
| 55,030 | 110 | 1 | 1,674 | 42 | 74 | 5 | 896 | 28 | 2,754 | 76  |
| 55,031 | 110 | 1 | 1,676 | 45 | 73 | 5 | 898 | 30 | 2,757 | 81  |
| 55,032 | 110 | 1 | 1,680 | 54 | 73 | 5 | 904 | 33 | 2,767 | 93  |
| 55,033 | 110 | 1 | 1,680 | 54 | 73 | 5 | 906 | 34 | 2,769 | 94  |
| 55,034 | 108 | 2 | 1,677 | 54 | 73 | 5 | 905 | 34 | 2,763 | 95  |
| 55,035 | 107 | 2 | 1,668 | 54 | 72 | 5 | 900 | 35 | 2,747 | 96  |
| 55,036 | 108 | 2 | 1,673 | 51 | 71 | 5 | 899 | 29 | 2,751 | 87  |
| 55,037 | 107 | 2 | 1,669 | 48 | 71 | 5 | 897 | 28 | 2,744 | 83  |
| 55,038 | 107 | 2 | 1,664 | 42 | 71 | 5 | 898 | 27 | 2,740 | 76  |
| 55,039 | 112 | 2 | 1,724 | 42 | 71 | 5 | 945 | 27 | 2,852 | 76  |
| 55,040 | 110 | 2 | 1,714 | 39 | 71 | 5 | 950 | 26 | 2,845 | 72  |
| 55,041 | 110 | 2 | 1,713 | 39 | 71 | 5 | 950 | 26 | 2,844 | 72  |
| 55,042 | 111 | 2 | 1,716 | 39 | 72 | 5 | 948 | 26 | 2,847 | 72  |
| 55,043 | 108 | 2 | 1,668 | 39 | 69 | 5 | 931 | 26 | 2,776 | 72  |
| 55,044 | 107 | 3 | 1,666 | 44 | 69 | 5 | 931 | 26 | 2,773 | 78  |
| 55,045 | 103 | 3 | 1,598 | 51 | 60 | 6 | 809 | 26 | 2,570 | 86  |
| 55,046 | 108 | 3 | 1,641 | 53 | 60 | 6 | 842 | 25 | 2,651 | 87  |
| 55,047 | 114 | 3 | 1,719 | 51 | 59 | 6 | 896 | 26 | 2,788 | 86  |
| 55,048 | 119 | 3 | 1,739 | 52 | 61 | 6 | 921 | 26 | 2,840 | 87  |
| 55,049 | 117 | 3 | 1,722 | 53 | 56 | 6 | 861 | 25 | 2,756 | 87  |
| 55,050 | 112 | 3 | 1,707 | 53 | 55 | 6 | 843 | 25 | 2,717 | 87  |
| 55,051 | 113 | 4 | 1,734 | 54 | 55 | 6 | 852 | 25 | 2,754 | 89  |

|        |     |   |       |    |    |   |       |    |       |     |
|--------|-----|---|-------|----|----|---|-------|----|-------|-----|
| 55,052 | 113 | 4 | 1,735 | 53 | 56 | 6 | 854   | 24 | 2,758 | 87  |
| 55,053 | 125 | 4 | 1,825 | 53 | 62 | 6 | 956   | 24 | 2,968 | 87  |
| 55,054 | 125 | 4 | 1,826 | 52 | 62 | 6 | 961   | 24 | 2,974 | 86  |
| 55,055 | 128 | 4 | 1,842 | 52 | 62 | 6 | 968   | 25 | 3,000 | 87  |
| 55,056 | 127 | 4 | 1,854 | 52 | 62 | 5 | 973   | 25 | 3,016 | 86  |
| 55,057 | 126 | 4 | 1,833 | 52 | 60 | 5 | 965   | 25 | 2,984 | 86  |
| 55,058 | 125 | 7 | 1,831 | 57 | 60 | 5 | 965   | 31 | 2,981 | 100 |
| 55,059 | 124 | 7 | 1,826 | 57 | 60 | 5 | 962   | 32 | 2,972 | 101 |
| 55,060 | 125 | 7 | 1,849 | 57 | 61 | 5 | 1,002 | 32 | 3,037 | 101 |
| 55,061 | 122 | 8 | 1,802 | 58 | 59 | 7 | 991   | 35 | 2,974 | 108 |
| 55,062 | 121 | 8 | 1,738 | 59 | 57 | 7 | 978   | 36 | 2,894 | 110 |
| 55,063 | 101 | 8 | 1,300 | 59 | 40 | 7 | 783   | 34 | 2,224 | 108 |
| 55,064 | 98  | 8 | 1,201 | 59 | 34 | 7 | 760   | 34 | 2,093 | 108 |
| 55,065 | 99  | 9 | 1,211 | 61 | 33 | 7 | 772   | 35 | 2,115 | 112 |
| 55,066 | 98  | 9 | 1,212 | 61 | 33 | 7 | 785   | 36 | 2,128 | 113 |
| 55,067 | 97  | 9 | 1,171 | 63 | 31 | 7 | 779   | 36 | 2,078 | 115 |
| 55,068 | 99  | 9 | 1,155 | 63 | 31 | 7 | 778   | 35 | 2,063 | 114 |
| 55,069 | 96  | 9 | 1,079 | 63 | 30 | 7 | 757   | 35 | 1,962 | 114 |
| 55,070 | 95  | 9 | 1,064 | 63 | 30 | 7 | 752   | 35 | 1,941 | 114 |
| 55,071 | 95  | 9 | 1,027 | 62 | 27 | 7 | 741   | 35 | 1,890 | 113 |
| 55,072 | 97  | 9 | 1,014 | 62 | 27 | 7 | 740   | 35 | 1,878 | 113 |
| 55,073 | 97  | 8 | 962   | 56 | 26 | 7 | 725   | 31 | 1,810 | 102 |
| 55,074 | 98  | 8 | 962   | 57 | 28 | 7 | 730   | 31 | 1,818 | 103 |
| 55,075 | 96  | 8 | 948   | 57 | 28 | 7 | 724   | 31 | 1,796 | 103 |
| 55,076 | 96  | 8 | 941   | 51 | 28 | 7 | 723   | 31 | 1,788 | 97  |
| 55,077 | 94  | 8 | 888   | 51 | 26 | 6 | 675   | 31 | 1,683 | 96  |
| 55,078 | 89  | 8 | 832   | 50 | 22 | 5 | 634   | 28 | 1,577 | 91  |
| 55,079 | 89  | 8 | 832   | 46 | 23 | 4 | 632   | 26 | 1,576 | 84  |
| 55,080 | 82  | 8 | 726   | 46 | 22 | 3 | 583   | 26 | 1,413 | 83  |
| 55,081 | 82  | 8 | 719   | 46 | 21 | 3 | 579   | 26 | 1,401 | 83  |
| 55,082 | 82  | 8 | 715   | 34 | 21 | 3 | 580   | 21 | 1,398 | 66  |
| 55,083 | 82  | 8 | 706   | 34 | 21 | 3 | 573   | 20 | 1,382 | 65  |
| 55,084 | 82  | 8 | 703   | 34 | 21 | 3 | 571   | 20 | 1,377 | 65  |
| 55,085 | 81  | 7 | 702   | 34 | 21 | 3 | 570   | 20 | 1,374 | 64  |
| 55,086 | 87  | 7 | 719   | 34 | 21 | 3 | 572   | 19 | 1,399 | 63  |
| 55,087 | 85  | 7 | 705   | 34 | 21 | 3 | 563   | 19 | 1,374 | 63  |
| 55,088 | 85  | 7 | 705   | 32 | 21 | 3 | 562   | 19 | 1,373 | 61  |
| 55,089 | 88  | 7 | 739   | 32 | 22 | 3 | 572   | 19 | 1,421 | 61  |
| 55,090 | 84  | 7 | 683   | 32 | 22 | 3 | 526   | 19 | 1,315 | 61  |
| 55,091 | 95  | 7 | 721   | 32 | 22 | 3 | 535   | 19 | 1,373 | 61  |
| 55,092 | 95  | 7 | 720   | 32 | 22 | 3 | 535   | 20 | 1,372 | 62  |



|        |     |   |     |    |    |   |     |    |       |    |
|--------|-----|---|-----|----|----|---|-----|----|-------|----|
| 55,093 | 94  | 7 | 721 | 34 | 22 | 3 | 535 | 20 | 1,372 | 64 |
| 55,094 | 104 | 6 | 737 | 19 | 24 | 2 | 558 | 20 | 1,423 | 47 |
| 55,095 | 119 | 6 | 754 | 19 | 24 | 2 | 571 | 21 | 1,468 | 48 |
| 55,096 | 118 | 6 | 813 | 19 | 26 | 2 | 596 | 21 | 1,553 | 48 |
| 55,097 | 110 | 6 | 768 | 19 | 26 | 2 | 565 | 20 | 1,469 | 47 |
| 55,098 | 107 | 6 | 660 | 19 | 24 | 2 | 493 | 19 | 1,284 | 46 |
| 55,099 | 102 | 6 | 634 | 18 | 22 | 2 | 463 | 19 | 1,221 | 45 |
| 55,100 | 101 | 6 | 610 | 17 | 21 | 2 | 446 | 19 | 1,178 | 44 |
| 55,101 | 100 | 5 | 583 | 16 | 21 | 2 | 438 | 19 | 1,142 | 42 |
| 55,102 | 100 | 5 | 582 | 16 | 20 | 2 | 436 | 20 | 1,138 | 43 |
| 55,103 | 88  | 5 | 491 | 16 | 14 | 2 | 333 | 20 | 926   | 43 |
| 55,104 | 88  | 5 | 496 | 17 | 14 | 2 | 333 | 20 | 931   | 44 |
| 55,105 | 88  | 5 | 496 | 17 | 15 | 2 | 330 | 20 | 929   | 44 |
| 55,106 | 85  | 5 | 481 | 18 | 15 | 2 | 324 | 21 | 905   | 46 |
| 55,107 | 85  | 5 | 453 | 18 | 15 | 2 | 311 | 21 | 864   | 46 |
| 55,108 | 85  | 5 | 448 | 18 | 15 | 2 | 307 | 21 | 855   | 46 |
| 55,109 | 81  | 2 | 418 | 14 | 14 | 2 | 270 | 14 | 783   | 32 |
| 55,110 | 81  | 2 | 417 | 14 | 14 | 2 | 266 | 14 | 778   | 32 |
| 55,111 | 81  | 2 | 417 | 16 | 14 | 2 | 266 | 18 | 778   | 38 |
| 55,112 | 81  | 1 | 417 | 16 | 14 | 0 | 266 | 15 | 778   | 32 |
| 55,113 | 81  | 2 | 416 | 17 | 14 | 1 | 266 | 23 | 777   | 43 |
| 55,114 | 81  | 2 | 416 | 21 | 14 | 1 | 266 | 27 | 777   | 51 |
| 55,115 | 80  | 2 | 415 | 23 | 14 | 1 | 266 | 27 | 775   | 53 |
| 55,116 | 79  | 1 | 401 | 21 | 14 | 1 | 251 | 26 | 745   | 49 |
| 55,117 | 79  | 1 | 386 | 19 | 14 | 1 | 233 | 25 | 712   | 46 |
| 55,118 | 79  | 1 | 382 | 19 | 14 | 1 | 233 | 25 | 708   | 46 |
| 55,119 | 77  | 1 | 380 | 20 | 14 | 1 | 226 | 25 | 697   | 47 |
| 55,120 | 77  | 1 | 380 | 20 | 14 | 1 | 227 | 25 | 698   | 47 |
| 55,121 | 77  | 1 | 378 | 21 | 14 | 1 | 227 | 25 | 696   | 48 |
| 55,122 | 79  | 1 | 375 | 21 | 14 | 1 | 227 | 25 | 695   | 48 |
| 55,123 | 77  | 1 | 372 | 21 | 14 | 1 | 224 | 24 | 687   | 47 |
| 55,124 | 77  | 1 | 355 | 21 | 14 | 1 | 216 | 24 | 662   | 47 |
| 55,125 | 75  | 1 | 348 | 20 | 12 | 1 | 206 | 25 | 641   | 47 |
| 55,126 | 75  | 1 | 344 | 20 | 12 | 1 | 203 | 25 | 634   | 47 |
| 55,127 | 75  | 1 | 342 | 20 | 12 | 1 | 203 | 23 | 632   | 45 |
| 55,128 | 74  | 1 | 345 | 21 | 12 | 1 | 203 | 24 | 634   | 47 |
| 55,129 | 74  | 1 | 339 | 21 | 11 | 1 | 204 | 24 | 628   | 47 |
| 55,130 | 73  | 1 | 334 | 21 | 10 | 1 | 201 | 24 | 618   | 47 |
| 55,131 | 74  | 2 | 328 | 21 | 9  | 1 | 200 | 24 | 611   | 48 |
| 55,132 | 74  | 2 | 327 | 21 | 9  | 1 | 200 | 24 | 610   | 48 |
| 55,133 | 74  | 2 | 327 | 21 | 9  | 1 | 197 | 24 | 607   | 48 |

|        |     |   |     |    |    |   |     |    |       |    |
|--------|-----|---|-----|----|----|---|-----|----|-------|----|
| 55,134 | 75  | 2 | 334 | 21 | 9  | 1 | 198 | 24 | 616   | 48 |
| 55,135 | 75  | 2 | 334 | 21 | 9  | 1 | 198 | 24 | 616   | 48 |
| 55,136 | 75  | 2 | 334 | 21 | 9  | 1 | 198 | 24 | 616   | 48 |
| 55,137 | 69  | 2 | 314 | 21 | 9  | 1 | 196 | 24 | 588   | 48 |
| 55,138 | 71  | 2 | 319 | 21 | 9  | 1 | 200 | 24 | 599   | 48 |
| 55,139 | 71  | 2 | 319 | 21 | 9  | 1 | 200 | 24 | 599   | 48 |
| 55,140 | 69  | 2 | 288 | 21 | 8  | 1 | 191 | 24 | 556   | 48 |
| 55,141 | 68  | 2 | 288 | 23 | 9  | 1 | 192 | 24 | 557   | 50 |
| 55,142 | 56  | 2 | 303 | 30 | 9  | 1 | 181 | 24 | 549   | 57 |
| 55,143 | 96  | 3 | 460 | 30 | 16 | 1 | 290 | 26 | 862   | 60 |
| 55,144 | 105 | 3 | 564 | 33 | 18 | 1 | 326 | 25 | 1,013 | 62 |
| 55,145 | 108 | 3 | 628 | 39 | 20 | 1 | 353 | 29 | 1,109 | 72 |
| 55,146 | 99  | 3 | 635 | 39 | 25 | 1 | 367 | 29 | 1,126 | 72 |
| 55,147 | 84  | 3 | 541 | 39 | 22 | 1 | 298 | 31 | 945   | 74 |
| 55,148 | 84  | 3 | 533 | 39 | 21 | 1 | 291 | 31 | 929   | 74 |
| 55,149 | 100 | 3 | 909 | 39 | 48 | 1 | 549 | 31 | 1,606 | 74 |
| 55,150 | 100 | 3 | 907 | 39 | 48 | 1 | 546 | 31 | 1,601 | 74 |
| 55,151 | 100 | 3 | 931 | 41 | 48 | 1 | 569 | 31 | 1,648 | 76 |
| 55,152 | 104 | 3 | 952 | 41 | 52 | 1 | 578 | 31 | 1,686 | 76 |
| 55,153 | 104 | 3 | 951 | 41 | 52 | 1 | 578 | 30 | 1,685 | 75 |
| 55,154 | 104 | 3 | 948 | 41 | 52 | 1 | 579 | 30 | 1,683 | 75 |
| 55,155 | 105 | 3 | 951 | 41 | 52 | 1 | 581 | 30 | 1,689 | 75 |
| 55,156 | 105 | 3 | 950 | 41 | 51 | 1 | 581 | 31 | 1,687 | 76 |
| 55,157 | 105 | 3 | 948 | 40 | 51 | 1 | 580 | 30 | 1,684 | 74 |
| 55,158 | 105 | 3 | 949 | 40 | 52 | 1 | 580 | 30 | 1,686 | 74 |
| 55,159 | 105 | 4 | 948 | 40 | 52 | 1 | 580 | 30 | 1,685 | 75 |
| 55,160 | 105 | 4 | 949 | 39 | 52 | 2 | 580 | 30 | 1,686 | 75 |
| 55,161 | 105 | 4 | 950 | 39 | 52 | 2 | 580 | 30 | 1,687 | 75 |
| 55,162 | 106 | 4 | 952 | 35 | 52 | 2 | 581 | 26 | 1,691 | 67 |
| 55,163 | 106 | 4 | 952 | 35 | 52 | 2 | 581 | 26 | 1,691 | 67 |
| 55,164 | 106 | 3 | 952 | 29 | 52 | 1 | 582 | 13 | 1,692 | 46 |
| 55,165 | 106 | 3 | 952 | 27 | 52 | 1 | 583 | 13 | 1,693 | 44 |
| 55,166 | 106 | 3 | 952 | 27 | 52 | 1 | 583 | 13 | 1,693 | 44 |
| 55,167 | 106 | 3 | 952 | 27 | 53 | 1 | 583 | 13 | 1,694 | 44 |
| 55,168 | 106 | 3 | 952 | 27 | 53 | 1 | 583 | 13 | 1,694 | 44 |
| 55,169 | 107 | 3 | 954 | 27 | 53 | 1 | 583 | 13 | 1,697 | 44 |
| 55,170 | 107 | 3 | 956 | 27 | 53 | 1 | 582 | 13 | 1,698 | 44 |
| 55,171 | 107 | 3 | 958 | 26 | 53 | 1 | 582 | 13 | 1,700 | 43 |
| 55,172 | 108 | 3 | 958 | 26 | 53 | 1 | 582 | 13 | 1,701 | 43 |
| 55,173 | 108 | 3 | 959 | 26 | 53 | 1 | 581 | 13 | 1,701 | 43 |
| 55,174 | 108 | 3 | 959 | 26 | 53 | 1 | 581 | 13 | 1,701 | 43 |

|        |     |   |       |    |    |   |     |    |       |     |
|--------|-----|---|-------|----|----|---|-----|----|-------|-----|
| 55,175 | 107 | 3 | 963   | 29 | 53 | 1 | 581 | 13 | 1,704 | 46  |
| 55,176 | 108 | 3 | 985   | 37 | 54 | 1 | 595 | 13 | 1,742 | 54  |
| 55,177 | 108 | 4 | 986   | 39 | 54 | 1 | 594 | 14 | 1,742 | 58  |
| 55,178 | 109 | 4 | 988   | 38 | 54 | 1 | 599 | 13 | 1,750 | 56  |
| 55,179 | 109 | 4 | 988   | 38 | 55 | 1 | 601 | 13 | 1,753 | 56  |
| 55,180 | 109 | 4 | 994   | 38 | 56 | 2 | 598 | 13 | 1,757 | 57  |
| 55,181 | 110 | 4 | 1,011 | 38 | 56 | 2 | 604 | 15 | 1,781 | 59  |
| 55,182 | 110 | 3 | 1,011 | 40 | 56 | 2 | 603 | 17 | 1,780 | 62  |
| 55,183 | 110 | 3 | 1,047 | 41 | 57 | 2 | 621 | 17 | 1,835 | 63  |
| 55,184 | 110 | 3 | 1,051 | 41 | 57 | 2 | 626 | 17 | 1,844 | 63  |
| 55,185 | 110 | 3 | 1,062 | 41 | 60 | 2 | 638 | 18 | 1,870 | 64  |
| 55,186 | 110 | 3 | 1,089 | 41 | 60 | 2 | 649 | 18 | 1,908 | 64  |
| 55,187 | 110 | 3 | 1,098 | 41 | 60 | 2 | 659 | 18 | 1,927 | 64  |
| 55,188 | 108 | 3 | 1,092 | 41 | 60 | 2 | 655 | 18 | 1,915 | 64  |
| 55,189 | 108 | 3 | 1,098 | 41 | 60 | 2 | 657 | 18 | 1,923 | 64  |
| 55,190 | 109 | 3 | 1,108 | 41 | 60 | 2 | 665 | 18 | 1,942 | 64  |
| 55,191 | 108 | 3 | 1,124 | 40 | 60 | 2 | 676 | 18 | 1,968 | 63  |
| 55,192 | 108 | 2 | 1,120 | 31 | 59 | 2 | 675 | 15 | 1,962 | 50  |
| 55,193 | 108 | 2 | 1,062 | 38 | 59 | 2 | 671 | 17 | 1,900 | 59  |
| 55,194 | 68  | 2 | 899   | 43 | 51 | 2 | 560 | 18 | 1,578 | 65  |
| 55,195 | 49  | 2 | 779   | 50 | 47 | 2 | 505 | 26 | 1,380 | 80  |
| 55,196 | 46  | 2 | 722   | 44 | 45 | 2 | 475 | 22 | 1,288 | 70  |
| 55,197 | 42  | 2 | 710   | 49 | 41 | 2 | 445 | 23 | 1,238 | 76  |
| 55,198 | 42  | 2 | 711   | 52 | 41 | 2 | 462 | 24 | 1,256 | 80  |
| 55,199 | 26  | 2 | 488   | 54 | 23 | 2 | 304 | 24 | 841   | 82  |
| 55,200 | 44  | 4 | 422   | 58 | 15 | 2 | 245 | 26 | 726   | 90  |
| 55,201 | 44  | 4 | 395   | 58 | 15 | 2 | 222 | 26 | 676   | 90  |
| 55,202 | 43  | 4 | 399   | 57 | 16 | 2 | 220 | 27 | 678   | 90  |
| 55,203 | 43  | 4 | 395   | 58 | 16 | 2 | 220 | 28 | 674   | 92  |
| 55,204 | 45  | 4 | 461   | 61 | 17 | 2 | 245 | 30 | 768   | 97  |
| 55,205 | 45  | 4 | 460   | 61 | 17 | 3 | 245 | 30 | 767   | 98  |
| 55,206 | 49  | 4 | 511   | 63 | 18 | 3 | 263 | 31 | 841   | 101 |
| 55,207 | 49  | 4 | 525   | 63 | 18 | 3 | 271 | 30 | 863   | 100 |
| 55,208 | 49  | 4 | 526   | 63 | 17 | 3 | 276 | 30 | 868   | 100 |
| 55,209 | 49  | 3 | 526   | 63 | 17 | 3 | 278 | 30 | 870   | 99  |
| 55,210 | 49  | 3 | 526   | 63 | 17 | 2 | 278 | 30 | 870   | 98  |
| 55,211 | 49  | 3 | 526   | 62 | 17 | 2 | 278 | 30 | 870   | 97  |
| 55,212 | 49  | 3 | 527   | 62 | 17 | 2 | 278 | 30 | 871   | 97  |
| 55,213 | 48  | 3 | 525   | 62 | 17 | 2 | 277 | 30 | 867   | 97  |
| 55,214 | 48  | 3 | 525   | 62 | 17 | 2 | 277 | 30 | 867   | 97  |
| 55,215 | 48  | 3 | 525   | 62 | 17 | 2 | 276 | 30 | 866   | 97  |

|        |    |   |     |    |    |   |     |    |     |     |
|--------|----|---|-----|----|----|---|-----|----|-----|-----|
| 55,216 | 48 | 3 | 525 | 62 | 17 | 2 | 275 | 30 | 865 | 97  |
| 55,217 | 48 | 3 | 525 | 62 | 17 | 2 | 275 | 31 | 865 | 98  |
| 55,218 | 48 | 3 | 526 | 62 | 16 | 2 | 276 | 31 | 866 | 98  |
| 55,219 | 48 | 3 | 526 | 62 | 16 | 2 | 276 | 31 | 866 | 98  |
| 55,220 | 48 | 3 | 525 | 61 | 16 | 2 | 276 | 31 | 865 | 97  |
| 55,221 | 48 | 3 | 523 | 61 | 16 | 2 | 276 | 32 | 863 | 98  |
| 55,222 | 48 | 3 | 520 | 61 | 16 | 2 | 276 | 32 | 860 | 98  |
| 55,223 | 47 | 3 | 521 | 61 | 16 | 2 | 276 | 32 | 860 | 98  |
| 55,224 | 46 | 3 | 534 | 58 | 17 | 2 | 289 | 32 | 886 | 95  |
| 55,225 | 47 | 3 | 547 | 59 | 17 | 2 | 294 | 32 | 905 | 96  |
| 55,226 | 46 | 3 | 545 | 60 | 16 | 3 | 290 | 32 | 897 | 98  |
| 55,227 | 46 | 2 | 530 | 51 | 17 | 3 | 291 | 30 | 884 | 86  |
| 55,228 | 46 | 2 | 529 | 51 | 17 | 3 | 291 | 30 | 883 | 86  |
| 55,229 | 45 | 2 | 529 | 51 | 17 | 3 | 288 | 31 | 879 | 87  |
| 55,230 | 45 | 2 | 539 | 52 | 16 | 3 | 290 | 31 | 890 | 88  |
| 55,231 | 47 | 2 | 535 | 52 | 15 | 2 | 288 | 32 | 885 | 88  |
| 55,232 | 45 | 2 | 527 | 53 | 15 | 2 | 287 | 32 | 874 | 89  |
| 55,233 | 45 | 2 | 498 | 51 | 14 | 2 | 269 | 30 | 826 | 85  |
| 55,234 | 45 | 2 | 498 | 50 | 14 | 2 | 273 | 30 | 830 | 84  |
| 55,235 | 45 | 2 | 495 | 50 | 14 | 2 | 268 | 30 | 822 | 84  |
| 55,236 | 44 | 3 | 475 | 64 | 11 | 2 | 255 | 39 | 785 | 108 |
| 55,237 | 44 | 3 | 447 | 66 | 11 | 2 | 244 | 41 | 746 | 112 |
| 55,238 | 44 | 3 | 440 | 67 | 11 | 2 | 235 | 43 | 730 | 115 |
| 55,239 | 44 | 3 | 436 | 68 | 11 | 2 | 233 | 43 | 724 | 116 |
| 55,240 | 43 | 3 | 426 | 70 | 11 | 2 | 225 | 43 | 705 | 118 |
| 55,241 | 43 | 3 | 421 | 69 | 11 | 2 | 217 | 43 | 692 | 117 |
| 55,242 | 45 | 3 | 435 | 62 | 11 | 2 | 219 | 40 | 710 | 107 |
| 55,243 | 46 | 3 | 454 | 62 | 14 | 2 | 238 | 40 | 752 | 107 |
| 55,244 | 46 | 3 | 449 | 62 | 14 | 2 | 232 | 40 | 741 | 107 |
| 55,245 | 46 | 3 | 461 | 57 | 14 | 2 | 239 | 39 | 760 | 101 |
| 55,246 | 46 | 3 | 457 | 47 | 14 | 2 | 239 | 31 | 756 | 83  |
| 55,247 | 45 | 3 | 448 | 47 | 14 | 2 | 236 | 31 | 743 | 83  |
| 55,248 | 43 | 3 | 432 | 42 | 13 | 2 | 233 | 28 | 721 | 75  |
| 55,249 | 43 | 3 | 433 | 37 | 14 | 2 | 226 | 27 | 716 | 69  |
| 55,250 | 43 | 3 | 404 | 37 | 13 | 2 | 214 | 27 | 674 | 69  |
| 55,251 | 21 | 1 | 353 | 33 | 14 | 2 | 184 | 25 | 572 | 61  |
| 55,252 | 21 | 1 | 348 | 34 | 12 | 2 | 182 | 25 | 563 | 62  |
| 55,253 | 19 | 1 | 333 | 34 | 9  | 2 | 177 | 24 | 538 | 61  |
| 55,254 | 20 | 1 | 329 | 33 | 8  | 2 | 177 | 23 | 534 | 59  |
| 55,255 | 19 | 1 | 285 | 30 | 8  | 1 | 164 | 21 | 476 | 53  |
| 55,256 | 27 | 1 | 314 | 28 | 9  | 1 | 186 | 20 | 536 | 50  |

|        |    |   |     |    |    |   |     |    |       |    |
|--------|----|---|-----|----|----|---|-----|----|-------|----|
| 55,257 | 33 | 1 | 352 | 28 | 13 | 1 | 222 | 20 | 620   | 50 |
| 55,258 | 33 | 1 | 348 | 28 | 13 | 1 | 221 | 20 | 615   | 50 |
| 55,259 | 54 | 1 | 512 | 28 | 28 | 1 | 357 | 20 | 951   | 50 |
| 55,260 | 58 | 1 | 575 | 28 | 31 | 1 | 418 | 20 | 1,082 | 50 |
| 55,261 | 58 | 1 | 575 | 28 | 31 | 1 | 418 | 20 | 1,082 | 50 |
| 55,262 | 58 | 1 | 574 | 28 | 31 | 1 | 418 | 20 | 1,081 | 50 |
| 55,263 | 58 | 1 | 581 | 28 | 31 | 1 | 423 | 20 | 1,093 | 50 |
| 55,264 | 58 | 1 | 583 | 29 | 31 | 1 | 425 | 20 | 1,097 | 51 |
| 55,265 | 58 | 1 | 583 | 29 | 31 | 1 | 425 | 20 | 1,097 | 51 |
| 55,266 | 58 | 1 | 585 | 29 | 31 | 1 | 426 | 19 | 1,100 | 50 |
| 55,267 | 58 | 1 | 587 | 29 | 31 | 1 | 426 | 19 | 1,102 | 50 |
| 55,268 | 58 | 1 | 586 | 29 | 31 | 1 | 424 | 19 | 1,099 | 50 |
| 55,269 | 58 | 1 | 586 | 29 | 31 | 1 | 424 | 19 | 1,099 | 50 |
| 55,270 | 57 | 1 | 584 | 29 | 31 | 2 | 425 | 23 | 1,097 | 55 |
| 55,271 | 57 | 1 | 583 | 30 | 31 | 2 | 425 | 27 | 1,096 | 60 |
| 55,272 | 57 | 1 | 583 | 35 | 31 | 2 | 426 | 27 | 1,097 | 65 |
| 55,273 | 57 | 1 | 582 | 38 | 31 | 2 | 426 | 27 | 1,096 | 68 |
| 55,274 | 57 | 2 | 580 | 51 | 31 | 2 | 426 | 32 | 1,094 | 87 |
| 55,275 | 56 | 2 | 569 | 51 | 30 | 2 | 414 | 32 | 1,069 | 87 |
| 55,276 | 55 | 2 | 552 | 50 | 30 | 1 | 410 | 32 | 1,047 | 85 |
| 55,277 | 55 | 2 | 548 | 50 | 30 | 1 | 407 | 32 | 1,040 | 85 |
| 55,278 | 55 | 2 | 561 | 49 | 29 | 1 | 403 | 33 | 1,048 | 85 |
| 55,279 | 55 | 2 | 565 | 49 | 29 | 1 | 408 | 33 | 1,057 | 85 |
| 55,280 | 55 | 2 | 562 | 49 | 29 | 1 | 408 | 34 | 1,054 | 86 |
| 55,281 | 55 | 2 | 553 | 48 | 29 | 1 | 405 | 35 | 1,042 | 86 |
| 55,282 | 53 | 2 | 551 | 48 | 29 | 1 | 404 | 34 | 1,037 | 85 |
| 55,283 | 53 | 2 | 543 | 48 | 29 | 1 | 400 | 32 | 1,025 | 83 |
| 55,284 | 53 | 2 | 542 | 48 | 29 | 1 | 398 | 33 | 1,022 | 84 |
| 55,285 | 53 | 2 | 537 | 48 | 29 | 1 | 396 | 33 | 1,015 | 84 |
| 55,286 | 53 | 1 | 536 | 34 | 29 | 1 | 396 | 23 | 1,014 | 59 |
| 55,287 | 53 | 1 | 536 | 32 | 30 | 1 | 397 | 21 | 1,016 | 55 |
| 55,288 | 53 | 1 | 536 | 33 | 30 | 1 | 397 | 21 | 1,016 | 56 |
| 55,289 | 53 | 2 | 534 | 32 | 30 | 1 | 396 | 19 | 1,013 | 54 |
| 55,290 | 54 | 2 | 533 | 35 | 31 | 2 | 399 | 19 | 1,017 | 58 |
| 55,291 | 54 | 2 | 535 | 33 | 31 | 2 | 399 | 19 | 1,019 | 56 |
| 55,292 | 54 | 3 | 526 | 33 | 31 | 2 | 398 | 19 | 1,009 | 57 |
| 55,293 | 52 | 3 | 510 | 33 | 31 | 2 | 393 | 19 | 986   | 57 |
| 55,294 | 51 | 3 | 490 | 34 | 28 | 2 | 372 | 19 | 941   | 58 |
| 55,295 | 57 | 3 | 497 | 34 | 28 | 2 | 389 | 19 | 971   | 58 |
| 55,296 | 57 | 3 | 497 | 34 | 28 | 2 | 390 | 19 | 972   | 58 |
| 55,297 | 57 | 3 | 506 | 34 | 29 | 2 | 391 | 19 | 983   | 58 |

|        |     |   |       |    |    |   |     |    |       |    |
|--------|-----|---|-------|----|----|---|-----|----|-------|----|
| 55,298 | 61  | 3 | 539   | 34 | 29 | 2 | 414 | 19 | 1,043 | 58 |
| 55,299 | 66  | 3 | 562   | 34 | 30 | 2 | 443 | 19 | 1,101 | 58 |
| 55,300 | 66  | 3 | 547   | 32 | 29 | 2 | 435 | 19 | 1,077 | 56 |
| 55,301 | 66  | 3 | 542   | 32 | 29 | 2 | 434 | 19 | 1,071 | 56 |
| 55,302 | 64  | 4 | 539   | 32 | 30 | 2 | 434 | 19 | 1,067 | 57 |
| 55,303 | 64  | 4 | 538   | 32 | 30 | 2 | 433 | 19 | 1,065 | 57 |
| 55,304 | 64  | 4 | 559   | 32 | 30 | 2 | 449 | 19 | 1,102 | 57 |
| 55,305 | 61  | 4 | 550   | 32 | 30 | 2 | 442 | 19 | 1,083 | 57 |
| 55,306 | 62  | 4 | 570   | 32 | 31 | 2 | 449 | 19 | 1,112 | 57 |
| 55,307 | 51  | 4 | 510   | 32 | 30 | 2 | 425 | 19 | 1,016 | 57 |
| 55,308 | 46  | 4 | 471   | 32 | 26 | 2 | 386 | 19 | 929   | 57 |
| 55,309 | 25  | 4 | 339   | 32 | 11 | 2 | 250 | 19 | 625   | 57 |
| 55,310 | 25  | 4 | 339   | 32 | 12 | 2 | 239 | 19 | 615   | 57 |
| 55,311 | 27  | 4 | 326   | 32 | 10 | 2 | 222 | 19 | 585   | 57 |
| 55,312 | 29  | 4 | 333   | 32 | 10 | 2 | 222 | 19 | 594   | 57 |
| 55,313 | 29  | 4 | 349   | 32 | 13 | 2 | 231 | 19 | 622   | 57 |
| 55,314 | 75  | 4 | 802   | 31 | 37 | 2 | 429 | 19 | 1,343 | 56 |
| 55,315 | 75  | 4 | 800   | 31 | 37 | 2 | 427 | 19 | 1,339 | 56 |
| 55,316 | 80  | 4 | 843   | 31 | 37 | 2 | 429 | 19 | 1,389 | 56 |
| 55,317 | 94  | 4 | 904   | 31 | 40 | 2 | 496 | 19 | 1,534 | 56 |
| 55,318 | 97  | 4 | 944   | 31 | 45 | 2 | 533 | 19 | 1,619 | 56 |
| 55,319 | 97  | 4 | 944   | 31 | 45 | 2 | 533 | 19 | 1,619 | 56 |
| 55,320 | 99  | 4 | 951   | 31 | 46 | 1 | 539 | 15 | 1,635 | 51 |
| 55,321 | 99  | 4 | 955   | 25 | 46 | 1 | 542 | 10 | 1,642 | 40 |
| 55,322 | 99  | 5 | 955   | 25 | 46 | 1 | 542 | 10 | 1,642 | 41 |
| 55,323 | 99  | 5 | 954   | 25 | 46 | 1 | 540 | 10 | 1,639 | 41 |
| 55,324 | 99  | 5 | 956   | 24 | 46 | 1 | 541 | 10 | 1,642 | 40 |
| 55,325 | 101 | 4 | 978   | 12 | 47 | 1 | 556 | 5  | 1,682 | 22 |
| 55,326 | 101 | 4 | 1,009 | 17 | 48 | 2 | 581 | 8  | 1,739 | 31 |
| 55,327 | 131 | 4 | 1,081 | 16 | 58 | 2 | 707 | 8  | 1,977 | 30 |
| 55,328 | 131 | 4 | 1,080 | 16 | 58 | 2 | 707 | 8  | 1,976 | 30 |
| 55,329 | 132 | 4 | 1,072 | 16 | 58 | 2 | 705 | 6  | 1,967 | 28 |
| 55,330 | 132 | 4 | 1,071 | 16 | 58 | 2 | 705 | 4  | 1,966 | 26 |
| 55,331 | 132 | 4 | 1,072 | 16 | 58 | 2 | 703 | 4  | 1,965 | 26 |
| 55,332 | 132 | 4 | 1,070 | 17 | 58 | 2 | 702 | 4  | 1,962 | 27 |
| 55,333 | 132 | 4 | 1,078 | 17 | 58 | 2 | 702 | 5  | 1,970 | 28 |
| 55,334 | 132 | 4 | 1,078 | 16 | 58 | 2 | 700 | 5  | 1,968 | 27 |
| 55,335 | 132 | 4 | 1,077 | 16 | 58 | 2 | 703 | 4  | 1,970 | 26 |
| 55,336 | 132 | 4 | 1,077 | 16 | 58 | 2 | 703 | 4  | 1,970 | 26 |
| 55,337 | 132 | 4 | 1,077 | 17 | 58 | 2 | 703 | 4  | 1,970 | 27 |
| 55,338 | 132 | 4 | 1,078 | 17 | 57 | 2 | 703 | 5  | 1,970 | 28 |

|        |     |   |       |    |    |   |     |    |       |    |
|--------|-----|---|-------|----|----|---|-----|----|-------|----|
| 55,339 | 132 | 4 | 1,078 | 16 | 57 | 2 | 704 | 6  | 1,971 | 28 |
| 55,340 | 131 | 3 | 1,077 | 16 | 56 | 2 | 703 | 6  | 1,967 | 27 |
| 55,341 | 131 | 3 | 1,082 | 12 | 57 | 1 | 707 | 6  | 1,977 | 22 |
| 55,342 | 131 | 2 | 1,080 | 12 | 57 | 1 | 707 | 6  | 1,975 | 21 |
| 55,343 | 131 | 2 | 1,078 | 11 | 57 | 1 | 707 | 6  | 1,973 | 20 |
| 55,344 | 131 | 2 | 1,075 | 11 | 57 | 1 | 706 | 6  | 1,969 | 20 |
| 55,345 | 125 | 2 | 1,055 | 11 | 57 | 1 | 683 | 6  | 1,920 | 20 |
| 55,346 | 125 | 3 | 1,052 | 11 | 57 | 1 | 681 | 6  | 1,915 | 21 |
| 55,347 | 125 | 3 | 1,051 | 11 | 56 | 1 | 682 | 6  | 1,914 | 21 |
| 55,348 | 125 | 3 | 1,045 | 11 | 56 | 1 | 680 | 6  | 1,906 | 21 |
| 55,349 | 121 | 3 | 1,017 | 11 | 56 | 1 | 658 | 6  | 1,852 | 21 |
| 55,350 | 116 | 3 | 989   | 11 | 55 | 1 | 627 | 6  | 1,787 | 21 |
| 55,351 | 117 | 3 | 1,007 | 11 | 58 | 1 | 640 | 6  | 1,822 | 21 |
| 55,352 | 117 | 3 | 1,006 | 11 | 58 | 1 | 641 | 6  | 1,822 | 21 |
| 55,353 | 116 | 2 | 991   | 12 | 56 | 1 | 630 | 7  | 1,793 | 22 |
| 55,354 | 115 | 2 | 985   | 13 | 56 | 1 | 619 | 7  | 1,775 | 23 |
| 55,355 | 115 | 2 | 974   | 14 | 56 | 1 | 616 | 7  | 1,761 | 24 |
| 55,356 | 115 | 2 | 968   | 14 | 56 | 1 | 611 | 7  | 1,750 | 24 |
| 55,357 | 113 | 2 | 940   | 14 | 55 | 1 | 601 | 7  | 1,709 | 24 |
| 55,358 | 112 | 2 | 922   | 13 | 54 | 1 | 587 | 7  | 1,675 | 23 |
| 55,359 | 112 | 2 | 913   | 13 | 54 | 1 | 583 | 7  | 1,662 | 23 |
| 55,360 | 112 | 2 | 879   | 13 | 54 | 1 | 579 | 7  | 1,624 | 23 |
| 55,361 | 112 | 2 | 866   | 13 | 53 | 1 | 573 | 7  | 1,604 | 23 |
| 55,362 | 107 | 2 | 835   | 13 | 53 | 1 | 549 | 7  | 1,544 | 23 |
| 55,363 | 105 | 2 | 826   | 13 | 53 | 1 | 547 | 7  | 1,531 | 23 |
| 55,364 | 106 | 2 | 808   | 13 | 50 | 1 | 534 | 7  | 1,498 | 23 |
| 55,365 | 60  | 2 | 351   | 14 | 26 | 1 | 337 | 8  | 774   | 25 |
| 55,366 | 55  | 2 | 308   | 14 | 26 | 2 | 334 | 8  | 723   | 26 |
| 55,367 | 55  | 2 | 294   | 14 | 26 | 2 | 331 | 8  | 706   | 26 |
| 55,368 | 42  | 2 | 251   | 15 | 23 | 2 | 270 | 8  | 586   | 27 |
| 55,369 | 39  | 2 | 214   | 15 | 18 | 2 | 236 | 8  | 507   | 27 |
| 55,370 | 39  | 2 | 228   | 15 | 17 | 2 | 233 | 8  | 517   | 27 |
| 55,371 | 38  | 2 | 235   | 15 | 17 | 2 | 234 | 8  | 524   | 27 |
| 55,372 | 38  | 2 | 231   | 15 | 17 | 2 | 231 | 8  | 517   | 27 |
| 55,373 | 38  | 1 | 231   | 15 | 17 | 2 | 232 | 8  | 518   | 26 |
| 55,374 | 38  | 1 | 231   | 15 | 17 | 2 | 234 | 10 | 520   | 28 |
| 55,375 | 36  | 1 | 209   | 12 | 16 | 2 | 219 | 10 | 480   | 25 |
| 55,376 | 36  | 1 | 206   | 7  | 16 | 1 | 216 | 7  | 474   | 16 |
| 55,377 | 36  | 1 | 178   | 7  | 15 | 2 | 193 | 7  | 422   | 17 |
| 55,378 | 6   | 1 | 108   | 8  | 5  | 2 | 65  | 7  | 184   | 18 |
| 55,379 | 6   | 1 | 107   | 8  | 5  | 3 | 65  | 7  | 183   | 19 |

|        |    |   |     |    |    |   |     |   |     |    |
|--------|----|---|-----|----|----|---|-----|---|-----|----|
| 55,380 | 5  | 1 | 102 | 8  | 5  | 3 | 63  | 7 | 175 | 19 |
| 55,381 | 5  | 1 | 99  | 8  | 5  | 3 | 58  | 7 | 167 | 19 |
| 55,382 | 5  | 1 | 98  | 8  | 5  | 3 | 57  | 7 | 165 | 19 |
| 55,383 | 5  | 1 | 90  | 7  | 5  | 3 | 57  | 6 | 157 | 17 |
| 55,384 | 5  | 1 | 90  | 7  | 5  | 3 | 57  | 6 | 157 | 17 |
| 55,385 | 5  | 1 | 90  | 7  | 5  | 3 | 54  | 6 | 154 | 17 |
| 55,386 | 5  | 1 | 90  | 7  | 5  | 3 | 54  | 6 | 154 | 17 |
| 55,387 | 5  | 1 | 92  | 6  | 5  | 3 | 56  | 5 | 158 | 15 |
| 55,388 | 5  | 1 | 95  | 6  | 5  | 3 | 60  | 5 | 165 | 15 |
| 55,389 | 5  | 1 | 94  | 6  | 5  | 3 | 60  | 5 | 164 | 15 |
| 55,390 | 5  | 1 | 96  | 6  | 4  | 3 | 62  | 4 | 167 | 14 |
| 55,391 | 5  | 1 | 96  | 6  | 4  | 3 | 60  | 4 | 165 | 14 |
| 55,392 | 5  | 1 | 93  | 6  | 4  | 3 | 60  | 4 | 162 | 14 |
| 55,393 | 5  | 1 | 93  | 6  | 4  | 3 | 61  | 4 | 163 | 14 |
| 55,394 | 5  | 1 | 94  | 7  | 4  | 3 | 61  | 4 | 164 | 15 |
| 55,395 | 5  | 1 | 94  | 7  | 4  | 3 | 62  | 4 | 165 | 15 |
| 55,396 | 5  | 0 | 94  | 7  | 4  | 3 | 61  | 4 | 164 | 14 |
| 55,397 | 5  | 0 | 94  | 7  | 4  | 3 | 61  | 4 | 164 | 14 |
| 55,398 | 5  | 0 | 101 | 8  | 4  | 3 | 59  | 4 | 169 | 15 |
| 55,399 | 11 | 0 | 107 | 8  | 4  | 3 | 63  | 4 | 185 | 15 |
| 55,400 | 11 | 0 | 110 | 9  | 5  | 3 | 66  | 4 | 192 | 16 |
| 55,401 | 11 | 1 | 109 | 9  | 4  | 3 | 66  | 4 | 190 | 17 |
| 55,402 | 10 | 1 | 97  | 8  | 2  | 3 | 54  | 3 | 163 | 15 |
| 55,403 | 10 | 1 | 108 | 8  | 5  | 3 | 59  | 3 | 182 | 15 |
| 55,404 | 10 | 2 | 115 | 9  | 6  | 3 | 59  | 3 | 190 | 17 |
| 55,405 | 11 | 2 | 129 | 7  | 6  | 3 | 76  | 3 | 222 | 15 |
| 55,406 | 11 | 2 | 127 | 7  | 6  | 3 | 75  | 3 | 219 | 15 |
| 55,407 | 11 | 2 | 140 | 7  | 6  | 3 | 77  | 3 | 234 | 15 |
| 55,408 | 11 | 2 | 140 | 8  | 6  | 3 | 77  | 4 | 234 | 17 |
| 55,409 | 12 | 2 | 149 | 8  | 7  | 3 | 83  | 4 | 251 | 17 |
| 55,410 | 12 | 2 | 151 | 8  | 7  | 3 | 85  | 4 | 255 | 17 |
| 55,411 | 12 | 5 | 151 | 9  | 7  | 3 | 85  | 7 | 255 | 24 |
| 55,412 | 12 | 5 | 145 | 9  | 6  | 3 | 81  | 7 | 244 | 24 |
| 55,413 | 11 | 5 | 147 | 11 | 6  | 3 | 81  | 7 | 245 | 26 |
| 55,414 | 11 | 5 | 146 | 11 | 6  | 3 | 81  | 8 | 244 | 27 |
| 55,415 | 19 | 5 | 211 | 10 | 10 | 3 | 104 | 7 | 344 | 25 |
| 55,416 | 24 | 5 | 235 | 11 | 11 | 2 | 116 | 7 | 386 | 25 |
| 55,417 | 24 | 5 | 234 | 11 | 11 | 2 | 116 | 7 | 385 | 25 |
| 55,418 | 24 | 5 | 243 | 11 | 15 | 2 | 119 | 7 | 401 | 25 |
| 55,419 | 27 | 5 | 259 | 11 | 17 | 2 | 150 | 7 | 453 | 25 |
| 55,420 | 27 | 5 | 259 | 11 | 17 | 2 | 151 | 7 | 454 | 25 |



|        |    |   |     |    |    |   |     |    |       |    |
|--------|----|---|-----|----|----|---|-----|----|-------|----|
| 55,421 | 27 | 6 | 246 | 12 | 18 | 2 | 159 | 7  | 450   | 27 |
| 55,422 | 27 | 6 | 237 | 12 | 18 | 2 | 157 | 7  | 439   | 27 |
| 55,423 | 28 | 7 | 259 | 12 | 19 | 2 | 171 | 8  | 477   | 29 |
| 55,424 | 28 | 7 | 265 | 12 | 19 | 2 | 172 | 6  | 484   | 27 |
| 55,425 | 28 | 7 | 269 | 12 | 19 | 2 | 178 | 6  | 494   | 27 |
| 55,426 | 28 | 7 | 273 | 12 | 19 | 3 | 179 | 6  | 499   | 28 |
| 55,427 | 28 | 7 | 273 | 12 | 19 | 2 | 180 | 6  | 500   | 27 |
| 55,428 | 28 | 7 | 273 | 12 | 19 | 2 | 180 | 6  | 500   | 27 |
| 55,429 | 28 | 7 | 274 | 11 | 19 | 1 | 182 | 6  | 503   | 25 |
| 55,430 | 28 | 7 | 274 | 11 | 19 | 1 | 182 | 6  | 503   | 25 |
| 55,431 | 28 | 7 | 276 | 11 | 19 | 1 | 182 | 6  | 505   | 25 |
| 55,432 | 28 | 7 | 276 | 11 | 19 | 1 | 185 | 6  | 508   | 25 |
| 55,433 | 28 | 7 | 276 | 11 | 19 | 1 | 185 | 7  | 508   | 26 |
| 55,434 | 28 | 7 | 277 | 11 | 19 | 1 | 185 | 7  | 509   | 26 |
| 55,435 | 28 | 7 | 277 | 12 | 19 | 1 | 185 | 7  | 509   | 27 |
| 55,436 | 28 | 7 | 277 | 13 | 19 | 1 | 184 | 8  | 508   | 29 |
| 55,437 | 28 | 8 | 303 | 18 | 19 | 2 | 201 | 11 | 551   | 39 |
| 55,438 | 28 | 8 | 301 | 20 | 19 | 2 | 199 | 11 | 547   | 41 |
| 55,439 | 31 | 8 | 327 | 22 | 20 | 2 | 216 | 11 | 594   | 43 |
| 55,440 | 33 | 8 | 342 | 23 | 23 | 2 | 218 | 14 | 616   | 47 |
| 55,441 | 33 | 8 | 342 | 23 | 23 | 2 | 218 | 14 | 616   | 47 |
| 55,442 | 37 | 8 | 356 | 25 | 23 | 2 | 225 | 17 | 641   | 52 |
| 55,443 | 37 | 8 | 356 | 25 | 23 | 2 | 225 | 18 | 641   | 53 |
| 55,444 | 42 | 8 | 477 | 25 | 33 | 2 | 270 | 18 | 822   | 53 |
| 55,445 | 43 | 8 | 540 | 24 | 37 | 2 | 294 | 19 | 914   | 53 |
| 55,446 | 43 | 8 | 546 | 25 | 37 | 3 | 297 | 20 | 923   | 56 |
| 55,447 | 43 | 8 | 549 | 25 | 37 | 3 | 297 | 20 | 926   | 56 |
| 55,448 | 43 | 8 | 549 | 24 | 37 | 3 | 298 | 20 | 927   | 55 |
| 55,449 | 43 | 8 | 543 | 26 | 37 | 3 | 298 | 20 | 921   | 57 |
| 55,450 | 37 | 8 | 537 | 26 | 37 | 3 | 294 | 20 | 905   | 57 |
| 55,451 | 37 | 7 | 528 | 25 | 36 | 3 | 289 | 20 | 890   | 55 |
| 55,452 | 37 | 7 | 529 | 25 | 36 | 3 | 289 | 21 | 891   | 56 |
| 55,453 | 38 | 7 | 532 | 25 | 36 | 3 | 288 | 21 | 894   | 56 |
| 55,454 | 43 | 7 | 546 | 25 | 33 | 3 | 288 | 21 | 910   | 56 |
| 55,455 | 45 | 6 | 569 | 24 | 32 | 3 | 291 | 21 | 937   | 54 |
| 55,456 | 44 | 6 | 551 | 24 | 32 | 3 | 273 | 21 | 900   | 54 |
| 55,457 | 44 | 6 | 547 | 24 | 32 | 3 | 271 | 21 | 894   | 54 |
| 55,458 | 54 | 6 | 591 | 23 | 33 | 3 | 319 | 20 | 997   | 52 |
| 55,459 | 54 | 6 | 591 | 23 | 33 | 3 | 317 | 20 | 995   | 52 |
| 55,460 | 53 | 6 | 581 | 23 | 32 | 3 | 313 | 20 | 979   | 52 |
| 55,461 | 67 | 3 | 866 | 22 | 50 | 3 | 474 | 17 | 1,457 | 45 |

|        |    |   |     |    |    |   |     |    |       |    |
|--------|----|---|-----|----|----|---|-----|----|-------|----|
| 55,462 | 69 | 3 | 890 | 22 | 52 | 3 | 508 | 17 | 1,519 | 45 |
| 55,463 | 66 | 3 | 890 | 22 | 51 | 3 | 507 | 17 | 1,514 | 45 |
| 55,464 | 64 | 3 | 889 | 20 | 52 | 3 | 507 | 16 | 1,512 | 42 |
| 55,465 | 63 | 3 | 849 | 20 | 51 | 3 | 495 | 16 | 1,458 | 42 |
| 55,466 | 62 | 3 | 847 | 21 | 51 | 3 | 494 | 16 | 1,454 | 43 |
| 55,467 | 57 | 3 | 823 | 20 | 50 | 3 | 486 | 16 | 1,416 | 42 |
| 55,468 | 58 | 3 | 818 | 20 | 48 | 3 | 482 | 16 | 1,406 | 42 |
| 55,469 | 58 | 3 | 819 | 20 | 46 | 4 | 482 | 16 | 1,405 | 43 |
| 55,470 | 57 | 3 | 804 | 19 | 44 | 4 | 460 | 16 | 1,365 | 42 |
| 55,471 | 57 | 3 | 800 | 20 | 44 | 4 | 459 | 16 | 1,360 | 43 |
| 55,472 | 56 | 2 | 794 | 22 | 43 | 4 | 449 | 16 | 1,342 | 44 |
| 55,473 | 55 | 2 | 784 | 22 | 42 | 4 | 440 | 16 | 1,321 | 44 |
| 55,474 | 55 | 1 | 773 | 23 | 42 | 4 | 435 | 15 | 1,305 | 43 |
| 55,475 | 55 | 1 | 767 | 23 | 42 | 4 | 435 | 15 | 1,299 | 43 |
| 55,476 | 55 | 1 | 766 | 23 | 42 | 3 | 427 | 15 | 1,290 | 42 |
| 55,477 | 55 | 1 | 762 | 23 | 42 | 3 | 426 | 15 | 1,285 | 42 |
| 55,478 | 56 | 1 | 766 | 23 | 42 | 3 | 432 | 15 | 1,296 | 42 |
| 55,479 | 56 | 1 | 764 | 24 | 42 | 3 | 431 | 16 | 1,293 | 44 |
| 55,480 | 56 | 1 | 763 | 24 | 42 | 3 | 430 | 16 | 1,291 | 44 |
| 55,481 | 56 | 1 | 765 | 24 | 42 | 3 | 430 | 16 | 1,293 | 44 |
| 55,482 | 57 | 1 | 765 | 26 | 42 | 3 | 430 | 16 | 1,294 | 46 |
| 55,483 | 58 | 1 | 767 | 28 | 42 | 3 | 429 | 16 | 1,296 | 48 |
| 55,484 | 58 | 1 | 765 | 28 | 42 | 3 | 430 | 15 | 1,295 | 47 |
| 55,485 | 58 | 1 | 769 | 29 | 43 | 3 | 434 | 15 | 1,304 | 48 |
| 55,486 | 58 | 1 | 772 | 29 | 43 | 3 | 438 | 15 | 1,311 | 48 |
| 55,487 | 59 | 0 | 760 | 23 | 44 | 2 | 428 | 11 | 1,291 | 36 |
| 55,488 | 59 | 0 | 754 | 21 | 44 | 2 | 430 | 11 | 1,287 | 34 |
| 55,489 | 60 | 0 | 757 | 21 | 45 | 2 | 442 | 11 | 1,304 | 34 |
| 55,490 | 57 | 0 | 730 | 20 | 44 | 2 | 421 | 11 | 1,252 | 33 |
| 55,491 | 55 | 0 | 714 | 19 | 41 | 2 | 417 | 9  | 1,227 | 30 |
| 55,492 | 55 | 0 | 716 | 20 | 41 | 2 | 418 | 11 | 1,230 | 33 |
| 55,493 | 51 | 0 | 703 | 18 | 41 | 2 | 412 | 8  | 1,207 | 28 |
| 55,494 | 47 | 0 | 632 | 20 | 38 | 2 | 399 | 7  | 1,116 | 29 |
| 55,495 | 52 | 0 | 633 | 20 | 34 | 2 | 436 | 6  | 1,155 | 28 |
| 55,496 | 54 | 0 | 579 | 19 | 34 | 1 | 416 | 5  | 1,083 | 25 |
| 55,497 | 54 | 0 | 583 | 20 | 35 | 1 | 417 | 5  | 1,089 | 26 |
| 55,498 | 55 | 0 | 581 | 20 | 35 | 1 | 418 | 5  | 1,089 | 26 |
| 55,499 | 58 | 0 | 628 | 18 | 36 | 1 | 478 | 5  | 1,200 | 24 |
| 55,500 | 58 | 0 | 627 | 18 | 36 | 1 | 478 | 5  | 1,199 | 24 |
| 55,501 | 59 | 0 | 660 | 18 | 37 | 1 | 496 | 6  | 1,252 | 25 |
| 55,502 | 59 | 0 | 660 | 18 | 37 | 1 | 496 | 6  | 1,252 | 25 |

|        |    |   |     |    |    |   |     |    |       |    |
|--------|----|---|-----|----|----|---|-----|----|-------|----|
| 55,503 | 58 | 0 | 655 | 19 | 37 | 1 | 495 | 5  | 1,245 | 25 |
| 55,504 | 58 | 0 | 652 | 19 | 37 | 1 | 496 | 7  | 1,243 | 27 |
| 55,505 | 53 | 0 | 627 | 21 | 37 | 1 | 489 | 7  | 1,206 | 29 |
| 55,506 | 51 | 0 | 596 | 21 | 37 | 1 | 481 | 7  | 1,165 | 29 |
| 55,507 | 51 | 0 | 596 | 23 | 37 | 1 | 481 | 7  | 1,165 | 31 |
| 55,508 | 45 | 0 | 571 | 26 | 36 | 1 | 450 | 8  | 1,102 | 35 |
| 55,509 | 41 | 0 | 543 | 29 | 36 | 1 | 433 | 9  | 1,053 | 39 |
| 55,510 | 38 | 0 | 447 | 29 | 32 | 1 | 400 | 9  | 917   | 39 |
| 55,511 | 36 | 0 | 397 | 30 | 25 | 1 | 368 | 9  | 826   | 40 |
| 55,512 | 27 | 0 | 262 | 31 | 18 | 1 | 280 | 9  | 587   | 41 |
| 55,513 | 25 | 0 | 236 | 31 | 15 | 1 | 246 | 11 | 522   | 43 |
| 55,514 | 23 | 0 | 219 | 33 | 14 | 1 | 239 | 12 | 495   | 46 |
| 55,515 | 23 | 0 | 215 | 33 | 13 | 1 | 238 | 12 | 489   | 46 |
| 55,516 | 23 | 2 | 214 | 33 | 13 | 1 | 239 | 12 | 489   | 48 |
| 55,517 | 23 | 2 | 214 | 35 | 13 | 1 | 238 | 12 | 488   | 50 |
| 55,518 | 23 | 2 | 214 | 42 | 13 | 1 | 234 | 16 | 484   | 61 |
| 55,519 | 21 | 2 | 211 | 42 | 13 | 1 | 233 | 16 | 478   | 61 |
| 55,520 | 21 | 2 | 208 | 42 | 13 | 0 | 233 | 16 | 475   | 60 |
| 55,521 | 19 | 3 | 204 | 41 | 13 | 0 | 224 | 16 | 460   | 60 |
| 55,522 | 19 | 4 | 203 | 41 | 13 | 0 | 222 | 16 | 457   | 61 |
| 55,523 | 19 | 4 | 203 | 41 | 13 | 0 | 222 | 16 | 457   | 61 |
| 55,524 | 19 | 5 | 204 | 41 | 13 | 0 | 222 | 16 | 458   | 62 |
| 55,525 | 19 | 5 | 205 | 41 | 13 | 0 | 223 | 17 | 460   | 63 |
| 55,526 | 22 | 5 | 210 | 41 | 13 | 0 | 224 | 17 | 469   | 63 |
| 55,527 | 22 | 5 | 206 | 41 | 13 | 0 | 226 | 17 | 467   | 63 |
| 55,528 | 22 | 5 | 205 | 41 | 13 | 0 | 223 | 17 | 463   | 63 |
| 55,529 | 21 | 5 | 211 | 41 | 13 | 0 | 235 | 17 | 480   | 63 |
| 55,530 | 21 | 5 | 211 | 41 | 13 | 0 | 235 | 16 | 480   | 62 |
| 55,531 | 21 | 5 | 207 | 41 | 13 | 0 | 235 | 16 | 476   | 62 |
| 55,532 | 20 | 5 | 207 | 41 | 13 | 0 | 235 | 16 | 475   | 62 |
| 55,533 | 32 | 5 | 326 | 39 | 20 | 0 | 314 | 16 | 692   | 60 |
| 55,534 | 31 | 5 | 329 | 36 | 21 | 0 | 315 | 18 | 696   | 59 |
| 55,535 | 36 | 5 | 407 | 36 | 27 | 0 | 405 | 18 | 875   | 59 |
| 55,536 | 36 | 5 | 410 | 36 | 28 | 0 | 424 | 18 | 898   | 59 |
| 55,537 | 36 | 5 | 419 | 35 | 28 | 1 | 427 | 18 | 910   | 59 |
| 55,538 | 37 | 5 | 444 | 35 | 28 | 1 | 480 | 18 | 989   | 59 |
| 55,539 | 37 | 5 | 448 | 35 | 28 | 1 | 481 | 18 | 994   | 59 |
| 55,540 | 36 | 5 | 443 | 35 | 27 | 1 | 469 | 18 | 975   | 59 |
| 55,541 | 45 | 5 | 558 | 34 | 45 | 1 | 786 | 18 | 1,434 | 58 |
| 55,542 | 46 | 5 | 562 | 34 | 45 | 1 | 797 | 17 | 1,450 | 57 |
| 55,543 | 46 | 5 | 558 | 33 | 45 | 1 | 794 | 15 | 1,443 | 54 |

|        |    |   |     |    |    |   |     |    |       |    |
|--------|----|---|-----|----|----|---|-----|----|-------|----|
| 55,544 | 48 | 5 | 558 | 32 | 45 | 1 | 793 | 15 | 1,444 | 53 |
| 55,545 | 48 | 6 | 556 | 35 | 46 | 1 | 790 | 16 | 1,440 | 58 |
| 55,546 | 42 | 6 | 511 | 35 | 44 | 1 | 727 | 16 | 1,324 | 58 |
| 55,547 | 44 | 6 | 519 | 35 | 40 | 1 | 724 | 16 | 1,327 | 58 |
| 55,548 | 44 | 6 | 509 | 34 | 39 | 1 | 719 | 15 | 1,311 | 56 |
| 55,549 | 45 | 6 | 510 | 34 | 40 | 1 | 719 | 15 | 1,314 | 56 |
| 55,550 | 43 | 6 | 462 | 34 | 39 | 1 | 657 | 15 | 1,201 | 56 |
| 55,551 | 42 | 6 | 433 | 34 | 38 | 1 | 647 | 15 | 1,160 | 56 |
| 55,552 | 48 | 6 | 438 | 34 | 38 | 1 | 642 | 15 | 1,166 | 56 |
| 55,553 | 51 | 6 | 442 | 33 | 38 | 1 | 644 | 15 | 1,175 | 55 |
| 55,554 | 51 | 6 | 451 | 34 | 39 | 1 | 645 | 13 | 1,186 | 54 |
| 55,555 | 51 | 6 | 451 | 34 | 39 | 1 | 645 | 13 | 1,186 | 54 |
| 55,556 | 52 | 6 | 461 | 32 | 39 | 1 | 647 | 13 | 1,199 | 52 |
| 55,557 | 52 | 6 | 461 | 33 | 39 | 1 | 646 | 14 | 1,198 | 54 |
| 55,558 | 53 | 6 | 472 | 31 | 39 | 1 | 649 | 14 | 1,213 | 52 |
| 55,559 | 60 | 6 | 569 | 28 | 44 | 1 | 676 | 14 | 1,349 | 49 |
| 55,560 | 60 | 6 | 582 | 25 | 44 | 1 | 683 | 14 | 1,369 | 46 |
| 55,561 | 60 | 6 | 578 | 26 | 44 | 1 | 679 | 14 | 1,361 | 47 |
| 55,562 | 60 | 6 | 577 | 25 | 44 | 1 | 676 | 14 | 1,357 | 46 |
| 55,563 | 60 | 6 | 588 | 24 | 45 | 1 | 679 | 14 | 1,372 | 45 |
| 55,564 | 60 | 6 | 589 | 22 | 46 | 1 | 679 | 13 | 1,374 | 42 |
| 55,565 | 60 | 6 | 589 | 22 | 46 | 2 | 678 | 13 | 1,373 | 43 |
| 55,566 | 60 | 6 | 591 | 24 | 46 | 2 | 678 | 14 | 1,375 | 46 |
| 55,567 | 60 | 4 | 603 | 21 | 48 | 2 | 679 | 14 | 1,390 | 41 |
| 55,568 | 60 | 4 | 603 | 21 | 48 | 2 | 679 | 14 | 1,390 | 41 |
| 55,569 | 60 | 4 | 621 | 14 | 48 | 2 | 684 | 10 | 1,413 | 30 |
| 55,570 | 60 | 4 | 631 | 14 | 49 | 2 | 685 | 10 | 1,425 | 30 |
| 55,571 | 60 | 4 | 631 | 15 | 49 | 2 | 685 | 10 | 1,425 | 31 |
| 55,572 | 60 | 3 | 635 | 15 | 49 | 2 | 685 | 10 | 1,429 | 30 |
| 55,573 | 60 | 2 | 636 | 12 | 49 | 2 | 686 | 10 | 1,431 | 26 |
| 55,574 | 60 | 2 | 650 | 12 | 49 | 2 | 692 | 10 | 1,451 | 26 |
| 55,575 | 64 | 1 | 704 | 15 | 52 | 2 | 741 | 10 | 1,561 | 28 |
| 55,576 | 64 | 1 | 725 | 14 | 53 | 2 | 760 | 9  | 1,602 | 26 |
| 55,577 | 61 | 1 | 721 | 15 | 53 | 2 | 765 | 9  | 1,600 | 27 |
| 55,578 | 61 | 1 | 721 | 15 | 53 | 2 | 763 | 9  | 1,598 | 27 |
| 55,579 | 61 | 1 | 712 | 15 | 53 | 2 | 747 | 9  | 1,573 | 27 |
| 55,580 | 65 | 1 | 727 | 15 | 53 | 2 | 751 | 9  | 1,596 | 27 |
| 55,581 | 65 | 1 | 740 | 14 | 53 | 2 | 754 | 9  | 1,612 | 26 |
| 55,582 | 67 | 1 | 748 | 15 | 54 | 2 | 761 | 9  | 1,630 | 27 |
| 55,583 | 69 | 1 | 793 | 15 | 57 | 2 | 780 | 9  | 1,699 | 27 |
| 55,584 | 57 | 1 | 676 | 15 | 50 | 2 | 703 | 7  | 1,486 | 25 |

|        |    |   |     |    |    |   |     |    |       |    |
|--------|----|---|-----|----|----|---|-----|----|-------|----|
| 55,585 | 61 | 2 | 683 | 16 | 49 | 2 | 708 | 10 | 1,501 | 30 |
| 55,586 | 56 | 4 | 611 | 18 | 42 | 2 | 620 | 10 | 1,329 | 34 |
| 55,587 | 58 | 4 | 618 | 18 | 41 | 2 | 600 | 10 | 1,317 | 34 |
| 55,588 | 58 | 4 | 605 | 18 | 42 | 1 | 591 | 10 | 1,296 | 33 |
| 55,589 | 58 | 4 | 586 | 19 | 41 | 1 | 543 | 10 | 1,228 | 34 |
| 55,590 | 59 | 4 | 600 | 19 | 44 | 1 | 551 | 10 | 1,254 | 34 |
| 55,591 | 70 | 4 | 549 | 19 | 30 | 1 | 317 | 10 | 966   | 34 |
| 55,592 | 69 | 4 | 546 | 19 | 30 | 1 | 306 | 10 | 951   | 34 |
| 55,593 | 73 | 4 | 570 | 19 | 30 | 1 | 330 | 10 | 1,003 | 34 |
| 55,594 | 73 | 4 | 570 | 19 | 30 | 1 | 330 | 10 | 1,003 | 34 |
| 55,595 | 74 | 3 | 588 | 15 | 30 | 1 | 362 | 9  | 1,054 | 28 |
| 55,596 | 74 | 3 | 586 | 15 | 30 | 1 | 363 | 9  | 1,053 | 28 |
| 55,597 | 74 | 3 | 586 | 15 | 30 | 1 | 363 | 10 | 1,053 | 29 |
| 55,598 | 69 | 3 | 569 | 15 | 30 | 1 | 361 | 10 | 1,029 | 29 |
| 55,599 | 69 | 3 | 569 | 15 | 30 | 1 | 361 | 10 | 1,029 | 29 |
| 55,600 | 68 | 3 | 568 | 15 | 29 | 1 | 362 | 10 | 1,027 | 29 |
| 55,601 | 67 | 3 | 570 | 15 | 29 | 1 | 362 | 10 | 1,028 | 29 |
| 55,602 | 61 | 3 | 561 | 15 | 29 | 1 | 360 | 10 | 1,011 | 29 |
| 55,603 | 61 | 3 | 561 | 15 | 29 | 1 | 358 | 10 | 1,009 | 29 |
| 55,604 | 58 | 3 | 556 | 15 | 29 | 1 | 356 | 10 | 999   | 29 |
| 55,605 | 58 | 3 | 547 | 14 | 28 | 1 | 355 | 10 | 988   | 28 |
| 55,606 | 58 | 3 | 548 | 14 | 28 | 1 | 356 | 12 | 990   | 30 |
| 55,607 | 57 | 3 | 541 | 18 | 28 | 1 | 356 | 12 | 982   | 34 |
| 55,608 | 56 | 3 | 530 | 21 | 28 | 1 | 354 | 11 | 968   | 36 |
| 55,609 | 54 | 3 | 466 | 22 | 24 | 2 | 339 | 15 | 883   | 42 |
| 55,610 | 49 | 3 | 433 | 25 | 23 | 2 | 329 | 14 | 834   | 44 |
| 55,611 | 49 | 3 | 418 | 25 | 23 | 2 | 320 | 13 | 810   | 43 |
| 55,612 | 49 | 3 | 411 | 25 | 22 | 2 | 317 | 13 | 799   | 43 |
| 55,613 | 49 | 3 | 410 | 26 | 22 | 2 | 317 | 13 | 798   | 44 |
| 55,614 | 49 | 3 | 411 | 26 | 22 | 2 | 317 | 13 | 799   | 44 |
| 55,615 | 49 | 3 | 410 | 26 | 23 | 2 | 317 | 12 | 799   | 43 |
| 55,616 | 49 | 3 | 409 | 28 | 23 | 1 | 317 | 15 | 798   | 47 |
| 55,617 | 49 | 3 | 410 | 28 | 23 | 1 | 318 | 14 | 800   | 46 |
| 55,618 | 49 | 3 | 399 | 28 | 21 | 1 | 316 | 15 | 785   | 47 |
| 55,619 | 49 | 3 | 391 | 30 | 21 | 1 | 317 | 15 | 778   | 49 |
| 55,620 | 49 | 3 | 383 | 34 | 21 | 1 | 314 | 19 | 767   | 57 |
| 55,621 | 49 | 3 | 373 | 34 | 20 | 1 | 312 | 19 | 754   | 57 |
| 55,622 | 49 | 3 | 372 | 33 | 20 | 1 | 312 | 19 | 753   | 56 |
| 55,623 | 49 | 3 | 375 | 34 | 21 | 1 | 315 | 21 | 760   | 59 |
| 55,624 | 49 | 3 | 360 | 35 | 21 | 1 | 309 | 21 | 739   | 60 |
| 55,625 | 48 | 3 | 347 | 37 | 19 | 2 | 292 | 22 | 706   | 64 |

|        |    |   |     |    |    |   |     |    |       |     |
|--------|----|---|-----|----|----|---|-----|----|-------|-----|
| 55,626 | 45 | 3 | 307 | 36 | 18 | 2 | 261 | 22 | 631   | 63  |
| 55,627 | 45 | 3 | 285 | 35 | 17 | 2 | 239 | 22 | 586   | 62  |
| 55,628 | 45 | 3 | 284 | 35 | 17 | 2 | 233 | 22 | 579   | 62  |
| 55,629 | 43 | 3 | 281 | 36 | 17 | 2 | 231 | 25 | 572   | 66  |
| 55,630 | 42 | 3 | 279 | 43 | 17 | 2 | 231 | 27 | 569   | 75  |
| 55,631 | 42 | 3 | 266 | 43 | 17 | 3 | 228 | 27 | 553   | 76  |
| 55,632 | 51 | 3 | 354 | 44 | 20 | 3 | 292 | 27 | 717   | 77  |
| 55,633 | 52 | 3 | 371 | 43 | 21 | 3 | 309 | 27 | 753   | 76  |
| 55,634 | 51 | 5 | 334 | 51 | 18 | 3 | 295 | 32 | 698   | 91  |
| 55,635 | 51 | 5 | 332 | 52 | 18 | 3 | 294 | 33 | 695   | 93  |
| 55,636 | 47 | 3 | 322 | 50 | 18 | 3 | 285 | 30 | 672   | 86  |
| 55,637 | 47 | 3 | 319 | 51 | 18 | 3 | 283 | 31 | 667   | 88  |
| 55,638 | 45 | 3 | 305 | 53 | 18 | 3 | 277 | 35 | 645   | 94  |
| 55,639 | 45 | 3 | 304 | 54 | 17 | 3 | 280 | 36 | 646   | 96  |
| 55,640 | 44 | 3 | 301 | 57 | 17 | 3 | 273 | 36 | 635   | 99  |
| 55,641 | 43 | 3 | 281 | 59 | 14 | 3 | 266 | 38 | 604   | 103 |
| 55,642 | 23 | 3 | 213 | 59 | 8  | 3 | 179 | 38 | 423   | 103 |
| 55,643 | 19 | 3 | 196 | 59 | 8  | 3 | 162 | 38 | 385   | 103 |
| 55,644 | 19 | 3 | 199 | 59 | 8  | 3 | 157 | 38 | 383   | 103 |
| 55,645 | 17 | 3 | 230 | 59 | 8  | 3 | 148 | 38 | 403   | 103 |
| 55,646 | 17 | 3 | 228 | 59 | 8  | 3 | 145 | 38 | 398   | 103 |
| 55,647 | 22 | 3 | 274 | 59 | 10 | 3 | 179 | 38 | 485   | 103 |
| 55,648 | 28 | 3 | 342 | 59 | 12 | 3 | 229 | 37 | 611   | 102 |
| 55,649 | 29 | 3 | 353 | 59 | 13 | 3 | 246 | 37 | 641   | 102 |
| 55,650 | 32 | 3 | 377 | 59 | 16 | 3 | 265 | 37 | 690   | 102 |
| 55,651 | 32 | 3 | 385 | 59 | 16 | 3 | 273 | 37 | 706   | 102 |
| 55,652 | 32 | 3 | 383 | 59 | 16 | 3 | 273 | 37 | 704   | 102 |
| 55,653 | 33 | 3 | 383 | 59 | 16 | 3 | 273 | 37 | 705   | 102 |
| 55,654 | 33 | 3 | 389 | 59 | 16 | 3 | 281 | 37 | 719   | 102 |
| 55,655 | 33 | 3 | 389 | 59 | 16 | 3 | 281 | 37 | 719   | 102 |
| 55,656 | 34 | 3 | 437 | 59 | 17 | 3 | 309 | 37 | 797   | 102 |
| 55,657 | 34 | 3 | 443 | 59 | 18 | 3 | 311 | 35 | 806   | 100 |
| 55,658 | 34 | 3 | 448 | 52 | 18 | 3 | 312 | 35 | 812   | 93  |
| 55,659 | 35 | 3 | 453 | 50 | 18 | 2 | 313 | 31 | 819   | 86  |
| 55,660 | 35 | 3 | 453 | 50 | 18 | 2 | 311 | 31 | 817   | 86  |
| 55,661 | 50 | 3 | 506 | 47 | 19 | 2 | 368 | 31 | 943   | 83  |
| 55,662 | 50 | 3 | 522 | 46 | 19 | 2 | 378 | 31 | 969   | 82  |
| 55,663 | 60 | 4 | 579 | 46 | 25 | 2 | 448 | 33 | 1,112 | 85  |
| 55,664 | 60 | 4 | 578 | 46 | 25 | 2 | 448 | 33 | 1,111 | 85  |
| 55,665 | 60 | 4 | 585 | 47 | 27 | 2 | 457 | 34 | 1,129 | 87  |
| 55,666 | 60 | 5 | 591 | 51 | 27 | 2 | 460 | 33 | 1,138 | 91  |

|        |    |   |       |    |    |   |     |    |       |     |
|--------|----|---|-------|----|----|---|-----|----|-------|-----|
| 55,667 | 60 | 5 | 590   | 49 | 27 | 2 | 460 | 30 | 1,137 | 86  |
| 55,668 | 60 | 5 | 590   | 47 | 27 | 2 | 460 | 30 | 1,137 | 84  |
| 55,669 | 61 | 5 | 591   | 47 | 27 | 2 | 465 | 29 | 1,144 | 83  |
| 55,670 | 63 | 5 | 619   | 46 | 27 | 2 | 466 | 29 | 1,175 | 82  |
| 55,671 | 66 | 5 | 659   | 42 | 27 | 2 | 483 | 27 | 1,235 | 76  |
| 55,672 | 67 | 5 | 666   | 42 | 29 | 2 | 501 | 27 | 1,263 | 76  |
| 55,673 | 68 | 5 | 683   | 42 | 29 | 2 | 513 | 27 | 1,293 | 76  |
| 55,674 | 69 | 5 | 691   | 41 | 28 | 2 | 509 | 25 | 1,297 | 73  |
| 55,675 | 72 | 5 | 706   | 37 | 28 | 1 | 510 | 24 | 1,316 | 67  |
| 55,676 | 72 | 5 | 726   | 37 | 28 | 1 | 512 | 24 | 1,338 | 67  |
| 55,677 | 72 | 5 | 724   | 37 | 28 | 1 | 512 | 24 | 1,336 | 67  |
| 55,678 | 72 | 5 | 729   | 37 | 28 | 1 | 514 | 24 | 1,343 | 67  |
| 55,679 | 72 | 5 | 731   | 44 | 28 | 2 | 516 | 25 | 1,347 | 76  |
| 55,680 | 74 | 5 | 873   | 43 | 28 | 2 | 543 | 22 | 1,518 | 72  |
| 55,681 | 77 | 5 | 915   | 35 | 28 | 1 | 569 | 20 | 1,589 | 61  |
| 55,682 | 77 | 5 | 939   | 37 | 29 | 1 | 568 | 22 | 1,613 | 65  |
| 55,683 | 67 | 5 | 858   | 38 | 26 | 1 | 501 | 23 | 1,452 | 67  |
| 55,684 | 65 | 6 | 851   | 39 | 25 | 1 | 481 | 29 | 1,422 | 75  |
| 55,685 | 64 | 5 | 843   | 36 | 25 | 1 | 477 | 25 | 1,409 | 67  |
| 55,686 | 66 | 5 | 878   | 38 | 26 | 1 | 495 | 25 | 1,465 | 69  |
| 55,687 | 67 | 4 | 1,048 | 40 | 33 | 2 | 546 | 27 | 1,694 | 73  |
| 55,688 | 67 | 4 | 1,045 | 41 | 33 | 2 | 546 | 28 | 1,691 | 75  |
| 55,689 | 68 | 4 | 1,057 | 39 | 33 | 2 | 552 | 27 | 1,710 | 72  |
| 55,690 | 68 | 4 | 1,056 | 42 | 33 | 2 | 549 | 27 | 1,706 | 75  |
| 55,691 | 67 | 4 | 1,052 | 42 | 33 | 2 | 545 | 27 | 1,697 | 75  |
| 55,692 | 67 | 4 | 1,053 | 43 | 33 | 2 | 544 | 28 | 1,697 | 77  |
| 55,693 | 68 | 5 | 1,057 | 43 | 33 | 2 | 545 | 28 | 1,703 | 78  |
| 55,694 | 68 | 5 | 1,061 | 44 | 33 | 2 | 549 | 28 | 1,711 | 79  |
| 55,695 | 68 | 7 | 1,065 | 47 | 33 | 2 | 557 | 30 | 1,723 | 86  |
| 55,696 | 70 | 7 | 1,054 | 55 | 34 | 2 | 557 | 37 | 1,715 | 101 |
| 55,697 | 65 | 7 | 1,009 | 57 | 32 | 2 | 522 | 37 | 1,628 | 103 |
| 55,698 | 62 | 7 | 964   | 57 | 32 | 2 | 498 | 37 | 1,556 | 103 |
| 55,699 | 59 | 8 | 939   | 57 | 30 | 2 | 471 | 38 | 1,499 | 105 |
| 55,700 | 58 | 8 | 929   | 57 | 29 | 2 | 455 | 38 | 1,471 | 105 |
| 55,701 | 55 | 9 | 905   | 59 | 26 | 2 | 435 | 39 | 1,421 | 109 |
| 55,702 | 54 | 9 | 898   | 61 | 26 | 2 | 426 | 39 | 1,404 | 111 |
| 55,703 | 63 | 9 | 1,077 | 61 | 30 | 2 | 515 | 39 | 1,685 | 111 |
| 55,704 | 64 | 9 | 1,156 | 62 | 35 | 2 | 594 | 39 | 1,849 | 112 |
| 55,705 | 64 | 9 | 1,153 | 62 | 36 | 2 | 587 | 39 | 1,840 | 112 |
| 55,706 | 64 | 9 | 1,157 | 62 | 36 | 2 | 591 | 39 | 1,848 | 112 |
| 55,707 | 64 | 9 | 1,111 | 62 | 35 | 2 | 564 | 39 | 1,774 | 112 |

|        |    |   |       |    |    |   |     |    |       |     |
|--------|----|---|-------|----|----|---|-----|----|-------|-----|
| 55,708 | 64 | 9 | 1,105 | 63 | 34 | 2 | 561 | 39 | 1,764 | 113 |
| 55,709 | 64 | 9 | 1,097 | 63 | 34 | 2 | 558 | 40 | 1,753 | 114 |
| 55,710 | 63 | 9 | 1,101 | 63 | 34 | 2 | 558 | 41 | 1,756 | 115 |
| 55,711 | 63 | 9 | 1,101 | 63 | 34 | 2 | 557 | 42 | 1,755 | 116 |
| 55,712 | 48 | 8 | 1,055 | 62 | 35 | 2 | 509 | 40 | 1,647 | 112 |
| 55,713 | 48 | 8 | 1,041 | 62 | 35 | 2 | 505 | 40 | 1,629 | 112 |
| 55,714 | 38 | 8 | 984   | 62 | 29 | 2 | 434 | 40 | 1,485 | 112 |
| 55,715 | 38 | 8 | 982   | 61 | 29 | 2 | 428 | 39 | 1,477 | 110 |
| 55,716 | 38 | 8 | 977   | 61 | 25 | 2 | 425 | 39 | 1,465 | 110 |
| 55,717 | 38 | 7 | 971   | 58 | 25 | 2 | 425 | 39 | 1,459 | 106 |
| 55,718 | 39 | 7 | 977   | 59 | 26 | 2 | 427 | 39 | 1,469 | 107 |
| 55,719 | 38 | 7 | 975   | 65 | 26 | 2 | 422 | 42 | 1,461 | 116 |
| 55,720 | 36 | 7 | 946   | 65 | 26 | 2 | 418 | 42 | 1,426 | 116 |
| 55,721 | 35 | 7 | 946   | 67 | 26 | 2 | 424 | 43 | 1,431 | 119 |
| 55,722 | 35 | 7 | 911   | 67 | 26 | 3 | 412 | 42 | 1,384 | 119 |
| 55,723 | 34 | 7 | 906   | 67 | 24 | 3 | 395 | 42 | 1,359 | 119 |
| 55,724 | 34 | 7 | 891   | 67 | 24 | 3 | 383 | 42 | 1,332 | 119 |
| 55,725 | 36 | 7 | 899   | 67 | 24 | 3 | 388 | 42 | 1,347 | 119 |
| 55,726 | 33 | 7 | 883   | 66 | 24 | 3 | 387 | 43 | 1,327 | 119 |
| 55,727 | 33 | 7 | 863   | 66 | 24 | 3 | 384 | 43 | 1,304 | 119 |
| 55,728 | 36 | 7 | 879   | 68 | 24 | 3 | 395 | 43 | 1,334 | 121 |
| 55,729 | 38 | 7 | 911   | 68 | 25 | 3 | 405 | 43 | 1,379 | 121 |
| 55,730 | 35 | 7 | 808   | 61 | 25 | 2 | 393 | 42 | 1,261 | 112 |
| 55,731 | 37 | 7 | 815   | 62 | 26 | 2 | 402 | 42 | 1,280 | 113 |
| 55,732 | 34 | 7 | 792   | 64 | 26 | 2 | 378 | 48 | 1,230 | 121 |
| 55,733 | 34 | 7 | 766   | 63 | 26 | 2 | 380 | 46 | 1,206 | 118 |
| 55,734 | 34 | 7 | 765   | 62 | 25 | 2 | 384 | 46 | 1,208 | 117 |
| 55,735 | 34 | 7 | 757   | 63 | 25 | 2 | 386 | 40 | 1,202 | 112 |
| 55,736 | 32 | 6 | 724   | 59 | 25 | 2 | 370 | 40 | 1,151 | 107 |
| 55,737 | 32 | 6 | 576   | 52 | 17 | 1 | 324 | 36 | 949   | 95  |
| 55,738 | 31 | 6 | 560   | 51 | 17 | 1 | 321 | 35 | 929   | 93  |
| 55,739 | 30 | 6 | 552   | 51 | 17 | 1 | 318 | 35 | 917   | 93  |
| 55,740 | 30 | 6 | 547   | 44 | 17 | 1 | 315 | 29 | 909   | 80  |
| 55,741 | 30 | 6 | 550   | 41 | 17 | 1 | 315 | 29 | 912   | 77  |
| 55,742 | 30 | 6 | 555   | 41 | 17 | 1 | 318 | 29 | 920   | 77  |
| 55,743 | 35 | 6 | 574   | 40 | 17 | 1 | 342 | 28 | 968   | 75  |
| 55,744 | 34 | 5 | 572   | 40 | 18 | 1 | 345 | 28 | 969   | 74  |
| 55,745 | 34 | 3 | 567   | 28 | 18 | 1 | 341 | 19 | 960   | 51  |
| 55,746 | 34 | 3 | 563   | 30 | 18 | 1 | 335 | 21 | 950   | 55  |
| 55,747 | 31 | 3 | 526   | 30 | 17 | 1 | 316 | 21 | 890   | 55  |
| 55,748 | 32 | 3 | 538   | 30 | 17 | 1 | 332 | 22 | 919   | 56  |



|        |    |   |     |    |    |   |     |    |     |     |
|--------|----|---|-----|----|----|---|-----|----|-----|-----|
| 55,749 | 32 | 2 | 533 | 30 | 17 | 1 | 329 | 21 | 911 | 54  |
| 55,750 | 31 | 2 | 526 | 30 | 17 | 1 | 323 | 21 | 897 | 54  |
| 55,751 | 26 | 2 | 464 | 37 | 16 | 2 | 305 | 27 | 811 | 68  |
| 55,752 | 24 | 1 | 420 | 36 | 13 | 2 | 262 | 29 | 719 | 68  |
| 55,753 | 22 | 1 | 359 | 36 | 13 | 2 | 242 | 30 | 636 | 69  |
| 55,754 | 21 | 1 | 280 | 36 | 8  | 2 | 162 | 30 | 471 | 69  |
| 55,755 | 21 | 1 | 285 | 35 | 8  | 2 | 163 | 31 | 477 | 69  |
| 55,756 | 21 | 1 | 287 | 35 | 7  | 2 | 163 | 32 | 478 | 70  |
| 55,757 | 21 | 1 | 282 | 36 | 7  | 2 | 159 | 32 | 469 | 71  |
| 55,758 | 20 | 1 | 280 | 36 | 7  | 2 | 156 | 32 | 463 | 71  |
| 55,759 | 20 | 1 | 283 | 35 | 7  | 2 | 156 | 33 | 466 | 71  |
| 55,760 | 21 | 1 | 287 | 35 | 7  | 2 | 159 | 31 | 474 | 69  |
| 55,761 | 21 | 1 | 285 | 35 | 7  | 2 | 160 | 30 | 473 | 68  |
| 55,762 | 23 | 1 | 304 | 35 | 8  | 2 | 165 | 30 | 500 | 68  |
| 55,763 | 23 | 1 | 303 | 35 | 7  | 2 | 157 | 30 | 490 | 68  |
| 55,764 | 33 | 2 | 329 | 41 | 10 | 2 | 177 | 32 | 549 | 77  |
| 55,765 | 33 | 2 | 328 | 41 | 10 | 2 | 177 | 32 | 548 | 77  |
| 55,766 | 34 | 3 | 342 | 41 | 11 | 2 | 182 | 32 | 569 | 78  |
| 55,767 | 37 | 3 | 363 | 46 | 12 | 2 | 201 | 35 | 613 | 86  |
| 55,768 | 36 | 3 | 395 | 67 | 11 | 2 | 211 | 41 | 653 | 113 |
| 55,769 | 35 | 3 | 393 | 67 | 11 | 2 | 211 | 41 | 650 | 113 |
| 55,770 | 43 | 3 | 470 | 69 | 15 | 2 | 255 | 40 | 783 | 114 |
| 55,771 | 43 | 4 | 479 | 76 | 15 | 2 | 260 | 41 | 797 | 123 |
| 55,772 | 43 | 4 | 479 | 73 | 15 | 2 | 251 | 40 | 788 | 119 |
| 55,773 | 41 | 4 | 477 | 73 | 15 | 1 | 252 | 40 | 785 | 118 |
| 55,774 | 42 | 4 | 474 | 73 | 15 | 1 | 253 | 40 | 784 | 118 |
| 55,775 | 42 | 4 | 473 | 77 | 15 | 1 | 253 | 41 | 783 | 123 |
| 55,776 | 38 | 4 | 454 | 77 | 15 | 1 | 248 | 41 | 755 | 123 |
| 55,777 | 38 | 4 | 456 | 77 | 15 | 1 | 250 | 40 | 759 | 122 |
| 55,778 | 38 | 4 | 458 | 77 | 15 | 1 | 252 | 40 | 763 | 122 |
| 55,779 | 35 | 4 | 448 | 75 | 15 | 1 | 250 | 40 | 748 | 120 |
| 55,780 | 38 | 4 | 482 | 74 | 16 | 1 | 317 | 40 | 853 | 119 |
| 55,781 | 38 | 4 | 461 | 74 | 16 | 1 | 314 | 40 | 829 | 119 |
| 55,782 | 38 | 4 | 447 | 74 | 15 | 1 | 320 | 40 | 820 | 119 |
| 55,783 | 38 | 4 | 432 | 72 | 14 | 1 | 326 | 34 | 810 | 111 |
| 55,784 | 38 | 4 | 447 | 71 | 14 | 1 | 336 | 33 | 835 | 109 |
| 55,785 | 40 | 3 | 452 | 70 | 14 | 1 | 339 | 33 | 845 | 107 |
| 55,786 | 41 | 3 | 450 | 69 | 14 | 1 | 344 | 32 | 849 | 105 |
| 55,787 | 43 | 3 | 446 | 69 | 14 | 1 | 342 | 32 | 845 | 105 |
| 55,788 | 43 | 3 | 446 | 69 | 14 | 1 | 345 | 32 | 848 | 105 |
| 55,789 | 43 | 4 | 442 | 69 | 14 | 1 | 343 | 32 | 842 | 106 |

|        |     |   |       |    |     |   |       |    |       |     |
|--------|-----|---|-------|----|-----|---|-------|----|-------|-----|
| 55,790 | 46  | 4 | 440   | 69 | 14  | 1 | 345   | 32 | 845   | 106 |
| 55,791 | 46  | 4 | 450   | 69 | 14  | 1 | 348   | 32 | 858   | 106 |
| 55,792 | 49  | 4 | 472   | 69 | 15  | 1 | 370   | 33 | 906   | 107 |
| 55,793 | 44  | 4 | 475   | 69 | 17  | 1 | 352   | 33 | 888   | 107 |
| 55,794 | 63  | 4 | 585   | 72 | 22  | 1 | 412   | 33 | 1,082 | 110 |
| 55,795 | 63  | 4 | 587   | 72 | 22  | 1 | 416   | 33 | 1,088 | 110 |
| 55,796 | 63  | 4 | 592   | 70 | 23  | 1 | 420   | 31 | 1,098 | 106 |
| 55,797 | 109 | 4 | 803   | 70 | 36  | 1 | 587   | 31 | 1,535 | 106 |
| 55,798 | 108 | 4 | 791   | 70 | 36  | 1 | 571   | 31 | 1,506 | 106 |
| 55,799 | 108 | 4 | 791   | 68 | 36  | 1 | 575   | 30 | 1,510 | 103 |
| 55,800 | 108 | 4 | 805   | 68 | 36  | 1 | 592   | 30 | 1,541 | 103 |
| 55,801 | 161 | 4 | 1,125 | 69 | 56  | 1 | 761   | 34 | 2,103 | 108 |
| 55,802 | 161 | 4 | 1,122 | 62 | 56  | 0 | 761   | 28 | 2,100 | 94  |
| 55,803 | 173 | 4 | 1,555 | 61 | 65  | 0 | 857   | 25 | 2,650 | 90  |
| 55,804 | 232 | 4 | 2,334 | 60 | 114 | 0 | 1,424 | 25 | 4,104 | 89  |
| 55,805 | 234 | 4 | 2,389 | 60 | 116 | 0 | 1,467 | 25 | 4,206 | 89  |
| 55,806 | 235 | 4 | 2,388 | 60 | 116 | 0 | 1,468 | 25 | 4,207 | 89  |
| 55,807 | 235 | 4 | 2,385 | 61 | 116 | 0 | 1,468 | 24 | 4,204 | 89  |
| 55,808 | 238 | 4 | 2,421 | 61 | 121 | 0 | 1,487 | 24 | 4,267 | 89  |
| 55,809 | 238 | 4 | 2,420 | 61 | 121 | 0 | 1,487 | 25 | 4,266 | 90  |
| 55,810 | 237 | 4 | 2,411 | 61 | 121 | 0 | 1,483 | 24 | 4,252 | 89  |
| 55,811 | 238 | 4 | 2,411 | 61 | 121 | 0 | 1,483 | 24 | 4,253 | 89  |
| 55,812 | 238 | 4 | 2,409 | 61 | 121 | 0 | 1,482 | 24 | 4,250 | 89  |
| 55,813 | 236 | 3 | 2,390 | 55 | 120 | 0 | 1,477 | 22 | 4,223 | 80  |
| 55,814 | 236 | 3 | 2,385 | 55 | 119 | 0 | 1,476 | 22 | 4,216 | 80  |
| 55,815 | 226 | 3 | 2,357 | 56 | 116 | 0 | 1,450 | 22 | 4,149 | 81  |
| 55,816 | 225 | 3 | 2,350 | 59 | 115 | 0 | 1,447 | 22 | 4,137 | 84  |
| 55,817 | 223 | 2 | 2,336 | 60 | 114 | 0 | 1,431 | 23 | 4,104 | 85  |
| 55,818 | 222 | 2 | 2,328 | 55 | 114 | 0 | 1,429 | 21 | 4,093 | 78  |
| 55,819 | 222 | 2 | 2,292 | 41 | 114 | 0 | 1,418 | 27 | 4,046 | 70  |
| 55,820 | 215 | 2 | 2,214 | 40 | 110 | 0 | 1,370 | 27 | 3,909 | 69  |
| 55,821 | 215 | 2 | 2,217 | 32 | 110 | 0 | 1,373 | 26 | 3,915 | 60  |
| 55,822 | 215 | 1 | 2,213 | 26 | 110 | 0 | 1,369 | 25 | 3,907 | 52  |
| 55,823 | 215 | 1 | 2,210 | 28 | 110 | 0 | 1,369 | 25 | 3,904 | 54  |
| 55,824 | 215 | 1 | 2,210 | 29 | 110 | 0 | 1,365 | 25 | 3,900 | 55  |
| 55,825 | 214 | 1 | 2,208 | 29 | 110 | 0 | 1,363 | 25 | 3,895 | 55  |
| 55,826 | 214 | 1 | 2,209 | 28 | 110 | 0 | 1,363 | 25 | 3,896 | 54  |
| 55,827 | 214 | 1 | 2,220 | 28 | 110 | 0 | 1,360 | 25 | 3,904 | 54  |
| 55,828 | 214 | 1 | 2,221 | 28 | 110 | 0 | 1,363 | 25 | 3,908 | 54  |
| 55,829 | 218 | 1 | 2,248 | 28 | 113 | 0 | 1,371 | 25 | 3,950 | 54  |
| 55,830 | 218 | 1 | 2,244 | 28 | 113 | 0 | 1,362 | 25 | 3,937 | 54  |

|        |     |   |       |    |     |   |       |    |       |    |
|--------|-----|---|-------|----|-----|---|-------|----|-------|----|
| 55,831 | 218 | 1 | 2,204 | 28 | 111 | 0 | 1,292 | 25 | 3,825 | 54 |
| 55,832 | 220 | 1 | 2,217 | 28 | 111 | 0 | 1,305 | 25 | 3,853 | 54 |
| 55,833 | 219 | 1 | 2,210 | 28 | 112 | 0 | 1,284 | 25 | 3,825 | 54 |
| 55,834 | 219 | 1 | 2,201 | 28 | 112 | 0 | 1,275 | 25 | 3,807 | 54 |
| 55,835 | 233 | 1 | 2,285 | 27 | 114 | 0 | 1,313 | 25 | 3,945 | 53 |
| 55,836 | 257 | 1 | 2,457 | 29 | 120 | 0 | 1,362 | 25 | 4,196 | 55 |
| 55,837 | 256 | 1 | 2,454 | 29 | 120 | 0 | 1,353 | 25 | 4,183 | 55 |
| 55,838 | 254 | 1 | 2,486 | 29 | 121 | 0 | 1,360 | 25 | 4,221 | 55 |
| 55,839 | 297 | 1 | 2,739 | 30 | 126 | 0 | 1,534 | 26 | 4,696 | 57 |
| 55,840 | 297 | 1 | 2,742 | 30 | 126 | 0 | 1,535 | 27 | 4,700 | 58 |
| 55,841 | 294 | 1 | 2,751 | 30 | 127 | 0 | 1,537 | 28 | 4,709 | 59 |
| 55,842 | 300 | 1 | 2,779 | 30 | 128 | 0 | 1,550 | 28 | 4,757 | 59 |
| 55,843 | 297 | 1 | 2,771 | 30 | 127 | 0 | 1,535 | 27 | 4,730 | 58 |
| 55,844 | 297 | 1 | 2,749 | 30 | 125 | 0 | 1,528 | 27 | 4,699 | 58 |
| 55,845 | 278 | 1 | 2,637 | 27 | 119 | 0 | 1,467 | 27 | 4,501 | 55 |
| 55,846 | 278 | 1 | 2,634 | 27 | 119 | 0 | 1,463 | 27 | 4,494 | 55 |
| 55,847 | 278 | 1 | 2,626 | 27 | 118 | 0 | 1,457 | 27 | 4,479 | 55 |
| 55,848 | 232 | 1 | 2,411 | 27 | 105 | 0 | 1,289 | 27 | 4,037 | 55 |
| 55,849 | 232 | 1 | 2,410 | 29 | 105 | 0 | 1,286 | 28 | 4,033 | 58 |
| 55,850 | 232 | 1 | 2,396 | 29 | 105 | 0 | 1,269 | 28 | 4,002 | 58 |
| 55,851 | 192 | 1 | 2,215 | 29 | 94  | 0 | 1,171 | 28 | 3,672 | 58 |
| 55,852 | 179 | 1 | 2,079 | 29 | 85  | 0 | 1,103 | 24 | 3,446 | 54 |
| 55,853 | 167 | 1 | 1,646 | 31 | 76  | 0 | 1,007 | 25 | 2,896 | 57 |
| 55,854 | 163 | 1 | 1,478 | 39 | 67  | 0 | 867   | 28 | 2,575 | 68 |
| 55,855 | 108 | 1 | 872   | 39 | 27  | 0 | 440   | 29 | 1,447 | 69 |
| 55,856 | 106 | 1 | 814   | 41 | 25  | 0 | 404   | 30 | 1,349 | 72 |
| 55,857 | 106 | 1 | 806   | 40 | 24  | 0 | 394   | 29 | 1,330 | 70 |
| 55,858 | 103 | 1 | 785   | 39 | 20  | 0 | 387   | 29 | 1,295 | 69 |
| 55,859 | 103 | 1 | 783   | 39 | 20  | 0 | 387   | 30 | 1,293 | 70 |
| 55,860 | 103 | 1 | 783   | 39 | 20  | 0 | 387   | 30 | 1,293 | 70 |
| 55,861 | 108 | 1 | 810   | 39 | 21  | 0 | 405   | 30 | 1,344 | 70 |
| 55,862 | 109 | 1 | 818   | 39 | 22  | 0 | 409   | 30 | 1,358 | 70 |
| 55,863 | 120 | 1 | 846   | 39 | 28  | 0 | 457   | 30 | 1,451 | 70 |
| 55,864 | 120 | 1 | 853   | 39 | 28  | 0 | 463   | 30 | 1,464 | 70 |
| 55,865 | 120 | 1 | 851   | 39 | 28  | 0 | 463   | 30 | 1,462 | 70 |
| 55,866 | 120 | 1 | 850   | 39 | 28  | 0 | 461   | 30 | 1,459 | 70 |
| 55,867 | 121 | 1 | 845   | 36 | 28  | 0 | 464   | 30 | 1,458 | 67 |
| 55,868 | 121 | 1 | 849   | 35 | 28  | 0 | 464   | 29 | 1,462 | 65 |
| 55,869 | 124 | 1 | 850   | 27 | 28  | 0 | 464   | 15 | 1,466 | 43 |
| 55,870 | 126 | 1 | 856   | 27 | 28  | 0 | 464   | 15 | 1,474 | 43 |
| 55,871 | 126 | 1 | 855   | 27 | 28  | 0 | 461   | 14 | 1,470 | 42 |

|        |     |   |     |    |    |   |     |    |       |    |
|--------|-----|---|-----|----|----|---|-----|----|-------|----|
| 55,872 | 126 | 1 | 853 | 26 | 29 | 0 | 460 | 14 | 1,468 | 41 |
| 55,873 | 126 | 1 | 851 | 26 | 29 | 0 | 460 | 14 | 1,466 | 41 |
| 55,874 | 126 | 1 | 859 | 24 | 29 | 0 | 465 | 14 | 1,479 | 39 |
| 55,875 | 134 | 1 | 896 | 23 | 30 | 0 | 475 | 14 | 1,535 | 38 |
| 55,876 | 134 | 1 | 904 | 20 | 30 | 0 | 476 | 13 | 1,544 | 34 |
| 55,877 | 134 | 1 | 903 | 20 | 30 | 0 | 477 | 13 | 1,544 | 34 |
| 55,878 | 134 | 1 | 895 | 20 | 30 | 0 | 478 | 13 | 1,537 | 34 |
| 55,879 | 134 | 1 | 895 | 20 | 30 | 0 | 478 | 13 | 1,537 | 34 |
| 55,880 | 133 | 1 | 897 | 20 | 27 | 0 | 487 | 13 | 1,544 | 34 |
| 55,881 | 133 | 1 | 892 | 20 | 27 | 0 | 486 | 13 | 1,538 | 34 |
| 55,882 | 128 | 1 | 864 | 21 | 27 | 0 | 477 | 13 | 1,496 | 35 |
| 55,883 | 128 | 1 | 867 | 21 | 29 | 0 | 475 | 13 | 1,499 | 35 |
| 55,884 | 127 | 1 | 864 | 21 | 28 | 0 | 470 | 13 | 1,489 | 35 |
| 55,885 | 122 | 1 | 829 | 23 | 28 | 0 | 458 | 13 | 1,437 | 37 |
| 55,886 | 113 | 1 | 762 | 23 | 26 | 0 | 417 | 13 | 1,318 | 37 |
| 55,887 | 89  | 2 | 605 | 22 | 21 | 0 | 378 | 13 | 1,093 | 37 |
| 55,888 | 89  | 3 | 575 | 22 | 20 | 1 | 371 | 14 | 1,055 | 40 |
| 55,889 | 57  | 3 | 415 | 22 | 19 | 1 | 237 | 17 | 728   | 43 |
| 55,890 | 48  | 2 | 355 | 21 | 17 | 1 | 220 | 15 | 640   | 39 |
| 55,891 | 48  | 2 | 351 | 21 | 17 | 1 | 220 | 15 | 636   | 39 |
| 55,892 | 48  | 2 | 346 | 21 | 16 | 1 | 220 | 14 | 630   | 38 |
| 55,893 | 42  | 2 | 308 | 22 | 15 | 1 | 205 | 14 | 570   | 39 |
| 55,894 | 42  | 2 | 290 | 22 | 15 | 1 | 196 | 14 | 543   | 39 |
| 55,895 | 42  | 2 | 290 | 22 | 15 | 1 | 193 | 14 | 540   | 39 |
| 55,896 | 42  | 2 | 291 | 22 | 15 | 1 | 193 | 14 | 541   | 39 |
| 55,897 | 42  | 2 | 291 | 22 | 15 | 1 | 193 | 14 | 541   | 39 |
| 55,898 | 42  | 2 | 291 | 22 | 16 | 1 | 193 | 14 | 542   | 39 |
| 55,899 | 42  | 2 | 294 | 21 | 16 | 1 | 194 | 13 | 546   | 37 |
| 55,900 | 42  | 2 | 295 | 21 | 16 | 1 | 198 | 13 | 551   | 37 |
| 55,901 | 42  | 2 | 294 | 22 | 16 | 1 | 198 | 13 | 550   | 38 |
| 55,902 | 46  | 2 | 329 | 22 | 19 | 1 | 222 | 13 | 616   | 38 |
| 55,903 | 49  | 2 | 348 | 20 | 20 | 1 | 224 | 12 | 641   | 35 |
| 55,904 | 49  | 2 | 351 | 12 | 20 | 1 | 224 | 9  | 644   | 24 |
| 55,905 | 71  | 2 | 499 | 11 | 31 | 1 | 350 | 7  | 951   | 21 |
| 55,906 | 86  | 2 | 556 | 11 | 34 | 1 | 411 | 7  | 1,087 | 21 |
| 55,907 | 88  | 2 | 593 | 9  | 36 | 1 | 429 | 6  | 1,146 | 18 |
| 55,908 | 90  | 2 | 629 | 9  | 38 | 1 | 459 | 6  | 1,216 | 18 |
| 55,909 | 94  | 2 | 647 | 9  | 39 | 1 | 479 | 5  | 1,259 | 17 |
| 55,910 | 95  | 2 | 690 | 9  | 42 | 1 | 489 | 5  | 1,316 | 17 |
| 55,911 | 91  | 2 | 675 | 10 | 42 | 1 | 474 | 4  | 1,282 | 17 |
| 55,912 | 92  | 2 | 686 | 10 | 42 | 2 | 473 | 4  | 1,293 | 18 |

|        |     |   |       |    |    |   |     |   |       |    |
|--------|-----|---|-------|----|----|---|-----|---|-------|----|
| 55,913 | 107 | 2 | 798   | 10 | 47 | 2 | 516 | 4 | 1,468 | 18 |
| 55,914 | 96  | 2 | 771   | 10 | 41 | 2 | 469 | 4 | 1,377 | 18 |
| 55,915 | 103 | 3 | 906   | 10 | 51 | 2 | 527 | 4 | 1,587 | 19 |
| 55,916 | 108 | 3 | 988   | 10 | 59 | 2 | 576 | 4 | 1,731 | 19 |
| 55,917 | 111 | 3 | 1,144 | 9  | 65 | 2 | 615 | 4 | 1,935 | 18 |
| 55,918 | 111 | 3 | 1,140 | 10 | 65 | 2 | 615 | 4 | 1,931 | 19 |
| 55,919 | 111 | 3 | 1,140 | 10 | 65 | 2 | 615 | 4 | 1,931 | 19 |
| 55,920 | 108 | 3 | 1,139 | 10 | 65 | 2 | 615 | 4 | 1,927 | 19 |
| 55,921 | 106 | 3 | 1,133 | 10 | 65 | 2 | 615 | 4 | 1,919 | 19 |
| 55,922 | 106 | 3 | 1,131 | 10 | 65 | 2 | 617 | 4 | 1,919 | 19 |
| 55,923 | 108 | 3 | 1,132 | 10 | 64 | 2 | 617 | 4 | 1,921 | 19 |
| 55,924 | 108 | 3 | 1,132 | 10 | 64 | 2 | 616 | 4 | 1,920 | 19 |
| 55,925 | 108 | 3 | 1,127 | 10 | 64 | 2 | 612 | 4 | 1,911 | 19 |
| 55,926 | 100 | 3 | 1,098 | 10 | 63 | 2 | 605 | 4 | 1,866 | 19 |
| 55,927 | 100 | 3 | 1,099 | 11 | 63 | 2 | 606 | 4 | 1,868 | 20 |
| 55,928 | 101 | 3 | 1,101 | 11 | 63 | 2 | 606 | 4 | 1,871 | 20 |
| 55,929 | 102 | 3 | 1,117 | 11 | 63 | 2 | 616 | 6 | 1,898 | 22 |
| 55,930 | 102 | 3 | 1,113 | 11 | 63 | 2 | 614 | 6 | 1,892 | 22 |
| 55,931 | 100 | 3 | 1,090 | 11 | 64 | 2 | 606 | 6 | 1,860 | 22 |
| 55,932 | 101 | 3 | 1,087 | 11 | 63 | 2 | 603 | 6 | 1,854 | 22 |
| 55,933 | 99  | 3 | 1,077 | 10 | 63 | 2 | 595 | 6 | 1,834 | 21 |
| 55,934 | 99  | 3 | 1,072 | 12 | 63 | 2 | 594 | 6 | 1,828 | 23 |
| 55,935 | 99  | 3 | 1,062 | 14 | 62 | 2 | 586 | 7 | 1,809 | 26 |
| 55,936 | 98  | 3 | 1,047 | 12 | 62 | 2 | 582 | 7 | 1,789 | 24 |
| 55,937 | 97  | 3 | 1,101 | 13 | 63 | 2 | 602 | 7 | 1,863 | 25 |
| 55,938 | 97  | 1 | 1,104 | 12 | 63 | 1 | 603 | 4 | 1,867 | 18 |
| 55,939 | 97  | 1 | 1,104 | 12 | 63 | 2 | 603 | 4 | 1,867 | 19 |
| 55,940 | 95  | 1 | 1,079 | 12 | 61 | 2 | 580 | 4 | 1,815 | 19 |
| 55,941 | 95  | 1 | 1,081 | 12 | 62 | 2 | 581 | 4 | 1,819 | 19 |
| 55,942 | 96  | 1 | 1,087 | 12 | 62 | 2 | 584 | 4 | 1,829 | 19 |
| 55,943 | 100 | 1 | 1,104 | 11 | 64 | 2 | 604 | 4 | 1,872 | 18 |
| 55,944 | 100 | 1 | 1,103 | 11 | 64 | 2 | 604 | 4 | 1,871 | 18 |
| 55,945 | 102 | 1 | 1,115 | 11 | 64 | 2 | 615 | 4 | 1,896 | 18 |
| 55,946 | 102 | 1 | 1,113 | 11 | 64 | 2 | 614 | 4 | 1,893 | 18 |
| 55,947 | 102 | 1 | 1,113 | 11 | 64 | 2 | 615 | 5 | 1,894 | 19 |
| 55,948 | 102 | 1 | 1,113 | 11 | 63 | 2 | 615 | 5 | 1,893 | 19 |
| 55,949 | 102 | 1 | 1,112 | 10 | 63 | 2 | 616 | 5 | 1,893 | 18 |
| 55,950 | 103 | 1 | 1,116 | 10 | 63 | 2 | 617 | 5 | 1,899 | 18 |
| 55,951 | 103 | 1 | 1,118 | 9  | 63 | 2 | 612 | 5 | 1,896 | 17 |
| 55,952 | 104 | 1 | 1,106 | 9  | 63 | 2 | 606 | 5 | 1,879 | 17 |
| 55,953 | 101 | 1 | 1,084 | 9  | 60 | 2 | 589 | 5 | 1,834 | 17 |

|        |    |   |       |    |    |   |     |    |       |    |
|--------|----|---|-------|----|----|---|-----|----|-------|----|
| 55,954 | 98 | 1 | 1,064 | 8  | 59 | 2 | 584 | 5  | 1,805 | 16 |
| 55,955 | 98 | 1 | 1,061 | 8  | 59 | 2 | 585 | 5  | 1,803 | 16 |
| 55,956 | 75 | 1 | 908   | 8  | 48 | 2 | 456 | 5  | 1,487 | 16 |
| 55,957 | 60 | 1 | 850   | 8  | 45 | 2 | 394 | 5  | 1,349 | 16 |
| 55,958 | 58 | 1 | 811   | 8  | 43 | 2 | 371 | 5  | 1,283 | 16 |
| 55,959 | 56 | 1 | 771   | 9  | 41 | 2 | 339 | 7  | 1,207 | 19 |
| 55,960 | 52 | 1 | 752   | 9  | 40 | 2 | 319 | 7  | 1,163 | 19 |
| 55,961 | 51 | 2 | 709   | 13 | 37 | 2 | 309 | 8  | 1,106 | 25 |
| 55,962 | 49 | 2 | 697   | 12 | 36 | 2 | 307 | 8  | 1,089 | 24 |
| 55,963 | 47 | 2 | 678   | 12 | 35 | 1 | 304 | 8  | 1,064 | 23 |
| 55,964 | 32 | 2 | 567   | 12 | 31 | 1 | 260 | 8  | 890   | 23 |
| 55,965 | 25 | 2 | 426   | 12 | 21 | 1 | 196 | 8  | 668   | 23 |
| 55,966 | 19 | 3 | 343   | 12 | 13 | 1 | 143 | 10 | 518   | 26 |
| 55,967 | 16 | 3 | 193   | 12 | 7  | 1 | 104 | 10 | 320   | 26 |
| 55,968 | 17 | 3 | 192   | 12 | 6  | 1 | 104 | 10 | 319   | 26 |
| 55,969 | 17 | 3 | 192   | 12 | 6  | 1 | 103 | 10 | 318   | 26 |
| 55,970 | 17 | 3 | 193   | 12 | 6  | 1 | 104 | 10 | 320   | 26 |
| 55,971 | 20 | 3 | 214   | 12 | 7  | 1 | 129 | 10 | 370   | 26 |
| 55,972 | 20 | 3 | 214   | 12 | 7  | 1 | 129 | 10 | 370   | 26 |
| 55,973 | 21 | 3 | 219   | 12 | 7  | 1 | 137 | 10 | 384   | 26 |
| 55,974 | 19 | 3 | 220   | 14 | 7  | 1 | 138 | 10 | 384   | 28 |
| 55,975 | 19 | 3 | 220   | 14 | 7  | 1 | 138 | 11 | 384   | 29 |
| 55,976 | 19 | 3 | 218   | 14 | 7  | 1 | 138 | 11 | 382   | 29 |
| 55,977 | 19 | 4 | 216   | 14 | 7  | 1 | 135 | 11 | 377   | 30 |
| 55,978 | 19 | 4 | 233   | 13 | 8  | 1 | 145 | 11 | 405   | 29 |
| 55,979 | 18 | 4 | 235   | 13 | 8  | 1 | 145 | 11 | 406   | 29 |
| 55,980 | 17 | 4 | 216   | 13 | 8  | 1 | 138 | 9  | 379   | 27 |
| 55,981 | 16 | 4 | 211   | 13 | 7  | 1 | 135 | 9  | 369   | 27 |
| 55,982 | 16 | 4 | 207   | 13 | 7  | 1 | 129 | 9  | 359   | 27 |
| 55,983 | 15 | 4 | 202   | 13 | 7  | 1 | 129 | 9  | 353   | 27 |
| 55,984 | 58 | 4 | 500   | 11 | 21 | 1 | 353 | 9  | 932   | 25 |
| 55,985 | 58 | 4 | 500   | 11 | 21 | 1 | 353 | 9  | 932   | 25 |
| 55,986 | 59 | 4 | 505   | 9  | 23 | 1 | 360 | 8  | 947   | 22 |
| 55,987 | 61 | 4 | 508   | 9  | 23 | 1 | 363 | 8  | 955   | 22 |
| 55,988 | 61 | 4 | 494   | 8  | 22 | 1 | 360 | 7  | 937   | 20 |
| 55,989 | 61 | 4 | 492   | 8  | 22 | 0 | 361 | 7  | 936   | 19 |
| 55,990 | 61 | 4 | 493   | 8  | 22 | 0 | 361 | 7  | 937   | 19 |
| 55,991 | 61 | 4 | 490   | 9  | 21 | 0 | 362 | 7  | 934   | 20 |
| 55,992 | 61 | 4 | 491   | 9  | 23 | 0 | 364 | 7  | 939   | 20 |
| 55,993 | 60 | 4 | 486   | 9  | 23 | 0 | 361 | 7  | 930   | 20 |
| 55,994 | 56 | 4 | 476   | 9  | 21 | 0 | 347 | 7  | 900   | 20 |

|        |    |   |     |    |    |   |     |    |       |    |
|--------|----|---|-----|----|----|---|-----|----|-------|----|
| 55,995 | 56 | 4 | 471 | 9  | 21 | 0 | 341 | 7  | 889   | 20 |
| 55,996 | 54 | 4 | 467 | 9  | 21 | 0 | 342 | 7  | 884   | 20 |
| 55,997 | 54 | 4 | 472 | 10 | 21 | 0 | 346 | 8  | 893   | 22 |
| 55,998 | 54 | 4 | 472 | 10 | 21 | 0 | 346 | 7  | 893   | 21 |
| 55,999 | 54 | 4 | 475 | 10 | 21 | 0 | 349 | 7  | 899   | 21 |
| 56,000 | 54 | 4 | 475 | 11 | 21 | 0 | 349 | 8  | 899   | 23 |
| 56,001 | 53 | 4 | 469 | 11 | 21 | 0 | 347 | 8  | 890   | 23 |
| 56,002 | 56 | 4 | 476 | 11 | 21 | 0 | 356 | 8  | 909   | 23 |
| 56,003 | 55 | 4 | 476 | 11 | 21 | 0 | 356 | 8  | 908   | 23 |
| 56,004 | 54 | 4 | 474 | 11 | 21 | 0 | 355 | 8  | 904   | 23 |
| 56,005 | 54 | 4 | 473 | 11 | 21 | 0 | 355 | 8  | 903   | 23 |
| 56,006 | 54 | 4 | 473 | 11 | 21 | 0 | 355 | 8  | 903   | 23 |
| 56,007 | 54 | 4 | 475 | 11 | 21 | 0 | 355 | 8  | 905   | 23 |
| 56,008 | 54 | 4 | 476 | 11 | 21 | 0 | 355 | 7  | 906   | 22 |
| 56,009 | 54 | 4 | 476 | 11 | 21 | 0 | 355 | 7  | 906   | 22 |
| 56,010 | 54 | 4 | 479 | 10 | 21 | 0 | 355 | 6  | 909   | 20 |
| 56,011 | 54 | 4 | 477 | 10 | 21 | 0 | 355 | 6  | 907   | 20 |
| 56,012 | 54 | 3 | 477 | 6  | 21 | 0 | 355 | 5  | 907   | 14 |
| 56,013 | 55 | 3 | 479 | 6  | 21 | 0 | 354 | 5  | 909   | 14 |
| 56,014 | 55 | 4 | 479 | 6  | 21 | 0 | 354 | 5  | 909   | 15 |
| 56,015 | 55 | 4 | 476 | 7  | 20 | 0 | 353 | 5  | 904   | 16 |
| 56,016 | 55 | 2 | 476 | 10 | 20 | 0 | 355 | 4  | 906   | 16 |
| 56,017 | 54 | 2 | 475 | 14 | 20 | 1 | 357 | 5  | 906   | 22 |
| 56,018 | 54 | 2 | 482 | 19 | 20 | 2 | 361 | 22 | 917   | 45 |
| 56,019 | 54 | 4 | 480 | 21 | 20 | 2 | 362 | 22 | 916   | 49 |
| 56,020 | 59 | 4 | 507 | 37 | 23 | 2 | 384 | 25 | 973   | 68 |
| 56,021 | 66 | 4 | 539 | 38 | 25 | 2 | 411 | 25 | 1,041 | 69 |
| 56,022 | 64 | 4 | 523 | 38 | 24 | 2 | 384 | 25 | 995   | 69 |
| 56,023 | 64 | 4 | 526 | 38 | 24 | 2 | 376 | 25 | 990   | 69 |
| 56,024 | 64 | 4 | 526 | 38 | 24 | 2 | 376 | 25 | 990   | 69 |
| 56,025 | 69 | 4 | 567 | 38 | 26 | 2 | 418 | 32 | 1,080 | 76 |
| 56,026 | 69 | 4 | 567 | 38 | 26 | 2 | 419 | 34 | 1,081 | 78 |
| 56,027 | 71 | 4 | 577 | 39 | 27 | 2 | 430 | 35 | 1,105 | 80 |
| 56,028 | 71 | 3 | 574 | 39 | 27 | 2 | 431 | 35 | 1,103 | 79 |
| 56,029 | 71 | 3 | 547 | 39 | 26 | 2 | 420 | 35 | 1,064 | 79 |
| 56,030 | 66 | 3 | 497 | 40 | 27 | 2 | 420 | 35 | 1,010 | 80 |
| 56,031 | 37 | 3 | 366 | 40 | 18 | 2 | 305 | 38 | 726   | 83 |
| 56,032 | 37 | 3 | 332 | 40 | 16 | 2 | 277 | 38 | 662   | 83 |
| 56,033 | 30 | 4 | 279 | 41 | 14 | 2 | 217 | 38 | 540   | 85 |
| 56,034 | 29 | 4 | 272 | 42 | 14 | 2 | 213 | 38 | 528   | 86 |
| 56,035 | 29 | 4 | 288 | 42 | 14 | 2 | 216 | 38 | 547   | 86 |

|        |    |   |       |    |    |   |       |    |       |     |
|--------|----|---|-------|----|----|---|-------|----|-------|-----|
| 56,036 | 30 | 4 | 310   | 43 | 15 | 2 | 221   | 39 | 576   | 88  |
| 56,037 | 29 | 4 | 294   | 43 | 13 | 2 | 214   | 39 | 550   | 88  |
| 56,038 | 27 | 4 | 263   | 43 | 13 | 2 | 199   | 39 | 502   | 88  |
| 56,039 | 38 | 4 | 494   | 43 | 22 | 2 | 311   | 39 | 865   | 88  |
| 56,040 | 51 | 4 | 624   | 44 | 30 | 2 | 453   | 39 | 1,158 | 89  |
| 56,041 | 66 | 4 | 761   | 44 | 45 | 2 | 669   | 39 | 1,541 | 89  |
| 56,042 | 67 | 4 | 822   | 43 | 46 | 2 | 682   | 39 | 1,617 | 88  |
| 56,043 | 72 | 4 | 873   | 43 | 47 | 2 | 707   | 39 | 1,699 | 88  |
| 56,044 | 72 | 4 | 998   | 44 | 49 | 2 | 770   | 39 | 1,889 | 89  |
| 56,045 | 74 | 4 | 1,068 | 44 | 56 | 2 | 841   | 40 | 2,039 | 90  |
| 56,046 | 74 | 5 | 1,071 | 44 | 57 | 2 | 845   | 40 | 2,047 | 91  |
| 56,047 | 74 | 5 | 1,075 | 44 | 57 | 2 | 846   | 40 | 2,052 | 91  |
| 56,048 | 78 | 5 | 1,085 | 49 | 57 | 2 | 854   | 40 | 2,074 | 96  |
| 56,049 | 79 | 5 | 1,086 | 50 | 57 | 2 | 854   | 40 | 2,076 | 97  |
| 56,050 | 79 | 5 | 1,083 | 52 | 57 | 2 | 851   | 40 | 2,070 | 99  |
| 56,051 | 79 | 6 | 1,080 | 52 | 57 | 2 | 850   | 42 | 2,066 | 102 |
| 56,052 | 76 | 6 | 1,074 | 52 | 57 | 2 | 845   | 43 | 2,052 | 103 |
| 56,053 | 76 | 6 | 1,078 | 53 | 57 | 2 | 845   | 43 | 2,056 | 104 |
| 56,054 | 76 | 6 | 1,079 | 53 | 57 | 2 | 846   | 43 | 2,058 | 104 |
| 56,055 | 78 | 6 | 1,080 | 54 | 57 | 2 | 848   | 43 | 2,063 | 105 |
| 56,056 | 78 | 6 | 1,079 | 54 | 57 | 2 | 848   | 43 | 2,062 | 105 |
| 56,057 | 78 | 6 | 1,081 | 54 | 57 | 2 | 848   | 43 | 2,064 | 105 |
| 56,058 | 78 | 6 | 1,088 | 58 | 57 | 2 | 850   | 44 | 2,073 | 110 |
| 56,059 | 78 | 6 | 1,087 | 58 | 57 | 2 | 850   | 44 | 2,072 | 110 |
| 56,060 | 83 | 6 | 1,139 | 60 | 60 | 2 | 892   | 44 | 2,174 | 112 |
| 56,061 | 83 | 6 | 1,137 | 60 | 60 | 2 | 892   | 44 | 2,172 | 112 |
| 56,062 | 83 | 6 | 1,137 | 60 | 60 | 2 | 892   | 44 | 2,172 | 112 |
| 56,063 | 83 | 6 | 1,147 | 62 | 60 | 2 | 910   | 49 | 2,200 | 119 |
| 56,064 | 83 | 6 | 1,147 | 62 | 60 | 2 | 910   | 49 | 2,200 | 119 |
| 56,065 | 84 | 5 | 1,172 | 62 | 60 | 2 | 957   | 49 | 2,273 | 118 |
| 56,066 | 85 | 5 | 1,184 | 62 | 60 | 2 | 972   | 49 | 2,301 | 118 |
| 56,067 | 93 | 5 | 1,248 | 60 | 65 | 2 | 1,047 | 48 | 2,453 | 115 |
| 56,068 | 95 | 5 | 1,260 | 51 | 67 | 0 | 1,054 | 30 | 2,476 | 86  |
| 56,069 | 98 | 3 | 1,299 | 48 | 71 | 0 | 1,089 | 30 | 2,557 | 81  |
| 56,070 | 98 | 3 | 1,305 | 49 | 71 | 0 | 1,088 | 36 | 2,562 | 88  |
| 56,071 | 98 | 3 | 1,350 | 39 | 71 | 1 | 1,127 | 36 | 2,646 | 79  |
| 56,072 | 91 | 3 | 1,370 | 38 | 72 | 1 | 1,153 | 36 | 2,686 | 78  |
| 56,073 | 90 | 3 | 1,367 | 44 | 72 | 2 | 1,154 | 43 | 2,683 | 92  |
| 56,074 | 89 | 3 | 1,358 | 44 | 72 | 2 | 1,154 | 43 | 2,673 | 92  |
| 56,075 | 88 | 3 | 1,368 | 44 | 74 | 2 | 1,158 | 43 | 2,688 | 92  |
| 56,076 | 85 | 3 | 1,337 | 44 | 72 | 2 | 1,119 | 40 | 2,613 | 89  |



|        |     |   |       |    |     |   |       |    |       |     |
|--------|-----|---|-------|----|-----|---|-------|----|-------|-----|
| 56,077 | 83  | 4 | 1,329 | 44 | 71  | 2 | 1,113 | 39 | 2,596 | 89  |
| 56,078 | 88  | 4 | 1,381 | 46 | 75  | 2 | 1,164 | 38 | 2,708 | 90  |
| 56,079 | 91  | 4 | 1,395 | 47 | 75  | 2 | 1,176 | 38 | 2,737 | 91  |
| 56,080 | 92  | 4 | 1,403 | 47 | 75  | 2 | 1,180 | 38 | 2,750 | 91  |
| 56,081 | 93  | 4 | 1,407 | 47 | 73  | 2 | 1,163 | 38 | 2,736 | 91  |
| 56,082 | 96  | 4 | 1,419 | 47 | 75  | 2 | 1,169 | 35 | 2,759 | 88  |
| 56,083 | 99  | 3 | 1,482 | 46 | 78  | 3 | 1,194 | 35 | 2,853 | 87  |
| 56,084 | 99  | 3 | 1,479 | 46 | 78  | 3 | 1,194 | 35 | 2,850 | 87  |
| 56,085 | 99  | 3 | 1,485 | 45 | 78  | 3 | 1,216 | 35 | 2,878 | 86  |
| 56,086 | 122 | 3 | 1,579 | 45 | 90  | 3 | 1,360 | 35 | 3,151 | 86  |
| 56,087 | 157 | 3 | 1,726 | 44 | 101 | 3 | 1,517 | 37 | 3,501 | 87  |
| 56,088 | 155 | 3 | 1,705 | 47 | 101 | 3 | 1,502 | 38 | 3,463 | 91  |
| 56,089 | 146 | 3 | 1,493 | 47 | 93  | 3 | 1,406 | 38 | 3,138 | 91  |
| 56,090 | 180 | 3 | 1,636 | 51 | 138 | 3 | 1,705 | 40 | 3,659 | 97  |
| 56,091 | 171 | 3 | 1,564 | 53 | 138 | 3 | 1,638 | 41 | 3,511 | 100 |
| 56,092 | 157 | 3 | 1,437 | 54 | 124 | 3 | 1,427 | 46 | 3,145 | 106 |
| 56,093 | 156 | 3 | 1,375 | 54 | 124 | 3 | 1,419 | 46 | 3,074 | 106 |
| 56,094 | 151 | 3 | 1,323 | 54 | 122 | 3 | 1,394 | 46 | 2,990 | 106 |
| 56,095 | 153 | 3 | 1,209 | 53 | 120 | 3 | 1,334 | 46 | 2,816 | 105 |
| 56,096 | 151 | 3 | 1,127 | 54 | 113 | 3 | 1,250 | 45 | 2,641 | 105 |
| 56,097 | 151 | 2 | 1,122 | 55 | 112 | 3 | 1,243 | 47 | 2,628 | 107 |
| 56,098 | 151 | 3 | 1,118 | 56 | 112 | 3 | 1,240 | 47 | 2,621 | 109 |
| 56,099 | 149 | 3 | 1,119 | 50 | 112 | 3 | 1,235 | 48 | 2,615 | 104 |
| 56,100 | 148 | 3 | 1,118 | 49 | 112 | 3 | 1,234 | 48 | 2,612 | 103 |
| 56,101 | 200 | 2 | 1,575 | 46 | 148 | 3 | 1,565 | 45 | 3,488 | 96  |
| 56,102 | 200 | 2 | 1,574 | 46 | 148 | 3 | 1,565 | 45 | 3,487 | 96  |
| 56,103 | 200 | 2 | 1,571 | 47 | 148 | 3 | 1,565 | 44 | 3,484 | 96  |
| 56,104 | 200 | 2 | 1,570 | 46 | 148 | 3 | 1,565 | 44 | 3,483 | 95  |
| 56,105 | 263 | 2 | 1,905 | 46 | 178 | 3 | 1,870 | 45 | 4,216 | 96  |
| 56,106 | 263 | 2 | 1,909 | 45 | 178 | 3 | 1,879 | 46 | 4,229 | 96  |
| 56,107 | 263 | 2 | 1,907 | 45 | 178 | 3 | 1,882 | 46 | 4,230 | 96  |
| 56,108 | 264 | 2 | 1,914 | 39 | 178 | 3 | 1,885 | 45 | 4,241 | 89  |
| 56,109 | 264 | 2 | 1,909 | 39 | 178 | 3 | 1,885 | 45 | 4,236 | 89  |
| 56,110 | 261 | 2 | 1,875 | 39 | 175 | 3 | 1,848 | 45 | 4,159 | 89  |
| 56,111 | 261 | 2 | 1,869 | 39 | 175 | 3 | 1,849 | 45 | 4,154 | 89  |
| 56,112 | 261 | 2 | 1,868 | 39 | 175 | 3 | 1,849 | 45 | 4,153 | 89  |
| 56,113 | 265 | 2 | 1,889 | 39 | 175 | 3 | 1,880 | 45 | 4,209 | 89  |
| 56,114 | 265 | 2 | 1,885 | 37 | 176 | 3 | 1,867 | 40 | 4,193 | 82  |
| 56,115 | 281 | 2 | 1,992 | 39 | 184 | 3 | 1,853 | 42 | 4,310 | 86  |
| 56,116 | 280 | 2 | 1,980 | 39 | 184 | 3 | 1,837 | 42 | 4,281 | 86  |
| 56,117 | 311 | 2 | 2,072 | 38 | 197 | 3 | 1,961 | 44 | 4,541 | 87  |

|        |     |    |       |    |     |   |       |    |       |     |
|--------|-----|----|-------|----|-----|---|-------|----|-------|-----|
| 56,118 | 310 | 2  | 2,073 | 39 | 194 | 5 | 1,929 | 45 | 4,506 | 91  |
| 56,119 | 310 | 6  | 2,080 | 61 | 195 | 6 | 1,945 | 53 | 4,530 | 126 |
| 56,120 | 307 | 6  | 2,034 | 62 | 191 | 6 | 1,904 | 55 | 4,436 | 129 |
| 56,121 | 307 | 8  | 2,056 | 70 | 193 | 6 | 1,924 | 54 | 4,480 | 138 |
| 56,122 | 312 | 8  | 2,158 | 66 | 197 | 5 | 1,906 | 51 | 4,573 | 130 |
| 56,123 | 333 | 11 | 2,303 | 62 | 205 | 4 | 1,940 | 44 | 4,781 | 121 |
| 56,124 | 333 | 11 | 2,385 | 62 | 206 | 4 | 1,975 | 44 | 4,899 | 121 |
| 56,125 | 376 | 11 | 3,073 | 62 | 261 | 4 | 2,421 | 44 | 6,131 | 121 |
| 56,126 | 377 | 11 | 3,110 | 62 | 269 | 4 | 2,453 | 44 | 6,209 | 121 |
| 56,127 | 371 | 10 | 3,065 | 60 | 266 | 4 | 2,405 | 38 | 6,107 | 112 |
| 56,128 | 371 | 10 | 3,065 | 60 | 266 | 4 | 2,405 | 38 | 6,107 | 112 |
| 56,129 | 371 | 10 | 3,057 | 57 | 265 | 4 | 2,399 | 38 | 6,092 | 109 |
| 56,130 | 373 | 10 | 3,074 | 55 | 269 | 4 | 2,400 | 38 | 6,116 | 107 |
| 56,131 | 373 | 10 | 3,072 | 55 | 269 | 4 | 2,403 | 38 | 6,117 | 107 |
| 56,132 | 371 | 10 | 3,048 | 55 | 269 | 4 | 2,396 | 38 | 6,084 | 107 |
| 56,133 | 372 | 10 | 3,079 | 55 | 270 | 4 | 2,428 | 38 | 6,149 | 107 |
| 56,134 | 370 | 10 | 3,054 | 55 | 270 | 3 | 2,415 | 38 | 6,109 | 106 |
| 56,135 | 370 | 10 | 3,042 | 55 | 270 | 3 | 2,390 | 38 | 6,072 | 106 |
| 56,136 | 363 | 10 | 3,012 | 55 | 267 | 3 | 2,346 | 38 | 5,988 | 106 |
| 56,137 | 349 | 10 | 2,973 | 55 | 258 | 3 | 2,271 | 38 | 5,851 | 106 |
| 56,138 | 313 | 10 | 2,802 | 52 | 246 | 3 | 2,104 | 34 | 5,465 | 99  |
| 56,139 | 303 | 10 | 2,768 | 52 | 237 | 3 | 2,020 | 34 | 5,328 | 99  |
| 56,140 | 276 | 10 | 2,624 | 52 | 199 | 3 | 1,753 | 35 | 4,852 | 100 |
| 56,141 | 276 | 10 | 2,608 | 45 | 197 | 3 | 1,745 | 32 | 4,826 | 90  |
| 56,142 | 275 | 10 | 2,609 | 45 | 193 | 3 | 1,734 | 32 | 4,811 | 90  |
| 56,143 | 274 | 10 | 2,597 | 44 | 192 | 3 | 1,721 | 27 | 4,784 | 84  |
| 56,144 | 275 | 10 | 2,593 | 44 | 192 | 3 | 1,717 | 27 | 4,777 | 84  |
| 56,145 | 275 | 10 | 2,596 | 44 | 192 | 3 | 1,720 | 27 | 4,783 | 84  |
| 56,146 | 273 | 10 | 2,595 | 43 | 192 | 3 | 1,717 | 27 | 4,777 | 83  |
| 56,147 | 278 | 10 | 2,718 | 42 | 204 | 3 | 1,853 | 25 | 5,053 | 80  |
| 56,148 | 282 | 10 | 2,876 | 42 | 213 | 3 | 1,961 | 25 | 5,332 | 80  |
| 56,149 | 256 | 9  | 2,641 | 41 | 218 | 3 | 1,904 | 23 | 5,019 | 76  |
| 56,150 | 256 | 9  | 2,666 | 44 | 217 | 4 | 1,917 | 25 | 5,056 | 82  |
| 56,151 | 235 | 10 | 2,510 | 44 | 194 | 4 | 1,751 | 25 | 4,690 | 83  |
| 56,152 | 226 | 10 | 2,457 | 44 | 196 | 4 | 1,718 | 25 | 4,597 | 83  |
| 56,153 | 202 | 10 | 2,389 | 44 | 189 | 4 | 1,678 | 25 | 4,458 | 83  |
| 56,154 | 183 | 10 | 2,297 | 43 | 177 | 4 | 1,545 | 25 | 4,202 | 82  |
| 56,155 | 183 | 10 | 2,275 | 44 | 175 | 4 | 1,534 | 25 | 4,167 | 83  |
| 56,156 | 179 | 10 | 2,239 | 44 | 170 | 4 | 1,479 | 24 | 4,067 | 82  |
| 56,157 | 182 | 10 | 2,267 | 44 | 170 | 4 | 1,488 | 23 | 4,107 | 81  |
| 56,158 | 183 | 10 | 2,270 | 44 | 170 | 4 | 1,488 | 23 | 4,111 | 81  |

|        |     |    |       |    |     |   |       |    |       |    |
|--------|-----|----|-------|----|-----|---|-------|----|-------|----|
| 56,159 | 191 | 10 | 2,340 | 44 | 171 | 4 | 1,539 | 23 | 4,241 | 81 |
| 56,160 | 192 | 10 | 2,343 | 44 | 171 | 4 | 1,544 | 23 | 4,250 | 81 |
| 56,161 | 190 | 10 | 2,339 | 44 | 171 | 4 | 1,545 | 23 | 4,245 | 81 |
| 56,162 | 190 | 10 | 2,338 | 44 | 171 | 4 | 1,542 | 24 | 4,241 | 82 |
| 56,163 | 195 | 10 | 2,358 | 44 | 173 | 4 | 1,537 | 24 | 4,263 | 82 |
| 56,164 | 198 | 10 | 2,377 | 44 | 174 | 4 | 1,539 | 24 | 4,288 | 82 |
| 56,165 | 208 | 10 | 2,412 | 44 | 177 | 5 | 1,578 | 24 | 4,375 | 83 |
| 56,166 | 199 | 6  | 2,315 | 17 | 170 | 2 | 1,573 | 9  | 4,257 | 34 |
| 56,167 | 197 | 6  | 2,311 | 17 | 171 | 2 | 1,578 | 9  | 4,257 | 34 |
| 56,168 | 165 | 6  | 2,204 | 17 | 162 | 2 | 1,489 | 9  | 4,020 | 34 |
| 56,169 | 165 | 6  | 2,184 | 18 | 160 | 2 | 1,475 | 9  | 3,984 | 35 |
| 56,170 | 176 | 6  | 2,233 | 18 | 168 | 2 | 1,526 | 9  | 4,103 | 35 |
| 56,171 | 178 | 6  | 2,232 | 18 | 167 | 2 | 1,531 | 9  | 4,108 | 35 |
| 56,172 | 182 | 4  | 2,227 | 9  | 167 | 2 | 1,531 | 4  | 4,107 | 19 |
| 56,173 | 172 | 4  | 2,058 | 9  | 160 | 2 | 1,489 | 4  | 3,879 | 19 |
| 56,174 | 151 | 1  | 1,852 | 7  | 149 | 2 | 1,395 | 4  | 3,547 | 14 |
| 56,175 | 151 | 1  | 1,761 | 7  | 146 | 2 | 1,362 | 4  | 3,420 | 14 |
| 56,176 | 108 | 1  | 1,066 | 7  | 92  | 2 | 910   | 4  | 2,176 | 14 |
| 56,177 | 107 | 1  | 1,028 | 7  | 83  | 2 | 876   | 4  | 2,094 | 14 |
| 56,178 | 107 | 1  | 1,029 | 7  | 83  | 2 | 875   | 4  | 2,094 | 14 |
| 56,179 | 106 | 1  | 1,024 | 7  | 81  | 2 | 876   | 4  | 2,087 | 14 |
| 56,180 | 103 | 1  | 1,019 | 9  | 79  | 2 | 870   | 6  | 2,071 | 18 |
| 56,181 | 102 | 1  | 996   | 15 | 79  | 2 | 862   | 11 | 2,039 | 29 |
| 56,182 | 101 | 1  | 990   | 18 | 79  | 2 | 857   | 15 | 2,027 | 36 |
| 56,183 | 100 | 1  | 983   | 23 | 79  | 2 | 855   | 16 | 2,017 | 42 |
| 56,184 | 97  | 1  | 945   | 23 | 76  | 2 | 818   | 16 | 1,936 | 42 |
| 56,185 | 96  | 1  | 905   | 23 | 73  | 2 | 806   | 18 | 1,880 | 44 |
| 56,186 | 94  | 2  | 890   | 24 | 73  | 2 | 794   | 18 | 1,851 | 46 |
| 56,187 | 95  | 2  | 884   | 27 | 73  | 2 | 790   | 19 | 1,842 | 50 |
| 56,188 | 95  | 2  | 872   | 27 | 72  | 2 | 779   | 19 | 1,818 | 50 |
| 56,189 | 96  | 2  | 872   | 27 | 72  | 2 | 779   | 19 | 1,819 | 50 |
| 56,190 | 100 | 2  | 942   | 27 | 72  | 2 | 804   | 19 | 1,918 | 50 |
| 56,191 | 100 | 2  | 949   | 27 | 72  | 2 | 802   | 18 | 1,923 | 49 |
| 56,192 | 101 | 2  | 957   | 27 | 72  | 2 | 807   | 18 | 1,937 | 49 |
| 56,193 | 101 | 2  | 951   | 29 | 72  | 2 | 804   | 18 | 1,928 | 51 |
| 56,194 | 101 | 2  | 950   | 30 | 72  | 3 | 804   | 18 | 1,927 | 53 |
| 56,195 | 101 | 2  | 965   | 30 | 71  | 3 | 817   | 19 | 1,954 | 54 |
| 56,196 | 107 | 2  | 997   | 32 | 70  | 3 | 839   | 20 | 2,013 | 57 |
| 56,197 | 110 | 2  | 1,051 | 37 | 71  | 3 | 865   | 23 | 2,097 | 65 |
| 56,198 | 104 | 2  | 917   | 37 | 59  | 3 | 722   | 24 | 1,802 | 66 |
| 56,199 | 100 | 2  | 822   | 41 | 52  | 3 | 684   | 25 | 1,658 | 71 |

|        |     |   |       |    |    |   |     |    |       |    |
|--------|-----|---|-------|----|----|---|-----|----|-------|----|
| 56,200 | 97  | 2 | 794   | 41 | 38 | 3 | 593 | 25 | 1,522 | 71 |
| 56,201 | 96  | 2 | 753   | 41 | 36 | 2 | 573 | 24 | 1,458 | 69 |
| 56,202 | 101 | 2 | 770   | 42 | 36 | 2 | 567 | 24 | 1,474 | 70 |
| 56,203 | 95  | 2 | 754   | 43 | 31 | 2 | 554 | 24 | 1,434 | 71 |
| 56,204 | 95  | 2 | 736   | 43 | 31 | 2 | 552 | 24 | 1,414 | 71 |
| 56,205 | 103 | 2 | 922   | 42 | 40 | 2 | 621 | 24 | 1,686 | 70 |
| 56,206 | 115 | 2 | 965   | 42 | 42 | 2 | 641 | 25 | 1,763 | 71 |
| 56,207 | 115 | 2 | 963   | 43 | 42 | 2 | 637 | 25 | 1,757 | 72 |
| 56,208 | 120 | 2 | 960   | 43 | 43 | 2 | 639 | 25 | 1,762 | 72 |
| 56,209 | 123 | 2 | 999   | 43 | 45 | 2 | 651 | 25 | 1,818 | 72 |
| 56,210 | 114 | 2 | 920   | 43 | 44 | 2 | 597 | 26 | 1,675 | 73 |
| 56,211 | 156 | 2 | 1,167 | 43 | 92 | 2 | 887 | 26 | 2,302 | 73 |
| 56,212 | 156 | 2 | 1,160 | 43 | 92 | 2 | 885 | 26 | 2,293 | 73 |
| 56,213 | 156 | 2 | 1,161 | 43 | 94 | 2 | 886 | 25 | 2,297 | 72 |
| 56,214 | 150 | 2 | 1,142 | 43 | 94 | 2 | 879 | 26 | 2,265 | 73 |
| 56,215 | 147 | 2 | 1,137 | 43 | 93 | 2 | 892 | 26 | 2,269 | 73 |
| 56,216 | 136 | 3 | 1,096 | 43 | 90 | 1 | 852 | 26 | 2,174 | 73 |
| 56,217 | 128 | 3 | 1,061 | 43 | 89 | 1 | 825 | 26 | 2,103 | 73 |
| 56,218 | 128 | 3 | 1,052 | 43 | 88 | 1 | 817 | 26 | 2,085 | 73 |
| 56,219 | 124 | 3 | 1,037 | 43 | 83 | 1 | 755 | 26 | 1,999 | 73 |
| 56,220 | 111 | 3 | 976   | 42 | 74 | 1 | 683 | 26 | 1,844 | 72 |
| 56,221 | 131 | 3 | 1,024 | 42 | 76 | 1 | 781 | 26 | 2,012 | 72 |
| 56,222 | 129 | 4 | 1,021 | 42 | 76 | 1 | 773 | 26 | 1,999 | 73 |
| 56,223 | 125 | 4 | 1,001 | 42 | 75 | 1 | 757 | 26 | 1,958 | 73 |
| 56,224 | 129 | 4 | 1,013 | 40 | 80 | 1 | 772 | 26 | 1,994 | 71 |
| 56,225 | 130 | 4 | 1,014 | 40 | 80 | 1 | 774 | 26 | 1,998 | 71 |
| 56,226 | 130 | 4 | 1,014 | 40 | 80 | 1 | 774 | 26 | 1,998 | 71 |
| 56,227 | 131 | 4 | 1,019 | 41 | 80 | 1 | 788 | 26 | 2,018 | 72 |
| 56,228 | 131 | 4 | 1,021 | 41 | 81 | 1 | 794 | 26 | 2,027 | 72 |
| 56,229 | 131 | 4 | 1,021 | 44 | 81 | 1 | 794 | 27 | 2,027 | 76 |
| 56,230 | 131 | 4 | 1,021 | 44 | 81 | 1 | 794 | 27 | 2,027 | 76 |
| 56,231 | 131 | 4 | 1,020 | 44 | 81 | 1 | 794 | 26 | 2,026 | 75 |
| 56,232 | 131 | 4 | 1,022 | 38 | 81 | 1 | 794 | 21 | 2,028 | 64 |
| 56,233 | 131 | 4 | 1,021 | 31 | 81 | 1 | 794 | 16 | 2,027 | 52 |
| 56,234 | 131 | 4 | 1,021 | 32 | 81 | 1 | 794 | 16 | 2,027 | 53 |
| 56,235 | 131 | 4 | 1,021 | 32 | 81 | 1 | 794 | 16 | 2,027 | 53 |
| 56,236 | 131 | 4 | 1,021 | 32 | 81 | 1 | 794 | 14 | 2,027 | 51 |
| 56,237 | 131 | 3 | 1,021 | 31 | 81 | 1 | 794 | 14 | 2,027 | 49 |
| 56,238 | 130 | 3 | 1,022 | 28 | 81 | 1 | 796 | 13 | 2,029 | 45 |
| 56,239 | 129 | 3 | 1,022 | 28 | 81 | 1 | 796 | 13 | 2,028 | 45 |
| 56,240 | 127 | 3 | 979   | 28 | 81 | 1 | 789 | 13 | 1,976 | 45 |

|        |     |   |     |    |    |   |     |    |       |    |
|--------|-----|---|-----|----|----|---|-----|----|-------|----|
| 56,241 | 128 | 3 | 969 | 29 | 82 | 1 | 781 | 13 | 1,960 | 46 |
| 56,242 | 128 | 3 | 962 | 29 | 82 | 1 | 780 | 13 | 1,952 | 46 |
| 56,243 | 131 | 3 | 969 | 29 | 82 | 1 | 816 | 13 | 1,998 | 46 |
| 56,244 | 131 | 3 | 969 | 28 | 82 | 1 | 815 | 17 | 1,997 | 49 |
| 56,245 | 131 | 3 | 964 | 29 | 82 | 0 | 814 | 17 | 1,991 | 49 |
| 56,246 | 130 | 4 | 961 | 29 | 82 | 0 | 807 | 16 | 1,980 | 49 |
| 56,247 | 124 | 4 | 925 | 27 | 82 | 0 | 781 | 15 | 1,912 | 46 |
| 56,248 | 121 | 4 | 859 | 18 | 81 | 0 | 755 | 10 | 1,816 | 32 |
| 56,249 | 121 | 4 | 839 | 18 | 81 | 0 | 738 | 10 | 1,779 | 32 |
| 56,250 | 120 | 4 | 789 | 18 | 79 | 0 | 683 | 10 | 1,671 | 32 |
| 56,251 | 119 | 4 | 788 | 19 | 79 | 0 | 683 | 10 | 1,669 | 33 |
| 56,252 | 119 | 4 | 784 | 16 | 79 | 0 | 680 | 9  | 1,662 | 29 |
| 56,253 | 116 | 3 | 763 | 14 | 78 | 0 | 685 | 9  | 1,642 | 26 |
| 56,254 | 116 | 3 | 763 | 14 | 78 | 0 | 687 | 9  | 1,644 | 26 |
| 56,255 | 107 | 3 | 580 | 14 | 70 | 0 | 619 | 9  | 1,376 | 26 |
| 56,256 | 107 | 3 | 549 | 14 | 68 | 0 | 596 | 9  | 1,320 | 26 |
| 56,257 | 96  | 4 | 513 | 13 | 66 | 0 | 593 | 8  | 1,268 | 25 |
| 56,258 | 91  | 4 | 502 | 13 | 66 | 0 | 588 | 9  | 1,247 | 26 |
| 56,259 | 86  | 4 | 500 | 13 | 67 | 0 | 595 | 10 | 1,248 | 27 |
| 56,260 | 82  | 4 | 458 | 15 | 65 | 0 | 584 | 10 | 1,189 | 29 |
| 56,261 | 82  | 4 | 458 | 17 | 65 | 0 | 584 | 11 | 1,189 | 32 |
| 56,262 | 39  | 4 | 211 | 17 | 17 | 0 | 288 | 11 | 555   | 32 |
| 56,263 | 38  | 4 | 208 | 18 | 14 | 0 | 287 | 11 | 547   | 33 |
| 56,264 | 37  | 4 | 201 | 19 | 14 | 0 | 281 | 11 | 533   | 34 |
| 56,265 | 36  | 4 | 195 | 19 | 13 | 0 | 272 | 10 | 516   | 33 |
| 56,266 | 36  | 4 | 182 | 20 | 13 | 0 | 257 | 10 | 488   | 34 |
| 56,267 | 36  | 4 | 199 | 20 | 13 | 0 | 263 | 10 | 511   | 34 |
| 56,268 | 37  | 4 | 221 | 20 | 17 | 0 | 287 | 10 | 562   | 34 |
| 56,269 | 38  | 4 | 258 | 20 | 17 | 0 | 304 | 10 | 617   | 34 |
| 56,270 | 38  | 4 | 256 | 21 | 17 | 1 | 304 | 12 | 615   | 38 |
| 56,271 | 38  | 4 | 254 | 21 | 17 | 1 | 304 | 12 | 613   | 38 |
| 56,272 | 18  | 3 | 206 | 21 | 14 | 1 | 205 | 12 | 443   | 37 |
| 56,273 | 16  | 3 | 201 | 23 | 12 | 1 | 201 | 13 | 430   | 40 |
| 56,274 | 14  | 3 | 192 | 23 | 9  | 1 | 187 | 14 | 402   | 41 |
| 56,275 | 14  | 3 | 190 | 24 | 9  | 1 | 187 | 14 | 400   | 42 |
| 56,276 | 13  | 3 | 189 | 24 | 9  | 1 | 185 | 14 | 396   | 42 |
| 56,277 | 12  | 3 | 186 | 24 | 9  | 1 | 172 | 16 | 379   | 44 |
| 56,278 | 12  | 3 | 186 | 23 | 9  | 1 | 172 | 16 | 379   | 43 |
| 56,279 | 12  | 3 | 184 | 23 | 8  | 1 | 166 | 16 | 370   | 43 |
| 56,280 | 12  | 3 | 258 | 20 | 10 | 1 | 183 | 15 | 463   | 39 |
| 56,281 | 15  | 3 | 325 | 20 | 20 | 1 | 242 | 15 | 602   | 39 |

|        |    |   |     |    |    |   |     |    |       |     |
|--------|----|---|-----|----|----|---|-----|----|-------|-----|
| 56,282 | 15 | 3 | 325 | 20 | 20 | 1 | 242 | 15 | 602   | 39  |
| 56,283 | 16 | 3 | 370 | 20 | 20 | 1 | 279 | 15 | 685   | 39  |
| 56,284 | 19 | 3 | 382 | 18 | 21 | 1 | 307 | 15 | 729   | 37  |
| 56,285 | 19 | 4 | 383 | 18 | 21 | 1 | 308 | 15 | 731   | 38  |
| 56,286 | 19 | 4 | 403 | 18 | 22 | 1 | 313 | 15 | 757   | 38  |
| 56,287 | 19 | 4 | 403 | 18 | 22 | 1 | 313 | 15 | 757   | 38  |
| 56,288 | 20 | 4 | 465 | 19 | 24 | 1 | 330 | 18 | 839   | 42  |
| 56,289 | 20 | 4 | 465 | 19 | 24 | 1 | 329 | 18 | 838   | 42  |
| 56,290 | 28 | 4 | 546 | 22 | 26 | 1 | 369 | 19 | 969   | 46  |
| 56,291 | 28 | 5 | 577 | 24 | 27 | 1 | 378 | 19 | 1,010 | 49  |
| 56,292 | 25 | 5 | 560 | 25 | 26 | 1 | 369 | 20 | 980   | 51  |
| 56,293 | 22 | 5 | 557 | 30 | 26 | 1 | 353 | 22 | 958   | 58  |
| 56,294 | 23 | 5 | 547 | 30 | 26 | 1 | 340 | 18 | 936   | 54  |
| 56,295 | 23 | 5 | 553 | 31 | 26 | 1 | 346 | 19 | 948   | 56  |
| 56,296 | 23 | 5 | 551 | 29 | 26 | 1 | 346 | 19 | 946   | 54  |
| 56,297 | 23 | 4 | 549 | 29 | 26 | 1 | 345 | 19 | 943   | 53  |
| 56,298 | 31 | 4 | 573 | 30 | 30 | 1 | 371 | 19 | 1,005 | 54  |
| 56,299 | 31 | 4 | 572 | 31 | 30 | 1 | 370 | 19 | 1,003 | 55  |
| 56,300 | 31 | 7 | 572 | 39 | 30 | 1 | 370 | 30 | 1,003 | 77  |
| 56,301 | 31 | 7 | 572 | 43 | 30 | 1 | 369 | 30 | 1,002 | 81  |
| 56,302 | 38 | 7 | 677 | 43 | 38 | 1 | 480 | 36 | 1,233 | 87  |
| 56,303 | 38 | 7 | 678 | 47 | 38 | 1 | 479 | 41 | 1,233 | 96  |
| 56,304 | 36 | 7 | 670 | 47 | 38 | 1 | 474 | 41 | 1,218 | 96  |
| 56,305 | 36 | 8 | 671 | 47 | 38 | 1 | 474 | 43 | 1,219 | 99  |
| 56,306 | 36 | 8 | 666 | 48 | 38 | 1 | 474 | 44 | 1,214 | 101 |
| 56,307 | 35 | 8 | 658 | 48 | 38 | 1 | 457 | 44 | 1,188 | 101 |
| 56,308 | 35 | 7 | 654 | 48 | 38 | 1 | 459 | 44 | 1,186 | 100 |
| 56,309 | 39 | 7 | 665 | 48 | 38 | 1 | 460 | 43 | 1,202 | 99  |
| 56,310 | 39 | 7 | 658 | 48 | 36 | 1 | 453 | 42 | 1,186 | 98  |
| 56,311 | 39 | 7 | 671 | 47 | 36 | 1 | 455 | 41 | 1,201 | 96  |
| 56,312 | 44 | 7 | 683 | 45 | 37 | 2 | 465 | 42 | 1,229 | 96  |
| 56,313 | 44 | 7 | 680 | 45 | 37 | 2 | 464 | 42 | 1,225 | 96  |
| 56,314 | 46 | 7 | 683 | 56 | 37 | 3 | 463 | 45 | 1,229 | 111 |
| 56,315 | 46 | 7 | 682 | 57 | 37 | 3 | 462 | 47 | 1,227 | 114 |
| 56,316 | 49 | 7 | 702 | 57 | 40 | 3 | 476 | 47 | 1,267 | 114 |
| 56,317 | 49 | 6 | 712 | 56 | 40 | 3 | 488 | 47 | 1,289 | 112 |
| 56,318 | 51 | 6 | 712 | 56 | 39 | 3 | 487 | 47 | 1,289 | 112 |
| 56,319 | 50 | 6 | 695 | 56 | 37 | 3 | 462 | 47 | 1,244 | 112 |
| 56,320 | 49 | 6 | 657 | 56 | 37 | 4 | 443 | 48 | 1,186 | 114 |
| 56,321 | 53 | 6 | 706 | 55 | 37 | 3 | 486 | 46 | 1,282 | 110 |
| 56,322 | 54 | 6 | 709 | 55 | 37 | 3 | 489 | 46 | 1,289 | 110 |

|        |    |   |     |    |    |   |     |    |       |     |
|--------|----|---|-----|----|----|---|-----|----|-------|-----|
| 56,323 | 54 | 6 | 706 | 53 | 37 | 3 | 494 | 45 | 1,291 | 107 |
| 56,324 | 54 | 6 | 704 | 53 | 37 | 3 | 494 | 44 | 1,289 | 106 |
| 56,325 | 54 | 6 | 704 | 52 | 37 | 3 | 494 | 44 | 1,289 | 105 |
| 56,326 | 54 | 6 | 705 | 52 | 37 | 3 | 494 | 45 | 1,290 | 106 |
| 56,327 | 54 | 6 | 703 | 53 | 37 | 3 | 493 | 45 | 1,287 | 107 |
| 56,328 | 54 | 6 | 703 | 53 | 38 | 3 | 493 | 43 | 1,288 | 105 |
| 56,329 | 54 | 6 | 703 | 55 | 38 | 3 | 493 | 43 | 1,288 | 107 |
| 56,330 | 54 | 6 | 697 | 55 | 38 | 3 | 493 | 43 | 1,282 | 107 |
| 56,331 | 54 | 6 | 631 | 55 | 36 | 3 | 482 | 43 | 1,203 | 107 |
| 56,332 | 51 | 6 | 564 | 53 | 26 | 3 | 421 | 42 | 1,062 | 104 |
| 56,333 | 52 | 6 | 537 | 53 | 26 | 3 | 409 | 42 | 1,024 | 104 |
| 56,334 | 52 | 6 | 523 | 54 | 26 | 3 | 384 | 43 | 985   | 106 |
| 56,335 | 49 | 6 | 510 | 56 | 25 | 3 | 357 | 42 | 941   | 107 |
| 56,336 | 49 | 5 | 510 | 58 | 25 | 3 | 356 | 42 | 940   | 108 |
| 56,337 | 49 | 5 | 490 | 58 | 24 | 3 | 351 | 45 | 914   | 111 |
| 56,338 | 49 | 5 | 480 | 58 | 24 | 3 | 341 | 45 | 894   | 111 |
| 56,339 | 48 | 5 | 428 | 57 | 22 | 3 | 332 | 42 | 830   | 107 |
| 56,340 | 40 | 7 | 347 | 57 | 20 | 3 | 288 | 42 | 695   | 109 |
| 56,341 | 40 | 7 | 326 | 54 | 19 | 3 | 281 | 41 | 666   | 105 |
| 56,342 | 40 | 6 | 317 | 52 | 19 | 3 | 279 | 41 | 655   | 102 |
| 56,343 | 40 | 6 | 317 | 50 | 19 | 3 | 279 | 40 | 655   | 99  |
| 56,344 | 42 | 6 | 321 | 46 | 19 | 3 | 286 | 38 | 668   | 93  |
| 56,345 | 40 | 6 | 320 | 47 | 19 | 3 | 277 | 38 | 656   | 94  |
| 56,346 | 40 | 6 | 312 | 46 | 19 | 3 | 270 | 38 | 641   | 93  |
| 56,347 | 40 | 6 | 311 | 47 | 19 | 3 | 268 | 38 | 638   | 94  |
| 56,348 | 32 | 6 | 286 | 48 | 15 | 3 | 243 | 40 | 576   | 97  |
| 56,349 | 31 | 6 | 282 | 48 | 15 | 4 | 243 | 44 | 571   | 102 |
| 56,350 | 31 | 6 | 276 | 47 | 15 | 4 | 243 | 44 | 565   | 101 |
| 56,351 | 31 | 3 | 259 | 35 | 12 | 4 | 251 | 33 | 553   | 75  |
| 56,352 | 29 | 3 | 252 | 35 | 12 | 4 | 248 | 35 | 541   | 77  |
| 56,353 | 25 | 3 | 198 | 34 | 6  | 4 | 159 | 29 | 388   | 70  |
| 56,354 | 26 | 3 | 203 | 30 | 7  | 4 | 165 | 24 | 401   | 61  |
| 56,355 | 26 | 4 | 203 | 31 | 7  | 4 | 165 | 24 | 401   | 63  |
| 56,356 | 26 | 3 | 204 | 31 | 8  | 4 | 168 | 23 | 406   | 61  |
| 56,357 | 26 | 3 | 204 | 30 | 8  | 4 | 169 | 22 | 407   | 59  |
| 56,358 | 26 | 3 | 209 | 30 | 8  | 4 | 168 | 22 | 411   | 59  |
| 56,359 | 28 | 3 | 208 | 30 | 8  | 4 | 168 | 22 | 412   | 59  |
| 56,360 | 24 | 3 | 196 | 30 | 8  | 4 | 163 | 22 | 391   | 59  |
| 56,361 | 25 | 3 | 187 | 30 | 9  | 4 | 161 | 22 | 382   | 59  |
| 56,362 | 25 | 3 | 184 | 30 | 9  | 4 | 159 | 22 | 377   | 59  |
| 56,363 | 21 | 3 | 172 | 30 | 8  | 3 | 147 | 20 | 348   | 56  |

|        |    |   |     |    |    |   |     |    |       |    |
|--------|----|---|-----|----|----|---|-----|----|-------|----|
| 56,364 | 20 | 3 | 176 | 18 | 8  | 2 | 150 | 17 | 354   | 40 |
| 56,365 | 20 | 3 | 176 | 16 | 8  | 2 | 150 | 15 | 354   | 36 |
| 56,366 | 20 | 3 | 176 | 16 | 8  | 2 | 151 | 15 | 355   | 36 |
| 56,367 | 17 | 3 | 156 | 16 | 6  | 2 | 137 | 16 | 316   | 37 |
| 56,368 | 18 | 3 | 131 | 16 | 5  | 2 | 116 | 16 | 270   | 37 |
| 56,369 | 16 | 3 | 128 | 16 | 4  | 2 | 117 | 16 | 265   | 37 |
| 56,370 | 17 | 3 | 152 | 16 | 5  | 1 | 116 | 15 | 290   | 35 |
| 56,371 | 30 | 3 | 224 | 16 | 8  | 1 | 154 | 15 | 416   | 35 |
| 56,372 | 27 | 3 | 199 | 16 | 8  | 1 | 135 | 15 | 369   | 35 |
| 56,373 | 39 | 3 | 550 | 16 | 18 | 1 | 358 | 15 | 965   | 35 |
| 56,374 | 39 | 3 | 548 | 16 | 18 | 1 | 354 | 15 | 959   | 35 |
| 56,375 | 39 | 3 | 547 | 16 | 18 | 1 | 354 | 15 | 958   | 35 |
| 56,376 | 40 | 3 | 586 | 16 | 28 | 1 | 427 | 15 | 1,081 | 35 |
| 56,377 | 40 | 3 | 602 | 16 | 29 | 1 | 440 | 14 | 1,111 | 34 |
| 56,378 | 40 | 3 | 605 | 14 | 28 | 1 | 450 | 14 | 1,123 | 32 |
| 56,379 | 40 | 3 | 607 | 16 | 28 | 1 | 452 | 15 | 1,127 | 35 |
| 56,380 | 40 | 3 | 607 | 16 | 28 | 1 | 453 | 15 | 1,128 | 35 |
| 56,381 | 40 | 3 | 606 | 16 | 28 | 1 | 453 | 15 | 1,127 | 35 |
| 56,382 | 41 | 3 | 604 | 16 | 28 | 1 | 453 | 15 | 1,126 | 35 |
| 56,383 | 41 | 3 | 609 | 17 | 28 | 1 | 456 | 15 | 1,134 | 36 |
| 56,384 | 39 | 3 | 610 | 17 | 28 | 1 | 457 | 16 | 1,134 | 37 |
| 56,385 | 41 | 3 | 612 | 14 | 28 | 1 | 456 | 15 | 1,137 | 33 |
| 56,386 | 43 | 3 | 621 | 14 | 28 | 1 | 463 | 15 | 1,155 | 33 |
| 56,387 | 43 | 3 | 628 | 12 | 28 | 1 | 466 | 15 | 1,165 | 31 |
| 56,388 | 43 | 3 | 634 | 12 | 28 | 1 | 472 | 13 | 1,177 | 29 |
| 56,389 | 43 | 3 | 632 | 12 | 28 | 1 | 472 | 13 | 1,175 | 29 |
| 56,390 | 43 | 3 | 632 | 12 | 28 | 1 | 472 | 13 | 1,175 | 29 |
| 56,391 | 43 | 1 | 633 | 12 | 28 | 1 | 473 | 13 | 1,177 | 27 |
| 56,392 | 43 | 1 | 632 | 12 | 28 | 1 | 473 | 13 | 1,176 | 27 |
| 56,393 | 43 | 1 | 635 | 13 | 28 | 1 | 474 | 13 | 1,180 | 28 |
| 56,394 | 43 | 1 | 635 | 13 | 28 | 1 | 473 | 13 | 1,179 | 28 |
| 56,395 | 41 | 1 | 633 | 10 | 28 | 1 | 467 | 14 | 1,169 | 26 |
| 56,396 | 41 | 1 | 632 | 10 | 28 | 1 | 467 | 14 | 1,168 | 26 |
| 56,397 | 42 | 1 | 637 | 10 | 28 | 1 | 470 | 14 | 1,177 | 26 |
| 56,398 | 42 | 1 | 656 | 8  | 29 | 1 | 473 | 12 | 1,200 | 22 |
| 56,399 | 45 | 1 | 690 | 7  | 31 | 0 | 487 | 8  | 1,253 | 16 |
| 56,400 | 45 | 1 | 700 | 7  | 31 | 0 | 489 | 8  | 1,265 | 16 |
| 56,401 | 52 | 1 | 747 | 7  | 35 | 0 | 537 | 8  | 1,371 | 16 |
| 56,402 | 52 | 1 | 732 | 7  | 35 | 0 | 511 | 8  | 1,330 | 16 |
| 56,403 | 52 | 1 | 739 | 7  | 35 | 0 | 518 | 6  | 1,344 | 14 |
| 56,404 | 52 | 1 | 738 | 7  | 34 | 0 | 518 | 6  | 1,342 | 14 |



|        |     |   |       |    |    |   |       |    |       |    |
|--------|-----|---|-------|----|----|---|-------|----|-------|----|
| 56,405 | 52  | 2 | 742   | 7  | 34 | 0 | 516   | 6  | 1,344 | 15 |
| 56,406 | 53  | 1 | 744   | 6  | 33 | 0 | 518   | 5  | 1,348 | 12 |
| 56,407 | 54  | 1 | 751   | 6  | 33 | 0 | 521   | 5  | 1,359 | 12 |
| 56,408 | 70  | 1 | 794   | 6  | 37 | 0 | 569   | 5  | 1,470 | 12 |
| 56,409 | 70  | 1 | 799   | 7  | 37 | 0 | 577   | 7  | 1,483 | 15 |
| 56,410 | 68  | 3 | 798   | 16 | 37 | 0 | 576   | 11 | 1,479 | 30 |
| 56,411 | 68  | 3 | 798   | 17 | 37 | 0 | 576   | 12 | 1,479 | 32 |
| 56,412 | 67  | 3 | 810   | 17 | 36 | 0 | 580   | 12 | 1,493 | 32 |
| 56,413 | 71  | 3 | 861   | 18 | 36 | 0 | 594   | 12 | 1,562 | 33 |
| 56,414 | 70  | 3 | 857   | 18 | 36 | 0 | 593   | 12 | 1,556 | 33 |
| 56,415 | 121 | 3 | 1,092 | 18 | 50 | 0 | 721   | 12 | 1,984 | 33 |
| 56,416 | 121 | 3 | 1,091 | 18 | 50 | 0 | 721   | 13 | 1,983 | 34 |
| 56,417 | 121 | 3 | 1,091 | 19 | 50 | 0 | 721   | 13 | 1,983 | 35 |
| 56,418 | 121 | 3 | 1,088 | 22 | 50 | 0 | 722   | 18 | 1,981 | 43 |
| 56,419 | 120 | 3 | 1,085 | 22 | 50 | 0 | 720   | 18 | 1,975 | 43 |
| 56,420 | 185 | 3 | 1,518 | 22 | 77 | 0 | 988   | 18 | 2,768 | 43 |
| 56,421 | 188 | 3 | 1,560 | 24 | 80 | 0 | 1,002 | 19 | 2,830 | 46 |
| 56,422 | 181 | 3 | 1,562 | 25 | 80 | 0 | 1,010 | 20 | 2,833 | 48 |
| 56,423 | 182 | 3 | 1,511 | 28 | 77 | 0 | 953   | 21 | 2,723 | 52 |
| 56,424 | 169 | 3 | 1,218 | 28 | 70 | 0 | 782   | 21 | 2,239 | 52 |
| 56,425 | 168 | 3 | 1,182 | 28 | 61 | 0 | 712   | 21 | 2,123 | 52 |
| 56,426 | 168 | 3 | 1,180 | 28 | 60 | 0 | 708   | 21 | 2,116 | 52 |
| 56,427 | 168 | 5 | 1,164 | 28 | 59 | 1 | 698   | 21 | 2,089 | 55 |
| 56,428 | 168 | 5 | 1,161 | 28 | 59 | 1 | 690   | 21 | 2,078 | 55 |
| 56,429 | 168 | 5 | 1,163 | 27 | 59 | 1 | 689   | 21 | 2,079 | 54 |
| 56,430 | 168 | 5 | 1,161 | 25 | 59 | 1 | 688   | 20 | 2,076 | 51 |
| 56,431 | 168 | 5 | 1,161 | 26 | 59 | 1 | 688   | 20 | 2,076 | 52 |
| 56,432 | 168 | 5 | 1,161 | 29 | 59 | 1 | 687   | 22 | 2,075 | 57 |
| 56,433 | 167 | 5 | 1,161 | 30 | 59 | 1 | 683   | 22 | 2,070 | 58 |
| 56,434 | 167 | 5 | 1,158 | 29 | 59 | 1 | 683   | 22 | 2,067 | 57 |
| 56,435 | 167 | 5 | 1,156 | 29 | 60 | 1 | 682   | 21 | 2,065 | 56 |
| 56,436 | 165 | 5 | 1,153 | 31 | 60 | 1 | 683   | 22 | 2,061 | 59 |
| 56,437 | 163 | 5 | 1,144 | 31 | 60 | 1 | 676   | 22 | 2,043 | 59 |
| 56,438 | 163 | 5 | 1,136 | 31 | 60 | 1 | 674   | 22 | 2,033 | 59 |
| 56,439 | 163 | 5 | 1,130 | 31 | 60 | 1 | 670   | 21 | 2,023 | 58 |
| 56,440 | 163 | 6 | 1,130 | 31 | 60 | 1 | 670   | 21 | 2,023 | 59 |
| 56,441 | 163 | 6 | 1,129 | 31 | 60 | 1 | 669   | 21 | 2,021 | 59 |
| 56,442 | 163 | 6 | 1,135 | 31 | 60 | 1 | 673   | 21 | 2,031 | 59 |
| 56,443 | 163 | 6 | 1,135 | 30 | 60 | 1 | 673   | 21 | 2,031 | 58 |
| 56,444 | 163 | 6 | 1,132 | 30 | 60 | 1 | 672   | 21 | 2,027 | 58 |
| 56,445 | 164 | 6 | 1,137 | 30 | 60 | 1 | 672   | 21 | 2,033 | 58 |

|        |     |   |       |    |    |   |     |    |       |    |
|--------|-----|---|-------|----|----|---|-----|----|-------|----|
| 56,446 | 165 | 6 | 1,145 | 32 | 61 | 1 | 677 | 25 | 2,048 | 64 |
| 56,447 | 164 | 6 | 1,141 | 32 | 61 | 1 | 674 | 25 | 2,040 | 64 |
| 56,448 | 165 | 6 | 1,139 | 34 | 61 | 1 | 674 | 31 | 2,039 | 72 |
| 56,449 | 165 | 6 | 1,121 | 34 | 60 | 1 | 672 | 31 | 2,018 | 72 |
| 56,450 | 162 | 6 | 1,087 | 34 | 58 | 1 | 658 | 31 | 1,965 | 72 |
| 56,451 | 162 | 6 | 1,078 | 34 | 58 | 1 | 656 | 31 | 1,954 | 72 |
| 56,452 | 155 | 6 | 1,028 | 34 | 54 | 1 | 605 | 31 | 1,842 | 72 |
| 56,453 | 155 | 6 | 1,024 | 34 | 54 | 1 | 605 | 32 | 1,838 | 73 |
| 56,454 | 155 | 6 | 1,019 | 36 | 54 | 1 | 599 | 33 | 1,827 | 76 |
| 56,455 | 154 | 6 | 1,013 | 36 | 54 | 1 | 595 | 34 | 1,816 | 77 |
| 56,456 | 156 | 5 | 1,025 | 37 | 54 | 1 | 603 | 34 | 1,838 | 77 |
| 56,457 | 155 | 5 | 1,022 | 37 | 54 | 1 | 598 | 34 | 1,829 | 77 |
| 56,458 | 154 | 5 | 1,015 | 37 | 54 | 1 | 594 | 34 | 1,817 | 77 |
| 56,459 | 138 | 5 | 977   | 37 | 50 | 1 | 551 | 32 | 1,716 | 75 |
| 56,460 | 138 | 5 | 970   | 37 | 50 | 1 | 543 | 32 | 1,701 | 75 |
| 56,461 | 138 | 3 | 973   | 28 | 50 | 1 | 544 | 28 | 1,705 | 60 |
| 56,462 | 138 | 3 | 975   | 25 | 51 | 1 | 545 | 27 | 1,709 | 56 |
| 56,463 | 139 | 3 | 988   | 25 | 51 | 1 | 567 | 27 | 1,745 | 56 |
| 56,464 | 134 | 3 | 951   | 25 | 51 | 1 | 558 | 27 | 1,694 | 56 |
| 56,465 | 131 | 3 | 917   | 25 | 51 | 1 | 537 | 27 | 1,636 | 56 |
| 56,466 | 84  | 3 | 731   | 25 | 37 | 1 | 441 | 26 | 1,293 | 55 |
| 56,467 | 84  | 3 | 734   | 26 | 37 | 1 | 443 | 26 | 1,298 | 56 |
| 56,468 | 74  | 3 | 679   | 22 | 37 | 1 | 421 | 21 | 1,211 | 47 |
| 56,469 | 73  | 3 | 673   | 22 | 37 | 1 | 422 | 21 | 1,205 | 47 |
| 56,470 | 58  | 3 | 542   | 22 | 30 | 1 | 362 | 21 | 992   | 47 |
| 56,471 | 21  | 3 | 319   | 22 | 12 | 1 | 178 | 22 | 530   | 48 |
| 56,472 | 24  | 3 | 276   | 19 | 11 | 1 | 158 | 20 | 469   | 43 |
| 56,473 | 17  | 3 | 188   | 19 | 8  | 1 | 99  | 20 | 312   | 43 |
| 56,474 | 19  | 3 | 209   | 17 | 8  | 1 | 116 | 19 | 352   | 40 |
| 56,475 | 35  | 3 | 310   | 17 | 14 | 1 | 172 | 19 | 531   | 40 |
| 56,476 | 35  | 3 | 310   | 17 | 14 | 1 | 172 | 19 | 531   | 40 |
| 56,477 | 55  | 1 | 450   | 17 | 19 | 0 | 240 | 19 | 764   | 37 |
| 56,478 | 55  | 1 | 450   | 17 | 19 | 0 | 238 | 19 | 762   | 37 |
| 56,479 | 55  | 1 | 448   | 17 | 19 | 0 | 238 | 19 | 760   | 37 |
| 56,480 | 60  | 1 | 617   | 17 | 29 | 0 | 335 | 19 | 1,041 | 37 |
| 56,481 | 60  | 1 | 641   | 17 | 29 | 0 | 350 | 19 | 1,080 | 37 |
| 56,482 | 60  | 1 | 644   | 13 | 29 | 0 | 351 | 17 | 1,084 | 31 |
| 56,483 | 60  | 1 | 643   | 14 | 29 | 0 | 350 | 17 | 1,082 | 32 |
| 56,484 | 60  | 1 | 643   | 14 | 29 | 0 | 350 | 17 | 1,082 | 32 |
| 56,485 | 60  | 1 | 642   | 15 | 29 | 0 | 350 | 17 | 1,081 | 33 |
| 56,486 | 60  | 1 | 641   | 15 | 28 | 0 | 349 | 17 | 1,078 | 33 |

|        |     |   |       |    |    |   |     |    |       |    |
|--------|-----|---|-------|----|----|---|-----|----|-------|----|
| 56,487 | 60  | 1 | 638   | 13 | 28 | 0 | 347 | 16 | 1,073 | 30 |
| 56,488 | 60  | 1 | 640   | 13 | 28 | 0 | 347 | 16 | 1,075 | 30 |
| 56,489 | 60  | 1 | 640   | 13 | 28 | 0 | 347 | 17 | 1,075 | 31 |
| 56,490 | 60  | 0 | 639   | 13 | 28 | 0 | 346 | 17 | 1,073 | 30 |
| 56,491 | 60  | 0 | 638   | 13 | 28 | 0 | 346 | 17 | 1,072 | 30 |
| 56,492 | 61  | 0 | 638   | 13 | 28 | 0 | 345 | 17 | 1,072 | 30 |
| 56,493 | 61  | 0 | 637   | 13 | 28 | 0 | 345 | 17 | 1,071 | 30 |
| 56,494 | 61  | 0 | 637   | 15 | 28 | 0 | 345 | 17 | 1,071 | 32 |
| 56,495 | 60  | 0 | 631   | 16 | 28 | 0 | 344 | 17 | 1,063 | 33 |
| 56,496 | 60  | 0 | 629   | 16 | 28 | 0 | 343 | 17 | 1,060 | 33 |
| 56,497 | 59  | 0 | 623   | 14 | 27 | 0 | 339 | 12 | 1,048 | 26 |
| 56,498 | 59  | 1 | 629   | 14 | 27 | 0 | 340 | 7  | 1,055 | 22 |
| 56,499 | 58  | 1 | 629   | 14 | 27 | 0 | 340 | 7  | 1,054 | 22 |
| 56,500 | 58  | 1 | 628   | 16 | 27 | 0 | 339 | 10 | 1,052 | 27 |
| 56,501 | 58  | 1 | 628   | 17 | 27 | 0 | 339 | 10 | 1,052 | 28 |
| 56,502 | 60  | 1 | 642   | 20 | 28 | 0 | 343 | 11 | 1,073 | 32 |
| 56,503 | 62  | 1 | 663   | 20 | 28 | 0 | 343 | 11 | 1,096 | 32 |
| 56,504 | 62  | 1 | 663   | 20 | 28 | 0 | 342 | 10 | 1,095 | 31 |
| 56,505 | 126 | 1 | 895   | 17 | 38 | 0 | 417 | 8  | 1,476 | 26 |
| 56,506 | 128 | 1 | 903   | 17 | 39 | 0 | 422 | 8  | 1,492 | 26 |
| 56,507 | 126 | 1 | 897   | 17 | 39 | 0 | 418 | 8  | 1,480 | 26 |
| 56,508 | 147 | 1 | 1,006 | 17 | 48 | 0 | 462 | 8  | 1,663 | 26 |
| 56,509 | 147 | 1 | 1,006 | 17 | 48 | 0 | 464 | 8  | 1,665 | 26 |
| 56,510 | 147 | 1 | 998   | 16 | 48 | 0 | 459 | 8  | 1,652 | 25 |
| 56,511 | 166 | 1 | 1,184 | 16 | 61 | 0 | 545 | 8  | 1,956 | 25 |
| 56,512 | 167 | 1 | 1,229 | 16 | 62 | 2 | 573 | 8  | 2,031 | 27 |
| 56,513 | 167 | 1 | 1,230 | 16 | 61 | 2 | 572 | 8  | 2,030 | 27 |
| 56,514 | 166 | 1 | 1,224 | 16 | 61 | 2 | 556 | 8  | 2,007 | 27 |
| 56,515 | 166 | 1 | 1,210 | 17 | 61 | 2 | 551 | 8  | 1,988 | 28 |
| 56,516 | 165 | 1 | 1,194 | 17 | 61 | 2 | 540 | 8  | 1,960 | 28 |
| 56,517 | 165 | 1 | 1,189 | 17 | 61 | 2 | 537 | 8  | 1,952 | 28 |
| 56,518 | 166 | 4 | 1,189 | 16 | 61 | 2 | 535 | 8  | 1,951 | 30 |
| 56,519 | 166 | 4 | 1,187 | 16 | 61 | 2 | 534 | 7  | 1,948 | 29 |
| 56,520 | 166 | 4 | 1,183 | 16 | 61 | 2 | 532 | 7  | 1,942 | 29 |
| 56,521 | 164 | 4 | 1,189 | 16 | 61 | 2 | 540 | 6  | 1,954 | 28 |
| 56,522 | 164 | 4 | 1,181 | 16 | 59 | 2 | 539 | 6  | 1,943 | 28 |
| 56,523 | 159 | 4 | 1,169 | 15 | 58 | 2 | 550 | 7  | 1,936 | 28 |
| 56,524 | 157 | 4 | 1,157 | 17 | 58 | 2 | 538 | 8  | 1,910 | 31 |
| 56,525 | 149 | 5 | 1,121 | 17 | 55 | 2 | 511 | 8  | 1,836 | 32 |
| 56,526 | 143 | 5 | 1,086 | 18 | 52 | 2 | 489 | 9  | 1,770 | 34 |
| 56,527 | 130 | 6 | 1,032 | 18 | 52 | 2 | 450 | 10 | 1,664 | 36 |

|        |     |    |     |    |    |   |     |    |       |    |
|--------|-----|----|-----|----|----|---|-----|----|-------|----|
| 56,528 | 126 | 6  | 965 | 18 | 48 | 2 | 424 | 10 | 1,563 | 36 |
| 56,529 | 126 | 6  | 972 | 18 | 51 | 2 | 434 | 10 | 1,583 | 36 |
| 56,530 | 123 | 9  | 825 | 19 | 42 | 2 | 341 | 10 | 1,331 | 40 |
| 56,531 | 123 | 9  | 812 | 20 | 42 | 2 | 330 | 10 | 1,307 | 41 |
| 56,532 | 124 | 9  | 808 | 20 | 42 | 2 | 326 | 11 | 1,300 | 42 |
| 56,533 | 124 | 10 | 805 | 20 | 42 | 2 | 324 | 11 | 1,295 | 43 |
| 56,534 | 124 | 10 | 807 | 18 | 43 | 2 | 330 | 11 | 1,304 | 41 |
| 56,535 | 124 | 10 | 808 | 17 | 43 | 2 | 329 | 11 | 1,304 | 40 |
| 56,536 | 124 | 10 | 808 | 17 | 43 | 2 | 329 | 11 | 1,304 | 40 |
| 56,537 | 124 | 10 | 807 | 17 | 43 | 2 | 329 | 11 | 1,303 | 40 |
| 56,538 | 124 | 10 | 814 | 17 | 43 | 2 | 334 | 11 | 1,315 | 40 |
| 56,539 | 124 | 10 | 815 | 17 | 43 | 2 | 335 | 11 | 1,317 | 40 |
| 56,540 | 124 | 10 | 815 | 17 | 43 | 2 | 335 | 10 | 1,317 | 39 |
| 56,541 | 125 | 10 | 822 | 17 | 43 | 2 | 342 | 10 | 1,332 | 39 |
| 56,542 | 124 | 10 | 820 | 17 | 43 | 2 | 342 | 10 | 1,329 | 39 |
| 56,543 | 124 | 10 | 819 | 15 | 43 | 2 | 340 | 10 | 1,326 | 37 |
| 56,544 | 124 | 10 | 823 | 16 | 43 | 2 | 342 | 10 | 1,332 | 38 |
| 56,545 | 124 | 10 | 823 | 16 | 43 | 2 | 342 | 10 | 1,332 | 38 |
| 56,546 | 124 | 10 | 826 | 15 | 43 | 2 | 343 | 10 | 1,336 | 37 |
| 56,547 | 134 | 9  | 838 | 13 | 43 | 2 | 364 | 9  | 1,379 | 33 |
| 56,548 | 134 | 9  | 834 | 13 | 43 | 2 | 367 | 9  | 1,378 | 33 |
| 56,549 | 133 | 9  | 834 | 13 | 43 | 2 | 366 | 9  | 1,376 | 33 |
| 56,550 | 133 | 9  | 836 | 13 | 42 | 2 | 367 | 9  | 1,378 | 33 |
| 56,551 | 133 | 9  | 836 | 11 | 42 | 2 | 367 | 6  | 1,378 | 28 |
| 56,552 | 134 | 9  | 827 | 7  | 42 | 2 | 365 | 5  | 1,368 | 23 |
| 56,553 | 135 | 9  | 833 | 7  | 42 | 2 | 365 | 5  | 1,375 | 23 |
| 56,554 | 133 | 9  | 814 | 7  | 42 | 2 | 366 | 5  | 1,355 | 23 |
| 56,555 | 133 | 9  | 806 | 7  | 42 | 2 | 366 | 6  | 1,347 | 24 |
| 56,556 | 74  | 9  | 581 | 7  | 32 | 2 | 288 | 6  | 975   | 24 |
| 56,557 | 72  | 9  | 575 | 7  | 31 | 2 | 282 | 6  | 960   | 24 |
| 56,558 | 70  | 9  | 566 | 8  | 31 | 2 | 284 | 6  | 951   | 25 |
| 56,559 | 51  | 9  | 472 | 10 | 22 | 2 | 241 | 6  | 786   | 27 |
| 56,560 | 44  | 9  | 403 | 12 | 16 | 2 | 212 | 6  | 675   | 29 |
| 56,561 | 36  | 9  | 306 | 15 | 11 | 2 | 175 | 6  | 528   | 32 |
| 56,562 | 34  | 9  | 310 | 16 | 9  | 2 | 173 | 6  | 526   | 33 |
| 56,563 | 37  | 9  | 313 | 23 | 9  | 0 | 199 | 6  | 558   | 38 |
| 56,564 | 37  | 9  | 305 | 23 | 9  | 0 | 197 | 6  | 548   | 38 |
| 56,565 | 37  | 9  | 294 | 22 | 9  | 0 | 191 | 6  | 531   | 37 |
| 56,566 | 37  | 9  | 294 | 24 | 9  | 0 | 191 | 6  | 531   | 39 |
| 56,567 | 37  | 9  | 294 | 26 | 9  | 0 | 191 | 6  | 531   | 41 |
| 56,568 | 36  | 9  | 296 | 27 | 9  | 0 | 190 | 7  | 531   | 43 |

|        |    |   |     |    |    |   |     |    |     |     |
|--------|----|---|-----|----|----|---|-----|----|-----|-----|
| 56,569 | 36 | 6 | 293 | 27 | 9  | 0 | 190 | 7  | 528 | 40  |
| 56,570 | 36 | 6 | 295 | 27 | 10 | 0 | 191 | 7  | 532 | 40  |
| 56,571 | 36 | 6 | 298 | 27 | 10 | 0 | 189 | 7  | 533 | 40  |
| 56,572 | 37 | 6 | 289 | 27 | 10 | 0 | 182 | 6  | 518 | 39  |
| 56,573 | 37 | 6 | 288 | 27 | 10 | 0 | 182 | 6  | 517 | 39  |
| 56,574 | 35 | 6 | 268 | 27 | 8  | 0 | 163 | 6  | 474 | 39  |
| 56,575 | 34 | 8 | 264 | 27 | 8  | 0 | 162 | 5  | 468 | 40  |
| 56,576 | 33 | 7 | 258 | 28 | 8  | 0 | 160 | 5  | 459 | 40  |
| 56,577 | 32 | 7 | 233 | 27 | 8  | 0 | 156 | 4  | 429 | 38  |
| 56,578 | 30 | 6 | 217 | 27 | 7  | 0 | 156 | 3  | 410 | 36  |
| 56,579 | 30 | 6 | 210 | 29 | 6  | 0 | 158 | 4  | 404 | 39  |
| 56,580 | 30 | 6 | 195 | 28 | 3  | 0 | 152 | 4  | 380 | 38  |
| 56,581 | 29 | 3 | 189 | 27 | 3  | 0 | 152 | 4  | 373 | 34  |
| 56,582 | 29 | 3 | 194 | 27 | 3  | 0 | 153 | 4  | 379 | 34  |
| 56,583 | 29 | 3 | 206 | 27 | 3  | 0 | 155 | 3  | 393 | 33  |
| 56,584 | 29 | 2 | 207 | 27 | 3  | 0 | 157 | 3  | 396 | 32  |
| 56,585 | 29 | 2 | 207 | 27 | 3  | 0 | 155 | 3  | 394 | 32  |
| 56,586 | 29 | 2 | 206 | 27 | 3  | 0 | 155 | 3  | 393 | 32  |
| 56,587 | 29 | 2 | 205 | 27 | 3  | 0 | 155 | 3  | 392 | 32  |
| 56,588 | 30 | 2 | 200 | 27 | 3  | 0 | 150 | 3  | 383 | 32  |
| 56,589 | 30 | 2 | 201 | 27 | 3  | 0 | 152 | 3  | 386 | 32  |
| 56,590 | 30 | 2 | 206 | 28 | 3  | 0 | 153 | 3  | 392 | 33  |
| 56,591 | 30 | 2 | 206 | 28 | 3  | 0 | 153 | 3  | 392 | 33  |
| 56,592 | 31 | 2 | 224 | 28 | 4  | 0 | 154 | 3  | 413 | 33  |
| 56,593 | 31 | 2 | 227 | 30 | 4  | 0 | 156 | 3  | 418 | 35  |
| 56,594 | 31 | 2 | 248 | 30 | 5  | 0 | 162 | 3  | 446 | 35  |
| 56,595 | 38 | 2 | 281 | 30 | 6  | 0 | 192 | 3  | 517 | 35  |
| 56,596 | 41 | 2 | 292 | 30 | 7  | 0 | 197 | 3  | 537 | 35  |
| 56,597 | 42 | 2 | 304 | 30 | 8  | 0 | 207 | 3  | 561 | 35  |
| 56,598 | 32 | 2 | 291 | 30 | 8  | 0 | 187 | 3  | 518 | 35  |
| 56,599 | 32 | 2 | 292 | 30 | 8  | 0 | 186 | 3  | 518 | 35  |
| 56,600 | 32 | 2 | 300 | 30 | 8  | 0 | 196 | 3  | 536 | 35  |
| 56,601 | 32 | 2 | 301 | 30 | 8  | 0 | 196 | 3  | 537 | 35  |
| 56,602 | 32 | 2 | 301 | 30 | 8  | 0 | 196 | 3  | 537 | 35  |
| 56,603 | 31 | 2 | 299 | 30 | 8  | 0 | 196 | 2  | 534 | 34  |
| 56,604 | 29 | 2 | 290 | 30 | 8  | 0 | 194 | 2  | 521 | 34  |
| 56,605 | 29 | 2 | 288 | 30 | 8  | 0 | 193 | 2  | 518 | 34  |
| 56,606 | 26 | 3 | 288 | 30 | 8  | 0 | 195 | 5  | 517 | 38  |
| 56,607 | 25 | 3 | 287 | 31 | 8  | 0 | 195 | 6  | 515 | 40  |
| 56,608 | 30 | 4 | 295 | 31 | 8  | 1 | 197 | 20 | 530 | 56  |
| 56,609 | 30 | 6 | 291 | 45 | 8  | 3 | 194 | 47 | 523 | 101 |

|        |    |   |     |    |    |   |     |    |     |     |
|--------|----|---|-----|----|----|---|-----|----|-----|-----|
| 56,610 | 28 | 6 | 285 | 40 | 8  | 3 | 192 | 47 | 513 | 96  |
| 56,611 | 29 | 6 | 298 | 43 | 9  | 3 | 194 | 48 | 530 | 100 |
| 56,612 | 31 | 6 | 308 | 34 | 9  | 3 | 182 | 49 | 530 | 92  |
| 56,613 | 31 | 6 | 301 | 34 | 9  | 3 | 181 | 49 | 522 | 92  |
| 56,614 | 27 | 6 | 250 | 35 | 8  | 3 | 127 | 49 | 412 | 93  |
| 56,615 | 27 | 6 | 250 | 35 | 8  | 3 | 126 | 49 | 411 | 93  |
| 56,616 | 27 | 6 | 250 | 35 | 8  | 3 | 127 | 51 | 412 | 95  |
| 56,617 | 27 | 6 | 249 | 35 | 8  | 3 | 127 | 51 | 411 | 95  |
| 56,618 | 31 | 7 | 356 | 36 | 12 | 3 | 186 | 53 | 585 | 99  |
| 56,619 | 31 | 7 | 354 | 36 | 12 | 3 | 186 | 53 | 583 | 99  |
| 56,620 | 31 | 7 | 359 | 36 | 11 | 3 | 186 | 53 | 587 | 99  |
| 56,621 | 31 | 7 | 359 | 36 | 11 | 3 | 185 | 54 | 586 | 100 |
| 56,622 | 31 | 7 | 361 | 36 | 11 | 3 | 185 | 54 | 588 | 100 |
| 56,623 | 30 | 7 | 359 | 36 | 11 | 3 | 185 | 54 | 585 | 100 |
| 56,624 | 30 | 7 | 360 | 36 | 11 | 3 | 185 | 54 | 586 | 100 |
| 56,625 | 30 | 7 | 359 | 36 | 11 | 3 | 182 | 55 | 582 | 101 |
| 56,626 | 30 | 5 | 351 | 34 | 11 | 3 | 180 | 55 | 572 | 97  |
| 56,627 | 30 | 5 | 351 | 33 | 11 | 3 | 178 | 55 | 570 | 96  |
| 56,628 | 30 | 5 | 351 | 35 | 11 | 3 | 178 | 56 | 570 | 99  |
| 56,629 | 29 | 5 | 351 | 35 | 11 | 3 | 175 | 56 | 566 | 99  |
| 56,630 | 27 | 5 | 345 | 34 | 11 | 3 | 168 | 55 | 551 | 97  |
| 56,631 | 27 | 6 | 347 | 36 | 11 | 3 | 173 | 56 | 558 | 101 |
| 56,632 | 27 | 6 | 344 | 37 | 11 | 3 | 172 | 56 | 554 | 102 |
| 56,633 | 28 | 6 | 357 | 43 | 11 | 3 | 175 | 59 | 571 | 111 |
| 56,634 | 29 | 6 | 364 | 45 | 11 | 3 | 178 | 60 | 582 | 114 |
| 56,635 | 29 | 7 | 363 | 49 | 11 | 3 | 175 | 60 | 578 | 119 |
| 56,636 | 29 | 7 | 361 | 50 | 10 | 3 | 172 | 61 | 572 | 121 |
| 56,637 | 31 | 7 | 373 | 50 | 10 | 3 | 182 | 61 | 596 | 121 |
| 56,638 | 32 | 7 | 374 | 50 | 10 | 3 | 183 | 61 | 599 | 121 |
| 56,639 | 31 | 7 | 372 | 50 | 10 | 3 | 183 | 61 | 596 | 121 |
| 56,640 | 31 | 7 | 371 | 51 | 10 | 3 | 181 | 62 | 593 | 123 |
| 56,641 | 31 | 7 | 365 | 50 | 10 | 3 | 180 | 62 | 586 | 122 |
| 56,642 | 30 | 7 | 364 | 50 | 10 | 3 | 177 | 62 | 581 | 122 |
| 56,643 | 30 | 7 | 342 | 48 | 9  | 3 | 173 | 62 | 554 | 120 |
| 56,644 | 30 | 7 | 339 | 47 | 9  | 3 | 171 | 62 | 549 | 119 |
| 56,645 | 30 | 8 | 319 | 49 | 8  | 3 | 165 | 62 | 522 | 122 |
| 56,646 | 23 | 8 | 285 | 49 | 7  | 3 | 133 | 62 | 448 | 122 |
| 56,647 | 20 | 8 | 272 | 49 | 6  | 3 | 128 | 62 | 426 | 122 |
| 56,648 | 19 | 8 | 260 | 49 | 5  | 3 | 117 | 62 | 401 | 122 |
| 56,649 | 19 | 8 | 257 | 49 | 5  | 3 | 114 | 62 | 395 | 122 |
| 56,650 | 19 | 8 | 253 | 49 | 5  | 3 | 105 | 61 | 382 | 121 |

|        |    |   |     |    |   |   |     |    |     |     |
|--------|----|---|-----|----|---|---|-----|----|-----|-----|
| 56,651 | 19 | 8 | 248 | 50 | 5 | 3 | 104 | 61 | 376 | 122 |
| 56,652 | 19 | 8 | 248 | 50 | 5 | 3 | 105 | 61 | 377 | 122 |
| 56,653 | 19 | 8 | 250 | 50 | 5 | 3 | 105 | 61 | 379 | 122 |
| 56,654 | 19 | 8 | 253 | 50 | 5 | 3 | 109 | 61 | 386 | 122 |
| 56,655 | 19 | 8 | 253 | 50 | 5 | 3 | 109 | 61 | 386 | 122 |
| 56,656 | 19 | 8 | 252 | 50 | 5 | 3 | 109 | 61 | 385 | 122 |
| 56,657 | 19 | 7 | 251 | 49 | 5 | 3 | 109 | 57 | 384 | 116 |
| 56,658 | 19 | 7 | 248 | 49 | 5 | 3 | 108 | 57 | 380 | 116 |
| 56,659 | 14 | 6 | 241 | 49 | 5 | 2 | 107 | 44 | 367 | 101 |
| 56,660 | 13 | 5 | 240 | 39 | 5 | 0 | 107 | 23 | 365 | 67  |
| 56,661 | 13 | 5 | 259 | 38 | 5 | 0 | 114 | 24 | 391 | 67  |
| 56,662 | 14 | 6 | 257 | 49 | 7 | 2 | 138 | 26 | 416 | 83  |
| 56,663 | 13 | 6 | 237 | 53 | 7 | 2 | 134 | 26 | 391 | 87  |
| 56,664 | 9  | 7 | 165 | 55 | 4 | 2 | 94  | 26 | 272 | 90  |
| 56,665 | 9  | 7 | 142 | 58 | 3 | 2 | 88  | 30 | 242 | 97  |
| 56,666 | 9  | 7 | 133 | 58 | 3 | 2 | 76  | 30 | 221 | 97  |
| 56,667 | 10 | 7 | 139 | 58 | 3 | 2 | 77  | 29 | 229 | 96  |
| 56,668 | 10 | 6 | 141 | 55 | 3 | 2 | 78  | 27 | 232 | 90  |
| 56,669 | 10 | 6 | 139 | 55 | 3 | 2 | 77  | 27 | 229 | 90  |
| 56,670 | 10 | 6 | 133 | 54 | 3 | 2 | 77  | 27 | 223 | 89  |
| 56,671 | 10 | 6 | 136 | 56 | 3 | 2 | 78  | 26 | 227 | 90  |
| 56,672 | 10 | 6 | 139 | 56 | 3 | 3 | 79  | 26 | 231 | 91  |
| 56,673 | 10 | 6 | 133 | 56 | 3 | 3 | 80  | 26 | 226 | 91  |
| 56,674 | 10 | 6 | 132 | 56 | 3 | 3 | 80  | 26 | 225 | 91  |
| 56,675 | 14 | 6 | 156 | 56 | 3 | 3 | 91  | 25 | 264 | 90  |
| 56,676 | 14 | 6 | 156 | 56 | 3 | 3 | 91  | 25 | 264 | 90  |
| 56,677 | 14 | 6 | 169 | 56 | 3 | 3 | 102 | 25 | 288 | 90  |
| 56,678 | 14 | 6 | 167 | 56 | 3 | 4 | 102 | 25 | 286 | 91  |
| 56,679 | 14 | 6 | 168 | 54 | 3 | 4 | 102 | 24 | 287 | 88  |
| 56,680 | 14 | 6 | 167 | 53 | 3 | 4 | 103 | 24 | 287 | 87  |
| 56,681 | 14 | 6 | 167 | 55 | 3 | 4 | 101 | 26 | 285 | 91  |
| 56,682 | 15 | 5 | 168 | 55 | 3 | 4 | 99  | 25 | 285 | 89  |
| 56,683 | 15 | 5 | 161 | 46 | 3 | 4 | 101 | 21 | 280 | 76  |
| 56,684 | 18 | 6 | 157 | 50 | 3 | 4 | 104 | 25 | 282 | 85  |
| 56,685 | 18 | 6 | 154 | 51 | 3 | 4 | 110 | 25 | 285 | 86  |
| 56,686 | 16 | 5 | 148 | 47 | 3 | 5 | 108 | 25 | 275 | 82  |
| 56,687 | 16 | 5 | 146 | 47 | 3 | 5 | 106 | 25 | 271 | 82  |
| 56,688 | 17 | 5 | 147 | 47 | 3 | 5 | 107 | 25 | 274 | 82  |
| 56,689 | 16 | 5 | 148 | 50 | 3 | 5 | 106 | 25 | 273 | 85  |
| 56,690 | 16 | 5 | 148 | 51 | 3 | 5 | 106 | 25 | 273 | 86  |
| 56,691 | 17 | 5 | 148 | 51 | 3 | 5 | 107 | 25 | 275 | 86  |

|        |    |   |     |    |   |   |     |    |     |    |
|--------|----|---|-----|----|---|---|-----|----|-----|----|
| 56,692 | 17 | 5 | 149 | 54 | 3 | 5 | 106 | 25 | 275 | 89 |
| 56,693 | 16 | 5 | 147 | 54 | 3 | 5 | 105 | 25 | 271 | 89 |
| 56,694 | 16 | 5 | 147 | 54 | 3 | 5 | 105 | 26 | 271 | 90 |
| 56,695 | 16 | 4 | 151 | 52 | 3 | 5 | 106 | 26 | 276 | 87 |
| 56,696 | 16 | 4 | 151 | 52 | 3 | 5 | 106 | 26 | 276 | 87 |
| 56,697 | 16 | 4 | 148 | 52 | 3 | 5 | 106 | 26 | 273 | 87 |
| 56,698 | 16 | 4 | 147 | 52 | 3 | 5 | 105 | 26 | 271 | 87 |
| 56,699 | 17 | 4 | 147 | 53 | 3 | 6 | 105 | 27 | 272 | 90 |
| 56,700 | 17 | 4 | 147 | 53 | 3 | 6 | 104 | 28 | 271 | 91 |
| 56,701 | 17 | 4 | 147 | 54 | 3 | 6 | 104 | 29 | 271 | 93 |
| 56,702 | 17 | 4 | 146 | 53 | 3 | 6 | 103 | 29 | 269 | 92 |
| 56,703 | 17 | 4 | 149 | 54 | 3 | 6 | 104 | 29 | 273 | 93 |
| 56,704 | 18 | 4 | 146 | 54 | 4 | 6 | 100 | 29 | 268 | 93 |
| 56,705 | 17 | 4 | 144 | 54 | 4 | 6 | 98  | 29 | 263 | 93 |
| 56,706 | 17 | 4 | 144 | 54 | 4 | 6 | 99  | 29 | 264 | 93 |
| 56,707 | 17 | 4 | 144 | 54 | 4 | 6 | 98  | 29 | 263 | 93 |
| 56,708 | 19 | 4 | 160 | 54 | 4 | 6 | 113 | 29 | 296 | 93 |
| 56,709 | 19 | 4 | 160 | 54 | 4 | 6 | 113 | 29 | 296 | 93 |
| 56,710 | 19 | 4 | 160 | 54 | 4 | 6 | 114 | 29 | 297 | 93 |
| 56,711 | 19 | 2 | 152 | 33 | 4 | 4 | 114 | 19 | 289 | 58 |
| 56,712 | 19 | 2 | 142 | 33 | 4 | 4 | 106 | 19 | 271 | 58 |
| 56,713 | 17 | 2 | 127 | 33 | 1 | 4 | 80  | 19 | 225 | 58 |
| 56,714 | 17 | 2 | 127 | 29 | 1 | 4 | 80  | 20 | 225 | 55 |
| 56,715 | 17 | 1 | 127 | 27 | 1 | 4 | 80  | 20 | 225 | 52 |
| 56,716 | 17 | 1 | 127 | 24 | 1 | 4 | 79  | 16 | 224 | 45 |
| 56,717 | 17 | 1 | 122 | 24 | 1 | 4 | 78  | 16 | 218 | 45 |
| 56,718 | 16 | 1 | 119 | 24 | 1 | 4 | 78  | 15 | 214 | 44 |
| 56,719 | 18 | 1 | 120 | 25 | 2 | 4 | 76  | 15 | 216 | 45 |
| 56,720 | 18 | 1 | 119 | 25 | 2 | 4 | 75  | 15 | 214 | 45 |
| 56,721 | 18 | 1 | 116 | 28 | 2 | 4 | 76  | 17 | 212 | 50 |
| 56,722 | 18 | 1 | 116 | 26 | 2 | 4 | 76  | 17 | 212 | 48 |
| 56,723 | 21 | 1 | 117 | 28 | 2 | 3 | 78  | 19 | 218 | 51 |
| 56,724 | 21 | 4 | 121 | 35 | 2 | 3 | 77  | 23 | 221 | 65 |
| 56,725 | 22 | 4 | 129 | 37 | 2 | 3 | 82  | 25 | 235 | 69 |
| 56,726 | 19 | 4 | 109 | 38 | 2 | 3 | 73  | 25 | 203 | 70 |
| 56,727 | 19 | 4 | 98  | 38 | 2 | 3 | 71  | 25 | 190 | 70 |
| 56,728 | 19 | 4 | 97  | 38 | 2 | 3 | 68  | 25 | 186 | 70 |
| 56,729 | 20 | 4 | 96  | 38 | 2 | 2 | 70  | 25 | 188 | 69 |
| 56,730 | 20 | 4 | 104 | 40 | 2 | 2 | 72  | 26 | 198 | 72 |
| 56,731 | 20 | 4 | 103 | 40 | 2 | 2 | 72  | 26 | 197 | 72 |
| 56,732 | 20 | 4 | 108 | 38 | 2 | 2 | 74  | 24 | 204 | 68 |



|        |    |   |     |    |    |   |     |    |     |    |
|--------|----|---|-----|----|----|---|-----|----|-----|----|
| 56,733 | 32 | 3 | 186 | 32 | 7  | 2 | 102 | 20 | 327 | 57 |
| 56,734 | 32 | 3 | 243 | 32 | 10 | 2 | 119 | 20 | 404 | 57 |
| 56,735 | 36 | 4 | 315 | 32 | 13 | 2 | 146 | 20 | 510 | 58 |
| 56,736 | 37 | 4 | 336 | 30 | 15 | 1 | 152 | 19 | 540 | 54 |
| 56,737 | 37 | 4 | 335 | 30 | 15 | 1 | 152 | 19 | 539 | 54 |
| 56,738 | 36 | 4 | 331 | 30 | 15 | 1 | 145 | 19 | 527 | 54 |
| 56,739 | 42 | 4 | 483 | 30 | 15 | 1 | 182 | 19 | 722 | 54 |
| 56,740 | 43 | 4 | 525 | 26 | 18 | 1 | 209 | 19 | 795 | 50 |
| 56,741 | 43 | 4 | 527 | 26 | 18 | 1 | 209 | 19 | 797 | 50 |
| 56,742 | 42 | 4 | 527 | 27 | 18 | 1 | 209 | 18 | 796 | 50 |
| 56,743 | 42 | 4 | 526 | 24 | 18 | 1 | 209 | 18 | 795 | 47 |
| 56,744 | 42 | 4 | 530 | 24 | 18 | 1 | 209 | 17 | 799 | 46 |
| 56,745 | 42 | 4 | 530 | 25 | 18 | 1 | 208 | 17 | 798 | 47 |
| 56,746 | 42 | 4 | 526 | 26 | 18 | 1 | 208 | 17 | 794 | 48 |
| 56,747 | 42 | 4 | 525 | 26 | 18 | 1 | 208 | 17 | 793 | 48 |
| 56,748 | 42 | 4 | 525 | 26 | 18 | 1 | 208 | 17 | 793 | 48 |
| 56,749 | 42 | 4 | 525 | 26 | 18 | 1 | 209 | 17 | 794 | 48 |
| 56,750 | 42 | 4 | 527 | 25 | 18 | 0 | 211 | 16 | 798 | 45 |
| 56,751 | 42 | 4 | 528 | 24 | 18 | 0 | 212 | 15 | 800 | 43 |
| 56,752 | 42 | 4 | 528 | 24 | 18 | 0 | 212 | 15 | 800 | 43 |
| 56,753 | 42 | 4 | 527 | 24 | 18 | 0 | 212 | 15 | 799 | 43 |
| 56,754 | 42 | 4 | 523 | 23 | 18 | 0 | 211 | 15 | 794 | 42 |
| 56,755 | 47 | 5 | 544 | 23 | 17 | 0 | 218 | 15 | 826 | 43 |
| 56,756 | 47 | 5 | 551 | 23 | 17 | 0 | 227 | 15 | 842 | 43 |
| 56,757 | 48 | 5 | 551 | 23 | 17 | 0 | 226 | 15 | 842 | 43 |
| 56,758 | 49 | 5 | 551 | 23 | 17 | 0 | 230 | 15 | 847 | 43 |
| 56,759 | 47 | 5 | 536 | 23 | 17 | 0 | 215 | 14 | 815 | 42 |
| 56,760 | 47 | 5 | 536 | 23 | 17 | 0 | 215 | 14 | 815 | 42 |
| 56,761 | 47 | 5 | 535 | 23 | 17 | 0 | 214 | 14 | 813 | 42 |
| 56,762 | 47 | 5 | 546 | 23 | 17 | 0 | 239 | 14 | 849 | 42 |
| 56,763 | 47 | 5 | 546 | 23 | 17 | 0 | 239 | 14 | 849 | 42 |
| 56,764 | 47 | 5 | 546 | 23 | 17 | 0 | 239 | 14 | 849 | 42 |
| 56,765 | 47 | 5 | 547 | 23 | 17 | 0 | 239 | 12 | 850 | 40 |
| 56,766 | 47 | 5 | 549 | 22 | 17 | 0 | 242 | 12 | 855 | 39 |
| 56,767 | 47 | 5 | 552 | 22 | 17 | 0 | 244 | 12 | 860 | 39 |
| 56,768 | 47 | 5 | 552 | 18 | 17 | 0 | 246 | 10 | 862 | 33 |
| 56,769 | 47 | 5 | 554 | 18 | 17 | 0 | 246 | 10 | 864 | 33 |
| 56,770 | 45 | 5 | 551 | 19 | 16 | 0 | 246 | 10 | 858 | 34 |
| 56,771 | 45 | 5 | 551 | 19 | 16 | 0 | 246 | 10 | 858 | 34 |
| 56,772 | 46 | 2 | 558 | 11 | 16 | 0 | 245 | 4  | 865 | 17 |
| 56,773 | 47 | 2 | 563 | 12 | 16 | 0 | 246 | 4  | 872 | 18 |

|        |     |   |       |    |    |   |     |    |       |    |
|--------|-----|---|-------|----|----|---|-----|----|-------|----|
| 56,774 | 48  | 2 | 582   | 9  | 16 | 0 | 253 | 2  | 899   | 13 |
| 56,775 | 48  | 2 | 579   | 9  | 16 | 0 | 255 | 2  | 898   | 13 |
| 56,776 | 50  | 2 | 573   | 9  | 16 | 0 | 252 | 2  | 891   | 13 |
| 56,777 | 50  | 2 | 571   | 9  | 16 | 0 | 252 | 2  | 889   | 13 |
| 56,778 | 50  | 2 | 565   | 9  | 16 | 0 | 245 | 2  | 876   | 13 |
| 56,779 | 50  | 2 | 572   | 10 | 16 | 0 | 243 | 2  | 881   | 14 |
| 56,780 | 51  | 2 | 600   | 11 | 17 | 0 | 246 | 2  | 914   | 15 |
| 56,781 | 53  | 2 | 638   | 9  | 18 | 0 | 260 | 1  | 969   | 12 |
| 56,782 | 53  | 2 | 633   | 10 | 18 | 0 | 258 | 3  | 962   | 15 |
| 56,783 | 48  | 2 | 616   | 15 | 16 | 0 | 254 | 5  | 934   | 22 |
| 56,784 | 45  | 2 | 584   | 15 | 13 | 0 | 245 | 5  | 887   | 22 |
| 56,785 | 44  | 2 | 529   | 15 | 10 | 1 | 226 | 8  | 809   | 26 |
| 56,786 | 37  | 1 | 454   | 15 | 7  | 1 | 195 | 9  | 693   | 26 |
| 56,787 | 35  | 1 | 420   | 16 | 5  | 2 | 178 | 9  | 638   | 28 |
| 56,788 | 35  | 1 | 307   | 16 | 5  | 2 | 169 | 11 | 516   | 30 |
| 56,789 | 34  | 1 | 310   | 19 | 5  | 2 | 158 | 11 | 507   | 33 |
| 56,790 | 34  | 1 | 286   | 20 | 3  | 2 | 138 | 13 | 461   | 36 |
| 56,791 | 34  | 1 | 273   | 20 | 2  | 2 | 134 | 13 | 443   | 36 |
| 56,792 | 34  | 1 | 285   | 18 | 2  | 2 | 136 | 13 | 457   | 34 |
| 56,793 | 35  | 1 | 286   | 18 | 2  | 2 | 136 | 13 | 459   | 34 |
| 56,794 | 35  | 1 | 284   | 18 | 2  | 2 | 136 | 13 | 457   | 34 |
| 56,795 | 40  | 1 | 294   | 17 | 2  | 2 | 142 | 13 | 478   | 33 |
| 56,796 | 40  | 1 | 294   | 17 | 2  | 2 | 142 | 13 | 478   | 33 |
| 56,797 | 42  | 2 | 311   | 16 | 2  | 2 | 147 | 13 | 502   | 33 |
| 56,798 | 42  | 2 | 311   | 16 | 2  | 2 | 147 | 13 | 502   | 33 |
| 56,799 | 45  | 2 | 369   | 17 | 2  | 2 | 154 | 13 | 570   | 34 |
| 56,800 | 119 | 2 | 852   | 17 | 30 | 2 | 387 | 13 | 1,388 | 34 |
| 56,801 | 119 | 2 | 865   | 17 | 30 | 2 | 386 | 12 | 1,400 | 33 |
| 56,802 | 119 | 2 | 888   | 17 | 30 | 2 | 392 | 12 | 1,429 | 33 |
| 56,803 | 123 | 2 | 906   | 17 | 30 | 2 | 394 | 12 | 1,453 | 33 |
| 56,804 | 123 | 1 | 1,054 | 17 | 37 | 2 | 460 | 12 | 1,674 | 32 |
| 56,805 | 123 | 1 | 1,163 | 18 | 39 | 2 | 492 | 13 | 1,817 | 34 |
| 56,806 | 124 | 1 | 1,188 | 18 | 41 | 2 | 496 | 13 | 1,849 | 34 |
| 56,807 | 124 | 1 | 1,187 | 19 | 41 | 2 | 498 | 13 | 1,850 | 35 |
| 56,808 | 123 | 1 | 1,186 | 19 | 41 | 2 | 498 | 13 | 1,848 | 35 |
| 56,809 | 122 | 1 | 1,186 | 19 | 41 | 2 | 494 | 13 | 1,843 | 35 |
| 56,810 | 122 | 1 | 1,186 | 19 | 41 | 2 | 494 | 13 | 1,843 | 35 |
| 56,811 | 122 | 1 | 1,173 | 20 | 41 | 2 | 469 | 15 | 1,805 | 38 |
| 56,812 | 122 | 1 | 1,173 | 24 | 41 | 2 | 470 | 16 | 1,806 | 43 |
| 56,813 | 124 | 1 | 1,177 | 32 | 42 | 2 | 471 | 16 | 1,814 | 51 |
| 56,814 | 124 | 1 | 1,177 | 34 | 42 | 2 | 471 | 16 | 1,814 | 53 |

|        |     |   |       |    |    |   |     |    |       |    |
|--------|-----|---|-------|----|----|---|-----|----|-------|----|
| 56,815 | 124 | 2 | 1,176 | 37 | 42 | 2 | 471 | 17 | 1,813 | 58 |
| 56,816 | 124 | 2 | 1,175 | 38 | 42 | 2 | 469 | 20 | 1,810 | 62 |
| 56,817 | 125 | 2 | 1,175 | 38 | 42 | 2 | 470 | 20 | 1,812 | 62 |
| 56,818 | 125 | 2 | 1,173 | 38 | 42 | 2 | 468 | 20 | 1,808 | 62 |
| 56,819 | 125 | 2 | 1,173 | 38 | 42 | 2 | 466 | 20 | 1,806 | 62 |
| 56,820 | 126 | 2 | 1,176 | 38 | 42 | 2 | 468 | 21 | 1,812 | 63 |
| 56,821 | 127 | 2 | 1,179 | 38 | 42 | 2 | 468 | 22 | 1,816 | 64 |
| 56,822 | 128 | 2 | 1,176 | 37 | 42 | 2 | 471 | 22 | 1,817 | 63 |
| 56,823 | 128 | 2 | 1,177 | 41 | 42 | 2 | 473 | 23 | 1,820 | 68 |
| 56,824 | 127 | 2 | 1,171 | 42 | 42 | 2 | 472 | 23 | 1,812 | 69 |
| 56,825 | 123 | 2 | 1,149 | 43 | 42 | 2 | 463 | 23 | 1,777 | 70 |
| 56,826 | 123 | 2 | 1,148 | 43 | 42 | 2 | 461 | 23 | 1,774 | 70 |
| 56,827 | 120 | 2 | 1,145 | 43 | 42 | 2 | 457 | 23 | 1,764 | 70 |
| 56,828 | 119 | 2 | 1,143 | 43 | 42 | 2 | 457 | 23 | 1,761 | 70 |
| 56,829 | 118 | 3 | 1,136 | 44 | 42 | 2 | 457 | 23 | 1,753 | 72 |
| 56,830 | 117 | 3 | 1,108 | 43 | 41 | 2 | 454 | 23 | 1,720 | 71 |
| 56,831 | 117 | 3 | 1,102 | 36 | 41 | 2 | 453 | 19 | 1,713 | 60 |
| 56,832 | 118 | 3 | 1,064 | 36 | 40 | 2 | 442 | 19 | 1,664 | 60 |
| 56,833 | 113 | 3 | 1,053 | 36 | 40 | 2 | 434 | 19 | 1,640 | 60 |
| 56,834 | 113 | 3 | 1,046 | 36 | 40 | 2 | 430 | 19 | 1,629 | 60 |
| 56,835 | 113 | 3 | 1,031 | 36 | 40 | 2 | 423 | 19 | 1,607 | 60 |
| 56,836 | 113 | 3 | 1,028 | 36 | 40 | 1 | 427 | 15 | 1,608 | 55 |
| 56,837 | 113 | 3 | 1,027 | 36 | 40 | 1 | 427 | 15 | 1,607 | 55 |
| 56,838 | 112 | 3 | 1,014 | 32 | 40 | 0 | 423 | 13 | 1,589 | 48 |
| 56,839 | 117 | 3 | 1,018 | 35 | 40 | 1 | 427 | 16 | 1,602 | 55 |
| 56,840 | 113 | 3 | 990   | 35 | 40 | 1 | 415 | 16 | 1,558 | 55 |
| 56,841 | 115 | 3 | 989   | 34 | 41 | 1 | 417 | 14 | 1,562 | 52 |
| 56,842 | 115 | 3 | 992   | 34 | 41 | 1 | 417 | 14 | 1,565 | 52 |
| 56,843 | 115 | 3 | 978   | 34 | 41 | 1 | 416 | 14 | 1,550 | 52 |
| 56,844 | 123 | 3 | 1,015 | 34 | 42 | 1 | 438 | 14 | 1,618 | 52 |
| 56,845 | 123 | 3 | 1,010 | 34 | 42 | 1 | 435 | 14 | 1,610 | 52 |
| 56,846 | 118 | 3 | 1,005 | 34 | 43 | 1 | 433 | 14 | 1,599 | 52 |
| 56,847 | 116 | 3 | 1,008 | 34 | 43 | 1 | 435 | 14 | 1,602 | 52 |
| 56,848 | 116 | 2 | 996   | 34 | 43 | 1 | 430 | 14 | 1,585 | 51 |
| 56,849 | 114 | 2 | 981   | 33 | 43 | 1 | 429 | 14 | 1,567 | 50 |
| 56,850 | 113 | 2 | 945   | 34 | 43 | 1 | 422 | 15 | 1,523 | 52 |
| 56,851 | 39  | 2 | 468   | 40 | 15 | 1 | 190 | 16 | 712   | 59 |
| 56,852 | 38  | 2 | 457   | 40 | 15 | 1 | 191 | 16 | 701   | 59 |
| 56,853 | 38  | 2 | 435   | 40 | 15 | 1 | 185 | 16 | 673   | 59 |
| 56,854 | 34  | 2 | 419   | 41 | 15 | 1 | 183 | 16 | 651   | 60 |
| 56,855 | 28  | 2 | 251   | 40 | 8  | 1 | 111 | 15 | 398   | 58 |

|        |     |   |     |    |    |   |     |    |       |    |
|--------|-----|---|-----|----|----|---|-----|----|-------|----|
| 56,856 | 29  | 2 | 143 | 40 | 6  | 1 | 80  | 15 | 258   | 58 |
| 56,857 | 28  | 2 | 111 | 39 | 4  | 1 | 69  | 15 | 212   | 57 |
| 56,858 | 28  | 2 | 111 | 39 | 4  | 1 | 65  | 15 | 208   | 57 |
| 56,859 | 28  | 2 | 120 | 39 | 4  | 1 | 70  | 15 | 222   | 57 |
| 56,860 | 28  | 2 | 120 | 39 | 4  | 1 | 70  | 15 | 222   | 57 |
| 56,861 | 29  | 2 | 120 | 39 | 4  | 1 | 76  | 13 | 229   | 55 |
| 56,862 | 29  | 2 | 121 | 35 | 4  | 1 | 76  | 12 | 230   | 50 |
| 56,863 | 29  | 2 | 120 | 35 | 4  | 1 | 76  | 12 | 229   | 50 |
| 56,864 | 31  | 2 | 189 | 27 | 5  | 1 | 109 | 12 | 334   | 42 |
| 56,865 | 33  | 2 | 214 | 25 | 6  | 1 | 120 | 12 | 373   | 40 |
| 56,866 | 34  | 1 | 244 | 21 | 8  | 1 | 144 | 9  | 430   | 32 |
| 56,867 | 34  | 1 | 244 | 21 | 8  | 1 | 143 | 9  | 429   | 32 |
| 56,868 | 41  | 1 | 293 | 21 | 8  | 1 | 163 | 10 | 505   | 33 |
| 56,869 | 49  | 1 | 353 | 23 | 10 | 1 | 181 | 11 | 593   | 36 |
| 56,870 | 51  | 1 | 403 | 23 | 10 | 1 | 191 | 11 | 655   | 36 |
| 56,871 | 50  | 2 | 400 | 25 | 10 | 2 | 189 | 13 | 649   | 42 |
| 56,872 | 49  | 2 | 397 | 29 | 10 | 2 | 189 | 13 | 645   | 46 |
| 56,873 | 82  | 3 | 691 | 30 | 23 | 2 | 298 | 16 | 1,094 | 51 |
| 56,874 | 81  | 3 | 697 | 30 | 23 | 2 | 298 | 15 | 1,099 | 50 |
| 56,875 | 81  | 4 | 698 | 31 | 23 | 3 | 297 | 17 | 1,099 | 55 |
| 56,876 | 81  | 4 | 698 | 30 | 23 | 3 | 297 | 17 | 1,099 | 54 |
| 56,877 | 84  | 4 | 711 | 30 | 23 | 3 | 308 | 17 | 1,126 | 54 |
| 56,878 | 84  | 4 | 714 | 30 | 24 | 3 | 313 | 17 | 1,135 | 54 |
| 56,879 | 87  | 4 | 773 | 30 | 24 | 3 | 332 | 17 | 1,216 | 54 |
| 56,880 | 89  | 3 | 794 | 29 | 26 | 3 | 346 | 17 | 1,255 | 52 |
| 56,881 | 102 | 3 | 845 | 29 | 30 | 3 | 379 | 17 | 1,356 | 52 |
| 56,882 | 102 | 3 | 843 | 29 | 30 | 3 | 377 | 17 | 1,352 | 52 |
| 56,883 | 100 | 3 | 893 | 29 | 33 | 3 | 397 | 17 | 1,423 | 52 |
| 56,884 | 101 | 3 | 895 | 29 | 33 | 3 | 407 | 17 | 1,436 | 52 |
| 56,885 | 101 | 3 | 895 | 29 | 33 | 3 | 406 | 17 | 1,435 | 52 |
| 56,886 | 101 | 3 | 894 | 29 | 33 | 3 | 402 | 17 | 1,430 | 52 |
| 56,887 | 101 | 3 | 894 | 29 | 33 | 3 | 402 | 17 | 1,430 | 52 |
| 56,888 | 101 | 3 | 896 | 26 | 34 | 2 | 404 | 14 | 1,435 | 45 |
| 56,889 | 101 | 4 | 896 | 26 | 34 | 2 | 404 | 14 | 1,435 | 46 |
| 56,890 | 96  | 4 | 891 | 27 | 34 | 2 | 399 | 14 | 1,420 | 47 |
| 56,891 | 94  | 4 | 892 | 29 | 34 | 2 | 399 | 14 | 1,419 | 49 |
| 56,892 | 94  | 4 | 891 | 29 | 33 | 3 | 397 | 14 | 1,415 | 50 |
| 56,893 | 93  | 4 | 885 | 30 | 33 | 3 | 394 | 14 | 1,405 | 51 |
| 56,894 | 93  | 4 | 885 | 30 | 33 | 3 | 393 | 14 | 1,404 | 51 |
| 56,895 | 84  | 6 | 847 | 30 | 32 | 3 | 370 | 15 | 1,333 | 54 |
| 56,896 | 84  | 6 | 845 | 31 | 31 | 3 | 369 | 15 | 1,329 | 55 |

|        |     |    |     |    |    |   |     |    |       |     |
|--------|-----|----|-----|----|----|---|-----|----|-------|-----|
| 56,897 | 84  | 6  | 841 | 32 | 31 | 5 | 368 | 15 | 1,324 | 58  |
| 56,898 | 85  | 6  | 869 | 47 | 32 | 5 | 371 | 25 | 1,357 | 83  |
| 56,899 | 85  | 6  | 866 | 48 | 32 | 5 | 373 | 26 | 1,356 | 85  |
| 56,900 | 92  | 6  | 952 | 54 | 34 | 5 | 422 | 27 | 1,500 | 92  |
| 56,901 | 95  | 7  | 960 | 58 | 34 | 5 | 427 | 28 | 1,516 | 98  |
| 56,902 | 96  | 7  | 962 | 52 | 35 | 5 | 425 | 27 | 1,518 | 91  |
| 56,903 | 98  | 7  | 975 | 55 | 36 | 5 | 437 | 27 | 1,546 | 94  |
| 56,904 | 98  | 7  | 974 | 55 | 36 | 5 | 436 | 27 | 1,544 | 94  |
| 56,905 | 98  | 9  | 973 | 55 | 37 | 5 | 439 | 28 | 1,547 | 97  |
| 56,906 | 98  | 9  | 972 | 57 | 37 | 5 | 439 | 28 | 1,546 | 99  |
| 56,907 | 98  | 9  | 971 | 57 | 37 | 6 | 438 | 28 | 1,544 | 100 |
| 56,908 | 99  | 9  | 973 | 58 | 37 | 6 | 438 | 28 | 1,547 | 101 |
| 56,909 | 99  | 9  | 973 | 58 | 37 | 6 | 438 | 29 | 1,547 | 102 |
| 56,910 | 103 | 9  | 977 | 59 | 40 | 7 | 447 | 31 | 1,567 | 106 |
| 56,911 | 103 | 9  | 977 | 63 | 40 | 7 | 447 | 32 | 1,567 | 111 |
| 56,912 | 104 | 9  | 984 | 64 | 42 | 7 | 451 | 33 | 1,581 | 113 |
| 56,913 | 104 | 9  | 983 | 66 | 42 | 7 | 452 | 34 | 1,581 | 116 |
| 56,914 | 104 | 9  | 969 | 66 | 42 | 7 | 448 | 34 | 1,563 | 116 |
| 56,915 | 100 | 9  | 925 | 67 | 40 | 7 | 424 | 33 | 1,489 | 116 |
| 56,916 | 98  | 9  | 903 | 68 | 39 | 7 | 424 | 33 | 1,464 | 117 |
| 56,917 | 97  | 9  | 883 | 69 | 37 | 7 | 401 | 34 | 1,418 | 119 |
| 56,918 | 89  | 9  | 839 | 70 | 37 | 7 | 384 | 34 | 1,349 | 120 |
| 56,919 | 82  | 10 | 809 | 71 | 35 | 7 | 372 | 34 | 1,298 | 122 |
| 56,920 | 81  | 10 | 783 | 70 | 35 | 7 | 370 | 35 | 1,269 | 122 |
| 56,921 | 79  | 10 | 731 | 70 | 35 | 7 | 361 | 35 | 1,206 | 122 |
| 56,922 | 50  | 10 | 463 | 63 | 24 | 6 | 259 | 31 | 796   | 110 |
| 56,923 | 48  | 10 | 440 | 64 | 22 | 6 | 253 | 31 | 763   | 111 |
| 56,924 | 45  | 9  | 434 | 63 | 22 | 6 | 252 | 28 | 753   | 106 |
| 56,925 | 45  | 8  | 432 | 58 | 23 | 5 | 251 | 27 | 751   | 98  |
| 56,926 | 45  | 8  | 431 | 59 | 23 | 5 | 251 | 29 | 750   | 101 |
| 56,927 | 42  | 9  | 419 | 63 | 23 | 5 | 240 | 30 | 724   | 107 |
| 56,928 | 42  | 9  | 417 | 64 | 22 | 5 | 235 | 31 | 716   | 109 |
| 56,929 | 39  | 9  | 358 | 64 | 22 | 5 | 217 | 31 | 636   | 109 |
| 56,930 | 37  | 9  | 339 | 67 | 20 | 5 | 204 | 31 | 600   | 112 |
| 56,931 | 32  | 9  | 304 | 74 | 17 | 5 | 185 | 34 | 538   | 122 |
| 56,932 | 24  | 9  | 291 | 75 | 16 | 5 | 173 | 34 | 504   | 123 |
| 56,933 | 24  | 9  | 290 | 75 | 16 | 5 | 170 | 37 | 500   | 126 |
| 56,934 | 23  | 9  | 242 | 75 | 13 | 5 | 150 | 37 | 428   | 126 |
| 56,935 | 22  | 9  | 239 | 75 | 13 | 5 | 140 | 37 | 414   | 126 |
| 56,936 | 22  | 9  | 239 | 76 | 13 | 5 | 140 | 37 | 414   | 127 |
| 56,937 | 22  | 9  | 249 | 76 | 13 | 5 | 145 | 37 | 429   | 127 |

|        |     |    |       |    |    |   |     |    |       |     |
|--------|-----|----|-------|----|----|---|-----|----|-------|-----|
| 56,938 | 22  | 12 | 248   | 83 | 13 | 7 | 144 | 53 | 427   | 155 |
| 56,939 | 22  | 12 | 247   | 85 | 12 | 7 | 143 | 53 | 424   | 157 |
| 56,940 | 22  | 11 | 252   | 85 | 12 | 7 | 145 | 54 | 431   | 157 |
| 56,941 | 22  | 11 | 262   | 82 | 12 | 6 | 149 | 54 | 445   | 153 |
| 56,942 | 23  | 11 | 267   | 84 | 12 | 6 | 151 | 54 | 453   | 155 |
| 56,943 | 23  | 11 | 266   | 84 | 12 | 6 | 151 | 54 | 452   | 155 |
| 56,944 | 27  | 11 | 299   | 83 | 12 | 6 | 158 | 54 | 496   | 154 |
| 56,945 | 32  | 11 | 397   | 84 | 15 | 6 | 194 | 54 | 638   | 155 |
| 56,946 | 55  | 9  | 626   | 84 | 32 | 6 | 336 | 53 | 1,049 | 152 |
| 56,947 | 58  | 9  | 674   | 85 | 37 | 6 | 379 | 53 | 1,148 | 153 |
| 56,948 | 58  | 9  | 726   | 88 | 40 | 5 | 409 | 60 | 1,233 | 162 |
| 56,949 | 57  | 9  | 718   | 73 | 40 | 5 | 413 | 52 | 1,228 | 139 |
| 56,950 | 50  | 9  | 650   | 62 | 40 | 5 | 381 | 50 | 1,121 | 126 |
| 56,951 | 50  | 9  | 652   | 64 | 40 | 5 | 376 | 53 | 1,118 | 131 |
| 56,952 | 49  | 9  | 669   | 67 | 40 | 5 | 389 | 54 | 1,147 | 135 |
| 56,953 | 51  | 9  | 664   | 67 | 40 | 5 | 394 | 54 | 1,149 | 135 |
| 56,954 | 55  | 9  | 682   | 64 | 42 | 5 | 416 | 54 | 1,195 | 132 |
| 56,955 | 55  | 9  | 681   | 68 | 41 | 6 | 415 | 54 | 1,192 | 137 |
| 56,956 | 55  | 7  | 681   | 68 | 41 | 6 | 414 | 53 | 1,191 | 134 |
| 56,957 | 58  | 7  | 745   | 66 | 45 | 6 | 473 | 53 | 1,321 | 132 |
| 56,958 | 62  | 7  | 786   | 66 | 46 | 5 | 503 | 53 | 1,397 | 131 |
| 56,959 | 63  | 7  | 871   | 65 | 47 | 5 | 516 | 53 | 1,497 | 130 |
| 56,960 | 61  | 7  | 880   | 65 | 47 | 5 | 520 | 52 | 1,508 | 129 |
| 56,961 | 64  | 7  | 918   | 62 | 46 | 4 | 541 | 49 | 1,569 | 122 |
| 56,962 | 64  | 7  | 942   | 65 | 46 | 4 | 546 | 49 | 1,598 | 125 |
| 56,963 | 63  | 7  | 943   | 64 | 44 | 4 | 542 | 48 | 1,592 | 123 |
| 56,964 | 63  | 7  | 950   | 62 | 44 | 4 | 542 | 47 | 1,599 | 120 |
| 56,965 | 63  | 7  | 956   | 62 | 44 | 5 | 541 | 47 | 1,604 | 121 |
| 56,966 | 63  | 7  | 960   | 61 | 44 | 5 | 550 | 47 | 1,617 | 120 |
| 56,967 | 66  | 7  | 1,126 | 61 | 49 | 5 | 565 | 47 | 1,806 | 120 |
| 56,968 | 67  | 7  | 1,134 | 62 | 54 | 5 | 584 | 48 | 1,839 | 122 |
| 56,969 | 99  | 7  | 1,634 | 62 | 69 | 6 | 827 | 50 | 2,629 | 125 |
| 56,970 | 100 | 6  | 1,667 | 63 | 69 | 6 | 832 | 49 | 2,668 | 124 |
| 56,971 | 102 | 5  | 1,695 | 63 | 69 | 6 | 841 | 47 | 2,707 | 121 |
| 56,972 | 103 | 5  | 1,725 | 66 | 69 | 6 | 843 | 48 | 2,740 | 125 |
| 56,973 | 103 | 5  | 1,732 | 68 | 69 | 6 | 841 | 48 | 2,745 | 127 |
| 56,974 | 117 | 5  | 1,906 | 67 | 78 | 6 | 935 | 49 | 3,036 | 127 |
| 56,975 | 117 | 5  | 1,905 | 66 | 78 | 7 | 942 | 50 | 3,042 | 128 |
| 56,976 | 123 | 5  | 1,932 | 66 | 78 | 7 | 955 | 51 | 3,088 | 129 |
| 56,977 | 123 | 5  | 1,931 | 67 | 78 | 7 | 954 | 49 | 3,086 | 128 |
| 56,978 | 129 | 4  | 1,987 | 63 | 81 | 7 | 983 | 50 | 3,180 | 124 |

|        |     |    |       |    |     |   |       |    |       |     |
|--------|-----|----|-------|----|-----|---|-------|----|-------|-----|
| 56,979 | 138 | 4  | 2,140 | 62 | 84  | 7 | 1,087 | 49 | 3,449 | 122 |
| 56,980 | 141 | 4  | 2,162 | 62 | 85  | 7 | 1,117 | 49 | 3,505 | 122 |
| 56,981 | 143 | 4  | 2,187 | 52 | 86  | 7 | 1,129 | 46 | 3,545 | 109 |
| 56,982 | 146 | 4  | 2,215 | 52 | 86  | 7 | 1,134 | 46 | 3,581 | 109 |
| 56,983 | 146 | 5  | 2,218 | 51 | 86  | 7 | 1,135 | 43 | 3,585 | 106 |
| 56,984 | 146 | 6  | 2,217 | 52 | 86  | 7 | 1,135 | 44 | 3,584 | 109 |
| 56,985 | 184 | 8  | 2,684 | 53 | 105 | 7 | 1,392 | 47 | 4,365 | 115 |
| 56,986 | 184 | 8  | 2,685 | 53 | 105 | 7 | 1,392 | 47 | 4,366 | 115 |
| 56,987 | 185 | 8  | 2,692 | 52 | 106 | 7 | 1,406 | 47 | 4,389 | 114 |
| 56,988 | 186 | 9  | 2,685 | 53 | 107 | 7 | 1,406 | 47 | 4,384 | 116 |
| 56,989 | 186 | 6  | 2,685 | 46 | 107 | 5 | 1,406 | 31 | 4,384 | 88  |
| 56,990 | 186 | 6  | 2,688 | 44 | 107 | 5 | 1,406 | 31 | 4,387 | 86  |
| 56,991 | 186 | 7  | 2,683 | 46 | 107 | 5 | 1,405 | 35 | 4,381 | 93  |
| 56,992 | 186 | 8  | 2,673 | 48 | 107 | 5 | 1,401 | 35 | 4,367 | 96  |
| 56,993 | 186 | 8  | 2,676 | 46 | 107 | 5 | 1,404 | 35 | 4,373 | 94  |
| 56,994 | 182 | 8  | 2,649 | 46 | 107 | 5 | 1,399 | 35 | 4,337 | 94  |
| 56,995 | 177 | 8  | 2,578 | 46 | 104 | 5 | 1,375 | 35 | 4,234 | 94  |
| 56,996 | 154 | 8  | 2,356 | 47 | 87  | 5 | 1,235 | 35 | 3,832 | 95  |
| 56,997 | 152 | 8  | 2,313 | 54 | 82  | 5 | 1,192 | 37 | 3,739 | 104 |
| 56,998 | 152 | 8  | 2,302 | 53 | 81  | 5 | 1,182 | 38 | 3,717 | 104 |
| 56,999 | 152 | 8  | 2,262 | 50 | 79  | 4 | 1,161 | 32 | 3,654 | 94  |
| 57,000 | 155 | 7  | 2,256 | 51 | 79  | 5 | 1,174 | 28 | 3,664 | 91  |
| 57,001 | 156 | 7  | 2,253 | 55 | 77  | 5 | 1,165 | 28 | 3,651 | 95  |
| 57,002 | 157 | 7  | 2,249 | 54 | 78  | 5 | 1,163 | 26 | 3,647 | 92  |
| 57,003 | 156 | 7  | 2,226 | 51 | 79  | 5 | 1,151 | 25 | 3,612 | 88  |
| 57,004 | 153 | 7  | 2,221 | 51 | 78  | 7 | 1,146 | 27 | 3,598 | 92  |
| 57,005 | 147 | 7  | 2,188 | 46 | 75  | 6 | 1,109 | 27 | 3,519 | 86  |
| 57,006 | 148 | 7  | 2,191 | 51 | 73  | 6 | 1,109 | 27 | 3,521 | 91  |
| 57,007 | 145 | 7  | 2,133 | 53 | 71  | 6 | 1,054 | 31 | 3,403 | 97  |
| 57,008 | 140 | 7  | 2,105 | 56 | 71  | 6 | 1,040 | 31 | 3,356 | 100 |
| 57,009 | 140 | 11 | 2,093 | 61 | 70  | 6 | 1,023 | 40 | 3,326 | 118 |
| 57,010 | 138 | 11 | 2,006 | 62 | 69  | 6 | 1,010 | 40 | 3,223 | 119 |
| 57,011 | 140 | 11 | 2,023 | 63 | 73  | 6 | 1,032 | 41 | 3,268 | 121 |
| 57,012 | 136 | 11 | 1,976 | 63 | 71  | 6 | 1,002 | 41 | 3,185 | 121 |
| 57,013 | 136 | 11 | 1,952 | 60 | 71  | 6 | 997   | 41 | 3,156 | 118 |
| 57,014 | 135 | 11 | 1,947 | 60 | 72  | 6 | 992   | 41 | 3,146 | 118 |
| 57,015 | 135 | 11 | 1,943 | 60 | 72  | 6 | 994   | 41 | 3,144 | 118 |
| 57,016 | 135 | 11 | 1,957 | 64 | 73  | 5 | 997   | 45 | 3,162 | 125 |
| 57,017 | 135 | 11 | 1,962 | 66 | 74  | 5 | 998   | 47 | 3,169 | 129 |
| 57,018 | 132 | 11 | 1,817 | 64 | 69  | 5 | 980   | 45 | 2,998 | 125 |
| 57,019 | 133 | 11 | 1,803 | 64 | 64  | 5 | 963   | 46 | 2,963 | 126 |

|        |     |    |       |    |    |   |     |    |       |     |
|--------|-----|----|-------|----|----|---|-----|----|-------|-----|
| 57,020 | 101 | 11 | 1,302 | 63 | 49 | 4 | 716 | 44 | 2,168 | 122 |
| 57,021 | 100 | 11 | 1,269 | 61 | 49 | 4 | 710 | 44 | 2,128 | 120 |
| 57,022 | 98  | 12 | 1,241 | 60 | 49 | 4 | 701 | 44 | 2,089 | 120 |
| 57,023 | 98  | 12 | 1,231 | 55 | 51 | 4 | 714 | 44 | 2,094 | 115 |
| 57,024 | 98  | 12 | 1,223 | 56 | 51 | 4 | 715 | 48 | 2,087 | 120 |
| 57,025 | 84  | 12 | 1,049 | 56 | 42 | 3 | 620 | 46 | 1,795 | 117 |
| 57,026 | 84  | 12 | 1,047 | 56 | 42 | 3 | 612 | 46 | 1,785 | 117 |
| 57,027 | 78  | 12 | 1,018 | 55 | 41 | 3 | 600 | 44 | 1,737 | 114 |
| 57,028 | 72  | 12 | 962   | 53 | 38 | 3 | 571 | 44 | 1,643 | 112 |
| 57,029 | 67  | 12 | 874   | 53 | 35 | 3 | 509 | 42 | 1,485 | 110 |
| 57,030 | 63  | 12 | 808   | 53 | 35 | 3 | 467 | 42 | 1,373 | 110 |
| 57,031 | 60  | 12 | 787   | 53 | 34 | 3 | 435 | 42 | 1,316 | 110 |
| 57,032 | 58  | 12 | 761   | 53 | 33 | 3 | 422 | 42 | 1,274 | 110 |
| 57,033 | 55  | 11 | 732   | 53 | 33 | 3 | 417 | 42 | 1,237 | 109 |
| 57,034 | 55  | 11 | 726   | 54 | 33 | 3 | 415 | 43 | 1,229 | 111 |
| 57,035 | 47  | 10 | 615   | 53 | 27 | 4 | 335 | 42 | 1,024 | 109 |
| 57,036 | 17  | 8  | 259   | 52 | 15 | 4 | 156 | 39 | 447   | 103 |
| 57,037 | 17  | 8  | 263   | 52 | 15 | 4 | 157 | 39 | 452   | 103 |
| 57,038 | 24  | 8  | 419   | 53 | 18 | 4 | 193 | 40 | 654   | 105 |
| 57,039 | 23  | 7  | 416   | 52 | 18 | 4 | 188 | 40 | 645   | 103 |
| 57,040 | 23  | 7  | 429   | 52 | 22 | 4 | 213 | 40 | 687   | 103 |
| 57,041 | 22  | 7  | 446   | 52 | 22 | 4 | 223 | 40 | 713   | 103 |
| 57,042 | 27  | 6  | 514   | 50 | 25 | 4 | 267 | 35 | 833   | 95  |
| 57,043 | 27  | 5  | 527   | 48 | 27 | 4 | 276 | 35 | 857   | 92  |
| 57,044 | 27  | 5  | 528   | 48 | 27 | 4 | 286 | 35 | 868   | 92  |
| 57,045 | 27  | 5  | 526   | 48 | 27 | 4 | 285 | 35 | 865   | 92  |
| 57,046 | 27  | 5  | 499   | 48 | 28 | 4 | 273 | 35 | 827   | 92  |
| 57,047 | 27  | 5  | 492   | 46 | 28 | 4 | 272 | 35 | 819   | 90  |
| 57,048 | 27  | 5  | 487   | 38 | 28 | 4 | 276 | 32 | 818   | 79  |
| 57,049 | 29  | 5  | 490   | 38 | 28 | 4 | 277 | 31 | 824   | 78  |
| 57,050 | 29  | 5  | 493   | 38 | 28 | 4 | 279 | 32 | 829   | 79  |
| 57,051 | 26  | 5  | 485   | 36 | 27 | 3 | 260 | 32 | 798   | 76  |
| 57,052 | 27  | 5  | 494   | 32 | 29 | 3 | 264 | 32 | 814   | 72  |
| 57,053 | 28  | 5  | 554   | 31 | 29 | 3 | 280 | 31 | 891   | 70  |
| 57,054 | 27  | 5  | 547   | 31 | 28 | 3 | 274 | 31 | 876   | 70  |
| 57,055 | 30  | 5  | 554   | 31 | 29 | 1 | 274 | 29 | 887   | 66  |
| 57,056 | 30  | 5  | 555   | 31 | 29 | 1 | 279 | 29 | 893   | 66  |
| 57,057 | 29  | 5  | 550   | 31 | 29 | 1 | 277 | 30 | 885   | 67  |
| 57,058 | 29  | 6  | 545   | 30 | 29 | 1 | 275 | 26 | 878   | 63  |
| 57,059 | 29  | 6  | 544   | 27 | 29 | 1 | 275 | 26 | 877   | 60  |
| 57,060 | 28  | 2  | 533   | 22 | 27 | 1 | 258 | 17 | 846   | 42  |



|        |    |   |     |    |    |   |     |    |     |     |
|--------|----|---|-----|----|----|---|-----|----|-----|-----|
| 57,061 | 28 | 2 | 527 | 21 | 26 | 1 | 248 | 17 | 829 | 41  |
| 57,062 | 26 | 2 | 523 | 18 | 25 | 1 | 246 | 16 | 820 | 37  |
| 57,063 | 26 | 2 | 522 | 18 | 24 | 1 | 245 | 16 | 817 | 37  |
| 57,064 | 27 | 2 | 522 | 22 | 24 | 1 | 247 | 17 | 820 | 42  |
| 57,065 | 27 | 2 | 521 | 23 | 24 | 1 | 245 | 17 | 817 | 43  |
| 57,066 | 28 | 2 | 510 | 26 | 24 | 1 | 240 | 17 | 802 | 46  |
| 57,067 | 28 | 2 | 510 | 24 | 24 | 1 | 241 | 13 | 803 | 40  |
| 57,068 | 30 | 2 | 506 | 22 | 23 | 1 | 232 | 12 | 791 | 37  |
| 57,069 | 31 | 4 | 503 | 26 | 25 | 2 | 232 | 18 | 791 | 50  |
| 57,070 | 29 | 6 | 500 | 29 | 25 | 3 | 230 | 19 | 784 | 57  |
| 57,071 | 29 | 6 | 508 | 32 | 25 | 3 | 234 | 22 | 796 | 63  |
| 57,072 | 29 | 7 | 506 | 51 | 26 | 3 | 231 | 23 | 792 | 84  |
| 57,073 | 29 | 6 | 494 | 51 | 26 | 3 | 227 | 23 | 776 | 83  |
| 57,074 | 28 | 6 | 488 | 50 | 24 | 3 | 215 | 19 | 755 | 78  |
| 57,075 | 28 | 6 | 488 | 50 | 24 | 3 | 214 | 19 | 754 | 78  |
| 57,076 | 28 | 7 | 488 | 50 | 24 | 3 | 216 | 19 | 756 | 79  |
| 57,077 | 29 | 7 | 492 | 51 | 24 | 3 | 218 | 19 | 763 | 80  |
| 57,078 | 29 | 7 | 492 | 52 | 24 | 3 | 218 | 19 | 763 | 81  |
| 57,079 | 29 | 7 | 492 | 52 | 24 | 3 | 218 | 19 | 763 | 81  |
| 57,080 | 29 | 7 | 492 | 52 | 24 | 3 | 218 | 19 | 763 | 81  |
| 57,081 | 29 | 7 | 491 | 52 | 24 | 3 | 219 | 19 | 763 | 81  |
| 57,082 | 29 | 7 | 489 | 52 | 24 | 3 | 219 | 19 | 761 | 81  |
| 57,083 | 29 | 7 | 491 | 52 | 24 | 3 | 219 | 19 | 763 | 81  |
| 57,084 | 29 | 7 | 492 | 52 | 24 | 3 | 220 | 19 | 765 | 81  |
| 57,085 | 29 | 7 | 492 | 52 | 24 | 3 | 220 | 18 | 765 | 80  |
| 57,086 | 29 | 8 | 495 | 56 | 24 | 2 | 219 | 19 | 767 | 85  |
| 57,087 | 30 | 8 | 510 | 74 | 23 | 2 | 221 | 19 | 784 | 103 |
| 57,088 | 30 | 8 | 506 | 83 | 23 | 3 | 220 | 20 | 779 | 114 |
| 57,089 | 25 | 8 | 367 | 85 | 18 | 3 | 171 | 20 | 581 | 116 |
| 57,090 | 25 | 8 | 350 | 88 | 14 | 3 | 149 | 20 | 538 | 119 |
| 57,091 | 26 | 8 | 334 | 88 | 14 | 3 | 136 | 20 | 510 | 119 |
| 57,092 | 39 | 8 | 307 | 88 | 14 | 3 | 117 | 20 | 477 | 119 |
| 57,093 | 39 | 8 | 290 | 89 | 12 | 3 | 106 | 20 | 447 | 120 |
| 57,094 | 39 | 8 | 285 | 89 | 11 | 3 | 96  | 20 | 431 | 120 |
| 57,095 | 44 | 8 | 344 | 89 | 16 | 3 | 112 | 21 | 516 | 121 |
| 57,096 | 49 | 8 | 400 | 89 | 21 | 3 | 136 | 21 | 606 | 121 |
| 57,097 | 49 | 8 | 400 | 89 | 21 | 3 | 136 | 22 | 606 | 122 |
| 57,098 | 50 | 8 | 429 | 88 | 21 | 3 | 144 | 22 | 644 | 121 |
| 57,099 | 50 | 8 | 432 | 90 | 21 | 3 | 143 | 22 | 646 | 123 |
| 57,100 | 48 | 9 | 428 | 92 | 21 | 3 | 142 | 26 | 639 | 130 |
| 57,101 | 48 | 9 | 424 | 97 | 21 | 4 | 142 | 27 | 635 | 137 |

|        |     |   |     |     |    |   |     |    |       |     |
|--------|-----|---|-----|-----|----|---|-----|----|-------|-----|
| 57,102 | 49  | 9 | 430 | 103 | 21 | 4 | 150 | 29 | 650   | 145 |
| 57,103 | 47  | 9 | 427 | 102 | 19 | 4 | 151 | 30 | 644   | 145 |
| 57,104 | 45  | 9 | 363 | 106 | 18 | 4 | 134 | 31 | 560   | 150 |
| 57,105 | 42  | 9 | 355 | 106 | 17 | 4 | 132 | 31 | 546   | 150 |
| 57,106 | 43  | 9 | 365 | 106 | 17 | 4 | 135 | 31 | 560   | 150 |
| 57,107 | 43  | 9 | 366 | 106 | 17 | 4 | 136 | 31 | 562   | 150 |
| 57,108 | 47  | 9 | 370 | 101 | 17 | 4 | 137 | 30 | 571   | 144 |
| 57,109 | 47  | 8 | 371 | 100 | 17 | 4 | 137 | 30 | 572   | 142 |
| 57,110 | 52  | 8 | 403 | 101 | 17 | 4 | 145 | 30 | 617   | 143 |
| 57,111 | 61  | 8 | 435 | 101 | 19 | 4 | 154 | 29 | 669   | 142 |
| 57,112 | 63  | 8 | 449 | 101 | 19 | 4 | 159 | 29 | 690   | 142 |
| 57,113 | 79  | 8 | 619 | 100 | 24 | 4 | 208 | 29 | 930   | 141 |
| 57,114 | 78  | 8 | 617 | 100 | 24 | 4 | 206 | 29 | 925   | 141 |
| 57,115 | 90  | 8 | 685 | 95  | 26 | 4 | 253 | 29 | 1,054 | 136 |
| 57,116 | 97  | 8 | 708 | 98  | 28 | 4 | 268 | 30 | 1,101 | 140 |
| 57,117 | 97  | 8 | 708 | 95  | 27 | 4 | 268 | 31 | 1,100 | 138 |
| 57,118 | 98  | 8 | 713 | 94  | 27 | 4 | 269 | 31 | 1,107 | 137 |
| 57,119 | 96  | 8 | 711 | 93  | 27 | 4 | 271 | 30 | 1,105 | 135 |
| 57,120 | 95  | 6 | 687 | 89  | 25 | 3 | 262 | 25 | 1,069 | 123 |
| 57,121 | 95  | 4 | 693 | 82  | 26 | 2 | 267 | 20 | 1,081 | 108 |
| 57,122 | 96  | 4 | 689 | 83  | 28 | 2 | 271 | 20 | 1,084 | 109 |
| 57,123 | 96  | 3 | 693 | 66  | 27 | 2 | 272 | 19 | 1,088 | 90  |
| 57,124 | 96  | 3 | 692 | 66  | 27 | 2 | 272 | 19 | 1,087 | 90  |
| 57,125 | 96  | 3 | 705 | 67  | 27 | 2 | 277 | 18 | 1,105 | 90  |
| 57,126 | 96  | 3 | 705 | 70  | 27 | 2 | 276 | 18 | 1,104 | 93  |
| 57,127 | 96  | 2 | 703 | 70  | 27 | 2 | 275 | 18 | 1,101 | 92  |
| 57,128 | 107 | 2 | 778 | 69  | 31 | 2 | 331 | 18 | 1,247 | 91  |
| 57,129 | 107 | 2 | 789 | 68  | 34 | 2 | 342 | 18 | 1,272 | 90  |
| 57,130 | 107 | 2 | 792 | 68  | 34 | 2 | 343 | 18 | 1,276 | 90  |
| 57,131 | 107 | 2 | 793 | 68  | 35 | 2 | 344 | 18 | 1,279 | 90  |
| 57,132 | 107 | 3 | 794 | 68  | 35 | 2 | 343 | 18 | 1,279 | 91  |
| 57,133 | 107 | 3 | 793 | 68  | 35 | 2 | 343 | 18 | 1,278 | 91  |
| 57,134 | 107 | 3 | 794 | 68  | 35 | 2 | 342 | 18 | 1,278 | 91  |
| 57,135 | 107 | 3 | 796 | 67  | 35 | 2 | 342 | 18 | 1,280 | 90  |
| 57,136 | 107 | 2 | 802 | 63  | 35 | 2 | 343 | 17 | 1,287 | 84  |
| 57,137 | 107 | 2 | 800 | 45  | 35 | 2 | 343 | 17 | 1,285 | 66  |
| 57,138 | 109 | 2 | 790 | 36  | 35 | 1 | 342 | 16 | 1,276 | 55  |
| 57,139 | 109 | 2 | 795 | 36  | 35 | 1 | 342 | 16 | 1,281 | 55  |
| 57,140 | 107 | 2 | 777 | 30  | 36 | 1 | 338 | 15 | 1,258 | 48  |
| 57,141 | 108 | 2 | 779 | 31  | 36 | 1 | 340 | 15 | 1,263 | 49  |
| 57,142 | 108 | 2 | 781 | 35  | 36 | 1 | 340 | 19 | 1,265 | 57  |

|        |    |   |     |    |    |   |     |    |       |    |
|--------|----|---|-----|----|----|---|-----|----|-------|----|
| 57,143 | 90 | 2 | 744 | 36 | 33 | 1 | 319 | 19 | 1,186 | 58 |
| 57,144 | 86 | 2 | 714 | 36 | 30 | 1 | 310 | 20 | 1,140 | 59 |
| 57,145 | 86 | 2 | 750 | 39 | 30 | 1 | 324 | 20 | 1,190 | 62 |
| 57,146 | 88 | 2 | 770 | 39 | 30 | 1 | 330 | 19 | 1,218 | 61 |
| 57,147 | 83 | 2 | 725 | 39 | 27 | 1 | 309 | 18 | 1,144 | 60 |
| 57,148 | 82 | 2 | 709 | 39 | 27 | 1 | 309 | 18 | 1,127 | 60 |
| 57,149 | 84 | 2 | 723 | 39 | 28 | 1 | 314 | 18 | 1,149 | 60 |
| 57,150 | 84 | 1 | 719 | 35 | 28 | 1 | 313 | 14 | 1,144 | 51 |
| 57,151 | 84 | 1 | 719 | 25 | 28 | 0 | 313 | 10 | 1,144 | 36 |
| 57,152 | 85 | 1 | 721 | 25 | 28 | 0 | 312 | 10 | 1,146 | 36 |
| 57,153 | 84 | 1 | 708 | 25 | 28 | 0 | 301 | 10 | 1,121 | 36 |
| 57,154 | 84 | 1 | 691 | 25 | 28 | 0 | 298 | 9  | 1,101 | 35 |
| 57,155 | 83 | 1 | 691 | 22 | 28 | 0 | 296 | 8  | 1,098 | 31 |
| 57,156 | 83 | 1 | 684 | 22 | 28 | 0 | 293 | 8  | 1,088 | 31 |
| 57,157 | 83 | 1 | 686 | 22 | 28 | 0 | 294 | 8  | 1,091 | 31 |
| 57,158 | 79 | 1 | 683 | 22 | 28 | 0 | 293 | 8  | 1,083 | 31 |
| 57,159 | 79 | 1 | 682 | 22 | 28 | 0 | 293 | 8  | 1,082 | 31 |
| 57,160 | 76 | 1 | 656 | 25 | 28 | 0 | 285 | 11 | 1,045 | 37 |
| 57,161 | 76 | 1 | 651 | 25 | 28 | 0 | 285 | 11 | 1,040 | 37 |
| 57,162 | 68 | 1 | 621 | 26 | 26 | 1 | 276 | 11 | 991   | 39 |
| 57,163 | 66 | 1 | 611 | 27 | 26 | 1 | 273 | 12 | 976   | 41 |
| 57,164 | 50 | 1 | 443 | 27 | 21 | 1 | 220 | 12 | 734   | 41 |
| 57,165 | 49 | 1 | 424 | 28 | 21 | 1 | 214 | 12 | 708   | 42 |
| 57,166 | 38 | 1 | 372 | 28 | 19 | 1 | 174 | 11 | 603   | 41 |
| 57,167 | 31 | 1 | 408 | 25 | 17 | 1 | 177 | 10 | 633   | 37 |
| 57,168 | 36 | 1 | 450 | 25 | 18 | 1 | 212 | 9  | 716   | 36 |
| 57,169 | 35 | 1 | 445 | 25 | 18 | 1 | 214 | 9  | 712   | 36 |
| 57,170 | 35 | 1 | 445 | 25 | 18 | 1 | 217 | 9  | 715   | 36 |
| 57,171 | 36 | 1 | 453 | 25 | 18 | 1 | 215 | 9  | 722   | 36 |
| 57,172 | 40 | 1 | 487 | 25 | 23 | 1 | 233 | 9  | 783   | 36 |
| 57,173 | 46 | 1 | 550 | 24 | 27 | 1 | 258 | 9  | 881   | 35 |
| 57,174 | 47 | 1 | 574 | 24 | 27 | 1 | 271 | 9  | 919   | 35 |
| 57,175 | 55 | 1 | 676 | 20 | 30 | 1 | 312 | 9  | 1,073 | 31 |
| 57,176 | 56 | 1 | 709 | 20 | 33 | 1 | 335 | 9  | 1,133 | 31 |
| 57,177 | 59 | 1 | 813 | 20 | 39 | 1 | 433 | 9  | 1,344 | 31 |
| 57,178 | 56 | 1 | 800 | 20 | 39 | 1 | 440 | 9  | 1,335 | 31 |
| 57,179 | 56 | 1 | 804 | 20 | 36 | 1 | 445 | 10 | 1,341 | 32 |
| 57,180 | 56 | 1 | 797 | 20 | 36 | 1 | 435 | 10 | 1,324 | 32 |
| 57,181 | 56 | 1 | 807 | 20 | 36 | 1 | 435 | 10 | 1,334 | 32 |
| 57,182 | 58 | 0 | 868 | 20 | 37 | 1 | 454 | 10 | 1,417 | 31 |
| 57,183 | 58 | 0 | 881 | 20 | 38 | 1 | 460 | 12 | 1,437 | 33 |

|        |     |   |       |    |     |   |       |    |       |    |
|--------|-----|---|-------|----|-----|---|-------|----|-------|----|
| 57,184 | 60  | 0 | 902   | 20 | 38  | 1 | 475   | 12 | 1,475 | 33 |
| 57,185 | 61  | 0 | 901   | 20 | 38  | 1 | 475   | 12 | 1,475 | 33 |
| 57,186 | 64  | 0 | 927   | 20 | 39  | 1 | 491   | 12 | 1,521 | 33 |
| 57,187 | 64  | 0 | 933   | 20 | 40  | 1 | 498   | 12 | 1,535 | 33 |
| 57,188 | 68  | 0 | 972   | 20 | 42  | 1 | 520   | 12 | 1,602 | 33 |
| 57,189 | 65  | 0 | 967   | 20 | 42  | 1 | 519   | 12 | 1,593 | 33 |
| 57,190 | 69  | 0 | 1,023 | 21 | 48  | 1 | 540   | 13 | 1,680 | 35 |
| 57,191 | 75  | 0 | 1,116 | 20 | 50  | 1 | 583   | 13 | 1,824 | 34 |
| 57,192 | 77  | 0 | 1,170 | 20 | 55  | 1 | 620   | 14 | 1,922 | 35 |
| 57,193 | 76  | 0 | 1,174 | 16 | 55  | 1 | 626   | 10 | 1,931 | 27 |
| 57,194 | 77  | 0 | 1,162 | 15 | 55  | 1 | 623   | 11 | 1,917 | 27 |
| 57,195 | 76  | 0 | 1,152 | 14 | 55  | 1 | 621   | 10 | 1,904 | 25 |
| 57,196 | 75  | 0 | 1,111 | 12 | 52  | 1 | 603   | 10 | 1,841 | 23 |
| 57,197 | 73  | 0 | 1,087 | 13 | 53  | 1 | 598   | 10 | 1,811 | 24 |
| 57,198 | 73  | 0 | 1,070 | 13 | 51  | 1 | 595   | 10 | 1,789 | 24 |
| 57,199 | 73  | 0 | 1,063 | 13 | 51  | 1 | 587   | 10 | 1,774 | 24 |
| 57,200 | 73  | 0 | 1,057 | 13 | 50  | 1 | 590   | 10 | 1,770 | 24 |
| 57,201 | 73  | 0 | 1,061 | 12 | 51  | 1 | 592   | 10 | 1,777 | 23 |
| 57,202 | 73  | 0 | 1,061 | 12 | 51  | 1 | 595   | 10 | 1,780 | 23 |
| 57,203 | 72  | 0 | 1,062 | 12 | 51  | 1 | 597   | 10 | 1,782 | 23 |
| 57,204 | 72  | 0 | 1,071 | 12 | 51  | 1 | 599   | 10 | 1,793 | 23 |
| 57,205 | 74  | 0 | 1,097 | 12 | 52  | 1 | 610   | 10 | 1,833 | 23 |
| 57,206 | 74  | 0 | 1,094 | 12 | 52  | 1 | 608   | 10 | 1,828 | 23 |
| 57,207 | 98  | 0 | 1,413 | 12 | 65  | 1 | 721   | 10 | 2,297 | 23 |
| 57,208 | 101 | 0 | 1,545 | 12 | 90  | 1 | 921   | 11 | 2,657 | 24 |
| 57,209 | 101 | 0 | 1,545 | 12 | 90  | 1 | 926   | 11 | 2,662 | 24 |
| 57,210 | 99  | 0 | 1,541 | 12 | 90  | 1 | 927   | 11 | 2,657 | 24 |
| 57,211 | 102 | 0 | 1,593 | 8  | 92  | 1 | 1,018 | 8  | 2,805 | 17 |
| 57,212 | 102 | 0 | 1,596 | 8  | 92  | 1 | 1,022 | 8  | 2,812 | 17 |
| 57,213 | 100 | 0 | 1,602 | 7  | 94  | 0 | 1,010 | 8  | 2,806 | 15 |
| 57,214 | 101 | 0 | 1,628 | 6  | 95  | 0 | 1,022 | 7  | 2,846 | 13 |
| 57,215 | 103 | 0 | 1,636 | 6  | 99  | 0 | 1,046 | 7  | 2,884 | 13 |
| 57,216 | 103 | 0 | 1,624 | 7  | 99  | 0 | 1,041 | 7  | 2,867 | 14 |
| 57,217 | 103 | 0 | 1,601 | 7  | 99  | 0 | 1,031 | 7  | 2,834 | 14 |
| 57,218 | 103 | 0 | 1,596 | 8  | 99  | 0 | 1,030 | 7  | 2,828 | 15 |
| 57,219 | 99  | 1 | 1,568 | 8  | 100 | 0 | 1,001 | 7  | 2,768 | 16 |
| 57,220 | 99  | 1 | 1,562 | 7  | 100 | 0 | 997   | 7  | 2,758 | 15 |
| 57,221 | 101 | 1 | 1,561 | 7  | 100 | 0 | 999   | 7  | 2,761 | 15 |
| 57,222 | 100 | 1 | 1,564 | 7  | 101 | 0 | 1,000 | 7  | 2,765 | 15 |
| 57,223 | 99  | 1 | 1,532 | 7  | 96  | 0 | 988   | 7  | 2,715 | 15 |
| 57,224 | 92  | 1 | 1,479 | 7  | 90  | 0 | 967   | 7  | 2,628 | 15 |

|        |    |   |       |    |    |   |     |   |       |    |
|--------|----|---|-------|----|----|---|-----|---|-------|----|
| 57,225 | 91 | 1 | 1,453 | 6  | 90 | 0 | 963 | 7 | 2,597 | 14 |
| 57,226 | 87 | 1 | 1,397 | 6  | 91 | 0 | 957 | 7 | 2,532 | 14 |
| 57,227 | 87 | 1 | 1,364 | 6  | 89 | 0 | 932 | 7 | 2,472 | 14 |
| 57,228 | 76 | 1 | 1,239 | 6  | 80 | 0 | 799 | 7 | 2,194 | 14 |
| 57,229 | 76 | 1 | 1,225 | 6  | 79 | 1 | 788 | 6 | 2,168 | 14 |
| 57,230 | 76 | 1 | 1,216 | 6  | 79 | 1 | 785 | 5 | 2,156 | 13 |
| 57,231 | 87 | 1 | 1,292 | 6  | 84 | 1 | 856 | 5 | 2,319 | 13 |
| 57,232 | 87 | 1 | 1,289 | 6  | 84 | 1 | 852 | 5 | 2,312 | 13 |
| 57,233 | 85 | 1 | 1,230 | 6  | 82 | 1 | 833 | 5 | 2,230 | 13 |
| 57,234 | 85 | 1 | 1,237 | 7  | 82 | 1 | 840 | 3 | 2,244 | 12 |
| 57,235 | 86 | 1 | 1,216 | 7  | 82 | 1 | 829 | 3 | 2,213 | 12 |
| 57,236 | 85 | 1 | 1,215 | 7  | 82 | 1 | 829 | 3 | 2,211 | 12 |
| 57,237 | 82 | 1 | 1,189 | 7  | 81 | 1 | 811 | 3 | 2,163 | 12 |
| 57,238 | 82 | 1 | 1,178 | 8  | 80 | 1 | 803 | 4 | 2,143 | 14 |
| 57,239 | 78 | 1 | 1,138 | 8  | 78 | 1 | 781 | 5 | 2,075 | 15 |
| 57,240 | 74 | 1 | 1,077 | 10 | 72 | 2 | 760 | 5 | 1,983 | 18 |
| 57,241 | 70 | 1 | 1,048 | 9  | 71 | 2 | 753 | 4 | 1,942 | 16 |
| 57,242 | 68 | 1 | 1,009 | 9  | 70 | 2 | 741 | 3 | 1,888 | 15 |
| 57,243 | 65 | 1 | 965   | 9  | 65 | 2 | 704 | 3 | 1,799 | 15 |
| 57,244 | 65 | 1 | 956   | 9  | 65 | 2 | 699 | 3 | 1,785 | 15 |
| 57,245 | 64 | 1 | 956   | 7  | 65 | 2 | 700 | 3 | 1,785 | 13 |
| 57,246 | 64 | 1 | 957   | 9  | 65 | 2 | 700 | 3 | 1,786 | 15 |
| 57,247 | 64 | 1 | 957   | 9  | 65 | 2 | 700 | 3 | 1,786 | 15 |
| 57,248 | 64 | 1 | 957   | 9  | 65 | 2 | 700 | 3 | 1,786 | 15 |
| 57,249 | 64 | 1 | 961   | 9  | 65 | 2 | 700 | 3 | 1,790 | 15 |
| 57,250 | 62 | 1 | 957   | 9  | 65 | 2 | 697 | 3 | 1,781 | 15 |
| 57,251 | 62 | 1 | 957   | 9  | 65 | 2 | 697 | 3 | 1,781 | 15 |
| 57,252 | 62 | 1 | 957   | 9  | 64 | 2 | 695 | 3 | 1,778 | 15 |
| 57,253 | 62 | 1 | 957   | 9  | 64 | 2 | 695 | 3 | 1,778 | 15 |
| 57,254 | 62 | 1 | 955   | 9  | 64 | 2 | 694 | 3 | 1,775 | 15 |
| 57,255 | 65 | 1 | 954   | 10 | 64 | 2 | 707 | 3 | 1,790 | 16 |
| 57,256 | 64 | 1 | 937   | 11 | 64 | 2 | 701 | 3 | 1,766 | 17 |
| 57,257 | 63 | 1 | 885   | 11 | 61 | 2 | 684 | 3 | 1,693 | 17 |
| 57,258 | 39 | 1 | 608   | 11 | 51 | 2 | 583 | 3 | 1,281 | 17 |
| 57,259 | 36 | 1 | 474   | 11 | 25 | 2 | 378 | 2 | 913   | 16 |
| 57,260 | 36 | 1 | 464   | 11 | 25 | 2 | 368 | 2 | 893   | 16 |
| 57,261 | 33 | 1 | 419   | 11 | 22 | 2 | 281 | 2 | 755   | 16 |
| 57,262 | 35 | 1 | 417   | 11 | 22 | 2 | 278 | 2 | 752   | 16 |
| 57,263 | 36 | 1 | 423   | 11 | 20 | 2 | 279 | 2 | 758   | 16 |
| 57,264 | 36 | 1 | 410   | 11 | 19 | 2 | 273 | 2 | 738   | 16 |
| 57,265 | 37 | 1 | 419   | 11 | 22 | 2 | 291 | 2 | 769   | 16 |

|        |     |   |       |    |     |   |       |   |       |    |
|--------|-----|---|-------|----|-----|---|-------|---|-------|----|
| 57,266 | 36  | 1 | 419   | 10 | 20  | 2 | 289   | 2 | 764   | 15 |
| 57,267 | 36  | 1 | 418   | 10 | 20  | 2 | 289   | 2 | 763   | 15 |
| 57,268 | 56  | 1 | 466   | 9  | 23  | 2 | 328   | 2 | 873   | 14 |
| 57,269 | 59  | 1 | 536   | 9  | 26  | 2 | 352   | 2 | 973   | 14 |
| 57,270 | 103 | 0 | 1,086 | 9  | 62  | 2 | 679   | 3 | 1,930 | 14 |
| 57,271 | 103 | 0 | 1,086 | 9  | 62  | 2 | 679   | 3 | 1,930 | 14 |
| 57,272 | 101 | 0 | 1,074 | 9  | 62  | 2 | 669   | 3 | 1,906 | 14 |
| 57,273 | 217 | 0 | 1,658 | 9  | 130 | 2 | 1,453 | 3 | 3,458 | 14 |
| 57,274 | 229 | 0 | 1,789 | 9  | 143 | 2 | 1,606 | 3 | 3,767 | 14 |
| 57,275 | 230 | 0 | 1,806 | 10 | 145 | 2 | 1,611 | 3 | 3,792 | 15 |
| 57,276 | 231 | 0 | 1,807 | 10 | 145 | 2 | 1,614 | 3 | 3,797 | 15 |
| 57,277 | 227 | 0 | 1,763 | 10 | 141 | 2 | 1,578 | 4 | 3,709 | 16 |
| 57,278 | 227 | 0 | 1,756 | 10 | 141 | 2 | 1,577 | 4 | 3,701 | 16 |
| 57,279 | 226 | 0 | 1,724 | 10 | 140 | 2 | 1,556 | 4 | 3,646 | 16 |
| 57,280 | 224 | 0 | 1,711 | 10 | 140 | 1 | 1,555 | 6 | 3,630 | 17 |
| 57,281 | 222 | 0 | 1,688 | 10 | 140 | 1 | 1,542 | 6 | 3,592 | 17 |
| 57,282 | 217 | 0 | 1,645 | 10 | 136 | 1 | 1,494 | 7 | 3,492 | 18 |
| 57,283 | 217 | 0 | 1,631 | 10 | 135 | 1 | 1,491 | 7 | 3,474 | 18 |
| 57,284 | 218 | 0 | 1,640 | 9  | 135 | 1 | 1,490 | 7 | 3,483 | 17 |
| 57,285 | 218 | 0 | 1,640 | 9  | 135 | 1 | 1,491 | 7 | 3,484 | 17 |
| 57,286 | 224 | 0 | 1,663 | 9  | 137 | 1 | 1,494 | 7 | 3,518 | 17 |
| 57,287 | 224 | 0 | 1,663 | 9  | 137 | 1 | 1,494 | 7 | 3,518 | 17 |
| 57,288 | 224 | 0 | 1,672 | 8  | 137 | 1 | 1,498 | 5 | 3,531 | 14 |
| 57,289 | 225 | 0 | 1,674 | 9  | 137 | 1 | 1,498 | 5 | 3,534 | 15 |
| 57,290 | 230 | 0 | 1,686 | 9  | 137 | 1 | 1,502 | 5 | 3,555 | 15 |
| 57,291 | 230 | 0 | 1,699 | 7  | 137 | 0 | 1,513 | 5 | 3,579 | 12 |
| 57,292 | 230 | 0 | 1,697 | 7  | 137 | 0 | 1,510 | 5 | 3,574 | 12 |
| 57,293 | 229 | 0 | 1,672 | 7  | 137 | 0 | 1,500 | 5 | 3,538 | 12 |
| 57,294 | 229 | 0 | 1,658 | 7  | 137 | 0 | 1,495 | 5 | 3,519 | 12 |
| 57,295 | 231 | 0 | 1,659 | 7  | 137 | 0 | 1,496 | 5 | 3,523 | 12 |
| 57,296 | 231 | 0 | 1,662 | 7  | 137 | 0 | 1,497 | 5 | 3,527 | 12 |
| 57,297 | 231 | 0 | 1,660 | 5  | 137 | 0 | 1,500 | 5 | 3,528 | 10 |
| 57,298 | 233 | 0 | 1,661 | 5  | 137 | 0 | 1,502 | 5 | 3,533 | 10 |
| 57,299 | 233 | 0 | 1,661 | 5  | 137 | 0 | 1,502 | 5 | 3,533 | 10 |
| 57,300 | 233 | 0 | 1,657 | 5  | 137 | 0 | 1,502 | 5 | 3,529 | 10 |
| 57,301 | 236 | 0 | 1,656 | 5  | 137 | 0 | 1,502 | 5 | 3,531 | 10 |
| 57,302 | 236 | 0 | 1,657 | 5  | 137 | 0 | 1,503 | 5 | 3,533 | 10 |
| 57,303 | 238 | 0 | 1,659 | 5  | 137 | 0 | 1,504 | 5 | 3,538 | 10 |
| 57,304 | 239 | 0 | 1,665 | 5  | 138 | 0 | 1,505 | 5 | 3,547 | 10 |
| 57,305 | 239 | 0 | 1,666 | 5  | 138 | 0 | 1,505 | 6 | 3,548 | 11 |
| 57,306 | 242 | 0 | 1,756 | 3  | 146 | 0 | 1,550 | 6 | 3,694 | 9  |

|        |     |   |       |   |     |   |       |   |       |    |
|--------|-----|---|-------|---|-----|---|-------|---|-------|----|
| 57,307 | 242 | 0 | 1,768 | 3 | 146 | 0 | 1,562 | 6 | 3,718 | 9  |
| 57,308 | 242 | 0 | 1,845 | 3 | 152 | 0 | 1,588 | 6 | 3,827 | 9  |
| 57,309 | 242 | 0 | 1,845 | 4 | 152 | 0 | 1,588 | 6 | 3,827 | 10 |
| 57,310 | 242 | 0 | 1,849 | 4 | 152 | 0 | 1,589 | 6 | 3,832 | 10 |
| 57,311 | 241 | 0 | 1,848 | 4 | 152 | 0 | 1,589 | 6 | 3,830 | 10 |
| 57,312 | 243 | 0 | 1,865 | 4 | 153 | 0 | 1,602 | 6 | 3,863 | 10 |
| 57,313 | 242 | 0 | 1,871 | 4 | 154 | 0 | 1,601 | 6 | 3,868 | 10 |
| 57,314 | 242 | 0 | 1,872 | 3 | 154 | 0 | 1,602 | 7 | 3,870 | 10 |
| 57,315 | 242 | 0 | 1,876 | 3 | 154 | 0 | 1,605 | 7 | 3,877 | 10 |
| 57,316 | 240 | 0 | 1,846 | 3 | 151 | 0 | 1,577 | 7 | 3,814 | 10 |
| 57,317 | 240 | 0 | 1,849 | 3 | 151 | 0 | 1,580 | 7 | 3,820 | 10 |
| 57,318 | 240 | 0 | 1,848 | 3 | 151 | 0 | 1,581 | 7 | 3,820 | 10 |
| 57,319 | 224 | 0 | 1,796 | 5 | 148 | 0 | 1,558 | 7 | 3,726 | 12 |
| 57,320 | 221 | 0 | 1,728 | 6 | 145 | 0 | 1,535 | 7 | 3,629 | 13 |
| 57,321 | 175 | 0 | 1,156 | 8 | 107 | 0 | 1,198 | 7 | 2,636 | 15 |
| 57,322 | 175 | 2 | 1,146 | 9 | 107 | 0 | 1,191 | 7 | 2,619 | 18 |
| 57,323 | 168 | 2 | 1,049 | 9 | 100 | 0 | 1,059 | 7 | 2,376 | 18 |
| 57,324 | 62  | 2 | 566   | 9 | 38  | 1 | 410   | 7 | 1,076 | 19 |
| 57,325 | 47  | 2 | 423   | 8 | 25  | 1 | 247   | 7 | 742   | 18 |
| 57,326 | 46  | 2 | 402   | 8 | 24  | 1 | 236   | 7 | 708   | 18 |
| 57,327 | 47  | 2 | 422   | 8 | 26  | 1 | 249   | 6 | 744   | 17 |
| 57,328 | 47  | 2 | 419   | 9 | 26  | 1 | 246   | 6 | 738   | 18 |
| 57,329 | 58  | 2 | 494   | 9 | 28  | 1 | 271   | 6 | 851   | 18 |
| 57,330 | 59  | 2 | 509   | 9 | 29  | 1 | 285   | 4 | 882   | 16 |
| 57,331 | 59  | 2 | 509   | 9 | 29  | 1 | 285   | 4 | 882   | 16 |
| 57,332 | 69  | 2 | 591   | 9 | 37  | 1 | 306   | 4 | 1,003 | 16 |
| 57,333 | 109 | 2 | 1,106 | 9 | 55  | 1 | 516   | 3 | 1,786 | 15 |
| 57,334 | 111 | 2 | 1,123 | 9 | 56  | 1 | 525   | 3 | 1,815 | 15 |
| 57,335 | 110 | 2 | 1,117 | 9 | 56  | 1 | 525   | 3 | 1,808 | 15 |
| 57,336 | 110 | 2 | 1,117 | 9 | 56  | 1 | 521   | 3 | 1,804 | 15 |
| 57,337 | 101 | 2 | 1,092 | 9 | 54  | 1 | 516   | 3 | 1,763 | 15 |
| 57,338 | 101 | 2 | 1,089 | 9 | 54  | 1 | 514   | 3 | 1,758 | 15 |
| 57,339 | 101 | 2 | 1,083 | 8 | 54  | 1 | 511   | 3 | 1,749 | 14 |
| 57,340 | 100 | 2 | 1,080 | 8 | 54  | 1 | 511   | 3 | 1,745 | 14 |
| 57,341 | 95  | 2 | 1,072 | 8 | 54  | 1 | 507   | 3 | 1,728 | 14 |
| 57,342 | 98  | 2 | 1,069 | 8 | 54  | 1 | 500   | 3 | 1,721 | 14 |
| 57,343 | 100 | 2 | 1,070 | 8 | 54  | 1 | 500   | 4 | 1,724 | 15 |
| 57,344 | 100 | 2 | 1,066 | 9 | 53  | 1 | 486   | 4 | 1,705 | 16 |
| 57,345 | 98  | 2 | 1,064 | 9 | 53  | 1 | 483   | 4 | 1,698 | 16 |
| 57,346 | 99  | 3 | 1,066 | 9 | 53  | 1 | 485   | 4 | 1,703 | 17 |
| 57,347 | 102 | 3 | 1,073 | 9 | 53  | 1 | 482   | 4 | 1,710 | 17 |

|        |     |   |       |    |    |   |     |    |       |    |
|--------|-----|---|-------|----|----|---|-----|----|-------|----|
| 57,348 | 102 | 3 | 1,078 | 9  | 53 | 1 | 485 | 4  | 1,718 | 17 |
| 57,349 | 100 | 3 | 1,075 | 9  | 53 | 1 | 484 | 4  | 1,712 | 17 |
| 57,350 | 101 | 3 | 1,079 | 9  | 53 | 1 | 486 | 4  | 1,719 | 17 |
| 57,351 | 101 | 3 | 1,080 | 9  | 53 | 1 | 486 | 4  | 1,720 | 17 |
| 57,352 | 98  | 3 | 1,080 | 10 | 54 | 1 | 485 | 5  | 1,717 | 19 |
| 57,353 | 98  | 3 | 1,079 | 10 | 54 | 1 | 484 | 5  | 1,715 | 19 |
| 57,354 | 157 | 3 | 1,437 | 10 | 81 | 1 | 698 | 5  | 2,373 | 19 |
| 57,355 | 162 | 3 | 1,571 | 10 | 84 | 1 | 739 | 5  | 2,556 | 19 |
| 57,356 | 162 | 3 | 1,533 | 11 | 84 | 1 | 739 | 4  | 2,518 | 19 |
| 57,357 | 160 | 3 | 1,500 | 11 | 76 | 1 | 695 | 4  | 2,431 | 19 |
| 57,358 | 161 | 3 | 1,491 | 11 | 76 | 1 | 687 | 5  | 2,415 | 20 |
| 57,359 | 161 | 3 | 1,416 | 11 | 71 | 1 | 663 | 5  | 2,311 | 20 |
| 57,360 | 161 | 3 | 1,415 | 10 | 71 | 1 | 664 | 5  | 2,311 | 19 |
| 57,361 | 161 | 3 | 1,416 | 10 | 71 | 1 | 663 | 5  | 2,311 | 19 |
| 57,362 | 162 | 3 | 1,425 | 10 | 72 | 1 | 665 | 5  | 2,324 | 19 |
| 57,363 | 162 | 3 | 1,416 | 10 | 71 | 1 | 654 | 5  | 2,303 | 19 |
| 57,364 | 162 | 3 | 1,411 | 12 | 70 | 1 | 654 | 5  | 2,297 | 21 |
| 57,365 | 161 | 3 | 1,406 | 12 | 70 | 1 | 652 | 4  | 2,289 | 20 |
| 57,366 | 161 | 4 | 1,398 | 12 | 70 | 1 | 649 | 6  | 2,278 | 23 |
| 57,367 | 162 | 4 | 1,419 | 12 | 71 | 1 | 661 | 6  | 2,313 | 23 |
| 57,368 | 163 | 4 | 1,423 | 10 | 71 | 1 | 663 | 6  | 2,320 | 21 |
| 57,369 | 163 | 4 | 1,424 | 10 | 71 | 1 | 662 | 6  | 2,320 | 21 |
| 57,370 | 159 | 4 | 1,418 | 10 | 71 | 1 | 645 | 6  | 2,293 | 21 |
| 57,371 | 159 | 4 | 1,415 | 8  | 71 | 1 | 644 | 5  | 2,289 | 18 |
| 57,372 | 159 | 4 | 1,415 | 8  | 71 | 1 | 644 | 5  | 2,289 | 18 |
| 57,373 | 159 | 2 | 1,416 | 7  | 72 | 1 | 643 | 5  | 2,290 | 15 |
| 57,374 | 158 | 2 | 1,414 | 7  | 71 | 1 | 643 | 5  | 2,286 | 15 |
| 57,375 | 166 | 2 | 1,551 | 7  | 79 | 0 | 685 | 5  | 2,481 | 14 |
| 57,376 | 168 | 2 | 1,596 | 7  | 80 | 0 | 705 | 5  | 2,549 | 14 |
| 57,377 | 170 | 2 | 1,656 | 6  | 80 | 0 | 729 | 7  | 2,635 | 15 |
| 57,378 | 173 | 2 | 1,755 | 12 | 79 | 0 | 734 | 7  | 2,741 | 21 |
| 57,379 | 167 | 3 | 1,753 | 12 | 79 | 0 | 717 | 7  | 2,716 | 22 |
| 57,380 | 162 | 4 | 1,730 | 15 | 78 | 0 | 716 | 10 | 2,686 | 29 |
| 57,381 | 161 | 5 | 1,718 | 16 | 77 | 0 | 701 | 12 | 2,657 | 33 |
| 57,382 | 151 | 5 | 1,632 | 17 | 68 | 0 | 676 | 12 | 2,527 | 34 |
| 57,383 | 127 | 5 | 1,561 | 18 | 60 | 0 | 607 | 12 | 2,355 | 35 |
| 57,384 | 110 | 5 | 1,105 | 19 | 48 | 0 | 459 | 11 | 1,722 | 35 |
| 57,385 | 108 | 5 | 1,094 | 20 | 49 | 0 | 456 | 12 | 1,707 | 37 |
| 57,386 | 108 | 5 | 1,091 | 20 | 49 | 0 | 457 | 12 | 1,705 | 37 |
| 57,387 | 108 | 5 | 1,091 | 20 | 49 | 0 | 457 | 12 | 1,705 | 37 |
| 57,388 | 108 | 5 | 1,091 | 20 | 49 | 0 | 457 | 13 | 1,705 | 38 |



|        |     |   |       |    |    |   |     |    |       |    |
|--------|-----|---|-------|----|----|---|-----|----|-------|----|
| 57,389 | 108 | 5 | 1,094 | 20 | 49 | 0 | 457 | 13 | 1,708 | 38 |
| 57,390 | 108 | 5 | 1,095 | 20 | 49 | 0 | 456 | 13 | 1,708 | 38 |
| 57,391 | 108 | 5 | 1,093 | 20 | 49 | 0 | 456 | 13 | 1,706 | 38 |
| 57,392 | 108 | 5 | 1,092 | 20 | 49 | 0 | 456 | 13 | 1,705 | 38 |
| 57,393 | 104 | 6 | 1,083 | 20 | 49 | 0 | 451 | 12 | 1,687 | 38 |
| 57,394 | 104 | 5 | 1,081 | 19 | 49 | 0 | 451 | 12 | 1,685 | 36 |
| 57,395 | 104 | 5 | 1,085 | 19 | 49 | 0 | 453 | 13 | 1,691 | 37 |
| 57,396 | 103 | 7 | 1,118 | 19 | 49 | 0 | 455 | 13 | 1,725 | 39 |
| 57,397 | 103 | 7 | 1,117 | 19 | 49 | 0 | 455 | 13 | 1,724 | 39 |
| 57,398 | 100 | 7 | 1,111 | 19 | 49 | 0 | 455 | 13 | 1,715 | 39 |
| 57,399 | 116 | 7 | 1,352 | 19 | 64 | 0 | 638 | 13 | 2,170 | 39 |
| 57,400 | 127 | 7 | 1,427 | 22 | 74 | 0 | 739 | 14 | 2,367 | 43 |
| 57,401 | 108 | 8 | 1,394 | 28 | 71 | 1 | 722 | 17 | 2,295 | 54 |
| 57,402 | 90  | 8 | 1,296 | 29 | 66 | 1 | 678 | 19 | 2,130 | 57 |
| 57,403 | 73  | 8 | 1,160 | 28 | 56 | 1 | 581 | 18 | 1,870 | 55 |
| 57,404 | 73  | 8 | 1,129 | 28 | 56 | 1 | 566 | 18 | 1,824 | 55 |
| 57,405 | 66  | 8 | 1,061 | 29 | 46 | 1 | 524 | 19 | 1,697 | 57 |
| 57,406 | 59  | 8 | 911   | 30 | 43 | 1 | 483 | 19 | 1,496 | 58 |
| 57,407 | 57  | 8 | 899   | 29 | 42 | 2 | 470 | 19 | 1,468 | 58 |
| 57,408 | 56  | 8 | 899   | 29 | 42 | 2 | 469 | 19 | 1,466 | 58 |
| 57,409 | 57  | 8 | 923   | 29 | 42 | 2 | 482 | 18 | 1,504 | 57 |
| 57,410 | 58  | 8 | 944   | 29 | 43 | 2 | 492 | 18 | 1,537 | 57 |
| 57,411 | 58  | 8 | 950   | 29 | 43 | 2 | 490 | 18 | 1,541 | 57 |
| 57,412 | 58  | 8 | 950   | 29 | 43 | 2 | 490 | 18 | 1,541 | 57 |
| 57,413 | 56  | 8 | 933   | 29 | 42 | 2 | 488 | 18 | 1,519 | 57 |
| 57,414 | 56  | 8 | 939   | 30 | 42 | 2 | 493 | 18 | 1,530 | 58 |
| 57,415 | 56  | 8 | 948   | 29 | 43 | 2 | 494 | 18 | 1,541 | 57 |
| 57,416 | 56  | 7 | 953   | 29 | 43 | 2 | 498 | 17 | 1,550 | 55 |
| 57,417 | 58  | 7 | 987   | 29 | 43 | 2 | 506 | 17 | 1,594 | 55 |
| 57,418 | 57  | 7 | 961   | 29 | 41 | 2 | 489 | 17 | 1,548 | 55 |
| 57,419 | 56  | 7 | 950   | 28 | 41 | 2 | 483 | 17 | 1,530 | 54 |
| 57,420 | 56  | 7 | 947   | 28 | 41 | 2 | 483 | 17 | 1,527 | 54 |
| 57,421 | 56  | 7 | 945   | 28 | 41 | 2 | 483 | 17 | 1,525 | 54 |
| 57,422 | 58  | 7 | 962   | 28 | 41 | 2 | 486 | 17 | 1,547 | 54 |
| 57,423 | 64  | 7 | 968   | 29 | 41 | 2 | 512 | 18 | 1,585 | 56 |
| 57,424 | 64  | 7 | 969   | 29 | 41 | 3 | 511 | 18 | 1,585 | 57 |
| 57,425 | 59  | 7 | 914   | 31 | 38 | 3 | 487 | 20 | 1,498 | 61 |
| 57,426 | 53  | 7 | 858   | 31 | 34 | 3 | 470 | 20 | 1,415 | 61 |
| 57,427 | 51  | 7 | 813   | 31 | 33 | 3 | 450 | 20 | 1,347 | 61 |
| 57,428 | 49  | 7 | 747   | 31 | 32 | 3 | 422 | 18 | 1,250 | 59 |
| 57,429 | 44  | 8 | 614   | 26 | 31 | 3 | 395 | 19 | 1,084 | 56 |

|        |    |   |     |    |    |   |     |    |       |    |
|--------|----|---|-----|----|----|---|-----|----|-------|----|
| 57,430 | 44 | 7 | 581 | 26 | 30 | 3 | 392 | 19 | 1,047 | 55 |
| 57,431 | 44 | 6 | 570 | 23 | 30 | 3 | 390 | 15 | 1,034 | 47 |
| 57,432 | 45 | 5 | 571 | 22 | 30 | 3 | 393 | 14 | 1,039 | 44 |
| 57,433 | 44 | 5 | 570 | 21 | 30 | 3 | 394 | 14 | 1,038 | 43 |
| 57,434 | 44 | 5 | 570 | 20 | 30 | 3 | 392 | 14 | 1,036 | 42 |
| 57,435 | 45 | 5 | 572 | 19 | 30 | 3 | 396 | 14 | 1,043 | 41 |
| 57,436 | 45 | 5 | 579 | 18 | 30 | 3 | 399 | 14 | 1,053 | 40 |
| 57,437 | 45 | 5 | 584 | 18 | 30 | 3 | 399 | 14 | 1,058 | 40 |
| 57,438 | 45 | 5 | 587 | 18 | 30 | 3 | 399 | 14 | 1,061 | 40 |
| 57,439 | 45 | 5 | 587 | 18 | 30 | 3 | 399 | 13 | 1,061 | 39 |
| 57,440 | 45 | 5 | 584 | 18 | 30 | 3 | 399 | 13 | 1,058 | 39 |
| 57,441 | 45 | 5 | 583 | 18 | 30 | 3 | 399 | 13 | 1,057 | 39 |
| 57,442 | 45 | 5 | 585 | 18 | 30 | 3 | 399 | 13 | 1,059 | 39 |
| 57,443 | 45 | 6 | 584 | 18 | 30 | 3 | 399 | 13 | 1,058 | 40 |
| 57,444 | 44 | 5 | 589 | 19 | 30 | 3 | 400 | 13 | 1,063 | 40 |
| 57,445 | 44 | 5 | 593 | 22 | 30 | 3 | 401 | 13 | 1,068 | 43 |
| 57,446 | 44 | 5 | 616 | 23 | 30 | 3 | 401 | 12 | 1,091 | 43 |
| 57,447 | 46 | 3 | 611 | 23 | 30 | 3 | 407 | 13 | 1,094 | 42 |
| 57,448 | 48 | 3 | 585 | 24 | 28 | 3 | 402 | 13 | 1,063 | 43 |
| 57,449 | 61 | 3 | 553 | 21 | 19 | 3 | 405 | 11 | 1,038 | 38 |
| 57,450 | 82 | 3 | 643 | 22 | 21 | 3 | 460 | 11 | 1,206 | 39 |
| 57,451 | 72 | 3 | 591 | 22 | 14 | 3 | 372 | 11 | 1,049 | 39 |
| 57,452 | 79 | 2 | 681 | 15 | 23 | 2 | 456 | 6  | 1,239 | 25 |
| 57,453 | 79 | 2 | 679 | 15 | 23 | 2 | 454 | 6  | 1,235 | 25 |
| 57,454 | 82 | 2 | 693 | 15 | 24 | 2 | 468 | 6  | 1,267 | 25 |
| 57,455 | 82 | 2 | 693 | 15 | 24 | 2 | 468 | 6  | 1,267 | 25 |
| 57,456 | 82 | 2 | 692 | 14 | 24 | 2 | 468 | 5  | 1,266 | 23 |
| 57,457 | 82 | 2 | 696 | 13 | 24 | 2 | 473 | 5  | 1,275 | 22 |
| 57,458 | 82 | 2 | 692 | 13 | 24 | 1 | 473 | 5  | 1,271 | 21 |
| 57,459 | 80 | 2 | 667 | 13 | 24 | 1 | 460 | 5  | 1,231 | 21 |
| 57,460 | 79 | 2 | 666 | 13 | 24 | 1 | 458 | 5  | 1,227 | 21 |
| 57,461 | 79 | 2 | 645 | 13 | 23 | 1 | 450 | 5  | 1,197 | 21 |
| 57,462 | 79 | 2 | 637 | 13 | 23 | 1 | 450 | 5  | 1,189 | 21 |
| 57,463 | 79 | 2 | 630 | 13 | 23 | 1 | 444 | 5  | 1,176 | 21 |
| 57,464 | 79 | 2 | 630 | 13 | 23 | 1 | 444 | 5  | 1,176 | 21 |
| 57,465 | 79 | 2 | 631 | 12 | 23 | 1 | 444 | 5  | 1,177 | 20 |
| 57,466 | 79 | 2 | 621 | 11 | 22 | 1 | 443 | 5  | 1,165 | 19 |
| 57,467 | 79 | 2 | 613 | 11 | 22 | 1 | 439 | 5  | 1,153 | 19 |
| 57,468 | 77 | 2 | 577 | 11 | 22 | 1 | 431 | 5  | 1,107 | 19 |
| 57,469 | 77 | 2 | 574 | 11 | 22 | 1 | 430 | 6  | 1,103 | 20 |
| 57,470 | 76 | 2 | 565 | 12 | 22 | 1 | 424 | 8  | 1,087 | 23 |

|        |    |   |     |    |    |   |     |    |       |    |
|--------|----|---|-----|----|----|---|-----|----|-------|----|
| 57,471 | 75 | 3 | 560 | 12 | 22 | 1 | 424 | 8  | 1,081 | 24 |
| 57,472 | 75 | 3 | 556 | 11 | 22 | 0 | 424 | 7  | 1,077 | 21 |
| 57,473 | 75 | 3 | 555 | 11 | 22 | 0 | 424 | 7  | 1,076 | 21 |
| 57,474 | 69 | 3 | 526 | 11 | 20 | 0 | 393 | 7  | 1,008 | 21 |
| 57,475 | 69 | 3 | 517 | 9  | 20 | 0 | 392 | 5  | 998   | 17 |
| 57,476 | 69 | 3 | 516 | 9  | 20 | 0 | 392 | 5  | 997   | 17 |
| 57,477 | 69 | 3 | 516 | 9  | 20 | 0 | 392 | 5  | 997   | 17 |
| 57,478 | 69 | 3 | 516 | 9  | 20 | 0 | 391 | 5  | 996   | 17 |
| 57,479 | 70 | 2 | 518 | 8  | 20 | 0 | 391 | 4  | 999   | 14 |
| 57,480 | 70 | 2 | 518 | 8  | 20 | 0 | 391 | 4  | 999   | 14 |
| 57,481 | 70 | 2 | 518 | 8  | 20 | 0 | 394 | 4  | 1,002 | 14 |
| 57,482 | 69 | 2 | 515 | 8  | 20 | 0 | 393 | 4  | 997   | 14 |
| 57,483 | 69 | 2 | 513 | 8  | 20 | 0 | 393 | 4  | 995   | 14 |
| 57,484 | 69 | 2 | 514 | 8  | 20 | 0 | 393 | 4  | 996   | 14 |
| 57,485 | 68 | 2 | 513 | 8  | 21 | 0 | 390 | 4  | 992   | 14 |
| 57,486 | 68 | 2 | 507 | 9  | 21 | 0 | 387 | 4  | 983   | 15 |
| 57,487 | 68 | 2 | 504 | 9  | 21 | 0 | 386 | 4  | 979   | 15 |
| 57,488 | 68 | 2 | 507 | 13 | 21 | 0 | 386 | 4  | 982   | 19 |
| 57,489 | 68 | 2 | 504 | 13 | 21 | 0 | 386 | 4  | 979   | 19 |
| 57,490 | 68 | 2 | 504 | 13 | 21 | 0 | 387 | 4  | 980   | 19 |
| 57,491 | 68 | 2 | 504 | 13 | 21 | 0 | 388 | 4  | 981   | 19 |
| 57,492 | 68 | 2 | 507 | 13 | 21 | 0 | 389 | 4  | 985   | 19 |
| 57,493 | 68 | 2 | 504 | 13 | 21 | 0 | 389 | 4  | 982   | 19 |
| 57,494 | 68 | 1 | 501 | 9  | 21 | 0 | 388 | 4  | 978   | 14 |
| 57,495 | 68 | 1 | 502 | 9  | 21 | 0 | 388 | 4  | 979   | 14 |
| 57,496 | 68 | 1 | 498 | 9  | 21 | 0 | 387 | 4  | 974   | 14 |
| 57,497 | 68 | 1 | 471 | 8  | 21 | 0 | 386 | 4  | 946   | 13 |
| 57,498 | 66 | 1 | 441 | 7  | 21 | 0 | 377 | 3  | 905   | 11 |
| 57,499 | 63 | 1 | 388 | 8  | 20 | 0 | 354 | 3  | 825   | 12 |
| 57,500 | 35 | 1 | 275 | 15 | 17 | 1 | 204 | 3  | 531   | 20 |
| 57,501 | 14 | 1 | 165 | 14 | 15 | 1 | 138 | 3  | 332   | 19 |
| 57,502 | 17 | 1 | 146 | 14 | 12 | 1 | 130 | 3  | 305   | 19 |
| 57,503 | 14 | 3 | 56  | 23 | 3  | 1 | 43  | 9  | 116   | 36 |
| 57,504 | 11 | 3 | 49  | 23 | 3  | 1 | 29  | 9  | 92    | 36 |
| 57,505 | 11 | 3 | 50  | 23 | 1  | 1 | 27  | 10 | 89    | 37 |
| 57,506 | 11 | 3 | 54  | 23 | 1  | 1 | 22  | 10 | 88    | 37 |
| 57,507 | 11 | 5 | 62  | 27 | 1  | 1 | 26  | 12 | 100   | 45 |
| 57,508 | 11 | 5 | 62  | 27 | 1  | 1 | 26  | 12 | 100   | 45 |
| 57,509 | 11 | 5 | 62  | 28 | 1  | 1 | 26  | 12 | 100   | 46 |
| 57,510 | 12 | 5 | 70  | 28 | 2  | 1 | 30  | 12 | 114   | 46 |
| 57,511 | 12 | 5 | 71  | 29 | 2  | 1 | 30  | 12 | 115   | 47 |

|        |    |    |     |    |   |   |    |    |     |    |
|--------|----|----|-----|----|---|---|----|----|-----|----|
| 57,512 | 12 | 5  | 96  | 29 | 2 | 1 | 32 | 12 | 142 | 47 |
| 57,513 | 12 | 5  | 97  | 30 | 2 | 1 | 32 | 12 | 143 | 48 |
| 57,514 | 11 | 5  | 97  | 31 | 2 | 1 | 32 | 12 | 142 | 49 |
| 57,515 | 11 | 5  | 97  | 31 | 2 | 1 | 33 | 12 | 143 | 49 |
| 57,516 | 11 | 5  | 99  | 31 | 2 | 1 | 35 | 12 | 147 | 49 |
| 57,517 | 11 | 5  | 106 | 31 | 3 | 1 | 42 | 12 | 162 | 49 |
| 57,518 | 11 | 5  | 106 | 31 | 3 | 1 | 42 | 12 | 162 | 49 |
| 57,519 | 19 | 5  | 126 | 31 | 5 | 1 | 55 | 12 | 205 | 49 |
| 57,520 | 26 | 5  | 150 | 30 | 7 | 1 | 70 | 9  | 253 | 45 |
| 57,521 | 26 | 4  | 155 | 30 | 7 | 1 | 71 | 9  | 259 | 44 |
| 57,522 | 26 | 4  | 155 | 30 | 7 | 1 | 71 | 9  | 259 | 44 |
| 57,523 | 26 | 4  | 165 | 30 | 7 | 1 | 71 | 9  | 269 | 44 |
| 57,524 | 26 | 4  | 165 | 30 | 7 | 1 | 71 | 9  | 269 | 44 |
| 57,525 | 26 | 4  | 165 | 30 | 7 | 1 | 71 | 9  | 269 | 44 |
| 57,526 | 26 | 4  | 165 | 30 | 7 | 1 | 71 | 9  | 269 | 44 |
| 57,527 | 26 | 4  | 165 | 30 | 7 | 1 | 71 | 9  | 269 | 44 |
| 57,528 | 26 | 4  | 165 | 30 | 7 | 1 | 71 | 9  | 269 | 44 |
| 57,529 | 25 | 4  | 165 | 30 | 7 | 1 | 71 | 9  | 268 | 44 |
| 57,530 | 25 | 4  | 164 | 31 | 7 | 1 | 71 | 9  | 267 | 45 |
| 57,531 | 25 | 4  | 164 | 33 | 7 | 1 | 71 | 9  | 267 | 47 |
| 57,532 | 25 | 4  | 163 | 33 | 7 | 1 | 68 | 9  | 263 | 47 |
| 57,533 | 25 | 4  | 163 | 33 | 7 | 1 | 67 | 9  | 262 | 47 |
| 57,534 | 25 | 4  | 163 | 33 | 7 | 1 | 67 | 9  | 262 | 47 |
| 57,535 | 25 | 4  | 162 | 33 | 7 | 1 | 67 | 9  | 261 | 47 |
| 57,536 | 28 | 4  | 162 | 33 | 6 | 1 | 66 | 9  | 262 | 47 |
| 57,537 | 28 | 6  | 161 | 37 | 6 | 1 | 66 | 9  | 261 | 53 |
| 57,538 | 28 | 6  | 158 | 38 | 6 | 1 | 65 | 9  | 257 | 54 |
| 57,539 | 28 | 6  | 156 | 34 | 6 | 1 | 65 | 9  | 255 | 50 |
| 57,540 | 28 | 8  | 158 | 34 | 6 | 1 | 64 | 9  | 256 | 52 |
| 57,541 | 28 | 8  | 158 | 34 | 6 | 1 | 64 | 9  | 256 | 52 |
| 57,542 | 28 | 8  | 158 | 35 | 6 | 1 | 63 | 9  | 255 | 53 |
| 57,543 | 28 | 8  | 155 | 35 | 6 | 1 | 62 | 9  | 251 | 53 |
| 57,544 | 28 | 8  | 154 | 35 | 6 | 1 | 62 | 10 | 250 | 54 |
| 57,545 | 28 | 8  | 154 | 35 | 6 | 1 | 62 | 10 | 250 | 54 |
| 57,546 | 28 | 8  | 152 | 37 | 6 | 1 | 62 | 11 | 248 | 57 |
| 57,547 | 28 | 8  | 153 | 37 | 6 | 1 | 63 | 11 | 250 | 57 |
| 57,548 | 28 | 8  | 152 | 38 | 6 | 1 | 62 | 12 | 248 | 59 |
| 57,549 | 28 | 8  | 152 | 38 | 6 | 1 | 62 | 14 | 248 | 61 |
| 57,550 | 28 | 8  | 148 | 39 | 6 | 1 | 59 | 15 | 241 | 63 |
| 57,551 | 28 | 11 | 149 | 42 | 6 | 1 | 59 | 35 | 242 | 89 |
| 57,552 | 28 | 11 | 149 | 42 | 6 | 1 | 59 | 35 | 242 | 89 |

|        |    |    |     |    |    |   |    |    |     |     |
|--------|----|----|-----|----|----|---|----|----|-----|-----|
| 57,553 | 23 | 12 | 147 | 43 | 6  | 1 | 56 | 41 | 232 | 97  |
| 57,554 | 19 | 10 | 146 | 36 | 6  | 1 | 56 | 36 | 227 | 83  |
| 57,555 | 19 | 10 | 135 | 40 | 6  | 1 | 54 | 36 | 214 | 87  |
| 57,556 | 19 | 10 | 126 | 40 | 6  | 1 | 53 | 36 | 204 | 87  |
| 57,557 | 19 | 10 | 122 | 40 | 6  | 1 | 53 | 36 | 200 | 87  |
| 57,558 | 19 | 8  | 121 | 37 | 6  | 1 | 53 | 34 | 199 | 80  |
| 57,559 | 20 | 8  | 145 | 37 | 7  | 1 | 54 | 35 | 226 | 81  |
| 57,560 | 19 | 8  | 140 | 36 | 6  | 1 | 52 | 35 | 217 | 80  |
| 57,561 | 19 | 8  | 142 | 36 | 6  | 1 | 51 | 35 | 218 | 80  |
| 57,562 | 19 | 8  | 126 | 36 | 7  | 1 | 49 | 35 | 201 | 80  |
| 57,563 | 19 | 8  | 120 | 36 | 7  | 1 | 49 | 35 | 195 | 80  |
| 57,564 | 21 | 8  | 132 | 35 | 10 | 1 | 54 | 35 | 217 | 79  |
| 57,565 | 21 | 8  | 152 | 34 | 10 | 1 | 60 | 35 | 243 | 78  |
| 57,566 | 27 | 8  | 197 | 34 | 11 | 1 | 65 | 37 | 300 | 80  |
| 57,567 | 30 | 8  | 217 | 35 | 11 | 1 | 67 | 37 | 325 | 81  |
| 57,568 | 30 | 8  | 225 | 36 | 11 | 1 | 66 | 37 | 332 | 82  |
| 57,569 | 22 | 8  | 207 | 37 | 9  | 1 | 54 | 39 | 292 | 85  |
| 57,570 | 19 | 8  | 219 | 40 | 9  | 1 | 52 | 39 | 299 | 88  |
| 57,571 | 15 | 9  | 209 | 42 | 9  | 1 | 46 | 43 | 279 | 95  |
| 57,572 | 15 | 9  | 206 | 42 | 9  | 1 | 45 | 43 | 275 | 95  |
| 57,573 | 15 | 9  | 198 | 42 | 9  | 1 | 45 | 43 | 267 | 95  |
| 57,574 | 15 | 9  | 207 | 42 | 9  | 1 | 46 | 44 | 277 | 96  |
| 57,575 | 15 | 9  | 207 | 42 | 9  | 1 | 46 | 44 | 277 | 96  |
| 57,576 | 15 | 9  | 207 | 43 | 9  | 1 | 46 | 44 | 277 | 97  |
| 57,577 | 15 | 9  | 207 | 43 | 9  | 1 | 46 | 44 | 277 | 97  |
| 57,578 | 15 | 9  | 207 | 43 | 9  | 1 | 46 | 44 | 277 | 97  |
| 57,579 | 15 | 9  | 207 | 43 | 9  | 1 | 46 | 44 | 277 | 97  |
| 57,580 | 15 | 9  | 206 | 42 | 9  | 1 | 46 | 45 | 276 | 97  |
| 57,581 | 15 | 9  | 206 | 43 | 9  | 1 | 46 | 45 | 276 | 98  |
| 57,582 | 15 | 9  | 207 | 41 | 9  | 1 | 46 | 47 | 277 | 98  |
| 57,583 | 16 | 10 | 211 | 41 | 9  | 1 | 48 | 49 | 284 | 101 |
| 57,584 | 16 | 10 | 212 | 41 | 9  | 1 | 50 | 49 | 287 | 101 |
| 57,585 | 16 | 11 | 212 | 41 | 9  | 1 | 50 | 49 | 287 | 102 |
| 57,586 | 16 | 11 | 212 | 41 | 9  | 1 | 50 | 49 | 287 | 102 |
| 57,587 | 13 | 9  | 211 | 36 | 9  | 1 | 53 | 49 | 286 | 95  |
| 57,588 | 13 | 9  | 212 | 35 | 9  | 1 | 53 | 49 | 287 | 94  |
| 57,589 | 13 | 9  | 212 | 35 | 9  | 1 | 53 | 49 | 287 | 94  |
| 57,590 | 13 | 7  | 210 | 36 | 9  | 1 | 53 | 49 | 285 | 93  |
| 57,591 | 13 | 7  | 210 | 36 | 9  | 1 | 53 | 49 | 285 | 93  |
| 57,592 | 13 | 7  | 211 | 35 | 9  | 1 | 53 | 49 | 286 | 92  |
| 57,593 | 13 | 7  | 211 | 35 | 9  | 1 | 53 | 49 | 286 | 92  |

|        |    |   |     |    |    |   |    |    |     |    |
|--------|----|---|-----|----|----|---|----|----|-----|----|
| 57,594 | 13 | 7 | 211 | 35 | 9  | 1 | 53 | 48 | 286 | 91 |
| 57,595 | 13 | 7 | 211 | 35 | 9  | 1 | 53 | 48 | 286 | 91 |
| 57,596 | 14 | 7 | 211 | 33 | 9  | 1 | 53 | 47 | 287 | 88 |
| 57,597 | 14 | 7 | 210 | 33 | 9  | 1 | 54 | 47 | 287 | 88 |
| 57,598 | 14 | 7 | 210 | 34 | 10 | 1 | 53 | 47 | 287 | 89 |
| 57,599 | 15 | 7 | 211 | 34 | 10 | 1 | 53 | 46 | 289 | 88 |
| 57,600 | 15 | 7 | 210 | 34 | 10 | 1 | 53 | 44 | 288 | 86 |
| 57,601 | 15 | 7 | 207 | 33 | 10 | 1 | 53 | 43 | 285 | 84 |
| 57,602 | 15 | 4 | 205 | 23 | 10 | 0 | 51 | 23 | 281 | 50 |
| 57,603 | 15 | 4 | 204 | 23 | 10 | 0 | 51 | 24 | 280 | 51 |
| 57,604 | 15 | 3 | 207 | 22 | 10 | 0 | 53 | 18 | 285 | 43 |
| 57,605 | 15 | 3 | 209 | 20 | 10 | 0 | 60 | 17 | 294 | 40 |
| 57,606 | 15 | 3 | 211 | 16 | 10 | 0 | 60 | 16 | 296 | 35 |
| 57,607 | 15 | 3 | 211 | 16 | 10 | 0 | 60 | 16 | 296 | 35 |
| 57,608 | 15 | 3 | 214 | 15 | 10 | 0 | 62 | 18 | 301 | 36 |
| 57,609 | 15 | 3 | 212 | 15 | 10 | 0 | 59 | 18 | 296 | 36 |
| 57,610 | 14 | 3 | 188 | 16 | 9  | 0 | 58 | 17 | 269 | 36 |
| 57,611 | 14 | 3 | 185 | 16 | 10 | 0 | 57 | 17 | 266 | 36 |
| 57,612 | 16 | 3 | 182 | 18 | 10 | 0 | 57 | 17 | 265 | 38 |
| 57,613 | 16 | 3 | 180 | 18 | 9  | 0 | 57 | 17 | 262 | 38 |
| 57,614 | 18 | 3 | 192 | 18 | 7  | 0 | 69 | 17 | 286 | 38 |
| 57,615 | 18 | 3 | 189 | 18 | 6  | 0 | 66 | 17 | 279 | 38 |
| 57,616 | 19 | 5 | 183 | 18 | 10 | 0 | 69 | 17 | 281 | 40 |
| 57,617 | 14 | 5 | 159 | 18 | 11 | 0 | 66 | 15 | 250 | 38 |
| 57,618 | 11 | 5 | 134 | 17 | 11 | 0 | 60 | 16 | 216 | 38 |
| 57,619 | 11 | 5 | 128 | 16 | 11 | 0 | 60 | 14 | 210 | 35 |
| 57,620 | 11 | 5 | 133 | 16 | 11 | 0 | 63 | 14 | 218 | 35 |
| 57,621 | 12 | 5 | 108 | 13 | 9  | 0 | 56 | 15 | 185 | 33 |
| 57,622 | 12 | 4 | 108 | 11 | 9  | 0 | 56 | 11 | 185 | 26 |
| 57,623 | 13 | 4 | 114 | 11 | 11 | 0 | 59 | 11 | 197 | 26 |
| 57,624 | 13 | 4 | 106 | 11 | 12 | 0 | 61 | 10 | 192 | 25 |
| 57,625 | 13 | 4 | 105 | 11 | 12 | 0 | 61 | 10 | 191 | 25 |
| 57,626 | 13 | 4 | 107 | 11 | 12 | 0 | 61 | 10 | 193 | 25 |
| 57,627 | 13 | 4 | 107 | 11 | 12 | 0 | 61 | 10 | 193 | 25 |
| 57,628 | 13 | 4 | 107 | 12 | 12 | 0 | 61 | 10 | 193 | 26 |
| 57,629 | 13 | 4 | 107 | 12 | 12 | 0 | 61 | 10 | 193 | 26 |
| 57,630 | 19 | 4 | 143 | 12 | 14 | 0 | 81 | 10 | 257 | 26 |
| 57,631 | 21 | 4 | 151 | 11 | 14 | 0 | 87 | 9  | 273 | 24 |
| 57,632 | 21 | 4 | 151 | 11 | 14 | 0 | 88 | 7  | 274 | 22 |
| 57,633 | 21 | 4 | 152 | 12 | 14 | 0 | 90 | 12 | 277 | 28 |
| 57,634 | 20 | 3 | 149 | 12 | 14 | 0 | 92 | 14 | 275 | 29 |

|        |    |   |     |    |    |   |     |    |     |    |
|--------|----|---|-----|----|----|---|-----|----|-----|----|
| 57,635 | 20 | 3 | 149 | 13 | 14 | 0 | 91  | 15 | 274 | 31 |
| 57,636 | 20 | 2 | 152 | 13 | 14 | 0 | 91  | 17 | 277 | 32 |
| 57,637 | 20 | 2 | 155 | 17 | 14 | 0 | 91  | 19 | 280 | 38 |
| 57,638 | 20 | 2 | 155 | 17 | 14 | 0 | 88  | 19 | 277 | 38 |
| 57,639 | 21 | 2 | 163 | 17 | 17 | 0 | 95  | 19 | 296 | 38 |
| 57,640 | 21 | 2 | 167 | 16 | 17 | 0 | 98  | 20 | 303 | 38 |
| 57,641 | 21 | 2 | 167 | 16 | 17 | 0 | 98  | 21 | 303 | 39 |
| 57,642 | 21 | 2 | 181 | 16 | 17 | 0 | 99  | 21 | 318 | 39 |
| 57,643 | 21 | 2 | 180 | 16 | 17 | 0 | 100 | 21 | 318 | 39 |
| 57,644 | 21 | 2 | 180 | 16 | 17 | 0 | 100 | 21 | 318 | 39 |
| 57,645 | 21 | 2 | 180 | 17 | 17 | 0 | 100 | 22 | 318 | 41 |
| 57,646 | 21 | 2 | 183 | 17 | 17 | 0 | 100 | 22 | 321 | 41 |
| 57,647 | 20 | 2 | 183 | 17 | 17 | 0 | 100 | 22 | 320 | 41 |
| 57,648 | 24 | 2 | 237 | 16 | 20 | 0 | 115 | 22 | 396 | 40 |
| 57,649 | 24 | 2 | 237 | 16 | 19 | 0 | 115 | 22 | 395 | 40 |
| 57,650 | 25 | 2 | 254 | 16 | 19 | 0 | 124 | 22 | 422 | 40 |
| 57,651 | 27 | 2 | 287 | 16 | 19 | 0 | 132 | 22 | 465 | 40 |
| 57,652 | 27 | 2 | 287 | 15 | 19 | 0 | 131 | 22 | 464 | 39 |
| 57,653 | 27 | 3 | 287 | 15 | 19 | 0 | 132 | 22 | 465 | 40 |
| 57,654 | 27 | 3 | 284 | 15 | 19 | 0 | 130 | 22 | 460 | 40 |
| 57,655 | 31 | 3 | 328 | 15 | 20 | 0 | 136 | 22 | 515 | 40 |
| 57,656 | 32 | 3 | 342 | 15 | 23 | 0 | 141 | 22 | 538 | 40 |
| 57,657 | 32 | 3 | 341 | 15 | 23 | 0 | 142 | 22 | 538 | 40 |
| 57,658 | 32 | 3 | 341 | 15 | 23 | 0 | 142 | 20 | 538 | 38 |
| 57,659 | 32 | 3 | 339 | 15 | 23 | 0 | 141 | 20 | 535 | 38 |
| 57,660 | 33 | 3 | 343 | 15 | 23 | 0 | 141 | 20 | 540 | 38 |
| 57,661 | 32 | 3 | 350 | 14 | 23 | 0 | 147 | 20 | 552 | 37 |
| 57,662 | 33 | 3 | 353 | 14 | 24 | 0 | 150 | 20 | 560 | 37 |
| 57,663 | 33 | 3 | 373 | 18 | 24 | 0 | 152 | 24 | 582 | 45 |
| 57,664 | 32 | 3 | 371 | 17 | 25 | 0 | 148 | 24 | 576 | 44 |
| 57,665 | 29 | 3 | 362 | 19 | 25 | 0 | 144 | 24 | 560 | 46 |
| 57,666 | 29 | 3 | 358 | 19 | 25 | 0 | 143 | 25 | 555 | 47 |
| 57,667 | 28 | 1 | 343 | 19 | 21 | 0 | 133 | 25 | 525 | 45 |
| 57,668 | 27 | 1 | 320 | 19 | 19 | 0 | 130 | 25 | 496 | 45 |
| 57,669 | 27 | 1 | 319 | 18 | 18 | 0 | 130 | 24 | 494 | 43 |
| 57,670 | 27 | 1 | 317 | 18 | 18 | 1 | 130 | 25 | 492 | 45 |
| 57,671 | 27 | 1 | 310 | 19 | 18 | 1 | 126 | 24 | 481 | 45 |
| 57,672 | 26 | 1 | 310 | 19 | 18 | 1 | 126 | 24 | 480 | 45 |
| 57,673 | 26 | 1 | 310 | 19 | 18 | 1 | 126 | 24 | 480 | 45 |
| 57,674 | 25 | 1 | 302 | 19 | 16 | 1 | 126 | 24 | 469 | 45 |
| 57,675 | 25 | 1 | 300 | 19 | 15 | 2 | 123 | 25 | 463 | 47 |

|        |    |   |     |    |    |   |     |    |     |     |
|--------|----|---|-----|----|----|---|-----|----|-----|-----|
| 57,676 | 25 | 1 | 300 | 22 | 16 | 2 | 123 | 26 | 464 | 51  |
| 57,677 | 25 | 2 | 295 | 23 | 16 | 2 | 118 | 26 | 454 | 53  |
| 57,678 | 22 | 2 | 266 | 27 | 14 | 2 | 107 | 27 | 409 | 58  |
| 57,679 | 19 | 2 | 264 | 26 | 14 | 2 | 104 | 27 | 401 | 57  |
| 57,680 | 19 | 2 | 264 | 28 | 14 | 2 | 103 | 28 | 400 | 60  |
| 57,681 | 17 | 2 | 267 | 28 | 14 | 2 | 115 | 28 | 413 | 60  |
| 57,682 | 17 | 2 | 265 | 28 | 14 | 2 | 111 | 28 | 407 | 60  |
| 57,683 | 17 | 3 | 265 | 29 | 14 | 2 | 110 | 27 | 406 | 61  |
| 57,684 | 17 | 3 | 263 | 28 | 14 | 2 | 108 | 23 | 402 | 56  |
| 57,685 | 17 | 3 | 264 | 27 | 14 | 2 | 106 | 19 | 401 | 51  |
| 57,686 | 17 | 3 | 263 | 27 | 14 | 2 | 105 | 19 | 399 | 51  |
| 57,687 | 17 | 3 | 262 | 28 | 14 | 2 | 109 | 18 | 402 | 51  |
| 57,688 | 18 | 3 | 260 | 24 | 14 | 2 | 110 | 16 | 402 | 45  |
| 57,689 | 18 | 3 | 256 | 25 | 11 | 2 | 105 | 16 | 390 | 46  |
| 57,690 | 18 | 3 | 252 | 25 | 11 | 2 | 103 | 16 | 384 | 46  |
| 57,691 | 18 | 3 | 256 | 25 | 12 | 2 | 104 | 17 | 390 | 47  |
| 57,692 | 19 | 3 | 242 | 25 | 13 | 2 | 103 | 16 | 377 | 46  |
| 57,693 | 19 | 3 | 242 | 25 | 13 | 2 | 103 | 16 | 377 | 46  |
| 57,694 | 23 | 4 | 259 | 25 | 13 | 2 | 106 | 16 | 401 | 47  |
| 57,695 | 24 | 4 | 270 | 25 | 16 | 2 | 109 | 20 | 419 | 51  |
| 57,696 | 24 | 4 | 270 | 25 | 16 | 2 | 109 | 20 | 419 | 51  |
| 57,697 | 42 | 4 | 398 | 25 | 23 | 2 | 181 | 21 | 644 | 52  |
| 57,698 | 52 | 4 | 426 | 28 | 27 | 3 | 204 | 25 | 709 | 60  |
| 57,699 | 48 | 5 | 390 | 42 | 29 | 4 | 194 | 34 | 661 | 85  |
| 57,700 | 47 | 5 | 375 | 44 | 29 | 4 | 185 | 34 | 636 | 87  |
| 57,701 | 49 | 5 | 412 | 48 | 29 | 4 | 207 | 36 | 697 | 93  |
| 57,702 | 47 | 6 | 386 | 52 | 29 | 4 | 201 | 36 | 663 | 98  |
| 57,703 | 45 | 5 | 358 | 53 | 29 | 4 | 191 | 36 | 623 | 98  |
| 57,704 | 43 | 5 | 354 | 53 | 29 | 4 | 188 | 35 | 614 | 97  |
| 57,705 | 43 | 5 | 351 | 53 | 29 | 4 | 188 | 35 | 611 | 97  |
| 57,706 | 43 | 5 | 350 | 53 | 29 | 4 | 188 | 36 | 610 | 98  |
| 57,707 | 42 | 5 | 335 | 53 | 26 | 4 | 182 | 37 | 585 | 99  |
| 57,708 | 42 | 5 | 335 | 76 | 26 | 4 | 181 | 41 | 584 | 126 |
| 57,709 | 42 | 6 | 333 | 80 | 26 | 5 | 181 | 42 | 582 | 133 |
| 57,710 | 41 | 6 | 329 | 83 | 26 | 5 | 181 | 42 | 577 | 136 |
| 57,711 | 40 | 6 | 327 | 83 | 26 | 5 | 179 | 44 | 572 | 138 |
| 57,712 | 40 | 6 | 322 | 86 | 26 | 5 | 178 | 46 | 566 | 143 |
| 57,713 | 39 | 6 | 316 | 88 | 24 | 6 | 174 | 46 | 553 | 146 |
| 57,714 | 39 | 7 | 296 | 88 | 24 | 6 | 171 | 42 | 530 | 143 |
| 57,715 | 39 | 7 | 293 | 88 | 23 | 6 | 171 | 42 | 526 | 143 |
| 57,716 | 39 | 8 | 294 | 86 | 23 | 6 | 171 | 42 | 527 | 142 |



|        |     |    |     |    |    |   |     |    |       |     |
|--------|-----|----|-----|----|----|---|-----|----|-------|-----|
| 57,717 | 39  | 8  | 295 | 86 | 23 | 6 | 175 | 41 | 532   | 141 |
| 57,718 | 39  | 8  | 296 | 86 | 23 | 6 | 180 | 41 | 538   | 141 |
| 57,719 | 39  | 8  | 296 | 87 | 23 | 6 | 180 | 43 | 538   | 144 |
| 57,720 | 39  | 8  | 295 | 87 | 23 | 6 | 178 | 43 | 535   | 144 |
| 57,721 | 39  | 8  | 295 | 87 | 23 | 5 | 178 | 43 | 535   | 143 |
| 57,722 | 39  | 8  | 295 | 86 | 23 | 5 | 178 | 43 | 535   | 142 |
| 57,723 | 41  | 8  | 311 | 86 | 23 | 5 | 190 | 43 | 565   | 142 |
| 57,724 | 42  | 8  | 326 | 86 | 24 | 5 | 191 | 43 | 583   | 142 |
| 57,725 | 63  | 8  | 408 | 86 | 29 | 4 | 218 | 42 | 718   | 140 |
| 57,726 | 63  | 8  | 408 | 86 | 29 | 4 | 218 | 42 | 718   | 140 |
| 57,727 | 64  | 8  | 413 | 84 | 28 | 4 | 219 | 41 | 724   | 137 |
| 57,728 | 64  | 7  | 416 | 78 | 28 | 4 | 219 | 40 | 727   | 129 |
| 57,729 | 75  | 7  | 485 | 78 | 37 | 4 | 252 | 40 | 849   | 129 |
| 57,730 | 77  | 7  | 496 | 76 | 37 | 4 | 260 | 39 | 870   | 126 |
| 57,731 | 77  | 7  | 505 | 76 | 37 | 4 | 260 | 39 | 879   | 126 |
| 57,732 | 82  | 6  | 534 | 75 | 39 | 4 | 267 | 39 | 922   | 124 |
| 57,733 | 87  | 6  | 538 | 75 | 41 | 4 | 272 | 40 | 938   | 125 |
| 57,734 | 87  | 6  | 537 | 75 | 41 | 4 | 272 | 40 | 937   | 125 |
| 57,735 | 88  | 6  | 576 | 75 | 42 | 4 | 308 | 39 | 1,014 | 124 |
| 57,736 | 88  | 6  | 578 | 75 | 43 | 4 | 309 | 39 | 1,018 | 124 |
| 57,737 | 89  | 6  | 579 | 74 | 43 | 4 | 307 | 38 | 1,018 | 122 |
| 57,738 | 89  | 6  | 579 | 73 | 43 | 4 | 307 | 36 | 1,018 | 119 |
| 57,739 | 88  | 6  | 578 | 73 | 43 | 4 | 306 | 36 | 1,015 | 119 |
| 57,740 | 89  | 6  | 576 | 74 | 43 | 4 | 306 | 36 | 1,014 | 120 |
| 57,741 | 89  | 6  | 577 | 74 | 43 | 4 | 306 | 36 | 1,015 | 120 |
| 57,742 | 89  | 6  | 578 | 74 | 42 | 4 | 305 | 35 | 1,014 | 119 |
| 57,743 | 88  | 6  | 578 | 76 | 41 | 4 | 305 | 35 | 1,012 | 121 |
| 57,744 | 88  | 6  | 568 | 77 | 41 | 4 | 302 | 35 | 999   | 122 |
| 57,745 | 108 | 5  | 756 | 79 | 47 | 4 | 368 | 35 | 1,279 | 123 |
| 57,746 | 108 | 5  | 762 | 78 | 44 | 4 | 379 | 32 | 1,293 | 119 |
| 57,747 | 103 | 5  | 711 | 79 | 46 | 4 | 384 | 33 | 1,244 | 121 |
| 57,748 | 97  | 5  | 706 | 85 | 46 | 4 | 367 | 36 | 1,216 | 130 |
| 57,749 | 89  | 7  | 727 | 95 | 44 | 5 | 371 | 41 | 1,231 | 148 |
| 57,750 | 89  | 9  | 715 | 87 | 39 | 4 | 365 | 35 | 1,208 | 135 |
| 57,751 | 94  | 9  | 743 | 85 | 40 | 4 | 381 | 35 | 1,258 | 133 |
| 57,752 | 91  | 10 | 724 | 80 | 40 | 4 | 368 | 33 | 1,223 | 127 |
| 57,753 | 91  | 9  | 718 | 76 | 40 | 4 | 367 | 34 | 1,216 | 123 |
| 57,754 | 93  | 9  | 726 | 75 | 40 | 4 | 368 | 34 | 1,227 | 122 |
| 57,755 | 93  | 9  | 722 | 75 | 40 | 4 | 368 | 34 | 1,223 | 122 |
| 57,756 | 93  | 10 | 724 | 75 | 40 | 4 | 370 | 34 | 1,227 | 123 |
| 57,757 | 95  | 10 | 753 | 75 | 40 | 4 | 379 | 33 | 1,267 | 122 |

|        |     |    |     |    |    |   |     |    |       |    |
|--------|-----|----|-----|----|----|---|-----|----|-------|----|
| 57,758 | 96  | 10 | 762 | 52 | 40 | 4 | 387 | 28 | 1,285 | 94 |
| 57,759 | 96  | 10 | 762 | 52 | 40 | 4 | 387 | 28 | 1,285 | 94 |
| 57,760 | 99  | 9  | 803 | 48 | 40 | 3 | 399 | 27 | 1,341 | 87 |
| 57,761 | 101 | 9  | 833 | 45 | 41 | 3 | 406 | 25 | 1,381 | 82 |
| 57,762 | 104 | 8  | 860 | 34 | 41 | 2 | 424 | 23 | 1,429 | 67 |
| 57,763 | 104 | 8  | 874 | 34 | 41 | 2 | 425 | 23 | 1,444 | 67 |
| 57,764 | 110 | 9  | 904 | 34 | 41 | 2 | 471 | 23 | 1,526 | 68 |
| 57,765 | 110 | 9  | 904 | 34 | 41 | 2 | 471 | 23 | 1,526 | 68 |
| 57,766 | 110 | 8  | 905 | 34 | 41 | 2 | 472 | 23 | 1,528 | 67 |
| 57,767 | 110 | 8  | 904 | 36 | 41 | 2 | 472 | 23 | 1,527 | 69 |
| 57,768 | 110 | 8  | 903 | 38 | 41 | 3 | 468 | 23 | 1,522 | 72 |
| 57,769 | 110 | 8  | 902 | 38 | 41 | 3 | 463 | 23 | 1,516 | 72 |
| 57,770 | 110 | 9  | 902 | 40 | 41 | 3 | 463 | 21 | 1,516 | 73 |
| 57,771 | 110 | 9  | 901 | 40 | 41 | 3 | 462 | 20 | 1,514 | 72 |
| 57,772 | 110 | 9  | 901 | 40 | 41 | 3 | 461 | 20 | 1,513 | 72 |
| 57,773 | 109 | 9  | 896 | 40 | 41 | 3 | 455 | 20 | 1,501 | 72 |
| 57,774 | 109 | 9  | 893 | 40 | 41 | 3 | 454 | 20 | 1,497 | 72 |
| 57,775 | 109 | 9  | 887 | 40 | 40 | 3 | 461 | 20 | 1,497 | 72 |
| 57,776 | 88  | 9  | 814 | 40 | 35 | 3 | 438 | 20 | 1,375 | 72 |
| 57,777 | 92  | 9  | 859 | 40 | 35 | 3 | 450 | 20 | 1,436 | 72 |
| 57,778 | 93  | 9  | 870 | 39 | 35 | 3 | 476 | 20 | 1,474 | 71 |
| 57,779 | 94  | 9  | 878 | 39 | 35 | 3 | 483 | 23 | 1,490 | 74 |
| 57,780 | 83  | 9  | 811 | 41 | 26 | 3 | 455 | 24 | 1,375 | 77 |
| 57,781 | 81  | 9  | 802 | 41 | 26 | 3 | 446 | 24 | 1,355 | 77 |
| 57,782 | 81  | 10 | 810 | 44 | 29 | 3 | 469 | 24 | 1,389 | 81 |
| 57,783 | 76  | 10 | 772 | 45 | 27 | 3 | 448 | 24 | 1,323 | 82 |
| 57,784 | 71  | 10 | 772 | 46 | 25 | 3 | 450 | 25 | 1,318 | 84 |
| 57,785 | 71  | 10 | 745 | 46 | 24 | 3 | 422 | 25 | 1,262 | 84 |
| 57,786 | 71  | 10 | 741 | 46 | 24 | 3 | 416 | 25 | 1,252 | 84 |
| 57,787 | 71  | 10 | 744 | 48 | 23 | 3 | 415 | 25 | 1,253 | 86 |
| 57,788 | 70  | 10 | 741 | 48 | 23 | 3 | 413 | 25 | 1,247 | 86 |
| 57,789 | 70  | 10 | 745 | 48 | 23 | 3 | 416 | 25 | 1,254 | 86 |
| 57,790 | 70  | 10 | 743 | 49 | 23 | 3 | 416 | 25 | 1,252 | 87 |
| 57,791 | 68  | 10 | 741 | 48 | 23 | 3 | 414 | 25 | 1,246 | 86 |
| 57,792 | 68  | 10 | 742 | 49 | 24 | 3 | 416 | 25 | 1,250 | 87 |
| 57,793 | 68  | 10 | 739 | 49 | 24 | 3 | 416 | 25 | 1,247 | 87 |
| 57,794 | 66  | 10 | 730 | 47 | 25 | 3 | 416 | 26 | 1,237 | 86 |
| 57,795 | 56  | 10 | 638 | 46 | 20 | 3 | 385 | 27 | 1,099 | 86 |
| 57,796 | 47  | 10 | 560 | 47 | 19 | 3 | 360 | 28 | 986   | 88 |
| 57,797 | 51  | 10 | 551 | 48 | 22 | 3 | 350 | 26 | 974   | 87 |
| 57,798 | 44  | 10 | 515 | 47 | 15 | 3 | 301 | 25 | 875   | 85 |

|        |    |    |     |    |    |   |     |    |       |    |
|--------|----|----|-----|----|----|---|-----|----|-------|----|
| 57,799 | 44 | 10 | 485 | 41 | 13 | 3 | 294 | 21 | 836   | 75 |
| 57,800 | 43 | 5  | 445 | 22 | 11 | 1 | 271 | 10 | 770   | 38 |
| 57,801 | 43 | 5  | 439 | 22 | 11 | 1 | 270 | 10 | 763   | 38 |
| 57,802 | 39 | 5  | 404 | 22 | 10 | 1 | 251 | 10 | 704   | 38 |
| 57,803 | 40 | 4  | 416 | 22 | 10 | 1 | 254 | 10 | 720   | 37 |
| 57,804 | 40 | 4  | 415 | 22 | 10 | 1 | 254 | 9  | 719   | 36 |
| 57,805 | 41 | 4  | 478 | 22 | 13 | 1 | 278 | 9  | 810   | 36 |
| 57,806 | 41 | 4  | 482 | 22 | 13 | 1 | 279 | 9  | 815   | 36 |
| 57,807 | 40 | 3  | 459 | 22 | 14 | 1 | 283 | 9  | 796   | 35 |
| 57,808 | 54 | 3  | 502 | 22 | 17 | 1 | 309 | 9  | 882   | 35 |
| 57,809 | 53 | 3  | 497 | 22 | 17 | 1 | 304 | 10 | 871   | 36 |
| 57,810 | 53 | 3  | 473 | 22 | 17 | 1 | 297 | 10 | 840   | 36 |
| 57,811 | 50 | 3  | 469 | 22 | 17 | 1 | 299 | 10 | 835   | 36 |
| 57,812 | 48 | 3  | 466 | 22 | 17 | 1 | 299 | 10 | 830   | 36 |
| 57,813 | 46 | 3  | 439 | 22 | 17 | 1 | 279 | 10 | 781   | 36 |
| 57,814 | 46 | 3  | 426 | 22 | 17 | 1 | 277 | 10 | 766   | 36 |
| 57,815 | 40 | 3  | 396 | 22 | 17 | 1 | 229 | 11 | 682   | 37 |
| 57,816 | 41 | 3  | 395 | 22 | 17 | 1 | 228 | 11 | 681   | 37 |
| 57,817 | 41 | 3  | 399 | 22 | 17 | 1 | 231 | 12 | 688   | 38 |
| 57,818 | 41 | 3  | 399 | 20 | 17 | 1 | 231 | 12 | 688   | 36 |
| 57,819 | 41 | 3  | 416 | 19 | 17 | 0 | 240 | 12 | 714   | 34 |
| 57,820 | 41 | 3  | 416 | 19 | 17 | 0 | 240 | 12 | 714   | 34 |
| 57,821 | 41 | 2  | 439 | 16 | 18 | 0 | 254 | 12 | 752   | 30 |
| 57,822 | 41 | 2  | 439 | 16 | 18 | 0 | 254 | 12 | 752   | 30 |
| 57,823 | 41 | 2  | 446 | 16 | 18 | 0 | 258 | 12 | 763   | 30 |
| 57,824 | 41 | 3  | 444 | 17 | 18 | 2 | 258 | 13 | 761   | 35 |
| 57,825 | 41 | 3  | 439 | 19 | 18 | 2 | 255 | 14 | 753   | 38 |
| 57,826 | 44 | 3  | 477 | 21 | 18 | 2 | 275 | 14 | 814   | 40 |
| 57,827 | 44 | 3  | 468 | 23 | 18 | 2 | 267 | 14 | 797   | 42 |
| 57,828 | 42 | 4  | 436 | 37 | 20 | 2 | 263 | 19 | 761   | 62 |
| 57,829 | 41 | 4  | 467 | 42 | 20 | 2 | 239 | 19 | 767   | 67 |
| 57,830 | 43 | 4  | 503 | 42 | 23 | 2 | 263 | 16 | 832   | 64 |
| 57,831 | 43 | 4  | 518 | 40 | 23 | 2 | 263 | 15 | 847   | 61 |
| 57,832 | 55 | 4  | 610 | 42 | 35 | 2 | 329 | 15 | 1,029 | 63 |
| 57,833 | 55 | 3  | 594 | 39 | 32 | 2 | 306 | 13 | 987   | 57 |
| 57,834 | 55 | 3  | 597 | 39 | 33 | 2 | 312 | 13 | 997   | 57 |
| 57,835 | 55 | 3  | 591 | 39 | 33 | 2 | 305 | 13 | 984   | 57 |
| 57,836 | 55 | 3  | 585 | 40 | 33 | 2 | 303 | 13 | 976   | 58 |
| 57,837 | 60 | 3  | 653 | 38 | 37 | 2 | 336 | 13 | 1,086 | 56 |
| 57,838 | 60 | 3  | 656 | 38 | 37 | 3 | 338 | 13 | 1,091 | 57 |
| 57,839 | 70 | 3  | 710 | 38 | 44 | 3 | 371 | 13 | 1,195 | 57 |

|        |    |   |     |    |    |   |     |    |       |    |
|--------|----|---|-----|----|----|---|-----|----|-------|----|
| 57,840 | 70 | 3 | 706 | 38 | 44 | 3 | 368 | 13 | 1,188 | 57 |
| 57,841 | 70 | 4 | 706 | 37 | 44 | 3 | 368 | 13 | 1,188 | 57 |
| 57,842 | 70 | 4 | 731 | 37 | 44 | 3 | 375 | 13 | 1,220 | 57 |
| 57,843 | 70 | 4 | 726 | 36 | 43 | 3 | 374 | 13 | 1,213 | 56 |
| 57,844 | 77 | 4 | 767 | 36 | 46 | 3 | 443 | 13 | 1,333 | 56 |
| 57,845 | 78 | 4 | 770 | 36 | 47 | 3 | 447 | 12 | 1,342 | 55 |
| 57,846 | 76 | 4 | 758 | 33 | 47 | 3 | 441 | 11 | 1,322 | 51 |
| 57,847 | 76 | 4 | 758 | 33 | 47 | 3 | 441 | 11 | 1,322 | 51 |
| 57,848 | 72 | 4 | 753 | 33 | 44 | 3 | 437 | 11 | 1,306 | 51 |
| 57,849 | 72 | 4 | 745 | 33 | 44 | 3 | 437 | 11 | 1,298 | 51 |
| 57,850 | 72 | 4 | 745 | 34 | 44 | 3 | 434 | 11 | 1,295 | 52 |
| 57,851 | 71 | 4 | 738 | 34 | 44 | 3 | 430 | 11 | 1,283 | 52 |
| 57,852 | 71 | 4 | 737 | 34 | 44 | 3 | 430 | 11 | 1,282 | 52 |
| 57,853 | 74 | 4 | 746 | 34 | 45 | 3 | 445 | 11 | 1,310 | 52 |
| 57,854 | 73 | 4 | 733 | 34 | 45 | 4 | 439 | 13 | 1,290 | 55 |
| 57,855 | 70 | 4 | 694 | 34 | 41 | 4 | 429 | 13 | 1,234 | 55 |
| 57,856 | 70 | 4 | 662 | 34 | 41 | 4 | 414 | 13 | 1,187 | 55 |
| 57,857 | 71 | 4 | 661 | 34 | 41 | 4 | 412 | 13 | 1,185 | 55 |
| 57,858 | 70 | 4 | 662 | 34 | 40 | 4 | 403 | 13 | 1,175 | 55 |
| 57,859 | 56 | 4 | 617 | 34 | 37 | 5 | 375 | 12 | 1,085 | 55 |
| 57,860 | 56 | 4 | 619 | 34 | 37 | 5 | 375 | 12 | 1,087 | 55 |
| 57,861 | 56 | 4 | 622 | 34 | 37 | 5 | 377 | 12 | 1,092 | 55 |
| 57,862 | 57 | 4 | 628 | 34 | 37 | 5 | 382 | 12 | 1,104 | 55 |
| 57,863 | 57 | 4 | 602 | 34 | 36 | 5 | 375 | 12 | 1,070 | 55 |
| 57,864 | 56 | 3 | 602 | 34 | 36 | 5 | 375 | 12 | 1,069 | 54 |
| 57,865 | 83 | 3 | 751 | 34 | 49 | 5 | 583 | 12 | 1,466 | 54 |
| 57,866 | 88 | 3 | 791 | 34 | 52 | 5 | 633 | 11 | 1,564 | 53 |
| 57,867 | 88 | 3 | 805 | 34 | 52 | 6 | 649 | 11 | 1,594 | 54 |
| 57,868 | 88 | 3 | 839 | 35 | 52 | 6 | 676 | 10 | 1,655 | 54 |
| 57,869 | 90 | 3 | 838 | 36 | 54 | 6 | 683 | 11 | 1,665 | 56 |
| 57,870 | 90 | 3 | 843 | 35 | 55 | 6 | 687 | 11 | 1,675 | 55 |
| 57,871 | 90 | 3 | 831 | 35 | 55 | 6 | 683 | 12 | 1,659 | 56 |
| 57,872 | 89 | 3 | 820 | 35 | 54 | 6 | 673 | 12 | 1,636 | 56 |
| 57,873 | 89 | 3 | 824 | 35 | 55 | 6 | 671 | 12 | 1,639 | 56 |
| 57,874 | 91 | 2 | 828 | 34 | 56 | 4 | 670 | 11 | 1,645 | 51 |
| 57,875 | 91 | 2 | 828 | 33 | 56 | 4 | 671 | 10 | 1,646 | 49 |
| 57,876 | 92 | 2 | 832 | 33 | 56 | 4 | 674 | 10 | 1,654 | 49 |
| 57,877 | 92 | 2 | 799 | 31 | 56 | 4 | 648 | 10 | 1,595 | 47 |
| 57,878 | 90 | 2 | 794 | 30 | 56 | 4 | 648 | 10 | 1,588 | 46 |
| 57,879 | 90 | 1 | 805 | 16 | 56 | 4 | 644 | 5  | 1,595 | 26 |
| 57,880 | 89 | 1 | 759 | 12 | 56 | 4 | 644 | 5  | 1,548 | 22 |

|        |     |   |       |    |    |   |     |    |       |    |
|--------|-----|---|-------|----|----|---|-----|----|-------|----|
| 57,881 | 93  | 1 | 825   | 12 | 55 | 4 | 710 | 5  | 1,683 | 22 |
| 57,882 | 94  | 1 | 814   | 12 | 55 | 4 | 709 | 5  | 1,672 | 22 |
| 57,883 | 82  | 1 | 725   | 8  | 45 | 4 | 649 | 5  | 1,501 | 18 |
| 57,884 | 83  | 1 | 732   | 8  | 45 | 4 | 652 | 5  | 1,512 | 18 |
| 57,885 | 84  | 1 | 743   | 8  | 45 | 4 | 653 | 5  | 1,525 | 18 |
| 57,886 | 88  | 1 | 814   | 8  | 50 | 4 | 699 | 5  | 1,651 | 18 |
| 57,887 | 92  | 1 | 1,003 | 7  | 52 | 4 | 736 | 5  | 1,883 | 17 |
| 57,888 | 87  | 1 | 975   | 7  | 54 | 3 | 728 | 5  | 1,844 | 16 |
| 57,889 | 87  | 1 | 968   | 7  | 54 | 3 | 724 | 5  | 1,833 | 16 |
| 57,890 | 80  | 1 | 970   | 7  | 55 | 3 | 729 | 5  | 1,834 | 16 |
| 57,891 | 80  | 1 | 986   | 7  | 55 | 4 | 735 | 5  | 1,856 | 17 |
| 57,892 | 81  | 0 | 1,015 | 7  | 56 | 4 | 763 | 5  | 1,915 | 16 |
| 57,893 | 81  | 0 | 1,001 | 7  | 56 | 4 | 760 | 5  | 1,898 | 16 |
| 57,894 | 81  | 0 | 999   | 7  | 56 | 4 | 760 | 6  | 1,896 | 17 |
| 57,895 | 74  | 0 | 960   | 7  | 53 | 4 | 688 | 5  | 1,775 | 16 |
| 57,896 | 73  | 1 | 961   | 6  | 51 | 4 | 690 | 5  | 1,775 | 16 |
| 57,897 | 73  | 1 | 960   | 6  | 51 | 4 | 690 | 5  | 1,774 | 16 |
| 57,898 | 73  | 1 | 959   | 6  | 51 | 4 | 689 | 5  | 1,772 | 16 |
| 57,899 | 86  | 1 | 1,031 | 6  | 53 | 4 | 713 | 6  | 1,883 | 17 |
| 57,900 | 115 | 1 | 1,160 | 5  | 60 | 4 | 818 | 6  | 2,153 | 16 |
| 57,901 | 118 | 1 | 1,168 | 5  | 63 | 4 | 832 | 6  | 2,181 | 16 |
| 57,902 | 118 | 1 | 1,177 | 5  | 63 | 4 | 849 | 6  | 2,207 | 16 |
| 57,903 | 127 | 1 | 1,204 | 5  | 67 | 4 | 882 | 6  | 2,280 | 16 |
| 57,904 | 125 | 1 | 1,230 | 5  | 70 | 3 | 910 | 4  | 2,335 | 13 |
| 57,905 | 126 | 1 | 1,238 | 5  | 71 | 3 | 925 | 4  | 2,360 | 13 |
| 57,906 | 128 | 1 | 1,247 | 5  | 73 | 3 | 934 | 4  | 2,382 | 13 |
| 57,907 | 128 | 1 | 1,246 | 5  | 73 | 3 | 934 | 4  | 2,381 | 13 |
| 57,908 | 128 | 1 | 1,242 | 5  | 73 | 3 | 937 | 5  | 2,380 | 14 |
| 57,909 | 128 | 1 | 1,235 | 5  | 73 | 3 | 934 | 5  | 2,370 | 14 |
| 57,910 | 128 | 1 | 1,238 | 7  | 73 | 2 | 937 | 5  | 2,376 | 15 |
| 57,911 | 129 | 1 | 1,236 | 7  | 73 | 2 | 939 | 5  | 2,377 | 15 |
| 57,912 | 129 | 2 | 1,229 | 8  | 74 | 2 | 935 | 5  | 2,367 | 17 |
| 57,913 | 128 | 2 | 1,213 | 12 | 74 | 2 | 925 | 5  | 2,340 | 21 |
| 57,914 | 109 | 3 | 1,135 | 20 | 64 | 6 | 778 | 10 | 2,086 | 39 |
| 57,915 | 101 | 3 | 1,064 | 31 | 61 | 7 | 718 | 13 | 1,944 | 54 |
| 57,916 | 96  | 4 | 1,026 | 36 | 58 | 7 | 668 | 18 | 1,848 | 65 |
| 57,917 | 95  | 4 | 1,011 | 38 | 58 | 8 | 651 | 20 | 1,815 | 70 |
| 57,918 | 95  | 4 | 1,011 | 39 | 58 | 7 | 648 | 20 | 1,812 | 70 |
| 57,919 | 95  | 4 | 974   | 39 | 58 | 7 | 621 | 20 | 1,748 | 70 |
| 57,920 | 93  | 4 | 961   | 43 | 56 | 7 | 615 | 24 | 1,725 | 78 |
| 57,921 | 93  | 4 | 952   | 43 | 55 | 7 | 604 | 24 | 1,704 | 78 |

|        |    |   |     |    |    |   |     |    |       |     |
|--------|----|---|-----|----|----|---|-----|----|-------|-----|
| 57,922 | 93 | 4 | 954 | 43 | 54 | 7 | 603 | 23 | 1,704 | 77  |
| 57,923 | 93 | 5 | 983 | 43 | 54 | 7 | 607 | 23 | 1,737 | 78  |
| 57,924 | 93 | 5 | 983 | 43 | 53 | 7 | 606 | 23 | 1,735 | 78  |
| 57,925 | 92 | 7 | 988 | 43 | 53 | 7 | 618 | 23 | 1,751 | 80  |
| 57,926 | 92 | 7 | 985 | 43 | 53 | 7 | 617 | 23 | 1,747 | 80  |
| 57,927 | 91 | 7 | 986 | 43 | 53 | 7 | 617 | 24 | 1,747 | 81  |
| 57,928 | 87 | 7 | 979 | 43 | 53 | 7 | 619 | 24 | 1,738 | 81  |
| 57,929 | 87 | 7 | 978 | 42 | 53 | 7 | 619 | 24 | 1,737 | 80  |
| 57,930 | 87 | 7 | 960 | 41 | 51 | 7 | 616 | 24 | 1,714 | 79  |
| 57,931 | 87 | 8 | 957 | 42 | 51 | 7 | 613 | 24 | 1,708 | 81  |
| 57,932 | 80 | 8 | 842 | 42 | 49 | 7 | 515 | 25 | 1,486 | 82  |
| 57,933 | 80 | 8 | 847 | 45 | 49 | 7 | 514 | 25 | 1,490 | 85  |
| 57,934 | 80 | 8 | 873 | 46 | 51 | 7 | 526 | 25 | 1,530 | 86  |
| 57,935 | 83 | 8 | 933 | 47 | 57 | 7 | 581 | 26 | 1,654 | 88  |
| 57,936 | 83 | 8 | 931 | 49 | 56 | 7 | 584 | 28 | 1,654 | 92  |
| 57,937 | 79 | 8 | 842 | 54 | 48 | 8 | 532 | 32 | 1,501 | 102 |
| 57,938 | 74 | 8 | 640 | 58 | 45 | 9 | 490 | 34 | 1,249 | 109 |
| 57,939 | 76 | 9 | 655 | 69 | 48 | 9 | 496 | 38 | 1,275 | 125 |
| 57,940 | 75 | 9 | 650 | 69 | 43 | 9 | 476 | 38 | 1,244 | 125 |
| 57,941 | 74 | 9 | 634 | 69 | 43 | 8 | 465 | 37 | 1,216 | 123 |
| 57,942 | 80 | 9 | 691 | 69 | 50 | 8 | 499 | 37 | 1,320 | 123 |
| 57,943 | 80 | 9 | 681 | 69 | 52 | 8 | 481 | 37 | 1,294 | 123 |
| 57,944 | 80 | 9 | 680 | 69 | 52 | 8 | 480 | 37 | 1,292 | 123 |
| 57,945 | 87 | 9 | 828 | 69 | 68 | 8 | 626 | 37 | 1,609 | 123 |
| 57,946 | 94 | 8 | 887 | 69 | 70 | 8 | 686 | 37 | 1,737 | 122 |
| 57,947 | 94 | 8 | 887 | 69 | 70 | 8 | 686 | 37 | 1,737 | 122 |
| 57,948 | 83 | 8 | 834 | 70 | 68 | 8 | 673 | 39 | 1,658 | 125 |
| 57,949 | 82 | 8 | 822 | 70 | 68 | 8 | 676 | 38 | 1,648 | 124 |
| 57,950 | 81 | 8 | 806 | 72 | 67 | 8 | 664 | 38 | 1,618 | 126 |
| 57,951 | 54 | 8 | 700 | 72 | 61 | 8 | 572 | 38 | 1,387 | 126 |
| 57,952 | 51 | 8 | 693 | 73 | 58 | 8 | 560 | 39 | 1,362 | 128 |
| 57,953 | 53 | 8 | 689 | 75 | 58 | 8 | 551 | 39 | 1,351 | 130 |
| 57,954 | 44 | 8 | 661 | 75 | 54 | 8 | 516 | 39 | 1,275 | 130 |
| 57,955 | 43 | 8 | 622 | 77 | 52 | 8 | 485 | 41 | 1,202 | 134 |
| 57,956 | 42 | 8 | 614 | 78 | 51 | 8 | 472 | 41 | 1,179 | 135 |
| 57,957 | 41 | 8 | 612 | 80 | 49 | 8 | 473 | 43 | 1,175 | 139 |
| 57,958 | 41 | 9 | 612 | 81 | 49 | 8 | 475 | 44 | 1,177 | 142 |
| 57,959 | 40 | 9 | 613 | 81 | 49 | 8 | 474 | 43 | 1,176 | 141 |
| 57,960 | 41 | 9 | 616 | 82 | 49 | 8 | 477 | 44 | 1,183 | 143 |
| 57,961 | 41 | 9 | 635 | 81 | 51 | 8 | 497 | 44 | 1,224 | 142 |
| 57,962 | 40 | 9 | 635 | 81 | 51 | 8 | 494 | 44 | 1,220 | 142 |

|        |     |   |       |    |     |   |       |    |       |     |
|--------|-----|---|-------|----|-----|---|-------|----|-------|-----|
| 57,963 | 43  | 8 | 819   | 80 | 57  | 8 | 529   | 44 | 1,448 | 140 |
| 57,964 | 43  | 8 | 827   | 76 | 59  | 8 | 536   | 44 | 1,465 | 136 |
| 57,965 | 43  | 7 | 843   | 68 | 60  | 4 | 550   | 40 | 1,496 | 119 |
| 57,966 | 44  | 7 | 850   | 57 | 60  | 3 | 554   | 37 | 1,508 | 104 |
| 57,967 | 45  | 6 | 859   | 50 | 61  | 2 | 558   | 30 | 1,523 | 88  |
| 57,968 | 45  | 6 | 859   | 51 | 61  | 2 | 558   | 31 | 1,523 | 90  |
| 57,969 | 48  | 6 | 868   | 51 | 61  | 2 | 564   | 36 | 1,541 | 95  |
| 57,970 | 51  | 6 | 877   | 50 | 63  | 2 | 565   | 36 | 1,556 | 94  |
| 57,971 | 51  | 6 | 881   | 47 | 64  | 2 | 566   | 35 | 1,562 | 90  |
| 57,972 | 65  | 6 | 922   | 48 | 66  | 2 | 589   | 35 | 1,642 | 91  |
| 57,973 | 66  | 6 | 921   | 51 | 66  | 2 | 596   | 35 | 1,649 | 94  |
| 57,974 | 72  | 5 | 933   | 51 | 73  | 2 | 657   | 35 | 1,735 | 93  |
| 57,975 | 71  | 5 | 924   | 52 | 73  | 2 | 646   | 35 | 1,714 | 94  |
| 57,976 | 83  | 3 | 1,001 | 51 | 83  | 2 | 726   | 35 | 1,893 | 91  |
| 57,977 | 83  | 3 | 994   | 51 | 83  | 2 | 723   | 35 | 1,883 | 91  |
| 57,978 | 104 | 3 | 1,116 | 55 | 115 | 2 | 970   | 35 | 2,305 | 95  |
| 57,979 | 104 | 3 | 1,116 | 55 | 115 | 2 | 970   | 35 | 2,305 | 95  |
| 57,980 | 107 | 3 | 1,140 | 56 | 122 | 2 | 1,009 | 36 | 2,378 | 97  |
| 57,981 | 107 | 3 | 1,142 | 57 | 122 | 2 | 1,010 | 36 | 2,381 | 98  |
| 57,982 | 107 | 2 | 1,167 | 56 | 127 | 2 | 1,025 | 36 | 2,426 | 96  |
| 57,983 | 132 | 2 | 1,302 | 56 | 153 | 3 | 1,254 | 35 | 2,841 | 96  |
| 57,984 | 140 | 2 | 1,345 | 53 | 160 | 3 | 1,305 | 35 | 2,950 | 93  |
| 57,985 | 140 | 2 | 1,325 | 52 | 156 | 3 | 1,295 | 35 | 2,916 | 92  |
| 57,986 | 137 | 2 | 1,275 | 49 | 153 | 3 | 1,261 | 32 | 2,826 | 86  |
| 57,987 | 136 | 2 | 1,263 | 49 | 153 | 3 | 1,251 | 32 | 2,803 | 86  |
| 57,988 | 135 | 2 | 1,248 | 40 | 148 | 1 | 1,238 | 26 | 2,769 | 69  |
| 57,989 | 137 | 2 | 1,255 | 41 | 149 | 1 | 1,252 | 26 | 2,793 | 70  |
| 57,990 | 141 | 1 | 1,270 | 30 | 149 | 1 | 1,263 | 22 | 2,823 | 54  |
| 57,991 | 141 | 1 | 1,255 | 30 | 146 | 1 | 1,262 | 22 | 2,804 | 54  |
| 57,992 | 141 | 1 | 1,244 | 30 | 146 | 1 | 1,258 | 22 | 2,789 | 54  |
| 57,993 | 135 | 1 | 1,173 | 30 | 139 | 1 | 1,217 | 22 | 2,664 | 54  |
| 57,994 | 134 | 1 | 1,151 | 30 | 136 | 1 | 1,207 | 22 | 2,628 | 54  |
| 57,995 | 127 | 2 | 1,003 | 30 | 120 | 1 | 1,053 | 22 | 2,303 | 55  |
| 57,996 | 125 | 2 | 995   | 30 | 120 | 1 | 1,055 | 22 | 2,295 | 55  |
| 57,997 | 119 | 2 | 953   | 30 | 118 | 1 | 1,007 | 22 | 2,197 | 55  |
| 57,998 | 120 | 2 | 957   | 29 | 120 | 1 | 1,035 | 20 | 2,232 | 52  |
| 57,999 | 122 | 2 | 967   | 29 | 121 | 1 | 1,041 | 20 | 2,251 | 52  |
| 58,000 | 124 | 2 | 985   | 27 | 122 | 1 | 1,072 | 20 | 2,303 | 50  |
| 58,001 | 127 | 2 | 997   | 27 | 123 | 1 | 1,089 | 20 | 2,336 | 50  |
| 58,002 | 126 | 2 | 996   | 26 | 123 | 1 | 1,088 | 19 | 2,333 | 48  |
| 58,003 | 126 | 2 | 995   | 26 | 123 | 1 | 1,087 | 19 | 2,331 | 48  |

|        |     |   |       |    |     |   |       |    |       |    |
|--------|-----|---|-------|----|-----|---|-------|----|-------|----|
| 58,004 | 124 | 2 | 990   | 24 | 123 | 1 | 1,084 | 20 | 2,321 | 47 |
| 58,005 | 123 | 2 | 984   | 24 | 122 | 1 | 1,072 | 20 | 2,301 | 47 |
| 58,006 | 123 | 2 | 987   | 21 | 121 | 1 | 1,070 | 18 | 2,301 | 42 |
| 58,007 | 123 | 2 | 986   | 22 | 121 | 1 | 1,069 | 19 | 2,299 | 44 |
| 58,008 | 122 | 2 | 983   | 20 | 122 | 1 | 1,056 | 17 | 2,283 | 40 |
| 58,009 | 123 | 1 | 983   | 19 | 122 | 1 | 1,055 | 17 | 2,283 | 38 |
| 58,010 | 123 | 2 | 985   | 20 | 122 | 1 | 1,056 | 19 | 2,286 | 42 |
| 58,011 | 123 | 2 | 986   | 21 | 122 | 1 | 1,053 | 18 | 2,284 | 42 |
| 58,012 | 125 | 2 | 995   | 20 | 122 | 1 | 1,039 | 18 | 2,281 | 41 |
| 58,013 | 131 | 2 | 854   | 20 | 118 | 1 | 1,039 | 17 | 2,142 | 40 |
| 58,014 | 132 | 2 | 877   | 20 | 116 | 1 | 1,035 | 17 | 2,160 | 40 |
| 58,015 | 132 | 2 | 867   | 20 | 115 | 1 | 1,027 | 17 | 2,141 | 40 |
| 58,016 | 171 | 2 | 1,076 | 20 | 126 | 1 | 1,238 | 16 | 2,611 | 39 |
| 58,017 | 170 | 2 | 1,069 | 20 | 126 | 1 | 1,234 | 16 | 2,599 | 39 |
| 58,018 | 176 | 2 | 1,083 | 19 | 125 | 1 | 1,237 | 15 | 2,621 | 37 |
| 58,019 | 176 | 2 | 1,080 | 19 | 125 | 1 | 1,235 | 15 | 2,616 | 37 |
| 58,020 | 178 | 2 | 1,104 | 18 | 127 | 1 | 1,256 | 10 | 2,665 | 31 |
| 58,021 | 180 | 2 | 1,144 | 16 | 131 | 1 | 1,281 | 6  | 2,736 | 25 |
| 58,022 | 180 | 2 | 1,140 | 16 | 130 | 1 | 1,277 | 7  | 2,727 | 26 |
| 58,023 | 167 | 2 | 1,100 | 15 | 128 | 1 | 1,255 | 7  | 2,650 | 25 |
| 58,024 | 166 | 2 | 1,095 | 12 | 128 | 1 | 1,251 | 7  | 2,640 | 22 |
| 58,025 | 160 | 2 | 1,050 | 12 | 121 | 1 | 1,184 | 8  | 2,515 | 23 |
| 58,026 | 150 | 2 | 994   | 7  | 119 | 0 | 1,130 | 8  | 2,393 | 17 |
| 58,027 | 148 | 2 | 971   | 7  | 111 | 0 | 1,101 | 8  | 2,331 | 17 |
| 58,028 | 127 | 2 | 857   | 7  | 79  | 2 | 861   | 8  | 1,924 | 19 |
| 58,029 | 127 | 2 | 849   | 8  | 79  | 2 | 853   | 10 | 1,908 | 22 |
| 58,030 | 124 | 2 | 825   | 8  | 72  | 2 | 814   | 10 | 1,835 | 22 |
| 58,031 | 125 | 2 | 824   | 7  | 72  | 2 | 815   | 9  | 1,836 | 20 |
| 58,032 | 125 | 2 | 821   | 6  | 71  | 2 | 812   | 9  | 1,829 | 19 |
| 58,033 | 125 | 2 | 798   | 6  | 67  | 2 | 800   | 9  | 1,790 | 19 |
| 58,034 | 99  | 2 | 660   | 6  | 41  | 2 | 570   | 9  | 1,370 | 19 |
| 58,035 | 91  | 2 | 613   | 6  | 34  | 2 | 519   | 9  | 1,257 | 19 |
| 58,036 | 91  | 2 | 602   | 6  | 34  | 2 | 512   | 9  | 1,239 | 19 |
| 58,037 | 92  | 2 | 590   | 6  | 32  | 2 | 489   | 9  | 1,203 | 19 |
| 58,038 | 92  | 2 | 587   | 6  | 32  | 2 | 487   | 9  | 1,198 | 19 |
| 58,039 | 92  | 2 | 586   | 6  | 32  | 2 | 487   | 9  | 1,197 | 19 |
| 58,040 | 90  | 2 | 583   | 5  | 31  | 2 | 473   | 9  | 1,177 | 18 |
| 58,041 | 86  | 2 | 566   | 5  | 31  | 2 | 460   | 9  | 1,143 | 18 |
| 58,042 | 86  | 2 | 558   | 5  | 31  | 2 | 458   | 9  | 1,133 | 18 |
| 58,043 | 124 | 2 | 700   | 5  | 33  | 2 | 498   | 9  | 1,355 | 18 |
| 58,044 | 125 | 2 | 700   | 5  | 34  | 2 | 497   | 9  | 1,356 | 18 |



|        |     |   |     |   |    |   |     |   |       |    |
|--------|-----|---|-----|---|----|---|-----|---|-------|----|
| 58,045 | 125 | 2 | 694 | 5 | 34 | 2 | 494 | 9 | 1,347 | 18 |
| 58,046 | 136 | 1 | 731 | 5 | 36 | 2 | 502 | 9 | 1,405 | 17 |
| 58,047 | 185 | 1 | 890 | 5 | 47 | 2 | 568 | 9 | 1,690 | 17 |
| 58,048 | 192 | 1 | 910 | 5 | 48 | 2 | 566 | 9 | 1,716 | 17 |
| 58,049 | 190 | 1 | 908 | 6 | 47 | 2 | 535 | 9 | 1,680 | 18 |
| 58,050 | 191 | 1 | 925 | 6 | 49 | 2 | 545 | 9 | 1,710 | 18 |
| 58,051 | 189 | 1 | 905 | 6 | 49 | 2 | 515 | 9 | 1,658 | 18 |
| 58,052 | 188 | 1 | 917 | 6 | 49 | 2 | 500 | 9 | 1,654 | 18 |
| 58,053 | 188 | 1 | 916 | 6 | 49 | 2 | 500 | 9 | 1,653 | 18 |
| 58,054 | 189 | 1 | 932 | 6 | 50 | 2 | 506 | 9 | 1,677 | 18 |
| 58,055 | 189 | 1 | 933 | 6 | 50 | 2 | 504 | 8 | 1,676 | 17 |
| 58,056 | 189 | 1 | 932 | 5 | 50 | 2 | 503 | 6 | 1,674 | 14 |
| 58,057 | 189 | 1 | 928 | 5 | 50 | 2 | 503 | 6 | 1,670 | 14 |
| 58,058 | 189 | 1 | 922 | 5 | 49 | 2 | 502 | 6 | 1,662 | 14 |
| 58,059 | 189 | 1 | 921 | 5 | 49 | 2 | 502 | 6 | 1,661 | 14 |
| 58,060 | 188 | 1 | 920 | 5 | 49 | 2 | 500 | 6 | 1,657 | 14 |
| 58,061 | 188 | 0 | 918 | 4 | 49 | 2 | 499 | 4 | 1,654 | 10 |
| 58,062 | 187 | 0 | 913 | 2 | 49 | 2 | 498 | 4 | 1,647 | 8  |
| 58,063 | 185 | 0 | 886 | 2 | 47 | 2 | 492 | 4 | 1,610 | 8  |
| 58,064 | 176 | 0 | 841 | 2 | 44 | 2 | 456 | 4 | 1,517 | 8  |
| 58,065 | 175 | 0 | 810 | 2 | 44 | 2 | 450 | 5 | 1,479 | 9  |
| 58,066 | 136 | 0 | 597 | 2 | 33 | 2 | 233 | 5 | 999   | 9  |
| 58,067 | 136 | 0 | 595 | 2 | 33 | 2 | 230 | 5 | 994   | 9  |
| 58,068 | 133 | 0 | 583 | 2 | 33 | 2 | 226 | 5 | 975   | 9  |
| 58,069 | 129 | 0 | 570 | 2 | 33 | 2 | 224 | 5 | 956   | 9  |
| 58,070 | 124 | 0 | 541 | 2 | 31 | 2 | 199 | 5 | 895   | 9  |
| 58,071 | 120 | 0 | 501 | 2 | 29 | 2 | 190 | 5 | 840   | 9  |
| 58,072 | 119 | 0 | 494 | 2 | 25 | 2 | 171 | 5 | 809   | 9  |
| 58,073 | 118 | 0 | 492 | 2 | 25 | 2 | 171 | 4 | 806   | 8  |
| 58,074 | 118 | 0 | 493 | 2 | 25 | 2 | 172 | 4 | 808   | 8  |
| 58,075 | 118 | 0 | 495 | 2 | 26 | 2 | 175 | 3 | 814   | 7  |
| 58,076 | 118 | 0 | 495 | 2 | 26 | 2 | 175 | 3 | 814   | 7  |
| 58,077 | 118 | 0 | 497 | 2 | 26 | 2 | 176 | 3 | 817   | 7  |
| 58,078 | 118 | 0 | 498 | 2 | 26 | 2 | 176 | 3 | 818   | 7  |
| 58,079 | 119 | 0 | 504 | 1 | 26 | 0 | 178 | 1 | 827   | 2  |
| 58,080 | 119 | 0 | 506 | 1 | 27 | 0 | 179 | 1 | 831   | 2  |
| 58,081 | 119 | 0 | 506 | 1 | 27 | 0 | 179 | 1 | 831   | 2  |
| 58,082 | 118 | 0 | 505 | 1 | 27 | 0 | 179 | 1 | 829   | 2  |
| 58,083 | 118 | 0 | 505 | 1 | 27 | 0 | 181 | 1 | 831   | 2  |
| 58,084 | 121 | 0 | 507 | 1 | 27 | 0 | 184 | 1 | 839   | 2  |
| 58,085 | 121 | 0 | 508 | 1 | 27 | 0 | 185 | 1 | 841   | 2  |

|        |     |   |     |   |    |   |     |   |     |   |
|--------|-----|---|-----|---|----|---|-----|---|-----|---|
| 58,086 | 121 | 1 | 509 | 1 | 27 | 1 | 185 | 1 | 842 | 4 |
| 58,087 | 121 | 1 | 509 | 1 | 27 | 1 | 185 | 1 | 842 | 4 |
| 58,088 | 119 | 1 | 517 | 1 | 26 | 1 | 186 | 1 | 848 | 4 |
| 58,089 | 119 | 1 | 517 | 1 | 26 | 1 | 186 | 1 | 848 | 4 |
| 58,090 | 119 | 1 | 517 | 1 | 26 | 1 | 186 | 1 | 848 | 4 |
| 58,091 | 119 | 1 | 512 | 1 | 26 | 1 | 186 | 1 | 843 | 4 |
| 58,092 | 118 | 1 | 509 | 1 | 26 | 1 | 185 | 1 | 838 | 4 |
| 58,093 | 80  | 1 | 377 | 1 | 24 | 1 | 145 | 1 | 626 | 4 |
| 58,094 | 79  | 1 | 366 | 1 | 24 | 1 | 144 | 1 | 613 | 4 |
| 58,095 | 78  | 1 | 362 | 2 | 23 | 1 | 144 | 1 | 607 | 5 |
| 58,096 | 70  | 1 | 350 | 2 | 22 | 1 | 141 | 1 | 583 | 5 |
| 58,097 | 67  | 1 | 322 | 2 | 21 | 1 | 135 | 1 | 545 | 5 |
| 58,098 | 18  | 1 | 159 | 2 | 10 | 1 | 64  | 1 | 251 | 5 |
| 58,099 | 11  | 1 | 133 | 1 | 9  | 1 | 55  | 1 | 208 | 4 |
| 58,100 | 10  | 1 | 126 | 1 | 8  | 1 | 50  | 1 | 194 | 4 |
| 58,101 | 7   | 1 | 99  | 2 | 5  | 1 | 33  | 1 | 144 | 5 |
| 58,102 | 7   | 1 | 96  | 2 | 4  | 1 | 30  | 1 | 137 | 5 |
| 58,103 | 5   | 1 | 66  | 2 | 3  | 1 | 25  | 1 | 99  | 5 |
| 58,104 | 4   | 1 | 50  | 2 | 2  | 1 | 19  | 1 | 75  | 5 |
| 58,105 | 4   | 1 | 50  | 2 | 2  | 1 | 17  | 1 | 73  | 5 |
| 58,106 | 4   | 1 | 47  | 2 | 2  | 1 | 16  | 1 | 69  | 5 |
| 58,107 | 4   | 1 | 47  | 2 | 2  | 1 | 16  | 1 | 69  | 5 |
| 58,108 | 4   | 1 | 47  | 2 | 2  | 1 | 16  | 2 | 69  | 6 |
| 58,109 | 4   | 1 | 46  | 2 | 2  | 1 | 16  | 2 | 68  | 6 |
| 58,110 | 4   | 1 | 46  | 2 | 2  | 1 | 16  | 2 | 68  | 6 |
| 58,111 | 4   | 1 | 46  | 2 | 2  | 1 | 16  | 3 | 68  | 7 |
| 58,112 | 4   | 1 | 45  | 2 | 2  | 1 | 16  | 3 | 67  | 7 |
| 58,113 | 4   | 1 | 45  | 2 | 2  | 1 | 16  | 4 | 67  | 8 |
| 58,114 | 4   | 1 | 43  | 2 | 2  | 1 | 16  | 4 | 65  | 8 |
| 58,115 | 4   | 1 | 43  | 2 | 2  | 1 | 17  | 4 | 66  | 8 |
| 58,116 | 4   | 1 | 43  | 2 | 2  | 1 | 17  | 3 | 66  | 7 |
| 58,117 | 4   | 1 | 43  | 3 | 2  | 1 | 17  | 3 | 66  | 8 |
| 58,118 | 5   | 1 | 46  | 3 | 2  | 1 | 18  | 4 | 71  | 9 |
| 58,119 | 5   | 1 | 46  | 3 | 3  | 1 | 19  | 4 | 73  | 9 |
| 58,120 | 5   | 1 | 46  | 3 | 3  | 1 | 20  | 4 | 74  | 9 |
| 58,121 | 5   | 1 | 44  | 3 | 3  | 1 | 20  | 4 | 72  | 9 |
| 58,122 | 5   | 1 | 42  | 3 | 3  | 1 | 20  | 4 | 70  | 9 |
| 58,123 | 5   | 1 | 40  | 3 | 3  | 1 | 20  | 4 | 68  | 9 |
| 58,124 | 5   | 1 | 40  | 3 | 3  | 1 | 20  | 4 | 68  | 9 |
| 58,125 | 5   | 1 | 39  | 3 | 3  | 1 | 19  | 4 | 66  | 9 |
| 58,126 | 5   | 1 | 37  | 3 | 2  | 1 | 16  | 4 | 60  | 9 |

|        |    |   |     |    |    |   |    |    |     |    |
|--------|----|---|-----|----|----|---|----|----|-----|----|
| 58,127 | 5  | 1 | 35  | 3  | 2  | 1 | 15 | 4  | 57  | 9  |
| 58,128 | 5  | 1 | 34  | 4  | 2  | 1 | 15 | 4  | 56  | 10 |
| 58,129 | 5  | 1 | 30  | 4  | 2  | 1 | 13 | 4  | 50  | 10 |
| 58,130 | 4  | 1 | 28  | 4  | 2  | 1 | 13 | 4  | 47  | 10 |
| 58,131 | 4  | 1 | 25  | 4  | 1  | 1 | 12 | 4  | 42  | 10 |
| 58,132 | 4  | 1 | 25  | 4  | 1  | 1 | 10 | 4  | 40  | 10 |
| 58,133 | 4  | 1 | 25  | 4  | 1  | 1 | 10 | 4  | 40  | 10 |
| 58,134 | 1  | 1 | 24  | 4  | 1  | 1 | 7  | 4  | 33  | 10 |
| 58,135 | 1  | 1 | 24  | 4  | 1  | 1 | 7  | 4  | 33  | 10 |
| 58,136 | 1  | 1 | 23  | 7  | 1  | 1 | 6  | 4  | 31  | 13 |
| 58,137 | 1  | 0 | 21  | 7  | 1  | 0 | 6  | 4  | 29  | 11 |
| 58,138 | 1  | 0 | 20  | 7  | 1  | 0 | 6  | 4  | 28  | 11 |
| 58,139 | 1  | 0 | 7   | 7  | 1  | 0 | 4  | 5  | 13  | 12 |
| 58,140 | 2  | 0 | 6   | 7  | 1  | 0 | 4  | 5  | 13  | 12 |
| 58,141 | 1  | 0 | 7   | 7  | 1  | 0 | 4  | 5  | 13  | 12 |
| 58,142 | 1  | 0 | 6   | 7  | 1  | 0 | 4  | 5  | 12  | 12 |
| 58,143 | 1  | 0 | 4   | 7  | 1  | 0 | 2  | 5  | 8   | 12 |
| 58,144 | 1  | 0 | 6   | 6  | 0  | 0 | 5  | 4  | 12  | 10 |
| 58,145 | 2  | 0 | 7   | 6  | 1  | 0 | 5  | 4  | 15  | 10 |
| 58,146 | 2  | 0 | 7   | 6  | 2  | 0 | 5  | 5  | 16  | 11 |
| 58,147 | 2  | 0 | 7   | 6  | 2  | 0 | 5  | 5  | 16  | 11 |
| 58,148 | 2  | 0 | 8   | 6  | 2  | 0 | 5  | 5  | 17  | 11 |
| 58,149 | 3  | 0 | 10  | 6  | 4  | 0 | 6  | 5  | 23  | 11 |
| 58,150 | 3  | 0 | 10  | 7  | 4  | 0 | 6  | 6  | 23  | 13 |
| 58,151 | 3  | 0 | 10  | 7  | 4  | 0 | 6  | 6  | 23  | 13 |
| 58,152 | 4  | 0 | 10  | 7  | 4  | 0 | 6  | 6  | 24  | 13 |
| 58,153 | 4  | 0 | 10  | 7  | 4  | 0 | 6  | 6  | 24  | 13 |
| 58,154 | 4  | 0 | 10  | 7  | 4  | 0 | 6  | 6  | 24  | 13 |
| 58,155 | 4  | 0 | 13  | 7  | 4  | 0 | 7  | 6  | 28  | 13 |
| 58,156 | 4  | 0 | 14  | 7  | 4  | 0 | 7  | 6  | 29  | 13 |
| 58,157 | 7  | 0 | 25  | 7  | 4  | 0 | 11 | 6  | 47  | 13 |
| 58,158 | 7  | 0 | 30  | 7  | 4  | 0 | 14 | 4  | 55  | 11 |
| 58,159 | 7  | 0 | 32  | 7  | 4  | 1 | 16 | 4  | 59  | 12 |
| 58,160 | 11 | 0 | 47  | 7  | 4  | 1 | 23 | 4  | 85  | 12 |
| 58,161 | 14 | 0 | 87  | 7  | 10 | 1 | 38 | 4  | 149 | 12 |
| 58,162 | 14 | 0 | 119 | 7  | 11 | 1 | 44 | 4  | 188 | 12 |
| 58,163 | 14 | 0 | 121 | 7  | 11 | 1 | 44 | 4  | 190 | 12 |
| 58,164 | 15 | 0 | 126 | 7  | 11 | 1 | 45 | 4  | 197 | 12 |
| 58,165 | 15 | 0 | 126 | 7  | 11 | 1 | 46 | 5  | 198 | 13 |
| 58,166 | 15 | 1 | 125 | 8  | 11 | 1 | 45 | 7  | 196 | 17 |
| 58,167 | 16 | 4 | 125 | 17 | 11 | 1 | 45 | 14 | 197 | 36 |

|        |    |     |     |       |    |    |    |     |     |       |
|--------|----|-----|-----|-------|----|----|----|-----|-----|-------|
| 58,168 | 16 | 4   | 125 | 21    | 11 | 1  | 45 | 15  | 197 | 41    |
| 58,169 | 16 | 4   | 125 | 21    | 11 | 1  | 43 | 15  | 195 | 41    |
| 58,170 | 15 | 5   | 124 | 28    | 10 | 1  | 43 | 19  | 192 | 53    |
| 58,171 | 15 | 5   | 122 | 29    | 10 | 1  | 42 | 19  | 189 | 54    |
| 58,172 | 15 | 5   | 122 | 30    | 10 | 1  | 42 | 18  | 189 | 54    |
| 58,173 | 15 | 5   | 122 | 31    | 10 | 2  | 42 | 18  | 189 | 56    |
| 58,174 | 15 | 5   | 122 | 31    | 12 | 2  | 42 | 18  | 191 | 56    |
| 58,175 | 15 | 5   | 122 | 31    | 12 | 2  | 42 | 18  | 191 | 56    |
| 58,176 | 15 | 5   | 122 | 35    | 12 | 2  | 42 | 18  | 191 | 60    |
| 58,177 | 15 | 5   | 122 | 37    | 13 | 2  | 43 | 21  | 193 | 65    |
| 58,178 | 15 | 5   | 122 | 37    | 13 | 2  | 43 | 21  | 193 | 65    |
| 58,179 | 15 | 5   | 122 | 37    | 13 | 2  | 43 | 21  | 193 | 65    |
| 58,180 | 15 | 5   | 122 | 38    | 13 | 2  | 43 | 21  | 193 | 66    |
| 58,181 | 16 | 5   | 125 | 39    | 13 | 2  | 44 | 24  | 198 | 70    |
| 58,182 | 16 | 5   | 126 | 40    | 13 | 2  | 44 | 27  | 199 | 74    |
| 58,183 | 16 | 8   | 127 | 40    | 13 | 2  | 46 | 27  | 202 | 77    |
| 58,184 | 17 | 10  | 127 | 39    | 13 | 2  | 49 | 27  | 206 | 78    |
| 58,185 | 17 | 10  | 127 | 39    | 13 | 2  | 49 | 27  | 206 | 78    |
| 58,186 | 17 | 10  | 126 | 39    | 13 | 2  | 49 | 27  | 205 | 78    |
| 58,187 | 17 | 12  | 126 | 43    | 13 | 2  | 49 | 33  | 205 | 90    |
| 58,188 | 16 | 12  | 126 | 46    | 13 | 2  | 49 | 34  | 204 | 94    |
| 58,189 | 16 | 12  | 126 | 46    | 13 | 2  | 49 | 36  | 204 | 96    |
| 58,190 | 16 | 12  | 127 | 46    | 13 | 2  | 49 | 35  | 205 | 95    |
| 58,191 | 17 | 12  | 130 | 47    | 13 | 2  | 49 | 35  | 209 | 96    |
| 58,192 | 18 | 12  | 133 | 47    | 13 | 2  | 58 | 36  | 222 | 97    |
| 58,193 | 18 | 12  | 133 | 48    | 13 | 2  | 58 | 36  | 222 | 98    |
| 58,194 | 19 | 12  | 140 | 50    | 13 | 2  | 68 | 38  | 240 | 102   |
| 58,195 | 19 | 20  | 141 | 109   | 13 | 4  | 69 | 71  | 242 | 204   |
| 58,196 | 19 | 32  | 141 | 226   | 13 | 8  | 71 | 132 | 244 | 398   |
| 58,197 | 19 | 33  | 141 | 268   | 12 | 9  | 71 | 137 | 243 | 447   |
| 58,198 | 19 | 33  | 141 | 305   | 12 | 10 | 71 | 147 | 243 | 495   |
| 58,199 | 19 | 59  | 140 | 568   | 12 | 14 | 71 | 220 | 242 | 861   |
| 58,200 | 18 | 95  | 138 | 827   | 10 | 24 | 70 | 341 | 236 | 1,287 |
| 58,201 | 18 | 96  | 138 | 837   | 10 | 24 | 70 | 341 | 236 | 1,298 |
| 58,202 | 18 | 98  | 142 | 880   | 10 | 25 | 70 | 347 | 240 | 1,350 |
| 58,203 | 17 | 98  | 153 | 889   | 10 | 25 | 79 | 351 | 259 | 1,363 |
| 58,204 | 17 | 98  | 154 | 892   | 10 | 25 | 79 | 352 | 260 | 1,367 |
| 58,205 | 17 | 99  | 154 | 913   | 10 | 25 | 81 | 362 | 262 | 1,399 |
| 58,206 | 17 | 99  | 160 | 923   | 14 | 26 | 93 | 367 | 284 | 1,415 |
| 58,207 | 17 | 100 | 160 | 958   | 14 | 29 | 94 | 389 | 285 | 1,476 |
| 58,208 | 17 | 111 | 154 | 1,054 | 14 | 36 | 98 | 460 | 283 | 1,661 |

|        |    |     |     |       |    |    |    |     |     |       |
|--------|----|-----|-----|-------|----|----|----|-----|-----|-------|
| 58,209 | 17 | 116 | 149 | 1,149 | 14 | 37 | 96 | 507 | 276 | 1,809 |
| 58,210 | 17 | 118 | 148 | 1,191 | 14 | 39 | 95 | 571 | 274 | 1,919 |
| 58,211 | 14 | 134 | 137 | 1,311 | 14 | 45 | 88 | 675 | 253 | 2,165 |
| 58,212 | 11 | 141 | 99  | 1,436 | 8  | 55 | 75 | 768 | 193 | 2,400 |
| 58,213 | 11 | 143 | 69  | 1,488 | 7  | 59 | 74 | 814 | 161 | 2,504 |
| 58,214 | 11 | 143 | 67  | 1,504 | 7  | 60 | 74 | 820 | 159 | 2,527 |
| 58,215 | 10 | 148 | 62  | 1,531 | 7  | 61 | 73 | 860 | 152 | 2,600 |
| 58,216 | 10 | 151 | 62  | 1,552 | 7  | 61 | 72 | 873 | 151 | 2,637 |
| 58,217 | 10 | 148 | 62  | 1,551 | 7  | 61 | 72 | 864 | 151 | 2,624 |
| 58,218 | 9  | 148 | 62  | 1,551 | 7  | 61 | 72 | 864 | 150 | 2,624 |
| 58,219 | 9  | 148 | 62  | 1,550 | 7  | 61 | 72 | 866 | 150 | 2,625 |
| 58,220 | 9  | 147 | 62  | 1,559 | 7  | 62 | 72 | 873 | 150 | 2,641 |
| 58,221 | 9  | 147 | 62  | 1,562 | 7  | 62 | 72 | 877 | 150 | 2,648 |
| 58,222 | 9  | 151 | 62  | 1,602 | 7  | 63 | 72 | 915 | 150 | 2,731 |
| 58,223 | 9  | 151 | 62  | 1,606 | 7  | 63 | 72 | 919 | 150 | 2,739 |
| 58,224 | 9  | 151 | 63  | 1,605 | 5  | 62 | 72 | 920 | 149 | 2,738 |
| 58,225 | 9  | 151 | 63  | 1,606 | 5  | 62 | 72 | 920 | 149 | 2,739 |
| 58,226 | 9  | 151 | 63  | 1,608 | 5  | 62 | 72 | 921 | 149 | 2,742 |
| 58,227 | 9  | 151 | 64  | 1,611 | 4  | 62 | 71 | 921 | 148 | 2,745 |
| 58,228 | 9  | 151 | 64  | 1,610 | 4  | 62 | 71 | 918 | 148 | 2,741 |
| 58,229 | 9  | 151 | 64  | 1,609 | 4  | 62 | 71 | 919 | 148 | 2,741 |
| 58,230 | 9  | 151 | 64  | 1,609 | 5  | 62 | 71 | 919 | 149 | 2,741 |
| 58,231 | 8  | 152 | 61  | 1,608 | 5  | 62 | 70 | 916 | 144 | 2,738 |
| 58,232 | 8  | 152 | 61  | 1,606 | 5  | 62 | 70 | 913 | 144 | 2,733 |
| 58,233 | 8  | 149 | 59  | 1,606 | 5  | 62 | 70 | 913 | 142 | 2,730 |
| 58,234 | 8  | 149 | 59  | 1,606 | 5  | 62 | 68 | 913 | 140 | 2,730 |
| 58,235 | 7  | 147 | 58  | 1,606 | 5  | 62 | 65 | 913 | 135 | 2,728 |
| 58,236 | 7  | 147 | 58  | 1,606 | 5  | 62 | 65 | 915 | 135 | 2,730 |
| 58,237 | 8  | 145 | 71  | 1,602 | 5  | 63 | 67 | 917 | 151 | 2,727 |
| 58,238 | 8  | 145 | 71  | 1,604 | 5  | 63 | 67 | 918 | 151 | 2,730 |
| 58,239 | 8  | 145 | 75  | 1,605 | 5  | 64 | 68 | 921 | 156 | 2,735 |
| 58,240 | 8  | 145 | 75  | 1,607 | 5  | 64 | 69 | 922 | 157 | 2,738 |
| 58,241 | 7  | 145 | 73  | 1,612 | 5  | 64 | 71 | 926 | 156 | 2,747 |
| 58,242 | 7  | 145 | 70  | 1,611 | 5  | 64 | 65 | 926 | 147 | 2,746 |
| 58,243 | 7  | 147 | 69  | 1,619 | 5  | 64 | 62 | 929 | 143 | 2,759 |
| 58,244 | 6  | 147 | 62  | 1,622 | 5  | 64 | 51 | 930 | 124 | 2,763 |
| 58,245 | 6  | 147 | 61  | 1,624 | 5  | 64 | 50 | 933 | 122 | 2,768 |
| 58,246 | 6  | 139 | 61  | 1,571 | 5  | 62 | 50 | 903 | 122 | 2,675 |
| 58,247 | 6  | 127 | 61  | 1,455 | 5  | 58 | 48 | 841 | 120 | 2,481 |
| 58,248 | 6  | 126 | 61  | 1,427 | 5  | 57 | 48 | 842 | 120 | 2,452 |
| 58,249 | 6  | 126 | 61  | 1,390 | 5  | 56 | 48 | 832 | 120 | 2,404 |

|        |   |     |    |       |   |    |    |     |     |       |
|--------|---|-----|----|-------|---|----|----|-----|-----|-------|
| 58,250 | 6 | 100 | 61 | 1,132 | 5 | 52 | 48 | 761 | 120 | 2,045 |
| 58,251 | 6 | 64  | 62 | 875   | 5 | 42 | 48 | 640 | 121 | 1,621 |
| 58,252 | 6 | 63  | 58 | 866   | 5 | 42 | 48 | 639 | 117 | 1,610 |
| 58,253 | 6 | 61  | 55 | 822   | 5 | 41 | 48 | 635 | 114 | 1,559 |
| 58,254 | 6 | 61  | 47 | 813   | 5 | 41 | 39 | 631 | 97  | 1,546 |
| 58,255 | 6 | 61  | 47 | 810   | 5 | 41 | 39 | 631 | 97  | 1,543 |
| 58,256 | 6 | 60  | 47 | 789   | 5 | 41 | 36 | 621 | 94  | 1,511 |
| 58,257 | 6 | 59  | 38 | 744   | 1 | 37 | 23 | 594 | 68  | 1,434 |
| 58,258 | 7 | 59  | 37 | 745   | 1 | 37 | 22 | 595 | 67  | 1,436 |
| 58,259 | 4 | 48  | 34 | 649   | 1 | 30 | 14 | 524 | 53  | 1,251 |
| 58,260 | 4 | 43  | 36 | 554   | 1 | 29 | 15 | 476 | 56  | 1,102 |
| 58,261 | 4 | 41  | 35 | 512   | 1 | 26 | 14 | 413 | 54  | 992   |
| 58,262 | 3 | 25  | 31 | 392   | 1 | 20 | 14 | 309 | 49  | 746   |
| 58,263 | 3 | 18  | 32 | 267   | 1 | 10 | 13 | 216 | 49  | 511   |
| 58,264 | 3 | 16  | 30 | 215   | 1 | 6  | 9  | 169 | 43  | 406   |
| 58,265 | 3 | 11  | 33 | 173   | 1 | 4  | 9  | 123 | 46  | 311   |
| 58,266 | 3 | 11  | 33 | 173   | 1 | 4  | 9  | 123 | 46  | 311   |
| 58,267 | 3 | 8   | 33 | 152   | 1 | 4  | 9  | 109 | 46  | 273   |
| 58,268 | 3 | 7   | 33 | 142   | 1 | 4  | 9  | 108 | 46  | 261   |
| 58,269 | 3 | 7   | 33 | 139   | 1 | 4  | 9  | 106 | 46  | 256   |
| 58,270 | 3 | 7   | 33 | 130   | 1 | 3  | 9  | 102 | 46  | 242   |
| 58,271 | 3 | 8   | 33 | 175   | 1 | 5  | 9  | 123 | 46  | 311   |
| 58,272 | 3 | 16  | 32 | 275   | 1 | 9  | 9  | 171 | 45  | 471   |
| 58,273 | 3 | 12  | 32 | 268   | 1 | 11 | 9  | 145 | 45  | 436   |
| 58,274 | 3 | 13  | 32 | 286   | 1 | 11 | 9  | 157 | 45  | 467   |
| 58,275 | 3 | 15  | 32 | 333   | 1 | 11 | 9  | 175 | 45  | 534   |
| 58,276 | 3 | 38  | 32 | 441   | 1 | 16 | 9  | 304 | 45  | 799   |
| 58,277 | 3 | 38  | 31 | 466   | 1 | 16 | 9  | 305 | 44  | 825   |
| 58,278 | 3 | 38  | 31 | 462   | 1 | 16 | 9  | 305 | 44  | 821   |
| 58,279 | 3 | 38  | 32 | 464   | 1 | 16 | 9  | 306 | 45  | 824   |
| 58,280 | 3 | 38  | 32 | 465   | 1 | 16 | 9  | 305 | 45  | 824   |
| 58,281 | 3 | 37  | 32 | 464   | 0 | 16 | 9  | 305 | 44  | 822   |
| 58,282 | 3 | 37  | 32 | 464   | 0 | 16 | 10 | 305 | 45  | 822   |
| 58,283 | 3 | 40  | 32 | 475   | 0 | 16 | 10 | 311 | 45  | 842   |
| 58,284 | 3 | 40  | 32 | 475   | 0 | 16 | 10 | 311 | 45  | 842   |
| 58,285 | 3 | 40  | 32 | 483   | 0 | 16 | 10 | 320 | 45  | 859   |
| 58,286 | 3 | 40  | 32 | 487   | 0 | 16 | 10 | 323 | 45  | 866   |
| 58,287 | 3 | 41  | 31 | 489   | 0 | 16 | 10 | 324 | 44  | 870   |
| 58,288 | 2 | 44  | 19 | 512   | 0 | 16 | 8  | 340 | 29  | 912   |
| 58,289 | 2 | 44  | 15 | 511   | 0 | 16 | 7  | 339 | 24  | 910   |
| 58,290 | 2 | 44  | 17 | 507   | 0 | 15 | 7  | 335 | 26  | 901   |

|        |    |    |     |     |   |    |    |     |     |       |
|--------|----|----|-----|-----|---|----|----|-----|-----|-------|
| 58,291 | 2  | 45 | 16  | 506 | 0 | 15 | 6  | 332 | 24  | 898   |
| 58,292 | 2  | 45 | 15  | 503 | 0 | 15 | 4  | 330 | 21  | 893   |
| 58,293 | 2  | 45 | 15  | 508 | 0 | 15 | 4  | 342 | 21  | 910   |
| 58,294 | 1  | 43 | 15  | 502 | 0 | 16 | 4  | 338 | 20  | 899   |
| 58,295 | 2  | 43 | 15  | 499 | 0 | 16 | 4  | 338 | 21  | 896   |
| 58,296 | 2  | 43 | 15  | 495 | 0 | 16 | 4  | 333 | 21  | 887   |
| 58,297 | 2  | 43 | 15  | 489 | 0 | 16 | 6  | 331 | 23  | 879   |
| 58,298 | 2  | 43 | 15  | 493 | 0 | 17 | 6  | 331 | 23  | 884   |
| 58,299 | 2  | 43 | 20  | 479 | 0 | 18 | 8  | 325 | 30  | 865   |
| 58,300 | 2  | 43 | 21  | 479 | 1 | 18 | 9  | 325 | 33  | 865   |
| 58,301 | 2  | 43 | 21  | 472 | 2 | 18 | 9  | 323 | 34  | 856   |
| 58,302 | 2  | 43 | 20  | 472 | 2 | 18 | 10 | 325 | 34  | 858   |
| 58,303 | 2  | 44 | 20  | 474 | 2 | 18 | 10 | 324 | 34  | 860   |
| 58,304 | 2  | 44 | 20  | 476 | 2 | 18 | 10 | 325 | 34  | 863   |
| 58,305 | 2  | 46 | 19  | 487 | 2 | 19 | 10 | 340 | 33  | 892   |
| 58,306 | 2  | 46 | 19  | 487 | 2 | 19 | 10 | 339 | 33  | 891   |
| 58,307 | 4  | 46 | 32  | 493 | 2 | 20 | 14 | 343 | 52  | 902   |
| 58,308 | 5  | 53 | 33  | 578 | 2 | 23 | 16 | 409 | 56  | 1,063 |
| 58,309 | 4  | 53 | 33  | 587 | 2 | 23 | 16 | 412 | 55  | 1,075 |
| 58,310 | 10 | 53 | 43  | 600 | 3 | 24 | 23 | 416 | 79  | 1,093 |
| 58,311 | 11 | 53 | 51  | 612 | 3 | 24 | 30 | 423 | 95  | 1,112 |
| 58,312 | 11 | 54 | 54  | 615 | 3 | 24 | 36 | 426 | 104 | 1,119 |
| 58,313 | 11 | 54 | 54  | 619 | 3 | 24 | 36 | 428 | 104 | 1,125 |
| 58,314 | 11 | 56 | 54  | 622 | 3 | 24 | 36 | 432 | 104 | 1,134 |
| 58,315 | 11 | 56 | 52  | 630 | 3 | 24 | 36 | 433 | 102 | 1,143 |
| 58,316 | 16 | 56 | 100 | 632 | 5 | 24 | 63 | 432 | 184 | 1,144 |
| 58,317 | 16 | 56 | 100 | 633 | 5 | 24 | 63 | 432 | 184 | 1,145 |
| 58,318 | 16 | 58 | 100 | 635 | 5 | 24 | 64 | 434 | 185 | 1,151 |
| 58,319 | 16 | 58 | 100 | 637 | 5 | 24 | 64 | 434 | 185 | 1,153 |
| 58,320 | 16 | 58 | 100 | 643 | 5 | 25 | 64 | 435 | 185 | 1,161 |
| 58,321 | 16 | 58 | 100 | 638 | 5 | 25 | 64 | 426 | 185 | 1,147 |
| 58,322 | 16 | 58 | 100 | 592 | 5 | 24 | 66 | 407 | 187 | 1,081 |
| 58,323 | 16 | 50 | 100 | 494 | 5 | 20 | 66 | 357 | 187 | 921   |
| 58,324 | 16 | 49 | 100 | 438 | 5 | 17 | 66 | 332 | 187 | 836   |
| 58,325 | 16 | 52 | 100 | 446 | 5 | 17 | 66 | 333 | 187 | 848   |
| 58,326 | 16 | 58 | 101 | 447 | 5 | 20 | 66 | 343 | 188 | 868   |
| 58,327 | 16 | 37 | 101 | 380 | 5 | 18 | 66 | 231 | 188 | 666   |
| 58,328 | 19 | 51 | 103 | 489 | 5 | 32 | 67 | 283 | 194 | 855   |
| 58,329 | 19 | 58 | 102 | 565 | 5 | 41 | 67 | 305 | 193 | 969   |
| 58,330 | 19 | 74 | 102 | 722 | 5 | 46 | 67 | 363 | 193 | 1,205 |
| 58,331 | 19 | 83 | 102 | 764 | 5 | 49 | 67 | 396 | 193 | 1,292 |

|        |    |     |     |       |   |    |    |     |     |       |
|--------|----|-----|-----|-------|---|----|----|-----|-----|-------|
| 58,332 | 19 | 86  | 102 | 808   | 5 | 56 | 67 | 438 | 193 | 1,388 |
| 58,333 | 19 | 120 | 102 | 1,178 | 5 | 72 | 66 | 570 | 192 | 1,940 |
| 58,334 | 19 | 125 | 102 | 1,190 | 5 | 72 | 66 | 585 | 192 | 1,972 |
| 58,335 | 19 | 126 | 102 | 1,197 | 5 | 72 | 66 | 585 | 192 | 1,980 |
| 58,336 | 19 | 127 | 102 | 1,191 | 5 | 72 | 66 | 578 | 192 | 1,968 |
| 58,337 | 19 | 143 | 102 | 1,260 | 5 | 77 | 66 | 602 | 192 | 2,082 |
| 58,338 | 19 | 142 | 102 | 1,259 | 5 | 77 | 66 | 600 | 192 | 2,078 |
| 58,339 | 19 | 140 | 101 | 1,243 | 5 | 77 | 66 | 578 | 191 | 2,038 |
| 58,340 | 19 | 140 | 101 | 1,251 | 5 | 79 | 66 | 582 | 191 | 2,052 |
| 58,341 | 19 | 140 | 100 | 1,250 | 5 | 79 | 66 | 582 | 190 | 2,051 |
| 58,342 | 19 | 142 | 101 | 1,259 | 5 | 80 | 67 | 584 | 192 | 2,065 |
| 58,343 | 19 | 142 | 101 | 1,265 | 5 | 80 | 67 | 584 | 192 | 2,071 |
| 58,344 | 19 | 142 | 101 | 1,284 | 5 | 80 | 67 | 575 | 192 | 2,081 |
| 58,345 | 18 | 142 | 101 | 1,283 | 5 | 79 | 67 | 575 | 191 | 2,079 |
| 58,346 | 18 | 142 | 101 | 1,285 | 5 | 79 | 67 | 577 | 191 | 2,083 |
| 58,347 | 18 | 144 | 103 | 1,300 | 5 | 79 | 67 | 577 | 193 | 2,100 |
| 58,348 | 18 | 153 | 103 | 1,328 | 5 | 79 | 64 | 585 | 190 | 2,145 |
| 58,349 | 18 | 153 | 98  | 1,334 | 5 | 78 | 62 | 593 | 183 | 2,158 |
| 58,350 | 18 | 154 | 97  | 1,343 | 4 | 77 | 61 | 602 | 180 | 2,176 |
| 58,351 | 18 | 155 | 97  | 1,371 | 3 | 77 | 61 | 620 | 179 | 2,223 |
| 58,352 | 19 | 155 | 103 | 1,378 | 4 | 78 | 63 | 623 | 189 | 2,234 |
| 58,353 | 22 | 154 | 121 | 1,376 | 5 | 78 | 83 | 623 | 231 | 2,231 |
| 58,354 | 24 | 154 | 127 | 1,378 | 5 | 78 | 90 | 626 | 246 | 2,236 |
| 58,355 | 22 | 155 | 124 | 1,379 | 5 | 78 | 90 | 629 | 241 | 2,241 |
| 58,356 | 23 | 158 | 122 | 1,385 | 5 | 79 | 90 | 623 | 240 | 2,245 |
| 58,357 | 23 | 158 | 119 | 1,385 | 5 | 79 | 89 | 624 | 236 | 2,246 |
| 58,358 | 22 | 151 | 120 | 1,275 | 5 | 74 | 90 | 548 | 237 | 2,048 |
| 58,359 | 22 | 151 | 121 | 1,279 | 5 | 74 | 89 | 550 | 237 | 2,054 |
| 58,360 | 16 | 151 | 112 | 1,283 | 4 | 74 | 83 | 550 | 215 | 2,058 |
| 58,361 | 16 | 153 | 115 | 1,286 | 4 | 74 | 82 | 557 | 217 | 2,070 |
| 58,362 | 15 | 153 | 107 | 1,292 | 4 | 75 | 73 | 567 | 199 | 2,087 |
| 58,363 | 15 | 153 | 102 | 1,298 | 4 | 75 | 67 | 574 | 188 | 2,100 |
| 58,364 | 15 | 153 | 102 | 1,298 | 4 | 75 | 67 | 573 | 188 | 2,099 |
| 58,365 | 11 | 152 | 68  | 1,287 | 2 | 75 | 49 | 568 | 130 | 2,082 |
| 58,366 | 10 | 152 | 62  | 1,289 | 2 | 75 | 47 | 567 | 121 | 2,083 |
| 58,367 | 10 | 152 | 62  | 1,288 | 2 | 75 | 40 | 570 | 114 | 2,085 |
| 58,368 | 11 | 152 | 62  | 1,290 | 2 | 75 | 39 | 571 | 114 | 2,088 |
| 58,369 | 11 | 150 | 62  | 1,289 | 2 | 75 | 40 | 566 | 115 | 2,080 |
| 58,370 | 11 | 155 | 62  | 1,290 | 2 | 75 | 39 | 566 | 114 | 2,086 |
| 58,371 | 11 | 155 | 62  | 1,286 | 2 | 74 | 39 | 563 | 114 | 2,078 |
| 58,372 | 12 | 155 | 62  | 1,282 | 2 | 74 | 38 | 560 | 114 | 2,071 |



|        |    |     |    |       |   |    |    |     |     |       |
|--------|----|-----|----|-------|---|----|----|-----|-----|-------|
| 58,373 | 12 | 154 | 62 | 1,282 | 2 | 73 | 38 | 560 | 114 | 2,069 |
| 58,374 | 12 | 154 | 64 | 1,281 | 2 | 73 | 38 | 560 | 116 | 2,068 |
| 58,375 | 12 | 152 | 64 | 1,274 | 2 | 73 | 38 | 557 | 116 | 2,056 |
| 58,376 | 12 | 145 | 64 | 1,188 | 2 | 68 | 38 | 520 | 116 | 1,921 |
| 58,377 | 12 | 146 | 63 | 1,197 | 2 | 68 | 38 | 528 | 115 | 1,939 |
| 58,378 | 9  | 148 | 61 | 1,201 | 2 | 67 | 37 | 535 | 109 | 1,951 |
| 58,379 | 9  | 134 | 61 | 1,069 | 2 | 53 | 37 | 486 | 109 | 1,742 |
| 58,380 | 9  | 144 | 63 | 1,060 | 2 | 48 | 37 | 502 | 111 | 1,754 |
| 58,381 | 9  | 128 | 63 | 908   | 2 | 44 | 37 | 446 | 111 | 1,526 |
| 58,382 | 9  | 119 | 63 | 868   | 2 | 41 | 37 | 414 | 111 | 1,442 |
| 58,383 | 10 | 117 | 63 | 826   | 2 | 34 | 37 | 375 | 112 | 1,352 |
| 58,384 | 10 | 83  | 63 | 463   | 2 | 18 | 37 | 244 | 112 | 808   |
| 58,385 | 11 | 74  | 63 | 437   | 2 | 18 | 37 | 224 | 113 | 753   |
| 58,386 | 11 | 73  | 63 | 449   | 2 | 18 | 38 | 226 | 114 | 766   |
| 58,387 | 11 | 73  | 63 | 449   | 2 | 18 | 38 | 226 | 114 | 766   |
| 58,388 | 11 | 57  | 71 | 375   | 2 | 13 | 41 | 198 | 125 | 643   |
| 58,389 | 11 | 56  | 73 | 368   | 2 | 12 | 43 | 197 | 129 | 633   |
| 58,390 | 11 | 56  | 75 | 361   | 2 | 10 | 43 | 193 | 131 | 620   |
| 58,391 | 11 | 56  | 78 | 361   | 3 | 10 | 45 | 194 | 137 | 621   |
| 58,392 | 11 | 56  | 78 | 363   | 3 | 10 | 45 | 194 | 137 | 623   |
| 58,393 | 11 | 53  | 77 | 355   | 3 | 10 | 46 | 192 | 137 | 610   |
| 58,394 | 11 | 53  | 77 | 349   | 3 | 10 | 46 | 192 | 137 | 604   |
| 58,395 | 11 | 53  | 77 | 323   | 3 | 10 | 46 | 189 | 137 | 575   |
| 58,396 | 11 | 53  | 77 | 323   | 3 | 10 | 46 | 189 | 137 | 575   |
| 58,397 | 11 | 51  | 77 | 306   | 3 | 10 | 46 | 186 | 137 | 553   |
| 58,398 | 11 | 52  | 76 | 306   | 3 | 10 | 46 | 186 | 136 | 554   |
| 58,399 | 11 | 43  | 76 | 277   | 3 | 10 | 46 | 178 | 136 | 508   |
| 58,400 | 11 | 43  | 77 | 267   | 3 | 10 | 46 | 172 | 137 | 492   |
| 58,401 | 11 | 42  | 77 | 258   | 3 | 10 | 46 | 163 | 137 | 473   |
| 58,402 | 10 | 41  | 73 | 219   | 2 | 9  | 44 | 137 | 129 | 406   |
| 58,403 | 10 | 41  | 71 | 219   | 2 | 9  | 44 | 138 | 127 | 407   |
| 58,404 | 7  | 41  | 53 | 220   | 1 | 9  | 24 | 138 | 85  | 408   |
| 58,405 | 5  | 40  | 47 | 220   | 1 | 10 | 17 | 141 | 70  | 411   |
| 58,406 | 5  | 42  | 46 | 245   | 1 | 12 | 15 | 154 | 67  | 453   |
| 58,407 | 4  | 47  | 42 | 263   | 1 | 12 | 17 | 180 | 64  | 502   |
| 58,408 | 4  | 50  | 40 | 267   | 1 | 12 | 17 | 182 | 62  | 511   |
| 58,409 | 4  | 51  | 40 | 273   | 1 | 13 | 16 | 191 | 61  | 528   |
| 58,410 | 4  | 51  | 39 | 271   | 1 | 13 | 16 | 189 | 60  | 524   |
| 58,411 | 4  | 51  | 38 | 268   | 1 | 12 | 16 | 192 | 59  | 523   |
| 58,412 | 4  | 49  | 33 | 270   | 1 | 13 | 16 | 198 | 54  | 530   |
| 58,413 | 4  | 49  | 31 | 262   | 1 | 14 | 16 | 187 | 52  | 512   |

|        |   |     |    |       |   |    |    |     |    |       |
|--------|---|-----|----|-------|---|----|----|-----|----|-------|
| 58,414 | 4 | 49  | 30 | 294   | 1 | 18 | 16 | 215 | 51 | 576   |
| 58,415 | 4 | 53  | 30 | 298   | 1 | 19 | 15 | 224 | 50 | 594   |
| 58,416 | 4 | 56  | 28 | 310   | 1 | 19 | 15 | 237 | 48 | 622   |
| 58,417 | 4 | 69  | 25 | 386   | 1 | 25 | 15 | 330 | 45 | 810   |
| 58,418 | 4 | 70  | 21 | 403   | 1 | 25 | 15 | 339 | 41 | 837   |
| 58,419 | 3 | 86  | 21 | 478   | 1 | 31 | 15 | 465 | 40 | 1,060 |
| 58,420 | 3 | 86  | 21 | 486   | 1 | 31 | 14 | 468 | 39 | 1,071 |
| 58,421 | 2 | 81  | 21 | 509   | 1 | 33 | 14 | 472 | 38 | 1,095 |
| 58,422 | 2 | 89  | 21 | 532   | 1 | 35 | 14 | 491 | 38 | 1,147 |
| 58,423 | 2 | 89  | 21 | 534   | 1 | 35 | 14 | 492 | 38 | 1,150 |
| 58,424 | 2 | 91  | 21 | 542   | 1 | 35 | 14 | 494 | 38 | 1,162 |
| 58,425 | 2 | 91  | 19 | 549   | 1 | 35 | 14 | 495 | 36 | 1,170 |
| 58,426 | 2 | 90  | 19 | 566   | 1 | 38 | 14 | 501 | 36 | 1,195 |
| 58,427 | 2 | 90  | 19 | 572   | 1 | 38 | 14 | 504 | 36 | 1,204 |
| 58,428 | 2 | 89  | 19 | 567   | 1 | 38 | 14 | 496 | 36 | 1,190 |
| 58,429 | 2 | 87  | 19 | 565   | 1 | 38 | 14 | 489 | 36 | 1,179 |
| 58,430 | 2 | 88  | 19 | 563   | 1 | 38 | 14 | 487 | 36 | 1,176 |
| 58,431 | 2 | 71  | 17 | 494   | 1 | 34 | 14 | 450 | 34 | 1,049 |
| 58,432 | 2 | 71  | 17 | 487   | 1 | 33 | 14 | 451 | 34 | 1,042 |
| 58,433 | 1 | 74  | 17 | 502   | 1 | 34 | 14 | 460 | 33 | 1,070 |
| 58,434 | 1 | 73  | 18 | 504   | 1 | 34 | 14 | 462 | 34 | 1,073 |
| 58,435 | 1 | 81  | 18 | 518   | 1 | 39 | 14 | 481 | 34 | 1,119 |
| 58,436 | 0 | 81  | 18 | 521   | 1 | 39 | 14 | 485 | 33 | 1,126 |
| 58,437 | 0 | 86  | 18 | 679   | 1 | 41 | 14 | 520 | 33 | 1,326 |
| 58,438 | 0 | 97  | 18 | 802   | 1 | 49 | 13 | 632 | 32 | 1,580 |
| 58,439 | 0 | 100 | 10 | 845   | 1 | 53 | 11 | 646 | 22 | 1,644 |
| 58,440 | 0 | 100 | 8  | 846   | 1 | 53 | 9  | 647 | 18 | 1,646 |
| 58,441 | 0 | 100 | 6  | 852   | 1 | 53 | 9  | 652 | 16 | 1,657 |
| 58,442 | 0 | 101 | 3  | 859   | 0 | 53 | 7  | 657 | 10 | 1,670 |
| 58,443 | 0 | 101 | 3  | 857   | 0 | 53 | 6  | 657 | 9  | 1,668 |
| 58,444 | 0 | 102 | 3  | 860   | 0 | 53 | 5  | 658 | 8  | 1,673 |
| 58,445 | 0 | 103 | 3  | 869   | 0 | 53 | 5  | 662 | 8  | 1,687 |
| 58,446 | 0 | 103 | 3  | 869   | 0 | 53 | 5  | 663 | 8  | 1,688 |
| 58,447 | 0 | 103 | 3  | 871   | 0 | 54 | 5  | 665 | 8  | 1,693 |
| 58,448 | 0 | 106 | 2  | 871   | 0 | 55 | 5  | 666 | 7  | 1,698 |
| 58,449 | 0 | 106 | 2  | 871   | 0 | 55 | 5  | 666 | 7  | 1,698 |
| 58,450 | 0 | 106 | 2  | 876   | 0 | 55 | 5  | 667 | 7  | 1,704 |
| 58,451 | 0 | 106 | 3  | 878   | 0 | 55 | 5  | 668 | 8  | 1,707 |
| 58,452 | 3 | 106 | 11 | 878   | 1 | 55 | 10 | 668 | 25 | 1,707 |
| 58,453 | 3 | 106 | 11 | 879   | 1 | 55 | 10 | 674 | 25 | 1,714 |
| 58,454 | 3 | 145 | 15 | 1,010 | 1 | 85 | 10 | 921 | 29 | 2,161 |

|        |    |     |    |       |   |     |    |       |    |       |
|--------|----|-----|----|-------|---|-----|----|-------|----|-------|
| 58,455 | 3  | 155 | 15 | 1,063 | 1 | 87  | 9  | 984   | 28 | 2,289 |
| 58,456 | 5  | 247 | 16 | 1,593 | 1 | 136 | 11 | 1,412 | 33 | 3,388 |
| 58,457 | 5  | 252 | 18 | 1,690 | 1 | 142 | 9  | 1,470 | 33 | 3,554 |
| 58,458 | 5  | 249 | 18 | 1,718 | 1 | 149 | 8  | 1,509 | 32 | 3,625 |
| 58,459 | 5  | 274 | 19 | 1,878 | 1 | 178 | 8  | 1,640 | 33 | 3,970 |
| 58,460 | 5  | 279 | 19 | 1,896 | 1 | 178 | 8  | 1,649 | 33 | 4,002 |
| 58,461 | 8  | 291 | 23 | 1,936 | 2 | 181 | 8  | 1,663 | 41 | 4,071 |
| 58,462 | 10 | 299 | 27 | 2,020 | 4 | 185 | 14 | 1,674 | 55 | 4,178 |
| 58,463 | 10 | 304 | 29 | 2,072 | 4 | 187 | 14 | 1,684 | 57 | 4,247 |
| 58,464 | 10 | 314 | 29 | 2,143 | 4 | 186 | 14 | 1,692 | 57 | 4,335 |
| 58,465 | 10 | 313 | 29 | 2,107 | 4 | 182 | 14 | 1,654 | 57 | 4,256 |
| 58,466 | 11 | 311 | 29 | 2,112 | 4 | 181 | 14 | 1,647 | 58 | 4,251 |
| 58,467 | 11 | 296 | 30 | 2,024 | 4 | 175 | 14 | 1,550 | 59 | 4,045 |
| 58,468 | 11 | 297 | 30 | 2,033 | 4 | 175 | 14 | 1,552 | 59 | 4,057 |
| 58,469 | 11 | 296 | 30 | 2,021 | 4 | 175 | 14 | 1,542 | 59 | 4,034 |
| 58,470 | 11 | 280 | 30 | 1,946 | 4 | 169 | 14 | 1,418 | 59 | 3,813 |
| 58,471 | 11 | 280 | 30 | 1,943 | 4 | 169 | 14 | 1,423 | 59 | 3,815 |
| 58,472 | 11 | 273 | 31 | 1,905 | 4 | 167 | 17 | 1,413 | 63 | 3,758 |
| 58,473 | 11 | 278 | 31 | 1,928 | 4 | 168 | 17 | 1,418 | 63 | 3,792 |
| 58,474 | 11 | 288 | 31 | 1,945 | 4 | 172 | 17 | 1,458 | 63 | 3,863 |
| 58,475 | 11 | 289 | 31 | 1,960 | 4 | 172 | 17 | 1,471 | 63 | 3,892 |
| 58,476 | 11 | 322 | 31 | 2,105 | 4 | 186 | 17 | 1,717 | 63 | 4,330 |
| 58,477 | 11 | 319 | 31 | 2,092 | 4 | 182 | 17 | 1,712 | 63 | 4,305 |
| 58,478 | 11 | 324 | 33 | 2,205 | 4 | 183 | 20 | 1,765 | 68 | 4,477 |
| 58,479 | 11 | 325 | 33 | 2,203 | 4 | 183 | 20 | 1,772 | 68 | 4,483 |
| 58,480 | 11 | 325 | 38 | 2,205 | 4 | 183 | 25 | 1,779 | 78 | 4,492 |
| 58,481 | 11 | 327 | 38 | 2,235 | 4 | 183 | 25 | 1,802 | 78 | 4,547 |
| 58,482 | 11 | 334 | 39 | 2,281 | 4 | 186 | 25 | 1,856 | 79 | 4,657 |
| 58,483 | 11 | 366 | 39 | 2,415 | 4 | 195 | 25 | 2,034 | 79 | 5,010 |
| 58,484 | 11 | 366 | 39 | 2,454 | 4 | 198 | 25 | 2,067 | 79 | 5,085 |
| 58,485 | 12 | 374 | 38 | 2,504 | 4 | 201 | 26 | 2,118 | 80 | 5,197 |
| 58,486 | 12 | 367 | 38 | 2,507 | 4 | 196 | 26 | 2,115 | 80 | 5,185 |
| 58,487 | 12 | 367 | 38 | 2,507 | 4 | 196 | 25 | 2,114 | 79 | 5,184 |
| 58,488 | 12 | 365 | 38 | 2,358 | 4 | 194 | 24 | 2,089 | 78 | 5,006 |
| 58,489 | 12 | 354 | 38 | 2,239 | 4 | 188 | 24 | 1,978 | 78 | 4,759 |
| 58,490 | 12 | 352 | 38 | 2,211 | 4 | 185 | 25 | 1,973 | 79 | 4,721 |
| 58,491 | 12 | 352 | 38 | 2,219 | 4 | 185 | 25 | 1,975 | 79 | 4,731 |
| 58,492 | 12 | 352 | 38 | 2,214 | 4 | 185 | 26 | 1,971 | 80 | 4,722 |
| 58,493 | 12 | 350 | 38 | 2,200 | 4 | 185 | 27 | 1,963 | 81 | 4,698 |
| 58,494 | 12 | 351 | 38 | 2,201 | 4 | 185 | 27 | 1,968 | 81 | 4,705 |
| 58,495 | 12 | 351 | 38 | 2,201 | 4 | 185 | 27 | 1,966 | 81 | 4,703 |

|        |    |     |    |       |   |     |    |       |    |       |
|--------|----|-----|----|-------|---|-----|----|-------|----|-------|
| 58,496 | 12 | 350 | 38 | 2,196 | 4 | 185 | 27 | 1,963 | 81 | 4,694 |
| 58,497 | 12 | 351 | 38 | 2,198 | 4 | 185 | 27 | 1,962 | 81 | 4,696 |
| 58,498 | 12 | 351 | 38 | 2,199 | 4 | 184 | 27 | 1,966 | 81 | 4,700 |
| 58,499 | 12 | 348 | 38 | 2,213 | 4 | 183 | 28 | 1,978 | 82 | 4,722 |
| 58,500 | 12 | 348 | 40 | 2,221 | 4 | 183 | 28 | 1,986 | 84 | 4,738 |
| 58,501 | 12 | 348 | 39 | 2,232 | 4 | 183 | 28 | 1,998 | 83 | 4,761 |
| 58,502 | 9  | 348 | 32 | 2,230 | 3 | 182 | 23 | 1,989 | 67 | 4,749 |
| 58,503 | 9  | 348 | 33 | 2,230 | 3 | 182 | 23 | 1,989 | 68 | 4,749 |
| 58,504 | 9  | 309 | 29 | 2,097 | 3 | 153 | 23 | 1,736 | 64 | 4,295 |
| 58,505 | 9  | 299 | 30 | 2,048 | 3 | 151 | 23 | 1,672 | 65 | 4,170 |
| 58,506 | 9  | 299 | 32 | 2,054 | 3 | 151 | 23 | 1,676 | 67 | 4,180 |
| 58,507 | 7  | 207 | 32 | 1,536 | 3 | 102 | 22 | 1,254 | 64 | 3,099 |
| 58,508 | 7  | 201 | 30 | 1,424 | 3 | 95  | 22 | 1,195 | 62 | 2,915 |
| 58,509 | 7  | 194 | 30 | 1,370 | 3 | 86  | 22 | 1,126 | 62 | 2,776 |
| 58,510 | 7  | 151 | 29 | 1,142 | 3 | 53  | 22 | 970   | 61 | 2,316 |
| 58,511 | 4  | 150 | 25 | 1,150 | 2 | 53  | 22 | 970   | 53 | 2,323 |
| 58,512 | 2  | 151 | 21 | 1,150 | 0 | 53  | 16 | 969   | 39 | 2,323 |
| 58,513 | 2  | 138 | 19 | 1,007 | 0 | 46  | 16 | 931   | 37 | 2,122 |
| 58,514 | 2  | 129 | 19 | 926   | 0 | 47  | 16 | 923   | 37 | 2,025 |
| 58,515 | 2  | 130 | 19 | 938   | 0 | 47  | 16 | 925   | 37 | 2,040 |
| 58,516 | 2  | 130 | 19 | 942   | 0 | 47  | 16 | 927   | 37 | 2,046 |
| 58,517 | 1  | 128 | 19 | 931   | 0 | 47  | 16 | 924   | 36 | 2,030 |
| 58,518 | 1  | 135 | 18 | 967   | 0 | 50  | 17 | 935   | 36 | 2,087 |
| 58,519 | 1  | 135 | 18 | 975   | 0 | 50  | 17 | 936   | 36 | 2,096 |
| 58,520 | 1  | 135 | 18 | 974   | 0 | 50  | 17 | 940   | 36 | 2,099 |
| 58,521 | 1  | 136 | 18 | 982   | 0 | 50  | 17 | 938   | 36 | 2,106 |
| 58,522 | 1  | 140 | 18 | 992   | 0 | 51  | 16 | 940   | 35 | 2,123 |
| 58,523 | 1  | 139 | 17 | 977   | 0 | 49  | 13 | 922   | 31 | 2,087 |
| 58,524 | 1  | 141 | 17 | 1,026 | 0 | 48  | 13 | 948   | 31 | 2,163 |
| 58,525 | 1  | 139 | 17 | 1,069 | 0 | 46  | 13 | 949   | 31 | 2,203 |
| 58,526 | 1  | 138 | 16 | 1,069 | 0 | 46  | 12 | 940   | 29 | 2,193 |
| 58,527 | 1  | 110 | 17 | 956   | 0 | 32  | 11 | 707   | 29 | 1,805 |
| 58,528 | 2  | 105 | 17 | 831   | 0 | 31  | 10 | 647   | 29 | 1,614 |
| 58,529 | 2  | 105 | 17 | 835   | 0 | 31  | 10 | 649   | 29 | 1,620 |
| 58,530 | 2  | 105 | 12 | 833   | 0 | 31  | 5  | 642   | 19 | 1,611 |
| 58,531 | 2  | 105 | 12 | 816   | 0 | 31  | 5  | 613   | 19 | 1,565 |
| 58,532 | 2  | 105 | 12 | 818   | 0 | 31  | 5  | 613   | 19 | 1,567 |
| 58,533 | 2  | 98  | 12 | 777   | 0 | 28  | 5  | 563   | 19 | 1,466 |
| 58,534 | 3  | 55  | 12 | 523   | 0 | 12  | 5  | 275   | 20 | 865   |
| 58,535 | 3  | 55  | 12 | 525   | 0 | 12  | 5  | 276   | 20 | 868   |
| 58,536 | 2  | 55  | 12 | 524   | 0 | 12  | 5  | 276   | 19 | 867   |

|        |   |    |    |     |   |    |    |     |    |       |
|--------|---|----|----|-----|---|----|----|-----|----|-------|
| 58,537 | 2 | 55 | 12 | 514 | 0 | 12 | 5  | 272 | 19 | 853   |
| 58,538 | 2 | 52 | 12 | 489 | 0 | 12 | 5  | 259 | 19 | 812   |
| 58,539 | 2 | 55 | 12 | 494 | 0 | 12 | 5  | 262 | 19 | 823   |
| 58,540 | 2 | 55 | 12 | 494 | 0 | 10 | 4  | 262 | 18 | 821   |
| 58,541 | 2 | 54 | 12 | 482 | 0 | 9  | 4  | 257 | 18 | 802   |
| 58,542 | 2 | 57 | 12 | 471 | 0 | 9  | 4  | 255 | 18 | 792   |
| 58,543 | 3 | 57 | 13 | 472 | 0 | 9  | 3  | 256 | 19 | 794   |
| 58,544 | 3 | 57 | 13 | 476 | 0 | 9  | 2  | 255 | 18 | 797   |
| 58,545 | 3 | 56 | 13 | 481 | 1 | 9  | 2  | 258 | 19 | 804   |
| 58,546 | 3 | 56 | 13 | 482 | 1 | 9  | 2  | 261 | 19 | 808   |
| 58,547 | 3 | 61 | 13 | 501 | 1 | 11 | 2  | 285 | 19 | 858   |
| 58,548 | 3 | 60 | 13 | 503 | 1 | 11 | 2  | 288 | 19 | 862   |
| 58,549 | 4 | 62 | 13 | 510 | 1 | 12 | 1  | 290 | 19 | 874   |
| 58,550 | 4 | 71 | 13 | 508 | 1 | 14 | 1  | 291 | 19 | 884   |
| 58,551 | 4 | 72 | 10 | 512 | 1 | 15 | 1  | 290 | 16 | 889   |
| 58,552 | 4 | 83 | 10 | 559 | 1 | 21 | 1  | 312 | 16 | 975   |
| 58,553 | 4 | 83 | 10 | 574 | 1 | 21 | 1  | 317 | 16 | 995   |
| 58,554 | 4 | 85 | 8  | 596 | 1 | 21 | 1  | 324 | 14 | 1,026 |
| 58,555 | 4 | 85 | 11 | 598 | 1 | 21 | 1  | 324 | 17 | 1,028 |
| 58,556 | 4 | 85 | 10 | 596 | 1 | 21 | 1  | 326 | 16 | 1,028 |
| 58,557 | 5 | 84 | 9  | 579 | 1 | 20 | 3  | 311 | 18 | 994   |
| 58,558 | 5 | 84 | 19 | 573 | 1 | 19 | 3  | 299 | 28 | 975   |
| 58,559 | 5 | 84 | 19 | 573 | 1 | 19 | 3  | 299 | 28 | 975   |
| 58,560 | 8 | 82 | 26 | 567 | 1 | 19 | 14 | 286 | 49 | 954   |
| 58,561 | 8 | 82 | 26 | 570 | 1 | 19 | 14 | 286 | 49 | 957   |
| 58,562 | 9 | 81 | 45 | 558 | 1 | 19 | 21 | 286 | 76 | 944   |
| 58,563 | 9 | 82 | 45 | 556 | 2 | 19 | 21 | 285 | 77 | 942   |
| 58,564 | 9 | 82 | 45 | 560 | 2 | 19 | 21 | 285 | 77 | 946   |
| 58,565 | 9 | 81 | 45 | 569 | 2 | 18 | 21 | 286 | 77 | 954   |
| 58,566 | 9 | 81 | 45 | 563 | 2 | 20 | 22 | 284 | 78 | 948   |
| 58,567 | 9 | 74 | 45 | 504 | 2 | 17 | 22 | 260 | 78 | 855   |
| 58,568 | 9 | 74 | 45 | 505 | 2 | 17 | 22 | 261 | 78 | 857   |
| 58,569 | 9 | 74 | 45 | 506 | 2 | 17 | 22 | 261 | 78 | 858   |
| 58,570 | 9 | 75 | 45 | 502 | 2 | 17 | 22 | 254 | 78 | 848   |
| 58,571 | 9 | 74 | 45 | 492 | 2 | 17 | 22 | 254 | 78 | 837   |
| 58,572 | 9 | 74 | 45 | 492 | 2 | 17 | 22 | 256 | 78 | 839   |
| 58,573 | 9 | 70 | 45 | 477 | 2 | 16 | 22 | 247 | 78 | 810   |
| 58,574 | 9 | 70 | 45 | 477 | 3 | 16 | 22 | 247 | 79 | 810   |
| 58,575 | 9 | 63 | 45 | 405 | 3 | 16 | 22 | 216 | 79 | 700   |
| 58,576 | 9 | 53 | 45 | 322 | 3 | 14 | 22 | 168 | 79 | 557   |
| 58,577 | 9 | 53 | 45 | 323 | 3 | 14 | 23 | 168 | 80 | 558   |

|        |    |    |    |     |   |    |    |     |    |       |
|--------|----|----|----|-----|---|----|----|-----|----|-------|
| 58,578 | 9  | 48 | 44 | 286 | 3 | 14 | 24 | 154 | 80 | 502   |
| 58,579 | 8  | 48 | 44 | 287 | 3 | 14 | 24 | 154 | 79 | 503   |
| 58,580 | 8  | 55 | 44 | 306 | 3 | 15 | 24 | 187 | 79 | 563   |
| 58,581 | 8  | 54 | 44 | 307 | 3 | 15 | 24 | 189 | 79 | 565   |
| 58,582 | 8  | 51 | 45 | 291 | 3 | 16 | 25 | 190 | 81 | 548   |
| 58,583 | 8  | 51 | 44 | 293 | 3 | 16 | 25 | 193 | 80 | 553   |
| 58,584 | 7  | 51 | 44 | 287 | 3 | 16 | 25 | 191 | 79 | 545   |
| 58,585 | 7  | 50 | 44 | 283 | 3 | 16 | 25 | 192 | 79 | 541   |
| 58,586 | 7  | 54 | 44 | 343 | 3 | 19 | 25 | 228 | 79 | 644   |
| 58,587 | 7  | 57 | 45 | 627 | 3 | 25 | 25 | 304 | 80 | 1,013 |
| 58,588 | 9  | 61 | 45 | 652 | 3 | 25 | 25 | 314 | 82 | 1,052 |
| 58,589 | 9  | 68 | 45 | 693 | 3 | 25 | 27 | 334 | 84 | 1,120 |
| 58,590 | 9  | 65 | 45 | 689 | 3 | 25 | 27 | 333 | 84 | 1,112 |
| 58,591 | 8  | 65 | 45 | 707 | 3 | 26 | 27 | 342 | 83 | 1,140 |
| 58,592 | 8  | 67 | 46 | 722 | 3 | 27 | 27 | 339 | 84 | 1,155 |
| 58,593 | 8  | 67 | 46 | 734 | 3 | 27 | 27 | 343 | 84 | 1,171 |
| 58,594 | 8  | 71 | 45 | 743 | 3 | 28 | 27 | 345 | 83 | 1,187 |
| 58,595 | 8  | 71 | 45 | 743 | 3 | 28 | 27 | 347 | 83 | 1,189 |
| 58,596 | 8  | 71 | 45 | 737 | 2 | 28 | 27 | 336 | 82 | 1,172 |
| 58,597 | 8  | 73 | 45 | 754 | 2 | 28 | 27 | 343 | 82 | 1,198 |
| 58,598 | 8  | 70 | 45 | 743 | 2 | 27 | 27 | 325 | 82 | 1,165 |
| 58,599 | 8  | 70 | 45 | 740 | 2 | 27 | 27 | 322 | 82 | 1,159 |
| 58,600 | 7  | 68 | 45 | 732 | 2 | 26 | 27 | 314 | 81 | 1,140 |
| 58,601 | 7  | 58 | 45 | 723 | 2 | 24 | 27 | 302 | 81 | 1,107 |
| 58,602 | 7  | 61 | 45 | 719 | 2 | 23 | 27 | 293 | 81 | 1,096 |
| 58,603 | 7  | 50 | 45 | 656 | 2 | 17 | 27 | 259 | 81 | 982   |
| 58,604 | 7  | 50 | 45 | 640 | 2 | 18 | 27 | 255 | 81 | 963   |
| 58,605 | 9  | 49 | 53 | 621 | 2 | 18 | 27 | 253 | 91 | 941   |
| 58,606 | 11 | 49 | 53 | 618 | 3 | 18 | 30 | 251 | 97 | 936   |
| 58,607 | 11 | 49 | 53 | 623 | 3 | 18 | 30 | 264 | 97 | 954   |
| 58,608 | 10 | 51 | 52 | 651 | 4 | 19 | 28 | 278 | 94 | 999   |
| 58,609 | 10 | 55 | 42 | 659 | 5 | 21 | 27 | 287 | 84 | 1,022 |
| 58,610 | 8  | 62 | 38 | 679 | 5 | 21 | 18 | 298 | 69 | 1,060 |
| 58,611 | 7  | 62 | 35 | 675 | 5 | 21 | 16 | 301 | 63 | 1,059 |
| 58,612 | 7  | 63 | 26 | 671 | 5 | 21 | 11 | 301 | 49 | 1,056 |
| 58,613 | 6  | 62 | 16 | 671 | 5 | 21 | 8  | 301 | 35 | 1,055 |
| 58,614 | 6  | 62 | 16 | 667 | 4 | 21 | 8  | 301 | 34 | 1,051 |
| 58,615 | 6  | 62 | 16 | 655 | 4 | 21 | 8  | 296 | 34 | 1,034 |
| 58,616 | 6  | 62 | 16 | 655 | 4 | 21 | 8  | 296 | 34 | 1,034 |
| 58,617 | 6  | 58 | 16 | 644 | 5 | 19 | 10 | 295 | 37 | 1,016 |
| 58,618 | 6  | 58 | 16 | 644 | 5 | 19 | 10 | 295 | 37 | 1,016 |

|        |   |    |    |     |   |    |    |     |    |       |
|--------|---|----|----|-----|---|----|----|-----|----|-------|
| 58,619 | 6 | 58 | 16 | 642 | 5 | 19 | 10 | 294 | 37 | 1,013 |
| 58,620 | 6 | 58 | 16 | 642 | 5 | 19 | 10 | 294 | 37 | 1,013 |
| 58,621 | 7 | 57 | 16 | 642 | 5 | 19 | 10 | 294 | 38 | 1,012 |
| 58,622 | 7 | 57 | 16 | 642 | 5 | 19 | 10 | 294 | 38 | 1,012 |
| 58,623 | 7 | 57 | 16 | 642 | 5 | 19 | 10 | 292 | 38 | 1,010 |
| 58,624 | 7 | 57 | 16 | 644 | 5 | 19 | 10 | 291 | 38 | 1,011 |
| 58,625 | 7 | 57 | 18 | 641 | 4 | 19 | 13 | 290 | 42 | 1,007 |
| 58,626 | 7 | 57 | 18 | 641 | 4 | 19 | 13 | 290 | 42 | 1,007 |
| 58,627 | 7 | 57 | 18 | 646 | 4 | 19 | 13 | 293 | 42 | 1,015 |
| 58,628 | 7 | 57 | 19 | 650 | 4 | 19 | 12 | 294 | 42 | 1,020 |
| 58,629 | 7 | 57 | 18 | 652 | 4 | 19 | 11 | 294 | 40 | 1,022 |
| 58,630 | 8 | 50 | 17 | 626 | 4 | 18 | 10 | 257 | 39 | 951   |
| 58,631 | 8 | 50 | 17 | 624 | 4 | 18 | 10 | 255 | 39 | 947   |
| 58,632 | 8 | 50 | 17 | 619 | 4 | 17 | 10 | 249 | 39 | 935   |
| 58,633 | 8 | 51 | 17 | 619 | 4 | 17 | 10 | 251 | 39 | 938   |
| 58,634 | 8 | 51 | 17 | 616 | 4 | 17 | 10 | 249 | 39 | 933   |
| 58,635 | 8 | 52 | 17 | 621 | 4 | 17 | 10 | 254 | 39 | 944   |
| 58,636 | 8 | 52 | 17 | 616 | 4 | 17 | 10 | 251 | 39 | 936   |
| 58,637 | 8 | 48 | 19 | 558 | 4 | 14 | 10 | 216 | 41 | 836   |
| 58,638 | 8 | 45 | 18 | 278 | 4 | 8  | 10 | 144 | 40 | 475   |
| 58,639 | 6 | 42 | 18 | 270 | 4 | 9  | 10 | 151 | 38 | 472   |
| 58,640 | 6 | 35 | 18 | 229 | 4 | 9  | 8  | 131 | 36 | 404   |
| 58,641 | 6 | 35 | 19 | 230 | 4 | 9  | 8  | 129 | 37 | 403   |
| 58,642 | 6 | 35 | 18 | 208 | 4 | 8  | 8  | 118 | 36 | 369   |
| 58,643 | 6 | 31 | 18 | 185 | 4 | 9  | 8  | 113 | 36 | 338   |
| 58,644 | 6 | 31 | 18 | 186 | 4 | 9  | 8  | 112 | 36 | 338   |
| 58,645 | 6 | 27 | 18 | 171 | 4 | 8  | 8  | 108 | 36 | 314   |
| 58,646 | 6 | 27 | 18 | 171 | 4 | 8  | 8  | 107 | 36 | 313   |
| 58,647 | 6 | 27 | 18 | 170 | 4 | 8  | 8  | 107 | 36 | 312   |
| 58,648 | 6 | 23 | 18 | 138 | 4 | 7  | 9  | 95  | 37 | 263   |
| 58,649 | 6 | 23 | 18 | 138 | 4 | 7  | 9  | 95  | 37 | 263   |
| 58,650 | 6 | 23 | 18 | 138 | 4 | 7  | 9  | 95  | 37 | 263   |
| 58,651 | 6 | 26 | 18 | 151 | 4 | 12 | 9  | 117 | 37 | 306   |
| 58,652 | 6 | 26 | 18 | 154 | 4 | 12 | 9  | 118 | 37 | 310   |
| 58,653 | 8 | 30 | 19 | 197 | 4 | 14 | 11 | 149 | 42 | 390   |
| 58,654 | 8 | 32 | 19 | 214 | 4 | 16 | 11 | 161 | 42 | 423   |
| 58,655 | 8 | 32 | 16 | 222 | 4 | 15 | 12 | 164 | 40 | 433   |
| 58,656 | 7 | 31 | 11 | 220 | 4 | 15 | 12 | 159 | 34 | 425   |
| 58,657 | 5 | 31 | 8  | 214 | 3 | 15 | 9  | 146 | 25 | 406   |
| 58,658 | 5 | 32 | 8  | 216 | 3 | 15 | 9  | 145 | 25 | 408   |
| 58,659 | 5 | 30 | 8  | 187 | 2 | 14 | 9  | 131 | 24 | 362   |

|        |   |     |    |       |   |    |    |     |    |       |
|--------|---|-----|----|-------|---|----|----|-----|----|-------|
| 58,660 | 5 | 19  | 7  | 163   | 1 | 12 | 10 | 117 | 23 | 311   |
| 58,661 | 5 | 19  | 7  | 164   | 1 | 12 | 10 | 117 | 23 | 312   |
| 58,662 | 5 | 19  | 11 | 165   | 1 | 12 | 10 | 113 | 27 | 309   |
| 58,663 | 5 | 19  | 11 | 165   | 1 | 12 | 11 | 113 | 28 | 309   |
| 58,664 | 5 | 19  | 11 | 173   | 1 | 12 | 11 | 114 | 28 | 318   |
| 58,665 | 5 | 19  | 11 | 173   | 1 | 12 | 13 | 114 | 30 | 318   |
| 58,666 | 5 | 19  | 11 | 173   | 1 | 12 | 13 | 114 | 30 | 318   |
| 58,667 | 5 | 19  | 11 | 173   | 1 | 12 | 13 | 114 | 30 | 318   |
| 58,668 | 5 | 19  | 11 | 173   | 0 | 12 | 11 | 114 | 27 | 318   |
| 58,669 | 5 | 19  | 11 | 178   | 0 | 13 | 11 | 114 | 27 | 324   |
| 58,670 | 5 | 19  | 11 | 178   | 0 | 13 | 11 | 115 | 27 | 325   |
| 58,671 | 4 | 19  | 11 | 178   | 1 | 13 | 11 | 115 | 27 | 325   |
| 58,672 | 4 | 19  | 11 | 178   | 1 | 13 | 11 | 115 | 27 | 325   |
| 58,673 | 4 | 19  | 11 | 182   | 1 | 13 | 11 | 116 | 27 | 330   |
| 58,674 | 4 | 23  | 11 | 188   | 1 | 13 | 11 | 136 | 27 | 360   |
| 58,675 | 4 | 29  | 11 | 226   | 1 | 15 | 10 | 178 | 26 | 448   |
| 58,676 | 4 | 29  | 9  | 254   | 1 | 18 | 8  | 205 | 22 | 506   |
| 58,677 | 4 | 32  | 10 | 278   | 1 | 19 | 8  | 238 | 23 | 567   |
| 58,678 | 4 | 33  | 11 | 290   | 1 | 20 | 8  | 242 | 24 | 585   |
| 58,679 | 4 | 63  | 10 | 407   | 1 | 26 | 8  | 366 | 23 | 862   |
| 58,680 | 4 | 64  | 10 | 407   | 1 | 26 | 8  | 366 | 23 | 863   |
| 58,681 | 3 | 64  | 10 | 407   | 1 | 26 | 8  | 366 | 22 | 863   |
| 58,682 | 3 | 64  | 10 | 410   | 1 | 26 | 9  | 369 | 23 | 869   |
| 58,683 | 3 | 64  | 10 | 427   | 1 | 29 | 9  | 376 | 23 | 896   |
| 58,684 | 3 | 63  | 10 | 435   | 1 | 31 | 9  | 387 | 23 | 916   |
| 58,685 | 3 | 63  | 10 | 447   | 1 | 31 | 9  | 397 | 23 | 938   |
| 58,686 | 3 | 78  | 8  | 570   | 1 | 41 | 9  | 492 | 21 | 1,181 |
| 58,687 | 3 | 78  | 8  | 578   | 1 | 41 | 9  | 502 | 21 | 1,199 |
| 58,688 | 3 | 87  | 8  | 647   | 1 | 49 | 9  | 568 | 21 | 1,351 |
| 58,689 | 3 | 87  | 8  | 668   | 1 | 50 | 9  | 580 | 21 | 1,385 |
| 58,690 | 3 | 89  | 8  | 660   | 1 | 49 | 9  | 568 | 21 | 1,366 |
| 58,691 | 3 | 94  | 7  | 690   | 1 | 50 | 9  | 578 | 20 | 1,412 |
| 58,692 | 3 | 103 | 7  | 740   | 1 | 53 | 9  | 605 | 20 | 1,501 |
| 58,693 | 3 | 155 | 7  | 1,017 | 1 | 65 | 9  | 813 | 20 | 2,050 |
| 58,694 | 3 | 154 | 7  | 1,079 | 1 | 64 | 9  | 826 | 20 | 2,123 |
| 58,695 | 3 | 154 | 8  | 1,088 | 1 | 64 | 9  | 828 | 21 | 2,134 |
| 58,696 | 3 | 154 | 8  | 1,093 | 1 | 64 | 9  | 830 | 21 | 2,141 |
| 58,697 | 3 | 154 | 8  | 1,093 | 1 | 64 | 9  | 830 | 21 | 2,141 |
| 58,698 | 4 | 154 | 8  | 1,093 | 1 | 64 | 9  | 830 | 22 | 2,141 |
| 58,699 | 4 | 161 | 8  | 1,131 | 1 | 68 | 8  | 901 | 21 | 2,261 |
| 58,700 | 4 | 167 | 8  | 1,198 | 1 | 78 | 8  | 985 | 21 | 2,428 |



|        |   |     |    |       |   |     |    |       |    |       |
|--------|---|-----|----|-------|---|-----|----|-------|----|-------|
| 58,701 | 4 | 188 | 8  | 1,333 | 1 | 88  | 8  | 1,095 | 21 | 2,704 |
| 58,702 | 3 | 190 | 10 | 1,467 | 1 | 88  | 7  | 1,186 | 21 | 2,931 |
| 58,703 | 3 | 193 | 11 | 1,508 | 1 | 89  | 8  | 1,207 | 23 | 2,997 |
| 58,704 | 2 | 197 | 10 | 1,607 | 1 | 88  | 7  | 1,240 | 20 | 3,132 |
| 58,705 | 2 | 197 | 10 | 1,599 | 1 | 86  | 7  | 1,229 | 20 | 3,111 |
| 58,706 | 2 | 197 | 10 | 1,593 | 1 | 86  | 6  | 1,227 | 19 | 3,103 |
| 58,707 | 1 | 197 | 10 | 1,604 | 1 | 86  | 6  | 1,230 | 18 | 3,117 |
| 58,708 | 1 | 197 | 10 | 1,634 | 1 | 86  | 6  | 1,239 | 18 | 3,156 |
| 58,709 | 1 | 197 | 10 | 1,664 | 1 | 86  | 6  | 1,258 | 18 | 3,205 |
| 58,710 | 1 | 199 | 10 | 1,684 | 1 | 88  | 6  | 1,271 | 18 | 3,242 |
| 58,711 | 1 | 201 | 10 | 1,700 | 1 | 88  | 5  | 1,275 | 17 | 3,264 |
| 58,712 | 1 | 205 | 7  | 1,745 | 1 | 91  | 5  | 1,303 | 14 | 3,344 |
| 58,713 | 1 | 204 | 6  | 1,745 | 1 | 91  | 5  | 1,306 | 13 | 3,346 |
| 58,714 | 1 | 204 | 6  | 1,746 | 1 | 91  | 4  | 1,305 | 12 | 3,346 |
| 58,715 | 1 | 205 | 6  | 1,784 | 1 | 93  | 4  | 1,338 | 12 | 3,420 |
| 58,716 | 1 | 206 | 6  | 1,804 | 1 | 94  | 2  | 1,345 | 10 | 3,449 |
| 58,717 | 1 | 206 | 6  | 1,814 | 1 | 95  | 2  | 1,345 | 10 | 3,460 |
| 58,718 | 1 | 213 | 6  | 1,904 | 1 | 105 | 2  | 1,402 | 10 | 3,624 |
| 58,719 | 1 | 213 | 8  | 1,913 | 1 | 106 | 2  | 1,406 | 12 | 3,638 |
| 58,720 | 1 | 213 | 8  | 1,910 | 1 | 105 | 2  | 1,406 | 12 | 3,634 |
| 58,721 | 1 | 213 | 8  | 1,909 | 0 | 105 | 2  | 1,405 | 11 | 3,632 |
| 58,722 | 1 | 215 | 9  | 1,929 | 0 | 106 | 2  | 1,420 | 12 | 3,670 |
| 58,723 | 1 | 227 | 9  | 1,971 | 0 | 107 | 3  | 1,505 | 13 | 3,810 |
| 58,724 | 1 | 227 | 9  | 1,988 | 0 | 107 | 3  | 1,512 | 13 | 3,834 |
| 58,725 | 1 | 224 | 10 | 2,012 | 0 | 107 | 3  | 1,507 | 14 | 3,850 |
| 58,726 | 1 | 218 | 10 | 1,985 | 0 | 105 | 3  | 1,465 | 14 | 3,773 |
| 58,727 | 1 | 220 | 11 | 1,976 | 0 | 102 | 3  | 1,456 | 15 | 3,754 |
| 58,728 | 1 | 217 | 11 | 1,953 | 0 | 101 | 3  | 1,423 | 15 | 3,694 |
| 58,729 | 1 | 216 | 11 | 1,945 | 0 | 101 | 3  | 1,417 | 15 | 3,679 |
| 58,730 | 1 | 186 | 16 | 1,828 | 0 | 95  | 3  | 1,296 | 20 | 3,405 |
| 58,731 | 1 | 185 | 20 | 1,839 | 1 | 99  | 14 | 1,300 | 36 | 3,423 |
| 58,732 | 2 | 189 | 25 | 1,855 | 1 | 100 | 15 | 1,304 | 43 | 3,448 |
| 58,733 | 2 | 189 | 25 | 1,854 | 1 | 100 | 15 | 1,301 | 43 | 3,444 |
| 58,734 | 2 | 199 | 25 | 1,940 | 1 | 107 | 15 | 1,437 | 43 | 3,683 |
| 58,735 | 2 | 200 | 25 | 2,038 | 1 | 110 | 15 | 1,500 | 43 | 3,848 |
| 58,736 | 3 | 304 | 34 | 3,558 | 2 | 128 | 18 | 2,001 | 57 | 5,991 |
| 58,737 | 3 | 295 | 34 | 3,609 | 2 | 123 | 18 | 1,955 | 57 | 5,982 |
| 58,738 | 3 | 287 | 35 | 3,566 | 2 | 116 | 18 | 1,886 | 58 | 5,855 |
| 58,739 | 3 | 287 | 35 | 3,550 | 2 | 115 | 18 | 1,876 | 58 | 5,828 |
| 58,740 | 3 | 284 | 35 | 3,556 | 2 | 115 | 18 | 1,869 | 58 | 5,824 |
| 58,741 | 3 | 279 | 35 | 3,531 | 2 | 114 | 18 | 1,859 | 58 | 5,783 |

|        |   |     |    |       |   |     |    |       |    |       |
|--------|---|-----|----|-------|---|-----|----|-------|----|-------|
| 58,742 | 3 | 279 | 35 | 3,536 | 2 | 114 | 18 | 1,859 | 58 | 5,788 |
| 58,743 | 3 | 270 | 36 | 3,486 | 2 | 111 | 18 | 1,833 | 59 | 5,700 |
| 58,744 | 3 | 218 | 36 | 3,209 | 2 | 99  | 18 | 1,626 | 59 | 5,152 |
| 58,745 | 3 | 218 | 35 | 3,132 | 2 | 98  | 18 | 1,610 | 58 | 5,058 |
| 58,746 | 3 | 218 | 35 | 3,133 | 2 | 98  | 19 | 1,610 | 59 | 5,059 |
| 58,747 | 3 | 218 | 36 | 3,127 | 2 | 98  | 19 | 1,607 | 60 | 5,050 |
| 58,748 | 3 | 218 | 36 | 3,129 | 2 | 98  | 20 | 1,608 | 61 | 5,053 |
| 58,749 | 2 | 211 | 36 | 3,092 | 2 | 93  | 20 | 1,537 | 60 | 4,933 |
| 58,750 | 2 | 211 | 40 | 3,092 | 2 | 93  | 20 | 1,536 | 64 | 4,932 |
| 58,751 | 2 | 205 | 41 | 3,051 | 2 | 84  | 21 | 1,456 | 66 | 4,796 |
| 58,752 | 2 | 184 | 45 | 2,919 | 3 | 74  | 30 | 1,346 | 80 | 4,523 |
| 58,753 | 3 | 179 | 43 | 2,772 | 3 | 70  | 33 | 1,237 | 82 | 4,258 |
| 58,754 | 3 | 176 | 44 | 2,733 | 3 | 70  | 33 | 1,214 | 83 | 4,193 |
| 58,755 | 3 | 164 | 44 | 2,585 | 3 | 69  | 33 | 1,151 | 83 | 3,969 |
| 58,756 | 3 | 162 | 44 | 2,592 | 3 | 69  | 33 | 1,166 | 83 | 3,989 |
| 58,757 | 3 | 162 | 44 | 2,593 | 3 | 69  | 33 | 1,165 | 83 | 3,989 |
| 58,758 | 3 | 162 | 44 | 2,586 | 3 | 69  | 34 | 1,162 | 84 | 3,979 |
| 58,759 | 3 | 162 | 44 | 2,560 | 3 | 69  | 34 | 1,154 | 84 | 3,945 |
| 58,760 | 3 | 159 | 44 | 2,508 | 3 | 67  | 34 | 1,122 | 84 | 3,856 |
| 58,761 | 3 | 153 | 44 | 2,441 | 3 | 64  | 34 | 1,087 | 84 | 3,745 |
| 58,762 | 3 | 153 | 44 | 2,444 | 3 | 64  | 34 | 1,087 | 84 | 3,748 |
| 58,763 | 3 | 153 | 44 | 2,444 | 3 | 64  | 34 | 1,086 | 84 | 3,747 |
| 58,764 | 3 | 153 | 44 | 2,442 | 3 | 64  | 34 | 1,085 | 84 | 3,744 |
| 58,765 | 3 | 152 | 44 | 2,395 | 3 | 62  | 34 | 1,052 | 84 | 3,661 |
| 58,766 | 3 | 151 | 45 | 2,375 | 3 | 61  | 34 | 1,045 | 85 | 3,632 |
| 58,767 | 3 | 151 | 45 | 2,377 | 3 | 61  | 34 | 1,052 | 85 | 3,641 |
| 58,768 | 3 | 144 | 46 | 2,300 | 3 | 50  | 34 | 1,010 | 86 | 3,504 |
| 58,769 | 4 | 168 | 46 | 2,515 | 3 | 67  | 34 | 1,213 | 87 | 3,963 |
| 58,770 | 5 | 173 | 44 | 2,608 | 3 | 68  | 35 | 1,281 | 87 | 4,130 |
| 58,771 | 5 | 173 | 44 | 2,626 | 3 | 69  | 35 | 1,284 | 87 | 4,152 |
| 58,772 | 5 | 182 | 44 | 2,696 | 3 | 72  | 35 | 1,323 | 87 | 4,273 |
| 58,773 | 6 | 184 | 44 | 2,747 | 3 | 73  | 35 | 1,326 | 88 | 4,330 |
| 58,774 | 6 | 172 | 44 | 2,712 | 3 | 72  | 34 | 1,245 | 87 | 4,201 |
| 58,775 | 6 | 173 | 43 | 2,752 | 3 | 72  | 34 | 1,251 | 86 | 4,248 |
| 58,776 | 6 | 175 | 44 | 2,886 | 3 | 79  | 34 | 1,308 | 87 | 4,448 |
| 58,777 | 6 | 179 | 44 | 2,982 | 3 | 82  | 34 | 1,323 | 87 | 4,566 |
| 58,778 | 6 | 181 | 42 | 3,284 | 3 | 87  | 34 | 1,365 | 85 | 4,917 |
| 58,779 | 6 | 185 | 41 | 3,344 | 3 | 93  | 34 | 1,440 | 84 | 5,062 |
| 58,780 | 6 | 194 | 36 | 3,517 | 3 | 97  | 34 | 1,502 | 79 | 5,310 |
| 58,781 | 6 | 202 | 32 | 3,549 | 2 | 97  | 23 | 1,515 | 63 | 5,363 |
| 58,782 | 6 | 202 | 32 | 3,560 | 2 | 94  | 21 | 1,519 | 61 | 5,375 |

|        |   |     |    |       |   |    |    |       |    |       |
|--------|---|-----|----|-------|---|----|----|-------|----|-------|
| 58,783 | 5 | 199 | 27 | 3,558 | 2 | 94 | 22 | 1,519 | 56 | 5,370 |
| 58,784 | 5 | 191 | 22 | 3,457 | 1 | 84 | 22 | 1,377 | 50 | 5,109 |
| 58,785 | 5 | 191 | 18 | 3,357 | 1 | 79 | 20 | 1,299 | 44 | 4,926 |
| 58,786 | 4 | 191 | 18 | 3,368 | 1 | 79 | 20 | 1,301 | 43 | 4,939 |
| 58,787 | 4 | 88  | 18 | 1,847 | 1 | 61 | 20 | 800   | 43 | 2,796 |
| 58,788 | 4 | 81  | 18 | 1,672 | 1 | 56 | 20 | 751   | 43 | 2,560 |
| 58,789 | 4 | 81  | 17 | 1,653 | 1 | 55 | 20 | 746   | 42 | 2,535 |
| 58,790 | 4 | 81  | 17 | 1,654 | 1 | 55 | 20 | 747   | 42 | 2,537 |
| 58,791 | 4 | 81  | 17 | 1,643 | 1 | 55 | 20 | 749   | 42 | 2,528 |
| 58,792 | 4 | 81  | 19 | 1,645 | 2 | 55 | 23 | 752   | 48 | 2,533 |
| 58,793 | 4 | 83  | 18 | 1,647 | 2 | 55 | 26 | 752   | 50 | 2,537 |
| 58,794 | 4 | 83  | 18 | 1,649 | 2 | 55 | 26 | 752   | 50 | 2,539 |
| 58,795 | 4 | 83  | 18 | 1,652 | 2 | 55 | 26 | 753   | 50 | 2,543 |
| 58,796 | 4 | 83  | 18 | 1,651 | 2 | 55 | 26 | 753   | 50 | 2,542 |
| 58,797 | 4 | 83  | 19 | 1,658 | 2 | 55 | 27 | 758   | 52 | 2,554 |
| 58,798 | 4 | 83  | 18 | 1,667 | 2 | 56 | 27 | 767   | 51 | 2,573 |
| 58,799 | 4 | 88  | 18 | 1,785 | 2 | 60 | 29 | 835   | 53 | 2,768 |
| 58,800 | 4 | 92  | 23 | 1,855 | 2 | 61 | 30 | 932   | 59 | 2,940 |
| 58,801 | 4 | 96  | 19 | 1,877 | 2 | 61 | 30 | 941   | 55 | 2,975 |
| 58,802 | 4 | 97  | 20 | 1,853 | 2 | 61 | 30 | 944   | 56 | 2,955 |
| 58,803 | 4 | 97  | 16 | 1,851 | 1 | 60 | 21 | 943   | 42 | 2,951 |
| 58,804 | 3 | 97  | 16 | 1,854 | 1 | 60 | 18 | 943   | 38 | 2,954 |
| 58,805 | 3 | 100 | 14 | 1,852 | 1 | 60 | 18 | 946   | 36 | 2,958 |
| 58,806 | 3 | 101 | 14 | 1,853 | 1 | 60 | 17 | 952   | 35 | 2,966 |
| 58,807 | 3 | 101 | 14 | 1,839 | 1 | 60 | 18 | 939   | 36 | 2,939 |
| 58,808 | 3 | 101 | 14 | 1,842 | 1 | 60 | 18 | 944   | 36 | 2,947 |
| 58,809 | 3 | 101 | 19 | 1,839 | 2 | 60 | 24 | 945   | 48 | 2,945 |
| 58,810 | 4 | 101 | 24 | 1,836 | 2 | 60 | 26 | 943   | 56 | 2,940 |
| 58,811 | 4 | 101 | 27 | 1,834 | 2 | 60 | 27 | 941   | 60 | 2,936 |
| 58,812 | 4 | 101 | 27 | 1,834 | 2 | 60 | 27 | 940   | 60 | 2,935 |
| 58,813 | 4 | 101 | 27 | 1,837 | 2 | 60 | 27 | 940   | 60 | 2,938 |
| 58,814 | 4 | 101 | 27 | 1,837 | 2 | 60 | 27 | 940   | 60 | 2,938 |
| 58,815 | 4 | 101 | 27 | 1,842 | 2 | 60 | 28 | 940   | 61 | 2,943 |
| 58,816 | 4 | 102 | 27 | 1,843 | 2 | 60 | 28 | 941   | 61 | 2,946 |
| 58,817 | 4 | 102 | 26 | 1,843 | 2 | 60 | 28 | 934   | 60 | 2,939 |
| 58,818 | 4 | 102 | 25 | 1,819 | 2 | 60 | 28 | 916   | 59 | 2,897 |
| 58,819 | 5 | 78  | 25 | 1,604 | 2 | 43 | 28 | 719   | 60 | 2,444 |
| 58,820 | 4 | 78  | 26 | 1,604 | 2 | 43 | 28 | 718   | 60 | 2,443 |
| 58,821 | 3 | 73  | 28 | 1,506 | 2 | 41 | 29 | 646   | 62 | 2,266 |
| 58,822 | 3 | 65  | 32 | 1,417 | 2 | 37 | 29 | 607   | 66 | 2,126 |
| 58,823 | 3 | 65  | 32 | 1,422 | 2 | 38 | 29 | 607   | 66 | 2,132 |

|        |    |     |    |       |   |    |    |     |     |       |
|--------|----|-----|----|-------|---|----|----|-----|-----|-------|
| 58,824 | 2  | 63  | 31 | 1,375 | 2 | 38 | 29 | 606 | 64  | 2,082 |
| 58,825 | 2  | 65  | 31 | 1,381 | 2 | 38 | 32 | 615 | 67  | 2,099 |
| 58,826 | 2  | 64  | 31 | 1,327 | 2 | 38 | 33 | 604 | 68  | 2,033 |
| 58,827 | 2  | 62  | 30 | 1,169 | 2 | 32 | 33 | 538 | 67  | 1,801 |
| 58,828 | 2  | 58  | 30 | 1,073 | 2 | 29 | 33 | 522 | 67  | 1,682 |
| 58,829 | 2  | 83  | 30 | 1,055 | 3 | 36 | 34 | 582 | 69  | 1,756 |
| 58,830 | 3  | 137 | 30 | 1,547 | 3 | 57 | 34 | 770 | 70  | 2,511 |
| 58,831 | 3  | 140 | 30 | 1,505 | 3 | 57 | 34 | 750 | 70  | 2,452 |
| 58,832 | 3  | 144 | 32 | 1,667 | 3 | 61 | 35 | 757 | 73  | 2,629 |
| 58,833 | 3  | 144 | 33 | 1,671 | 3 | 61 | 35 | 757 | 74  | 2,633 |
| 58,834 | 3  | 147 | 36 | 1,682 | 3 | 60 | 34 | 754 | 76  | 2,643 |
| 58,835 | 3  | 148 | 36 | 1,684 | 3 | 60 | 33 | 755 | 75  | 2,647 |
| 58,836 | 4  | 148 | 45 | 1,682 | 4 | 60 | 37 | 759 | 90  | 2,649 |
| 58,837 | 4  | 148 | 45 | 1,686 | 4 | 60 | 37 | 759 | 90  | 2,653 |
| 58,838 | 8  | 149 | 49 | 1,719 | 5 | 62 | 39 | 803 | 101 | 2,733 |
| 58,839 | 8  | 151 | 54 | 1,772 | 6 | 64 | 44 | 829 | 112 | 2,816 |
| 58,840 | 8  | 150 | 59 | 1,767 | 6 | 64 | 50 | 839 | 123 | 2,820 |
| 58,841 | 9  | 150 | 60 | 1,764 | 6 | 64 | 50 | 837 | 125 | 2,815 |
| 58,842 | 9  | 150 | 60 | 1,760 | 6 | 64 | 48 | 835 | 123 | 2,809 |
| 58,843 | 9  | 148 | 58 | 1,743 | 5 | 64 | 47 | 831 | 119 | 2,786 |
| 58,844 | 9  | 148 | 58 | 1,743 | 5 | 64 | 44 | 831 | 116 | 2,786 |
| 58,845 | 9  | 148 | 58 | 1,741 | 5 | 64 | 44 | 831 | 116 | 2,784 |
| 58,846 | 9  | 148 | 58 | 1,754 | 5 | 64 | 44 | 838 | 116 | 2,804 |
| 58,847 | 9  | 148 | 59 | 1,763 | 5 | 64 | 44 | 839 | 117 | 2,814 |
| 58,848 | 9  | 148 | 58 | 1,759 | 5 | 64 | 42 | 837 | 114 | 2,808 |
| 58,849 | 9  | 149 | 58 | 1,774 | 5 | 63 | 42 | 838 | 114 | 2,824 |
| 58,850 | 9  | 144 | 58 | 1,654 | 5 | 59 | 39 | 770 | 111 | 2,627 |
| 58,851 | 9  | 136 | 53 | 1,562 | 5 | 58 | 38 | 667 | 105 | 2,423 |
| 58,852 | 9  | 136 | 53 | 1,562 | 5 | 58 | 38 | 667 | 105 | 2,423 |
| 58,853 | 9  | 135 | 51 | 1,563 | 6 | 58 | 38 | 663 | 104 | 2,419 |
| 58,854 | 9  | 135 | 52 | 1,564 | 6 | 58 | 38 | 665 | 105 | 2,422 |
| 58,855 | 9  | 135 | 52 | 1,563 | 6 | 58 | 38 | 665 | 105 | 2,421 |
| 58,856 | 9  | 132 | 52 | 1,562 | 6 | 57 | 37 | 666 | 104 | 2,417 |
| 58,857 | 9  | 136 | 52 | 1,575 | 6 | 57 | 36 | 672 | 103 | 2,440 |
| 58,858 | 9  | 140 | 52 | 1,595 | 6 | 59 | 36 | 685 | 103 | 2,479 |
| 58,859 | 10 | 141 | 52 | 1,615 | 6 | 61 | 35 | 689 | 103 | 2,506 |
| 58,860 | 10 | 141 | 52 | 1,620 | 5 | 61 | 32 | 688 | 99  | 2,510 |
| 58,861 | 9  | 141 | 49 | 1,621 | 6 | 61 | 35 | 688 | 99  | 2,511 |
| 58,862 | 9  | 141 | 46 | 1,621 | 6 | 61 | 33 | 688 | 94  | 2,511 |
| 58,863 | 9  | 141 | 46 | 1,615 | 6 | 61 | 33 | 688 | 94  | 2,505 |
| 58,864 | 9  | 141 | 46 | 1,616 | 6 | 61 | 33 | 688 | 94  | 2,506 |

|        |   |     |    |       |   |    |    |     |    |       |
|--------|---|-----|----|-------|---|----|----|-----|----|-------|
| 58,865 | 9 | 141 | 46 | 1,616 | 6 | 61 | 33 | 687 | 94 | 2,505 |
| 58,866 | 9 | 142 | 46 | 1,612 | 6 | 61 | 33 | 690 | 94 | 2,505 |
| 58,867 | 9 | 141 | 46 | 1,611 | 6 | 61 | 33 | 689 | 94 | 2,502 |
| 58,868 | 9 | 141 | 46 | 1,610 | 6 | 64 | 33 | 691 | 94 | 2,506 |
| 58,869 | 9 | 141 | 46 | 1,651 | 6 | 66 | 33 | 721 | 94 | 2,579 |
| 58,870 | 8 | 141 | 46 | 1,683 | 6 | 68 | 33 | 730 | 93 | 2,622 |
| 58,871 | 8 | 141 | 45 | 1,687 | 6 | 68 | 33 | 730 | 92 | 2,626 |
| 58,872 | 8 | 141 | 43 | 1,685 | 6 | 68 | 31 | 728 | 88 | 2,622 |
| 58,873 | 8 | 138 | 39 | 1,659 | 6 | 65 | 31 | 712 | 84 | 2,574 |
| 58,874 | 8 | 139 | 39 | 1,662 | 6 | 66 | 31 | 713 | 84 | 2,580 |
| 58,875 | 8 | 139 | 39 | 1,677 | 6 | 66 | 28 | 721 | 81 | 2,603 |
| 58,876 | 8 | 136 | 39 | 1,662 | 6 | 67 | 28 | 707 | 81 | 2,572 |
| 58,877 | 8 | 136 | 39 | 1,660 | 6 | 67 | 27 | 706 | 80 | 2,569 |
| 58,878 | 8 | 138 | 39 | 1,640 | 6 | 66 | 28 | 700 | 81 | 2,544 |
| 58,879 | 8 | 109 | 39 | 1,340 | 5 | 54 | 28 | 582 | 80 | 2,085 |
| 58,880 | 8 | 109 | 39 | 1,340 | 5 | 54 | 27 | 582 | 79 | 2,085 |
| 58,881 | 7 | 51  | 39 | 787   | 5 | 27 | 27 | 316 | 78 | 1,181 |
| 58,882 | 8 | 28  | 37 | 447   | 5 | 18 | 26 | 252 | 76 | 745   |
| 58,883 | 8 | 28  | 37 | 447   | 5 | 18 | 26 | 253 | 76 | 746   |
| 58,884 | 8 | 22  | 36 | 392   | 5 | 17 | 27 | 242 | 76 | 673   |
| 58,885 | 8 | 21  | 33 | 402   | 5 | 17 | 27 | 250 | 73 | 690   |
| 58,886 | 8 | 21  | 34 | 403   | 5 | 17 | 27 | 258 | 74 | 699   |
| 58,887 | 7 | 26  | 25 | 439   | 4 | 22 | 22 | 274 | 58 | 761   |
| 58,888 | 4 | 31  | 24 | 475   | 3 | 22 | 23 | 307 | 54 | 835   |
| 58,889 | 3 | 39  | 21 | 517   | 3 | 23 | 21 | 303 | 48 | 882   |
| 58,890 | 3 | 47  | 16 | 487   | 2 | 21 | 17 | 286 | 38 | 841   |
| 58,891 | 3 | 47  | 11 | 474   | 2 | 21 | 12 | 271 | 28 | 813   |
| 58,892 | 2 | 49  | 10 | 484   | 2 | 21 | 12 | 277 | 26 | 831   |
| 58,893 | 2 | 50  | 10 | 489   | 2 | 21 | 12 | 278 | 26 | 838   |
| 58,894 | 2 | 50  | 10 | 509   | 2 | 22 | 12 | 291 | 26 | 872   |
| 58,895 | 2 | 50  | 10 | 510   | 2 | 22 | 12 | 292 | 26 | 874   |
| 58,896 | 2 | 51  | 10 | 519   | 2 | 22 | 12 | 291 | 26 | 883   |
| 58,897 | 2 | 52  | 10 | 516   | 2 | 22 | 12 | 287 | 26 | 877   |
| 58,898 | 2 | 53  | 9  | 529   | 2 | 22 | 12 | 288 | 25 | 892   |
| 58,899 | 2 | 61  | 9  | 613   | 2 | 25 | 14 | 322 | 27 | 1,021 |
| 58,900 | 2 | 61  | 9  | 646   | 2 | 26 | 14 | 338 | 27 | 1,071 |
| 58,901 | 2 | 80  | 10 | 906   | 2 | 29 | 15 | 394 | 29 | 1,409 |
| 58,902 | 2 | 86  | 10 | 1,013 | 2 | 34 | 15 | 430 | 29 | 1,563 |
| 58,903 | 2 | 86  | 11 | 1,021 | 2 | 35 | 15 | 431 | 30 | 1,573 |
| 58,904 | 2 | 92  | 11 | 1,024 | 1 | 35 | 14 | 427 | 28 | 1,578 |
| 58,905 | 2 | 94  | 10 | 1,044 | 1 | 36 | 14 | 431 | 27 | 1,605 |

|        |   |     |    |       |   |    |    |     |    |       |
|--------|---|-----|----|-------|---|----|----|-----|----|-------|
| 58,906 | 2 | 94  | 10 | 1,073 | 1 | 36 | 14 | 434 | 27 | 1,637 |
| 58,907 | 2 | 95  | 11 | 1,101 | 1 | 36 | 14 | 435 | 28 | 1,667 |
| 58,908 | 2 | 91  | 11 | 1,105 | 1 | 36 | 17 | 430 | 31 | 1,662 |
| 58,909 | 2 | 89  | 12 | 1,074 | 1 | 32 | 17 | 406 | 32 | 1,601 |
| 58,910 | 1 | 91  | 11 | 1,138 | 1 | 32 | 17 | 415 | 30 | 1,676 |
| 58,911 | 1 | 92  | 7  | 1,230 | 1 | 32 | 18 | 422 | 27 | 1,776 |
| 58,912 | 1 | 99  | 7  | 1,330 | 0 | 34 | 14 | 450 | 22 | 1,913 |
| 58,913 | 1 | 99  | 7  | 1,344 | 0 | 34 | 15 | 450 | 23 | 1,927 |
| 58,914 | 1 | 99  | 7  | 1,350 | 0 | 34 | 15 | 450 | 23 | 1,933 |
| 58,915 | 1 | 99  | 8  | 1,364 | 0 | 34 | 15 | 452 | 24 | 1,949 |
| 58,916 | 1 | 99  | 8  | 1,368 | 0 | 34 | 15 | 452 | 24 | 1,953 |
| 58,917 | 1 | 101 | 10 | 1,398 | 0 | 36 | 15 | 461 | 26 | 1,996 |
| 58,918 | 1 | 101 | 10 | 1,411 | 0 | 38 | 15 | 462 | 26 | 2,012 |
| 58,919 | 1 | 101 | 11 | 1,420 | 0 | 35 | 15 | 463 | 27 | 2,019 |
| 58,920 | 1 | 101 | 11 | 1,390 | 0 | 33 | 15 | 433 | 27 | 1,957 |
| 58,921 | 1 | 100 | 11 | 1,333 | 0 | 30 | 15 | 411 | 27 | 1,874 |
| 58,922 | 1 | 100 | 11 | 1,335 | 0 | 30 | 15 | 411 | 27 | 1,876 |
| 58,923 | 1 | 102 | 12 | 1,342 | 0 | 30 | 15 | 413 | 28 | 1,887 |
| 58,924 | 1 | 102 | 12 | 1,343 | 0 | 30 | 15 | 415 | 28 | 1,890 |
| 58,925 | 1 | 102 | 13 | 1,344 | 0 | 30 | 15 | 415 | 29 | 1,891 |
| 58,926 | 1 | 102 | 13 | 1,344 | 0 | 30 | 15 | 414 | 29 | 1,890 |
| 58,927 | 1 | 102 | 14 | 1,345 | 0 | 29 | 15 | 413 | 30 | 1,889 |
| 58,928 | 1 | 103 | 14 | 1,352 | 0 | 29 | 15 | 415 | 30 | 1,899 |
| 58,929 | 1 | 102 | 16 | 1,353 | 0 | 29 | 16 | 415 | 33 | 1,899 |
| 58,930 | 1 | 102 | 16 | 1,369 | 0 | 29 | 16 | 421 | 33 | 1,921 |
| 58,931 | 1 | 112 | 16 | 1,417 | 0 | 34 | 16 | 459 | 33 | 2,022 |
| 58,932 | 1 | 115 | 16 | 1,483 | 0 | 36 | 16 | 474 | 33 | 2,108 |
| 58,933 | 0 | 119 | 16 | 1,584 | 0 | 51 | 16 | 543 | 32 | 2,297 |
| 58,934 | 0 | 130 | 16 | 1,697 | 0 | 56 | 16 | 595 | 32 | 2,478 |
| 58,935 | 0 | 151 | 18 | 1,957 | 0 | 71 | 15 | 758 | 33 | 2,937 |
| 58,936 | 0 | 151 | 18 | 1,956 | 0 | 71 | 16 | 753 | 34 | 2,931 |
| 58,937 | 0 | 145 | 17 | 1,905 | 0 | 66 | 16 | 724 | 33 | 2,840 |
| 58,938 | 0 | 148 | 17 | 1,907 | 0 | 66 | 16 | 725 | 33 | 2,846 |
| 58,939 | 0 | 143 | 17 | 1,872 | 0 | 66 | 15 | 692 | 32 | 2,773 |
| 58,940 | 0 | 123 | 19 | 1,760 | 0 | 63 | 14 | 635 | 33 | 2,581 |
| 58,941 | 0 | 123 | 19 | 1,760 | 0 | 63 | 14 | 635 | 33 | 2,581 |
| 58,942 | 0 | 122 | 21 | 1,745 | 0 | 63 | 14 | 626 | 35 | 2,556 |
| 58,943 | 0 | 122 | 21 | 1,745 | 0 | 63 | 14 | 626 | 35 | 2,556 |
| 58,944 | 0 | 121 | 25 | 1,720 | 0 | 62 | 14 | 615 | 39 | 2,518 |
| 58,945 | 0 | 121 | 25 | 1,721 | 0 | 62 | 14 | 615 | 39 | 2,519 |
| 58,946 | 0 | 121 | 25 | 1,725 | 0 | 62 | 14 | 614 | 39 | 2,522 |

|        |   |     |    |       |   |     |    |       |    |       |
|--------|---|-----|----|-------|---|-----|----|-------|----|-------|
| 58,947 | 0 | 152 | 43 | 1,908 | 0 | 82  | 18 | 863   | 61 | 3,005 |
| 58,948 | 0 | 151 | 43 | 1,915 | 0 | 85  | 18 | 868   | 61 | 3,019 |
| 58,949 | 0 | 154 | 46 | 1,978 | 0 | 90  | 19 | 930   | 65 | 3,152 |
| 58,950 | 0 | 174 | 46 | 2,082 | 0 | 99  | 17 | 1,027 | 63 | 3,382 |
| 58,951 | 0 | 200 | 45 | 2,292 | 0 | 112 | 17 | 1,121 | 62 | 3,725 |
| 58,952 | 0 | 181 | 45 | 2,037 | 0 | 109 | 16 | 1,066 | 61 | 3,393 |
| 58,953 | 1 | 177 | 45 | 1,937 | 0 | 104 | 17 | 1,032 | 63 | 3,250 |
| 58,954 | 1 | 238 | 44 | 2,290 | 0 | 119 | 17 | 1,125 | 62 | 3,772 |
| 58,955 | 1 | 238 | 44 | 2,308 | 0 | 119 | 17 | 1,128 | 62 | 3,793 |
| 58,956 | 1 | 236 | 44 | 2,308 | 0 | 118 | 17 | 1,117 | 62 | 3,779 |
| 58,957 | 1 | 243 | 45 | 2,375 | 0 | 120 | 17 | 1,144 | 63 | 3,882 |
| 58,958 | 1 | 242 | 44 | 2,370 | 0 | 120 | 17 | 1,151 | 62 | 3,883 |
| 58,959 | 1 | 241 | 44 | 2,354 | 0 | 120 | 14 | 1,147 | 59 | 3,862 |
| 58,960 | 1 | 236 | 43 | 2,185 | 0 | 120 | 14 | 1,137 | 58 | 3,678 |
| 58,961 | 1 | 237 | 43 | 2,196 | 0 | 120 | 14 | 1,138 | 58 | 3,691 |
| 58,962 | 1 | 280 | 43 | 2,383 | 0 | 133 | 11 | 1,336 | 55 | 4,132 |
| 58,963 | 1 | 273 | 41 | 2,294 | 0 | 131 | 10 | 1,316 | 52 | 4,014 |
| 58,964 | 1 | 275 | 43 | 2,334 | 0 | 133 | 11 | 1,329 | 55 | 4,071 |
| 58,965 | 1 | 278 | 43 | 2,339 | 1 | 134 | 12 | 1,335 | 57 | 4,086 |
| 58,966 | 1 | 281 | 42 | 2,331 | 1 | 134 | 12 | 1,336 | 56 | 4,082 |
| 58,967 | 1 | 281 | 40 | 2,325 | 2 | 132 | 12 | 1,329 | 55 | 4,067 |
| 58,968 | 1 | 281 | 40 | 2,328 | 2 | 132 | 12 | 1,329 | 55 | 4,070 |
| 58,969 | 1 | 281 | 40 | 2,318 | 2 | 130 | 12 | 1,329 | 55 | 4,058 |
| 58,970 | 2 | 281 | 47 | 2,309 | 5 | 131 | 14 | 1,323 | 68 | 4,044 |
| 58,971 | 2 | 281 | 48 | 2,301 | 5 | 131 | 17 | 1,323 | 72 | 4,036 |
| 58,972 | 2 | 281 | 48 | 2,303 | 5 | 131 | 17 | 1,323 | 72 | 4,038 |
| 58,973 | 2 | 279 | 48 | 2,297 | 5 | 133 | 17 | 1,321 | 72 | 4,030 |
| 58,974 | 2 | 279 | 47 | 2,317 | 5 | 134 | 17 | 1,332 | 71 | 4,062 |
| 58,975 | 2 | 288 | 47 | 2,390 | 5 | 140 | 17 | 1,387 | 71 | 4,205 |
| 58,976 | 2 | 292 | 46 | 2,420 | 5 | 143 | 17 | 1,413 | 70 | 4,268 |
| 58,977 | 2 | 303 | 46 | 2,824 | 5 | 147 | 17 | 1,495 | 70 | 4,769 |
| 58,978 | 2 | 310 | 45 | 2,921 | 5 | 147 | 17 | 1,522 | 69 | 4,900 |
| 58,979 | 2 | 313 | 44 | 2,933 | 5 | 148 | 15 | 1,521 | 66 | 4,915 |
| 58,980 | 2 | 312 | 43 | 2,935 | 5 | 148 | 15 | 1,521 | 65 | 4,916 |
| 58,981 | 2 | 305 | 44 | 2,873 | 5 | 143 | 15 | 1,483 | 66 | 4,804 |
| 58,982 | 2 | 304 | 44 | 2,867 | 5 | 143 | 15 | 1,474 | 66 | 4,788 |
| 58,983 | 2 | 301 | 44 | 2,802 | 5 | 141 | 15 | 1,461 | 66 | 4,705 |
| 58,984 | 2 | 296 | 44 | 2,702 | 5 | 126 | 15 | 1,396 | 66 | 4,520 |
| 58,985 | 2 | 285 | 44 | 2,592 | 5 | 121 | 15 | 1,343 | 66 | 4,341 |
| 58,986 | 2 | 264 | 42 | 2,333 | 5 | 106 | 15 | 1,183 | 64 | 3,886 |
| 58,987 | 2 | 261 | 42 | 2,322 | 5 | 106 | 14 | 1,178 | 63 | 3,867 |

|        |   |     |    |       |   |     |    |       |    |       |
|--------|---|-----|----|-------|---|-----|----|-------|----|-------|
| 58,988 | 2 | 261 | 42 | 2,327 | 5 | 106 | 14 | 1,177 | 63 | 3,871 |
| 58,989 | 2 | 261 | 42 | 2,329 | 5 | 107 | 14 | 1,177 | 63 | 3,874 |
| 58,990 | 2 | 263 | 42 | 2,354 | 5 | 109 | 14 | 1,195 | 63 | 3,921 |
| 58,991 | 2 | 267 | 40 | 2,397 | 5 | 113 | 14 | 1,231 | 61 | 4,008 |
| 58,992 | 2 | 279 | 47 | 2,651 | 6 | 122 | 14 | 1,324 | 69 | 4,376 |
| 58,993 | 2 | 302 | 49 | 2,867 | 6 | 130 | 14 | 1,485 | 71 | 4,784 |
| 58,994 | 2 | 314 | 48 | 3,143 | 6 | 135 | 14 | 1,595 | 70 | 5,187 |
| 58,995 | 2 | 319 | 45 | 3,259 | 6 | 138 | 14 | 1,657 | 67 | 5,373 |
| 58,996 | 2 | 321 | 28 | 3,331 | 6 | 139 | 13 | 1,669 | 49 | 5,460 |
| 58,997 | 2 | 330 | 28 | 3,432 | 6 | 142 | 10 | 1,696 | 46 | 5,600 |
| 58,998 | 2 | 299 | 28 | 3,244 | 6 | 122 | 10 | 1,455 | 46 | 5,120 |
| 58,999 | 2 | 299 | 27 | 3,228 | 6 | 119 | 10 | 1,442 | 45 | 5,088 |
| 59,000 | 4 | 267 | 25 | 2,972 | 6 | 102 | 9  | 1,254 | 44 | 4,595 |
| 59,001 | 4 | 240 | 25 | 2,711 | 6 | 88  | 9  | 1,132 | 44 | 4,171 |
| 59,002 | 4 | 240 | 25 | 2,727 | 6 | 89  | 9  | 1,140 | 44 | 4,196 |
| 59,003 | 3 | 171 | 25 | 2,351 | 6 | 73  | 8  | 1,045 | 42 | 3,640 |
| 59,004 | 3 | 172 | 25 | 2,368 | 6 | 74  | 8  | 1,053 | 42 | 3,667 |
| 59,005 | 3 | 173 | 25 | 2,375 | 6 | 74  | 8  | 1,056 | 42 | 3,678 |
| 59,006 | 3 | 173 | 25 | 2,363 | 6 | 74  | 8  | 1,057 | 42 | 3,667 |
| 59,007 | 3 | 179 | 24 | 2,398 | 6 | 75  | 10 | 1,125 | 43 | 3,777 |
| 59,008 | 3 | 172 | 24 | 2,301 | 6 | 73  | 10 | 1,095 | 43 | 3,641 |
| 59,009 | 3 | 178 | 27 | 2,364 | 6 | 73  | 10 | 1,120 | 46 | 3,735 |
| 59,010 | 3 | 177 | 27 | 2,362 | 6 | 73  | 11 | 1,112 | 47 | 3,724 |
| 59,011 | 3 | 180 | 28 | 2,382 | 6 | 73  | 11 | 1,121 | 48 | 3,756 |
| 59,012 | 3 | 180 | 28 | 2,393 | 6 | 73  | 11 | 1,120 | 48 | 3,766 |
| 59,013 | 3 | 140 | 30 | 2,204 | 6 | 60  | 13 | 917   | 52 | 3,321 |
| 59,014 | 3 | 146 | 31 | 2,177 | 6 | 59  | 14 | 916   | 54 | 3,298 |
| 59,015 | 3 | 146 | 31 | 2,178 | 6 | 59  | 14 | 916   | 54 | 3,299 |
| 59,016 | 3 | 140 | 32 | 2,165 | 5 | 59  | 13 | 910   | 53 | 3,274 |
| 59,017 | 3 | 141 | 30 | 2,199 | 5 | 61  | 13 | 948   | 51 | 3,349 |
| 59,018 | 3 | 138 | 30 | 2,279 | 4 | 61  | 13 | 968   | 50 | 3,446 |
| 59,019 | 3 | 139 | 32 | 2,296 | 4 | 61  | 13 | 979   | 52 | 3,475 |
| 59,020 | 2 | 145 | 28 | 2,368 | 3 | 61  | 13 | 1,015 | 46 | 3,589 |
| 59,021 | 2 | 149 | 24 | 2,445 | 1 | 66  | 12 | 1,091 | 39 | 3,751 |
| 59,022 | 2 | 151 | 23 | 2,449 | 1 | 67  | 9  | 1,098 | 35 | 3,765 |
| 59,023 | 2 | 152 | 23 | 2,439 | 1 | 64  | 9  | 1,095 | 35 | 3,750 |
| 59,024 | 2 | 156 | 23 | 2,476 | 1 | 65  | 9  | 1,114 | 35 | 3,811 |
| 59,025 | 2 | 158 | 23 | 2,496 | 1 | 66  | 9  | 1,119 | 35 | 3,839 |
| 59,026 | 2 | 151 | 23 | 2,439 | 1 | 60  | 10 | 1,081 | 36 | 3,731 |
| 59,027 | 2 | 136 | 23 | 2,019 | 1 | 54  | 11 | 986   | 37 | 3,195 |
| 59,028 | 2 | 136 | 23 | 2,019 | 1 | 54  | 11 | 986   | 37 | 3,195 |



|        |   |     |    |       |   |    |    |     |    |       |
|--------|---|-----|----|-------|---|----|----|-----|----|-------|
| 59,029 | 2 | 129 | 23 | 1,919 | 1 | 54 | 11 | 960 | 37 | 3,062 |
| 59,030 | 2 | 124 | 23 | 1,895 | 1 | 53 | 11 | 954 | 37 | 3,026 |
| 59,031 | 2 | 129 | 23 | 1,918 | 1 | 54 | 11 | 962 | 37 | 3,063 |
| 59,032 | 2 | 129 | 22 | 1,921 | 1 | 54 | 11 | 962 | 36 | 3,066 |
| 59,033 | 2 | 129 | 22 | 1,920 | 1 | 54 | 11 | 963 | 36 | 3,066 |
| 59,034 | 3 | 129 | 22 | 1,926 | 1 | 54 | 11 | 964 | 37 | 3,073 |
| 59,035 | 3 | 129 | 22 | 1,925 | 1 | 54 | 11 | 964 | 37 | 3,072 |
| 59,036 | 3 | 129 | 22 | 1,926 | 1 | 54 | 11 | 964 | 37 | 3,073 |
| 59,037 | 3 | 129 | 22 | 1,922 | 1 | 54 | 11 | 963 | 37 | 3,068 |
| 59,038 | 3 | 130 | 22 | 1,936 | 1 | 55 | 11 | 966 | 37 | 3,087 |
| 59,039 | 3 | 130 | 22 | 1,939 | 1 | 56 | 11 | 973 | 37 | 3,098 |
| 59,040 | 3 | 130 | 22 | 1,944 | 1 | 55 | 11 | 983 | 37 | 3,112 |
| 59,041 | 3 | 128 | 22 | 1,928 | 1 | 54 | 11 | 972 | 37 | 3,082 |
| 59,042 | 3 | 126 | 17 | 1,891 | 1 | 50 | 12 | 944 | 33 | 3,011 |
| 59,043 | 3 | 118 | 14 | 1,694 | 0 | 46 | 12 | 917 | 29 | 2,775 |
| 59,044 | 3 | 94  | 11 | 1,500 | 0 | 38 | 12 | 764 | 26 | 2,396 |
| 59,045 | 3 | 82  | 13 | 1,258 | 0 | 33 | 12 | 668 | 28 | 2,041 |
| 59,046 | 3 | 77  | 13 | 1,144 | 0 | 31 | 12 | 604 | 28 | 1,856 |
| 59,047 | 3 | 75  | 13 | 1,083 | 0 | 31 | 12 | 593 | 28 | 1,782 |
| 59,048 | 3 | 67  | 12 | 999   | 0 | 28 | 12 | 573 | 27 | 1,667 |
| 59,049 | 3 | 66  | 12 | 996   | 0 | 28 | 12 | 571 | 27 | 1,661 |
| 59,050 | 3 | 66  | 12 | 985   | 0 | 28 | 12 | 570 | 27 | 1,649 |
| 59,051 | 1 | 66  | 12 | 982   | 0 | 28 | 13 | 566 | 26 | 1,642 |
| 59,052 | 1 | 66  | 12 | 980   | 0 | 28 | 13 | 567 | 26 | 1,641 |
| 59,053 | 1 | 66  | 12 | 960   | 0 | 27 | 13 | 558 | 26 | 1,611 |
| 59,054 | 1 | 65  | 16 | 943   | 0 | 26 | 13 | 550 | 30 | 1,584 |
| 59,055 | 2 | 66  | 18 | 952   | 0 | 26 | 13 | 557 | 33 | 1,601 |
| 59,056 | 2 | 67  | 19 | 955   | 0 | 26 | 12 | 554 | 33 | 1,602 |
| 59,057 | 3 | 67  | 22 | 953   | 0 | 26 | 12 | 552 | 37 | 1,598 |
| 59,058 | 3 | 61  | 22 | 900   | 0 | 25 | 12 | 486 | 37 | 1,472 |
| 59,059 | 3 | 62  | 24 | 909   | 0 | 25 | 12 | 493 | 39 | 1,489 |
| 59,060 | 3 | 56  | 22 | 825   | 0 | 25 | 12 | 460 | 37 | 1,366 |
| 59,061 | 3 | 51  | 22 | 791   | 0 | 25 | 11 | 449 | 36 | 1,316 |
| 59,062 | 3 | 51  | 21 | 802   | 0 | 25 | 11 | 455 | 35 | 1,333 |
| 59,063 | 3 | 54  | 17 | 822   | 0 | 26 | 8  | 467 | 28 | 1,369 |
| 59,064 | 3 | 52  | 17 | 825   | 0 | 26 | 7  | 474 | 27 | 1,377 |
| 59,065 | 3 | 45  | 16 | 819   | 0 | 27 | 6  | 474 | 25 | 1,365 |
| 59,066 | 3 | 45  | 15 | 826   | 0 | 28 | 6  | 478 | 24 | 1,377 |
| 59,067 | 3 | 50  | 15 | 890   | 0 | 29 | 6  | 514 | 24 | 1,483 |
| 59,068 | 3 | 52  | 15 | 884   | 0 | 30 | 6  | 499 | 24 | 1,465 |
| 59,069 | 3 | 52  | 15 | 795   | 0 | 30 | 5  | 474 | 23 | 1,351 |

|        |   |     |    |       |   |    |    |       |    |       |
|--------|---|-----|----|-------|---|----|----|-------|----|-------|
| 59,070 | 3 | 54  | 15 | 804   | 0 | 31 | 5  | 479   | 23 | 1,368 |
| 59,071 | 3 | 51  | 15 | 744   | 0 | 33 | 4  | 459   | 22 | 1,287 |
| 59,072 | 3 | 47  | 16 | 672   | 0 | 27 | 4  | 387   | 23 | 1,133 |
| 59,073 | 3 | 129 | 16 | 1,250 | 0 | 81 | 4  | 950   | 23 | 2,410 |
| 59,074 | 3 | 132 | 16 | 1,300 | 0 | 83 | 4  | 985   | 23 | 2,500 |
| 59,075 | 3 | 133 | 16 | 1,347 | 0 | 86 | 4  | 986   | 23 | 2,552 |
| 59,076 | 3 | 135 | 16 | 1,366 | 0 | 84 | 4  | 964   | 23 | 2,549 |
| 59,077 | 3 | 140 | 16 | 1,424 | 0 | 86 | 4  | 999   | 23 | 2,649 |
| 59,078 | 3 | 149 | 16 | 1,453 | 0 | 90 | 4  | 1,013 | 23 | 2,705 |
| 59,079 | 3 | 151 | 16 | 1,488 | 0 | 90 | 4  | 1,024 | 23 | 2,753 |
| 59,080 | 3 | 155 | 16 | 1,526 | 0 | 90 | 4  | 1,037 | 23 | 2,808 |
| 59,081 | 3 | 156 | 16 | 1,528 | 0 | 90 | 4  | 1,040 | 23 | 2,814 |
| 59,082 | 3 | 151 | 16 | 1,514 | 0 | 89 | 5  | 1,033 | 24 | 2,787 |
| 59,083 | 4 | 152 | 16 | 1,533 | 0 | 90 | 5  | 1,036 | 25 | 2,811 |
| 59,084 | 4 | 154 | 16 | 1,547 | 0 | 90 | 5  | 1,039 | 25 | 2,830 |
| 59,085 | 3 | 154 | 16 | 1,542 | 0 | 90 | 5  | 1,038 | 24 | 2,824 |
| 59,086 | 4 | 155 | 17 | 1,543 | 0 | 90 | 5  | 1,042 | 26 | 2,830 |
| 59,087 | 4 | 155 | 17 | 1,548 | 0 | 90 | 5  | 1,045 | 26 | 2,838 |
| 59,088 | 4 | 155 | 17 | 1,548 | 0 | 90 | 5  | 1,045 | 26 | 2,838 |
| 59,089 | 4 | 154 | 17 | 1,542 | 0 | 89 | 5  | 1,047 | 26 | 2,832 |
| 59,090 | 4 | 154 | 17 | 1,534 | 0 | 88 | 5  | 1,038 | 26 | 2,814 |
| 59,091 | 4 | 154 | 17 | 1,527 | 0 | 88 | 5  | 1,029 | 26 | 2,798 |
| 59,092 | 4 | 152 | 18 | 1,509 | 0 | 87 | 5  | 1,021 | 27 | 2,769 |
| 59,093 | 4 | 152 | 18 | 1,510 | 0 | 87 | 4  | 1,025 | 26 | 2,774 |
| 59,094 | 4 | 149 | 17 | 1,461 | 0 | 85 | 4  | 975   | 25 | 2,670 |
| 59,095 | 4 | 149 | 16 | 1,443 | 0 | 85 | 4  | 967   | 24 | 2,644 |
| 59,096 | 4 | 149 | 17 | 1,418 | 0 | 86 | 4  | 954   | 25 | 2,607 |
| 59,097 | 4 | 149 | 17 | 1,425 | 0 | 85 | 4  | 964   | 25 | 2,623 |
| 59,098 | 4 | 149 | 17 | 1,412 | 0 | 84 | 4  | 966   | 25 | 2,611 |
| 59,099 | 4 | 148 | 23 | 1,391 | 0 | 85 | 4  | 958   | 31 | 2,582 |
| 59,100 | 4 | 149 | 25 | 1,391 | 1 | 85 | 4  | 961   | 34 | 2,586 |
| 59,101 | 4 | 149 | 30 | 1,384 | 2 | 85 | 9  | 960   | 45 | 2,578 |
| 59,102 | 4 | 149 | 34 | 1,385 | 4 | 85 | 11 | 960   | 53 | 2,579 |
| 59,103 | 4 | 149 | 36 | 1,385 | 4 | 85 | 11 | 963   | 55 | 2,582 |
| 59,104 | 4 | 149 | 36 | 1,384 | 4 | 86 | 11 | 963   | 55 | 2,582 |
| 59,105 | 4 | 150 | 32 | 1,399 | 4 | 87 | 11 | 977   | 51 | 2,613 |
| 59,106 | 3 | 150 | 30 | 1,403 | 4 | 88 | 11 | 979   | 48 | 2,620 |
| 59,107 | 3 | 148 | 29 | 1,393 | 4 | 88 | 11 | 979   | 47 | 2,608 |
| 59,108 | 2 | 149 | 26 | 1,376 | 4 | 88 | 11 | 971   | 43 | 2,584 |
| 59,109 | 2 | 149 | 26 | 1,382 | 4 | 89 | 11 | 972   | 43 | 2,592 |
| 59,110 | 2 | 148 | 23 | 1,375 | 4 | 90 | 11 | 973   | 40 | 2,586 |

|        |   |     |    |       |   |    |    |     |    |       |
|--------|---|-----|----|-------|---|----|----|-----|----|-------|
| 59,111 | 2 | 148 | 23 | 1,379 | 4 | 90 | 11 | 975 | 40 | 2,592 |
| 59,112 | 2 | 149 | 23 | 1,389 | 4 | 89 | 11 | 986 | 40 | 2,613 |
| 59,113 | 2 | 150 | 24 | 1,387 | 4 | 89 | 11 | 985 | 41 | 2,611 |
| 59,114 | 2 | 147 | 24 | 1,357 | 4 | 89 | 11 | 976 | 41 | 2,569 |
| 59,115 | 2 | 147 | 24 | 1,346 | 4 | 89 | 11 | 978 | 41 | 2,560 |
| 59,116 | 2 | 147 | 24 | 1,333 | 4 | 88 | 11 | 976 | 41 | 2,544 |
| 59,117 | 2 | 147 | 24 | 1,326 | 4 | 87 | 11 | 972 | 41 | 2,532 |
| 59,118 | 2 | 142 | 24 | 1,262 | 4 | 85 | 11 | 946 | 41 | 2,435 |
| 59,119 | 2 | 141 | 24 | 1,260 | 4 | 82 | 11 | 937 | 41 | 2,420 |
| 59,120 | 2 | 141 | 24 | 1,255 | 4 | 83 | 11 | 941 | 41 | 2,420 |
| 59,121 | 2 | 138 | 24 | 1,231 | 4 | 82 | 11 | 927 | 41 | 2,378 |
| 59,122 | 2 | 135 | 24 | 1,218 | 4 | 80 | 11 | 917 | 41 | 2,350 |
| 59,123 | 2 | 137 | 23 | 1,218 | 4 | 80 | 11 | 917 | 40 | 2,352 |
| 59,124 | 2 | 54  | 23 | 639   | 4 | 25 | 11 | 353 | 40 | 1,071 |
| 59,125 | 2 | 46  | 24 | 492   | 4 | 19 | 12 | 292 | 42 | 849   |
| 59,126 | 2 | 46  | 24 | 495   | 4 | 19 | 13 | 292 | 43 | 852   |
| 59,127 | 2 | 35  | 24 | 367   | 4 | 17 | 13 | 241 | 43 | 660   |
| 59,128 | 2 | 35  | 24 | 368   | 4 | 17 | 13 | 244 | 43 | 664   |
| 59,129 | 2 | 24  | 28 | 306   | 4 | 13 | 12 | 221 | 46 | 564   |
| 59,130 | 2 | 19  | 30 | 269   | 4 | 13 | 12 | 205 | 48 | 506   |
| 59,131 | 2 | 21  | 30 | 303   | 4 | 18 | 12 | 266 | 48 | 608   |
| 59,132 | 2 | 20  | 30 | 306   | 4 | 18 | 11 | 275 | 47 | 619   |
| 59,133 | 1 | 22  | 40 | 323   | 4 | 18 | 12 | 280 | 57 | 643   |
| 59,134 | 1 | 21  | 58 | 309   | 4 | 17 | 17 | 290 | 80 | 637   |
| 59,135 | 0 | 24  | 62 | 367   | 4 | 17 | 19 | 338 | 85 | 746   |
| 59,136 | 0 | 24  | 61 | 368   | 4 | 17 | 19 | 339 | 84 | 748   |
| 59,137 | 0 | 23  | 63 | 360   | 4 | 17 | 19 | 333 | 86 | 733   |
| 59,138 | 0 | 23  | 63 | 361   | 4 | 17 | 19 | 333 | 86 | 734   |
| 59,139 | 0 | 23  | 63 | 362   | 4 | 17 | 19 | 334 | 86 | 736   |
| 59,140 | 0 | 24  | 63 | 359   | 4 | 17 | 19 | 332 | 86 | 732   |
| 59,141 | 0 | 24  | 63 | 360   | 4 | 17 | 19 | 332 | 86 | 733   |
| 59,142 | 0 | 24  | 62 | 360   | 4 | 17 | 19 | 331 | 85 | 732   |
| 59,143 | 0 | 24  | 63 | 356   | 4 | 17 | 19 | 325 | 86 | 722   |
| 59,144 | 1 | 24  | 64 | 350   | 4 | 14 | 19 | 305 | 88 | 693   |
| 59,145 | 1 | 24  | 64 | 344   | 4 | 14 | 19 | 305 | 88 | 687   |
| 59,146 | 1 | 29  | 64 | 359   | 4 | 13 | 19 | 332 | 88 | 733   |
| 59,147 | 1 | 30  | 63 | 409   | 4 | 17 | 19 | 373 | 87 | 829   |
| 59,148 | 1 | 32  | 61 | 505   | 4 | 18 | 19 | 381 | 85 | 936   |
| 59,149 | 2 | 32  | 70 | 519   | 4 | 19 | 23 | 394 | 99 | 964   |
| 59,150 | 2 | 33  | 70 | 535   | 4 | 18 | 23 | 408 | 99 | 994   |
| 59,151 | 2 | 32  | 68 | 538   | 3 | 19 | 23 | 409 | 96 | 998   |

|        |   |    |    |     |   |    |    |     |    |       |
|--------|---|----|----|-----|---|----|----|-----|----|-------|
| 59,152 | 2 | 32 | 63 | 535 | 2 | 19 | 17 | 410 | 84 | 996   |
| 59,153 | 2 | 32 | 59 | 542 | 0 | 19 | 15 | 412 | 76 | 1,005 |
| 59,154 | 2 | 33 | 57 | 547 | 0 | 19 | 15 | 418 | 74 | 1,017 |
| 59,155 | 2 | 32 | 57 | 524 | 0 | 16 | 15 | 396 | 74 | 968   |
| 59,156 | 2 | 33 | 59 | 534 | 0 | 16 | 15 | 404 | 76 | 987   |
| 59,157 | 2 | 33 | 59 | 536 | 0 | 16 | 15 | 406 | 76 | 991   |
| 59,158 | 2 | 40 | 59 | 556 | 0 | 19 | 15 | 431 | 76 | 1,046 |
| 59,159 | 2 | 39 | 59 | 556 | 0 | 19 | 14 | 432 | 75 | 1,046 |
| 59,160 | 2 | 39 | 60 | 553 | 0 | 18 | 16 | 434 | 78 | 1,044 |
| 59,161 | 2 | 39 | 60 | 555 | 0 | 17 | 16 | 429 | 78 | 1,040 |
| 59,162 | 2 | 41 | 60 | 555 | 0 | 17 | 20 | 429 | 82 | 1,042 |
| 59,163 | 2 | 41 | 65 | 542 | 0 | 17 | 24 | 420 | 91 | 1,020 |
| 59,164 | 2 | 41 | 64 | 535 | 0 | 17 | 24 | 414 | 90 | 1,007 |
| 59,165 | 2 | 41 | 64 | 535 | 0 | 17 | 24 | 414 | 90 | 1,007 |
| 59,166 | 2 | 40 | 65 | 524 | 0 | 16 | 24 | 394 | 91 | 974   |
| 59,167 | 2 | 41 | 65 | 523 | 0 | 16 | 24 | 395 | 91 | 975   |
| 59,168 | 2 | 41 | 65 | 526 | 0 | 16 | 24 | 399 | 91 | 982   |
| 59,169 | 2 | 42 | 65 | 519 | 0 | 18 | 24 | 390 | 91 | 969   |
| 59,170 | 2 | 40 | 65 | 494 | 0 | 18 | 24 | 376 | 91 | 928   |
| 59,171 | 2 | 40 | 67 | 487 | 0 | 17 | 24 | 370 | 93 | 914   |
| 59,172 | 2 | 40 | 67 | 483 | 0 | 17 | 25 | 367 | 94 | 907   |
| 59,173 | 2 | 40 | 67 | 478 | 0 | 17 | 25 | 359 | 94 | 894   |
| 59,174 | 2 | 40 | 66 | 478 | 0 | 17 | 24 | 359 | 92 | 894   |
| 59,175 | 2 | 39 | 66 | 474 | 0 | 17 | 24 | 356 | 92 | 886   |
| 59,176 | 2 | 38 | 66 | 470 | 0 | 17 | 24 | 355 | 92 | 880   |
| 59,177 | 2 | 38 | 66 | 467 | 0 | 17 | 23 | 355 | 91 | 877   |
| 59,178 | 2 | 38 | 66 | 470 | 0 | 17 | 23 | 351 | 91 | 876   |
| 59,179 | 2 | 38 | 66 | 475 | 0 | 17 | 23 | 355 | 91 | 885   |
| 59,180 | 2 | 40 | 62 | 482 | 0 | 19 | 23 | 358 | 87 | 899   |
| 59,181 | 2 | 42 | 60 | 489 | 0 | 20 | 23 | 364 | 85 | 915   |
| 59,182 | 2 | 41 | 59 | 462 | 0 | 15 | 23 | 305 | 84 | 823   |
| 59,183 | 2 | 41 | 54 | 465 | 0 | 18 | 22 | 298 | 78 | 822   |
| 59,184 | 2 | 40 | 51 | 443 | 0 | 18 | 22 | 290 | 75 | 791   |
| 59,185 | 2 | 35 | 33 | 363 | 0 | 18 | 17 | 222 | 52 | 638   |
| 59,186 | 2 | 35 | 29 | 361 | 0 | 18 | 15 | 222 | 46 | 636   |
| 59,187 | 2 | 35 | 27 | 361 | 0 | 18 | 15 | 222 | 44 | 636   |
| 59,188 | 2 | 35 | 28 | 360 | 0 | 18 | 15 | 221 | 45 | 634   |
| 59,189 | 2 | 35 | 28 | 362 | 0 | 18 | 15 | 221 | 45 | 636   |
| 59,190 | 2 | 35 | 28 | 362 | 0 | 18 | 15 | 220 | 45 | 635   |
| 59,191 | 2 | 34 | 28 | 358 | 0 | 18 | 16 | 217 | 46 | 627   |
| 59,192 | 2 | 34 | 28 | 359 | 0 | 18 | 16 | 217 | 46 | 628   |

|        |   |    |    |       |   |    |    |     |    |       |
|--------|---|----|----|-------|---|----|----|-----|----|-------|
| 59,193 | 2 | 34 | 27 | 358   | 0 | 18 | 16 | 217 | 45 | 627   |
| 59,194 | 2 | 34 | 27 | 358   | 0 | 18 | 16 | 218 | 45 | 628   |
| 59,195 | 1 | 33 | 26 | 361   | 0 | 18 | 16 | 219 | 43 | 631   |
| 59,196 | 1 | 33 | 26 | 361   | 0 | 18 | 16 | 219 | 43 | 631   |
| 59,197 | 1 | 28 | 26 | 336   | 0 | 18 | 16 | 193 | 43 | 575   |
| 59,198 | 1 | 24 | 26 | 137   | 0 | 11 | 16 | 93  | 43 | 265   |
| 59,199 | 1 | 24 | 26 | 137   | 0 | 11 | 16 | 93  | 43 | 265   |
| 59,200 | 0 | 24 | 13 | 137   | 0 | 11 | 12 | 95  | 25 | 267   |
| 59,201 | 0 | 24 | 13 | 137   | 0 | 11 | 12 | 95  | 25 | 267   |
| 59,202 | 0 | 24 | 13 | 137   | 0 | 11 | 12 | 95  | 25 | 267   |
| 59,203 | 0 | 24 | 13 | 138   | 0 | 11 | 12 | 95  | 25 | 268   |
| 59,204 | 0 | 24 | 13 | 138   | 0 | 11 | 12 | 95  | 25 | 268   |
| 59,205 | 1 | 22 | 13 | 130   | 0 | 11 | 12 | 89  | 26 | 252   |
| 59,206 | 1 | 22 | 13 | 131   | 0 | 11 | 12 | 90  | 26 | 254   |
| 59,207 | 1 | 21 | 11 | 125   | 0 | 11 | 12 | 84  | 24 | 241   |
| 59,208 | 1 | 21 | 11 | 128   | 0 | 13 | 12 | 85  | 24 | 247   |
| 59,209 | 1 | 15 | 10 | 112   | 0 | 10 | 12 | 64  | 23 | 201   |
| 59,210 | 1 | 15 | 10 | 126   | 0 | 11 | 10 | 71  | 21 | 223   |
| 59,211 | 1 | 15 | 10 | 144   | 0 | 11 | 11 | 73  | 22 | 243   |
| 59,212 | 1 | 16 | 10 | 143   | 0 | 11 | 7  | 75  | 18 | 245   |
| 59,213 | 1 | 14 | 10 | 150   | 0 | 12 | 6  | 79  | 17 | 255   |
| 59,214 | 1 | 13 | 5  | 156   | 0 | 12 | 3  | 83  | 9  | 264   |
| 59,215 | 1 | 13 | 5  | 193   | 0 | 13 | 3  | 90  | 9  | 309   |
| 59,216 | 1 | 14 | 5  | 207   | 0 | 13 | 5  | 93  | 11 | 327   |
| 59,217 | 1 | 15 | 4  | 210   | 0 | 13 | 5  | 93  | 10 | 331   |
| 59,218 | 1 | 14 | 4  | 211   | 0 | 13 | 5  | 93  | 10 | 331   |
| 59,219 | 1 | 14 | 2  | 209   | 0 | 13 | 5  | 89  | 8  | 325   |
| 59,220 | 1 | 13 | 2  | 203   | 0 | 11 | 5  | 83  | 8  | 310   |
| 59,221 | 1 | 14 | 2  | 202   | 0 | 12 | 5  | 88  | 8  | 316   |
| 59,222 | 1 | 14 | 2  | 202   | 0 | 12 | 5  | 88  | 8  | 316   |
| 59,223 | 1 | 14 | 2  | 205   | 0 | 12 | 4  | 89  | 7  | 320   |
| 59,224 | 1 | 12 | 2  | 200   | 0 | 12 | 4  | 88  | 7  | 312   |
| 59,225 | 1 | 12 | 2  | 200   | 0 | 12 | 4  | 88  | 7  | 312   |
| 59,226 | 1 | 12 | 2  | 200   | 0 | 12 | 4  | 87  | 7  | 311   |
| 59,227 | 1 | 12 | 2  | 211   | 0 | 12 | 4  | 94  | 7  | 329   |
| 59,228 | 1 | 13 | 2  | 216   | 0 | 13 | 4  | 96  | 7  | 338   |
| 59,229 | 1 | 14 | 2  | 220   | 0 | 13 | 4  | 102 | 7  | 349   |
| 59,230 | 2 | 53 | 2  | 898   | 0 | 38 | 4  | 343 | 8  | 1,332 |
| 59,231 | 2 | 52 | 2  | 947   | 0 | 37 | 4  | 355 | 8  | 1,391 |
| 59,232 | 2 | 52 | 2  | 988   | 0 | 37 | 4  | 357 | 8  | 1,434 |
| 59,233 | 2 | 73 | 1  | 1,168 | 0 | 41 | 4  | 415 | 7  | 1,697 |

|        |   |    |    |       |   |    |    |     |    |       |
|--------|---|----|----|-------|---|----|----|-----|----|-------|
| 59,234 | 2 | 73 | 1  | 1,165 | 0 | 38 | 4  | 412 | 7  | 1,688 |
| 59,235 | 2 | 75 | 1  | 1,227 | 0 | 40 | 4  | 416 | 7  | 1,758 |
| 59,236 | 2 | 77 | 1  | 1,238 | 0 | 40 | 4  | 418 | 7  | 1,773 |
| 59,237 | 2 | 80 | 1  | 1,250 | 0 | 40 | 4  | 424 | 7  | 1,794 |
| 59,238 | 2 | 80 | 1  | 1,251 | 0 | 41 | 4  | 424 | 7  | 1,796 |
| 59,239 | 2 | 80 | 2  | 1,247 | 0 | 41 | 7  | 424 | 11 | 1,792 |
| 59,240 | 2 | 80 | 2  | 1,246 | 0 | 41 | 7  | 424 | 11 | 1,791 |
| 59,241 | 4 | 80 | 6  | 1,248 | 0 | 41 | 13 | 424 | 23 | 1,793 |
| 59,242 | 4 | 80 | 10 | 1,246 | 1 | 41 | 13 | 423 | 28 | 1,790 |
| 59,243 | 4 | 81 | 10 | 1,252 | 1 | 41 | 13 | 429 | 28 | 1,803 |
| 59,244 | 4 | 81 | 10 | 1,254 | 1 | 41 | 13 | 430 | 28 | 1,806 |
| 59,245 | 4 | 82 | 10 | 1,272 | 1 | 41 | 13 | 445 | 28 | 1,840 |
| 59,246 | 4 | 82 | 10 | 1,283 | 1 | 41 | 13 | 447 | 28 | 1,853 |
| 59,247 | 4 | 82 | 10 | 1,290 | 1 | 41 | 13 | 449 | 28 | 1,862 |
| 59,248 | 4 | 83 | 10 | 1,294 | 1 | 41 | 13 | 454 | 28 | 1,872 |
| 59,249 | 4 | 83 | 10 | 1,294 | 1 | 41 | 13 | 455 | 28 | 1,873 |
| 59,250 | 4 | 83 | 10 | 1,296 | 1 | 42 | 13 | 457 | 28 | 1,878 |
| 59,251 | 4 | 86 | 10 | 1,326 | 1 | 42 | 13 | 462 | 28 | 1,916 |
| 59,252 | 4 | 88 | 10 | 1,337 | 1 | 42 | 14 | 474 | 29 | 1,941 |
| 59,253 | 4 | 89 | 10 | 1,342 | 1 | 42 | 14 | 479 | 29 | 1,952 |
| 59,254 | 4 | 89 | 10 | 1,341 | 1 | 42 | 14 | 478 | 29 | 1,950 |
| 59,255 | 3 | 89 | 11 | 1,340 | 1 | 42 | 15 | 479 | 30 | 1,950 |
| 59,256 | 3 | 91 | 13 | 1,348 | 1 | 43 | 16 | 482 | 33 | 1,964 |
| 59,257 | 3 | 91 | 13 | 1,349 | 1 | 43 | 16 | 482 | 33 | 1,965 |
| 59,258 | 3 | 91 | 14 | 1,348 | 1 | 43 | 16 | 479 | 34 | 1,961 |
| 59,259 | 3 | 91 | 14 | 1,345 | 1 | 42 | 17 | 477 | 35 | 1,955 |
| 59,260 | 3 | 89 | 14 | 1,301 | 1 | 42 | 17 | 456 | 35 | 1,888 |
| 59,261 | 3 | 89 | 14 | 1,301 | 1 | 42 | 17 | 456 | 35 | 1,888 |
| 59,262 | 4 | 89 | 15 | 1,301 | 1 | 42 | 17 | 456 | 37 | 1,888 |
| 59,263 | 4 | 89 | 15 | 1,308 | 1 | 43 | 17 | 470 | 37 | 1,910 |
| 59,264 | 4 | 89 | 15 | 1,301 | 1 | 43 | 17 | 467 | 37 | 1,900 |
| 59,265 | 4 | 89 | 17 | 1,305 | 1 | 43 | 17 | 475 | 39 | 1,912 |
| 59,266 | 4 | 90 | 17 | 1,277 | 1 | 45 | 17 | 485 | 39 | 1,897 |
| 59,267 | 4 | 89 | 17 | 1,268 | 1 | 46 | 15 | 487 | 37 | 1,890 |
| 59,268 | 4 | 92 | 17 | 1,277 | 1 | 47 | 15 | 497 | 37 | 1,913 |
| 59,269 | 4 | 93 | 17 | 1,285 | 1 | 47 | 16 | 499 | 38 | 1,924 |
| 59,270 | 4 | 93 | 17 | 1,285 | 1 | 47 | 16 | 501 | 38 | 1,926 |
| 59,271 | 4 | 95 | 17 | 1,309 | 1 | 48 | 16 | 513 | 38 | 1,965 |
| 59,272 | 4 | 94 | 18 | 1,323 | 1 | 48 | 16 | 517 | 39 | 1,982 |
| 59,273 | 4 | 94 | 18 | 1,324 | 1 | 48 | 16 | 518 | 39 | 1,984 |
| 59,274 | 4 | 94 | 18 | 1,321 | 1 | 48 | 16 | 518 | 39 | 1,981 |

|        |   |    |    |       |   |    |    |     |    |       |
|--------|---|----|----|-------|---|----|----|-----|----|-------|
| 59,275 | 5 | 94 | 22 | 1,320 | 1 | 48 | 17 | 518 | 45 | 1,980 |
| 59,276 | 5 | 94 | 24 | 1,320 | 1 | 48 | 18 | 518 | 48 | 1,980 |
| 59,277 | 5 | 96 | 24 | 1,325 | 1 | 49 | 18 | 526 | 48 | 1,996 |
| 59,278 | 5 | 97 | 24 | 1,317 | 1 | 49 | 21 | 526 | 51 | 1,989 |
| 59,279 | 5 | 96 | 24 | 1,314 | 1 | 48 | 21 | 524 | 51 | 1,982 |
| 59,280 | 5 | 95 | 24 | 1,315 | 1 | 48 | 21 | 520 | 51 | 1,978 |
| 59,281 | 5 | 57 | 34 | 659   | 4 | 25 | 28 | 288 | 71 | 1,029 |
| 59,282 | 5 | 57 | 34 | 603   | 4 | 24 | 29 | 276 | 72 | 960   |
| 59,283 | 5 | 55 | 34 | 553   | 4 | 23 | 29 | 267 | 72 | 898   |
| 59,284 | 5 | 33 | 38 | 372   | 4 | 19 | 30 | 213 | 77 | 637   |
| 59,285 | 5 | 31 | 38 | 312   | 4 | 17 | 30 | 221 | 77 | 581   |
| 59,286 | 5 | 31 | 38 | 314   | 4 | 17 | 30 | 222 | 77 | 584   |
| 59,287 | 5 | 29 | 38 | 329   | 4 | 17 | 30 | 232 | 77 | 607   |
| 59,288 | 5 | 29 | 39 | 363   | 4 | 17 | 30 | 246 | 78 | 655   |
| 59,289 | 5 | 29 | 39 | 376   | 4 | 16 | 29 | 247 | 77 | 668   |
| 59,290 | 8 | 32 | 37 | 382   | 4 | 16 | 26 | 255 | 75 | 685   |
| 59,291 | 8 | 32 | 39 | 383   | 4 | 16 | 26 | 255 | 77 | 686   |
| 59,292 | 6 | 33 | 38 | 383   | 4 | 16 | 21 | 255 | 69 | 687   |
| 59,293 | 6 | 32 | 39 | 376   | 3 | 16 | 20 | 249 | 68 | 673   |
| 59,294 | 6 | 31 | 39 | 358   | 3 | 16 | 20 | 234 | 68 | 639   |
| 59,295 | 6 | 32 | 39 | 372   | 3 | 16 | 20 | 242 | 68 | 662   |
| 59,296 | 6 | 32 | 39 | 376   | 3 | 16 | 20 | 243 | 68 | 667   |
| 59,297 | 6 | 32 | 39 | 368   | 3 | 16 | 20 | 241 | 68 | 657   |
| 59,298 | 6 | 32 | 39 | 363   | 3 | 16 | 20 | 240 | 68 | 651   |
| 59,299 | 6 | 31 | 39 | 360   | 3 | 16 | 20 | 234 | 68 | 641   |
| 59,300 | 6 | 31 | 39 | 361   | 3 | 16 | 20 | 234 | 68 | 642   |
| 59,301 | 6 | 33 | 39 | 358   | 3 | 15 | 20 | 241 | 68 | 647   |
| 59,302 | 6 | 33 | 39 | 372   | 3 | 16 | 20 | 251 | 68 | 672   |
| 59,303 | 6 | 31 | 39 | 390   | 3 | 17 | 20 | 264 | 68 | 702   |
| 59,304 | 6 | 30 | 39 | 404   | 3 | 17 | 20 | 270 | 68 | 721   |
| 59,305 | 6 | 30 | 39 | 408   | 3 | 17 | 20 | 270 | 68 | 725   |
| 59,306 | 6 | 31 | 38 | 410   | 3 | 17 | 19 | 269 | 66 | 727   |
| 59,307 | 6 | 29 | 36 | 401   | 3 | 16 | 18 | 267 | 63 | 713   |
| 59,308 | 6 | 29 | 35 | 416   | 3 | 17 | 18 | 276 | 62 | 738   |
| 59,309 | 6 | 30 | 35 | 436   | 3 | 17 | 17 | 303 | 61 | 786   |
| 59,310 | 6 | 30 | 35 | 436   | 3 | 16 | 17 | 302 | 61 | 784   |
| 59,311 | 7 | 30 | 40 | 438   | 3 | 16 | 18 | 303 | 68 | 787   |
| 59,312 | 7 | 30 | 41 | 446   | 3 | 17 | 19 | 313 | 70 | 806   |
| 59,313 | 6 | 30 | 40 | 458   | 3 | 17 | 18 | 322 | 67 | 827   |
| 59,314 | 6 | 34 | 39 | 477   | 3 | 17 | 18 | 334 | 66 | 862   |
| 59,315 | 6 | 34 | 38 | 487   | 3 | 16 | 18 | 346 | 65 | 883   |

|        |   |    |    |     |   |    |    |     |     |       |
|--------|---|----|----|-----|---|----|----|-----|-----|-------|
| 59,316 | 6 | 34 | 41 | 477 | 3 | 16 | 18 | 336 | 68  | 863   |
| 59,317 | 6 | 31 | 46 | 459 | 3 | 12 | 19 | 314 | 74  | 816   |
| 59,318 | 7 | 25 | 55 | 418 | 3 | 10 | 22 | 291 | 87  | 744   |
| 59,319 | 7 | 25 | 55 | 420 | 3 | 10 | 22 | 293 | 87  | 748   |
| 59,320 | 7 | 25 | 58 | 427 | 3 | 10 | 25 | 293 | 93  | 755   |
| 59,321 | 7 | 25 | 58 | 427 | 3 | 10 | 25 | 293 | 93  | 755   |
| 59,322 | 7 | 25 | 73 | 412 | 4 | 9  | 29 | 284 | 113 | 730   |
| 59,323 | 7 | 25 | 73 | 411 | 4 | 9  | 30 | 283 | 114 | 728   |
| 59,324 | 7 | 26 | 73 | 413 | 4 | 9  | 30 | 282 | 114 | 730   |
| 59,325 | 7 | 27 | 73 | 414 | 4 | 9  | 30 | 282 | 114 | 732   |
| 59,326 | 6 | 29 | 69 | 417 | 4 | 9  | 29 | 283 | 108 | 738   |
| 59,327 | 6 | 29 | 67 | 418 | 4 | 9  | 28 | 283 | 105 | 739   |
| 59,328 | 6 | 28 | 68 | 414 | 4 | 8  | 28 | 278 | 106 | 728   |
| 59,329 | 6 | 27 | 68 | 411 | 4 | 9  | 25 | 270 | 103 | 717   |
| 59,330 | 6 | 28 | 68 | 414 | 4 | 9  | 26 | 276 | 104 | 727   |
| 59,331 | 5 | 28 | 59 | 412 | 1 | 9  | 20 | 282 | 85  | 731   |
| 59,332 | 5 | 29 | 58 | 413 | 1 | 8  | 19 | 284 | 83  | 734   |
| 59,333 | 5 | 29 | 58 | 428 | 1 | 8  | 18 | 292 | 82  | 757   |
| 59,334 | 5 | 29 | 54 | 428 | 1 | 8  | 17 | 292 | 77  | 757   |
| 59,335 | 5 | 28 | 54 | 413 | 1 | 8  | 17 | 277 | 77  | 726   |
| 59,336 | 5 | 28 | 54 | 420 | 1 | 11 | 17 | 284 | 77  | 743   |
| 59,337 | 5 | 30 | 54 | 450 | 1 | 12 | 17 | 304 | 77  | 796   |
| 59,338 | 5 | 33 | 54 | 546 | 1 | 17 | 17 | 356 | 77  | 952   |
| 59,339 | 5 | 50 | 53 | 694 | 1 | 23 | 17 | 438 | 76  | 1,205 |
| 59,340 | 5 | 50 | 53 | 699 | 1 | 27 | 17 | 461 | 76  | 1,237 |
| 59,341 | 2 | 47 | 53 | 704 | 1 | 29 | 18 | 459 | 74  | 1,239 |
| 59,342 | 2 | 47 | 51 | 706 | 1 | 29 | 18 | 462 | 72  | 1,244 |
| 59,343 | 2 | 56 | 48 | 737 | 1 | 29 | 17 | 501 | 68  | 1,323 |
| 59,344 | 2 | 57 | 43 | 759 | 1 | 29 | 17 | 516 | 63  | 1,361 |
| 59,345 | 2 | 58 | 43 | 772 | 2 | 29 | 17 | 516 | 64  | 1,375 |
| 59,346 | 2 | 59 | 43 | 803 | 2 | 34 | 17 | 537 | 64  | 1,433 |
| 59,347 | 2 | 59 | 43 | 810 | 2 | 34 | 17 | 536 | 64  | 1,439 |
| 59,348 | 2 | 59 | 47 | 809 | 2 | 34 | 17 | 537 | 68  | 1,439 |
| 59,349 | 2 | 62 | 47 | 824 | 2 | 35 | 17 | 545 | 68  | 1,466 |
| 59,350 | 2 | 62 | 47 | 829 | 2 | 35 | 17 | 545 | 68  | 1,471 |
| 59,351 | 2 | 72 | 47 | 865 | 2 | 38 | 17 | 592 | 68  | 1,567 |
| 59,352 | 2 | 69 | 47 | 844 | 2 | 38 | 17 | 576 | 68  | 1,527 |
| 59,353 | 3 | 70 | 48 | 813 | 2 | 37 | 19 | 545 | 72  | 1,465 |
| 59,354 | 3 | 71 | 48 | 822 | 2 | 37 | 19 | 548 | 72  | 1,478 |
| 59,355 | 3 | 71 | 48 | 816 | 2 | 37 | 19 | 542 | 72  | 1,466 |
| 59,356 | 3 | 71 | 48 | 814 | 2 | 37 | 19 | 542 | 72  | 1,464 |



|        |   |     |    |     |   |    |    |     |    |       |
|--------|---|-----|----|-----|---|----|----|-----|----|-------|
| 59,357 | 3 | 70  | 48 | 817 | 2 | 38 | 19 | 541 | 72 | 1,466 |
| 59,358 | 3 | 70  | 48 | 819 | 2 | 38 | 19 | 538 | 72 | 1,465 |
| 59,359 | 4 | 70  | 48 | 803 | 2 | 37 | 19 | 529 | 73 | 1,439 |
| 59,360 | 3 | 69  | 46 | 779 | 2 | 37 | 19 | 503 | 70 | 1,388 |
| 59,361 | 3 | 69  | 46 | 780 | 2 | 37 | 19 | 504 | 70 | 1,390 |
| 59,362 | 3 | 69  | 43 | 769 | 2 | 35 | 18 | 490 | 66 | 1,363 |
| 59,363 | 3 | 69  | 42 | 758 | 2 | 35 | 17 | 481 | 64 | 1,343 |
| 59,364 | 3 | 70  | 42 | 759 | 2 | 34 | 17 | 483 | 64 | 1,346 |
| 59,365 | 3 | 66  | 42 | 735 | 2 | 34 | 17 | 461 | 64 | 1,296 |
| 59,366 | 3 | 66  | 39 | 718 | 2 | 34 | 17 | 443 | 61 | 1,261 |
| 59,367 | 3 | 66  | 39 | 718 | 2 | 34 | 17 | 445 | 61 | 1,263 |
| 59,368 | 3 | 69  | 35 | 752 | 2 | 36 | 16 | 481 | 56 | 1,338 |
| 59,369 | 2 | 69  | 26 | 760 | 2 | 36 | 13 | 485 | 43 | 1,350 |
| 59,370 | 2 | 79  | 27 | 830 | 2 | 45 | 13 | 532 | 44 | 1,486 |
| 59,371 | 3 | 84  | 24 | 840 | 2 | 45 | 9  | 542 | 38 | 1,511 |
| 59,372 | 3 | 93  | 14 | 870 | 1 | 49 | 8  | 565 | 26 | 1,577 |
| 59,373 | 3 | 99  | 9  | 886 | 1 | 52 | 5  | 583 | 18 | 1,620 |
| 59,374 | 3 | 99  | 8  | 891 | 1 | 52 | 4  | 586 | 16 | 1,628 |
| 59,375 | 3 | 114 | 8  | 919 | 1 | 55 | 4  | 602 | 16 | 1,690 |
| 59,376 | 3 | 113 | 8  | 929 | 1 | 55 | 4  | 602 | 16 | 1,699 |
| 59,377 | 3 | 113 | 10 | 932 | 1 | 55 | 6  | 606 | 20 | 1,706 |
| 59,378 | 3 | 113 | 9  | 934 | 1 | 55 | 6  | 607 | 19 | 1,709 |
| 59,379 | 3 | 116 | 9  | 939 | 1 | 55 | 6  | 613 | 19 | 1,723 |
| 59,380 | 3 | 116 | 9  | 941 | 1 | 54 | 6  | 612 | 19 | 1,723 |
| 59,381 | 3 | 116 | 9  | 942 | 1 | 54 | 6  | 611 | 19 | 1,723 |
| 59,382 | 3 | 116 | 9  | 937 | 1 | 54 | 6  | 604 | 19 | 1,711 |
| 59,383 | 3 | 114 | 9  | 909 | 1 | 53 | 6  | 590 | 19 | 1,666 |
| 59,384 | 3 | 113 | 9  | 891 | 1 | 53 | 6  | 579 | 19 | 1,636 |
| 59,385 | 3 | 113 | 9  | 891 | 1 | 53 | 6  | 578 | 19 | 1,635 |
| 59,386 | 3 | 113 | 10 | 883 | 1 | 50 | 6  | 570 | 20 | 1,616 |
| 59,387 | 3 | 107 | 10 | 730 | 1 | 44 | 6  | 487 | 20 | 1,368 |
| 59,388 | 3 | 107 | 10 | 731 | 1 | 44 | 6  | 488 | 20 | 1,370 |
| 59,389 | 3 | 107 | 10 | 731 | 1 | 44 | 6  | 486 | 20 | 1,368 |
| 59,390 | 3 | 88  | 10 | 520 | 1 | 34 | 6  | 361 | 20 | 1,003 |
| 59,391 | 3 | 88  | 10 | 519 | 1 | 34 | 6  | 361 | 20 | 1,002 |
| 59,392 | 3 | 88  | 12 | 503 | 1 | 32 | 5  | 354 | 21 | 977   |
| 59,393 | 3 | 88  | 12 | 503 | 1 | 32 | 5  | 354 | 21 | 977   |
| 59,394 | 3 | 78  | 12 | 472 | 1 | 32 | 5  | 315 | 21 | 897   |
| 59,395 | 3 | 77  | 13 | 453 | 0 | 32 | 5  | 303 | 21 | 865   |
| 59,396 | 3 | 76  | 13 | 442 | 0 | 33 | 5  | 300 | 21 | 851   |
| 59,397 | 3 | 74  | 13 | 412 | 0 | 28 | 5  | 276 | 21 | 790   |

|        |   |    |    |     |   |    |    |     |    |       |
|--------|---|----|----|-----|---|----|----|-----|----|-------|
| 59,398 | 3 | 76 | 24 | 441 | 0 | 29 | 6  | 307 | 33 | 853   |
| 59,399 | 3 | 73 | 20 | 433 | 0 | 28 | 6  | 301 | 29 | 835   |
| 59,400 | 3 | 74 | 20 | 483 | 0 | 30 | 6  | 325 | 29 | 912   |
| 59,401 | 3 | 74 | 19 | 488 | 0 | 30 | 4  | 328 | 26 | 920   |
| 59,402 | 3 | 67 | 19 | 476 | 0 | 29 | 4  | 288 | 26 | 860   |
| 59,403 | 2 | 67 | 19 | 475 | 0 | 29 | 4  | 296 | 25 | 867   |
| 59,404 | 2 | 66 | 19 | 465 | 0 | 28 | 4  | 301 | 25 | 860   |
| 59,405 | 2 | 74 | 19 | 521 | 1 | 32 | 5  | 356 | 27 | 983   |
| 59,406 | 2 | 74 | 19 | 509 | 1 | 32 | 5  | 353 | 27 | 968   |
| 59,407 | 2 | 78 | 19 | 577 | 1 | 35 | 5  | 371 | 27 | 1,061 |
| 59,408 | 3 | 80 | 19 | 603 | 1 | 34 | 6  | 379 | 29 | 1,096 |
| 59,409 | 2 | 84 | 19 | 616 | 1 | 34 | 6  | 386 | 28 | 1,120 |
| 59,410 | 2 | 84 | 19 | 619 | 1 | 34 | 6  | 387 | 28 | 1,124 |
| 59,411 | 2 | 85 | 20 | 622 | 1 | 34 | 6  | 388 | 29 | 1,129 |
| 59,412 | 4 | 86 | 29 | 627 | 1 | 34 | 10 | 394 | 44 | 1,141 |
| 59,413 | 4 | 86 | 29 | 629 | 1 | 34 | 10 | 394 | 44 | 1,143 |
| 59,414 | 4 | 85 | 31 | 628 | 1 | 35 | 11 | 395 | 47 | 1,143 |
| 59,415 | 4 | 85 | 32 | 626 | 2 | 35 | 11 | 394 | 49 | 1,140 |
| 59,416 | 4 | 85 | 48 | 626 | 3 | 35 | 17 | 394 | 72 | 1,140 |
| 59,417 | 6 | 85 | 56 | 631 | 3 | 35 | 19 | 390 | 84 | 1,141 |
| 59,418 | 6 | 85 | 56 | 634 | 3 | 35 | 20 | 391 | 85 | 1,145 |
| 59,419 | 6 | 88 | 55 | 605 | 3 | 33 | 20 | 358 | 84 | 1,084 |
| 59,420 | 6 | 88 | 55 | 598 | 3 | 33 | 20 | 352 | 84 | 1,071 |
| 59,421 | 6 | 78 | 54 | 530 | 3 | 24 | 20 | 306 | 83 | 938   |
| 59,422 | 5 | 77 | 54 | 548 | 3 | 25 | 20 | 319 | 82 | 969   |
| 59,423 | 5 | 69 | 54 | 531 | 3 | 22 | 20 | 300 | 82 | 922   |
| 59,424 | 5 | 63 | 54 | 523 | 3 | 19 | 18 | 282 | 80 | 887   |
| 59,425 | 5 | 63 | 52 | 519 | 3 | 19 | 19 | 277 | 79 | 878   |
| 59,426 | 5 | 45 | 53 | 476 | 3 | 16 | 19 | 256 | 80 | 793   |
| 59,427 | 5 | 46 | 54 | 478 | 3 | 16 | 19 | 259 | 81 | 799   |
| 59,428 | 5 | 46 | 54 | 478 | 3 | 16 | 18 | 259 | 80 | 799   |
| 59,429 | 5 | 46 | 57 | 478 | 3 | 16 | 19 | 258 | 84 | 798   |
| 59,430 | 5 | 42 | 59 | 472 | 3 | 16 | 19 | 250 | 86 | 780   |
| 59,431 | 5 | 41 | 59 | 466 | 3 | 16 | 19 | 246 | 86 | 769   |
| 59,432 | 5 | 41 | 59 | 474 | 3 | 16 | 19 | 246 | 86 | 777   |
| 59,433 | 5 | 54 | 59 | 575 | 3 | 23 | 19 | 321 | 86 | 973   |
| 59,434 | 5 | 55 | 59 | 583 | 3 | 26 | 19 | 330 | 86 | 994   |
| 59,435 | 5 | 55 | 66 | 588 | 3 | 26 | 22 | 334 | 96 | 1,003 |
| 59,436 | 5 | 57 | 66 | 628 | 3 | 26 | 23 | 354 | 97 | 1,065 |
| 59,437 | 5 | 58 | 65 | 639 | 3 | 26 | 23 | 359 | 96 | 1,082 |
| 59,438 | 5 | 62 | 65 | 653 | 3 | 27 | 23 | 368 | 96 | 1,110 |

|        |   |     |    |       |   |    |    |     |     |       |
|--------|---|-----|----|-------|---|----|----|-----|-----|-------|
| 59,439 | 5 | 62  | 65 | 653   | 3 | 28 | 23 | 370 | 96  | 1,113 |
| 59,440 | 5 | 63  | 67 | 670   | 3 | 28 | 23 | 390 | 98  | 1,151 |
| 59,441 | 5 | 64  | 67 | 690   | 3 | 30 | 23 | 401 | 98  | 1,185 |
| 59,442 | 5 | 68  | 67 | 709   | 3 | 32 | 24 | 417 | 99  | 1,226 |
| 59,443 | 5 | 107 | 65 | 899   | 3 | 44 | 24 | 583 | 97  | 1,633 |
| 59,444 | 5 | 111 | 65 | 932   | 3 | 47 | 24 | 602 | 97  | 1,692 |
| 59,445 | 5 | 111 | 65 | 943   | 3 | 48 | 29 | 620 | 102 | 1,722 |
| 59,446 | 5 | 120 | 69 | 994   | 5 | 48 | 35 | 635 | 114 | 1,797 |
| 59,447 | 5 | 121 | 69 | 994   | 5 | 47 | 35 | 636 | 114 | 1,798 |
| 59,448 | 5 | 119 | 62 | 944   | 5 | 46 | 35 | 604 | 107 | 1,713 |
| 59,449 | 5 | 119 | 58 | 944   | 5 | 46 | 34 | 603 | 102 | 1,712 |
| 59,450 | 5 | 119 | 58 | 895   | 5 | 44 | 34 | 580 | 102 | 1,638 |
| 59,451 | 5 | 124 | 58 | 923   | 5 | 44 | 34 | 587 | 102 | 1,678 |
| 59,452 | 5 | 124 | 58 | 912   | 5 | 44 | 34 | 583 | 102 | 1,663 |
| 59,453 | 5 | 121 | 58 | 888   | 5 | 42 | 34 | 577 | 102 | 1,628 |
| 59,454 | 5 | 119 | 58 | 882   | 5 | 42 | 34 | 568 | 102 | 1,611 |
| 59,455 | 5 | 110 | 58 | 820   | 5 | 38 | 34 | 503 | 102 | 1,471 |
| 59,456 | 5 | 110 | 58 | 820   | 4 | 38 | 33 | 503 | 100 | 1,471 |
| 59,457 | 5 | 110 | 60 | 818   | 4 | 38 | 34 | 500 | 103 | 1,466 |
| 59,458 | 5 | 106 | 61 | 747   | 4 | 35 | 34 | 482 | 104 | 1,370 |
| 59,459 | 4 | 100 | 63 | 701   | 4 | 35 | 34 | 467 | 105 | 1,303 |
| 59,460 | 4 | 100 | 63 | 701   | 4 | 35 | 34 | 471 | 105 | 1,307 |
| 59,461 | 4 | 99  | 63 | 717   | 4 | 35 | 34 | 486 | 105 | 1,337 |
| 59,462 | 4 | 114 | 62 | 888   | 4 | 53 | 34 | 660 | 104 | 1,715 |
| 59,463 | 2 | 117 | 53 | 945   | 4 | 54 | 30 | 715 | 89  | 1,831 |
| 59,464 | 2 | 127 | 51 | 1,040 | 4 | 64 | 29 | 779 | 86  | 2,010 |
| 59,465 | 2 | 132 | 51 | 1,115 | 4 | 64 | 29 | 785 | 86  | 2,096 |
| 59,466 | 2 | 133 | 50 | 1,125 | 3 | 66 | 29 | 792 | 84  | 2,116 |
| 59,467 | 2 | 142 | 35 | 1,183 | 2 | 70 | 23 | 811 | 62  | 2,206 |
| 59,468 | 0 | 142 | 27 | 1,179 | 2 | 70 | 21 | 811 | 50  | 2,202 |
| 59,469 | 0 | 138 | 27 | 1,168 | 2 | 70 | 20 | 804 | 49  | 2,180 |
| 59,470 | 0 | 140 | 28 | 1,182 | 2 | 70 | 21 | 816 | 51  | 2,208 |
| 59,471 | 0 | 140 | 28 | 1,183 | 2 | 70 | 21 | 818 | 51  | 2,211 |
| 59,472 | 0 | 146 | 28 | 1,194 | 2 | 70 | 21 | 822 | 51  | 2,232 |
| 59,473 | 0 | 142 | 28 | 1,160 | 2 | 69 | 21 | 800 | 51  | 2,171 |
| 59,474 | 0 | 141 | 28 | 1,147 | 2 | 68 | 25 | 795 | 55  | 2,151 |
| 59,475 | 0 | 141 | 28 | 1,139 | 2 | 68 | 25 | 794 | 55  | 2,142 |
| 59,476 | 0 | 141 | 28 | 1,133 | 2 | 68 | 24 | 794 | 54  | 2,136 |
| 59,477 | 0 | 140 | 27 | 1,131 | 2 | 68 | 24 | 793 | 53  | 2,132 |
| 59,478 | 0 | 142 | 26 | 1,134 | 2 | 68 | 24 | 794 | 52  | 2,138 |
| 59,479 | 0 | 142 | 23 | 1,134 | 2 | 68 | 23 | 794 | 48  | 2,138 |

|        |   |     |    |       |   |    |    |     |    |       |
|--------|---|-----|----|-------|---|----|----|-----|----|-------|
| 59,480 | 0 | 142 | 21 | 1,133 | 2 | 68 | 23 | 795 | 46 | 2,138 |
| 59,481 | 1 | 142 | 21 | 1,136 | 2 | 68 | 23 | 797 | 47 | 2,143 |
| 59,482 | 1 | 142 | 21 | 1,138 | 2 | 68 | 23 | 802 | 47 | 2,150 |
| 59,483 | 1 | 142 | 18 | 1,131 | 2 | 68 | 22 | 802 | 43 | 2,143 |
| 59,484 | 1 | 128 | 15 | 1,020 | 2 | 58 | 20 | 718 | 38 | 1,924 |
| 59,485 | 1 | 128 | 14 | 1,021 | 2 | 58 | 20 | 718 | 37 | 1,925 |
| 59,486 | 1 | 126 | 14 | 974   | 2 | 58 | 20 | 693 | 37 | 1,851 |
| 59,487 | 1 | 125 | 14 | 963   | 2 | 58 | 19 | 688 | 36 | 1,834 |
| 59,488 | 1 | 125 | 14 | 963   | 2 | 58 | 19 | 688 | 36 | 1,834 |
| 59,489 | 1 | 121 | 12 | 948   | 2 | 57 | 19 | 676 | 34 | 1,802 |
| 59,490 | 1 | 120 | 12 | 945   | 2 | 57 | 19 | 665 | 34 | 1,787 |
| 59,491 | 1 | 132 | 12 | 1,125 | 2 | 75 | 19 | 797 | 34 | 2,129 |
| 59,492 | 1 | 145 | 12 | 1,216 | 2 | 79 | 19 | 886 | 34 | 2,326 |
| 59,493 | 1 | 142 | 13 | 1,262 | 2 | 79 | 18 | 882 | 34 | 2,365 |
| 59,494 | 1 | 106 | 13 | 1,087 | 2 | 68 | 14 | 723 | 30 | 1,984 |
| 59,495 | 1 | 104 | 12 | 1,092 | 2 | 65 | 13 | 721 | 28 | 1,982 |
| 59,496 | 1 | 118 | 8  | 1,125 | 0 | 64 | 7  | 733 | 16 | 2,040 |
| 59,497 | 1 | 111 | 8  | 1,081 | 0 | 64 | 7  | 719 | 16 | 1,975 |
| 59,498 | 1 | 110 | 8  | 1,084 | 0 | 64 | 7  | 721 | 16 | 1,979 |
| 59,499 | 1 | 110 | 8  | 1,077 | 0 | 64 | 7  | 718 | 16 | 1,969 |
| 59,500 | 1 | 109 | 8  | 1,065 | 0 | 64 | 7  | 712 | 16 | 1,950 |
| 59,501 | 1 | 111 | 8  | 1,071 | 0 | 65 | 7  | 714 | 16 | 1,961 |
| 59,502 | 1 | 106 | 8  | 1,051 | 0 | 65 | 7  | 709 | 16 | 1,931 |
| 59,503 | 1 | 106 | 8  | 1,053 | 0 | 65 | 7  | 710 | 16 | 1,934 |
| 59,504 | 1 | 106 | 8  | 1,057 | 0 | 65 | 7  | 710 | 16 | 1,938 |
| 59,505 | 1 | 106 | 9  | 1,057 | 0 | 65 | 7  | 712 | 17 | 1,940 |
| 59,506 | 1 | 106 | 9  | 1,054 | 0 | 65 | 7  | 715 | 17 | 1,940 |
| 59,507 | 1 | 106 | 7  | 1,053 | 0 | 65 | 6  | 714 | 14 | 1,938 |
| 59,508 | 1 | 106 | 6  | 1,053 | 0 | 65 | 6  | 714 | 13 | 1,938 |
| 59,509 | 1 | 106 | 4  | 1,054 | 0 | 65 | 5  | 718 | 10 | 1,943 |
| 59,510 | 1 | 106 | 4  | 1,057 | 0 | 65 | 6  | 723 | 11 | 1,951 |
| 59,511 | 1 | 106 | 4  | 1,036 | 0 | 65 | 6  | 702 | 11 | 1,909 |
| 59,512 | 1 | 106 | 4  | 1,038 | 0 | 65 | 6  | 702 | 11 | 1,911 |
| 59,513 | 2 | 87  | 5  | 807   | 0 | 46 | 7  | 472 | 14 | 1,412 |
| 59,514 | 2 | 77  | 5  | 710   | 0 | 36 | 7  | 408 | 14 | 1,231 |
| 59,515 | 2 | 72  | 5  | 634   | 0 | 35 | 7  | 399 | 14 | 1,140 |
| 59,516 | 2 | 71  | 5  | 624   | 0 | 33 | 7  | 392 | 14 | 1,120 |
| 59,517 | 2 | 71  | 5  | 624   | 0 | 33 | 7  | 392 | 14 | 1,120 |
| 59,518 | 2 | 62  | 4  | 566   | 0 | 29 | 7  | 373 | 13 | 1,030 |
| 59,519 | 2 | 62  | 4  | 567   | 1 | 30 | 7  | 376 | 14 | 1,035 |
| 59,520 | 2 | 60  | 4  | 566   | 1 | 30 | 7  | 377 | 14 | 1,033 |

|        |   |    |    |     |   |    |    |     |    |       |
|--------|---|----|----|-----|---|----|----|-----|----|-------|
| 59,521 | 2 | 58 | 3  | 553 | 1 | 30 | 7  | 365 | 13 | 1,006 |
| 59,522 | 3 | 52 | 3  | 537 | 1 | 30 | 4  | 357 | 11 | 976   |
| 59,523 | 3 | 52 | 3  | 536 | 1 | 30 | 3  | 356 | 10 | 974   |
| 59,524 | 3 | 52 | 3  | 536 | 1 | 30 | 3  | 356 | 10 | 974   |
| 59,525 | 3 | 52 | 5  | 536 | 1 | 30 | 5  | 356 | 14 | 974   |
| 59,526 | 3 | 52 | 5  | 537 | 1 | 30 | 5  | 358 | 14 | 977   |
| 59,527 | 3 | 52 | 5  | 537 | 1 | 30 | 5  | 358 | 14 | 977   |
| 59,528 | 3 | 52 | 5  | 537 | 1 | 30 | 5  | 356 | 14 | 975   |
| 59,529 | 3 | 50 | 7  | 534 | 1 | 30 | 6  | 355 | 17 | 969   |
| 59,530 | 3 | 50 | 7  | 530 | 1 | 30 | 6  | 354 | 17 | 964   |
| 59,531 | 3 | 50 | 7  | 527 | 1 | 30 | 6  | 352 | 17 | 959   |
| 59,532 | 2 | 50 | 7  | 527 | 1 | 30 | 6  | 352 | 16 | 959   |
| 59,533 | 2 | 50 | 8  | 525 | 1 | 30 | 6  | 347 | 17 | 952   |
| 59,534 | 2 | 50 | 9  | 524 | 1 | 30 | 7  | 345 | 19 | 949   |
| 59,535 | 3 | 50 | 9  | 523 | 1 | 30 | 7  | 345 | 20 | 948   |
| 59,536 | 3 | 50 | 9  | 523 | 1 | 29 | 8  | 344 | 21 | 946   |
| 59,537 | 3 | 50 | 9  | 523 | 1 | 29 | 8  | 344 | 21 | 946   |
| 59,538 | 3 | 50 | 9  | 523 | 1 | 29 | 8  | 342 | 21 | 944   |
| 59,539 | 3 | 50 | 9  | 525 | 1 | 29 | 8  | 355 | 21 | 959   |
| 59,540 | 3 | 51 | 9  | 557 | 1 | 29 | 8  | 378 | 21 | 1,015 |
| 59,541 | 3 | 54 | 11 | 674 | 1 | 35 | 10 | 453 | 25 | 1,216 |
| 59,542 | 3 | 45 | 11 | 514 | 1 | 18 | 10 | 346 | 25 | 923   |
| 59,543 | 3 | 31 | 11 | 424 | 1 | 12 | 10 | 252 | 25 | 719   |
| 59,544 | 3 | 30 | 10 | 375 | 1 | 11 | 10 | 246 | 24 | 662   |
| 59,545 | 3 | 31 | 10 | 368 | 1 | 10 | 10 | 243 | 24 | 652   |
| 59,546 | 3 | 31 | 12 | 374 | 1 | 11 | 15 | 252 | 31 | 668   |
| 59,547 | 3 | 17 | 12 | 330 | 1 | 11 | 15 | 223 | 31 | 581   |
| 59,548 | 3 | 15 | 14 | 314 | 1 | 11 | 15 | 216 | 33 | 556   |
| 59,549 | 3 | 15 | 19 | 314 | 1 | 11 | 15 | 216 | 38 | 556   |
| 59,550 | 3 | 13 | 20 | 312 | 1 | 10 | 15 | 213 | 39 | 548   |
| 59,551 | 3 | 15 | 24 | 322 | 1 | 10 | 18 | 229 | 46 | 576   |
| 59,552 | 3 | 15 | 24 | 329 | 1 | 10 | 19 | 231 | 47 | 585   |
| 59,553 | 3 | 15 | 24 | 321 | 1 | 10 | 19 | 230 | 47 | 576   |
| 59,554 | 3 | 16 | 24 | 316 | 1 | 10 | 20 | 229 | 48 | 571   |
| 59,555 | 3 | 16 | 24 | 316 | 1 | 10 | 20 | 229 | 48 | 571   |
| 59,556 | 4 | 17 | 28 | 313 | 2 | 10 | 25 | 224 | 59 | 564   |
| 59,557 | 4 | 17 | 32 | 313 | 2 | 10 | 27 | 225 | 65 | 565   |
| 59,558 | 4 | 17 | 32 | 313 | 2 | 10 | 27 | 225 | 65 | 565   |
| 59,559 | 4 | 17 | 37 | 319 | 2 | 11 | 27 | 232 | 70 | 579   |
| 59,560 | 4 | 17 | 37 | 348 | 2 | 11 | 27 | 257 | 70 | 633   |
| 59,561 | 4 | 17 | 37 | 349 | 2 | 11 | 26 | 254 | 69 | 631   |

|        |   |    |    |     |   |    |    |     |     |       |
|--------|---|----|----|-----|---|----|----|-----|-----|-------|
| 59,562 | 4 | 18 | 38 | 355 | 2 | 11 | 26 | 268 | 70  | 652   |
| 59,563 | 3 | 24 | 37 | 383 | 2 | 14 | 25 | 316 | 67  | 737   |
| 59,564 | 3 | 24 | 37 | 386 | 2 | 14 | 25 | 317 | 67  | 741   |
| 59,565 | 3 | 24 | 37 | 395 | 2 | 15 | 25 | 325 | 67  | 759   |
| 59,566 | 3 | 25 | 37 | 397 | 2 | 15 | 25 | 328 | 67  | 765   |
| 59,567 | 3 | 29 | 37 | 434 | 2 | 16 | 26 | 364 | 68  | 843   |
| 59,568 | 3 | 29 | 37 | 439 | 2 | 16 | 26 | 367 | 68  | 851   |
| 59,569 | 3 | 29 | 37 | 447 | 2 | 17 | 26 | 372 | 68  | 865   |
| 59,570 | 3 | 29 | 37 | 456 | 1 | 17 | 27 | 373 | 68  | 875   |
| 59,571 | 3 | 29 | 37 | 461 | 1 | 17 | 27 | 378 | 68  | 885   |
| 59,572 | 3 | 31 | 37 | 472 | 1 | 17 | 26 | 385 | 67  | 905   |
| 59,573 | 2 | 32 | 37 | 480 | 1 | 18 | 26 | 388 | 66  | 918   |
| 59,574 | 2 | 34 | 37 | 504 | 1 | 20 | 26 | 426 | 66  | 984   |
| 59,575 | 2 | 35 | 36 | 578 | 1 | 21 | 25 | 447 | 64  | 1,081 |
| 59,576 | 2 | 35 | 35 | 580 | 1 | 22 | 25 | 450 | 63  | 1,087 |
| 59,577 | 2 | 35 | 36 | 590 | 1 | 22 | 25 | 459 | 64  | 1,106 |
| 59,578 | 2 | 35 | 36 | 594 | 1 | 22 | 25 | 460 | 64  | 1,111 |
| 59,579 | 2 | 53 | 35 | 658 | 1 | 27 | 25 | 520 | 63  | 1,258 |
| 59,580 | 2 | 54 | 34 | 662 | 1 | 27 | 24 | 523 | 61  | 1,266 |
| 59,581 | 2 | 55 | 35 | 671 | 1 | 27 | 24 | 529 | 62  | 1,282 |
| 59,582 | 2 | 55 | 36 | 678 | 1 | 27 | 25 | 533 | 64  | 1,293 |
| 59,583 | 3 | 55 | 36 | 685 | 1 | 27 | 25 | 538 | 65  | 1,305 |
| 59,584 | 3 | 55 | 38 | 686 | 1 | 27 | 24 | 540 | 66  | 1,308 |
| 59,585 | 3 | 55 | 38 | 687 | 1 | 27 | 24 | 540 | 66  | 1,309 |
| 59,586 | 2 | 55 | 42 | 689 | 1 | 27 | 24 | 540 | 69  | 1,311 |
| 59,587 | 2 | 55 | 43 | 689 | 1 | 27 | 26 | 540 | 72  | 1,311 |
| 59,588 | 3 | 55 | 52 | 689 | 3 | 27 | 35 | 540 | 93  | 1,311 |
| 59,589 | 5 | 55 | 55 | 690 | 3 | 27 | 51 | 540 | 114 | 1,312 |
| 59,590 | 5 | 54 | 55 | 655 | 3 | 27 | 51 | 504 | 114 | 1,240 |
| 59,591 | 6 | 54 | 56 | 656 | 3 | 27 | 51 | 503 | 116 | 1,240 |
| 59,592 | 6 | 48 | 54 | 505 | 3 | 20 | 49 | 398 | 112 | 971   |
| 59,593 | 6 | 48 | 54 | 505 | 3 | 20 | 49 | 401 | 112 | 974   |
| 59,594 | 6 | 47 | 54 | 469 | 3 | 19 | 49 | 392 | 112 | 927   |
| 59,595 | 6 | 44 | 54 | 463 | 3 | 19 | 50 | 387 | 113 | 913   |
| 59,596 | 6 | 44 | 54 | 474 | 3 | 22 | 50 | 389 | 113 | 929   |
| 59,597 | 6 | 42 | 52 | 436 | 3 | 21 | 45 | 365 | 106 | 864   |
| 59,598 | 6 | 43 | 52 | 438 | 3 | 21 | 45 | 364 | 106 | 866   |
| 59,599 | 6 | 43 | 50 | 438 | 3 | 21 | 45 | 365 | 104 | 867   |
| 59,600 | 6 | 43 | 45 | 434 | 3 | 21 | 44 | 364 | 98  | 862   |
| 59,601 | 6 | 43 | 44 | 439 | 3 | 21 | 44 | 366 | 97  | 869   |
| 59,602 | 6 | 41 | 40 | 422 | 3 | 21 | 41 | 348 | 90  | 832   |

|        |   |     |    |       |   |    |    |     |     |       |
|--------|---|-----|----|-------|---|----|----|-----|-----|-------|
| 59,603 | 6 | 41  | 40 | 422   | 3 | 21 | 40 | 348 | 89  | 832   |
| 59,604 | 6 | 41  | 40 | 424   | 3 | 21 | 40 | 348 | 89  | 834   |
| 59,605 | 6 | 40  | 40 | 422   | 3 | 21 | 39 | 348 | 88  | 831   |
| 59,606 | 6 | 40  | 40 | 422   | 3 | 21 | 39 | 351 | 88  | 834   |
| 59,607 | 5 | 39  | 35 | 422   | 2 | 21 | 34 | 351 | 76  | 833   |
| 59,608 | 5 | 39  | 30 | 428   | 2 | 21 | 33 | 351 | 70  | 839   |
| 59,609 | 5 | 39  | 29 | 422   | 3 | 20 | 34 | 344 | 71  | 825   |
| 59,610 | 5 | 39  | 29 | 392   | 3 | 20 | 34 | 315 | 71  | 766   |
| 59,611 | 5 | 39  | 30 | 387   | 3 | 20 | 34 | 312 | 72  | 758   |
| 59,612 | 5 | 38  | 30 | 381   | 3 | 20 | 34 | 297 | 72  | 736   |
| 59,613 | 5 | 32  | 29 | 351   | 3 | 17 | 34 | 250 | 71  | 650   |
| 59,614 | 5 | 32  | 29 | 348   | 3 | 17 | 34 | 248 | 71  | 645   |
| 59,615 | 5 | 32  | 29 | 348   | 3 | 17 | 34 | 248 | 71  | 645   |
| 59,616 | 5 | 32  | 29 | 339   | 3 | 19 | 34 | 241 | 71  | 631   |
| 59,617 | 5 | 27  | 29 | 310   | 3 | 18 | 33 | 206 | 70  | 561   |
| 59,618 | 5 | 27  | 29 | 310   | 3 | 18 | 33 | 208 | 70  | 563   |
| 59,619 | 6 | 28  | 29 | 309   | 3 | 18 | 33 | 208 | 71  | 563   |
| 59,620 | 6 | 29  | 29 | 308   | 3 | 17 | 33 | 218 | 71  | 572   |
| 59,621 | 6 | 30  | 29 | 311   | 3 | 17 | 32 | 221 | 70  | 579   |
| 59,622 | 6 | 54  | 29 | 515   | 3 | 24 | 32 | 411 | 70  | 1,004 |
| 59,623 | 6 | 53  | 29 | 536   | 3 | 25 | 32 | 418 | 70  | 1,032 |
| 59,624 | 6 | 54  | 29 | 558   | 3 | 24 | 32 | 419 | 70  | 1,055 |
| 59,625 | 6 | 56  | 29 | 561   | 3 | 23 | 32 | 393 | 70  | 1,033 |
| 59,626 | 6 | 55  | 29 | 490   | 3 | 22 | 31 | 372 | 69  | 939   |
| 59,627 | 6 | 66  | 29 | 505   | 3 | 22 | 31 | 384 | 69  | 977   |
| 59,628 | 6 | 71  | 28 | 531   | 3 | 22 | 31 | 388 | 68  | 1,012 |
| 59,629 | 6 | 72  | 28 | 550   | 3 | 23 | 31 | 394 | 68  | 1,039 |
| 59,630 | 6 | 54  | 28 | 489   | 3 | 18 | 31 | 338 | 68  | 899   |
| 59,631 | 6 | 54  | 34 | 487   | 3 | 18 | 32 | 336 | 75  | 895   |
| 59,632 | 6 | 55  | 34 | 487   | 3 | 18 | 32 | 334 | 75  | 894   |
| 59,633 | 6 | 58  | 34 | 532   | 3 | 19 | 31 | 340 | 74  | 949   |
| 59,634 | 5 | 59  | 35 | 614   | 3 | 22 | 32 | 356 | 75  | 1,051 |
| 59,635 | 5 | 65  | 46 | 754   | 3 | 36 | 52 | 422 | 106 | 1,277 |
| 59,636 | 5 | 88  | 43 | 923   | 3 | 39 | 52 | 487 | 103 | 1,537 |
| 59,637 | 5 | 100 | 39 | 1,030 | 3 | 42 | 52 | 529 | 99  | 1,701 |
| 59,638 | 5 | 124 | 38 | 1,263 | 3 | 54 | 49 | 606 | 95  | 2,047 |
| 59,639 | 4 | 125 | 32 | 1,279 | 1 | 58 | 43 | 617 | 80  | 2,079 |
| 59,640 | 2 | 125 | 29 | 1,278 | 1 | 59 | 25 | 618 | 57  | 2,080 |
| 59,641 | 2 | 126 | 29 | 1,282 | 1 | 60 | 25 | 619 | 57  | 2,087 |
| 59,642 | 1 | 128 | 28 | 1,288 | 1 | 60 | 25 | 621 | 55  | 2,097 |
| 59,643 | 1 | 135 | 34 | 1,307 | 1 | 63 | 25 | 624 | 61  | 2,129 |

|        |   |     |    |       |   |    |    |     |     |       |
|--------|---|-----|----|-------|---|----|----|-----|-----|-------|
| 59,644 | 1 | 135 | 34 | 1,307 | 1 | 63 | 25 | 624 | 61  | 2,129 |
| 59,645 | 1 | 135 | 37 | 1,307 | 1 | 63 | 28 | 622 | 67  | 2,127 |
| 59,646 | 1 | 135 | 38 | 1,315 | 2 | 64 | 31 | 624 | 72  | 2,138 |
| 59,647 | 1 | 135 | 38 | 1,304 | 2 | 61 | 31 | 622 | 72  | 2,122 |
| 59,648 | 1 | 135 | 52 | 1,301 | 2 | 61 | 32 | 620 | 87  | 2,117 |
| 59,649 | 1 | 134 | 52 | 1,299 | 2 | 61 | 33 | 620 | 88  | 2,114 |
| 59,650 | 1 | 134 | 53 | 1,297 | 2 | 61 | 38 | 619 | 94  | 2,111 |
| 59,651 | 1 | 134 | 54 | 1,296 | 2 | 61 | 38 | 619 | 95  | 2,110 |
| 59,652 | 1 | 134 | 54 | 1,291 | 2 | 61 | 38 | 617 | 95  | 2,103 |
| 59,653 | 1 | 134 | 54 | 1,291 | 2 | 61 | 38 | 617 | 95  | 2,103 |
| 59,654 | 1 | 134 | 54 | 1,295 | 2 | 61 | 39 | 619 | 96  | 2,109 |
| 59,655 | 1 | 134 | 55 | 1,297 | 2 | 61 | 39 | 619 | 97  | 2,111 |
| 59,656 | 2 | 134 | 58 | 1,300 | 2 | 61 | 39 | 622 | 101 | 2,117 |
| 59,657 | 2 | 134 | 60 | 1,294 | 3 | 61 | 41 | 617 | 106 | 2,106 |
| 59,658 | 2 | 135 | 59 | 1,323 | 3 | 61 | 41 | 622 | 105 | 2,141 |
| 59,659 | 2 | 135 | 60 | 1,324 | 3 | 61 | 40 | 622 | 105 | 2,142 |
| 59,660 | 2 | 135 | 58 | 1,325 | 2 | 62 | 40 | 621 | 102 | 2,143 |
| 59,661 | 2 | 135 | 60 | 1,325 | 2 | 62 | 46 | 621 | 110 | 2,143 |
| 59,662 | 2 | 135 | 59 | 1,327 | 2 | 62 | 46 | 622 | 109 | 2,146 |
| 59,663 | 2 | 135 | 59 | 1,334 | 2 | 64 | 46 | 622 | 109 | 2,155 |
| 59,664 | 2 | 139 | 59 | 1,361 | 2 | 65 | 46 | 636 | 109 | 2,201 |
| 59,665 | 2 | 139 | 59 | 1,367 | 2 | 65 | 46 | 642 | 109 | 2,213 |
| 59,666 | 2 | 140 | 59 | 1,371 | 2 | 65 | 46 | 645 | 109 | 2,221 |
| 59,667 | 2 | 145 | 59 | 1,383 | 2 | 63 | 46 | 653 | 109 | 2,244 |
| 59,668 | 2 | 151 | 59 | 1,460 | 2 | 67 | 46 | 672 | 109 | 2,350 |
| 59,669 | 2 | 156 | 59 | 1,492 | 2 | 67 | 46 | 680 | 109 | 2,395 |
| 59,670 | 1 | 166 | 59 | 1,521 | 2 | 72 | 46 | 701 | 108 | 2,460 |
| 59,671 | 1 | 165 | 59 | 1,525 | 2 | 73 | 46 | 690 | 108 | 2,453 |
| 59,672 | 1 | 142 | 59 | 1,326 | 2 | 68 | 46 | 502 | 108 | 2,038 |
| 59,673 | 1 | 141 | 60 | 1,272 | 2 | 67 | 46 | 489 | 109 | 1,969 |
| 59,674 | 1 | 154 | 60 | 1,385 | 2 | 69 | 46 | 526 | 109 | 2,134 |
| 59,675 | 1 | 154 | 60 | 1,388 | 2 | 69 | 46 | 526 | 109 | 2,137 |
| 59,676 | 1 | 150 | 60 | 1,367 | 2 | 68 | 46 | 513 | 109 | 2,098 |
| 59,677 | 1 | 140 | 60 | 1,346 | 2 | 67 | 46 | 491 | 109 | 2,044 |
| 59,678 | 1 | 142 | 59 | 1,373 | 2 | 68 | 46 | 492 | 108 | 2,075 |
| 59,679 | 1 | 139 | 59 | 1,354 | 2 | 68 | 46 | 488 | 108 | 2,049 |
| 59,680 | 1 | 139 | 59 | 1,333 | 2 | 67 | 46 | 482 | 108 | 2,021 |
| 59,681 | 1 | 141 | 54 | 1,351 | 2 | 67 | 45 | 497 | 102 | 2,056 |
| 59,682 | 1 | 141 | 53 | 1,365 | 2 | 68 | 45 | 507 | 101 | 2,081 |
| 59,683 | 1 | 146 | 52 | 1,389 | 3 | 73 | 45 | 528 | 101 | 2,136 |
| 59,684 | 1 | 147 | 51 | 1,418 | 3 | 75 | 44 | 578 | 99  | 2,218 |



|        |   |     |    |       |   |    |    |     |    |       |
|--------|---|-----|----|-------|---|----|----|-----|----|-------|
| 59,685 | 1 | 148 | 50 | 1,463 | 3 | 78 | 43 | 605 | 97 | 2,294 |
| 59,686 | 1 | 143 | 40 | 1,372 | 3 | 67 | 24 | 562 | 68 | 2,144 |
| 59,687 | 1 | 107 | 40 | 1,110 | 3 | 61 | 24 | 459 | 68 | 1,737 |
| 59,688 | 1 | 82  | 40 | 865   | 3 | 45 | 24 | 372 | 68 | 1,364 |
| 59,689 | 1 | 93  | 40 | 913   | 3 | 46 | 24 | 398 | 68 | 1,450 |
| 59,690 | 1 | 93  | 37 | 916   | 3 | 46 | 22 | 400 | 63 | 1,455 |
| 59,691 | 1 | 98  | 37 | 935   | 3 | 45 | 22 | 404 | 63 | 1,482 |
| 59,692 | 1 | 98  | 37 | 935   | 3 | 45 | 22 | 404 | 63 | 1,482 |
| 59,693 | 1 | 92  | 39 | 913   | 3 | 42 | 22 | 399 | 65 | 1,446 |
| 59,694 | 1 | 92  | 34 | 913   | 3 | 42 | 22 | 399 | 60 | 1,446 |
| 59,695 | 1 | 93  | 34 | 958   | 3 | 48 | 22 | 437 | 60 | 1,536 |
| 59,696 | 1 | 113 | 31 | 1,258 | 3 | 58 | 20 | 560 | 55 | 1,989 |
| 59,697 | 1 | 115 | 31 | 1,264 | 2 | 58 | 17 | 575 | 51 | 2,012 |
| 59,698 | 1 | 115 | 17 | 1,262 | 2 | 58 | 16 | 575 | 36 | 2,010 |
| 59,699 | 1 | 115 | 17 | 1,264 | 2 | 58 | 15 | 577 | 35 | 2,014 |
| 59,700 | 1 | 116 | 17 | 1,281 | 2 | 59 | 10 | 587 | 30 | 2,043 |
| 59,701 | 1 | 116 | 16 | 1,282 | 2 | 60 | 10 | 590 | 29 | 2,048 |
| 59,702 | 1 | 116 | 23 | 1,285 | 4 | 60 | 16 | 590 | 44 | 2,051 |
| 59,703 | 1 | 116 | 23 | 1,292 | 4 | 60 | 16 | 602 | 44 | 2,070 |
| 59,704 | 1 | 116 | 23 | 1,291 | 4 | 60 | 16 | 601 | 44 | 2,068 |
| 59,705 | 1 | 119 | 32 | 1,298 | 4 | 61 | 15 | 614 | 52 | 2,092 |
| 59,706 | 1 | 119 | 31 | 1,322 | 4 | 61 | 15 | 620 | 51 | 2,122 |
| 59,707 | 0 | 122 | 28 | 1,366 | 4 | 61 | 15 | 657 | 47 | 2,206 |
| 59,708 | 0 | 125 | 26 | 1,399 | 3 | 64 | 13 | 677 | 42 | 2,265 |
| 59,709 | 0 | 124 | 26 | 1,380 | 3 | 64 | 13 | 675 | 42 | 2,243 |
| 59,710 | 0 | 129 | 26 | 1,388 | 3 | 62 | 13 | 686 | 42 | 2,265 |
| 59,711 | 1 | 129 | 30 | 1,394 | 4 | 62 | 14 | 690 | 49 | 2,275 |
| 59,712 | 1 | 133 | 28 | 1,401 | 4 | 63 | 8  | 693 | 41 | 2,290 |
| 59,713 | 1 | 133 | 28 | 1,402 | 4 | 63 | 8  | 693 | 41 | 2,291 |
| 59,714 | 1 | 129 | 32 | 1,377 | 4 | 62 | 8  | 679 | 45 | 2,247 |
| 59,715 | 1 | 129 | 33 | 1,376 | 4 | 62 | 10 | 677 | 48 | 2,244 |
| 59,716 | 1 | 129 | 33 | 1,378 | 4 | 62 | 10 | 679 | 48 | 2,248 |
| 59,717 | 1 | 123 | 43 | 1,354 | 7 | 61 | 10 | 661 | 61 | 2,199 |
| 59,718 | 1 | 123 | 44 | 1,356 | 7 | 61 | 12 | 661 | 64 | 2,201 |
| 59,719 | 2 | 101 | 45 | 1,203 | 7 | 51 | 12 | 604 | 66 | 1,959 |
| 59,720 | 2 | 101 | 46 | 1,203 | 7 | 51 | 13 | 604 | 68 | 1,959 |
| 59,721 | 2 | 101 | 46 | 1,203 | 7 | 51 | 13 | 604 | 68 | 1,959 |
| 59,722 | 2 | 100 | 46 | 1,179 | 7 | 48 | 13 | 591 | 68 | 1,918 |
| 59,723 | 2 | 103 | 46 | 1,183 | 7 | 48 | 13 | 599 | 68 | 1,933 |
| 59,724 | 2 | 102 | 45 | 1,181 | 7 | 51 | 13 | 609 | 67 | 1,943 |
| 59,725 | 2 | 89  | 45 | 1,073 | 7 | 49 | 13 | 576 | 67 | 1,787 |

|        |   |    |    |       |   |    |    |     |    |       |
|--------|---|----|----|-------|---|----|----|-----|----|-------|
| 59,726 | 2 | 94 | 45 | 1,078 | 7 | 49 | 13 | 584 | 67 | 1,805 |
| 59,727 | 2 | 94 | 45 | 1,070 | 7 | 49 | 13 | 584 | 67 | 1,797 |
| 59,728 | 2 | 91 | 46 | 1,040 | 7 | 48 | 13 | 582 | 68 | 1,761 |
| 59,729 | 2 | 91 | 46 | 1,041 | 7 | 48 | 13 | 582 | 68 | 1,762 |
| 59,730 | 2 | 89 | 46 | 1,034 | 7 | 48 | 16 | 582 | 71 | 1,753 |
| 59,731 | 6 | 88 | 48 | 1,031 | 7 | 48 | 17 | 579 | 78 | 1,746 |
| 59,732 | 8 | 86 | 49 | 1,011 | 7 | 48 | 20 | 560 | 84 | 1,705 |
| 59,733 | 8 | 85 | 49 | 996   | 6 | 47 | 20 | 550 | 83 | 1,678 |
| 59,734 | 8 | 73 | 46 | 796   | 6 | 36 | 18 | 445 | 78 | 1,350 |
| 59,735 | 8 | 72 | 48 | 749   | 6 | 33 | 20 | 418 | 82 | 1,272 |
| 59,736 | 8 | 72 | 48 | 699   | 6 | 30 | 20 | 395 | 82 | 1,196 |
| 59,737 | 8 | 71 | 48 | 682   | 6 | 30 | 20 | 392 | 82 | 1,175 |
| 59,738 | 8 | 71 | 48 | 679   | 6 | 30 | 20 | 392 | 82 | 1,172 |
| 59,739 | 8 | 60 | 48 | 631   | 6 | 29 | 20 | 366 | 82 | 1,086 |
| 59,740 | 8 | 60 | 48 | 628   | 6 | 29 | 20 | 364 | 82 | 1,081 |
| 59,741 | 8 | 60 | 48 | 629   | 6 | 29 | 20 | 363 | 82 | 1,081 |
| 59,742 | 8 | 54 | 48 | 606   | 6 | 28 | 20 | 359 | 82 | 1,047 |
| 59,743 | 8 | 54 | 48 | 606   | 6 | 28 | 20 | 359 | 82 | 1,047 |
| 59,744 | 8 | 53 | 46 | 602   | 6 | 28 | 20 | 356 | 80 | 1,039 |
| 59,745 | 8 | 52 | 45 | 554   | 6 | 22 | 20 | 317 | 79 | 945   |
| 59,746 | 8 | 32 | 45 | 259   | 6 | 13 | 20 | 197 | 79 | 501   |
| 59,747 | 8 | 32 | 45 | 271   | 6 | 13 | 19 | 216 | 78 | 532   |
| 59,748 | 8 | 30 | 44 | 257   | 6 | 12 | 19 | 207 | 77 | 506   |
| 59,749 | 8 | 50 | 44 | 449   | 6 | 30 | 19 | 482 | 77 | 1,011 |
| 59,750 | 8 | 62 | 45 | 659   | 6 | 41 | 19 | 660 | 78 | 1,422 |
| 59,751 | 8 | 61 | 45 | 668   | 6 | 43 | 19 | 669 | 78 | 1,441 |
| 59,752 | 8 | 61 | 37 | 682   | 4 | 42 | 13 | 672 | 62 | 1,457 |
| 59,753 | 8 | 63 | 36 | 727   | 4 | 43 | 13 | 697 | 61 | 1,530 |
| 59,754 | 8 | 70 | 35 | 763   | 4 | 46 | 13 | 738 | 60 | 1,617 |
| 59,755 | 8 | 70 | 29 | 766   | 4 | 47 | 13 | 740 | 54 | 1,623 |
| 59,756 | 8 | 67 | 28 | 750   | 4 | 46 | 13 | 723 | 53 | 1,586 |
| 59,757 | 8 | 67 | 29 | 727   | 4 | 46 | 15 | 717 | 56 | 1,557 |
| 59,758 | 8 | 61 | 29 | 655   | 4 | 43 | 15 | 660 | 56 | 1,419 |
| 59,759 | 8 | 61 | 29 | 645   | 4 | 42 | 15 | 657 | 56 | 1,405 |
| 59,760 | 8 | 56 | 29 | 625   | 4 | 42 | 15 | 645 | 56 | 1,368 |
| 59,761 | 8 | 56 | 28 | 626   | 4 | 42 | 15 | 646 | 55 | 1,370 |
| 59,762 | 7 | 52 | 24 | 612   | 3 | 41 | 14 | 639 | 48 | 1,344 |
| 59,763 | 7 | 52 | 24 | 612   | 3 | 41 | 14 | 639 | 48 | 1,344 |
| 59,764 | 7 | 52 | 25 | 617   | 3 | 41 | 14 | 643 | 49 | 1,353 |
| 59,765 | 7 | 52 | 21 | 622   | 3 | 42 | 14 | 654 | 45 | 1,370 |
| 59,766 | 7 | 52 | 20 | 631   | 3 | 42 | 12 | 658 | 42 | 1,383 |

|        |   |    |    |     |   |    |    |     |     |       |
|--------|---|----|----|-----|---|----|----|-----|-----|-------|
| 59,767 | 7 | 52 | 17 | 633 | 2 | 42 | 12 | 662 | 38  | 1,389 |
| 59,768 | 7 | 54 | 10 | 634 | 0 | 42 | 13 | 664 | 30  | 1,394 |
| 59,769 | 7 | 54 | 9  | 634 | 0 | 42 | 11 | 664 | 27  | 1,394 |
| 59,770 | 6 | 57 | 8  | 642 | 0 | 42 | 11 | 665 | 25  | 1,406 |
| 59,771 | 6 | 57 | 7  | 642 | 0 | 42 | 10 | 665 | 23  | 1,406 |
| 59,772 | 6 | 57 | 7  | 645 | 0 | 42 | 10 | 665 | 23  | 1,409 |
| 59,773 | 6 | 57 | 7  | 644 | 0 | 42 | 10 | 665 | 23  | 1,408 |
| 59,774 | 6 | 52 | 7  | 627 | 0 | 39 | 10 | 638 | 23  | 1,356 |
| 59,775 | 6 | 52 | 7  | 639 | 0 | 39 | 10 | 639 | 23  | 1,369 |
| 59,776 | 6 | 52 | 7  | 639 | 0 | 39 | 10 | 639 | 23  | 1,369 |
| 59,777 | 6 | 47 | 7  | 632 | 0 | 39 | 10 | 630 | 23  | 1,348 |
| 59,778 | 6 | 47 | 7  | 633 | 0 | 39 | 10 | 629 | 23  | 1,348 |
| 59,779 | 6 | 47 | 6  | 633 | 0 | 39 | 10 | 629 | 22  | 1,348 |
| 59,780 | 6 | 48 | 6  | 634 | 0 | 39 | 9  | 629 | 21  | 1,350 |
| 59,781 | 2 | 48 | 4  | 635 | 0 | 39 | 6  | 629 | 12  | 1,351 |
| 59,782 | 2 | 48 | 3  | 635 | 0 | 39 | 5  | 629 | 10  | 1,351 |
| 59,783 | 0 | 48 | 3  | 635 | 0 | 39 | 4  | 629 | 7   | 1,351 |
| 59,784 | 0 | 48 | 3  | 634 | 0 | 39 | 4  | 627 | 7   | 1,348 |
| 59,785 | 0 | 48 | 3  | 634 | 0 | 39 | 4  | 627 | 7   | 1,348 |
| 59,786 | 0 | 48 | 3  | 634 | 0 | 39 | 4  | 627 | 7   | 1,348 |
| 59,787 | 0 | 47 | 3  | 636 | 0 | 39 | 4  | 627 | 7   | 1,349 |
| 59,788 | 1 | 47 | 7  | 636 | 0 | 39 | 7  | 627 | 15  | 1,349 |
| 59,789 | 1 | 47 | 8  | 636 | 0 | 39 | 8  | 627 | 17  | 1,349 |
| 59,790 | 1 | 47 | 10 | 636 | 0 | 39 | 8  | 627 | 19  | 1,349 |
| 59,791 | 1 | 47 | 11 | 636 | 1 | 39 | 9  | 627 | 22  | 1,349 |
| 59,792 | 1 | 47 | 14 | 635 | 2 | 39 | 13 | 627 | 30  | 1,348 |
| 59,793 | 1 | 47 | 15 | 635 | 2 | 39 | 13 | 627 | 31  | 1,348 |
| 59,794 | 2 | 47 | 21 | 635 | 2 | 39 | 24 | 627 | 49  | 1,348 |
| 59,795 | 2 | 47 | 31 | 635 | 5 | 39 | 33 | 627 | 71  | 1,348 |
| 59,796 | 2 | 47 | 32 | 634 | 8 | 39 | 37 | 626 | 79  | 1,346 |
| 59,797 | 3 | 47 | 35 | 632 | 8 | 38 | 43 | 621 | 89  | 1,338 |
| 59,798 | 5 | 47 | 41 | 615 | 8 | 38 | 51 | 595 | 105 | 1,295 |
| 59,799 | 5 | 27 | 41 | 426 | 8 | 20 | 52 | 321 | 106 | 794   |
| 59,800 | 5 | 15 | 41 | 214 | 8 | 9  | 55 | 144 | 109 | 382   |
| 59,801 | 5 | 15 | 40 | 188 | 8 | 6  | 55 | 123 | 108 | 332   |
| 59,802 | 5 | 15 | 41 | 173 | 8 | 6  | 55 | 117 | 109 | 311   |
| 59,803 | 5 | 13 | 41 | 125 | 8 | 5  | 55 | 92  | 109 | 235   |
| 59,804 | 5 | 6  | 41 | 82  | 8 | 2  | 55 | 39  | 109 | 129   |
| 59,805 | 5 | 6  | 41 | 78  | 8 | 1  | 55 | 37  | 109 | 122   |
| 59,806 | 5 | 6  | 41 | 76  | 8 | 1  | 55 | 36  | 109 | 119   |
| 59,807 | 5 | 6  | 40 | 79  | 8 | 1  | 55 | 38  | 108 | 124   |

|        |   |    |    |     |   |    |    |     |     |       |
|--------|---|----|----|-----|---|----|----|-----|-----|-------|
| 59,808 | 5 | 10 | 40 | 130 | 8 | 5  | 53 | 82  | 106 | 227   |
| 59,809 | 5 | 13 | 40 | 158 | 8 | 6  | 53 | 92  | 106 | 269   |
| 59,810 | 5 | 24 | 40 | 250 | 8 | 19 | 53 | 142 | 106 | 435   |
| 59,811 | 5 | 27 | 43 | 357 | 8 | 21 | 53 | 178 | 109 | 583   |
| 59,812 | 5 | 27 | 44 | 368 | 8 | 21 | 55 | 178 | 112 | 594   |
| 59,813 | 5 | 27 | 44 | 369 | 8 | 21 | 55 | 182 | 112 | 599   |
| 59,814 | 5 | 27 | 43 | 372 | 8 | 21 | 55 | 181 | 111 | 601   |
| 59,815 | 5 | 27 | 43 | 367 | 8 | 21 | 55 | 180 | 111 | 595   |
| 59,816 | 5 | 27 | 43 | 352 | 8 | 20 | 56 | 161 | 112 | 560   |
| 59,817 | 5 | 27 | 43 | 357 | 8 | 20 | 56 | 161 | 112 | 565   |
| 59,818 | 5 | 30 | 43 | 369 | 8 | 21 | 56 | 178 | 112 | 598   |
| 59,819 | 5 | 29 | 43 | 367 | 8 | 21 | 55 | 176 | 111 | 593   |
| 59,820 | 5 | 31 | 43 | 370 | 8 | 21 | 57 | 185 | 113 | 607   |
| 59,821 | 5 | 48 | 43 | 500 | 8 | 25 | 57 | 304 | 113 | 877   |
| 59,822 | 5 | 48 | 43 | 511 | 8 | 25 | 57 | 311 | 113 | 895   |
| 59,823 | 5 | 54 | 43 | 545 | 8 | 27 | 58 | 347 | 114 | 973   |
| 59,824 | 5 | 56 | 43 | 562 | 8 | 27 | 58 | 352 | 114 | 997   |
| 59,825 | 5 | 56 | 43 | 562 | 8 | 27 | 58 | 352 | 114 | 997   |
| 59,826 | 5 | 56 | 43 | 565 | 8 | 27 | 58 | 353 | 114 | 1,001 |
| 59,827 | 5 | 57 | 44 | 580 | 8 | 27 | 58 | 357 | 115 | 1,021 |
| 59,828 | 5 | 60 | 45 | 607 | 8 | 28 | 58 | 373 | 116 | 1,068 |
| 59,829 | 5 | 60 | 45 | 614 | 8 | 28 | 58 | 377 | 116 | 1,079 |
| 59,830 | 5 | 62 | 45 | 631 | 8 | 28 | 58 | 391 | 116 | 1,112 |
| 59,831 | 5 | 61 | 45 | 675 | 8 | 29 | 58 | 403 | 116 | 1,168 |
| 59,832 | 5 | 63 | 45 | 696 | 8 | 29 | 58 | 407 | 116 | 1,195 |
| 59,833 | 5 | 65 | 45 | 712 | 8 | 29 | 58 | 414 | 116 | 1,220 |
| 59,834 | 5 | 65 | 45 | 717 | 8 | 29 | 57 | 414 | 115 | 1,225 |
| 59,835 | 5 | 65 | 45 | 717 | 8 | 29 | 57 | 413 | 115 | 1,224 |
| 59,836 | 5 | 65 | 44 | 717 | 8 | 29 | 57 | 414 | 114 | 1,225 |
| 59,837 | 5 | 65 | 42 | 715 | 8 | 29 | 56 | 414 | 111 | 1,223 |
| 59,838 | 5 | 65 | 42 | 716 | 8 | 29 | 56 | 414 | 111 | 1,224 |
| 59,839 | 4 | 65 | 41 | 716 | 8 | 29 | 54 | 416 | 107 | 1,226 |
| 59,840 | 4 | 65 | 42 | 718 | 8 | 29 | 53 | 418 | 107 | 1,230 |
| 59,841 | 4 | 66 | 39 | 728 | 8 | 29 | 52 | 425 | 103 | 1,248 |
| 59,842 | 4 | 66 | 36 | 735 | 7 | 29 | 50 | 426 | 97  | 1,256 |
| 59,843 | 4 | 66 | 36 | 744 | 7 | 31 | 48 | 431 | 95  | 1,272 |
| 59,844 | 3 | 66 | 28 | 764 | 7 | 32 | 43 | 440 | 81  | 1,302 |
| 59,845 | 3 | 68 | 26 | 775 | 7 | 33 | 36 | 446 | 72  | 1,322 |
| 59,846 | 1 | 68 | 21 | 779 | 4 | 33 | 20 | 446 | 46  | 1,326 |
| 59,847 | 1 | 68 | 22 | 786 | 1 | 33 | 20 | 452 | 44  | 1,339 |
| 59,848 | 1 | 68 | 20 | 786 | 1 | 33 | 20 | 452 | 42  | 1,339 |

|        |   |    |    |     |   |    |    |     |     |       |
|--------|---|----|----|-----|---|----|----|-----|-----|-------|
| 59,849 | 0 | 68 | 27 | 787 | 1 | 33 | 17 | 456 | 45  | 1,344 |
| 59,850 | 0 | 68 | 27 | 791 | 1 | 33 | 18 | 457 | 46  | 1,349 |
| 59,851 | 0 | 68 | 27 | 796 | 1 | 33 | 15 | 460 | 43  | 1,357 |
| 59,852 | 1 | 68 | 27 | 796 | 1 | 33 | 15 | 463 | 44  | 1,360 |
| 59,853 | 1 | 68 | 27 | 796 | 1 | 33 | 15 | 463 | 44  | 1,360 |
| 59,854 | 1 | 68 | 27 | 799 | 1 | 33 | 15 | 465 | 44  | 1,365 |
| 59,855 | 1 | 68 | 27 | 799 | 1 | 33 | 15 | 465 | 44  | 1,365 |
| 59,856 | 1 | 73 | 27 | 800 | 1 | 34 | 15 | 470 | 44  | 1,377 |
| 59,857 | 1 | 73 | 27 | 800 | 1 | 34 | 15 | 472 | 44  | 1,379 |
| 59,858 | 1 | 73 | 36 | 799 | 1 | 34 | 19 | 469 | 57  | 1,375 |
| 59,859 | 3 | 69 | 46 | 748 | 2 | 30 | 39 | 429 | 90  | 1,276 |
| 59,860 | 3 | 66 | 47 | 723 | 2 | 29 | 39 | 421 | 91  | 1,239 |
| 59,861 | 3 | 58 | 51 | 637 | 2 | 16 | 39 | 374 | 95  | 1,085 |
| 59,862 | 3 | 55 | 48 | 532 | 2 | 14 | 40 | 339 | 93  | 940   |
| 59,863 | 4 | 56 | 47 | 516 | 2 | 14 | 38 | 331 | 91  | 917   |
| 59,864 | 4 | 56 | 47 | 517 | 2 | 14 | 38 | 333 | 91  | 920   |
| 59,865 | 4 | 56 | 47 | 521 | 2 | 14 | 38 | 335 | 91  | 926   |
| 59,866 | 4 | 56 | 47 | 522 | 2 | 14 | 37 | 335 | 90  | 927   |
| 59,867 | 4 | 57 | 47 | 525 | 2 | 14 | 37 | 336 | 90  | 932   |
| 59,868 | 4 | 57 | 47 | 523 | 2 | 14 | 37 | 341 | 90  | 935   |
| 59,869 | 4 | 54 | 47 | 509 | 2 | 13 | 37 | 319 | 90  | 895   |
| 59,870 | 4 | 51 | 49 | 501 | 2 | 13 | 37 | 303 | 92  | 868   |
| 59,871 | 4 | 51 | 49 | 501 | 2 | 13 | 37 | 305 | 92  | 870   |
| 59,872 | 4 | 33 | 57 | 396 | 2 | 9  | 41 | 205 | 104 | 643   |
| 59,873 | 4 | 33 | 57 | 385 | 2 | 9  | 40 | 197 | 103 | 624   |
| 59,874 | 4 | 27 | 58 | 351 | 2 | 7  | 46 | 164 | 110 | 549   |
| 59,875 | 4 | 25 | 58 | 332 | 2 | 7  | 46 | 162 | 110 | 526   |
| 59,876 | 4 | 25 | 58 | 327 | 2 | 8  | 46 | 163 | 110 | 523   |
| 59,877 | 4 | 26 | 57 | 332 | 2 | 8  | 46 | 169 | 109 | 535   |
| 59,878 | 4 | 27 | 57 | 327 | 2 | 8  | 46 | 168 | 109 | 530   |
| 59,879 | 4 | 25 | 56 | 302 | 2 | 7  | 46 | 153 | 108 | 487   |
| 59,880 | 4 | 28 | 56 | 306 | 2 | 9  | 46 | 159 | 108 | 502   |
| 59,881 | 4 | 26 | 56 | 286 | 2 | 9  | 46 | 145 | 108 | 466   |
| 59,882 | 4 | 26 | 56 | 225 | 2 | 9  | 46 | 137 | 108 | 397   |
| 59,883 | 4 | 26 | 56 | 229 | 2 | 9  | 46 | 138 | 108 | 402   |
| 59,884 | 4 | 24 | 56 | 218 | 2 | 9  | 46 | 132 | 108 | 383   |
| 59,885 | 4 | 24 | 56 | 212 | 2 | 9  | 46 | 132 | 108 | 377   |
| 59,886 | 4 | 24 | 56 | 212 | 2 | 9  | 46 | 132 | 108 | 377   |
| 59,887 | 4 | 24 | 56 | 212 | 2 | 9  | 46 | 132 | 108 | 377   |
| 59,888 | 4 | 25 | 56 | 214 | 2 | 9  | 46 | 132 | 108 | 380   |
| 59,889 | 4 | 25 | 55 | 214 | 2 | 9  | 46 | 132 | 107 | 380   |

|        |   |    |    |     |   |    |    |     |     |     |
|--------|---|----|----|-----|---|----|----|-----|-----|-----|
| 59,890 | 4 | 24 | 56 | 203 | 2 | 9  | 46 | 121 | 108 | 357 |
| 59,891 | 4 | 24 | 56 | 205 | 2 | 9  | 46 | 121 | 108 | 359 |
| 59,892 | 4 | 24 | 56 | 205 | 2 | 10 | 46 | 121 | 108 | 360 |
| 59,893 | 4 | 24 | 56 | 174 | 2 | 7  | 46 | 108 | 108 | 313 |
| 59,894 | 4 | 24 | 56 | 178 | 1 | 7  | 46 | 109 | 107 | 318 |
| 59,895 | 4 | 25 | 55 | 182 | 1 | 7  | 45 | 110 | 105 | 324 |
| 59,896 | 4 | 24 | 54 | 181 | 1 | 6  | 45 | 114 | 104 | 325 |
| 59,897 | 4 | 24 | 52 | 195 | 1 | 8  | 45 | 118 | 102 | 345 |
| 59,898 | 4 | 24 | 51 | 191 | 1 | 8  | 43 | 112 | 99  | 335 |
| 59,899 | 4 | 24 | 50 | 191 | 1 | 8  | 42 | 112 | 97  | 335 |
| 59,900 | 4 | 24 | 38 | 185 | 1 | 8  | 39 | 106 | 82  | 323 |
| 59,901 | 4 | 25 | 38 | 182 | 1 | 8  | 38 | 103 | 81  | 318 |
| 59,902 | 4 | 25 | 38 | 185 | 1 | 8  | 38 | 101 | 81  | 319 |
| 59,903 | 3 | 25 | 38 | 187 | 1 | 9  | 38 | 101 | 80  | 322 |
| 59,904 | 3 | 25 | 38 | 187 | 1 | 9  | 38 | 101 | 80  | 322 |
| 59,905 | 3 | 25 | 38 | 188 | 1 | 9  | 38 | 100 | 80  | 322 |
| 59,906 | 3 | 25 | 36 | 189 | 1 | 9  | 37 | 102 | 77  | 325 |
| 59,907 | 3 | 20 | 31 | 187 | 1 | 8  | 34 | 95  | 69  | 310 |
| 59,908 | 3 | 20 | 29 | 194 | 1 | 8  | 34 | 98  | 67  | 320 |
| 59,909 | 1 | 22 | 19 | 206 | 0 | 9  | 14 | 106 | 34  | 343 |
| 59,910 | 1 | 22 | 18 | 219 | 0 | 9  | 14 | 110 | 33  | 360 |
| 59,911 | 1 | 22 | 19 | 217 | 0 | 9  | 14 | 108 | 34  | 356 |
| 59,912 | 1 | 19 | 15 | 212 | 0 | 9  | 14 | 104 | 30  | 344 |
| 59,913 | 1 | 19 | 15 | 212 | 0 | 9  | 13 | 105 | 29  | 345 |
| 59,914 | 0 | 18 | 15 | 211 | 0 | 9  | 13 | 103 | 28  | 341 |
| 59,915 | 0 | 18 | 15 | 202 | 0 | 9  | 13 | 100 | 28  | 329 |
| 59,916 | 0 | 18 | 15 | 202 | 0 | 9  | 13 | 100 | 28  | 329 |
| 59,917 | 0 | 18 | 15 | 200 | 0 | 9  | 13 | 100 | 28  | 327 |
| 59,918 | 0 | 17 | 15 | 197 | 0 | 9  | 13 | 99  | 28  | 322 |
| 59,919 | 1 | 17 | 16 | 198 | 1 | 9  | 14 | 99  | 32  | 323 |
| 59,920 | 1 | 18 | 16 | 198 | 1 | 9  | 14 | 99  | 32  | 324 |
| 59,921 | 3 | 18 | 24 | 200 | 1 | 9  | 12 | 99  | 40  | 326 |
| 59,922 | 6 | 18 | 21 | 204 | 1 | 9  | 10 | 98  | 38  | 329 |
| 59,923 | 6 | 16 | 23 | 174 | 1 | 9  | 10 | 86  | 40  | 285 |
| 59,924 | 6 | 16 | 22 | 178 | 1 | 10 | 4  | 88  | 33  | 292 |
| 59,925 | 6 | 16 | 22 | 176 | 1 | 10 | 4  | 88  | 33  | 290 |
| 59,926 | 6 | 16 | 23 | 168 | 1 | 9  | 4  | 83  | 34  | 276 |
| 59,927 | 6 | 15 | 23 | 163 | 1 | 9  | 4  | 77  | 34  | 264 |
| 59,928 | 6 | 15 | 23 | 163 | 1 | 9  | 4  | 77  | 34  | 264 |
| 59,929 | 6 | 13 | 23 | 152 | 1 | 9  | 5  | 74  | 35  | 248 |
| 59,930 | 6 | 13 | 23 | 152 | 1 | 9  | 5  | 74  | 35  | 248 |

|        |   |    |    |     |   |    |   |     |    |     |
|--------|---|----|----|-----|---|----|---|-----|----|-----|
| 59,931 | 6 | 10 | 23 | 141 | 1 | 7  | 5 | 64  | 35 | 222 |
| 59,932 | 6 | 10 | 23 | 138 | 1 | 7  | 5 | 63  | 35 | 218 |
| 59,933 | 6 | 8  | 23 | 128 | 1 | 6  | 5 | 55  | 35 | 197 |
| 59,934 | 6 | 8  | 23 | 123 | 1 | 6  | 5 | 58  | 35 | 195 |
| 59,935 | 6 | 13 | 23 | 138 | 1 | 7  | 5 | 68  | 35 | 226 |
| 59,936 | 6 | 18 | 24 | 183 | 1 | 10 | 5 | 93  | 36 | 304 |
| 59,937 | 6 | 25 | 24 | 224 | 1 | 15 | 5 | 132 | 36 | 396 |
| 59,938 | 7 | 27 | 23 | 229 | 1 | 15 | 5 | 135 | 36 | 406 |
| 59,939 | 7 | 31 | 22 | 235 | 1 | 15 | 5 | 139 | 35 | 420 |
| 59,940 | 7 | 36 | 22 | 248 | 1 | 15 | 5 | 154 | 35 | 453 |
| 59,941 | 7 | 36 | 22 | 255 | 1 | 15 | 5 | 159 | 35 | 465 |
| 59,942 | 7 | 36 | 22 | 256 | 1 | 15 | 5 | 161 | 35 | 468 |
| 59,943 | 7 | 41 | 22 | 272 | 1 | 17 | 5 | 178 | 35 | 508 |
| 59,944 | 7 | 44 | 22 | 271 | 1 | 17 | 5 | 178 | 35 | 510 |
| 59,945 | 7 | 44 | 22 | 265 | 1 | 17 | 5 | 177 | 35 | 503 |
| 59,946 | 7 | 43 | 22 | 262 | 1 | 17 | 5 | 177 | 35 | 499 |
| 59,947 | 7 | 45 | 22 | 259 | 1 | 17 | 5 | 176 | 35 | 497 |
| 59,948 | 7 | 46 | 22 | 275 | 1 | 16 | 5 | 191 | 35 | 528 |
| 59,949 | 7 | 46 | 23 | 275 | 1 | 16 | 5 | 191 | 36 | 528 |
| 59,950 | 7 | 46 | 23 | 276 | 1 | 16 | 4 | 193 | 35 | 531 |
| 59,951 | 7 | 46 | 23 | 279 | 1 | 16 | 4 | 193 | 35 | 534 |
| 59,952 | 7 | 45 | 23 | 276 | 1 | 17 | 4 | 192 | 35 | 530 |
| 59,953 | 7 | 48 | 23 | 276 | 1 | 16 | 4 | 193 | 35 | 533 |
| 59,954 | 7 | 49 | 23 | 276 | 1 | 16 | 4 | 194 | 35 | 535 |
| 59,955 | 7 | 49 | 22 | 271 | 1 | 16 | 4 | 193 | 34 | 529 |
| 59,956 | 7 | 49 | 22 | 271 | 1 | 16 | 4 | 193 | 34 | 529 |
| 59,957 | 7 | 49 | 22 | 270 | 1 | 16 | 4 | 191 | 34 | 526 |
| 59,958 | 7 | 47 | 22 | 249 | 1 | 15 | 4 | 180 | 34 | 491 |
| 59,959 | 7 | 47 | 22 | 252 | 1 | 15 | 4 | 181 | 34 | 495 |
| 59,960 | 7 | 47 | 22 | 253 | 1 | 15 | 4 | 182 | 34 | 497 |
| 59,961 | 7 | 47 | 22 | 239 | 1 | 15 | 4 | 177 | 34 | 478 |
| 59,962 | 7 | 47 | 21 | 238 | 1 | 15 | 4 | 177 | 33 | 477 |
| 59,963 | 7 | 47 | 26 | 236 | 2 | 15 | 6 | 176 | 41 | 474 |
| 59,964 | 7 | 47 | 27 | 236 | 2 | 15 | 6 | 176 | 42 | 474 |
| 59,965 | 7 | 47 | 27 | 236 | 2 | 15 | 6 | 176 | 42 | 474 |
| 59,966 | 7 | 47 | 27 | 236 | 2 | 15 | 6 | 177 | 42 | 475 |
| 59,967 | 6 | 47 | 29 | 238 | 1 | 15 | 6 | 178 | 42 | 478 |
| 59,968 | 6 | 47 | 29 | 240 | 1 | 15 | 6 | 185 | 42 | 487 |
| 59,969 | 6 | 48 | 29 | 245 | 1 | 15 | 6 | 195 | 42 | 503 |
| 59,970 | 5 | 48 | 29 | 249 | 1 | 15 | 6 | 196 | 41 | 508 |
| 59,971 | 5 | 47 | 26 | 242 | 1 | 15 | 6 | 195 | 38 | 499 |

|        |   |    |    |     |   |    |   |     |    |     |
|--------|---|----|----|-----|---|----|---|-----|----|-----|
| 59,972 | 4 | 48 | 20 | 276 | 1 | 16 | 6 | 219 | 31 | 559 |
| 59,973 | 1 | 49 | 17 | 280 | 1 | 16 | 4 | 224 | 23 | 569 |
| 59,974 | 1 | 49 | 15 | 285 | 1 | 16 | 4 | 227 | 21 | 577 |
| 59,975 | 2 | 50 | 16 | 282 | 1 | 15 | 4 | 225 | 23 | 572 |
| 59,976 | 2 | 50 | 17 | 283 | 1 | 15 | 4 | 226 | 24 | 574 |
| 59,977 | 2 | 50 | 18 | 291 | 1 | 16 | 4 | 228 | 25 | 585 |
| 59,978 | 2 | 50 | 18 | 291 | 1 | 16 | 4 | 228 | 25 | 585 |
| 59,979 | 2 | 51 | 24 | 296 | 1 | 16 | 3 | 228 | 30 | 591 |
| 59,980 | 2 | 51 | 24 | 298 | 1 | 16 | 3 | 232 | 30 | 597 |
| 59,981 | 2 | 51 | 26 | 299 | 1 | 16 | 3 | 234 | 32 | 600 |
| 59,982 | 2 | 51 | 26 | 301 | 1 | 16 | 4 | 238 | 33 | 606 |
| 59,983 | 2 | 51 | 26 | 303 | 1 | 16 | 4 | 247 | 33 | 617 |
| 59,984 | 2 | 51 | 26 | 304 | 1 | 16 | 4 | 248 | 33 | 619 |
| 59,985 | 2 | 53 | 26 | 318 | 1 | 16 | 4 | 260 | 33 | 647 |
| 59,986 | 2 | 48 | 25 | 307 | 1 | 15 | 4 | 255 | 32 | 625 |
| 59,987 | 2 | 43 | 25 | 269 | 1 | 12 | 4 | 232 | 32 | 556 |
| 59,988 | 2 | 36 | 25 | 230 | 1 | 7  | 4 | 195 | 32 | 468 |
| 59,989 | 1 | 29 | 25 | 217 | 1 | 7  | 4 | 188 | 31 | 441 |
| 59,990 | 1 | 29 | 25 | 217 | 1 | 7  | 4 | 189 | 31 | 442 |
| 59,991 | 2 | 24 | 25 | 192 | 1 | 7  | 4 | 167 | 32 | 390 |
| 59,992 | 2 | 24 | 25 | 197 | 1 | 7  | 4 | 169 | 32 | 397 |
| 59,993 | 2 | 24 | 25 | 198 | 1 | 7  | 4 | 172 | 32 | 401 |
| 59,994 | 2 | 19 | 25 | 183 | 1 | 4  | 4 | 157 | 32 | 363 |
| 59,995 | 2 | 20 | 25 | 186 | 1 | 4  | 4 | 160 | 32 | 370 |
| 59,996 | 2 | 20 | 25 | 187 | 1 | 4  | 4 | 160 | 32 | 371 |
| 59,997 | 2 | 20 | 25 | 187 | 1 | 4  | 4 | 162 | 32 | 373 |
| 59,998 | 2 | 17 | 24 | 181 | 1 | 4  | 4 | 153 | 31 | 355 |
| 59,999 | 2 | 16 | 24 | 149 | 1 | 3  | 4 | 134 | 31 | 302 |
| 60,000 | 2 | 16 | 24 | 148 | 1 | 4  | 4 | 134 | 31 | 302 |
| 60,001 | 2 | 16 | 24 | 151 | 1 | 4  | 5 | 137 | 32 | 308 |
| 60,002 | 2 | 16 | 24 | 148 | 1 | 4  | 5 | 137 | 32 | 305 |
| 60,003 | 2 | 16 | 24 | 148 | 1 | 3  | 5 | 138 | 32 | 305 |
| 60,004 | 2 | 12 | 24 | 146 | 1 | 3  | 5 | 137 | 32 | 298 |
| 60,005 | 2 | 12 | 24 | 149 | 1 | 3  | 5 | 137 | 32 | 301 |
| 60,006 | 2 | 12 | 24 | 149 | 1 | 3  | 5 | 137 | 32 | 301 |
| 60,007 | 2 | 12 | 24 | 149 | 1 | 3  | 5 | 137 | 32 | 301 |
| 60,008 | 2 | 12 | 24 | 150 | 1 | 3  | 5 | 137 | 32 | 302 |
| 60,009 | 2 | 12 | 24 | 150 | 1 | 3  | 5 | 136 | 32 | 301 |
| 60,010 | 2 | 12 | 24 | 149 | 1 | 3  | 5 | 133 | 32 | 297 |
| 60,011 | 2 | 12 | 26 | 152 | 1 | 3  | 5 | 133 | 34 | 300 |
| 60,012 | 2 | 12 | 24 | 153 | 0 | 3  | 3 | 135 | 29 | 303 |



|        |   |    |    |     |   |   |    |     |     |     |
|--------|---|----|----|-----|---|---|----|-----|-----|-----|
| 60,013 | 2 | 12 | 21 | 155 | 0 | 3 | 3  | 141 | 26  | 311 |
| 60,014 | 2 | 12 | 22 | 162 | 0 | 3 | 3  | 146 | 27  | 323 |
| 60,015 | 2 | 12 | 21 | 162 | 0 | 3 | 3  | 146 | 26  | 323 |
| 60,016 | 2 | 12 | 22 | 163 | 0 | 3 | 3  | 146 | 27  | 324 |
| 60,017 | 2 | 12 | 20 | 161 | 0 | 3 | 3  | 143 | 25  | 319 |
| 60,018 | 2 | 12 | 19 | 161 | 0 | 3 | 2  | 143 | 23  | 319 |
| 60,019 | 2 | 12 | 19 | 159 | 0 | 3 | 2  | 136 | 23  | 310 |
| 60,020 | 2 | 12 | 20 | 146 | 0 | 3 | 2  | 119 | 24  | 280 |
| 60,021 | 2 | 12 | 20 | 146 | 0 | 4 | 2  | 119 | 24  | 281 |
| 60,022 | 2 | 11 | 18 | 111 | 0 | 3 | 2  | 95  | 22  | 220 |
| 60,023 | 2 | 10 | 21 | 107 | 0 | 3 | 2  | 90  | 25  | 210 |
| 60,024 | 2 | 10 | 25 | 101 | 0 | 3 | 2  | 87  | 29  | 201 |
| 60,025 | 2 | 10 | 23 | 101 | 0 | 3 | 2  | 87  | 27  | 201 |
| 60,026 | 1 | 9  | 22 | 98  | 0 | 3 | 2  | 86  | 25  | 196 |
| 60,027 | 1 | 9  | 24 | 98  | 0 | 3 | 2  | 86  | 27  | 196 |
| 60,028 | 1 | 9  | 24 | 93  | 0 | 2 | 3  | 84  | 28  | 188 |
| 60,029 | 1 | 9  | 21 | 96  | 0 | 2 | 3  | 85  | 25  | 192 |
| 60,030 | 1 | 7  | 29 | 88  | 0 | 2 | 7  | 84  | 37  | 181 |
| 60,031 | 2 | 7  | 29 | 85  | 0 | 2 | 7  | 78  | 38  | 172 |
| 60,032 | 5 | 7  | 33 | 86  | 0 | 2 | 10 | 78  | 48  | 173 |
| 60,033 | 5 | 7  | 37 | 88  | 0 | 2 | 10 | 76  | 52  | 173 |
| 60,034 | 5 | 7  | 39 | 87  | 0 | 2 | 10 | 68  | 54  | 164 |
| 60,035 | 6 | 5  | 41 | 76  | 0 | 2 | 11 | 51  | 58  | 134 |
| 60,036 | 6 | 5  | 44 | 77  | 0 | 2 | 11 | 54  | 61  | 138 |
| 60,037 | 6 | 5  | 45 | 81  | 0 | 2 | 12 | 51  | 63  | 139 |
| 60,038 | 6 | 5  | 57 | 75  | 1 | 2 | 22 | 52  | 86  | 134 |
| 60,039 | 6 | 5  | 59 | 73  | 1 | 2 | 23 | 50  | 89  | 130 |
| 60,040 | 6 | 5  | 61 | 73  | 1 | 2 | 23 | 49  | 91  | 129 |
| 60,041 | 6 | 5  | 61 | 73  | 1 | 2 | 23 | 49  | 91  | 129 |
| 60,042 | 5 | 5  | 67 | 67  | 1 | 2 | 30 | 44  | 103 | 118 |
| 60,043 | 5 | 5  | 67 | 68  | 1 | 2 | 30 | 44  | 103 | 119 |
| 60,044 | 5 | 5  | 67 | 68  | 1 | 2 | 31 | 44  | 104 | 119 |
| 60,045 | 5 | 5  | 67 | 67  | 1 | 2 | 31 | 43  | 104 | 117 |
| 60,046 | 5 | 1  | 67 | 61  | 1 | 2 | 31 | 38  | 104 | 102 |
| 60,047 | 5 | 1  | 67 | 59  | 1 | 2 | 33 | 35  | 106 | 97  |
| 60,048 | 5 | 1  | 67 | 59  | 1 | 2 | 33 | 35  | 106 | 97  |
| 60,049 | 5 | 1  | 68 | 58  | 1 | 2 | 33 | 35  | 107 | 96  |
| 60,050 | 5 | 3  | 68 | 60  | 1 | 2 | 33 | 35  | 107 | 100 |
| 60,051 | 5 | 3  | 68 | 63  | 1 | 1 | 33 | 35  | 107 | 102 |
| 60,052 | 5 | 4  | 68 | 69  | 1 | 1 | 32 | 31  | 106 | 105 |
| 60,053 | 5 | 4  | 68 | 75  | 1 | 1 | 32 | 36  | 106 | 116 |

|        |   |    |    |     |   |   |    |     |     |     |
|--------|---|----|----|-----|---|---|----|-----|-----|-----|
| 60,054 | 5 | 4  | 69 | 75  | 1 | 1 | 33 | 37  | 108 | 117 |
| 60,055 | 5 | 4  | 69 | 76  | 1 | 1 | 33 | 36  | 108 | 117 |
| 60,056 | 5 | 4  | 70 | 75  | 1 | 1 | 33 | 36  | 109 | 116 |
| 60,057 | 5 | 4  | 70 | 78  | 1 | 1 | 33 | 39  | 109 | 122 |
| 60,058 | 6 | 4  | 70 | 94  | 1 | 1 | 33 | 49  | 110 | 148 |
| 60,059 | 6 | 4  | 70 | 97  | 1 | 1 | 33 | 51  | 110 | 153 |
| 60,060 | 6 | 5  | 70 | 109 | 1 | 2 | 33 | 52  | 110 | 168 |
| 60,061 | 6 | 5  | 70 | 111 | 1 | 2 | 33 | 53  | 110 | 171 |
| 60,062 | 6 | 5  | 68 | 122 | 1 | 2 | 33 | 49  | 108 | 178 |
| 60,063 | 6 | 17 | 69 | 315 | 1 | 4 | 33 | 127 | 109 | 463 |
| 60,064 | 6 | 17 | 69 | 323 | 1 | 4 | 33 | 128 | 109 | 472 |
| 60,065 | 6 | 17 | 68 | 319 | 1 | 4 | 34 | 124 | 109 | 464 |
| 60,066 | 6 | 17 | 68 | 325 | 1 | 4 | 34 | 127 | 109 | 473 |
| 60,067 | 6 | 17 | 67 | 323 | 1 | 4 | 34 | 127 | 108 | 471 |
| 60,068 | 6 | 17 | 67 | 323 | 1 | 4 | 34 | 127 | 108 | 471 |
| 60,069 | 6 | 17 | 67 | 329 | 1 | 4 | 34 | 128 | 108 | 478 |
| 60,070 | 6 | 17 | 66 | 331 | 1 | 4 | 34 | 129 | 107 | 481 |
| 60,071 | 6 | 16 | 66 | 331 | 1 | 4 | 34 | 128 | 107 | 479 |
| 60,072 | 6 | 16 | 67 | 331 | 1 | 3 | 34 | 128 | 108 | 478 |
| 60,073 | 6 | 16 | 67 | 333 | 1 | 3 | 34 | 128 | 108 | 480 |
| 60,074 | 6 | 16 | 65 | 334 | 1 | 3 | 34 | 129 | 106 | 482 |
| 60,075 | 6 | 16 | 61 | 334 | 1 | 3 | 34 | 129 | 102 | 482 |
| 60,076 | 6 | 16 | 61 | 334 | 1 | 3 | 34 | 130 | 102 | 483 |
| 60,077 | 6 | 16 | 61 | 334 | 1 | 3 | 34 | 132 | 102 | 485 |
| 60,078 | 6 | 16 | 58 | 334 | 1 | 3 | 34 | 132 | 99  | 485 |
| 60,079 | 6 | 16 | 56 | 328 | 1 | 3 | 32 | 130 | 95  | 477 |
| 60,080 | 6 | 16 | 54 | 329 | 1 | 3 | 32 | 133 | 93  | 481 |
| 60,081 | 6 | 16 | 46 | 334 | 1 | 3 | 29 | 134 | 82  | 487 |
| 60,082 | 5 | 16 | 45 | 344 | 1 | 3 | 29 | 137 | 80  | 500 |
| 60,083 | 2 | 16 | 43 | 343 | 1 | 3 | 27 | 137 | 73  | 499 |
| 60,084 | 2 | 17 | 41 | 342 | 1 | 3 | 27 | 136 | 71  | 498 |
| 60,085 | 2 | 17 | 40 | 344 | 1 | 3 | 26 | 139 | 69  | 503 |
| 60,086 | 1 | 17 | 38 | 343 | 1 | 3 | 25 | 136 | 65  | 499 |
| 60,087 | 1 | 17 | 35 | 336 | 1 | 3 | 25 | 134 | 62  | 490 |
| 60,088 | 1 | 17 | 34 | 336 | 1 | 3 | 25 | 134 | 61  | 490 |
| 60,089 | 1 | 17 | 22 | 335 | 0 | 3 | 15 | 133 | 38  | 488 |
| 60,090 | 1 | 17 | 20 | 339 | 0 | 3 | 14 | 134 | 35  | 493 |
| 60,091 | 1 | 17 | 18 | 340 | 0 | 3 | 14 | 134 | 33  | 494 |
| 60,092 | 1 | 17 | 19 | 340 | 0 | 3 | 14 | 135 | 34  | 495 |
| 60,093 | 1 | 17 | 14 | 339 | 0 | 3 | 7  | 135 | 22  | 494 |
| 60,094 | 1 | 17 | 14 | 339 | 0 | 3 | 7  | 135 | 22  | 494 |

|        |   |    |    |     |   |   |   |     |    |     |
|--------|---|----|----|-----|---|---|---|-----|----|-----|
| 60,095 | 1 | 17 | 14 | 339 | 0 | 3 | 7 | 134 | 22 | 493 |
| 60,096 | 1 | 17 | 14 | 339 | 0 | 3 | 7 | 134 | 22 | 493 |
| 60,097 | 1 | 17 | 14 | 339 | 0 | 3 | 7 | 134 | 22 | 493 |
| 60,098 | 1 | 17 | 14 | 339 | 0 | 3 | 5 | 135 | 20 | 494 |
| 60,099 | 1 | 17 | 14 | 339 | 0 | 3 | 7 | 135 | 22 | 494 |
| 60,100 | 1 | 14 | 13 | 322 | 0 | 3 | 7 | 137 | 21 | 476 |
| 60,101 | 1 | 14 | 13 | 322 | 0 | 3 | 7 | 137 | 21 | 476 |
| 60,102 | 1 | 14 | 13 | 322 | 0 | 3 | 7 | 137 | 21 | 476 |
| 60,103 | 1 | 14 | 13 | 312 | 0 | 3 | 7 | 128 | 21 | 457 |
| 60,104 | 1 | 14 | 13 | 314 | 0 | 3 | 7 | 129 | 21 | 460 |
| 60,105 | 1 | 14 | 12 | 315 | 0 | 3 | 6 | 130 | 19 | 462 |
| 60,106 | 1 | 14 | 12 | 317 | 0 | 3 | 6 | 130 | 19 | 464 |
| 60,107 | 1 | 14 | 12 | 326 | 0 | 3 | 6 | 133 | 19 | 476 |
| 60,108 | 0 | 16 | 12 | 315 | 0 | 3 | 6 | 123 | 18 | 457 |
| 60,109 | 0 | 16 | 12 | 315 | 0 | 3 | 6 | 123 | 18 | 457 |
| 60,110 | 0 | 16 | 12 | 303 | 0 | 2 | 6 | 120 | 18 | 441 |
| 60,111 | 0 | 16 | 12 | 329 | 0 | 4 | 6 | 138 | 18 | 487 |
| 60,112 | 0 | 16 | 12 | 332 | 0 | 4 | 6 | 138 | 18 | 490 |
| 60,113 | 0 | 16 | 12 | 315 | 0 | 4 | 6 | 137 | 18 | 472 |
| 60,114 | 0 | 4  | 11 | 115 | 0 | 2 | 6 | 58  | 17 | 179 |
| 60,115 | 0 | 4  | 11 | 116 | 0 | 2 | 6 | 58  | 17 | 180 |
| 60,116 | 0 | 5  | 11 | 115 | 0 | 2 | 5 | 59  | 16 | 181 |
| 60,117 | 0 | 5  | 11 | 115 | 0 | 2 | 5 | 60  | 16 | 182 |
| 60,118 | 0 | 5  | 11 | 117 | 0 | 3 | 5 | 60  | 16 | 185 |
| 60,119 | 0 | 5  | 11 | 117 | 0 | 3 | 5 | 60  | 16 | 185 |
| 60,120 | 0 | 5  | 11 | 109 | 0 | 3 | 5 | 58  | 16 | 175 |
| 60,121 | 0 | 5  | 11 | 109 | 0 | 3 | 5 | 58  | 16 | 175 |
| 60,122 | 0 | 5  | 11 | 112 | 0 | 3 | 5 | 59  | 16 | 179 |
| 60,123 | 0 | 5  | 10 | 112 | 0 | 3 | 5 | 61  | 15 | 181 |
| 60,124 | 0 | 5  | 10 | 110 | 0 | 3 | 5 | 61  | 15 | 179 |
| 60,125 | 0 | 5  | 10 | 109 | 0 | 3 | 5 | 60  | 15 | 177 |
| 60,126 | 0 | 5  | 10 | 109 | 0 | 3 | 5 | 60  | 15 | 177 |
| 60,127 | 0 | 5  | 11 | 109 | 0 | 3 | 5 | 57  | 16 | 174 |
| 60,128 | 0 | 5  | 11 | 109 | 0 | 3 | 5 | 57  | 16 | 174 |
| 60,129 | 0 | 5  | 11 | 109 | 0 | 3 | 5 | 57  | 16 | 174 |
| 60,130 | 0 | 5  | 11 | 109 | 0 | 3 | 5 | 57  | 16 | 174 |
| 60,131 | 0 | 5  | 11 | 108 | 0 | 3 | 5 | 54  | 16 | 170 |
| 60,132 | 0 | 5  | 10 | 103 | 0 | 3 | 4 | 53  | 14 | 164 |
| 60,133 | 0 | 5  | 9  | 93  | 0 | 3 | 4 | 50  | 13 | 151 |
| 60,134 | 0 | 5  | 7  | 94  | 0 | 3 | 3 | 50  | 10 | 152 |
| 60,135 | 0 | 4  | 5  | 84  | 0 | 3 | 3 | 45  | 8  | 136 |

|        |   |    |    |     |   |   |    |    |    |     |
|--------|---|----|----|-----|---|---|----|----|----|-----|
| 60,136 | 0 | 4  | 5  | 83  | 0 | 3 | 3  | 45 | 8  | 135 |
| 60,137 | 0 | 4  | 5  | 83  | 0 | 3 | 3  | 45 | 8  | 135 |
| 60,138 | 0 | 4  | 5  | 83  | 0 | 3 | 3  | 45 | 8  | 135 |
| 60,139 | 0 | 4  | 5  | 85  | 0 | 3 | 2  | 46 | 7  | 138 |
| 60,140 | 0 | 4  | 5  | 86  | 0 | 3 | 2  | 45 | 7  | 138 |
| 60,141 | 0 | 4  | 5  | 85  | 0 | 3 | 2  | 44 | 7  | 136 |
| 60,142 | 0 | 4  | 5  | 85  | 0 | 3 | 2  | 44 | 7  | 136 |
| 60,143 | 0 | 4  | 4  | 85  | 0 | 3 | 2  | 43 | 6  | 135 |
| 60,144 | 1 | 4  | 8  | 85  | 0 | 3 | 3  | 43 | 12 | 135 |
| 60,145 | 1 | 5  | 8  | 85  | 0 | 3 | 3  | 43 | 12 | 136 |
| 60,146 | 1 | 5  | 8  | 85  | 0 | 3 | 3  | 43 | 12 | 136 |
| 60,147 | 1 | 5  | 11 | 85  | 0 | 3 | 3  | 43 | 15 | 136 |
| 60,148 | 2 | 5  | 12 | 85  | 0 | 3 | 4  | 43 | 18 | 136 |
| 60,149 | 2 | 5  | 12 | 85  | 0 | 3 | 4  | 42 | 18 | 135 |
| 60,150 | 2 | 5  | 12 | 85  | 0 | 3 | 4  | 42 | 18 | 135 |
| 60,151 | 3 | 5  | 41 | 84  | 0 | 3 | 23 | 39 | 67 | 131 |
| 60,152 | 3 | 5  | 44 | 84  | 0 | 3 | 24 | 39 | 71 | 131 |
| 60,153 | 3 | 5  | 44 | 84  | 0 | 3 | 24 | 38 | 71 | 130 |
| 60,154 | 3 | 5  | 44 | 79  | 0 | 3 | 24 | 36 | 71 | 123 |
| 60,155 | 3 | 5  | 44 | 78  | 0 | 4 | 24 | 35 | 71 | 122 |
| 60,156 | 3 | 5  | 44 | 78  | 0 | 4 | 24 | 36 | 71 | 123 |
| 60,157 | 3 | 5  | 43 | 76  | 0 | 4 | 25 | 41 | 71 | 126 |
| 60,158 | 3 | 5  | 43 | 67  | 0 | 4 | 25 | 38 | 71 | 114 |
| 60,159 | 3 | 3  | 45 | 65  | 0 | 4 | 25 | 41 | 73 | 113 |
| 60,160 | 3 | 3  | 45 | 65  | 0 | 4 | 25 | 42 | 73 | 114 |
| 60,161 | 3 | 3  | 45 | 56  | 0 | 4 | 25 | 41 | 73 | 104 |
| 60,162 | 3 | 3  | 45 | 30  | 0 | 2 | 25 | 23 | 73 | 58  |
| 60,163 | 3 | 3  | 45 | 27  | 0 | 2 | 25 | 24 | 73 | 56  |
| 60,164 | 3 | 3  | 45 | 26  | 0 | 2 | 25 | 21 | 73 | 52  |
| 60,165 | 3 | 3  | 46 | 26  | 0 | 2 | 25 | 21 | 74 | 52  |
| 60,166 | 3 | 2  | 46 | 23  | 0 | 2 | 25 | 19 | 74 | 46  |
| 60,167 | 3 | 2  | 47 | 28  | 0 | 3 | 26 | 19 | 76 | 52  |
| 60,168 | 3 | 2  | 48 | 25  | 0 | 2 | 26 | 17 | 77 | 46  |
| 60,169 | 3 | 2  | 48 | 36  | 0 | 2 | 26 | 29 | 77 | 69  |
| 60,170 | 3 | 3  | 48 | 47  | 0 | 2 | 28 | 32 | 79 | 84  |
| 60,171 | 3 | 3  | 48 | 47  | 0 | 4 | 28 | 32 | 79 | 86  |
| 60,172 | 3 | 7  | 48 | 78  | 0 | 5 | 28 | 40 | 79 | 130 |
| 60,173 | 3 | 8  | 48 | 80  | 0 | 5 | 28 | 45 | 79 | 138 |
| 60,174 | 3 | 8  | 48 | 85  | 0 | 5 | 28 | 44 | 79 | 142 |
| 60,175 | 3 | 10 | 49 | 110 | 0 | 5 | 29 | 75 | 81 | 200 |
| 60,176 | 3 | 15 | 49 | 156 | 0 | 6 | 29 | 95 | 81 | 272 |

|        |   |    |    |     |   |    |    |     |     |     |
|--------|---|----|----|-----|---|----|----|-----|-----|-----|
| 60,177 | 3 | 20 | 50 | 190 | 0 | 7  | 29 | 114 | 82  | 331 |
| 60,178 | 3 | 21 | 49 | 193 | 0 | 7  | 29 | 116 | 81  | 337 |
| 60,179 | 3 | 21 | 49 | 204 | 0 | 7  | 29 | 123 | 81  | 355 |
| 60,180 | 3 | 27 | 49 | 233 | 0 | 7  | 29 | 144 | 81  | 411 |
| 60,181 | 3 | 30 | 51 | 252 | 0 | 7  | 30 | 163 | 84  | 452 |
| 60,182 | 3 | 30 | 51 | 255 | 0 | 7  | 30 | 164 | 84  | 456 |
| 60,183 | 3 | 34 | 52 | 285 | 0 | 7  | 30 | 173 | 85  | 499 |
| 60,184 | 3 | 35 | 52 | 285 | 0 | 7  | 30 | 173 | 85  | 500 |
| 60,185 | 3 | 35 | 52 | 285 | 0 | 7  | 30 | 173 | 85  | 500 |
| 60,186 | 4 | 35 | 52 | 285 | 0 | 7  | 30 | 173 | 86  | 500 |
| 60,187 | 4 | 37 | 59 | 287 | 0 | 7  | 32 | 173 | 95  | 504 |
| 60,188 | 4 | 37 | 59 | 287 | 0 | 7  | 32 | 173 | 95  | 504 |
| 60,189 | 4 | 37 | 59 | 287 | 0 | 7  | 32 | 173 | 95  | 504 |
| 60,190 | 4 | 37 | 61 | 285 | 0 | 7  | 33 | 172 | 98  | 501 |
| 60,191 | 4 | 37 | 62 | 285 | 0 | 7  | 34 | 172 | 100 | 501 |
| 60,192 | 4 | 37 | 66 | 281 | 0 | 7  | 35 | 172 | 105 | 497 |
| 60,193 | 4 | 37 | 66 | 281 | 0 | 7  | 38 | 172 | 108 | 497 |
| 60,194 | 4 | 37 | 68 | 281 | 0 | 7  | 40 | 176 | 112 | 501 |
| 60,195 | 3 | 37 | 63 | 285 | 0 | 9  | 37 | 188 | 103 | 519 |
| 60,196 | 3 | 41 | 66 | 310 | 0 | 10 | 39 | 211 | 108 | 572 |
| 60,197 | 3 | 41 | 63 | 333 | 0 | 10 | 39 | 222 | 105 | 606 |
| 60,198 | 2 | 41 | 62 | 334 | 0 | 11 | 39 | 224 | 103 | 610 |
| 60,199 | 1 | 41 | 52 | 342 | 0 | 11 | 31 | 231 | 84  | 625 |
| 60,200 | 1 | 42 | 41 | 352 | 0 | 11 | 26 | 236 | 68  | 641 |
| 60,201 | 1 | 42 | 34 | 353 | 0 | 11 | 19 | 236 | 54  | 642 |
| 60,202 | 1 | 42 | 31 | 354 | 0 | 11 | 18 | 236 | 50  | 643 |
| 60,203 | 1 | 42 | 32 | 354 | 0 | 11 | 18 | 237 | 51  | 644 |
| 60,204 | 1 | 42 | 35 | 354 | 0 | 11 | 20 | 237 | 56  | 644 |
| 60,205 | 1 | 42 | 35 | 354 | 0 | 11 | 20 | 237 | 56  | 644 |
| 60,206 | 1 | 42 | 37 | 355 | 0 | 10 | 20 | 236 | 58  | 643 |
| 60,207 | 1 | 42 | 37 | 355 | 0 | 10 | 20 | 237 | 58  | 644 |
| 60,208 | 1 | 42 | 37 | 355 | 0 | 10 | 19 | 232 | 57  | 639 |
| 60,209 | 1 | 42 | 37 | 357 | 0 | 10 | 19 | 232 | 57  | 641 |
| 60,210 | 1 | 42 | 35 | 354 | 0 | 10 | 19 | 230 | 55  | 636 |
| 60,211 | 1 | 41 | 36 | 354 | 0 | 10 | 19 | 229 | 56  | 634 |
| 60,212 | 1 | 41 | 36 | 354 | 0 | 10 | 19 | 229 | 56  | 634 |
| 60,213 | 1 | 41 | 36 | 354 | 0 | 10 | 19 | 229 | 56  | 634 |
| 60,214 | 1 | 41 | 36 | 354 | 0 | 10 | 19 | 228 | 56  | 633 |
| 60,215 | 1 | 41 | 35 | 354 | 0 | 10 | 19 | 228 | 55  | 633 |
| 60,216 | 1 | 41 | 35 | 354 | 0 | 10 | 19 | 228 | 55  | 633 |
| 60,217 | 1 | 41 | 35 | 349 | 0 | 9  | 19 | 229 | 55  | 628 |

|        |   |    |    |     |   |   |    |     |    |     |
|--------|---|----|----|-----|---|---|----|-----|----|-----|
| 60,218 | 1 | 41 | 34 | 349 | 0 | 9 | 18 | 229 | 53 | 628 |
| 60,219 | 1 | 41 | 35 | 332 | 0 | 9 | 18 | 216 | 54 | 598 |
| 60,220 | 1 | 41 | 35 | 332 | 0 | 9 | 18 | 216 | 54 | 598 |
| 60,221 | 1 | 40 | 35 | 321 | 0 | 9 | 16 | 213 | 52 | 583 |
| 60,222 | 1 | 40 | 36 | 323 | 0 | 8 | 17 | 216 | 54 | 587 |
| 60,223 | 1 | 37 | 36 | 292 | 0 | 7 | 17 | 208 | 54 | 544 |
| 60,224 | 2 | 36 | 38 | 288 | 0 | 7 | 17 | 203 | 57 | 534 |
| 60,225 | 2 | 34 | 40 | 258 | 0 | 7 | 17 | 171 | 59 | 470 |
| 60,226 | 2 | 34 | 40 | 262 | 0 | 7 | 17 | 171 | 59 | 474 |
| 60,227 | 2 | 29 | 41 | 216 | 0 | 6 | 18 | 151 | 61 | 402 |
| 60,228 | 2 | 25 | 40 | 182 | 0 | 5 | 18 | 133 | 60 | 345 |
| 60,229 | 2 | 24 | 41 | 169 | 0 | 5 | 18 | 127 | 61 | 325 |
| 60,230 | 2 | 24 | 41 | 169 | 0 | 5 | 18 | 127 | 61 | 325 |
| 60,231 | 2 | 18 | 41 | 143 | 0 | 5 | 18 | 106 | 61 | 272 |
| 60,232 | 2 | 15 | 39 | 125 | 0 | 5 | 17 | 87  | 58 | 232 |
| 60,233 | 2 | 11 | 38 | 93  | 0 | 5 | 17 | 78  | 57 | 187 |
| 60,234 | 2 | 11 | 38 | 96  | 0 | 5 | 17 | 78  | 57 | 190 |
| 60,235 | 2 | 10 | 38 | 97  | 0 | 5 | 18 | 78  | 58 | 190 |
| 60,236 | 2 | 10 | 38 | 97  | 0 | 5 | 18 | 78  | 58 | 190 |
| 60,237 | 1 | 10 | 38 | 102 | 0 | 5 | 18 | 80  | 57 | 197 |
| 60,238 | 1 | 8  | 31 | 100 | 0 | 5 | 16 | 79  | 48 | 192 |
| 60,239 | 1 | 8  | 32 | 111 | 0 | 7 | 16 | 88  | 49 | 214 |
| 60,240 | 1 | 9  | 32 | 160 | 0 | 7 | 16 | 96  | 49 | 272 |
| 60,241 | 1 | 10 | 30 | 213 | 0 | 7 | 15 | 102 | 46 | 332 |
| 60,242 | 1 | 10 | 29 | 229 | 0 | 7 | 14 | 106 | 44 | 352 |
| 60,243 | 1 | 10 | 25 | 230 | 0 | 7 | 13 | 107 | 39 | 354 |
| 60,244 | 1 | 10 | 25 | 245 | 0 | 7 | 11 | 111 | 37 | 373 |
| 60,245 | 1 | 10 | 23 | 247 | 0 | 7 | 9  | 107 | 33 | 371 |
| 60,246 | 1 | 10 | 21 | 244 | 0 | 5 | 7  | 96  | 29 | 355 |
| 60,247 | 1 | 6  | 20 | 196 | 0 | 5 | 7  | 65  | 28 | 272 |
| 60,248 | 1 | 6  | 20 | 198 | 0 | 5 | 7  | 66  | 28 | 275 |
| 60,249 | 1 | 6  | 20 | 200 | 0 | 4 | 8  | 64  | 29 | 274 |
| 60,250 | 1 | 6  | 19 | 195 | 0 | 4 | 8  | 57  | 28 | 262 |
| 60,251 | 1 | 8  | 20 | 201 | 0 | 4 | 8  | 63  | 29 | 276 |
| 60,252 | 1 | 8  | 20 | 223 | 0 | 5 | 8  | 69  | 29 | 305 |
| 60,253 | 1 | 8  | 20 | 233 | 0 | 6 | 8  | 76  | 29 | 323 |
| 60,254 | 1 | 11 | 19 | 263 | 0 | 7 | 8  | 88  | 28 | 369 |
| 60,255 | 1 | 13 | 18 | 279 | 0 | 7 | 6  | 92  | 25 | 391 |
| 60,256 | 1 | 13 | 21 | 283 | 0 | 7 | 6  | 94  | 28 | 397 |
| 60,257 | 1 | 13 | 20 | 283 | 0 | 7 | 8  | 95  | 29 | 398 |
| 60,258 | 1 | 13 | 20 | 283 | 0 | 7 | 8  | 95  | 29 | 398 |

|        |   |    |    |     |   |    |    |     |    |     |
|--------|---|----|----|-----|---|----|----|-----|----|-----|
| 60,259 | 1 | 14 | 20 | 299 | 0 | 7  | 9  | 103 | 30 | 423 |
| 60,260 | 1 | 15 | 20 | 303 | 0 | 7  | 9  | 107 | 30 | 432 |
| 60,261 | 1 | 15 | 21 | 308 | 0 | 7  | 9  | 107 | 31 | 437 |
| 60,262 | 1 | 15 | 20 | 310 | 0 | 7  | 9  | 107 | 30 | 439 |
| 60,263 | 1 | 15 | 20 | 310 | 0 | 7  | 9  | 107 | 30 | 439 |
| 60,264 | 1 | 16 | 20 | 316 | 0 | 7  | 9  | 108 | 30 | 447 |
| 60,265 | 1 | 16 | 20 | 317 | 0 | 7  | 9  | 108 | 30 | 448 |
| 60,266 | 1 | 16 | 20 | 318 | 0 | 7  | 9  | 108 | 30 | 449 |
| 60,267 | 1 | 16 | 20 | 318 | 0 | 7  | 9  | 108 | 30 | 449 |
| 60,268 | 2 | 16 | 20 | 319 | 0 | 7  | 9  | 110 | 31 | 452 |
| 60,269 | 3 | 16 | 20 | 323 | 1 | 7  | 9  | 114 | 33 | 460 |
| 60,270 | 3 | 16 | 18 | 326 | 1 | 7  | 9  | 115 | 31 | 464 |
| 60,271 | 3 | 26 | 18 | 427 | 1 | 11 | 9  | 135 | 31 | 599 |
| 60,272 | 3 | 28 | 18 | 435 | 1 | 11 | 9  | 142 | 31 | 616 |
| 60,273 | 3 | 30 | 18 | 500 | 1 | 11 | 8  | 151 | 30 | 692 |
| 60,274 | 3 | 43 | 19 | 574 | 1 | 14 | 8  | 191 | 31 | 822 |
| 60,275 | 2 | 43 | 21 | 576 | 1 | 14 | 10 | 190 | 34 | 823 |
| 60,276 | 2 | 45 | 20 | 581 | 1 | 14 | 10 | 191 | 33 | 831 |
| 60,277 | 2 | 45 | 20 | 577 | 1 | 14 | 9  | 192 | 32 | 828 |
| 60,278 | 2 | 46 | 20 | 585 | 1 | 15 | 12 | 194 | 35 | 840 |
| 60,279 | 2 | 45 | 20 | 588 | 1 | 15 | 12 | 194 | 35 | 842 |
| 60,280 | 2 | 45 | 19 | 607 | 1 | 15 | 13 | 195 | 35 | 862 |
| 60,281 | 2 | 47 | 19 | 616 | 1 | 15 | 13 | 201 | 35 | 879 |
| 60,282 | 2 | 47 | 19 | 618 | 1 | 15 | 13 | 202 | 35 | 882 |
| 60,283 | 2 | 47 | 21 | 616 | 1 | 15 | 14 | 201 | 38 | 879 |
| 60,284 | 2 | 47 | 21 | 616 | 1 | 15 | 14 | 202 | 38 | 880 |
| 60,285 | 2 | 47 | 21 | 620 | 1 | 15 | 14 | 206 | 38 | 888 |
| 60,286 | 2 | 47 | 21 | 618 | 1 | 15 | 13 | 206 | 37 | 886 |
| 60,287 | 2 | 47 | 21 | 618 | 1 | 15 | 13 | 206 | 37 | 886 |
| 60,288 | 2 | 47 | 21 | 613 | 1 | 15 | 13 | 204 | 37 | 879 |
| 60,289 | 2 | 47 | 20 | 602 | 1 | 13 | 13 | 194 | 36 | 856 |
| 60,290 | 2 | 46 | 19 | 555 | 1 | 13 | 13 | 186 | 35 | 800 |
| 60,291 | 2 | 46 | 19 | 555 | 1 | 13 | 13 | 187 | 35 | 801 |
| 60,292 | 2 | 45 | 20 | 504 | 1 | 13 | 13 | 181 | 36 | 743 |
| 60,293 | 2 | 45 | 20 | 488 | 1 | 13 | 13 | 178 | 36 | 724 |
| 60,294 | 2 | 46 | 20 | 472 | 1 | 13 | 13 | 173 | 36 | 704 |
| 60,295 | 2 | 46 | 20 | 470 | 1 | 13 | 12 | 173 | 35 | 702 |
| 60,296 | 2 | 46 | 20 | 470 | 1 | 13 | 12 | 173 | 35 | 702 |
| 60,297 | 2 | 46 | 20 | 469 | 1 | 13 | 12 | 172 | 35 | 700 |
| 60,298 | 2 | 45 | 20 | 467 | 1 | 12 | 12 | 171 | 35 | 695 |
| 60,299 | 2 | 45 | 20 | 461 | 1 | 12 | 11 | 171 | 34 | 689 |

|        |   |    |    |     |   |    |    |     |    |     |
|--------|---|----|----|-----|---|----|----|-----|----|-----|
| 60,300 | 2 | 45 | 20 | 462 | 1 | 12 | 11 | 171 | 34 | 690 |
| 60,301 | 2 | 45 | 20 | 462 | 1 | 12 | 11 | 171 | 34 | 690 |
| 60,302 | 2 | 42 | 19 | 446 | 1 | 11 | 11 | 160 | 33 | 659 |
| 60,303 | 2 | 42 | 19 | 423 | 1 | 10 | 12 | 154 | 34 | 629 |
| 60,304 | 2 | 39 | 21 | 383 | 1 | 9  | 12 | 134 | 36 | 565 |
| 60,305 | 2 | 40 | 21 | 383 | 1 | 9  | 12 | 134 | 36 | 566 |
| 60,306 | 2 | 38 | 19 | 368 | 1 | 9  | 12 | 130 | 34 | 545 |
| 60,307 | 2 | 38 | 15 | 374 | 1 | 11 | 12 | 143 | 30 | 566 |
| 60,308 | 2 | 40 | 15 | 399 | 1 | 12 | 10 | 154 | 28 | 605 |
| 60,309 | 2 | 40 | 15 | 405 | 1 | 12 | 9  | 155 | 27 | 612 |
| 60,310 | 2 | 39 | 15 | 390 | 1 | 12 | 9  | 150 | 27 | 591 |
| 60,311 | 2 | 38 | 14 | 385 | 1 | 12 | 9  | 148 | 26 | 583 |
| 60,312 | 2 | 38 | 14 | 378 | 1 | 12 | 9  | 147 | 26 | 575 |
| 60,313 | 2 | 39 | 14 | 379 | 1 | 12 | 9  | 147 | 26 | 577 |
| 60,314 | 2 | 42 | 14 | 389 | 1 | 12 | 9  | 151 | 26 | 594 |
| 60,315 | 2 | 41 | 14 | 383 | 1 | 12 | 9  | 149 | 26 | 585 |
| 60,316 | 3 | 41 | 24 | 384 | 2 | 12 | 15 | 149 | 44 | 586 |
| 60,317 | 3 | 41 | 24 | 384 | 2 | 12 | 15 | 150 | 44 | 587 |
| 60,318 | 2 | 41 | 24 | 387 | 2 | 12 | 15 | 149 | 43 | 589 |
| 60,319 | 1 | 41 | 24 | 386 | 2 | 12 | 15 | 146 | 42 | 585 |
| 60,320 | 1 | 40 | 24 | 379 | 1 | 12 | 15 | 140 | 41 | 571 |
| 60,321 | 1 | 40 | 24 | 379 | 1 | 12 | 15 | 141 | 41 | 572 |
| 60,322 | 1 | 31 | 24 | 278 | 1 | 8  | 15 | 121 | 41 | 438 |
| 60,323 | 2 | 30 | 24 | 281 | 1 | 8  | 15 | 122 | 42 | 441 |
| 60,324 | 2 | 28 | 24 | 214 | 1 | 7  | 15 | 112 | 42 | 361 |
| 60,325 | 2 | 14 | 26 | 142 | 1 | 5  | 15 | 73  | 44 | 234 |
| 60,326 | 3 | 14 | 24 | 143 | 1 | 5  | 13 | 74  | 41 | 236 |
| 60,327 | 3 | 12 | 22 | 132 | 1 | 4  | 12 | 69  | 38 | 217 |
| 60,328 | 3 | 12 | 22 | 134 | 1 | 4  | 12 | 72  | 38 | 222 |
| 60,329 | 3 | 12 | 21 | 136 | 1 | 4  | 9  | 73  | 34 | 225 |
| 60,330 | 3 | 10 | 21 | 102 | 1 | 4  | 8  | 62  | 33 | 178 |
| 60,331 | 3 | 11 | 21 | 105 | 1 | 4  | 8  | 65  | 33 | 185 |
| 60,332 | 3 | 11 | 21 | 105 | 1 | 4  | 7  | 66  | 32 | 186 |
| 60,333 | 3 | 11 | 22 | 106 | 1 | 4  | 8  | 66  | 34 | 187 |
| 60,334 | 4 | 11 | 23 | 103 | 1 | 4  | 9  | 65  | 37 | 183 |
| 60,335 | 4 | 11 | 23 | 103 | 1 | 4  | 9  | 65  | 37 | 183 |
| 60,336 | 4 | 11 | 23 | 101 | 1 | 4  | 9  | 61  | 37 | 177 |
| 60,337 | 4 | 11 | 23 | 101 | 1 | 4  | 9  | 61  | 37 | 177 |
| 60,338 | 4 | 12 | 23 | 101 | 1 | 4  | 9  | 61  | 37 | 178 |
| 60,339 | 4 | 12 | 23 | 101 | 1 | 4  | 9  | 61  | 37 | 178 |
| 60,340 | 4 | 12 | 24 | 100 | 1 | 4  | 10 | 61  | 39 | 177 |



|        |   |    |    |     |   |    |    |     |    |     |
|--------|---|----|----|-----|---|----|----|-----|----|-----|
| 60,341 | 4 | 12 | 24 | 100 | 1 | 4  | 10 | 63  | 39 | 179 |
| 60,342 | 4 | 14 | 26 | 108 | 1 | 4  | 11 | 74  | 42 | 200 |
| 60,343 | 4 | 14 | 27 | 107 | 1 | 4  | 11 | 75  | 43 | 200 |
| 60,344 | 4 | 15 | 27 | 110 | 1 | 4  | 11 | 77  | 43 | 206 |
| 60,345 | 4 | 14 | 30 | 115 | 2 | 4  | 12 | 77  | 48 | 210 |
| 60,346 | 4 | 17 | 30 | 148 | 2 | 4  | 12 | 95  | 48 | 264 |
| 60,347 | 4 | 17 | 30 | 152 | 2 | 4  | 12 | 96  | 48 | 269 |
| 60,348 | 4 | 17 | 30 | 162 | 2 | 4  | 14 | 98  | 50 | 281 |
| 60,349 | 4 | 26 | 30 | 178 | 2 | 5  | 14 | 116 | 50 | 325 |
| 60,350 | 4 | 26 | 30 | 179 | 2 | 5  | 14 | 116 | 50 | 326 |
| 60,351 | 4 | 26 | 33 | 179 | 2 | 5  | 15 | 117 | 54 | 327 |
| 60,352 | 4 | 28 | 38 | 196 | 2 | 5  | 15 | 122 | 59 | 351 |
| 60,353 | 4 | 31 | 38 | 212 | 2 | 6  | 14 | 130 | 58 | 379 |
| 60,354 | 4 | 31 | 37 | 218 | 2 | 7  | 14 | 132 | 57 | 388 |
| 60,355 | 4 | 30 | 36 | 217 | 2 | 7  | 15 | 133 | 57 | 387 |
| 60,356 | 5 | 30 | 36 | 216 | 2 | 7  | 15 | 133 | 58 | 386 |
| 60,357 | 5 | 30 | 38 | 205 | 2 | 5  | 15 | 116 | 60 | 356 |
| 60,358 | 5 | 30 | 38 | 207 | 2 | 5  | 15 | 116 | 60 | 358 |
| 60,359 | 5 | 28 | 38 | 186 | 2 | 4  | 15 | 108 | 60 | 326 |
| 60,360 | 6 | 28 | 42 | 191 | 2 | 6  | 21 | 109 | 71 | 334 |
| 60,361 | 6 | 30 | 45 | 213 | 2 | 8  | 27 | 120 | 80 | 371 |
| 60,362 | 6 | 30 | 45 | 216 | 2 | 8  | 27 | 121 | 80 | 375 |
| 60,363 | 6 | 29 | 42 | 215 | 2 | 8  | 27 | 121 | 77 | 373 |
| 60,364 | 6 | 29 | 43 | 221 | 2 | 8  | 27 | 123 | 78 | 381 |
| 60,365 | 5 | 26 | 36 | 211 | 1 | 8  | 21 | 119 | 63 | 364 |
| 60,366 | 5 | 26 | 36 | 210 | 1 | 8  | 21 | 119 | 63 | 363 |
| 60,367 | 5 | 26 | 36 | 210 | 1 | 8  | 21 | 121 | 63 | 365 |
| 60,368 | 5 | 27 | 36 | 209 | 1 | 8  | 21 | 120 | 63 | 364 |
| 60,369 | 6 | 27 | 36 | 206 | 1 | 8  | 21 | 120 | 64 | 361 |
| 60,370 | 6 | 28 | 36 | 211 | 1 | 9  | 21 | 121 | 64 | 369 |
| 60,371 | 7 | 29 | 36 | 265 | 1 | 12 | 23 | 143 | 67 | 449 |
| 60,372 | 7 | 33 | 36 | 294 | 1 | 17 | 23 | 167 | 67 | 511 |
| 60,373 | 7 | 38 | 35 | 316 | 1 | 17 | 23 | 172 | 66 | 543 |
| 60,374 | 6 | 37 | 36 | 310 | 1 | 18 | 25 | 166 | 68 | 531 |
| 60,375 | 6 | 39 | 34 | 318 | 1 | 18 | 25 | 166 | 66 | 541 |
| 60,376 | 6 | 39 | 35 | 322 | 1 | 17 | 26 | 171 | 68 | 549 |
| 60,377 | 5 | 39 | 33 | 318 | 1 | 17 | 26 | 170 | 65 | 544 |
| 60,378 | 5 | 39 | 33 | 318 | 1 | 17 | 27 | 169 | 66 | 543 |
| 60,379 | 5 | 41 | 33 | 350 | 1 | 18 | 27 | 197 | 66 | 606 |
| 60,380 | 5 | 41 | 33 | 434 | 1 | 19 | 27 | 209 | 66 | 703 |
| 60,381 | 5 | 41 | 33 | 479 | 1 | 24 | 28 | 242 | 67 | 786 |

|        |    |    |    |     |   |    |    |     |    |     |
|--------|----|----|----|-----|---|----|----|-----|----|-----|
| 60,382 | 5  | 40 | 33 | 481 | 1 | 24 | 28 | 239 | 67 | 784 |
| 60,383 | 7  | 41 | 32 | 484 | 1 | 25 | 29 | 239 | 69 | 789 |
| 60,384 | 7  | 44 | 31 | 518 | 1 | 28 | 28 | 280 | 67 | 870 |
| 60,385 | 6  | 44 | 30 | 521 | 1 | 28 | 27 | 281 | 64 | 874 |
| 60,386 | 6  | 48 | 30 | 538 | 1 | 28 | 27 | 286 | 64 | 900 |
| 60,387 | 6  | 49 | 29 | 542 | 1 | 28 | 26 | 291 | 62 | 910 |
| 60,388 | 6  | 51 | 34 | 558 | 1 | 29 | 26 | 303 | 67 | 941 |
| 60,389 | 6  | 51 | 36 | 559 | 1 | 29 | 27 | 303 | 70 | 942 |
| 60,390 | 6  | 52 | 36 | 570 | 1 | 29 | 27 | 305 | 70 | 956 |
| 60,391 | 6  | 52 | 36 | 573 | 1 | 29 | 27 | 309 | 70 | 963 |
| 60,392 | 6  | 50 | 33 | 565 | 1 | 29 | 26 | 295 | 66 | 939 |
| 60,393 | 6  | 49 | 32 | 563 | 1 | 29 | 26 | 293 | 65 | 934 |
| 60,394 | 6  | 46 | 32 | 522 | 1 | 29 | 26 | 275 | 65 | 872 |
| 60,395 | 6  | 46 | 32 | 522 | 1 | 29 | 26 | 275 | 65 | 872 |
| 60,396 | 6  | 46 | 29 | 518 | 0 | 29 | 25 | 273 | 60 | 866 |
| 60,397 | 6  | 46 | 29 | 519 | 0 | 29 | 25 | 275 | 60 | 869 |
| 60,398 | 6  | 46 | 29 | 519 | 0 | 29 | 23 | 275 | 58 | 869 |
| 60,399 | 6  | 37 | 27 | 493 | 0 | 28 | 22 | 255 | 55 | 813 |
| 60,400 | 6  | 37 | 27 | 492 | 0 | 28 | 22 | 255 | 55 | 812 |
| 60,401 | 6  | 37 | 26 | 492 | 0 | 28 | 22 | 255 | 54 | 812 |
| 60,402 | 6  | 37 | 22 | 491 | 0 | 28 | 22 | 254 | 50 | 810 |
| 60,403 | 9  | 32 | 22 | 458 | 0 | 27 | 23 | 241 | 54 | 758 |
| 60,404 | 9  | 32 | 23 | 452 | 1 | 26 | 24 | 239 | 57 | 749 |
| 60,405 | 9  | 32 | 21 | 456 | 1 | 26 | 24 | 240 | 55 | 754 |
| 60,406 | 10 | 33 | 29 | 464 | 1 | 26 | 24 | 250 | 64 | 773 |
| 60,407 | 10 | 35 | 32 | 467 | 1 | 26 | 26 | 252 | 69 | 780 |
| 60,408 | 10 | 35 | 31 | 469 | 1 | 26 | 27 | 249 | 69 | 779 |
| 60,409 | 10 | 37 | 31 | 474 | 1 | 26 | 28 | 252 | 70 | 789 |
| 60,410 | 9  | 37 | 27 | 478 | 1 | 26 | 22 | 256 | 59 | 797 |
| 60,411 | 9  | 35 | 24 | 444 | 1 | 22 | 18 | 242 | 52 | 743 |
| 60,412 | 9  | 35 | 24 | 440 | 1 | 22 | 16 | 239 | 50 | 736 |
| 60,413 | 10 | 35 | 24 | 440 | 1 | 22 | 16 | 239 | 51 | 736 |
| 60,414 | 10 | 36 | 24 | 441 | 1 | 22 | 16 | 239 | 51 | 738 |
| 60,415 | 10 | 36 | 23 | 436 | 1 | 22 | 16 | 237 | 50 | 731 |
| 60,416 | 10 | 36 | 23 | 437 | 1 | 22 | 16 | 237 | 50 | 732 |
| 60,417 | 10 | 36 | 24 | 436 | 1 | 22 | 16 | 237 | 51 | 731 |
| 60,418 | 10 | 36 | 25 | 436 | 1 | 22 | 16 | 236 | 52 | 730 |
| 60,419 | 10 | 35 | 25 | 437 | 1 | 22 | 16 | 236 | 52 | 730 |
| 60,420 | 9  | 33 | 26 | 378 | 1 | 19 | 16 | 214 | 52 | 644 |
| 60,421 | 9  | 36 | 26 | 389 | 1 | 20 | 16 | 223 | 52 | 668 |
| 60,422 | 8  | 37 | 26 | 389 | 1 | 20 | 14 | 222 | 49 | 668 |

|        |   |    |    |     |   |    |    |     |    |     |
|--------|---|----|----|-----|---|----|----|-----|----|-----|
| 60,423 | 8 | 35 | 26 | 366 | 1 | 15 | 14 | 200 | 49 | 616 |
| 60,424 | 8 | 28 | 26 | 332 | 1 | 14 | 14 | 193 | 49 | 567 |
| 60,425 | 8 | 28 | 25 | 336 | 1 | 14 | 12 | 199 | 46 | 577 |
| 60,426 | 8 | 29 | 25 | 341 | 1 | 15 | 12 | 203 | 46 | 588 |
| 60,427 | 8 | 29 | 23 | 335 | 1 | 15 | 11 | 196 | 43 | 575 |
| 60,428 | 8 | 29 | 23 | 341 | 1 | 15 | 11 | 202 | 43 | 587 |
| 60,429 | 8 | 28 | 23 | 336 | 1 | 15 | 11 | 200 | 43 | 579 |
| 60,430 | 8 | 26 | 23 | 305 | 1 | 14 | 12 | 172 | 44 | 517 |
| 60,431 | 8 | 26 | 23 | 221 | 1 | 13 | 12 | 159 | 44 | 419 |
| 60,432 | 8 | 26 | 23 | 176 | 1 | 8  | 11 | 128 | 43 | 338 |
| 60,433 | 8 | 69 | 23 | 395 | 1 | 26 | 11 | 282 | 43 | 772 |
| 60,434 | 6 | 68 | 22 | 399 | 1 | 25 | 10 | 283 | 39 | 775 |
| 60,435 | 7 | 65 | 22 | 387 | 1 | 23 | 10 | 252 | 40 | 727 |
| 60,436 | 7 | 65 | 21 | 387 | 1 | 23 | 10 | 251 | 39 | 726 |
| 60,437 | 7 | 61 | 18 | 372 | 1 | 23 | 10 | 249 | 36 | 705 |
| 60,438 | 7 | 57 | 17 | 353 | 1 | 22 | 10 | 234 | 35 | 666 |
| 60,439 | 7 | 57 | 17 | 355 | 1 | 22 | 10 | 234 | 35 | 668 |
| 60,440 | 7 | 57 | 19 | 356 | 1 | 22 | 9  | 236 | 36 | 671 |
| 60,441 | 7 | 56 | 19 | 344 | 1 | 22 | 9  | 234 | 36 | 656 |
| 60,442 | 7 | 56 | 21 | 342 | 1 | 22 | 10 | 230 | 39 | 650 |
| 60,443 | 7 | 56 | 21 | 342 | 1 | 22 | 10 | 230 | 39 | 650 |
| 60,444 | 7 | 56 | 21 | 342 | 1 | 22 | 10 | 231 | 39 | 651 |
| 60,445 | 8 | 56 | 21 | 342 | 1 | 22 | 10 | 231 | 40 | 651 |
| 60,446 | 8 | 56 | 21 | 342 | 1 | 22 | 10 | 231 | 40 | 651 |
| 60,447 | 9 | 56 | 22 | 343 | 1 | 22 | 11 | 232 | 43 | 653 |
| 60,448 | 9 | 56 | 22 | 343 | 1 | 22 | 11 | 232 | 43 | 653 |
| 60,449 | 9 | 56 | 23 | 343 | 1 | 22 | 11 | 232 | 44 | 653 |
| 60,450 | 9 | 56 | 24 | 343 | 1 | 22 | 11 | 233 | 45 | 654 |
| 60,451 | 9 | 56 | 24 | 343 | 1 | 22 | 11 | 234 | 45 | 655 |
| 60,452 | 8 | 56 | 24 | 346 | 1 | 22 | 11 | 235 | 44 | 659 |
| 60,453 | 7 | 56 | 24 | 358 | 1 | 23 | 11 | 240 | 43 | 677 |
| 60,454 | 6 | 57 | 23 | 360 | 1 | 23 | 10 | 241 | 40 | 681 |
| 60,455 | 6 | 63 | 22 | 380 | 0 | 25 | 9  | 253 | 37 | 721 |
| 60,456 | 6 | 63 | 16 | 377 | 0 | 25 | 8  | 253 | 30 | 718 |
| 60,457 | 5 | 73 | 17 | 414 | 0 | 26 | 11 | 258 | 33 | 771 |
| 60,458 | 4 | 74 | 14 | 416 | 0 | 27 | 9  | 261 | 27 | 778 |
| 60,459 | 4 | 75 | 12 | 420 | 0 | 27 | 8  | 260 | 24 | 782 |
| 60,460 | 4 | 76 | 13 | 421 | 0 | 27 | 7  | 254 | 24 | 778 |
| 60,461 | 4 | 76 | 14 | 423 | 0 | 27 | 7  | 258 | 25 | 784 |
| 60,462 | 6 | 79 | 17 | 428 | 0 | 27 | 14 | 258 | 37 | 792 |
| 60,463 | 6 | 79 | 17 | 430 | 0 | 27 | 14 | 259 | 37 | 795 |

|        |   |    |    |     |   |    |    |     |    |     |
|--------|---|----|----|-----|---|----|----|-----|----|-----|
| 60,464 | 5 | 78 | 17 | 432 | 0 | 27 | 15 | 260 | 37 | 797 |
| 60,465 | 5 | 78 | 17 | 432 | 0 | 27 | 15 | 260 | 37 | 797 |
| 60,466 | 5 | 81 | 18 | 446 | 0 | 27 | 15 | 268 | 38 | 822 |
| 60,467 | 5 | 89 | 17 | 463 | 0 | 27 | 15 | 280 | 37 | 859 |
| 60,468 | 5 | 89 | 16 | 464 | 0 | 27 | 15 | 281 | 36 | 861 |
| 60,469 | 5 | 89 | 16 | 464 | 0 | 27 | 15 | 280 | 36 | 860 |
| 60,470 | 5 | 89 | 18 | 463 | 0 | 27 | 16 | 281 | 39 | 860 |
| 60,471 | 5 | 86 | 17 | 452 | 0 | 25 | 16 | 271 | 38 | 834 |
| 60,472 | 5 | 86 | 17 | 452 | 0 | 25 | 16 | 272 | 38 | 835 |
| 60,473 | 5 | 84 | 19 | 451 | 0 | 25 | 16 | 270 | 40 | 830 |
| 60,474 | 5 | 84 | 19 | 452 | 0 | 25 | 16 | 271 | 40 | 832 |
| 60,475 | 5 | 84 | 19 | 447 | 0 | 25 | 17 | 265 | 41 | 821 |
| 60,476 | 5 | 83 | 19 | 442 | 0 | 24 | 20 | 261 | 44 | 810 |
| 60,477 | 6 | 83 | 23 | 442 | 0 | 24 | 19 | 261 | 48 | 810 |
| 60,478 | 6 | 83 | 23 | 436 | 0 | 24 | 19 | 254 | 48 | 797 |
| 60,479 | 6 | 83 | 24 | 434 | 0 | 24 | 19 | 253 | 49 | 794 |
| 60,480 | 6 | 83 | 24 | 434 | 0 | 24 | 18 | 253 | 48 | 794 |
| 60,481 | 6 | 83 | 24 | 432 | 0 | 24 | 19 | 253 | 49 | 792 |
| 60,482 | 6 | 83 | 26 | 430 | 0 | 24 | 20 | 253 | 52 | 790 |
| 60,483 | 6 | 40 | 33 | 208 | 1 | 6  | 22 | 99  | 62 | 353 |
| 60,484 | 6 | 40 | 34 | 200 | 1 | 6  | 22 | 97  | 63 | 343 |
| 60,485 | 5 | 40 | 34 | 174 | 1 | 5  | 22 | 89  | 62 | 308 |
| 60,486 | 5 | 40 | 34 | 174 | 1 | 6  | 22 | 90  | 62 | 310 |
| 60,487 | 5 | 41 | 34 | 174 | 1 | 6  | 22 | 90  | 62 | 311 |
| 60,488 | 6 | 41 | 34 | 172 | 1 | 6  | 22 | 86  | 63 | 305 |
| 60,489 | 6 | 41 | 34 | 168 | 1 | 6  | 22 | 84  | 63 | 299 |
| 60,490 | 6 | 41 | 31 | 168 | 1 | 6  | 22 | 84  | 60 | 299 |
| 60,491 | 6 | 41 | 31 | 166 | 1 | 6  | 22 | 82  | 60 | 295 |
| 60,492 | 6 | 41 | 30 | 165 | 1 | 6  | 22 | 82  | 59 | 294 |
| 60,493 | 6 | 41 | 29 | 165 | 1 | 6  | 21 | 83  | 57 | 295 |
| 60,494 | 6 | 42 | 29 | 196 | 1 | 8  | 21 | 105 | 57 | 351 |
| 60,495 | 6 | 51 | 29 | 296 | 1 | 13 | 21 | 191 | 57 | 551 |
| 60,496 | 5 | 52 | 29 | 364 | 1 | 17 | 21 | 242 | 56 | 675 |
| 60,497 | 4 | 52 | 28 | 384 | 1 | 17 | 21 | 257 | 54 | 710 |
| 60,498 | 4 | 52 | 28 | 382 | 1 | 17 | 20 | 254 | 53 | 705 |
| 60,499 | 4 | 54 | 27 | 389 | 1 | 17 | 20 | 259 | 52 | 719 |
| 60,500 | 4 | 54 | 27 | 395 | 1 | 17 | 20 | 264 | 52 | 730 |
| 60,501 | 4 | 54 | 31 | 397 | 1 | 17 | 21 | 263 | 57 | 731 |
| 60,502 | 4 | 54 | 31 | 397 | 1 | 17 | 21 | 262 | 57 | 730 |
| 60,503 | 4 | 54 | 31 | 394 | 1 | 17 | 21 | 261 | 57 | 726 |
| 60,504 | 4 | 53 | 33 | 380 | 1 | 16 | 21 | 254 | 59 | 703 |

|        |   |    |    |     |   |    |    |     |    |     |
|--------|---|----|----|-----|---|----|----|-----|----|-----|
| 60,505 | 4 | 47 | 34 | 360 | 1 | 14 | 21 | 243 | 60 | 664 |
| 60,506 | 4 | 47 | 35 | 359 | 1 | 14 | 22 | 242 | 62 | 662 |
| 60,507 | 4 | 48 | 35 | 363 | 1 | 16 | 22 | 256 | 62 | 683 |
| 60,508 | 4 | 37 | 34 | 318 | 1 | 15 | 19 | 242 | 58 | 612 |
| 60,509 | 4 | 34 | 36 | 313 | 1 | 14 | 19 | 240 | 60 | 601 |
| 60,510 | 4 | 33 | 36 | 305 | 1 | 14 | 19 | 239 | 60 | 591 |
| 60,511 | 4 | 30 | 35 | 296 | 1 | 14 | 19 | 238 | 59 | 578 |
| 60,512 | 2 | 30 | 35 | 295 | 1 | 14 | 15 | 238 | 53 | 577 |
| 60,513 | 2 | 28 | 32 | 290 | 1 | 14 | 12 | 236 | 47 | 568 |
| 60,514 | 2 | 28 | 32 | 290 | 1 | 14 | 12 | 236 | 47 | 568 |
| 60,515 | 2 | 28 | 32 | 287 | 1 | 14 | 11 | 236 | 46 | 565 |
| 60,516 | 2 | 25 | 32 | 273 | 1 | 14 | 11 | 228 | 46 | 540 |
| 60,517 | 2 | 17 | 32 | 255 | 1 | 14 | 11 | 216 | 46 | 502 |
| 60,518 | 2 | 17 | 32 | 255 | 1 | 14 | 12 | 216 | 47 | 502 |
| 60,519 | 2 | 17 | 32 | 259 | 1 | 14 | 14 | 217 | 49 | 507 |
| 60,520 | 2 | 20 | 32 | 265 | 1 | 14 | 13 | 220 | 48 | 519 |
| 60,521 | 2 | 20 | 32 | 267 | 1 | 14 | 13 | 220 | 48 | 521 |
| 60,522 | 2 | 22 | 33 | 278 | 1 | 14 | 13 | 225 | 49 | 539 |
| 60,523 | 2 | 22 | 38 | 281 | 1 | 14 | 18 | 224 | 59 | 541 |
| 60,524 | 2 | 21 | 36 | 276 | 1 | 14 | 18 | 224 | 57 | 535 |
| 60,525 | 2 | 21 | 37 | 278 | 1 | 14 | 18 | 225 | 58 | 538 |
| 60,526 | 2 | 22 | 38 | 283 | 1 | 14 | 17 | 227 | 58 | 546 |
| 60,527 | 2 | 26 | 38 | 300 | 1 | 17 | 14 | 243 | 55 | 586 |
| 60,528 | 1 | 26 | 34 | 301 | 1 | 17 | 14 | 243 | 50 | 587 |
| 60,529 | 1 | 26 | 34 | 303 | 2 | 17 | 14 | 247 | 51 | 593 |
| 60,530 | 1 | 26 | 33 | 307 | 2 | 17 | 14 | 248 | 50 | 598 |
| 60,531 | 1 | 27 | 34 | 319 | 2 | 17 | 13 | 249 | 50 | 612 |
| 60,532 | 2 | 27 | 34 | 324 | 2 | 17 | 12 | 251 | 50 | 619 |
| 60,533 | 5 | 27 | 49 | 328 | 2 | 17 | 18 | 252 | 74 | 624 |
| 60,534 | 5 | 27 | 42 | 328 | 1 | 17 | 16 | 251 | 64 | 623 |
| 60,535 | 5 | 27 | 42 | 328 | 1 | 17 | 17 | 251 | 65 | 623 |
| 60,536 | 6 | 26 | 44 | 327 | 1 | 16 | 17 | 250 | 68 | 619 |
| 60,537 | 8 | 26 | 57 | 327 | 1 | 16 | 31 | 251 | 97 | 620 |
| 60,538 | 8 | 26 | 58 | 327 | 1 | 16 | 32 | 251 | 99 | 620 |
| 60,539 | 8 | 26 | 58 | 327 | 1 | 16 | 32 | 252 | 99 | 621 |
| 60,540 | 8 | 26 | 58 | 327 | 1 | 16 | 32 | 252 | 99 | 621 |
| 60,541 | 8 | 26 | 58 | 327 | 1 | 16 | 32 | 252 | 99 | 621 |
| 60,542 | 8 | 26 | 58 | 327 | 1 | 16 | 32 | 252 | 99 | 621 |
| 60,543 | 8 | 26 | 57 | 328 | 1 | 16 | 32 | 248 | 98 | 618 |
| 60,544 | 8 | 26 | 57 | 328 | 1 | 16 | 32 | 248 | 98 | 618 |
| 60,545 | 8 | 25 | 57 | 299 | 1 | 14 | 32 | 226 | 98 | 564 |

|        |    |    |    |     |   |   |    |     |     |     |
|--------|----|----|----|-----|---|---|----|-----|-----|-----|
| 60,546 | 8  | 16 | 57 | 200 | 1 | 9 | 32 | 141 | 98  | 366 |
| 60,547 | 8  | 15 | 57 | 132 | 1 | 5 | 32 | 93  | 98  | 245 |
| 60,548 | 8  | 15 | 57 | 115 | 1 | 5 | 32 | 79  | 98  | 214 |
| 60,549 | 8  | 19 | 57 | 123 | 1 | 5 | 32 | 81  | 98  | 228 |
| 60,550 | 8  | 18 | 55 | 123 | 1 | 6 | 31 | 79  | 95  | 226 |
| 60,551 | 8  | 18 | 52 | 121 | 1 | 6 | 31 | 76  | 92  | 221 |
| 60,552 | 8  | 21 | 52 | 134 | 1 | 6 | 31 | 94  | 92  | 255 |
| 60,553 | 8  | 22 | 52 | 139 | 1 | 6 | 30 | 100 | 91  | 267 |
| 60,554 | 8  | 22 | 52 | 141 | 1 | 6 | 30 | 101 | 91  | 270 |
| 60,555 | 9  | 22 | 52 | 152 | 1 | 6 | 30 | 110 | 92  | 290 |
| 60,556 | 9  | 22 | 52 | 158 | 1 | 6 | 30 | 119 | 92  | 305 |
| 60,557 | 9  | 22 | 51 | 159 | 1 | 6 | 29 | 119 | 90  | 306 |
| 60,558 | 9  | 21 | 49 | 158 | 1 | 4 | 29 | 107 | 88  | 290 |
| 60,559 | 11 | 23 | 49 | 166 | 1 | 4 | 29 | 107 | 90  | 300 |
| 60,560 | 11 | 23 | 49 | 168 | 1 | 4 | 29 | 107 | 90  | 302 |
| 60,561 | 11 | 23 | 49 | 166 | 1 | 4 | 29 | 108 | 90  | 301 |
| 60,562 | 12 | 25 | 51 | 170 | 1 | 4 | 30 | 113 | 94  | 312 |
| 60,563 | 12 | 25 | 51 | 169 | 1 | 4 | 30 | 111 | 94  | 309 |
| 60,564 | 13 | 24 | 52 | 170 | 1 | 4 | 30 | 111 | 96  | 309 |
| 60,565 | 13 | 24 | 53 | 172 | 1 | 4 | 32 | 111 | 99  | 311 |
| 60,566 | 13 | 24 | 53 | 174 | 1 | 4 | 32 | 113 | 99  | 315 |
| 60,567 | 13 | 24 | 53 | 173 | 1 | 4 | 32 | 115 | 99  | 316 |
| 60,568 | 13 | 24 | 54 | 174 | 1 | 4 | 33 | 115 | 101 | 317 |
| 60,569 | 13 | 24 | 54 | 175 | 1 | 4 | 33 | 114 | 101 | 317 |
| 60,570 | 13 | 24 | 54 | 173 | 1 | 4 | 31 | 113 | 99  | 314 |
| 60,571 | 13 | 21 | 52 | 169 | 1 | 4 | 32 | 110 | 98  | 304 |
| 60,572 | 13 | 19 | 52 | 157 | 1 | 4 | 32 | 103 | 98  | 283 |
| 60,573 | 13 | 19 | 51 | 157 | 1 | 4 | 32 | 103 | 97  | 283 |
| 60,574 | 13 | 19 | 46 | 154 | 1 | 4 | 27 | 103 | 87  | 280 |
| 60,575 | 13 | 19 | 46 | 154 | 1 | 4 | 27 | 103 | 87  | 280 |
| 60,576 | 13 | 18 | 45 | 146 | 1 | 4 | 27 | 98  | 86  | 266 |
| 60,577 | 13 | 14 | 45 | 129 | 1 | 1 | 27 | 82  | 86  | 226 |
| 60,578 | 13 | 14 | 45 | 129 | 0 | 1 | 27 | 82  | 85  | 226 |
| 60,579 | 13 | 14 | 45 | 129 | 0 | 1 | 27 | 82  | 85  | 226 |
| 60,580 | 13 | 14 | 47 | 123 | 0 | 1 | 27 | 76  | 87  | 214 |
| 60,581 | 13 | 13 | 47 | 111 | 0 | 1 | 27 | 75  | 87  | 200 |
| 60,582 | 13 | 13 | 47 | 110 | 0 | 2 | 27 | 74  | 87  | 199 |
| 60,583 | 12 | 13 | 47 | 115 | 0 | 2 | 27 | 78  | 86  | 208 |
| 60,584 | 9  | 13 | 31 | 112 | 0 | 3 | 21 | 78  | 61  | 206 |
| 60,585 | 9  | 13 | 31 | 112 | 0 | 3 | 21 | 78  | 61  | 206 |
| 60,586 | 9  | 13 | 30 | 112 | 0 | 3 | 20 | 77  | 59  | 205 |

|        |   |    |    |     |   |   |    |     |    |     |
|--------|---|----|----|-----|---|---|----|-----|----|-----|
| 60,587 | 8 | 13 | 28 | 112 | 0 | 3 | 20 | 78  | 56 | 206 |
| 60,588 | 6 | 13 | 15 | 112 | 0 | 3 | 6  | 78  | 27 | 206 |
| 60,589 | 5 | 13 | 15 | 114 | 0 | 3 | 5  | 78  | 25 | 208 |
| 60,590 | 5 | 13 | 22 | 114 | 0 | 3 | 6  | 77  | 33 | 207 |
| 60,591 | 6 | 13 | 30 | 114 | 1 | 3 | 10 | 77  | 47 | 207 |
| 60,592 | 7 | 13 | 36 | 114 | 1 | 3 | 10 | 77  | 54 | 207 |
| 60,593 | 8 | 13 | 37 | 113 | 4 | 3 | 14 | 77  | 63 | 206 |
| 60,594 | 8 | 13 | 37 | 113 | 4 | 3 | 14 | 77  | 63 | 206 |
| 60,595 | 8 | 13 | 37 | 114 | 4 | 3 | 14 | 77  | 63 | 207 |
| 60,596 | 8 | 13 | 37 | 112 | 4 | 3 | 14 | 77  | 63 | 205 |
| 60,597 | 8 | 13 | 37 | 111 | 4 | 3 | 14 | 77  | 63 | 204 |
| 60,598 | 8 | 13 | 37 | 111 | 4 | 3 | 14 | 77  | 63 | 204 |
| 60,599 | 8 | 13 | 37 | 108 | 4 | 3 | 14 | 77  | 63 | 201 |
| 60,600 | 8 | 9  | 39 | 101 | 4 | 3 | 14 | 75  | 65 | 188 |
| 60,601 | 8 | 8  | 39 | 94  | 4 | 2 | 14 | 72  | 65 | 176 |
| 60,602 | 8 | 8  | 40 | 90  | 4 | 2 | 15 | 70  | 67 | 170 |
| 60,603 | 8 | 5  | 40 | 75  | 4 | 2 | 15 | 52  | 67 | 134 |
| 60,604 | 9 | 4  | 40 | 61  | 4 | 2 | 16 | 36  | 69 | 103 |
| 60,605 | 9 | 4  | 38 | 63  | 4 | 2 | 16 | 37  | 67 | 106 |
| 60,606 | 8 | 4  | 38 | 64  | 4 | 2 | 16 | 37  | 66 | 107 |
| 60,607 | 8 | 4  | 37 | 59  | 4 | 2 | 16 | 28  | 65 | 93  |
| 60,608 | 8 | 4  | 38 | 59  | 4 | 2 | 16 | 29  | 66 | 94  |
| 60,609 | 8 | 3  | 38 | 51  | 4 | 2 | 18 | 28  | 68 | 84  |
| 60,610 | 6 | 6  | 38 | 67  | 4 | 2 | 18 | 36  | 66 | 111 |
| 60,611 | 6 | 16 | 38 | 108 | 4 | 5 | 18 | 82  | 66 | 211 |
| 60,612 | 5 | 16 | 37 | 108 | 4 | 5 | 18 | 84  | 64 | 213 |
| 60,613 | 5 | 14 | 43 | 103 | 4 | 5 | 22 | 82  | 74 | 204 |
| 60,614 | 4 | 14 | 42 | 112 | 4 | 5 | 22 | 87  | 72 | 218 |
| 60,615 | 4 | 18 | 41 | 120 | 4 | 5 | 22 | 88  | 71 | 231 |
| 60,616 | 4 | 18 | 41 | 121 | 4 | 5 | 20 | 88  | 69 | 232 |
| 60,617 | 4 | 18 | 40 | 125 | 4 | 5 | 20 | 85  | 68 | 233 |
| 60,618 | 4 | 18 | 39 | 125 | 4 | 5 | 19 | 85  | 66 | 233 |
| 60,619 | 4 | 18 | 39 | 122 | 4 | 5 | 19 | 85  | 66 | 230 |
| 60,620 | 4 | 18 | 40 | 122 | 4 | 5 | 19 | 87  | 67 | 232 |
| 60,621 | 4 | 18 | 41 | 122 | 4 | 5 | 19 | 87  | 68 | 232 |
| 60,622 | 4 | 20 | 41 | 132 | 4 | 6 | 19 | 95  | 68 | 253 |
| 60,623 | 4 | 21 | 41 | 143 | 4 | 7 | 19 | 107 | 68 | 278 |
| 60,624 | 4 | 22 | 41 | 172 | 4 | 8 | 19 | 128 | 68 | 330 |
| 60,625 | 4 | 22 | 41 | 180 | 4 | 8 | 19 | 132 | 68 | 342 |
| 60,626 | 4 | 22 | 41 | 181 | 4 | 8 | 19 | 135 | 68 | 346 |
| 60,627 | 4 | 22 | 41 | 186 | 4 | 8 | 19 | 139 | 68 | 355 |

|        |   |    |    |     |   |   |    |     |    |     |
|--------|---|----|----|-----|---|---|----|-----|----|-----|
| 60,628 | 4 | 22 | 40 | 187 | 4 | 8 | 19 | 140 | 67 | 357 |
| 60,629 | 4 | 22 | 40 | 188 | 4 | 8 | 19 | 140 | 67 | 358 |
| 60,630 | 4 | 22 | 40 | 189 | 4 | 8 | 20 | 144 | 68 | 363 |
| 60,631 | 4 | 22 | 38 | 190 | 4 | 8 | 20 | 144 | 66 | 364 |
| 60,632 | 4 | 23 | 38 | 190 | 4 | 7 | 20 | 143 | 66 | 363 |
| 60,633 | 4 | 23 | 37 | 190 | 4 | 7 | 20 | 143 | 65 | 363 |
| 60,634 | 4 | 23 | 38 | 184 | 4 | 6 | 21 | 139 | 67 | 352 |
| 60,635 | 4 | 23 | 37 | 184 | 4 | 6 | 21 | 139 | 66 | 352 |
| 60,636 | 4 | 23 | 37 | 184 | 4 | 6 | 21 | 139 | 66 | 352 |
| 60,637 | 4 | 23 | 37 | 184 | 4 | 6 | 21 | 139 | 66 | 352 |
| 60,638 | 4 | 23 | 37 | 184 | 4 | 6 | 21 | 139 | 66 | 352 |
| 60,639 | 4 | 23 | 36 | 188 | 4 | 6 | 21 | 139 | 65 | 356 |
| 60,640 | 4 | 26 | 35 | 189 | 4 | 6 | 21 | 141 | 64 | 362 |
| 60,641 | 4 | 26 | 29 | 189 | 4 | 6 | 20 | 143 | 57 | 364 |
| 60,642 | 3 | 26 | 21 | 190 | 3 | 6 | 16 | 143 | 43 | 365 |
| 60,643 | 2 | 26 | 15 | 192 | 3 | 6 | 16 | 144 | 36 | 368 |
| 60,644 | 1 | 26 | 14 | 192 | 0 | 6 | 12 | 145 | 27 | 369 |
| 60,645 | 1 | 26 | 14 | 193 | 0 | 6 | 12 | 145 | 27 | 370 |
| 60,646 | 1 | 26 | 14 | 192 | 0 | 6 | 12 | 145 | 27 | 369 |
| 60,647 | 1 | 27 | 14 | 192 | 0 | 6 | 12 | 145 | 27 | 370 |
| 60,648 | 1 | 27 | 14 | 192 | 0 | 6 | 12 | 146 | 27 | 371 |
| 60,649 | 1 | 27 | 14 | 192 | 0 | 6 | 12 | 146 | 27 | 371 |
| 60,650 | 1 | 27 | 12 | 191 | 0 | 7 | 12 | 146 | 25 | 371 |
| 60,651 | 1 | 27 | 12 | 191 | 0 | 7 | 12 | 146 | 25 | 371 |
| 60,652 | 1 | 27 | 11 | 191 | 0 | 7 | 11 | 146 | 23 | 371 |
| 60,653 | 1 | 27 | 11 | 191 | 0 | 7 | 11 | 146 | 23 | 371 |
| 60,654 | 1 | 27 | 11 | 191 | 0 | 7 | 10 | 146 | 22 | 371 |
| 60,655 | 0 | 27 | 11 | 185 | 0 | 7 | 10 | 147 | 21 | 366 |
| 60,656 | 0 | 27 | 12 | 184 | 2 | 7 | 10 | 147 | 24 | 365 |
| 60,657 | 0 | 28 | 12 | 188 | 2 | 7 | 10 | 155 | 24 | 378 |
| 60,658 | 0 | 28 | 11 | 190 | 2 | 7 | 10 | 157 | 23 | 382 |
| 60,659 | 0 | 28 | 11 | 194 | 2 | 7 | 8  | 160 | 21 | 389 |
| 60,660 | 0 | 27 | 10 | 194 | 2 | 7 | 8  | 157 | 20 | 385 |
| 60,661 | 0 | 25 | 6  | 178 | 2 | 7 | 6  | 149 | 14 | 359 |
| 60,662 | 0 | 15 | 4  | 135 | 2 | 4 | 4  | 99  | 10 | 253 |
| 60,663 | 0 | 16 | 4  | 135 | 2 | 4 | 4  | 93  | 10 | 248 |
| 60,664 | 0 | 16 | 4  | 127 | 2 | 4 | 3  | 88  | 9  | 235 |
| 60,665 | 0 | 16 | 4  | 127 | 2 | 4 | 3  | 88  | 9  | 235 |
| 60,666 | 0 | 12 | 4  | 117 | 2 | 4 | 3  | 87  | 9  | 220 |
| 60,667 | 0 | 13 | 4  | 114 | 2 | 4 | 3  | 88  | 9  | 219 |
| 60,668 | 0 | 13 | 4  | 108 | 2 | 4 | 3  | 86  | 9  | 211 |



|        |   |    |    |     |   |   |   |    |    |     |
|--------|---|----|----|-----|---|---|---|----|----|-----|
| 60,669 | 0 | 14 | 5  | 113 | 2 | 4 | 3 | 87 | 10 | 218 |
| 60,670 | 0 | 14 | 5  | 113 | 2 | 4 | 2 | 87 | 9  | 218 |
| 60,671 | 0 | 14 | 9  | 113 | 4 | 4 | 3 | 85 | 16 | 216 |
| 60,672 | 0 | 12 | 8  | 99  | 4 | 3 | 3 | 78 | 15 | 192 |
| 60,673 | 0 | 11 | 8  | 87  | 4 | 2 | 3 | 66 | 15 | 166 |
| 60,674 | 0 | 11 | 8  | 88  | 4 | 2 | 3 | 66 | 15 | 167 |
| 60,675 | 0 | 10 | 8  | 59  | 4 | 1 | 3 | 46 | 15 | 116 |
| 60,676 | 0 | 10 | 10 | 51  | 4 | 1 | 3 | 41 | 17 | 103 |
| 60,677 | 0 | 10 | 10 | 50  | 4 | 1 | 3 | 38 | 17 | 99  |
| 60,678 | 0 | 10 | 10 | 46  | 4 | 1 | 3 | 34 | 17 | 91  |
| 60,679 | 0 | 10 | 10 | 44  | 4 | 1 | 3 | 33 | 17 | 88  |
| 60,680 | 0 | 10 | 10 | 42  | 4 | 1 | 2 | 29 | 16 | 82  |
| 60,681 | 0 | 10 | 10 | 44  | 4 | 1 | 2 | 29 | 16 | 84  |
| 60,682 | 0 | 10 | 10 | 43  | 4 | 2 | 2 | 29 | 16 | 84  |
| 60,683 | 0 | 9  | 10 | 39  | 4 | 2 | 2 | 27 | 16 | 77  |
| 60,684 | 0 | 9  | 10 | 39  | 4 | 2 | 1 | 27 | 15 | 77  |
| 60,685 | 0 | 9  | 10 | 39  | 4 | 2 | 1 | 27 | 15 | 77  |
| 60,686 | 0 | 9  | 11 | 39  | 4 | 2 | 1 | 27 | 16 | 77  |
| 60,687 | 0 | 9  | 11 | 39  | 4 | 2 | 1 | 27 | 16 | 77  |
| 60,688 | 0 | 6  | 16 | 32  | 6 | 2 | 1 | 24 | 23 | 64  |
| 60,689 | 0 | 6  | 16 | 32  | 6 | 2 | 3 | 24 | 25 | 64  |
| 60,690 | 0 | 6  | 18 | 32  | 6 | 2 | 3 | 22 | 27 | 62  |
| 60,691 | 0 | 6  | 19 | 38  | 6 | 2 | 3 | 29 | 28 | 75  |
| 60,692 | 0 | 6  | 19 | 38  | 6 | 2 | 3 | 29 | 28 | 75  |
| 60,693 | 0 | 7  | 23 | 40  | 6 | 2 | 4 | 29 | 33 | 78  |
| 60,694 | 0 | 8  | 27 | 53  | 6 | 2 | 5 | 33 | 38 | 96  |
| 60,695 | 0 | 8  | 27 | 55  | 6 | 3 | 5 | 32 | 38 | 98  |
| 60,696 | 0 | 8  | 27 | 57  | 6 | 5 | 5 | 36 | 38 | 106 |
| 60,697 | 0 | 8  | 27 | 57  | 6 | 5 | 5 | 37 | 38 | 107 |
| 60,698 | 0 | 10 | 27 | 74  | 6 | 6 | 5 | 53 | 38 | 143 |
| 60,699 | 0 | 10 | 27 | 78  | 6 | 7 | 5 | 58 | 38 | 153 |
| 60,700 | 0 | 10 | 27 | 79  | 6 | 7 | 6 | 64 | 39 | 160 |
| 60,701 | 1 | 10 | 27 | 87  | 6 | 6 | 6 | 67 | 40 | 170 |
| 60,702 | 1 | 12 | 27 | 90  | 6 | 6 | 6 | 69 | 40 | 177 |
| 60,703 | 1 | 16 | 27 | 123 | 7 | 6 | 6 | 86 | 41 | 231 |
| 60,704 | 1 | 16 | 27 | 126 | 7 | 6 | 6 | 90 | 41 | 238 |
| 60,705 | 1 | 16 | 27 | 132 | 7 | 6 | 6 | 89 | 41 | 243 |
| 60,706 | 1 | 15 | 27 | 128 | 7 | 6 | 6 | 79 | 41 | 228 |
| 60,707 | 1 | 15 | 26 | 130 | 5 | 6 | 6 | 79 | 38 | 230 |
| 60,708 | 1 | 15 | 26 | 130 | 5 | 6 | 6 | 79 | 38 | 230 |
| 60,709 | 1 | 15 | 28 | 125 | 5 | 6 | 6 | 75 | 40 | 221 |

|        |   |    |    |     |   |    |    |     |    |       |
|--------|---|----|----|-----|---|----|----|-----|----|-------|
| 60,710 | 1 | 15 | 29 | 122 | 5 | 6  | 6  | 75  | 41 | 218   |
| 60,711 | 1 | 15 | 30 | 123 | 5 | 6  | 7  | 75  | 43 | 219   |
| 60,712 | 2 | 14 | 31 | 124 | 5 | 6  | 7  | 75  | 45 | 219   |
| 60,713 | 2 | 14 | 33 | 124 | 5 | 6  | 7  | 75  | 47 | 219   |
| 60,714 | 2 | 13 | 33 | 122 | 5 | 6  | 7  | 75  | 47 | 216   |
| 60,715 | 2 | 13 | 33 | 122 | 5 | 6  | 7  | 75  | 47 | 216   |
| 60,716 | 2 | 13 | 34 | 122 | 5 | 6  | 7  | 75  | 48 | 216   |
| 60,717 | 2 | 13 | 34 | 122 | 5 | 6  | 7  | 76  | 48 | 217   |
| 60,718 | 2 | 12 | 34 | 132 | 5 | 6  | 7  | 80  | 48 | 230   |
| 60,719 | 2 | 12 | 35 | 133 | 5 | 6  | 7  | 81  | 49 | 232   |
| 60,720 | 2 | 12 | 34 | 131 | 5 | 6  | 7  | 86  | 48 | 235   |
| 60,721 | 2 | 30 | 32 | 302 | 5 | 23 | 7  | 181 | 46 | 536   |
| 60,722 | 2 | 34 | 32 | 336 | 3 | 32 | 7  | 202 | 44 | 604   |
| 60,723 | 2 | 34 | 32 | 341 | 3 | 33 | 8  | 205 | 45 | 613   |
| 60,724 | 2 | 34 | 32 | 345 | 3 | 33 | 8  | 206 | 45 | 618   |
| 60,725 | 2 | 40 | 32 | 367 | 4 | 33 | 8  | 217 | 46 | 657   |
| 60,726 | 2 | 40 | 31 | 368 | 4 | 33 | 8  | 218 | 45 | 659   |
| 60,727 | 2 | 40 | 30 | 378 | 4 | 33 | 8  | 220 | 44 | 671   |
| 60,728 | 2 | 43 | 30 | 391 | 4 | 33 | 8  | 222 | 44 | 689   |
| 60,729 | 2 | 43 | 30 | 390 | 4 | 33 | 8  | 222 | 44 | 688   |
| 60,730 | 2 | 43 | 32 | 392 | 5 | 33 | 10 | 222 | 49 | 690   |
| 60,731 | 2 | 43 | 32 | 390 | 5 | 33 | 10 | 224 | 49 | 690   |
| 60,732 | 2 | 44 | 32 | 390 | 5 | 32 | 13 | 224 | 52 | 690   |
| 60,733 | 2 | 44 | 32 | 391 | 5 | 32 | 13 | 224 | 52 | 691   |
| 60,734 | 3 | 44 | 34 | 391 | 5 | 32 | 15 | 224 | 57 | 691   |
| 60,735 | 3 | 44 | 34 | 398 | 5 | 32 | 15 | 227 | 57 | 701   |
| 60,736 | 3 | 44 | 33 | 420 | 5 | 32 | 15 | 232 | 56 | 728   |
| 60,737 | 3 | 44 | 32 | 436 | 5 | 32 | 15 | 234 | 55 | 746   |
| 60,738 | 3 | 44 | 33 | 447 | 4 | 33 | 15 | 237 | 55 | 761   |
| 60,739 | 3 | 44 | 28 | 474 | 3 | 34 | 15 | 238 | 49 | 790   |
| 60,740 | 3 | 44 | 28 | 484 | 3 | 34 | 13 | 238 | 47 | 800   |
| 60,741 | 3 | 44 | 27 | 492 | 3 | 34 | 13 | 237 | 46 | 807   |
| 60,742 | 3 | 50 | 26 | 532 | 3 | 37 | 13 | 236 | 45 | 855   |
| 60,743 | 3 | 50 | 22 | 546 | 3 | 37 | 12 | 242 | 40 | 875   |
| 60,744 | 3 | 58 | 18 | 624 | 3 | 39 | 11 | 296 | 35 | 1,017 |
| 60,745 | 3 | 57 | 19 | 639 | 3 | 41 | 11 | 304 | 36 | 1,041 |
| 60,746 | 3 | 57 | 19 | 642 | 3 | 40 | 11 | 306 | 36 | 1,045 |
| 60,747 | 3 | 58 | 19 | 646 | 3 | 38 | 11 | 308 | 36 | 1,050 |
| 60,748 | 3 | 58 | 19 | 650 | 3 | 38 | 11 | 308 | 36 | 1,054 |
| 60,749 | 3 | 64 | 19 | 761 | 3 | 46 | 11 | 354 | 36 | 1,225 |
| 60,750 | 3 | 64 | 19 | 758 | 3 | 45 | 11 | 349 | 36 | 1,216 |

|        |   |    |    |     |   |    |    |     |    |       |
|--------|---|----|----|-----|---|----|----|-----|----|-------|
| 60,751 | 2 | 64 | 21 | 771 | 3 | 45 | 15 | 350 | 41 | 1,230 |
| 60,752 | 2 | 66 | 25 | 764 | 3 | 45 | 19 | 350 | 49 | 1,225 |
| 60,753 | 3 | 60 | 27 | 728 | 3 | 45 | 20 | 333 | 53 | 1,166 |
| 60,754 | 3 | 60 | 27 | 730 | 2 | 46 | 20 | 336 | 52 | 1,172 |
| 60,755 | 3 | 60 | 27 | 730 | 2 | 46 | 20 | 336 | 52 | 1,172 |
| 60,756 | 3 | 63 | 27 | 736 | 2 | 47 | 20 | 348 | 52 | 1,194 |
| 60,757 | 3 | 63 | 27 | 733 | 2 | 47 | 20 | 349 | 52 | 1,192 |
| 60,758 | 3 | 64 | 43 | 736 | 3 | 47 | 28 | 354 | 77 | 1,201 |
| 60,759 | 3 | 74 | 43 | 772 | 3 | 48 | 28 | 386 | 77 | 1,280 |
| 60,760 | 3 | 74 | 41 | 782 | 3 | 50 | 28 | 397 | 75 | 1,303 |
| 60,761 | 3 | 74 | 40 | 798 | 3 | 50 | 28 | 410 | 74 | 1,332 |
| 60,762 | 3 | 76 | 40 | 806 | 3 | 51 | 27 | 418 | 73 | 1,351 |
| 60,763 | 2 | 76 | 39 | 807 | 3 | 51 | 27 | 419 | 71 | 1,353 |
| 60,764 | 2 | 76 | 37 | 807 | 3 | 51 | 27 | 421 | 69 | 1,355 |
| 60,765 | 2 | 76 | 37 | 810 | 3 | 51 | 27 | 421 | 69 | 1,358 |
| 60,766 | 2 | 76 | 36 | 810 | 3 | 51 | 27 | 421 | 68 | 1,358 |
| 60,767 | 2 | 77 | 36 | 811 | 3 | 51 | 27 | 422 | 68 | 1,361 |
| 60,768 | 2 | 77 | 36 | 817 | 3 | 52 | 27 | 428 | 68 | 1,374 |
| 60,769 | 2 | 77 | 38 | 812 | 3 | 52 | 30 | 426 | 73 | 1,367 |
| 60,770 | 2 | 77 | 37 | 813 | 3 | 55 | 30 | 435 | 72 | 1,380 |
| 60,771 | 2 | 76 | 39 | 811 | 3 | 55 | 33 | 434 | 77 | 1,376 |
| 60,772 | 2 | 58 | 39 | 651 | 3 | 41 | 33 | 354 | 77 | 1,104 |
| 60,773 | 2 | 55 | 37 | 618 | 3 | 32 | 32 | 334 | 74 | 1,039 |
| 60,774 | 2 | 54 | 38 | 614 | 3 | 31 | 31 | 335 | 74 | 1,034 |
| 60,775 | 2 | 54 | 38 | 614 | 3 | 31 | 31 | 337 | 74 | 1,036 |
| 60,776 | 3 | 48 | 38 | 592 | 2 | 31 | 31 | 328 | 74 | 999   |
| 60,777 | 3 | 50 | 40 | 590 | 2 | 31 | 31 | 341 | 76 | 1,012 |
| 60,778 | 3 | 50 | 40 | 590 | 2 | 31 | 31 | 342 | 76 | 1,013 |
| 60,779 | 3 | 47 | 40 | 579 | 2 | 31 | 31 | 342 | 76 | 999   |
| 60,780 | 3 | 48 | 40 | 584 | 2 | 31 | 30 | 350 | 75 | 1,013 |
| 60,781 | 3 | 48 | 38 | 583 | 1 | 31 | 29 | 350 | 71 | 1,012 |
| 60,782 | 3 | 50 | 38 | 587 | 1 | 31 | 29 | 351 | 71 | 1,019 |
| 60,783 | 3 | 50 | 38 | 588 | 1 | 31 | 26 | 356 | 68 | 1,025 |
| 60,784 | 3 | 50 | 37 | 588 | 1 | 31 | 26 | 356 | 67 | 1,025 |
| 60,785 | 2 | 50 | 37 | 589 | 1 | 31 | 24 | 360 | 64 | 1,030 |
| 60,786 | 2 | 50 | 38 | 561 | 1 | 31 | 24 | 352 | 65 | 994   |
| 60,787 | 2 | 50 | 38 | 545 | 1 | 31 | 24 | 349 | 65 | 975   |
| 60,788 | 2 | 50 | 38 | 546 | 1 | 31 | 24 | 351 | 65 | 978   |
| 60,789 | 2 | 50 | 37 | 508 | 1 | 29 | 24 | 347 | 64 | 934   |
| 60,790 | 2 | 50 | 37 | 498 | 1 | 29 | 24 | 347 | 64 | 924   |
| 60,791 | 2 | 50 | 37 | 498 | 1 | 29 | 24 | 348 | 64 | 925   |

|        |   |    |    |     |   |    |    |     |    |     |
|--------|---|----|----|-----|---|----|----|-----|----|-----|
| 60,792 | 2 | 50 | 37 | 490 | 1 | 29 | 24 | 348 | 64 | 917 |
| 60,793 | 2 | 44 | 37 | 444 | 1 | 26 | 24 | 341 | 64 | 855 |
| 60,794 | 2 | 44 | 37 | 430 | 1 | 27 | 24 | 335 | 64 | 836 |
| 60,795 | 2 | 37 | 37 | 322 | 1 | 23 | 24 | 271 | 64 | 653 |
| 60,796 | 2 | 37 | 36 | 322 | 1 | 23 | 24 | 271 | 63 | 653 |
| 60,797 | 2 | 37 | 37 | 318 | 1 | 23 | 24 | 269 | 64 | 647 |
| 60,798 | 2 | 36 | 37 | 307 | 1 | 23 | 25 | 262 | 65 | 628 |
| 60,799 | 2 | 27 | 37 | 179 | 1 | 14 | 24 | 200 | 64 | 420 |
| 60,800 | 2 | 27 | 37 | 182 | 1 | 14 | 24 | 212 | 64 | 435 |
| 60,801 | 2 | 29 | 36 | 202 | 1 | 18 | 20 | 251 | 59 | 500 |
| 60,802 | 2 | 31 | 36 | 223 | 1 | 23 | 19 | 280 | 58 | 557 |
| 60,803 | 2 | 29 | 36 | 226 | 1 | 24 | 20 | 282 | 59 | 561 |
| 60,804 | 2 | 29 | 46 | 224 | 1 | 23 | 21 | 273 | 70 | 549 |
| 60,805 | 4 | 29 | 48 | 228 | 1 | 23 | 23 | 273 | 76 | 553 |
| 60,806 | 4 | 29 | 46 | 232 | 1 | 23 | 20 | 274 | 71 | 558 |
| 60,807 | 4 | 27 | 41 | 224 | 1 | 22 | 18 | 263 | 64 | 536 |
| 60,808 | 4 | 27 | 40 | 224 | 0 | 22 | 16 | 263 | 60 | 536 |
| 60,809 | 4 | 26 | 40 | 219 | 0 | 23 | 16 | 258 | 60 | 526 |
| 60,810 | 4 | 16 | 40 | 173 | 0 | 20 | 16 | 215 | 60 | 424 |
| 60,811 | 4 | 16 | 40 | 157 | 0 | 20 | 16 | 202 | 60 | 395 |
| 60,812 | 4 | 14 | 40 | 148 | 0 | 19 | 16 | 194 | 60 | 375 |
| 60,813 | 4 | 14 | 39 | 148 | 0 | 19 | 16 | 194 | 59 | 375 |
| 60,814 | 4 | 14 | 39 | 146 | 0 | 19 | 16 | 193 | 59 | 372 |
| 60,815 | 4 | 14 | 40 | 146 | 0 | 19 | 16 | 191 | 60 | 370 |
| 60,816 | 4 | 13 | 40 | 142 | 0 | 19 | 16 | 191 | 60 | 365 |
| 60,817 | 4 | 13 | 40 | 143 | 0 | 19 | 16 | 191 | 60 | 366 |
| 60,818 | 4 | 13 | 40 | 141 | 0 | 19 | 16 | 188 | 60 | 361 |
| 60,819 | 4 | 13 | 38 | 128 | 0 | 15 | 13 | 169 | 55 | 325 |
| 60,820 | 4 | 13 | 38 | 128 | 0 | 15 | 13 | 169 | 55 | 325 |
| 60,821 | 4 | 13 | 38 | 128 | 0 | 15 | 13 | 170 | 55 | 326 |
| 60,822 | 4 | 13 | 36 | 127 | 0 | 15 | 10 | 165 | 50 | 320 |
| 60,823 | 4 | 13 | 35 | 116 | 0 | 12 | 10 | 149 | 49 | 290 |
| 60,824 | 4 | 13 | 34 | 115 | 0 | 12 | 10 | 149 | 48 | 289 |
| 60,825 | 4 | 13 | 34 | 109 | 0 | 12 | 10 | 140 | 48 | 274 |
| 60,826 | 4 | 13 | 34 | 108 | 0 | 12 | 10 | 140 | 48 | 273 |
| 60,827 | 3 | 13 | 34 | 108 | 0 | 12 | 10 | 139 | 47 | 272 |
| 60,828 | 3 | 11 | 33 | 100 | 0 | 12 | 10 | 123 | 46 | 246 |
| 60,829 | 6 | 11 | 36 | 100 | 0 | 12 | 10 | 122 | 52 | 245 |
| 60,830 | 6 | 11 | 38 | 98  | 0 | 12 | 10 | 120 | 54 | 241 |
| 60,831 | 6 | 10 | 38 | 94  | 0 | 12 | 10 | 113 | 54 | 229 |
| 60,832 | 6 | 7  | 38 | 87  | 0 | 12 | 12 | 104 | 56 | 210 |

|        |   |    |    |    |   |    |    |     |     |     |
|--------|---|----|----|----|---|----|----|-----|-----|-----|
| 60,833 | 6 | 8  | 43 | 87 | 0 | 12 | 12 | 104 | 61  | 211 |
| 60,834 | 6 | 8  | 44 | 87 | 0 | 12 | 14 | 104 | 64  | 211 |
| 60,835 | 6 | 8  | 45 | 86 | 0 | 12 | 16 | 100 | 67  | 206 |
| 60,836 | 6 | 8  | 45 | 86 | 0 | 12 | 16 | 101 | 67  | 207 |
| 60,837 | 6 | 8  | 44 | 85 | 0 | 12 | 16 | 102 | 66  | 207 |
| 60,838 | 6 | 8  | 44 | 85 | 0 | 12 | 16 | 102 | 66  | 207 |
| 60,839 | 6 | 8  | 44 | 86 | 0 | 12 | 18 | 100 | 68  | 206 |
| 60,840 | 6 | 8  | 44 | 86 | 0 | 12 | 18 | 100 | 68  | 206 |
| 60,841 | 6 | 8  | 44 | 86 | 0 | 12 | 18 | 99  | 68  | 205 |
| 60,842 | 6 | 8  | 43 | 86 | 0 | 12 | 18 | 99  | 67  | 205 |
| 60,843 | 6 | 8  | 44 | 86 | 0 | 12 | 18 | 99  | 68  | 205 |
| 60,844 | 6 | 8  | 46 | 86 | 0 | 12 | 18 | 99  | 70  | 205 |
| 60,845 | 6 | 8  | 46 | 87 | 0 | 11 | 20 | 101 | 72  | 207 |
| 60,846 | 6 | 6  | 46 | 85 | 0 | 11 | 20 | 100 | 72  | 202 |
| 60,847 | 6 | 6  | 47 | 84 | 0 | 11 | 21 | 100 | 74  | 201 |
| 60,848 | 6 | 6  | 47 | 84 | 0 | 11 | 21 | 100 | 74  | 201 |
| 60,849 | 6 | 7  | 56 | 84 | 0 | 11 | 27 | 100 | 89  | 202 |
| 60,850 | 6 | 6  | 58 | 67 | 0 | 7  | 28 | 53  | 92  | 133 |
| 60,851 | 6 | 6  | 66 | 67 | 1 | 7  | 28 | 53  | 101 | 133 |
| 60,852 | 6 | 6  | 67 | 73 | 1 | 7  | 28 | 55  | 102 | 141 |
| 60,853 | 6 | 4  | 69 | 37 | 1 | 2  | 27 | 19  | 103 | 62  |
| 60,854 | 6 | 4  | 69 | 33 | 1 | 1  | 24 | 14  | 100 | 52  |
| 60,855 | 5 | 4  | 59 | 27 | 1 | 1  | 22 | 15  | 87  | 47  |
| 60,856 | 3 | 4  | 52 | 27 | 1 | 1  | 19 | 15  | 75  | 47  |
| 60,857 | 3 | 4  | 56 | 23 | 1 | 1  | 22 | 14  | 82  | 42  |
| 60,858 | 3 | 3  | 56 | 19 | 1 | 1  | 22 | 12  | 82  | 35  |
| 60,859 | 3 | 3  | 56 | 21 | 1 | 0  | 22 | 13  | 82  | 37  |
| 60,860 | 3 | 3  | 56 | 21 | 1 | 0  | 22 | 13  | 82  | 37  |
| 60,861 | 3 | 3  | 56 | 21 | 1 | 0  | 22 | 14  | 82  | 38  |
| 60,862 | 3 | 3  | 57 | 23 | 1 | 0  | 22 | 14  | 83  | 40  |
| 60,863 | 3 | 3  | 60 | 24 | 1 | 0  | 22 | 14  | 86  | 41  |
| 60,864 | 3 | 3  | 60 | 24 | 1 | 0  | 22 | 14  | 86  | 41  |
| 60,865 | 3 | 3  | 64 | 24 | 1 | 0  | 22 | 14  | 90  | 41  |
| 60,866 | 3 | 3  | 65 | 24 | 1 | 0  | 22 | 14  | 91  | 41  |
| 60,867 | 3 | 3  | 65 | 23 | 1 | 0  | 23 | 14  | 92  | 40  |
| 60,868 | 3 | 3  | 65 | 23 | 1 | 0  | 23 | 14  | 92  | 40  |
| 60,869 | 3 | 3  | 69 | 25 | 2 | 1  | 23 | 17  | 97  | 46  |
| 60,870 | 3 | 3  | 69 | 28 | 2 | 1  | 23 | 17  | 97  | 49  |
| 60,871 | 3 | 4  | 72 | 34 | 2 | 1  | 26 | 23  | 103 | 62  |
| 60,872 | 3 | 4  | 72 | 40 | 2 | 1  | 26 | 22  | 103 | 67  |
| 60,873 | 3 | 14 | 72 | 71 | 2 | 2  | 26 | 40  | 103 | 127 |

|        |   |    |    |     |   |    |    |     |     |     |
|--------|---|----|----|-----|---|----|----|-----|-----|-----|
| 60,874 | 3 | 15 | 72 | 90  | 2 | 5  | 26 | 56  | 103 | 166 |
| 60,875 | 3 | 15 | 72 | 92  | 2 | 5  | 26 | 56  | 103 | 168 |
| 60,876 | 3 | 16 | 74 | 98  | 2 | 5  | 26 | 57  | 105 | 176 |
| 60,877 | 3 | 16 | 74 | 106 | 2 | 6  | 26 | 61  | 105 | 189 |
| 60,878 | 3 | 17 | 75 | 125 | 2 | 8  | 26 | 75  | 106 | 225 |
| 60,879 | 3 | 18 | 75 | 187 | 2 | 8  | 26 | 109 | 106 | 322 |
| 60,880 | 0 | 18 | 72 | 219 | 2 | 8  | 26 | 112 | 100 | 357 |
| 60,881 | 1 | 19 | 71 | 230 | 2 | 9  | 26 | 119 | 100 | 377 |
| 60,882 | 1 | 20 | 71 | 240 | 2 | 9  | 24 | 124 | 98  | 393 |
| 60,883 | 1 | 20 | 71 | 249 | 2 | 10 | 24 | 129 | 98  | 408 |
| 60,884 | 1 | 19 | 66 | 257 | 2 | 11 | 24 | 137 | 93  | 424 |
| 60,885 | 1 | 19 | 65 | 257 | 2 | 11 | 23 | 137 | 91  | 424 |
| 60,886 | 1 | 19 | 64 | 258 | 3 | 11 | 21 | 137 | 89  | 425 |
| 60,887 | 1 | 19 | 67 | 260 | 3 | 11 | 21 | 136 | 92  | 426 |
| 60,888 | 1 | 19 | 67 | 260 | 3 | 11 | 21 | 135 | 92  | 425 |
| 60,889 | 1 | 19 | 67 | 260 | 3 | 11 | 21 | 135 | 92  | 425 |
| 60,890 | 3 | 19 | 68 | 258 | 3 | 11 | 21 | 135 | 95  | 423 |
| 60,891 | 3 | 19 | 68 | 258 | 3 | 11 | 21 | 135 | 95  | 423 |
| 60,892 | 3 | 19 | 68 | 258 | 3 | 11 | 21 | 135 | 95  | 423 |
| 60,893 | 3 | 19 | 68 | 258 | 3 | 11 | 21 | 135 | 95  | 423 |
| 60,894 | 3 | 19 | 67 | 260 | 3 | 11 | 21 | 135 | 94  | 425 |
| 60,895 | 3 | 19 | 65 | 260 | 3 | 11 | 21 | 135 | 92  | 425 |
| 60,896 | 3 | 19 | 65 | 260 | 3 | 11 | 19 | 133 | 90  | 423 |
| 60,897 | 3 | 20 | 64 | 262 | 3 | 11 | 18 | 133 | 88  | 426 |
| 60,898 | 3 | 21 | 63 | 263 | 3 | 12 | 18 | 133 | 87  | 429 |
| 60,899 | 3 | 21 | 60 | 264 | 3 | 12 | 15 | 133 | 81  | 430 |
| 60,900 | 3 | 21 | 55 | 272 | 3 | 12 | 12 | 137 | 73  | 442 |
| 60,901 | 3 | 20 | 53 | 267 | 3 | 12 | 11 | 134 | 70  | 433 |
| 60,902 | 3 | 20 | 45 | 270 | 2 | 12 | 12 | 135 | 62  | 437 |
| 60,903 | 3 | 20 | 43 | 266 | 2 | 12 | 12 | 133 | 60  | 431 |
| 60,904 | 3 | 20 | 39 | 267 | 2 | 12 | 12 | 133 | 56  | 432 |
| 60,905 | 3 | 20 | 37 | 267 | 2 | 12 | 12 | 133 | 54  | 432 |
| 60,906 | 3 | 20 | 35 | 267 | 2 | 12 | 12 | 132 | 52  | 431 |
| 60,907 | 3 | 20 | 34 | 267 | 2 | 12 | 12 | 132 | 51  | 431 |
| 60,908 | 3 | 20 | 28 | 267 | 3 | 12 | 9  | 132 | 43  | 431 |
| 60,909 | 3 | 20 | 28 | 265 | 3 | 12 | 9  | 131 | 43  | 428 |
| 60,910 | 3 | 20 | 28 | 265 | 3 | 12 | 9  | 130 | 43  | 427 |
| 60,911 | 3 | 20 | 29 | 265 | 3 | 12 | 9  | 130 | 44  | 427 |
| 60,912 | 3 | 20 | 29 | 263 | 3 | 12 | 9  | 130 | 44  | 425 |
| 60,913 | 3 | 20 | 28 | 262 | 3 | 12 | 9  | 130 | 43  | 424 |
| 60,914 | 3 | 20 | 25 | 262 | 3 | 12 | 9  | 132 | 40  | 426 |

|        |   |    |    |     |   |    |   |     |    |     |
|--------|---|----|----|-----|---|----|---|-----|----|-----|
| 60,915 | 3 | 20 | 25 | 262 | 3 | 12 | 9 | 132 | 40 | 426 |
| 60,916 | 3 | 20 | 20 | 261 | 3 | 12 | 9 | 133 | 35 | 426 |
| 60,917 | 3 | 20 | 20 | 262 | 3 | 12 | 9 | 133 | 35 | 427 |
| 60,918 | 3 | 20 | 20 | 272 | 3 | 13 | 8 | 143 | 34 | 448 |
| 60,919 | 3 | 20 | 18 | 272 | 2 | 13 | 8 | 143 | 31 | 448 |
| 60,920 | 3 | 20 | 16 | 276 | 2 | 14 | 7 | 145 | 28 | 455 |
| 60,921 | 3 | 20 | 13 | 291 | 2 | 14 | 5 | 145 | 23 | 470 |
| 60,922 | 3 | 21 | 13 | 287 | 2 | 15 | 4 | 140 | 22 | 463 |
| 60,923 | 3 | 21 | 13 | 292 | 2 | 15 | 4 | 141 | 22 | 469 |
| 60,924 | 3 | 11 | 13 | 268 | 2 | 14 | 4 | 121 | 22 | 414 |
| 60,925 | 3 | 11 | 13 | 257 | 2 | 12 | 4 | 109 | 22 | 389 |
| 60,926 | 3 | 12 | 12 | 266 | 2 | 12 | 4 | 110 | 21 | 400 |
| 60,927 | 3 | 11 | 12 | 260 | 2 | 12 | 4 | 110 | 21 | 393 |
| 60,928 | 3 | 11 | 12 | 152 | 2 | 10 | 4 | 63  | 21 | 236 |
| 60,929 | 3 | 11 | 11 | 156 | 2 | 10 | 4 | 66  | 20 | 243 |
| 60,930 | 3 | 11 | 10 | 156 | 3 | 10 | 4 | 66  | 20 | 243 |
| 60,931 | 3 | 11 | 10 | 159 | 3 | 10 | 4 | 67  | 20 | 247 |
| 60,932 | 2 | 10 | 9  | 151 | 3 | 9  | 4 | 60  | 18 | 230 |
| 60,933 | 2 | 9  | 9  | 132 | 3 | 8  | 4 | 52  | 18 | 201 |
| 60,934 | 2 | 9  | 9  | 132 | 3 | 8  | 4 | 52  | 18 | 201 |
| 60,935 | 2 | 10 | 8  | 124 | 2 | 7  | 4 | 44  | 16 | 185 |
| 60,936 | 2 | 10 | 8  | 123 | 2 | 7  | 4 | 43  | 16 | 183 |
| 60,937 | 2 | 10 | 7  | 123 | 2 | 8  | 4 | 43  | 15 | 184 |
| 60,938 | 2 | 10 | 5  | 122 | 2 | 8  | 4 | 44  | 13 | 184 |
| 60,939 | 2 | 10 | 5  | 122 | 2 | 8  | 4 | 44  | 13 | 184 |
| 60,940 | 1 | 10 | 4  | 122 | 2 | 8  | 2 | 45  | 9  | 185 |
| 60,941 | 0 | 10 | 4  | 122 | 2 | 8  | 2 | 45  | 8  | 185 |
| 60,942 | 0 | 10 | 4  | 122 | 2 | 8  | 2 | 45  | 8  | 185 |
| 60,943 | 0 | 10 | 4  | 122 | 2 | 8  | 2 | 45  | 8  | 185 |
| 60,944 | 0 | 10 | 4  | 120 | 2 | 8  | 2 | 45  | 8  | 183 |
| 60,945 | 0 | 10 | 4  | 120 | 2 | 8  | 2 | 45  | 8  | 183 |
| 60,946 | 0 | 10 | 4  | 120 | 2 | 8  | 3 | 45  | 9  | 183 |
| 60,947 | 0 | 10 | 4  | 120 | 2 | 8  | 3 | 45  | 9  | 183 |
| 60,948 | 0 | 8  | 5  | 116 | 3 | 7  | 3 | 45  | 11 | 176 |
| 60,949 | 0 | 8  | 5  | 116 | 3 | 7  | 3 | 46  | 11 | 177 |
| 60,950 | 0 | 7  | 5  | 107 | 3 | 7  | 2 | 42  | 10 | 163 |
| 60,951 | 0 | 7  | 5  | 106 | 3 | 7  | 2 | 41  | 10 | 161 |
| 60,952 | 0 | 7  | 5  | 106 | 3 | 7  | 2 | 41  | 10 | 161 |
| 60,953 | 0 | 7  | 5  | 103 | 3 | 7  | 1 | 40  | 9  | 157 |
| 60,954 | 0 | 7  | 5  | 104 | 3 | 8  | 1 | 40  | 9  | 159 |
| 60,955 | 0 | 7  | 5  | 103 | 3 | 8  | 1 | 40  | 9  | 158 |

|        |   |    |   |     |   |    |   |     |    |     |
|--------|---|----|---|-----|---|----|---|-----|----|-----|
| 60,956 | 0 | 7  | 5 | 104 | 3 | 8  | 2 | 40  | 10 | 159 |
| 60,957 | 1 | 7  | 5 | 104 | 3 | 8  | 2 | 40  | 11 | 159 |
| 60,958 | 1 | 7  | 5 | 104 | 3 | 8  | 3 | 41  | 12 | 160 |
| 60,959 | 1 | 7  | 5 | 104 | 2 | 8  | 4 | 41  | 12 | 160 |
| 60,960 | 1 | 7  | 6 | 104 | 2 | 8  | 6 | 41  | 15 | 160 |
| 60,961 | 1 | 7  | 6 | 104 | 2 | 8  | 6 | 41  | 15 | 160 |
| 60,962 | 1 | 7  | 5 | 104 | 2 | 8  | 6 | 41  | 14 | 160 |
| 60,963 | 1 | 8  | 5 | 107 | 2 | 8  | 6 | 40  | 14 | 163 |
| 60,964 | 1 | 8  | 5 | 109 | 2 | 8  | 7 | 41  | 15 | 166 |
| 60,965 | 1 | 8  | 5 | 126 | 2 | 10 | 8 | 52  | 16 | 196 |
| 60,966 | 1 | 8  | 5 | 136 | 2 | 10 | 8 | 54  | 16 | 208 |
| 60,967 | 1 | 8  | 5 | 140 | 2 | 11 | 8 | 55  | 16 | 214 |
| 60,968 | 1 | 8  | 4 | 147 | 2 | 11 | 8 | 55  | 15 | 221 |
| 60,969 | 1 | 8  | 4 | 139 | 2 | 10 | 8 | 44  | 15 | 201 |
| 60,970 | 1 | 20 | 4 | 182 | 2 | 13 | 8 | 61  | 15 | 276 |
| 60,971 | 1 | 22 | 4 | 184 | 2 | 11 | 8 | 61  | 15 | 278 |
| 60,972 | 1 | 22 | 4 | 170 | 2 | 12 | 8 | 63  | 15 | 267 |
| 60,973 | 1 | 25 | 4 | 192 | 2 | 12 | 8 | 74  | 15 | 303 |
| 60,974 | 1 | 25 | 4 | 181 | 2 | 12 | 8 | 73  | 15 | 291 |
| 60,975 | 1 | 27 | 4 | 178 | 2 | 12 | 8 | 74  | 15 | 291 |
| 60,976 | 1 | 42 | 4 | 203 | 2 | 13 | 8 | 79  | 15 | 337 |
| 60,977 | 1 | 43 | 3 | 208 | 2 | 13 | 8 | 80  | 14 | 344 |
| 60,978 | 1 | 44 | 3 | 229 | 2 | 14 | 8 | 86  | 14 | 373 |
| 60,979 | 1 | 44 | 3 | 231 | 2 | 14 | 8 | 87  | 14 | 376 |
| 60,980 | 1 | 44 | 4 | 231 | 2 | 14 | 8 | 85  | 15 | 374 |
| 60,981 | 1 | 45 | 4 | 233 | 1 | 14 | 8 | 85  | 14 | 377 |
| 60,982 | 1 | 45 | 4 | 233 | 1 | 14 | 8 | 85  | 14 | 377 |
| 60,983 | 1 | 45 | 4 | 233 | 1 | 14 | 9 | 85  | 15 | 377 |
| 60,984 | 1 | 45 | 4 | 236 | 1 | 14 | 9 | 85  | 15 | 380 |
| 60,985 | 1 | 44 | 4 | 236 | 1 | 14 | 9 | 86  | 15 | 380 |
| 60,986 | 1 | 44 | 4 | 237 | 1 | 14 | 9 | 86  | 15 | 381 |
| 60,987 | 1 | 44 | 4 | 237 | 1 | 13 | 9 | 86  | 15 | 380 |
| 60,988 | 1 | 44 | 4 | 236 | 1 | 13 | 9 | 85  | 15 | 378 |
| 60,989 | 1 | 44 | 4 | 236 | 1 | 13 | 9 | 85  | 15 | 378 |
| 60,990 | 1 | 44 | 4 | 237 | 1 | 13 | 9 | 86  | 15 | 380 |
| 60,991 | 1 | 44 | 4 | 237 | 1 | 13 | 9 | 87  | 15 | 381 |
| 60,992 | 1 | 45 | 4 | 244 | 1 | 13 | 9 | 88  | 15 | 390 |
| 60,993 | 1 | 46 | 4 | 257 | 1 | 13 | 9 | 101 | 15 | 417 |
| 60,994 | 1 | 46 | 4 | 260 | 1 | 13 | 9 | 103 | 15 | 422 |
| 60,995 | 1 | 47 | 4 | 262 | 1 | 13 | 9 | 106 | 15 | 428 |
| 60,996 | 1 | 47 | 4 | 268 | 1 | 13 | 8 | 109 | 14 | 437 |



|        |   |    |    |     |   |    |   |     |    |     |
|--------|---|----|----|-----|---|----|---|-----|----|-----|
| 60,997 | 1 | 49 | 4  | 284 | 1 | 13 | 8 | 119 | 14 | 465 |
| 60,998 | 1 | 49 | 4  | 284 | 1 | 13 | 8 | 118 | 14 | 464 |
| 60,999 | 2 | 49 | 3  | 288 | 0 | 13 | 8 | 117 | 13 | 467 |
| 61,000 | 2 | 49 | 3  | 289 | 0 | 13 | 8 | 118 | 13 | 469 |
| 61,001 | 2 | 51 | 4  | 297 | 0 | 13 | 8 | 119 | 14 | 480 |
| 61,002 | 2 | 51 | 4  | 299 | 0 | 13 | 8 | 119 | 14 | 482 |
| 61,003 | 2 | 53 | 5  | 303 | 0 | 13 | 8 | 123 | 15 | 492 |
| 61,004 | 2 | 53 | 5  | 312 | 0 | 14 | 9 | 134 | 16 | 513 |
| 61,005 | 2 | 53 | 5  | 314 | 0 | 13 | 9 | 135 | 16 | 515 |
| 61,006 | 2 | 53 | 5  | 323 | 0 | 13 | 8 | 136 | 15 | 525 |
| 61,007 | 1 | 53 | 5  | 322 | 0 | 15 | 8 | 138 | 14 | 528 |
| 61,008 | 1 | 54 | 5  | 326 | 0 | 16 | 7 | 138 | 13 | 534 |
| 61,009 | 1 | 54 | 5  | 352 | 0 | 18 | 6 | 154 | 12 | 578 |
| 61,010 | 1 | 54 | 5  | 353 | 0 | 18 | 4 | 155 | 10 | 580 |
| 61,011 | 1 | 63 | 4  | 437 | 0 | 28 | 4 | 196 | 9  | 724 |
| 61,012 | 1 | 64 | 4  | 447 | 0 | 30 | 4 | 199 | 9  | 740 |
| 61,013 | 1 | 64 | 4  | 498 | 0 | 32 | 4 | 211 | 9  | 805 |
| 61,014 | 1 | 66 | 4  | 502 | 0 | 33 | 3 | 212 | 8  | 813 |
| 61,015 | 1 | 66 | 4  | 502 | 0 | 33 | 2 | 211 | 7  | 812 |
| 61,016 | 1 | 72 | 4  | 512 | 0 | 35 | 2 | 209 | 7  | 828 |
| 61,017 | 1 | 74 | 4  | 511 | 0 | 35 | 2 | 211 | 7  | 831 |
| 61,018 | 1 | 77 | 4  | 512 | 0 | 34 | 2 | 219 | 7  | 842 |
| 61,019 | 1 | 77 | 4  | 514 | 0 | 34 | 2 | 220 | 7  | 845 |
| 61,020 | 1 | 66 | 5  | 470 | 0 | 31 | 2 | 202 | 8  | 769 |
| 61,021 | 2 | 65 | 5  | 458 | 0 | 30 | 2 | 196 | 9  | 749 |
| 61,022 | 2 | 65 | 5  | 461 | 0 | 30 | 2 | 196 | 9  | 752 |
| 61,023 | 2 | 65 | 5  | 464 | 0 | 31 | 2 | 196 | 9  | 756 |
| 61,024 | 2 | 60 | 5  | 441 | 0 | 30 | 2 | 186 | 9  | 717 |
| 61,025 | 2 | 60 | 6  | 442 | 0 | 30 | 2 | 185 | 10 | 717 |
| 61,026 | 2 | 58 | 6  | 438 | 0 | 30 | 2 | 188 | 10 | 714 |
| 61,027 | 2 | 41 | 6  | 399 | 0 | 28 | 2 | 176 | 10 | 644 |
| 61,028 | 2 | 41 | 7  | 400 | 0 | 28 | 2 | 177 | 11 | 646 |
| 61,029 | 2 | 38 | 7  | 366 | 0 | 26 | 2 | 168 | 11 | 598 |
| 61,030 | 2 | 38 | 7  | 361 | 0 | 26 | 2 | 166 | 11 | 591 |
| 61,031 | 2 | 37 | 7  | 356 | 0 | 26 | 2 | 165 | 11 | 584 |
| 61,032 | 2 | 37 | 7  | 356 | 0 | 26 | 2 | 165 | 11 | 584 |
| 61,033 | 2 | 37 | 9  | 356 | 1 | 26 | 1 | 166 | 13 | 585 |
| 61,034 | 2 | 37 | 9  | 349 | 1 | 26 | 1 | 167 | 13 | 579 |
| 61,035 | 2 | 37 | 9  | 351 | 1 | 26 | 1 | 167 | 13 | 581 |
| 61,036 | 2 | 37 | 10 | 351 | 1 | 26 | 1 | 167 | 14 | 581 |
| 61,037 | 2 | 37 | 10 | 350 | 1 | 26 | 1 | 167 | 14 | 580 |

|        |   |    |    |     |   |    |    |     |    |     |
|--------|---|----|----|-----|---|----|----|-----|----|-----|
| 61,038 | 2 | 37 | 10 | 350 | 1 | 26 | 1  | 167 | 14 | 580 |
| 61,039 | 2 | 37 | 10 | 350 | 1 | 26 | 1  | 167 | 14 | 580 |
| 61,040 | 2 | 37 | 10 | 351 | 1 | 26 | 1  | 169 | 14 | 583 |
| 61,041 | 2 | 37 | 10 | 350 | 1 | 26 | 1  | 168 | 14 | 581 |
| 61,042 | 2 | 37 | 11 | 351 | 1 | 26 | 1  | 168 | 15 | 582 |
| 61,043 | 2 | 36 | 13 | 344 | 1 | 26 | 1  | 167 | 17 | 573 |
| 61,044 | 2 | 34 | 13 | 327 | 1 | 26 | 1  | 148 | 17 | 535 |
| 61,045 | 2 | 35 | 13 | 329 | 1 | 26 | 2  | 148 | 18 | 538 |
| 61,046 | 2 | 35 | 13 | 332 | 1 | 26 | 4  | 153 | 20 | 546 |
| 61,047 | 2 | 35 | 13 | 329 | 1 | 26 | 4  | 150 | 20 | 540 |
| 61,048 | 2 | 33 | 21 | 317 | 1 | 26 | 7  | 140 | 31 | 516 |
| 61,049 | 1 | 33 | 26 | 319 | 1 | 27 | 11 | 141 | 39 | 520 |
| 61,050 | 1 | 33 | 26 | 317 | 1 | 27 | 11 | 141 | 39 | 518 |
| 61,051 | 1 | 33 | 25 | 316 | 1 | 27 | 11 | 140 | 38 | 516 |
| 61,052 | 1 | 32 | 25 | 310 | 1 | 27 | 11 | 139 | 38 | 508 |
| 61,053 | 1 | 32 | 24 | 308 | 1 | 27 | 11 | 139 | 37 | 506 |
| 61,054 | 1 | 30 | 24 | 295 | 1 | 26 | 10 | 124 | 36 | 475 |
| 61,055 | 1 | 30 | 24 | 295 | 1 | 26 | 10 | 124 | 36 | 475 |
| 61,056 | 1 | 30 | 24 | 281 | 1 | 26 | 10 | 120 | 36 | 457 |
| 61,057 | 1 | 30 | 24 | 281 | 1 | 26 | 10 | 120 | 36 | 457 |
| 61,058 | 1 | 30 | 24 | 281 | 1 | 24 | 10 | 118 | 36 | 453 |
| 61,059 | 1 | 29 | 24 | 252 | 1 | 21 | 11 | 102 | 37 | 404 |
| 61,060 | 1 | 29 | 24 | 252 | 1 | 21 | 11 | 102 | 37 | 404 |
| 61,061 | 1 | 29 | 24 | 251 | 1 | 21 | 11 | 100 | 37 | 401 |
| 61,062 | 1 | 16 | 24 | 98  | 1 | 6  | 11 | 46  | 37 | 166 |
| 61,063 | 1 | 16 | 24 | 98  | 1 | 6  | 11 | 46  | 37 | 166 |
| 61,064 | 1 | 16 | 24 | 97  | 1 | 6  | 11 | 46  | 37 | 165 |
| 61,065 | 1 | 16 | 24 | 101 | 1 | 6  | 11 | 46  | 37 | 169 |
| 61,066 | 1 | 16 | 24 | 103 | 1 | 6  | 11 | 49  | 37 | 174 |
| 61,067 | 1 | 10 | 24 | 76  | 1 | 2  | 11 | 39  | 37 | 127 |
| 61,068 | 1 | 8  | 24 | 69  | 1 | 2  | 11 | 36  | 37 | 115 |
| 61,069 | 1 | 6  | 24 | 57  | 1 | 2  | 11 | 34  | 37 | 99  |
| 61,070 | 1 | 6  | 23 | 59  | 1 | 3  | 11 | 34  | 36 | 102 |
| 61,071 | 1 | 5  | 23 | 59  | 1 | 3  | 12 | 34  | 37 | 101 |
| 61,072 | 0 | 5  | 23 | 59  | 1 | 3  | 12 | 34  | 36 | 101 |
| 61,073 | 0 | 6  | 23 | 53  | 1 | 2  | 12 | 34  | 36 | 95  |
| 61,074 | 0 | 6  | 23 | 54  | 1 | 2  | 12 | 34  | 36 | 96  |
| 61,075 | 0 | 9  | 22 | 62  | 1 | 2  | 12 | 34  | 35 | 107 |
| 61,076 | 0 | 9  | 22 | 62  | 1 | 2  | 12 | 34  | 35 | 107 |
| 61,077 | 0 | 9  | 22 | 65  | 1 | 2  | 12 | 29  | 35 | 105 |
| 61,078 | 0 | 8  | 22 | 54  | 1 | 2  | 12 | 27  | 35 | 91  |

|        |   |    |    |     |   |   |    |    |    |     |
|--------|---|----|----|-----|---|---|----|----|----|-----|
| 61,079 | 0 | 8  | 21 | 55  | 1 | 2 | 12 | 27 | 34 | 92  |
| 61,080 | 0 | 9  | 21 | 56  | 1 | 2 | 12 | 27 | 34 | 94  |
| 61,081 | 0 | 9  | 20 | 56  | 1 | 2 | 12 | 27 | 33 | 94  |
| 61,082 | 0 | 9  | 20 | 56  | 1 | 2 | 12 | 27 | 33 | 94  |
| 61,083 | 0 | 9  | 20 | 56  | 1 | 2 | 12 | 27 | 33 | 94  |
| 61,084 | 0 | 9  | 18 | 56  | 0 | 2 | 12 | 25 | 30 | 92  |
| 61,085 | 0 | 9  | 18 | 54  | 0 | 3 | 12 | 25 | 30 | 91  |
| 61,086 | 0 | 9  | 18 | 54  | 0 | 3 | 12 | 24 | 30 | 90  |
| 61,087 | 0 | 9  | 17 | 54  | 0 | 3 | 12 | 24 | 29 | 90  |
| 61,088 | 0 | 9  | 17 | 54  | 0 | 3 | 12 | 24 | 29 | 90  |
| 61,089 | 0 | 9  | 17 | 54  | 0 | 3 | 12 | 24 | 29 | 90  |
| 61,090 | 0 | 9  | 17 | 53  | 0 | 3 | 12 | 22 | 29 | 87  |
| 61,091 | 1 | 9  | 17 | 53  | 0 | 3 | 14 | 22 | 32 | 87  |
| 61,092 | 1 | 10 | 17 | 53  | 0 | 3 | 14 | 22 | 32 | 88  |
| 61,093 | 1 | 11 | 21 | 56  | 0 | 3 | 18 | 22 | 40 | 92  |
| 61,094 | 1 | 11 | 22 | 67  | 0 | 3 | 20 | 27 | 43 | 108 |
| 61,095 | 1 | 12 | 23 | 69  | 0 | 3 | 20 | 29 | 44 | 113 |
| 61,096 | 1 | 11 | 24 | 75  | 0 | 4 | 19 | 32 | 44 | 122 |
| 61,097 | 1 | 13 | 24 | 74  | 0 | 4 | 17 | 27 | 42 | 118 |
| 61,098 | 1 | 13 | 17 | 66  | 0 | 4 | 14 | 27 | 32 | 110 |
| 61,099 | 1 | 13 | 16 | 66  | 0 | 4 | 10 | 27 | 27 | 110 |
| 61,100 | 1 | 13 | 12 | 63  | 0 | 3 | 10 | 26 | 23 | 105 |
| 61,101 | 1 | 13 | 12 | 65  | 0 | 3 | 10 | 27 | 23 | 108 |
| 61,102 | 1 | 13 | 11 | 65  | 0 | 3 | 10 | 27 | 22 | 108 |
| 61,103 | 1 | 12 | 11 | 62  | 0 | 3 | 10 | 27 | 22 | 104 |
| 61,104 | 1 | 12 | 14 | 62  | 0 | 3 | 10 | 27 | 25 | 104 |
| 61,105 | 1 | 12 | 14 | 62  | 0 | 3 | 10 | 27 | 25 | 104 |
| 61,106 | 1 | 12 | 14 | 64  | 0 | 3 | 10 | 27 | 25 | 106 |
| 61,107 | 1 | 12 | 14 | 65  | 0 | 3 | 10 | 27 | 25 | 107 |
| 61,108 | 1 | 12 | 14 | 66  | 0 | 3 | 9  | 27 | 24 | 108 |
| 61,109 | 1 | 12 | 14 | 66  | 0 | 3 | 9  | 27 | 24 | 108 |
| 61,110 | 1 | 12 | 14 | 65  | 0 | 3 | 9  | 27 | 24 | 107 |
| 61,111 | 1 | 12 | 14 | 65  | 0 | 3 | 9  | 27 | 24 | 107 |
| 61,112 | 1 | 12 | 14 | 65  | 0 | 3 | 9  | 27 | 24 | 107 |
| 61,113 | 1 | 12 | 14 | 71  | 0 | 3 | 9  | 28 | 24 | 114 |
| 61,114 | 1 | 12 | 14 | 72  | 0 | 3 | 9  | 28 | 24 | 115 |
| 61,115 | 1 | 12 | 14 | 79  | 0 | 4 | 9  | 30 | 24 | 125 |
| 61,116 | 1 | 12 | 14 | 83  | 0 | 4 | 9  | 33 | 24 | 132 |
| 61,117 | 1 | 12 | 14 | 112 | 0 | 4 | 9  | 35 | 24 | 163 |
| 61,118 | 1 | 13 | 14 | 122 | 0 | 4 | 9  | 40 | 24 | 179 |
| 61,119 | 1 | 16 | 14 | 132 | 0 | 4 | 9  | 46 | 24 | 198 |

|        |   |    |    |     |   |    |   |     |    |     |
|--------|---|----|----|-----|---|----|---|-----|----|-----|
| 61,120 | 1 | 16 | 14 | 136 | 0 | 5  | 8 | 42  | 23 | 199 |
| 61,121 | 1 | 16 | 14 | 134 | 0 | 4  | 8 | 41  | 23 | 195 |
| 61,122 | 1 | 16 | 14 | 135 | 0 | 4  | 8 | 41  | 23 | 196 |
| 61,123 | 1 | 18 | 14 | 146 | 0 | 4  | 8 | 47  | 23 | 215 |
| 61,124 | 1 | 23 | 14 | 182 | 0 | 6  | 8 | 94  | 23 | 305 |
| 61,125 | 1 | 23 | 14 | 182 | 0 | 6  | 8 | 97  | 23 | 308 |
| 61,126 | 1 | 21 | 14 | 186 | 0 | 6  | 8 | 96  | 23 | 309 |
| 61,127 | 1 | 21 | 14 | 188 | 0 | 6  | 8 | 99  | 23 | 314 |
| 61,128 | 1 | 21 | 14 | 186 | 0 | 6  | 8 | 99  | 23 | 312 |
| 61,129 | 1 | 21 | 14 | 185 | 0 | 6  | 8 | 99  | 23 | 311 |
| 61,130 | 1 | 21 | 14 | 186 | 0 | 6  | 8 | 99  | 23 | 312 |
| 61,131 | 1 | 20 | 14 | 186 | 0 | 6  | 8 | 99  | 23 | 311 |
| 61,132 | 1 | 20 | 14 | 186 | 0 | 6  | 8 | 99  | 23 | 311 |
| 61,133 | 1 | 20 | 14 | 186 | 0 | 6  | 8 | 99  | 23 | 311 |
| 61,134 | 1 | 20 | 14 | 187 | 0 | 6  | 8 | 99  | 23 | 312 |
| 61,135 | 1 | 20 | 14 | 189 | 0 | 5  | 8 | 99  | 23 | 313 |
| 61,136 | 1 | 20 | 14 | 189 | 0 | 5  | 8 | 99  | 23 | 313 |
| 61,137 | 1 | 20 | 14 | 189 | 0 | 5  | 8 | 99  | 23 | 313 |
| 61,138 | 1 | 21 | 14 | 208 | 0 | 6  | 8 | 116 | 23 | 351 |
| 61,139 | 1 | 21 | 14 | 210 | 0 | 6  | 8 | 117 | 23 | 354 |
| 61,140 | 1 | 23 | 14 | 216 | 0 | 6  | 8 | 128 | 23 | 373 |
| 61,141 | 1 | 23 | 14 | 239 | 0 | 7  | 8 | 141 | 23 | 410 |
| 61,142 | 0 | 24 | 13 | 278 | 0 | 9  | 6 | 155 | 19 | 466 |
| 61,143 | 0 | 30 | 11 | 321 | 0 | 10 | 4 | 163 | 15 | 524 |
| 61,144 | 0 | 29 | 9  | 367 | 0 | 10 | 3 | 164 | 12 | 570 |
| 61,145 | 0 | 30 | 14 | 360 | 0 | 10 | 2 | 161 | 16 | 561 |
| 61,146 | 0 | 29 | 13 | 365 | 0 | 10 | 3 | 164 | 16 | 568 |
| 61,147 | 0 | 29 | 12 | 357 | 0 | 9  | 4 | 161 | 16 | 556 |
| 61,148 | 0 | 27 | 12 | 355 | 0 | 9  | 4 | 161 | 16 | 552 |
| 61,149 | 0 | 29 | 11 | 359 | 0 | 9  | 4 | 164 | 15 | 561 |
| 61,150 | 0 | 29 | 11 | 361 | 0 | 9  | 4 | 167 | 15 | 566 |
| 61,151 | 0 | 29 | 17 | 363 | 0 | 9  | 4 | 168 | 21 | 569 |
| 61,152 | 0 | 29 | 17 | 361 | 0 | 9  | 4 | 168 | 21 | 567 |
| 61,153 | 0 | 30 | 18 | 364 | 0 | 9  | 4 | 170 | 22 | 573 |
| 61,154 | 0 | 30 | 18 | 368 | 0 | 9  | 4 | 171 | 22 | 578 |
| 61,155 | 0 | 30 | 15 | 368 | 0 | 9  | 4 | 171 | 19 | 578 |
| 61,156 | 0 | 30 | 15 | 368 | 0 | 9  | 4 | 171 | 19 | 578 |
| 61,157 | 0 | 30 | 16 | 365 | 0 | 9  | 4 | 171 | 20 | 575 |
| 61,158 | 0 | 30 | 16 | 365 | 0 | 9  | 4 | 171 | 20 | 575 |
| 61,159 | 0 | 30 | 16 | 365 | 0 | 9  | 4 | 172 | 20 | 576 |
| 61,160 | 0 | 30 | 16 | 365 | 0 | 9  | 4 | 173 | 20 | 577 |

|        |   |    |    |     |   |    |    |     |    |     |
|--------|---|----|----|-----|---|----|----|-----|----|-----|
| 61,161 | 0 | 30 | 16 | 367 | 0 | 9  | 4  | 174 | 20 | 580 |
| 61,162 | 0 | 30 | 16 | 373 | 0 | 9  | 4  | 173 | 20 | 585 |
| 61,163 | 0 | 30 | 17 | 380 | 0 | 11 | 4  | 179 | 21 | 600 |
| 61,164 | 0 | 30 | 18 | 381 | 0 | 11 | 4  | 183 | 22 | 605 |
| 61,165 | 0 | 32 | 18 | 386 | 0 | 12 | 4  | 189 | 22 | 619 |
| 61,166 | 0 | 32 | 18 | 376 | 0 | 11 | 4  | 189 | 22 | 608 |
| 61,167 | 0 | 32 | 25 | 373 | 0 | 11 | 4  | 186 | 29 | 602 |
| 61,168 | 0 | 32 | 30 | 349 | 0 | 11 | 4  | 181 | 34 | 573 |
| 61,169 | 0 | 31 | 30 | 339 | 0 | 11 | 4  | 176 | 34 | 557 |
| 61,170 | 0 | 28 | 31 | 330 | 0 | 12 | 4  | 172 | 35 | 542 |
| 61,171 | 0 | 27 | 31 | 324 | 0 | 11 | 4  | 170 | 35 | 532 |
| 61,172 | 0 | 27 | 31 | 322 | 0 | 11 | 4  | 170 | 35 | 530 |
| 61,173 | 0 | 26 | 31 | 336 | 0 | 11 | 4  | 187 | 35 | 560 |
| 61,174 | 0 | 18 | 31 | 291 | 1 | 9  | 6  | 140 | 38 | 458 |
| 61,175 | 0 | 18 | 31 | 291 | 1 | 9  | 6  | 140 | 38 | 458 |
| 61,176 | 0 | 17 | 32 | 280 | 1 | 9  | 6  | 136 | 39 | 442 |
| 61,177 | 2 | 17 | 34 | 278 | 2 | 9  | 10 | 133 | 48 | 437 |
| 61,178 | 2 | 17 | 34 | 277 | 2 | 9  | 10 | 133 | 48 | 436 |
| 61,179 | 2 | 17 | 41 | 277 | 2 | 9  | 16 | 134 | 61 | 437 |
| 61,180 | 2 | 17 | 47 | 277 | 2 | 9  | 20 | 134 | 71 | 437 |
| 61,181 | 2 | 17 | 47 | 276 | 2 | 9  | 20 | 134 | 71 | 436 |
| 61,182 | 3 | 18 | 47 | 279 | 2 | 9  | 20 | 136 | 72 | 442 |
| 61,183 | 3 | 18 | 47 | 282 | 2 | 9  | 20 | 140 | 72 | 449 |
| 61,184 | 3 | 19 | 47 | 291 | 2 | 9  | 21 | 142 | 73 | 461 |
| 61,185 | 3 | 19 | 48 | 290 | 2 | 9  | 21 | 142 | 74 | 460 |
| 61,186 | 3 | 19 | 48 | 288 | 2 | 9  | 21 | 142 | 74 | 458 |
| 61,187 | 3 | 19 | 48 | 288 | 2 | 9  | 21 | 142 | 74 | 458 |
| 61,188 | 3 | 18 | 48 | 269 | 2 | 8  | 21 | 125 | 74 | 420 |
| 61,189 | 3 | 18 | 48 | 267 | 2 | 8  | 21 | 124 | 74 | 417 |
| 61,190 | 3 | 18 | 48 | 267 | 2 | 8  | 21 | 124 | 74 | 417 |
| 61,191 | 3 | 16 | 48 | 266 | 2 | 8  | 21 | 114 | 74 | 404 |
| 61,192 | 3 | 17 | 48 | 259 | 2 | 9  | 21 | 112 | 74 | 397 |
| 61,193 | 3 | 20 | 48 | 254 | 2 | 9  | 21 | 115 | 74 | 398 |
| 61,194 | 3 | 20 | 49 | 247 | 2 | 15 | 22 | 139 | 76 | 421 |
| 61,195 | 3 | 20 | 49 | 205 | 2 | 15 | 21 | 141 | 75 | 381 |
| 61,196 | 4 | 20 | 43 | 215 | 2 | 15 | 20 | 146 | 69 | 396 |
| 61,197 | 4 | 20 | 43 | 214 | 2 | 15 | 19 | 143 | 68 | 392 |
| 61,198 | 4 | 20 | 43 | 214 | 2 | 15 | 18 | 143 | 67 | 392 |
| 61,199 | 4 | 20 | 43 | 227 | 2 | 16 | 18 | 144 | 67 | 407 |
| 61,200 | 4 | 18 | 40 | 226 | 2 | 16 | 18 | 143 | 64 | 403 |
| 61,201 | 4 | 18 | 38 | 225 | 2 | 16 | 20 | 140 | 64 | 399 |

|        |    |    |    |     |   |    |    |     |    |     |
|--------|----|----|----|-----|---|----|----|-----|----|-----|
| 61,202 | 4  | 18 | 38 | 222 | 2 | 16 | 20 | 139 | 64 | 395 |
| 61,203 | 4  | 17 | 37 | 219 | 2 | 17 | 20 | 136 | 63 | 389 |
| 61,204 | 4  | 17 | 39 | 219 | 2 | 17 | 20 | 137 | 65 | 390 |
| 61,205 | 4  | 17 | 39 | 215 | 2 | 17 | 20 | 136 | 65 | 385 |
| 61,206 | 4  | 17 | 40 | 216 | 3 | 17 | 20 | 137 | 67 | 387 |
| 61,207 | 4  | 17 | 40 | 216 | 3 | 17 | 20 | 137 | 67 | 387 |
| 61,208 | 4  | 17 | 39 | 216 | 3 | 17 | 21 | 138 | 67 | 388 |
| 61,209 | 4  | 17 | 39 | 215 | 3 | 17 | 21 | 136 | 67 | 385 |
| 61,210 | 4  | 17 | 39 | 215 | 3 | 17 | 21 | 135 | 67 | 384 |
| 61,211 | 4  | 17 | 39 | 223 | 3 | 18 | 21 | 146 | 67 | 404 |
| 61,212 | 4  | 17 | 39 | 227 | 3 | 18 | 21 | 149 | 67 | 411 |
| 61,213 | 5  | 18 | 42 | 228 | 3 | 18 | 21 | 154 | 71 | 418 |
| 61,214 | 5  | 18 | 46 | 224 | 3 | 16 | 21 | 150 | 75 | 408 |
| 61,215 | 5  | 18 | 45 | 228 | 3 | 16 | 21 | 145 | 74 | 407 |
| 61,216 | 6  | 16 | 46 | 226 | 3 | 16 | 21 | 141 | 76 | 399 |
| 61,217 | 6  | 16 | 39 | 228 | 3 | 16 | 21 | 141 | 69 | 401 |
| 61,218 | 6  | 16 | 37 | 227 | 3 | 17 | 21 | 142 | 67 | 402 |
| 61,219 | 7  | 17 | 36 | 236 | 3 | 17 | 22 | 143 | 68 | 413 |
| 61,220 | 7  | 17 | 36 | 241 | 3 | 17 | 22 | 146 | 68 | 421 |
| 61,221 | 8  | 17 | 37 | 240 | 3 | 16 | 23 | 144 | 71 | 417 |
| 61,222 | 11 | 17 | 43 | 242 | 3 | 16 | 26 | 144 | 83 | 419 |
| 61,223 | 11 | 18 | 43 | 247 | 3 | 16 | 26 | 145 | 83 | 426 |
| 61,224 | 11 | 18 | 43 | 231 | 3 | 16 | 26 | 129 | 83 | 394 |
| 61,225 | 12 | 18 | 48 | 230 | 2 | 16 | 30 | 124 | 92 | 388 |
| 61,226 | 12 | 18 | 49 | 232 | 2 | 17 | 30 | 127 | 93 | 394 |
| 61,227 | 12 | 18 | 48 | 230 | 2 | 17 | 30 | 127 | 92 | 392 |
| 61,228 | 10 | 20 | 46 | 247 | 1 | 17 | 26 | 144 | 83 | 428 |
| 61,229 | 10 | 20 | 46 | 250 | 1 | 17 | 26 | 147 | 83 | 434 |
| 61,230 | 12 | 20 | 39 | 250 | 1 | 17 | 20 | 146 | 72 | 433 |
| 61,231 | 12 | 20 | 33 | 250 | 1 | 17 | 16 | 147 | 62 | 434 |
| 61,232 | 12 | 20 | 33 | 250 | 1 | 17 | 16 | 149 | 62 | 436 |
| 61,233 | 11 | 19 | 33 | 247 | 1 | 17 | 16 | 145 | 61 | 428 |
| 61,234 | 11 | 19 | 33 | 247 | 1 | 17 | 16 | 145 | 61 | 428 |
| 61,235 | 11 | 18 | 33 | 238 | 1 | 17 | 16 | 145 | 61 | 418 |
| 61,236 | 11 | 18 | 32 | 239 | 1 | 17 | 16 | 146 | 60 | 420 |
| 61,237 | 11 | 18 | 40 | 239 | 1 | 17 | 17 | 146 | 69 | 420 |
| 61,238 | 12 | 18 | 41 | 239 | 1 | 17 | 17 | 146 | 71 | 420 |
| 61,239 | 13 | 18 | 44 | 239 | 2 | 17 | 21 | 146 | 80 | 420 |
| 61,240 | 13 | 18 | 45 | 239 | 2 | 17 | 22 | 146 | 82 | 420 |
| 61,241 | 13 | 18 | 48 | 239 | 2 | 17 | 23 | 147 | 86 | 421 |
| 61,242 | 13 | 17 | 48 | 219 | 2 | 15 | 23 | 136 | 86 | 387 |

|        |    |    |    |     |   |    |    |     |     |     |
|--------|----|----|----|-----|---|----|----|-----|-----|-----|
| 61,243 | 13 | 6  | 48 | 168 | 2 | 7  | 23 | 99  | 86  | 280 |
| 61,244 | 13 | 6  | 48 | 173 | 2 | 8  | 23 | 106 | 86  | 293 |
| 61,245 | 14 | 6  | 47 | 174 | 2 | 8  | 22 | 108 | 85  | 296 |
| 61,246 | 14 | 7  | 46 | 171 | 2 | 10 | 22 | 108 | 84  | 296 |
| 61,247 | 13 | 6  | 46 | 172 | 2 | 10 | 22 | 110 | 83  | 298 |
| 61,248 | 13 | 6  | 46 | 168 | 2 | 10 | 22 | 108 | 83  | 292 |
| 61,249 | 13 | 6  | 47 | 169 | 2 | 10 | 22 | 108 | 84  | 293 |
| 61,250 | 13 | 6  | 56 | 158 | 2 | 9  | 20 | 110 | 91  | 283 |
| 61,251 | 13 | 8  | 56 | 176 | 2 | 9  | 20 | 120 | 91  | 313 |
| 61,252 | 13 | 8  | 55 | 177 | 2 | 9  | 20 | 123 | 90  | 317 |
| 61,253 | 15 | 8  | 57 | 181 | 2 | 9  | 23 | 124 | 97  | 322 |
| 61,254 | 15 | 8  | 58 | 186 | 2 | 8  | 24 | 126 | 99  | 328 |
| 61,255 | 15 | 8  | 56 | 185 | 2 | 8  | 24 | 124 | 97  | 325 |
| 61,256 | 15 | 8  | 56 | 185 | 2 | 8  | 24 | 125 | 97  | 326 |
| 61,257 | 16 | 8  | 58 | 185 | 1 | 8  | 24 | 124 | 99  | 325 |
| 61,258 | 16 | 8  | 60 | 188 | 1 | 8  | 24 | 124 | 101 | 328 |
| 61,259 | 16 | 8  | 60 | 188 | 1 | 8  | 23 | 124 | 100 | 328 |
| 61,260 | 16 | 8  | 61 | 188 | 1 | 8  | 23 | 124 | 101 | 328 |
| 61,261 | 16 | 8  | 61 | 189 | 1 | 8  | 23 | 126 | 101 | 331 |
| 61,262 | 16 | 8  | 60 | 183 | 1 | 7  | 23 | 113 | 100 | 311 |
| 61,263 | 15 | 7  | 59 | 170 | 1 | 7  | 23 | 104 | 98  | 288 |
| 61,264 | 15 | 7  | 58 | 170 | 1 | 7  | 23 | 104 | 97  | 288 |
| 61,265 | 15 | 7  | 55 | 156 | 2 | 7  | 25 | 102 | 97  | 272 |
| 61,266 | 15 | 7  | 55 | 157 | 2 | 7  | 26 | 102 | 98  | 273 |
| 61,267 | 14 | 7  | 57 | 157 | 2 | 6  | 27 | 102 | 100 | 272 |
| 61,268 | 14 | 7  | 57 | 156 | 2 | 5  | 27 | 98  | 100 | 266 |
| 61,269 | 14 | 7  | 56 | 164 | 2 | 5  | 27 | 105 | 99  | 281 |
| 61,270 | 14 | 6  | 59 | 151 | 2 | 5  | 28 | 107 | 103 | 269 |
| 61,271 | 14 | 6  | 59 | 149 | 2 | 6  | 29 | 107 | 104 | 268 |
| 61,272 | 13 | 9  | 60 | 191 | 2 | 15 | 29 | 160 | 104 | 375 |
| 61,273 | 10 | 15 | 56 | 295 | 2 | 24 | 25 | 213 | 93  | 547 |
| 61,274 | 10 | 20 | 60 | 345 | 2 | 27 | 23 | 239 | 95  | 631 |
| 61,275 | 10 | 22 | 58 | 358 | 2 | 28 | 24 | 242 | 94  | 650 |
| 61,276 | 9  | 23 | 57 | 357 | 2 | 27 | 21 | 244 | 89  | 651 |
| 61,277 | 10 | 23 | 59 | 359 | 3 | 27 | 22 | 246 | 94  | 655 |
| 61,278 | 10 | 21 | 59 | 343 | 3 | 27 | 22 | 230 | 94  | 621 |
| 61,279 | 10 | 21 | 59 | 341 | 3 | 27 | 22 | 227 | 94  | 616 |
| 61,280 | 10 | 21 | 60 | 341 | 3 | 27 | 22 | 229 | 95  | 618 |
| 61,281 | 8  | 21 | 62 | 342 | 4 | 27 | 22 | 228 | 96  | 618 |
| 61,282 | 8  | 21 | 62 | 342 | 4 | 27 | 22 | 226 | 96  | 616 |
| 61,283 | 8  | 21 | 62 | 344 | 4 | 27 | 22 | 228 | 96  | 620 |

|        |   |    |    |     |   |    |    |     |    |     |
|--------|---|----|----|-----|---|----|----|-----|----|-----|
| 61,284 | 8 | 21 | 61 | 350 | 4 | 27 | 22 | 232 | 95 | 630 |
| 61,285 | 8 | 21 | 60 | 352 | 4 | 27 | 22 | 235 | 94 | 635 |
| 61,286 | 8 | 23 | 57 | 362 | 4 | 27 | 22 | 251 | 91 | 663 |
| 61,287 | 8 | 23 | 57 | 363 | 4 | 27 | 21 | 253 | 90 | 666 |
| 61,288 | 8 | 24 | 60 | 365 | 4 | 27 | 23 | 255 | 95 | 671 |
| 61,289 | 7 | 24 | 59 | 374 | 4 | 28 | 23 | 260 | 93 | 686 |
| 61,290 | 6 | 24 | 57 | 374 | 3 | 28 | 24 | 260 | 90 | 686 |
| 61,291 | 6 | 24 | 56 | 379 | 3 | 28 | 23 | 260 | 88 | 691 |
| 61,292 | 6 | 24 | 53 | 362 | 3 | 27 | 22 | 249 | 84 | 662 |
| 61,293 | 6 | 24 | 53 | 363 | 3 | 27 | 23 | 248 | 85 | 662 |
| 61,294 | 6 | 24 | 53 | 363 | 3 | 27 | 23 | 248 | 85 | 662 |
| 61,295 | 6 | 24 | 53 | 359 | 3 | 26 | 23 | 241 | 85 | 650 |
| 61,296 | 5 | 23 | 52 | 356 | 3 | 24 | 23 | 234 | 83 | 637 |
| 61,297 | 5 | 23 | 52 | 357 | 3 | 24 | 23 | 234 | 83 | 638 |
| 61,298 | 5 | 25 | 52 | 364 | 3 | 27 | 23 | 234 | 83 | 650 |
| 61,299 | 5 | 25 | 52 | 382 | 3 | 29 | 23 | 244 | 83 | 680 |
| 61,300 | 5 | 25 | 49 | 383 | 3 | 30 | 23 | 247 | 80 | 685 |
| 61,301 | 5 | 25 | 43 | 392 | 3 | 31 | 23 | 249 | 74 | 697 |
| 61,302 | 4 | 29 | 42 | 411 | 3 | 31 | 22 | 256 | 71 | 727 |
| 61,303 | 4 | 34 | 42 | 437 | 3 | 33 | 20 | 261 | 69 | 765 |
| 61,304 | 3 | 35 | 41 | 434 | 3 | 33 | 20 | 261 | 67 | 763 |
| 61,305 | 3 | 35 | 40 | 443 | 3 | 33 | 19 | 267 | 65 | 778 |
| 61,306 | 3 | 38 | 40 | 500 | 3 | 34 | 19 | 284 | 65 | 856 |
| 61,307 | 3 | 39 | 40 | 516 | 3 | 36 | 19 | 292 | 65 | 883 |
| 61,308 | 2 | 40 | 37 | 521 | 3 | 36 | 19 | 293 | 61 | 890 |
| 61,309 | 2 | 44 | 35 | 537 | 3 | 36 | 19 | 299 | 59 | 916 |
| 61,310 | 2 | 45 | 34 | 538 | 3 | 37 | 19 | 308 | 58 | 928 |
| 61,311 | 2 | 45 | 34 | 541 | 3 | 37 | 19 | 308 | 58 | 931 |
| 61,312 | 2 | 45 | 34 | 546 | 3 | 37 | 19 | 309 | 58 | 937 |
| 61,313 | 2 | 45 | 34 | 545 | 3 | 37 | 20 | 309 | 59 | 936 |
| 61,314 | 2 | 45 | 34 | 545 | 3 | 37 | 20 | 308 | 59 | 935 |
| 61,315 | 2 | 45 | 32 | 545 | 2 | 37 | 18 | 308 | 54 | 935 |
| 61,316 | 2 | 45 | 35 | 539 | 2 | 37 | 18 | 307 | 57 | 928 |
| 61,317 | 2 | 45 | 35 | 540 | 2 | 37 | 17 | 307 | 56 | 929 |
| 61,318 | 2 | 45 | 32 | 541 | 2 | 37 | 16 | 307 | 52 | 930 |
| 61,319 | 2 | 45 | 37 | 531 | 2 | 37 | 18 | 301 | 59 | 914 |
| 61,320 | 1 | 45 | 36 | 534 | 2 | 37 | 18 | 304 | 57 | 920 |
| 61,321 | 1 | 46 | 33 | 535 | 2 | 36 | 16 | 304 | 52 | 921 |
| 61,322 | 1 | 46 | 33 | 552 | 2 | 38 | 15 | 313 | 51 | 949 |
| 61,323 | 1 | 44 | 30 | 522 | 2 | 29 | 14 | 268 | 47 | 863 |
| 61,324 | 1 | 31 | 28 | 361 | 2 | 16 | 14 | 194 | 45 | 602 |



|        |   |    |    |     |   |    |    |     |    |     |
|--------|---|----|----|-----|---|----|----|-----|----|-----|
| 61,325 | 1 | 32 | 23 | 395 | 2 | 16 | 14 | 199 | 40 | 642 |
| 61,326 | 1 | 32 | 23 | 395 | 2 | 16 | 13 | 199 | 39 | 642 |
| 61,327 | 1 | 32 | 22 | 401 | 2 | 16 | 13 | 197 | 38 | 646 |
| 61,328 | 0 | 33 | 19 | 402 | 1 | 16 | 12 | 198 | 32 | 649 |
| 61,329 | 0 | 35 | 19 | 409 | 1 | 16 | 12 | 200 | 32 | 660 |
| 61,330 | 0 | 47 | 22 | 455 | 1 | 20 | 13 | 214 | 36 | 736 |
| 61,331 | 0 | 47 | 21 | 455 | 1 | 20 | 13 | 214 | 35 | 736 |
| 61,332 | 0 | 47 | 21 | 457 | 2 | 20 | 12 | 215 | 35 | 739 |
| 61,333 | 0 | 47 | 21 | 457 | 2 | 20 | 12 | 213 | 35 | 737 |
| 61,334 | 0 | 47 | 21 | 448 | 2 | 20 | 12 | 207 | 35 | 722 |
| 61,335 | 0 | 51 | 22 | 456 | 2 | 20 | 12 | 215 | 36 | 742 |
| 61,336 | 0 | 51 | 22 | 462 | 2 | 22 | 12 | 224 | 36 | 759 |
| 61,337 | 0 | 53 | 20 | 464 | 2 | 23 | 10 | 224 | 32 | 764 |
| 61,338 | 0 | 53 | 17 | 463 | 2 | 23 | 10 | 221 | 29 | 760 |
| 61,339 | 0 | 52 | 16 | 453 | 2 | 22 | 10 | 216 | 28 | 743 |
| 61,340 | 0 | 56 | 16 | 464 | 2 | 22 | 10 | 227 | 28 | 769 |
| 61,341 | 0 | 56 | 15 | 464 | 2 | 22 | 5  | 230 | 22 | 772 |
| 61,342 | 0 | 57 | 17 | 460 | 2 | 22 | 5  | 232 | 24 | 771 |
| 61,343 | 0 | 57 | 18 | 462 | 2 | 22 | 5  | 233 | 25 | 774 |
| 61,344 | 0 | 57 | 19 | 461 | 2 | 22 | 4  | 233 | 25 | 773 |
| 61,345 | 0 | 57 | 21 | 460 | 2 | 22 | 4  | 233 | 27 | 772 |
| 61,346 | 0 | 57 | 25 | 457 | 5 | 22 | 9  | 234 | 39 | 770 |
| 61,347 | 0 | 57 | 28 | 457 | 6 | 22 | 10 | 236 | 44 | 772 |
| 61,348 | 0 | 57 | 28 | 460 | 6 | 22 | 10 | 236 | 44 | 775 |
| 61,349 | 0 | 55 | 28 | 439 | 6 | 19 | 16 | 228 | 50 | 741 |
| 61,350 | 1 | 55 | 30 | 417 | 6 | 17 | 17 | 218 | 54 | 707 |
| 61,351 | 1 | 56 | 30 | 422 | 6 | 16 | 18 | 221 | 55 | 715 |
| 61,352 | 1 | 57 | 30 | 415 | 6 | 15 | 18 | 217 | 55 | 704 |
| 61,353 | 1 | 48 | 30 | 355 | 6 | 15 | 18 | 210 | 55 | 628 |
| 61,354 | 1 | 48 | 30 | 370 | 6 | 15 | 18 | 213 | 55 | 646 |
| 61,355 | 2 | 49 | 30 | 383 | 6 | 15 | 18 | 227 | 56 | 674 |
| 61,356 | 2 | 51 | 30 | 381 | 6 | 15 | 18 | 225 | 56 | 672 |
| 61,357 | 2 | 49 | 30 | 326 | 6 | 14 | 18 | 209 | 56 | 598 |
| 61,358 | 2 | 47 | 30 | 306 | 6 | 12 | 18 | 200 | 56 | 565 |
| 61,359 | 2 | 45 | 30 | 324 | 6 | 12 | 18 | 220 | 56 | 601 |
| 61,360 | 2 | 41 | 30 | 313 | 6 | 12 | 18 | 218 | 56 | 584 |
| 61,361 | 2 | 42 | 31 | 328 | 6 | 11 | 18 | 212 | 57 | 593 |
| 61,362 | 2 | 42 | 31 | 340 | 6 | 12 | 18 | 233 | 57 | 627 |
| 61,363 | 2 | 42 | 31 | 335 | 6 | 12 | 18 | 231 | 57 | 620 |
| 61,364 | 2 | 43 | 32 | 337 | 6 | 12 | 17 | 232 | 57 | 624 |
| 61,365 | 2 | 46 | 33 | 373 | 6 | 18 | 17 | 269 | 58 | 706 |

|        |   |     |    |     |   |    |    |     |    |       |
|--------|---|-----|----|-----|---|----|----|-----|----|-------|
| 61,366 | 2 | 48  | 33 | 403 | 6 | 22 | 17 | 287 | 58 | 760   |
| 61,367 | 2 | 51  | 30 | 416 | 6 | 22 | 17 | 308 | 55 | 797   |
| 61,368 | 2 | 51  | 30 | 418 | 6 | 23 | 17 | 309 | 55 | 801   |
| 61,369 | 2 | 53  | 31 | 424 | 6 | 24 | 17 | 313 | 56 | 814   |
| 61,370 | 2 | 56  | 26 | 431 | 6 | 24 | 15 | 317 | 49 | 828   |
| 61,371 | 2 | 64  | 26 | 449 | 6 | 30 | 15 | 354 | 49 | 897   |
| 61,372 | 2 | 64  | 26 | 450 | 6 | 30 | 15 | 356 | 49 | 900   |
| 61,373 | 2 | 69  | 26 | 446 | 6 | 29 | 15 | 353 | 49 | 897   |
| 61,374 | 2 | 77  | 26 | 457 | 6 | 30 | 15 | 380 | 49 | 944   |
| 61,375 | 2 | 77  | 26 | 457 | 6 | 30 | 15 | 380 | 49 | 944   |
| 61,376 | 2 | 76  | 26 | 436 | 6 | 30 | 15 | 374 | 49 | 916   |
| 61,377 | 2 | 76  | 26 | 441 | 6 | 30 | 15 | 378 | 49 | 925   |
| 61,378 | 2 | 75  | 26 | 446 | 6 | 30 | 15 | 380 | 49 | 931   |
| 61,379 | 2 | 75  | 26 | 447 | 6 | 30 | 15 | 380 | 49 | 932   |
| 61,380 | 2 | 73  | 26 | 453 | 6 | 30 | 15 | 386 | 49 | 942   |
| 61,381 | 2 | 63  | 23 | 413 | 6 | 26 | 14 | 371 | 45 | 873   |
| 61,382 | 2 | 63  | 21 | 413 | 4 | 26 | 14 | 371 | 41 | 873   |
| 61,383 | 2 | 61  | 21 | 409 | 4 | 26 | 14 | 370 | 41 | 866   |
| 61,384 | 2 | 62  | 21 | 410 | 4 | 26 | 14 | 370 | 41 | 868   |
| 61,385 | 2 | 62  | 21 | 410 | 4 | 26 | 14 | 370 | 41 | 868   |
| 61,386 | 2 | 58  | 20 | 400 | 4 | 26 | 14 | 359 | 40 | 843   |
| 61,387 | 2 | 58  | 20 | 395 | 4 | 24 | 14 | 351 | 40 | 828   |
| 61,388 | 2 | 54  | 20 | 383 | 4 | 23 | 14 | 335 | 40 | 795   |
| 61,389 | 2 | 54  | 20 | 382 | 4 | 23 | 14 | 335 | 40 | 794   |
| 61,390 | 2 | 50  | 20 | 370 | 4 | 23 | 14 | 322 | 40 | 765   |
| 61,391 | 2 | 50  | 20 | 372 | 4 | 23 | 14 | 322 | 40 | 767   |
| 61,392 | 2 | 57  | 18 | 479 | 4 | 29 | 14 | 393 | 38 | 958   |
| 61,393 | 2 | 56  | 17 | 492 | 4 | 29 | 14 | 395 | 37 | 972   |
| 61,394 | 2 | 59  | 17 | 537 | 4 | 34 | 14 | 428 | 37 | 1,058 |
| 61,395 | 2 | 69  | 16 | 587 | 4 | 38 | 14 | 459 | 36 | 1,153 |
| 61,396 | 2 | 71  | 14 | 595 | 4 | 38 | 14 | 463 | 34 | 1,167 |
| 61,397 | 2 | 78  | 10 | 680 | 1 | 42 | 9  | 484 | 22 | 1,284 |
| 61,398 | 2 | 80  | 7  | 696 | 0 | 45 | 8  | 487 | 17 | 1,308 |
| 61,399 | 2 | 80  | 6  | 696 | 0 | 48 | 2  | 489 | 10 | 1,313 |
| 61,400 | 1 | 95  | 4  | 747 | 0 | 54 | 1  | 520 | 6  | 1,416 |
| 61,401 | 1 | 97  | 4  | 776 | 0 | 56 | 0  | 534 | 5  | 1,463 |
| 61,402 | 1 | 102 | 5  | 810 | 0 | 61 | 0  | 543 | 6  | 1,516 |
| 61,403 | 1 | 102 | 5  | 820 | 0 | 61 | 0  | 547 | 6  | 1,530 |
| 61,404 | 1 | 98  | 5  | 797 | 0 | 62 | 0  | 513 | 6  | 1,470 |
| 61,405 | 1 | 99  | 5  | 801 | 0 | 62 | 0  | 517 | 6  | 1,479 |
| 61,406 | 0 | 99  | 6  | 801 | 0 | 62 | 0  | 517 | 6  | 1,479 |

|        |    |     |    |     |   |    |    |     |     |       |
|--------|----|-----|----|-----|---|----|----|-----|-----|-------|
| 61,407 | 0  | 102 | 6  | 811 | 0 | 62 | 0  | 522 | 6   | 1,497 |
| 61,408 | 0  | 101 | 6  | 812 | 0 | 62 | 0  | 522 | 6   | 1,497 |
| 61,409 | 0  | 101 | 6  | 810 | 0 | 62 | 1  | 522 | 7   | 1,495 |
| 61,410 | 0  | 101 | 7  | 794 | 0 | 63 | 1  | 504 | 8   | 1,462 |
| 61,411 | 0  | 101 | 7  | 798 | 0 | 63 | 1  | 506 | 8   | 1,468 |
| 61,412 | 1  | 102 | 8  | 797 | 0 | 63 | 1  | 517 | 10  | 1,479 |
| 61,413 | 1  | 106 | 11 | 802 | 0 | 63 | 1  | 511 | 13  | 1,482 |
| 61,414 | 7  | 107 | 37 | 802 | 0 | 63 | 6  | 510 | 50  | 1,482 |
| 61,415 | 8  | 113 | 38 | 820 | 0 | 66 | 8  | 534 | 54  | 1,533 |
| 61,416 | 8  | 110 | 37 | 790 | 0 | 61 | 8  | 500 | 53  | 1,461 |
| 61,417 | 9  | 106 | 55 | 757 | 0 | 59 | 13 | 479 | 77  | 1,401 |
| 61,418 | 9  | 106 | 55 | 759 | 0 | 59 | 13 | 482 | 77  | 1,406 |
| 61,419 | 9  | 111 | 57 | 779 | 0 | 58 | 13 | 488 | 79  | 1,436 |
| 61,420 | 9  | 108 | 59 | 776 | 0 | 58 | 14 | 504 | 82  | 1,446 |
| 61,421 | 9  | 108 | 59 | 782 | 0 | 58 | 14 | 505 | 82  | 1,453 |
| 61,422 | 9  | 99  | 59 | 759 | 0 | 52 | 16 | 460 | 84  | 1,370 |
| 61,423 | 9  | 99  | 61 | 759 | 0 | 52 | 17 | 461 | 87  | 1,371 |
| 61,424 | 9  | 97  | 61 | 755 | 0 | 52 | 17 | 468 | 87  | 1,372 |
| 61,425 | 9  | 91  | 61 | 724 | 0 | 52 | 17 | 432 | 87  | 1,299 |
| 61,426 | 9  | 91  | 65 | 740 | 0 | 52 | 18 | 448 | 92  | 1,331 |
| 61,427 | 9  | 91  | 65 | 731 | 0 | 52 | 18 | 452 | 92  | 1,326 |
| 61,428 | 9  | 91  | 67 | 716 | 1 | 52 | 20 | 446 | 97  | 1,305 |
| 61,429 | 9  | 93  | 67 | 734 | 1 | 52 | 20 | 471 | 97  | 1,350 |
| 61,430 | 9  | 96  | 68 | 751 | 1 | 54 | 20 | 484 | 98  | 1,385 |
| 61,431 | 9  | 96  | 68 | 747 | 1 | 54 | 20 | 483 | 98  | 1,380 |
| 61,432 | 9  | 108 | 68 | 815 | 2 | 62 | 20 | 535 | 99  | 1,520 |
| 61,433 | 9  | 108 | 68 | 816 | 2 | 63 | 20 | 538 | 99  | 1,525 |
| 61,434 | 9  | 110 | 68 | 819 | 2 | 64 | 20 | 540 | 99  | 1,533 |
| 61,435 | 9  | 111 | 75 | 819 | 2 | 64 | 21 | 546 | 107 | 1,540 |
| 61,436 | 9  | 113 | 75 | 820 | 2 | 65 | 22 | 547 | 108 | 1,545 |
| 61,437 | 9  | 113 | 75 | 823 | 2 | 65 | 22 | 547 | 108 | 1,548 |
| 61,438 | 9  | 113 | 77 | 823 | 2 | 65 | 23 | 548 | 111 | 1,549 |
| 61,439 | 9  | 113 | 78 | 831 | 2 | 65 | 24 | 557 | 113 | 1,566 |
| 61,440 | 9  | 120 | 78 | 871 | 2 | 67 | 25 | 598 | 114 | 1,656 |
| 61,441 | 9  | 120 | 78 | 873 | 2 | 67 | 25 | 599 | 114 | 1,659 |
| 61,442 | 9  | 120 | 78 | 872 | 2 | 67 | 25 | 599 | 114 | 1,658 |
| 61,443 | 9  | 100 | 78 | 643 | 2 | 52 | 25 | 450 | 114 | 1,245 |
| 61,444 | 9  | 100 | 78 | 643 | 2 | 52 | 25 | 450 | 114 | 1,245 |
| 61,445 | 10 | 100 | 78 | 643 | 2 | 52 | 25 | 450 | 115 | 1,245 |
| 61,446 | 10 | 100 | 78 | 651 | 2 | 52 | 25 | 451 | 115 | 1,254 |
| 61,447 | 10 | 104 | 78 | 657 | 2 | 52 | 25 | 454 | 115 | 1,267 |

|        |    |    |    |     |   |    |    |     |     |       |
|--------|----|----|----|-----|---|----|----|-----|-----|-------|
| 61,448 | 10 | 98 | 79 | 575 | 2 | 48 | 26 | 443 | 117 | 1,164 |
| 61,449 | 10 | 95 | 79 | 561 | 2 | 45 | 26 | 438 | 117 | 1,139 |
| 61,450 | 10 | 98 | 80 | 564 | 2 | 42 | 26 | 438 | 118 | 1,142 |
| 61,451 | 10 | 84 | 80 | 513 | 2 | 36 | 26 | 407 | 118 | 1,040 |
| 61,452 | 10 | 78 | 80 | 450 | 2 | 29 | 26 | 396 | 118 | 953   |
| 61,453 | 10 | 80 | 79 | 458 | 2 | 29 | 26 | 408 | 117 | 975   |
| 61,454 | 10 | 84 | 80 | 467 | 2 | 29 | 26 | 441 | 118 | 1,021 |
| 61,455 | 10 | 82 | 80 | 443 | 2 | 26 | 26 | 440 | 118 | 991   |
| 61,456 | 10 | 81 | 89 | 463 | 3 | 26 | 34 | 450 | 136 | 1,020 |
| 61,457 | 10 | 82 | 88 | 478 | 3 | 27 | 34 | 456 | 135 | 1,043 |
| 61,458 | 10 | 79 | 88 | 471 | 3 | 27 | 34 | 453 | 135 | 1,030 |
| 61,459 | 10 | 79 | 89 | 470 | 3 | 27 | 33 | 457 | 135 | 1,033 |
| 61,460 | 10 | 81 | 89 | 506 | 3 | 30 | 33 | 508 | 135 | 1,125 |
| 61,461 | 10 | 83 | 87 | 545 | 3 | 33 | 33 | 541 | 133 | 1,202 |
| 61,462 | 9  | 91 | 87 | 617 | 3 | 36 | 34 | 584 | 133 | 1,328 |
| 61,463 | 9  | 90 | 85 | 648 | 3 | 39 | 34 | 617 | 131 | 1,394 |
| 61,464 | 9  | 85 | 84 | 716 | 3 | 41 | 34 | 673 | 130 | 1,515 |
| 61,465 | 3  | 86 | 58 | 734 | 3 | 41 | 29 | 681 | 93  | 1,542 |
| 61,466 | 2  | 81 | 56 | 718 | 3 | 38 | 27 | 661 | 88  | 1,498 |
| 61,467 | 2  | 86 | 49 | 767 | 3 | 42 | 25 | 719 | 79  | 1,614 |
| 61,468 | 1  | 85 | 38 | 771 | 3 | 40 | 22 | 703 | 64  | 1,599 |
| 61,469 | 1  | 85 | 36 | 778 | 3 | 40 | 22 | 703 | 62  | 1,606 |
| 61,470 | 1  | 80 | 36 | 761 | 3 | 40 | 22 | 697 | 62  | 1,578 |
| 61,471 | 1  | 78 | 33 | 753 | 3 | 39 | 21 | 673 | 58  | 1,543 |
| 61,472 | 1  | 78 | 33 | 749 | 3 | 39 | 19 | 672 | 56  | 1,538 |
| 61,473 | 1  | 75 | 33 | 733 | 3 | 38 | 18 | 654 | 55  | 1,500 |
| 61,474 | 3  | 75 | 36 | 734 | 3 | 38 | 18 | 654 | 60  | 1,501 |
| 61,475 | 3  | 75 | 34 | 739 | 3 | 39 | 18 | 663 | 58  | 1,516 |
| 61,476 | 3  | 71 | 32 | 714 | 3 | 38 | 20 | 636 | 58  | 1,459 |
| 61,477 | 4  | 72 | 40 | 747 | 3 | 38 | 25 | 647 | 72  | 1,504 |
| 61,478 | 4  | 72 | 44 | 752 | 2 | 39 | 23 | 650 | 73  | 1,513 |
| 61,479 | 5  | 72 | 44 | 751 | 2 | 39 | 29 | 651 | 80  | 1,513 |
| 61,480 | 5  | 70 | 44 | 734 | 2 | 39 | 30 | 628 | 81  | 1,471 |
| 61,481 | 5  | 66 | 43 | 712 | 2 | 37 | 30 | 613 | 80  | 1,428 |
| 61,482 | 5  | 71 | 43 | 728 | 2 | 37 | 30 | 629 | 80  | 1,465 |
| 61,483 | 5  | 59 | 43 | 656 | 1 | 30 | 30 | 580 | 79  | 1,325 |
| 61,484 | 6  | 62 | 49 | 687 | 1 | 32 | 38 | 605 | 94  | 1,386 |
| 61,485 | 6  | 61 | 49 | 697 | 1 | 31 | 38 | 610 | 94  | 1,399 |
| 61,486 | 6  | 69 | 42 | 744 | 1 | 34 | 37 | 644 | 86  | 1,491 |
| 61,487 | 6  | 72 | 42 | 759 | 1 | 35 | 36 | 650 | 85  | 1,516 |
| 61,488 | 6  | 72 | 42 | 770 | 1 | 35 | 35 | 656 | 84  | 1,533 |

|        |   |    |    |     |   |    |    |     |     |       |
|--------|---|----|----|-----|---|----|----|-----|-----|-------|
| 61,489 | 6 | 72 | 42 | 769 | 1 | 35 | 34 | 654 | 83  | 1,530 |
| 61,490 | 8 | 65 | 45 | 721 | 1 | 33 | 34 | 603 | 88  | 1,422 |
| 61,491 | 8 | 66 | 45 | 720 | 1 | 33 | 34 | 602 | 88  | 1,421 |
| 61,492 | 8 | 66 | 45 | 720 | 1 | 33 | 34 | 602 | 88  | 1,421 |
| 61,493 | 8 | 66 | 48 | 719 | 1 | 33 | 36 | 605 | 93  | 1,423 |
| 61,494 | 8 | 64 | 54 | 719 | 1 | 33 | 40 | 605 | 103 | 1,421 |
| 61,495 | 8 | 64 | 55 | 719 | 1 | 33 | 40 | 605 | 104 | 1,421 |
| 61,496 | 7 | 64 | 56 | 711 | 1 | 33 | 40 | 604 | 104 | 1,412 |
| 61,497 | 7 | 60 | 56 | 705 | 1 | 33 | 40 | 601 | 104 | 1,399 |
| 61,498 | 7 | 59 | 56 | 701 | 1 | 33 | 40 | 590 | 104 | 1,383 |
| 61,499 | 7 | 59 | 55 | 703 | 1 | 33 | 39 | 590 | 102 | 1,385 |
| 61,500 | 7 | 59 | 54 | 709 | 1 | 36 | 39 | 592 | 101 | 1,396 |
| 61,501 | 7 | 56 | 54 | 705 | 1 | 36 | 39 | 591 | 101 | 1,388 |
| 61,502 | 7 | 57 | 54 | 730 | 1 | 36 | 39 | 596 | 101 | 1,419 |
| 61,503 | 7 | 57 | 53 | 733 | 1 | 36 | 39 | 584 | 100 | 1,410 |
| 61,504 | 7 | 54 | 48 | 751 | 0 | 37 | 33 | 585 | 88  | 1,427 |
| 61,505 | 7 | 52 | 45 | 736 | 0 | 38 | 32 | 549 | 84  | 1,375 |
| 61,506 | 7 | 52 | 45 | 743 | 0 | 39 | 31 | 542 | 83  | 1,376 |
| 61,507 | 7 | 59 | 44 | 745 | 0 | 44 | 31 | 538 | 82  | 1,386 |
| 61,508 | 7 | 59 | 44 | 754 | 0 | 44 | 31 | 545 | 82  | 1,402 |
| 61,509 | 7 | 61 | 43 | 780 | 0 | 44 | 31 | 548 | 81  | 1,433 |
| 61,510 | 7 | 62 | 44 | 823 | 0 | 47 | 31 | 592 | 82  | 1,524 |
| 61,511 | 7 | 61 | 44 | 793 | 0 | 44 | 31 | 550 | 82  | 1,448 |
| 61,512 | 7 | 60 | 43 | 756 | 0 | 40 | 30 | 516 | 80  | 1,372 |
| 61,513 | 7 | 57 | 44 | 691 | 0 | 37 | 30 | 485 | 81  | 1,270 |
| 61,514 | 7 | 57 | 44 | 644 | 0 | 34 | 30 | 437 | 81  | 1,172 |
| 61,515 | 7 | 57 | 44 | 558 | 0 | 31 | 30 | 366 | 81  | 1,012 |
| 61,516 | 7 | 55 | 44 | 484 | 0 | 26 | 31 | 295 | 82  | 860   |
| 61,517 | 7 | 55 | 44 | 485 | 0 | 26 | 31 | 301 | 82  | 867   |
| 61,518 | 7 | 55 | 44 | 485 | 0 | 26 | 31 | 301 | 82  | 867   |
| 61,519 | 7 | 55 | 44 | 474 | 0 | 26 | 32 | 301 | 83  | 856   |
| 61,520 | 7 | 58 | 44 | 467 | 0 | 26 | 32 | 299 | 83  | 850   |
| 61,521 | 7 | 58 | 44 | 462 | 0 | 26 | 32 | 298 | 83  | 844   |
| 61,522 | 7 | 58 | 44 | 459 | 0 | 26 | 32 | 297 | 83  | 840   |
| 61,523 | 7 | 58 | 44 | 459 | 0 | 26 | 32 | 297 | 83  | 840   |
| 61,524 | 7 | 58 | 42 | 461 | 0 | 26 | 32 | 295 | 81  | 840   |
| 61,525 | 5 | 58 | 39 | 460 | 0 | 26 | 32 | 295 | 76  | 839   |
| 61,526 | 5 | 58 | 40 | 457 | 0 | 26 | 31 | 290 | 76  | 831   |
| 61,527 | 5 | 58 | 41 | 455 | 0 | 26 | 29 | 289 | 75  | 828   |
| 61,528 | 4 | 57 | 33 | 422 | 0 | 25 | 24 | 285 | 61  | 789   |
| 61,529 | 4 | 57 | 27 | 437 | 0 | 25 | 23 | 293 | 54  | 812   |

|        |   |    |    |     |   |    |    |     |    |     |
|--------|---|----|----|-----|---|----|----|-----|----|-----|
| 61,530 | 3 | 57 | 28 | 441 | 0 | 25 | 17 | 299 | 48 | 822 |
| 61,531 | 3 | 57 | 28 | 442 | 0 | 25 | 16 | 300 | 47 | 824 |
| 61,532 | 3 | 57 | 28 | 443 | 0 | 25 | 16 | 299 | 47 | 824 |
| 61,533 | 3 | 63 | 28 | 442 | 0 | 27 | 16 | 291 | 47 | 823 |
| 61,534 | 3 | 63 | 28 | 441 | 0 | 26 | 16 | 290 | 47 | 820 |
| 61,535 | 2 | 60 | 22 | 409 | 0 | 23 | 8  | 263 | 32 | 755 |
| 61,536 | 2 | 58 | 22 | 394 | 0 | 23 | 8  | 256 | 32 | 731 |
| 61,537 | 2 | 44 | 22 | 329 | 0 | 18 | 8  | 210 | 32 | 601 |
| 61,538 | 2 | 44 | 22 | 318 | 0 | 18 | 8  | 204 | 32 | 584 |
| 61,539 | 2 | 45 | 20 | 320 | 0 | 18 | 8  | 204 | 30 | 587 |
| 61,540 | 3 | 47 | 20 | 326 | 0 | 18 | 8  | 209 | 31 | 600 |
| 61,541 | 1 | 47 | 16 | 326 | 0 | 18 | 8  | 212 | 25 | 603 |
| 61,542 | 1 | 46 | 16 | 326 | 0 | 18 | 8  | 212 | 25 | 602 |
| 61,543 | 1 | 46 | 16 | 327 | 0 | 18 | 8  | 214 | 25 | 605 |
| 61,544 | 1 | 46 | 13 | 328 | 0 | 18 | 6  | 212 | 20 | 604 |
| 61,545 | 1 | 46 | 7  | 329 | 0 | 18 | 2  | 213 | 10 | 606 |
| 61,546 | 1 | 46 | 6  | 332 | 0 | 18 | 2  | 218 | 9  | 614 |
| 61,547 | 1 | 46 | 5  | 334 | 0 | 18 | 2  | 218 | 8  | 616 |
| 61,548 | 1 | 46 | 5  | 335 | 0 | 18 | 2  | 219 | 8  | 618 |
| 61,549 | 1 | 46 | 6  | 337 | 0 | 19 | 3  | 221 | 10 | 623 |
| 61,550 | 1 | 46 | 6  | 340 | 0 | 19 | 3  | 223 | 10 | 628 |
| 61,551 | 1 | 46 | 6  | 340 | 0 | 17 | 3  | 227 | 10 | 630 |
| 61,552 | 1 | 48 | 6  | 345 | 0 | 17 | 3  | 231 | 10 | 641 |
| 61,553 | 1 | 47 | 7  | 329 | 0 | 17 | 3  | 240 | 11 | 633 |
| 61,554 | 1 | 44 | 8  | 327 | 0 | 17 | 3  | 239 | 12 | 627 |
| 61,555 | 1 | 48 | 16 | 305 | 1 | 17 | 4  | 240 | 22 | 610 |
| 61,556 | 1 | 47 | 16 | 306 | 1 | 16 | 4  | 243 | 22 | 612 |
| 61,557 | 1 | 47 | 17 | 311 | 1 | 16 | 5  | 246 | 24 | 620 |
| 61,558 | 2 | 39 | 23 | 276 | 1 | 10 | 7  | 229 | 33 | 554 |
| 61,559 | 2 | 40 | 24 | 276 | 1 | 10 | 7  | 228 | 34 | 554 |
| 61,560 | 2 | 38 | 24 | 248 | 1 | 10 | 7  | 223 | 34 | 519 |
| 61,561 | 2 | 36 | 24 | 200 | 1 | 8  | 7  | 170 | 34 | 414 |
| 61,562 | 2 | 35 | 24 | 192 | 1 | 8  | 7  | 164 | 34 | 399 |
| 61,563 | 2 | 35 | 24 | 193 | 1 | 8  | 7  | 165 | 34 | 401 |
| 61,564 | 2 | 30 | 23 | 187 | 1 | 8  | 7  | 152 | 33 | 377 |
| 61,565 | 2 | 30 | 23 | 187 | 1 | 8  | 7  | 152 | 33 | 377 |
| 61,566 | 2 | 24 | 23 | 183 | 1 | 8  | 7  | 153 | 33 | 368 |
| 61,567 | 2 | 24 | 25 | 182 | 1 | 8  | 6  | 148 | 34 | 362 |
| 61,568 | 2 | 24 | 25 | 182 | 1 | 8  | 6  | 148 | 34 | 362 |
| 61,569 | 2 | 24 | 25 | 183 | 1 | 8  | 5  | 149 | 33 | 364 |
| 61,570 | 2 | 24 | 26 | 179 | 1 | 8  | 5  | 148 | 34 | 359 |

|        |   |    |    |     |   |    |    |     |    |     |
|--------|---|----|----|-----|---|----|----|-----|----|-----|
| 61,571 | 2 | 21 | 26 | 176 | 1 | 8  | 5  | 147 | 34 | 352 |
| 61,572 | 2 | 22 | 26 | 177 | 1 | 8  | 5  | 148 | 34 | 355 |
| 61,573 | 2 | 22 | 27 | 179 | 1 | 8  | 5  | 150 | 35 | 359 |
| 61,574 | 2 | 22 | 27 | 180 | 1 | 9  | 5  | 158 | 35 | 369 |
| 61,575 | 2 | 23 | 27 | 182 | 1 | 9  | 5  | 175 | 35 | 389 |
| 61,576 | 2 | 24 | 27 | 187 | 1 | 9  | 6  | 192 | 36 | 412 |
| 61,577 | 2 | 24 | 27 | 198 | 1 | 9  | 6  | 214 | 36 | 445 |
| 61,578 | 2 | 24 | 26 | 214 | 1 | 9  | 6  | 220 | 35 | 467 |
| 61,579 | 2 | 25 | 26 | 212 | 1 | 9  | 6  | 210 | 35 | 456 |
| 61,580 | 2 | 25 | 27 | 198 | 1 | 11 | 6  | 204 | 36 | 438 |
| 61,581 | 2 | 25 | 26 | 192 | 1 | 11 | 6  | 198 | 35 | 426 |
| 61,582 | 2 | 15 | 26 | 169 | 1 | 9  | 6  | 184 | 35 | 377 |
| 61,583 | 2 | 15 | 26 | 170 | 1 | 9  | 6  | 184 | 35 | 378 |
| 61,584 | 2 | 16 | 26 | 174 | 1 | 10 | 6  | 192 | 35 | 392 |
| 61,585 | 2 | 16 | 26 | 172 | 1 | 10 | 6  | 191 | 35 | 389 |
| 61,586 | 2 | 16 | 26 | 172 | 1 | 10 | 6  | 190 | 35 | 388 |
| 61,587 | 2 | 17 | 27 | 199 | 1 | 10 | 6  | 204 | 36 | 430 |
| 61,588 | 2 | 17 | 27 | 199 | 1 | 10 | 6  | 203 | 36 | 429 |
| 61,589 | 2 | 17 | 27 | 203 | 1 | 10 | 6  | 204 | 36 | 434 |
| 61,590 | 2 | 16 | 27 | 207 | 1 | 11 | 6  | 205 | 36 | 439 |
| 61,591 | 1 | 14 | 27 | 202 | 1 | 11 | 6  | 197 | 35 | 424 |
| 61,592 | 1 | 14 | 28 | 202 | 1 | 11 | 6  | 197 | 36 | 424 |
| 61,593 | 1 | 14 | 28 | 204 | 1 | 11 | 6  | 197 | 36 | 426 |
| 61,594 | 1 | 14 | 28 | 210 | 1 | 11 | 7  | 195 | 37 | 430 |
| 61,595 | 1 | 14 | 29 | 210 | 1 | 11 | 8  | 194 | 39 | 429 |
| 61,596 | 1 | 14 | 34 | 209 | 1 | 11 | 10 | 192 | 46 | 426 |
| 61,597 | 1 | 14 | 36 | 206 | 1 | 11 | 11 | 187 | 49 | 418 |
| 61,598 | 1 | 14 | 37 | 204 | 1 | 11 | 11 | 187 | 50 | 416 |
| 61,599 | 1 | 14 | 36 | 199 | 1 | 10 | 10 | 184 | 48 | 407 |
| 61,600 | 1 | 14 | 36 | 197 | 1 | 10 | 10 | 182 | 48 | 403 |
| 61,601 | 1 | 14 | 36 | 197 | 1 | 10 | 10 | 184 | 48 | 405 |
| 61,602 | 2 | 14 | 37 | 190 | 1 | 9  | 10 | 178 | 50 | 391 |
| 61,603 | 2 | 12 | 37 | 183 | 1 | 9  | 11 | 173 | 51 | 377 |
| 61,604 | 5 | 12 | 39 | 174 | 1 | 9  | 12 | 157 | 57 | 352 |
| 61,605 | 5 | 12 | 39 | 162 | 1 | 9  | 12 | 153 | 57 | 336 |
| 61,606 | 5 | 8  | 34 | 161 | 0 | 9  | 11 | 142 | 50 | 320 |
| 61,607 | 5 | 8  | 38 | 156 | 0 | 9  | 10 | 141 | 53 | 314 |
| 61,608 | 5 | 8  | 42 | 144 | 0 | 10 | 10 | 138 | 57 | 300 |
| 61,609 | 4 | 8  | 38 | 138 | 0 | 10 | 9  | 137 | 51 | 293 |
| 61,610 | 4 | 7  | 37 | 129 | 0 | 10 | 10 | 131 | 51 | 277 |
| 61,611 | 4 | 7  | 36 | 125 | 0 | 9  | 10 | 128 | 50 | 269 |

|        |   |   |    |     |   |   |    |     |     |     |
|--------|---|---|----|-----|---|---|----|-----|-----|-----|
| 61,612 | 4 | 7 | 36 | 124 | 0 | 9 | 10 | 127 | 50  | 267 |
| 61,613 | 4 | 7 | 36 | 123 | 0 | 9 | 10 | 128 | 50  | 267 |
| 61,614 | 4 | 7 | 36 | 122 | 0 | 9 | 10 | 127 | 50  | 265 |
| 61,615 | 4 | 7 | 36 | 117 | 0 | 9 | 10 | 127 | 50  | 260 |
| 61,616 | 4 | 7 | 37 | 117 | 0 | 9 | 10 | 127 | 51  | 260 |
| 61,617 | 4 | 7 | 37 | 116 | 0 | 9 | 10 | 124 | 51  | 256 |
| 61,618 | 4 | 7 | 35 | 117 | 0 | 9 | 10 | 123 | 49  | 256 |
| 61,619 | 4 | 7 | 36 | 116 | 0 | 9 | 11 | 122 | 51  | 254 |
| 61,620 | 4 | 7 | 36 | 118 | 0 | 9 | 11 | 122 | 51  | 256 |
| 61,621 | 4 | 7 | 37 | 119 | 0 | 9 | 14 | 122 | 55  | 257 |
| 61,622 | 4 | 7 | 37 | 119 | 0 | 9 | 14 | 122 | 55  | 257 |
| 61,623 | 4 | 6 | 36 | 118 | 0 | 9 | 14 | 121 | 54  | 254 |
| 61,624 | 4 | 6 | 37 | 113 | 0 | 8 | 14 | 111 | 55  | 238 |
| 61,625 | 5 | 5 | 52 | 109 | 1 | 8 | 21 | 94  | 79  | 216 |
| 61,626 | 6 | 5 | 54 | 109 | 2 | 8 | 25 | 94  | 87  | 216 |
| 61,627 | 6 | 4 | 53 | 104 | 2 | 8 | 24 | 77  | 85  | 193 |
| 61,628 | 6 | 4 | 53 | 92  | 2 | 7 | 24 | 52  | 85  | 155 |
| 61,629 | 6 | 3 | 55 | 71  | 2 | 7 | 30 | 42  | 93  | 123 |
| 61,630 | 6 | 3 | 55 | 72  | 2 | 7 | 30 | 42  | 93  | 124 |
| 61,631 | 6 | 3 | 55 | 71  | 2 | 5 | 30 | 40  | 93  | 119 |
| 61,632 | 6 | 3 | 59 | 71  | 2 | 5 | 30 | 38  | 97  | 117 |
| 61,633 | 6 | 2 | 60 | 68  | 2 | 5 | 30 | 37  | 98  | 112 |
| 61,634 | 6 | 2 | 63 | 68  | 2 | 5 | 31 | 36  | 102 | 111 |
| 61,635 | 6 | 1 | 64 | 64  | 2 | 4 | 31 | 30  | 103 | 99  |
| 61,636 | 7 | 1 | 64 | 64  | 2 | 4 | 31 | 29  | 104 | 98  |
| 61,637 | 7 | 1 | 64 | 64  | 2 | 4 | 31 | 29  | 104 | 98  |
| 61,638 | 8 | 0 | 64 | 37  | 2 | 4 | 31 | 15  | 105 | 56  |
| 61,639 | 8 | 0 | 64 | 32  | 2 | 4 | 31 | 14  | 105 | 50  |
| 61,640 | 8 | 0 | 65 | 26  | 2 | 3 | 31 | 13  | 106 | 42  |
| 61,641 | 8 | 0 | 65 | 35  | 2 | 3 | 31 | 14  | 106 | 52  |
| 61,642 | 8 | 0 | 65 | 40  | 2 | 3 | 31 | 14  | 106 | 57  |
| 61,643 | 8 | 0 | 64 | 42  | 2 | 3 | 31 | 17  | 105 | 62  |
| 61,644 | 8 | 0 | 65 | 43  | 2 | 3 | 32 | 17  | 107 | 63  |
| 61,645 | 8 | 0 | 65 | 36  | 2 | 3 | 32 | 17  | 107 | 56  |
| 61,646 | 8 | 0 | 66 | 35  | 2 | 3 | 32 | 17  | 108 | 55  |
| 61,647 | 8 | 0 | 62 | 35  | 2 | 3 | 30 | 17  | 102 | 55  |
| 61,648 | 8 | 0 | 60 | 35  | 2 | 3 | 29 | 17  | 99  | 55  |
| 61,649 | 8 | 0 | 60 | 35  | 2 | 3 | 29 | 17  | 99  | 55  |
| 61,650 | 8 | 0 | 60 | 35  | 2 | 3 | 29 | 17  | 99  | 55  |
| 61,651 | 8 | 0 | 60 | 34  | 2 | 3 | 29 | 15  | 99  | 52  |
| 61,652 | 8 | 0 | 60 | 34  | 2 | 3 | 29 | 15  | 99  | 52  |



|        |   |    |    |     |   |    |    |    |    |     |
|--------|---|----|----|-----|---|----|----|----|----|-----|
| 61,653 | 7 | 0  | 59 | 36  | 2 | 4  | 29 | 17 | 97 | 57  |
| 61,654 | 7 | 1  | 58 | 39  | 2 | 5  | 28 | 29 | 95 | 74  |
| 61,655 | 4 | 1  | 56 | 41  | 2 | 6  | 27 | 29 | 89 | 77  |
| 61,656 | 4 | 1  | 61 | 45  | 2 | 8  | 28 | 31 | 95 | 85  |
| 61,657 | 5 | 1  | 61 | 49  | 2 | 7  | 30 | 30 | 98 | 87  |
| 61,658 | 5 | 6  | 56 | 53  | 2 | 7  | 30 | 31 | 93 | 97  |
| 61,659 | 5 | 6  | 50 | 67  | 2 | 5  | 30 | 38 | 87 | 116 |
| 61,660 | 5 | 10 | 51 | 96  | 2 | 7  | 30 | 52 | 88 | 165 |
| 61,661 | 5 | 10 | 51 | 98  | 2 | 7  | 29 | 52 | 87 | 167 |
| 61,662 | 5 | 10 | 51 | 99  | 2 | 7  | 29 | 52 | 87 | 168 |
| 61,663 | 5 | 10 | 51 | 99  | 2 | 7  | 29 | 53 | 87 | 169 |
| 61,664 | 5 | 11 | 51 | 99  | 2 | 7  | 29 | 53 | 87 | 170 |
| 61,665 | 5 | 11 | 51 | 103 | 2 | 7  | 29 | 54 | 87 | 175 |
| 61,666 | 5 | 11 | 50 | 103 | 2 | 7  | 29 | 54 | 86 | 175 |
| 61,667 | 5 | 11 | 50 | 103 | 2 | 7  | 29 | 54 | 86 | 175 |
| 61,668 | 5 | 11 | 50 | 102 | 2 | 7  | 29 | 54 | 86 | 174 |
| 61,669 | 5 | 11 | 50 | 102 | 2 | 7  | 30 | 54 | 87 | 174 |
| 61,670 | 5 | 11 | 49 | 100 | 2 | 7  | 29 | 54 | 85 | 172 |
| 61,671 | 5 | 11 | 49 | 106 | 2 | 7  | 30 | 55 | 86 | 179 |
| 61,672 | 5 | 11 | 47 | 113 | 2 | 7  | 27 | 55 | 81 | 186 |
| 61,673 | 5 | 11 | 48 | 117 | 2 | 7  | 28 | 56 | 83 | 191 |
| 61,674 | 5 | 12 | 48 | 121 | 2 | 7  | 28 | 56 | 83 | 196 |
| 61,675 | 5 | 12 | 47 | 121 | 2 | 7  | 29 | 56 | 83 | 196 |
| 61,676 | 4 | 12 | 31 | 122 | 1 | 7  | 22 | 57 | 58 | 198 |
| 61,677 | 3 | 12 | 31 | 123 | 0 | 7  | 19 | 58 | 53 | 200 |
| 61,678 | 4 | 13 | 31 | 143 | 0 | 7  | 21 | 60 | 56 | 223 |
| 61,679 | 5 | 14 | 30 | 151 | 0 | 7  | 16 | 66 | 51 | 238 |
| 61,680 | 5 | 15 | 30 | 151 | 0 | 7  | 16 | 66 | 51 | 239 |
| 61,681 | 6 | 17 | 30 | 166 | 0 | 9  | 16 | 71 | 52 | 263 |
| 61,682 | 6 | 17 | 26 | 167 | 0 | 9  | 16 | 71 | 48 | 264 |
| 61,683 | 6 | 17 | 25 | 172 | 0 | 9  | 16 | 73 | 47 | 271 |
| 61,684 | 6 | 17 | 22 | 178 | 0 | 9  | 15 | 79 | 43 | 283 |
| 61,685 | 6 | 17 | 21 | 182 | 0 | 9  | 15 | 79 | 42 | 287 |
| 61,686 | 5 | 17 | 22 | 185 | 0 | 9  | 15 | 80 | 42 | 291 |
| 61,687 | 5 | 17 | 22 | 186 | 0 | 9  | 15 | 80 | 42 | 292 |
| 61,688 | 6 | 17 | 28 | 187 | 1 | 9  | 16 | 80 | 51 | 293 |
| 61,689 | 5 | 17 | 28 | 189 | 1 | 9  | 16 | 80 | 50 | 295 |
| 61,690 | 5 | 17 | 28 | 189 | 1 | 9  | 16 | 80 | 50 | 295 |
| 61,691 | 5 | 17 | 31 | 189 | 1 | 9  | 19 | 81 | 56 | 296 |
| 61,692 | 5 | 17 | 31 | 179 | 1 | 9  | 19 | 80 | 56 | 285 |
| 61,693 | 6 | 17 | 32 | 171 | 1 | 10 | 21 | 77 | 60 | 275 |

|        |   |    |    |     |   |    |    |     |    |     |
|--------|---|----|----|-----|---|----|----|-----|----|-----|
| 61,694 | 6 | 17 | 32 | 173 | 1 | 10 | 21 | 78  | 60 | 278 |
| 61,695 | 6 | 19 | 32 | 176 | 1 | 11 | 20 | 84  | 59 | 290 |
| 61,696 | 6 | 19 | 32 | 186 | 1 | 11 | 19 | 87  | 58 | 303 |
| 61,697 | 6 | 20 | 30 | 191 | 1 | 11 | 18 | 87  | 55 | 309 |
| 61,698 | 6 | 22 | 29 | 191 | 1 | 11 | 18 | 87  | 54 | 311 |
| 61,699 | 6 | 22 | 28 | 193 | 1 | 11 | 18 | 87  | 53 | 313 |
| 61,700 | 6 | 22 | 28 | 193 | 1 | 11 | 18 | 87  | 53 | 313 |
| 61,701 | 6 | 22 | 28 | 193 | 1 | 11 | 18 | 87  | 53 | 313 |
| 61,702 | 6 | 22 | 28 | 193 | 1 | 11 | 18 | 84  | 53 | 310 |
| 61,703 | 6 | 22 | 28 | 199 | 1 | 11 | 18 | 85  | 53 | 317 |
| 61,704 | 6 | 32 | 28 | 264 | 1 | 13 | 20 | 98  | 55 | 407 |
| 61,705 | 6 | 35 | 28 | 282 | 1 | 16 | 20 | 96  | 55 | 429 |
| 61,706 | 6 | 38 | 28 | 347 | 1 | 17 | 20 | 104 | 55 | 506 |
| 61,707 | 7 | 39 | 23 | 349 | 1 | 15 | 19 | 103 | 50 | 506 |
| 61,708 | 6 | 39 | 20 | 347 | 1 | 15 | 16 | 102 | 43 | 503 |
| 61,709 | 6 | 39 | 20 | 369 | 1 | 15 | 16 | 107 | 43 | 530 |
| 61,710 | 6 | 41 | 20 | 358 | 1 | 18 | 16 | 99  | 43 | 516 |
| 61,711 | 6 | 41 | 19 | 338 | 1 | 16 | 16 | 92  | 42 | 487 |
| 61,712 | 6 | 41 | 19 | 344 | 1 | 16 | 16 | 93  | 42 | 494 |
| 61,713 | 6 | 44 | 19 | 345 | 1 | 16 | 17 | 94  | 43 | 499 |
| 61,714 | 6 | 43 | 19 | 345 | 1 | 16 | 17 | 94  | 43 | 498 |
| 61,715 | 6 | 43 | 20 | 345 | 1 | 16 | 17 | 93  | 44 | 497 |
| 61,716 | 6 | 43 | 20 | 347 | 1 | 16 | 17 | 93  | 44 | 499 |
| 61,717 | 6 | 43 | 20 | 347 | 1 | 16 | 17 | 93  | 44 | 499 |
| 61,718 | 6 | 43 | 22 | 347 | 1 | 16 | 17 | 93  | 46 | 499 |
| 61,719 | 6 | 43 | 22 | 348 | 1 | 16 | 17 | 93  | 46 | 500 |
| 61,720 | 6 | 43 | 22 | 348 | 1 | 16 | 16 | 93  | 45 | 500 |
| 61,721 | 7 | 43 | 24 | 348 | 1 | 16 | 17 | 92  | 49 | 499 |
| 61,722 | 7 | 43 | 26 | 331 | 1 | 16 | 16 | 89  | 50 | 479 |
| 61,723 | 8 | 43 | 31 | 331 | 1 | 16 | 19 | 90  | 59 | 480 |
| 61,724 | 8 | 43 | 30 | 331 | 1 | 16 | 18 | 91  | 57 | 481 |
| 61,725 | 8 | 42 | 31 | 329 | 1 | 16 | 18 | 93  | 58 | 480 |
| 61,726 | 8 | 42 | 31 | 329 | 3 | 16 | 17 | 93  | 59 | 480 |
| 61,727 | 8 | 42 | 31 | 329 | 3 | 16 | 17 | 92  | 59 | 479 |
| 61,728 | 8 | 39 | 32 | 300 | 3 | 16 | 16 | 83  | 59 | 438 |
| 61,729 | 7 | 39 | 32 | 302 | 3 | 16 | 14 | 83  | 56 | 440 |
| 61,730 | 6 | 39 | 31 | 302 | 3 | 16 | 13 | 83  | 53 | 440 |
| 61,731 | 6 | 39 | 31 | 302 | 3 | 16 | 13 | 83  | 53 | 440 |
| 61,732 | 5 | 37 | 31 | 285 | 3 | 14 | 13 | 78  | 52 | 414 |
| 61,733 | 5 | 37 | 31 | 280 | 3 | 14 | 14 | 76  | 53 | 407 |
| 61,734 | 5 | 37 | 35 | 274 | 3 | 14 | 14 | 70  | 57 | 395 |

|        |   |    |    |     |   |    |    |     |     |     |
|--------|---|----|----|-----|---|----|----|-----|-----|-----|
| 61,735 | 5 | 37 | 35 | 269 | 3 | 14 | 14 | 70  | 57  | 390 |
| 61,736 | 5 | 37 | 35 | 266 | 3 | 14 | 15 | 70  | 58  | 387 |
| 61,737 | 5 | 37 | 34 | 266 | 3 | 14 | 15 | 70  | 57  | 387 |
| 61,738 | 4 | 38 | 28 | 264 | 2 | 14 | 15 | 70  | 49  | 386 |
| 61,739 | 4 | 38 | 28 | 266 | 2 | 14 | 15 | 75  | 49  | 393 |
| 61,740 | 4 | 43 | 27 | 284 | 2 | 16 | 15 | 100 | 48  | 443 |
| 61,741 | 4 | 43 | 27 | 291 | 2 | 16 | 12 | 103 | 45  | 453 |
| 61,742 | 4 | 43 | 24 | 298 | 2 | 16 | 12 | 110 | 42  | 467 |
| 61,743 | 3 | 43 | 23 | 298 | 2 | 15 | 10 | 110 | 38  | 466 |
| 61,744 | 4 | 43 | 23 | 298 | 2 | 15 | 10 | 110 | 39  | 466 |
| 61,745 | 4 | 43 | 24 | 296 | 2 | 14 | 10 | 105 | 40  | 458 |
| 61,746 | 4 | 43 | 23 | 297 | 2 | 14 | 10 | 106 | 39  | 460 |
| 61,747 | 5 | 43 | 23 | 288 | 2 | 14 | 10 | 103 | 40  | 448 |
| 61,748 | 5 | 42 | 23 | 283 | 2 | 14 | 11 | 103 | 41  | 442 |
| 61,749 | 5 | 40 | 33 | 285 | 2 | 14 | 13 | 104 | 53  | 443 |
| 61,750 | 5 | 40 | 33 | 285 | 2 | 14 | 13 | 104 | 53  | 443 |
| 61,751 | 5 | 40 | 34 | 287 | 2 | 14 | 14 | 104 | 55  | 445 |
| 61,752 | 5 | 40 | 43 | 287 | 2 | 14 | 17 | 104 | 67  | 445 |
| 61,753 | 5 | 41 | 44 | 287 | 2 | 14 | 17 | 104 | 68  | 446 |
| 61,754 | 6 | 41 | 45 | 281 | 2 | 14 | 16 | 103 | 69  | 439 |
| 61,755 | 6 | 27 | 45 | 193 | 2 | 7  | 16 | 79  | 69  | 306 |
| 61,756 | 6 | 24 | 46 | 125 | 2 | 5  | 17 | 71  | 71  | 225 |
| 61,757 | 6 | 23 | 46 | 119 | 2 | 5  | 17 | 68  | 71  | 215 |
| 61,758 | 5 | 23 | 45 | 119 | 2 | 5  | 17 | 68  | 69  | 215 |
| 61,759 | 5 | 23 | 45 | 114 | 2 | 5  | 17 | 68  | 69  | 210 |
| 61,760 | 5 | 9  | 46 | 63  | 2 | 2  | 17 | 50  | 70  | 124 |
| 61,761 | 5 | 9  | 46 | 63  | 2 | 2  | 17 | 50  | 70  | 124 |
| 61,762 | 5 | 9  | 47 | 63  | 2 | 2  | 17 | 50  | 71  | 124 |
| 61,763 | 5 | 9  | 47 | 63  | 2 | 2  | 17 | 50  | 71  | 124 |
| 61,764 | 5 | 9  | 51 | 57  | 3 | 2  | 16 | 50  | 75  | 118 |
| 61,765 | 7 | 9  | 59 | 57  | 3 | 2  | 20 | 50  | 89  | 118 |
| 61,766 | 7 | 10 | 59 | 59  | 3 | 2  | 21 | 52  | 90  | 123 |
| 61,767 | 7 | 10 | 59 | 59  | 3 | 2  | 21 | 52  | 90  | 123 |
| 61,768 | 7 | 10 | 59 | 63  | 3 | 2  | 23 | 52  | 92  | 127 |
| 61,769 | 7 | 10 | 63 | 63  | 4 | 2  | 26 | 52  | 100 | 127 |
| 61,770 | 8 | 10 | 72 | 62  | 4 | 2  | 34 | 52  | 118 | 126 |
| 61,771 | 7 | 10 | 72 | 62  | 4 | 2  | 34 | 52  | 117 | 126 |
| 61,772 | 7 | 10 | 73 | 62  | 5 | 2  | 38 | 53  | 123 | 127 |
| 61,773 | 7 | 10 | 71 | 68  | 5 | 2  | 38 | 59  | 121 | 139 |
| 61,774 | 6 | 11 | 66 | 69  | 5 | 3  | 35 | 58  | 112 | 141 |
| 61,775 | 6 | 11 | 65 | 72  | 5 | 3  | 35 | 57  | 111 | 143 |

|        |   |    |    |     |   |   |    |    |     |     |
|--------|---|----|----|-----|---|---|----|----|-----|-----|
| 61,776 | 6 | 11 | 65 | 70  | 5 | 3 | 35 | 55 | 111 | 139 |
| 61,777 | 6 | 11 | 65 | 70  | 3 | 3 | 35 | 55 | 109 | 139 |
| 61,778 | 6 | 11 | 64 | 70  | 3 | 3 | 35 | 55 | 108 | 139 |
| 61,779 | 6 | 11 | 63 | 71  | 3 | 3 | 35 | 55 | 107 | 140 |
| 61,780 | 6 | 11 | 63 | 74  | 3 | 3 | 36 | 59 | 108 | 147 |
| 61,781 | 6 | 11 | 63 | 77  | 3 | 3 | 36 | 59 | 108 | 150 |
| 61,782 | 6 | 11 | 64 | 81  | 3 | 7 | 38 | 68 | 111 | 167 |
| 61,783 | 6 | 13 | 63 | 91  | 3 | 7 | 38 | 71 | 110 | 182 |
| 61,784 | 7 | 13 | 63 | 96  | 3 | 7 | 39 | 75 | 112 | 191 |
| 61,785 | 7 | 13 | 60 | 99  | 3 | 7 | 41 | 76 | 111 | 195 |
| 61,786 | 7 | 13 | 61 | 105 | 3 | 7 | 42 | 77 | 113 | 202 |
| 61,787 | 7 | 13 | 61 | 106 | 3 | 7 | 41 | 77 | 112 | 203 |
| 61,788 | 7 | 15 | 61 | 106 | 3 | 7 | 40 | 79 | 111 | 207 |
| 61,789 | 7 | 14 | 61 | 104 | 3 | 7 | 40 | 75 | 111 | 200 |
| 61,790 | 7 | 14 | 61 | 105 | 3 | 7 | 40 | 77 | 111 | 203 |
| 61,791 | 7 | 9  | 61 | 95  | 3 | 5 | 40 | 54 | 111 | 163 |
| 61,792 | 7 | 9  | 61 | 88  | 3 | 5 | 40 | 51 | 111 | 153 |
| 61,793 | 7 | 9  | 60 | 81  | 3 | 5 | 40 | 43 | 110 | 138 |
| 61,794 | 7 | 9  | 61 | 92  | 3 | 5 | 40 | 55 | 111 | 161 |
| 61,795 | 6 | 9  | 61 | 92  | 3 | 5 | 40 | 55 | 110 | 161 |
| 61,796 | 6 | 7  | 60 | 97  | 3 | 5 | 40 | 56 | 109 | 165 |
| 61,797 | 5 | 7  | 60 | 96  | 3 | 5 | 40 | 55 | 108 | 163 |
| 61,798 | 5 | 7  | 60 | 104 | 3 | 5 | 39 | 61 | 107 | 177 |
| 61,799 | 5 | 8  | 58 | 112 | 3 | 5 | 38 | 69 | 104 | 194 |
| 61,800 | 5 | 8  | 50 | 110 | 3 | 5 | 37 | 72 | 95  | 195 |
| 61,801 | 5 | 8  | 49 | 110 | 3 | 6 | 36 | 72 | 93  | 196 |
| 61,802 | 6 | 8  | 45 | 111 | 3 | 6 | 34 | 74 | 88  | 199 |
| 61,803 | 6 | 7  | 41 | 117 | 3 | 6 | 33 | 74 | 83  | 204 |
| 61,804 | 6 | 7  | 40 | 118 | 3 | 6 | 33 | 74 | 82  | 205 |
| 61,805 | 5 | 7  | 39 | 120 | 3 | 6 | 33 | 74 | 80  | 207 |
| 61,806 | 5 | 7  | 39 | 120 | 3 | 6 | 32 | 74 | 79  | 207 |
| 61,807 | 5 | 7  | 38 | 120 | 3 | 6 | 31 | 74 | 77  | 207 |
| 61,808 | 5 | 7  | 38 | 120 | 3 | 6 | 31 | 74 | 77  | 207 |
| 61,809 | 5 | 7  | 38 | 120 | 3 | 6 | 31 | 73 | 77  | 206 |
| 61,810 | 6 | 7  | 38 | 120 | 3 | 6 | 31 | 73 | 78  | 206 |
| 61,811 | 6 | 7  | 37 | 120 | 3 | 6 | 31 | 73 | 77  | 206 |
| 61,812 | 6 | 7  | 37 | 121 | 3 | 6 | 31 | 73 | 77  | 207 |
| 61,813 | 6 | 7  | 36 | 122 | 4 | 6 | 31 | 73 | 77  | 208 |
| 61,814 | 6 | 7  | 33 | 125 | 3 | 6 | 31 | 75 | 73  | 213 |
| 61,815 | 6 | 7  | 32 | 136 | 3 | 6 | 31 | 78 | 72  | 227 |
| 61,816 | 4 | 7  | 24 | 136 | 3 | 6 | 27 | 79 | 58  | 228 |

|        |    |    |    |     |   |   |    |     |     |     |
|--------|----|----|----|-----|---|---|----|-----|-----|-----|
| 61,817 | 4  | 8  | 25 | 135 | 4 | 6 | 27 | 80  | 60  | 229 |
| 61,818 | 4  | 8  | 25 | 136 | 4 | 6 | 27 | 83  | 60  | 233 |
| 61,819 | 4  | 8  | 23 | 155 | 4 | 6 | 25 | 99  | 56  | 268 |
| 61,820 | 4  | 10 | 19 | 175 | 3 | 6 | 22 | 103 | 48  | 294 |
| 61,821 | 3  | 10 | 10 | 175 | 3 | 6 | 13 | 104 | 29  | 295 |
| 61,822 | 3  | 14 | 9  | 176 | 3 | 6 | 12 | 104 | 27  | 300 |
| 61,823 | 3  | 15 | 8  | 169 | 2 | 6 | 8  | 97  | 21  | 287 |
| 61,824 | 3  | 15 | 8  | 171 | 2 | 5 | 8  | 100 | 21  | 291 |
| 61,825 | 3  | 15 | 8  | 171 | 2 | 5 | 8  | 100 | 21  | 291 |
| 61,826 | 3  | 15 | 8  | 174 | 2 | 5 | 8  | 100 | 21  | 294 |
| 61,827 | 3  | 15 | 8  | 174 | 2 | 5 | 8  | 100 | 21  | 294 |
| 61,828 | 3  | 15 | 8  | 173 | 2 | 5 | 9  | 100 | 22  | 293 |
| 61,829 | 3  | 15 | 9  | 172 | 2 | 5 | 9  | 100 | 23  | 292 |
| 61,830 | 4  | 15 | 9  | 168 | 2 | 5 | 9  | 96  | 24  | 284 |
| 61,831 | 4  | 15 | 8  | 169 | 2 | 5 | 9  | 96  | 23  | 285 |
| 61,832 | 4  | 15 | 8  | 165 | 2 | 5 | 9  | 96  | 23  | 281 |
| 61,833 | 4  | 15 | 8  | 161 | 2 | 1 | 7  | 87  | 21  | 264 |
| 61,834 | 4  | 13 | 8  | 151 | 2 | 1 | 7  | 84  | 21  | 249 |
| 61,835 | 3  | 13 | 8  | 146 | 2 | 1 | 5  | 80  | 18  | 240 |
| 61,836 | 3  | 14 | 7  | 137 | 2 | 1 | 3  | 77  | 15  | 229 |
| 61,837 | 3  | 14 | 6  | 138 | 2 | 1 | 2  | 77  | 13  | 230 |
| 61,838 | 3  | 14 | 6  | 138 | 2 | 1 | 2  | 77  | 13  | 230 |
| 61,839 | 3  | 12 | 7  | 138 | 2 | 1 | 2  | 75  | 14  | 226 |
| 61,840 | 3  | 12 | 7  | 138 | 2 | 1 | 2  | 75  | 14  | 226 |
| 61,841 | 3  | 12 | 7  | 137 | 2 | 1 | 2  | 73  | 14  | 223 |
| 61,842 | 3  | 12 | 7  | 127 | 2 | 1 | 2  | 72  | 14  | 212 |
| 61,843 | 3  | 12 | 7  | 127 | 2 | 1 | 2  | 72  | 14  | 212 |
| 61,844 | 3  | 12 | 6  | 116 | 2 | 1 | 3  | 60  | 14  | 189 |
| 61,845 | 3  | 12 | 6  | 116 | 2 | 1 | 4  | 60  | 15  | 189 |
| 61,846 | 3  | 12 | 6  | 105 | 2 | 1 | 4  | 57  | 15  | 175 |
| 61,847 | 3  | 12 | 9  | 96  | 2 | 1 | 5  | 51  | 19  | 160 |
| 61,848 | 4  | 12 | 20 | 96  | 3 | 1 | 7  | 51  | 34  | 160 |
| 61,849 | 4  | 12 | 20 | 97  | 3 | 1 | 7  | 51  | 34  | 161 |
| 61,850 | 4  | 11 | 20 | 89  | 3 | 1 | 7  | 44  | 34  | 145 |
| 61,851 | 12 | 11 | 68 | 87  | 4 | 1 | 37 | 40  | 121 | 139 |
| 61,852 | 12 | 11 | 68 | 87  | 4 | 0 | 37 | 41  | 121 | 139 |
| 61,853 | 11 | 11 | 69 | 86  | 4 | 0 | 38 | 41  | 122 | 138 |
| 61,854 | 11 | 11 | 71 | 80  | 4 | 0 | 39 | 41  | 125 | 132 |
| 61,855 | 11 | 11 | 72 | 79  | 4 | 0 | 39 | 41  | 126 | 131 |
| 61,856 | 11 | 11 | 72 | 77  | 4 | 0 | 39 | 41  | 126 | 129 |
| 61,857 | 11 | 11 | 72 | 77  | 4 | 0 | 39 | 41  | 126 | 129 |

|        |    |    |     |     |   |   |    |    |     |     |
|--------|----|----|-----|-----|---|---|----|----|-----|-----|
| 61,858 | 12 | 11 | 78  | 77  | 4 | 0 | 41 | 42 | 135 | 130 |
| 61,859 | 12 | 11 | 79  | 77  | 5 | 0 | 42 | 43 | 138 | 131 |
| 61,860 | 12 | 11 | 83  | 77  | 5 | 1 | 42 | 43 | 142 | 132 |
| 61,861 | 11 | 11 | 85  | 77  | 6 | 1 | 45 | 43 | 147 | 132 |
| 61,862 | 11 | 11 | 86  | 77  | 6 | 1 | 46 | 43 | 149 | 132 |
| 61,863 | 11 | 11 | 86  | 76  | 6 | 1 | 46 | 44 | 149 | 132 |
| 61,864 | 11 | 11 | 86  | 76  | 5 | 1 | 46 | 44 | 148 | 132 |
| 61,865 | 11 | 11 | 87  | 77  | 5 | 1 | 46 | 42 | 149 | 131 |
| 61,866 | 11 | 11 | 86  | 67  | 4 | 1 | 46 | 39 | 147 | 118 |
| 61,867 | 11 | 11 | 87  | 67  | 4 | 1 | 46 | 38 | 148 | 117 |
| 61,868 | 13 | 9  | 90  | 65  | 4 | 1 | 46 | 32 | 153 | 107 |
| 61,869 | 13 | 9  | 94  | 42  | 4 | 1 | 46 | 16 | 157 | 68  |
| 61,870 | 16 | 7  | 104 | 22  | 4 | 1 | 56 | 12 | 180 | 42  |
| 61,871 | 16 | 7  | 110 | 22  | 4 | 1 | 67 | 11 | 197 | 41  |
| 61,872 | 16 | 7  | 112 | 22  | 4 | 1 | 70 | 11 | 202 | 41  |
| 61,873 | 16 | 2  | 111 | 21  | 4 | 1 | 71 | 13 | 202 | 37  |
| 61,874 | 16 | 2  | 111 | 26  | 4 | 1 | 71 | 17 | 202 | 46  |
| 61,875 | 16 | 7  | 111 | 65  | 4 | 2 | 71 | 43 | 202 | 117 |
| 61,876 | 16 | 7  | 111 | 72  | 4 | 3 | 71 | 43 | 202 | 125 |
| 61,877 | 16 | 7  | 111 | 67  | 4 | 3 | 71 | 45 | 202 | 122 |
| 61,878 | 16 | 7  | 111 | 68  | 4 | 4 | 72 | 45 | 203 | 124 |
| 61,879 | 16 | 7  | 113 | 68  | 4 | 4 | 71 | 45 | 204 | 124 |
| 61,880 | 16 | 7  | 112 | 68  | 4 | 4 | 71 | 45 | 203 | 124 |
| 61,881 | 15 | 7  | 112 | 70  | 4 | 4 | 71 | 45 | 202 | 126 |
| 61,882 | 15 | 8  | 112 | 78  | 4 | 4 | 71 | 50 | 202 | 140 |
| 61,883 | 15 | 8  | 112 | 78  | 4 | 4 | 71 | 50 | 202 | 140 |
| 61,884 | 15 | 8  | 112 | 80  | 4 | 4 | 71 | 50 | 202 | 142 |
| 61,885 | 15 | 8  | 112 | 82  | 4 | 4 | 71 | 51 | 202 | 145 |
| 61,886 | 15 | 8  | 112 | 82  | 4 | 4 | 71 | 51 | 202 | 145 |
| 61,887 | 15 | 7  | 112 | 82  | 4 | 4 | 71 | 52 | 202 | 145 |
| 61,888 | 15 | 7  | 112 | 83  | 4 | 4 | 71 | 52 | 202 | 146 |
| 61,889 | 15 | 7  | 112 | 84  | 5 | 4 | 71 | 52 | 203 | 147 |
| 61,890 | 15 | 7  | 112 | 84  | 5 | 4 | 71 | 52 | 203 | 147 |
| 61,891 | 16 | 7  | 116 | 84  | 5 | 4 | 75 | 51 | 212 | 146 |
| 61,892 | 16 | 7  | 116 | 84  | 5 | 4 | 75 | 51 | 212 | 146 |
| 61,893 | 16 | 7  | 116 | 84  | 5 | 4 | 75 | 51 | 212 | 146 |
| 61,894 | 16 | 7  | 116 | 86  | 5 | 4 | 75 | 51 | 212 | 148 |
| 61,895 | 16 | 7  | 116 | 89  | 5 | 4 | 74 | 54 | 211 | 154 |
| 61,896 | 16 | 7  | 116 | 103 | 5 | 4 | 73 | 56 | 210 | 170 |
| 61,897 | 16 | 9  | 117 | 112 | 5 | 4 | 73 | 61 | 211 | 186 |
| 61,898 | 16 | 9  | 115 | 122 | 5 | 4 | 74 | 62 | 210 | 197 |

|        |    |   |     |     |   |   |    |    |     |     |
|--------|----|---|-----|-----|---|---|----|----|-----|-----|
| 61,899 | 15 | 9 | 104 | 124 | 4 | 4 | 72 | 66 | 195 | 203 |
| 61,900 | 15 | 9 | 101 | 126 | 4 | 5 | 71 | 68 | 191 | 208 |
| 61,901 | 7  | 9 | 58  | 127 | 3 | 5 | 42 | 67 | 110 | 208 |
| 61,902 | 7  | 9 | 62  | 126 | 3 | 5 | 43 | 66 | 115 | 206 |
| 61,903 | 7  | 9 | 61  | 127 | 3 | 5 | 42 | 67 | 113 | 208 |
| 61,904 | 7  | 9 | 59  | 127 | 3 | 5 | 41 | 65 | 110 | 206 |
| 61,905 | 7  | 9 | 58  | 127 | 3 | 5 | 41 | 65 | 109 | 206 |
| 61,906 | 7  | 9 | 56  | 127 | 3 | 5 | 40 | 65 | 106 | 206 |
| 61,907 | 6  | 9 | 54  | 127 | 3 | 5 | 40 | 65 | 103 | 206 |
| 61,908 | 6  | 9 | 52  | 127 | 3 | 5 | 39 | 64 | 100 | 205 |
| 61,909 | 6  | 9 | 52  | 127 | 2 | 5 | 39 | 64 | 99  | 205 |
| 61,910 | 6  | 9 | 51  | 129 | 2 | 6 | 38 | 66 | 97  | 210 |
| 61,911 | 6  | 9 | 47  | 130 | 2 | 5 | 38 | 66 | 93  | 210 |
| 61,912 | 6  | 9 | 46  | 131 | 1 | 5 | 36 | 66 | 89  | 211 |
| 61,913 | 6  | 9 | 45  | 131 | 1 | 5 | 35 | 65 | 87  | 210 |
| 61,914 | 6  | 9 | 45  | 126 | 1 | 5 | 35 | 65 | 87  | 205 |
| 61,915 | 6  | 9 | 45  | 126 | 1 | 5 | 35 | 65 | 87  | 205 |
| 61,916 | 6  | 9 | 44  | 127 | 1 | 5 | 35 | 65 | 86  | 206 |
| 61,917 | 6  | 9 | 44  | 127 | 1 | 5 | 35 | 69 | 86  | 210 |
| 61,918 | 6  | 9 | 43  | 129 | 1 | 5 | 35 | 69 | 85  | 212 |
| 61,919 | 4  | 9 | 40  | 131 | 1 | 5 | 34 | 69 | 79  | 214 |
| 61,920 | 4  | 9 | 36  | 131 | 1 | 5 | 34 | 69 | 75  | 214 |
| 61,921 | 1  | 9 | 26  | 132 | 1 | 5 | 24 | 70 | 52  | 216 |
| 61,922 | 1  | 9 | 20  | 132 | 1 | 5 | 13 | 70 | 35  | 216 |
| 61,923 | 1  | 9 | 21  | 132 | 1 | 5 | 10 | 70 | 33  | 216 |
| 61,924 | 1  | 9 | 21  | 133 | 1 | 5 | 9  | 68 | 32  | 215 |
| 61,925 | 1  | 9 | 21  | 129 | 1 | 5 | 9  | 64 | 32  | 207 |
| 61,926 | 2  | 3 | 24  | 80  | 1 | 3 | 13 | 35 | 40  | 121 |
| 61,927 | 2  | 3 | 25  | 78  | 1 | 2 | 14 | 33 | 42  | 116 |
| 61,928 | 2  | 3 | 27  | 78  | 1 | 2 | 16 | 33 | 46  | 116 |
| 61,929 | 2  | 3 | 31  | 78  | 1 | 2 | 18 | 33 | 52  | 116 |
| 61,930 | 4  | 3 | 33  | 79  | 2 | 2 | 25 | 33 | 64  | 117 |
| 61,931 | 4  | 3 | 35  | 79  | 2 | 2 | 32 | 33 | 73  | 117 |
| 61,932 | 4  | 3 | 35  | 76  | 2 | 2 | 32 | 33 | 73  | 114 |
| 61,933 | 4  | 2 | 35  | 67  | 2 | 2 | 32 | 28 | 73  | 99  |
| 61,934 | 4  | 2 | 35  | 65  | 2 | 2 | 34 | 28 | 75  | 97  |
| 61,935 | 4  | 2 | 39  | 63  | 2 | 2 | 37 | 27 | 82  | 94  |
| 61,936 | 4  | 2 | 39  | 63  | 2 | 2 | 37 | 26 | 82  | 93  |
| 61,937 | 4  | 4 | 40  | 63  | 2 | 2 | 38 | 27 | 84  | 96  |
| 61,938 | 4  | 4 | 39  | 65  | 2 | 3 | 38 | 26 | 83  | 98  |
| 61,939 | 4  | 4 | 39  | 62  | 1 | 3 | 38 | 26 | 82  | 95  |

|        |   |    |    |     |   |   |    |    |     |     |
|--------|---|----|----|-----|---|---|----|----|-----|-----|
| 61,940 | 4 | 4  | 39 | 62  | 1 | 3 | 38 | 27 | 82  | 96  |
| 61,941 | 4 | 4  | 36 | 69  | 1 | 3 | 36 | 28 | 77  | 104 |
| 61,942 | 3 | 5  | 35 | 75  | 1 | 3 | 35 | 30 | 74  | 113 |
| 61,943 | 3 | 5  | 35 | 76  | 1 | 3 | 35 | 33 | 74  | 117 |
| 61,944 | 3 | 5  | 35 | 75  | 1 | 3 | 35 | 33 | 74  | 116 |
| 61,945 | 3 | 5  | 36 | 75  | 1 | 3 | 35 | 33 | 75  | 116 |
| 61,946 | 3 | 5  | 36 | 59  | 1 | 3 | 35 | 28 | 75  | 95  |
| 61,947 | 4 | 5  | 44 | 41  | 1 | 3 | 36 | 24 | 85  | 73  |
| 61,948 | 4 | 7  | 43 | 49  | 1 | 3 | 36 | 28 | 84  | 87  |
| 61,949 | 4 | 13 | 42 | 60  | 1 | 6 | 34 | 51 | 81  | 130 |
| 61,950 | 4 | 13 | 42 | 72  | 1 | 7 | 34 | 57 | 81  | 149 |
| 61,951 | 4 | 13 | 46 | 112 | 1 | 6 | 36 | 69 | 87  | 200 |
| 61,952 | 4 | 13 | 47 | 112 | 1 | 6 | 36 | 69 | 88  | 200 |
| 61,953 | 4 | 19 | 41 | 136 | 1 | 6 | 35 | 84 | 81  | 245 |
| 61,954 | 4 | 19 | 41 | 136 | 1 | 6 | 35 | 85 | 81  | 246 |
| 61,955 | 4 | 19 | 40 | 136 | 1 | 7 | 35 | 85 | 80  | 247 |
| 61,956 | 4 | 19 | 40 | 137 | 1 | 7 | 35 | 88 | 80  | 251 |
| 61,957 | 4 | 19 | 40 | 137 | 1 | 7 | 35 | 90 | 80  | 253 |
| 61,958 | 4 | 19 | 40 | 137 | 1 | 7 | 35 | 92 | 80  | 255 |
| 61,959 | 4 | 19 | 40 | 137 | 1 | 7 | 35 | 92 | 80  | 255 |
| 61,960 | 4 | 19 | 41 | 137 | 1 | 7 | 35 | 92 | 81  | 255 |
| 61,961 | 4 | 19 | 40 | 136 | 1 | 6 | 35 | 90 | 80  | 251 |
| 61,962 | 4 | 20 | 41 | 134 | 1 | 6 | 37 | 88 | 83  | 248 |
| 61,963 | 4 | 20 | 41 | 133 | 1 | 6 | 37 | 90 | 83  | 249 |
| 61,964 | 4 | 20 | 46 | 133 | 1 | 6 | 45 | 90 | 96  | 249 |
| 61,965 | 4 | 20 | 46 | 133 | 1 | 6 | 45 | 90 | 96  | 249 |
| 61,966 | 4 | 20 | 46 | 133 | 1 | 6 | 45 | 90 | 96  | 249 |
| 61,967 | 5 | 20 | 47 | 132 | 1 | 6 | 45 | 90 | 98  | 248 |
| 61,968 | 5 | 20 | 47 | 132 | 1 | 6 | 45 | 86 | 98  | 244 |
| 61,969 | 5 | 20 | 47 | 130 | 1 | 6 | 45 | 86 | 98  | 242 |
| 61,970 | 5 | 20 | 46 | 128 | 1 | 6 | 45 | 86 | 97  | 240 |
| 61,971 | 5 | 20 | 47 | 128 | 1 | 6 | 45 | 86 | 98  | 240 |
| 61,972 | 5 | 20 | 48 | 128 | 1 | 6 | 45 | 85 | 99  | 239 |
| 61,973 | 5 | 20 | 48 | 128 | 1 | 6 | 45 | 85 | 99  | 239 |
| 61,974 | 8 | 20 | 50 | 128 | 2 | 6 | 50 | 86 | 110 | 240 |
| 61,975 | 8 | 20 | 52 | 130 | 2 | 6 | 53 | 86 | 115 | 242 |
| 61,976 | 7 | 21 | 52 | 131 | 2 | 6 | 52 | 87 | 113 | 245 |
| 61,977 | 7 | 21 | 51 | 134 | 2 | 6 | 49 | 88 | 109 | 249 |
| 61,978 | 7 | 21 | 50 | 134 | 2 | 6 | 48 | 89 | 107 | 250 |
| 61,979 | 7 | 21 | 48 | 134 | 2 | 6 | 46 | 89 | 103 | 250 |
| 61,980 | 7 | 21 | 44 | 133 | 2 | 6 | 43 | 89 | 96  | 249 |



|        |    |    |    |     |   |   |    |     |     |     |
|--------|----|----|----|-----|---|---|----|-----|-----|-----|
| 61,981 | 5  | 21 | 40 | 134 | 1 | 6 | 35 | 91  | 81  | 252 |
| 61,982 | 5  | 21 | 38 | 135 | 1 | 6 | 28 | 91  | 72  | 253 |
| 61,983 | 5  | 21 | 39 | 135 | 1 | 6 | 28 | 91  | 73  | 253 |
| 61,984 | 5  | 21 | 39 | 137 | 1 | 6 | 28 | 92  | 73  | 256 |
| 61,985 | 5  | 21 | 40 | 140 | 1 | 6 | 26 | 94  | 72  | 261 |
| 61,986 | 6  | 24 | 36 | 150 | 1 | 6 | 23 | 108 | 66  | 288 |
| 61,987 | 7  | 25 | 36 | 152 | 1 | 6 | 23 | 114 | 67  | 297 |
| 61,988 | 7  | 25 | 37 | 157 | 1 | 5 | 23 | 115 | 68  | 302 |
| 61,989 | 7  | 26 | 37 | 162 | 1 | 5 | 23 | 119 | 68  | 312 |
| 61,990 | 7  | 27 | 39 | 163 | 1 | 5 | 23 | 121 | 70  | 316 |
| 61,991 | 7  | 28 | 39 | 157 | 1 | 5 | 23 | 120 | 70  | 310 |
| 61,992 | 7  | 28 | 39 | 157 | 1 | 5 | 23 | 120 | 70  | 310 |
| 61,993 | 7  | 27 | 40 | 152 | 1 | 6 | 23 | 118 | 71  | 303 |
| 61,994 | 7  | 27 | 40 | 153 | 1 | 6 | 23 | 115 | 71  | 301 |
| 61,995 | 8  | 27 | 46 | 159 | 1 | 8 | 25 | 129 | 80  | 323 |
| 61,996 | 8  | 31 | 45 | 174 | 1 | 8 | 25 | 148 | 79  | 361 |
| 61,997 | 8  | 34 | 45 | 189 | 1 | 9 | 25 | 171 | 79  | 403 |
| 61,998 | 7  | 31 | 37 | 183 | 1 | 9 | 25 | 169 | 70  | 392 |
| 61,999 | 7  | 33 | 37 | 197 | 1 | 9 | 26 | 174 | 71  | 413 |
| 62,000 | 7  | 29 | 33 | 191 | 1 | 6 | 24 | 153 | 65  | 379 |
| 62,001 | 7  | 32 | 33 | 181 | 1 | 5 | 24 | 145 | 65  | 363 |
| 62,002 | 7  | 32 | 33 | 138 | 1 | 5 | 24 | 133 | 65  | 308 |
| 62,003 | 7  | 32 | 37 | 138 | 1 | 5 | 25 | 133 | 70  | 308 |
| 62,004 | 7  | 26 | 38 | 112 | 1 | 5 | 25 | 117 | 71  | 260 |
| 62,005 | 7  | 26 | 38 | 112 | 1 | 5 | 25 | 116 | 71  | 259 |
| 62,006 | 7  | 26 | 43 | 112 | 1 | 4 | 25 | 116 | 76  | 258 |
| 62,007 | 7  | 26 | 47 | 111 | 1 | 4 | 26 | 113 | 81  | 254 |
| 62,008 | 7  | 26 | 49 | 111 | 1 | 4 | 30 | 111 | 87  | 252 |
| 62,009 | 7  | 26 | 49 | 111 | 1 | 4 | 30 | 109 | 87  | 250 |
| 62,010 | 7  | 26 | 58 | 111 | 1 | 4 | 38 | 109 | 104 | 250 |
| 62,011 | 11 | 25 | 71 | 110 | 2 | 4 | 41 | 108 | 125 | 247 |
| 62,012 | 11 | 25 | 75 | 111 | 2 | 4 | 45 | 108 | 133 | 248 |
| 62,013 | 11 | 25 | 75 | 111 | 2 | 4 | 42 | 108 | 130 | 248 |
| 62,014 | 13 | 25 | 82 | 111 | 4 | 4 | 51 | 108 | 150 | 248 |
| 62,015 | 13 | 25 | 77 | 111 | 4 | 4 | 43 | 108 | 137 | 248 |
| 62,016 | 12 | 25 | 76 | 111 | 4 | 4 | 43 | 108 | 135 | 248 |
| 62,017 | 12 | 25 | 76 | 111 | 4 | 4 | 43 | 108 | 135 | 248 |
| 62,018 | 12 | 25 | 76 | 111 | 4 | 4 | 43 | 108 | 135 | 248 |
| 62,019 | 12 | 25 | 76 | 111 | 4 | 4 | 43 | 108 | 135 | 248 |
| 62,020 | 13 | 25 | 76 | 111 | 4 | 4 | 44 | 108 | 137 | 248 |
| 62,021 | 13 | 25 | 79 | 111 | 4 | 4 | 49 | 109 | 145 | 249 |

|        |    |    |     |     |   |   |    |     |     |     |
|--------|----|----|-----|-----|---|---|----|-----|-----|-----|
| 62,022 | 13 | 25 | 83  | 117 | 5 | 4 | 49 | 110 | 150 | 256 |
| 62,023 | 13 | 25 | 80  | 116 | 5 | 4 | 49 | 110 | 147 | 255 |
| 62,024 | 16 | 25 | 87  | 118 | 5 | 4 | 50 | 111 | 158 | 258 |
| 62,025 | 13 | 25 | 93  | 114 | 4 | 4 | 48 | 110 | 158 | 253 |
| 62,026 | 13 | 24 | 93  | 113 | 4 | 4 | 47 | 109 | 157 | 250 |
| 62,027 | 13 | 24 | 92  | 113 | 4 | 4 | 47 | 109 | 156 | 250 |
| 62,028 | 13 | 24 | 91  | 110 | 4 | 4 | 47 | 108 | 155 | 246 |
| 62,029 | 13 | 24 | 91  | 110 | 4 | 4 | 47 | 107 | 155 | 245 |
| 62,030 | 13 | 24 | 91  | 110 | 4 | 4 | 47 | 107 | 155 | 245 |
| 62,031 | 13 | 24 | 91  | 110 | 4 | 4 | 47 | 108 | 155 | 246 |
| 62,032 | 13 | 24 | 91  | 109 | 4 | 4 | 47 | 106 | 155 | 243 |
| 62,033 | 13 | 24 | 91  | 108 | 4 | 4 | 47 | 106 | 155 | 242 |
| 62,034 | 13 | 24 | 90  | 108 | 4 | 4 | 47 | 106 | 154 | 242 |
| 62,035 | 13 | 24 | 89  | 106 | 4 | 4 | 47 | 105 | 153 | 239 |
| 62,036 | 13 | 24 | 90  | 103 | 4 | 4 | 47 | 103 | 154 | 234 |
| 62,037 | 12 | 21 | 102 | 97  | 4 | 4 | 47 | 89  | 165 | 211 |
| 62,038 | 11 | 20 | 102 | 95  | 4 | 4 | 47 | 84  | 164 | 203 |
| 62,039 | 11 | 17 | 100 | 86  | 4 | 4 | 46 | 79  | 161 | 186 |
| 62,040 | 11 | 17 | 99  | 88  | 4 | 4 | 46 | 79  | 160 | 188 |
| 62,041 | 12 | 16 | 98  | 92  | 4 | 3 | 46 | 77  | 160 | 188 |
| 62,042 | 12 | 16 | 98  | 92  | 4 | 3 | 46 | 77  | 160 | 188 |
| 62,043 | 12 | 16 | 97  | 92  | 4 | 3 | 46 | 77  | 159 | 188 |
| 62,044 | 12 | 16 | 97  | 94  | 4 | 3 | 46 | 79  | 159 | 192 |
| 62,045 | 11 | 16 | 96  | 96  | 4 | 3 | 46 | 81  | 157 | 196 |
| 62,046 | 11 | 16 | 91  | 89  | 4 | 1 | 44 | 66  | 150 | 172 |
| 62,047 | 11 | 13 | 91  | 100 | 4 | 3 | 44 | 65  | 150 | 181 |
| 62,048 | 11 | 10 | 91  | 87  | 4 | 2 | 44 | 44  | 150 | 143 |
| 62,049 | 11 | 9  | 96  | 86  | 4 | 3 | 44 | 41  | 155 | 139 |
| 62,050 | 11 | 7  | 96  | 81  | 4 | 3 | 43 | 43  | 154 | 134 |
| 62,051 | 11 | 5  | 99  | 77  | 4 | 4 | 44 | 43  | 158 | 129 |
| 62,052 | 11 | 3  | 97  | 72  | 4 | 4 | 44 | 39  | 156 | 118 |
| 62,053 | 11 | 3  | 94  | 72  | 4 | 5 | 43 | 39  | 152 | 119 |
| 62,054 | 11 | 5  | 94  | 81  | 4 | 5 | 43 | 50  | 152 | 141 |
| 62,055 | 11 | 5  | 94  | 81  | 4 | 5 | 43 | 51  | 152 | 142 |
| 62,056 | 11 | 5  | 97  | 86  | 4 | 5 | 45 | 55  | 157 | 151 |
| 62,057 | 11 | 5  | 96  | 87  | 4 | 5 | 45 | 55  | 156 | 152 |
| 62,058 | 15 | 5  | 107 | 88  | 6 | 5 | 59 | 56  | 187 | 154 |
| 62,059 | 15 | 5  | 105 | 89  | 6 | 5 | 55 | 56  | 181 | 155 |
| 62,060 | 15 | 5  | 104 | 90  | 6 | 5 | 55 | 58  | 180 | 158 |
| 62,061 | 15 | 5  | 97  | 90  | 6 | 5 | 49 | 58  | 167 | 158 |
| 62,062 | 11 | 5  | 85  | 90  | 5 | 5 | 47 | 58  | 148 | 158 |

|        |    |    |    |     |   |    |    |     |     |     |
|--------|----|----|----|-----|---|----|----|-----|-----|-----|
| 62,063 | 11 | 5  | 81 | 90  | 5 | 5  | 43 | 58  | 140 | 158 |
| 62,064 | 11 | 7  | 80 | 91  | 5 | 5  | 43 | 58  | 139 | 161 |
| 62,065 | 9  | 7  | 73 | 95  | 3 | 5  | 34 | 58  | 119 | 165 |
| 62,066 | 9  | 7  | 73 | 95  | 3 | 5  | 34 | 58  | 119 | 165 |
| 62,067 | 9  | 7  | 73 | 95  | 3 | 6  | 34 | 59  | 119 | 167 |
| 62,068 | 9  | 7  | 73 | 95  | 3 | 6  | 34 | 59  | 119 | 167 |
| 62,069 | 9  | 7  | 73 | 98  | 3 | 6  | 34 | 59  | 119 | 170 |
| 62,070 | 9  | 8  | 74 | 116 | 3 | 7  | 35 | 68  | 121 | 199 |
| 62,071 | 9  | 9  | 76 | 124 | 3 | 7  | 38 | 69  | 126 | 209 |
| 62,072 | 9  | 9  | 72 | 160 | 4 | 8  | 34 | 77  | 119 | 254 |
| 62,073 | 9  | 10 | 68 | 158 | 3 | 8  | 34 | 78  | 114 | 254 |
| 62,074 | 8  | 17 | 67 | 297 | 3 | 17 | 34 | 131 | 112 | 462 |
| 62,075 | 6  | 18 | 60 | 332 | 3 | 18 | 33 | 146 | 102 | 514 |
| 62,076 | 6  | 21 | 53 | 361 | 3 | 19 | 30 | 157 | 92  | 558 |
| 62,077 | 6  | 26 | 51 | 391 | 3 | 20 | 28 | 171 | 88  | 608 |
| 62,078 | 6  | 26 | 51 | 391 | 3 | 20 | 28 | 171 | 88  | 608 |
| 62,079 | 6  | 28 | 51 | 408 | 3 | 20 | 30 | 176 | 90  | 632 |
| 62,080 | 6  | 28 | 51 | 414 | 3 | 20 | 30 | 177 | 90  | 639 |
| 62,081 | 6  | 29 | 52 | 421 | 3 | 20 | 30 | 177 | 91  | 647 |
| 62,082 | 6  | 30 | 52 | 425 | 3 | 20 | 30 | 177 | 91  | 652 |
| 62,083 | 6  | 30 | 52 | 428 | 3 | 20 | 31 | 179 | 92  | 657 |
| 62,084 | 6  | 30 | 52 | 440 | 3 | 20 | 33 | 182 | 94  | 672 |
| 62,085 | 6  | 31 | 52 | 443 | 3 | 20 | 33 | 185 | 94  | 679 |
| 62,086 | 6  | 31 | 52 | 447 | 3 | 20 | 33 | 186 | 94  | 684 |
| 62,087 | 6  | 34 | 50 | 448 | 3 | 20 | 33 | 190 | 92  | 692 |
| 62,088 | 6  | 34 | 40 | 444 | 3 | 20 | 33 | 190 | 82  | 688 |
| 62,089 | 8  | 34 | 40 | 442 | 3 | 20 | 34 | 188 | 85  | 684 |
| 62,090 | 8  | 34 | 40 | 442 | 3 | 20 | 35 | 189 | 86  | 685 |
| 62,091 | 7  | 33 | 40 | 433 | 3 | 20 | 35 | 188 | 85  | 674 |
| 62,092 | 7  | 33 | 40 | 434 | 3 | 20 | 35 | 188 | 85  | 675 |
| 62,093 | 7  | 33 | 40 | 434 | 3 | 20 | 35 | 189 | 85  | 676 |
| 62,094 | 7  | 33 | 40 | 434 | 3 | 21 | 36 | 189 | 86  | 677 |
| 62,095 | 7  | 33 | 40 | 432 | 3 | 21 | 36 | 187 | 86  | 673 |
| 62,096 | 8  | 33 | 41 | 430 | 3 | 21 | 36 | 185 | 88  | 669 |
| 62,097 | 8  | 33 | 41 | 430 | 3 | 21 | 36 | 185 | 88  | 669 |
| 62,098 | 8  | 32 | 37 | 401 | 3 | 19 | 36 | 165 | 84  | 617 |
| 62,099 | 8  | 32 | 36 | 399 | 3 | 18 | 35 | 165 | 82  | 614 |
| 62,100 | 8  | 32 | 36 | 391 | 3 | 18 | 35 | 158 | 82  | 599 |
| 62,101 | 8  | 32 | 36 | 393 | 3 | 18 | 35 | 159 | 82  | 602 |
| 62,102 | 9  | 32 | 34 | 396 | 3 | 17 | 34 | 161 | 80  | 606 |
| 62,103 | 9  | 31 | 33 | 406 | 3 | 18 | 34 | 169 | 79  | 624 |

|        |   |    |    |     |   |    |    |     |    |     |
|--------|---|----|----|-----|---|----|----|-----|----|-----|
| 62,104 | 9 | 31 | 32 | 408 | 3 | 17 | 34 | 168 | 78 | 624 |
| 62,105 | 9 | 29 | 24 | 399 | 3 | 17 | 32 | 156 | 68 | 601 |
| 62,106 | 9 | 29 | 24 | 407 | 3 | 18 | 32 | 162 | 68 | 616 |
| 62,107 | 5 | 30 | 12 | 407 | 1 | 18 | 20 | 158 | 38 | 613 |
| 62,108 | 5 | 30 | 12 | 411 | 1 | 18 | 18 | 161 | 36 | 620 |
| 62,109 | 5 | 30 | 11 | 411 | 1 | 18 | 18 | 163 | 35 | 622 |
| 62,110 | 6 | 30 | 11 | 410 | 1 | 18 | 18 | 164 | 36 | 622 |
| 62,111 | 6 | 30 | 11 | 414 | 1 | 18 | 18 | 166 | 36 | 628 |
| 62,112 | 6 | 30 | 9  | 416 | 1 | 18 | 16 | 167 | 32 | 631 |
| 62,113 | 6 | 30 | 8  | 415 | 1 | 18 | 15 | 168 | 30 | 631 |
| 62,114 | 6 | 30 | 8  | 416 | 1 | 18 | 15 | 168 | 30 | 632 |
| 62,115 | 6 | 28 | 8  | 411 | 1 | 18 | 15 | 168 | 30 | 625 |
| 62,116 | 6 | 28 | 8  | 411 | 1 | 18 | 15 | 169 | 30 | 626 |
| 62,117 | 6 | 28 | 8  | 411 | 1 | 18 | 16 | 170 | 31 | 627 |
| 62,118 | 6 | 28 | 9  | 411 | 1 | 17 | 16 | 170 | 32 | 626 |
| 62,119 | 6 | 27 | 9  | 390 | 1 | 16 | 16 | 161 | 32 | 594 |
| 62,120 | 6 | 27 | 10 | 391 | 1 | 16 | 17 | 161 | 34 | 595 |
| 62,121 | 6 | 27 | 14 | 393 | 1 | 16 | 17 | 162 | 38 | 598 |
| 62,122 | 5 | 26 | 12 | 387 | 1 | 16 | 13 | 160 | 31 | 589 |
| 62,123 | 5 | 26 | 13 | 351 | 0 | 15 | 13 | 152 | 31 | 544 |
| 62,124 | 5 | 25 | 18 | 347 | 0 | 15 | 16 | 150 | 39 | 537 |
| 62,125 | 5 | 19 | 19 | 210 | 0 | 6  | 16 | 97  | 40 | 332 |
| 62,126 | 5 | 18 | 21 | 174 | 0 | 5  | 17 | 82  | 43 | 279 |
| 62,127 | 5 | 10 | 21 | 115 | 0 | 3  | 19 | 57  | 45 | 185 |
| 62,128 | 5 | 10 | 21 | 115 | 0 | 3  | 19 | 57  | 45 | 185 |
| 62,129 | 5 | 10 | 21 | 115 | 0 | 3  | 17 | 57  | 43 | 185 |
| 62,130 | 5 | 8  | 21 | 92  | 0 | 4  | 17 | 51  | 43 | 155 |
| 62,131 | 5 | 7  | 21 | 85  | 0 | 4  | 17 | 50  | 43 | 146 |
| 62,132 | 5 | 7  | 20 | 86  | 0 | 4  | 17 | 51  | 42 | 148 |
| 62,133 | 6 | 6  | 23 | 82  | 0 | 4  | 16 | 53  | 45 | 145 |
| 62,134 | 6 | 6  | 26 | 67  | 0 | 4  | 17 | 48  | 49 | 125 |
| 62,135 | 6 | 6  | 26 | 67  | 0 | 4  | 16 | 48  | 48 | 125 |
| 62,136 | 6 | 5  | 26 | 65  | 0 | 4  | 16 | 45  | 48 | 119 |
| 62,137 | 6 | 5  | 25 | 61  | 0 | 4  | 16 | 45  | 47 | 115 |
| 62,138 | 4 | 2  | 25 | 60  | 0 | 4  | 15 | 41  | 44 | 107 |
| 62,139 | 4 | 2  | 26 | 60  | 0 | 4  | 15 | 41  | 45 | 107 |
| 62,140 | 4 | 2  | 34 | 61  | 1 | 4  | 19 | 41  | 58 | 108 |
| 62,141 | 4 | 2  | 34 | 64  | 1 | 4  | 18 | 45  | 57 | 115 |
| 62,142 | 4 | 2  | 36 | 69  | 1 | 4  | 20 | 49  | 61 | 124 |
| 62,143 | 4 | 2  | 38 | 68  | 1 | 4  | 21 | 49  | 64 | 123 |
| 62,144 | 3 | 2  | 44 | 69  | 2 | 4  | 25 | 48  | 74 | 123 |

|        |    |   |     |    |   |   |    |    |     |     |
|--------|----|---|-----|----|---|---|----|----|-----|-----|
| 62,145 | 3  | 2 | 43  | 69 | 2 | 3 | 25 | 49 | 73  | 123 |
| 62,146 | 5  | 2 | 55  | 68 | 2 | 3 | 29 | 49 | 91  | 122 |
| 62,147 | 5  | 2 | 57  | 68 | 2 | 3 | 30 | 49 | 94  | 122 |
| 62,148 | 8  | 2 | 69  | 69 | 2 | 3 | 40 | 50 | 119 | 124 |
| 62,149 | 17 | 2 | 104 | 69 | 7 | 3 | 55 | 51 | 183 | 125 |
| 62,150 | 18 | 2 | 104 | 69 | 8 | 3 | 59 | 51 | 189 | 125 |
| 62,151 | 19 | 2 | 104 | 63 | 8 | 3 | 59 | 47 | 190 | 115 |
| 62,152 | 19 | 2 | 106 | 63 | 8 | 3 | 59 | 48 | 192 | 116 |
| 62,153 | 18 | 2 | 105 | 63 | 8 | 3 | 59 | 48 | 190 | 116 |
| 62,154 | 18 | 2 | 105 | 54 | 8 | 2 | 59 | 40 | 190 | 98  |
| 62,155 | 18 | 2 | 105 | 52 | 8 | 2 | 59 | 40 | 190 | 96  |
| 62,156 | 18 | 2 | 105 | 52 | 8 | 2 | 59 | 40 | 190 | 96  |
| 62,157 | 18 | 2 | 105 | 44 | 8 | 1 | 59 | 34 | 190 | 81  |
| 62,158 | 18 | 1 | 105 | 39 | 8 | 1 | 58 | 34 | 189 | 75  |
| 62,159 | 18 | 1 | 106 | 35 | 8 | 1 | 58 | 32 | 190 | 69  |
| 62,160 | 17 | 1 | 106 | 34 | 8 | 1 | 58 | 29 | 189 | 65  |
| 62,161 | 17 | 1 | 106 | 29 | 8 | 1 | 58 | 24 | 189 | 55  |
| 62,162 | 17 | 1 | 106 | 27 | 8 | 1 | 58 | 23 | 189 | 52  |
| 62,163 | 17 | 1 | 106 | 27 | 8 | 1 | 58 | 23 | 189 | 52  |
| 62,164 | 17 | 1 | 106 | 26 | 8 | 1 | 58 | 22 | 189 | 50  |
| 62,165 | 17 | 1 | 108 | 27 | 8 | 1 | 59 | 22 | 192 | 51  |
| 62,166 | 17 | 1 | 111 | 28 | 8 | 1 | 60 | 22 | 196 | 52  |
| 62,167 | 17 | 1 | 111 | 28 | 8 | 1 | 60 | 21 | 196 | 51  |
| 62,168 | 17 | 1 | 111 | 28 | 8 | 1 | 60 | 20 | 196 | 50  |
| 62,169 | 17 | 1 | 112 | 28 | 8 | 1 | 61 | 19 | 198 | 49  |
| 62,170 | 17 | 1 | 113 | 23 | 8 | 1 | 61 | 18 | 199 | 43  |
| 62,171 | 17 | 1 | 113 | 23 | 8 | 1 | 60 | 18 | 198 | 43  |
| 62,172 | 17 | 1 | 108 | 23 | 8 | 1 | 59 | 18 | 192 | 43  |
| 62,173 | 17 | 1 | 107 | 24 | 8 | 1 | 58 | 18 | 190 | 44  |
| 62,174 | 17 | 1 | 102 | 24 | 8 | 2 | 55 | 20 | 182 | 47  |
| 62,175 | 17 | 1 | 101 | 24 | 8 | 2 | 55 | 20 | 181 | 47  |
| 62,176 | 17 | 0 | 102 | 22 | 8 | 2 | 55 | 21 | 182 | 45  |
| 62,177 | 17 | 0 | 102 | 21 | 8 | 2 | 54 | 21 | 181 | 44  |
| 62,178 | 17 | 0 | 101 | 21 | 8 | 2 | 52 | 22 | 178 | 45  |
| 62,179 | 17 | 0 | 101 | 23 | 8 | 2 | 54 | 22 | 180 | 47  |
| 62,180 | 20 | 0 | 105 | 23 | 8 | 2 | 54 | 22 | 187 | 47  |
| 62,181 | 20 | 0 | 105 | 22 | 8 | 1 | 54 | 19 | 187 | 42  |
| 62,182 | 20 | 0 | 105 | 22 | 8 | 1 | 54 | 19 | 187 | 42  |
| 62,183 | 19 | 0 | 102 | 22 | 8 | 1 | 54 | 19 | 183 | 42  |
| 62,184 | 19 | 0 | 102 | 22 | 8 | 1 | 54 | 19 | 183 | 42  |
| 62,185 | 19 | 0 | 99  | 22 | 8 | 1 | 52 | 19 | 178 | 42  |

|        |    |    |    |     |   |   |    |    |     |     |
|--------|----|----|----|-----|---|---|----|----|-----|-----|
| 62,186 | 19 | 0  | 99 | 22  | 8 | 1 | 52 | 19 | 178 | 42  |
| 62,187 | 19 | 0  | 99 | 21  | 8 | 1 | 52 | 18 | 178 | 40  |
| 62,188 | 19 | 0  | 99 | 21  | 9 | 1 | 52 | 19 | 179 | 41  |
| 62,189 | 19 | 0  | 98 | 21  | 9 | 1 | 52 | 19 | 178 | 41  |
| 62,190 | 19 | 0  | 97 | 22  | 9 | 1 | 51 | 19 | 176 | 42  |
| 62,191 | 19 | 0  | 90 | 17  | 8 | 1 | 48 | 14 | 165 | 32  |
| 62,192 | 19 | 0  | 90 | 17  | 8 | 1 | 48 | 14 | 165 | 32  |
| 62,193 | 19 | 0  | 88 | 12  | 8 | 1 | 46 | 10 | 161 | 23  |
| 62,194 | 19 | 0  | 87 | 11  | 8 | 1 | 45 | 9  | 159 | 21  |
| 62,195 | 19 | 0  | 81 | 11  | 7 | 1 | 40 | 9  | 147 | 21  |
| 62,196 | 17 | 0  | 70 | 12  | 7 | 1 | 38 | 9  | 132 | 22  |
| 62,197 | 17 | 0  | 69 | 16  | 7 | 1 | 36 | 11 | 129 | 28  |
| 62,198 | 17 | 0  | 67 | 20  | 7 | 1 | 35 | 14 | 126 | 35  |
| 62,199 | 14 | 2  | 55 | 26  | 7 | 1 | 25 | 16 | 101 | 45  |
| 62,200 | 6  | 6  | 20 | 69  | 2 | 3 | 10 | 29 | 38  | 107 |
| 62,201 | 5  | 8  | 21 | 74  | 1 | 3 | 6  | 30 | 33  | 115 |
| 62,202 | 4  | 10 | 21 | 93  | 1 | 3 | 6  | 30 | 32  | 136 |
| 62,203 | 4  | 11 | 19 | 97  | 1 | 4 | 7  | 34 | 31  | 146 |
| 62,204 | 4  | 12 | 19 | 97  | 1 | 4 | 7  | 34 | 31  | 147 |
| 62,205 | 4  | 12 | 19 | 96  | 1 | 4 | 7  | 39 | 31  | 151 |
| 62,206 | 4  | 12 | 20 | 96  | 1 | 4 | 7  | 39 | 32  | 151 |
| 62,207 | 4  | 12 | 20 | 97  | 1 | 4 | 7  | 41 | 32  | 154 |
| 62,208 | 4  | 12 | 19 | 99  | 1 | 4 | 7  | 42 | 31  | 157 |
| 62,209 | 4  | 12 | 19 | 99  | 1 | 4 | 7  | 42 | 31  | 157 |
| 62,210 | 4  | 12 | 19 | 99  | 1 | 4 | 7  | 42 | 31  | 157 |
| 62,211 | 4  | 12 | 19 | 99  | 1 | 4 | 7  | 42 | 31  | 157 |
| 62,212 | 4  | 12 | 19 | 101 | 1 | 4 | 7  | 42 | 31  | 159 |
| 62,213 | 4  | 12 | 19 | 101 | 1 | 4 | 7  | 42 | 31  | 159 |
| 62,214 | 4  | 12 | 20 | 102 | 1 | 4 | 7  | 42 | 32  | 160 |
| 62,215 | 4  | 12 | 20 | 102 | 1 | 4 | 7  | 42 | 32  | 160 |
| 62,216 | 4  | 12 | 19 | 101 | 1 | 4 | 6  | 42 | 30  | 159 |
| 62,217 | 4  | 12 | 19 | 100 | 1 | 4 | 6  | 42 | 30  | 158 |
| 62,218 | 4  | 12 | 19 | 100 | 1 | 4 | 5  | 42 | 29  | 158 |
| 62,219 | 4  | 12 | 19 | 100 | 1 | 4 | 6  | 42 | 30  | 158 |
| 62,220 | 4  | 12 | 18 | 99  | 1 | 3 | 5  | 40 | 28  | 154 |
| 62,221 | 4  | 12 | 17 | 99  | 1 | 3 | 5  | 40 | 27  | 154 |
| 62,222 | 4  | 12 | 16 | 99  | 1 | 3 | 5  | 40 | 26  | 154 |
| 62,223 | 4  | 12 | 16 | 99  | 1 | 3 | 5  | 40 | 26  | 154 |
| 62,224 | 4  | 12 | 18 | 101 | 1 | 3 | 6  | 40 | 29  | 156 |
| 62,225 | 4  | 12 | 18 | 101 | 1 | 3 | 6  | 41 | 29  | 157 |
| 62,226 | 4  | 12 | 18 | 102 | 1 | 3 | 6  | 41 | 29  | 158 |

|        |   |    |    |     |   |   |   |    |    |     |
|--------|---|----|----|-----|---|---|---|----|----|-----|
| 62,227 | 4 | 12 | 17 | 102 | 1 | 3 | 6 | 41 | 28 | 158 |
| 62,228 | 4 | 12 | 15 | 102 | 1 | 3 | 6 | 40 | 26 | 157 |
| 62,229 | 6 | 12 | 16 | 103 | 1 | 3 | 5 | 39 | 28 | 157 |
| 62,230 | 3 | 12 | 14 | 102 | 1 | 3 | 5 | 39 | 23 | 156 |
| 62,231 | 3 | 12 | 12 | 105 | 1 | 3 | 5 | 40 | 21 | 160 |
| 62,232 | 3 | 12 | 12 | 105 | 1 | 3 | 5 | 41 | 21 | 161 |
| 62,233 | 3 | 13 | 14 | 109 | 1 | 3 | 6 | 44 | 24 | 169 |
| 62,234 | 3 | 13 | 14 | 109 | 1 | 3 | 6 | 44 | 24 | 169 |
| 62,235 | 3 | 13 | 14 | 113 | 1 | 4 | 6 | 44 | 24 | 174 |
| 62,236 | 3 | 13 | 14 | 123 | 1 | 4 | 6 | 46 | 24 | 186 |
| 62,237 | 3 | 13 | 14 | 123 | 1 | 4 | 6 | 46 | 24 | 186 |
| 62,238 | 3 | 14 | 14 | 123 | 1 | 4 | 6 | 46 | 24 | 187 |
| 62,239 | 3 | 14 | 14 | 123 | 0 | 4 | 6 | 45 | 23 | 186 |
| 62,240 | 3 | 14 | 14 | 130 | 0 | 4 | 6 | 46 | 23 | 194 |
| 62,241 | 3 | 15 | 14 | 133 | 0 | 4 | 6 | 46 | 23 | 198 |
| 62,242 | 3 | 15 | 14 | 133 | 0 | 4 | 6 | 46 | 23 | 198 |
| 62,243 | 3 | 15 | 14 | 133 | 1 | 4 | 6 | 46 | 24 | 198 |
| 62,244 | 3 | 16 | 15 | 134 | 1 | 4 | 6 | 46 | 25 | 200 |
| 62,245 | 3 | 16 | 15 | 134 | 1 | 4 | 6 | 46 | 25 | 200 |
| 62,246 | 3 | 16 | 15 | 134 | 1 | 4 | 6 | 46 | 25 | 200 |
| 62,247 | 3 | 16 | 15 | 133 | 1 | 4 | 6 | 46 | 25 | 199 |
| 62,248 | 3 | 16 | 16 | 123 | 1 | 4 | 6 | 40 | 26 | 183 |
| 62,249 | 3 | 14 | 16 | 117 | 1 | 4 | 6 | 38 | 26 | 173 |
| 62,250 | 3 | 8  | 16 | 69  | 1 | 2 | 6 | 23 | 26 | 102 |
| 62,251 | 2 | 8  | 16 | 70  | 1 | 2 | 6 | 26 | 25 | 106 |
| 62,252 | 2 | 11 | 16 | 71  | 1 | 3 | 6 | 27 | 25 | 112 |
| 62,253 | 2 | 9  | 16 | 51  | 1 | 3 | 6 | 28 | 25 | 91  |
| 62,254 | 2 | 7  | 16 | 48  | 1 | 2 | 5 | 24 | 24 | 81  |
| 62,255 | 2 | 7  | 16 | 48  | 1 | 2 | 5 | 24 | 24 | 81  |
| 62,256 | 2 | 7  | 16 | 49  | 1 | 2 | 5 | 19 | 24 | 77  |
| 62,257 | 2 | 7  | 16 | 52  | 1 | 2 | 5 | 19 | 24 | 80  |
| 62,258 | 2 | 7  | 16 | 51  | 1 | 2 | 5 | 17 | 24 | 77  |
| 62,259 | 2 | 7  | 16 | 49  | 1 | 2 | 6 | 16 | 25 | 74  |
| 62,260 | 2 | 7  | 16 | 49  | 1 | 2 | 6 | 16 | 25 | 74  |
| 62,261 | 2 | 7  | 16 | 49  | 1 | 2 | 6 | 16 | 25 | 74  |
| 62,262 | 2 | 7  | 16 | 49  | 1 | 2 | 6 | 16 | 25 | 74  |
| 62,263 | 2 | 8  | 16 | 49  | 1 | 2 | 6 | 17 | 25 | 76  |
| 62,264 | 2 | 8  | 15 | 49  | 1 | 2 | 6 | 18 | 24 | 77  |
| 62,265 | 2 | 8  | 15 | 48  | 1 | 2 | 6 | 18 | 24 | 76  |
| 62,266 | 2 | 8  | 14 | 48  | 1 | 2 | 6 | 18 | 23 | 76  |
| 62,267 | 2 | 8  | 14 | 48  | 1 | 2 | 7 | 18 | 24 | 76  |

|        |   |    |    |     |   |   |    |    |     |     |
|--------|---|----|----|-----|---|---|----|----|-----|-----|
| 62,268 | 2 | 8  | 11 | 51  | 1 | 3 | 6  | 20 | 20  | 82  |
| 62,269 | 2 | 8  | 10 | 51  | 1 | 3 | 5  | 20 | 18  | 82  |
| 62,270 | 2 | 8  | 10 | 52  | 1 | 3 | 5  | 20 | 18  | 83  |
| 62,271 | 2 | 8  | 10 | 52  | 1 | 3 | 5  | 20 | 18  | 83  |
| 62,272 | 2 | 8  | 10 | 52  | 1 | 3 | 6  | 20 | 19  | 83  |
| 62,273 | 2 | 9  | 12 | 52  | 1 | 3 | 6  | 21 | 21  | 85  |
| 62,274 | 2 | 9  | 11 | 52  | 1 | 3 | 9  | 21 | 23  | 85  |
| 62,275 | 2 | 9  | 10 | 50  | 1 | 3 | 8  | 20 | 21  | 82  |
| 62,276 | 2 | 9  | 10 | 50  | 1 | 3 | 8  | 20 | 21  | 82  |
| 62,277 | 2 | 9  | 11 | 49  | 1 | 3 | 8  | 19 | 22  | 80  |
| 62,278 | 2 | 9  | 11 | 49  | 1 | 3 | 8  | 19 | 22  | 80  |
| 62,279 | 0 | 9  | 10 | 50  | 1 | 3 | 8  | 19 | 19  | 81  |
| 62,280 | 0 | 9  | 10 | 49  | 1 | 3 | 8  | 21 | 19  | 82  |
| 62,281 | 0 | 9  | 10 | 48  | 1 | 3 | 8  | 21 | 19  | 81  |
| 62,282 | 1 | 9  | 49 | 49  | 3 | 3 | 29 | 23 | 82  | 84  |
| 62,283 | 2 | 9  | 55 | 50  | 3 | 3 | 36 | 22 | 96  | 84  |
| 62,284 | 3 | 8  | 54 | 46  | 3 | 4 | 36 | 19 | 96  | 77  |
| 62,285 | 3 | 8  | 55 | 42  | 3 | 3 | 36 | 19 | 97  | 72  |
| 62,286 | 3 | 8  | 55 | 32  | 3 | 3 | 38 | 17 | 99  | 60  |
| 62,287 | 3 | 8  | 55 | 32  | 3 | 3 | 38 | 17 | 99  | 60  |
| 62,288 | 3 | 7  | 55 | 34  | 3 | 3 | 38 | 17 | 99  | 61  |
| 62,289 | 3 | 7  | 55 | 38  | 3 | 3 | 38 | 19 | 99  | 67  |
| 62,290 | 3 | 7  | 55 | 39  | 3 | 3 | 38 | 20 | 99  | 69  |
| 62,291 | 3 | 8  | 55 | 34  | 3 | 3 | 38 | 19 | 99  | 64  |
| 62,292 | 3 | 7  | 55 | 43  | 3 | 3 | 38 | 26 | 99  | 79  |
| 62,293 | 3 | 7  | 55 | 44  | 2 | 3 | 38 | 26 | 98  | 80  |
| 62,294 | 3 | 7  | 54 | 47  | 2 | 3 | 38 | 26 | 97  | 83  |
| 62,295 | 3 | 6  | 53 | 47  | 2 | 3 | 38 | 26 | 96  | 82  |
| 62,296 | 3 | 6  | 53 | 47  | 2 | 3 | 38 | 26 | 96  | 82  |
| 62,297 | 3 | 6  | 53 | 47  | 2 | 3 | 38 | 26 | 96  | 82  |
| 62,298 | 3 | 6  | 52 | 48  | 2 | 3 | 38 | 26 | 95  | 83  |
| 62,299 | 3 | 6  | 52 | 48  | 2 | 3 | 38 | 26 | 95  | 83  |
| 62,300 | 3 | 6  | 56 | 48  | 2 | 3 | 42 | 26 | 103 | 83  |
| 62,301 | 3 | 3  | 56 | 49  | 2 | 2 | 42 | 22 | 103 | 76  |
| 62,302 | 3 | 3  | 56 | 52  | 2 | 2 | 42 | 23 | 103 | 80  |
| 62,303 | 3 | 3  | 55 | 55  | 2 | 2 | 42 | 23 | 102 | 83  |
| 62,304 | 3 | 5  | 55 | 69  | 2 | 4 | 42 | 23 | 102 | 101 |
| 62,305 | 3 | 14 | 55 | 130 | 2 | 6 | 43 | 38 | 103 | 188 |
| 62,306 | 4 | 15 | 55 | 142 | 2 | 6 | 43 | 39 | 104 | 202 |
| 62,307 | 4 | 17 | 55 | 150 | 2 | 6 | 43 | 41 | 104 | 214 |
| 62,308 | 4 | 17 | 54 | 148 | 2 | 6 | 43 | 41 | 103 | 212 |



|        |   |    |    |     |   |   |    |    |     |     |
|--------|---|----|----|-----|---|---|----|----|-----|-----|
| 62,309 | 4 | 17 | 54 | 150 | 2 | 7 | 42 | 42 | 102 | 216 |
| 62,310 | 4 | 20 | 55 | 154 | 3 | 7 | 43 | 46 | 105 | 227 |
| 62,311 | 4 | 20 | 55 | 158 | 3 | 7 | 43 | 47 | 105 | 232 |
| 62,312 | 4 | 21 | 55 | 169 | 3 | 8 | 43 | 50 | 105 | 248 |
| 62,313 | 4 | 21 | 55 | 169 | 3 | 8 | 43 | 51 | 105 | 249 |
| 62,314 | 4 | 20 | 55 | 168 | 3 | 8 | 43 | 50 | 105 | 246 |
| 62,315 | 4 | 20 | 55 | 168 | 3 | 8 | 43 | 50 | 105 | 246 |
| 62,316 | 4 | 22 | 55 | 172 | 3 | 8 | 43 | 51 | 105 | 253 |
| 62,317 | 4 | 22 | 55 | 172 | 3 | 8 | 43 | 51 | 105 | 253 |
| 62,318 | 4 | 22 | 55 | 173 | 3 | 8 | 42 | 51 | 104 | 254 |
| 62,319 | 4 | 22 | 55 | 170 | 3 | 7 | 42 | 50 | 104 | 249 |
| 62,320 | 4 | 22 | 55 | 172 | 3 | 7 | 42 | 50 | 104 | 251 |
| 62,321 | 4 | 22 | 55 | 173 | 3 | 7 | 42 | 50 | 104 | 252 |
| 62,322 | 4 | 22 | 55 | 178 | 3 | 7 | 43 | 51 | 105 | 258 |
| 62,323 | 4 | 24 | 55 | 187 | 3 | 7 | 42 | 51 | 104 | 269 |
| 62,324 | 4 | 23 | 53 | 188 | 3 | 7 | 42 | 50 | 102 | 268 |
| 62,325 | 4 | 23 | 53 | 189 | 3 | 7 | 39 | 50 | 99  | 269 |
| 62,326 | 4 | 23 | 53 | 189 | 3 | 7 | 39 | 50 | 99  | 269 |
| 62,327 | 4 | 23 | 53 | 191 | 3 | 7 | 39 | 50 | 99  | 271 |
| 62,328 | 4 | 23 | 52 | 191 | 3 | 7 | 39 | 50 | 98  | 271 |
| 62,329 | 4 | 23 | 52 | 199 | 3 | 7 | 39 | 52 | 98  | 281 |
| 62,330 | 4 | 24 | 52 | 199 | 3 | 7 | 37 | 56 | 96  | 286 |
| 62,331 | 4 | 26 | 50 | 207 | 3 | 7 | 36 | 63 | 93  | 303 |
| 62,332 | 4 | 27 | 47 | 212 | 3 | 7 | 32 | 70 | 86  | 316 |
| 62,333 | 3 | 28 | 13 | 206 | 1 | 7 | 16 | 67 | 33  | 308 |
| 62,334 | 2 | 28 | 7  | 207 | 1 | 6 | 9  | 67 | 19  | 308 |
| 62,335 | 1 | 28 | 6  | 208 | 1 | 6 | 8  | 67 | 16  | 309 |
| 62,336 | 1 | 29 | 5  | 208 | 1 | 6 | 8  | 67 | 15  | 310 |
| 62,337 | 1 | 29 | 5  | 209 | 1 | 6 | 7  | 67 | 14  | 311 |
| 62,338 | 1 | 29 | 5  | 209 | 1 | 6 | 7  | 67 | 14  | 311 |
| 62,339 | 1 | 29 | 5  | 208 | 1 | 6 | 7  | 67 | 14  | 310 |
| 62,340 | 1 | 29 | 7  | 204 | 1 | 6 | 7  | 65 | 16  | 304 |
| 62,341 | 1 | 28 | 7  | 201 | 1 | 6 | 7  | 64 | 16  | 299 |
| 62,342 | 1 | 28 | 7  | 188 | 1 | 6 | 7  | 58 | 16  | 280 |
| 62,343 | 1 | 28 | 7  | 193 | 1 | 6 | 7  | 61 | 16  | 288 |
| 62,344 | 1 | 28 | 9  | 198 | 1 | 6 | 9  | 64 | 20  | 296 |
| 62,345 | 1 | 28 | 9  | 199 | 1 | 6 | 10 | 70 | 21  | 303 |
| 62,346 | 1 | 28 | 11 | 198 | 1 | 6 | 10 | 70 | 23  | 302 |
| 62,347 | 1 | 28 | 11 | 198 | 1 | 6 | 10 | 70 | 23  | 302 |
| 62,348 | 1 | 29 | 11 | 202 | 1 | 6 | 10 | 70 | 23  | 307 |
| 62,349 | 1 | 29 | 7  | 203 | 1 | 6 | 5  | 70 | 14  | 308 |

|        |    |    |     |     |   |   |     |    |     |     |
|--------|----|----|-----|-----|---|---|-----|----|-----|-----|
| 62,350 | 2  | 31 | 11  | 207 | 1 | 6 | 10  | 71 | 24  | 315 |
| 62,351 | 2  | 31 | 11  | 207 | 1 | 6 | 10  | 71 | 24  | 315 |
| 62,352 | 2  | 31 | 22  | 209 | 1 | 6 | 23  | 70 | 48  | 316 |
| 62,353 | 2  | 31 | 22  | 207 | 1 | 6 | 23  | 72 | 48  | 316 |
| 62,354 | 2  | 29 | 22  | 193 | 1 | 4 | 23  | 70 | 48  | 296 |
| 62,355 | 2  | 20 | 23  | 133 | 1 | 2 | 25  | 55 | 51  | 210 |
| 62,356 | 2  | 20 | 23  | 133 | 1 | 2 | 25  | 55 | 51  | 210 |
| 62,357 | 1  | 17 | 23  | 111 | 1 | 2 | 25  | 53 | 50  | 183 |
| 62,358 | 1  | 17 | 23  | 111 | 1 | 2 | 25  | 53 | 50  | 183 |
| 62,359 | 1  | 17 | 24  | 110 | 1 | 1 | 25  | 52 | 51  | 180 |
| 62,360 | 1  | 17 | 25  | 111 | 1 | 1 | 25  | 53 | 52  | 182 |
| 62,361 | 2  | 14 | 26  | 109 | 0 | 1 | 27  | 49 | 55  | 173 |
| 62,362 | 2  | 14 | 30  | 106 | 1 | 1 | 37  | 49 | 70  | 170 |
| 62,363 | 2  | 13 | 30  | 95  | 1 | 0 | 37  | 46 | 70  | 154 |
| 62,364 | 2  | 14 | 30  | 99  | 1 | 0 | 37  | 47 | 70  | 160 |
| 62,365 | 2  | 14 | 30  | 98  | 1 | 0 | 37  | 46 | 70  | 158 |
| 62,366 | 2  | 13 | 31  | 99  | 1 | 0 | 37  | 47 | 71  | 159 |
| 62,367 | 3  | 12 | 31  | 97  | 1 | 0 | 37  | 48 | 72  | 157 |
| 62,368 | 3  | 12 | 32  | 99  | 1 | 0 | 37  | 51 | 73  | 162 |
| 62,369 | 3  | 12 | 32  | 101 | 1 | 0 | 37  | 51 | 73  | 164 |
| 62,370 | 3  | 12 | 33  | 100 | 1 | 0 | 37  | 52 | 74  | 164 |
| 62,371 | 3  | 12 | 34  | 102 | 1 | 0 | 37  | 53 | 75  | 167 |
| 62,372 | 3  | 12 | 34  | 101 | 1 | 0 | 37  | 56 | 75  | 169 |
| 62,373 | 3  | 10 | 34  | 87  | 1 | 0 | 37  | 55 | 75  | 152 |
| 62,374 | 3  | 10 | 34  | 89  | 1 | 0 | 37  | 55 | 75  | 154 |
| 62,375 | 3  | 10 | 34  | 89  | 1 | 0 | 37  | 55 | 75  | 154 |
| 62,376 | 3  | 10 | 34  | 89  | 1 | 0 | 37  | 59 | 75  | 158 |
| 62,377 | 3  | 11 | 34  | 92  | 1 | 0 | 37  | 60 | 75  | 163 |
| 62,378 | 3  | 11 | 34  | 91  | 1 | 0 | 37  | 61 | 75  | 163 |
| 62,379 | 3  | 11 | 37  | 91  | 1 | 0 | 37  | 61 | 78  | 163 |
| 62,380 | 4  | 11 | 37  | 83  | 1 | 0 | 37  | 59 | 79  | 153 |
| 62,381 | 4  | 8  | 37  | 74  | 1 | 0 | 37  | 46 | 79  | 128 |
| 62,382 | 4  | 8  | 37  | 74  | 1 | 0 | 37  | 46 | 79  | 128 |
| 62,383 | 5  | 7  | 53  | 69  | 1 | 0 | 44  | 39 | 103 | 115 |
| 62,384 | 6  | 6  | 57  | 69  | 1 | 0 | 45  | 39 | 109 | 114 |
| 62,385 | 6  | 6  | 58  | 69  | 1 | 0 | 46  | 39 | 111 | 114 |
| 62,386 | 6  | 6  | 58  | 68  | 1 | 0 | 46  | 39 | 111 | 113 |
| 62,387 | 6  | 5  | 58  | 68  | 1 | 0 | 46  | 39 | 111 | 112 |
| 62,388 | 6  | 5  | 59  | 67  | 1 | 0 | 47  | 39 | 113 | 111 |
| 62,389 | 6  | 5  | 60  | 67  | 1 | 0 | 47  | 39 | 114 | 111 |
| 62,390 | 14 | 5  | 154 | 67  | 4 | 0 | 134 | 39 | 306 | 111 |

|        |    |    |     |     |    |   |     |     |     |     |
|--------|----|----|-----|-----|----|---|-----|-----|-----|-----|
| 62,391 | 14 | 5  | 155 | 67  | 4  | 0 | 134 | 39  | 307 | 111 |
| 62,392 | 15 | 5  | 160 | 67  | 5  | 0 | 136 | 38  | 316 | 110 |
| 62,393 | 15 | 5  | 160 | 67  | 5  | 0 | 136 | 38  | 316 | 110 |
| 62,394 | 15 | 5  | 166 | 56  | 5  | 0 | 151 | 32  | 337 | 93  |
| 62,395 | 15 | 5  | 166 | 52  | 5  | 1 | 150 | 26  | 336 | 84  |
| 62,396 | 15 | 5  | 166 | 52  | 5  | 1 | 150 | 26  | 336 | 84  |
| 62,397 | 16 | 5  | 165 | 52  | 5  | 1 | 151 | 26  | 337 | 84  |
| 62,398 | 17 | 6  | 165 | 52  | 5  | 1 | 151 | 26  | 338 | 85  |
| 62,399 | 16 | 5  | 164 | 46  | 5  | 1 | 148 | 26  | 333 | 78  |
| 62,400 | 16 | 3  | 168 | 42  | 5  | 1 | 147 | 25  | 336 | 71  |
| 62,401 | 16 | 3  | 168 | 42  | 5  | 1 | 146 | 25  | 335 | 71  |
| 62,402 | 16 | 3  | 171 | 42  | 5  | 1 | 145 | 25  | 337 | 71  |
| 62,403 | 18 | 3  | 181 | 33  | 6  | 1 | 144 | 22  | 349 | 59  |
| 62,404 | 19 | 3  | 194 | 33  | 7  | 1 | 152 | 22  | 372 | 59  |
| 62,405 | 19 | 3  | 200 | 32  | 7  | 1 | 152 | 22  | 378 | 58  |
| 62,406 | 23 | 3  | 226 | 33  | 9  | 1 | 166 | 23  | 424 | 60  |
| 62,407 | 23 | 3  | 226 | 35  | 9  | 1 | 166 | 24  | 424 | 63  |
| 62,408 | 25 | 5  | 246 | 42  | 10 | 1 | 175 | 34  | 456 | 82  |
| 62,409 | 27 | 7  | 278 | 49  | 11 | 2 | 186 | 36  | 502 | 94  |
| 62,410 | 27 | 7  | 288 | 48  | 11 | 2 | 188 | 36  | 514 | 93  |
| 62,411 | 29 | 7  | 330 | 59  | 13 | 2 | 192 | 39  | 564 | 107 |
| 62,412 | 29 | 7  | 347 | 66  | 13 | 2 | 196 | 39  | 585 | 114 |
| 62,413 | 29 | 9  | 345 | 87  | 12 | 2 | 186 | 55  | 572 | 153 |
| 62,414 | 29 | 9  | 345 | 134 | 12 | 2 | 186 | 80  | 572 | 225 |
| 62,415 | 29 | 8  | 345 | 134 | 12 | 2 | 186 | 79  | 572 | 223 |
| 62,416 | 29 | 9  | 348 | 178 | 12 | 2 | 188 | 103 | 577 | 292 |
| 62,417 | 28 | 9  | 348 | 192 | 12 | 3 | 188 | 105 | 576 | 309 |
| 62,418 | 30 | 9  | 352 | 193 | 12 | 3 | 190 | 103 | 584 | 308 |
| 62,419 | 30 | 9  | 351 | 191 | 12 | 3 | 191 | 100 | 584 | 303 |
| 62,420 | 30 | 11 | 351 | 189 | 12 | 3 | 191 | 106 | 584 | 309 |
| 62,421 | 30 | 11 | 350 | 189 | 12 | 3 | 191 | 107 | 583 | 310 |
| 62,422 | 30 | 12 | 360 | 233 | 13 | 3 | 193 | 140 | 596 | 388 |
| 62,423 | 30 | 12 | 361 | 238 | 13 | 3 | 193 | 138 | 597 | 391 |
| 62,424 | 30 | 12 | 368 | 244 | 14 | 3 | 193 | 144 | 605 | 403 |
| 62,425 | 30 | 12 | 375 | 242 | 14 | 3 | 197 | 146 | 616 | 403 |
| 62,426 | 30 | 12 | 375 | 241 | 14 | 3 | 197 | 142 | 616 | 398 |
| 62,427 | 30 | 11 | 375 | 241 | 14 | 3 | 197 | 143 | 616 | 398 |
| 62,428 | 30 | 11 | 374 | 242 | 14 | 3 | 197 | 143 | 615 | 399 |
| 62,429 | 31 | 11 | 375 | 242 | 15 | 3 | 197 | 142 | 618 | 398 |
| 62,430 | 31 | 11 | 379 | 242 | 16 | 4 | 206 | 142 | 632 | 399 |
| 62,431 | 30 | 11 | 381 | 242 | 16 | 4 | 207 | 142 | 634 | 399 |

|        |    |    |     |     |    |   |     |     |     |     |
|--------|----|----|-----|-----|----|---|-----|-----|-----|-----|
| 62,432 | 30 | 11 | 381 | 242 | 16 | 4 | 207 | 142 | 634 | 399 |
| 62,433 | 29 | 11 | 365 | 242 | 16 | 4 | 200 | 142 | 610 | 399 |
| 62,434 | 28 | 11 | 363 | 242 | 16 | 4 | 199 | 142 | 606 | 399 |
| 62,435 | 29 | 11 | 364 | 242 | 16 | 4 | 205 | 142 | 614 | 399 |
| 62,436 | 31 | 11 | 368 | 242 | 16 | 4 | 209 | 142 | 624 | 399 |
| 62,437 | 32 | 11 | 378 | 242 | 17 | 4 | 216 | 142 | 643 | 399 |
| 62,438 | 34 | 12 | 399 | 242 | 18 | 4 | 248 | 142 | 699 | 400 |
| 62,439 | 34 | 12 | 401 | 242 | 18 | 4 | 251 | 145 | 704 | 403 |
| 62,440 | 25 | 12 | 322 | 242 | 16 | 4 | 171 | 145 | 534 | 403 |
| 62,441 | 25 | 12 | 324 | 241 | 16 | 4 | 170 | 145 | 535 | 402 |
| 62,442 | 25 | 12 | 327 | 241 | 16 | 4 | 169 | 145 | 537 | 402 |
| 62,443 | 26 | 12 | 332 | 240 | 15 | 4 | 173 | 145 | 546 | 401 |
| 62,444 | 26 | 12 | 324 | 240 | 15 | 4 | 157 | 145 | 522 | 401 |
| 62,445 | 26 | 12 | 328 | 241 | 15 | 4 | 157 | 145 | 526 | 402 |
| 62,446 | 28 | 12 | 345 | 241 | 15 | 3 | 173 | 145 | 561 | 401 |
| 62,447 | 28 | 12 | 345 | 242 | 15 | 3 | 173 | 145 | 561 | 402 |
| 62,448 | 27 | 12 | 345 | 242 | 15 | 3 | 172 | 145 | 559 | 402 |
| 62,449 | 26 | 11 | 344 | 242 | 15 | 3 | 172 | 146 | 557 | 402 |
| 62,450 | 26 | 11 | 343 | 244 | 15 | 3 | 172 | 146 | 556 | 404 |
| 62,451 | 26 | 11 | 347 | 246 | 16 | 3 | 178 | 146 | 567 | 406 |
| 62,452 | 28 | 11 | 382 | 246 | 18 | 3 | 195 | 146 | 623 | 406 |
| 62,453 | 29 | 11 | 379 | 247 | 18 | 3 | 192 | 146 | 618 | 407 |
| 62,454 | 27 | 11 | 361 | 247 | 17 | 3 | 184 | 146 | 589 | 407 |
| 62,455 | 26 | 11 | 347 | 247 | 16 | 3 | 180 | 146 | 569 | 407 |
| 62,456 | 26 | 11 | 341 | 247 | 16 | 3 | 180 | 148 | 563 | 409 |
| 62,457 | 22 | 9  | 317 | 241 | 14 | 7 | 166 | 145 | 519 | 402 |
| 62,458 | 21 | 9  | 311 | 243 | 14 | 7 | 163 | 150 | 509 | 409 |
| 62,459 | 20 | 9  | 299 | 243 | 13 | 7 | 157 | 150 | 489 | 409 |
| 62,460 | 18 | 7  | 273 | 237 | 12 | 6 | 148 | 148 | 451 | 398 |
| 62,461 | 18 | 8  | 262 | 253 | 12 | 6 | 146 | 157 | 438 | 424 |
| 62,462 | 16 | 8  | 219 | 249 | 10 | 6 | 142 | 155 | 387 | 418 |
| 62,463 | 15 | 8  | 202 | 239 | 10 | 6 | 136 | 155 | 363 | 408 |
| 62,464 | 15 | 6  | 201 | 222 | 10 | 6 | 136 | 138 | 362 | 372 |
| 62,465 | 15 | 6  | 201 | 175 | 10 | 6 | 136 | 113 | 362 | 300 |
| 62,466 | 15 | 5  | 202 | 127 | 10 | 6 | 137 | 88  | 364 | 226 |
| 62,467 | 16 | 5  | 212 | 111 | 10 | 5 | 145 | 85  | 383 | 206 |
| 62,468 | 17 | 5  | 215 | 111 | 10 | 5 | 145 | 85  | 387 | 206 |
| 62,469 | 15 | 5  | 230 | 108 | 11 | 5 | 147 | 85  | 403 | 203 |
| 62,470 | 15 | 5  | 230 | 108 | 11 | 5 | 146 | 85  | 402 | 203 |
| 62,471 | 15 | 3  | 273 | 107 | 15 | 5 | 163 | 80  | 466 | 195 |
| 62,472 | 21 | 3  | 381 | 107 | 17 | 5 | 229 | 77  | 648 | 192 |

|        |    |   |     |     |    |    |     |     |       |     |
|--------|----|---|-----|-----|----|----|-----|-----|-------|-----|
| 62,473 | 26 | 2 | 421 | 54  | 18 | 5  | 240 | 42  | 705   | 103 |
| 62,474 | 26 | 2 | 429 | 55  | 18 | 5  | 245 | 42  | 718   | 104 |
| 62,475 | 26 | 2 | 431 | 50  | 17 | 5  | 244 | 37  | 718   | 94  |
| 62,476 | 26 | 2 | 424 | 49  | 17 | 5  | 240 | 35  | 707   | 91  |
| 62,477 | 26 | 3 | 443 | 52  | 19 | 5  | 263 | 37  | 751   | 97  |
| 62,478 | 27 | 3 | 451 | 50  | 19 | 5  | 268 | 35  | 765   | 93  |
| 62,479 | 26 | 3 | 448 | 49  | 18 | 5  | 269 | 35  | 761   | 92  |
| 62,480 | 27 | 3 | 450 | 50  | 18 | 4  | 267 | 35  | 762   | 92  |
| 62,481 | 27 | 3 | 449 | 50  | 18 | 4  | 267 | 35  | 761   | 92  |
| 62,482 | 30 | 3 | 451 | 53  | 18 | 4  | 268 | 35  | 767   | 95  |
| 62,483 | 31 | 3 | 458 | 55  | 19 | 4  | 269 | 35  | 777   | 97  |
| 62,484 | 43 | 3 | 547 | 60  | 25 | 4  | 389 | 38  | 1,004 | 105 |
| 62,485 | 43 | 3 | 555 | 90  | 25 | 4  | 396 | 46  | 1,019 | 143 |
| 62,486 | 49 | 3 | 633 | 93  | 31 | 4  | 530 | 47  | 1,243 | 147 |
| 62,487 | 47 | 3 | 631 | 106 | 31 | 5  | 527 | 59  | 1,236 | 173 |
| 62,488 | 46 | 3 | 622 | 112 | 31 | 5  | 518 | 65  | 1,217 | 185 |
| 62,489 | 44 | 2 | 602 | 112 | 30 | 5  | 486 | 62  | 1,162 | 181 |
| 62,490 | 44 | 3 | 602 | 115 | 30 | 5  | 485 | 65  | 1,161 | 188 |
| 62,491 | 44 | 4 | 587 | 124 | 29 | 5  | 481 | 72  | 1,141 | 205 |
| 62,492 | 44 | 5 | 585 | 131 | 29 | 6  | 481 | 79  | 1,139 | 221 |
| 62,493 | 44 | 5 | 582 | 131 | 29 | 6  | 481 | 80  | 1,136 | 222 |
| 62,494 | 43 | 5 | 572 | 130 | 29 | 6  | 476 | 80  | 1,120 | 221 |
| 62,495 | 43 | 5 | 569 | 136 | 29 | 6  | 478 | 80  | 1,119 | 227 |
| 62,496 | 41 | 5 | 549 | 136 | 29 | 6  | 463 | 80  | 1,082 | 227 |
| 62,497 | 41 | 5 | 551 | 137 | 29 | 6  | 463 | 80  | 1,084 | 228 |
| 62,498 | 41 | 5 | 550 | 137 | 29 | 6  | 464 | 80  | 1,084 | 228 |
| 62,499 | 41 | 5 | 552 | 138 | 29 | 6  | 464 | 81  | 1,086 | 230 |
| 62,500 | 41 | 5 | 552 | 145 | 29 | 8  | 464 | 83  | 1,086 | 241 |
| 62,501 | 42 | 5 | 551 | 148 | 28 | 9  | 461 | 90  | 1,082 | 252 |
| 62,502 | 42 | 5 | 543 | 146 | 28 | 10 | 459 | 90  | 1,072 | 251 |
| 62,503 | 40 | 5 | 509 | 146 | 26 | 10 | 441 | 90  | 1,016 | 251 |
| 62,504 | 39 | 5 | 507 | 147 | 26 | 10 | 441 | 90  | 1,013 | 252 |
| 62,505 | 39 | 5 | 507 | 147 | 27 | 10 | 439 | 93  | 1,012 | 255 |
| 62,506 | 39 | 6 | 507 | 162 | 27 | 10 | 438 | 117 | 1,011 | 295 |
| 62,507 | 39 | 6 | 507 | 164 | 27 | 10 | 438 | 115 | 1,011 | 295 |
| 62,508 | 41 | 8 | 509 | 160 | 28 | 6  | 442 | 108 | 1,020 | 282 |
| 62,509 | 41 | 8 | 511 | 158 | 30 | 6  | 444 | 103 | 1,026 | 275 |
| 62,510 | 41 | 8 | 511 | 160 | 30 | 6  | 444 | 103 | 1,026 | 277 |
| 62,511 | 42 | 8 | 506 | 162 | 31 | 6  | 446 | 103 | 1,025 | 279 |
| 62,512 | 42 | 7 | 504 | 146 | 31 | 6  | 445 | 94  | 1,022 | 253 |
| 62,513 | 42 | 8 | 504 | 138 | 31 | 6  | 445 | 92  | 1,022 | 244 |

|        |    |   |     |     |    |   |     |     |       |     |
|--------|----|---|-----|-----|----|---|-----|-----|-------|-----|
| 62,514 | 42 | 8 | 503 | 139 | 31 | 6 | 446 | 92  | 1,022 | 245 |
| 62,515 | 42 | 8 | 502 | 135 | 31 | 6 | 446 | 92  | 1,021 | 241 |
| 62,516 | 42 | 8 | 502 | 135 | 31 | 6 | 447 | 92  | 1,022 | 241 |
| 62,517 | 42 | 8 | 501 | 135 | 31 | 6 | 448 | 92  | 1,022 | 241 |
| 62,518 | 41 | 8 | 489 | 135 | 31 | 6 | 440 | 92  | 1,001 | 241 |
| 62,519 | 40 | 8 | 488 | 135 | 31 | 6 | 440 | 94  | 999   | 243 |
| 62,520 | 40 | 8 | 469 | 136 | 30 | 6 | 436 | 95  | 975   | 245 |
| 62,521 | 40 | 8 | 446 | 136 | 29 | 6 | 423 | 95  | 938   | 245 |
| 62,522 | 40 | 8 | 427 | 139 | 26 | 6 | 418 | 98  | 911   | 251 |
| 62,523 | 34 | 8 | 317 | 145 | 24 | 6 | 352 | 106 | 727   | 265 |
| 62,524 | 29 | 8 | 267 | 149 | 22 | 6 | 337 | 107 | 655   | 270 |
| 62,525 | 29 | 8 | 259 | 149 | 22 | 6 | 332 | 107 | 642   | 270 |
| 62,526 | 29 | 8 | 250 | 148 | 22 | 6 | 332 | 106 | 633   | 268 |
| 62,527 | 29 | 7 | 240 | 144 | 20 | 6 | 315 | 104 | 604   | 261 |
| 62,528 | 31 | 7 | 241 | 143 | 20 | 6 | 325 | 104 | 617   | 260 |
| 62,529 | 31 | 7 | 234 | 143 | 20 | 6 | 323 | 104 | 608   | 260 |
| 62,530 | 31 | 7 | 234 | 143 | 20 | 6 | 323 | 104 | 608   | 260 |
| 62,531 | 30 | 7 | 228 | 142 | 19 | 6 | 315 | 104 | 592   | 259 |
| 62,532 | 27 | 7 | 225 | 142 | 19 | 6 | 314 | 104 | 585   | 259 |
| 62,533 | 29 | 7 | 238 | 139 | 20 | 6 | 323 | 104 | 610   | 256 |
| 62,534 | 28 | 7 | 277 | 137 | 20 | 6 | 342 | 104 | 667   | 254 |
| 62,535 | 19 | 7 | 204 | 102 | 15 | 6 | 228 | 93  | 466   | 208 |
| 62,536 | 19 | 7 | 198 | 102 | 15 | 6 | 221 | 93  | 453   | 208 |
| 62,537 | 12 | 7 | 119 | 100 | 8  | 6 | 80  | 93  | 219   | 206 |
| 62,538 | 12 | 7 | 116 | 87  | 8  | 5 | 78  | 81  | 214   | 180 |
| 62,539 | 12 | 7 | 119 | 81  | 8  | 5 | 79  | 75  | 218   | 168 |
| 62,540 | 13 | 7 | 117 | 81  | 8  | 5 | 80  | 75  | 218   | 168 |
| 62,541 | 13 | 6 | 114 | 78  | 8  | 5 | 81  | 73  | 216   | 162 |
| 62,542 | 13 | 5 | 112 | 69  | 8  | 5 | 79  | 66  | 212   | 145 |
| 62,543 | 13 | 4 | 112 | 65  | 8  | 4 | 79  | 60  | 212   | 133 |
| 62,544 | 15 | 5 | 140 | 65  | 8  | 5 | 93  | 59  | 256   | 134 |
| 62,545 | 15 | 5 | 140 | 65  | 8  | 5 | 93  | 59  | 256   | 134 |
| 62,546 | 16 | 5 | 152 | 59  | 8  | 5 | 96  | 59  | 272   | 128 |
| 62,547 | 16 | 5 | 153 | 58  | 8  | 5 | 96  | 59  | 273   | 127 |
| 62,548 | 16 | 5 | 155 | 58  | 8  | 5 | 95  | 59  | 274   | 127 |
| 62,549 | 16 | 5 | 153 | 58  | 8  | 5 | 95  | 59  | 272   | 127 |
| 62,550 | 16 | 5 | 165 | 53  | 9  | 3 | 114 | 62  | 304   | 123 |
| 62,551 | 16 | 5 | 165 | 53  | 9  | 3 | 114 | 62  | 304   | 123 |
| 62,552 | 15 | 6 | 170 | 49  | 9  | 2 | 115 | 55  | 309   | 112 |
| 62,553 | 15 | 7 | 170 | 51  | 9  | 1 | 115 | 55  | 309   | 114 |
| 62,554 | 15 | 7 | 169 | 52  | 9  | 1 | 115 | 55  | 308   | 115 |

|        |     |   |       |     |     |   |       |    |       |     |
|--------|-----|---|-------|-----|-----|---|-------|----|-------|-----|
| 62,555 | 17  | 7 | 196   | 51  | 9   | 1 | 123   | 55 | 345   | 114 |
| 62,556 | 39  | 7 | 263   | 51  | 12  | 1 | 154   | 52 | 468   | 111 |
| 62,557 | 40  | 6 | 266   | 36  | 12  | 1 | 156   | 28 | 474   | 71  |
| 62,558 | 41  | 6 | 288   | 34  | 12  | 1 | 167   | 28 | 508   | 69  |
| 62,559 | 42  | 4 | 326   | 34  | 15  | 1 | 174   | 26 | 557   | 65  |
| 62,560 | 57  | 4 | 383   | 29  | 19  | 1 | 239   | 26 | 698   | 60  |
| 62,561 | 61  | 5 | 399   | 29  | 20  | 1 | 246   | 26 | 726   | 61  |
| 62,562 | 60  | 5 | 399   | 29  | 19  | 1 | 242   | 26 | 720   | 61  |
| 62,563 | 96  | 5 | 932   | 29  | 54  | 1 | 466   | 26 | 1,548 | 61  |
| 62,564 | 106 | 5 | 1,043 | 29  | 60  | 1 | 513   | 26 | 1,722 | 61  |
| 62,565 | 118 | 5 | 1,330 | 28  | 75  | 1 | 707   | 26 | 2,230 | 60  |
| 62,566 | 118 | 5 | 1,330 | 28  | 75  | 1 | 707   | 26 | 2,230 | 60  |
| 62,567 | 118 | 5 | 1,400 | 28  | 77  | 1 | 724   | 26 | 2,319 | 60  |
| 62,568 | 119 | 5 | 1,410 | 28  | 78  | 1 | 738   | 26 | 2,345 | 60  |
| 62,569 | 119 | 5 | 1,410 | 28  | 78  | 1 | 738   | 26 | 2,345 | 60  |
| 62,570 | 119 | 5 | 1,408 | 28  | 78  | 1 | 738   | 23 | 2,343 | 57  |
| 62,571 | 119 | 5 | 1,413 | 28  | 80  | 1 | 742   | 23 | 2,354 | 57  |
| 62,572 | 119 | 5 | 1,413 | 25  | 80  | 1 | 742   | 19 | 2,354 | 50  |
| 62,573 | 121 | 5 | 1,511 | 19  | 84  | 1 | 800   | 11 | 2,516 | 36  |
| 62,574 | 121 | 5 | 1,514 | 15  | 85  | 1 | 804   | 10 | 2,524 | 31  |
| 62,575 | 121 | 5 | 1,515 | 15  | 85  | 1 | 805   | 10 | 2,526 | 31  |
| 62,576 | 122 | 5 | 1,518 | 15  | 86  | 1 | 810   | 10 | 2,536 | 31  |
| 62,577 | 124 | 5 | 1,543 | 15  | 87  | 1 | 817   | 10 | 2,571 | 31  |
| 62,578 | 136 | 5 | 1,726 | 15  | 100 | 1 | 916   | 10 | 2,878 | 31  |
| 62,579 | 134 | 5 | 1,718 | 21  | 100 | 1 | 902   | 12 | 2,854 | 39  |
| 62,580 | 135 | 5 | 1,769 | 37  | 103 | 2 | 948   | 22 | 2,955 | 66  |
| 62,581 | 135 | 5 | 1,769 | 48  | 103 | 2 | 948   | 26 | 2,955 | 81  |
| 62,582 | 143 | 6 | 1,920 | 95  | 121 | 3 | 1,073 | 39 | 3,257 | 143 |
| 62,583 | 143 | 6 | 1,918 | 111 | 120 | 4 | 1,072 | 50 | 3,253 | 171 |
| 62,584 | 142 | 6 | 1,908 | 119 | 120 | 5 | 1,067 | 57 | 3,237 | 187 |
| 62,585 | 142 | 6 | 1,861 | 119 | 119 | 5 | 1,048 | 57 | 3,170 | 187 |
| 62,586 | 139 | 6 | 1,845 | 119 | 118 | 5 | 1,044 | 57 | 3,146 | 187 |
| 62,587 | 139 | 6 | 1,844 | 121 | 118 | 5 | 1,047 | 58 | 3,148 | 190 |
| 62,588 | 139 | 6 | 1,842 | 121 | 118 | 5 | 1,046 | 57 | 3,145 | 189 |
| 62,589 | 139 | 6 | 1,839 | 121 | 118 | 5 | 1,045 | 57 | 3,141 | 189 |
| 62,590 | 139 | 6 | 1,838 | 121 | 118 | 5 | 1,045 | 58 | 3,140 | 190 |
| 62,591 | 138 | 6 | 1,839 | 122 | 118 | 5 | 1,045 | 59 | 3,140 | 192 |
| 62,592 | 138 | 6 | 1,839 | 122 | 118 | 5 | 1,044 | 59 | 3,139 | 192 |
| 62,593 | 138 | 7 | 1,838 | 126 | 118 | 6 | 1,044 | 69 | 3,138 | 208 |
| 62,594 | 137 | 7 | 1,836 | 124 | 118 | 6 | 1,040 | 68 | 3,131 | 205 |
| 62,595 | 137 | 6 | 1,824 | 124 | 118 | 5 | 1,031 | 68 | 3,110 | 203 |

|        |     |   |       |     |     |    |       |     |       |     |
|--------|-----|---|-------|-----|-----|----|-------|-----|-------|-----|
| 62,596 | 139 | 6 | 1,865 | 124 | 120 | 5  | 1,062 | 69  | 3,186 | 204 |
| 62,597 | 139 | 6 | 1,880 | 126 | 120 | 5  | 1,066 | 69  | 3,205 | 206 |
| 62,598 | 140 | 6 | 1,905 | 126 | 121 | 5  | 1,081 | 69  | 3,247 | 206 |
| 62,599 | 143 | 6 | 1,932 | 125 | 121 | 5  | 1,091 | 69  | 3,287 | 205 |
| 62,600 | 144 | 6 | 1,922 | 127 | 120 | 5  | 1,077 | 69  | 3,263 | 207 |
| 62,601 | 145 | 7 | 1,924 | 125 | 120 | 5  | 1,079 | 62  | 3,268 | 199 |
| 62,602 | 149 | 6 | 1,960 | 124 | 122 | 5  | 1,093 | 62  | 3,324 | 197 |
| 62,603 | 149 | 5 | 1,968 | 122 | 123 | 5  | 1,094 | 62  | 3,334 | 194 |
| 62,604 | 147 | 5 | 1,945 | 120 | 123 | 5  | 1,088 | 62  | 3,303 | 192 |
| 62,605 | 147 | 5 | 1,949 | 120 | 123 | 5  | 1,091 | 62  | 3,310 | 192 |
| 62,606 | 126 | 5 | 1,882 | 120 | 119 | 5  | 1,059 | 62  | 3,186 | 192 |
| 62,607 | 125 | 5 | 1,879 | 120 | 119 | 5  | 1,056 | 62  | 3,179 | 192 |
| 62,608 | 124 | 5 | 1,857 | 120 | 119 | 5  | 1,045 | 62  | 3,145 | 192 |
| 62,609 | 125 | 5 | 1,851 | 121 | 117 | 5  | 1,042 | 62  | 3,135 | 193 |
| 62,610 | 125 | 5 | 1,845 | 124 | 116 | 5  | 1,055 | 65  | 3,141 | 199 |
| 62,611 | 110 | 5 | 1,793 | 125 | 110 | 6  | 987   | 67  | 3,000 | 203 |
| 62,612 | 106 | 5 | 1,783 | 144 | 111 | 8  | 983   | 77  | 2,983 | 234 |
| 62,613 | 84  | 6 | 1,423 | 152 | 90  | 10 | 840   | 89  | 2,437 | 257 |
| 62,614 | 71  | 5 | 1,253 | 153 | 76  | 10 | 757   | 89  | 2,157 | 257 |
| 62,615 | 68  | 5 | 1,208 | 153 | 74  | 10 | 770   | 89  | 2,120 | 257 |
| 62,616 | 56  | 5 | 924   | 154 | 60  | 10 | 576   | 89  | 1,616 | 258 |
| 62,617 | 59  | 5 | 906   | 154 | 61  | 10 | 614   | 89  | 1,640 | 258 |
| 62,618 | 59  | 5 | 887   | 154 | 60  | 10 | 606   | 89  | 1,612 | 258 |
| 62,619 | 58  | 5 | 876   | 154 | 61  | 10 | 595   | 89  | 1,590 | 258 |
| 62,620 | 62  | 5 | 919   | 154 | 64  | 10 | 623   | 89  | 1,668 | 258 |
| 62,621 | 62  | 5 | 929   | 153 | 64  | 10 | 628   | 89  | 1,683 | 257 |
| 62,622 | 62  | 5 | 928   | 153 | 62  | 10 | 627   | 89  | 1,679 | 257 |
| 62,623 | 62  | 5 | 927   | 153 | 62  | 10 | 627   | 89  | 1,678 | 257 |
| 62,624 | 60  | 5 | 829   | 153 | 58  | 10 | 567   | 90  | 1,514 | 258 |
| 62,625 | 60  | 5 | 826   | 152 | 57  | 10 | 563   | 91  | 1,506 | 258 |
| 62,626 | 60  | 5 | 825   | 156 | 57  | 10 | 563   | 92  | 1,505 | 263 |
| 62,627 | 60  | 5 | 822   | 161 | 56  | 10 | 558   | 98  | 1,496 | 274 |
| 62,628 | 59  | 7 | 797   | 161 | 55  | 10 | 551   | 100 | 1,462 | 278 |
| 62,629 | 47  | 7 | 614   | 162 | 42  | 10 | 450   | 100 | 1,153 | 279 |
| 62,630 | 46  | 7 | 577   | 140 | 40  | 9  | 406   | 88  | 1,069 | 244 |
| 62,631 | 45  | 7 | 565   | 140 | 39  | 9  | 398   | 88  | 1,047 | 244 |
| 62,632 | 36  | 6 | 416   | 82  | 21  | 8  | 276   | 71  | 749   | 167 |
| 62,633 | 36  | 6 | 414   | 82  | 21  | 8  | 275   | 71  | 746   | 167 |
| 62,634 | 36  | 6 | 416   | 58  | 21  | 6  | 275   | 53  | 748   | 123 |
| 62,635 | 36  | 6 | 416   | 58  | 21  | 6  | 275   | 53  | 748   | 123 |
| 62,636 | 36  | 6 | 416   | 58  | 21  | 6  | 275   | 53  | 748   | 123 |



|        |    |   |     |    |    |   |     |    |     |     |
|--------|----|---|-----|----|----|---|-----|----|-----|-----|
| 62,637 | 36 | 6 | 420 | 58 | 21 | 6 | 277 | 53 | 754 | 123 |
| 62,638 | 36 | 6 | 420 | 56 | 21 | 6 | 277 | 52 | 754 | 120 |
| 62,639 | 36 | 6 | 420 | 55 | 21 | 6 | 277 | 52 | 754 | 119 |
| 62,640 | 36 | 7 | 420 | 54 | 21 | 6 | 277 | 49 | 754 | 116 |
| 62,641 | 36 | 7 | 420 | 54 | 21 | 6 | 278 | 49 | 755 | 116 |
| 62,642 | 36 | 7 | 419 | 54 | 21 | 6 | 277 | 49 | 753 | 116 |
| 62,643 | 36 | 7 | 421 | 54 | 21 | 6 | 278 | 49 | 756 | 116 |
| 62,644 | 36 | 6 | 430 | 51 | 21 | 5 | 279 | 39 | 766 | 101 |
| 62,645 | 38 | 6 | 437 | 51 | 22 | 5 | 282 | 39 | 779 | 101 |
| 62,646 | 37 | 6 | 428 | 51 | 22 | 5 | 283 | 39 | 770 | 101 |
| 62,647 | 34 | 5 | 383 | 52 | 20 | 5 | 248 | 39 | 685 | 101 |
| 62,648 | 34 | 5 | 361 | 51 | 20 | 6 | 246 | 39 | 661 | 101 |
| 62,649 | 33 | 5 | 337 | 55 | 19 | 6 | 231 | 39 | 620 | 105 |
| 62,650 | 30 | 5 | 308 | 56 | 19 | 6 | 221 | 40 | 578 | 107 |
| 62,651 | 29 | 4 | 308 | 55 | 19 | 6 | 219 | 40 | 575 | 105 |
| 62,652 | 28 | 4 | 306 | 56 | 19 | 6 | 214 | 40 | 567 | 106 |
| 62,653 | 24 | 4 | 279 | 56 | 18 | 6 | 207 | 40 | 528 | 106 |
| 62,654 | 24 | 4 | 271 | 56 | 17 | 6 | 206 | 40 | 518 | 106 |
| 62,655 | 25 | 4 | 290 | 56 | 17 | 6 | 212 | 40 | 544 | 106 |
| 62,656 | 25 | 4 | 284 | 56 | 17 | 6 | 209 | 40 | 535 | 106 |
| 62,657 | 24 | 4 | 284 | 56 | 17 | 6 | 209 | 40 | 534 | 106 |
| 62,658 | 29 | 4 | 299 | 56 | 18 | 6 | 243 | 40 | 589 | 106 |
| 62,659 | 29 | 4 | 297 | 55 | 18 | 6 | 243 | 40 | 587 | 105 |
| 62,660 | 29 | 4 | 296 | 55 | 18 | 6 | 241 | 40 | 584 | 105 |
| 62,661 | 27 | 4 | 275 | 53 | 17 | 6 | 224 | 36 | 543 | 99  |
| 62,662 | 27 | 4 | 268 | 51 | 17 | 5 | 223 | 34 | 535 | 94  |
| 62,663 | 29 | 3 | 261 | 25 | 15 | 1 | 218 | 13 | 523 | 42  |
| 62,664 | 29 | 3 | 262 | 23 | 15 | 1 | 217 | 13 | 523 | 40  |
| 62,665 | 31 | 3 | 277 | 23 | 15 | 1 | 230 | 13 | 553 | 40  |
| 62,666 | 24 | 3 | 223 | 23 | 11 | 1 | 177 | 13 | 435 | 40  |
| 62,667 | 27 | 3 | 226 | 23 | 9  | 1 | 181 | 14 | 443 | 41  |
| 62,668 | 27 | 3 | 228 | 23 | 11 | 1 | 176 | 14 | 442 | 41  |
| 62,669 | 32 | 4 | 287 | 27 | 11 | 2 | 248 | 14 | 578 | 47  |
| 62,670 | 33 | 4 | 286 | 32 | 13 | 2 | 285 | 17 | 617 | 55  |
| 62,671 | 29 | 4 | 259 | 32 | 10 | 2 | 263 | 17 | 561 | 55  |
| 62,672 | 29 | 4 | 248 | 32 | 10 | 2 | 262 | 17 | 549 | 55  |
| 62,673 | 29 | 4 | 248 | 32 | 10 | 2 | 263 | 17 | 550 | 55  |
| 62,674 | 29 | 4 | 248 | 33 | 10 | 2 | 263 | 18 | 550 | 57  |
| 62,675 | 29 | 4 | 248 | 33 | 10 | 2 | 263 | 17 | 550 | 56  |
| 62,676 | 29 | 5 | 248 | 38 | 10 | 3 | 263 | 21 | 550 | 67  |
| 62,677 | 29 | 5 | 248 | 36 | 10 | 3 | 263 | 21 | 550 | 65  |

|        |    |    |     |     |    |   |     |    |     |     |
|--------|----|----|-----|-----|----|---|-----|----|-----|-----|
| 62,678 | 28 | 3  | 251 | 31  | 10 | 3 | 264 | 13 | 553 | 50  |
| 62,679 | 27 | 3  | 251 | 32  | 10 | 3 | 264 | 14 | 552 | 52  |
| 62,680 | 27 | 3  | 249 | 32  | 10 | 3 | 265 | 14 | 551 | 52  |
| 62,681 | 27 | 3  | 248 | 32  | 10 | 3 | 265 | 14 | 550 | 52  |
| 62,682 | 27 | 3  | 248 | 32  | 10 | 3 | 265 | 14 | 550 | 52  |
| 62,683 | 27 | 3  | 247 | 32  | 10 | 3 | 265 | 15 | 549 | 53  |
| 62,684 | 27 | 3  | 247 | 32  | 10 | 3 | 265 | 15 | 549 | 53  |
| 62,685 | 27 | 3  | 248 | 32  | 10 | 3 | 265 | 15 | 550 | 53  |
| 62,686 | 28 | 3  | 254 | 32  | 10 | 3 | 265 | 15 | 557 | 53  |
| 62,687 | 28 | 3  | 252 | 32  | 10 | 3 | 265 | 15 | 555 | 53  |
| 62,688 | 28 | 3  | 252 | 32  | 10 | 3 | 265 | 15 | 555 | 53  |
| 62,689 | 28 | 3  | 252 | 32  | 10 | 3 | 266 | 15 | 556 | 53  |
| 62,690 | 28 | 3  | 252 | 32  | 10 | 3 | 267 | 15 | 557 | 53  |
| 62,691 | 29 | 2  | 261 | 33  | 10 | 3 | 282 | 16 | 582 | 54  |
| 62,692 | 29 | 2  | 263 | 33  | 10 | 3 | 281 | 16 | 583 | 54  |
| 62,693 | 31 | 2  | 267 | 33  | 10 | 3 | 287 | 16 | 595 | 54  |
| 62,694 | 34 | 2  | 269 | 33  | 10 | 3 | 292 | 16 | 605 | 54  |
| 62,695 | 36 | 2  | 286 | 32  | 11 | 3 | 308 | 16 | 641 | 53  |
| 62,696 | 34 | 2  | 279 | 31  | 12 | 3 | 305 | 16 | 630 | 52  |
| 62,697 | 34 | 2  | 275 | 31  | 12 | 3 | 303 | 15 | 624 | 51  |
| 62,698 | 34 | 2  | 275 | 31  | 12 | 3 | 303 | 15 | 624 | 51  |
| 62,699 | 34 | 2  | 275 | 26  | 12 | 2 | 301 | 15 | 622 | 45  |
| 62,700 | 34 | 2  | 273 | 25  | 12 | 2 | 300 | 14 | 619 | 43  |
| 62,701 | 34 | 2  | 273 | 24  | 12 | 2 | 300 | 14 | 619 | 42  |
| 62,702 | 34 | 2  | 271 | 23  | 12 | 2 | 300 | 14 | 617 | 41  |
| 62,703 | 34 | 2  | 271 | 23  | 12 | 2 | 300 | 14 | 617 | 41  |
| 62,704 | 34 | 3  | 262 | 23  | 11 | 2 | 294 | 14 | 601 | 42  |
| 62,705 | 34 | 3  | 259 | 23  | 11 | 2 | 293 | 14 | 597 | 42  |
| 62,706 | 33 | 3  | 240 | 23  | 11 | 2 | 287 | 14 | 571 | 42  |
| 62,707 | 33 | 3  | 235 | 23  | 11 | 2 | 285 | 14 | 564 | 42  |
| 62,708 | 27 | 3  | 223 | 24  | 11 | 2 | 259 | 14 | 520 | 43  |
| 62,709 | 26 | 3  | 218 | 24  | 10 | 2 | 252 | 14 | 506 | 43  |
| 62,710 | 27 | 3  | 228 | 23  | 10 | 2 | 259 | 14 | 524 | 42  |
| 62,711 | 27 | 3  | 235 | 23  | 11 | 2 | 262 | 14 | 535 | 42  |
| 62,712 | 27 | 3  | 235 | 23  | 11 | 2 | 262 | 14 | 535 | 42  |
| 62,713 | 30 | 3  | 269 | 23  | 17 | 2 | 284 | 14 | 600 | 42  |
| 62,714 | 29 | 3  | 304 | 23  | 24 | 2 | 309 | 14 | 666 | 42  |
| 62,715 | 29 | 4  | 303 | 30  | 24 | 2 | 307 | 17 | 663 | 53  |
| 62,716 | 30 | 8  | 303 | 67  | 29 | 3 | 302 | 32 | 664 | 110 |
| 62,717 | 34 | 11 | 306 | 133 | 30 | 6 | 305 | 47 | 675 | 197 |
| 62,718 | 31 | 12 | 310 | 138 | 33 | 6 | 303 | 47 | 677 | 203 |

|        |    |    |     |     |    |   |     |    |       |     |
|--------|----|----|-----|-----|----|---|-----|----|-------|-----|
| 62,719 | 29 | 13 | 286 | 140 | 32 | 7 | 266 | 49 | 613   | 209 |
| 62,720 | 29 | 15 | 295 | 143 | 33 | 7 | 211 | 51 | 568   | 216 |
| 62,721 | 28 | 15 | 278 | 138 | 31 | 7 | 164 | 48 | 501   | 208 |
| 62,722 | 30 | 15 | 327 | 143 | 40 | 7 | 208 | 49 | 605   | 214 |
| 62,723 | 31 | 15 | 386 | 144 | 45 | 7 | 217 | 49 | 679   | 215 |
| 62,724 | 34 | 16 | 431 | 145 | 47 | 7 | 236 | 51 | 748   | 219 |
| 62,725 | 34 | 16 | 450 | 145 | 48 | 7 | 247 | 50 | 779   | 218 |
| 62,726 | 35 | 16 | 453 | 146 | 48 | 7 | 247 | 50 | 783   | 219 |
| 62,727 | 35 | 15 | 457 | 143 | 48 | 6 | 250 | 45 | 790   | 209 |
| 62,728 | 35 | 15 | 456 | 141 | 48 | 6 | 249 | 45 | 788   | 207 |
| 62,729 | 35 | 16 | 455 | 146 | 48 | 6 | 251 | 48 | 789   | 216 |
| 62,730 | 35 | 16 | 455 | 146 | 48 | 6 | 251 | 48 | 789   | 216 |
| 62,731 | 36 | 16 | 456 | 146 | 48 | 6 | 252 | 48 | 792   | 216 |
| 62,732 | 37 | 16 | 459 | 147 | 48 | 6 | 252 | 49 | 796   | 218 |
| 62,733 | 37 | 17 | 477 | 150 | 49 | 6 | 257 | 49 | 820   | 222 |
| 62,734 | 37 | 17 | 477 | 150 | 49 | 6 | 257 | 49 | 820   | 222 |
| 62,735 | 44 | 17 | 590 | 150 | 52 | 6 | 304 | 49 | 990   | 222 |
| 62,736 | 44 | 17 | 605 | 151 | 53 | 6 | 316 | 49 | 1,018 | 223 |
| 62,737 | 47 | 17 | 643 | 151 | 55 | 6 | 374 | 51 | 1,119 | 225 |
| 62,738 | 47 | 17 | 642 | 151 | 55 | 6 | 372 | 51 | 1,116 | 225 |
| 62,739 | 47 | 17 | 644 | 151 | 55 | 6 | 371 | 51 | 1,117 | 225 |
| 62,740 | 47 | 18 | 644 | 152 | 55 | 6 | 372 | 52 | 1,118 | 228 |
| 62,741 | 46 | 18 | 641 | 154 | 55 | 6 | 369 | 52 | 1,111 | 230 |
| 62,742 | 46 | 18 | 639 | 153 | 55 | 6 | 364 | 51 | 1,104 | 228 |
| 62,743 | 46 | 18 | 637 | 161 | 55 | 6 | 364 | 55 | 1,102 | 240 |
| 62,744 | 44 | 18 | 631 | 161 | 55 | 6 | 358 | 55 | 1,088 | 240 |
| 62,745 | 41 | 18 | 627 | 161 | 55 | 6 | 353 | 55 | 1,076 | 240 |
| 62,746 | 39 | 18 | 614 | 163 | 54 | 6 | 336 | 56 | 1,043 | 243 |
| 62,747 | 39 | 18 | 614 | 163 | 52 | 6 | 336 | 56 | 1,041 | 243 |
| 62,748 | 39 | 18 | 625 | 167 | 52 | 6 | 340 | 61 | 1,056 | 252 |
| 62,749 | 39 | 18 | 625 | 168 | 52 | 6 | 340 | 61 | 1,056 | 253 |
| 62,750 | 41 | 18 | 644 | 170 | 52 | 6 | 347 | 61 | 1,084 | 255 |
| 62,751 | 41 | 18 | 645 | 170 | 52 | 6 | 347 | 62 | 1,085 | 256 |
| 62,752 | 42 | 18 | 660 | 170 | 53 | 6 | 353 | 62 | 1,108 | 256 |
| 62,753 | 42 | 18 | 670 | 170 | 53 | 6 | 360 | 62 | 1,125 | 256 |
| 62,754 | 42 | 18 | 670 | 170 | 53 | 6 | 360 | 62 | 1,125 | 256 |
| 62,755 | 42 | 17 | 679 | 170 | 53 | 6 | 372 | 62 | 1,146 | 255 |
| 62,756 | 43 | 17 | 702 | 170 | 54 | 6 | 386 | 64 | 1,185 | 257 |
| 62,757 | 43 | 17 | 708 | 170 | 54 | 6 | 388 | 64 | 1,193 | 257 |
| 62,758 | 44 | 17 | 707 | 169 | 54 | 6 | 388 | 64 | 1,193 | 256 |
| 62,759 | 46 | 17 | 723 | 169 | 56 | 6 | 402 | 64 | 1,227 | 256 |

|        |    |    |     |     |    |   |     |    |       |     |
|--------|----|----|-----|-----|----|---|-----|----|-------|-----|
| 62,760 | 45 | 17 | 718 | 170 | 56 | 6 | 400 | 64 | 1,219 | 257 |
| 62,761 | 45 | 17 | 720 | 170 | 56 | 6 | 400 | 64 | 1,221 | 257 |
| 62,762 | 47 | 18 | 780 | 170 | 56 | 6 | 438 | 65 | 1,321 | 259 |
| 62,763 | 50 | 18 | 805 | 170 | 57 | 6 | 459 | 65 | 1,371 | 259 |
| 62,764 | 49 | 18 | 797 | 170 | 51 | 6 | 479 | 65 | 1,376 | 259 |
| 62,765 | 49 | 17 | 761 | 164 | 44 | 6 | 454 | 62 | 1,308 | 249 |
| 62,766 | 49 | 17 | 761 | 170 | 44 | 6 | 454 | 64 | 1,308 | 257 |
| 62,767 | 45 | 13 | 743 | 138 | 39 | 5 | 443 | 51 | 1,270 | 207 |
| 62,768 | 41 | 10 | 729 | 75  | 39 | 2 | 433 | 39 | 1,242 | 126 |
| 62,769 | 41 | 9  | 733 | 80  | 38 | 2 | 431 | 39 | 1,243 | 130 |
| 62,770 | 40 | 8  | 724 | 83  | 36 | 1 | 425 | 42 | 1,225 | 134 |
| 62,771 | 36 | 5  | 660 | 82  | 33 | 1 | 405 | 45 | 1,134 | 133 |
| 62,772 | 34 | 6  | 610 | 84  | 24 | 1 | 360 | 47 | 1,028 | 138 |
| 62,773 | 33 | 6  | 555 | 80  | 19 | 1 | 352 | 47 | 959   | 134 |
| 62,774 | 30 | 8  | 510 | 81  | 17 | 1 | 337 | 49 | 894   | 139 |
| 62,775 | 32 | 7  | 519 | 80  | 20 | 1 | 345 | 47 | 916   | 135 |
| 62,776 | 33 | 7  | 539 | 78  | 20 | 1 | 370 | 46 | 962   | 132 |
| 62,777 | 33 | 7  | 550 | 79  | 20 | 1 | 380 | 46 | 983   | 133 |
| 62,778 | 35 | 7  | 586 | 79  | 24 | 1 | 409 | 46 | 1,054 | 133 |
| 62,779 | 40 | 6  | 604 | 73  | 24 | 1 | 428 | 42 | 1,096 | 122 |
| 62,780 | 40 | 6  | 604 | 73  | 24 | 1 | 428 | 42 | 1,096 | 122 |
| 62,781 | 43 | 6  | 639 | 73  | 28 | 1 | 469 | 42 | 1,179 | 122 |
| 62,782 | 43 | 6  | 645 | 72  | 28 | 1 | 471 | 42 | 1,187 | 121 |
| 62,783 | 44 | 6  | 659 | 71  | 30 | 1 | 483 | 42 | 1,216 | 120 |
| 62,784 | 64 | 5  | 772 | 68  | 38 | 1 | 537 | 41 | 1,411 | 115 |
| 62,785 | 71 | 5  | 697 | 69  | 35 | 1 | 520 | 40 | 1,323 | 115 |
| 62,786 | 72 | 5  | 700 | 78  | 34 | 1 | 516 | 42 | 1,322 | 126 |
| 62,787 | 68 | 5  | 659 | 77  | 33 | 1 | 460 | 41 | 1,220 | 124 |
| 62,788 | 68 | 5  | 656 | 78  | 32 | 1 | 461 | 45 | 1,217 | 129 |
| 62,789 | 69 | 5  | 656 | 78  | 32 | 1 | 461 | 45 | 1,218 | 129 |
| 62,790 | 69 | 4  | 654 | 77  | 32 | 1 | 461 | 44 | 1,216 | 126 |
| 62,791 | 69 | 6  | 654 | 79  | 32 | 1 | 460 | 48 | 1,215 | 134 |
| 62,792 | 69 | 6  | 653 | 77  | 32 | 1 | 454 | 48 | 1,208 | 132 |
| 62,793 | 69 | 6  | 651 | 77  | 32 | 1 | 453 | 48 | 1,205 | 132 |
| 62,794 | 69 | 6  | 651 | 69  | 32 | 1 | 453 | 44 | 1,205 | 120 |
| 62,795 | 69 | 6  | 652 | 69  | 32 | 1 | 453 | 44 | 1,206 | 120 |
| 62,796 | 69 | 6  | 655 | 69  | 32 | 1 | 456 | 44 | 1,212 | 120 |
| 62,797 | 69 | 6  | 644 | 67  | 32 | 1 | 460 | 44 | 1,205 | 118 |
| 62,798 | 69 | 6  | 634 | 62  | 32 | 1 | 460 | 39 | 1,195 | 108 |
| 62,799 | 69 | 6  | 632 | 62  | 32 | 1 | 460 | 39 | 1,193 | 108 |
| 62,800 | 69 | 6  | 614 | 59  | 32 | 1 | 455 | 40 | 1,170 | 106 |

|        |    |    |     |     |    |    |     |     |       |     |
|--------|----|----|-----|-----|----|----|-----|-----|-------|-----|
| 62,801 | 69 | 6  | 612 | 59  | 32 | 1  | 455 | 39  | 1,168 | 105 |
| 62,802 | 69 | 6  | 614 | 59  | 32 | 1  | 455 | 39  | 1,170 | 105 |
| 62,803 | 68 | 6  | 598 | 60  | 31 | 1  | 449 | 39  | 1,146 | 106 |
| 62,804 | 68 | 6  | 590 | 60  | 31 | 1  | 442 | 39  | 1,131 | 106 |
| 62,805 | 68 | 6  | 586 | 60  | 31 | 1  | 432 | 39  | 1,117 | 106 |
| 62,806 | 68 | 6  | 589 | 60  | 31 | 1  | 431 | 37  | 1,119 | 104 |
| 62,807 | 67 | 6  | 580 | 61  | 30 | 1  | 422 | 40  | 1,099 | 108 |
| 62,808 | 68 | 8  | 581 | 74  | 30 | 1  | 430 | 45  | 1,109 | 128 |
| 62,809 | 67 | 8  | 581 | 86  | 30 | 1  | 428 | 50  | 1,106 | 145 |
| 62,810 | 65 | 9  | 568 | 89  | 28 | 1  | 414 | 52  | 1,075 | 151 |
| 62,811 | 65 | 9  | 578 | 89  | 28 | 1  | 417 | 52  | 1,088 | 151 |
| 62,812 | 65 | 9  | 571 | 89  | 28 | 1  | 413 | 52  | 1,077 | 151 |
| 62,813 | 63 | 9  | 504 | 89  | 27 | 1  | 372 | 52  | 966   | 151 |
| 62,814 | 60 | 9  | 479 | 89  | 26 | 1  | 351 | 52  | 916   | 151 |
| 62,815 | 58 | 10 | 453 | 94  | 26 | 1  | 309 | 56  | 846   | 161 |
| 62,816 | 57 | 11 | 453 | 93  | 26 | 1  | 309 | 56  | 845   | 161 |
| 62,817 | 59 | 11 | 469 | 87  | 26 | 1  | 317 | 54  | 871   | 153 |
| 62,818 | 59 | 11 | 474 | 78  | 26 | 1  | 317 | 49  | 876   | 139 |
| 62,819 | 59 | 12 | 473 | 80  | 25 | 1  | 317 | 49  | 874   | 142 |
| 62,820 | 59 | 12 | 458 | 70  | 23 | 1  | 313 | 47  | 853   | 130 |
| 62,821 | 59 | 12 | 463 | 66  | 23 | 1  | 316 | 43  | 861   | 122 |
| 62,822 | 58 | 11 | 461 | 59  | 23 | 0  | 317 | 36  | 859   | 106 |
| 62,823 | 58 | 11 | 461 | 60  | 23 | 0  | 317 | 36  | 859   | 107 |
| 62,824 | 58 | 11 | 458 | 62  | 23 | 0  | 314 | 37  | 853   | 110 |
| 62,825 | 58 | 9  | 458 | 62  | 23 | 0  | 312 | 35  | 851   | 106 |
| 62,826 | 56 | 9  | 439 | 69  | 20 | 1  | 293 | 39  | 808   | 118 |
| 62,827 | 57 | 9  | 430 | 71  | 19 | 1  | 269 | 40  | 775   | 121 |
| 62,828 | 56 | 9  | 420 | 73  | 19 | 1  | 261 | 40  | 756   | 123 |
| 62,829 | 54 | 9  | 385 | 75  | 15 | 3  | 229 | 43  | 683   | 130 |
| 62,830 | 52 | 9  | 374 | 75  | 15 | 3  | 211 | 44  | 652   | 131 |
| 62,831 | 48 | 10 | 350 | 89  | 11 | 4  | 169 | 56  | 578   | 159 |
| 62,832 | 51 | 15 | 424 | 100 | 13 | 5  | 180 | 71  | 668   | 191 |
| 62,833 | 50 | 15 | 412 | 103 | 11 | 5  | 168 | 73  | 641   | 196 |
| 62,834 | 30 | 16 | 286 | 116 | 2  | 8  | 108 | 85  | 426   | 225 |
| 62,835 | 30 | 16 | 277 | 116 | 2  | 8  | 105 | 85  | 414   | 225 |
| 62,836 | 43 | 20 | 553 | 160 | 36 | 10 | 351 | 105 | 983   | 295 |
| 62,837 | 42 | 20 | 531 | 151 | 36 | 10 | 343 | 103 | 952   | 284 |
| 62,838 | 42 | 20 | 535 | 151 | 36 | 10 | 349 | 102 | 962   | 283 |
| 62,839 | 42 | 22 | 537 | 153 | 36 | 10 | 352 | 98  | 967   | 283 |
| 62,840 | 41 | 22 | 537 | 154 | 36 | 10 | 352 | 98  | 966   | 284 |
| 62,841 | 41 | 20 | 542 | 157 | 37 | 10 | 357 | 94  | 977   | 281 |

|        |    |    |     |     |    |    |     |     |       |     |
|--------|----|----|-----|-----|----|----|-----|-----|-------|-----|
| 62,842 | 41 | 20 | 542 | 157 | 37 | 10 | 357 | 94  | 977   | 281 |
| 62,843 | 41 | 20 | 542 | 157 | 37 | 10 | 357 | 94  | 977   | 281 |
| 62,844 | 42 | 20 | 546 | 158 | 37 | 10 | 361 | 95  | 986   | 283 |
| 62,845 | 42 | 22 | 550 | 163 | 38 | 10 | 363 | 96  | 993   | 291 |
| 62,846 | 42 | 22 | 555 | 164 | 38 | 10 | 364 | 98  | 999   | 294 |
| 62,847 | 42 | 22 | 553 | 164 | 38 | 10 | 363 | 98  | 996   | 294 |
| 62,848 | 42 | 22 | 553 | 164 | 38 | 10 | 357 | 98  | 990   | 294 |
| 62,849 | 46 | 22 | 682 | 164 | 44 | 10 | 381 | 98  | 1,153 | 294 |
| 62,850 | 45 | 22 | 761 | 164 | 48 | 10 | 423 | 97  | 1,277 | 293 |
| 62,851 | 49 | 22 | 787 | 164 | 49 | 10 | 458 | 97  | 1,343 | 293 |
| 62,852 | 49 | 22 | 787 | 164 | 49 | 10 | 458 | 97  | 1,343 | 293 |
| 62,853 | 49 | 22 | 784 | 166 | 49 | 10 | 458 | 97  | 1,340 | 295 |
| 62,854 | 49 | 22 | 791 | 165 | 49 | 10 | 460 | 99  | 1,349 | 296 |
| 62,855 | 49 | 22 | 795 | 166 | 49 | 10 | 461 | 99  | 1,354 | 297 |
| 62,856 | 49 | 22 | 791 | 172 | 50 | 11 | 459 | 104 | 1,349 | 309 |
| 62,857 | 49 | 20 | 782 | 160 | 50 | 11 | 458 | 96  | 1,339 | 287 |
| 62,858 | 50 | 20 | 777 | 180 | 50 | 11 | 457 | 103 | 1,334 | 314 |
| 62,859 | 49 | 20 | 771 | 184 | 50 | 11 | 448 | 107 | 1,318 | 322 |
| 62,860 | 49 | 20 | 771 | 178 | 50 | 12 | 448 | 104 | 1,318 | 314 |
| 62,861 | 49 | 19 | 768 | 175 | 50 | 12 | 447 | 102 | 1,314 | 308 |
| 62,862 | 49 | 18 | 762 | 175 | 51 | 12 | 449 | 102 | 1,311 | 307 |
| 62,863 | 49 | 18 | 762 | 178 | 51 | 12 | 449 | 103 | 1,311 | 311 |
| 62,864 | 48 | 18 | 755 | 180 | 51 | 12 | 445 | 104 | 1,299 | 314 |
| 62,865 | 48 | 17 | 753 | 177 | 51 | 12 | 445 | 103 | 1,297 | 309 |
| 62,866 | 48 | 17 | 753 | 183 | 51 | 12 | 446 | 117 | 1,298 | 329 |
| 62,867 | 47 | 16 | 747 | 185 | 51 | 12 | 444 | 117 | 1,289 | 330 |
| 62,868 | 47 | 16 | 746 | 185 | 51 | 12 | 444 | 117 | 1,288 | 330 |
| 62,869 | 47 | 16 | 741 | 188 | 51 | 12 | 444 | 117 | 1,283 | 333 |
| 62,870 | 47 | 15 | 737 | 188 | 51 | 12 | 441 | 117 | 1,276 | 332 |
| 62,871 | 47 | 15 | 737 | 188 | 51 | 12 | 441 | 117 | 1,276 | 332 |
| 62,872 | 47 | 15 | 738 | 187 | 52 | 12 | 442 | 118 | 1,279 | 332 |
| 62,873 | 47 | 15 | 746 | 194 | 52 | 12 | 445 | 122 | 1,290 | 343 |
| 62,874 | 47 | 15 | 747 | 232 | 52 | 12 | 448 | 129 | 1,294 | 388 |
| 62,875 | 47 | 15 | 753 | 230 | 52 | 12 | 448 | 131 | 1,300 | 388 |
| 62,876 | 47 | 15 | 755 | 230 | 52 | 12 | 449 | 132 | 1,303 | 389 |
| 62,877 | 49 | 15 | 779 | 222 | 57 | 11 | 460 | 128 | 1,345 | 376 |
| 62,878 | 48 | 15 | 760 | 216 | 57 | 11 | 457 | 127 | 1,322 | 369 |
| 62,879 | 48 | 15 | 755 | 214 | 57 | 9  | 457 | 124 | 1,317 | 362 |
| 62,880 | 48 | 16 | 751 | 214 | 57 | 9  | 457 | 124 | 1,313 | 363 |
| 62,881 | 46 | 16 | 748 | 214 | 58 | 9  | 461 | 123 | 1,313 | 362 |
| 62,882 | 47 | 15 | 767 | 200 | 59 | 8  | 463 | 111 | 1,336 | 334 |

|        |    |    |     |     |    |   |     |    |       |     |
|--------|----|----|-----|-----|----|---|-----|----|-------|-----|
| 62,883 | 47 | 10 | 738 | 187 | 60 | 7 | 481 | 94 | 1,326 | 298 |
| 62,884 | 47 | 10 | 739 | 188 | 60 | 7 | 483 | 93 | 1,329 | 298 |
| 62,885 | 30 | 9  | 543 | 175 | 48 | 4 | 364 | 81 | 985   | 269 |
| 62,886 | 26 | 9  | 459 | 175 | 27 | 4 | 243 | 81 | 755   | 269 |
| 62,887 | 23 | 5  | 459 | 130 | 27 | 2 | 229 | 61 | 738   | 198 |
| 62,888 | 25 | 5  | 538 | 130 | 28 | 2 | 236 | 61 | 827   | 198 |
| 62,889 | 30 | 5  | 640 | 130 | 31 | 2 | 265 | 61 | 966   | 198 |
| 62,890 | 33 | 3  | 674 | 126 | 38 | 2 | 287 | 61 | 1,032 | 192 |
| 62,891 | 34 | 3  | 721 | 126 | 41 | 2 | 298 | 61 | 1,094 | 192 |
| 62,892 | 36 | 3  | 730 | 121 | 41 | 2 | 301 | 61 | 1,108 | 187 |
| 62,893 | 38 | 3  | 741 | 121 | 41 | 2 | 308 | 61 | 1,128 | 187 |
| 62,894 | 37 | 3  | 740 | 120 | 45 | 2 | 306 | 60 | 1,128 | 185 |
| 62,895 | 37 | 4  | 738 | 120 | 45 | 2 | 305 | 60 | 1,125 | 186 |
| 62,896 | 37 | 2  | 733 | 118 | 44 | 2 | 302 | 61 | 1,116 | 183 |
| 62,897 | 38 | 2  | 742 | 132 | 45 | 4 | 312 | 71 | 1,137 | 209 |
| 62,898 | 39 | 2  | 742 | 135 | 45 | 5 | 311 | 75 | 1,137 | 217 |
| 62,899 | 37 | 2  | 727 | 139 | 43 | 5 | 308 | 76 | 1,115 | 222 |
| 62,900 | 35 | 2  | 615 | 139 | 39 | 5 | 287 | 78 | 976   | 224 |
| 62,901 | 34 | 3  | 536 | 148 | 35 | 6 | 243 | 82 | 848   | 239 |
| 62,902 | 30 | 3  | 510 | 148 | 34 | 6 | 209 | 82 | 783   | 239 |
| 62,903 | 30 | 3  | 503 | 155 | 34 | 6 | 207 | 84 | 774   | 248 |
| 62,904 | 30 | 3  | 503 | 154 | 34 | 6 | 207 | 84 | 774   | 247 |
| 62,905 | 31 | 3  | 502 | 156 | 34 | 6 | 207 | 82 | 774   | 247 |
| 62,906 | 31 | 3  | 505 | 149 | 35 | 5 | 211 | 77 | 782   | 234 |
| 62,907 | 31 | 3  | 505 | 148 | 34 | 5 | 211 | 77 | 781   | 233 |
| 62,908 | 31 | 3  | 504 | 148 | 34 | 5 | 211 | 77 | 780   | 233 |
| 62,909 | 30 | 4  | 502 | 128 | 34 | 5 | 209 | 70 | 775   | 207 |
| 62,910 | 30 | 4  | 500 | 124 | 34 | 5 | 208 | 66 | 772   | 199 |
| 62,911 | 30 | 4  | 498 | 114 | 34 | 4 | 208 | 62 | 770   | 184 |
| 62,912 | 30 | 4  | 500 | 114 | 34 | 4 | 208 | 62 | 772   | 184 |
| 62,913 | 30 | 4  | 496 | 114 | 33 | 4 | 202 | 62 | 761   | 184 |
| 62,914 | 30 | 4  | 496 | 114 | 33 | 4 | 202 | 62 | 761   | 184 |
| 62,915 | 30 | 4  | 496 | 112 | 33 | 4 | 200 | 61 | 759   | 181 |
| 62,916 | 30 | 4  | 496 | 109 | 33 | 4 | 200 | 58 | 759   | 175 |
| 62,917 | 30 | 4  | 497 | 104 | 33 | 4 | 200 | 44 | 760   | 156 |
| 62,918 | 30 | 4  | 498 | 102 | 33 | 4 | 201 | 44 | 762   | 154 |
| 62,919 | 30 | 4  | 503 | 103 | 33 | 4 | 202 | 45 | 768   | 156 |
| 62,920 | 30 | 4  | 512 | 103 | 33 | 4 | 206 | 46 | 781   | 157 |
| 62,921 | 30 | 4  | 512 | 101 | 33 | 4 | 207 | 46 | 782   | 155 |
| 62,922 | 30 | 4  | 511 | 101 | 32 | 4 | 206 | 47 | 779   | 156 |
| 62,923 | 30 | 4  | 502 | 101 | 32 | 4 | 202 | 46 | 766   | 155 |

|        |    |   |     |    |    |   |     |    |     |     |
|--------|----|---|-----|----|----|---|-----|----|-----|-----|
| 62,924 | 33 | 4 | 620 | 93 | 36 | 4 | 231 | 42 | 920 | 143 |
| 62,925 | 33 | 4 | 662 | 54 | 36 | 4 | 236 | 32 | 967 | 94  |
| 62,926 | 33 | 4 | 661 | 52 | 36 | 4 | 237 | 31 | 967 | 91  |
| 62,927 | 33 | 4 | 661 | 52 | 36 | 4 | 237 | 31 | 967 | 91  |
| 62,928 | 31 | 4 | 637 | 52 | 31 | 4 | 226 | 31 | 925 | 91  |
| 62,929 | 30 | 4 | 637 | 52 | 31 | 4 | 226 | 31 | 924 | 91  |
| 62,930 | 30 | 4 | 638 | 52 | 31 | 4 | 224 | 31 | 923 | 91  |
| 62,931 | 29 | 3 | 633 | 52 | 30 | 4 | 218 | 31 | 910 | 90  |
| 62,932 | 28 | 3 | 602 | 52 | 29 | 4 | 215 | 32 | 874 | 91  |
| 62,933 | 28 | 3 | 576 | 52 | 28 | 4 | 207 | 32 | 839 | 91  |
| 62,934 | 24 | 3 | 548 | 50 | 26 | 4 | 182 | 32 | 780 | 89  |
| 62,935 | 24 | 3 | 541 | 50 | 26 | 4 | 180 | 32 | 771 | 89  |
| 62,936 | 24 | 3 | 540 | 50 | 26 | 4 | 180 | 32 | 770 | 89  |
| 62,937 | 21 | 3 | 528 | 50 | 26 | 4 | 171 | 32 | 746 | 89  |
| 62,938 | 21 | 3 | 516 | 50 | 25 | 4 | 164 | 32 | 726 | 89  |
| 62,939 | 19 | 3 | 433 | 50 | 24 | 4 | 152 | 32 | 628 | 89  |
| 62,940 | 14 | 4 | 331 | 50 | 21 | 4 | 119 | 32 | 485 | 90  |
| 62,941 | 11 | 4 | 295 | 50 | 14 | 4 | 93  | 32 | 413 | 90  |
| 62,942 | 10 | 4 | 245 | 50 | 10 | 4 | 83  | 32 | 348 | 90  |
| 62,943 | 8  | 4 | 234 | 50 | 10 | 4 | 78  | 32 | 330 | 90  |
| 62,944 | 6  | 4 | 223 | 50 | 10 | 4 | 69  | 32 | 308 | 90  |
| 62,945 | 6  | 4 | 223 | 50 | 6  | 4 | 69  | 32 | 304 | 90  |
| 62,946 | 6  | 3 | 222 | 50 | 6  | 4 | 68  | 32 | 302 | 89  |
| 62,947 | 5  | 3 | 211 | 47 | 5  | 4 | 58  | 30 | 279 | 84  |
| 62,948 | 5  | 3 | 220 | 32 | 5  | 2 | 58  | 18 | 288 | 55  |
| 62,949 | 7  | 3 | 219 | 25 | 5  | 1 | 58  | 13 | 289 | 42  |
| 62,950 | 7  | 3 | 217 | 26 | 5  | 1 | 58  | 13 | 287 | 43  |
| 62,951 | 7  | 3 | 235 | 26 | 5  | 1 | 60  | 11 | 307 | 41  |
| 62,952 | 22 | 2 | 286 | 17 | 9  | 0 | 86  | 7  | 403 | 26  |
| 62,953 | 24 | 2 | 327 | 17 | 18 | 0 | 121 | 7  | 490 | 26  |
| 62,954 | 25 | 2 | 349 | 10 | 20 | 0 | 137 | 5  | 531 | 17  |
| 62,955 | 24 | 2 | 349 | 6  | 20 | 0 | 138 | 5  | 531 | 13  |
| 62,956 | 24 | 2 | 350 | 6  | 19 | 0 | 138 | 5  | 531 | 13  |
| 62,957 | 25 | 2 | 350 | 6  | 19 | 0 | 135 | 6  | 529 | 14  |
| 62,958 | 25 | 2 | 355 | 6  | 19 | 0 | 142 | 7  | 541 | 15  |
| 62,959 | 32 | 2 | 375 | 6  | 21 | 0 | 154 | 7  | 582 | 15  |
| 62,960 | 32 | 1 | 375 | 7  | 21 | 0 | 154 | 7  | 582 | 15  |
| 62,961 | 32 | 1 | 375 | 7  | 21 | 0 | 154 | 7  | 582 | 15  |
| 62,962 | 38 | 1 | 411 | 7  | 24 | 0 | 174 | 7  | 647 | 15  |
| 62,963 | 38 | 1 | 409 | 7  | 24 | 0 | 174 | 7  | 645 | 15  |
| 62,964 | 39 | 1 | 422 | 7  | 26 | 0 | 193 | 7  | 680 | 15  |



|        |    |   |     |    |    |   |     |    |     |    |
|--------|----|---|-----|----|----|---|-----|----|-----|----|
| 62,965 | 39 | 1 | 422 | 7  | 26 | 0 | 193 | 7  | 680 | 15 |
| 62,966 | 39 | 1 | 421 | 7  | 26 | 0 | 193 | 7  | 679 | 15 |
| 62,967 | 40 | 1 | 434 | 7  | 27 | 0 | 197 | 7  | 698 | 15 |
| 62,968 | 40 | 1 | 433 | 7  | 27 | 0 | 196 | 7  | 696 | 15 |
| 62,969 | 41 | 1 | 437 | 7  | 27 | 0 | 202 | 7  | 707 | 15 |
| 62,970 | 41 | 1 | 434 | 7  | 27 | 0 | 201 | 6  | 703 | 14 |
| 62,971 | 41 | 1 | 425 | 4  | 27 | 0 | 197 | 5  | 690 | 10 |
| 62,972 | 41 | 1 | 422 | 4  | 27 | 0 | 197 | 5  | 687 | 10 |
| 62,973 | 42 | 1 | 418 | 4  | 25 | 0 | 197 | 4  | 682 | 9  |
| 62,974 | 39 | 1 | 333 | 4  | 23 | 1 | 187 | 4  | 582 | 10 |
| 62,975 | 40 | 1 | 306 | 4  | 25 | 1 | 176 | 5  | 547 | 11 |
| 62,976 | 40 | 1 | 266 | 4  | 25 | 1 | 172 | 4  | 503 | 10 |
| 62,977 | 40 | 1 | 261 | 4  | 25 | 1 | 171 | 4  | 497 | 10 |
| 62,978 | 40 | 1 | 263 | 4  | 25 | 1 | 177 | 4  | 505 | 10 |
| 62,979 | 40 | 1 | 261 | 4  | 26 | 1 | 179 | 4  | 506 | 10 |
| 62,980 | 40 | 1 | 261 | 4  | 26 | 1 | 179 | 4  | 506 | 10 |
| 62,981 | 40 | 1 | 262 | 4  | 26 | 1 | 179 | 4  | 507 | 10 |
| 62,982 | 40 | 1 | 262 | 4  | 26 | 1 | 179 | 4  | 507 | 10 |
| 62,983 | 40 | 1 | 272 | 4  | 26 | 1 | 188 | 3  | 526 | 9  |
| 62,984 | 41 | 1 | 289 | 4  | 27 | 1 | 194 | 3  | 551 | 9  |
| 62,985 | 41 | 1 | 288 | 4  | 27 | 1 | 194 | 3  | 550 | 9  |
| 62,986 | 42 | 1 | 294 | 4  | 27 | 1 | 199 | 3  | 562 | 9  |
| 62,987 | 42 | 1 | 294 | 4  | 27 | 1 | 198 | 3  | 561 | 9  |
| 62,988 | 43 | 1 | 295 | 4  | 27 | 1 | 197 | 3  | 562 | 9  |
| 62,989 | 43 | 1 | 295 | 4  | 27 | 1 | 197 | 3  | 562 | 9  |
| 62,990 | 43 | 1 | 299 | 5  | 27 | 1 | 198 | 3  | 567 | 10 |
| 62,991 | 43 | 0 | 300 | 8  | 27 | 1 | 198 | 4  | 568 | 13 |
| 62,992 | 43 | 0 | 307 | 8  | 27 | 1 | 200 | 4  | 577 | 13 |
| 62,993 | 47 | 0 | 355 | 8  | 29 | 1 | 213 | 4  | 644 | 13 |
| 62,994 | 47 | 0 | 356 | 8  | 29 | 1 | 214 | 4  | 646 | 13 |
| 62,995 | 48 | 0 | 369 | 8  | 32 | 1 | 219 | 4  | 668 | 13 |
| 62,996 | 49 | 0 | 368 | 9  | 32 | 1 | 218 | 4  | 667 | 14 |
| 62,997 | 49 | 0 | 367 | 9  | 32 | 1 | 218 | 4  | 666 | 14 |
| 62,998 | 49 | 0 | 367 | 15 | 32 | 1 | 218 | 13 | 666 | 29 |
| 62,999 | 49 | 0 | 357 | 15 | 32 | 1 | 218 | 13 | 656 | 29 |
| 63,000 | 74 | 0 | 462 | 18 | 45 | 1 | 293 | 14 | 874 | 33 |
| 63,001 | 76 | 0 | 451 | 17 | 45 | 1 | 293 | 14 | 865 | 32 |
| 63,002 | 62 | 0 | 429 | 18 | 44 | 1 | 298 | 14 | 833 | 33 |
| 63,003 | 60 | 0 | 396 | 18 | 37 | 1 | 267 | 14 | 760 | 33 |
| 63,004 | 59 | 0 | 377 | 18 | 37 | 1 | 258 | 14 | 731 | 33 |
| 63,005 | 59 | 0 | 375 | 18 | 37 | 1 | 252 | 14 | 723 | 33 |

|        |    |   |     |    |    |   |     |    |     |    |
|--------|----|---|-----|----|----|---|-----|----|-----|----|
| 63,006 | 60 | 0 | 376 | 21 | 37 | 1 | 251 | 14 | 724 | 36 |
| 63,007 | 60 | 0 | 375 | 21 | 38 | 1 | 251 | 14 | 724 | 36 |
| 63,008 | 59 | 0 | 370 | 21 | 38 | 1 | 249 | 13 | 716 | 35 |
| 63,009 | 59 | 0 | 364 | 21 | 38 | 1 | 242 | 13 | 703 | 35 |
| 63,010 | 52 | 1 | 345 | 21 | 37 | 1 | 231 | 13 | 665 | 36 |
| 63,011 | 49 | 1 | 330 | 20 | 35 | 1 | 221 | 13 | 635 | 35 |
| 63,012 | 46 | 1 | 319 | 20 | 35 | 1 | 215 | 13 | 615 | 35 |
| 63,013 | 46 | 1 | 310 | 20 | 34 | 1 | 213 | 13 | 603 | 35 |
| 63,014 | 45 | 1 | 297 | 20 | 32 | 1 | 194 | 13 | 568 | 35 |
| 63,015 | 45 | 1 | 290 | 20 | 31 | 1 | 192 | 13 | 558 | 35 |
| 63,016 | 44 | 1 | 291 | 20 | 31 | 1 | 192 | 14 | 558 | 36 |
| 63,017 | 44 | 1 | 287 | 20 | 31 | 1 | 191 | 14 | 553 | 36 |
| 63,018 | 47 | 1 | 290 | 20 | 31 | 1 | 190 | 14 | 558 | 36 |
| 63,019 | 46 | 1 | 284 | 21 | 31 | 1 | 184 | 14 | 545 | 37 |
| 63,020 | 53 | 1 | 319 | 20 | 31 | 1 | 196 | 14 | 599 | 36 |
| 63,021 | 54 | 1 | 345 | 20 | 33 | 1 | 211 | 14 | 643 | 36 |
| 63,022 | 54 | 1 | 345 | 21 | 33 | 1 | 211 | 15 | 643 | 38 |
| 63,023 | 54 | 1 | 345 | 21 | 33 | 1 | 210 | 15 | 642 | 38 |
| 63,024 | 58 | 1 | 376 | 23 | 36 | 1 | 224 | 16 | 694 | 41 |
| 63,025 | 58 | 1 | 385 | 23 | 37 | 0 | 228 | 16 | 708 | 40 |
| 63,026 | 57 | 1 | 384 | 23 | 35 | 0 | 221 | 15 | 697 | 39 |
| 63,027 | 57 | 1 | 381 | 23 | 35 | 0 | 217 | 15 | 690 | 39 |
| 63,028 | 57 | 1 | 380 | 24 | 35 | 0 | 216 | 15 | 688 | 40 |
| 63,029 | 57 | 1 | 377 | 29 | 35 | 0 | 210 | 15 | 679 | 45 |
| 63,030 | 57 | 1 | 377 | 29 | 34 | 0 | 208 | 15 | 676 | 45 |
| 63,031 | 60 | 1 | 401 | 29 | 34 | 0 | 220 | 16 | 715 | 46 |
| 63,032 | 60 | 1 | 408 | 30 | 34 | 0 | 224 | 16 | 726 | 47 |
| 63,033 | 60 | 1 | 398 | 30 | 34 | 0 | 215 | 16 | 707 | 47 |
| 63,034 | 59 | 2 | 392 | 30 | 34 | 0 | 212 | 16 | 697 | 48 |
| 63,035 | 60 | 2 | 397 | 30 | 34 | 0 | 211 | 16 | 702 | 48 |
| 63,036 | 60 | 2 | 398 | 30 | 34 | 0 | 209 | 16 | 701 | 48 |
| 63,037 | 60 | 2 | 407 | 30 | 34 | 0 | 210 | 16 | 711 | 48 |
| 63,038 | 60 | 2 | 449 | 30 | 35 | 0 | 219 | 16 | 763 | 48 |
| 63,039 | 59 | 2 | 448 | 30 | 35 | 0 | 218 | 16 | 760 | 48 |
| 63,040 | 61 | 2 | 455 | 29 | 36 | 0 | 222 | 16 | 774 | 47 |
| 63,041 | 61 | 2 | 457 | 26 | 37 | 0 | 225 | 15 | 780 | 43 |
| 63,042 | 61 | 2 | 456 | 26 | 37 | 0 | 225 | 15 | 779 | 43 |
| 63,043 | 61 | 3 | 449 | 26 | 37 | 0 | 223 | 15 | 770 | 44 |
| 63,044 | 57 | 3 | 401 | 26 | 34 | 0 | 207 | 15 | 699 | 44 |
| 63,045 | 57 | 3 | 400 | 25 | 34 | 0 | 206 | 15 | 697 | 43 |
| 63,046 | 56 | 3 | 386 | 25 | 31 | 0 | 201 | 15 | 674 | 43 |

|        |    |   |     |    |    |   |     |    |     |    |
|--------|----|---|-----|----|----|---|-----|----|-----|----|
| 63,047 | 43 | 3 | 358 | 26 | 29 | 0 | 183 | 15 | 613 | 44 |
| 63,048 | 41 | 3 | 332 | 20 | 27 | 0 | 170 | 6  | 570 | 29 |
| 63,049 | 37 | 3 | 303 | 24 | 24 | 0 | 154 | 6  | 518 | 33 |
| 63,050 | 28 | 3 | 285 | 25 | 18 | 0 | 130 | 6  | 461 | 34 |
| 63,051 | 27 | 3 | 281 | 22 | 18 | 0 | 125 | 5  | 451 | 30 |
| 63,052 | 25 | 3 | 274 | 26 | 18 | 0 | 123 | 5  | 440 | 34 |
| 63,053 | 24 | 3 | 245 | 31 | 15 | 0 | 92  | 6  | 376 | 40 |
| 63,054 | 24 | 3 | 239 | 39 | 13 | 0 | 88  | 8  | 364 | 50 |
| 63,055 | 24 | 3 | 238 | 39 | 11 | 0 | 87  | 8  | 360 | 50 |
| 63,056 | 24 | 4 | 246 | 36 | 11 | 1 | 91  | 8  | 372 | 49 |
| 63,057 | 24 | 4 | 247 | 37 | 11 | 1 | 91  | 8  | 373 | 50 |
| 63,058 | 24 | 4 | 248 | 37 | 11 | 1 | 91  | 7  | 374 | 49 |
| 63,059 | 24 | 4 | 247 | 37 | 11 | 1 | 92  | 7  | 374 | 49 |
| 63,060 | 24 | 4 | 247 | 37 | 10 | 1 | 92  | 7  | 373 | 49 |
| 63,061 | 25 | 3 | 248 | 37 | 10 | 1 | 93  | 7  | 376 | 48 |
| 63,062 | 27 | 3 | 273 | 39 | 11 | 1 | 101 | 7  | 412 | 50 |
| 63,063 | 27 | 3 | 273 | 39 | 11 | 1 | 101 | 7  | 412 | 50 |
| 63,064 | 28 | 3 | 281 | 39 | 11 | 1 | 105 | 7  | 425 | 50 |
| 63,065 | 28 | 3 | 281 | 39 | 11 | 1 | 105 | 7  | 425 | 50 |
| 63,066 | 28 | 3 | 280 | 39 | 11 | 1 | 105 | 7  | 424 | 50 |
| 63,067 | 28 | 3 | 282 | 39 | 11 | 1 | 106 | 8  | 427 | 51 |
| 63,068 | 28 | 3 | 282 | 39 | 11 | 1 | 106 | 8  | 427 | 51 |
| 63,069 | 25 | 3 | 278 | 41 | 11 | 1 | 106 | 8  | 420 | 53 |
| 63,070 | 25 | 3 | 277 | 42 | 11 | 1 | 105 | 8  | 418 | 54 |
| 63,071 | 19 | 3 | 244 | 43 | 11 | 1 | 95  | 8  | 369 | 55 |
| 63,072 | 18 | 3 | 218 | 42 | 9  | 1 | 80  | 7  | 325 | 53 |
| 63,073 | 18 | 3 | 219 | 42 | 9  | 1 | 81  | 7  | 327 | 53 |
| 63,074 | 13 | 3 | 197 | 43 | 7  | 1 | 66  | 7  | 283 | 54 |
| 63,075 | 13 | 3 | 191 | 41 | 6  | 1 | 68  | 6  | 278 | 51 |
| 63,076 | 13 | 3 | 181 | 41 | 5  | 1 | 66  | 6  | 265 | 51 |
| 63,077 | 13 | 3 | 180 | 42 | 5  | 1 | 66  | 6  | 264 | 52 |
| 63,078 | 16 | 3 | 177 | 42 | 5  | 1 | 67  | 6  | 265 | 52 |
| 63,079 | 15 | 3 | 171 | 43 | 5  | 1 | 62  | 6  | 253 | 53 |
| 63,080 | 15 | 3 | 172 | 39 | 5  | 1 | 63  | 6  | 255 | 49 |
| 63,081 | 13 | 3 | 166 | 39 | 5  | 1 | 64  | 6  | 248 | 49 |
| 63,082 | 13 | 3 | 167 | 38 | 5  | 1 | 65  | 5  | 250 | 47 |
| 63,083 | 14 | 3 | 158 | 39 | 5  | 1 | 62  | 5  | 239 | 48 |
| 63,084 | 14 | 3 | 155 | 40 | 4  | 1 | 61  | 5  | 234 | 49 |
| 63,085 | 14 | 3 | 153 | 47 | 4  | 1 | 65  | 10 | 236 | 61 |
| 63,086 | 13 | 3 | 153 | 51 | 5  | 1 | 70  | 11 | 241 | 66 |
| 63,087 | 15 | 3 | 166 | 51 | 6  | 1 | 82  | 15 | 269 | 70 |

|        |    |    |     |     |    |   |     |    |     |     |
|--------|----|----|-----|-----|----|---|-----|----|-----|-----|
| 63,088 | 15 | 6  | 157 | 63  | 6  | 3 | 82  | 20 | 260 | 92  |
| 63,089 | 15 | 6  | 114 | 63  | 5  | 3 | 73  | 21 | 207 | 93  |
| 63,090 | 14 | 6  | 156 | 66  | 10 | 3 | 100 | 21 | 280 | 96  |
| 63,091 | 14 | 6  | 164 | 66  | 11 | 3 | 101 | 21 | 290 | 96  |
| 63,092 | 14 | 6  | 166 | 66  | 10 | 3 | 100 | 21 | 290 | 96  |
| 63,093 | 14 | 6  | 166 | 66  | 10 | 3 | 100 | 21 | 290 | 96  |
| 63,094 | 14 | 5  | 166 | 66  | 10 | 3 | 100 | 21 | 290 | 95  |
| 63,095 | 15 | 5  | 186 | 67  | 10 | 3 | 111 | 21 | 322 | 96  |
| 63,096 | 15 | 5  | 186 | 67  | 10 | 3 | 111 | 21 | 322 | 96  |
| 63,097 | 16 | 6  | 193 | 66  | 10 | 3 | 112 | 21 | 331 | 96  |
| 63,098 | 16 | 6  | 193 | 66  | 10 | 3 | 112 | 21 | 331 | 96  |
| 63,099 | 16 | 6  | 193 | 67  | 10 | 3 | 112 | 22 | 331 | 98  |
| 63,100 | 16 | 6  | 193 | 64  | 10 | 3 | 112 | 22 | 331 | 95  |
| 63,101 | 16 | 6  | 195 | 66  | 10 | 3 | 113 | 23 | 334 | 98  |
| 63,102 | 16 | 6  | 202 | 68  | 10 | 3 | 114 | 30 | 342 | 107 |
| 63,103 | 17 | 6  | 203 | 64  | 10 | 3 | 115 | 32 | 345 | 105 |
| 63,104 | 18 | 8  | 206 | 82  | 10 | 4 | 116 | 43 | 350 | 137 |
| 63,105 | 19 | 8  | 206 | 77  | 10 | 4 | 116 | 44 | 351 | 133 |
| 63,106 | 19 | 11 | 202 | 81  | 10 | 4 | 113 | 46 | 344 | 142 |
| 63,107 | 18 | 10 | 197 | 81  | 10 | 3 | 112 | 46 | 337 | 140 |
| 63,108 | 18 | 10 | 196 | 84  | 10 | 3 | 112 | 46 | 336 | 143 |
| 63,109 | 18 | 10 | 194 | 91  | 10 | 3 | 112 | 46 | 334 | 150 |
| 63,110 | 18 | 10 | 194 | 94  | 10 | 3 | 111 | 48 | 333 | 155 |
| 63,111 | 17 | 11 | 192 | 103 | 10 | 3 | 110 | 55 | 329 | 172 |
| 63,112 | 16 | 15 | 188 | 123 | 10 | 4 | 110 | 65 | 324 | 207 |
| 63,113 | 15 | 15 | 167 | 124 | 9  | 4 | 102 | 65 | 293 | 208 |
| 63,114 | 15 | 15 | 165 | 127 | 9  | 4 | 102 | 65 | 291 | 211 |
| 63,115 | 14 | 15 | 165 | 128 | 9  | 4 | 104 | 65 | 292 | 212 |
| 63,116 | 14 | 15 | 164 | 128 | 9  | 4 | 104 | 65 | 291 | 212 |
| 63,117 | 14 | 16 | 161 | 128 | 9  | 4 | 104 | 63 | 288 | 211 |
| 63,118 | 14 | 16 | 161 | 131 | 9  | 4 | 104 | 64 | 288 | 215 |
| 63,119 | 14 | 16 | 161 | 131 | 9  | 4 | 104 | 64 | 288 | 215 |
| 63,120 | 14 | 16 | 163 | 130 | 9  | 4 | 105 | 64 | 291 | 214 |
| 63,121 | 15 | 16 | 167 | 127 | 10 | 4 | 107 | 64 | 299 | 211 |
| 63,122 | 16 | 16 | 177 | 128 | 10 | 4 | 111 | 64 | 314 | 212 |
| 63,123 | 16 | 16 | 177 | 128 | 10 | 4 | 111 | 64 | 314 | 212 |
| 63,124 | 16 | 16 | 196 | 137 | 11 | 4 | 123 | 65 | 346 | 222 |
| 63,125 | 16 | 16 | 200 | 138 | 11 | 4 | 124 | 67 | 351 | 225 |
| 63,126 | 16 | 16 | 198 | 139 | 11 | 4 | 123 | 67 | 348 | 226 |
| 63,127 | 16 | 16 | 199 | 134 | 11 | 4 | 121 | 67 | 347 | 221 |
| 63,128 | 16 | 16 | 200 | 134 | 11 | 4 | 122 | 67 | 349 | 221 |

|        |    |    |     |     |    |    |     |     |     |     |
|--------|----|----|-----|-----|----|----|-----|-----|-----|-----|
| 63,129 | 13 | 16 | 209 | 134 | 11 | 4  | 116 | 66  | 349 | 220 |
| 63,130 | 13 | 16 | 207 | 134 | 11 | 4  | 114 | 66  | 345 | 220 |
| 63,131 | 14 | 16 | 215 | 134 | 11 | 4  | 115 | 67  | 355 | 221 |
| 63,132 | 14 | 16 | 215 | 134 | 11 | 4  | 114 | 67  | 354 | 221 |
| 63,133 | 16 | 16 | 249 | 135 | 14 | 4  | 120 | 68  | 399 | 223 |
| 63,134 | 15 | 16 | 249 | 134 | 14 | 4  | 119 | 68  | 397 | 222 |
| 63,135 | 16 | 16 | 285 | 133 | 18 | 4  | 129 | 68  | 448 | 221 |
| 63,136 | 16 | 15 | 292 | 126 | 18 | 4  | 126 | 64  | 452 | 209 |
| 63,137 | 16 | 15 | 300 | 123 | 17 | 4  | 124 | 66  | 457 | 208 |
| 63,138 | 13 | 16 | 280 | 123 | 16 | 4  | 109 | 62  | 418 | 205 |
| 63,139 | 13 | 13 | 268 | 109 | 16 | 2  | 104 | 56  | 401 | 180 |
| 63,140 | 13 | 14 | 253 | 112 | 16 | 2  | 97  | 58  | 379 | 186 |
| 63,141 | 12 | 15 | 232 | 120 | 10 | 2  | 77  | 63  | 331 | 200 |
| 63,142 | 12 | 15 | 222 | 126 | 9  | 2  | 75  | 65  | 318 | 208 |
| 63,143 | 12 | 15 | 218 | 128 | 9  | 2  | 73  | 67  | 312 | 212 |
| 63,144 | 12 | 15 | 214 | 129 | 9  | 2  | 71  | 68  | 306 | 214 |
| 63,145 | 12 | 15 | 207 | 130 | 9  | 2  | 69  | 69  | 297 | 216 |
| 63,146 | 11 | 15 | 198 | 131 | 9  | 2  | 62  | 68  | 280 | 216 |
| 63,147 | 10 | 15 | 193 | 132 | 9  | 2  | 61  | 68  | 273 | 217 |
| 63,148 | 10 | 14 | 191 | 136 | 9  | 2  | 61  | 69  | 271 | 221 |
| 63,149 | 10 | 16 | 192 | 145 | 9  | 4  | 62  | 79  | 273 | 244 |
| 63,150 | 10 | 22 | 192 | 173 | 9  | 11 | 62  | 112 | 273 | 318 |
| 63,151 | 10 | 22 | 190 | 172 | 9  | 12 | 61  | 113 | 270 | 319 |
| 63,152 | 10 | 23 | 183 | 174 | 9  | 12 | 60  | 115 | 262 | 324 |
| 63,153 | 9  | 24 | 182 | 174 | 9  | 12 | 59  | 109 | 259 | 319 |
| 63,154 | 8  | 25 | 183 | 178 | 9  | 12 | 60  | 111 | 260 | 326 |
| 63,155 | 8  | 23 | 182 | 157 | 9  | 11 | 58  | 102 | 257 | 293 |
| 63,156 | 7  | 23 | 180 | 157 | 9  | 11 | 58  | 99  | 254 | 290 |
| 63,157 | 8  | 20 | 192 | 153 | 9  | 11 | 64  | 100 | 273 | 284 |
| 63,158 | 8  | 20 | 192 | 153 | 9  | 11 | 64  | 100 | 273 | 284 |
| 63,159 | 8  | 20 | 193 | 149 | 9  | 11 | 65  | 100 | 275 | 280 |
| 63,160 | 8  | 20 | 194 | 146 | 9  | 11 | 65  | 104 | 276 | 281 |
| 63,161 | 8  | 20 | 194 | 145 | 9  | 12 | 65  | 102 | 276 | 279 |
| 63,162 | 8  | 19 | 198 | 136 | 9  | 12 | 66  | 95  | 281 | 262 |
| 63,163 | 10 | 15 | 227 | 117 | 10 | 11 | 75  | 86  | 322 | 229 |
| 63,164 | 11 | 15 | 261 | 112 | 10 | 11 | 89  | 85  | 371 | 223 |
| 63,165 | 15 | 15 | 413 | 112 | 16 | 11 | 145 | 85  | 589 | 223 |
| 63,166 | 15 | 15 | 414 | 111 | 17 | 11 | 151 | 85  | 597 | 222 |
| 63,167 | 15 | 15 | 415 | 112 | 17 | 11 | 151 | 86  | 598 | 224 |
| 63,168 | 15 | 14 | 415 | 113 | 17 | 11 | 150 | 86  | 597 | 224 |
| 63,169 | 18 | 14 | 457 | 113 | 20 | 11 | 165 | 85  | 660 | 223 |

|        |    |    |     |     |    |    |     |     |       |     |
|--------|----|----|-----|-----|----|----|-----|-----|-------|-----|
| 63,170 | 21 | 14 | 542 | 113 | 23 | 11 | 184 | 87  | 770   | 225 |
| 63,171 | 27 | 14 | 577 | 115 | 25 | 11 | 218 | 88  | 847   | 228 |
| 63,172 | 31 | 15 | 601 | 116 | 27 | 11 | 242 | 88  | 901   | 230 |
| 63,173 | 31 | 15 | 593 | 117 | 27 | 11 | 238 | 88  | 889   | 231 |
| 63,174 | 31 | 15 | 580 | 118 | 26 | 11 | 228 | 88  | 865   | 232 |
| 63,175 | 31 | 15 | 573 | 109 | 26 | 11 | 225 | 87  | 855   | 222 |
| 63,176 | 31 | 15 | 568 | 107 | 26 | 11 | 224 | 85  | 849   | 218 |
| 63,177 | 31 | 15 | 569 | 106 | 26 | 11 | 223 | 85  | 849   | 217 |
| 63,178 | 31 | 15 | 569 | 106 | 26 | 11 | 224 | 85  | 850   | 217 |
| 63,179 | 31 | 15 | 568 | 104 | 25 | 11 | 223 | 85  | 847   | 215 |
| 63,180 | 32 | 15 | 557 | 106 | 26 | 11 | 223 | 85  | 838   | 217 |
| 63,181 | 32 | 15 | 558 | 106 | 27 | 11 | 221 | 88  | 838   | 220 |
| 63,182 | 34 | 17 | 560 | 126 | 27 | 14 | 230 | 117 | 851   | 274 |
| 63,183 | 34 | 17 | 549 | 134 | 27 | 14 | 230 | 128 | 840   | 293 |
| 63,184 | 34 | 17 | 528 | 134 | 24 | 14 | 227 | 128 | 813   | 293 |
| 63,185 | 33 | 17 | 513 | 135 | 20 | 14 | 219 | 129 | 785   | 295 |
| 63,186 | 36 | 17 | 506 | 144 | 20 | 14 | 225 | 132 | 787   | 307 |
| 63,187 | 36 | 18 | 494 | 146 | 20 | 14 | 226 | 131 | 776   | 309 |
| 63,188 | 36 | 17 | 480 | 146 | 20 | 14 | 223 | 132 | 759   | 309 |
| 63,189 | 36 | 17 | 480 | 150 | 20 | 14 | 223 | 133 | 759   | 314 |
| 63,190 | 36 | 17 | 480 | 152 | 20 | 14 | 224 | 133 | 760   | 316 |
| 63,191 | 36 | 15 | 490 | 142 | 20 | 14 | 228 | 126 | 774   | 297 |
| 63,192 | 36 | 15 | 492 | 135 | 20 | 14 | 229 | 124 | 777   | 288 |
| 63,193 | 36 | 15 | 492 | 136 | 20 | 14 | 229 | 124 | 777   | 289 |
| 63,194 | 36 | 15 | 491 | 135 | 20 | 14 | 229 | 122 | 776   | 286 |
| 63,195 | 36 | 15 | 501 | 134 | 20 | 14 | 231 | 121 | 788   | 284 |
| 63,196 | 48 | 15 | 612 | 133 | 22 | 14 | 281 | 120 | 963   | 282 |
| 63,197 | 53 | 15 | 640 | 134 | 22 | 14 | 294 | 122 | 1,009 | 285 |
| 63,198 | 53 | 15 | 640 | 132 | 22 | 14 | 294 | 122 | 1,009 | 283 |
| 63,199 | 74 | 7  | 795 | 90  | 31 | 5  | 418 | 77  | 1,318 | 179 |
| 63,200 | 80 | 7  | 864 | 91  | 34 | 5  | 466 | 77  | 1,444 | 180 |
| 63,201 | 80 | 7  | 864 | 91  | 34 | 5  | 466 | 77  | 1,444 | 180 |
| 63,202 | 82 | 7  | 883 | 91  | 37 | 4  | 480 | 76  | 1,482 | 178 |
| 63,203 | 82 | 6  | 891 | 86  | 37 | 4  | 487 | 73  | 1,497 | 169 |
| 63,204 | 82 | 5  | 894 | 83  | 37 | 4  | 488 | 72  | 1,501 | 164 |
| 63,205 | 82 | 4  | 891 | 80  | 37 | 4  | 487 | 68  | 1,497 | 156 |
| 63,206 | 82 | 4  | 893 | 74  | 37 | 4  | 488 | 66  | 1,500 | 148 |
| 63,207 | 82 | 4  | 900 | 74  | 37 | 4  | 491 | 66  | 1,510 | 148 |
| 63,208 | 84 | 4  | 910 | 74  | 38 | 4  | 500 | 63  | 1,532 | 145 |
| 63,209 | 84 | 4  | 922 | 74  | 38 | 4  | 502 | 63  | 1,546 | 145 |
| 63,210 | 84 | 4  | 921 | 74  | 38 | 4  | 502 | 63  | 1,545 | 145 |

|        |    |   |     |    |    |   |     |    |       |     |
|--------|----|---|-----|----|----|---|-----|----|-------|-----|
| 63,211 | 86 | 4 | 946 | 71 | 38 | 4 | 536 | 59 | 1,606 | 138 |
| 63,212 | 86 | 4 | 942 | 69 | 38 | 3 | 536 | 59 | 1,602 | 135 |
| 63,213 | 84 | 4 | 913 | 69 | 37 | 3 | 528 | 59 | 1,562 | 135 |
| 63,214 | 83 | 4 | 887 | 67 | 37 | 3 | 517 | 59 | 1,524 | 133 |
| 63,215 | 83 | 4 | 878 | 67 | 37 | 3 | 514 | 59 | 1,512 | 133 |
| 63,216 | 79 | 4 | 725 | 68 | 31 | 3 | 457 | 59 | 1,292 | 134 |
| 63,217 | 80 | 5 | 718 | 68 | 30 | 3 | 444 | 59 | 1,272 | 135 |
| 63,218 | 79 | 5 | 706 | 67 | 30 | 3 | 440 | 58 | 1,255 | 133 |
| 63,219 | 77 | 5 | 674 | 66 | 27 | 3 | 429 | 58 | 1,207 | 132 |
| 63,220 | 77 | 5 | 659 | 63 | 25 | 3 | 424 | 58 | 1,185 | 129 |
| 63,221 | 74 | 4 | 589 | 59 | 24 | 3 | 410 | 55 | 1,097 | 121 |
| 63,222 | 68 | 4 | 554 | 59 | 21 | 3 | 375 | 55 | 1,018 | 121 |
| 63,223 | 63 | 4 | 525 | 59 | 19 | 3 | 350 | 55 | 957   | 121 |
| 63,224 | 61 | 4 | 523 | 58 | 19 | 3 | 349 | 55 | 952   | 120 |
| 63,225 | 61 | 4 | 523 | 57 | 19 | 3 | 349 | 55 | 952   | 119 |
| 63,226 | 61 | 4 | 523 | 57 | 19 | 3 | 349 | 55 | 952   | 119 |
| 63,227 | 61 | 4 | 524 | 57 | 19 | 3 | 349 | 55 | 953   | 119 |
| 63,228 | 61 | 4 | 521 | 57 | 19 | 3 | 349 | 55 | 950   | 119 |
| 63,229 | 61 | 4 | 521 | 57 | 19 | 3 | 348 | 56 | 949   | 120 |
| 63,230 | 61 | 4 | 520 | 57 | 19 | 3 | 347 | 56 | 947   | 120 |
| 63,231 | 60 | 4 | 521 | 57 | 19 | 3 | 348 | 59 | 948   | 123 |
| 63,232 | 60 | 4 | 517 | 57 | 18 | 3 | 348 | 56 | 943   | 120 |
| 63,233 | 57 | 2 | 509 | 27 | 18 | 0 | 341 | 15 | 925   | 44  |
| 63,234 | 57 | 2 | 513 | 27 | 18 | 0 | 346 | 15 | 934   | 44  |
| 63,235 | 56 | 2 | 510 | 18 | 18 | 0 | 342 | 12 | 926   | 32  |
| 63,236 | 56 | 2 | 507 | 18 | 18 | 0 | 341 | 12 | 922   | 32  |
| 63,237 | 53 | 2 | 496 | 18 | 18 | 0 | 333 | 12 | 900   | 32  |
| 63,238 | 53 | 1 | 496 | 15 | 19 | 0 | 332 | 9  | 900   | 25  |
| 63,239 | 53 | 1 | 498 | 9  | 19 | 0 | 335 | 8  | 905   | 18  |
| 63,240 | 53 | 1 | 498 | 8  | 19 | 0 | 335 | 8  | 905   | 17  |
| 63,241 | 53 | 1 | 497 | 8  | 19 | 0 | 334 | 8  | 903   | 17  |
| 63,242 | 53 | 1 | 489 | 7  | 19 | 0 | 332 | 8  | 893   | 16  |
| 63,243 | 53 | 1 | 489 | 6  | 20 | 0 | 332 | 8  | 894   | 15  |
| 63,244 | 57 | 1 | 507 | 6  | 23 | 0 | 366 | 8  | 953   | 15  |
| 63,245 | 58 | 1 | 501 | 7  | 23 | 0 | 367 | 8  | 949   | 16  |
| 63,246 | 48 | 1 | 437 | 7  | 21 | 0 | 347 | 8  | 853   | 16  |
| 63,247 | 46 | 1 | 392 | 8  | 21 | 0 | 318 | 8  | 777   | 17  |
| 63,248 | 41 | 1 | 365 | 7  | 21 | 0 | 307 | 6  | 734   | 14  |
| 63,249 | 28 | 1 | 270 | 7  | 16 | 0 | 237 | 6  | 551   | 14  |
| 63,250 | 20 | 2 | 211 | 7  | 12 | 0 | 182 | 6  | 425   | 15  |
| 63,251 | 14 | 2 | 142 | 8  | 9  | 0 | 133 | 6  | 298   | 16  |

|        |    |   |     |    |   |   |     |    |     |    |
|--------|----|---|-----|----|---|---|-----|----|-----|----|
| 63,252 | 12 | 2 | 127 | 9  | 6 | 0 | 120 | 7  | 265 | 18 |
| 63,253 | 12 | 2 | 119 | 10 | 7 | 0 | 113 | 7  | 251 | 19 |
| 63,254 | 12 | 2 | 118 | 10 | 7 | 0 | 113 | 7  | 250 | 19 |
| 63,255 | 12 | 2 | 116 | 10 | 7 | 0 | 112 | 8  | 247 | 20 |
| 63,256 | 12 | 3 | 114 | 10 | 7 | 0 | 111 | 8  | 244 | 21 |
| 63,257 | 12 | 3 | 115 | 11 | 7 | 0 | 111 | 8  | 245 | 22 |
| 63,258 | 13 | 3 | 108 | 12 | 7 | 0 | 108 | 8  | 236 | 23 |
| 63,259 | 10 | 3 | 86  | 11 | 6 | 0 | 93  | 8  | 195 | 22 |
| 63,260 | 10 | 3 | 74  | 11 | 6 | 0 | 91  | 8  | 181 | 22 |
| 63,261 | 8  | 3 | 49  | 12 | 6 | 0 | 58  | 8  | 121 | 23 |
| 63,262 | 8  | 3 | 49  | 12 | 6 | 0 | 58  | 8  | 121 | 23 |
| 63,263 | 9  | 3 | 49  | 12 | 6 | 0 | 57  | 8  | 121 | 23 |
| 63,264 | 9  | 3 | 50  | 12 | 6 | 0 | 57  | 8  | 122 | 23 |
| 63,265 | 9  | 3 | 50  | 12 | 6 | 0 | 57  | 9  | 122 | 24 |
| 63,266 | 8  | 3 | 50  | 12 | 6 | 0 | 57  | 9  | 121 | 24 |
| 63,267 | 8  | 3 | 50  | 11 | 6 | 0 | 57  | 9  | 121 | 23 |
| 63,268 | 8  | 2 | 50  | 11 | 6 | 0 | 57  | 9  | 121 | 22 |
| 63,269 | 8  | 2 | 50  | 11 | 6 | 0 | 58  | 9  | 122 | 22 |
| 63,270 | 8  | 2 | 50  | 11 | 6 | 0 | 58  | 9  | 122 | 22 |
| 63,271 | 8  | 2 | 50  | 11 | 6 | 0 | 58  | 9  | 122 | 22 |
| 63,272 | 8  | 3 | 50  | 14 | 6 | 1 | 58  | 17 | 122 | 35 |
| 63,273 | 8  | 3 | 50  | 14 | 6 | 1 | 58  | 19 | 122 | 37 |
| 63,274 | 8  | 3 | 51  | 17 | 6 | 4 | 58  | 19 | 123 | 43 |
| 63,275 | 8  | 3 | 51  | 16 | 6 | 4 | 58  | 19 | 123 | 42 |
| 63,276 | 8  | 4 | 51  | 16 | 6 | 4 | 58  | 19 | 123 | 43 |
| 63,277 | 8  | 4 | 50  | 16 | 6 | 4 | 58  | 19 | 122 | 43 |
| 63,278 | 8  | 4 | 50  | 16 | 6 | 4 | 58  | 19 | 122 | 43 |
| 63,279 | 8  | 4 | 50  | 16 | 6 | 4 | 58  | 19 | 122 | 43 |
| 63,280 | 8  | 4 | 50  | 16 | 6 | 4 | 58  | 18 | 122 | 42 |
| 63,281 | 8  | 4 | 48  | 16 | 6 | 4 | 58  | 18 | 120 | 42 |
| 63,282 | 8  | 4 | 47  | 16 | 6 | 4 | 57  | 15 | 118 | 39 |
| 63,283 | 8  | 4 | 47  | 16 | 6 | 4 | 58  | 15 | 119 | 39 |
| 63,284 | 8  | 4 | 47  | 16 | 7 | 4 | 57  | 14 | 119 | 38 |
| 63,285 | 8  | 4 | 43  | 16 | 7 | 4 | 52  | 14 | 110 | 38 |
| 63,286 | 7  | 4 | 42  | 16 | 7 | 4 | 52  | 14 | 108 | 38 |
| 63,287 | 7  | 4 | 43  | 16 | 7 | 4 | 52  | 14 | 109 | 38 |
| 63,288 | 7  | 4 | 43  | 17 | 6 | 4 | 51  | 14 | 107 | 39 |
| 63,289 | 7  | 4 | 43  | 18 | 6 | 4 | 51  | 14 | 107 | 40 |
| 63,290 | 7  | 5 | 41  | 19 | 6 | 4 | 48  | 14 | 102 | 42 |
| 63,291 | 7  | 5 | 41  | 21 | 6 | 4 | 48  | 14 | 102 | 44 |
| 63,292 | 7  | 5 | 43  | 21 | 6 | 4 | 49  | 14 | 105 | 44 |



|        |    |   |     |    |    |   |     |    |     |    |
|--------|----|---|-----|----|----|---|-----|----|-----|----|
| 63,293 | 10 | 5 | 46  | 20 | 7  | 4 | 48  | 14 | 111 | 43 |
| 63,294 | 10 | 5 | 44  | 20 | 6  | 4 | 47  | 14 | 107 | 43 |
| 63,295 | 6  | 5 | 24  | 20 | 3  | 4 | 12  | 14 | 45  | 43 |
| 63,296 | 5  | 5 | 25  | 20 | 4  | 4 | 11  | 14 | 45  | 43 |
| 63,297 | 5  | 5 | 23  | 19 | 4  | 4 | 9   | 14 | 41  | 42 |
| 63,298 | 5  | 5 | 23  | 20 | 4  | 4 | 9   | 14 | 41  | 43 |
| 63,299 | 5  | 6 | 29  | 19 | 4  | 4 | 13  | 14 | 51  | 43 |
| 63,300 | 5  | 6 | 28  | 19 | 4  | 4 | 13  | 14 | 50  | 43 |
| 63,301 | 11 | 5 | 80  | 17 | 9  | 4 | 39  | 14 | 139 | 40 |
| 63,302 | 11 | 5 | 80  | 17 | 9  | 4 | 39  | 14 | 139 | 40 |
| 63,303 | 11 | 5 | 86  | 15 | 9  | 4 | 41  | 13 | 147 | 37 |
| 63,304 | 11 | 5 | 86  | 15 | 8  | 4 | 41  | 13 | 146 | 37 |
| 63,305 | 11 | 5 | 106 | 15 | 10 | 4 | 49  | 12 | 176 | 36 |
| 63,306 | 11 | 5 | 106 | 15 | 10 | 4 | 49  | 12 | 176 | 36 |
| 63,307 | 13 | 4 | 182 | 14 | 12 | 4 | 91  | 12 | 298 | 34 |
| 63,308 | 13 | 4 | 186 | 14 | 12 | 4 | 91  | 12 | 302 | 34 |
| 63,309 | 12 | 4 | 186 | 14 | 12 | 4 | 91  | 12 | 301 | 34 |
| 63,310 | 13 | 4 | 197 | 14 | 12 | 4 | 94  | 13 | 316 | 35 |
| 63,311 | 13 | 4 | 196 | 14 | 12 | 4 | 94  | 13 | 315 | 35 |
| 63,312 | 13 | 4 | 195 | 13 | 12 | 4 | 93  | 13 | 313 | 34 |
| 63,313 | 15 | 4 | 204 | 13 | 12 | 4 | 96  | 13 | 327 | 34 |
| 63,314 | 15 | 4 | 216 | 13 | 13 | 4 | 101 | 13 | 345 | 34 |
| 63,315 | 15 | 4 | 216 | 13 | 13 | 4 | 101 | 13 | 345 | 34 |
| 63,316 | 15 | 4 | 217 | 13 | 13 | 4 | 101 | 12 | 346 | 33 |
| 63,317 | 16 | 4 | 224 | 13 | 13 | 4 | 101 | 12 | 354 | 33 |
| 63,318 | 17 | 4 | 229 | 13 | 13 | 4 | 101 | 12 | 360 | 33 |
| 63,319 | 17 | 4 | 229 | 13 | 13 | 4 | 101 | 12 | 360 | 33 |
| 63,320 | 17 | 4 | 230 | 13 | 13 | 4 | 101 | 12 | 361 | 33 |
| 63,321 | 18 | 4 | 231 | 14 | 13 | 4 | 101 | 12 | 363 | 34 |
| 63,322 | 18 | 3 | 232 | 11 | 13 | 3 | 101 | 4  | 364 | 21 |
| 63,323 | 18 | 3 | 232 | 11 | 13 | 3 | 101 | 2  | 364 | 19 |
| 63,324 | 18 | 3 | 232 | 12 | 13 | 3 | 101 | 2  | 364 | 20 |
| 63,325 | 18 | 3 | 230 | 9  | 13 | 0 | 101 | 3  | 362 | 15 |
| 63,326 | 19 | 2 | 230 | 9  | 13 | 0 | 101 | 3  | 363 | 14 |
| 63,327 | 19 | 2 | 231 | 9  | 13 | 0 | 101 | 3  | 364 | 14 |
| 63,328 | 19 | 2 | 231 | 9  | 13 | 0 | 101 | 3  | 364 | 14 |
| 63,329 | 19 | 2 | 231 | 9  | 13 | 0 | 101 | 3  | 364 | 14 |
| 63,330 | 19 | 2 | 231 | 9  | 13 | 0 | 101 | 3  | 364 | 14 |
| 63,331 | 19 | 2 | 231 | 9  | 13 | 0 | 101 | 4  | 364 | 15 |
| 63,332 | 19 | 2 | 231 | 9  | 13 | 0 | 101 | 4  | 364 | 15 |
| 63,333 | 19 | 2 | 231 | 9  | 13 | 0 | 100 | 4  | 363 | 15 |

|        |    |   |     |     |    |   |     |    |     |     |
|--------|----|---|-----|-----|----|---|-----|----|-----|-----|
| 63,334 | 19 | 2 | 232 | 10  | 13 | 0 | 100 | 4  | 364 | 16  |
| 63,335 | 19 | 2 | 232 | 10  | 12 | 0 | 101 | 4  | 364 | 16  |
| 63,336 | 19 | 2 | 232 | 10  | 12 | 0 | 101 | 4  | 364 | 16  |
| 63,337 | 19 | 2 | 232 | 10  | 12 | 0 | 101 | 4  | 364 | 16  |
| 63,338 | 19 | 2 | 231 | 9   | 12 | 0 | 101 | 4  | 363 | 15  |
| 63,339 | 19 | 2 | 231 | 9   | 12 | 0 | 101 | 4  | 363 | 15  |
| 63,340 | 19 | 2 | 228 | 8   | 12 | 0 | 100 | 3  | 359 | 13  |
| 63,341 | 19 | 1 | 228 | 5   | 12 | 0 | 100 | 3  | 359 | 9   |
| 63,342 | 19 | 2 | 228 | 6   | 12 | 0 | 100 | 3  | 359 | 11  |
| 63,343 | 19 | 2 | 228 | 6   | 12 | 0 | 100 | 3  | 359 | 11  |
| 63,344 | 16 | 2 | 223 | 6   | 11 | 0 | 99  | 3  | 349 | 11  |
| 63,345 | 16 | 2 | 224 | 6   | 11 | 0 | 100 | 3  | 351 | 11  |
| 63,346 | 16 | 3 | 224 | 7   | 11 | 0 | 100 | 4  | 351 | 14  |
| 63,347 | 16 | 3 | 221 | 8   | 10 | 0 | 98  | 5  | 345 | 16  |
| 63,348 | 16 | 3 | 221 | 8   | 10 | 0 | 99  | 5  | 346 | 16  |
| 63,349 | 16 | 3 | 218 | 7   | 10 | 0 | 99  | 5  | 343 | 15  |
| 63,350 | 16 | 2 | 214 | 8   | 11 | 0 | 95  | 7  | 336 | 17  |
| 63,351 | 10 | 2 | 166 | 8   | 7  | 0 | 74  | 7  | 257 | 17  |
| 63,352 | 10 | 5 | 162 | 12  | 6  | 0 | 69  | 9  | 247 | 26  |
| 63,353 | 10 | 5 | 158 | 54  | 6  | 1 | 67  | 9  | 241 | 69  |
| 63,354 | 10 | 5 | 152 | 63  | 6  | 1 | 66  | 11 | 234 | 80  |
| 63,355 | 10 | 5 | 149 | 64  | 6  | 2 | 66  | 11 | 231 | 82  |
| 63,356 | 10 | 7 | 131 | 68  | 4  | 2 | 58  | 16 | 203 | 93  |
| 63,357 | 9  | 7 | 76  | 75  | 3  | 2 | 28  | 20 | 116 | 104 |
| 63,358 | 8  | 8 | 56  | 98  | 2  | 3 | 16  | 40 | 82  | 149 |
| 63,359 | 8  | 9 | 51  | 98  | 2  | 3 | 16  | 41 | 77  | 151 |
| 63,360 | 7  | 9 | 43  | 101 | 2  | 3 | 14  | 41 | 66  | 154 |
| 63,361 | 7  | 9 | 41  | 102 | 2  | 3 | 14  | 41 | 64  | 155 |
| 63,362 | 5  | 9 | 38  | 103 | 2  | 3 | 11  | 41 | 56  | 156 |
| 63,363 | 5  | 9 | 37  | 103 | 2  | 3 | 11  | 41 | 55  | 156 |
| 63,364 | 5  | 9 | 34  | 103 | 1  | 3 | 10  | 41 | 50  | 156 |
| 63,365 | 7  | 9 | 30  | 103 | 2  | 3 | 17  | 41 | 56  | 156 |
| 63,366 | 7  | 9 | 29  | 103 | 2  | 3 | 17  | 41 | 55  | 156 |
| 63,367 | 7  | 9 | 22  | 103 | 2  | 3 | 17  | 41 | 48  | 156 |
| 63,368 | 6  | 9 | 22  | 103 | 2  | 3 | 17  | 41 | 47  | 156 |
| 63,369 | 5  | 9 | 17  | 103 | 2  | 3 | 17  | 41 | 41  | 156 |
| 63,370 | 5  | 9 | 16  | 103 | 2  | 3 | 16  | 41 | 39  | 156 |
| 63,371 | 5  | 9 | 16  | 103 | 2  | 3 | 16  | 41 | 39  | 156 |
| 63,372 | 4  | 9 | 15  | 102 | 2  | 3 | 16  | 41 | 37  | 155 |
| 63,373 | 4  | 9 | 17  | 102 | 2  | 3 | 16  | 41 | 39  | 155 |
| 63,374 | 4  | 9 | 17  | 102 | 2  | 3 | 16  | 41 | 39  | 155 |

|        |    |    |     |     |    |   |     |    |     |     |
|--------|----|----|-----|-----|----|---|-----|----|-----|-----|
| 63,375 | 4  | 9  | 17  | 101 | 2  | 3 | 16  | 41 | 39  | 154 |
| 63,376 | 3  | 9  | 23  | 101 | 2  | 3 | 17  | 40 | 45  | 153 |
| 63,377 | 3  | 9  | 23  | 101 | 2  | 3 | 17  | 40 | 45  | 153 |
| 63,378 | 4  | 9  | 33  | 101 | 3  | 3 | 18  | 40 | 58  | 153 |
| 63,379 | 4  | 9  | 33  | 102 | 3  | 3 | 18  | 40 | 58  | 154 |
| 63,380 | 4  | 9  | 34  | 102 | 3  | 3 | 27  | 40 | 68  | 154 |
| 63,381 | 4  | 9  | 39  | 102 | 4  | 3 | 32  | 39 | 79  | 153 |
| 63,382 | 4  | 9  | 39  | 102 | 4  | 3 | 32  | 39 | 79  | 153 |
| 63,383 | 4  | 9  | 42  | 102 | 4  | 3 | 34  | 39 | 84  | 153 |
| 63,384 | 5  | 9  | 50  | 101 | 4  | 3 | 44  | 39 | 103 | 152 |
| 63,385 | 5  | 9  | 50  | 101 | 4  | 3 | 44  | 39 | 103 | 152 |
| 63,386 | 5  | 9  | 51  | 101 | 4  | 3 | 45  | 39 | 105 | 152 |
| 63,387 | 5  | 10 | 51  | 101 | 4  | 3 | 45  | 39 | 105 | 153 |
| 63,388 | 5  | 10 | 56  | 101 | 4  | 3 | 47  | 39 | 112 | 153 |
| 63,389 | 5  | 10 | 56  | 101 | 4  | 3 | 47  | 39 | 112 | 153 |
| 63,390 | 5  | 10 | 59  | 101 | 5  | 3 | 47  | 39 | 116 | 153 |
| 63,391 | 5  | 10 | 71  | 101 | 6  | 3 | 55  | 39 | 137 | 153 |
| 63,392 | 5  | 9  | 99  | 100 | 10 | 3 | 93  | 39 | 207 | 151 |
| 63,393 | 5  | 9  | 101 | 100 | 10 | 3 | 99  | 39 | 215 | 151 |
| 63,394 | 5  | 9  | 101 | 100 | 10 | 3 | 100 | 39 | 216 | 151 |
| 63,395 | 5  | 9  | 101 | 100 | 10 | 3 | 100 | 39 | 216 | 151 |
| 63,396 | 5  | 8  | 101 | 98  | 10 | 3 | 101 | 37 | 217 | 146 |
| 63,397 | 5  | 9  | 101 | 98  | 10 | 3 | 101 | 37 | 217 | 147 |
| 63,398 | 5  | 9  | 101 | 98  | 10 | 3 | 106 | 37 | 222 | 147 |
| 63,399 | 14 | 9  | 125 | 98  | 12 | 3 | 128 | 37 | 279 | 147 |
| 63,400 | 14 | 9  | 125 | 97  | 12 | 3 | 128 | 35 | 279 | 144 |
| 63,401 | 14 | 9  | 125 | 97  | 11 | 3 | 128 | 35 | 278 | 144 |
| 63,402 | 14 | 9  | 125 | 97  | 11 | 3 | 128 | 35 | 278 | 144 |
| 63,403 | 14 | 6  | 126 | 51  | 11 | 2 | 128 | 33 | 279 | 92  |
| 63,404 | 19 | 6  | 127 | 51  | 11 | 2 | 138 | 33 | 295 | 92  |
| 63,405 | 19 | 6  | 127 | 41  | 11 | 1 | 138 | 31 | 295 | 79  |
| 63,406 | 19 | 4  | 127 | 37  | 11 | 1 | 138 | 27 | 295 | 69  |
| 63,407 | 19 | 4  | 127 | 30  | 11 | 1 | 138 | 23 | 295 | 58  |
| 63,408 | 19 | 3  | 129 | 7   | 11 | 0 | 138 | 3  | 297 | 13  |
| 63,409 | 19 | 3  | 129 | 6   | 11 | 0 | 138 | 2  | 297 | 11  |
| 63,410 | 19 | 3  | 129 | 8   | 11 | 0 | 138 | 4  | 297 | 15  |
| 63,411 | 20 | 3  | 128 | 9   | 12 | 0 | 139 | 5  | 299 | 17  |
| 63,412 | 20 | 5  | 130 | 15  | 12 | 0 | 138 | 7  | 300 | 27  |
| 63,413 | 20 | 5  | 131 | 14  | 13 | 0 | 142 | 7  | 306 | 26  |
| 63,414 | 20 | 5  | 138 | 15  | 14 | 0 | 151 | 7  | 323 | 27  |
| 63,415 | 21 | 5  | 141 | 15  | 14 | 0 | 155 | 7  | 331 | 27  |

|        |    |    |     |     |    |   |     |    |     |     |
|--------|----|----|-----|-----|----|---|-----|----|-----|-----|
| 63,416 | 18 | 5  | 136 | 15  | 13 | 0 | 144 | 7  | 311 | 27  |
| 63,417 | 18 | 5  | 136 | 17  | 13 | 0 | 144 | 8  | 311 | 30  |
| 63,418 | 18 | 5  | 136 | 17  | 13 | 0 | 144 | 9  | 311 | 31  |
| 63,419 | 18 | 5  | 136 | 18  | 13 | 0 | 144 | 11 | 311 | 34  |
| 63,420 | 18 | 5  | 136 | 20  | 13 | 0 | 144 | 11 | 311 | 36  |
| 63,421 | 18 | 5  | 136 | 21  | 13 | 0 | 144 | 11 | 311 | 37  |
| 63,422 | 18 | 5  | 136 | 21  | 13 | 0 | 144 | 11 | 311 | 37  |
| 63,423 | 18 | 5  | 136 | 21  | 13 | 0 | 144 | 11 | 311 | 37  |
| 63,424 | 18 | 5  | 133 | 21  | 13 | 0 | 144 | 11 | 308 | 37  |
| 63,425 | 18 | 5  | 133 | 22  | 13 | 0 | 144 | 11 | 308 | 38  |
| 63,426 | 18 | 5  | 127 | 24  | 13 | 0 | 143 | 11 | 301 | 40  |
| 63,427 | 18 | 5  | 130 | 25  | 13 | 0 | 145 | 11 | 306 | 41  |
| 63,428 | 18 | 6  | 138 | 26  | 13 | 0 | 150 | 11 | 319 | 43  |
| 63,429 | 17 | 6  | 131 | 27  | 12 | 0 | 158 | 11 | 318 | 44  |
| 63,430 | 17 | 6  | 131 | 26  | 13 | 0 | 155 | 12 | 316 | 44  |
| 63,431 | 17 | 6  | 131 | 28  | 14 | 0 | 154 | 12 | 316 | 46  |
| 63,432 | 17 | 6  | 126 | 28  | 13 | 0 | 149 | 12 | 305 | 46  |
| 63,433 | 17 | 6  | 125 | 28  | 13 | 0 | 148 | 12 | 303 | 46  |
| 63,434 | 17 | 6  | 124 | 28  | 13 | 0 | 147 | 12 | 301 | 46  |
| 63,435 | 16 | 6  | 115 | 28  | 13 | 0 | 137 | 12 | 281 | 46  |
| 63,436 | 16 | 6  | 114 | 28  | 13 | 0 | 135 | 12 | 278 | 46  |
| 63,437 | 16 | 7  | 114 | 37  | 13 | 1 | 135 | 16 | 278 | 61  |
| 63,438 | 16 | 15 | 112 | 98  | 13 | 3 | 135 | 62 | 276 | 178 |
| 63,439 | 16 | 15 | 109 | 105 | 13 | 3 | 133 | 62 | 271 | 185 |
| 63,440 | 16 | 15 | 106 | 107 | 12 | 3 | 134 | 63 | 268 | 188 |
| 63,441 | 16 | 17 | 94  | 116 | 11 | 3 | 126 | 63 | 247 | 199 |
| 63,442 | 16 | 17 | 89  | 118 | 9  | 3 | 117 | 65 | 231 | 203 |
| 63,443 | 16 | 18 | 66  | 121 | 7  | 3 | 89  | 67 | 178 | 209 |
| 63,444 | 16 | 18 | 64  | 121 | 7  | 3 | 83  | 67 | 170 | 209 |
| 63,445 | 16 | 18 | 64  | 124 | 7  | 3 | 82  | 68 | 169 | 213 |
| 63,446 | 16 | 18 | 65  | 125 | 7  | 3 | 82  | 68 | 170 | 214 |
| 63,447 | 16 | 17 | 64  | 125 | 7  | 3 | 80  | 69 | 167 | 214 |
| 63,448 | 17 | 17 | 64  | 125 | 7  | 3 | 81  | 69 | 169 | 214 |
| 63,449 | 17 | 17 | 64  | 125 | 7  | 3 | 76  | 69 | 164 | 214 |
| 63,450 | 8  | 17 | 42  | 127 | 5  | 4 | 53  | 70 | 108 | 218 |
| 63,451 | 8  | 17 | 42  | 127 | 5  | 4 | 53  | 71 | 108 | 219 |
| 63,452 | 8  | 17 | 43  | 127 | 5  | 4 | 54  | 71 | 110 | 219 |
| 63,453 | 8  | 17 | 43  | 127 | 5  | 4 | 54  | 72 | 110 | 220 |
| 63,454 | 8  | 17 | 43  | 127 | 5  | 4 | 55  | 72 | 111 | 220 |
| 63,455 | 3  | 17 | 42  | 127 | 5  | 4 | 45  | 72 | 95  | 220 |
| 63,456 | 3  | 17 | 43  | 127 | 5  | 4 | 47  | 72 | 98  | 220 |

|        |    |    |     |     |    |   |     |    |       |     |
|--------|----|----|-----|-----|----|---|-----|----|-------|-----|
| 63,457 | 4  | 17 | 52  | 127 | 6  | 4 | 57  | 71 | 119   | 219 |
| 63,458 | 4  | 17 | 52  | 127 | 6  | 4 | 57  | 71 | 119   | 219 |
| 63,459 | 5  | 17 | 65  | 130 | 6  | 4 | 71  | 71 | 147   | 222 |
| 63,460 | 9  | 18 | 109 | 132 | 6  | 4 | 106 | 74 | 230   | 228 |
| 63,461 | 12 | 18 | 148 | 145 | 5  | 5 | 152 | 81 | 317   | 249 |
| 63,462 | 11 | 18 | 151 | 146 | 6  | 5 | 152 | 86 | 320   | 255 |
| 63,463 | 11 | 17 | 151 | 145 | 6  | 5 | 155 | 84 | 323   | 251 |
| 63,464 | 11 | 17 | 150 | 147 | 5  | 5 | 155 | 85 | 321   | 254 |
| 63,465 | 11 | 17 | 142 | 146 | 4  | 5 | 145 | 85 | 302   | 253 |
| 63,466 | 11 | 17 | 173 | 150 | 7  | 5 | 163 | 85 | 354   | 257 |
| 63,467 | 11 | 17 | 173 | 153 | 7  | 5 | 163 | 87 | 354   | 262 |
| 63,468 | 11 | 17 | 173 | 151 | 7  | 5 | 163 | 86 | 354   | 259 |
| 63,469 | 14 | 17 | 202 | 151 | 7  | 5 | 198 | 85 | 421   | 258 |
| 63,470 | 15 | 17 | 213 | 148 | 7  | 5 | 211 | 83 | 446   | 253 |
| 63,471 | 15 | 17 | 215 | 147 | 7  | 5 | 212 | 83 | 449   | 252 |
| 63,472 | 15 | 17 | 223 | 147 | 7  | 5 | 220 | 83 | 465   | 252 |
| 63,473 | 15 | 17 | 223 | 147 | 7  | 5 | 220 | 83 | 465   | 252 |
| 63,474 | 15 | 17 | 223 | 147 | 7  | 5 | 220 | 83 | 465   | 252 |
| 63,475 | 17 | 17 | 255 | 147 | 9  | 5 | 260 | 83 | 541   | 252 |
| 63,476 | 20 | 17 | 290 | 146 | 10 | 5 | 294 | 86 | 614   | 254 |
| 63,477 | 20 | 18 | 297 | 146 | 11 | 5 | 299 | 87 | 627   | 256 |
| 63,478 | 23 | 18 | 302 | 146 | 11 | 5 | 305 | 88 | 641   | 257 |
| 63,479 | 23 | 17 | 299 | 145 | 11 | 5 | 304 | 88 | 637   | 255 |
| 63,480 | 24 | 17 | 312 | 142 | 11 | 5 | 303 | 87 | 650   | 251 |
| 63,481 | 24 | 17 | 317 | 142 | 10 | 5 | 307 | 87 | 658   | 251 |
| 63,482 | 25 | 17 | 318 | 142 | 9  | 5 | 302 | 87 | 654   | 251 |
| 63,483 | 25 | 17 | 317 | 142 | 9  | 5 | 302 | 87 | 653   | 251 |
| 63,484 | 55 | 17 | 515 | 142 | 22 | 5 | 518 | 88 | 1,110 | 252 |
| 63,485 | 59 | 17 | 555 | 143 | 26 | 5 | 585 | 88 | 1,225 | 253 |
| 63,486 | 61 | 17 | 585 | 144 | 26 | 5 | 592 | 88 | 1,264 | 254 |
| 63,487 | 61 | 17 | 603 | 147 | 29 | 5 | 614 | 90 | 1,307 | 259 |
| 63,488 | 61 | 16 | 604 | 138 | 29 | 4 | 615 | 86 | 1,309 | 244 |
| 63,489 | 61 | 7  | 604 | 77  | 29 | 2 | 616 | 41 | 1,310 | 127 |
| 63,490 | 61 | 5  | 604 | 58  | 29 | 2 | 615 | 38 | 1,309 | 103 |
| 63,491 | 61 | 5  | 604 | 58  | 29 | 2 | 615 | 38 | 1,309 | 103 |
| 63,492 | 61 | 4  | 604 | 55  | 29 | 2 | 614 | 36 | 1,308 | 97  |
| 63,493 | 61 | 4  | 604 | 55  | 29 | 2 | 614 | 36 | 1,308 | 97  |
| 63,494 | 61 | 4  | 604 | 55  | 29 | 2 | 613 | 36 | 1,307 | 97  |
| 63,495 | 61 | 4  | 604 | 55  | 29 | 2 | 614 | 36 | 1,308 | 97  |
| 63,496 | 61 | 4  | 604 | 52  | 29 | 2 | 615 | 36 | 1,309 | 94  |
| 63,497 | 61 | 4  | 603 | 51  | 29 | 3 | 615 | 36 | 1,308 | 94  |

|        |    |   |     |    |    |   |     |    |       |    |
|--------|----|---|-----|----|----|---|-----|----|-------|----|
| 63,498 | 61 | 4 | 607 | 51 | 29 | 3 | 616 | 35 | 1,313 | 93 |
| 63,499 | 60 | 4 | 609 | 51 | 30 | 3 | 615 | 35 | 1,314 | 93 |
| 63,500 | 60 | 4 | 609 | 49 | 30 | 2 | 617 | 34 | 1,316 | 89 |
| 63,501 | 60 | 4 | 609 | 49 | 30 | 2 | 619 | 33 | 1,318 | 88 |
| 63,502 | 60 | 4 | 609 | 49 | 30 | 2 | 619 | 33 | 1,318 | 88 |
| 63,503 | 60 | 4 | 609 | 49 | 30 | 2 | 621 | 32 | 1,320 | 87 |
| 63,504 | 60 | 4 | 609 | 49 | 30 | 2 | 621 | 32 | 1,320 | 87 |
| 63,505 | 60 | 4 | 613 | 49 | 30 | 2 | 622 | 32 | 1,325 | 87 |
| 63,506 | 60 | 4 | 612 | 49 | 30 | 2 | 620 | 32 | 1,322 | 87 |
| 63,507 | 60 | 4 | 610 | 49 | 30 | 2 | 618 | 32 | 1,318 | 87 |
| 63,508 | 59 | 4 | 606 | 49 | 29 | 2 | 613 | 33 | 1,307 | 88 |
| 63,509 | 57 | 4 | 591 | 49 | 29 | 2 | 600 | 34 | 1,277 | 89 |
| 63,510 | 56 | 4 | 566 | 46 | 29 | 2 | 575 | 34 | 1,226 | 86 |
| 63,511 | 54 | 2 | 547 | 44 | 28 | 2 | 565 | 31 | 1,194 | 79 |
| 63,512 | 51 | 2 | 508 | 29 | 28 | 1 | 519 | 22 | 1,106 | 54 |
| 63,513 | 51 | 2 | 504 | 24 | 28 | 1 | 518 | 16 | 1,101 | 43 |
| 63,514 | 51 | 1 | 502 | 16 | 28 | 1 | 515 | 15 | 1,096 | 33 |
| 63,515 | 51 | 1 | 498 | 16 | 28 | 1 | 511 | 16 | 1,088 | 34 |
| 63,516 | 50 | 1 | 473 | 16 | 25 | 1 | 493 | 17 | 1,041 | 35 |
| 63,517 | 50 | 2 | 464 | 15 | 25 | 1 | 489 | 17 | 1,028 | 35 |
| 63,518 | 48 | 2 | 449 | 13 | 25 | 1 | 472 | 15 | 994   | 31 |
| 63,519 | 47 | 2 | 435 | 13 | 25 | 1 | 454 | 15 | 961   | 31 |
| 63,520 | 47 | 2 | 431 | 16 | 25 | 1 | 447 | 15 | 950   | 34 |
| 63,521 | 46 | 2 | 424 | 16 | 25 | 1 | 441 | 15 | 936   | 34 |
| 63,522 | 46 | 3 | 424 | 17 | 25 | 1 | 444 | 16 | 939   | 37 |
| 63,523 | 46 | 3 | 418 | 17 | 25 | 1 | 436 | 16 | 925   | 37 |
| 63,524 | 46 | 3 | 408 | 19 | 25 | 1 | 431 | 16 | 910   | 39 |
| 63,525 | 44 | 3 | 387 | 19 | 23 | 1 | 397 | 16 | 851   | 39 |
| 63,526 | 42 | 3 | 378 | 20 | 22 | 1 | 374 | 15 | 816   | 39 |
| 63,527 | 41 | 2 | 368 | 19 | 22 | 1 | 366 | 15 | 797   | 37 |
| 63,528 | 41 | 2 | 361 | 19 | 21 | 1 | 361 | 15 | 784   | 37 |
| 63,529 | 42 | 2 | 364 | 19 | 22 | 1 | 357 | 14 | 785   | 36 |
| 63,530 | 43 | 2 | 364 | 19 | 22 | 1 | 356 | 14 | 785   | 36 |
| 63,531 | 51 | 2 | 371 | 19 | 23 | 1 | 359 | 14 | 804   | 36 |
| 63,532 | 51 | 2 | 379 | 19 | 23 | 1 | 357 | 14 | 810   | 36 |
| 63,533 | 21 | 2 | 225 | 19 | 10 | 1 | 171 | 16 | 427   | 38 |
| 63,534 | 32 | 2 | 249 | 20 | 13 | 1 | 182 | 16 | 476   | 39 |
| 63,535 | 28 | 2 | 211 | 20 | 9  | 1 | 117 | 16 | 365   | 39 |
| 63,536 | 26 | 2 | 183 | 19 | 9  | 1 | 110 | 18 | 328   | 40 |
| 63,537 | 26 | 2 | 181 | 18 | 9  | 1 | 110 | 18 | 326   | 39 |
| 63,538 | 30 | 2 | 186 | 15 | 8  | 1 | 103 | 16 | 327   | 34 |

|        |    |   |     |    |    |   |     |    |     |    |
|--------|----|---|-----|----|----|---|-----|----|-----|----|
| 63,539 | 36 | 2 | 245 | 15 | 12 | 1 | 178 | 16 | 471 | 34 |
| 63,540 | 37 | 2 | 254 | 15 | 12 | 1 | 180 | 16 | 483 | 34 |
| 63,541 | 37 | 2 | 275 | 14 | 14 | 1 | 186 | 16 | 512 | 33 |
| 63,542 | 37 | 2 | 275 | 14 | 15 | 1 | 186 | 16 | 513 | 33 |
| 63,543 | 37 | 2 | 281 | 14 | 16 | 1 | 194 | 16 | 528 | 33 |
| 63,544 | 37 | 2 | 281 | 14 | 16 | 1 | 194 | 17 | 528 | 34 |
| 63,545 | 37 | 2 | 281 | 14 | 16 | 1 | 194 | 17 | 528 | 34 |
| 63,546 | 40 | 2 | 307 | 14 | 17 | 1 | 216 | 17 | 580 | 34 |
| 63,547 | 40 | 2 | 307 | 14 | 17 | 1 | 216 | 16 | 580 | 33 |
| 63,548 | 40 | 2 | 307 | 14 | 17 | 0 | 216 | 16 | 580 | 32 |
| 63,549 | 42 | 2 | 303 | 14 | 17 | 0 | 218 | 16 | 580 | 32 |
| 63,550 | 42 | 3 | 302 | 14 | 16 | 0 | 218 | 16 | 578 | 33 |
| 63,551 | 42 | 3 | 303 | 14 | 16 | 0 | 217 | 16 | 578 | 33 |
| 63,552 | 42 | 3 | 305 | 14 | 16 | 0 | 219 | 16 | 582 | 33 |
| 63,553 | 42 | 3 | 327 | 14 | 16 | 0 | 227 | 16 | 612 | 33 |
| 63,554 | 42 | 3 | 327 | 14 | 18 | 0 | 224 | 16 | 611 | 33 |
| 63,555 | 42 | 3 | 322 | 14 | 18 | 0 | 222 | 16 | 604 | 33 |
| 63,556 | 42 | 3 | 324 | 14 | 18 | 0 | 222 | 16 | 606 | 33 |
| 63,557 | 42 | 3 | 321 | 14 | 18 | 0 | 221 | 16 | 602 | 33 |
| 63,558 | 42 | 3 | 321 | 14 | 18 | 0 | 220 | 17 | 601 | 34 |
| 63,559 | 43 | 3 | 322 | 14 | 18 | 0 | 220 | 16 | 603 | 33 |
| 63,560 | 43 | 3 | 322 | 16 | 18 | 0 | 219 | 15 | 602 | 34 |
| 63,561 | 43 | 5 | 322 | 19 | 18 | 0 | 219 | 17 | 602 | 41 |
| 63,562 | 43 | 5 | 322 | 19 | 18 | 0 | 219 | 18 | 602 | 42 |
| 63,563 | 43 | 5 | 322 | 19 | 18 | 0 | 219 | 18 | 602 | 42 |
| 63,564 | 43 | 5 | 322 | 19 | 18 | 0 | 219 | 19 | 602 | 43 |
| 63,565 | 43 | 6 | 322 | 20 | 18 | 0 | 219 | 19 | 602 | 45 |
| 63,566 | 43 | 6 | 322 | 20 | 18 | 0 | 219 | 18 | 602 | 44 |
| 63,567 | 43 | 6 | 322 | 20 | 19 | 0 | 219 | 17 | 603 | 43 |
| 63,568 | 43 | 5 | 325 | 17 | 19 | 0 | 221 | 17 | 608 | 39 |
| 63,569 | 43 | 5 | 325 | 19 | 20 | 0 | 221 | 17 | 609 | 41 |
| 63,570 | 43 | 5 | 325 | 18 | 20 | 0 | 221 | 18 | 609 | 41 |
| 63,571 | 43 | 5 | 332 | 16 | 21 | 0 | 223 | 19 | 619 | 40 |
| 63,572 | 43 | 5 | 332 | 16 | 21 | 0 | 223 | 19 | 619 | 40 |
| 63,573 | 43 | 4 | 345 | 15 | 22 | 0 | 228 | 18 | 638 | 37 |
| 63,574 | 45 | 4 | 355 | 13 | 22 | 0 | 232 | 18 | 654 | 35 |
| 63,575 | 45 | 4 | 355 | 13 | 22 | 0 | 232 | 18 | 654 | 35 |
| 63,576 | 45 | 4 | 364 | 13 | 24 | 0 | 237 | 18 | 670 | 35 |
| 63,577 | 47 | 4 | 375 | 13 | 24 | 0 | 242 | 17 | 688 | 34 |
| 63,578 | 47 | 4 | 367 | 12 | 24 | 0 | 240 | 16 | 678 | 32 |
| 63,579 | 51 | 4 | 451 | 12 | 28 | 0 | 263 | 16 | 793 | 32 |

|        |    |   |     |    |    |   |     |    |       |    |
|--------|----|---|-----|----|----|---|-----|----|-------|----|
| 63,580 | 50 | 4 | 475 | 11 | 28 | 0 | 272 | 16 | 825   | 31 |
| 63,581 | 51 | 4 | 527 | 11 | 36 | 0 | 311 | 16 | 925   | 31 |
| 63,582 | 42 | 4 | 504 | 11 | 35 | 0 | 300 | 16 | 881   | 31 |
| 63,583 | 43 | 4 | 497 | 11 | 35 | 0 | 308 | 14 | 883   | 29 |
| 63,584 | 43 | 4 | 491 | 11 | 35 | 0 | 309 | 14 | 878   | 29 |
| 63,585 | 31 | 4 | 429 | 10 | 32 | 0 | 268 | 10 | 760   | 24 |
| 63,586 | 33 | 4 | 435 | 10 | 32 | 0 | 277 | 10 | 777   | 24 |
| 63,587 | 30 | 4 | 430 | 10 | 31 | 0 | 274 | 11 | 765   | 25 |
| 63,588 | 34 | 4 | 489 | 11 | 34 | 0 | 288 | 11 | 845   | 26 |
| 63,589 | 35 | 4 | 457 | 11 | 31 | 0 | 223 | 11 | 746   | 26 |
| 63,590 | 35 | 4 | 490 | 14 | 35 | 0 | 243 | 17 | 803   | 35 |
| 63,591 | 37 | 5 | 554 | 20 | 38 | 0 | 276 | 18 | 905   | 43 |
| 63,592 | 43 | 5 | 762 | 24 | 41 | 0 | 309 | 20 | 1,155 | 49 |
| 63,593 | 43 | 5 | 780 | 27 | 40 | 0 | 316 | 21 | 1,179 | 53 |
| 63,594 | 43 | 5 | 774 | 30 | 39 | 0 | 308 | 21 | 1,164 | 56 |
| 63,595 | 42 | 5 | 760 | 30 | 38 | 0 | 298 | 21 | 1,138 | 56 |
| 63,596 | 40 | 5 | 756 | 30 | 38 | 0 | 286 | 21 | 1,120 | 56 |
| 63,597 | 40 | 5 | 754 | 30 | 38 | 0 | 286 | 21 | 1,118 | 56 |
| 63,598 | 40 | 6 | 753 | 31 | 38 | 0 | 284 | 21 | 1,115 | 58 |
| 63,599 | 38 | 6 | 756 | 36 | 38 | 0 | 283 | 21 | 1,115 | 63 |
| 63,600 | 40 | 6 | 756 | 41 | 38 | 0 | 283 | 22 | 1,117 | 69 |
| 63,601 | 40 | 5 | 757 | 42 | 38 | 0 | 283 | 22 | 1,118 | 69 |
| 63,602 | 40 | 5 | 759 | 42 | 38 | 0 | 284 | 22 | 1,121 | 69 |
| 63,603 | 40 | 5 | 758 | 43 | 38 | 0 | 281 | 23 | 1,117 | 71 |
| 63,604 | 40 | 5 | 735 | 45 | 38 | 0 | 273 | 25 | 1,086 | 75 |
| 63,605 | 40 | 5 | 745 | 48 | 37 | 0 | 277 | 29 | 1,099 | 82 |
| 63,606 | 40 | 5 | 766 | 48 | 38 | 0 | 297 | 29 | 1,141 | 82 |
| 63,607 | 40 | 5 | 778 | 48 | 38 | 0 | 301 | 28 | 1,157 | 81 |
| 63,608 | 40 | 5 | 781 | 48 | 40 | 0 | 304 | 28 | 1,165 | 81 |
| 63,609 | 39 | 5 | 799 | 48 | 40 | 0 | 325 | 28 | 1,203 | 81 |
| 63,610 | 39 | 5 | 800 | 46 | 40 | 0 | 325 | 28 | 1,204 | 79 |
| 63,611 | 39 | 5 | 800 | 46 | 40 | 0 | 325 | 28 | 1,204 | 79 |
| 63,612 | 39 | 3 | 800 | 43 | 40 | 0 | 325 | 26 | 1,204 | 72 |
| 63,613 | 39 | 3 | 800 | 43 | 40 | 0 | 326 | 25 | 1,205 | 71 |
| 63,614 | 39 | 3 | 802 | 44 | 40 | 0 | 326 | 24 | 1,207 | 71 |
| 63,615 | 39 | 2 | 803 | 43 | 40 | 0 | 327 | 23 | 1,209 | 68 |
| 63,616 | 39 | 2 | 803 | 43 | 40 | 0 | 327 | 23 | 1,209 | 68 |
| 63,617 | 39 | 2 | 804 | 43 | 39 | 0 | 329 | 23 | 1,211 | 68 |
| 63,618 | 39 | 2 | 804 | 43 | 39 | 0 | 329 | 23 | 1,211 | 68 |
| 63,619 | 39 | 2 | 801 | 43 | 39 | 0 | 327 | 23 | 1,206 | 68 |
| 63,620 | 39 | 2 | 801 | 40 | 38 | 0 | 327 | 24 | 1,205 | 66 |



|        |    |   |     |    |    |   |     |    |       |    |
|--------|----|---|-----|----|----|---|-----|----|-------|----|
| 63,621 | 39 | 2 | 801 | 41 | 38 | 0 | 327 | 23 | 1,205 | 66 |
| 63,622 | 40 | 2 | 794 | 41 | 37 | 0 | 325 | 22 | 1,196 | 65 |
| 63,623 | 40 | 2 | 779 | 41 | 36 | 0 | 316 | 22 | 1,171 | 65 |
| 63,624 | 40 | 2 | 771 | 41 | 36 | 0 | 315 | 22 | 1,162 | 65 |
| 63,625 | 38 | 2 | 772 | 41 | 36 | 0 | 313 | 22 | 1,159 | 65 |
| 63,626 | 39 | 2 | 781 | 42 | 34 | 0 | 314 | 23 | 1,168 | 67 |
| 63,627 | 42 | 2 | 786 | 42 | 35 | 1 | 317 | 23 | 1,180 | 68 |
| 63,628 | 40 | 2 | 772 | 41 | 35 | 1 | 310 | 22 | 1,157 | 66 |
| 63,629 | 38 | 2 | 700 | 41 | 31 | 1 | 294 | 23 | 1,063 | 67 |
| 63,630 | 36 | 2 | 693 | 41 | 32 | 1 | 290 | 23 | 1,051 | 67 |
| 63,631 | 40 | 2 | 692 | 42 | 31 | 1 | 297 | 23 | 1,060 | 68 |
| 63,632 | 38 | 2 | 638 | 42 | 23 | 1 | 255 | 23 | 954   | 68 |
| 63,633 | 38 | 2 | 638 | 42 | 23 | 1 | 255 | 23 | 954   | 68 |
| 63,634 | 37 | 2 | 635 | 42 | 23 | 1 | 246 | 23 | 941   | 68 |
| 63,635 | 37 | 2 | 634 | 42 | 23 | 1 | 245 | 23 | 939   | 68 |
| 63,636 | 37 | 2 | 634 | 42 | 23 | 1 | 245 | 23 | 939   | 68 |
| 63,637 | 35 | 2 | 625 | 42 | 23 | 1 | 235 | 23 | 918   | 68 |
| 63,638 | 34 | 2 | 607 | 49 | 22 | 2 | 226 | 24 | 889   | 77 |
| 63,639 | 30 | 2 | 549 | 56 | 19 | 2 | 212 | 32 | 810   | 92 |
| 63,640 | 24 | 2 | 526 | 56 | 17 | 2 | 201 | 33 | 768   | 93 |
| 63,641 | 24 | 2 | 490 | 53 | 13 | 2 | 183 | 27 | 710   | 84 |
| 63,642 | 22 | 1 | 430 | 48 | 10 | 2 | 150 | 26 | 612   | 77 |
| 63,643 | 17 | 1 | 202 | 41 | 5  | 2 | 112 | 23 | 336   | 67 |
| 63,644 | 19 | 1 | 186 | 38 | 5  | 2 | 106 | 22 | 316   | 63 |
| 63,645 | 19 | 1 | 194 | 38 | 5  | 2 | 107 | 23 | 325   | 64 |
| 63,646 | 19 | 1 | 196 | 38 | 5  | 2 | 107 | 23 | 327   | 64 |
| 63,647 | 23 | 1 | 220 | 38 | 6  | 2 | 124 | 23 | 373   | 64 |
| 63,648 | 23 | 1 | 220 | 38 | 6  | 2 | 124 | 23 | 373   | 64 |
| 63,649 | 24 | 0 | 232 | 37 | 7  | 2 | 132 | 23 | 395   | 62 |
| 63,650 | 24 | 0 | 229 | 33 | 7  | 2 | 132 | 23 | 392   | 58 |
| 63,651 | 23 | 0 | 246 | 28 | 9  | 2 | 151 | 22 | 429   | 52 |
| 63,652 | 23 | 1 | 244 | 41 | 9  | 3 | 151 | 34 | 427   | 79 |
| 63,653 | 23 | 1 | 241 | 43 | 9  | 3 | 150 | 34 | 423   | 81 |
| 63,654 | 23 | 1 | 246 | 44 | 9  | 3 | 162 | 35 | 440   | 83 |
| 63,655 | 23 | 1 | 246 | 42 | 9  | 3 | 163 | 34 | 441   | 80 |
| 63,656 | 23 | 1 | 236 | 45 | 9  | 3 | 159 | 30 | 427   | 79 |
| 63,657 | 23 | 1 | 216 | 45 | 8  | 3 | 139 | 30 | 386   | 79 |
| 63,658 | 23 | 1 | 202 | 46 | 8  | 3 | 134 | 33 | 367   | 83 |
| 63,659 | 24 | 1 | 202 | 47 | 6  | 3 | 132 | 33 | 364   | 84 |
| 63,660 | 28 | 1 | 190 | 47 | 6  | 3 | 113 | 34 | 337   | 85 |
| 63,661 | 28 | 2 | 190 | 47 | 6  | 3 | 113 | 36 | 337   | 88 |

|        |    |   |     |    |    |   |     |    |     |     |
|--------|----|---|-----|----|----|---|-----|----|-----|-----|
| 63,662 | 28 | 2 | 190 | 47 | 6  | 4 | 112 | 36 | 336 | 89  |
| 63,663 | 28 | 4 | 197 | 51 | 6  | 4 | 112 | 39 | 343 | 98  |
| 63,664 | 29 | 4 | 197 | 52 | 6  | 4 | 113 | 39 | 345 | 99  |
| 63,665 | 29 | 4 | 195 | 52 | 6  | 4 | 113 | 40 | 343 | 100 |
| 63,666 | 29 | 4 | 196 | 52 | 6  | 4 | 113 | 40 | 344 | 100 |
| 63,667 | 29 | 4 | 196 | 52 | 6  | 4 | 113 | 40 | 344 | 100 |
| 63,668 | 29 | 5 | 201 | 52 | 7  | 4 | 113 | 40 | 350 | 101 |
| 63,669 | 29 | 5 | 201 | 53 | 7  | 4 | 113 | 41 | 350 | 103 |
| 63,670 | 30 | 5 | 203 | 55 | 8  | 4 | 113 | 41 | 354 | 105 |
| 63,671 | 30 | 5 | 203 | 55 | 8  | 4 | 113 | 41 | 354 | 105 |
| 63,672 | 29 | 5 | 204 | 54 | 8  | 4 | 113 | 41 | 354 | 104 |
| 63,673 | 30 | 5 | 207 | 54 | 8  | 4 | 115 | 41 | 360 | 104 |
| 63,674 | 30 | 5 | 205 | 54 | 9  | 4 | 115 | 41 | 359 | 104 |
| 63,675 | 30 | 5 | 204 | 54 | 9  | 4 | 115 | 41 | 358 | 104 |
| 63,676 | 30 | 5 | 202 | 53 | 9  | 3 | 115 | 40 | 356 | 101 |
| 63,677 | 29 | 5 | 191 | 53 | 10 | 3 | 113 | 40 | 343 | 101 |
| 63,678 | 26 | 5 | 179 | 53 | 9  | 3 | 107 | 39 | 321 | 100 |
| 63,679 | 26 | 5 | 183 | 53 | 9  | 3 | 112 | 39 | 330 | 100 |
| 63,680 | 24 | 8 | 171 | 55 | 9  | 3 | 105 | 42 | 309 | 108 |
| 63,681 | 23 | 8 | 157 | 55 | 8  | 3 | 101 | 42 | 289 | 108 |
| 63,682 | 19 | 8 | 150 | 54 | 8  | 3 | 90  | 42 | 267 | 107 |
| 63,683 | 21 | 8 | 151 | 54 | 8  | 3 | 90  | 42 | 270 | 107 |
| 63,684 | 21 | 8 | 151 | 54 | 8  | 3 | 89  | 42 | 269 | 107 |
| 63,685 | 21 | 8 | 149 | 55 | 9  | 3 | 89  | 42 | 268 | 108 |
| 63,686 | 22 | 8 | 155 | 55 | 9  | 3 | 90  | 42 | 276 | 108 |
| 63,687 | 24 | 8 | 182 | 56 | 9  | 3 | 97  | 42 | 312 | 109 |
| 63,688 | 24 | 8 | 182 | 56 | 9  | 3 | 96  | 43 | 311 | 110 |
| 63,689 | 25 | 8 | 191 | 59 | 10 | 2 | 97  | 44 | 323 | 113 |
| 63,690 | 33 | 8 | 246 | 51 | 15 | 2 | 166 | 36 | 460 | 97  |
| 63,691 | 33 | 8 | 251 | 51 | 15 | 2 | 167 | 35 | 466 | 96  |
| 63,692 | 33 | 9 | 251 | 66 | 15 | 3 | 166 | 42 | 465 | 120 |
| 63,693 | 33 | 9 | 247 | 67 | 15 | 3 | 165 | 42 | 460 | 121 |
| 63,694 | 32 | 9 | 246 | 67 | 15 | 3 | 164 | 42 | 457 | 121 |
| 63,695 | 30 | 9 | 246 | 68 | 15 | 3 | 163 | 42 | 454 | 122 |
| 63,696 | 30 | 9 | 238 | 68 | 15 | 3 | 162 | 41 | 445 | 121 |
| 63,697 | 31 | 9 | 245 | 68 | 15 | 3 | 169 | 41 | 460 | 121 |
| 63,698 | 27 | 9 | 217 | 68 | 14 | 3 | 152 | 42 | 410 | 122 |
| 63,699 | 26 | 9 | 212 | 68 | 13 | 3 | 148 | 42 | 399 | 122 |
| 63,700 | 27 | 9 | 210 | 68 | 13 | 3 | 149 | 42 | 399 | 122 |
| 63,701 | 26 | 9 | 194 | 67 | 11 | 3 | 131 | 42 | 362 | 121 |
| 63,702 | 26 | 8 | 193 | 53 | 11 | 2 | 133 | 30 | 363 | 93  |

|        |    |   |     |    |    |   |     |    |     |    |
|--------|----|---|-----|----|----|---|-----|----|-----|----|
| 63,703 | 26 | 8 | 193 | 54 | 11 | 2 | 133 | 30 | 363 | 94 |
| 63,704 | 26 | 8 | 189 | 50 | 11 | 2 | 121 | 28 | 347 | 88 |
| 63,705 | 26 | 8 | 188 | 50 | 11 | 2 | 119 | 28 | 344 | 88 |
| 63,706 | 26 | 8 | 188 | 50 | 11 | 2 | 118 | 27 | 343 | 87 |
| 63,707 | 27 | 8 | 190 | 44 | 11 | 3 | 119 | 27 | 347 | 82 |
| 63,708 | 27 | 8 | 192 | 45 | 11 | 3 | 120 | 28 | 350 | 84 |
| 63,709 | 26 | 8 | 192 | 44 | 11 | 3 | 119 | 25 | 348 | 80 |
| 63,710 | 26 | 8 | 189 | 43 | 11 | 3 | 119 | 25 | 345 | 79 |
| 63,711 | 22 | 7 | 182 | 43 | 11 | 3 | 116 | 22 | 331 | 75 |
| 63,712 | 22 | 7 | 182 | 43 | 11 | 2 | 116 | 22 | 331 | 74 |
| 63,713 | 22 | 5 | 177 | 39 | 11 | 2 | 118 | 19 | 328 | 65 |
| 63,714 | 22 | 5 | 175 | 39 | 11 | 2 | 118 | 19 | 326 | 65 |
| 63,715 | 21 | 5 | 175 | 38 | 11 | 2 | 119 | 18 | 326 | 63 |
| 63,716 | 21 | 5 | 175 | 38 | 11 | 2 | 119 | 18 | 326 | 63 |
| 63,717 | 22 | 5 | 174 | 38 | 11 | 2 | 118 | 18 | 325 | 63 |
| 63,718 | 22 | 5 | 172 | 38 | 11 | 2 | 118 | 18 | 323 | 63 |
| 63,719 | 22 | 5 | 168 | 39 | 10 | 2 | 116 | 19 | 316 | 65 |
| 63,720 | 21 | 5 | 166 | 39 | 9  | 2 | 116 | 18 | 312 | 64 |
| 63,721 | 21 | 5 | 172 | 37 | 9  | 2 | 119 | 17 | 321 | 61 |
| 63,722 | 21 | 5 | 171 | 37 | 9  | 2 | 119 | 17 | 320 | 61 |
| 63,723 | 20 | 5 | 170 | 37 | 9  | 2 | 117 | 17 | 316 | 61 |
| 63,724 | 20 | 5 | 169 | 37 | 9  | 2 | 119 | 17 | 317 | 61 |
| 63,725 | 20 | 5 | 169 | 37 | 8  | 2 | 119 | 17 | 316 | 61 |
| 63,726 | 20 | 5 | 169 | 37 | 9  | 2 | 119 | 17 | 317 | 61 |
| 63,727 | 20 | 5 | 169 | 37 | 9  | 2 | 119 | 17 | 317 | 61 |
| 63,728 | 20 | 5 | 168 | 37 | 8  | 2 | 120 | 17 | 316 | 61 |
| 63,729 | 20 | 5 | 169 | 37 | 8  | 2 | 119 | 17 | 316 | 61 |
| 63,730 | 20 | 5 | 160 | 37 | 8  | 2 | 114 | 17 | 302 | 61 |
| 63,731 | 20 | 2 | 154 | 36 | 8  | 2 | 113 | 14 | 295 | 54 |
| 63,732 | 20 | 2 | 153 | 36 | 8  | 2 | 113 | 14 | 294 | 54 |
| 63,733 | 20 | 2 | 150 | 36 | 8  | 2 | 113 | 14 | 291 | 54 |
| 63,734 | 18 | 2 | 149 | 36 | 8  | 2 | 112 | 14 | 287 | 54 |
| 63,735 | 18 | 2 | 149 | 36 | 7  | 2 | 112 | 14 | 286 | 54 |
| 63,736 | 18 | 2 | 148 | 35 | 7  | 2 | 112 | 14 | 285 | 53 |
| 63,737 | 17 | 2 | 144 | 35 | 7  | 2 | 111 | 14 | 279 | 53 |
| 63,738 | 15 | 2 | 117 | 34 | 7  | 2 | 104 | 13 | 243 | 51 |
| 63,739 | 15 | 2 | 111 | 24 | 6  | 2 | 103 | 10 | 235 | 38 |
| 63,740 | 14 | 2 | 108 | 26 | 6  | 2 | 101 | 12 | 229 | 42 |
| 63,741 | 6  | 2 | 52  | 26 | 1  | 2 | 32  | 12 | 91  | 42 |
| 63,742 | 4  | 1 | 41  | 10 | 1  | 1 | 30  | 5  | 76  | 17 |
| 63,743 | 4  | 1 | 36  | 9  | 1  | 1 | 27  | 5  | 68  | 16 |

|        |   |   |    |    |   |   |    |    |    |    |
|--------|---|---|----|----|---|---|----|----|----|----|
| 63,744 | 4 | 1 | 35 | 9  | 1 | 1 | 27 | 5  | 67 | 16 |
| 63,745 | 4 | 1 | 34 | 8  | 1 | 1 | 27 | 5  | 66 | 15 |
| 63,746 | 4 | 1 | 33 | 8  | 1 | 1 | 27 | 4  | 65 | 14 |
| 63,747 | 4 | 1 | 33 | 8  | 1 | 1 | 27 | 4  | 65 | 14 |
| 63,748 | 3 | 1 | 25 | 8  | 1 | 1 | 20 | 4  | 49 | 14 |
| 63,749 | 3 | 1 | 25 | 8  | 1 | 1 | 19 | 4  | 48 | 14 |
| 63,750 | 3 | 1 | 26 | 8  | 1 | 1 | 25 | 4  | 55 | 14 |
| 63,751 | 2 | 1 | 22 | 8  | 1 | 1 | 22 | 4  | 47 | 14 |
| 63,752 | 2 | 1 | 22 | 8  | 1 | 1 | 22 | 4  | 47 | 14 |
| 63,753 | 2 | 1 | 22 | 7  | 1 | 1 | 20 | 4  | 45 | 13 |
| 63,754 | 2 | 1 | 24 | 7  | 1 | 1 | 20 | 4  | 47 | 13 |
| 63,755 | 2 | 1 | 21 | 7  | 1 | 1 | 20 | 4  | 44 | 13 |
| 63,756 | 3 | 1 | 21 | 7  | 1 | 1 | 21 | 4  | 46 | 13 |
| 63,757 | 3 | 1 | 21 | 7  | 1 | 0 | 21 | 4  | 46 | 12 |
| 63,758 | 3 | 1 | 20 | 7  | 1 | 0 | 20 | 4  | 44 | 12 |
| 63,759 | 3 | 1 | 19 | 6  | 1 | 0 | 21 | 3  | 44 | 10 |
| 63,760 | 3 | 1 | 24 | 6  | 1 | 0 | 22 | 3  | 50 | 10 |
| 63,761 | 3 | 1 | 24 | 6  | 1 | 0 | 23 | 3  | 51 | 10 |
| 63,762 | 3 | 1 | 26 | 6  | 1 | 0 | 24 | 3  | 54 | 10 |
| 63,763 | 3 | 1 | 25 | 6  | 1 | 0 | 24 | 3  | 53 | 10 |
| 63,764 | 3 | 1 | 25 | 6  | 1 | 0 | 22 | 3  | 51 | 10 |
| 63,765 | 3 | 1 | 26 | 5  | 1 | 0 | 21 | 3  | 51 | 9  |
| 63,766 | 3 | 1 | 26 | 10 | 1 | 1 | 21 | 6  | 51 | 18 |
| 63,767 | 3 | 1 | 25 | 13 | 1 | 1 | 21 | 6  | 50 | 21 |
| 63,768 | 2 | 1 | 25 | 21 | 1 | 1 | 22 | 9  | 50 | 32 |
| 63,769 | 2 | 1 | 25 | 28 | 1 | 1 | 22 | 10 | 50 | 40 |
| 63,770 | 2 | 0 | 24 | 31 | 1 | 2 | 22 | 10 | 49 | 43 |
| 63,771 | 2 | 4 | 21 | 33 | 1 | 2 | 22 | 11 | 46 | 50 |
| 63,772 | 2 | 4 | 19 | 33 | 1 | 2 | 19 | 11 | 41 | 50 |
| 63,773 | 2 | 5 | 20 | 35 | 1 | 2 | 19 | 11 | 42 | 53 |
| 63,774 | 2 | 5 | 20 | 35 | 1 | 2 | 17 | 12 | 40 | 54 |
| 63,775 | 2 | 5 | 19 | 36 | 1 | 2 | 17 | 12 | 39 | 55 |
| 63,776 | 2 | 5 | 19 | 38 | 0 | 2 | 18 | 12 | 39 | 57 |
| 63,777 | 2 | 5 | 20 | 41 | 0 | 2 | 18 | 13 | 40 | 61 |
| 63,778 | 2 | 5 | 20 | 41 | 0 | 2 | 17 | 13 | 39 | 61 |
| 63,779 | 2 | 6 | 49 | 48 | 0 | 2 | 21 | 15 | 72 | 71 |
| 63,780 | 2 | 6 | 48 | 47 | 0 | 2 | 21 | 15 | 71 | 70 |
| 63,781 | 2 | 7 | 55 | 51 | 0 | 2 | 25 | 15 | 82 | 75 |
| 63,782 | 2 | 7 | 55 | 52 | 0 | 3 | 25 | 16 | 82 | 78 |
| 63,783 | 2 | 7 | 55 | 52 | 0 | 3 | 25 | 17 | 82 | 79 |
| 63,784 | 2 | 7 | 55 | 52 | 0 | 3 | 25 | 17 | 82 | 79 |

|        |   |    |    |    |   |   |    |    |    |     |
|--------|---|----|----|----|---|---|----|----|----|-----|
| 63,785 | 2 | 7  | 55 | 54 | 0 | 3 | 25 | 17 | 82 | 81  |
| 63,786 | 2 | 7  | 54 | 54 | 0 | 3 | 25 | 17 | 81 | 81  |
| 63,787 | 2 | 7  | 55 | 54 | 0 | 3 | 25 | 17 | 82 | 81  |
| 63,788 | 2 | 7  | 55 | 54 | 0 | 3 | 26 | 17 | 83 | 81  |
| 63,789 | 2 | 7  | 55 | 54 | 0 | 3 | 26 | 17 | 83 | 81  |
| 63,790 | 2 | 8  | 55 | 54 | 0 | 3 | 26 | 17 | 83 | 82  |
| 63,791 | 2 | 8  | 55 | 52 | 0 | 3 | 26 | 15 | 83 | 78  |
| 63,792 | 2 | 8  | 55 | 52 | 0 | 3 | 29 | 15 | 86 | 78  |
| 63,793 | 2 | 8  | 55 | 52 | 0 | 3 | 29 | 15 | 86 | 78  |
| 63,794 | 2 | 8  | 56 | 52 | 0 | 3 | 29 | 15 | 87 | 78  |
| 63,795 | 2 | 8  | 56 | 52 | 0 | 3 | 29 | 15 | 87 | 78  |
| 63,796 | 2 | 8  | 57 | 52 | 0 | 3 | 29 | 15 | 88 | 78  |
| 63,797 | 2 | 8  | 57 | 54 | 0 | 3 | 29 | 15 | 88 | 80  |
| 63,798 | 2 | 8  | 56 | 54 | 0 | 3 | 30 | 16 | 88 | 81  |
| 63,799 | 2 | 8  | 56 | 54 | 0 | 3 | 30 | 16 | 88 | 81  |
| 63,800 | 3 | 11 | 57 | 61 | 0 | 3 | 34 | 24 | 94 | 99  |
| 63,801 | 3 | 11 | 55 | 61 | 0 | 3 | 27 | 24 | 85 | 99  |
| 63,802 | 3 | 11 | 55 | 62 | 0 | 3 | 27 | 24 | 85 | 100 |
| 63,803 | 3 | 11 | 55 | 68 | 0 | 3 | 27 | 24 | 85 | 106 |
| 63,804 | 3 | 11 | 55 | 68 | 0 | 3 | 27 | 24 | 85 | 106 |
| 63,805 | 3 | 11 | 53 | 68 | 0 | 3 | 27 | 24 | 83 | 106 |
| 63,806 | 3 | 11 | 53 | 68 | 1 | 3 | 27 | 24 | 84 | 106 |
| 63,807 | 1 | 11 | 53 | 68 | 1 | 3 | 26 | 25 | 81 | 107 |
| 63,808 | 1 | 11 | 50 | 68 | 1 | 3 | 25 | 25 | 77 | 107 |
| 63,809 | 1 | 11 | 50 | 68 | 1 | 3 | 24 | 25 | 76 | 107 |
| 63,810 | 1 | 11 | 48 | 68 | 1 | 3 | 23 | 26 | 73 | 108 |
| 63,811 | 1 | 11 | 45 | 69 | 1 | 3 | 23 | 26 | 70 | 109 |
| 63,812 | 1 | 11 | 43 | 69 | 1 | 3 | 21 | 26 | 66 | 109 |
| 63,813 | 1 | 11 | 43 | 69 | 1 | 3 | 21 | 26 | 66 | 109 |
| 63,814 | 1 | 11 | 43 | 70 | 1 | 3 | 21 | 26 | 66 | 110 |
| 63,815 | 1 | 11 | 43 | 70 | 1 | 3 | 20 | 26 | 65 | 110 |
| 63,816 | 1 | 11 | 43 | 70 | 1 | 3 | 20 | 26 | 65 | 110 |
| 63,817 | 1 | 11 | 43 | 65 | 1 | 2 | 21 | 23 | 66 | 101 |
| 63,818 | 1 | 11 | 43 | 63 | 1 | 2 | 21 | 23 | 66 | 99  |
| 63,819 | 1 | 11 | 43 | 55 | 1 | 2 | 20 | 20 | 65 | 88  |
| 63,820 | 1 | 11 | 62 | 49 | 1 | 2 | 24 | 19 | 88 | 81  |
| 63,821 | 1 | 11 | 64 | 44 | 1 | 1 | 24 | 18 | 90 | 74  |
| 63,822 | 1 | 7  | 67 | 41 | 1 | 1 | 24 | 17 | 93 | 66  |
| 63,823 | 1 | 6  | 68 | 39 | 1 | 1 | 24 | 17 | 94 | 63  |
| 63,824 | 1 | 6  | 67 | 45 | 1 | 3 | 24 | 20 | 93 | 74  |
| 63,825 | 1 | 11 | 68 | 67 | 1 | 3 | 25 | 31 | 95 | 112 |

|        |   |    |    |     |   |   |    |    |    |     |
|--------|---|----|----|-----|---|---|----|----|----|-----|
| 63,826 | 1 | 12 | 69 | 77  | 1 | 4 | 25 | 35 | 96 | 128 |
| 63,827 | 1 | 13 | 69 | 80  | 1 | 4 | 24 | 36 | 95 | 133 |
| 63,828 | 1 | 14 | 69 | 81  | 1 | 4 | 24 | 35 | 95 | 134 |
| 63,829 | 1 | 14 | 64 | 84  | 1 | 4 | 24 | 36 | 90 | 138 |
| 63,830 | 1 | 14 | 40 | 78  | 1 | 4 | 20 | 35 | 62 | 131 |
| 63,831 | 1 | 14 | 33 | 78  | 1 | 4 | 16 | 35 | 51 | 131 |
| 63,832 | 1 | 13 | 33 | 75  | 1 | 4 | 16 | 35 | 51 | 127 |
| 63,833 | 1 | 14 | 33 | 73  | 1 | 3 | 16 | 34 | 51 | 124 |
| 63,834 | 1 | 14 | 33 | 73  | 1 | 3 | 16 | 33 | 51 | 123 |
| 63,835 | 1 | 14 | 33 | 74  | 1 | 3 | 16 | 34 | 51 | 125 |
| 63,836 | 1 | 14 | 33 | 74  | 1 | 3 | 16 | 34 | 51 | 125 |
| 63,837 | 1 | 14 | 32 | 74  | 1 | 3 | 16 | 34 | 50 | 125 |
| 63,838 | 1 | 14 | 33 | 74  | 1 | 3 | 15 | 34 | 50 | 125 |
| 63,839 | 1 | 14 | 34 | 75  | 1 | 3 | 16 | 35 | 52 | 127 |
| 63,840 | 1 | 14 | 34 | 75  | 1 | 3 | 16 | 37 | 52 | 129 |
| 63,841 | 1 | 13 | 34 | 75  | 1 | 3 | 16 | 37 | 52 | 128 |
| 63,842 | 2 | 13 | 35 | 76  | 1 | 3 | 13 | 37 | 51 | 129 |
| 63,843 | 2 | 13 | 35 | 76  | 1 | 3 | 13 | 37 | 51 | 129 |
| 63,844 | 2 | 13 | 34 | 76  | 2 | 3 | 13 | 37 | 51 | 129 |
| 63,845 | 2 | 13 | 35 | 76  | 3 | 3 | 13 | 37 | 53 | 129 |
| 63,846 | 2 | 13 | 35 | 77  | 3 | 3 | 13 | 37 | 53 | 130 |
| 63,847 | 2 | 14 | 34 | 78  | 3 | 3 | 13 | 37 | 52 | 132 |
| 63,848 | 2 | 14 | 34 | 76  | 3 | 3 | 13 | 37 | 52 | 130 |
| 63,849 | 2 | 11 | 34 | 69  | 3 | 3 | 12 | 30 | 51 | 113 |
| 63,850 | 2 | 12 | 34 | 69  | 3 | 3 | 12 | 30 | 51 | 114 |
| 63,851 | 1 | 12 | 33 | 69  | 3 | 3 | 7  | 30 | 44 | 114 |
| 63,852 | 1 | 13 | 33 | 73  | 3 | 3 | 7  | 35 | 44 | 124 |
| 63,853 | 1 | 14 | 33 | 84  | 3 | 3 | 7  | 37 | 44 | 138 |
| 63,854 | 1 | 14 | 33 | 78  | 3 | 3 | 7  | 37 | 44 | 132 |
| 63,855 | 1 | 14 | 33 | 78  | 3 | 3 | 7  | 37 | 44 | 132 |
| 63,856 | 1 | 14 | 33 | 78  | 2 | 3 | 7  | 37 | 43 | 132 |
| 63,857 | 1 | 14 | 33 | 78  | 2 | 3 | 7  | 37 | 43 | 132 |
| 63,858 | 1 | 15 | 33 | 86  | 2 | 3 | 7  | 37 | 43 | 141 |
| 63,859 | 1 | 15 | 33 | 86  | 2 | 3 | 7  | 37 | 43 | 141 |
| 63,860 | 1 | 16 | 33 | 86  | 2 | 3 | 7  | 37 | 43 | 142 |
| 63,861 | 1 | 16 | 33 | 85  | 2 | 3 | 7  | 36 | 43 | 140 |
| 63,862 | 1 | 16 | 33 | 85  | 2 | 3 | 7  | 36 | 43 | 140 |
| 63,863 | 1 | 16 | 34 | 86  | 2 | 3 | 7  | 36 | 44 | 141 |
| 63,864 | 1 | 16 | 34 | 89  | 2 | 3 | 7  | 37 | 44 | 145 |
| 63,865 | 2 | 16 | 34 | 99  | 2 | 3 | 8  | 37 | 46 | 155 |
| 63,866 | 2 | 16 | 33 | 100 | 2 | 3 | 9  | 40 | 46 | 159 |

|        |   |    |    |     |   |   |    |     |    |     |
|--------|---|----|----|-----|---|---|----|-----|----|-----|
| 63,867 | 2 | 16 | 33 | 127 | 2 | 3 | 9  | 48  | 46 | 194 |
| 63,868 | 2 | 19 | 33 | 143 | 2 | 3 | 8  | 51  | 45 | 216 |
| 63,869 | 2 | 19 | 31 | 142 | 2 | 3 | 8  | 52  | 43 | 216 |
| 63,870 | 2 | 19 | 14 | 144 | 2 | 3 | 4  | 54  | 22 | 220 |
| 63,871 | 2 | 19 | 12 | 144 | 2 | 3 | 4  | 56  | 20 | 222 |
| 63,872 | 2 | 21 | 12 | 147 | 2 | 3 | 6  | 57  | 22 | 228 |
| 63,873 | 2 | 22 | 9  | 154 | 2 | 3 | 8  | 60  | 21 | 239 |
| 63,874 | 2 | 22 | 9  | 154 | 2 | 3 | 8  | 60  | 21 | 239 |
| 63,875 | 2 | 22 | 8  | 155 | 2 | 1 | 8  | 59  | 20 | 237 |
| 63,876 | 2 | 17 | 8  | 137 | 2 | 1 | 8  | 48  | 20 | 203 |
| 63,877 | 2 | 17 | 9  | 128 | 2 | 0 | 10 | 46  | 23 | 191 |
| 63,878 | 2 | 16 | 9  | 123 | 2 | 0 | 10 | 46  | 23 | 185 |
| 63,879 | 2 | 15 | 8  | 121 | 2 | 0 | 10 | 49  | 22 | 185 |
| 63,880 | 2 | 16 | 8  | 122 | 2 | 0 | 10 | 49  | 22 | 187 |
| 63,881 | 2 | 15 | 8  | 122 | 2 | 1 | 10 | 49  | 22 | 187 |
| 63,882 | 2 | 15 | 8  | 126 | 2 | 2 | 10 | 51  | 22 | 194 |
| 63,883 | 2 | 16 | 8  | 155 | 2 | 2 | 10 | 53  | 22 | 226 |
| 63,884 | 2 | 15 | 8  | 159 | 2 | 2 | 10 | 56  | 22 | 232 |
| 63,885 | 2 | 16 | 8  | 171 | 2 | 4 | 10 | 71  | 22 | 262 |
| 63,886 | 2 | 16 | 8  | 171 | 2 | 4 | 10 | 70  | 22 | 261 |
| 63,887 | 2 | 17 | 10 | 185 | 2 | 4 | 11 | 71  | 25 | 277 |
| 63,888 | 2 | 17 | 10 | 193 | 2 | 6 | 11 | 76  | 25 | 292 |
| 63,889 | 2 | 17 | 9  | 230 | 2 | 6 | 11 | 80  | 24 | 333 |
| 63,890 | 2 | 17 | 9  | 231 | 2 | 6 | 10 | 80  | 23 | 334 |
| 63,891 | 2 | 18 | 14 | 233 | 2 | 6 | 10 | 80  | 28 | 337 |
| 63,892 | 2 | 21 | 14 | 259 | 2 | 7 | 10 | 83  | 28 | 370 |
| 63,893 | 1 | 23 | 13 | 276 | 2 | 7 | 10 | 90  | 26 | 396 |
| 63,894 | 1 | 23 | 13 | 298 | 2 | 8 | 10 | 102 | 26 | 431 |
| 63,895 | 1 | 24 | 13 | 310 | 1 | 9 | 10 | 114 | 25 | 457 |
| 63,896 | 1 | 24 | 12 | 315 | 0 | 9 | 10 | 115 | 23 | 463 |
| 63,897 | 1 | 24 | 12 | 315 | 0 | 9 | 13 | 115 | 26 | 463 |
| 63,898 | 1 | 24 | 14 | 315 | 1 | 9 | 18 | 115 | 34 | 463 |
| 63,899 | 1 | 23 | 21 | 316 | 2 | 9 | 21 | 113 | 45 | 461 |
| 63,900 | 1 | 23 | 23 | 316 | 2 | 9 | 22 | 116 | 48 | 464 |
| 63,901 | 1 | 23 | 23 | 318 | 2 | 9 | 22 | 117 | 48 | 467 |
| 63,902 | 2 | 23 | 27 | 319 | 2 | 9 | 29 | 118 | 60 | 469 |
| 63,903 | 2 | 21 | 28 | 303 | 2 | 9 | 30 | 111 | 62 | 444 |
| 63,904 | 2 | 21 | 29 | 306 | 2 | 9 | 30 | 112 | 63 | 448 |
| 63,905 | 2 | 21 | 29 | 308 | 2 | 9 | 30 | 112 | 63 | 450 |
| 63,906 | 2 | 23 | 29 | 308 | 2 | 9 | 30 | 112 | 63 | 452 |
| 63,907 | 2 | 23 | 29 | 307 | 2 | 9 | 30 | 112 | 63 | 451 |

|        |   |    |    |     |   |    |    |     |    |     |
|--------|---|----|----|-----|---|----|----|-----|----|-----|
| 63,908 | 2 | 23 | 30 | 308 | 2 | 9  | 31 | 112 | 65 | 452 |
| 63,909 | 2 | 22 | 30 | 301 | 2 | 9  | 31 | 112 | 65 | 444 |
| 63,910 | 3 | 22 | 30 | 305 | 2 | 9  | 31 | 113 | 66 | 449 |
| 63,911 | 3 | 21 | 30 | 307 | 2 | 9  | 31 | 113 | 66 | 450 |
| 63,912 | 3 | 22 | 30 | 316 | 2 | 9  | 32 | 122 | 67 | 469 |
| 63,913 | 3 | 22 | 36 | 320 | 2 | 9  | 32 | 123 | 73 | 474 |
| 63,914 | 3 | 25 | 35 | 322 | 2 | 9  | 32 | 126 | 72 | 482 |
| 63,915 | 3 | 25 | 35 | 326 | 2 | 9  | 32 | 128 | 72 | 488 |
| 63,916 | 2 | 25 | 35 | 316 | 2 | 9  | 31 | 126 | 70 | 476 |
| 63,917 | 2 | 25 | 35 | 289 | 2 | 9  | 30 | 118 | 69 | 441 |
| 63,918 | 2 | 25 | 35 | 290 | 2 | 9  | 30 | 118 | 69 | 442 |
| 63,919 | 2 | 22 | 35 | 275 | 2 | 9  | 30 | 117 | 69 | 423 |
| 63,920 | 2 | 22 | 35 | 276 | 2 | 9  | 30 | 118 | 69 | 425 |
| 63,921 | 2 | 22 | 35 | 283 | 2 | 11 | 29 | 124 | 68 | 440 |
| 63,922 | 3 | 22 | 35 | 296 | 2 | 14 | 29 | 126 | 69 | 458 |
| 63,923 | 3 | 29 | 39 | 362 | 2 | 28 | 28 | 200 | 72 | 619 |
| 63,924 | 3 | 31 | 39 | 363 | 2 | 28 | 28 | 197 | 72 | 619 |
| 63,925 | 3 | 42 | 38 | 438 | 2 | 34 | 28 | 233 | 71 | 747 |
| 63,926 | 3 | 45 | 36 | 441 | 2 | 34 | 28 | 235 | 69 | 755 |
| 63,927 | 3 | 45 | 37 | 439 | 2 | 34 | 29 | 235 | 71 | 753 |
| 63,928 | 3 | 46 | 37 | 437 | 2 | 34 | 32 | 232 | 74 | 749 |
| 63,929 | 3 | 46 | 37 | 438 | 2 | 34 | 32 | 231 | 74 | 749 |
| 63,930 | 3 | 45 | 38 | 434 | 2 | 34 | 33 | 228 | 76 | 741 |
| 63,931 | 3 | 45 | 38 | 438 | 2 | 34 | 33 | 228 | 76 | 745 |
| 63,932 | 3 | 45 | 38 | 437 | 2 | 33 | 34 | 228 | 77 | 743 |
| 63,933 | 3 | 45 | 38 | 433 | 2 | 32 | 34 | 226 | 77 | 736 |
| 63,934 | 3 | 44 | 38 | 405 | 2 | 32 | 34 | 224 | 77 | 705 |
| 63,935 | 3 | 43 | 38 | 389 | 2 | 30 | 34 | 208 | 77 | 670 |
| 63,936 | 3 | 43 | 38 | 391 | 2 | 30 | 34 | 208 | 77 | 672 |
| 63,937 | 3 | 43 | 36 | 391 | 2 | 30 | 33 | 210 | 74 | 674 |
| 63,938 | 3 | 42 | 39 | 375 | 2 | 30 | 33 | 209 | 77 | 656 |
| 63,939 | 3 | 42 | 40 | 366 | 2 | 28 | 33 | 203 | 78 | 639 |
| 63,940 | 3 | 42 | 40 | 328 | 2 | 28 | 33 | 199 | 78 | 597 |
| 63,941 | 3 | 38 | 39 | 299 | 2 | 27 | 33 | 194 | 77 | 558 |
| 63,942 | 3 | 38 | 35 | 299 | 2 | 27 | 34 | 194 | 74 | 558 |
| 63,943 | 3 | 38 | 35 | 299 | 2 | 27 | 34 | 194 | 74 | 558 |
| 63,944 | 3 | 36 | 36 | 263 | 2 | 26 | 37 | 177 | 78 | 502 |
| 63,945 | 3 | 35 | 37 | 251 | 2 | 25 | 38 | 167 | 80 | 478 |
| 63,946 | 3 | 36 | 37 | 253 | 2 | 25 | 38 | 167 | 80 | 481 |
| 63,947 | 3 | 35 | 37 | 245 | 2 | 25 | 38 | 168 | 80 | 473 |
| 63,948 | 3 | 35 | 37 | 247 | 2 | 25 | 35 | 173 | 77 | 480 |



|        |    |    |     |     |    |    |     |     |     |     |
|--------|----|----|-----|-----|----|----|-----|-----|-----|-----|
| 63,949 | 3  | 35 | 35  | 250 | 1  | 26 | 30  | 176 | 69  | 487 |
| 63,950 | 3  | 35 | 28  | 249 | 0  | 26 | 28  | 177 | 59  | 487 |
| 63,951 | 3  | 35 | 26  | 247 | 0  | 26 | 28  | 173 | 57  | 481 |
| 63,952 | 3  | 35 | 26  | 247 | 0  | 26 | 28  | 173 | 57  | 481 |
| 63,953 | 2  | 35 | 22  | 246 | 0  | 26 | 21  | 172 | 45  | 479 |
| 63,954 | 2  | 35 | 22  | 243 | 0  | 26 | 23  | 171 | 47  | 475 |
| 63,955 | 2  | 35 | 21  | 243 | 0  | 26 | 23  | 172 | 46  | 476 |
| 63,956 | 2  | 35 | 21  | 241 | 0  | 26 | 24  | 173 | 47  | 475 |
| 63,957 | 2  | 33 | 21  | 241 | 0  | 26 | 23  | 173 | 46  | 473 |
| 63,958 | 2  | 33 | 21  | 241 | 0  | 26 | 23  | 173 | 46  | 473 |
| 63,959 | 2  | 33 | 20  | 242 | 0  | 26 | 23  | 174 | 45  | 475 |
| 63,960 | 2  | 33 | 20  | 242 | 0  | 26 | 23  | 173 | 45  | 474 |
| 63,961 | 1  | 34 | 20  | 240 | 0  | 26 | 24  | 175 | 45  | 475 |
| 63,962 | 1  | 35 | 22  | 247 | 0  | 26 | 24  | 181 | 47  | 489 |
| 63,963 | 1  | 35 | 22  | 244 | 0  | 27 | 23  | 180 | 46  | 486 |
| 63,964 | 1  | 35 | 16  | 240 | 0  | 27 | 23  | 179 | 40  | 481 |
| 63,965 | 1  | 32 | 18  | 228 | 1  | 27 | 24  | 172 | 44  | 459 |
| 63,966 | 2  | 33 | 35  | 234 | 2  | 27 | 40  | 172 | 79  | 466 |
| 63,967 | 2  | 33 | 35  | 234 | 2  | 27 | 40  | 172 | 79  | 466 |
| 63,968 | 2  | 33 | 35  | 234 | 2  | 27 | 40  | 172 | 79  | 466 |
| 63,969 | 2  | 33 | 38  | 233 | 2  | 27 | 42  | 172 | 84  | 465 |
| 63,970 | 2  | 33 | 38  | 232 | 2  | 27 | 42  | 170 | 84  | 462 |
| 63,971 | 3  | 33 | 49  | 209 | 2  | 22 | 50  | 156 | 104 | 420 |
| 63,972 | 4  | 34 | 52  | 210 | 2  | 22 | 51  | 156 | 109 | 422 |
| 63,973 | 3  | 34 | 70  | 210 | 4  | 22 | 64  | 156 | 141 | 422 |
| 63,974 | 3  | 25 | 68  | 142 | 4  | 8  | 63  | 81  | 138 | 256 |
| 63,975 | 4  | 23 | 70  | 135 | 5  | 8  | 62  | 82  | 141 | 248 |
| 63,976 | 4  | 13 | 70  | 60  | 5  | 2  | 63  | 46  | 142 | 121 |
| 63,977 | 5  | 12 | 118 | 60  | 7  | 3  | 126 | 44  | 256 | 119 |
| 63,978 | 8  | 12 | 157 | 61  | 9  | 3  | 157 | 45  | 331 | 121 |
| 63,979 | 8  | 10 | 157 | 61  | 9  | 3  | 152 | 45  | 326 | 119 |
| 63,980 | 8  | 10 | 175 | 62  | 11 | 3  | 159 | 46  | 353 | 121 |
| 63,981 | 13 | 10 | 199 | 59  | 15 | 3  | 182 | 46  | 409 | 118 |
| 63,982 | 13 | 10 | 199 | 59  | 15 | 3  | 181 | 46  | 408 | 118 |
| 63,983 | 14 | 10 | 226 | 60  | 22 | 3  | 222 | 46  | 484 | 119 |
| 63,984 | 14 | 13 | 226 | 64  | 22 | 4  | 223 | 56  | 485 | 137 |
| 63,985 | 14 | 13 | 226 | 64  | 22 | 4  | 223 | 59  | 485 | 140 |
| 63,986 | 14 | 13 | 258 | 63  | 26 | 4  | 271 | 60  | 569 | 140 |
| 63,987 | 14 | 13 | 259 | 61  | 26 | 4  | 275 | 61  | 574 | 139 |
| 63,988 | 14 | 13 | 259 | 61  | 26 | 4  | 275 | 61  | 574 | 139 |
| 63,989 | 14 | 13 | 256 | 61  | 26 | 4  | 275 | 61  | 571 | 139 |

|        |    |    |     |    |    |   |     |    |       |     |
|--------|----|----|-----|----|----|---|-----|----|-------|-----|
| 63,990 | 14 | 13 | 256 | 63 | 26 | 4 | 275 | 61 | 571   | 141 |
| 63,991 | 14 | 13 | 255 | 63 | 26 | 4 | 275 | 63 | 570   | 143 |
| 63,992 | 14 | 13 | 318 | 63 | 27 | 4 | 285 | 63 | 644   | 143 |
| 63,993 | 14 | 13 | 324 | 63 | 27 | 4 | 293 | 63 | 658   | 143 |
| 63,994 | 16 | 13 | 340 | 64 | 27 | 4 | 300 | 64 | 683   | 145 |
| 63,995 | 16 | 13 | 344 | 63 | 28 | 4 | 301 | 62 | 689   | 142 |
| 63,996 | 18 | 13 | 358 | 61 | 29 | 5 | 309 | 61 | 714   | 140 |
| 63,997 | 24 | 14 | 391 | 65 | 29 | 5 | 322 | 62 | 766   | 146 |
| 63,998 | 27 | 14 | 412 | 78 | 29 | 5 | 325 | 62 | 793   | 159 |
| 63,999 | 27 | 14 | 412 | 74 | 29 | 4 | 325 | 55 | 793   | 147 |
| 64,000 | 33 | 14 | 520 | 77 | 34 | 4 | 410 | 57 | 997   | 152 |
| 64,001 | 33 | 15 | 522 | 82 | 34 | 5 | 411 | 57 | 1,000 | 159 |
| 64,002 | 33 | 15 | 522 | 82 | 34 | 5 | 410 | 57 | 999   | 159 |
| 64,003 | 33 | 15 | 521 | 82 | 34 | 5 | 407 | 56 | 995   | 158 |
| 64,004 | 33 | 15 | 521 | 82 | 34 | 5 | 407 | 58 | 995   | 160 |
| 64,005 | 33 | 15 | 521 | 84 | 34 | 5 | 407 | 61 | 995   | 165 |
| 64,006 | 33 | 15 | 522 | 84 | 34 | 5 | 406 | 60 | 995   | 164 |
| 64,007 | 33 | 15 | 522 | 84 | 34 | 5 | 406 | 60 | 995   | 164 |
| 64,008 | 33 | 15 | 526 | 84 | 34 | 5 | 406 | 61 | 999   | 165 |
| 64,009 | 34 | 15 | 529 | 82 | 34 | 5 | 406 | 60 | 1,003 | 162 |
| 64,010 | 34 | 15 | 530 | 82 | 34 | 5 | 406 | 60 | 1,004 | 162 |
| 64,011 | 34 | 15 | 530 | 82 | 34 | 5 | 406 | 61 | 1,004 | 163 |
| 64,012 | 34 | 14 | 530 | 82 | 34 | 5 | 405 | 58 | 1,003 | 159 |
| 64,013 | 34 | 13 | 528 | 73 | 34 | 5 | 405 | 52 | 1,001 | 143 |
| 64,014 | 35 | 12 | 537 | 67 | 33 | 4 | 408 | 46 | 1,013 | 129 |
| 64,015 | 35 | 12 | 541 | 67 | 33 | 4 | 407 | 46 | 1,016 | 129 |
| 64,016 | 35 | 12 | 543 | 67 | 33 | 4 | 408 | 48 | 1,019 | 131 |
| 64,017 | 34 | 11 | 526 | 61 | 32 | 4 | 394 | 48 | 986   | 124 |
| 64,018 | 34 | 11 | 526 | 61 | 32 | 4 | 394 | 48 | 986   | 124 |
| 64,019 | 35 | 11 | 528 | 61 | 32 | 4 | 394 | 48 | 989   | 124 |
| 64,020 | 35 | 11 | 529 | 61 | 32 | 4 | 396 | 48 | 992   | 124 |
| 64,021 | 36 | 11 | 536 | 61 | 32 | 4 | 402 | 48 | 1,006 | 124 |
| 64,022 | 35 | 10 | 526 | 62 | 32 | 4 | 394 | 48 | 987   | 124 |
| 64,023 | 34 | 10 | 526 | 62 | 32 | 4 | 394 | 48 | 986   | 124 |
| 64,024 | 35 | 10 | 509 | 62 | 30 | 4 | 382 | 48 | 956   | 124 |
| 64,025 | 35 | 9  | 514 | 62 | 30 | 4 | 382 | 48 | 961   | 123 |
| 64,026 | 35 | 8  | 529 | 63 | 29 | 4 | 385 | 49 | 978   | 124 |
| 64,027 | 35 | 8  | 532 | 66 | 29 | 4 | 384 | 51 | 980   | 129 |
| 64,028 | 35 | 7  | 514 | 58 | 29 | 3 | 331 | 51 | 909   | 119 |
| 64,029 | 49 | 7  | 765 | 61 | 33 | 3 | 388 | 55 | 1,235 | 126 |
| 64,030 | 49 | 8  | 759 | 77 | 32 | 4 | 387 | 74 | 1,227 | 163 |

|        |    |   |       |    |    |   |     |    |       |     |
|--------|----|---|-------|----|----|---|-----|----|-------|-----|
| 64,031 | 49 | 8 | 747   | 76 | 31 | 4 | 383 | 72 | 1,210 | 160 |
| 64,032 | 95 | 8 | 1,388 | 79 | 69 | 4 | 846 | 72 | 2,398 | 163 |
| 64,033 | 96 | 8 | 1,386 | 81 | 63 | 4 | 816 | 71 | 2,361 | 164 |
| 64,034 | 97 | 8 | 1,367 | 83 | 63 | 4 | 797 | 71 | 2,324 | 166 |
| 64,035 | 97 | 5 | 1,379 | 80 | 62 | 3 | 773 | 63 | 2,311 | 151 |
| 64,036 | 97 | 6 | 1,379 | 80 | 61 | 3 | 773 | 70 | 2,310 | 159 |
| 64,037 | 97 | 6 | 1,378 | 83 | 61 | 3 | 769 | 69 | 2,305 | 161 |
| 64,038 | 98 | 6 | 1,387 | 83 | 61 | 3 | 772 | 68 | 2,318 | 160 |
| 64,039 | 98 | 6 | 1,386 | 88 | 61 | 3 | 773 | 68 | 2,318 | 165 |
| 64,040 | 98 | 7 | 1,374 | 88 | 60 | 3 | 770 | 69 | 2,302 | 167 |
| 64,041 | 97 | 7 | 1,328 | 86 | 60 | 3 | 764 | 69 | 2,249 | 165 |
| 64,042 | 98 | 7 | 1,323 | 87 | 60 | 3 | 763 | 67 | 2,244 | 164 |
| 64,043 | 98 | 7 | 1,317 | 87 | 60 | 3 | 754 | 67 | 2,229 | 164 |
| 64,044 | 99 | 7 | 1,310 | 86 | 60 | 3 | 747 | 68 | 2,216 | 164 |
| 64,045 | 99 | 7 | 1,301 | 86 | 60 | 3 | 746 | 68 | 2,206 | 164 |
| 64,046 | 98 | 7 | 1,297 | 86 | 59 | 3 | 745 | 68 | 2,199 | 164 |
| 64,047 | 96 | 6 | 1,282 | 88 | 58 | 2 | 736 | 68 | 2,172 | 164 |
| 64,048 | 90 | 5 | 1,250 | 84 | 58 | 2 | 724 | 67 | 2,122 | 158 |
| 64,049 | 87 | 5 | 1,236 | 70 | 58 | 2 | 722 | 62 | 2,103 | 139 |
| 64,050 | 87 | 6 | 1,239 | 70 | 58 | 2 | 723 | 63 | 2,107 | 141 |
| 64,051 | 80 | 5 | 1,145 | 62 | 54 | 1 | 649 | 59 | 1,928 | 127 |
| 64,052 | 80 | 5 | 1,144 | 62 | 54 | 1 | 647 | 59 | 1,925 | 127 |
| 64,053 | 81 | 5 | 1,151 | 62 | 54 | 1 | 652 | 60 | 1,938 | 128 |
| 64,054 | 81 | 5 | 1,151 | 63 | 54 | 1 | 652 | 60 | 1,938 | 129 |
| 64,055 | 88 | 5 | 1,196 | 66 | 55 | 1 | 690 | 58 | 2,029 | 130 |
| 64,056 | 88 | 5 | 1,196 | 64 | 55 | 1 | 690 | 54 | 2,029 | 124 |
| 64,057 | 88 | 7 | 1,196 | 67 | 55 | 1 | 690 | 65 | 2,029 | 140 |
| 64,058 | 88 | 7 | 1,194 | 70 | 55 | 2 | 690 | 67 | 2,027 | 146 |
| 64,059 | 89 | 7 | 1,196 | 72 | 55 | 2 | 706 | 67 | 2,046 | 148 |
| 64,060 | 88 | 7 | 1,193 | 80 | 55 | 2 | 706 | 68 | 2,042 | 157 |
| 64,061 | 87 | 7 | 1,187 | 81 | 55 | 2 | 706 | 71 | 2,035 | 161 |
| 64,062 | 88 | 7 | 1,190 | 87 | 55 | 3 | 709 | 73 | 2,042 | 170 |
| 64,063 | 88 | 7 | 1,190 | 89 | 55 | 3 | 710 | 73 | 2,043 | 172 |
| 64,064 | 89 | 7 | 1,196 | 90 | 55 | 3 | 716 | 73 | 2,056 | 173 |
| 64,065 | 89 | 7 | 1,196 | 91 | 55 | 3 | 716 | 75 | 2,056 | 176 |
| 64,066 | 89 | 7 | 1,191 | 92 | 55 | 3 | 716 | 75 | 2,051 | 177 |
| 64,067 | 89 | 7 | 1,194 | 92 | 55 | 3 | 719 | 73 | 2,057 | 175 |
| 64,068 | 89 | 7 | 1,196 | 92 | 55 | 3 | 718 | 73 | 2,058 | 175 |
| 64,069 | 88 | 7 | 1,194 | 92 | 55 | 3 | 718 | 73 | 2,055 | 175 |
| 64,070 | 88 | 7 | 1,193 | 90 | 55 | 3 | 716 | 73 | 2,052 | 173 |
| 64,071 | 88 | 7 | 1,192 | 90 | 55 | 3 | 714 | 74 | 2,049 | 174 |

|        |    |   |       |    |    |   |     |    |       |     |
|--------|----|---|-------|----|----|---|-----|----|-------|-----|
| 64,072 | 87 | 7 | 1,185 | 90 | 55 | 3 | 707 | 74 | 2,034 | 174 |
| 64,073 | 87 | 7 | 1,184 | 90 | 55 | 3 | 707 | 74 | 2,033 | 174 |
| 64,074 | 87 | 7 | 1,181 | 90 | 55 | 3 | 706 | 74 | 2,029 | 174 |
| 64,075 | 86 | 7 | 1,180 | 88 | 55 | 3 | 704 | 73 | 2,025 | 171 |
| 64,076 | 86 | 7 | 1,173 | 88 | 55 | 3 | 704 | 73 | 2,018 | 171 |
| 64,077 | 85 | 7 | 1,156 | 87 | 55 | 3 | 699 | 72 | 1,995 | 169 |
| 64,078 | 85 | 7 | 1,153 | 87 | 55 | 3 | 700 | 72 | 1,993 | 169 |
| 64,079 | 85 | 6 | 1,125 | 85 | 53 | 3 | 691 | 70 | 1,954 | 164 |
| 64,080 | 68 | 6 | 833   | 79 | 47 | 3 | 600 | 64 | 1,548 | 152 |
| 64,081 | 48 | 5 | 606   | 60 | 36 | 2 | 446 | 46 | 1,136 | 113 |
| 64,082 | 46 | 5 | 508   | 62 | 36 | 2 | 423 | 46 | 1,013 | 115 |
| 64,083 | 16 | 5 | 170   | 59 | 5  | 2 | 111 | 46 | 302   | 112 |
| 64,084 | 14 | 5 | 149   | 57 | 4  | 2 | 101 | 47 | 268   | 111 |
| 64,085 | 13 | 5 | 144   | 54 | 3  | 2 | 98  | 47 | 258   | 108 |
| 64,086 | 14 | 4 | 129   | 55 | 2  | 2 | 103 | 37 | 248   | 98  |
| 64,087 | 13 | 4 | 122   | 52 | 2  | 2 | 100 | 36 | 237   | 94  |
| 64,088 | 13 | 4 | 122   | 52 | 2  | 2 | 100 | 36 | 237   | 94  |
| 64,089 | 13 | 4 | 122   | 47 | 2  | 2 | 100 | 35 | 237   | 88  |
| 64,090 | 13 | 4 | 122   | 49 | 2  | 2 | 100 | 35 | 237   | 90  |
| 64,091 | 14 | 3 | 122   | 49 | 2  | 2 | 104 | 34 | 242   | 88  |
| 64,092 | 14 | 3 | 122   | 49 | 2  | 2 | 104 | 34 | 242   | 88  |
| 64,093 | 14 | 4 | 122   | 51 | 2  | 2 | 104 | 42 | 242   | 99  |
| 64,094 | 14 | 4 | 122   | 51 | 2  | 2 | 104 | 42 | 242   | 99  |
| 64,095 | 12 | 5 | 126   | 56 | 2  | 2 | 104 | 50 | 244   | 113 |
| 64,096 | 12 | 5 | 126   | 58 | 2  | 2 | 104 | 50 | 244   | 115 |
| 64,097 | 20 | 5 | 184   | 57 | 2  | 2 | 121 | 50 | 327   | 114 |
| 64,098 | 20 | 5 | 185   | 55 | 2  | 2 | 123 | 51 | 330   | 113 |
| 64,099 | 21 | 5 | 207   | 55 | 4  | 2 | 129 | 51 | 361   | 113 |
| 64,100 | 22 | 4 | 210   | 55 | 4  | 2 | 129 | 51 | 365   | 112 |
| 64,101 | 22 | 4 | 207   | 55 | 4  | 2 | 128 | 51 | 361   | 112 |
| 64,102 | 25 | 4 | 222   | 55 | 6  | 2 | 127 | 51 | 380   | 112 |
| 64,103 | 27 | 4 | 245   | 51 | 6  | 2 | 138 | 51 | 416   | 108 |
| 64,104 | 28 | 4 | 294   | 51 | 10 | 2 | 164 | 51 | 496   | 108 |
| 64,105 | 24 | 4 | 261   | 51 | 10 | 2 | 155 | 52 | 450   | 109 |
| 64,106 | 29 | 2 | 279   | 49 | 15 | 2 | 155 | 45 | 478   | 98  |
| 64,107 | 34 | 2 | 319   | 50 | 16 | 2 | 165 | 46 | 534   | 100 |
| 64,108 | 36 | 2 | 349   | 50 | 17 | 2 | 182 | 46 | 584   | 100 |
| 64,109 | 35 | 2 | 350   | 56 | 17 | 3 | 181 | 47 | 583   | 108 |
| 64,110 | 35 | 2 | 349   | 54 | 17 | 3 | 181 | 46 | 582   | 105 |
| 64,111 | 61 | 2 | 620   | 47 | 38 | 3 | 343 | 45 | 1,062 | 97  |
| 64,112 | 61 | 2 | 622   | 46 | 39 | 3 | 341 | 42 | 1,063 | 93  |

|        |    |   |     |    |    |   |     |    |       |     |
|--------|----|---|-----|----|----|---|-----|----|-------|-----|
| 64,113 | 61 | 2 | 626 | 40 | 39 | 2 | 338 | 39 | 1,064 | 83  |
| 64,114 | 60 | 2 | 627 | 35 | 39 | 2 | 337 | 40 | 1,063 | 79  |
| 64,115 | 60 | 2 | 627 | 35 | 39 | 2 | 336 | 40 | 1,062 | 79  |
| 64,116 | 60 | 2 | 625 | 34 | 39 | 2 | 336 | 38 | 1,060 | 76  |
| 64,117 | 60 | 2 | 625 | 35 | 39 | 2 | 335 | 38 | 1,059 | 77  |
| 64,118 | 60 | 2 | 621 | 35 | 39 | 2 | 333 | 38 | 1,053 | 77  |
| 64,119 | 60 | 2 | 621 | 36 | 39 | 2 | 335 | 38 | 1,055 | 78  |
| 64,120 | 60 | 4 | 621 | 40 | 39 | 2 | 335 | 43 | 1,055 | 89  |
| 64,121 | 60 | 4 | 619 | 40 | 39 | 2 | 335 | 43 | 1,053 | 89  |
| 64,122 | 60 | 5 | 622 | 40 | 39 | 2 | 335 | 42 | 1,056 | 89  |
| 64,123 | 61 | 7 | 625 | 44 | 39 | 3 | 340 | 50 | 1,065 | 104 |
| 64,124 | 61 | 7 | 625 | 45 | 39 | 3 | 340 | 51 | 1,065 | 106 |
| 64,125 | 61 | 7 | 625 | 45 | 39 | 3 | 340 | 51 | 1,065 | 106 |
| 64,126 | 61 | 7 | 626 | 45 | 39 | 3 | 341 | 51 | 1,067 | 106 |
| 64,127 | 61 | 7 | 626 | 46 | 39 | 3 | 342 | 52 | 1,068 | 108 |
| 64,128 | 61 | 7 | 626 | 46 | 39 | 3 | 342 | 52 | 1,068 | 108 |
| 64,129 | 61 | 8 | 626 | 44 | 39 | 3 | 341 | 49 | 1,067 | 104 |
| 64,130 | 61 | 8 | 626 | 45 | 39 | 3 | 341 | 50 | 1,067 | 106 |
| 64,131 | 61 | 8 | 625 | 45 | 39 | 3 | 341 | 50 | 1,066 | 106 |
| 64,132 | 61 | 8 | 625 | 44 | 39 | 3 | 341 | 49 | 1,066 | 104 |
| 64,133 | 61 | 8 | 628 | 43 | 39 | 3 | 341 | 48 | 1,069 | 102 |
| 64,134 | 61 | 8 | 625 | 43 | 39 | 3 | 341 | 48 | 1,066 | 102 |
| 64,135 | 61 | 8 | 621 | 43 | 39 | 3 | 339 | 48 | 1,060 | 102 |
| 64,136 | 60 | 8 | 615 | 40 | 39 | 3 | 333 | 48 | 1,047 | 99  |
| 64,137 | 60 | 8 | 615 | 40 | 39 | 3 | 333 | 48 | 1,047 | 99  |
| 64,138 | 60 | 8 | 614 | 41 | 39 | 3 | 333 | 48 | 1,046 | 100 |
| 64,139 | 60 | 8 | 614 | 41 | 39 | 3 | 333 | 48 | 1,046 | 100 |
| 64,140 | 60 | 8 | 614 | 39 | 39 | 3 | 333 | 46 | 1,046 | 96  |
| 64,141 | 59 | 8 | 614 | 39 | 39 | 3 | 331 | 46 | 1,043 | 96  |
| 64,142 | 59 | 8 | 616 | 39 | 39 | 3 | 331 | 46 | 1,045 | 96  |
| 64,143 | 59 | 7 | 613 | 36 | 39 | 3 | 333 | 38 | 1,044 | 84  |
| 64,144 | 59 | 7 | 611 | 36 | 39 | 3 | 333 | 38 | 1,042 | 84  |
| 64,145 | 59 | 6 | 603 | 31 | 39 | 3 | 334 | 28 | 1,035 | 68  |
| 64,146 | 59 | 6 | 603 | 31 | 39 | 3 | 334 | 28 | 1,035 | 68  |
| 64,147 | 59 | 6 | 599 | 29 | 39 | 3 | 332 | 29 | 1,029 | 67  |
| 64,148 | 57 | 6 | 556 | 29 | 39 | 3 | 320 | 28 | 972   | 66  |
| 64,149 | 57 | 6 | 555 | 29 | 39 | 3 | 318 | 28 | 969   | 66  |
| 64,150 | 56 | 6 | 532 | 29 | 37 | 3 | 311 | 28 | 936   | 66  |
| 64,151 | 55 | 6 | 528 | 29 | 37 | 3 | 312 | 27 | 932   | 65  |
| 64,152 | 54 | 6 | 521 | 29 | 35 | 3 | 327 | 27 | 937   | 65  |
| 64,153 | 56 | 6 | 529 | 29 | 37 | 3 | 328 | 27 | 950   | 65  |

|        |    |   |     |    |    |   |     |    |     |    |
|--------|----|---|-----|----|----|---|-----|----|-----|----|
| 64,154 | 54 | 6 | 525 | 32 | 37 | 3 | 324 | 29 | 940 | 70 |
| 64,155 | 52 | 6 | 472 | 33 | 33 | 3 | 294 | 30 | 851 | 72 |
| 64,156 | 54 | 6 | 470 | 33 | 33 | 3 | 276 | 29 | 833 | 71 |
| 64,157 | 51 | 6 | 457 | 40 | 30 | 3 | 289 | 29 | 827 | 78 |
| 64,158 | 47 | 6 | 419 | 40 | 30 | 3 | 274 | 28 | 770 | 77 |
| 64,159 | 45 | 6 | 389 | 41 | 29 | 3 | 253 | 28 | 716 | 78 |
| 64,160 | 21 | 6 | 129 | 32 | 11 | 1 | 96  | 25 | 257 | 64 |
| 64,161 | 18 | 6 | 109 | 31 | 8  | 1 | 85  | 25 | 220 | 63 |
| 64,162 | 18 | 6 | 104 | 31 | 7  | 1 | 83  | 25 | 212 | 63 |
| 64,163 | 18 | 6 | 100 | 31 | 7  | 1 | 83  | 25 | 208 | 63 |
| 64,164 | 18 | 6 | 99  | 31 | 7  | 1 | 84  | 25 | 208 | 63 |
| 64,165 | 19 | 6 | 106 | 32 | 7  | 1 | 86  | 24 | 218 | 63 |
| 64,166 | 19 | 6 | 106 | 32 | 7  | 1 | 86  | 24 | 218 | 63 |
| 64,167 | 19 | 6 | 108 | 29 | 7  | 1 | 88  | 24 | 222 | 60 |
| 64,168 | 19 | 6 | 110 | 29 | 7  | 1 | 88  | 24 | 224 | 60 |
| 64,169 | 19 | 6 | 111 | 29 | 9  | 1 | 91  | 24 | 230 | 60 |
| 64,170 | 19 | 4 | 111 | 25 | 9  | 1 | 91  | 19 | 230 | 49 |
| 64,171 | 20 | 4 | 116 | 25 | 9  | 1 | 93  | 19 | 238 | 49 |
| 64,172 | 20 | 3 | 116 | 25 | 9  | 1 | 95  | 19 | 240 | 48 |
| 64,173 | 20 | 3 | 116 | 26 | 9  | 1 | 95  | 19 | 240 | 49 |
| 64,174 | 20 | 1 | 114 | 21 | 9  | 0 | 91  | 10 | 234 | 32 |
| 64,175 | 20 | 1 | 114 | 21 | 9  | 0 | 91  | 10 | 234 | 32 |
| 64,176 | 20 | 1 | 113 | 23 | 9  | 0 | 90  | 10 | 232 | 34 |
| 64,177 | 20 | 1 | 113 | 23 | 9  | 0 | 89  | 10 | 231 | 34 |
| 64,178 | 21 | 1 | 118 | 22 | 9  | 0 | 90  | 9  | 238 | 32 |
| 64,179 | 23 | 1 | 145 | 22 | 11 | 0 | 101 | 9  | 280 | 32 |
| 64,180 | 29 | 0 | 161 | 22 | 12 | 0 | 121 | 9  | 323 | 31 |
| 64,181 | 29 | 1 | 160 | 29 | 12 | 0 | 121 | 14 | 322 | 44 |
| 64,182 | 29 | 1 | 160 | 29 | 12 | 0 | 121 | 14 | 322 | 44 |
| 64,183 | 32 | 1 | 206 | 28 | 14 | 0 | 137 | 14 | 389 | 43 |
| 64,184 | 34 | 3 | 233 | 32 | 14 | 0 | 157 | 16 | 438 | 51 |
| 64,185 | 34 | 3 | 234 | 33 | 14 | 0 | 160 | 16 | 442 | 52 |
| 64,186 | 34 | 3 | 234 | 33 | 14 | 0 | 160 | 16 | 442 | 52 |
| 64,187 | 34 | 3 | 234 | 33 | 14 | 0 | 160 | 16 | 442 | 52 |
| 64,188 | 34 | 3 | 234 | 32 | 14 | 0 | 160 | 16 | 442 | 51 |
| 64,189 | 34 | 3 | 234 | 32 | 14 | 0 | 160 | 16 | 442 | 51 |
| 64,190 | 34 | 3 | 234 | 32 | 14 | 0 | 160 | 16 | 442 | 51 |
| 64,191 | 34 | 3 | 235 | 33 | 14 | 0 | 160 | 17 | 443 | 53 |
| 64,192 | 34 | 3 | 233 | 33 | 14 | 0 | 158 | 17 | 439 | 53 |
| 64,193 | 34 | 3 | 233 | 33 | 14 | 0 | 156 | 17 | 437 | 53 |
| 64,194 | 34 | 3 | 235 | 33 | 14 | 0 | 158 | 17 | 441 | 53 |

|        |    |   |     |    |    |   |     |    |     |    |
|--------|----|---|-----|----|----|---|-----|----|-----|----|
| 64,195 | 34 | 3 | 235 | 33 | 14 | 0 | 158 | 17 | 441 | 53 |
| 64,196 | 34 | 3 | 237 | 33 | 14 | 0 | 157 | 17 | 442 | 53 |
| 64,197 | 30 | 3 | 235 | 33 | 14 | 0 | 154 | 17 | 433 | 53 |
| 64,198 | 30 | 3 | 235 | 33 | 14 | 0 | 154 | 16 | 433 | 52 |
| 64,199 | 28 | 3 | 236 | 33 | 14 | 0 | 154 | 16 | 432 | 52 |
| 64,200 | 28 | 3 | 233 | 33 | 14 | 0 | 154 | 16 | 429 | 52 |
| 64,201 | 28 | 3 | 230 | 33 | 14 | 0 | 153 | 16 | 425 | 52 |
| 64,202 | 28 | 3 | 230 | 33 | 16 | 0 | 153 | 16 | 427 | 52 |
| 64,203 | 28 | 4 | 212 | 33 | 16 | 0 | 131 | 16 | 387 | 53 |
| 64,204 | 26 | 4 | 184 | 35 | 14 | 0 | 122 | 20 | 346 | 59 |
| 64,205 | 25 | 4 | 181 | 32 | 13 | 0 | 118 | 18 | 337 | 54 |
| 64,206 | 22 | 4 | 184 | 32 | 13 | 0 | 122 | 17 | 341 | 53 |
| 64,207 | 28 | 5 | 189 | 32 | 13 | 0 | 125 | 19 | 355 | 56 |
| 64,208 | 27 | 5 | 188 | 23 | 11 | 0 | 108 | 15 | 334 | 43 |
| 64,209 | 29 | 5 | 198 | 22 | 11 | 0 | 113 | 15 | 351 | 42 |
| 64,210 | 29 | 5 | 304 | 22 | 13 | 0 | 139 | 15 | 485 | 42 |
| 64,211 | 36 | 5 | 395 | 22 | 19 | 0 | 194 | 15 | 644 | 42 |
| 64,212 | 36 | 5 | 403 | 22 | 19 | 0 | 201 | 15 | 659 | 42 |
| 64,213 | 36 | 5 | 405 | 22 | 19 | 0 | 210 | 15 | 670 | 42 |
| 64,214 | 36 | 5 | 407 | 24 | 19 | 0 | 211 | 15 | 673 | 44 |
| 64,215 | 36 | 5 | 406 | 24 | 19 | 0 | 210 | 15 | 671 | 44 |
| 64,216 | 35 | 5 | 399 | 23 | 19 | 0 | 208 | 15 | 661 | 43 |
| 64,217 | 35 | 5 | 399 | 23 | 19 | 0 | 208 | 15 | 661 | 43 |
| 64,218 | 35 | 5 | 397 | 23 | 19 | 0 | 207 | 15 | 658 | 43 |
| 64,219 | 35 | 5 | 395 | 23 | 19 | 0 | 207 | 16 | 656 | 44 |
| 64,220 | 35 | 5 | 392 | 23 | 17 | 0 | 201 | 16 | 645 | 44 |
| 64,221 | 35 | 5 | 393 | 23 | 17 | 0 | 202 | 16 | 647 | 44 |
| 64,222 | 34 | 5 | 389 | 23 | 17 | 0 | 200 | 16 | 640 | 44 |
| 64,223 | 34 | 5 | 389 | 23 | 17 | 0 | 199 | 16 | 639 | 44 |
| 64,224 | 34 | 5 | 389 | 23 | 17 | 0 | 200 | 18 | 640 | 46 |
| 64,225 | 33 | 5 | 388 | 23 | 17 | 0 | 199 | 18 | 637 | 46 |
| 64,226 | 35 | 6 | 413 | 26 | 17 | 0 | 218 | 25 | 683 | 57 |
| 64,227 | 35 | 6 | 413 | 25 | 17 | 0 | 220 | 28 | 685 | 59 |
| 64,228 | 35 | 6 | 425 | 26 | 17 | 0 | 251 | 30 | 728 | 62 |
| 64,229 | 34 | 6 | 411 | 30 | 17 | 0 | 257 | 35 | 719 | 71 |
| 64,230 | 28 | 6 | 395 | 31 | 16 | 0 | 237 | 36 | 676 | 73 |
| 64,231 | 25 | 6 | 370 | 30 | 16 | 0 | 226 | 36 | 637 | 72 |
| 64,232 | 26 | 5 | 374 | 22 | 16 | 1 | 233 | 32 | 649 | 60 |
| 64,233 | 26 | 7 | 362 | 26 | 15 | 1 | 233 | 34 | 636 | 68 |
| 64,234 | 24 | 7 | 341 | 26 | 15 | 1 | 223 | 34 | 603 | 68 |
| 64,235 | 24 | 5 | 330 | 25 | 15 | 1 | 212 | 32 | 581 | 63 |

|        |    |    |     |     |    |   |     |    |     |     |
|--------|----|----|-----|-----|----|---|-----|----|-----|-----|
| 64,236 | 26 | 5  | 346 | 24  | 16 | 1 | 224 | 32 | 612 | 62  |
| 64,237 | 26 | 5  | 347 | 25  | 16 | 1 | 225 | 32 | 614 | 63  |
| 64,238 | 47 | 5  | 485 | 25  | 23 | 1 | 327 | 32 | 882 | 63  |
| 64,239 | 47 | 5  | 485 | 25  | 23 | 1 | 327 | 32 | 882 | 63  |
| 64,240 | 47 | 5  | 487 | 25  | 23 | 1 | 329 | 32 | 886 | 63  |
| 64,241 | 47 | 5  | 493 | 25  | 23 | 1 | 338 | 32 | 901 | 63  |
| 64,242 | 47 | 5  | 514 | 25  | 23 | 1 | 343 | 31 | 927 | 62  |
| 64,243 | 47 | 5  | 514 | 25  | 23 | 1 | 343 | 31 | 927 | 62  |
| 64,244 | 47 | 5  | 513 | 25  | 23 | 1 | 341 | 31 | 924 | 62  |
| 64,245 | 47 | 5  | 512 | 25  | 23 | 1 | 342 | 31 | 924 | 62  |
| 64,246 | 47 | 5  | 512 | 25  | 23 | 1 | 342 | 31 | 924 | 62  |
| 64,247 | 47 | 5  | 512 | 25  | 23 | 1 | 342 | 31 | 924 | 62  |
| 64,248 | 47 | 5  | 512 | 25  | 23 | 1 | 342 | 32 | 924 | 63  |
| 64,249 | 47 | 5  | 519 | 25  | 23 | 1 | 346 | 33 | 935 | 64  |
| 64,250 | 47 | 5  | 519 | 26  | 23 | 1 | 346 | 36 | 935 | 68  |
| 64,251 | 47 | 5  | 519 | 27  | 23 | 1 | 345 | 38 | 934 | 71  |
| 64,252 | 49 | 5  | 522 | 27  | 23 | 1 | 348 | 38 | 942 | 71  |
| 64,253 | 49 | 5  | 522 | 28  | 21 | 1 | 349 | 40 | 941 | 74  |
| 64,254 | 47 | 4  | 518 | 28  | 20 | 1 | 346 | 40 | 931 | 73  |
| 64,255 | 47 | 6  | 517 | 31  | 20 | 3 | 344 | 39 | 928 | 79  |
| 64,256 | 47 | 8  | 515 | 34  | 20 | 5 | 343 | 45 | 925 | 92  |
| 64,257 | 47 | 8  | 512 | 42  | 20 | 5 | 343 | 48 | 922 | 103 |
| 64,258 | 41 | 12 | 507 | 72  | 20 | 7 | 340 | 82 | 908 | 173 |
| 64,259 | 40 | 12 | 500 | 82  | 20 | 7 | 337 | 85 | 897 | 186 |
| 64,260 | 37 | 12 | 486 | 82  | 19 | 7 | 327 | 85 | 869 | 186 |
| 64,261 | 37 | 12 | 381 | 91  | 17 | 7 | 302 | 85 | 737 | 195 |
| 64,262 | 30 | 14 | 288 | 96  | 11 | 8 | 247 | 90 | 576 | 208 |
| 64,263 | 30 | 14 | 281 | 96  | 11 | 8 | 240 | 94 | 562 | 212 |
| 64,264 | 30 | 16 | 278 | 97  | 11 | 8 | 231 | 95 | 550 | 216 |
| 64,265 | 30 | 16 | 276 | 101 | 11 | 8 | 230 | 96 | 547 | 221 |
| 64,266 | 30 | 16 | 276 | 102 | 11 | 8 | 230 | 96 | 547 | 222 |
| 64,267 | 30 | 17 | 276 | 105 | 11 | 8 | 230 | 97 | 547 | 227 |
| 64,268 | 30 | 17 | 276 | 108 | 11 | 8 | 230 | 99 | 547 | 232 |
| 64,269 | 30 | 17 | 276 | 108 | 11 | 8 | 230 | 99 | 547 | 232 |
| 64,270 | 30 | 17 | 289 | 108 | 11 | 8 | 241 | 98 | 571 | 231 |
| 64,271 | 31 | 17 | 307 | 109 | 12 | 8 | 257 | 98 | 607 | 232 |
| 64,272 | 31 | 17 | 306 | 109 | 12 | 8 | 256 | 98 | 605 | 232 |
| 64,273 | 31 | 17 | 306 | 109 | 12 | 8 | 258 | 98 | 607 | 232 |
| 64,274 | 31 | 17 | 306 | 109 | 12 | 8 | 258 | 96 | 607 | 230 |
| 64,275 | 31 | 17 | 307 | 109 | 13 | 8 | 266 | 96 | 617 | 230 |
| 64,276 | 29 | 17 | 291 | 109 | 13 | 8 | 252 | 96 | 585 | 230 |



|        |    |    |     |     |    |    |     |     |     |     |
|--------|----|----|-----|-----|----|----|-----|-----|-----|-----|
| 64,277 | 29 | 16 | 287 | 102 | 13 | 8  | 253 | 79  | 582 | 205 |
| 64,278 | 29 | 16 | 292 | 102 | 13 | 8  | 256 | 79  | 590 | 205 |
| 64,279 | 28 | 16 | 277 | 102 | 13 | 8  | 225 | 79  | 543 | 205 |
| 64,280 | 27 | 16 | 265 | 101 | 11 | 8  | 207 | 78  | 510 | 203 |
| 64,281 | 27 | 16 | 264 | 101 | 10 | 8  | 205 | 78  | 506 | 203 |
| 64,282 | 27 | 16 | 264 | 101 | 10 | 7  | 203 | 76  | 504 | 200 |
| 64,283 | 27 | 16 | 263 | 101 | 10 | 7  | 202 | 76  | 502 | 200 |
| 64,284 | 31 | 14 | 279 | 98  | 10 | 7  | 211 | 74  | 531 | 193 |
| 64,285 | 31 | 14 | 280 | 98  | 10 | 7  | 213 | 74  | 534 | 193 |
| 64,286 | 29 | 14 | 280 | 94  | 10 | 7  | 207 | 74  | 526 | 189 |
| 64,287 | 30 | 14 | 299 | 99  | 10 | 8  | 216 | 81  | 555 | 202 |
| 64,288 | 23 | 14 | 301 | 104 | 12 | 8  | 190 | 83  | 526 | 209 |
| 64,289 | 12 | 14 | 206 | 112 | 7  | 8  | 138 | 89  | 363 | 223 |
| 64,290 | 21 | 14 | 288 | 113 | 9  | 8  | 194 | 92  | 512 | 227 |
| 64,291 | 22 | 14 | 289 | 113 | 9  | 8  | 191 | 92  | 511 | 227 |
| 64,292 | 22 | 14 | 288 | 114 | 9  | 8  | 192 | 94  | 511 | 230 |
| 64,293 | 22 | 15 | 269 | 115 | 9  | 8  | 187 | 94  | 487 | 232 |
| 64,294 | 22 | 15 | 268 | 115 | 9  | 8  | 195 | 95  | 494 | 233 |
| 64,295 | 22 | 15 | 269 | 122 | 9  | 8  | 196 | 97  | 496 | 242 |
| 64,296 | 24 | 15 | 287 | 124 | 11 | 8  | 214 | 100 | 536 | 247 |
| 64,297 | 24 | 16 | 287 | 134 | 11 | 8  | 215 | 102 | 537 | 260 |
| 64,298 | 24 | 16 | 285 | 138 | 11 | 8  | 215 | 100 | 535 | 262 |
| 64,299 | 24 | 17 | 282 | 142 | 11 | 8  | 217 | 108 | 534 | 275 |
| 64,300 | 24 | 18 | 278 | 148 | 11 | 9  | 214 | 112 | 527 | 287 |
| 64,301 | 22 | 19 | 276 | 155 | 11 | 9  | 213 | 113 | 522 | 296 |
| 64,302 | 25 | 22 | 276 | 164 | 11 | 9  | 213 | 128 | 525 | 323 |
| 64,303 | 26 | 23 | 278 | 178 | 11 | 10 | 213 | 136 | 528 | 347 |
| 64,304 | 26 | 23 | 278 | 177 | 11 | 10 | 212 | 135 | 527 | 345 |
| 64,305 | 26 | 23 | 280 | 178 | 11 | 10 | 215 | 135 | 532 | 346 |
| 64,306 | 26 | 21 | 278 | 180 | 11 | 8  | 215 | 138 | 530 | 347 |
| 64,307 | 26 | 19 | 278 | 176 | 11 | 6  | 214 | 132 | 529 | 333 |
| 64,308 | 26 | 19 | 279 | 171 | 11 | 6  | 215 | 130 | 531 | 326 |
| 64,309 | 26 | 14 | 279 | 142 | 12 | 4  | 215 | 95  | 532 | 255 |
| 64,310 | 26 | 14 | 279 | 132 | 12 | 4  | 215 | 93  | 532 | 243 |
| 64,311 | 27 | 14 | 282 | 132 | 12 | 4  | 220 | 93  | 541 | 243 |
| 64,312 | 27 | 14 | 281 | 123 | 12 | 4  | 218 | 93  | 538 | 234 |
| 64,313 | 27 | 12 | 283 | 118 | 12 | 3  | 219 | 84  | 541 | 217 |
| 64,314 | 27 | 12 | 281 | 117 | 12 | 3  | 219 | 84  | 539 | 216 |
| 64,315 | 32 | 10 | 286 | 115 | 13 | 3  | 222 | 83  | 553 | 211 |
| 64,316 | 34 | 10 | 294 | 112 | 13 | 3  | 224 | 82  | 565 | 207 |
| 64,317 | 34 | 10 | 294 | 111 | 13 | 3  | 224 | 82  | 565 | 206 |

|        |    |    |     |     |    |   |     |    |       |     |
|--------|----|----|-----|-----|----|---|-----|----|-------|-----|
| 64,318 | 34 | 9  | 294 | 108 | 13 | 3 | 224 | 81 | 565   | 201 |
| 64,319 | 39 | 9  | 663 | 105 | 21 | 3 | 279 | 79 | 1,002 | 196 |
| 64,320 | 40 | 9  | 707 | 104 | 21 | 3 | 289 | 79 | 1,057 | 195 |
| 64,321 | 40 | 9  | 708 | 104 | 22 | 3 | 289 | 79 | 1,059 | 195 |
| 64,322 | 39 | 9  | 694 | 107 | 21 | 3 | 274 | 78 | 1,028 | 197 |
| 64,323 | 39 | 9  | 697 | 116 | 21 | 3 | 276 | 83 | 1,033 | 211 |
| 64,324 | 39 | 9  | 696 | 116 | 21 | 3 | 274 | 83 | 1,030 | 211 |
| 64,325 | 39 | 9  | 694 | 118 | 21 | 3 | 273 | 83 | 1,027 | 213 |
| 64,326 | 39 | 9  | 692 | 119 | 20 | 3 | 263 | 83 | 1,014 | 214 |
| 64,327 | 39 | 9  | 688 | 123 | 20 | 4 | 261 | 85 | 1,008 | 221 |
| 64,328 | 39 | 9  | 687 | 120 | 20 | 4 | 258 | 85 | 1,004 | 218 |
| 64,329 | 40 | 9  | 690 | 125 | 20 | 4 | 260 | 85 | 1,010 | 223 |
| 64,330 | 40 | 9  | 688 | 125 | 20 | 4 | 259 | 86 | 1,007 | 224 |
| 64,331 | 40 | 9  | 688 | 125 | 20 | 4 | 260 | 86 | 1,008 | 224 |
| 64,332 | 39 | 9  | 680 | 125 | 20 | 4 | 253 | 86 | 992   | 224 |
| 64,333 | 39 | 9  | 689 | 125 | 20 | 4 | 254 | 86 | 1,002 | 224 |
| 64,334 | 36 | 9  | 680 | 129 | 20 | 4 | 246 | 89 | 982   | 231 |
| 64,335 | 36 | 10 | 679 | 133 | 20 | 4 | 245 | 98 | 980   | 245 |
| 64,336 | 36 | 10 | 679 | 138 | 20 | 4 | 244 | 99 | 979   | 251 |
| 64,337 | 36 | 10 | 669 | 139 | 20 | 4 | 239 | 99 | 964   | 252 |
| 64,338 | 35 | 11 | 642 | 134 | 19 | 3 | 226 | 93 | 922   | 241 |
| 64,339 | 32 | 11 | 604 | 123 | 15 | 3 | 206 | 85 | 857   | 222 |
| 64,340 | 32 | 11 | 597 | 123 | 15 | 3 | 202 | 86 | 846   | 223 |
| 64,341 | 23 | 11 | 513 | 128 | 13 | 3 | 144 | 87 | 693   | 229 |
| 64,342 | 22 | 11 | 506 | 133 | 13 | 3 | 138 | 89 | 679   | 236 |
| 64,343 | 22 | 11 | 505 | 132 | 13 | 3 | 137 | 89 | 677   | 235 |
| 64,344 | 22 | 10 | 505 | 125 | 13 | 3 | 129 | 86 | 669   | 224 |
| 64,345 | 22 | 14 | 504 | 134 | 13 | 3 | 128 | 89 | 667   | 240 |
| 64,346 | 20 | 14 | 487 | 141 | 11 | 3 | 109 | 97 | 627   | 255 |
| 64,347 | 20 | 14 | 486 | 140 | 11 | 3 | 109 | 95 | 626   | 252 |
| 64,348 | 20 | 13 | 485 | 130 | 11 | 3 | 106 | 93 | 622   | 239 |
| 64,349 | 20 | 13 | 485 | 126 | 11 | 3 | 106 | 94 | 622   | 236 |
| 64,350 | 20 | 12 | 485 | 124 | 11 | 3 | 106 | 88 | 622   | 227 |
| 64,351 | 19 | 11 | 486 | 118 | 11 | 2 | 106 | 83 | 622   | 214 |
| 64,352 | 19 | 11 | 486 | 110 | 11 | 2 | 106 | 79 | 622   | 202 |
| 64,353 | 18 | 8  | 495 | 102 | 11 | 2 | 106 | 64 | 630   | 176 |
| 64,354 | 17 | 7  | 494 | 89  | 11 | 1 | 106 | 55 | 628   | 152 |
| 64,355 | 17 | 7  | 494 | 89  | 11 | 1 | 106 | 55 | 628   | 152 |
| 64,356 | 18 | 7  | 493 | 81  | 11 | 1 | 104 | 49 | 626   | 138 |
| 64,357 | 18 | 7  | 494 | 84  | 11 | 1 | 104 | 59 | 627   | 151 |
| 64,358 | 18 | 7  | 493 | 84  | 11 | 1 | 103 | 59 | 625   | 151 |

|        |    |    |     |     |    |    |     |     |       |     |
|--------|----|----|-----|-----|----|----|-----|-----|-------|-----|
| 64,359 | 18 | 7  | 496 | 81  | 10 | 1  | 103 | 58  | 627   | 147 |
| 64,360 | 25 | 7  | 603 | 80  | 13 | 1  | 131 | 57  | 772   | 145 |
| 64,361 | 32 | 7  | 630 | 80  | 13 | 1  | 142 | 57  | 817   | 145 |
| 64,362 | 31 | 7  | 628 | 82  | 14 | 1  | 140 | 57  | 813   | 147 |
| 64,363 | 34 | 7  | 720 | 82  | 16 | 1  | 167 | 57  | 937   | 147 |
| 64,364 | 46 | 7  | 915 | 90  | 28 | 1  | 259 | 60  | 1,248 | 158 |
| 64,365 | 43 | 7  | 931 | 100 | 27 | 1  | 260 | 63  | 1,261 | 171 |
| 64,366 | 43 | 7  | 933 | 103 | 27 | 3  | 260 | 66  | 1,263 | 179 |
| 64,367 | 43 | 13 | 932 | 164 | 27 | 10 | 259 | 107 | 1,261 | 294 |
| 64,368 | 46 | 13 | 965 | 170 | 32 | 10 | 286 | 110 | 1,329 | 303 |
| 64,369 | 41 | 13 | 658 | 171 | 25 | 10 | 261 | 110 | 985   | 304 |
| 64,370 | 40 | 13 | 651 | 172 | 25 | 10 | 260 | 110 | 976   | 305 |
| 64,371 | 40 | 13 | 608 | 173 | 25 | 10 | 240 | 111 | 913   | 307 |
| 64,372 | 49 | 13 | 750 | 173 | 34 | 10 | 299 | 114 | 1,132 | 310 |
| 64,373 | 49 | 13 | 747 | 173 | 34 | 10 | 298 | 114 | 1,128 | 310 |
| 64,374 | 51 | 13 | 759 | 164 | 35 | 10 | 309 | 109 | 1,154 | 296 |
| 64,375 | 51 | 13 | 764 | 165 | 35 | 10 | 311 | 109 | 1,161 | 297 |
| 64,376 | 52 | 13 | 767 | 162 | 36 | 10 | 313 | 109 | 1,168 | 294 |
| 64,377 | 52 | 13 | 767 | 158 | 36 | 9  | 315 | 107 | 1,170 | 287 |
| 64,378 | 52 | 13 | 767 | 158 | 36 | 10 | 315 | 107 | 1,170 | 288 |
| 64,379 | 51 | 13 | 759 | 158 | 36 | 10 | 309 | 107 | 1,155 | 288 |
| 64,380 | 52 | 13 | 768 | 154 | 37 | 10 | 311 | 106 | 1,168 | 283 |
| 64,381 | 52 | 13 | 771 | 154 | 37 | 10 | 311 | 106 | 1,171 | 283 |
| 64,382 | 52 | 13 | 774 | 155 | 37 | 10 | 313 | 106 | 1,176 | 284 |
| 64,383 | 52 | 13 | 778 | 155 | 37 | 10 | 315 | 106 | 1,182 | 284 |
| 64,384 | 52 | 13 | 769 | 150 | 37 | 10 | 314 | 103 | 1,172 | 276 |
| 64,385 | 51 | 12 | 766 | 146 | 37 | 10 | 313 | 94  | 1,167 | 262 |
| 64,386 | 51 | 12 | 767 | 146 | 37 | 10 | 313 | 94  | 1,168 | 262 |
| 64,387 | 51 | 12 | 766 | 140 | 37 | 10 | 313 | 93  | 1,167 | 255 |
| 64,388 | 51 | 12 | 766 | 140 | 37 | 10 | 313 | 93  | 1,167 | 255 |
| 64,389 | 51 | 11 | 766 | 140 | 37 | 10 | 313 | 93  | 1,167 | 254 |
| 64,390 | 51 | 11 | 766 | 139 | 37 | 10 | 313 | 93  | 1,167 | 253 |
| 64,391 | 52 | 11 | 771 | 139 | 37 | 10 | 313 | 94  | 1,173 | 254 |
| 64,392 | 52 | 11 | 775 | 132 | 37 | 10 | 313 | 90  | 1,177 | 243 |
| 64,393 | 52 | 11 | 775 | 127 | 37 | 10 | 313 | 88  | 1,177 | 236 |
| 64,394 | 52 | 11 | 780 | 127 | 37 | 10 | 316 | 86  | 1,185 | 234 |
| 64,395 | 54 | 11 | 804 | 127 | 37 | 10 | 320 | 86  | 1,215 | 234 |
| 64,396 | 55 | 7  | 812 | 119 | 38 | 10 | 327 | 83  | 1,232 | 219 |
| 64,397 | 55 | 7  | 816 | 113 | 38 | 10 | 330 | 76  | 1,239 | 206 |
| 64,398 | 55 | 7  | 816 | 112 | 38 | 10 | 330 | 75  | 1,239 | 204 |
| 64,399 | 69 | 7  | 874 | 112 | 39 | 10 | 392 | 75  | 1,374 | 204 |

|        |    |   |       |     |    |    |     |    |       |     |
|--------|----|---|-------|-----|----|----|-----|----|-------|-----|
| 64,400 | 69 | 7 | 875   | 112 | 39 | 10 | 392 | 74 | 1,375 | 203 |
| 64,401 | 69 | 7 | 914   | 110 | 41 | 10 | 409 | 71 | 1,433 | 198 |
| 64,402 | 69 | 7 | 914   | 110 | 41 | 10 | 409 | 71 | 1,433 | 198 |
| 64,403 | 69 | 6 | 911   | 110 | 41 | 11 | 408 | 71 | 1,429 | 198 |
| 64,404 | 70 | 6 | 991   | 107 | 41 | 11 | 434 | 71 | 1,536 | 195 |
| 64,405 | 73 | 6 | 1,039 | 107 | 45 | 11 | 481 | 71 | 1,638 | 195 |
| 64,406 | 73 | 6 | 1,040 | 107 | 45 | 11 | 482 | 71 | 1,640 | 195 |
| 64,407 | 72 | 6 | 1,039 | 106 | 45 | 11 | 481 | 71 | 1,637 | 194 |
| 64,408 | 72 | 6 | 1,040 | 104 | 45 | 11 | 486 | 61 | 1,643 | 182 |
| 64,409 | 72 | 6 | 1,040 | 104 | 45 | 11 | 486 | 61 | 1,643 | 182 |
| 64,410 | 67 | 6 | 1,008 | 104 | 45 | 11 | 477 | 61 | 1,597 | 182 |
| 64,411 | 65 | 6 | 933   | 104 | 42 | 11 | 458 | 61 | 1,498 | 182 |
| 64,412 | 58 | 6 | 909   | 102 | 40 | 11 | 444 | 60 | 1,451 | 179 |
| 64,413 | 55 | 6 | 822   | 102 | 38 | 11 | 417 | 60 | 1,332 | 179 |
| 64,414 | 44 | 6 | 637   | 102 | 27 | 11 | 334 | 60 | 1,042 | 179 |
| 64,415 | 42 | 6 | 630   | 84  | 27 | 11 | 336 | 54 | 1,035 | 155 |
| 64,416 | 42 | 6 | 621   | 81  | 27 | 9  | 334 | 51 | 1,024 | 147 |
| 64,417 | 40 | 0 | 613   | 19  | 27 | 2  | 332 | 11 | 1,012 | 32  |
| 64,418 | 42 | 0 | 627   | 23  | 28 | 2  | 345 | 13 | 1,042 | 38  |
| 64,419 | 45 | 0 | 584   | 18  | 26 | 2  | 317 | 10 | 972   | 30  |
| 64,420 | 46 | 0 | 571   | 17  | 25 | 3  | 315 | 10 | 957   | 30  |
| 64,421 | 50 | 0 | 606   | 17  | 26 | 3  | 373 | 11 | 1,055 | 31  |
| 64,422 | 47 | 2 | 521   | 16  | 22 | 3  | 351 | 11 | 941   | 32  |
| 64,423 | 41 | 2 | 459   | 13  | 16 | 3  | 313 | 8  | 829   | 26  |
| 64,424 | 44 | 2 | 472   | 13  | 16 | 3  | 337 | 8  | 869   | 26  |
| 64,425 | 44 | 2 | 469   | 15  | 16 | 3  | 337 | 8  | 866   | 28  |
| 64,426 | 44 | 2 | 468   | 14  | 15 | 3  | 336 | 8  | 863   | 27  |
| 64,427 | 43 | 2 | 467   | 16  | 15 | 3  | 335 | 8  | 860   | 29  |
| 64,428 | 43 | 2 | 467   | 16  | 15 | 3  | 333 | 8  | 858   | 29  |
| 64,429 | 42 | 2 | 462   | 22  | 15 | 2  | 336 | 8  | 855   | 34  |
| 64,430 | 42 | 2 | 462   | 22  | 14 | 2  | 336 | 8  | 854   | 34  |
| 64,431 | 42 | 2 | 462   | 22  | 14 | 3  | 336 | 8  | 854   | 35  |
| 64,432 | 42 | 2 | 459   | 25  | 14 | 3  | 336 | 9  | 851   | 39  |
| 64,433 | 42 | 2 | 455   | 25  | 14 | 3  | 333 | 9  | 844   | 39  |
| 64,434 | 42 | 2 | 451   | 25  | 14 | 3  | 331 | 9  | 838   | 39  |
| 64,435 | 42 | 2 | 455   | 25  | 14 | 3  | 331 | 9  | 842   | 39  |
| 64,436 | 42 | 2 | 453   | 28  | 14 | 3  | 331 | 9  | 840   | 42  |
| 64,437 | 42 | 2 | 452   | 29  | 14 | 3  | 331 | 9  | 839   | 43  |
| 64,438 | 42 | 2 | 454   | 29  | 14 | 3  | 332 | 9  | 842   | 43  |
| 64,439 | 49 | 2 | 484   | 29  | 17 | 3  | 347 | 9  | 897   | 43  |
| 64,440 | 48 | 2 | 488   | 29  | 18 | 3  | 350 | 8  | 904   | 42  |

|        |    |   |       |    |    |   |     |    |       |    |
|--------|----|---|-------|----|----|---|-----|----|-------|----|
| 64,441 | 51 | 2 | 523   | 29 | 21 | 3 | 373 | 8  | 968   | 42 |
| 64,442 | 53 | 2 | 538   | 29 | 23 | 3 | 380 | 8  | 994   | 42 |
| 64,443 | 58 | 2 | 645   | 29 | 26 | 3 | 410 | 8  | 1,139 | 42 |
| 64,444 | 58 | 2 | 639   | 29 | 26 | 3 | 407 | 8  | 1,130 | 42 |
| 64,445 | 56 | 2 | 619   | 31 | 26 | 3 | 405 | 8  | 1,106 | 44 |
| 64,446 | 60 | 2 | 761   | 29 | 28 | 3 | 441 | 8  | 1,290 | 42 |
| 64,447 | 65 | 2 | 826   | 27 | 28 | 3 | 440 | 7  | 1,359 | 39 |
| 64,448 | 72 | 2 | 958   | 27 | 34 | 3 | 493 | 7  | 1,557 | 39 |
| 64,449 | 59 | 2 | 968   | 27 | 33 | 3 | 437 | 7  | 1,497 | 39 |
| 64,450 | 60 | 2 | 993   | 27 | 33 | 3 | 440 | 7  | 1,526 | 39 |
| 64,451 | 63 | 2 | 1,039 | 27 | 36 | 3 | 451 | 7  | 1,589 | 39 |
| 64,452 | 64 | 2 | 1,034 | 27 | 36 | 3 | 448 | 8  | 1,582 | 40 |
| 64,453 | 64 | 2 | 1,039 | 29 | 36 | 3 | 445 | 8  | 1,584 | 42 |
| 64,454 | 64 | 2 | 999   | 30 | 36 | 2 | 439 | 8  | 1,538 | 42 |
| 64,455 | 62 | 2 | 988   | 30 | 36 | 2 | 431 | 8  | 1,517 | 42 |
| 64,456 | 59 | 2 | 943   | 30 | 32 | 2 | 392 | 8  | 1,426 | 42 |
| 64,457 | 60 | 2 | 942   | 31 | 32 | 2 | 392 | 9  | 1,426 | 44 |
| 64,458 | 61 | 2 | 954   | 31 | 33 | 2 | 393 | 9  | 1,441 | 44 |
| 64,459 | 61 | 2 | 953   | 31 | 33 | 2 | 393 | 9  | 1,440 | 44 |
| 64,460 | 61 | 2 | 951   | 31 | 33 | 2 | 393 | 9  | 1,438 | 44 |
| 64,461 | 80 | 2 | 1,264 | 31 | 38 | 2 | 533 | 9  | 1,915 | 44 |
| 64,462 | 80 | 2 | 1,282 | 31 | 39 | 2 | 551 | 9  | 1,952 | 44 |
| 64,463 | 80 | 2 | 1,286 | 31 | 39 | 2 | 557 | 9  | 1,962 | 44 |
| 64,464 | 81 | 2 | 1,294 | 31 | 40 | 2 | 582 | 9  | 1,997 | 44 |
| 64,465 | 80 | 2 | 1,286 | 31 | 40 | 2 | 572 | 9  | 1,978 | 44 |
| 64,466 | 80 | 2 | 1,286 | 31 | 41 | 2 | 570 | 9  | 1,977 | 44 |
| 64,467 | 80 | 2 | 1,284 | 27 | 41 | 2 | 570 | 6  | 1,975 | 37 |
| 64,468 | 80 | 2 | 1,282 | 28 | 41 | 2 | 571 | 8  | 1,974 | 40 |
| 64,469 | 78 | 2 | 1,266 | 31 | 40 | 2 | 558 | 10 | 1,942 | 45 |
| 64,470 | 73 | 2 | 1,231 | 30 | 37 | 2 | 537 | 10 | 1,878 | 44 |
| 64,471 | 72 | 2 | 1,230 | 30 | 38 | 1 | 532 | 10 | 1,872 | 43 |
| 64,472 | 68 | 3 | 1,188 | 30 | 37 | 1 | 472 | 10 | 1,765 | 44 |
| 64,473 | 63 | 1 | 1,166 | 30 | 36 | 1 | 439 | 9  | 1,704 | 41 |
| 64,474 | 64 | 1 | 1,163 | 30 | 36 | 1 | 436 | 9  | 1,699 | 41 |
| 64,475 | 64 | 1 | 1,165 | 30 | 36 | 1 | 435 | 9  | 1,700 | 41 |
| 64,476 | 64 | 1 | 1,172 | 29 | 37 | 1 | 441 | 10 | 1,714 | 41 |
| 64,477 | 65 | 1 | 1,185 | 28 | 37 | 1 | 453 | 10 | 1,740 | 40 |
| 64,478 | 65 | 2 | 1,192 | 26 | 37 | 1 | 458 | 10 | 1,752 | 39 |
| 64,479 | 65 | 2 | 1,198 | 27 | 37 | 1 | 464 | 10 | 1,764 | 40 |
| 64,480 | 65 | 2 | 1,196 | 21 | 37 | 1 | 462 | 10 | 1,760 | 34 |
| 64,481 | 66 | 2 | 1,203 | 22 | 37 | 0 | 465 | 12 | 1,771 | 36 |

|        |    |   |       |    |    |   |     |    |       |    |
|--------|----|---|-------|----|----|---|-----|----|-------|----|
| 64,482 | 66 | 2 | 1,203 | 18 | 37 | 0 | 465 | 11 | 1,771 | 31 |
| 64,483 | 66 | 2 | 1,203 | 19 | 37 | 0 | 465 | 11 | 1,771 | 32 |
| 64,484 | 66 | 2 | 1,202 | 19 | 37 | 0 | 465 | 11 | 1,770 | 32 |
| 64,485 | 66 | 2 | 1,198 | 19 | 37 | 0 | 466 | 11 | 1,767 | 32 |
| 64,486 | 66 | 2 | 1,198 | 19 | 37 | 0 | 466 | 11 | 1,767 | 32 |
| 64,487 | 66 | 2 | 1,218 | 16 | 40 | 0 | 470 | 11 | 1,794 | 29 |
| 64,488 | 68 | 2 | 1,241 | 15 | 40 | 0 | 483 | 11 | 1,832 | 28 |
| 64,489 | 68 | 2 | 1,242 | 15 | 40 | 0 | 492 | 11 | 1,842 | 28 |
| 64,490 | 63 | 2 | 1,255 | 19 | 38 | 0 | 506 | 10 | 1,862 | 31 |
| 64,491 | 63 | 2 | 1,253 | 19 | 37 | 1 | 509 | 10 | 1,862 | 32 |
| 64,492 | 60 | 2 | 1,215 | 19 | 34 | 1 | 486 | 10 | 1,795 | 32 |
| 64,493 | 58 | 2 | 1,196 | 19 | 32 | 1 | 480 | 10 | 1,766 | 32 |
| 64,494 | 53 | 2 | 1,089 | 19 | 29 | 1 | 450 | 10 | 1,621 | 32 |
| 64,495 | 49 | 2 | 1,063 | 19 | 27 | 1 | 434 | 10 | 1,573 | 32 |
| 64,496 | 49 | 2 | 1,012 | 17 | 27 | 1 | 429 | 10 | 1,517 | 30 |
| 64,497 | 50 | 2 | 948   | 17 | 27 | 1 | 416 | 10 | 1,441 | 30 |
| 64,498 | 44 | 2 | 880   | 18 | 26 | 1 | 411 | 11 | 1,361 | 32 |
| 64,499 | 37 | 2 | 749   | 18 | 20 | 1 | 355 | 11 | 1,161 | 32 |
| 64,500 | 36 | 2 | 681   | 18 | 20 | 1 | 349 | 12 | 1,086 | 33 |
| 64,501 | 35 | 2 | 656   | 18 | 20 | 1 | 347 | 12 | 1,058 | 33 |
| 64,502 | 32 | 2 | 591   | 18 | 16 | 1 | 327 | 11 | 966   | 32 |
| 64,503 | 31 | 2 | 578   | 16 | 15 | 1 | 326 | 11 | 950   | 30 |
| 64,504 | 31 | 2 | 582   | 16 | 16 | 1 | 329 | 11 | 958   | 30 |
| 64,505 | 31 | 2 | 565   | 15 | 16 | 2 | 329 | 11 | 941   | 30 |
| 64,506 | 32 | 2 | 549   | 15 | 18 | 2 | 328 | 11 | 927   | 30 |
| 64,507 | 32 | 2 | 545   | 15 | 18 | 2 | 320 | 11 | 915   | 30 |
| 64,508 | 32 | 2 | 545   | 14 | 18 | 2 | 320 | 10 | 915   | 28 |
| 64,509 | 31 | 2 | 544   | 16 | 17 | 2 | 315 | 10 | 907   | 30 |
| 64,510 | 22 | 2 | 379   | 17 | 15 | 2 | 257 | 10 | 673   | 31 |
| 64,511 | 19 | 2 | 346   | 19 | 15 | 2 | 244 | 10 | 624   | 33 |
| 64,512 | 14 | 2 | 235   | 19 | 12 | 2 | 179 | 10 | 440   | 33 |
| 64,513 | 14 | 2 | 221   | 19 | 11 | 2 | 162 | 10 | 408   | 33 |
| 64,514 | 14 | 2 | 234   | 20 | 12 | 2 | 162 | 10 | 422   | 34 |
| 64,515 | 21 | 2 | 297   | 20 | 15 | 2 | 159 | 10 | 492   | 34 |
| 64,516 | 24 | 2 | 353   | 22 | 17 | 2 | 168 | 10 | 562   | 36 |
| 64,517 | 24 | 2 | 353   | 22 | 16 | 2 | 168 | 10 | 561   | 36 |
| 64,518 | 28 | 2 | 498   | 21 | 26 | 2 | 217 | 8  | 769   | 33 |
| 64,519 | 28 | 2 | 498   | 21 | 26 | 2 | 217 | 8  | 769   | 33 |
| 64,520 | 28 | 2 | 497   | 18 | 26 | 2 | 217 | 6  | 768   | 28 |
| 64,521 | 27 | 2 | 535   | 18 | 30 | 2 | 231 | 7  | 823   | 29 |
| 64,522 | 27 | 2 | 535   | 19 | 29 | 2 | 231 | 7  | 822   | 30 |

|        |    |    |     |     |    |   |     |    |       |     |
|--------|----|----|-----|-----|----|---|-----|----|-------|-----|
| 64,523 | 27 | 1  | 534 | 24  | 29 | 2 | 231 | 8  | 821   | 35  |
| 64,524 | 26 | 1  | 534 | 34  | 29 | 2 | 231 | 17 | 820   | 54  |
| 64,525 | 26 | 1  | 531 | 35  | 29 | 2 | 231 | 17 | 817   | 55  |
| 64,526 | 26 | 1  | 529 | 41  | 29 | 2 | 232 | 17 | 816   | 61  |
| 64,527 | 26 | 1  | 523 | 40  | 28 | 2 | 224 | 17 | 801   | 60  |
| 64,528 | 25 | 0  | 511 | 40  | 28 | 2 | 212 | 17 | 776   | 59  |
| 64,529 | 25 | 0  | 507 | 40  | 28 | 2 | 207 | 17 | 767   | 59  |
| 64,530 | 25 | 0  | 503 | 40  | 28 | 2 | 199 | 17 | 755   | 59  |
| 64,531 | 24 | 1  | 497 | 41  | 28 | 2 | 199 | 17 | 748   | 61  |
| 64,532 | 24 | 1  | 497 | 41  | 28 | 2 | 199 | 17 | 748   | 61  |
| 64,533 | 25 | 1  | 514 | 40  | 28 | 2 | 204 | 18 | 771   | 61  |
| 64,534 | 25 | 1  | 525 | 40  | 28 | 2 | 206 | 19 | 784   | 62  |
| 64,535 | 25 | 1  | 542 | 50  | 29 | 2 | 208 | 28 | 804   | 81  |
| 64,536 | 26 | 2  | 565 | 101 | 28 | 3 | 217 | 41 | 836   | 147 |
| 64,537 | 30 | 2  | 612 | 108 | 27 | 4 | 237 | 45 | 906   | 159 |
| 64,538 | 28 | 3  | 603 | 114 | 27 | 4 | 231 | 45 | 889   | 166 |
| 64,539 | 28 | 3  | 633 | 115 | 27 | 4 | 238 | 45 | 926   | 167 |
| 64,540 | 28 | 3  | 634 | 113 | 31 | 4 | 253 | 46 | 946   | 166 |
| 64,541 | 26 | 3  | 619 | 116 | 30 | 4 | 239 | 46 | 914   | 169 |
| 64,542 | 27 | 3  | 618 | 118 | 30 | 3 | 235 | 46 | 910   | 170 |
| 64,543 | 27 | 4  | 621 | 118 | 30 | 3 | 238 | 46 | 916   | 171 |
| 64,544 | 27 | 5  | 622 | 121 | 30 | 3 | 238 | 47 | 917   | 176 |
| 64,545 | 28 | 5  | 630 | 124 | 30 | 3 | 238 | 47 | 926   | 179 |
| 64,546 | 28 | 5  | 630 | 125 | 30 | 3 | 238 | 51 | 926   | 184 |
| 64,547 | 28 | 5  | 630 | 125 | 30 | 3 | 237 | 51 | 925   | 184 |
| 64,548 | 32 | 6  | 646 | 126 | 30 | 3 | 243 | 50 | 951   | 185 |
| 64,549 | 32 | 7  | 653 | 126 | 30 | 3 | 246 | 52 | 961   | 188 |
| 64,550 | 35 | 7  | 677 | 131 | 31 | 3 | 268 | 55 | 1,011 | 196 |
| 64,551 | 35 | 7  | 677 | 134 | 31 | 3 | 268 | 56 | 1,011 | 200 |
| 64,552 | 37 | 8  | 688 | 148 | 32 | 4 | 270 | 68 | 1,027 | 228 |
| 64,553 | 37 | 8  | 693 | 167 | 32 | 5 | 270 | 73 | 1,032 | 253 |
| 64,554 | 38 | 9  | 691 | 173 | 32 | 5 | 267 | 74 | 1,028 | 261 |
| 64,555 | 39 | 10 | 683 | 176 | 31 | 4 | 264 | 76 | 1,017 | 266 |
| 64,556 | 39 | 11 | 682 | 177 | 31 | 4 | 262 | 77 | 1,014 | 269 |
| 64,557 | 38 | 11 | 682 | 180 | 29 | 4 | 254 | 79 | 1,003 | 274 |
| 64,558 | 38 | 11 | 682 | 180 | 29 | 4 | 254 | 80 | 1,003 | 275 |
| 64,559 | 37 | 17 | 684 | 190 | 29 | 4 | 257 | 85 | 1,007 | 296 |
| 64,560 | 37 | 17 | 671 | 189 | 29 | 5 | 256 | 86 | 993   | 297 |
| 64,561 | 36 | 17 | 669 | 188 | 29 | 5 | 253 | 86 | 987   | 296 |
| 64,562 | 36 | 17 | 669 | 186 | 29 | 5 | 251 | 87 | 985   | 295 |
| 64,563 | 35 | 18 | 669 | 189 | 29 | 5 | 251 | 89 | 984   | 301 |

|        |    |    |     |     |    |   |     |    |     |     |
|--------|----|----|-----|-----|----|---|-----|----|-----|-----|
| 64,564 | 35 | 18 | 670 | 189 | 29 | 5 | 250 | 89 | 984 | 301 |
| 64,565 | 35 | 18 | 653 | 188 | 28 | 5 | 246 | 89 | 962 | 300 |
| 64,566 | 27 | 18 | 578 | 188 | 24 | 5 | 224 | 89 | 853 | 300 |
| 64,567 | 24 | 18 | 518 | 186 | 22 | 5 | 215 | 89 | 779 | 298 |
| 64,568 | 20 | 18 | 381 | 186 | 12 | 5 | 168 | 89 | 581 | 298 |
| 64,569 | 20 | 18 | 372 | 186 | 12 | 5 | 168 | 89 | 572 | 298 |
| 64,570 | 20 | 18 | 344 | 186 | 9  | 5 | 157 | 89 | 530 | 298 |
| 64,571 | 20 | 18 | 336 | 186 | 8  | 5 | 155 | 89 | 519 | 298 |
| 64,572 | 20 | 18 | 340 | 185 | 8  | 5 | 159 | 88 | 527 | 296 |
| 64,573 | 20 | 18 | 340 | 185 | 8  | 5 | 159 | 88 | 527 | 296 |
| 64,574 | 20 | 18 | 337 | 178 | 8  | 5 | 153 | 84 | 518 | 285 |
| 64,575 | 20 | 18 | 346 | 169 | 8  | 5 | 159 | 77 | 533 | 269 |
| 64,576 | 20 | 18 | 347 | 168 | 8  | 5 | 159 | 77 | 534 | 268 |
| 64,577 | 20 | 18 | 347 | 162 | 8  | 5 | 159 | 77 | 534 | 262 |
| 64,578 | 21 | 18 | 361 | 162 | 9  | 5 | 161 | 76 | 552 | 261 |
| 64,579 | 21 | 18 | 368 | 162 | 9  | 5 | 164 | 76 | 562 | 261 |
| 64,580 | 21 | 18 | 376 | 161 | 9  | 5 | 169 | 76 | 575 | 260 |
| 64,581 | 21 | 18 | 383 | 161 | 9  | 5 | 170 | 76 | 583 | 260 |
| 64,582 | 21 | 17 | 381 | 159 | 9  | 6 | 167 | 74 | 578 | 256 |
| 64,583 | 20 | 17 | 375 | 159 | 9  | 6 | 165 | 74 | 569 | 256 |
| 64,584 | 20 | 17 | 365 | 159 | 9  | 6 | 161 | 73 | 555 | 255 |
| 64,585 | 20 | 17 | 354 | 159 | 9  | 6 | 159 | 72 | 542 | 254 |
| 64,586 | 20 | 17 | 334 | 149 | 8  | 6 | 156 | 63 | 518 | 235 |
| 64,587 | 19 | 16 | 310 | 98  | 8  | 5 | 148 | 50 | 485 | 169 |
| 64,588 | 15 | 16 | 248 | 85  | 7  | 4 | 124 | 46 | 394 | 151 |
| 64,589 | 15 | 16 | 236 | 82  | 7  | 4 | 119 | 46 | 377 | 148 |
| 64,590 | 16 | 16 | 204 | 82  | 7  | 4 | 104 | 46 | 331 | 148 |
| 64,591 | 16 | 16 | 173 | 82  | 3  | 4 | 70  | 45 | 262 | 147 |
| 64,592 | 15 | 16 | 174 | 77  | 3  | 4 | 68  | 45 | 260 | 142 |
| 64,593 | 15 | 15 | 172 | 77  | 3  | 4 | 65  | 45 | 255 | 141 |
| 64,594 | 15 | 15 | 171 | 77  | 3  | 4 | 65  | 45 | 254 | 141 |
| 64,595 | 16 | 14 | 173 | 75  | 3  | 4 | 66  | 45 | 258 | 138 |
| 64,596 | 16 | 14 | 169 | 71  | 3  | 4 | 67  | 40 | 255 | 129 |
| 64,597 | 16 | 14 | 168 | 71  | 3  | 4 | 63  | 40 | 250 | 129 |
| 64,598 | 17 | 14 | 201 | 71  | 5  | 4 | 71  | 43 | 294 | 132 |
| 64,599 | 15 | 12 | 200 | 69  | 5  | 4 | 72  | 41 | 292 | 126 |
| 64,600 | 16 | 12 | 193 | 69  | 5  | 4 | 70  | 42 | 284 | 127 |
| 64,601 | 13 | 12 | 160 | 64  | 4  | 4 | 45  | 39 | 222 | 119 |
| 64,602 | 13 | 11 | 153 | 47  | 3  | 3 | 43  | 26 | 212 | 87  |
| 64,603 | 11 | 11 | 148 | 29  | 3  | 2 | 43  | 21 | 205 | 63  |
| 64,604 | 11 | 11 | 143 | 29  | 3  | 2 | 43  | 21 | 200 | 63  |



|        |    |    |     |    |   |   |    |    |     |     |
|--------|----|----|-----|----|---|---|----|----|-----|-----|
| 64,605 | 10 | 10 | 143 | 22 | 3 | 2 | 42 | 20 | 198 | 54  |
| 64,606 | 9  | 9  | 154 | 19 | 3 | 2 | 47 | 18 | 213 | 48  |
| 64,607 | 9  | 8  | 154 | 15 | 3 | 2 | 47 | 15 | 213 | 40  |
| 64,608 | 11 | 8  | 158 | 15 | 3 | 2 | 47 | 14 | 219 | 39  |
| 64,609 | 11 | 8  | 158 | 15 | 3 | 2 | 47 | 14 | 219 | 39  |
| 64,610 | 11 | 2  | 156 | 5  | 3 | 2 | 46 | 10 | 216 | 19  |
| 64,611 | 11 | 2  | 155 | 4  | 3 | 1 | 46 | 8  | 215 | 15  |
| 64,612 | 14 | 2  | 180 | 4  | 4 | 1 | 72 | 8  | 270 | 15  |
| 64,613 | 14 | 2  | 205 | 4  | 5 | 1 | 93 | 7  | 317 | 14  |
| 64,614 | 14 | 1  | 206 | 1  | 5 | 1 | 97 | 5  | 322 | 8   |
| 64,615 | 14 | 1  | 204 | 1  | 5 | 1 | 98 | 5  | 321 | 8   |
| 64,616 | 14 | 1  | 200 | 1  | 5 | 1 | 96 | 5  | 315 | 8   |
| 64,617 | 14 | 1  | 199 | 1  | 5 | 1 | 96 | 5  | 314 | 8   |
| 64,618 | 14 | 1  | 199 | 1  | 5 | 1 | 96 | 5  | 314 | 8   |
| 64,619 | 14 | 1  | 199 | 1  | 5 | 1 | 95 | 5  | 313 | 8   |
| 64,620 | 14 | 1  | 199 | 1  | 5 | 1 | 96 | 5  | 314 | 8   |
| 64,621 | 14 | 1  | 196 | 1  | 5 | 1 | 95 | 5  | 310 | 8   |
| 64,622 | 14 | 1  | 196 | 1  | 5 | 1 | 93 | 5  | 308 | 8   |
| 64,623 | 14 | 1  | 193 | 2  | 5 | 1 | 91 | 5  | 303 | 9   |
| 64,624 | 14 | 1  | 189 | 4  | 5 | 1 | 90 | 6  | 298 | 12  |
| 64,625 | 14 | 3  | 188 | 6  | 5 | 4 | 90 | 11 | 297 | 24  |
| 64,626 | 14 | 4  | 187 | 11 | 5 | 4 | 90 | 16 | 296 | 35  |
| 64,627 | 14 | 4  | 187 | 20 | 5 | 5 | 90 | 26 | 296 | 55  |
| 64,628 | 13 | 4  | 173 | 20 | 4 | 5 | 88 | 26 | 278 | 55  |
| 64,629 | 13 | 7  | 165 | 26 | 4 | 5 | 85 | 36 | 267 | 74  |
| 64,630 | 13 | 7  | 154 | 26 | 4 | 5 | 80 | 36 | 251 | 74  |
| 64,631 | 13 | 7  | 143 | 27 | 4 | 5 | 78 | 37 | 238 | 76  |
| 64,632 | 13 | 7  | 143 | 28 | 4 | 5 | 77 | 38 | 237 | 78  |
| 64,633 | 14 | 7  | 144 | 28 | 4 | 5 | 77 | 38 | 239 | 78  |
| 64,634 | 14 | 7  | 144 | 29 | 4 | 5 | 77 | 38 | 239 | 79  |
| 64,635 | 15 | 7  | 150 | 29 | 4 | 5 | 79 | 39 | 248 | 80  |
| 64,636 | 16 | 7  | 151 | 32 | 4 | 5 | 79 | 41 | 250 | 85  |
| 64,637 | 18 | 9  | 155 | 44 | 4 | 6 | 85 | 51 | 262 | 110 |
| 64,638 | 18 | 9  | 153 | 44 | 4 | 6 | 85 | 52 | 260 | 111 |
| 64,639 | 18 | 8  | 158 | 45 | 4 | 6 | 87 | 52 | 267 | 111 |
| 64,640 | 18 | 8  | 158 | 52 | 4 | 6 | 87 | 51 | 267 | 117 |
| 64,641 | 17 | 8  | 163 | 53 | 4 | 6 | 95 | 51 | 279 | 118 |
| 64,642 | 17 | 8  | 163 | 53 | 4 | 6 | 94 | 51 | 278 | 118 |
| 64,643 | 18 | 8  | 162 | 57 | 4 | 6 | 95 | 54 | 279 | 125 |
| 64,644 | 18 | 10 | 161 | 58 | 4 | 6 | 95 | 55 | 278 | 129 |
| 64,645 | 17 | 10 | 160 | 73 | 6 | 7 | 98 | 66 | 281 | 156 |

|        |    |    |     |     |   |    |     |    |     |     |
|--------|----|----|-----|-----|---|----|-----|----|-----|-----|
| 64,646 | 16 | 10 | 163 | 89  | 6 | 8  | 100 | 77 | 285 | 184 |
| 64,647 | 16 | 10 | 162 | 89  | 6 | 8  | 101 | 77 | 285 | 184 |
| 64,648 | 12 | 12 | 126 | 92  | 4 | 8  | 91  | 78 | 233 | 190 |
| 64,649 | 12 | 12 | 118 | 92  | 5 | 8  | 90  | 75 | 225 | 187 |
| 64,650 | 12 | 12 | 107 | 93  | 5 | 8  | 86  | 74 | 210 | 187 |
| 64,651 | 11 | 12 | 107 | 93  | 5 | 8  | 86  | 74 | 209 | 187 |
| 64,652 | 11 | 12 | 108 | 93  | 5 | 8  | 86  | 74 | 210 | 187 |
| 64,653 | 11 | 12 | 109 | 93  | 5 | 8  | 87  | 74 | 212 | 187 |
| 64,654 | 11 | 12 | 109 | 93  | 5 | 8  | 87  | 74 | 212 | 187 |
| 64,655 | 11 | 12 | 109 | 93  | 5 | 8  | 87  | 74 | 212 | 187 |
| 64,656 | 11 | 12 | 109 | 93  | 5 | 8  | 87  | 74 | 212 | 187 |
| 64,657 | 11 | 12 | 98  | 93  | 5 | 8  | 82  | 74 | 196 | 187 |
| 64,658 | 11 | 12 | 98  | 94  | 5 | 8  | 82  | 74 | 196 | 188 |
| 64,659 | 9  | 13 | 94  | 95  | 5 | 8  | 82  | 74 | 190 | 190 |
| 64,660 | 9  | 13 | 94  | 99  | 5 | 8  | 82  | 74 | 190 | 194 |
| 64,661 | 9  | 13 | 94  | 99  | 5 | 8  | 82  | 74 | 190 | 194 |
| 64,662 | 7  | 13 | 70  | 103 | 4 | 8  | 58  | 75 | 139 | 199 |
| 64,663 | 7  | 13 | 63  | 103 | 4 | 8  | 48  | 77 | 122 | 201 |
| 64,664 | 7  | 13 | 45  | 104 | 3 | 8  | 36  | 78 | 91  | 203 |
| 64,665 | 7  | 16 | 43  | 106 | 3 | 8  | 32  | 83 | 85  | 213 |
| 64,666 | 7  | 16 | 42  | 112 | 3 | 8  | 33  | 84 | 85  | 220 |
| 64,667 | 10 | 16 | 44  | 114 | 3 | 8  | 40  | 84 | 97  | 222 |
| 64,668 | 11 | 16 | 46  | 117 | 3 | 8  | 42  | 84 | 102 | 225 |
| 64,669 | 11 | 16 | 49  | 124 | 3 | 8  | 46  | 90 | 109 | 238 |
| 64,670 | 11 | 16 | 49  | 125 | 3 | 8  | 45  | 90 | 108 | 239 |
| 64,671 | 11 | 16 | 49  | 128 | 3 | 8  | 45  | 90 | 108 | 242 |
| 64,672 | 11 | 16 | 55  | 129 | 3 | 9  | 50  | 91 | 119 | 245 |
| 64,673 | 13 | 16 | 61  | 129 | 3 | 9  | 57  | 92 | 134 | 246 |
| 64,674 | 14 | 16 | 64  | 128 | 3 | 10 | 61  | 94 | 142 | 248 |
| 64,675 | 14 | 16 | 63  | 126 | 3 | 10 | 61  | 93 | 141 | 245 |
| 64,676 | 14 | 14 | 64  | 127 | 3 | 7  | 61  | 88 | 142 | 236 |
| 64,677 | 14 | 13 | 64  | 122 | 3 | 7  | 61  | 83 | 142 | 225 |
| 64,678 | 14 | 14 | 64  | 113 | 3 | 6  | 61  | 73 | 142 | 206 |
| 64,679 | 14 | 14 | 64  | 113 | 3 | 6  | 63  | 73 | 144 | 206 |
| 64,680 | 14 | 11 | 64  | 107 | 3 | 6  | 63  | 63 | 144 | 187 |
| 64,681 | 14 | 11 | 64  | 107 | 3 | 6  | 63  | 63 | 144 | 187 |
| 64,682 | 16 | 11 | 70  | 106 | 4 | 6  | 76  | 62 | 166 | 185 |
| 64,683 | 15 | 11 | 69  | 105 | 4 | 5  | 76  | 61 | 164 | 182 |
| 64,684 | 15 | 11 | 69  | 105 | 4 | 5  | 77  | 61 | 165 | 182 |
| 64,685 | 14 | 11 | 65  | 104 | 4 | 6  | 75  | 60 | 158 | 181 |
| 64,686 | 14 | 9  | 70  | 91  | 4 | 5  | 81  | 48 | 169 | 153 |

|        |    |    |     |     |   |    |     |    |     |     |
|--------|----|----|-----|-----|---|----|-----|----|-----|-----|
| 64,687 | 13 | 9  | 81  | 91  | 4 | 5  | 83  | 48 | 181 | 153 |
| 64,688 | 11 | 9  | 78  | 91  | 4 | 5  | 77  | 48 | 170 | 153 |
| 64,689 | 11 | 9  | 77  | 91  | 4 | 5  | 76  | 48 | 168 | 153 |
| 64,690 | 11 | 9  | 75  | 83  | 4 | 5  | 75  | 48 | 165 | 145 |
| 64,691 | 11 | 9  | 75  | 85  | 4 | 6  | 75  | 51 | 165 | 151 |
| 64,692 | 11 | 9  | 69  | 86  | 4 | 6  | 67  | 51 | 151 | 152 |
| 64,693 | 11 | 9  | 67  | 89  | 4 | 8  | 66  | 52 | 148 | 158 |
| 64,694 | 12 | 9  | 69  | 85  | 4 | 8  | 66  | 49 | 151 | 151 |
| 64,695 | 13 | 7  | 65  | 84  | 2 | 8  | 64  | 48 | 144 | 147 |
| 64,696 | 13 | 7  | 67  | 70  | 2 | 8  | 62  | 41 | 144 | 126 |
| 64,697 | 13 | 7  | 64  | 53  | 2 | 7  | 59  | 30 | 138 | 97  |
| 64,698 | 13 | 7  | 91  | 53  | 3 | 7  | 64  | 30 | 171 | 97  |
| 64,699 | 14 | 5  | 95  | 50  | 3 | 7  | 66  | 29 | 178 | 91  |
| 64,700 | 14 | 5  | 95  | 56  | 2 | 7  | 66  | 31 | 177 | 99  |
| 64,701 | 17 | 6  | 124 | 61  | 2 | 7  | 80  | 36 | 223 | 110 |
| 64,702 | 17 | 7  | 123 | 62  | 2 | 7  | 80  | 36 | 222 | 112 |
| 64,703 | 19 | 8  | 137 | 63  | 2 | 7  | 89  | 37 | 247 | 115 |
| 64,704 | 21 | 8  | 153 | 63  | 2 | 7  | 105 | 37 | 281 | 115 |
| 64,705 | 21 | 8  | 166 | 63  | 3 | 7  | 116 | 37 | 306 | 115 |
| 64,706 | 21 | 9  | 177 | 66  | 4 | 7  | 133 | 38 | 335 | 120 |
| 64,707 | 21 | 11 | 176 | 72  | 4 | 7  | 133 | 39 | 334 | 129 |
| 64,708 | 21 | 11 | 176 | 73  | 4 | 7  | 133 | 39 | 334 | 130 |
| 64,709 | 22 | 11 | 180 | 72  | 4 | 7  | 143 | 39 | 349 | 129 |
| 64,710 | 22 | 11 | 181 | 68  | 4 | 7  | 143 | 39 | 350 | 125 |
| 64,711 | 22 | 11 | 186 | 68  | 4 | 7  | 146 | 39 | 358 | 125 |
| 64,712 | 22 | 11 | 186 | 70  | 4 | 7  | 146 | 39 | 358 | 127 |
| 64,713 | 22 | 11 | 194 | 67  | 4 | 7  | 164 | 37 | 384 | 122 |
| 64,714 | 22 | 11 | 194 | 67  | 4 | 7  | 164 | 37 | 384 | 122 |
| 64,715 | 22 | 11 | 196 | 67  | 5 | 8  | 165 | 36 | 388 | 122 |
| 64,716 | 22 | 8  | 199 | 65  | 5 | 8  | 167 | 31 | 393 | 112 |
| 64,717 | 22 | 9  | 197 | 60  | 5 | 8  | 168 | 31 | 392 | 108 |
| 64,718 | 19 | 9  | 195 | 60  | 5 | 8  | 161 | 32 | 380 | 109 |
| 64,719 | 18 | 14 | 193 | 77  | 5 | 10 | 159 | 45 | 375 | 146 |
| 64,720 | 18 | 14 | 188 | 71  | 5 | 10 | 155 | 39 | 366 | 134 |
| 64,721 | 19 | 18 | 191 | 75  | 5 | 9  | 155 | 42 | 370 | 144 |
| 64,722 | 19 | 20 | 191 | 96  | 5 | 11 | 154 | 53 | 369 | 180 |
| 64,723 | 19 | 21 | 185 | 101 | 5 | 11 | 150 | 54 | 359 | 187 |
| 64,724 | 24 | 22 | 196 | 104 | 6 | 10 | 151 | 51 | 377 | 187 |
| 64,725 | 23 | 22 | 193 | 106 | 6 | 10 | 147 | 52 | 369 | 190 |
| 64,726 | 29 | 23 | 202 | 107 | 7 | 10 | 151 | 52 | 389 | 192 |
| 64,727 | 30 | 23 | 213 | 105 | 7 | 10 | 156 | 52 | 406 | 190 |

|        |     |    |     |     |    |    |     |    |       |     |
|--------|-----|----|-----|-----|----|----|-----|----|-------|-----|
| 64,728 | 30  | 22 | 227 | 105 | 7  | 10 | 163 | 52 | 427   | 189 |
| 64,729 | 30  | 22 | 227 | 106 | 7  | 10 | 163 | 52 | 427   | 190 |
| 64,730 | 41  | 22 | 308 | 106 | 10 | 10 | 226 | 52 | 585   | 190 |
| 64,731 | 41  | 22 | 310 | 107 | 10 | 10 | 232 | 53 | 593   | 192 |
| 64,732 | 43  | 23 | 319 | 115 | 10 | 10 | 239 | 57 | 611   | 205 |
| 64,733 | 43  | 23 | 318 | 121 | 10 | 11 | 234 | 71 | 605   | 226 |
| 64,734 | 43  | 23 | 318 | 123 | 10 | 11 | 234 | 72 | 605   | 229 |
| 64,735 | 43  | 23 | 351 | 127 | 12 | 12 | 251 | 76 | 657   | 238 |
| 64,736 | 43  | 23 | 363 | 132 | 14 | 12 | 260 | 76 | 680   | 243 |
| 64,737 | 43  | 23 | 358 | 131 | 14 | 12 | 254 | 78 | 669   | 244 |
| 64,738 | 43  | 23 | 346 | 131 | 14 | 12 | 252 | 78 | 655   | 244 |
| 64,739 | 44  | 24 | 349 | 132 | 14 | 12 | 252 | 78 | 659   | 246 |
| 64,740 | 44  | 25 | 349 | 133 | 14 | 12 | 252 | 77 | 659   | 247 |
| 64,741 | 44  | 25 | 347 | 133 | 14 | 12 | 252 | 77 | 657   | 247 |
| 64,742 | 44  | 25 | 348 | 131 | 14 | 11 | 252 | 74 | 658   | 241 |
| 64,743 | 44  | 25 | 348 | 129 | 14 | 11 | 253 | 74 | 659   | 239 |
| 64,744 | 43  | 25 | 348 | 127 | 14 | 9  | 253 | 74 | 658   | 235 |
| 64,745 | 42  | 25 | 346 | 127 | 14 | 9  | 253 | 74 | 655   | 235 |
| 64,746 | 41  | 25 | 346 | 127 | 14 | 9  | 254 | 74 | 655   | 235 |
| 64,747 | 41  | 25 | 344 | 126 | 15 | 8  | 254 | 70 | 654   | 229 |
| 64,748 | 41  | 25 | 323 | 126 | 14 | 8  | 250 | 70 | 628   | 229 |
| 64,749 | 41  | 25 | 319 | 126 | 14 | 8  | 249 | 70 | 623   | 229 |
| 64,750 | 40  | 25 | 316 | 125 | 14 | 8  | 247 | 70 | 617   | 228 |
| 64,751 | 40  | 26 | 314 | 120 | 14 | 8  | 247 | 70 | 615   | 224 |
| 64,752 | 37  | 25 | 287 | 115 | 14 | 8  | 233 | 65 | 571   | 213 |
| 64,753 | 36  | 24 | 281 | 114 | 14 | 8  | 227 | 67 | 558   | 213 |
| 64,754 | 36  | 23 | 274 | 113 | 14 | 8  | 226 | 66 | 550   | 210 |
| 64,755 | 37  | 23 | 298 | 113 | 17 | 8  | 224 | 66 | 576   | 210 |
| 64,756 | 39  | 23 | 314 | 113 | 18 | 8  | 232 | 66 | 603   | 210 |
| 64,757 | 40  | 20 | 320 | 104 | 17 | 8  | 229 | 64 | 606   | 196 |
| 64,758 | 41  | 20 | 319 | 104 | 17 | 8  | 229 | 64 | 606   | 196 |
| 64,759 | 40  | 20 | 317 | 103 | 17 | 8  | 219 | 64 | 593   | 195 |
| 64,760 | 40  | 19 | 327 | 102 | 17 | 8  | 223 | 64 | 607   | 193 |
| 64,761 | 40  | 19 | 332 | 102 | 17 | 8  | 224 | 64 | 613   | 193 |
| 64,762 | 40  | 19 | 341 | 102 | 17 | 8  | 223 | 64 | 621   | 193 |
| 64,763 | 54  | 19 | 412 | 100 | 20 | 8  | 260 | 65 | 746   | 192 |
| 64,764 | 55  | 19 | 468 | 99  | 21 | 8  | 251 | 64 | 795   | 190 |
| 64,765 | 55  | 19 | 467 | 100 | 20 | 8  | 250 | 64 | 792   | 191 |
| 64,766 | 58  | 18 | 527 | 97  | 21 | 7  | 271 | 62 | 877   | 184 |
| 64,767 | 101 | 18 | 901 | 97  | 52 | 7  | 452 | 62 | 1,506 | 184 |
| 64,768 | 104 | 18 | 938 | 97  | 53 | 7  | 471 | 63 | 1,566 | 185 |

|        |     |    |       |    |    |   |     |    |       |     |
|--------|-----|----|-------|----|----|---|-----|----|-------|-----|
| 64,769 | 106 | 13 | 945   | 77 | 53 | 5 | 475 | 50 | 1,579 | 145 |
| 64,770 | 106 | 13 | 945   | 77 | 53 | 5 | 475 | 50 | 1,579 | 145 |
| 64,771 | 106 | 13 | 985   | 75 | 53 | 5 | 489 | 50 | 1,633 | 143 |
| 64,772 | 106 | 7  | 1,001 | 45 | 58 | 3 | 491 | 35 | 1,656 | 90  |
| 64,773 | 106 | 6  | 1,011 | 40 | 59 | 3 | 495 | 34 | 1,671 | 83  |
| 64,774 | 106 | 6  | 1,011 | 40 | 59 | 3 | 495 | 34 | 1,671 | 83  |
| 64,775 | 99  | 5  | 997   | 37 | 58 | 3 | 490 | 34 | 1,644 | 79  |
| 64,776 | 93  | 5  | 988   | 35 | 58 | 3 | 486 | 33 | 1,625 | 76  |
| 64,777 | 92  | 4  | 977   | 35 | 58 | 3 | 481 | 33 | 1,608 | 75  |
| 64,778 | 92  | 4  | 972   | 34 | 58 | 3 | 478 | 33 | 1,600 | 74  |
| 64,779 | 92  | 4  | 967   | 34 | 58 | 3 | 475 | 33 | 1,592 | 74  |
| 64,780 | 84  | 4  | 902   | 33 | 54 | 3 | 423 | 33 | 1,463 | 73  |
| 64,781 | 82  | 4  | 901   | 33 | 54 | 3 | 417 | 32 | 1,454 | 72  |
| 64,782 | 86  | 4  | 949   | 33 | 55 | 3 | 434 | 32 | 1,524 | 72  |
| 64,783 | 85  | 3  | 992   | 25 | 56 | 3 | 439 | 28 | 1,572 | 59  |
| 64,784 | 86  | 3  | 980   | 17 | 56 | 2 | 431 | 13 | 1,553 | 35  |
| 64,785 | 86  | 3  | 974   | 17 | 55 | 2 | 428 | 13 | 1,543 | 35  |
| 64,786 | 86  | 3  | 969   | 8  | 54 | 0 | 424 | 9  | 1,533 | 20  |
| 64,787 | 86  | 3  | 955   | 8  | 52 | 0 | 415 | 9  | 1,508 | 20  |
| 64,788 | 89  | 3  | 994   | 7  | 52 | 0 | 417 | 7  | 1,552 | 17  |
| 64,789 | 89  | 3  | 997   | 7  | 52 | 0 | 421 | 7  | 1,559 | 17  |
| 64,790 | 95  | 1  | 1,076 | 5  | 55 | 0 | 436 | 7  | 1,662 | 13  |
| 64,791 | 95  | 1  | 1,086 | 5  | 55 | 0 | 436 | 7  | 1,672 | 13  |
| 64,792 | 95  | 1  | 1,085 | 5  | 55 | 0 | 436 | 7  | 1,671 | 13  |
| 64,793 | 120 | 1  | 1,328 | 5  | 63 | 0 | 552 | 7  | 2,063 | 13  |
| 64,794 | 122 | 1  | 1,346 | 4  | 65 | 0 | 568 | 6  | 2,101 | 11  |
| 64,795 | 122 | 1  | 1,369 | 4  | 65 | 0 | 578 | 6  | 2,134 | 11  |
| 64,796 | 122 | 1  | 1,372 | 4  | 65 | 0 | 579 | 6  | 2,138 | 11  |
| 64,797 | 122 | 1  | 1,372 | 4  | 64 | 0 | 581 | 6  | 2,139 | 11  |
| 64,798 | 122 | 1  | 1,370 | 4  | 64 | 1 | 580 | 6  | 2,136 | 12  |
| 64,799 | 122 | 1  | 1,379 | 4  | 64 | 1 | 587 | 6  | 2,152 | 12  |
| 64,800 | 123 | 1  | 1,382 | 4  | 64 | 1 | 590 | 6  | 2,159 | 12  |
| 64,801 | 123 | 0  | 1,384 | 4  | 64 | 1 | 596 | 4  | 2,167 | 9   |
| 64,802 | 122 | 0  | 1,384 | 6  | 64 | 1 | 594 | 7  | 2,164 | 14  |
| 64,803 | 119 | 0  | 1,374 | 12 | 63 | 1 | 586 | 7  | 2,142 | 20  |
| 64,804 | 120 | 0  | 1,374 | 12 | 63 | 1 | 587 | 5  | 2,144 | 18  |
| 64,805 | 120 | 0  | 1,374 | 12 | 63 | 1 | 587 | 5  | 2,144 | 18  |
| 64,806 | 120 | 0  | 1,366 | 14 | 61 | 1 | 589 | 5  | 2,136 | 20  |
| 64,807 | 118 | 0  | 1,337 | 15 | 59 | 1 | 570 | 5  | 2,084 | 21  |
| 64,808 | 118 | 0  | 1,352 | 15 | 61 | 1 | 571 | 5  | 2,102 | 21  |
| 64,809 | 127 | 0  | 1,464 | 15 | 69 | 1 | 637 | 5  | 2,297 | 21  |

|        |     |   |       |    |    |   |     |    |       |    |
|--------|-----|---|-------|----|----|---|-----|----|-------|----|
| 64,810 | 128 | 0 | 1,483 | 15 | 70 | 1 | 642 | 5  | 2,323 | 21 |
| 64,811 | 128 | 0 | 1,475 | 15 | 70 | 1 | 640 | 5  | 2,313 | 21 |
| 64,812 | 128 | 0 | 1,473 | 18 | 70 | 1 | 639 | 4  | 2,310 | 23 |
| 64,813 | 128 | 0 | 1,460 | 18 | 70 | 1 | 637 | 4  | 2,295 | 23 |
| 64,814 | 114 | 0 | 1,388 | 18 | 67 | 1 | 600 | 5  | 2,169 | 24 |
| 64,815 | 112 | 0 | 1,324 | 18 | 66 | 1 | 588 | 5  | 2,090 | 24 |
| 64,816 | 109 | 0 | 1,262 | 17 | 65 | 1 | 566 | 5  | 2,002 | 23 |
| 64,817 | 109 | 0 | 1,262 | 19 | 65 | 1 | 565 | 5  | 2,001 | 25 |
| 64,818 | 66  | 0 | 887   | 19 | 33 | 1 | 385 | 4  | 1,371 | 24 |
| 64,819 | 64  | 0 | 855   | 19 | 32 | 1 | 364 | 4  | 1,315 | 24 |
| 64,820 | 62  | 0 | 850   | 20 | 32 | 1 | 360 | 4  | 1,304 | 25 |
| 64,821 | 61  | 0 | 807   | 22 | 32 | 1 | 346 | 4  | 1,246 | 27 |
| 64,822 | 61  | 0 | 798   | 23 | 31 | 1 | 349 | 4  | 1,239 | 28 |
| 64,823 | 61  | 0 | 796   | 23 | 28 | 1 | 348 | 4  | 1,233 | 28 |
| 64,824 | 61  | 0 | 786   | 23 | 27 | 1 | 344 | 4  | 1,218 | 28 |
| 64,825 | 61  | 0 | 784   | 23 | 27 | 1 | 341 | 4  | 1,213 | 28 |
| 64,826 | 61  | 0 | 783   | 23 | 27 | 1 | 341 | 5  | 1,212 | 29 |
| 64,827 | 61  | 0 | 783   | 23 | 27 | 1 | 341 | 5  | 1,212 | 29 |
| 64,828 | 61  | 0 | 785   | 24 | 27 | 1 | 342 | 8  | 1,215 | 33 |
| 64,829 | 61  | 0 | 785   | 26 | 27 | 1 | 343 | 8  | 1,216 | 35 |
| 64,830 | 61  | 0 | 782   | 28 | 27 | 1 | 340 | 9  | 1,210 | 38 |
| 64,831 | 59  | 0 | 770   | 27 | 27 | 1 | 338 | 9  | 1,194 | 37 |
| 64,832 | 59  | 0 | 766   | 32 | 27 | 1 | 335 | 11 | 1,187 | 44 |
| 64,833 | 54  | 0 | 713   | 32 | 26 | 1 | 306 | 11 | 1,099 | 44 |
| 64,834 | 53  | 0 | 660   | 32 | 25 | 1 | 295 | 11 | 1,033 | 44 |
| 64,835 | 52  | 0 | 664   | 32 | 25 | 1 | 293 | 11 | 1,034 | 44 |
| 64,836 | 52  | 0 | 659   | 32 | 25 | 1 | 292 | 11 | 1,028 | 44 |
| 64,837 | 54  | 0 | 662   | 32 | 25 | 1 | 299 | 11 | 1,040 | 44 |
| 64,838 | 54  | 0 | 643   | 32 | 25 | 1 | 299 | 11 | 1,021 | 44 |
| 64,839 | 50  | 0 | 623   | 36 | 25 | 1 | 298 | 12 | 996   | 49 |
| 64,840 | 50  | 0 | 621   | 37 | 25 | 1 | 294 | 12 | 990   | 50 |
| 64,841 | 46  | 0 | 551   | 39 | 22 | 1 | 284 | 13 | 903   | 53 |
| 64,842 | 48  | 0 | 573   | 43 | 22 | 1 | 299 | 15 | 942   | 59 |
| 64,843 | 41  | 0 | 474   | 47 | 21 | 1 | 236 | 17 | 772   | 65 |
| 64,844 | 23  | 0 | 330   | 47 | 14 | 1 | 182 | 17 | 549   | 65 |
| 64,845 | 21  | 0 | 313   | 50 | 12 | 1 | 166 | 17 | 512   | 68 |
| 64,846 | 21  | 0 | 290   | 54 | 12 | 1 | 158 | 20 | 481   | 75 |
| 64,847 | 21  | 0 | 287   | 55 | 12 | 1 | 156 | 20 | 476   | 76 |
| 64,848 | 21  | 0 | 281   | 57 | 12 | 1 | 153 | 20 | 467   | 78 |
| 64,849 | 21  | 0 | 279   | 61 | 12 | 0 | 149 | 20 | 461   | 81 |
| 64,850 | 21  | 0 | 278   | 62 | 12 | 0 | 149 | 20 | 460   | 82 |

|        |    |    |     |     |    |   |     |    |     |     |
|--------|----|----|-----|-----|----|---|-----|----|-----|-----|
| 64,851 | 20 | 0  | 275 | 62  | 12 | 0 | 146 | 20 | 453 | 82  |
| 64,852 | 20 | 0  | 272 | 62  | 12 | 0 | 140 | 18 | 444 | 80  |
| 64,853 | 20 | 0  | 269 | 62  | 12 | 0 | 140 | 18 | 441 | 80  |
| 64,854 | 20 | 0  | 262 | 69  | 12 | 0 | 137 | 23 | 431 | 92  |
| 64,855 | 19 | 0  | 261 | 79  | 12 | 0 | 136 | 24 | 428 | 103 |
| 64,856 | 19 | 0  | 260 | 85  | 12 | 2 | 136 | 24 | 427 | 111 |
| 64,857 | 19 | 3  | 249 | 98  | 12 | 2 | 131 | 26 | 411 | 129 |
| 64,858 | 18 | 4  | 217 | 115 | 10 | 2 | 116 | 29 | 361 | 150 |
| 64,859 | 10 | 7  | 121 | 123 | 5  | 2 | 60  | 31 | 196 | 163 |
| 64,860 | 9  | 7  | 111 | 124 | 2  | 2 | 50  | 31 | 172 | 164 |
| 64,861 | 8  | 7  | 96  | 124 | 1  | 2 | 48  | 31 | 153 | 164 |
| 64,862 | 8  | 8  | 97  | 130 | 1  | 2 | 48  | 32 | 154 | 172 |
| 64,863 | 8  | 8  | 93  | 131 | 1  | 2 | 48  | 32 | 150 | 173 |
| 64,864 | 8  | 10 | 93  | 133 | 1  | 2 | 48  | 33 | 150 | 178 |
| 64,865 | 8  | 10 | 93  | 133 | 1  | 2 | 48  | 32 | 150 | 177 |
| 64,866 | 14 | 10 | 129 | 134 | 2  | 2 | 58  | 32 | 203 | 178 |
| 64,867 | 23 | 10 | 171 | 136 | 2  | 2 | 85  | 36 | 281 | 184 |
| 64,868 | 23 | 10 | 170 | 138 | 2  | 2 | 85  | 36 | 280 | 186 |
| 64,869 | 24 | 11 | 176 | 140 | 5  | 2 | 88  | 38 | 293 | 191 |
| 64,870 | 23 | 11 | 173 | 142 | 6  | 2 | 88  | 38 | 290 | 193 |
| 64,871 | 23 | 11 | 186 | 138 | 6  | 2 | 97  | 39 | 312 | 190 |
| 64,872 | 24 | 11 | 192 | 138 | 8  | 2 | 98  | 40 | 322 | 191 |
| 64,873 | 24 | 11 | 190 | 139 | 8  | 2 | 95  | 41 | 317 | 193 |
| 64,874 | 24 | 11 | 211 | 139 | 9  | 2 | 105 | 41 | 349 | 193 |
| 64,875 | 24 | 11 | 223 | 140 | 9  | 2 | 108 | 41 | 364 | 194 |
| 64,876 | 28 | 11 | 254 | 141 | 11 | 2 | 136 | 40 | 429 | 194 |
| 64,877 | 28 | 11 | 254 | 143 | 10 | 2 | 136 | 41 | 428 | 197 |
| 64,878 | 28 | 11 | 255 | 143 | 10 | 2 | 135 | 41 | 428 | 197 |
| 64,879 | 29 | 11 | 258 | 141 | 10 | 2 | 136 | 38 | 433 | 192 |
| 64,880 | 30 | 11 | 259 | 137 | 10 | 2 | 136 | 37 | 435 | 187 |
| 64,881 | 30 | 12 | 259 | 138 | 10 | 2 | 136 | 37 | 435 | 189 |
| 64,882 | 30 | 12 | 258 | 138 | 10 | 2 | 134 | 37 | 432 | 189 |
| 64,883 | 31 | 12 | 260 | 133 | 10 | 2 | 134 | 35 | 435 | 182 |
| 64,884 | 31 | 12 | 272 | 133 | 10 | 2 | 136 | 35 | 449 | 182 |
| 64,885 | 33 | 12 | 291 | 135 | 10 | 2 | 152 | 36 | 486 | 185 |
| 64,886 | 33 | 12 | 302 | 136 | 10 | 2 | 159 | 36 | 504 | 186 |
| 64,887 | 33 | 12 | 315 | 139 | 10 | 2 | 166 | 44 | 524 | 197 |
| 64,888 | 31 | 12 | 314 | 140 | 11 | 3 | 163 | 44 | 519 | 199 |
| 64,889 | 31 | 12 | 311 | 140 | 11 | 4 | 162 | 45 | 515 | 201 |
| 64,890 | 31 | 14 | 312 | 142 | 11 | 5 | 163 | 44 | 517 | 205 |
| 64,891 | 31 | 15 | 310 | 141 | 11 | 5 | 163 | 46 | 515 | 207 |

|        |    |    |     |     |    |    |     |    |     |     |
|--------|----|----|-----|-----|----|----|-----|----|-----|-----|
| 64,892 | 29 | 23 | 301 | 212 | 11 | 8  | 158 | 85 | 499 | 328 |
| 64,893 | 27 | 23 | 268 | 223 | 11 | 9  | 143 | 85 | 449 | 340 |
| 64,894 | 27 | 24 | 271 | 232 | 12 | 9  | 146 | 83 | 456 | 348 |
| 64,895 | 27 | 28 | 282 | 238 | 14 | 9  | 155 | 84 | 478 | 359 |
| 64,896 | 27 | 28 | 284 | 238 | 14 | 9  | 154 | 84 | 479 | 359 |
| 64,897 | 27 | 31 | 293 | 234 | 14 | 9  | 159 | 81 | 493 | 355 |
| 64,898 | 27 | 31 | 293 | 236 | 14 | 9  | 159 | 81 | 493 | 357 |
| 64,899 | 27 | 32 | 293 | 237 | 14 | 10 | 160 | 84 | 494 | 363 |
| 64,900 | 27 | 32 | 293 | 237 | 14 | 10 | 160 | 84 | 494 | 363 |
| 64,901 | 27 | 33 | 297 | 237 | 14 | 10 | 163 | 84 | 501 | 364 |
| 64,902 | 27 | 33 | 297 | 234 | 14 | 10 | 163 | 83 | 501 | 360 |
| 64,903 | 27 | 33 | 297 | 235 | 14 | 10 | 163 | 83 | 501 | 361 |
| 64,904 | 27 | 33 | 297 | 235 | 14 | 10 | 163 | 83 | 501 | 361 |
| 64,905 | 28 | 33 | 298 | 222 | 14 | 10 | 163 | 78 | 503 | 343 |
| 64,906 | 28 | 33 | 299 | 212 | 14 | 10 | 163 | 77 | 504 | 332 |
| 64,907 | 29 | 33 | 305 | 206 | 14 | 8  | 163 | 77 | 511 | 324 |
| 64,908 | 29 | 30 | 306 | 191 | 14 | 8  | 163 | 75 | 512 | 304 |
| 64,909 | 30 | 29 | 315 | 173 | 15 | 8  | 166 | 72 | 526 | 282 |
| 64,910 | 29 | 26 | 308 | 164 | 15 | 8  | 165 | 70 | 517 | 268 |
| 64,911 | 29 | 26 | 310 | 164 | 15 | 8  | 164 | 70 | 518 | 268 |
| 64,912 | 31 | 25 | 326 | 154 | 15 | 8  | 161 | 69 | 533 | 256 |
| 64,913 | 43 | 25 | 440 | 154 | 21 | 8  | 212 | 69 | 716 | 256 |
| 64,914 | 40 | 25 | 431 | 154 | 20 | 8  | 211 | 69 | 702 | 256 |
| 64,915 | 40 | 23 | 428 | 152 | 21 | 8  | 214 | 68 | 703 | 251 |
| 64,916 | 40 | 23 | 424 | 152 | 21 | 8  | 213 | 68 | 698 | 251 |
| 64,917 | 34 | 23 | 410 | 151 | 21 | 8  | 206 | 69 | 671 | 251 |
| 64,918 | 32 | 23 | 383 | 149 | 21 | 8  | 186 | 70 | 622 | 250 |
| 64,919 | 32 | 23 | 379 | 147 | 21 | 8  | 186 | 71 | 618 | 249 |
| 64,920 | 31 | 22 | 375 | 145 | 18 | 8  | 181 | 69 | 605 | 244 |
| 64,921 | 31 | 22 | 375 | 146 | 17 | 8  | 181 | 69 | 604 | 245 |
| 64,922 | 31 | 22 | 360 | 150 | 17 | 8  | 174 | 72 | 582 | 252 |
| 64,923 | 30 | 22 | 354 | 154 | 15 | 8  | 175 | 76 | 574 | 260 |
| 64,924 | 30 | 22 | 330 | 153 | 14 | 8  | 165 | 75 | 539 | 258 |
| 64,925 | 33 | 22 | 321 | 153 | 14 | 8  | 169 | 75 | 537 | 258 |
| 64,926 | 36 | 22 | 332 | 152 | 15 | 8  | 168 | 75 | 551 | 257 |
| 64,927 | 32 | 22 | 307 | 149 | 13 | 8  | 147 | 74 | 499 | 253 |
| 64,928 | 32 | 22 | 304 | 149 | 13 | 8  | 148 | 74 | 497 | 253 |
| 64,929 | 34 | 22 | 308 | 149 | 13 | 8  | 152 | 74 | 507 | 253 |
| 64,930 | 34 | 22 | 307 | 149 | 13 | 8  | 152 | 74 | 506 | 253 |
| 64,931 | 34 | 21 | 335 | 148 | 15 | 8  | 171 | 74 | 555 | 251 |
| 64,932 | 34 | 21 | 335 | 155 | 15 | 8  | 171 | 75 | 555 | 259 |



|        |    |    |     |     |    |   |     |    |     |     |
|--------|----|----|-----|-----|----|---|-----|----|-----|-----|
| 64,933 | 33 | 21 | 346 | 158 | 16 | 8 | 170 | 76 | 565 | 263 |
| 64,934 | 33 | 21 | 344 | 162 | 16 | 8 | 168 | 78 | 561 | 269 |
| 64,935 | 33 | 21 | 344 | 162 | 16 | 8 | 168 | 78 | 561 | 269 |
| 64,936 | 31 | 21 | 321 | 160 | 16 | 8 | 152 | 79 | 520 | 268 |
| 64,937 | 31 | 21 | 312 | 156 | 16 | 8 | 147 | 72 | 506 | 257 |
| 64,938 | 31 | 21 | 299 | 156 | 16 | 8 | 140 | 71 | 486 | 256 |
| 64,939 | 31 | 21 | 296 | 155 | 15 | 6 | 136 | 70 | 478 | 252 |
| 64,940 | 31 | 21 | 298 | 155 | 15 | 6 | 136 | 71 | 480 | 253 |
| 64,941 | 31 | 19 | 311 | 152 | 15 | 5 | 142 | 75 | 499 | 251 |
| 64,942 | 31 | 18 | 311 | 156 | 15 | 5 | 145 | 73 | 502 | 252 |
| 64,943 | 31 | 10 | 315 | 85  | 16 | 2 | 145 | 36 | 507 | 133 |
| 64,944 | 31 | 10 | 312 | 70  | 15 | 1 | 141 | 34 | 499 | 115 |
| 64,945 | 31 | 5  | 308 | 51  | 15 | 1 | 132 | 33 | 486 | 90  |
| 64,946 | 31 | 2  | 303 | 45  | 13 | 1 | 131 | 33 | 478 | 81  |
| 64,947 | 31 | 2  | 301 | 46  | 13 | 1 | 131 | 33 | 476 | 82  |
| 64,948 | 31 | 1  | 294 | 39  | 13 | 0 | 125 | 30 | 463 | 70  |
| 64,949 | 31 | 1  | 297 | 39  | 13 | 0 | 126 | 30 | 467 | 70  |
| 64,950 | 31 | 0  | 301 | 38  | 13 | 0 | 126 | 30 | 471 | 68  |
| 64,951 | 31 | 0  | 301 | 39  | 13 | 0 | 126 | 31 | 471 | 70  |
| 64,952 | 31 | 0  | 297 | 39  | 13 | 0 | 123 | 31 | 464 | 70  |
| 64,953 | 31 | 0  | 298 | 39  | 14 | 0 | 123 | 31 | 466 | 70  |
| 64,954 | 31 | 0  | 298 | 39  | 14 | 0 | 123 | 31 | 466 | 70  |
| 64,955 | 30 | 0  | 298 | 39  | 14 | 0 | 126 | 31 | 468 | 70  |
| 64,956 | 30 | 0  | 298 | 39  | 14 | 0 | 127 | 31 | 469 | 70  |
| 64,957 | 29 | 0  | 295 | 39  | 14 | 0 | 127 | 30 | 465 | 69  |
| 64,958 | 29 | 0  | 294 | 39  | 14 | 0 | 127 | 30 | 464 | 69  |
| 64,959 | 30 | 0  | 299 | 40  | 13 | 0 | 131 | 30 | 473 | 70  |
| 64,960 | 29 | 0  | 302 | 40  | 13 | 0 | 135 | 31 | 479 | 71  |
| 64,961 | 29 | 0  | 311 | 40  | 13 | 2 | 137 | 36 | 490 | 78  |
| 64,962 | 34 | 0  | 353 | 42  | 15 | 2 | 165 | 37 | 567 | 81  |
| 64,963 | 32 | 0  | 344 | 42  | 15 | 2 | 171 | 37 | 562 | 81  |
| 64,964 | 20 | 1  | 225 | 43  | 9  | 2 | 118 | 39 | 372 | 85  |
| 64,965 | 17 | 1  | 217 | 43  | 9  | 3 | 115 | 39 | 358 | 86  |
| 64,966 | 19 | 1  | 295 | 43  | 17 | 3 | 174 | 39 | 505 | 86  |
| 64,967 | 18 | 1  | 294 | 43  | 17 | 3 | 174 | 39 | 503 | 86  |
| 64,968 | 20 | 2  | 331 | 43  | 20 | 3 | 203 | 38 | 574 | 86  |
| 64,969 | 23 | 2  | 335 | 41  | 21 | 3 | 203 | 33 | 582 | 79  |
| 64,970 | 23 | 2  | 335 | 41  | 21 | 3 | 203 | 33 | 582 | 79  |
| 64,971 | 23 | 2  | 337 | 39  | 21 | 3 | 203 | 33 | 584 | 77  |
| 64,972 | 24 | 2  | 337 | 38  | 21 | 3 | 203 | 33 | 585 | 76  |
| 64,973 | 27 | 2  | 359 | 30  | 23 | 3 | 227 | 24 | 636 | 59  |

|        |    |   |     |    |    |   |     |    |       |    |
|--------|----|---|-----|----|----|---|-----|----|-------|----|
| 64,974 | 27 | 2 | 359 | 30 | 23 | 3 | 226 | 24 | 635   | 59 |
| 64,975 | 25 | 2 | 371 | 30 | 23 | 3 | 222 | 24 | 641   | 59 |
| 64,976 | 24 | 2 | 372 | 30 | 23 | 3 | 220 | 24 | 639   | 59 |
| 64,977 | 21 | 2 | 369 | 30 | 23 | 3 | 230 | 24 | 643   | 59 |
| 64,978 | 21 | 2 | 366 | 30 | 23 | 3 | 230 | 24 | 640   | 59 |
| 64,979 | 20 | 2 | 366 | 31 | 23 | 3 | 230 | 24 | 639   | 60 |
| 64,980 | 18 | 3 | 360 | 31 | 23 | 3 | 231 | 25 | 632   | 62 |
| 64,981 | 17 | 3 | 358 | 34 | 23 | 3 | 225 | 28 | 623   | 68 |
| 64,982 | 17 | 3 | 335 | 34 | 21 | 3 | 213 | 28 | 586   | 68 |
| 64,983 | 18 | 3 | 354 | 27 | 21 | 3 | 220 | 27 | 613   | 60 |
| 64,984 | 20 | 3 | 353 | 21 | 20 | 3 | 226 | 24 | 619   | 51 |
| 64,985 | 20 | 3 | 348 | 21 | 20 | 3 | 226 | 24 | 614   | 51 |
| 64,986 | 52 | 3 | 472 | 21 | 30 | 3 | 330 | 22 | 884   | 49 |
| 64,987 | 72 | 3 | 557 | 22 | 33 | 3 | 409 | 24 | 1,071 | 52 |
| 64,988 | 75 | 3 | 580 | 29 | 34 | 3 | 433 | 26 | 1,122 | 61 |
| 64,989 | 78 | 3 | 593 | 29 | 34 | 3 | 447 | 26 | 1,152 | 61 |
| 64,990 | 78 | 3 | 594 | 27 | 34 | 3 | 451 | 21 | 1,157 | 54 |
| 64,991 | 79 | 4 | 596 | 27 | 35 | 3 | 455 | 21 | 1,165 | 55 |
| 64,992 | 80 | 4 | 588 | 28 | 35 | 3 | 450 | 21 | 1,153 | 56 |
| 64,993 | 80 | 4 | 588 | 24 | 35 | 3 | 447 | 21 | 1,150 | 52 |
| 64,994 | 80 | 4 | 584 | 22 | 34 | 3 | 447 | 18 | 1,145 | 47 |
| 64,995 | 80 | 6 | 586 | 25 | 34 | 4 | 448 | 27 | 1,148 | 62 |
| 64,996 | 80 | 6 | 586 | 27 | 34 | 4 | 448 | 28 | 1,148 | 65 |
| 64,997 | 81 | 6 | 592 | 35 | 34 | 4 | 450 | 29 | 1,157 | 74 |
| 64,998 | 82 | 6 | 594 | 34 | 34 | 4 | 450 | 30 | 1,160 | 74 |
| 64,999 | 82 | 6 | 593 | 34 | 34 | 4 | 451 | 31 | 1,160 | 75 |
| 65,000 | 82 | 6 | 591 | 34 | 34 | 4 | 450 | 31 | 1,157 | 75 |
| 65,001 | 82 | 6 | 587 | 33 | 34 | 4 | 451 | 31 | 1,154 | 74 |
| 65,002 | 82 | 6 | 587 | 33 | 34 | 4 | 451 | 32 | 1,154 | 75 |
| 65,003 | 82 | 6 | 590 | 33 | 33 | 4 | 452 | 32 | 1,157 | 75 |
| 65,004 | 82 | 6 | 590 | 33 | 33 | 4 | 452 | 32 | 1,157 | 75 |
| 65,005 | 82 | 6 | 594 | 33 | 33 | 4 | 454 | 32 | 1,163 | 75 |
| 65,006 | 82 | 6 | 615 | 33 | 33 | 4 | 455 | 32 | 1,185 | 75 |
| 65,007 | 83 | 6 | 629 | 33 | 34 | 4 | 464 | 32 | 1,210 | 75 |
| 65,008 | 84 | 6 | 716 | 33 | 40 | 4 | 517 | 32 | 1,357 | 75 |
| 65,009 | 83 | 6 | 762 | 33 | 41 | 4 | 522 | 32 | 1,408 | 75 |
| 65,010 | 83 | 6 | 783 | 33 | 42 | 4 | 524 | 31 | 1,432 | 74 |
| 65,011 | 83 | 7 | 783 | 33 | 42 | 2 | 523 | 30 | 1,431 | 72 |
| 65,012 | 85 | 7 | 796 | 40 | 44 | 2 | 531 | 35 | 1,456 | 84 |
| 65,013 | 80 | 7 | 750 | 42 | 42 | 2 | 504 | 35 | 1,376 | 86 |
| 65,014 | 80 | 7 | 739 | 46 | 42 | 2 | 498 | 38 | 1,359 | 93 |

|        |    |   |       |    |    |   |     |    |       |    |
|--------|----|---|-------|----|----|---|-----|----|-------|----|
| 65,015 | 82 | 6 | 759   | 45 | 46 | 2 | 496 | 36 | 1,383 | 89 |
| 65,016 | 82 | 6 | 734   | 46 | 44 | 2 | 471 | 36 | 1,331 | 90 |
| 65,017 | 87 | 6 | 711   | 46 | 40 | 2 | 450 | 36 | 1,288 | 90 |
| 65,018 | 87 | 6 | 690   | 46 | 39 | 2 | 440 | 36 | 1,256 | 90 |
| 65,019 | 97 | 5 | 840   | 46 | 48 | 2 | 499 | 36 | 1,484 | 89 |
| 65,020 | 94 | 5 | 841   | 46 | 47 | 2 | 500 | 36 | 1,482 | 89 |
| 65,021 | 94 | 5 | 843   | 46 | 47 | 2 | 507 | 36 | 1,491 | 89 |
| 65,022 | 94 | 5 | 863   | 46 | 49 | 2 | 514 | 36 | 1,520 | 89 |
| 65,023 | 94 | 5 | 857   | 46 | 50 | 2 | 509 | 36 | 1,510 | 89 |
| 65,024 | 91 | 5 | 841   | 47 | 48 | 2 | 489 | 36 | 1,469 | 90 |
| 65,025 | 91 | 5 | 833   | 47 | 48 | 2 | 490 | 36 | 1,462 | 90 |
| 65,026 | 91 | 5 | 828   | 47 | 48 | 2 | 490 | 36 | 1,457 | 90 |
| 65,027 | 91 | 5 | 825   | 47 | 48 | 3 | 490 | 36 | 1,454 | 91 |
| 65,028 | 91 | 5 | 814   | 47 | 47 | 3 | 474 | 36 | 1,426 | 91 |
| 65,029 | 91 | 5 | 811   | 47 | 47 | 3 | 471 | 36 | 1,420 | 91 |
| 65,030 | 91 | 4 | 812   | 46 | 47 | 3 | 469 | 35 | 1,419 | 88 |
| 65,031 | 91 | 4 | 812   | 43 | 47 | 3 | 467 | 32 | 1,417 | 82 |
| 65,032 | 91 | 4 | 812   | 43 | 47 | 3 | 466 | 32 | 1,416 | 82 |
| 65,033 | 91 | 4 | 809   | 44 | 47 | 3 | 466 | 32 | 1,413 | 83 |
| 65,034 | 90 | 4 | 792   | 45 | 47 | 3 | 459 | 33 | 1,388 | 85 |
| 65,035 | 88 | 4 | 781   | 44 | 47 | 4 | 454 | 33 | 1,370 | 85 |
| 65,036 | 88 | 4 | 779   | 45 | 47 | 4 | 454 | 34 | 1,368 | 87 |
| 65,037 | 56 | 4 | 650   | 45 | 37 | 4 | 348 | 34 | 1,091 | 87 |
| 65,038 | 36 | 4 | 564   | 37 | 34 | 4 | 268 | 30 | 902   | 75 |
| 65,039 | 33 | 5 | 540   | 37 | 33 | 4 | 242 | 30 | 848   | 76 |
| 65,040 | 30 | 4 | 530   | 36 | 33 | 4 | 230 | 30 | 823   | 74 |
| 65,041 | 32 | 4 | 539   | 36 | 35 | 4 | 226 | 30 | 832   | 74 |
| 65,042 | 31 | 4 | 533   | 36 | 34 | 4 | 222 | 30 | 820   | 74 |
| 65,043 | 30 | 4 | 529   | 35 | 34 | 4 | 222 | 30 | 815   | 73 |
| 65,044 | 31 | 4 | 546   | 35 | 34 | 4 | 225 | 30 | 836   | 73 |
| 65,045 | 30 | 4 | 546   | 35 | 34 | 4 | 225 | 30 | 835   | 73 |
| 65,046 | 39 | 2 | 580   | 32 | 37 | 3 | 255 | 21 | 911   | 58 |
| 65,047 | 42 | 2 | 606   | 23 | 37 | 3 | 267 | 19 | 952   | 47 |
| 65,048 | 53 | 2 | 698   | 23 | 42 | 3 | 340 | 19 | 1,133 | 47 |
| 65,049 | 56 | 2 | 771   | 23 | 46 | 3 | 374 | 18 | 1,247 | 46 |
| 65,050 | 65 | 2 | 872   | 23 | 52 | 3 | 469 | 17 | 1,458 | 45 |
| 65,051 | 65 | 2 | 871   | 23 | 52 | 3 | 469 | 17 | 1,457 | 45 |
| 65,052 | 75 | 2 | 946   | 23 | 57 | 3 | 524 | 15 | 1,602 | 43 |
| 65,053 | 75 | 2 | 945   | 24 | 57 | 3 | 524 | 15 | 1,601 | 44 |
| 65,054 | 81 | 2 | 1,039 | 33 | 60 | 5 | 575 | 19 | 1,755 | 59 |
| 65,055 | 82 | 2 | 1,043 | 35 | 60 | 5 | 578 | 19 | 1,763 | 61 |

|        |    |   |       |    |    |   |     |    |       |     |
|--------|----|---|-------|----|----|---|-----|----|-------|-----|
| 65,056 | 82 | 2 | 1,044 | 36 | 60 | 5 | 579 | 20 | 1,765 | 63  |
| 65,057 | 82 | 3 | 1,029 | 38 | 60 | 5 | 576 | 25 | 1,747 | 71  |
| 65,058 | 82 | 3 | 1,020 | 40 | 60 | 5 | 570 | 26 | 1,732 | 74  |
| 65,059 | 82 | 3 | 940   | 40 | 55 | 5 | 528 | 26 | 1,605 | 74  |
| 65,060 | 82 | 3 | 887   | 39 | 54 | 5 | 517 | 26 | 1,540 | 73  |
| 65,061 | 82 | 2 | 863   | 28 | 53 | 5 | 511 | 16 | 1,509 | 51  |
| 65,062 | 82 | 2 | 862   | 28 | 53 | 5 | 511 | 16 | 1,508 | 51  |
| 65,063 | 80 | 2 | 840   | 28 | 51 | 5 | 501 | 16 | 1,472 | 51  |
| 65,064 | 80 | 2 | 838   | 24 | 51 | 5 | 501 | 13 | 1,470 | 44  |
| 65,065 | 80 | 2 | 838   | 24 | 51 | 5 | 501 | 13 | 1,470 | 44  |
| 65,066 | 78 | 2 | 811   | 31 | 47 | 4 | 496 | 17 | 1,432 | 54  |
| 65,067 | 78 | 2 | 809   | 39 | 47 | 4 | 494 | 20 | 1,428 | 65  |
| 65,068 | 71 | 2 | 781   | 41 | 44 | 4 | 484 | 20 | 1,380 | 67  |
| 65,069 | 69 | 2 | 703   | 42 | 41 | 4 | 457 | 20 | 1,270 | 68  |
| 65,070 | 62 | 2 | 616   | 42 | 33 | 4 | 407 | 20 | 1,118 | 68  |
| 65,071 | 62 | 2 | 611   | 43 | 33 | 4 | 406 | 20 | 1,112 | 69  |
| 65,072 | 62 | 3 | 609   | 46 | 33 | 4 | 400 | 21 | 1,104 | 74  |
| 65,073 | 61 | 3 | 589   | 46 | 31 | 4 | 393 | 21 | 1,074 | 74  |
| 65,074 | 61 | 3 | 598   | 46 | 30 | 4 | 397 | 21 | 1,086 | 74  |
| 65,075 | 61 | 3 | 598   | 45 | 30 | 4 | 396 | 21 | 1,085 | 73  |
| 65,076 | 63 | 3 | 601   | 45 | 30 | 4 | 400 | 21 | 1,094 | 73  |
| 65,077 | 63 | 3 | 601   | 45 | 30 | 4 | 400 | 21 | 1,094 | 73  |
| 65,078 | 63 | 3 | 602   | 45 | 30 | 3 | 402 | 21 | 1,097 | 72  |
| 65,079 | 63 | 3 | 601   | 46 | 30 | 3 | 402 | 21 | 1,096 | 73  |
| 65,080 | 68 | 3 | 610   | 48 | 30 | 3 | 412 | 21 | 1,120 | 75  |
| 65,081 | 68 | 4 | 612   | 49 | 30 | 3 | 413 | 23 | 1,123 | 79  |
| 65,082 | 69 | 4 | 615   | 56 | 30 | 3 | 416 | 23 | 1,130 | 86  |
| 65,083 | 69 | 4 | 618   | 59 | 30 | 3 | 418 | 23 | 1,135 | 89  |
| 65,084 | 69 | 4 | 620   | 60 | 30 | 3 | 419 | 24 | 1,138 | 91  |
| 65,085 | 69 | 4 | 618   | 59 | 30 | 3 | 419 | 23 | 1,136 | 89  |
| 65,086 | 69 | 4 | 619   | 60 | 30 | 2 | 420 | 23 | 1,138 | 89  |
| 65,087 | 72 | 8 | 625   | 79 | 30 | 4 | 425 | 27 | 1,152 | 118 |
| 65,088 | 72 | 8 | 625   | 81 | 30 | 4 | 425 | 27 | 1,152 | 120 |
| 65,089 | 72 | 8 | 626   | 90 | 30 | 5 | 425 | 30 | 1,153 | 133 |
| 65,090 | 72 | 7 | 626   | 90 | 30 | 5 | 426 | 30 | 1,154 | 132 |
| 65,091 | 72 | 7 | 622   | 90 | 30 | 5 | 424 | 30 | 1,148 | 132 |
| 65,092 | 70 | 7 | 613   | 90 | 30 | 5 | 424 | 30 | 1,137 | 132 |
| 65,093 | 71 | 7 | 609   | 90 | 31 | 5 | 423 | 30 | 1,134 | 132 |
| 65,094 | 71 | 7 | 603   | 90 | 32 | 5 | 425 | 31 | 1,131 | 133 |
| 65,095 | 70 | 7 | 597   | 91 | 32 | 5 | 424 | 33 | 1,123 | 136 |
| 65,096 | 61 | 7 | 558   | 95 | 29 | 5 | 394 | 33 | 1,042 | 140 |

|        |    |    |     |     |    |    |     |    |       |     |
|--------|----|----|-----|-----|----|----|-----|----|-------|-----|
| 65,097 | 60 | 9  | 556 | 117 | 29 | 6  | 393 | 39 | 1,038 | 171 |
| 65,098 | 58 | 12 | 530 | 141 | 29 | 10 | 379 | 44 | 996   | 207 |
| 65,099 | 47 | 13 | 437 | 148 | 24 | 10 | 308 | 46 | 816   | 217 |
| 65,100 | 43 | 13 | 362 | 153 | 20 | 10 | 274 | 46 | 699   | 222 |
| 65,101 | 34 | 16 | 260 | 161 | 14 | 11 | 176 | 48 | 484   | 236 |
| 65,102 | 24 | 16 | 198 | 161 | 9  | 11 | 127 | 48 | 358   | 236 |
| 65,103 | 24 | 16 | 186 | 160 | 9  | 11 | 120 | 48 | 339   | 235 |
| 65,104 | 24 | 16 | 177 | 165 | 9  | 11 | 117 | 48 | 327   | 240 |
| 65,105 | 18 | 17 | 90  | 160 | 6  | 9  | 69  | 44 | 183   | 230 |
| 65,106 | 17 | 17 | 86  | 156 | 6  | 9  | 66  | 44 | 175   | 226 |
| 65,107 | 17 | 17 | 81  | 157 | 6  | 9  | 63  | 44 | 167   | 227 |
| 65,108 | 17 | 16 | 74  | 153 | 6  | 9  | 62  | 38 | 159   | 216 |
| 65,109 | 16 | 16 | 69  | 155 | 5  | 9  | 57  | 38 | 147   | 218 |
| 65,110 | 15 | 16 | 59  | 156 | 4  | 9  | 44  | 38 | 122   | 219 |
| 65,111 | 15 | 16 | 53  | 156 | 4  | 9  | 44  | 38 | 116   | 219 |
| 65,112 | 15 | 16 | 53  | 156 | 4  | 9  | 43  | 38 | 115   | 219 |
| 65,113 | 15 | 16 | 55  | 156 | 4  | 9  | 43  | 38 | 117   | 219 |
| 65,114 | 15 | 16 | 55  | 156 | 4  | 9  | 43  | 38 | 117   | 219 |
| 65,115 | 15 | 16 | 55  | 156 | 4  | 9  | 43  | 38 | 117   | 219 |
| 65,116 | 15 | 16 | 55  | 156 | 4  | 9  | 43  | 38 | 117   | 219 |
| 65,117 | 15 | 16 | 55  | 148 | 4  | 9  | 43  | 34 | 117   | 207 |
| 65,118 | 15 | 16 | 55  | 140 | 4  | 9  | 43  | 31 | 117   | 196 |
| 65,119 | 15 | 16 | 55  | 138 | 4  | 9  | 43  | 31 | 117   | 194 |
| 65,120 | 12 | 16 | 53  | 137 | 4  | 9  | 40  | 31 | 109   | 193 |
| 65,121 | 12 | 16 | 53  | 137 | 4  | 9  | 40  | 31 | 109   | 193 |
| 65,122 | 12 | 16 | 53  | 136 | 4  | 9  | 40  | 31 | 109   | 192 |
| 65,123 | 12 | 15 | 53  | 133 | 6  | 9  | 40  | 30 | 111   | 187 |
| 65,124 | 12 | 15 | 52  | 133 | 6  | 9  | 38  | 30 | 108   | 187 |
| 65,125 | 12 | 15 | 45  | 134 | 6  | 9  | 37  | 32 | 100   | 190 |
| 65,126 | 12 | 15 | 45  | 134 | 6  | 9  | 37  | 32 | 100   | 190 |
| 65,127 | 11 | 15 | 45  | 135 | 6  | 9  | 33  | 32 | 95    | 191 |
| 65,128 | 11 | 14 | 45  | 121 | 6  | 9  | 31  | 30 | 93    | 174 |
| 65,129 | 11 | 14 | 46  | 121 | 6  | 9  | 31  | 30 | 94    | 174 |
| 65,130 | 6  | 14 | 38  | 121 | 7  | 9  | 24  | 30 | 75    | 174 |
| 65,131 | 6  | 14 | 36  | 121 | 7  | 9  | 23  | 30 | 72    | 174 |
| 65,132 | 8  | 14 | 49  | 121 | 7  | 9  | 32  | 31 | 96    | 175 |
| 65,133 | 8  | 15 | 49  | 122 | 7  | 9  | 33  | 31 | 97    | 177 |
| 65,134 | 8  | 15 | 46  | 122 | 7  | 9  | 31  | 31 | 92    | 177 |
| 65,135 | 8  | 11 | 44  | 98  | 7  | 7  | 31  | 25 | 90    | 141 |
| 65,136 | 8  | 12 | 44  | 98  | 7  | 7  | 30  | 25 | 89    | 142 |
| 65,137 | 5  | 12 | 47  | 97  | 8  | 8  | 33  | 25 | 93    | 142 |

|        |    |    |     |     |    |   |     |    |     |     |
|--------|----|----|-----|-----|----|---|-----|----|-----|-----|
| 65,138 | 5  | 12 | 46  | 97  | 8  | 8 | 32  | 25 | 91  | 142 |
| 65,139 | 5  | 13 | 46  | 106 | 8  | 8 | 32  | 29 | 91  | 156 |
| 65,140 | 5  | 13 | 45  | 100 | 8  | 7 | 32  | 26 | 90  | 146 |
| 65,141 | 5  | 13 | 46  | 102 | 8  | 7 | 31  | 27 | 90  | 149 |
| 65,142 | 5  | 13 | 52  | 103 | 8  | 7 | 32  | 27 | 97  | 150 |
| 65,143 | 5  | 13 | 50  | 103 | 6  | 7 | 32  | 26 | 93  | 149 |
| 65,144 | 4  | 14 | 51  | 106 | 5  | 7 | 31  | 27 | 91  | 154 |
| 65,145 | 4  | 14 | 50  | 106 | 4  | 7 | 29  | 28 | 87  | 155 |
| 65,146 | 4  | 14 | 50  | 101 | 4  | 7 | 30  | 26 | 88  | 148 |
| 65,147 | 4  | 14 | 50  | 101 | 4  | 7 | 30  | 26 | 88  | 148 |
| 65,148 | 4  | 12 | 57  | 79  | 4  | 6 | 32  | 20 | 97  | 117 |
| 65,149 | 4  | 8  | 59  | 47  | 4  | 2 | 32  | 13 | 99  | 70  |
| 65,150 | 4  | 8  | 69  | 43  | 4  | 2 | 32  | 13 | 109 | 66  |
| 65,151 | 4  | 8  | 69  | 44  | 4  | 2 | 32  | 13 | 109 | 67  |
| 65,152 | 5  | 5  | 88  | 37  | 4  | 1 | 39  | 11 | 136 | 54  |
| 65,153 | 5  | 5  | 88  | 37  | 4  | 1 | 40  | 11 | 137 | 54  |
| 65,154 | 5  | 5  | 112 | 32  | 7  | 1 | 63  | 11 | 187 | 49  |
| 65,155 | 5  | 4  | 112 | 28  | 7  | 1 | 63  | 11 | 187 | 44  |
| 65,156 | 5  | 4  | 112 | 28  | 7  | 1 | 63  | 10 | 187 | 43  |
| 65,157 | 5  | 5  | 112 | 28  | 7  | 1 | 63  | 12 | 187 | 46  |
| 65,158 | 5  | 5  | 112 | 27  | 7  | 1 | 63  | 12 | 187 | 45  |
| 65,159 | 5  | 5  | 114 | 27  | 7  | 1 | 63  | 12 | 189 | 45  |
| 65,160 | 5  | 5  | 113 | 25  | 7  | 1 | 63  | 12 | 188 | 43  |
| 65,161 | 5  | 5  | 113 | 24  | 7  | 1 | 63  | 12 | 188 | 42  |
| 65,162 | 5  | 5  | 113 | 24  | 7  | 1 | 63  | 12 | 188 | 42  |
| 65,163 | 5  | 5  | 114 | 24  | 7  | 1 | 63  | 12 | 189 | 42  |
| 65,164 | 5  | 5  | 121 | 24  | 7  | 1 | 66  | 12 | 199 | 42  |
| 65,165 | 5  | 5  | 121 | 24  | 7  | 1 | 66  | 12 | 199 | 42  |
| 65,166 | 7  | 5  | 134 | 24  | 7  | 1 | 74  | 12 | 222 | 42  |
| 65,167 | 9  | 5  | 166 | 24  | 7  | 1 | 86  | 12 | 268 | 42  |
| 65,168 | 9  | 5  | 167 | 24  | 8  | 1 | 87  | 12 | 271 | 42  |
| 65,169 | 9  | 5  | 166 | 24  | 8  | 1 | 88  | 12 | 271 | 42  |
| 65,170 | 9  | 5  | 166 | 24  | 8  | 1 | 88  | 12 | 271 | 42  |
| 65,171 | 9  | 5  | 165 | 24  | 8  | 1 | 88  | 12 | 270 | 42  |
| 65,172 | 9  | 5  | 166 | 24  | 8  | 1 | 89  | 12 | 272 | 42  |
| 65,173 | 10 | 5  | 188 | 24  | 11 | 1 | 109 | 12 | 318 | 42  |
| 65,174 | 10 | 5  | 203 | 24  | 10 | 1 | 116 | 12 | 339 | 42  |
| 65,175 | 11 | 5  | 204 | 25  | 10 | 1 | 118 | 10 | 343 | 41  |
| 65,176 | 11 | 5  | 203 | 30  | 10 | 1 | 117 | 10 | 341 | 46  |
| 65,177 | 10 | 6  | 200 | 39  | 10 | 1 | 117 | 11 | 337 | 57  |
| 65,178 | 10 | 6  | 200 | 39  | 10 | 1 | 117 | 11 | 337 | 57  |

|        |    |    |     |    |    |   |     |    |     |    |
|--------|----|----|-----|----|----|---|-----|----|-----|----|
| 65,179 | 10 | 7  | 199 | 39 | 10 | 1 | 117 | 11 | 336 | 58 |
| 65,180 | 10 | 7  | 199 | 40 | 10 | 1 | 117 | 11 | 336 | 59 |
| 65,181 | 10 | 7  | 198 | 40 | 9  | 1 | 114 | 11 | 331 | 59 |
| 65,182 | 10 | 7  | 190 | 40 | 9  | 1 | 113 | 11 | 322 | 59 |
| 65,183 | 7  | 6  | 184 | 40 | 9  | 1 | 102 | 10 | 302 | 57 |
| 65,184 | 7  | 6  | 184 | 40 | 9  | 1 | 101 | 11 | 301 | 58 |
| 65,185 | 7  | 6  | 187 | 40 | 9  | 1 | 102 | 12 | 305 | 59 |
| 65,186 | 7  | 5  | 191 | 40 | 9  | 0 | 103 | 12 | 310 | 57 |
| 65,187 | 7  | 5  | 198 | 40 | 9  | 0 | 110 | 13 | 324 | 58 |
| 65,188 | 7  | 5  | 193 | 40 | 8  | 0 | 103 | 14 | 311 | 59 |
| 65,189 | 7  | 6  | 194 | 28 | 8  | 0 | 104 | 10 | 313 | 44 |
| 65,190 | 7  | 6  | 199 | 28 | 8  | 0 | 104 | 10 | 318 | 44 |
| 65,191 | 7  | 6  | 199 | 28 | 8  | 0 | 105 | 10 | 319 | 44 |
| 65,192 | 7  | 6  | 199 | 25 | 9  | 0 | 108 | 9  | 323 | 40 |
| 65,193 | 8  | 6  | 201 | 25 | 9  | 0 | 109 | 9  | 327 | 40 |
| 65,194 | 8  | 6  | 201 | 25 | 9  | 0 | 109 | 9  | 327 | 40 |
| 65,195 | 8  | 5  | 198 | 22 | 9  | 0 | 108 | 8  | 323 | 35 |
| 65,196 | 11 | 5  | 217 | 22 | 9  | 0 | 112 | 7  | 349 | 34 |
| 65,197 | 11 | 5  | 243 | 22 | 9  | 0 | 116 | 7  | 379 | 34 |
| 65,198 | 11 | 5  | 243 | 23 | 9  | 1 | 115 | 7  | 378 | 36 |
| 65,199 | 11 | 5  | 285 | 25 | 10 | 2 | 144 | 12 | 450 | 44 |
| 65,200 | 11 | 5  | 294 | 26 | 11 | 3 | 145 | 13 | 461 | 47 |
| 65,201 | 11 | 6  | 286 | 26 | 11 | 3 | 143 | 13 | 451 | 48 |
| 65,202 | 10 | 6  | 269 | 24 | 11 | 3 | 137 | 13 | 427 | 46 |
| 65,203 | 10 | 6  | 276 | 24 | 11 | 3 | 139 | 13 | 436 | 46 |
| 65,204 | 10 | 6  | 288 | 24 | 11 | 3 | 139 | 13 | 448 | 46 |
| 65,205 | 12 | 6  | 277 | 24 | 9  | 3 | 124 | 13 | 422 | 46 |
| 65,206 | 12 | 7  | 276 | 24 | 9  | 3 | 125 | 13 | 422 | 47 |
| 65,207 | 12 | 7  | 276 | 24 | 9  | 3 | 125 | 13 | 422 | 47 |
| 65,208 | 14 | 6  | 313 | 24 | 9  | 3 | 159 | 11 | 495 | 44 |
| 65,209 | 14 | 6  | 313 | 24 | 9  | 3 | 159 | 11 | 495 | 44 |
| 65,210 | 15 | 7  | 324 | 25 | 9  | 3 | 165 | 13 | 513 | 48 |
| 65,211 | 15 | 7  | 324 | 27 | 9  | 3 | 165 | 13 | 513 | 50 |
| 65,212 | 16 | 7  | 334 | 32 | 9  | 4 | 177 | 18 | 536 | 61 |
| 65,213 | 16 | 7  | 336 | 32 | 9  | 4 | 177 | 18 | 538 | 61 |
| 65,214 | 16 | 7  | 335 | 32 | 9  | 4 | 177 | 18 | 537 | 61 |
| 65,215 | 16 | 7  | 329 | 32 | 9  | 4 | 174 | 18 | 528 | 61 |
| 65,216 | 14 | 7  | 316 | 32 | 9  | 4 | 165 | 18 | 504 | 61 |
| 65,217 | 13 | 7  | 293 | 32 | 9  | 4 | 157 | 18 | 472 | 61 |
| 65,218 | 12 | 7  | 284 | 37 | 9  | 4 | 154 | 19 | 459 | 67 |
| 65,219 | 12 | 13 | 283 | 46 | 8  | 4 | 153 | 28 | 456 | 91 |

|        |    |    |     |    |    |   |     |    |       |    |
|--------|----|----|-----|----|----|---|-----|----|-------|----|
| 65,220 | 12 | 13 | 283 | 48 | 8  | 4 | 153 | 28 | 456   | 93 |
| 65,221 | 13 | 14 | 283 | 48 | 8  | 4 | 154 | 28 | 458   | 94 |
| 65,222 | 13 | 14 | 283 | 48 | 8  | 4 | 153 | 28 | 457   | 94 |
| 65,223 | 12 | 14 | 260 | 48 | 5  | 4 | 133 | 28 | 410   | 94 |
| 65,224 | 12 | 14 | 247 | 48 | 4  | 4 | 126 | 28 | 389   | 94 |
| 65,225 | 12 | 14 | 245 | 48 | 4  | 4 | 126 | 28 | 387   | 94 |
| 65,226 | 11 | 14 | 244 | 46 | 4  | 4 | 124 | 31 | 383   | 95 |
| 65,227 | 11 | 14 | 244 | 41 | 4  | 4 | 124 | 31 | 383   | 90 |
| 65,228 | 12 | 13 | 253 | 32 | 4  | 4 | 125 | 30 | 394   | 79 |
| 65,229 | 12 | 12 | 253 | 33 | 4  | 4 | 125 | 30 | 394   | 79 |
| 65,230 | 12 | 12 | 253 | 33 | 4  | 4 | 125 | 30 | 394   | 79 |
| 65,231 | 12 | 12 | 252 | 32 | 4  | 4 | 125 | 30 | 393   | 78 |
| 65,232 | 12 | 12 | 252 | 32 | 4  | 4 | 125 | 30 | 393   | 78 |
| 65,233 | 14 | 12 | 270 | 32 | 4  | 4 | 146 | 30 | 434   | 78 |
| 65,234 | 14 | 12 | 274 | 31 | 4  | 4 | 150 | 30 | 442   | 77 |
| 65,235 | 16 | 12 | 279 | 33 | 4  | 4 | 159 | 31 | 458   | 80 |
| 65,236 | 16 | 12 | 276 | 33 | 4  | 4 | 159 | 30 | 455   | 79 |
| 65,237 | 16 | 12 | 273 | 33 | 4  | 4 | 157 | 30 | 450   | 79 |
| 65,238 | 16 | 12 | 270 | 33 | 4  | 4 | 150 | 29 | 440   | 78 |
| 65,239 | 20 | 10 | 292 | 33 | 5  | 4 | 170 | 28 | 487   | 75 |
| 65,240 | 20 | 10 | 291 | 34 | 5  | 4 | 169 | 28 | 485   | 76 |
| 65,241 | 20 | 10 | 309 | 34 | 6  | 4 | 173 | 28 | 508   | 76 |
| 65,242 | 23 | 10 | 334 | 34 | 7  | 4 | 186 | 28 | 550   | 76 |
| 65,243 | 32 | 10 | 717 | 34 | 24 | 4 | 311 | 28 | 1,084 | 76 |
| 65,244 | 31 | 10 | 714 | 34 | 24 | 4 | 311 | 29 | 1,080 | 77 |
| 65,245 | 33 | 10 | 758 | 34 | 33 | 4 | 347 | 29 | 1,171 | 77 |
| 65,246 | 32 | 10 | 743 | 34 | 33 | 4 | 345 | 30 | 1,153 | 78 |
| 65,247 | 31 | 10 | 740 | 34 | 33 | 4 | 343 | 30 | 1,147 | 78 |
| 65,248 | 31 | 10 | 714 | 31 | 33 | 2 | 339 | 25 | 1,117 | 68 |
| 65,249 | 31 | 10 | 709 | 31 | 33 | 2 | 339 | 25 | 1,112 | 68 |
| 65,250 | 31 | 10 | 665 | 31 | 32 | 2 | 309 | 25 | 1,037 | 68 |
| 65,251 | 31 | 11 | 654 | 30 | 31 | 2 | 308 | 24 | 1,024 | 67 |
| 65,252 | 31 | 10 | 653 | 29 | 31 | 2 | 309 | 24 | 1,024 | 65 |
| 65,253 | 31 | 10 | 652 | 29 | 31 | 2 | 312 | 24 | 1,026 | 65 |
| 65,254 | 31 | 10 | 644 | 29 | 31 | 2 | 310 | 24 | 1,016 | 65 |
| 65,255 | 31 | 10 | 632 | 29 | 31 | 2 | 309 | 24 | 1,003 | 65 |
| 65,256 | 29 | 10 | 621 | 29 | 30 | 2 | 301 | 24 | 981   | 65 |
| 65,257 | 28 | 9  | 592 | 30 | 30 | 2 | 280 | 24 | 930   | 65 |
| 65,258 | 28 | 9  | 591 | 30 | 30 | 2 | 280 | 24 | 929   | 65 |
| 65,259 | 27 | 9  | 586 | 30 | 30 | 2 | 266 | 24 | 909   | 65 |
| 65,260 | 26 | 8  | 581 | 29 | 30 | 2 | 263 | 22 | 900   | 61 |



|        |    |    |     |    |    |   |     |    |       |    |
|--------|----|----|-----|----|----|---|-----|----|-------|----|
| 65,261 | 26 | 9  | 574 | 27 | 30 | 2 | 260 | 22 | 890   | 60 |
| 65,262 | 25 | 9  | 569 | 27 | 30 | 2 | 254 | 23 | 878   | 61 |
| 65,263 | 25 | 10 | 564 | 22 | 30 | 1 | 248 | 18 | 867   | 51 |
| 65,264 | 25 | 10 | 564 | 23 | 30 | 1 | 249 | 18 | 868   | 52 |
| 65,265 | 25 | 11 | 565 | 24 | 30 | 1 | 250 | 18 | 870   | 54 |
| 65,266 | 25 | 11 | 567 | 24 | 30 | 1 | 251 | 19 | 873   | 55 |
| 65,267 | 25 | 11 | 567 | 24 | 30 | 1 | 251 | 19 | 873   | 55 |
| 65,268 | 25 | 11 | 567 | 24 | 30 | 1 | 251 | 19 | 873   | 55 |
| 65,269 | 25 | 11 | 567 | 19 | 30 | 1 | 250 | 18 | 872   | 49 |
| 65,270 | 27 | 5  | 569 | 10 | 30 | 1 | 250 | 9  | 876   | 25 |
| 65,271 | 26 | 5  | 569 | 8  | 30 | 1 | 250 | 9  | 875   | 23 |
| 65,272 | 26 | 4  | 568 | 8  | 30 | 1 | 250 | 9  | 874   | 22 |
| 65,273 | 26 | 4  | 571 | 8  | 30 | 1 | 254 | 9  | 881   | 22 |
| 65,274 | 26 | 4  | 571 | 8  | 30 | 1 | 255 | 9  | 882   | 22 |
| 65,275 | 26 | 4  | 572 | 8  | 30 | 1 | 257 | 9  | 885   | 22 |
| 65,276 | 28 | 4  | 582 | 8  | 34 | 1 | 275 | 9  | 919   | 22 |
| 65,277 | 35 | 4  | 599 | 8  | 35 | 1 | 291 | 6  | 960   | 19 |
| 65,278 | 35 | 4  | 611 | 8  | 35 | 1 | 294 | 7  | 975   | 20 |
| 65,279 | 34 | 4  | 603 | 8  | 35 | 1 | 287 | 6  | 959   | 19 |
| 65,280 | 39 | 4  | 704 | 6  | 40 | 1 | 336 | 6  | 1,119 | 17 |
| 65,281 | 40 | 4  | 722 | 6  | 43 | 1 | 356 | 6  | 1,161 | 17 |
| 65,282 | 40 | 4  | 721 | 7  | 43 | 1 | 359 | 6  | 1,163 | 18 |
| 65,283 | 40 | 4  | 715 | 7  | 43 | 1 | 351 | 6  | 1,149 | 18 |
| 65,284 | 40 | 4  | 710 | 7  | 43 | 1 | 347 | 6  | 1,140 | 18 |
| 65,285 | 40 | 4  | 708 | 6  | 43 | 1 | 343 | 4  | 1,134 | 15 |
| 65,286 | 38 | 4  | 706 | 6  | 43 | 1 | 338 | 4  | 1,125 | 15 |
| 65,287 | 38 | 4  | 708 | 6  | 43 | 1 | 339 | 4  | 1,128 | 15 |
| 65,288 | 38 | 4  | 707 | 6  | 43 | 1 | 339 | 4  | 1,127 | 15 |
| 65,289 | 38 | 4  | 704 | 6  | 43 | 1 | 338 | 5  | 1,123 | 16 |
| 65,290 | 34 | 4  | 681 | 6  | 41 | 1 | 319 | 6  | 1,075 | 17 |
| 65,291 | 34 | 4  | 679 | 5  | 41 | 1 | 318 | 6  | 1,072 | 16 |
| 65,292 | 43 | 4  | 685 | 5  | 40 | 1 | 354 | 6  | 1,122 | 16 |
| 65,293 | 40 | 4  | 659 | 5  | 39 | 1 | 340 | 6  | 1,078 | 16 |
| 65,294 | 32 | 4  | 281 | 5  | 22 | 1 | 217 | 6  | 552   | 16 |
| 65,295 | 32 | 4  | 244 | 5  | 15 | 1 | 187 | 6  | 478   | 16 |
| 65,296 | 34 | 4  | 245 | 5  | 15 | 1 | 191 | 5  | 485   | 15 |
| 65,297 | 33 | 4  | 245 | 5  | 15 | 1 | 191 | 7  | 484   | 17 |
| 65,298 | 37 | 4  | 400 | 7  | 26 | 1 | 242 | 9  | 705   | 21 |
| 65,299 | 37 | 4  | 400 | 7  | 26 | 0 | 242 | 9  | 705   | 20 |
| 65,300 | 38 | 4  | 414 | 7  | 26 | 0 | 253 | 13 | 731   | 24 |
| 65,301 | 38 | 4  | 417 | 9  | 26 | 0 | 254 | 13 | 735   | 26 |

|        |    |   |     |    |    |   |     |    |     |     |
|--------|----|---|-----|----|----|---|-----|----|-----|-----|
| 65,302 | 38 | 3 | 417 | 10 | 26 | 0 | 253 | 13 | 734 | 26  |
| 65,303 | 38 | 3 | 416 | 10 | 26 | 0 | 253 | 13 | 733 | 26  |
| 65,304 | 38 | 3 | 421 | 10 | 26 | 0 | 251 | 13 | 736 | 26  |
| 65,305 | 38 | 5 | 442 | 11 | 26 | 0 | 260 | 14 | 766 | 30  |
| 65,306 | 38 | 5 | 442 | 11 | 26 | 0 | 260 | 14 | 766 | 30  |
| 65,307 | 38 | 5 | 445 | 11 | 26 | 0 | 265 | 14 | 774 | 30  |
| 65,308 | 38 | 5 | 447 | 10 | 26 | 0 | 265 | 14 | 776 | 29  |
| 65,309 | 38 | 5 | 448 | 10 | 26 | 0 | 265 | 14 | 777 | 29  |
| 65,310 | 38 | 5 | 446 | 10 | 26 | 0 | 265 | 14 | 775 | 29  |
| 65,311 | 38 | 5 | 445 | 10 | 26 | 0 | 265 | 14 | 774 | 29  |
| 65,312 | 40 | 4 | 448 | 11 | 26 | 0 | 266 | 14 | 780 | 29  |
| 65,313 | 40 | 4 | 457 | 11 | 26 | 0 | 268 | 13 | 791 | 28  |
| 65,314 | 40 | 3 | 458 | 12 | 26 | 0 | 269 | 14 | 793 | 29  |
| 65,315 | 40 | 2 | 457 | 10 | 26 | 0 | 270 | 14 | 793 | 26  |
| 65,316 | 40 | 2 | 456 | 10 | 26 | 0 | 270 | 14 | 792 | 26  |
| 65,317 | 40 | 2 | 455 | 10 | 26 | 0 | 269 | 13 | 790 | 25  |
| 65,318 | 40 | 2 | 455 | 10 | 26 | 0 | 269 | 13 | 790 | 25  |
| 65,319 | 38 | 2 | 454 | 10 | 26 | 0 | 268 | 13 | 786 | 25  |
| 65,320 | 38 | 2 | 456 | 10 | 26 | 0 | 270 | 13 | 790 | 25  |
| 65,321 | 38 | 2 | 456 | 10 | 26 | 0 | 270 | 13 | 790 | 25  |
| 65,322 | 38 | 2 | 455 | 10 | 26 | 0 | 271 | 13 | 790 | 25  |
| 65,323 | 38 | 2 | 453 | 10 | 26 | 0 | 268 | 13 | 785 | 25  |
| 65,324 | 38 | 2 | 453 | 11 | 26 | 0 | 267 | 13 | 784 | 26  |
| 65,325 | 38 | 2 | 452 | 12 | 26 | 0 | 266 | 14 | 782 | 28  |
| 65,326 | 36 | 2 | 438 | 22 | 22 | 1 | 247 | 28 | 743 | 53  |
| 65,327 | 30 | 5 | 427 | 46 | 21 | 1 | 236 | 44 | 714 | 96  |
| 65,328 | 28 | 5 | 417 | 47 | 21 | 1 | 231 | 45 | 697 | 98  |
| 65,329 | 28 | 5 | 405 | 49 | 21 | 1 | 228 | 47 | 682 | 102 |
| 65,330 | 26 | 5 | 350 | 51 | 18 | 1 | 196 | 48 | 590 | 105 |
| 65,331 | 22 | 6 | 303 | 52 | 16 | 2 | 183 | 48 | 524 | 108 |
| 65,332 | 21 | 6 | 284 | 52 | 13 | 2 | 161 | 48 | 479 | 108 |
| 65,333 | 21 | 6 | 283 | 52 | 13 | 2 | 157 | 48 | 474 | 108 |
| 65,334 | 21 | 7 | 284 | 53 | 13 | 2 | 156 | 48 | 474 | 110 |
| 65,335 | 21 | 7 | 285 | 53 | 13 | 2 | 157 | 48 | 476 | 110 |
| 65,336 | 21 | 7 | 285 | 53 | 14 | 2 | 159 | 48 | 479 | 110 |
| 65,337 | 21 | 7 | 284 | 55 | 14 | 2 | 159 | 48 | 478 | 112 |
| 65,338 | 21 | 7 | 282 | 56 | 14 | 2 | 157 | 48 | 474 | 113 |
| 65,339 | 22 | 8 | 288 | 57 | 14 | 2 | 157 | 47 | 481 | 114 |
| 65,340 | 24 | 8 | 312 | 57 | 14 | 2 | 165 | 46 | 515 | 113 |
| 65,341 | 25 | 8 | 338 | 57 | 14 | 2 | 169 | 46 | 546 | 113 |
| 65,342 | 35 | 8 | 363 | 57 | 16 | 2 | 196 | 47 | 610 | 114 |

|        |    |   |     |    |    |   |     |    |       |     |
|--------|----|---|-----|----|----|---|-----|----|-------|-----|
| 65,343 | 29 | 8 | 370 | 57 | 16 | 2 | 166 | 51 | 581   | 118 |
| 65,344 | 31 | 8 | 389 | 66 | 17 | 2 | 179 | 54 | 616   | 130 |
| 65,345 | 31 | 8 | 430 | 69 | 16 | 2 | 185 | 56 | 662   | 135 |
| 65,346 | 34 | 8 | 523 | 69 | 15 | 2 | 198 | 57 | 770   | 136 |
| 65,347 | 32 | 8 | 541 | 69 | 16 | 2 | 198 | 57 | 787   | 136 |
| 65,348 | 34 | 8 | 456 | 67 | 10 | 2 | 222 | 54 | 722   | 131 |
| 65,349 | 34 | 8 | 439 | 67 | 9  | 2 | 212 | 54 | 694   | 131 |
| 65,350 | 35 | 8 | 446 | 67 | 9  | 2 | 209 | 50 | 699   | 127 |
| 65,351 | 35 | 8 | 462 | 71 | 9  | 2 | 220 | 50 | 726   | 131 |
| 65,352 | 35 | 8 | 458 | 69 | 9  | 2 | 219 | 50 | 721   | 129 |
| 65,353 | 35 | 8 | 459 | 68 | 9  | 2 | 219 | 50 | 722   | 128 |
| 65,354 | 35 | 8 | 454 | 68 | 9  | 2 | 218 | 50 | 716   | 128 |
| 65,355 | 35 | 8 | 439 | 68 | 9  | 2 | 210 | 51 | 693   | 129 |
| 65,356 | 35 | 6 | 433 | 67 | 9  | 2 | 209 | 50 | 686   | 125 |
| 65,357 | 35 | 6 | 428 | 67 | 9  | 2 | 205 | 50 | 677   | 125 |
| 65,358 | 35 | 6 | 426 | 67 | 9  | 2 | 205 | 50 | 675   | 125 |
| 65,359 | 35 | 6 | 426 | 73 | 9  | 2 | 208 | 52 | 678   | 133 |
| 65,360 | 36 | 6 | 431 | 75 | 9  | 2 | 210 | 52 | 686   | 135 |
| 65,361 | 36 | 6 | 433 | 75 | 9  | 2 | 213 | 52 | 691   | 135 |
| 65,362 | 34 | 6 | 430 | 75 | 9  | 2 | 214 | 54 | 687   | 137 |
| 65,363 | 34 | 6 | 420 | 74 | 9  | 2 | 212 | 54 | 675   | 136 |
| 65,364 | 43 | 6 | 473 | 74 | 9  | 2 | 243 | 54 | 768   | 136 |
| 65,365 | 43 | 6 | 476 | 73 | 9  | 2 | 248 | 54 | 776   | 135 |
| 65,366 | 43 | 6 | 474 | 74 | 9  | 2 | 246 | 54 | 772   | 136 |
| 65,367 | 43 | 6 | 477 | 74 | 9  | 2 | 246 | 54 | 775   | 136 |
| 65,368 | 44 | 6 | 484 | 74 | 9  | 2 | 250 | 54 | 787   | 136 |
| 65,369 | 44 | 6 | 489 | 74 | 9  | 2 | 250 | 54 | 792   | 136 |
| 65,370 | 46 | 6 | 508 | 74 | 9  | 2 | 254 | 55 | 817   | 137 |
| 65,371 | 46 | 6 | 514 | 74 | 9  | 2 | 255 | 55 | 824   | 137 |
| 65,372 | 46 | 6 | 517 | 74 | 9  | 2 | 257 | 55 | 829   | 137 |
| 65,373 | 67 | 6 | 610 | 74 | 15 | 2 | 317 | 55 | 1,009 | 137 |
| 65,374 | 77 | 6 | 629 | 73 | 17 | 2 | 326 | 55 | 1,049 | 136 |
| 65,375 | 77 | 6 | 629 | 73 | 17 | 2 | 326 | 55 | 1,049 | 136 |
| 65,376 | 91 | 6 | 699 | 72 | 21 | 2 | 362 | 54 | 1,173 | 134 |
| 65,377 | 91 | 6 | 699 | 62 | 21 | 1 | 362 | 40 | 1,173 | 109 |
| 65,378 | 94 | 3 | 769 | 38 | 25 | 1 | 397 | 24 | 1,285 | 66  |
| 65,379 | 94 | 3 | 771 | 35 | 25 | 1 | 396 | 20 | 1,286 | 59  |
| 65,380 | 94 | 4 | 772 | 33 | 25 | 1 | 396 | 19 | 1,287 | 57  |
| 65,381 | 94 | 4 | 772 | 33 | 25 | 1 | 394 | 19 | 1,285 | 57  |
| 65,382 | 94 | 3 | 771 | 35 | 25 | 0 | 390 | 19 | 1,280 | 57  |
| 65,383 | 94 | 3 | 771 | 34 | 25 | 0 | 390 | 18 | 1,280 | 55  |

|        |    |    |     |    |    |   |     |    |       |    |
|--------|----|----|-----|----|----|---|-----|----|-------|----|
| 65,384 | 94 | 2  | 771 | 33 | 25 | 0 | 390 | 19 | 1,280 | 54 |
| 65,385 | 94 | 2  | 770 | 33 | 25 | 0 | 391 | 19 | 1,280 | 54 |
| 65,386 | 94 | 2  | 769 | 32 | 25 | 0 | 390 | 19 | 1,278 | 53 |
| 65,387 | 94 | 2  | 770 | 32 | 24 | 0 | 388 | 19 | 1,276 | 53 |
| 65,388 | 94 | 2  | 771 | 30 | 24 | 0 | 390 | 19 | 1,279 | 51 |
| 65,389 | 93 | 2  | 771 | 29 | 24 | 0 | 390 | 19 | 1,278 | 50 |
| 65,390 | 93 | 1  | 765 | 28 | 24 | 0 | 390 | 19 | 1,272 | 48 |
| 65,391 | 91 | 2  | 742 | 28 | 24 | 1 | 382 | 19 | 1,239 | 50 |
| 65,392 | 90 | 2  | 714 | 28 | 24 | 1 | 377 | 19 | 1,205 | 50 |
| 65,393 | 80 | 2  | 683 | 28 | 22 | 1 | 350 | 20 | 1,135 | 51 |
| 65,394 | 77 | 2  | 655 | 29 | 22 | 1 | 342 | 16 | 1,096 | 48 |
| 65,395 | 75 | 4  | 636 | 21 | 21 | 1 | 328 | 16 | 1,060 | 42 |
| 65,396 | 74 | 4  | 584 | 23 | 21 | 1 | 315 | 14 | 994   | 42 |
| 65,397 | 69 | 5  | 488 | 23 | 21 | 1 | 298 | 12 | 876   | 41 |
| 65,398 | 69 | 5  | 466 | 26 | 20 | 1 | 292 | 12 | 847   | 44 |
| 65,399 | 63 | 5  | 413 | 39 | 16 | 1 | 228 | 13 | 720   | 58 |
| 65,400 | 62 | 5  | 401 | 41 | 16 | 1 | 221 | 15 | 700   | 62 |
| 65,401 | 62 | 5  | 395 | 41 | 16 | 1 | 222 | 15 | 695   | 62 |
| 65,402 | 61 | 5  | 379 | 37 | 16 | 1 | 212 | 15 | 668   | 58 |
| 65,403 | 61 | 5  | 382 | 42 | 16 | 1 | 213 | 18 | 672   | 66 |
| 65,404 | 61 | 5  | 381 | 42 | 16 | 1 | 213 | 18 | 671   | 66 |
| 65,405 | 61 | 5  | 382 | 42 | 16 | 1 | 212 | 18 | 671   | 66 |
| 65,406 | 61 | 6  | 397 | 43 | 16 | 2 | 219 | 17 | 693   | 68 |
| 65,407 | 61 | 6  | 397 | 44 | 16 | 2 | 218 | 18 | 692   | 70 |
| 65,408 | 63 | 6  | 398 | 45 | 16 | 2 | 218 | 18 | 695   | 71 |
| 65,409 | 63 | 6  | 407 | 39 | 16 | 2 | 228 | 16 | 714   | 63 |
| 65,410 | 63 | 6  | 406 | 41 | 16 | 2 | 226 | 16 | 711   | 65 |
| 65,411 | 63 | 6  | 405 | 39 | 17 | 2 | 236 | 16 | 721   | 63 |
| 65,412 | 70 | 6  | 421 | 40 | 18 | 2 | 254 | 14 | 763   | 62 |
| 65,413 | 70 | 6  | 426 | 41 | 18 | 2 | 253 | 15 | 767   | 64 |
| 65,414 | 66 | 6  | 419 | 41 | 18 | 2 | 264 | 15 | 767   | 64 |
| 65,415 | 66 | 6  | 377 | 43 | 21 | 2 | 256 | 14 | 720   | 65 |
| 65,416 | 66 | 6  | 373 | 43 | 21 | 2 | 250 | 14 | 710   | 65 |
| 65,417 | 67 | 9  | 382 | 42 | 21 | 2 | 251 | 14 | 721   | 67 |
| 65,418 | 67 | 9  | 381 | 42 | 21 | 2 | 251 | 14 | 720   | 67 |
| 65,419 | 66 | 9  | 375 | 42 | 21 | 2 | 247 | 14 | 709   | 67 |
| 65,420 | 66 | 9  | 370 | 43 | 21 | 2 | 247 | 15 | 704   | 69 |
| 65,421 | 64 | 9  | 350 | 43 | 21 | 2 | 243 | 14 | 678   | 68 |
| 65,422 | 64 | 9  | 342 | 45 | 21 | 2 | 240 | 16 | 667   | 72 |
| 65,423 | 64 | 11 | 339 | 47 | 21 | 2 | 238 | 18 | 662   | 78 |
| 65,424 | 43 | 11 | 246 | 49 | 15 | 2 | 176 | 19 | 480   | 81 |

|        |    |    |     |    |    |   |     |    |     |     |
|--------|----|----|-----|----|----|---|-----|----|-----|-----|
| 65,425 | 33 | 13 | 227 | 54 | 13 | 3 | 167 | 25 | 440 | 95  |
| 65,426 | 20 | 13 | 162 | 57 | 9  | 3 | 134 | 27 | 325 | 100 |
| 65,427 | 19 | 13 | 157 | 62 | 9  | 4 | 130 | 34 | 315 | 113 |
| 65,428 | 17 | 13 | 102 | 65 | 5  | 4 | 105 | 35 | 229 | 117 |
| 65,429 | 16 | 14 | 87  | 68 | 5  | 4 | 99  | 35 | 207 | 121 |
| 65,430 | 16 | 14 | 85  | 70 | 5  | 4 | 99  | 38 | 205 | 126 |
| 65,431 | 16 | 13 | 83  | 75 | 5  | 4 | 99  | 39 | 203 | 131 |
| 65,432 | 16 | 14 | 83  | 75 | 5  | 4 | 99  | 38 | 203 | 131 |
| 65,433 | 16 | 14 | 84  | 73 | 5  | 4 | 100 | 38 | 205 | 129 |
| 65,434 | 16 | 14 | 84  | 73 | 5  | 4 | 100 | 38 | 205 | 129 |
| 65,435 | 16 | 14 | 84  | 73 | 5  | 5 | 100 | 37 | 205 | 129 |
| 65,436 | 16 | 14 | 84  | 73 | 5  | 5 | 100 | 37 | 205 | 129 |
| 65,437 | 16 | 14 | 83  | 73 | 5  | 5 | 100 | 37 | 204 | 129 |
| 65,438 | 16 | 14 | 82  | 74 | 5  | 5 | 98  | 37 | 201 | 130 |
| 65,439 | 16 | 14 | 80  | 74 | 5  | 5 | 98  | 37 | 199 | 130 |
| 65,440 | 16 | 14 | 80  | 74 | 5  | 5 | 98  | 37 | 199 | 130 |
| 65,441 | 17 | 13 | 80  | 74 | 5  | 4 | 97  | 37 | 199 | 128 |
| 65,442 | 17 | 13 | 80  | 74 | 5  | 4 | 97  | 37 | 199 | 128 |
| 65,443 | 17 | 13 | 80  | 74 | 5  | 4 | 97  | 36 | 199 | 127 |
| 65,444 | 17 | 13 | 80  | 74 | 5  | 4 | 97  | 36 | 199 | 127 |
| 65,445 | 17 | 13 | 79  | 73 | 5  | 4 | 97  | 36 | 198 | 126 |
| 65,446 | 17 | 11 | 79  | 72 | 5  | 4 | 98  | 34 | 199 | 121 |
| 65,447 | 17 | 10 | 79  | 67 | 5  | 4 | 98  | 34 | 199 | 115 |
| 65,448 | 17 | 10 | 79  | 64 | 5  | 4 | 98  | 34 | 199 | 112 |
| 65,449 | 17 | 10 | 78  | 51 | 6  | 4 | 97  | 33 | 198 | 98  |
| 65,450 | 17 | 10 | 78  | 51 | 6  | 4 | 95  | 33 | 196 | 98  |
| 65,451 | 17 | 10 | 76  | 49 | 6  | 4 | 96  | 31 | 195 | 94  |
| 65,452 | 17 | 10 | 76  | 50 | 6  | 4 | 95  | 31 | 194 | 95  |
| 65,453 | 17 | 10 | 76  | 50 | 6  | 4 | 94  | 31 | 193 | 95  |
| 65,454 | 19 | 10 | 133 | 45 | 9  | 4 | 120 | 28 | 281 | 87  |
| 65,455 | 20 | 10 | 153 | 45 | 10 | 4 | 146 | 28 | 329 | 87  |
| 65,456 | 20 | 9  | 141 | 42 | 10 | 3 | 141 | 27 | 312 | 81  |
| 65,457 | 20 | 9  | 142 | 42 | 10 | 3 | 141 | 27 | 313 | 81  |
| 65,458 | 21 | 9  | 161 | 40 | 10 | 3 | 155 | 27 | 347 | 79  |
| 65,459 | 23 | 9  | 166 | 40 | 13 | 3 | 163 | 27 | 365 | 79  |
| 65,460 | 23 | 9  | 157 | 41 | 13 | 3 | 153 | 27 | 346 | 80  |
| 65,461 | 23 | 9  | 157 | 41 | 13 | 3 | 153 | 28 | 346 | 81  |
| 65,462 | 22 | 9  | 153 | 41 | 12 | 3 | 141 | 28 | 328 | 81  |
| 65,463 | 15 | 9  | 135 | 40 | 11 | 3 | 120 | 28 | 281 | 80  |
| 65,464 | 15 | 9  | 130 | 37 | 11 | 3 | 119 | 27 | 275 | 76  |
| 65,465 | 14 | 9  | 127 | 37 | 11 | 3 | 100 | 27 | 252 | 76  |

|        |    |   |     |    |    |   |     |    |     |    |
|--------|----|---|-----|----|----|---|-----|----|-----|----|
| 65,466 | 10 | 9 | 125 | 37 | 8  | 3 | 86  | 27 | 229 | 76 |
| 65,467 | 10 | 9 | 118 | 37 | 8  | 3 | 85  | 29 | 221 | 78 |
| 65,468 | 9  | 6 | 113 | 38 | 8  | 3 | 85  | 29 | 215 | 76 |
| 65,469 | 9  | 6 | 112 | 38 | 8  | 3 | 85  | 29 | 214 | 76 |
| 65,470 | 9  | 6 | 114 | 38 | 8  | 3 | 86  | 28 | 217 | 75 |
| 65,471 | 10 | 6 | 120 | 37 | 8  | 3 | 87  | 28 | 225 | 74 |
| 65,472 | 10 | 6 | 120 | 37 | 8  | 3 | 87  | 28 | 225 | 74 |
| 65,473 | 10 | 6 | 121 | 35 | 8  | 3 | 88  | 26 | 227 | 70 |
| 65,474 | 10 | 4 | 123 | 33 | 8  | 3 | 88  | 24 | 229 | 64 |
| 65,475 | 10 | 4 | 124 | 31 | 8  | 3 | 88  | 23 | 230 | 61 |
| 65,476 | 10 | 2 | 124 | 26 | 8  | 2 | 88  | 17 | 230 | 47 |
| 65,477 | 10 | 2 | 126 | 23 | 8  | 2 | 88  | 16 | 232 | 43 |
| 65,478 | 10 | 2 | 145 | 20 | 9  | 1 | 93  | 12 | 257 | 35 |
| 65,479 | 12 | 2 | 164 | 19 | 12 | 1 | 111 | 11 | 299 | 33 |
| 65,480 | 12 | 3 | 164 | 17 | 12 | 1 | 110 | 12 | 298 | 33 |
| 65,481 | 12 | 3 | 164 | 15 | 12 | 1 | 111 | 9  | 299 | 28 |
| 65,482 | 12 | 3 | 171 | 13 | 12 | 1 | 112 | 8  | 307 | 25 |
| 65,483 | 12 | 2 | 172 | 15 | 12 | 1 | 112 | 8  | 308 | 26 |
| 65,484 | 12 | 2 | 177 | 15 | 12 | 1 | 116 | 8  | 317 | 26 |
| 65,485 | 12 | 3 | 177 | 15 | 12 | 1 | 116 | 8  | 317 | 27 |
| 65,486 | 19 | 3 | 197 | 15 | 13 | 0 | 119 | 8  | 348 | 26 |
| 65,487 | 21 | 3 | 217 | 16 | 13 | 0 | 133 | 8  | 384 | 27 |
| 65,488 | 21 | 3 | 217 | 16 | 13 | 0 | 133 | 8  | 384 | 27 |
| 65,489 | 21 | 3 | 219 | 15 | 13 | 0 | 134 | 8  | 387 | 26 |
| 65,490 | 21 | 3 | 231 | 15 | 13 | 0 | 137 | 8  | 402 | 26 |
| 65,491 | 21 | 3 | 243 | 15 | 13 | 0 | 139 | 8  | 416 | 26 |
| 65,492 | 29 | 3 | 297 | 15 | 17 | 0 | 179 | 8  | 522 | 26 |
| 65,493 | 29 | 3 | 297 | 15 | 17 | 0 | 179 | 8  | 522 | 26 |
| 65,494 | 29 | 3 | 345 | 15 | 17 | 0 | 191 | 8  | 582 | 26 |
| 65,495 | 30 | 3 | 356 | 15 | 17 | 0 | 204 | 8  | 607 | 26 |
| 65,496 | 33 | 3 | 359 | 15 | 19 | 0 | 204 | 8  | 615 | 26 |
| 65,497 | 33 | 3 | 360 | 15 | 19 | 0 | 204 | 8  | 616 | 26 |
| 65,498 | 33 | 3 | 360 | 16 | 19 | 0 | 204 | 8  | 616 | 27 |
| 65,499 | 33 | 3 | 360 | 17 | 19 | 0 | 204 | 8  | 616 | 28 |
| 65,500 | 33 | 3 | 360 | 17 | 18 | 0 | 204 | 8  | 615 | 28 |
| 65,501 | 33 | 3 | 359 | 18 | 18 | 0 | 204 | 9  | 614 | 30 |
| 65,502 | 33 | 3 | 360 | 18 | 18 | 0 | 203 | 9  | 614 | 30 |
| 65,503 | 33 | 3 | 355 | 17 | 18 | 0 | 201 | 9  | 607 | 29 |
| 65,504 | 33 | 3 | 330 | 18 | 17 | 0 | 187 | 11 | 567 | 32 |
| 65,505 | 31 | 3 | 301 | 18 | 15 | 0 | 177 | 11 | 524 | 32 |
| 65,506 | 30 | 3 | 279 | 18 | 14 | 0 | 151 | 11 | 474 | 32 |

|        |    |   |     |    |    |   |     |    |     |     |
|--------|----|---|-----|----|----|---|-----|----|-----|-----|
| 65,507 | 30 | 3 | 278 | 18 | 14 | 0 | 149 | 11 | 471 | 32  |
| 65,508 | 30 | 3 | 276 | 18 | 14 | 0 | 151 | 11 | 471 | 32  |
| 65,509 | 28 | 3 | 257 | 18 | 15 | 0 | 137 | 11 | 437 | 32  |
| 65,510 | 27 | 3 | 264 | 17 | 12 | 0 | 147 | 11 | 450 | 31  |
| 65,511 | 27 | 3 | 264 | 17 | 12 | 0 | 146 | 11 | 449 | 31  |
| 65,512 | 27 | 3 | 264 | 17 | 12 | 0 | 146 | 10 | 449 | 30  |
| 65,513 | 28 | 3 | 266 | 17 | 12 | 0 | 153 | 10 | 459 | 30  |
| 65,514 | 28 | 3 | 266 | 17 | 12 | 0 | 153 | 10 | 459 | 30  |
| 65,515 | 27 | 3 | 266 | 17 | 12 | 0 | 153 | 10 | 458 | 30  |
| 65,516 | 28 | 3 | 267 | 17 | 13 | 0 | 154 | 10 | 462 | 30  |
| 65,517 | 28 | 3 | 272 | 17 | 13 | 0 | 156 | 8  | 469 | 28  |
| 65,518 | 28 | 3 | 275 | 16 | 13 | 0 | 156 | 8  | 472 | 27  |
| 65,519 | 28 | 3 | 275 | 16 | 13 | 0 | 156 | 8  | 472 | 27  |
| 65,520 | 31 | 3 | 275 | 16 | 13 | 0 | 155 | 8  | 474 | 27  |
| 65,521 | 33 | 3 | 287 | 16 | 13 | 0 | 158 | 8  | 491 | 27  |
| 65,522 | 32 | 3 | 282 | 16 | 13 | 0 | 157 | 8  | 484 | 27  |
| 65,523 | 32 | 3 | 281 | 16 | 13 | 0 | 156 | 9  | 482 | 28  |
| 65,524 | 32 | 4 | 279 | 27 | 13 | 0 | 156 | 20 | 480 | 51  |
| 65,525 | 32 | 4 | 278 | 30 | 13 | 0 | 156 | 22 | 479 | 56  |
| 65,526 | 34 | 6 | 307 | 36 | 14 | 0 | 169 | 28 | 524 | 70  |
| 65,527 | 34 | 6 | 313 | 39 | 15 | 0 | 173 | 30 | 535 | 75  |
| 65,528 | 34 | 6 | 365 | 39 | 20 | 0 | 183 | 29 | 602 | 74  |
| 65,529 | 34 | 6 | 351 | 37 | 19 | 0 | 183 | 26 | 587 | 69  |
| 65,530 | 32 | 6 | 331 | 35 | 16 | 0 | 161 | 26 | 540 | 67  |
| 65,531 | 34 | 5 | 350 | 35 | 20 | 0 | 182 | 25 | 586 | 65  |
| 65,532 | 34 | 5 | 347 | 35 | 20 | 0 | 182 | 25 | 583 | 65  |
| 65,533 | 34 | 5 | 352 | 32 | 20 | 0 | 186 | 25 | 592 | 62  |
| 65,534 | 34 | 4 | 357 | 33 | 20 | 0 | 186 | 26 | 597 | 63  |
| 65,535 | 34 | 4 | 362 | 34 | 20 | 0 | 185 | 26 | 601 | 64  |
| 65,536 | 27 | 4 | 347 | 34 | 19 | 1 | 184 | 26 | 577 | 65  |
| 65,537 | 28 | 4 | 378 | 34 | 20 | 1 | 194 | 27 | 620 | 66  |
| 65,538 | 26 | 5 | 376 | 39 | 20 | 2 | 190 | 29 | 612 | 75  |
| 65,539 | 26 | 5 | 378 | 42 | 20 | 2 | 188 | 31 | 612 | 80  |
| 65,540 | 26 | 5 | 366 | 44 | 20 | 2 | 186 | 31 | 598 | 82  |
| 65,541 | 28 | 5 | 361 | 47 | 20 | 2 | 193 | 35 | 602 | 89  |
| 65,542 | 30 | 5 | 363 | 62 | 20 | 2 | 192 | 40 | 605 | 109 |
| 65,543 | 22 | 6 | 317 | 64 | 16 | 4 | 157 | 41 | 512 | 115 |
| 65,544 | 22 | 6 | 269 | 64 | 16 | 4 | 145 | 41 | 452 | 115 |
| 65,545 | 24 | 6 | 285 | 65 | 17 | 4 | 164 | 41 | 490 | 116 |
| 65,546 | 25 | 6 | 316 | 65 | 18 | 4 | 177 | 42 | 536 | 117 |
| 65,547 | 22 | 6 | 314 | 65 | 16 | 4 | 180 | 42 | 532 | 117 |

|        |    |   |     |    |    |   |     |    |     |     |
|--------|----|---|-----|----|----|---|-----|----|-----|-----|
| 65,548 | 22 | 6 | 313 | 65 | 16 | 4 | 180 | 42 | 531 | 117 |
| 65,549 | 22 | 6 | 313 | 64 | 16 | 4 | 180 | 43 | 531 | 117 |
| 65,550 | 25 | 7 | 336 | 63 | 17 | 4 | 196 | 43 | 574 | 117 |
| 65,551 | 25 | 7 | 344 | 63 | 18 | 4 | 203 | 44 | 590 | 118 |
| 65,552 | 25 | 7 | 354 | 62 | 18 | 4 | 213 | 44 | 610 | 117 |
| 65,553 | 25 | 7 | 353 | 63 | 18 | 4 | 213 | 46 | 609 | 120 |
| 65,554 | 25 | 7 | 352 | 63 | 18 | 4 | 213 | 47 | 608 | 121 |
| 65,555 | 25 | 7 | 353 | 62 | 18 | 4 | 213 | 45 | 609 | 118 |
| 65,556 | 25 | 7 | 352 | 62 | 18 | 4 | 213 | 45 | 608 | 118 |
| 65,557 | 25 | 7 | 353 | 62 | 18 | 4 | 218 | 45 | 614 | 118 |
| 65,558 | 25 | 8 | 353 | 62 | 18 | 4 | 218 | 45 | 614 | 119 |
| 65,559 | 25 | 8 | 353 | 62 | 18 | 4 | 216 | 45 | 612 | 119 |
| 65,560 | 25 | 8 | 352 | 62 | 17 | 4 | 216 | 45 | 610 | 119 |
| 65,561 | 23 | 8 | 341 | 62 | 17 | 4 | 198 | 44 | 579 | 118 |
| 65,562 | 23 | 8 | 342 | 62 | 17 | 4 | 200 | 44 | 582 | 118 |
| 65,563 | 26 | 8 | 357 | 62 | 17 | 4 | 214 | 44 | 614 | 118 |
| 65,564 | 25 | 8 | 355 | 62 | 17 | 4 | 207 | 46 | 604 | 120 |
| 65,565 | 25 | 8 | 355 | 62 | 17 | 4 | 207 | 47 | 604 | 121 |
| 65,566 | 30 | 8 | 376 | 62 | 20 | 4 | 220 | 47 | 646 | 121 |
| 65,567 | 31 | 8 | 393 | 62 | 22 | 4 | 230 | 47 | 676 | 121 |
| 65,568 | 33 | 8 | 406 | 62 | 26 | 4 | 246 | 47 | 711 | 121 |
| 65,569 | 33 | 8 | 403 | 62 | 26 | 4 | 246 | 47 | 708 | 121 |
| 65,570 | 37 | 8 | 444 | 63 | 27 | 5 | 266 | 47 | 774 | 123 |
| 65,571 | 35 | 8 | 433 | 63 | 27 | 5 | 263 | 47 | 758 | 123 |
| 65,572 | 44 | 8 | 480 | 63 | 32 | 5 | 282 | 47 | 838 | 123 |
| 65,573 | 44 | 8 | 479 | 63 | 32 | 5 | 280 | 47 | 835 | 123 |
| 65,574 | 47 | 7 | 577 | 53 | 36 | 5 | 332 | 36 | 992 | 101 |
| 65,575 | 48 | 7 | 578 | 57 | 36 | 5 | 332 | 37 | 994 | 106 |
| 65,576 | 47 | 7 | 563 | 55 | 35 | 5 | 328 | 35 | 973 | 102 |
| 65,577 | 46 | 5 | 555 | 49 | 35 | 5 | 325 | 30 | 961 | 89  |
| 65,578 | 46 | 5 | 547 | 46 | 34 | 5 | 321 | 28 | 948 | 84  |
| 65,579 | 46 | 5 | 495 | 46 | 29 | 5 | 309 | 28 | 879 | 84  |
| 65,580 | 46 | 5 | 490 | 46 | 29 | 5 | 306 | 28 | 871 | 84  |
| 65,581 | 44 | 5 | 470 | 46 | 25 | 5 | 284 | 28 | 823 | 84  |
| 65,582 | 44 | 4 | 468 | 45 | 25 | 5 | 284 | 28 | 821 | 82  |
| 65,583 | 44 | 4 | 463 | 45 | 25 | 5 | 280 | 29 | 812 | 83  |
| 65,584 | 44 | 4 | 457 | 41 | 25 | 5 | 282 | 28 | 808 | 78  |
| 65,585 | 46 | 4 | 457 | 41 | 25 | 5 | 282 | 29 | 810 | 79  |
| 65,586 | 46 | 4 | 448 | 40 | 25 | 5 | 278 | 29 | 797 | 78  |
| 65,587 | 47 | 4 | 445 | 40 | 25 | 5 | 276 | 29 | 793 | 78  |
| 65,588 | 49 | 4 | 418 | 40 | 25 | 6 | 268 | 28 | 760 | 78  |



|        |    |    |     |    |    |   |     |    |     |     |
|--------|----|----|-----|----|----|---|-----|----|-----|-----|
| 65,589 | 50 | 3  | 402 | 31 | 25 | 5 | 260 | 24 | 737 | 63  |
| 65,590 | 50 | 3  | 399 | 31 | 25 | 5 | 260 | 24 | 734 | 63  |
| 65,591 | 49 | 3  | 398 | 29 | 25 | 5 | 261 | 24 | 733 | 61  |
| 65,592 | 48 | 3  | 395 | 26 | 25 | 5 | 252 | 20 | 720 | 54  |
| 65,593 | 45 | 2  | 403 | 9  | 25 | 3 | 257 | 14 | 730 | 28  |
| 65,594 | 45 | 3  | 398 | 8  | 25 | 3 | 254 | 14 | 722 | 28  |
| 65,595 | 45 | 3  | 398 | 9  | 25 | 4 | 254 | 14 | 722 | 30  |
| 65,596 | 43 | 3  | 381 | 9  | 24 | 4 | 232 | 14 | 680 | 30  |
| 65,597 | 41 | 4  | 342 | 9  | 23 | 4 | 209 | 14 | 615 | 31  |
| 65,598 | 41 | 4  | 341 | 10 | 23 | 4 | 205 | 14 | 610 | 32  |
| 65,599 | 38 | 4  | 334 | 11 | 22 | 4 | 192 | 14 | 586 | 33  |
| 65,600 | 38 | 3  | 318 | 11 | 22 | 4 | 188 | 13 | 566 | 31  |
| 65,601 | 38 | 3  | 310 | 11 | 21 | 4 | 181 | 14 | 550 | 32  |
| 65,602 | 38 | 3  | 302 | 11 | 21 | 4 | 173 | 13 | 534 | 31  |
| 65,603 | 38 | 3  | 303 | 11 | 21 | 4 | 173 | 13 | 535 | 31  |
| 65,604 | 38 | 3  | 317 | 10 | 23 | 4 | 185 | 10 | 563 | 27  |
| 65,605 | 38 | 3  | 320 | 10 | 23 | 4 | 187 | 10 | 568 | 27  |
| 65,606 | 39 | 3  | 323 | 10 | 23 | 4 | 190 | 10 | 575 | 27  |
| 65,607 | 39 | 3  | 322 | 10 | 23 | 4 | 185 | 10 | 569 | 27  |
| 65,608 | 39 | 3  | 322 | 10 | 23 | 4 | 185 | 10 | 569 | 27  |
| 65,609 | 41 | 2  | 328 | 10 | 23 | 4 | 188 | 10 | 580 | 26  |
| 65,610 | 41 | 2  | 333 | 10 | 23 | 4 | 193 | 10 | 590 | 26  |
| 65,611 | 43 | 2  | 340 | 10 | 24 | 4 | 197 | 10 | 604 | 26  |
| 65,612 | 43 | 2  | 343 | 10 | 24 | 4 | 197 | 8  | 607 | 24  |
| 65,613 | 43 | 2  | 344 | 10 | 24 | 4 | 196 | 8  | 607 | 24  |
| 65,614 | 40 | 2  | 329 | 11 | 24 | 4 | 182 | 8  | 575 | 25  |
| 65,615 | 40 | 2  | 329 | 11 | 24 | 4 | 182 | 7  | 575 | 24  |
| 65,616 | 40 | 2  | 329 | 11 | 24 | 4 | 180 | 7  | 573 | 24  |
| 65,617 | 35 | 2  | 309 | 18 | 21 | 4 | 172 | 11 | 537 | 35  |
| 65,618 | 34 | 5  | 292 | 31 | 18 | 5 | 160 | 21 | 504 | 62  |
| 65,619 | 32 | 8  | 273 | 60 | 14 | 8 | 142 | 40 | 461 | 116 |
| 65,620 | 27 | 9  | 262 | 61 | 14 | 8 | 133 | 40 | 436 | 118 |
| 65,621 | 28 | 9  | 231 | 85 | 13 | 9 | 125 | 42 | 397 | 145 |
| 65,622 | 24 | 9  | 199 | 88 | 9  | 9 | 111 | 42 | 343 | 148 |
| 65,623 | 19 | 10 | 183 | 90 | 8  | 9 | 105 | 42 | 315 | 151 |
| 65,624 | 16 | 10 | 101 | 90 | 6  | 9 | 62  | 41 | 185 | 150 |
| 65,625 | 16 | 10 | 87  | 90 | 4  | 9 | 56  | 41 | 163 | 150 |
| 65,626 | 15 | 10 | 86  | 85 | 4  | 9 | 56  | 40 | 161 | 144 |
| 65,627 | 15 | 10 | 83  | 87 | 4  | 9 | 55  | 41 | 157 | 147 |
| 65,628 | 15 | 10 | 83  | 87 | 4  | 9 | 54  | 41 | 156 | 147 |
| 65,629 | 15 | 10 | 83  | 87 | 4  | 9 | 54  | 41 | 156 | 147 |

|        |    |    |     |    |    |   |     |    |     |     |
|--------|----|----|-----|----|----|---|-----|----|-----|-----|
| 65,630 | 15 | 10 | 83  | 87 | 4  | 9 | 54  | 41 | 156 | 147 |
| 65,631 | 15 | 10 | 83  | 87 | 4  | 9 | 54  | 41 | 156 | 147 |
| 65,632 | 15 | 10 | 83  | 87 | 4  | 9 | 54  | 41 | 156 | 147 |
| 65,633 | 15 | 10 | 83  | 87 | 4  | 9 | 54  | 41 | 156 | 147 |
| 65,634 | 15 | 10 | 83  | 88 | 4  | 9 | 56  | 40 | 158 | 147 |
| 65,635 | 15 | 12 | 83  | 91 | 4  | 9 | 54  | 44 | 156 | 156 |
| 65,636 | 13 | 12 | 83  | 95 | 4  | 9 | 54  | 44 | 154 | 160 |
| 65,637 | 13 | 12 | 82  | 95 | 4  | 9 | 54  | 44 | 153 | 160 |
| 65,638 | 12 | 12 | 104 | 95 | 5  | 8 | 55  | 44 | 176 | 159 |
| 65,639 | 11 | 12 | 104 | 95 | 4  | 7 | 54  | 44 | 173 | 158 |
| 65,640 | 11 | 13 | 111 | 95 | 4  | 7 | 52  | 44 | 178 | 159 |
| 65,641 | 11 | 13 | 125 | 95 | 4  | 7 | 54  | 44 | 194 | 159 |
| 65,642 | 11 | 13 | 146 | 95 | 4  | 7 | 62  | 44 | 223 | 159 |
| 65,643 | 11 | 13 | 154 | 95 | 4  | 7 | 64  | 44 | 233 | 159 |
| 65,644 | 12 | 12 | 148 | 95 | 5  | 7 | 59  | 44 | 224 | 158 |
| 65,645 | 16 | 12 | 186 | 95 | 6  | 7 | 72  | 44 | 280 | 158 |
| 65,646 | 16 | 12 | 185 | 94 | 6  | 6 | 72  | 44 | 279 | 156 |
| 65,647 | 16 | 12 | 183 | 94 | 6  | 6 | 72  | 44 | 277 | 156 |
| 65,648 | 23 | 11 | 197 | 95 | 6  | 6 | 79  | 43 | 305 | 155 |
| 65,649 | 23 | 11 | 197 | 94 | 6  | 6 | 79  | 43 | 305 | 154 |
| 65,650 | 26 | 11 | 221 | 93 | 10 | 6 | 99  | 43 | 356 | 153 |
| 65,651 | 26 | 11 | 225 | 93 | 10 | 7 | 100 | 43 | 361 | 154 |
| 65,652 | 26 | 11 | 233 | 93 | 10 | 7 | 105 | 42 | 374 | 153 |
| 65,653 | 26 | 11 | 237 | 93 | 10 | 7 | 108 | 42 | 381 | 153 |
| 65,654 | 27 | 11 | 229 | 93 | 8  | 7 | 103 | 41 | 367 | 152 |
| 65,655 | 27 | 11 | 236 | 93 | 8  | 7 | 106 | 41 | 377 | 152 |
| 65,656 | 27 | 11 | 233 | 93 | 8  | 7 | 104 | 41 | 372 | 152 |
| 65,657 | 26 | 11 | 238 | 93 | 9  | 7 | 103 | 41 | 376 | 152 |
| 65,658 | 26 | 11 | 242 | 93 | 9  | 7 | 104 | 41 | 381 | 152 |
| 65,659 | 27 | 11 | 245 | 93 | 10 | 7 | 114 | 41 | 396 | 152 |
| 65,660 | 27 | 11 | 245 | 93 | 10 | 7 | 112 | 41 | 394 | 152 |
| 65,661 | 27 | 11 | 242 | 93 | 10 | 7 | 109 | 41 | 388 | 152 |
| 65,662 | 25 | 11 | 234 | 93 | 9  | 7 | 105 | 41 | 373 | 152 |
| 65,663 | 25 | 11 | 231 | 93 | 9  | 7 | 106 | 41 | 371 | 152 |
| 65,664 | 25 | 11 | 229 | 93 | 9  | 7 | 105 | 41 | 368 | 152 |
| 65,665 | 25 | 11 | 229 | 92 | 9  | 7 | 105 | 41 | 368 | 151 |
| 65,666 | 25 | 11 | 229 | 92 | 9  | 7 | 105 | 41 | 368 | 151 |
| 65,667 | 25 | 11 | 229 | 92 | 9  | 7 | 105 | 41 | 368 | 151 |
| 65,668 | 25 | 8  | 227 | 72 | 9  | 6 | 103 | 27 | 364 | 113 |
| 65,669 | 25 | 8  | 227 | 72 | 9  | 6 | 103 | 28 | 364 | 114 |
| 65,670 | 23 | 4  | 226 | 17 | 9  | 1 | 100 | 7  | 358 | 29  |

|        |    |   |     |    |    |   |     |    |     |    |
|--------|----|---|-----|----|----|---|-----|----|-----|----|
| 65,671 | 23 | 4 | 226 | 17 | 9  | 1 | 100 | 8  | 358 | 30 |
| 65,672 | 22 | 4 | 226 | 17 | 9  | 1 | 100 | 8  | 357 | 30 |
| 65,673 | 22 | 4 | 226 | 14 | 9  | 1 | 100 | 8  | 357 | 27 |
| 65,674 | 22 | 3 | 226 | 12 | 9  | 1 | 100 | 8  | 357 | 24 |
| 65,675 | 22 | 3 | 223 | 11 | 9  | 1 | 97  | 8  | 351 | 23 |
| 65,676 | 22 | 3 | 222 | 11 | 9  | 1 | 97  | 8  | 350 | 23 |
| 65,677 | 22 | 3 | 222 | 11 | 9  | 1 | 97  | 8  | 350 | 23 |
| 65,678 | 22 | 3 | 222 | 10 | 9  | 1 | 97  | 7  | 350 | 21 |
| 65,679 | 22 | 4 | 222 | 10 | 9  | 1 | 97  | 7  | 350 | 22 |
| 65,680 | 22 | 4 | 222 | 10 | 9  | 1 | 97  | 7  | 350 | 22 |
| 65,681 | 22 | 5 | 222 | 11 | 9  | 1 | 97  | 7  | 350 | 24 |
| 65,682 | 22 | 5 | 223 | 11 | 9  | 1 | 97  | 7  | 351 | 24 |
| 65,683 | 22 | 5 | 223 | 12 | 9  | 1 | 97  | 8  | 351 | 26 |
| 65,684 | 22 | 5 | 223 | 12 | 9  | 1 | 96  | 9  | 350 | 27 |
| 65,685 | 22 | 5 | 223 | 11 | 9  | 1 | 95  | 10 | 349 | 27 |
| 65,686 | 23 | 3 | 229 | 8  | 9  | 1 | 95  | 6  | 356 | 18 |
| 65,687 | 26 | 3 | 242 | 4  | 10 | 1 | 104 | 6  | 382 | 14 |
| 65,688 | 26 | 3 | 232 | 6  | 10 | 2 | 104 | 6  | 372 | 17 |
| 65,689 | 26 | 3 | 220 | 6  | 9  | 2 | 103 | 6  | 358 | 17 |
| 65,690 | 24 | 3 | 218 | 6  | 10 | 2 | 103 | 6  | 355 | 17 |
| 65,691 | 23 | 2 | 214 | 6  | 11 | 2 | 106 | 6  | 354 | 16 |
| 65,692 | 24 | 2 | 203 | 6  | 11 | 2 | 104 | 6  | 342 | 16 |
| 65,693 | 24 | 2 | 181 | 6  | 11 | 2 | 96  | 6  | 312 | 16 |
| 65,694 | 26 | 2 | 187 | 6  | 12 | 2 | 95  | 6  | 320 | 16 |
| 65,695 | 25 | 2 | 188 | 6  | 11 | 2 | 94  | 6  | 318 | 16 |
| 65,696 | 36 | 2 | 235 | 5  | 20 | 2 | 125 | 6  | 416 | 15 |
| 65,697 | 36 | 2 | 244 | 5  | 20 | 2 | 135 | 6  | 435 | 15 |
| 65,698 | 30 | 2 | 243 | 5  | 21 | 2 | 133 | 6  | 427 | 15 |
| 65,699 | 33 | 2 | 251 | 5  | 22 | 2 | 140 | 6  | 446 | 15 |
| 65,700 | 30 | 2 | 227 | 5  | 18 | 2 | 120 | 6  | 395 | 15 |
| 65,701 | 30 | 2 | 223 | 5  | 18 | 2 | 120 | 6  | 391 | 15 |
| 65,702 | 38 | 2 | 389 | 6  | 29 | 1 | 195 | 6  | 651 | 15 |
| 65,703 | 39 | 2 | 390 | 6  | 29 | 1 | 199 | 6  | 657 | 15 |
| 65,704 | 46 | 2 | 405 | 7  | 35 | 1 | 219 | 6  | 705 | 16 |
| 65,705 | 46 | 2 | 418 | 7  | 36 | 1 | 229 | 7  | 729 | 17 |
| 65,706 | 46 | 2 | 415 | 7  | 36 | 1 | 225 | 7  | 722 | 17 |
| 65,707 | 48 | 2 | 414 | 7  | 35 | 1 | 224 | 7  | 721 | 17 |
| 65,708 | 48 | 2 | 412 | 7  | 35 | 1 | 224 | 7  | 719 | 17 |
| 65,709 | 48 | 2 | 408 | 7  | 35 | 1 | 223 | 7  | 714 | 17 |
| 65,710 | 47 | 2 | 401 | 7  | 34 | 1 | 212 | 7  | 694 | 17 |
| 65,711 | 45 | 2 | 401 | 7  | 34 | 1 | 212 | 7  | 692 | 17 |

|        |    |   |     |    |    |   |     |    |     |    |
|--------|----|---|-----|----|----|---|-----|----|-----|----|
| 65,712 | 51 | 2 | 413 | 7  | 35 | 1 | 220 | 7  | 719 | 17 |
| 65,713 | 51 | 2 | 413 | 7  | 35 | 1 | 220 | 7  | 719 | 17 |
| 65,714 | 53 | 2 | 413 | 7  | 35 | 1 | 221 | 7  | 722 | 17 |
| 65,715 | 56 | 2 | 427 | 7  | 35 | 1 | 231 | 7  | 749 | 17 |
| 65,716 | 56 | 2 | 427 | 7  | 35 | 1 | 232 | 7  | 750 | 17 |
| 65,717 | 56 | 2 | 427 | 7  | 35 | 1 | 232 | 7  | 750 | 17 |
| 65,718 | 56 | 2 | 430 | 7  | 35 | 1 | 236 | 8  | 757 | 18 |
| 65,719 | 56 | 2 | 430 | 7  | 35 | 1 | 235 | 8  | 756 | 18 |
| 65,720 | 56 | 2 | 430 | 7  | 35 | 1 | 237 | 7  | 758 | 17 |
| 65,721 | 56 | 2 | 433 | 7  | 35 | 1 | 238 | 6  | 762 | 16 |
| 65,722 | 56 | 2 | 433 | 7  | 35 | 1 | 238 | 6  | 762 | 16 |
| 65,723 | 56 | 2 | 446 | 7  | 35 | 1 | 243 | 6  | 780 | 16 |
| 65,724 | 61 | 2 | 462 | 7  | 35 | 1 | 247 | 6  | 805 | 16 |
| 65,725 | 61 | 2 | 462 | 7  | 35 | 1 | 247 | 6  | 805 | 16 |
| 65,726 | 61 | 2 | 462 | 7  | 35 | 1 | 246 | 6  | 804 | 16 |
| 65,727 | 61 | 2 | 462 | 7  | 35 | 1 | 246 | 7  | 804 | 17 |
| 65,728 | 61 | 2 | 462 | 7  | 35 | 1 | 246 | 8  | 804 | 18 |
| 65,729 | 64 | 2 | 519 | 6  | 38 | 1 | 270 | 8  | 891 | 17 |
| 65,730 | 64 | 1 | 519 | 6  | 38 | 1 | 270 | 9  | 891 | 17 |
| 65,731 | 64 | 1 | 519 | 7  | 38 | 1 | 270 | 9  | 891 | 18 |
| 65,732 | 67 | 0 | 529 | 10 | 41 | 1 | 289 | 11 | 926 | 22 |
| 65,733 | 67 | 0 | 528 | 10 | 41 | 1 | 289 | 11 | 925 | 22 |
| 65,734 | 71 | 0 | 539 | 14 | 41 | 1 | 289 | 10 | 940 | 25 |
| 65,735 | 71 | 1 | 540 | 16 | 41 | 1 | 289 | 9  | 941 | 27 |
| 65,736 | 71 | 1 | 544 | 16 | 41 | 1 | 303 | 8  | 959 | 26 |
| 65,737 | 71 | 1 | 548 | 16 | 41 | 1 | 307 | 8  | 967 | 26 |
| 65,738 | 68 | 1 | 535 | 14 | 41 | 0 | 300 | 7  | 944 | 22 |
| 65,739 | 68 | 1 | 534 | 14 | 41 | 0 | 302 | 7  | 945 | 22 |
| 65,740 | 68 | 1 | 534 | 14 | 40 | 0 | 300 | 7  | 942 | 22 |
| 65,741 | 68 | 1 | 528 | 14 | 39 | 0 | 297 | 7  | 932 | 22 |
| 65,742 | 68 | 1 | 528 | 14 | 39 | 0 | 298 | 7  | 933 | 22 |
| 65,743 | 67 | 1 | 526 | 14 | 39 | 0 | 298 | 7  | 930 | 22 |
| 65,744 | 65 | 1 | 523 | 14 | 39 | 0 | 297 | 7  | 924 | 22 |
| 65,745 | 65 | 1 | 511 | 14 | 38 | 0 | 297 | 7  | 911 | 22 |
| 65,746 | 66 | 1 | 504 | 14 | 38 | 0 | 297 | 7  | 905 | 22 |
| 65,747 | 51 | 1 | 422 | 14 | 30 | 0 | 253 | 7  | 756 | 22 |
| 65,748 | 51 | 1 | 413 | 15 | 30 | 0 | 243 | 10 | 737 | 26 |
| 65,749 | 50 | 1 | 408 | 15 | 29 | 0 | 240 | 10 | 727 | 26 |
| 65,750 | 47 | 1 | 392 | 21 | 28 | 0 | 232 | 12 | 699 | 34 |
| 65,751 | 50 | 3 | 352 | 32 | 27 | 2 | 230 | 25 | 659 | 62 |
| 65,752 | 50 | 3 | 274 | 42 | 23 | 2 | 187 | 26 | 534 | 73 |

|        |    |   |     |    |    |   |     |    |       |    |
|--------|----|---|-----|----|----|---|-----|----|-------|----|
| 65,753 | 50 | 3 | 268 | 42 | 23 | 2 | 184 | 26 | 525   | 73 |
| 65,754 | 72 | 3 | 344 | 42 | 30 | 2 | 252 | 27 | 698   | 74 |
| 65,755 | 66 | 3 | 325 | 44 | 24 | 2 | 230 | 28 | 645   | 77 |
| 65,756 | 65 | 3 | 324 | 44 | 23 | 2 | 218 | 27 | 630   | 76 |
| 65,757 | 65 | 3 | 319 | 44 | 23 | 2 | 217 | 27 | 624   | 76 |
| 65,758 | 63 | 3 | 314 | 44 | 23 | 2 | 217 | 27 | 617   | 76 |
| 65,759 | 69 | 3 | 364 | 44 | 28 | 2 | 240 | 27 | 701   | 76 |
| 65,760 | 86 | 3 | 676 | 44 | 45 | 2 | 371 | 27 | 1,178 | 76 |
| 65,761 | 86 | 3 | 675 | 45 | 45 | 2 | 370 | 27 | 1,176 | 77 |
| 65,762 | 86 | 3 | 674 | 45 | 45 | 2 | 371 | 27 | 1,176 | 77 |
| 65,763 | 80 | 4 | 660 | 45 | 44 | 2 | 361 | 27 | 1,145 | 78 |
| 65,764 | 78 | 4 | 660 | 45 | 44 | 2 | 360 | 27 | 1,142 | 78 |
| 65,765 | 78 | 4 | 660 | 45 | 44 | 2 | 360 | 27 | 1,142 | 78 |
| 65,766 | 75 | 4 | 646 | 45 | 44 | 2 | 350 | 27 | 1,115 | 78 |
| 65,767 | 75 | 4 | 646 | 45 | 44 | 2 | 349 | 27 | 1,114 | 78 |
| 65,768 | 76 | 4 | 648 | 45 | 45 | 2 | 346 | 26 | 1,115 | 77 |
| 65,769 | 76 | 4 | 648 | 45 | 45 | 2 | 345 | 26 | 1,114 | 77 |
| 65,770 | 77 | 4 | 648 | 45 | 45 | 2 | 344 | 26 | 1,114 | 77 |
| 65,771 | 77 | 4 | 645 | 45 | 45 | 2 | 344 | 26 | 1,111 | 77 |
| 65,772 | 77 | 4 | 647 | 45 | 45 | 2 | 345 | 26 | 1,114 | 77 |
| 65,773 | 77 | 4 | 635 | 45 | 45 | 2 | 342 | 26 | 1,099 | 77 |
| 65,774 | 77 | 4 | 634 | 45 | 45 | 2 | 341 | 26 | 1,097 | 77 |
| 65,775 | 73 | 4 | 618 | 45 | 45 | 2 | 338 | 26 | 1,074 | 77 |
| 65,776 | 73 | 4 | 613 | 46 | 45 | 2 | 338 | 26 | 1,069 | 78 |
| 65,777 | 71 | 4 | 595 | 46 | 43 | 2 | 329 | 27 | 1,038 | 79 |
| 65,778 | 71 | 4 | 586 | 46 | 43 | 2 | 324 | 26 | 1,024 | 78 |
| 65,779 | 70 | 4 | 581 | 46 | 42 | 2 | 321 | 26 | 1,014 | 78 |
| 65,780 | 70 | 4 | 561 | 46 | 42 | 2 | 315 | 25 | 988   | 77 |
| 65,781 | 69 | 4 | 558 | 46 | 42 | 2 | 315 | 25 | 984   | 77 |
| 65,782 | 67 | 4 | 554 | 45 | 39 | 2 | 298 | 25 | 958   | 76 |
| 65,783 | 70 | 3 | 554 | 34 | 39 | 2 | 299 | 24 | 962   | 63 |
| 65,784 | 70 | 3 | 553 | 34 | 39 | 2 | 300 | 24 | 962   | 63 |
| 65,785 | 66 | 3 | 544 | 34 | 39 | 2 | 300 | 24 | 949   | 63 |
| 65,786 | 66 | 3 | 543 | 34 | 39 | 2 | 300 | 24 | 948   | 63 |
| 65,787 | 65 | 3 | 532 | 34 | 39 | 2 | 285 | 24 | 921   | 63 |
| 65,788 | 65 | 3 | 528 | 34 | 39 | 2 | 281 | 24 | 913   | 63 |
| 65,789 | 65 | 3 | 528 | 34 | 38 | 2 | 279 | 24 | 910   | 63 |
| 65,790 | 65 | 3 | 525 | 34 | 38 | 2 | 277 | 24 | 905   | 63 |
| 65,791 | 65 | 3 | 525 | 34 | 38 | 2 | 277 | 25 | 905   | 64 |
| 65,792 | 65 | 3 | 525 | 34 | 38 | 2 | 276 | 25 | 904   | 64 |
| 65,793 | 65 | 4 | 525 | 34 | 38 | 2 | 277 | 25 | 905   | 65 |

|        |    |   |     |    |    |   |     |    |     |    |
|--------|----|---|-----|----|----|---|-----|----|-----|----|
| 65,794 | 65 | 4 | 524 | 34 | 38 | 2 | 277 | 25 | 904 | 65 |
| 65,795 | 65 | 4 | 523 | 34 | 38 | 2 | 277 | 25 | 903 | 65 |
| 65,796 | 65 | 4 | 525 | 34 | 38 | 2 | 277 | 25 | 905 | 65 |
| 65,797 | 64 | 4 | 525 | 34 | 38 | 2 | 277 | 25 | 904 | 65 |
| 65,798 | 65 | 4 | 524 | 33 | 36 | 2 | 276 | 22 | 901 | 61 |
| 65,799 | 65 | 4 | 524 | 33 | 36 | 2 | 276 | 22 | 901 | 61 |
| 65,800 | 65 | 4 | 524 | 33 | 36 | 2 | 276 | 22 | 901 | 61 |
| 65,801 | 66 | 4 | 525 | 27 | 36 | 2 | 277 | 20 | 904 | 53 |
| 65,802 | 62 | 2 | 513 | 16 | 36 | 0 | 271 | 7  | 882 | 25 |
| 65,803 | 55 | 2 | 486 | 5  | 30 | 0 | 250 | 6  | 821 | 13 |
| 65,804 | 55 | 2 | 489 | 8  | 30 | 0 | 250 | 6  | 824 | 16 |
| 65,805 | 33 | 2 | 402 | 28 | 23 | 2 | 173 | 11 | 631 | 43 |
| 65,806 | 32 | 2 | 433 | 29 | 23 | 2 | 177 | 12 | 665 | 45 |
| 65,807 | 32 | 2 | 425 | 31 | 24 | 2 | 178 | 13 | 659 | 48 |
| 65,808 | 29 | 2 | 395 | 31 | 21 | 2 | 170 | 13 | 615 | 48 |
| 65,809 | 30 | 2 | 384 | 31 | 20 | 2 | 161 | 13 | 595 | 48 |
| 65,810 | 18 | 2 | 101 | 31 | 5  | 2 | 58  | 13 | 182 | 48 |
| 65,811 | 14 | 2 | 79  | 31 | 3  | 2 | 35  | 13 | 131 | 48 |
| 65,812 | 14 | 2 | 86  | 30 | 3  | 2 | 35  | 13 | 138 | 47 |
| 65,813 | 21 | 2 | 113 | 30 | 3  | 2 | 50  | 13 | 187 | 47 |
| 65,814 | 30 | 1 | 165 | 30 | 4  | 2 | 69  | 13 | 268 | 46 |
| 65,815 | 37 | 1 | 253 | 30 | 11 | 2 | 135 | 13 | 436 | 46 |
| 65,816 | 38 | 1 | 258 | 30 | 12 | 2 | 140 | 13 | 448 | 46 |
| 65,817 | 44 | 1 | 306 | 30 | 15 | 2 | 182 | 13 | 547 | 46 |
| 65,818 | 43 | 1 | 307 | 30 | 16 | 2 | 187 | 14 | 553 | 47 |
| 65,819 | 43 | 2 | 306 | 30 | 15 | 3 | 196 | 14 | 560 | 49 |
| 65,820 | 42 | 2 | 311 | 30 | 15 | 3 | 199 | 14 | 567 | 49 |
| 65,821 | 42 | 2 | 311 | 30 | 15 | 3 | 199 | 14 | 567 | 49 |
| 65,822 | 42 | 2 | 325 | 31 | 15 | 3 | 207 | 14 | 589 | 50 |
| 65,823 | 44 | 2 | 326 | 31 | 16 | 3 | 209 | 15 | 595 | 51 |
| 65,824 | 44 | 2 | 326 | 32 | 16 | 3 | 208 | 15 | 594 | 52 |
| 65,825 | 43 | 2 | 329 | 33 | 16 | 3 | 211 | 15 | 599 | 53 |
| 65,826 | 43 | 2 | 329 | 32 | 16 | 3 | 212 | 15 | 600 | 52 |
| 65,827 | 43 | 2 | 329 | 32 | 16 | 3 | 212 | 15 | 600 | 52 |
| 65,828 | 43 | 2 | 334 | 32 | 16 | 3 | 213 | 14 | 606 | 51 |
| 65,829 | 45 | 2 | 342 | 32 | 18 | 3 | 215 | 14 | 620 | 51 |
| 65,830 | 46 | 2 | 344 | 32 | 18 | 3 | 215 | 13 | 623 | 50 |
| 65,831 | 47 | 2 | 353 | 32 | 18 | 3 | 236 | 13 | 654 | 50 |
| 65,832 | 48 | 2 | 359 | 32 | 19 | 3 | 243 | 13 | 669 | 50 |
| 65,833 | 47 | 2 | 360 | 32 | 19 | 3 | 252 | 13 | 678 | 50 |
| 65,834 | 45 | 2 | 360 | 32 | 19 | 3 | 249 | 12 | 673 | 49 |

|        |    |   |     |    |    |   |     |    |       |    |
|--------|----|---|-----|----|----|---|-----|----|-------|----|
| 65,835 | 45 | 2 | 361 | 32 | 19 | 3 | 249 | 14 | 674   | 51 |
| 65,836 | 46 | 2 | 361 | 32 | 21 | 3 | 249 | 15 | 677   | 52 |
| 65,837 | 46 | 2 | 362 | 32 | 21 | 3 | 249 | 15 | 678   | 52 |
| 65,838 | 46 | 2 | 362 | 33 | 21 | 3 | 249 | 15 | 678   | 53 |
| 65,839 | 48 | 2 | 369 | 33 | 21 | 3 | 253 | 15 | 691   | 53 |
| 65,840 | 50 | 2 | 377 | 33 | 22 | 3 | 260 | 15 | 709   | 53 |
| 65,841 | 50 | 2 | 384 | 33 | 23 | 3 | 262 | 14 | 719   | 52 |
| 65,842 | 50 | 2 | 384 | 35 | 23 | 3 | 261 | 17 | 718   | 57 |
| 65,843 | 50 | 2 | 384 | 35 | 23 | 3 | 261 | 17 | 718   | 57 |
| 65,844 | 50 | 1 | 388 | 37 | 23 | 4 | 265 | 21 | 726   | 63 |
| 65,845 | 50 | 1 | 388 | 40 | 23 | 4 | 267 | 21 | 728   | 66 |
| 65,846 | 50 | 1 | 392 | 43 | 23 | 4 | 269 | 25 | 734   | 73 |
| 65,847 | 50 | 1 | 395 | 46 | 23 | 4 | 270 | 25 | 738   | 76 |
| 65,848 | 54 | 1 | 432 | 46 | 24 | 4 | 290 | 25 | 800   | 76 |
| 65,849 | 53 | 1 | 431 | 48 | 24 | 4 | 290 | 25 | 798   | 78 |
| 65,850 | 58 | 1 | 440 | 48 | 24 | 4 | 296 | 25 | 818   | 78 |
| 65,851 | 57 | 1 | 450 | 48 | 24 | 4 | 299 | 25 | 830   | 78 |
| 65,852 | 57 | 1 | 450 | 48 | 24 | 4 | 299 | 25 | 830   | 78 |
| 65,853 | 58 | 1 | 485 | 48 | 25 | 4 | 306 | 25 | 874   | 78 |
| 65,854 | 60 | 1 | 530 | 47 | 27 | 4 | 334 | 25 | 951   | 77 |
| 65,855 | 77 | 1 | 684 | 44 | 49 | 4 | 458 | 25 | 1,268 | 74 |
| 65,856 | 77 | 1 | 691 | 24 | 50 | 2 | 459 | 19 | 1,277 | 46 |
| 65,857 | 78 | 1 | 697 | 19 | 54 | 2 | 483 | 16 | 1,312 | 38 |
| 65,858 | 78 | 1 | 689 | 19 | 53 | 2 | 479 | 16 | 1,299 | 38 |
| 65,859 | 75 | 1 | 716 | 19 | 58 | 2 | 490 | 16 | 1,339 | 38 |
| 65,860 | 74 | 1 | 714 | 19 | 57 | 2 | 490 | 16 | 1,335 | 38 |
| 65,861 | 73 | 1 | 719 | 19 | 57 | 2 | 492 | 16 | 1,341 | 38 |
| 65,862 | 73 | 1 | 712 | 19 | 57 | 2 | 492 | 16 | 1,334 | 38 |
| 65,863 | 66 | 1 | 685 | 19 | 57 | 2 | 477 | 16 | 1,285 | 38 |
| 65,864 | 57 | 1 | 639 | 19 | 56 | 2 | 460 | 17 | 1,212 | 39 |
| 65,865 | 57 | 1 | 640 | 19 | 56 | 2 | 461 | 17 | 1,214 | 39 |
| 65,866 | 50 | 1 | 555 | 19 | 49 | 2 | 395 | 17 | 1,049 | 39 |
| 65,867 | 49 | 1 | 556 | 19 | 48 | 2 | 394 | 17 | 1,047 | 39 |
| 65,868 | 43 | 1 | 510 | 19 | 45 | 2 | 353 | 16 | 951   | 38 |
| 65,869 | 52 | 1 | 549 | 21 | 46 | 2 | 387 | 18 | 1,034 | 42 |
| 65,870 | 52 | 0 | 549 | 21 | 46 | 1 | 381 | 19 | 1,028 | 41 |
| 65,871 | 52 | 0 | 544 | 21 | 46 | 1 | 378 | 20 | 1,020 | 42 |
| 65,872 | 52 | 0 | 544 | 20 | 46 | 2 | 375 | 20 | 1,017 | 42 |
| 65,873 | 52 | 0 | 532 | 21 | 46 | 2 | 371 | 20 | 1,001 | 43 |
| 65,874 | 52 | 0 | 530 | 21 | 45 | 2 | 367 | 19 | 994   | 42 |
| 65,875 | 52 | 0 | 527 | 21 | 45 | 2 | 364 | 19 | 988   | 42 |

|        |    |   |     |    |    |   |     |    |       |     |
|--------|----|---|-----|----|----|---|-----|----|-------|-----|
| 65,876 | 53 | 0 | 529 | 22 | 45 | 2 | 366 | 19 | 993   | 43  |
| 65,877 | 53 | 0 | 533 | 22 | 45 | 2 | 373 | 19 | 1,004 | 43  |
| 65,878 | 54 | 0 | 528 | 22 | 45 | 2 | 373 | 21 | 1,000 | 45  |
| 65,879 | 52 | 0 | 521 | 22 | 43 | 2 | 372 | 21 | 988   | 45  |
| 65,880 | 51 | 1 | 520 | 23 | 43 | 2 | 372 | 21 | 986   | 47  |
| 65,881 | 50 | 1 | 511 | 23 | 43 | 2 | 351 | 21 | 955   | 47  |
| 65,882 | 50 | 1 | 507 | 23 | 42 | 2 | 348 | 21 | 947   | 47  |
| 65,883 | 49 | 1 | 505 | 23 | 42 | 2 | 344 | 22 | 940   | 48  |
| 65,884 | 49 | 1 | 502 | 23 | 42 | 2 | 334 | 22 | 927   | 48  |
| 65,885 | 49 | 1 | 507 | 23 | 42 | 2 | 334 | 20 | 932   | 46  |
| 65,886 | 49 | 1 | 506 | 23 | 42 | 2 | 333 | 21 | 930   | 47  |
| 65,887 | 48 | 1 | 505 | 23 | 40 | 2 | 333 | 21 | 926   | 47  |
| 65,888 | 48 | 1 | 510 | 23 | 40 | 2 | 334 | 23 | 932   | 49  |
| 65,889 | 52 | 1 | 559 | 23 | 41 | 2 | 361 | 24 | 1,013 | 50  |
| 65,890 | 54 | 1 | 564 | 24 | 41 | 2 | 364 | 24 | 1,023 | 51  |
| 65,891 | 52 | 1 | 562 | 24 | 40 | 2 | 357 | 27 | 1,011 | 54  |
| 65,892 | 52 | 1 | 555 | 25 | 39 | 2 | 355 | 28 | 1,001 | 56  |
| 65,893 | 52 | 3 | 569 | 37 | 41 | 4 | 361 | 29 | 1,023 | 73  |
| 65,894 | 52 | 3 | 566 | 37 | 41 | 4 | 356 | 29 | 1,015 | 73  |
| 65,895 | 54 | 3 | 615 | 38 | 42 | 3 | 368 | 25 | 1,079 | 69  |
| 65,896 | 55 | 3 | 655 | 33 | 42 | 3 | 383 | 21 | 1,135 | 60  |
| 65,897 | 55 | 3 | 672 | 28 | 43 | 3 | 389 | 21 | 1,159 | 55  |
| 65,898 | 76 | 3 | 822 | 28 | 56 | 3 | 544 | 21 | 1,498 | 55  |
| 65,899 | 75 | 3 | 821 | 31 | 56 | 3 | 554 | 21 | 1,506 | 58  |
| 65,900 | 75 | 3 | 821 | 31 | 56 | 3 | 554 | 21 | 1,506 | 58  |
| 65,901 | 77 | 3 | 921 | 34 | 59 | 3 | 655 | 22 | 1,712 | 62  |
| 65,902 | 77 | 3 | 913 | 34 | 59 | 3 | 659 | 23 | 1,708 | 63  |
| 65,903 | 76 | 3 | 885 | 36 | 59 | 3 | 658 | 23 | 1,678 | 65  |
| 65,904 | 74 | 3 | 840 | 45 | 57 | 4 | 631 | 23 | 1,602 | 75  |
| 65,905 | 58 | 4 | 762 | 48 | 42 | 4 | 532 | 25 | 1,394 | 81  |
| 65,906 | 57 | 4 | 682 | 55 | 35 | 4 | 505 | 27 | 1,279 | 90  |
| 65,907 | 56 | 4 | 674 | 56 | 34 | 4 | 502 | 27 | 1,266 | 91  |
| 65,908 | 55 | 4 | 637 | 60 | 30 | 6 | 474 | 30 | 1,196 | 100 |
| 65,909 | 55 | 4 | 624 | 66 | 29 | 6 | 467 | 30 | 1,175 | 106 |
| 65,910 | 55 | 4 | 603 | 66 | 25 | 6 | 460 | 30 | 1,143 | 106 |
| 65,911 | 55 | 4 | 603 | 69 | 25 | 6 | 457 | 30 | 1,140 | 109 |
| 65,912 | 55 | 4 | 594 | 69 | 25 | 6 | 455 | 30 | 1,129 | 109 |
| 65,913 | 57 | 4 | 599 | 69 | 25 | 6 | 456 | 31 | 1,137 | 110 |
| 65,914 | 57 | 4 | 601 | 69 | 25 | 6 | 456 | 30 | 1,139 | 109 |
| 65,915 | 57 | 4 | 605 | 69 | 25 | 6 | 460 | 31 | 1,147 | 110 |
| 65,916 | 57 | 4 | 607 | 69 | 25 | 6 | 458 | 31 | 1,147 | 110 |



|        |    |   |     |    |    |   |     |    |       |     |
|--------|----|---|-----|----|----|---|-----|----|-------|-----|
| 65,917 | 59 | 4 | 608 | 70 | 25 | 6 | 462 | 31 | 1,154 | 111 |
| 65,918 | 61 | 4 | 632 | 68 | 26 | 6 | 470 | 28 | 1,189 | 106 |
| 65,919 | 61 | 4 | 631 | 68 | 26 | 6 | 471 | 28 | 1,189 | 106 |
| 65,920 | 56 | 4 | 614 | 69 | 24 | 6 | 446 | 28 | 1,140 | 107 |
| 65,921 | 58 | 4 | 619 | 69 | 24 | 6 | 445 | 27 | 1,146 | 106 |
| 65,922 | 58 | 4 | 619 | 70 | 24 | 6 | 445 | 27 | 1,146 | 107 |
| 65,923 | 59 | 4 | 650 | 69 | 24 | 5 | 456 | 28 | 1,189 | 106 |
| 65,924 | 59 | 4 | 650 | 70 | 24 | 5 | 456 | 28 | 1,189 | 107 |
| 65,925 | 57 | 4 | 657 | 70 | 25 | 6 | 461 | 28 | 1,200 | 108 |
| 65,926 | 56 | 4 | 657 | 69 | 25 | 7 | 461 | 28 | 1,199 | 108 |
| 65,927 | 56 | 4 | 655 | 87 | 25 | 8 | 459 | 43 | 1,195 | 142 |
| 65,928 | 56 | 5 | 651 | 91 | 25 | 8 | 452 | 52 | 1,184 | 156 |
| 65,929 | 55 | 5 | 651 | 91 | 25 | 8 | 451 | 50 | 1,182 | 154 |
| 65,930 | 57 | 5 | 654 | 95 | 25 | 8 | 454 | 53 | 1,190 | 161 |
| 65,931 | 57 | 4 | 653 | 95 | 25 | 8 | 454 | 54 | 1,189 | 161 |
| 65,932 | 57 | 4 | 653 | 95 | 25 | 8 | 453 | 54 | 1,188 | 161 |
| 65,933 | 57 | 4 | 652 | 95 | 25 | 8 | 453 | 54 | 1,187 | 161 |
| 65,934 | 57 | 4 | 652 | 95 | 25 | 8 | 453 | 53 | 1,187 | 160 |
| 65,935 | 57 | 4 | 650 | 95 | 25 | 8 | 453 | 53 | 1,185 | 160 |
| 65,936 | 58 | 4 | 647 | 95 | 25 | 8 | 454 | 53 | 1,184 | 160 |
| 65,937 | 58 | 4 | 647 | 95 | 25 | 8 | 457 | 52 | 1,187 | 159 |
| 65,938 | 58 | 4 | 641 | 95 | 25 | 8 | 456 | 51 | 1,180 | 158 |
| 65,939 | 52 | 4 | 591 | 93 | 24 | 8 | 430 | 48 | 1,097 | 153 |
| 65,940 | 52 | 4 | 587 | 93 | 24 | 8 | 427 | 48 | 1,090 | 153 |
| 65,941 | 50 | 4 | 581 | 93 | 24 | 8 | 423 | 48 | 1,078 | 153 |
| 65,942 | 50 | 4 | 575 | 93 | 24 | 8 | 422 | 45 | 1,071 | 150 |
| 65,943 | 50 | 4 | 563 | 92 | 23 | 8 | 418 | 45 | 1,054 | 149 |
| 65,944 | 50 | 2 | 561 | 78 | 22 | 6 | 417 | 41 | 1,050 | 127 |
| 65,945 | 50 | 2 | 560 | 78 | 22 | 6 | 418 | 41 | 1,050 | 127 |
| 65,946 | 48 | 2 | 510 | 76 | 21 | 6 | 405 | 41 | 984   | 125 |
| 65,947 | 48 | 2 | 470 | 75 | 21 | 6 | 389 | 41 | 928   | 124 |
| 65,948 | 48 | 2 | 449 | 75 | 20 | 6 | 382 | 41 | 899   | 124 |
| 65,949 | 27 | 2 | 294 | 75 | 7  | 6 | 224 | 41 | 552   | 124 |
| 65,950 | 24 | 2 | 257 | 72 | 6  | 6 | 194 | 41 | 481   | 121 |
| 65,951 | 18 | 2 | 165 | 70 | 4  | 6 | 96  | 40 | 283   | 118 |
| 65,952 | 17 | 2 | 150 | 70 | 3  | 6 | 87  | 40 | 257   | 118 |
| 65,953 | 17 | 2 | 147 | 68 | 3  | 6 | 80  | 40 | 247   | 116 |
| 65,954 | 18 | 2 | 144 | 68 | 2  | 6 | 76  | 40 | 240   | 116 |
| 65,955 | 19 | 1 | 143 | 49 | 2  | 5 | 75  | 36 | 239   | 91  |
| 65,956 | 19 | 1 | 143 | 49 | 2  | 5 | 75  | 36 | 239   | 91  |
| 65,957 | 19 | 1 | 143 | 49 | 2  | 5 | 75  | 36 | 239   | 91  |

|        |    |   |     |    |    |   |     |    |     |    |
|--------|----|---|-----|----|----|---|-----|----|-----|----|
| 65,958 | 19 | 1 | 142 | 48 | 2  | 5 | 76  | 36 | 239 | 90 |
| 65,959 | 19 | 1 | 142 | 38 | 2  | 3 | 76  | 33 | 239 | 75 |
| 65,960 | 19 | 1 | 142 | 38 | 2  | 3 | 75  | 33 | 238 | 75 |
| 65,961 | 19 | 1 | 142 | 38 | 2  | 3 | 74  | 33 | 237 | 75 |
| 65,962 | 19 | 1 | 138 | 35 | 2  | 3 | 73  | 33 | 232 | 72 |
| 65,963 | 19 | 1 | 138 | 36 | 2  | 3 | 73  | 34 | 232 | 74 |
| 65,964 | 18 | 1 | 131 | 36 | 2  | 3 | 72  | 33 | 223 | 73 |
| 65,965 | 18 | 1 | 128 | 36 | 2  | 3 | 72  | 33 | 220 | 73 |
| 65,966 | 18 | 1 | 124 | 36 | 2  | 3 | 68  | 32 | 212 | 72 |
| 65,967 | 18 | 1 | 120 | 35 | 2  | 3 | 68  | 32 | 208 | 71 |
| 65,968 | 16 | 1 | 116 | 35 | 2  | 3 | 64  | 33 | 198 | 72 |
| 65,969 | 14 | 1 | 87  | 35 | 1  | 3 | 51  | 33 | 153 | 72 |
| 65,970 | 14 | 1 | 87  | 35 | 1  | 3 | 49  | 33 | 151 | 72 |
| 65,971 | 10 | 1 | 70  | 34 | 1  | 3 | 36  | 33 | 117 | 71 |
| 65,972 | 10 | 1 | 91  | 33 | 2  | 3 | 40  | 33 | 143 | 70 |
| 65,973 | 18 | 1 | 105 | 33 | 3  | 3 | 46  | 32 | 172 | 69 |
| 65,974 | 19 | 1 | 111 | 32 | 3  | 3 | 40  | 32 | 173 | 68 |
| 65,975 | 20 | 1 | 113 | 32 | 2  | 3 | 41  | 32 | 176 | 68 |
| 65,976 | 34 | 1 | 179 | 32 | 6  | 1 | 86  | 32 | 305 | 66 |
| 65,977 | 36 | 1 | 196 | 12 | 6  | 0 | 97  | 17 | 335 | 30 |
| 65,978 | 53 | 0 | 392 | 8  | 15 | 0 | 201 | 8  | 661 | 16 |
| 65,979 | 61 | 0 | 448 | 8  | 20 | 0 | 227 | 8  | 756 | 16 |
| 65,980 | 59 | 0 | 444 | 8  | 20 | 0 | 224 | 8  | 747 | 16 |
| 65,981 | 59 | 0 | 444 | 4  | 20 | 0 | 224 | 5  | 747 | 9  |
| 65,982 | 64 | 0 | 515 | 4  | 23 | 0 | 266 | 4  | 868 | 8  |
| 65,983 | 64 | 0 | 516 | 4  | 23 | 0 | 266 | 4  | 869 | 8  |
| 65,984 | 63 | 0 | 516 | 4  | 23 | 0 | 266 | 4  | 868 | 8  |
| 65,985 | 63 | 0 | 518 | 4  | 23 | 0 | 266 | 4  | 870 | 8  |
| 65,986 | 63 | 0 | 519 | 4  | 23 | 0 | 265 | 4  | 870 | 8  |
| 65,987 | 63 | 0 | 520 | 4  | 23 | 0 | 264 | 5  | 870 | 9  |
| 65,988 | 63 | 0 | 522 | 4  | 23 | 0 | 263 | 5  | 871 | 9  |
| 65,989 | 63 | 0 | 522 | 5  | 23 | 0 | 264 | 5  | 872 | 10 |
| 65,990 | 63 | 0 | 521 | 5  | 23 | 0 | 264 | 5  | 871 | 10 |
| 65,991 | 63 | 0 | 521 | 5  | 23 | 0 | 264 | 5  | 871 | 10 |
| 65,992 | 63 | 0 | 521 | 5  | 23 | 0 | 264 | 6  | 871 | 11 |
| 65,993 | 63 | 0 | 521 | 5  | 24 | 0 | 266 | 6  | 874 | 11 |
| 65,994 | 63 | 0 | 521 | 5  | 24 | 0 | 266 | 5  | 874 | 10 |
| 65,995 | 63 | 1 | 521 | 5  | 24 | 0 | 266 | 5  | 874 | 11 |
| 65,996 | 63 | 1 | 525 | 4  | 24 | 0 | 265 | 5  | 877 | 10 |
| 65,997 | 63 | 1 | 525 | 4  | 24 | 0 | 265 | 5  | 877 | 10 |
| 65,998 | 62 | 1 | 527 | 4  | 24 | 0 | 265 | 5  | 878 | 10 |

|        |    |   |     |    |    |   |     |    |     |    |
|--------|----|---|-----|----|----|---|-----|----|-----|----|
| 65,999 | 62 | 1 | 527 | 4  | 24 | 0 | 265 | 5  | 878 | 10 |
| 66,000 | 62 | 1 | 532 | 4  | 24 | 0 | 269 | 5  | 887 | 10 |
| 66,001 | 65 | 1 | 546 | 4  | 25 | 0 | 272 | 5  | 908 | 10 |
| 66,002 | 69 | 1 | 549 | 4  | 26 | 0 | 274 | 5  | 918 | 10 |
| 66,003 | 69 | 2 | 548 | 5  | 26 | 0 | 273 | 6  | 916 | 13 |
| 66,004 | 69 | 2 | 548 | 6  | 26 | 0 | 272 | 5  | 915 | 13 |
| 66,005 | 71 | 2 | 562 | 7  | 26 | 0 | 282 | 5  | 941 | 14 |
| 66,006 | 70 | 2 | 562 | 7  | 26 | 0 | 282 | 5  | 940 | 14 |
| 66,007 | 70 | 2 | 562 | 7  | 26 | 0 | 282 | 5  | 940 | 14 |
| 66,008 | 70 | 2 | 562 | 7  | 26 | 0 | 281 | 5  | 939 | 14 |
| 66,009 | 70 | 2 | 562 | 7  | 26 | 0 | 281 | 5  | 939 | 14 |
| 66,010 | 70 | 2 | 562 | 7  | 26 | 0 | 281 | 5  | 939 | 14 |
| 66,011 | 70 | 2 | 562 | 7  | 26 | 0 | 281 | 5  | 939 | 14 |
| 66,012 | 70 | 2 | 565 | 7  | 26 | 0 | 282 | 6  | 943 | 15 |
| 66,013 | 70 | 2 | 565 | 7  | 26 | 0 | 282 | 6  | 943 | 15 |
| 66,014 | 70 | 2 | 568 | 6  | 26 | 0 | 286 | 5  | 950 | 13 |
| 66,015 | 70 | 2 | 569 | 6  | 26 | 0 | 288 | 6  | 953 | 14 |
| 66,016 | 70 | 2 | 569 | 7  | 26 | 0 | 288 | 6  | 953 | 15 |
| 66,017 | 70 | 2 | 568 | 7  | 26 | 0 | 288 | 6  | 952 | 15 |
| 66,018 | 70 | 2 | 568 | 9  | 26 | 0 | 288 | 7  | 952 | 18 |
| 66,019 | 70 | 2 | 568 | 10 | 26 | 0 | 288 | 7  | 952 | 19 |
| 66,020 | 70 | 2 | 573 | 10 | 26 | 0 | 288 | 8  | 957 | 20 |
| 66,021 | 70 | 2 | 571 | 10 | 26 | 0 | 288 | 8  | 955 | 20 |
| 66,022 | 74 | 2 | 585 | 11 | 26 | 0 | 296 | 8  | 981 | 21 |
| 66,023 | 72 | 2 | 555 | 11 | 25 | 0 | 288 | 8  | 940 | 21 |
| 66,024 | 64 | 3 | 534 | 11 | 24 | 0 | 280 | 8  | 902 | 22 |
| 66,025 | 62 | 3 | 504 | 12 | 24 | 0 | 282 | 8  | 872 | 23 |
| 66,026 | 61 | 3 | 500 | 14 | 24 | 0 | 284 | 8  | 869 | 25 |
| 66,027 | 48 | 3 | 433 | 16 | 20 | 0 | 236 | 9  | 737 | 28 |
| 66,028 | 46 | 3 | 418 | 16 | 20 | 0 | 229 | 9  | 713 | 28 |
| 66,029 | 29 | 3 | 223 | 16 | 11 | 0 | 126 | 9  | 389 | 28 |
| 66,030 | 21 | 3 | 166 | 17 | 6  | 0 | 100 | 10 | 293 | 30 |
| 66,031 | 16 | 3 | 107 | 17 | 6  | 0 | 69  | 10 | 198 | 30 |
| 66,032 | 16 | 3 | 105 | 19 | 3  | 0 | 63  | 10 | 187 | 32 |
| 66,033 | 16 | 3 | 102 | 19 | 3  | 0 | 62  | 10 | 183 | 32 |
| 66,034 | 16 | 3 | 107 | 19 | 3  | 0 | 66  | 13 | 192 | 35 |
| 66,035 | 16 | 4 | 108 | 21 | 3  | 1 | 66  | 13 | 193 | 39 |
| 66,036 | 22 | 4 | 111 | 21 | 3  | 1 | 72  | 13 | 208 | 39 |
| 66,037 | 22 | 4 | 109 | 21 | 3  | 1 | 72  | 13 | 206 | 39 |
| 66,038 | 22 | 4 | 109 | 21 | 3  | 1 | 71  | 12 | 205 | 38 |
| 66,039 | 26 | 6 | 118 | 21 | 4  | 1 | 81  | 12 | 229 | 40 |

|        |    |   |     |    |    |   |     |    |     |     |
|--------|----|---|-----|----|----|---|-----|----|-----|-----|
| 66,040 | 26 | 6 | 118 | 20 | 4  | 1 | 80  | 12 | 228 | 39  |
| 66,041 | 27 | 6 | 123 | 20 | 4  | 1 | 83  | 12 | 237 | 39  |
| 66,042 | 30 | 6 | 139 | 20 | 5  | 1 | 94  | 13 | 268 | 40  |
| 66,043 | 33 | 6 | 174 | 21 | 5  | 1 | 110 | 12 | 322 | 40  |
| 66,044 | 33 | 6 | 173 | 21 | 4  | 1 | 108 | 12 | 318 | 40  |
| 66,045 | 33 | 6 | 208 | 22 | 4  | 1 | 111 | 12 | 356 | 41  |
| 66,046 | 33 | 5 | 213 | 22 | 4  | 1 | 111 | 12 | 361 | 40  |
| 66,047 | 34 | 5 | 237 | 22 | 4  | 1 | 114 | 12 | 389 | 40  |
| 66,048 | 34 | 5 | 238 | 22 | 4  | 1 | 114 | 13 | 390 | 41  |
| 66,049 | 35 | 5 | 255 | 23 | 4  | 1 | 114 | 13 | 408 | 42  |
| 66,050 | 41 | 5 | 336 | 23 | 8  | 1 | 133 | 15 | 518 | 44  |
| 66,051 | 41 | 6 | 344 | 25 | 9  | 1 | 135 | 19 | 529 | 51  |
| 66,052 | 43 | 7 | 356 | 36 | 9  | 1 | 134 | 23 | 542 | 67  |
| 66,053 | 40 | 7 | 377 | 38 | 8  | 1 | 137 | 23 | 562 | 69  |
| 66,054 | 40 | 6 | 374 | 37 | 8  | 1 | 136 | 22 | 558 | 66  |
| 66,055 | 38 | 6 | 366 | 36 | 8  | 1 | 129 | 22 | 541 | 65  |
| 66,056 | 38 | 6 | 364 | 37 | 8  | 1 | 129 | 22 | 539 | 66  |
| 66,057 | 42 | 6 | 399 | 37 | 8  | 1 | 141 | 22 | 590 | 66  |
| 66,058 | 42 | 6 | 399 | 37 | 9  | 1 | 143 | 23 | 593 | 67  |
| 66,059 | 42 | 6 | 399 | 39 | 9  | 2 | 143 | 23 | 593 | 70  |
| 66,060 | 43 | 6 | 426 | 41 | 12 | 3 | 153 | 27 | 634 | 77  |
| 66,061 | 46 | 6 | 474 | 44 | 14 | 3 | 182 | 27 | 716 | 80  |
| 66,062 | 46 | 6 | 472 | 53 | 14 | 3 | 183 | 28 | 715 | 90  |
| 66,063 | 46 | 6 | 471 | 53 | 14 | 3 | 182 | 27 | 713 | 89  |
| 66,064 | 45 | 6 | 469 | 54 | 14 | 3 | 178 | 27 | 706 | 90  |
| 66,065 | 45 | 9 | 468 | 61 | 14 | 3 | 179 | 28 | 706 | 101 |
| 66,066 | 45 | 9 | 467 | 61 | 14 | 3 | 177 | 27 | 703 | 100 |
| 66,067 | 45 | 9 | 467 | 63 | 14 | 3 | 177 | 29 | 703 | 104 |
| 66,068 | 45 | 9 | 467 | 67 | 14 | 3 | 177 | 29 | 703 | 108 |
| 66,069 | 45 | 9 | 466 | 65 | 14 | 3 | 177 | 28 | 702 | 105 |
| 66,070 | 45 | 9 | 463 | 64 | 14 | 3 | 177 | 26 | 699 | 102 |
| 66,071 | 45 | 9 | 461 | 64 | 14 | 3 | 177 | 26 | 697 | 102 |
| 66,072 | 45 | 9 | 461 | 64 | 14 | 3 | 176 | 26 | 696 | 102 |
| 66,073 | 41 | 9 | 443 | 63 | 14 | 3 | 167 | 26 | 665 | 101 |
| 66,074 | 41 | 9 | 443 | 64 | 14 | 3 | 166 | 26 | 664 | 102 |
| 66,075 | 41 | 8 | 442 | 64 | 14 | 3 | 166 | 26 | 663 | 101 |
| 66,076 | 41 | 8 | 441 | 63 | 14 | 3 | 163 | 26 | 659 | 100 |
| 66,077 | 41 | 8 | 441 | 61 | 14 | 3 | 158 | 26 | 654 | 98  |
| 66,078 | 40 | 8 | 436 | 59 | 14 | 3 | 159 | 25 | 649 | 95  |
| 66,079 | 40 | 8 | 434 | 59 | 14 | 3 | 155 | 25 | 643 | 95  |
| 66,080 | 40 | 8 | 433 | 59 | 14 | 3 | 155 | 25 | 642 | 95  |

|        |    |   |     |    |    |   |     |    |     |     |
|--------|----|---|-----|----|----|---|-----|----|-----|-----|
| 66,081 | 41 | 9 | 432 | 59 | 14 | 3 | 156 | 24 | 643 | 95  |
| 66,082 | 41 | 9 | 429 | 59 | 14 | 3 | 154 | 24 | 638 | 95  |
| 66,083 | 41 | 8 | 427 | 54 | 14 | 2 | 152 | 21 | 634 | 85  |
| 66,084 | 41 | 8 | 427 | 54 | 14 | 2 | 151 | 21 | 633 | 85  |
| 66,085 | 41 | 9 | 422 | 56 | 14 | 2 | 152 | 21 | 629 | 88  |
| 66,086 | 41 | 9 | 431 | 57 | 15 | 5 | 167 | 22 | 654 | 93  |
| 66,087 | 35 | 9 | 427 | 58 | 16 | 5 | 161 | 22 | 639 | 94  |
| 66,088 | 35 | 9 | 429 | 58 | 16 | 5 | 165 | 22 | 645 | 94  |
| 66,089 | 32 | 9 | 429 | 65 | 15 | 5 | 164 | 22 | 640 | 101 |
| 66,090 | 31 | 7 | 421 | 73 | 15 | 8 | 159 | 24 | 626 | 112 |
| 66,091 | 30 | 7 | 416 | 75 | 15 | 8 | 156 | 24 | 617 | 114 |
| 66,092 | 28 | 7 | 400 | 77 | 14 | 8 | 145 | 25 | 587 | 117 |
| 66,093 | 28 | 7 | 391 | 77 | 14 | 8 | 141 | 24 | 574 | 116 |
| 66,094 | 25 | 7 | 365 | 76 | 14 | 8 | 129 | 24 | 533 | 115 |
| 66,095 | 25 | 7 | 332 | 75 | 14 | 8 | 127 | 24 | 498 | 114 |
| 66,096 | 25 | 7 | 326 | 75 | 14 | 8 | 128 | 24 | 493 | 114 |
| 66,097 | 25 | 7 | 301 | 75 | 14 | 8 | 125 | 22 | 465 | 112 |
| 66,098 | 24 | 7 | 299 | 76 | 14 | 8 | 126 | 22 | 463 | 113 |
| 66,099 | 24 | 8 | 297 | 76 | 14 | 8 | 129 | 23 | 464 | 115 |
| 66,100 | 23 | 8 | 279 | 75 | 13 | 8 | 129 | 23 | 444 | 114 |
| 66,101 | 17 | 8 | 193 | 75 | 8  | 8 | 105 | 21 | 323 | 112 |
| 66,102 | 14 | 7 | 173 | 72 | 7  | 8 | 100 | 17 | 294 | 104 |
| 66,103 | 12 | 6 | 160 | 59 | 7  | 8 | 100 | 15 | 279 | 88  |
| 66,104 | 11 | 6 | 136 | 59 | 7  | 8 | 95  | 15 | 249 | 88  |
| 66,105 | 10 | 6 | 132 | 62 | 7  | 8 | 95  | 16 | 244 | 92  |
| 66,106 | 10 | 6 | 134 | 61 | 7  | 8 | 95  | 16 | 246 | 91  |
| 66,107 | 7  | 8 | 105 | 66 | 7  | 8 | 83  | 17 | 202 | 99  |
| 66,108 | 6  | 8 | 103 | 66 | 7  | 8 | 81  | 17 | 197 | 99  |
| 66,109 | 6  | 8 | 82  | 64 | 4  | 7 | 72  | 18 | 164 | 97  |
| 66,110 | 7  | 8 | 98  | 65 | 5  | 7 | 81  | 18 | 191 | 98  |
| 66,111 | 6  | 9 | 70  | 60 | 3  | 6 | 54  | 14 | 133 | 89  |
| 66,112 | 6  | 9 | 74  | 51 | 3  | 6 | 58  | 13 | 141 | 79  |
| 66,113 | 6  | 9 | 74  | 51 | 3  | 6 | 58  | 13 | 141 | 79  |
| 66,114 | 8  | 9 | 111 | 51 | 4  | 6 | 74  | 13 | 197 | 79  |
| 66,115 | 8  | 9 | 136 | 50 | 7  | 6 | 85  | 13 | 236 | 78  |
| 66,116 | 28 | 6 | 318 | 43 | 17 | 6 | 193 | 12 | 556 | 67  |
| 66,117 | 32 | 6 | 347 | 40 | 17 | 6 | 204 | 10 | 600 | 62  |
| 66,118 | 33 | 6 | 360 | 36 | 18 | 6 | 215 | 10 | 626 | 58  |
| 66,119 | 33 | 6 | 385 | 36 | 19 | 6 | 236 | 10 | 673 | 58  |
| 66,120 | 34 | 6 | 400 | 36 | 21 | 6 | 258 | 10 | 713 | 58  |
| 66,121 | 34 | 6 | 405 | 36 | 21 | 6 | 260 | 10 | 720 | 58  |

|        |    |   |     |    |    |   |     |    |     |     |
|--------|----|---|-----|----|----|---|-----|----|-----|-----|
| 66,122 | 35 | 6 | 407 | 36 | 21 | 6 | 263 | 10 | 726 | 58  |
| 66,123 | 35 | 6 | 407 | 37 | 21 | 6 | 263 | 10 | 726 | 59  |
| 66,124 | 35 | 6 | 406 | 37 | 21 | 6 | 263 | 11 | 725 | 60  |
| 66,125 | 35 | 6 | 406 | 36 | 21 | 6 | 263 | 11 | 725 | 59  |
| 66,126 | 35 | 6 | 406 | 36 | 21 | 7 | 263 | 11 | 725 | 60  |
| 66,127 | 35 | 6 | 408 | 36 | 21 | 7 | 264 | 11 | 728 | 60  |
| 66,128 | 35 | 6 | 411 | 36 | 21 | 7 | 264 | 11 | 731 | 60  |
| 66,129 | 35 | 6 | 411 | 36 | 21 | 7 | 262 | 12 | 729 | 61  |
| 66,130 | 35 | 6 | 411 | 36 | 21 | 7 | 263 | 12 | 730 | 61  |
| 66,131 | 35 | 6 | 411 | 38 | 21 | 7 | 262 | 12 | 729 | 63  |
| 66,132 | 34 | 5 | 411 | 42 | 21 | 9 | 261 | 19 | 727 | 75  |
| 66,133 | 34 | 5 | 412 | 65 | 21 | 9 | 261 | 23 | 728 | 102 |
| 66,134 | 36 | 5 | 416 | 70 | 21 | 9 | 261 | 28 | 734 | 112 |
| 66,135 | 36 | 5 | 417 | 71 | 21 | 9 | 260 | 29 | 734 | 114 |
| 66,136 | 36 | 4 | 419 | 69 | 21 | 9 | 257 | 29 | 733 | 111 |
| 66,137 | 36 | 4 | 412 | 67 | 21 | 6 | 244 | 28 | 713 | 105 |
| 66,138 | 37 | 4 | 413 | 60 | 20 | 6 | 244 | 28 | 714 | 98  |
| 66,139 | 39 | 6 | 415 | 61 | 21 | 6 | 239 | 28 | 714 | 101 |
| 66,140 | 39 | 6 | 412 | 61 | 21 | 6 | 235 | 28 | 707 | 101 |
| 66,141 | 46 | 7 | 419 | 54 | 21 | 3 | 235 | 27 | 721 | 91  |
| 66,142 | 45 | 7 | 419 | 53 | 21 | 3 | 235 | 27 | 720 | 90  |
| 66,143 | 45 | 7 | 425 | 52 | 21 | 3 | 236 | 26 | 727 | 88  |
| 66,144 | 45 | 7 | 425 | 52 | 21 | 3 | 237 | 26 | 728 | 88  |
| 66,145 | 50 | 7 | 457 | 52 | 23 | 3 | 273 | 26 | 803 | 88  |
| 66,146 | 50 | 7 | 456 | 52 | 23 | 3 | 275 | 26 | 804 | 88  |
| 66,147 | 50 | 7 | 456 | 52 | 23 | 3 | 274 | 26 | 803 | 88  |
| 66,148 | 50 | 7 | 456 | 52 | 23 | 3 | 274 | 26 | 803 | 88  |
| 66,149 | 50 | 7 | 474 | 51 | 23 | 3 | 282 | 26 | 829 | 87  |
| 66,150 | 50 | 6 | 475 | 51 | 23 | 3 | 280 | 24 | 828 | 84  |
| 66,151 | 50 | 6 | 476 | 51 | 23 | 3 | 286 | 24 | 835 | 84  |
| 66,152 | 50 | 6 | 476 | 51 | 23 | 3 | 286 | 24 | 835 | 84  |
| 66,153 | 50 | 6 | 475 | 51 | 23 | 3 | 286 | 24 | 834 | 84  |
| 66,154 | 50 | 6 | 475 | 51 | 23 | 3 | 286 | 24 | 834 | 84  |
| 66,155 | 50 | 6 | 475 | 51 | 23 | 3 | 286 | 24 | 834 | 84  |
| 66,156 | 50 | 7 | 474 | 48 | 23 | 3 | 283 | 23 | 830 | 81  |
| 66,157 | 50 | 7 | 472 | 49 | 23 | 3 | 282 | 23 | 827 | 82  |
| 66,158 | 55 | 5 | 490 | 43 | 23 | 3 | 292 | 21 | 860 | 72  |
| 66,159 | 55 | 5 | 487 | 43 | 23 | 3 | 293 | 20 | 858 | 71  |
| 66,160 | 58 | 5 | 490 | 43 | 23 | 3 | 301 | 20 | 872 | 71  |
| 66,161 | 57 | 6 | 477 | 42 | 22 | 3 | 293 | 20 | 849 | 71  |
| 66,162 | 55 | 5 | 458 | 43 | 22 | 3 | 291 | 20 | 826 | 71  |

|        |    |    |     |     |    |   |     |    |     |     |
|--------|----|----|-----|-----|----|---|-----|----|-----|-----|
| 66,163 | 55 | 5  | 482 | 44  | 22 | 3 | 306 | 21 | 865 | 73  |
| 66,164 | 54 | 5  | 454 | 53  | 21 | 3 | 292 | 21 | 821 | 82  |
| 66,165 | 54 | 5  | 433 | 55  | 18 | 3 | 281 | 21 | 786 | 84  |
| 66,166 | 53 | 6  | 390 | 62  | 15 | 4 | 257 | 28 | 715 | 100 |
| 66,167 | 34 | 9  | 254 | 89  | 8  | 6 | 173 | 38 | 469 | 142 |
| 66,168 | 30 | 9  | 227 | 95  | 8  | 6 | 162 | 38 | 427 | 148 |
| 66,169 | 29 | 9  | 215 | 97  | 7  | 7 | 152 | 38 | 403 | 151 |
| 66,170 | 29 | 9  | 198 | 99  | 7  | 7 | 136 | 38 | 370 | 153 |
| 66,171 | 30 | 10 | 198 | 99  | 6  | 7 | 123 | 38 | 357 | 154 |
| 66,172 | 30 | 10 | 192 | 99  | 6  | 7 | 121 | 38 | 349 | 154 |
| 66,173 | 29 | 10 | 201 | 99  | 6  | 8 | 124 | 38 | 360 | 155 |
| 66,174 | 29 | 10 | 221 | 98  | 6  | 8 | 128 | 37 | 384 | 153 |
| 66,175 | 29 | 10 | 221 | 98  | 6  | 8 | 128 | 37 | 384 | 153 |
| 66,176 | 29 | 10 | 224 | 98  | 6  | 8 | 128 | 37 | 387 | 153 |
| 66,177 | 29 | 10 | 223 | 100 | 6  | 7 | 127 | 37 | 385 | 154 |
| 66,178 | 29 | 10 | 220 | 100 | 6  | 7 | 127 | 37 | 382 | 154 |
| 66,179 | 29 | 10 | 220 | 100 | 6  | 7 | 127 | 38 | 382 | 155 |
| 66,180 | 30 | 10 | 225 | 100 | 6  | 7 | 127 | 37 | 388 | 154 |
| 66,181 | 30 | 10 | 225 | 100 | 6  | 7 | 127 | 37 | 388 | 154 |
| 66,182 | 30 | 10 | 227 | 94  | 6  | 5 | 127 | 30 | 390 | 139 |
| 66,183 | 30 | 10 | 226 | 71  | 7  | 5 | 129 | 26 | 392 | 112 |
| 66,184 | 30 | 10 | 226 | 71  | 7  | 5 | 129 | 26 | 392 | 112 |
| 66,185 | 28 | 10 | 223 | 68  | 7  | 5 | 129 | 21 | 387 | 104 |
| 66,186 | 29 | 10 | 241 | 67  | 7  | 5 | 130 | 20 | 407 | 102 |
| 66,187 | 29 | 10 | 238 | 67  | 7  | 5 | 130 | 20 | 404 | 102 |
| 66,188 | 29 | 10 | 246 | 68  | 6  | 5 | 131 | 20 | 412 | 103 |
| 66,189 | 31 | 8  | 268 | 67  | 7  | 5 | 140 | 20 | 446 | 100 |
| 66,190 | 29 | 8  | 264 | 67  | 6  | 5 | 140 | 20 | 439 | 100 |
| 66,191 | 23 | 8  | 262 | 72  | 6  | 5 | 140 | 22 | 431 | 107 |
| 66,192 | 22 | 7  | 261 | 71  | 6  | 5 | 141 | 21 | 430 | 104 |
| 66,193 | 22 | 7  | 265 | 69  | 6  | 5 | 144 | 21 | 437 | 102 |
| 66,194 | 27 | 7  | 301 | 74  | 6  | 5 | 147 | 25 | 481 | 111 |
| 66,195 | 22 | 9  | 271 | 80  | 4  | 5 | 115 | 29 | 412 | 123 |
| 66,196 | 33 | 11 | 376 | 86  | 9  | 5 | 168 | 34 | 586 | 136 |
| 66,197 | 33 | 11 | 376 | 89  | 9  | 5 | 169 | 46 | 587 | 151 |
| 66,198 | 33 | 11 | 368 | 90  | 9  | 5 | 166 | 47 | 576 | 153 |
| 66,199 | 34 | 11 | 362 | 90  | 9  | 5 | 164 | 47 | 569 | 153 |
| 66,200 | 34 | 11 | 361 | 90  | 9  | 5 | 163 | 47 | 567 | 153 |
| 66,201 | 34 | 11 | 361 | 90  | 9  | 5 | 163 | 47 | 567 | 153 |
| 66,202 | 35 | 11 | 361 | 91  | 9  | 5 | 157 | 47 | 562 | 154 |
| 66,203 | 35 | 11 | 361 | 91  | 9  | 5 | 157 | 49 | 562 | 156 |

|        |    |    |     |     |    |   |     |     |     |     |
|--------|----|----|-----|-----|----|---|-----|-----|-----|-----|
| 66,204 | 37 | 11 | 364 | 91  | 9  | 5 | 159 | 49  | 569 | 156 |
| 66,205 | 37 | 12 | 366 | 91  | 9  | 5 | 159 | 49  | 571 | 157 |
| 66,206 | 37 | 11 | 364 | 90  | 9  | 5 | 158 | 49  | 568 | 155 |
| 66,207 | 37 | 11 | 363 | 90  | 9  | 5 | 155 | 49  | 564 | 155 |
| 66,208 | 38 | 11 | 413 | 90  | 9  | 5 | 170 | 50  | 630 | 156 |
| 66,209 | 36 | 11 | 423 | 90  | 9  | 5 | 176 | 50  | 644 | 156 |
| 66,210 | 37 | 11 | 441 | 90  | 11 | 5 | 182 | 50  | 671 | 156 |
| 66,211 | 34 | 11 | 436 | 90  | 11 | 5 | 176 | 50  | 657 | 156 |
| 66,212 | 33 | 10 | 430 | 89  | 11 | 5 | 175 | 50  | 649 | 154 |
| 66,213 | 34 | 10 | 432 | 89  | 12 | 5 | 176 | 50  | 654 | 154 |
| 66,214 | 34 | 10 | 414 | 79  | 12 | 5 | 159 | 49  | 619 | 143 |
| 66,215 | 34 | 10 | 408 | 77  | 12 | 5 | 158 | 49  | 612 | 141 |
| 66,216 | 34 | 10 | 404 | 77  | 12 | 5 | 158 | 49  | 608 | 141 |
| 66,217 | 34 | 9  | 401 | 71  | 12 | 4 | 158 | 44  | 605 | 128 |
| 66,218 | 36 | 6  | 450 | 39  | 14 | 1 | 177 | 41  | 677 | 87  |
| 66,219 | 38 | 8  | 469 | 46  | 15 | 1 | 184 | 52  | 706 | 107 |
| 66,220 | 39 | 8  | 484 | 47  | 16 | 1 | 204 | 56  | 743 | 112 |
| 66,221 | 39 | 8  | 487 | 48  | 15 | 1 | 203 | 57  | 744 | 114 |
| 66,222 | 39 | 7  | 475 | 53  | 14 | 1 | 198 | 57  | 726 | 118 |
| 66,223 | 39 | 7  | 464 | 55  | 14 | 1 | 192 | 59  | 709 | 122 |
| 66,224 | 39 | 7  | 448 | 57  | 14 | 0 | 189 | 59  | 690 | 123 |
| 66,225 | 41 | 7  | 449 | 60  | 14 | 0 | 194 | 62  | 698 | 129 |
| 66,226 | 41 | 9  | 448 | 62  | 14 | 0 | 194 | 64  | 697 | 135 |
| 66,227 | 41 | 10 | 447 | 67  | 14 | 0 | 196 | 68  | 698 | 145 |
| 66,228 | 41 | 10 | 446 | 67  | 14 | 0 | 196 | 70  | 697 | 147 |
| 66,229 | 41 | 10 | 448 | 68  | 14 | 0 | 196 | 70  | 699 | 148 |
| 66,230 | 40 | 10 | 446 | 70  | 14 | 0 | 196 | 70  | 696 | 150 |
| 66,231 | 42 | 10 | 457 | 70  | 14 | 0 | 208 | 70  | 721 | 150 |
| 66,232 | 42 | 10 | 463 | 69  | 14 | 0 | 210 | 70  | 729 | 149 |
| 66,233 | 42 | 12 | 463 | 70  | 14 | 0 | 211 | 70  | 730 | 152 |
| 66,234 | 42 | 12 | 463 | 70  | 13 | 0 | 209 | 71  | 727 | 153 |
| 66,235 | 43 | 12 | 469 | 71  | 13 | 0 | 216 | 71  | 741 | 154 |
| 66,236 | 43 | 12 | 475 | 70  | 13 | 0 | 220 | 71  | 751 | 153 |
| 66,237 | 42 | 12 | 458 | 70  | 13 | 0 | 222 | 71  | 735 | 153 |
| 66,238 | 42 | 12 | 453 | 70  | 13 | 0 | 221 | 71  | 729 | 153 |
| 66,239 | 39 | 12 | 426 | 69  | 12 | 0 | 210 | 71  | 687 | 152 |
| 66,240 | 39 | 12 | 423 | 69  | 12 | 0 | 210 | 71  | 684 | 152 |
| 66,241 | 39 | 12 | 422 | 70  | 12 | 0 | 210 | 72  | 683 | 154 |
| 66,242 | 39 | 12 | 419 | 69  | 12 | 0 | 209 | 73  | 679 | 154 |
| 66,243 | 39 | 13 | 420 | 98  | 12 | 4 | 209 | 94  | 680 | 209 |
| 66,244 | 39 | 18 | 410 | 108 | 12 | 4 | 205 | 105 | 666 | 235 |



|        |    |    |     |     |    |    |     |     |     |     |
|--------|----|----|-----|-----|----|----|-----|-----|-----|-----|
| 66,245 | 34 | 17 | 374 | 98  | 12 | 4  | 202 | 99  | 622 | 218 |
| 66,246 | 34 | 18 | 372 | 105 | 12 | 5  | 197 | 106 | 615 | 234 |
| 66,247 | 24 | 16 | 269 | 99  | 7  | 5  | 137 | 101 | 437 | 221 |
| 66,248 | 24 | 17 | 268 | 120 | 7  | 5  | 135 | 121 | 434 | 263 |
| 66,249 | 24 | 17 | 266 | 120 | 7  | 5  | 134 | 122 | 431 | 264 |
| 66,250 | 23 | 17 | 271 | 121 | 7  | 5  | 134 | 122 | 435 | 265 |
| 66,251 | 24 | 17 | 281 | 123 | 7  | 5  | 137 | 122 | 449 | 267 |
| 66,252 | 24 | 17 | 288 | 122 | 7  | 5  | 149 | 122 | 468 | 266 |
| 66,253 | 23 | 17 | 288 | 123 | 7  | 5  | 150 | 120 | 468 | 265 |
| 66,254 | 23 | 17 | 288 | 123 | 7  | 5  | 150 | 120 | 468 | 265 |
| 66,255 | 21 | 17 | 293 | 123 | 8  | 5  | 155 | 123 | 477 | 268 |
| 66,256 | 21 | 16 | 299 | 125 | 9  | 5  | 166 | 126 | 495 | 272 |
| 66,257 | 21 | 16 | 294 | 125 | 9  | 5  | 169 | 125 | 493 | 271 |
| 66,258 | 22 | 16 | 295 | 125 | 9  | 5  | 169 | 125 | 495 | 271 |
| 66,259 | 18 | 16 | 235 | 125 | 9  | 5  | 148 | 125 | 410 | 271 |
| 66,260 | 18 | 16 | 224 | 125 | 9  | 5  | 142 | 125 | 393 | 271 |
| 66,261 | 17 | 16 | 209 | 126 | 7  | 5  | 143 | 125 | 376 | 272 |
| 66,262 | 17 | 16 | 209 | 126 | 7  | 5  | 141 | 125 | 374 | 272 |
| 66,263 | 17 | 16 | 213 | 131 | 7  | 5  | 143 | 127 | 380 | 279 |
| 66,264 | 17 | 16 | 210 | 140 | 6  | 6  | 142 | 134 | 375 | 296 |
| 66,265 | 17 | 16 | 200 | 162 | 6  | 7  | 141 | 139 | 364 | 324 |
| 66,266 | 16 | 16 | 199 | 193 | 6  | 9  | 140 | 151 | 361 | 369 |
| 66,267 | 15 | 19 | 174 | 211 | 6  | 10 | 143 | 155 | 338 | 395 |
| 66,268 | 16 | 19 | 163 | 216 | 5  | 10 | 135 | 156 | 319 | 401 |
| 66,269 | 14 | 21 | 161 | 227 | 5  | 10 | 132 | 153 | 312 | 411 |
| 66,270 | 12 | 19 | 142 | 233 | 4  | 11 | 125 | 145 | 283 | 408 |
| 66,271 | 12 | 19 | 126 | 231 | 3  | 11 | 103 | 140 | 244 | 401 |
| 66,272 | 12 | 19 | 115 | 236 | 3  | 11 | 99  | 141 | 229 | 407 |
| 66,273 | 10 | 19 | 112 | 231 | 3  | 11 | 97  | 141 | 222 | 402 |
| 66,274 | 8  | 19 | 108 | 227 | 3  | 11 | 98  | 139 | 217 | 396 |
| 66,275 | 8  | 19 | 107 | 228 | 3  | 11 | 98  | 141 | 216 | 399 |
| 66,276 | 8  | 19 | 107 | 225 | 3  | 11 | 95  | 138 | 213 | 393 |
| 66,277 | 8  | 17 | 109 | 224 | 3  | 11 | 97  | 137 | 217 | 389 |
| 66,278 | 8  | 16 | 109 | 219 | 3  | 11 | 97  | 134 | 217 | 380 |
| 66,279 | 8  | 17 | 112 | 216 | 3  | 11 | 99  | 132 | 222 | 376 |
| 66,280 | 8  | 17 | 112 | 216 | 3  | 11 | 102 | 133 | 225 | 377 |
| 66,281 | 8  | 17 | 114 | 216 | 3  | 11 | 101 | 133 | 226 | 377 |
| 66,282 | 6  | 18 | 114 | 218 | 3  | 11 | 102 | 133 | 225 | 380 |
| 66,283 | 6  | 20 | 106 | 225 | 3  | 11 | 100 | 151 | 215 | 407 |
| 66,284 | 6  | 18 | 102 | 225 | 3  | 11 | 99  | 151 | 210 | 405 |
| 66,285 | 11 | 18 | 141 | 228 | 4  | 11 | 139 | 151 | 295 | 408 |

|        |     |    |       |     |     |    |       |     |       |     |
|--------|-----|----|-------|-----|-----|----|-------|-----|-------|-----|
| 66,286 | 10  | 18 | 139   | 227 | 4   | 11 | 134   | 151 | 287   | 407 |
| 66,287 | 18  | 18 | 202   | 228 | 12  | 11 | 215   | 155 | 447   | 412 |
| 66,288 | 18  | 18 | 200   | 228 | 13  | 11 | 212   | 155 | 443   | 412 |
| 66,289 | 18  | 18 | 204   | 228 | 13  | 11 | 214   | 155 | 449   | 412 |
| 66,290 | 19  | 18 | 221   | 241 | 13  | 11 | 226   | 164 | 479   | 434 |
| 66,291 | 19  | 18 | 221   | 241 | 13  | 11 | 226   | 164 | 479   | 434 |
| 66,292 | 19  | 21 | 226   | 242 | 13  | 11 | 226   | 163 | 484   | 437 |
| 66,293 | 20  | 21 | 277   | 240 | 17  | 11 | 269   | 160 | 583   | 432 |
| 66,294 | 20  | 20 | 277   | 211 | 17  | 7  | 269   | 139 | 583   | 377 |
| 66,295 | 21  | 15 | 303   | 203 | 19  | 7  | 289   | 127 | 632   | 352 |
| 66,296 | 22  | 14 | 306   | 203 | 20  | 7  | 292   | 126 | 640   | 350 |
| 66,297 | 23  | 13 | 312   | 196 | 21  | 6  | 295   | 119 | 651   | 334 |
| 66,298 | 22  | 13 | 313   | 196 | 22  | 6  | 297   | 118 | 654   | 333 |
| 66,299 | 22  | 12 | 310   | 171 | 22  | 6  | 296   | 85  | 650   | 274 |
| 66,300 | 22  | 12 | 308   | 170 | 22  | 6  | 296   | 85  | 648   | 273 |
| 66,301 | 22  | 12 | 306   | 169 | 22  | 6  | 297   | 86  | 647   | 273 |
| 66,302 | 23  | 12 | 305   | 169 | 23  | 6  | 295   | 86  | 646   | 273 |
| 66,303 | 23  | 12 | 302   | 169 | 23  | 6  | 285   | 86  | 633   | 273 |
| 66,304 | 23  | 12 | 302   | 168 | 23  | 6  | 285   | 86  | 633   | 272 |
| 66,305 | 25  | 12 | 311   | 168 | 24  | 6  | 284   | 83  | 644   | 269 |
| 66,306 | 39  | 12 | 435   | 166 | 32  | 6  | 400   | 80  | 906   | 264 |
| 66,307 | 39  | 12 | 427   | 167 | 31  | 6  | 390   | 85  | 887   | 270 |
| 66,308 | 39  | 12 | 427   | 167 | 31  | 6  | 387   | 85  | 884   | 270 |
| 66,309 | 58  | 12 | 749   | 169 | 66  | 6  | 834   | 86  | 1,707 | 273 |
| 66,310 | 58  | 12 | 748   | 169 | 66  | 6  | 836   | 86  | 1,708 | 273 |
| 66,311 | 63  | 12 | 778   | 170 | 71  | 6  | 912   | 89  | 1,824 | 277 |
| 66,312 | 63  | 12 | 775   | 169 | 71  | 6  | 907   | 90  | 1,816 | 277 |
| 66,313 | 63  | 12 | 773   | 169 | 71  | 6  | 905   | 90  | 1,812 | 277 |
| 66,314 | 66  | 12 | 785   | 157 | 71  | 5  | 913   | 82  | 1,835 | 256 |
| 66,315 | 66  | 12 | 800   | 135 | 71  | 4  | 919   | 78  | 1,856 | 229 |
| 66,316 | 66  | 12 | 815   | 138 | 71  | 4  | 929   | 84  | 1,881 | 238 |
| 66,317 | 68  | 12 | 829   | 110 | 71  | 2  | 938   | 72  | 1,906 | 196 |
| 66,318 | 68  | 9  | 824   | 92  | 70  | 1  | 929   | 68  | 1,891 | 170 |
| 66,319 | 68  | 9  | 820   | 87  | 70  | 1  | 925   | 69  | 1,883 | 166 |
| 66,320 | 81  | 7  | 929   | 73  | 75  | 1  | 981   | 65  | 2,066 | 146 |
| 66,321 | 81  | 9  | 930   | 60  | 75  | 1  | 982   | 67  | 2,068 | 137 |
| 66,322 | 80  | 9  | 930   | 59  | 75  | 1  | 981   | 71  | 2,066 | 140 |
| 66,323 | 118 | 9  | 1,321 | 54  | 99  | 1  | 1,399 | 71  | 2,937 | 135 |
| 66,324 | 118 | 9  | 1,324 | 59  | 102 | 2  | 1,403 | 71  | 2,947 | 141 |
| 66,325 | 118 | 9  | 1,329 | 59  | 103 | 2  | 1,411 | 71  | 2,961 | 141 |
| 66,326 | 118 | 9  | 1,331 | 59  | 103 | 2  | 1,410 | 69  | 2,962 | 139 |

|        |     |   |       |    |     |   |       |    |       |     |
|--------|-----|---|-------|----|-----|---|-------|----|-------|-----|
| 66,327 | 118 | 9 | 1,331 | 59 | 103 | 2 | 1,410 | 69 | 2,962 | 139 |
| 66,328 | 118 | 9 | 1,336 | 58 | 103 | 2 | 1,410 | 68 | 2,967 | 137 |
| 66,329 | 118 | 9 | 1,336 | 58 | 103 | 2 | 1,410 | 67 | 2,967 | 136 |
| 66,330 | 118 | 8 | 1,334 | 58 | 103 | 2 | 1,409 | 67 | 2,964 | 135 |
| 66,331 | 118 | 8 | 1,339 | 56 | 103 | 2 | 1,409 | 67 | 2,969 | 133 |
| 66,332 | 118 | 7 | 1,340 | 54 | 103 | 2 | 1,409 | 67 | 2,970 | 130 |
| 66,333 | 118 | 7 | 1,327 | 54 | 103 | 2 | 1,395 | 67 | 2,943 | 130 |
| 66,334 | 117 | 5 | 1,304 | 47 | 103 | 2 | 1,377 | 49 | 2,901 | 103 |
| 66,335 | 116 | 5 | 1,295 | 43 | 103 | 2 | 1,361 | 48 | 2,875 | 98  |
| 66,336 | 116 | 5 | 1,300 | 43 | 103 | 2 | 1,362 | 48 | 2,881 | 98  |
| 66,337 | 116 | 5 | 1,290 | 43 | 102 | 2 | 1,350 | 48 | 2,858 | 98  |
| 66,338 | 111 | 5 | 1,239 | 41 | 97  | 2 | 1,290 | 44 | 2,737 | 92  |
| 66,339 | 112 | 5 | 1,241 | 41 | 97  | 2 | 1,301 | 44 | 2,751 | 92  |
| 66,340 | 112 | 5 | 1,238 | 28 | 97  | 2 | 1,292 | 36 | 2,739 | 71  |
| 66,341 | 111 | 2 | 1,224 | 26 | 97  | 2 | 1,289 | 36 | 2,721 | 66  |
| 66,342 | 111 | 2 | 1,219 | 26 | 97  | 2 | 1,289 | 36 | 2,716 | 66  |
| 66,343 | 110 | 2 | 1,199 | 26 | 97  | 2 | 1,263 | 36 | 2,669 | 66  |
| 66,344 | 110 | 2 | 1,168 | 24 | 93  | 2 | 1,246 | 36 | 2,617 | 64  |
| 66,345 | 109 | 2 | 1,152 | 22 | 91  | 2 | 1,232 | 36 | 2,584 | 62  |
| 66,346 | 108 | 2 | 1,149 | 22 | 90  | 2 | 1,228 | 36 | 2,575 | 62  |
| 66,347 | 114 | 2 | 1,225 | 21 | 91  | 2 | 1,268 | 36 | 2,698 | 61  |
| 66,348 | 114 | 2 | 1,230 | 21 | 91  | 2 | 1,266 | 36 | 2,701 | 61  |
| 66,349 | 114 | 2 | 1,242 | 21 | 90  | 2 | 1,272 | 36 | 2,718 | 61  |
| 66,350 | 116 | 2 | 1,249 | 21 | 90  | 2 | 1,275 | 36 | 2,730 | 61  |
| 66,351 | 116 | 2 | 1,253 | 20 | 90  | 2 | 1,278 | 35 | 2,737 | 59  |
| 66,352 | 116 | 2 | 1,251 | 20 | 90  | 2 | 1,277 | 35 | 2,734 | 59  |
| 66,353 | 118 | 2 | 1,259 | 20 | 89  | 3 | 1,284 | 37 | 2,750 | 62  |
| 66,354 | 117 | 2 | 1,255 | 20 | 89  | 3 | 1,282 | 37 | 2,743 | 62  |
| 66,355 | 125 | 3 | 1,290 | 31 | 89  | 3 | 1,313 | 47 | 2,817 | 84  |
| 66,356 | 142 | 3 | 1,417 | 36 | 93  | 3 | 1,428 | 48 | 3,080 | 90  |
| 66,357 | 131 | 3 | 1,342 | 39 | 86  | 3 | 1,359 | 48 | 2,918 | 93  |
| 66,358 | 123 | 4 | 1,191 | 38 | 75  | 3 | 1,216 | 43 | 2,605 | 88  |
| 66,359 | 116 | 5 | 1,049 | 36 | 54  | 3 | 950   | 42 | 2,169 | 86  |
| 66,360 | 115 | 5 | 1,030 | 36 | 51  | 3 | 917   | 42 | 2,113 | 86  |
| 66,361 | 110 | 5 | 1,004 | 35 | 48  | 3 | 846   | 39 | 2,008 | 82  |
| 66,362 | 110 | 5 | 1,004 | 35 | 46  | 3 | 841   | 38 | 2,001 | 81  |
| 66,363 | 110 | 5 | 1,004 | 35 | 46  | 3 | 840   | 38 | 2,000 | 81  |
| 66,364 | 107 | 5 | 992   | 33 | 46  | 3 | 834   | 37 | 1,979 | 78  |
| 66,365 | 107 | 5 | 994   | 33 | 46  | 3 | 834   | 37 | 1,981 | 78  |
| 66,366 | 106 | 5 | 979   | 33 | 46  | 3 | 830   | 36 | 1,961 | 77  |
| 66,367 | 106 | 5 | 964   | 30 | 46  | 3 | 822   | 30 | 1,938 | 68  |

|        |     |    |     |    |    |   |     |    |       |    |
|--------|-----|----|-----|----|----|---|-----|----|-------|----|
| 66,368 | 104 | 5  | 951 | 27 | 46 | 3 | 813 | 30 | 1,914 | 65 |
| 66,369 | 97  | 5  | 917 | 27 | 42 | 3 | 801 | 31 | 1,857 | 66 |
| 66,370 | 93  | 5  | 887 | 27 | 41 | 2 | 777 | 27 | 1,798 | 61 |
| 66,371 | 79  | 6  | 737 | 31 | 31 | 2 | 573 | 30 | 1,420 | 69 |
| 66,372 | 71  | 4  | 634 | 33 | 24 | 2 | 455 | 25 | 1,184 | 64 |
| 66,373 | 63  | 4  | 590 | 32 | 20 | 2 | 443 | 21 | 1,116 | 59 |
| 66,374 | 61  | 5  | 556 | 32 | 20 | 2 | 425 | 21 | 1,062 | 60 |
| 66,375 | 61  | 5  | 554 | 27 | 17 | 1 | 420 | 21 | 1,052 | 54 |
| 66,376 | 62  | 5  | 552 | 28 | 16 | 1 | 410 | 21 | 1,040 | 55 |
| 66,377 | 62  | 6  | 547 | 27 | 16 | 1 | 410 | 21 | 1,035 | 55 |
| 66,378 | 62  | 6  | 549 | 27 | 18 | 1 | 426 | 21 | 1,055 | 55 |
| 66,379 | 62  | 6  | 550 | 28 | 18 | 1 | 428 | 21 | 1,058 | 56 |
| 66,380 | 62  | 6  | 550 | 28 | 18 | 1 | 427 | 20 | 1,057 | 55 |
| 66,381 | 62  | 6  | 550 | 28 | 18 | 1 | 427 | 20 | 1,057 | 55 |
| 66,382 | 62  | 6  | 549 | 28 | 18 | 1 | 426 | 20 | 1,055 | 55 |
| 66,383 | 63  | 6  | 545 | 29 | 18 | 1 | 426 | 20 | 1,052 | 56 |
| 66,384 | 63  | 6  | 545 | 30 | 18 | 1 | 427 | 20 | 1,053 | 57 |
| 66,385 | 60  | 6  | 543 | 32 | 17 | 1 | 424 | 20 | 1,044 | 59 |
| 66,386 | 60  | 7  | 543 | 44 | 18 | 1 | 424 | 23 | 1,045 | 75 |
| 66,387 | 60  | 7  | 545 | 47 | 18 | 1 | 426 | 23 | 1,049 | 78 |
| 66,388 | 59  | 7  | 547 | 47 | 17 | 1 | 431 | 23 | 1,054 | 78 |
| 66,389 | 57  | 7  | 541 | 49 | 15 | 1 | 423 | 23 | 1,036 | 80 |
| 66,390 | 56  | 7  | 535 | 49 | 15 | 1 | 410 | 23 | 1,016 | 80 |
| 66,391 | 56  | 7  | 535 | 49 | 16 | 1 | 410 | 22 | 1,017 | 79 |
| 66,392 | 56  | 7  | 535 | 49 | 16 | 1 | 410 | 22 | 1,017 | 79 |
| 66,393 | 56  | 8  | 535 | 49 | 16 | 1 | 410 | 23 | 1,017 | 81 |
| 66,394 | 56  | 8  | 535 | 49 | 16 | 1 | 410 | 23 | 1,017 | 81 |
| 66,395 | 78  | 8  | 710 | 49 | 39 | 1 | 567 | 24 | 1,394 | 82 |
| 66,396 | 85  | 8  | 797 | 49 | 45 | 1 | 621 | 24 | 1,548 | 82 |
| 66,397 | 83  | 8  | 791 | 49 | 45 | 1 | 614 | 24 | 1,533 | 82 |
| 66,398 | 79  | 8  | 727 | 49 | 43 | 1 | 594 | 24 | 1,443 | 82 |
| 66,399 | 79  | 8  | 719 | 49 | 43 | 1 | 593 | 24 | 1,434 | 82 |
| 66,400 | 79  | 8  | 704 | 49 | 43 | 1 | 584 | 24 | 1,410 | 82 |
| 66,401 | 77  | 8  | 699 | 49 | 43 | 1 | 581 | 25 | 1,400 | 83 |
| 66,402 | 77  | 8  | 694 | 49 | 43 | 1 | 578 | 25 | 1,392 | 83 |
| 66,403 | 74  | 8  | 684 | 49 | 43 | 1 | 574 | 26 | 1,375 | 84 |
| 66,404 | 74  | 9  | 686 | 54 | 43 | 0 | 572 | 25 | 1,375 | 88 |
| 66,405 | 71  | 10 | 668 | 56 | 43 | 0 | 560 | 25 | 1,342 | 91 |
| 66,406 | 67  | 10 | 651 | 45 | 43 | 0 | 540 | 15 | 1,301 | 70 |
| 66,407 | 48  | 12 | 515 | 47 | 38 | 1 | 421 | 15 | 1,022 | 75 |
| 66,408 | 45  | 12 | 460 | 44 | 36 | 1 | 369 | 15 | 910   | 72 |

|        |    |    |     |    |    |   |     |    |     |    |
|--------|----|----|-----|----|----|---|-----|----|-----|----|
| 66,409 | 47 | 11 | 460 | 49 | 36 | 1 | 364 | 16 | 907 | 77 |
| 66,410 | 43 | 10 | 458 | 49 | 36 | 1 | 362 | 16 | 899 | 76 |
| 66,411 | 44 | 10 | 468 | 50 | 36 | 1 | 362 | 16 | 910 | 77 |
| 66,412 | 44 | 10 | 468 | 50 | 36 | 1 | 362 | 16 | 910 | 77 |
| 66,413 | 44 | 10 | 464 | 50 | 36 | 1 | 362 | 16 | 906 | 77 |
| 66,414 | 44 | 11 | 466 | 50 | 36 | 1 | 363 | 17 | 909 | 79 |
| 66,415 | 44 | 11 | 466 | 50 | 36 | 1 | 361 | 17 | 907 | 79 |
| 66,416 | 44 | 11 | 471 | 51 | 36 | 1 | 360 | 17 | 911 | 80 |
| 66,417 | 62 | 11 | 519 | 51 | 36 | 1 | 371 | 17 | 988 | 80 |
| 66,418 | 62 | 11 | 518 | 52 | 36 | 1 | 371 | 17 | 987 | 81 |
| 66,419 | 63 | 11 | 525 | 55 | 36 | 1 | 375 | 17 | 999 | 84 |
| 66,420 | 64 | 12 | 522 | 55 | 36 | 1 | 367 | 16 | 989 | 84 |
| 66,421 | 62 | 12 | 491 | 55 | 36 | 1 | 361 | 16 | 950 | 84 |
| 66,422 | 59 | 11 | 475 | 50 | 34 | 1 | 336 | 12 | 904 | 74 |
| 66,423 | 59 | 11 | 459 | 50 | 34 | 1 | 332 | 16 | 884 | 78 |
| 66,424 | 59 | 11 | 450 | 51 | 33 | 1 | 305 | 16 | 847 | 79 |
| 66,425 | 58 | 10 | 456 | 51 | 35 | 1 | 307 | 15 | 856 | 77 |
| 66,426 | 58 | 10 | 451 | 50 | 34 | 1 | 299 | 15 | 842 | 76 |
| 66,427 | 58 | 10 | 449 | 50 | 34 | 1 | 293 | 16 | 834 | 77 |
| 66,428 | 58 | 9  | 448 | 50 | 33 | 1 | 291 | 16 | 830 | 76 |
| 66,429 | 58 | 9  | 447 | 51 | 33 | 2 | 289 | 16 | 827 | 78 |
| 66,430 | 58 | 9  | 447 | 50 | 33 | 2 | 289 | 16 | 827 | 77 |
| 66,431 | 58 | 9  | 447 | 52 | 33 | 2 | 289 | 16 | 827 | 79 |
| 66,432 | 58 | 9  | 447 | 53 | 33 | 2 | 289 | 16 | 827 | 80 |
| 66,433 | 58 | 9  | 442 | 58 | 33 | 2 | 288 | 17 | 821 | 86 |
| 66,434 | 57 | 9  | 442 | 57 | 33 | 2 | 288 | 19 | 820 | 87 |
| 66,435 | 58 | 9  | 443 | 58 | 33 | 2 | 289 | 19 | 823 | 88 |
| 66,436 | 58 | 9  | 441 | 56 | 33 | 2 | 288 | 19 | 820 | 86 |
| 66,437 | 58 | 8  | 438 | 41 | 32 | 2 | 285 | 17 | 813 | 68 |
| 66,438 | 58 | 8  | 431 | 41 | 32 | 2 | 282 | 17 | 803 | 68 |
| 66,439 | 58 | 8  | 427 | 39 | 32 | 3 | 274 | 17 | 791 | 67 |
| 66,440 | 58 | 8  | 427 | 39 | 32 | 3 | 274 | 17 | 791 | 67 |
| 66,441 | 58 | 8  | 427 | 42 | 31 | 3 | 274 | 17 | 790 | 70 |
| 66,442 | 58 | 8  | 427 | 46 | 32 | 5 | 274 | 17 | 791 | 76 |
| 66,443 | 58 | 8  | 426 | 53 | 32 | 5 | 273 | 20 | 789 | 86 |
| 66,444 | 58 | 7  | 406 | 53 | 29 | 5 | 261 | 19 | 754 | 84 |
| 66,445 | 49 | 7  | 356 | 53 | 23 | 5 | 237 | 19 | 665 | 84 |
| 66,446 | 36 | 7  | 254 | 53 | 9  | 5 | 116 | 19 | 415 | 84 |
| 66,447 | 29 | 7  | 157 | 53 | 3  | 5 | 56  | 19 | 245 | 84 |
| 66,448 | 29 | 7  | 150 | 53 | 3  | 5 | 49  | 19 | 231 | 84 |
| 66,449 | 29 | 7  | 154 | 53 | 3  | 5 | 44  | 19 | 230 | 84 |

|        |    |   |     |    |   |   |    |    |     |    |
|--------|----|---|-----|----|---|---|----|----|-----|----|
| 66,450 | 31 | 8 | 158 | 53 | 3 | 5 | 47 | 19 | 239 | 85 |
| 66,451 | 33 | 8 | 157 | 53 | 3 | 5 | 48 | 19 | 241 | 85 |
| 66,452 | 33 | 7 | 156 | 48 | 3 | 5 | 50 | 17 | 242 | 77 |
| 66,453 | 33 | 7 | 161 | 48 | 4 | 5 | 55 | 17 | 253 | 77 |
| 66,454 | 33 | 7 | 158 | 48 | 4 | 5 | 54 | 17 | 249 | 77 |
| 66,455 | 33 | 6 | 156 | 46 | 4 | 5 | 53 | 17 | 246 | 74 |
| 66,456 | 33 | 6 | 155 | 46 | 4 | 5 | 53 | 17 | 245 | 74 |
| 66,457 | 32 | 3 | 156 | 39 | 4 | 4 | 53 | 16 | 245 | 62 |
| 66,458 | 32 | 3 | 155 | 39 | 4 | 4 | 53 | 16 | 244 | 62 |
| 66,459 | 30 | 3 | 150 | 34 | 4 | 4 | 54 | 15 | 238 | 56 |
| 66,460 | 30 | 3 | 149 | 34 | 4 | 4 | 57 | 15 | 240 | 56 |
| 66,461 | 30 | 3 | 148 | 34 | 4 | 4 | 57 | 15 | 239 | 56 |
| 66,462 | 29 | 3 | 141 | 33 | 4 | 4 | 57 | 15 | 231 | 55 |
| 66,463 | 29 | 3 | 141 | 33 | 4 | 4 | 57 | 15 | 231 | 55 |
| 66,464 | 29 | 2 | 139 | 33 | 4 | 4 | 58 | 14 | 230 | 53 |
| 66,465 | 29 | 2 | 138 | 33 | 4 | 4 | 58 | 14 | 229 | 53 |
| 66,466 | 29 | 2 | 130 | 33 | 4 | 4 | 58 | 15 | 221 | 54 |
| 66,467 | 11 | 2 | 79  | 32 | 4 | 4 | 47 | 15 | 141 | 53 |
| 66,468 | 11 | 2 | 79  | 32 | 4 | 4 | 47 | 17 | 141 | 55 |
| 66,469 | 11 | 3 | 73  | 36 | 4 | 5 | 43 | 26 | 131 | 70 |
| 66,470 | 10 | 3 | 66  | 33 | 4 | 5 | 43 | 26 | 123 | 67 |
| 66,471 | 9  | 2 | 61  | 41 | 4 | 5 | 43 | 31 | 117 | 79 |
| 66,472 | 9  | 2 | 59  | 41 | 4 | 5 | 36 | 31 | 108 | 79 |
| 66,473 | 9  | 2 | 49  | 41 | 4 | 5 | 35 | 31 | 97  | 79 |
| 66,474 | 6  | 2 | 38  | 40 | 4 | 5 | 25 | 27 | 73  | 74 |
| 66,475 | 6  | 2 | 38  | 40 | 4 | 5 | 24 | 27 | 72  | 74 |
| 66,476 | 6  | 2 | 29  | 40 | 2 | 5 | 21 | 27 | 58  | 74 |
| 66,477 | 6  | 2 | 28  | 40 | 2 | 5 | 20 | 27 | 56  | 74 |
| 66,478 | 6  | 2 | 28  | 40 | 2 | 5 | 20 | 26 | 56  | 73 |
| 66,479 | 6  | 2 | 28  | 39 | 2 | 4 | 20 | 26 | 56  | 71 |
| 66,480 | 6  | 2 | 28  | 39 | 2 | 4 | 20 | 26 | 56  | 71 |
| 66,481 | 6  | 2 | 28  | 37 | 2 | 4 | 20 | 26 | 56  | 69 |
| 66,482 | 6  | 2 | 28  | 36 | 2 | 4 | 20 | 26 | 56  | 68 |
| 66,483 | 6  | 2 | 27  | 31 | 2 | 4 | 20 | 25 | 55  | 62 |
| 66,484 | 6  | 2 | 28  | 31 | 2 | 4 | 21 | 25 | 57  | 62 |
| 66,485 | 5  | 2 | 27  | 30 | 2 | 4 | 19 | 23 | 53  | 59 |
| 66,486 | 5  | 2 | 27  | 30 | 2 | 4 | 19 | 23 | 53  | 59 |
| 66,487 | 5  | 2 | 29  | 30 | 2 | 4 | 19 | 23 | 55  | 59 |
| 66,488 | 5  | 2 | 28  | 30 | 2 | 4 | 19 | 22 | 54  | 58 |
| 66,489 | 5  | 2 | 29  | 30 | 2 | 3 | 20 | 22 | 56  | 57 |
| 66,490 | 5  | 3 | 29  | 30 | 2 | 3 | 20 | 22 | 56  | 58 |

|        |   |   |    |    |   |   |    |    |    |     |
|--------|---|---|----|----|---|---|----|----|----|-----|
| 66,491 | 5 | 3 | 30 | 27 | 2 | 3 | 20 | 22 | 57 | 55  |
| 66,492 | 5 | 3 | 31 | 23 | 2 | 1 | 20 | 23 | 58 | 50  |
| 66,493 | 5 | 3 | 31 | 23 | 1 | 1 | 20 | 23 | 57 | 50  |
| 66,494 | 5 | 3 | 33 | 16 | 1 | 1 | 23 | 20 | 62 | 40  |
| 66,495 | 5 | 3 | 33 | 17 | 1 | 1 | 23 | 20 | 62 | 41  |
| 66,496 | 5 | 3 | 30 | 17 | 1 | 1 | 23 | 19 | 59 | 40  |
| 66,497 | 5 | 3 | 30 | 18 | 1 | 1 | 23 | 19 | 59 | 41  |
| 66,498 | 4 | 3 | 28 | 19 | 1 | 1 | 23 | 19 | 56 | 42  |
| 66,499 | 4 | 3 | 27 | 20 | 1 | 1 | 23 | 19 | 55 | 43  |
| 66,500 | 2 | 3 | 24 | 20 | 1 | 1 | 20 | 19 | 47 | 43  |
| 66,501 | 2 | 2 | 23 | 21 | 1 | 1 | 20 | 20 | 46 | 44  |
| 66,502 | 0 | 2 | 23 | 21 | 1 | 1 | 19 | 19 | 43 | 43  |
| 66,503 | 0 | 3 | 23 | 23 | 1 | 1 | 17 | 19 | 41 | 46  |
| 66,504 | 0 | 3 | 18 | 24 | 0 | 1 | 12 | 19 | 30 | 47  |
| 66,505 | 0 | 3 | 19 | 25 | 0 | 1 | 12 | 19 | 31 | 48  |
| 66,506 | 0 | 3 | 19 | 26 | 0 | 1 | 12 | 19 | 31 | 49  |
| 66,507 | 0 | 3 | 17 | 27 | 0 | 1 | 12 | 19 | 29 | 50  |
| 66,508 | 0 | 3 | 18 | 27 | 0 | 1 | 12 | 20 | 30 | 51  |
| 66,509 | 0 | 3 | 15 | 27 | 0 | 1 | 11 | 20 | 26 | 51  |
| 66,510 | 0 | 3 | 15 | 27 | 0 | 1 | 11 | 20 | 26 | 51  |
| 66,511 | 0 | 3 | 15 | 27 | 0 | 1 | 8  | 20 | 23 | 51  |
| 66,512 | 0 | 3 | 13 | 29 | 0 | 1 | 8  | 20 | 21 | 53  |
| 66,513 | 0 | 3 | 13 | 31 | 0 | 1 | 8  | 27 | 21 | 62  |
| 66,514 | 0 | 3 | 13 | 34 | 0 | 1 | 8  | 35 | 21 | 73  |
| 66,515 | 0 | 3 | 13 | 39 | 0 | 1 | 6  | 37 | 19 | 80  |
| 66,516 | 0 | 5 | 13 | 53 | 0 | 1 | 6  | 58 | 19 | 117 |
| 66,517 | 0 | 5 | 13 | 54 | 0 | 1 | 6  | 58 | 19 | 118 |
| 66,518 | 0 | 7 | 14 | 66 | 0 | 1 | 6  | 65 | 20 | 139 |
| 66,519 | 0 | 7 | 14 | 67 | 0 | 1 | 6  | 63 | 20 | 138 |
| 66,520 | 0 | 6 | 14 | 64 | 0 | 0 | 6  | 55 | 20 | 125 |
| 66,521 | 0 | 6 | 14 | 66 | 0 | 1 | 6  | 58 | 20 | 131 |
| 66,522 | 0 | 6 | 14 | 59 | 0 | 1 | 6  | 53 | 20 | 119 |
| 66,523 | 0 | 6 | 14 | 59 | 0 | 1 | 6  | 53 | 20 | 119 |
| 66,524 | 0 | 6 | 14 | 59 | 0 | 1 | 6  | 53 | 20 | 119 |
| 66,525 | 0 | 6 | 14 | 59 | 0 | 1 | 9  | 54 | 23 | 120 |
| 66,526 | 0 | 6 | 14 | 60 | 0 | 1 | 9  | 55 | 23 | 122 |
| 66,527 | 0 | 6 | 14 | 60 | 0 | 1 | 9  | 55 | 23 | 122 |
| 66,528 | 0 | 7 | 14 | 61 | 0 | 1 | 10 | 55 | 24 | 124 |
| 66,529 | 0 | 7 | 14 | 62 | 0 | 1 | 10 | 55 | 24 | 125 |
| 66,530 | 0 | 8 | 14 | 69 | 0 | 2 | 11 | 70 | 25 | 149 |
| 66,531 | 0 | 8 | 14 | 82 | 0 | 2 | 11 | 79 | 25 | 171 |

|        |   |    |    |     |   |   |    |     |    |     |
|--------|---|----|----|-----|---|---|----|-----|----|-----|
| 66,532 | 0 | 8  | 14 | 94  | 0 | 2 | 11 | 85  | 25 | 189 |
| 66,533 | 0 | 8  | 14 | 120 | 0 | 3 | 11 | 120 | 25 | 251 |
| 66,534 | 0 | 10 | 14 | 151 | 0 | 4 | 11 | 129 | 25 | 294 |
| 66,535 | 0 | 10 | 13 | 152 | 0 | 4 | 10 | 131 | 23 | 297 |
| 66,536 | 1 | 10 | 13 | 155 | 0 | 4 | 10 | 131 | 24 | 300 |
| 66,537 | 1 | 10 | 12 | 155 | 0 | 4 | 11 | 131 | 24 | 300 |
| 66,538 | 1 | 10 | 11 | 155 | 0 | 4 | 11 | 132 | 23 | 301 |
| 66,539 | 1 | 10 | 10 | 155 | 0 | 4 | 10 | 132 | 21 | 301 |
| 66,540 | 1 | 9  | 11 | 156 | 0 | 4 | 10 | 132 | 22 | 301 |
| 66,541 | 1 | 9  | 11 | 156 | 0 | 4 | 10 | 133 | 22 | 302 |
| 66,542 | 1 | 9  | 10 | 156 | 0 | 4 | 10 | 133 | 21 | 302 |
| 66,543 | 1 | 10 | 9  | 156 | 0 | 4 | 10 | 132 | 20 | 302 |
| 66,544 | 1 | 10 | 9  | 157 | 0 | 4 | 11 | 133 | 21 | 304 |
| 66,545 | 1 | 10 | 8  | 157 | 0 | 4 | 9  | 133 | 18 | 304 |
| 66,546 | 1 | 10 | 8  | 157 | 0 | 4 | 9  | 133 | 18 | 304 |
| 66,547 | 1 | 10 | 8  | 157 | 0 | 4 | 9  | 133 | 18 | 304 |
| 66,548 | 1 | 10 | 8  | 160 | 0 | 4 | 9  | 135 | 18 | 309 |
| 66,549 | 1 | 10 | 8  | 159 | 0 | 4 | 9  | 135 | 18 | 308 |
| 66,550 | 1 | 10 | 5  | 158 | 0 | 4 | 9  | 135 | 15 | 307 |
| 66,551 | 1 | 10 | 5  | 158 | 0 | 4 | 9  | 136 | 15 | 308 |
| 66,552 | 1 | 10 | 5  | 157 | 0 | 4 | 10 | 135 | 16 | 306 |
| 66,553 | 1 | 10 | 5  | 157 | 0 | 4 | 10 | 135 | 16 | 306 |
| 66,554 | 1 | 9  | 4  | 155 | 1 | 4 | 10 | 135 | 16 | 303 |
| 66,555 | 1 | 9  | 4  | 154 | 1 | 4 | 10 | 135 | 16 | 302 |
| 66,556 | 1 | 9  | 5  | 153 | 1 | 4 | 12 | 135 | 19 | 301 |
| 66,557 | 1 | 11 | 5  | 152 | 2 | 4 | 12 | 135 | 20 | 302 |
| 66,558 | 1 | 11 | 5  | 151 | 2 | 4 | 12 | 135 | 20 | 301 |
| 66,559 | 1 | 11 | 4  | 149 | 2 | 4 | 12 | 132 | 19 | 296 |
| 66,560 | 1 | 11 | 4  | 150 | 2 | 4 | 12 | 134 | 19 | 299 |
| 66,561 | 1 | 11 | 5  | 150 | 2 | 4 | 12 | 134 | 20 | 299 |
| 66,562 | 1 | 11 | 5  | 150 | 2 | 4 | 13 | 134 | 21 | 299 |
| 66,563 | 1 | 11 | 5  | 150 | 2 | 4 | 13 | 134 | 21 | 299 |
| 66,564 | 1 | 11 | 5  | 150 | 2 | 4 | 13 | 128 | 21 | 293 |
| 66,565 | 1 | 11 | 5  | 149 | 2 | 4 | 14 | 123 | 22 | 287 |
| 66,566 | 1 | 11 | 4  | 152 | 2 | 4 | 14 | 128 | 21 | 295 |
| 66,567 | 1 | 9  | 4  | 140 | 2 | 4 | 14 | 108 | 21 | 261 |
| 66,568 | 1 | 9  | 4  | 142 | 2 | 4 | 14 | 107 | 21 | 262 |
| 66,569 | 1 | 7  | 4  | 132 | 2 | 4 | 14 | 102 | 21 | 245 |
| 66,570 | 1 | 7  | 4  | 132 | 2 | 4 | 14 | 103 | 21 | 246 |
| 66,571 | 1 | 8  | 4  | 134 | 2 | 4 | 14 | 104 | 21 | 250 |
| 66,572 | 1 | 9  | 4  | 146 | 2 | 5 | 14 | 107 | 21 | 267 |



|        |   |    |    |     |    |   |    |     |     |     |
|--------|---|----|----|-----|----|---|----|-----|-----|-----|
| 66,573 | 1 | 9  | 4  | 146 | 2  | 5 | 14 | 107 | 21  | 267 |
| 66,574 | 1 | 9  | 4  | 148 | 2  | 5 | 14 | 108 | 21  | 270 |
| 66,575 | 1 | 9  | 4  | 150 | 2  | 5 | 11 | 106 | 18  | 270 |
| 66,576 | 1 | 9  | 4  | 149 | 2  | 5 | 11 | 105 | 18  | 268 |
| 66,577 | 1 | 9  | 6  | 152 | 2  | 5 | 10 | 108 | 19  | 274 |
| 66,578 | 1 | 10 | 6  | 162 | 2  | 5 | 10 | 113 | 19  | 290 |
| 66,579 | 1 | 9  | 7  | 173 | 2  | 5 | 10 | 119 | 20  | 306 |
| 66,580 | 1 | 9  | 9  | 174 | 2  | 5 | 12 | 122 | 24  | 310 |
| 66,581 | 1 | 8  | 9  | 167 | 2  | 4 | 12 | 109 | 24  | 288 |
| 66,582 | 1 | 12 | 16 | 180 | 3  | 4 | 16 | 109 | 36  | 305 |
| 66,583 | 1 | 12 | 16 | 167 | 3  | 4 | 16 | 101 | 36  | 284 |
| 66,584 | 1 | 12 | 21 | 145 | 3  | 3 | 17 | 71  | 42  | 231 |
| 66,585 | 1 | 10 | 21 | 116 | 3  | 2 | 18 | 60  | 43  | 188 |
| 66,586 | 1 | 10 | 25 | 115 | 6  | 2 | 22 | 58  | 54  | 185 |
| 66,587 | 2 | 11 | 34 | 116 | 7  | 2 | 35 | 63  | 78  | 192 |
| 66,588 | 2 | 11 | 34 | 116 | 7  | 2 | 34 | 63  | 77  | 192 |
| 66,589 | 4 | 11 | 46 | 117 | 8  | 2 | 55 | 62  | 113 | 192 |
| 66,590 | 4 | 11 | 47 | 117 | 10 | 2 | 56 | 62  | 117 | 192 |
| 66,591 | 4 | 11 | 47 | 116 | 10 | 2 | 55 | 61  | 116 | 190 |
| 66,592 | 4 | 11 | 47 | 117 | 10 | 2 | 55 | 61  | 116 | 191 |
| 66,593 | 4 | 11 | 47 | 117 | 10 | 2 | 55 | 61  | 116 | 191 |
| 66,594 | 4 | 10 | 47 | 118 | 10 | 2 | 55 | 61  | 116 | 191 |
| 66,595 | 4 | 10 | 46 | 117 | 10 | 2 | 54 | 60  | 114 | 189 |
| 66,596 | 4 | 10 | 50 | 116 | 10 | 2 | 53 | 60  | 117 | 188 |
| 66,597 | 4 | 10 | 50 | 116 | 10 | 2 | 53 | 60  | 117 | 188 |
| 66,598 | 4 | 10 | 50 | 115 | 10 | 2 | 53 | 60  | 117 | 187 |
| 66,599 | 4 | 10 | 51 | 112 | 10 | 2 | 51 | 58  | 116 | 182 |
| 66,600 | 4 | 10 | 51 | 113 | 10 | 2 | 51 | 58  | 116 | 183 |
| 66,601 | 4 | 10 | 51 | 113 | 10 | 2 | 52 | 57  | 117 | 182 |
| 66,602 | 4 | 10 | 51 | 113 | 10 | 2 | 52 | 57  | 117 | 182 |
| 66,603 | 4 | 10 | 51 | 113 | 9  | 2 | 52 | 57  | 116 | 182 |
| 66,604 | 4 | 10 | 51 | 113 | 9  | 2 | 52 | 57  | 116 | 182 |
| 66,605 | 4 | 10 | 51 | 113 | 9  | 2 | 52 | 57  | 116 | 182 |
| 66,606 | 6 | 8  | 58 | 114 | 11 | 2 | 57 | 56  | 132 | 180 |
| 66,607 | 6 | 8  | 60 | 115 | 11 | 2 | 59 | 56  | 136 | 181 |
| 66,608 | 6 | 8  | 60 | 115 | 10 | 2 | 60 | 59  | 136 | 184 |
| 66,609 | 6 | 8  | 60 | 116 | 10 | 2 | 61 | 59  | 137 | 185 |
| 66,610 | 7 | 9  | 62 | 124 | 10 | 2 | 61 | 67  | 140 | 202 |
| 66,611 | 7 | 12 | 61 | 135 | 10 | 2 | 62 | 72  | 140 | 221 |
| 66,612 | 7 | 12 | 61 | 157 | 10 | 2 | 61 | 84  | 139 | 255 |
| 66,613 | 7 | 12 | 61 | 159 | 10 | 2 | 61 | 85  | 139 | 258 |

|        |    |    |    |     |    |    |    |     |     |     |
|--------|----|----|----|-----|----|----|----|-----|-----|-----|
| 66,614 | 7  | 12 | 61 | 161 | 10 | 2  | 61 | 85  | 139 | 260 |
| 66,615 | 8  | 12 | 65 | 157 | 10 | 2  | 63 | 81  | 146 | 252 |
| 66,616 | 12 | 12 | 67 | 147 | 10 | 2  | 64 | 74  | 153 | 235 |
| 66,617 | 12 | 12 | 69 | 151 | 10 | 2  | 64 | 75  | 155 | 240 |
| 66,618 | 12 | 12 | 69 | 152 | 10 | 2  | 64 | 76  | 155 | 242 |
| 66,619 | 13 | 14 | 69 | 153 | 10 | 3  | 68 | 75  | 160 | 245 |
| 66,620 | 13 | 14 | 69 | 155 | 10 | 3  | 68 | 75  | 160 | 247 |
| 66,621 | 13 | 14 | 69 | 159 | 10 | 3  | 68 | 74  | 160 | 250 |
| 66,622 | 13 | 14 | 69 | 156 | 10 | 3  | 68 | 74  | 160 | 247 |
| 66,623 | 13 | 13 | 69 | 143 | 10 | 1  | 68 | 69  | 160 | 226 |
| 66,624 | 13 | 13 | 69 | 139 | 10 | 1  | 68 | 69  | 160 | 222 |
| 66,625 | 13 | 13 | 69 | 139 | 10 | 1  | 68 | 69  | 160 | 222 |
| 66,626 | 13 | 13 | 71 | 140 | 10 | 1  | 68 | 69  | 162 | 223 |
| 66,627 | 13 | 13 | 71 | 140 | 10 | 1  | 68 | 69  | 162 | 223 |
| 66,628 | 13 | 12 | 69 | 127 | 10 | 1  | 68 | 63  | 160 | 203 |
| 66,629 | 14 | 12 | 69 | 123 | 10 | 1  | 68 | 58  | 161 | 194 |
| 66,630 | 15 | 13 | 68 | 141 | 10 | 4  | 69 | 70  | 162 | 228 |
| 66,631 | 15 | 13 | 66 | 140 | 10 | 4  | 66 | 71  | 157 | 228 |
| 66,632 | 15 | 17 | 65 | 162 | 9  | 4  | 66 | 89  | 155 | 272 |
| 66,633 | 15 | 23 | 59 | 195 | 9  | 7  | 62 | 130 | 145 | 355 |
| 66,634 | 15 | 23 | 54 | 201 | 9  | 7  | 61 | 131 | 139 | 362 |
| 66,635 | 16 | 24 | 73 | 210 | 11 | 9  | 72 | 143 | 172 | 386 |
| 66,636 | 21 | 26 | 76 | 224 | 12 | 9  | 76 | 146 | 185 | 405 |
| 66,637 | 21 | 29 | 79 | 285 | 9  | 13 | 82 | 169 | 191 | 496 |
| 66,638 | 23 | 29 | 76 | 305 | 8  | 13 | 74 | 172 | 181 | 519 |
| 66,639 | 23 | 29 | 74 | 325 | 8  | 13 | 67 | 172 | 172 | 539 |
| 66,640 | 21 | 29 | 66 | 326 | 7  | 13 | 55 | 174 | 149 | 542 |
| 66,641 | 21 | 29 | 65 | 330 | 5  | 13 | 54 | 175 | 145 | 547 |
| 66,642 | 21 | 29 | 64 | 329 | 5  | 13 | 54 | 175 | 144 | 546 |
| 66,643 | 21 | 29 | 64 | 329 | 5  | 13 | 54 | 175 | 144 | 546 |
| 66,644 | 21 | 29 | 64 | 329 | 5  | 14 | 54 | 179 | 144 | 551 |
| 66,645 | 21 | 29 | 63 | 333 | 5  | 14 | 54 | 180 | 143 | 556 |
| 66,646 | 21 | 29 | 60 | 336 | 5  | 14 | 54 | 181 | 140 | 560 |
| 66,647 | 21 | 29 | 60 | 336 | 5  | 14 | 55 | 184 | 141 | 563 |
| 66,648 | 21 | 29 | 60 | 337 | 5  | 14 | 55 | 184 | 141 | 564 |
| 66,649 | 21 | 33 | 60 | 361 | 5  | 15 | 55 | 193 | 141 | 602 |
| 66,650 | 21 | 33 | 59 | 364 | 5  | 15 | 55 | 199 | 140 | 611 |
| 66,651 | 21 | 33 | 59 | 364 | 5  | 15 | 55 | 199 | 140 | 611 |
| 66,652 | 21 | 33 | 61 | 367 | 5  | 15 | 55 | 200 | 142 | 615 |
| 66,653 | 21 | 33 | 61 | 369 | 5  | 15 | 55 | 201 | 142 | 618 |
| 66,654 | 21 | 33 | 66 | 371 | 5  | 15 | 56 | 201 | 148 | 620 |

|        |    |    |    |     |   |    |    |     |     |     |
|--------|----|----|----|-----|---|----|----|-----|-----|-----|
| 66,655 | 21 | 33 | 66 | 370 | 5 | 15 | 56 | 204 | 148 | 622 |
| 66,656 | 21 | 33 | 65 | 370 | 5 | 15 | 57 | 204 | 148 | 622 |
| 66,657 | 19 | 33 | 59 | 370 | 3 | 15 | 50 | 204 | 131 | 622 |
| 66,658 | 19 | 33 | 57 | 369 | 3 | 15 | 48 | 205 | 127 | 622 |
| 66,659 | 19 | 33 | 57 | 368 | 3 | 16 | 49 | 202 | 128 | 619 |
| 66,660 | 19 | 33 | 57 | 368 | 3 | 16 | 48 | 202 | 127 | 619 |
| 66,661 | 18 | 32 | 55 | 360 | 3 | 16 | 49 | 194 | 125 | 602 |
| 66,662 | 18 | 31 | 55 | 343 | 3 | 16 | 48 | 191 | 124 | 581 |
| 66,663 | 18 | 32 | 55 | 362 | 3 | 16 | 49 | 206 | 125 | 616 |
| 66,664 | 18 | 32 | 63 | 383 | 3 | 17 | 49 | 218 | 133 | 650 |
| 66,665 | 19 | 33 | 63 | 401 | 3 | 17 | 50 | 227 | 135 | 678 |
| 66,666 | 18 | 34 | 60 | 402 | 3 | 17 | 47 | 227 | 128 | 680 |
| 66,667 | 14 | 34 | 65 | 396 | 5 | 17 | 50 | 225 | 134 | 672 |
| 66,668 | 14 | 34 | 64 | 396 | 5 | 17 | 50 | 225 | 133 | 672 |
| 66,669 | 13 | 32 | 66 | 391 | 5 | 16 | 48 | 225 | 132 | 664 |
| 66,670 | 13 | 32 | 66 | 391 | 5 | 16 | 48 | 225 | 132 | 664 |
| 66,671 | 13 | 32 | 66 | 389 | 5 | 16 | 49 | 225 | 133 | 662 |
| 66,672 | 13 | 32 | 70 | 385 | 5 | 16 | 50 | 225 | 138 | 658 |
| 66,673 | 13 | 31 | 70 | 384 | 5 | 16 | 50 | 223 | 138 | 654 |
| 66,674 | 13 | 31 | 71 | 384 | 5 | 16 | 51 | 221 | 140 | 652 |
| 66,675 | 13 | 31 | 71 | 386 | 5 | 16 | 51 | 221 | 140 | 654 |
| 66,676 | 13 | 31 | 74 | 387 | 5 | 16 | 52 | 222 | 144 | 656 |
| 66,677 | 13 | 31 | 77 | 389 | 5 | 16 | 54 | 223 | 149 | 659 |
| 66,678 | 13 | 31 | 77 | 389 | 5 | 16 | 54 | 223 | 149 | 659 |
| 66,679 | 14 | 30 | 77 | 363 | 5 | 13 | 58 | 206 | 154 | 612 |
| 66,680 | 13 | 30 | 77 | 378 | 5 | 13 | 59 | 211 | 154 | 632 |
| 66,681 | 12 | 30 | 77 | 379 | 5 | 13 | 58 | 214 | 152 | 636 |
| 66,682 | 13 | 26 | 78 | 359 | 5 | 13 | 58 | 196 | 154 | 594 |
| 66,683 | 13 | 28 | 78 | 375 | 5 | 13 | 58 | 209 | 154 | 625 |
| 66,684 | 12 | 19 | 77 | 318 | 5 | 8  | 58 | 160 | 152 | 505 |
| 66,685 | 12 | 22 | 75 | 442 | 5 | 13 | 57 | 186 | 149 | 663 |
| 66,686 | 12 | 34 | 59 | 517 | 3 | 14 | 47 | 222 | 121 | 787 |
| 66,687 | 7  | 32 | 56 | 515 | 2 | 14 | 43 | 225 | 108 | 786 |
| 66,688 | 7  | 29 | 50 | 457 | 2 | 10 | 33 | 203 | 92  | 699 |
| 66,689 | 3  | 29 | 44 | 417 | 2 | 10 | 29 | 199 | 78  | 655 |
| 66,690 | 3  | 31 | 43 | 431 | 2 | 11 | 28 | 210 | 76  | 683 |
| 66,691 | 3  | 31 | 43 | 460 | 2 | 11 | 26 | 224 | 74  | 726 |
| 66,692 | 3  | 33 | 43 | 490 | 2 | 11 | 26 | 230 | 74  | 764 |
| 66,693 | 3  | 34 | 43 | 492 | 2 | 11 | 26 | 230 | 74  | 767 |
| 66,694 | 3  | 35 | 43 | 498 | 2 | 11 | 26 | 233 | 74  | 777 |
| 66,695 | 3  | 36 | 46 | 497 | 2 | 10 | 26 | 230 | 77  | 773 |

|        |   |    |    |     |   |    |    |     |    |     |
|--------|---|----|----|-----|---|----|----|-----|----|-----|
| 66,696 | 3 | 36 | 46 | 496 | 2 | 10 | 26 | 232 | 77 | 774 |
| 66,697 | 3 | 36 | 46 | 496 | 2 | 10 | 26 | 232 | 77 | 774 |
| 66,698 | 3 | 36 | 46 | 502 | 2 | 10 | 25 | 229 | 76 | 777 |
| 66,699 | 3 | 36 | 46 | 501 | 2 | 10 | 25 | 229 | 76 | 776 |
| 66,700 | 3 | 32 | 46 | 476 | 2 | 9  | 25 | 214 | 76 | 731 |
| 66,701 | 3 | 32 | 46 | 476 | 2 | 9  | 25 | 214 | 76 | 731 |
| 66,702 | 3 | 33 | 44 | 475 | 2 | 9  | 25 | 214 | 74 | 731 |
| 66,703 | 3 | 33 | 44 | 470 | 2 | 9  | 25 | 214 | 74 | 726 |
| 66,704 | 3 | 33 | 44 | 473 | 2 | 9  | 25 | 214 | 74 | 729 |
| 66,705 | 3 | 33 | 39 | 471 | 2 | 9  | 24 | 214 | 68 | 727 |
| 66,706 | 3 | 33 | 39 | 471 | 2 | 9  | 24 | 211 | 68 | 724 |
| 66,707 | 3 | 37 | 39 | 477 | 2 | 9  | 23 | 224 | 67 | 747 |
| 66,708 | 3 | 38 | 38 | 478 | 2 | 9  | 24 | 223 | 67 | 748 |
| 66,709 | 3 | 38 | 40 | 480 | 2 | 8  | 24 | 223 | 69 | 749 |
| 66,710 | 3 | 38 | 40 | 481 | 2 | 8  | 22 | 224 | 67 | 751 |
| 66,711 | 4 | 38 | 42 | 482 | 2 | 8  | 26 | 224 | 74 | 752 |
| 66,712 | 4 | 36 | 42 | 466 | 2 | 8  | 27 | 211 | 75 | 721 |
| 66,713 | 4 | 35 | 42 | 454 | 2 | 8  | 27 | 196 | 75 | 693 |
| 66,714 | 4 | 35 | 43 | 461 | 2 | 8  | 26 | 198 | 75 | 702 |
| 66,715 | 4 | 35 | 35 | 441 | 2 | 7  | 26 | 186 | 67 | 669 |
| 66,716 | 3 | 34 | 34 | 421 | 2 | 7  | 25 | 177 | 64 | 639 |
| 66,717 | 3 | 33 | 34 | 421 | 2 | 7  | 25 | 179 | 64 | 640 |
| 66,718 | 3 | 34 | 26 | 422 | 0 | 7  | 20 | 181 | 49 | 644 |
| 66,719 | 3 | 34 | 24 | 422 | 0 | 7  | 19 | 181 | 46 | 644 |
| 66,720 | 3 | 35 | 24 | 424 | 0 | 8  | 19 | 190 | 46 | 657 |
| 66,721 | 3 | 35 | 24 | 424 | 0 | 8  | 18 | 190 | 45 | 657 |
| 66,722 | 3 | 36 | 21 | 424 | 0 | 8  | 17 | 190 | 41 | 658 |
| 66,723 | 3 | 36 | 20 | 427 | 0 | 8  | 17 | 194 | 40 | 665 |
| 66,724 | 3 | 36 | 20 | 428 | 0 | 8  | 17 | 195 | 40 | 667 |
| 66,725 | 3 | 36 | 19 | 426 | 0 | 8  | 16 | 196 | 38 | 666 |
| 66,726 | 3 | 36 | 16 | 424 | 0 | 8  | 15 | 195 | 34 | 663 |
| 66,727 | 3 | 36 | 17 | 424 | 0 | 8  | 14 | 195 | 34 | 663 |
| 66,728 | 3 | 36 | 13 | 419 | 0 | 8  | 13 | 196 | 29 | 659 |
| 66,729 | 2 | 36 | 13 | 433 | 0 | 8  | 13 | 202 | 28 | 679 |
| 66,730 | 2 | 37 | 13 | 494 | 0 | 12 | 9  | 251 | 24 | 794 |
| 66,731 | 2 | 37 | 13 | 494 | 0 | 12 | 8  | 257 | 23 | 800 |
| 66,732 | 1 | 37 | 13 | 493 | 0 | 12 | 8  | 255 | 22 | 797 |
| 66,733 | 1 | 37 | 12 | 499 | 0 | 12 | 8  | 252 | 21 | 800 |
| 66,734 | 1 | 36 | 12 | 487 | 0 | 12 | 8  | 245 | 21 | 780 |
| 66,735 | 1 | 34 | 12 | 467 | 0 | 12 | 7  | 232 | 20 | 745 |
| 66,736 | 1 | 32 | 12 | 344 | 0 | 7  | 7  | 207 | 20 | 590 |

|        |   |     |    |       |   |     |    |       |     |       |
|--------|---|-----|----|-------|---|-----|----|-------|-----|-------|
| 66,737 | 1 | 21  | 12 | 256   | 0 | 6   | 7  | 164   | 20  | 447   |
| 66,738 | 1 | 21  | 12 | 258   | 0 | 6   | 7  | 164   | 20  | 449   |
| 66,739 | 1 | 19  | 11 | 245   | 0 | 6   | 7  | 150   | 19  | 420   |
| 66,740 | 1 | 23  | 11 | 308   | 0 | 10  | 7  | 169   | 19  | 510   |
| 66,741 | 1 | 26  | 10 | 367   | 0 | 14  | 7  | 208   | 18  | 615   |
| 66,742 | 1 | 29  | 11 | 352   | 0 | 16  | 7  | 216   | 19  | 613   |
| 66,743 | 1 | 53  | 11 | 747   | 0 | 44  | 7  | 392   | 19  | 1,236 |
| 66,744 | 1 | 54  | 11 | 762   | 0 | 44  | 7  | 401   | 19  | 1,261 |
| 66,745 | 1 | 64  | 11 | 930   | 0 | 49  | 7  | 454   | 19  | 1,497 |
| 66,746 | 1 | 70  | 8  | 958   | 0 | 51  | 7  | 480   | 16  | 1,559 |
| 66,747 | 1 | 70  | 8  | 957   | 0 | 51  | 7  | 479   | 16  | 1,557 |
| 66,748 | 1 | 122 | 8  | 1,275 | 0 | 74  | 7  | 736   | 16  | 2,207 |
| 66,749 | 1 | 122 | 8  | 1,288 | 0 | 74  | 7  | 743   | 16  | 2,227 |
| 66,750 | 2 | 131 | 11 | 1,375 | 0 | 78  | 7  | 781   | 20  | 2,365 |
| 66,751 | 2 | 134 | 12 | 1,386 | 0 | 80  | 10 | 784   | 24  | 2,384 |
| 66,752 | 2 | 133 | 13 | 1,393 | 0 | 80  | 10 | 784   | 25  | 2,390 |
| 66,753 | 2 | 134 | 15 | 1,395 | 0 | 80  | 13 | 784   | 30  | 2,393 |
| 66,754 | 2 | 134 | 15 | 1,398 | 0 | 80  | 13 | 784   | 30  | 2,396 |
| 66,755 | 2 | 135 | 18 | 1,411 | 0 | 80  | 13 | 789   | 33  | 2,415 |
| 66,756 | 2 | 135 | 18 | 1,412 | 0 | 80  | 13 | 790   | 33  | 2,417 |
| 66,757 | 2 | 131 | 21 | 1,425 | 0 | 80  | 15 | 791   | 38  | 2,427 |
| 66,758 | 2 | 132 | 23 | 1,437 | 0 | 80  | 15 | 812   | 40  | 2,461 |
| 66,759 | 2 | 142 | 24 | 1,517 | 0 | 86  | 15 | 875   | 41  | 2,620 |
| 66,760 | 2 | 143 | 25 | 1,533 | 0 | 87  | 16 | 888   | 43  | 2,651 |
| 66,761 | 2 | 145 | 35 | 1,547 | 0 | 88  | 16 | 893   | 53  | 2,673 |
| 66,762 | 2 | 147 | 33 | 1,552 | 0 | 89  | 14 | 900   | 49  | 2,688 |
| 66,763 | 2 | 147 | 33 | 1,561 | 0 | 89  | 13 | 900   | 48  | 2,697 |
| 66,764 | 2 | 147 | 33 | 1,554 | 0 | 89  | 14 | 911   | 49  | 2,701 |
| 66,765 | 2 | 147 | 32 | 1,558 | 0 | 89  | 14 | 912   | 48  | 2,706 |
| 66,766 | 2 | 149 | 32 | 1,567 | 0 | 89  | 14 | 918   | 48  | 2,723 |
| 66,767 | 2 | 149 | 32 | 1,567 | 0 | 89  | 14 | 920   | 48  | 2,725 |
| 66,768 | 2 | 148 | 45 | 1,567 | 0 | 89  | 20 | 916   | 67  | 2,720 |
| 66,769 | 2 | 147 | 47 | 1,566 | 0 | 88  | 20 | 906   | 69  | 2,707 |
| 66,770 | 3 | 147 | 57 | 1,570 | 0 | 88  | 23 | 906   | 83  | 2,711 |
| 66,771 | 3 | 147 | 57 | 1,574 | 0 | 89  | 23 | 911   | 83  | 2,721 |
| 66,772 | 5 | 146 | 64 | 1,587 | 0 | 91  | 28 | 924   | 97  | 2,748 |
| 66,773 | 5 | 152 | 64 | 1,674 | 0 | 99  | 31 | 1,061 | 100 | 2,986 |
| 66,774 | 5 | 160 | 64 | 1,754 | 0 | 101 | 31 | 1,126 | 100 | 3,141 |
| 66,775 | 5 | 161 | 64 | 1,820 | 0 | 110 | 31 | 1,168 | 100 | 3,259 |
| 66,776 | 5 | 162 | 64 | 1,834 | 0 | 111 | 31 | 1,176 | 100 | 3,283 |
| 66,777 | 5 | 163 | 64 | 1,843 | 0 | 111 | 31 | 1,181 | 100 | 3,298 |

|        |   |     |    |       |   |     |    |       |     |       |
|--------|---|-----|----|-------|---|-----|----|-------|-----|-------|
| 66,778 | 5 | 165 | 62 | 1,844 | 0 | 111 | 31 | 1,179 | 98  | 3,299 |
| 66,779 | 5 | 165 | 62 | 1,844 | 0 | 111 | 31 | 1,179 | 98  | 3,299 |
| 66,780 | 5 | 164 | 63 | 1,773 | 0 | 107 | 31 | 1,137 | 99  | 3,181 |
| 66,781 | 5 | 165 | 63 | 1,776 | 0 | 107 | 31 | 1,139 | 99  | 3,187 |
| 66,782 | 5 | 172 | 63 | 1,789 | 0 | 108 | 31 | 1,160 | 99  | 3,229 |
| 66,783 | 5 | 172 | 63 | 1,790 | 0 | 108 | 31 | 1,159 | 99  | 3,229 |
| 66,784 | 5 | 172 | 73 | 1,786 | 0 | 108 | 36 | 1,161 | 114 | 3,227 |
| 66,785 | 5 | 171 | 73 | 1,784 | 0 | 108 | 36 | 1,153 | 114 | 3,216 |
| 66,786 | 5 | 171 | 73 | 1,784 | 0 | 108 | 36 | 1,152 | 114 | 3,215 |
| 66,787 | 6 | 169 | 73 | 1,780 | 0 | 108 | 36 | 1,154 | 115 | 3,211 |
| 66,788 | 6 | 169 | 73 | 1,786 | 0 | 109 | 36 | 1,166 | 115 | 3,230 |
| 66,789 | 6 | 171 | 73 | 1,789 | 0 | 109 | 36 | 1,171 | 115 | 3,240 |
| 66,790 | 6 | 175 | 78 | 1,797 | 1 | 108 | 37 | 1,198 | 122 | 3,278 |
| 66,791 | 6 | 171 | 84 | 1,682 | 1 | 103 | 41 | 1,178 | 132 | 3,134 |
| 66,792 | 6 | 175 | 84 | 1,717 | 1 | 110 | 41 | 1,221 | 132 | 3,223 |
| 66,793 | 6 | 171 | 84 | 1,685 | 1 | 109 | 41 | 1,216 | 132 | 3,181 |
| 66,794 | 6 | 149 | 84 | 1,301 | 1 | 81  | 41 | 1,049 | 132 | 2,580 |
| 66,795 | 6 | 157 | 84 | 1,313 | 1 | 85  | 41 | 1,104 | 132 | 2,659 |
| 66,796 | 6 | 146 | 84 | 1,149 | 1 | 80  | 41 | 1,055 | 132 | 2,430 |
| 66,797 | 6 | 139 | 84 | 1,123 | 1 | 78  | 41 | 1,029 | 132 | 2,369 |
| 66,798 | 6 | 139 | 84 | 1,125 | 1 | 80  | 41 | 1,035 | 132 | 2,379 |
| 66,799 | 6 | 87  | 84 | 815   | 1 | 57  | 41 | 788   | 132 | 1,747 |
| 66,800 | 6 | 91  | 84 | 806   | 1 | 57  | 41 | 785   | 132 | 1,739 |
| 66,801 | 5 | 82  | 81 | 720   | 1 | 53  | 41 | 750   | 128 | 1,605 |
| 66,802 | 5 | 79  | 80 | 712   | 1 | 51  | 38 | 748   | 124 | 1,590 |
| 66,803 | 5 | 81  | 82 | 713   | 1 | 51  | 38 | 754   | 126 | 1,599 |
| 66,804 | 5 | 80  | 82 | 712   | 1 | 51  | 35 | 757   | 123 | 1,600 |
| 66,805 | 5 | 80  | 82 | 715   | 1 | 51  | 35 | 764   | 123 | 1,610 |
| 66,806 | 5 | 78  | 80 | 674   | 1 | 51  | 35 | 728   | 121 | 1,531 |
| 66,807 | 5 | 78  | 80 | 678   | 1 | 51  | 35 | 728   | 121 | 1,535 |
| 66,808 | 5 | 78  | 78 | 678   | 1 | 51  | 33 | 727   | 117 | 1,534 |
| 66,809 | 5 | 67  | 82 | 596   | 2 | 45  | 44 | 664   | 133 | 1,372 |
| 66,810 | 5 | 67  | 81 | 580   | 2 | 44  | 44 | 651   | 132 | 1,342 |
| 66,811 | 5 | 67  | 78 | 580   | 2 | 44  | 45 | 651   | 130 | 1,342 |
| 66,812 | 4 | 63  | 68 | 560   | 2 | 42  | 42 | 638   | 116 | 1,303 |
| 66,813 | 4 | 63  | 68 | 560   | 2 | 42  | 42 | 638   | 116 | 1,303 |
| 66,814 | 4 | 63  | 69 | 551   | 2 | 42  | 41 | 638   | 116 | 1,294 |
| 66,815 | 4 | 63  | 68 | 540   | 2 | 42  | 40 | 623   | 114 | 1,268 |
| 66,816 | 4 | 61  | 68 | 529   | 2 | 42  | 39 | 618   | 113 | 1,250 |
| 66,817 | 5 | 61  | 68 | 529   | 2 | 42  | 39 | 618   | 114 | 1,250 |
| 66,818 | 5 | 61  | 63 | 530   | 2 | 42  | 37 | 618   | 107 | 1,251 |

|        |   |    |    |     |   |    |    |     |     |       |
|--------|---|----|----|-----|---|----|----|-----|-----|-------|
| 66,819 | 5 | 61 | 64 | 528 | 2 | 42 | 36 | 616 | 107 | 1,247 |
| 66,820 | 5 | 61 | 67 | 526 | 2 | 42 | 36 | 616 | 110 | 1,245 |
| 66,821 | 5 | 61 | 57 | 518 | 2 | 41 | 33 | 614 | 97  | 1,234 |
| 66,822 | 4 | 61 | 50 | 505 | 2 | 39 | 30 | 601 | 86  | 1,206 |
| 66,823 | 3 | 61 | 50 | 505 | 2 | 39 | 29 | 601 | 84  | 1,206 |
| 66,824 | 3 | 46 | 50 | 266 | 2 | 20 | 26 | 353 | 81  | 685   |
| 66,825 | 3 | 46 | 51 | 266 | 2 | 20 | 26 | 353 | 82  | 685   |
| 66,826 | 3 | 48 | 51 | 266 | 2 | 20 | 26 | 354 | 82  | 688   |
| 66,827 | 3 | 46 | 51 | 245 | 2 | 19 | 27 | 342 | 83  | 652   |
| 66,828 | 3 | 46 | 51 | 245 | 2 | 20 | 27 | 342 | 83  | 653   |
| 66,829 | 3 | 45 | 51 | 248 | 2 | 20 | 27 | 340 | 83  | 653   |
| 66,830 | 3 | 47 | 50 | 268 | 2 | 20 | 27 | 370 | 82  | 705   |
| 66,831 | 3 | 47 | 50 | 266 | 2 | 20 | 27 | 358 | 82  | 691   |
| 66,832 | 3 | 39 | 48 | 237 | 2 | 19 | 27 | 324 | 80  | 619   |
| 66,833 | 3 | 39 | 48 | 240 | 2 | 19 | 27 | 325 | 80  | 623   |
| 66,834 | 3 | 39 | 41 | 237 | 2 | 19 | 22 | 324 | 68  | 619   |
| 66,835 | 3 | 39 | 41 | 236 | 2 | 19 | 22 | 325 | 68  | 619   |
| 66,836 | 3 | 39 | 41 | 240 | 2 | 19 | 22 | 325 | 68  | 623   |
| 66,837 | 3 | 39 | 41 | 241 | 2 | 19 | 22 | 325 | 68  | 624   |
| 66,838 | 2 | 40 | 41 | 241 | 2 | 19 | 22 | 322 | 67  | 622   |
| 66,839 | 2 | 38 | 36 | 232 | 1 | 18 | 22 | 305 | 61  | 593   |
| 66,840 | 2 | 33 | 36 | 214 | 1 | 18 | 22 | 276 | 61  | 541   |
| 66,841 | 2 | 36 | 36 | 230 | 1 | 18 | 21 | 314 | 60  | 598   |
| 66,842 | 2 | 33 | 30 | 219 | 1 | 15 | 17 | 280 | 50  | 547   |
| 66,843 | 2 | 29 | 29 | 185 | 1 | 8  | 17 | 240 | 49  | 462   |
| 66,844 | 2 | 27 | 29 | 170 | 1 | 7  | 17 | 215 | 49  | 419   |
| 66,845 | 2 | 25 | 29 | 165 | 1 | 7  | 17 | 210 | 49  | 407   |
| 66,846 | 2 | 16 | 30 | 145 | 1 | 3  | 18 | 154 | 51  | 318   |
| 66,847 | 2 | 16 | 30 | 137 | 1 | 3  | 18 | 148 | 51  | 304   |
| 66,848 | 2 | 16 | 30 | 132 | 1 | 3  | 18 | 147 | 51  | 298   |
| 66,849 | 2 | 16 | 30 | 129 | 1 | 1  | 19 | 140 | 52  | 286   |
| 66,850 | 2 | 16 | 30 | 122 | 1 | 1  | 19 | 132 | 52  | 271   |
| 66,851 | 2 | 12 | 30 | 113 | 1 | 1  | 19 | 128 | 52  | 254   |
| 66,852 | 2 | 12 | 30 | 113 | 1 | 1  | 19 | 127 | 52  | 253   |
| 66,853 | 2 | 12 | 30 | 109 | 1 | 1  | 19 | 127 | 52  | 249   |
| 66,854 | 2 | 10 | 26 | 94  | 1 | 1  | 19 | 116 | 48  | 221   |
| 66,855 | 2 | 10 | 25 | 88  | 1 | 1  | 19 | 105 | 47  | 204   |
| 66,856 | 2 | 10 | 25 | 89  | 1 | 1  | 19 | 105 | 47  | 205   |
| 66,857 | 2 | 10 | 24 | 90  | 1 | 1  | 18 | 105 | 45  | 206   |
| 66,858 | 2 | 10 | 24 | 87  | 1 | 1  | 18 | 106 | 45  | 204   |
| 66,859 | 2 | 12 | 23 | 95  | 1 | 1  | 18 | 110 | 44  | 218   |

|        |   |    |    |     |   |   |    |     |    |     |
|--------|---|----|----|-----|---|---|----|-----|----|-----|
| 66,860 | 2 | 13 | 17 | 93  | 0 | 1 | 7  | 110 | 26 | 217 |
| 66,861 | 2 | 12 | 17 | 93  | 0 | 1 | 6  | 111 | 25 | 217 |
| 66,862 | 2 | 12 | 17 | 93  | 0 | 1 | 5  | 111 | 24 | 217 |
| 66,863 | 2 | 12 | 20 | 93  | 0 | 1 | 5  | 111 | 27 | 217 |
| 66,864 | 2 | 12 | 20 | 92  | 0 | 1 | 5  | 111 | 27 | 216 |
| 66,865 | 2 | 12 | 19 | 92  | 0 | 1 | 5  | 111 | 26 | 216 |
| 66,866 | 2 | 12 | 19 | 92  | 0 | 1 | 5  | 111 | 26 | 216 |
| 66,867 | 2 | 12 | 19 | 91  | 0 | 1 | 6  | 110 | 27 | 214 |
| 66,868 | 1 | 12 | 19 | 91  | 0 | 1 | 7  | 110 | 27 | 214 |
| 66,869 | 1 | 12 | 19 | 89  | 0 | 1 | 7  | 108 | 27 | 210 |
| 66,870 | 1 | 12 | 11 | 89  | 0 | 1 | 7  | 108 | 19 | 210 |
| 66,871 | 1 | 12 | 14 | 90  | 0 | 1 | 15 | 108 | 30 | 211 |
| 66,872 | 0 | 12 | 15 | 90  | 1 | 1 | 17 | 106 | 33 | 209 |
| 66,873 | 1 | 12 | 16 | 90  | 1 | 1 | 16 | 106 | 34 | 209 |
| 66,874 | 1 | 12 | 16 | 91  | 1 | 1 | 16 | 108 | 34 | 212 |
| 66,875 | 1 | 12 | 16 | 91  | 1 | 1 | 16 | 109 | 34 | 213 |
| 66,876 | 2 | 12 | 16 | 91  | 1 | 1 | 19 | 109 | 38 | 213 |
| 66,877 | 2 | 10 | 16 | 91  | 1 | 1 | 18 | 109 | 37 | 211 |
| 66,878 | 2 | 11 | 16 | 92  | 1 | 1 | 18 | 108 | 37 | 212 |
| 66,879 | 2 | 11 | 16 | 91  | 1 | 0 | 18 | 108 | 37 | 210 |
| 66,880 | 2 | 10 | 17 | 88  | 1 | 0 | 18 | 108 | 38 | 206 |
| 66,881 | 2 | 8  | 17 | 68  | 1 | 0 | 18 | 79  | 38 | 155 |
| 66,882 | 2 | 8  | 16 | 66  | 1 | 0 | 18 | 79  | 37 | 153 |
| 66,883 | 2 | 8  | 16 | 65  | 1 | 0 | 20 | 79  | 39 | 152 |
| 66,884 | 2 | 8  | 16 | 62  | 1 | 0 | 20 | 79  | 39 | 149 |
| 66,885 | 2 | 8  | 18 | 67  | 1 | 0 | 25 | 76  | 46 | 151 |
| 66,886 | 2 | 8  | 18 | 67  | 1 | 0 | 25 | 76  | 46 | 151 |
| 66,887 | 2 | 9  | 18 | 62  | 1 | 0 | 25 | 76  | 46 | 147 |
| 66,888 | 2 | 5  | 18 | 46  | 1 | 0 | 26 | 37  | 47 | 88  |
| 66,889 | 2 | 5  | 21 | 46  | 1 | 0 | 26 | 37  | 50 | 88  |
| 66,890 | 2 | 5  | 21 | 46  | 1 | 0 | 26 | 37  | 50 | 88  |
| 66,891 | 2 | 5  | 21 | 47  | 1 | 0 | 26 | 37  | 50 | 89  |
| 66,892 | 2 | 6  | 22 | 51  | 1 | 0 | 26 | 40  | 51 | 97  |
| 66,893 | 2 | 6  | 22 | 57  | 1 | 1 | 26 | 43  | 51 | 107 |
| 66,894 | 2 | 7  | 23 | 82  | 1 | 1 | 26 | 51  | 52 | 141 |
| 66,895 | 2 | 7  | 23 | 84  | 1 | 1 | 27 | 48  | 53 | 140 |
| 66,896 | 2 | 7  | 26 | 88  | 1 | 1 | 29 | 48  | 58 | 144 |
| 66,897 | 2 | 16 | 27 | 112 | 1 | 3 | 32 | 65  | 62 | 196 |
| 66,898 | 2 | 16 | 27 | 117 | 1 | 3 | 32 | 66  | 62 | 202 |
| 66,899 | 3 | 16 | 42 | 118 | 1 | 3 | 48 | 67  | 94 | 204 |
| 66,900 | 3 | 16 | 47 | 118 | 1 | 3 | 48 | 67  | 99 | 204 |



|        |   |    |    |     |   |    |    |     |     |     |
|--------|---|----|----|-----|---|----|----|-----|-----|-----|
| 66,901 | 3 | 16 | 51 | 119 | 1 | 3  | 52 | 71  | 107 | 209 |
| 66,902 | 3 | 19 | 51 | 122 | 1 | 3  | 52 | 78  | 107 | 222 |
| 66,903 | 3 | 19 | 51 | 123 | 1 | 3  | 52 | 76  | 107 | 221 |
| 66,904 | 3 | 19 | 54 | 123 | 1 | 3  | 54 | 75  | 112 | 220 |
| 66,905 | 3 | 19 | 55 | 130 | 1 | 4  | 57 | 77  | 116 | 230 |
| 66,906 | 3 | 19 | 55 | 131 | 1 | 4  | 57 | 78  | 116 | 232 |
| 66,907 | 3 | 19 | 59 | 130 | 2 | 4  | 60 | 78  | 124 | 231 |
| 66,908 | 3 | 19 | 72 | 129 | 3 | 4  | 73 | 77  | 151 | 229 |
| 66,909 | 3 | 19 | 77 | 141 | 3 | 6  | 73 | 85  | 156 | 251 |
| 66,910 | 3 | 16 | 77 | 142 | 3 | 6  | 74 | 84  | 157 | 248 |
| 66,911 | 3 | 17 | 79 | 150 | 3 | 8  | 75 | 88  | 160 | 263 |
| 66,912 | 3 | 18 | 79 | 162 | 3 | 8  | 75 | 88  | 160 | 276 |
| 66,913 | 3 | 18 | 79 | 162 | 3 | 8  | 75 | 88  | 160 | 276 |
| 66,914 | 3 | 18 | 76 | 162 | 3 | 8  | 75 | 88  | 157 | 276 |
| 66,915 | 3 | 18 | 77 | 162 | 3 | 8  | 77 | 88  | 160 | 276 |
| 66,916 | 4 | 18 | 86 | 163 | 3 | 8  | 78 | 88  | 171 | 277 |
| 66,917 | 4 | 20 | 86 | 181 | 3 | 11 | 77 | 98  | 170 | 310 |
| 66,918 | 4 | 22 | 86 | 206 | 3 | 12 | 77 | 113 | 170 | 353 |
| 66,919 | 4 | 26 | 92 | 230 | 3 | 13 | 77 | 120 | 176 | 389 |
| 66,920 | 4 | 31 | 93 | 304 | 3 | 16 | 77 | 145 | 177 | 496 |
| 66,921 | 4 | 39 | 93 | 359 | 3 | 21 | 76 | 170 | 176 | 589 |
| 66,922 | 4 | 43 | 85 | 388 | 3 | 23 | 68 | 195 | 160 | 649 |
| 66,923 | 4 | 43 | 84 | 390 | 2 | 23 | 66 | 196 | 156 | 652 |
| 66,924 | 3 | 43 | 84 | 391 | 2 | 23 | 67 | 197 | 156 | 654 |
| 66,925 | 3 | 44 | 84 | 393 | 2 | 23 | 65 | 201 | 154 | 661 |
| 66,926 | 2 | 44 | 84 | 395 | 2 | 23 | 64 | 201 | 152 | 663 |
| 66,927 | 2 | 50 | 86 | 443 | 2 | 25 | 64 | 214 | 154 | 732 |
| 66,928 | 2 | 53 | 86 | 484 | 2 | 29 | 64 | 247 | 154 | 813 |
| 66,929 | 2 | 52 | 85 | 486 | 2 | 30 | 64 | 250 | 153 | 818 |
| 66,930 | 3 | 57 | 86 | 512 | 2 | 30 | 64 | 267 | 155 | 866 |
| 66,931 | 3 | 57 | 87 | 538 | 2 | 31 | 64 | 277 | 156 | 903 |
| 66,932 | 3 | 60 | 87 | 564 | 2 | 31 | 64 | 281 | 156 | 936 |
| 66,933 | 3 | 60 | 87 | 564 | 2 | 31 | 62 | 281 | 154 | 936 |
| 66,934 | 3 | 60 | 87 | 565 | 2 | 31 | 63 | 280 | 155 | 936 |
| 66,935 | 3 | 60 | 87 | 566 | 2 | 31 | 62 | 280 | 154 | 937 |
| 66,936 | 3 | 62 | 85 | 559 | 2 | 31 | 59 | 280 | 149 | 932 |
| 66,937 | 3 | 61 | 86 | 560 | 2 | 31 | 59 | 280 | 150 | 932 |
| 66,938 | 3 | 61 | 86 | 560 | 2 | 31 | 59 | 280 | 150 | 932 |
| 66,939 | 3 | 61 | 86 | 560 | 2 | 31 | 62 | 280 | 153 | 932 |
| 66,940 | 3 | 61 | 83 | 560 | 2 | 31 | 62 | 279 | 150 | 931 |
| 66,941 | 3 | 60 | 84 | 554 | 2 | 31 | 63 | 275 | 152 | 920 |

|        |   |    |    |     |   |    |    |     |     |     |
|--------|---|----|----|-----|---|----|----|-----|-----|-----|
| 66,942 | 3 | 60 | 84 | 554 | 2 | 31 | 63 | 277 | 152 | 922 |
| 66,943 | 3 | 60 | 83 | 554 | 2 | 31 | 63 | 276 | 151 | 921 |
| 66,944 | 3 | 60 | 84 | 548 | 2 | 30 | 65 | 271 | 154 | 909 |
| 66,945 | 3 | 59 | 84 | 527 | 2 | 30 | 65 | 260 | 154 | 876 |
| 66,946 | 3 | 59 | 85 | 527 | 2 | 30 | 65 | 260 | 155 | 876 |
| 66,947 | 3 | 51 | 83 | 487 | 2 | 28 | 64 | 238 | 152 | 804 |
| 66,948 | 3 | 51 | 88 | 494 | 2 | 29 | 62 | 238 | 155 | 812 |
| 66,949 | 2 | 51 | 73 | 495 | 2 | 29 | 46 | 238 | 123 | 813 |
| 66,950 | 2 | 51 | 69 | 497 | 2 | 29 | 48 | 238 | 121 | 815 |
| 66,951 | 2 | 51 | 68 | 495 | 2 | 29 | 52 | 233 | 124 | 808 |
| 66,952 | 2 | 48 | 69 | 491 | 2 | 29 | 50 | 226 | 123 | 794 |
| 66,953 | 2 | 48 | 69 | 493 | 2 | 29 | 50 | 231 | 123 | 801 |
| 66,954 | 2 | 48 | 66 | 497 | 2 | 29 | 48 | 233 | 118 | 807 |
| 66,955 | 2 | 48 | 65 | 505 | 2 | 29 | 45 | 234 | 114 | 816 |
| 66,956 | 2 | 51 | 68 | 508 | 2 | 28 | 48 | 238 | 120 | 825 |
| 66,957 | 2 | 53 | 68 | 508 | 2 | 28 | 48 | 237 | 120 | 826 |
| 66,958 | 2 | 55 | 73 | 512 | 1 | 28 | 46 | 242 | 122 | 837 |
| 66,959 | 2 | 55 | 62 | 505 | 0 | 26 | 33 | 234 | 97  | 820 |
| 66,960 | 2 | 56 | 58 | 499 | 0 | 26 | 35 | 233 | 95  | 814 |
| 66,961 | 2 | 56 | 58 | 500 | 0 | 26 | 34 | 233 | 94  | 815 |
| 66,962 | 3 | 54 | 57 | 481 | 0 | 24 | 34 | 229 | 94  | 788 |
| 66,963 | 3 | 54 | 57 | 481 | 0 | 24 | 34 | 229 | 94  | 788 |
| 66,964 | 3 | 54 | 57 | 485 | 0 | 24 | 34 | 238 | 94  | 801 |
| 66,965 | 3 | 61 | 57 | 508 | 0 | 28 | 34 | 250 | 94  | 847 |
| 66,966 | 3 | 62 | 57 | 530 | 0 | 29 | 32 | 276 | 92  | 897 |
| 66,967 | 2 | 62 | 48 | 533 | 0 | 29 | 32 | 281 | 82  | 905 |
| 66,968 | 2 | 60 | 45 | 516 | 0 | 26 | 32 | 271 | 79  | 873 |
| 66,969 | 2 | 54 | 44 | 467 | 0 | 24 | 31 | 249 | 77  | 794 |
| 66,970 | 2 | 55 | 44 | 475 | 0 | 25 | 31 | 264 | 77  | 819 |
| 66,971 | 2 | 50 | 43 | 402 | 0 | 22 | 31 | 239 | 76  | 713 |
| 66,972 | 2 | 42 | 46 | 351 | 0 | 17 | 32 | 218 | 80  | 628 |
| 66,973 | 3 | 38 | 51 | 321 | 0 | 15 | 34 | 197 | 88  | 571 |
| 66,974 | 4 | 39 | 51 | 321 | 0 | 15 | 37 | 198 | 92  | 573 |
| 66,975 | 4 | 39 | 50 | 322 | 0 | 15 | 36 | 199 | 90  | 575 |
| 66,976 | 4 | 38 | 49 | 325 | 0 | 15 | 36 | 194 | 89  | 572 |
| 66,977 | 4 | 40 | 51 | 326 | 0 | 15 | 36 | 194 | 91  | 575 |
| 66,978 | 5 | 31 | 52 | 237 | 0 | 9  | 36 | 148 | 93  | 425 |
| 66,979 | 5 | 26 | 52 | 182 | 0 | 7  | 36 | 116 | 93  | 331 |
| 66,980 | 4 | 26 | 53 | 184 | 0 | 7  | 36 | 116 | 93  | 333 |
| 66,981 | 4 | 23 | 52 | 169 | 0 | 8  | 36 | 120 | 92  | 320 |
| 66,982 | 4 | 23 | 52 | 172 | 0 | 10 | 36 | 123 | 92  | 328 |

|        |   |    |    |     |   |    |    |     |    |       |
|--------|---|----|----|-----|---|----|----|-----|----|-------|
| 66,983 | 4 | 25 | 52 | 203 | 0 | 14 | 36 | 145 | 92 | 387   |
| 66,984 | 4 | 28 | 52 | 206 | 0 | 15 | 36 | 151 | 92 | 400   |
| 66,985 | 4 | 29 | 52 | 205 | 0 | 15 | 35 | 152 | 91 | 401   |
| 66,986 | 4 | 31 | 52 | 250 | 0 | 16 | 36 | 178 | 92 | 475   |
| 66,987 | 4 | 29 | 52 | 250 | 0 | 16 | 35 | 177 | 91 | 472   |
| 66,988 | 4 | 29 | 54 | 271 | 0 | 16 | 37 | 186 | 95 | 502   |
| 66,989 | 4 | 29 | 54 | 288 | 0 | 16 | 40 | 194 | 98 | 527   |
| 66,990 | 4 | 31 | 54 | 350 | 0 | 19 | 36 | 215 | 94 | 615   |
| 66,991 | 4 | 31 | 54 | 356 | 0 | 20 | 36 | 218 | 94 | 625   |
| 66,992 | 4 | 31 | 53 | 366 | 0 | 20 | 35 | 221 | 92 | 638   |
| 66,993 | 4 | 33 | 55 | 374 | 0 | 20 | 36 | 223 | 95 | 650   |
| 66,994 | 4 | 33 | 53 | 375 | 0 | 20 | 34 | 223 | 91 | 651   |
| 66,995 | 4 | 34 | 55 | 381 | 0 | 21 | 34 | 228 | 93 | 664   |
| 66,996 | 4 | 34 | 55 | 385 | 0 | 21 | 34 | 230 | 93 | 670   |
| 66,997 | 4 | 35 | 58 | 389 | 0 | 21 | 34 | 235 | 96 | 680   |
| 66,998 | 4 | 34 | 57 | 392 | 1 | 21 | 33 | 242 | 95 | 689   |
| 66,999 | 4 | 34 | 51 | 385 | 1 | 20 | 31 | 242 | 87 | 681   |
| 67,000 | 5 | 34 | 53 | 385 | 1 | 20 | 31 | 244 | 90 | 683   |
| 67,001 | 5 | 34 | 54 | 381 | 1 | 20 | 30 | 243 | 90 | 678   |
| 67,002 | 5 | 34 | 51 | 381 | 1 | 20 | 27 | 243 | 84 | 678   |
| 67,003 | 5 | 34 | 50 | 383 | 1 | 20 | 26 | 243 | 82 | 680   |
| 67,004 | 5 | 34 | 50 | 383 | 1 | 20 | 27 | 239 | 83 | 676   |
| 67,005 | 5 | 57 | 50 | 548 | 1 | 46 | 27 | 446 | 83 | 1,097 |
| 67,006 | 5 | 57 | 50 | 599 | 1 | 46 | 24 | 464 | 80 | 1,166 |
| 67,007 | 5 | 57 | 47 | 646 | 1 | 51 | 24 | 477 | 77 | 1,231 |
| 67,008 | 5 | 57 | 50 | 653 | 1 | 51 | 24 | 478 | 80 | 1,239 |
| 67,009 | 5 | 57 | 41 | 659 | 1 | 52 | 22 | 480 | 69 | 1,248 |
| 67,010 | 5 | 57 | 39 | 654 | 1 | 52 | 22 | 482 | 67 | 1,245 |
| 67,011 | 5 | 74 | 38 | 728 | 2 | 56 | 20 | 530 | 65 | 1,388 |
| 67,012 | 5 | 75 | 38 | 739 | 2 | 57 | 20 | 539 | 65 | 1,410 |
| 67,013 | 4 | 77 | 37 | 760 | 2 | 58 | 19 | 547 | 62 | 1,442 |
| 67,014 | 4 | 78 | 37 | 756 | 2 | 59 | 19 | 538 | 62 | 1,431 |
| 67,015 | 4 | 71 | 37 | 734 | 2 | 55 | 19 | 526 | 62 | 1,386 |
| 67,016 | 4 | 72 | 37 | 732 | 2 | 58 | 19 | 511 | 62 | 1,373 |
| 67,017 | 4 | 72 | 36 | 736 | 2 | 58 | 19 | 511 | 61 | 1,377 |
| 67,018 | 4 | 72 | 36 | 741 | 2 | 58 | 18 | 507 | 60 | 1,378 |
| 67,019 | 4 | 72 | 36 | 741 | 2 | 58 | 18 | 507 | 60 | 1,378 |
| 67,020 | 4 | 72 | 34 | 744 | 2 | 58 | 18 | 510 | 58 | 1,384 |
| 67,021 | 4 | 71 | 34 | 743 | 2 | 58 | 17 | 497 | 57 | 1,369 |
| 67,022 | 4 | 71 | 31 | 741 | 2 | 58 | 17 | 491 | 54 | 1,361 |
| 67,023 | 5 | 71 | 31 | 747 | 2 | 58 | 17 | 494 | 55 | 1,370 |

|        |   |    |    |     |   |    |    |     |    |       |
|--------|---|----|----|-----|---|----|----|-----|----|-------|
| 67,024 | 4 | 72 | 26 | 748 | 2 | 58 | 15 | 497 | 47 | 1,375 |
| 67,025 | 3 | 71 | 26 | 743 | 2 | 58 | 13 | 490 | 44 | 1,362 |
| 67,026 | 3 | 72 | 25 | 738 | 2 | 58 | 13 | 493 | 43 | 1,361 |
| 67,027 | 3 | 72 | 24 | 739 | 2 | 58 | 13 | 493 | 42 | 1,362 |
| 67,028 | 3 | 70 | 24 | 736 | 2 | 58 | 13 | 492 | 42 | 1,356 |
| 67,029 | 2 | 70 | 21 | 736 | 2 | 58 | 13 | 493 | 38 | 1,357 |
| 67,030 | 2 | 70 | 21 | 739 | 2 | 58 | 13 | 493 | 38 | 1,360 |
| 67,031 | 2 | 74 | 20 | 737 | 2 | 57 | 13 | 506 | 37 | 1,374 |
| 67,032 | 2 | 75 | 20 | 755 | 2 | 57 | 13 | 519 | 37 | 1,406 |
| 67,033 | 2 | 76 | 19 | 766 | 2 | 56 | 13 | 532 | 36 | 1,430 |
| 67,034 | 2 | 77 | 19 | 753 | 2 | 53 | 13 | 535 | 36 | 1,418 |
| 67,035 | 2 | 74 | 19 | 766 | 2 | 53 | 12 | 539 | 35 | 1,432 |
| 67,036 | 2 | 73 | 19 | 766 | 2 | 53 | 12 | 539 | 35 | 1,431 |
| 67,037 | 3 | 75 | 19 | 739 | 2 | 54 | 12 | 542 | 36 | 1,410 |
| 67,038 | 3 | 75 | 16 | 738 | 2 | 54 | 10 | 542 | 31 | 1,409 |
| 67,039 | 3 | 75 | 17 | 720 | 2 | 54 | 7  | 536 | 29 | 1,385 |
| 67,040 | 4 | 75 | 17 | 651 | 2 | 51 | 7  | 513 | 30 | 1,290 |
| 67,041 | 4 | 75 | 17 | 653 | 2 | 51 | 7  | 515 | 30 | 1,294 |
| 67,042 | 4 | 75 | 28 | 652 | 4 | 50 | 17 | 512 | 53 | 1,289 |
| 67,043 | 4 | 74 | 32 | 639 | 5 | 50 | 22 | 506 | 63 | 1,269 |
| 67,044 | 4 | 74 | 32 | 640 | 5 | 50 | 21 | 507 | 62 | 1,271 |
| 67,045 | 5 | 74 | 31 | 640 | 6 | 50 | 25 | 510 | 67 | 1,274 |
| 67,046 | 5 | 73 | 30 | 626 | 6 | 49 | 25 | 500 | 66 | 1,248 |
| 67,047 | 5 | 73 | 30 | 629 | 6 | 49 | 25 | 506 | 66 | 1,257 |
| 67,048 | 5 | 72 | 26 | 620 | 6 | 49 | 25 | 500 | 62 | 1,241 |
| 67,049 | 5 | 72 | 27 | 617 | 5 | 49 | 25 | 493 | 62 | 1,231 |
| 67,050 | 5 | 72 | 26 | 616 | 5 | 49 | 25 | 493 | 61 | 1,230 |
| 67,051 | 4 | 72 | 24 | 617 | 5 | 49 | 24 | 492 | 57 | 1,230 |
| 67,052 | 4 | 72 | 22 | 617 | 5 | 49 | 23 | 492 | 54 | 1,230 |
| 67,053 | 4 | 72 | 22 | 615 | 5 | 49 | 21 | 492 | 52 | 1,228 |
| 67,054 | 4 | 72 | 22 | 613 | 5 | 49 | 21 | 491 | 52 | 1,225 |
| 67,055 | 4 | 72 | 22 | 612 | 5 | 49 | 20 | 491 | 51 | 1,224 |
| 67,056 | 4 | 49 | 24 | 443 | 5 | 23 | 20 | 287 | 53 | 802   |
| 67,057 | 4 | 49 | 24 | 384 | 5 | 23 | 20 | 268 | 53 | 724   |
| 67,058 | 4 | 46 | 24 | 327 | 5 | 18 | 20 | 249 | 53 | 640   |
| 67,059 | 4 | 44 | 21 | 319 | 5 | 18 | 20 | 247 | 50 | 628   |
| 67,060 | 4 | 42 | 21 | 308 | 5 | 17 | 22 | 240 | 52 | 607   |
| 67,061 | 4 | 24 | 23 | 230 | 5 | 13 | 23 | 187 | 55 | 454   |
| 67,062 | 5 | 23 | 28 | 219 | 5 | 12 | 24 | 178 | 62 | 432   |
| 67,063 | 5 | 23 | 36 | 219 | 5 | 12 | 27 | 178 | 73 | 432   |
| 67,064 | 5 | 20 | 38 | 196 | 5 | 10 | 28 | 171 | 76 | 397   |

|        |   |    |    |     |   |    |    |     |     |     |
|--------|---|----|----|-----|---|----|----|-----|-----|-----|
| 67,065 | 5 | 20 | 38 | 196 | 5 | 10 | 28 | 171 | 76  | 397 |
| 67,066 | 6 | 18 | 49 | 177 | 5 | 7  | 30 | 160 | 90  | 362 |
| 67,067 | 6 | 18 | 49 | 173 | 5 | 7  | 30 | 160 | 90  | 358 |
| 67,068 | 6 | 18 | 49 | 174 | 5 | 7  | 30 | 160 | 90  | 359 |
| 67,069 | 6 | 18 | 49 | 166 | 5 | 7  | 30 | 160 | 90  | 351 |
| 67,070 | 6 | 18 | 54 | 163 | 5 | 7  | 31 | 158 | 96  | 346 |
| 67,071 | 6 | 18 | 54 | 164 | 5 | 7  | 31 | 160 | 96  | 349 |
| 67,072 | 6 | 18 | 54 | 163 | 5 | 6  | 31 | 158 | 96  | 345 |
| 67,073 | 6 | 18 | 56 | 162 | 5 | 7  | 31 | 156 | 98  | 343 |
| 67,074 | 5 | 19 | 56 | 162 | 5 | 7  | 32 | 157 | 98  | 345 |
| 67,075 | 5 | 18 | 56 | 162 | 5 | 7  | 32 | 153 | 98  | 340 |
| 67,076 | 5 | 19 | 56 | 166 | 5 | 7  | 32 | 153 | 98  | 345 |
| 67,077 | 6 | 18 | 56 | 165 | 5 | 7  | 32 | 150 | 99  | 340 |
| 67,078 | 6 | 18 | 56 | 165 | 5 | 7  | 32 | 150 | 99  | 340 |
| 67,079 | 6 | 18 | 56 | 164 | 5 | 7  | 32 | 150 | 99  | 339 |
| 67,080 | 6 | 18 | 56 | 164 | 5 | 7  | 32 | 150 | 99  | 339 |
| 67,081 | 6 | 18 | 56 | 161 | 5 | 7  | 32 | 151 | 99  | 337 |
| 67,082 | 6 | 14 | 56 | 150 | 5 | 7  | 32 | 131 | 99  | 302 |
| 67,083 | 6 | 13 | 56 | 132 | 5 | 7  | 32 | 118 | 99  | 270 |
| 67,084 | 6 | 12 | 56 | 117 | 5 | 6  | 33 | 103 | 100 | 238 |
| 67,085 | 6 | 9  | 57 | 84  | 5 | 5  | 33 | 68  | 101 | 166 |
| 67,086 | 6 | 9  | 57 | 86  | 5 | 5  | 33 | 66  | 101 | 166 |
| 67,087 | 6 | 9  | 57 | 86  | 5 | 5  | 33 | 66  | 101 | 166 |
| 67,088 | 5 | 5  | 57 | 70  | 5 | 3  | 33 | 38  | 100 | 116 |
| 67,089 | 5 | 5  | 56 | 73  | 5 | 3  | 33 | 36  | 99  | 117 |
| 67,090 | 5 | 7  | 60 | 89  | 5 | 6  | 33 | 55  | 103 | 157 |
| 67,091 | 5 | 7  | 63 | 82  | 5 | 6  | 33 | 53  | 106 | 148 |
| 67,092 | 6 | 7  | 63 | 80  | 4 | 6  | 30 | 51  | 103 | 144 |
| 67,093 | 6 | 7  | 57 | 76  | 3 | 6  | 24 | 51  | 90  | 140 |
| 67,094 | 6 | 8  | 51 | 80  | 2 | 8  | 18 | 59  | 77  | 155 |
| 67,095 | 5 | 8  | 51 | 89  | 1 | 8  | 14 | 67  | 71  | 172 |
| 67,096 | 5 | 8  | 51 | 90  | 1 | 8  | 18 | 64  | 75  | 170 |
| 67,097 | 5 | 8  | 51 | 87  | 1 | 8  | 18 | 58  | 75  | 161 |
| 67,098 | 5 | 8  | 51 | 88  | 1 | 8  | 18 | 59  | 75  | 163 |
| 67,099 | 5 | 8  | 51 | 85  | 1 | 8  | 18 | 57  | 75  | 158 |
| 67,100 | 5 | 8  | 50 | 85  | 1 | 8  | 19 | 57  | 75  | 158 |
| 67,101 | 5 | 8  | 50 | 86  | 1 | 8  | 19 | 57  | 75  | 159 |
| 67,102 | 5 | 8  | 50 | 85  | 1 | 9  | 19 | 56  | 75  | 158 |
| 67,103 | 5 | 8  | 52 | 86  | 1 | 9  | 22 | 57  | 80  | 160 |
| 67,104 | 5 | 9  | 52 | 89  | 1 | 9  | 22 | 58  | 80  | 165 |
| 67,105 | 5 | 9  | 52 | 95  | 1 | 9  | 22 | 59  | 80  | 172 |

|        |   |    |    |     |   |    |    |     |    |     |
|--------|---|----|----|-----|---|----|----|-----|----|-----|
| 67,106 | 5 | 9  | 52 | 107 | 1 | 10 | 22 | 66  | 80 | 192 |
| 67,107 | 5 | 9  | 50 | 114 | 1 | 10 | 26 | 68  | 82 | 201 |
| 67,108 | 5 | 19 | 50 | 135 | 1 | 11 | 26 | 80  | 82 | 245 |
| 67,109 | 5 | 20 | 50 | 152 | 1 | 12 | 26 | 89  | 82 | 273 |
| 67,110 | 5 | 20 | 50 | 161 | 1 | 12 | 24 | 92  | 80 | 285 |
| 67,111 | 5 | 24 | 50 | 187 | 1 | 14 | 24 | 120 | 80 | 345 |
| 67,112 | 5 | 28 | 48 | 210 | 1 | 16 | 23 | 143 | 77 | 397 |
| 67,113 | 4 | 29 | 43 | 265 | 0 | 23 | 22 | 182 | 69 | 499 |
| 67,114 | 4 | 29 | 34 | 285 | 0 | 24 | 19 | 190 | 57 | 528 |
| 67,115 | 4 | 30 | 34 | 328 | 0 | 26 | 18 | 202 | 56 | 586 |
| 67,116 | 3 | 36 | 26 | 363 | 0 | 27 | 16 | 217 | 45 | 643 |
| 67,117 | 3 | 36 | 25 | 368 | 0 | 26 | 16 | 219 | 44 | 649 |
| 67,118 | 3 | 37 | 25 | 375 | 0 | 26 | 16 | 230 | 44 | 668 |
| 67,119 | 3 | 38 | 25 | 378 | 0 | 26 | 16 | 234 | 44 | 676 |
| 67,120 | 3 | 38 | 21 | 382 | 0 | 26 | 15 | 238 | 39 | 684 |
| 67,121 | 3 | 38 | 20 | 382 | 0 | 26 | 15 | 238 | 38 | 684 |
| 67,122 | 3 | 38 | 20 | 374 | 0 | 25 | 15 | 237 | 38 | 674 |
| 67,123 | 3 | 38 | 20 | 377 | 0 | 25 | 15 | 239 | 38 | 679 |
| 67,124 | 3 | 38 | 18 | 377 | 0 | 25 | 15 | 242 | 36 | 682 |
| 67,125 | 3 | 38 | 18 | 373 | 0 | 25 | 15 | 240 | 36 | 676 |
| 67,126 | 3 | 38 | 18 | 373 | 0 | 25 | 15 | 240 | 36 | 676 |
| 67,127 | 4 | 38 | 20 | 375 | 0 | 25 | 15 | 242 | 39 | 680 |
| 67,128 | 4 | 38 | 20 | 377 | 0 | 25 | 15 | 244 | 39 | 684 |
| 67,129 | 4 | 38 | 20 | 379 | 0 | 25 | 15 | 245 | 39 | 687 |
| 67,130 | 4 | 38 | 20 | 380 | 0 | 25 | 15 | 246 | 39 | 689 |
| 67,131 | 4 | 38 | 20 | 382 | 0 | 25 | 15 | 247 | 39 | 692 |
| 67,132 | 4 | 39 | 21 | 381 | 0 | 25 | 16 | 246 | 41 | 691 |
| 67,133 | 4 | 39 | 27 | 381 | 0 | 25 | 16 | 246 | 47 | 691 |
| 67,134 | 4 | 39 | 41 | 381 | 0 | 25 | 15 | 247 | 60 | 692 |
| 67,135 | 4 | 39 | 42 | 382 | 0 | 26 | 15 | 247 | 61 | 694 |
| 67,136 | 4 | 39 | 41 | 381 | 0 | 25 | 15 | 246 | 60 | 691 |
| 67,137 | 4 | 39 | 41 | 382 | 0 | 25 | 15 | 248 | 60 | 694 |
| 67,138 | 4 | 39 | 41 | 382 | 0 | 25 | 15 | 248 | 60 | 694 |
| 67,139 | 4 | 39 | 41 | 378 | 0 | 25 | 15 | 251 | 60 | 693 |
| 67,140 | 4 | 37 | 41 | 355 | 0 | 22 | 15 | 234 | 60 | 648 |
| 67,141 | 4 | 37 | 37 | 357 | 0 | 22 | 15 | 236 | 56 | 652 |
| 67,142 | 3 | 35 | 34 | 354 | 0 | 22 | 15 | 234 | 52 | 645 |
| 67,143 | 2 | 36 | 29 | 352 | 0 | 22 | 14 | 234 | 45 | 644 |
| 67,144 | 2 | 34 | 30 | 342 | 0 | 20 | 15 | 227 | 47 | 623 |
| 67,145 | 2 | 34 | 30 | 342 | 0 | 20 | 15 | 228 | 47 | 624 |
| 67,146 | 2 | 34 | 30 | 336 | 0 | 20 | 11 | 225 | 43 | 615 |

|        |   |    |    |     |   |    |    |     |     |     |
|--------|---|----|----|-----|---|----|----|-----|-----|-----|
| 67,147 | 2 | 36 | 30 | 337 | 0 | 21 | 11 | 232 | 43  | 626 |
| 67,148 | 2 | 36 | 30 | 337 | 0 | 21 | 11 | 232 | 43  | 626 |
| 67,149 | 2 | 36 | 30 | 343 | 0 | 21 | 11 | 234 | 43  | 634 |
| 67,150 | 3 | 36 | 40 | 344 | 0 | 21 | 15 | 234 | 58  | 635 |
| 67,151 | 5 | 37 | 52 | 346 | 0 | 21 | 21 | 234 | 78  | 638 |
| 67,152 | 6 | 37 | 60 | 348 | 0 | 22 | 26 | 235 | 92  | 642 |
| 67,153 | 6 | 36 | 61 | 344 | 0 | 21 | 23 | 233 | 90  | 634 |
| 67,154 | 6 | 36 | 61 | 347 | 0 | 21 | 23 | 233 | 90  | 637 |
| 67,155 | 6 | 37 | 61 | 347 | 0 | 22 | 23 | 233 | 90  | 639 |
| 67,156 | 6 | 37 | 61 | 329 | 0 | 21 | 23 | 225 | 90  | 612 |
| 67,157 | 6 | 37 | 61 | 329 | 0 | 21 | 23 | 229 | 90  | 616 |
| 67,158 | 6 | 37 | 61 | 321 | 0 | 21 | 20 | 226 | 87  | 605 |
| 67,159 | 6 | 27 | 61 | 300 | 0 | 20 | 20 | 214 | 87  | 561 |
| 67,160 | 6 | 26 | 62 | 283 | 0 | 19 | 20 | 205 | 88  | 533 |
| 67,161 | 6 | 16 | 62 | 107 | 0 | 5  | 20 | 92  | 88  | 220 |
| 67,162 | 6 | 16 | 63 | 107 | 1 | 5  | 20 | 92  | 90  | 220 |
| 67,163 | 6 | 16 | 63 | 109 | 1 | 5  | 21 | 92  | 91  | 222 |
| 67,164 | 6 | 16 | 63 | 109 | 1 | 5  | 21 | 92  | 91  | 222 |
| 67,165 | 6 | 16 | 62 | 109 | 1 | 6  | 22 | 96  | 91  | 227 |
| 67,166 | 6 | 10 | 62 | 74  | 1 | 5  | 22 | 81  | 91  | 170 |
| 67,167 | 6 | 10 | 65 | 77  | 1 | 5  | 24 | 86  | 96  | 178 |
| 67,168 | 6 | 10 | 65 | 95  | 1 | 7  | 25 | 111 | 97  | 223 |
| 67,169 | 6 | 10 | 65 | 87  | 1 | 7  | 25 | 98  | 97  | 202 |
| 67,170 | 6 | 12 | 73 | 95  | 1 | 11 | 29 | 108 | 109 | 226 |
| 67,171 | 6 | 15 | 73 | 105 | 1 | 17 | 29 | 128 | 109 | 265 |
| 67,172 | 6 | 18 | 73 | 128 | 1 | 19 | 29 | 152 | 109 | 317 |
| 67,173 | 6 | 18 | 73 | 130 | 1 | 19 | 29 | 153 | 109 | 320 |
| 67,174 | 6 | 18 | 73 | 127 | 1 | 19 | 29 | 148 | 109 | 312 |
| 67,175 | 6 | 17 | 73 | 124 | 1 | 19 | 28 | 147 | 108 | 307 |
| 67,176 | 6 | 19 | 74 | 132 | 1 | 19 | 28 | 151 | 109 | 321 |
| 67,177 | 4 | 19 | 74 | 133 | 1 | 20 | 28 | 152 | 107 | 324 |
| 67,178 | 4 | 18 | 76 | 128 | 1 | 20 | 28 | 148 | 109 | 314 |
| 67,179 | 4 | 18 | 76 | 130 | 1 | 20 | 28 | 159 | 109 | 327 |
| 67,180 | 4 | 18 | 77 | 132 | 1 | 20 | 29 | 168 | 111 | 338 |
| 67,181 | 4 | 18 | 77 | 140 | 1 | 20 | 29 | 184 | 111 | 362 |
| 67,182 | 4 | 18 | 77 | 173 | 1 | 25 | 29 | 256 | 111 | 472 |
| 67,183 | 5 | 18 | 76 | 279 | 1 | 34 | 28 | 374 | 110 | 705 |
| 67,184 | 5 | 18 | 70 | 329 | 1 | 34 | 28 | 387 | 104 | 768 |
| 67,185 | 5 | 18 | 57 | 333 | 1 | 33 | 29 | 386 | 92  | 770 |
| 67,186 | 5 | 18 | 56 | 333 | 1 | 33 | 29 | 386 | 91  | 770 |
| 67,187 | 5 | 18 | 56 | 332 | 1 | 33 | 29 | 385 | 91  | 768 |

|        |   |    |    |     |   |    |    |     |     |     |
|--------|---|----|----|-----|---|----|----|-----|-----|-----|
| 67,188 | 6 | 18 | 56 | 334 | 1 | 33 | 29 | 386 | 92  | 771 |
| 67,189 | 6 | 19 | 56 | 335 | 1 | 33 | 30 | 383 | 93  | 770 |
| 67,190 | 6 | 19 | 56 | 335 | 1 | 33 | 30 | 384 | 93  | 771 |
| 67,191 | 6 | 19 | 60 | 338 | 1 | 33 | 30 | 383 | 97  | 773 |
| 67,192 | 6 | 19 | 64 | 336 | 1 | 33 | 36 | 381 | 107 | 769 |
| 67,193 | 6 | 18 | 66 | 336 | 1 | 34 | 36 | 378 | 109 | 766 |
| 67,194 | 6 | 18 | 66 | 336 | 1 | 34 | 36 | 374 | 109 | 762 |
| 67,195 | 7 | 18 | 70 | 336 | 1 | 34 | 35 | 374 | 113 | 762 |
| 67,196 | 7 | 18 | 70 | 340 | 1 | 34 | 35 | 374 | 113 | 766 |
| 67,197 | 7 | 19 | 74 | 339 | 1 | 34 | 39 | 370 | 121 | 762 |
| 67,198 | 7 | 18 | 75 | 339 | 1 | 33 | 43 | 374 | 126 | 764 |
| 67,199 | 7 | 18 | 77 | 353 | 1 | 33 | 45 | 390 | 130 | 794 |
| 67,200 | 6 | 19 | 72 | 361 | 1 | 34 | 43 | 405 | 122 | 819 |
| 67,201 | 6 | 19 | 68 | 365 | 1 | 34 | 41 | 413 | 116 | 831 |
| 67,202 | 4 | 19 | 56 | 363 | 1 | 34 | 34 | 417 | 95  | 833 |
| 67,203 | 3 | 19 | 48 | 361 | 1 | 33 | 28 | 417 | 80  | 830 |
| 67,204 | 3 | 19 | 45 | 367 | 1 | 33 | 28 | 420 | 77  | 839 |
| 67,205 | 3 | 19 | 45 | 364 | 1 | 33 | 27 | 420 | 76  | 836 |
| 67,206 | 3 | 18 | 45 | 364 | 1 | 32 | 27 | 420 | 76  | 834 |
| 67,207 | 3 | 18 | 45 | 364 | 1 | 32 | 27 | 420 | 76  | 834 |
| 67,208 | 3 | 18 | 45 | 364 | 2 | 32 | 27 | 417 | 77  | 831 |
| 67,209 | 3 | 18 | 45 | 363 | 2 | 32 | 26 | 416 | 76  | 829 |
| 67,210 | 3 | 18 | 45 | 363 | 2 | 32 | 26 | 416 | 76  | 829 |
| 67,211 | 3 | 19 | 44 | 363 | 2 | 32 | 25 | 416 | 74  | 830 |
| 67,212 | 3 | 19 | 44 | 363 | 2 | 32 | 25 | 416 | 74  | 830 |
| 67,213 | 3 | 19 | 43 | 361 | 1 | 32 | 25 | 416 | 72  | 828 |
| 67,214 | 3 | 19 | 43 | 361 | 1 | 32 | 25 | 416 | 72  | 828 |
| 67,215 | 3 | 19 | 43 | 361 | 1 | 31 | 25 | 412 | 72  | 823 |
| 67,216 | 3 | 19 | 43 | 361 | 1 | 31 | 25 | 412 | 72  | 823 |
| 67,217 | 3 | 19 | 43 | 361 | 1 | 31 | 25 | 412 | 72  | 823 |
| 67,218 | 3 | 19 | 40 | 359 | 1 | 31 | 23 | 406 | 67  | 815 |
| 67,219 | 3 | 19 | 42 | 336 | 1 | 29 | 23 | 379 | 69  | 763 |
| 67,220 | 3 | 15 | 36 | 323 | 1 | 25 | 25 | 365 | 65  | 728 |
| 67,221 | 3 | 12 | 36 | 309 | 1 | 19 | 25 | 342 | 65  | 682 |
| 67,222 | 3 | 12 | 36 | 309 | 1 | 19 | 25 | 342 | 65  | 682 |
| 67,223 | 3 | 9  | 36 | 283 | 1 | 17 | 25 | 315 | 65  | 624 |
| 67,224 | 3 | 9  | 36 | 283 | 1 | 17 | 25 | 316 | 65  | 625 |
| 67,225 | 3 | 9  | 36 | 284 | 1 | 17 | 25 | 317 | 65  | 627 |
| 67,226 | 3 | 9  | 36 | 284 | 1 | 17 | 25 | 316 | 65  | 626 |
| 67,227 | 3 | 7  | 48 | 280 | 3 | 17 | 38 | 314 | 92  | 618 |
| 67,228 | 3 | 7  | 48 | 279 | 3 | 16 | 38 | 313 | 92  | 615 |



|        |   |    |    |     |   |    |    |     |    |     |
|--------|---|----|----|-----|---|----|----|-----|----|-----|
| 67,229 | 3 | 7  | 44 | 270 | 3 | 16 | 38 | 292 | 88 | 585 |
| 67,230 | 3 | 7  | 43 | 270 | 3 | 16 | 37 | 291 | 86 | 584 |
| 67,231 | 3 | 7  | 43 | 269 | 3 | 16 | 37 | 291 | 86 | 583 |
| 67,232 | 3 | 7  | 43 | 227 | 3 | 11 | 37 | 203 | 86 | 448 |
| 67,233 | 3 | 7  | 43 | 230 | 3 | 11 | 37 | 202 | 86 | 450 |
| 67,234 | 2 | 6  | 43 | 77  | 3 | 2  | 37 | 73  | 85 | 158 |
| 67,235 | 2 | 6  | 43 | 78  | 3 | 2  | 37 | 73  | 85 | 159 |
| 67,236 | 2 | 6  | 42 | 76  | 3 | 2  | 36 | 74  | 83 | 158 |
| 67,237 | 2 | 6  | 42 | 76  | 3 | 2  | 36 | 74  | 83 | 158 |
| 67,238 | 2 | 7  | 42 | 78  | 3 | 2  | 36 | 73  | 83 | 160 |
| 67,239 | 1 | 7  | 43 | 76  | 3 | 2  | 36 | 72  | 83 | 157 |
| 67,240 | 1 | 6  | 43 | 75  | 3 | 2  | 35 | 73  | 82 | 156 |
| 67,241 | 1 | 6  | 41 | 79  | 3 | 2  | 35 | 76  | 80 | 163 |
| 67,242 | 1 | 6  | 39 | 79  | 3 | 2  | 35 | 76  | 78 | 163 |
| 67,243 | 1 | 8  | 35 | 89  | 3 | 4  | 29 | 84  | 68 | 185 |
| 67,244 | 1 | 8  | 34 | 110 | 3 | 3  | 29 | 94  | 67 | 215 |
| 67,245 | 1 | 13 | 34 | 136 | 3 | 6  | 30 | 113 | 68 | 268 |
| 67,246 | 0 | 15 | 30 | 153 | 3 | 6  | 30 | 118 | 63 | 292 |
| 67,247 | 0 | 15 | 26 | 164 | 3 | 6  | 26 | 125 | 55 | 310 |
| 67,248 | 0 | 16 | 26 | 186 | 3 | 8  | 26 | 133 | 55 | 343 |
| 67,249 | 0 | 17 | 25 | 187 | 3 | 9  | 22 | 130 | 50 | 343 |
| 67,250 | 0 | 17 | 23 | 175 | 3 | 9  | 20 | 117 | 46 | 318 |
| 67,251 | 1 | 16 | 24 | 160 | 3 | 8  | 20 | 99  | 48 | 283 |
| 67,252 | 1 | 16 | 24 | 157 | 3 | 8  | 20 | 93  | 48 | 274 |
| 67,253 | 2 | 15 | 24 | 158 | 3 | 8  | 20 | 89  | 49 | 270 |
| 67,254 | 2 | 15 | 24 | 159 | 3 | 8  | 20 | 89  | 49 | 271 |
| 67,255 | 2 | 15 | 26 | 153 | 4 | 8  | 22 | 86  | 54 | 262 |
| 67,256 | 3 | 15 | 30 | 154 | 4 | 8  | 22 | 86  | 59 | 263 |
| 67,257 | 3 | 15 | 36 | 154 | 4 | 8  | 24 | 85  | 67 | 262 |
| 67,258 | 3 | 16 | 39 | 159 | 4 | 8  | 25 | 86  | 71 | 269 |
| 67,259 | 3 | 16 | 39 | 159 | 3 | 8  | 25 | 88  | 70 | 271 |
| 67,260 | 3 | 16 | 42 | 159 | 3 | 8  | 26 | 92  | 74 | 275 |
| 67,261 | 3 | 16 | 43 | 159 | 3 | 8  | 26 | 94  | 75 | 277 |
| 67,262 | 3 | 15 | 43 | 159 | 3 | 8  | 26 | 95  | 75 | 277 |
| 67,263 | 3 | 15 | 43 | 159 | 3 | 8  | 26 | 95  | 75 | 277 |
| 67,264 | 3 | 15 | 43 | 163 | 3 | 8  | 26 | 97  | 75 | 283 |
| 67,265 | 3 | 15 | 43 | 164 | 3 | 9  | 26 | 98  | 75 | 286 |
| 67,266 | 3 | 15 | 44 | 164 | 3 | 9  | 26 | 98  | 76 | 286 |
| 67,267 | 3 | 15 | 45 | 165 | 4 | 9  | 26 | 98  | 78 | 287 |
| 67,268 | 4 | 15 | 55 | 164 | 4 | 9  | 27 | 98  | 90 | 286 |
| 67,269 | 4 | 15 | 59 | 163 | 4 | 9  | 28 | 98  | 95 | 285 |

|        |   |    |    |     |   |   |    |     |     |     |
|--------|---|----|----|-----|---|---|----|-----|-----|-----|
| 67,270 | 4 | 15 | 55 | 167 | 4 | 9 | 28 | 101 | 91  | 292 |
| 67,271 | 4 | 15 | 53 | 168 | 4 | 9 | 23 | 102 | 84  | 294 |
| 67,272 | 6 | 15 | 64 | 169 | 4 | 9 | 25 | 105 | 99  | 298 |
| 67,273 | 6 | 15 | 66 | 170 | 5 | 9 | 28 | 105 | 105 | 299 |
| 67,274 | 6 | 15 | 67 | 169 | 5 | 9 | 28 | 104 | 106 | 297 |
| 67,275 | 6 | 15 | 67 | 174 | 5 | 9 | 28 | 105 | 106 | 303 |
| 67,276 | 6 | 15 | 55 | 175 | 3 | 9 | 18 | 107 | 82  | 306 |
| 67,277 | 6 | 15 | 54 | 175 | 3 | 9 | 16 | 107 | 79  | 306 |
| 67,278 | 6 | 15 | 54 | 171 | 3 | 9 | 15 | 105 | 78  | 300 |
| 67,279 | 6 | 15 | 54 | 171 | 3 | 9 | 15 | 103 | 78  | 298 |
| 67,280 | 6 | 15 | 54 | 171 | 3 | 9 | 15 | 103 | 78  | 298 |
| 67,281 | 6 | 15 | 54 | 171 | 3 | 9 | 15 | 103 | 78  | 298 |
| 67,282 | 6 | 15 | 58 | 172 | 3 | 9 | 15 | 103 | 82  | 299 |
| 67,283 | 6 | 15 | 58 | 178 | 3 | 9 | 15 | 105 | 82  | 307 |
| 67,284 | 6 | 16 | 58 | 188 | 3 | 9 | 15 | 116 | 82  | 329 |
| 67,285 | 6 | 17 | 58 | 186 | 3 | 9 | 15 | 117 | 82  | 329 |
| 67,286 | 6 | 17 | 60 | 186 | 3 | 9 | 16 | 117 | 85  | 329 |
| 67,287 | 6 | 17 | 61 | 182 | 3 | 9 | 16 | 117 | 86  | 325 |
| 67,288 | 6 | 17 | 61 | 182 | 3 | 9 | 16 | 119 | 86  | 327 |
| 67,289 | 6 | 16 | 61 | 181 | 3 | 9 | 16 | 119 | 86  | 325 |
| 67,290 | 6 | 16 | 62 | 181 | 3 | 9 | 16 | 119 | 87  | 325 |
| 67,291 | 6 | 16 | 62 | 181 | 3 | 9 | 16 | 117 | 87  | 323 |
| 67,292 | 6 | 16 | 62 | 174 | 3 | 9 | 16 | 113 | 87  | 312 |
| 67,293 | 6 | 14 | 62 | 165 | 3 | 7 | 16 | 105 | 87  | 291 |
| 67,294 | 6 | 14 | 62 | 144 | 3 | 7 | 16 | 95  | 87  | 260 |
| 67,295 | 6 | 14 | 61 | 144 | 3 | 7 | 16 | 95  | 86  | 260 |
| 67,296 | 6 | 7  | 61 | 102 | 3 | 4 | 15 | 72  | 85  | 185 |
| 67,297 | 6 | 7  | 60 | 102 | 3 | 4 | 15 | 72  | 84  | 185 |
| 67,298 | 6 | 5  | 61 | 65  | 3 | 3 | 15 | 56  | 85  | 129 |
| 67,299 | 6 | 3  | 61 | 60  | 3 | 2 | 15 | 49  | 85  | 114 |
| 67,300 | 6 | 3  | 62 | 61  | 3 | 2 | 15 | 50  | 86  | 116 |
| 67,301 | 5 | 4  | 60 | 79  | 3 | 2 | 15 | 58  | 83  | 143 |
| 67,302 | 5 | 4  | 60 | 81  | 3 | 2 | 15 | 58  | 83  | 145 |
| 67,303 | 6 | 4  | 61 | 80  | 3 | 3 | 15 | 56  | 85  | 143 |
| 67,304 | 5 | 4  | 70 | 82  | 3 | 3 | 15 | 58  | 93  | 147 |
| 67,305 | 5 | 4  | 68 | 81  | 2 | 3 | 13 | 58  | 88  | 146 |
| 67,306 | 5 | 4  | 69 | 83  | 2 | 3 | 13 | 59  | 89  | 149 |
| 67,307 | 4 | 4  | 67 | 83  | 2 | 3 | 13 | 59  | 86  | 149 |
| 67,308 | 4 | 4  | 61 | 84  | 2 | 3 | 12 | 60  | 79  | 151 |
| 67,309 | 4 | 3  | 58 | 79  | 2 | 3 | 11 | 59  | 75  | 144 |
| 67,310 | 4 | 3  | 55 | 79  | 2 | 3 | 10 | 52  | 71  | 137 |

|        |   |    |    |     |   |    |    |     |    |     |
|--------|---|----|----|-----|---|----|----|-----|----|-----|
| 67,311 | 4 | 3  | 54 | 79  | 2 | 3  | 10 | 51  | 70 | 136 |
| 67,312 | 4 | 3  | 54 | 79  | 2 | 3  | 10 | 50  | 70 | 135 |
| 67,313 | 4 | 3  | 54 | 79  | 2 | 3  | 10 | 50  | 70 | 135 |
| 67,314 | 4 | 3  | 54 | 75  | 2 | 3  | 10 | 48  | 70 | 129 |
| 67,315 | 4 | 3  | 53 | 74  | 2 | 2  | 10 | 47  | 69 | 126 |
| 67,316 | 4 | 3  | 53 | 74  | 2 | 2  | 10 | 47  | 69 | 126 |
| 67,317 | 4 | 3  | 52 | 73  | 2 | 2  | 10 | 47  | 68 | 125 |
| 67,318 | 4 | 3  | 52 | 73  | 1 | 2  | 10 | 47  | 67 | 125 |
| 67,319 | 3 | 3  | 42 | 73  | 1 | 2  | 9  | 47  | 55 | 125 |
| 67,320 | 3 | 3  | 38 | 73  | 1 | 2  | 8  | 47  | 50 | 125 |
| 67,321 | 3 | 3  | 39 | 69  | 1 | 2  | 7  | 44  | 50 | 118 |
| 67,322 | 1 | 3  | 29 | 67  | 1 | 2  | 5  | 40  | 36 | 112 |
| 67,323 | 1 | 3  | 28 | 67  | 1 | 2  | 4  | 40  | 34 | 112 |
| 67,324 | 1 | 3  | 26 | 65  | 0 | 2  | 2  | 38  | 29 | 108 |
| 67,325 | 1 | 3  | 25 | 65  | 0 | 2  | 2  | 38  | 28 | 108 |
| 67,326 | 1 | 3  | 25 | 61  | 0 | 2  | 2  | 38  | 28 | 104 |
| 67,327 | 1 | 3  | 25 | 60  | 0 | 2  | 2  | 36  | 28 | 101 |
| 67,328 | 1 | 3  | 25 | 60  | 0 | 2  | 2  | 36  | 28 | 101 |
| 67,329 | 2 | 3  | 29 | 60  | 0 | 2  | 2  | 36  | 33 | 101 |
| 67,330 | 3 | 3  | 29 | 60  | 0 | 2  | 2  | 37  | 34 | 102 |
| 67,331 | 3 | 3  | 29 | 66  | 0 | 3  | 2  | 45  | 34 | 117 |
| 67,332 | 3 | 3  | 26 | 85  | 0 | 3  | 2  | 53  | 31 | 144 |
| 67,333 | 3 | 5  | 26 | 168 | 0 | 7  | 2  | 98  | 31 | 278 |
| 67,334 | 3 | 6  | 26 | 196 | 0 | 7  | 2  | 97  | 31 | 306 |
| 67,335 | 3 | 5  | 26 | 194 | 0 | 7  | 2  | 88  | 31 | 294 |
| 67,336 | 3 | 6  | 34 | 204 | 0 | 8  | 3  | 86  | 40 | 304 |
| 67,337 | 4 | 6  | 38 | 204 | 0 | 8  | 9  | 87  | 51 | 305 |
| 67,338 | 4 | 6  | 45 | 204 | 0 | 8  | 12 | 85  | 61 | 303 |
| 67,339 | 4 | 6  | 43 | 204 | 0 | 8  | 12 | 85  | 59 | 303 |
| 67,340 | 5 | 6  | 55 | 205 | 0 | 8  | 14 | 86  | 74 | 305 |
| 67,341 | 5 | 6  | 57 | 205 | 0 | 8  | 17 | 87  | 79 | 306 |
| 67,342 | 5 | 6  | 57 | 205 | 0 | 8  | 17 | 87  | 79 | 306 |
| 67,343 | 5 | 6  | 57 | 204 | 0 | 8  | 17 | 87  | 79 | 305 |
| 67,344 | 5 | 6  | 57 | 204 | 0 | 8  | 19 | 87  | 81 | 305 |
| 67,345 | 5 | 6  | 57 | 204 | 0 | 8  | 19 | 87  | 81 | 305 |
| 67,346 | 5 | 6  | 57 | 203 | 0 | 8  | 19 | 87  | 81 | 304 |
| 67,347 | 5 | 6  | 57 | 203 | 0 | 8  | 19 | 87  | 81 | 304 |
| 67,348 | 5 | 6  | 56 | 204 | 0 | 8  | 19 | 87  | 80 | 305 |
| 67,349 | 5 | 11 | 57 | 214 | 0 | 7  | 20 | 96  | 82 | 328 |
| 67,350 | 5 | 17 | 57 | 264 | 0 | 11 | 20 | 139 | 82 | 431 |
| 67,351 | 5 | 17 | 55 | 270 | 0 | 11 | 20 | 142 | 80 | 440 |

|        |   |    |    |     |   |    |    |     |    |       |
|--------|---|----|----|-----|---|----|----|-----|----|-------|
| 67,352 | 5 | 20 | 56 | 298 | 0 | 13 | 20 | 153 | 81 | 484   |
| 67,353 | 4 | 24 | 56 | 327 | 0 | 17 | 20 | 160 | 80 | 528   |
| 67,354 | 4 | 25 | 56 | 343 | 0 | 18 | 20 | 167 | 80 | 553   |
| 67,355 | 4 | 25 | 46 | 351 | 0 | 18 | 20 | 167 | 70 | 561   |
| 67,356 | 4 | 25 | 45 | 353 | 0 | 18 | 20 | 167 | 69 | 563   |
| 67,357 | 4 | 26 | 45 | 351 | 0 | 18 | 20 | 166 | 69 | 561   |
| 67,358 | 4 | 26 | 47 | 355 | 0 | 18 | 21 | 165 | 72 | 564   |
| 67,359 | 4 | 26 | 47 | 356 | 0 | 18 | 20 | 165 | 71 | 565   |
| 67,360 | 4 | 29 | 47 | 408 | 0 | 19 | 20 | 178 | 71 | 634   |
| 67,361 | 4 | 29 | 47 | 435 | 0 | 19 | 20 | 181 | 71 | 664   |
| 67,362 | 4 | 31 | 47 | 450 | 0 | 19 | 20 | 191 | 71 | 691   |
| 67,363 | 4 | 31 | 47 | 460 | 0 | 19 | 20 | 192 | 71 | 702   |
| 67,364 | 4 | 32 | 47 | 461 | 0 | 19 | 20 | 192 | 71 | 704   |
| 67,365 | 4 | 32 | 47 | 465 | 0 | 19 | 20 | 192 | 71 | 708   |
| 67,366 | 4 | 32 | 47 | 465 | 0 | 19 | 20 | 192 | 71 | 708   |
| 67,367 | 4 | 32 | 47 | 466 | 0 | 19 | 20 | 192 | 71 | 709   |
| 67,368 | 4 | 32 | 47 | 466 | 0 | 19 | 20 | 192 | 71 | 709   |
| 67,369 | 4 | 33 | 48 | 476 | 0 | 20 | 21 | 205 | 73 | 734   |
| 67,370 | 5 | 33 | 48 | 479 | 0 | 20 | 21 | 206 | 74 | 738   |
| 67,371 | 5 | 33 | 48 | 479 | 0 | 20 | 21 | 207 | 74 | 739   |
| 67,372 | 5 | 33 | 47 | 479 | 0 | 20 | 21 | 207 | 73 | 739   |
| 67,373 | 5 | 33 | 47 | 479 | 0 | 20 | 21 | 207 | 73 | 739   |
| 67,374 | 5 | 33 | 47 | 480 | 0 | 20 | 21 | 207 | 73 | 740   |
| 67,375 | 5 | 33 | 47 | 480 | 0 | 20 | 21 | 207 | 73 | 740   |
| 67,376 | 6 | 33 | 47 | 484 | 0 | 20 | 21 | 209 | 74 | 746   |
| 67,377 | 6 | 33 | 47 | 484 | 0 | 20 | 21 | 209 | 74 | 746   |
| 67,378 | 6 | 33 | 47 | 486 | 0 | 20 | 21 | 209 | 74 | 748   |
| 67,379 | 6 | 34 | 47 | 486 | 0 | 20 | 21 | 210 | 74 | 750   |
| 67,380 | 5 | 34 | 43 | 487 | 0 | 20 | 21 | 207 | 69 | 748   |
| 67,381 | 4 | 34 | 43 | 487 | 0 | 20 | 21 | 207 | 68 | 748   |
| 67,382 | 4 | 34 | 43 | 481 | 0 | 19 | 22 | 199 | 69 | 733   |
| 67,383 | 4 | 32 | 45 | 381 | 0 | 15 | 24 | 149 | 73 | 577   |
| 67,384 | 4 | 32 | 48 | 409 | 0 | 16 | 25 | 162 | 77 | 619   |
| 67,385 | 4 | 32 | 48 | 452 | 0 | 21 | 25 | 192 | 77 | 697   |
| 67,386 | 6 | 35 | 50 | 511 | 0 | 25 | 27 | 231 | 83 | 802   |
| 67,387 | 6 | 36 | 41 | 631 | 0 | 27 | 25 | 255 | 72 | 949   |
| 67,388 | 5 | 36 | 36 | 671 | 0 | 27 | 18 | 266 | 59 | 1,000 |
| 67,389 | 5 | 36 | 28 | 691 | 0 | 27 | 15 | 269 | 48 | 1,023 |
| 67,390 | 5 | 39 | 18 | 739 | 0 | 28 | 13 | 278 | 36 | 1,084 |
| 67,391 | 5 | 40 | 16 | 738 | 0 | 28 | 12 | 281 | 33 | 1,087 |
| 67,392 | 5 | 40 | 14 | 739 | 0 | 28 | 9  | 280 | 28 | 1,087 |

|        |   |    |    |     |   |    |    |     |    |       |
|--------|---|----|----|-----|---|----|----|-----|----|-------|
| 67,393 | 5 | 40 | 14 | 739 | 0 | 28 | 9  | 280 | 28 | 1,087 |
| 67,394 | 5 | 40 | 17 | 740 | 0 | 28 | 10 | 281 | 32 | 1,089 |
| 67,395 | 5 | 47 | 17 | 753 | 0 | 28 | 10 | 287 | 32 | 1,115 |
| 67,396 | 5 | 47 | 17 | 755 | 0 | 28 | 10 | 289 | 32 | 1,119 |
| 67,397 | 5 | 49 | 17 | 759 | 0 | 28 | 12 | 291 | 34 | 1,127 |
| 67,398 | 5 | 51 | 17 | 787 | 0 | 29 | 12 | 315 | 34 | 1,182 |
| 67,399 | 5 | 51 | 16 | 786 | 0 | 29 | 11 | 315 | 32 | 1,181 |
| 67,400 | 5 | 40 | 17 | 728 | 0 | 25 | 11 | 265 | 33 | 1,058 |
| 67,401 | 5 | 41 | 17 | 724 | 0 | 26 | 11 | 264 | 33 | 1,055 |
| 67,402 | 5 | 41 | 16 | 725 | 0 | 26 | 11 | 264 | 32 | 1,056 |
| 67,403 | 5 | 39 | 16 | 680 | 0 | 24 | 11 | 244 | 32 | 987   |
| 67,404 | 5 | 35 | 16 | 648 | 0 | 20 | 11 | 237 | 32 | 940   |
| 67,405 | 5 | 35 | 16 | 643 | 0 | 18 | 12 | 233 | 33 | 929   |
| 67,406 | 5 | 35 | 15 | 635 | 0 | 18 | 12 | 232 | 32 | 920   |
| 67,407 | 5 | 34 | 15 | 634 | 0 | 18 | 12 | 232 | 32 | 918   |
| 67,408 | 5 | 34 | 15 | 634 | 0 | 18 | 12 | 232 | 32 | 918   |
| 67,409 | 5 | 34 | 13 | 627 | 0 | 18 | 11 | 232 | 29 | 911   |
| 67,410 | 5 | 31 | 13 | 577 | 0 | 17 | 11 | 219 | 29 | 844   |
| 67,411 | 5 | 29 | 13 | 535 | 1 | 17 | 11 | 206 | 30 | 787   |
| 67,412 | 5 | 29 | 13 | 536 | 1 | 17 | 11 | 206 | 30 | 788   |
| 67,413 | 5 | 29 | 13 | 536 | 1 | 17 | 11 | 206 | 30 | 788   |
| 67,414 | 5 | 29 | 13 | 526 | 1 | 17 | 11 | 205 | 30 | 777   |
| 67,415 | 7 | 28 | 13 | 522 | 1 | 17 | 11 | 206 | 32 | 773   |
| 67,416 | 7 | 28 | 13 | 522 | 1 | 17 | 11 | 208 | 32 | 775   |
| 67,417 | 7 | 28 | 13 | 522 | 1 | 17 | 11 | 208 | 32 | 775   |
| 67,418 | 7 | 28 | 13 | 521 | 1 | 17 | 11 | 208 | 32 | 774   |
| 67,419 | 7 | 27 | 13 | 508 | 1 | 16 | 11 | 194 | 32 | 745   |
| 67,420 | 7 | 28 | 12 | 510 | 1 | 16 | 10 | 195 | 30 | 749   |
| 67,421 | 6 | 28 | 12 | 510 | 1 | 16 | 10 | 195 | 29 | 749   |
| 67,422 | 6 | 28 | 16 | 511 | 1 | 17 | 10 | 194 | 33 | 750   |
| 67,423 | 6 | 28 | 16 | 512 | 1 | 17 | 10 | 194 | 33 | 751   |
| 67,424 | 6 | 28 | 16 | 512 | 1 | 17 | 11 | 194 | 34 | 751   |
| 67,425 | 6 | 31 | 16 | 517 | 1 | 19 | 11 | 201 | 34 | 768   |
| 67,426 | 6 | 31 | 16 | 520 | 1 | 19 | 11 | 201 | 34 | 771   |
| 67,427 | 6 | 31 | 17 | 517 | 1 | 19 | 16 | 198 | 40 | 765   |
| 67,428 | 6 | 31 | 17 | 520 | 1 | 19 | 16 | 202 | 40 | 772   |
| 67,429 | 6 | 33 | 29 | 535 | 1 | 20 | 19 | 212 | 55 | 800   |
| 67,430 | 6 | 38 | 31 | 552 | 1 | 25 | 19 | 268 | 57 | 883   |
| 67,431 | 6 | 38 | 31 | 580 | 1 | 25 | 19 | 288 | 57 | 931   |
| 67,432 | 6 | 56 | 31 | 764 | 1 | 43 | 19 | 484 | 57 | 1,347 |
| 67,433 | 6 | 65 | 29 | 827 | 1 | 46 | 18 | 522 | 54 | 1,460 |

|        |   |     |    |     |   |    |    |     |    |       |
|--------|---|-----|----|-----|---|----|----|-----|----|-------|
| 67,434 | 6 | 65  | 28 | 827 | 1 | 46 | 17 | 523 | 52 | 1,461 |
| 67,435 | 6 | 64  | 25 | 726 | 1 | 40 | 16 | 482 | 48 | 1,312 |
| 67,436 | 6 | 67  | 25 | 738 | 1 | 41 | 16 | 489 | 48 | 1,335 |
| 67,437 | 4 | 64  | 23 | 671 | 1 | 37 | 14 | 450 | 42 | 1,222 |
| 67,438 | 4 | 61  | 42 | 541 | 1 | 34 | 20 | 427 | 67 | 1,063 |
| 67,439 | 4 | 61  | 42 | 510 | 1 | 35 | 20 | 419 | 67 | 1,025 |
| 67,440 | 4 | 61  | 42 | 491 | 1 | 35 | 20 | 416 | 67 | 1,003 |
| 67,441 | 4 | 58  | 45 | 445 | 2 | 34 | 26 | 407 | 77 | 944   |
| 67,442 | 3 | 57  | 45 | 452 | 2 | 34 | 26 | 404 | 76 | 947   |
| 67,443 | 3 | 58  | 45 | 457 | 3 | 35 | 26 | 414 | 77 | 964   |
| 67,444 | 3 | 58  | 43 | 475 | 3 | 35 | 25 | 427 | 74 | 995   |
| 67,445 | 3 | 58  | 42 | 474 | 3 | 36 | 25 | 429 | 73 | 997   |
| 67,446 | 3 | 52  | 42 | 462 | 3 | 36 | 25 | 426 | 73 | 976   |
| 67,447 | 3 | 54  | 42 | 468 | 3 | 37 | 23 | 436 | 71 | 995   |
| 67,448 | 3 | 52  | 42 | 467 | 3 | 37 | 23 | 434 | 71 | 990   |
| 67,449 | 3 | 63  | 42 | 461 | 3 | 40 | 23 | 452 | 71 | 1,016 |
| 67,450 | 3 | 63  | 42 | 466 | 3 | 40 | 23 | 460 | 71 | 1,029 |
| 67,451 | 3 | 65  | 42 | 474 | 3 | 44 | 24 | 479 | 72 | 1,062 |
| 67,452 | 3 | 69  | 43 | 539 | 3 | 48 | 24 | 549 | 73 | 1,205 |
| 67,453 | 3 | 87  | 43 | 640 | 3 | 52 | 24 | 651 | 73 | 1,430 |
| 67,454 | 3 | 95  | 43 | 668 | 3 | 60 | 23 | 703 | 72 | 1,526 |
| 67,455 | 3 | 95  | 43 | 686 | 3 | 60 | 23 | 719 | 72 | 1,560 |
| 67,456 | 3 | 96  | 43 | 712 | 3 | 64 | 23 | 764 | 72 | 1,636 |
| 67,457 | 3 | 96  | 43 | 712 | 3 | 64 | 23 | 763 | 72 | 1,635 |
| 67,458 | 3 | 96  | 43 | 717 | 3 | 64 | 23 | 768 | 72 | 1,645 |
| 67,459 | 3 | 97  | 43 | 761 | 3 | 69 | 23 | 788 | 72 | 1,715 |
| 67,460 | 3 | 106 | 43 | 806 | 3 | 72 | 23 | 845 | 72 | 1,829 |
| 67,461 | 3 | 107 | 43 | 807 | 3 | 73 | 23 | 845 | 72 | 1,832 |
| 67,462 | 4 | 107 | 51 | 812 | 2 | 73 | 26 | 849 | 83 | 1,841 |
| 67,463 | 4 | 107 | 51 | 810 | 2 | 73 | 26 | 849 | 83 | 1,839 |
| 67,464 | 4 | 107 | 51 | 812 | 2 | 73 | 26 | 849 | 83 | 1,841 |
| 67,465 | 2 | 107 | 53 | 812 | 2 | 73 | 26 | 849 | 83 | 1,841 |
| 67,466 | 2 | 108 | 58 | 812 | 2 | 73 | 28 | 848 | 90 | 1,841 |
| 67,467 | 2 | 108 | 58 | 812 | 2 | 73 | 28 | 849 | 90 | 1,842 |
| 67,468 | 2 | 108 | 59 | 812 | 2 | 73 | 28 | 849 | 91 | 1,842 |
| 67,469 | 2 | 108 | 60 | 812 | 2 | 73 | 28 | 849 | 92 | 1,842 |
| 67,470 | 2 | 108 | 61 | 812 | 2 | 73 | 28 | 849 | 93 | 1,842 |
| 67,471 | 2 | 107 | 61 | 811 | 2 | 73 | 29 | 852 | 94 | 1,843 |
| 67,472 | 2 | 107 | 61 | 811 | 2 | 73 | 29 | 852 | 94 | 1,843 |
| 67,473 | 2 | 107 | 57 | 810 | 2 | 72 | 29 | 852 | 90 | 1,841 |
| 67,474 | 2 | 107 | 57 | 809 | 2 | 72 | 28 | 853 | 89 | 1,841 |

|        |   |     |    |     |   |    |    |     |    |       |
|--------|---|-----|----|-----|---|----|----|-----|----|-------|
| 67,475 | 2 | 104 | 59 | 803 | 2 | 70 | 28 | 846 | 91 | 1,823 |
| 67,476 | 2 | 104 | 61 | 803 | 2 | 70 | 28 | 847 | 93 | 1,824 |
| 67,477 | 2 | 104 | 61 | 801 | 2 | 70 | 28 | 847 | 93 | 1,822 |
| 67,478 | 1 | 104 | 61 | 800 | 2 | 70 | 24 | 847 | 88 | 1,821 |
| 67,479 | 1 | 104 | 59 | 797 | 2 | 70 | 22 | 843 | 84 | 1,814 |
| 67,480 | 1 | 96  | 54 | 762 | 2 | 64 | 21 | 776 | 78 | 1,698 |
| 67,481 | 1 | 96  | 53 | 734 | 2 | 64 | 21 | 756 | 77 | 1,650 |
| 67,482 | 1 | 78  | 59 | 550 | 2 | 46 | 21 | 562 | 83 | 1,236 |
| 67,483 | 1 | 78  | 59 | 552 | 2 | 46 | 21 | 563 | 83 | 1,239 |
| 67,484 | 1 | 71  | 61 | 509 | 2 | 43 | 23 | 543 | 87 | 1,166 |
| 67,485 | 1 | 71  | 61 | 511 | 2 | 43 | 23 | 543 | 87 | 1,168 |
| 67,486 | 1 | 71  | 67 | 514 | 2 | 43 | 24 | 545 | 94 | 1,173 |
| 67,487 | 1 | 68  | 63 | 504 | 2 | 44 | 21 | 540 | 87 | 1,156 |
| 67,488 | 1 | 69  | 49 | 507 | 2 | 44 | 19 | 543 | 71 | 1,163 |
| 67,489 | 1 | 69  | 49 | 507 | 1 | 44 | 17 | 545 | 68 | 1,165 |
| 67,490 | 1 | 69  | 46 | 496 | 1 | 43 | 13 | 541 | 61 | 1,149 |
| 67,491 | 1 | 69  | 46 | 496 | 1 | 43 | 13 | 541 | 61 | 1,149 |
| 67,492 | 1 | 69  | 46 | 494 | 1 | 43 | 13 | 541 | 61 | 1,147 |
| 67,493 | 1 | 68  | 46 | 480 | 1 | 42 | 13 | 534 | 61 | 1,124 |
| 67,494 | 1 | 68  | 46 | 482 | 0 | 42 | 13 | 535 | 60 | 1,127 |
| 67,495 | 1 | 69  | 46 | 468 | 0 | 42 | 13 | 528 | 60 | 1,107 |
| 67,496 | 1 | 69  | 46 | 468 | 0 | 41 | 13 | 525 | 60 | 1,103 |
| 67,497 | 1 | 68  | 46 | 468 | 0 | 41 | 13 | 522 | 60 | 1,099 |
| 67,498 | 1 | 66  | 46 | 462 | 0 | 40 | 13 | 514 | 60 | 1,082 |
| 67,499 | 1 | 66  | 46 | 458 | 0 | 40 | 13 | 514 | 60 | 1,078 |
| 67,500 | 1 | 53  | 46 | 437 | 0 | 36 | 12 | 472 | 59 | 998   |
| 67,501 | 1 | 53  | 46 | 432 | 0 | 36 | 12 | 464 | 59 | 985   |
| 67,502 | 1 | 50  | 46 | 415 | 0 | 31 | 12 | 440 | 59 | 936   |
| 67,503 | 1 | 28  | 45 | 249 | 1 | 23 | 12 | 267 | 59 | 567   |
| 67,504 | 1 | 28  | 45 | 249 | 1 | 23 | 12 | 267 | 59 | 567   |
| 67,505 | 1 | 18  | 45 | 221 | 1 | 15 | 12 | 220 | 59 | 474   |
| 67,506 | 1 | 18  | 45 | 203 | 1 | 15 | 12 | 204 | 59 | 440   |
| 67,507 | 1 | 18  | 45 | 180 | 1 | 12 | 12 | 174 | 59 | 384   |
| 67,508 | 1 | 18  | 45 | 177 | 1 | 12 | 12 | 177 | 59 | 384   |
| 67,509 | 1 | 18  | 46 | 175 | 1 | 12 | 12 | 173 | 60 | 378   |
| 67,510 | 2 | 17  | 46 | 133 | 1 | 7  | 12 | 160 | 61 | 317   |
| 67,511 | 2 | 8   | 46 | 90  | 1 | 4  | 12 | 105 | 61 | 207   |
| 67,512 | 1 | 7   | 45 | 86  | 1 | 3  | 10 | 105 | 57 | 201   |
| 67,513 | 1 | 7   | 39 | 82  | 1 | 3  | 9  | 101 | 50 | 193   |
| 67,514 | 1 | 7   | 39 | 80  | 1 | 3  | 9  | 101 | 50 | 191   |
| 67,515 | 1 | 7   | 39 | 81  | 1 | 3  | 10 | 101 | 51 | 192   |

|        |   |   |    |     |   |   |    |     |    |     |
|--------|---|---|----|-----|---|---|----|-----|----|-----|
| 67,516 | 1 | 7 | 37 | 84  | 1 | 3 | 10 | 102 | 49 | 196 |
| 67,517 | 1 | 6 | 32 | 84  | 1 | 3 | 8  | 101 | 42 | 194 |
| 67,518 | 1 | 6 | 31 | 85  | 1 | 3 | 8  | 101 | 41 | 195 |
| 67,519 | 1 | 6 | 31 | 86  | 1 | 3 | 9  | 101 | 42 | 196 |
| 67,520 | 1 | 6 | 30 | 86  | 1 | 3 | 9  | 101 | 41 | 196 |
| 67,521 | 1 | 6 | 29 | 87  | 1 | 3 | 9  | 101 | 40 | 197 |
| 67,522 | 1 | 6 | 29 | 88  | 1 | 3 | 8  | 97  | 39 | 194 |
| 67,523 | 1 | 6 | 29 | 88  | 1 | 3 | 8  | 96  | 39 | 193 |
| 67,524 | 1 | 6 | 29 | 88  | 1 | 3 | 8  | 96  | 39 | 193 |
| 67,525 | 1 | 6 | 29 | 89  | 1 | 3 | 8  | 98  | 39 | 196 |
| 67,526 | 1 | 6 | 29 | 89  | 1 | 3 | 8  | 98  | 39 | 196 |
| 67,527 | 1 | 6 | 27 | 90  | 1 | 3 | 8  | 98  | 37 | 197 |
| 67,528 | 1 | 6 | 27 | 93  | 1 | 3 | 7  | 102 | 36 | 204 |
| 67,529 | 1 | 6 | 26 | 118 | 1 | 6 | 7  | 109 | 35 | 239 |
| 67,530 | 1 | 6 | 29 | 120 | 1 | 6 | 7  | 119 | 38 | 251 |
| 67,531 | 1 | 6 | 27 | 124 | 1 | 6 | 9  | 121 | 38 | 257 |
| 67,532 | 1 | 7 | 26 | 126 | 1 | 6 | 11 | 123 | 39 | 262 |
| 67,533 | 1 | 8 | 21 | 129 | 1 | 6 | 11 | 121 | 34 | 264 |
| 67,534 | 1 | 8 | 21 | 127 | 1 | 6 | 12 | 120 | 35 | 261 |
| 67,535 | 1 | 6 | 19 | 103 | 1 | 6 | 11 | 100 | 32 | 215 |
| 67,536 | 1 | 8 | 19 | 107 | 1 | 6 | 11 | 101 | 32 | 222 |
| 67,537 | 1 | 8 | 13 | 97  | 1 | 6 | 10 | 97  | 25 | 208 |
| 67,538 | 1 | 7 | 12 | 91  | 1 | 4 | 10 | 89  | 24 | 191 |
| 67,539 | 1 | 7 | 12 | 91  | 1 | 4 | 9  | 87  | 23 | 189 |
| 67,540 | 1 | 7 | 12 | 91  | 1 | 4 | 9  | 87  | 23 | 189 |
| 67,541 | 1 | 7 | 12 | 91  | 1 | 4 | 9  | 87  | 23 | 189 |
| 67,542 | 1 | 8 | 12 | 91  | 1 | 4 | 9  | 87  | 23 | 190 |
| 67,543 | 1 | 8 | 12 | 92  | 1 | 4 | 9  | 87  | 23 | 191 |
| 67,544 | 1 | 8 | 13 | 92  | 1 | 4 | 9  | 82  | 24 | 186 |
| 67,545 | 1 | 7 | 13 | 86  | 1 | 4 | 10 | 75  | 25 | 172 |
| 67,546 | 1 | 7 | 13 | 86  | 1 | 4 | 10 | 76  | 25 | 173 |
| 67,547 | 1 | 7 | 13 | 86  | 1 | 4 | 10 | 76  | 25 | 173 |
| 67,548 | 1 | 7 | 13 | 86  | 1 | 4 | 10 | 76  | 25 | 173 |
| 67,549 | 1 | 7 | 13 | 84  | 1 | 4 | 10 | 72  | 25 | 167 |
| 67,550 | 1 | 7 | 13 | 84  | 2 | 4 | 13 | 72  | 29 | 167 |
| 67,551 | 1 | 8 | 12 | 88  | 2 | 4 | 13 | 75  | 28 | 175 |
| 67,552 | 1 | 8 | 12 | 88  | 2 | 4 | 13 | 75  | 28 | 175 |
| 67,553 | 1 | 8 | 15 | 89  | 2 | 4 | 13 | 75  | 31 | 176 |
| 67,554 | 2 | 8 | 15 | 90  | 1 | 4 | 13 | 75  | 31 | 177 |
| 67,555 | 2 | 8 | 15 | 90  | 1 | 4 | 16 | 75  | 34 | 177 |
| 67,556 | 2 | 8 | 15 | 89  | 1 | 4 | 16 | 71  | 34 | 172 |



|        |    |    |    |     |   |    |    |     |    |       |
|--------|----|----|----|-----|---|----|----|-----|----|-------|
| 67,557 | 2  | 8  | 15 | 93  | 1 | 4  | 17 | 77  | 35 | 182   |
| 67,558 | 2  | 6  | 16 | 87  | 1 | 3  | 18 | 70  | 37 | 166   |
| 67,559 | 2  | 8  | 15 | 95  | 1 | 5  | 18 | 73  | 36 | 181   |
| 67,560 | 2  | 8  | 15 | 101 | 1 | 6  | 18 | 80  | 36 | 195   |
| 67,561 | 2  | 12 | 18 | 133 | 1 | 8  | 18 | 103 | 39 | 256   |
| 67,562 | 2  | 26 | 20 | 248 | 1 | 14 | 18 | 222 | 41 | 510   |
| 67,563 | 2  | 26 | 20 | 254 | 1 | 14 | 18 | 226 | 41 | 520   |
| 67,564 | 3  | 36 | 25 | 293 | 3 | 17 | 19 | 255 | 50 | 601   |
| 67,565 | 7  | 43 | 35 | 327 | 3 | 17 | 21 | 281 | 66 | 668   |
| 67,566 | 7  | 43 | 35 | 326 | 3 | 17 | 20 | 281 | 65 | 667   |
| 67,567 | 7  | 43 | 35 | 324 | 3 | 18 | 20 | 282 | 65 | 667   |
| 67,568 | 7  | 43 | 38 | 323 | 3 | 18 | 23 | 285 | 71 | 669   |
| 67,569 | 7  | 50 | 38 | 352 | 3 | 18 | 23 | 317 | 71 | 737   |
| 67,570 | 7  | 50 | 38 | 358 | 3 | 18 | 22 | 321 | 70 | 747   |
| 67,571 | 7  | 50 | 38 | 359 | 3 | 18 | 22 | 325 | 70 | 752   |
| 67,572 | 8  | 50 | 39 | 366 | 3 | 18 | 24 | 334 | 74 | 768   |
| 67,573 | 8  | 50 | 39 | 373 | 3 | 18 | 24 | 336 | 74 | 777   |
| 67,574 | 8  | 52 | 40 | 383 | 3 | 18 | 26 | 338 | 77 | 791   |
| 67,575 | 8  | 52 | 40 | 383 | 3 | 18 | 26 | 338 | 77 | 791   |
| 67,576 | 8  | 52 | 40 | 385 | 3 | 18 | 26 | 336 | 77 | 791   |
| 67,577 | 9  | 52 | 39 | 383 | 4 | 18 | 26 | 336 | 78 | 789   |
| 67,578 | 9  | 53 | 40 | 362 | 4 | 15 | 26 | 341 | 79 | 771   |
| 67,579 | 10 | 53 | 42 | 389 | 4 | 15 | 26 | 348 | 82 | 805   |
| 67,580 | 10 | 60 | 44 | 462 | 4 | 20 | 26 | 409 | 84 | 951   |
| 67,581 | 10 | 61 | 41 | 503 | 4 | 22 | 26 | 411 | 81 | 997   |
| 67,582 | 10 | 62 | 40 | 503 | 4 | 22 | 24 | 411 | 78 | 998   |
| 67,583 | 10 | 62 | 40 | 523 | 4 | 23 | 22 | 436 | 76 | 1,044 |
| 67,584 | 10 | 61 | 39 | 526 | 4 | 23 | 21 | 438 | 74 | 1,048 |
| 67,585 | 10 | 85 | 39 | 647 | 4 | 37 | 19 | 562 | 72 | 1,331 |
| 67,586 | 10 | 85 | 39 | 647 | 4 | 37 | 19 | 562 | 72 | 1,331 |
| 67,587 | 10 | 83 | 39 | 661 | 4 | 37 | 19 | 570 | 72 | 1,351 |
| 67,588 | 10 | 83 | 39 | 666 | 4 | 37 | 19 | 571 | 72 | 1,357 |
| 67,589 | 10 | 83 | 39 | 665 | 4 | 37 | 19 | 571 | 72 | 1,356 |
| 67,590 | 10 | 85 | 41 | 669 | 4 | 37 | 19 | 577 | 74 | 1,368 |
| 67,591 | 10 | 85 | 41 | 670 | 4 | 37 | 19 | 578 | 74 | 1,370 |
| 67,592 | 10 | 85 | 41 | 692 | 4 | 37 | 19 | 594 | 74 | 1,408 |
| 67,593 | 10 | 84 | 41 | 697 | 4 | 37 | 19 | 593 | 74 | 1,411 |
| 67,594 | 11 | 85 | 43 | 713 | 4 | 39 | 20 | 607 | 78 | 1,444 |
| 67,595 | 11 | 85 | 43 | 717 | 4 | 39 | 20 | 610 | 78 | 1,451 |
| 67,596 | 11 | 85 | 44 | 742 | 4 | 42 | 19 | 618 | 78 | 1,487 |
| 67,597 | 11 | 85 | 45 | 744 | 4 | 42 | 19 | 618 | 79 | 1,489 |

|        |    |    |    |     |   |    |    |     |    |       |
|--------|----|----|----|-----|---|----|----|-----|----|-------|
| 67,598 | 11 | 85 | 45 | 745 | 4 | 42 | 20 | 620 | 80 | 1,492 |
| 67,599 | 11 | 86 | 50 | 766 | 4 | 46 | 17 | 638 | 82 | 1,536 |
| 67,600 | 11 | 85 | 50 | 766 | 3 | 46 | 17 | 636 | 81 | 1,533 |
| 67,601 | 11 | 87 | 51 | 782 | 3 | 47 | 18 | 647 | 83 | 1,563 |
| 67,602 | 11 | 87 | 55 | 802 | 5 | 47 | 20 | 653 | 91 | 1,589 |
| 67,603 | 11 | 87 | 53 | 809 | 5 | 47 | 22 | 663 | 91 | 1,606 |
| 67,604 | 10 | 90 | 53 | 891 | 5 | 48 | 22 | 692 | 90 | 1,721 |
| 67,605 | 10 | 90 | 53 | 889 | 5 | 48 | 19 | 692 | 87 | 1,719 |
| 67,606 | 10 | 92 | 54 | 900 | 5 | 48 | 19 | 694 | 88 | 1,734 |
| 67,607 | 10 | 93 | 54 | 912 | 5 | 48 | 18 | 691 | 87 | 1,744 |
| 67,608 | 10 | 93 | 54 | 898 | 5 | 48 | 17 | 677 | 86 | 1,716 |
| 67,609 | 10 | 92 | 56 | 891 | 5 | 46 | 18 | 670 | 89 | 1,699 |
| 67,610 | 10 | 92 | 56 | 892 | 5 | 46 | 18 | 670 | 89 | 1,700 |
| 67,611 | 9  | 88 | 54 | 855 | 6 | 44 | 18 | 634 | 87 | 1,621 |
| 67,612 | 10 | 74 | 54 | 744 | 6 | 39 | 18 | 516 | 88 | 1,373 |
| 67,613 | 10 | 74 | 52 | 748 | 6 | 39 | 18 | 517 | 86 | 1,378 |
| 67,614 | 10 | 76 | 52 | 753 | 6 | 39 | 20 | 518 | 88 | 1,386 |
| 67,615 | 10 | 66 | 47 | 719 | 4 | 36 | 19 | 489 | 80 | 1,310 |
| 67,616 | 6  | 59 | 37 | 685 | 4 | 36 | 18 | 462 | 65 | 1,242 |
| 67,617 | 6  | 59 | 37 | 691 | 4 | 36 | 18 | 464 | 65 | 1,250 |
| 67,618 | 6  | 59 | 34 | 690 | 4 | 35 | 15 | 462 | 59 | 1,246 |
| 67,619 | 8  | 59 | 39 | 690 | 4 | 35 | 16 | 458 | 67 | 1,242 |
| 67,620 | 8  | 52 | 39 | 657 | 4 | 35 | 16 | 421 | 67 | 1,165 |
| 67,621 | 8  | 52 | 39 | 659 | 4 | 35 | 15 | 421 | 66 | 1,167 |
| 67,622 | 7  | 52 | 38 | 659 | 4 | 35 | 14 | 418 | 63 | 1,164 |
| 67,623 | 8  | 50 | 40 | 639 | 4 | 35 | 13 | 407 | 65 | 1,131 |
| 67,624 | 9  | 50 | 40 | 654 | 4 | 37 | 13 | 410 | 66 | 1,151 |
| 67,625 | 9  | 52 | 39 | 680 | 4 | 45 | 12 | 448 | 64 | 1,225 |
| 67,626 | 9  | 52 | 39 | 685 | 4 | 45 | 12 | 451 | 64 | 1,233 |
| 67,627 | 10 | 56 | 40 | 698 | 4 | 50 | 12 | 472 | 66 | 1,276 |
| 67,628 | 9  | 60 | 39 | 718 | 3 | 52 | 12 | 512 | 63 | 1,342 |
| 67,629 | 9  | 60 | 38 | 726 | 3 | 53 | 12 | 503 | 62 | 1,342 |
| 67,630 | 9  | 62 | 39 | 729 | 4 | 54 | 16 | 505 | 68 | 1,350 |
| 67,631 | 10 | 57 | 51 | 679 | 4 | 50 | 24 | 450 | 89 | 1,236 |
| 67,632 | 10 | 55 | 50 | 636 | 4 | 48 | 26 | 437 | 90 | 1,176 |
| 67,633 | 10 | 54 | 50 | 615 | 4 | 47 | 26 | 411 | 90 | 1,127 |
| 67,634 | 10 | 54 | 50 | 610 | 4 | 47 | 26 | 409 | 90 | 1,120 |
| 67,635 | 10 | 54 | 50 | 611 | 4 | 47 | 26 | 410 | 90 | 1,122 |
| 67,636 | 10 | 30 | 50 | 491 | 4 | 33 | 26 | 288 | 90 | 842   |
| 67,637 | 10 | 30 | 51 | 497 | 4 | 33 | 26 | 291 | 91 | 851   |
| 67,638 | 10 | 30 | 51 | 482 | 4 | 34 | 26 | 290 | 91 | 836   |

|        |    |    |    |     |   |    |    |     |    |     |
|--------|----|----|----|-----|---|----|----|-----|----|-----|
| 67,639 | 10 | 34 | 51 | 481 | 4 | 35 | 26 | 296 | 91 | 846 |
| 67,640 | 10 | 34 | 49 | 486 | 4 | 35 | 26 | 297 | 89 | 852 |
| 67,641 | 10 | 33 | 50 | 488 | 4 | 35 | 27 | 296 | 91 | 852 |
| 67,642 | 10 | 33 | 50 | 490 | 4 | 35 | 26 | 295 | 90 | 853 |
| 67,643 | 9  | 33 | 49 | 469 | 4 | 35 | 26 | 279 | 88 | 816 |
| 67,644 | 9  | 32 | 48 | 447 | 4 | 33 | 26 | 265 | 87 | 777 |
| 67,645 | 9  | 32 | 48 | 441 | 4 | 33 | 26 | 260 | 87 | 766 |
| 67,646 | 9  | 33 | 48 | 442 | 4 | 33 | 26 | 267 | 87 | 775 |
| 67,647 | 9  | 33 | 47 | 418 | 4 | 30 | 26 | 260 | 86 | 741 |
| 67,648 | 9  | 35 | 46 | 415 | 5 | 30 | 28 | 261 | 88 | 741 |
| 67,649 | 9  | 35 | 46 | 414 | 5 | 30 | 27 | 259 | 87 | 738 |
| 67,650 | 9  | 34 | 41 | 393 | 5 | 26 | 27 | 245 | 82 | 698 |
| 67,651 | 9  | 32 | 41 | 377 | 5 | 25 | 26 | 234 | 81 | 668 |
| 67,652 | 9  | 32 | 40 | 377 | 5 | 25 | 26 | 234 | 80 | 668 |
| 67,653 | 9  | 32 | 36 | 344 | 3 | 25 | 24 | 218 | 72 | 619 |
| 67,654 | 9  | 32 | 35 | 344 | 3 | 25 | 22 | 219 | 69 | 620 |
| 67,655 | 9  | 29 | 38 | 263 | 3 | 24 | 22 | 190 | 72 | 506 |
| 67,656 | 9  | 29 | 38 | 266 | 3 | 24 | 22 | 192 | 72 | 511 |
| 67,657 | 9  | 27 | 37 | 255 | 3 | 24 | 22 | 191 | 71 | 497 |
| 67,658 | 9  | 26 | 37 | 243 | 3 | 24 | 22 | 190 | 71 | 483 |
| 67,659 | 9  | 26 | 36 | 239 | 3 | 24 | 22 | 188 | 70 | 477 |
| 67,660 | 9  | 26 | 34 | 239 | 3 | 24 | 21 | 188 | 67 | 477 |
| 67,661 | 10 | 26 | 33 | 236 | 3 | 23 | 21 | 188 | 67 | 473 |
| 67,662 | 10 | 26 | 32 | 236 | 2 | 23 | 21 | 189 | 65 | 474 |
| 67,663 | 9  | 26 | 32 | 227 | 2 | 22 | 21 | 185 | 64 | 460 |
| 67,664 | 9  | 26 | 32 | 227 | 2 | 22 | 21 | 185 | 64 | 460 |
| 67,665 | 9  | 24 | 32 | 211 | 2 | 22 | 19 | 180 | 62 | 437 |
| 67,666 | 8  | 24 | 32 | 211 | 2 | 22 | 19 | 180 | 61 | 437 |
| 67,667 | 8  | 24 | 32 | 210 | 2 | 22 | 18 | 180 | 60 | 436 |
| 67,668 | 6  | 24 | 28 | 205 | 2 | 22 | 17 | 178 | 53 | 429 |
| 67,669 | 6  | 25 | 28 | 205 | 2 | 22 | 17 | 178 | 53 | 430 |
| 67,670 | 6  | 25 | 27 | 205 | 2 | 22 | 17 | 178 | 52 | 430 |
| 67,671 | 6  | 25 | 27 | 205 | 2 | 22 | 17 | 178 | 52 | 430 |
| 67,672 | 6  | 25 | 26 | 201 | 2 | 22 | 17 | 177 | 51 | 425 |
| 67,673 | 5  | 25 | 28 | 195 | 2 | 22 | 18 | 175 | 53 | 417 |
| 67,674 | 5  | 25 | 28 | 180 | 2 | 20 | 18 | 173 | 53 | 398 |
| 67,675 | 4  | 25 | 28 | 157 | 2 | 12 | 18 | 137 | 52 | 331 |
| 67,676 | 3  | 25 | 28 | 156 | 2 | 12 | 18 | 137 | 51 | 330 |
| 67,677 | 4  | 25 | 28 | 159 | 2 | 12 | 18 | 142 | 52 | 338 |
| 67,678 | 4  | 21 | 28 | 145 | 2 | 8  | 18 | 122 | 52 | 296 |
| 67,679 | 4  | 17 | 30 | 126 | 2 | 6  | 19 | 83  | 55 | 232 |

|        |   |    |    |     |   |   |    |     |    |     |
|--------|---|----|----|-----|---|---|----|-----|----|-----|
| 67,680 | 5 | 16 | 29 | 111 | 2 | 5 | 19 | 76  | 55 | 208 |
| 67,681 | 4 | 14 | 28 | 84  | 1 | 4 | 16 | 69  | 49 | 171 |
| 67,682 | 3 | 12 | 14 | 60  | 1 | 3 | 8  | 62  | 26 | 137 |
| 67,683 | 3 | 12 | 13 | 57  | 1 | 3 | 6  | 62  | 23 | 134 |
| 67,684 | 3 | 12 | 13 | 57  | 1 | 3 | 6  | 62  | 23 | 134 |
| 67,685 | 3 | 13 | 14 | 59  | 1 | 3 | 6  | 65  | 24 | 140 |
| 67,686 | 3 | 13 | 14 | 66  | 1 | 3 | 6  | 67  | 24 | 149 |
| 67,687 | 3 | 13 | 14 | 72  | 1 | 3 | 6  | 69  | 24 | 157 |
| 67,688 | 3 | 13 | 15 | 72  | 1 | 3 | 6  | 71  | 25 | 159 |
| 67,689 | 3 | 13 | 14 | 75  | 1 | 2 | 6  | 67  | 24 | 157 |
| 67,690 | 3 | 10 | 14 | 87  | 1 | 1 | 6  | 70  | 24 | 168 |
| 67,691 | 3 | 10 | 14 | 87  | 1 | 1 | 6  | 69  | 24 | 167 |
| 67,692 | 3 | 9  | 14 | 83  | 1 | 1 | 5  | 66  | 23 | 159 |
| 67,693 | 3 | 10 | 13 | 95  | 1 | 2 | 5  | 77  | 22 | 184 |
| 67,694 | 3 | 11 | 13 | 104 | 1 | 3 | 5  | 86  | 22 | 204 |
| 67,695 | 3 | 11 | 13 | 105 | 1 | 3 | 5  | 86  | 22 | 205 |
| 67,696 | 3 | 10 | 13 | 106 | 1 | 3 | 5  | 80  | 22 | 199 |
| 67,697 | 3 | 17 | 13 | 121 | 1 | 6 | 5  | 85  | 22 | 229 |
| 67,698 | 3 | 16 | 13 | 130 | 0 | 6 | 4  | 83  | 20 | 235 |
| 67,699 | 3 | 16 | 13 | 130 | 0 | 6 | 3  | 83  | 19 | 235 |
| 67,700 | 3 | 16 | 13 | 134 | 0 | 6 | 3  | 81  | 19 | 237 |
| 67,701 | 3 | 16 | 13 | 137 | 0 | 7 | 3  | 82  | 19 | 242 |
| 67,702 | 3 | 16 | 13 | 151 | 0 | 8 | 3  | 85  | 19 | 260 |
| 67,703 | 3 | 16 | 13 | 166 | 0 | 8 | 3  | 90  | 19 | 280 |
| 67,704 | 3 | 16 | 13 | 166 | 0 | 8 | 3  | 90  | 19 | 280 |
| 67,705 | 3 | 18 | 11 | 168 | 0 | 8 | 3  | 90  | 17 | 284 |
| 67,706 | 4 | 19 | 11 | 168 | 0 | 8 | 3  | 92  | 18 | 287 |
| 67,707 | 4 | 19 | 11 | 168 | 0 | 8 | 3  | 92  | 18 | 287 |
| 67,708 | 5 | 19 | 12 | 171 | 0 | 8 | 5  | 94  | 22 | 292 |
| 67,709 | 5 | 19 | 38 | 178 | 1 | 8 | 10 | 96  | 54 | 301 |
| 67,710 | 5 | 18 | 50 | 189 | 1 | 8 | 15 | 99  | 71 | 314 |
| 67,711 | 5 | 18 | 50 | 189 | 1 | 8 | 15 | 99  | 71 | 314 |
| 67,712 | 4 | 18 | 52 | 193 | 1 | 8 | 16 | 100 | 73 | 319 |
| 67,713 | 4 | 18 | 52 | 195 | 1 | 8 | 16 | 105 | 73 | 326 |
| 67,714 | 4 | 18 | 52 | 195 | 1 | 8 | 16 | 105 | 73 | 326 |
| 67,715 | 5 | 20 | 53 | 196 | 1 | 9 | 17 | 107 | 76 | 332 |
| 67,716 | 5 | 20 | 53 | 199 | 1 | 9 | 17 | 107 | 76 | 335 |
| 67,717 | 5 | 20 | 53 | 199 | 1 | 9 | 17 | 109 | 76 | 337 |
| 67,718 | 5 | 20 | 53 | 199 | 1 | 9 | 17 | 109 | 76 | 337 |
| 67,719 | 5 | 20 | 55 | 201 | 1 | 9 | 17 | 110 | 78 | 340 |
| 67,720 | 5 | 20 | 55 | 204 | 1 | 9 | 17 | 111 | 78 | 344 |

|        |   |    |    |     |   |    |    |     |     |     |
|--------|---|----|----|-----|---|----|----|-----|-----|-----|
| 67,721 | 6 | 20 | 57 | 215 | 1 | 9  | 18 | 115 | 82  | 359 |
| 67,722 | 6 | 20 | 64 | 218 | 1 | 9  | 20 | 117 | 91  | 364 |
| 67,723 | 6 | 20 | 66 | 220 | 1 | 11 | 20 | 120 | 93  | 371 |
| 67,724 | 6 | 25 | 66 | 241 | 1 | 11 | 19 | 132 | 92  | 409 |
| 67,725 | 6 | 26 | 70 | 244 | 1 | 11 | 20 | 139 | 97  | 420 |
| 67,726 | 6 | 24 | 70 | 248 | 1 | 11 | 20 | 146 | 97  | 429 |
| 67,727 | 6 | 24 | 74 | 268 | 1 | 12 | 21 | 148 | 102 | 452 |
| 67,728 | 5 | 25 | 77 | 270 | 1 | 12 | 23 | 148 | 106 | 455 |
| 67,729 | 5 | 25 | 77 | 270 | 1 | 12 | 22 | 148 | 105 | 455 |
| 67,730 | 5 | 26 | 74 | 269 | 1 | 12 | 21 | 146 | 101 | 453 |
| 67,731 | 4 | 42 | 74 | 408 | 1 | 26 | 21 | 224 | 100 | 700 |
| 67,732 | 4 | 44 | 74 | 413 | 1 | 26 | 21 | 223 | 100 | 706 |
| 67,733 | 4 | 45 | 74 | 428 | 1 | 26 | 21 | 225 | 100 | 724 |
| 67,734 | 4 | 50 | 74 | 456 | 1 | 26 | 21 | 232 | 100 | 764 |
| 67,735 | 4 | 51 | 74 | 460 | 1 | 26 | 21 | 232 | 100 | 769 |
| 67,736 | 4 | 54 | 73 | 464 | 1 | 26 | 21 | 235 | 99  | 779 |
| 67,737 | 4 | 56 | 72 | 470 | 1 | 26 | 21 | 236 | 98  | 788 |
| 67,738 | 4 | 56 | 71 | 465 | 1 | 26 | 21 | 231 | 97  | 778 |
| 67,739 | 4 | 56 | 71 | 465 | 1 | 26 | 21 | 231 | 97  | 778 |
| 67,740 | 4 | 55 | 71 | 442 | 1 | 26 | 21 | 215 | 97  | 738 |
| 67,741 | 4 | 56 | 71 | 438 | 1 | 27 | 21 | 216 | 97  | 737 |
| 67,742 | 4 | 56 | 71 | 438 | 1 | 27 | 21 | 216 | 97  | 737 |
| 67,743 | 4 | 56 | 71 | 434 | 1 | 28 | 21 | 215 | 97  | 733 |
| 67,744 | 5 | 55 | 71 | 422 | 1 | 27 | 21 | 205 | 98  | 709 |
| 67,745 | 5 | 55 | 71 | 413 | 1 | 26 | 22 | 197 | 99  | 691 |
| 67,746 | 7 | 48 | 78 | 397 | 1 | 23 | 28 | 193 | 114 | 661 |
| 67,747 | 7 | 49 | 79 | 406 | 1 | 23 | 28 | 200 | 115 | 678 |
| 67,748 | 7 | 49 | 79 | 409 | 1 | 23 | 28 | 204 | 115 | 685 |
| 67,749 | 7 | 48 | 79 | 401 | 1 | 23 | 28 | 203 | 115 | 675 |
| 67,750 | 7 | 48 | 80 | 401 | 1 | 23 | 28 | 203 | 116 | 675 |
| 67,751 | 7 | 48 | 83 | 396 | 1 | 22 | 29 | 202 | 120 | 668 |
| 67,752 | 7 | 48 | 83 | 396 | 1 | 22 | 29 | 202 | 120 | 668 |
| 67,753 | 7 | 48 | 83 | 390 | 1 | 21 | 29 | 201 | 120 | 660 |
| 67,754 | 7 | 50 | 83 | 452 | 1 | 28 | 29 | 256 | 120 | 786 |
| 67,755 | 7 | 50 | 83 | 459 | 1 | 28 | 29 | 258 | 120 | 795 |
| 67,756 | 8 | 48 | 92 | 471 | 1 | 32 | 33 | 268 | 134 | 819 |
| 67,757 | 7 | 47 | 92 | 486 | 1 | 33 | 34 | 265 | 134 | 831 |
| 67,758 | 6 | 47 | 91 | 522 | 1 | 36 | 33 | 277 | 131 | 882 |
| 67,759 | 6 | 47 | 67 | 541 | 0 | 36 | 27 | 277 | 100 | 901 |
| 67,760 | 6 | 47 | 56 | 540 | 0 | 36 | 23 | 276 | 85  | 899 |
| 67,761 | 6 | 48 | 55 | 555 | 0 | 36 | 22 | 277 | 83  | 916 |

|        |   |    |    |     |   |    |    |     |    |     |
|--------|---|----|----|-----|---|----|----|-----|----|-----|
| 67,762 | 6 | 48 | 54 | 557 | 0 | 36 | 21 | 277 | 81 | 918 |
| 67,763 | 6 | 48 | 55 | 552 | 0 | 36 | 22 | 270 | 83 | 906 |
| 67,764 | 6 | 48 | 55 | 552 | 0 | 36 | 22 | 270 | 83 | 906 |
| 67,765 | 6 | 48 | 55 | 553 | 0 | 36 | 22 | 270 | 83 | 907 |
| 67,766 | 5 | 46 | 54 | 550 | 0 | 35 | 21 | 267 | 80 | 898 |
| 67,767 | 5 | 46 | 54 | 551 | 0 | 35 | 21 | 267 | 80 | 899 |
| 67,768 | 5 | 46 | 54 | 551 | 0 | 35 | 21 | 265 | 80 | 897 |
| 67,769 | 5 | 46 | 54 | 550 | 0 | 36 | 21 | 265 | 80 | 897 |
| 67,770 | 5 | 45 | 53 | 551 | 0 | 36 | 22 | 264 | 80 | 896 |
| 67,771 | 5 | 45 | 53 | 554 | 0 | 36 | 22 | 267 | 80 | 902 |
| 67,772 | 6 | 45 | 51 | 545 | 0 | 35 | 22 | 265 | 79 | 890 |
| 67,773 | 7 | 46 | 48 | 561 | 0 | 35 | 22 | 274 | 77 | 916 |
| 67,774 | 7 | 46 | 47 | 579 | 0 | 33 | 22 | 272 | 76 | 930 |
| 67,775 | 7 | 41 | 52 | 561 | 0 | 33 | 26 | 263 | 85 | 898 |
| 67,776 | 7 | 40 | 47 | 560 | 0 | 33 | 25 | 257 | 79 | 890 |
| 67,777 | 7 | 40 | 44 | 554 | 0 | 33 | 26 | 250 | 77 | 877 |
| 67,778 | 7 | 40 | 43 | 535 | 0 | 33 | 25 | 246 | 75 | 854 |
| 67,779 | 7 | 39 | 40 | 529 | 0 | 32 | 24 | 241 | 71 | 841 |
| 67,780 | 8 | 39 | 44 | 530 | 0 | 32 | 25 | 242 | 77 | 843 |
| 67,781 | 8 | 38 | 44 | 530 | 0 | 32 | 25 | 244 | 77 | 844 |
| 67,782 | 8 | 20 | 50 | 383 | 0 | 19 | 25 | 167 | 83 | 589 |
| 67,783 | 8 | 19 | 50 | 368 | 0 | 19 | 26 | 165 | 84 | 571 |
| 67,784 | 8 | 19 | 50 | 369 | 0 | 19 | 26 | 165 | 84 | 572 |
| 67,785 | 8 | 14 | 54 | 343 | 0 | 19 | 26 | 159 | 88 | 535 |
| 67,786 | 8 | 13 | 54 | 338 | 0 | 19 | 26 | 159 | 88 | 529 |
| 67,787 | 8 | 9  | 54 | 323 | 0 | 19 | 26 | 150 | 88 | 501 |
| 67,788 | 8 | 7  | 60 | 309 | 0 | 19 | 26 | 146 | 94 | 481 |
| 67,789 | 9 | 8  | 60 | 309 | 0 | 19 | 26 | 146 | 95 | 482 |
| 67,790 | 9 | 8  | 60 | 309 | 0 | 19 | 26 | 146 | 95 | 482 |
| 67,791 | 9 | 8  | 60 | 315 | 0 | 21 | 26 | 149 | 95 | 493 |
| 67,792 | 9 | 7  | 60 | 315 | 0 | 20 | 26 | 148 | 95 | 490 |
| 67,793 | 9 | 7  | 60 | 316 | 0 | 20 | 26 | 149 | 95 | 492 |
| 67,794 | 8 | 8  | 60 | 335 | 0 | 21 | 26 | 159 | 94 | 523 |
| 67,795 | 8 | 8  | 60 | 335 | 0 | 21 | 25 | 158 | 93 | 522 |
| 67,796 | 8 | 7  | 62 | 343 | 0 | 21 | 25 | 169 | 95 | 540 |
| 67,797 | 6 | 6  | 55 | 355 | 0 | 22 | 20 | 168 | 81 | 551 |
| 67,798 | 6 | 10 | 54 | 389 | 0 | 23 | 21 | 220 | 81 | 642 |
| 67,799 | 6 | 11 | 53 | 419 | 0 | 24 | 21 | 225 | 80 | 679 |
| 67,800 | 6 | 14 | 53 | 477 | 0 | 29 | 21 | 255 | 80 | 775 |
| 67,801 | 6 | 15 | 52 | 485 | 0 | 30 | 20 | 265 | 78 | 795 |
| 67,802 | 6 | 15 | 50 | 496 | 0 | 30 | 20 | 271 | 76 | 812 |

|        |   |    |    |     |   |    |    |     |    |       |
|--------|---|----|----|-----|---|----|----|-----|----|-------|
| 67,803 | 6 | 14 | 50 | 441 | 0 | 26 | 20 | 236 | 76 | 717   |
| 67,804 | 6 | 14 | 50 | 483 | 0 | 26 | 20 | 245 | 76 | 768   |
| 67,805 | 6 | 14 | 43 | 491 | 0 | 26 | 18 | 247 | 67 | 778   |
| 67,806 | 5 | 14 | 41 | 495 | 0 | 26 | 18 | 250 | 64 | 785   |
| 67,807 | 5 | 14 | 41 | 471 | 0 | 22 | 16 | 239 | 62 | 746   |
| 67,808 | 5 | 14 | 44 | 481 | 0 | 23 | 16 | 253 | 65 | 771   |
| 67,809 | 5 | 14 | 46 | 426 | 0 | 20 | 17 | 241 | 68 | 701   |
| 67,810 | 5 | 15 | 48 | 432 | 0 | 20 | 20 | 250 | 73 | 717   |
| 67,811 | 5 | 16 | 48 | 429 | 0 | 20 | 20 | 251 | 73 | 716   |
| 67,812 | 5 | 15 | 49 | 404 | 0 | 22 | 20 | 255 | 74 | 696   |
| 67,813 | 5 | 15 | 51 | 405 | 0 | 22 | 20 | 255 | 76 | 697   |
| 67,814 | 7 | 15 | 49 | 406 | 0 | 22 | 19 | 256 | 75 | 699   |
| 67,815 | 7 | 15 | 49 | 408 | 0 | 22 | 19 | 257 | 75 | 702   |
| 67,816 | 7 | 15 | 49 | 407 | 0 | 22 | 19 | 257 | 75 | 701   |
| 67,817 | 7 | 15 | 49 | 407 | 0 | 22 | 19 | 258 | 75 | 702   |
| 67,818 | 7 | 15 | 49 | 409 | 0 | 22 | 19 | 258 | 75 | 704   |
| 67,819 | 7 | 15 | 49 | 428 | 0 | 22 | 19 | 295 | 75 | 760   |
| 67,820 | 7 | 15 | 49 | 441 | 0 | 23 | 19 | 305 | 75 | 784   |
| 67,821 | 7 | 15 | 58 | 528 | 0 | 28 | 19 | 321 | 84 | 892   |
| 67,822 | 7 | 21 | 58 | 564 | 0 | 34 | 19 | 339 | 84 | 958   |
| 67,823 | 5 | 21 | 59 | 573 | 0 | 35 | 18 | 338 | 82 | 967   |
| 67,824 | 4 | 20 | 57 | 545 | 0 | 35 | 16 | 325 | 77 | 925   |
| 67,825 | 4 | 20 | 58 | 575 | 0 | 35 | 17 | 339 | 79 | 969   |
| 67,826 | 5 | 20 | 52 | 579 | 0 | 35 | 14 | 351 | 71 | 985   |
| 67,827 | 5 | 21 | 54 | 622 | 0 | 36 | 14 | 376 | 73 | 1,055 |
| 67,828 | 5 | 21 | 54 | 624 | 0 | 36 | 13 | 375 | 72 | 1,056 |
| 67,829 | 5 | 23 | 63 | 647 | 0 | 36 | 15 | 389 | 83 | 1,095 |
| 67,830 | 5 | 27 | 65 | 713 | 0 | 38 | 14 | 419 | 84 | 1,197 |
| 67,831 | 4 | 28 | 64 | 716 | 0 | 39 | 14 | 420 | 82 | 1,203 |
| 67,832 | 4 | 29 | 65 | 743 | 0 | 42 | 15 | 443 | 84 | 1,257 |
| 67,833 | 4 | 29 | 59 | 743 | 0 | 43 | 15 | 446 | 78 | 1,261 |
| 67,834 | 4 | 29 | 60 | 751 | 1 | 45 | 16 | 455 | 81 | 1,280 |
| 67,835 | 4 | 56 | 60 | 843 | 1 | 51 | 15 | 559 | 80 | 1,509 |
| 67,836 | 4 | 56 | 56 | 854 | 1 | 52 | 15 | 563 | 76 | 1,525 |
| 67,837 | 4 | 56 | 56 | 856 | 1 | 54 | 15 | 566 | 76 | 1,532 |
| 67,838 | 4 | 56 | 56 | 858 | 2 | 54 | 15 | 567 | 77 | 1,535 |
| 67,839 | 4 | 55 | 50 | 859 | 2 | 54 | 15 | 567 | 71 | 1,535 |
| 67,840 | 3 | 56 | 50 | 863 | 2 | 54 | 15 | 572 | 70 | 1,545 |
| 67,841 | 3 | 56 | 50 | 863 | 2 | 54 | 15 | 574 | 70 | 1,547 |
| 67,842 | 3 | 56 | 53 | 858 | 2 | 52 | 15 | 572 | 73 | 1,538 |
| 67,843 | 3 | 56 | 55 | 859 | 2 | 52 | 16 | 571 | 76 | 1,538 |

|        |    |    |     |     |   |    |    |     |     |       |
|--------|----|----|-----|-----|---|----|----|-----|-----|-------|
| 67,844 | 3  | 55 | 55  | 838 | 2 | 50 | 17 | 561 | 77  | 1,504 |
| 67,845 | 3  | 55 | 55  | 838 | 2 | 50 | 17 | 561 | 77  | 1,504 |
| 67,846 | 3  | 55 | 55  | 837 | 2 | 50 | 17 | 561 | 77  | 1,503 |
| 67,847 | 3  | 55 | 53  | 805 | 2 | 49 | 18 | 542 | 76  | 1,451 |
| 67,848 | 3  | 55 | 53  | 805 | 2 | 49 | 18 | 542 | 76  | 1,451 |
| 67,849 | 3  | 51 | 53  | 773 | 2 | 48 | 18 | 492 | 76  | 1,364 |
| 67,850 | 3  | 47 | 53  | 684 | 2 | 42 | 18 | 453 | 76  | 1,226 |
| 67,851 | 13 | 46 | 58  | 674 | 2 | 41 | 27 | 443 | 100 | 1,204 |
| 67,852 | 14 | 46 | 62  | 661 | 2 | 41 | 28 | 437 | 106 | 1,185 |
| 67,853 | 14 | 46 | 62  | 662 | 2 | 41 | 28 | 437 | 106 | 1,186 |
| 67,854 | 15 | 45 | 90  | 632 | 3 | 38 | 55 | 412 | 163 | 1,127 |
| 67,855 | 15 | 45 | 90  | 594 | 3 | 40 | 55 | 409 | 163 | 1,088 |
| 67,856 | 15 | 45 | 94  | 591 | 3 | 40 | 57 | 412 | 169 | 1,088 |
| 67,857 | 15 | 47 | 96  | 592 | 3 | 41 | 60 | 425 | 174 | 1,105 |
| 67,858 | 15 | 48 | 96  | 603 | 3 | 42 | 60 | 464 | 174 | 1,157 |
| 67,859 | 15 | 48 | 93  | 605 | 3 | 41 | 60 | 458 | 171 | 1,152 |
| 67,860 | 15 | 48 | 91  | 608 | 3 | 42 | 59 | 456 | 168 | 1,154 |
| 67,861 | 15 | 48 | 87  | 601 | 3 | 42 | 56 | 445 | 161 | 1,136 |
| 67,862 | 15 | 48 | 87  | 596 | 3 | 40 | 56 | 437 | 161 | 1,121 |
| 67,863 | 15 | 48 | 86  | 594 | 3 | 40 | 57 | 436 | 161 | 1,118 |
| 67,864 | 15 | 48 | 84  | 596 | 3 | 40 | 57 | 437 | 159 | 1,121 |
| 67,865 | 13 | 50 | 84  | 619 | 3 | 41 | 57 | 471 | 157 | 1,181 |
| 67,866 | 13 | 50 | 84  | 628 | 3 | 41 | 57 | 476 | 157 | 1,195 |
| 67,867 | 13 | 50 | 89  | 636 | 3 | 41 | 57 | 478 | 162 | 1,205 |
| 67,868 | 13 | 50 | 89  | 635 | 3 | 41 | 57 | 478 | 162 | 1,204 |
| 67,869 | 13 | 50 | 104 | 633 | 3 | 41 | 62 | 477 | 182 | 1,201 |
| 67,870 | 13 | 50 | 97  | 615 | 3 | 42 | 62 | 440 | 175 | 1,147 |
| 67,871 | 13 | 50 | 102 | 511 | 3 | 35 | 64 | 413 | 182 | 1,009 |
| 67,872 | 13 | 50 | 102 | 510 | 3 | 35 | 64 | 413 | 182 | 1,008 |
| 67,873 | 14 | 44 | 109 | 472 | 3 | 29 | 72 | 394 | 198 | 939   |
| 67,874 | 14 | 44 | 108 | 462 | 3 | 28 | 78 | 392 | 203 | 926   |
| 67,875 | 15 | 44 | 109 | 417 | 3 | 28 | 80 | 375 | 207 | 864   |
| 67,876 | 15 | 44 | 107 | 422 | 3 | 28 | 79 | 375 | 204 | 869   |
| 67,877 | 14 | 44 | 106 | 421 | 3 | 28 | 78 | 363 | 201 | 856   |
| 67,878 | 14 | 43 | 104 | 380 | 3 | 27 | 78 | 339 | 199 | 789   |
| 67,879 | 14 | 44 | 104 | 382 | 3 | 27 | 76 | 342 | 197 | 795   |
| 67,880 | 15 | 42 | 95  | 374 | 3 | 26 | 76 | 337 | 189 | 779   |
| 67,881 | 15 | 41 | 93  | 329 | 3 | 24 | 76 | 310 | 187 | 704   |
| 67,882 | 15 | 40 | 90  | 333 | 3 | 23 | 77 | 310 | 185 | 706   |
| 67,883 | 15 | 39 | 89  | 307 | 3 | 19 | 76 | 286 | 183 | 651   |
| 67,884 | 15 | 39 | 89  | 307 | 3 | 18 | 75 | 283 | 182 | 647   |



|        |    |    |     |     |   |    |    |     |     |     |
|--------|----|----|-----|-----|---|----|----|-----|-----|-----|
| 67,885 | 15 | 12 | 88  | 207 | 2 | 11 | 75 | 173 | 180 | 403 |
| 67,886 | 15 | 12 | 88  | 240 | 2 | 11 | 75 | 197 | 180 | 460 |
| 67,887 | 16 | 20 | 90  | 317 | 2 | 15 | 75 | 264 | 183 | 616 |
| 67,888 | 16 | 20 | 90  | 320 | 2 | 17 | 75 | 266 | 183 | 623 |
| 67,889 | 16 | 20 | 90  | 329 | 1 | 18 | 75 | 272 | 182 | 639 |
| 67,890 | 18 | 22 | 93  | 371 | 1 | 19 | 75 | 289 | 187 | 701 |
| 67,891 | 18 | 25 | 93  | 395 | 1 | 20 | 75 | 311 | 187 | 751 |
| 67,892 | 18 | 25 | 90  | 396 | 1 | 20 | 75 | 309 | 184 | 750 |
| 67,893 | 21 | 25 | 91  | 410 | 1 | 20 | 76 | 310 | 189 | 765 |
| 67,894 | 21 | 25 | 92  | 411 | 1 | 20 | 79 | 310 | 193 | 766 |
| 67,895 | 22 | 25 | 114 | 412 | 1 | 20 | 78 | 311 | 215 | 768 |
| 67,896 | 23 | 25 | 128 | 412 | 3 | 20 | 85 | 310 | 239 | 767 |
| 67,897 | 25 | 25 | 132 | 412 | 3 | 20 | 85 | 311 | 245 | 768 |
| 67,898 | 25 | 25 | 132 | 412 | 3 | 20 | 83 | 311 | 243 | 768 |
| 67,899 | 25 | 25 | 135 | 410 | 3 | 20 | 83 | 311 | 246 | 766 |
| 67,900 | 25 | 26 | 135 | 414 | 3 | 20 | 83 | 313 | 246 | 773 |
| 67,901 | 25 | 28 | 135 | 465 | 3 | 20 | 83 | 344 | 246 | 857 |
| 67,902 | 15 | 28 | 130 | 480 | 3 | 20 | 74 | 350 | 222 | 878 |
| 67,903 | 14 | 29 | 127 | 491 | 3 | 21 | 73 | 357 | 217 | 898 |
| 67,904 | 13 | 29 | 114 | 492 | 2 | 21 | 62 | 358 | 191 | 900 |
| 67,905 | 13 | 29 | 101 | 500 | 2 | 19 | 47 | 356 | 163 | 904 |
| 67,906 | 13 | 29 | 97  | 504 | 2 | 19 | 45 | 364 | 157 | 916 |
| 67,907 | 13 | 29 | 97  | 500 | 2 | 20 | 44 | 358 | 156 | 907 |
| 67,908 | 15 | 27 | 101 | 488 | 2 | 19 | 45 | 340 | 163 | 874 |
| 67,909 | 15 | 26 | 101 | 469 | 2 | 17 | 45 | 300 | 163 | 812 |
| 67,910 | 15 | 26 | 101 | 451 | 2 | 16 | 44 | 291 | 162 | 784 |
| 67,911 | 15 | 26 | 101 | 453 | 2 | 16 | 44 | 291 | 162 | 786 |
| 67,912 | 15 | 24 | 101 | 454 | 2 | 16 | 44 | 292 | 162 | 786 |
| 67,913 | 15 | 24 | 101 | 457 | 2 | 16 | 43 | 297 | 161 | 794 |
| 67,914 | 15 | 24 | 101 | 455 | 2 | 16 | 42 | 297 | 160 | 792 |
| 67,915 | 15 | 22 | 101 | 433 | 2 | 15 | 43 | 264 | 161 | 734 |
| 67,916 | 15 | 22 | 101 | 423 | 2 | 15 | 43 | 258 | 161 | 718 |
| 67,917 | 15 | 22 | 101 | 415 | 2 | 15 | 43 | 256 | 161 | 708 |
| 67,918 | 15 | 22 | 96  | 418 | 2 | 15 | 43 | 255 | 156 | 710 |
| 67,919 | 15 | 22 | 97  | 420 | 2 | 15 | 45 | 262 | 159 | 719 |
| 67,920 | 15 | 22 | 82  | 419 | 2 | 14 | 40 | 265 | 139 | 720 |
| 67,921 | 15 | 23 | 82  | 423 | 2 | 14 | 40 | 271 | 139 | 731 |
| 67,922 | 15 | 23 | 76  | 423 | 2 | 14 | 37 | 273 | 130 | 733 |
| 67,923 | 14 | 23 | 73  | 423 | 2 | 14 | 36 | 273 | 125 | 733 |
| 67,924 | 14 | 23 | 69  | 422 | 2 | 14 | 29 | 272 | 114 | 731 |
| 67,925 | 14 | 24 | 69  | 423 | 2 | 15 | 23 | 273 | 108 | 735 |

|        |    |    |    |     |   |    |    |     |     |     |
|--------|----|----|----|-----|---|----|----|-----|-----|-----|
| 67,926 | 13 | 24 | 66 | 424 | 2 | 15 | 22 | 274 | 103 | 737 |
| 67,927 | 13 | 24 | 66 | 419 | 2 | 15 | 22 | 274 | 103 | 732 |
| 67,928 | 13 | 24 | 66 | 414 | 2 | 15 | 22 | 274 | 103 | 727 |
| 67,929 | 13 | 24 | 66 | 414 | 2 | 15 | 22 | 274 | 103 | 727 |
| 67,930 | 13 | 23 | 66 | 410 | 2 | 15 | 22 | 270 | 103 | 718 |
| 67,931 | 12 | 20 | 67 | 368 | 2 | 15 | 24 | 255 | 105 | 658 |
| 67,932 | 12 | 20 | 67 | 368 | 2 | 15 | 23 | 254 | 104 | 657 |
| 67,933 | 12 | 20 | 68 | 363 | 2 | 15 | 22 | 252 | 104 | 650 |
| 67,934 | 12 | 20 | 68 | 366 | 2 | 15 | 23 | 253 | 105 | 654 |
| 67,935 | 12 | 20 | 69 | 367 | 2 | 15 | 23 | 253 | 106 | 655 |
| 67,936 | 12 | 20 | 70 | 334 | 2 | 15 | 24 | 227 | 108 | 596 |
| 67,937 | 12 | 20 | 70 | 335 | 2 | 15 | 24 | 227 | 108 | 597 |
| 67,938 | 11 | 12 | 69 | 246 | 2 | 10 | 26 | 156 | 108 | 424 |
| 67,939 | 11 | 12 | 69 | 231 | 2 | 5  | 27 | 144 | 109 | 392 |
| 67,940 | 11 | 12 | 69 | 232 | 2 | 5  | 27 | 152 | 109 | 401 |
| 67,941 | 9  | 7  | 68 | 174 | 2 | 3  | 30 | 115 | 109 | 299 |
| 67,942 | 9  | 7  | 68 | 180 | 2 | 5  | 32 | 126 | 111 | 318 |
| 67,943 | 6  | 8  | 67 | 215 | 2 | 8  | 31 | 158 | 106 | 389 |
| 67,944 | 6  | 8  | 66 | 208 | 2 | 9  | 31 | 163 | 105 | 388 |
| 67,945 | 6  | 10 | 64 | 228 | 2 | 14 | 27 | 184 | 99  | 436 |
| 67,946 | 6  | 11 | 42 | 235 | 2 | 14 | 27 | 194 | 77  | 454 |
| 67,947 | 5  | 11 | 28 | 239 | 0 | 15 | 21 | 198 | 54  | 463 |
| 67,948 | 3  | 11 | 24 | 243 | 0 | 15 | 21 | 199 | 48  | 468 |
| 67,949 | 3  | 11 | 22 | 243 | 0 | 15 | 21 | 199 | 46  | 468 |
| 67,950 | 4  | 11 | 21 | 246 | 0 | 15 | 21 | 203 | 46  | 475 |
| 67,951 | 4  | 10 | 21 | 244 | 0 | 15 | 21 | 201 | 46  | 470 |
| 67,952 | 4  | 10 | 21 | 197 | 0 | 15 | 21 | 177 | 46  | 399 |
| 67,953 | 4  | 10 | 20 | 184 | 0 | 15 | 21 | 172 | 45  | 381 |
| 67,954 | 5  | 9  | 20 | 175 | 0 | 14 | 21 | 171 | 46  | 369 |
| 67,955 | 5  | 10 | 18 | 188 | 0 | 17 | 20 | 185 | 43  | 400 |
| 67,956 | 5  | 10 | 18 | 178 | 0 | 17 | 20 | 180 | 43  | 385 |
| 67,957 | 4  | 10 | 16 | 179 | 0 | 17 | 19 | 173 | 39  | 379 |
| 67,958 | 4  | 10 | 14 | 178 | 0 | 16 | 19 | 174 | 37  | 378 |
| 67,959 | 3  | 12 | 13 | 202 | 0 | 16 | 17 | 190 | 33  | 420 |
| 67,960 | 3  | 12 | 12 | 202 | 0 | 16 | 17 | 191 | 32  | 421 |
| 67,961 | 3  | 12 | 12 | 203 | 0 | 16 | 17 | 193 | 32  | 424 |
| 67,962 | 3  | 13 | 12 | 201 | 0 | 16 | 17 | 193 | 32  | 423 |
| 67,963 | 3  | 13 | 12 | 202 | 0 | 18 | 17 | 192 | 32  | 425 |
| 67,964 | 4  | 13 | 14 | 203 | 0 | 18 | 18 | 186 | 36  | 420 |
| 67,965 | 4  | 13 | 14 | 203 | 0 | 18 | 18 | 186 | 36  | 420 |
| 67,966 | 4  | 13 | 14 | 202 | 0 | 18 | 17 | 186 | 35  | 419 |

|        |   |    |     |     |   |    |    |     |     |     |
|--------|---|----|-----|-----|---|----|----|-----|-----|-----|
| 67,967 | 4 | 13 | 15  | 201 | 0 | 18 | 17 | 186 | 36  | 418 |
| 67,968 | 5 | 13 | 16  | 196 | 0 | 18 | 17 | 179 | 38  | 406 |
| 67,969 | 5 | 13 | 21  | 196 | 0 | 18 | 17 | 180 | 43  | 407 |
| 67,970 | 5 | 16 | 20  | 206 | 0 | 19 | 15 | 199 | 40  | 440 |
| 67,971 | 5 | 16 | 19  | 206 | 0 | 19 | 15 | 197 | 39  | 438 |
| 67,972 | 5 | 15 | 26  | 202 | 0 | 19 | 19 | 191 | 50  | 427 |
| 67,973 | 5 | 15 | 28  | 201 | 0 | 19 | 20 | 188 | 53  | 423 |
| 67,974 | 5 | 15 | 28  | 201 | 0 | 19 | 20 | 189 | 53  | 424 |
| 67,975 | 5 | 15 | 28  | 200 | 0 | 19 | 20 | 188 | 53  | 422 |
| 67,976 | 5 | 14 | 28  | 198 | 0 | 18 | 20 | 187 | 53  | 417 |
| 67,977 | 5 | 14 | 28  | 197 | 0 | 18 | 21 | 186 | 54  | 415 |
| 67,978 | 5 | 14 | 28  | 197 | 0 | 18 | 21 | 186 | 54  | 415 |
| 67,979 | 5 | 14 | 28  | 195 | 0 | 18 | 21 | 185 | 54  | 412 |
| 67,980 | 5 | 14 | 28  | 195 | 0 | 17 | 21 | 185 | 54  | 411 |
| 67,981 | 5 | 14 | 27  | 195 | 0 | 17 | 21 | 185 | 53  | 411 |
| 67,982 | 5 | 14 | 27  | 194 | 0 | 17 | 19 | 184 | 51  | 409 |
| 67,983 | 5 | 14 | 26  | 194 | 0 | 17 | 19 | 183 | 50  | 408 |
| 67,984 | 5 | 14 | 27  | 188 | 0 | 17 | 19 | 181 | 51  | 400 |
| 67,985 | 5 | 14 | 27  | 188 | 0 | 17 | 19 | 181 | 51  | 400 |
| 67,986 | 5 | 14 | 26  | 188 | 0 | 18 | 19 | 184 | 50  | 404 |
| 67,987 | 5 | 14 | 25  | 188 | 0 | 18 | 17 | 184 | 47  | 404 |
| 67,988 | 5 | 14 | 25  | 188 | 0 | 18 | 16 | 184 | 46  | 404 |
| 67,989 | 5 | 14 | 24  | 188 | 0 | 18 | 15 | 185 | 44  | 405 |
| 67,990 | 5 | 14 | 25  | 188 | 0 | 18 | 14 | 185 | 44  | 405 |
| 67,991 | 5 | 13 | 24  | 172 | 0 | 18 | 11 | 173 | 40  | 376 |
| 67,992 | 5 | 13 | 24  | 166 | 0 | 16 | 11 | 160 | 40  | 355 |
| 67,993 | 5 | 13 | 24  | 166 | 0 | 16 | 9  | 160 | 38  | 355 |
| 67,994 | 5 | 9  | 24  | 86  | 0 | 7  | 11 | 83  | 40  | 185 |
| 67,995 | 5 | 9  | 24  | 86  | 0 | 7  | 11 | 83  | 40  | 185 |
| 67,996 | 5 | 9  | 24  | 86  | 0 | 7  | 11 | 83  | 40  | 185 |
| 67,997 | 4 | 9  | 24  | 86  | 0 | 7  | 11 | 83  | 39  | 185 |
| 67,998 | 4 | 9  | 24  | 86  | 0 | 7  | 10 | 82  | 38  | 184 |
| 67,999 | 4 | 9  | 24  | 86  | 0 | 7  | 10 | 82  | 38  | 184 |
| 68,000 | 8 | 9  | 104 | 86  | 1 | 7  | 42 | 82  | 155 | 184 |
| 68,001 | 7 | 9  | 104 | 84  | 1 | 7  | 42 | 77  | 154 | 177 |
| 68,002 | 7 | 9  | 118 | 83  | 1 | 7  | 47 | 78  | 173 | 177 |
| 68,003 | 7 | 7  | 121 | 80  | 1 | 7  | 47 | 70  | 176 | 164 |
| 68,004 | 6 | 7  | 123 | 82  | 1 | 7  | 47 | 70  | 177 | 166 |
| 68,005 | 6 | 7  | 123 | 79  | 1 | 7  | 47 | 64  | 177 | 157 |
| 68,006 | 6 | 6  | 123 | 64  | 1 | 4  | 47 | 50  | 177 | 124 |
| 68,007 | 6 | 6  | 123 | 63  | 1 | 4  | 47 | 49  | 177 | 122 |

|        |   |   |     |    |   |   |    |    |     |     |
|--------|---|---|-----|----|---|---|----|----|-----|-----|
| 68,008 | 6 | 6 | 122 | 61 | 1 | 4 | 47 | 49 | 176 | 120 |
| 68,009 | 6 | 6 | 122 | 63 | 1 | 4 | 47 | 48 | 176 | 121 |
| 68,010 | 7 | 4 | 122 | 39 | 1 | 4 | 47 | 33 | 177 | 80  |
| 68,011 | 7 | 4 | 126 | 38 | 1 | 4 | 47 | 32 | 181 | 78  |
| 68,012 | 7 | 4 | 130 | 38 | 1 | 4 | 51 | 30 | 189 | 76  |
| 68,013 | 8 | 3 | 134 | 36 | 1 | 2 | 55 | 31 | 198 | 72  |
| 68,014 | 8 | 3 | 134 | 37 | 1 | 2 | 56 | 31 | 199 | 73  |
| 68,015 | 7 | 3 | 133 | 45 | 1 | 2 | 55 | 43 | 196 | 93  |
| 68,016 | 7 | 5 | 133 | 65 | 1 | 3 | 56 | 52 | 197 | 125 |
| 68,017 | 7 | 5 | 133 | 69 | 1 | 3 | 56 | 54 | 197 | 131 |
| 68,018 | 7 | 5 | 132 | 69 | 1 | 3 | 56 | 55 | 196 | 132 |
| 68,019 | 6 | 5 | 131 | 69 | 1 | 3 | 56 | 55 | 194 | 132 |
| 68,020 | 6 | 5 | 126 | 69 | 1 | 3 | 56 | 54 | 189 | 131 |
| 68,021 | 6 | 2 | 119 | 59 | 1 | 3 | 52 | 34 | 178 | 98  |
| 68,022 | 6 | 2 | 119 | 59 | 1 | 3 | 52 | 34 | 178 | 98  |
| 68,023 | 6 | 2 | 119 | 59 | 1 | 3 | 52 | 34 | 178 | 98  |
| 68,024 | 6 | 2 | 116 | 59 | 1 | 3 | 51 | 33 | 174 | 97  |
| 68,025 | 6 | 2 | 116 | 58 | 1 | 3 | 51 | 34 | 174 | 97  |
| 68,026 | 6 | 2 | 116 | 58 | 1 | 3 | 51 | 34 | 174 | 97  |
| 68,027 | 6 | 2 | 116 | 58 | 1 | 3 | 51 | 34 | 174 | 97  |
| 68,028 | 6 | 2 | 116 | 59 | 1 | 3 | 51 | 34 | 174 | 98  |
| 68,029 | 6 | 2 | 118 | 62 | 1 | 3 | 53 | 37 | 178 | 104 |
| 68,030 | 6 | 2 | 118 | 62 | 1 | 3 | 53 | 39 | 178 | 106 |
| 68,031 | 6 | 2 | 118 | 70 | 1 | 3 | 53 | 42 | 178 | 117 |
| 68,032 | 6 | 2 | 118 | 73 | 1 | 3 | 53 | 42 | 178 | 120 |
| 68,033 | 6 | 2 | 120 | 72 | 1 | 3 | 53 | 42 | 180 | 119 |
| 68,034 | 7 | 2 | 131 | 72 | 1 | 3 | 53 | 42 | 192 | 119 |
| 68,035 | 7 | 3 | 135 | 71 | 1 | 3 | 57 | 42 | 200 | 119 |
| 68,036 | 7 | 3 | 135 | 71 | 1 | 3 | 57 | 42 | 200 | 119 |
| 68,037 | 8 | 3 | 143 | 72 | 1 | 2 | 60 | 39 | 212 | 116 |
| 68,038 | 8 | 3 | 144 | 71 | 1 | 2 | 64 | 39 | 217 | 115 |
| 68,039 | 8 | 3 | 153 | 70 | 1 | 2 | 64 | 39 | 226 | 114 |
| 68,040 | 8 | 3 | 153 | 73 | 1 | 2 | 64 | 39 | 226 | 117 |
| 68,041 | 8 | 3 | 152 | 72 | 1 | 2 | 64 | 39 | 225 | 116 |
| 68,042 | 8 | 3 | 152 | 72 | 1 | 2 | 64 | 38 | 225 | 115 |
| 68,043 | 8 | 3 | 151 | 73 | 1 | 2 | 64 | 38 | 224 | 116 |
| 68,044 | 8 | 3 | 151 | 74 | 1 | 2 | 64 | 38 | 224 | 117 |
| 68,045 | 8 | 8 | 151 | 81 | 1 | 5 | 62 | 41 | 222 | 135 |
| 68,046 | 8 | 8 | 151 | 84 | 1 | 5 | 62 | 42 | 222 | 139 |
| 68,047 | 9 | 8 | 158 | 97 | 2 | 6 | 64 | 47 | 233 | 158 |
| 68,048 | 9 | 8 | 153 | 97 | 2 | 6 | 62 | 47 | 226 | 158 |

|        |   |    |     |     |   |   |    |    |     |     |
|--------|---|----|-----|-----|---|---|----|----|-----|-----|
| 68,049 | 9 | 9  | 140 | 105 | 1 | 6 | 57 | 51 | 207 | 171 |
| 68,050 | 8 | 12 | 97  | 114 | 1 | 6 | 52 | 63 | 158 | 195 |
| 68,051 | 5 | 13 | 79  | 127 | 1 | 7 | 32 | 68 | 117 | 215 |
| 68,052 | 7 | 13 | 76  | 132 | 2 | 7 | 34 | 68 | 119 | 220 |
| 68,053 | 7 | 13 | 72  | 132 | 2 | 7 | 33 | 69 | 114 | 221 |
| 68,054 | 7 | 13 | 70  | 129 | 2 | 7 | 34 | 70 | 113 | 219 |
| 68,055 | 7 | 13 | 68  | 130 | 2 | 7 | 34 | 72 | 111 | 222 |
| 68,056 | 7 | 13 | 69  | 141 | 3 | 7 | 38 | 72 | 117 | 233 |
| 68,057 | 7 | 13 | 71  | 141 | 3 | 7 | 38 | 72 | 119 | 233 |
| 68,058 | 7 | 13 | 73  | 142 | 3 | 7 | 39 | 72 | 122 | 234 |
| 68,059 | 7 | 13 | 73  | 139 | 3 | 7 | 39 | 71 | 122 | 230 |
| 68,060 | 7 | 14 | 77  | 137 | 3 | 8 | 41 | 71 | 128 | 230 |
| 68,061 | 6 | 14 | 78  | 137 | 3 | 8 | 41 | 70 | 128 | 229 |
| 68,062 | 6 | 14 | 77  | 139 | 3 | 8 | 43 | 70 | 129 | 231 |
| 68,063 | 6 | 14 | 75  | 139 | 3 | 8 | 41 | 70 | 125 | 231 |
| 68,064 | 5 | 14 | 74  | 139 | 3 | 8 | 37 | 69 | 119 | 230 |
| 68,065 | 5 | 14 | 75  | 138 | 3 | 8 | 36 | 69 | 119 | 229 |
| 68,066 | 5 | 14 | 75  | 126 | 3 | 8 | 36 | 57 | 119 | 205 |
| 68,067 | 5 | 13 | 76  | 102 | 3 | 7 | 37 | 47 | 121 | 169 |
| 68,068 | 5 | 13 | 76  | 102 | 3 | 7 | 37 | 47 | 121 | 169 |
| 68,069 | 5 | 13 | 77  | 102 | 3 | 7 | 37 | 46 | 122 | 168 |
| 68,070 | 5 | 13 | 77  | 103 | 3 | 7 | 37 | 46 | 122 | 169 |
| 68,071 | 5 | 13 | 77  | 104 | 3 | 6 | 37 | 46 | 122 | 169 |
| 68,072 | 5 | 13 | 77  | 104 | 3 | 6 | 37 | 46 | 122 | 169 |
| 68,073 | 5 | 13 | 77  | 105 | 3 | 6 | 37 | 46 | 122 | 170 |
| 68,074 | 5 | 13 | 77  | 105 | 3 | 6 | 37 | 46 | 122 | 170 |
| 68,075 | 5 | 13 | 77  | 105 | 3 | 6 | 37 | 46 | 122 | 170 |
| 68,076 | 5 | 13 | 77  | 105 | 3 | 6 | 37 | 45 | 122 | 169 |
| 68,077 | 5 | 13 | 77  | 104 | 3 | 6 | 38 | 45 | 123 | 168 |
| 68,078 | 5 | 13 | 77  | 104 | 3 | 6 | 37 | 45 | 122 | 168 |
| 68,079 | 5 | 13 | 79  | 104 | 3 | 6 | 38 | 45 | 125 | 168 |
| 68,080 | 5 | 13 | 77  | 101 | 3 | 6 | 36 | 40 | 121 | 160 |
| 68,081 | 5 | 13 | 77  | 101 | 3 | 6 | 36 | 40 | 121 | 160 |
| 68,082 | 5 | 13 | 78  | 93  | 3 | 6 | 37 | 39 | 123 | 151 |
| 68,083 | 5 | 13 | 80  | 91  | 3 | 6 | 38 | 39 | 126 | 149 |
| 68,084 | 5 | 13 | 82  | 95  | 3 | 7 | 39 | 43 | 129 | 158 |
| 68,085 | 4 | 13 | 70  | 96  | 3 | 7 | 41 | 45 | 118 | 161 |
| 68,086 | 4 | 12 | 69  | 98  | 3 | 7 | 38 | 45 | 114 | 162 |
| 68,087 | 3 | 12 | 67  | 98  | 3 | 7 | 38 | 45 | 111 | 162 |
| 68,088 | 3 | 12 | 69  | 97  | 3 | 7 | 35 | 45 | 110 | 161 |
| 68,089 | 3 | 12 | 61  | 96  | 3 | 7 | 36 | 45 | 103 | 160 |

|        |   |    |    |     |   |    |    |     |     |     |
|--------|---|----|----|-----|---|----|----|-----|-----|-----|
| 68,090 | 3 | 12 | 61 | 96  | 3 | 7  | 36 | 45  | 103 | 160 |
| 68,091 | 3 | 12 | 61 | 93  | 3 | 7  | 37 | 44  | 104 | 156 |
| 68,092 | 3 | 12 | 61 | 93  | 3 | 7  | 37 | 44  | 104 | 156 |
| 68,093 | 3 | 12 | 61 | 92  | 3 | 7  | 37 | 44  | 104 | 155 |
| 68,094 | 3 | 12 | 60 | 91  | 3 | 7  | 37 | 44  | 103 | 154 |
| 68,095 | 3 | 7  | 61 | 82  | 3 | 4  | 37 | 41  | 104 | 134 |
| 68,096 | 3 | 7  | 57 | 81  | 3 | 4  | 37 | 40  | 100 | 132 |
| 68,097 | 3 | 7  | 57 | 82  | 3 | 4  | 37 | 41  | 100 | 134 |
| 68,098 | 2 | 8  | 54 | 86  | 2 | 3  | 35 | 38  | 93  | 135 |
| 68,099 | 2 | 8  | 54 | 107 | 2 | 8  | 35 | 57  | 93  | 180 |
| 68,100 | 2 | 8  | 55 | 123 | 2 | 9  | 35 | 67  | 94  | 207 |
| 68,101 | 2 | 8  | 55 | 136 | 2 | 11 | 35 | 75  | 94  | 230 |
| 68,102 | 2 | 24 | 51 | 174 | 2 | 11 | 34 | 104 | 89  | 313 |
| 68,103 | 0 | 31 | 48 | 213 | 1 | 13 | 29 | 147 | 78  | 404 |
| 68,104 | 0 | 32 | 48 | 222 | 1 | 13 | 29 | 148 | 78  | 415 |
| 68,105 | 0 | 32 | 47 | 222 | 1 | 14 | 28 | 147 | 76  | 415 |
| 68,106 | 0 | 33 | 47 | 237 | 1 | 14 | 27 | 147 | 75  | 431 |
| 68,107 | 0 | 33 | 46 | 229 | 0 | 14 | 24 | 148 | 70  | 424 |
| 68,108 | 0 | 33 | 42 | 230 | 0 | 14 | 23 | 148 | 65  | 425 |
| 68,109 | 0 | 33 | 42 | 240 | 0 | 14 | 23 | 149 | 65  | 436 |
| 68,110 | 0 | 33 | 42 | 242 | 0 | 14 | 23 | 151 | 65  | 440 |
| 68,111 | 0 | 32 | 38 | 243 | 0 | 13 | 21 | 151 | 59  | 439 |
| 68,112 | 0 | 32 | 37 | 249 | 0 | 13 | 21 | 158 | 58  | 452 |
| 68,113 | 0 | 33 | 34 | 250 | 0 | 13 | 19 | 159 | 53  | 455 |
| 68,114 | 0 | 33 | 32 | 249 | 0 | 13 | 17 | 162 | 49  | 457 |
| 68,115 | 0 | 33 | 29 | 249 | 0 | 13 | 17 | 162 | 46  | 457 |
| 68,116 | 0 | 34 | 27 | 250 | 0 | 14 | 17 | 163 | 44  | 461 |
| 68,117 | 0 | 35 | 27 | 259 | 0 | 14 | 15 | 164 | 42  | 472 |
| 68,118 | 0 | 34 | 26 | 260 | 0 | 14 | 15 | 163 | 41  | 471 |
| 68,119 | 0 | 34 | 25 | 260 | 0 | 14 | 15 | 163 | 40  | 471 |
| 68,120 | 0 | 34 | 25 | 259 | 0 | 14 | 15 | 163 | 40  | 470 |
| 68,121 | 0 | 34 | 25 | 258 | 0 | 14 | 15 | 164 | 40  | 470 |
| 68,122 | 0 | 34 | 25 | 258 | 1 | 14 | 15 | 164 | 41  | 470 |
| 68,123 | 0 | 34 | 25 | 258 | 1 | 14 | 15 | 164 | 41  | 470 |
| 68,124 | 0 | 34 | 25 | 258 | 1 | 14 | 15 | 164 | 41  | 470 |
| 68,125 | 0 | 34 | 25 | 258 | 1 | 14 | 15 | 163 | 41  | 469 |
| 68,126 | 0 | 34 | 25 | 258 | 1 | 14 | 15 | 163 | 41  | 469 |
| 68,127 | 0 | 34 | 25 | 258 | 1 | 14 | 15 | 163 | 41  | 469 |
| 68,128 | 0 | 34 | 25 | 258 | 1 | 14 | 14 | 163 | 40  | 469 |
| 68,129 | 0 | 34 | 25 | 258 | 1 | 14 | 14 | 164 | 40  | 470 |
| 68,130 | 0 | 34 | 23 | 258 | 1 | 14 | 13 | 165 | 37  | 471 |

|        |   |    |    |     |   |    |    |     |    |     |
|--------|---|----|----|-----|---|----|----|-----|----|-----|
| 68,131 | 0 | 34 | 23 | 257 | 1 | 14 | 13 | 165 | 37 | 470 |
| 68,132 | 0 | 35 | 23 | 258 | 1 | 14 | 13 | 165 | 37 | 472 |
| 68,133 | 0 | 35 | 22 | 263 | 1 | 14 | 12 | 164 | 35 | 476 |
| 68,134 | 0 | 36 | 20 | 285 | 1 | 17 | 11 | 196 | 32 | 534 |
| 68,135 | 1 | 38 | 18 | 290 | 1 | 16 | 11 | 198 | 31 | 542 |
| 68,136 | 3 | 38 | 19 | 289 | 1 | 16 | 8  | 196 | 31 | 539 |
| 68,137 | 3 | 38 | 17 | 287 | 1 | 16 | 7  | 197 | 28 | 538 |
| 68,138 | 3 | 38 | 12 | 289 | 1 | 17 | 5  | 198 | 21 | 542 |
| 68,139 | 3 | 38 | 9  | 290 | 1 | 17 | 4  | 200 | 17 | 545 |
| 68,140 | 4 | 38 | 10 | 290 | 2 | 17 | 9  | 200 | 25 | 545 |
| 68,141 | 5 | 38 | 17 | 290 | 2 | 17 | 11 | 201 | 35 | 546 |
| 68,142 | 5 | 38 | 17 | 292 | 2 | 17 | 11 | 201 | 35 | 548 |
| 68,143 | 6 | 38 | 19 | 292 | 2 | 17 | 14 | 201 | 41 | 548 |
| 68,144 | 6 | 38 | 20 | 290 | 2 | 17 | 14 | 200 | 42 | 545 |
| 68,145 | 6 | 38 | 20 | 291 | 2 | 17 | 14 | 200 | 42 | 546 |
| 68,146 | 6 | 38 | 19 | 291 | 2 | 17 | 14 | 200 | 41 | 546 |
| 68,147 | 6 | 38 | 19 | 291 | 2 | 17 | 14 | 200 | 41 | 546 |
| 68,148 | 6 | 37 | 21 | 275 | 2 | 17 | 14 | 198 | 43 | 527 |
| 68,149 | 6 | 37 | 22 | 276 | 2 | 17 | 14 | 198 | 44 | 528 |
| 68,150 | 6 | 37 | 22 | 254 | 3 | 12 | 15 | 180 | 46 | 483 |
| 68,151 | 6 | 37 | 21 | 232 | 3 | 11 | 15 | 174 | 45 | 454 |
| 68,152 | 6 | 34 | 21 | 210 | 3 | 9  | 15 | 154 | 45 | 407 |
| 68,153 | 6 | 17 | 21 | 160 | 3 | 8  | 15 | 120 | 45 | 305 |
| 68,154 | 6 | 10 | 23 | 115 | 4 | 6  | 17 | 82  | 50 | 213 |
| 68,155 | 6 | 9  | 26 | 103 | 4 | 5  | 17 | 82  | 53 | 199 |
| 68,156 | 6 | 8  | 27 | 89  | 4 | 5  | 17 | 82  | 54 | 184 |
| 68,157 | 6 | 8  | 27 | 89  | 4 | 5  | 17 | 82  | 54 | 184 |
| 68,158 | 6 | 8  | 27 | 86  | 4 | 5  | 17 | 81  | 54 | 180 |
| 68,159 | 6 | 8  | 27 | 73  | 4 | 5  | 17 | 80  | 54 | 166 |
| 68,160 | 6 | 8  | 27 | 73  | 4 | 5  | 17 | 80  | 54 | 166 |
| 68,161 | 6 | 8  | 35 | 70  | 5 | 5  | 19 | 77  | 65 | 160 |
| 68,162 | 6 | 8  | 35 | 70  | 5 | 5  | 19 | 78  | 65 | 161 |
| 68,163 | 6 | 8  | 47 | 64  | 5 | 5  | 27 | 72  | 85 | 149 |
| 68,164 | 6 | 7  | 48 | 61  | 5 | 5  | 27 | 71  | 86 | 144 |
| 68,165 | 6 | 7  | 49 | 61  | 5 | 5  | 27 | 68  | 87 | 141 |
| 68,166 | 6 | 6  | 51 | 60  | 5 | 4  | 27 | 67  | 89 | 137 |
| 68,167 | 6 | 5  | 54 | 51  | 5 | 4  | 27 | 66  | 92 | 126 |
| 68,168 | 6 | 5  | 54 | 51  | 5 | 4  | 27 | 66  | 92 | 126 |
| 68,169 | 6 | 5  | 54 | 50  | 5 | 4  | 27 | 66  | 92 | 125 |
| 68,170 | 6 | 5  | 55 | 50  | 5 | 4  | 28 | 66  | 94 | 125 |
| 68,171 | 6 | 5  | 55 | 50  | 5 | 4  | 28 | 66  | 94 | 125 |

|        |   |   |    |    |   |   |    |    |     |     |
|--------|---|---|----|----|---|---|----|----|-----|-----|
| 68,172 | 6 | 5 | 55 | 50 | 5 | 4 | 28 | 65 | 94  | 124 |
| 68,173 | 6 | 5 | 55 | 50 | 4 | 4 | 28 | 65 | 93  | 124 |
| 68,174 | 6 | 5 | 56 | 50 | 4 | 4 | 28 | 65 | 94  | 124 |
| 68,175 | 6 | 5 | 56 | 50 | 4 | 4 | 28 | 65 | 94  | 124 |
| 68,176 | 6 | 5 | 57 | 51 | 4 | 4 | 28 | 65 | 95  | 125 |
| 68,177 | 7 | 5 | 57 | 51 | 4 | 4 | 28 | 65 | 96  | 125 |
| 68,178 | 7 | 5 | 57 | 51 | 4 | 4 | 28 | 65 | 96  | 125 |
| 68,179 | 7 | 5 | 57 | 52 | 4 | 4 | 28 | 64 | 96  | 125 |
| 68,180 | 7 | 5 | 59 | 53 | 4 | 4 | 29 | 64 | 99  | 126 |
| 68,181 | 7 | 5 | 59 | 53 | 4 | 4 | 30 | 65 | 100 | 127 |
| 68,182 | 7 | 5 | 59 | 53 | 4 | 4 | 31 | 67 | 101 | 129 |
| 68,183 | 7 | 5 | 59 | 52 | 4 | 4 | 31 | 67 | 101 | 128 |
| 68,184 | 8 | 5 | 63 | 49 | 5 | 4 | 37 | 66 | 113 | 124 |
| 68,185 | 8 | 4 | 63 | 27 | 5 | 1 | 37 | 34 | 113 | 66  |
| 68,186 | 7 | 4 | 64 | 19 | 5 | 1 | 38 | 32 | 114 | 56  |
| 68,187 | 5 | 4 | 63 | 19 | 5 | 1 | 38 | 32 | 111 | 56  |
| 68,188 | 5 | 5 | 63 | 20 | 5 | 1 | 38 | 34 | 111 | 60  |
| 68,189 | 5 | 5 | 62 | 19 | 5 | 0 | 37 | 33 | 109 | 57  |
| 68,190 | 4 | 5 | 61 | 18 | 4 | 0 | 31 | 31 | 100 | 54  |
| 68,191 | 5 | 5 | 57 | 18 | 4 | 0 | 33 | 30 | 99  | 53  |
| 68,192 | 5 | 5 | 57 | 16 | 4 | 0 | 38 | 30 | 104 | 51  |
| 68,193 | 5 | 5 | 61 | 16 | 4 | 0 | 38 | 30 | 108 | 51  |
| 68,194 | 4 | 5 | 61 | 16 | 4 | 0 | 35 | 31 | 104 | 52  |
| 68,195 | 4 | 5 | 60 | 16 | 4 | 0 | 36 | 31 | 104 | 52  |
| 68,196 | 4 | 5 | 62 | 15 | 4 | 0 | 36 | 31 | 106 | 51  |
| 68,197 | 4 | 5 | 67 | 15 | 4 | 0 | 45 | 31 | 120 | 51  |
| 68,198 | 4 | 5 | 70 | 13 | 4 | 1 | 45 | 31 | 123 | 50  |
| 68,199 | 4 | 5 | 68 | 16 | 4 | 1 | 45 | 38 | 121 | 60  |
| 68,200 | 4 | 5 | 67 | 25 | 4 | 1 | 45 | 48 | 120 | 79  |
| 68,201 | 4 | 6 | 67 | 25 | 3 | 1 | 44 | 47 | 118 | 79  |
| 68,202 | 5 | 5 | 74 | 24 | 3 | 1 | 44 | 39 | 126 | 69  |
| 68,203 | 5 | 5 | 74 | 24 | 3 | 1 | 44 | 39 | 126 | 69  |
| 68,204 | 6 | 5 | 72 | 24 | 2 | 1 | 43 | 34 | 123 | 64  |
| 68,205 | 6 | 5 | 72 | 24 | 2 | 1 | 43 | 31 | 123 | 61  |
| 68,206 | 6 | 6 | 69 | 26 | 2 | 2 | 43 | 31 | 120 | 65  |
| 68,207 | 6 | 6 | 68 | 24 | 2 | 2 | 43 | 30 | 119 | 62  |
| 68,208 | 6 | 6 | 68 | 27 | 2 | 2 | 44 | 35 | 120 | 70  |
| 68,209 | 6 | 6 | 73 | 38 | 2 | 3 | 45 | 41 | 126 | 88  |
| 68,210 | 6 | 6 | 74 | 39 | 2 | 3 | 47 | 44 | 129 | 92  |
| 68,211 | 6 | 6 | 72 | 44 | 2 | 3 | 46 | 44 | 126 | 97  |
| 68,212 | 6 | 6 | 68 | 53 | 1 | 4 | 46 | 50 | 121 | 113 |



|        |    |   |    |     |   |   |    |    |     |     |
|--------|----|---|----|-----|---|---|----|----|-----|-----|
| 68,213 | 6  | 6 | 61 | 55  | 1 | 4 | 39 | 49 | 107 | 114 |
| 68,214 | 6  | 6 | 56 | 59  | 1 | 4 | 39 | 48 | 102 | 117 |
| 68,215 | 6  | 8 | 55 | 77  | 1 | 7 | 39 | 61 | 101 | 153 |
| 68,216 | 7  | 8 | 57 | 86  | 1 | 7 | 40 | 61 | 105 | 162 |
| 68,217 | 7  | 8 | 60 | 92  | 1 | 7 | 40 | 62 | 108 | 169 |
| 68,218 | 7  | 8 | 57 | 94  | 1 | 7 | 40 | 64 | 105 | 173 |
| 68,219 | 7  | 9 | 58 | 96  | 1 | 7 | 40 | 65 | 106 | 177 |
| 68,220 | 10 | 9 | 60 | 99  | 2 | 7 | 39 | 65 | 111 | 180 |
| 68,221 | 10 | 9 | 60 | 99  | 2 | 7 | 39 | 65 | 111 | 180 |
| 68,222 | 11 | 9 | 60 | 100 | 2 | 7 | 40 | 65 | 113 | 181 |
| 68,223 | 11 | 9 | 67 | 102 | 4 | 7 | 46 | 65 | 128 | 183 |
| 68,224 | 11 | 9 | 67 | 102 | 4 | 7 | 46 | 65 | 128 | 183 |
| 68,225 | 14 | 9 | 71 | 102 | 5 | 7 | 50 | 65 | 140 | 183 |
| 68,226 | 14 | 9 | 70 | 102 | 5 | 7 | 50 | 64 | 139 | 182 |
| 68,227 | 14 | 9 | 75 | 101 | 6 | 7 | 51 | 64 | 146 | 181 |
| 68,228 | 14 | 9 | 81 | 102 | 7 | 7 | 53 | 64 | 155 | 182 |
| 68,229 | 14 | 9 | 81 | 102 | 7 | 7 | 53 | 64 | 155 | 182 |
| 68,230 | 14 | 9 | 82 | 106 | 7 | 7 | 54 | 66 | 157 | 188 |
| 68,231 | 14 | 9 | 80 | 109 | 7 | 7 | 53 | 66 | 154 | 191 |
| 68,232 | 14 | 9 | 80 | 109 | 7 | 7 | 52 | 65 | 153 | 190 |
| 68,233 | 14 | 9 | 80 | 109 | 7 | 7 | 52 | 63 | 153 | 188 |
| 68,234 | 13 | 8 | 76 | 106 | 6 | 7 | 46 | 63 | 141 | 184 |
| 68,235 | 13 | 8 | 76 | 106 | 6 | 7 | 45 | 63 | 140 | 184 |
| 68,236 | 13 | 8 | 77 | 106 | 6 | 7 | 45 | 63 | 141 | 184 |
| 68,237 | 13 | 6 | 73 | 105 | 6 | 7 | 43 | 60 | 135 | 178 |
| 68,238 | 13 | 6 | 72 | 105 | 6 | 7 | 43 | 60 | 134 | 178 |
| 68,239 | 14 | 5 | 78 | 104 | 6 | 7 | 47 | 57 | 145 | 173 |
| 68,240 | 17 | 5 | 79 | 103 | 6 | 7 | 51 | 57 | 153 | 172 |
| 68,241 | 17 | 5 | 80 | 104 | 6 | 7 | 51 | 57 | 154 | 173 |
| 68,242 | 15 | 5 | 77 | 105 | 6 | 7 | 47 | 60 | 145 | 177 |
| 68,243 | 15 | 5 | 77 | 105 | 6 | 7 | 42 | 60 | 140 | 177 |
| 68,244 | 15 | 5 | 81 | 105 | 6 | 7 | 48 | 61 | 150 | 178 |
| 68,245 | 15 | 5 | 79 | 105 | 6 | 7 | 50 | 59 | 150 | 176 |
| 68,246 | 15 | 5 | 77 | 105 | 6 | 8 | 52 | 59 | 150 | 177 |
| 68,247 | 15 | 5 | 79 | 105 | 6 | 8 | 51 | 59 | 151 | 177 |
| 68,248 | 15 | 5 | 75 | 105 | 6 | 7 | 46 | 61 | 142 | 178 |
| 68,249 | 15 | 5 | 72 | 107 | 6 | 7 | 46 | 64 | 139 | 183 |
| 68,250 | 15 | 5 | 72 | 105 | 6 | 7 | 46 | 60 | 139 | 177 |
| 68,251 | 15 | 5 | 71 | 95  | 6 | 7 | 46 | 50 | 138 | 157 |
| 68,252 | 15 | 4 | 71 | 95  | 6 | 7 | 47 | 50 | 139 | 156 |
| 68,253 | 14 | 4 | 68 | 95  | 6 | 7 | 47 | 50 | 135 | 156 |

|        |    |   |    |    |   |   |    |    |     |     |
|--------|----|---|----|----|---|---|----|----|-----|-----|
| 68,254 | 14 | 4 | 68 | 95 | 6 | 7 | 47 | 50 | 135 | 156 |
| 68,255 | 13 | 4 | 69 | 95 | 6 | 7 | 46 | 50 | 134 | 156 |
| 68,256 | 13 | 4 | 69 | 96 | 6 | 7 | 46 | 50 | 134 | 157 |
| 68,257 | 13 | 3 | 70 | 94 | 6 | 6 | 47 | 51 | 136 | 154 |
| 68,258 | 13 | 3 | 71 | 79 | 6 | 5 | 46 | 38 | 136 | 125 |
| 68,259 | 13 | 3 | 69 | 79 | 6 | 5 | 46 | 38 | 134 | 125 |
| 68,260 | 13 | 3 | 66 | 79 | 6 | 5 | 45 | 38 | 130 | 125 |
| 68,261 | 13 | 3 | 65 | 73 | 6 | 5 | 43 | 38 | 127 | 119 |
| 68,262 | 13 | 4 | 63 | 65 | 6 | 4 | 42 | 32 | 124 | 105 |
| 68,263 | 13 | 4 | 63 | 65 | 6 | 4 | 42 | 32 | 124 | 105 |
| 68,264 | 13 | 4 | 63 | 59 | 6 | 4 | 41 | 32 | 123 | 99  |
| 68,265 | 13 | 4 | 63 | 59 | 6 | 4 | 41 | 32 | 123 | 99  |
| 68,266 | 13 | 3 | 63 | 32 | 6 | 1 | 41 | 19 | 123 | 55  |
| 68,267 | 12 | 3 | 60 | 32 | 6 | 1 | 40 | 19 | 118 | 55  |
| 68,268 | 12 | 3 | 55 | 24 | 6 | 1 | 41 | 16 | 114 | 44  |
| 68,269 | 12 | 2 | 55 | 22 | 6 | 1 | 41 | 15 | 114 | 40  |
| 68,270 | 12 | 2 | 55 | 22 | 6 | 1 | 41 | 15 | 114 | 40  |
| 68,271 | 9  | 2 | 52 | 19 | 5 | 1 | 41 | 17 | 107 | 39  |
| 68,272 | 8  | 2 | 59 | 18 | 5 | 1 | 41 | 17 | 113 | 38  |
| 68,273 | 9  | 2 | 60 | 20 | 5 | 1 | 41 | 20 | 115 | 43  |
| 68,274 | 9  | 2 | 57 | 18 | 3 | 1 | 36 | 20 | 105 | 41  |
| 68,275 | 6  | 2 | 58 | 20 | 3 | 1 | 36 | 28 | 103 | 51  |
| 68,276 | 6  | 2 | 56 | 20 | 2 | 1 | 33 | 28 | 97  | 51  |
| 68,277 | 5  | 2 | 56 | 20 | 1 | 1 | 34 | 28 | 96  | 51  |
| 68,278 | 5  | 2 | 52 | 19 | 1 | 1 | 32 | 28 | 90  | 50  |
| 68,279 | 5  | 2 | 46 | 19 | 1 | 1 | 30 | 28 | 82  | 50  |
| 68,280 | 5  | 2 | 46 | 14 | 1 | 1 | 29 | 26 | 81  | 43  |
| 68,281 | 5  | 2 | 48 | 14 | 1 | 1 | 29 | 26 | 83  | 43  |
| 68,282 | 7  | 2 | 54 | 10 | 1 | 1 | 29 | 26 | 91  | 39  |
| 68,283 | 7  | 2 | 54 | 10 | 1 | 1 | 29 | 26 | 91  | 39  |
| 68,284 | 7  | 2 | 58 | 10 | 1 | 1 | 29 | 26 | 95  | 39  |
| 68,285 | 7  | 2 | 62 | 10 | 1 | 1 | 29 | 26 | 99  | 39  |
| 68,286 | 7  | 2 | 65 | 10 | 1 | 1 | 32 | 26 | 105 | 39  |
| 68,287 | 7  | 2 | 65 | 10 | 1 | 1 | 33 | 26 | 106 | 39  |
| 68,288 | 7  | 2 | 66 | 10 | 1 | 1 | 33 | 26 | 107 | 39  |
| 68,289 | 6  | 2 | 60 | 10 | 1 | 1 | 30 | 26 | 97  | 39  |
| 68,290 | 6  | 2 | 62 | 10 | 1 | 1 | 30 | 31 | 99  | 44  |
| 68,291 | 4  | 2 | 69 | 9  | 1 | 1 | 28 | 32 | 102 | 44  |
| 68,292 | 4  | 3 | 67 | 11 | 1 | 2 | 28 | 33 | 100 | 49  |
| 68,293 | 4  | 4 | 67 | 14 | 1 | 2 | 27 | 40 | 99  | 60  |
| 68,294 | 4  | 4 | 60 | 20 | 1 | 3 | 22 | 44 | 87  | 71  |

|        |   |   |    |    |   |   |    |    |    |     |
|--------|---|---|----|----|---|---|----|----|----|-----|
| 68,295 | 4 | 4 | 59 | 21 | 1 | 3 | 21 | 43 | 85 | 71  |
| 68,296 | 4 | 4 | 59 | 34 | 1 | 3 | 20 | 45 | 84 | 86  |
| 68,297 | 4 | 4 | 59 | 42 | 1 | 2 | 18 | 47 | 82 | 95  |
| 68,298 | 4 | 4 | 57 | 44 | 1 | 2 | 15 | 49 | 77 | 99  |
| 68,299 | 4 | 4 | 57 | 43 | 1 | 2 | 15 | 48 | 77 | 97  |
| 68,300 | 4 | 4 | 57 | 43 | 1 | 2 | 15 | 48 | 77 | 97  |
| 68,301 | 5 | 4 | 57 | 43 | 1 | 2 | 15 | 47 | 78 | 96  |
| 68,302 | 5 | 5 | 56 | 47 | 1 | 2 | 15 | 48 | 77 | 102 |
| 68,303 | 5 | 5 | 54 | 47 | 1 | 2 | 14 | 48 | 74 | 102 |
| 68,304 | 5 | 5 | 54 | 48 | 1 | 2 | 14 | 48 | 74 | 103 |
| 68,305 | 5 | 5 | 55 | 48 | 1 | 2 | 14 | 48 | 75 | 103 |
| 68,306 | 5 | 5 | 54 | 47 | 1 | 2 | 14 | 49 | 74 | 103 |
| 68,307 | 5 | 6 | 54 | 48 | 1 | 2 | 15 | 52 | 75 | 108 |
| 68,308 | 5 | 6 | 54 | 48 | 1 | 2 | 14 | 52 | 74 | 108 |
| 68,309 | 5 | 6 | 53 | 48 | 1 | 2 | 14 | 52 | 73 | 108 |
| 68,310 | 6 | 6 | 55 | 48 | 1 | 2 | 14 | 52 | 76 | 108 |
| 68,311 | 6 | 6 | 55 | 48 | 1 | 2 | 14 | 52 | 76 | 108 |
| 68,312 | 6 | 6 | 55 | 48 | 1 | 2 | 14 | 52 | 76 | 108 |
| 68,313 | 6 | 5 | 55 | 49 | 1 | 2 | 14 | 53 | 76 | 109 |
| 68,314 | 6 | 5 | 55 | 50 | 1 | 2 | 14 | 53 | 76 | 110 |
| 68,315 | 6 | 6 | 55 | 50 | 1 | 2 | 14 | 53 | 76 | 111 |
| 68,316 | 6 | 5 | 55 | 50 | 1 | 2 | 14 | 53 | 76 | 110 |
| 68,317 | 6 | 5 | 58 | 50 | 1 | 2 | 15 | 53 | 80 | 110 |
| 68,318 | 6 | 5 | 58 | 50 | 1 | 2 | 15 | 53 | 80 | 110 |
| 68,319 | 6 | 5 | 58 | 48 | 1 | 2 | 14 | 48 | 79 | 103 |
| 68,320 | 6 | 5 | 57 | 48 | 1 | 2 | 14 | 48 | 78 | 103 |
| 68,321 | 6 | 5 | 52 | 48 | 1 | 2 | 13 | 49 | 72 | 104 |
| 68,322 | 6 | 5 | 52 | 48 | 1 | 2 | 13 | 49 | 72 | 104 |
| 68,323 | 6 | 5 | 50 | 48 | 1 | 2 | 13 | 49 | 70 | 104 |
| 68,324 | 5 | 5 | 50 | 48 | 1 | 2 | 13 | 49 | 69 | 104 |
| 68,325 | 5 | 5 | 46 | 46 | 1 | 2 | 12 | 43 | 64 | 96  |
| 68,326 | 5 | 5 | 44 | 46 | 1 | 2 | 12 | 43 | 62 | 96  |
| 68,327 | 5 | 5 | 42 | 46 | 1 | 2 | 11 | 43 | 59 | 96  |
| 68,328 | 5 | 5 | 42 | 46 | 1 | 3 | 11 | 43 | 59 | 97  |
| 68,329 | 5 | 5 | 41 | 46 | 1 | 3 | 11 | 43 | 58 | 97  |
| 68,330 | 5 | 5 | 41 | 46 | 0 | 3 | 11 | 44 | 57 | 98  |
| 68,331 | 5 | 5 | 41 | 46 | 0 | 3 | 11 | 44 | 57 | 98  |
| 68,332 | 5 | 5 | 39 | 46 | 0 | 3 | 11 | 44 | 55 | 98  |
| 68,333 | 3 | 5 | 33 | 46 | 0 | 3 | 12 | 44 | 48 | 98  |
| 68,334 | 3 | 5 | 29 | 46 | 0 | 3 | 12 | 45 | 44 | 99  |
| 68,335 | 3 | 5 | 27 | 47 | 0 | 3 | 12 | 45 | 42 | 100 |

|        |   |   |    |    |   |   |    |    |    |     |
|--------|---|---|----|----|---|---|----|----|----|-----|
| 68,336 | 3 | 5 | 25 | 47 | 0 | 3 | 12 | 45 | 40 | 100 |
| 68,337 | 3 | 5 | 23 | 47 | 0 | 3 | 10 | 45 | 36 | 100 |
| 68,338 | 3 | 5 | 23 | 48 | 0 | 3 | 9  | 46 | 35 | 102 |
| 68,339 | 3 | 5 | 22 | 48 | 0 | 3 | 9  | 47 | 34 | 103 |
| 68,340 | 3 | 5 | 22 | 48 | 0 | 3 | 9  | 47 | 34 | 103 |
| 68,341 | 3 | 5 | 21 | 48 | 0 | 3 | 9  | 43 | 33 | 99  |
| 68,342 | 2 | 4 | 13 | 47 | 0 | 2 | 8  | 41 | 23 | 94  |
| 68,343 | 2 | 4 | 13 | 47 | 0 | 2 | 8  | 41 | 23 | 94  |
| 68,344 | 2 | 3 | 14 | 38 | 0 | 1 | 9  | 27 | 25 | 69  |
| 68,345 | 2 | 4 | 14 | 40 | 0 | 1 | 9  | 29 | 25 | 74  |
| 68,346 | 2 | 6 | 14 | 42 | 0 | 1 | 8  | 31 | 24 | 80  |
| 68,347 | 2 | 6 | 14 | 29 | 0 | 1 | 8  | 30 | 24 | 66  |
| 68,348 | 2 | 7 | 16 | 25 | 0 | 1 | 9  | 28 | 27 | 61  |
| 68,349 | 2 | 7 | 15 | 27 | 0 | 1 | 9  | 27 | 26 | 62  |
| 68,350 | 2 | 7 | 15 | 27 | 0 | 1 | 9  | 23 | 26 | 58  |
| 68,351 | 1 | 7 | 15 | 26 | 0 | 1 | 9  | 22 | 25 | 56  |
| 68,352 | 1 | 7 | 15 | 27 | 0 | 1 | 9  | 23 | 25 | 58  |
| 68,353 | 1 | 6 | 17 | 23 | 0 | 1 | 9  | 22 | 27 | 52  |
| 68,354 | 1 | 6 | 17 | 25 | 0 | 1 | 10 | 22 | 28 | 54  |
| 68,355 | 1 | 6 | 16 | 24 | 0 | 1 | 10 | 22 | 27 | 53  |
| 68,356 | 1 | 6 | 16 | 24 | 0 | 1 | 11 | 22 | 28 | 53  |
| 68,357 | 1 | 6 | 16 | 24 | 0 | 1 | 11 | 21 | 28 | 52  |
| 68,358 | 1 | 5 | 17 | 23 | 0 | 1 | 13 | 17 | 31 | 46  |
| 68,359 | 1 | 5 | 17 | 23 | 0 | 1 | 14 | 17 | 32 | 46  |
| 68,360 | 1 | 5 | 15 | 23 | 0 | 1 | 20 | 17 | 36 | 46  |
| 68,361 | 0 | 5 | 16 | 23 | 0 | 1 | 20 | 17 | 36 | 46  |
| 68,362 | 0 | 5 | 16 | 23 | 0 | 1 | 21 | 17 | 37 | 46  |
| 68,363 | 0 | 5 | 16 | 25 | 0 | 1 | 21 | 17 | 37 | 48  |
| 68,364 | 0 | 5 | 16 | 24 | 0 | 1 | 21 | 16 | 37 | 46  |
| 68,365 | 0 | 5 | 17 | 23 | 0 | 1 | 21 | 16 | 38 | 45  |
| 68,366 | 0 | 4 | 17 | 23 | 0 | 1 | 22 | 16 | 39 | 44  |
| 68,367 | 0 | 4 | 17 | 23 | 0 | 1 | 22 | 16 | 39 | 44  |
| 68,368 | 0 | 4 | 14 | 23 | 0 | 1 | 21 | 16 | 35 | 44  |
| 68,369 | 0 | 4 | 14 | 23 | 0 | 1 | 21 | 16 | 35 | 44  |
| 68,370 | 0 | 4 | 15 | 23 | 0 | 1 | 23 | 16 | 38 | 44  |
| 68,371 | 0 | 4 | 15 | 23 | 0 | 1 | 23 | 17 | 38 | 45  |
| 68,372 | 0 | 4 | 15 | 25 | 0 | 1 | 23 | 16 | 38 | 46  |
| 68,373 | 0 | 4 | 15 | 25 | 0 | 1 | 23 | 16 | 38 | 46  |
| 68,374 | 0 | 4 | 15 | 25 | 0 | 1 | 24 | 16 | 39 | 46  |
| 68,375 | 0 | 4 | 14 | 25 | 0 | 1 | 24 | 14 | 38 | 44  |
| 68,376 | 0 | 4 | 15 | 25 | 0 | 1 | 24 | 14 | 39 | 44  |

|        |   |    |    |    |   |   |    |    |     |     |
|--------|---|----|----|----|---|---|----|----|-----|-----|
| 68,377 | 0 | 4  | 17 | 25 | 0 | 1 | 24 | 14 | 41  | 44  |
| 68,378 | 0 | 4  | 17 | 25 | 0 | 1 | 23 | 14 | 40  | 44  |
| 68,379 | 1 | 4  | 23 | 25 | 0 | 0 | 24 | 14 | 48  | 43  |
| 68,380 | 1 | 4  | 23 | 26 | 0 | 0 | 24 | 14 | 48  | 44  |
| 68,381 | 1 | 4  | 23 | 26 | 0 | 0 | 24 | 14 | 48  | 44  |
| 68,382 | 1 | 5  | 34 | 26 | 0 | 0 | 26 | 14 | 61  | 45  |
| 68,383 | 1 | 5  | 43 | 26 | 0 | 0 | 28 | 14 | 72  | 45  |
| 68,384 | 1 | 5  | 49 | 26 | 0 | 0 | 27 | 13 | 77  | 44  |
| 68,385 | 1 | 5  | 49 | 25 | 0 | 0 | 27 | 13 | 77  | 43  |
| 68,386 | 1 | 5  | 49 | 25 | 0 | 0 | 27 | 13 | 77  | 43  |
| 68,387 | 1 | 5  | 50 | 26 | 0 | 1 | 27 | 13 | 78  | 45  |
| 68,388 | 1 | 5  | 48 | 25 | 0 | 1 | 26 | 12 | 75  | 43  |
| 68,389 | 1 | 5  | 48 | 25 | 0 | 1 | 26 | 12 | 75  | 43  |
| 68,390 | 1 | 5  | 48 | 26 | 0 | 1 | 25 | 11 | 74  | 43  |
| 68,391 | 1 | 5  | 48 | 26 | 0 | 1 | 27 | 12 | 76  | 44  |
| 68,392 | 1 | 5  | 48 | 26 | 0 | 1 | 26 | 11 | 75  | 43  |
| 68,393 | 1 | 5  | 48 | 25 | 0 | 1 | 26 | 11 | 75  | 42  |
| 68,394 | 3 | 5  | 53 | 24 | 0 | 1 | 27 | 10 | 83  | 40  |
| 68,395 | 3 | 4  | 52 | 22 | 0 | 1 | 26 | 8  | 81  | 35  |
| 68,396 | 3 | 2  | 53 | 19 | 0 | 1 | 26 | 6  | 82  | 28  |
| 68,397 | 3 | 2  | 53 | 19 | 0 | 1 | 26 | 6  | 82  | 28  |
| 68,398 | 3 | 1  | 51 | 16 | 0 | 1 | 25 | 5  | 79  | 23  |
| 68,399 | 3 | 1  | 51 | 15 | 0 | 1 | 25 | 5  | 79  | 22  |
| 68,400 | 4 | 1  | 52 | 11 | 0 | 1 | 25 | 4  | 81  | 17  |
| 68,401 | 4 | 1  | 53 | 10 | 0 | 1 | 25 | 4  | 82  | 16  |
| 68,402 | 4 | 1  | 53 | 7  | 0 | 1 | 25 | 3  | 82  | 12  |
| 68,403 | 4 | 1  | 54 | 7  | 0 | 1 | 25 | 4  | 83  | 13  |
| 68,404 | 4 | 4  | 57 | 9  | 0 | 1 | 26 | 5  | 87  | 19  |
| 68,405 | 4 | 4  | 58 | 9  | 0 | 1 | 25 | 6  | 87  | 20  |
| 68,406 | 4 | 4  | 58 | 15 | 0 | 1 | 24 | 7  | 86  | 27  |
| 68,407 | 4 | 7  | 59 | 37 | 0 | 2 | 24 | 11 | 87  | 57  |
| 68,408 | 4 | 7  | 60 | 40 | 0 | 2 | 21 | 11 | 85  | 60  |
| 68,409 | 5 | 7  | 62 | 45 | 0 | 2 | 23 | 11 | 90  | 65  |
| 68,410 | 5 | 7  | 61 | 48 | 0 | 2 | 22 | 11 | 88  | 68  |
| 68,411 | 6 | 8  | 70 | 57 | 1 | 2 | 27 | 20 | 104 | 87  |
| 68,412 | 6 | 8  | 69 | 59 | 1 | 2 | 27 | 21 | 103 | 90  |
| 68,413 | 6 | 9  | 73 | 60 | 1 | 2 | 28 | 25 | 108 | 96  |
| 68,414 | 6 | 15 | 73 | 78 | 1 | 2 | 28 | 28 | 108 | 123 |
| 68,415 | 6 | 16 | 73 | 85 | 1 | 2 | 28 | 30 | 108 | 133 |
| 68,416 | 7 | 17 | 72 | 85 | 1 | 2 | 28 | 30 | 108 | 134 |
| 68,417 | 7 | 17 | 72 | 85 | 1 | 2 | 27 | 30 | 107 | 134 |

|        |   |    |    |     |   |   |    |    |     |     |
|--------|---|----|----|-----|---|---|----|----|-----|-----|
| 68,418 | 7 | 17 | 72 | 85  | 1 | 2 | 27 | 30 | 107 | 134 |
| 68,419 | 7 | 17 | 72 | 85  | 1 | 2 | 25 | 30 | 105 | 134 |
| 68,420 | 7 | 17 | 73 | 85  | 1 | 2 | 25 | 30 | 106 | 134 |
| 68,421 | 7 | 17 | 72 | 85  | 1 | 2 | 25 | 30 | 105 | 134 |
| 68,422 | 7 | 17 | 72 | 85  | 1 | 2 | 25 | 29 | 105 | 133 |
| 68,423 | 7 | 17 | 72 | 84  | 1 | 2 | 25 | 29 | 105 | 132 |
| 68,424 | 7 | 17 | 72 | 85  | 2 | 2 | 26 | 31 | 107 | 135 |
| 68,425 | 7 | 17 | 72 | 85  | 2 | 2 | 26 | 31 | 107 | 135 |
| 68,426 | 7 | 17 | 72 | 88  | 2 | 2 | 26 | 32 | 107 | 139 |
| 68,427 | 7 | 17 | 71 | 94  | 2 | 2 | 26 | 33 | 106 | 146 |
| 68,428 | 7 | 17 | 70 | 98  | 2 | 2 | 26 | 33 | 105 | 150 |
| 68,429 | 6 | 18 | 64 | 117 | 2 | 2 | 26 | 34 | 98  | 171 |
| 68,430 | 6 | 19 | 64 | 120 | 2 | 2 | 26 | 36 | 98  | 177 |
| 68,431 | 6 | 20 | 62 | 137 | 2 | 5 | 26 | 43 | 96  | 205 |
| 68,432 | 6 | 20 | 58 | 140 | 2 | 5 | 25 | 43 | 91  | 208 |
| 68,433 | 6 | 22 | 52 | 151 | 2 | 5 | 24 | 45 | 84  | 223 |
| 68,434 | 6 | 25 | 43 | 158 | 2 | 6 | 22 | 46 | 73  | 235 |
| 68,435 | 6 | 25 | 37 | 158 | 2 | 6 | 22 | 46 | 67  | 235 |
| 68,436 | 6 | 25 | 37 | 159 | 2 | 6 | 22 | 47 | 67  | 237 |
| 68,437 | 6 | 25 | 37 | 159 | 2 | 6 | 22 | 47 | 67  | 237 |
| 68,438 | 6 | 25 | 36 | 159 | 2 | 5 | 25 | 49 | 69  | 238 |
| 68,439 | 6 | 25 | 36 | 159 | 2 | 5 | 25 | 49 | 69  | 238 |
| 68,440 | 6 | 25 | 37 | 159 | 3 | 5 | 25 | 49 | 71  | 238 |
| 68,441 | 6 | 27 | 37 | 162 | 3 | 5 | 25 | 49 | 71  | 243 |
| 68,442 | 6 | 27 | 37 | 162 | 3 | 5 | 23 | 48 | 69  | 242 |
| 68,443 | 6 | 27 | 38 | 162 | 3 | 5 | 24 | 48 | 71  | 242 |
| 68,444 | 5 | 27 | 38 | 162 | 3 | 5 | 24 | 48 | 70  | 242 |
| 68,445 | 4 | 27 | 33 | 164 | 3 | 5 | 23 | 48 | 63  | 244 |
| 68,446 | 4 | 27 | 33 | 164 | 3 | 5 | 23 | 48 | 63  | 244 |
| 68,447 | 4 | 27 | 32 | 164 | 3 | 5 | 23 | 48 | 62  | 244 |
| 68,448 | 4 | 27 | 32 | 164 | 3 | 5 | 23 | 48 | 62  | 244 |
| 68,449 | 4 | 27 | 32 | 164 | 3 | 5 | 23 | 48 | 62  | 244 |
| 68,450 | 3 | 27 | 31 | 164 | 3 | 5 | 23 | 48 | 60  | 244 |
| 68,451 | 3 | 27 | 30 | 164 | 3 | 6 | 23 | 48 | 59  | 245 |
| 68,452 | 3 | 27 | 31 | 164 | 3 | 6 | 24 | 48 | 61  | 245 |
| 68,453 | 3 | 25 | 32 | 162 | 3 | 6 | 24 | 46 | 62  | 239 |
| 68,454 | 3 | 25 | 31 | 162 | 3 | 6 | 27 | 46 | 64  | 239 |
| 68,455 | 3 | 26 | 28 | 162 | 3 | 6 | 26 | 46 | 60  | 240 |
| 68,456 | 3 | 25 | 27 | 170 | 3 | 6 | 26 | 64 | 59  | 265 |
| 68,457 | 3 | 25 | 27 | 172 | 3 | 6 | 26 | 68 | 59  | 271 |
| 68,458 | 3 | 24 | 27 | 156 | 3 | 5 | 27 | 67 | 60  | 252 |

|        |   |    |    |     |   |   |    |    |    |     |
|--------|---|----|----|-----|---|---|----|----|----|-----|
| 68,459 | 3 | 24 | 27 | 154 | 3 | 5 | 27 | 68 | 60 | 251 |
| 68,460 | 2 | 24 | 25 | 152 | 3 | 5 | 25 | 68 | 55 | 249 |
| 68,461 | 1 | 25 | 22 | 157 | 3 | 5 | 25 | 71 | 51 | 258 |
| 68,462 | 1 | 24 | 16 | 152 | 2 | 5 | 14 | 63 | 33 | 244 |
| 68,463 | 1 | 24 | 13 | 151 | 2 | 5 | 12 | 63 | 28 | 243 |
| 68,464 | 1 | 23 | 13 | 150 | 2 | 5 | 12 | 59 | 28 | 237 |
| 68,465 | 1 | 16 | 14 | 123 | 3 | 5 | 13 | 54 | 31 | 198 |
| 68,466 | 0 | 15 | 15 | 123 | 3 | 5 | 14 | 54 | 32 | 197 |
| 68,467 | 0 | 15 | 15 | 123 | 3 | 5 | 14 | 54 | 32 | 197 |
| 68,468 | 0 | 15 | 15 | 124 | 3 | 5 | 14 | 54 | 32 | 198 |
| 68,469 | 0 | 15 | 17 | 125 | 3 | 5 | 15 | 54 | 35 | 199 |
| 68,470 | 1 | 15 | 20 | 125 | 3 | 5 | 15 | 56 | 39 | 201 |
| 68,471 | 1 | 15 | 27 | 126 | 3 | 5 | 15 | 56 | 46 | 202 |
| 68,472 | 1 | 15 | 27 | 126 | 3 | 5 | 15 | 56 | 46 | 202 |
| 68,473 | 1 | 15 | 35 | 126 | 3 | 5 | 21 | 58 | 60 | 204 |
| 68,474 | 1 | 15 | 35 | 124 | 2 | 5 | 20 | 58 | 58 | 202 |
| 68,475 | 1 | 15 | 35 | 124 | 3 | 5 | 20 | 58 | 59 | 202 |
| 68,476 | 1 | 15 | 36 | 124 | 3 | 5 | 20 | 58 | 60 | 202 |
| 68,477 | 1 | 15 | 36 | 115 | 3 | 5 | 20 | 58 | 60 | 193 |
| 68,478 | 1 | 15 | 36 | 115 | 3 | 5 | 20 | 58 | 60 | 193 |
| 68,479 | 1 | 15 | 35 | 110 | 3 | 5 | 20 | 58 | 59 | 188 |
| 68,480 | 1 | 14 | 35 | 93  | 3 | 5 | 19 | 57 | 58 | 169 |
| 68,481 | 1 | 13 | 35 | 90  | 3 | 5 | 19 | 55 | 58 | 163 |
| 68,482 | 1 | 12 | 35 | 72  | 3 | 2 | 19 | 48 | 58 | 134 |
| 68,483 | 1 | 9  | 40 | 58  | 4 | 2 | 20 | 45 | 65 | 114 |
| 68,484 | 1 | 9  | 40 | 59  | 4 | 2 | 20 | 46 | 65 | 116 |
| 68,485 | 1 | 6  | 40 | 53  | 4 | 2 | 20 | 46 | 65 | 107 |
| 68,486 | 1 | 6  | 40 | 53  | 4 | 2 | 20 | 47 | 65 | 108 |
| 68,487 | 1 | 6  | 40 | 53  | 4 | 3 | 20 | 46 | 65 | 108 |
| 68,488 | 1 | 6  | 40 | 53  | 4 | 3 | 20 | 46 | 65 | 108 |
| 68,489 | 1 | 6  | 40 | 52  | 4 | 3 | 17 | 44 | 62 | 105 |
| 68,490 | 1 | 6  | 39 | 52  | 3 | 3 | 18 | 44 | 61 | 105 |
| 68,491 | 1 | 7  | 39 | 56  | 3 | 3 | 18 | 51 | 61 | 117 |
| 68,492 | 1 | 5  | 37 | 52  | 3 | 3 | 17 | 51 | 58 | 111 |
| 68,493 | 1 | 5  | 37 | 53  | 3 | 3 | 18 | 51 | 59 | 112 |
| 68,494 | 1 | 5  | 37 | 53  | 3 | 3 | 18 | 52 | 59 | 113 |
| 68,495 | 1 | 5  | 37 | 50  | 3 | 3 | 18 | 52 | 59 | 110 |
| 68,496 | 1 | 5  | 37 | 51  | 3 | 3 | 18 | 52 | 59 | 111 |
| 68,497 | 1 | 5  | 37 | 51  | 4 | 3 | 19 | 52 | 61 | 111 |
| 68,498 | 1 | 5  | 37 | 53  | 4 | 3 | 19 | 56 | 61 | 117 |
| 68,499 | 1 | 5  | 37 | 55  | 4 | 4 | 19 | 58 | 61 | 122 |

|        |    |   |     |    |   |   |    |    |     |     |
|--------|----|---|-----|----|---|---|----|----|-----|-----|
| 68,500 | 1  | 5 | 37  | 61 | 4 | 4 | 19 | 59 | 61  | 129 |
| 68,501 | 2  | 6 | 37  | 69 | 4 | 4 | 19 | 61 | 62  | 140 |
| 68,502 | 2  | 6 | 37  | 70 | 4 | 3 | 21 | 61 | 64  | 140 |
| 68,503 | 2  | 6 | 36  | 72 | 4 | 3 | 20 | 62 | 62  | 143 |
| 68,504 | 2  | 9 | 35  | 82 | 4 | 3 | 20 | 66 | 61  | 160 |
| 68,505 | 2  | 9 | 35  | 87 | 4 | 3 | 17 | 66 | 58  | 165 |
| 68,506 | 2  | 8 | 34  | 88 | 4 | 3 | 18 | 67 | 58  | 166 |
| 68,507 | 2  | 8 | 34  | 74 | 4 | 3 | 18 | 43 | 58  | 128 |
| 68,508 | 2  | 7 | 33  | 67 | 4 | 3 | 18 | 40 | 57  | 117 |
| 68,509 | 2  | 7 | 33  | 68 | 4 | 3 | 17 | 40 | 56  | 118 |
| 68,510 | 2  | 7 | 31  | 69 | 4 | 3 | 17 | 39 | 54  | 118 |
| 68,511 | 2  | 7 | 31  | 66 | 4 | 3 | 17 | 39 | 54  | 115 |
| 68,512 | 2  | 6 | 30  | 58 | 4 | 3 | 17 | 35 | 53  | 102 |
| 68,513 | 2  | 6 | 30  | 53 | 4 | 3 | 18 | 34 | 54  | 96  |
| 68,514 | 2  | 6 | 30  | 53 | 4 | 3 | 18 | 34 | 54  | 96  |
| 68,515 | 3  | 6 | 30  | 53 | 3 | 3 | 20 | 34 | 56  | 96  |
| 68,516 | 3  | 6 | 30  | 53 | 3 | 3 | 19 | 34 | 55  | 96  |
| 68,517 | 3  | 6 | 29  | 54 | 3 | 3 | 19 | 34 | 54  | 97  |
| 68,518 | 3  | 6 | 29  | 55 | 3 | 3 | 19 | 35 | 54  | 99  |
| 68,519 | 3  | 6 | 27  | 54 | 3 | 3 | 18 | 36 | 51  | 99  |
| 68,520 | 2  | 6 | 24  | 53 | 3 | 3 | 18 | 36 | 47  | 98  |
| 68,521 | 2  | 6 | 20  | 52 | 3 | 3 | 18 | 34 | 43  | 95  |
| 68,522 | 2  | 6 | 16  | 52 | 3 | 3 | 18 | 34 | 39  | 95  |
| 68,523 | 2  | 6 | 12  | 52 | 3 | 3 | 15 | 34 | 32  | 95  |
| 68,524 | 2  | 6 | 9   | 52 | 3 | 3 | 12 | 32 | 26  | 93  |
| 68,525 | 5  | 6 | 21  | 52 | 3 | 3 | 21 | 30 | 50  | 91  |
| 68,526 | 6  | 6 | 30  | 52 | 4 | 3 | 21 | 30 | 61  | 91  |
| 68,527 | 6  | 6 | 29  | 52 | 4 | 3 | 23 | 28 | 62  | 89  |
| 68,528 | 7  | 6 | 38  | 52 | 4 | 3 | 29 | 28 | 78  | 89  |
| 68,529 | 7  | 6 | 53  | 52 | 4 | 3 | 37 | 29 | 101 | 90  |
| 68,530 | 7  | 6 | 56  | 52 | 5 | 3 | 39 | 29 | 107 | 90  |
| 68,531 | 9  | 6 | 63  | 51 | 6 | 3 | 46 | 29 | 124 | 89  |
| 68,532 | 9  | 6 | 63  | 52 | 6 | 3 | 46 | 29 | 124 | 90  |
| 68,533 | 9  | 6 | 63  | 52 | 5 | 3 | 46 | 29 | 123 | 90  |
| 68,534 | 9  | 6 | 61  | 52 | 6 | 3 | 45 | 29 | 121 | 90  |
| 68,535 | 9  | 6 | 61  | 51 | 6 | 3 | 45 | 28 | 121 | 88  |
| 68,536 | 9  | 6 | 61  | 52 | 6 | 2 | 45 | 32 | 121 | 92  |
| 68,537 | 9  | 6 | 61  | 52 | 6 | 2 | 45 | 32 | 121 | 92  |
| 68,538 | 10 | 6 | 100 | 53 | 7 | 1 | 79 | 32 | 196 | 92  |
| 68,539 | 10 | 6 | 100 | 54 | 7 | 1 | 79 | 32 | 196 | 93  |
| 68,540 | 14 | 6 | 111 | 54 | 7 | 1 | 85 | 32 | 217 | 93  |



|        |    |   |     |    |    |   |     |    |     |    |
|--------|----|---|-----|----|----|---|-----|----|-----|----|
| 68,541 | 15 | 5 | 116 | 50 | 7  | 1 | 94  | 25 | 232 | 81 |
| 68,542 | 17 | 5 | 119 | 50 | 7  | 1 | 100 | 25 | 243 | 81 |
| 68,543 | 22 | 5 | 157 | 50 | 8  | 1 | 155 | 25 | 342 | 81 |
| 68,544 | 22 | 5 | 161 | 50 | 8  | 1 | 161 | 24 | 352 | 80 |
| 68,545 | 22 | 5 | 191 | 50 | 10 | 1 | 174 | 25 | 397 | 81 |
| 68,546 | 22 | 5 | 199 | 50 | 10 | 1 | 179 | 24 | 410 | 80 |
| 68,547 | 22 | 5 | 199 | 50 | 10 | 1 | 180 | 24 | 411 | 80 |
| 68,548 | 22 | 5 | 199 | 48 | 10 | 1 | 181 | 21 | 412 | 75 |
| 68,549 | 22 | 5 | 199 | 46 | 10 | 0 | 181 | 19 | 412 | 70 |
| 68,550 | 22 | 4 | 199 | 32 | 10 | 0 | 182 | 16 | 413 | 52 |
| 68,551 | 23 | 4 | 199 | 34 | 10 | 0 | 183 | 16 | 415 | 54 |
| 68,552 | 22 | 4 | 199 | 35 | 10 | 0 | 183 | 16 | 414 | 55 |
| 68,553 | 22 | 3 | 200 | 32 | 10 | 0 | 182 | 15 | 414 | 50 |
| 68,554 | 22 | 3 | 200 | 32 | 10 | 0 | 182 | 15 | 414 | 50 |
| 68,555 | 22 | 0 | 199 | 23 | 10 | 0 | 181 | 11 | 412 | 34 |
| 68,556 | 22 | 0 | 200 | 18 | 10 | 0 | 182 | 11 | 414 | 29 |
| 68,557 | 22 | 0 | 200 | 18 | 10 | 0 | 182 | 10 | 414 | 28 |
| 68,558 | 22 | 1 | 200 | 18 | 10 | 1 | 182 | 12 | 414 | 32 |
| 68,559 | 22 | 1 | 200 | 19 | 10 | 1 | 182 | 12 | 414 | 33 |
| 68,560 | 22 | 1 | 204 | 19 | 10 | 1 | 184 | 12 | 420 | 33 |
| 68,561 | 22 | 1 | 208 | 24 | 10 | 1 | 185 | 21 | 425 | 47 |
| 68,562 | 22 | 1 | 210 | 29 | 11 | 1 | 185 | 22 | 428 | 53 |
| 68,563 | 22 | 1 | 216 | 31 | 11 | 1 | 200 | 22 | 449 | 55 |
| 68,564 | 24 | 4 | 221 | 49 | 11 | 1 | 205 | 25 | 461 | 79 |
| 68,565 | 24 | 5 | 220 | 50 | 11 | 1 | 203 | 25 | 458 | 81 |
| 68,566 | 23 | 5 | 221 | 51 | 12 | 1 | 228 | 25 | 484 | 82 |
| 68,567 | 23 | 6 | 223 | 52 | 12 | 1 | 228 | 26 | 486 | 85 |
| 68,568 | 23 | 6 | 223 | 56 | 12 | 1 | 227 | 26 | 485 | 89 |
| 68,569 | 23 | 6 | 226 | 59 | 12 | 1 | 227 | 26 | 488 | 92 |
| 68,570 | 23 | 6 | 228 | 62 | 12 | 1 | 227 | 25 | 490 | 94 |
| 68,571 | 23 | 6 | 228 | 63 | 12 | 1 | 227 | 25 | 490 | 95 |
| 68,572 | 23 | 6 | 229 | 63 | 12 | 1 | 227 | 25 | 491 | 95 |
| 68,573 | 23 | 6 | 230 | 63 | 12 | 1 | 228 | 25 | 493 | 95 |
| 68,574 | 24 | 6 | 243 | 63 | 13 | 1 | 241 | 26 | 521 | 96 |
| 68,575 | 24 | 6 | 254 | 63 | 13 | 1 | 244 | 27 | 535 | 97 |
| 68,576 | 21 | 6 | 242 | 63 | 14 | 1 | 239 | 27 | 516 | 97 |
| 68,577 | 20 | 6 | 235 | 63 | 12 | 1 | 240 | 27 | 507 | 97 |
| 68,578 | 20 | 6 | 236 | 64 | 12 | 1 | 238 | 27 | 506 | 98 |
| 68,579 | 19 | 6 | 227 | 64 | 12 | 1 | 232 | 27 | 490 | 98 |
| 68,580 | 19 | 6 | 212 | 64 | 12 | 1 | 224 | 26 | 467 | 97 |
| 68,581 | 19 | 6 | 209 | 64 | 11 | 1 | 222 | 26 | 461 | 97 |

|        |    |   |     |    |    |   |     |    |     |    |
|--------|----|---|-----|----|----|---|-----|----|-----|----|
| 68,582 | 18 | 6 | 205 | 64 | 10 | 1 | 215 | 26 | 448 | 97 |
| 68,583 | 18 | 6 | 206 | 64 | 10 | 1 | 216 | 26 | 450 | 97 |
| 68,584 | 18 | 6 | 206 | 64 | 10 | 1 | 216 | 26 | 450 | 97 |
| 68,585 | 18 | 6 | 205 | 64 | 9  | 1 | 216 | 26 | 448 | 97 |
| 68,586 | 18 | 6 | 192 | 62 | 9  | 1 | 211 | 21 | 430 | 90 |
| 68,587 | 18 | 7 | 190 | 59 | 9  | 1 | 211 | 20 | 428 | 87 |
| 68,588 | 18 | 7 | 186 | 59 | 9  | 1 | 212 | 20 | 425 | 87 |
| 68,589 | 17 | 7 | 168 | 59 | 8  | 1 | 187 | 20 | 380 | 87 |
| 68,590 | 17 | 7 | 168 | 59 | 9  | 1 | 187 | 21 | 381 | 88 |
| 68,591 | 15 | 7 | 157 | 59 | 9  | 1 | 181 | 21 | 362 | 88 |
| 68,592 | 14 | 7 | 153 | 59 | 9  | 1 | 173 | 21 | 349 | 88 |
| 68,593 | 12 | 7 | 151 | 59 | 9  | 1 | 168 | 21 | 340 | 88 |
| 68,594 | 7  | 7 | 113 | 60 | 8  | 1 | 112 | 21 | 240 | 89 |
| 68,595 | 7  | 7 | 110 | 59 | 8  | 1 | 106 | 21 | 231 | 88 |
| 68,596 | 7  | 7 | 80  | 59 | 6  | 1 | 94  | 20 | 187 | 87 |
| 68,597 | 7  | 7 | 72  | 59 | 6  | 1 | 89  | 20 | 174 | 87 |
| 68,598 | 7  | 7 | 72  | 59 | 6  | 1 | 89  | 20 | 174 | 87 |
| 68,599 | 7  | 7 | 72  | 60 | 5  | 1 | 87  | 20 | 171 | 88 |
| 68,600 | 7  | 7 | 72  | 60 | 5  | 1 | 87  | 20 | 171 | 88 |
| 68,601 | 7  | 7 | 72  | 60 | 5  | 1 | 86  | 20 | 170 | 88 |
| 68,602 | 6  | 7 | 73  | 58 | 5  | 1 | 86  | 20 | 170 | 86 |
| 68,603 | 6  | 7 | 73  | 63 | 5  | 1 | 86  | 20 | 170 | 91 |
| 68,604 | 6  | 8 | 75  | 64 | 6  | 1 | 88  | 20 | 175 | 93 |
| 68,605 | 6  | 8 | 75  | 64 | 6  | 1 | 88  | 20 | 175 | 93 |
| 68,606 | 7  | 8 | 76  | 63 | 6  | 1 | 91  | 20 | 180 | 92 |
| 68,607 | 7  | 9 | 76  | 62 | 6  | 1 | 91  | 20 | 180 | 92 |
| 68,608 | 8  | 8 | 77  | 62 | 6  | 0 | 92  | 19 | 183 | 89 |
| 68,609 | 8  | 8 | 77  | 62 | 6  | 0 | 91  | 19 | 182 | 89 |
| 68,610 | 8  | 8 | 76  | 62 | 6  | 0 | 92  | 19 | 182 | 89 |
| 68,611 | 8  | 8 | 72  | 61 | 6  | 0 | 92  | 19 | 178 | 88 |
| 68,612 | 8  | 8 | 72  | 47 | 6  | 0 | 91  | 9  | 177 | 64 |
| 68,613 | 8  | 9 | 71  | 49 | 6  | 0 | 95  | 9  | 180 | 67 |
| 68,614 | 8  | 9 | 65  | 50 | 6  | 0 | 79  | 9  | 158 | 68 |
| 68,615 | 6  | 6 | 61  | 32 | 6  | 0 | 75  | 6  | 148 | 44 |
| 68,616 | 6  | 5 | 60  | 30 | 5  | 0 | 50  | 6  | 121 | 41 |
| 68,617 | 6  | 5 | 59  | 30 | 5  | 0 | 50  | 6  | 120 | 41 |
| 68,618 | 6  | 4 | 60  | 24 | 5  | 0 | 51  | 5  | 122 | 33 |
| 68,619 | 7  | 4 | 57  | 20 | 5  | 0 | 51  | 4  | 120 | 28 |
| 68,620 | 7  | 4 | 57  | 20 | 5  | 0 | 51  | 4  | 120 | 28 |
| 68,621 | 7  | 4 | 56  | 17 | 5  | 0 | 51  | 4  | 119 | 25 |
| 68,622 | 8  | 4 | 68  | 21 | 5  | 2 | 62  | 13 | 143 | 40 |

|        |    |   |     |    |   |   |    |    |     |    |
|--------|----|---|-----|----|---|---|----|----|-----|----|
| 68,623 | 8  | 4 | 67  | 21 | 5 | 2 | 61 | 16 | 141 | 43 |
| 68,624 | 8  | 4 | 67  | 23 | 5 | 2 | 61 | 20 | 141 | 49 |
| 68,625 | 7  | 4 | 53  | 23 | 4 | 2 | 48 | 19 | 112 | 48 |
| 68,626 | 7  | 5 | 42  | 23 | 4 | 2 | 45 | 18 | 98  | 48 |
| 68,627 | 7  | 5 | 42  | 23 | 3 | 2 | 41 | 18 | 93  | 48 |
| 68,628 | 7  | 5 | 40  | 23 | 3 | 2 | 39 | 18 | 89  | 48 |
| 68,629 | 7  | 5 | 40  | 22 | 3 | 2 | 39 | 18 | 89  | 47 |
| 68,630 | 7  | 5 | 40  | 22 | 3 | 2 | 39 | 18 | 89  | 47 |
| 68,631 | 7  | 5 | 40  | 22 | 3 | 2 | 40 | 18 | 90  | 47 |
| 68,632 | 7  | 5 | 40  | 22 | 3 | 2 | 40 | 18 | 90  | 47 |
| 68,633 | 8  | 5 | 40  | 21 | 4 | 2 | 39 | 18 | 91  | 46 |
| 68,634 | 8  | 5 | 39  | 22 | 4 | 2 | 38 | 18 | 89  | 47 |
| 68,635 | 8  | 5 | 38  | 22 | 4 | 2 | 38 | 18 | 88  | 47 |
| 68,636 | 8  | 5 | 38  | 22 | 4 | 2 | 38 | 18 | 88  | 47 |
| 68,637 | 8  | 5 | 39  | 24 | 4 | 2 | 38 | 19 | 89  | 50 |
| 68,638 | 8  | 4 | 43  | 24 | 4 | 2 | 41 | 19 | 96  | 49 |
| 68,639 | 8  | 4 | 43  | 24 | 4 | 2 | 40 | 19 | 95  | 49 |
| 68,640 | 8  | 4 | 43  | 24 | 4 | 2 | 39 | 19 | 94  | 49 |
| 68,641 | 9  | 5 | 45  | 24 | 3 | 2 | 40 | 18 | 97  | 49 |
| 68,642 | 7  | 5 | 46  | 25 | 3 | 2 | 41 | 18 | 97  | 50 |
| 68,643 | 7  | 5 | 44  | 25 | 3 | 3 | 39 | 18 | 93  | 51 |
| 68,644 | 7  | 5 | 45  | 25 | 3 | 3 | 38 | 18 | 93  | 51 |
| 68,645 | 9  | 5 | 72  | 24 | 3 | 3 | 49 | 18 | 133 | 50 |
| 68,646 | 9  | 5 | 71  | 24 | 3 | 3 | 49 | 18 | 132 | 50 |
| 68,647 | 10 | 5 | 118 | 24 | 4 | 3 | 58 | 18 | 190 | 50 |
| 68,648 | 10 | 5 | 118 | 24 | 4 | 3 | 58 | 18 | 190 | 50 |
| 68,649 | 12 | 5 | 184 | 24 | 4 | 3 | 70 | 18 | 270 | 50 |
| 68,650 | 12 | 5 | 213 | 23 | 5 | 3 | 88 | 18 | 318 | 49 |
| 68,651 | 12 | 5 | 213 | 23 | 5 | 3 | 88 | 18 | 318 | 49 |
| 68,652 | 12 | 5 | 213 | 23 | 5 | 3 | 89 | 18 | 319 | 49 |
| 68,653 | 12 | 5 | 212 | 23 | 5 | 3 | 88 | 18 | 317 | 49 |
| 68,654 | 12 | 5 | 209 | 17 | 4 | 3 | 86 | 18 | 311 | 43 |
| 68,655 | 12 | 4 | 211 | 16 | 4 | 3 | 85 | 18 | 312 | 41 |
| 68,656 | 12 | 4 | 211 | 17 | 4 | 3 | 85 | 19 | 312 | 43 |
| 68,657 | 11 | 4 | 216 | 20 | 5 | 3 | 84 | 20 | 316 | 47 |
| 68,658 | 11 | 4 | 216 | 22 | 5 | 3 | 87 | 20 | 319 | 49 |
| 68,659 | 10 | 6 | 215 | 28 | 5 | 3 | 86 | 22 | 316 | 59 |
| 68,660 | 10 | 7 | 215 | 31 | 5 | 4 | 86 | 23 | 316 | 65 |
| 68,661 | 10 | 7 | 213 | 30 | 5 | 4 | 84 | 26 | 312 | 67 |
| 68,662 | 10 | 7 | 213 | 30 | 5 | 4 | 84 | 27 | 312 | 68 |
| 68,663 | 10 | 7 | 219 | 33 | 5 | 4 | 92 | 28 | 326 | 72 |

|        |    |    |     |    |   |   |     |    |     |     |
|--------|----|----|-----|----|---|---|-----|----|-----|-----|
| 68,664 | 10 | 6  | 218 | 36 | 4 | 4 | 89  | 34 | 321 | 80  |
| 68,665 | 10 | 6  | 218 | 41 | 4 | 4 | 89  | 34 | 321 | 85  |
| 68,666 | 13 | 7  | 222 | 42 | 5 | 4 | 89  | 34 | 329 | 87  |
| 68,667 | 14 | 8  | 224 | 45 | 5 | 4 | 89  | 34 | 332 | 91  |
| 68,668 | 14 | 8  | 227 | 45 | 5 | 4 | 90  | 34 | 336 | 91  |
| 68,669 | 14 | 8  | 231 | 45 | 7 | 4 | 102 | 34 | 354 | 91  |
| 68,670 | 15 | 8  | 242 | 46 | 7 | 4 | 109 | 34 | 373 | 92  |
| 68,671 | 15 | 8  | 241 | 46 | 7 | 4 | 109 | 34 | 372 | 92  |
| 68,672 | 14 | 8  | 228 | 46 | 7 | 4 | 99  | 33 | 348 | 91  |
| 68,673 | 15 | 8  | 255 | 41 | 8 | 2 | 115 | 25 | 393 | 76  |
| 68,674 | 15 | 8  | 258 | 39 | 8 | 2 | 115 | 18 | 396 | 67  |
| 68,675 | 15 | 8  | 258 | 39 | 8 | 2 | 115 | 18 | 396 | 67  |
| 68,676 | 15 | 8  | 258 | 39 | 8 | 2 | 115 | 18 | 396 | 67  |
| 68,677 | 16 | 7  | 260 | 39 | 8 | 2 | 116 | 18 | 400 | 66  |
| 68,678 | 16 | 7  | 260 | 39 | 8 | 2 | 116 | 18 | 400 | 66  |
| 68,679 | 16 | 7  | 259 | 39 | 9 | 2 | 117 | 18 | 401 | 66  |
| 68,680 | 16 | 7  | 263 | 39 | 9 | 2 | 121 | 18 | 409 | 66  |
| 68,681 | 16 | 7  | 263 | 39 | 9 | 2 | 121 | 18 | 409 | 66  |
| 68,682 | 16 | 7  | 263 | 40 | 9 | 2 | 120 | 18 | 408 | 67  |
| 68,683 | 14 | 8  | 261 | 44 | 9 | 2 | 120 | 23 | 404 | 77  |
| 68,684 | 14 | 8  | 260 | 48 | 8 | 2 | 120 | 25 | 402 | 83  |
| 68,685 | 14 | 8  | 261 | 48 | 8 | 3 | 120 | 26 | 403 | 85  |
| 68,686 | 14 | 8  | 261 | 49 | 8 | 3 | 120 | 26 | 403 | 86  |
| 68,687 | 14 | 10 | 263 | 51 | 8 | 3 | 120 | 26 | 405 | 90  |
| 68,688 | 14 | 10 | 266 | 49 | 8 | 3 | 127 | 25 | 415 | 87  |
| 68,689 | 14 | 10 | 264 | 50 | 9 | 3 | 126 | 25 | 413 | 88  |
| 68,690 | 14 | 10 | 264 | 50 | 9 | 3 | 124 | 25 | 411 | 88  |
| 68,691 | 13 | 10 | 266 | 50 | 9 | 3 | 125 | 25 | 413 | 88  |
| 68,692 | 13 | 9  | 265 | 50 | 9 | 3 | 125 | 25 | 412 | 87  |
| 68,693 | 13 | 9  | 264 | 49 | 9 | 2 | 124 | 25 | 410 | 85  |
| 68,694 | 13 | 9  | 263 | 50 | 9 | 4 | 124 | 30 | 409 | 93  |
| 68,695 | 13 | 9  | 256 | 50 | 9 | 4 | 120 | 35 | 398 | 98  |
| 68,696 | 11 | 10 | 236 | 54 | 9 | 5 | 114 | 41 | 370 | 110 |
| 68,697 | 11 | 10 | 226 | 54 | 9 | 5 | 113 | 41 | 359 | 110 |
| 68,698 | 10 | 10 | 190 | 55 | 8 | 5 | 104 | 42 | 312 | 112 |
| 68,699 | 8  | 10 | 124 | 56 | 8 | 5 | 92  | 42 | 232 | 113 |
| 68,700 | 8  | 10 | 113 | 57 | 8 | 5 | 84  | 42 | 213 | 114 |
| 68,701 | 8  | 10 | 95  | 57 | 7 | 5 | 74  | 42 | 184 | 114 |
| 68,702 | 8  | 10 | 95  | 57 | 7 | 5 | 74  | 42 | 184 | 114 |
| 68,703 | 8  | 10 | 95  | 57 | 7 | 5 | 73  | 43 | 183 | 115 |
| 68,704 | 8  | 10 | 95  | 57 | 7 | 5 | 73  | 43 | 183 | 115 |

|        |   |    |    |    |   |   |    |    |     |     |
|--------|---|----|----|----|---|---|----|----|-----|-----|
| 68,705 | 8 | 10 | 93 | 58 | 7 | 5 | 73 | 42 | 181 | 115 |
| 68,706 | 8 | 10 | 93 | 58 | 7 | 5 | 73 | 42 | 181 | 115 |
| 68,707 | 8 | 10 | 94 | 57 | 7 | 5 | 73 | 42 | 182 | 114 |
| 68,708 | 8 | 10 | 89 | 55 | 7 | 5 | 73 | 41 | 177 | 111 |
| 68,709 | 8 | 9  | 89 | 54 | 7 | 5 | 70 | 41 | 174 | 109 |
| 68,710 | 8 | 6  | 90 | 44 | 7 | 4 | 71 | 37 | 176 | 91  |
| 68,711 | 8 | 6  | 90 | 44 | 7 | 4 | 71 | 34 | 176 | 88  |
| 68,712 | 8 | 6  | 89 | 44 | 7 | 4 | 71 | 33 | 175 | 87  |
| 68,713 | 8 | 6  | 89 | 44 | 7 | 4 | 71 | 33 | 175 | 87  |
| 68,714 | 8 | 6  | 83 | 30 | 7 | 4 | 63 | 26 | 161 | 66  |
| 68,715 | 8 | 6  | 83 | 30 | 7 | 4 | 62 | 26 | 160 | 66  |
| 68,716 | 7 | 7  | 85 | 35 | 7 | 6 | 63 | 27 | 162 | 75  |
| 68,717 | 5 | 6  | 80 | 34 | 6 | 6 | 62 | 27 | 153 | 73  |
| 68,718 | 4 | 5  | 79 | 32 | 6 | 6 | 62 | 34 | 151 | 77  |
| 68,719 | 4 | 6  | 77 | 36 | 6 | 6 | 60 | 35 | 147 | 83  |
| 68,720 | 4 | 6  | 71 | 36 | 4 | 6 | 48 | 35 | 127 | 83  |
| 68,721 | 2 | 6  | 61 | 39 | 4 | 7 | 42 | 36 | 109 | 88  |
| 68,722 | 1 | 6  | 38 | 42 | 3 | 7 | 30 | 38 | 72  | 93  |
| 68,723 | 1 | 6  | 35 | 42 | 3 | 7 | 26 | 38 | 65  | 93  |
| 68,724 | 1 | 6  | 33 | 43 | 3 | 7 | 26 | 38 | 63  | 94  |
| 68,725 | 1 | 6  | 32 | 43 | 3 | 7 | 26 | 38 | 62  | 94  |
| 68,726 | 1 | 6  | 32 | 43 | 3 | 7 | 26 | 38 | 62  | 94  |
| 68,727 | 1 | 6  | 32 | 43 | 3 | 7 | 26 | 38 | 62  | 94  |
| 68,728 | 0 | 6  | 31 | 43 | 3 | 7 | 25 | 38 | 59  | 94  |
| 68,729 | 0 | 6  | 31 | 43 | 2 | 7 | 24 | 38 | 57  | 94  |
| 68,730 | 0 | 6  | 28 | 43 | 2 | 7 | 20 | 38 | 50  | 94  |
| 68,731 | 0 | 6  | 27 | 44 | 2 | 7 | 20 | 38 | 49  | 95  |
| 68,732 | 0 | 6  | 28 | 44 | 2 | 7 | 20 | 38 | 50  | 95  |
| 68,733 | 0 | 5  | 28 | 39 | 2 | 7 | 19 | 33 | 49  | 84  |
| 68,734 | 0 | 5  | 27 | 39 | 2 | 7 | 19 | 33 | 48  | 84  |
| 68,735 | 0 | 5  | 27 | 35 | 2 | 7 | 19 | 31 | 48  | 78  |
| 68,736 | 0 | 5  | 27 | 34 | 2 | 6 | 21 | 30 | 50  | 75  |
| 68,737 | 0 | 5  | 28 | 33 | 2 | 6 | 21 | 30 | 51  | 74  |
| 68,738 | 0 | 3  | 26 | 31 | 2 | 6 | 21 | 30 | 49  | 70  |
| 68,739 | 0 | 3  | 21 | 31 | 2 | 6 | 14 | 30 | 37  | 70  |
| 68,740 | 0 | 4  | 18 | 30 | 1 | 6 | 11 | 30 | 30  | 70  |
| 68,741 | 0 | 4  | 15 | 30 | 1 | 6 | 10 | 30 | 26  | 70  |
| 68,742 | 0 | 4  | 16 | 30 | 1 | 6 | 9  | 30 | 26  | 70  |
| 68,743 | 0 | 4  | 16 | 30 | 1 | 6 | 9  | 30 | 26  | 70  |
| 68,744 | 0 | 4  | 16 | 30 | 1 | 6 | 9  | 30 | 26  | 70  |
| 68,745 | 0 | 4  | 16 | 29 | 1 | 4 | 9  | 20 | 26  | 57  |

|        |   |   |    |    |   |   |    |    |    |     |
|--------|---|---|----|----|---|---|----|----|----|-----|
| 68,746 | 0 | 4 | 16 | 29 | 1 | 4 | 9  | 20 | 26 | 57  |
| 68,747 | 0 | 3 | 16 | 25 | 1 | 3 | 9  | 15 | 26 | 46  |
| 68,748 | 0 | 3 | 16 | 25 | 1 | 3 | 9  | 15 | 26 | 46  |
| 68,749 | 0 | 3 | 15 | 24 | 2 | 3 | 9  | 14 | 26 | 44  |
| 68,750 | 0 | 3 | 15 | 22 | 2 | 3 | 9  | 15 | 26 | 43  |
| 68,751 | 0 | 3 | 15 | 22 | 2 | 3 | 9  | 15 | 26 | 43  |
| 68,752 | 0 | 3 | 15 | 22 | 2 | 3 | 9  | 15 | 26 | 43  |
| 68,753 | 0 | 3 | 15 | 23 | 2 | 3 | 9  | 17 | 26 | 46  |
| 68,754 | 0 | 3 | 15 | 37 | 2 | 4 | 9  | 35 | 26 | 79  |
| 68,755 | 0 | 3 | 15 | 42 | 2 | 6 | 9  | 43 | 26 | 94  |
| 68,756 | 0 | 4 | 15 | 44 | 2 | 6 | 9  | 46 | 26 | 100 |
| 68,757 | 0 | 4 | 18 | 44 | 2 | 6 | 9  | 46 | 29 | 100 |
| 68,758 | 0 | 5 | 17 | 44 | 2 | 6 | 9  | 46 | 28 | 101 |
| 68,759 | 0 | 5 | 17 | 43 | 1 | 6 | 9  | 46 | 27 | 100 |
| 68,760 | 0 | 5 | 17 | 43 | 1 | 6 | 9  | 48 | 27 | 102 |
| 68,761 | 1 | 5 | 40 | 44 | 1 | 6 | 21 | 48 | 63 | 103 |
| 68,762 | 1 | 5 | 40 | 44 | 1 | 6 | 21 | 48 | 63 | 103 |
| 68,763 | 2 | 5 | 43 | 44 | 1 | 6 | 22 | 48 | 68 | 103 |
| 68,764 | 2 | 5 | 44 | 46 | 1 | 6 | 22 | 48 | 69 | 105 |
| 68,765 | 2 | 5 | 44 | 48 | 1 | 6 | 23 | 48 | 70 | 107 |
| 68,766 | 2 | 5 | 44 | 48 | 1 | 6 | 23 | 49 | 70 | 108 |
| 68,767 | 2 | 5 | 42 | 43 | 1 | 4 | 22 | 48 | 67 | 100 |
| 68,768 | 2 | 5 | 42 | 43 | 1 | 5 | 23 | 48 | 68 | 101 |
| 68,769 | 2 | 4 | 41 | 38 | 2 | 5 | 23 | 40 | 68 | 87  |
| 68,770 | 2 | 4 | 40 | 38 | 2 | 5 | 23 | 40 | 67 | 87  |
| 68,771 | 2 | 4 | 40 | 38 | 2 | 5 | 23 | 40 | 67 | 87  |
| 68,772 | 2 | 4 | 39 | 34 | 2 | 4 | 22 | 39 | 65 | 81  |
| 68,773 | 2 | 4 | 38 | 31 | 2 | 4 | 21 | 37 | 63 | 76  |
| 68,774 | 2 | 4 | 38 | 30 | 2 | 4 | 21 | 37 | 63 | 75  |
| 68,775 | 2 | 4 | 38 | 30 | 2 | 4 | 21 | 37 | 63 | 75  |
| 68,776 | 3 | 4 | 41 | 30 | 2 | 4 | 21 | 37 | 67 | 75  |
| 68,777 | 3 | 4 | 41 | 30 | 2 | 4 | 21 | 37 | 67 | 75  |
| 68,778 | 3 | 4 | 46 | 31 | 2 | 4 | 21 | 38 | 72 | 77  |
| 68,779 | 3 | 4 | 45 | 31 | 2 | 4 | 21 | 38 | 71 | 77  |
| 68,780 | 3 | 4 | 46 | 31 | 2 | 4 | 22 | 39 | 73 | 78  |
| 68,781 | 3 | 4 | 49 | 31 | 2 | 4 | 25 | 39 | 79 | 78  |
| 68,782 | 3 | 4 | 49 | 30 | 2 | 4 | 25 | 40 | 79 | 78  |
| 68,783 | 4 | 4 | 53 | 30 | 2 | 4 | 28 | 41 | 87 | 79  |
| 68,784 | 4 | 4 | 53 | 30 | 2 | 4 | 29 | 41 | 88 | 79  |
| 68,785 | 4 | 5 | 53 | 31 | 2 | 4 | 29 | 42 | 88 | 82  |
| 68,786 | 4 | 5 | 54 | 31 | 2 | 4 | 28 | 44 | 88 | 84  |

|        |   |   |    |    |   |   |    |    |     |    |
|--------|---|---|----|----|---|---|----|----|-----|----|
| 68,787 | 4 | 5 | 60 | 31 | 2 | 4 | 28 | 44 | 94  | 84 |
| 68,788 | 4 | 6 | 60 | 31 | 2 | 4 | 28 | 43 | 94  | 84 |
| 68,789 | 4 | 5 | 47 | 30 | 2 | 4 | 26 | 43 | 79  | 82 |
| 68,790 | 4 | 6 | 72 | 31 | 3 | 4 | 30 | 46 | 109 | 87 |
| 68,791 | 4 | 5 | 78 | 31 | 3 | 4 | 31 | 46 | 116 | 86 |
| 68,792 | 4 | 5 | 77 | 32 | 3 | 4 | 31 | 46 | 115 | 87 |
| 68,793 | 5 | 5 | 77 | 32 | 3 | 4 | 31 | 46 | 116 | 87 |
| 68,794 | 5 | 5 | 77 | 32 | 3 | 4 | 31 | 46 | 116 | 87 |
| 68,795 | 5 | 5 | 77 | 32 | 3 | 4 | 31 | 46 | 116 | 87 |
| 68,796 | 5 | 5 | 77 | 32 | 3 | 4 | 31 | 46 | 116 | 87 |
| 68,797 | 5 | 5 | 77 | 32 | 3 | 4 | 31 | 46 | 116 | 87 |
| 68,798 | 5 | 5 | 77 | 32 | 3 | 4 | 31 | 45 | 116 | 86 |
| 68,799 | 5 | 5 | 77 | 31 | 2 | 4 | 31 | 45 | 115 | 85 |
| 68,800 | 5 | 5 | 77 | 32 | 2 | 4 | 31 | 45 | 115 | 86 |
| 68,801 | 5 | 5 | 76 | 33 | 2 | 4 | 31 | 44 | 114 | 86 |
| 68,802 | 5 | 5 | 83 | 33 | 2 | 4 | 36 | 44 | 126 | 86 |
| 68,803 | 5 | 5 | 84 | 33 | 2 | 4 | 36 | 44 | 127 | 86 |
| 68,804 | 5 | 5 | 85 | 18 | 2 | 3 | 36 | 25 | 128 | 51 |
| 68,805 | 5 | 5 | 85 | 13 | 2 | 1 | 36 | 16 | 128 | 35 |
| 68,806 | 5 | 4 | 85 | 10 | 2 | 1 | 36 | 12 | 128 | 27 |
| 68,807 | 5 | 4 | 85 | 17 | 2 | 1 | 36 | 14 | 128 | 36 |
| 68,808 | 5 | 5 | 82 | 20 | 2 | 1 | 36 | 14 | 125 | 40 |
| 68,809 | 5 | 4 | 81 | 20 | 2 | 1 | 36 | 14 | 124 | 39 |
| 68,810 | 5 | 4 | 80 | 19 | 2 | 1 | 36 | 13 | 123 | 37 |
| 68,811 | 5 | 4 | 76 | 19 | 2 | 1 | 36 | 19 | 119 | 43 |
| 68,812 | 3 | 4 | 56 | 21 | 2 | 1 | 22 | 19 | 83  | 45 |
| 68,813 | 3 | 4 | 53 | 21 | 2 | 2 | 21 | 19 | 79  | 46 |
| 68,814 | 3 | 4 | 53 | 24 | 2 | 3 | 21 | 19 | 79  | 50 |
| 68,815 | 3 | 4 | 53 | 22 | 2 | 3 | 21 | 21 | 79  | 50 |
| 68,816 | 3 | 4 | 53 | 20 | 2 | 3 | 20 | 21 | 78  | 48 |
| 68,817 | 3 | 4 | 53 | 21 | 2 | 3 | 20 | 20 | 78  | 48 |
| 68,818 | 3 | 3 | 53 | 21 | 2 | 3 | 20 | 20 | 78  | 47 |
| 68,819 | 3 | 3 | 55 | 22 | 2 | 2 | 19 | 20 | 79  | 47 |
| 68,820 | 3 | 3 | 55 | 22 | 1 | 2 | 19 | 20 | 78  | 47 |
| 68,821 | 3 | 3 | 55 | 23 | 1 | 2 | 20 | 20 | 79  | 48 |
| 68,822 | 3 | 3 | 55 | 26 | 1 | 4 | 21 | 34 | 80  | 67 |
| 68,823 | 3 | 3 | 55 | 29 | 1 | 4 | 21 | 34 | 80  | 70 |
| 68,824 | 3 | 5 | 55 | 30 | 1 | 4 | 22 | 36 | 81  | 75 |
| 68,825 | 3 | 5 | 55 | 30 | 1 | 4 | 22 | 36 | 81  | 75 |
| 68,826 | 3 | 5 | 52 | 30 | 1 | 4 | 23 | 36 | 79  | 75 |
| 68,827 | 2 | 5 | 52 | 30 | 1 | 4 | 23 | 36 | 78  | 75 |

|        |   |   |    |    |   |   |    |    |    |     |
|--------|---|---|----|----|---|---|----|----|----|-----|
| 68,828 | 2 | 5 | 50 | 30 | 1 | 4 | 23 | 36 | 76 | 75  |
| 68,829 | 2 | 5 | 47 | 29 | 1 | 4 | 23 | 35 | 73 | 73  |
| 68,830 | 2 | 5 | 46 | 29 | 1 | 4 | 22 | 35 | 71 | 73  |
| 68,831 | 2 | 5 | 44 | 29 | 1 | 4 | 22 | 34 | 69 | 72  |
| 68,832 | 2 | 5 | 44 | 29 | 1 | 4 | 22 | 35 | 69 | 73  |
| 68,833 | 1 | 5 | 38 | 31 | 1 | 4 | 15 | 35 | 55 | 75  |
| 68,834 | 1 | 5 | 38 | 34 | 1 | 4 | 16 | 38 | 56 | 81  |
| 68,835 | 1 | 5 | 35 | 38 | 1 | 4 | 15 | 41 | 52 | 88  |
| 68,836 | 1 | 5 | 33 | 42 | 1 | 5 | 15 | 47 | 50 | 99  |
| 68,837 | 1 | 4 | 33 | 42 | 1 | 5 | 15 | 45 | 50 | 96  |
| 68,838 | 1 | 4 | 28 | 43 | 1 | 6 | 15 | 46 | 45 | 99  |
| 68,839 | 1 | 6 | 21 | 43 | 0 | 6 | 13 | 48 | 35 | 103 |
| 68,840 | 1 | 6 | 14 | 43 | 0 | 6 | 12 | 46 | 27 | 101 |
| 68,841 | 1 | 6 | 11 | 43 | 0 | 6 | 12 | 46 | 24 | 101 |
| 68,842 | 1 | 6 | 11 | 42 | 0 | 6 | 12 | 46 | 24 | 100 |
| 68,843 | 0 | 6 | 11 | 42 | 0 | 6 | 12 | 47 | 23 | 101 |
| 68,844 | 0 | 6 | 11 | 42 | 0 | 6 | 12 | 47 | 23 | 101 |
| 68,845 | 0 | 6 | 11 | 42 | 0 | 6 | 12 | 47 | 23 | 101 |
| 68,846 | 0 | 7 | 11 | 42 | 0 | 6 | 12 | 47 | 23 | 102 |
| 68,847 | 0 | 7 | 11 | 42 | 0 | 6 | 12 | 47 | 23 | 102 |
| 68,848 | 0 | 7 | 14 | 42 | 0 | 6 | 13 | 47 | 27 | 102 |
| 68,849 | 0 | 7 | 14 | 42 | 0 | 6 | 13 | 47 | 27 | 102 |
| 68,850 | 0 | 7 | 14 | 42 | 0 | 6 | 13 | 47 | 27 | 102 |
| 68,851 | 0 | 7 | 9  | 42 | 0 | 6 | 8  | 47 | 17 | 102 |
| 68,852 | 0 | 8 | 9  | 41 | 0 | 6 | 9  | 48 | 18 | 103 |
| 68,853 | 0 | 8 | 9  | 41 | 0 | 6 | 9  | 48 | 18 | 103 |
| 68,854 | 0 | 8 | 9  | 41 | 0 | 6 | 9  | 48 | 18 | 103 |
| 68,855 | 0 | 8 | 8  | 41 | 0 | 6 | 9  | 48 | 17 | 103 |
| 68,856 | 0 | 8 | 8  | 41 | 0 | 6 | 9  | 48 | 17 | 103 |
| 68,857 | 0 | 8 | 8  | 34 | 0 | 6 | 10 | 46 | 18 | 94  |
| 68,858 | 0 | 8 | 8  | 34 | 0 | 6 | 10 | 46 | 18 | 94  |
| 68,859 | 0 | 7 | 8  | 31 | 0 | 6 | 8  | 46 | 16 | 90  |
| 68,860 | 0 | 7 | 8  | 31 | 0 | 6 | 8  | 46 | 16 | 90  |
| 68,861 | 0 | 7 | 9  | 31 | 0 | 6 | 8  | 45 | 17 | 89  |
| 68,862 | 1 | 7 | 11 | 28 | 0 | 6 | 8  | 39 | 20 | 80  |
| 68,863 | 1 | 7 | 10 | 28 | 0 | 6 | 8  | 39 | 19 | 80  |
| 68,864 | 1 | 7 | 10 | 28 | 0 | 5 | 8  | 39 | 19 | 79  |
| 68,865 | 1 | 7 | 12 | 26 | 1 | 4 | 12 | 39 | 26 | 76  |
| 68,866 | 1 | 7 | 12 | 26 | 1 | 4 | 12 | 39 | 26 | 76  |
| 68,867 | 1 | 7 | 14 | 29 | 2 | 4 | 12 | 41 | 29 | 81  |
| 68,868 | 2 | 7 | 18 | 28 | 2 | 4 | 12 | 41 | 34 | 80  |



|        |   |   |    |    |   |   |    |    |    |    |
|--------|---|---|----|----|---|---|----|----|----|----|
| 68,869 | 4 | 7 | 21 | 27 | 3 | 4 | 17 | 41 | 45 | 79 |
| 68,870 | 4 | 7 | 21 | 27 | 3 | 4 | 17 | 42 | 45 | 80 |
| 68,871 | 4 | 7 | 21 | 27 | 3 | 4 | 15 | 42 | 43 | 80 |
| 68,872 | 4 | 7 | 21 | 26 | 3 | 4 | 15 | 42 | 43 | 79 |
| 68,873 | 4 | 7 | 21 | 20 | 3 | 2 | 15 | 28 | 43 | 57 |
| 68,874 | 4 | 7 | 21 | 20 | 3 | 2 | 15 | 28 | 43 | 57 |
| 68,875 | 4 | 5 | 21 | 20 | 4 | 2 | 15 | 26 | 44 | 53 |
| 68,876 | 4 | 5 | 21 | 20 | 4 | 2 | 14 | 26 | 43 | 53 |
| 68,877 | 4 | 5 | 21 | 20 | 4 | 2 | 14 | 26 | 43 | 53 |
| 68,878 | 4 | 5 | 21 | 20 | 4 | 2 | 14 | 27 | 43 | 54 |
| 68,879 | 6 | 5 | 25 | 20 | 4 | 2 | 16 | 27 | 51 | 54 |
| 68,880 | 6 | 5 | 25 | 20 | 4 | 2 | 16 | 27 | 51 | 54 |
| 68,881 | 6 | 5 | 25 | 20 | 4 | 2 | 16 | 26 | 51 | 53 |
| 68,882 | 6 | 5 | 25 | 20 | 4 | 2 | 16 | 26 | 51 | 53 |
| 68,883 | 6 | 5 | 25 | 20 | 5 | 2 | 16 | 25 | 52 | 52 |
| 68,884 | 6 | 5 | 25 | 16 | 5 | 2 | 16 | 21 | 52 | 44 |
| 68,885 | 6 | 5 | 25 | 16 | 5 | 3 | 15 | 21 | 51 | 45 |
| 68,886 | 6 | 5 | 25 | 12 | 5 | 3 | 15 | 19 | 51 | 39 |
| 68,887 | 6 | 5 | 25 | 7  | 5 | 2 | 15 | 12 | 51 | 26 |
| 68,888 | 6 | 5 | 25 | 7  | 5 | 2 | 15 | 12 | 51 | 26 |
| 68,889 | 7 | 5 | 28 | 6  | 6 | 1 | 19 | 13 | 60 | 25 |
| 68,890 | 7 | 2 | 28 | 7  | 6 | 1 | 19 | 12 | 60 | 22 |
| 68,891 | 7 | 2 | 28 | 8  | 6 | 1 | 19 | 15 | 60 | 26 |
| 68,892 | 7 | 2 | 28 | 9  | 6 | 1 | 19 | 15 | 60 | 27 |
| 68,893 | 7 | 4 | 28 | 11 | 6 | 1 | 19 | 18 | 60 | 34 |
| 68,894 | 7 | 4 | 28 | 11 | 6 | 1 | 19 | 21 | 60 | 37 |
| 68,895 | 7 | 4 | 28 | 13 | 6 | 1 | 19 | 21 | 60 | 39 |
| 68,896 | 7 | 4 | 28 | 28 | 6 | 2 | 19 | 40 | 60 | 74 |
| 68,897 | 7 | 3 | 28 | 30 | 6 | 2 | 19 | 41 | 60 | 76 |
| 68,898 | 7 | 3 | 27 | 34 | 6 | 2 | 19 | 46 | 59 | 85 |
| 68,899 | 7 | 3 | 25 | 34 | 6 | 2 | 18 | 46 | 56 | 85 |
| 68,900 | 7 | 3 | 25 | 34 | 6 | 2 | 18 | 46 | 56 | 85 |
| 68,901 | 7 | 3 | 25 | 34 | 6 | 2 | 18 | 46 | 56 | 85 |
| 68,902 | 7 | 4 | 24 | 35 | 6 | 2 | 18 | 46 | 55 | 87 |
| 68,903 | 7 | 3 | 23 | 38 | 6 | 2 | 17 | 45 | 53 | 88 |
| 68,904 | 7 | 3 | 23 | 38 | 6 | 2 | 17 | 45 | 53 | 88 |
| 68,905 | 7 | 3 | 23 | 38 | 6 | 2 | 17 | 45 | 53 | 88 |
| 68,906 | 7 | 3 | 23 | 38 | 6 | 2 | 17 | 45 | 53 | 88 |
| 68,907 | 7 | 3 | 23 | 38 | 6 | 2 | 16 | 45 | 52 | 88 |
| 68,908 | 7 | 3 | 23 | 38 | 6 | 2 | 16 | 47 | 52 | 90 |
| 68,909 | 7 | 3 | 23 | 38 | 6 | 2 | 16 | 47 | 52 | 90 |

|        |   |   |    |    |    |   |    |    |     |     |
|--------|---|---|----|----|----|---|----|----|-----|-----|
| 68,910 | 7 | 3 | 23 | 40 | 6  | 2 | 16 | 49 | 52  | 94  |
| 68,911 | 7 | 3 | 23 | 42 | 6  | 3 | 16 | 49 | 52  | 97  |
| 68,912 | 7 | 4 | 22 | 42 | 6  | 3 | 16 | 49 | 51  | 98  |
| 68,913 | 6 | 4 | 22 | 47 | 6  | 3 | 16 | 51 | 50  | 105 |
| 68,914 | 6 | 4 | 22 | 49 | 6  | 3 | 16 | 52 | 50  | 108 |
| 68,915 | 6 | 4 | 20 | 52 | 5  | 3 | 12 | 53 | 43  | 112 |
| 68,916 | 6 | 4 | 20 | 56 | 5  | 3 | 12 | 54 | 43  | 117 |
| 68,917 | 6 | 4 | 21 | 57 | 6  | 3 | 19 | 54 | 52  | 118 |
| 68,918 | 6 | 6 | 19 | 55 | 5  | 3 | 19 | 53 | 49  | 117 |
| 68,919 | 5 | 6 | 15 | 55 | 5  | 3 | 19 | 54 | 44  | 118 |
| 68,920 | 3 | 6 | 14 | 55 | 4  | 3 | 19 | 56 | 40  | 120 |
| 68,921 | 3 | 7 | 14 | 63 | 4  | 3 | 21 | 66 | 42  | 139 |
| 68,922 | 3 | 7 | 14 | 65 | 4  | 3 | 22 | 70 | 43  | 145 |
| 68,923 | 3 | 9 | 14 | 65 | 4  | 4 | 21 | 70 | 42  | 148 |
| 68,924 | 3 | 9 | 14 | 65 | 4  | 4 | 21 | 70 | 42  | 148 |
| 68,925 | 3 | 9 | 19 | 65 | 4  | 4 | 27 | 70 | 53  | 148 |
| 68,926 | 3 | 9 | 19 | 66 | 5  | 4 | 27 | 70 | 54  | 149 |
| 68,927 | 3 | 9 | 19 | 66 | 5  | 4 | 27 | 70 | 54  | 149 |
| 68,928 | 3 | 9 | 19 | 66 | 5  | 4 | 27 | 70 | 54  | 149 |
| 68,929 | 2 | 9 | 15 | 66 | 5  | 4 | 25 | 69 | 47  | 148 |
| 68,930 | 2 | 9 | 18 | 66 | 5  | 4 | 29 | 69 | 54  | 148 |
| 68,931 | 2 | 9 | 19 | 66 | 5  | 4 | 29 | 69 | 55  | 148 |
| 68,932 | 2 | 9 | 20 | 66 | 5  | 4 | 29 | 69 | 56  | 148 |
| 68,933 | 2 | 9 | 20 | 66 | 4  | 4 | 29 | 69 | 55  | 148 |
| 68,934 | 2 | 9 | 20 | 66 | 4  | 4 | 29 | 69 | 55  | 148 |
| 68,935 | 2 | 9 | 21 | 65 | 4  | 4 | 29 | 69 | 56  | 147 |
| 68,936 | 2 | 9 | 22 | 65 | 4  | 3 | 30 | 69 | 58  | 146 |
| 68,937 | 2 | 9 | 23 | 65 | 4  | 3 | 30 | 68 | 59  | 145 |
| 68,938 | 4 | 9 | 24 | 66 | 5  | 3 | 34 | 68 | 67  | 146 |
| 68,939 | 3 | 9 | 21 | 66 | 4  | 3 | 31 | 68 | 59  | 146 |
| 68,940 | 3 | 9 | 21 | 65 | 4  | 3 | 31 | 65 | 59  | 142 |
| 68,941 | 3 | 9 | 23 | 64 | 5  | 3 | 32 | 62 | 63  | 138 |
| 68,942 | 3 | 9 | 23 | 64 | 5  | 3 | 32 | 62 | 63  | 138 |
| 68,943 | 3 | 9 | 23 | 63 | 5  | 3 | 32 | 62 | 63  | 137 |
| 68,944 | 5 | 7 | 46 | 62 | 8  | 3 | 49 | 59 | 108 | 131 |
| 68,945 | 5 | 7 | 46 | 62 | 8  | 3 | 49 | 57 | 108 | 129 |
| 68,946 | 5 | 7 | 46 | 61 | 8  | 3 | 49 | 57 | 108 | 128 |
| 68,947 | 6 | 7 | 53 | 49 | 10 | 2 | 67 | 38 | 136 | 96  |
| 68,948 | 6 | 9 | 53 | 51 | 10 | 2 | 67 | 43 | 136 | 105 |
| 68,949 | 6 | 9 | 53 | 48 | 10 | 2 | 67 | 39 | 136 | 98  |
| 68,950 | 6 | 9 | 53 | 53 | 10 | 2 | 67 | 40 | 136 | 104 |

|        |    |   |    |    |    |   |    |    |     |     |
|--------|----|---|----|----|----|---|----|----|-----|-----|
| 68,951 | 6  | 9 | 53 | 53 | 10 | 3 | 67 | 40 | 136 | 105 |
| 68,952 | 6  | 9 | 53 | 54 | 10 | 3 | 67 | 40 | 136 | 106 |
| 68,953 | 7  | 8 | 53 | 50 | 11 | 3 | 67 | 40 | 138 | 101 |
| 68,954 | 7  | 8 | 53 | 50 | 11 | 3 | 67 | 40 | 138 | 101 |
| 68,955 | 7  | 8 | 53 | 50 | 11 | 3 | 67 | 40 | 138 | 101 |
| 68,956 | 7  | 8 | 53 | 50 | 11 | 3 | 67 | 40 | 138 | 101 |
| 68,957 | 7  | 8 | 55 | 51 | 11 | 3 | 67 | 41 | 140 | 103 |
| 68,958 | 7  | 8 | 55 | 51 | 11 | 3 | 67 | 41 | 140 | 103 |
| 68,959 | 7  | 8 | 55 | 51 | 11 | 3 | 67 | 39 | 140 | 101 |
| 68,960 | 7  | 8 | 57 | 51 | 11 | 3 | 71 | 39 | 146 | 101 |
| 68,961 | 7  | 8 | 57 | 49 | 11 | 3 | 71 | 37 | 146 | 97  |
| 68,962 | 7  | 8 | 57 | 54 | 11 | 2 | 72 | 38 | 147 | 102 |
| 68,963 | 7  | 7 | 62 | 55 | 12 | 2 | 77 | 38 | 158 | 102 |
| 68,964 | 7  | 7 | 60 | 52 | 12 | 2 | 78 | 36 | 157 | 97  |
| 68,965 | 7  | 7 | 60 | 54 | 12 | 2 | 79 | 36 | 158 | 99  |
| 68,966 | 7  | 7 | 62 | 47 | 13 | 2 | 80 | 34 | 162 | 90  |
| 68,967 | 7  | 9 | 62 | 67 | 12 | 2 | 80 | 55 | 161 | 133 |
| 68,968 | 7  | 9 | 62 | 69 | 12 | 2 | 76 | 54 | 157 | 134 |
| 68,969 | 8  | 8 | 71 | 72 | 14 | 2 | 81 | 54 | 174 | 136 |
| 68,970 | 8  | 9 | 72 | 81 | 14 | 3 | 81 | 53 | 175 | 146 |
| 68,971 | 9  | 8 | 77 | 73 | 14 | 3 | 82 | 40 | 182 | 124 |
| 68,972 | 10 | 8 | 81 | 71 | 14 | 3 | 83 | 36 | 188 | 118 |
| 68,973 | 10 | 8 | 90 | 71 | 16 | 3 | 85 | 36 | 201 | 118 |
| 68,974 | 10 | 6 | 86 | 71 | 15 | 2 | 81 | 36 | 192 | 115 |
| 68,975 | 10 | 6 | 85 | 71 | 15 | 2 | 80 | 36 | 190 | 115 |
| 68,976 | 10 | 6 | 85 | 71 | 14 | 2 | 80 | 36 | 189 | 115 |
| 68,977 | 10 | 6 | 84 | 70 | 14 | 2 | 79 | 36 | 187 | 114 |
| 68,978 | 10 | 6 | 83 | 70 | 14 | 2 | 76 | 37 | 183 | 115 |
| 68,979 | 10 | 6 | 81 | 70 | 14 | 2 | 76 | 37 | 181 | 115 |
| 68,980 | 9  | 6 | 82 | 73 | 14 | 2 | 76 | 37 | 181 | 118 |
| 68,981 | 9  | 6 | 83 | 73 | 14 | 2 | 76 | 37 | 182 | 118 |
| 68,982 | 9  | 6 | 82 | 73 | 14 | 2 | 76 | 37 | 181 | 118 |
| 68,983 | 9  | 6 | 81 | 74 | 14 | 2 | 78 | 37 | 182 | 119 |
| 68,984 | 9  | 6 | 81 | 74 | 14 | 2 | 78 | 37 | 182 | 119 |
| 68,985 | 9  | 6 | 81 | 74 | 14 | 2 | 78 | 37 | 182 | 119 |
| 68,986 | 9  | 6 | 80 | 74 | 14 | 2 | 78 | 37 | 181 | 119 |
| 68,987 | 10 | 6 | 81 | 74 | 14 | 2 | 78 | 37 | 183 | 119 |
| 68,988 | 10 | 6 | 80 | 74 | 14 | 2 | 78 | 37 | 182 | 119 |
| 68,989 | 8  | 6 | 79 | 73 | 13 | 2 | 75 | 39 | 175 | 120 |
| 68,990 | 8  | 6 | 80 | 78 | 13 | 2 | 75 | 41 | 176 | 127 |
| 68,991 | 8  | 6 | 88 | 86 | 13 | 5 | 77 | 55 | 186 | 152 |

|        |   |    |    |     |    |   |    |    |     |     |
|--------|---|----|----|-----|----|---|----|----|-----|-----|
| 68,992 | 9 | 12 | 91 | 121 | 12 | 5 | 81 | 69 | 193 | 207 |
| 68,993 | 8 | 12 | 89 | 128 | 10 | 5 | 78 | 72 | 185 | 217 |
| 68,994 | 7 | 12 | 84 | 128 | 9  | 5 | 73 | 72 | 173 | 217 |
| 68,995 | 7 | 16 | 71 | 133 | 9  | 7 | 65 | 72 | 152 | 228 |
| 68,996 | 6 | 16 | 67 | 133 | 7  | 7 | 48 | 71 | 128 | 227 |
| 68,997 | 6 | 17 | 64 | 137 | 7  | 7 | 47 | 73 | 124 | 234 |
| 68,998 | 6 | 17 | 64 | 138 | 7  | 7 | 47 | 73 | 124 | 235 |
| 68,999 | 6 | 15 | 64 | 135 | 7  | 7 | 47 | 69 | 124 | 226 |
| 69,000 | 6 | 17 | 64 | 130 | 7  | 7 | 47 | 67 | 124 | 221 |
| 69,001 | 6 | 17 | 64 | 130 | 7  | 7 | 47 | 67 | 124 | 221 |
| 69,002 | 6 | 17 | 64 | 130 | 7  | 6 | 47 | 67 | 124 | 220 |
| 69,003 | 6 | 17 | 64 | 134 | 7  | 6 | 47 | 69 | 124 | 226 |
| 69,004 | 5 | 17 | 64 | 134 | 6  | 6 | 47 | 69 | 122 | 226 |
| 69,005 | 5 | 18 | 64 | 134 | 6  | 6 | 47 | 70 | 122 | 228 |
| 69,006 | 5 | 18 | 64 | 134 | 6  | 6 | 47 | 70 | 122 | 228 |
| 69,007 | 5 | 18 | 63 | 134 | 6  | 6 | 47 | 70 | 121 | 228 |
| 69,008 | 5 | 18 | 62 | 135 | 6  | 6 | 47 | 69 | 120 | 228 |
| 69,009 | 5 | 18 | 65 | 135 | 6  | 6 | 48 | 69 | 124 | 228 |
| 69,010 | 5 | 18 | 64 | 135 | 6  | 6 | 48 | 69 | 123 | 228 |
| 69,011 | 5 | 18 | 63 | 135 | 6  | 6 | 46 | 69 | 120 | 228 |
| 69,012 | 5 | 18 | 63 | 135 | 6  | 6 | 45 | 69 | 119 | 228 |
| 69,013 | 5 | 18 | 61 | 121 | 5  | 6 | 43 | 67 | 114 | 212 |
| 69,014 | 5 | 18 | 58 | 121 | 5  | 6 | 39 | 67 | 107 | 212 |
| 69,015 | 5 | 18 | 59 | 121 | 5  | 6 | 38 | 67 | 107 | 212 |
| 69,016 | 5 | 18 | 59 | 121 | 5  | 6 | 38 | 67 | 107 | 212 |
| 69,017 | 5 | 16 | 56 | 100 | 4  | 6 | 35 | 46 | 100 | 168 |
| 69,018 | 6 | 16 | 56 | 107 | 4  | 6 | 35 | 53 | 101 | 182 |
| 69,019 | 6 | 19 | 58 | 111 | 4  | 8 | 34 | 58 | 102 | 196 |
| 69,020 | 5 | 18 | 52 | 114 | 2  | 9 | 34 | 63 | 93  | 204 |
| 69,021 | 5 | 17 | 51 | 108 | 2  | 8 | 34 | 63 | 92  | 196 |
| 69,022 | 4 | 17 | 44 | 108 | 2  | 8 | 29 | 63 | 79  | 196 |
| 69,023 | 3 | 17 | 40 | 108 | 2  | 8 | 27 | 63 | 72  | 196 |
| 69,024 | 3 | 17 | 32 | 108 | 0  | 8 | 24 | 63 | 59  | 196 |
| 69,025 | 4 | 17 | 32 | 116 | 0  | 8 | 23 | 66 | 59  | 207 |
| 69,026 | 4 | 17 | 31 | 117 | 0  | 8 | 23 | 66 | 58  | 208 |
| 69,027 | 4 | 17 | 36 | 117 | 0  | 8 | 25 | 66 | 65  | 208 |
| 69,028 | 4 | 19 | 36 | 119 | 0  | 8 | 25 | 71 | 65  | 217 |
| 69,029 | 4 | 19 | 35 | 120 | 0  | 8 | 25 | 71 | 64  | 218 |
| 69,030 | 5 | 19 | 37 | 120 | 0  | 8 | 28 | 71 | 70  | 218 |
| 69,031 | 5 | 19 | 37 | 117 | 0  | 8 | 28 | 71 | 70  | 215 |
| 69,032 | 5 | 19 | 37 | 118 | 0  | 8 | 28 | 71 | 70  | 216 |

|        |   |    |    |     |   |   |    |    |     |     |
|--------|---|----|----|-----|---|---|----|----|-----|-----|
| 69,033 | 5 | 19 | 37 | 119 | 0 | 8 | 26 | 71 | 68  | 217 |
| 69,034 | 5 | 19 | 37 | 118 | 0 | 8 | 26 | 71 | 68  | 216 |
| 69,035 | 5 | 19 | 37 | 118 | 0 | 8 | 26 | 71 | 68  | 216 |
| 69,036 | 5 | 19 | 37 | 118 | 0 | 8 | 26 | 71 | 68  | 216 |
| 69,037 | 4 | 19 | 35 | 119 | 0 | 8 | 25 | 72 | 64  | 218 |
| 69,038 | 5 | 19 | 35 | 120 | 0 | 8 | 25 | 72 | 65  | 219 |
| 69,039 | 5 | 19 | 35 | 124 | 0 | 8 | 25 | 74 | 65  | 225 |
| 69,040 | 5 | 19 | 35 | 127 | 0 | 8 | 25 | 75 | 65  | 229 |
| 69,041 | 5 | 19 | 35 | 122 | 0 | 8 | 24 | 74 | 64  | 223 |
| 69,042 | 5 | 19 | 27 | 115 | 0 | 5 | 22 | 60 | 54  | 199 |
| 69,043 | 4 | 13 | 22 | 73  | 0 | 5 | 17 | 43 | 43  | 134 |
| 69,044 | 4 | 13 | 21 | 73  | 0 | 5 | 17 | 43 | 42  | 134 |
| 69,045 | 4 | 9  | 20 | 67  | 0 | 3 | 16 | 43 | 40  | 122 |
| 69,046 | 4 | 9  | 19 | 67  | 0 | 3 | 16 | 43 | 39  | 122 |
| 69,047 | 4 | 9  | 19 | 67  | 0 | 3 | 16 | 42 | 39  | 121 |
| 69,048 | 5 | 8  | 19 | 59  | 0 | 3 | 17 | 40 | 41  | 110 |
| 69,049 | 5 | 8  | 19 | 58  | 0 | 3 | 17 | 40 | 41  | 109 |
| 69,050 | 5 | 8  | 26 | 57  | 0 | 3 | 18 | 38 | 49  | 106 |
| 69,051 | 5 | 6  | 27 | 56  | 0 | 4 | 19 | 38 | 51  | 104 |
| 69,052 | 6 | 6  | 34 | 56  | 0 | 4 | 21 | 39 | 61  | 105 |
| 69,053 | 6 | 6  | 39 | 52  | 0 | 4 | 28 | 37 | 73  | 99  |
| 69,054 | 6 | 6  | 40 | 52  | 0 | 5 | 28 | 42 | 74  | 105 |
| 69,055 | 6 | 7  | 40 | 53  | 0 | 5 | 28 | 46 | 74  | 111 |
| 69,056 | 6 | 6  | 41 | 53  | 0 | 5 | 30 | 45 | 77  | 109 |
| 69,057 | 6 | 6  | 41 | 51  | 0 | 5 | 30 | 45 | 77  | 107 |
| 69,058 | 6 | 6  | 43 | 51  | 0 | 5 | 30 | 45 | 79  | 107 |
| 69,059 | 6 | 7  | 40 | 55  | 0 | 5 | 29 | 51 | 75  | 118 |
| 69,060 | 6 | 7  | 40 | 56  | 0 | 5 | 29 | 51 | 75  | 119 |
| 69,061 | 6 | 7  | 40 | 64  | 0 | 5 | 29 | 52 | 75  | 128 |
| 69,062 | 6 | 7  | 41 | 69  | 0 | 5 | 29 | 56 | 76  | 137 |
| 69,063 | 6 | 7  | 41 | 69  | 0 | 5 | 29 | 56 | 76  | 137 |
| 69,064 | 6 | 7  | 42 | 69  | 0 | 5 | 29 | 56 | 77  | 137 |
| 69,065 | 6 | 7  | 42 | 70  | 0 | 5 | 29 | 58 | 77  | 140 |
| 69,066 | 6 | 7  | 44 | 73  | 0 | 5 | 31 | 58 | 81  | 143 |
| 69,067 | 8 | 7  | 48 | 73  | 0 | 5 | 47 | 59 | 103 | 144 |
| 69,068 | 8 | 7  | 49 | 73  | 0 | 5 | 47 | 60 | 104 | 145 |
| 69,069 | 7 | 7  | 49 | 66  | 0 | 5 | 48 | 53 | 104 | 131 |
| 69,070 | 7 | 4  | 45 | 49  | 0 | 2 | 45 | 41 | 97  | 96  |
| 69,071 | 7 | 4  | 46 | 49  | 0 | 2 | 43 | 41 | 96  | 96  |
| 69,072 | 7 | 4  | 46 | 49  | 0 | 2 | 43 | 41 | 96  | 96  |
| 69,073 | 7 | 4  | 46 | 50  | 0 | 2 | 43 | 42 | 96  | 98  |

|        |   |   |    |     |   |   |    |    |     |     |
|--------|---|---|----|-----|---|---|----|----|-----|-----|
| 69,074 | 8 | 4 | 46 | 46  | 0 | 3 | 42 | 44 | 96  | 97  |
| 69,075 | 7 | 4 | 46 | 47  | 0 | 3 | 42 | 44 | 95  | 98  |
| 69,076 | 7 | 4 | 46 | 47  | 0 | 3 | 42 | 44 | 95  | 98  |
| 69,077 | 7 | 4 | 41 | 46  | 0 | 3 | 40 | 46 | 88  | 99  |
| 69,078 | 7 | 4 | 41 | 46  | 0 | 3 | 39 | 46 | 87  | 99  |
| 69,079 | 7 | 2 | 40 | 43  | 0 | 3 | 38 | 41 | 85  | 89  |
| 69,080 | 6 | 3 | 39 | 42  | 0 | 3 | 37 | 40 | 82  | 88  |
| 69,081 | 6 | 4 | 39 | 42  | 0 | 3 | 37 | 41 | 82  | 90  |
| 69,082 | 7 | 4 | 39 | 41  | 0 | 3 | 39 | 41 | 85  | 89  |
| 69,083 | 7 | 4 | 39 | 40  | 0 | 3 | 39 | 41 | 85  | 88  |
| 69,084 | 7 | 4 | 39 | 40  | 0 | 3 | 40 | 41 | 86  | 88  |
| 69,085 | 7 | 4 | 45 | 40  | 0 | 3 | 46 | 41 | 98  | 88  |
| 69,086 | 7 | 4 | 54 | 40  | 0 | 3 | 51 | 41 | 112 | 88  |
| 69,087 | 7 | 4 | 54 | 40  | 0 | 3 | 51 | 41 | 112 | 88  |
| 69,088 | 8 | 4 | 88 | 38  | 0 | 3 | 67 | 41 | 163 | 86  |
| 69,089 | 7 | 4 | 88 | 41  | 0 | 3 | 67 | 46 | 162 | 94  |
| 69,090 | 7 | 4 | 88 | 39  | 0 | 3 | 66 | 45 | 161 | 91  |
| 69,091 | 7 | 4 | 93 | 36  | 0 | 3 | 66 | 43 | 166 | 86  |
| 69,092 | 7 | 4 | 94 | 42  | 0 | 3 | 66 | 45 | 167 | 94  |
| 69,093 | 7 | 4 | 94 | 43  | 0 | 3 | 66 | 46 | 167 | 96  |
| 69,094 | 7 | 4 | 94 | 43  | 0 | 3 | 66 | 46 | 167 | 96  |
| 69,095 | 7 | 4 | 94 | 45  | 0 | 3 | 66 | 47 | 167 | 99  |
| 69,096 | 7 | 4 | 94 | 45  | 0 | 3 | 66 | 47 | 167 | 99  |
| 69,097 | 6 | 4 | 95 | 46  | 0 | 4 | 66 | 52 | 167 | 106 |
| 69,098 | 6 | 4 | 95 | 46  | 0 | 4 | 65 | 52 | 166 | 106 |
| 69,099 | 6 | 4 | 97 | 46  | 0 | 4 | 65 | 54 | 168 | 108 |
| 69,100 | 6 | 6 | 97 | 71  | 0 | 5 | 65 | 68 | 168 | 150 |
| 69,101 | 6 | 7 | 90 | 72  | 0 | 5 | 65 | 69 | 161 | 153 |
| 69,102 | 6 | 7 | 91 | 88  | 0 | 4 | 64 | 74 | 161 | 173 |
| 69,103 | 5 | 7 | 84 | 91  | 0 | 4 | 62 | 74 | 151 | 176 |
| 69,104 | 5 | 7 | 79 | 99  | 0 | 4 | 55 | 76 | 139 | 186 |
| 69,105 | 5 | 8 | 79 | 116 | 0 | 3 | 55 | 83 | 139 | 210 |
| 69,106 | 5 | 8 | 78 | 123 | 0 | 3 | 53 | 81 | 136 | 215 |
| 69,107 | 6 | 8 | 78 | 125 | 0 | 3 | 53 | 81 | 137 | 217 |
| 69,108 | 6 | 8 | 78 | 125 | 0 | 3 | 53 | 82 | 137 | 218 |
| 69,109 | 6 | 7 | 76 | 121 | 0 | 3 | 53 | 76 | 135 | 207 |
| 69,110 | 6 | 7 | 76 | 112 | 0 | 3 | 53 | 75 | 135 | 197 |
| 69,111 | 6 | 7 | 76 | 112 | 0 | 3 | 53 | 75 | 135 | 197 |
| 69,112 | 6 | 7 | 75 | 112 | 0 | 3 | 51 | 75 | 132 | 197 |
| 69,113 | 7 | 8 | 80 | 108 | 0 | 3 | 52 | 71 | 139 | 190 |
| 69,114 | 8 | 8 | 80 | 108 | 0 | 3 | 52 | 72 | 140 | 191 |

|        |   |    |    |     |   |   |    |    |     |     |
|--------|---|----|----|-----|---|---|----|----|-----|-----|
| 69,115 | 8 | 8  | 81 | 105 | 0 | 3 | 52 | 70 | 141 | 186 |
| 69,116 | 8 | 8  | 81 | 107 | 0 | 3 | 51 | 74 | 140 | 192 |
| 69,117 | 6 | 8  | 80 | 108 | 0 | 4 | 39 | 75 | 125 | 195 |
| 69,118 | 6 | 8  | 79 | 109 | 0 | 4 | 38 | 74 | 123 | 195 |
| 69,119 | 6 | 8  | 79 | 109 | 0 | 4 | 38 | 73 | 123 | 194 |
| 69,120 | 6 | 8  | 79 | 110 | 0 | 4 | 37 | 73 | 122 | 195 |
| 69,121 | 6 | 8  | 80 | 112 | 0 | 4 | 37 | 73 | 123 | 197 |
| 69,122 | 6 | 8  | 76 | 113 | 0 | 4 | 37 | 73 | 119 | 198 |
| 69,123 | 6 | 8  | 77 | 113 | 0 | 4 | 37 | 73 | 120 | 198 |
| 69,124 | 5 | 8  | 79 | 108 | 0 | 3 | 37 | 67 | 121 | 186 |
| 69,125 | 5 | 8  | 79 | 109 | 0 | 3 | 37 | 67 | 121 | 187 |
| 69,126 | 5 | 8  | 79 | 108 | 0 | 3 | 37 | 67 | 121 | 186 |
| 69,127 | 5 | 8  | 82 | 108 | 0 | 3 | 39 | 67 | 126 | 186 |
| 69,128 | 5 | 8  | 82 | 108 | 0 | 3 | 39 | 65 | 126 | 184 |
| 69,129 | 5 | 8  | 82 | 108 | 0 | 3 | 39 | 65 | 126 | 184 |
| 69,130 | 5 | 7  | 83 | 108 | 0 | 3 | 39 | 65 | 127 | 183 |
| 69,131 | 5 | 6  | 83 | 110 | 0 | 3 | 39 | 64 | 127 | 183 |
| 69,132 | 5 | 6  | 83 | 111 | 0 | 3 | 39 | 64 | 127 | 184 |
| 69,133 | 4 | 6  | 87 | 118 | 1 | 3 | 42 | 65 | 134 | 192 |
| 69,134 | 4 | 6  | 87 | 131 | 1 | 3 | 42 | 67 | 134 | 207 |
| 69,135 | 4 | 6  | 94 | 138 | 1 | 3 | 42 | 68 | 141 | 215 |
| 69,136 | 5 | 8  | 88 | 145 | 1 | 3 | 36 | 71 | 130 | 227 |
| 69,137 | 5 | 8  | 79 | 149 | 1 | 3 | 31 | 73 | 116 | 233 |
| 69,138 | 4 | 10 | 72 | 150 | 1 | 3 | 26 | 73 | 103 | 236 |
| 69,139 | 4 | 10 | 51 | 145 | 2 | 3 | 20 | 66 | 77  | 224 |
| 69,140 | 4 | 11 | 47 | 145 | 2 | 3 | 20 | 66 | 73  | 225 |
| 69,141 | 4 | 11 | 46 | 145 | 2 | 3 | 20 | 66 | 72  | 225 |
| 69,142 | 4 | 11 | 45 | 145 | 2 | 3 | 20 | 66 | 71  | 225 |
| 69,143 | 4 | 11 | 55 | 137 | 2 | 3 | 31 | 62 | 92  | 213 |
| 69,144 | 4 | 11 | 55 | 137 | 2 | 3 | 31 | 62 | 92  | 213 |
| 69,145 | 4 | 11 | 56 | 137 | 2 | 3 | 31 | 62 | 93  | 213 |
| 69,146 | 4 | 11 | 56 | 137 | 2 | 3 | 32 | 61 | 94  | 212 |
| 69,147 | 4 | 11 | 63 | 136 | 2 | 2 | 33 | 56 | 102 | 205 |
| 69,148 | 4 | 11 | 66 | 136 | 2 | 2 | 35 | 56 | 107 | 205 |
| 69,149 | 4 | 11 | 66 | 136 | 2 | 2 | 38 | 56 | 110 | 205 |
| 69,150 | 4 | 11 | 66 | 136 | 2 | 2 | 38 | 54 | 110 | 203 |
| 69,151 | 4 | 9  | 66 | 112 | 2 | 1 | 38 | 42 | 110 | 164 |
| 69,152 | 4 | 9  | 68 | 97  | 2 | 1 | 41 | 36 | 115 | 143 |
| 69,153 | 4 | 9  | 68 | 97  | 2 | 1 | 41 | 36 | 115 | 143 |
| 69,154 | 4 | 9  | 74 | 94  | 2 | 1 | 43 | 38 | 123 | 142 |
| 69,155 | 4 | 9  | 74 | 87  | 2 | 1 | 44 | 36 | 124 | 133 |

|        |   |   |    |    |   |   |    |    |     |    |
|--------|---|---|----|----|---|---|----|----|-----|----|
| 69,156 | 5 | 7 | 80 | 62 | 2 | 1 | 46 | 22 | 133 | 92 |
| 69,157 | 5 | 7 | 80 | 62 | 2 | 1 | 46 | 22 | 133 | 92 |
| 69,158 | 4 | 7 | 80 | 60 | 2 | 1 | 46 | 23 | 132 | 91 |
| 69,159 | 5 | 7 | 85 | 62 | 2 | 1 | 47 | 23 | 139 | 93 |
| 69,160 | 5 | 7 | 85 | 62 | 2 | 1 | 47 | 23 | 139 | 93 |
| 69,161 | 5 | 7 | 85 | 62 | 2 | 1 | 48 | 23 | 140 | 93 |
| 69,162 | 5 | 7 | 85 | 64 | 2 | 1 | 48 | 23 | 140 | 95 |
| 69,163 | 4 | 7 | 83 | 64 | 2 | 1 | 47 | 23 | 136 | 95 |
| 69,164 | 4 | 6 | 80 | 63 | 2 | 1 | 47 | 23 | 133 | 93 |
| 69,165 | 3 | 6 | 79 | 63 | 2 | 1 | 47 | 22 | 131 | 92 |
| 69,166 | 3 | 6 | 78 | 65 | 2 | 1 | 47 | 22 | 130 | 94 |
| 69,167 | 3 | 6 | 75 | 63 | 3 | 1 | 46 | 18 | 127 | 88 |
| 69,168 | 3 | 6 | 72 | 61 | 3 | 0 | 42 | 17 | 120 | 84 |
| 69,169 | 3 | 6 | 73 | 61 | 3 | 0 | 44 | 17 | 123 | 84 |
| 69,170 | 3 | 6 | 73 | 60 | 3 | 0 | 44 | 17 | 123 | 83 |
| 69,171 | 3 | 6 | 73 | 62 | 3 | 0 | 44 | 17 | 123 | 85 |
| 69,172 | 3 | 6 | 72 | 60 | 4 | 0 | 44 | 17 | 123 | 83 |
| 69,173 | 3 | 6 | 71 | 59 | 4 | 0 | 44 | 17 | 122 | 82 |
| 69,174 | 3 | 6 | 71 | 59 | 4 | 0 | 44 | 18 | 122 | 83 |
| 69,175 | 3 | 6 | 69 | 58 | 4 | 0 | 44 | 18 | 120 | 82 |
| 69,176 | 3 | 6 | 68 | 58 | 4 | 0 | 42 | 18 | 117 | 82 |
| 69,177 | 3 | 6 | 66 | 58 | 4 | 0 | 44 | 18 | 117 | 82 |
| 69,178 | 3 | 6 | 66 | 58 | 4 | 0 | 44 | 17 | 117 | 81 |
| 69,179 | 3 | 6 | 66 | 58 | 4 | 0 | 44 | 17 | 117 | 81 |
| 69,180 | 3 | 6 | 66 | 58 | 4 | 0 | 44 | 17 | 117 | 81 |
| 69,181 | 3 | 6 | 65 | 58 | 4 | 0 | 44 | 17 | 116 | 81 |
| 69,182 | 3 | 6 | 65 | 56 | 4 | 0 | 44 | 17 | 116 | 79 |
| 69,183 | 3 | 7 | 65 | 56 | 4 | 0 | 43 | 17 | 115 | 80 |
| 69,184 | 3 | 7 | 62 | 49 | 3 | 0 | 39 | 18 | 107 | 74 |
| 69,185 | 3 | 7 | 64 | 36 | 3 | 0 | 39 | 16 | 109 | 59 |
| 69,186 | 3 | 7 | 57 | 33 | 3 | 0 | 38 | 15 | 101 | 55 |
| 69,187 | 2 | 5 | 57 | 37 | 3 | 0 | 37 | 12 | 99  | 54 |
| 69,188 | 2 | 5 | 57 | 33 | 3 | 0 | 37 | 10 | 99  | 48 |
| 69,189 | 2 | 4 | 51 | 36 | 3 | 1 | 32 | 10 | 88  | 51 |
| 69,190 | 2 | 5 | 51 | 38 | 2 | 1 | 32 | 10 | 87  | 54 |
| 69,191 | 2 | 5 | 50 | 38 | 2 | 1 | 32 | 9  | 86  | 53 |
| 69,192 | 2 | 5 | 50 | 40 | 2 | 1 | 32 | 9  | 86  | 55 |
| 69,193 | 2 | 5 | 48 | 41 | 2 | 1 | 29 | 9  | 81  | 56 |
| 69,194 | 2 | 5 | 40 | 41 | 2 | 1 | 21 | 9  | 65  | 56 |
| 69,195 | 2 | 5 | 39 | 41 | 2 | 1 | 21 | 9  | 64  | 56 |
| 69,196 | 2 | 5 | 39 | 41 | 2 | 1 | 20 | 10 | 63  | 57 |



|        |   |   |    |    |   |   |    |    |    |    |
|--------|---|---|----|----|---|---|----|----|----|----|
| 69,197 | 2 | 5 | 36 | 39 | 2 | 1 | 20 | 10 | 60 | 55 |
| 69,198 | 2 | 5 | 30 | 39 | 2 | 1 | 19 | 10 | 53 | 55 |
| 69,199 | 2 | 5 | 27 | 40 | 2 | 1 | 17 | 10 | 48 | 56 |
| 69,200 | 2 | 6 | 25 | 48 | 2 | 1 | 14 | 12 | 43 | 67 |
| 69,201 | 2 | 6 | 23 | 49 | 2 | 1 | 11 | 13 | 38 | 69 |
| 69,202 | 2 | 6 | 21 | 56 | 2 | 1 | 11 | 11 | 36 | 74 |
| 69,203 | 2 | 5 | 21 | 54 | 2 | 1 | 11 | 11 | 36 | 71 |
| 69,204 | 2 | 5 | 19 | 56 | 2 | 1 | 10 | 11 | 33 | 73 |
| 69,205 | 2 | 5 | 18 | 55 | 2 | 1 | 9  | 8  | 31 | 69 |
| 69,206 | 3 | 5 | 18 | 55 | 2 | 1 | 8  | 9  | 31 | 70 |
| 69,207 | 2 | 5 | 11 | 55 | 2 | 1 | 6  | 9  | 21 | 70 |
| 69,208 | 2 | 5 | 7  | 55 | 2 | 1 | 5  | 9  | 16 | 70 |
| 69,209 | 2 | 5 | 7  | 53 | 2 | 1 | 5  | 7  | 16 | 66 |
| 69,210 | 1 | 5 | 7  | 53 | 2 | 1 | 5  | 7  | 15 | 66 |
| 69,211 | 1 | 5 | 7  | 57 | 2 | 1 | 4  | 7  | 14 | 70 |
| 69,212 | 1 | 5 | 7  | 57 | 2 | 1 | 4  | 7  | 14 | 70 |
| 69,213 | 2 | 5 | 7  | 55 | 2 | 1 | 4  | 7  | 15 | 68 |
| 69,214 | 2 | 5 | 9  | 56 | 2 | 1 | 4  | 7  | 17 | 69 |
| 69,215 | 5 | 6 | 12 | 56 | 2 | 1 | 5  | 7  | 24 | 70 |
| 69,216 | 5 | 6 | 12 | 53 | 2 | 1 | 5  | 7  | 24 | 67 |
| 69,217 | 5 | 6 | 14 | 53 | 2 | 2 | 5  | 7  | 26 | 68 |
| 69,218 | 5 | 6 | 14 | 53 | 1 | 2 | 5  | 7  | 25 | 68 |
| 69,219 | 6 | 6 | 16 | 53 | 1 | 2 | 5  | 7  | 28 | 68 |
| 69,220 | 6 | 6 | 15 | 53 | 1 | 2 | 3  | 7  | 25 | 68 |
| 69,221 | 6 | 6 | 15 | 53 | 1 | 2 | 3  | 7  | 25 | 68 |
| 69,222 | 6 | 6 | 15 | 51 | 1 | 2 | 3  | 7  | 25 | 66 |
| 69,223 | 6 | 6 | 15 | 51 | 0 | 2 | 3  | 7  | 24 | 66 |
| 69,224 | 7 | 6 | 22 | 51 | 0 | 2 | 6  | 6  | 35 | 65 |
| 69,225 | 7 | 6 | 22 | 51 | 0 | 2 | 6  | 6  | 35 | 65 |
| 69,226 | 7 | 6 | 22 | 51 | 0 | 2 | 6  | 6  | 35 | 65 |
| 69,227 | 7 | 6 | 23 | 51 | 0 | 2 | 5  | 6  | 35 | 65 |
| 69,228 | 7 | 6 | 24 | 51 | 0 | 2 | 5  | 6  | 36 | 65 |
| 69,229 | 7 | 6 | 26 | 51 | 0 | 2 | 6  | 6  | 39 | 65 |
| 69,230 | 7 | 7 | 26 | 51 | 0 | 2 | 6  | 6  | 39 | 66 |
| 69,231 | 7 | 8 | 26 | 51 | 0 | 2 | 6  | 6  | 39 | 67 |
| 69,232 | 7 | 8 | 26 | 51 | 0 | 2 | 7  | 6  | 40 | 67 |
| 69,233 | 7 | 8 | 26 | 50 | 0 | 2 | 8  | 6  | 41 | 66 |
| 69,234 | 7 | 7 | 32 | 50 | 0 | 2 | 14 | 5  | 53 | 64 |
| 69,235 | 7 | 7 | 38 | 50 | 0 | 2 | 19 | 5  | 64 | 64 |
| 69,236 | 7 | 7 | 36 | 50 | 0 | 2 | 19 | 5  | 62 | 64 |
| 69,237 | 7 | 7 | 38 | 46 | 0 | 2 | 24 | 5  | 69 | 60 |

|        |    |   |     |    |   |   |    |    |     |    |
|--------|----|---|-----|----|---|---|----|----|-----|----|
| 69,238 | 7  | 7 | 38  | 35 | 0 | 2 | 24 | 5  | 69  | 49 |
| 69,239 | 7  | 6 | 38  | 31 | 0 | 1 | 24 | 5  | 69  | 43 |
| 69,240 | 7  | 6 | 38  | 31 | 0 | 1 | 24 | 5  | 69  | 43 |
| 69,241 | 7  | 4 | 39  | 29 | 0 | 1 | 24 | 5  | 70  | 39 |
| 69,242 | 7  | 4 | 39  | 29 | 0 | 1 | 24 | 5  | 70  | 39 |
| 69,243 | 7  | 4 | 39  | 27 | 0 | 1 | 25 | 5  | 71  | 37 |
| 69,244 | 7  | 4 | 40  | 26 | 0 | 1 | 25 | 5  | 72  | 36 |
| 69,245 | 8  | 6 | 43  | 26 | 0 | 1 | 25 | 5  | 76  | 38 |
| 69,246 | 8  | 6 | 43  | 26 | 0 | 1 | 25 | 5  | 76  | 38 |
| 69,247 | 8  | 6 | 43  | 26 | 0 | 1 | 25 | 4  | 76  | 37 |
| 69,248 | 8  | 6 | 48  | 26 | 0 | 1 | 26 | 4  | 82  | 37 |
| 69,249 | 9  | 6 | 75  | 25 | 1 | 1 | 33 | 4  | 118 | 36 |
| 69,250 | 9  | 6 | 75  | 25 | 1 | 1 | 33 | 4  | 118 | 36 |
| 69,251 | 10 | 5 | 94  | 17 | 1 | 1 | 34 | 2  | 139 | 25 |
| 69,252 | 10 | 5 | 94  | 17 | 1 | 1 | 34 | 1  | 139 | 24 |
| 69,253 | 11 | 5 | 105 | 9  | 1 | 1 | 36 | 1  | 153 | 16 |
| 69,254 | 11 | 5 | 105 | 9  | 1 | 1 | 36 | 2  | 153 | 17 |
| 69,255 | 11 | 5 | 102 | 8  | 1 | 1 | 36 | 2  | 150 | 16 |
| 69,256 | 12 | 5 | 117 | 7  | 1 | 1 | 41 | 1  | 171 | 14 |
| 69,257 | 11 | 5 | 117 | 7  | 1 | 1 | 41 | 1  | 170 | 14 |
| 69,258 | 11 | 5 | 117 | 7  | 1 | 1 | 41 | 1  | 170 | 14 |
| 69,259 | 11 | 5 | 117 | 7  | 1 | 1 | 41 | 1  | 170 | 14 |
| 69,260 | 11 | 5 | 117 | 7  | 1 | 1 | 41 | 1  | 170 | 14 |
| 69,261 | 11 | 5 | 117 | 7  | 1 | 1 | 41 | 1  | 170 | 14 |
| 69,262 | 11 | 5 | 117 | 24 | 1 | 2 | 41 | 9  | 170 | 40 |
| 69,263 | 10 | 5 | 117 | 25 | 1 | 2 | 41 | 9  | 169 | 41 |
| 69,264 | 10 | 5 | 116 | 27 | 1 | 2 | 41 | 10 | 168 | 44 |
| 69,265 | 11 | 6 | 115 | 27 | 1 | 2 | 41 | 10 | 168 | 45 |
| 69,266 | 8  | 5 | 112 | 27 | 1 | 1 | 40 | 10 | 161 | 43 |
| 69,267 | 8  | 5 | 112 | 27 | 1 | 1 | 40 | 12 | 161 | 45 |
| 69,268 | 8  | 5 | 110 | 27 | 1 | 1 | 40 | 12 | 159 | 45 |
| 69,269 | 8  | 5 | 110 | 36 | 1 | 1 | 40 | 13 | 159 | 55 |
| 69,270 | 7  | 5 | 108 | 36 | 1 | 1 | 40 | 15 | 156 | 57 |
| 69,271 | 6  | 5 | 105 | 39 | 1 | 1 | 40 | 16 | 152 | 61 |
| 69,272 | 6  | 5 | 105 | 39 | 1 | 1 | 40 | 16 | 152 | 61 |
| 69,273 | 7  | 5 | 118 | 40 | 1 | 1 | 51 | 17 | 177 | 63 |
| 69,274 | 7  | 5 | 121 | 40 | 1 | 1 | 51 | 17 | 180 | 63 |
| 69,275 | 7  | 5 | 122 | 40 | 1 | 1 | 53 | 17 | 183 | 63 |
| 69,276 | 7  | 5 | 122 | 40 | 1 | 1 | 53 | 17 | 183 | 63 |
| 69,277 | 8  | 5 | 121 | 40 | 1 | 1 | 52 | 17 | 182 | 63 |
| 69,278 | 8  | 5 | 120 | 40 | 1 | 1 | 52 | 17 | 181 | 63 |

|        |    |    |     |     |   |    |    |     |     |     |
|--------|----|----|-----|-----|---|----|----|-----|-----|-----|
| 69,279 | 8  | 5  | 120 | 40  | 1 | 1  | 52 | 17  | 181 | 63  |
| 69,280 | 8  | 5  | 118 | 41  | 1 | 1  | 51 | 19  | 178 | 66  |
| 69,281 | 8  | 4  | 118 | 41  | 1 | 1  | 51 | 19  | 178 | 65  |
| 69,282 | 8  | 3  | 119 | 42  | 1 | 1  | 50 | 19  | 178 | 65  |
| 69,283 | 8  | 4  | 121 | 42  | 1 | 1  | 49 | 19  | 179 | 66  |
| 69,284 | 8  | 5  | 118 | 43  | 1 | 1  | 47 | 20  | 174 | 69  |
| 69,285 | 8  | 5  | 114 | 43  | 1 | 1  | 43 | 20  | 166 | 69  |
| 69,286 | 8  | 5  | 108 | 44  | 1 | 1  | 38 | 20  | 155 | 70  |
| 69,287 | 10 | 6  | 122 | 48  | 1 | 1  | 35 | 20  | 168 | 75  |
| 69,288 | 10 | 6  | 122 | 49  | 1 | 1  | 33 | 21  | 166 | 77  |
| 69,289 | 10 | 6  | 122 | 55  | 1 | 1  | 34 | 21  | 167 | 83  |
| 69,290 | 10 | 7  | 128 | 56  | 1 | 1  | 39 | 21  | 178 | 85  |
| 69,291 | 10 | 7  | 128 | 57  | 1 | 1  | 39 | 21  | 178 | 86  |
| 69,292 | 10 | 7  | 128 | 57  | 1 | 1  | 39 | 21  | 178 | 86  |
| 69,293 | 10 | 7  | 128 | 57  | 1 | 1  | 38 | 21  | 177 | 86  |
| 69,294 | 10 | 7  | 128 | 57  | 1 | 1  | 38 | 21  | 177 | 86  |
| 69,295 | 10 | 7  | 127 | 57  | 1 | 1  | 38 | 21  | 176 | 86  |
| 69,296 | 9  | 5  | 124 | 57  | 1 | 2  | 38 | 23  | 172 | 87  |
| 69,297 | 9  | 5  | 125 | 59  | 1 | 3  | 38 | 24  | 173 | 91  |
| 69,298 | 9  | 5  | 126 | 67  | 1 | 3  | 38 | 25  | 174 | 100 |
| 69,299 | 9  | 5  | 121 | 72  | 1 | 4  | 37 | 29  | 168 | 110 |
| 69,300 | 8  | 5  | 94  | 73  | 0 | 4  | 30 | 30  | 132 | 112 |
| 69,301 | 8  | 6  | 89  | 90  | 0 | 7  | 29 | 45  | 126 | 148 |
| 69,302 | 7  | 16 | 77  | 106 | 0 | 10 | 29 | 58  | 113 | 190 |
| 69,303 | 6  | 19 | 70  | 137 | 0 | 13 | 27 | 76  | 103 | 245 |
| 69,304 | 6  | 21 | 66  | 147 | 0 | 14 | 27 | 80  | 99  | 262 |
| 69,305 | 5  | 21 | 65  | 154 | 0 | 14 | 27 | 92  | 97  | 281 |
| 69,306 | 5  | 21 | 55  | 154 | 0 | 14 | 23 | 92  | 83  | 281 |
| 69,307 | 5  | 21 | 52  | 154 | 0 | 14 | 22 | 92  | 79  | 281 |
| 69,308 | 5  | 22 | 56  | 161 | 0 | 14 | 23 | 96  | 84  | 293 |
| 69,309 | 5  | 22 | 56  | 161 | 0 | 14 | 23 | 96  | 84  | 293 |
| 69,310 | 5  | 22 | 56  | 161 | 0 | 14 | 23 | 97  | 84  | 294 |
| 69,311 | 5  | 22 | 56  | 163 | 0 | 14 | 23 | 97  | 84  | 296 |
| 69,312 | 5  | 23 | 56  | 169 | 0 | 14 | 23 | 101 | 84  | 307 |
| 69,313 | 5  | 23 | 56  | 149 | 0 | 13 | 23 | 93  | 84  | 278 |
| 69,314 | 5  | 23 | 56  | 148 | 0 | 13 | 23 | 93  | 84  | 277 |
| 69,315 | 5  | 23 | 56  | 146 | 0 | 13 | 23 | 92  | 84  | 274 |
| 69,316 | 4  | 22 | 56  | 145 | 0 | 13 | 23 | 92  | 83  | 272 |
| 69,317 | 4  | 22 | 56  | 145 | 0 | 13 | 23 | 90  | 83  | 270 |
| 69,318 | 4  | 22 | 57  | 145 | 0 | 13 | 23 | 90  | 84  | 270 |
| 69,319 | 4  | 22 | 57  | 136 | 0 | 13 | 23 | 89  | 84  | 260 |

|        |   |    |    |     |   |    |    |     |    |     |
|--------|---|----|----|-----|---|----|----|-----|----|-----|
| 69,320 | 4 | 22 | 57 | 136 | 0 | 13 | 23 | 91  | 84 | 262 |
| 69,321 | 4 | 22 | 54 | 133 | 0 | 13 | 21 | 88  | 79 | 256 |
| 69,322 | 6 | 23 | 57 | 134 | 0 | 14 | 20 | 88  | 83 | 259 |
| 69,323 | 8 | 23 | 66 | 134 | 1 | 14 | 23 | 88  | 98 | 259 |
| 69,324 | 7 | 23 | 56 | 134 | 1 | 14 | 12 | 87  | 76 | 258 |
| 69,325 | 7 | 23 | 73 | 134 | 1 | 14 | 14 | 87  | 95 | 258 |
| 69,326 | 7 | 23 | 72 | 134 | 1 | 14 | 11 | 87  | 91 | 258 |
| 69,327 | 9 | 23 | 75 | 134 | 1 | 14 | 12 | 87  | 97 | 258 |
| 69,328 | 8 | 23 | 75 | 135 | 1 | 14 | 12 | 87  | 96 | 259 |
| 69,329 | 8 | 23 | 75 | 135 | 1 | 14 | 12 | 87  | 96 | 259 |
| 69,330 | 8 | 23 | 75 | 135 | 1 | 14 | 12 | 87  | 96 | 259 |
| 69,331 | 8 | 23 | 75 | 134 | 1 | 14 | 12 | 86  | 96 | 257 |
| 69,332 | 8 | 23 | 74 | 134 | 1 | 14 | 12 | 86  | 95 | 257 |
| 69,333 | 8 | 24 | 74 | 145 | 1 | 14 | 12 | 91  | 95 | 274 |
| 69,334 | 8 | 23 | 72 | 147 | 1 | 14 | 12 | 96  | 93 | 280 |
| 69,335 | 8 | 22 | 72 | 153 | 1 | 14 | 12 | 98  | 93 | 287 |
| 69,336 | 8 | 23 | 72 | 173 | 1 | 16 | 13 | 115 | 94 | 327 |
| 69,337 | 8 | 23 | 73 | 174 | 2 | 16 | 14 | 115 | 97 | 328 |
| 69,338 | 6 | 22 | 57 | 169 | 2 | 16 | 14 | 115 | 79 | 322 |
| 69,339 | 6 | 25 | 57 | 172 | 2 | 16 | 14 | 115 | 79 | 328 |
| 69,340 | 6 | 25 | 51 | 168 | 2 | 16 | 9  | 115 | 68 | 324 |
| 69,341 | 6 | 24 | 50 | 169 | 2 | 16 | 9  | 115 | 67 | 324 |
| 69,342 | 6 | 24 | 50 | 168 | 2 | 16 | 9  | 115 | 67 | 323 |
| 69,343 | 6 | 24 | 53 | 168 | 2 | 16 | 14 | 115 | 75 | 323 |
| 69,344 | 6 | 24 | 53 | 168 | 2 | 16 | 14 | 115 | 75 | 323 |
| 69,345 | 6 | 24 | 54 | 168 | 2 | 16 | 14 | 116 | 76 | 324 |
| 69,346 | 6 | 24 | 54 | 168 | 2 | 16 | 14 | 116 | 76 | 324 |
| 69,347 | 6 | 24 | 53 | 170 | 2 | 15 | 14 | 114 | 75 | 323 |
| 69,348 | 6 | 24 | 53 | 160 | 2 | 14 | 14 | 113 | 75 | 311 |
| 69,349 | 6 | 24 | 52 | 155 | 2 | 13 | 14 | 109 | 74 | 301 |
| 69,350 | 6 | 24 | 53 | 154 | 2 | 13 | 15 | 108 | 76 | 299 |
| 69,351 | 6 | 25 | 53 | 154 | 2 | 13 | 15 | 108 | 76 | 300 |
| 69,352 | 6 | 24 | 52 | 137 | 2 | 10 | 15 | 93  | 75 | 264 |
| 69,353 | 6 | 14 | 51 | 122 | 2 | 7  | 17 | 83  | 76 | 226 |
| 69,354 | 6 | 11 | 51 | 95  | 2 | 4  | 17 | 76  | 76 | 186 |
| 69,355 | 6 | 9  | 51 | 86  | 2 | 3  | 17 | 72  | 76 | 170 |
| 69,356 | 7 | 9  | 55 | 82  | 3 | 3  | 19 | 64  | 84 | 158 |
| 69,357 | 7 | 9  | 54 | 81  | 3 | 3  | 20 | 64  | 84 | 157 |
| 69,358 | 7 | 10 | 53 | 81  | 3 | 3  | 21 | 65  | 84 | 159 |
| 69,359 | 7 | 9  | 50 | 74  | 3 | 3  | 20 | 61  | 80 | 147 |
| 69,360 | 7 | 9  | 51 | 74  | 3 | 3  | 20 | 61  | 81 | 147 |

|        |    |   |     |    |   |   |    |    |     |     |
|--------|----|---|-----|----|---|---|----|----|-----|-----|
| 69,361 | 7  | 9 | 51  | 74 | 3 | 3 | 20 | 60 | 81  | 146 |
| 69,362 | 7  | 9 | 51  | 72 | 3 | 3 | 20 | 60 | 81  | 144 |
| 69,363 | 7  | 8 | 53  | 66 | 3 | 3 | 21 | 57 | 84  | 134 |
| 69,364 | 7  | 8 | 53  | 65 | 3 | 3 | 22 | 57 | 85  | 133 |
| 69,365 | 7  | 8 | 53  | 65 | 3 | 3 | 22 | 57 | 85  | 133 |
| 69,366 | 7  | 8 | 53  | 65 | 3 | 3 | 22 | 57 | 85  | 133 |
| 69,367 | 10 | 8 | 56  | 65 | 3 | 3 | 26 | 57 | 95  | 133 |
| 69,368 | 10 | 8 | 56  | 65 | 3 | 4 | 27 | 59 | 96  | 136 |
| 69,369 | 10 | 8 | 55  | 65 | 3 | 4 | 27 | 59 | 95  | 136 |
| 69,370 | 10 | 8 | 63  | 66 | 3 | 4 | 27 | 61 | 103 | 139 |
| 69,371 | 10 | 8 | 71  | 70 | 3 | 4 | 31 | 61 | 115 | 143 |
| 69,372 | 10 | 8 | 74  | 71 | 3 | 4 | 32 | 61 | 119 | 144 |
| 69,373 | 8  | 7 | 71  | 71 | 3 | 3 | 32 | 62 | 114 | 143 |
| 69,374 | 6  | 7 | 72  | 71 | 2 | 3 | 34 | 64 | 114 | 145 |
| 69,375 | 6  | 7 | 69  | 71 | 2 | 3 | 35 | 65 | 112 | 146 |
| 69,376 | 6  | 7 | 50  | 71 | 2 | 3 | 33 | 65 | 91  | 146 |
| 69,377 | 4  | 7 | 49  | 71 | 2 | 3 | 36 | 65 | 91  | 146 |
| 69,378 | 4  | 7 | 52  | 71 | 2 | 3 | 36 | 65 | 94  | 146 |
| 69,379 | 6  | 7 | 55  | 71 | 2 | 3 | 37 | 65 | 100 | 146 |
| 69,380 | 7  | 7 | 57  | 72 | 2 | 3 | 38 | 65 | 104 | 147 |
| 69,381 | 7  | 7 | 57  | 72 | 3 | 3 | 40 | 65 | 107 | 147 |
| 69,382 | 7  | 7 | 57  | 72 | 3 | 3 | 40 | 64 | 107 | 146 |
| 69,383 | 7  | 7 | 57  | 72 | 3 | 3 | 40 | 64 | 107 | 146 |
| 69,384 | 7  | 6 | 57  | 58 | 3 | 3 | 40 | 54 | 107 | 121 |
| 69,385 | 7  | 6 | 59  | 58 | 3 | 3 | 40 | 54 | 109 | 121 |
| 69,386 | 7  | 6 | 61  | 31 | 4 | 1 | 39 | 34 | 111 | 72  |
| 69,387 | 7  | 6 | 61  | 31 | 4 | 1 | 39 | 35 | 111 | 73  |
| 69,388 | 7  | 6 | 62  | 32 | 3 | 1 | 39 | 42 | 111 | 81  |
| 69,389 | 7  | 6 | 62  | 38 | 3 | 1 | 39 | 46 | 111 | 91  |
| 69,390 | 8  | 3 | 89  | 39 | 3 | 1 | 44 | 51 | 144 | 94  |
| 69,391 | 10 | 3 | 113 | 38 | 7 | 1 | 73 | 51 | 203 | 93  |
| 69,392 | 10 | 3 | 143 | 36 | 7 | 1 | 77 | 51 | 237 | 91  |
| 69,393 | 10 | 3 | 147 | 36 | 7 | 1 | 78 | 51 | 242 | 91  |
| 69,394 | 10 | 3 | 148 | 36 | 7 | 1 | 75 | 52 | 240 | 92  |
| 69,395 | 10 | 3 | 148 | 36 | 7 | 1 | 75 | 53 | 240 | 93  |
| 69,396 | 10 | 3 | 147 | 36 | 7 | 1 | 75 | 52 | 239 | 92  |
| 69,397 | 10 | 3 | 151 | 36 | 7 | 1 | 79 | 52 | 247 | 92  |
| 69,398 | 10 | 3 | 151 | 34 | 7 | 1 | 79 | 51 | 247 | 89  |
| 69,399 | 10 | 3 | 151 | 34 | 7 | 1 | 79 | 51 | 247 | 89  |
| 69,400 | 10 | 3 | 151 | 34 | 7 | 1 | 79 | 54 | 247 | 92  |
| 69,401 | 10 | 3 | 150 | 35 | 7 | 1 | 79 | 54 | 246 | 93  |

|        |    |   |     |    |    |   |     |    |     |    |
|--------|----|---|-----|----|----|---|-----|----|-----|----|
| 69,402 | 10 | 2 | 155 | 36 | 7  | 1 | 80  | 54 | 252 | 93 |
| 69,403 | 10 | 2 | 155 | 36 | 7  | 1 | 80  | 54 | 252 | 93 |
| 69,404 | 9  | 2 | 155 | 36 | 7  | 1 | 80  | 51 | 251 | 90 |
| 69,405 | 9  | 2 | 155 | 30 | 7  | 1 | 80  | 40 | 251 | 73 |
| 69,406 | 9  | 2 | 155 | 28 | 8  | 1 | 78  | 36 | 250 | 67 |
| 69,407 | 11 | 2 | 165 | 28 | 7  | 1 | 86  | 36 | 269 | 67 |
| 69,408 | 11 | 2 | 165 | 28 | 7  | 1 | 86  | 36 | 269 | 67 |
| 69,409 | 11 | 2 | 165 | 31 | 7  | 1 | 85  | 39 | 268 | 73 |
| 69,410 | 11 | 2 | 165 | 31 | 7  | 1 | 85  | 39 | 268 | 73 |
| 69,411 | 12 | 2 | 172 | 32 | 7  | 1 | 91  | 40 | 282 | 75 |
| 69,412 | 12 | 2 | 172 | 32 | 7  | 1 | 91  | 40 | 282 | 75 |
| 69,413 | 12 | 2 | 170 | 39 | 7  | 1 | 90  | 42 | 279 | 84 |
| 69,414 | 13 | 2 | 182 | 40 | 8  | 1 | 105 | 44 | 308 | 87 |
| 69,415 | 11 | 2 | 186 | 40 | 8  | 1 | 104 | 44 | 309 | 87 |
| 69,416 | 11 | 2 | 186 | 42 | 8  | 1 | 104 | 44 | 309 | 89 |
| 69,417 | 10 | 2 | 182 | 42 | 8  | 1 | 102 | 44 | 302 | 89 |
| 69,418 | 10 | 3 | 184 | 42 | 8  | 0 | 102 | 43 | 304 | 88 |
| 69,419 | 10 | 3 | 184 | 42 | 8  | 0 | 101 | 43 | 303 | 88 |
| 69,420 | 10 | 3 | 177 | 41 | 8  | 0 | 101 | 41 | 296 | 85 |
| 69,421 | 10 | 3 | 176 | 41 | 8  | 0 | 100 | 41 | 294 | 85 |
| 69,422 | 10 | 3 | 169 | 37 | 8  | 0 | 98  | 39 | 285 | 79 |
| 69,423 | 10 | 3 | 166 | 35 | 8  | 0 | 97  | 38 | 281 | 76 |
| 69,424 | 10 | 3 | 166 | 36 | 8  | 0 | 97  | 38 | 281 | 77 |
| 69,425 | 10 | 3 | 157 | 35 | 7  | 1 | 91  | 36 | 265 | 75 |
| 69,426 | 10 | 3 | 158 | 35 | 7  | 1 | 90  | 36 | 265 | 75 |
| 69,427 | 10 | 3 | 157 | 35 | 7  | 1 | 92  | 36 | 266 | 75 |
| 69,428 | 10 | 3 | 156 | 35 | 7  | 1 | 89  | 36 | 262 | 75 |
| 69,429 | 10 | 3 | 159 | 35 | 7  | 1 | 90  | 37 | 266 | 76 |
| 69,430 | 8  | 3 | 156 | 35 | 7  | 1 | 89  | 37 | 260 | 76 |
| 69,431 | 7  | 3 | 159 | 35 | 7  | 1 | 94  | 37 | 267 | 76 |
| 69,432 | 7  | 3 | 163 | 35 | 7  | 1 | 96  | 38 | 273 | 77 |
| 69,433 | 9  | 3 | 173 | 35 | 10 | 1 | 115 | 38 | 307 | 77 |
| 69,434 | 9  | 3 | 174 | 36 | 10 | 1 | 115 | 38 | 308 | 78 |
| 69,435 | 9  | 3 | 174 | 36 | 10 | 1 | 115 | 38 | 308 | 78 |
| 69,436 | 9  | 3 | 172 | 37 | 10 | 1 | 115 | 39 | 306 | 80 |
| 69,437 | 9  | 2 | 170 | 38 | 9  | 1 | 115 | 39 | 303 | 80 |
| 69,438 | 9  | 2 | 169 | 39 | 9  | 1 | 115 | 39 | 302 | 81 |
| 69,439 | 9  | 2 | 168 | 40 | 9  | 1 | 114 | 38 | 300 | 81 |
| 69,440 | 9  | 2 | 168 | 37 | 9  | 1 | 114 | 34 | 300 | 74 |
| 69,441 | 8  | 2 | 142 | 35 | 9  | 1 | 110 | 29 | 269 | 67 |
| 69,442 | 6  | 2 | 117 | 34 | 5  | 1 | 79  | 29 | 207 | 66 |

|        |    |   |     |    |    |   |     |    |     |     |
|--------|----|---|-----|----|----|---|-----|----|-----|-----|
| 69,443 | 6  | 2 | 85  | 34 | 5  | 1 | 73  | 29 | 169 | 66  |
| 69,444 | 6  | 2 | 81  | 34 | 5  | 1 | 71  | 28 | 163 | 65  |
| 69,445 | 6  | 2 | 79  | 35 | 5  | 1 | 71  | 27 | 161 | 65  |
| 69,446 | 6  | 2 | 79  | 39 | 5  | 1 | 71  | 27 | 161 | 69  |
| 69,447 | 6  | 2 | 81  | 42 | 5  | 1 | 71  | 27 | 163 | 72  |
| 69,448 | 6  | 2 | 77  | 42 | 5  | 1 | 69  | 27 | 157 | 72  |
| 69,449 | 6  | 2 | 77  | 45 | 5  | 1 | 69  | 27 | 157 | 75  |
| 69,450 | 6  | 2 | 78  | 46 | 5  | 1 | 69  | 24 | 158 | 73  |
| 69,451 | 6  | 2 | 78  | 46 | 5  | 1 | 69  | 24 | 158 | 73  |
| 69,452 | 6  | 2 | 77  | 45 | 5  | 1 | 67  | 25 | 155 | 73  |
| 69,453 | 6  | 2 | 73  | 44 | 5  | 1 | 66  | 25 | 150 | 72  |
| 69,454 | 6  | 3 | 73  | 48 | 5  | 1 | 66  | 25 | 150 | 77  |
| 69,455 | 6  | 3 | 70  | 47 | 5  | 1 | 66  | 25 | 147 | 76  |
| 69,456 | 6  | 3 | 70  | 46 | 5  | 1 | 66  | 24 | 147 | 74  |
| 69,457 | 6  | 3 | 70  | 46 | 4  | 1 | 66  | 25 | 146 | 75  |
| 69,458 | 4  | 3 | 61  | 46 | 4  | 1 | 58  | 25 | 127 | 75  |
| 69,459 | 4  | 2 | 61  | 44 | 4  | 1 | 57  | 22 | 126 | 69  |
| 69,460 | 5  | 2 | 60  | 44 | 4  | 1 | 56  | 22 | 125 | 69  |
| 69,461 | 4  | 2 | 60  | 44 | 4  | 1 | 55  | 23 | 123 | 70  |
| 69,462 | 4  | 2 | 55  | 43 | 4  | 1 | 51  | 22 | 114 | 68  |
| 69,463 | 4  | 2 | 46  | 36 | 3  | 1 | 46  | 20 | 99  | 59  |
| 69,464 | 3  | 2 | 43  | 35 | 3  | 1 | 41  | 17 | 90  | 55  |
| 69,465 | 3  | 2 | 42  | 35 | 3  | 1 | 35  | 17 | 83  | 55  |
| 69,466 | 3  | 2 | 38  | 35 | 3  | 1 | 34  | 17 | 78  | 55  |
| 69,467 | 3  | 2 | 38  | 33 | 3  | 1 | 34  | 17 | 78  | 53  |
| 69,468 | 3  | 2 | 44  | 33 | 3  | 1 | 41  | 17 | 91  | 53  |
| 69,469 | 3  | 1 | 47  | 33 | 3  | 1 | 45  | 16 | 98  | 51  |
| 69,470 | 3  | 1 | 47  | 33 | 3  | 1 | 45  | 16 | 98  | 51  |
| 69,471 | 4  | 1 | 50  | 33 | 3  | 1 | 48  | 16 | 105 | 51  |
| 69,472 | 4  | 1 | 50  | 33 | 3  | 1 | 47  | 16 | 104 | 51  |
| 69,473 | 4  | 1 | 50  | 33 | 3  | 1 | 47  | 16 | 104 | 51  |
| 69,474 | 12 | 1 | 94  | 32 | 4  | 1 | 82  | 16 | 192 | 50  |
| 69,475 | 12 | 1 | 94  | 32 | 4  | 1 | 82  | 16 | 192 | 50  |
| 69,476 | 13 | 2 | 128 | 32 | 4  | 0 | 101 | 15 | 246 | 49  |
| 69,477 | 18 | 2 | 149 | 32 | 8  | 0 | 128 | 16 | 303 | 50  |
| 69,478 | 18 | 2 | 149 | 37 | 8  | 0 | 126 | 28 | 301 | 67  |
| 69,479 | 18 | 2 | 148 | 37 | 8  | 2 | 126 | 29 | 300 | 70  |
| 69,480 | 21 | 3 | 152 | 46 | 11 | 5 | 129 | 33 | 313 | 87  |
| 69,481 | 21 | 3 | 147 | 54 | 11 | 5 | 125 | 37 | 304 | 99  |
| 69,482 | 21 | 3 | 157 | 57 | 14 | 5 | 135 | 37 | 327 | 102 |
| 69,483 | 19 | 3 | 147 | 57 | 11 | 5 | 118 | 36 | 295 | 101 |

|        |    |   |     |    |    |   |     |    |     |     |
|--------|----|---|-----|----|----|---|-----|----|-----|-----|
| 69,484 | 19 | 3 | 151 | 57 | 12 | 5 | 116 | 36 | 298 | 101 |
| 69,485 | 19 | 3 | 152 | 57 | 12 | 5 | 118 | 37 | 301 | 102 |
| 69,486 | 19 | 3 | 152 | 57 | 12 | 5 | 118 | 37 | 301 | 102 |
| 69,487 | 19 | 3 | 152 | 57 | 12 | 5 | 118 | 36 | 301 | 101 |
| 69,488 | 19 | 3 | 156 | 56 | 12 | 5 | 130 | 36 | 317 | 100 |
| 69,489 | 20 | 3 | 157 | 51 | 12 | 5 | 133 | 29 | 322 | 88  |
| 69,490 | 20 | 3 | 157 | 48 | 12 | 5 | 133 | 28 | 322 | 84  |
| 69,491 | 20 | 3 | 159 | 48 | 12 | 5 | 133 | 28 | 324 | 84  |
| 69,492 | 20 | 3 | 159 | 46 | 12 | 5 | 137 | 28 | 328 | 82  |
| 69,493 | 20 | 3 | 159 | 46 | 12 | 5 | 137 | 28 | 328 | 82  |
| 69,494 | 20 | 3 | 159 | 46 | 12 | 5 | 137 | 28 | 328 | 82  |
| 69,495 | 20 | 3 | 159 | 46 | 12 | 5 | 137 | 28 | 328 | 82  |
| 69,496 | 20 | 3 | 159 | 45 | 12 | 5 | 140 | 28 | 331 | 81  |
| 69,497 | 20 | 3 | 162 | 38 | 12 | 5 | 140 | 28 | 334 | 74  |
| 69,498 | 20 | 3 | 160 | 38 | 12 | 5 | 141 | 28 | 333 | 74  |
| 69,499 | 20 | 3 | 166 | 38 | 13 | 5 | 142 | 30 | 341 | 76  |
| 69,500 | 20 | 3 | 166 | 38 | 13 | 5 | 142 | 30 | 341 | 76  |
| 69,501 | 20 | 5 | 165 | 37 | 13 | 5 | 142 | 30 | 340 | 77  |
| 69,502 | 20 | 5 | 165 | 39 | 13 | 5 | 143 | 31 | 341 | 80  |
| 69,503 | 20 | 7 | 165 | 45 | 13 | 6 | 143 | 35 | 341 | 93  |
| 69,504 | 20 | 6 | 165 | 42 | 13 | 6 | 143 | 35 | 341 | 89  |
| 69,505 | 20 | 6 | 165 | 42 | 13 | 6 | 143 | 35 | 341 | 89  |
| 69,506 | 20 | 6 | 167 | 42 | 13 | 6 | 144 | 35 | 344 | 89  |
| 69,507 | 20 | 6 | 167 | 42 | 14 | 6 | 144 | 34 | 345 | 88  |
| 69,508 | 20 | 6 | 166 | 42 | 14 | 6 | 144 | 34 | 344 | 88  |
| 69,509 | 20 | 6 | 165 | 42 | 14 | 6 | 144 | 34 | 343 | 88  |
| 69,510 | 20 | 6 | 165 | 41 | 14 | 6 | 144 | 33 | 343 | 86  |
| 69,511 | 19 | 6 | 165 | 41 | 14 | 6 | 144 | 33 | 342 | 86  |
| 69,512 | 19 | 6 | 164 | 41 | 14 | 6 | 144 | 32 | 341 | 85  |
| 69,513 | 19 | 6 | 164 | 41 | 14 | 6 | 144 | 32 | 341 | 85  |
| 69,514 | 19 | 6 | 164 | 41 | 14 | 6 | 144 | 33 | 341 | 86  |
| 69,515 | 19 | 6 | 162 | 41 | 14 | 6 | 141 | 33 | 336 | 86  |
| 69,516 | 19 | 6 | 161 | 41 | 14 | 6 | 141 | 33 | 335 | 86  |
| 69,517 | 19 | 6 | 161 | 41 | 14 | 6 | 140 | 33 | 334 | 86  |
| 69,518 | 19 | 6 | 161 | 41 | 14 | 6 | 141 | 33 | 335 | 86  |
| 69,519 | 19 | 6 | 158 | 41 | 14 | 6 | 138 | 33 | 329 | 86  |
| 69,520 | 19 | 6 | 154 | 41 | 14 | 6 | 134 | 33 | 321 | 86  |
| 69,521 | 19 | 6 | 154 | 41 | 14 | 6 | 134 | 33 | 321 | 86  |
| 69,522 | 18 | 6 | 154 | 41 | 14 | 6 | 131 | 33 | 317 | 86  |
| 69,523 | 18 | 6 | 154 | 41 | 14 | 6 | 130 | 33 | 316 | 86  |
| 69,524 | 17 | 6 | 152 | 43 | 14 | 6 | 128 | 33 | 311 | 88  |



|        |    |   |     |    |    |   |     |    |     |    |
|--------|----|---|-----|----|----|---|-----|----|-----|----|
| 69,525 | 10 | 6 | 110 | 43 | 13 | 6 | 95  | 36 | 228 | 91 |
| 69,526 | 9  | 6 | 75  | 44 | 13 | 6 | 74  | 37 | 171 | 93 |
| 69,527 | 6  | 5 | 58  | 47 | 10 | 6 | 57  | 38 | 131 | 96 |
| 69,528 | 4  | 5 | 52  | 47 | 9  | 6 | 47  | 37 | 112 | 95 |
| 69,529 | 5  | 5 | 53  | 46 | 9  | 6 | 48  | 26 | 115 | 83 |
| 69,530 | 3  | 4 | 56  | 36 | 9  | 2 | 51  | 20 | 119 | 62 |
| 69,531 | 2  | 4 | 48  | 28 | 6  | 2 | 46  | 16 | 102 | 50 |
| 69,532 | 2  | 4 | 48  | 28 | 6  | 2 | 44  | 16 | 100 | 50 |
| 69,533 | 2  | 4 | 35  | 24 | 2  | 2 | 32  | 16 | 71  | 46 |
| 69,534 | 2  | 4 | 33  | 24 | 2  | 2 | 34  | 16 | 71  | 46 |
| 69,535 | 2  | 4 | 32  | 24 | 2  | 2 | 33  | 16 | 69  | 46 |
| 69,536 | 2  | 4 | 31  | 22 | 2  | 2 | 34  | 15 | 69  | 43 |
| 69,537 | 2  | 4 | 32  | 22 | 3  | 2 | 35  | 15 | 72  | 43 |
| 69,538 | 2  | 4 | 30  | 22 | 3  | 2 | 24  | 15 | 59  | 43 |
| 69,539 | 1  | 4 | 30  | 22 | 3  | 2 | 24  | 15 | 58  | 43 |
| 69,540 | 3  | 4 | 45  | 22 | 3  | 2 | 31  | 15 | 82  | 43 |
| 69,541 | 3  | 4 | 45  | 22 | 3  | 2 | 31  | 15 | 82  | 43 |
| 69,542 | 3  | 4 | 43  | 22 | 3  | 2 | 31  | 15 | 80  | 43 |
| 69,543 | 3  | 4 | 43  | 22 | 3  | 2 | 27  | 15 | 76  | 43 |
| 69,544 | 4  | 4 | 60  | 22 | 4  | 2 | 30  | 16 | 98  | 44 |
| 69,545 | 4  | 4 | 60  | 22 | 4  | 2 | 31  | 16 | 99  | 44 |
| 69,546 | 9  | 4 | 89  | 22 | 5  | 2 | 56  | 16 | 159 | 44 |
| 69,547 | 9  | 4 | 91  | 22 | 5  | 2 | 57  | 16 | 162 | 44 |
| 69,548 | 12 | 4 | 108 | 22 | 5  | 2 | 77  | 16 | 202 | 44 |
| 69,549 | 14 | 5 | 115 | 23 | 5  | 2 | 78  | 16 | 212 | 46 |
| 69,550 | 14 | 5 | 116 | 20 | 4  | 2 | 84  | 14 | 218 | 41 |
| 69,551 | 14 | 5 | 123 | 20 | 4  | 2 | 89  | 14 | 230 | 41 |
| 69,552 | 15 | 3 | 126 | 23 | 4  | 2 | 89  | 14 | 234 | 42 |
| 69,553 | 15 | 3 | 128 | 23 | 4  | 2 | 90  | 14 | 237 | 42 |
| 69,554 | 15 | 1 | 128 | 17 | 4  | 1 | 90  | 9  | 237 | 28 |
| 69,555 | 15 | 1 | 128 | 16 | 4  | 1 | 90  | 9  | 237 | 27 |
| 69,556 | 15 | 1 | 130 | 21 | 4  | 1 | 95  | 9  | 244 | 32 |
| 69,557 | 15 | 1 | 133 | 22 | 4  | 1 | 94  | 9  | 246 | 33 |
| 69,558 | 15 | 1 | 135 | 22 | 3  | 1 | 102 | 10 | 255 | 34 |
| 69,559 | 15 | 1 | 135 | 22 | 3  | 1 | 102 | 10 | 255 | 34 |
| 69,560 | 15 | 2 | 138 | 22 | 3  | 1 | 103 | 10 | 259 | 35 |
| 69,561 | 15 | 2 | 154 | 22 | 4  | 1 | 113 | 10 | 286 | 35 |
| 69,562 | 15 | 2 | 162 | 22 | 4  | 1 | 116 | 10 | 297 | 35 |
| 69,563 | 15 | 2 | 164 | 22 | 4  | 1 | 117 | 10 | 300 | 35 |
| 69,564 | 15 | 2 | 164 | 22 | 4  | 1 | 117 | 11 | 300 | 36 |
| 69,565 | 15 | 2 | 165 | 22 | 4  | 1 | 117 | 10 | 301 | 35 |

|        |    |   |     |    |    |   |     |    |       |    |
|--------|----|---|-----|----|----|---|-----|----|-------|----|
| 69,566 | 15 | 2 | 165 | 22 | 4  | 1 | 117 | 10 | 301   | 35 |
| 69,567 | 15 | 2 | 165 | 22 | 4  | 1 | 118 | 10 | 302   | 35 |
| 69,568 | 15 | 2 | 166 | 22 | 4  | 1 | 118 | 10 | 303   | 35 |
| 69,569 | 15 | 2 | 168 | 22 | 4  | 1 | 117 | 10 | 304   | 35 |
| 69,570 | 15 | 2 | 168 | 22 | 4  | 1 | 117 | 10 | 304   | 35 |
| 69,571 | 16 | 2 | 184 | 22 | 4  | 1 | 121 | 10 | 325   | 35 |
| 69,572 | 18 | 2 | 184 | 22 | 4  | 1 | 121 | 10 | 327   | 35 |
| 69,573 | 18 | 2 | 182 | 21 | 5  | 1 | 122 | 10 | 327   | 34 |
| 69,574 | 19 | 2 | 184 | 19 | 5  | 1 | 122 | 10 | 330   | 32 |
| 69,575 | 28 | 2 | 243 | 19 | 6  | 1 | 136 | 7  | 413   | 29 |
| 69,576 | 29 | 2 | 255 | 19 | 8  | 1 | 140 | 7  | 432   | 29 |
| 69,577 | 31 | 2 | 280 | 15 | 10 | 1 | 173 | 5  | 494   | 23 |
| 69,578 | 54 | 2 | 397 | 15 | 22 | 1 | 248 | 5  | 721   | 23 |
| 69,579 | 65 | 2 | 461 | 12 | 32 | 1 | 311 | 4  | 869   | 19 |
| 69,580 | 64 | 2 | 459 | 12 | 32 | 1 | 311 | 4  | 866   | 19 |
| 69,581 | 70 | 2 | 484 | 12 | 39 | 0 | 339 | 4  | 932   | 18 |
| 69,582 | 72 | 2 | 502 | 12 | 41 | 0 | 361 | 4  | 976   | 18 |
| 69,583 | 72 | 2 | 503 | 12 | 41 | 0 | 361 | 4  | 977   | 18 |
| 69,584 | 72 | 2 | 505 | 12 | 41 | 0 | 365 | 4  | 983   | 18 |
| 69,585 | 72 | 2 | 503 | 12 | 41 | 0 | 363 | 4  | 979   | 18 |
| 69,586 | 72 | 2 | 520 | 12 | 41 | 0 | 363 | 4  | 996   | 18 |
| 69,587 | 72 | 2 | 522 | 13 | 41 | 0 | 363 | 4  | 998   | 19 |
| 69,588 | 72 | 2 | 521 | 13 | 41 | 0 | 363 | 4  | 997   | 19 |
| 69,589 | 72 | 2 | 520 | 13 | 41 | 0 | 363 | 4  | 996   | 19 |
| 69,590 | 72 | 2 | 519 | 14 | 41 | 0 | 365 | 4  | 997   | 20 |
| 69,591 | 70 | 2 | 537 | 15 | 41 | 0 | 358 | 4  | 1,006 | 21 |
| 69,592 | 70 | 2 | 542 | 15 | 42 | 0 | 359 | 4  | 1,013 | 21 |
| 69,593 | 70 | 2 | 542 | 15 | 42 | 0 | 359 | 4  | 1,013 | 21 |
| 69,594 | 69 | 2 | 535 | 15 | 42 | 0 | 360 | 3  | 1,006 | 20 |
| 69,595 | 69 | 2 | 530 | 15 | 42 | 0 | 356 | 4  | 997   | 21 |
| 69,596 | 69 | 2 | 522 | 15 | 42 | 0 | 352 | 4  | 985   | 21 |
| 69,597 | 64 | 2 | 501 | 15 | 41 | 0 | 332 | 4  | 938   | 21 |
| 69,598 | 64 | 2 | 499 | 15 | 41 | 0 | 328 | 4  | 932   | 21 |
| 69,599 | 61 | 2 | 479 | 15 | 41 | 0 | 308 | 4  | 889   | 21 |
| 69,600 | 59 | 2 | 471 | 14 | 41 | 0 | 307 | 4  | 878   | 20 |
| 69,601 | 59 | 2 | 465 | 14 | 41 | 0 | 299 | 4  | 864   | 20 |
| 69,602 | 59 | 2 | 460 | 14 | 41 | 0 | 294 | 4  | 854   | 20 |
| 69,603 | 59 | 2 | 458 | 11 | 41 | 0 | 294 | 4  | 852   | 17 |
| 69,604 | 59 | 2 | 456 | 9  | 41 | 0 | 292 | 3  | 848   | 14 |
| 69,605 | 59 | 2 | 456 | 9  | 41 | 0 | 293 | 4  | 849   | 15 |
| 69,606 | 59 | 2 | 453 | 9  | 41 | 0 | 289 | 4  | 842   | 15 |

|        |    |   |     |     |    |   |     |    |     |     |
|--------|----|---|-----|-----|----|---|-----|----|-----|-----|
| 69,607 | 59 | 2 | 454 | 9   | 43 | 0 | 288 | 7  | 844 | 18  |
| 69,608 | 59 | 2 | 458 | 8   | 43 | 0 | 290 | 7  | 850 | 17  |
| 69,609 | 59 | 2 | 461 | 9   | 43 | 0 | 291 | 6  | 854 | 17  |
| 69,610 | 59 | 4 | 458 | 13  | 43 | 0 | 290 | 10 | 850 | 27  |
| 69,611 | 59 | 3 | 442 | 13  | 42 | 0 | 280 | 10 | 823 | 26  |
| 69,612 | 59 | 3 | 434 | 13  | 42 | 0 | 281 | 11 | 816 | 27  |
| 69,613 | 59 | 3 | 432 | 13  | 42 | 0 | 280 | 11 | 813 | 27  |
| 69,614 | 59 | 3 | 432 | 13  | 42 | 0 | 280 | 11 | 813 | 27  |
| 69,615 | 59 | 3 | 432 | 13  | 42 | 0 | 280 | 11 | 813 | 27  |
| 69,616 | 59 | 3 | 431 | 14  | 42 | 0 | 281 | 11 | 813 | 28  |
| 69,617 | 59 | 3 | 433 | 14  | 42 | 0 | 280 | 12 | 814 | 29  |
| 69,618 | 59 | 3 | 434 | 14  | 42 | 0 | 280 | 12 | 815 | 29  |
| 69,619 | 59 | 3 | 434 | 14  | 42 | 0 | 281 | 12 | 816 | 29  |
| 69,620 | 59 | 3 | 434 | 14  | 42 | 0 | 281 | 12 | 816 | 29  |
| 69,621 | 58 | 3 | 418 | 14  | 42 | 0 | 277 | 12 | 795 | 29  |
| 69,622 | 56 | 3 | 418 | 14  | 42 | 0 | 277 | 12 | 793 | 29  |
| 69,623 | 56 | 3 | 417 | 14  | 41 | 0 | 278 | 12 | 792 | 29  |
| 69,624 | 56 | 3 | 417 | 14  | 41 | 0 | 277 | 12 | 791 | 29  |
| 69,625 | 55 | 3 | 415 | 14  | 41 | 0 | 277 | 12 | 788 | 29  |
| 69,626 | 47 | 3 | 360 | 14  | 40 | 0 | 263 | 12 | 710 | 29  |
| 69,627 | 49 | 3 | 367 | 19  | 40 | 0 | 273 | 14 | 729 | 36  |
| 69,628 | 47 | 3 | 345 | 26  | 38 | 1 | 242 | 17 | 672 | 47  |
| 69,629 | 25 | 3 | 234 | 28  | 25 | 1 | 170 | 18 | 454 | 50  |
| 69,630 | 14 | 5 | 170 | 84  | 15 | 4 | 106 | 32 | 305 | 125 |
| 69,631 | 12 | 6 | 161 | 93  | 13 | 5 | 98  | 37 | 284 | 141 |
| 69,632 | 8  | 6 | 142 | 96  | 8  | 5 | 74  | 37 | 232 | 144 |
| 69,633 | 6  | 6 | 129 | 100 | 6  | 5 | 53  | 37 | 194 | 148 |
| 69,634 | 6  | 6 | 128 | 100 | 6  | 5 | 53  | 37 | 193 | 148 |
| 69,635 | 6  | 7 | 125 | 101 | 6  | 5 | 49  | 37 | 186 | 150 |
| 69,636 | 6  | 7 | 110 | 102 | 6  | 5 | 47  | 37 | 169 | 151 |
| 69,637 | 6  | 7 | 117 | 101 | 6  | 5 | 52  | 37 | 181 | 150 |
| 69,638 | 6  | 7 | 115 | 104 | 6  | 6 | 53  | 37 | 180 | 154 |
| 69,639 | 6  | 7 | 115 | 105 | 6  | 6 | 53  | 37 | 180 | 155 |
| 69,640 | 6  | 7 | 124 | 108 | 6  | 6 | 55  | 37 | 191 | 158 |
| 69,641 | 6  | 7 | 124 | 107 | 6  | 6 | 56  | 37 | 192 | 157 |
| 69,642 | 7  | 7 | 100 | 108 | 6  | 6 | 53  | 37 | 166 | 158 |
| 69,643 | 7  | 7 | 95  | 108 | 5  | 6 | 51  | 37 | 158 | 158 |
| 69,644 | 7  | 7 | 93  | 108 | 5  | 6 | 51  | 37 | 156 | 158 |
| 69,645 | 7  | 7 | 92  | 108 | 4  | 6 | 53  | 36 | 156 | 157 |
| 69,646 | 7  | 7 | 91  | 108 | 4  | 6 | 53  | 36 | 155 | 157 |
| 69,647 | 7  | 7 | 93  | 108 | 4  | 6 | 53  | 36 | 157 | 157 |

|        |    |    |     |     |    |   |     |    |     |     |
|--------|----|----|-----|-----|----|---|-----|----|-----|-----|
| 69,648 | 7  | 7  | 93  | 108 | 4  | 6 | 52  | 36 | 156 | 157 |
| 69,649 | 7  | 7  | 94  | 108 | 4  | 6 | 52  | 36 | 157 | 157 |
| 69,650 | 7  | 6  | 102 | 108 | 4  | 6 | 54  | 36 | 167 | 156 |
| 69,651 | 7  | 6  | 100 | 108 | 4  | 6 | 54  | 36 | 165 | 156 |
| 69,652 | 7  | 6  | 100 | 108 | 4  | 6 | 54  | 36 | 165 | 156 |
| 69,653 | 6  | 6  | 99  | 108 | 4  | 6 | 54  | 36 | 163 | 156 |
| 69,654 | 6  | 6  | 99  | 108 | 4  | 6 | 54  | 36 | 163 | 156 |
| 69,655 | 6  | 6  | 99  | 110 | 4  | 6 | 54  | 36 | 163 | 158 |
| 69,656 | 6  | 6  | 100 | 112 | 3  | 6 | 54  | 38 | 163 | 162 |
| 69,657 | 7  | 9  | 99  | 127 | 3  | 8 | 54  | 49 | 163 | 193 |
| 69,658 | 7  | 9  | 98  | 125 | 2  | 8 | 54  | 47 | 161 | 189 |
| 69,659 | 10 | 10 | 104 | 145 | 2  | 8 | 54  | 55 | 170 | 218 |
| 69,660 | 14 | 10 | 156 | 145 | 5  | 8 | 82  | 55 | 257 | 218 |
| 69,661 | 15 | 8  | 169 | 163 | 6  | 8 | 104 | 53 | 294 | 232 |
| 69,662 | 15 | 8  | 168 | 163 | 6  | 8 | 101 | 53 | 290 | 232 |
| 69,663 | 15 | 8  | 173 | 163 | 6  | 8 | 102 | 52 | 296 | 231 |
| 69,664 | 20 | 8  | 191 | 164 | 7  | 8 | 122 | 52 | 340 | 232 |
| 69,665 | 20 | 8  | 191 | 164 | 7  | 8 | 123 | 51 | 341 | 231 |
| 69,666 | 20 | 8  | 191 | 165 | 7  | 8 | 122 | 51 | 340 | 232 |
| 69,667 | 20 | 8  | 190 | 164 | 7  | 8 | 122 | 51 | 339 | 231 |
| 69,668 | 20 | 8  | 215 | 164 | 8  | 8 | 136 | 50 | 379 | 230 |
| 69,669 | 20 | 8  | 215 | 164 | 8  | 8 | 138 | 50 | 381 | 230 |
| 69,670 | 20 | 8  | 215 | 164 | 8  | 8 | 137 | 50 | 380 | 230 |
| 69,671 | 20 | 8  | 215 | 164 | 8  | 8 | 137 | 50 | 380 | 230 |
| 69,672 | 20 | 8  | 215 | 165 | 8  | 8 | 137 | 50 | 380 | 231 |
| 69,673 | 20 | 8  | 214 | 165 | 8  | 8 | 136 | 50 | 378 | 231 |
| 69,674 | 20 | 8  | 218 | 167 | 8  | 9 | 137 | 50 | 383 | 234 |
| 69,675 | 21 | 9  | 218 | 171 | 8  | 9 | 138 | 53 | 385 | 242 |
| 69,676 | 20 | 9  | 219 | 172 | 8  | 9 | 138 | 53 | 385 | 243 |
| 69,677 | 17 | 10 | 202 | 171 | 6  | 9 | 133 | 52 | 358 | 242 |
| 69,678 | 17 | 10 | 199 | 173 | 6  | 9 | 131 | 52 | 353 | 244 |
| 69,679 | 16 | 10 | 193 | 166 | 6  | 8 | 127 | 50 | 342 | 234 |
| 69,680 | 17 | 11 | 209 | 164 | 9  | 8 | 136 | 50 | 371 | 233 |
| 69,681 | 17 | 9  | 209 | 108 | 9  | 5 | 136 | 37 | 371 | 159 |
| 69,682 | 17 | 8  | 209 | 100 | 9  | 5 | 136 | 32 | 371 | 145 |
| 69,683 | 17 | 8  | 208 | 98  | 9  | 5 | 136 | 33 | 370 | 144 |
| 69,684 | 19 | 8  | 229 | 94  | 10 | 5 | 150 | 37 | 408 | 144 |
| 69,685 | 19 | 8  | 229 | 94  | 10 | 5 | 150 | 37 | 408 | 144 |
| 69,686 | 21 | 7  | 270 | 93  | 11 | 5 | 180 | 42 | 482 | 147 |
| 69,687 | 21 | 8  | 275 | 95  | 11 | 5 | 181 | 43 | 488 | 151 |
| 69,688 | 21 | 8  | 268 | 97  | 11 | 6 | 178 | 52 | 478 | 163 |

|        |    |    |     |     |    |   |     |    |     |     |
|--------|----|----|-----|-----|----|---|-----|----|-----|-----|
| 69,689 | 21 | 8  | 258 | 95  | 11 | 5 | 177 | 52 | 467 | 160 |
| 69,690 | 21 | 8  | 258 | 94  | 11 | 5 | 176 | 53 | 466 | 160 |
| 69,691 | 22 | 8  | 258 | 91  | 11 | 5 | 176 | 53 | 467 | 157 |
| 69,692 | 24 | 8  | 255 | 91  | 11 | 5 | 175 | 54 | 465 | 158 |
| 69,693 | 23 | 9  | 249 | 91  | 11 | 5 | 175 | 54 | 458 | 159 |
| 69,694 | 23 | 9  | 249 | 94  | 11 | 5 | 175 | 54 | 458 | 162 |
| 69,695 | 23 | 11 | 249 | 95  | 11 | 5 | 172 | 56 | 455 | 167 |
| 69,696 | 23 | 11 | 248 | 95  | 11 | 5 | 172 | 56 | 454 | 167 |
| 69,697 | 25 | 11 | 250 | 96  | 11 | 5 | 173 | 56 | 459 | 168 |
| 69,698 | 25 | 12 | 248 | 96  | 11 | 5 | 173 | 57 | 457 | 170 |
| 69,699 | 28 | 12 | 282 | 97  | 13 | 5 | 209 | 57 | 532 | 171 |
| 69,700 | 28 | 15 | 279 | 99  | 13 | 5 | 208 | 57 | 528 | 176 |
| 69,701 | 28 | 15 | 274 | 99  | 13 | 5 | 207 | 57 | 522 | 176 |
| 69,702 | 28 | 15 | 274 | 100 | 13 | 5 | 208 | 58 | 523 | 178 |
| 69,703 | 28 | 15 | 274 | 101 | 13 | 5 | 208 | 58 | 523 | 179 |
| 69,704 | 29 | 15 | 279 | 101 | 13 | 5 | 211 | 58 | 532 | 179 |
| 69,705 | 29 | 15 | 279 | 101 | 13 | 5 | 211 | 58 | 532 | 179 |
| 69,706 | 29 | 15 | 279 | 101 | 14 | 5 | 212 | 58 | 534 | 179 |
| 69,707 | 32 | 15 | 288 | 99  | 14 | 5 | 219 | 58 | 553 | 177 |
| 69,708 | 32 | 12 | 288 | 85  | 14 | 3 | 221 | 48 | 555 | 148 |
| 69,709 | 33 | 12 | 291 | 83  | 16 | 3 | 224 | 48 | 564 | 146 |
| 69,710 | 32 | 11 | 308 | 63  | 18 | 3 | 233 | 40 | 591 | 117 |
| 69,711 | 28 | 11 | 253 | 62  | 15 | 3 | 195 | 40 | 491 | 116 |
| 69,712 | 27 | 11 | 244 | 40  | 14 | 3 | 173 | 38 | 458 | 92  |
| 69,713 | 27 | 11 | 240 | 41  | 15 | 3 | 173 | 38 | 455 | 93  |
| 69,714 | 22 | 11 | 222 | 43  | 14 | 4 | 153 | 40 | 411 | 98  |
| 69,715 | 22 | 11 | 222 | 42  | 14 | 4 | 153 | 40 | 411 | 97  |
| 69,716 | 22 | 11 | 223 | 42  | 14 | 4 | 154 | 40 | 413 | 97  |
| 69,717 | 22 | 11 | 215 | 41  | 13 | 4 | 151 | 40 | 401 | 96  |
| 69,718 | 22 | 11 | 213 | 41  | 13 | 4 | 150 | 40 | 398 | 96  |
| 69,719 | 22 | 11 | 197 | 41  | 13 | 4 | 139 | 40 | 371 | 96  |
| 69,720 | 22 | 11 | 196 | 41  | 13 | 4 | 141 | 40 | 372 | 96  |
| 69,721 | 23 | 11 | 200 | 41  | 13 | 4 | 142 | 40 | 378 | 96  |
| 69,722 | 23 | 11 | 200 | 42  | 13 | 4 | 142 | 40 | 378 | 97  |
| 69,723 | 23 | 11 | 197 | 41  | 13 | 4 | 142 | 40 | 375 | 96  |
| 69,724 | 23 | 11 | 195 | 41  | 13 | 4 | 141 | 40 | 372 | 96  |
| 69,725 | 23 | 11 | 199 | 39  | 13 | 3 | 141 | 40 | 376 | 93  |
| 69,726 | 24 | 10 | 205 | 35  | 13 | 3 | 144 | 37 | 386 | 85  |
| 69,727 | 24 | 10 | 203 | 34  | 13 | 3 | 146 | 37 | 386 | 84  |
| 69,728 | 24 | 8  | 212 | 28  | 14 | 3 | 143 | 33 | 393 | 72  |
| 69,729 | 27 | 8  | 252 | 28  | 14 | 3 | 155 | 33 | 448 | 72  |

|        |    |   |     |    |    |   |     |    |       |    |
|--------|----|---|-----|----|----|---|-----|----|-------|----|
| 69,730 | 28 | 8 | 250 | 28 | 11 | 3 | 162 | 33 | 451   | 72 |
| 69,731 | 27 | 8 | 248 | 28 | 11 | 4 | 160 | 34 | 446   | 74 |
| 69,732 | 29 | 8 | 363 | 28 | 12 | 4 | 200 | 34 | 604   | 74 |
| 69,733 | 28 | 8 | 397 | 35 | 13 | 3 | 222 | 34 | 660   | 80 |
| 69,734 | 28 | 8 | 391 | 37 | 12 | 3 | 221 | 36 | 652   | 84 |
| 69,735 | 28 | 8 | 377 | 37 | 12 | 3 | 215 | 32 | 632   | 80 |
| 69,736 | 26 | 8 | 357 | 37 | 11 | 3 | 193 | 32 | 587   | 80 |
| 69,737 | 27 | 8 | 346 | 37 | 11 | 3 | 188 | 27 | 572   | 75 |
| 69,738 | 35 | 7 | 445 | 33 | 17 | 2 | 214 | 18 | 711   | 60 |
| 69,739 | 35 | 7 | 446 | 33 | 17 | 2 | 214 | 18 | 712   | 60 |
| 69,740 | 39 | 7 | 504 | 32 | 20 | 2 | 253 | 18 | 816   | 59 |
| 69,741 | 45 | 7 | 604 | 32 | 28 | 2 | 311 | 17 | 988   | 58 |
| 69,742 | 51 | 7 | 652 | 32 | 33 | 2 | 377 | 16 | 1,113 | 57 |
| 69,743 | 49 | 6 | 657 | 30 | 33 | 2 | 377 | 16 | 1,116 | 54 |
| 69,744 | 49 | 7 | 657 | 30 | 33 | 2 | 377 | 16 | 1,116 | 55 |
| 69,745 | 49 | 7 | 673 | 27 | 35 | 2 | 388 | 16 | 1,145 | 52 |
| 69,746 | 51 | 5 | 690 | 28 | 35 | 2 | 394 | 14 | 1,170 | 49 |
| 69,747 | 59 | 5 | 737 | 28 | 35 | 2 | 424 | 14 | 1,255 | 49 |
| 69,748 | 59 | 4 | 756 | 26 | 35 | 2 | 436 | 13 | 1,286 | 45 |
| 69,749 | 68 | 4 | 937 | 26 | 46 | 2 | 515 | 14 | 1,566 | 46 |
| 69,750 | 66 | 4 | 915 | 26 | 44 | 2 | 488 | 15 | 1,513 | 47 |
| 69,751 | 66 | 1 | 915 | 24 | 44 | 2 | 488 | 15 | 1,513 | 42 |
| 69,752 | 66 | 1 | 926 | 23 | 45 | 2 | 494 | 14 | 1,531 | 40 |
| 69,753 | 66 | 1 | 926 | 24 | 45 | 2 | 495 | 15 | 1,532 | 42 |
| 69,754 | 66 | 1 | 928 | 23 | 45 | 2 | 497 | 15 | 1,536 | 41 |
| 69,755 | 65 | 1 | 923 | 23 | 45 | 2 | 494 | 15 | 1,527 | 41 |
| 69,756 | 65 | 1 | 923 | 23 | 44 | 2 | 493 | 15 | 1,525 | 41 |
| 69,757 | 61 | 1 | 917 | 21 | 44 | 2 | 485 | 12 | 1,507 | 36 |
| 69,758 | 61 | 1 | 920 | 20 | 44 | 2 | 484 | 11 | 1,509 | 34 |
| 69,759 | 61 | 1 | 922 | 20 | 44 | 2 | 486 | 11 | 1,513 | 34 |
| 69,760 | 60 | 1 | 919 | 19 | 42 | 2 | 484 | 11 | 1,505 | 33 |
| 69,761 | 58 | 1 | 889 | 19 | 40 | 2 | 472 | 11 | 1,459 | 33 |
| 69,762 | 58 | 1 | 891 | 19 | 40 | 2 | 473 | 11 | 1,462 | 33 |
| 69,763 | 58 | 1 | 887 | 20 | 40 | 2 | 472 | 11 | 1,457 | 34 |
| 69,764 | 58 | 1 | 887 | 19 | 39 | 2 | 472 | 11 | 1,456 | 33 |
| 69,765 | 58 | 1 | 886 | 17 | 39 | 1 | 472 | 9  | 1,455 | 28 |
| 69,766 | 58 | 1 | 886 | 18 | 39 | 1 | 472 | 10 | 1,455 | 30 |
| 69,767 | 58 | 1 | 888 | 18 | 39 | 1 | 471 | 10 | 1,456 | 30 |
| 69,768 | 59 | 1 | 888 | 18 | 39 | 1 | 471 | 10 | 1,457 | 30 |
| 69,769 | 59 | 1 | 890 | 21 | 39 | 1 | 468 | 14 | 1,456 | 37 |
| 69,770 | 59 | 1 | 892 | 21 | 39 | 1 | 469 | 15 | 1,459 | 38 |

|        |    |   |       |    |    |   |     |    |       |     |
|--------|----|---|-------|----|----|---|-----|----|-------|-----|
| 69,771 | 59 | 1 | 904   | 21 | 40 | 2 | 480 | 15 | 1,483 | 39  |
| 69,772 | 67 | 1 | 943   | 23 | 41 | 3 | 488 | 18 | 1,539 | 45  |
| 69,773 | 67 | 1 | 943   | 22 | 41 | 3 | 489 | 18 | 1,540 | 44  |
| 69,774 | 69 | 1 | 996   | 22 | 43 | 3 | 542 | 19 | 1,650 | 45  |
| 69,775 | 69 | 1 | 1,014 | 25 | 43 | 3 | 549 | 20 | 1,675 | 49  |
| 69,776 | 69 | 1 | 1,012 | 27 | 43 | 3 | 549 | 20 | 1,673 | 51  |
| 69,777 | 70 | 1 | 1,066 | 33 | 47 | 3 | 595 | 21 | 1,778 | 58  |
| 69,778 | 71 | 1 | 1,068 | 40 | 47 | 3 | 597 | 27 | 1,783 | 71  |
| 69,779 | 71 | 1 | 1,057 | 48 | 46 | 3 | 591 | 30 | 1,765 | 82  |
| 69,780 | 68 | 1 | 1,017 | 50 | 46 | 3 | 578 | 31 | 1,709 | 85  |
| 69,781 | 67 | 1 | 1,013 | 50 | 46 | 3 | 566 | 31 | 1,692 | 85  |
| 69,782 | 66 | 1 | 923   | 50 | 45 | 2 | 538 | 30 | 1,572 | 83  |
| 69,783 | 71 | 1 | 927   | 50 | 47 | 2 | 552 | 30 | 1,597 | 83  |
| 69,784 | 72 | 1 | 898   | 40 | 47 | 2 | 528 | 27 | 1,545 | 70  |
| 69,785 | 72 | 1 | 898   | 40 | 47 | 2 | 528 | 27 | 1,545 | 70  |
| 69,786 | 71 | 2 | 905   | 45 | 49 | 2 | 536 | 28 | 1,561 | 77  |
| 69,787 | 70 | 2 | 896   | 50 | 49 | 3 | 533 | 30 | 1,548 | 85  |
| 69,788 | 70 | 3 | 895   | 53 | 49 | 3 | 531 | 33 | 1,545 | 92  |
| 69,789 | 62 | 5 | 795   | 53 | 43 | 3 | 506 | 32 | 1,406 | 93  |
| 69,790 | 58 | 5 | 736   | 53 | 40 | 3 | 467 | 32 | 1,301 | 93  |
| 69,791 | 53 | 6 | 677   | 55 | 38 | 3 | 442 | 32 | 1,210 | 96  |
| 69,792 | 51 | 6 | 635   | 55 | 32 | 3 | 410 | 32 | 1,128 | 96  |
| 69,793 | 45 | 6 | 587   | 55 | 27 | 3 | 344 | 32 | 1,003 | 96  |
| 69,794 | 45 | 6 | 584   | 55 | 27 | 3 | 344 | 32 | 1,000 | 96  |
| 69,795 | 46 | 5 | 572   | 55 | 25 | 3 | 334 | 33 | 977   | 96  |
| 69,796 | 45 | 5 | 555   | 54 | 25 | 3 | 329 | 34 | 954   | 96  |
| 69,797 | 42 | 5 | 544   | 60 | 26 | 3 | 316 | 38 | 928   | 106 |
| 69,798 | 35 | 5 | 512   | 68 | 26 | 3 | 298 | 42 | 871   | 118 |
| 69,799 | 35 | 5 | 494   | 70 | 26 | 3 | 286 | 43 | 841   | 121 |
| 69,800 | 26 | 5 | 313   | 70 | 15 | 3 | 206 | 42 | 560   | 120 |
| 69,801 | 25 | 6 | 307   | 73 | 15 | 3 | 199 | 42 | 546   | 124 |
| 69,802 | 25 | 6 | 301   | 74 | 14 | 3 | 193 | 42 | 533   | 125 |
| 69,803 | 25 | 6 | 294   | 76 | 14 | 3 | 192 | 42 | 525   | 127 |
| 69,804 | 25 | 6 | 295   | 76 | 14 | 3 | 191 | 41 | 525   | 126 |
| 69,805 | 25 | 6 | 293   | 76 | 14 | 3 | 189 | 41 | 521   | 126 |
| 69,806 | 25 | 6 | 293   | 76 | 14 | 3 | 189 | 41 | 521   | 126 |
| 69,807 | 25 | 8 | 292   | 76 | 14 | 3 | 190 | 41 | 521   | 128 |
| 69,808 | 25 | 8 | 289   | 76 | 14 | 3 | 190 | 41 | 518   | 128 |
| 69,809 | 25 | 8 | 286   | 76 | 14 | 3 | 189 | 41 | 514   | 128 |
| 69,810 | 25 | 8 | 284   | 76 | 14 | 3 | 186 | 41 | 509   | 128 |
| 69,811 | 25 | 8 | 286   | 77 | 14 | 4 | 186 | 40 | 511   | 129 |

|        |    |    |     |     |    |   |     |    |     |     |
|--------|----|----|-----|-----|----|---|-----|----|-----|-----|
| 69,812 | 25 | 8  | 286 | 77  | 14 | 4 | 187 | 40 | 512 | 129 |
| 69,813 | 25 | 8  | 283 | 76  | 14 | 4 | 186 | 40 | 508 | 128 |
| 69,814 | 25 | 8  | 283 | 76  | 14 | 4 | 186 | 40 | 508 | 128 |
| 69,815 | 25 | 8  | 286 | 76  | 14 | 4 | 186 | 41 | 511 | 129 |
| 69,816 | 27 | 8  | 289 | 76  | 14 | 4 | 188 | 41 | 518 | 129 |
| 69,817 | 27 | 9  | 287 | 75  | 14 | 4 | 188 | 40 | 516 | 128 |
| 69,818 | 27 | 9  | 287 | 75  | 14 | 4 | 188 | 40 | 516 | 128 |
| 69,819 | 26 | 9  | 294 | 79  | 14 | 4 | 189 | 41 | 523 | 133 |
| 69,820 | 28 | 10 | 296 | 101 | 14 | 5 | 190 | 46 | 528 | 162 |
| 69,821 | 30 | 10 | 296 | 122 | 14 | 5 | 190 | 51 | 530 | 188 |
| 69,822 | 30 | 11 | 285 | 142 | 13 | 5 | 180 | 62 | 508 | 220 |
| 69,823 | 21 | 11 | 243 | 149 | 12 | 4 | 171 | 60 | 447 | 224 |
| 69,824 | 19 | 11 | 213 | 152 | 11 | 4 | 137 | 60 | 380 | 227 |
| 69,825 | 19 | 11 | 189 | 150 | 10 | 4 | 116 | 58 | 334 | 223 |
| 69,826 | 19 | 11 | 169 | 150 | 10 | 4 | 109 | 58 | 307 | 223 |
| 69,827 | 16 | 11 | 113 | 142 | 6  | 4 | 63  | 57 | 198 | 214 |
| 69,828 | 16 | 11 | 110 | 146 | 6  | 4 | 59  | 57 | 191 | 218 |
| 69,829 | 15 | 11 | 107 | 132 | 6  | 4 | 56  | 48 | 184 | 195 |
| 69,830 | 15 | 11 | 108 | 131 | 6  | 4 | 57  | 48 | 186 | 194 |
| 69,831 | 15 | 11 | 111 | 131 | 6  | 4 | 57  | 47 | 189 | 193 |
| 69,832 | 15 | 11 | 108 | 132 | 6  | 4 | 55  | 48 | 184 | 195 |
| 69,833 | 18 | 11 | 126 | 135 | 7  | 4 | 64  | 48 | 215 | 198 |
| 69,834 | 13 | 11 | 104 | 143 | 4  | 4 | 46  | 48 | 167 | 206 |
| 69,835 | 12 | 13 | 113 | 149 | 3  | 4 | 51  | 52 | 179 | 218 |
| 69,836 | 12 | 13 | 103 | 149 | 2  | 4 | 39  | 52 | 156 | 218 |
| 69,837 | 14 | 12 | 113 | 144 | 3  | 4 | 48  | 51 | 178 | 211 |
| 69,838 | 16 | 13 | 124 | 140 | 3  | 3 | 52  | 49 | 195 | 205 |
| 69,839 | 16 | 12 | 120 | 153 | 3  | 3 | 53  | 48 | 192 | 216 |
| 69,840 | 16 | 10 | 119 | 154 | 3  | 3 | 52  | 48 | 190 | 215 |
| 69,841 | 16 | 10 | 121 | 157 | 3  | 3 | 62  | 48 | 202 | 218 |
| 69,842 | 16 | 9  | 130 | 155 | 3  | 3 | 68  | 48 | 217 | 215 |
| 69,843 | 16 | 9  | 132 | 156 | 3  | 3 | 70  | 49 | 221 | 217 |
| 69,844 | 16 | 9  | 133 | 160 | 3  | 3 | 70  | 49 | 222 | 221 |
| 69,845 | 15 | 9  | 133 | 160 | 3  | 3 | 70  | 49 | 221 | 221 |
| 69,846 | 15 | 9  | 129 | 165 | 3  | 3 | 70  | 48 | 217 | 225 |
| 69,847 | 14 | 9  | 127 | 165 | 3  | 3 | 69  | 52 | 213 | 229 |
| 69,848 | 14 | 9  | 127 | 165 | 2  | 3 | 69  | 49 | 212 | 226 |
| 69,849 | 14 | 9  | 125 | 157 | 2  | 3 | 69  | 46 | 210 | 215 |
| 69,850 | 14 | 9  | 122 | 156 | 2  | 3 | 69  | 45 | 207 | 213 |
| 69,851 | 14 | 9  | 121 | 158 | 2  | 3 | 69  | 47 | 206 | 217 |
| 69,852 | 14 | 9  | 121 | 155 | 2  | 3 | 69  | 47 | 206 | 214 |



|        |    |    |     |     |   |   |    |    |     |     |
|--------|----|----|-----|-----|---|---|----|----|-----|-----|
| 69,853 | 14 | 9  | 128 | 155 | 2 | 3 | 75 | 47 | 219 | 214 |
| 69,854 | 14 | 9  | 128 | 153 | 3 | 3 | 77 | 47 | 222 | 212 |
| 69,855 | 15 | 9  | 134 | 153 | 3 | 3 | 81 | 47 | 233 | 212 |
| 69,856 | 15 | 9  | 136 | 153 | 3 | 3 | 81 | 47 | 235 | 212 |
| 69,857 | 15 | 7  | 142 | 153 | 3 | 3 | 87 | 47 | 247 | 210 |
| 69,858 | 15 | 7  | 142 | 153 | 3 | 3 | 86 | 47 | 246 | 210 |
| 69,859 | 15 | 8  | 142 | 153 | 3 | 3 | 86 | 47 | 246 | 211 |
| 69,860 | 15 | 8  | 142 | 153 | 3 | 3 | 87 | 47 | 247 | 211 |
| 69,861 | 15 | 8  | 145 | 153 | 3 | 3 | 92 | 47 | 255 | 211 |
| 69,862 | 15 | 8  | 144 | 152 | 3 | 2 | 92 | 47 | 254 | 209 |
| 69,863 | 15 | 8  | 144 | 152 | 3 | 2 | 92 | 51 | 254 | 213 |
| 69,864 | 15 | 8  | 143 | 154 | 3 | 2 | 92 | 51 | 253 | 215 |
| 69,865 | 15 | 8  | 143 | 162 | 3 | 3 | 93 | 52 | 254 | 225 |
| 69,866 | 15 | 10 | 141 | 166 | 3 | 3 | 93 | 54 | 252 | 233 |
| 69,867 | 14 | 10 | 145 | 169 | 3 | 4 | 93 | 54 | 255 | 237 |
| 69,868 | 14 | 9  | 146 | 169 | 3 | 4 | 95 | 54 | 258 | 236 |
| 69,869 | 14 | 8  | 145 | 140 | 3 | 2 | 95 | 43 | 257 | 193 |
| 69,870 | 14 | 8  | 140 | 141 | 3 | 2 | 94 | 43 | 251 | 194 |
| 69,871 | 12 | 8  | 137 | 141 | 3 | 2 | 93 | 45 | 245 | 196 |
| 69,872 | 10 | 8  | 136 | 121 | 3 | 3 | 92 | 41 | 241 | 173 |
| 69,873 | 10 | 7  | 133 | 102 | 3 | 3 | 92 | 30 | 238 | 142 |
| 69,874 | 10 | 7  | 134 | 95  | 3 | 3 | 94 | 29 | 241 | 134 |
| 69,875 | 10 | 7  | 135 | 92  | 3 | 3 | 94 | 29 | 242 | 131 |
| 69,876 | 10 | 8  | 135 | 92  | 3 | 3 | 94 | 30 | 242 | 133 |
| 69,877 | 10 | 8  | 137 | 92  | 3 | 3 | 94 | 30 | 244 | 133 |
| 69,878 | 10 | 8  | 137 | 92  | 3 | 3 | 93 | 30 | 243 | 133 |
| 69,879 | 10 | 8  | 136 | 89  | 3 | 3 | 93 | 30 | 242 | 130 |
| 69,880 | 10 | 8  | 136 | 91  | 3 | 3 | 93 | 31 | 242 | 133 |
| 69,881 | 11 | 8  | 137 | 93  | 3 | 3 | 92 | 32 | 243 | 136 |
| 69,882 | 11 | 8  | 134 | 92  | 3 | 3 | 92 | 33 | 240 | 136 |
| 69,883 | 11 | 8  | 131 | 91  | 3 | 3 | 91 | 32 | 236 | 134 |
| 69,884 | 10 | 8  | 133 | 81  | 5 | 3 | 92 | 32 | 240 | 124 |
| 69,885 | 9  | 6  | 131 | 74  | 5 | 3 | 86 | 28 | 231 | 111 |
| 69,886 | 10 | 6  | 123 | 75  | 5 | 3 | 88 | 28 | 226 | 112 |
| 69,887 | 8  | 6  | 110 | 75  | 4 | 3 | 78 | 28 | 200 | 112 |
| 69,888 | 8  | 5  | 110 | 74  | 4 | 3 | 79 | 28 | 201 | 110 |
| 69,889 | 7  | 5  | 105 | 58  | 4 | 3 | 79 | 26 | 195 | 92  |
| 69,890 | 7  | 5  | 105 | 60  | 4 | 3 | 79 | 26 | 195 | 94  |
| 69,891 | 7  | 5  | 105 | 55  | 4 | 3 | 70 | 26 | 186 | 89  |
| 69,892 | 8  | 5  | 102 | 55  | 4 | 3 | 71 | 26 | 185 | 89  |
| 69,893 | 8  | 5  | 97  | 55  | 4 | 3 | 65 | 25 | 174 | 88  |

|        |    |   |     |    |    |   |     |    |     |    |
|--------|----|---|-----|----|----|---|-----|----|-----|----|
| 69,894 | 8  | 5 | 94  | 55 | 4  | 3 | 62  | 25 | 168 | 88 |
| 69,895 | 8  | 5 | 97  | 51 | 4  | 3 | 65  | 25 | 174 | 84 |
| 69,896 | 8  | 5 | 96  | 51 | 4  | 3 | 64  | 25 | 172 | 84 |
| 69,897 | 8  | 5 | 98  | 46 | 4  | 3 | 64  | 25 | 174 | 79 |
| 69,898 | 8  | 5 | 98  | 45 | 4  | 3 | 64  | 20 | 174 | 73 |
| 69,899 | 8  | 6 | 98  | 40 | 4  | 3 | 64  | 19 | 174 | 68 |
| 69,900 | 8  | 6 | 98  | 40 | 4  | 3 | 64  | 18 | 174 | 67 |
| 69,901 | 8  | 6 | 97  | 38 | 4  | 3 | 63  | 16 | 172 | 63 |
| 69,902 | 8  | 6 | 95  | 39 | 4  | 3 | 63  | 16 | 170 | 64 |
| 69,903 | 8  | 5 | 89  | 39 | 4  | 3 | 57  | 16 | 158 | 63 |
| 69,904 | 8  | 5 | 88  | 40 | 3  | 3 | 55  | 18 | 154 | 66 |
| 69,905 | 7  | 5 | 84  | 46 | 3  | 3 | 54  | 19 | 148 | 73 |
| 69,906 | 7  | 5 | 82  | 47 | 3  | 3 | 52  | 19 | 144 | 74 |
| 69,907 | 7  | 5 | 82  | 55 | 3  | 3 | 52  | 20 | 144 | 83 |
| 69,908 | 7  | 5 | 76  | 55 | 3  | 3 | 46  | 20 | 132 | 83 |
| 69,909 | 8  | 5 | 89  | 56 | 4  | 3 | 48  | 20 | 149 | 84 |
| 69,910 | 8  | 5 | 89  | 57 | 4  | 3 | 47  | 16 | 148 | 81 |
| 69,911 | 8  | 5 | 103 | 57 | 4  | 3 | 49  | 16 | 164 | 81 |
| 69,912 | 8  | 5 | 105 | 58 | 4  | 3 | 46  | 16 | 163 | 82 |
| 69,913 | 8  | 5 | 104 | 59 | 4  | 3 | 46  | 17 | 162 | 84 |
| 69,914 | 10 | 5 | 195 | 59 | 9  | 3 | 87  | 17 | 301 | 84 |
| 69,915 | 18 | 5 | 334 | 57 | 12 | 3 | 159 | 17 | 523 | 82 |
| 69,916 | 18 | 3 | 338 | 45 | 12 | 2 | 161 | 13 | 529 | 63 |
| 69,917 | 18 | 3 | 338 | 49 | 12 | 2 | 161 | 14 | 529 | 68 |
| 69,918 | 17 | 3 | 331 | 46 | 12 | 1 | 159 | 14 | 519 | 64 |
| 69,919 | 21 | 3 | 363 | 46 | 13 | 1 | 174 | 14 | 571 | 64 |
| 69,920 | 21 | 3 | 369 | 44 | 13 | 1 | 180 | 15 | 583 | 63 |
| 69,921 | 21 | 3 | 368 | 44 | 13 | 1 | 180 | 15 | 582 | 63 |
| 69,922 | 21 | 3 | 368 | 44 | 13 | 1 | 183 | 13 | 585 | 61 |
| 69,923 | 21 | 3 | 367 | 44 | 13 | 0 | 183 | 13 | 584 | 60 |
| 69,924 | 21 | 3 | 365 | 43 | 13 | 0 | 181 | 13 | 580 | 59 |
| 69,925 | 21 | 3 | 370 | 41 | 13 | 0 | 183 | 13 | 587 | 57 |
| 69,926 | 21 | 2 | 379 | 40 | 13 | 0 | 189 | 12 | 602 | 54 |
| 69,927 | 21 | 2 | 385 | 40 | 13 | 0 | 194 | 12 | 613 | 54 |
| 69,928 | 21 | 2 | 383 | 40 | 13 | 0 | 194 | 12 | 611 | 54 |
| 69,929 | 21 | 2 | 383 | 40 | 13 | 0 | 194 | 12 | 611 | 54 |
| 69,930 | 21 | 2 | 383 | 38 | 13 | 0 | 194 | 11 | 611 | 51 |
| 69,931 | 21 | 2 | 381 | 38 | 13 | 0 | 193 | 11 | 608 | 51 |
| 69,932 | 20 | 2 | 383 | 35 | 13 | 0 | 194 | 9  | 610 | 46 |
| 69,933 | 20 | 2 | 385 | 34 | 13 | 0 | 194 | 9  | 612 | 45 |
| 69,934 | 20 | 2 | 387 | 34 | 12 | 0 | 194 | 9  | 613 | 45 |

|        |    |   |       |    |    |   |     |    |       |    |
|--------|----|---|-------|----|----|---|-----|----|-------|----|
| 69,935 | 18 | 2 | 367   | 33 | 10 | 0 | 181 | 9  | 576   | 44 |
| 69,936 | 18 | 2 | 366   | 33 | 10 | 0 | 181 | 9  | 575   | 44 |
| 69,937 | 17 | 2 | 358   | 33 | 10 | 0 | 175 | 9  | 560   | 44 |
| 69,938 | 17 | 2 | 356   | 33 | 10 | 0 | 176 | 9  | 559   | 44 |
| 69,939 | 22 | 2 | 455   | 33 | 12 | 0 | 217 | 9  | 706   | 44 |
| 69,940 | 22 | 2 | 455   | 33 | 12 | 0 | 216 | 9  | 705   | 44 |
| 69,941 | 39 | 2 | 601   | 31 | 24 | 0 | 352 | 9  | 1,016 | 42 |
| 69,942 | 49 | 2 | 805   | 31 | 39 | 0 | 472 | 9  | 1,365 | 42 |
| 69,943 | 49 | 2 | 821   | 30 | 42 | 0 | 481 | 10 | 1,393 | 42 |
| 69,944 | 50 | 2 | 839   | 30 | 43 | 0 | 488 | 10 | 1,420 | 42 |
| 69,945 | 50 | 2 | 853   | 30 | 43 | 0 | 494 | 10 | 1,440 | 42 |
| 69,946 | 51 | 1 | 860   | 29 | 43 | 0 | 496 | 10 | 1,450 | 40 |
| 69,947 | 51 | 1 | 900   | 29 | 43 | 0 | 506 | 10 | 1,500 | 40 |
| 69,948 | 54 | 1 | 984   | 29 | 46 | 0 | 545 | 10 | 1,629 | 40 |
| 69,949 | 54 | 1 | 984   | 29 | 46 | 0 | 545 | 10 | 1,629 | 40 |
| 69,950 | 58 | 1 | 1,158 | 29 | 49 | 0 | 608 | 10 | 1,873 | 40 |
| 69,951 | 65 | 1 | 1,224 | 29 | 55 | 0 | 681 | 10 | 2,025 | 40 |
| 69,952 | 65 | 1 | 1,224 | 30 | 55 | 1 | 681 | 11 | 2,025 | 43 |
| 69,953 | 65 | 1 | 1,224 | 31 | 55 | 1 | 681 | 12 | 2,025 | 45 |
| 69,954 | 65 | 3 | 1,243 | 34 | 55 | 1 | 690 | 11 | 2,053 | 49 |
| 69,955 | 65 | 3 | 1,243 | 32 | 55 | 1 | 690 | 10 | 2,053 | 46 |
| 69,956 | 65 | 3 | 1,243 | 26 | 55 | 1 | 690 | 10 | 2,053 | 40 |
| 69,957 | 65 | 3 | 1,245 | 20 | 55 | 1 | 689 | 9  | 2,054 | 33 |
| 69,958 | 65 | 2 | 1,244 | 20 | 55 | 1 | 689 | 9  | 2,053 | 32 |
| 69,959 | 65 | 2 | 1,244 | 20 | 55 | 1 | 689 | 9  | 2,053 | 32 |
| 69,960 | 64 | 2 | 1,232 | 19 | 54 | 1 | 687 | 9  | 2,037 | 31 |
| 69,961 | 64 | 2 | 1,239 | 18 | 54 | 1 | 691 | 10 | 2,048 | 31 |
| 69,962 | 66 | 2 | 1,241 | 17 | 54 | 1 | 698 | 10 | 2,059 | 30 |
| 69,963 | 66 | 2 | 1,236 | 17 | 54 | 1 | 696 | 11 | 2,052 | 31 |
| 69,964 | 64 | 2 | 1,146 | 19 | 49 | 1 | 655 | 12 | 1,914 | 34 |
| 69,965 | 61 | 3 | 1,114 | 19 | 49 | 2 | 628 | 13 | 1,852 | 37 |
| 69,966 | 57 | 3 | 1,008 | 22 | 46 | 2 | 584 | 17 | 1,695 | 44 |
| 69,967 | 57 | 3 | 1,005 | 26 | 46 | 2 | 582 | 20 | 1,690 | 51 |
| 69,968 | 56 | 3 | 1,005 | 22 | 46 | 2 | 581 | 19 | 1,688 | 46 |
| 69,969 | 56 | 4 | 1,001 | 27 | 46 | 3 | 581 | 19 | 1,684 | 53 |
| 69,970 | 53 | 4 | 976   | 27 | 45 | 3 | 565 | 19 | 1,639 | 53 |
| 69,971 | 53 | 4 | 971   | 27 | 45 | 3 | 560 | 18 | 1,629 | 52 |
| 69,972 | 53 | 4 | 971   | 27 | 45 | 3 | 558 | 18 | 1,627 | 52 |
| 69,973 | 53 | 4 | 972   | 27 | 45 | 3 | 558 | 19 | 1,628 | 53 |
| 69,974 | 54 | 5 | 972   | 27 | 45 | 3 | 559 | 18 | 1,630 | 53 |
| 69,975 | 63 | 5 | 985   | 27 | 47 | 3 | 587 | 18 | 1,682 | 53 |

|        |     |    |       |    |    |   |       |    |       |     |
|--------|-----|----|-------|----|----|---|-------|----|-------|-----|
| 69,976 | 63  | 5  | 979   | 27 | 48 | 3 | 585   | 18 | 1,675 | 53  |
| 69,977 | 63  | 7  | 976   | 32 | 48 | 4 | 584   | 23 | 1,671 | 66  |
| 69,978 | 63  | 7  | 970   | 32 | 48 | 4 | 579   | 23 | 1,660 | 66  |
| 69,979 | 65  | 7  | 1,001 | 32 | 48 | 4 | 599   | 23 | 1,713 | 66  |
| 69,980 | 76  | 11 | 1,162 | 35 | 53 | 4 | 654   | 24 | 1,945 | 74  |
| 69,981 | 76  | 11 | 1,162 | 35 | 53 | 4 | 654   | 24 | 1,945 | 74  |
| 69,982 | 83  | 11 | 1,220 | 36 | 55 | 4 | 688   | 24 | 2,046 | 75  |
| 69,983 | 98  | 11 | 1,452 | 36 | 67 | 4 | 785   | 24 | 2,402 | 75  |
| 69,984 | 142 | 11 | 1,915 | 37 | 89 | 4 | 1,003 | 24 | 3,149 | 76  |
| 69,985 | 145 | 11 | 1,959 | 37 | 90 | 4 | 1,022 | 24 | 3,216 | 76  |
| 69,986 | 147 | 11 | 1,990 | 37 | 90 | 4 | 1,026 | 24 | 3,253 | 76  |
| 69,987 | 149 | 11 | 2,025 | 39 | 91 | 4 | 1,035 | 24 | 3,300 | 78  |
| 69,988 | 143 | 11 | 1,951 | 39 | 90 | 4 | 1,007 | 24 | 3,191 | 78  |
| 69,989 | 144 | 11 | 1,969 | 39 | 90 | 4 | 1,010 | 24 | 3,213 | 78  |
| 69,990 | 144 | 11 | 1,976 | 40 | 90 | 4 | 1,012 | 24 | 3,222 | 79  |
| 69,991 | 131 | 12 | 1,925 | 40 | 89 | 4 | 957   | 26 | 3,102 | 82  |
| 69,992 | 127 | 12 | 1,836 | 40 | 78 | 4 | 880   | 26 | 2,921 | 82  |
| 69,993 | 118 | 12 | 1,630 | 40 | 63 | 4 | 759   | 25 | 2,570 | 81  |
| 69,994 | 117 | 13 | 1,613 | 48 | 60 | 4 | 750   | 32 | 2,540 | 97  |
| 69,995 | 116 | 13 | 1,595 | 53 | 59 | 4 | 744   | 38 | 2,514 | 108 |
| 69,996 | 116 | 13 | 1,599 | 56 | 60 | 4 | 737   | 38 | 2,512 | 111 |
| 69,997 | 115 | 13 | 1,595 | 57 | 60 | 4 | 733   | 40 | 2,503 | 114 |
| 69,998 | 115 | 13 | 1,556 | 58 | 60 | 4 | 724   | 42 | 2,455 | 117 |
| 69,999 | 112 | 13 | 1,470 | 59 | 57 | 4 | 686   | 42 | 2,325 | 118 |
| 70,000 | 109 | 14 | 1,310 | 60 | 54 | 4 | 632   | 45 | 2,105 | 123 |
| 70,001 | 108 | 14 | 1,296 | 60 | 54 | 4 | 623   | 45 | 2,081 | 123 |
| 70,002 | 102 | 14 | 1,235 | 61 | 49 | 4 | 553   | 46 | 1,939 | 125 |
| 70,003 | 103 | 14 | 1,224 | 57 | 49 | 3 | 556   | 44 | 1,932 | 118 |
| 70,004 | 103 | 12 | 1,231 | 56 | 49 | 3 | 551   | 44 | 1,934 | 115 |
| 70,005 | 103 | 12 | 1,231 | 57 | 49 | 3 | 551   | 44 | 1,934 | 116 |
| 70,006 | 103 | 12 | 1,231 | 57 | 49 | 3 | 551   | 42 | 1,934 | 114 |
| 70,007 | 104 | 12 | 1,229 | 59 | 49 | 3 | 551   | 42 | 1,933 | 116 |
| 70,008 | 104 | 14 | 1,229 | 61 | 49 | 3 | 551   | 48 | 1,933 | 126 |
| 70,009 | 104 | 14 | 1,228 | 64 | 49 | 3 | 551   | 50 | 1,932 | 131 |
| 70,010 | 105 | 14 | 1,231 | 64 | 49 | 3 | 554   | 50 | 1,939 | 131 |
| 70,011 | 105 | 14 | 1,224 | 66 | 49 | 3 | 550   | 50 | 1,928 | 133 |
| 70,012 | 103 | 14 | 1,220 | 66 | 49 | 3 | 547   | 50 | 1,919 | 133 |
| 70,013 | 103 | 14 | 1,212 | 66 | 49 | 3 | 541   | 50 | 1,905 | 133 |
| 70,014 | 104 | 16 | 1,216 | 73 | 49 | 3 | 543   | 57 | 1,912 | 149 |
| 70,015 | 104 | 16 | 1,215 | 70 | 49 | 3 | 543   | 56 | 1,911 | 145 |
| 70,016 | 105 | 15 | 1,219 | 70 | 49 | 2 | 542   | 55 | 1,915 | 142 |

|        |     |    |       |    |     |   |       |    |       |     |
|--------|-----|----|-------|----|-----|---|-------|----|-------|-----|
| 70,017 | 104 | 16 | 1,219 | 68 | 49  | 2 | 542   | 51 | 1,914 | 137 |
| 70,018 | 104 | 16 | 1,218 | 64 | 49  | 2 | 542   | 50 | 1,913 | 132 |
| 70,019 | 113 | 16 | 1,295 | 59 | 51  | 1 | 569   | 50 | 2,028 | 126 |
| 70,020 | 113 | 16 | 1,293 | 60 | 51  | 1 | 569   | 50 | 2,026 | 127 |
| 70,021 | 113 | 16 | 1,310 | 61 | 52  | 1 | 576   | 50 | 2,051 | 128 |
| 70,022 | 134 | 16 | 1,397 | 64 | 58  | 1 | 638   | 50 | 2,227 | 131 |
| 70,023 | 134 | 16 | 1,401 | 65 | 58  | 1 | 639   | 50 | 2,232 | 132 |
| 70,024 | 135 | 15 | 1,450 | 66 | 58  | 1 | 654   | 49 | 2,297 | 131 |
| 70,025 | 134 | 15 | 1,506 | 67 | 58  | 1 | 656   | 49 | 2,354 | 132 |
| 70,026 | 184 | 15 | 1,963 | 67 | 104 | 1 | 1,005 | 49 | 3,256 | 132 |
| 70,027 | 197 | 13 | 1,999 | 62 | 109 | 0 | 1,033 | 44 | 3,338 | 119 |
| 70,028 | 203 | 13 | 2,032 | 62 | 114 | 0 | 1,053 | 44 | 3,402 | 119 |
| 70,029 | 203 | 13 | 2,023 | 62 | 114 | 0 | 1,052 | 44 | 3,392 | 119 |
| 70,030 | 201 | 13 | 2,007 | 62 | 114 | 0 | 1,041 | 45 | 3,363 | 120 |
| 70,031 | 191 | 9  | 1,855 | 70 | 110 | 0 | 991   | 50 | 3,147 | 129 |
| 70,032 | 184 | 9  | 1,797 | 75 | 108 | 0 | 957   | 51 | 3,046 | 135 |
| 70,033 | 170 | 11 | 1,564 | 79 | 96  | 0 | 859   | 52 | 2,689 | 142 |
| 70,034 | 136 | 11 | 1,153 | 79 | 78  | 0 | 687   | 53 | 2,054 | 143 |
| 70,035 | 126 | 11 | 1,098 | 84 | 74  | 0 | 640   | 53 | 1,938 | 148 |
| 70,036 | 123 | 12 | 1,050 | 85 | 73  | 0 | 622   | 53 | 1,868 | 150 |
| 70,037 | 121 | 12 | 1,019 | 87 | 73  | 0 | 617   | 55 | 1,830 | 154 |
| 70,038 | 119 | 12 | 983   | 85 | 72  | 0 | 607   | 55 | 1,781 | 152 |
| 70,039 | 119 | 12 | 961   | 87 | 72  | 0 | 594   | 55 | 1,746 | 154 |
| 70,040 | 118 | 12 | 940   | 86 | 71  | 0 | 586   | 55 | 1,715 | 153 |
| 70,041 | 118 | 12 | 932   | 87 | 71  | 0 | 584   | 55 | 1,705 | 154 |
| 70,042 | 118 | 12 | 940   | 89 | 71  | 0 | 584   | 54 | 1,713 | 155 |
| 70,043 | 119 | 12 | 946   | 94 | 71  | 0 | 591   | 59 | 1,727 | 165 |
| 70,044 | 118 | 12 | 946   | 97 | 71  | 0 | 590   | 60 | 1,725 | 169 |
| 70,045 | 118 | 11 | 936   | 89 | 71  | 0 | 590   | 53 | 1,715 | 153 |
| 70,046 | 120 | 11 | 951   | 85 | 70  | 0 | 595   | 47 | 1,736 | 143 |
| 70,047 | 120 | 11 | 944   | 83 | 70  | 0 | 595   | 47 | 1,729 | 141 |
| 70,048 | 120 | 11 | 937   | 82 | 70  | 0 | 594   | 45 | 1,721 | 138 |
| 70,049 | 120 | 11 | 970   | 81 | 71  | 0 | 604   | 43 | 1,765 | 135 |
| 70,050 | 120 | 11 | 971   | 81 | 71  | 0 | 606   | 43 | 1,768 | 135 |
| 70,051 | 120 | 10 | 998   | 80 | 71  | 0 | 613   | 39 | 1,802 | 129 |
| 70,052 | 119 | 10 | 1,019 | 79 | 71  | 0 | 613   | 39 | 1,822 | 128 |
| 70,053 | 121 | 10 | 1,079 | 79 | 73  | 0 | 647   | 39 | 1,920 | 128 |
| 70,054 | 121 | 10 | 1,084 | 79 | 73  | 0 | 644   | 39 | 1,922 | 128 |
| 70,055 | 122 | 10 | 1,114 | 76 | 74  | 0 | 655   | 38 | 1,965 | 124 |
| 70,056 | 126 | 10 | 1,151 | 76 | 74  | 0 | 667   | 38 | 2,018 | 124 |
| 70,057 | 125 | 10 | 1,151 | 76 | 74  | 0 | 667   | 38 | 2,017 | 124 |

|        |     |    |       |    |    |   |     |    |       |     |
|--------|-----|----|-------|----|----|---|-----|----|-------|-----|
| 70,058 | 125 | 10 | 1,153 | 74 | 74 | 0 | 670 | 37 | 2,022 | 121 |
| 70,059 | 125 | 8  | 1,163 | 65 | 74 | 0 | 673 | 29 | 2,035 | 102 |
| 70,060 | 124 | 8  | 1,160 | 65 | 74 | 0 | 672 | 28 | 2,030 | 101 |
| 70,061 | 124 | 8  | 1,160 | 65 | 74 | 0 | 673 | 28 | 2,031 | 101 |
| 70,062 | 124 | 8  | 1,162 | 63 | 74 | 0 | 673 | 28 | 2,033 | 99  |
| 70,063 | 124 | 8  | 1,159 | 63 | 74 | 0 | 673 | 28 | 2,030 | 99  |
| 70,064 | 123 | 6  | 1,160 | 56 | 74 | 0 | 672 | 21 | 2,029 | 83  |
| 70,065 | 123 | 6  | 1,158 | 56 | 74 | 0 | 671 | 21 | 2,026 | 83  |
| 70,066 | 122 | 6  | 1,161 | 56 | 74 | 0 | 676 | 21 | 2,033 | 83  |
| 70,067 | 124 | 6  | 1,193 | 56 | 74 | 0 | 697 | 21 | 2,088 | 83  |
| 70,068 | 124 | 5  | 1,213 | 55 | 76 | 0 | 710 | 21 | 2,123 | 81  |
| 70,069 | 117 | 4  | 1,152 | 55 | 74 | 0 | 692 | 21 | 2,035 | 80  |
| 70,070 | 115 | 5  | 1,144 | 55 | 74 | 0 | 690 | 21 | 2,023 | 81  |
| 70,071 | 115 | 5  | 1,127 | 54 | 73 | 1 | 684 | 21 | 1,999 | 81  |
| 70,072 | 96  | 5  | 1,056 | 59 | 67 | 1 | 629 | 23 | 1,848 | 88  |
| 70,073 | 95  | 5  | 1,046 | 62 | 67 | 1 | 625 | 23 | 1,833 | 91  |
| 70,074 | 95  | 5  | 1,041 | 61 | 67 | 1 | 624 | 23 | 1,827 | 90  |
| 70,075 | 94  | 5  | 996   | 59 | 67 | 1 | 611 | 23 | 1,768 | 88  |
| 70,076 | 94  | 5  | 940   | 87 | 67 | 2 | 609 | 30 | 1,710 | 124 |
| 70,077 | 35  | 5  | 465   | 90 | 19 | 2 | 227 | 30 | 746   | 127 |
| 70,078 | 22  | 5  | 428   | 91 | 13 | 2 | 196 | 31 | 659   | 129 |
| 70,079 | 17  | 5  | 391   | 91 | 8  | 2 | 176 | 31 | 592   | 129 |
| 70,080 | 17  | 5  | 390   | 92 | 8  | 2 | 175 | 32 | 590   | 131 |
| 70,081 | 17  | 6  | 388   | 82 | 8  | 2 | 173 | 26 | 586   | 116 |
| 70,082 | 16  | 6  | 380   | 84 | 7  | 2 | 170 | 26 | 573   | 118 |
| 70,083 | 16  | 6  | 379   | 78 | 7  | 2 | 170 | 25 | 572   | 111 |
| 70,084 | 15  | 4  | 379   | 73 | 7  | 2 | 170 | 24 | 571   | 103 |
| 70,085 | 15  | 4  | 381   | 67 | 7  | 2 | 172 | 23 | 575   | 96  |
| 70,086 | 16  | 3  | 387   | 66 | 7  | 2 | 172 | 23 | 582   | 94  |
| 70,087 | 17  | 3  | 403   | 65 | 7  | 2 | 187 | 27 | 614   | 97  |
| 70,088 | 17  | 3  | 403   | 69 | 7  | 2 | 187 | 27 | 614   | 101 |
| 70,089 | 17  | 3  | 420   | 70 | 7  | 2 | 200 | 30 | 644   | 105 |
| 70,090 | 18  | 3  | 423   | 68 | 7  | 2 | 202 | 31 | 650   | 104 |
| 70,091 | 18  | 3  | 422   | 68 | 7  | 2 | 202 | 31 | 649   | 104 |
| 70,092 | 23  | 3  | 447   | 71 | 8  | 2 | 228 | 32 | 706   | 108 |
| 70,093 | 23  | 2  | 435   | 69 | 8  | 2 | 223 | 31 | 689   | 104 |
| 70,094 | 22  | 2  | 429   | 64 | 8  | 2 | 216 | 26 | 675   | 94  |
| 70,095 | 22  | 3  | 426   | 68 | 8  | 2 | 215 | 30 | 671   | 103 |
| 70,096 | 21  | 3  | 419   | 69 | 8  | 2 | 212 | 30 | 660   | 104 |
| 70,097 | 21  | 3  | 413   | 69 | 8  | 2 | 212 | 30 | 654   | 104 |
| 70,098 | 21  | 3  | 407   | 71 | 8  | 2 | 209 | 30 | 645   | 106 |

|        |    |   |     |     |    |   |     |    |       |     |
|--------|----|---|-----|-----|----|---|-----|----|-------|-----|
| 70,099 | 22 | 3 | 380 | 73  | 7  | 2 | 204 | 30 | 613   | 108 |
| 70,100 | 22 | 3 | 381 | 74  | 7  | 2 | 203 | 30 | 613   | 109 |
| 70,101 | 24 | 3 | 384 | 73  | 8  | 2 | 208 | 30 | 624   | 108 |
| 70,102 | 24 | 3 | 377 | 73  | 8  | 2 | 205 | 30 | 614   | 108 |
| 70,103 | 26 | 3 | 361 | 74  | 8  | 2 | 207 | 29 | 602   | 108 |
| 70,104 | 24 | 3 | 302 | 75  | 5  | 2 | 173 | 30 | 504   | 110 |
| 70,105 | 23 | 3 | 290 | 75  | 5  | 2 | 170 | 30 | 488   | 110 |
| 70,106 | 25 | 3 | 255 | 75  | 4  | 2 | 163 | 30 | 447   | 110 |
| 70,107 | 21 | 5 | 218 | 77  | 4  | 2 | 150 | 30 | 393   | 114 |
| 70,108 | 21 | 5 | 216 | 77  | 4  | 2 | 146 | 30 | 387   | 114 |
| 70,109 | 28 | 5 | 289 | 77  | 10 | 2 | 195 | 30 | 522   | 114 |
| 70,110 | 28 | 5 | 287 | 77  | 10 | 2 | 191 | 30 | 516   | 114 |
| 70,111 | 28 | 5 | 286 | 77  | 10 | 2 | 192 | 30 | 516   | 114 |
| 70,112 | 31 | 5 | 406 | 77  | 16 | 2 | 248 | 30 | 701   | 114 |
| 70,113 | 31 | 5 | 409 | 77  | 16 | 2 | 254 | 30 | 710   | 114 |
| 70,114 | 32 | 5 | 424 | 80  | 16 | 2 | 265 | 33 | 737   | 120 |
| 70,115 | 32 | 5 | 426 | 82  | 17 | 2 | 265 | 33 | 740   | 122 |
| 70,116 | 35 | 5 | 480 | 82  | 17 | 2 | 277 | 33 | 809   | 122 |
| 70,117 | 33 | 5 | 464 | 82  | 18 | 2 | 263 | 33 | 778   | 122 |
| 70,118 | 37 | 5 | 507 | 82  | 24 | 2 | 326 | 33 | 894   | 122 |
| 70,119 | 37 | 5 | 475 | 85  | 22 | 3 | 308 | 36 | 842   | 129 |
| 70,120 | 37 | 5 | 476 | 85  | 23 | 3 | 307 | 35 | 843   | 128 |
| 70,121 | 46 | 4 | 543 | 84  | 27 | 3 | 358 | 35 | 974   | 126 |
| 70,122 | 46 | 4 | 543 | 79  | 27 | 2 | 357 | 33 | 973   | 118 |
| 70,123 | 46 | 4 | 542 | 73  | 27 | 2 | 358 | 33 | 973   | 112 |
| 70,124 | 45 | 4 | 548 | 73  | 27 | 2 | 358 | 33 | 978   | 112 |
| 70,125 | 45 | 4 | 549 | 73  | 27 | 2 | 358 | 33 | 979   | 112 |
| 70,126 | 45 | 4 | 545 | 74  | 27 | 2 | 357 | 34 | 974   | 114 |
| 70,127 | 45 | 4 | 545 | 46  | 27 | 1 | 357 | 27 | 974   | 78  |
| 70,128 | 48 | 4 | 565 | 41  | 28 | 1 | 375 | 25 | 1,016 | 71  |
| 70,129 | 50 | 4 | 590 | 41  | 31 | 1 | 388 | 25 | 1,059 | 71  |
| 70,130 | 49 | 3 | 594 | 41  | 31 | 1 | 384 | 24 | 1,058 | 69  |
| 70,131 | 49 | 3 | 599 | 41  | 31 | 1 | 390 | 24 | 1,069 | 69  |
| 70,132 | 49 | 3 | 599 | 41  | 31 | 1 | 388 | 24 | 1,067 | 69  |
| 70,133 | 49 | 3 | 599 | 40  | 32 | 1 | 388 | 24 | 1,068 | 68  |
| 70,134 | 49 | 3 | 599 | 43  | 32 | 1 | 388 | 24 | 1,068 | 71  |
| 70,135 | 49 | 4 | 605 | 72  | 32 | 2 | 393 | 43 | 1,079 | 121 |
| 70,136 | 49 | 4 | 604 | 77  | 32 | 3 | 393 | 59 | 1,078 | 143 |
| 70,137 | 49 | 6 | 598 | 143 | 32 | 4 | 393 | 68 | 1,072 | 221 |
| 70,138 | 48 | 7 | 585 | 159 | 32 | 5 | 378 | 68 | 1,043 | 239 |
| 70,139 | 49 | 7 | 575 | 157 | 32 | 5 | 372 | 68 | 1,028 | 237 |

|        |    |    |       |     |    |   |     |    |       |     |
|--------|----|----|-------|-----|----|---|-----|----|-------|-----|
| 70,140 | 49 | 9  | 568   | 157 | 32 | 5 | 366 | 65 | 1,015 | 236 |
| 70,141 | 48 | 9  | 563   | 157 | 32 | 5 | 364 | 64 | 1,007 | 235 |
| 70,142 | 48 | 9  | 560   | 158 | 32 | 5 | 362 | 64 | 1,002 | 236 |
| 70,143 | 43 | 9  | 538   | 154 | 31 | 5 | 338 | 63 | 950   | 231 |
| 70,144 | 43 | 9  | 536   | 154 | 31 | 5 | 338 | 63 | 948   | 231 |
| 70,145 | 43 | 9  | 536   | 156 | 31 | 5 | 339 | 63 | 949   | 233 |
| 70,146 | 43 | 8  | 535   | 149 | 31 | 5 | 338 | 58 | 947   | 220 |
| 70,147 | 43 | 8  | 537   | 148 | 32 | 5 | 339 | 58 | 951   | 219 |
| 70,148 | 42 | 9  | 537   | 146 | 32 | 5 | 338 | 58 | 949   | 218 |
| 70,149 | 43 | 9  | 538   | 144 | 32 | 5 | 339 | 58 | 952   | 216 |
| 70,150 | 42 | 9  | 548   | 143 | 32 | 5 | 341 | 58 | 963   | 215 |
| 70,151 | 42 | 9  | 552   | 142 | 32 | 5 | 350 | 58 | 976   | 214 |
| 70,152 | 40 | 9  | 536   | 142 | 31 | 5 | 347 | 58 | 954   | 214 |
| 70,153 | 40 | 9  | 530   | 142 | 31 | 5 | 343 | 59 | 944   | 215 |
| 70,154 | 38 | 9  | 520   | 141 | 31 | 5 | 339 | 60 | 928   | 215 |
| 70,155 | 39 | 9  | 519   | 140 | 30 | 5 | 338 | 59 | 926   | 213 |
| 70,156 | 39 | 9  | 519   | 140 | 30 | 5 | 339 | 59 | 927   | 213 |
| 70,157 | 36 | 9  | 517   | 140 | 30 | 5 | 335 | 59 | 918   | 213 |
| 70,158 | 36 | 7  | 511   | 140 | 30 | 5 | 334 | 60 | 911   | 212 |
| 70,159 | 34 | 7  | 483   | 140 | 30 | 5 | 332 | 60 | 879   | 212 |
| 70,160 | 30 | 7  | 442   | 140 | 24 | 5 | 286 | 60 | 782   | 212 |
| 70,161 | 32 | 7  | 456   | 140 | 25 | 5 | 291 | 60 | 804   | 212 |
| 70,162 | 29 | 7  | 403   | 140 | 20 | 5 | 248 | 60 | 700   | 212 |
| 70,163 | 43 | 7  | 621   | 140 | 40 | 5 | 431 | 60 | 1,135 | 212 |
| 70,164 | 49 | 7  | 773   | 140 | 47 | 5 | 496 | 60 | 1,365 | 212 |
| 70,165 | 48 | 7  | 779   | 137 | 48 | 5 | 503 | 57 | 1,378 | 206 |
| 70,166 | 65 | 7  | 937   | 136 | 50 | 5 | 583 | 57 | 1,635 | 205 |
| 70,167 | 67 | 11 | 964   | 138 | 52 | 5 | 593 | 57 | 1,676 | 211 |
| 70,168 | 72 | 11 | 1,082 | 138 | 58 | 5 | 648 | 57 | 1,860 | 211 |
| 70,169 | 68 | 11 | 1,072 | 138 | 52 | 5 | 605 | 57 | 1,797 | 211 |
| 70,170 | 66 | 11 | 1,053 | 135 | 52 | 4 | 592 | 54 | 1,763 | 204 |
| 70,171 | 59 | 11 | 1,031 | 135 | 49 | 4 | 575 | 54 | 1,714 | 204 |
| 70,172 | 59 | 11 | 1,024 | 135 | 49 | 4 | 571 | 54 | 1,703 | 204 |
| 70,173 | 59 | 11 | 1,025 | 135 | 49 | 4 | 570 | 54 | 1,703 | 204 |
| 70,174 | 59 | 11 | 1,019 | 136 | 49 | 4 | 567 | 54 | 1,694 | 205 |
| 70,175 | 59 | 11 | 1,013 | 136 | 49 | 4 | 566 | 54 | 1,687 | 205 |
| 70,176 | 60 | 11 | 1,013 | 135 | 49 | 4 | 567 | 53 | 1,689 | 203 |
| 70,177 | 60 | 11 | 1,012 | 140 | 49 | 5 | 566 | 54 | 1,687 | 210 |
| 70,178 | 59 | 11 | 1,003 | 142 | 48 | 5 | 557 | 56 | 1,667 | 214 |
| 70,179 | 57 | 11 | 994   | 147 | 48 | 6 | 549 | 56 | 1,648 | 220 |
| 70,180 | 55 | 11 | 969   | 147 | 45 | 6 | 536 | 56 | 1,605 | 220 |



|        |    |    |       |     |    |   |     |    |       |     |
|--------|----|----|-------|-----|----|---|-----|----|-------|-----|
| 70,181 | 55 | 11 | 969   | 147 | 45 | 6 | 535 | 56 | 1,604 | 220 |
| 70,182 | 55 | 11 | 964   | 147 | 45 | 6 | 529 | 56 | 1,593 | 220 |
| 70,183 | 55 | 11 | 956   | 147 | 44 | 6 | 525 | 56 | 1,580 | 220 |
| 70,184 | 55 | 11 | 955   | 152 | 44 | 7 | 524 | 62 | 1,578 | 232 |
| 70,185 | 55 | 11 | 957   | 147 | 44 | 7 | 524 | 63 | 1,580 | 228 |
| 70,186 | 55 | 11 | 958   | 121 | 44 | 6 | 524 | 56 | 1,581 | 194 |
| 70,187 | 54 | 11 | 958   | 120 | 44 | 5 | 524 | 41 | 1,580 | 177 |
| 70,188 | 54 | 9  | 965   | 56  | 44 | 4 | 525 | 33 | 1,588 | 102 |
| 70,189 | 54 | 9  | 964   | 42  | 45 | 3 | 525 | 27 | 1,588 | 81  |
| 70,190 | 54 | 9  | 970   | 41  | 45 | 4 | 527 | 27 | 1,596 | 81  |
| 70,191 | 54 | 7  | 970   | 40  | 45 | 4 | 525 | 27 | 1,594 | 78  |
| 70,192 | 54 | 7  | 972   | 39  | 45 | 4 | 528 | 27 | 1,599 | 77  |
| 70,193 | 54 | 7  | 972   | 39  | 45 | 4 | 528 | 27 | 1,599 | 77  |
| 70,194 | 54 | 7  | 972   | 39  | 45 | 4 | 528 | 29 | 1,599 | 79  |
| 70,195 | 54 | 7  | 972   | 39  | 45 | 4 | 527 | 30 | 1,598 | 80  |
| 70,196 | 58 | 8  | 991   | 59  | 47 | 5 | 538 | 37 | 1,634 | 109 |
| 70,197 | 58 | 8  | 990   | 59  | 46 | 5 | 538 | 37 | 1,632 | 109 |
| 70,198 | 58 | 9  | 1,005 | 61  | 46 | 5 | 538 | 38 | 1,647 | 113 |
| 70,199 | 57 | 8  | 1,006 | 61  | 46 | 5 | 537 | 39 | 1,646 | 113 |
| 70,200 | 58 | 8  | 998   | 61  | 46 | 5 | 533 | 39 | 1,635 | 113 |
| 70,201 | 58 | 8  | 992   | 60  | 46 | 5 | 524 | 39 | 1,620 | 112 |
| 70,202 | 58 | 8  | 992   | 60  | 46 | 5 | 524 | 39 | 1,620 | 112 |
| 70,203 | 58 | 8  | 995   | 63  | 46 | 5 | 522 | 38 | 1,621 | 114 |
| 70,204 | 58 | 8  | 994   | 63  | 46 | 5 | 521 | 38 | 1,619 | 114 |
| 70,205 | 58 | 8  | 994   | 63  | 46 | 5 | 522 | 37 | 1,620 | 113 |
| 70,206 | 60 | 8  | 1,016 | 63  | 46 | 5 | 536 | 37 | 1,658 | 113 |
| 70,207 | 60 | 8  | 1,016 | 63  | 46 | 5 | 535 | 37 | 1,657 | 113 |
| 70,208 | 60 | 8  | 1,015 | 64  | 46 | 5 | 537 | 37 | 1,658 | 114 |
| 70,209 | 60 | 8  | 1,015 | 62  | 46 | 5 | 536 | 36 | 1,657 | 111 |
| 70,210 | 61 | 8  | 1,028 | 62  | 46 | 5 | 536 | 36 | 1,671 | 111 |
| 70,211 | 62 | 8  | 1,024 | 63  | 47 | 5 | 537 | 37 | 1,670 | 113 |
| 70,212 | 60 | 8  | 998   | 63  | 46 | 5 | 528 | 37 | 1,632 | 113 |
| 70,213 | 60 | 8  | 997   | 63  | 51 | 5 | 548 | 37 | 1,656 | 113 |
| 70,214 | 51 | 8  | 799   | 65  | 36 | 6 | 389 | 37 | 1,275 | 116 |
| 70,215 | 47 | 8  | 652   | 65  | 29 | 6 | 324 | 37 | 1,052 | 116 |
| 70,216 | 51 | 8  | 671   | 67  | 32 | 6 | 339 | 37 | 1,093 | 118 |
| 70,217 | 34 | 8  | 512   | 66  | 29 | 6 | 259 | 37 | 834   | 117 |
| 70,218 | 32 | 4  | 433   | 66  | 27 | 6 | 237 | 37 | 729   | 113 |
| 70,219 | 27 | 4  | 320   | 66  | 21 | 6 | 182 | 37 | 550   | 113 |
| 70,220 | 28 | 4  | 281   | 66  | 22 | 6 | 160 | 37 | 491   | 113 |
| 70,221 | 30 | 4  | 276   | 66  | 24 | 6 | 169 | 37 | 499   | 113 |

|        |     |   |       |    |    |   |     |    |       |     |
|--------|-----|---|-------|----|----|---|-----|----|-------|-----|
| 70,222 | 30  | 4 | 271   | 66 | 23 | 6 | 163 | 37 | 487   | 113 |
| 70,223 | 30  | 4 | 274   | 66 | 23 | 6 | 163 | 37 | 490   | 113 |
| 70,224 | 30  | 4 | 273   | 66 | 23 | 6 | 163 | 37 | 489   | 113 |
| 70,225 | 30  | 4 | 273   | 65 | 23 | 6 | 166 | 37 | 492   | 112 |
| 70,226 | 30  | 4 | 273   | 65 | 23 | 6 | 166 | 37 | 492   | 112 |
| 70,227 | 29  | 4 | 273   | 66 | 23 | 6 | 170 | 37 | 495   | 113 |
| 70,228 | 29  | 4 | 273   | 63 | 23 | 5 | 170 | 36 | 495   | 108 |
| 70,229 | 29  | 4 | 284   | 61 | 23 | 5 | 176 | 34 | 512   | 104 |
| 70,230 | 29  | 4 | 283   | 55 | 23 | 4 | 177 | 34 | 512   | 97  |
| 70,231 | 29  | 4 | 281   | 55 | 23 | 4 | 177 | 34 | 510   | 97  |
| 70,232 | 29  | 4 | 283   | 55 | 23 | 4 | 182 | 34 | 517   | 97  |
| 70,233 | 29  | 4 | 284   | 55 | 23 | 4 | 182 | 34 | 518   | 97  |
| 70,234 | 29  | 4 | 284   | 55 | 23 | 4 | 182 | 34 | 518   | 97  |
| 70,235 | 29  | 4 | 285   | 50 | 23 | 3 | 184 | 27 | 521   | 84  |
| 70,236 | 29  | 4 | 285   | 50 | 23 | 3 | 184 | 27 | 521   | 84  |
| 70,237 | 32  | 3 | 287   | 48 | 23 | 3 | 187 | 16 | 529   | 70  |
| 70,238 | 32  | 3 | 285   | 42 | 23 | 3 | 187 | 14 | 527   | 62  |
| 70,239 | 32  | 3 | 297   | 42 | 23 | 3 | 188 | 14 | 540   | 62  |
| 70,240 | 32  | 2 | 296   | 39 | 22 | 4 | 188 | 14 | 538   | 59  |
| 70,241 | 35  | 2 | 322   | 38 | 24 | 3 | 194 | 14 | 575   | 57  |
| 70,242 | 35  | 2 | 324   | 38 | 25 | 3 | 192 | 14 | 576   | 57  |
| 70,243 | 35  | 2 | 320   | 38 | 25 | 3 | 189 | 14 | 569   | 57  |
| 70,244 | 36  | 2 | 387   | 39 | 27 | 3 | 215 | 12 | 665   | 56  |
| 70,245 | 36  | 2 | 388   | 39 | 27 | 3 | 216 | 11 | 667   | 55  |
| 70,246 | 36  | 2 | 388   | 40 | 27 | 3 | 215 | 11 | 666   | 56  |
| 70,247 | 35  | 1 | 385   | 18 | 26 | 2 | 211 | 4  | 657   | 25  |
| 70,248 | 45  | 1 | 498   | 18 | 31 | 2 | 296 | 4  | 870   | 25  |
| 70,249 | 45  | 0 | 506   | 16 | 33 | 2 | 300 | 2  | 884   | 20  |
| 70,250 | 45  | 0 | 504   | 16 | 33 | 2 | 300 | 2  | 882   | 20  |
| 70,251 | 49  | 0 | 571   | 16 | 38 | 2 | 340 | 2  | 998   | 20  |
| 70,252 | 49  | 0 | 572   | 16 | 38 | 2 | 342 | 2  | 1,001 | 20  |
| 70,253 | 49  | 0 | 571   | 13 | 38 | 2 | 342 | 2  | 1,000 | 17  |
| 70,254 | 49  | 0 | 575   | 13 | 38 | 2 | 344 | 2  | 1,006 | 17  |
| 70,255 | 49  | 0 | 580   | 13 | 38 | 2 | 343 | 2  | 1,010 | 17  |
| 70,256 | 51  | 0 | 595   | 13 | 38 | 2 | 347 | 2  | 1,031 | 17  |
| 70,257 | 48  | 0 | 591   | 14 | 38 | 2 | 337 | 2  | 1,014 | 18  |
| 70,258 | 48  | 0 | 590   | 14 | 38 | 2 | 336 | 3  | 1,012 | 19  |
| 70,259 | 48  | 0 | 590   | 14 | 38 | 2 | 336 | 3  | 1,012 | 19  |
| 70,260 | 63  | 0 | 694   | 16 | 42 | 2 | 390 | 11 | 1,189 | 29  |
| 70,261 | 95  | 0 | 1,392 | 18 | 81 | 2 | 646 | 11 | 2,214 | 31  |
| 70,262 | 111 | 0 | 1,638 | 17 | 96 | 2 | 821 | 10 | 2,666 | 29  |

|        |     |   |       |    |     |   |       |    |       |    |
|--------|-----|---|-------|----|-----|---|-------|----|-------|----|
| 70,263 | 112 | 0 | 1,645 | 18 | 95  | 2 | 833   | 10 | 2,685 | 30 |
| 70,264 | 117 | 1 | 1,649 | 18 | 90  | 2 | 817   | 10 | 2,673 | 31 |
| 70,265 | 113 | 1 | 1,657 | 17 | 85  | 2 | 792   | 10 | 2,647 | 30 |
| 70,266 | 111 | 1 | 1,646 | 22 | 85  | 2 | 787   | 11 | 2,629 | 36 |
| 70,267 | 111 | 1 | 1,636 | 28 | 84  | 2 | 765   | 11 | 2,596 | 42 |
| 70,268 | 116 | 1 | 1,691 | 29 | 85  | 2 | 781   | 11 | 2,673 | 43 |
| 70,269 | 114 | 1 | 1,691 | 28 | 85  | 2 | 776   | 11 | 2,666 | 42 |
| 70,270 | 138 | 1 | 1,853 | 28 | 95  | 2 | 908   | 11 | 2,994 | 42 |
| 70,271 | 141 | 2 | 1,869 | 30 | 97  | 2 | 918   | 11 | 3,025 | 45 |
| 70,272 | 147 | 2 | 1,923 | 30 | 108 | 2 | 974   | 11 | 3,152 | 45 |
| 70,273 | 147 | 2 | 1,921 | 30 | 108 | 2 | 973   | 11 | 3,149 | 45 |
| 70,274 | 157 | 2 | 1,977 | 31 | 110 | 3 | 1,008 | 11 | 3,252 | 47 |
| 70,275 | 198 | 3 | 2,276 | 31 | 136 | 3 | 1,279 | 11 | 3,889 | 48 |
| 70,276 | 200 | 4 | 2,289 | 31 | 137 | 3 | 1,294 | 11 | 3,920 | 49 |
| 70,277 | 201 | 4 | 2,293 | 31 | 137 | 3 | 1,297 | 11 | 3,928 | 49 |
| 70,278 | 201 | 5 | 2,292 | 32 | 137 | 3 | 1,292 | 11 | 3,922 | 51 |
| 70,279 | 201 | 5 | 2,279 | 31 | 137 | 3 | 1,287 | 11 | 3,904 | 50 |
| 70,280 | 201 | 5 | 2,278 | 31 | 137 | 3 | 1,286 | 11 | 3,902 | 50 |
| 70,281 | 201 | 5 | 2,281 | 31 | 137 | 3 | 1,285 | 11 | 3,904 | 50 |
| 70,282 | 201 | 5 | 2,279 | 32 | 137 | 3 | 1,282 | 11 | 3,899 | 51 |
| 70,283 | 202 | 5 | 2,299 | 40 | 139 | 3 | 1,288 | 12 | 3,928 | 60 |
| 70,284 | 202 | 5 | 2,297 | 41 | 139 | 3 | 1,288 | 12 | 3,926 | 61 |
| 70,285 | 202 | 5 | 2,300 | 43 | 139 | 3 | 1,290 | 12 | 3,931 | 63 |
| 70,286 | 202 | 5 | 2,300 | 48 | 139 | 3 | 1,290 | 13 | 3,931 | 69 |
| 70,287 | 202 | 5 | 2,300 | 50 | 139 | 3 | 1,288 | 14 | 3,929 | 72 |
| 70,288 | 199 | 5 | 2,297 | 51 | 139 | 3 | 1,290 | 13 | 3,925 | 72 |
| 70,289 | 201 | 5 | 2,344 | 53 | 139 | 3 | 1,299 | 13 | 3,983 | 74 |
| 70,290 | 257 | 5 | 2,775 | 53 | 168 | 2 | 1,484 | 13 | 4,684 | 73 |
| 70,291 | 266 | 5 | 2,798 | 53 | 172 | 2 | 1,501 | 13 | 4,737 | 73 |
| 70,292 | 262 | 5 | 2,770 | 54 | 170 | 2 | 1,495 | 13 | 4,697 | 74 |
| 70,293 | 274 | 5 | 2,816 | 54 | 178 | 2 | 1,547 | 13 | 4,815 | 74 |
| 70,294 | 274 | 6 | 2,817 | 54 | 178 | 2 | 1,546 | 13 | 4,815 | 75 |
| 70,295 | 273 | 6 | 2,761 | 52 | 175 | 2 | 1,518 | 13 | 4,727 | 73 |
| 70,296 | 281 | 6 | 2,867 | 52 | 179 | 2 | 1,541 | 13 | 4,868 | 73 |
| 70,297 | 278 | 6 | 2,859 | 52 | 177 | 2 | 1,530 | 13 | 4,844 | 73 |
| 70,298 | 273 | 6 | 2,826 | 52 | 177 | 2 | 1,492 | 13 | 4,768 | 73 |
| 70,299 | 272 | 6 | 2,810 | 52 | 178 | 2 | 1,474 | 13 | 4,734 | 73 |
| 70,300 | 272 | 6 | 2,845 | 53 | 180 | 2 | 1,478 | 13 | 4,775 | 74 |
| 70,301 | 271 | 6 | 2,834 | 53 | 180 | 2 | 1,467 | 13 | 4,752 | 74 |
| 70,302 | 267 | 6 | 2,775 | 53 | 175 | 2 | 1,439 | 13 | 4,656 | 74 |
| 70,303 | 267 | 6 | 2,806 | 53 | 175 | 2 | 1,438 | 13 | 4,686 | 74 |

|        |     |    |       |    |     |   |       |    |       |     |
|--------|-----|----|-------|----|-----|---|-------|----|-------|-----|
| 70,304 | 267 | 6  | 2,810 | 53 | 175 | 2 | 1,439 | 13 | 4,691 | 74  |
| 70,305 | 268 | 6  | 2,823 | 53 | 175 | 2 | 1,442 | 13 | 4,708 | 74  |
| 70,306 | 268 | 6  | 2,821 | 54 | 175 | 2 | 1,442 | 13 | 4,706 | 75  |
| 70,307 | 266 | 6  | 2,807 | 55 | 175 | 2 | 1,439 | 13 | 4,687 | 76  |
| 70,308 | 266 | 6  | 2,789 | 55 | 176 | 2 | 1,435 | 13 | 4,666 | 76  |
| 70,309 | 251 | 6  | 2,719 | 62 | 174 | 2 | 1,404 | 18 | 4,548 | 88  |
| 70,310 | 250 | 6  | 2,716 | 62 | 172 | 2 | 1,400 | 18 | 4,538 | 88  |
| 70,311 | 251 | 7  | 2,692 | 60 | 172 | 2 | 1,388 | 10 | 4,503 | 79  |
| 70,312 | 220 | 8  | 1,996 | 60 | 133 | 2 | 1,135 | 10 | 3,484 | 80  |
| 70,313 | 202 | 8  | 1,749 | 59 | 117 | 2 | 961   | 10 | 3,029 | 79  |
| 70,314 | 201 | 8  | 1,708 | 59 | 117 | 2 | 938   | 10 | 2,964 | 79  |
| 70,315 | 196 | 7  | 1,683 | 59 | 117 | 2 | 934   | 10 | 2,930 | 78  |
| 70,316 | 195 | 7  | 1,655 | 53 | 117 | 1 | 933   | 9  | 2,900 | 70  |
| 70,317 | 195 | 7  | 1,650 | 53 | 117 | 1 | 933   | 9  | 2,895 | 70  |
| 70,318 | 191 | 7  | 1,634 | 47 | 114 | 1 | 927   | 9  | 2,866 | 64  |
| 70,319 | 186 | 7  | 1,581 | 47 | 113 | 1 | 913   | 10 | 2,793 | 65  |
| 70,320 | 187 | 9  | 1,579 | 50 | 114 | 1 | 912   | 10 | 2,792 | 70  |
| 70,321 | 163 | 9  | 1,407 | 50 | 103 | 1 | 774   | 13 | 2,447 | 73  |
| 70,322 | 162 | 10 | 1,391 | 71 | 100 | 1 | 771   | 19 | 2,424 | 101 |
| 70,323 | 162 | 10 | 1,422 | 74 | 91  | 1 | 756   | 21 | 2,431 | 106 |
| 70,324 | 157 | 10 | 1,411 | 77 | 92  | 1 | 789   | 21 | 2,449 | 109 |
| 70,325 | 118 | 9  | 1,174 | 76 | 69  | 0 | 561   | 21 | 1,922 | 106 |
| 70,326 | 117 | 8  | 1,148 | 76 | 67  | 0 | 532   | 22 | 1,864 | 106 |
| 70,327 | 115 | 8  | 1,135 | 76 | 66  | 0 | 516   | 22 | 1,832 | 106 |
| 70,328 | 114 | 8  | 1,133 | 77 | 66  | 0 | 516   | 22 | 1,829 | 107 |
| 70,329 | 114 | 7  | 1,139 | 76 | 66  | 0 | 519   | 22 | 1,838 | 105 |
| 70,330 | 114 | 7  | 1,145 | 76 | 66  | 0 | 522   | 22 | 1,847 | 105 |
| 70,331 | 114 | 7  | 1,152 | 76 | 66  | 0 | 523   | 22 | 1,855 | 105 |
| 70,332 | 119 | 7  | 1,167 | 76 | 66  | 0 | 526   | 22 | 1,878 | 105 |
| 70,333 | 126 | 7  | 1,187 | 67 | 65  | 0 | 537   | 21 | 1,915 | 95  |
| 70,334 | 132 | 7  | 1,227 | 66 | 67  | 0 | 548   | 21 | 1,974 | 94  |
| 70,335 | 132 | 8  | 1,229 | 64 | 67  | 0 | 548   | 21 | 1,976 | 93  |
| 70,336 | 132 | 8  | 1,229 | 64 | 67  | 0 | 548   | 21 | 1,976 | 93  |
| 70,337 | 139 | 8  | 1,320 | 59 | 70  | 0 | 585   | 20 | 2,114 | 87  |
| 70,338 | 150 | 8  | 1,458 | 57 | 86  | 0 | 688   | 19 | 2,382 | 84  |
| 70,339 | 150 | 8  | 1,463 | 54 | 89  | 0 | 694   | 19 | 2,396 | 81  |
| 70,340 | 154 | 8  | 1,498 | 55 | 92  | 0 | 720   | 19 | 2,464 | 82  |
| 70,341 | 105 | 8  | 1,141 | 55 | 72  | 0 | 608   | 19 | 1,926 | 82  |
| 70,342 | 96  | 8  | 1,118 | 54 | 69  | 0 | 591   | 19 | 1,874 | 81  |
| 70,343 | 96  | 8  | 1,117 | 54 | 72  | 0 | 595   | 19 | 1,880 | 81  |
| 70,344 | 84  | 8  | 1,071 | 54 | 64  | 0 | 544   | 19 | 1,763 | 81  |

|        |    |   |       |    |    |   |     |    |       |     |
|--------|----|---|-------|----|----|---|-----|----|-------|-----|
| 70,345 | 84 | 8 | 1,074 | 58 | 64 | 0 | 544 | 19 | 1,766 | 85  |
| 70,346 | 81 | 8 | 1,052 | 59 | 64 | 0 | 544 | 20 | 1,741 | 87  |
| 70,347 | 73 | 8 | 947   | 59 | 60 | 0 | 520 | 20 | 1,600 | 87  |
| 70,348 | 73 | 8 | 937   | 60 | 60 | 0 | 517 | 21 | 1,587 | 89  |
| 70,349 | 72 | 8 | 898   | 63 | 58 | 1 | 509 | 24 | 1,537 | 96  |
| 70,350 | 72 | 9 | 887   | 63 | 56 | 1 | 505 | 24 | 1,520 | 97  |
| 70,351 | 72 | 9 | 837   | 63 | 52 | 1 | 498 | 26 | 1,459 | 99  |
| 70,352 | 72 | 9 | 813   | 63 | 52 | 1 | 496 | 27 | 1,433 | 100 |
| 70,353 | 72 | 9 | 814   | 63 | 53 | 1 | 503 | 27 | 1,442 | 100 |
| 70,354 | 73 | 9 | 810   | 63 | 53 | 1 | 503 | 27 | 1,439 | 100 |
| 70,355 | 73 | 9 | 816   | 64 | 53 | 2 | 504 | 27 | 1,446 | 102 |
| 70,356 | 73 | 9 | 802   | 64 | 53 | 2 | 500 | 27 | 1,428 | 102 |
| 70,357 | 73 | 9 | 799   | 63 | 53 | 2 | 501 | 27 | 1,426 | 101 |
| 70,358 | 76 | 9 | 894   | 63 | 56 | 2 | 512 | 27 | 1,538 | 101 |
| 70,359 | 76 | 9 | 917   | 63 | 56 | 2 | 523 | 28 | 1,572 | 102 |
| 70,360 | 76 | 9 | 918   | 56 | 56 | 2 | 520 | 22 | 1,570 | 89  |
| 70,361 | 76 | 7 | 915   | 53 | 56 | 2 | 521 | 22 | 1,568 | 84  |
| 70,362 | 75 | 8 | 912   | 55 | 56 | 2 | 516 | 23 | 1,559 | 88  |
| 70,363 | 74 | 8 | 900   | 55 | 56 | 2 | 507 | 23 | 1,537 | 88  |
| 70,364 | 74 | 8 | 898   | 55 | 56 | 2 | 507 | 23 | 1,535 | 88  |
| 70,365 | 74 | 8 | 899   | 55 | 56 | 2 | 505 | 23 | 1,534 | 88  |
| 70,366 | 74 | 8 | 899   | 56 | 56 | 2 | 505 | 23 | 1,534 | 89  |
| 70,367 | 74 | 8 | 895   | 56 | 56 | 2 | 505 | 23 | 1,530 | 89  |
| 70,368 | 74 | 8 | 891   | 57 | 56 | 2 | 505 | 23 | 1,526 | 90  |
| 70,369 | 74 | 8 | 890   | 54 | 56 | 2 | 502 | 22 | 1,522 | 86  |
| 70,370 | 74 | 8 | 889   | 56 | 56 | 2 | 502 | 22 | 1,521 | 88  |
| 70,371 | 74 | 6 | 883   | 64 | 55 | 3 | 512 | 29 | 1,524 | 102 |
| 70,372 | 74 | 6 | 886   | 66 | 55 | 3 | 515 | 25 | 1,530 | 100 |
| 70,373 | 71 | 5 | 882   | 45 | 55 | 3 | 507 | 21 | 1,515 | 74  |
| 70,374 | 64 | 5 | 809   | 44 | 51 | 3 | 468 | 19 | 1,392 | 71  |
| 70,375 | 59 | 5 | 762   | 41 | 49 | 3 | 399 | 19 | 1,269 | 68  |
| 70,376 | 60 | 5 | 758   | 41 | 50 | 3 | 404 | 18 | 1,272 | 67  |
| 70,377 | 60 | 5 | 744   | 41 | 49 | 3 | 401 | 18 | 1,254 | 67  |
| 70,378 | 60 | 5 | 742   | 41 | 49 | 3 | 397 | 18 | 1,248 | 67  |
| 70,379 | 60 | 5 | 739   | 40 | 49 | 3 | 402 | 18 | 1,250 | 66  |
| 70,380 | 60 | 5 | 733   | 40 | 49 | 3 | 403 | 20 | 1,245 | 68  |
| 70,381 | 60 | 5 | 728   | 39 | 49 | 3 | 403 | 20 | 1,240 | 67  |
| 70,382 | 60 | 5 | 724   | 39 | 49 | 3 | 404 | 20 | 1,237 | 67  |
| 70,383 | 55 | 5 | 708   | 39 | 49 | 3 | 401 | 20 | 1,213 | 67  |
| 70,384 | 47 | 5 | 667   | 39 | 48 | 3 | 382 | 20 | 1,144 | 67  |
| 70,385 | 41 | 4 | 652   | 39 | 46 | 3 | 387 | 20 | 1,126 | 66  |

|        |    |    |     |    |    |   |     |    |       |     |
|--------|----|----|-----|----|----|---|-----|----|-------|-----|
| 70,386 | 41 | 5  | 648 | 40 | 46 | 3 | 385 | 22 | 1,120 | 70  |
| 70,387 | 34 | 5  | 556 | 40 | 42 | 3 | 348 | 22 | 980   | 70  |
| 70,388 | 30 | 5  | 452 | 40 | 29 | 3 | 268 | 22 | 779   | 70  |
| 70,389 | 23 | 5  | 417 | 40 | 26 | 3 | 246 | 23 | 712   | 71  |
| 70,390 | 21 | 6  | 382 | 55 | 23 | 3 | 234 | 27 | 660   | 91  |
| 70,391 | 17 | 6  | 331 | 56 | 20 | 3 | 208 | 29 | 576   | 94  |
| 70,392 | 10 | 6  | 243 | 56 | 13 | 3 | 135 | 30 | 401   | 95  |
| 70,393 | 10 | 6  | 242 | 57 | 12 | 4 | 136 | 30 | 400   | 97  |
| 70,394 | 10 | 5  | 238 | 59 | 10 | 4 | 130 | 30 | 388   | 98  |
| 70,395 | 10 | 5  | 235 | 55 | 10 | 4 | 128 | 30 | 383   | 94  |
| 70,396 | 10 | 5  | 232 | 55 | 10 | 4 | 129 | 29 | 381   | 93  |
| 70,397 | 10 | 8  | 232 | 55 | 10 | 4 | 129 | 29 | 381   | 96  |
| 70,398 | 10 | 8  | 230 | 56 | 10 | 4 | 128 | 30 | 378   | 98  |
| 70,399 | 10 | 8  | 231 | 55 | 10 | 4 | 129 | 29 | 380   | 96  |
| 70,400 | 13 | 8  | 248 | 52 | 13 | 3 | 149 | 26 | 423   | 89  |
| 70,401 | 15 | 7  | 267 | 52 | 15 | 3 | 162 | 26 | 459   | 88  |
| 70,402 | 15 | 7  | 266 | 51 | 15 | 3 | 161 | 24 | 457   | 85  |
| 70,403 | 25 | 7  | 353 | 51 | 32 | 3 | 211 | 24 | 621   | 85  |
| 70,404 | 31 | 7  | 605 | 54 | 39 | 4 | 262 | 25 | 937   | 90  |
| 70,405 | 30 | 8  | 619 | 61 | 40 | 4 | 268 | 29 | 957   | 102 |
| 70,406 | 30 | 8  | 627 | 68 | 41 | 3 | 271 | 43 | 969   | 122 |
| 70,407 | 30 | 8  | 624 | 74 | 41 | 3 | 271 | 44 | 966   | 129 |
| 70,408 | 30 | 8  | 613 | 75 | 41 | 3 | 269 | 45 | 953   | 131 |
| 70,409 | 27 | 8  | 527 | 73 | 38 | 3 | 259 | 47 | 851   | 131 |
| 70,410 | 27 | 8  | 504 | 75 | 37 | 3 | 248 | 52 | 816   | 138 |
| 70,411 | 27 | 8  | 502 | 76 | 37 | 3 | 248 | 52 | 814   | 139 |
| 70,412 | 27 | 9  | 504 | 76 | 37 | 3 | 247 | 52 | 815   | 140 |
| 70,413 | 27 | 8  | 517 | 74 | 37 | 3 | 249 | 52 | 830   | 137 |
| 70,414 | 27 | 8  | 516 | 74 | 37 | 3 | 249 | 52 | 829   | 137 |
| 70,415 | 27 | 8  | 526 | 74 | 37 | 3 | 252 | 52 | 842   | 137 |
| 70,416 | 30 | 9  | 540 | 75 | 37 | 3 | 261 | 53 | 868   | 140 |
| 70,417 | 30 | 10 | 540 | 75 | 37 | 3 | 261 | 53 | 868   | 141 |
| 70,418 | 37 | 10 | 567 | 77 | 39 | 3 | 273 | 54 | 916   | 144 |
| 70,419 | 37 | 10 | 573 | 77 | 40 | 3 | 278 | 55 | 928   | 145 |
| 70,420 | 37 | 10 | 573 | 77 | 41 | 4 | 278 | 55 | 929   | 146 |
| 70,421 | 41 | 11 | 627 | 64 | 44 | 3 | 297 | 48 | 1,009 | 126 |
| 70,422 | 47 | 10 | 686 | 61 | 48 | 3 | 309 | 48 | 1,090 | 122 |
| 70,423 | 48 | 10 | 739 | 60 | 52 | 3 | 331 | 48 | 1,170 | 121 |
| 70,424 | 48 | 10 | 747 | 61 | 52 | 3 | 331 | 48 | 1,178 | 122 |
| 70,425 | 70 | 10 | 926 | 62 | 82 | 3 | 488 | 49 | 1,566 | 124 |
| 70,426 | 72 | 10 | 930 | 63 | 81 | 3 | 489 | 49 | 1,572 | 125 |

|        |     |    |       |     |    |   |     |    |       |     |
|--------|-----|----|-------|-----|----|---|-----|----|-------|-----|
| 70,427 | 72  | 10 | 920   | 63  | 80 | 3 | 481 | 49 | 1,553 | 125 |
| 70,428 | 71  | 10 | 931   | 64  | 81 | 3 | 480 | 52 | 1,563 | 129 |
| 70,429 | 71  | 10 | 930   | 65  | 81 | 3 | 472 | 52 | 1,554 | 130 |
| 70,430 | 71  | 10 | 932   | 74  | 81 | 3 | 475 | 60 | 1,559 | 147 |
| 70,431 | 72  | 10 | 945   | 84  | 82 | 3 | 485 | 69 | 1,584 | 166 |
| 70,432 | 72  | 10 | 945   | 94  | 82 | 3 | 485 | 69 | 1,584 | 176 |
| 70,433 | 73  | 10 | 943   | 94  | 82 | 3 | 486 | 69 | 1,584 | 176 |
| 70,434 | 73  | 10 | 942   | 96  | 82 | 3 | 487 | 69 | 1,584 | 178 |
| 70,435 | 73  | 10 | 940   | 97  | 82 | 4 | 487 | 69 | 1,582 | 180 |
| 70,436 | 73  | 9  | 928   | 97  | 82 | 4 | 477 | 67 | 1,560 | 177 |
| 70,437 | 73  | 9  | 931   | 97  | 83 | 4 | 480 | 67 | 1,567 | 177 |
| 70,438 | 73  | 9  | 931   | 99  | 83 | 4 | 480 | 67 | 1,567 | 179 |
| 70,439 | 73  | 10 | 938   | 101 | 83 | 4 | 482 | 68 | 1,576 | 183 |
| 70,440 | 76  | 10 | 967   | 101 | 86 | 4 | 502 | 67 | 1,631 | 182 |
| 70,441 | 76  | 9  | 972   | 84  | 86 | 4 | 507 | 61 | 1,641 | 158 |
| 70,442 | 76  | 9  | 972   | 84  | 86 | 4 | 507 | 61 | 1,641 | 158 |
| 70,443 | 77  | 9  | 976   | 84  | 84 | 4 | 509 | 60 | 1,646 | 157 |
| 70,444 | 86  | 9  | 989   | 81  | 84 | 3 | 533 | 61 | 1,692 | 154 |
| 70,445 | 86  | 9  | 990   | 81  | 84 | 3 | 533 | 61 | 1,693 | 154 |
| 70,446 | 92  | 9  | 1,043 | 81  | 83 | 3 | 561 | 61 | 1,779 | 154 |
| 70,447 | 92  | 9  | 1,042 | 80  | 83 | 3 | 561 | 61 | 1,778 | 153 |
| 70,448 | 95  | 6  | 1,055 | 80  | 85 | 3 | 566 | 61 | 1,801 | 150 |
| 70,449 | 99  | 6  | 1,078 | 81  | 87 | 3 | 586 | 62 | 1,850 | 152 |
| 70,450 | 96  | 6  | 1,083 | 90  | 85 | 3 | 577 | 62 | 1,841 | 161 |
| 70,451 | 100 | 6  | 1,107 | 99  | 86 | 4 | 585 | 68 | 1,878 | 177 |
| 70,452 | 98  | 6  | 1,096 | 100 | 85 | 4 | 570 | 69 | 1,849 | 179 |
| 70,453 | 99  | 6  | 1,080 | 101 | 83 | 4 | 571 | 71 | 1,833 | 182 |
| 70,454 | 92  | 6  | 1,044 | 103 | 67 | 4 | 528 | 70 | 1,731 | 183 |
| 70,455 | 89  | 6  | 808   | 100 | 61 | 3 | 480 | 69 | 1,438 | 178 |
| 70,456 | 89  | 5  | 793   | 85  | 60 | 3 | 474 | 51 | 1,416 | 144 |
| 70,457 | 89  | 5  | 779   | 85  | 59 | 3 | 469 | 52 | 1,396 | 145 |
| 70,458 | 88  | 6  | 779   | 81  | 59 | 3 | 469 | 55 | 1,395 | 145 |
| 70,459 | 88  | 6  | 779   | 81  | 59 | 3 | 469 | 54 | 1,395 | 144 |
| 70,460 | 103 | 6  | 991   | 92  | 67 | 3 | 531 | 54 | 1,692 | 155 |
| 70,461 | 103 | 7  | 990   | 90  | 67 | 3 | 531 | 52 | 1,691 | 152 |
| 70,462 | 103 | 7  | 987   | 89  | 67 | 3 | 531 | 52 | 1,688 | 151 |
| 70,463 | 103 | 6  | 983   | 89  | 67 | 3 | 531 | 52 | 1,684 | 150 |
| 70,464 | 103 | 6  | 976   | 89  | 67 | 3 | 529 | 51 | 1,675 | 149 |
| 70,465 | 103 | 6  | 965   | 89  | 67 | 3 | 523 | 51 | 1,658 | 149 |
| 70,466 | 103 | 6  | 965   | 89  | 67 | 3 | 522 | 51 | 1,657 | 149 |
| 70,467 | 100 | 5  | 969   | 87  | 68 | 3 | 518 | 50 | 1,655 | 145 |

|        |     |   |     |    |    |   |     |    |       |     |
|--------|-----|---|-----|----|----|---|-----|----|-------|-----|
| 70,468 | 100 | 5 | 969 | 87 | 68 | 3 | 516 | 50 | 1,653 | 145 |
| 70,469 | 94  | 5 | 942 | 84 | 66 | 3 | 509 | 50 | 1,611 | 142 |
| 70,470 | 94  | 5 | 936 | 85 | 65 | 2 | 507 | 50 | 1,602 | 142 |
| 70,471 | 94  | 5 | 944 | 88 | 64 | 2 | 510 | 52 | 1,612 | 147 |
| 70,472 | 88  | 4 | 890 | 91 | 62 | 2 | 485 | 54 | 1,525 | 151 |
| 70,473 | 83  | 4 | 835 | 90 | 59 | 2 | 480 | 53 | 1,457 | 149 |
| 70,474 | 82  | 4 | 780 | 90 | 55 | 2 | 456 | 53 | 1,373 | 149 |
| 70,475 | 82  | 4 | 771 | 92 | 55 | 2 | 453 | 54 | 1,361 | 152 |
| 70,476 | 59  | 4 | 573 | 92 | 25 | 2 | 273 | 53 | 930   | 151 |
| 70,477 | 57  | 5 | 569 | 94 | 25 | 3 | 271 | 57 | 922   | 159 |
| 70,478 | 56  | 7 | 564 | 98 | 25 | 3 | 269 | 61 | 914   | 169 |
| 70,479 | 65  | 7 | 694 | 97 | 25 | 3 | 316 | 58 | 1,100 | 165 |
| 70,480 | 65  | 7 | 692 | 89 | 25 | 3 | 314 | 50 | 1,096 | 149 |
| 70,481 | 66  | 7 | 698 | 89 | 29 | 3 | 334 | 50 | 1,127 | 149 |
| 70,482 | 65  | 7 | 689 | 68 | 28 | 3 | 323 | 39 | 1,105 | 117 |
| 70,483 | 69  | 7 | 696 | 68 | 29 | 3 | 335 | 39 | 1,129 | 117 |
| 70,484 | 68  | 7 | 697 | 69 | 29 | 3 | 333 | 39 | 1,127 | 118 |
| 70,485 | 68  | 7 | 695 | 67 | 29 | 3 | 333 | 39 | 1,125 | 116 |
| 70,486 | 69  | 7 | 693 | 66 | 29 | 3 | 330 | 39 | 1,121 | 115 |
| 70,487 | 69  | 7 | 702 | 65 | 29 | 3 | 338 | 39 | 1,138 | 114 |
| 70,488 | 73  | 7 | 725 | 63 | 29 | 3 | 346 | 39 | 1,173 | 112 |
| 70,489 | 73  | 6 | 725 | 61 | 30 | 3 | 345 | 38 | 1,173 | 108 |
| 70,490 | 73  | 6 | 726 | 61 | 30 | 3 | 348 | 38 | 1,177 | 108 |
| 70,491 | 70  | 6 | 697 | 61 | 27 | 3 | 327 | 38 | 1,121 | 108 |
| 70,492 | 70  | 6 | 691 | 61 | 27 | 3 | 323 | 38 | 1,111 | 108 |
| 70,493 | 69  | 6 | 687 | 61 | 28 | 3 | 319 | 38 | 1,103 | 108 |
| 70,494 | 69  | 6 | 688 | 61 | 28 | 3 | 320 | 38 | 1,105 | 108 |
| 70,495 | 60  | 6 | 674 | 61 | 28 | 3 | 295 | 37 | 1,057 | 107 |
| 70,496 | 55  | 6 | 630 | 61 | 28 | 3 | 272 | 37 | 985   | 107 |
| 70,497 | 54  | 6 | 620 | 61 | 28 | 3 | 267 | 37 | 969   | 107 |
| 70,498 | 54  | 6 | 610 | 61 | 27 | 3 | 264 | 37 | 955   | 107 |
| 70,499 | 51  | 6 | 605 | 60 | 26 | 3 | 260 | 36 | 942   | 105 |
| 70,500 | 47  | 6 | 591 | 50 | 25 | 3 | 244 | 35 | 907   | 94  |
| 70,501 | 47  | 6 | 582 | 50 | 25 | 3 | 242 | 35 | 896   | 94  |
| 70,502 | 43  | 6 | 549 | 40 | 23 | 2 | 233 | 28 | 848   | 76  |
| 70,503 | 43  | 6 | 540 | 40 | 23 | 2 | 235 | 28 | 841   | 76  |
| 70,504 | 41  | 6 | 513 | 39 | 23 | 2 | 224 | 26 | 801   | 73  |
| 70,505 | 39  | 6 | 518 | 37 | 25 | 2 | 229 | 26 | 811   | 71  |
| 70,506 | 36  | 6 | 512 | 37 | 24 | 2 | 224 | 27 | 796   | 72  |
| 70,507 | 27  | 6 | 336 | 37 | 19 | 2 | 176 | 27 | 558   | 72  |
| 70,508 | 24  | 5 | 327 | 35 | 19 | 2 | 170 | 22 | 540   | 64  |



|        |    |   |     |    |    |   |     |    |     |    |
|--------|----|---|-----|----|----|---|-----|----|-----|----|
| 70,509 | 22 | 5 | 314 | 35 | 16 | 2 | 165 | 22 | 517 | 64 |
| 70,510 | 21 | 5 | 305 | 23 | 16 | 2 | 163 | 20 | 505 | 50 |
| 70,511 | 21 | 4 | 306 | 23 | 16 | 2 | 163 | 16 | 506 | 45 |
| 70,512 | 21 | 4 | 306 | 23 | 16 | 2 | 163 | 16 | 506 | 45 |
| 70,513 | 23 | 4 | 308 | 23 | 16 | 2 | 165 | 16 | 512 | 45 |
| 70,514 | 23 | 4 | 309 | 23 | 16 | 2 | 168 | 16 | 516 | 45 |
| 70,515 | 23 | 4 | 309 | 23 | 17 | 2 | 174 | 16 | 523 | 45 |
| 70,516 | 23 | 4 | 315 | 23 | 17 | 2 | 177 | 16 | 532 | 45 |
| 70,517 | 23 | 4 | 315 | 23 | 17 | 2 | 177 | 16 | 532 | 45 |
| 70,518 | 23 | 3 | 298 | 23 | 16 | 2 | 172 | 16 | 509 | 44 |
| 70,519 | 22 | 4 | 301 | 23 | 16 | 2 | 172 | 16 | 511 | 45 |
| 70,520 | 22 | 4 | 301 | 23 | 16 | 2 | 171 | 14 | 510 | 43 |
| 70,521 | 22 | 4 | 301 | 22 | 16 | 2 | 170 | 14 | 509 | 42 |
| 70,522 | 22 | 4 | 292 | 16 | 16 | 2 | 168 | 10 | 498 | 32 |
| 70,523 | 22 | 4 | 291 | 16 | 15 | 2 | 166 | 10 | 494 | 32 |
| 70,524 | 21 | 4 | 285 | 16 | 14 | 2 | 157 | 10 | 477 | 32 |
| 70,525 | 21 | 4 | 282 | 14 | 14 | 2 | 156 | 10 | 473 | 30 |
| 70,526 | 21 | 4 | 282 | 12 | 14 | 2 | 157 | 9  | 474 | 27 |
| 70,527 | 21 | 3 | 280 | 9  | 14 | 1 | 156 | 5  | 471 | 18 |
| 70,528 | 22 | 3 | 279 | 9  | 14 | 1 | 154 | 5  | 469 | 18 |
| 70,529 | 14 | 1 | 142 | 6  | 13 | 1 | 109 | 1  | 278 | 9  |
| 70,530 | 13 | 1 | 137 | 4  | 13 | 1 | 109 | 1  | 272 | 7  |
| 70,531 | 14 | 1 | 142 | 4  | 13 | 1 | 112 | 1  | 281 | 7  |
| 70,532 | 15 | 1 | 138 | 4  | 9  | 1 | 102 | 1  | 264 | 7  |
| 70,533 | 15 | 1 | 136 | 4  | 9  | 1 | 101 | 1  | 261 | 7  |
| 70,534 | 11 | 1 | 129 | 5  | 8  | 1 | 88  | 1  | 236 | 8  |
| 70,535 | 11 | 1 | 127 | 5  | 8  | 1 | 88  | 1  | 234 | 8  |
| 70,536 | 10 | 1 | 131 | 5  | 8  | 1 | 88  | 1  | 237 | 8  |
| 70,537 | 10 | 1 | 127 | 5  | 8  | 0 | 84  | 1  | 229 | 7  |
| 70,538 | 10 | 1 | 119 | 5  | 8  | 0 | 79  | 1  | 216 | 7  |
| 70,539 | 6  | 1 | 93  | 7  | 7  | 0 | 68  | 1  | 174 | 9  |
| 70,540 | 6  | 1 | 85  | 8  | 6  | 0 | 67  | 1  | 164 | 10 |
| 70,541 | 6  | 1 | 85  | 8  | 6  | 0 | 64  | 2  | 161 | 11 |
| 70,542 | 6  | 1 | 85  | 8  | 6  | 0 | 64  | 3  | 161 | 12 |
| 70,543 | 6  | 1 | 87  | 8  | 6  | 0 | 64  | 3  | 163 | 12 |
| 70,544 | 6  | 1 | 90  | 11 | 5  | 0 | 65  | 3  | 166 | 15 |
| 70,545 | 6  | 1 | 91  | 12 | 5  | 0 | 64  | 3  | 166 | 16 |
| 70,546 | 6  | 1 | 89  | 12 | 5  | 0 | 64  | 3  | 164 | 16 |
| 70,547 | 8  | 1 | 97  | 12 | 5  | 0 | 67  | 3  | 177 | 16 |
| 70,548 | 8  | 1 | 101 | 12 | 5  | 0 | 68  | 3  | 182 | 16 |
| 70,549 | 8  | 1 | 102 | 12 | 5  | 0 | 69  | 3  | 184 | 16 |

|        |    |    |     |    |    |    |     |    |       |     |
|--------|----|----|-----|----|----|----|-----|----|-------|-----|
| 70,550 | 10 | 1  | 128 | 12 | 5  | 0  | 85  | 6  | 228   | 19  |
| 70,551 | 12 | 1  | 227 | 13 | 7  | 0  | 148 | 8  | 394   | 22  |
| 70,552 | 41 | 1  | 315 | 14 | 12 | 0  | 229 | 9  | 597   | 24  |
| 70,553 | 44 | 1  | 346 | 18 | 14 | 0  | 246 | 12 | 650   | 31  |
| 70,554 | 46 | 1  | 359 | 18 | 13 | 1  | 249 | 12 | 667   | 32  |
| 70,555 | 50 | 1  | 361 | 19 | 14 | 1  | 267 | 12 | 692   | 33  |
| 70,556 | 50 | 1  | 348 | 19 | 12 | 1  | 261 | 12 | 671   | 33  |
| 70,557 | 50 | 1  | 359 | 20 | 12 | 1  | 284 | 12 | 705   | 34  |
| 70,558 | 50 | 1  | 357 | 20 | 12 | 1  | 281 | 12 | 700   | 34  |
| 70,559 | 51 | 1  | 361 | 21 | 12 | 1  | 284 | 12 | 708   | 35  |
| 70,560 | 52 | 1  | 371 | 21 | 13 | 1  | 286 | 12 | 722   | 35  |
| 70,561 | 52 | 1  | 371 | 24 | 13 | 1  | 286 | 16 | 722   | 42  |
| 70,562 | 52 | 4  | 368 | 25 | 13 | 1  | 286 | 18 | 719   | 48  |
| 70,563 | 51 | 5  | 372 | 29 | 14 | 1  | 295 | 19 | 732   | 54  |
| 70,564 | 53 | 5  | 380 | 31 | 15 | 1  | 298 | 19 | 746   | 56  |
| 70,565 | 53 | 5  | 386 | 31 | 15 | 1  | 298 | 19 | 752   | 56  |
| 70,566 | 53 | 5  | 384 | 31 | 14 | 1  | 293 | 19 | 744   | 56  |
| 70,567 | 53 | 5  | 395 | 31 | 14 | 1  | 299 | 19 | 761   | 56  |
| 70,568 | 53 | 5  | 394 | 31 | 14 | 1  | 299 | 19 | 760   | 56  |
| 70,569 | 60 | 5  | 480 | 31 | 21 | 1  | 345 | 19 | 906   | 56  |
| 70,570 | 60 | 4  | 514 | 31 | 23 | 1  | 364 | 19 | 961   | 55  |
| 70,571 | 64 | 4  | 543 | 30 | 25 | 1  | 373 | 19 | 1,005 | 54  |
| 70,572 | 64 | 4  | 544 | 30 | 26 | 1  | 376 | 19 | 1,010 | 54  |
| 70,573 | 64 | 4  | 544 | 30 | 26 | 1  | 375 | 19 | 1,009 | 54  |
| 70,574 | 64 | 4  | 547 | 30 | 26 | 1  | 377 | 19 | 1,014 | 54  |
| 70,575 | 64 | 4  | 554 | 30 | 26 | 1  | 380 | 19 | 1,024 | 54  |
| 70,576 | 64 | 4  | 554 | 30 | 26 | 1  | 380 | 19 | 1,024 | 54  |
| 70,577 | 66 | 5  | 580 | 31 | 27 | 1  | 387 | 19 | 1,060 | 56  |
| 70,578 | 66 | 5  | 584 | 35 | 27 | 5  | 392 | 20 | 1,069 | 65  |
| 70,579 | 65 | 5  | 584 | 39 | 27 | 5  | 392 | 21 | 1,068 | 70  |
| 70,580 | 68 | 6  | 605 | 42 | 28 | 5  | 414 | 23 | 1,115 | 76  |
| 70,581 | 70 | 6  | 653 | 42 | 30 | 5  | 432 | 24 | 1,185 | 77  |
| 70,582 | 69 | 8  | 651 | 48 | 30 | 6  | 428 | 27 | 1,178 | 89  |
| 70,583 | 68 | 16 | 674 | 66 | 30 | 8  | 422 | 42 | 1,194 | 132 |
| 70,584 | 69 | 16 | 684 | 69 | 31 | 10 | 424 | 44 | 1,208 | 139 |
| 70,585 | 70 | 17 | 709 | 78 | 32 | 10 | 426 | 46 | 1,237 | 151 |
| 70,586 | 70 | 17 | 709 | 80 | 32 | 11 | 426 | 49 | 1,237 | 157 |
| 70,587 | 73 | 17 | 781 | 80 | 34 | 11 | 460 | 50 | 1,348 | 158 |
| 70,588 | 76 | 17 | 816 | 80 | 37 | 11 | 472 | 50 | 1,401 | 158 |
| 70,589 | 76 | 17 | 825 | 78 | 37 | 11 | 474 | 50 | 1,412 | 156 |
| 70,590 | 76 | 17 | 824 | 82 | 37 | 11 | 474 | 50 | 1,411 | 160 |

|        |     |    |       |    |    |    |     |    |       |     |
|--------|-----|----|-------|----|----|----|-----|----|-------|-----|
| 70,591 | 76  | 17 | 824   | 81 | 37 | 11 | 474 | 50 | 1,411 | 159 |
| 70,592 | 80  | 17 | 880   | 81 | 38 | 11 | 491 | 49 | 1,489 | 158 |
| 70,593 | 89  | 17 | 970   | 81 | 40 | 11 | 517 | 48 | 1,616 | 157 |
| 70,594 | 89  | 17 | 969   | 81 | 40 | 11 | 517 | 48 | 1,615 | 157 |
| 70,595 | 96  | 17 | 1,091 | 80 | 41 | 11 | 550 | 48 | 1,778 | 156 |
| 70,596 | 96  | 17 | 1,088 | 80 | 41 | 11 | 550 | 48 | 1,775 | 156 |
| 70,597 | 97  | 17 | 1,139 | 80 | 42 | 11 | 579 | 48 | 1,857 | 156 |
| 70,598 | 97  | 17 | 1,138 | 80 | 42 | 11 | 579 | 50 | 1,856 | 158 |
| 70,599 | 97  | 17 | 1,133 | 81 | 42 | 11 | 578 | 50 | 1,850 | 159 |
| 70,600 | 101 | 17 | 1,198 | 81 | 45 | 11 | 595 | 50 | 1,939 | 159 |
| 70,601 | 99  | 17 | 1,175 | 75 | 45 | 11 | 582 | 41 | 1,901 | 144 |
| 70,602 | 97  | 17 | 1,077 | 75 | 42 | 11 | 515 | 41 | 1,731 | 144 |
| 70,603 | 68  | 17 | 988   | 76 | 37 | 11 | 429 | 41 | 1,522 | 145 |
| 70,604 | 65  | 17 | 957   | 75 | 35 | 10 | 411 | 41 | 1,468 | 143 |
| 70,605 | 63  | 17 | 942   | 75 | 35 | 10 | 406 | 41 | 1,446 | 143 |
| 70,606 | 59  | 17 | 934   | 76 | 34 | 10 | 389 | 42 | 1,416 | 145 |
| 70,607 | 59  | 17 | 925   | 75 | 34 | 10 | 376 | 41 | 1,394 | 143 |
| 70,608 | 59  | 17 | 913   | 75 | 34 | 10 | 363 | 41 | 1,369 | 143 |
| 70,609 | 58  | 17 | 908   | 75 | 34 | 10 | 360 | 41 | 1,360 | 143 |
| 70,610 | 57  | 15 | 903   | 70 | 34 | 10 | 361 | 35 | 1,355 | 130 |
| 70,611 | 57  | 15 | 900   | 70 | 33 | 10 | 361 | 35 | 1,351 | 130 |
| 70,612 | 57  | 14 | 896   | 70 | 32 | 10 | 357 | 35 | 1,342 | 129 |
| 70,613 | 57  | 13 | 895   | 66 | 32 | 10 | 356 | 34 | 1,340 | 123 |
| 70,614 | 57  | 13 | 895   | 69 | 32 | 10 | 354 | 36 | 1,338 | 128 |
| 70,615 | 55  | 13 | 886   | 80 | 31 | 10 | 351 | 39 | 1,323 | 142 |
| 70,616 | 56  | 13 | 879   | 82 | 31 | 10 | 348 | 39 | 1,314 | 144 |
| 70,617 | 56  | 13 | 879   | 84 | 31 | 11 | 347 | 39 | 1,313 | 147 |
| 70,618 | 56  | 13 | 862   | 84 | 31 | 13 | 339 | 41 | 1,288 | 151 |
| 70,619 | 49  | 14 | 774   | 85 | 24 | 13 | 292 | 44 | 1,139 | 156 |
| 70,620 | 49  | 14 | 740   | 85 | 22 | 13 | 273 | 44 | 1,084 | 156 |
| 70,621 | 47  | 14 | 718   | 85 | 20 | 13 | 266 | 44 | 1,051 | 156 |
| 70,622 | 45  | 14 | 711   | 85 | 20 | 13 | 264 | 44 | 1,040 | 156 |
| 70,623 | 45  | 14 | 710   | 85 | 19 | 13 | 261 | 46 | 1,035 | 158 |
| 70,624 | 45  | 14 | 707   | 85 | 19 | 13 | 262 | 47 | 1,033 | 159 |
| 70,625 | 45  | 14 | 707   | 86 | 19 | 13 | 260 | 47 | 1,031 | 160 |
| 70,626 | 45  | 14 | 700   | 87 | 19 | 13 | 257 | 47 | 1,021 | 161 |
| 70,627 | 43  | 13 | 675   | 85 | 18 | 13 | 249 | 47 | 985   | 158 |
| 70,628 | 43  | 13 | 674   | 77 | 18 | 9  | 246 | 45 | 981   | 144 |
| 70,629 | 43  | 13 | 672   | 77 | 18 | 9  | 244 | 45 | 977   | 144 |
| 70,630 | 40  | 14 | 651   | 79 | 17 | 9  | 222 | 46 | 930   | 148 |
| 70,631 | 38  | 13 | 608   | 75 | 17 | 9  | 203 | 44 | 866   | 141 |

|        |    |    |     |    |    |   |     |    |     |     |
|--------|----|----|-----|----|----|---|-----|----|-----|-----|
| 70,632 | 39 | 11 | 602 | 70 | 15 | 8 | 201 | 41 | 857 | 130 |
| 70,633 | 39 | 11 | 601 | 71 | 15 | 8 | 201 | 43 | 856 | 133 |
| 70,634 | 38 | 3  | 575 | 55 | 15 | 6 | 195 | 29 | 823 | 93  |
| 70,635 | 37 | 3  | 563 | 52 | 14 | 4 | 192 | 27 | 806 | 86  |
| 70,636 | 36 | 2  | 534 | 41 | 13 | 4 | 189 | 25 | 772 | 72  |
| 70,637 | 33 | 2  | 492 | 39 | 12 | 3 | 159 | 22 | 696 | 66  |
| 70,638 | 33 | 3  | 463 | 39 | 11 | 3 | 155 | 21 | 662 | 66  |
| 70,639 | 30 | 3  | 428 | 40 | 8  | 3 | 142 | 21 | 608 | 67  |
| 70,640 | 30 | 3  | 419 | 40 | 8  | 3 | 140 | 21 | 597 | 67  |
| 70,641 | 28 | 3  | 392 | 38 | 8  | 3 | 136 | 22 | 564 | 66  |
| 70,642 | 26 | 3  | 363 | 38 | 7  | 3 | 123 | 22 | 519 | 66  |
| 70,643 | 25 | 4  | 344 | 38 | 7  | 3 | 120 | 22 | 496 | 67  |
| 70,644 | 17 | 4  | 273 | 38 | 5  | 3 | 97  | 22 | 392 | 67  |
| 70,645 | 10 | 4  | 170 | 35 | 4  | 3 | 77  | 22 | 261 | 64  |
| 70,646 | 10 | 4  | 147 | 35 | 4  | 3 | 63  | 24 | 224 | 66  |
| 70,647 | 7  | 4  | 88  | 36 | 3  | 3 | 32  | 24 | 130 | 67  |
| 70,648 | 6  | 5  | 76  | 36 | 2  | 3 | 30  | 26 | 114 | 70  |
| 70,649 | 3  | 5  | 29  | 36 | 1  | 3 | 16  | 24 | 49  | 68  |
| 70,650 | 3  | 5  | 19  | 36 | 0  | 3 | 15  | 24 | 37  | 68  |
| 70,651 | 3  | 5  | 17  | 36 | 0  | 3 | 14  | 24 | 34  | 68  |
| 70,652 | 3  | 5  | 20  | 36 | 1  | 3 | 15  | 24 | 39  | 68  |
| 70,653 | 3  | 5  | 21  | 35 | 1  | 3 | 15  | 25 | 40  | 68  |
| 70,654 | 3  | 5  | 20  | 36 | 1  | 3 | 14  | 25 | 38  | 69  |
| 70,655 | 3  | 5  | 18  | 36 | 1  | 3 | 13  | 25 | 35  | 69  |
| 70,656 | 7  | 5  | 73  | 37 | 2  | 3 | 26  | 25 | 108 | 70  |
| 70,657 | 8  | 5  | 76  | 37 | 2  | 3 | 25  | 24 | 111 | 69  |
| 70,658 | 8  | 5  | 79  | 37 | 2  | 3 | 27  | 24 | 116 | 69  |
| 70,659 | 11 | 5  | 153 | 37 | 2  | 3 | 41  | 24 | 207 | 69  |
| 70,660 | 11 | 5  | 178 | 37 | 2  | 3 | 66  | 24 | 257 | 69  |
| 70,661 | 11 | 5  | 178 | 37 | 2  | 3 | 66  | 25 | 257 | 70  |
| 70,662 | 31 | 5  | 272 | 37 | 8  | 3 | 151 | 25 | 462 | 70  |
| 70,663 | 31 | 5  | 272 | 37 | 8  | 3 | 151 | 25 | 462 | 70  |
| 70,664 | 31 | 5  | 297 | 17 | 9  | 2 | 176 | 20 | 513 | 44  |
| 70,665 | 30 | 5  | 305 | 17 | 10 | 2 | 177 | 20 | 522 | 44  |
| 70,666 | 31 | 5  | 339 | 17 | 10 | 2 | 188 | 20 | 568 | 44  |
| 70,667 | 30 | 5  | 339 | 17 | 10 | 2 | 187 | 20 | 566 | 44  |
| 70,668 | 37 | 5  | 368 | 19 | 10 | 0 | 206 | 18 | 621 | 42  |
| 70,669 | 37 | 5  | 368 | 19 | 10 | 0 | 206 | 18 | 621 | 42  |
| 70,670 | 41 | 4  | 382 | 18 | 10 | 0 | 210 | 15 | 643 | 37  |
| 70,671 | 47 | 4  | 416 | 18 | 12 | 0 | 222 | 15 | 697 | 37  |
| 70,672 | 49 | 4  | 425 | 18 | 12 | 0 | 230 | 15 | 716 | 37  |

|        |    |   |     |    |    |   |     |    |       |    |
|--------|----|---|-----|----|----|---|-----|----|-------|----|
| 70,673 | 57 | 4 | 475 | 18 | 13 | 0 | 256 | 15 | 801   | 37 |
| 70,674 | 57 | 4 | 475 | 18 | 13 | 0 | 256 | 13 | 801   | 35 |
| 70,675 | 58 | 4 | 497 | 18 | 15 | 0 | 267 | 12 | 837   | 34 |
| 70,676 | 65 | 4 | 542 | 17 | 18 | 0 | 297 | 12 | 922   | 33 |
| 70,677 | 69 | 4 | 574 | 16 | 19 | 0 | 321 | 13 | 983   | 33 |
| 70,678 | 69 | 4 | 573 | 16 | 19 | 0 | 321 | 13 | 982   | 33 |
| 70,679 | 75 | 4 | 612 | 16 | 24 | 0 | 357 | 13 | 1,068 | 33 |
| 70,680 | 75 | 3 | 614 | 14 | 23 | 1 | 359 | 12 | 1,071 | 30 |
| 70,681 | 75 | 3 | 614 | 14 | 24 | 1 | 360 | 12 | 1,073 | 30 |
| 70,682 | 77 | 3 | 630 | 14 | 24 | 1 | 369 | 12 | 1,100 | 30 |
| 70,683 | 77 | 3 | 677 | 13 | 28 | 1 | 380 | 11 | 1,162 | 28 |
| 70,684 | 82 | 3 | 693 | 13 | 28 | 1 | 394 | 9  | 1,197 | 26 |
| 70,685 | 86 | 3 | 736 | 11 | 29 | 1 | 424 | 9  | 1,275 | 24 |
| 70,686 | 90 | 3 | 774 | 11 | 29 | 1 | 432 | 9  | 1,325 | 24 |
| 70,687 | 90 | 3 | 774 | 12 | 29 | 1 | 432 | 9  | 1,325 | 25 |
| 70,688 | 90 | 6 | 800 | 13 | 29 | 1 | 447 | 9  | 1,366 | 29 |
| 70,689 | 90 | 5 | 800 | 20 | 29 | 2 | 448 | 10 | 1,367 | 37 |
| 70,690 | 90 | 5 | 800 | 23 | 29 | 3 | 449 | 10 | 1,368 | 41 |
| 70,691 | 90 | 5 | 800 | 22 | 29 | 3 | 450 | 8  | 1,369 | 38 |
| 70,692 | 90 | 5 | 800 | 22 | 29 | 3 | 450 | 8  | 1,369 | 38 |
| 70,693 | 90 | 5 | 800 | 22 | 29 | 3 | 450 | 8  | 1,369 | 38 |
| 70,694 | 90 | 6 | 800 | 29 | 29 | 3 | 453 | 11 | 1,372 | 49 |
| 70,695 | 90 | 6 | 800 | 29 | 29 | 3 | 453 | 11 | 1,372 | 49 |
| 70,696 | 90 | 6 | 800 | 29 | 29 | 3 | 453 | 11 | 1,372 | 49 |
| 70,697 | 90 | 6 | 801 | 29 | 29 | 3 | 453 | 9  | 1,373 | 47 |
| 70,698 | 90 | 6 | 802 | 28 | 29 | 3 | 453 | 9  | 1,374 | 46 |
| 70,699 | 90 | 5 | 802 | 28 | 29 | 3 | 452 | 7  | 1,373 | 43 |
| 70,700 | 90 | 5 | 802 | 28 | 29 | 3 | 452 | 7  | 1,373 | 43 |
| 70,701 | 90 | 5 | 800 | 28 | 28 | 3 | 450 | 7  | 1,368 | 43 |
| 70,702 | 90 | 5 | 803 | 28 | 28 | 3 | 455 | 7  | 1,376 | 43 |
| 70,703 | 90 | 5 | 799 | 29 | 28 | 3 | 454 | 6  | 1,371 | 43 |
| 70,704 | 90 | 5 | 806 | 28 | 28 | 3 | 454 | 6  | 1,378 | 42 |
| 70,705 | 90 | 5 | 810 | 28 | 28 | 3 | 457 | 5  | 1,385 | 41 |
| 70,706 | 90 | 5 | 805 | 28 | 28 | 3 | 457 | 5  | 1,380 | 41 |
| 70,707 | 86 | 5 | 755 | 27 | 27 | 3 | 444 | 5  | 1,312 | 40 |
| 70,708 | 86 | 5 | 780 | 26 | 28 | 3 | 459 | 5  | 1,353 | 39 |
| 70,709 | 86 | 5 | 779 | 26 | 28 | 3 | 456 | 5  | 1,349 | 39 |
| 70,710 | 84 | 5 | 708 | 26 | 28 | 3 | 444 | 5  | 1,264 | 39 |
| 70,711 | 84 | 5 | 680 | 26 | 28 | 3 | 416 | 6  | 1,208 | 40 |
| 70,712 | 68 | 5 | 601 | 26 | 22 | 3 | 336 | 9  | 1,027 | 43 |
| 70,713 | 67 | 5 | 595 | 29 | 23 | 3 | 334 | 11 | 1,019 | 48 |

|        |     |   |       |    |    |   |     |    |       |     |
|--------|-----|---|-------|----|----|---|-----|----|-------|-----|
| 70,714 | 67  | 5 | 571   | 29 | 22 | 3 | 309 | 11 | 969   | 48  |
| 70,715 | 68  | 5 | 587   | 29 | 24 | 3 | 313 | 11 | 992   | 48  |
| 70,716 | 68  | 5 | 580   | 28 | 23 | 3 | 313 | 12 | 984   | 48  |
| 70,717 | 68  | 5 | 554   | 28 | 24 | 3 | 303 | 12 | 949   | 48  |
| 70,718 | 65  | 5 | 563   | 28 | 24 | 3 | 301 | 12 | 953   | 48  |
| 70,719 | 65  | 5 | 559   | 28 | 24 | 3 | 301 | 12 | 949   | 48  |
| 70,720 | 61  | 5 | 545   | 28 | 25 | 3 | 297 | 12 | 928   | 48  |
| 70,721 | 59  | 5 | 523   | 28 | 25 | 3 | 289 | 12 | 896   | 48  |
| 70,722 | 56  | 5 | 515   | 28 | 26 | 3 | 286 | 12 | 883   | 48  |
| 70,723 | 54  | 5 | 507   | 28 | 26 | 3 | 278 | 12 | 865   | 48  |
| 70,724 | 48  | 5 | 460   | 28 | 25 | 3 | 252 | 12 | 785   | 48  |
| 70,725 | 47  | 5 | 445   | 28 | 24 | 3 | 245 | 14 | 761   | 50  |
| 70,726 | 40  | 5 | 407   | 28 | 21 | 3 | 214 | 14 | 682   | 50  |
| 70,727 | 44  | 5 | 491   | 28 | 21 | 3 | 215 | 13 | 771   | 49  |
| 70,728 | 51  | 5 | 715   | 28 | 28 | 3 | 276 | 13 | 1,070 | 49  |
| 70,729 | 94  | 5 | 1,054 | 29 | 46 | 3 | 477 | 13 | 1,671 | 50  |
| 70,730 | 99  | 5 | 1,094 | 30 | 46 | 3 | 474 | 16 | 1,713 | 54  |
| 70,731 | 99  | 5 | 1,094 | 35 | 46 | 2 | 473 | 20 | 1,712 | 62  |
| 70,732 | 98  | 5 | 1,095 | 38 | 46 | 2 | 468 | 25 | 1,707 | 70  |
| 70,733 | 99  | 5 | 1,112 | 55 | 47 | 3 | 476 | 36 | 1,734 | 99  |
| 70,734 | 99  | 7 | 1,079 | 84 | 44 | 3 | 466 | 42 | 1,688 | 136 |
| 70,735 | 101 | 7 | 1,127 | 87 | 53 | 3 | 499 | 44 | 1,780 | 141 |
| 70,736 | 100 | 7 | 1,100 | 90 | 52 | 3 | 483 | 45 | 1,735 | 145 |
| 70,737 | 97  | 7 | 1,076 | 92 | 54 | 3 | 484 | 45 | 1,711 | 147 |
| 70,738 | 97  | 4 | 1,056 | 90 | 54 | 3 | 470 | 45 | 1,677 | 142 |
| 70,739 | 97  | 4 | 1,050 | 90 | 54 | 3 | 470 | 45 | 1,671 | 142 |
| 70,740 | 97  | 4 | 1,052 | 83 | 54 | 2 | 471 | 44 | 1,674 | 133 |
| 70,741 | 97  | 4 | 1,054 | 79 | 54 | 1 | 473 | 44 | 1,678 | 128 |
| 70,742 | 97  | 4 | 1,054 | 78 | 54 | 1 | 473 | 44 | 1,678 | 127 |
| 70,743 | 97  | 4 | 1,054 | 78 | 54 | 1 | 473 | 44 | 1,678 | 127 |
| 70,744 | 97  | 4 | 1,054 | 78 | 54 | 1 | 473 | 44 | 1,678 | 127 |
| 70,745 | 97  | 2 | 1,054 | 71 | 54 | 1 | 473 | 41 | 1,678 | 115 |
| 70,746 | 97  | 2 | 1,054 | 71 | 54 | 1 | 473 | 41 | 1,678 | 115 |
| 70,747 | 97  | 2 | 1,053 | 71 | 54 | 1 | 473 | 41 | 1,677 | 115 |
| 70,748 | 97  | 2 | 1,052 | 71 | 54 | 1 | 473 | 41 | 1,676 | 115 |
| 70,749 | 97  | 2 | 1,053 | 71 | 54 | 1 | 473 | 41 | 1,677 | 115 |
| 70,750 | 97  | 2 | 1,053 | 70 | 54 | 1 | 473 | 41 | 1,677 | 114 |
| 70,751 | 97  | 2 | 1,053 | 70 | 54 | 1 | 473 | 41 | 1,677 | 114 |
| 70,752 | 97  | 2 | 1,053 | 70 | 54 | 1 | 473 | 41 | 1,677 | 114 |
| 70,753 | 98  | 2 | 1,049 | 70 | 54 | 1 | 468 | 41 | 1,669 | 114 |
| 70,754 | 98  | 2 | 1,048 | 69 | 54 | 1 | 468 | 41 | 1,668 | 113 |

|        |     |   |       |    |    |   |     |    |       |     |
|--------|-----|---|-------|----|----|---|-----|----|-------|-----|
| 70,755 | 99  | 2 | 1,043 | 69 | 54 | 1 | 468 | 41 | 1,664 | 113 |
| 70,756 | 103 | 2 | 1,074 | 69 | 55 | 1 | 476 | 41 | 1,708 | 113 |
| 70,757 | 103 | 2 | 1,073 | 69 | 55 | 1 | 476 | 39 | 1,707 | 111 |
| 70,758 | 104 | 2 | 1,064 | 69 | 55 | 1 | 477 | 40 | 1,700 | 112 |
| 70,759 | 105 | 2 | 1,054 | 69 | 55 | 1 | 469 | 40 | 1,683 | 112 |
| 70,760 | 106 | 2 | 1,056 | 69 | 55 | 1 | 469 | 41 | 1,686 | 113 |
| 70,761 | 111 | 2 | 1,083 | 69 | 57 | 1 | 497 | 41 | 1,748 | 113 |
| 70,762 | 111 | 2 | 1,083 | 69 | 57 | 1 | 506 | 39 | 1,757 | 111 |
| 70,763 | 111 | 2 | 1,082 | 72 | 57 | 1 | 506 | 39 | 1,756 | 114 |
| 70,764 | 111 | 2 | 1,087 | 70 | 56 | 1 | 506 | 39 | 1,760 | 112 |
| 70,765 | 111 | 2 | 1,087 | 70 | 56 | 1 | 506 | 39 | 1,760 | 112 |
| 70,766 | 110 | 2 | 1,071 | 69 | 54 | 1 | 502 | 38 | 1,737 | 110 |
| 70,767 | 110 | 2 | 1,071 | 69 | 54 | 1 | 501 | 41 | 1,736 | 113 |
| 70,768 | 109 | 2 | 1,063 | 72 | 53 | 1 | 500 | 42 | 1,725 | 117 |
| 70,769 | 105 | 2 | 1,029 | 72 | 53 | 1 | 483 | 42 | 1,670 | 117 |
| 70,770 | 105 | 2 | 1,031 | 72 | 52 | 1 | 485 | 42 | 1,673 | 117 |
| 70,771 | 105 | 2 | 1,031 | 72 | 52 | 1 | 485 | 42 | 1,673 | 117 |
| 70,772 | 104 | 2 | 1,030 | 72 | 49 | 1 | 484 | 42 | 1,667 | 117 |
| 70,773 | 104 | 2 | 1,027 | 72 | 49 | 1 | 484 | 42 | 1,664 | 117 |
| 70,774 | 104 | 2 | 1,027 | 72 | 49 | 1 | 484 | 43 | 1,664 | 118 |
| 70,775 | 102 | 2 | 1,026 | 72 | 49 | 1 | 484 | 43 | 1,661 | 118 |
| 70,776 | 103 | 2 | 1,020 | 73 | 49 | 1 | 480 | 41 | 1,652 | 117 |
| 70,777 | 103 | 2 | 1,013 | 73 | 49 | 1 | 480 | 42 | 1,645 | 118 |
| 70,778 | 95  | 2 | 897   | 73 | 47 | 1 | 455 | 42 | 1,494 | 118 |
| 70,779 | 88  | 2 | 672   | 73 | 40 | 1 | 392 | 42 | 1,192 | 118 |
| 70,780 | 41  | 2 | 295   | 72 | 17 | 1 | 156 | 42 | 509   | 117 |
| 70,781 | 34  | 3 | 254   | 73 | 17 | 1 | 154 | 39 | 459   | 116 |
| 70,782 | 34  | 4 | 251   | 70 | 17 | 1 | 152 | 37 | 454   | 112 |
| 70,783 | 33  | 4 | 238   | 51 | 17 | 0 | 151 | 21 | 439   | 76  |
| 70,784 | 33  | 2 | 220   | 18 | 16 | 1 | 141 | 13 | 410   | 34  |
| 70,785 | 32  | 2 | 206   | 18 | 15 | 1 | 141 | 14 | 394   | 35  |
| 70,786 | 27  | 2 | 141   | 20 | 6  | 2 | 95  | 16 | 269   | 40  |
| 70,787 | 25  | 3 | 124   | 17 | 6  | 2 | 82  | 15 | 237   | 37  |
| 70,788 | 24  | 3 | 112   | 19 | 4  | 2 | 74  | 15 | 214   | 39  |
| 70,789 | 22  | 3 | 108   | 19 | 4  | 2 | 73  | 16 | 207   | 40  |
| 70,790 | 24  | 3 | 109   | 19 | 4  | 2 | 72  | 16 | 209   | 40  |
| 70,791 | 24  | 3 | 108   | 19 | 4  | 2 | 72  | 16 | 208   | 40  |
| 70,792 | 24  | 3 | 109   | 19 | 4  | 2 | 73  | 16 | 210   | 40  |
| 70,793 | 24  | 3 | 110   | 19 | 4  | 2 | 73  | 16 | 211   | 40  |
| 70,794 | 24  | 3 | 112   | 19 | 5  | 2 | 72  | 16 | 213   | 40  |
| 70,795 | 24  | 3 | 115   | 19 | 5  | 2 | 72  | 16 | 216   | 40  |

|        |    |    |     |    |    |   |     |    |     |     |
|--------|----|----|-----|----|----|---|-----|----|-----|-----|
| 70,796 | 24 | 3  | 115 | 19 | 5  | 2 | 72  | 16 | 216 | 40  |
| 70,797 | 24 | 3  | 117 | 19 | 5  | 2 | 73  | 16 | 219 | 40  |
| 70,798 | 24 | 3  | 124 | 19 | 5  | 2 | 75  | 16 | 228 | 40  |
| 70,799 | 24 | 3  | 124 | 19 | 5  | 2 | 75  | 16 | 228 | 40  |
| 70,800 | 24 | 3  | 128 | 19 | 5  | 2 | 80  | 16 | 237 | 40  |
| 70,801 | 24 | 3  | 128 | 19 | 5  | 2 | 80  | 16 | 237 | 40  |
| 70,802 | 24 | 3  | 128 | 19 | 5  | 2 | 80  | 16 | 237 | 40  |
| 70,803 | 23 | 3  | 128 | 19 | 5  | 2 | 80  | 16 | 236 | 40  |
| 70,804 | 24 | 3  | 141 | 19 | 5  | 2 | 81  | 16 | 251 | 40  |
| 70,805 | 24 | 3  | 144 | 19 | 5  | 2 | 81  | 15 | 254 | 39  |
| 70,806 | 25 | 3  | 160 | 20 | 5  | 2 | 84  | 15 | 274 | 40  |
| 70,807 | 28 | 4  | 190 | 22 | 5  | 2 | 96  | 17 | 319 | 45  |
| 70,808 | 28 | 5  | 190 | 38 | 5  | 3 | 96  | 19 | 319 | 65  |
| 70,809 | 27 | 6  | 194 | 67 | 5  | 3 | 95  | 31 | 321 | 107 |
| 70,810 | 26 | 7  | 190 | 80 | 5  | 3 | 92  | 32 | 313 | 122 |
| 70,811 | 25 | 9  | 190 | 82 | 5  | 3 | 93  | 31 | 313 | 125 |
| 70,812 | 20 | 9  | 157 | 82 | 3  | 3 | 59  | 32 | 239 | 126 |
| 70,813 | 18 | 11 | 152 | 87 | 3  | 3 | 53  | 33 | 226 | 134 |
| 70,814 | 16 | 12 | 146 | 86 | 3  | 3 | 51  | 31 | 216 | 132 |
| 70,815 | 16 | 12 | 146 | 87 | 3  | 3 | 51  | 31 | 216 | 133 |
| 70,816 | 16 | 12 | 146 | 87 | 3  | 3 | 51  | 31 | 216 | 133 |
| 70,817 | 16 | 12 | 147 | 88 | 3  | 3 | 50  | 28 | 216 | 131 |
| 70,818 | 16 | 12 | 146 | 85 | 3  | 5 | 50  | 27 | 215 | 129 |
| 70,819 | 17 | 12 | 147 | 85 | 3  | 5 | 51  | 27 | 218 | 129 |
| 70,820 | 17 | 12 | 145 | 85 | 3  | 5 | 49  | 27 | 214 | 129 |
| 70,821 | 17 | 12 | 145 | 85 | 3  | 5 | 49  | 27 | 214 | 129 |
| 70,822 | 17 | 12 | 145 | 87 | 3  | 5 | 50  | 27 | 215 | 131 |
| 70,823 | 17 | 13 | 146 | 87 | 3  | 5 | 52  | 27 | 218 | 132 |
| 70,824 | 17 | 13 | 145 | 87 | 3  | 5 | 52  | 27 | 217 | 132 |
| 70,825 | 17 | 14 | 143 | 87 | 3  | 5 | 52  | 26 | 215 | 132 |
| 70,826 | 17 | 14 | 148 | 87 | 3  | 5 | 53  | 26 | 221 | 132 |
| 70,827 | 16 | 14 | 147 | 86 | 3  | 5 | 53  | 25 | 219 | 130 |
| 70,828 | 16 | 15 | 147 | 87 | 3  | 5 | 53  | 25 | 219 | 132 |
| 70,829 | 16 | 15 | 147 | 87 | 3  | 5 | 53  | 25 | 219 | 132 |
| 70,830 | 19 | 17 | 153 | 91 | 3  | 5 | 55  | 31 | 230 | 144 |
| 70,831 | 19 | 17 | 153 | 91 | 3  | 5 | 55  | 32 | 230 | 145 |
| 70,832 | 44 | 16 | 334 | 94 | 16 | 5 | 148 | 32 | 542 | 147 |
| 70,833 | 50 | 15 | 399 | 92 | 20 | 5 | 169 | 30 | 638 | 142 |
| 70,834 | 50 | 15 | 400 | 92 | 20 | 5 | 170 | 30 | 640 | 142 |
| 70,835 | 49 | 15 | 398 | 92 | 20 | 4 | 169 | 30 | 636 | 141 |
| 70,836 | 50 | 16 | 403 | 92 | 20 | 4 | 177 | 30 | 650 | 142 |



|        |    |    |     |     |    |   |     |    |     |     |
|--------|----|----|-----|-----|----|---|-----|----|-----|-----|
| 70,837 | 48 | 15 | 402 | 89  | 20 | 3 | 175 | 29 | 645 | 136 |
| 70,838 | 47 | 15 | 402 | 89  | 20 | 3 | 175 | 29 | 644 | 136 |
| 70,839 | 47 | 16 | 400 | 88  | 20 | 3 | 173 | 30 | 640 | 137 |
| 70,840 | 47 | 16 | 400 | 89  | 20 | 3 | 174 | 29 | 641 | 137 |
| 70,841 | 47 | 16 | 401 | 89  | 20 | 3 | 174 | 29 | 642 | 137 |
| 70,842 | 47 | 16 | 403 | 89  | 20 | 3 | 173 | 29 | 643 | 137 |
| 70,843 | 47 | 16 | 402 | 89  | 20 | 3 | 173 | 29 | 642 | 137 |
| 70,844 | 49 | 16 | 417 | 90  | 19 | 3 | 177 | 30 | 662 | 139 |
| 70,845 | 49 | 16 | 427 | 93  | 21 | 3 | 179 | 31 | 676 | 143 |
| 70,846 | 49 | 16 | 443 | 95  | 21 | 3 | 181 | 32 | 694 | 146 |
| 70,847 | 49 | 16 | 441 | 95  | 21 | 3 | 180 | 32 | 691 | 146 |
| 70,848 | 51 | 16 | 447 | 97  | 22 | 3 | 180 | 32 | 700 | 148 |
| 70,849 | 51 | 20 | 460 | 98  | 22 | 3 | 182 | 32 | 715 | 153 |
| 70,850 | 51 | 20 | 467 | 98  | 22 | 3 | 181 | 32 | 721 | 153 |
| 70,851 | 51 | 20 | 464 | 98  | 22 | 3 | 178 | 32 | 715 | 153 |
| 70,852 | 51 | 20 | 464 | 98  | 22 | 3 | 178 | 32 | 715 | 153 |
| 70,853 | 51 | 20 | 464 | 99  | 22 | 3 | 178 | 34 | 715 | 156 |
| 70,854 | 51 | 20 | 463 | 102 | 22 | 3 | 178 | 35 | 714 | 160 |
| 70,855 | 54 | 20 | 604 | 105 | 23 | 3 | 199 | 39 | 880 | 167 |
| 70,856 | 55 | 21 | 602 | 107 | 23 | 3 | 198 | 42 | 878 | 173 |
| 70,857 | 54 | 21 | 585 | 106 | 23 | 3 | 195 | 43 | 857 | 173 |
| 70,858 | 46 | 19 | 519 | 89  | 22 | 2 | 172 | 39 | 759 | 149 |
| 70,859 | 46 | 19 | 516 | 89  | 22 | 2 | 170 | 39 | 754 | 149 |
| 70,860 | 46 | 15 | 515 | 45  | 22 | 2 | 169 | 26 | 752 | 88  |
| 70,861 | 45 | 15 | 513 | 46  | 21 | 2 | 168 | 27 | 747 | 90  |
| 70,862 | 45 | 15 | 511 | 46  | 21 | 2 | 167 | 27 | 744 | 90  |
| 70,863 | 45 | 15 | 513 | 46  | 21 | 2 | 170 | 26 | 749 | 89  |
| 70,864 | 45 | 13 | 520 | 42  | 21 | 2 | 172 | 25 | 758 | 82  |
| 70,865 | 45 | 12 | 519 | 38  | 21 | 2 | 180 | 25 | 765 | 77  |
| 70,866 | 45 | 12 | 519 | 39  | 21 | 2 | 180 | 26 | 765 | 79  |
| 70,867 | 45 | 12 | 518 | 39  | 21 | 2 | 181 | 26 | 765 | 79  |
| 70,868 | 45 | 14 | 521 | 48  | 21 | 2 | 181 | 27 | 768 | 91  |
| 70,869 | 45 | 14 | 521 | 51  | 21 | 0 | 181 | 28 | 768 | 93  |
| 70,870 | 44 | 14 | 520 | 53  | 21 | 0 | 180 | 28 | 765 | 95  |
| 70,871 | 44 | 14 | 526 | 53  | 21 | 0 | 184 | 28 | 775 | 95  |
| 70,872 | 46 | 14 | 540 | 53  | 22 | 0 | 205 | 28 | 813 | 95  |
| 70,873 | 46 | 13 | 540 | 52  | 22 | 0 | 204 | 28 | 812 | 93  |
| 70,874 | 46 | 13 | 539 | 52  | 22 | 0 | 203 | 29 | 810 | 94  |
| 70,875 | 46 | 15 | 540 | 60  | 22 | 0 | 203 | 31 | 811 | 106 |
| 70,876 | 46 | 14 | 536 | 60  | 22 | 0 | 202 | 31 | 806 | 105 |
| 70,877 | 46 | 14 | 535 | 64  | 22 | 0 | 202 | 32 | 805 | 110 |

|        |    |    |     |    |    |   |     |    |     |     |
|--------|----|----|-----|----|----|---|-----|----|-----|-----|
| 70,878 | 46 | 14 | 535 | 64 | 22 | 0 | 202 | 32 | 805 | 110 |
| 70,879 | 45 | 11 | 529 | 59 | 22 | 0 | 201 | 26 | 797 | 96  |
| 70,880 | 45 | 11 | 508 | 62 | 22 | 0 | 200 | 28 | 775 | 101 |
| 70,881 | 20 | 11 | 371 | 62 | 10 | 0 | 113 | 29 | 514 | 102 |
| 70,882 | 19 | 12 | 348 | 62 | 9  | 0 | 105 | 28 | 481 | 102 |
| 70,883 | 17 | 12 | 316 | 58 | 6  | 0 | 100 | 29 | 439 | 99  |
| 70,884 | 13 | 12 | 282 | 57 | 5  | 0 | 86  | 29 | 386 | 98  |
| 70,885 | 13 | 12 | 282 | 57 | 5  | 0 | 85  | 29 | 385 | 98  |
| 70,886 | 12 | 11 | 277 | 58 | 5  | 0 | 80  | 28 | 374 | 97  |
| 70,887 | 12 | 11 | 277 | 58 | 5  | 0 | 78  | 28 | 372 | 97  |
| 70,888 | 12 | 11 | 277 | 57 | 5  | 0 | 78  | 27 | 372 | 95  |
| 70,889 | 12 | 11 | 277 | 57 | 5  | 0 | 80  | 27 | 374 | 95  |
| 70,890 | 15 | 10 | 283 | 57 | 5  | 0 | 81  | 26 | 384 | 93  |
| 70,891 | 15 | 10 | 283 | 56 | 5  | 1 | 81  | 26 | 384 | 93  |
| 70,892 | 15 | 10 | 285 | 56 | 5  | 1 | 81  | 26 | 386 | 93  |
| 70,893 | 16 | 10 | 306 | 56 | 6  | 1 | 98  | 26 | 426 | 93  |
| 70,894 | 14 | 10 | 303 | 59 | 6  | 1 | 98  | 30 | 421 | 100 |
| 70,895 | 15 | 10 | 319 | 59 | 8  | 1 | 107 | 31 | 449 | 101 |
| 70,896 | 15 | 10 | 306 | 59 | 6  | 1 | 105 | 36 | 432 | 106 |
| 70,897 | 15 | 10 | 290 | 58 | 6  | 1 | 104 | 35 | 415 | 104 |
| 70,898 | 13 | 10 | 296 | 59 | 5  | 1 | 107 | 37 | 421 | 107 |
| 70,899 | 14 | 10 | 306 | 58 | 5  | 1 | 113 | 37 | 438 | 106 |
| 70,900 | 15 | 6  | 302 | 57 | 5  | 1 | 115 | 37 | 437 | 101 |
| 70,901 | 16 | 6  | 299 | 58 | 5  | 1 | 126 | 37 | 446 | 102 |
| 70,902 | 12 | 6  | 168 | 58 | 4  | 1 | 117 | 38 | 301 | 103 |
| 70,903 | 12 | 6  | 158 | 57 | 4  | 1 | 117 | 36 | 291 | 100 |
| 70,904 | 13 | 6  | 167 | 54 | 4  | 1 | 113 | 35 | 297 | 96  |
| 70,905 | 13 | 6  | 168 | 55 | 4  | 1 | 113 | 35 | 298 | 97  |
| 70,906 | 15 | 5  | 190 | 50 | 4  | 1 | 126 | 28 | 335 | 84  |
| 70,907 | 14 | 5  | 212 | 50 | 4  | 1 | 131 | 27 | 361 | 83  |
| 70,908 | 23 | 5  | 251 | 50 | 12 | 1 | 178 | 27 | 464 | 83  |
| 70,909 | 30 | 5  | 329 | 49 | 14 | 1 | 207 | 27 | 580 | 82  |
| 70,910 | 30 | 5  | 329 | 49 | 14 | 1 | 208 | 27 | 581 | 82  |
| 70,911 | 30 | 5  | 330 | 50 | 15 | 1 | 210 | 27 | 585 | 83  |
| 70,912 | 51 | 5  | 512 | 49 | 24 | 1 | 350 | 26 | 937 | 81  |
| 70,913 | 51 | 3  | 517 | 38 | 24 | 1 | 350 | 24 | 942 | 66  |
| 70,914 | 54 | 3  | 517 | 39 | 24 | 1 | 352 | 24 | 947 | 67  |
| 70,915 | 54 | 3  | 514 | 39 | 24 | 1 | 350 | 24 | 942 | 67  |
| 70,916 | 54 | 3  | 513 | 40 | 24 | 1 | 342 | 24 | 933 | 68  |
| 70,917 | 54 | 3  | 513 | 46 | 24 | 1 | 341 | 29 | 932 | 79  |
| 70,918 | 54 | 5  | 518 | 50 | 24 | 2 | 346 | 33 | 942 | 90  |

|        |     |    |       |    |    |   |       |    |       |     |
|--------|-----|----|-------|----|----|---|-------|----|-------|-----|
| 70,919 | 54  | 5  | 517   | 49 | 24 | 2 | 346   | 33 | 941   | 89  |
| 70,920 | 54  | 5  | 524   | 47 | 25 | 2 | 350   | 32 | 953   | 86  |
| 70,921 | 54  | 5  | 519   | 45 | 25 | 2 | 347   | 32 | 945   | 84  |
| 70,922 | 53  | 5  | 515   | 46 | 24 | 3 | 337   | 34 | 929   | 88  |
| 70,923 | 52  | 6  | 505   | 46 | 24 | 3 | 326   | 35 | 907   | 90  |
| 70,924 | 52  | 8  | 507   | 56 | 25 | 3 | 326   | 38 | 910   | 105 |
| 70,925 | 52  | 8  | 507   | 56 | 25 | 3 | 326   | 37 | 910   | 104 |
| 70,926 | 52  | 6  | 521   | 48 | 26 | 3 | 330   | 35 | 929   | 92  |
| 70,927 | 52  | 6  | 537   | 51 | 26 | 3 | 332   | 36 | 947   | 96  |
| 70,928 | 52  | 6  | 536   | 54 | 26 | 3 | 331   | 36 | 945   | 99  |
| 70,929 | 81  | 6  | 643   | 56 | 29 | 3 | 363   | 36 | 1,116 | 101 |
| 70,930 | 88  | 6  | 662   | 58 | 29 | 3 | 369   | 36 | 1,148 | 103 |
| 70,931 | 89  | 6  | 672   | 55 | 29 | 3 | 371   | 34 | 1,161 | 98  |
| 70,932 | 190 | 6  | 1,333 | 55 | 60 | 3 | 692   | 33 | 2,275 | 97  |
| 70,933 | 194 | 5  | 1,361 | 55 | 61 | 3 | 721   | 33 | 2,337 | 96  |
| 70,934 | 194 | 6  | 1,361 | 54 | 61 | 3 | 720   | 32 | 2,336 | 95  |
| 70,935 | 256 | 7  | 1,609 | 63 | 73 | 3 | 899   | 34 | 2,837 | 107 |
| 70,936 | 256 | 7  | 1,608 | 63 | 73 | 3 | 899   | 34 | 2,836 | 107 |
| 70,937 | 256 | 7  | 1,610 | 62 | 75 | 3 | 905   | 35 | 2,846 | 107 |
| 70,938 | 256 | 7  | 1,610 | 62 | 75 | 3 | 905   | 35 | 2,846 | 107 |
| 70,939 | 256 | 7  | 1,614 | 65 | 75 | 3 | 906   | 35 | 2,851 | 110 |
| 70,940 | 256 | 7  | 1,619 | 65 | 75 | 3 | 910   | 36 | 2,860 | 111 |
| 70,941 | 253 | 7  | 1,618 | 64 | 75 | 3 | 910   | 36 | 2,856 | 110 |
| 70,942 | 253 | 7  | 1,616 | 64 | 75 | 2 | 910   | 36 | 2,854 | 109 |
| 70,943 | 254 | 7  | 1,621 | 64 | 75 | 2 | 909   | 37 | 2,859 | 110 |
| 70,944 | 253 | 8  | 1,605 | 73 | 74 | 2 | 894   | 38 | 2,826 | 121 |
| 70,945 | 253 | 8  | 1,607 | 70 | 74 | 2 | 892   | 34 | 2,826 | 114 |
| 70,946 | 253 | 9  | 1,601 | 70 | 72 | 2 | 884   | 32 | 2,810 | 113 |
| 70,947 | 256 | 9  | 1,619 | 68 | 75 | 2 | 895   | 26 | 2,845 | 105 |
| 70,948 | 257 | 10 | 1,615 | 66 | 75 | 2 | 892   | 24 | 2,839 | 102 |
| 70,949 | 266 | 10 | 1,716 | 66 | 80 | 2 | 947   | 24 | 3,009 | 102 |
| 70,950 | 276 | 10 | 1,774 | 66 | 83 | 2 | 1,014 | 24 | 3,147 | 102 |
| 70,951 | 289 | 11 | 1,844 | 69 | 85 | 2 | 1,064 | 24 | 3,282 | 106 |
| 70,952 | 288 | 11 | 1,838 | 68 | 85 | 2 | 1,052 | 24 | 3,263 | 105 |
| 70,953 | 291 | 11 | 1,891 | 68 | 86 | 2 | 1,066 | 23 | 3,334 | 104 |
| 70,954 | 292 | 11 | 1,926 | 68 | 87 | 2 | 1,082 | 25 | 3,387 | 106 |
| 70,955 | 292 | 11 | 1,911 | 69 | 87 | 2 | 1,082 | 25 | 3,372 | 107 |
| 70,956 | 294 | 11 | 1,912 | 69 | 87 | 2 | 1,083 | 25 | 3,376 | 107 |
| 70,957 | 293 | 12 | 1,897 | 69 | 87 | 2 | 1,067 | 25 | 3,344 | 108 |
| 70,958 | 294 | 12 | 1,881 | 70 | 87 | 2 | 1,064 | 27 | 3,326 | 111 |
| 70,959 | 285 | 12 | 1,863 | 70 | 79 | 2 | 1,021 | 27 | 3,248 | 111 |

|        |     |    |       |    |    |   |     |    |       |     |
|--------|-----|----|-------|----|----|---|-----|----|-------|-----|
| 70,960 | 278 | 12 | 1,781 | 69 | 77 | 2 | 991 | 27 | 3,127 | 110 |
| 70,961 | 286 | 12 | 1,797 | 69 | 79 | 2 | 996 | 27 | 3,158 | 110 |
| 70,962 | 266 | 12 | 1,616 | 69 | 70 | 2 | 857 | 27 | 2,809 | 110 |
| 70,963 | 267 | 12 | 1,628 | 69 | 70 | 2 | 859 | 27 | 2,824 | 110 |
| 70,964 | 271 | 12 | 1,636 | 68 | 70 | 2 | 862 | 27 | 2,839 | 109 |
| 70,965 | 268 | 12 | 1,632 | 68 | 70 | 2 | 860 | 27 | 2,830 | 109 |
| 70,966 | 269 | 12 | 1,636 | 69 | 70 | 2 | 863 | 28 | 2,838 | 111 |
| 70,967 | 272 | 12 | 1,657 | 68 | 70 | 2 | 869 | 29 | 2,868 | 111 |
| 70,968 | 272 | 12 | 1,658 | 62 | 70 | 2 | 869 | 24 | 2,869 | 100 |
| 70,969 | 272 | 10 | 1,653 | 58 | 70 | 1 | 865 | 20 | 2,860 | 89  |
| 70,970 | 272 | 10 | 1,650 | 58 | 70 | 1 | 865 | 20 | 2,857 | 89  |
| 70,971 | 272 | 10 | 1,646 | 58 | 69 | 1 | 863 | 21 | 2,850 | 90  |
| 70,972 | 272 | 10 | 1,646 | 59 | 69 | 1 | 863 | 21 | 2,850 | 91  |
| 70,973 | 272 | 10 | 1,647 | 58 | 69 | 0 | 863 | 19 | 2,851 | 87  |
| 70,974 | 272 | 9  | 1,654 | 59 | 69 | 0 | 866 | 18 | 2,861 | 86  |
| 70,975 | 272 | 7  | 1,652 | 48 | 68 | 0 | 866 | 15 | 2,858 | 70  |
| 70,976 | 272 | 7  | 1,637 | 48 | 67 | 0 | 862 | 15 | 2,838 | 70  |
| 70,977 | 272 | 7  | 1,631 | 41 | 67 | 0 | 861 | 13 | 2,831 | 61  |
| 70,978 | 272 | 8  | 1,621 | 41 | 67 | 0 | 860 | 15 | 2,820 | 64  |
| 70,979 | 243 | 8  | 1,516 | 43 | 64 | 0 | 829 | 16 | 2,652 | 67  |
| 70,980 | 236 | 9  | 1,498 | 52 | 64 | 1 | 823 | 19 | 2,621 | 81  |
| 70,981 | 235 | 9  | 1,489 | 66 | 64 | 1 | 821 | 22 | 2,609 | 98  |
| 70,982 | 220 | 9  | 1,240 | 67 | 55 | 1 | 744 | 22 | 2,259 | 99  |
| 70,983 | 134 | 8  | 828   | 69 | 33 | 1 | 499 | 22 | 1,494 | 100 |
| 70,984 | 129 | 9  | 802   | 75 | 32 | 1 | 470 | 24 | 1,433 | 109 |
| 70,985 | 77  | 10 | 612   | 78 | 22 | 1 | 334 | 25 | 1,045 | 114 |
| 70,986 | 67  | 9  | 555   | 70 | 20 | 1 | 290 | 23 | 932   | 103 |
| 70,987 | 67  | 9  | 560   | 70 | 21 | 1 | 291 | 23 | 939   | 103 |
| 70,988 | 68  | 9  | 567   | 69 | 20 | 1 | 291 | 22 | 946   | 101 |
| 70,989 | 68  | 9  | 564   | 68 | 20 | 1 | 289 | 23 | 941   | 101 |
| 70,990 | 68  | 9  | 564   | 67 | 20 | 1 | 289 | 23 | 941   | 100 |
| 70,991 | 71  | 9  | 580   | 67 | 20 | 1 | 302 | 22 | 973   | 99  |
| 70,992 | 71  | 9  | 575   | 67 | 20 | 1 | 301 | 22 | 967   | 99  |
| 70,993 | 70  | 9  | 568   | 67 | 20 | 1 | 302 | 20 | 960   | 97  |
| 70,994 | 70  | 8  | 567   | 58 | 20 | 1 | 303 | 19 | 960   | 86  |
| 70,995 | 70  | 8  | 562   | 58 | 20 | 1 | 302 | 19 | 954   | 86  |
| 70,996 | 70  | 8  | 558   | 58 | 20 | 1 | 302 | 19 | 950   | 86  |
| 70,997 | 69  | 7  | 547   | 58 | 20 | 1 | 303 | 19 | 939   | 85  |
| 70,998 | 66  | 7  | 525   | 58 | 17 | 1 | 292 | 20 | 900   | 86  |
| 70,999 | 65  | 6  | 523   | 61 | 17 | 1 | 292 | 20 | 897   | 88  |
| 71,000 | 56  | 7  | 424   | 78 | 12 | 2 | 241 | 26 | 733   | 113 |

|        |    |   |     |    |    |   |     |    |     |     |
|--------|----|---|-----|----|----|---|-----|----|-----|-----|
| 71,001 | 45 | 8 | 351 | 82 | 9  | 2 | 164 | 28 | 569 | 120 |
| 71,002 | 31 | 7 | 276 | 82 | 7  | 2 | 109 | 28 | 423 | 119 |
| 71,003 | 28 | 7 | 232 | 84 | 6  | 2 | 105 | 26 | 371 | 119 |
| 71,004 | 28 | 7 | 229 | 87 | 6  | 2 | 100 | 26 | 363 | 122 |
| 71,005 | 32 | 7 | 207 | 89 | 7  | 2 | 92  | 26 | 338 | 124 |
| 71,006 | 31 | 7 | 205 | 89 | 7  | 2 | 89  | 26 | 332 | 124 |
| 71,007 | 29 | 6 | 207 | 90 | 8  | 2 | 96  | 26 | 340 | 124 |
| 71,008 | 28 | 6 | 199 | 90 | 8  | 2 | 96  | 26 | 331 | 124 |
| 71,009 | 27 | 6 | 193 | 89 | 8  | 2 | 93  | 26 | 321 | 123 |
| 71,010 | 27 | 6 | 177 | 89 | 8  | 2 | 92  | 26 | 304 | 123 |
| 71,011 | 27 | 6 | 177 | 89 | 8  | 2 | 92  | 26 | 304 | 123 |
| 71,012 | 22 | 6 | 177 | 90 | 6  | 2 | 95  | 27 | 300 | 125 |
| 71,013 | 23 | 6 | 183 | 90 | 6  | 2 | 97  | 28 | 309 | 126 |
| 71,014 | 22 | 7 | 166 | 91 | 6  | 2 | 93  | 28 | 287 | 128 |
| 71,015 | 18 | 7 | 159 | 91 | 6  | 2 | 90  | 28 | 273 | 128 |
| 71,016 | 20 | 7 | 164 | 92 | 6  | 2 | 93  | 28 | 283 | 129 |
| 71,017 | 20 | 7 | 157 | 91 | 6  | 2 | 91  | 26 | 274 | 126 |
| 71,018 | 17 | 7 | 146 | 91 | 6  | 2 | 87  | 26 | 256 | 126 |
| 71,019 | 20 | 7 | 216 | 91 | 11 | 2 | 112 | 27 | 359 | 127 |
| 71,020 | 20 | 7 | 220 | 91 | 11 | 2 | 114 | 27 | 365 | 127 |
| 71,021 | 34 | 7 | 345 | 91 | 18 | 2 | 181 | 27 | 578 | 127 |
| 71,022 | 40 | 7 | 452 | 90 | 21 | 2 | 201 | 26 | 714 | 125 |
| 71,023 | 40 | 7 | 451 | 89 | 21 | 2 | 201 | 26 | 713 | 124 |
| 71,024 | 40 | 7 | 444 | 89 | 21 | 2 | 200 | 26 | 705 | 124 |
| 71,025 | 42 | 7 | 466 | 88 | 22 | 2 | 201 | 26 | 731 | 123 |
| 71,026 | 46 | 7 | 488 | 88 | 24 | 2 | 202 | 26 | 760 | 123 |
| 71,027 | 46 | 7 | 488 | 88 | 24 | 2 | 202 | 26 | 760 | 123 |
| 71,028 | 46 | 7 | 489 | 88 | 24 | 2 | 202 | 26 | 761 | 123 |
| 71,029 | 46 | 6 | 587 | 88 | 24 | 3 | 209 | 24 | 866 | 121 |
| 71,030 | 47 | 6 | 612 | 83 | 25 | 3 | 220 | 24 | 904 | 116 |
| 71,031 | 47 | 5 | 620 | 72 | 25 | 2 | 221 | 23 | 913 | 102 |
| 71,032 | 47 | 5 | 619 | 56 | 25 | 2 | 221 | 20 | 912 | 83  |
| 71,033 | 47 | 5 | 620 | 53 | 25 | 2 | 220 | 20 | 912 | 80  |
| 71,034 | 47 | 4 | 620 | 47 | 25 | 2 | 220 | 18 | 912 | 71  |
| 71,035 | 47 | 3 | 617 | 44 | 25 | 2 | 220 | 17 | 909 | 66  |
| 71,036 | 47 | 3 | 617 | 44 | 25 | 2 | 221 | 17 | 910 | 66  |
| 71,037 | 47 | 3 | 611 | 44 | 23 | 2 | 219 | 17 | 900 | 66  |
| 71,038 | 46 | 3 | 603 | 44 | 23 | 2 | 213 | 17 | 885 | 66  |
| 71,039 | 46 | 3 | 602 | 43 | 23 | 2 | 212 | 16 | 883 | 64  |
| 71,040 | 46 | 4 | 602 | 43 | 23 | 2 | 212 | 16 | 883 | 65  |
| 71,041 | 43 | 4 | 583 | 43 | 23 | 2 | 198 | 16 | 847 | 65  |

|        |    |   |     |    |    |   |     |    |       |    |
|--------|----|---|-----|----|----|---|-----|----|-------|----|
| 71,042 | 43 | 4 | 583 | 43 | 23 | 2 | 195 | 16 | 844   | 65 |
| 71,043 | 43 | 4 | 583 | 43 | 23 | 2 | 196 | 16 | 845   | 65 |
| 71,044 | 43 | 4 | 584 | 43 | 23 | 2 | 196 | 16 | 846   | 65 |
| 71,045 | 44 | 4 | 589 | 43 | 23 | 2 | 195 | 16 | 851   | 65 |
| 71,046 | 44 | 4 | 587 | 43 | 23 | 2 | 195 | 16 | 849   | 65 |
| 71,047 | 44 | 4 | 591 | 43 | 24 | 2 | 195 | 16 | 854   | 65 |
| 71,048 | 44 | 4 | 585 | 41 | 24 | 2 | 192 | 15 | 845   | 62 |
| 71,049 | 55 | 4 | 666 | 37 | 28 | 2 | 224 | 15 | 973   | 58 |
| 71,050 | 55 | 4 | 665 | 37 | 28 | 2 | 224 | 15 | 972   | 58 |
| 71,051 | 55 | 3 | 666 | 20 | 28 | 1 | 220 | 9  | 969   | 33 |
| 71,052 | 55 | 2 | 665 | 17 | 28 | 1 | 220 | 8  | 968   | 28 |
| 71,053 | 55 | 2 | 661 | 16 | 28 | 1 | 219 | 8  | 963   | 27 |
| 71,054 | 80 | 2 | 936 | 10 | 42 | 1 | 278 | 8  | 1,336 | 21 |
| 71,055 | 80 | 2 | 945 | 11 | 43 | 1 | 289 | 8  | 1,357 | 22 |
| 71,056 | 75 | 2 | 935 | 7  | 42 | 1 | 280 | 8  | 1,332 | 18 |
| 71,057 | 75 | 2 | 935 | 8  | 41 | 1 | 282 | 8  | 1,333 | 19 |
| 71,058 | 75 | 2 | 930 | 8  | 41 | 1 | 274 | 8  | 1,320 | 19 |
| 71,059 | 75 | 2 | 930 | 8  | 41 | 1 | 274 | 8  | 1,320 | 19 |
| 71,060 | 75 | 2 | 930 | 8  | 41 | 1 | 274 | 7  | 1,320 | 18 |
| 71,061 | 75 | 2 | 925 | 8  | 41 | 1 | 272 | 7  | 1,313 | 18 |
| 71,062 | 75 | 2 | 925 | 9  | 41 | 1 | 272 | 7  | 1,313 | 19 |
| 71,063 | 73 | 1 | 909 | 7  | 40 | 1 | 262 | 5  | 1,284 | 14 |
| 71,064 | 72 | 2 | 902 | 15 | 40 | 1 | 259 | 9  | 1,273 | 27 |
| 71,065 | 70 | 2 | 900 | 20 | 40 | 2 | 258 | 13 | 1,268 | 37 |
| 71,066 | 69 | 2 | 891 | 20 | 40 | 2 | 254 | 13 | 1,254 | 37 |
| 71,067 | 69 | 2 | 901 | 20 | 40 | 2 | 256 | 13 | 1,266 | 37 |
| 71,068 | 69 | 2 | 901 | 22 | 40 | 2 | 257 | 17 | 1,267 | 43 |
| 71,069 | 66 | 2 | 889 | 23 | 40 | 2 | 256 | 19 | 1,251 | 46 |
| 71,070 | 66 | 2 | 831 | 23 | 35 | 2 | 234 | 18 | 1,166 | 45 |
| 71,071 | 66 | 2 | 828 | 23 | 35 | 2 | 232 | 18 | 1,161 | 45 |
| 71,072 | 52 | 2 | 710 | 23 | 27 | 2 | 164 | 18 | 953   | 45 |
| 71,073 | 46 | 2 | 602 | 23 | 24 | 2 | 141 | 18 | 813   | 45 |
| 71,074 | 46 | 2 | 603 | 23 | 24 | 2 | 144 | 19 | 817   | 46 |
| 71,075 | 46 | 2 | 607 | 35 | 24 | 5 | 144 | 22 | 821   | 64 |
| 71,076 | 44 | 2 | 594 | 38 | 24 | 5 | 147 | 27 | 809   | 72 |
| 71,077 | 40 | 2 | 574 | 42 | 23 | 5 | 149 | 32 | 786   | 81 |
| 71,078 | 40 | 2 | 583 | 42 | 24 | 5 | 155 | 32 | 802   | 81 |
| 71,079 | 41 | 2 | 591 | 42 | 26 | 5 | 162 | 32 | 820   | 81 |
| 71,080 | 41 | 2 | 505 | 42 | 26 | 4 | 161 | 33 | 733   | 81 |
| 71,081 | 40 | 2 | 479 | 42 | 25 | 4 | 150 | 33 | 694   | 81 |
| 71,082 | 40 | 2 | 471 | 42 | 25 | 4 | 149 | 34 | 685   | 82 |

|        |    |    |     |     |    |    |     |     |     |     |
|--------|----|----|-----|-----|----|----|-----|-----|-----|-----|
| 71,083 | 40 | 2  | 470 | 42  | 25 | 5  | 149 | 35  | 684 | 84  |
| 71,084 | 40 | 2  | 469 | 42  | 26 | 5  | 152 | 35  | 687 | 84  |
| 71,085 | 40 | 2  | 469 | 42  | 26 | 5  | 152 | 35  | 687 | 84  |
| 71,086 | 40 | 2  | 469 | 42  | 26 | 5  | 152 | 35  | 687 | 84  |
| 71,087 | 40 | 2  | 469 | 44  | 26 | 5  | 151 | 35  | 686 | 86  |
| 71,088 | 40 | 2  | 469 | 44  | 26 | 5  | 151 | 35  | 686 | 86  |
| 71,089 | 40 | 2  | 470 | 45  | 26 | 5  | 152 | 35  | 688 | 87  |
| 71,090 | 40 | 2  | 471 | 45  | 26 | 5  | 152 | 35  | 689 | 87  |
| 71,091 | 40 | 1  | 471 | 45  | 26 | 5  | 152 | 35  | 689 | 86  |
| 71,092 | 40 | 1  | 469 | 45  | 26 | 5  | 152 | 35  | 687 | 86  |
| 71,093 | 42 | 1  | 475 | 45  | 26 | 5  | 159 | 35  | 702 | 86  |
| 71,094 | 42 | 1  | 474 | 45  | 26 | 5  | 158 | 35  | 700 | 86  |
| 71,095 | 42 | 1  | 500 | 45  | 28 | 5  | 167 | 35  | 737 | 86  |
| 71,096 | 43 | 1  | 570 | 45  | 30 | 5  | 202 | 35  | 845 | 86  |
| 71,097 | 43 | 1  | 572 | 45  | 30 | 5  | 202 | 35  | 847 | 86  |
| 71,098 | 43 | 1  | 592 | 46  | 29 | 5  | 218 | 35  | 882 | 87  |
| 71,099 | 43 | 1  | 595 | 55  | 29 | 6  | 217 | 40  | 884 | 102 |
| 71,100 | 33 | 5  | 527 | 76  | 25 | 7  | 189 | 62  | 774 | 150 |
| 71,101 | 33 | 11 | 531 | 135 | 25 | 12 | 188 | 99  | 777 | 257 |
| 71,102 | 32 | 11 | 519 | 142 | 25 | 12 | 186 | 109 | 762 | 274 |
| 71,103 | 29 | 12 | 507 | 142 | 23 | 13 | 212 | 111 | 771 | 278 |
| 71,104 | 18 | 12 | 464 | 140 | 20 | 13 | 180 | 111 | 682 | 276 |
| 71,105 | 11 | 18 | 289 | 143 | 12 | 13 | 157 | 114 | 469 | 288 |
| 71,106 | 11 | 18 | 278 | 144 | 11 | 13 | 146 | 116 | 446 | 291 |
| 71,107 | 11 | 18 | 276 | 144 | 10 | 13 | 146 | 117 | 443 | 292 |
| 71,108 | 11 | 18 | 275 | 144 | 10 | 13 | 145 | 119 | 441 | 294 |
| 71,109 | 11 | 18 | 281 | 149 | 10 | 13 | 146 | 120 | 448 | 300 |
| 71,110 | 11 | 20 | 284 | 153 | 10 | 14 | 147 | 120 | 452 | 307 |
| 71,111 | 11 | 20 | 284 | 151 | 10 | 14 | 146 | 118 | 451 | 303 |
| 71,112 | 12 | 20 | 289 | 154 | 12 | 14 | 148 | 120 | 461 | 308 |
| 71,113 | 13 | 20 | 291 | 153 | 12 | 14 | 148 | 120 | 464 | 307 |
| 71,114 | 13 | 20 | 294 | 154 | 12 | 14 | 148 | 120 | 467 | 308 |
| 71,115 | 12 | 19 | 295 | 147 | 12 | 14 | 149 | 116 | 468 | 296 |
| 71,116 | 12 | 19 | 301 | 141 | 12 | 13 | 149 | 112 | 474 | 285 |
| 71,117 | 14 | 19 | 308 | 141 | 12 | 13 | 153 | 112 | 487 | 285 |
| 71,118 | 15 | 19 | 327 | 140 | 12 | 13 | 157 | 112 | 511 | 284 |
| 71,119 | 15 | 19 | 324 | 138 | 12 | 13 | 156 | 108 | 507 | 278 |
| 71,120 | 15 | 19 | 326 | 137 | 12 | 13 | 158 | 106 | 511 | 275 |
| 71,121 | 23 | 19 | 372 | 137 | 13 | 13 | 193 | 106 | 601 | 275 |
| 71,122 | 24 | 19 | 424 | 137 | 15 | 13 | 209 | 106 | 672 | 275 |
| 71,123 | 33 | 19 | 513 | 137 | 15 | 13 | 238 | 106 | 799 | 275 |

|        |    |    |     |     |    |    |     |     |       |     |
|--------|----|----|-----|-----|----|----|-----|-----|-------|-----|
| 71,124 | 33 | 19 | 527 | 137 | 16 | 13 | 244 | 106 | 820   | 275 |
| 71,125 | 33 | 19 | 527 | 137 | 15 | 13 | 240 | 105 | 815   | 274 |
| 71,126 | 43 | 19 | 624 | 126 | 22 | 10 | 349 | 102 | 1,038 | 257 |
| 71,127 | 43 | 19 | 635 | 123 | 23 | 10 | 357 | 97  | 1,058 | 249 |
| 71,128 | 45 | 19 | 644 | 120 | 23 | 10 | 366 | 93  | 1,078 | 242 |
| 71,129 | 45 | 19 | 640 | 120 | 22 | 10 | 361 | 93  | 1,068 | 242 |
| 71,130 | 44 | 19 | 624 | 120 | 21 | 10 | 354 | 93  | 1,043 | 242 |
| 71,131 | 46 | 19 | 643 | 120 | 21 | 10 | 364 | 91  | 1,074 | 240 |
| 71,132 | 46 | 19 | 653 | 120 | 20 | 10 | 363 | 91  | 1,082 | 240 |
| 71,133 | 56 | 19 | 710 | 120 | 26 | 10 | 426 | 88  | 1,218 | 237 |
| 71,134 | 56 | 19 | 709 | 120 | 26 | 9  | 426 | 87  | 1,217 | 235 |
| 71,135 | 57 | 19 | 750 | 118 | 29 | 9  | 450 | 87  | 1,286 | 233 |
| 71,136 | 57 | 19 | 757 | 118 | 30 | 9  | 454 | 87  | 1,298 | 233 |
| 71,137 | 57 | 19 | 758 | 118 | 30 | 9  | 456 | 87  | 1,301 | 233 |
| 71,138 | 57 | 19 | 768 | 118 | 30 | 9  | 462 | 87  | 1,317 | 233 |
| 71,139 | 57 | 19 | 768 | 118 | 30 | 9  | 461 | 87  | 1,316 | 233 |
| 71,140 | 57 | 19 | 767 | 117 | 30 | 9  | 461 | 87  | 1,315 | 232 |
| 71,141 | 57 | 19 | 773 | 117 | 30 | 9  | 469 | 87  | 1,329 | 232 |
| 71,142 | 57 | 19 | 773 | 118 | 30 | 9  | 471 | 87  | 1,331 | 233 |
| 71,143 | 58 | 19 | 784 | 119 | 30 | 9  | 477 | 87  | 1,349 | 234 |
| 71,144 | 57 | 19 | 786 | 119 | 31 | 9  | 481 | 87  | 1,355 | 234 |
| 71,145 | 60 | 19 | 784 | 119 | 30 | 9  | 508 | 87  | 1,382 | 234 |
| 71,146 | 60 | 19 | 761 | 119 | 29 | 9  | 500 | 87  | 1,350 | 234 |
| 71,147 | 60 | 19 | 719 | 119 | 28 | 9  | 475 | 87  | 1,282 | 234 |
| 71,148 | 60 | 19 | 721 | 120 | 28 | 9  | 476 | 87  | 1,285 | 235 |
| 71,149 | 60 | 19 | 699 | 119 | 28 | 9  | 460 | 87  | 1,247 | 234 |
| 71,150 | 61 | 19 | 702 | 109 | 28 | 8  | 461 | 82  | 1,252 | 218 |
| 71,151 | 62 | 15 | 699 | 89  | 28 | 7  | 460 | 60  | 1,249 | 171 |
| 71,152 | 68 | 8  | 732 | 22  | 29 | 1  | 477 | 10  | 1,306 | 41  |
| 71,153 | 68 | 8  | 732 | 22  | 28 | 1  | 478 | 10  | 1,306 | 41  |
| 71,154 | 70 | 8  | 714 | 22  | 28 | 1  | 472 | 10  | 1,284 | 41  |
| 71,155 | 70 | 8  | 725 | 23  | 30 | 1  | 485 | 10  | 1,310 | 42  |
| 71,156 | 70 | 2  | 723 | 20  | 30 | 1  | 485 | 7   | 1,308 | 30  |
| 71,157 | 72 | 2  | 746 | 19  | 32 | 1  | 514 | 5   | 1,364 | 27  |
| 71,158 | 72 | 2  | 765 | 19  | 32 | 1  | 525 | 4   | 1,394 | 26  |
| 71,159 | 73 | 2  | 766 | 19  | 32 | 1  | 530 | 4   | 1,401 | 26  |
| 71,160 | 73 | 2  | 767 | 14  | 34 | 1  | 537 | 3   | 1,411 | 20  |
| 71,161 | 74 | 0  | 767 | 10  | 34 | 0  | 537 | 3   | 1,412 | 13  |
| 71,162 | 75 | 0  | 762 | 9   | 31 | 0  | 536 | 3   | 1,404 | 12  |
| 71,163 | 73 | 0  | 759 | 9   | 31 | 0  | 538 | 3   | 1,401 | 12  |
| 71,164 | 73 | 0  | 760 | 8   | 31 | 0  | 539 | 3   | 1,403 | 11  |



|        |    |   |     |    |    |   |     |    |       |    |
|--------|----|---|-----|----|----|---|-----|----|-------|----|
| 71,165 | 74 | 0 | 772 | 9  | 31 | 0 | 549 | 3  | 1,426 | 12 |
| 71,166 | 76 | 0 | 792 | 11 | 33 | 0 | 564 | 4  | 1,465 | 15 |
| 71,167 | 82 | 0 | 885 | 14 | 35 | 0 | 629 | 4  | 1,631 | 18 |
| 71,168 | 84 | 0 | 900 | 15 | 35 | 0 | 638 | 5  | 1,657 | 20 |
| 71,169 | 87 | 0 | 908 | 15 | 38 | 0 | 662 | 6  | 1,695 | 21 |
| 71,170 | 87 | 0 | 906 | 15 | 38 | 0 | 660 | 6  | 1,691 | 21 |
| 71,171 | 84 | 0 | 918 | 20 | 41 | 1 | 645 | 8  | 1,688 | 29 |
| 71,172 | 81 | 0 | 905 | 20 | 41 | 1 | 636 | 8  | 1,663 | 29 |
| 71,173 | 80 | 0 | 857 | 23 | 39 | 1 | 622 | 8  | 1,598 | 32 |
| 71,174 | 73 | 0 | 768 | 23 | 39 | 1 | 601 | 8  | 1,481 | 32 |
| 71,175 | 73 | 0 | 754 | 24 | 38 | 1 | 597 | 8  | 1,462 | 33 |
| 71,176 | 80 | 0 | 763 | 24 | 38 | 1 | 600 | 8  | 1,481 | 33 |
| 71,177 | 72 | 0 | 672 | 23 | 32 | 1 | 493 | 8  | 1,269 | 32 |
| 71,178 | 72 | 0 | 659 | 23 | 32 | 1 | 481 | 9  | 1,244 | 33 |
| 71,179 | 70 | 0 | 649 | 22 | 32 | 1 | 469 | 8  | 1,220 | 31 |
| 71,180 | 71 | 0 | 657 | 22 | 32 | 1 | 473 | 8  | 1,233 | 31 |
| 71,181 | 80 | 0 | 795 | 22 | 31 | 1 | 506 | 8  | 1,412 | 31 |
| 71,182 | 79 | 0 | 793 | 23 | 33 | 1 | 499 | 8  | 1,404 | 32 |
| 71,183 | 79 | 0 | 785 | 24 | 33 | 1 | 501 | 8  | 1,398 | 33 |
| 71,184 | 69 | 0 | 731 | 24 | 27 | 1 | 439 | 8  | 1,266 | 33 |
| 71,185 | 68 | 0 | 722 | 24 | 26 | 1 | 434 | 8  | 1,250 | 33 |
| 71,186 | 68 | 0 | 690 | 24 | 24 | 1 | 414 | 8  | 1,196 | 33 |
| 71,187 | 68 | 0 | 683 | 24 | 23 | 1 | 410 | 8  | 1,184 | 33 |
| 71,188 | 68 | 0 | 687 | 24 | 23 | 1 | 408 | 8  | 1,186 | 33 |
| 71,189 | 68 | 0 | 679 | 24 | 23 | 1 | 402 | 8  | 1,172 | 33 |
| 71,190 | 68 | 0 | 672 | 24 | 23 | 2 | 395 | 8  | 1,158 | 34 |
| 71,191 | 68 | 0 | 674 | 24 | 23 | 2 | 395 | 8  | 1,160 | 34 |
| 71,192 | 69 | 0 | 677 | 25 | 26 | 2 | 396 | 8  | 1,168 | 35 |
| 71,193 | 69 | 0 | 679 | 27 | 26 | 2 | 395 | 12 | 1,169 | 41 |
| 71,194 | 83 | 0 | 766 | 28 | 33 | 2 | 456 | 13 | 1,338 | 43 |
| 71,195 | 82 | 0 | 761 | 28 | 32 | 2 | 445 | 13 | 1,320 | 43 |
| 71,196 | 78 | 0 | 732 | 28 | 31 | 2 | 409 | 13 | 1,250 | 43 |
| 71,197 | 78 | 0 | 732 | 28 | 31 | 2 | 406 | 13 | 1,247 | 43 |
| 71,198 | 77 | 0 | 728 | 28 | 31 | 2 | 407 | 13 | 1,243 | 43 |
| 71,199 | 78 | 0 | 727 | 27 | 31 | 2 | 408 | 13 | 1,244 | 42 |
| 71,200 | 78 | 0 | 725 | 27 | 31 | 2 | 408 | 13 | 1,242 | 42 |
| 71,201 | 78 | 0 | 735 | 27 | 32 | 2 | 415 | 13 | 1,260 | 42 |
| 71,202 | 77 | 0 | 765 | 27 | 32 | 2 | 418 | 13 | 1,292 | 42 |
| 71,203 | 74 | 0 | 752 | 28 | 33 | 2 | 424 | 13 | 1,283 | 43 |
| 71,204 | 74 | 0 | 783 | 28 | 39 | 2 | 440 | 13 | 1,336 | 43 |
| 71,205 | 69 | 0 | 784 | 29 | 41 | 2 | 420 | 13 | 1,314 | 44 |

|        |    |    |       |     |    |    |     |    |       |     |
|--------|----|----|-------|-----|----|----|-----|----|-------|-----|
| 71,206 | 69 | 0  | 816   | 28  | 39 | 2  | 422 | 13 | 1,346 | 43  |
| 71,207 | 69 | 0  | 823   | 27  | 39 | 2  | 412 | 13 | 1,343 | 42  |
| 71,208 | 68 | 0  | 810   | 27  | 37 | 2  | 400 | 13 | 1,315 | 42  |
| 71,209 | 68 | 0  | 791   | 26  | 37 | 2  | 389 | 11 | 1,285 | 39  |
| 71,210 | 68 | 1  | 787   | 27  | 37 | 2  | 386 | 11 | 1,278 | 41  |
| 71,211 | 68 | 1  | 786   | 27  | 35 | 2  | 385 | 11 | 1,274 | 41  |
| 71,212 | 67 | 1  | 783   | 27  | 35 | 2  | 385 | 11 | 1,270 | 41  |
| 71,213 | 68 | 1  | 796   | 28  | 35 | 2  | 390 | 11 | 1,289 | 42  |
| 71,214 | 68 | 1  | 795   | 28  | 35 | 2  | 389 | 12 | 1,287 | 43  |
| 71,215 | 68 | 1  | 792   | 31  | 35 | 2  | 388 | 15 | 1,283 | 49  |
| 71,216 | 67 | 1  | 779   | 33  | 36 | 2  | 377 | 18 | 1,259 | 54  |
| 71,217 | 65 | 1  | 757   | 32  | 34 | 2  | 364 | 18 | 1,220 | 53  |
| 71,218 | 57 | 1  | 653   | 31  | 32 | 2  | 295 | 20 | 1,037 | 54  |
| 71,219 | 55 | 1  | 634   | 32  | 32 | 2  | 287 | 19 | 1,008 | 54  |
| 71,220 | 52 | 1  | 605   | 40  | 29 | 3  | 257 | 19 | 943   | 63  |
| 71,221 | 51 | 2  | 580   | 46  | 26 | 3  | 252 | 20 | 909   | 71  |
| 71,222 | 50 | 2  | 566   | 42  | 25 | 2  | 248 | 18 | 889   | 64  |
| 71,223 | 50 | 2  | 559   | 44  | 25 | 2  | 245 | 20 | 879   | 68  |
| 71,224 | 50 | 2  | 553   | 41  | 25 | 2  | 243 | 20 | 871   | 65  |
| 71,225 | 48 | 3  | 552   | 40  | 25 | 2  | 246 | 20 | 871   | 65  |
| 71,226 | 48 | 3  | 552   | 41  | 25 | 2  | 244 | 20 | 869   | 66  |
| 71,227 | 44 | 6  | 554   | 58  | 25 | 5  | 251 | 41 | 874   | 110 |
| 71,228 | 42 | 8  | 544   | 69  | 24 | 7  | 248 | 46 | 858   | 130 |
| 71,229 | 42 | 15 | 549   | 98  | 24 | 10 | 255 | 55 | 870   | 178 |
| 71,230 | 42 | 16 | 538   | 103 | 24 | 10 | 252 | 55 | 856   | 184 |
| 71,231 | 46 | 16 | 531   | 104 | 24 | 10 | 245 | 56 | 846   | 186 |
| 71,232 | 39 | 17 | 432   | 111 | 24 | 10 | 224 | 60 | 719   | 198 |
| 71,233 | 38 | 18 | 415   | 114 | 22 | 10 | 220 | 60 | 695   | 202 |
| 71,234 | 38 | 19 | 413   | 117 | 23 | 10 | 218 | 61 | 692   | 207 |
| 71,235 | 44 | 19 | 441   | 118 | 24 | 10 | 230 | 61 | 739   | 208 |
| 71,236 | 47 | 20 | 460   | 121 | 24 | 10 | 237 | 61 | 768   | 212 |
| 71,237 | 53 | 20 | 541   | 123 | 30 | 10 | 295 | 61 | 919   | 214 |
| 71,238 | 53 | 20 | 541   | 124 | 30 | 10 | 295 | 61 | 919   | 215 |
| 71,239 | 73 | 20 | 694   | 125 | 42 | 10 | 358 | 61 | 1,167 | 216 |
| 71,240 | 79 | 20 | 773   | 125 | 46 | 10 | 390 | 61 | 1,288 | 216 |
| 71,241 | 88 | 20 | 891   | 129 | 60 | 9  | 460 | 61 | 1,499 | 219 |
| 71,242 | 90 | 20 | 957   | 129 | 62 | 9  | 492 | 61 | 1,601 | 219 |
| 71,243 | 92 | 20 | 1,136 | 123 | 64 | 9  | 522 | 56 | 1,814 | 208 |
| 71,244 | 92 | 20 | 1,150 | 123 | 64 | 9  | 528 | 56 | 1,834 | 208 |
| 71,245 | 77 | 20 | 1,053 | 123 | 57 | 9  | 461 | 56 | 1,648 | 208 |
| 71,246 | 77 | 20 | 1,050 | 123 | 57 | 9  | 461 | 57 | 1,645 | 209 |

|        |     |    |       |     |    |   |     |    |       |     |
|--------|-----|----|-------|-----|----|---|-----|----|-------|-----|
| 71,247 | 77  | 20 | 1,050 | 123 | 57 | 9 | 461 | 57 | 1,645 | 209 |
| 71,248 | 77  | 21 | 1,050 | 123 | 57 | 9 | 460 | 57 | 1,644 | 210 |
| 71,249 | 77  | 21 | 1,050 | 123 | 57 | 9 | 460 | 57 | 1,644 | 210 |
| 71,250 | 76  | 21 | 1,047 | 126 | 57 | 9 | 459 | 61 | 1,639 | 217 |
| 71,251 | 76  | 21 | 1,045 | 130 | 57 | 9 | 458 | 61 | 1,636 | 221 |
| 71,252 | 75  | 21 | 1,026 | 130 | 56 | 9 | 450 | 61 | 1,607 | 221 |
| 71,253 | 74  | 21 | 988   | 131 | 56 | 9 | 445 | 61 | 1,563 | 222 |
| 71,254 | 71  | 21 | 969   | 130 | 54 | 9 | 425 | 61 | 1,519 | 221 |
| 71,255 | 71  | 21 | 940   | 129 | 48 | 9 | 409 | 61 | 1,468 | 220 |
| 71,256 | 71  | 21 | 922   | 129 | 46 | 9 | 401 | 61 | 1,440 | 220 |
| 71,257 | 71  | 21 | 881   | 129 | 46 | 9 | 390 | 61 | 1,388 | 220 |
| 71,258 | 71  | 21 | 873   | 129 | 46 | 9 | 387 | 61 | 1,377 | 220 |
| 71,259 | 71  | 21 | 872   | 129 | 46 | 9 | 389 | 61 | 1,378 | 220 |
| 71,260 | 71  | 20 | 872   | 128 | 46 | 9 | 389 | 61 | 1,378 | 218 |
| 71,261 | 70  | 20 | 872   | 128 | 46 | 9 | 387 | 61 | 1,375 | 218 |
| 71,262 | 68  | 20 | 870   | 128 | 46 | 9 | 382 | 62 | 1,366 | 219 |
| 71,263 | 67  | 20 | 858   | 128 | 46 | 9 | 376 | 62 | 1,347 | 219 |
| 71,264 | 71  | 20 | 867   | 127 | 47 | 9 | 382 | 63 | 1,367 | 219 |
| 71,265 | 72  | 20 | 867   | 127 | 47 | 9 | 388 | 62 | 1,374 | 218 |
| 71,266 | 72  | 20 | 868   | 126 | 47 | 9 | 388 | 59 | 1,375 | 214 |
| 71,267 | 72  | 20 | 863   | 123 | 46 | 9 | 387 | 56 | 1,368 | 208 |
| 71,268 | 73  | 20 | 864   | 123 | 46 | 9 | 386 | 54 | 1,369 | 206 |
| 71,269 | 73  | 20 | 864   | 121 | 46 | 9 | 385 | 52 | 1,368 | 202 |
| 71,270 | 73  | 20 | 864   | 119 | 46 | 9 | 386 | 53 | 1,369 | 201 |
| 71,271 | 73  | 20 | 864   | 111 | 47 | 8 | 388 | 53 | 1,372 | 192 |
| 71,272 | 73  | 19 | 866   | 105 | 48 | 8 | 391 | 52 | 1,378 | 184 |
| 71,273 | 73  | 19 | 862   | 102 | 48 | 8 | 383 | 51 | 1,366 | 180 |
| 71,274 | 75  | 18 | 877   | 101 | 49 | 8 | 392 | 51 | 1,393 | 178 |
| 71,275 | 78  | 18 | 891   | 101 | 52 | 8 | 409 | 51 | 1,430 | 178 |
| 71,276 | 78  | 18 | 889   | 101 | 52 | 8 | 407 | 51 | 1,426 | 178 |
| 71,277 | 80  | 18 | 894   | 101 | 53 | 8 | 412 | 52 | 1,439 | 179 |
| 71,278 | 79  | 13 | 885   | 74  | 53 | 3 | 404 | 26 | 1,421 | 116 |
| 71,279 | 79  | 13 | 881   | 74  | 53 | 3 | 401 | 26 | 1,414 | 116 |
| 71,280 | 91  | 5  | 1,120 | 40  | 60 | 0 | 469 | 16 | 1,740 | 61  |
| 71,281 | 91  | 5  | 1,168 | 40  | 66 | 0 | 522 | 16 | 1,847 | 61  |
| 71,282 | 94  | 4  | 1,371 | 31  | 67 | 0 | 552 | 11 | 2,084 | 46  |
| 71,283 | 93  | 3  | 1,384 | 28  | 68 | 0 | 567 | 11 | 2,112 | 42  |
| 71,284 | 93  | 3  | 1,384 | 28  | 67 | 0 | 566 | 11 | 2,110 | 42  |
| 71,285 | 89  | 2  | 1,371 | 24  | 68 | 0 | 573 | 9  | 2,101 | 35  |
| 71,286 | 96  | 1  | 1,419 | 20  | 69 | 0 | 589 | 9  | 2,173 | 30  |
| 71,287 | 100 | 1  | 1,468 | 20  | 69 | 0 | 596 | 9  | 2,233 | 30  |

|        |     |   |       |    |    |   |     |    |       |    |
|--------|-----|---|-------|----|----|---|-----|----|-------|----|
| 71,288 | 101 | 1 | 1,434 | 18 | 65 | 0 | 545 | 9  | 2,145 | 28 |
| 71,289 | 84  | 1 | 1,392 | 20 | 57 | 1 | 515 | 10 | 2,048 | 32 |
| 71,290 | 79  | 2 | 1,329 | 21 | 54 | 1 | 486 | 10 | 1,948 | 34 |
| 71,291 | 86  | 2 | 1,332 | 21 | 53 | 1 | 528 | 10 | 1,999 | 34 |
| 71,292 | 80  | 2 | 1,260 | 17 | 42 | 1 | 470 | 10 | 1,852 | 30 |
| 71,293 | 78  | 2 | 1,192 | 17 | 40 | 1 | 439 | 10 | 1,749 | 30 |
| 71,294 | 75  | 2 | 1,010 | 17 | 35 | 1 | 406 | 10 | 1,526 | 30 |
| 71,295 | 75  | 2 | 994   | 17 | 35 | 1 | 400 | 10 | 1,504 | 30 |
| 71,296 | 75  | 2 | 998   | 17 | 35 | 1 | 400 | 10 | 1,508 | 30 |
| 71,297 | 75  | 2 | 1,002 | 17 | 35 | 1 | 400 | 9  | 1,512 | 29 |
| 71,298 | 76  | 1 | 1,021 | 17 | 35 | 1 | 409 | 9  | 1,541 | 28 |
| 71,299 | 76  | 1 | 1,021 | 17 | 35 | 1 | 409 | 9  | 1,541 | 28 |
| 71,300 | 76  | 1 | 1,030 | 17 | 35 | 1 | 412 | 9  | 1,553 | 28 |
| 71,301 | 77  | 1 | 1,056 | 10 | 36 | 1 | 421 | 6  | 1,590 | 18 |
| 71,302 | 77  | 1 | 1,056 | 10 | 36 | 1 | 422 | 6  | 1,591 | 18 |
| 71,303 | 77  | 1 | 1,056 | 9  | 36 | 1 | 422 | 6  | 1,591 | 17 |
| 71,304 | 78  | 1 | 1,057 | 9  | 36 | 1 | 421 | 6  | 1,592 | 17 |
| 71,305 | 78  | 1 | 1,056 | 10 | 36 | 2 | 420 | 7  | 1,590 | 20 |
| 71,306 | 79  | 1 | 1,064 | 10 | 36 | 2 | 424 | 7  | 1,603 | 20 |
| 71,307 | 79  | 1 | 1,062 | 15 | 36 | 4 | 422 | 8  | 1,599 | 28 |
| 71,308 | 79  | 1 | 1,058 | 15 | 36 | 4 | 417 | 9  | 1,590 | 29 |
| 71,309 | 89  | 1 | 1,100 | 18 | 38 | 4 | 452 | 9  | 1,679 | 32 |
| 71,310 | 89  | 1 | 1,112 | 18 | 39 | 4 | 461 | 9  | 1,701 | 32 |
| 71,311 | 90  | 1 | 1,120 | 18 | 39 | 4 | 466 | 9  | 1,715 | 32 |
| 71,312 | 92  | 1 | 1,125 | 21 | 39 | 4 | 474 | 9  | 1,730 | 35 |
| 71,313 | 88  | 1 | 1,127 | 22 | 39 | 4 | 471 | 9  | 1,725 | 36 |
| 71,314 | 89  | 1 | 1,127 | 23 | 38 | 4 | 473 | 8  | 1,727 | 36 |
| 71,315 | 89  | 1 | 1,126 | 23 | 38 | 4 | 474 | 8  | 1,727 | 36 |
| 71,316 | 88  | 1 | 1,134 | 21 | 38 | 4 | 470 | 8  | 1,730 | 34 |
| 71,317 | 88  | 1 | 1,133 | 21 | 38 | 4 | 470 | 8  | 1,729 | 34 |
| 71,318 | 87  | 1 | 1,134 | 20 | 38 | 4 | 470 | 8  | 1,729 | 33 |
| 71,319 | 87  | 1 | 1,134 | 20 | 38 | 4 | 470 | 8  | 1,729 | 33 |
| 71,320 | 88  | 1 | 1,137 | 21 | 38 | 4 | 469 | 8  | 1,732 | 34 |
| 71,321 | 88  | 1 | 1,141 | 21 | 38 | 4 | 473 | 7  | 1,740 | 33 |
| 71,322 | 91  | 1 | 1,155 | 21 | 38 | 4 | 478 | 7  | 1,762 | 33 |
| 71,323 | 91  | 2 | 1,156 | 21 | 37 | 4 | 477 | 6  | 1,761 | 33 |
| 71,324 | 91  | 2 | 1,163 | 21 | 37 | 5 | 481 | 6  | 1,772 | 34 |
| 71,325 | 89  | 2 | 1,153 | 21 | 36 | 5 | 478 | 6  | 1,756 | 34 |
| 71,326 | 86  | 2 | 1,145 | 25 | 33 | 5 | 462 | 7  | 1,726 | 39 |
| 71,327 | 86  | 2 | 1,146 | 28 | 33 | 6 | 462 | 11 | 1,727 | 47 |
| 71,328 | 85  | 2 | 1,148 | 40 | 32 | 7 | 461 | 20 | 1,726 | 69 |

|        |    |    |       |     |    |   |     |    |       |     |
|--------|----|----|-------|-----|----|---|-----|----|-------|-----|
| 71,329 | 83 | 2  | 1,142 | 43  | 32 | 7 | 460 | 20 | 1,717 | 72  |
| 71,330 | 78 | 2  | 1,133 | 47  | 29 | 7 | 444 | 22 | 1,684 | 78  |
| 71,331 | 71 | 2  | 901   | 48  | 25 | 7 | 389 | 22 | 1,386 | 79  |
| 71,332 | 70 | 2  | 853   | 48  | 20 | 7 | 336 | 22 | 1,279 | 79  |
| 71,333 | 62 | 2  | 637   | 48  | 19 | 7 | 304 | 24 | 1,022 | 81  |
| 71,334 | 62 | 2  | 613   | 48  | 18 | 8 | 285 | 26 | 978   | 84  |
| 71,335 | 62 | 2  | 598   | 49  | 16 | 8 | 268 | 26 | 944   | 85  |
| 71,336 | 62 | 2  | 598   | 51  | 16 | 8 | 267 | 27 | 943   | 88  |
| 71,337 | 54 | 3  | 546   | 51  | 15 | 8 | 246 | 27 | 861   | 89  |
| 71,338 | 50 | 5  | 494   | 53  | 15 | 8 | 237 | 31 | 796   | 97  |
| 71,339 | 43 | 5  | 446   | 51  | 13 | 7 | 229 | 30 | 731   | 93  |
| 71,340 | 40 | 4  | 330   | 49  | 9  | 7 | 196 | 30 | 575   | 90  |
| 71,341 | 39 | 4  | 312   | 51  | 8  | 7 | 192 | 30 | 551   | 92  |
| 71,342 | 31 | 4  | 276   | 51  | 6  | 7 | 143 | 30 | 456   | 92  |
| 71,343 | 29 | 4  | 275   | 51  | 8  | 7 | 146 | 31 | 458   | 93  |
| 71,344 | 29 | 4  | 274   | 51  | 8  | 7 | 146 | 31 | 457   | 93  |
| 71,345 | 29 | 4  | 278   | 51  | 9  | 7 | 154 | 32 | 470   | 94  |
| 71,346 | 29 | 4  | 280   | 51  | 9  | 7 | 154 | 32 | 472   | 94  |
| 71,347 | 29 | 4  | 282   | 51  | 9  | 7 | 155 | 32 | 475   | 94  |
| 71,348 | 29 | 4  | 276   | 52  | 9  | 7 | 155 | 32 | 469   | 95  |
| 71,349 | 28 | 4  | 257   | 52  | 9  | 7 | 146 | 32 | 440   | 95  |
| 71,350 | 28 | 6  | 265   | 52  | 10 | 7 | 149 | 32 | 452   | 97  |
| 71,351 | 29 | 6  | 267   | 52  | 10 | 7 | 148 | 34 | 454   | 99  |
| 71,352 | 29 | 6  | 259   | 52  | 9  | 7 | 153 | 34 | 450   | 99  |
| 71,353 | 29 | 6  | 259   | 52  | 9  | 7 | 152 | 34 | 449   | 99  |
| 71,354 | 32 | 6  | 280   | 53  | 9  | 7 | 181 | 35 | 502   | 101 |
| 71,355 | 31 | 6  | 278   | 54  | 9  | 7 | 181 | 37 | 499   | 104 |
| 71,356 | 31 | 6  | 271   | 54  | 9  | 6 | 178 | 36 | 489   | 102 |
| 71,357 | 32 | 8  | 279   | 48  | 14 | 4 | 194 | 34 | 519   | 94  |
| 71,358 | 32 | 9  | 279   | 49  | 14 | 4 | 194 | 34 | 519   | 96  |
| 71,359 | 22 | 9  | 236   | 53  | 12 | 4 | 158 | 36 | 428   | 102 |
| 71,360 | 22 | 12 | 231   | 66  | 12 | 4 | 156 | 50 | 421   | 132 |
| 71,361 | 21 | 12 | 221   | 77  | 11 | 4 | 145 | 52 | 398   | 145 |
| 71,362 | 20 | 15 | 213   | 96  | 11 | 4 | 140 | 81 | 384   | 196 |
| 71,363 | 18 | 17 | 207   | 106 | 11 | 4 | 133 | 82 | 369   | 209 |
| 71,364 | 19 | 17 | 209   | 111 | 11 | 4 | 133 | 87 | 372   | 219 |
| 71,365 | 18 | 17 | 206   | 110 | 11 | 4 | 130 | 87 | 365   | 218 |
| 71,366 | 18 | 17 | 200   | 113 | 11 | 4 | 128 | 87 | 357   | 221 |
| 71,367 | 18 | 19 | 198   | 121 | 11 | 5 | 129 | 87 | 356   | 232 |
| 71,368 | 18 | 19 | 198   | 124 | 11 | 5 | 129 | 87 | 356   | 235 |
| 71,369 | 18 | 19 | 198   | 124 | 11 | 5 | 129 | 88 | 356   | 236 |

|        |    |    |     |     |    |   |     |    |       |     |
|--------|----|----|-----|-----|----|---|-----|----|-------|-----|
| 71,370 | 17 | 19 | 198 | 124 | 11 | 5 | 130 | 90 | 356   | 238 |
| 71,371 | 17 | 21 | 194 | 131 | 11 | 5 | 126 | 91 | 348   | 248 |
| 71,372 | 16 | 21 | 189 | 132 | 10 | 5 | 121 | 93 | 336   | 251 |
| 71,373 | 13 | 21 | 180 | 143 | 10 | 5 | 119 | 93 | 322   | 262 |
| 71,374 | 13 | 20 | 177 | 143 | 10 | 5 | 117 | 93 | 317   | 261 |
| 71,375 | 13 | 20 | 174 | 143 | 10 | 4 | 113 | 93 | 310   | 260 |
| 71,376 | 13 | 20 | 175 | 142 | 10 | 4 | 106 | 92 | 304   | 258 |
| 71,377 | 13 | 20 | 209 | 139 | 12 | 3 | 137 | 88 | 371   | 250 |
| 71,378 | 13 | 20 | 226 | 139 | 13 | 3 | 170 | 88 | 422   | 250 |
| 71,379 | 14 | 20 | 258 | 127 | 13 | 2 | 204 | 78 | 489   | 227 |
| 71,380 | 15 | 20 | 258 | 119 | 14 | 2 | 205 | 76 | 492   | 217 |
| 71,381 | 15 | 20 | 257 | 118 | 14 | 2 | 205 | 76 | 491   | 216 |
| 71,382 | 15 | 20 | 258 | 118 | 14 | 1 | 207 | 72 | 494   | 211 |
| 71,383 | 15 | 20 | 256 | 118 | 13 | 1 | 205 | 72 | 489   | 211 |
| 71,384 | 19 | 20 | 248 | 118 | 13 | 1 | 200 | 72 | 480   | 211 |
| 71,385 | 17 | 20 | 257 | 117 | 13 | 1 | 205 | 72 | 492   | 210 |
| 71,386 | 18 | 20 | 268 | 115 | 13 | 1 | 215 | 71 | 514   | 207 |
| 71,387 | 18 | 20 | 266 | 115 | 13 | 1 | 215 | 71 | 512   | 207 |
| 71,388 | 16 | 19 | 254 | 115 | 13 | 1 | 214 | 71 | 497   | 206 |
| 71,389 | 19 | 17 | 268 | 113 | 14 | 1 | 236 | 67 | 537   | 198 |
| 71,390 | 19 | 17 | 268 | 112 | 14 | 1 | 238 | 67 | 539   | 197 |
| 71,391 | 19 | 17 | 268 | 114 | 14 | 1 | 237 | 69 | 538   | 201 |
| 71,392 | 20 | 20 | 284 | 135 | 15 | 3 | 237 | 81 | 556   | 239 |
| 71,393 | 20 | 21 | 279 | 137 | 13 | 3 | 234 | 84 | 546   | 245 |
| 71,394 | 21 | 21 | 287 | 144 | 13 | 3 | 235 | 84 | 556   | 252 |
| 71,395 | 21 | 22 | 299 | 146 | 12 | 3 | 231 | 86 | 563   | 257 |
| 71,396 | 21 | 23 | 300 | 150 | 12 | 3 | 232 | 87 | 565   | 263 |
| 71,397 | 21 | 23 | 293 | 150 | 12 | 3 | 231 | 87 | 557   | 263 |
| 71,398 | 27 | 23 | 370 | 151 | 13 | 3 | 269 | 88 | 679   | 265 |
| 71,399 | 37 | 23 | 440 | 152 | 18 | 3 | 303 | 88 | 798   | 266 |
| 71,400 | 37 | 24 | 440 | 156 | 18 | 3 | 301 | 91 | 796   | 274 |
| 71,401 | 37 | 22 | 431 | 157 | 18 | 3 | 298 | 93 | 784   | 275 |
| 71,402 | 40 | 23 | 469 | 162 | 22 | 3 | 309 | 93 | 840   | 281 |
| 71,403 | 45 | 23 | 497 | 165 | 22 | 3 | 326 | 93 | 890   | 284 |
| 71,404 | 48 | 23 | 609 | 165 | 25 | 3 | 400 | 93 | 1,082 | 284 |
| 71,405 | 55 | 23 | 894 | 163 | 33 | 3 | 478 | 91 | 1,460 | 280 |
| 71,406 | 54 | 23 | 891 | 163 | 33 | 3 | 477 | 91 | 1,455 | 280 |
| 71,407 | 53 | 23 | 877 | 162 | 29 | 3 | 466 | 91 | 1,425 | 279 |
| 71,408 | 61 | 21 | 971 | 161 | 29 | 3 | 507 | 91 | 1,568 | 276 |
| 71,409 | 61 | 20 | 971 | 160 | 29 | 3 | 507 | 91 | 1,568 | 274 |
| 71,410 | 61 | 20 | 971 | 156 | 29 | 3 | 507 | 89 | 1,568 | 268 |

|        |    |    |     |     |    |   |     |    |       |     |
|--------|----|----|-----|-----|----|---|-----|----|-------|-----|
| 71,411 | 61 | 17 | 971 | 132 | 29 | 3 | 506 | 73 | 1,567 | 225 |
| 71,412 | 61 | 14 | 967 | 113 | 29 | 3 | 505 | 43 | 1,562 | 173 |
| 71,413 | 61 | 14 | 967 | 113 | 29 | 3 | 505 | 43 | 1,562 | 173 |
| 71,414 | 60 | 12 | 958 | 94  | 29 | 3 | 505 | 37 | 1,552 | 146 |
| 71,415 | 60 | 12 | 964 | 94  | 29 | 3 | 504 | 37 | 1,557 | 146 |
| 71,416 | 60 | 10 | 964 | 83  | 29 | 2 | 504 | 37 | 1,557 | 132 |
| 71,417 | 60 | 10 | 964 | 83  | 29 | 2 | 503 | 37 | 1,556 | 132 |
| 71,418 | 60 | 10 | 964 | 83  | 29 | 2 | 503 | 37 | 1,556 | 132 |
| 71,419 | 60 | 10 | 966 | 80  | 29 | 2 | 504 | 37 | 1,559 | 129 |
| 71,420 | 60 | 10 | 965 | 80  | 29 | 2 | 503 | 36 | 1,557 | 128 |
| 71,421 | 61 | 8  | 963 | 72  | 29 | 2 | 505 | 33 | 1,558 | 115 |
| 71,422 | 61 | 8  | 963 | 73  | 29 | 2 | 505 | 33 | 1,558 | 116 |
| 71,423 | 62 | 8  | 969 | 73  | 29 | 2 | 505 | 31 | 1,565 | 114 |
| 71,424 | 62 | 8  | 972 | 67  | 29 | 5 | 514 | 42 | 1,577 | 122 |
| 71,425 | 62 | 8  | 973 | 80  | 29 | 5 | 518 | 44 | 1,582 | 137 |
| 71,426 | 62 | 8  | 970 | 86  | 29 | 5 | 518 | 51 | 1,579 | 150 |
| 71,427 | 62 | 8  | 964 | 86  | 29 | 5 | 518 | 53 | 1,573 | 152 |
| 71,428 | 62 | 9  | 923 | 87  | 27 | 5 | 486 | 53 | 1,498 | 154 |
| 71,429 | 62 | 12 | 907 | 87  | 26 | 5 | 456 | 53 | 1,451 | 157 |
| 71,430 | 60 | 12 | 868 | 87  | 26 | 5 | 416 | 53 | 1,370 | 157 |
| 71,431 | 59 | 12 | 870 | 88  | 25 | 5 | 413 | 58 | 1,367 | 163 |
| 71,432 | 59 | 12 | 870 | 88  | 25 | 5 | 413 | 58 | 1,367 | 163 |
| 71,433 | 59 | 12 | 873 | 88  | 25 | 5 | 414 | 58 | 1,371 | 163 |
| 71,434 | 59 | 12 | 874 | 89  | 25 | 5 | 417 | 59 | 1,375 | 165 |
| 71,435 | 55 | 12 | 870 | 91  | 25 | 5 | 417 | 59 | 1,367 | 167 |
| 71,436 | 55 | 12 | 871 | 91  | 25 | 5 | 416 | 59 | 1,367 | 167 |
| 71,437 | 55 | 12 | 862 | 91  | 25 | 5 | 408 | 60 | 1,350 | 168 |
| 71,438 | 55 | 12 | 865 | 91  | 25 | 5 | 408 | 60 | 1,353 | 168 |
| 71,439 | 52 | 12 | 853 | 91  | 24 | 5 | 391 | 60 | 1,320 | 168 |
| 71,440 | 52 | 12 | 840 | 91  | 23 | 5 | 389 | 59 | 1,304 | 167 |
| 71,441 | 52 | 12 | 841 | 89  | 23 | 5 | 390 | 58 | 1,306 | 164 |
| 71,442 | 52 | 12 | 839 | 89  | 23 | 5 | 390 | 58 | 1,304 | 164 |
| 71,443 | 51 | 9  | 838 | 66  | 23 | 3 | 391 | 47 | 1,303 | 125 |
| 71,444 | 51 | 8  | 839 | 64  | 23 | 3 | 398 | 44 | 1,311 | 119 |
| 71,445 | 52 | 8  | 840 | 57  | 23 | 3 | 397 | 43 | 1,312 | 111 |
| 71,446 | 52 | 6  | 824 | 51  | 23 | 3 | 393 | 39 | 1,292 | 99  |
| 71,447 | 52 | 6  | 822 | 51  | 23 | 3 | 392 | 40 | 1,289 | 100 |
| 71,448 | 47 | 6  | 745 | 48  | 22 | 3 | 356 | 39 | 1,170 | 96  |
| 71,449 | 47 | 6  | 736 | 48  | 21 | 3 | 350 | 39 | 1,154 | 96  |
| 71,450 | 37 | 6  | 670 | 50  | 16 | 3 | 323 | 39 | 1,046 | 98  |
| 71,451 | 36 | 5  | 671 | 46  | 14 | 3 | 323 | 38 | 1,044 | 92  |

|        |    |   |     |    |    |   |     |    |       |     |
|--------|----|---|-----|----|----|---|-----|----|-------|-----|
| 71,452 | 36 | 5 | 660 | 47 | 14 | 3 | 317 | 37 | 1,027 | 92  |
| 71,453 | 42 | 5 | 690 | 76 | 15 | 3 | 381 | 45 | 1,128 | 129 |
| 71,454 | 37 | 5 | 679 | 74 | 15 | 3 | 365 | 46 | 1,096 | 128 |
| 71,455 | 32 | 5 | 572 | 74 | 12 | 3 | 290 | 46 | 906   | 128 |
| 71,456 | 25 | 5 | 296 | 79 | 4  | 3 | 193 | 45 | 518   | 132 |
| 71,457 | 17 | 5 | 211 | 81 | 3  | 3 | 147 | 45 | 378   | 134 |
| 71,458 | 19 | 5 | 210 | 84 | 4  | 3 | 154 | 45 | 387   | 137 |
| 71,459 | 19 | 5 | 218 | 83 | 4  | 3 | 157 | 45 | 398   | 136 |
| 71,460 | 21 | 5 | 263 | 84 | 4  | 3 | 185 | 45 | 473   | 137 |
| 71,461 | 21 | 5 | 263 | 84 | 4  | 3 | 185 | 45 | 473   | 137 |
| 71,462 | 33 | 5 | 302 | 85 | 7  | 3 | 232 | 45 | 574   | 138 |
| 71,463 | 40 | 5 | 317 | 88 | 9  | 3 | 257 | 45 | 623   | 141 |
| 71,464 | 40 | 5 | 317 | 91 | 9  | 3 | 258 | 45 | 624   | 144 |
| 71,465 | 40 | 5 | 316 | 91 | 9  | 3 | 258 | 45 | 623   | 144 |
| 71,466 | 40 | 5 | 311 | 91 | 9  | 3 | 259 | 45 | 619   | 144 |
| 71,467 | 40 | 5 | 311 | 92 | 9  | 3 | 259 | 45 | 619   | 145 |
| 71,468 | 40 | 5 | 311 | 93 | 9  | 3 | 259 | 45 | 619   | 146 |
| 71,469 | 40 | 5 | 308 | 93 | 9  | 3 | 258 | 45 | 615   | 146 |
| 71,470 | 42 | 5 | 318 | 93 | 9  | 3 | 260 | 45 | 629   | 146 |
| 71,471 | 42 | 5 | 326 | 93 | 9  | 3 | 264 | 45 | 641   | 146 |
| 71,472 | 41 | 5 | 346 | 94 | 9  | 3 | 270 | 45 | 666   | 147 |
| 71,473 | 43 | 5 | 344 | 92 | 9  | 3 | 272 | 45 | 668   | 145 |
| 71,474 | 43 | 5 | 344 | 92 | 9  | 3 | 273 | 45 | 669   | 145 |
| 71,475 | 43 | 5 | 342 | 74 | 9  | 0 | 264 | 32 | 658   | 111 |
| 71,476 | 43 | 5 | 341 | 74 | 9  | 0 | 260 | 32 | 653   | 111 |
| 71,477 | 43 | 5 | 341 | 68 | 9  | 0 | 261 | 25 | 654   | 98  |
| 71,478 | 43 | 5 | 341 | 65 | 9  | 0 | 261 | 23 | 654   | 93  |
| 71,479 | 43 | 4 | 342 | 64 | 9  | 0 | 261 | 23 | 655   | 91  |
| 71,480 | 45 | 1 | 341 | 64 | 9  | 0 | 259 | 23 | 654   | 88  |
| 71,481 | 45 | 1 | 339 | 63 | 9  | 0 | 259 | 18 | 652   | 82  |
| 71,482 | 45 | 1 | 337 | 63 | 9  | 0 | 258 | 18 | 649   | 82  |
| 71,483 | 45 | 1 | 334 | 64 | 9  | 0 | 254 | 18 | 642   | 83  |
| 71,484 | 45 | 1 | 333 | 64 | 9  | 0 | 251 | 18 | 638   | 83  |
| 71,485 | 45 | 1 | 336 | 61 | 9  | 0 | 251 | 17 | 641   | 79  |
| 71,486 | 45 | 1 | 339 | 61 | 10 | 0 | 251 | 17 | 645   | 79  |
| 71,487 | 45 | 1 | 329 | 61 | 10 | 0 | 247 | 16 | 631   | 78  |
| 71,488 | 44 | 1 | 326 | 62 | 10 | 0 | 245 | 16 | 625   | 79  |
| 71,489 | 45 | 1 | 325 | 62 | 10 | 0 | 242 | 16 | 622   | 79  |
| 71,490 | 45 | 1 | 326 | 62 | 10 | 0 | 240 | 16 | 621   | 79  |
| 71,491 | 45 | 1 | 325 | 62 | 10 | 0 | 240 | 16 | 620   | 79  |
| 71,492 | 45 | 1 | 323 | 62 | 10 | 0 | 239 | 16 | 617   | 79  |



|        |    |   |     |    |    |   |     |    |     |     |
|--------|----|---|-----|----|----|---|-----|----|-----|-----|
| 71,493 | 45 | 1 | 346 | 62 | 10 | 0 | 253 | 15 | 654 | 78  |
| 71,494 | 50 | 1 | 362 | 62 | 10 | 0 | 265 | 15 | 687 | 78  |
| 71,495 | 50 | 1 | 369 | 62 | 10 | 0 | 259 | 15 | 688 | 78  |
| 71,496 | 49 | 1 | 363 | 62 | 10 | 0 | 259 | 15 | 681 | 78  |
| 71,497 | 49 | 1 | 365 | 62 | 10 | 0 | 261 | 14 | 685 | 77  |
| 71,498 | 49 | 1 | 364 | 63 | 10 | 0 | 261 | 14 | 684 | 78  |
| 71,499 | 48 | 3 | 363 | 72 | 10 | 1 | 259 | 23 | 680 | 99  |
| 71,500 | 48 | 3 | 362 | 75 | 10 | 1 | 258 | 23 | 678 | 102 |
| 71,501 | 51 | 4 | 425 | 75 | 11 | 1 | 279 | 23 | 766 | 103 |
| 71,502 | 51 | 4 | 427 | 80 | 11 | 1 | 282 | 21 | 771 | 106 |
| 71,503 | 47 | 4 | 443 | 78 | 11 | 1 | 272 | 20 | 773 | 103 |
| 71,504 | 46 | 3 | 409 | 43 | 8  | 1 | 219 | 9  | 682 | 56  |
| 71,505 | 45 | 3 | 391 | 43 | 9  | 1 | 206 | 9  | 651 | 56  |
| 71,506 | 44 | 3 | 381 | 38 | 9  | 1 | 201 | 9  | 635 | 51  |
| 71,507 | 45 | 3 | 372 | 38 | 10 | 1 | 201 | 10 | 628 | 52  |
| 71,508 | 43 | 3 | 365 | 37 | 9  | 1 | 192 | 10 | 609 | 51  |
| 71,509 | 43 | 3 | 357 | 35 | 9  | 1 | 188 | 10 | 597 | 49  |
| 71,510 | 43 | 3 | 344 | 35 | 9  | 1 | 171 | 10 | 567 | 49  |
| 71,511 | 41 | 3 | 315 | 34 | 9  | 1 | 161 | 10 | 526 | 48  |
| 71,512 | 32 | 3 | 288 | 30 | 6  | 1 | 124 | 10 | 450 | 44  |
| 71,513 | 31 | 3 | 282 | 32 | 6  | 1 | 118 | 10 | 437 | 46  |
| 71,514 | 24 | 3 | 267 | 32 | 4  | 1 | 93  | 10 | 388 | 46  |
| 71,515 | 24 | 3 | 267 | 29 | 4  | 1 | 92  | 10 | 387 | 43  |
| 71,516 | 24 | 3 | 275 | 29 | 4  | 1 | 98  | 10 | 401 | 43  |
| 71,517 | 24 | 3 | 284 | 30 | 4  | 1 | 101 | 10 | 413 | 44  |
| 71,518 | 25 | 3 | 285 | 29 | 4  | 1 | 101 | 10 | 415 | 43  |
| 71,519 | 25 | 4 | 286 | 28 | 4  | 1 | 102 | 10 | 417 | 43  |
| 71,520 | 23 | 4 | 291 | 28 | 4  | 1 | 104 | 10 | 422 | 43  |
| 71,521 | 24 | 4 | 301 | 28 | 5  | 1 | 108 | 10 | 438 | 43  |
| 71,522 | 25 | 4 | 294 | 27 | 6  | 1 | 106 | 10 | 431 | 42  |
| 71,523 | 27 | 5 | 389 | 27 | 7  | 1 | 113 | 10 | 536 | 43  |
| 71,524 | 24 | 5 | 385 | 27 | 7  | 1 | 112 | 10 | 528 | 43  |
| 71,525 | 24 | 5 | 385 | 27 | 7  | 1 | 111 | 10 | 527 | 43  |
| 71,526 | 24 | 5 | 384 | 27 | 7  | 1 | 111 | 10 | 526 | 43  |
| 71,527 | 29 | 5 | 456 | 27 | 10 | 1 | 126 | 10 | 621 | 43  |
| 71,528 | 29 | 5 | 456 | 27 | 10 | 1 | 125 | 10 | 620 | 43  |
| 71,529 | 32 | 5 | 479 | 27 | 10 | 1 | 132 | 10 | 653 | 43  |
| 71,530 | 32 | 5 | 478 | 27 | 10 | 1 | 131 | 10 | 651 | 43  |
| 71,531 | 30 | 5 | 478 | 27 | 10 | 1 | 131 | 10 | 649 | 43  |
| 71,532 | 32 | 5 | 487 | 27 | 11 | 1 | 136 | 10 | 666 | 43  |
| 71,533 | 32 | 7 | 486 | 26 | 11 | 1 | 135 | 10 | 664 | 44  |

|        |     |    |     |    |    |   |     |    |       |    |
|--------|-----|----|-----|----|----|---|-----|----|-------|----|
| 71,534 | 32  | 7  | 486 | 29 | 11 | 1 | 135 | 10 | 664   | 47 |
| 71,535 | 39  | 7  | 501 | 29 | 12 | 1 | 152 | 10 | 704   | 47 |
| 71,536 | 39  | 7  | 498 | 29 | 12 | 1 | 152 | 10 | 701   | 47 |
| 71,537 | 39  | 7  | 516 | 29 | 12 | 1 | 161 | 10 | 728   | 47 |
| 71,538 | 39  | 7  | 516 | 29 | 12 | 1 | 161 | 10 | 728   | 47 |
| 71,539 | 46  | 7  | 546 | 30 | 14 | 3 | 184 | 16 | 790   | 56 |
| 71,540 | 45  | 7  | 544 | 35 | 14 | 3 | 184 | 20 | 787   | 65 |
| 71,541 | 45  | 7  | 547 | 38 | 14 | 3 | 187 | 20 | 793   | 68 |
| 71,542 | 45  | 7  | 542 | 40 | 14 | 3 | 186 | 20 | 787   | 70 |
| 71,543 | 50  | 7  | 563 | 40 | 15 | 3 | 190 | 20 | 818   | 70 |
| 71,544 | 50  | 7  | 551 | 40 | 15 | 3 | 176 | 20 | 792   | 70 |
| 71,545 | 45  | 7  | 534 | 41 | 15 | 3 | 164 | 20 | 758   | 71 |
| 71,546 | 44  | 8  | 522 | 41 | 15 | 3 | 163 | 20 | 744   | 72 |
| 71,547 | 44  | 9  | 523 | 41 | 15 | 3 | 161 | 20 | 743   | 73 |
| 71,548 | 44  | 9  | 523 | 42 | 15 | 3 | 161 | 21 | 743   | 75 |
| 71,549 | 44  | 7  | 533 | 34 | 15 | 2 | 162 | 12 | 754   | 55 |
| 71,550 | 44  | 9  | 532 | 39 | 15 | 2 | 161 | 15 | 752   | 65 |
| 71,551 | 44  | 9  | 500 | 36 | 15 | 2 | 152 | 15 | 711   | 62 |
| 71,552 | 63  | 8  | 585 | 59 | 20 | 2 | 182 | 15 | 850   | 84 |
| 71,553 | 62  | 9  | 581 | 54 | 20 | 2 | 185 | 15 | 848   | 80 |
| 71,554 | 79  | 9  | 591 | 58 | 22 | 2 | 201 | 15 | 893   | 84 |
| 71,555 | 84  | 10 | 623 | 59 | 24 | 2 | 205 | 16 | 936   | 87 |
| 71,556 | 160 | 10 | 782 | 59 | 37 | 2 | 308 | 16 | 1,287 | 87 |
| 71,557 | 181 | 10 | 853 | 60 | 44 | 2 | 360 | 15 | 1,438 | 87 |
| 71,558 | 180 | 10 | 843 | 60 | 43 | 2 | 355 | 16 | 1,421 | 88 |
| 71,559 | 189 | 10 | 889 | 60 | 45 | 2 | 391 | 17 | 1,514 | 89 |
| 71,560 | 189 | 10 | 889 | 59 | 45 | 2 | 391 | 17 | 1,514 | 88 |
| 71,561 | 191 | 10 | 906 | 59 | 46 | 2 | 398 | 18 | 1,541 | 89 |
| 71,562 | 191 | 10 | 910 | 57 | 46 | 2 | 399 | 18 | 1,546 | 87 |
| 71,563 | 191 | 10 | 911 | 57 | 46 | 2 | 399 | 18 | 1,547 | 87 |
| 71,564 | 189 | 10 | 905 | 57 | 46 | 2 | 395 | 18 | 1,535 | 87 |
| 71,565 | 189 | 10 | 908 | 58 | 46 | 2 | 395 | 18 | 1,538 | 88 |
| 71,566 | 189 | 10 | 900 | 59 | 46 | 2 | 389 | 18 | 1,524 | 89 |
| 71,567 | 189 | 10 | 895 | 58 | 46 | 2 | 386 | 18 | 1,516 | 88 |
| 71,568 | 189 | 10 | 892 | 58 | 46 | 2 | 384 | 18 | 1,511 | 88 |
| 71,569 | 188 | 10 | 895 | 58 | 46 | 2 | 385 | 18 | 1,514 | 88 |
| 71,570 | 188 | 9  | 894 | 58 | 46 | 2 | 390 | 18 | 1,518 | 87 |
| 71,571 | 192 | 9  | 893 | 59 | 46 | 2 | 392 | 22 | 1,523 | 92 |
| 71,572 | 191 | 9  | 874 | 61 | 45 | 2 | 384 | 22 | 1,494 | 94 |
| 71,573 | 192 | 9  | 870 | 61 | 44 | 2 | 383 | 22 | 1,489 | 94 |
| 71,574 | 191 | 8  | 775 | 61 | 43 | 2 | 374 | 22 | 1,383 | 93 |

|        |     |   |     |    |    |   |     |    |       |    |
|--------|-----|---|-----|----|----|---|-----|----|-------|----|
| 71,575 | 189 | 8 | 742 | 61 | 43 | 2 | 368 | 22 | 1,342 | 93 |
| 71,576 | 187 | 8 | 718 | 61 | 41 | 2 | 361 | 22 | 1,307 | 93 |
| 71,577 | 188 | 8 | 720 | 61 | 40 | 2 | 364 | 22 | 1,312 | 93 |
| 71,578 | 188 | 8 | 717 | 61 | 40 | 2 | 364 | 22 | 1,309 | 93 |
| 71,579 | 186 | 8 | 694 | 61 | 40 | 2 | 357 | 22 | 1,277 | 93 |
| 71,580 | 188 | 8 | 760 | 61 | 44 | 2 | 392 | 22 | 1,384 | 93 |
| 71,581 | 188 | 8 | 760 | 61 | 44 | 2 | 392 | 23 | 1,384 | 94 |
| 71,582 | 191 | 8 | 780 | 62 | 45 | 2 | 413 | 23 | 1,429 | 95 |
| 71,583 | 190 | 6 | 785 | 62 | 44 | 2 | 415 | 24 | 1,434 | 94 |
| 71,584 | 193 | 6 | 870 | 62 | 45 | 2 | 436 | 24 | 1,544 | 94 |
| 71,585 | 192 | 6 | 922 | 59 | 45 | 2 | 465 | 24 | 1,624 | 91 |
| 71,586 | 190 | 6 | 930 | 59 | 45 | 2 | 466 | 24 | 1,631 | 91 |
| 71,587 | 190 | 6 | 918 | 59 | 44 | 2 | 460 | 24 | 1,612 | 91 |
| 71,588 | 190 | 6 | 910 | 59 | 44 | 2 | 458 | 24 | 1,602 | 91 |
| 71,589 | 183 | 6 | 880 | 59 | 42 | 2 | 441 | 24 | 1,546 | 91 |
| 71,590 | 184 | 6 | 880 | 57 | 42 | 0 | 436 | 18 | 1,542 | 81 |
| 71,591 | 184 | 6 | 881 | 52 | 42 | 0 | 436 | 14 | 1,543 | 72 |
| 71,592 | 184 | 6 | 880 | 47 | 43 | 0 | 433 | 14 | 1,540 | 67 |
| 71,593 | 184 | 6 | 881 | 47 | 43 | 0 | 433 | 15 | 1,541 | 68 |
| 71,594 | 179 | 6 | 857 | 47 | 42 | 0 | 429 | 15 | 1,507 | 68 |
| 71,595 | 179 | 6 | 854 | 46 | 42 | 0 | 429 | 15 | 1,504 | 67 |
| 71,596 | 179 | 6 | 854 | 46 | 42 | 0 | 429 | 15 | 1,504 | 67 |
| 71,597 | 179 | 4 | 850 | 46 | 42 | 0 | 429 | 15 | 1,500 | 65 |
| 71,598 | 179 | 4 | 850 | 46 | 42 | 0 | 429 | 15 | 1,500 | 65 |
| 71,599 | 179 | 4 | 842 | 43 | 42 | 0 | 428 | 15 | 1,491 | 62 |
| 71,600 | 179 | 2 | 840 | 38 | 42 | 0 | 427 | 12 | 1,488 | 52 |
| 71,601 | 178 | 2 | 824 | 39 | 41 | 0 | 425 | 13 | 1,468 | 54 |
| 71,602 | 158 | 2 | 736 | 39 | 36 | 0 | 394 | 13 | 1,324 | 54 |
| 71,603 | 157 | 0 | 725 | 10 | 36 | 0 | 387 | 12 | 1,305 | 22 |
| 71,604 | 157 | 0 | 717 | 11 | 36 | 0 | 380 | 12 | 1,290 | 23 |
| 71,605 | 137 | 0 | 672 | 11 | 34 | 0 | 361 | 13 | 1,204 | 24 |
| 71,606 | 132 | 0 | 640 | 14 | 32 | 0 | 356 | 13 | 1,160 | 27 |
| 71,607 | 56  | 0 | 470 | 15 | 18 | 0 | 251 | 13 | 795   | 28 |
| 71,608 | 35  | 0 | 394 | 20 | 11 | 0 | 199 | 16 | 639   | 36 |
| 71,609 | 30  | 0 | 375 | 20 | 10 | 0 | 185 | 15 | 600   | 35 |
| 71,610 | 26  | 0 | 346 | 19 | 9  | 0 | 163 | 14 | 544   | 33 |
| 71,611 | 24  | 2 | 335 | 21 | 8  | 0 | 159 | 14 | 526   | 37 |
| 71,612 | 24  | 2 | 327 | 21 | 8  | 0 | 155 | 14 | 514   | 37 |
| 71,613 | 25  | 2 | 324 | 22 | 8  | 0 | 155 | 14 | 512   | 38 |
| 71,614 | 25  | 2 | 326 | 22 | 8  | 0 | 156 | 15 | 515   | 39 |
| 71,615 | 26  | 2 | 329 | 22 | 9  | 0 | 157 | 15 | 521   | 39 |

|        |    |   |     |    |    |   |     |    |     |    |
|--------|----|---|-----|----|----|---|-----|----|-----|----|
| 71,616 | 26 | 2 | 346 | 21 | 9  | 0 | 159 | 15 | 540 | 38 |
| 71,617 | 27 | 2 | 359 | 21 | 9  | 0 | 167 | 15 | 562 | 38 |
| 71,618 | 27 | 2 | 367 | 21 | 10 | 0 | 173 | 15 | 577 | 38 |
| 71,619 | 28 | 2 | 363 | 21 | 10 | 0 | 176 | 15 | 577 | 38 |
| 71,620 | 30 | 2 | 370 | 18 | 10 | 0 | 182 | 11 | 592 | 31 |
| 71,621 | 30 | 2 | 370 | 18 | 10 | 0 | 182 | 11 | 592 | 31 |
| 71,622 | 26 | 2 | 365 | 18 | 10 | 0 | 177 | 11 | 578 | 31 |
| 71,623 | 26 | 2 | 365 | 18 | 10 | 0 | 177 | 11 | 578 | 31 |
| 71,624 | 24 | 2 | 361 | 23 | 10 | 1 | 176 | 15 | 571 | 41 |
| 71,625 | 23 | 2 | 357 | 25 | 10 | 1 | 176 | 15 | 566 | 43 |
| 71,626 | 23 | 2 | 357 | 26 | 10 | 1 | 176 | 15 | 566 | 44 |
| 71,627 | 23 | 2 | 356 | 26 | 10 | 1 | 176 | 15 | 565 | 44 |
| 71,628 | 21 | 2 | 345 | 26 | 10 | 1 | 172 | 15 | 548 | 44 |
| 71,629 | 19 | 2 | 300 | 26 | 6  | 1 | 146 | 15 | 471 | 44 |
| 71,630 | 19 | 2 | 287 | 26 | 6  | 1 | 143 | 14 | 455 | 43 |
| 71,631 | 18 | 2 | 283 | 26 | 6  | 1 | 137 | 14 | 444 | 43 |
| 71,632 | 15 | 2 | 271 | 28 | 5  | 1 | 117 | 14 | 408 | 45 |
| 71,633 | 14 | 2 | 260 | 31 | 5  | 1 | 115 | 14 | 394 | 48 |
| 71,634 | 14 | 2 | 249 | 31 | 5  | 1 | 109 | 13 | 377 | 47 |
| 71,635 | 11 | 2 | 164 | 31 | 4  | 1 | 88  | 13 | 267 | 47 |
| 71,636 | 7  | 2 | 99  | 31 | 3  | 1 | 47  | 13 | 156 | 47 |
| 71,637 | 7  | 2 | 89  | 31 | 3  | 1 | 42  | 13 | 141 | 47 |
| 71,638 | 7  | 2 | 88  | 31 | 3  | 1 | 41  | 13 | 139 | 47 |
| 71,639 | 7  | 2 | 88  | 31 | 3  | 1 | 41  | 13 | 139 | 47 |
| 71,640 | 6  | 2 | 90  | 31 | 4  | 1 | 43  | 13 | 143 | 47 |
| 71,641 | 6  | 2 | 90  | 31 | 4  | 1 | 44  | 13 | 144 | 47 |
| 71,642 | 6  | 2 | 92  | 31 | 4  | 1 | 44  | 13 | 146 | 47 |
| 71,643 | 7  | 2 | 90  | 31 | 3  | 1 | 45  | 12 | 145 | 46 |
| 71,644 | 7  | 2 | 89  | 31 | 3  | 1 | 45  | 12 | 144 | 46 |
| 71,645 | 7  | 2 | 89  | 31 | 3  | 1 | 46  | 12 | 145 | 46 |
| 71,646 | 7  | 2 | 89  | 31 | 3  | 1 | 46  | 12 | 145 | 46 |
| 71,647 | 7  | 2 | 89  | 31 | 3  | 1 | 46  | 12 | 145 | 46 |
| 71,648 | 7  | 2 | 97  | 31 | 3  | 1 | 47  | 12 | 154 | 46 |
| 71,649 | 7  | 2 | 107 | 31 | 3  | 1 | 50  | 11 | 167 | 45 |
| 71,650 | 7  | 2 | 108 | 31 | 3  | 1 | 53  | 11 | 171 | 45 |
| 71,651 | 7  | 2 | 107 | 31 | 3  | 1 | 55  | 11 | 172 | 45 |
| 71,652 | 8  | 2 | 115 | 30 | 4  | 1 | 55  | 10 | 182 | 43 |
| 71,653 | 12 | 2 | 134 | 30 | 5  | 1 | 58  | 10 | 209 | 43 |
| 71,654 | 12 | 2 | 134 | 30 | 5  | 1 | 58  | 11 | 209 | 44 |
| 71,655 | 12 | 2 | 153 | 29 | 8  | 1 | 70  | 11 | 243 | 43 |
| 71,656 | 12 | 2 | 168 | 27 | 10 | 1 | 88  | 11 | 278 | 41 |

|        |    |   |     |    |    |   |     |    |     |     |
|--------|----|---|-----|----|----|---|-----|----|-----|-----|
| 71,657 | 12 | 3 | 170 | 31 | 12 | 1 | 93  | 12 | 287 | 47  |
| 71,658 | 13 | 3 | 175 | 24 | 12 | 1 | 94  | 9  | 294 | 37  |
| 71,659 | 13 | 3 | 175 | 25 | 12 | 1 | 94  | 9  | 294 | 38  |
| 71,660 | 13 | 3 | 175 | 29 | 12 | 2 | 94  | 10 | 294 | 44  |
| 71,661 | 13 | 3 | 174 | 29 | 12 | 2 | 94  | 10 | 293 | 44  |
| 71,662 | 13 | 1 | 174 | 27 | 12 | 2 | 95  | 9  | 294 | 39  |
| 71,663 | 13 | 1 | 181 | 27 | 12 | 2 | 107 | 9  | 313 | 39  |
| 71,664 | 12 | 1 | 200 | 27 | 12 | 2 | 109 | 8  | 333 | 38  |
| 71,665 | 12 | 1 | 197 | 27 | 12 | 2 | 108 | 8  | 329 | 38  |
| 71,666 | 12 | 1 | 208 | 27 | 11 | 2 | 112 | 9  | 343 | 39  |
| 71,667 | 16 | 1 | 365 | 29 | 23 | 2 | 168 | 9  | 572 | 41  |
| 71,668 | 15 | 1 | 356 | 29 | 23 | 2 | 162 | 13 | 556 | 45  |
| 71,669 | 15 | 1 | 354 | 29 | 23 | 2 | 168 | 13 | 560 | 45  |
| 71,670 | 14 | 1 | 359 | 30 | 23 | 2 | 167 | 13 | 563 | 46  |
| 71,671 | 12 | 5 | 350 | 30 | 23 | 2 | 156 | 14 | 541 | 51  |
| 71,672 | 12 | 5 | 348 | 30 | 23 | 2 | 154 | 14 | 537 | 51  |
| 71,673 | 12 | 5 | 351 | 32 | 23 | 2 | 163 | 17 | 549 | 56  |
| 71,674 | 12 | 5 | 350 | 32 | 23 | 2 | 163 | 18 | 548 | 57  |
| 71,675 | 12 | 5 | 352 | 27 | 23 | 1 | 163 | 14 | 550 | 47  |
| 71,676 | 12 | 5 | 352 | 28 | 23 | 1 | 163 | 15 | 550 | 49  |
| 71,677 | 12 | 5 | 352 | 28 | 23 | 1 | 163 | 15 | 550 | 49  |
| 71,678 | 16 | 5 | 381 | 33 | 25 | 2 | 171 | 17 | 593 | 57  |
| 71,679 | 16 | 5 | 379 | 34 | 25 | 2 | 171 | 21 | 591 | 62  |
| 71,680 | 17 | 5 | 384 | 38 | 25 | 2 | 173 | 21 | 599 | 66  |
| 71,681 | 17 | 5 | 388 | 40 | 25 | 2 | 178 | 23 | 608 | 70  |
| 71,682 | 21 | 5 | 443 | 40 | 25 | 2 | 193 | 23 | 682 | 70  |
| 71,683 | 23 | 5 | 455 | 36 | 25 | 2 | 203 | 24 | 706 | 67  |
| 71,684 | 23 | 5 | 455 | 37 | 25 | 2 | 203 | 24 | 706 | 68  |
| 71,685 | 23 | 5 | 491 | 37 | 26 | 2 | 208 | 24 | 748 | 68  |
| 71,686 | 23 | 5 | 497 | 45 | 26 | 2 | 208 | 26 | 754 | 78  |
| 71,687 | 23 | 5 | 497 | 45 | 26 | 2 | 208 | 26 | 754 | 78  |
| 71,688 | 23 | 5 | 497 | 46 | 26 | 2 | 208 | 26 | 754 | 79  |
| 71,689 | 23 | 5 | 498 | 46 | 26 | 2 | 208 | 26 | 755 | 79  |
| 71,690 | 23 | 6 | 498 | 46 | 26 | 2 | 207 | 27 | 754 | 81  |
| 71,691 | 23 | 6 | 496 | 49 | 25 | 2 | 206 | 27 | 750 | 84  |
| 71,692 | 23 | 8 | 496 | 64 | 25 | 2 | 210 | 37 | 754 | 111 |
| 71,693 | 23 | 8 | 497 | 72 | 25 | 2 | 210 | 40 | 755 | 122 |
| 71,694 | 22 | 8 | 495 | 72 | 25 | 2 | 209 | 40 | 751 | 122 |
| 71,695 | 22 | 8 | 495 | 72 | 25 | 2 | 209 | 42 | 751 | 124 |
| 71,696 | 24 | 8 | 498 | 73 | 25 | 2 | 208 | 43 | 755 | 126 |
| 71,697 | 24 | 8 | 503 | 73 | 25 | 2 | 213 | 43 | 765 | 126 |

|        |    |   |     |    |    |   |     |    |       |     |
|--------|----|---|-----|----|----|---|-----|----|-------|-----|
| 71,698 | 24 | 8 | 498 | 73 | 25 | 2 | 213 | 43 | 760   | 126 |
| 71,699 | 25 | 8 | 500 | 73 | 28 | 2 | 225 | 43 | 778   | 126 |
| 71,700 | 25 | 8 | 496 | 73 | 28 | 2 | 223 | 43 | 772   | 126 |
| 71,701 | 34 | 8 | 545 | 78 | 34 | 2 | 266 | 44 | 879   | 132 |
| 71,702 | 34 | 8 | 554 | 80 | 34 | 2 | 287 | 44 | 909   | 134 |
| 71,703 | 33 | 8 | 550 | 80 | 33 | 2 | 290 | 44 | 906   | 134 |
| 71,704 | 29 | 8 | 532 | 80 | 32 | 2 | 287 | 44 | 880   | 134 |
| 71,705 | 29 | 8 | 524 | 80 | 30 | 2 | 277 | 46 | 860   | 136 |
| 71,706 | 29 | 8 | 521 | 81 | 30 | 2 | 283 | 46 | 863   | 137 |
| 71,707 | 29 | 7 | 512 | 76 | 28 | 2 | 267 | 44 | 836   | 129 |
| 71,708 | 29 | 7 | 510 | 76 | 26 | 2 | 262 | 44 | 827   | 129 |
| 71,709 | 30 | 7 | 509 | 76 | 27 | 2 | 268 | 44 | 834   | 129 |
| 71,710 | 31 | 7 | 531 | 71 | 27 | 1 | 292 | 43 | 881   | 122 |
| 71,711 | 31 | 7 | 531 | 72 | 27 | 1 | 296 | 43 | 885   | 123 |
| 71,712 | 34 | 7 | 537 | 72 | 27 | 1 | 295 | 43 | 893   | 123 |
| 71,713 | 34 | 7 | 540 | 72 | 27 | 1 | 285 | 43 | 886   | 123 |
| 71,714 | 34 | 7 | 534 | 72 | 27 | 1 | 289 | 43 | 884   | 123 |
| 71,715 | 35 | 7 | 546 | 72 | 27 | 1 | 296 | 43 | 904   | 123 |
| 71,716 | 36 | 7 | 569 | 72 | 27 | 1 | 339 | 43 | 971   | 123 |
| 71,717 | 37 | 7 | 623 | 73 | 23 | 1 | 386 | 42 | 1,069 | 123 |
| 71,718 | 39 | 7 | 532 | 71 | 18 | 1 | 355 | 42 | 944   | 121 |
| 71,719 | 39 | 7 | 531 | 71 | 19 | 1 | 358 | 38 | 947   | 117 |
| 71,720 | 39 | 3 | 536 | 70 | 18 | 1 | 353 | 37 | 946   | 111 |
| 71,721 | 39 | 3 | 534 | 70 | 18 | 1 | 350 | 37 | 941   | 111 |
| 71,722 | 39 | 3 | 527 | 70 | 18 | 1 | 344 | 37 | 928   | 111 |
| 71,723 | 39 | 3 | 527 | 70 | 18 | 1 | 343 | 37 | 927   | 111 |
| 71,724 | 39 | 3 | 527 | 68 | 18 | 1 | 340 | 34 | 924   | 106 |
| 71,725 | 39 | 3 | 525 | 68 | 18 | 1 | 340 | 33 | 922   | 105 |
| 71,726 | 39 | 3 | 520 | 65 | 18 | 1 | 340 | 32 | 917   | 101 |
| 71,727 | 39 | 3 | 518 | 65 | 18 | 1 | 340 | 32 | 915   | 101 |
| 71,728 | 37 | 3 | 501 | 64 | 16 | 1 | 333 | 32 | 887   | 100 |
| 71,729 | 35 | 3 | 503 | 59 | 17 | 0 | 333 | 31 | 888   | 93  |
| 71,730 | 35 | 4 | 506 | 58 | 17 | 0 | 337 | 27 | 895   | 89  |
| 71,731 | 34 | 4 | 514 | 54 | 17 | 0 | 342 | 28 | 907   | 86  |
| 71,732 | 34 | 4 | 508 | 52 | 17 | 0 | 338 | 27 | 897   | 83  |
| 71,733 | 32 | 4 | 462 | 52 | 17 | 0 | 324 | 27 | 835   | 83  |
| 71,734 | 30 | 4 | 452 | 50 | 17 | 0 | 316 | 26 | 815   | 80  |
| 71,735 | 31 | 4 | 429 | 49 | 16 | 0 | 316 | 26 | 792   | 79  |
| 71,736 | 32 | 4 | 438 | 42 | 17 | 0 | 317 | 24 | 804   | 70  |
| 71,737 | 32 | 4 | 438 | 42 | 17 | 0 | 317 | 25 | 804   | 71  |
| 71,738 | 33 | 4 | 439 | 42 | 17 | 0 | 317 | 25 | 806   | 71  |

|        |     |   |       |    |    |   |     |    |       |    |
|--------|-----|---|-------|----|----|---|-----|----|-------|----|
| 71,739 | 45  | 4 | 572   | 41 | 25 | 0 | 383 | 25 | 1,025 | 70 |
| 71,740 | 50  | 4 | 666   | 42 | 31 | 0 | 423 | 25 | 1,170 | 71 |
| 71,741 | 50  | 3 | 666   | 42 | 31 | 0 | 423 | 24 | 1,170 | 69 |
| 71,742 | 57  | 3 | 801   | 39 | 38 | 0 | 508 | 24 | 1,404 | 66 |
| 71,743 | 57  | 1 | 800   | 24 | 38 | 0 | 505 | 14 | 1,400 | 39 |
| 71,744 | 57  | 1 | 840   | 16 | 39 | 0 | 526 | 11 | 1,462 | 28 |
| 71,745 | 57  | 1 | 844   | 15 | 39 | 1 | 526 | 8  | 1,466 | 25 |
| 71,746 | 57  | 1 | 844   | 15 | 39 | 1 | 527 | 9  | 1,467 | 26 |
| 71,747 | 55  | 1 | 841   | 18 | 39 | 1 | 527 | 10 | 1,462 | 30 |
| 71,748 | 55  | 2 | 835   | 21 | 39 | 1 | 523 | 11 | 1,452 | 35 |
| 71,749 | 55  | 2 | 832   | 42 | 37 | 1 | 520 | 19 | 1,444 | 64 |
| 71,750 | 54  | 3 | 828   | 50 | 36 | 1 | 513 | 20 | 1,431 | 74 |
| 71,751 | 48  | 3 | 797   | 51 | 33 | 1 | 476 | 20 | 1,354 | 75 |
| 71,752 | 51  | 3 | 852   | 48 | 30 | 1 | 488 | 19 | 1,421 | 71 |
| 71,753 | 55  | 3 | 893   | 46 | 31 | 1 | 474 | 19 | 1,453 | 69 |
| 71,754 | 57  | 3 | 904   | 46 | 32 | 1 | 475 | 21 | 1,468 | 71 |
| 71,755 | 112 | 4 | 1,261 | 46 | 47 | 1 | 647 | 18 | 2,067 | 69 |
| 71,756 | 115 | 4 | 1,270 | 46 | 47 | 1 | 662 | 18 | 2,094 | 69 |
| 71,757 | 115 | 4 | 1,263 | 45 | 46 | 1 | 654 | 18 | 2,078 | 68 |
| 71,758 | 122 | 4 | 1,343 | 45 | 53 | 1 | 725 | 18 | 2,243 | 68 |
| 71,759 | 126 | 4 | 1,471 | 46 | 65 | 1 | 810 | 18 | 2,472 | 69 |
| 71,760 | 125 | 4 | 1,469 | 46 | 65 | 1 | 806 | 19 | 2,465 | 70 |
| 71,761 | 135 | 4 | 1,634 | 45 | 68 | 1 | 878 | 19 | 2,715 | 69 |
| 71,762 | 137 | 4 | 1,656 | 45 | 68 | 1 | 884 | 19 | 2,745 | 69 |
| 71,763 | 136 | 4 | 1,687 | 45 | 71 | 1 | 921 | 19 | 2,815 | 69 |
| 71,764 | 137 | 4 | 1,677 | 45 | 71 | 1 | 920 | 19 | 2,805 | 69 |
| 71,765 | 137 | 4 | 1,676 | 44 | 71 | 2 | 915 | 20 | 2,799 | 70 |
| 71,766 | 136 | 4 | 1,651 | 44 | 71 | 2 | 910 | 22 | 2,768 | 72 |
| 71,767 | 134 | 4 | 1,614 | 44 | 71 | 2 | 862 | 21 | 2,681 | 71 |
| 71,768 | 130 | 4 | 1,493 | 44 | 69 | 2 | 806 | 24 | 2,498 | 74 |
| 71,769 | 127 | 5 | 1,473 | 49 | 68 | 2 | 787 | 33 | 2,455 | 89 |
| 71,770 | 127 | 5 | 1,470 | 49 | 67 | 2 | 781 | 35 | 2,445 | 91 |
| 71,771 | 127 | 5 | 1,462 | 49 | 67 | 2 | 775 | 35 | 2,431 | 91 |
| 71,772 | 127 | 6 | 1,470 | 51 | 67 | 2 | 780 | 35 | 2,444 | 94 |
| 71,773 | 127 | 6 | 1,480 | 51 | 67 | 2 | 780 | 35 | 2,454 | 94 |
| 71,774 | 127 | 6 | 1,480 | 51 | 67 | 2 | 780 | 35 | 2,454 | 94 |
| 71,775 | 127 | 6 | 1,479 | 51 | 67 | 2 | 780 | 35 | 2,453 | 94 |
| 71,776 | 128 | 6 | 1,513 | 51 | 67 | 2 | 783 | 36 | 2,491 | 95 |
| 71,777 | 134 | 6 | 1,557 | 51 | 69 | 2 | 799 | 36 | 2,559 | 95 |
| 71,778 | 141 | 6 | 1,627 | 52 | 69 | 2 | 844 | 36 | 2,681 | 96 |
| 71,779 | 141 | 6 | 1,626 | 53 | 69 | 2 | 844 | 36 | 2,680 | 97 |

|        |     |   |       |     |    |    |     |    |       |     |
|--------|-----|---|-------|-----|----|----|-----|----|-------|-----|
| 71,780 | 155 | 6 | 1,753 | 53  | 81 | 2  | 946 | 35 | 2,935 | 96  |
| 71,781 | 157 | 5 | 1,777 | 53  | 81 | 2  | 977 | 35 | 2,992 | 95  |
| 71,782 | 157 | 5 | 1,765 | 56  | 81 | 2  | 969 | 34 | 2,972 | 97  |
| 71,783 | 157 | 5 | 1,764 | 56  | 81 | 2  | 970 | 34 | 2,972 | 97  |
| 71,784 | 155 | 5 | 1,775 | 56  | 83 | 2  | 995 | 34 | 3,008 | 97  |
| 71,785 | 155 | 5 | 1,773 | 58  | 83 | 2  | 993 | 34 | 3,004 | 99  |
| 71,786 | 154 | 5 | 1,768 | 58  | 83 | 2  | 991 | 34 | 2,996 | 99  |
| 71,787 | 153 | 6 | 1,754 | 88  | 82 | 3  | 990 | 44 | 2,979 | 141 |
| 71,788 | 153 | 6 | 1,763 | 98  | 83 | 5  | 997 | 48 | 2,996 | 157 |
| 71,789 | 144 | 6 | 1,676 | 108 | 77 | 6  | 944 | 56 | 2,841 | 176 |
| 71,790 | 142 | 6 | 1,641 | 111 | 74 | 6  | 936 | 56 | 2,793 | 179 |
| 71,791 | 137 | 6 | 1,546 | 112 | 68 | 9  | 896 | 56 | 2,647 | 183 |
| 71,792 | 133 | 7 | 1,487 | 116 | 65 | 9  | 868 | 58 | 2,553 | 190 |
| 71,793 | 130 | 7 | 1,420 | 116 | 61 | 9  | 820 | 58 | 2,431 | 190 |
| 71,794 | 130 | 7 | 1,407 | 119 | 60 | 9  | 822 | 59 | 2,419 | 194 |
| 71,795 | 130 | 7 | 1,391 | 119 | 60 | 9  | 808 | 59 | 2,389 | 194 |
| 71,796 | 131 | 7 | 1,395 | 119 | 61 | 8  | 824 | 58 | 2,411 | 192 |
| 71,797 | 132 | 7 | 1,402 | 117 | 61 | 8  | 828 | 58 | 2,423 | 190 |
| 71,798 | 132 | 7 | 1,402 | 117 | 61 | 8  | 828 | 59 | 2,423 | 191 |
| 71,799 | 132 | 6 | 1,400 | 114 | 61 | 8  | 826 | 58 | 2,419 | 186 |
| 71,800 | 132 | 6 | 1,406 | 93  | 61 | 8  | 834 | 50 | 2,433 | 157 |
| 71,801 | 132 | 5 | 1,406 | 85  | 61 | 8  | 831 | 49 | 2,430 | 147 |
| 71,802 | 132 | 5 | 1,405 | 84  | 61 | 8  | 835 | 49 | 2,433 | 146 |
| 71,803 | 127 | 5 | 1,337 | 82  | 62 | 8  | 813 | 49 | 2,339 | 144 |
| 71,804 | 123 | 5 | 1,290 | 81  | 62 | 8  | 808 | 47 | 2,283 | 141 |
| 71,805 | 121 | 5 | 1,278 | 83  | 62 | 8  | 804 | 48 | 2,265 | 144 |
| 71,806 | 66  | 4 | 921   | 83  | 47 | 8  | 630 | 49 | 1,664 | 144 |
| 71,807 | 63  | 4 | 912   | 84  | 48 | 9  | 621 | 49 | 1,644 | 146 |
| 71,808 | 63  | 4 | 914   | 86  | 48 | 10 | 621 | 57 | 1,646 | 157 |
| 71,809 | 56  | 5 | 833   | 101 | 41 | 10 | 550 | 62 | 1,480 | 178 |
| 71,810 | 51  | 6 | 705   | 106 | 28 | 10 | 465 | 62 | 1,249 | 184 |
| 71,811 | 50  | 6 | 623   | 106 | 27 | 10 | 443 | 61 | 1,143 | 183 |
| 71,812 | 38  | 6 | 519   | 106 | 25 | 10 | 368 | 61 | 950   | 183 |
| 71,813 | 38  | 6 | 497   | 106 | 25 | 10 | 359 | 61 | 919   | 183 |
| 71,814 | 36  | 6 | 464   | 106 | 22 | 10 | 324 | 61 | 846   | 183 |
| 71,815 | 35  | 6 | 466   | 106 | 24 | 9  | 324 | 60 | 849   | 181 |
| 71,816 | 35  | 6 | 466   | 106 | 24 | 9  | 324 | 60 | 849   | 181 |
| 71,817 | 43  | 6 | 530   | 106 | 26 | 9  | 337 | 58 | 936   | 179 |
| 71,818 | 43  | 6 | 530   | 109 | 26 | 9  | 337 | 58 | 936   | 182 |
| 71,819 | 50  | 6 | 610   | 108 | 29 | 9  | 377 | 55 | 1,066 | 178 |
| 71,820 | 50  | 5 | 607   | 103 | 29 | 9  | 377 | 46 | 1,063 | 163 |



|        |    |   |     |     |    |   |     |    |       |     |
|--------|----|---|-----|-----|----|---|-----|----|-------|-----|
| 71,821 | 54 | 5 | 628 | 102 | 29 | 9 | 393 | 44 | 1,104 | 160 |
| 71,822 | 54 | 4 | 643 | 100 | 33 | 9 | 410 | 44 | 1,140 | 157 |
| 71,823 | 55 | 4 | 655 | 100 | 33 | 9 | 414 | 44 | 1,157 | 157 |
| 71,824 | 55 | 4 | 644 | 100 | 33 | 9 | 414 | 44 | 1,146 | 157 |
| 71,825 | 70 | 4 | 781 | 100 | 37 | 9 | 459 | 44 | 1,347 | 157 |
| 71,826 | 71 | 4 | 770 | 100 | 37 | 9 | 460 | 44 | 1,338 | 157 |
| 71,827 | 66 | 4 | 737 | 101 | 35 | 9 | 453 | 43 | 1,291 | 157 |
| 71,828 | 66 | 4 | 733 | 101 | 35 | 9 | 454 | 43 | 1,288 | 157 |
| 71,829 | 59 | 4 | 671 | 101 | 34 | 9 | 410 | 43 | 1,174 | 157 |
| 71,830 | 50 | 4 | 611 | 100 | 28 | 9 | 356 | 43 | 1,045 | 156 |
| 71,831 | 45 | 4 | 544 | 100 | 22 | 9 | 304 | 43 | 915   | 156 |
| 71,832 | 43 | 4 | 515 | 97  | 23 | 9 | 270 | 43 | 851   | 153 |
| 71,833 | 45 | 4 | 520 | 97  | 23 | 9 | 271 | 43 | 859   | 153 |
| 71,834 | 45 | 4 | 509 | 97  | 21 | 9 | 246 | 44 | 821   | 154 |
| 71,835 | 49 | 4 | 538 | 97  | 23 | 9 | 266 | 45 | 876   | 155 |
| 71,836 | 50 | 4 | 540 | 95  | 23 | 9 | 266 | 45 | 879   | 153 |
| 71,837 | 50 | 4 | 555 | 95  | 24 | 9 | 280 | 45 | 909   | 153 |
| 71,838 | 50 | 3 | 567 | 64  | 25 | 8 | 288 | 35 | 930   | 110 |
| 71,839 | 49 | 3 | 556 | 54  | 24 | 6 | 281 | 30 | 910   | 93  |
| 71,840 | 49 | 3 | 573 | 46  | 24 | 5 | 289 | 23 | 935   | 77  |
| 71,841 | 49 | 3 | 578 | 43  | 24 | 5 | 293 | 24 | 944   | 75  |
| 71,842 | 49 | 3 | 579 | 42  | 24 | 2 | 293 | 24 | 945   | 71  |
| 71,843 | 49 | 2 | 575 | 41  | 24 | 2 | 288 | 22 | 936   | 67  |
| 71,844 | 49 | 2 | 570 | 42  | 24 | 2 | 284 | 22 | 927   | 68  |
| 71,845 | 49 | 2 | 556 | 39  | 24 | 2 | 273 | 22 | 902   | 65  |
| 71,846 | 48 | 2 | 548 | 38  | 23 | 2 | 258 | 20 | 877   | 62  |
| 71,847 | 48 | 2 | 550 | 39  | 23 | 2 | 260 | 20 | 881   | 63  |
| 71,848 | 47 | 2 | 543 | 39  | 24 | 2 | 258 | 20 | 872   | 63  |
| 71,849 | 47 | 2 | 543 | 39  | 24 | 2 | 257 | 20 | 871   | 63  |
| 71,850 | 47 | 2 | 537 | 39  | 24 | 2 | 250 | 20 | 858   | 63  |
| 71,851 | 47 | 2 | 537 | 39  | 24 | 2 | 250 | 20 | 858   | 63  |
| 71,852 | 47 | 2 | 536 | 39  | 24 | 2 | 250 | 20 | 857   | 63  |
| 71,853 | 46 | 2 | 533 | 39  | 24 | 2 | 249 | 22 | 852   | 65  |
| 71,854 | 46 | 3 | 531 | 39  | 23 | 2 | 248 | 24 | 848   | 68  |
| 71,855 | 46 | 3 | 528 | 40  | 22 | 2 | 241 | 24 | 837   | 69  |
| 71,856 | 46 | 3 | 533 | 39  | 22 | 2 | 241 | 27 | 842   | 71  |
| 71,857 | 46 | 3 | 531 | 38  | 22 | 0 | 241 | 18 | 840   | 59  |
| 71,858 | 46 | 3 | 534 | 41  | 21 | 0 | 241 | 18 | 842   | 62  |
| 71,859 | 48 | 3 | 548 | 45  | 22 | 0 | 253 | 18 | 871   | 66  |
| 71,860 | 48 | 2 | 545 | 32  | 22 | 0 | 252 | 13 | 867   | 47  |
| 71,861 | 48 | 1 | 540 | 26  | 22 | 0 | 250 | 13 | 860   | 40  |

|        |    |   |     |    |    |   |     |    |       |    |
|--------|----|---|-----|----|----|---|-----|----|-------|----|
| 71,862 | 49 | 1 | 543 | 28 | 22 | 0 | 252 | 14 | 866   | 43 |
| 71,863 | 49 | 1 | 542 | 28 | 22 | 0 | 252 | 14 | 865   | 43 |
| 71,864 | 50 | 1 | 546 | 28 | 22 | 0 | 256 | 14 | 874   | 43 |
| 71,865 | 52 | 1 | 580 | 28 | 25 | 0 | 283 | 15 | 940   | 44 |
| 71,866 | 52 | 1 | 580 | 28 | 23 | 0 | 283 | 15 | 938   | 44 |
| 71,867 | 47 | 1 | 550 | 31 | 22 | 0 | 275 | 15 | 894   | 47 |
| 71,868 | 44 | 1 | 516 | 28 | 21 | 0 | 267 | 15 | 848   | 44 |
| 71,869 | 43 | 1 | 473 | 28 | 21 | 0 | 260 | 15 | 797   | 44 |
| 71,870 | 37 | 1 | 436 | 28 | 18 | 0 | 228 | 15 | 719   | 44 |
| 71,871 | 33 | 1 | 416 | 28 | 18 | 0 | 211 | 15 | 678   | 44 |
| 71,872 | 33 | 1 | 419 | 28 | 16 | 0 | 211 | 15 | 679   | 44 |
| 71,873 | 33 | 1 | 401 | 28 | 14 | 0 | 195 | 15 | 643   | 44 |
| 71,874 | 32 | 1 | 383 | 28 | 14 | 0 | 187 | 15 | 616   | 44 |
| 71,875 | 24 | 1 | 293 | 28 | 11 | 0 | 162 | 15 | 490   | 44 |
| 71,876 | 18 | 1 | 239 | 28 | 10 | 0 | 145 | 15 | 412   | 44 |
| 71,877 | 17 | 1 | 231 | 28 | 10 | 0 | 143 | 15 | 401   | 44 |
| 71,878 | 16 | 1 | 248 | 27 | 11 | 0 | 141 | 15 | 416   | 43 |
| 71,879 | 16 | 1 | 258 | 27 | 11 | 0 | 140 | 15 | 425   | 43 |
| 71,880 | 17 | 1 | 262 | 27 | 11 | 0 | 140 | 15 | 430   | 43 |
| 71,881 | 19 | 1 | 269 | 27 | 11 | 0 | 144 | 15 | 443   | 43 |
| 71,882 | 19 | 1 | 269 | 27 | 11 | 0 | 144 | 15 | 443   | 43 |
| 71,883 | 26 | 1 | 320 | 27 | 11 | 0 | 162 | 15 | 519   | 43 |
| 71,884 | 26 | 1 | 369 | 27 | 12 | 0 | 178 | 14 | 585   | 42 |
| 71,885 | 31 | 1 | 585 | 27 | 14 | 0 | 234 | 14 | 864   | 42 |
| 71,886 | 30 | 1 | 571 | 27 | 13 | 0 | 231 | 13 | 845   | 41 |
| 71,887 | 29 | 1 | 569 | 27 | 13 | 0 | 230 | 13 | 841   | 41 |
| 71,888 | 29 | 1 | 548 | 28 | 12 | 0 | 214 | 13 | 803   | 42 |
| 71,889 | 29 | 1 | 535 | 28 | 11 | 0 | 206 | 13 | 781   | 42 |
| 71,890 | 28 | 1 | 514 | 26 | 11 | 0 | 190 | 12 | 743   | 39 |
| 71,891 | 28 | 1 | 510 | 26 | 11 | 0 | 185 | 11 | 734   | 38 |
| 71,892 | 28 | 1 | 507 | 26 | 11 | 1 | 185 | 11 | 731   | 39 |
| 71,893 | 38 | 1 | 638 | 27 | 13 | 2 | 222 | 12 | 911   | 42 |
| 71,894 | 45 | 4 | 729 | 31 | 24 | 2 | 285 | 16 | 1,083 | 53 |
| 71,895 | 47 | 4 | 809 | 33 | 26 | 2 | 304 | 16 | 1,186 | 55 |
| 71,896 | 48 | 4 | 841 | 34 | 27 | 2 | 317 | 16 | 1,233 | 56 |
| 71,897 | 48 | 4 | 841 | 34 | 27 | 2 | 316 | 16 | 1,232 | 56 |
| 71,898 | 48 | 5 | 871 | 40 | 27 | 2 | 324 | 18 | 1,270 | 65 |
| 71,899 | 48 | 5 | 871 | 40 | 26 | 2 | 322 | 18 | 1,267 | 65 |
| 71,900 | 48 | 5 | 872 | 41 | 26 | 2 | 323 | 18 | 1,269 | 66 |
| 71,901 | 48 | 6 | 872 | 41 | 26 | 2 | 323 | 19 | 1,269 | 68 |
| 71,902 | 48 | 6 | 872 | 41 | 26 | 2 | 323 | 19 | 1,269 | 68 |

|        |    |    |     |     |    |    |     |    |       |     |
|--------|----|----|-----|-----|----|----|-----|----|-------|-----|
| 71,903 | 48 | 6  | 872 | 47  | 26 | 2  | 323 | 21 | 1,269 | 76  |
| 71,904 | 48 | 6  | 872 | 47  | 26 | 2  | 323 | 20 | 1,269 | 75  |
| 71,905 | 48 | 6  | 872 | 55  | 26 | 2  | 323 | 23 | 1,269 | 86  |
| 71,906 | 48 | 6  | 873 | 57  | 26 | 2  | 323 | 23 | 1,270 | 88  |
| 71,907 | 48 | 6  | 868 | 56  | 26 | 2  | 324 | 20 | 1,266 | 84  |
| 71,908 | 49 | 6  | 869 | 48  | 26 | 2  | 326 | 20 | 1,270 | 76  |
| 71,909 | 49 | 6  | 871 | 49  | 26 | 2  | 328 | 20 | 1,274 | 77  |
| 71,910 | 47 | 6  | 854 | 51  | 25 | 2  | 316 | 21 | 1,242 | 80  |
| 71,911 | 47 | 6  | 851 | 51  | 25 | 2  | 316 | 21 | 1,239 | 80  |
| 71,912 | 46 | 6  | 849 | 51  | 25 | 2  | 312 | 21 | 1,232 | 80  |
| 71,913 | 46 | 6  | 855 | 49  | 25 | 2  | 316 | 20 | 1,242 | 77  |
| 71,914 | 50 | 6  | 855 | 49  | 25 | 2  | 325 | 20 | 1,255 | 77  |
| 71,915 | 50 | 6  | 846 | 49  | 25 | 2  | 325 | 21 | 1,246 | 78  |
| 71,916 | 48 | 6  | 819 | 49  | 22 | 2  | 296 | 20 | 1,185 | 77  |
| 71,917 | 51 | 6  | 854 | 46  | 26 | 2  | 335 | 20 | 1,266 | 74  |
| 71,918 | 51 | 6  | 854 | 46  | 26 | 2  | 335 | 20 | 1,266 | 74  |
| 71,919 | 51 | 6  | 852 | 46  | 26 | 2  | 334 | 21 | 1,263 | 75  |
| 71,920 | 51 | 6  | 859 | 47  | 26 | 2  | 339 | 21 | 1,275 | 76  |
| 71,921 | 51 | 6  | 860 | 48  | 26 | 2  | 339 | 21 | 1,276 | 77  |
| 71,922 | 51 | 6  | 860 | 48  | 26 | 2  | 339 | 21 | 1,276 | 77  |
| 71,923 | 51 | 6  | 857 | 48  | 26 | 2  | 337 | 21 | 1,271 | 77  |
| 71,924 | 51 | 6  | 855 | 51  | 26 | 3  | 336 | 22 | 1,268 | 82  |
| 71,925 | 51 | 6  | 855 | 51  | 26 | 3  | 336 | 23 | 1,268 | 83  |
| 71,926 | 50 | 6  | 850 | 51  | 26 | 3  | 334 | 23 | 1,260 | 83  |
| 71,927 | 51 | 6  | 850 | 52  | 26 | 3  | 334 | 25 | 1,261 | 86  |
| 71,928 | 50 | 6  | 851 | 52  | 26 | 3  | 332 | 26 | 1,259 | 87  |
| 71,929 | 50 | 6  | 823 | 53  | 25 | 3  | 326 | 27 | 1,224 | 89  |
| 71,930 | 50 | 6  | 811 | 54  | 25 | 3  | 325 | 29 | 1,211 | 92  |
| 71,931 | 49 | 10 | 807 | 61  | 25 | 3  | 325 | 33 | 1,206 | 107 |
| 71,932 | 47 | 12 | 796 | 71  | 25 | 4  | 321 | 50 | 1,189 | 137 |
| 71,933 | 43 | 12 | 765 | 75  | 24 | 4  | 310 | 52 | 1,142 | 143 |
| 71,934 | 40 | 12 | 767 | 85  | 24 | 4  | 310 | 52 | 1,141 | 153 |
| 71,935 | 38 | 12 | 716 | 86  | 23 | 4  | 294 | 52 | 1,071 | 154 |
| 71,936 | 33 | 12 | 494 | 87  | 21 | 4  | 236 | 52 | 784   | 155 |
| 71,937 | 30 | 12 | 474 | 87  | 20 | 4  | 219 | 52 | 743   | 155 |
| 71,938 | 30 | 12 | 478 | 89  | 20 | 4  | 221 | 52 | 749   | 157 |
| 71,939 | 30 | 12 | 482 | 88  | 20 | 4  | 221 | 53 | 753   | 157 |
| 71,940 | 30 | 12 | 487 | 94  | 20 | 5  | 222 | 54 | 759   | 165 |
| 71,941 | 31 | 15 | 493 | 126 | 20 | 7  | 226 | 74 | 770   | 222 |
| 71,942 | 34 | 15 | 520 | 167 | 23 | 10 | 231 | 90 | 808   | 282 |
| 71,943 | 28 | 18 | 461 | 187 | 22 | 10 | 216 | 97 | 727   | 312 |

|        |    |    |     |     |    |    |     |     |     |     |
|--------|----|----|-----|-----|----|----|-----|-----|-----|-----|
| 71,944 | 24 | 18 | 394 | 186 | 22 | 9  | 196 | 96  | 636 | 309 |
| 71,945 | 17 | 15 | 305 | 179 | 11 | 9  | 133 | 92  | 466 | 295 |
| 71,946 | 15 | 15 | 223 | 182 | 9  | 9  | 114 | 92  | 361 | 298 |
| 71,947 | 14 | 15 | 195 | 185 | 8  | 9  | 103 | 93  | 320 | 302 |
| 71,948 | 14 | 15 | 167 | 187 | 8  | 9  | 94  | 94  | 283 | 305 |
| 71,949 | 15 | 14 | 168 | 180 | 9  | 9  | 97  | 92  | 289 | 295 |
| 71,950 | 19 | 14 | 196 | 180 | 10 | 9  | 111 | 93  | 336 | 296 |
| 71,951 | 19 | 13 | 197 | 179 | 11 | 9  | 113 | 92  | 340 | 293 |
| 71,952 | 19 | 13 | 197 | 179 | 11 | 9  | 113 | 92  | 340 | 293 |
| 71,953 | 19 | 13 | 204 | 179 | 12 | 9  | 120 | 93  | 355 | 294 |
| 71,954 | 19 | 13 | 204 | 173 | 12 | 9  | 120 | 91  | 355 | 286 |
| 71,955 | 19 | 13 | 213 | 173 | 12 | 9  | 120 | 91  | 364 | 286 |
| 71,956 | 19 | 12 | 214 | 168 | 12 | 9  | 121 | 88  | 366 | 277 |
| 71,957 | 19 | 12 | 213 | 165 | 12 | 9  | 121 | 89  | 365 | 275 |
| 71,958 | 19 | 12 | 215 | 163 | 12 | 9  | 120 | 89  | 366 | 273 |
| 71,959 | 18 | 12 | 214 | 163 | 12 | 9  | 119 | 89  | 363 | 273 |
| 71,960 | 18 | 12 | 209 | 162 | 12 | 9  | 118 | 89  | 357 | 272 |
| 71,961 | 18 | 12 | 210 | 162 | 12 | 9  | 120 | 89  | 360 | 272 |
| 71,962 | 18 | 12 | 210 | 162 | 12 | 9  | 120 | 90  | 360 | 273 |
| 71,963 | 18 | 12 | 207 | 162 | 12 | 9  | 121 | 90  | 358 | 273 |
| 71,964 | 16 | 13 | 212 | 168 | 12 | 9  | 120 | 92  | 360 | 282 |
| 71,965 | 13 | 13 | 212 | 177 | 12 | 9  | 113 | 95  | 350 | 294 |
| 71,966 | 13 | 13 | 219 | 179 | 12 | 9  | 114 | 96  | 358 | 297 |
| 71,967 | 12 | 14 | 212 | 188 | 11 | 10 | 107 | 108 | 342 | 320 |
| 71,968 | 10 | 14 | 195 | 189 | 9  | 10 | 86  | 110 | 300 | 323 |
| 71,969 | 10 | 14 | 196 | 197 | 9  | 10 | 86  | 112 | 301 | 333 |
| 71,970 | 10 | 14 | 195 | 197 | 9  | 10 | 84  | 111 | 298 | 332 |
| 71,971 | 10 | 14 | 190 | 198 | 9  | 11 | 82  | 115 | 291 | 338 |
| 71,972 | 10 | 14 | 189 | 197 | 9  | 11 | 82  | 116 | 290 | 338 |
| 71,973 | 10 | 14 | 209 | 198 | 9  | 11 | 85  | 116 | 313 | 339 |
| 71,974 | 29 | 15 | 320 | 195 | 16 | 10 | 155 | 115 | 520 | 335 |
| 71,975 | 29 | 15 | 320 | 195 | 16 | 10 | 155 | 115 | 520 | 335 |
| 71,976 | 31 | 15 | 380 | 196 | 18 | 10 | 179 | 114 | 608 | 335 |
| 71,977 | 30 | 15 | 381 | 197 | 18 | 10 | 182 | 112 | 611 | 334 |
| 71,978 | 30 | 15 | 379 | 197 | 18 | 10 | 181 | 112 | 608 | 334 |
| 71,979 | 31 | 15 | 389 | 199 | 19 | 10 | 181 | 113 | 620 | 337 |
| 71,980 | 31 | 15 | 389 | 199 | 19 | 10 | 182 | 112 | 621 | 336 |
| 71,981 | 31 | 15 | 388 | 198 | 19 | 10 | 182 | 110 | 620 | 333 |
| 71,982 | 31 | 11 | 387 | 190 | 19 | 10 | 182 | 106 | 619 | 317 |
| 71,983 | 31 | 9  | 372 | 180 | 19 | 9  | 175 | 89  | 597 | 287 |
| 71,984 | 37 | 9  | 395 | 166 | 21 | 9  | 184 | 87  | 637 | 271 |

|        |     |   |       |     |     |   |       |    |       |     |
|--------|-----|---|-------|-----|-----|---|-------|----|-------|-----|
| 71,985 | 37  | 9 | 395   | 166 | 21  | 9 | 184   | 87 | 637   | 271 |
| 71,986 | 58  | 9 | 479   | 166 | 25  | 9 | 220   | 87 | 782   | 271 |
| 71,987 | 64  | 9 | 540   | 167 | 26  | 9 | 237   | 89 | 867   | 274 |
| 71,988 | 93  | 9 | 772   | 169 | 39  | 9 | 343   | 89 | 1,247 | 276 |
| 71,989 | 93  | 9 | 768   | 171 | 39  | 9 | 344   | 93 | 1,244 | 282 |
| 71,990 | 94  | 9 | 765   | 174 | 39  | 9 | 343   | 93 | 1,241 | 285 |
| 71,991 | 125 | 9 | 1,114 | 169 | 68  | 8 | 528   | 93 | 1,835 | 279 |
| 71,992 | 125 | 6 | 1,120 | 137 | 68  | 6 | 533   | 73 | 1,846 | 222 |
| 71,993 | 122 | 6 | 1,117 | 97  | 67  | 3 | 536   | 58 | 1,842 | 164 |
| 71,994 | 122 | 3 | 1,112 | 77  | 66  | 2 | 534   | 50 | 1,834 | 132 |
| 71,995 | 122 | 3 | 1,118 | 76  | 67  | 2 | 535   | 50 | 1,842 | 131 |
| 71,996 | 123 | 3 | 1,120 | 70  | 67  | 2 | 537   | 50 | 1,847 | 125 |
| 71,997 | 127 | 3 | 1,148 | 70  | 67  | 2 | 547   | 52 | 1,889 | 127 |
| 71,998 | 131 | 3 | 1,202 | 64  | 68  | 2 | 554   | 51 | 1,955 | 120 |
| 71,999 | 131 | 3 | 1,216 | 69  | 67  | 2 | 558   | 54 | 1,972 | 128 |
| 72,000 | 127 | 3 | 1,201 | 69  | 67  | 2 | 549   | 55 | 1,944 | 129 |
| 72,001 | 129 | 3 | 1,253 | 69  | 78  | 2 | 611   | 54 | 2,071 | 128 |
| 72,002 | 129 | 3 | 1,263 | 69  | 77  | 2 | 616   | 53 | 2,085 | 127 |
| 72,003 | 129 | 3 | 1,267 | 70  | 77  | 2 | 618   | 58 | 2,091 | 133 |
| 72,004 | 129 | 3 | 1,259 | 70  | 76  | 2 | 614   | 58 | 2,078 | 133 |
| 72,005 | 131 | 3 | 1,256 | 71  | 77  | 2 | 621   | 59 | 2,085 | 135 |
| 72,006 | 131 | 3 | 1,256 | 70  | 77  | 2 | 622   | 57 | 2,086 | 132 |
| 72,007 | 131 | 3 | 1,256 | 70  | 77  | 2 | 622   | 57 | 2,086 | 132 |
| 72,008 | 133 | 3 | 1,286 | 71  | 78  | 2 | 637   | 56 | 2,134 | 132 |
| 72,009 | 133 | 3 | 1,307 | 71  | 80  | 2 | 645   | 56 | 2,165 | 132 |
| 72,010 | 133 | 3 | 1,307 | 74  | 80  | 2 | 643   | 58 | 2,163 | 137 |
| 72,011 | 133 | 3 | 1,327 | 74  | 80  | 2 | 649   | 58 | 2,189 | 137 |
| 72,012 | 234 | 3 | 1,709 | 78  | 113 | 2 | 1,055 | 64 | 3,111 | 147 |
| 72,013 | 238 | 3 | 1,720 | 87  | 117 | 2 | 1,101 | 68 | 3,176 | 160 |
| 72,014 | 238 | 3 | 1,719 | 87  | 117 | 2 | 1,101 | 68 | 3,175 | 160 |
| 72,015 | 242 | 2 | 1,717 | 81  | 117 | 2 | 1,121 | 66 | 3,197 | 151 |
| 72,016 | 247 | 2 | 1,755 | 70  | 121 | 2 | 1,140 | 61 | 3,263 | 135 |
| 72,017 | 248 | 1 | 1,751 | 61  | 121 | 1 | 1,146 | 49 | 3,266 | 112 |
| 72,018 | 252 | 1 | 1,768 | 60  | 122 | 1 | 1,160 | 47 | 3,302 | 109 |
| 72,019 | 252 | 2 | 1,768 | 61  | 122 | 1 | 1,159 | 47 | 3,301 | 111 |
| 72,020 | 252 | 2 | 1,768 | 54  | 122 | 1 | 1,159 | 45 | 3,301 | 102 |
| 72,021 | 258 | 2 | 1,806 | 54  | 122 | 2 | 1,176 | 46 | 3,362 | 104 |
| 72,022 | 266 | 2 | 1,899 | 60  | 124 | 1 | 1,191 | 47 | 3,480 | 110 |
| 72,023 | 266 | 2 | 1,900 | 68  | 126 | 1 | 1,200 | 49 | 3,492 | 120 |
| 72,024 | 275 | 2 | 2,006 | 67  | 129 | 1 | 1,243 | 49 | 3,653 | 119 |
| 72,025 | 261 | 1 | 1,934 | 67  | 122 | 1 | 1,185 | 52 | 3,502 | 121 |

|        |     |   |       |     |     |   |       |    |       |     |
|--------|-----|---|-------|-----|-----|---|-------|----|-------|-----|
| 72,026 | 259 | 1 | 1,881 | 68  | 120 | 1 | 1,166 | 54 | 3,426 | 124 |
| 72,027 | 267 | 1 | 2,032 | 71  | 124 | 1 | 1,201 | 54 | 3,624 | 127 |
| 72,028 | 267 | 1 | 2,039 | 69  | 124 | 1 | 1,204 | 55 | 3,634 | 126 |
| 72,029 | 266 | 1 | 2,039 | 70  | 124 | 1 | 1,205 | 55 | 3,634 | 127 |
| 72,030 | 268 | 1 | 2,044 | 68  | 124 | 1 | 1,216 | 55 | 3,652 | 125 |
| 72,031 | 268 | 1 | 2,050 | 67  | 124 | 1 | 1,216 | 56 | 3,658 | 125 |
| 72,032 | 268 | 1 | 2,055 | 67  | 125 | 2 | 1,219 | 56 | 3,667 | 126 |
| 72,033 | 268 | 1 | 2,055 | 67  | 125 | 2 | 1,221 | 56 | 3,669 | 126 |
| 72,034 | 263 | 1 | 2,047 | 67  | 123 | 2 | 1,224 | 56 | 3,657 | 126 |
| 72,035 | 263 | 1 | 2,045 | 65  | 124 | 2 | 1,221 | 56 | 3,653 | 124 |
| 72,036 | 261 | 1 | 2,023 | 85  | 123 | 3 | 1,213 | 63 | 3,620 | 152 |
| 72,037 | 242 | 4 | 1,961 | 102 | 121 | 4 | 1,184 | 78 | 3,508 | 188 |
| 72,038 | 236 | 4 | 1,904 | 109 | 120 | 4 | 1,168 | 86 | 3,428 | 203 |
| 72,039 | 208 | 4 | 1,678 | 109 | 107 | 4 | 1,063 | 86 | 3,056 | 203 |
| 72,040 | 203 | 4 | 1,649 | 108 | 102 | 4 | 1,056 | 84 | 3,010 | 200 |
| 72,041 | 192 | 4 | 1,480 | 106 | 89  | 4 | 964   | 82 | 2,725 | 196 |
| 72,042 | 181 | 4 | 1,372 | 106 | 78  | 4 | 894   | 82 | 2,525 | 196 |
| 72,043 | 181 | 4 | 1,363 | 106 | 78  | 4 | 888   | 82 | 2,510 | 196 |
| 72,044 | 181 | 4 | 1,338 | 106 | 76  | 4 | 880   | 82 | 2,475 | 196 |
| 72,045 | 185 | 4 | 1,449 | 106 | 78  | 4 | 950   | 82 | 2,662 | 196 |
| 72,046 | 184 | 4 | 1,450 | 106 | 78  | 4 | 950   | 83 | 2,662 | 197 |
| 72,047 | 184 | 5 | 1,446 | 110 | 78  | 4 | 950   | 84 | 2,658 | 203 |
| 72,048 | 180 | 5 | 1,419 | 115 | 78  | 4 | 947   | 86 | 2,624 | 210 |
| 72,049 | 176 | 5 | 1,362 | 117 | 77  | 4 | 939   | 85 | 2,554 | 211 |
| 72,050 | 176 | 6 | 1,346 | 129 | 78  | 4 | 935   | 85 | 2,535 | 224 |
| 72,051 | 176 | 6 | 1,335 | 129 | 77  | 4 | 928   | 87 | 2,516 | 226 |
| 72,052 | 174 | 6 | 1,283 | 129 | 66  | 4 | 866   | 86 | 2,389 | 225 |
| 72,053 | 174 | 6 | 1,272 | 125 | 66  | 4 | 859   | 79 | 2,371 | 214 |
| 72,054 | 175 | 6 | 1,269 | 126 | 66  | 4 | 858   | 79 | 2,368 | 215 |
| 72,055 | 174 | 6 | 1,268 | 127 | 65  | 5 | 855   | 79 | 2,362 | 217 |
| 72,056 | 174 | 6 | 1,268 | 128 | 65  | 5 | 855   | 79 | 2,362 | 218 |
| 72,057 | 175 | 6 | 1,270 | 128 | 65  | 5 | 856   | 80 | 2,366 | 219 |
| 72,058 | 175 | 6 | 1,274 | 128 | 64  | 5 | 857   | 80 | 2,370 | 219 |
| 72,059 | 173 | 6 | 1,248 | 126 | 64  | 5 | 844   | 80 | 2,329 | 217 |
| 72,060 | 176 | 6 | 1,242 | 117 | 62  | 5 | 858   | 71 | 2,338 | 199 |
| 72,061 | 176 | 6 | 1,223 | 117 | 62  | 5 | 854   | 71 | 2,315 | 199 |
| 72,062 | 75  | 6 | 850   | 117 | 29  | 5 | 435   | 72 | 1,389 | 200 |
| 72,063 | 75  | 7 | 846   | 117 | 29  | 5 | 436   | 72 | 1,386 | 201 |
| 72,064 | 71  | 7 | 848   | 110 | 26  | 6 | 396   | 74 | 1,341 | 197 |
| 72,065 | 72  | 8 | 855   | 111 | 26  | 6 | 400   | 76 | 1,353 | 201 |
| 72,066 | 72  | 9 | 877   | 111 | 26  | 6 | 387   | 76 | 1,362 | 202 |

|        |    |    |     |     |    |   |     |    |       |     |
|--------|----|----|-----|-----|----|---|-----|----|-------|-----|
| 72,067 | 67 | 9  | 834 | 111 | 22 | 5 | 366 | 76 | 1,289 | 201 |
| 72,068 | 66 | 9  | 830 | 111 | 22 | 5 | 358 | 76 | 1,276 | 201 |
| 72,069 | 63 | 9  | 817 | 116 | 20 | 5 | 338 | 78 | 1,238 | 208 |
| 72,070 | 63 | 8  | 817 | 115 | 20 | 5 | 338 | 78 | 1,238 | 206 |
| 72,071 | 64 | 8  | 821 | 114 | 21 | 5 | 329 | 78 | 1,235 | 205 |
| 72,072 | 66 | 8  | 919 | 114 | 24 | 4 | 378 | 77 | 1,387 | 203 |
| 72,073 | 62 | 8  | 849 | 98  | 25 | 4 | 405 | 68 | 1,341 | 178 |
| 72,074 | 62 | 9  | 835 | 99  | 23 | 5 | 409 | 68 | 1,329 | 181 |
| 72,075 | 50 | 9  | 701 | 100 | 20 | 5 | 358 | 67 | 1,129 | 181 |
| 72,076 | 43 | 9  | 675 | 100 | 20 | 5 | 340 | 65 | 1,078 | 179 |
| 72,077 | 44 | 9  | 570 | 95  | 19 | 5 | 335 | 63 | 968   | 172 |
| 72,078 | 43 | 9  | 555 | 95  | 16 | 5 | 335 | 63 | 949   | 172 |
| 72,079 | 43 | 9  | 548 | 94  | 16 | 5 | 332 | 62 | 939   | 170 |
| 72,080 | 42 | 9  | 544 | 94  | 16 | 5 | 328 | 62 | 930   | 170 |
| 72,081 | 41 | 9  | 533 | 95  | 15 | 5 | 321 | 61 | 910   | 170 |
| 72,082 | 41 | 9  | 529 | 95  | 15 | 5 | 320 | 61 | 905   | 170 |
| 72,083 | 41 | 9  | 524 | 96  | 15 | 5 | 317 | 61 | 897   | 171 |
| 72,084 | 41 | 10 | 521 | 99  | 15 | 5 | 316 | 63 | 893   | 177 |
| 72,085 | 41 | 10 | 511 | 99  | 15 | 5 | 309 | 63 | 876   | 177 |
| 72,086 | 40 | 10 | 505 | 99  | 14 | 5 | 309 | 63 | 868   | 177 |
| 72,087 | 41 | 10 | 504 | 79  | 14 | 4 | 309 | 59 | 868   | 152 |
| 72,088 | 41 | 7  | 501 | 65  | 13 | 3 | 309 | 44 | 864   | 119 |
| 72,089 | 41 | 7  | 497 | 60  | 13 | 3 | 310 | 35 | 861   | 105 |
| 72,090 | 40 | 7  | 485 | 60  | 13 | 3 | 304 | 36 | 842   | 106 |
| 72,091 | 40 | 7  | 477 | 57  | 13 | 3 | 297 | 33 | 827   | 100 |
| 72,092 | 34 | 7  | 453 | 55  | 13 | 3 | 287 | 33 | 787   | 98  |
| 72,093 | 34 | 7  | 440 | 55  | 14 | 3 | 286 | 33 | 774   | 98  |
| 72,094 | 34 | 7  | 431 | 54  | 14 | 3 | 285 | 33 | 764   | 97  |
| 72,095 | 34 | 9  | 393 | 55  | 14 | 3 | 269 | 33 | 710   | 100 |
| 72,096 | 30 | 9  | 322 | 55  | 11 | 3 | 214 | 33 | 577   | 100 |
| 72,097 | 30 | 9  | 323 | 55  | 11 | 3 | 214 | 32 | 578   | 99  |
| 72,098 | 30 | 8  | 323 | 52  | 11 | 3 | 214 | 31 | 578   | 94  |
| 72,099 | 31 | 10 | 327 | 48  | 12 | 3 | 208 | 28 | 578   | 89  |
| 72,100 | 31 | 10 | 326 | 46  | 12 | 3 | 207 | 27 | 576   | 86  |
| 72,101 | 32 | 9  | 381 | 29  | 13 | 3 | 215 | 23 | 641   | 64  |
| 72,102 | 35 | 9  | 473 | 29  | 17 | 4 | 233 | 22 | 758   | 64  |
| 72,103 | 36 | 10 | 476 | 29  | 17 | 4 | 241 | 22 | 770   | 65  |
| 72,104 | 37 | 10 | 497 | 29  | 17 | 4 | 278 | 22 | 829   | 65  |
| 72,105 | 36 | 10 | 495 | 28  | 17 | 4 | 275 | 22 | 823   | 64  |
| 72,106 | 35 | 11 | 490 | 27  | 17 | 3 | 270 | 22 | 812   | 63  |
| 72,107 | 34 | 11 | 492 | 26  | 17 | 3 | 277 | 22 | 820   | 62  |

|        |     |    |     |    |    |   |     |    |       |    |
|--------|-----|----|-----|----|----|---|-----|----|-------|----|
| 72,108 | 34  | 11 | 497 | 26 | 17 | 3 | 276 | 21 | 824   | 61 |
| 72,109 | 34  | 11 | 491 | 26 | 17 | 3 | 274 | 21 | 816   | 61 |
| 72,110 | 34  | 11 | 489 | 26 | 17 | 3 | 273 | 21 | 813   | 61 |
| 72,111 | 31  | 11 | 472 | 26 | 17 | 3 | 251 | 21 | 771   | 61 |
| 72,112 | 32  | 11 | 476 | 26 | 18 | 3 | 249 | 21 | 775   | 61 |
| 72,113 | 33  | 11 | 480 | 26 | 18 | 3 | 253 | 19 | 784   | 59 |
| 72,114 | 34  | 10 | 485 | 26 | 18 | 3 | 254 | 18 | 791   | 57 |
| 72,115 | 34  | 9  | 471 | 23 | 17 | 2 | 249 | 11 | 771   | 45 |
| 72,116 | 33  | 9  | 462 | 23 | 17 | 2 | 243 | 11 | 755   | 45 |
| 72,117 | 31  | 8  | 455 | 23 | 17 | 2 | 237 | 11 | 740   | 44 |
| 72,118 | 30  | 8  | 439 | 23 | 17 | 2 | 232 | 11 | 718   | 44 |
| 72,119 | 30  | 8  | 435 | 23 | 17 | 2 | 231 | 12 | 713   | 45 |
| 72,120 | 30  | 8  | 443 | 18 | 18 | 2 | 253 | 10 | 744   | 38 |
| 72,121 | 29  | 8  | 437 | 18 | 17 | 2 | 255 | 10 | 738   | 38 |
| 72,122 | 33  | 8  | 339 | 18 | 15 | 2 | 227 | 10 | 614   | 38 |
| 72,123 | 36  | 8  | 338 | 18 | 15 | 2 | 222 | 10 | 611   | 38 |
| 72,124 | 48  | 7  | 395 | 17 | 13 | 1 | 272 | 10 | 728   | 35 |
| 72,125 | 52  | 7  | 399 | 17 | 15 | 1 | 262 | 10 | 728   | 35 |
| 72,126 | 50  | 7  | 389 | 16 | 15 | 1 | 256 | 10 | 710   | 34 |
| 72,127 | 50  | 7  | 388 | 16 | 15 | 1 | 252 | 10 | 705   | 34 |
| 72,128 | 51  | 7  | 387 | 16 | 15 | 1 | 249 | 10 | 702   | 34 |
| 72,129 | 51  | 7  | 381 | 16 | 15 | 1 | 243 | 10 | 690   | 34 |
| 72,130 | 52  | 7  | 380 | 16 | 15 | 1 | 242 | 10 | 689   | 34 |
| 72,131 | 55  | 7  | 408 | 18 | 15 | 1 | 260 | 10 | 738   | 36 |
| 72,132 | 55  | 7  | 410 | 17 | 15 | 1 | 261 | 10 | 741   | 35 |
| 72,133 | 55  | 7  | 409 | 17 | 15 | 1 | 261 | 10 | 740   | 35 |
| 72,134 | 55  | 7  | 419 | 16 | 16 | 1 | 270 | 10 | 760   | 34 |
| 72,135 | 55  | 6  | 425 | 13 | 16 | 1 | 277 | 8  | 773   | 28 |
| 72,136 | 58  | 6  | 451 | 13 | 17 | 1 | 282 | 8  | 808   | 28 |
| 72,137 | 58  | 6  | 451 | 13 | 17 | 1 | 283 | 8  | 809   | 28 |
| 72,138 | 58  | 6  | 459 | 13 | 17 | 1 | 287 | 5  | 821   | 25 |
| 72,139 | 59  | 6  | 461 | 10 | 17 | 1 | 287 | 5  | 824   | 22 |
| 72,140 | 59  | 6  | 461 | 7  | 17 | 1 | 287 | 4  | 824   | 18 |
| 72,141 | 77  | 6  | 583 | 5  | 18 | 1 | 347 | 3  | 1,025 | 15 |
| 72,142 | 77  | 6  | 582 | 5  | 18 | 1 | 351 | 4  | 1,028 | 16 |
| 72,143 | 77  | 6  | 581 | 5  | 18 | 1 | 351 | 4  | 1,027 | 16 |
| 72,144 | 82  | 6  | 644 | 5  | 20 | 1 | 397 | 4  | 1,143 | 16 |
| 72,145 | 83  | 6  | 674 | 5  | 20 | 1 | 408 | 4  | 1,185 | 16 |
| 72,146 | 91  | 4  | 802 | 4  | 26 | 1 | 487 | 4  | 1,406 | 13 |
| 72,147 | 90  | 4  | 799 | 4  | 26 | 1 | 487 | 4  | 1,402 | 13 |
| 72,148 | 102 | 4  | 976 | 4  | 30 | 1 | 557 | 4  | 1,665 | 13 |



|        |     |   |       |    |    |   |     |    |       |    |
|--------|-----|---|-------|----|----|---|-----|----|-------|----|
| 72,149 | 105 | 4 | 1,023 | 6  | 32 | 1 | 574 | 6  | 1,734 | 17 |
| 72,150 | 105 | 2 | 1,016 | 7  | 30 | 1 | 567 | 7  | 1,718 | 17 |
| 72,151 | 103 | 2 | 968   | 8  | 30 | 1 | 563 | 8  | 1,664 | 19 |
| 72,152 | 104 | 2 | 956   | 8  | 30 | 1 | 562 | 9  | 1,652 | 20 |
| 72,153 | 102 | 1 | 874   | 8  | 26 | 0 | 546 | 8  | 1,548 | 17 |
| 72,154 | 101 | 1 | 880   | 9  | 26 | 0 | 543 | 8  | 1,550 | 18 |
| 72,155 | 100 | 1 | 861   | 9  | 26 | 0 | 507 | 8  | 1,494 | 18 |
| 72,156 | 100 | 1 | 861   | 10 | 26 | 0 | 507 | 8  | 1,494 | 19 |
| 72,157 | 100 | 0 | 857   | 10 | 26 | 0 | 501 | 8  | 1,484 | 18 |
| 72,158 | 100 | 0 | 855   | 11 | 26 | 0 | 502 | 8  | 1,483 | 19 |
| 72,159 | 100 | 0 | 855   | 11 | 26 | 0 | 504 | 8  | 1,485 | 19 |
| 72,160 | 101 | 0 | 860   | 11 | 26 | 0 | 504 | 8  | 1,491 | 19 |
| 72,161 | 117 | 0 | 921   | 11 | 29 | 0 | 538 | 8  | 1,605 | 19 |
| 72,162 | 122 | 0 | 1,017 | 11 | 31 | 0 | 554 | 8  | 1,724 | 19 |
| 72,163 | 122 | 0 | 1,020 | 11 | 32 | 0 | 564 | 8  | 1,738 | 19 |
| 72,164 | 124 | 0 | 1,161 | 11 | 33 | 0 | 587 | 9  | 1,905 | 20 |
| 72,165 | 123 | 0 | 1,153 | 11 | 33 | 0 | 585 | 9  | 1,894 | 20 |
| 72,166 | 130 | 0 | 1,268 | 11 | 37 | 0 | 627 | 9  | 2,062 | 20 |
| 72,167 | 141 | 0 | 1,378 | 11 | 53 | 0 | 659 | 9  | 2,231 | 20 |
| 72,168 | 144 | 0 | 1,392 | 11 | 55 | 0 | 673 | 10 | 2,264 | 21 |
| 72,169 | 144 | 1 | 1,392 | 12 | 55 | 0 | 673 | 11 | 2,264 | 24 |
| 72,170 | 140 | 3 | 1,393 | 24 | 55 | 0 | 664 | 17 | 2,252 | 44 |
| 72,171 | 139 | 3 | 1,390 | 27 | 55 | 0 | 662 | 18 | 2,246 | 48 |
| 72,172 | 138 | 4 | 1,385 | 27 | 55 | 0 | 658 | 18 | 2,236 | 49 |
| 72,173 | 132 | 4 | 1,376 | 28 | 54 | 0 | 641 | 18 | 2,203 | 50 |
| 72,174 | 131 | 4 | 1,376 | 28 | 54 | 0 | 643 | 18 | 2,204 | 50 |
| 72,175 | 119 | 4 | 1,304 | 29 | 52 | 0 | 554 | 18 | 2,029 | 51 |
| 72,176 | 115 | 4 | 1,293 | 30 | 50 | 0 | 550 | 18 | 2,008 | 52 |
| 72,177 | 120 | 4 | 1,334 | 30 | 51 | 0 | 563 | 18 | 2,068 | 52 |
| 72,178 | 120 | 4 | 1,334 | 32 | 51 | 0 | 563 | 19 | 2,068 | 55 |
| 72,179 | 120 | 4 | 1,341 | 44 | 51 | 0 | 574 | 22 | 2,086 | 70 |
| 72,180 | 122 | 4 | 1,361 | 47 | 51 | 0 | 574 | 22 | 2,108 | 73 |
| 72,181 | 121 | 5 | 1,361 | 49 | 51 | 1 | 574 | 22 | 2,107 | 77 |
| 72,182 | 118 | 5 | 1,333 | 48 | 51 | 1 | 555 | 23 | 2,057 | 77 |
| 72,183 | 136 | 5 | 1,699 | 54 | 55 | 1 | 614 | 24 | 2,504 | 84 |
| 72,184 | 138 | 5 | 1,691 | 54 | 55 | 1 | 606 | 25 | 2,490 | 85 |
| 72,185 | 143 | 5 | 1,790 | 54 | 59 | 1 | 630 | 25 | 2,622 | 85 |
| 72,186 | 150 | 6 | 1,847 | 57 | 60 | 1 | 640 | 25 | 2,697 | 89 |
| 72,187 | 148 | 6 | 1,824 | 57 | 59 | 1 | 634 | 25 | 2,665 | 89 |
| 72,188 | 156 | 6 | 1,994 | 57 | 65 | 1 | 679 | 25 | 2,894 | 89 |
| 72,189 | 157 | 6 | 2,013 | 57 | 65 | 1 | 682 | 25 | 2,917 | 89 |

|        |     |   |       |    |    |   |     |    |       |    |
|--------|-----|---|-------|----|----|---|-----|----|-------|----|
| 72,190 | 156 | 6 | 2,021 | 57 | 65 | 1 | 684 | 25 | 2,926 | 89 |
| 72,191 | 146 | 6 | 1,990 | 57 | 65 | 1 | 668 | 26 | 2,869 | 90 |
| 72,192 | 140 | 6 | 1,962 | 57 | 65 | 1 | 645 | 25 | 2,812 | 89 |
| 72,193 | 140 | 7 | 1,963 | 57 | 65 | 1 | 642 | 26 | 2,810 | 91 |
| 72,194 | 139 | 7 | 1,934 | 58 | 64 | 1 | 621 | 26 | 2,758 | 92 |
| 72,195 | 136 | 7 | 1,914 | 59 | 62 | 1 | 610 | 26 | 2,722 | 93 |
| 72,196 | 135 | 7 | 1,886 | 59 | 62 | 1 | 601 | 26 | 2,684 | 93 |
| 72,197 | 135 | 7 | 1,787 | 59 | 57 | 1 | 545 | 26 | 2,524 | 93 |
| 72,198 | 124 | 7 | 1,630 | 59 | 54 | 1 | 481 | 26 | 2,289 | 93 |
| 72,199 | 121 | 8 | 1,584 | 59 | 52 | 1 | 468 | 27 | 2,225 | 95 |
| 72,200 | 121 | 8 | 1,590 | 56 | 52 | 1 | 474 | 25 | 2,237 | 90 |
| 72,201 | 123 | 8 | 1,590 | 54 | 52 | 1 | 474 | 24 | 2,239 | 87 |
| 72,202 | 123 | 8 | 1,591 | 53 | 52 | 1 | 474 | 23 | 2,240 | 85 |
| 72,203 | 124 | 8 | 1,592 | 52 | 52 | 1 | 476 | 22 | 2,244 | 83 |
| 72,204 | 124 | 8 | 1,599 | 52 | 52 | 1 | 479 | 22 | 2,254 | 83 |
| 72,205 | 124 | 8 | 1,590 | 52 | 52 | 1 | 477 | 22 | 2,243 | 83 |
| 72,206 | 132 | 8 | 1,605 | 51 | 55 | 1 | 496 | 22 | 2,288 | 82 |
| 72,207 | 132 | 8 | 1,605 | 51 | 55 | 1 | 495 | 22 | 2,287 | 82 |
| 72,208 | 132 | 8 | 1,608 | 51 | 56 | 1 | 506 | 22 | 2,302 | 82 |
| 72,209 | 133 | 8 | 1,612 | 50 | 56 | 1 | 507 | 22 | 2,308 | 81 |
| 72,210 | 133 | 8 | 1,612 | 50 | 57 | 1 | 505 | 22 | 2,307 | 81 |
| 72,211 | 137 | 8 | 1,619 | 51 | 57 | 1 | 507 | 22 | 2,320 | 82 |
| 72,212 | 120 | 8 | 1,557 | 51 | 54 | 1 | 471 | 23 | 2,202 | 83 |
| 72,213 | 129 | 8 | 1,488 | 52 | 53 | 1 | 457 | 23 | 2,127 | 84 |
| 72,214 | 130 | 8 | 1,499 | 52 | 54 | 1 | 452 | 23 | 2,135 | 84 |
| 72,215 | 128 | 8 | 1,357 | 55 | 53 | 1 | 427 | 22 | 1,965 | 86 |
| 72,216 | 128 | 8 | 1,268 | 55 | 53 | 1 | 414 | 22 | 1,863 | 86 |
| 72,217 | 119 | 8 | 1,167 | 55 | 39 | 1 | 395 | 22 | 1,720 | 86 |
| 72,218 | 127 | 8 | 1,183 | 55 | 41 | 1 | 414 | 22 | 1,765 | 86 |
| 72,219 | 125 | 8 | 1,166 | 55 | 42 | 1 | 410 | 20 | 1,743 | 84 |
| 72,220 | 141 | 5 | 1,228 | 42 | 54 | 1 | 482 | 13 | 1,905 | 61 |
| 72,221 | 141 | 5 | 1,226 | 44 | 53 | 1 | 481 | 13 | 1,901 | 63 |
| 72,222 | 147 | 5 | 1,261 | 50 | 55 | 1 | 504 | 13 | 1,967 | 69 |
| 72,223 | 148 | 4 | 1,286 | 50 | 55 | 2 | 508 | 13 | 1,997 | 69 |
| 72,224 | 148 | 4 | 1,289 | 50 | 55 | 2 | 515 | 13 | 2,007 | 69 |
| 72,225 | 147 | 4 | 1,290 | 54 | 55 | 2 | 516 | 13 | 2,008 | 73 |
| 72,226 | 143 | 4 | 1,282 | 53 | 55 | 2 | 515 | 13 | 1,995 | 72 |
| 72,227 | 139 | 4 | 1,251 | 50 | 54 | 2 | 503 | 12 | 1,947 | 68 |
| 72,228 | 142 | 4 | 1,254 | 51 | 56 | 2 | 503 | 13 | 1,955 | 70 |
| 72,229 | 141 | 4 | 1,248 | 51 | 56 | 2 | 500 | 13 | 1,945 | 70 |
| 72,230 | 140 | 5 | 1,256 | 40 | 56 | 2 | 503 | 12 | 1,955 | 59 |

|        |     |   |       |    |    |   |     |    |       |    |
|--------|-----|---|-------|----|----|---|-----|----|-------|----|
| 72,231 | 139 | 5 | 1,245 | 37 | 56 | 2 | 507 | 12 | 1,947 | 56 |
| 72,232 | 138 | 4 | 1,239 | 35 | 56 | 1 | 505 | 12 | 1,938 | 52 |
| 72,233 | 138 | 4 | 1,202 | 38 | 56 | 1 | 502 | 12 | 1,898 | 55 |
| 72,234 | 121 | 4 | 906   | 32 | 52 | 1 | 466 | 10 | 1,545 | 47 |
| 72,235 | 119 | 4 | 916   | 32 | 51 | 1 | 470 | 11 | 1,556 | 48 |
| 72,236 | 114 | 4 | 820   | 33 | 47 | 1 | 447 | 11 | 1,428 | 49 |
| 72,237 | 108 | 3 | 759   | 30 | 46 | 1 | 433 | 11 | 1,346 | 45 |
| 72,238 | 107 | 4 | 758   | 30 | 46 | 1 | 433 | 12 | 1,344 | 47 |
| 72,239 | 102 | 4 | 587   | 30 | 40 | 1 | 386 | 12 | 1,115 | 47 |
| 72,240 | 104 | 5 | 585   | 30 | 42 | 1 | 399 | 12 | 1,130 | 48 |
| 72,241 | 104 | 5 | 576   | 30 | 43 | 1 | 399 | 12 | 1,122 | 48 |
| 72,242 | 108 | 5 | 546   | 30 | 43 | 1 | 404 | 12 | 1,101 | 48 |
| 72,243 | 107 | 4 | 549   | 32 | 44 | 1 | 405 | 11 | 1,105 | 48 |
| 72,244 | 107 | 4 | 551   | 32 | 44 | 1 | 408 | 11 | 1,110 | 48 |
| 72,245 | 110 | 4 | 555   | 31 | 44 | 1 | 423 | 12 | 1,132 | 48 |
| 72,246 | 109 | 5 | 545   | 30 | 44 | 1 | 415 | 12 | 1,113 | 48 |
| 72,247 | 109 | 6 | 544   | 31 | 44 | 1 | 414 | 12 | 1,111 | 50 |
| 72,248 | 101 | 6 | 517   | 31 | 43 | 1 | 393 | 12 | 1,054 | 50 |
| 72,249 | 100 | 5 | 504   | 31 | 43 | 1 | 397 | 11 | 1,044 | 48 |
| 72,250 | 101 | 5 | 511   | 32 | 43 | 1 | 401 | 11 | 1,056 | 49 |
| 72,251 | 99  | 5 | 511   | 32 | 43 | 1 | 401 | 11 | 1,054 | 49 |
| 72,252 | 99  | 5 | 511   | 32 | 43 | 1 | 400 | 10 | 1,053 | 48 |
| 72,253 | 99  | 5 | 511   | 32 | 43 | 1 | 400 | 10 | 1,053 | 48 |
| 72,254 | 96  | 5 | 517   | 32 | 43 | 1 | 406 | 10 | 1,062 | 48 |
| 72,255 | 98  | 5 | 547   | 32 | 45 | 1 | 425 | 10 | 1,115 | 48 |
| 72,256 | 98  | 5 | 549   | 32 | 45 | 1 | 427 | 10 | 1,119 | 48 |
| 72,257 | 104 | 5 | 651   | 32 | 46 | 1 | 465 | 10 | 1,266 | 48 |
| 72,258 | 106 | 5 | 677   | 32 | 48 | 1 | 475 | 10 | 1,306 | 48 |
| 72,259 | 106 | 5 | 673   | 32 | 47 | 1 | 471 | 10 | 1,297 | 48 |
| 72,260 | 105 | 5 | 682   | 32 | 48 | 1 | 474 | 10 | 1,309 | 48 |
| 72,261 | 105 | 5 | 681   | 32 | 47 | 1 | 474 | 10 | 1,307 | 48 |
| 72,262 | 107 | 6 | 712   | 31 | 47 | 1 | 496 | 9  | 1,362 | 47 |
| 72,263 | 107 | 6 | 711   | 34 | 47 | 1 | 496 | 9  | 1,361 | 50 |
| 72,264 | 94  | 6 | 687   | 33 | 45 | 1 | 492 | 9  | 1,318 | 49 |
| 72,265 | 94  | 6 | 673   | 30 | 43 | 1 | 484 | 9  | 1,294 | 46 |
| 72,266 | 95  | 6 | 679   | 32 | 43 | 1 | 488 | 11 | 1,305 | 50 |
| 72,267 | 89  | 6 | 657   | 33 | 39 | 1 | 460 | 12 | 1,245 | 52 |
| 72,268 | 87  | 7 | 657   | 43 | 38 | 1 | 452 | 15 | 1,234 | 66 |
| 72,269 | 82  | 8 | 671   | 44 | 38 | 1 | 436 | 18 | 1,227 | 71 |
| 72,270 | 80  | 8 | 662   | 45 | 35 | 1 | 427 | 18 | 1,204 | 72 |
| 72,271 | 64  | 8 | 583   | 47 | 23 | 1 | 342 | 20 | 1,012 | 76 |

|        |    |   |     |    |    |   |     |    |       |     |
|--------|----|---|-----|----|----|---|-----|----|-------|-----|
| 72,272 | 60 | 8 | 555 | 46 | 22 | 1 | 335 | 20 | 972   | 75  |
| 72,273 | 60 | 8 | 550 | 38 | 21 | 1 | 324 | 19 | 955   | 66  |
| 72,274 | 59 | 8 | 525 | 39 | 21 | 0 | 319 | 19 | 924   | 66  |
| 72,275 | 66 | 8 | 555 | 38 | 23 | 0 | 321 | 19 | 965   | 65  |
| 72,276 | 68 | 8 | 585 | 34 | 23 | 0 | 327 | 19 | 1,003 | 61  |
| 72,277 | 68 | 8 | 593 | 34 | 23 | 0 | 330 | 19 | 1,014 | 61  |
| 72,278 | 85 | 8 | 685 | 34 | 31 | 0 | 381 | 19 | 1,182 | 61  |
| 72,279 | 86 | 8 | 720 | 33 | 29 | 0 | 392 | 19 | 1,227 | 60  |
| 72,280 | 86 | 7 | 735 | 35 | 29 | 0 | 395 | 17 | 1,245 | 59  |
| 72,281 | 86 | 7 | 727 | 38 | 29 | 0 | 392 | 18 | 1,234 | 63  |
| 72,282 | 96 | 7 | 827 | 39 | 32 | 0 | 448 | 19 | 1,403 | 65  |
| 72,283 | 97 | 7 | 832 | 43 | 33 | 1 | 456 | 22 | 1,418 | 73  |
| 72,284 | 97 | 7 | 823 | 39 | 33 | 1 | 450 | 21 | 1,403 | 68  |
| 72,285 | 97 | 7 | 807 | 40 | 33 | 1 | 439 | 21 | 1,376 | 69  |
| 72,286 | 97 | 7 | 794 | 41 | 33 | 1 | 434 | 20 | 1,358 | 69  |
| 72,287 | 97 | 7 | 789 | 40 | 33 | 1 | 432 | 20 | 1,351 | 68  |
| 72,288 | 96 | 6 | 788 | 42 | 33 | 1 | 431 | 20 | 1,348 | 69  |
| 72,289 | 96 | 6 | 787 | 42 | 33 | 1 | 430 | 20 | 1,346 | 69  |
| 72,290 | 92 | 7 | 780 | 43 | 33 | 1 | 427 | 20 | 1,332 | 71  |
| 72,291 | 90 | 6 | 764 | 43 | 31 | 1 | 411 | 20 | 1,296 | 70  |
| 72,292 | 90 | 6 | 763 | 43 | 30 | 1 | 408 | 20 | 1,291 | 70  |
| 72,293 | 85 | 6 | 736 | 43 | 29 | 1 | 385 | 20 | 1,235 | 70  |
| 72,294 | 85 | 6 | 730 | 42 | 28 | 1 | 382 | 21 | 1,225 | 70  |
| 72,295 | 85 | 6 | 727 | 43 | 28 | 1 | 379 | 22 | 1,219 | 72  |
| 72,296 | 82 | 6 | 718 | 56 | 28 | 1 | 359 | 23 | 1,187 | 86  |
| 72,297 | 82 | 5 | 715 | 59 | 28 | 1 | 355 | 24 | 1,180 | 89  |
| 72,298 | 82 | 4 | 716 | 58 | 28 | 1 | 355 | 27 | 1,181 | 90  |
| 72,299 | 82 | 4 | 712 | 58 | 28 | 1 | 351 | 27 | 1,173 | 90  |
| 72,300 | 82 | 4 | 702 | 58 | 26 | 2 | 340 | 27 | 1,150 | 91  |
| 72,301 | 81 | 4 | 688 | 60 | 26 | 2 | 329 | 28 | 1,124 | 94  |
| 72,302 | 81 | 4 | 688 | 60 | 26 | 2 | 329 | 32 | 1,124 | 98  |
| 72,303 | 82 | 4 | 700 | 63 | 26 | 2 | 328 | 34 | 1,136 | 103 |
| 72,304 | 83 | 4 | 715 | 64 | 26 | 2 | 328 | 34 | 1,152 | 104 |
| 72,305 | 83 | 4 | 717 | 64 | 26 | 2 | 325 | 34 | 1,151 | 104 |
| 72,306 | 81 | 4 | 682 | 65 | 24 | 2 | 304 | 34 | 1,091 | 105 |
| 72,307 | 81 | 4 | 681 | 65 | 24 | 2 | 302 | 36 | 1,088 | 107 |
| 72,308 | 67 | 4 | 562 | 70 | 20 | 2 | 243 | 43 | 892   | 119 |
| 72,309 | 65 | 4 | 536 | 70 | 18 | 2 | 225 | 43 | 844   | 119 |
| 72,310 | 67 | 5 | 555 | 70 | 18 | 2 | 233 | 43 | 873   | 120 |
| 72,311 | 67 | 5 | 555 | 71 | 18 | 3 | 232 | 46 | 872   | 125 |
| 72,312 | 62 | 5 | 523 | 80 | 18 | 3 | 213 | 47 | 816   | 135 |

|        |    |   |     |    |    |   |     |    |     |     |
|--------|----|---|-----|----|----|---|-----|----|-----|-----|
| 72,313 | 61 | 4 | 518 | 77 | 18 | 3 | 211 | 48 | 808 | 132 |
| 72,314 | 61 | 4 | 518 | 80 | 18 | 3 | 210 | 48 | 807 | 135 |
| 72,315 | 60 | 4 | 523 | 82 | 18 | 3 | 221 | 50 | 822 | 139 |
| 72,316 | 58 | 4 | 517 | 80 | 18 | 3 | 221 | 48 | 814 | 135 |
| 72,317 | 57 | 4 | 510 | 80 | 18 | 3 | 217 | 47 | 802 | 134 |
| 72,318 | 56 | 3 | 508 | 70 | 18 | 3 | 215 | 44 | 797 | 120 |
| 72,319 | 56 | 3 | 503 | 70 | 18 | 3 | 215 | 43 | 792 | 119 |
| 72,320 | 52 | 2 | 464 | 69 | 15 | 3 | 204 | 41 | 735 | 115 |
| 72,321 | 52 | 2 | 463 | 66 | 15 | 3 | 205 | 39 | 735 | 110 |
| 72,322 | 52 | 2 | 462 | 66 | 15 | 3 | 205 | 39 | 734 | 110 |
| 72,323 | 50 | 2 | 462 | 65 | 15 | 3 | 201 | 39 | 728 | 109 |
| 72,324 | 48 | 2 | 442 | 64 | 15 | 3 | 195 | 40 | 700 | 109 |
| 72,325 | 43 | 2 | 428 | 63 | 13 | 3 | 192 | 40 | 676 | 108 |
| 72,326 | 41 | 2 | 400 | 63 | 13 | 3 | 185 | 40 | 639 | 108 |
| 72,327 | 41 | 2 | 408 | 64 | 14 | 3 | 186 | 40 | 649 | 109 |
| 72,328 | 42 | 3 | 409 | 64 | 15 | 3 | 184 | 42 | 650 | 112 |
| 72,329 | 24 | 3 | 321 | 65 | 7  | 3 | 134 | 46 | 486 | 117 |
| 72,330 | 20 | 3 | 277 | 65 | 7  | 3 | 120 | 45 | 424 | 116 |
| 72,331 | 20 | 3 | 258 | 62 | 7  | 3 | 112 | 45 | 397 | 113 |
| 72,332 | 13 | 4 | 225 | 59 | 5  | 3 | 85  | 44 | 328 | 110 |
| 72,333 | 9  | 4 | 150 | 54 | 4  | 2 | 52  | 40 | 215 | 100 |
| 72,334 | 8  | 4 | 139 | 54 | 3  | 2 | 42  | 41 | 192 | 101 |
| 72,335 | 8  | 4 | 137 | 54 | 3  | 2 | 40  | 41 | 188 | 101 |
| 72,336 | 8  | 4 | 138 | 53 | 3  | 2 | 41  | 41 | 190 | 100 |
| 72,337 | 8  | 4 | 138 | 52 | 3  | 2 | 41  | 41 | 190 | 99  |
| 72,338 | 8  | 4 | 139 | 53 | 3  | 2 | 41  | 40 | 191 | 99  |
| 72,339 | 8  | 4 | 147 | 51 | 3  | 2 | 44  | 39 | 202 | 96  |
| 72,340 | 8  | 5 | 148 | 51 | 3  | 2 | 44  | 39 | 203 | 97  |
| 72,341 | 8  | 4 | 148 | 50 | 3  | 2 | 44  | 39 | 203 | 95  |
| 72,342 | 7  | 4 | 147 | 50 | 3  | 2 | 43  | 39 | 200 | 95  |
| 72,343 | 7  | 4 | 148 | 50 | 3  | 2 | 44  | 39 | 202 | 95  |
| 72,344 | 7  | 4 | 148 | 50 | 3  | 2 | 44  | 39 | 202 | 95  |
| 72,345 | 7  | 4 | 147 | 50 | 3  | 2 | 43  | 38 | 200 | 94  |
| 72,346 | 7  | 4 | 149 | 49 | 3  | 2 | 43  | 37 | 202 | 92  |
| 72,347 | 7  | 4 | 157 | 36 | 3  | 2 | 48  | 35 | 215 | 77  |
| 72,348 | 7  | 4 | 161 | 37 | 3  | 2 | 49  | 34 | 220 | 77  |
| 72,349 | 7  | 4 | 159 | 37 | 3  | 2 | 48  | 31 | 217 | 74  |
| 72,350 | 8  | 4 | 165 | 37 | 3  | 2 | 53  | 31 | 229 | 74  |
| 72,351 | 10 | 4 | 177 | 37 | 4  | 1 | 63  | 32 | 254 | 74  |
| 72,352 | 10 | 4 | 175 | 34 | 4  | 1 | 65  | 31 | 254 | 70  |
| 72,353 | 10 | 4 | 172 | 35 | 4  | 1 | 67  | 27 | 253 | 67  |

|        |    |    |     |    |   |   |     |    |     |     |
|--------|----|----|-----|----|---|---|-----|----|-----|-----|
| 72,354 | 9  | 4  | 164 | 32 | 4 | 1 | 68  | 25 | 245 | 62  |
| 72,355 | 8  | 5  | 147 | 31 | 4 | 1 | 66  | 25 | 225 | 62  |
| 72,356 | 8  | 5  | 143 | 31 | 4 | 1 | 66  | 25 | 221 | 62  |
| 72,357 | 9  | 5  | 147 | 30 | 4 | 1 | 73  | 23 | 233 | 59  |
| 72,358 | 9  | 5  | 151 | 27 | 6 | 1 | 82  | 18 | 248 | 51  |
| 72,359 | 9  | 5  | 150 | 27 | 6 | 1 | 82  | 20 | 247 | 53  |
| 72,360 | 9  | 6  | 130 | 30 | 5 | 1 | 74  | 24 | 218 | 61  |
| 72,361 | 7  | 10 | 123 | 37 | 5 | 1 | 73  | 32 | 208 | 80  |
| 72,362 | 7  | 10 | 121 | 39 | 5 | 0 | 73  | 30 | 206 | 79  |
| 72,363 | 6  | 10 | 116 | 34 | 5 | 0 | 72  | 31 | 199 | 75  |
| 72,364 | 6  | 10 | 115 | 35 | 5 | 0 | 71  | 31 | 197 | 76  |
| 72,365 | 12 | 10 | 142 | 34 | 6 | 0 | 79  | 32 | 239 | 76  |
| 72,366 | 12 | 10 | 139 | 32 | 6 | 0 | 79  | 30 | 236 | 72  |
| 72,367 | 12 | 10 | 142 | 33 | 6 | 0 | 80  | 30 | 240 | 73  |
| 72,368 | 12 | 10 | 153 | 32 | 7 | 0 | 83  | 32 | 255 | 74  |
| 72,369 | 14 | 10 | 182 | 32 | 8 | 0 | 113 | 32 | 317 | 74  |
| 72,370 | 14 | 10 | 204 | 32 | 8 | 0 | 139 | 32 | 365 | 74  |
| 72,371 | 15 | 10 | 213 | 32 | 9 | 0 | 146 | 32 | 383 | 74  |
| 72,372 | 15 | 10 | 213 | 32 | 9 | 0 | 145 | 32 | 382 | 74  |
| 72,373 | 15 | 10 | 214 | 33 | 9 | 0 | 147 | 33 | 385 | 76  |
| 72,374 | 15 | 10 | 214 | 34 | 9 | 0 | 147 | 33 | 385 | 77  |
| 72,375 | 15 | 10 | 214 | 40 | 9 | 1 | 147 | 36 | 385 | 87  |
| 72,376 | 15 | 10 | 214 | 45 | 9 | 1 | 148 | 39 | 386 | 95  |
| 72,377 | 14 | 16 | 214 | 52 | 9 | 1 | 149 | 42 | 386 | 111 |
| 72,378 | 14 | 16 | 196 | 53 | 8 | 1 | 146 | 43 | 364 | 113 |
| 72,379 | 13 | 15 | 194 | 52 | 7 | 1 | 145 | 37 | 359 | 105 |
| 72,380 | 13 | 15 | 190 | 52 | 7 | 1 | 144 | 37 | 354 | 105 |
| 72,381 | 13 | 15 | 192 | 52 | 7 | 1 | 144 | 37 | 356 | 105 |
| 72,382 | 13 | 14 | 192 | 52 | 7 | 1 | 144 | 37 | 356 | 104 |
| 72,383 | 13 | 14 | 192 | 52 | 7 | 1 | 145 | 37 | 357 | 104 |
| 72,384 | 14 | 14 | 214 | 52 | 7 | 1 | 157 | 37 | 392 | 104 |
| 72,385 | 15 | 14 | 218 | 52 | 7 | 1 | 158 | 36 | 398 | 103 |
| 72,386 | 16 | 14 | 244 | 52 | 7 | 1 | 172 | 36 | 439 | 103 |
| 72,387 | 16 | 14 | 247 | 52 | 8 | 1 | 174 | 36 | 445 | 103 |
| 72,388 | 17 | 14 | 266 | 52 | 8 | 1 | 183 | 36 | 474 | 103 |
| 72,389 | 17 | 14 | 262 | 51 | 8 | 1 | 179 | 36 | 466 | 102 |
| 72,390 | 17 | 14 | 261 | 51 | 8 | 1 | 179 | 36 | 465 | 102 |
| 72,391 | 17 | 13 | 279 | 51 | 8 | 1 | 194 | 36 | 498 | 101 |
| 72,392 | 19 | 13 | 319 | 51 | 8 | 1 | 210 | 36 | 556 | 101 |
| 72,393 | 19 | 13 | 319 | 51 | 8 | 1 | 209 | 36 | 555 | 101 |
| 72,394 | 19 | 13 | 338 | 51 | 8 | 1 | 214 | 36 | 579 | 101 |

|        |    |    |       |    |    |   |     |    |       |     |
|--------|----|----|-------|----|----|---|-----|----|-------|-----|
| 72,395 | 20 | 13 | 347   | 51 | 8  | 1 | 217 | 36 | 592   | 101 |
| 72,396 | 21 | 13 | 354   | 50 | 9  | 1 | 218 | 36 | 602   | 100 |
| 72,397 | 21 | 13 | 357   | 50 | 9  | 1 | 218 | 36 | 605   | 100 |
| 72,398 | 21 | 14 | 349   | 50 | 9  | 1 | 213 | 36 | 592   | 101 |
| 72,399 | 21 | 14 | 356   | 49 | 9  | 1 | 215 | 36 | 601   | 100 |
| 72,400 | 20 | 14 | 359   | 49 | 10 | 1 | 214 | 36 | 603   | 100 |
| 72,401 | 18 | 14 | 354   | 49 | 9  | 1 | 206 | 35 | 587   | 99  |
| 72,402 | 18 | 14 | 359   | 49 | 9  | 1 | 208 | 35 | 594   | 99  |
| 72,403 | 18 | 14 | 359   | 49 | 9  | 1 | 206 | 35 | 592   | 99  |
| 72,404 | 18 | 14 | 363   | 48 | 9  | 1 | 207 | 35 | 597   | 98  |
| 72,405 | 18 | 13 | 383   | 48 | 9  | 1 | 210 | 35 | 620   | 97  |
| 72,406 | 19 | 13 | 423   | 48 | 11 | 1 | 230 | 35 | 683   | 97  |
| 72,407 | 29 | 13 | 523   | 48 | 13 | 1 | 251 | 35 | 816   | 97  |
| 72,408 | 36 | 13 | 758   | 46 | 29 | 1 | 423 | 33 | 1,246 | 93  |
| 72,409 | 40 | 13 | 788   | 47 | 31 | 1 | 452 | 31 | 1,311 | 92  |
| 72,410 | 40 | 13 | 788   | 47 | 31 | 1 | 452 | 31 | 1,311 | 92  |
| 72,411 | 42 | 12 | 833   | 44 | 32 | 1 | 477 | 27 | 1,384 | 84  |
| 72,412 | 42 | 7  | 834   | 37 | 32 | 1 | 477 | 19 | 1,385 | 64  |
| 72,413 | 42 | 7  | 832   | 34 | 32 | 1 | 474 | 18 | 1,380 | 60  |
| 72,414 | 52 | 7  | 1,010 | 27 | 43 | 1 | 555 | 14 | 1,660 | 49  |
| 72,415 | 52 | 7  | 1,078 | 28 | 48 | 1 | 588 | 16 | 1,766 | 52  |
| 72,416 | 47 | 8  | 1,076 | 32 | 47 | 1 | 589 | 16 | 1,759 | 57  |
| 72,417 | 65 | 9  | 1,301 | 34 | 58 | 1 | 732 | 16 | 2,156 | 60  |
| 72,418 | 71 | 9  | 1,314 | 33 | 59 | 1 | 740 | 16 | 2,184 | 59  |
| 72,419 | 70 | 9  | 1,318 | 33 | 62 | 1 | 744 | 14 | 2,194 | 57  |
| 72,420 | 71 | 9  | 1,327 | 33 | 64 | 1 | 751 | 14 | 2,213 | 57  |
| 72,421 | 71 | 9  | 1,302 | 33 | 64 | 1 | 725 | 14 | 2,162 | 57  |
| 72,422 | 70 | 9  | 1,315 | 33 | 65 | 1 | 724 | 14 | 2,174 | 57  |
| 72,423 | 71 | 9  | 1,320 | 33 | 67 | 1 | 733 | 14 | 2,191 | 57  |
| 72,424 | 74 | 9  | 1,347 | 32 | 70 | 1 | 774 | 13 | 2,265 | 55  |
| 72,425 | 75 | 11 | 1,377 | 31 | 72 | 1 | 791 | 13 | 2,315 | 56  |
| 72,426 | 75 | 11 | 1,385 | 25 | 72 | 0 | 799 | 9  | 2,331 | 45  |
| 72,427 | 75 | 11 | 1,384 | 20 | 72 | 0 | 800 | 6  | 2,331 | 37  |
| 72,428 | 75 | 5  | 1,387 | 11 | 72 | 0 | 799 | 2  | 2,333 | 18  |
| 72,429 | 76 | 5  | 1,395 | 11 | 73 | 0 | 805 | 2  | 2,349 | 18  |
| 72,430 | 76 | 5  | 1,395 | 11 | 73 | 0 | 806 | 2  | 2,350 | 18  |
| 72,431 | 76 | 5  | 1,407 | 11 | 73 | 0 | 814 | 2  | 2,370 | 18  |
| 72,432 | 76 | 5  | 1,408 | 11 | 73 | 0 | 817 | 2  | 2,374 | 18  |
| 72,433 | 76 | 5  | 1,407 | 11 | 73 | 0 | 817 | 2  | 2,373 | 18  |
| 72,434 | 87 | 5  | 1,472 | 11 | 75 | 0 | 834 | 2  | 2,468 | 18  |
| 72,435 | 92 | 6  | 1,552 | 11 | 76 | 0 | 856 | 2  | 2,576 | 19  |

|        |     |   |       |    |    |   |     |    |       |     |
|--------|-----|---|-------|----|----|---|-----|----|-------|-----|
| 72,436 | 91  | 6 | 1,548 | 11 | 76 | 0 | 851 | 2  | 2,566 | 19  |
| 72,437 | 96  | 6 | 1,610 | 12 | 77 | 0 | 883 | 2  | 2,666 | 20  |
| 72,438 | 96  | 6 | 1,635 | 12 | 76 | 0 | 890 | 3  | 2,697 | 21  |
| 72,439 | 105 | 6 | 1,719 | 12 | 81 | 0 | 933 | 4  | 2,838 | 22  |
| 72,440 | 105 | 6 | 1,729 | 14 | 81 | 0 | 940 | 4  | 2,855 | 24  |
| 72,441 | 105 | 6 | 1,735 | 16 | 81 | 0 | 936 | 5  | 2,857 | 27  |
| 72,442 | 105 | 6 | 1,720 | 16 | 81 | 0 | 928 | 5  | 2,834 | 27  |
| 72,443 | 103 | 6 | 1,687 | 16 | 81 | 0 | 912 | 5  | 2,783 | 27  |
| 72,444 | 103 | 6 | 1,688 | 16 | 82 | 0 | 921 | 5  | 2,794 | 27  |
| 72,445 | 103 | 6 | 1,683 | 16 | 82 | 0 | 920 | 6  | 2,788 | 28  |
| 72,446 | 107 | 6 | 1,726 | 18 | 82 | 0 | 930 | 8  | 2,845 | 32  |
| 72,447 | 106 | 6 | 1,734 | 19 | 83 | 0 | 931 | 8  | 2,854 | 33  |
| 72,448 | 106 | 6 | 1,729 | 21 | 83 | 0 | 931 | 14 | 2,849 | 41  |
| 72,449 | 106 | 5 | 1,721 | 21 | 83 | 0 | 930 | 14 | 2,840 | 40  |
| 72,450 | 110 | 5 | 1,765 | 18 | 85 | 0 | 943 | 14 | 2,903 | 37  |
| 72,451 | 110 | 5 | 1,756 | 19 | 84 | 0 | 938 | 15 | 2,888 | 39  |
| 72,452 | 110 | 5 | 1,751 | 19 | 84 | 0 | 938 | 15 | 2,883 | 39  |
| 72,453 | 112 | 5 | 1,760 | 19 | 84 | 0 | 940 | 15 | 2,896 | 39  |
| 72,454 | 113 | 5 | 1,771 | 19 | 84 | 0 | 943 | 15 | 2,911 | 39  |
| 72,455 | 113 | 5 | 1,768 | 22 | 84 | 0 | 943 | 15 | 2,908 | 42  |
| 72,456 | 113 | 5 | 1,748 | 28 | 84 | 0 | 940 | 16 | 2,885 | 49  |
| 72,457 | 112 | 5 | 1,708 | 28 | 82 | 0 | 920 | 16 | 2,822 | 49  |
| 72,458 | 102 | 5 | 1,679 | 29 | 83 | 0 | 917 | 16 | 2,781 | 50  |
| 72,459 | 94  | 5 | 1,438 | 30 | 67 | 0 | 737 | 16 | 2,336 | 51  |
| 72,460 | 90  | 5 | 1,421 | 33 | 65 | 0 | 705 | 16 | 2,281 | 54  |
| 72,461 | 90  | 5 | 1,404 | 35 | 65 | 0 | 691 | 17 | 2,250 | 57  |
| 72,462 | 92  | 5 | 1,402 | 45 | 66 | 0 | 702 | 17 | 2,262 | 67  |
| 72,463 | 89  | 5 | 1,357 | 54 | 63 | 2 | 669 | 20 | 2,178 | 81  |
| 72,464 | 87  | 5 | 1,311 | 61 | 63 | 2 | 662 | 22 | 2,123 | 90  |
| 72,465 | 84  | 5 | 1,224 | 61 | 56 | 2 | 623 | 20 | 1,987 | 88  |
| 72,466 | 84  | 4 | 1,154 | 57 | 51 | 2 | 587 | 20 | 1,876 | 83  |
| 72,467 | 83  | 4 | 1,131 | 61 | 51 | 4 | 573 | 20 | 1,838 | 89  |
| 72,468 | 66  | 3 | 909   | 60 | 40 | 5 | 438 | 22 | 1,453 | 90  |
| 72,469 | 60  | 3 | 891   | 60 | 38 | 5 | 431 | 23 | 1,420 | 91  |
| 72,470 | 61  | 3 | 887   | 61 | 35 | 5 | 424 | 27 | 1,407 | 96  |
| 72,471 | 61  | 3 | 889   | 64 | 33 | 5 | 404 | 28 | 1,387 | 100 |
| 72,472 | 63  | 3 | 955   | 64 | 32 | 5 | 437 | 28 | 1,487 | 100 |
| 72,473 | 62  | 3 | 988   | 66 | 30 | 6 | 436 | 30 | 1,516 | 105 |
| 72,474 | 62  | 4 | 974   | 66 | 27 | 6 | 413 | 30 | 1,476 | 106 |
| 72,475 | 61  | 4 | 965   | 67 | 26 | 6 | 401 | 32 | 1,453 | 109 |
| 72,476 | 61  | 2 | 950   | 67 | 25 | 6 | 397 | 32 | 1,433 | 107 |



|        |    |   |     |    |    |   |     |    |       |     |
|--------|----|---|-----|----|----|---|-----|----|-------|-----|
| 72,477 | 61 | 2 | 942 | 67 | 25 | 6 | 389 | 32 | 1,417 | 107 |
| 72,478 | 61 | 2 | 942 | 67 | 25 | 6 | 389 | 33 | 1,417 | 108 |
| 72,479 | 61 | 2 | 933 | 67 | 25 | 6 | 386 | 33 | 1,405 | 108 |
| 72,480 | 60 | 2 | 929 | 67 | 24 | 6 | 382 | 33 | 1,395 | 108 |
| 72,481 | 60 | 2 | 929 | 67 | 24 | 6 | 382 | 33 | 1,395 | 108 |
| 72,482 | 60 | 2 | 916 | 67 | 24 | 6 | 376 | 33 | 1,376 | 108 |
| 72,483 | 60 | 2 | 911 | 68 | 24 | 6 | 373 | 33 | 1,368 | 109 |
| 72,484 | 50 | 2 | 861 | 68 | 23 | 6 | 356 | 33 | 1,290 | 109 |
| 72,485 | 48 | 2 | 823 | 68 | 22 | 6 | 346 | 33 | 1,239 | 109 |
| 72,486 | 42 | 1 | 737 | 68 | 21 | 6 | 322 | 34 | 1,122 | 109 |
| 72,487 | 37 | 1 | 674 | 67 | 21 | 6 | 296 | 33 | 1,028 | 107 |
| 72,488 | 38 | 1 | 654 | 67 | 20 | 6 | 282 | 32 | 994   | 106 |
| 72,489 | 38 | 1 | 629 | 67 | 20 | 6 | 274 | 33 | 961   | 107 |
| 72,490 | 28 | 1 | 525 | 69 | 15 | 6 | 222 | 32 | 790   | 108 |
| 72,491 | 28 | 1 | 511 | 69 | 15 | 6 | 214 | 32 | 768   | 108 |
| 72,492 | 28 | 1 | 504 | 67 | 15 | 6 | 214 | 31 | 761   | 105 |
| 72,493 | 28 | 1 | 502 | 67 | 15 | 6 | 210 | 31 | 755   | 105 |
| 72,494 | 28 | 1 | 495 | 69 | 15 | 6 | 210 | 31 | 748   | 107 |
| 72,495 | 28 | 1 | 474 | 69 | 14 | 6 | 196 | 31 | 712   | 107 |
| 72,496 | 25 | 1 | 469 | 69 | 14 | 6 | 185 | 30 | 693   | 106 |
| 72,497 | 23 | 1 | 428 | 70 | 14 | 6 | 184 | 28 | 649   | 105 |
| 72,498 | 23 | 1 | 411 | 69 | 12 | 6 | 182 | 28 | 628   | 104 |
| 72,499 | 23 | 1 | 408 | 67 | 12 | 6 | 179 | 23 | 622   | 97  |
| 72,500 | 23 | 1 | 393 | 69 | 11 | 6 | 176 | 23 | 603   | 99  |
| 72,501 | 21 | 1 | 367 | 69 | 11 | 6 | 170 | 23 | 569   | 99  |
| 72,502 | 20 | 1 | 360 | 68 | 11 | 6 | 168 | 23 | 559   | 98  |
| 72,503 | 20 | 1 | 356 | 68 | 11 | 6 | 165 | 23 | 552   | 98  |
| 72,504 | 20 | 1 | 348 | 68 | 11 | 6 | 161 | 23 | 540   | 98  |
| 72,505 | 20 | 1 | 347 | 68 | 11 | 6 | 160 | 23 | 538   | 98  |
| 72,506 | 20 | 1 | 341 | 59 | 10 | 6 | 160 | 22 | 531   | 88  |
| 72,507 | 20 | 1 | 334 | 59 | 10 | 6 | 158 | 22 | 522   | 88  |
| 72,508 | 20 | 1 | 331 | 59 | 9  | 6 | 157 | 22 | 517   | 88  |
| 72,509 | 20 | 1 | 274 | 58 | 8  | 6 | 139 | 22 | 441   | 87  |
| 72,510 | 20 | 1 | 274 | 58 | 8  | 6 | 139 | 22 | 441   | 87  |
| 72,511 | 20 | 1 | 256 | 52 | 6  | 6 | 132 | 21 | 414   | 80  |
| 72,512 | 18 | 1 | 232 | 52 | 5  | 6 | 121 | 21 | 376   | 80  |
| 72,513 | 16 | 1 | 227 | 26 | 4  | 4 | 109 | 16 | 356   | 47  |
| 72,514 | 16 | 1 | 226 | 26 | 4  | 4 | 109 | 16 | 355   | 47  |
| 72,515 | 14 | 1 | 223 | 26 | 3  | 4 | 107 | 16 | 347   | 47  |
| 72,516 | 17 | 1 | 233 | 25 | 3  | 4 | 107 | 16 | 360   | 46  |
| 72,517 | 20 | 1 | 243 | 20 | 3  | 1 | 107 | 14 | 373   | 36  |

|        |    |    |     |    |   |   |     |    |     |     |
|--------|----|----|-----|----|---|---|-----|----|-----|-----|
| 72,518 | 20 | 2  | 241 | 28 | 3 | 1 | 106 | 19 | 370 | 50  |
| 72,519 | 19 | 2  | 234 | 29 | 3 | 1 | 98  | 19 | 354 | 51  |
| 72,520 | 19 | 3  | 234 | 29 | 3 | 1 | 93  | 18 | 349 | 51  |
| 72,521 | 25 | 3  | 295 | 28 | 5 | 1 | 111 | 14 | 436 | 46  |
| 72,522 | 23 | 3  | 272 | 25 | 4 | 1 | 105 | 13 | 404 | 42  |
| 72,523 | 22 | 3  | 195 | 23 | 4 | 0 | 71  | 11 | 292 | 37  |
| 72,524 | 22 | 3  | 153 | 23 | 4 | 0 | 61  | 11 | 240 | 37  |
| 72,525 | 20 | 2  | 144 | 23 | 4 | 0 | 43  | 12 | 211 | 37  |
| 72,526 | 20 | 2  | 140 | 22 | 4 | 0 | 41  | 10 | 205 | 34  |
| 72,527 | 20 | 2  | 143 | 22 | 4 | 0 | 41  | 10 | 208 | 34  |
| 72,528 | 21 | 2  | 150 | 22 | 4 | 0 | 43  | 9  | 218 | 33  |
| 72,529 | 23 | 2  | 157 | 22 | 4 | 0 | 43  | 9  | 227 | 33  |
| 72,530 | 23 | 2  | 156 | 22 | 4 | 0 | 43  | 9  | 226 | 33  |
| 72,531 | 23 | 2  | 157 | 22 | 5 | 0 | 43  | 9  | 228 | 33  |
| 72,532 | 23 | 2  | 157 | 22 | 5 | 0 | 41  | 9  | 226 | 33  |
| 72,533 | 23 | 2  | 156 | 23 | 5 | 0 | 41  | 9  | 225 | 34  |
| 72,534 | 28 | 2  | 175 | 23 | 6 | 0 | 48  | 11 | 257 | 36  |
| 72,535 | 28 | 2  | 175 | 23 | 6 | 0 | 48  | 11 | 257 | 36  |
| 72,536 | 32 | 2  | 193 | 23 | 6 | 0 | 56  | 12 | 287 | 37  |
| 72,537 | 33 | 2  | 195 | 23 | 6 | 0 | 59  | 11 | 293 | 36  |
| 72,538 | 33 | 2  | 197 | 23 | 6 | 0 | 60  | 11 | 296 | 36  |
| 72,539 | 32 | 2  | 197 | 23 | 6 | 0 | 61  | 10 | 296 | 35  |
| 72,540 | 32 | 2  | 197 | 23 | 6 | 0 | 60  | 10 | 295 | 35  |
| 72,541 | 32 | 4  | 200 | 21 | 6 | 0 | 60  | 10 | 298 | 35  |
| 72,542 | 32 | 4  | 200 | 21 | 6 | 0 | 60  | 10 | 298 | 35  |
| 72,543 | 32 | 4  | 207 | 21 | 6 | 0 | 62  | 10 | 307 | 35  |
| 72,544 | 32 | 5  | 207 | 25 | 6 | 0 | 62  | 15 | 307 | 45  |
| 72,545 | 32 | 5  | 207 | 25 | 6 | 0 | 62  | 15 | 307 | 45  |
| 72,546 | 36 | 5  | 233 | 31 | 6 | 0 | 68  | 15 | 343 | 51  |
| 72,547 | 36 | 5  | 233 | 31 | 6 | 0 | 68  | 15 | 343 | 51  |
| 72,548 | 38 | 5  | 246 | 28 | 6 | 0 | 70  | 15 | 360 | 48  |
| 72,549 | 38 | 5  | 245 | 28 | 6 | 0 | 70  | 16 | 359 | 49  |
| 72,550 | 37 | 5  | 245 | 28 | 5 | 0 | 70  | 15 | 357 | 48  |
| 72,551 | 37 | 6  | 264 | 28 | 5 | 0 | 83  | 16 | 389 | 50  |
| 72,552 | 39 | 6  | 280 | 29 | 6 | 0 | 96  | 16 | 421 | 51  |
| 72,553 | 38 | 7  | 277 | 32 | 6 | 0 | 97  | 17 | 418 | 56  |
| 72,554 | 42 | 8  | 343 | 33 | 8 | 0 | 156 | 18 | 549 | 59  |
| 72,555 | 43 | 9  | 366 | 56 | 9 | 1 | 172 | 26 | 590 | 92  |
| 72,556 | 46 | 11 | 367 | 69 | 9 | 1 | 177 | 38 | 599 | 119 |
| 72,557 | 46 | 11 | 367 | 69 | 9 | 1 | 177 | 40 | 599 | 121 |
| 72,558 | 46 | 11 | 367 | 69 | 9 | 1 | 177 | 40 | 599 | 121 |

|        |    |    |     |     |    |   |     |    |       |     |
|--------|----|----|-----|-----|----|---|-----|----|-------|-----|
| 72,559 | 46 | 12 | 371 | 72  | 9  | 3 | 179 | 43 | 605   | 130 |
| 72,560 | 46 | 14 | 371 | 73  | 9  | 3 | 179 | 43 | 605   | 133 |
| 72,561 | 46 | 14 | 371 | 81  | 9  | 3 | 180 | 43 | 606   | 141 |
| 72,562 | 48 | 14 | 387 | 81  | 9  | 3 | 192 | 43 | 636   | 141 |
| 72,563 | 49 | 14 | 395 | 82  | 9  | 3 | 193 | 43 | 646   | 142 |
| 72,564 | 49 | 14 | 399 | 82  | 9  | 3 | 199 | 43 | 656   | 142 |
| 72,565 | 49 | 14 | 406 | 82  | 9  | 3 | 204 | 43 | 668   | 142 |
| 72,566 | 49 | 14 | 425 | 82  | 9  | 3 | 212 | 43 | 695   | 142 |
| 72,567 | 46 | 14 | 416 | 82  | 9  | 3 | 211 | 43 | 682   | 142 |
| 72,568 | 47 | 14 | 497 | 83  | 10 | 3 | 261 | 43 | 815   | 143 |
| 72,569 | 47 | 13 | 497 | 75  | 10 | 3 | 264 | 38 | 818   | 129 |
| 72,570 | 47 | 12 | 494 | 74  | 10 | 3 | 264 | 38 | 815   | 127 |
| 72,571 | 47 | 12 | 492 | 77  | 10 | 4 | 265 | 44 | 814   | 137 |
| 72,572 | 40 | 12 | 430 | 80  | 8  | 4 | 247 | 44 | 725   | 140 |
| 72,573 | 41 | 12 | 426 | 83  | 8  | 4 | 246 | 47 | 721   | 146 |
| 72,574 | 41 | 12 | 422 | 84  | 7  | 4 | 242 | 48 | 712   | 148 |
| 72,575 | 40 | 12 | 420 | 86  | 7  | 4 | 243 | 47 | 710   | 149 |
| 72,576 | 40 | 12 | 423 | 86  | 7  | 4 | 242 | 47 | 712   | 149 |
| 72,577 | 40 | 12 | 420 | 86  | 7  | 4 | 242 | 48 | 709   | 150 |
| 72,578 | 39 | 12 | 419 | 86  | 7  | 4 | 240 | 48 | 705   | 150 |
| 72,579 | 39 | 13 | 413 | 89  | 7  | 4 | 240 | 49 | 699   | 155 |
| 72,580 | 37 | 17 | 406 | 97  | 7  | 4 | 241 | 53 | 691   | 171 |
| 72,581 | 37 | 17 | 406 | 98  | 7  | 4 | 241 | 53 | 691   | 172 |
| 72,582 | 39 | 17 | 427 | 99  | 6  | 4 | 254 | 55 | 726   | 175 |
| 72,583 | 34 | 17 | 408 | 103 | 5  | 4 | 247 | 55 | 694   | 179 |
| 72,584 | 36 | 17 | 428 | 102 | 5  | 4 | 254 | 55 | 723   | 178 |
| 72,585 | 32 | 17 | 419 | 101 | 5  | 5 | 250 | 53 | 706   | 176 |
| 72,586 | 32 | 17 | 430 | 102 | 5  | 5 | 252 | 53 | 719   | 177 |
| 72,587 | 32 | 17 | 449 | 102 | 5  | 5 | 257 | 52 | 743   | 176 |
| 72,588 | 31 | 17 | 490 | 102 | 6  | 5 | 259 | 52 | 786   | 176 |
| 72,589 | 31 | 18 | 544 | 102 | 7  | 5 | 261 | 52 | 843   | 177 |
| 72,590 | 31 | 18 | 544 | 102 | 7  | 5 | 260 | 52 | 842   | 177 |
| 72,591 | 35 | 18 | 664 | 102 | 9  | 6 | 308 | 52 | 1,016 | 178 |
| 72,592 | 39 | 16 | 699 | 100 | 9  | 6 | 317 | 52 | 1,064 | 174 |
| 72,593 | 40 | 17 | 701 | 100 | 9  | 6 | 317 | 52 | 1,067 | 175 |
| 72,594 | 40 | 17 | 693 | 100 | 9  | 6 | 317 | 52 | 1,059 | 175 |
| 72,595 | 36 | 16 | 675 | 96  | 9  | 6 | 311 | 47 | 1,031 | 165 |
| 72,596 | 34 | 16 | 672 | 88  | 9  | 6 | 309 | 47 | 1,024 | 157 |
| 72,597 | 33 | 16 | 675 | 88  | 9  | 6 | 308 | 47 | 1,025 | 157 |
| 72,598 | 33 | 16 | 674 | 88  | 9  | 6 | 313 | 47 | 1,029 | 157 |
| 72,599 | 34 | 16 | 667 | 88  | 9  | 6 | 306 | 46 | 1,016 | 156 |

|        |    |    |     |    |    |   |     |    |       |     |
|--------|----|----|-----|----|----|---|-----|----|-------|-----|
| 72,600 | 34 | 16 | 663 | 89 | 9  | 6 | 303 | 47 | 1,009 | 158 |
| 72,601 | 34 | 16 | 666 | 89 | 9  | 6 | 313 | 47 | 1,022 | 158 |
| 72,602 | 32 | 15 | 665 | 87 | 8  | 6 | 300 | 46 | 1,005 | 154 |
| 72,603 | 34 | 15 | 734 | 86 | 8  | 6 | 322 | 46 | 1,098 | 153 |
| 72,604 | 34 | 14 | 742 | 83 | 8  | 6 | 327 | 45 | 1,111 | 148 |
| 72,605 | 31 | 12 | 701 | 59 | 6  | 5 | 276 | 36 | 1,014 | 112 |
| 72,606 | 29 | 12 | 677 | 59 | 5  | 5 | 260 | 36 | 971   | 112 |
| 72,607 | 27 | 10 | 688 | 46 | 5  | 5 | 258 | 24 | 978   | 85  |
| 72,608 | 28 | 10 | 711 | 46 | 5  | 5 | 267 | 22 | 1,011 | 83  |
| 72,609 | 28 | 10 | 728 | 46 | 5  | 5 | 278 | 22 | 1,039 | 83  |
| 72,610 | 28 | 7  | 729 | 43 | 5  | 3 | 278 | 19 | 1,040 | 72  |
| 72,611 | 28 | 7  | 731 | 45 | 6  | 3 | 279 | 20 | 1,044 | 75  |
| 72,612 | 26 | 7  | 716 | 37 | 6  | 4 | 268 | 21 | 1,016 | 69  |
| 72,613 | 25 | 8  | 720 | 38 | 6  | 4 | 272 | 22 | 1,023 | 72  |
| 72,614 | 25 | 8  | 720 | 40 | 6  | 4 | 272 | 22 | 1,023 | 74  |
| 72,615 | 25 | 8  | 717 | 40 | 6  | 4 | 271 | 23 | 1,019 | 75  |
| 72,616 | 25 | 8  | 710 | 40 | 6  | 4 | 266 | 23 | 1,007 | 75  |
| 72,617 | 25 | 8  | 693 | 40 | 6  | 4 | 258 | 26 | 982   | 78  |
| 72,618 | 21 | 9  | 604 | 42 | 5  | 4 | 208 | 27 | 838   | 82  |
| 72,619 | 21 | 10 | 603 | 42 | 5  | 4 | 205 | 28 | 834   | 84  |
| 72,620 | 21 | 12 | 607 | 44 | 5  | 4 | 209 | 29 | 842   | 89  |
| 72,621 | 21 | 12 | 610 | 46 | 5  | 4 | 210 | 29 | 846   | 91  |
| 72,622 | 21 | 12 | 613 | 44 | 5  | 3 | 209 | 23 | 848   | 82  |
| 72,623 | 21 | 13 | 609 | 48 | 5  | 3 | 208 | 35 | 843   | 99  |
| 72,624 | 20 | 13 | 599 | 45 | 5  | 3 | 202 | 32 | 826   | 93  |
| 72,625 | 20 | 13 | 620 | 44 | 5  | 3 | 204 | 31 | 849   | 91  |
| 72,626 | 26 | 14 | 644 | 42 | 7  | 3 | 210 | 31 | 887   | 90  |
| 72,627 | 36 | 14 | 712 | 42 | 14 | 3 | 259 | 30 | 1,021 | 89  |
| 72,628 | 36 | 14 | 732 | 42 | 14 | 3 | 266 | 30 | 1,048 | 89  |
| 72,629 | 35 | 14 | 730 | 43 | 15 | 3 | 265 | 30 | 1,045 | 90  |
| 72,630 | 34 | 13 | 717 | 40 | 15 | 3 | 260 | 29 | 1,026 | 85  |
| 72,631 | 34 | 9  | 713 | 32 | 15 | 3 | 254 | 25 | 1,016 | 69  |
| 72,632 | 34 | 9  | 723 | 26 | 15 | 3 | 261 | 23 | 1,033 | 61  |
| 72,633 | 34 | 9  | 724 | 29 | 15 | 3 | 259 | 23 | 1,032 | 64  |
| 72,634 | 32 | 9  | 707 | 30 | 15 | 3 | 251 | 23 | 1,005 | 65  |
| 72,635 | 32 | 9  | 706 | 31 | 15 | 3 | 251 | 23 | 1,004 | 66  |
| 72,636 | 32 | 10 | 701 | 39 | 15 | 2 | 250 | 32 | 998   | 83  |
| 72,637 | 32 | 11 | 689 | 56 | 15 | 2 | 248 | 40 | 984   | 109 |
| 72,638 | 32 | 13 | 668 | 62 | 15 | 2 | 241 | 47 | 956   | 124 |
| 72,639 | 32 | 13 | 627 | 63 | 14 | 2 | 239 | 52 | 912   | 130 |
| 72,640 | 32 | 12 | 571 | 63 | 13 | 1 | 237 | 52 | 853   | 128 |

|        |    |    |     |     |    |   |     |    |       |     |
|--------|----|----|-----|-----|----|---|-----|----|-------|-----|
| 72,641 | 30 | 12 | 506 | 65  | 11 | 1 | 222 | 52 | 769   | 130 |
| 72,642 | 28 | 12 | 452 | 65  | 11 | 1 | 189 | 53 | 680   | 131 |
| 72,643 | 24 | 11 | 416 | 65  | 11 | 1 | 178 | 54 | 629   | 131 |
| 72,644 | 23 | 11 | 408 | 65  | 11 | 1 | 176 | 54 | 618   | 131 |
| 72,645 | 23 | 12 | 408 | 65  | 11 | 1 | 183 | 54 | 625   | 132 |
| 72,646 | 23 | 12 | 409 | 65  | 11 | 1 | 183 | 55 | 626   | 133 |
| 72,647 | 23 | 12 | 408 | 67  | 11 | 1 | 183 | 55 | 625   | 135 |
| 72,648 | 23 | 12 | 404 | 68  | 11 | 1 | 183 | 56 | 621   | 137 |
| 72,649 | 23 | 12 | 401 | 68  | 11 | 2 | 179 | 56 | 614   | 138 |
| 72,650 | 23 | 12 | 405 | 69  | 11 | 2 | 179 | 57 | 618   | 140 |
| 72,651 | 24 | 12 | 425 | 68  | 11 | 2 | 183 | 56 | 643   | 138 |
| 72,652 | 36 | 12 | 545 | 69  | 18 | 2 | 250 | 56 | 849   | 139 |
| 72,653 | 36 | 12 | 546 | 70  | 20 | 2 | 261 | 56 | 863   | 140 |
| 72,654 | 34 | 12 | 472 | 70  | 20 | 2 | 238 | 56 | 764   | 140 |
| 72,655 | 35 | 12 | 469 | 70  | 20 | 2 | 243 | 56 | 767   | 140 |
| 72,656 | 35 | 12 | 448 | 70  | 20 | 2 | 236 | 54 | 739   | 138 |
| 72,657 | 34 | 12 | 435 | 70  | 20 | 2 | 236 | 54 | 725   | 138 |
| 72,658 | 33 | 12 | 412 | 70  | 20 | 2 | 227 | 56 | 692   | 140 |
| 72,659 | 34 | 12 | 409 | 70  | 20 | 2 | 227 | 56 | 690   | 140 |
| 72,660 | 37 | 12 | 398 | 70  | 20 | 2 | 217 | 56 | 672   | 140 |
| 72,661 | 38 | 12 | 396 | 67  | 20 | 2 | 220 | 55 | 674   | 136 |
| 72,662 | 39 | 12 | 403 | 66  | 19 | 1 | 218 | 54 | 679   | 133 |
| 72,663 | 39 | 13 | 401 | 66  | 19 | 1 | 217 | 54 | 676   | 134 |
| 72,664 | 39 | 12 | 390 | 65  | 19 | 1 | 212 | 53 | 660   | 131 |
| 72,665 | 70 | 12 | 470 | 62  | 21 | 1 | 241 | 53 | 802   | 128 |
| 72,666 | 71 | 12 | 476 | 62  | 21 | 1 | 243 | 52 | 811   | 127 |
| 72,667 | 71 | 12 | 482 | 62  | 21 | 1 | 243 | 52 | 817   | 127 |
| 72,668 | 74 | 11 | 502 | 60  | 22 | 1 | 256 | 48 | 854   | 120 |
| 72,669 | 74 | 11 | 501 | 60  | 22 | 1 | 256 | 48 | 853   | 120 |
| 72,670 | 91 | 8  | 653 | 60  | 27 | 1 | 292 | 46 | 1,063 | 115 |
| 72,671 | 91 | 8  | 651 | 69  | 27 | 1 | 291 | 48 | 1,060 | 126 |
| 72,672 | 92 | 9  | 682 | 94  | 27 | 2 | 304 | 57 | 1,105 | 162 |
| 72,673 | 92 | 9  | 680 | 96  | 27 | 2 | 306 | 60 | 1,105 | 167 |
| 72,674 | 94 | 9  | 698 | 108 | 27 | 2 | 315 | 54 | 1,134 | 173 |
| 72,675 | 92 | 9  | 679 | 110 | 28 | 2 | 312 | 54 | 1,111 | 175 |
| 72,676 | 86 | 8  | 653 | 113 | 26 | 2 | 308 | 55 | 1,073 | 178 |
| 72,677 | 85 | 8  | 630 | 119 | 24 | 2 | 305 | 55 | 1,044 | 184 |
| 72,678 | 81 | 8  | 594 | 119 | 19 | 2 | 263 | 62 | 957   | 191 |
| 72,679 | 81 | 8  | 575 | 122 | 19 | 3 | 256 | 65 | 931   | 198 |
| 72,680 | 81 | 8  | 571 | 121 | 18 | 3 | 254 | 65 | 924   | 197 |
| 72,681 | 82 | 8  | 582 | 125 | 18 | 3 | 260 | 65 | 942   | 201 |

|        |    |    |     |     |    |   |     |    |       |     |
|--------|----|----|-----|-----|----|---|-----|----|-------|-----|
| 72,682 | 82 | 11 | 580 | 133 | 18 | 3 | 259 | 69 | 939   | 216 |
| 72,683 | 82 | 11 | 567 | 134 | 18 | 3 | 254 | 69 | 921   | 217 |
| 72,684 | 82 | 11 | 576 | 136 | 18 | 3 | 257 | 70 | 933   | 220 |
| 72,685 | 82 | 11 | 576 | 136 | 18 | 3 | 257 | 71 | 933   | 221 |
| 72,686 | 82 | 11 | 576 | 135 | 18 | 3 | 257 | 73 | 933   | 222 |
| 72,687 | 84 | 10 | 629 | 127 | 20 | 3 | 291 | 64 | 1,024 | 204 |
| 72,688 | 89 | 7  | 660 | 103 | 22 | 3 | 303 | 50 | 1,074 | 163 |
| 72,689 | 92 | 7  | 678 | 102 | 23 | 3 | 318 | 47 | 1,111 | 159 |
| 72,690 | 92 | 7  | 678 | 102 | 23 | 3 | 318 | 47 | 1,111 | 159 |
| 72,691 | 92 | 7  | 689 | 102 | 23 | 3 | 328 | 46 | 1,132 | 158 |
| 72,692 | 92 | 7  | 688 | 100 | 23 | 3 | 327 | 45 | 1,130 | 155 |
| 72,693 | 92 | 7  | 685 | 100 | 23 | 3 | 327 | 44 | 1,127 | 154 |
| 72,694 | 92 | 7  | 688 | 100 | 23 | 3 | 327 | 43 | 1,130 | 153 |
| 72,695 | 92 | 7  | 688 | 100 | 23 | 3 | 327 | 43 | 1,130 | 153 |
| 72,696 | 92 | 6  | 683 | 100 | 23 | 3 | 320 | 43 | 1,118 | 152 |
| 72,697 | 92 | 6  | 682 | 100 | 23 | 3 | 320 | 42 | 1,117 | 151 |
| 72,698 | 92 | 6  | 682 | 101 | 23 | 3 | 320 | 43 | 1,117 | 153 |
| 72,699 | 92 | 6  | 682 | 101 | 23 | 3 | 320 | 43 | 1,117 | 153 |
| 72,700 | 91 | 6  | 676 | 101 | 23 | 2 | 318 | 43 | 1,108 | 152 |
| 72,701 | 91 | 7  | 677 | 104 | 23 | 5 | 319 | 45 | 1,110 | 161 |
| 72,702 | 90 | 7  | 657 | 106 | 23 | 5 | 315 | 45 | 1,085 | 163 |
| 72,703 | 78 | 8  | 532 | 112 | 16 | 6 | 240 | 49 | 866   | 175 |
| 72,704 | 78 | 8  | 521 | 112 | 14 | 6 | 229 | 49 | 842   | 175 |
| 72,705 | 78 | 8  | 520 | 112 | 14 | 6 | 229 | 49 | 841   | 175 |
| 72,706 | 77 | 8  | 512 | 112 | 14 | 6 | 219 | 49 | 822   | 175 |
| 72,707 | 76 | 8  | 507 | 112 | 14 | 6 | 217 | 49 | 814   | 175 |
| 72,708 | 76 | 8  | 509 | 112 | 14 | 6 | 217 | 49 | 816   | 175 |
| 72,709 | 76 | 8  | 509 | 112 | 14 | 6 | 217 | 49 | 816   | 175 |
| 72,710 | 75 | 8  | 509 | 112 | 14 | 6 | 216 | 49 | 814   | 175 |
| 72,711 | 72 | 8  | 506 | 112 | 14 | 6 | 216 | 49 | 808   | 175 |
| 72,712 | 72 | 8  | 507 | 112 | 14 | 6 | 214 | 49 | 807   | 175 |
| 72,713 | 71 | 7  | 502 | 112 | 14 | 6 | 214 | 49 | 801   | 174 |
| 72,714 | 70 | 7  | 486 | 112 | 14 | 6 | 213 | 49 | 783   | 174 |
| 72,715 | 40 | 7  | 422 | 112 | 12 | 6 | 180 | 49 | 654   | 174 |
| 72,716 | 40 | 7  | 428 | 112 | 13 | 6 | 189 | 49 | 670   | 174 |
| 72,717 | 41 | 7  | 438 | 112 | 13 | 6 | 190 | 49 | 682   | 174 |
| 72,718 | 41 | 7  | 430 | 111 | 13 | 6 | 187 | 49 | 671   | 173 |
| 72,719 | 41 | 7  | 428 | 111 | 12 | 6 | 182 | 50 | 663   | 174 |
| 72,720 | 30 | 7  | 295 | 111 | 8  | 6 | 147 | 50 | 480   | 174 |
| 72,721 | 24 | 7  | 273 | 100 | 7  | 6 | 141 | 48 | 445   | 161 |
| 72,722 | 24 | 7  | 251 | 100 | 7  | 6 | 132 | 48 | 414   | 161 |

|        |    |   |     |    |    |   |     |    |     |     |
|--------|----|---|-----|----|----|---|-----|----|-----|-----|
| 72,723 | 24 | 8 | 263 | 73 | 7  | 5 | 137 | 39 | 431 | 125 |
| 72,724 | 24 | 7 | 265 | 52 | 7  | 5 | 139 | 30 | 435 | 94  |
| 72,725 | 22 | 7 | 245 | 52 | 7  | 5 | 130 | 30 | 404 | 94  |
| 72,726 | 22 | 7 | 247 | 50 | 6  | 5 | 135 | 30 | 410 | 92  |
| 72,727 | 22 | 7 | 250 | 41 | 6  | 5 | 137 | 29 | 415 | 82  |
| 72,728 | 22 | 7 | 249 | 41 | 6  | 5 | 135 | 29 | 412 | 82  |
| 72,729 | 20 | 7 | 269 | 41 | 7  | 5 | 150 | 22 | 446 | 75  |
| 72,730 | 21 | 7 | 268 | 38 | 7  | 4 | 150 | 19 | 446 | 68  |
| 72,731 | 21 | 7 | 264 | 38 | 7  | 4 | 146 | 19 | 438 | 68  |
| 72,732 | 21 | 4 | 260 | 26 | 7  | 4 | 148 | 15 | 436 | 49  |
| 72,733 | 21 | 4 | 256 | 26 | 7  | 4 | 148 | 15 | 432 | 49  |
| 72,734 | 23 | 4 | 268 | 26 | 7  | 4 | 160 | 16 | 458 | 50  |
| 72,735 | 23 | 4 | 287 | 24 | 8  | 4 | 171 | 15 | 489 | 47  |
| 72,736 | 23 | 4 | 279 | 25 | 8  | 4 | 173 | 15 | 483 | 48  |
| 72,737 | 22 | 4 | 268 | 25 | 8  | 4 | 170 | 13 | 468 | 46  |
| 72,738 | 21 | 4 | 246 | 30 | 6  | 5 | 148 | 14 | 421 | 53  |
| 72,739 | 16 | 4 | 217 | 36 | 4  | 5 | 135 | 15 | 372 | 60  |
| 72,740 | 13 | 6 | 209 | 44 | 3  | 6 | 129 | 23 | 354 | 79  |
| 72,741 | 14 | 6 | 209 | 57 | 3  | 6 | 130 | 30 | 356 | 99  |
| 72,742 | 14 | 6 | 208 | 57 | 3  | 6 | 129 | 30 | 354 | 99  |
| 72,743 | 14 | 9 | 216 | 59 | 4  | 6 | 132 | 30 | 366 | 104 |
| 72,744 | 14 | 9 | 219 | 59 | 4  | 6 | 133 | 30 | 370 | 104 |
| 72,745 | 14 | 9 | 219 | 60 | 4  | 6 | 133 | 30 | 370 | 105 |
| 72,746 | 14 | 9 | 219 | 60 | 4  | 6 | 134 | 30 | 371 | 105 |
| 72,747 | 14 | 9 | 219 | 60 | 4  | 6 | 134 | 30 | 371 | 105 |
| 72,748 | 14 | 9 | 225 | 60 | 5  | 6 | 142 | 30 | 386 | 105 |
| 72,749 | 15 | 9 | 225 | 57 | 5  | 6 | 144 | 29 | 389 | 101 |
| 72,750 | 17 | 9 | 234 | 56 | 5  | 6 | 148 | 28 | 404 | 99  |
| 72,751 | 18 | 9 | 244 | 56 | 6  | 6 | 154 | 28 | 422 | 99  |
| 72,752 | 18 | 8 | 243 | 52 | 6  | 3 | 153 | 25 | 420 | 88  |
| 72,753 | 18 | 8 | 241 | 50 | 6  | 3 | 153 | 25 | 418 | 86  |
| 72,754 | 18 | 7 | 241 | 43 | 6  | 2 | 153 | 21 | 418 | 73  |
| 72,755 | 19 | 7 | 249 | 42 | 7  | 2 | 157 | 21 | 432 | 72  |
| 72,756 | 19 | 7 | 251 | 42 | 7  | 2 | 157 | 21 | 434 | 72  |
| 72,757 | 19 | 7 | 255 | 42 | 7  | 2 | 160 | 21 | 441 | 72  |
| 72,758 | 20 | 7 | 274 | 42 | 8  | 2 | 162 | 21 | 464 | 72  |
| 72,759 | 26 | 7 | 368 | 42 | 13 | 2 | 207 | 21 | 614 | 72  |
| 72,760 | 26 | 7 | 370 | 42 | 13 | 2 | 212 | 21 | 621 | 72  |
| 72,761 | 26 | 7 | 387 | 42 | 13 | 3 | 217 | 21 | 643 | 73  |
| 72,762 | 26 | 7 | 391 | 42 | 13 | 3 | 220 | 21 | 650 | 73  |
| 72,763 | 25 | 7 | 391 | 42 | 13 | 3 | 221 | 21 | 650 | 73  |

|        |    |    |     |    |    |   |     |    |       |     |
|--------|----|----|-----|----|----|---|-----|----|-------|-----|
| 72,764 | 26 | 7  | 401 | 42 | 13 | 3 | 225 | 21 | 665   | 73  |
| 72,765 | 26 | 9  | 408 | 42 | 13 | 3 | 232 | 21 | 679   | 75  |
| 72,766 | 28 | 9  | 439 | 42 | 14 | 3 | 254 | 21 | 735   | 75  |
| 72,767 | 28 | 9  | 440 | 42 | 13 | 3 | 250 | 21 | 731   | 75  |
| 72,768 | 31 | 9  | 468 | 42 | 13 | 3 | 271 | 21 | 783   | 75  |
| 72,769 | 28 | 10 | 460 | 42 | 13 | 3 | 268 | 24 | 769   | 79  |
| 72,770 | 28 | 10 | 454 | 42 | 13 | 3 | 268 | 23 | 763   | 78  |
| 72,771 | 33 | 10 | 564 | 42 | 18 | 3 | 326 | 23 | 941   | 78  |
| 72,772 | 35 | 10 | 597 | 42 | 18 | 3 | 339 | 23 | 989   | 78  |
| 72,773 | 36 | 10 | 642 | 42 | 22 | 3 | 402 | 23 | 1,102 | 78  |
| 72,774 | 35 | 8  | 628 | 42 | 22 | 3 | 398 | 23 | 1,083 | 76  |
| 72,775 | 35 | 8  | 625 | 41 | 22 | 3 | 394 | 23 | 1,076 | 75  |
| 72,776 | 37 | 8  | 633 | 42 | 24 | 3 | 407 | 23 | 1,101 | 76  |
| 72,777 | 37 | 8  | 639 | 42 | 24 | 3 | 402 | 23 | 1,102 | 76  |
| 72,778 | 40 | 8  | 669 | 42 | 24 | 3 | 414 | 23 | 1,147 | 76  |
| 72,779 | 44 | 8  | 725 | 43 | 24 | 3 | 428 | 24 | 1,221 | 78  |
| 72,780 | 42 | 8  | 697 | 46 | 23 | 3 | 411 | 25 | 1,173 | 82  |
| 72,781 | 41 | 8  | 697 | 48 | 23 | 3 | 411 | 25 | 1,172 | 84  |
| 72,782 | 43 | 8  | 737 | 48 | 23 | 3 | 426 | 25 | 1,229 | 84  |
| 72,783 | 43 | 8  | 744 | 50 | 23 | 4 | 423 | 25 | 1,233 | 87  |
| 72,784 | 42 | 8  | 735 | 52 | 23 | 4 | 409 | 25 | 1,209 | 89  |
| 72,785 | 43 | 8  | 728 | 47 | 24 | 4 | 400 | 23 | 1,195 | 82  |
| 72,786 | 43 | 8  | 731 | 52 | 25 | 5 | 402 | 27 | 1,201 | 92  |
| 72,787 | 43 | 8  | 728 | 56 | 25 | 6 | 395 | 27 | 1,191 | 97  |
| 72,788 | 43 | 8  | 737 | 71 | 25 | 6 | 398 | 30 | 1,203 | 115 |
| 72,789 | 44 | 8  | 742 | 69 | 25 | 5 | 406 | 29 | 1,217 | 111 |
| 72,790 | 44 | 8  | 740 | 63 | 25 | 5 | 408 | 28 | 1,217 | 104 |
| 72,791 | 44 | 6  | 730 | 57 | 25 | 4 | 397 | 19 | 1,196 | 86  |
| 72,792 | 43 | 6  | 719 | 44 | 25 | 4 | 386 | 12 | 1,173 | 66  |
| 72,793 | 46 | 3  | 714 | 44 | 25 | 4 | 390 | 12 | 1,175 | 63  |
| 72,794 | 46 | 4  | 714 | 44 | 24 | 4 | 389 | 12 | 1,173 | 64  |
| 72,795 | 49 | 4  | 751 | 43 | 30 | 5 | 430 | 12 | 1,260 | 64  |
| 72,796 | 49 | 4  | 756 | 43 | 31 | 5 | 437 | 12 | 1,273 | 64  |
| 72,797 | 49 | 5  | 751 | 44 | 30 | 5 | 435 | 13 | 1,265 | 67  |
| 72,798 | 49 | 5  | 750 | 50 | 30 | 5 | 431 | 15 | 1,260 | 75  |
| 72,799 | 48 | 5  | 750 | 50 | 30 | 5 | 429 | 15 | 1,257 | 75  |
| 72,800 | 46 | 5  | 741 | 50 | 30 | 5 | 427 | 15 | 1,244 | 75  |
| 72,801 | 47 | 5  | 742 | 51 | 30 | 5 | 425 | 16 | 1,244 | 77  |
| 72,802 | 46 | 5  | 730 | 51 | 29 | 5 | 419 | 16 | 1,224 | 77  |
| 72,803 | 47 | 5  | 736 | 51 | 29 | 5 | 420 | 18 | 1,232 | 79  |
| 72,804 | 47 | 5  | 736 | 51 | 29 | 5 | 418 | 19 | 1,230 | 80  |



|        |    |   |     |     |    |   |     |    |       |     |
|--------|----|---|-----|-----|----|---|-----|----|-------|-----|
| 72,805 | 48 | 5 | 749 | 52  | 28 | 5 | 420 | 19 | 1,245 | 81  |
| 72,806 | 48 | 5 | 747 | 53  | 28 | 5 | 420 | 19 | 1,243 | 82  |
| 72,807 | 48 | 5 | 747 | 56  | 28 | 5 | 420 | 19 | 1,243 | 85  |
| 72,808 | 48 | 5 | 743 | 57  | 28 | 5 | 416 | 20 | 1,235 | 87  |
| 72,809 | 47 | 5 | 721 | 57  | 27 | 5 | 413 | 20 | 1,208 | 87  |
| 72,810 | 41 | 5 | 626 | 57  | 22 | 5 | 365 | 20 | 1,054 | 87  |
| 72,811 | 41 | 5 | 623 | 60  | 22 | 5 | 360 | 20 | 1,046 | 90  |
| 72,812 | 41 | 6 | 606 | 60  | 22 | 5 | 355 | 20 | 1,024 | 91  |
| 72,813 | 41 | 6 | 602 | 60  | 22 | 5 | 352 | 20 | 1,017 | 91  |
| 72,814 | 42 | 6 | 599 | 60  | 22 | 5 | 348 | 20 | 1,011 | 91  |
| 72,815 | 41 | 4 | 589 | 61  | 22 | 5 | 344 | 20 | 996   | 90  |
| 72,816 | 41 | 5 | 581 | 63  | 22 | 5 | 337 | 20 | 981   | 93  |
| 72,817 | 39 | 5 | 551 | 78  | 21 | 6 | 316 | 25 | 927   | 114 |
| 72,818 | 38 | 5 | 538 | 83  | 21 | 6 | 309 | 27 | 906   | 121 |
| 72,819 | 34 | 6 | 493 | 94  | 21 | 6 | 287 | 37 | 835   | 143 |
| 72,820 | 34 | 5 | 451 | 94  | 21 | 6 | 273 | 34 | 779   | 139 |
| 72,821 | 34 | 5 | 478 | 101 | 23 | 6 | 272 | 36 | 807   | 148 |
| 72,822 | 30 | 5 | 416 | 101 | 18 | 7 | 234 | 37 | 698   | 150 |
| 72,823 | 29 | 5 | 395 | 102 | 18 | 7 | 225 | 37 | 667   | 151 |
| 72,824 | 28 | 5 | 356 | 104 | 15 | 8 | 171 | 37 | 570   | 154 |
| 72,825 | 28 | 5 | 351 | 106 | 15 | 8 | 166 | 39 | 560   | 158 |
| 72,826 | 33 | 5 | 367 | 109 | 14 | 8 | 169 | 40 | 583   | 162 |
| 72,827 | 32 | 5 | 371 | 113 | 16 | 8 | 171 | 41 | 590   | 167 |
| 72,828 | 33 | 5 | 363 | 115 | 16 | 8 | 174 | 43 | 586   | 171 |
| 72,829 | 30 | 5 | 330 | 117 | 16 | 8 | 157 | 45 | 533   | 175 |
| 72,830 | 26 | 5 | 271 | 116 | 16 | 8 | 142 | 44 | 455   | 173 |
| 72,831 | 39 | 5 | 286 | 118 | 19 | 8 | 165 | 49 | 509   | 180 |
| 72,832 | 39 | 5 | 282 | 118 | 19 | 8 | 162 | 49 | 502   | 180 |
| 72,833 | 50 | 5 | 343 | 118 | 20 | 8 | 201 | 51 | 614   | 182 |
| 72,834 | 54 | 5 | 351 | 116 | 21 | 7 | 216 | 51 | 642   | 179 |
| 72,835 | 53 | 5 | 359 | 116 | 21 | 7 | 221 | 51 | 654   | 179 |
| 72,836 | 56 | 5 | 375 | 115 | 22 | 7 | 241 | 51 | 694   | 178 |
| 72,837 | 63 | 5 | 402 | 110 | 22 | 6 | 256 | 47 | 743   | 168 |
| 72,838 | 66 | 5 | 401 | 91  | 22 | 5 | 258 | 44 | 747   | 145 |
| 72,839 | 66 | 5 | 398 | 91  | 22 | 5 | 256 | 44 | 742   | 145 |
| 72,840 | 66 | 5 | 399 | 88  | 23 | 5 | 252 | 44 | 740   | 142 |
| 72,841 | 66 | 5 | 399 | 89  | 23 | 5 | 250 | 44 | 738   | 143 |
| 72,842 | 66 | 5 | 398 | 88  | 23 | 5 | 251 | 45 | 738   | 143 |
| 72,843 | 66 | 5 | 398 | 88  | 23 | 5 | 250 | 45 | 737   | 143 |
| 72,844 | 66 | 5 | 400 | 86  | 23 | 5 | 248 | 45 | 737   | 141 |
| 72,845 | 63 | 4 | 368 | 87  | 19 | 5 | 219 | 45 | 669   | 141 |

|        |    |   |     |    |    |   |     |    |     |     |
|--------|----|---|-----|----|----|---|-----|----|-----|-----|
| 72,846 | 63 | 4 | 359 | 87 | 17 | 4 | 206 | 45 | 645 | 140 |
| 72,847 | 63 | 3 | 354 | 86 | 16 | 4 | 199 | 44 | 632 | 137 |
| 72,848 | 63 | 3 | 354 | 86 | 16 | 4 | 198 | 44 | 631 | 137 |
| 72,849 | 63 | 3 | 354 | 81 | 16 | 4 | 199 | 42 | 632 | 130 |
| 72,850 | 62 | 3 | 354 | 83 | 16 | 4 | 199 | 42 | 631 | 132 |
| 72,851 | 62 | 3 | 353 | 85 | 16 | 4 | 199 | 44 | 630 | 136 |
| 72,852 | 62 | 3 | 358 | 86 | 16 | 4 | 199 | 47 | 635 | 140 |
| 72,853 | 62 | 3 | 358 | 90 | 16 | 4 | 199 | 51 | 635 | 148 |
| 72,854 | 61 | 3 | 356 | 96 | 16 | 4 | 198 | 50 | 631 | 153 |
| 72,855 | 61 | 3 | 349 | 97 | 16 | 4 | 197 | 50 | 623 | 154 |
| 72,856 | 59 | 3 | 341 | 95 | 16 | 4 | 195 | 51 | 611 | 153 |
| 72,857 | 60 | 3 | 346 | 92 | 16 | 4 | 198 | 51 | 620 | 150 |
| 72,858 | 62 | 3 | 349 | 91 | 16 | 4 | 200 | 50 | 627 | 148 |
| 72,859 | 62 | 3 | 349 | 91 | 16 | 4 | 200 | 50 | 627 | 148 |
| 72,860 | 62 | 3 | 349 | 91 | 16 | 4 | 200 | 50 | 627 | 148 |
| 72,861 | 62 | 3 | 349 | 91 | 16 | 4 | 200 | 49 | 627 | 147 |
| 72,862 | 59 | 3 | 336 | 87 | 16 | 4 | 185 | 49 | 596 | 143 |
| 72,863 | 62 | 2 | 359 | 88 | 16 | 3 | 217 | 49 | 654 | 142 |
| 72,864 | 62 | 2 | 359 | 88 | 16 | 3 | 217 | 49 | 654 | 142 |
| 72,865 | 61 | 2 | 360 | 88 | 16 | 3 | 219 | 49 | 656 | 142 |
| 72,866 | 61 | 2 | 356 | 87 | 16 | 3 | 219 | 49 | 652 | 141 |
| 72,867 | 61 | 1 | 356 | 85 | 16 | 3 | 221 | 49 | 654 | 138 |
| 72,868 | 65 | 2 | 362 | 70 | 16 | 2 | 225 | 45 | 668 | 119 |
| 72,869 | 65 | 2 | 368 | 65 | 16 | 2 | 230 | 43 | 679 | 112 |
| 72,870 | 66 | 1 | 375 | 54 | 16 | 2 | 243 | 33 | 700 | 90  |
| 72,871 | 66 | 1 | 381 | 55 | 15 | 2 | 248 | 33 | 710 | 91  |
| 72,872 | 68 | 1 | 377 | 48 | 14 | 1 | 270 | 31 | 729 | 81  |
| 72,873 | 67 | 1 | 381 | 48 | 14 | 1 | 267 | 31 | 729 | 81  |
| 72,874 | 66 | 1 | 372 | 47 | 14 | 1 | 262 | 31 | 714 | 80  |
| 72,875 | 74 | 1 | 419 | 43 | 14 | 0 | 297 | 30 | 804 | 74  |
| 72,876 | 74 | 1 | 420 | 43 | 15 | 0 | 300 | 32 | 809 | 76  |
| 72,877 | 68 | 1 | 403 | 44 | 14 | 0 | 290 | 32 | 775 | 77  |
| 72,878 | 73 | 1 | 415 | 37 | 12 | 0 | 292 | 27 | 792 | 65  |
| 72,879 | 73 | 1 | 416 | 37 | 12 | 0 | 295 | 28 | 796 | 66  |
| 72,880 | 57 | 1 | 377 | 36 | 10 | 0 | 261 | 28 | 705 | 65  |
| 72,881 | 57 | 1 | 371 | 31 | 10 | 0 | 259 | 20 | 697 | 52  |
| 72,882 | 57 | 1 | 372 | 31 | 10 | 0 | 269 | 20 | 708 | 52  |
| 72,883 | 48 | 1 | 343 | 31 | 9  | 1 | 244 | 21 | 644 | 54  |
| 72,884 | 47 | 1 | 333 | 33 | 9  | 1 | 238 | 23 | 627 | 58  |
| 72,885 | 47 | 1 | 325 | 31 | 9  | 1 | 236 | 23 | 617 | 56  |
| 72,886 | 46 | 2 | 312 | 32 | 9  | 1 | 229 | 23 | 596 | 58  |

|        |     |   |       |    |    |   |     |    |       |     |
|--------|-----|---|-------|----|----|---|-----|----|-------|-----|
| 72,887 | 43  | 2 | 294   | 33 | 6  | 1 | 204 | 23 | 547   | 59  |
| 72,888 | 37  | 2 | 288   | 33 | 6  | 1 | 199 | 23 | 530   | 59  |
| 72,889 | 36  | 2 | 284   | 33 | 6  | 1 | 196 | 23 | 522   | 59  |
| 72,890 | 38  | 2 | 280   | 36 | 5  | 1 | 198 | 23 | 521   | 62  |
| 72,891 | 37  | 2 | 280   | 36 | 5  | 1 | 197 | 23 | 519   | 62  |
| 72,892 | 37  | 2 | 281   | 35 | 5  | 1 | 198 | 22 | 521   | 60  |
| 72,893 | 37  | 2 | 282   | 34 | 5  | 1 | 198 | 22 | 522   | 59  |
| 72,894 | 37  | 2 | 284   | 34 | 5  | 1 | 199 | 22 | 525   | 59  |
| 72,895 | 34  | 3 | 278   | 33 | 5  | 1 | 197 | 22 | 514   | 59  |
| 72,896 | 34  | 3 | 278   | 33 | 5  | 1 | 197 | 22 | 514   | 59  |
| 72,897 | 34  | 3 | 278   | 33 | 5  | 1 | 197 | 22 | 514   | 59  |
| 72,898 | 34  | 3 | 282   | 33 | 5  | 1 | 197 | 22 | 518   | 59  |
| 72,899 | 34  | 3 | 282   | 33 | 5  | 1 | 197 | 22 | 518   | 59  |
| 72,900 | 38  | 3 | 295   | 29 | 5  | 1 | 202 | 22 | 540   | 55  |
| 72,901 | 40  | 3 | 298   | 28 | 5  | 1 | 202 | 20 | 545   | 52  |
| 72,902 | 40  | 3 | 303   | 28 | 5  | 1 | 202 | 20 | 550   | 52  |
| 72,903 | 42  | 3 | 345   | 25 | 8  | 1 | 207 | 16 | 602   | 45  |
| 72,904 | 42  | 3 | 342   | 23 | 8  | 1 | 207 | 12 | 599   | 39  |
| 72,905 | 44  | 3 | 370   | 17 | 8  | 1 | 214 | 11 | 636   | 32  |
| 72,906 | 70  | 3 | 547   | 16 | 11 | 1 | 299 | 9  | 927   | 29  |
| 72,907 | 71  | 3 | 562   | 16 | 12 | 1 | 302 | 9  | 947   | 29  |
| 72,908 | 71  | 3 | 562   | 17 | 12 | 1 | 300 | 10 | 945   | 31  |
| 72,909 | 68  | 3 | 563   | 17 | 13 | 1 | 298 | 10 | 942   | 31  |
| 72,910 | 78  | 3 | 717   | 17 | 19 | 1 | 318 | 10 | 1,132 | 31  |
| 72,911 | 81  | 3 | 750   | 17 | 20 | 1 | 329 | 10 | 1,180 | 31  |
| 72,912 | 81  | 3 | 748   | 18 | 20 | 1 | 326 | 10 | 1,175 | 32  |
| 72,913 | 89  | 4 | 853   | 19 | 22 | 1 | 324 | 10 | 1,288 | 34  |
| 72,914 | 104 | 4 | 917   | 19 | 24 | 1 | 349 | 14 | 1,394 | 38  |
| 72,915 | 104 | 4 | 916   | 19 | 24 | 1 | 347 | 14 | 1,391 | 38  |
| 72,916 | 105 | 4 | 930   | 25 | 25 | 2 | 356 | 17 | 1,416 | 48  |
| 72,917 | 118 | 4 | 1,070 | 38 | 30 | 2 | 406 | 19 | 1,624 | 63  |
| 72,918 | 115 | 4 | 1,072 | 38 | 30 | 3 | 407 | 20 | 1,624 | 65  |
| 72,919 | 116 | 3 | 1,075 | 51 | 30 | 3 | 403 | 31 | 1,624 | 88  |
| 72,920 | 115 | 3 | 1,066 | 52 | 30 | 3 | 390 | 31 | 1,601 | 89  |
| 72,921 | 116 | 3 | 1,076 | 56 | 30 | 3 | 394 | 32 | 1,616 | 94  |
| 72,922 | 116 | 6 | 1,072 | 59 | 30 | 3 | 389 | 34 | 1,607 | 102 |
| 72,923 | 114 | 6 | 1,048 | 60 | 30 | 3 | 364 | 33 | 1,556 | 102 |
| 72,924 | 114 | 7 | 1,044 | 64 | 30 | 3 | 365 | 33 | 1,553 | 107 |
| 72,925 | 114 | 7 | 1,038 | 65 | 30 | 3 | 365 | 33 | 1,547 | 108 |
| 72,926 | 107 | 7 | 1,023 | 62 | 29 | 3 | 341 | 30 | 1,500 | 102 |
| 72,927 | 110 | 7 | 1,175 | 61 | 33 | 3 | 368 | 30 | 1,686 | 101 |

|        |     |    |       |    |    |   |     |    |       |     |
|--------|-----|----|-------|----|----|---|-----|----|-------|-----|
| 72,928 | 111 | 7  | 1,202 | 62 | 35 | 3 | 406 | 30 | 1,754 | 102 |
| 72,929 | 106 | 7  | 1,210 | 63 | 37 | 3 | 415 | 29 | 1,768 | 102 |
| 72,930 | 106 | 7  | 1,218 | 64 | 37 | 3 | 416 | 29 | 1,777 | 103 |
| 72,931 | 106 | 7  | 1,226 | 64 | 36 | 3 | 421 | 29 | 1,789 | 103 |
| 72,932 | 107 | 7  | 1,224 | 63 | 36 | 3 | 424 | 29 | 1,791 | 102 |
| 72,933 | 107 | 7  | 1,213 | 64 | 36 | 3 | 412 | 29 | 1,768 | 103 |
| 72,934 | 106 | 7  | 1,209 | 68 | 36 | 2 | 410 | 30 | 1,761 | 107 |
| 72,935 | 106 | 7  | 1,208 | 68 | 36 | 2 | 410 | 29 | 1,760 | 106 |
| 72,936 | 103 | 7  | 1,200 | 69 | 35 | 2 | 397 | 29 | 1,735 | 107 |
| 72,937 | 103 | 6  | 1,198 | 73 | 35 | 2 | 397 | 34 | 1,733 | 115 |
| 72,938 | 103 | 6  | 1,187 | 74 | 35 | 2 | 394 | 38 | 1,719 | 120 |
| 72,939 | 101 | 6  | 1,159 | 78 | 34 | 3 | 381 | 39 | 1,675 | 126 |
| 72,940 | 101 | 7  | 1,158 | 78 | 34 | 4 | 377 | 44 | 1,670 | 133 |
| 72,941 | 98  | 7  | 1,156 | 75 | 34 | 4 | 377 | 44 | 1,665 | 130 |
| 72,942 | 99  | 7  | 1,163 | 76 | 34 | 4 | 379 | 47 | 1,675 | 134 |
| 72,943 | 99  | 8  | 1,163 | 81 | 34 | 4 | 379 | 48 | 1,675 | 141 |
| 72,944 | 99  | 9  | 1,161 | 83 | 34 | 5 | 379 | 50 | 1,673 | 147 |
| 72,945 | 99  | 9  | 1,159 | 84 | 34 | 5 | 378 | 51 | 1,670 | 149 |
| 72,946 | 99  | 8  | 1,159 | 85 | 34 | 5 | 377 | 51 | 1,669 | 149 |
| 72,947 | 99  | 8  | 1,158 | 85 | 34 | 5 | 378 | 51 | 1,669 | 149 |
| 72,948 | 100 | 8  | 1,159 | 85 | 34 | 5 | 379 | 51 | 1,672 | 149 |
| 72,949 | 100 | 8  | 1,157 | 85 | 34 | 5 | 380 | 51 | 1,671 | 149 |
| 72,950 | 100 | 8  | 1,157 | 85 | 34 | 5 | 380 | 51 | 1,671 | 149 |
| 72,951 | 96  | 8  | 1,170 | 85 | 34 | 5 | 389 | 51 | 1,689 | 149 |
| 72,952 | 94  | 8  | 1,171 | 86 | 33 | 5 | 392 | 51 | 1,690 | 150 |
| 72,953 | 94  | 8  | 1,162 | 86 | 33 | 5 | 395 | 51 | 1,684 | 150 |
| 72,954 | 92  | 8  | 1,119 | 85 | 30 | 5 | 391 | 51 | 1,632 | 149 |
| 72,955 | 90  | 8  | 1,093 | 85 | 30 | 5 | 384 | 51 | 1,597 | 149 |
| 72,956 | 64  | 8  | 924   | 85 | 27 | 5 | 300 | 52 | 1,315 | 150 |
| 72,957 | 64  | 8  | 914   | 85 | 27 | 5 | 298 | 52 | 1,303 | 150 |
| 72,958 | 63  | 8  | 899   | 84 | 26 | 5 | 294 | 51 | 1,282 | 148 |
| 72,959 | 64  | 8  | 896   | 84 | 26 | 5 | 295 | 51 | 1,281 | 148 |
| 72,960 | 64  | 9  | 896   | 86 | 26 | 5 | 296 | 55 | 1,282 | 155 |
| 72,961 | 58  | 10 | 774   | 88 | 22 | 5 | 284 | 57 | 1,138 | 160 |
| 72,962 | 56  | 10 | 744   | 89 | 21 | 5 | 275 | 58 | 1,096 | 162 |
| 72,963 | 54  | 10 | 718   | 88 | 21 | 5 | 273 | 59 | 1,066 | 162 |
| 72,964 | 48  | 9  | 634   | 88 | 19 | 5 | 269 | 59 | 970   | 161 |
| 72,965 | 36  | 9  | 598   | 91 | 18 | 5 | 265 | 57 | 917   | 162 |
| 72,966 | 40  | 9  | 602   | 93 | 19 | 5 | 277 | 58 | 938   | 165 |
| 72,967 | 37  | 9  | 538   | 88 | 18 | 4 | 241 | 56 | 834   | 157 |
| 72,968 | 28  | 9  | 462   | 76 | 14 | 4 | 226 | 54 | 730   | 143 |

|        |    |    |     |    |    |   |     |    |     |     |
|--------|----|----|-----|----|----|---|-----|----|-----|-----|
| 72,969 | 27 | 9  | 453 | 66 | 14 | 3 | 221 | 42 | 715 | 120 |
| 72,970 | 26 | 9  | 444 | 66 | 14 | 3 | 220 | 42 | 704 | 120 |
| 72,971 | 26 | 10 | 439 | 66 | 14 | 3 | 219 | 42 | 698 | 121 |
| 72,972 | 25 | 10 | 434 | 62 | 14 | 3 | 219 | 41 | 692 | 116 |
| 72,973 | 25 | 7  | 446 | 58 | 14 | 3 | 226 | 39 | 711 | 107 |
| 72,974 | 25 | 8  | 445 | 62 | 14 | 3 | 223 | 41 | 707 | 114 |
| 72,975 | 27 | 7  | 448 | 62 | 14 | 3 | 223 | 41 | 712 | 113 |
| 72,976 | 27 | 7  | 432 | 63 | 14 | 3 | 222 | 41 | 695 | 114 |
| 72,977 | 26 | 7  | 409 | 62 | 14 | 3 | 207 | 41 | 656 | 113 |
| 72,978 | 23 | 7  | 254 | 62 | 9  | 3 | 178 | 41 | 464 | 113 |
| 72,979 | 22 | 7  | 224 | 62 | 7  | 3 | 139 | 41 | 392 | 113 |
| 72,980 | 22 | 7  | 197 | 60 | 5  | 3 | 121 | 41 | 345 | 111 |
| 72,981 | 22 | 7  | 185 | 61 | 5  | 3 | 117 | 41 | 329 | 112 |
| 72,982 | 21 | 7  | 168 | 61 | 5  | 3 | 109 | 41 | 303 | 112 |
| 72,983 | 21 | 7  | 163 | 59 | 5  | 3 | 106 | 41 | 295 | 110 |
| 72,984 | 21 | 7  | 165 | 59 | 5  | 3 | 108 | 41 | 299 | 110 |
| 72,985 | 21 | 7  | 167 | 56 | 5  | 3 | 108 | 39 | 301 | 105 |
| 72,986 | 21 | 7  | 167 | 53 | 5  | 3 | 107 | 38 | 300 | 101 |
| 72,987 | 20 | 7  | 173 | 52 | 5  | 3 | 108 | 38 | 306 | 100 |
| 72,988 | 20 | 7  | 170 | 47 | 5  | 3 | 108 | 33 | 303 | 90  |
| 72,989 | 20 | 7  | 168 | 45 | 5  | 3 | 106 | 29 | 299 | 84  |
| 72,990 | 23 | 7  | 271 | 43 | 9  | 2 | 162 | 29 | 465 | 81  |
| 72,991 | 23 | 6  | 271 | 43 | 9  | 1 | 162 | 24 | 465 | 74  |
| 72,992 | 23 | 6  | 263 | 44 | 9  | 1 | 161 | 24 | 456 | 75  |
| 72,993 | 25 | 5  | 338 | 39 | 11 | 1 | 248 | 20 | 622 | 65  |
| 72,994 | 25 | 6  | 341 | 38 | 12 | 1 | 249 | 20 | 627 | 65  |
| 72,995 | 25 | 5  | 342 | 35 | 13 | 0 | 250 | 17 | 630 | 57  |
| 72,996 | 25 | 5  | 342 | 35 | 13 | 0 | 250 | 17 | 630 | 57  |
| 72,997 | 25 | 5  | 346 | 35 | 13 | 0 | 250 | 17 | 634 | 57  |
| 72,998 | 25 | 5  | 350 | 41 | 13 | 0 | 250 | 18 | 638 | 64  |
| 72,999 | 24 | 5  | 353 | 43 | 13 | 0 | 249 | 19 | 639 | 67  |
| 73,000 | 24 | 5  | 355 | 43 | 13 | 0 | 248 | 21 | 640 | 69  |
| 73,001 | 24 | 5  | 359 | 43 | 14 | 0 | 246 | 21 | 643 | 69  |
| 73,002 | 24 | 5  | 341 | 43 | 14 | 0 | 233 | 21 | 612 | 69  |
| 73,003 | 26 | 5  | 338 | 43 | 14 | 0 | 229 | 21 | 607 | 69  |
| 73,004 | 27 | 5  | 346 | 43 | 14 | 0 | 230 | 21 | 617 | 69  |
| 73,005 | 29 | 5  | 373 | 43 | 14 | 0 | 234 | 21 | 650 | 69  |
| 73,006 | 29 | 5  | 372 | 45 | 14 | 0 | 234 | 21 | 649 | 71  |
| 73,007 | 29 | 5  | 390 | 45 | 14 | 0 | 239 | 20 | 672 | 70  |
| 73,008 | 34 | 5  | 538 | 45 | 15 | 1 | 283 | 20 | 870 | 71  |
| 73,009 | 34 | 5  | 558 | 46 | 15 | 1 | 297 | 20 | 904 | 72  |

|        |    |   |     |    |    |   |     |    |       |    |
|--------|----|---|-----|----|----|---|-----|----|-------|----|
| 73,010 | 33 | 4 | 576 | 44 | 16 | 1 | 301 | 16 | 926   | 65 |
| 73,011 | 43 | 4 | 642 | 44 | 20 | 1 | 352 | 16 | 1,057 | 65 |
| 73,012 | 40 | 3 | 691 | 42 | 20 | 1 | 361 | 14 | 1,112 | 60 |
| 73,013 | 39 | 3 | 689 | 40 | 21 | 1 | 363 | 12 | 1,112 | 56 |
| 73,014 | 39 | 3 | 686 | 41 | 21 | 1 | 364 | 12 | 1,110 | 57 |
| 73,015 | 36 | 3 | 673 | 42 | 20 | 1 | 351 | 12 | 1,080 | 58 |
| 73,016 | 36 | 3 | 668 | 39 | 20 | 1 | 349 | 10 | 1,073 | 53 |
| 73,017 | 31 | 3 | 651 | 37 | 18 | 1 | 331 | 9  | 1,031 | 50 |
| 73,018 | 31 | 3 | 650 | 35 | 18 | 1 | 330 | 8  | 1,029 | 47 |
| 73,019 | 30 | 3 | 649 | 32 | 18 | 1 | 328 | 8  | 1,025 | 44 |
| 73,020 | 30 | 3 | 643 | 32 | 18 | 1 | 326 | 8  | 1,017 | 44 |
| 73,021 | 30 | 3 | 636 | 32 | 18 | 1 | 323 | 8  | 1,007 | 44 |
| 73,022 | 30 | 2 | 635 | 32 | 18 | 1 | 321 | 9  | 1,004 | 44 |
| 73,023 | 30 | 3 | 634 | 32 | 18 | 1 | 321 | 9  | 1,003 | 45 |
| 73,024 | 32 | 3 | 634 | 32 | 18 | 1 | 321 | 10 | 1,005 | 46 |
| 73,025 | 32 | 2 | 634 | 28 | 18 | 1 | 321 | 8  | 1,005 | 39 |
| 73,026 | 32 | 2 | 661 | 24 | 20 | 1 | 336 | 8  | 1,049 | 35 |
| 73,027 | 32 | 2 | 661 | 22 | 20 | 1 | 334 | 8  | 1,047 | 33 |
| 73,028 | 32 | 2 | 680 | 22 | 20 | 1 | 338 | 7  | 1,070 | 32 |
| 73,029 | 32 | 2 | 679 | 23 | 20 | 1 | 338 | 7  | 1,069 | 33 |
| 73,030 | 32 | 2 | 684 | 24 | 20 | 1 | 340 | 11 | 1,076 | 38 |
| 73,031 | 32 | 2 | 684 | 25 | 20 | 1 | 340 | 11 | 1,076 | 39 |
| 73,032 | 35 | 2 | 825 | 25 | 24 | 2 | 409 | 11 | 1,293 | 40 |
| 73,033 | 36 | 2 | 838 | 25 | 25 | 2 | 417 | 11 | 1,316 | 40 |
| 73,034 | 35 | 3 | 840 | 28 | 25 | 2 | 420 | 12 | 1,320 | 45 |
| 73,035 | 35 | 3 | 838 | 28 | 25 | 2 | 418 | 12 | 1,316 | 45 |
| 73,036 | 35 | 3 | 852 | 29 | 26 | 2 | 429 | 13 | 1,342 | 47 |
| 73,037 | 36 | 3 | 856 | 29 | 26 | 2 | 435 | 13 | 1,353 | 47 |
| 73,038 | 36 | 3 | 853 | 29 | 27 | 3 | 437 | 13 | 1,353 | 48 |
| 73,039 | 36 | 3 | 839 | 30 | 27 | 3 | 434 | 13 | 1,336 | 49 |
| 73,040 | 36 | 3 | 835 | 34 | 27 | 3 | 435 | 14 | 1,333 | 54 |
| 73,041 | 34 | 3 | 750 | 35 | 23 | 3 | 381 | 14 | 1,188 | 55 |
| 73,042 | 31 | 3 | 714 | 36 | 21 | 3 | 316 | 14 | 1,082 | 56 |
| 73,043 | 40 | 3 | 689 | 36 | 22 | 3 | 318 | 14 | 1,069 | 56 |
| 73,044 | 40 | 2 | 697 | 36 | 22 | 3 | 322 | 14 | 1,081 | 55 |
| 73,045 | 40 | 2 | 694 | 38 | 21 | 3 | 321 | 15 | 1,076 | 58 |
| 73,046 | 43 | 2 | 703 | 42 | 20 | 3 | 335 | 16 | 1,101 | 63 |
| 73,047 | 43 | 4 | 698 | 51 | 20 | 3 | 337 | 20 | 1,098 | 78 |
| 73,048 | 45 | 4 | 702 | 51 | 20 | 3 | 338 | 20 | 1,105 | 78 |
| 73,049 | 45 | 4 | 723 | 45 | 22 | 3 | 351 | 19 | 1,141 | 71 |
| 73,050 | 46 | 4 | 729 | 43 | 22 | 3 | 354 | 18 | 1,151 | 68 |

|        |    |   |     |    |    |   |     |    |       |    |
|--------|----|---|-----|----|----|---|-----|----|-------|----|
| 73,051 | 46 | 5 | 726 | 46 | 22 | 3 | 354 | 16 | 1,148 | 70 |
| 73,052 | 51 | 5 | 777 | 46 | 26 | 3 | 434 | 17 | 1,288 | 71 |
| 73,053 | 51 | 5 | 773 | 46 | 26 | 3 | 434 | 17 | 1,284 | 71 |
| 73,054 | 49 | 6 | 780 | 46 | 28 | 3 | 441 | 18 | 1,298 | 73 |
| 73,055 | 48 | 6 | 772 | 47 | 28 | 3 | 438 | 18 | 1,286 | 74 |
| 73,056 | 46 | 6 | 747 | 45 | 28 | 3 | 433 | 19 | 1,254 | 73 |
| 73,057 | 46 | 6 | 729 | 45 | 28 | 3 | 428 | 19 | 1,231 | 73 |
| 73,058 | 41 | 6 | 611 | 45 | 27 | 3 | 386 | 19 | 1,065 | 73 |
| 73,059 | 42 | 6 | 581 | 45 | 27 | 2 | 386 | 19 | 1,036 | 72 |
| 73,060 | 42 | 6 | 562 | 44 | 27 | 2 | 372 | 19 | 1,003 | 71 |
| 73,061 | 42 | 6 | 540 | 44 | 26 | 2 | 367 | 19 | 975   | 71 |
| 73,062 | 32 | 6 | 470 | 44 | 22 | 2 | 314 | 19 | 838   | 71 |
| 73,063 | 31 | 6 | 388 | 44 | 20 | 2 | 289 | 19 | 728   | 71 |
| 73,064 | 31 | 6 | 385 | 43 | 19 | 2 | 284 | 19 | 719   | 70 |
| 73,065 | 31 | 6 | 384 | 43 | 19 | 2 | 282 | 19 | 716   | 70 |
| 73,066 | 31 | 6 | 385 | 42 | 21 | 2 | 286 | 19 | 723   | 69 |
| 73,067 | 31 | 6 | 380 | 42 | 21 | 2 | 283 | 19 | 715   | 69 |
| 73,068 | 31 | 6 | 379 | 42 | 21 | 2 | 282 | 19 | 713   | 69 |
| 73,069 | 31 | 6 | 380 | 42 | 23 | 2 | 283 | 18 | 717   | 68 |
| 73,070 | 31 | 7 | 380 | 42 | 23 | 2 | 283 | 18 | 717   | 69 |
| 73,071 | 31 | 7 | 381 | 42 | 23 | 2 | 284 | 18 | 719   | 69 |
| 73,072 | 32 | 7 | 383 | 42 | 23 | 2 | 284 | 18 | 722   | 69 |
| 73,073 | 30 | 7 | 386 | 41 | 23 | 2 | 287 | 17 | 726   | 67 |
| 73,074 | 30 | 6 | 388 | 40 | 24 | 2 | 301 | 16 | 743   | 64 |
| 73,075 | 32 | 6 | 398 | 40 | 25 | 2 | 312 | 16 | 767   | 64 |
| 73,076 | 30 | 6 | 377 | 40 | 24 | 2 | 299 | 16 | 730   | 64 |
| 73,077 | 30 | 6 | 380 | 41 | 24 | 2 | 304 | 16 | 738   | 65 |
| 73,078 | 30 | 6 | 379 | 41 | 24 | 2 | 302 | 16 | 735   | 65 |
| 73,079 | 30 | 6 | 361 | 41 | 24 | 2 | 300 | 16 | 715   | 65 |
| 73,080 | 30 | 6 | 364 | 40 | 24 | 2 | 302 | 16 | 720   | 64 |
| 73,081 | 30 | 6 | 364 | 38 | 26 | 2 | 303 | 13 | 723   | 59 |
| 73,082 | 28 | 6 | 280 | 36 | 24 | 1 | 288 | 13 | 620   | 56 |
| 73,083 | 27 | 6 | 224 | 36 | 22 | 1 | 234 | 13 | 507   | 56 |
| 73,084 | 27 | 6 | 221 | 36 | 22 | 1 | 232 | 13 | 502   | 56 |
| 73,085 | 27 | 5 | 220 | 33 | 22 | 1 | 232 | 12 | 501   | 51 |
| 73,086 | 27 | 5 | 216 | 32 | 21 | 1 | 224 | 11 | 488   | 49 |
| 73,087 | 26 | 5 | 212 | 32 | 21 | 1 | 219 | 11 | 478   | 49 |
| 73,088 | 26 | 5 | 209 | 34 | 21 | 1 | 219 | 11 | 475   | 51 |
| 73,089 | 26 | 5 | 219 | 34 | 20 | 0 | 219 | 10 | 484   | 49 |
| 73,090 | 26 | 5 | 219 | 33 | 20 | 0 | 219 | 10 | 484   | 48 |
| 73,091 | 26 | 5 | 218 | 29 | 20 | 0 | 218 | 9  | 482   | 43 |

|        |    |   |     |    |    |   |     |    |     |    |
|--------|----|---|-----|----|----|---|-----|----|-----|----|
| 73,092 | 25 | 5 | 218 | 24 | 20 | 0 | 221 | 8  | 484 | 37 |
| 73,093 | 25 | 5 | 217 | 24 | 20 | 0 | 223 | 8  | 485 | 37 |
| 73,094 | 17 | 5 | 207 | 22 | 19 | 0 | 203 | 8  | 446 | 35 |
| 73,095 | 17 | 5 | 201 | 22 | 19 | 0 | 205 | 8  | 442 | 35 |
| 73,096 | 14 | 5 | 195 | 27 | 19 | 0 | 196 | 11 | 424 | 43 |
| 73,097 | 14 | 5 | 195 | 23 | 19 | 0 | 196 | 10 | 424 | 38 |
| 73,098 | 14 | 4 | 196 | 16 | 19 | 0 | 196 | 6  | 425 | 26 |
| 73,099 | 12 | 4 | 193 | 17 | 19 | 0 | 195 | 6  | 419 | 27 |
| 73,100 | 12 | 3 | 170 | 14 | 17 | 0 | 182 | 6  | 381 | 23 |
| 73,101 | 11 | 3 | 160 | 14 | 17 | 0 | 179 | 6  | 367 | 23 |
| 73,102 | 7  | 3 | 119 | 14 | 12 | 0 | 118 | 6  | 256 | 23 |
| 73,103 | 6  | 3 | 101 | 13 | 12 | 0 | 99  | 5  | 218 | 21 |
| 73,104 | 6  | 3 | 97  | 13 | 11 | 0 | 93  | 5  | 207 | 21 |
| 73,105 | 6  | 3 | 93  | 15 | 10 | 0 | 92  | 5  | 201 | 23 |
| 73,106 | 6  | 3 | 93  | 14 | 10 | 0 | 92  | 5  | 201 | 22 |
| 73,107 | 6  | 3 | 97  | 14 | 10 | 0 | 96  | 4  | 209 | 21 |
| 73,108 | 7  | 3 | 112 | 14 | 10 | 0 | 101 | 5  | 230 | 22 |
| 73,109 | 7  | 3 | 111 | 14 | 10 | 0 | 100 | 5  | 228 | 22 |
| 73,110 | 6  | 3 | 112 | 14 | 10 | 0 | 110 | 5  | 238 | 22 |
| 73,111 | 6  | 3 | 111 | 14 | 10 | 0 | 109 | 5  | 236 | 22 |
| 73,112 | 6  | 3 | 113 | 14 | 10 | 0 | 119 | 5  | 248 | 22 |
| 73,113 | 6  | 3 | 113 | 14 | 10 | 0 | 119 | 5  | 248 | 22 |
| 73,114 | 6  | 3 | 119 | 14 | 10 | 0 | 124 | 5  | 259 | 22 |
| 73,115 | 6  | 3 | 126 | 14 | 11 | 0 | 128 | 5  | 271 | 22 |
| 73,116 | 6  | 3 | 126 | 14 | 11 | 0 | 129 | 5  | 272 | 22 |
| 73,117 | 6  | 4 | 127 | 14 | 9  | 0 | 130 | 5  | 272 | 23 |
| 73,118 | 6  | 4 | 127 | 14 | 9  | 0 | 129 | 5  | 271 | 23 |
| 73,119 | 6  | 4 | 130 | 16 | 7  | 1 | 129 | 6  | 272 | 27 |
| 73,120 | 6  | 4 | 130 | 18 | 7  | 1 | 129 | 6  | 272 | 29 |
| 73,121 | 6  | 3 | 130 | 22 | 8  | 1 | 129 | 7  | 273 | 33 |
| 73,122 | 5  | 3 | 128 | 23 | 8  | 1 | 129 | 7  | 270 | 34 |
| 73,123 | 5  | 7 | 125 | 31 | 8  | 2 | 128 | 10 | 266 | 50 |
| 73,124 | 5  | 7 | 116 | 32 | 7  | 2 | 113 | 10 | 241 | 51 |
| 73,125 | 6  | 7 | 118 | 35 | 7  | 2 | 113 | 11 | 244 | 55 |
| 73,126 | 4  | 7 | 108 | 35 | 5  | 2 | 103 | 11 | 220 | 55 |
| 73,127 | 4  | 7 | 107 | 35 | 5  | 2 | 103 | 11 | 219 | 55 |
| 73,128 | 4  | 7 | 103 | 35 | 5  | 2 | 98  | 11 | 210 | 55 |
| 73,129 | 4  | 7 | 102 | 37 | 5  | 2 | 101 | 11 | 212 | 57 |
| 73,130 | 4  | 7 | 100 | 37 | 5  | 2 | 100 | 11 | 209 | 57 |
| 73,131 | 4  | 7 | 105 | 37 | 5  | 2 | 99  | 11 | 213 | 57 |
| 73,132 | 4  | 7 | 102 | 37 | 3  | 2 | 96  | 11 | 205 | 57 |



|        |    |    |     |    |    |   |     |    |     |    |
|--------|----|----|-----|----|----|---|-----|----|-----|----|
| 73,133 | 5  | 7  | 101 | 39 | 3  | 2 | 96  | 11 | 205 | 59 |
| 73,134 | 4  | 7  | 95  | 40 | 2  | 2 | 89  | 11 | 190 | 60 |
| 73,135 | 4  | 7  | 94  | 40 | 2  | 2 | 89  | 11 | 189 | 60 |
| 73,136 | 4  | 7  | 95  | 40 | 2  | 2 | 87  | 11 | 188 | 60 |
| 73,137 | 4  | 7  | 86  | 40 | 2  | 2 | 86  | 11 | 178 | 60 |
| 73,138 | 4  | 7  | 84  | 38 | 2  | 2 | 84  | 11 | 174 | 58 |
| 73,139 | 4  | 7  | 84  | 38 | 2  | 2 | 84  | 11 | 174 | 58 |
| 73,140 | 4  | 7  | 74  | 38 | 2  | 2 | 81  | 11 | 161 | 58 |
| 73,141 | 4  | 7  | 74  | 38 | 2  | 2 | 79  | 11 | 159 | 58 |
| 73,142 | 4  | 7  | 78  | 38 | 2  | 2 | 79  | 11 | 163 | 58 |
| 73,143 | 4  | 7  | 79  | 38 | 2  | 2 | 80  | 11 | 165 | 58 |
| 73,144 | 8  | 7  | 86  | 38 | 3  | 2 | 82  | 11 | 179 | 58 |
| 73,145 | 7  | 7  | 106 | 38 | 3  | 2 | 85  | 11 | 201 | 58 |
| 73,146 | 7  | 7  | 110 | 38 | 3  | 2 | 79  | 11 | 199 | 58 |
| 73,147 | 7  | 10 | 106 | 34 | 3  | 2 | 73  | 10 | 189 | 56 |
| 73,148 | 7  | 10 | 106 | 34 | 3  | 2 | 72  | 10 | 188 | 56 |
| 73,149 | 7  | 10 | 107 | 30 | 3  | 2 | 71  | 11 | 188 | 53 |
| 73,150 | 7  | 11 | 106 | 31 | 3  | 2 | 71  | 11 | 187 | 55 |
| 73,151 | 7  | 11 | 106 | 31 | 3  | 2 | 70  | 11 | 186 | 55 |
| 73,152 | 7  | 11 | 111 | 31 | 3  | 2 | 72  | 11 | 193 | 55 |
| 73,153 | 7  | 11 | 111 | 31 | 3  | 2 | 72  | 11 | 193 | 55 |
| 73,154 | 8  | 11 | 125 | 31 | 4  | 2 | 72  | 11 | 209 | 55 |
| 73,155 | 8  | 11 | 125 | 31 | 4  | 2 | 72  | 11 | 209 | 55 |
| 73,156 | 30 | 10 | 239 | 30 | 7  | 2 | 105 | 10 | 381 | 52 |
| 73,157 | 30 | 10 | 257 | 30 | 7  | 2 | 107 | 10 | 401 | 52 |
| 73,158 | 33 | 10 | 311 | 30 | 8  | 2 | 125 | 10 | 477 | 52 |
| 73,159 | 43 | 10 | 347 | 30 | 12 | 2 | 146 | 9  | 548 | 51 |
| 73,160 | 43 | 10 | 347 | 30 | 12 | 2 | 145 | 9  | 547 | 51 |
| 73,161 | 50 | 10 | 424 | 30 | 13 | 2 | 183 | 9  | 670 | 51 |
| 73,162 | 50 | 10 | 438 | 30 | 14 | 2 | 180 | 9  | 682 | 51 |
| 73,163 | 50 | 10 | 438 | 30 | 14 | 2 | 179 | 9  | 681 | 51 |
| 73,164 | 50 | 10 | 450 | 31 | 16 | 2 | 181 | 9  | 697 | 52 |
| 73,165 | 50 | 11 | 458 | 31 | 16 | 2 | 182 | 9  | 706 | 53 |
| 73,166 | 50 | 11 | 450 | 31 | 15 | 2 | 178 | 9  | 693 | 53 |
| 73,167 | 50 | 11 | 449 | 31 | 15 | 2 | 174 | 9  | 688 | 53 |
| 73,168 | 50 | 10 | 450 | 31 | 15 | 2 | 174 | 9  | 689 | 52 |
| 73,169 | 50 | 10 | 446 | 30 | 15 | 1 | 175 | 8  | 686 | 49 |
| 73,170 | 50 | 10 | 446 | 30 | 15 | 1 | 175 | 8  | 686 | 49 |
| 73,171 | 50 | 10 | 449 | 30 | 14 | 1 | 177 | 9  | 690 | 50 |
| 73,172 | 50 | 10 | 449 | 26 | 14 | 2 | 177 | 8  | 690 | 46 |
| 73,173 | 50 | 10 | 449 | 25 | 14 | 2 | 177 | 8  | 690 | 45 |

|        |     |   |     |    |    |   |     |    |       |    |
|--------|-----|---|-----|----|----|---|-----|----|-------|----|
| 73,174 | 54  | 6 | 465 | 16 | 14 | 1 | 177 | 5  | 710   | 28 |
| 73,175 | 54  | 6 | 464 | 16 | 14 | 1 | 177 | 5  | 709   | 28 |
| 73,176 | 54  | 6 | 471 | 13 | 14 | 1 | 178 | 4  | 717   | 24 |
| 73,177 | 54  | 6 | 471 | 13 | 14 | 1 | 177 | 4  | 716   | 24 |
| 73,178 | 54  | 7 | 474 | 13 | 14 | 1 | 177 | 4  | 719   | 25 |
| 73,179 | 57  | 7 | 492 | 12 | 15 | 1 | 183 | 4  | 747   | 24 |
| 73,180 | 57  | 7 | 491 | 10 | 15 | 1 | 180 | 4  | 743   | 22 |
| 73,181 | 57  | 7 | 486 | 10 | 15 | 1 | 180 | 4  | 738   | 22 |
| 73,182 | 57  | 7 | 495 | 11 | 16 | 1 | 183 | 4  | 751   | 23 |
| 73,183 | 65  | 7 | 535 | 9  | 16 | 1 | 198 | 4  | 814   | 21 |
| 73,184 | 64  | 7 | 535 | 9  | 16 | 1 | 198 | 4  | 813   | 21 |
| 73,185 | 65  | 7 | 546 | 9  | 16 | 1 | 200 | 4  | 827   | 21 |
| 73,186 | 70  | 7 | 589 | 9  | 19 | 1 | 227 | 4  | 905   | 21 |
| 73,187 | 70  | 7 | 593 | 9  | 21 | 1 | 229 | 4  | 913   | 21 |
| 73,188 | 77  | 7 | 623 | 9  | 24 | 1 | 243 | 4  | 967   | 21 |
| 73,189 | 78  | 7 | 656 | 10 | 25 | 1 | 250 | 5  | 1,009 | 23 |
| 73,190 | 78  | 7 | 656 | 10 | 25 | 1 | 250 | 5  | 1,009 | 23 |
| 73,191 | 86  | 8 | 695 | 12 | 30 | 1 | 282 | 5  | 1,093 | 26 |
| 73,192 | 86  | 8 | 714 | 12 | 31 | 1 | 289 | 6  | 1,120 | 27 |
| 73,193 | 89  | 8 | 728 | 12 | 33 | 1 | 302 | 7  | 1,152 | 28 |
| 73,194 | 89  | 9 | 729 | 14 | 33 | 1 | 302 | 7  | 1,153 | 31 |
| 73,195 | 88  | 9 | 730 | 14 | 32 | 1 | 300 | 7  | 1,150 | 31 |
| 73,196 | 88  | 9 | 711 | 14 | 32 | 1 | 295 | 7  | 1,126 | 31 |
| 73,197 | 90  | 6 | 724 | 13 | 33 | 1 | 296 | 5  | 1,143 | 25 |
| 73,198 | 90  | 6 | 724 | 13 | 33 | 1 | 296 | 5  | 1,143 | 25 |
| 73,199 | 90  | 6 | 724 | 13 | 33 | 1 | 296 | 5  | 1,143 | 25 |
| 73,200 | 90  | 5 | 725 | 13 | 33 | 1 | 300 | 5  | 1,148 | 24 |
| 73,201 | 90  | 4 | 724 | 12 | 33 | 1 | 300 | 5  | 1,147 | 22 |
| 73,202 | 95  | 4 | 786 | 12 | 39 | 1 | 324 | 5  | 1,244 | 22 |
| 73,203 | 97  | 4 | 859 | 12 | 42 | 1 | 360 | 5  | 1,358 | 22 |
| 73,204 | 97  | 4 | 854 | 12 | 41 | 1 | 366 | 5  | 1,358 | 22 |
| 73,205 | 102 | 4 | 947 | 12 | 45 | 1 | 424 | 6  | 1,518 | 23 |
| 73,206 | 80  | 4 | 835 | 12 | 42 | 1 | 390 | 6  | 1,347 | 23 |
| 73,207 | 80  | 4 | 820 | 11 | 42 | 1 | 389 | 7  | 1,331 | 23 |
| 73,208 | 77  | 4 | 783 | 12 | 41 | 1 | 381 | 8  | 1,282 | 25 |
| 73,209 | 77  | 4 | 758 | 14 | 41 | 3 | 369 | 22 | 1,245 | 43 |
| 73,210 | 67  | 5 | 719 | 17 | 37 | 3 | 349 | 29 | 1,172 | 54 |
| 73,211 | 64  | 7 | 682 | 22 | 36 | 6 | 324 | 37 | 1,106 | 72 |
| 73,212 | 63  | 7 | 660 | 24 | 36 | 7 | 300 | 37 | 1,059 | 75 |
| 73,213 | 63  | 8 | 644 | 26 | 35 | 7 | 298 | 39 | 1,040 | 80 |
| 73,214 | 63  | 8 | 643 | 29 | 35 | 7 | 297 | 39 | 1,038 | 83 |

|        |    |   |     |    |    |   |     |    |       |    |
|--------|----|---|-----|----|----|---|-----|----|-------|----|
| 73,215 | 63 | 8 | 624 | 29 | 33 | 7 | 289 | 39 | 1,009 | 83 |
| 73,216 | 63 | 7 | 624 | 33 | 33 | 7 | 292 | 45 | 1,012 | 92 |
| 73,217 | 69 | 7 | 694 | 33 | 35 | 7 | 317 | 45 | 1,115 | 92 |
| 73,218 | 69 | 7 | 695 | 35 | 37 | 7 | 317 | 45 | 1,118 | 94 |
| 73,219 | 75 | 7 | 714 | 35 | 38 | 7 | 330 | 45 | 1,157 | 94 |
| 73,220 | 75 | 7 | 720 | 35 | 38 | 7 | 331 | 45 | 1,164 | 94 |
| 73,221 | 75 | 7 | 723 | 33 | 38 | 7 | 333 | 44 | 1,169 | 91 |
| 73,222 | 80 | 7 | 751 | 33 | 41 | 6 | 349 | 44 | 1,221 | 90 |
| 73,223 | 82 | 7 | 788 | 33 | 41 | 6 | 354 | 44 | 1,265 | 90 |
| 73,224 | 82 | 7 | 804 | 33 | 41 | 6 | 358 | 44 | 1,285 | 90 |
| 73,225 | 78 | 7 | 791 | 33 | 41 | 6 | 357 | 44 | 1,267 | 90 |
| 73,226 | 78 | 7 | 790 | 33 | 41 | 6 | 357 | 44 | 1,266 | 90 |
| 73,227 | 77 | 7 | 783 | 33 | 41 | 6 | 354 | 44 | 1,255 | 90 |
| 73,228 | 77 | 8 | 783 | 33 | 41 | 6 | 356 | 44 | 1,257 | 91 |
| 73,229 | 76 | 7 | 778 | 33 | 41 | 6 | 350 | 44 | 1,245 | 90 |
| 73,230 | 75 | 7 | 775 | 33 | 41 | 6 | 350 | 44 | 1,241 | 90 |
| 73,231 | 78 | 7 | 794 | 33 | 41 | 6 | 354 | 44 | 1,267 | 90 |
| 73,232 | 80 | 7 | 798 | 34 | 41 | 6 | 357 | 44 | 1,276 | 91 |
| 73,233 | 77 | 7 | 793 | 33 | 41 | 6 | 348 | 44 | 1,259 | 90 |
| 73,234 | 75 | 7 | 806 | 33 | 41 | 6 | 346 | 44 | 1,268 | 90 |
| 73,235 | 75 | 7 | 804 | 33 | 41 | 6 | 346 | 44 | 1,266 | 90 |
| 73,236 | 76 | 8 | 808 | 34 | 43 | 6 | 350 | 44 | 1,277 | 92 |
| 73,237 | 72 | 8 | 785 | 34 | 40 | 6 | 335 | 44 | 1,232 | 92 |
| 73,238 | 72 | 8 | 790 | 34 | 38 | 6 | 342 | 44 | 1,242 | 92 |
| 73,239 | 69 | 8 | 780 | 33 | 36 | 6 | 336 | 43 | 1,221 | 90 |
| 73,240 | 68 | 8 | 753 | 33 | 35 | 6 | 331 | 43 | 1,187 | 90 |
| 73,241 | 64 | 8 | 735 | 33 | 32 | 6 | 315 | 43 | 1,146 | 90 |
| 73,242 | 61 | 7 | 723 | 31 | 30 | 6 | 299 | 43 | 1,113 | 87 |
| 73,243 | 61 | 7 | 704 | 31 | 29 | 6 | 291 | 42 | 1,085 | 86 |
| 73,244 | 59 | 6 | 701 | 29 | 27 | 7 | 288 | 42 | 1,075 | 84 |
| 73,245 | 59 | 6 | 699 | 29 | 27 | 7 | 288 | 42 | 1,073 | 84 |
| 73,246 | 56 | 6 | 693 | 29 | 27 | 7 | 287 | 42 | 1,063 | 84 |
| 73,247 | 56 | 6 | 690 | 29 | 27 | 7 | 286 | 42 | 1,059 | 84 |
| 73,248 | 54 | 6 | 670 | 29 | 26 | 7 | 284 | 42 | 1,034 | 84 |
| 73,249 | 54 | 6 | 667 | 29 | 26 | 7 | 280 | 42 | 1,027 | 84 |
| 73,250 | 54 | 6 | 666 | 29 | 26 | 7 | 281 | 42 | 1,027 | 84 |
| 73,251 | 51 | 6 | 641 | 29 | 24 | 7 | 267 | 41 | 983   | 83 |
| 73,252 | 50 | 6 | 608 | 29 | 20 | 7 | 258 | 41 | 936   | 83 |
| 73,253 | 49 | 6 | 537 | 29 | 17 | 7 | 225 | 41 | 828   | 83 |
| 73,254 | 48 | 6 | 529 | 29 | 17 | 7 | 220 | 41 | 814   | 83 |
| 73,255 | 47 | 6 | 520 | 29 | 17 | 7 | 214 | 41 | 798   | 83 |

|        |    |   |     |    |    |   |     |    |     |    |
|--------|----|---|-----|----|----|---|-----|----|-----|----|
| 73,256 | 42 | 6 | 429 | 29 | 14 | 7 | 157 | 40 | 642 | 82 |
| 73,257 | 42 | 6 | 427 | 29 | 14 | 7 | 157 | 40 | 640 | 82 |
| 73,258 | 44 | 6 | 469 | 28 | 14 | 7 | 167 | 38 | 694 | 79 |
| 73,259 | 45 | 6 | 494 | 28 | 15 | 7 | 175 | 38 | 729 | 79 |
| 73,260 | 45 | 5 | 486 | 23 | 15 | 5 | 173 | 17 | 719 | 50 |
| 73,261 | 47 | 3 | 487 | 18 | 15 | 2 | 173 | 9  | 722 | 32 |
| 73,262 | 47 | 3 | 493 | 18 | 15 | 2 | 173 | 9  | 728 | 32 |
| 73,263 | 44 | 3 | 475 | 16 | 15 | 1 | 169 | 9  | 703 | 29 |
| 73,264 | 44 | 2 | 475 | 14 | 15 | 1 | 168 | 7  | 702 | 24 |
| 73,265 | 51 | 2 | 508 | 10 | 18 | 1 | 192 | 7  | 769 | 20 |
| 73,266 | 53 | 2 | 570 | 6  | 21 | 1 | 219 | 1  | 863 | 10 |
| 73,267 | 54 | 2 | 603 | 6  | 22 | 1 | 226 | 1  | 905 | 10 |
| 73,268 | 48 | 2 | 537 | 9  | 19 | 1 | 201 | 4  | 805 | 16 |
| 73,269 | 58 | 2 | 591 | 13 | 23 | 1 | 246 | 7  | 918 | 23 |
| 73,270 | 54 | 2 | 570 | 13 | 22 | 1 | 233 | 7  | 879 | 23 |
| 73,271 | 54 | 2 | 565 | 13 | 22 | 1 | 234 | 9  | 875 | 25 |
| 73,272 | 54 | 2 | 560 | 13 | 22 | 1 | 231 | 9  | 867 | 25 |
| 73,273 | 49 | 2 | 531 | 13 | 19 | 1 | 215 | 9  | 814 | 25 |
| 73,274 | 47 | 2 | 493 | 13 | 19 | 1 | 210 | 9  | 769 | 25 |
| 73,275 | 47 | 2 | 478 | 14 | 19 | 1 | 206 | 10 | 750 | 27 |
| 73,276 | 47 | 2 | 476 | 18 | 19 | 2 | 207 | 15 | 749 | 37 |
| 73,277 | 47 | 2 | 476 | 18 | 19 | 2 | 207 | 15 | 749 | 37 |
| 73,278 | 49 | 2 | 476 | 19 | 19 | 2 | 208 | 16 | 752 | 39 |
| 73,279 | 49 | 1 | 474 | 19 | 19 | 2 | 206 | 17 | 748 | 39 |
| 73,280 | 48 | 1 | 464 | 19 | 18 | 2 | 205 | 17 | 735 | 39 |
| 73,281 | 45 | 1 | 451 | 19 | 17 | 2 | 201 | 17 | 714 | 39 |
| 73,282 | 45 | 1 | 441 | 19 | 17 | 2 | 200 | 17 | 703 | 39 |
| 73,283 | 43 | 1 | 434 | 18 | 17 | 2 | 196 | 17 | 690 | 38 |
| 73,284 | 41 | 1 | 411 | 18 | 17 | 2 | 195 | 17 | 664 | 38 |
| 73,285 | 43 | 1 | 393 | 19 | 17 | 2 | 193 | 17 | 646 | 39 |
| 73,286 | 43 | 1 | 397 | 19 | 17 | 2 | 196 | 17 | 653 | 39 |
| 73,287 | 43 | 0 | 395 | 17 | 16 | 2 | 197 | 18 | 651 | 37 |
| 73,288 | 42 | 0 | 375 | 17 | 16 | 2 | 186 | 18 | 619 | 37 |
| 73,289 | 42 | 0 | 366 | 17 | 16 | 2 | 176 | 18 | 600 | 37 |
| 73,290 | 38 | 1 | 344 | 18 | 15 | 2 | 167 | 18 | 564 | 39 |
| 73,291 | 37 | 1 | 349 | 23 | 15 | 2 | 168 | 19 | 569 | 45 |
| 73,292 | 37 | 1 | 344 | 23 | 15 | 2 | 167 | 21 | 563 | 47 |
| 73,293 | 36 | 1 | 336 | 23 | 15 | 2 | 161 | 21 | 548 | 47 |
| 73,294 | 38 | 1 | 346 | 25 | 17 | 2 | 184 | 21 | 585 | 49 |
| 73,295 | 38 | 1 | 344 | 25 | 17 | 1 | 183 | 20 | 582 | 47 |
| 73,296 | 38 | 1 | 344 | 25 | 17 | 1 | 182 | 20 | 581 | 47 |

|        |    |   |     |    |    |   |     |    |     |    |
|--------|----|---|-----|----|----|---|-----|----|-----|----|
| 73,297 | 39 | 1 | 346 | 25 | 17 | 1 | 189 | 20 | 591 | 47 |
| 73,298 | 39 | 1 | 346 | 25 | 17 | 1 | 189 | 20 | 591 | 47 |
| 73,299 | 39 | 1 | 349 | 25 | 18 | 1 | 192 | 20 | 598 | 47 |
| 73,300 | 39 | 1 | 353 | 25 | 18 | 1 | 198 | 20 | 608 | 47 |
| 73,301 | 39 | 1 | 365 | 25 | 19 | 1 | 202 | 20 | 625 | 47 |
| 73,302 | 39 | 1 | 365 | 25 | 19 | 1 | 202 | 20 | 625 | 47 |
| 73,303 | 38 | 1 | 369 | 25 | 20 | 1 | 202 | 20 | 629 | 47 |
| 73,304 | 38 | 1 | 369 | 25 | 20 | 1 | 202 | 20 | 629 | 47 |
| 73,305 | 38 | 1 | 369 | 25 | 20 | 1 | 202 | 20 | 629 | 47 |
| 73,306 | 38 | 1 | 371 | 25 | 20 | 1 | 202 | 20 | 631 | 47 |
| 73,307 | 38 | 1 | 371 | 25 | 19 | 1 | 201 | 20 | 629 | 47 |
| 73,308 | 36 | 1 | 340 | 25 | 19 | 1 | 194 | 18 | 589 | 45 |
| 73,309 | 36 | 1 | 330 | 25 | 19 | 1 | 192 | 18 | 577 | 45 |
| 73,310 | 35 | 1 | 307 | 25 | 18 | 1 | 183 | 18 | 543 | 45 |
| 73,311 | 37 | 1 | 316 | 25 | 18 | 1 | 184 | 18 | 555 | 45 |
| 73,312 | 34 | 1 | 312 | 26 | 18 | 1 | 183 | 18 | 547 | 46 |
| 73,313 | 34 | 1 | 306 | 26 | 18 | 1 | 183 | 18 | 541 | 46 |
| 73,314 | 34 | 1 | 302 | 31 | 18 | 1 | 183 | 18 | 537 | 51 |
| 73,315 | 27 | 1 | 273 | 34 | 15 | 1 | 157 | 18 | 472 | 54 |
| 73,316 | 27 | 2 | 258 | 36 | 15 | 1 | 154 | 19 | 454 | 58 |
| 73,317 | 25 | 3 | 210 | 37 | 12 | 1 | 132 | 19 | 379 | 60 |
| 73,318 | 24 | 3 | 174 | 28 | 10 | 1 | 123 | 14 | 331 | 46 |
| 73,319 | 24 | 5 | 171 | 29 | 10 | 1 | 123 | 15 | 328 | 50 |
| 73,320 | 14 | 7 | 115 | 34 | 6  | 1 | 76  | 18 | 211 | 60 |
| 73,321 | 12 | 7 | 115 | 34 | 6  | 1 | 75  | 18 | 208 | 60 |
| 73,322 | 13 | 7 | 115 | 34 | 6  | 1 | 74  | 17 | 208 | 59 |
| 73,323 | 14 | 7 | 121 | 34 | 6  | 1 | 81  | 17 | 222 | 59 |
| 73,324 | 15 | 7 | 126 | 34 | 7  | 1 | 81  | 17 | 229 | 59 |
| 73,325 | 15 | 7 | 127 | 35 | 7  | 1 | 83  | 17 | 232 | 60 |
| 73,326 | 15 | 7 | 135 | 30 | 8  | 0 | 93  | 12 | 251 | 49 |
| 73,327 | 15 | 7 | 135 | 31 | 8  | 0 | 92  | 12 | 250 | 50 |
| 73,328 | 13 | 7 | 135 | 31 | 8  | 0 | 92  | 12 | 248 | 50 |
| 73,329 | 13 | 8 | 146 | 30 | 9  | 0 | 107 | 10 | 275 | 48 |
| 73,330 | 13 | 8 | 160 | 30 | 9  | 0 | 108 | 10 | 290 | 48 |
| 73,331 | 13 | 8 | 159 | 31 | 9  | 0 | 108 | 10 | 289 | 49 |
| 73,332 | 12 | 8 | 162 | 31 | 9  | 0 | 106 | 10 | 289 | 49 |
| 73,333 | 11 | 8 | 163 | 31 | 10 | 0 | 107 | 10 | 291 | 49 |
| 73,334 | 10 | 8 | 162 | 31 | 10 | 0 | 107 | 10 | 289 | 49 |
| 73,335 | 13 | 8 | 194 | 30 | 12 | 0 | 110 | 10 | 329 | 48 |
| 73,336 | 14 | 8 | 201 | 30 | 12 | 0 | 116 | 10 | 343 | 48 |
| 73,337 | 14 | 8 | 197 | 30 | 12 | 0 | 113 | 10 | 336 | 48 |

|        |    |    |     |     |    |   |     |    |       |     |
|--------|----|----|-----|-----|----|---|-----|----|-------|-----|
| 73,338 | 19 | 8  | 249 | 30  | 12 | 0 | 115 | 9  | 395   | 47  |
| 73,339 | 23 | 8  | 298 | 30  | 12 | 0 | 126 | 9  | 459   | 47  |
| 73,340 | 27 | 7  | 404 | 31  | 16 | 0 | 162 | 10 | 609   | 48  |
| 73,341 | 27 | 7  | 404 | 32  | 16 | 0 | 161 | 10 | 608   | 49  |
| 73,342 | 27 | 7  | 394 | 27  | 16 | 0 | 158 | 9  | 595   | 43  |
| 73,343 | 27 | 8  | 422 | 27  | 17 | 0 | 166 | 7  | 632   | 42  |
| 73,344 | 29 | 8  | 431 | 27  | 17 | 0 | 166 | 7  | 643   | 42  |
| 73,345 | 28 | 9  | 434 | 37  | 15 | 1 | 146 | 8  | 623   | 55  |
| 73,346 | 27 | 10 | 432 | 45  | 15 | 1 | 143 | 11 | 617   | 67  |
| 73,347 | 27 | 10 | 431 | 51  | 15 | 3 | 139 | 14 | 612   | 78  |
| 73,348 | 27 | 11 | 431 | 54  | 15 | 3 | 139 | 15 | 612   | 83  |
| 73,349 | 27 | 11 | 434 | 54  | 14 | 4 | 138 | 15 | 613   | 84  |
| 73,350 | 27 | 12 | 432 | 62  | 14 | 4 | 136 | 16 | 609   | 94  |
| 73,351 | 27 | 12 | 428 | 66  | 14 | 4 | 130 | 17 | 599   | 99  |
| 73,352 | 27 | 12 | 417 | 66  | 13 | 4 | 128 | 17 | 585   | 99  |
| 73,353 | 27 | 13 | 412 | 68  | 12 | 4 | 128 | 17 | 579   | 102 |
| 73,354 | 27 | 13 | 412 | 68  | 12 | 4 | 128 | 17 | 579   | 102 |
| 73,355 | 27 | 13 | 416 | 69  | 12 | 4 | 128 | 17 | 583   | 103 |
| 73,356 | 27 | 13 | 422 | 71  | 12 | 4 | 128 | 18 | 589   | 106 |
| 73,357 | 27 | 13 | 420 | 71  | 12 | 4 | 128 | 19 | 587   | 107 |
| 73,358 | 30 | 13 | 425 | 76  | 12 | 4 | 128 | 21 | 595   | 114 |
| 73,359 | 31 | 13 | 426 | 77  | 12 | 4 | 127 | 21 | 596   | 115 |
| 73,360 | 31 | 14 | 425 | 79  | 12 | 4 | 127 | 23 | 595   | 120 |
| 73,361 | 31 | 14 | 438 | 103 | 12 | 5 | 128 | 35 | 609   | 157 |
| 73,362 | 30 | 14 | 466 | 106 | 12 | 5 | 130 | 36 | 638   | 161 |
| 73,363 | 74 | 14 | 639 | 105 | 19 | 5 | 188 | 38 | 920   | 162 |
| 73,364 | 81 | 14 | 665 | 103 | 21 | 5 | 207 | 38 | 974   | 160 |
| 73,365 | 81 | 14 | 673 | 100 | 22 | 5 | 207 | 39 | 983   | 158 |
| 73,366 | 85 | 12 | 715 | 97  | 26 | 5 | 232 | 38 | 1,058 | 152 |
| 73,367 | 87 | 13 | 767 | 97  | 29 | 5 | 241 | 38 | 1,124 | 153 |
| 73,368 | 90 | 13 | 805 | 97  | 32 | 5 | 258 | 38 | 1,185 | 153 |
| 73,369 | 90 | 13 | 803 | 100 | 32 | 6 | 258 | 42 | 1,183 | 161 |
| 73,370 | 90 | 11 | 803 | 101 | 32 | 6 | 257 | 41 | 1,182 | 159 |
| 73,371 | 91 | 9  | 815 | 100 | 33 | 7 | 263 | 41 | 1,202 | 157 |
| 73,372 | 90 | 9  | 815 | 102 | 33 | 7 | 263 | 41 | 1,201 | 159 |
| 73,373 | 91 | 9  | 820 | 113 | 33 | 8 | 261 | 48 | 1,205 | 178 |
| 73,374 | 91 | 9  | 819 | 115 | 33 | 8 | 259 | 49 | 1,202 | 181 |
| 73,375 | 90 | 9  | 814 | 116 | 32 | 8 | 259 | 49 | 1,195 | 182 |
| 73,376 | 90 | 11 | 812 | 124 | 32 | 8 | 257 | 50 | 1,191 | 193 |
| 73,377 | 90 | 11 | 804 | 124 | 31 | 8 | 247 | 49 | 1,172 | 192 |
| 73,378 | 90 | 11 | 807 | 123 | 31 | 8 | 246 | 49 | 1,174 | 191 |

|        |     |    |     |     |    |   |     |    |       |     |
|--------|-----|----|-----|-----|----|---|-----|----|-------|-----|
| 73,379 | 90  | 11 | 806 | 124 | 31 | 8 | 241 | 49 | 1,168 | 192 |
| 73,380 | 90  | 10 | 809 | 124 | 30 | 8 | 232 | 49 | 1,161 | 191 |
| 73,381 | 90  | 10 | 801 | 123 | 30 | 8 | 232 | 49 | 1,153 | 190 |
| 73,382 | 90  | 10 | 801 | 123 | 30 | 8 | 232 | 49 | 1,153 | 190 |
| 73,383 | 90  | 10 | 808 | 123 | 30 | 8 | 234 | 49 | 1,162 | 190 |
| 73,384 | 90  | 11 | 818 | 125 | 31 | 8 | 236 | 49 | 1,175 | 193 |
| 73,385 | 88  | 11 | 799 | 126 | 30 | 8 | 233 | 49 | 1,150 | 194 |
| 73,386 | 87  | 11 | 786 | 126 | 29 | 8 | 233 | 49 | 1,135 | 194 |
| 73,387 | 89  | 11 | 803 | 128 | 31 | 8 | 234 | 50 | 1,157 | 197 |
| 73,388 | 94  | 11 | 843 | 128 | 35 | 8 | 262 | 50 | 1,234 | 197 |
| 73,389 | 89  | 11 | 791 | 130 | 35 | 8 | 256 | 51 | 1,171 | 200 |
| 73,390 | 88  | 11 | 752 | 132 | 35 | 8 | 254 | 51 | 1,129 | 202 |
| 73,391 | 84  | 11 | 659 | 131 | 31 | 8 | 222 | 50 | 996   | 200 |
| 73,392 | 92  | 11 | 662 | 131 | 33 | 8 | 230 | 50 | 1,017 | 200 |
| 73,393 | 96  | 10 | 671 | 131 | 33 | 8 | 237 | 50 | 1,037 | 199 |
| 73,394 | 99  | 10 | 681 | 131 | 33 | 8 | 243 | 50 | 1,056 | 199 |
| 73,395 | 99  | 9  | 671 | 119 | 33 | 7 | 244 | 49 | 1,047 | 184 |
| 73,396 | 98  | 9  | 657 | 122 | 33 | 7 | 244 | 50 | 1,032 | 188 |
| 73,397 | 98  | 8  | 656 | 114 | 33 | 7 | 245 | 47 | 1,032 | 176 |
| 73,398 | 98  | 8  | 660 | 108 | 33 | 5 | 248 | 44 | 1,039 | 165 |
| 73,399 | 98  | 7  | 661 | 105 | 33 | 4 | 250 | 43 | 1,042 | 159 |
| 73,400 | 98  | 6  | 668 | 97  | 33 | 4 | 254 | 42 | 1,053 | 149 |
| 73,401 | 98  | 6  | 667 | 97  | 33 | 4 | 253 | 42 | 1,051 | 149 |
| 73,402 | 99  | 6  | 669 | 93  | 33 | 4 | 255 | 41 | 1,056 | 144 |
| 73,403 | 99  | 6  | 667 | 93  | 33 | 4 | 255 | 41 | 1,054 | 144 |
| 73,404 | 99  | 5  | 677 | 91  | 34 | 4 | 256 | 41 | 1,066 | 141 |
| 73,405 | 100 | 5  | 684 | 90  | 34 | 4 | 263 | 41 | 1,081 | 140 |
| 73,406 | 100 | 5  | 684 | 88  | 34 | 4 | 263 | 40 | 1,081 | 137 |
| 73,407 | 100 | 5  | 676 | 88  | 34 | 4 | 263 | 40 | 1,073 | 137 |
| 73,408 | 99  | 5  | 673 | 88  | 34 | 4 | 261 | 39 | 1,067 | 136 |
| 73,409 | 97  | 5  | 670 | 84  | 34 | 4 | 261 | 37 | 1,062 | 130 |
| 73,410 | 97  | 4  | 670 | 81  | 34 | 4 | 261 | 35 | 1,062 | 124 |
| 73,411 | 97  | 4  | 678 | 57  | 34 | 3 | 262 | 23 | 1,071 | 87  |
| 73,412 | 97  | 4  | 663 | 54  | 34 | 3 | 262 | 22 | 1,056 | 83  |
| 73,413 | 96  | 4  | 632 | 56  | 34 | 3 | 258 | 23 | 1,020 | 86  |
| 73,414 | 54  | 4  | 465 | 57  | 27 | 3 | 206 | 21 | 752   | 85  |
| 73,415 | 47  | 4  | 439 | 54  | 25 | 3 | 187 | 22 | 698   | 83  |
| 73,416 | 47  | 5  | 433 | 54  | 24 | 3 | 189 | 21 | 693   | 83  |
| 73,417 | 43  | 5  | 391 | 54  | 20 | 3 | 164 | 21 | 618   | 83  |
| 73,418 | 41  | 5  | 339 | 56  | 17 | 3 | 154 | 21 | 551   | 85  |
| 73,419 | 40  | 5  | 324 | 56  | 15 | 4 | 142 | 24 | 521   | 89  |

|        |    |   |     |    |    |   |     |    |     |    |
|--------|----|---|-----|----|----|---|-----|----|-----|----|
| 73,420 | 39 | 5 | 321 | 52 | 15 | 3 | 141 | 21 | 516 | 81 |
| 73,421 | 39 | 6 | 322 | 51 | 15 | 3 | 140 | 21 | 516 | 81 |
| 73,422 | 46 | 6 | 323 | 47 | 15 | 2 | 142 | 18 | 526 | 73 |
| 73,423 | 44 | 6 | 319 | 45 | 15 | 2 | 143 | 18 | 521 | 71 |
| 73,424 | 44 | 6 | 316 | 35 | 15 | 1 | 142 | 11 | 517 | 53 |
| 73,425 | 47 | 7 | 346 | 33 | 16 | 1 | 151 | 10 | 560 | 51 |
| 73,426 | 47 | 7 | 346 | 32 | 16 | 1 | 151 | 12 | 560 | 52 |
| 73,427 | 47 | 5 | 346 | 23 | 16 | 1 | 151 | 11 | 560 | 40 |
| 73,428 | 66 | 5 | 475 | 23 | 21 | 1 | 202 | 11 | 764 | 40 |
| 73,429 | 66 | 5 | 480 | 24 | 21 | 1 | 208 | 11 | 775 | 41 |
| 73,430 | 67 | 5 | 480 | 23 | 21 | 2 | 209 | 11 | 777 | 41 |
| 73,431 | 67 | 5 | 467 | 23 | 21 | 2 | 210 | 11 | 765 | 41 |
| 73,432 | 67 | 5 | 463 | 23 | 21 | 2 | 209 | 11 | 760 | 41 |
| 73,433 | 67 | 5 | 460 | 23 | 21 | 2 | 209 | 11 | 757 | 41 |
| 73,434 | 67 | 4 | 462 | 21 | 21 | 2 | 207 | 11 | 757 | 38 |
| 73,435 | 67 | 4 | 449 | 21 | 19 | 2 | 205 | 11 | 740 | 38 |
| 73,436 | 64 | 4 | 427 | 20 | 18 | 2 | 199 | 11 | 708 | 37 |
| 73,437 | 64 | 4 | 426 | 19 | 17 | 2 | 197 | 10 | 704 | 35 |
| 73,438 | 64 | 4 | 427 | 19 | 17 | 2 | 197 | 10 | 705 | 35 |
| 73,439 | 58 | 4 | 394 | 17 | 12 | 2 | 178 | 9  | 642 | 32 |
| 73,440 | 58 | 4 | 410 | 17 | 12 | 2 | 179 | 10 | 659 | 33 |
| 73,441 | 56 | 4 | 408 | 14 | 14 | 2 | 179 | 11 | 657 | 31 |
| 73,442 | 56 | 4 | 394 | 14 | 14 | 2 | 175 | 11 | 639 | 31 |
| 73,443 | 50 | 4 | 388 | 16 | 12 | 2 | 169 | 11 | 619 | 33 |
| 73,444 | 49 | 4 | 366 | 21 | 13 | 2 | 167 | 13 | 595 | 40 |
| 73,445 | 46 | 4 | 355 | 23 | 13 | 2 | 160 | 13 | 574 | 42 |
| 73,446 | 45 | 4 | 369 | 24 | 14 | 2 | 165 | 13 | 593 | 43 |
| 73,447 | 45 | 4 | 374 | 22 | 15 | 2 | 168 | 12 | 602 | 40 |
| 73,448 | 46 | 4 | 430 | 22 | 18 | 2 | 182 | 12 | 676 | 40 |
| 73,449 | 46 | 4 | 428 | 22 | 18 | 2 | 181 | 12 | 673 | 40 |
| 73,450 | 47 | 4 | 448 | 23 | 18 | 2 | 190 | 14 | 703 | 43 |
| 73,451 | 47 | 4 | 437 | 23 | 18 | 2 | 186 | 15 | 688 | 44 |
| 73,452 | 47 | 4 | 438 | 24 | 18 | 2 | 186 | 16 | 689 | 46 |
| 73,453 | 46 | 5 | 435 | 29 | 18 | 2 | 183 | 17 | 682 | 53 |
| 73,454 | 46 | 5 | 433 | 36 | 18 | 2 | 183 | 17 | 680 | 60 |
| 73,455 | 46 | 7 | 425 | 40 | 17 | 2 | 182 | 18 | 670 | 67 |
| 73,456 | 45 | 7 | 416 | 43 | 17 | 2 | 174 | 18 | 652 | 70 |
| 73,457 | 46 | 7 | 421 | 43 | 17 | 2 | 175 | 18 | 659 | 70 |
| 73,458 | 46 | 7 | 422 | 43 | 17 | 2 | 175 | 18 | 660 | 70 |
| 73,459 | 46 | 7 | 426 | 43 | 17 | 2 | 176 | 18 | 665 | 70 |
| 73,460 | 46 | 7 | 427 | 42 | 17 | 2 | 176 | 18 | 666 | 69 |



|        |    |   |     |    |    |   |     |    |       |    |
|--------|----|---|-----|----|----|---|-----|----|-------|----|
| 73,461 | 46 | 7 | 448 | 42 | 17 | 2 | 181 | 18 | 692   | 69 |
| 73,462 | 46 | 7 | 444 | 42 | 17 | 2 | 180 | 18 | 687   | 69 |
| 73,463 | 49 | 7 | 511 | 39 | 19 | 2 | 197 | 16 | 776   | 64 |
| 73,464 | 52 | 7 | 516 | 39 | 19 | 2 | 201 | 16 | 788   | 64 |
| 73,465 | 50 | 7 | 511 | 39 | 19 | 2 | 196 | 16 | 776   | 64 |
| 73,466 | 50 | 6 | 513 | 39 | 19 | 2 | 199 | 16 | 781   | 63 |
| 73,467 | 50 | 6 | 520 | 40 | 19 | 2 | 200 | 16 | 789   | 64 |
| 73,468 | 50 | 6 | 518 | 40 | 19 | 2 | 200 | 16 | 787   | 64 |
| 73,469 | 49 | 5 | 508 | 38 | 19 | 1 | 199 | 13 | 775   | 57 |
| 73,470 | 49 | 5 | 499 | 38 | 18 | 1 | 197 | 13 | 763   | 57 |
| 73,471 | 49 | 4 | 503 | 37 | 18 | 1 | 209 | 12 | 779   | 54 |
| 73,472 | 49 | 4 | 498 | 37 | 18 | 1 | 209 | 12 | 774   | 54 |
| 73,473 | 46 | 4 | 521 | 37 | 18 | 1 | 239 | 12 | 824   | 54 |
| 73,474 | 48 | 4 | 531 | 37 | 23 | 1 | 269 | 12 | 871   | 54 |
| 73,475 | 45 | 3 | 502 | 36 | 22 | 1 | 265 | 12 | 834   | 52 |
| 73,476 | 44 | 3 | 480 | 36 | 22 | 1 | 261 | 13 | 807   | 53 |
| 73,477 | 38 | 3 | 448 | 36 | 20 | 1 | 235 | 11 | 741   | 51 |
| 73,478 | 26 | 3 | 377 | 36 | 17 | 1 | 215 | 11 | 635   | 51 |
| 73,479 | 26 | 3 | 373 | 36 | 17 | 1 | 213 | 11 | 629   | 51 |
| 73,480 | 26 | 3 | 368 | 35 | 17 | 1 | 209 | 11 | 620   | 50 |
| 73,481 | 33 | 3 | 437 | 35 | 22 | 0 | 269 | 11 | 761   | 49 |
| 73,482 | 33 | 3 | 437 | 35 | 22 | 0 | 269 | 11 | 761   | 49 |
| 73,483 | 40 | 3 | 501 | 35 | 36 | 1 | 362 | 12 | 939   | 51 |
| 73,484 | 40 | 3 | 500 | 35 | 36 | 1 | 362 | 12 | 938   | 51 |
| 73,485 | 40 | 3 | 491 | 35 | 36 | 1 | 362 | 12 | 929   | 51 |
| 73,486 | 41 | 3 | 502 | 35 | 37 | 1 | 379 | 12 | 959   | 51 |
| 73,487 | 41 | 3 | 502 | 34 | 37 | 1 | 379 | 12 | 959   | 50 |
| 73,488 | 42 | 3 | 495 | 34 | 37 | 1 | 380 | 12 | 954   | 50 |
| 73,489 | 42 | 3 | 495 | 34 | 37 | 1 | 382 | 12 | 956   | 50 |
| 73,490 | 41 | 3 | 479 | 34 | 37 | 1 | 373 | 12 | 930   | 50 |
| 73,491 | 41 | 3 | 460 | 34 | 37 | 1 | 370 | 11 | 908   | 49 |
| 73,492 | 41 | 3 | 456 | 34 | 35 | 1 | 367 | 10 | 899   | 48 |
| 73,493 | 41 | 3 | 455 | 34 | 35 | 1 | 367 | 11 | 898   | 49 |
| 73,494 | 42 | 3 | 464 | 32 | 35 | 1 | 365 | 12 | 906   | 48 |
| 73,495 | 40 | 3 | 478 | 29 | 33 | 1 | 354 | 15 | 905   | 48 |
| 73,496 | 39 | 3 | 484 | 31 | 34 | 1 | 354 | 20 | 911   | 55 |
| 73,497 | 51 | 3 | 672 | 34 | 39 | 1 | 419 | 21 | 1,181 | 59 |
| 73,498 | 55 | 3 | 690 | 33 | 40 | 1 | 426 | 21 | 1,211 | 58 |
| 73,499 | 57 | 3 | 670 | 33 | 38 | 1 | 424 | 21 | 1,189 | 58 |
| 73,500 | 56 | 3 | 679 | 32 | 38 | 1 | 420 | 19 | 1,193 | 55 |
| 73,501 | 56 | 3 | 675 | 32 | 38 | 1 | 417 | 19 | 1,186 | 55 |

|        |     |   |       |    |     |   |       |    |       |    |
|--------|-----|---|-------|----|-----|---|-------|----|-------|----|
| 73,502 | 70  | 3 | 883   | 36 | 51  | 1 | 476   | 18 | 1,480 | 58 |
| 73,503 | 70  | 3 | 882   | 36 | 51  | 1 | 476   | 17 | 1,479 | 57 |
| 73,504 | 88  | 2 | 1,268 | 31 | 78  | 1 | 672   | 16 | 2,106 | 50 |
| 73,505 | 92  | 0 | 1,324 | 23 | 83  | 1 | 706   | 15 | 2,205 | 39 |
| 73,506 | 92  | 0 | 1,349 | 23 | 83  | 1 | 706   | 15 | 2,230 | 39 |
| 73,507 | 91  | 0 | 1,351 | 20 | 83  | 1 | 712   | 15 | 2,237 | 36 |
| 73,508 | 91  | 0 | 1,351 | 20 | 83  | 1 | 714   | 15 | 2,239 | 36 |
| 73,509 | 91  | 0 | 1,348 | 20 | 83  | 1 | 713   | 15 | 2,235 | 36 |
| 73,510 | 91  | 0 | 1,347 | 20 | 83  | 1 | 715   | 15 | 2,236 | 36 |
| 73,511 | 92  | 1 | 1,331 | 21 | 83  | 1 | 710   | 15 | 2,216 | 38 |
| 73,512 | 94  | 1 | 1,336 | 21 | 85  | 1 | 713   | 15 | 2,228 | 38 |
| 73,513 | 94  | 1 | 1,333 | 21 | 85  | 1 | 713   | 16 | 2,225 | 39 |
| 73,514 | 91  | 1 | 1,263 | 21 | 83  | 1 | 694   | 16 | 2,131 | 39 |
| 73,515 | 92  | 1 | 1,265 | 21 | 84  | 1 | 697   | 16 | 2,138 | 39 |
| 73,516 | 93  | 1 | 1,268 | 21 | 84  | 1 | 696   | 16 | 2,141 | 39 |
| 73,517 | 94  | 1 | 1,274 | 21 | 84  | 1 | 703   | 16 | 2,155 | 39 |
| 73,518 | 94  | 1 | 1,272 | 22 | 84  | 1 | 703   | 16 | 2,153 | 40 |
| 73,519 | 141 | 1 | 1,580 | 22 | 114 | 1 | 997   | 16 | 2,832 | 40 |
| 73,520 | 144 | 1 | 1,598 | 22 | 114 | 1 | 1,020 | 16 | 2,876 | 40 |
| 73,521 | 160 | 1 | 1,630 | 24 | 118 | 1 | 1,071 | 16 | 2,979 | 42 |
| 73,522 | 162 | 1 | 1,630 | 26 | 119 | 1 | 1,070 | 17 | 2,981 | 45 |
| 73,523 | 159 | 1 | 1,623 | 27 | 118 | 1 | 1,045 | 17 | 2,945 | 46 |
| 73,524 | 184 | 1 | 1,828 | 27 | 147 | 1 | 1,206 | 17 | 3,365 | 46 |
| 73,525 | 182 | 1 | 1,832 | 27 | 142 | 1 | 1,173 | 17 | 3,329 | 46 |
| 73,526 | 182 | 1 | 1,842 | 27 | 142 | 1 | 1,172 | 16 | 3,338 | 45 |
| 73,527 | 188 | 1 | 1,880 | 27 | 146 | 1 | 1,205 | 16 | 3,419 | 45 |
| 73,528 | 190 | 1 | 1,944 | 27 | 147 | 1 | 1,210 | 16 | 3,491 | 45 |
| 73,529 | 195 | 1 | 1,988 | 27 | 147 | 1 | 1,217 | 16 | 3,547 | 45 |
| 73,530 | 195 | 1 | 2,010 | 28 | 147 | 1 | 1,224 | 16 | 3,576 | 46 |
| 73,531 | 193 | 1 | 2,009 | 29 | 147 | 1 | 1,219 | 16 | 3,568 | 47 |
| 73,532 | 187 | 1 | 1,966 | 32 | 142 | 1 | 1,169 | 16 | 3,464 | 50 |
| 73,533 | 181 | 1 | 1,922 | 32 | 129 | 1 | 1,096 | 15 | 3,328 | 49 |
| 73,534 | 180 | 1 | 1,903 | 32 | 128 | 0 | 1,075 | 14 | 3,286 | 47 |
| 73,535 | 180 | 1 | 1,898 | 33 | 127 | 0 | 1,077 | 14 | 3,282 | 48 |
| 73,536 | 180 | 1 | 1,898 | 33 | 127 | 0 | 1,074 | 14 | 3,279 | 48 |
| 73,537 | 179 | 1 | 1,895 | 34 | 127 | 0 | 1,064 | 14 | 3,265 | 49 |
| 73,538 | 179 | 1 | 1,895 | 34 | 127 | 0 | 1,064 | 15 | 3,265 | 50 |
| 73,539 | 179 | 1 | 1,895 | 34 | 127 | 0 | 1,063 | 15 | 3,264 | 50 |
| 73,540 | 179 | 1 | 1,895 | 34 | 127 | 0 | 1,064 | 15 | 3,265 | 50 |
| 73,541 | 179 | 1 | 1,895 | 33 | 127 | 0 | 1,062 | 15 | 3,263 | 49 |
| 73,542 | 179 | 1 | 1,894 | 34 | 127 | 0 | 1,062 | 17 | 3,262 | 52 |

|        |     |    |       |    |     |   |       |    |       |     |
|--------|-----|----|-------|----|-----|---|-------|----|-------|-----|
| 73,543 | 178 | 1  | 1,890 | 34 | 127 | 0 | 1,055 | 17 | 3,250 | 52  |
| 73,544 | 176 | 1  | 1,877 | 34 | 127 | 0 | 1,054 | 17 | 3,234 | 52  |
| 73,545 | 175 | 1  | 1,876 | 34 | 127 | 0 | 1,055 | 16 | 3,233 | 51  |
| 73,546 | 174 | 1  | 1,853 | 28 | 127 | 0 | 1,052 | 6  | 3,206 | 35  |
| 73,547 | 174 | 1  | 1,845 | 28 | 126 | 0 | 1,051 | 6  | 3,196 | 35  |
| 73,548 | 162 | 1  | 1,642 | 24 | 120 | 0 | 978   | 5  | 2,902 | 30  |
| 73,549 | 158 | 1  | 1,631 | 24 | 118 | 0 | 971   | 5  | 2,878 | 30  |
| 73,550 | 155 | 1  | 1,597 | 25 | 117 | 0 | 960   | 7  | 2,829 | 33  |
| 73,551 | 155 | 3  | 1,578 | 49 | 117 | 0 | 957   | 27 | 2,807 | 79  |
| 73,552 | 147 | 3  | 1,568 | 57 | 114 | 1 | 954   | 30 | 2,783 | 91  |
| 73,553 | 143 | 8  | 1,406 | 65 | 106 | 1 | 909   | 37 | 2,564 | 111 |
| 73,554 | 128 | 9  | 1,064 | 68 | 81  | 1 | 748   | 41 | 2,021 | 119 |
| 73,555 | 127 | 10 | 1,078 | 66 | 81  | 1 | 740   | 42 | 2,026 | 119 |
| 73,556 | 127 | 10 | 1,080 | 67 | 80  | 1 | 743   | 42 | 2,030 | 120 |
| 73,557 | 127 | 10 | 1,055 | 67 | 80  | 1 | 742   | 42 | 2,004 | 120 |
| 73,558 | 127 | 10 | 1,062 | 74 | 80  | 1 | 744   | 44 | 2,013 | 129 |
| 73,559 | 127 | 10 | 1,060 | 78 | 80  | 1 | 742   | 45 | 2,009 | 134 |
| 73,560 | 127 | 10 | 1,059 | 79 | 80  | 1 | 743   | 45 | 2,009 | 135 |
| 73,561 | 127 | 10 | 1,059 | 79 | 80  | 1 | 743   | 45 | 2,009 | 135 |
| 73,562 | 127 | 9  | 1,075 | 78 | 80  | 1 | 749   | 45 | 2,031 | 133 |
| 73,563 | 123 | 9  | 1,079 | 78 | 78  | 2 | 750   | 45 | 2,030 | 134 |
| 73,564 | 123 | 9  | 1,079 | 78 | 78  | 2 | 750   | 45 | 2,030 | 134 |
| 73,565 | 121 | 9  | 1,110 | 78 | 77  | 2 | 751   | 45 | 2,059 | 134 |
| 73,566 | 147 | 9  | 1,331 | 78 | 83  | 2 | 821   | 45 | 2,382 | 134 |
| 73,567 | 152 | 9  | 1,378 | 78 | 84  | 2 | 832   | 45 | 2,446 | 134 |
| 73,568 | 152 | 9  | 1,380 | 76 | 84  | 2 | 825   | 45 | 2,441 | 132 |
| 73,569 | 154 | 9  | 1,392 | 76 | 85  | 2 | 826   | 45 | 2,457 | 132 |
| 73,570 | 106 | 9  | 1,090 | 76 | 55  | 2 | 532   | 45 | 1,783 | 132 |
| 73,571 | 104 | 10 | 1,132 | 76 | 55  | 2 | 514   | 47 | 1,805 | 135 |
| 73,572 | 105 | 10 | 1,398 | 74 | 62  | 2 | 527   | 47 | 2,092 | 133 |
| 73,573 | 103 | 10 | 1,402 | 75 | 61  | 2 | 524   | 46 | 2,090 | 133 |
| 73,574 | 103 | 11 | 1,392 | 76 | 63  | 2 | 530   | 47 | 2,088 | 136 |
| 73,575 | 77  | 11 | 1,184 | 76 | 34  | 2 | 363   | 47 | 1,658 | 136 |
| 73,576 | 78  | 11 | 1,221 | 76 | 39  | 3 | 369   | 50 | 1,707 | 140 |
| 73,577 | 79  | 11 | 1,213 | 76 | 39  | 3 | 367   | 50 | 1,698 | 140 |
| 73,578 | 73  | 11 | 1,177 | 76 | 35  | 3 | 334   | 50 | 1,619 | 140 |
| 73,579 | 74  | 11 | 1,121 | 76 | 34  | 3 | 330   | 50 | 1,559 | 140 |
| 73,580 | 79  | 11 | 1,125 | 76 | 34  | 3 | 327   | 50 | 1,565 | 140 |
| 73,581 | 79  | 11 | 1,098 | 76 | 34  | 3 | 320   | 50 | 1,531 | 140 |
| 73,582 | 79  | 11 | 1,089 | 75 | 34  | 3 | 318   | 50 | 1,520 | 139 |
| 73,583 | 92  | 11 | 1,181 | 72 | 36  | 3 | 330   | 50 | 1,639 | 136 |

|        |     |    |       |    |    |   |     |    |       |     |
|--------|-----|----|-------|----|----|---|-----|----|-------|-----|
| 73,584 | 102 | 11 | 1,267 | 72 | 42 | 3 | 368 | 50 | 1,779 | 136 |
| 73,585 | 102 | 11 | 1,282 | 74 | 42 | 3 | 375 | 50 | 1,801 | 138 |
| 73,586 | 109 | 11 | 1,367 | 76 | 43 | 3 | 392 | 51 | 1,911 | 141 |
| 73,587 | 110 | 11 | 1,370 | 77 | 43 | 3 | 398 | 52 | 1,921 | 143 |
| 73,588 | 111 | 11 | 1,400 | 76 | 43 | 3 | 408 | 52 | 1,962 | 142 |
| 73,589 | 110 | 12 | 1,405 | 76 | 43 | 3 | 409 | 51 | 1,967 | 142 |
| 73,590 | 110 | 12 | 1,405 | 76 | 43 | 3 | 409 | 51 | 1,967 | 142 |
| 73,591 | 111 | 12 | 1,426 | 76 | 43 | 3 | 413 | 51 | 1,993 | 142 |
| 73,592 | 111 | 12 | 1,426 | 76 | 43 | 3 | 413 | 51 | 1,993 | 142 |
| 73,593 | 111 | 13 | 1,426 | 80 | 43 | 3 | 414 | 54 | 1,994 | 150 |
| 73,594 | 111 | 13 | 1,426 | 80 | 43 | 3 | 414 | 58 | 1,994 | 154 |
| 73,595 | 112 | 13 | 1,448 | 80 | 43 | 3 | 416 | 59 | 2,019 | 155 |
| 73,596 | 139 | 13 | 1,597 | 80 | 48 | 3 | 495 | 59 | 2,279 | 155 |
| 73,597 | 139 | 13 | 1,598 | 81 | 48 | 3 | 496 | 62 | 2,281 | 159 |
| 73,598 | 139 | 13 | 1,591 | 81 | 48 | 3 | 493 | 62 | 2,271 | 159 |
| 73,599 | 147 | 13 | 1,669 | 83 | 55 | 3 | 547 | 64 | 2,418 | 163 |
| 73,600 | 147 | 14 | 1,665 | 84 | 55 | 3 | 546 | 65 | 2,413 | 166 |
| 73,601 | 167 | 14 | 1,715 | 84 | 60 | 3 | 595 | 64 | 2,537 | 165 |
| 73,602 | 167 | 12 | 1,722 | 63 | 60 | 3 | 596 | 44 | 2,545 | 122 |
| 73,603 | 170 | 12 | 1,722 | 59 | 62 | 3 | 599 | 42 | 2,553 | 116 |
| 73,604 | 169 | 7  | 1,693 | 49 | 61 | 3 | 589 | 36 | 2,512 | 95  |
| 73,605 | 173 | 6  | 1,674 | 45 | 61 | 3 | 561 | 32 | 2,469 | 86  |
| 73,606 | 173 | 5  | 1,675 | 46 | 63 | 3 | 562 | 31 | 2,473 | 85  |
| 73,607 | 170 | 5  | 1,654 | 46 | 64 | 3 | 541 | 31 | 2,429 | 85  |
| 73,608 | 170 | 5  | 1,641 | 46 | 64 | 4 | 534 | 31 | 2,409 | 86  |
| 73,609 | 171 | 5  | 1,725 | 36 | 65 | 4 | 550 | 28 | 2,511 | 73  |
| 73,610 | 173 | 5  | 1,732 | 35 | 65 | 4 | 558 | 29 | 2,528 | 73  |
| 73,611 | 173 | 5  | 1,730 | 35 | 65 | 4 | 558 | 29 | 2,526 | 73  |
| 73,612 | 174 | 5  | 1,724 | 35 | 65 | 4 | 556 | 29 | 2,519 | 73  |
| 73,613 | 174 | 5  | 1,723 | 35 | 65 | 4 | 557 | 29 | 2,519 | 73  |
| 73,614 | 175 | 5  | 1,723 | 35 | 65 | 3 | 553 | 28 | 2,516 | 71  |
| 73,615 | 174 | 5  | 1,684 | 35 | 65 | 3 | 549 | 28 | 2,472 | 71  |
| 73,616 | 173 | 5  | 1,663 | 36 | 66 | 3 | 545 | 28 | 2,447 | 72  |
| 73,617 | 148 | 5  | 1,462 | 36 | 60 | 3 | 481 | 28 | 2,151 | 72  |
| 73,618 | 142 | 5  | 1,411 | 36 | 59 | 3 | 470 | 28 | 2,082 | 72  |
| 73,619 | 141 | 5  | 1,402 | 37 | 59 | 3 | 468 | 28 | 2,070 | 73  |
| 73,620 | 139 | 5  | 1,384 | 37 | 59 | 3 | 465 | 28 | 2,047 | 73  |
| 73,621 | 139 | 6  | 1,377 | 37 | 59 | 3 | 464 | 28 | 2,039 | 74  |
| 73,622 | 138 | 5  | 1,314 | 37 | 59 | 3 | 458 | 26 | 1,969 | 71  |
| 73,623 | 121 | 5  | 1,008 | 37 | 48 | 3 | 383 | 26 | 1,560 | 71  |
| 73,624 | 121 | 4  | 1,001 | 32 | 48 | 3 | 381 | 25 | 1,551 | 64  |

|        |     |   |     |    |    |   |     |    |       |    |
|--------|-----|---|-----|----|----|---|-----|----|-------|----|
| 73,625 | 121 | 4 | 994 | 32 | 46 | 3 | 373 | 25 | 1,534 | 64 |
| 73,626 | 120 | 4 | 950 | 33 | 41 | 2 | 368 | 22 | 1,479 | 61 |
| 73,627 | 120 | 4 | 945 | 33 | 41 | 2 | 368 | 22 | 1,474 | 61 |
| 73,628 | 119 | 4 | 942 | 33 | 41 | 2 | 368 | 23 | 1,470 | 62 |
| 73,629 | 119 | 4 | 940 | 35 | 41 | 2 | 368 | 23 | 1,468 | 64 |
| 73,630 | 116 | 4 | 932 | 35 | 41 | 2 | 367 | 23 | 1,456 | 64 |
| 73,631 | 106 | 4 | 888 | 35 | 41 | 2 | 362 | 24 | 1,397 | 65 |
| 73,632 | 93  | 4 | 808 | 34 | 39 | 2 | 359 | 24 | 1,299 | 64 |
| 73,633 | 93  | 4 | 784 | 34 | 39 | 2 | 351 | 24 | 1,267 | 64 |
| 73,634 | 84  | 4 | 716 | 34 | 33 | 2 | 319 | 24 | 1,152 | 64 |
| 73,635 | 85  | 4 | 700 | 33 | 33 | 2 | 316 | 24 | 1,134 | 63 |
| 73,636 | 86  | 4 | 683 | 32 | 33 | 2 | 310 | 24 | 1,112 | 62 |
| 73,637 | 79  | 6 | 599 | 30 | 32 | 2 | 289 | 23 | 999   | 61 |
| 73,638 | 79  | 6 | 596 | 29 | 32 | 2 | 283 | 22 | 990   | 59 |
| 73,639 | 81  | 5 | 592 | 29 | 32 | 2 | 279 | 22 | 984   | 58 |
| 73,640 | 81  | 5 | 587 | 29 | 32 | 2 | 278 | 22 | 978   | 58 |
| 73,641 | 81  | 5 | 577 | 29 | 33 | 2 | 277 | 22 | 968   | 58 |
| 73,642 | 81  | 5 | 578 | 29 | 33 | 2 | 278 | 22 | 970   | 58 |
| 73,643 | 82  | 4 | 607 | 24 | 33 | 2 | 285 | 17 | 1,007 | 47 |
| 73,644 | 83  | 4 | 617 | 24 | 33 | 2 | 286 | 15 | 1,019 | 45 |
| 73,645 | 82  | 4 | 605 | 26 | 33 | 2 | 285 | 16 | 1,005 | 48 |
| 73,646 | 55  | 4 | 482 | 30 | 28 | 2 | 212 | 15 | 777   | 51 |
| 73,647 | 55  | 4 | 473 | 30 | 28 | 2 | 209 | 17 | 765   | 53 |
| 73,648 | 47  | 5 | 390 | 29 | 21 | 3 | 153 | 16 | 611   | 53 |
| 73,649 | 47  | 5 | 383 | 29 | 19 | 3 | 150 | 16 | 599   | 53 |
| 73,650 | 34  | 5 | 370 | 28 | 18 | 3 | 132 | 14 | 554   | 50 |
| 73,651 | 27  | 4 | 347 | 27 | 16 | 3 | 106 | 13 | 496   | 47 |
| 73,652 | 28  | 4 | 336 | 19 | 16 | 2 | 107 | 11 | 487   | 36 |
| 73,653 | 28  | 4 | 340 | 22 | 16 | 2 | 106 | 11 | 490   | 39 |
| 73,654 | 26  | 4 | 337 | 23 | 13 | 2 | 102 | 11 | 478   | 40 |
| 73,655 | 26  | 4 | 338 | 23 | 13 | 2 | 102 | 11 | 479   | 40 |
| 73,656 | 19  | 4 | 315 | 23 | 11 | 2 | 94  | 11 | 439   | 40 |
| 73,657 | 21  | 4 | 295 | 21 | 8  | 2 | 93  | 11 | 417   | 38 |
| 73,658 | 30  | 4 | 327 | 20 | 6  | 2 | 101 | 11 | 464   | 37 |
| 73,659 | 31  | 4 | 282 | 21 | 5  | 1 | 85  | 11 | 403   | 37 |
| 73,660 | 31  | 5 | 273 | 21 | 5  | 1 | 83  | 11 | 392   | 38 |
| 73,661 | 29  | 5 | 267 | 21 | 5  | 1 | 76  | 11 | 377   | 38 |
| 73,662 | 33  | 5 | 413 | 21 | 6  | 1 | 119 | 11 | 571   | 38 |
| 73,663 | 33  | 5 | 450 | 21 | 6  | 1 | 127 | 11 | 616   | 38 |
| 73,664 | 33  | 5 | 453 | 21 | 6  | 1 | 130 | 11 | 622   | 38 |
| 73,665 | 32  | 5 | 443 | 23 | 6  | 1 | 129 | 11 | 610   | 40 |

|        |    |    |     |    |    |   |     |    |     |    |
|--------|----|----|-----|----|----|---|-----|----|-----|----|
| 73,666 | 31 | 5  | 441 | 23 | 6  | 1 | 125 | 12 | 603 | 41 |
| 73,667 | 31 | 6  | 440 | 22 | 5  | 1 | 123 | 12 | 599 | 41 |
| 73,668 | 31 | 6  | 440 | 22 | 5  | 1 | 123 | 12 | 599 | 41 |
| 73,669 | 33 | 6  | 461 | 22 | 5  | 1 | 129 | 12 | 628 | 41 |
| 73,670 | 34 | 6  | 467 | 21 | 5  | 1 | 130 | 12 | 636 | 40 |
| 73,671 | 34 | 6  | 467 | 21 | 4  | 1 | 130 | 13 | 635 | 41 |
| 73,672 | 34 | 5  | 467 | 21 | 4  | 1 | 129 | 13 | 634 | 40 |
| 73,673 | 35 | 5  | 485 | 21 | 4  | 1 | 129 | 13 | 653 | 40 |
| 73,674 | 41 | 5  | 539 | 22 | 5  | 1 | 151 | 13 | 736 | 41 |
| 73,675 | 41 | 5  | 539 | 21 | 5  | 1 | 151 | 12 | 736 | 39 |
| 73,676 | 41 | 5  | 542 | 21 | 6  | 1 | 156 | 12 | 745 | 39 |
| 73,677 | 41 | 5  | 549 | 21 | 6  | 1 | 155 | 12 | 751 | 39 |
| 73,678 | 41 | 5  | 549 | 22 | 6  | 1 | 155 | 12 | 751 | 40 |
| 73,679 | 44 | 5  | 564 | 22 | 6  | 1 | 156 | 12 | 770 | 40 |
| 73,680 | 44 | 5  | 565 | 20 | 6  | 1 | 161 | 12 | 776 | 38 |
| 73,681 | 49 | 5  | 606 | 20 | 8  | 1 | 193 | 12 | 856 | 38 |
| 73,682 | 49 | 5  | 607 | 20 | 8  | 1 | 195 | 11 | 859 | 37 |
| 73,683 | 49 | 5  | 606 | 20 | 8  | 1 | 192 | 11 | 855 | 37 |
| 73,684 | 49 | 5  | 606 | 20 | 8  | 1 | 191 | 11 | 854 | 37 |
| 73,685 | 47 | 5  | 603 | 20 | 8  | 1 | 188 | 11 | 846 | 37 |
| 73,686 | 47 | 5  | 603 | 21 | 8  | 1 | 188 | 11 | 846 | 38 |
| 73,687 | 46 | 5  | 605 | 22 | 8  | 1 | 188 | 11 | 847 | 39 |
| 73,688 | 46 | 3  | 604 | 22 | 8  | 1 | 190 | 11 | 848 | 37 |
| 73,689 | 45 | 3  | 601 | 22 | 8  | 1 | 190 | 11 | 844 | 37 |
| 73,690 | 42 | 3  | 576 | 27 | 8  | 1 | 183 | 11 | 809 | 42 |
| 73,691 | 42 | 3  | 576 | 29 | 8  | 1 | 184 | 13 | 810 | 46 |
| 73,692 | 41 | 3  | 568 | 44 | 7  | 1 | 181 | 17 | 797 | 65 |
| 73,693 | 41 | 3  | 565 | 46 | 7  | 1 | 179 | 18 | 792 | 68 |
| 73,694 | 40 | 3  | 540 | 46 | 7  | 1 | 172 | 19 | 759 | 69 |
| 73,695 | 39 | 3  | 528 | 46 | 7  | 2 | 172 | 16 | 746 | 67 |
| 73,696 | 40 | 3  | 527 | 40 | 7  | 2 | 178 | 15 | 752 | 60 |
| 73,697 | 40 | 4  | 522 | 40 | 7  | 2 | 178 | 15 | 747 | 61 |
| 73,698 | 40 | 4  | 507 | 40 | 7  | 2 | 176 | 13 | 730 | 59 |
| 73,699 | 45 | 3  | 504 | 40 | 7  | 1 | 180 | 11 | 736 | 55 |
| 73,700 | 66 | 3  | 556 | 40 | 12 | 1 | 251 | 11 | 885 | 55 |
| 73,701 | 71 | 8  | 566 | 46 | 14 | 1 | 274 | 12 | 925 | 67 |
| 73,702 | 70 | 8  | 566 | 46 | 14 | 1 | 273 | 12 | 923 | 67 |
| 73,703 | 70 | 10 | 566 | 50 | 14 | 1 | 272 | 13 | 922 | 74 |
| 73,704 | 70 | 10 | 560 | 47 | 14 | 1 | 272 | 13 | 916 | 71 |
| 73,705 | 72 | 10 | 562 | 53 | 16 | 1 | 282 | 16 | 932 | 80 |
| 73,706 | 72 | 10 | 560 | 53 | 16 | 1 | 282 | 16 | 930 | 80 |

|        |     |    |       |    |    |   |     |    |       |    |
|--------|-----|----|-------|----|----|---|-----|----|-------|----|
| 73,707 | 72  | 10 | 563   | 54 | 16 | 1 | 281 | 16 | 932   | 81 |
| 73,708 | 70  | 10 | 556   | 57 | 16 | 1 | 279 | 17 | 921   | 85 |
| 73,709 | 61  | 11 | 516   | 58 | 15 | 1 | 271 | 19 | 863   | 89 |
| 73,710 | 64  | 10 | 521   | 57 | 15 | 1 | 281 | 19 | 881   | 87 |
| 73,711 | 79  | 10 | 618   | 58 | 18 | 1 | 314 | 20 | 1,029 | 89 |
| 73,712 | 76  | 10 | 515   | 61 | 17 | 1 | 295 | 20 | 903   | 92 |
| 73,713 | 75  | 10 | 495   | 61 | 17 | 1 | 282 | 21 | 869   | 93 |
| 73,714 | 75  | 10 | 458   | 61 | 17 | 1 | 273 | 21 | 823   | 93 |
| 73,715 | 102 | 10 | 638   | 62 | 28 | 1 | 410 | 21 | 1,178 | 94 |
| 73,716 | 139 | 10 | 818   | 62 | 42 | 1 | 634 | 22 | 1,633 | 95 |
| 73,717 | 139 | 10 | 813   | 62 | 42 | 1 | 632 | 21 | 1,626 | 94 |
| 73,718 | 137 | 9  | 797   | 64 | 42 | 1 | 628 | 21 | 1,604 | 95 |
| 73,719 | 140 | 9  | 816   | 65 | 43 | 1 | 648 | 21 | 1,647 | 96 |
| 73,720 | 141 | 9  | 821   | 65 | 43 | 1 | 654 | 21 | 1,659 | 96 |
| 73,721 | 142 | 9  | 819   | 65 | 43 | 1 | 654 | 20 | 1,658 | 95 |
| 73,722 | 142 | 9  | 809   | 65 | 43 | 1 | 655 | 20 | 1,649 | 95 |
| 73,723 | 143 | 9  | 823   | 65 | 45 | 1 | 666 | 20 | 1,677 | 95 |
| 73,724 | 148 | 9  | 838   | 64 | 47 | 1 | 674 | 20 | 1,707 | 94 |
| 73,725 | 153 | 9  | 876   | 65 | 49 | 1 | 693 | 20 | 1,771 | 95 |
| 73,726 | 165 | 9  | 981   | 65 | 54 | 1 | 726 | 20 | 1,926 | 95 |
| 73,727 | 178 | 9  | 1,208 | 65 | 59 | 1 | 819 | 21 | 2,264 | 96 |
| 73,728 | 178 | 9  | 1,199 | 65 | 59 | 1 | 817 | 21 | 2,253 | 96 |
| 73,729 | 188 | 9  | 1,583 | 64 | 77 | 1 | 951 | 21 | 2,799 | 95 |
| 73,730 | 188 | 9  | 1,620 | 64 | 80 | 1 | 980 | 21 | 2,868 | 95 |
| 73,731 | 186 | 9  | 1,613 | 64 | 80 | 1 | 975 | 21 | 2,854 | 95 |
| 73,732 | 183 | 9  | 1,580 | 64 | 78 | 1 | 946 | 21 | 2,787 | 95 |
| 73,733 | 184 | 9  | 1,621 | 64 | 82 | 1 | 968 | 21 | 2,855 | 95 |
| 73,734 | 184 | 9  | 1,621 | 64 | 82 | 1 | 967 | 21 | 2,854 | 95 |
| 73,735 | 185 | 9  | 1,631 | 64 | 82 | 1 | 970 | 22 | 2,868 | 96 |
| 73,736 | 185 | 9  | 1,631 | 64 | 82 | 1 | 970 | 22 | 2,868 | 96 |
| 73,737 | 185 | 9  | 1,632 | 63 | 82 | 1 | 970 | 22 | 2,869 | 95 |
| 73,738 | 185 | 9  | 1,635 | 62 | 82 | 1 | 972 | 23 | 2,874 | 95 |
| 73,739 | 185 | 9  | 1,635 | 62 | 82 | 1 | 972 | 23 | 2,874 | 95 |
| 73,740 | 185 | 9  | 1,635 | 62 | 82 | 1 | 973 | 23 | 2,875 | 95 |
| 73,741 | 185 | 9  | 1,640 | 57 | 82 | 1 | 976 | 23 | 2,883 | 90 |
| 73,742 | 185 | 9  | 1,656 | 55 | 82 | 1 | 986 | 21 | 2,909 | 86 |
| 73,743 | 185 | 9  | 1,658 | 38 | 82 | 0 | 990 | 15 | 2,915 | 62 |
| 73,744 | 185 | 9  | 1,658 | 38 | 82 | 0 | 990 | 15 | 2,915 | 62 |
| 73,745 | 185 | 9  | 1,650 | 38 | 82 | 0 | 988 | 15 | 2,905 | 62 |
| 73,746 | 185 | 9  | 1,650 | 38 | 82 | 0 | 987 | 15 | 2,904 | 62 |
| 73,747 | 184 | 8  | 1,649 | 38 | 82 | 0 | 983 | 15 | 2,898 | 61 |

|        |     |    |       |    |     |   |       |    |       |    |
|--------|-----|----|-------|----|-----|---|-------|----|-------|----|
| 73,748 | 185 | 8  | 1,659 | 38 | 82  | 0 | 995   | 16 | 2,921 | 62 |
| 73,749 | 183 | 8  | 1,657 | 39 | 82  | 0 | 991   | 16 | 2,913 | 63 |
| 73,750 | 183 | 8  | 1,647 | 39 | 82  | 0 | 991   | 17 | 2,903 | 64 |
| 73,751 | 162 | 10 | 1,610 | 40 | 78  | 0 | 921   | 17 | 2,771 | 67 |
| 73,752 | 157 | 5  | 1,599 | 34 | 76  | 0 | 898   | 17 | 2,730 | 56 |
| 73,753 | 163 | 3  | 1,640 | 29 | 74  | 0 | 902   | 16 | 2,779 | 48 |
| 73,754 | 160 | 4  | 1,638 | 29 | 74  | 0 | 899   | 16 | 2,771 | 49 |
| 73,755 | 160 | 4  | 1,647 | 29 | 74  | 0 | 901   | 16 | 2,782 | 49 |
| 73,756 | 171 | 4  | 1,787 | 20 | 77  | 0 | 959   | 15 | 2,994 | 39 |
| 73,757 | 171 | 4  | 1,782 | 20 | 77  | 0 | 959   | 15 | 2,989 | 39 |
| 73,758 | 223 | 4  | 1,949 | 19 | 90  | 0 | 1,178 | 15 | 3,440 | 38 |
| 73,759 | 242 | 3  | 2,053 | 15 | 96  | 0 | 1,319 | 12 | 3,710 | 30 |
| 73,760 | 250 | 3  | 2,124 | 15 | 102 | 0 | 1,388 | 12 | 3,864 | 30 |
| 73,761 | 249 | 3  | 2,106 | 15 | 103 | 0 | 1,423 | 12 | 3,881 | 30 |
| 73,762 | 235 | 4  | 2,020 | 13 | 100 | 0 | 1,401 | 11 | 3,756 | 28 |
| 73,763 | 234 | 4  | 1,998 | 14 | 100 | 0 | 1,393 | 11 | 3,725 | 29 |
| 73,764 | 221 | 4  | 1,895 | 14 | 95  | 0 | 1,325 | 11 | 3,536 | 29 |
| 73,765 | 208 | 4  | 1,818 | 11 | 89  | 0 | 1,252 | 10 | 3,367 | 25 |
| 73,766 | 207 | 4  | 1,805 | 11 | 88  | 0 | 1,246 | 10 | 3,346 | 25 |
| 73,767 | 172 | 4  | 1,639 | 11 | 75  | 0 | 1,030 | 10 | 2,916 | 25 |
| 73,768 | 169 | 4  | 1,624 | 9  | 74  | 0 | 1,020 | 10 | 2,887 | 23 |
| 73,769 | 169 | 4  | 1,623 | 9  | 74  | 0 | 1,013 | 10 | 2,879 | 23 |
| 73,770 | 167 | 4  | 1,616 | 8  | 74  | 0 | 1,009 | 10 | 2,866 | 22 |
| 73,771 | 168 | 4  | 1,623 | 8  | 74  | 0 | 1,009 | 10 | 2,874 | 22 |
| 73,772 | 167 | 4  | 1,622 | 8  | 74  | 0 | 1,008 | 10 | 2,871 | 22 |
| 73,773 | 167 | 4  | 1,626 | 8  | 74  | 0 | 1,009 | 11 | 2,876 | 23 |
| 73,774 | 165 | 4  | 1,608 | 8  | 72  | 0 | 998   | 11 | 2,843 | 23 |
| 73,775 | 157 | 4  | 1,546 | 8  | 70  | 0 | 976   | 12 | 2,749 | 24 |
| 73,776 | 154 | 4  | 1,515 | 13 | 68  | 0 | 957   | 12 | 2,694 | 29 |
| 73,777 | 144 | 4  | 1,419 | 19 | 64  | 0 | 926   | 13 | 2,553 | 36 |
| 73,778 | 134 | 4  | 1,240 | 25 | 60  | 0 | 836   | 12 | 2,270 | 41 |
| 73,779 | 131 | 4  | 1,177 | 28 | 49  | 0 | 799   | 12 | 2,156 | 44 |
| 73,780 | 125 | 4  | 897   | 30 | 44  | 0 | 744   | 14 | 1,810 | 48 |
| 73,781 | 127 | 4  | 900   | 30 | 42  | 0 | 718   | 14 | 1,787 | 48 |
| 73,782 | 128 | 4  | 935   | 30 | 38  | 0 | 707   | 14 | 1,808 | 48 |
| 73,783 | 129 | 4  | 951   | 30 | 38  | 0 | 708   | 14 | 1,826 | 48 |
| 73,784 | 131 | 4  | 986   | 30 | 38  | 0 | 734   | 14 | 1,889 | 48 |
| 73,785 | 140 | 4  | 1,528 | 30 | 48  | 0 | 819   | 14 | 2,535 | 48 |
| 73,786 | 139 | 4  | 1,522 | 30 | 48  | 0 | 816   | 13 | 2,525 | 47 |
| 73,787 | 139 | 4  | 1,522 | 30 | 48  | 0 | 816   | 13 | 2,525 | 47 |
| 73,788 | 139 | 4  | 1,521 | 30 | 48  | 0 | 816   | 14 | 2,524 | 48 |



|        |     |   |       |    |    |   |     |    |       |    |
|--------|-----|---|-------|----|----|---|-----|----|-------|----|
| 73,789 | 139 | 4 | 1,516 | 29 | 48 | 0 | 814 | 13 | 2,517 | 46 |
| 73,790 | 148 | 4 | 1,621 | 29 | 53 | 0 | 897 | 13 | 2,719 | 46 |
| 73,791 | 148 | 4 | 1,628 | 29 | 53 | 0 | 895 | 13 | 2,724 | 46 |
| 73,792 | 151 | 4 | 1,668 | 29 | 54 | 0 | 903 | 13 | 2,776 | 46 |
| 73,793 | 151 | 4 | 1,666 | 29 | 54 | 0 | 900 | 13 | 2,771 | 46 |
| 73,794 | 151 | 4 | 1,667 | 29 | 54 | 0 | 896 | 13 | 2,768 | 46 |
| 73,795 | 159 | 4 | 1,757 | 29 | 58 | 0 | 929 | 13 | 2,903 | 46 |
| 73,796 | 162 | 4 | 1,763 | 29 | 58 | 0 | 937 | 13 | 2,920 | 46 |
| 73,797 | 162 | 4 | 1,761 | 28 | 58 | 0 | 936 | 12 | 2,917 | 44 |
| 73,798 | 162 | 4 | 1,765 | 28 | 58 | 0 | 935 | 12 | 2,920 | 44 |
| 73,799 | 159 | 4 | 1,758 | 28 | 58 | 0 | 922 | 12 | 2,897 | 44 |
| 73,800 | 160 | 4 | 1,778 | 28 | 59 | 0 | 926 | 11 | 2,923 | 43 |
| 73,801 | 160 | 2 | 1,779 | 27 | 58 | 0 | 925 | 11 | 2,922 | 40 |
| 73,802 | 160 | 2 | 1,777 | 27 | 58 | 0 | 925 | 11 | 2,920 | 40 |
| 73,803 | 160 | 2 | 1,770 | 26 | 58 | 0 | 926 | 10 | 2,914 | 38 |
| 73,804 | 155 | 2 | 1,742 | 26 | 58 | 0 | 920 | 9  | 2,875 | 37 |
| 73,805 | 155 | 1 | 1,769 | 26 | 58 | 0 | 936 | 9  | 2,918 | 36 |
| 73,806 | 152 | 1 | 1,725 | 27 | 60 | 0 | 934 | 7  | 2,871 | 35 |
| 73,807 | 150 | 1 | 1,684 | 29 | 58 | 0 | 904 | 8  | 2,796 | 38 |
| 73,808 | 99  | 1 | 1,520 | 35 | 45 | 0 | 685 | 8  | 2,349 | 44 |
| 73,809 | 90  | 2 | 1,466 | 37 | 42 | 0 | 664 | 11 | 2,262 | 50 |
| 73,810 | 80  | 2 | 1,406 | 39 | 38 | 0 | 538 | 11 | 2,062 | 52 |
| 73,811 | 73  | 2 | 1,332 | 41 | 32 | 0 | 464 | 11 | 1,901 | 54 |
| 73,812 | 71  | 1 | 1,312 | 39 | 31 | 0 | 417 | 10 | 1,831 | 50 |
| 73,813 | 73  | 1 | 1,362 | 38 | 33 | 0 | 421 | 10 | 1,889 | 49 |
| 73,814 | 73  | 1 | 1,371 | 39 | 35 | 0 | 431 | 10 | 1,910 | 50 |
| 73,815 | 72  | 1 | 1,370 | 39 | 35 | 0 | 431 | 10 | 1,908 | 50 |
| 73,816 | 72  | 1 | 1,476 | 39 | 39 | 0 | 442 | 10 | 2,029 | 50 |
| 73,817 | 72  | 1 | 1,514 | 39 | 39 | 0 | 478 | 10 | 2,103 | 50 |
| 73,818 | 72  | 1 | 1,515 | 41 | 39 | 0 | 477 | 10 | 2,103 | 52 |
| 73,819 | 72  | 1 | 1,513 | 41 | 39 | 0 | 476 | 10 | 2,100 | 52 |
| 73,820 | 72  | 1 | 1,539 | 41 | 39 | 0 | 481 | 10 | 2,131 | 52 |
| 73,821 | 71  | 1 | 1,539 | 41 | 39 | 0 | 481 | 10 | 2,130 | 52 |
| 73,822 | 71  | 1 | 1,534 | 41 | 39 | 0 | 480 | 10 | 2,124 | 52 |
| 73,823 | 71  | 1 | 1,533 | 42 | 39 | 0 | 480 | 10 | 2,123 | 53 |
| 73,824 | 72  | 1 | 1,528 | 42 | 39 | 0 | 479 | 9  | 2,118 | 52 |
| 73,825 | 72  | 1 | 1,528 | 42 | 39 | 0 | 479 | 9  | 2,118 | 52 |
| 73,826 | 69  | 1 | 1,520 | 42 | 38 | 0 | 473 | 8  | 2,100 | 51 |
| 73,827 | 67  | 1 | 1,512 | 37 | 38 | 0 | 469 | 9  | 2,086 | 47 |
| 73,828 | 65  | 1 | 1,502 | 25 | 37 | 0 | 467 | 8  | 2,071 | 34 |
| 73,829 | 62  | 1 | 1,452 | 22 | 35 | 0 | 459 | 9  | 2,008 | 32 |

|        |    |   |       |    |    |   |     |    |       |    |
|--------|----|---|-------|----|----|---|-----|----|-------|----|
| 73,830 | 62 | 1 | 1,432 | 25 | 35 | 0 | 452 | 9  | 1,981 | 35 |
| 73,831 | 58 | 1 | 1,396 | 25 | 33 | 3 | 415 | 11 | 1,902 | 40 |
| 73,832 | 56 | 1 | 1,355 | 27 | 32 | 3 | 407 | 12 | 1,850 | 43 |
| 73,833 | 55 | 1 | 1,290 | 27 | 32 | 3 | 402 | 12 | 1,779 | 43 |
| 73,834 | 54 | 1 | 1,262 | 35 | 32 | 3 | 397 | 13 | 1,745 | 52 |
| 73,835 | 52 | 1 | 1,222 | 35 | 32 | 3 | 366 | 13 | 1,672 | 52 |
| 73,836 | 42 | 1 | 681   | 35 | 22 | 3 | 282 | 13 | 1,027 | 52 |
| 73,837 | 34 | 1 | 596   | 35 | 17 | 3 | 202 | 13 | 849   | 52 |
| 73,838 | 33 | 1 | 586   | 35 | 17 | 3 | 202 | 13 | 838   | 52 |
| 73,839 | 33 | 4 | 583   | 35 | 17 | 3 | 201 | 12 | 834   | 54 |
| 73,840 | 33 | 4 | 578   | 36 | 17 | 3 | 198 | 12 | 826   | 55 |
| 73,841 | 34 | 4 | 577   | 36 | 17 | 3 | 198 | 12 | 826   | 55 |
| 73,842 | 34 | 4 | 564   | 36 | 17 | 3 | 197 | 12 | 812   | 55 |
| 73,843 | 31 | 4 | 510   | 36 | 16 | 3 | 181 | 12 | 738   | 55 |
| 73,844 | 31 | 4 | 506   | 36 | 16 | 3 | 181 | 12 | 734   | 55 |
| 73,845 | 25 | 4 | 476   | 36 | 12 | 3 | 159 | 12 | 672   | 55 |
| 73,846 | 23 | 4 | 416   | 36 | 12 | 3 | 148 | 12 | 599   | 55 |
| 73,847 | 20 | 4 | 411   | 36 | 12 | 3 | 140 | 12 | 583   | 55 |
| 73,848 | 20 | 4 | 414   | 36 | 12 | 3 | 140 | 12 | 586   | 55 |
| 73,849 | 20 | 4 | 410   | 36 | 12 | 3 | 140 | 12 | 582   | 55 |
| 73,850 | 19 | 4 | 407   | 36 | 12 | 3 | 140 | 12 | 578   | 55 |
| 73,851 | 18 | 4 | 385   | 36 | 11 | 3 | 136 | 12 | 550   | 55 |
| 73,852 | 19 | 4 | 382   | 36 | 11 | 3 | 135 | 12 | 547   | 55 |
| 73,853 | 19 | 4 | 379   | 37 | 11 | 3 | 134 | 12 | 543   | 56 |
| 73,854 | 18 | 4 | 374   | 37 | 11 | 3 | 132 | 12 | 535   | 56 |
| 73,855 | 18 | 4 | 369   | 37 | 11 | 3 | 132 | 12 | 530   | 56 |
| 73,856 | 18 | 4 | 337   | 37 | 11 | 3 | 113 | 12 | 479   | 56 |
| 73,857 | 11 | 4 | 284   | 34 | 8  | 3 | 84  | 11 | 387   | 52 |
| 73,858 | 11 | 4 | 281   | 34 | 8  | 3 | 84  | 11 | 384   | 52 |
| 73,859 | 10 | 3 | 279   | 26 | 8  | 3 | 85  | 8  | 382   | 40 |
| 73,860 | 10 | 3 | 277   | 26 | 8  | 3 | 85  | 8  | 380   | 40 |
| 73,861 | 9  | 3 | 281   | 24 | 8  | 3 | 86  | 8  | 384   | 38 |
| 73,862 | 9  | 3 | 281   | 26 | 8  | 3 | 86  | 8  | 384   | 40 |
| 73,863 | 8  | 3 | 280   | 26 | 8  | 3 | 86  | 10 | 382   | 42 |
| 73,864 | 6  | 3 | 221   | 31 | 7  | 3 | 79  | 10 | 313   | 47 |
| 73,865 | 6  | 3 | 211   | 30 | 5  | 3 | 68  | 11 | 290   | 47 |
| 73,866 | 6  | 3 | 100   | 30 | 1  | 3 | 57  | 11 | 164   | 47 |
| 73,867 | 15 | 3 | 150   | 31 | 4  | 3 | 83  | 12 | 252   | 49 |
| 73,868 | 15 | 3 | 125   | 29 | 4  | 3 | 56  | 12 | 200   | 47 |
| 73,869 | 19 | 3 | 151   | 32 | 5  | 4 | 88  | 15 | 263   | 54 |
| 73,870 | 19 | 3 | 153   | 35 | 5  | 4 | 93  | 19 | 270   | 61 |

|        |    |   |     |    |    |   |     |    |       |    |
|--------|----|---|-----|----|----|---|-----|----|-------|----|
| 73,871 | 19 | 3 | 130 | 35 | 5  | 4 | 87  | 19 | 241   | 61 |
| 73,872 | 20 | 3 | 139 | 36 | 5  | 4 | 94  | 19 | 258   | 62 |
| 73,873 | 20 | 4 | 141 | 35 | 5  | 4 | 96  | 19 | 262   | 62 |
| 73,874 | 19 | 4 | 141 | 35 | 5  | 4 | 95  | 19 | 260   | 62 |
| 73,875 | 19 | 4 | 143 | 36 | 5  | 4 | 95  | 19 | 262   | 63 |
| 73,876 | 19 | 4 | 143 | 36 | 5  | 4 | 95  | 19 | 262   | 63 |
| 73,877 | 19 | 4 | 147 | 36 | 6  | 4 | 95  | 19 | 267   | 63 |
| 73,878 | 19 | 4 | 160 | 35 | 6  | 4 | 98  | 18 | 283   | 61 |
| 73,879 | 20 | 4 | 168 | 35 | 6  | 4 | 115 | 18 | 309   | 61 |
| 73,880 | 20 | 4 | 168 | 32 | 6  | 4 | 115 | 17 | 309   | 57 |
| 73,881 | 20 | 4 | 168 | 32 | 6  | 4 | 115 | 17 | 309   | 57 |
| 73,882 | 20 | 4 | 169 | 30 | 6  | 1 | 115 | 13 | 310   | 48 |
| 73,883 | 20 | 4 | 174 | 28 | 6  | 1 | 115 | 12 | 315   | 45 |
| 73,884 | 21 | 4 | 177 | 20 | 6  | 1 | 120 | 11 | 324   | 36 |
| 73,885 | 22 | 5 | 177 | 23 | 6  | 1 | 120 | 12 | 325   | 41 |
| 73,886 | 22 | 5 | 179 | 23 | 6  | 1 | 120 | 13 | 327   | 42 |
| 73,887 | 24 | 5 | 179 | 23 | 6  | 1 | 122 | 13 | 331   | 42 |
| 73,888 | 24 | 5 | 179 | 23 | 6  | 1 | 122 | 13 | 331   | 42 |
| 73,889 | 31 | 5 | 361 | 25 | 14 | 1 | 185 | 13 | 591   | 44 |
| 73,890 | 31 | 2 | 360 | 25 | 14 | 1 | 185 | 14 | 590   | 42 |
| 73,891 | 31 | 2 | 359 | 24 | 14 | 1 | 185 | 14 | 589   | 41 |
| 73,892 | 37 | 2 | 531 | 24 | 30 | 1 | 278 | 15 | 876   | 42 |
| 73,893 | 37 | 2 | 544 | 25 | 32 | 1 | 289 | 15 | 902   | 43 |
| 73,894 | 37 | 2 | 550 | 25 | 32 | 1 | 292 | 15 | 911   | 43 |
| 73,895 | 37 | 2 | 551 | 25 | 32 | 1 | 294 | 15 | 914   | 43 |
| 73,896 | 37 | 2 | 555 | 25 | 32 | 1 | 299 | 15 | 923   | 43 |
| 73,897 | 40 | 2 | 579 | 25 | 33 | 1 | 304 | 15 | 956   | 43 |
| 73,898 | 41 | 2 | 611 | 25 | 33 | 1 | 311 | 15 | 996   | 43 |
| 73,899 | 42 | 2 | 618 | 25 | 33 | 1 | 313 | 15 | 1,006 | 43 |
| 73,900 | 55 | 2 | 686 | 25 | 34 | 1 | 341 | 15 | 1,116 | 43 |
| 73,901 | 55 | 2 | 688 | 25 | 34 | 1 | 341 | 15 | 1,118 | 43 |
| 73,902 | 56 | 2 | 705 | 25 | 35 | 1 | 353 | 15 | 1,149 | 43 |
| 73,903 | 58 | 3 | 734 | 26 | 39 | 1 | 373 | 15 | 1,204 | 45 |
| 73,904 | 58 | 3 | 734 | 26 | 39 | 1 | 373 | 15 | 1,204 | 45 |
| 73,905 | 58 | 3 | 734 | 26 | 39 | 1 | 373 | 15 | 1,204 | 45 |
| 73,906 | 73 | 5 | 921 | 28 | 56 | 2 | 480 | 18 | 1,530 | 53 |
| 73,907 | 73 | 5 | 921 | 28 | 56 | 2 | 481 | 19 | 1,531 | 54 |
| 73,908 | 80 | 5 | 990 | 29 | 64 | 2 | 557 | 20 | 1,691 | 56 |
| 73,909 | 80 | 5 | 990 | 30 | 64 | 2 | 557 | 20 | 1,691 | 57 |
| 73,910 | 80 | 5 | 989 | 30 | 64 | 2 | 556 | 20 | 1,689 | 57 |
| 73,911 | 80 | 5 | 989 | 30 | 64 | 2 | 556 | 20 | 1,689 | 57 |

|        |    |   |       |    |    |   |     |    |       |     |
|--------|----|---|-------|----|----|---|-----|----|-------|-----|
| 73,912 | 80 | 5 | 984   | 28 | 64 | 2 | 556 | 21 | 1,684 | 56  |
| 73,913 | 80 | 5 | 982   | 26 | 64 | 2 | 556 | 21 | 1,682 | 54  |
| 73,914 | 79 | 5 | 982   | 26 | 64 | 2 | 555 | 19 | 1,680 | 52  |
| 73,915 | 79 | 5 | 1,006 | 23 | 65 | 2 | 568 | 17 | 1,718 | 47  |
| 73,916 | 79 | 5 | 1,004 | 24 | 66 | 2 | 566 | 17 | 1,715 | 48  |
| 73,917 | 70 | 5 | 947   | 24 | 63 | 2 | 538 | 17 | 1,618 | 48  |
| 73,918 | 69 | 5 | 944   | 28 | 63 | 2 | 536 | 18 | 1,612 | 53  |
| 73,919 | 65 | 5 | 919   | 29 | 62 | 3 | 515 | 18 | 1,561 | 55  |
| 73,920 | 65 | 5 | 916   | 26 | 62 | 2 | 503 | 15 | 1,546 | 48  |
| 73,921 | 65 | 5 | 909   | 23 | 62 | 2 | 498 | 11 | 1,534 | 41  |
| 73,922 | 64 | 5 | 905   | 23 | 62 | 2 | 493 | 11 | 1,524 | 41  |
| 73,923 | 64 | 4 | 900   | 26 | 62 | 3 | 493 | 11 | 1,519 | 44  |
| 73,924 | 65 | 4 | 897   | 27 | 62 | 3 | 496 | 11 | 1,520 | 45  |
| 73,925 | 66 | 4 | 902   | 29 | 62 | 3 | 507 | 11 | 1,537 | 47  |
| 73,926 | 66 | 4 | 903   | 28 | 62 | 3 | 508 | 12 | 1,539 | 47  |
| 73,927 | 67 | 4 | 903   | 28 | 61 | 3 | 514 | 12 | 1,545 | 47  |
| 73,928 | 67 | 4 | 901   | 28 | 61 | 3 | 517 | 12 | 1,546 | 47  |
| 73,929 | 67 | 4 | 901   | 28 | 61 | 3 | 516 | 12 | 1,545 | 47  |
| 73,930 | 66 | 4 | 917   | 28 | 61 | 3 | 504 | 12 | 1,548 | 47  |
| 73,931 | 66 | 4 | 917   | 28 | 61 | 3 | 504 | 12 | 1,548 | 47  |
| 73,932 | 66 | 4 | 916   | 28 | 61 | 3 | 504 | 12 | 1,547 | 47  |
| 73,933 | 66 | 4 | 914   | 28 | 61 | 3 | 504 | 12 | 1,545 | 47  |
| 73,934 | 66 | 4 | 911   | 28 | 61 | 3 | 504 | 12 | 1,542 | 47  |
| 73,935 | 65 | 4 | 907   | 29 | 61 | 3 | 499 | 12 | 1,532 | 48  |
| 73,936 | 64 | 4 | 908   | 33 | 61 | 3 | 500 | 16 | 1,533 | 56  |
| 73,937 | 64 | 4 | 906   | 44 | 61 | 3 | 500 | 17 | 1,531 | 68  |
| 73,938 | 62 | 6 | 903   | 54 | 61 | 3 | 497 | 17 | 1,523 | 80  |
| 73,939 | 59 | 6 | 883   | 81 | 61 | 5 | 494 | 25 | 1,497 | 117 |
| 73,940 | 55 | 6 | 719   | 80 | 53 | 5 | 432 | 25 | 1,259 | 116 |
| 73,941 | 51 | 6 | 653   | 80 | 44 | 5 | 382 | 24 | 1,130 | 115 |
| 73,942 | 48 | 6 | 564   | 82 | 38 | 6 | 342 | 24 | 992   | 118 |
| 73,943 | 48 | 7 | 550   | 84 | 37 | 6 | 336 | 25 | 971   | 122 |
| 73,944 | 48 | 7 | 537   | 84 | 35 | 6 | 326 | 25 | 946   | 122 |
| 73,945 | 48 | 7 | 533   | 85 | 35 | 6 | 324 | 25 | 940   | 123 |
| 73,946 | 48 | 7 | 536   | 85 | 35 | 6 | 326 | 25 | 945   | 123 |
| 73,947 | 48 | 7 | 531   | 85 | 35 | 6 | 325 | 25 | 939   | 123 |
| 73,948 | 45 | 7 | 508   | 85 | 34 | 6 | 321 | 25 | 908   | 123 |
| 73,949 | 44 | 7 | 480   | 85 | 34 | 6 | 315 | 25 | 873   | 123 |
| 73,950 | 43 | 7 | 471   | 87 | 34 | 6 | 314 | 25 | 862   | 125 |
| 73,951 | 30 | 7 | 411   | 87 | 33 | 6 | 286 | 25 | 760   | 125 |
| 73,952 | 30 | 7 | 410   | 87 | 33 | 6 | 287 | 26 | 760   | 126 |

|        |     |   |       |     |    |   |     |    |       |     |
|--------|-----|---|-------|-----|----|---|-----|----|-------|-----|
| 73,953 | 29  | 7 | 395   | 89  | 32 | 6 | 277 | 26 | 733   | 128 |
| 73,954 | 27  | 6 | 367   | 88  | 29 | 6 | 263 | 26 | 686   | 126 |
| 73,955 | 12  | 6 | 181   | 87  | 12 | 6 | 155 | 26 | 360   | 125 |
| 73,956 | 5   | 6 | 128   | 87  | 5  | 6 | 103 | 26 | 241   | 125 |
| 73,957 | 5   | 4 | 117   | 85  | 4  | 5 | 87  | 23 | 213   | 117 |
| 73,958 | 5   | 4 | 114   | 84  | 4  | 5 | 81  | 21 | 204   | 114 |
| 73,959 | 5   | 4 | 114   | 84  | 4  | 5 | 81  | 21 | 204   | 114 |
| 73,960 | 5   | 4 | 120   | 86  | 5  | 5 | 82  | 22 | 212   | 117 |
| 73,961 | 5   | 4 | 122   | 86  | 5  | 5 | 87  | 22 | 219   | 117 |
| 73,962 | 5   | 4 | 122   | 91  | 5  | 5 | 87  | 24 | 219   | 124 |
| 73,963 | 4   | 4 | 122   | 92  | 5  | 5 | 87  | 24 | 218   | 125 |
| 73,964 | 4   | 4 | 120   | 92  | 5  | 5 | 87  | 24 | 216   | 125 |
| 73,965 | 4   | 4 | 115   | 92  | 5  | 5 | 84  | 24 | 208   | 125 |
| 73,966 | 4   | 4 | 90    | 88  | 3  | 5 | 66  | 24 | 163   | 121 |
| 73,967 | 4   | 4 | 91    | 88  | 2  | 5 | 66  | 24 | 163   | 121 |
| 73,968 | 4   | 4 | 92    | 83  | 2  | 4 | 67  | 23 | 165   | 114 |
| 73,969 | 7   | 5 | 100   | 83  | 2  | 4 | 69  | 23 | 178   | 115 |
| 73,970 | 7   | 5 | 100   | 83  | 2  | 4 | 68  | 23 | 177   | 115 |
| 73,971 | 8   | 5 | 104   | 83  | 3  | 4 | 69  | 23 | 184   | 115 |
| 73,972 | 16  | 5 | 155   | 86  | 5  | 4 | 84  | 24 | 260   | 119 |
| 73,973 | 16  | 5 | 154   | 86  | 5  | 4 | 82  | 24 | 257   | 119 |
| 73,974 | 16  | 5 | 154   | 86  | 5  | 3 | 83  | 25 | 258   | 119 |
| 73,975 | 20  | 5 | 225   | 91  | 6  | 4 | 100 | 28 | 351   | 128 |
| 73,976 | 57  | 5 | 406   | 94  | 18 | 4 | 286 | 29 | 767   | 132 |
| 73,977 | 57  | 5 | 405   | 94  | 18 | 4 | 285 | 28 | 765   | 131 |
| 73,978 | 57  | 5 | 419   | 97  | 18 | 4 | 287 | 28 | 781   | 134 |
| 73,979 | 58  | 5 | 440   | 98  | 21 | 4 | 310 | 28 | 829   | 135 |
| 73,980 | 61  | 5 | 425   | 100 | 21 | 4 | 315 | 28 | 822   | 137 |
| 73,981 | 61  | 5 | 424   | 101 | 21 | 4 | 313 | 28 | 819   | 138 |
| 73,982 | 67  | 5 | 467   | 101 | 23 | 4 | 335 | 28 | 892   | 138 |
| 73,983 | 85  | 5 | 592   | 102 | 28 | 4 | 400 | 28 | 1,105 | 139 |
| 73,984 | 86  | 5 | 626   | 102 | 30 | 4 | 422 | 27 | 1,164 | 138 |
| 73,985 | 113 | 5 | 1,030 | 102 | 50 | 4 | 670 | 27 | 1,863 | 138 |
| 73,986 | 113 | 5 | 1,030 | 102 | 50 | 4 | 671 | 27 | 1,864 | 138 |
| 73,987 | 132 | 4 | 1,233 | 95  | 71 | 4 | 843 | 22 | 2,279 | 125 |
| 73,988 | 132 | 4 | 1,255 | 91  | 73 | 4 | 859 | 21 | 2,319 | 120 |
| 73,989 | 132 | 2 | 1,261 | 84  | 74 | 4 | 859 | 21 | 2,326 | 111 |
| 73,990 | 132 | 2 | 1,261 | 64  | 74 | 2 | 860 | 15 | 2,327 | 83  |
| 73,991 | 132 | 3 | 1,261 | 68  | 74 | 2 | 860 | 17 | 2,327 | 90  |
| 73,992 | 132 | 3 | 1,260 | 68  | 74 | 2 | 859 | 17 | 2,325 | 90  |
| 73,993 | 132 | 4 | 1,262 | 88  | 76 | 1 | 859 | 19 | 2,329 | 112 |

|        |     |   |       |     |    |   |       |    |       |     |
|--------|-----|---|-------|-----|----|---|-------|----|-------|-----|
| 73,994 | 132 | 3 | 1,261 | 87  | 76 | 3 | 855   | 21 | 2,324 | 114 |
| 73,995 | 132 | 3 | 1,261 | 87  | 76 | 3 | 855   | 22 | 2,324 | 115 |
| 73,996 | 132 | 3 | 1,261 | 87  | 76 | 3 | 855   | 22 | 2,324 | 115 |
| 73,997 | 138 | 3 | 1,285 | 87  | 77 | 3 | 870   | 22 | 2,370 | 115 |
| 73,998 | 138 | 3 | 1,285 | 88  | 77 | 3 | 871   | 22 | 2,371 | 116 |
| 73,999 | 138 | 3 | 1,284 | 89  | 77 | 3 | 871   | 22 | 2,370 | 117 |
| 74,000 | 138 | 3 | 1,296 | 89  | 77 | 3 | 885   | 22 | 2,396 | 117 |
| 74,001 | 138 | 3 | 1,296 | 87  | 77 | 3 | 885   | 22 | 2,396 | 115 |
| 74,002 | 138 | 3 | 1,288 | 87  | 77 | 3 | 884   | 22 | 2,387 | 115 |
| 74,003 | 141 | 3 | 1,339 | 85  | 79 | 3 | 934   | 21 | 2,493 | 112 |
| 74,004 | 143 | 3 | 1,476 | 85  | 91 | 3 | 1,077 | 21 | 2,787 | 112 |
| 74,005 | 143 | 3 | 1,488 | 85  | 92 | 3 | 1,084 | 21 | 2,807 | 112 |
| 74,006 | 143 | 3 | 1,500 | 85  | 93 | 3 | 1,091 | 22 | 2,827 | 113 |
| 74,007 | 143 | 3 | 1,505 | 87  | 93 | 3 | 1,098 | 22 | 2,839 | 115 |
| 74,008 | 143 | 3 | 1,506 | 88  | 93 | 3 | 1,098 | 22 | 2,840 | 116 |
| 74,009 | 144 | 3 | 1,509 | 88  | 93 | 3 | 1,097 | 22 | 2,843 | 116 |
| 74,010 | 144 | 3 | 1,505 | 88  | 92 | 3 | 1,097 | 23 | 2,838 | 117 |
| 74,011 | 145 | 3 | 1,509 | 86  | 92 | 3 | 1,101 | 22 | 2,847 | 114 |
| 74,012 | 145 | 3 | 1,507 | 86  | 92 | 3 | 1,096 | 22 | 2,840 | 114 |
| 74,013 | 145 | 3 | 1,513 | 81  | 92 | 3 | 1,096 | 20 | 2,846 | 107 |
| 74,014 | 145 | 4 | 1,525 | 84  | 92 | 3 | 1,097 | 20 | 2,859 | 111 |
| 74,015 | 145 | 4 | 1,526 | 84  | 92 | 3 | 1,097 | 20 | 2,860 | 111 |
| 74,016 | 145 | 4 | 1,534 | 85  | 92 | 3 | 1,099 | 20 | 2,870 | 112 |
| 74,017 | 148 | 4 | 1,578 | 85  | 94 | 3 | 1,124 | 20 | 2,944 | 112 |
| 74,018 | 150 | 4 | 1,598 | 87  | 94 | 3 | 1,132 | 20 | 2,974 | 114 |
| 74,019 | 150 | 4 | 1,597 | 87  | 94 | 3 | 1,131 | 20 | 2,972 | 114 |
| 74,020 | 151 | 3 | 1,598 | 87  | 94 | 3 | 1,131 | 20 | 2,974 | 113 |
| 74,021 | 151 | 3 | 1,599 | 87  | 93 | 3 | 1,132 | 20 | 2,975 | 113 |
| 74,022 | 148 | 3 | 1,593 | 84  | 94 | 3 | 1,134 | 19 | 2,969 | 109 |
| 74,023 | 144 | 3 | 1,592 | 84  | 93 | 3 | 1,136 | 19 | 2,965 | 109 |
| 74,024 | 145 | 3 | 1,604 | 80  | 93 | 3 | 1,136 | 18 | 2,978 | 104 |
| 74,025 | 143 | 3 | 1,604 | 74  | 92 | 2 | 1,134 | 15 | 2,973 | 94  |
| 74,026 | 140 | 3 | 1,569 | 74  | 92 | 2 | 1,125 | 15 | 2,926 | 94  |
| 74,027 | 107 | 3 | 1,565 | 69  | 83 | 2 | 1,001 | 14 | 2,756 | 88  |
| 74,028 | 107 | 3 | 1,579 | 69  | 83 | 2 | 1,006 | 14 | 2,775 | 88  |
| 74,029 | 106 | 3 | 1,580 | 65  | 83 | 2 | 1,002 | 14 | 2,771 | 84  |
| 74,030 | 105 | 3 | 1,549 | 66  | 80 | 2 | 974   | 17 | 2,708 | 88  |
| 74,031 | 102 | 5 | 1,548 | 79  | 81 | 4 | 966   | 29 | 2,697 | 117 |
| 74,032 | 101 | 7 | 1,532 | 95  | 79 | 5 | 954   | 38 | 2,666 | 145 |
| 74,033 | 96  | 7 | 1,512 | 102 | 79 | 5 | 944   | 41 | 2,631 | 155 |
| 74,034 | 80  | 7 | 1,400 | 104 | 74 | 5 | 888   | 43 | 2,442 | 159 |

|        |    |    |       |     |    |   |     |    |       |     |
|--------|----|----|-------|-----|----|---|-----|----|-------|-----|
| 74,035 | 79 | 10 | 1,372 | 113 | 73 | 5 | 876 | 50 | 2,400 | 178 |
| 74,036 | 52 | 11 | 968   | 125 | 53 | 5 | 629 | 58 | 1,702 | 199 |
| 74,037 | 33 | 11 | 764   | 125 | 30 | 5 | 454 | 58 | 1,281 | 199 |
| 74,038 | 33 | 12 | 744   | 127 | 28 | 5 | 442 | 61 | 1,247 | 205 |
| 74,039 | 33 | 13 | 743   | 121 | 28 | 5 | 440 | 62 | 1,244 | 201 |
| 74,040 | 33 | 13 | 737   | 111 | 27 | 5 | 440 | 60 | 1,237 | 189 |
| 74,041 | 33 | 13 | 737   | 111 | 27 | 5 | 439 | 60 | 1,236 | 189 |
| 74,042 | 33 | 13 | 737   | 109 | 27 | 5 | 439 | 59 | 1,236 | 186 |
| 74,043 | 33 | 13 | 735   | 111 | 27 | 6 | 439 | 59 | 1,234 | 189 |
| 74,044 | 42 | 12 | 835   | 88  | 28 | 6 | 481 | 57 | 1,386 | 163 |
| 74,045 | 42 | 12 | 835   | 87  | 28 | 4 | 482 | 54 | 1,387 | 157 |
| 74,046 | 42 | 12 | 834   | 87  | 28 | 4 | 483 | 53 | 1,387 | 156 |
| 74,047 | 37 | 12 | 815   | 86  | 27 | 4 | 469 | 53 | 1,348 | 155 |
| 74,048 | 36 | 12 | 806   | 86  | 27 | 4 | 463 | 53 | 1,332 | 155 |
| 74,049 | 36 | 12 | 804   | 85  | 27 | 4 | 459 | 53 | 1,326 | 154 |
| 74,050 | 36 | 12 | 798   | 85  | 27 | 4 | 457 | 53 | 1,318 | 154 |
| 74,051 | 36 | 12 | 792   | 90  | 27 | 4 | 449 | 53 | 1,304 | 159 |
| 74,052 | 36 | 12 | 790   | 90  | 26 | 4 | 449 | 53 | 1,301 | 159 |
| 74,053 | 36 | 12 | 783   | 90  | 26 | 4 | 444 | 54 | 1,289 | 160 |
| 74,054 | 33 | 12 | 743   | 90  | 25 | 4 | 399 | 54 | 1,200 | 160 |
| 74,055 | 32 | 12 | 613   | 90  | 13 | 4 | 260 | 54 | 918   | 160 |
| 74,056 | 31 | 12 | 599   | 90  | 11 | 4 | 249 | 54 | 890   | 160 |
| 74,057 | 31 | 12 | 588   | 90  | 10 | 4 | 242 | 53 | 871   | 159 |
| 74,058 | 31 | 12 | 582   | 87  | 10 | 4 | 234 | 53 | 857   | 156 |
| 74,059 | 31 | 12 | 581   | 89  | 10 | 4 | 234 | 53 | 856   | 158 |
| 74,060 | 30 | 12 | 578   | 90  | 10 | 4 | 234 | 52 | 852   | 158 |
| 74,061 | 30 | 12 | 576   | 90  | 10 | 4 | 233 | 53 | 849   | 159 |
| 74,062 | 29 | 13 | 572   | 90  | 10 | 4 | 228 | 55 | 839   | 162 |
| 74,063 | 29 | 13 | 566   | 90  | 10 | 4 | 228 | 55 | 833   | 162 |
| 74,064 | 29 | 13 | 568   | 91  | 10 | 4 | 230 | 55 | 837   | 163 |
| 74,065 | 29 | 12 | 561   | 87  | 10 | 4 | 230 | 54 | 830   | 157 |
| 74,066 | 29 | 12 | 552   | 87  | 10 | 4 | 228 | 54 | 819   | 157 |
| 74,067 | 26 | 12 | 518   | 86  | 9  | 4 | 206 | 54 | 759   | 156 |
| 74,068 | 24 | 12 | 506   | 84  | 9  | 4 | 213 | 54 | 752   | 154 |
| 74,069 | 24 | 12 | 504   | 85  | 9  | 4 | 211 | 54 | 748   | 155 |
| 74,070 | 20 | 12 | 495   | 85  | 9  | 4 | 209 | 54 | 733   | 155 |
| 74,071 | 20 | 12 | 496   | 85  | 9  | 4 | 211 | 54 | 736   | 155 |
| 74,072 | 19 | 12 | 494   | 86  | 9  | 4 | 210 | 54 | 732   | 156 |
| 74,073 | 19 | 14 | 470   | 104 | 7  | 6 | 201 | 80 | 697   | 204 |
| 74,074 | 18 | 14 | 450   | 107 | 7  | 6 | 191 | 83 | 666   | 210 |
| 74,075 | 18 | 14 | 440   | 115 | 7  | 7 | 190 | 85 | 655   | 221 |

|        |     |    |       |     |     |   |       |    |       |     |
|--------|-----|----|-------|-----|-----|---|-------|----|-------|-----|
| 74,076 | 18  | 14 | 403   | 115 | 7   | 7 | 180   | 87 | 608   | 223 |
| 74,077 | 14  | 14 | 253   | 116 | 5   | 7 | 127   | 87 | 399   | 224 |
| 74,078 | 13  | 14 | 219   | 120 | 4   | 7 | 105   | 87 | 341   | 228 |
| 74,079 | 13  | 14 | 204   | 120 | 4   | 7 | 98    | 87 | 319   | 228 |
| 74,080 | 13  | 14 | 187   | 120 | 4   | 7 | 94    | 87 | 298   | 228 |
| 74,081 | 13  | 14 | 182   | 119 | 3   | 8 | 94    | 84 | 292   | 225 |
| 74,082 | 16  | 12 | 185   | 104 | 3   | 6 | 94    | 72 | 298   | 194 |
| 74,083 | 22  | 10 | 213   | 89  | 3   | 5 | 99    | 64 | 337   | 168 |
| 74,084 | 24  | 10 | 218   | 82  | 3   | 5 | 101   | 62 | 346   | 159 |
| 74,085 | 26  | 10 | 238   | 79  | 4   | 5 | 106   | 60 | 374   | 154 |
| 74,086 | 38  | 7  | 411   | 70  | 8   | 5 | 141   | 55 | 598   | 137 |
| 74,087 | 38  | 6  | 414   | 57  | 8   | 5 | 138   | 47 | 598   | 115 |
| 74,088 | 56  | 6  | 522   | 58  | 13  | 5 | 177   | 50 | 768   | 119 |
| 74,089 | 57  | 5  | 554   | 58  | 13  | 5 | 184   | 50 | 808   | 118 |
| 74,090 | 62  | 5  | 608   | 57  | 15  | 5 | 204   | 49 | 889   | 116 |
| 74,091 | 62  | 5  | 628   | 57  | 16  | 5 | 206   | 49 | 912   | 116 |
| 74,092 | 88  | 4  | 840   | 52  | 39  | 4 | 351   | 47 | 1,318 | 107 |
| 74,093 | 95  | 4  | 919   | 52  | 46  | 4 | 393   | 47 | 1,453 | 107 |
| 74,094 | 89  | 4  | 897   | 52  | 47  | 4 | 367   | 47 | 1,400 | 107 |
| 74,095 | 89  | 4  | 896   | 52  | 47  | 4 | 366   | 48 | 1,398 | 108 |
| 74,096 | 89  | 4  | 896   | 52  | 47  | 4 | 365   | 48 | 1,397 | 108 |
| 74,097 | 139 | 4  | 1,448 | 52  | 87  | 4 | 570   | 48 | 2,244 | 108 |
| 74,098 | 186 | 4  | 1,999 | 51  | 122 | 4 | 820   | 48 | 3,127 | 107 |
| 74,099 | 209 | 4  | 2,252 | 51  | 130 | 4 | 879   | 48 | 3,470 | 107 |
| 74,100 | 209 | 4  | 2,251 | 51  | 130 | 4 | 879   | 48 | 3,469 | 107 |
| 74,101 | 217 | 4  | 2,544 | 51  | 152 | 4 | 967   | 48 | 3,880 | 107 |
| 74,102 | 254 | 4  | 3,073 | 46  | 200 | 4 | 1,402 | 48 | 4,929 | 102 |
| 74,103 | 257 | 4  | 3,100 | 46  | 200 | 4 | 1,406 | 51 | 4,963 | 105 |
| 74,104 | 257 | 4  | 3,099 | 47  | 200 | 5 | 1,408 | 52 | 4,964 | 108 |
| 74,105 | 257 | 5  | 3,098 | 47  | 200 | 5 | 1,408 | 52 | 4,963 | 109 |
| 74,106 | 257 | 5  | 3,095 | 47  | 202 | 5 | 1,406 | 52 | 4,960 | 109 |
| 74,107 | 257 | 5  | 3,095 | 47  | 202 | 5 | 1,407 | 52 | 4,961 | 109 |
| 74,108 | 257 | 5  | 3,096 | 47  | 202 | 5 | 1,407 | 52 | 4,962 | 109 |
| 74,109 | 257 | 5  | 3,095 | 45  | 202 | 5 | 1,407 | 52 | 4,961 | 107 |
| 74,110 | 257 | 5  | 3,095 | 45  | 202 | 5 | 1,407 | 52 | 4,961 | 107 |
| 74,111 | 257 | 5  | 3,092 | 44  | 202 | 5 | 1,405 | 52 | 4,956 | 106 |
| 74,112 | 261 | 5  | 3,102 | 44  | 202 | 5 | 1,413 | 52 | 4,978 | 106 |
| 74,113 | 261 | 4  | 3,102 | 43  | 202 | 5 | 1,413 | 50 | 4,978 | 102 |
| 74,114 | 262 | 4  | 3,119 | 45  | 203 | 5 | 1,420 | 50 | 5,004 | 104 |
| 74,115 | 262 | 4  | 3,117 | 44  | 203 | 5 | 1,419 | 50 | 5,001 | 103 |
| 74,116 | 302 | 4  | 3,349 | 44  | 215 | 5 | 1,690 | 50 | 5,556 | 103 |



|        |     |   |       |    |     |   |       |    |       |     |
|--------|-----|---|-------|----|-----|---|-------|----|-------|-----|
| 74,117 | 302 | 4 | 3,351 | 44 | 215 | 5 | 1,697 | 49 | 5,565 | 102 |
| 74,118 | 302 | 4 | 3,341 | 44 | 215 | 5 | 1,684 | 50 | 5,542 | 103 |
| 74,119 | 304 | 4 | 3,341 | 43 | 215 | 5 | 1,683 | 51 | 5,543 | 103 |
| 74,120 | 304 | 4 | 3,341 | 43 | 215 | 5 | 1,682 | 52 | 5,542 | 104 |
| 74,121 | 304 | 4 | 3,338 | 43 | 215 | 5 | 1,680 | 53 | 5,537 | 105 |
| 74,122 | 310 | 4 | 3,388 | 43 | 217 | 5 | 1,704 | 54 | 5,619 | 106 |
| 74,123 | 314 | 4 | 3,412 | 42 | 219 | 5 | 1,720 | 55 | 5,665 | 106 |
| 74,124 | 316 | 2 | 3,429 | 21 | 220 | 3 | 1,748 | 27 | 5,713 | 53  |
| 74,125 | 316 | 2 | 3,437 | 13 | 220 | 2 | 1,751 | 25 | 5,724 | 42  |
| 74,126 | 315 | 3 | 3,442 | 13 | 220 | 2 | 1,756 | 23 | 5,733 | 41  |
| 74,127 | 315 | 3 | 3,442 | 13 | 220 | 2 | 1,756 | 23 | 5,733 | 41  |
| 74,128 | 315 | 3 | 3,445 | 12 | 220 | 2 | 1,760 | 23 | 5,740 | 40  |
| 74,129 | 316 | 3 | 3,462 | 8  | 221 | 2 | 1,766 | 22 | 5,765 | 35  |
| 74,130 | 316 | 3 | 3,456 | 8  | 221 | 2 | 1,765 | 22 | 5,758 | 35  |
| 74,131 | 321 | 3 | 3,461 | 9  | 221 | 2 | 1,780 | 24 | 5,783 | 38  |
| 74,132 | 319 | 3 | 3,460 | 13 | 221 | 1 | 1,781 | 24 | 5,781 | 41  |
| 74,133 | 317 | 3 | 3,449 | 13 | 221 | 1 | 1,782 | 26 | 5,769 | 43  |
| 74,134 | 314 | 3 | 3,456 | 14 | 221 | 1 | 1,802 | 26 | 5,793 | 44  |
| 74,135 | 313 | 5 | 3,449 | 15 | 222 | 1 | 1,809 | 25 | 5,793 | 46  |
| 74,136 | 309 | 5 | 3,416 | 17 | 221 | 1 | 1,795 | 25 | 5,741 | 48  |
| 74,137 | 297 | 5 | 3,236 | 17 | 216 | 1 | 1,752 | 23 | 5,501 | 46  |
| 74,138 | 291 | 5 | 3,187 | 17 | 214 | 1 | 1,736 | 23 | 5,428 | 46  |
| 74,139 | 285 | 5 | 3,166 | 16 | 213 | 1 | 1,734 | 20 | 5,398 | 42  |
| 74,140 | 300 | 4 | 3,362 | 14 | 228 | 1 | 1,864 | 17 | 5,754 | 36  |
| 74,141 | 296 | 4 | 3,343 | 14 | 229 | 1 | 1,879 | 17 | 5,747 | 36  |
| 74,142 | 301 | 4 | 3,374 | 14 | 230 | 1 | 1,927 | 17 | 5,832 | 36  |
| 74,143 | 274 | 4 | 3,242 | 14 | 208 | 1 | 1,833 | 17 | 5,557 | 36  |
| 74,144 | 276 | 4 | 3,337 | 15 | 207 | 1 | 1,892 | 17 | 5,712 | 37  |
| 74,145 | 276 | 4 | 3,328 | 16 | 206 | 1 | 1,888 | 17 | 5,698 | 38  |
| 74,146 | 277 | 4 | 3,330 | 18 | 204 | 1 | 1,895 | 17 | 5,706 | 40  |
| 74,147 | 261 | 4 | 3,236 | 22 | 201 | 1 | 1,865 | 19 | 5,563 | 46  |
| 74,148 | 230 | 4 | 2,804 | 36 | 166 | 1 | 1,703 | 26 | 4,903 | 67  |
| 74,149 | 183 | 4 | 2,255 | 43 | 131 | 1 | 1,451 | 28 | 4,020 | 76  |
| 74,150 | 163 | 4 | 2,013 | 44 | 123 | 1 | 1,406 | 28 | 3,705 | 77  |
| 74,151 | 157 | 4 | 1,735 | 44 | 101 | 1 | 1,320 | 25 | 3,313 | 74  |
| 74,152 | 143 | 4 | 1,528 | 44 | 83  | 1 | 1,169 | 25 | 2,923 | 74  |
| 74,153 | 120 | 4 | 1,231 | 44 | 55  | 1 | 896   | 25 | 2,302 | 74  |
| 74,154 | 117 | 4 | 1,208 | 45 | 55  | 1 | 895   | 25 | 2,275 | 75  |
| 74,155 | 116 | 4 | 1,201 | 45 | 53  | 0 | 890   | 23 | 2,260 | 72  |
| 74,156 | 116 | 3 | 1,201 | 45 | 53  | 0 | 890   | 23 | 2,260 | 71  |
| 74,157 | 116 | 3 | 1,220 | 45 | 53  | 0 | 898   | 22 | 2,287 | 70  |

|        |     |   |       |    |     |   |       |    |       |    |
|--------|-----|---|-------|----|-----|---|-------|----|-------|----|
| 74,158 | 116 | 3 | 1,226 | 45 | 53  | 0 | 900   | 22 | 2,295 | 70 |
| 74,159 | 116 | 3 | 1,225 | 45 | 53  | 0 | 902   | 22 | 2,296 | 70 |
| 74,160 | 116 | 3 | 1,225 | 45 | 53  | 0 | 902   | 23 | 2,296 | 71 |
| 74,161 | 112 | 3 | 1,246 | 45 | 53  | 0 | 901   | 23 | 2,312 | 71 |
| 74,162 | 112 | 3 | 1,293 | 45 | 54  | 0 | 934   | 24 | 2,393 | 72 |
| 74,163 | 113 | 3 | 1,324 | 45 | 56  | 0 | 952   | 24 | 2,445 | 72 |
| 74,164 | 113 | 3 | 1,321 | 43 | 56  | 0 | 955   | 24 | 2,445 | 70 |
| 74,165 | 114 | 3 | 1,317 | 43 | 56  | 0 | 952   | 24 | 2,439 | 70 |
| 74,166 | 75  | 3 | 1,138 | 43 | 50  | 0 | 720   | 24 | 1,983 | 70 |
| 74,167 | 75  | 3 | 1,097 | 43 | 43  | 0 | 689   | 24 | 1,904 | 70 |
| 74,168 | 75  | 3 | 1,096 | 43 | 43  | 0 | 680   | 23 | 1,894 | 69 |
| 74,169 | 75  | 3 | 1,096 | 43 | 43  | 0 | 680   | 23 | 1,894 | 69 |
| 74,170 | 73  | 3 | 1,104 | 43 | 43  | 0 | 680   | 22 | 1,900 | 68 |
| 74,171 | 72  | 3 | 1,099 | 43 | 43  | 0 | 679   | 21 | 1,893 | 67 |
| 74,172 | 72  | 3 | 1,093 | 43 | 43  | 0 | 676   | 21 | 1,884 | 67 |
| 74,173 | 69  | 4 | 1,091 | 43 | 42  | 0 | 660   | 22 | 1,862 | 69 |
| 74,174 | 66  | 4 | 1,109 | 44 | 42  | 0 | 653   | 21 | 1,870 | 69 |
| 74,175 | 65  | 4 | 1,096 | 44 | 41  | 0 | 626   | 21 | 1,828 | 69 |
| 74,176 | 66  | 4 | 1,170 | 44 | 43  | 0 | 631   | 21 | 1,910 | 69 |
| 74,177 | 68  | 3 | 1,333 | 44 | 50  | 0 | 665   | 21 | 2,116 | 68 |
| 74,178 | 207 | 3 | 2,457 | 44 | 133 | 0 | 1,526 | 21 | 4,323 | 68 |
| 74,179 | 210 | 3 | 2,476 | 45 | 137 | 0 | 1,538 | 22 | 4,361 | 70 |
| 74,180 | 210 | 3 | 2,486 | 45 | 140 | 0 | 1,547 | 22 | 4,383 | 70 |
| 74,181 | 205 | 3 | 2,484 | 45 | 140 | 0 | 1,533 | 22 | 4,362 | 70 |
| 74,182 | 205 | 4 | 2,492 | 44 | 147 | 0 | 1,545 | 21 | 4,389 | 69 |
| 74,183 | 208 | 4 | 2,510 | 41 | 152 | 0 | 1,559 | 21 | 4,429 | 66 |
| 74,184 | 207 | 4 | 2,501 | 41 | 152 | 0 | 1,550 | 19 | 4,410 | 64 |
| 74,185 | 214 | 4 | 2,636 | 38 | 160 | 0 | 1,624 | 18 | 4,634 | 60 |
| 74,186 | 213 | 2 | 2,646 | 42 | 160 | 0 | 1,618 | 20 | 4,637 | 64 |
| 74,187 | 210 | 2 | 2,637 | 40 | 158 | 0 | 1,601 | 21 | 4,606 | 63 |
| 74,188 | 208 | 2 | 2,614 | 40 | 158 | 0 | 1,599 | 21 | 4,579 | 63 |
| 74,189 | 208 | 3 | 2,618 | 42 | 158 | 0 | 1,599 | 21 | 4,583 | 66 |
| 74,190 | 204 | 3 | 2,577 | 44 | 158 | 0 | 1,573 | 21 | 4,512 | 68 |
| 74,191 | 201 | 3 | 2,474 | 45 | 145 | 1 | 1,480 | 21 | 4,300 | 70 |
| 74,192 | 202 | 3 | 2,450 | 45 | 142 | 1 | 1,449 | 21 | 4,243 | 70 |
| 74,193 | 214 | 3 | 2,611 | 45 | 152 | 1 | 1,507 | 21 | 4,484 | 70 |
| 74,194 | 219 | 3 | 2,553 | 46 | 153 | 1 | 1,496 | 21 | 4,421 | 71 |
| 74,195 | 210 | 3 | 2,378 | 45 | 147 | 1 | 1,393 | 22 | 4,128 | 71 |
| 74,196 | 206 | 3 | 2,357 | 44 | 147 | 1 | 1,375 | 22 | 4,085 | 70 |
| 74,197 | 220 | 3 | 2,418 | 42 | 155 | 1 | 1,428 | 21 | 4,221 | 67 |
| 74,198 | 239 | 3 | 2,715 | 38 | 172 | 1 | 1,587 | 19 | 4,713 | 61 |

|        |     |   |       |    |     |   |       |    |       |    |
|--------|-----|---|-------|----|-----|---|-------|----|-------|----|
| 74,199 | 248 | 3 | 2,781 | 16 | 177 | 1 | 1,644 | 10 | 4,850 | 30 |
| 74,200 | 249 | 3 | 2,908 | 16 | 181 | 1 | 1,676 | 10 | 5,014 | 30 |
| 74,201 | 259 | 3 | 3,064 | 16 | 197 | 1 | 1,783 | 10 | 5,303 | 30 |
| 74,202 | 260 | 3 | 3,140 | 17 | 202 | 1 | 1,851 | 10 | 5,453 | 31 |
| 74,203 | 260 | 3 | 3,149 | 17 | 202 | 1 | 1,864 | 10 | 5,475 | 31 |
| 74,204 | 265 | 3 | 3,155 | 16 | 205 | 1 | 1,883 | 10 | 5,508 | 30 |
| 74,205 | 265 | 3 | 3,152 | 16 | 205 | 1 | 1,885 | 10 | 5,507 | 30 |
| 74,206 | 265 | 3 | 3,138 | 18 | 205 | 1 | 1,878 | 10 | 5,486 | 32 |
| 74,207 | 265 | 3 | 3,132 | 22 | 206 | 1 | 1,878 | 11 | 5,481 | 37 |
| 74,208 | 265 | 3 | 3,129 | 22 | 206 | 1 | 1,878 | 11 | 5,478 | 37 |
| 74,209 | 268 | 3 | 3,137 | 22 | 207 | 1 | 1,882 | 10 | 5,494 | 36 |
| 74,210 | 268 | 3 | 3,138 | 23 | 207 | 1 | 1,881 | 10 | 5,494 | 37 |
| 74,211 | 268 | 3 | 3,136 | 25 | 210 | 2 | 1,878 | 11 | 5,492 | 41 |
| 74,212 | 270 | 3 | 3,127 | 30 | 210 | 2 | 1,881 | 12 | 5,488 | 47 |
| 74,213 | 269 | 3 | 3,083 | 30 | 209 | 2 | 1,848 | 11 | 5,409 | 46 |
| 74,214 | 269 | 3 | 3,061 | 32 | 207 | 2 | 1,831 | 11 | 5,368 | 48 |
| 74,215 | 269 | 3 | 3,057 | 32 | 207 | 2 | 1,826 | 11 | 5,359 | 48 |
| 74,216 | 290 | 3 | 3,202 | 33 | 211 | 2 | 1,866 | 11 | 5,569 | 49 |
| 74,217 | 290 | 3 | 3,199 | 38 | 213 | 2 | 1,864 | 12 | 5,566 | 55 |
| 74,218 | 289 | 3 | 3,180 | 39 | 213 | 2 | 1,858 | 12 | 5,540 | 56 |
| 74,219 | 297 | 3 | 3,214 | 41 | 214 | 2 | 1,879 | 12 | 5,604 | 58 |
| 74,220 | 302 | 3 | 3,226 | 42 | 216 | 2 | 1,887 | 12 | 5,631 | 59 |
| 74,221 | 304 | 3 | 3,230 | 42 | 218 | 2 | 1,893 | 11 | 5,645 | 58 |
| 74,222 | 304 | 3 | 3,238 | 43 | 218 | 2 | 1,905 | 11 | 5,665 | 59 |
| 74,223 | 304 | 3 | 3,236 | 43 | 218 | 2 | 1,905 | 11 | 5,663 | 59 |
| 74,224 | 328 | 2 | 3,388 | 43 | 226 | 2 | 2,008 | 10 | 5,950 | 57 |
| 74,225 | 397 | 2 | 3,547 | 42 | 244 | 2 | 2,224 | 10 | 6,412 | 56 |
| 74,226 | 396 | 2 | 3,546 | 42 | 244 | 2 | 2,225 | 11 | 6,411 | 57 |
| 74,227 | 402 | 2 | 3,585 | 43 | 250 | 2 | 2,328 | 13 | 6,565 | 60 |
| 74,228 | 403 | 2 | 3,478 | 43 | 244 | 2 | 2,330 | 15 | 6,455 | 62 |
| 74,229 | 269 | 2 | 2,366 | 43 | 163 | 3 | 1,480 | 15 | 4,278 | 63 |
| 74,230 | 266 | 2 | 2,342 | 46 | 158 | 3 | 1,468 | 20 | 4,234 | 71 |
| 74,231 | 268 | 2 | 2,324 | 49 | 155 | 4 | 1,457 | 25 | 4,204 | 80 |
| 74,232 | 268 | 1 | 2,318 | 49 | 151 | 4 | 1,450 | 27 | 4,187 | 81 |
| 74,233 | 267 | 1 | 2,314 | 50 | 148 | 4 | 1,444 | 32 | 4,173 | 87 |
| 74,234 | 265 | 2 | 2,295 | 49 | 143 | 4 | 1,428 | 32 | 4,131 | 87 |
| 74,235 | 264 | 2 | 2,162 | 49 | 136 | 4 | 1,345 | 32 | 3,907 | 87 |
| 74,236 | 264 | 2 | 2,152 | 44 | 135 | 4 | 1,342 | 29 | 3,893 | 79 |
| 74,237 | 264 | 2 | 2,153 | 44 | 135 | 4 | 1,342 | 29 | 3,894 | 79 |
| 74,238 | 263 | 2 | 2,149 | 44 | 135 | 4 | 1,340 | 30 | 3,887 | 80 |
| 74,239 | 264 | 2 | 2,186 | 44 | 136 | 4 | 1,357 | 30 | 3,943 | 80 |

|        |     |   |       |    |     |   |       |    |       |     |
|--------|-----|---|-------|----|-----|---|-------|----|-------|-----|
| 74,240 | 264 | 1 | 2,180 | 42 | 136 | 4 | 1,359 | 30 | 3,939 | 77  |
| 74,241 | 264 | 1 | 2,169 | 40 | 136 | 4 | 1,355 | 30 | 3,924 | 75  |
| 74,242 | 260 | 1 | 2,197 | 39 | 136 | 3 | 1,384 | 30 | 3,977 | 73  |
| 74,243 | 258 | 1 | 2,183 | 40 | 136 | 3 | 1,382 | 30 | 3,959 | 74  |
| 74,244 | 241 | 1 | 1,968 | 40 | 123 | 3 | 1,272 | 30 | 3,604 | 74  |
| 74,245 | 235 | 1 | 1,894 | 39 | 120 | 3 | 1,224 | 29 | 3,473 | 72  |
| 74,246 | 241 | 1 | 1,899 | 39 | 122 | 3 | 1,226 | 29 | 3,488 | 72  |
| 74,247 | 227 | 1 | 1,840 | 40 | 114 | 3 | 1,173 | 29 | 3,354 | 73  |
| 74,248 | 222 | 1 | 1,783 | 49 | 110 | 5 | 1,144 | 36 | 3,259 | 91  |
| 74,249 | 210 | 1 | 1,549 | 58 | 97  | 5 | 1,018 | 38 | 2,874 | 102 |
| 74,250 | 202 | 1 | 1,516 | 59 | 94  | 5 | 976   | 38 | 2,788 | 103 |
| 74,251 | 201 | 1 | 1,392 | 59 | 90  | 5 | 945   | 38 | 2,628 | 103 |
| 74,252 | 188 | 1 | 1,226 | 59 | 74  | 5 | 822   | 38 | 2,310 | 103 |
| 74,253 | 189 | 1 | 1,135 | 58 | 67  | 5 | 753   | 38 | 2,144 | 102 |
| 74,254 | 189 | 1 | 1,109 | 58 | 65  | 5 | 730   | 38 | 2,093 | 102 |
| 74,255 | 184 | 1 | 1,095 | 58 | 62  | 5 | 710   | 39 | 2,051 | 103 |
| 74,256 | 184 | 1 | 1,095 | 58 | 62  | 5 | 709   | 39 | 2,050 | 103 |
| 74,257 | 184 | 1 | 1,096 | 56 | 62  | 5 | 709   | 39 | 2,051 | 101 |
| 74,258 | 203 | 1 | 1,264 | 55 | 74  | 5 | 778   | 39 | 2,319 | 100 |
| 74,259 | 203 | 1 | 1,263 | 55 | 74  | 5 | 779   | 39 | 2,319 | 100 |
| 74,260 | 213 | 1 | 1,310 | 55 | 77  | 5 | 812   | 39 | 2,412 | 100 |
| 74,261 | 217 | 1 | 1,393 | 54 | 78  | 5 | 841   | 39 | 2,529 | 99  |
| 74,262 | 240 | 1 | 1,544 | 52 | 84  | 4 | 938   | 38 | 2,806 | 95  |
| 74,263 | 238 | 1 | 1,533 | 47 | 84  | 4 | 936   | 37 | 2,791 | 89  |
| 74,264 | 240 | 1 | 1,555 | 47 | 86  | 4 | 955   | 37 | 2,836 | 89  |
| 74,265 | 241 | 1 | 1,563 | 45 | 86  | 4 | 965   | 37 | 2,855 | 87  |
| 74,266 | 238 | 1 | 1,556 | 45 | 86  | 5 | 963   | 37 | 2,843 | 88  |
| 74,267 | 219 | 1 | 1,432 | 39 | 81  | 5 | 930   | 36 | 2,662 | 81  |
| 74,268 | 219 | 1 | 1,434 | 38 | 80  | 5 | 936   | 36 | 2,669 | 80  |
| 74,269 | 218 | 1 | 1,432 | 38 | 80  | 5 | 933   | 36 | 2,663 | 80  |
| 74,270 | 214 | 1 | 1,416 | 39 | 81  | 5 | 927   | 36 | 2,638 | 81  |
| 74,271 | 209 | 1 | 1,400 | 39 | 79  | 5 | 920   | 36 | 2,608 | 81  |
| 74,272 | 207 | 1 | 1,396 | 38 | 77  | 5 | 913   | 36 | 2,593 | 80  |
| 74,273 | 208 | 1 | 1,392 | 38 | 78  | 5 | 901   | 36 | 2,579 | 80  |
| 74,274 | 183 | 6 | 1,230 | 50 | 71  | 9 | 798   | 43 | 2,282 | 108 |
| 74,275 | 117 | 6 | 1,083 | 53 | 53  | 9 | 587   | 44 | 1,840 | 112 |
| 74,276 | 118 | 6 | 1,087 | 53 | 54  | 9 | 585   | 44 | 1,844 | 112 |
| 74,277 | 114 | 6 | 1,045 | 55 | 51  | 9 | 552   | 45 | 1,762 | 115 |
| 74,278 | 111 | 6 | 966   | 54 | 46  | 9 | 473   | 43 | 1,596 | 112 |
| 74,279 | 109 | 6 | 908   | 54 | 45  | 9 | 433   | 42 | 1,495 | 111 |
| 74,280 | 104 | 6 | 900   | 51 | 43  | 8 | 420   | 39 | 1,467 | 104 |

|        |     |   |     |    |    |   |     |    |       |     |
|--------|-----|---|-----|----|----|---|-----|----|-------|-----|
| 74,281 | 103 | 6 | 897 | 51 | 43 | 8 | 417 | 39 | 1,460 | 104 |
| 74,282 | 101 | 6 | 950 | 48 | 43 | 7 | 428 | 34 | 1,522 | 95  |
| 74,283 | 101 | 6 | 957 | 47 | 43 | 7 | 428 | 26 | 1,529 | 86  |
| 74,284 | 110 | 5 | 988 | 48 | 44 | 7 | 456 | 26 | 1,598 | 86  |
| 74,285 | 109 | 5 | 986 | 49 | 44 | 7 | 456 | 27 | 1,595 | 88  |
| 74,286 | 103 | 5 | 972 | 49 | 43 | 7 | 451 | 27 | 1,569 | 88  |
| 74,287 | 103 | 5 | 978 | 49 | 43 | 7 | 453 | 27 | 1,577 | 88  |
| 74,288 | 103 | 5 | 974 | 49 | 43 | 7 | 453 | 27 | 1,573 | 88  |
| 74,289 | 102 | 5 | 933 | 49 | 42 | 7 | 438 | 26 | 1,515 | 87  |
| 74,290 | 101 | 5 | 915 | 49 | 42 | 7 | 432 | 26 | 1,490 | 87  |
| 74,291 | 101 | 5 | 878 | 49 | 40 | 7 | 423 | 26 | 1,442 | 87  |
| 74,292 | 101 | 5 | 868 | 49 | 40 | 7 | 420 | 26 | 1,429 | 87  |
| 74,293 | 97  | 5 | 830 | 48 | 40 | 7 | 393 | 26 | 1,360 | 86  |
| 74,294 | 97  | 5 | 830 | 49 | 40 | 7 | 392 | 26 | 1,359 | 87  |
| 74,295 | 97  | 5 | 830 | 49 | 40 | 7 | 392 | 26 | 1,359 | 87  |
| 74,296 | 96  | 5 | 826 | 49 | 40 | 7 | 391 | 26 | 1,353 | 87  |
| 74,297 | 90  | 5 | 817 | 49 | 38 | 7 | 389 | 26 | 1,334 | 87  |
| 74,298 | 90  | 5 | 814 | 48 | 38 | 7 | 389 | 26 | 1,331 | 86  |
| 74,299 | 88  | 5 | 806 | 30 | 38 | 5 | 386 | 17 | 1,318 | 57  |
| 74,300 | 88  | 5 | 804 | 30 | 38 | 5 | 383 | 17 | 1,313 | 57  |
| 74,301 | 87  | 5 | 770 | 29 | 36 | 5 | 365 | 17 | 1,258 | 56  |
| 74,302 | 87  | 5 | 765 | 29 | 36 | 5 | 363 | 18 | 1,251 | 57  |
| 74,303 | 87  | 5 | 764 | 29 | 36 | 5 | 363 | 18 | 1,250 | 57  |
| 74,304 | 83  | 5 | 760 | 30 | 36 | 5 | 361 | 18 | 1,240 | 58  |
| 74,305 | 83  | 5 | 760 | 31 | 36 | 5 | 361 | 18 | 1,240 | 59  |
| 74,306 | 83  | 5 | 760 | 33 | 36 | 5 | 361 | 18 | 1,240 | 61  |
| 74,307 | 83  | 5 | 759 | 33 | 36 | 5 | 361 | 18 | 1,239 | 61  |
| 74,308 | 71  | 5 | 677 | 34 | 33 | 5 | 335 | 20 | 1,116 | 64  |
| 74,309 | 66  | 5 | 594 | 40 | 24 | 5 | 294 | 25 | 978   | 75  |
| 74,310 | 53  | 5 | 537 | 46 | 21 | 5 | 256 | 25 | 867   | 81  |
| 74,311 | 49  | 5 | 456 | 46 | 20 | 5 | 230 | 26 | 755   | 82  |
| 74,312 | 30  | 5 | 313 | 49 | 11 | 5 | 134 | 30 | 488   | 89  |
| 74,313 | 26  | 5 | 301 | 49 | 11 | 5 | 126 | 30 | 464   | 89  |
| 74,314 | 24  | 5 | 277 | 57 | 9  | 5 | 106 | 35 | 416   | 102 |
| 74,315 | 22  | 5 | 260 | 58 | 9  | 5 | 103 | 35 | 394   | 103 |
| 74,316 | 24  | 5 | 293 | 58 | 10 | 5 | 113 | 35 | 440   | 103 |
| 74,317 | 23  | 5 | 289 | 58 | 10 | 4 | 112 | 35 | 434   | 102 |
| 74,318 | 31  | 5 | 352 | 58 | 18 | 4 | 222 | 35 | 623   | 102 |
| 74,319 | 36  | 5 | 375 | 58 | 20 | 4 | 256 | 35 | 687   | 102 |
| 74,320 | 36  | 5 | 372 | 58 | 20 | 4 | 256 | 35 | 684   | 102 |
| 74,321 | 36  | 5 | 399 | 57 | 22 | 4 | 325 | 36 | 782   | 102 |

|        |    |   |     |    |    |   |     |    |     |     |
|--------|----|---|-----|----|----|---|-----|----|-----|-----|
| 74,322 | 36 | 5 | 402 | 59 | 22 | 4 | 330 | 37 | 790 | 105 |
| 74,323 | 36 | 5 | 402 | 62 | 23 | 4 | 334 | 36 | 795 | 107 |
| 74,324 | 37 | 5 | 395 | 62 | 22 | 4 | 333 | 36 | 787 | 107 |
| 74,325 | 36 | 1 | 377 | 50 | 20 | 0 | 328 | 29 | 761 | 80  |
| 74,326 | 31 | 1 | 321 | 47 | 18 | 0 | 312 | 28 | 682 | 76  |
| 74,327 | 30 | 1 | 314 | 45 | 18 | 0 | 315 | 27 | 677 | 73  |
| 74,328 | 30 | 1 | 314 | 45 | 18 | 0 | 315 | 27 | 677 | 73  |
| 74,329 | 29 | 1 | 313 | 45 | 18 | 0 | 314 | 27 | 674 | 73  |
| 74,330 | 29 | 1 | 314 | 46 | 18 | 0 | 318 | 28 | 679 | 75  |
| 74,331 | 29 | 1 | 307 | 46 | 18 | 0 | 318 | 26 | 672 | 73  |
| 74,332 | 29 | 1 | 299 | 46 | 18 | 0 | 313 | 26 | 659 | 73  |
| 74,333 | 29 | 1 | 257 | 46 | 18 | 0 | 308 | 26 | 612 | 73  |
| 74,334 | 30 | 1 | 255 | 46 | 18 | 0 | 308 | 26 | 611 | 73  |
| 74,335 | 23 | 1 | 231 | 46 | 17 | 0 | 285 | 25 | 556 | 72  |
| 74,336 | 23 | 1 | 224 | 46 | 17 | 0 | 284 | 26 | 548 | 73  |
| 74,337 | 23 | 1 | 229 | 46 | 17 | 0 | 283 | 26 | 552 | 73  |
| 74,338 | 24 | 1 | 255 | 46 | 17 | 0 | 292 | 26 | 588 | 73  |
| 74,339 | 27 | 2 | 292 | 50 | 18 | 0 | 320 | 26 | 657 | 78  |
| 74,340 | 27 | 2 | 293 | 50 | 18 | 0 | 320 | 26 | 658 | 78  |
| 74,341 | 27 | 2 | 328 | 50 | 18 | 0 | 333 | 26 | 706 | 78  |
| 74,342 | 27 | 2 | 333 | 50 | 19 | 0 | 348 | 26 | 727 | 78  |
| 74,343 | 27 | 2 | 338 | 50 | 19 | 0 | 351 | 26 | 735 | 78  |
| 74,344 | 27 | 2 | 342 | 49 | 19 | 0 | 355 | 26 | 743 | 77  |
| 74,345 | 27 | 2 | 342 | 49 | 19 | 0 | 355 | 26 | 743 | 77  |
| 74,346 | 27 | 2 | 342 | 49 | 19 | 0 | 355 | 26 | 743 | 77  |
| 74,347 | 27 | 2 | 342 | 49 | 19 | 0 | 355 | 26 | 743 | 77  |
| 74,348 | 27 | 2 | 342 | 49 | 19 | 0 | 355 | 26 | 743 | 77  |
| 74,349 | 27 | 2 | 342 | 49 | 19 | 0 | 355 | 26 | 743 | 77  |
| 74,350 | 29 | 2 | 358 | 49 | 19 | 0 | 369 | 26 | 775 | 77  |
| 74,351 | 29 | 2 | 358 | 49 | 19 | 0 | 369 | 26 | 775 | 77  |
| 74,352 | 29 | 2 | 358 | 49 | 19 | 0 | 369 | 26 | 775 | 77  |
| 74,353 | 29 | 2 | 358 | 49 | 19 | 0 | 369 | 25 | 775 | 76  |
| 74,354 | 29 | 2 | 358 | 49 | 19 | 0 | 368 | 25 | 774 | 76  |
| 74,355 | 29 | 2 | 359 | 49 | 19 | 0 | 371 | 25 | 778 | 76  |
| 74,356 | 29 | 2 | 361 | 48 | 19 | 0 | 371 | 25 | 780 | 75  |
| 74,357 | 29 | 2 | 365 | 46 | 19 | 0 | 373 | 24 | 786 | 72  |
| 74,358 | 29 | 2 | 373 | 46 | 20 | 0 | 376 | 24 | 798 | 72  |
| 74,359 | 29 | 2 | 373 | 44 | 20 | 0 | 377 | 22 | 799 | 68  |
| 74,360 | 27 | 2 | 373 | 29 | 19 | 0 | 376 | 17 | 795 | 48  |
| 74,361 | 27 | 2 | 372 | 29 | 19 | 0 | 376 | 17 | 794 | 48  |
| 74,362 | 31 | 2 | 412 | 27 | 20 | 0 | 389 | 12 | 852 | 41  |

|        |     |   |       |    |    |   |     |    |       |    |
|--------|-----|---|-------|----|----|---|-----|----|-------|----|
| 74,363 | 32  | 2 | 424   | 27 | 20 | 0 | 390 | 12 | 866   | 41 |
| 74,364 | 56  | 3 | 509   | 20 | 28 | 0 | 475 | 7  | 1,068 | 30 |
| 74,365 | 80  | 3 | 722   | 20 | 37 | 0 | 592 | 8  | 1,431 | 31 |
| 74,366 | 78  | 3 | 706   | 19 | 37 | 0 | 591 | 8  | 1,412 | 30 |
| 74,367 | 84  | 4 | 700   | 20 | 38 | 0 | 591 | 8  | 1,413 | 32 |
| 74,368 | 91  | 4 | 838   | 25 | 52 | 0 | 643 | 10 | 1,624 | 39 |
| 74,369 | 84  | 4 | 788   | 25 | 47 | 0 | 550 | 10 | 1,469 | 39 |
| 74,370 | 87  | 4 | 838   | 25 | 48 | 0 | 541 | 10 | 1,514 | 39 |
| 74,371 | 84  | 4 | 813   | 23 | 45 | 0 | 479 | 9  | 1,421 | 36 |
| 74,372 | 84  | 4 | 806   | 24 | 45 | 0 | 463 | 9  | 1,398 | 37 |
| 74,373 | 88  | 4 | 875   | 26 | 48 | 0 | 485 | 11 | 1,496 | 41 |
| 74,374 | 88  | 4 | 872   | 24 | 47 | 0 | 483 | 12 | 1,490 | 40 |
| 74,375 | 88  | 4 | 871   | 24 | 47 | 0 | 483 | 12 | 1,489 | 40 |
| 74,376 | 88  | 3 | 871   | 24 | 47 | 0 | 484 | 13 | 1,490 | 40 |
| 74,377 | 102 | 3 | 1,022 | 26 | 58 | 1 | 557 | 14 | 1,739 | 44 |
| 74,378 | 102 | 5 | 1,021 | 38 | 57 | 1 | 554 | 21 | 1,734 | 65 |
| 74,379 | 102 | 5 | 1,018 | 39 | 57 | 1 | 552 | 22 | 1,729 | 67 |
| 74,380 | 104 | 5 | 1,037 | 39 | 58 | 1 | 569 | 22 | 1,768 | 67 |
| 74,381 | 105 | 5 | 1,041 | 38 | 58 | 1 | 570 | 20 | 1,774 | 64 |
| 74,382 | 105 | 5 | 1,043 | 37 | 58 | 1 | 571 | 20 | 1,777 | 63 |
| 74,383 | 105 | 5 | 1,042 | 37 | 58 | 1 | 571 | 20 | 1,776 | 63 |
| 74,384 | 105 | 5 | 1,040 | 37 | 58 | 1 | 570 | 20 | 1,773 | 63 |
| 74,385 | 104 | 5 | 1,036 | 37 | 58 | 1 | 570 | 20 | 1,768 | 63 |
| 74,386 | 102 | 5 | 1,028 | 35 | 58 | 1 | 566 | 21 | 1,754 | 62 |
| 74,387 | 103 | 6 | 1,028 | 36 | 58 | 1 | 566 | 22 | 1,755 | 65 |
| 74,388 | 103 | 6 | 1,029 | 37 | 58 | 1 | 567 | 24 | 1,757 | 68 |
| 74,389 | 102 | 7 | 1,004 | 50 | 58 | 2 | 559 | 26 | 1,723 | 85 |
| 74,390 | 99  | 6 | 967   | 46 | 57 | 2 | 531 | 26 | 1,654 | 80 |
| 74,391 | 99  | 6 | 931   | 47 | 57 | 2 | 518 | 26 | 1,605 | 81 |
| 74,392 | 100 | 6 | 933   | 47 | 56 | 2 | 507 | 26 | 1,596 | 81 |
| 74,393 | 100 | 6 | 930   | 47 | 56 | 2 | 507 | 26 | 1,593 | 81 |
| 74,394 | 100 | 6 | 929   | 47 | 56 | 2 | 507 | 26 | 1,592 | 81 |
| 74,395 | 100 | 6 | 926   | 48 | 56 | 2 | 503 | 26 | 1,585 | 82 |
| 74,396 | 100 | 6 | 928   | 48 | 56 | 2 | 503 | 26 | 1,587 | 82 |
| 74,397 | 101 | 6 | 934   | 48 | 56 | 2 | 506 | 26 | 1,597 | 82 |
| 74,398 | 101 | 6 | 935   | 48 | 56 | 2 | 505 | 26 | 1,597 | 82 |
| 74,399 | 101 | 6 | 939   | 48 | 56 | 2 | 506 | 26 | 1,602 | 82 |
| 74,400 | 100 | 6 | 938   | 48 | 56 | 2 | 505 | 26 | 1,599 | 82 |
| 74,401 | 99  | 6 | 925   | 48 | 56 | 2 | 494 | 26 | 1,574 | 82 |
| 74,402 | 105 | 6 | 981   | 48 | 58 | 2 | 520 | 26 | 1,664 | 82 |
| 74,403 | 106 | 6 | 1,000 | 48 | 60 | 2 | 523 | 26 | 1,689 | 82 |

|        |     |   |       |    |    |   |     |    |       |    |
|--------|-----|---|-------|----|----|---|-----|----|-------|----|
| 74,404 | 113 | 6 | 1,199 | 48 | 65 | 2 | 596 | 26 | 1,973 | 82 |
| 74,405 | 113 | 6 | 1,198 | 48 | 65 | 2 | 594 | 26 | 1,970 | 82 |
| 74,406 | 116 | 6 | 1,287 | 47 | 70 | 2 | 639 | 26 | 2,112 | 81 |
| 74,407 | 117 | 6 | 1,308 | 47 | 71 | 2 | 649 | 26 | 2,145 | 81 |
| 74,408 | 117 | 6 | 1,302 | 49 | 72 | 2 | 649 | 26 | 2,140 | 83 |
| 74,409 | 117 | 6 | 1,300 | 49 | 71 | 2 | 647 | 26 | 2,135 | 83 |
| 74,410 | 117 | 6 | 1,300 | 49 | 71 | 2 | 646 | 27 | 2,134 | 84 |
| 74,411 | 117 | 6 | 1,299 | 50 | 71 | 2 | 644 | 26 | 2,131 | 84 |
| 74,412 | 113 | 6 | 1,264 | 49 | 70 | 2 | 633 | 26 | 2,080 | 83 |
| 74,413 | 113 | 5 | 1,258 | 48 | 70 | 2 | 631 | 26 | 2,072 | 81 |
| 74,414 | 112 | 5 | 1,246 | 49 | 70 | 2 | 632 | 26 | 2,060 | 82 |
| 74,415 | 88  | 5 | 1,159 | 49 | 62 | 2 | 547 | 26 | 1,856 | 82 |
| 74,416 | 65  | 4 | 945   | 48 | 53 | 2 | 424 | 24 | 1,487 | 78 |
| 74,417 | 65  | 4 | 944   | 48 | 53 | 2 | 421 | 24 | 1,483 | 78 |
| 74,418 | 59  | 4 | 949   | 49 | 52 | 2 | 415 | 24 | 1,475 | 79 |
| 74,419 | 52  | 4 | 812   | 44 | 38 | 2 | 364 | 22 | 1,266 | 72 |
| 74,420 | 52  | 4 | 787   | 44 | 35 | 2 | 348 | 22 | 1,222 | 72 |
| 74,421 | 45  | 4 | 711   | 44 | 32 | 2 | 320 | 22 | 1,108 | 72 |
| 74,422 | 53  | 4 | 728   | 48 | 32 | 2 | 327 | 22 | 1,140 | 76 |
| 74,423 | 57  | 4 | 718   | 47 | 29 | 2 | 324 | 22 | 1,128 | 75 |
| 74,424 | 58  | 4 | 711   | 41 | 29 | 2 | 327 | 18 | 1,125 | 65 |
| 74,425 | 61  | 4 | 780   | 43 | 31 | 2 | 356 | 19 | 1,228 | 68 |
| 74,426 | 73  | 4 | 1,114 | 43 | 42 | 2 | 455 | 19 | 1,684 | 68 |
| 74,427 | 74  | 4 | 1,143 | 43 | 45 | 2 | 466 | 19 | 1,728 | 68 |
| 74,428 | 74  | 4 | 1,107 | 41 | 42 | 1 | 450 | 18 | 1,673 | 64 |
| 74,429 | 72  | 2 | 1,096 | 29 | 43 | 1 | 440 | 10 | 1,651 | 42 |
| 74,430 | 72  | 2 | 1,095 | 28 | 42 | 1 | 440 | 10 | 1,649 | 41 |
| 74,431 | 71  | 2 | 1,091 | 28 | 42 | 1 | 438 | 10 | 1,642 | 41 |
| 74,432 | 71  | 2 | 1,089 | 28 | 42 | 1 | 436 | 10 | 1,638 | 41 |
| 74,433 | 71  | 2 | 1,089 | 28 | 42 | 1 | 436 | 10 | 1,638 | 41 |
| 74,434 | 72  | 2 | 1,092 | 28 | 42 | 1 | 436 | 10 | 1,642 | 41 |
| 74,435 | 72  | 2 | 1,097 | 28 | 43 | 1 | 437 | 10 | 1,649 | 41 |
| 74,436 | 72  | 2 | 1,098 | 28 | 43 | 1 | 437 | 9  | 1,650 | 40 |
| 74,437 | 72  | 2 | 1,098 | 28 | 43 | 1 | 437 | 9  | 1,650 | 40 |
| 74,438 | 71  | 1 | 1,094 | 27 | 43 | 1 | 439 | 7  | 1,647 | 36 |
| 74,439 | 71  | 1 | 1,102 | 26 | 44 | 1 | 440 | 5  | 1,657 | 33 |
| 74,440 | 77  | 0 | 1,117 | 13 | 44 | 0 | 445 | 3  | 1,683 | 16 |
| 74,441 | 77  | 0 | 1,117 | 13 | 44 | 0 | 445 | 3  | 1,683 | 16 |
| 74,442 | 77  | 0 | 1,116 | 12 | 44 | 0 | 445 | 3  | 1,682 | 15 |
| 74,443 | 77  | 0 | 1,131 | 12 | 45 | 0 | 446 | 3  | 1,699 | 15 |
| 74,444 | 79  | 0 | 1,141 | 12 | 45 | 0 | 458 | 3  | 1,723 | 15 |



|        |     |   |       |    |    |   |     |   |       |    |
|--------|-----|---|-------|----|----|---|-----|---|-------|----|
| 74,445 | 79  | 0 | 1,141 | 12 | 45 | 0 | 459 | 3 | 1,724 | 15 |
| 74,446 | 84  | 0 | 1,235 | 11 | 48 | 0 | 493 | 3 | 1,860 | 14 |
| 74,447 | 85  | 0 | 1,257 | 11 | 48 | 0 | 503 | 3 | 1,893 | 14 |
| 74,448 | 84  | 0 | 1,254 | 11 | 48 | 0 | 502 | 3 | 1,888 | 14 |
| 74,449 | 84  | 0 | 1,253 | 11 | 48 | 0 | 503 | 3 | 1,888 | 14 |
| 74,450 | 84  | 0 | 1,249 | 11 | 48 | 0 | 502 | 3 | 1,883 | 14 |
| 74,451 | 84  | 0 | 1,248 | 12 | 48 | 0 | 501 | 3 | 1,881 | 15 |
| 74,452 | 77  | 1 | 1,191 | 16 | 46 | 1 | 476 | 3 | 1,790 | 21 |
| 74,453 | 76  | 1 | 1,175 | 18 | 44 | 2 | 476 | 3 | 1,771 | 24 |
| 74,454 | 76  | 2 | 1,191 | 18 | 44 | 2 | 474 | 3 | 1,785 | 25 |
| 74,455 | 71  | 2 | 1,010 | 18 | 39 | 2 | 408 | 3 | 1,528 | 25 |
| 74,456 | 68  | 2 | 921   | 19 | 37 | 2 | 367 | 3 | 1,393 | 26 |
| 74,457 | 68  | 2 | 898   | 19 | 36 | 2 | 357 | 3 | 1,359 | 26 |
| 74,458 | 67  | 2 | 896   | 19 | 36 | 2 | 356 | 3 | 1,355 | 26 |
| 74,459 | 68  | 2 | 896   | 17 | 35 | 2 | 355 | 3 | 1,354 | 24 |
| 74,460 | 68  | 2 | 896   | 17 | 35 | 2 | 355 | 3 | 1,354 | 24 |
| 74,461 | 68  | 2 | 895   | 17 | 35 | 2 | 355 | 2 | 1,353 | 23 |
| 74,462 | 68  | 2 | 894   | 16 | 35 | 2 | 355 | 2 | 1,352 | 22 |
| 74,463 | 68  | 2 | 893   | 16 | 35 | 2 | 354 | 2 | 1,350 | 22 |
| 74,464 | 81  | 2 | 943   | 16 | 39 | 2 | 403 | 2 | 1,466 | 22 |
| 74,465 | 82  | 2 | 956   | 15 | 41 | 2 | 427 | 2 | 1,506 | 21 |
| 74,466 | 83  | 2 | 959   | 16 | 41 | 2 | 433 | 2 | 1,516 | 22 |
| 74,467 | 82  | 2 | 973   | 15 | 42 | 2 | 447 | 2 | 1,544 | 21 |
| 74,468 | 95  | 2 | 1,193 | 15 | 58 | 2 | 618 | 2 | 1,964 | 21 |
| 74,469 | 96  | 2 | 1,185 | 15 | 59 | 2 | 621 | 2 | 1,961 | 21 |
| 74,470 | 99  | 2 | 1,230 | 15 | 60 | 2 | 644 | 3 | 2,033 | 22 |
| 74,471 | 99  | 2 | 1,233 | 15 | 60 | 2 | 642 | 3 | 2,034 | 22 |
| 74,472 | 101 | 2 | 1,231 | 16 | 60 | 2 | 636 | 3 | 2,028 | 23 |
| 74,473 | 93  | 2 | 1,206 | 14 | 60 | 2 | 630 | 3 | 1,989 | 21 |
| 74,474 | 85  | 3 | 1,168 | 14 | 60 | 2 | 611 | 3 | 1,924 | 22 |
| 74,475 | 83  | 3 | 1,160 | 14 | 60 | 2 | 606 | 3 | 1,909 | 22 |
| 74,476 | 79  | 3 | 1,092 | 12 | 58 | 2 | 579 | 2 | 1,808 | 19 |
| 74,477 | 55  | 4 | 658   | 12 | 39 | 2 | 432 | 3 | 1,184 | 21 |
| 74,478 | 53  | 5 | 623   | 12 | 36 | 2 | 412 | 2 | 1,124 | 21 |
| 74,479 | 53  | 5 | 618   | 13 | 35 | 2 | 409 | 3 | 1,115 | 23 |
| 74,480 | 53  | 5 | 616   | 14 | 35 | 2 | 405 | 3 | 1,109 | 24 |
| 74,481 | 53  | 5 | 616   | 14 | 35 | 2 | 405 | 3 | 1,109 | 24 |
| 74,482 | 53  | 5 | 617   | 14 | 35 | 2 | 406 | 3 | 1,111 | 24 |
| 74,483 | 54  | 5 | 639   | 14 | 35 | 2 | 411 | 4 | 1,139 | 25 |
| 74,484 | 54  | 5 | 638   | 14 | 35 | 2 | 411 | 4 | 1,138 | 25 |
| 74,485 | 53  | 5 | 638   | 14 | 35 | 2 | 411 | 4 | 1,137 | 25 |

|        |    |   |     |    |    |   |     |    |       |    |
|--------|----|---|-----|----|----|---|-----|----|-------|----|
| 74,486 | 53 | 5 | 634 | 14 | 34 | 2 | 412 | 4  | 1,133 | 25 |
| 74,487 | 53 | 5 | 634 | 14 | 34 | 2 | 411 | 4  | 1,132 | 25 |
| 74,488 | 53 | 5 | 632 | 14 | 34 | 2 | 409 | 4  | 1,128 | 25 |
| 74,489 | 53 | 5 | 624 | 14 | 33 | 2 | 406 | 4  | 1,116 | 25 |
| 74,490 | 53 | 5 | 618 | 14 | 33 | 2 | 405 | 4  | 1,109 | 25 |
| 74,491 | 47 | 5 | 609 | 14 | 33 | 2 | 401 | 4  | 1,090 | 25 |
| 74,492 | 47 | 5 | 608 | 15 | 33 | 2 | 402 | 4  | 1,090 | 26 |
| 74,493 | 46 | 5 | 605 | 16 | 33 | 2 | 402 | 5  | 1,086 | 28 |
| 74,494 | 46 | 5 | 588 | 16 | 32 | 2 | 398 | 5  | 1,064 | 28 |
| 74,495 | 44 | 5 | 576 | 16 | 32 | 2 | 383 | 5  | 1,035 | 28 |
| 74,496 | 39 | 5 | 484 | 16 | 29 | 2 | 348 | 5  | 900   | 28 |
| 74,497 | 39 | 5 | 480 | 16 | 29 | 2 | 346 | 5  | 894   | 28 |
| 74,498 | 38 | 5 | 461 | 16 | 29 | 2 | 336 | 5  | 864   | 28 |
| 74,499 | 38 | 5 | 458 | 16 | 29 | 2 | 335 | 6  | 860   | 29 |
| 74,500 | 38 | 5 | 456 | 19 | 29 | 2 | 333 | 8  | 856   | 34 |
| 74,501 | 38 | 5 | 456 | 25 | 29 | 2 | 333 | 11 | 856   | 43 |
| 74,502 | 38 | 5 | 456 | 33 | 29 | 2 | 333 | 16 | 856   | 56 |
| 74,503 | 38 | 4 | 456 | 30 | 29 | 1 | 334 | 17 | 857   | 52 |
| 74,504 | 38 | 4 | 455 | 28 | 29 | 0 | 332 | 17 | 854   | 49 |
| 74,505 | 37 | 3 | 433 | 28 | 29 | 0 | 331 | 17 | 830   | 48 |
| 74,506 | 37 | 3 | 424 | 28 | 29 | 0 | 327 | 17 | 817   | 48 |
| 74,507 | 37 | 3 | 428 | 27 | 26 | 0 | 323 | 17 | 814   | 47 |
| 74,508 | 37 | 3 | 428 | 27 | 26 | 0 | 323 | 17 | 814   | 47 |
| 74,509 | 36 | 3 | 430 | 27 | 26 | 0 | 324 | 17 | 816   | 47 |
| 74,510 | 37 | 3 | 433 | 27 | 26 | 0 | 328 | 17 | 824   | 47 |
| 74,511 | 37 | 3 | 434 | 27 | 26 | 0 | 328 | 17 | 825   | 47 |
| 74,512 | 37 | 3 | 434 | 27 | 26 | 0 | 328 | 17 | 825   | 47 |
| 74,513 | 37 | 3 | 436 | 27 | 26 | 0 | 329 | 17 | 828   | 47 |
| 74,514 | 24 | 3 | 390 | 27 | 22 | 0 | 282 | 18 | 718   | 48 |
| 74,515 | 26 | 6 | 401 | 27 | 23 | 1 | 288 | 18 | 738   | 52 |
| 74,516 | 26 | 6 | 391 | 27 | 21 | 1 | 264 | 18 | 702   | 52 |
| 74,517 | 25 | 6 | 389 | 26 | 21 | 1 | 258 | 18 | 693   | 51 |
| 74,518 | 25 | 7 | 375 | 26 | 20 | 1 | 244 | 19 | 664   | 53 |
| 74,519 | 12 | 7 | 155 | 26 | 4  | 1 | 72  | 19 | 243   | 53 |
| 74,520 | 12 | 7 | 145 | 27 | 2  | 1 | 65  | 21 | 224   | 56 |
| 74,521 | 9  | 7 | 100 | 27 | 1  | 1 | 41  | 21 | 151   | 56 |
| 74,522 | 11 | 7 | 113 | 27 | 1  | 1 | 41  | 21 | 166   | 56 |
| 74,523 | 8  | 7 | 113 | 26 | 1  | 1 | 41  | 21 | 163   | 55 |
| 74,524 | 13 | 7 | 114 | 24 | 1  | 1 | 40  | 21 | 168   | 53 |
| 74,525 | 13 | 6 | 115 | 24 | 1  | 1 | 41  | 21 | 170   | 52 |
| 74,526 | 13 | 6 | 125 | 24 | 1  | 1 | 50  | 21 | 189   | 52 |

|        |    |   |     |    |    |   |     |    |     |    |
|--------|----|---|-----|----|----|---|-----|----|-----|----|
| 74,527 | 13 | 5 | 120 | 24 | 1  | 1 | 48  | 20 | 182 | 50 |
| 74,528 | 13 | 5 | 119 | 24 | 1  | 1 | 48  | 20 | 181 | 50 |
| 74,529 | 13 | 4 | 122 | 25 | 1  | 1 | 48  | 20 | 184 | 50 |
| 74,530 | 13 | 4 | 133 | 24 | 2  | 1 | 58  | 20 | 206 | 49 |
| 74,531 | 40 | 4 | 308 | 23 | 11 | 1 | 165 | 20 | 524 | 48 |
| 74,532 | 45 | 4 | 323 | 23 | 11 | 1 | 182 | 20 | 561 | 48 |
| 74,533 | 45 | 5 | 323 | 23 | 11 | 1 | 182 | 20 | 561 | 49 |
| 74,534 | 44 | 5 | 301 | 23 | 11 | 1 | 177 | 19 | 533 | 48 |
| 74,535 | 44 | 5 | 299 | 23 | 11 | 1 | 177 | 19 | 531 | 48 |
| 74,536 | 44 | 5 | 299 | 23 | 11 | 1 | 179 | 19 | 533 | 48 |
| 74,537 | 44 | 5 | 299 | 23 | 11 | 2 | 178 | 19 | 532 | 49 |
| 74,538 | 45 | 5 | 299 | 23 | 11 | 2 | 178 | 19 | 533 | 49 |
| 74,539 | 45 | 5 | 298 | 23 | 11 | 2 | 178 | 19 | 532 | 49 |
| 74,540 | 46 | 5 | 303 | 23 | 11 | 2 | 178 | 19 | 538 | 49 |
| 74,541 | 46 | 5 | 312 | 23 | 11 | 2 | 185 | 19 | 554 | 49 |
| 74,542 | 46 | 5 | 316 | 22 | 12 | 2 | 185 | 19 | 559 | 48 |
| 74,543 | 47 | 5 | 317 | 21 | 12 | 2 | 184 | 18 | 560 | 46 |
| 74,544 | 47 | 5 | 317 | 21 | 12 | 2 | 184 | 18 | 560 | 46 |
| 74,545 | 47 | 5 | 317 | 21 | 12 | 2 | 183 | 18 | 559 | 46 |
| 74,546 | 47 | 5 | 318 | 21 | 12 | 2 | 185 | 18 | 562 | 46 |
| 74,547 | 47 | 5 | 318 | 21 | 12 | 2 | 185 | 18 | 562 | 46 |
| 74,548 | 47 | 5 | 320 | 21 | 12 | 2 | 185 | 18 | 564 | 46 |
| 74,549 | 48 | 5 | 324 | 21 | 12 | 2 | 190 | 18 | 574 | 46 |
| 74,550 | 49 | 5 | 351 | 21 | 15 | 2 | 207 | 17 | 622 | 45 |
| 74,551 | 49 | 5 | 352 | 12 | 15 | 2 | 207 | 12 | 623 | 31 |
| 74,552 | 49 | 5 | 352 | 12 | 15 | 2 | 207 | 12 | 623 | 31 |
| 74,553 | 49 | 5 | 352 | 9  | 15 | 2 | 207 | 12 | 623 | 28 |
| 74,554 | 49 | 5 | 352 | 10 | 15 | 2 | 206 | 13 | 622 | 30 |
| 74,555 | 53 | 5 | 421 | 10 | 17 | 2 | 225 | 14 | 716 | 31 |
| 74,556 | 53 | 5 | 421 | 11 | 17 | 2 | 226 | 14 | 717 | 32 |
| 74,557 | 53 | 5 | 420 | 11 | 17 | 2 | 226 | 14 | 716 | 32 |
| 74,558 | 53 | 5 | 414 | 11 | 17 | 2 | 224 | 14 | 708 | 32 |
| 74,559 | 53 | 5 | 412 | 12 | 17 | 2 | 223 | 15 | 705 | 34 |
| 74,560 | 52 | 5 | 430 | 12 | 17 | 2 | 232 | 16 | 731 | 35 |
| 74,561 | 52 | 5 | 430 | 12 | 17 | 2 | 232 | 16 | 731 | 35 |
| 74,562 | 54 | 5 | 435 | 12 | 17 | 2 | 236 | 16 | 742 | 35 |
| 74,563 | 55 | 5 | 436 | 12 | 17 | 2 | 236 | 16 | 744 | 35 |
| 74,564 | 55 | 5 | 434 | 12 | 17 | 2 | 235 | 15 | 741 | 34 |
| 74,565 | 55 | 5 | 430 | 12 | 17 | 2 | 233 | 15 | 735 | 34 |
| 74,566 | 53 | 2 | 419 | 12 | 16 | 1 | 227 | 15 | 715 | 30 |
| 74,567 | 52 | 2 | 416 | 12 | 16 | 1 | 227 | 15 | 711 | 30 |

|        |    |   |     |    |    |   |     |    |       |     |
|--------|----|---|-----|----|----|---|-----|----|-------|-----|
| 74,568 | 52 | 2 | 417 | 12 | 16 | 1 | 228 | 15 | 713   | 30  |
| 74,569 | 52 | 1 | 416 | 12 | 16 | 1 | 228 | 14 | 712   | 28  |
| 74,570 | 52 | 1 | 414 | 12 | 16 | 1 | 228 | 14 | 710   | 28  |
| 74,571 | 51 | 1 | 414 | 11 | 16 | 1 | 222 | 11 | 703   | 24  |
| 74,572 | 51 | 1 | 408 | 11 | 16 | 1 | 221 | 11 | 696   | 24  |
| 74,573 | 52 | 1 | 415 | 11 | 16 | 1 | 228 | 11 | 711   | 24  |
| 74,574 | 52 | 1 | 446 | 11 | 16 | 1 | 235 | 11 | 749   | 24  |
| 74,575 | 47 | 1 | 444 | 11 | 16 | 1 | 235 | 11 | 742   | 24  |
| 74,576 | 47 | 1 | 440 | 15 | 16 | 1 | 234 | 14 | 737   | 31  |
| 74,577 | 47 | 1 | 424 | 25 | 16 | 1 | 225 | 16 | 712   | 43  |
| 74,578 | 54 | 1 | 492 | 33 | 19 | 1 | 291 | 20 | 856   | 55  |
| 74,579 | 54 | 1 | 488 | 35 | 19 | 1 | 291 | 21 | 852   | 58  |
| 74,580 | 57 | 3 | 483 | 46 | 18 | 1 | 304 | 23 | 862   | 73  |
| 74,581 | 57 | 5 | 495 | 50 | 17 | 1 | 298 | 24 | 867   | 80  |
| 74,582 | 31 | 6 | 347 | 50 | 9  | 1 | 209 | 26 | 596   | 83  |
| 74,583 | 26 | 5 | 339 | 50 | 9  | 1 | 195 | 26 | 569   | 82  |
| 74,584 | 26 | 5 | 338 | 51 | 9  | 1 | 195 | 26 | 568   | 83  |
| 74,585 | 27 | 5 | 347 | 51 | 11 | 1 | 205 | 26 | 590   | 83  |
| 74,586 | 27 | 5 | 346 | 52 | 11 | 1 | 203 | 26 | 587   | 84  |
| 74,587 | 27 | 7 | 346 | 57 | 11 | 1 | 204 | 32 | 588   | 97  |
| 74,588 | 27 | 7 | 345 | 58 | 11 | 0 | 204 | 32 | 587   | 97  |
| 74,589 | 27 | 8 | 348 | 58 | 11 | 0 | 205 | 32 | 591   | 98  |
| 74,590 | 26 | 8 | 348 | 60 | 11 | 0 | 206 | 32 | 591   | 100 |
| 74,591 | 26 | 8 | 346 | 60 | 11 | 0 | 206 | 32 | 589   | 100 |
| 74,592 | 29 | 8 | 343 | 60 | 11 | 0 | 200 | 32 | 583   | 100 |
| 74,593 | 29 | 8 | 339 | 60 | 10 | 0 | 202 | 32 | 580   | 100 |
| 74,594 | 28 | 8 | 344 | 60 | 11 | 0 | 204 | 32 | 587   | 100 |
| 74,595 | 28 | 8 | 343 | 60 | 11 | 0 | 203 | 32 | 585   | 100 |
| 74,596 | 28 | 8 | 343 | 60 | 11 | 0 | 203 | 32 | 585   | 100 |
| 74,597 | 41 | 8 | 501 | 61 | 20 | 0 | 282 | 32 | 844   | 101 |
| 74,598 | 41 | 8 | 516 | 63 | 22 | 0 | 293 | 32 | 872   | 103 |
| 74,599 | 46 | 8 | 687 | 63 | 28 | 0 | 413 | 32 | 1,174 | 103 |
| 74,600 | 45 | 8 | 681 | 63 | 29 | 1 | 418 | 32 | 1,173 | 104 |
| 74,601 | 48 | 8 | 708 | 63 | 33 | 1 | 467 | 32 | 1,256 | 104 |
| 74,602 | 44 | 8 | 648 | 63 | 32 | 1 | 453 | 30 | 1,177 | 102 |
| 74,603 | 44 | 8 | 643 | 58 | 32 | 1 | 449 | 27 | 1,168 | 94  |
| 74,604 | 44 | 8 | 641 | 58 | 32 | 1 | 451 | 27 | 1,168 | 94  |
| 74,605 | 45 | 8 | 645 | 56 | 32 | 1 | 454 | 25 | 1,176 | 90  |
| 74,606 | 45 | 8 | 646 | 56 | 32 | 1 | 457 | 24 | 1,180 | 89  |
| 74,607 | 45 | 8 | 676 | 55 | 32 | 1 | 461 | 24 | 1,214 | 88  |
| 74,608 | 52 | 8 | 723 | 55 | 32 | 1 | 476 | 24 | 1,283 | 88  |

|        |    |    |       |    |    |   |     |    |       |     |
|--------|----|----|-------|----|----|---|-----|----|-------|-----|
| 74,609 | 52 | 8  | 726   | 56 | 34 | 1 | 478 | 27 | 1,290 | 92  |
| 74,610 | 52 | 8  | 712   | 55 | 34 | 1 | 476 | 27 | 1,274 | 91  |
| 74,611 | 54 | 8  | 746   | 56 | 34 | 1 | 482 | 27 | 1,316 | 92  |
| 74,612 | 53 | 8  | 762   | 57 | 34 | 1 | 480 | 27 | 1,329 | 93  |
| 74,613 | 53 | 8  | 762   | 59 | 34 | 1 | 480 | 28 | 1,329 | 96  |
| 74,614 | 52 | 8  | 761   | 59 | 34 | 1 | 480 | 28 | 1,327 | 96  |
| 74,615 | 52 | 9  | 761   | 60 | 34 | 1 | 480 | 28 | 1,327 | 98  |
| 74,616 | 52 | 9  | 797   | 62 | 35 | 2 | 494 | 28 | 1,378 | 101 |
| 74,617 | 52 | 9  | 797   | 63 | 35 | 2 | 494 | 28 | 1,378 | 102 |
| 74,618 | 52 | 9  | 800   | 64 | 35 | 2 | 496 | 28 | 1,383 | 103 |
| 74,619 | 52 | 9  | 800   | 65 | 35 | 2 | 495 | 28 | 1,382 | 104 |
| 74,620 | 50 | 11 | 798   | 76 | 35 | 2 | 498 | 30 | 1,381 | 119 |
| 74,621 | 50 | 11 | 795   | 76 | 35 | 2 | 497 | 30 | 1,377 | 119 |
| 74,622 | 51 | 11 | 796   | 76 | 35 | 2 | 497 | 30 | 1,379 | 119 |
| 74,623 | 52 | 11 | 817   | 76 | 35 | 2 | 513 | 30 | 1,417 | 119 |
| 74,624 | 52 | 11 | 816   | 78 | 35 | 2 | 511 | 30 | 1,414 | 121 |
| 74,625 | 52 | 11 | 785   | 78 | 35 | 2 | 504 | 30 | 1,376 | 121 |
| 74,626 | 52 | 11 | 785   | 80 | 35 | 2 | 504 | 30 | 1,376 | 123 |
| 74,627 | 51 | 12 | 772   | 78 | 35 | 2 | 473 | 31 | 1,331 | 123 |
| 74,628 | 49 | 12 | 768   | 68 | 33 | 2 | 470 | 29 | 1,320 | 111 |
| 74,629 | 60 | 12 | 807   | 67 | 35 | 2 | 519 | 27 | 1,421 | 108 |
| 74,630 | 60 | 12 | 806   | 69 | 35 | 2 | 521 | 28 | 1,422 | 111 |
| 74,631 | 62 | 11 | 815   | 57 | 37 | 2 | 519 | 26 | 1,433 | 96  |
| 74,632 | 62 | 10 | 782   | 62 | 37 | 2 | 510 | 33 | 1,391 | 107 |
| 74,633 | 62 | 9  | 778   | 62 | 37 | 2 | 510 | 32 | 1,387 | 105 |
| 74,634 | 77 | 12 | 884   | 67 | 42 | 2 | 610 | 34 | 1,613 | 115 |
| 74,635 | 77 | 12 | 883   | 67 | 42 | 2 | 610 | 34 | 1,612 | 115 |
| 74,636 | 81 | 12 | 970   | 67 | 47 | 2 | 734 | 34 | 1,832 | 115 |
| 74,637 | 81 | 12 | 969   | 68 | 47 | 2 | 733 | 34 | 1,830 | 116 |
| 74,638 | 80 | 10 | 966   | 63 | 47 | 2 | 732 | 29 | 1,825 | 104 |
| 74,639 | 80 | 10 | 966   | 62 | 47 | 2 | 733 | 29 | 1,826 | 103 |
| 74,640 | 80 | 9  | 964   | 62 | 47 | 2 | 732 | 29 | 1,823 | 102 |
| 74,641 | 80 | 9  | 964   | 60 | 47 | 2 | 732 | 29 | 1,823 | 100 |
| 74,642 | 80 | 9  | 969   | 60 | 47 | 2 | 731 | 29 | 1,827 | 100 |
| 74,643 | 77 | 9  | 966   | 60 | 47 | 2 | 729 | 29 | 1,819 | 100 |
| 74,644 | 77 | 9  | 965   | 60 | 47 | 2 | 728 | 29 | 1,817 | 100 |
| 74,645 | 84 | 9  | 1,027 | 63 | 47 | 2 | 737 | 29 | 1,895 | 103 |
| 74,646 | 84 | 9  | 1,018 | 70 | 47 | 2 | 734 | 29 | 1,883 | 110 |
| 74,647 | 81 | 9  | 988   | 72 | 46 | 2 | 719 | 29 | 1,834 | 112 |
| 74,648 | 73 | 9  | 890   | 71 | 38 | 2 | 669 | 29 | 1,670 | 111 |
| 74,649 | 74 | 9  | 877   | 69 | 35 | 2 | 664 | 29 | 1,650 | 109 |

|        |    |    |     |    |    |   |     |    |       |     |
|--------|----|----|-----|----|----|---|-----|----|-------|-----|
| 74,650 | 69 | 9  | 725 | 69 | 30 | 1 | 549 | 29 | 1,373 | 108 |
| 74,651 | 70 | 9  | 721 | 69 | 27 | 1 | 549 | 29 | 1,367 | 108 |
| 74,652 | 67 | 9  | 689 | 69 | 21 | 1 | 493 | 29 | 1,270 | 108 |
| 74,653 | 73 | 9  | 717 | 69 | 22 | 1 | 529 | 29 | 1,341 | 108 |
| 74,654 | 74 | 9  | 732 | 69 | 23 | 1 | 548 | 29 | 1,377 | 108 |
| 74,655 | 74 | 9  | 750 | 71 | 24 | 1 | 572 | 29 | 1,420 | 110 |
| 74,656 | 76 | 9  | 760 | 71 | 25 | 1 | 583 | 29 | 1,444 | 110 |
| 74,657 | 76 | 9  | 729 | 71 | 25 | 1 | 581 | 29 | 1,411 | 110 |
| 74,658 | 77 | 9  | 729 | 71 | 25 | 1 | 586 | 29 | 1,417 | 110 |
| 74,659 | 70 | 9  | 691 | 72 | 25 | 1 | 572 | 29 | 1,358 | 111 |
| 74,660 | 70 | 10 | 693 | 71 | 23 | 1 | 571 | 26 | 1,357 | 108 |
| 74,661 | 70 | 11 | 689 | 79 | 23 | 1 | 566 | 30 | 1,348 | 121 |
| 74,662 | 68 | 11 | 652 | 82 | 23 | 1 | 554 | 30 | 1,297 | 124 |
| 74,663 | 68 | 11 | 632 | 82 | 23 | 1 | 554 | 30 | 1,277 | 124 |
| 74,664 | 68 | 11 | 617 | 80 | 23 | 1 | 546 | 29 | 1,254 | 121 |
| 74,665 | 69 | 11 | 614 | 80 | 23 | 1 | 546 | 29 | 1,252 | 121 |
| 74,666 | 70 | 10 | 598 | 77 | 22 | 0 | 542 | 29 | 1,232 | 116 |
| 74,667 | 70 | 10 | 596 | 77 | 22 | 0 | 540 | 29 | 1,228 | 116 |
| 74,668 | 71 | 10 | 600 | 76 | 22 | 0 | 540 | 29 | 1,233 | 115 |
| 74,669 | 80 | 10 | 649 | 75 | 23 | 0 | 559 | 29 | 1,311 | 114 |
| 74,670 | 80 | 8  | 652 | 63 | 23 | 0 | 559 | 27 | 1,314 | 98  |
| 74,671 | 80 | 8  | 653 | 63 | 23 | 0 | 557 | 27 | 1,313 | 98  |
| 74,672 | 79 | 8  | 659 | 63 | 23 | 0 | 562 | 27 | 1,323 | 98  |
| 74,673 | 78 | 8  | 635 | 63 | 23 | 0 | 544 | 27 | 1,280 | 98  |
| 74,674 | 78 | 8  | 629 | 63 | 23 | 0 | 543 | 26 | 1,273 | 97  |
| 74,675 | 77 | 8  | 628 | 61 | 23 | 0 | 541 | 26 | 1,269 | 95  |
| 74,676 | 77 | 8  | 629 | 60 | 23 | 0 | 541 | 26 | 1,270 | 94  |
| 74,677 | 77 | 7  | 625 | 57 | 23 | 0 | 540 | 22 | 1,265 | 86  |
| 74,678 | 74 | 7  | 595 | 57 | 22 | 0 | 526 | 22 | 1,217 | 86  |
| 74,679 | 74 | 7  | 589 | 57 | 22 | 0 | 522 | 22 | 1,207 | 86  |
| 74,680 | 62 | 6  | 539 | 46 | 20 | 0 | 461 | 19 | 1,082 | 71  |
| 74,681 | 63 | 6  | 539 | 46 | 20 | 0 | 458 | 19 | 1,080 | 71  |
| 74,682 | 58 | 6  | 527 | 46 | 18 | 0 | 435 | 19 | 1,038 | 71  |
| 74,683 | 42 | 5  | 412 | 38 | 13 | 0 | 334 | 10 | 801   | 53  |
| 74,684 | 41 | 5  | 404 | 38 | 13 | 0 | 334 | 9  | 792   | 52  |
| 74,685 | 37 | 2  | 328 | 33 | 6  | 0 | 219 | 7  | 590   | 42  |
| 74,686 | 37 | 2  | 326 | 32 | 6  | 0 | 215 | 7  | 584   | 41  |
| 74,687 | 37 | 2  | 326 | 30 | 6  | 0 | 213 | 7  | 582   | 39  |
| 74,688 | 37 | 2  | 326 | 31 | 6  | 0 | 214 | 6  | 583   | 39  |
| 74,689 | 37 | 2  | 326 | 31 | 6  | 0 | 214 | 6  | 583   | 39  |
| 74,690 | 43 | 2  | 334 | 31 | 6  | 0 | 223 | 6  | 606   | 39  |

|        |    |    |     |     |   |    |     |     |     |     |
|--------|----|----|-----|-----|---|----|-----|-----|-----|-----|
| 74,691 | 48 | 2  | 337 | 31  | 6 | 0  | 227 | 6   | 618 | 39  |
| 74,692 | 48 | 2  | 337 | 31  | 6 | 0  | 227 | 6   | 618 | 39  |
| 74,693 | 48 | 2  | 333 | 31  | 6 | 0  | 231 | 6   | 618 | 39  |
| 74,694 | 50 | 2  | 333 | 31  | 6 | 0  | 233 | 6   | 622 | 39  |
| 74,695 | 50 | 2  | 334 | 31  | 6 | 0  | 235 | 6   | 625 | 39  |
| 74,696 | 43 | 2  | 272 | 21  | 5 | 0  | 224 | 6   | 544 | 29  |
| 74,697 | 43 | 2  | 272 | 21  | 5 | 0  | 223 | 6   | 543 | 29  |
| 74,698 | 41 | 2  | 262 | 21  | 5 | 0  | 219 | 6   | 527 | 29  |
| 74,699 | 40 | 2  | 254 | 21  | 5 | 0  | 212 | 6   | 511 | 29  |
| 74,700 | 39 | 2  | 250 | 21  | 5 | 0  | 206 | 7   | 500 | 30  |
| 74,701 | 39 | 2  | 225 | 21  | 5 | 0  | 195 | 8   | 464 | 31  |
| 74,702 | 40 | 2  | 226 | 21  | 5 | 0  | 193 | 8   | 464 | 31  |
| 74,703 | 40 | 3  | 227 | 23  | 6 | 0  | 187 | 9   | 460 | 35  |
| 74,704 | 34 | 3  | 198 | 23  | 5 | 0  | 147 | 9   | 384 | 35  |
| 74,705 | 33 | 3  | 180 | 23  | 4 | 0  | 127 | 9   | 344 | 35  |
| 74,706 | 32 | 3  | 158 | 21  | 3 | 0  | 100 | 9   | 293 | 33  |
| 74,707 | 33 | 3  | 158 | 21  | 2 | 0  | 93  | 9   | 286 | 33  |
| 74,708 | 33 | 3  | 159 | 21  | 2 | 0  | 91  | 11  | 285 | 35  |
| 74,709 | 32 | 3  | 153 | 21  | 2 | 0  | 86  | 11  | 273 | 35  |
| 74,710 | 32 | 5  | 152 | 20  | 2 | 0  | 85  | 12  | 271 | 37  |
| 74,711 | 32 | 3  | 158 | 12  | 2 | 0  | 87  | 7   | 279 | 22  |
| 74,712 | 32 | 3  | 159 | 12  | 2 | 0  | 87  | 7   | 280 | 22  |
| 74,713 | 32 | 3  | 160 | 7   | 2 | 0  | 87  | 9   | 281 | 19  |
| 74,714 | 31 | 3  | 158 | 7   | 2 | 0  | 85  | 9   | 276 | 19  |
| 74,715 | 31 | 3  | 157 | 8   | 2 | 0  | 85  | 10  | 275 | 21  |
| 74,716 | 30 | 5  | 155 | 12  | 2 | 1  | 85  | 11  | 272 | 29  |
| 74,717 | 29 | 8  | 155 | 43  | 2 | 4  | 86  | 37  | 272 | 92  |
| 74,718 | 28 | 11 | 150 | 55  | 2 | 5  | 84  | 46  | 264 | 117 |
| 74,719 | 28 | 14 | 151 | 106 | 2 | 8  | 84  | 83  | 265 | 211 |
| 74,720 | 19 | 14 | 101 | 118 | 1 | 9  | 65  | 85  | 186 | 226 |
| 74,721 | 19 | 14 | 102 | 119 | 1 | 10 | 67  | 86  | 189 | 229 |
| 74,722 | 21 | 16 | 101 | 123 | 1 | 10 | 67  | 98  | 190 | 247 |
| 74,723 | 21 | 16 | 94  | 126 | 1 | 10 | 62  | 101 | 178 | 253 |
| 74,724 | 21 | 41 | 94  | 170 | 1 | 12 | 62  | 148 | 178 | 371 |
| 74,725 | 21 | 41 | 94  | 171 | 1 | 12 | 62  | 149 | 178 | 373 |
| 74,726 | 25 | 41 | 114 | 175 | 2 | 12 | 68  | 150 | 209 | 378 |
| 74,727 | 26 | 50 | 125 | 202 | 2 | 14 | 71  | 166 | 224 | 432 |
| 74,728 | 26 | 52 | 125 | 208 | 2 | 14 | 71  | 170 | 224 | 444 |
| 74,729 | 28 | 52 | 130 | 209 | 2 | 15 | 73  | 170 | 233 | 446 |
| 74,730 | 28 | 52 | 130 | 211 | 2 | 15 | 73  | 170 | 233 | 448 |
| 74,731 | 28 | 52 | 129 | 212 | 2 | 15 | 73  | 170 | 232 | 449 |

|        |    |    |     |     |    |    |    |     |     |     |
|--------|----|----|-----|-----|----|----|----|-----|-----|-----|
| 74,732 | 27 | 52 | 128 | 212 | 2  | 15 | 72 | 171 | 229 | 450 |
| 74,733 | 27 | 52 | 143 | 211 | 2  | 15 | 80 | 171 | 252 | 449 |
| 74,734 | 27 | 52 | 143 | 211 | 2  | 15 | 78 | 171 | 250 | 449 |
| 74,735 | 29 | 52 | 143 | 211 | 4  | 15 | 74 | 171 | 250 | 449 |
| 74,736 | 33 | 52 | 155 | 211 | 8  | 15 | 76 | 171 | 272 | 449 |
| 74,737 | 33 | 52 | 161 | 211 | 8  | 15 | 82 | 171 | 284 | 449 |
| 74,738 | 33 | 52 | 174 | 210 | 10 | 15 | 90 | 171 | 307 | 448 |
| 74,739 | 33 | 52 | 174 | 211 | 10 | 15 | 89 | 171 | 306 | 449 |
| 74,740 | 28 | 52 | 169 | 211 | 10 | 15 | 86 | 171 | 293 | 449 |
| 74,741 | 27 | 52 | 166 | 211 | 10 | 15 | 82 | 173 | 285 | 451 |
| 74,742 | 22 | 52 | 166 | 211 | 10 | 15 | 79 | 175 | 277 | 453 |
| 74,743 | 23 | 52 | 168 | 211 | 10 | 15 | 79 | 175 | 280 | 453 |
| 74,744 | 23 | 52 | 167 | 211 | 10 | 15 | 75 | 177 | 275 | 455 |
| 74,745 | 21 | 52 | 164 | 211 | 10 | 15 | 73 | 177 | 268 | 455 |
| 74,746 | 21 | 52 | 164 | 211 | 10 | 15 | 71 | 177 | 266 | 455 |
| 74,747 | 22 | 53 | 166 | 212 | 10 | 15 | 72 | 178 | 270 | 458 |
| 74,748 | 22 | 53 | 172 | 210 | 11 | 15 | 73 | 178 | 278 | 456 |
| 74,749 | 22 | 53 | 176 | 210 | 11 | 15 | 76 | 178 | 285 | 456 |
| 74,750 | 23 | 53 | 174 | 210 | 12 | 15 | 77 | 179 | 286 | 457 |
| 74,751 | 23 | 53 | 174 | 210 | 12 | 15 | 77 | 179 | 286 | 457 |
| 74,752 | 23 | 53 | 177 | 210 | 12 | 15 | 79 | 178 | 291 | 456 |
| 74,753 | 21 | 53 | 171 | 210 | 12 | 15 | 76 | 178 | 280 | 456 |
| 74,754 | 21 | 52 | 164 | 208 | 11 | 15 | 72 | 177 | 268 | 452 |
| 74,755 | 19 | 52 | 156 | 207 | 11 | 15 | 66 | 177 | 252 | 451 |
| 74,756 | 18 | 52 | 154 | 207 | 11 | 15 | 65 | 177 | 248 | 451 |
| 74,757 | 19 | 52 | 154 | 207 | 11 | 15 | 65 | 179 | 249 | 453 |
| 74,758 | 19 | 52 | 154 | 207 | 11 | 15 | 66 | 179 | 250 | 453 |
| 74,759 | 19 | 52 | 153 | 207 | 11 | 15 | 66 | 177 | 249 | 451 |
| 74,760 | 19 | 52 | 151 | 207 | 11 | 15 | 66 | 177 | 247 | 451 |
| 74,761 | 19 | 50 | 143 | 206 | 11 | 15 | 65 | 176 | 238 | 447 |
| 74,762 | 20 | 50 | 140 | 206 | 11 | 15 | 62 | 176 | 233 | 447 |
| 74,763 | 20 | 50 | 139 | 207 | 11 | 15 | 62 | 176 | 232 | 448 |
| 74,764 | 20 | 50 | 138 | 207 | 11 | 15 | 62 | 173 | 231 | 445 |
| 74,765 | 20 | 50 | 139 | 207 | 11 | 15 | 62 | 173 | 232 | 445 |
| 74,766 | 20 | 48 | 139 | 203 | 11 | 14 | 62 | 171 | 232 | 436 |
| 74,767 | 20 | 48 | 139 | 203 | 11 | 14 | 62 | 171 | 232 | 436 |
| 74,768 | 20 | 45 | 139 | 173 | 11 | 11 | 62 | 145 | 232 | 374 |
| 74,769 | 20 | 39 | 138 | 109 | 11 | 7  | 62 | 99  | 231 | 254 |
| 74,770 | 20 | 40 | 137 | 97  | 11 | 6  | 62 | 97  | 230 | 240 |
| 74,771 | 20 | 41 | 137 | 97  | 11 | 6  | 62 | 98  | 230 | 242 |
| 74,772 | 20 | 41 | 132 | 97  | 11 | 5  | 60 | 97  | 223 | 240 |



|        |    |    |     |    |    |   |    |    |     |     |
|--------|----|----|-----|----|----|---|----|----|-----|-----|
| 74,773 | 18 | 39 | 132 | 94 | 11 | 5 | 60 | 86 | 221 | 224 |
| 74,774 | 18 | 39 | 131 | 93 | 11 | 5 | 60 | 83 | 220 | 220 |
| 74,775 | 17 | 14 | 130 | 49 | 11 | 3 | 61 | 36 | 219 | 102 |
| 74,776 | 14 | 14 | 112 | 44 | 10 | 3 | 55 | 34 | 191 | 95  |
| 74,777 | 13 | 5  | 109 | 17 | 10 | 1 | 54 | 18 | 186 | 41  |
| 74,778 | 13 | 5  | 108 | 17 | 10 | 1 | 54 | 18 | 185 | 41  |
| 74,779 | 11 | 3  | 108 | 10 | 10 | 0 | 58 | 14 | 187 | 27  |
| 74,780 | 11 | 3  | 108 | 10 | 10 | 0 | 58 | 14 | 187 | 27  |
| 74,781 | 11 | 3  | 111 | 7  | 11 | 0 | 66 | 14 | 199 | 24  |
| 74,782 | 11 | 4  | 111 | 11 | 11 | 0 | 66 | 16 | 199 | 31  |
| 74,783 | 11 | 4  | 98  | 12 | 11 | 0 | 60 | 15 | 180 | 31  |
| 74,784 | 11 | 4  | 95  | 13 | 11 | 0 | 57 | 15 | 174 | 32  |
| 74,785 | 9  | 4  | 85  | 14 | 9  | 0 | 51 | 17 | 154 | 35  |
| 74,786 | 5  | 4  | 70  | 15 | 5  | 0 | 48 | 19 | 128 | 38  |
| 74,787 | 5  | 4  | 69  | 15 | 5  | 0 | 45 | 19 | 124 | 38  |
| 74,788 | 5  | 4  | 67  | 15 | 6  | 0 | 45 | 19 | 123 | 38  |
| 74,789 | 5  | 4  | 53  | 14 | 4  | 0 | 37 | 20 | 99  | 38  |
| 74,790 | 5  | 4  | 51  | 14 | 4  | 0 | 33 | 20 | 93  | 38  |
| 74,791 | 6  | 4  | 67  | 15 | 5  | 0 | 47 | 18 | 125 | 37  |
| 74,792 | 7  | 4  | 70  | 15 | 5  | 0 | 49 | 17 | 131 | 36  |
| 74,793 | 7  | 4  | 70  | 15 | 5  | 0 | 49 | 17 | 131 | 36  |
| 74,794 | 6  | 4  | 70  | 16 | 5  | 0 | 50 | 17 | 131 | 37  |
| 74,795 | 6  | 4  | 72  | 16 | 5  | 0 | 52 | 15 | 135 | 35  |
| 74,796 | 6  | 4  | 70  | 17 | 5  | 0 | 53 | 16 | 134 | 37  |
| 74,797 | 6  | 4  | 69  | 17 | 5  | 0 | 53 | 16 | 133 | 37  |
| 74,798 | 5  | 3  | 69  | 18 | 5  | 0 | 52 | 15 | 131 | 36  |
| 74,799 | 5  | 4  | 64  | 20 | 4  | 0 | 51 | 16 | 124 | 40  |
| 74,800 | 5  | 4  | 60  | 20 | 3  | 0 | 51 | 14 | 119 | 38  |
| 74,801 | 4  | 4  | 60  | 20 | 3  | 0 | 50 | 14 | 117 | 38  |
| 74,802 | 4  | 4  | 60  | 20 | 3  | 0 | 50 | 14 | 117 | 38  |
| 74,803 | 4  | 4  | 57  | 21 | 3  | 0 | 48 | 14 | 112 | 39  |
| 74,804 | 4  | 5  | 56  | 22 | 3  | 0 | 47 | 15 | 110 | 42  |
| 74,805 | 4  | 6  | 55  | 22 | 3  | 0 | 47 | 15 | 109 | 43  |
| 74,806 | 4  | 6  | 55  | 22 | 3  | 0 | 48 | 15 | 110 | 43  |
| 74,807 | 3  | 6  | 54  | 22 | 3  | 0 | 48 | 13 | 108 | 41  |
| 74,808 | 3  | 6  | 54  | 22 | 3  | 0 | 48 | 13 | 108 | 41  |
| 74,809 | 3  | 6  | 54  | 22 | 3  | 0 | 47 | 13 | 107 | 41  |
| 74,810 | 3  | 6  | 54  | 22 | 3  | 0 | 47 | 13 | 107 | 41  |
| 74,811 | 3  | 6  | 55  | 22 | 3  | 0 | 49 | 13 | 110 | 41  |
| 74,812 | 2  | 6  | 55  | 22 | 3  | 0 | 49 | 13 | 109 | 41  |
| 74,813 | 2  | 6  | 55  | 22 | 3  | 0 | 49 | 13 | 109 | 41  |

|        |   |    |     |     |   |   |    |    |     |     |
|--------|---|----|-----|-----|---|---|----|----|-----|-----|
| 74,814 | 2 | 7  | 55  | 23  | 3 | 0 | 49 | 13 | 109 | 43  |
| 74,815 | 2 | 7  | 55  | 23  | 3 | 0 | 49 | 15 | 109 | 45  |
| 74,816 | 4 | 7  | 56  | 24  | 3 | 0 | 49 | 15 | 112 | 46  |
| 74,817 | 4 | 7  | 60  | 23  | 3 | 0 | 51 | 15 | 118 | 45  |
| 74,818 | 5 | 7  | 59  | 24  | 3 | 0 | 52 | 15 | 119 | 46  |
| 74,819 | 7 | 7  | 86  | 24  | 3 | 0 | 60 | 15 | 156 | 46  |
| 74,820 | 7 | 7  | 86  | 24  | 3 | 0 | 60 | 15 | 156 | 46  |
| 74,821 | 7 | 7  | 86  | 24  | 3 | 0 | 63 | 15 | 159 | 46  |
| 74,822 | 8 | 7  | 88  | 24  | 4 | 0 | 65 | 15 | 165 | 46  |
| 74,823 | 8 | 7  | 88  | 29  | 4 | 0 | 65 | 19 | 165 | 55  |
| 74,824 | 9 | 7  | 91  | 35  | 4 | 0 | 69 | 19 | 173 | 61  |
| 74,825 | 9 | 10 | 117 | 40  | 4 | 0 | 76 | 28 | 206 | 78  |
| 74,826 | 9 | 10 | 140 | 46  | 5 | 1 | 74 | 31 | 228 | 88  |
| 74,827 | 9 | 10 | 168 | 50  | 9 | 1 | 90 | 32 | 276 | 93  |
| 74,828 | 9 | 10 | 161 | 50  | 9 | 1 | 88 | 34 | 267 | 95  |
| 74,829 | 9 | 10 | 156 | 52  | 9 | 1 | 82 | 35 | 256 | 98  |
| 74,830 | 9 | 10 | 156 | 61  | 9 | 2 | 81 | 40 | 255 | 113 |
| 74,831 | 9 | 10 | 152 | 62  | 8 | 2 | 74 | 40 | 243 | 114 |
| 74,832 | 9 | 10 | 152 | 62  | 8 | 2 | 73 | 40 | 242 | 114 |
| 74,833 | 9 | 9  | 152 | 58  | 8 | 2 | 73 | 38 | 242 | 107 |
| 74,834 | 9 | 9  | 152 | 58  | 8 | 2 | 73 | 38 | 242 | 107 |
| 74,835 | 9 | 9  | 151 | 61  | 8 | 3 | 73 | 38 | 241 | 111 |
| 74,836 | 9 | 9  | 151 | 60  | 8 | 3 | 73 | 36 | 241 | 108 |
| 74,837 | 9 | 9  | 151 | 59  | 8 | 3 | 72 | 34 | 240 | 105 |
| 74,838 | 9 | 9  | 151 | 62  | 8 | 3 | 73 | 38 | 241 | 112 |
| 74,839 | 9 | 9  | 151 | 68  | 7 | 3 | 71 | 41 | 238 | 121 |
| 74,840 | 9 | 11 | 151 | 81  | 7 | 4 | 71 | 55 | 238 | 151 |
| 74,841 | 9 | 11 | 150 | 85  | 7 | 5 | 66 | 57 | 232 | 158 |
| 74,842 | 8 | 11 | 137 | 88  | 6 | 5 | 58 | 61 | 209 | 165 |
| 74,843 | 7 | 11 | 135 | 90  | 6 | 5 | 57 | 64 | 205 | 170 |
| 74,844 | 7 | 11 | 133 | 90  | 6 | 5 | 56 | 64 | 202 | 170 |
| 74,845 | 7 | 16 | 135 | 110 | 6 | 5 | 55 | 77 | 203 | 208 |
| 74,846 | 7 | 16 | 132 | 112 | 6 | 5 | 55 | 77 | 200 | 210 |
| 74,847 | 7 | 17 | 132 | 115 | 6 | 5 | 54 | 76 | 199 | 213 |
| 74,848 | 7 | 16 | 126 | 113 | 6 | 5 | 54 | 75 | 193 | 209 |
| 74,849 | 7 | 17 | 127 | 116 | 6 | 5 | 54 | 77 | 194 | 215 |
| 74,850 | 7 | 17 | 127 | 116 | 6 | 5 | 51 | 77 | 191 | 215 |
| 74,851 | 7 | 17 | 127 | 116 | 6 | 5 | 53 | 77 | 193 | 215 |
| 74,852 | 7 | 17 | 128 | 116 | 6 | 5 | 53 | 77 | 194 | 215 |
| 74,853 | 7 | 17 | 137 | 117 | 6 | 5 | 58 | 78 | 208 | 217 |
| 74,854 | 7 | 17 | 140 | 121 | 6 | 5 | 59 | 79 | 212 | 222 |

|        |   |    |     |     |   |   |    |     |     |     |
|--------|---|----|-----|-----|---|---|----|-----|-----|-----|
| 74,855 | 7 | 16 | 140 | 120 | 6 | 5 | 59 | 78  | 212 | 219 |
| 74,856 | 7 | 15 | 140 | 120 | 6 | 5 | 58 | 78  | 211 | 218 |
| 74,857 | 7 | 16 | 141 | 134 | 6 | 6 | 58 | 85  | 212 | 241 |
| 74,858 | 7 | 16 | 141 | 137 | 6 | 7 | 58 | 90  | 212 | 250 |
| 74,859 | 7 | 20 | 141 | 151 | 6 | 7 | 58 | 95  | 212 | 273 |
| 74,860 | 7 | 20 | 141 | 151 | 6 | 7 | 58 | 95  | 212 | 273 |
| 74,861 | 9 | 19 | 142 | 151 | 6 | 7 | 56 | 97  | 213 | 274 |
| 74,862 | 9 | 19 | 142 | 151 | 6 | 7 | 58 | 97  | 215 | 274 |
| 74,863 | 9 | 20 | 140 | 153 | 6 | 7 | 58 | 97  | 213 | 277 |
| 74,864 | 9 | 20 | 140 | 152 | 6 | 7 | 58 | 97  | 213 | 276 |
| 74,865 | 9 | 20 | 140 | 152 | 6 | 7 | 58 | 97  | 213 | 276 |
| 74,866 | 7 | 23 | 140 | 153 | 6 | 7 | 59 | 96  | 212 | 279 |
| 74,867 | 7 | 24 | 140 | 153 | 6 | 7 | 59 | 96  | 212 | 280 |
| 74,868 | 7 | 24 | 137 | 153 | 6 | 7 | 56 | 96  | 206 | 280 |
| 74,869 | 6 | 24 | 138 | 152 | 6 | 7 | 55 | 96  | 205 | 279 |
| 74,870 | 4 | 24 | 111 | 153 | 6 | 7 | 46 | 96  | 167 | 280 |
| 74,871 | 4 | 24 | 111 | 155 | 6 | 7 | 42 | 100 | 163 | 286 |
| 74,872 | 3 | 24 | 111 | 174 | 5 | 7 | 41 | 114 | 160 | 319 |
| 74,873 | 4 | 28 | 127 | 191 | 6 | 8 | 49 | 140 | 186 | 367 |
| 74,874 | 3 | 28 | 123 | 192 | 6 | 9 | 45 | 142 | 177 | 371 |
| 74,875 | 3 | 28 | 102 | 192 | 6 | 9 | 40 | 146 | 151 | 375 |
| 74,876 | 4 | 25 | 101 | 193 | 6 | 9 | 41 | 140 | 152 | 367 |
| 74,877 | 4 | 28 | 77  | 199 | 5 | 8 | 41 | 144 | 127 | 379 |
| 74,878 | 4 | 28 | 49  | 195 | 1 | 8 | 26 | 145 | 80  | 376 |
| 74,879 | 4 | 28 | 56  | 195 | 1 | 8 | 29 | 144 | 90  | 375 |
| 74,880 | 4 | 28 | 56  | 193 | 1 | 8 | 29 | 143 | 90  | 372 |
| 74,881 | 4 | 28 | 57  | 184 | 1 | 7 | 29 | 138 | 91  | 357 |
| 74,882 | 4 | 28 | 57  | 184 | 1 | 7 | 29 | 138 | 91  | 357 |
| 74,883 | 4 | 28 | 57  | 184 | 1 | 7 | 29 | 138 | 91  | 357 |
| 74,884 | 4 | 28 | 57  | 183 | 1 | 7 | 29 | 140 | 91  | 358 |
| 74,885 | 4 | 28 | 60  | 180 | 1 | 6 | 30 | 141 | 95  | 355 |
| 74,886 | 5 | 29 | 61  | 185 | 1 | 7 | 31 | 145 | 98  | 366 |
| 74,887 | 5 | 29 | 61  | 187 | 1 | 7 | 31 | 145 | 98  | 368 |
| 74,888 | 5 | 29 | 61  | 187 | 1 | 7 | 30 | 146 | 97  | 369 |
| 74,889 | 5 | 29 | 61  | 185 | 1 | 8 | 31 | 142 | 98  | 364 |
| 74,890 | 5 | 31 | 61  | 179 | 1 | 8 | 31 | 140 | 98  | 358 |
| 74,891 | 5 | 30 | 61  | 168 | 1 | 8 | 31 | 129 | 98  | 335 |
| 74,892 | 5 | 30 | 59  | 165 | 1 | 7 | 31 | 128 | 96  | 330 |
| 74,893 | 6 | 30 | 59  | 161 | 1 | 8 | 31 | 126 | 97  | 325 |
| 74,894 | 6 | 25 | 57  | 146 | 1 | 9 | 30 | 111 | 94  | 291 |
| 74,895 | 6 | 25 | 55  | 149 | 1 | 9 | 29 | 111 | 91  | 294 |

|        |   |    |    |     |   |   |    |     |    |     |
|--------|---|----|----|-----|---|---|----|-----|----|-----|
| 74,896 | 6 | 25 | 55 | 149 | 1 | 9 | 29 | 110 | 91 | 293 |
| 74,897 | 6 | 25 | 54 | 147 | 1 | 9 | 28 | 110 | 89 | 291 |
| 74,898 | 6 | 24 | 54 | 143 | 1 | 9 | 28 | 110 | 89 | 286 |
| 74,899 | 6 | 23 | 54 | 138 | 1 | 9 | 28 | 110 | 89 | 280 |
| 74,900 | 6 | 23 | 53 | 139 | 1 | 9 | 28 | 110 | 88 | 281 |
| 74,901 | 6 | 23 | 53 | 141 | 1 | 9 | 27 | 115 | 87 | 288 |
| 74,902 | 6 | 23 | 52 | 141 | 1 | 9 | 27 | 117 | 86 | 290 |
| 74,903 | 6 | 24 | 43 | 140 | 1 | 9 | 22 | 116 | 72 | 289 |
| 74,904 | 6 | 24 | 40 | 135 | 1 | 9 | 21 | 115 | 68 | 283 |
| 74,905 | 6 | 24 | 40 | 136 | 1 | 9 | 21 | 116 | 68 | 285 |
| 74,906 | 6 | 24 | 40 | 136 | 1 | 9 | 21 | 116 | 68 | 285 |
| 74,907 | 6 | 24 | 41 | 137 | 2 | 9 | 21 | 117 | 70 | 287 |
| 74,908 | 6 | 23 | 40 | 123 | 2 | 8 | 21 | 110 | 69 | 264 |
| 74,909 | 5 | 23 | 40 | 121 | 2 | 7 | 21 | 105 | 68 | 256 |
| 74,910 | 5 | 19 | 40 | 108 | 2 | 7 | 21 | 100 | 68 | 234 |
| 74,911 | 4 | 19 | 41 | 107 | 2 | 7 | 22 | 98  | 69 | 231 |
| 74,912 | 4 | 19 | 42 | 107 | 2 | 7 | 22 | 98  | 70 | 231 |
| 74,913 | 4 | 18 | 42 | 105 | 2 | 7 | 20 | 98  | 68 | 228 |
| 74,914 | 4 | 18 | 42 | 105 | 2 | 7 | 20 | 99  | 68 | 229 |
| 74,915 | 4 | 14 | 44 | 103 | 2 | 7 | 20 | 98  | 70 | 222 |
| 74,916 | 4 | 14 | 44 | 103 | 2 | 7 | 20 | 98  | 70 | 222 |
| 74,917 | 4 | 14 | 44 | 103 | 2 | 7 | 19 | 98  | 69 | 222 |
| 74,918 | 4 | 14 | 44 | 103 | 2 | 7 | 19 | 98  | 69 | 222 |
| 74,919 | 4 | 14 | 43 | 103 | 2 | 7 | 19 | 98  | 68 | 222 |
| 74,920 | 4 | 14 | 42 | 103 | 2 | 7 | 19 | 99  | 67 | 223 |
| 74,921 | 4 | 14 | 42 | 102 | 2 | 7 | 19 | 99  | 67 | 222 |
| 74,922 | 6 | 14 | 40 | 103 | 1 | 7 | 20 | 96  | 67 | 220 |
| 74,923 | 6 | 14 | 40 | 88  | 2 | 7 | 19 | 84  | 67 | 193 |
| 74,924 | 5 | 12 | 24 | 69  | 1 | 6 | 13 | 53  | 43 | 140 |
| 74,925 | 5 | 12 | 24 | 70  | 1 | 6 | 13 | 56  | 43 | 144 |
| 74,926 | 5 | 14 | 21 | 82  | 1 | 9 | 12 | 55  | 39 | 160 |
| 74,927 | 4 | 14 | 22 | 75  | 1 | 9 | 10 | 53  | 37 | 151 |
| 74,928 | 4 | 12 | 18 | 64  | 1 | 9 | 8  | 46  | 31 | 131 |
| 74,929 | 4 | 13 | 15 | 65  | 1 | 9 | 7  | 46  | 27 | 133 |
| 74,930 | 4 | 14 | 15 | 66  | 1 | 9 | 7  | 46  | 27 | 135 |
| 74,931 | 4 | 14 | 14 | 67  | 1 | 9 | 7  | 46  | 26 | 136 |
| 74,932 | 4 | 14 | 14 | 66  | 1 | 9 | 7  | 46  | 26 | 135 |
| 74,933 | 4 | 14 | 15 | 66  | 2 | 9 | 7  | 46  | 28 | 135 |
| 74,934 | 4 | 14 | 15 | 67  | 2 | 9 | 7  | 46  | 28 | 136 |
| 74,935 | 4 | 14 | 13 | 66  | 2 | 9 | 7  | 44  | 26 | 133 |
| 74,936 | 4 | 14 | 23 | 66  | 2 | 9 | 18 | 44  | 47 | 133 |

|        |    |    |     |    |   |   |    |    |     |     |
|--------|----|----|-----|----|---|---|----|----|-----|-----|
| 74,937 | 3  | 13 | 23  | 61 | 2 | 8 | 17 | 40 | 45  | 122 |
| 74,938 | 3  | 13 | 22  | 59 | 2 | 8 | 16 | 40 | 43  | 120 |
| 74,939 | 6  | 13 | 62  | 58 | 4 | 7 | 55 | 39 | 127 | 117 |
| 74,940 | 6  | 11 | 62  | 58 | 4 | 7 | 54 | 37 | 126 | 113 |
| 74,941 | 6  | 11 | 62  | 58 | 4 | 7 | 54 | 37 | 126 | 113 |
| 74,942 | 6  | 10 | 62  | 56 | 4 | 7 | 54 | 34 | 126 | 107 |
| 74,943 | 6  | 10 | 62  | 55 | 4 | 7 | 54 | 33 | 126 | 105 |
| 74,944 | 5  | 10 | 62  | 55 | 4 | 6 | 54 | 31 | 125 | 102 |
| 74,945 | 5  | 10 | 62  | 44 | 4 | 5 | 54 | 29 | 125 | 88  |
| 74,946 | 5  | 10 | 62  | 44 | 4 | 5 | 54 | 29 | 125 | 88  |
| 74,947 | 5  | 10 | 62  | 44 | 4 | 5 | 54 | 29 | 125 | 88  |
| 74,948 | 5  | 10 | 62  | 45 | 4 | 5 | 54 | 29 | 125 | 89  |
| 74,949 | 5  | 10 | 62  | 45 | 4 | 5 | 54 | 30 | 125 | 90  |
| 74,950 | 5  | 10 | 62  | 46 | 4 | 5 | 54 | 32 | 125 | 93  |
| 74,951 | 6  | 10 | 66  | 46 | 4 | 5 | 54 | 26 | 130 | 87  |
| 74,952 | 6  | 10 | 66  | 48 | 4 | 5 | 54 | 28 | 130 | 91  |
| 74,953 | 6  | 10 | 66  | 49 | 4 | 5 | 54 | 28 | 130 | 92  |
| 74,954 | 6  | 9  | 67  | 50 | 4 | 5 | 55 | 28 | 132 | 92  |
| 74,955 | 6  | 10 | 67  | 49 | 4 | 5 | 55 | 28 | 132 | 92  |
| 74,956 | 6  | 10 | 67  | 49 | 4 | 5 | 55 | 28 | 132 | 92  |
| 74,957 | 7  | 10 | 67  | 50 | 4 | 5 | 55 | 27 | 133 | 92  |
| 74,958 | 8  | 10 | 72  | 50 | 3 | 5 | 59 | 27 | 142 | 92  |
| 74,959 | 8  | 10 | 72  | 49 | 3 | 5 | 59 | 27 | 142 | 91  |
| 74,960 | 12 | 10 | 74  | 48 | 3 | 5 | 60 | 27 | 149 | 90  |
| 74,961 | 12 | 10 | 74  | 48 | 3 | 5 | 60 | 27 | 149 | 90  |
| 74,962 | 12 | 11 | 72  | 52 | 3 | 5 | 59 | 37 | 146 | 105 |
| 74,963 | 12 | 11 | 71  | 53 | 3 | 5 | 59 | 38 | 145 | 107 |
| 74,964 | 13 | 11 | 85  | 56 | 3 | 5 | 61 | 38 | 162 | 110 |
| 74,965 | 13 | 11 | 85  | 57 | 3 | 5 | 61 | 38 | 162 | 111 |
| 74,966 | 13 | 11 | 83  | 57 | 3 | 5 | 61 | 38 | 160 | 111 |
| 74,967 | 14 | 11 | 106 | 60 | 3 | 5 | 72 | 38 | 195 | 114 |
| 74,968 | 14 | 12 | 106 | 67 | 3 | 5 | 72 | 42 | 195 | 126 |
| 74,969 | 14 | 12 | 123 | 68 | 3 | 5 | 77 | 42 | 217 | 127 |
| 74,970 | 14 | 12 | 144 | 70 | 4 | 5 | 79 | 42 | 241 | 129 |
| 74,971 | 15 | 13 | 145 | 75 | 4 | 5 | 82 | 49 | 246 | 142 |
| 74,972 | 14 | 13 | 154 | 76 | 5 | 5 | 85 | 48 | 258 | 142 |
| 74,973 | 13 | 16 | 154 | 74 | 5 | 5 | 85 | 48 | 257 | 143 |
| 74,974 | 13 | 14 | 154 | 70 | 5 | 5 | 85 | 45 | 257 | 134 |
| 74,975 | 13 | 13 | 156 | 67 | 5 | 4 | 86 | 43 | 260 | 127 |
| 74,976 | 13 | 14 | 156 | 69 | 5 | 4 | 86 | 43 | 260 | 130 |
| 74,977 | 13 | 12 | 155 | 49 | 5 | 2 | 86 | 39 | 259 | 102 |

|        |    |    |     |    |   |   |    |    |     |     |
|--------|----|----|-----|----|---|---|----|----|-----|-----|
| 74,978 | 13 | 11 | 154 | 50 | 5 | 2 | 86 | 39 | 258 | 102 |
| 74,979 | 13 | 11 | 154 | 51 | 5 | 2 | 86 | 40 | 258 | 104 |
| 74,980 | 13 | 9  | 154 | 50 | 5 | 2 | 86 | 37 | 258 | 98  |
| 74,981 | 13 | 9  | 154 | 50 | 5 | 2 | 86 | 37 | 258 | 98  |
| 74,982 | 13 | 9  | 154 | 58 | 4 | 2 | 86 | 42 | 257 | 111 |
| 74,983 | 13 | 9  | 154 | 67 | 4 | 3 | 86 | 47 | 257 | 126 |
| 74,984 | 13 | 9  | 153 | 81 | 4 | 3 | 86 | 54 | 256 | 147 |
| 74,985 | 13 | 9  | 153 | 80 | 4 | 3 | 86 | 55 | 256 | 147 |
| 74,986 | 13 | 9  | 152 | 80 | 4 | 3 | 86 | 54 | 255 | 146 |
| 74,987 | 13 | 9  | 142 | 81 | 4 | 3 | 74 | 54 | 233 | 147 |
| 74,988 | 12 | 9  | 130 | 81 | 4 | 3 | 60 | 54 | 206 | 147 |
| 74,989 | 12 | 9  | 124 | 83 | 3 | 3 | 58 | 56 | 197 | 151 |
| 74,990 | 10 | 10 | 101 | 83 | 2 | 3 | 35 | 56 | 148 | 152 |
| 74,991 | 10 | 10 | 101 | 83 | 2 | 3 | 35 | 56 | 148 | 152 |
| 74,992 | 11 | 10 | 101 | 85 | 2 | 2 | 35 | 56 | 149 | 153 |
| 74,993 | 11 | 10 | 101 | 86 | 2 | 2 | 35 | 56 | 149 | 154 |
| 74,994 | 11 | 10 | 103 | 86 | 2 | 2 | 35 | 56 | 151 | 154 |
| 74,995 | 11 | 10 | 103 | 86 | 2 | 2 | 35 | 56 | 151 | 154 |
| 74,996 | 11 | 10 | 103 | 86 | 2 | 2 | 36 | 56 | 152 | 154 |
| 74,997 | 11 | 10 | 104 | 86 | 2 | 2 | 36 | 56 | 153 | 154 |
| 74,998 | 11 | 10 | 104 | 86 | 2 | 2 | 36 | 56 | 153 | 154 |
| 74,999 | 12 | 10 | 105 | 85 | 2 | 2 | 36 | 56 | 155 | 153 |
| 75,000 | 12 | 10 | 105 | 85 | 2 | 2 | 36 | 55 | 155 | 152 |
| 75,001 | 13 | 10 | 106 | 81 | 2 | 2 | 39 | 51 | 160 | 144 |
| 75,002 | 13 | 10 | 106 | 79 | 2 | 2 | 40 | 49 | 161 | 140 |
| 75,003 | 13 | 10 | 107 | 79 | 2 | 2 | 40 | 49 | 162 | 140 |
| 75,004 | 13 | 10 | 108 | 77 | 2 | 2 | 40 | 50 | 163 | 139 |
| 75,005 | 14 | 9  | 108 | 77 | 2 | 2 | 40 | 49 | 164 | 137 |
| 75,006 | 14 | 9  | 108 | 78 | 2 | 2 | 42 | 49 | 166 | 138 |
| 75,007 | 13 | 9  | 108 | 76 | 2 | 2 | 42 | 49 | 165 | 136 |
| 75,008 | 13 | 9  | 108 | 76 | 2 | 2 | 42 | 49 | 165 | 136 |
| 75,009 | 12 | 9  | 108 | 76 | 2 | 2 | 41 | 49 | 163 | 136 |
| 75,010 | 12 | 9  | 108 | 76 | 2 | 2 | 41 | 49 | 163 | 136 |
| 75,011 | 8  | 9  | 106 | 76 | 2 | 2 | 40 | 49 | 156 | 136 |
| 75,012 | 8  | 9  | 106 | 77 | 2 | 2 | 40 | 49 | 156 | 137 |
| 75,013 | 8  | 8  | 106 | 73 | 2 | 2 | 40 | 39 | 156 | 122 |
| 75,014 | 7  | 8  | 95  | 70 | 2 | 2 | 38 | 38 | 142 | 118 |
| 75,015 | 7  | 8  | 94  | 71 | 2 | 2 | 38 | 38 | 141 | 119 |
| 75,016 | 7  | 8  | 92  | 73 | 2 | 2 | 36 | 37 | 137 | 120 |
| 75,017 | 7  | 12 | 81  | 73 | 2 | 2 | 32 | 37 | 122 | 124 |
| 75,018 | 6  | 13 | 71  | 74 | 2 | 3 | 27 | 37 | 106 | 127 |

|        |   |    |    |     |   |   |    |    |    |     |
|--------|---|----|----|-----|---|---|----|----|----|-----|
| 75,019 | 6 | 13 | 55 | 67  | 2 | 3 | 25 | 34 | 88 | 117 |
| 75,020 | 6 | 14 | 55 | 89  | 2 | 3 | 22 | 39 | 85 | 145 |
| 75,021 | 6 | 14 | 35 | 93  | 2 | 3 | 20 | 41 | 63 | 151 |
| 75,022 | 5 | 13 | 44 | 89  | 2 | 4 | 25 | 34 | 76 | 140 |
| 75,023 | 5 | 14 | 38 | 90  | 1 | 4 | 21 | 34 | 65 | 142 |
| 75,024 | 5 | 11 | 36 | 88  | 1 | 4 | 19 | 33 | 61 | 136 |
| 75,025 | 6 | 11 | 38 | 88  | 1 | 4 | 23 | 33 | 68 | 136 |
| 75,026 | 6 | 10 | 38 | 85  | 1 | 4 | 23 | 33 | 68 | 132 |
| 75,027 | 6 | 9  | 38 | 83  | 1 | 4 | 23 | 33 | 68 | 129 |
| 75,028 | 6 | 9  | 38 | 84  | 1 | 3 | 23 | 33 | 68 | 129 |
| 75,029 | 6 | 9  | 38 | 83  | 1 | 3 | 23 | 32 | 68 | 127 |
| 75,030 | 6 | 9  | 39 | 83  | 1 | 3 | 23 | 31 | 69 | 126 |
| 75,031 | 6 | 9  | 39 | 82  | 1 | 3 | 23 | 31 | 69 | 125 |
| 75,032 | 6 | 9  | 39 | 82  | 1 | 3 | 23 | 31 | 69 | 125 |
| 75,033 | 6 | 9  | 40 | 73  | 1 | 3 | 23 | 27 | 70 | 112 |
| 75,034 | 6 | 9  | 40 | 64  | 1 | 2 | 23 | 22 | 70 | 97  |
| 75,035 | 6 | 9  | 40 | 50  | 1 | 2 | 23 | 15 | 70 | 76  |
| 75,036 | 6 | 9  | 40 | 50  | 1 | 2 | 23 | 14 | 70 | 75  |
| 75,037 | 6 | 9  | 40 | 50  | 1 | 2 | 23 | 14 | 70 | 75  |
| 75,038 | 6 | 9  | 41 | 49  | 1 | 2 | 23 | 14 | 71 | 74  |
| 75,039 | 6 | 9  | 41 | 47  | 1 | 2 | 23 | 13 | 71 | 71  |
| 75,040 | 6 | 9  | 41 | 47  | 1 | 2 | 23 | 13 | 71 | 71  |
| 75,041 | 6 | 8  | 41 | 45  | 1 | 2 | 24 | 12 | 72 | 67  |
| 75,042 | 6 | 8  | 41 | 45  | 1 | 2 | 24 | 13 | 72 | 68  |
| 75,043 | 5 | 8  | 42 | 44  | 1 | 2 | 24 | 13 | 72 | 67  |
| 75,044 | 5 | 8  | 43 | 44  | 1 | 3 | 24 | 13 | 73 | 68  |
| 75,045 | 5 | 8  | 41 | 44  | 1 | 3 | 24 | 13 | 71 | 68  |
| 75,046 | 5 | 8  | 41 | 44  | 1 | 3 | 24 | 13 | 71 | 68  |
| 75,047 | 6 | 9  | 45 | 44  | 1 | 3 | 23 | 13 | 75 | 69  |
| 75,048 | 6 | 10 | 45 | 44  | 1 | 3 | 24 | 13 | 76 | 70  |
| 75,049 | 5 | 10 | 44 | 46  | 1 | 3 | 24 | 14 | 74 | 73  |
| 75,050 | 5 | 11 | 44 | 48  | 1 | 3 | 24 | 18 | 74 | 80  |
| 75,051 | 3 | 11 | 39 | 48  | 1 | 3 | 22 | 18 | 65 | 80  |
| 75,052 | 3 | 11 | 41 | 50  | 1 | 3 | 23 | 20 | 68 | 84  |
| 75,053 | 3 | 11 | 41 | 54  | 1 | 3 | 22 | 20 | 67 | 88  |
| 75,054 | 4 | 11 | 47 | 63  | 2 | 4 | 28 | 20 | 81 | 98  |
| 75,055 | 4 | 12 | 45 | 86  | 2 | 5 | 28 | 34 | 79 | 137 |
| 75,056 | 3 | 12 | 47 | 98  | 2 | 7 | 27 | 37 | 79 | 154 |
| 75,057 | 4 | 14 | 48 | 117 | 2 | 8 | 25 | 54 | 79 | 193 |
| 75,058 | 4 | 14 | 48 | 125 | 2 | 8 | 25 | 60 | 79 | 207 |
| 75,059 | 4 | 14 | 45 | 127 | 2 | 8 | 23 | 60 | 74 | 209 |

|        |    |    |    |     |   |    |    |     |     |     |
|--------|----|----|----|-----|---|----|----|-----|-----|-----|
| 75,060 | 5  | 14 | 49 | 128 | 2 | 8  | 23 | 60  | 79  | 210 |
| 75,061 | 5  | 15 | 49 | 137 | 2 | 8  | 23 | 63  | 79  | 223 |
| 75,062 | 5  | 17 | 46 | 137 | 2 | 9  | 24 | 64  | 77  | 227 |
| 75,063 | 5  | 17 | 46 | 137 | 2 | 9  | 24 | 64  | 77  | 227 |
| 75,064 | 5  | 17 | 49 | 135 | 2 | 9  | 25 | 64  | 81  | 225 |
| 75,065 | 7  | 17 | 54 | 136 | 2 | 9  | 26 | 64  | 89  | 226 |
| 75,066 | 7  | 16 | 54 | 134 | 2 | 9  | 26 | 64  | 89  | 223 |
| 75,067 | 7  | 16 | 54 | 140 | 2 | 9  | 26 | 64  | 89  | 229 |
| 75,068 | 7  | 13 | 60 | 156 | 2 | 13 | 31 | 69  | 100 | 251 |
| 75,069 | 7  | 12 | 62 | 158 | 2 | 12 | 31 | 73  | 102 | 255 |
| 75,070 | 7  | 12 | 63 | 169 | 2 | 12 | 31 | 74  | 103 | 267 |
| 75,071 | 7  | 11 | 62 | 167 | 2 | 12 | 31 | 79  | 102 | 269 |
| 75,072 | 7  | 11 | 61 | 167 | 1 | 13 | 31 | 78  | 100 | 269 |
| 75,073 | 7  | 10 | 51 | 165 | 1 | 12 | 23 | 78  | 82  | 265 |
| 75,074 | 7  | 10 | 49 | 166 | 1 | 12 | 23 | 80  | 80  | 268 |
| 75,075 | 6  | 13 | 47 | 173 | 1 | 13 | 19 | 85  | 73  | 284 |
| 75,076 | 6  | 15 | 47 | 177 | 1 | 13 | 19 | 86  | 73  | 291 |
| 75,077 | 6  | 19 | 48 | 192 | 1 | 14 | 19 | 101 | 74  | 326 |
| 75,078 | 6  | 19 | 48 | 198 | 1 | 14 | 19 | 108 | 74  | 339 |
| 75,079 | 6  | 22 | 48 | 235 | 1 | 16 | 19 | 118 | 74  | 391 |
| 75,080 | 6  | 23 | 52 | 244 | 1 | 16 | 19 | 120 | 78  | 403 |
| 75,081 | 6  | 24 | 52 | 244 | 1 | 16 | 19 | 120 | 78  | 404 |
| 75,082 | 6  | 24 | 54 | 245 | 1 | 16 | 24 | 120 | 85  | 405 |
| 75,083 | 6  | 24 | 53 | 253 | 1 | 16 | 24 | 121 | 84  | 414 |
| 75,084 | 8  | 24 | 54 | 257 | 1 | 16 | 24 | 121 | 87  | 418 |
| 75,085 | 8  | 26 | 58 | 258 | 2 | 16 | 25 | 122 | 93  | 422 |
| 75,086 | 8  | 26 | 58 | 258 | 2 | 16 | 25 | 122 | 93  | 422 |
| 75,087 | 11 | 26 | 64 | 260 | 2 | 16 | 30 | 123 | 107 | 425 |
| 75,088 | 11 | 26 | 66 | 261 | 2 | 16 | 30 | 123 | 109 | 426 |
| 75,089 | 11 | 26 | 67 | 261 | 2 | 16 | 34 | 122 | 114 | 425 |
| 75,090 | 11 | 26 | 67 | 261 | 2 | 16 | 35 | 122 | 115 | 425 |
| 75,091 | 11 | 26 | 67 | 262 | 2 | 16 | 35 | 122 | 115 | 426 |
| 75,092 | 12 | 26 | 68 | 262 | 2 | 16 | 36 | 122 | 118 | 426 |
| 75,093 | 12 | 26 | 68 | 262 | 2 | 16 | 36 | 122 | 118 | 426 |
| 75,094 | 12 | 26 | 67 | 263 | 2 | 16 | 36 | 122 | 117 | 427 |
| 75,095 | 12 | 26 | 66 | 263 | 2 | 15 | 36 | 122 | 116 | 426 |
| 75,096 | 12 | 26 | 66 | 263 | 2 | 15 | 36 | 122 | 116 | 426 |
| 75,097 | 12 | 26 | 66 | 263 | 2 | 15 | 36 | 123 | 116 | 427 |
| 75,098 | 11 | 24 | 62 | 263 | 2 | 15 | 36 | 123 | 111 | 425 |
| 75,099 | 11 | 24 | 61 | 266 | 2 | 15 | 35 | 127 | 109 | 432 |
| 75,100 | 11 | 24 | 61 | 271 | 2 | 15 | 35 | 126 | 109 | 436 |



|        |    |    |     |     |   |    |     |     |     |     |
|--------|----|----|-----|-----|---|----|-----|-----|-----|-----|
| 75,101 | 11 | 23 | 62  | 269 | 2 | 15 | 36  | 122 | 111 | 429 |
| 75,102 | 11 | 23 | 63  | 269 | 2 | 15 | 35  | 122 | 111 | 429 |
| 75,103 | 11 | 23 | 62  | 254 | 3 | 14 | 35  | 119 | 111 | 410 |
| 75,104 | 11 | 24 | 62  | 348 | 3 | 14 | 33  | 140 | 109 | 526 |
| 75,105 | 10 | 24 | 59  | 363 | 2 | 15 | 29  | 152 | 100 | 554 |
| 75,106 | 10 | 25 | 59  | 361 | 2 | 14 | 29  | 141 | 100 | 541 |
| 75,107 | 10 | 25 | 57  | 353 | 2 | 12 | 29  | 138 | 98  | 528 |
| 75,108 | 9  | 23 | 56  | 325 | 2 | 11 | 29  | 116 | 96  | 475 |
| 75,109 | 9  | 20 | 55  | 312 | 2 | 10 | 29  | 112 | 95  | 454 |
| 75,110 | 10 | 20 | 56  | 312 | 2 | 10 | 29  | 112 | 97  | 454 |
| 75,111 | 9  | 20 | 52  | 312 | 2 | 10 | 29  | 112 | 92  | 454 |
| 75,112 | 9  | 20 | 52  | 312 | 2 | 10 | 29  | 112 | 92  | 454 |
| 75,113 | 9  | 20 | 52  | 312 | 2 | 10 | 29  | 113 | 92  | 455 |
| 75,114 | 9  | 20 | 51  | 313 | 2 | 10 | 29  | 113 | 91  | 456 |
| 75,115 | 9  | 20 | 50  | 313 | 2 | 10 | 28  | 113 | 89  | 456 |
| 75,116 | 7  | 20 | 45  | 311 | 2 | 10 | 27  | 113 | 81  | 454 |
| 75,117 | 7  | 20 | 45  | 311 | 2 | 10 | 27  | 113 | 81  | 454 |
| 75,118 | 7  | 21 | 40  | 305 | 2 | 10 | 24  | 113 | 73  | 449 |
| 75,119 | 7  | 21 | 39  | 287 | 2 | 6  | 23  | 109 | 71  | 423 |
| 75,120 | 7  | 22 | 38  | 282 | 2 | 6  | 24  | 106 | 71  | 416 |
| 75,121 | 7  | 21 | 37  | 269 | 2 | 6  | 24  | 104 | 70  | 400 |
| 75,122 | 8  | 21 | 40  | 251 | 2 | 6  | 24  | 95  | 74  | 373 |
| 75,123 | 8  | 21 | 40  | 245 | 2 | 5  | 25  | 92  | 75  | 363 |
| 75,124 | 8  | 21 | 40  | 246 | 2 | 5  | 25  | 92  | 75  | 364 |
| 75,125 | 8  | 21 | 39  | 245 | 2 | 5  | 25  | 90  | 74  | 361 |
| 75,126 | 8  | 18 | 39  | 238 | 2 | 4  | 26  | 85  | 75  | 345 |
| 75,127 | 8  | 16 | 41  | 234 | 2 | 4  | 26  | 84  | 77  | 338 |
| 75,128 | 8  | 12 | 42  | 218 | 2 | 3  | 26  | 68  | 78  | 301 |
| 75,129 | 8  | 12 | 42  | 212 | 2 | 3  | 26  | 61  | 78  | 288 |
| 75,130 | 8  | 9  | 42  | 175 | 2 | 1  | 26  | 51  | 78  | 236 |
| 75,131 | 10 | 7  | 43  | 164 | 2 | 1  | 30  | 49  | 85  | 221 |
| 75,132 | 10 | 7  | 44  | 164 | 2 | 1  | 30  | 49  | 86  | 221 |
| 75,133 | 13 | 7  | 71  | 164 | 3 | 1  | 41  | 49  | 128 | 221 |
| 75,134 | 13 | 7  | 108 | 152 | 9 | 1  | 78  | 47  | 208 | 207 |
| 75,135 | 13 | 7  | 125 | 152 | 9 | 1  | 105 | 47  | 252 | 207 |
| 75,136 | 13 | 5  | 121 | 149 | 8 | 1  | 104 | 45  | 246 | 200 |
| 75,137 | 13 | 5  | 121 | 149 | 8 | 1  | 104 | 45  | 246 | 200 |
| 75,138 | 10 | 5  | 114 | 149 | 8 | 1  | 99  | 45  | 231 | 200 |
| 75,139 | 10 | 5  | 113 | 148 | 8 | 1  | 99  | 45  | 230 | 199 |
| 75,140 | 10 | 5  | 112 | 148 | 8 | 1  | 95  | 45  | 225 | 199 |
| 75,141 | 10 | 5  | 112 | 147 | 8 | 1  | 94  | 45  | 224 | 198 |

|        |    |   |     |     |   |   |    |    |     |     |
|--------|----|---|-----|-----|---|---|----|----|-----|-----|
| 75,142 | 10 | 5 | 112 | 147 | 8 | 1 | 95 | 45 | 225 | 198 |
| 75,143 | 9  | 5 | 111 | 147 | 8 | 1 | 93 | 45 | 221 | 198 |
| 75,144 | 9  | 5 | 111 | 147 | 8 | 1 | 93 | 45 | 221 | 198 |
| 75,145 | 9  | 5 | 111 | 146 | 8 | 1 | 93 | 45 | 221 | 197 |
| 75,146 | 9  | 5 | 111 | 146 | 8 | 1 | 93 | 46 | 221 | 198 |
| 75,147 | 9  | 6 | 111 | 146 | 8 | 1 | 93 | 48 | 221 | 201 |
| 75,148 | 9  | 6 | 111 | 146 | 8 | 1 | 93 | 47 | 221 | 200 |
| 75,149 | 9  | 6 | 111 | 146 | 8 | 1 | 93 | 47 | 221 | 200 |
| 75,150 | 9  | 6 | 111 | 144 | 8 | 1 | 93 | 43 | 221 | 194 |
| 75,151 | 9  | 6 | 111 | 137 | 8 | 1 | 93 | 43 | 221 | 187 |
| 75,152 | 9  | 6 | 110 | 137 | 8 | 1 | 92 | 42 | 219 | 186 |
| 75,153 | 9  | 6 | 109 | 137 | 8 | 1 | 92 | 42 | 218 | 186 |
| 75,154 | 9  | 5 | 109 | 29  | 7 | 0 | 91 | 10 | 216 | 44  |
| 75,155 | 9  | 5 | 109 | 30  | 7 | 0 | 91 | 10 | 216 | 45  |
| 75,156 | 9  | 5 | 105 | 30  | 7 | 0 | 91 | 11 | 212 | 46  |
| 75,157 | 9  | 3 | 105 | 10  | 7 | 0 | 91 | 8  | 212 | 21  |
| 75,158 | 9  | 3 | 106 | 5   | 7 | 0 | 91 | 7  | 213 | 15  |
| 75,159 | 9  | 3 | 106 | 5   | 7 | 0 | 91 | 7  | 213 | 15  |
| 75,160 | 9  | 3 | 107 | 5   | 7 | 0 | 91 | 7  | 214 | 15  |
| 75,161 | 8  | 3 | 105 | 5   | 7 | 0 | 89 | 7  | 209 | 15  |
| 75,162 | 8  | 3 | 105 | 5   | 7 | 0 | 89 | 7  | 209 | 15  |
| 75,163 | 8  | 3 | 105 | 5   | 7 | 0 | 89 | 7  | 209 | 15  |
| 75,164 | 8  | 3 | 105 | 4   | 7 | 0 | 90 | 6  | 210 | 13  |
| 75,165 | 8  | 3 | 105 | 4   | 7 | 0 | 90 | 6  | 210 | 13  |
| 75,166 | 8  | 3 | 104 | 4   | 7 | 0 | 90 | 6  | 209 | 13  |
| 75,167 | 8  | 3 | 104 | 5   | 7 | 0 | 90 | 6  | 209 | 14  |
| 75,168 | 8  | 3 | 104 | 6   | 7 | 0 | 91 | 7  | 210 | 16  |
| 75,169 | 8  | 2 | 104 | 6   | 7 | 0 | 90 | 7  | 209 | 15  |
| 75,170 | 8  | 1 | 104 | 6   | 7 | 0 | 89 | 6  | 208 | 13  |
| 75,171 | 8  | 1 | 104 | 6   | 7 | 0 | 89 | 6  | 208 | 13  |
| 75,172 | 7  | 1 | 101 | 7   | 7 | 0 | 89 | 7  | 204 | 15  |
| 75,173 | 7  | 1 | 101 | 9   | 7 | 0 | 89 | 7  | 204 | 17  |
| 75,174 | 7  | 1 | 102 | 9   | 7 | 0 | 88 | 7  | 204 | 17  |
| 75,175 | 7  | 1 | 102 | 9   | 7 | 0 | 87 | 7  | 203 | 17  |
| 75,176 | 7  | 1 | 104 | 9   | 7 | 0 | 89 | 7  | 207 | 17  |
| 75,177 | 7  | 1 | 102 | 9   | 7 | 0 | 90 | 7  | 206 | 17  |
| 75,178 | 7  | 1 | 105 | 9   | 7 | 0 | 96 | 7  | 215 | 17  |
| 75,179 | 7  | 1 | 105 | 9   | 7 | 0 | 96 | 7  | 215 | 17  |
| 75,180 | 7  | 1 | 111 | 16  | 8 | 0 | 98 | 15 | 224 | 32  |
| 75,181 | 7  | 1 | 111 | 18  | 8 | 0 | 98 | 18 | 224 | 37  |
| 75,182 | 5  | 1 | 107 | 19  | 8 | 0 | 94 | 18 | 214 | 38  |

|        |    |   |     |    |   |   |     |    |     |     |
|--------|----|---|-----|----|---|---|-----|----|-----|-----|
| 75,183 | 7  | 2 | 125 | 24 | 8 | 0 | 119 | 21 | 259 | 47  |
| 75,184 | 5  | 3 | 102 | 26 | 7 | 0 | 108 | 22 | 222 | 51  |
| 75,185 | 3  | 4 | 64  | 36 | 1 | 0 | 71  | 32 | 139 | 72  |
| 75,186 | 3  | 4 | 47  | 38 | 1 | 0 | 43  | 32 | 94  | 74  |
| 75,187 | 3  | 4 | 49  | 42 | 1 | 0 | 44  | 32 | 97  | 78  |
| 75,188 | 3  | 4 | 49  | 43 | 1 | 0 | 44  | 32 | 97  | 79  |
| 75,189 | 3  | 4 | 49  | 43 | 1 | 0 | 44  | 32 | 97  | 79  |
| 75,190 | 3  | 4 | 50  | 44 | 2 | 0 | 45  | 32 | 100 | 80  |
| 75,191 | 3  | 4 | 50  | 44 | 2 | 0 | 45  | 35 | 100 | 83  |
| 75,192 | 3  | 4 | 50  | 45 | 2 | 0 | 45  | 35 | 100 | 84  |
| 75,193 | 3  | 4 | 52  | 46 | 2 | 0 | 45  | 36 | 102 | 86  |
| 75,194 | 5  | 4 | 62  | 47 | 2 | 0 | 61  | 37 | 130 | 88  |
| 75,195 | 5  | 4 | 62  | 49 | 2 | 0 | 61  | 37 | 130 | 90  |
| 75,196 | 5  | 4 | 62  | 51 | 2 | 0 | 61  | 39 | 130 | 94  |
| 75,197 | 5  | 4 | 62  | 51 | 2 | 0 | 61  | 38 | 130 | 93  |
| 75,198 | 5  | 3 | 62  | 53 | 2 | 0 | 61  | 38 | 130 | 94  |
| 75,199 | 5  | 3 | 62  | 55 | 2 | 0 | 61  | 39 | 130 | 97  |
| 75,200 | 5  | 3 | 82  | 61 | 3 | 0 | 73  | 40 | 163 | 104 |
| 75,201 | 5  | 3 | 82  | 61 | 3 | 0 | 73  | 40 | 163 | 104 |
| 75,202 | 8  | 3 | 123 | 62 | 4 | 0 | 93  | 40 | 228 | 105 |
| 75,203 | 8  | 3 | 126 | 64 | 4 | 0 | 94  | 40 | 232 | 107 |
| 75,204 | 9  | 3 | 128 | 64 | 4 | 0 | 95  | 40 | 236 | 107 |
| 75,205 | 9  | 3 | 128 | 63 | 4 | 0 | 95  | 40 | 236 | 106 |
| 75,206 | 9  | 3 | 131 | 62 | 4 | 0 | 96  | 39 | 240 | 104 |
| 75,207 | 9  | 3 | 132 | 62 | 4 | 0 | 96  | 39 | 241 | 104 |
| 75,208 | 9  | 3 | 134 | 63 | 4 | 0 | 96  | 39 | 243 | 105 |
| 75,209 | 9  | 3 | 133 | 63 | 4 | 0 | 96  | 39 | 242 | 105 |
| 75,210 | 9  | 4 | 133 | 71 | 4 | 0 | 96  | 46 | 242 | 121 |
| 75,211 | 9  | 4 | 132 | 72 | 4 | 0 | 96  | 46 | 241 | 122 |
| 75,212 | 9  | 4 | 131 | 72 | 4 | 0 | 96  | 46 | 240 | 122 |
| 75,213 | 10 | 4 | 131 | 75 | 4 | 0 | 97  | 46 | 242 | 125 |
| 75,214 | 10 | 4 | 133 | 79 | 4 | 0 | 96  | 46 | 243 | 129 |
| 75,215 | 10 | 4 | 133 | 81 | 4 | 0 | 96  | 46 | 243 | 131 |
| 75,216 | 10 | 4 | 133 | 81 | 4 | 0 | 96  | 46 | 243 | 131 |
| 75,217 | 10 | 4 | 134 | 84 | 4 | 0 | 96  | 46 | 244 | 134 |
| 75,218 | 10 | 4 | 136 | 83 | 4 | 0 | 98  | 47 | 248 | 134 |
| 75,219 | 10 | 4 | 136 | 83 | 4 | 0 | 97  | 46 | 247 | 133 |
| 75,220 | 10 | 4 | 144 | 84 | 4 | 0 | 99  | 45 | 257 | 133 |
| 75,221 | 10 | 4 | 145 | 85 | 4 | 0 | 101 | 45 | 260 | 134 |
| 75,222 | 11 | 4 | 156 | 84 | 4 | 0 | 102 | 44 | 273 | 132 |
| 75,223 | 11 | 4 | 156 | 84 | 4 | 0 | 102 | 44 | 273 | 132 |

|        |    |   |     |     |   |   |     |    |     |     |
|--------|----|---|-----|-----|---|---|-----|----|-----|-----|
| 75,224 | 12 | 4 | 179 | 82  | 5 | 0 | 105 | 45 | 301 | 131 |
| 75,225 | 12 | 4 | 178 | 82  | 5 | 0 | 105 | 45 | 300 | 131 |
| 75,226 | 13 | 4 | 186 | 82  | 6 | 0 | 107 | 48 | 312 | 134 |
| 75,227 | 13 | 4 | 184 | 86  | 6 | 0 | 105 | 49 | 308 | 139 |
| 75,228 | 13 | 4 | 187 | 91  | 6 | 0 | 105 | 51 | 311 | 146 |
| 75,229 | 13 | 5 | 183 | 95  | 6 | 0 | 100 | 54 | 302 | 154 |
| 75,230 | 13 | 5 | 183 | 97  | 5 | 0 | 99  | 54 | 300 | 156 |
| 75,231 | 13 | 5 | 179 | 92  | 5 | 0 | 98  | 46 | 295 | 143 |
| 75,232 | 12 | 5 | 176 | 99  | 5 | 1 | 92  | 56 | 285 | 161 |
| 75,233 | 11 | 5 | 160 | 115 | 5 | 1 | 73  | 62 | 249 | 183 |
| 75,234 | 12 | 5 | 161 | 115 | 5 | 1 | 73  | 64 | 251 | 185 |
| 75,235 | 11 | 4 | 154 | 115 | 5 | 1 | 68  | 64 | 238 | 184 |
| 75,236 | 11 | 3 | 153 | 106 | 5 | 1 | 67  | 56 | 236 | 166 |
| 75,237 | 11 | 3 | 153 | 104 | 5 | 1 | 67  | 56 | 236 | 164 |
| 75,238 | 11 | 3 | 153 | 103 | 5 | 1 | 67  | 56 | 236 | 163 |
| 75,239 | 11 | 3 | 153 | 104 | 5 | 1 | 67  | 56 | 236 | 164 |
| 75,240 | 11 | 3 | 155 | 105 | 5 | 1 | 68  | 56 | 239 | 165 |
| 75,241 | 11 | 3 | 155 | 104 | 4 | 1 | 68  | 56 | 238 | 164 |
| 75,242 | 11 | 4 | 156 | 102 | 4 | 1 | 68  | 52 | 239 | 159 |
| 75,243 | 11 | 4 | 154 | 102 | 5 | 1 | 68  | 52 | 238 | 159 |
| 75,244 | 10 | 4 | 145 | 102 | 5 | 1 | 56  | 52 | 216 | 159 |
| 75,245 | 10 | 4 | 153 | 99  | 5 | 1 | 53  | 51 | 221 | 155 |
| 75,246 | 10 | 4 | 153 | 100 | 5 | 1 | 53  | 51 | 221 | 156 |
| 75,247 | 10 | 4 | 169 | 98  | 6 | 1 | 62  | 49 | 247 | 152 |
| 75,248 | 10 | 5 | 168 | 99  | 6 | 1 | 62  | 49 | 246 | 154 |
| 75,249 | 10 | 5 | 168 | 97  | 6 | 1 | 59  | 49 | 243 | 152 |
| 75,250 | 10 | 5 | 159 | 99  | 6 | 1 | 55  | 50 | 230 | 155 |
| 75,251 | 10 | 5 | 150 | 95  | 5 | 1 | 50  | 50 | 215 | 151 |
| 75,252 | 7  | 6 | 112 | 100 | 4 | 1 | 31  | 59 | 154 | 166 |
| 75,253 | 7  | 6 | 109 | 100 | 4 | 1 | 30  | 60 | 150 | 167 |
| 75,254 | 7  | 6 | 108 | 98  | 4 | 1 | 29  | 60 | 148 | 165 |
| 75,255 | 6  | 6 | 106 | 98  | 4 | 1 | 30  | 60 | 146 | 165 |
| 75,256 | 8  | 6 | 107 | 98  | 4 | 1 | 31  | 60 | 150 | 165 |
| 75,257 | 8  | 6 | 104 | 100 | 4 | 1 | 30  | 60 | 146 | 167 |
| 75,258 | 8  | 6 | 103 | 100 | 4 | 1 | 30  | 60 | 145 | 167 |
| 75,259 | 8  | 6 | 101 | 100 | 4 | 1 | 30  | 61 | 143 | 168 |
| 75,260 | 8  | 6 | 104 | 100 | 4 | 1 | 30  | 61 | 146 | 168 |
| 75,261 | 8  | 5 | 104 | 92  | 4 | 1 | 30  | 55 | 146 | 153 |
| 75,262 | 8  | 5 | 104 | 88  | 4 | 1 | 30  | 55 | 146 | 149 |
| 75,263 | 8  | 5 | 104 | 89  | 4 | 1 | 30  | 55 | 146 | 150 |
| 75,264 | 7  | 5 | 104 | 89  | 4 | 1 | 29  | 55 | 144 | 150 |

|        |    |    |     |    |   |   |    |    |     |     |
|--------|----|----|-----|----|---|---|----|----|-----|-----|
| 75,265 | 7  | 6  | 102 | 83 | 4 | 1 | 30 | 56 | 143 | 146 |
| 75,266 | 7  | 6  | 102 | 83 | 4 | 1 | 30 | 56 | 143 | 146 |
| 75,267 | 7  | 6  | 102 | 83 | 4 | 1 | 30 | 56 | 143 | 146 |
| 75,268 | 7  | 6  | 103 | 80 | 4 | 1 | 28 | 56 | 142 | 143 |
| 75,269 | 10 | 6  | 113 | 80 | 4 | 1 | 34 | 55 | 161 | 142 |
| 75,270 | 10 | 6  | 106 | 78 | 4 | 1 | 35 | 54 | 155 | 139 |
| 75,271 | 11 | 6  | 105 | 77 | 4 | 1 | 39 | 54 | 159 | 138 |
| 75,272 | 14 | 6  | 108 | 79 | 4 | 1 | 42 | 54 | 168 | 140 |
| 75,273 | 15 | 7  | 98  | 86 | 4 | 1 | 45 | 56 | 162 | 150 |
| 75,274 | 15 | 7  | 96  | 87 | 3 | 1 | 43 | 56 | 157 | 151 |
| 75,275 | 18 | 7  | 83  | 87 | 3 | 1 | 43 | 55 | 147 | 150 |
| 75,276 | 17 | 7  | 78  | 86 | 3 | 1 | 42 | 55 | 140 | 149 |
| 75,277 | 17 | 8  | 75  | 85 | 2 | 1 | 41 | 53 | 135 | 147 |
| 75,278 | 17 | 8  | 79  | 78 | 2 | 1 | 43 | 50 | 141 | 137 |
| 75,279 | 17 | 8  | 79  | 79 | 2 | 1 | 43 | 50 | 141 | 138 |
| 75,280 | 17 | 7  | 78  | 75 | 2 | 1 | 42 | 48 | 139 | 131 |
| 75,281 | 17 | 7  | 75  | 73 | 2 | 1 | 42 | 48 | 136 | 129 |
| 75,282 | 17 | 7  | 81  | 71 | 2 | 1 | 45 | 48 | 145 | 127 |
| 75,283 | 17 | 7  | 81  | 45 | 2 | 0 | 47 | 30 | 147 | 82  |
| 75,284 | 16 | 8  | 81  | 46 | 2 | 0 | 47 | 30 | 146 | 84  |
| 75,285 | 16 | 7  | 79  | 41 | 2 | 0 | 47 | 25 | 144 | 73  |
| 75,286 | 16 | 7  | 81  | 41 | 2 | 0 | 47 | 24 | 146 | 72  |
| 75,287 | 16 | 7  | 80  | 38 | 2 | 0 | 47 | 22 | 145 | 67  |
| 75,288 | 17 | 7  | 82  | 37 | 2 | 0 | 47 | 22 | 148 | 66  |
| 75,289 | 17 | 7  | 85  | 35 | 2 | 0 | 48 | 23 | 152 | 65  |
| 75,290 | 17 | 7  | 86  | 35 | 2 | 0 | 48 | 23 | 153 | 65  |
| 75,291 | 18 | 7  | 88  | 35 | 2 | 0 | 46 | 23 | 154 | 65  |
| 75,292 | 18 | 7  | 87  | 38 | 2 | 0 | 46 | 24 | 153 | 69  |
| 75,293 | 18 | 8  | 87  | 45 | 2 | 0 | 47 | 33 | 154 | 86  |
| 75,294 | 18 | 8  | 87  | 48 | 1 | 0 | 47 | 35 | 153 | 91  |
| 75,295 | 19 | 9  | 89  | 65 | 3 | 0 | 50 | 48 | 161 | 122 |
| 75,296 | 20 | 9  | 88  | 65 | 3 | 0 | 50 | 48 | 161 | 122 |
| 75,297 | 20 | 9  | 87  | 65 | 3 | 0 | 44 | 48 | 154 | 122 |
| 75,298 | 20 | 8  | 79  | 65 | 2 | 0 | 41 | 47 | 142 | 120 |
| 75,299 | 22 | 10 | 158 | 66 | 4 | 0 | 68 | 51 | 252 | 127 |
| 75,300 | 22 | 10 | 158 | 67 | 4 | 0 | 68 | 52 | 252 | 129 |
| 75,301 | 22 | 10 | 160 | 66 | 4 | 0 | 70 | 50 | 256 | 126 |
| 75,302 | 22 | 9  | 161 | 58 | 4 | 0 | 71 | 40 | 258 | 107 |
| 75,303 | 22 | 9  | 164 | 57 | 4 | 0 | 73 | 39 | 263 | 105 |
| 75,304 | 22 | 9  | 168 | 57 | 4 | 0 | 75 | 39 | 269 | 105 |
| 75,305 | 22 | 9  | 169 | 57 | 4 | 0 | 75 | 39 | 270 | 105 |

|        |    |    |     |     |   |    |    |     |     |     |
|--------|----|----|-----|-----|---|----|----|-----|-----|-----|
| 75,306 | 22 | 11 | 168 | 57  | 4 | 0  | 73 | 40  | 267 | 108 |
| 75,307 | 20 | 11 | 167 | 57  | 4 | 0  | 72 | 40  | 263 | 108 |
| 75,308 | 24 | 11 | 171 | 55  | 4 | 0  | 75 | 40  | 274 | 106 |
| 75,309 | 24 | 11 | 171 | 55  | 4 | 0  | 75 | 40  | 274 | 106 |
| 75,310 | 28 | 11 | 194 | 55  | 6 | 0  | 90 | 39  | 318 | 105 |
| 75,311 | 28 | 12 | 194 | 54  | 6 | 0  | 90 | 39  | 318 | 105 |
| 75,312 | 28 | 12 | 196 | 55  | 6 | 0  | 90 | 40  | 320 | 107 |
| 75,313 | 28 | 12 | 195 | 54  | 6 | 0  | 90 | 40  | 319 | 106 |
| 75,314 | 28 | 12 | 196 | 56  | 6 | 0  | 90 | 40  | 320 | 108 |
| 75,315 | 28 | 11 | 196 | 56  | 6 | 0  | 90 | 39  | 320 | 106 |
| 75,316 | 28 | 12 | 197 | 56  | 6 | 0  | 89 | 39  | 320 | 107 |
| 75,317 | 28 | 12 | 197 | 57  | 6 | 0  | 89 | 39  | 320 | 108 |
| 75,318 | 28 | 12 | 197 | 57  | 6 | 0  | 91 | 39  | 322 | 108 |
| 75,319 | 32 | 12 | 199 | 58  | 6 | 1  | 92 | 41  | 329 | 112 |
| 75,320 | 29 | 12 | 187 | 58  | 6 | 1  | 86 | 44  | 308 | 115 |
| 75,321 | 29 | 12 | 193 | 58  | 6 | 1  | 86 | 44  | 314 | 115 |
| 75,322 | 28 | 37 | 193 | 175 | 6 | 19 | 80 | 168 | 307 | 399 |
| 75,323 | 25 | 37 | 189 | 176 | 6 | 19 | 75 | 169 | 295 | 401 |
| 75,324 | 23 | 36 | 192 | 172 | 6 | 19 | 71 | 172 | 292 | 399 |
| 75,325 | 23 | 36 | 188 | 172 | 6 | 19 | 71 | 172 | 288 | 399 |
| 75,326 | 20 | 36 | 184 | 172 | 6 | 19 | 70 | 172 | 280 | 399 |
| 75,327 | 20 | 35 | 178 | 173 | 6 | 19 | 69 | 171 | 273 | 398 |
| 75,328 | 20 | 35 | 178 | 173 | 6 | 19 | 69 | 172 | 273 | 399 |
| 75,329 | 20 | 35 | 176 | 172 | 6 | 19 | 69 | 172 | 271 | 398 |
| 75,330 | 20 | 35 | 177 | 171 | 6 | 19 | 67 | 172 | 270 | 397 |
| 75,331 | 20 | 35 | 176 | 173 | 6 | 19 | 67 | 171 | 269 | 398 |
| 75,332 | 20 | 35 | 180 | 173 | 6 | 19 | 68 | 171 | 274 | 398 |
| 75,333 | 24 | 35 | 194 | 173 | 6 | 19 | 74 | 171 | 298 | 398 |
| 75,334 | 24 | 35 | 194 | 173 | 6 | 19 | 72 | 171 | 296 | 398 |
| 75,335 | 25 | 34 | 200 | 172 | 6 | 19 | 78 | 171 | 309 | 396 |
| 75,336 | 25 | 34 | 199 | 172 | 6 | 19 | 78 | 171 | 308 | 396 |
| 75,337 | 25 | 34 | 200 | 170 | 6 | 19 | 79 | 171 | 310 | 394 |
| 75,338 | 25 | 35 | 201 | 174 | 6 | 19 | 79 | 173 | 311 | 401 |
| 75,339 | 24 | 35 | 199 | 178 | 6 | 19 | 79 | 176 | 308 | 408 |
| 75,340 | 24 | 35 | 199 | 179 | 6 | 19 | 80 | 175 | 309 | 408 |
| 75,341 | 24 | 35 | 198 | 179 | 6 | 19 | 80 | 176 | 308 | 409 |
| 75,342 | 23 | 35 | 194 | 177 | 6 | 19 | 80 | 175 | 303 | 406 |
| 75,343 | 23 | 35 | 194 | 173 | 6 | 19 | 80 | 167 | 303 | 394 |
| 75,344 | 23 | 35 | 193 | 174 | 6 | 19 | 79 | 167 | 301 | 395 |
| 75,345 | 21 | 35 | 186 | 179 | 4 | 19 | 77 | 169 | 288 | 402 |
| 75,346 | 21 | 34 | 184 | 164 | 4 | 19 | 76 | 156 | 285 | 373 |

|        |    |    |     |     |   |    |    |     |     |     |
|--------|----|----|-----|-----|---|----|----|-----|-----|-----|
| 75,347 | 20 | 34 | 184 | 164 | 4 | 19 | 75 | 156 | 283 | 373 |
| 75,348 | 20 | 33 | 179 | 162 | 4 | 19 | 75 | 154 | 278 | 368 |
| 75,349 | 20 | 33 | 178 | 162 | 4 | 19 | 75 | 154 | 277 | 368 |
| 75,350 | 18 | 33 | 96  | 161 | 2 | 19 | 48 | 151 | 164 | 364 |
| 75,351 | 18 | 33 | 96  | 160 | 2 | 19 | 52 | 150 | 168 | 362 |
| 75,352 | 18 | 33 | 96  | 158 | 2 | 19 | 52 | 149 | 168 | 359 |
| 75,353 | 18 | 33 | 95  | 158 | 2 | 19 | 52 | 149 | 167 | 359 |
| 75,354 | 18 | 33 | 93  | 159 | 2 | 19 | 51 | 149 | 164 | 360 |
| 75,355 | 18 | 33 | 89  | 159 | 2 | 19 | 49 | 149 | 158 | 360 |
| 75,356 | 20 | 33 | 88  | 159 | 2 | 19 | 53 | 149 | 163 | 360 |
| 75,357 | 16 | 31 | 84  | 159 | 2 | 19 | 50 | 148 | 152 | 357 |
| 75,358 | 16 | 31 | 86  | 159 | 2 | 19 | 49 | 148 | 153 | 357 |
| 75,359 | 16 | 31 | 86  | 159 | 2 | 19 | 51 | 148 | 155 | 357 |
| 75,360 | 21 | 31 | 83  | 158 | 2 | 19 | 51 | 148 | 157 | 356 |
| 75,361 | 23 | 30 | 79  | 158 | 4 | 19 | 55 | 148 | 161 | 355 |
| 75,362 | 23 | 30 | 80  | 157 | 4 | 19 | 55 | 147 | 162 | 353 |
| 75,363 | 23 | 30 | 78  | 157 | 4 | 19 | 55 | 147 | 160 | 353 |
| 75,364 | 23 | 30 | 78  | 157 | 4 | 19 | 55 | 146 | 160 | 352 |
| 75,365 | 23 | 30 | 80  | 157 | 4 | 19 | 55 | 146 | 162 | 352 |
| 75,366 | 23 | 30 | 80  | 157 | 4 | 19 | 55 | 146 | 162 | 352 |
| 75,367 | 23 | 29 | 79  | 157 | 4 | 19 | 55 | 147 | 161 | 352 |
| 75,368 | 23 | 29 | 79  | 156 | 4 | 19 | 55 | 147 | 161 | 351 |
| 75,369 | 23 | 29 | 78  | 156 | 4 | 19 | 53 | 147 | 158 | 351 |
| 75,370 | 19 | 29 | 74  | 155 | 4 | 18 | 52 | 146 | 149 | 348 |
| 75,371 | 19 | 29 | 70  | 155 | 4 | 18 | 51 | 144 | 144 | 346 |
| 75,372 | 19 | 30 | 68  | 157 | 4 | 18 | 51 | 144 | 142 | 349 |
| 75,373 | 19 | 5  | 70  | 39  | 4 | 0  | 53 | 20  | 146 | 64  |
| 75,374 | 20 | 5  | 78  | 39  | 5 | 0  | 57 | 21  | 160 | 65  |
| 75,375 | 20 | 5  | 81  | 36  | 5 | 0  | 58 | 17  | 164 | 58  |
| 75,376 | 19 | 5  | 81  | 34  | 5 | 0  | 59 | 17  | 164 | 56  |
| 75,377 | 19 | 5  | 90  | 34  | 5 | 0  | 62 | 17  | 176 | 56  |
| 75,378 | 19 | 5  | 90  | 34  | 5 | 0  | 60 | 17  | 174 | 56  |
| 75,379 | 20 | 5  | 93  | 34  | 7 | 0  | 64 | 16  | 184 | 55  |
| 75,380 | 20 | 5  | 97  | 35  | 7 | 0  | 68 | 17  | 192 | 57  |
| 75,381 | 20 | 5  | 93  | 35  | 7 | 1  | 68 | 17  | 188 | 58  |
| 75,382 | 20 | 5  | 94  | 34  | 7 | 1  | 69 | 17  | 190 | 57  |
| 75,383 | 20 | 5  | 91  | 34  | 7 | 1  | 68 | 17  | 186 | 57  |
| 75,384 | 17 | 5  | 84  | 34  | 8 | 1  | 65 | 17  | 174 | 57  |
| 75,385 | 17 | 5  | 84  | 37  | 8 | 1  | 66 | 21  | 175 | 64  |
| 75,386 | 17 | 5  | 96  | 37  | 8 | 1  | 72 | 21  | 193 | 64  |
| 75,387 | 17 | 6  | 95  | 51  | 8 | 2  | 72 | 32  | 192 | 91  |

|        |    |   |     |    |    |   |     |    |     |     |
|--------|----|---|-----|----|----|---|-----|----|-----|-----|
| 75,388 | 17 | 6 | 95  | 51 | 8  | 2 | 71  | 32 | 191 | 91  |
| 75,389 | 18 | 5 | 113 | 50 | 9  | 2 | 77  | 32 | 217 | 89  |
| 75,390 | 18 | 9 | 113 | 57 | 9  | 4 | 78  | 37 | 218 | 107 |
| 75,391 | 18 | 9 | 111 | 56 | 9  | 4 | 77  | 37 | 215 | 106 |
| 75,392 | 22 | 9 | 128 | 56 | 9  | 4 | 85  | 37 | 244 | 106 |
| 75,393 | 22 | 9 | 128 | 55 | 9  | 4 | 85  | 37 | 244 | 105 |
| 75,394 | 26 | 7 | 132 | 58 | 9  | 4 | 86  | 39 | 253 | 108 |
| 75,395 | 26 | 7 | 132 | 59 | 9  | 4 | 86  | 39 | 253 | 109 |
| 75,396 | 28 | 7 | 135 | 52 | 9  | 4 | 86  | 35 | 258 | 98  |
| 75,397 | 31 | 7 | 154 | 49 | 9  | 4 | 95  | 36 | 289 | 96  |
| 75,398 | 33 | 7 | 171 | 49 | 10 | 4 | 99  | 36 | 313 | 96  |
| 75,399 | 33 | 6 | 180 | 49 | 11 | 4 | 104 | 36 | 328 | 95  |
| 75,400 | 33 | 6 | 179 | 53 | 11 | 5 | 103 | 37 | 326 | 101 |
| 75,401 | 33 | 6 | 179 | 53 | 11 | 5 | 98  | 37 | 321 | 101 |
| 75,402 | 33 | 6 | 179 | 53 | 11 | 5 | 98  | 37 | 321 | 101 |
| 75,403 | 33 | 6 | 179 | 53 | 11 | 5 | 98  | 37 | 321 | 101 |
| 75,404 | 33 | 6 | 179 | 52 | 11 | 5 | 98  | 37 | 321 | 100 |
| 75,405 | 33 | 6 | 177 | 52 | 11 | 5 | 97  | 37 | 318 | 100 |
| 75,406 | 33 | 6 | 177 | 52 | 11 | 5 | 97  | 37 | 318 | 100 |
| 75,407 | 31 | 6 | 181 | 68 | 11 | 5 | 93  | 42 | 316 | 121 |
| 75,408 | 31 | 6 | 182 | 68 | 11 | 6 | 93  | 43 | 317 | 123 |
| 75,409 | 32 | 6 | 180 | 68 | 11 | 7 | 94  | 44 | 317 | 125 |
| 75,410 | 32 | 6 | 180 | 69 | 11 | 7 | 92  | 44 | 315 | 126 |
| 75,411 | 27 | 6 | 172 | 70 | 9  | 7 | 83  | 44 | 291 | 127 |
| 75,412 | 21 | 6 | 162 | 72 | 7  | 7 | 74  | 44 | 264 | 129 |
| 75,413 | 21 | 6 | 161 | 72 | 7  | 7 | 74  | 44 | 263 | 129 |
| 75,414 | 21 | 6 | 161 | 73 | 7  | 7 | 74  | 48 | 263 | 134 |
| 75,415 | 21 | 6 | 161 | 72 | 7  | 7 | 74  | 48 | 263 | 133 |
| 75,416 | 22 | 6 | 178 | 72 | 7  | 7 | 79  | 48 | 286 | 133 |
| 75,417 | 22 | 6 | 181 | 74 | 7  | 8 | 80  | 48 | 290 | 136 |
| 75,418 | 22 | 6 | 184 | 75 | 7  | 8 | 82  | 48 | 295 | 137 |
| 75,419 | 22 | 6 | 184 | 75 | 7  | 8 | 82  | 48 | 295 | 137 |
| 75,420 | 22 | 6 | 199 | 76 | 7  | 8 | 83  | 47 | 311 | 137 |
| 75,421 | 24 | 6 | 204 | 76 | 8  | 8 | 89  | 46 | 325 | 136 |
| 75,422 | 24 | 5 | 203 | 74 | 8  | 8 | 91  | 46 | 326 | 133 |
| 75,423 | 24 | 5 | 204 | 74 | 8  | 8 | 91  | 46 | 327 | 133 |
| 75,424 | 24 | 5 | 199 | 72 | 8  | 8 | 89  | 45 | 320 | 130 |
| 75,425 | 23 | 5 | 191 | 72 | 7  | 8 | 85  | 44 | 306 | 129 |
| 75,426 | 23 | 5 | 188 | 72 | 7  | 8 | 84  | 44 | 302 | 129 |
| 75,427 | 23 | 5 | 188 | 72 | 7  | 8 | 83  | 44 | 301 | 129 |
| 75,428 | 23 | 5 | 181 | 72 | 7  | 8 | 80  | 45 | 291 | 130 |



|        |    |   |     |    |   |    |    |    |     |     |
|--------|----|---|-----|----|---|----|----|----|-----|-----|
| 75,429 | 22 | 5 | 178 | 72 | 5 | 8  | 77 | 45 | 282 | 130 |
| 75,430 | 22 | 5 | 178 | 72 | 5 | 8  | 77 | 46 | 282 | 131 |
| 75,431 | 22 | 5 | 174 | 71 | 5 | 7  | 73 | 45 | 274 | 128 |
| 75,432 | 22 | 5 | 174 | 73 | 5 | 7  | 73 | 45 | 274 | 130 |
| 75,433 | 22 | 5 | 173 | 72 | 5 | 7  | 72 | 45 | 272 | 129 |
| 75,434 | 22 | 5 | 177 | 72 | 5 | 7  | 74 | 45 | 278 | 129 |
| 75,435 | 21 | 5 | 173 | 69 | 4 | 8  | 70 | 41 | 268 | 123 |
| 75,436 | 21 | 6 | 171 | 69 | 4 | 10 | 69 | 41 | 265 | 126 |
| 75,437 | 20 | 6 | 156 | 69 | 4 | 10 | 57 | 41 | 237 | 126 |
| 75,438 | 19 | 5 | 143 | 56 | 3 | 9  | 51 | 30 | 216 | 100 |
| 75,439 | 19 | 5 | 143 | 56 | 3 | 9  | 51 | 30 | 216 | 100 |
| 75,440 | 19 | 1 | 143 | 41 | 3 | 7  | 52 | 20 | 217 | 69  |
| 75,441 | 20 | 1 | 149 | 41 | 3 | 7  | 53 | 19 | 225 | 68  |
| 75,442 | 19 | 1 | 148 | 41 | 3 | 7  | 53 | 19 | 223 | 68  |
| 75,443 | 16 | 1 | 136 | 42 | 3 | 7  | 50 | 19 | 205 | 69  |
| 75,444 | 14 | 1 | 136 | 42 | 3 | 7  | 49 | 19 | 202 | 69  |
| 75,445 | 12 | 1 | 137 | 35 | 5 | 7  | 53 | 18 | 207 | 61  |
| 75,446 | 10 | 1 | 134 | 39 | 5 | 7  | 53 | 21 | 202 | 68  |
| 75,447 | 7  | 1 | 115 | 40 | 5 | 7  | 44 | 23 | 171 | 71  |
| 75,448 | 5  | 1 | 97  | 40 | 4 | 7  | 40 | 23 | 146 | 71  |
| 75,449 | 5  | 1 | 97  | 42 | 4 | 7  | 40 | 23 | 146 | 73  |
| 75,450 | 5  | 1 | 88  | 38 | 3 | 6  | 35 | 22 | 131 | 67  |
| 75,451 | 5  | 1 | 88  | 40 | 3 | 6  | 35 | 23 | 131 | 70  |
| 75,452 | 5  | 1 | 88  | 42 | 3 | 6  | 35 | 24 | 131 | 73  |
| 75,453 | 5  | 1 | 88  | 43 | 3 | 6  | 36 | 24 | 132 | 74  |
| 75,454 | 5  | 1 | 89  | 42 | 3 | 6  | 36 | 24 | 133 | 73  |
| 75,455 | 5  | 2 | 89  | 42 | 3 | 6  | 36 | 27 | 133 | 77  |
| 75,456 | 5  | 2 | 91  | 44 | 3 | 7  | 36 | 27 | 135 | 80  |
| 75,457 | 5  | 2 | 87  | 28 | 3 | 7  | 36 | 23 | 131 | 60  |
| 75,458 | 5  | 2 | 87  | 28 | 3 | 6  | 36 | 22 | 131 | 58  |
| 75,459 | 5  | 2 | 86  | 28 | 3 | 6  | 36 | 22 | 130 | 58  |
| 75,460 | 4  | 2 | 86  | 28 | 3 | 5  | 35 | 20 | 128 | 55  |
| 75,461 | 4  | 2 | 88  | 28 | 3 | 5  | 36 | 20 | 131 | 55  |
| 75,462 | 4  | 2 | 88  | 27 | 3 | 5  | 36 | 20 | 131 | 54  |
| 75,463 | 4  | 2 | 88  | 27 | 3 | 5  | 36 | 20 | 131 | 54  |
| 75,464 | 4  | 2 | 90  | 28 | 3 | 5  | 38 | 20 | 135 | 55  |
| 75,465 | 4  | 2 | 93  | 28 | 4 | 5  | 42 | 16 | 143 | 51  |
| 75,466 | 5  | 2 | 96  | 29 | 4 | 5  | 46 | 17 | 151 | 53  |
| 75,467 | 4  | 2 | 82  | 39 | 6 | 7  | 41 | 20 | 133 | 68  |
| 75,468 | 4  | 2 | 83  | 45 | 6 | 6  | 40 | 22 | 133 | 75  |
| 75,469 | 4  | 2 | 80  | 48 | 6 | 6  | 39 | 21 | 129 | 77  |

|        |    |   |     |    |   |   |    |    |     |     |
|--------|----|---|-----|----|---|---|----|----|-----|-----|
| 75,470 | 4  | 2 | 70  | 49 | 6 | 6 | 38 | 21 | 118 | 78  |
| 75,471 | 4  | 2 | 65  | 49 | 6 | 6 | 38 | 21 | 113 | 78  |
| 75,472 | 2  | 2 | 60  | 49 | 5 | 6 | 32 | 22 | 99  | 79  |
| 75,473 | 2  | 2 | 60  | 49 | 5 | 6 | 30 | 22 | 97  | 79  |
| 75,474 | 2  | 2 | 72  | 49 | 5 | 6 | 33 | 22 | 112 | 79  |
| 75,475 | 2  | 2 | 72  | 49 | 5 | 6 | 33 | 22 | 112 | 79  |
| 75,476 | 2  | 2 | 77  | 50 | 5 | 6 | 34 | 22 | 118 | 80  |
| 75,477 | 2  | 2 | 84  | 51 | 6 | 6 | 36 | 22 | 128 | 81  |
| 75,478 | 5  | 2 | 95  | 51 | 6 | 6 | 44 | 21 | 150 | 80  |
| 75,479 | 5  | 2 | 93  | 51 | 6 | 6 | 45 | 21 | 149 | 80  |
| 75,480 | 5  | 2 | 93  | 52 | 6 | 6 | 46 | 21 | 150 | 81  |
| 75,481 | 5  | 2 | 100 | 52 | 6 | 6 | 45 | 20 | 156 | 80  |
| 75,482 | 5  | 2 | 102 | 50 | 6 | 6 | 45 | 20 | 158 | 78  |
| 75,483 | 5  | 2 | 113 | 50 | 6 | 6 | 47 | 20 | 171 | 78  |
| 75,484 | 5  | 2 | 114 | 50 | 6 | 6 | 48 | 21 | 173 | 79  |
| 75,485 | 5  | 2 | 110 | 50 | 6 | 6 | 46 | 23 | 167 | 81  |
| 75,486 | 5  | 2 | 106 | 50 | 6 | 5 | 46 | 22 | 163 | 79  |
| 75,487 | 5  | 2 | 106 | 56 | 7 | 3 | 46 | 30 | 164 | 91  |
| 75,488 | 5  | 2 | 105 | 57 | 7 | 3 | 46 | 30 | 163 | 92  |
| 75,489 | 5  | 2 | 110 | 57 | 7 | 3 | 47 | 37 | 169 | 99  |
| 75,490 | 5  | 2 | 107 | 58 | 7 | 3 | 46 | 38 | 165 | 101 |
| 75,491 | 5  | 2 | 107 | 60 | 7 | 3 | 46 | 39 | 165 | 104 |
| 75,492 | 4  | 2 | 101 | 60 | 7 | 3 | 43 | 39 | 155 | 104 |
| 75,493 | 4  | 5 | 103 | 73 | 7 | 4 | 40 | 44 | 154 | 126 |
| 75,494 | 5  | 6 | 101 | 73 | 7 | 4 | 38 | 44 | 151 | 127 |
| 75,495 | 7  | 6 | 100 | 74 | 5 | 4 | 37 | 44 | 149 | 128 |
| 75,496 | 9  | 7 | 100 | 72 | 5 | 4 | 41 | 38 | 155 | 121 |
| 75,497 | 9  | 8 | 100 | 75 | 5 | 4 | 40 | 39 | 154 | 126 |
| 75,498 | 9  | 8 | 100 | 76 | 5 | 4 | 40 | 39 | 154 | 127 |
| 75,499 | 10 | 8 | 106 | 76 | 5 | 4 | 40 | 39 | 161 | 127 |
| 75,500 | 11 | 8 | 121 | 74 | 6 | 4 | 44 | 39 | 182 | 125 |
| 75,501 | 11 | 8 | 139 | 74 | 6 | 4 | 45 | 39 | 201 | 125 |
| 75,502 | 12 | 8 | 151 | 72 | 6 | 4 | 51 | 39 | 220 | 123 |
| 75,503 | 13 | 8 | 153 | 70 | 6 | 4 | 52 | 38 | 224 | 120 |
| 75,504 | 13 | 8 | 153 | 69 | 6 | 4 | 52 | 38 | 224 | 119 |
| 75,505 | 13 | 7 | 153 | 69 | 6 | 4 | 52 | 36 | 224 | 116 |
| 75,506 | 13 | 7 | 153 | 67 | 6 | 3 | 52 | 36 | 224 | 113 |
| 75,507 | 13 | 7 | 151 | 67 | 6 | 3 | 52 | 36 | 222 | 113 |
| 75,508 | 13 | 7 | 151 | 67 | 6 | 3 | 52 | 36 | 222 | 113 |
| 75,509 | 13 | 7 | 151 | 67 | 6 | 3 | 52 | 36 | 222 | 113 |
| 75,510 | 13 | 7 | 151 | 67 | 6 | 3 | 52 | 36 | 222 | 113 |

|        |    |    |     |     |    |   |    |    |     |     |
|--------|----|----|-----|-----|----|---|----|----|-----|-----|
| 75,511 | 13 | 7  | 150 | 70  | 6  | 3 | 52 | 38 | 221 | 118 |
| 75,512 | 13 | 8  | 148 | 89  | 6  | 3 | 51 | 43 | 218 | 143 |
| 75,513 | 13 | 8  | 148 | 97  | 6  | 3 | 51 | 45 | 218 | 153 |
| 75,514 | 13 | 8  | 147 | 101 | 6  | 3 | 50 | 46 | 216 | 158 |
| 75,515 | 13 | 8  | 155 | 103 | 6  | 4 | 49 | 52 | 223 | 167 |
| 75,516 | 13 | 8  | 156 | 111 | 7  | 5 | 47 | 52 | 223 | 176 |
| 75,517 | 12 | 8  | 153 | 120 | 7  | 5 | 43 | 52 | 215 | 185 |
| 75,518 | 12 | 8  | 149 | 110 | 5  | 3 | 43 | 49 | 209 | 170 |
| 75,519 | 12 | 8  | 149 | 102 | 6  | 3 | 46 | 47 | 213 | 160 |
| 75,520 | 12 | 8  | 151 | 97  | 6  | 3 | 46 | 47 | 215 | 155 |
| 75,521 | 12 | 8  | 151 | 96  | 6  | 3 | 46 | 47 | 215 | 154 |
| 75,522 | 12 | 8  | 152 | 96  | 6  | 3 | 46 | 46 | 216 | 153 |
| 75,523 | 12 | 8  | 152 | 99  | 6  | 3 | 46 | 46 | 216 | 156 |
| 75,524 | 12 | 8  | 143 | 99  | 6  | 3 | 44 | 47 | 205 | 157 |
| 75,525 | 12 | 8  | 139 | 100 | 8  | 3 | 44 | 47 | 203 | 158 |
| 75,526 | 12 | 8  | 139 | 100 | 8  | 3 | 43 | 47 | 202 | 158 |
| 75,527 | 12 | 8  | 134 | 98  | 9  | 3 | 45 | 47 | 200 | 156 |
| 75,528 | 12 | 8  | 127 | 98  | 8  | 3 | 43 | 49 | 190 | 158 |
| 75,529 | 9  | 8  | 116 | 98  | 8  | 3 | 35 | 49 | 168 | 158 |
| 75,530 | 11 | 8  | 118 | 98  | 8  | 3 | 34 | 49 | 171 | 158 |
| 75,531 | 11 | 9  | 115 | 98  | 9  | 3 | 36 | 51 | 171 | 161 |
| 75,532 | 12 | 9  | 133 | 101 | 9  | 3 | 43 | 51 | 197 | 164 |
| 75,533 | 12 | 11 | 138 | 107 | 9  | 3 | 43 | 56 | 202 | 177 |
| 75,534 | 12 | 11 | 130 | 113 | 9  | 3 | 44 | 57 | 195 | 184 |
| 75,535 | 12 | 10 | 129 | 108 | 10 | 3 | 43 | 46 | 194 | 167 |
| 75,536 | 12 | 10 | 128 | 108 | 9  | 3 | 43 | 46 | 192 | 167 |
| 75,537 | 12 | 10 | 121 | 108 | 9  | 3 | 42 | 46 | 184 | 167 |
| 75,538 | 12 | 11 | 120 | 107 | 9  | 3 | 42 | 46 | 183 | 167 |
| 75,539 | 12 | 11 | 120 | 107 | 9  | 3 | 42 | 46 | 183 | 167 |
| 75,540 | 12 | 11 | 120 | 106 | 9  | 3 | 42 | 39 | 183 | 159 |
| 75,541 | 12 | 11 | 120 | 105 | 9  | 3 | 42 | 38 | 183 | 157 |
| 75,542 | 12 | 11 | 120 | 103 | 9  | 3 | 42 | 37 | 183 | 154 |
| 75,543 | 12 | 11 | 121 | 103 | 9  | 3 | 42 | 38 | 184 | 155 |
| 75,544 | 12 | 9  | 119 | 90  | 9  | 2 | 42 | 33 | 182 | 134 |
| 75,545 | 11 | 8  | 117 | 89  | 9  | 2 | 42 | 33 | 179 | 132 |
| 75,546 | 9  | 8  | 115 | 88  | 9  | 2 | 39 | 34 | 172 | 132 |
| 75,547 | 7  | 7  | 116 | 84  | 9  | 2 | 35 | 34 | 167 | 127 |
| 75,548 | 8  | 7  | 120 | 92  | 9  | 3 | 36 | 47 | 173 | 149 |
| 75,549 | 8  | 7  | 114 | 97  | 9  | 3 | 36 | 47 | 167 | 154 |
| 75,550 | 7  | 9  | 99  | 112 | 8  | 5 | 32 | 72 | 146 | 198 |
| 75,551 | 7  | 11 | 81  | 118 | 8  | 5 | 31 | 77 | 127 | 211 |

|        |    |    |     |     |   |   |    |     |     |     |
|--------|----|----|-----|-----|---|---|----|-----|-----|-----|
| 75,552 | 6  | 11 | 71  | 118 | 8 | 5 | 25 | 79  | 110 | 213 |
| 75,553 | 6  | 11 | 72  | 119 | 8 | 5 | 25 | 79  | 111 | 214 |
| 75,554 | 5  | 11 | 73  | 120 | 8 | 5 | 23 | 79  | 109 | 215 |
| 75,555 | 5  | 13 | 72  | 125 | 8 | 5 | 23 | 81  | 108 | 224 |
| 75,556 | 5  | 13 | 72  | 126 | 8 | 5 | 23 | 80  | 108 | 224 |
| 75,557 | 5  | 14 | 82  | 129 | 8 | 5 | 31 | 80  | 126 | 228 |
| 75,558 | 5  | 14 | 82  | 129 | 8 | 5 | 31 | 82  | 126 | 230 |
| 75,559 | 5  | 14 | 83  | 129 | 8 | 5 | 31 | 82  | 127 | 230 |
| 75,560 | 5  | 14 | 82  | 129 | 8 | 5 | 31 | 83  | 126 | 231 |
| 75,561 | 5  | 14 | 82  | 129 | 8 | 5 | 31 | 83  | 126 | 231 |
| 75,562 | 5  | 15 | 82  | 126 | 8 | 5 | 31 | 81  | 126 | 227 |
| 75,563 | 5  | 14 | 82  | 108 | 8 | 5 | 31 | 77  | 126 | 204 |
| 75,564 | 5  | 14 | 82  | 102 | 8 | 5 | 31 | 76  | 126 | 197 |
| 75,565 | 5  | 14 | 82  | 98  | 8 | 5 | 31 | 76  | 126 | 193 |
| 75,566 | 5  | 14 | 72  | 95  | 8 | 4 | 30 | 70  | 115 | 183 |
| 75,567 | 5  | 15 | 69  | 92  | 7 | 3 | 28 | 74  | 109 | 184 |
| 75,568 | 5  | 15 | 69  | 83  | 7 | 3 | 28 | 73  | 109 | 174 |
| 75,569 | 5  | 15 | 65  | 84  | 6 | 3 | 25 | 73  | 101 | 175 |
| 75,570 | 5  | 17 | 65  | 87  | 6 | 3 | 25 | 73  | 101 | 180 |
| 75,571 | 5  | 17 | 63  | 87  | 6 | 3 | 25 | 73  | 99  | 180 |
| 75,572 | 5  | 17 | 63  | 89  | 6 | 3 | 25 | 73  | 99  | 182 |
| 75,573 | 5  | 17 | 62  | 86  | 6 | 3 | 26 | 72  | 99  | 178 |
| 75,574 | 5  | 17 | 62  | 87  | 6 | 3 | 26 | 72  | 99  | 179 |
| 75,575 | 5  | 17 | 62  | 88  | 6 | 3 | 25 | 73  | 98  | 181 |
| 75,576 | 5  | 17 | 62  | 87  | 5 | 3 | 24 | 73  | 96  | 180 |
| 75,577 | 5  | 17 | 62  | 107 | 5 | 3 | 25 | 82  | 97  | 209 |
| 75,578 | 5  | 17 | 62  | 112 | 4 | 3 | 23 | 84  | 94  | 216 |
| 75,579 | 5  | 17 | 62  | 137 | 4 | 4 | 23 | 90  | 94  | 248 |
| 75,580 | 5  | 17 | 62  | 140 | 4 | 4 | 23 | 90  | 94  | 251 |
| 75,581 | 3  | 20 | 62  | 153 | 4 | 7 | 23 | 101 | 92  | 281 |
| 75,582 | 3  | 20 | 58  | 154 | 3 | 7 | 23 | 100 | 87  | 281 |
| 75,583 | 2  | 20 | 40  | 155 | 3 | 7 | 16 | 100 | 61  | 282 |
| 75,584 | 2  | 19 | 35  | 144 | 3 | 7 | 16 | 95  | 56  | 265 |
| 75,585 | 2  | 19 | 31  | 144 | 3 | 7 | 13 | 95  | 49  | 265 |
| 75,586 | 10 | 19 | 61  | 153 | 4 | 7 | 26 | 97  | 101 | 276 |
| 75,587 | 13 | 19 | 108 | 159 | 6 | 7 | 53 | 99  | 180 | 284 |
| 75,588 | 14 | 18 | 118 | 161 | 6 | 7 | 58 | 99  | 196 | 285 |
| 75,589 | 14 | 18 | 118 | 166 | 6 | 7 | 58 | 99  | 196 | 290 |
| 75,590 | 14 | 18 | 118 | 168 | 6 | 8 | 58 | 99  | 196 | 293 |
| 75,591 | 14 | 18 | 119 | 168 | 6 | 8 | 58 | 99  | 197 | 293 |
| 75,592 | 14 | 18 | 119 | 170 | 6 | 8 | 58 | 100 | 197 | 296 |

|        |    |    |     |     |   |    |    |     |     |     |
|--------|----|----|-----|-----|---|----|----|-----|-----|-----|
| 75,593 | 14 | 18 | 119 | 170 | 6 | 8  | 58 | 101 | 197 | 297 |
| 75,594 | 14 | 19 | 117 | 193 | 6 | 9  | 59 | 127 | 196 | 348 |
| 75,595 | 14 | 18 | 117 | 196 | 6 | 9  | 59 | 129 | 196 | 352 |
| 75,596 | 16 | 18 | 121 | 202 | 6 | 10 | 59 | 130 | 202 | 360 |
| 75,597 | 16 | 18 | 120 | 202 | 6 | 10 | 59 | 129 | 201 | 359 |
| 75,598 | 17 | 17 | 120 | 186 | 6 | 9  | 60 | 116 | 203 | 328 |
| 75,599 | 16 | 17 | 116 | 200 | 6 | 9  | 59 | 120 | 197 | 346 |
| 75,600 | 15 | 17 | 116 | 202 | 6 | 10 | 59 | 121 | 196 | 350 |
| 75,601 | 15 | 15 | 116 | 198 | 6 | 8  | 60 | 100 | 197 | 321 |
| 75,602 | 15 | 13 | 117 | 202 | 6 | 8  | 60 | 99  | 198 | 322 |
| 75,603 | 16 | 13 | 117 | 208 | 6 | 8  | 63 | 99  | 202 | 328 |
| 75,604 | 16 | 13 | 116 | 207 | 6 | 8  | 63 | 100 | 201 | 328 |
| 75,605 | 16 | 13 | 113 | 208 | 6 | 8  | 63 | 101 | 198 | 330 |
| 75,606 | 16 | 11 | 111 | 204 | 6 | 8  | 63 | 99  | 196 | 322 |
| 75,607 | 16 | 11 | 108 | 203 | 6 | 8  | 58 | 100 | 188 | 322 |
| 75,608 | 16 | 10 | 104 | 202 | 6 | 8  | 55 | 98  | 181 | 318 |
| 75,609 | 16 | 10 | 105 | 202 | 6 | 8  | 55 | 98  | 182 | 318 |
| 75,610 | 17 | 10 | 110 | 202 | 6 | 8  | 59 | 98  | 192 | 318 |
| 75,611 | 17 | 10 | 110 | 204 | 6 | 8  | 59 | 102 | 192 | 324 |
| 75,612 | 17 | 10 | 110 | 204 | 6 | 8  | 59 | 106 | 192 | 328 |
| 75,613 | 17 | 9  | 110 | 204 | 6 | 8  | 59 | 106 | 192 | 327 |
| 75,614 | 17 | 9  | 114 | 202 | 7 | 8  | 60 | 106 | 198 | 325 |
| 75,615 | 17 | 9  | 115 | 201 | 7 | 8  | 60 | 105 | 199 | 323 |
| 75,616 | 17 | 9  | 115 | 199 | 7 | 8  | 60 | 105 | 199 | 321 |
| 75,617 | 17 | 9  | 114 | 199 | 7 | 8  | 60 | 105 | 198 | 321 |
| 75,618 | 17 | 8  | 114 | 193 | 6 | 8  | 60 | 101 | 197 | 310 |
| 75,619 | 17 | 8  | 114 | 192 | 6 | 8  | 60 | 101 | 197 | 309 |
| 75,620 | 17 | 6  | 114 | 188 | 6 | 8  | 60 | 101 | 197 | 303 |
| 75,621 | 17 | 6  | 114 | 188 | 6 | 8  | 60 | 101 | 197 | 303 |
| 75,622 | 17 | 6  | 114 | 188 | 6 | 8  | 60 | 101 | 197 | 303 |
| 75,623 | 17 | 6  | 114 | 186 | 6 | 8  | 60 | 102 | 197 | 302 |
| 75,624 | 17 | 6  | 114 | 186 | 6 | 9  | 59 | 102 | 196 | 303 |
| 75,625 | 18 | 6  | 114 | 185 | 6 | 9  | 59 | 102 | 197 | 302 |
| 75,626 | 18 | 6  | 114 | 184 | 6 | 9  | 59 | 101 | 197 | 300 |
| 75,627 | 18 | 6  | 114 | 184 | 5 | 9  | 59 | 101 | 196 | 300 |
| 75,628 | 18 | 6  | 114 | 164 | 5 | 9  | 58 | 92  | 195 | 271 |
| 75,629 | 18 | 6  | 114 | 134 | 5 | 8  | 58 | 82  | 195 | 230 |
| 75,630 | 18 | 6  | 114 | 132 | 5 | 8  | 58 | 82  | 195 | 228 |
| 75,631 | 18 | 4  | 115 | 120 | 5 | 5  | 58 | 72  | 196 | 201 |
| 75,632 | 18 | 3  | 115 | 123 | 5 | 5  | 58 | 72  | 196 | 203 |
| 75,633 | 18 | 3  | 115 | 133 | 5 | 7  | 56 | 97  | 194 | 240 |

|        |    |   |     |     |   |   |    |     |     |     |
|--------|----|---|-----|-----|---|---|----|-----|-----|-----|
| 75,634 | 18 | 5 | 117 | 132 | 5 | 7 | 58 | 106 | 198 | 250 |
| 75,635 | 18 | 4 | 117 | 138 | 5 | 8 | 59 | 129 | 199 | 279 |
| 75,636 | 18 | 4 | 112 | 140 | 5 | 8 | 58 | 132 | 193 | 284 |
| 75,637 | 10 | 5 | 87  | 133 | 3 | 8 | 46 | 136 | 146 | 282 |
| 75,638 | 7  | 5 | 40  | 129 | 1 | 8 | 17 | 136 | 65  | 278 |
| 75,639 | 6  | 5 | 33  | 127 | 1 | 8 | 14 | 136 | 54  | 276 |
| 75,640 | 8  | 5 | 34  | 120 | 1 | 9 | 16 | 136 | 59  | 270 |
| 75,641 | 8  | 5 | 34  | 120 | 1 | 9 | 16 | 136 | 59  | 270 |
| 75,642 | 10 | 5 | 49  | 120 | 1 | 9 | 19 | 136 | 79  | 270 |
| 75,643 | 11 | 5 | 64  | 118 | 1 | 9 | 27 | 135 | 103 | 267 |
| 75,644 | 10 | 4 | 72  | 95  | 1 | 8 | 32 | 107 | 115 | 214 |
| 75,645 | 10 | 4 | 75  | 92  | 1 | 9 | 33 | 105 | 119 | 210 |
| 75,646 | 10 | 5 | 75  | 92  | 1 | 9 | 33 | 105 | 119 | 211 |
| 75,647 | 9  | 5 | 71  | 86  | 1 | 8 | 33 | 104 | 114 | 203 |
| 75,648 | 9  | 5 | 71  | 86  | 1 | 8 | 33 | 104 | 114 | 203 |
| 75,649 | 8  | 5 | 69  | 71  | 1 | 8 | 32 | 99  | 110 | 183 |
| 75,650 | 8  | 5 | 69  | 71  | 1 | 8 | 32 | 99  | 110 | 183 |
| 75,651 | 8  | 5 | 70  | 58  | 1 | 7 | 32 | 94  | 111 | 164 |
| 75,652 | 8  | 6 | 70  | 48  | 1 | 7 | 32 | 90  | 111 | 151 |
| 75,653 | 8  | 6 | 69  | 48  | 2 | 7 | 32 | 90  | 111 | 151 |
| 75,654 | 7  | 6 | 67  | 42  | 2 | 7 | 30 | 87  | 106 | 142 |
| 75,655 | 7  | 6 | 69  | 42  | 2 | 7 | 30 | 87  | 108 | 142 |
| 75,656 | 8  | 6 | 70  | 40  | 2 | 7 | 31 | 86  | 111 | 139 |
| 75,657 | 8  | 6 | 77  | 39  | 2 | 7 | 33 | 85  | 120 | 137 |
| 75,658 | 8  | 6 | 78  | 37  | 2 | 7 | 33 | 85  | 121 | 135 |
| 75,659 | 8  | 6 | 77  | 37  | 2 | 7 | 33 | 85  | 120 | 135 |
| 75,660 | 7  | 6 | 72  | 37  | 2 | 7 | 29 | 85  | 110 | 135 |
| 75,661 | 7  | 6 | 70  | 35  | 2 | 7 | 29 | 76  | 108 | 124 |
| 75,662 | 7  | 6 | 70  | 35  | 2 | 7 | 29 | 80  | 108 | 128 |
| 75,663 | 7  | 7 | 70  | 38  | 1 | 7 | 29 | 92  | 107 | 144 |
| 75,664 | 7  | 7 | 67  | 39  | 1 | 7 | 28 | 96  | 103 | 149 |
| 75,665 | 7  | 7 | 71  | 49  | 1 | 7 | 29 | 99  | 108 | 162 |
| 75,666 | 7  | 7 | 70  | 48  | 1 | 7 | 29 | 100 | 107 | 162 |
| 75,667 | 7  | 7 | 73  | 52  | 1 | 7 | 29 | 101 | 110 | 167 |
| 75,668 | 7  | 7 | 73  | 53  | 1 | 7 | 29 | 101 | 110 | 168 |
| 75,669 | 7  | 7 | 73  | 54  | 1 | 7 | 29 | 105 | 110 | 173 |
| 75,670 | 7  | 7 | 74  | 56  | 1 | 9 | 32 | 114 | 114 | 186 |
| 75,671 | 7  | 7 | 74  | 57  | 1 | 9 | 32 | 114 | 114 | 187 |
| 75,672 | 8  | 7 | 74  | 57  | 1 | 9 | 32 | 116 | 115 | 189 |
| 75,673 | 9  | 7 | 76  | 59  | 1 | 9 | 32 | 116 | 118 | 191 |
| 75,674 | 9  | 8 | 76  | 61  | 1 | 9 | 32 | 116 | 118 | 194 |

|        |    |   |    |    |   |   |    |     |     |     |
|--------|----|---|----|----|---|---|----|-----|-----|-----|
| 75,675 | 9  | 8 | 76 | 61 | 1 | 8 | 32 | 116 | 118 | 193 |
| 75,676 | 9  | 8 | 79 | 61 | 2 | 8 | 32 | 118 | 122 | 195 |
| 75,677 | 9  | 8 | 79 | 63 | 2 | 8 | 32 | 118 | 122 | 197 |
| 75,678 | 9  | 8 | 79 | 63 | 2 | 8 | 32 | 120 | 122 | 199 |
| 75,679 | 9  | 8 | 79 | 65 | 2 | 8 | 32 | 120 | 122 | 201 |
| 75,680 | 9  | 8 | 80 | 69 | 2 | 8 | 34 | 123 | 125 | 208 |
| 75,681 | 9  | 9 | 80 | 71 | 2 | 8 | 34 | 132 | 125 | 220 |
| 75,682 | 9  | 8 | 79 | 70 | 2 | 8 | 34 | 131 | 124 | 217 |
| 75,683 | 9  | 9 | 80 | 57 | 2 | 6 | 35 | 106 | 126 | 178 |
| 75,684 | 9  | 7 | 80 | 54 | 2 | 6 | 35 | 99  | 126 | 166 |
| 75,685 | 9  | 7 | 78 | 47 | 2 | 5 | 34 | 75  | 123 | 134 |
| 75,686 | 9  | 7 | 76 | 45 | 2 | 5 | 33 | 72  | 120 | 129 |
| 75,687 | 9  | 7 | 76 | 47 | 2 | 6 | 35 | 78  | 122 | 138 |
| 75,688 | 9  | 7 | 73 | 44 | 2 | 6 | 34 | 71  | 118 | 128 |
| 75,689 | 9  | 7 | 73 | 54 | 2 | 7 | 34 | 87  | 118 | 155 |
| 75,690 | 10 | 7 | 74 | 73 | 2 | 7 | 37 | 91  | 123 | 178 |
| 75,691 | 8  | 7 | 73 | 75 | 3 | 5 | 35 | 93  | 119 | 180 |
| 75,692 | 6  | 7 | 58 | 84 | 3 | 5 | 35 | 94  | 102 | 190 |
| 75,693 | 5  | 8 | 45 | 85 | 3 | 5 | 31 | 94  | 84  | 192 |
| 75,694 | 5  | 8 | 42 | 85 | 3 | 5 | 29 | 94  | 79  | 192 |
| 75,695 | 5  | 9 | 37 | 85 | 3 | 4 | 26 | 94  | 71  | 192 |
| 75,696 | 5  | 9 | 34 | 86 | 3 | 4 | 25 | 94  | 67  | 193 |
| 75,697 | 8  | 9 | 40 | 87 | 3 | 4 | 27 | 94  | 78  | 194 |
| 75,698 | 8  | 9 | 40 | 87 | 3 | 4 | 27 | 94  | 78  | 194 |
| 75,699 | 9  | 9 | 40 | 87 | 3 | 4 | 28 | 94  | 80  | 194 |
| 75,700 | 9  | 9 | 41 | 87 | 3 | 4 | 30 | 93  | 83  | 193 |
| 75,701 | 9  | 9 | 41 | 87 | 3 | 4 | 30 | 93  | 83  | 193 |
| 75,702 | 10 | 9 | 42 | 87 | 3 | 4 | 31 | 93  | 86  | 193 |
| 75,703 | 10 | 8 | 42 | 87 | 3 | 4 | 30 | 93  | 85  | 192 |
| 75,704 | 10 | 8 | 42 | 87 | 2 | 4 | 30 | 93  | 84  | 192 |
| 75,705 | 10 | 8 | 44 | 87 | 4 | 4 | 36 | 93  | 94  | 192 |
| 75,706 | 10 | 8 | 42 | 88 | 4 | 4 | 36 | 93  | 92  | 193 |
| 75,707 | 9  | 8 | 41 | 88 | 4 | 4 | 35 | 93  | 89  | 193 |
| 75,708 | 9  | 8 | 34 | 88 | 4 | 4 | 33 | 93  | 80  | 193 |
| 75,709 | 9  | 8 | 33 | 88 | 4 | 4 | 33 | 93  | 79  | 193 |
| 75,710 | 9  | 8 | 34 | 88 | 4 | 4 | 33 | 93  | 80  | 193 |
| 75,711 | 9  | 8 | 34 | 89 | 4 | 4 | 33 | 93  | 80  | 194 |
| 75,712 | 9  | 8 | 34 | 89 | 4 | 4 | 33 | 89  | 80  | 190 |
| 75,713 | 9  | 8 | 34 | 89 | 4 | 4 | 33 | 89  | 80  | 190 |
| 75,714 | 9  | 7 | 33 | 85 | 4 | 4 | 33 | 73  | 79  | 169 |
| 75,715 | 9  | 7 | 33 | 85 | 4 | 4 | 33 | 73  | 79  | 169 |

|        |   |   |    |    |   |   |    |    |    |     |
|--------|---|---|----|----|---|---|----|----|----|-----|
| 75,716 | 9 | 7 | 29 | 75 | 4 | 4 | 32 | 69 | 74 | 155 |
| 75,717 | 9 | 7 | 26 | 75 | 4 | 4 | 32 | 68 | 71 | 154 |
| 75,718 | 9 | 7 | 26 | 70 | 4 | 4 | 32 | 66 | 71 | 147 |
| 75,719 | 9 | 7 | 26 | 69 | 4 | 4 | 32 | 62 | 71 | 142 |
| 75,720 | 9 | 7 | 26 | 69 | 4 | 4 | 32 | 62 | 71 | 142 |
| 75,721 | 9 | 7 | 25 | 66 | 4 | 2 | 29 | 53 | 67 | 128 |
| 75,722 | 8 | 7 | 25 | 66 | 4 | 2 | 29 | 51 | 66 | 126 |
| 75,723 | 8 | 7 | 25 | 66 | 4 | 2 | 29 | 51 | 66 | 126 |
| 75,724 | 7 | 7 | 23 | 64 | 4 | 2 | 29 | 51 | 63 | 124 |
| 75,725 | 7 | 6 | 21 | 62 | 3 | 2 | 29 | 50 | 60 | 120 |
| 75,726 | 7 | 6 | 21 | 62 | 3 | 2 | 30 | 50 | 61 | 120 |
| 75,727 | 6 | 6 | 20 | 62 | 3 | 2 | 31 | 48 | 60 | 118 |
| 75,728 | 6 | 6 | 21 | 60 | 3 | 2 | 35 | 46 | 65 | 114 |
| 75,729 | 6 | 6 | 21 | 58 | 3 | 2 | 35 | 46 | 65 | 112 |
| 75,730 | 6 | 6 | 21 | 58 | 3 | 2 | 35 | 46 | 65 | 112 |
| 75,731 | 6 | 5 | 20 | 52 | 3 | 2 | 33 | 34 | 62 | 93  |
| 75,732 | 6 | 5 | 20 | 52 | 3 | 2 | 32 | 34 | 61 | 93  |
| 75,733 | 6 | 5 | 20 | 52 | 3 | 2 | 32 | 34 | 61 | 93  |
| 75,734 | 6 | 4 | 17 | 50 | 3 | 2 | 32 | 33 | 58 | 89  |
| 75,735 | 7 | 4 | 29 | 50 | 3 | 2 | 56 | 31 | 95 | 87  |
| 75,736 | 7 | 4 | 29 | 50 | 3 | 2 | 57 | 31 | 96 | 87  |
| 75,737 | 7 | 4 | 29 | 50 | 3 | 2 | 57 | 31 | 96 | 87  |
| 75,738 | 7 | 4 | 29 | 51 | 3 | 1 | 60 | 27 | 99 | 83  |
| 75,739 | 7 | 3 | 29 | 50 | 3 | 1 | 59 | 27 | 98 | 81  |
| 75,740 | 7 | 3 | 29 | 40 | 3 | 0 | 59 | 11 | 98 | 54  |
| 75,741 | 6 | 3 | 28 | 19 | 3 | 0 | 56 | 5  | 93 | 27  |
| 75,742 | 6 | 3 | 28 | 19 | 2 | 0 | 56 | 6  | 92 | 28  |
| 75,743 | 6 | 3 | 28 | 11 | 2 | 1 | 53 | 5  | 89 | 20  |
| 75,744 | 6 | 2 | 26 | 10 | 2 | 1 | 50 | 7  | 84 | 20  |
| 75,745 | 6 | 2 | 26 | 13 | 2 | 1 | 50 | 7  | 84 | 23  |
| 75,746 | 6 | 1 | 26 | 13 | 2 | 1 | 50 | 6  | 84 | 21  |
| 75,747 | 7 | 1 | 26 | 13 | 2 | 1 | 50 | 14 | 85 | 29  |
| 75,748 | 4 | 0 | 20 | 13 | 2 | 1 | 48 | 15 | 74 | 29  |
| 75,749 | 4 | 0 | 20 | 14 | 2 | 1 | 48 | 15 | 74 | 30  |
| 75,750 | 3 | 0 | 20 | 15 | 2 | 1 | 47 | 16 | 72 | 32  |
| 75,751 | 3 | 0 | 19 | 15 | 2 | 1 | 45 | 16 | 69 | 32  |
| 75,752 | 3 | 0 | 17 | 15 | 2 | 1 | 45 | 17 | 67 | 33  |
| 75,753 | 2 | 0 | 17 | 15 | 2 | 1 | 44 | 17 | 65 | 33  |
| 75,754 | 2 | 0 | 15 | 15 | 2 | 1 | 43 | 17 | 62 | 33  |
| 75,755 | 2 | 0 | 15 | 15 | 0 | 1 | 38 | 17 | 55 | 33  |
| 75,756 | 2 | 0 | 15 | 15 | 0 | 1 | 39 | 17 | 56 | 33  |



|        |   |   |    |     |   |   |    |     |    |     |
|--------|---|---|----|-----|---|---|----|-----|----|-----|
| 75,757 | 2 | 0 | 15 | 15  | 0 | 1 | 39 | 17  | 56 | 33  |
| 75,758 | 2 | 0 | 15 | 15  | 0 | 1 | 39 | 17  | 56 | 33  |
| 75,759 | 2 | 0 | 15 | 15  | 0 | 1 | 39 | 18  | 56 | 34  |
| 75,760 | 3 | 0 | 15 | 15  | 0 | 1 | 39 | 18  | 57 | 34  |
| 75,761 | 3 | 0 | 14 | 14  | 0 | 1 | 39 | 18  | 56 | 33  |
| 75,762 | 3 | 0 | 14 | 14  | 0 | 1 | 39 | 18  | 56 | 33  |
| 75,763 | 3 | 0 | 14 | 14  | 0 | 1 | 39 | 18  | 56 | 33  |
| 75,764 | 3 | 0 | 14 | 14  | 0 | 1 | 39 | 18  | 56 | 33  |
| 75,765 | 3 | 0 | 15 | 14  | 1 | 1 | 40 | 18  | 59 | 33  |
| 75,766 | 3 | 1 | 15 | 15  | 1 | 1 | 40 | 18  | 59 | 35  |
| 75,767 | 3 | 1 | 15 | 15  | 1 | 1 | 40 | 18  | 59 | 35  |
| 75,768 | 3 | 1 | 15 | 15  | 1 | 1 | 40 | 18  | 59 | 35  |
| 75,769 | 3 | 1 | 16 | 15  | 1 | 1 | 40 | 18  | 60 | 35  |
| 75,770 | 3 | 1 | 16 | 15  | 1 | 1 | 40 | 18  | 60 | 35  |
| 75,771 | 3 | 1 | 16 | 15  | 1 | 1 | 40 | 18  | 60 | 35  |
| 75,772 | 3 | 1 | 16 | 15  | 1 | 2 | 40 | 19  | 60 | 37  |
| 75,773 | 3 | 4 | 16 | 26  | 1 | 3 | 40 | 37  | 60 | 70  |
| 75,774 | 3 | 4 | 16 | 27  | 1 | 3 | 40 | 38  | 60 | 72  |
| 75,775 | 3 | 4 | 16 | 29  | 1 | 3 | 40 | 40  | 60 | 76  |
| 75,776 | 3 | 4 | 16 | 29  | 1 | 3 | 39 | 42  | 59 | 78  |
| 75,777 | 3 | 4 | 16 | 32  | 1 | 3 | 38 | 44  | 58 | 83  |
| 75,778 | 3 | 4 | 15 | 34  | 1 | 3 | 36 | 44  | 55 | 85  |
| 75,779 | 3 | 4 | 15 | 39  | 1 | 3 | 34 | 45  | 53 | 91  |
| 75,780 | 3 | 4 | 15 | 50  | 1 | 4 | 34 | 60  | 53 | 118 |
| 75,781 | 4 | 4 | 15 | 70  | 1 | 4 | 34 | 84  | 54 | 162 |
| 75,782 | 4 | 7 | 15 | 91  | 1 | 5 | 34 | 122 | 54 | 225 |
| 75,783 | 4 | 7 | 15 | 96  | 1 | 5 | 34 | 127 | 54 | 235 |
| 75,784 | 4 | 8 | 13 | 105 | 1 | 5 | 34 | 127 | 52 | 245 |
| 75,785 | 4 | 8 | 5  | 107 | 1 | 5 | 16 | 127 | 26 | 247 |
| 75,786 | 4 | 9 | 3  | 107 | 1 | 5 | 11 | 127 | 19 | 248 |
| 75,787 | 4 | 9 | 3  | 107 | 1 | 5 | 9  | 128 | 17 | 249 |
| 75,788 | 4 | 9 | 3  | 107 | 1 | 5 | 4  | 128 | 12 | 249 |
| 75,789 | 4 | 9 | 4  | 105 | 1 | 5 | 8  | 126 | 17 | 245 |
| 75,790 | 4 | 9 | 4  | 105 | 1 | 5 | 8  | 127 | 17 | 246 |
| 75,791 | 4 | 9 | 4  | 107 | 2 | 5 | 11 | 127 | 21 | 248 |
| 75,792 | 4 | 9 | 4  | 107 | 2 | 5 | 11 | 127 | 21 | 248 |
| 75,793 | 4 | 9 | 4  | 109 | 2 | 5 | 11 | 126 | 21 | 249 |
| 75,794 | 4 | 9 | 3  | 110 | 2 | 4 | 11 | 127 | 20 | 250 |
| 75,795 | 5 | 9 | 3  | 107 | 2 | 4 | 11 | 126 | 21 | 246 |
| 75,796 | 5 | 9 | 3  | 107 | 2 | 4 | 11 | 126 | 21 | 246 |
| 75,797 | 5 | 9 | 4  | 107 | 2 | 4 | 11 | 126 | 22 | 246 |

|        |   |    |    |     |   |   |    |     |     |     |
|--------|---|----|----|-----|---|---|----|-----|-----|-----|
| 75,798 | 4 | 9  | 4  | 105 | 2 | 4 | 11 | 117 | 21  | 235 |
| 75,799 | 4 | 9  | 5  | 105 | 2 | 4 | 11 | 117 | 22  | 235 |
| 75,800 | 4 | 9  | 8  | 104 | 2 | 4 | 11 | 116 | 25  | 233 |
| 75,801 | 4 | 9  | 8  | 104 | 2 | 4 | 11 | 116 | 25  | 233 |
| 75,802 | 5 | 9  | 10 | 104 | 4 | 4 | 15 | 115 | 34  | 232 |
| 75,803 | 5 | 10 | 10 | 105 | 4 | 4 | 17 | 115 | 36  | 234 |
| 75,804 | 5 | 10 | 10 | 105 | 4 | 4 | 18 | 115 | 37  | 234 |
| 75,805 | 5 | 10 | 11 | 105 | 4 | 4 | 20 | 115 | 40  | 234 |
| 75,806 | 5 | 11 | 11 | 105 | 4 | 4 | 20 | 115 | 40  | 235 |
| 75,807 | 5 | 11 | 11 | 105 | 4 | 4 | 20 | 115 | 40  | 235 |
| 75,808 | 5 | 11 | 13 | 104 | 4 | 4 | 26 | 115 | 48  | 234 |
| 75,809 | 5 | 11 | 15 | 105 | 4 | 4 | 32 | 114 | 56  | 234 |
| 75,810 | 5 | 11 | 15 | 105 | 4 | 4 | 32 | 114 | 56  | 234 |
| 75,811 | 4 | 11 | 20 | 105 | 6 | 4 | 40 | 114 | 70  | 234 |
| 75,812 | 4 | 11 | 21 | 105 | 6 | 4 | 41 | 114 | 72  | 234 |
| 75,813 | 4 | 11 | 26 | 105 | 6 | 4 | 42 | 114 | 78  | 234 |
| 75,814 | 4 | 11 | 30 | 105 | 6 | 4 | 46 | 114 | 86  | 234 |
| 75,815 | 4 | 11 | 30 | 105 | 6 | 4 | 46 | 114 | 86  | 234 |
| 75,816 | 4 | 10 | 29 | 104 | 5 | 4 | 45 | 116 | 83  | 234 |
| 75,817 | 4 | 10 | 29 | 104 | 5 | 4 | 45 | 116 | 83  | 234 |
| 75,818 | 4 | 10 | 29 | 104 | 5 | 4 | 45 | 116 | 83  | 234 |
| 75,819 | 4 | 10 | 28 | 104 | 5 | 4 | 45 | 116 | 82  | 234 |
| 75,820 | 4 | 10 | 28 | 104 | 5 | 4 | 45 | 116 | 82  | 234 |
| 75,821 | 4 | 15 | 28 | 131 | 5 | 5 | 45 | 148 | 82  | 299 |
| 75,822 | 4 | 15 | 28 | 137 | 5 | 5 | 45 | 150 | 82  | 307 |
| 75,823 | 4 | 15 | 28 | 138 | 5 | 4 | 46 | 149 | 83  | 306 |
| 75,824 | 5 | 12 | 28 | 127 | 5 | 3 | 46 | 131 | 84  | 273 |
| 75,825 | 5 | 12 | 29 | 126 | 5 | 3 | 47 | 130 | 86  | 271 |
| 75,826 | 5 | 12 | 29 | 125 | 5 | 3 | 50 | 126 | 89  | 266 |
| 75,827 | 5 | 12 | 29 | 125 | 5 | 3 | 50 | 127 | 89  | 267 |
| 75,828 | 5 | 12 | 29 | 122 | 5 | 3 | 51 | 125 | 90  | 262 |
| 75,829 | 6 | 12 | 29 | 120 | 5 | 3 | 51 | 125 | 91  | 260 |
| 75,830 | 6 | 12 | 32 | 104 | 5 | 2 | 51 | 110 | 94  | 228 |
| 75,831 | 5 | 13 | 32 | 84  | 5 | 2 | 52 | 86  | 94  | 185 |
| 75,832 | 5 | 10 | 37 | 62  | 5 | 1 | 54 | 48  | 101 | 121 |
| 75,833 | 5 | 10 | 38 | 57  | 6 | 1 | 62 | 43  | 111 | 111 |
| 75,834 | 5 | 9  | 38 | 49  | 6 | 1 | 62 | 45  | 111 | 104 |
| 75,835 | 4 | 9  | 38 | 53  | 6 | 1 | 62 | 47  | 110 | 110 |
| 75,836 | 4 | 9  | 39 | 63  | 6 | 1 | 64 | 54  | 113 | 127 |
| 75,837 | 4 | 8  | 39 | 66  | 6 | 1 | 64 | 59  | 113 | 134 |
| 75,838 | 4 | 8  | 39 | 66  | 6 | 1 | 64 | 60  | 113 | 135 |

|        |   |    |    |    |   |   |    |    |     |     |
|--------|---|----|----|----|---|---|----|----|-----|-----|
| 75,839 | 4 | 8  | 38 | 65 | 6 | 1 | 60 | 60 | 108 | 134 |
| 75,840 | 4 | 8  | 38 | 65 | 6 | 1 | 60 | 60 | 108 | 134 |
| 75,841 | 4 | 8  | 38 | 64 | 5 | 1 | 57 | 58 | 104 | 131 |
| 75,842 | 4 | 8  | 38 | 62 | 5 | 1 | 57 | 58 | 104 | 129 |
| 75,843 | 4 | 8  | 38 | 62 | 5 | 1 | 57 | 58 | 104 | 129 |
| 75,844 | 4 | 8  | 39 | 61 | 5 | 1 | 57 | 56 | 105 | 126 |
| 75,845 | 4 | 8  | 39 | 61 | 5 | 1 | 57 | 57 | 105 | 127 |
| 75,846 | 3 | 8  | 39 | 61 | 5 | 1 | 56 | 57 | 103 | 127 |
| 75,847 | 3 | 8  | 38 | 61 | 5 | 1 | 56 | 59 | 102 | 129 |
| 75,848 | 3 | 8  | 38 | 61 | 5 | 1 | 56 | 59 | 102 | 129 |
| 75,849 | 3 | 8  | 38 | 65 | 5 | 1 | 56 | 61 | 102 | 135 |
| 75,850 | 3 | 9  | 37 | 65 | 5 | 1 | 56 | 63 | 101 | 138 |
| 75,851 | 4 | 9  | 36 | 67 | 5 | 1 | 56 | 63 | 101 | 140 |
| 75,852 | 4 | 9  | 36 | 68 | 5 | 1 | 56 | 64 | 101 | 142 |
| 75,853 | 3 | 8  | 34 | 67 | 3 | 1 | 52 | 64 | 92  | 140 |
| 75,854 | 3 | 8  | 34 | 67 | 3 | 1 | 50 | 64 | 90  | 140 |
| 75,855 | 3 | 8  | 34 | 67 | 3 | 1 | 49 | 64 | 89  | 140 |
| 75,856 | 3 | 7  | 33 | 69 | 3 | 3 | 48 | 65 | 87  | 144 |
| 75,857 | 3 | 7  | 33 | 72 | 3 | 3 | 47 | 65 | 86  | 147 |
| 75,858 | 3 | 7  | 32 | 72 | 3 | 3 | 41 | 66 | 79  | 148 |
| 75,859 | 3 | 7  | 31 | 72 | 3 | 3 | 41 | 68 | 78  | 150 |
| 75,860 | 3 | 7  | 29 | 78 | 3 | 3 | 35 | 69 | 70  | 157 |
| 75,861 | 3 | 10 | 24 | 86 | 1 | 5 | 27 | 81 | 55  | 182 |
| 75,862 | 3 | 10 | 23 | 86 | 1 | 5 | 26 | 81 | 53  | 182 |
| 75,863 | 3 | 10 | 19 | 86 | 1 | 5 | 32 | 82 | 55  | 183 |
| 75,864 | 3 | 11 | 20 | 87 | 1 | 5 | 33 | 82 | 57  | 185 |
| 75,865 | 3 | 12 | 18 | 90 | 3 | 5 | 30 | 85 | 54  | 192 |
| 75,866 | 3 | 12 | 18 | 94 | 3 | 5 | 31 | 86 | 55  | 197 |
| 75,867 | 3 | 12 | 18 | 94 | 3 | 5 | 31 | 86 | 55  | 197 |
| 75,868 | 3 | 12 | 20 | 97 | 5 | 5 | 32 | 86 | 60  | 200 |
| 75,869 | 3 | 12 | 20 | 97 | 5 | 5 | 34 | 86 | 62  | 200 |
| 75,870 | 3 | 12 | 21 | 97 | 5 | 5 | 37 | 87 | 66  | 201 |
| 75,871 | 3 | 7  | 22 | 71 | 5 | 4 | 37 | 56 | 67  | 138 |
| 75,872 | 3 | 7  | 22 | 71 | 5 | 4 | 37 | 56 | 67  | 138 |
| 75,873 | 4 | 7  | 28 | 65 | 6 | 4 | 71 | 54 | 109 | 130 |
| 75,874 | 4 | 7  | 32 | 64 | 6 | 4 | 76 | 54 | 118 | 129 |
| 75,875 | 4 | 7  | 32 | 65 | 6 | 4 | 77 | 55 | 119 | 131 |
| 75,876 | 4 | 7  | 32 | 65 | 6 | 4 | 76 | 55 | 118 | 131 |
| 75,877 | 4 | 7  | 32 | 64 | 6 | 4 | 73 | 56 | 115 | 131 |
| 75,878 | 4 | 7  | 32 | 64 | 6 | 4 | 72 | 55 | 114 | 130 |
| 75,879 | 3 | 7  | 32 | 64 | 6 | 4 | 72 | 56 | 113 | 131 |

|        |    |   |    |    |    |   |     |    |     |     |
|--------|----|---|----|----|----|---|-----|----|-----|-----|
| 75,880 | 3  | 7 | 31 | 65 | 6  | 4 | 72  | 55 | 112 | 131 |
| 75,881 | 3  | 7 | 29 | 65 | 6  | 4 | 72  | 56 | 110 | 132 |
| 75,882 | 3  | 6 | 29 | 65 | 6  | 4 | 71  | 57 | 109 | 132 |
| 75,883 | 3  | 6 | 24 | 67 | 6  | 4 | 69  | 58 | 102 | 135 |
| 75,884 | 4  | 6 | 23 | 66 | 5  | 4 | 61  | 56 | 93  | 132 |
| 75,885 | 4  | 6 | 23 | 66 | 5  | 4 | 61  | 56 | 93  | 132 |
| 75,886 | 4  | 6 | 23 | 50 | 5  | 4 | 60  | 47 | 92  | 107 |
| 75,887 | 4  | 6 | 22 | 47 | 5  | 4 | 59  | 42 | 90  | 99  |
| 75,888 | 5  | 6 | 22 | 47 | 5  | 4 | 59  | 40 | 91  | 97  |
| 75,889 | 5  | 6 | 22 | 47 | 5  | 4 | 59  | 40 | 91  | 97  |
| 75,890 | 6  | 6 | 22 | 47 | 5  | 4 | 59  | 40 | 92  | 97  |
| 75,891 | 6  | 6 | 22 | 47 | 5  | 4 | 62  | 41 | 95  | 98  |
| 75,892 | 7  | 6 | 23 | 47 | 5  | 4 | 63  | 41 | 98  | 98  |
| 75,893 | 7  | 6 | 23 | 44 | 5  | 4 | 63  | 40 | 98  | 94  |
| 75,894 | 8  | 6 | 25 | 44 | 5  | 4 | 63  | 40 | 101 | 94  |
| 75,895 | 8  | 6 | 29 | 44 | 5  | 4 | 65  | 40 | 107 | 94  |
| 75,896 | 8  | 6 | 29 | 44 | 5  | 4 | 65  | 40 | 107 | 94  |
| 75,897 | 11 | 6 | 39 | 44 | 11 | 4 | 78  | 40 | 139 | 94  |
| 75,898 | 15 | 6 | 65 | 44 | 15 | 4 | 120 | 38 | 215 | 92  |
| 75,899 | 16 | 6 | 70 | 40 | 21 | 4 | 132 | 36 | 239 | 86  |
| 75,900 | 16 | 5 | 72 | 39 | 21 | 4 | 133 | 34 | 242 | 82  |
| 75,901 | 16 | 5 | 72 | 37 | 21 | 4 | 133 | 34 | 242 | 80  |
| 75,902 | 15 | 5 | 70 | 37 | 21 | 4 | 133 | 34 | 239 | 80  |
| 75,903 | 15 | 5 | 70 | 37 | 21 | 4 | 133 | 35 | 239 | 81  |
| 75,904 | 15 | 5 | 70 | 37 | 21 | 4 | 133 | 35 | 239 | 81  |
| 75,905 | 15 | 6 | 71 | 37 | 22 | 4 | 134 | 35 | 242 | 82  |
| 75,906 | 15 | 6 | 71 | 37 | 22 | 4 | 134 | 35 | 242 | 82  |
| 75,907 | 15 | 6 | 71 | 32 | 22 | 2 | 133 | 34 | 241 | 74  |
| 75,908 | 15 | 6 | 71 | 34 | 22 | 2 | 133 | 35 | 241 | 77  |
| 75,909 | 15 | 6 | 71 | 35 | 22 | 2 | 133 | 41 | 241 | 84  |
| 75,910 | 15 | 6 | 71 | 34 | 22 | 2 | 133 | 39 | 241 | 81  |
| 75,911 | 15 | 6 | 71 | 28 | 22 | 2 | 133 | 40 | 241 | 76  |
| 75,912 | 15 | 3 | 71 | 20 | 22 | 0 | 134 | 29 | 242 | 52  |
| 75,913 | 16 | 3 | 71 | 20 | 22 | 0 | 134 | 28 | 243 | 51  |
| 75,914 | 16 | 2 | 71 | 19 | 22 | 0 | 127 | 27 | 236 | 48  |
| 75,915 | 16 | 2 | 69 | 19 | 22 | 0 | 126 | 27 | 233 | 48  |
| 75,916 | 16 | 1 | 68 | 12 | 20 | 0 | 126 | 21 | 230 | 34  |
| 75,917 | 16 | 1 | 70 | 12 | 20 | 0 | 125 | 22 | 231 | 35  |
| 75,918 | 16 | 1 | 70 | 16 | 19 | 0 | 127 | 23 | 232 | 40  |
| 75,919 | 16 | 1 | 68 | 17 | 19 | 1 | 127 | 28 | 230 | 47  |
| 75,920 | 16 | 1 | 68 | 20 | 19 | 1 | 125 | 29 | 228 | 51  |

|        |    |   |    |    |    |   |     |    |     |     |
|--------|----|---|----|----|----|---|-----|----|-----|-----|
| 75,921 | 17 | 1 | 67 | 23 | 19 | 1 | 122 | 32 | 225 | 57  |
| 75,922 | 17 | 3 | 68 | 23 | 19 | 1 | 123 | 34 | 227 | 61  |
| 75,923 | 16 | 3 | 62 | 23 | 19 | 1 | 91  | 36 | 188 | 63  |
| 75,924 | 15 | 3 | 61 | 23 | 19 | 1 | 89  | 36 | 184 | 63  |
| 75,925 | 21 | 3 | 66 | 23 | 20 | 1 | 97  | 35 | 204 | 62  |
| 75,926 | 21 | 3 | 66 | 22 | 20 | 1 | 97  | 35 | 204 | 61  |
| 75,927 | 21 | 5 | 68 | 23 | 20 | 1 | 99  | 34 | 208 | 63  |
| 75,928 | 21 | 5 | 68 | 23 | 20 | 1 | 99  | 34 | 208 | 63  |
| 75,929 | 22 | 5 | 71 | 22 | 21 | 1 | 102 | 32 | 216 | 60  |
| 75,930 | 24 | 5 | 73 | 22 | 22 | 1 | 141 | 32 | 260 | 60  |
| 75,931 | 24 | 5 | 73 | 22 | 23 | 1 | 142 | 32 | 262 | 60  |
| 75,932 | 24 | 5 | 74 | 22 | 23 | 1 | 143 | 31 | 264 | 59  |
| 75,933 | 24 | 5 | 75 | 20 | 23 | 1 | 143 | 30 | 265 | 56  |
| 75,934 | 24 | 5 | 75 | 20 | 23 | 1 | 143 | 30 | 265 | 56  |
| 75,935 | 23 | 5 | 75 | 20 | 23 | 1 | 143 | 30 | 264 | 56  |
| 75,936 | 23 | 5 | 75 | 20 | 23 | 1 | 143 | 30 | 264 | 56  |
| 75,937 | 23 | 5 | 75 | 20 | 23 | 1 | 143 | 30 | 264 | 56  |
| 75,938 | 23 | 5 | 75 | 20 | 23 | 1 | 142 | 30 | 263 | 56  |
| 75,939 | 22 | 5 | 75 | 20 | 23 | 1 | 142 | 30 | 262 | 56  |
| 75,940 | 22 | 5 | 75 | 20 | 23 | 1 | 142 | 30 | 262 | 56  |
| 75,941 | 21 | 5 | 75 | 20 | 23 | 1 | 142 | 29 | 261 | 55  |
| 75,942 | 21 | 5 | 75 | 20 | 23 | 1 | 139 | 29 | 258 | 55  |
| 75,943 | 20 | 5 | 74 | 20 | 23 | 1 | 138 | 29 | 255 | 55  |
| 75,944 | 20 | 5 | 75 | 24 | 23 | 1 | 138 | 32 | 256 | 62  |
| 75,945 | 19 | 5 | 74 | 25 | 23 | 1 | 138 | 33 | 254 | 64  |
| 75,946 | 19 | 5 | 69 | 36 | 23 | 1 | 136 | 39 | 247 | 81  |
| 75,947 | 16 | 5 | 59 | 36 | 17 | 1 | 123 | 42 | 215 | 84  |
| 75,948 | 12 | 5 | 45 | 36 | 15 | 2 | 93  | 43 | 165 | 86  |
| 75,949 | 12 | 5 | 33 | 37 | 13 | 2 | 81  | 47 | 139 | 91  |
| 75,950 | 11 | 5 | 29 | 42 | 7  | 2 | 70  | 49 | 117 | 98  |
| 75,951 | 11 | 8 | 26 | 44 | 7  | 2 | 69  | 54 | 113 | 108 |
| 75,952 | 11 | 8 | 26 | 47 | 7  | 4 | 69  | 59 | 113 | 118 |
| 75,953 | 11 | 8 | 26 | 47 | 7  | 4 | 69  | 57 | 113 | 116 |
| 75,954 | 11 | 8 | 26 | 47 | 6  | 4 | 68  | 57 | 111 | 116 |
| 75,955 | 11 | 7 | 26 | 47 | 6  | 4 | 68  | 57 | 111 | 115 |
| 75,956 | 11 | 7 | 26 | 47 | 6  | 4 | 68  | 57 | 111 | 115 |
| 75,957 | 11 | 7 | 26 | 47 | 6  | 4 | 68  | 57 | 111 | 115 |
| 75,958 | 11 | 7 | 26 | 47 | 6  | 4 | 68  | 57 | 111 | 115 |
| 75,959 | 11 | 7 | 27 | 45 | 6  | 4 | 68  | 55 | 112 | 111 |
| 75,960 | 11 | 7 | 27 | 44 | 6  | 4 | 68  | 49 | 112 | 104 |
| 75,961 | 11 | 7 | 27 | 44 | 6  | 4 | 68  | 47 | 112 | 102 |

|        |    |   |    |    |   |   |    |    |     |     |
|--------|----|---|----|----|---|---|----|----|-----|-----|
| 75,962 | 11 | 7 | 27 | 44 | 6 | 4 | 68 | 47 | 112 | 102 |
| 75,963 | 11 | 7 | 27 | 44 | 6 | 4 | 67 | 47 | 111 | 102 |
| 75,964 | 10 | 7 | 26 | 44 | 6 | 4 | 67 | 48 | 109 | 103 |
| 75,965 | 10 | 7 | 26 | 45 | 6 | 4 | 67 | 48 | 109 | 104 |
| 75,966 | 10 | 7 | 26 | 45 | 6 | 4 | 66 | 50 | 108 | 106 |
| 75,967 | 10 | 7 | 26 | 45 | 6 | 4 | 66 | 50 | 108 | 106 |
| 75,968 | 10 | 7 | 25 | 45 | 6 | 4 | 67 | 49 | 108 | 105 |
| 75,969 | 10 | 8 | 25 | 43 | 5 | 4 | 64 | 53 | 104 | 108 |
| 75,970 | 9  | 9 | 25 | 39 | 5 | 3 | 64 | 49 | 103 | 100 |
| 75,971 | 9  | 9 | 25 | 36 | 5 | 3 | 64 | 49 | 103 | 97  |
| 75,972 | 9  | 7 | 25 | 32 | 5 | 3 | 64 | 42 | 103 | 84  |
| 75,973 | 9  | 7 | 23 | 32 | 5 | 3 | 63 | 40 | 100 | 82  |
| 75,974 | 9  | 7 | 23 | 32 | 4 | 3 | 60 | 40 | 96  | 82  |
| 75,975 | 9  | 7 | 20 | 32 | 4 | 3 | 59 | 40 | 92  | 82  |
| 75,976 | 3  | 7 | 15 | 32 | 3 | 3 | 49 | 40 | 70  | 82  |
| 75,977 | 3  | 7 | 15 | 32 | 3 | 3 | 51 | 40 | 72  | 82  |
| 75,978 | 3  | 5 | 19 | 31 | 3 | 3 | 50 | 40 | 75  | 79  |
| 75,979 | 5  | 5 | 18 | 31 | 2 | 3 | 51 | 40 | 76  | 79  |
| 75,980 | 4  | 5 | 18 | 31 | 2 | 3 | 48 | 40 | 72  | 79  |
| 75,981 | 2  | 5 | 17 | 31 | 1 | 3 | 10 | 40 | 30  | 79  |
| 75,982 | 2  | 5 | 17 | 31 | 0 | 3 | 9  | 40 | 28  | 79  |
| 75,983 | 2  | 5 | 17 | 31 | 0 | 3 | 9  | 40 | 28  | 79  |
| 75,984 | 2  | 5 | 16 | 31 | 0 | 3 | 9  | 40 | 27  | 79  |
| 75,985 | 2  | 5 | 16 | 31 | 0 | 3 | 9  | 40 | 27  | 79  |
| 75,986 | 2  | 5 | 16 | 31 | 0 | 3 | 9  | 40 | 27  | 79  |
| 75,987 | 2  | 5 | 17 | 31 | 0 | 3 | 9  | 40 | 28  | 79  |
| 75,988 | 2  | 5 | 17 | 31 | 0 | 3 | 9  | 40 | 28  | 79  |
| 75,989 | 2  | 5 | 17 | 31 | 0 | 3 | 9  | 40 | 28  | 79  |
| 75,990 | 2  | 5 | 18 | 31 | 0 | 3 | 9  | 40 | 29  | 79  |
| 75,991 | 2  | 5 | 18 | 31 | 0 | 3 | 10 | 40 | 30  | 79  |
| 75,992 | 2  | 5 | 18 | 31 | 0 | 3 | 10 | 40 | 30  | 79  |
| 75,993 | 2  | 5 | 18 | 31 | 0 | 3 | 10 | 40 | 30  | 79  |
| 75,994 | 2  | 5 | 18 | 31 | 0 | 3 | 10 | 40 | 30  | 79  |
| 75,995 | 2  | 5 | 17 | 27 | 0 | 3 | 10 | 37 | 29  | 72  |
| 75,996 | 2  | 5 | 17 | 26 | 0 | 3 | 10 | 36 | 29  | 70  |
| 75,997 | 2  | 5 | 17 | 16 | 0 | 3 | 10 | 30 | 29  | 54  |
| 75,998 | 2  | 5 | 17 | 16 | 0 | 3 | 12 | 27 | 31  | 51  |
| 75,999 | 2  | 5 | 17 | 15 | 0 | 2 | 12 | 22 | 31  | 44  |
| 76,000 | 2  | 5 | 17 | 10 | 0 | 2 | 12 | 20 | 31  | 37  |
| 76,001 | 2  | 5 | 16 | 10 | 0 | 2 | 11 | 21 | 29  | 38  |
| 76,002 | 2  | 2 | 17 | 5  | 1 | 2 | 11 | 11 | 31  | 20  |

|        |   |   |    |    |    |   |    |    |     |    |
|--------|---|---|----|----|----|---|----|----|-----|----|
| 76,003 | 2 | 2 | 17 | 5  | 1  | 0 | 11 | 12 | 31  | 19 |
| 76,004 | 2 | 2 | 17 | 4  | 1  | 0 | 11 | 12 | 31  | 18 |
| 76,005 | 2 | 2 | 17 | 4  | 1  | 0 | 11 | 12 | 31  | 18 |
| 76,006 | 2 | 2 | 18 | 4  | 1  | 0 | 12 | 12 | 33  | 18 |
| 76,007 | 2 | 2 | 19 | 4  | 1  | 0 | 14 | 12 | 36  | 18 |
| 76,008 | 2 | 2 | 19 | 4  | 1  | 0 | 14 | 12 | 36  | 18 |
| 76,009 | 2 | 2 | 18 | 4  | 1  | 0 | 14 | 12 | 35  | 18 |
| 76,010 | 2 | 2 | 18 | 4  | 1  | 0 | 16 | 12 | 37  | 18 |
| 76,011 | 2 | 2 | 18 | 4  | 1  | 0 | 16 | 12 | 37  | 18 |
| 76,012 | 2 | 2 | 18 | 4  | 1  | 0 | 16 | 12 | 37  | 18 |
| 76,013 | 2 | 2 | 18 | 4  | 1  | 0 | 16 | 12 | 37  | 18 |
| 76,014 | 2 | 2 | 18 | 4  | 1  | 0 | 16 | 12 | 37  | 18 |
| 76,015 | 0 | 2 | 15 | 4  | 1  | 0 | 12 | 9  | 28  | 15 |
| 76,016 | 1 | 2 | 19 | 3  | 1  | 0 | 14 | 11 | 35  | 16 |
| 76,017 | 2 | 2 | 21 | 3  | 1  | 0 | 17 | 9  | 41  | 14 |
| 76,018 | 2 | 2 | 21 | 3  | 1  | 0 | 18 | 9  | 42  | 14 |
| 76,019 | 2 | 2 | 21 | 3  | 1  | 0 | 18 | 9  | 42  | 14 |
| 76,020 | 2 | 1 | 21 | 1  | 1  | 0 | 21 | 4  | 45  | 6  |
| 76,021 | 2 | 0 | 22 | 1  | 1  | 0 | 21 | 3  | 46  | 4  |
| 76,022 | 2 | 0 | 23 | 2  | 1  | 0 | 21 | 2  | 47  | 4  |
| 76,023 | 2 | 0 | 24 | 2  | 1  | 0 | 21 | 2  | 48  | 4  |
| 76,024 | 2 | 0 | 24 | 2  | 1  | 0 | 22 | 2  | 49  | 4  |
| 76,025 | 2 | 0 | 29 | 2  | 2  | 0 | 22 | 2  | 55  | 4  |
| 76,026 | 3 | 0 | 29 | 2  | 4  | 0 | 22 | 5  | 58  | 7  |
| 76,027 | 3 | 0 | 29 | 3  | 4  | 0 | 22 | 5  | 58  | 8  |
| 76,028 | 3 | 1 | 42 | 3  | 5  | 0 | 32 | 5  | 82  | 9  |
| 76,029 | 3 | 2 | 37 | 3  | 5  | 0 | 31 | 5  | 76  | 10 |
| 76,030 | 3 | 2 | 35 | 3  | 5  | 0 | 29 | 5  | 72  | 10 |
| 76,031 | 2 | 2 | 37 | 4  | 5  | 0 | 29 | 5  | 73  | 11 |
| 76,032 | 1 | 2 | 35 | 4  | 5  | 0 | 29 | 6  | 70  | 12 |
| 76,033 | 2 | 2 | 75 | 4  | 9  | 0 | 53 | 6  | 139 | 12 |
| 76,034 | 2 | 2 | 75 | 4  | 9  | 0 | 53 | 6  | 139 | 12 |
| 76,035 | 2 | 2 | 76 | 4  | 9  | 0 | 53 | 6  | 140 | 12 |
| 76,036 | 2 | 2 | 76 | 4  | 9  | 0 | 53 | 6  | 140 | 12 |
| 76,037 | 2 | 2 | 80 | 4  | 10 | 0 | 59 | 6  | 151 | 12 |
| 76,038 | 2 | 2 | 81 | 4  | 10 | 0 | 59 | 6  | 152 | 12 |
| 76,039 | 2 | 2 | 80 | 4  | 10 | 0 | 64 | 6  | 156 | 12 |
| 76,040 | 2 | 2 | 80 | 4  | 10 | 0 | 64 | 6  | 156 | 12 |
| 76,041 | 2 | 2 | 80 | 4  | 10 | 0 | 65 | 6  | 157 | 12 |
| 76,042 | 2 | 2 | 80 | 5  | 10 | 0 | 65 | 6  | 157 | 13 |
| 76,043 | 3 | 3 | 82 | 10 | 10 | 0 | 64 | 10 | 159 | 23 |

|        |    |   |     |    |    |   |     |    |     |    |
|--------|----|---|-----|----|----|---|-----|----|-----|----|
| 76,044 | 3  | 3 | 83  | 10 | 10 | 0 | 65  | 10 | 161 | 23 |
| 76,045 | 4  | 3 | 100 | 10 | 10 | 0 | 69  | 10 | 183 | 23 |
| 76,046 | 4  | 3 | 107 | 11 | 10 | 0 | 71  | 10 | 192 | 24 |
| 76,047 | 4  | 3 | 106 | 11 | 10 | 0 | 71  | 10 | 191 | 24 |
| 76,048 | 7  | 3 | 119 | 12 | 10 | 0 | 72  | 10 | 208 | 25 |
| 76,049 | 7  | 3 | 119 | 12 | 10 | 0 | 71  | 10 | 207 | 25 |
| 76,050 | 8  | 3 | 138 | 15 | 11 | 0 | 77  | 12 | 234 | 30 |
| 76,051 | 8  | 3 | 138 | 15 | 11 | 0 | 77  | 12 | 234 | 30 |
| 76,052 | 8  | 3 | 147 | 15 | 10 | 0 | 87  | 12 | 252 | 30 |
| 76,053 | 9  | 3 | 147 | 17 | 10 | 0 | 93  | 13 | 259 | 33 |
| 76,054 | 9  | 3 | 147 | 19 | 10 | 0 | 93  | 13 | 259 | 35 |
| 76,055 | 13 | 3 | 193 | 19 | 13 | 0 | 118 | 12 | 337 | 34 |
| 76,056 | 17 | 3 | 210 | 19 | 13 | 0 | 133 | 12 | 373 | 34 |
| 76,057 | 17 | 3 | 210 | 19 | 13 | 0 | 137 | 12 | 377 | 34 |
| 76,058 | 17 | 4 | 212 | 21 | 13 | 0 | 138 | 14 | 380 | 39 |
| 76,059 | 20 | 6 | 217 | 36 | 13 | 0 | 143 | 21 | 393 | 63 |
| 76,060 | 20 | 6 | 218 | 39 | 13 | 1 | 139 | 21 | 390 | 67 |
| 76,061 | 20 | 7 | 218 | 39 | 13 | 1 | 139 | 22 | 390 | 69 |
| 76,062 | 20 | 7 | 218 | 39 | 13 | 1 | 138 | 22 | 389 | 69 |
| 76,063 | 22 | 8 | 223 | 39 | 13 | 1 | 142 | 23 | 400 | 71 |
| 76,064 | 22 | 8 | 223 | 39 | 13 | 1 | 142 | 23 | 400 | 71 |
| 76,065 | 22 | 8 | 221 | 40 | 13 | 1 | 143 | 23 | 399 | 72 |
| 76,066 | 22 | 8 | 221 | 42 | 13 | 1 | 144 | 24 | 400 | 75 |
| 76,067 | 22 | 8 | 229 | 46 | 13 | 1 | 150 | 25 | 414 | 80 |
| 76,068 | 22 | 8 | 229 | 46 | 13 | 1 | 149 | 25 | 413 | 80 |
| 76,069 | 23 | 8 | 236 | 46 | 14 | 1 | 151 | 25 | 424 | 80 |
| 76,070 | 25 | 8 | 237 | 47 | 14 | 1 | 148 | 25 | 424 | 81 |
| 76,071 | 25 | 8 | 239 | 47 | 14 | 1 | 148 | 25 | 426 | 81 |
| 76,072 | 25 | 8 | 245 | 46 | 14 | 1 | 149 | 25 | 433 | 80 |
| 76,073 | 25 | 8 | 245 | 46 | 14 | 1 | 149 | 25 | 433 | 80 |
| 76,074 | 25 | 8 | 243 | 46 | 14 | 1 | 149 | 25 | 431 | 80 |
| 76,075 | 25 | 8 | 243 | 46 | 12 | 1 | 149 | 25 | 429 | 80 |
| 76,076 | 24 | 8 | 244 | 46 | 11 | 1 | 149 | 22 | 428 | 77 |
| 76,077 | 24 | 8 | 243 | 45 | 11 | 1 | 149 | 22 | 427 | 76 |
| 76,078 | 24 | 8 | 244 | 45 | 11 | 1 | 150 | 23 | 429 | 77 |
| 76,079 | 24 | 7 | 233 | 45 | 10 | 1 | 140 | 23 | 407 | 76 |
| 76,080 | 24 | 6 | 235 | 45 | 10 | 1 | 141 | 23 | 410 | 75 |
| 76,081 | 24 | 6 | 235 | 44 | 10 | 1 | 141 | 23 | 410 | 74 |
| 76,082 | 24 | 6 | 232 | 44 | 10 | 1 | 140 | 22 | 406 | 73 |
| 76,083 | 24 | 6 | 225 | 44 | 10 | 1 | 136 | 22 | 395 | 73 |
| 76,084 | 23 | 6 | 194 | 44 | 6  | 1 | 117 | 21 | 340 | 72 |



|        |    |   |     |    |    |   |     |    |     |    |
|--------|----|---|-----|----|----|---|-----|----|-----|----|
| 76,085 | 23 | 6 | 194 | 44 | 6  | 1 | 117 | 21 | 340 | 72 |
| 76,086 | 23 | 6 | 198 | 44 | 7  | 1 | 118 | 21 | 346 | 72 |
| 76,087 | 23 | 6 | 198 | 44 | 7  | 1 | 119 | 21 | 347 | 72 |
| 76,088 | 23 | 6 | 194 | 44 | 6  | 1 | 113 | 21 | 336 | 72 |
| 76,089 | 23 | 6 | 193 | 44 | 6  | 1 | 113 | 21 | 335 | 72 |
| 76,090 | 23 | 6 | 192 | 44 | 6  | 1 | 108 | 21 | 329 | 72 |
| 76,091 | 23 | 6 | 203 | 44 | 6  | 1 | 110 | 21 | 342 | 72 |
| 76,092 | 23 | 7 | 207 | 44 | 6  | 1 | 111 | 21 | 347 | 73 |
| 76,093 | 23 | 7 | 221 | 43 | 7  | 1 | 122 | 21 | 373 | 72 |
| 76,094 | 27 | 6 | 248 | 38 | 9  | 1 | 142 | 18 | 426 | 63 |
| 76,095 | 29 | 6 | 260 | 38 | 10 | 1 | 156 | 18 | 455 | 63 |
| 76,096 | 28 | 6 | 251 | 37 | 10 | 1 | 155 | 18 | 444 | 62 |
| 76,097 | 28 | 6 | 244 | 37 | 10 | 1 | 153 | 18 | 435 | 62 |
| 76,098 | 25 | 6 | 232 | 35 | 10 | 1 | 151 | 18 | 418 | 60 |
| 76,099 | 25 | 6 | 231 | 35 | 10 | 1 | 151 | 18 | 417 | 60 |
| 76,100 | 25 | 6 | 227 | 35 | 10 | 1 | 151 | 18 | 413 | 60 |
| 76,101 | 24 | 6 | 212 | 32 | 9  | 1 | 145 | 16 | 390 | 55 |
| 76,102 | 24 | 6 | 204 | 32 | 9  | 1 | 135 | 15 | 372 | 54 |
| 76,103 | 24 | 6 | 203 | 32 | 9  | 1 | 135 | 15 | 371 | 54 |
| 76,104 | 23 | 6 | 201 | 30 | 9  | 1 | 130 | 14 | 363 | 51 |
| 76,105 | 19 | 6 | 168 | 28 | 6  | 1 | 114 | 14 | 307 | 49 |
| 76,106 | 19 | 6 | 173 | 29 | 7  | 1 | 112 | 14 | 311 | 50 |
| 76,107 | 15 | 6 | 168 | 29 | 7  | 1 | 107 | 14 | 297 | 50 |
| 76,108 | 15 | 6 | 170 | 30 | 7  | 1 | 104 | 14 | 296 | 51 |
| 76,109 | 17 | 3 | 215 | 13 | 10 | 1 | 128 | 5  | 370 | 22 |
| 76,110 | 14 | 3 | 214 | 10 | 11 | 0 | 125 | 5  | 364 | 18 |
| 76,111 | 14 | 2 | 216 | 10 | 11 | 0 | 125 | 4  | 366 | 16 |
| 76,112 | 14 | 1 | 217 | 10 | 11 | 0 | 125 | 3  | 367 | 14 |
| 76,113 | 14 | 1 | 217 | 12 | 11 | 0 | 125 | 3  | 367 | 16 |
| 76,114 | 12 | 1 | 212 | 14 | 12 | 0 | 121 | 3  | 357 | 18 |
| 76,115 | 12 | 1 | 210 | 13 | 12 | 0 | 118 | 3  | 352 | 17 |
| 76,116 | 12 | 1 | 210 | 13 | 12 | 0 | 117 | 4  | 351 | 18 |
| 76,117 | 12 | 1 | 205 | 11 | 12 | 0 | 114 | 3  | 343 | 15 |
| 76,118 | 13 | 1 | 202 | 7  | 13 | 0 | 113 | 3  | 341 | 11 |
| 76,119 | 13 | 1 | 202 | 8  | 13 | 0 | 113 | 4  | 341 | 13 |
| 76,120 | 12 | 1 | 195 | 8  | 12 | 0 | 111 | 5  | 330 | 14 |
| 76,121 | 11 | 1 | 208 | 7  | 13 | 0 | 114 | 5  | 346 | 13 |
| 76,122 | 11 | 1 | 206 | 8  | 14 | 0 | 115 | 5  | 346 | 14 |
| 76,123 | 11 | 1 | 199 | 8  | 15 | 0 | 115 | 5  | 340 | 14 |
| 76,124 | 11 | 1 | 199 | 12 | 15 | 0 | 114 | 7  | 339 | 20 |
| 76,125 | 12 | 1 | 196 | 13 | 15 | 0 | 114 | 7  | 337 | 21 |

|        |    |    |     |     |    |   |     |    |     |     |
|--------|----|----|-----|-----|----|---|-----|----|-----|-----|
| 76,126 | 12 | 1  | 196 | 13  | 15 | 0 | 114 | 7  | 337 | 21  |
| 76,127 | 12 | 1  | 194 | 13  | 15 | 0 | 114 | 7  | 335 | 21  |
| 76,128 | 12 | 1  | 194 | 17  | 15 | 0 | 114 | 9  | 335 | 27  |
| 76,129 | 12 | 1  | 193 | 17  | 15 | 0 | 113 | 8  | 333 | 26  |
| 76,130 | 12 | 2  | 190 | 19  | 15 | 0 | 110 | 8  | 327 | 29  |
| 76,131 | 12 | 2  | 188 | 20  | 15 | 0 | 109 | 8  | 324 | 30  |
| 76,132 | 12 | 2  | 188 | 20  | 15 | 0 | 109 | 8  | 324 | 30  |
| 76,133 | 12 | 2  | 188 | 20  | 15 | 0 | 109 | 9  | 324 | 31  |
| 76,134 | 12 | 3  | 188 | 20  | 15 | 0 | 109 | 10 | 324 | 33  |
| 76,135 | 12 | 3  | 188 | 20  | 15 | 0 | 109 | 11 | 324 | 34  |
| 76,136 | 12 | 3  | 185 | 20  | 14 | 0 | 109 | 11 | 320 | 34  |
| 76,137 | 14 | 3  | 192 | 20  | 14 | 0 | 109 | 11 | 329 | 34  |
| 76,138 | 14 | 3  | 192 | 20  | 14 | 0 | 108 | 11 | 328 | 34  |
| 76,139 | 15 | 3  | 193 | 25  | 14 | 0 | 108 | 12 | 330 | 40  |
| 76,140 | 15 | 3  | 188 | 30  | 14 | 0 | 105 | 13 | 322 | 46  |
| 76,141 | 18 | 4  | 201 | 36  | 15 | 0 | 114 | 14 | 348 | 54  |
| 76,142 | 18 | 4  | 222 | 42  | 15 | 0 | 119 | 15 | 374 | 61  |
| 76,143 | 20 | 3  | 230 | 49  | 15 | 0 | 116 | 15 | 381 | 67  |
| 76,144 | 30 | 3  | 294 | 54  | 16 | 0 | 135 | 15 | 475 | 72  |
| 76,145 | 46 | 3  | 413 | 55  | 33 | 0 | 205 | 15 | 697 | 73  |
| 76,146 | 44 | 3  | 399 | 56  | 32 | 0 | 190 | 17 | 665 | 76  |
| 76,147 | 44 | 3  | 391 | 57  | 32 | 0 | 187 | 17 | 654 | 77  |
| 76,148 | 46 | 3  | 446 | 57  | 39 | 0 | 223 | 17 | 754 | 77  |
| 76,149 | 46 | 3  | 446 | 58  | 39 | 0 | 223 | 17 | 754 | 78  |
| 76,150 | 46 | 3  | 446 | 60  | 39 | 0 | 223 | 17 | 754 | 80  |
| 76,151 | 46 | 3  | 446 | 62  | 39 | 0 | 223 | 17 | 754 | 82  |
| 76,152 | 46 | 3  | 447 | 67  | 39 | 0 | 224 | 18 | 756 | 88  |
| 76,153 | 46 | 3  | 448 | 69  | 39 | 1 | 224 | 19 | 757 | 92  |
| 76,154 | 46 | 5  | 448 | 90  | 39 | 3 | 224 | 30 | 757 | 128 |
| 76,155 | 46 | 8  | 448 | 110 | 39 | 3 | 223 | 39 | 756 | 160 |
| 76,156 | 46 | 8  | 443 | 122 | 39 | 4 | 220 | 42 | 748 | 176 |
| 76,157 | 46 | 8  | 431 | 123 | 38 | 4 | 216 | 43 | 731 | 178 |
| 76,158 | 46 | 10 | 419 | 124 | 38 | 4 | 206 | 43 | 709 | 181 |
| 76,159 | 46 | 10 | 417 | 123 | 38 | 4 | 206 | 43 | 707 | 180 |
| 76,160 | 44 | 10 | 369 | 123 | 35 | 4 | 181 | 43 | 629 | 180 |
| 76,161 | 44 | 10 | 364 | 123 | 34 | 4 | 179 | 43 | 621 | 180 |
| 76,162 | 44 | 10 | 361 | 123 | 34 | 4 | 179 | 44 | 618 | 181 |
| 76,163 | 44 | 10 | 360 | 119 | 34 | 4 | 179 | 43 | 617 | 176 |
| 76,164 | 44 | 10 | 360 | 119 | 34 | 4 | 179 | 43 | 617 | 176 |
| 76,165 | 44 | 10 | 361 | 119 | 34 | 4 | 181 | 43 | 620 | 176 |
| 76,166 | 44 | 10 | 361 | 124 | 34 | 4 | 181 | 46 | 620 | 184 |

|        |    |    |     |     |    |    |     |    |     |     |
|--------|----|----|-----|-----|----|----|-----|----|-----|-----|
| 76,167 | 44 | 10 | 361 | 129 | 34 | 7  | 180 | 53 | 619 | 199 |
| 76,168 | 44 | 10 | 361 | 133 | 34 | 7  | 180 | 54 | 619 | 204 |
| 76,169 | 43 | 10 | 363 | 134 | 34 | 7  | 180 | 53 | 620 | 204 |
| 76,170 | 43 | 10 | 361 | 137 | 34 | 7  | 181 | 52 | 619 | 206 |
| 76,171 | 43 | 10 | 360 | 137 | 33 | 7  | 179 | 51 | 615 | 205 |
| 76,172 | 43 | 10 | 357 | 136 | 34 | 7  | 182 | 51 | 616 | 204 |
| 76,173 | 43 | 11 | 356 | 136 | 33 | 7  | 181 | 51 | 613 | 205 |
| 76,174 | 43 | 11 | 356 | 136 | 32 | 7  | 180 | 51 | 611 | 205 |
| 76,175 | 43 | 11 | 364 | 131 | 33 | 7  | 192 | 50 | 632 | 199 |
| 76,176 | 42 | 11 | 364 | 132 | 34 | 7  | 192 | 50 | 632 | 200 |
| 76,177 | 42 | 11 | 364 | 132 | 34 | 7  | 192 | 50 | 632 | 200 |
| 76,178 | 45 | 11 | 368 | 132 | 34 | 7  | 195 | 50 | 642 | 200 |
| 76,179 | 47 | 11 | 371 | 128 | 34 | 7  | 197 | 48 | 649 | 194 |
| 76,180 | 47 | 11 | 371 | 128 | 34 | 7  | 197 | 48 | 649 | 194 |
| 76,181 | 47 | 10 | 372 | 126 | 34 | 7  | 200 | 48 | 653 | 191 |
| 76,182 | 48 | 10 | 372 | 125 | 34 | 7  | 203 | 48 | 657 | 190 |
| 76,183 | 52 | 10 | 381 | 125 | 34 | 7  | 212 | 48 | 679 | 190 |
| 76,184 | 52 | 9  | 396 | 125 | 34 | 7  | 217 | 46 | 699 | 187 |
| 76,185 | 52 | 9  | 398 | 125 | 34 | 7  | 217 | 45 | 701 | 186 |
| 76,186 | 52 | 9  | 398 | 126 | 34 | 7  | 217 | 45 | 701 | 187 |
| 76,187 | 52 | 9  | 405 | 126 | 34 | 7  | 221 | 45 | 712 | 187 |
| 76,188 | 51 | 9  | 399 | 126 | 34 | 7  | 222 | 45 | 706 | 187 |
| 76,189 | 53 | 9  | 403 | 125 | 34 | 7  | 226 | 45 | 716 | 186 |
| 76,190 | 52 | 9  | 403 | 125 | 34 | 8  | 226 | 48 | 715 | 190 |
| 76,191 | 52 | 9  | 403 | 133 | 34 | 9  | 228 | 55 | 717 | 206 |
| 76,192 | 49 | 9  | 384 | 140 | 33 | 9  | 221 | 65 | 687 | 223 |
| 76,193 | 49 | 9  | 359 | 136 | 33 | 9  | 215 | 66 | 656 | 220 |
| 76,194 | 47 | 9  | 345 | 130 | 33 | 11 | 213 | 66 | 638 | 216 |
| 76,195 | 37 | 10 | 272 | 125 | 33 | 11 | 188 | 66 | 530 | 212 |
| 76,196 | 16 | 10 | 125 | 123 | 14 | 11 | 98  | 64 | 253 | 208 |
| 76,197 | 16 | 10 | 80  | 123 | 9  | 11 | 84  | 64 | 189 | 208 |
| 76,198 | 14 | 10 | 71  | 123 | 7  | 11 | 62  | 64 | 154 | 208 |
| 76,199 | 14 | 10 | 73  | 122 | 7  | 11 | 63  | 64 | 157 | 207 |
| 76,200 | 14 | 10 | 79  | 122 | 7  | 11 | 65  | 66 | 165 | 209 |
| 76,201 | 14 | 10 | 94  | 120 | 7  | 11 | 76  | 66 | 191 | 207 |
| 76,202 | 14 | 11 | 94  | 118 | 7  | 11 | 75  | 67 | 190 | 207 |
| 76,203 | 14 | 11 | 94  | 113 | 7  | 11 | 75  | 66 | 190 | 201 |
| 76,204 | 15 | 11 | 93  | 111 | 7  | 10 | 75  | 65 | 190 | 197 |
| 76,205 | 15 | 9  | 94  | 90  | 7  | 8  | 76  | 55 | 192 | 162 |
| 76,206 | 15 | 6  | 95  | 59  | 7  | 7  | 76  | 43 | 193 | 115 |
| 76,207 | 15 | 4  | 96  | 57  | 7  | 7  | 77  | 42 | 195 | 110 |

|        |    |    |     |    |    |   |     |    |     |     |
|--------|----|----|-----|----|----|---|-----|----|-----|-----|
| 76,208 | 15 | 5  | 96  | 57 | 7  | 7 | 77  | 42 | 195 | 111 |
| 76,209 | 15 | 5  | 96  | 58 | 7  | 7 | 77  | 44 | 195 | 114 |
| 76,210 | 15 | 5  | 96  | 58 | 7  | 7 | 77  | 44 | 195 | 114 |
| 76,211 | 15 | 5  | 96  | 58 | 7  | 7 | 77  | 44 | 195 | 114 |
| 76,212 | 15 | 5  | 96  | 58 | 7  | 7 | 77  | 44 | 195 | 114 |
| 76,213 | 17 | 5  | 96  | 58 | 7  | 7 | 77  | 43 | 197 | 113 |
| 76,214 | 17 | 5  | 96  | 58 | 7  | 7 | 77  | 43 | 197 | 113 |
| 76,215 | 17 | 5  | 96  | 59 | 7  | 7 | 77  | 43 | 197 | 114 |
| 76,216 | 17 | 5  | 95  | 59 | 6  | 7 | 75  | 43 | 193 | 114 |
| 76,217 | 17 | 5  | 97  | 49 | 6  | 4 | 75  | 33 | 195 | 91  |
| 76,218 | 17 | 5  | 103 | 49 | 6  | 4 | 77  | 33 | 203 | 91  |
| 76,219 | 19 | 5  | 120 | 44 | 6  | 4 | 95  | 32 | 240 | 85  |
| 76,220 | 19 | 5  | 172 | 40 | 7  | 4 | 102 | 32 | 300 | 81  |
| 76,221 | 19 | 5  | 199 | 40 | 7  | 4 | 111 | 32 | 336 | 81  |
| 76,222 | 20 | 5  | 200 | 40 | 7  | 4 | 114 | 32 | 341 | 81  |
| 76,223 | 20 | 4  | 199 | 40 | 6  | 4 | 111 | 32 | 336 | 80  |
| 76,224 | 20 | 4  | 210 | 39 | 6  | 4 | 117 | 31 | 353 | 78  |
| 76,225 | 20 | 4  | 212 | 39 | 6  | 4 | 118 | 31 | 356 | 78  |
| 76,226 | 20 | 4  | 204 | 39 | 5  | 4 | 106 | 31 | 335 | 78  |
| 76,227 | 20 | 4  | 204 | 39 | 4  | 4 | 106 | 31 | 334 | 78  |
| 76,228 | 17 | 4  | 202 | 40 | 4  | 4 | 103 | 33 | 326 | 81  |
| 76,229 | 17 | 4  | 200 | 41 | 4  | 4 | 103 | 33 | 324 | 82  |
| 76,230 | 15 | 4  | 198 | 42 | 4  | 4 | 101 | 34 | 318 | 84  |
| 76,231 | 15 | 4  | 198 | 42 | 4  | 4 | 98  | 34 | 315 | 84  |
| 76,232 | 14 | 4  | 198 | 43 | 4  | 4 | 95  | 34 | 311 | 85  |
| 76,233 | 12 | 4  | 195 | 44 | 5  | 4 | 87  | 34 | 299 | 86  |
| 76,234 | 12 | 8  | 192 | 48 | 5  | 5 | 87  | 46 | 296 | 107 |
| 76,235 | 12 | 8  | 179 | 48 | 5  | 6 | 81  | 46 | 277 | 108 |
| 76,236 | 22 | 9  | 270 | 47 | 9  | 6 | 142 | 46 | 443 | 108 |
| 76,237 | 22 | 9  | 274 | 50 | 9  | 6 | 147 | 49 | 452 | 114 |
| 76,238 | 22 | 9  | 265 | 47 | 9  | 6 | 143 | 48 | 439 | 110 |
| 76,239 | 23 | 9  | 269 | 47 | 9  | 6 | 144 | 48 | 445 | 110 |
| 76,240 | 21 | 12 | 268 | 54 | 9  | 6 | 142 | 53 | 440 | 125 |
| 76,241 | 21 | 12 | 267 | 49 | 9  | 5 | 142 | 49 | 439 | 115 |
| 76,242 | 24 | 12 | 303 | 41 | 12 | 4 | 162 | 42 | 501 | 99  |
| 76,243 | 24 | 11 | 305 | 26 | 12 | 4 | 162 | 29 | 503 | 70  |
| 76,244 | 24 | 11 | 306 | 25 | 12 | 2 | 165 | 29 | 507 | 67  |
| 76,245 | 24 | 11 | 306 | 26 | 12 | 2 | 165 | 29 | 507 | 68  |
| 76,246 | 25 | 10 | 306 | 26 | 11 | 2 | 165 | 29 | 507 | 67  |
| 76,247 | 25 | 10 | 308 | 26 | 11 | 2 | 165 | 29 | 509 | 67  |
| 76,248 | 25 | 10 | 308 | 26 | 11 | 2 | 165 | 29 | 509 | 67  |

|        |    |    |     |     |    |    |     |     |     |     |
|--------|----|----|-----|-----|----|----|-----|-----|-----|-----|
| 76,249 | 25 | 10 | 308 | 25  | 11 | 2  | 165 | 29  | 509 | 66  |
| 76,250 | 25 | 10 | 307 | 25  | 11 | 2  | 164 | 27  | 507 | 64  |
| 76,251 | 26 | 10 | 302 | 29  | 11 | 2  | 163 | 30  | 502 | 71  |
| 76,252 | 26 | 10 | 291 | 34  | 11 | 2  | 152 | 34  | 480 | 80  |
| 76,253 | 25 | 9  | 292 | 37  | 11 | 2  | 152 | 37  | 480 | 85  |
| 76,254 | 25 | 9  | 292 | 40  | 11 | 4  | 152 | 37  | 480 | 90  |
| 76,255 | 25 | 9  | 293 | 43  | 11 | 5  | 152 | 41  | 481 | 98  |
| 76,256 | 25 | 10 | 297 | 47  | 11 | 5  | 154 | 41  | 487 | 103 |
| 76,257 | 25 | 10 | 296 | 46  | 11 | 5  | 154 | 41  | 486 | 102 |
| 76,258 | 25 | 16 | 295 | 75  | 11 | 8  | 153 | 95  | 484 | 194 |
| 76,259 | 25 | 15 | 295 | 75  | 11 | 8  | 153 | 95  | 484 | 193 |
| 76,260 | 25 | 16 | 295 | 94  | 11 | 9  | 153 | 100 | 484 | 219 |
| 76,261 | 25 | 16 | 296 | 99  | 11 | 9  | 153 | 100 | 485 | 224 |
| 76,262 | 25 | 16 | 297 | 100 | 11 | 9  | 154 | 100 | 487 | 225 |
| 76,263 | 25 | 17 | 297 | 107 | 11 | 10 | 154 | 102 | 487 | 236 |
| 76,264 | 23 | 17 | 297 | 107 | 11 | 10 | 154 | 102 | 485 | 236 |
| 76,265 | 23 | 17 | 297 | 109 | 11 | 10 | 154 | 102 | 485 | 238 |
| 76,266 | 23 | 17 | 297 | 109 | 11 | 10 | 156 | 102 | 487 | 238 |
| 76,267 | 23 | 17 | 303 | 111 | 11 | 10 | 156 | 106 | 493 | 244 |
| 76,268 | 23 | 18 | 310 | 120 | 12 | 10 | 157 | 112 | 502 | 260 |
| 76,269 | 24 | 19 | 308 | 139 | 13 | 10 | 160 | 114 | 505 | 282 |
| 76,270 | 23 | 19 | 298 | 139 | 13 | 11 | 151 | 115 | 485 | 284 |
| 76,271 | 23 | 19 | 252 | 140 | 12 | 11 | 146 | 121 | 433 | 291 |
| 76,272 | 23 | 19 | 227 | 142 | 12 | 11 | 145 | 121 | 407 | 293 |
| 76,273 | 23 | 19 | 226 | 143 | 12 | 11 | 144 | 122 | 405 | 295 |
| 76,274 | 23 | 19 | 222 | 145 | 12 | 12 | 143 | 122 | 400 | 298 |
| 76,275 | 23 | 19 | 211 | 145 | 12 | 12 | 137 | 122 | 383 | 298 |
| 76,276 | 23 | 19 | 209 | 145 | 12 | 12 | 136 | 122 | 380 | 298 |
| 76,277 | 23 | 19 | 209 | 145 | 12 | 12 | 136 | 122 | 380 | 298 |
| 76,278 | 23 | 19 | 209 | 146 | 12 | 12 | 136 | 120 | 380 | 297 |
| 76,279 | 23 | 19 | 209 | 146 | 12 | 12 | 136 | 120 | 380 | 297 |
| 76,280 | 23 | 19 | 209 | 145 | 12 | 12 | 136 | 120 | 380 | 296 |
| 76,281 | 23 | 19 | 208 | 144 | 12 | 12 | 136 | 119 | 379 | 294 |
| 76,282 | 23 | 19 | 208 | 144 | 12 | 12 | 136 | 119 | 379 | 294 |
| 76,283 | 23 | 19 | 205 | 143 | 11 | 12 | 136 | 119 | 375 | 293 |
| 76,284 | 22 | 19 | 202 | 142 | 11 | 12 | 136 | 119 | 371 | 292 |
| 76,285 | 16 | 15 | 132 | 138 | 8  | 10 | 97  | 107 | 253 | 270 |
| 76,286 | 15 | 15 | 129 | 138 | 8  | 10 | 93  | 107 | 245 | 270 |
| 76,287 | 12 | 14 | 110 | 135 | 9  | 10 | 79  | 104 | 210 | 263 |
| 76,288 | 12 | 14 | 106 | 134 | 9  | 10 | 75  | 104 | 202 | 262 |
| 76,289 | 12 | 14 | 105 | 135 | 9  | 10 | 75  | 106 | 201 | 265 |

|        |    |    |     |     |    |    |     |     |     |     |
|--------|----|----|-----|-----|----|----|-----|-----|-----|-----|
| 76,290 | 10 | 14 | 101 | 135 | 9  | 10 | 72  | 106 | 192 | 265 |
| 76,291 | 10 | 11 | 98  | 128 | 9  | 10 | 70  | 103 | 187 | 252 |
| 76,292 | 7  | 11 | 69  | 128 | 7  | 10 | 53  | 103 | 136 | 252 |
| 76,293 | 7  | 11 | 62  | 129 | 6  | 10 | 48  | 103 | 123 | 253 |
| 76,294 | 7  | 11 | 63  | 129 | 7  | 10 | 47  | 103 | 124 | 253 |
| 76,295 | 10 | 11 | 100 | 128 | 8  | 10 | 51  | 104 | 169 | 253 |
| 76,296 | 13 | 11 | 121 | 128 | 8  | 10 | 70  | 104 | 212 | 253 |
| 76,297 | 13 | 11 | 142 | 128 | 10 | 10 | 92  | 104 | 257 | 253 |
| 76,298 | 14 | 11 | 163 | 128 | 11 | 10 | 97  | 104 | 285 | 253 |
| 76,299 | 17 | 11 | 178 | 128 | 12 | 10 | 108 | 105 | 315 | 254 |
| 76,300 | 17 | 11 | 178 | 128 | 12 | 10 | 108 | 105 | 315 | 254 |
| 76,301 | 17 | 11 | 176 | 128 | 12 | 10 | 108 | 105 | 313 | 254 |
| 76,302 | 16 | 11 | 175 | 124 | 12 | 10 | 107 | 103 | 310 | 248 |
| 76,303 | 16 | 11 | 172 | 119 | 12 | 10 | 107 | 99  | 307 | 239 |
| 76,304 | 19 | 11 | 222 | 116 | 13 | 10 | 114 | 95  | 368 | 232 |
| 76,305 | 19 | 11 | 221 | 113 | 13 | 8  | 114 | 95  | 367 | 227 |
| 76,306 | 20 | 11 | 272 | 110 | 13 | 7  | 123 | 91  | 428 | 219 |
| 76,307 | 20 | 10 | 269 | 106 | 13 | 7  | 120 | 90  | 422 | 213 |
| 76,308 | 20 | 4  | 270 | 76  | 14 | 4  | 120 | 36  | 424 | 120 |
| 76,309 | 20 | 4  | 270 | 76  | 14 | 4  | 120 | 36  | 424 | 120 |
| 76,310 | 20 | 3  | 285 | 56  | 14 | 3  | 123 | 29  | 442 | 91  |
| 76,311 | 20 | 3  | 287 | 56  | 14 | 3  | 128 | 29  | 449 | 91  |
| 76,312 | 28 | 3  | 374 | 51  | 25 | 3  | 215 | 29  | 642 | 86  |
| 76,313 | 35 | 2  | 411 | 43  | 27 | 2  | 233 | 27  | 706 | 74  |
| 76,314 | 39 | 2  | 422 | 43  | 27 | 2  | 240 | 27  | 728 | 74  |
| 76,315 | 39 | 2  | 441 | 41  | 28 | 2  | 250 | 27  | 758 | 72  |
| 76,316 | 39 | 2  | 441 | 40  | 28 | 2  | 250 | 27  | 758 | 71  |
| 76,317 | 40 | 2  | 438 | 38  | 29 | 2  | 252 | 24  | 759 | 66  |
| 76,318 | 40 | 2  | 440 | 38  | 29 | 2  | 252 | 23  | 761 | 65  |
| 76,319 | 40 | 1  | 431 | 31  | 28 | 2  | 251 | 17  | 750 | 51  |
| 76,320 | 39 | 0  | 427 | 12  | 27 | 2  | 246 | 15  | 739 | 29  |
| 76,321 | 38 | 0  | 420 | 11  | 27 | 1  | 237 | 8   | 722 | 20  |
| 76,322 | 38 | 0  | 412 | 9   | 26 | 1  | 234 | 8   | 710 | 18  |
| 76,323 | 37 | 0  | 407 | 10  | 26 | 1  | 224 | 8   | 694 | 19  |
| 76,324 | 36 | 0  | 407 | 9   | 26 | 1  | 222 | 7   | 691 | 17  |
| 76,325 | 36 | 0  | 407 | 7   | 26 | 0  | 222 | 7   | 691 | 14  |
| 76,326 | 36 | 0  | 407 | 7   | 26 | 0  | 222 | 7   | 691 | 14  |
| 76,327 | 36 | 0  | 407 | 7   | 26 | 0  | 222 | 7   | 691 | 14  |
| 76,328 | 36 | 0  | 408 | 7   | 26 | 0  | 222 | 7   | 692 | 14  |
| 76,329 | 36 | 0  | 408 | 5   | 26 | 0  | 222 | 7   | 692 | 12  |
| 76,330 | 36 | 0  | 408 | 5   | 26 | 0  | 222 | 7   | 692 | 12  |

|        |    |   |     |    |    |   |     |    |     |     |
|--------|----|---|-----|----|----|---|-----|----|-----|-----|
| 76,331 | 36 | 0 | 408 | 5  | 26 | 0 | 222 | 7  | 692 | 12  |
| 76,332 | 36 | 0 | 409 | 5  | 26 | 0 | 222 | 7  | 693 | 12  |
| 76,333 | 36 | 0 | 408 | 5  | 26 | 1 | 224 | 7  | 694 | 13  |
| 76,334 | 35 | 0 | 410 | 5  | 26 | 1 | 225 | 7  | 696 | 13  |
| 76,335 | 35 | 0 | 410 | 5  | 26 | 1 | 225 | 7  | 696 | 13  |
| 76,336 | 35 | 0 | 409 | 5  | 26 | 1 | 221 | 7  | 691 | 13  |
| 76,337 | 35 | 0 | 409 | 5  | 26 | 1 | 221 | 7  | 691 | 13  |
| 76,338 | 35 | 0 | 409 | 6  | 24 | 1 | 221 | 7  | 689 | 14  |
| 76,339 | 35 | 0 | 409 | 6  | 24 | 2 | 221 | 7  | 689 | 15  |
| 76,340 | 35 | 0 | 409 | 5  | 24 | 2 | 223 | 5  | 691 | 12  |
| 76,341 | 35 | 0 | 414 | 5  | 25 | 2 | 227 | 5  | 701 | 12  |
| 76,342 | 35 | 0 | 414 | 5  | 25 | 2 | 228 | 3  | 702 | 10  |
| 76,343 | 36 | 0 | 416 | 5  | 24 | 2 | 230 | 3  | 706 | 10  |
| 76,344 | 36 | 0 | 420 | 7  | 24 | 2 | 234 | 4  | 714 | 13  |
| 76,345 | 36 | 0 | 427 | 7  | 26 | 2 | 237 | 6  | 726 | 15  |
| 76,346 | 41 | 0 | 416 | 7  | 28 | 2 | 238 | 7  | 723 | 16  |
| 76,347 | 40 | 0 | 419 | 13 | 28 | 2 | 230 | 18 | 717 | 33  |
| 76,348 | 45 | 1 | 437 | 13 | 28 | 2 | 220 | 21 | 730 | 37  |
| 76,349 | 44 | 1 | 420 | 19 | 28 | 2 | 217 | 22 | 709 | 44  |
| 76,350 | 41 | 1 | 416 | 22 | 27 | 2 | 207 | 21 | 691 | 46  |
| 76,351 | 41 | 3 | 457 | 24 | 29 | 3 | 220 | 21 | 747 | 51  |
| 76,352 | 38 | 3 | 435 | 30 | 30 | 3 | 225 | 22 | 728 | 58  |
| 76,353 | 38 | 3 | 432 | 31 | 30 | 3 | 225 | 21 | 725 | 58  |
| 76,354 | 38 | 3 | 390 | 32 | 30 | 3 | 217 | 21 | 675 | 59  |
| 76,355 | 38 | 3 | 384 | 32 | 30 | 3 | 216 | 21 | 668 | 59  |
| 76,356 | 37 | 3 | 381 | 32 | 30 | 3 | 216 | 21 | 664 | 59  |
| 76,357 | 37 | 3 | 380 | 32 | 30 | 3 | 216 | 21 | 663 | 59  |
| 76,358 | 37 | 3 | 380 | 32 | 30 | 3 | 216 | 21 | 663 | 59  |
| 76,359 | 37 | 3 | 379 | 32 | 29 | 3 | 216 | 21 | 661 | 59  |
| 76,360 | 37 | 3 | 374 | 32 | 29 | 3 | 215 | 22 | 655 | 60  |
| 76,361 | 37 | 3 | 365 | 33 | 29 | 3 | 213 | 22 | 644 | 61  |
| 76,362 | 37 | 7 | 363 | 56 | 29 | 5 | 209 | 32 | 638 | 100 |
| 76,363 | 29 | 7 | 276 | 65 | 18 | 5 | 123 | 36 | 446 | 113 |
| 76,364 | 22 | 8 | 239 | 72 | 16 | 5 | 103 | 38 | 380 | 123 |
| 76,365 | 18 | 8 | 229 | 72 | 16 | 6 | 96  | 38 | 359 | 124 |
| 76,366 | 18 | 8 | 210 | 74 | 15 | 6 | 87  | 38 | 330 | 126 |
| 76,367 | 18 | 9 | 210 | 77 | 15 | 6 | 85  | 38 | 328 | 130 |
| 76,368 | 17 | 9 | 207 | 78 | 14 | 6 | 83  | 38 | 321 | 131 |
| 76,369 | 17 | 9 | 205 | 78 | 14 | 7 | 83  | 38 | 319 | 132 |
| 76,370 | 17 | 9 | 205 | 77 | 14 | 8 | 83  | 38 | 319 | 132 |
| 76,371 | 17 | 9 | 205 | 79 | 14 | 8 | 83  | 38 | 319 | 134 |

|        |    |    |     |     |    |    |    |    |     |     |
|--------|----|----|-----|-----|----|----|----|----|-----|-----|
| 76,372 | 17 | 9  | 204 | 80  | 14 | 8  | 83 | 38 | 318 | 135 |
| 76,373 | 17 | 9  | 208 | 80  | 14 | 8  | 83 | 38 | 322 | 135 |
| 76,374 | 17 | 9  | 208 | 79  | 14 | 8  | 83 | 38 | 322 | 134 |
| 76,375 | 17 | 9  | 209 | 79  | 14 | 8  | 83 | 38 | 323 | 134 |
| 76,376 | 17 | 9  | 209 | 79  | 14 | 8  | 83 | 38 | 323 | 134 |
| 76,377 | 17 | 9  | 209 | 79  | 14 | 8  | 83 | 38 | 323 | 134 |
| 76,378 | 18 | 9  | 208 | 79  | 14 | 8  | 83 | 38 | 323 | 134 |
| 76,379 | 18 | 9  | 209 | 79  | 14 | 8  | 84 | 40 | 325 | 136 |
| 76,380 | 18 | 9  | 209 | 80  | 14 | 8  | 84 | 41 | 325 | 138 |
| 76,381 | 18 | 9  | 209 | 81  | 14 | 10 | 86 | 48 | 327 | 148 |
| 76,382 | 19 | 9  | 212 | 90  | 14 | 11 | 87 | 56 | 332 | 166 |
| 76,383 | 19 | 9  | 213 | 91  | 14 | 12 | 87 | 60 | 333 | 172 |
| 76,384 | 19 | 9  | 213 | 91  | 14 | 11 | 85 | 61 | 331 | 172 |
| 76,385 | 19 | 9  | 211 | 97  | 14 | 11 | 83 | 61 | 327 | 178 |
| 76,386 | 19 | 10 | 212 | 115 | 16 | 11 | 86 | 73 | 333 | 209 |
| 76,387 | 19 | 10 | 212 | 115 | 16 | 11 | 86 | 73 | 333 | 209 |
| 76,388 | 19 | 10 | 212 | 117 | 16 | 11 | 86 | 73 | 333 | 211 |
| 76,389 | 19 | 10 | 212 | 117 | 16 | 11 | 86 | 73 | 333 | 211 |
| 76,390 | 19 | 10 | 212 | 117 | 16 | 10 | 84 | 73 | 331 | 210 |
| 76,391 | 19 | 10 | 207 | 117 | 15 | 10 | 80 | 73 | 321 | 210 |
| 76,392 | 19 | 10 | 207 | 117 | 15 | 10 | 79 | 73 | 320 | 210 |
| 76,393 | 18 | 10 | 204 | 117 | 15 | 10 | 77 | 73 | 314 | 210 |
| 76,394 | 18 | 10 | 198 | 117 | 15 | 10 | 74 | 73 | 305 | 210 |
| 76,395 | 18 | 10 | 202 | 114 | 14 | 10 | 72 | 68 | 306 | 202 |
| 76,396 | 18 | 10 | 200 | 114 | 13 | 10 | 71 | 68 | 302 | 202 |
| 76,397 | 10 | 11 | 175 | 116 | 10 | 10 | 63 | 70 | 258 | 207 |
| 76,398 | 8  | 14 | 152 | 115 | 9  | 10 | 51 | 62 | 220 | 201 |
| 76,399 | 2  | 14 | 112 | 118 | 7  | 10 | 39 | 66 | 160 | 208 |
| 76,400 | 5  | 14 | 111 | 112 | 6  | 10 | 41 | 66 | 163 | 202 |
| 76,401 | 5  | 14 | 104 | 110 | 7  | 10 | 42 | 66 | 158 | 200 |
| 76,402 | 6  | 12 | 63  | 108 | 5  | 9  | 33 | 67 | 107 | 196 |
| 76,403 | 6  | 12 | 53  | 102 | 4  | 9  | 24 | 66 | 87  | 189 |
| 76,404 | 6  | 12 | 41  | 101 | 3  | 9  | 22 | 66 | 72  | 188 |
| 76,405 | 7  | 12 | 44  | 100 | 4  | 9  | 26 | 66 | 81  | 187 |
| 76,406 | 7  | 12 | 54  | 100 | 4  | 9  | 28 | 66 | 93  | 187 |
| 76,407 | 7  | 12 | 54  | 100 | 4  | 9  | 28 | 66 | 93  | 187 |
| 76,408 | 7  | 12 | 114 | 100 | 5  | 9  | 37 | 66 | 163 | 187 |
| 76,409 | 7  | 12 | 114 | 101 | 5  | 9  | 39 | 68 | 165 | 190 |
| 76,410 | 7  | 12 | 113 | 101 | 5  | 9  | 39 | 68 | 164 | 190 |
| 76,411 | 13 | 12 | 170 | 101 | 5  | 9  | 72 | 67 | 260 | 189 |
| 76,412 | 16 | 12 | 180 | 100 | 5  | 9  | 72 | 67 | 273 | 188 |



|        |    |   |     |    |    |   |     |    |     |     |
|--------|----|---|-----|----|----|---|-----|----|-----|-----|
| 76,413 | 16 | 8 | 189 | 77 | 7  | 7 | 84  | 57 | 296 | 149 |
| 76,414 | 17 | 7 | 189 | 61 | 7  | 7 | 85  | 51 | 298 | 126 |
| 76,415 | 17 | 7 | 189 | 61 | 7  | 7 | 84  | 52 | 297 | 127 |
| 76,416 | 19 | 7 | 197 | 61 | 10 | 6 | 88  | 52 | 314 | 126 |
| 76,417 | 20 | 7 | 203 | 59 | 10 | 6 | 92  | 52 | 325 | 124 |
| 76,418 | 20 | 6 | 203 | 55 | 10 | 6 | 92  | 54 | 325 | 121 |
| 76,419 | 20 | 6 | 203 | 55 | 10 | 6 | 92  | 54 | 325 | 121 |
| 76,420 | 20 | 6 | 204 | 55 | 10 | 5 | 93  | 54 | 327 | 120 |
| 76,421 | 20 | 6 | 204 | 55 | 10 | 4 | 93  | 54 | 327 | 119 |
| 76,422 | 20 | 6 | 205 | 52 | 10 | 4 | 93  | 55 | 328 | 117 |
| 76,423 | 20 | 6 | 203 | 52 | 10 | 4 | 93  | 55 | 326 | 117 |
| 76,424 | 20 | 6 | 203 | 52 | 10 | 4 | 93  | 55 | 326 | 117 |
| 76,425 | 20 | 6 | 202 | 52 | 10 | 4 | 93  | 54 | 325 | 116 |
| 76,426 | 20 | 6 | 202 | 52 | 10 | 4 | 93  | 54 | 325 | 116 |
| 76,427 | 20 | 6 | 202 | 53 | 10 | 4 | 93  | 55 | 325 | 118 |
| 76,428 | 20 | 6 | 202 | 53 | 10 | 4 | 93  | 55 | 325 | 118 |
| 76,429 | 19 | 6 | 202 | 53 | 10 | 4 | 93  | 55 | 324 | 118 |
| 76,430 | 19 | 6 | 201 | 56 | 10 | 2 | 92  | 51 | 322 | 115 |
| 76,431 | 19 | 6 | 201 | 58 | 10 | 2 | 90  | 51 | 320 | 117 |
| 76,432 | 18 | 6 | 199 | 58 | 10 | 2 | 89  | 51 | 316 | 117 |
| 76,433 | 18 | 6 | 198 | 51 | 10 | 1 | 89  | 43 | 315 | 101 |
| 76,434 | 20 | 6 | 200 | 51 | 10 | 0 | 90  | 39 | 320 | 96  |
| 76,435 | 20 | 6 | 200 | 51 | 10 | 0 | 90  | 39 | 320 | 96  |
| 76,436 | 20 | 5 | 199 | 28 | 9  | 0 | 91  | 27 | 319 | 60  |
| 76,437 | 20 | 5 | 199 | 29 | 8  | 0 | 89  | 27 | 316 | 61  |
| 76,438 | 22 | 5 | 202 | 29 | 8  | 0 | 95  | 27 | 327 | 61  |
| 76,439 | 22 | 5 | 204 | 28 | 8  | 0 | 95  | 27 | 329 | 60  |
| 76,440 | 22 | 5 | 206 | 28 | 8  | 0 | 95  | 27 | 331 | 60  |
| 76,441 | 22 | 5 | 206 | 28 | 8  | 0 | 95  | 27 | 331 | 60  |
| 76,442 | 22 | 5 | 209 | 29 | 8  | 0 | 93  | 28 | 332 | 62  |
| 76,443 | 22 | 5 | 209 | 29 | 8  | 0 | 95  | 28 | 334 | 62  |
| 76,444 | 22 | 5 | 209 | 29 | 10 | 0 | 96  | 28 | 337 | 62  |
| 76,445 | 22 | 5 | 209 | 29 | 10 | 1 | 96  | 28 | 337 | 63  |
| 76,446 | 22 | 5 | 208 | 29 | 11 | 1 | 105 | 28 | 346 | 63  |
| 76,447 | 22 | 5 | 208 | 30 | 11 | 1 | 105 | 29 | 346 | 65  |
| 76,448 | 22 | 4 | 207 | 28 | 11 | 1 | 105 | 27 | 345 | 60  |
| 76,449 | 23 | 1 | 214 | 23 | 12 | 1 | 114 | 24 | 363 | 49  |
| 76,450 | 23 | 0 | 219 | 20 | 12 | 1 | 114 | 17 | 368 | 38  |
| 76,451 | 20 | 0 | 216 | 19 | 12 | 1 | 111 | 16 | 359 | 36  |
| 76,452 | 25 | 0 | 238 | 19 | 15 | 1 | 117 | 15 | 395 | 35  |
| 76,453 | 24 | 0 | 236 | 20 | 15 | 1 | 112 | 15 | 387 | 36  |

|        |    |   |     |    |    |   |     |    |     |    |
|--------|----|---|-----|----|----|---|-----|----|-----|----|
| 76,454 | 24 | 0 | 236 | 20 | 15 | 1 | 113 | 15 | 388 | 36 |
| 76,455 | 23 | 0 | 234 | 21 | 14 | 1 | 112 | 15 | 383 | 37 |
| 76,456 | 23 | 0 | 230 | 21 | 14 | 1 | 115 | 15 | 382 | 37 |
| 76,457 | 25 | 0 | 239 | 21 | 14 | 1 | 132 | 15 | 410 | 37 |
| 76,458 | 25 | 0 | 180 | 21 | 13 | 1 | 123 | 15 | 341 | 37 |
| 76,459 | 24 | 0 | 164 | 20 | 13 | 1 | 109 | 14 | 310 | 35 |
| 76,460 | 24 | 0 | 153 | 22 | 13 | 1 | 107 | 14 | 297 | 37 |
| 76,461 | 19 | 0 | 130 | 23 | 13 | 1 | 96  | 17 | 258 | 41 |
| 76,462 | 17 | 0 | 120 | 23 | 13 | 1 | 96  | 17 | 246 | 41 |
| 76,463 | 17 | 0 | 120 | 29 | 13 | 1 | 95  | 17 | 245 | 47 |
| 76,464 | 17 | 0 | 111 | 35 | 11 | 1 | 84  | 18 | 223 | 54 |
| 76,465 | 16 | 0 | 109 | 39 | 11 | 1 | 82  | 21 | 218 | 61 |
| 76,466 | 14 | 0 | 104 | 41 | 8  | 1 | 78  | 20 | 204 | 62 |
| 76,467 | 14 | 0 | 103 | 42 | 8  | 1 | 79  | 20 | 204 | 63 |
| 76,468 | 14 | 0 | 97  | 45 | 8  | 1 | 75  | 18 | 194 | 64 |
| 76,469 | 14 | 0 | 97  | 45 | 8  | 1 | 75  | 18 | 194 | 64 |
| 76,470 | 14 | 1 | 100 | 47 | 8  | 1 | 75  | 19 | 197 | 68 |
| 76,471 | 14 | 1 | 100 | 48 | 8  | 1 | 75  | 19 | 197 | 69 |
| 76,472 | 14 | 1 | 110 | 47 | 8  | 1 | 83  | 19 | 215 | 68 |
| 76,473 | 14 | 1 | 109 | 47 | 9  | 1 | 83  | 18 | 215 | 67 |
| 76,474 | 15 | 1 | 114 | 49 | 9  | 1 | 88  | 18 | 226 | 69 |
| 76,475 | 15 | 1 | 114 | 49 | 9  | 1 | 88  | 18 | 226 | 69 |
| 76,476 | 17 | 2 | 120 | 49 | 10 | 1 | 101 | 18 | 248 | 70 |
| 76,477 | 17 | 2 | 120 | 49 | 10 | 1 | 101 | 18 | 248 | 70 |
| 76,478 | 17 | 2 | 129 | 48 | 10 | 1 | 111 | 18 | 267 | 69 |
| 76,479 | 19 | 2 | 135 | 48 | 11 | 1 | 112 | 18 | 277 | 69 |
| 76,480 | 19 | 2 | 135 | 49 | 11 | 1 | 112 | 18 | 277 | 70 |
| 76,481 | 22 | 2 | 163 | 44 | 14 | 1 | 135 | 13 | 334 | 60 |
| 76,482 | 22 | 2 | 163 | 42 | 14 | 1 | 135 | 13 | 334 | 58 |
| 76,483 | 25 | 2 | 200 | 42 | 17 | 1 | 203 | 16 | 445 | 61 |
| 76,484 | 25 | 4 | 200 | 44 | 17 | 1 | 203 | 17 | 445 | 66 |
| 76,485 | 30 | 4 | 233 | 44 | 19 | 1 | 251 | 16 | 533 | 65 |
| 76,486 | 30 | 4 | 238 | 44 | 19 | 1 | 250 | 16 | 537 | 65 |
| 76,487 | 30 | 4 | 238 | 40 | 19 | 2 | 251 | 16 | 538 | 62 |
| 76,488 | 30 | 4 | 238 | 40 | 19 | 2 | 251 | 16 | 538 | 62 |
| 76,489 | 28 | 5 | 235 | 40 | 19 | 2 | 245 | 16 | 527 | 63 |
| 76,490 | 28 | 5 | 233 | 40 | 19 | 2 | 245 | 16 | 525 | 63 |
| 76,491 | 28 | 5 | 231 | 40 | 19 | 2 | 245 | 16 | 523 | 63 |
| 76,492 | 28 | 5 | 228 | 40 | 19 | 2 | 245 | 16 | 520 | 63 |
| 76,493 | 28 | 5 | 228 | 39 | 19 | 2 | 245 | 15 | 520 | 61 |
| 76,494 | 28 | 5 | 228 | 39 | 19 | 2 | 243 | 15 | 518 | 61 |

|        |    |   |     |    |    |   |     |    |     |    |
|--------|----|---|-----|----|----|---|-----|----|-----|----|
| 76,495 | 28 | 5 | 228 | 39 | 17 | 2 | 242 | 15 | 515 | 61 |
| 76,496 | 28 | 5 | 225 | 40 | 17 | 1 | 239 | 15 | 509 | 61 |
| 76,497 | 28 | 5 | 221 | 40 | 16 | 1 | 233 | 15 | 498 | 61 |
| 76,498 | 27 | 5 | 222 | 39 | 16 | 1 | 231 | 14 | 496 | 59 |
| 76,499 | 27 | 5 | 220 | 39 | 16 | 1 | 230 | 14 | 493 | 59 |
| 76,500 | 27 | 5 | 216 | 39 | 15 | 1 | 227 | 14 | 485 | 59 |
| 76,501 | 30 | 5 | 213 | 39 | 15 | 1 | 227 | 14 | 485 | 59 |
| 76,502 | 30 | 5 | 213 | 39 | 15 | 1 | 226 | 15 | 484 | 60 |
| 76,503 | 25 | 5 | 188 | 39 | 11 | 1 | 218 | 15 | 442 | 60 |
| 76,504 | 25 | 5 | 192 | 38 | 12 | 1 | 219 | 15 | 448 | 59 |
| 76,505 | 25 | 6 | 192 | 37 | 12 | 1 | 218 | 15 | 447 | 59 |
| 76,506 | 25 | 6 | 190 | 37 | 12 | 1 | 218 | 16 | 445 | 60 |
| 76,507 | 25 | 7 | 187 | 38 | 12 | 1 | 213 | 17 | 437 | 63 |
| 76,508 | 23 | 7 | 177 | 44 | 12 | 1 | 196 | 19 | 408 | 71 |
| 76,509 | 23 | 7 | 176 | 45 | 12 | 1 | 194 | 19 | 405 | 72 |
| 76,510 | 23 | 7 | 174 | 47 | 12 | 1 | 194 | 18 | 403 | 73 |
| 76,511 | 23 | 7 | 172 | 45 | 12 | 1 | 188 | 18 | 395 | 71 |
| 76,512 | 23 | 7 | 169 | 44 | 12 | 1 | 188 | 15 | 392 | 67 |
| 76,513 | 23 | 7 | 171 | 39 | 12 | 1 | 189 | 15 | 395 | 62 |
| 76,514 | 23 | 7 | 171 | 39 | 12 | 1 | 189 | 15 | 395 | 62 |
| 76,515 | 23 | 7 | 171 | 33 | 12 | 1 | 191 | 14 | 397 | 55 |
| 76,516 | 23 | 7 | 174 | 30 | 12 | 1 | 191 | 11 | 400 | 49 |
| 76,517 | 23 | 7 | 174 | 29 | 12 | 1 | 191 | 11 | 400 | 48 |
| 76,518 | 23 | 7 | 171 | 28 | 12 | 1 | 191 | 11 | 397 | 47 |
| 76,519 | 22 | 8 | 171 | 26 | 12 | 1 | 191 | 11 | 396 | 46 |
| 76,520 | 22 | 8 | 171 | 27 | 12 | 1 | 191 | 11 | 396 | 47 |
| 76,521 | 22 | 7 | 181 | 25 | 12 | 1 | 195 | 10 | 410 | 43 |
| 76,522 | 23 | 7 | 190 | 24 | 13 | 1 | 206 | 10 | 432 | 42 |
| 76,523 | 23 | 7 | 190 | 26 | 12 | 1 | 206 | 11 | 431 | 45 |
| 76,524 | 22 | 7 | 193 | 30 | 12 | 1 | 204 | 12 | 431 | 50 |
| 76,525 | 22 | 7 | 189 | 28 | 12 | 1 | 201 | 12 | 424 | 48 |
| 76,526 | 20 | 6 | 192 | 29 | 11 | 1 | 195 | 12 | 418 | 48 |
| 76,527 | 20 | 6 | 200 | 30 | 12 | 1 | 197 | 12 | 429 | 49 |
| 76,528 | 20 | 6 | 192 | 30 | 12 | 1 | 187 | 11 | 411 | 48 |
| 76,529 | 19 | 6 | 192 | 32 | 11 | 1 | 188 | 11 | 410 | 50 |
| 76,530 | 18 | 8 | 188 | 37 | 11 | 1 | 188 | 13 | 405 | 59 |
| 76,531 | 17 | 8 | 171 | 42 | 9  | 1 | 175 | 14 | 372 | 65 |
| 76,532 | 15 | 8 | 165 | 44 | 8  | 1 | 167 | 14 | 355 | 67 |
| 76,533 | 13 | 8 | 128 | 47 | 6  | 1 | 120 | 16 | 267 | 72 |
| 76,534 | 12 | 8 | 127 | 45 | 5  | 1 | 99  | 13 | 243 | 67 |
| 76,535 | 5  | 6 | 106 | 42 | 3  | 1 | 68  | 12 | 182 | 61 |

|        |   |   |     |    |   |   |    |    |     |    |
|--------|---|---|-----|----|---|---|----|----|-----|----|
| 76,536 | 5 | 6 | 93  | 44 | 3 | 1 | 51 | 12 | 152 | 63 |
| 76,537 | 5 | 6 | 88  | 45 | 3 | 1 | 50 | 12 | 146 | 64 |
| 76,538 | 5 | 6 | 89  | 45 | 4 | 0 | 49 | 12 | 147 | 63 |
| 76,539 | 5 | 6 | 90  | 46 | 4 | 0 | 50 | 12 | 149 | 64 |
| 76,540 | 5 | 5 | 91  | 46 | 4 | 0 | 50 | 12 | 150 | 63 |
| 76,541 | 6 | 5 | 91  | 46 | 4 | 0 | 50 | 12 | 151 | 63 |
| 76,542 | 6 | 5 | 91  | 46 | 4 | 0 | 50 | 12 | 151 | 63 |
| 76,543 | 6 | 5 | 91  | 46 | 4 | 0 | 51 | 12 | 152 | 63 |
| 76,544 | 6 | 5 | 91  | 46 | 5 | 0 | 51 | 12 | 153 | 63 |
| 76,545 | 6 | 5 | 91  | 46 | 5 | 0 | 51 | 12 | 153 | 63 |
| 76,546 | 6 | 5 | 92  | 46 | 5 | 0 | 52 | 12 | 155 | 63 |
| 76,547 | 6 | 5 | 92  | 46 | 5 | 0 | 53 | 12 | 156 | 63 |
| 76,548 | 6 | 5 | 91  | 46 | 5 | 0 | 53 | 12 | 155 | 63 |
| 76,549 | 6 | 5 | 89  | 46 | 5 | 0 | 53 | 12 | 153 | 63 |
| 76,550 | 6 | 5 | 87  | 46 | 5 | 0 | 51 | 12 | 149 | 63 |
| 76,551 | 6 | 5 | 88  | 47 | 5 | 0 | 51 | 12 | 150 | 64 |
| 76,552 | 3 | 5 | 86  | 47 | 5 | 0 | 51 | 11 | 145 | 63 |
| 76,553 | 3 | 5 | 84  | 47 | 5 | 0 | 52 | 11 | 144 | 63 |
| 76,554 | 3 | 5 | 83  | 47 | 5 | 0 | 52 | 11 | 143 | 63 |
| 76,555 | 3 | 5 | 78  | 47 | 4 | 0 | 51 | 11 | 136 | 63 |
| 76,556 | 3 | 4 | 78  | 47 | 4 | 0 | 51 | 11 | 136 | 62 |
| 76,557 | 3 | 3 | 77  | 46 | 4 | 0 | 48 | 9  | 132 | 58 |
| 76,558 | 3 | 3 | 75  | 46 | 4 | 0 | 48 | 9  | 130 | 58 |
| 76,559 | 3 | 3 | 75  | 40 | 4 | 0 | 48 | 7  | 130 | 50 |
| 76,560 | 3 | 3 | 77  | 39 | 4 | 0 | 48 | 7  | 132 | 49 |
| 76,561 | 3 | 3 | 77  | 37 | 4 | 0 | 50 | 7  | 134 | 47 |
| 76,562 | 3 | 3 | 78  | 37 | 4 | 0 | 50 | 7  | 135 | 47 |
| 76,563 | 3 | 3 | 78  | 37 | 4 | 0 | 50 | 8  | 135 | 48 |
| 76,564 | 2 | 3 | 83  | 36 | 4 | 0 | 49 | 8  | 138 | 47 |
| 76,565 | 2 | 3 | 83  | 36 | 4 | 0 | 47 | 8  | 136 | 47 |
| 76,566 | 2 | 3 | 80  | 35 | 4 | 0 | 48 | 8  | 134 | 46 |
| 76,567 | 2 | 3 | 80  | 35 | 4 | 0 | 48 | 8  | 134 | 46 |
| 76,568 | 3 | 3 | 82  | 34 | 4 | 0 | 50 | 8  | 139 | 45 |
| 76,569 | 4 | 3 | 83  | 34 | 4 | 0 | 49 | 8  | 140 | 45 |
| 76,570 | 4 | 2 | 84  | 34 | 4 | 0 | 48 | 8  | 140 | 44 |
| 76,571 | 4 | 2 | 77  | 33 | 4 | 0 | 45 | 8  | 130 | 43 |
| 76,572 | 4 | 2 | 77  | 33 | 4 | 0 | 45 | 8  | 130 | 43 |
| 76,573 | 5 | 2 | 76  | 33 | 5 | 0 | 36 | 8  | 122 | 43 |
| 76,574 | 5 | 2 | 92  | 31 | 6 | 0 | 46 | 7  | 149 | 40 |
| 76,575 | 5 | 2 | 100 | 27 | 6 | 0 | 52 | 6  | 163 | 35 |
| 76,576 | 5 | 2 | 110 | 31 | 8 | 0 | 65 | 9  | 188 | 42 |

|        |    |    |     |    |    |   |     |    |     |    |
|--------|----|----|-----|----|----|---|-----|----|-----|----|
| 76,577 | 6  | 6  | 125 | 41 | 8  | 1 | 66  | 11 | 205 | 59 |
| 76,578 | 7  | 7  | 118 | 41 | 7  | 1 | 61  | 12 | 193 | 61 |
| 76,579 | 7  | 9  | 117 | 46 | 7  | 1 | 61  | 16 | 192 | 72 |
| 76,580 | 7  | 9  | 115 | 44 | 7  | 1 | 60  | 16 | 189 | 70 |
| 76,581 | 7  | 7  | 118 | 40 | 9  | 1 | 60  | 14 | 194 | 62 |
| 76,582 | 7  | 7  | 117 | 35 | 9  | 1 | 61  | 13 | 194 | 56 |
| 76,583 | 7  | 7  | 114 | 33 | 9  | 1 | 59  | 13 | 189 | 54 |
| 76,584 | 7  | 7  | 114 | 35 | 9  | 1 | 59  | 11 | 189 | 54 |
| 76,585 | 7  | 7  | 114 | 35 | 9  | 1 | 57  | 11 | 187 | 54 |
| 76,586 | 7  | 7  | 122 | 36 | 9  | 1 | 68  | 11 | 206 | 55 |
| 76,587 | 7  | 7  | 127 | 34 | 9  | 1 | 70  | 11 | 213 | 53 |
| 76,588 | 8  | 7  | 136 | 33 | 9  | 1 | 74  | 11 | 227 | 52 |
| 76,589 | 9  | 7  | 146 | 33 | 10 | 1 | 75  | 13 | 240 | 54 |
| 76,590 | 9  | 7  | 145 | 33 | 10 | 1 | 75  | 13 | 239 | 54 |
| 76,591 | 9  | 7  | 160 | 35 | 10 | 2 | 81  | 13 | 260 | 57 |
| 76,592 | 10 | 7  | 167 | 36 | 10 | 2 | 85  | 13 | 272 | 58 |
| 76,593 | 10 | 7  | 167 | 36 | 10 | 2 | 84  | 13 | 271 | 58 |
| 76,594 | 10 | 7  | 167 | 36 | 10 | 2 | 85  | 14 | 272 | 59 |
| 76,595 | 10 | 7  | 167 | 37 | 9  | 2 | 85  | 14 | 271 | 60 |
| 76,596 | 19 | 7  | 223 | 37 | 9  | 2 | 106 | 14 | 357 | 60 |
| 76,597 | 19 | 7  | 223 | 37 | 9  | 2 | 106 | 14 | 357 | 60 |
| 76,598 | 17 | 7  | 225 | 36 | 9  | 2 | 105 | 14 | 356 | 59 |
| 76,599 | 20 | 8  | 226 | 36 | 9  | 2 | 108 | 14 | 363 | 60 |
| 76,600 | 20 | 8  | 231 | 36 | 9  | 2 | 110 | 14 | 370 | 60 |
| 76,601 | 21 | 8  | 235 | 35 | 9  | 2 | 110 | 14 | 375 | 59 |
| 76,602 | 26 | 8  | 255 | 35 | 9  | 2 | 119 | 14 | 409 | 59 |
| 76,603 | 26 | 8  | 255 | 35 | 9  | 2 | 119 | 14 | 409 | 59 |
| 76,604 | 27 | 8  | 257 | 35 | 9  | 2 | 121 | 14 | 414 | 59 |
| 76,605 | 27 | 8  | 257 | 35 | 9  | 2 | 121 | 14 | 414 | 59 |
| 76,606 | 39 | 8  | 316 | 36 | 14 | 2 | 161 | 14 | 530 | 60 |
| 76,607 | 39 | 8  | 317 | 38 | 14 | 2 | 162 | 14 | 532 | 62 |
| 76,608 | 39 | 8  | 319 | 43 | 14 | 2 | 163 | 14 | 535 | 67 |
| 76,609 | 39 | 8  | 319 | 43 | 14 | 2 | 163 | 14 | 535 | 67 |
| 76,610 | 39 | 8  | 317 | 44 | 14 | 2 | 163 | 14 | 533 | 68 |
| 76,611 | 39 | 8  | 317 | 44 | 14 | 2 | 163 | 14 | 533 | 68 |
| 76,612 | 39 | 8  | 317 | 45 | 14 | 2 | 161 | 13 | 531 | 68 |
| 76,613 | 39 | 8  | 316 | 45 | 14 | 2 | 161 | 13 | 530 | 68 |
| 76,614 | 39 | 8  | 312 | 47 | 14 | 2 | 161 | 13 | 526 | 70 |
| 76,615 | 39 | 8  | 310 | 47 | 14 | 2 | 161 | 15 | 524 | 72 |
| 76,616 | 39 | 8  | 310 | 47 | 14 | 2 | 160 | 15 | 523 | 72 |
| 76,617 | 39 | 11 | 311 | 47 | 14 | 2 | 160 | 15 | 524 | 75 |

|        |    |    |     |     |    |   |     |    |     |     |
|--------|----|----|-----|-----|----|---|-----|----|-----|-----|
| 76,618 | 39 | 11 | 311 | 49  | 14 | 2 | 160 | 17 | 524 | 79  |
| 76,619 | 38 | 11 | 310 | 50  | 15 | 2 | 158 | 17 | 521 | 80  |
| 76,620 | 37 | 11 | 310 | 57  | 15 | 2 | 159 | 18 | 521 | 88  |
| 76,621 | 37 | 11 | 308 | 61  | 15 | 2 | 159 | 18 | 519 | 92  |
| 76,622 | 37 | 15 | 302 | 83  | 15 | 4 | 157 | 28 | 511 | 130 |
| 76,623 | 37 | 16 | 300 | 104 | 15 | 4 | 159 | 30 | 511 | 154 |
| 76,624 | 35 | 18 | 286 | 116 | 13 | 4 | 149 | 33 | 483 | 171 |
| 76,625 | 35 | 18 | 270 | 113 | 12 | 4 | 139 | 30 | 456 | 165 |
| 76,626 | 35 | 18 | 258 | 119 | 12 | 4 | 133 | 30 | 438 | 171 |
| 76,627 | 35 | 19 | 247 | 120 | 10 | 4 | 120 | 30 | 412 | 173 |
| 76,628 | 34 | 15 | 228 | 112 | 10 | 3 | 117 | 28 | 389 | 158 |
| 76,629 | 33 | 12 | 223 | 106 | 10 | 3 | 116 | 25 | 382 | 146 |
| 76,630 | 33 | 12 | 221 | 108 | 10 | 3 | 116 | 26 | 380 | 149 |
| 76,631 | 33 | 12 | 221 | 113 | 10 | 3 | 115 | 27 | 379 | 155 |
| 76,632 | 33 | 12 | 220 | 120 | 8  | 3 | 115 | 29 | 376 | 164 |
| 76,633 | 33 | 12 | 219 | 125 | 8  | 3 | 114 | 31 | 374 | 171 |
| 76,634 | 33 | 12 | 213 | 126 | 8  | 3 | 106 | 32 | 360 | 173 |
| 76,635 | 33 | 12 | 213 | 121 | 8  | 3 | 106 | 33 | 360 | 169 |
| 76,636 | 33 | 12 | 210 | 120 | 8  | 3 | 103 | 33 | 354 | 168 |
| 76,637 | 33 | 12 | 208 | 120 | 8  | 3 | 102 | 33 | 351 | 168 |
| 76,638 | 33 | 12 | 204 | 120 | 8  | 3 | 101 | 33 | 346 | 168 |
| 76,639 | 32 | 12 | 195 | 121 | 7  | 3 | 97  | 34 | 331 | 170 |
| 76,640 | 31 | 12 | 184 | 121 | 6  | 3 | 95  | 32 | 316 | 168 |
| 76,641 | 31 | 12 | 183 | 122 | 6  | 3 | 94  | 33 | 314 | 170 |
| 76,642 | 31 | 12 | 171 | 119 | 6  | 2 | 88  | 34 | 296 | 167 |
| 76,643 | 31 | 12 | 166 | 119 | 6  | 2 | 85  | 35 | 288 | 168 |
| 76,644 | 20 | 12 | 114 | 119 | 6  | 2 | 61  | 34 | 201 | 167 |
| 76,645 | 20 | 12 | 112 | 119 | 6  | 2 | 61  | 35 | 199 | 168 |
| 76,646 | 20 | 12 | 112 | 120 | 6  | 2 | 62  | 37 | 200 | 171 |
| 76,647 | 20 | 12 | 111 | 120 | 6  | 2 | 62  | 37 | 199 | 171 |
| 76,648 | 20 | 12 | 110 | 120 | 6  | 2 | 62  | 37 | 198 | 171 |
| 76,649 | 20 | 11 | 110 | 121 | 6  | 2 | 62  | 37 | 198 | 171 |
| 76,650 | 19 | 11 | 109 | 121 | 6  | 2 | 60  | 37 | 194 | 171 |
| 76,651 | 19 | 11 | 104 | 121 | 6  | 2 | 58  | 37 | 187 | 171 |
| 76,652 | 18 | 11 | 100 | 121 | 6  | 2 | 58  | 38 | 182 | 172 |
| 76,653 | 13 | 12 | 81  | 122 | 6  | 2 | 49  | 40 | 149 | 176 |
| 76,654 | 13 | 12 | 80  | 122 | 6  | 2 | 47  | 40 | 146 | 176 |
| 76,655 | 12 | 12 | 80  | 137 | 6  | 2 | 46  | 53 | 144 | 204 |
| 76,656 | 6  | 12 | 61  | 138 | 4  | 2 | 33  | 54 | 104 | 206 |
| 76,657 | 0  | 12 | 24  | 135 | 1  | 2 | 5   | 54 | 30  | 203 |
| 76,658 | 0  | 12 | 24  | 138 | 1  | 2 | 4   | 54 | 29  | 206 |

|        |    |    |     |     |   |   |     |    |     |     |
|--------|----|----|-----|-----|---|---|-----|----|-----|-----|
| 76,659 | 0  | 12 | 23  | 133 | 1 | 2 | 4   | 54 | 28  | 201 |
| 76,660 | 0  | 12 | 27  | 132 | 2 | 2 | 8   | 54 | 37  | 200 |
| 76,661 | 0  | 12 | 27  | 132 | 2 | 2 | 8   | 54 | 37  | 200 |
| 76,662 | 4  | 12 | 50  | 131 | 2 | 2 | 30  | 54 | 86  | 199 |
| 76,663 | 4  | 12 | 50  | 131 | 2 | 2 | 30  | 54 | 86  | 199 |
| 76,664 | 5  | 13 | 58  | 131 | 2 | 2 | 35  | 54 | 100 | 200 |
| 76,665 | 6  | 13 | 58  | 130 | 2 | 2 | 36  | 54 | 102 | 199 |
| 76,666 | 6  | 13 | 59  | 130 | 2 | 2 | 37  | 52 | 104 | 197 |
| 76,667 | 6  | 10 | 58  | 131 | 2 | 2 | 37  | 53 | 103 | 196 |
| 76,668 | 6  | 10 | 59  | 135 | 2 | 2 | 37  | 56 | 104 | 203 |
| 76,669 | 7  | 10 | 58  | 133 | 1 | 2 | 37  | 54 | 103 | 199 |
| 76,670 | 7  | 10 | 58  | 132 | 1 | 2 | 37  | 54 | 103 | 198 |
| 76,671 | 7  | 10 | 58  | 127 | 1 | 2 | 41  | 55 | 107 | 194 |
| 76,672 | 7  | 10 | 58  | 122 | 1 | 2 | 41  | 55 | 107 | 189 |
| 76,673 | 7  | 6  | 60  | 100 | 1 | 0 | 41  | 45 | 109 | 151 |
| 76,674 | 7  | 5  | 60  | 79  | 1 | 0 | 39  | 43 | 107 | 127 |
| 76,675 | 9  | 3  | 65  | 67  | 3 | 0 | 41  | 40 | 118 | 110 |
| 76,676 | 9  | 3  | 65  | 60  | 3 | 0 | 43  | 40 | 120 | 103 |
| 76,677 | 9  | 3  | 65  | 60  | 3 | 0 | 43  | 40 | 120 | 103 |
| 76,678 | 9  | 2  | 84  | 61  | 4 | 0 | 53  | 40 | 150 | 103 |
| 76,679 | 10 | 2  | 91  | 58  | 5 | 0 | 55  | 40 | 161 | 100 |
| 76,680 | 10 | 2  | 94  | 56  | 6 | 0 | 59  | 37 | 169 | 95  |
| 76,681 | 10 | 2  | 94  | 56  | 6 | 0 | 59  | 37 | 169 | 95  |
| 76,682 | 10 | 2  | 102 | 43  | 6 | 0 | 60  | 34 | 178 | 79  |
| 76,683 | 10 | 2  | 103 | 37  | 6 | 0 | 60  | 32 | 179 | 71  |
| 76,684 | 10 | 2  | 103 | 37  | 6 | 0 | 60  | 32 | 179 | 71  |
| 76,685 | 10 | 2  | 105 | 36  | 6 | 0 | 63  | 31 | 184 | 69  |
| 76,686 | 10 | 2  | 105 | 36  | 6 | 0 | 63  | 30 | 184 | 68  |
| 76,687 | 10 | 2  | 104 | 36  | 6 | 0 | 63  | 30 | 183 | 68  |
| 76,688 | 10 | 2  | 104 | 36  | 6 | 0 | 63  | 30 | 183 | 68  |
| 76,689 | 10 | 2  | 104 | 36  | 6 | 0 | 63  | 30 | 183 | 68  |
| 76,690 | 10 | 2  | 104 | 35  | 6 | 0 | 63  | 28 | 183 | 65  |
| 76,691 | 10 | 2  | 110 | 34  | 6 | 0 | 71  | 28 | 197 | 64  |
| 76,692 | 12 | 2  | 150 | 33  | 6 | 0 | 93  | 29 | 261 | 64  |
| 76,693 | 12 | 2  | 150 | 33  | 7 | 0 | 99  | 27 | 268 | 62  |
| 76,694 | 12 | 2  | 148 | 33  | 7 | 0 | 99  | 27 | 266 | 62  |
| 76,695 | 12 | 2  | 150 | 35  | 7 | 0 | 100 | 27 | 269 | 64  |
| 76,696 | 12 | 2  | 152 | 35  | 7 | 1 | 100 | 26 | 271 | 64  |
| 76,697 | 12 | 2  | 152 | 33  | 7 | 1 | 99  | 24 | 270 | 60  |
| 76,698 | 13 | 2  | 163 | 33  | 7 | 1 | 105 | 24 | 288 | 60  |
| 76,699 | 16 | 2  | 178 | 32  | 9 | 1 | 116 | 24 | 319 | 59  |

|        |    |   |     |    |    |   |     |    |     |     |
|--------|----|---|-----|----|----|---|-----|----|-----|-----|
| 76,700 | 16 | 2 | 180 | 32 | 9  | 1 | 119 | 26 | 324 | 61  |
| 76,701 | 16 | 2 | 180 | 32 | 9  | 1 | 119 | 26 | 324 | 61  |
| 76,702 | 16 | 2 | 192 | 32 | 9  | 1 | 127 | 26 | 344 | 61  |
| 76,703 | 16 | 1 | 198 | 31 | 9  | 1 | 127 | 23 | 350 | 56  |
| 76,704 | 17 | 1 | 202 | 31 | 9  | 1 | 128 | 23 | 356 | 56  |
| 76,705 | 17 | 1 | 202 | 31 | 9  | 1 | 128 | 23 | 356 | 56  |
| 76,706 | 17 | 1 | 201 | 17 | 9  | 1 | 128 | 11 | 355 | 30  |
| 76,707 | 17 | 1 | 214 | 17 | 9  | 1 | 128 | 14 | 368 | 33  |
| 76,708 | 17 | 1 | 213 | 22 | 9  | 1 | 128 | 23 | 367 | 47  |
| 76,709 | 17 | 2 | 212 | 21 | 9  | 1 | 128 | 23 | 366 | 47  |
| 76,710 | 27 | 3 | 264 | 23 | 18 | 1 | 159 | 27 | 468 | 54  |
| 76,711 | 28 | 3 | 280 | 29 | 18 | 1 | 185 | 29 | 511 | 62  |
| 76,712 | 27 | 3 | 262 | 30 | 18 | 1 | 168 | 29 | 475 | 63  |
| 76,713 | 30 | 3 | 262 | 33 | 18 | 1 | 173 | 29 | 483 | 66  |
| 76,714 | 29 | 3 | 255 | 38 | 18 | 1 | 174 | 36 | 476 | 78  |
| 76,715 | 28 | 2 | 255 | 40 | 18 | 1 | 173 | 37 | 474 | 80  |
| 76,716 | 28 | 4 | 255 | 43 | 18 | 1 | 172 | 39 | 473 | 87  |
| 76,717 | 28 | 4 | 253 | 45 | 18 | 1 | 172 | 39 | 471 | 89  |
| 76,718 | 28 | 4 | 253 | 50 | 18 | 1 | 172 | 44 | 471 | 99  |
| 76,719 | 28 | 4 | 252 | 48 | 18 | 1 | 173 | 41 | 471 | 94  |
| 76,720 | 27 | 4 | 253 | 48 | 18 | 1 | 174 | 41 | 472 | 94  |
| 76,721 | 27 | 4 | 253 | 48 | 18 | 1 | 174 | 41 | 472 | 94  |
| 76,722 | 27 | 4 | 254 | 47 | 18 | 1 | 171 | 39 | 470 | 91  |
| 76,723 | 27 | 4 | 254 | 47 | 18 | 1 | 171 | 39 | 470 | 91  |
| 76,724 | 27 | 4 | 254 | 47 | 18 | 1 | 171 | 39 | 470 | 91  |
| 76,725 | 26 | 4 | 247 | 47 | 16 | 1 | 168 | 39 | 457 | 91  |
| 76,726 | 25 | 4 | 247 | 48 | 16 | 1 | 168 | 42 | 456 | 95  |
| 76,727 | 25 | 4 | 249 | 51 | 17 | 2 | 167 | 42 | 458 | 99  |
| 76,728 | 26 | 5 | 237 | 52 | 16 | 2 | 162 | 42 | 441 | 101 |
| 76,729 | 26 | 5 | 231 | 50 | 16 | 2 | 156 | 45 | 429 | 102 |
| 76,730 | 25 | 5 | 224 | 50 | 15 | 2 | 154 | 45 | 418 | 102 |
| 76,731 | 25 | 6 | 226 | 51 | 14 | 3 | 151 | 46 | 416 | 106 |
| 76,732 | 25 | 7 | 222 | 51 | 14 | 3 | 151 | 49 | 412 | 110 |
| 76,733 | 25 | 7 | 219 | 51 | 14 | 3 | 151 | 49 | 409 | 110 |
| 76,734 | 47 | 7 | 336 | 51 | 21 | 3 | 211 | 49 | 615 | 110 |
| 76,735 | 48 | 7 | 340 | 51 | 22 | 3 | 212 | 49 | 622 | 110 |
| 76,736 | 57 | 7 | 398 | 51 | 27 | 3 | 252 | 49 | 734 | 110 |
| 76,737 | 58 | 7 | 405 | 51 | 28 | 3 | 254 | 49 | 745 | 110 |
| 76,738 | 59 | 7 | 413 | 54 | 30 | 3 | 267 | 52 | 769 | 116 |
| 76,739 | 59 | 7 | 411 | 54 | 30 | 3 | 261 | 52 | 761 | 116 |
| 76,740 | 59 | 7 | 411 | 54 | 30 | 3 | 260 | 53 | 760 | 117 |



|        |    |    |     |    |    |   |     |    |     |     |
|--------|----|----|-----|----|----|---|-----|----|-----|-----|
| 76,741 | 59 | 7  | 409 | 55 | 30 | 3 | 259 | 53 | 757 | 118 |
| 76,742 | 57 | 8  | 405 | 55 | 30 | 3 | 254 | 53 | 746 | 119 |
| 76,743 | 57 | 8  | 370 | 55 | 30 | 3 | 237 | 52 | 694 | 118 |
| 76,744 | 57 | 8  | 368 | 55 | 29 | 3 | 231 | 52 | 685 | 118 |
| 76,745 | 57 | 8  | 366 | 53 | 29 | 3 | 230 | 52 | 682 | 116 |
| 76,746 | 58 | 8  | 366 | 53 | 29 | 3 | 230 | 54 | 683 | 118 |
| 76,747 | 58 | 8  | 364 | 53 | 29 | 2 | 230 | 54 | 681 | 117 |
| 76,748 | 58 | 8  | 363 | 54 | 29 | 2 | 230 | 56 | 680 | 120 |
| 76,749 | 57 | 8  | 352 | 54 | 29 | 2 | 224 | 57 | 662 | 121 |
| 76,750 | 54 | 8  | 339 | 54 | 27 | 2 | 213 | 55 | 633 | 119 |
| 76,751 | 54 | 8  | 336 | 54 | 27 | 2 | 210 | 55 | 627 | 119 |
| 76,752 | 54 | 8  | 325 | 54 | 27 | 2 | 207 | 55 | 613 | 119 |
| 76,753 | 54 | 8  | 322 | 54 | 27 | 2 | 207 | 55 | 610 | 119 |
| 76,754 | 54 | 8  | 321 | 54 | 27 | 2 | 207 | 55 | 609 | 119 |
| 76,755 | 54 | 8  | 322 | 56 | 27 | 2 | 209 | 55 | 612 | 121 |
| 76,756 | 54 | 9  | 326 | 59 | 27 | 2 | 209 | 58 | 616 | 128 |
| 76,757 | 54 | 9  | 312 | 62 | 27 | 2 | 208 | 58 | 601 | 131 |
| 76,758 | 58 | 10 | 360 | 76 | 29 | 3 | 256 | 64 | 703 | 153 |
| 76,759 | 59 | 10 | 366 | 79 | 29 | 3 | 263 | 59 | 717 | 151 |
| 76,760 | 52 | 9  | 337 | 82 | 23 | 3 | 242 | 62 | 654 | 156 |
| 76,761 | 51 | 9  | 327 | 87 | 20 | 3 | 236 | 63 | 634 | 162 |
| 76,762 | 50 | 9  | 319 | 83 | 19 | 4 | 207 | 63 | 595 | 159 |
| 76,763 | 47 | 10 | 319 | 88 | 19 | 4 | 206 | 66 | 591 | 168 |
| 76,764 | 45 | 12 | 318 | 89 | 19 | 4 | 199 | 68 | 581 | 173 |
| 76,765 | 45 | 12 | 317 | 84 | 19 | 4 | 194 | 62 | 575 | 162 |
| 76,766 | 47 | 12 | 331 | 97 | 19 | 4 | 198 | 66 | 595 | 179 |
| 76,767 | 47 | 11 | 331 | 96 | 19 | 5 | 198 | 64 | 595 | 176 |
| 76,768 | 47 | 11 | 331 | 96 | 19 | 5 | 198 | 64 | 595 | 176 |
| 76,769 | 48 | 11 | 342 | 90 | 19 | 5 | 203 | 58 | 612 | 164 |
| 76,770 | 48 | 11 | 350 | 88 | 21 | 5 | 208 | 58 | 627 | 162 |
| 76,771 | 49 | 11 | 358 | 87 | 21 | 5 | 210 | 59 | 638 | 162 |
| 76,772 | 49 | 11 | 362 | 87 | 21 | 5 | 212 | 60 | 644 | 163 |
| 76,773 | 49 | 11 | 360 | 87 | 21 | 5 | 211 | 60 | 641 | 163 |
| 76,774 | 49 | 11 | 358 | 87 | 21 | 5 | 211 | 60 | 639 | 163 |
| 76,775 | 49 | 11 | 359 | 87 | 21 | 5 | 211 | 60 | 640 | 163 |
| 76,776 | 49 | 11 | 363 | 86 | 21 | 5 | 214 | 57 | 647 | 159 |
| 76,777 | 49 | 11 | 363 | 86 | 21 | 5 | 214 | 57 | 647 | 159 |
| 76,778 | 50 | 10 | 364 | 82 | 20 | 4 | 214 | 57 | 648 | 153 |
| 76,779 | 49 | 10 | 364 | 82 | 20 | 4 | 215 | 54 | 648 | 150 |
| 76,780 | 49 | 10 | 364 | 82 | 20 | 4 | 215 | 54 | 648 | 150 |
| 76,781 | 50 | 9  | 359 | 82 | 20 | 3 | 216 | 53 | 645 | 147 |

|        |    |    |     |     |    |    |     |     |     |     |
|--------|----|----|-----|-----|----|----|-----|-----|-----|-----|
| 76,782 | 50 | 11 | 361 | 97  | 20 | 3  | 217 | 65  | 648 | 176 |
| 76,783 | 43 | 10 | 333 | 105 | 18 | 3  | 192 | 64  | 586 | 182 |
| 76,784 | 31 | 10 | 320 | 105 | 17 | 3  | 180 | 65  | 548 | 183 |
| 76,785 | 31 | 10 | 354 | 131 | 13 | 7  | 174 | 79  | 572 | 227 |
| 76,786 | 30 | 10 | 365 | 136 | 13 | 9  | 179 | 83  | 587 | 238 |
| 76,787 | 21 | 11 | 306 | 173 | 8  | 10 | 139 | 118 | 474 | 312 |
| 76,788 | 20 | 14 | 298 | 197 | 7  | 11 | 137 | 126 | 462 | 348 |
| 76,789 | 19 | 14 | 290 | 196 | 5  | 11 | 126 | 124 | 440 | 345 |
| 76,790 | 19 | 16 | 290 | 219 | 5  | 12 | 126 | 128 | 440 | 375 |
| 76,791 | 19 | 16 | 290 | 219 | 5  | 12 | 126 | 128 | 440 | 375 |
| 76,792 | 19 | 15 | 290 | 219 | 5  | 12 | 126 | 128 | 440 | 374 |
| 76,793 | 19 | 15 | 290 | 219 | 5  | 12 | 126 | 128 | 440 | 374 |
| 76,794 | 19 | 15 | 289 | 219 | 5  | 12 | 126 | 128 | 439 | 374 |
| 76,795 | 19 | 15 | 289 | 219 | 5  | 12 | 126 | 128 | 439 | 374 |
| 76,796 | 19 | 15 | 288 | 221 | 6  | 12 | 126 | 128 | 439 | 376 |
| 76,797 | 18 | 15 | 293 | 221 | 7  | 12 | 138 | 127 | 456 | 375 |
| 76,798 | 18 | 15 | 293 | 221 | 7  | 12 | 138 | 127 | 456 | 375 |
| 76,799 | 18 | 15 | 298 | 220 | 7  | 12 | 138 | 125 | 461 | 372 |
| 76,800 | 18 | 15 | 298 | 220 | 7  | 12 | 137 | 124 | 460 | 371 |
| 76,801 | 18 | 15 | 296 | 220 | 7  | 12 | 137 | 124 | 458 | 371 |
| 76,802 | 18 | 15 | 296 | 221 | 7  | 12 | 137 | 124 | 458 | 372 |
| 76,803 | 18 | 15 | 295 | 221 | 7  | 12 | 132 | 124 | 452 | 372 |
| 76,804 | 18 | 15 | 294 | 221 | 7  | 12 | 132 | 123 | 451 | 371 |
| 76,805 | 18 | 15 | 293 | 221 | 7  | 12 | 132 | 123 | 450 | 371 |
| 76,806 | 18 | 14 | 288 | 212 | 7  | 12 | 130 | 119 | 443 | 357 |
| 76,807 | 18 | 14 | 283 | 213 | 7  | 12 | 130 | 122 | 438 | 361 |
| 76,808 | 15 | 14 | 257 | 213 | 5  | 12 | 103 | 122 | 380 | 361 |
| 76,809 | 12 | 13 | 237 | 198 | 5  | 11 | 83  | 113 | 337 | 335 |
| 76,810 | 11 | 13 | 220 | 189 | 5  | 11 | 74  | 107 | 310 | 320 |
| 76,811 | 11 | 14 | 227 | 200 | 5  | 12 | 76  | 118 | 319 | 344 |
| 76,812 | 11 | 13 | 227 | 202 | 5  | 12 | 80  | 116 | 323 | 343 |
| 76,813 | 11 | 13 | 219 | 201 | 5  | 11 | 79  | 117 | 314 | 342 |
| 76,814 | 12 | 12 | 230 | 198 | 6  | 11 | 83  | 115 | 331 | 336 |
| 76,815 | 22 | 10 | 264 | 208 | 10 | 11 | 101 | 121 | 397 | 350 |
| 76,816 | 20 | 10 | 256 | 208 | 10 | 12 | 97  | 119 | 383 | 349 |
| 76,817 | 21 | 10 | 259 | 202 | 13 | 12 | 104 | 120 | 397 | 344 |
| 76,818 | 28 | 10 | 384 | 206 | 18 | 12 | 199 | 129 | 629 | 357 |
| 76,819 | 32 | 10 | 414 | 206 | 21 | 12 | 222 | 129 | 689 | 357 |
| 76,820 | 32 | 10 | 419 | 208 | 21 | 12 | 225 | 132 | 697 | 362 |
| 76,821 | 36 | 10 | 432 | 211 | 23 | 12 | 239 | 132 | 730 | 365 |
| 76,822 | 35 | 10 | 423 | 215 | 23 | 12 | 237 | 133 | 718 | 370 |

|        |    |    |     |     |    |    |     |     |       |     |
|--------|----|----|-----|-----|----|----|-----|-----|-------|-----|
| 76,823 | 35 | 10 | 419 | 216 | 23 | 12 | 235 | 132 | 712   | 370 |
| 76,824 | 35 | 10 | 431 | 217 | 23 | 12 | 240 | 135 | 729   | 374 |
| 76,825 | 35 | 10 | 431 | 219 | 23 | 12 | 240 | 137 | 729   | 378 |
| 76,826 | 35 | 10 | 430 | 219 | 23 | 12 | 240 | 137 | 728   | 378 |
| 76,827 | 38 | 10 | 456 | 219 | 26 | 12 | 256 | 137 | 776   | 378 |
| 76,828 | 38 | 10 | 466 | 219 | 26 | 12 | 257 | 137 | 787   | 378 |
| 76,829 | 37 | 10 | 463 | 219 | 26 | 12 | 256 | 138 | 782   | 379 |
| 76,830 | 37 | 10 | 465 | 232 | 26 | 15 | 257 | 155 | 785   | 412 |
| 76,831 | 37 | 13 | 465 | 278 | 26 | 15 | 258 | 196 | 786   | 502 |
| 76,832 | 37 | 14 | 470 | 309 | 26 | 16 | 262 | 204 | 795   | 543 |
| 76,833 | 37 | 12 | 469 | 306 | 26 | 16 | 261 | 195 | 793   | 529 |
| 76,834 | 35 | 12 | 427 | 299 | 26 | 16 | 257 | 193 | 745   | 520 |
| 76,835 | 35 | 12 | 417 | 303 | 26 | 16 | 256 | 195 | 734   | 526 |
| 76,836 | 34 | 12 | 394 | 286 | 26 | 14 | 267 | 185 | 721   | 497 |
| 76,837 | 34 | 12 | 377 | 282 | 25 | 12 | 258 | 181 | 694   | 487 |
| 76,838 | 38 | 11 | 412 | 246 | 25 | 11 | 280 | 146 | 755   | 414 |
| 76,839 | 42 | 8  | 459 | 223 | 27 | 10 | 337 | 138 | 865   | 379 |
| 76,840 | 42 | 8  | 462 | 221 | 27 | 10 | 340 | 137 | 871   | 376 |
| 76,841 | 42 | 7  | 462 | 199 | 27 | 10 | 340 | 135 | 871   | 351 |
| 76,842 | 42 | 7  | 462 | 202 | 27 | 10 | 340 | 137 | 871   | 356 |
| 76,843 | 42 | 9  | 462 | 220 | 27 | 11 | 340 | 163 | 871   | 403 |
| 76,844 | 42 | 9  | 462 | 222 | 27 | 11 | 340 | 165 | 871   | 407 |
| 76,845 | 42 | 9  | 485 | 223 | 28 | 11 | 359 | 165 | 914   | 408 |
| 76,846 | 42 | 9  | 490 | 259 | 27 | 11 | 360 | 186 | 919   | 465 |
| 76,847 | 42 | 11 | 489 | 274 | 27 | 14 | 360 | 197 | 918   | 496 |
| 76,848 | 42 | 11 | 485 | 275 | 26 | 14 | 349 | 196 | 902   | 496 |
| 76,849 | 42 | 11 | 500 | 276 | 27 | 14 | 366 | 196 | 935   | 497 |
| 76,850 | 53 | 11 | 538 | 284 | 28 | 14 | 420 | 198 | 1,039 | 507 |
| 76,851 | 53 | 16 | 538 | 295 | 28 | 14 | 420 | 209 | 1,039 | 534 |
| 76,852 | 53 | 16 | 538 | 295 | 28 | 14 | 420 | 209 | 1,039 | 534 |
| 76,853 | 53 | 16 | 545 | 294 | 28 | 14 | 423 | 209 | 1,049 | 533 |
| 76,854 | 53 | 16 | 546 | 294 | 28 | 14 | 423 | 209 | 1,050 | 533 |
| 76,855 | 53 | 16 | 546 | 294 | 28 | 14 | 424 | 208 | 1,051 | 532 |
| 76,856 | 53 | 16 | 545 | 294 | 28 | 14 | 424 | 208 | 1,050 | 532 |
| 76,857 | 53 | 16 | 545 | 293 | 28 | 14 | 424 | 205 | 1,050 | 528 |
| 76,858 | 53 | 16 | 546 | 293 | 28 | 14 | 425 | 205 | 1,052 | 528 |
| 76,859 | 53 | 16 | 544 | 293 | 28 | 14 | 423 | 205 | 1,048 | 528 |
| 76,860 | 53 | 16 | 549 | 295 | 28 | 14 | 425 | 203 | 1,055 | 528 |
| 76,861 | 53 | 16 | 549 | 289 | 28 | 14 | 425 | 202 | 1,055 | 521 |
| 76,862 | 53 | 15 | 541 | 263 | 28 | 13 | 421 | 189 | 1,043 | 480 |
| 76,863 | 53 | 15 | 540 | 263 | 28 | 13 | 418 | 188 | 1,039 | 479 |

|        |    |    |     |     |    |    |     |     |       |     |
|--------|----|----|-----|-----|----|----|-----|-----|-------|-----|
| 76,864 | 53 | 15 | 536 | 253 | 28 | 13 | 417 | 185 | 1,034 | 466 |
| 76,865 | 52 | 15 | 524 | 263 | 27 | 13 | 412 | 186 | 1,015 | 477 |
| 76,866 | 41 | 15 | 488 | 270 | 23 | 13 | 396 | 189 | 948   | 487 |
| 76,867 | 42 | 16 | 486 | 297 | 20 | 12 | 397 | 196 | 945   | 521 |
| 76,868 | 41 | 16 | 482 | 297 | 20 | 13 | 392 | 201 | 935   | 527 |
| 76,869 | 34 | 16 | 359 | 292 | 14 | 12 | 301 | 196 | 708   | 516 |
| 76,870 | 30 | 16 | 322 | 306 | 11 | 12 | 275 | 193 | 638   | 527 |
| 76,871 | 30 | 17 | 310 | 320 | 10 | 12 | 267 | 197 | 617   | 546 |
| 76,872 | 26 | 18 | 298 | 324 | 8  | 12 | 253 | 197 | 585   | 551 |
| 76,873 | 26 | 18 | 293 | 320 | 8  | 12 | 253 | 195 | 580   | 545 |
| 76,874 | 26 | 18 | 291 | 317 | 8  | 12 | 249 | 191 | 574   | 538 |
| 76,875 | 26 | 18 | 290 | 320 | 8  | 12 | 248 | 193 | 572   | 543 |
| 76,876 | 25 | 18 | 282 | 324 | 5  | 12 | 240 | 199 | 552   | 553 |
| 76,877 | 24 | 18 | 271 | 324 | 5  | 12 | 238 | 200 | 538   | 554 |
| 76,878 | 23 | 18 | 264 | 325 | 5  | 12 | 233 | 200 | 525   | 555 |
| 76,879 | 23 | 18 | 254 | 324 | 5  | 12 | 232 | 198 | 514   | 552 |
| 76,880 | 23 | 18 | 252 | 311 | 5  | 9  | 230 | 181 | 510   | 519 |
| 76,881 | 23 | 15 | 254 | 266 | 5  | 9  | 231 | 140 | 513   | 430 |
| 76,882 | 23 | 15 | 254 | 266 | 5  | 9  | 231 | 140 | 513   | 430 |
| 76,883 | 22 | 14 | 249 | 234 | 5  | 8  | 226 | 132 | 502   | 388 |
| 76,884 | 22 | 14 | 248 | 222 | 5  | 8  | 227 | 129 | 502   | 373 |
| 76,885 | 22 | 14 | 250 | 221 | 5  | 8  | 228 | 129 | 505   | 372 |
| 76,886 | 24 | 14 | 252 | 217 | 5  | 8  | 229 | 126 | 510   | 365 |
| 76,887 | 24 | 14 | 215 | 207 | 5  | 6  | 204 | 123 | 448   | 350 |
| 76,888 | 20 | 14 | 180 | 206 | 5  | 6  | 182 | 123 | 387   | 349 |
| 76,889 | 20 | 14 | 168 | 207 | 5  | 7  | 178 | 123 | 371   | 351 |
| 76,890 | 16 | 14 | 133 | 206 | 3  | 7  | 126 | 121 | 278   | 348 |
| 76,891 | 16 | 14 | 130 | 206 | 3  | 7  | 124 | 121 | 273   | 348 |
| 76,892 | 16 | 11 | 128 | 145 | 3  | 5  | 121 | 69  | 268   | 230 |
| 76,893 | 16 | 11 | 127 | 144 | 2  | 5  | 120 | 69  | 265   | 229 |
| 76,894 | 16 | 11 | 108 | 144 | 2  | 5  | 109 | 71  | 235   | 231 |
| 76,895 | 16 | 11 | 108 | 144 | 2  | 5  | 109 | 71  | 235   | 231 |
| 76,896 | 16 | 11 | 108 | 146 | 2  | 5  | 108 | 75  | 234   | 237 |
| 76,897 | 16 | 11 | 103 | 146 | 3  | 5  | 107 | 78  | 229   | 240 |
| 76,898 | 16 | 9  | 104 | 129 | 3  | 2  | 112 | 67  | 235   | 207 |
| 76,899 | 16 | 9  | 84  | 127 | 2  | 2  | 95  | 66  | 197   | 204 |
| 76,900 | 16 | 9  | 76  | 127 | 2  | 2  | 93  | 66  | 187   | 204 |
| 76,901 | 5  | 9  | 45  | 119 | 1  | 2  | 41  | 64  | 92    | 194 |
| 76,902 | 5  | 4  | 40  | 108 | 2  | 2  | 39  | 53  | 86    | 167 |
| 76,903 | 5  | 4  | 39  | 108 | 2  | 2  | 38  | 53  | 84    | 167 |
| 76,904 | 5  | 4  | 38  | 108 | 2  | 2  | 39  | 53  | 84    | 167 |

|        |    |   |     |     |    |   |     |    |     |     |
|--------|----|---|-----|-----|----|---|-----|----|-----|-----|
| 76,905 | 6  | 4 | 48  | 108 | 2  | 2 | 45  | 53 | 101 | 167 |
| 76,906 | 7  | 4 | 50  | 108 | 2  | 2 | 44  | 53 | 103 | 167 |
| 76,907 | 7  | 4 | 55  | 109 | 2  | 2 | 48  | 53 | 112 | 168 |
| 76,908 | 6  | 4 | 55  | 109 | 2  | 2 | 49  | 53 | 112 | 168 |
| 76,909 | 6  | 4 | 53  | 114 | 2  | 2 | 51  | 55 | 112 | 175 |
| 76,910 | 6  | 4 | 50  | 114 | 2  | 2 | 49  | 56 | 107 | 176 |
| 76,911 | 6  | 4 | 49  | 112 | 2  | 2 | 49  | 56 | 106 | 174 |
| 76,912 | 6  | 4 | 50  | 114 | 3  | 3 | 49  | 58 | 108 | 179 |
| 76,913 | 6  | 5 | 50  | 120 | 3  | 3 | 49  | 67 | 108 | 195 |
| 76,914 | 6  | 5 | 50  | 121 | 3  | 3 | 48  | 67 | 107 | 196 |
| 76,915 | 6  | 5 | 50  | 120 | 3  | 3 | 48  | 62 | 107 | 190 |
| 76,916 | 6  | 5 | 51  | 110 | 3  | 3 | 48  | 61 | 108 | 179 |
| 76,917 | 7  | 5 | 55  | 104 | 3  | 3 | 48  | 58 | 113 | 170 |
| 76,918 | 6  | 4 | 52  | 69  | 3  | 2 | 45  | 41 | 106 | 116 |
| 76,919 | 6  | 4 | 52  | 70  | 3  | 2 | 45  | 42 | 106 | 118 |
| 76,920 | 5  | 3 | 51  | 68  | 3  | 3 | 41  | 42 | 100 | 116 |
| 76,921 | 5  | 3 | 47  | 58  | 3  | 3 | 37  | 43 | 92  | 107 |
| 76,922 | 7  | 2 | 51  | 46  | 3  | 3 | 37  | 40 | 98  | 91  |
| 76,923 | 10 | 1 | 61  | 41  | 3  | 3 | 38  | 43 | 112 | 88  |
| 76,924 | 10 | 1 | 59  | 41  | 3  | 3 | 37  | 43 | 109 | 88  |
| 76,925 | 18 | 2 | 110 | 44  | 3  | 3 | 62  | 44 | 193 | 93  |
| 76,926 | 18 | 2 | 110 | 43  | 3  | 3 | 61  | 43 | 192 | 91  |
| 76,927 | 18 | 2 | 107 | 39  | 3  | 3 | 59  | 37 | 187 | 81  |
| 76,928 | 35 | 2 | 244 | 40  | 10 | 3 | 152 | 36 | 441 | 81  |
| 76,929 | 36 | 2 | 305 | 39  | 18 | 3 | 172 | 36 | 531 | 80  |
| 76,930 | 37 | 3 | 341 | 42  | 21 | 3 | 192 | 36 | 591 | 84  |
| 76,931 | 37 | 3 | 350 | 44  | 21 | 3 | 198 | 36 | 606 | 86  |
| 76,932 | 37 | 3 | 354 | 44  | 21 | 3 | 197 | 36 | 609 | 86  |
| 76,933 | 37 | 3 | 363 | 45  | 21 | 3 | 200 | 39 | 621 | 90  |
| 76,934 | 37 | 3 | 368 | 54  | 22 | 3 | 200 | 40 | 627 | 100 |
| 76,935 | 37 | 3 | 366 | 54  | 22 | 3 | 200 | 40 | 625 | 100 |
| 76,936 | 37 | 3 | 366 | 57  | 22 | 3 | 200 | 42 | 625 | 105 |
| 76,937 | 35 | 3 | 364 | 58  | 22 | 3 | 199 | 43 | 620 | 107 |
| 76,938 | 45 | 3 | 472 | 62  | 23 | 3 | 219 | 43 | 759 | 111 |
| 76,939 | 46 | 3 | 513 | 65  | 23 | 3 | 249 | 43 | 831 | 114 |
| 76,940 | 46 | 3 | 513 | 64  | 23 | 2 | 248 | 44 | 830 | 113 |
| 76,941 | 47 | 3 | 516 | 64  | 23 | 2 | 249 | 44 | 835 | 113 |
| 76,942 | 47 | 3 | 518 | 64  | 23 | 2 | 248 | 44 | 836 | 113 |
| 76,943 | 47 | 3 | 522 | 67  | 23 | 2 | 249 | 45 | 841 | 117 |
| 76,944 | 47 | 4 | 522 | 78  | 23 | 2 | 249 | 46 | 841 | 130 |
| 76,945 | 49 | 7 | 538 | 87  | 24 | 2 | 257 | 50 | 868 | 146 |

|        |    |   |     |     |    |   |     |    |       |     |
|--------|----|---|-----|-----|----|---|-----|----|-------|-----|
| 76,946 | 49 | 7 | 540 | 93  | 24 | 2 | 258 | 52 | 871   | 154 |
| 76,947 | 49 | 7 | 543 | 91  | 24 | 2 | 256 | 48 | 872   | 148 |
| 76,948 | 49 | 7 | 548 | 91  | 23 | 2 | 257 | 45 | 877   | 145 |
| 76,949 | 49 | 7 | 547 | 91  | 23 | 2 | 251 | 46 | 870   | 146 |
| 76,950 | 49 | 7 | 547 | 91  | 23 | 2 | 251 | 46 | 870   | 146 |
| 76,951 | 49 | 7 | 549 | 91  | 23 | 2 | 252 | 46 | 873   | 146 |
| 76,952 | 49 | 7 | 551 | 93  | 23 | 2 | 253 | 46 | 876   | 148 |
| 76,953 | 49 | 7 | 555 | 96  | 22 | 2 | 254 | 47 | 880   | 152 |
| 76,954 | 49 | 9 | 559 | 104 | 22 | 2 | 257 | 49 | 887   | 164 |
| 76,955 | 50 | 9 | 563 | 108 | 23 | 2 | 258 | 54 | 894   | 173 |
| 76,956 | 49 | 9 | 557 | 110 | 23 | 2 | 252 | 54 | 881   | 175 |
| 76,957 | 48 | 9 | 555 | 110 | 23 | 2 | 253 | 54 | 879   | 175 |
| 76,958 | 49 | 9 | 553 | 109 | 23 | 2 | 252 | 54 | 877   | 174 |
| 76,959 | 49 | 9 | 558 | 104 | 23 | 2 | 252 | 52 | 882   | 167 |
| 76,960 | 49 | 9 | 559 | 102 | 23 | 1 | 250 | 49 | 881   | 161 |
| 76,961 | 49 | 9 | 560 | 102 | 23 | 1 | 250 | 49 | 882   | 161 |
| 76,962 | 55 | 9 | 589 | 102 | 23 | 1 | 259 | 49 | 926   | 161 |
| 76,963 | 55 | 8 | 591 | 97  | 23 | 1 | 261 | 40 | 930   | 146 |
| 76,964 | 58 | 8 | 612 | 97  | 25 | 1 | 282 | 40 | 977   | 146 |
| 76,965 | 62 | 8 | 639 | 97  | 26 | 1 | 291 | 40 | 1,018 | 146 |
| 76,966 | 66 | 8 | 661 | 97  | 26 | 1 | 299 | 40 | 1,052 | 146 |
| 76,967 | 67 | 8 | 691 | 97  | 26 | 1 | 307 | 40 | 1,091 | 146 |
| 76,968 | 67 | 8 | 688 | 96  | 26 | 1 | 307 | 38 | 1,088 | 143 |
| 76,969 | 69 | 8 | 703 | 95  | 26 | 1 | 323 | 37 | 1,121 | 141 |
| 76,970 | 69 | 8 | 701 | 95  | 26 | 1 | 323 | 37 | 1,119 | 141 |
| 76,971 | 69 | 8 | 709 | 93  | 26 | 0 | 325 | 34 | 1,129 | 135 |
| 76,972 | 69 | 8 | 711 | 87  | 26 | 0 | 325 | 33 | 1,131 | 128 |
| 76,973 | 67 | 8 | 707 | 88  | 26 | 0 | 325 | 33 | 1,125 | 129 |
| 76,974 | 64 | 8 | 697 | 87  | 26 | 0 | 324 | 32 | 1,111 | 127 |
| 76,975 | 63 | 8 | 689 | 88  | 26 | 1 | 320 | 33 | 1,098 | 130 |
| 76,976 | 56 | 7 | 650 | 89  | 26 | 1 | 301 | 32 | 1,033 | 129 |
| 76,977 | 41 | 8 | 587 | 87  | 24 | 1 | 259 | 31 | 911   | 127 |
| 76,978 | 39 | 8 | 523 | 90  | 20 | 2 | 210 | 33 | 792   | 133 |
| 76,979 | 39 | 8 | 498 | 91  | 17 | 2 | 204 | 33 | 758   | 134 |
| 76,980 | 38 | 7 | 468 | 87  | 12 | 2 | 191 | 33 | 709   | 129 |
| 76,981 | 42 | 7 | 485 | 87  | 12 | 2 | 199 | 33 | 738   | 129 |
| 76,982 | 42 | 7 | 477 | 88  | 12 | 2 | 196 | 33 | 727   | 130 |
| 76,983 | 44 | 7 | 484 | 87  | 13 | 2 | 198 | 30 | 739   | 126 |
| 76,984 | 44 | 8 | 475 | 91  | 13 | 2 | 195 | 30 | 727   | 131 |
| 76,985 | 46 | 8 | 511 | 90  | 14 | 3 | 220 | 36 | 791   | 137 |
| 76,986 | 46 | 8 | 514 | 93  | 14 | 3 | 221 | 36 | 795   | 140 |

|        |    |    |     |     |    |   |     |    |     |     |
|--------|----|----|-----|-----|----|---|-----|----|-----|-----|
| 76,987 | 45 | 8  | 482 | 91  | 14 | 3 | 216 | 35 | 757 | 137 |
| 76,988 | 36 | 8  | 407 | 86  | 13 | 3 | 202 | 34 | 658 | 131 |
| 76,989 | 37 | 8  | 407 | 86  | 13 | 3 | 202 | 34 | 659 | 131 |
| 76,990 | 36 | 9  | 366 | 83  | 13 | 3 | 170 | 34 | 585 | 129 |
| 76,991 | 36 | 9  | 366 | 83  | 13 | 3 | 170 | 33 | 585 | 128 |
| 76,992 | 35 | 9  | 363 | 83  | 13 | 3 | 169 | 33 | 580 | 128 |
| 76,993 | 35 | 9  | 361 | 83  | 13 | 3 | 170 | 33 | 579 | 128 |
| 76,994 | 35 | 8  | 357 | 71  | 13 | 3 | 169 | 29 | 574 | 111 |
| 76,995 | 35 | 8  | 357 | 71  | 13 | 3 | 168 | 30 | 573 | 112 |
| 76,996 | 33 | 5  | 340 | 56  | 12 | 3 | 161 | 24 | 546 | 88  |
| 76,997 | 33 | 5  | 338 | 57  | 12 | 3 | 161 | 25 | 544 | 90  |
| 76,998 | 33 | 5  | 336 | 57  | 12 | 4 | 161 | 25 | 542 | 91  |
| 76,999 | 33 | 5  | 331 | 59  | 12 | 4 | 160 | 25 | 536 | 93  |
| 77,000 | 33 | 5  | 331 | 61  | 12 | 4 | 159 | 25 | 535 | 95  |
| 77,001 | 33 | 5  | 329 | 62  | 12 | 6 | 159 | 32 | 533 | 105 |
| 77,002 | 33 | 5  | 327 | 62  | 12 | 6 | 159 | 32 | 531 | 105 |
| 77,003 | 33 | 5  | 325 | 60  | 12 | 6 | 158 | 32 | 528 | 103 |
| 77,004 | 33 | 7  | 323 | 59  | 12 | 6 | 157 | 31 | 525 | 103 |
| 77,005 | 33 | 5  | 319 | 51  | 12 | 6 | 155 | 29 | 519 | 91  |
| 77,006 | 32 | 5  | 315 | 46  | 11 | 6 | 158 | 24 | 516 | 81  |
| 77,007 | 32 | 5  | 314 | 46  | 11 | 6 | 158 | 24 | 515 | 81  |
| 77,008 | 32 | 5  | 314 | 46  | 11 | 6 | 160 | 24 | 517 | 81  |
| 77,009 | 31 | 5  | 313 | 46  | 11 | 6 | 160 | 24 | 515 | 81  |
| 77,010 | 31 | 5  | 308 | 46  | 11 | 6 | 158 | 24 | 508 | 81  |
| 77,011 | 31 | 5  | 310 | 46  | 11 | 6 | 158 | 24 | 510 | 81  |
| 77,012 | 31 | 5  | 311 | 47  | 11 | 6 | 159 | 26 | 512 | 84  |
| 77,013 | 30 | 5  | 306 | 49  | 11 | 6 | 157 | 30 | 504 | 90  |
| 77,014 | 30 | 6  | 312 | 56  | 11 | 6 | 158 | 36 | 511 | 104 |
| 77,015 | 28 | 9  | 298 | 79  | 9  | 7 | 140 | 52 | 475 | 147 |
| 77,016 | 34 | 11 | 317 | 114 | 9  | 8 | 145 | 68 | 505 | 201 |
| 77,017 | 31 | 11 | 306 | 114 | 9  | 8 | 140 | 68 | 486 | 201 |
| 77,018 | 30 | 11 | 302 | 116 | 11 | 8 | 143 | 69 | 486 | 204 |
| 77,019 | 31 | 11 | 365 | 116 | 12 | 8 | 165 | 69 | 573 | 204 |
| 77,020 | 29 | 12 | 350 | 119 | 12 | 8 | 149 | 71 | 540 | 210 |
| 77,021 | 29 | 12 | 342 | 120 | 12 | 8 | 147 | 71 | 530 | 211 |
| 77,022 | 33 | 12 | 418 | 120 | 15 | 8 | 180 | 71 | 646 | 211 |
| 77,023 | 33 | 12 | 427 | 121 | 15 | 8 | 184 | 71 | 659 | 212 |
| 77,024 | 33 | 12 | 427 | 118 | 15 | 8 | 184 | 71 | 659 | 209 |
| 77,025 | 33 | 12 | 426 | 116 | 15 | 7 | 184 | 69 | 658 | 204 |
| 77,026 | 33 | 12 | 426 | 116 | 15 | 7 | 184 | 69 | 658 | 204 |
| 77,027 | 33 | 11 | 420 | 106 | 15 | 6 | 182 | 66 | 650 | 189 |

|        |    |    |     |     |    |   |     |    |     |     |
|--------|----|----|-----|-----|----|---|-----|----|-----|-----|
| 77,028 | 33 | 11 | 417 | 106 | 15 | 6 | 181 | 66 | 646 | 189 |
| 77,029 | 33 | 11 | 413 | 106 | 14 | 6 | 180 | 66 | 640 | 189 |
| 77,030 | 34 | 11 | 411 | 105 | 14 | 6 | 179 | 66 | 638 | 188 |
| 77,031 | 35 | 11 | 408 | 105 | 14 | 6 | 179 | 67 | 636 | 189 |
| 77,032 | 30 | 11 | 365 | 105 | 11 | 6 | 151 | 67 | 557 | 189 |
| 77,033 | 31 | 11 | 383 | 107 | 12 | 6 | 154 | 68 | 580 | 192 |
| 77,034 | 29 | 11 | 379 | 108 | 11 | 6 | 154 | 68 | 573 | 193 |
| 77,035 | 28 | 10 | 372 | 96  | 10 | 5 | 152 | 61 | 562 | 172 |
| 77,036 | 27 | 10 | 345 | 93  | 9  | 5 | 136 | 61 | 517 | 169 |
| 77,037 | 28 | 10 | 345 | 92  | 9  | 5 | 137 | 60 | 519 | 167 |
| 77,038 | 28 | 10 | 345 | 92  | 9  | 5 | 137 | 60 | 519 | 167 |
| 77,039 | 28 | 10 | 344 | 92  | 9  | 5 | 137 | 60 | 518 | 167 |
| 77,040 | 27 | 10 | 344 | 93  | 9  | 5 | 137 | 60 | 517 | 168 |
| 77,041 | 27 | 9  | 344 | 93  | 9  | 5 | 137 | 60 | 517 | 167 |
| 77,042 | 28 | 9  | 344 | 93  | 9  | 5 | 137 | 60 | 518 | 167 |
| 77,043 | 28 | 9  | 344 | 93  | 9  | 5 | 138 | 60 | 519 | 167 |
| 77,044 | 28 | 9  | 344 | 94  | 9  | 5 | 138 | 60 | 519 | 168 |
| 77,045 | 29 | 9  | 347 | 94  | 9  | 5 | 139 | 61 | 524 | 169 |
| 77,046 | 29 | 9  | 347 | 94  | 9  | 5 | 139 | 61 | 524 | 169 |
| 77,047 | 29 | 9  | 347 | 93  | 9  | 5 | 141 | 59 | 526 | 166 |
| 77,048 | 29 | 9  | 347 | 93  | 9  | 4 | 140 | 59 | 525 | 165 |
| 77,049 | 29 | 9  | 346 | 93  | 9  | 4 | 140 | 59 | 524 | 165 |
| 77,050 | 29 | 9  | 346 | 92  | 9  | 4 | 141 | 60 | 525 | 165 |
| 77,051 | 29 | 9  | 347 | 93  | 9  | 5 | 141 | 62 | 526 | 169 |
| 77,052 | 29 | 9  | 347 | 92  | 9  | 3 | 140 | 56 | 525 | 160 |
| 77,053 | 29 | 9  | 347 | 96  | 9  | 3 | 140 | 56 | 525 | 164 |
| 77,054 | 29 | 9  | 346 | 99  | 9  | 3 | 138 | 57 | 522 | 168 |
| 77,055 | 29 | 7  | 346 | 99  | 9  | 3 | 137 | 58 | 521 | 167 |
| 77,056 | 29 | 7  | 345 | 98  | 9  | 3 | 136 | 58 | 519 | 166 |
| 77,057 | 29 | 7  | 346 | 99  | 9  | 3 | 136 | 58 | 520 | 167 |
| 77,058 | 29 | 8  | 345 | 99  | 9  | 3 | 133 | 58 | 516 | 168 |
| 77,059 | 29 | 8  | 343 | 99  | 9  | 3 | 131 | 58 | 512 | 168 |
| 77,060 | 29 | 8  | 343 | 99  | 9  | 3 | 130 | 60 | 511 | 170 |
| 77,061 | 29 | 8  | 340 | 98  | 9  | 3 | 130 | 60 | 508 | 169 |
| 77,062 | 29 | 8  | 343 | 99  | 9  | 3 | 131 | 60 | 512 | 170 |
| 77,063 | 24 | 8  | 319 | 98  | 8  | 3 | 124 | 58 | 475 | 167 |
| 77,064 | 24 | 8  | 322 | 96  | 8  | 3 | 125 | 54 | 479 | 161 |
| 77,065 | 24 | 4  | 314 | 66  | 8  | 2 | 122 | 32 | 468 | 104 |
| 77,066 | 23 | 4  | 307 | 73  | 8  | 3 | 119 | 41 | 457 | 121 |
| 77,067 | 13 | 3  | 261 | 45  | 7  | 2 | 106 | 35 | 387 | 85  |
| 77,068 | 12 | 3  | 249 | 48  | 7  | 3 | 103 | 37 | 371 | 91  |



|        |    |   |     |    |    |   |     |    |     |     |
|--------|----|---|-----|----|----|---|-----|----|-----|-----|
| 77,069 | 12 | 3 | 225 | 48 | 5  | 3 | 92  | 36 | 334 | 90  |
| 77,070 | 10 | 3 | 160 | 51 | 4  | 3 | 68  | 41 | 242 | 98  |
| 77,071 | 8  | 3 | 115 | 50 | 2  | 3 | 55  | 41 | 180 | 97  |
| 77,072 | 6  | 3 | 83  | 51 | 1  | 3 | 35  | 42 | 125 | 99  |
| 77,073 | 6  | 3 | 74  | 51 | 1  | 3 | 33  | 42 | 114 | 99  |
| 77,074 | 6  | 3 | 73  | 53 | 1  | 3 | 31  | 42 | 111 | 101 |
| 77,075 | 7  | 3 | 73  | 53 | 1  | 3 | 32  | 42 | 113 | 101 |
| 77,076 | 7  | 3 | 75  | 55 | 1  | 3 | 32  | 42 | 115 | 103 |
| 77,077 | 7  | 3 | 75  | 56 | 1  | 3 | 32  | 42 | 115 | 104 |
| 77,078 | 8  | 3 | 76  | 57 | 1  | 3 | 32  | 42 | 117 | 105 |
| 77,079 | 8  | 3 | 75  | 57 | 1  | 3 | 32  | 42 | 116 | 105 |
| 77,080 | 10 | 3 | 93  | 57 | 1  | 3 | 44  | 42 | 148 | 105 |
| 77,081 | 9  | 3 | 99  | 57 | 1  | 3 | 50  | 42 | 159 | 105 |
| 77,082 | 10 | 3 | 108 | 57 | 3  | 3 | 55  | 41 | 176 | 104 |
| 77,083 | 11 | 3 | 113 | 57 | 3  | 3 | 56  | 41 | 183 | 104 |
| 77,084 | 12 | 3 | 140 | 54 | 3  | 3 | 72  | 40 | 227 | 100 |
| 77,085 | 12 | 3 | 138 | 53 | 5  | 3 | 74  | 40 | 229 | 99  |
| 77,086 | 16 | 3 | 174 | 53 | 7  | 3 | 90  | 40 | 287 | 99  |
| 77,087 | 16 | 3 | 175 | 53 | 7  | 3 | 88  | 40 | 286 | 99  |
| 77,088 | 15 | 3 | 172 | 53 | 7  | 3 | 85  | 40 | 279 | 99  |
| 77,089 | 15 | 3 | 172 | 53 | 7  | 3 | 85  | 40 | 279 | 99  |
| 77,090 | 15 | 3 | 172 | 53 | 7  | 3 | 85  | 40 | 279 | 99  |
| 77,091 | 15 | 3 | 174 | 52 | 7  | 3 | 85  | 40 | 281 | 98  |
| 77,092 | 15 | 3 | 174 | 52 | 7  | 3 | 87  | 40 | 283 | 98  |
| 77,093 | 18 | 3 | 185 | 51 | 7  | 3 | 91  | 40 | 301 | 97  |
| 77,094 | 18 | 3 | 190 | 52 | 7  | 3 | 92  | 40 | 307 | 98  |
| 77,095 | 20 | 3 | 200 | 52 | 8  | 3 | 119 | 40 | 347 | 98  |
| 77,096 | 20 | 3 | 202 | 50 | 8  | 3 | 119 | 38 | 349 | 94  |
| 77,097 | 20 | 3 | 206 | 50 | 8  | 3 | 119 | 38 | 353 | 94  |
| 77,098 | 20 | 3 | 212 | 50 | 8  | 3 | 123 | 38 | 363 | 94  |
| 77,099 | 20 | 3 | 212 | 50 | 8  | 3 | 123 | 38 | 363 | 94  |
| 77,100 | 20 | 3 | 213 | 50 | 8  | 3 | 123 | 38 | 364 | 94  |
| 77,101 | 20 | 3 | 228 | 49 | 8  | 3 | 127 | 37 | 383 | 92  |
| 77,102 | 20 | 3 | 227 | 46 | 8  | 2 | 127 | 35 | 382 | 86  |
| 77,103 | 20 | 3 | 227 | 46 | 8  | 2 | 128 | 34 | 383 | 85  |
| 77,104 | 51 | 3 | 450 | 42 | 17 | 2 | 238 | 34 | 756 | 81  |
| 77,105 | 52 | 3 | 465 | 39 | 19 | 2 | 248 | 33 | 784 | 77  |
| 77,106 | 52 | 3 | 465 | 37 | 19 | 2 | 248 | 32 | 784 | 74  |
| 77,107 | 52 | 3 | 466 | 36 | 19 | 2 | 248 | 33 | 785 | 74  |
| 77,108 | 52 | 2 | 468 | 36 | 19 | 2 | 248 | 33 | 787 | 73  |
| 77,109 | 52 | 2 | 468 | 36 | 19 | 2 | 248 | 33 | 787 | 73  |

|        |    |   |     |    |    |   |     |    |     |    |
|--------|----|---|-----|----|----|---|-----|----|-----|----|
| 77,110 | 52 | 2 | 468 | 36 | 19 | 2 | 248 | 33 | 787 | 73 |
| 77,111 | 52 | 2 | 468 | 36 | 19 | 2 | 248 | 31 | 787 | 71 |
| 77,112 | 53 | 2 | 467 | 37 | 19 | 2 | 250 | 31 | 789 | 72 |
| 77,113 | 53 | 2 | 463 | 39 | 19 | 2 | 248 | 32 | 783 | 75 |
| 77,114 | 53 | 2 | 459 | 41 | 19 | 3 | 247 | 33 | 778 | 79 |
| 77,115 | 53 | 3 | 459 | 47 | 19 | 3 | 247 | 37 | 778 | 90 |
| 77,116 | 53 | 3 | 459 | 49 | 19 | 3 | 247 | 37 | 778 | 92 |
| 77,117 | 53 | 3 | 459 | 45 | 19 | 2 | 246 | 28 | 777 | 78 |
| 77,118 | 53 | 2 | 459 | 39 | 19 | 2 | 246 | 18 | 777 | 61 |
| 77,119 | 53 | 2 | 459 | 38 | 19 | 1 | 246 | 16 | 777 | 57 |
| 77,120 | 53 | 4 | 458 | 35 | 19 | 1 | 246 | 11 | 776 | 51 |
| 77,121 | 53 | 4 | 458 | 35 | 19 | 1 | 246 | 11 | 776 | 51 |
| 77,122 | 53 | 3 | 458 | 33 | 19 | 1 | 246 | 9  | 776 | 46 |
| 77,123 | 53 | 3 | 457 | 32 | 19 | 1 | 247 | 8  | 776 | 44 |
| 77,124 | 53 | 3 | 457 | 29 | 19 | 1 | 248 | 8  | 777 | 41 |
| 77,125 | 53 | 3 | 457 | 29 | 19 | 1 | 248 | 8  | 777 | 41 |
| 77,126 | 52 | 3 | 457 | 29 | 19 | 1 | 247 | 7  | 775 | 40 |
| 77,127 | 52 | 3 | 456 | 27 | 19 | 1 | 247 | 7  | 774 | 38 |
| 77,128 | 51 | 3 | 455 | 26 | 19 | 1 | 247 | 7  | 772 | 37 |
| 77,129 | 51 | 3 | 454 | 26 | 19 | 1 | 247 | 7  | 771 | 37 |
| 77,130 | 52 | 3 | 454 | 29 | 19 | 1 | 247 | 9  | 772 | 42 |
| 77,131 | 50 | 3 | 435 | 37 | 19 | 1 | 235 | 15 | 739 | 56 |
| 77,132 | 50 | 3 | 427 | 41 | 19 | 1 | 229 | 16 | 725 | 61 |
| 77,133 | 48 | 3 | 418 | 43 | 17 | 1 | 224 | 16 | 707 | 63 |
| 77,134 | 47 | 3 | 404 | 43 | 17 | 1 | 222 | 16 | 690 | 63 |
| 77,135 | 45 | 3 | 357 | 43 | 16 | 1 | 199 | 16 | 617 | 63 |
| 77,136 | 45 | 3 | 350 | 44 | 14 | 1 | 194 | 16 | 603 | 64 |
| 77,137 | 41 | 3 | 308 | 44 | 12 | 1 | 170 | 16 | 531 | 64 |
| 77,138 | 41 | 3 | 306 | 44 | 12 | 1 | 170 | 16 | 529 | 64 |
| 77,139 | 41 | 3 | 307 | 44 | 12 | 1 | 170 | 16 | 530 | 64 |
| 77,140 | 43 | 3 | 312 | 44 | 12 | 1 | 174 | 16 | 541 | 64 |
| 77,141 | 43 | 3 | 314 | 44 | 12 | 1 | 176 | 16 | 545 | 64 |
| 77,142 | 42 | 3 | 312 | 44 | 12 | 1 | 176 | 16 | 542 | 64 |
| 77,143 | 42 | 3 | 312 | 44 | 12 | 1 | 175 | 16 | 541 | 64 |
| 77,144 | 39 | 3 | 301 | 43 | 12 | 1 | 171 | 16 | 523 | 63 |
| 77,145 | 39 | 3 | 296 | 43 | 12 | 1 | 171 | 16 | 518 | 63 |
| 77,146 | 36 | 3 | 289 | 43 | 11 | 1 | 144 | 16 | 480 | 63 |
| 77,147 | 36 | 3 | 287 | 43 | 11 | 1 | 146 | 16 | 480 | 63 |
| 77,148 | 36 | 3 | 283 | 43 | 11 | 1 | 146 | 16 | 476 | 63 |
| 77,149 | 37 | 4 | 279 | 45 | 11 | 2 | 140 | 19 | 467 | 70 |
| 77,150 | 37 | 4 | 278 | 47 | 11 | 2 | 139 | 21 | 465 | 74 |

|        |    |   |     |    |    |   |     |    |     |    |
|--------|----|---|-----|----|----|---|-----|----|-----|----|
| 77,151 | 37 | 4 | 263 | 49 | 11 | 2 | 135 | 21 | 446 | 76 |
| 77,152 | 34 | 4 | 252 | 50 | 11 | 2 | 130 | 21 | 427 | 77 |
| 77,153 | 22 | 4 | 124 | 50 | 6  | 2 | 72  | 21 | 224 | 77 |
| 77,154 | 9  | 4 | 55  | 50 | 3  | 2 | 38  | 21 | 105 | 77 |
| 77,155 | 6  | 4 | 39  | 50 | 2  | 2 | 23  | 21 | 70  | 77 |
| 77,156 | 5  | 4 | 23  | 50 | 0  | 2 | 13  | 21 | 41  | 77 |
| 77,157 | 6  | 4 | 24  | 50 | 0  | 2 | 14  | 21 | 44  | 77 |
| 77,158 | 6  | 4 | 24  | 50 | 0  | 2 | 14  | 21 | 44  | 77 |
| 77,159 | 8  | 4 | 23  | 51 | 0  | 2 | 16  | 21 | 47  | 78 |
| 77,160 | 8  | 4 | 23  | 51 | 0  | 2 | 16  | 21 | 47  | 78 |
| 77,161 | 9  | 4 | 32  | 51 | 0  | 2 | 17  | 21 | 58  | 78 |
| 77,162 | 12 | 4 | 50  | 51 | 3  | 2 | 36  | 21 | 101 | 78 |
| 77,163 | 13 | 4 | 71  | 47 | 3  | 2 | 48  | 20 | 135 | 73 |
| 77,164 | 13 | 5 | 71  | 47 | 3  | 2 | 48  | 20 | 135 | 74 |
| 77,165 | 14 | 5 | 83  | 45 | 3  | 1 | 52  | 19 | 152 | 70 |
| 77,166 | 15 | 4 | 91  | 40 | 4  | 1 | 60  | 15 | 170 | 60 |
| 77,167 | 15 | 4 | 91  | 38 | 4  | 1 | 60  | 15 | 170 | 58 |
| 77,168 | 16 | 5 | 93  | 32 | 4  | 1 | 63  | 15 | 176 | 53 |
| 77,169 | 16 | 5 | 95  | 33 | 5  | 1 | 66  | 15 | 182 | 54 |
| 77,170 | 16 | 5 | 95  | 33 | 5  | 1 | 66  | 15 | 182 | 54 |
| 77,171 | 16 | 3 | 95  | 31 | 5  | 1 | 69  | 15 | 185 | 50 |
| 77,172 | 16 | 3 | 95  | 31 | 5  | 1 | 69  | 15 | 185 | 50 |
| 77,173 | 16 | 3 | 95  | 30 | 5  | 1 | 68  | 15 | 184 | 49 |
| 77,174 | 16 | 3 | 95  | 30 | 5  | 1 | 68  | 15 | 184 | 49 |
| 77,175 | 16 | 3 | 96  | 30 | 5  | 1 | 67  | 15 | 184 | 49 |
| 77,176 | 18 | 3 | 107 | 30 | 5  | 1 | 72  | 15 | 202 | 49 |
| 77,177 | 19 | 3 | 109 | 30 | 5  | 1 | 72  | 15 | 205 | 49 |
| 77,178 | 19 | 3 | 111 | 30 | 5  | 1 | 74  | 15 | 209 | 49 |
| 77,179 | 19 | 3 | 111 | 29 | 5  | 1 | 74  | 15 | 209 | 48 |
| 77,180 | 19 | 3 | 111 | 31 | 5  | 1 | 74  | 16 | 209 | 51 |
| 77,181 | 18 | 3 | 113 | 30 | 5  | 1 | 74  | 16 | 210 | 50 |
| 77,182 | 18 | 3 | 113 | 22 | 5  | 1 | 75  | 11 | 211 | 37 |
| 77,183 | 19 | 3 | 123 | 18 | 6  | 1 | 75  | 13 | 223 | 35 |
| 77,184 | 19 | 3 | 123 | 24 | 6  | 1 | 75  | 13 | 223 | 41 |
| 77,185 | 20 | 4 | 135 | 26 | 6  | 2 | 78  | 14 | 239 | 46 |
| 77,186 | 20 | 6 | 135 | 29 | 6  | 2 | 78  | 18 | 239 | 55 |
| 77,187 | 20 | 6 | 135 | 30 | 6  | 2 | 78  | 18 | 239 | 56 |
| 77,188 | 20 | 6 | 154 | 30 | 6  | 2 | 79  | 19 | 259 | 57 |
| 77,189 | 20 | 6 | 153 | 31 | 6  | 2 | 79  | 21 | 258 | 60 |
| 77,190 | 18 | 6 | 179 | 31 | 7  | 2 | 91  | 21 | 295 | 60 |
| 77,191 | 18 | 6 | 184 | 31 | 7  | 3 | 96  | 21 | 305 | 61 |

|        |    |   |     |    |   |   |     |    |     |    |
|--------|----|---|-----|----|---|---|-----|----|-----|----|
| 77,192 | 18 | 6 | 182 | 35 | 7 | 3 | 94  | 22 | 301 | 66 |
| 77,193 | 18 | 6 | 182 | 35 | 7 | 3 | 94  | 22 | 301 | 66 |
| 77,194 | 19 | 6 | 197 | 36 | 7 | 3 | 100 | 22 | 323 | 67 |
| 77,195 | 19 | 6 | 197 | 36 | 8 | 3 | 100 | 22 | 324 | 67 |
| 77,196 | 19 | 6 | 197 | 36 | 8 | 3 | 99  | 22 | 323 | 67 |
| 77,197 | 19 | 6 | 192 | 36 | 8 | 3 | 98  | 22 | 317 | 67 |
| 77,198 | 19 | 5 | 191 | 34 | 8 | 2 | 96  | 19 | 314 | 60 |
| 77,199 | 19 | 6 | 191 | 34 | 8 | 2 | 96  | 19 | 314 | 61 |
| 77,200 | 18 | 6 | 189 | 34 | 8 | 2 | 96  | 19 | 311 | 61 |
| 77,201 | 18 | 6 | 189 | 30 | 8 | 2 | 96  | 17 | 311 | 55 |
| 77,202 | 18 | 6 | 191 | 30 | 8 | 2 | 96  | 17 | 313 | 55 |
| 77,203 | 18 | 6 | 191 | 29 | 8 | 2 | 96  | 17 | 313 | 54 |
| 77,204 | 18 | 6 | 191 | 29 | 8 | 2 | 96  | 17 | 313 | 54 |
| 77,205 | 18 | 6 | 192 | 29 | 8 | 2 | 96  | 17 | 314 | 54 |
| 77,206 | 18 | 6 | 192 | 29 | 8 | 2 | 96  | 17 | 314 | 54 |
| 77,207 | 19 | 6 | 192 | 29 | 8 | 2 | 97  | 18 | 316 | 55 |
| 77,208 | 18 | 6 | 191 | 29 | 8 | 2 | 97  | 18 | 314 | 55 |
| 77,209 | 18 | 6 | 191 | 29 | 8 | 2 | 98  | 18 | 315 | 55 |
| 77,210 | 16 | 6 | 189 | 30 | 8 | 2 | 96  | 19 | 309 | 57 |
| 77,211 | 15 | 6 | 180 | 30 | 8 | 2 | 95  | 19 | 298 | 57 |
| 77,212 | 14 | 6 | 172 | 30 | 8 | 2 | 88  | 20 | 282 | 58 |
| 77,213 | 12 | 6 | 161 | 30 | 5 | 2 | 77  | 20 | 255 | 58 |
| 77,214 | 10 | 5 | 140 | 30 | 6 | 2 | 64  | 20 | 220 | 57 |
| 77,215 | 9  | 7 | 129 | 31 | 6 | 2 | 60  | 23 | 204 | 63 |
| 77,216 | 8  | 7 | 122 | 31 | 5 | 2 | 54  | 23 | 189 | 63 |
| 77,217 | 9  | 7 | 121 | 29 | 5 | 2 | 54  | 23 | 189 | 61 |
| 77,218 | 9  | 7 | 122 | 29 | 6 | 2 | 54  | 23 | 191 | 61 |
| 77,219 | 9  | 6 | 120 | 28 | 6 | 2 | 52  | 23 | 187 | 59 |
| 77,220 | 11 | 6 | 127 | 28 | 5 | 2 | 49  | 23 | 192 | 59 |
| 77,221 | 11 | 6 | 126 | 28 | 5 | 2 | 46  | 23 | 188 | 59 |
| 77,222 | 11 | 6 | 129 | 28 | 5 | 2 | 47  | 23 | 192 | 59 |
| 77,223 | 14 | 6 | 140 | 28 | 6 | 2 | 50  | 23 | 210 | 59 |
| 77,224 | 15 | 6 | 153 | 28 | 6 | 2 | 61  | 23 | 235 | 59 |
| 77,225 | 17 | 6 | 156 | 28 | 6 | 2 | 66  | 23 | 245 | 59 |
| 77,226 | 17 | 6 | 156 | 28 | 6 | 2 | 64  | 23 | 243 | 59 |
| 77,227 | 15 | 6 | 145 | 29 | 6 | 2 | 61  | 23 | 227 | 60 |
| 77,228 | 14 | 6 | 143 | 29 | 6 | 2 | 61  | 23 | 224 | 60 |
| 77,229 | 14 | 6 | 147 | 29 | 6 | 2 | 60  | 23 | 227 | 60 |
| 77,230 | 14 | 6 | 148 | 27 | 6 | 2 | 60  | 22 | 228 | 57 |
| 77,231 | 14 | 6 | 148 | 28 | 6 | 2 | 60  | 22 | 228 | 58 |
| 77,232 | 14 | 6 | 146 | 26 | 6 | 2 | 60  | 20 | 226 | 54 |

|        |    |   |     |    |   |   |    |    |     |    |
|--------|----|---|-----|----|---|---|----|----|-----|----|
| 77,233 | 14 | 6 | 147 | 26 | 6 | 2 | 59 | 20 | 226 | 54 |
| 77,234 | 13 | 6 | 137 | 24 | 5 | 2 | 59 | 17 | 214 | 49 |
| 77,235 | 15 | 6 | 167 | 18 | 6 | 2 | 66 | 17 | 254 | 43 |
| 77,236 | 18 | 5 | 184 | 16 | 6 | 1 | 75 | 16 | 283 | 38 |
| 77,237 | 18 | 3 | 175 | 11 | 7 | 1 | 81 | 12 | 281 | 27 |
| 77,238 | 18 | 4 | 178 | 11 | 7 | 1 | 76 | 12 | 279 | 28 |
| 77,239 | 18 | 4 | 155 | 10 | 8 | 1 | 67 | 9  | 248 | 24 |
| 77,240 | 18 | 4 | 157 | 10 | 8 | 2 | 67 | 10 | 250 | 26 |
| 77,241 | 18 | 4 | 156 | 12 | 7 | 2 | 67 | 10 | 248 | 28 |
| 77,242 | 18 | 4 | 150 | 15 | 7 | 1 | 62 | 11 | 237 | 31 |
| 77,243 | 18 | 4 | 145 | 11 | 7 | 1 | 57 | 10 | 227 | 26 |
| 77,244 | 17 | 4 | 138 | 10 | 7 | 1 | 57 | 10 | 219 | 25 |
| 77,245 | 17 | 4 | 138 | 10 | 7 | 1 | 57 | 10 | 219 | 25 |
| 77,246 | 18 | 4 | 142 | 10 | 6 | 1 | 59 | 10 | 225 | 25 |
| 77,247 | 18 | 4 | 142 | 10 | 6 | 1 | 60 | 10 | 226 | 25 |
| 77,248 | 18 | 4 | 142 | 10 | 6 | 1 | 60 | 10 | 226 | 25 |
| 77,249 | 18 | 4 | 142 | 10 | 6 | 1 | 60 | 10 | 226 | 25 |
| 77,250 | 18 | 3 | 145 | 10 | 6 | 1 | 60 | 10 | 229 | 24 |
| 77,251 | 18 | 3 | 145 | 10 | 6 | 1 | 60 | 10 | 229 | 24 |
| 77,252 | 18 | 3 | 145 | 10 | 6 | 2 | 60 | 11 | 229 | 26 |
| 77,253 | 18 | 3 | 154 | 15 | 6 | 3 | 70 | 13 | 248 | 34 |
| 77,254 | 18 | 3 | 154 | 16 | 6 | 3 | 70 | 20 | 248 | 42 |
| 77,255 | 18 | 3 | 154 | 24 | 6 | 3 | 70 | 28 | 248 | 58 |
| 77,256 | 18 | 3 | 155 | 27 | 6 | 3 | 71 | 30 | 250 | 63 |
| 77,257 | 17 | 3 | 158 | 29 | 6 | 3 | 71 | 30 | 252 | 65 |
| 77,258 | 17 | 4 | 161 | 30 | 6 | 3 | 70 | 29 | 254 | 66 |
| 77,259 | 17 | 4 | 162 | 32 | 6 | 3 | 69 | 29 | 254 | 68 |
| 77,260 | 17 | 5 | 167 | 36 | 6 | 3 | 70 | 30 | 260 | 74 |
| 77,261 | 17 | 5 | 167 | 35 | 6 | 4 | 70 | 29 | 260 | 73 |
| 77,262 | 17 | 5 | 167 | 35 | 6 | 4 | 70 | 28 | 260 | 72 |
| 77,263 | 17 | 5 | 167 | 36 | 6 | 4 | 70 | 28 | 260 | 73 |
| 77,264 | 17 | 5 | 167 | 38 | 6 | 4 | 69 | 28 | 259 | 75 |
| 77,265 | 17 | 3 | 167 | 37 | 5 | 4 | 69 | 25 | 258 | 69 |
| 77,266 | 17 | 3 | 166 | 38 | 5 | 4 | 69 | 25 | 257 | 70 |
| 77,267 | 17 | 3 | 166 | 38 | 5 | 4 | 69 | 25 | 257 | 70 |
| 77,268 | 16 | 4 | 166 | 38 | 5 | 4 | 67 | 26 | 254 | 72 |
| 77,269 | 16 | 5 | 166 | 42 | 4 | 4 | 67 | 30 | 253 | 81 |
| 77,270 | 15 | 5 | 166 | 43 | 4 | 4 | 66 | 30 | 251 | 82 |
| 77,271 | 13 | 5 | 157 | 43 | 4 | 4 | 66 | 30 | 240 | 82 |
| 77,272 | 13 | 5 | 153 | 43 | 4 | 4 | 65 | 30 | 235 | 82 |
| 77,273 | 10 | 5 | 143 | 43 | 3 | 4 | 62 | 30 | 218 | 82 |

|        |    |    |     |    |   |   |    |    |     |     |
|--------|----|----|-----|----|---|---|----|----|-----|-----|
| 77,274 | 9  | 5  | 132 | 44 | 3 | 4 | 51 | 32 | 195 | 85  |
| 77,275 | 7  | 5  | 130 | 44 | 3 | 4 | 46 | 32 | 186 | 85  |
| 77,276 | 7  | 5  | 129 | 44 | 3 | 4 | 46 | 32 | 185 | 85  |
| 77,277 | 7  | 5  | 130 | 44 | 3 | 4 | 47 | 32 | 187 | 85  |
| 77,278 | 7  | 5  | 130 | 43 | 3 | 4 | 47 | 32 | 187 | 84  |
| 77,279 | 7  | 5  | 131 | 44 | 3 | 4 | 47 | 32 | 188 | 85  |
| 77,280 | 7  | 5  | 124 | 44 | 3 | 4 | 46 | 32 | 180 | 85  |
| 77,281 | 7  | 5  | 127 | 44 | 3 | 4 | 46 | 32 | 183 | 85  |
| 77,282 | 7  | 5  | 126 | 44 | 3 | 4 | 46 | 32 | 182 | 85  |
| 77,283 | 7  | 5  | 123 | 45 | 3 | 5 | 47 | 34 | 180 | 89  |
| 77,284 | 7  | 5  | 123 | 46 | 2 | 5 | 47 | 33 | 179 | 89  |
| 77,285 | 5  | 5  | 108 | 48 | 2 | 5 | 43 | 35 | 158 | 93  |
| 77,286 | 5  | 5  | 98  | 48 | 2 | 5 | 39 | 36 | 144 | 94  |
| 77,287 | 1  | 6  | 74  | 48 | 2 | 6 | 28 | 36 | 105 | 96  |
| 77,288 | 1  | 5  | 64  | 48 | 1 | 6 | 20 | 36 | 86  | 95  |
| 77,289 | 1  | 5  | 59  | 49 | 1 | 5 | 19 | 35 | 80  | 94  |
| 77,290 | 1  | 5  | 59  | 53 | 0 | 5 | 20 | 35 | 80  | 98  |
| 77,291 | 1  | 7  | 62  | 53 | 0 | 5 | 20 | 38 | 83  | 103 |
| 77,292 | 1  | 9  | 60  | 52 | 0 | 5 | 19 | 38 | 80  | 104 |
| 77,293 | 1  | 9  | 60  | 49 | 0 | 5 | 19 | 37 | 80  | 100 |
| 77,294 | 1  | 9  | 60  | 49 | 0 | 5 | 20 | 37 | 81  | 100 |
| 77,295 | 1  | 9  | 67  | 49 | 0 | 5 | 23 | 37 | 91  | 100 |
| 77,296 | 0  | 9  | 64  | 49 | 0 | 5 | 24 | 37 | 88  | 100 |
| 77,297 | 0  | 9  | 64  | 49 | 0 | 5 | 23 | 37 | 87  | 100 |
| 77,298 | 0  | 9  | 66  | 49 | 1 | 5 | 24 | 37 | 91  | 100 |
| 77,299 | 0  | 9  | 66  | 49 | 1 | 5 | 24 | 37 | 91  | 100 |
| 77,300 | 1  | 9  | 78  | 49 | 1 | 5 | 28 | 37 | 108 | 100 |
| 77,301 | 1  | 9  | 76  | 50 | 1 | 5 | 29 | 37 | 107 | 101 |
| 77,302 | 1  | 9  | 76  | 50 | 1 | 5 | 29 | 37 | 107 | 101 |
| 77,303 | 1  | 9  | 65  | 44 | 1 | 3 | 19 | 27 | 86  | 83  |
| 77,304 | 1  | 9  | 68  | 44 | 1 | 3 | 19 | 27 | 89  | 83  |
| 77,305 | 1  | 9  | 68  | 44 | 1 | 3 | 19 | 27 | 89  | 83  |
| 77,306 | 1  | 9  | 66  | 36 | 1 | 3 | 18 | 19 | 86  | 67  |
| 77,307 | 2  | 10 | 70  | 33 | 1 | 3 | 20 | 17 | 93  | 63  |
| 77,308 | 3  | 10 | 71  | 32 | 1 | 3 | 20 | 17 | 95  | 62  |
| 77,309 | 4  | 9  | 85  | 31 | 1 | 3 | 28 | 17 | 118 | 60  |
| 77,310 | 4  | 9  | 85  | 29 | 1 | 3 | 28 | 16 | 118 | 57  |
| 77,311 | 4  | 8  | 94  | 24 | 2 | 2 | 31 | 15 | 131 | 49  |
| 77,312 | 17 | 8  | 148 | 21 | 7 | 2 | 61 | 15 | 233 | 46  |
| 77,313 | 19 | 8  | 154 | 21 | 7 | 2 | 63 | 15 | 243 | 46  |
| 77,314 | 20 | 9  | 175 | 21 | 9 | 2 | 69 | 15 | 273 | 47  |

|        |    |   |     |    |    |   |     |    |     |    |
|--------|----|---|-----|----|----|---|-----|----|-----|----|
| 77,315 | 23 | 9 | 209 | 22 | 10 | 2 | 74  | 15 | 316 | 48 |
| 77,316 | 23 | 9 | 209 | 22 | 10 | 2 | 74  | 15 | 316 | 48 |
| 77,317 | 23 | 9 | 209 | 21 | 10 | 2 | 74  | 15 | 316 | 47 |
| 77,318 | 36 | 7 | 279 | 17 | 12 | 2 | 110 | 10 | 437 | 36 |
| 77,319 | 37 | 7 | 279 | 17 | 12 | 2 | 110 | 10 | 438 | 36 |
| 77,320 | 37 | 7 | 278 | 17 | 12 | 2 | 110 | 10 | 437 | 36 |
| 77,321 | 37 | 9 | 278 | 20 | 12 | 2 | 111 | 13 | 438 | 44 |
| 77,322 | 37 | 9 | 283 | 26 | 12 | 2 | 112 | 14 | 444 | 51 |
| 77,323 | 37 | 9 | 288 | 33 | 14 | 3 | 118 | 14 | 457 | 59 |
| 77,324 | 37 | 9 | 288 | 35 | 14 | 3 | 119 | 14 | 458 | 61 |
| 77,325 | 37 | 9 | 289 | 34 | 14 | 3 | 119 | 12 | 459 | 58 |
| 77,326 | 37 | 9 | 293 | 35 | 14 | 3 | 119 | 12 | 463 | 59 |
| 77,327 | 37 | 9 | 293 | 35 | 14 | 3 | 118 | 12 | 462 | 59 |
| 77,328 | 37 | 9 | 292 | 35 | 14 | 3 | 118 | 13 | 461 | 60 |
| 77,329 | 37 | 9 | 292 | 35 | 14 | 3 | 118 | 13 | 461 | 60 |
| 77,330 | 37 | 9 | 291 | 36 | 14 | 3 | 118 | 15 | 460 | 63 |
| 77,331 | 37 | 9 | 291 | 36 | 14 | 3 | 118 | 15 | 460 | 63 |
| 77,332 | 39 | 9 | 289 | 36 | 14 | 3 | 122 | 15 | 464 | 63 |
| 77,333 | 39 | 9 | 289 | 37 | 14 | 3 | 123 | 15 | 465 | 64 |
| 77,334 | 39 | 9 | 288 | 36 | 14 | 2 | 121 | 13 | 462 | 60 |
| 77,335 | 39 | 9 | 290 | 35 | 14 | 2 | 122 | 13 | 465 | 59 |
| 77,336 | 39 | 9 | 294 | 33 | 14 | 2 | 127 | 11 | 474 | 55 |
| 77,337 | 39 | 9 | 291 | 35 | 15 | 2 | 133 | 10 | 478 | 56 |
| 77,338 | 39 | 8 | 297 | 35 | 15 | 1 | 144 | 10 | 495 | 54 |
| 77,339 | 39 | 8 | 301 | 36 | 15 | 1 | 147 | 10 | 502 | 55 |
| 77,340 | 40 | 8 | 304 | 35 | 16 | 1 | 147 | 10 | 507 | 54 |
| 77,341 | 40 | 8 | 303 | 34 | 16 | 1 | 146 | 11 | 505 | 54 |
| 77,342 | 40 | 6 | 297 | 34 | 16 | 1 | 146 | 8  | 499 | 49 |
| 77,343 | 41 | 4 | 302 | 35 | 16 | 1 | 150 | 8  | 509 | 48 |
| 77,344 | 41 | 4 | 302 | 35 | 16 | 1 | 150 | 8  | 509 | 48 |
| 77,345 | 41 | 4 | 302 | 35 | 16 | 1 | 149 | 8  | 508 | 48 |
| 77,346 | 41 | 4 | 294 | 35 | 16 | 1 | 146 | 8  | 497 | 48 |
| 77,347 | 41 | 5 | 293 | 35 | 16 | 1 | 143 | 8  | 493 | 49 |
| 77,348 | 41 | 5 | 291 | 37 | 16 | 1 | 143 | 8  | 491 | 51 |
| 77,349 | 41 | 5 | 291 | 38 | 15 | 1 | 143 | 8  | 490 | 52 |
| 77,350 | 41 | 5 | 286 | 38 | 15 | 1 | 139 | 9  | 481 | 53 |
| 77,351 | 40 | 5 | 281 | 43 | 15 | 1 | 139 | 9  | 475 | 58 |
| 77,352 | 40 | 5 | 280 | 43 | 15 | 1 | 139 | 9  | 474 | 58 |
| 77,353 | 40 | 5 | 281 | 43 | 15 | 1 | 140 | 9  | 476 | 58 |
| 77,354 | 40 | 5 | 281 | 43 | 15 | 1 | 140 | 9  | 476 | 58 |
| 77,355 | 44 | 5 | 290 | 43 | 16 | 1 | 147 | 9  | 497 | 58 |

|        |    |    |     |     |    |   |     |    |     |     |
|--------|----|----|-----|-----|----|---|-----|----|-----|-----|
| 77,356 | 44 | 5  | 289 | 43  | 16 | 1 | 147 | 9  | 496 | 58  |
| 77,357 | 44 | 5  | 288 | 43  | 16 | 1 | 147 | 9  | 495 | 58  |
| 77,358 | 44 | 4  | 316 | 43  | 16 | 1 | 162 | 9  | 538 | 57  |
| 77,359 | 48 | 4  | 340 | 42  | 17 | 1 | 177 | 9  | 582 | 56  |
| 77,360 | 47 | 4  | 337 | 45  | 18 | 1 | 174 | 9  | 576 | 59  |
| 77,361 | 47 | 4  | 333 | 51  | 18 | 2 | 173 | 10 | 571 | 67  |
| 77,362 | 47 | 6  | 322 | 56  | 17 | 2 | 170 | 16 | 556 | 80  |
| 77,363 | 34 | 7  | 269 | 65  | 12 | 2 | 140 | 16 | 455 | 90  |
| 77,364 | 32 | 8  | 262 | 84  | 12 | 2 | 138 | 20 | 444 | 114 |
| 77,365 | 31 | 7  | 241 | 87  | 10 | 2 | 133 | 20 | 415 | 116 |
| 77,366 | 28 | 7  | 207 | 89  | 9  | 3 | 128 | 22 | 372 | 121 |
| 77,367 | 16 | 7  | 139 | 89  | 7  | 3 | 101 | 22 | 263 | 121 |
| 77,368 | 15 | 7  | 138 | 89  | 7  | 3 | 94  | 22 | 254 | 121 |
| 77,369 | 15 | 7  | 139 | 89  | 7  | 3 | 93  | 22 | 254 | 121 |
| 77,370 | 14 | 7  | 139 | 90  | 7  | 3 | 93  | 24 | 253 | 124 |
| 77,371 | 15 | 10 | 141 | 91  | 7  | 3 | 92  | 24 | 255 | 128 |
| 77,372 | 15 | 8  | 141 | 89  | 7  | 3 | 92  | 21 | 255 | 121 |
| 77,373 | 15 | 8  | 136 | 83  | 7  | 3 | 92  | 20 | 250 | 114 |
| 77,374 | 15 | 8  | 131 | 76  | 5  | 2 | 86  | 20 | 237 | 106 |
| 77,375 | 15 | 8  | 130 | 77  | 5  | 2 | 85  | 20 | 235 | 107 |
| 77,376 | 15 | 8  | 127 | 77  | 5  | 2 | 85  | 20 | 232 | 107 |
| 77,377 | 15 | 8  | 125 | 76  | 5  | 2 | 91  | 20 | 236 | 106 |
| 77,378 | 15 | 8  | 125 | 76  | 6  | 2 | 93  | 20 | 239 | 106 |
| 77,379 | 15 | 8  | 127 | 76  | 7  | 2 | 95  | 19 | 244 | 105 |
| 77,380 | 15 | 8  | 127 | 74  | 7  | 2 | 95  | 17 | 244 | 101 |
| 77,381 | 15 | 8  | 127 | 74  | 7  | 2 | 95  | 17 | 244 | 101 |
| 77,382 | 15 | 8  | 127 | 74  | 7  | 2 | 95  | 17 | 244 | 101 |
| 77,383 | 13 | 8  | 126 | 75  | 7  | 2 | 91  | 17 | 237 | 102 |
| 77,384 | 13 | 8  | 123 | 76  | 7  | 2 | 90  | 17 | 233 | 103 |
| 77,385 | 13 | 8  | 122 | 80  | 7  | 2 | 90  | 18 | 232 | 108 |
| 77,386 | 13 | 8  | 118 | 85  | 7  | 3 | 85  | 18 | 223 | 114 |
| 77,387 | 13 | 8  | 120 | 87  | 6  | 5 | 80  | 27 | 219 | 127 |
| 77,388 | 13 | 8  | 117 | 106 | 6  | 5 | 69  | 37 | 205 | 156 |
| 77,389 | 13 | 8  | 115 | 107 | 6  | 6 | 66  | 41 | 200 | 162 |
| 77,390 | 13 | 8  | 118 | 109 | 6  | 6 | 70  | 41 | 207 | 164 |
| 77,391 | 12 | 8  | 116 | 109 | 5  | 6 | 70  | 41 | 203 | 164 |
| 77,392 | 11 | 8  | 111 | 106 | 5  | 6 | 68  | 40 | 195 | 160 |
| 77,393 | 11 | 8  | 111 | 104 | 5  | 6 | 71  | 40 | 198 | 158 |
| 77,394 | 11 | 8  | 115 | 107 | 5  | 6 | 70  | 40 | 201 | 161 |
| 77,395 | 11 | 8  | 115 | 107 | 5  | 6 | 70  | 40 | 201 | 161 |
| 77,396 | 13 | 8  | 169 | 108 | 6  | 6 | 110 | 40 | 298 | 162 |



|        |    |   |     |     |    |   |     |    |     |     |
|--------|----|---|-----|-----|----|---|-----|----|-----|-----|
| 77,397 | 13 | 8 | 169 | 108 | 6  | 6 | 110 | 40 | 298 | 162 |
| 77,398 | 13 | 7 | 169 | 109 | 6  | 6 | 110 | 40 | 298 | 162 |
| 77,399 | 13 | 7 | 169 | 107 | 6  | 6 | 111 | 40 | 299 | 160 |
| 77,400 | 13 | 7 | 171 | 106 | 6  | 6 | 111 | 40 | 301 | 159 |
| 77,401 | 13 | 7 | 172 | 106 | 6  | 6 | 112 | 39 | 303 | 158 |
| 77,402 | 13 | 7 | 173 | 100 | 6  | 6 | 112 | 39 | 304 | 152 |
| 77,403 | 13 | 7 | 174 | 100 | 6  | 6 | 111 | 39 | 304 | 152 |
| 77,404 | 13 | 7 | 173 | 101 | 6  | 6 | 110 | 42 | 302 | 156 |
| 77,405 | 13 | 7 | 176 | 101 | 6  | 7 | 110 | 47 | 305 | 162 |
| 77,406 | 10 | 8 | 167 | 104 | 5  | 7 | 106 | 55 | 288 | 174 |
| 77,407 | 10 | 8 | 170 | 105 | 5  | 7 | 108 | 56 | 293 | 176 |
| 77,408 | 10 | 8 | 170 | 105 | 5  | 7 | 108 | 56 | 293 | 176 |
| 77,409 | 17 | 8 | 161 | 105 | 9  | 7 | 107 | 56 | 294 | 176 |
| 77,410 | 12 | 8 | 133 | 105 | 8  | 7 | 91  | 56 | 244 | 176 |
| 77,411 | 12 | 8 | 119 | 98  | 7  | 6 | 86  | 56 | 224 | 168 |
| 77,412 | 12 | 8 | 119 | 98  | 7  | 6 | 86  | 56 | 224 | 168 |
| 77,413 | 12 | 6 | 119 | 93  | 7  | 6 | 86  | 50 | 224 | 155 |
| 77,414 | 12 | 5 | 122 | 84  | 7  | 6 | 86  | 50 | 227 | 145 |
| 77,415 | 12 | 4 | 125 | 62  | 7  | 6 | 89  | 46 | 233 | 118 |
| 77,416 | 12 | 4 | 126 | 59  | 7  | 5 | 88  | 44 | 233 | 112 |
| 77,417 | 13 | 4 | 140 | 59  | 8  | 5 | 91  | 44 | 252 | 112 |
| 77,418 | 13 | 4 | 142 | 59  | 8  | 5 | 91  | 44 | 254 | 112 |
| 77,419 | 13 | 4 | 141 | 59  | 8  | 6 | 91  | 44 | 253 | 113 |
| 77,420 | 13 | 1 | 147 | 63  | 10 | 6 | 90  | 47 | 260 | 117 |
| 77,421 | 17 | 1 | 181 | 70  | 12 | 6 | 111 | 53 | 321 | 130 |
| 77,422 | 16 | 1 | 180 | 70  | 13 | 6 | 111 | 55 | 320 | 132 |
| 77,423 | 17 | 1 | 187 | 71  | 13 | 7 | 113 | 55 | 330 | 134 |
| 77,424 | 17 | 1 | 187 | 72  | 13 | 7 | 112 | 55 | 329 | 135 |
| 77,425 | 20 | 3 | 219 | 83  | 13 | 7 | 118 | 67 | 370 | 160 |
| 77,426 | 20 | 3 | 219 | 81  | 13 | 7 | 113 | 68 | 365 | 159 |
| 77,427 | 23 | 4 | 258 | 96  | 13 | 7 | 133 | 79 | 427 | 186 |
| 77,428 | 23 | 4 | 258 | 97  | 12 | 7 | 131 | 80 | 424 | 188 |
| 77,429 | 23 | 4 | 260 | 99  | 12 | 7 | 131 | 80 | 426 | 190 |
| 77,430 | 23 | 4 | 259 | 100 | 11 | 7 | 129 | 81 | 422 | 192 |
| 77,431 | 24 | 4 | 263 | 101 | 11 | 7 | 130 | 81 | 428 | 193 |
| 77,432 | 24 | 4 | 265 | 101 | 11 | 7 | 130 | 81 | 430 | 193 |
| 77,433 | 24 | 4 | 265 | 101 | 11 | 7 | 130 | 81 | 430 | 193 |
| 77,434 | 24 | 5 | 271 | 99  | 11 | 7 | 130 | 82 | 436 | 193 |
| 77,435 | 25 | 5 | 272 | 99  | 11 | 7 | 130 | 82 | 438 | 193 |
| 77,436 | 25 | 5 | 272 | 95  | 11 | 7 | 130 | 81 | 438 | 188 |
| 77,437 | 25 | 5 | 272 | 90  | 11 | 6 | 130 | 82 | 438 | 183 |

|        |    |   |     |    |    |   |     |    |     |     |
|--------|----|---|-----|----|----|---|-----|----|-----|-----|
| 77,438 | 25 | 5 | 273 | 67 | 11 | 4 | 130 | 63 | 439 | 139 |
| 77,439 | 25 | 5 | 269 | 66 | 11 | 3 | 130 | 59 | 435 | 133 |
| 77,440 | 25 | 5 | 270 | 66 | 11 | 3 | 130 | 59 | 436 | 133 |
| 77,441 | 25 | 5 | 264 | 63 | 11 | 3 | 126 | 59 | 426 | 130 |
| 77,442 | 25 | 5 | 263 | 63 | 11 | 3 | 126 | 59 | 425 | 130 |
| 77,443 | 25 | 5 | 263 | 63 | 11 | 3 | 128 | 60 | 427 | 131 |
| 77,444 | 25 | 5 | 263 | 60 | 11 | 3 | 128 | 60 | 427 | 128 |
| 77,445 | 25 | 5 | 260 | 60 | 11 | 3 | 129 | 60 | 425 | 128 |
| 77,446 | 23 | 5 | 219 | 60 | 10 | 3 | 100 | 60 | 352 | 128 |
| 77,447 | 23 | 5 | 206 | 59 | 10 | 3 | 89  | 60 | 328 | 127 |
| 77,448 | 23 | 5 | 206 | 59 | 10 | 3 | 89  | 60 | 328 | 127 |
| 77,449 | 23 | 6 | 206 | 58 | 10 | 3 | 88  | 61 | 327 | 128 |
| 77,450 | 24 | 6 | 204 | 58 | 10 | 3 | 88  | 61 | 326 | 128 |
| 77,451 | 25 | 6 | 203 | 58 | 10 | 3 | 87  | 61 | 325 | 128 |
| 77,452 | 25 | 6 | 202 | 58 | 10 | 3 | 87  | 61 | 324 | 128 |
| 77,453 | 25 | 7 | 201 | 58 | 10 | 3 | 86  | 61 | 322 | 129 |
| 77,454 | 25 | 7 | 200 | 57 | 10 | 3 | 86  | 58 | 321 | 125 |
| 77,455 | 25 | 7 | 200 | 57 | 10 | 3 | 86  | 59 | 321 | 126 |
| 77,456 | 25 | 7 | 199 | 57 | 10 | 2 | 88  | 54 | 322 | 120 |
| 77,457 | 24 | 6 | 197 | 54 | 10 | 2 | 85  | 46 | 316 | 108 |
| 77,458 | 27 | 6 | 195 | 53 | 11 | 2 | 89  | 45 | 322 | 106 |
| 77,459 | 27 | 6 | 193 | 53 | 11 | 2 | 88  | 45 | 319 | 106 |
| 77,460 | 19 | 6 | 174 | 53 | 7  | 2 | 73  | 45 | 273 | 106 |
| 77,461 | 19 | 6 | 175 | 53 | 7  | 2 | 73  | 45 | 274 | 106 |
| 77,462 | 19 | 6 | 175 | 51 | 7  | 2 | 73  | 44 | 274 | 103 |
| 77,463 | 19 | 6 | 179 | 51 | 7  | 2 | 73  | 44 | 278 | 103 |
| 77,464 | 19 | 6 | 176 | 51 | 7  | 2 | 74  | 44 | 276 | 103 |
| 77,465 | 19 | 6 | 182 | 51 | 7  | 2 | 77  | 44 | 285 | 103 |
| 77,466 | 22 | 6 | 189 | 51 | 8  | 2 | 92  | 44 | 311 | 103 |
| 77,467 | 23 | 6 | 192 | 51 | 8  | 2 | 95  | 44 | 318 | 103 |
| 77,468 | 22 | 6 | 180 | 51 | 7  | 2 | 96  | 44 | 305 | 103 |
| 77,469 | 22 | 6 | 181 | 51 | 7  | 1 | 97  | 44 | 307 | 102 |
| 77,470 | 22 | 6 | 181 | 45 | 7  | 1 | 101 | 39 | 311 | 91  |
| 77,471 | 22 | 6 | 181 | 45 | 5  | 1 | 112 | 42 | 320 | 94  |
| 77,472 | 18 | 6 | 148 | 38 | 3  | 1 | 93  | 36 | 262 | 81  |
| 77,473 | 18 | 6 | 147 | 38 | 2  | 1 | 93  | 34 | 260 | 79  |
| 77,474 | 17 | 6 | 141 | 35 | 2  | 0 | 92  | 34 | 252 | 75  |
| 77,475 | 14 | 4 | 119 | 23 | 2  | 0 | 87  | 22 | 222 | 49  |
| 77,476 | 14 | 4 | 110 | 23 | 2  | 0 | 86  | 22 | 212 | 49  |
| 77,477 | 12 | 4 | 76  | 22 | 2  | 0 | 65  | 21 | 155 | 47  |
| 77,478 | 11 | 3 | 69  | 7  | 2  | 0 | 65  | 10 | 147 | 20  |

|        |    |   |     |    |    |   |     |    |     |    |
|--------|----|---|-----|----|----|---|-----|----|-----|----|
| 77,479 | 11 | 3 | 66  | 6  | 2  | 0 | 65  | 9  | 144 | 18 |
| 77,480 | 11 | 3 | 67  | 3  | 2  | 0 | 65  | 8  | 145 | 14 |
| 77,481 | 11 | 3 | 68  | 3  | 2  | 0 | 65  | 8  | 146 | 14 |
| 77,482 | 10 | 3 | 66  | 2  | 2  | 0 | 64  | 8  | 142 | 13 |
| 77,483 | 10 | 3 | 64  | 3  | 2  | 1 | 64  | 8  | 140 | 15 |
| 77,484 | 10 | 3 | 66  | 3  | 2  | 1 | 65  | 8  | 143 | 15 |
| 77,485 | 10 | 2 | 61  | 1  | 2  | 1 | 66  | 7  | 139 | 11 |
| 77,486 | 9  | 2 | 60  | 1  | 2  | 1 | 69  | 7  | 140 | 11 |
| 77,487 | 9  | 2 | 59  | 1  | 2  | 1 | 69  | 7  | 139 | 11 |
| 77,488 | 9  | 2 | 58  | 1  | 2  | 1 | 68  | 6  | 137 | 10 |
| 77,489 | 10 | 2 | 71  | 1  | 2  | 1 | 71  | 6  | 154 | 10 |
| 77,490 | 10 | 2 | 82  | 1  | 2  | 1 | 77  | 6  | 171 | 10 |
| 77,491 | 10 | 2 | 81  | 1  | 2  | 1 | 77  | 6  | 170 | 10 |
| 77,492 | 17 | 2 | 101 | 1  | 3  | 1 | 98  | 6  | 219 | 10 |
| 77,493 | 17 | 2 | 106 | 1  | 3  | 1 | 100 | 6  | 226 | 10 |
| 77,494 | 17 | 2 | 109 | 1  | 3  | 1 | 97  | 5  | 226 | 9  |
| 77,495 | 17 | 2 | 132 | 1  | 8  | 1 | 114 | 5  | 271 | 9  |
| 77,496 | 17 | 2 | 131 | 1  | 8  | 1 | 113 | 5  | 269 | 9  |
| 77,497 | 17 | 2 | 271 | 1  | 10 | 1 | 131 | 5  | 429 | 9  |
| 77,498 | 16 | 2 | 271 | 1  | 10 | 1 | 131 | 5  | 428 | 9  |
| 77,499 | 17 | 2 | 284 | 1  | 10 | 1 | 139 | 5  | 450 | 9  |
| 77,500 | 17 | 1 | 285 | 1  | 10 | 1 | 139 | 4  | 451 | 7  |
| 77,501 | 17 | 1 | 285 | 1  | 10 | 1 | 139 | 4  | 451 | 7  |
| 77,502 | 16 | 1 | 287 | 1  | 10 | 1 | 140 | 4  | 453 | 7  |
| 77,503 | 16 | 1 | 286 | 2  | 10 | 1 | 140 | 4  | 452 | 8  |
| 77,504 | 17 | 0 | 298 | 3  | 10 | 1 | 156 | 6  | 481 | 10 |
| 77,505 | 17 | 0 | 300 | 7  | 10 | 1 | 162 | 8  | 489 | 16 |
| 77,506 | 17 | 0 | 301 | 9  | 10 | 1 | 162 | 7  | 490 | 17 |
| 77,507 | 17 | 0 | 298 | 10 | 10 | 1 | 160 | 7  | 485 | 18 |
| 77,508 | 17 | 0 | 302 | 10 | 10 | 1 | 161 | 9  | 490 | 20 |
| 77,509 | 14 | 0 | 301 | 10 | 9  | 1 | 155 | 9  | 479 | 20 |
| 77,510 | 14 | 0 | 301 | 10 | 9  | 1 | 155 | 9  | 479 | 20 |
| 77,511 | 14 | 0 | 303 | 10 | 9  | 1 | 157 | 9  | 483 | 20 |
| 77,512 | 14 | 0 | 303 | 10 | 9  | 1 | 157 | 13 | 483 | 24 |
| 77,513 | 14 | 1 | 303 | 10 | 9  | 1 | 157 | 14 | 483 | 26 |
| 77,514 | 14 | 1 | 300 | 10 | 9  | 1 | 158 | 14 | 481 | 26 |
| 77,515 | 14 | 1 | 304 | 12 | 9  | 1 | 159 | 16 | 486 | 30 |
| 77,516 | 15 | 1 | 299 | 14 | 10 | 1 | 163 | 16 | 487 | 32 |
| 77,517 | 12 | 1 | 290 | 14 | 9  | 1 | 146 | 16 | 457 | 32 |
| 77,518 | 11 | 1 | 286 | 14 | 9  | 1 | 143 | 16 | 449 | 32 |
| 77,519 | 11 | 2 | 285 | 14 | 9  | 1 | 139 | 19 | 444 | 36 |

|        |    |   |     |    |    |   |     |    |     |    |
|--------|----|---|-----|----|----|---|-----|----|-----|----|
| 77,520 | 11 | 2 | 282 | 15 | 9  | 1 | 138 | 19 | 440 | 37 |
| 77,521 | 12 | 2 | 282 | 18 | 9  | 1 | 134 | 21 | 437 | 42 |
| 77,522 | 13 | 2 | 275 | 20 | 9  | 1 | 123 | 18 | 420 | 41 |
| 77,523 | 13 | 2 | 274 | 20 | 9  | 1 | 121 | 19 | 417 | 42 |
| 77,524 | 13 | 2 | 274 | 20 | 9  | 1 | 121 | 21 | 417 | 44 |
| 77,525 | 13 | 2 | 273 | 21 | 9  | 1 | 120 | 21 | 415 | 45 |
| 77,526 | 13 | 2 | 274 | 21 | 9  | 1 | 120 | 21 | 416 | 45 |
| 77,527 | 13 | 2 | 274 | 21 | 9  | 1 | 120 | 21 | 416 | 45 |
| 77,528 | 13 | 2 | 275 | 21 | 9  | 1 | 120 | 21 | 417 | 45 |
| 77,529 | 13 | 2 | 274 | 21 | 9  | 1 | 122 | 21 | 418 | 45 |
| 77,530 | 13 | 2 | 274 | 21 | 9  | 1 | 122 | 22 | 418 | 46 |
| 77,531 | 13 | 2 | 274 | 21 | 9  | 1 | 122 | 22 | 418 | 46 |
| 77,532 | 13 | 2 | 273 | 21 | 9  | 1 | 122 | 22 | 417 | 46 |
| 77,533 | 13 | 2 | 271 | 20 | 9  | 0 | 122 | 22 | 415 | 44 |
| 77,534 | 13 | 2 | 271 | 20 | 9  | 0 | 123 | 22 | 416 | 44 |
| 77,535 | 13 | 2 | 269 | 20 | 10 | 0 | 123 | 22 | 415 | 44 |
| 77,536 | 13 | 2 | 267 | 20 | 10 | 0 | 122 | 22 | 412 | 44 |
| 77,537 | 13 | 2 | 267 | 20 | 10 | 0 | 119 | 22 | 409 | 44 |
| 77,538 | 12 | 2 | 263 | 20 | 12 | 0 | 120 | 22 | 407 | 44 |
| 77,539 | 12 | 2 | 256 | 20 | 12 | 0 | 119 | 22 | 399 | 44 |
| 77,540 | 12 | 2 | 255 | 20 | 12 | 0 | 119 | 23 | 398 | 45 |
| 77,541 | 12 | 2 | 244 | 24 | 12 | 0 | 113 | 23 | 381 | 49 |
| 77,542 | 5  | 2 | 226 | 26 | 12 | 0 | 94  | 24 | 337 | 52 |
| 77,543 | 5  | 3 | 224 | 26 | 11 | 0 | 94  | 26 | 334 | 55 |
| 77,544 | 5  | 3 | 222 | 30 | 11 | 0 | 94  | 27 | 332 | 60 |
| 77,545 | 5  | 3 | 220 | 34 | 12 | 0 | 95  | 27 | 332 | 64 |
| 77,546 | 7  | 3 | 205 | 34 | 7  | 0 | 77  | 27 | 296 | 64 |
| 77,547 | 7  | 3 | 75  | 34 | 5  | 0 | 64  | 27 | 151 | 64 |
| 77,548 | 7  | 3 | 68  | 34 | 5  | 0 | 63  | 27 | 143 | 64 |
| 77,549 | 6  | 3 | 61  | 35 | 5  | 0 | 56  | 27 | 128 | 65 |
| 77,550 | 8  | 3 | 65  | 35 | 5  | 0 | 69  | 27 | 147 | 65 |
| 77,551 | 9  | 3 | 81  | 35 | 5  | 0 | 79  | 27 | 174 | 65 |
| 77,552 | 9  | 3 | 81  | 33 | 5  | 0 | 78  | 25 | 173 | 61 |
| 77,553 | 9  | 3 | 81  | 33 | 5  | 0 | 82  | 25 | 177 | 61 |
| 77,554 | 8  | 3 | 69  | 34 | 5  | 0 | 66  | 27 | 148 | 64 |
| 77,555 | 8  | 3 | 69  | 34 | 5  | 0 | 67  | 27 | 149 | 64 |
| 77,556 | 8  | 3 | 67  | 30 | 5  | 0 | 62  | 25 | 142 | 58 |
| 77,557 | 8  | 3 | 66  | 29 | 5  | 0 | 61  | 25 | 140 | 57 |
| 77,558 | 8  | 3 | 66  | 28 | 5  | 0 | 61  | 25 | 140 | 56 |
| 77,559 | 8  | 3 | 63  | 30 | 5  | 0 | 60  | 24 | 136 | 57 |
| 77,560 | 8  | 4 | 63  | 30 | 5  | 0 | 60  | 24 | 136 | 58 |

|        |   |   |    |    |   |   |    |    |     |     |
|--------|---|---|----|----|---|---|----|----|-----|-----|
| 77,561 | 8 | 4 | 61 | 30 | 5 | 0 | 59 | 24 | 133 | 58  |
| 77,562 | 8 | 4 | 61 | 30 | 5 | 0 | 59 | 24 | 133 | 58  |
| 77,563 | 8 | 3 | 61 | 28 | 5 | 0 | 58 | 17 | 132 | 48  |
| 77,564 | 8 | 3 | 60 | 28 | 5 | 0 | 58 | 17 | 131 | 48  |
| 77,565 | 9 | 3 | 58 | 28 | 5 | 0 | 56 | 17 | 128 | 48  |
| 77,566 | 9 | 3 | 56 | 28 | 5 | 0 | 56 | 18 | 126 | 49  |
| 77,567 | 8 | 3 | 54 | 26 | 4 | 0 | 48 | 18 | 114 | 47  |
| 77,568 | 8 | 3 | 53 | 26 | 4 | 0 | 48 | 18 | 113 | 47  |
| 77,569 | 8 | 3 | 53 | 26 | 4 | 0 | 48 | 18 | 113 | 47  |
| 77,570 | 8 | 2 | 53 | 23 | 4 | 0 | 48 | 13 | 113 | 38  |
| 77,571 | 8 | 2 | 53 | 23 | 4 | 0 | 48 | 13 | 113 | 38  |
| 77,572 | 7 | 2 | 53 | 24 | 4 | 0 | 48 | 14 | 112 | 40  |
| 77,573 | 6 | 2 | 54 | 23 | 4 | 0 | 48 | 16 | 112 | 41  |
| 77,574 | 6 | 2 | 54 | 29 | 4 | 0 | 48 | 15 | 112 | 46  |
| 77,575 | 6 | 2 | 54 | 33 | 4 | 0 | 48 | 16 | 112 | 51  |
| 77,576 | 6 | 2 | 53 | 33 | 4 | 0 | 48 | 16 | 111 | 51  |
| 77,577 | 6 | 2 | 53 | 38 | 4 | 0 | 48 | 20 | 111 | 60  |
| 77,578 | 6 | 3 | 52 | 43 | 4 | 0 | 48 | 23 | 110 | 69  |
| 77,579 | 6 | 4 | 59 | 46 | 4 | 0 | 48 | 27 | 117 | 77  |
| 77,580 | 6 | 4 | 59 | 46 | 4 | 0 | 47 | 27 | 116 | 77  |
| 77,581 | 6 | 4 | 61 | 52 | 4 | 0 | 48 | 26 | 119 | 82  |
| 77,582 | 6 | 4 | 63 | 56 | 4 | 0 | 53 | 29 | 126 | 89  |
| 77,583 | 6 | 4 | 63 | 57 | 4 | 0 | 55 | 30 | 128 | 91  |
| 77,584 | 6 | 5 | 63 | 63 | 4 | 0 | 55 | 32 | 128 | 100 |
| 77,585 | 6 | 5 | 63 | 66 | 4 | 0 | 54 | 32 | 127 | 103 |
| 77,586 | 6 | 5 | 63 | 66 | 3 | 0 | 53 | 32 | 125 | 103 |
| 77,587 | 6 | 5 | 63 | 66 | 3 | 0 | 53 | 32 | 125 | 103 |
| 77,588 | 6 | 5 | 66 | 66 | 2 | 0 | 53 | 32 | 127 | 103 |
| 77,589 | 6 | 5 | 66 | 66 | 1 | 0 | 52 | 32 | 125 | 103 |
| 77,590 | 6 | 5 | 66 | 66 | 1 | 0 | 52 | 32 | 125 | 103 |
| 77,591 | 6 | 5 | 67 | 66 | 1 | 0 | 51 | 31 | 125 | 102 |
| 77,592 | 6 | 5 | 67 | 62 | 1 | 0 | 51 | 31 | 125 | 98  |
| 77,593 | 6 | 5 | 67 | 60 | 1 | 0 | 51 | 30 | 125 | 95  |
| 77,594 | 6 | 4 | 69 | 56 | 1 | 0 | 49 | 27 | 125 | 87  |
| 77,595 | 6 | 4 | 66 | 52 | 1 | 0 | 47 | 27 | 120 | 83  |
| 77,596 | 6 | 4 | 64 | 52 | 0 | 0 | 46 | 27 | 116 | 83  |
| 77,597 | 4 | 5 | 57 | 52 | 0 | 0 | 46 | 28 | 107 | 85  |
| 77,598 | 4 | 5 | 54 | 52 | 0 | 0 | 43 | 28 | 101 | 85  |
| 77,599 | 4 | 6 | 55 | 52 | 0 | 0 | 42 | 28 | 101 | 86  |
| 77,600 | 4 | 6 | 52 | 52 | 0 | 0 | 42 | 30 | 98  | 88  |
| 77,601 | 2 | 6 | 46 | 55 | 0 | 1 | 28 | 31 | 76  | 93  |

|        |    |    |     |    |    |   |     |    |     |     |
|--------|----|----|-----|----|----|---|-----|----|-----|-----|
| 77,602 | 2  | 6  | 33  | 55 | 0  | 1 | 18  | 31 | 53  | 93  |
| 77,603 | 2  | 6  | 36  | 55 | 0  | 1 | 18  | 31 | 56  | 93  |
| 77,604 | 2  | 6  | 35  | 55 | 0  | 1 | 15  | 31 | 52  | 93  |
| 77,605 | 2  | 6  | 39  | 54 | 1  | 1 | 18  | 29 | 60  | 90  |
| 77,606 | 7  | 6  | 75  | 54 | 2  | 1 | 26  | 29 | 110 | 90  |
| 77,607 | 7  | 6  | 76  | 54 | 2  | 1 | 29  | 29 | 114 | 90  |
| 77,608 | 9  | 6  | 92  | 53 | 5  | 1 | 35  | 29 | 141 | 89  |
| 77,609 | 9  | 6  | 92  | 54 | 5  | 1 | 35  | 29 | 141 | 90  |
| 77,610 | 12 | 5  | 112 | 52 | 5  | 1 | 42  | 28 | 171 | 86  |
| 77,611 | 17 | 5  | 137 | 52 | 6  | 1 | 56  | 28 | 216 | 86  |
| 77,612 | 25 | 5  | 214 | 52 | 7  | 1 | 103 | 28 | 349 | 86  |
| 77,613 | 26 | 5  | 215 | 52 | 7  | 1 | 104 | 30 | 352 | 88  |
| 77,614 | 33 | 5  | 244 | 54 | 9  | 1 | 132 | 31 | 418 | 91  |
| 77,615 | 33 | 6  | 244 | 54 | 9  | 1 | 132 | 32 | 418 | 93  |
| 77,616 | 32 | 6  | 244 | 54 | 9  | 1 | 132 | 32 | 417 | 93  |
| 77,617 | 36 | 6  | 270 | 63 | 11 | 1 | 149 | 44 | 466 | 114 |
| 77,618 | 36 | 6  | 270 | 64 | 11 | 1 | 149 | 46 | 466 | 117 |
| 77,619 | 36 | 6  | 270 | 65 | 11 | 1 | 149 | 46 | 466 | 118 |
| 77,620 | 36 | 6  | 271 | 65 | 11 | 1 | 149 | 46 | 467 | 118 |
| 77,621 | 36 | 6  | 275 | 64 | 11 | 1 | 152 | 47 | 474 | 118 |
| 77,622 | 36 | 6  | 275 | 63 | 11 | 1 | 153 | 46 | 475 | 116 |
| 77,623 | 36 | 6  | 274 | 63 | 11 | 1 | 153 | 46 | 474 | 116 |
| 77,624 | 36 | 6  | 276 | 62 | 12 | 1 | 155 | 44 | 479 | 113 |
| 77,625 | 36 | 6  | 276 | 56 | 12 | 1 | 155 | 44 | 479 | 107 |
| 77,626 | 38 | 6  | 293 | 54 | 13 | 1 | 167 | 43 | 511 | 104 |
| 77,627 | 38 | 6  | 293 | 58 | 13 | 1 | 167 | 46 | 511 | 111 |
| 77,628 | 39 | 8  | 307 | 70 | 14 | 2 | 174 | 43 | 534 | 123 |
| 77,629 | 39 | 7  | 304 | 68 | 14 | 2 | 174 | 40 | 531 | 117 |
| 77,630 | 39 | 6  | 299 | 65 | 14 | 2 | 173 | 36 | 525 | 109 |
| 77,631 | 39 | 7  | 298 | 70 | 14 | 3 | 172 | 36 | 523 | 116 |
| 77,632 | 39 | 7  | 298 | 64 | 14 | 3 | 171 | 36 | 522 | 110 |
| 77,633 | 39 | 7  | 296 | 60 | 14 | 3 | 167 | 33 | 516 | 103 |
| 77,634 | 39 | 7  | 296 | 66 | 14 | 3 | 165 | 34 | 514 | 110 |
| 77,635 | 39 | 8  | 296 | 64 | 14 | 3 | 165 | 37 | 514 | 112 |
| 77,636 | 39 | 10 | 296 | 80 | 14 | 3 | 165 | 44 | 514 | 137 |
| 77,637 | 39 | 10 | 296 | 84 | 14 | 4 | 165 | 44 | 514 | 142 |
| 77,638 | 39 | 11 | 296 | 88 | 14 | 4 | 165 | 46 | 514 | 149 |
| 77,639 | 39 | 12 | 293 | 92 | 14 | 4 | 164 | 48 | 510 | 156 |
| 77,640 | 39 | 12 | 293 | 93 | 14 | 4 | 164 | 48 | 510 | 157 |
| 77,641 | 39 | 13 | 291 | 94 | 14 | 4 | 164 | 48 | 508 | 159 |
| 77,642 | 39 | 13 | 290 | 94 | 14 | 4 | 164 | 48 | 507 | 159 |

|        |    |    |     |     |    |   |     |    |     |     |
|--------|----|----|-----|-----|----|---|-----|----|-----|-----|
| 77,643 | 39 | 14 | 290 | 97  | 14 | 5 | 164 | 49 | 507 | 165 |
| 77,644 | 39 | 16 | 290 | 97  | 14 | 5 | 164 | 49 | 507 | 167 |
| 77,645 | 39 | 16 | 288 | 99  | 14 | 5 | 164 | 52 | 505 | 172 |
| 77,646 | 39 | 16 | 288 | 99  | 14 | 5 | 164 | 52 | 505 | 172 |
| 77,647 | 39 | 16 | 289 | 100 | 14 | 6 | 166 | 53 | 508 | 175 |
| 77,648 | 39 | 15 | 289 | 101 | 14 | 6 | 164 | 52 | 506 | 174 |
| 77,649 | 39 | 15 | 287 | 101 | 14 | 6 | 164 | 52 | 504 | 174 |
| 77,650 | 39 | 14 | 286 | 100 | 14 | 6 | 164 | 53 | 503 | 173 |
| 77,651 | 39 | 14 | 286 | 100 | 14 | 6 | 164 | 51 | 503 | 171 |
| 77,652 | 39 | 14 | 292 | 97  | 14 | 5 | 165 | 50 | 510 | 166 |
| 77,653 | 38 | 14 | 288 | 97  | 14 | 5 | 164 | 50 | 504 | 166 |
| 77,654 | 38 | 14 | 286 | 97  | 14 | 5 | 164 | 50 | 502 | 166 |
| 77,655 | 38 | 14 | 282 | 97  | 13 | 5 | 161 | 50 | 494 | 166 |
| 77,656 | 33 | 14 | 247 | 97  | 12 | 5 | 152 | 50 | 444 | 166 |
| 77,657 | 33 | 14 | 246 | 97  | 12 | 5 | 149 | 50 | 440 | 166 |
| 77,658 | 32 | 14 | 236 | 97  | 9  | 5 | 144 | 50 | 421 | 166 |
| 77,659 | 32 | 14 | 233 | 97  | 9  | 5 | 143 | 51 | 417 | 167 |
| 77,660 | 30 | 14 | 218 | 97  | 9  | 5 | 140 | 51 | 397 | 167 |
| 77,661 | 29 | 14 | 212 | 97  | 9  | 5 | 136 | 51 | 386 | 167 |
| 77,662 | 24 | 14 | 185 | 97  | 8  | 5 | 122 | 51 | 339 | 167 |
| 77,663 | 16 | 14 | 109 | 97  | 7  | 5 | 74  | 49 | 206 | 165 |
| 77,664 | 15 | 14 | 108 | 97  | 7  | 5 | 73  | 49 | 203 | 165 |
| 77,665 | 8  | 14 | 79  | 95  | 5  | 5 | 45  | 48 | 137 | 162 |
| 77,666 | 8  | 13 | 74  | 95  | 5  | 5 | 41  | 47 | 128 | 160 |
| 77,667 | 7  | 13 | 66  | 95  | 4  | 5 | 37  | 47 | 114 | 160 |
| 77,668 | 4  | 13 | 53  | 85  | 3  | 5 | 28  | 32 | 88  | 135 |
| 77,669 | 4  | 13 | 52  | 84  | 3  | 5 | 28  | 32 | 87  | 134 |
| 77,670 | 4  | 13 | 52  | 84  | 3  | 5 | 28  | 32 | 87  | 134 |
| 77,671 | 4  | 13 | 50  | 84  | 3  | 5 | 27  | 32 | 84  | 134 |
| 77,672 | 4  | 13 | 48  | 84  | 3  | 5 | 25  | 31 | 80  | 133 |
| 77,673 | 4  | 13 | 48  | 85  | 3  | 5 | 24  | 31 | 79  | 134 |
| 77,674 | 4  | 15 | 48  | 85  | 3  | 5 | 24  | 31 | 79  | 136 |
| 77,675 | 4  | 15 | 46  | 86  | 2  | 5 | 23  | 31 | 75  | 137 |
| 77,676 | 4  | 15 | 37  | 86  | 1  | 5 | 20  | 31 | 62  | 137 |
| 77,677 | 2  | 15 | 29  | 83  | 1  | 5 | 11  | 28 | 43  | 131 |
| 77,678 | 1  | 15 | 18  | 79  | 0  | 5 | 6   | 25 | 25  | 124 |
| 77,679 | 1  | 13 | 14  | 62  | 0  | 4 | 4   | 24 | 19  | 103 |
| 77,680 | 1  | 13 | 14  | 59  | 0  | 4 | 4   | 24 | 19  | 100 |
| 77,681 | 1  | 13 | 14  | 59  | 0  | 4 | 4   | 24 | 19  | 100 |
| 77,682 | 1  | 12 | 14  | 54  | 0  | 3 | 4   | 24 | 19  | 93  |
| 77,683 | 1  | 12 | 14  | 54  | 0  | 3 | 4   | 24 | 19  | 93  |

|        |   |    |    |    |   |   |    |    |    |    |
|--------|---|----|----|----|---|---|----|----|----|----|
| 77,684 | 1 | 12 | 14 | 47 | 0 | 3 | 4  | 22 | 19 | 84 |
| 77,685 | 1 | 12 | 14 | 48 | 0 | 3 | 5  | 22 | 20 | 85 |
| 77,686 | 1 | 10 | 14 | 47 | 0 | 3 | 5  | 17 | 20 | 77 |
| 77,687 | 1 | 8  | 14 | 30 | 0 | 3 | 5  | 11 | 20 | 52 |
| 77,688 | 1 | 9  | 14 | 26 | 0 | 2 | 5  | 11 | 20 | 48 |
| 77,689 | 1 | 7  | 14 | 18 | 0 | 2 | 6  | 7  | 21 | 34 |
| 77,690 | 1 | 7  | 14 | 18 | 0 | 2 | 6  | 7  | 21 | 34 |
| 77,691 | 1 | 7  | 14 | 17 | 0 | 2 | 6  | 7  | 21 | 33 |
| 77,692 | 1 | 6  | 14 | 16 | 0 | 2 | 6  | 7  | 21 | 31 |
| 77,693 | 1 | 6  | 17 | 16 | 0 | 2 | 7  | 7  | 25 | 31 |
| 77,694 | 1 | 5  | 17 | 13 | 0 | 1 | 9  | 6  | 27 | 25 |
| 77,695 | 1 | 3  | 17 | 11 | 0 | 1 | 9  | 3  | 27 | 18 |
| 77,696 | 1 | 3  | 17 | 11 | 0 | 1 | 9  | 3  | 27 | 18 |
| 77,697 | 1 | 3  | 17 | 11 | 0 | 1 | 8  | 3  | 26 | 18 |
| 77,698 | 1 | 3  | 16 | 10 | 0 | 0 | 7  | 2  | 24 | 15 |
| 77,699 | 1 | 3  | 14 | 10 | 0 | 0 | 7  | 2  | 22 | 15 |
| 77,700 | 1 | 3  | 14 | 10 | 0 | 0 | 7  | 2  | 22 | 15 |
| 77,701 | 1 | 3  | 15 | 11 | 0 | 0 | 7  | 1  | 23 | 15 |
| 77,702 | 1 | 3  | 15 | 13 | 0 | 0 | 7  | 1  | 23 | 17 |
| 77,703 | 1 | 3  | 10 | 13 | 0 | 0 | 6  | 1  | 17 | 17 |
| 77,704 | 1 | 3  | 10 | 13 | 0 | 0 | 6  | 1  | 17 | 17 |
| 77,705 | 1 | 3  | 10 | 13 | 0 | 0 | 6  | 1  | 17 | 17 |
| 77,706 | 1 | 3  | 13 | 13 | 0 | 0 | 6  | 1  | 20 | 17 |
| 77,707 | 2 | 3  | 24 | 13 | 1 | 0 | 14 | 1  | 41 | 17 |
| 77,708 | 1 | 3  | 24 | 13 | 1 | 0 | 16 | 1  | 42 | 17 |
| 77,709 | 1 | 3  | 23 | 13 | 1 | 0 | 16 | 1  | 41 | 17 |
| 77,710 | 2 | 3  | 32 | 14 | 1 | 0 | 19 | 0  | 54 | 17 |
| 77,711 | 2 | 4  | 32 | 14 | 1 | 0 | 19 | 0  | 54 | 18 |
| 77,712 | 2 | 4  | 32 | 14 | 1 | 0 | 19 | 0  | 54 | 18 |
| 77,713 | 4 | 4  | 42 | 15 | 6 | 0 | 22 | 0  | 74 | 19 |
| 77,714 | 5 | 4  | 43 | 16 | 6 | 0 | 25 | 0  | 79 | 20 |
| 77,715 | 5 | 4  | 43 | 17 | 6 | 0 | 25 | 0  | 79 | 21 |
| 77,716 | 5 | 4  | 47 | 17 | 6 | 0 | 27 | 0  | 85 | 21 |
| 77,717 | 5 | 4  | 47 | 20 | 6 | 0 | 27 | 0  | 85 | 24 |
| 77,718 | 5 | 4  | 47 | 22 | 6 | 0 | 26 | 0  | 84 | 26 |
| 77,719 | 5 | 4  | 47 | 22 | 6 | 0 | 27 | 0  | 85 | 26 |
| 77,720 | 5 | 4  | 47 | 22 | 6 | 0 | 27 | 0  | 85 | 26 |
| 77,721 | 5 | 4  | 47 | 24 | 6 | 0 | 27 | 0  | 85 | 28 |
| 77,722 | 5 | 5  | 47 | 24 | 6 | 0 | 27 | 0  | 85 | 29 |
| 77,723 | 5 | 5  | 47 | 24 | 6 | 0 | 27 | 0  | 85 | 29 |
| 77,724 | 5 | 5  | 47 | 24 | 6 | 0 | 27 | 0  | 85 | 29 |



|        |   |   |    |    |   |   |    |    |     |     |
|--------|---|---|----|----|---|---|----|----|-----|-----|
| 77,725 | 5 | 3 | 47 | 25 | 6 | 0 | 27 | 1  | 85  | 29  |
| 77,726 | 5 | 3 | 47 | 24 | 6 | 0 | 27 | 1  | 85  | 28  |
| 77,727 | 5 | 3 | 47 | 27 | 6 | 0 | 26 | 1  | 84  | 31  |
| 77,728 | 5 | 3 | 47 | 27 | 6 | 0 | 26 | 1  | 84  | 31  |
| 77,729 | 5 | 3 | 47 | 27 | 6 | 0 | 26 | 1  | 84  | 31  |
| 77,730 | 5 | 3 | 51 | 27 | 6 | 0 | 29 | 1  | 91  | 31  |
| 77,731 | 5 | 3 | 51 | 27 | 6 | 0 | 29 | 1  | 91  | 31  |
| 77,732 | 5 | 3 | 54 | 27 | 6 | 0 | 29 | 1  | 94  | 31  |
| 77,733 | 5 | 3 | 54 | 27 | 6 | 0 | 29 | 1  | 94  | 31  |
| 77,734 | 5 | 3 | 59 | 28 | 6 | 0 | 34 | 2  | 104 | 33  |
| 77,735 | 5 | 3 | 59 | 29 | 6 | 0 | 34 | 2  | 104 | 34  |
| 77,736 | 5 | 3 | 59 | 28 | 6 | 0 | 33 | 2  | 103 | 33  |
| 77,737 | 5 | 3 | 59 | 25 | 6 | 0 | 33 | 2  | 103 | 30  |
| 77,738 | 6 | 2 | 67 | 26 | 6 | 0 | 35 | 4  | 114 | 32  |
| 77,739 | 6 | 2 | 67 | 27 | 6 | 0 | 35 | 4  | 114 | 33  |
| 77,740 | 6 | 2 | 68 | 27 | 6 | 0 | 35 | 4  | 115 | 33  |
| 77,741 | 7 | 2 | 72 | 29 | 6 | 1 | 37 | 6  | 122 | 38  |
| 77,742 | 7 | 2 | 69 | 29 | 6 | 1 | 37 | 6  | 119 | 38  |
| 77,743 | 7 | 2 | 71 | 29 | 7 | 2 | 36 | 6  | 121 | 39  |
| 77,744 | 7 | 2 | 71 | 29 | 7 | 2 | 36 | 6  | 121 | 39  |
| 77,745 | 7 | 2 | 71 | 29 | 7 | 2 | 34 | 6  | 119 | 39  |
| 77,746 | 7 | 2 | 82 | 29 | 7 | 2 | 35 | 7  | 131 | 40  |
| 77,747 | 7 | 2 | 82 | 33 | 7 | 2 | 35 | 7  | 131 | 44  |
| 77,748 | 8 | 3 | 86 | 33 | 7 | 2 | 36 | 8  | 137 | 46  |
| 77,749 | 8 | 3 | 86 | 32 | 7 | 2 | 37 | 8  | 138 | 45  |
| 77,750 | 8 | 3 | 86 | 32 | 7 | 2 | 37 | 8  | 138 | 45  |
| 77,751 | 8 | 3 | 87 | 32 | 7 | 2 | 37 | 8  | 139 | 45  |
| 77,752 | 8 | 3 | 86 | 31 | 7 | 2 | 37 | 8  | 138 | 44  |
| 77,753 | 8 | 3 | 85 | 31 | 7 | 2 | 37 | 8  | 137 | 44  |
| 77,754 | 8 | 3 | 84 | 31 | 7 | 2 | 37 | 8  | 136 | 44  |
| 77,755 | 8 | 3 | 84 | 31 | 7 | 2 | 37 | 8  | 136 | 44  |
| 77,756 | 8 | 3 | 84 | 32 | 7 | 2 | 37 | 8  | 136 | 45  |
| 77,757 | 8 | 3 | 81 | 32 | 7 | 2 | 37 | 8  | 133 | 45  |
| 77,758 | 7 | 3 | 69 | 32 | 6 | 2 | 30 | 9  | 112 | 46  |
| 77,759 | 7 | 4 | 68 | 33 | 6 | 2 | 28 | 10 | 109 | 49  |
| 77,760 | 7 | 4 | 67 | 35 | 6 | 2 | 28 | 10 | 108 | 51  |
| 77,761 | 6 | 4 | 58 | 48 | 6 | 2 | 25 | 17 | 95  | 71  |
| 77,762 | 6 | 5 | 58 | 60 | 6 | 2 | 24 | 23 | 94  | 90  |
| 77,763 | 6 | 5 | 56 | 66 | 5 | 2 | 24 | 28 | 91  | 101 |
| 77,764 | 4 | 5 | 49 | 65 | 1 | 2 | 23 | 29 | 77  | 101 |
| 77,765 | 3 | 5 | 48 | 64 | 1 | 2 | 20 | 29 | 72  | 100 |

|        |    |   |     |    |   |   |    |    |     |     |
|--------|----|---|-----|----|---|---|----|----|-----|-----|
| 77,766 | 3  | 6 | 44  | 64 | 1 | 2 | 18 | 29 | 66  | 101 |
| 77,767 | 3  | 6 | 44  | 64 | 1 | 2 | 18 | 29 | 66  | 101 |
| 77,768 | 3  | 6 | 44  | 59 | 1 | 2 | 18 | 29 | 66  | 96  |
| 77,769 | 3  | 6 | 44  | 59 | 1 | 2 | 18 | 29 | 66  | 96  |
| 77,770 | 3  | 6 | 44  | 59 | 1 | 2 | 18 | 29 | 66  | 96  |
| 77,771 | 3  | 6 | 44  | 59 | 1 | 2 | 18 | 29 | 66  | 96  |
| 77,772 | 3  | 5 | 46  | 57 | 1 | 2 | 18 | 29 | 68  | 93  |
| 77,773 | 3  | 5 | 46  | 56 | 1 | 2 | 18 | 29 | 68  | 92  |
| 77,774 | 3  | 5 | 46  | 56 | 1 | 2 | 18 | 29 | 68  | 92  |
| 77,775 | 3  | 5 | 46  | 56 | 1 | 2 | 18 | 29 | 68  | 92  |
| 77,776 | 3  | 5 | 46  | 55 | 1 | 2 | 18 | 28 | 68  | 90  |
| 77,777 | 4  | 5 | 48  | 55 | 3 | 2 | 18 | 28 | 73  | 90  |
| 77,778 | 4  | 5 | 51  | 52 | 3 | 2 | 18 | 28 | 76  | 87  |
| 77,779 | 8  | 5 | 79  | 52 | 4 | 2 | 20 | 28 | 111 | 87  |
| 77,780 | 11 | 5 | 89  | 52 | 5 | 2 | 24 | 28 | 129 | 87  |
| 77,781 | 11 | 5 | 86  | 52 | 5 | 2 | 25 | 28 | 127 | 87  |
| 77,782 | 11 | 5 | 86  | 52 | 5 | 2 | 25 | 28 | 127 | 87  |
| 77,783 | 11 | 5 | 84  | 52 | 5 | 2 | 25 | 28 | 125 | 87  |
| 77,784 | 11 | 6 | 81  | 52 | 5 | 2 | 20 | 28 | 117 | 88  |
| 77,785 | 11 | 6 | 79  | 53 | 5 | 2 | 20 | 33 | 115 | 94  |
| 77,786 | 11 | 7 | 81  | 65 | 5 | 2 | 20 | 40 | 117 | 114 |
| 77,787 | 11 | 7 | 81  | 68 | 5 | 2 | 20 | 42 | 117 | 119 |
| 77,788 | 11 | 7 | 78  | 69 | 5 | 2 | 18 | 43 | 112 | 121 |
| 77,789 | 14 | 7 | 107 | 69 | 6 | 2 | 48 | 41 | 175 | 119 |
| 77,790 | 16 | 8 | 135 | 71 | 7 | 2 | 64 | 43 | 222 | 124 |
| 77,791 | 15 | 8 | 131 | 71 | 7 | 2 | 62 | 44 | 215 | 125 |
| 77,792 | 15 | 8 | 136 | 69 | 7 | 1 | 66 | 43 | 224 | 121 |
| 77,793 | 17 | 8 | 152 | 70 | 8 | 1 | 75 | 43 | 252 | 122 |
| 77,794 | 17 | 8 | 153 | 70 | 7 | 0 | 78 | 44 | 255 | 122 |
| 77,795 | 17 | 8 | 148 | 70 | 7 | 0 | 77 | 44 | 249 | 122 |
| 77,796 | 17 | 8 | 147 | 70 | 7 | 0 | 79 | 44 | 250 | 122 |
| 77,797 | 17 | 8 | 142 | 70 | 7 | 0 | 79 | 43 | 245 | 121 |
| 77,798 | 16 | 7 | 140 | 66 | 7 | 0 | 78 | 42 | 241 | 115 |
| 77,799 | 16 | 7 | 140 | 66 | 7 | 0 | 77 | 42 | 240 | 115 |
| 77,800 | 16 | 7 | 140 | 66 | 7 | 0 | 77 | 42 | 240 | 115 |
| 77,801 | 16 | 7 | 139 | 67 | 7 | 0 | 77 | 42 | 239 | 116 |
| 77,802 | 16 | 7 | 139 | 66 | 7 | 0 | 77 | 42 | 239 | 115 |
| 77,803 | 16 | 7 | 148 | 65 | 7 | 0 | 83 | 42 | 254 | 114 |
| 77,804 | 16 | 7 | 150 | 65 | 8 | 0 | 86 | 42 | 260 | 114 |
| 77,805 | 16 | 8 | 154 | 65 | 8 | 0 | 86 | 42 | 264 | 115 |
| 77,806 | 16 | 8 | 157 | 66 | 8 | 0 | 86 | 42 | 267 | 116 |

|        |    |   |     |    |    |   |     |    |     |     |
|--------|----|---|-----|----|----|---|-----|----|-----|-----|
| 77,807 | 17 | 8 | 164 | 66 | 11 | 0 | 91  | 42 | 283 | 116 |
| 77,808 | 17 | 8 | 191 | 66 | 12 | 0 | 101 | 41 | 321 | 115 |
| 77,809 | 17 | 7 | 194 | 62 | 12 | 0 | 105 | 40 | 328 | 109 |
| 77,810 | 17 | 7 | 206 | 64 | 13 | 0 | 109 | 40 | 345 | 111 |
| 77,811 | 18 | 8 | 219 | 66 | 13 | 0 | 113 | 43 | 363 | 117 |
| 77,812 | 18 | 8 | 219 | 54 | 13 | 0 | 113 | 36 | 363 | 98  |
| 77,813 | 18 | 6 | 238 | 47 | 13 | 0 | 116 | 30 | 385 | 83  |
| 77,814 | 18 | 7 | 239 | 45 | 13 | 0 | 120 | 28 | 390 | 80  |
| 77,815 | 18 | 7 | 239 | 47 | 13 | 0 | 120 | 27 | 390 | 81  |
| 77,816 | 18 | 7 | 239 | 48 | 13 | 0 | 120 | 27 | 390 | 82  |
| 77,817 | 18 | 6 | 239 | 49 | 13 | 0 | 120 | 29 | 390 | 84  |
| 77,818 | 18 | 6 | 239 | 49 | 13 | 0 | 120 | 29 | 390 | 84  |
| 77,819 | 18 | 6 | 239 | 52 | 13 | 0 | 120 | 29 | 390 | 87  |
| 77,820 | 19 | 7 | 239 | 61 | 13 | 0 | 120 | 31 | 391 | 99  |
| 77,821 | 19 | 7 | 239 | 61 | 13 | 0 | 121 | 31 | 392 | 99  |
| 77,822 | 19 | 7 | 239 | 61 | 13 | 0 | 121 | 31 | 392 | 99  |
| 77,823 | 19 | 7 | 237 | 61 | 13 | 0 | 121 | 31 | 390 | 99  |
| 77,824 | 19 | 7 | 237 | 63 | 13 | 0 | 121 | 31 | 390 | 101 |
| 77,825 | 19 | 7 | 237 | 63 | 13 | 0 | 121 | 31 | 390 | 101 |
| 77,826 | 19 | 7 | 236 | 63 | 11 | 0 | 121 | 31 | 387 | 101 |
| 77,827 | 18 | 7 | 235 | 66 | 11 | 0 | 121 | 31 | 385 | 104 |
| 77,828 | 18 | 7 | 232 | 66 | 11 | 0 | 121 | 31 | 382 | 104 |
| 77,829 | 14 | 7 | 206 | 66 | 11 | 0 | 119 | 31 | 350 | 104 |
| 77,830 | 14 | 7 | 204 | 67 | 10 | 0 | 118 | 33 | 346 | 107 |
| 77,831 | 11 | 7 | 194 | 67 | 9  | 0 | 115 | 33 | 329 | 107 |
| 77,832 | 11 | 7 | 193 | 67 | 9  | 0 | 112 | 33 | 325 | 107 |
| 77,833 | 11 | 7 | 192 | 67 | 9  | 0 | 112 | 33 | 324 | 107 |
| 77,834 | 11 | 6 | 192 | 67 | 9  | 0 | 112 | 33 | 324 | 106 |
| 77,835 | 11 | 6 | 192 | 68 | 9  | 0 | 112 | 33 | 324 | 107 |
| 77,836 | 11 | 6 | 190 | 69 | 9  | 0 | 112 | 29 | 322 | 104 |
| 77,837 | 11 | 5 | 191 | 57 | 9  | 0 | 112 | 23 | 323 | 85  |
| 77,838 | 11 | 5 | 191 | 51 | 9  | 1 | 112 | 21 | 323 | 78  |
| 77,839 | 11 | 5 | 188 | 52 | 9  | 1 | 112 | 23 | 320 | 81  |
| 77,840 | 7  | 5 | 157 | 53 | 8  | 2 | 79  | 23 | 251 | 83  |
| 77,841 | 5  | 5 | 129 | 57 | 7  | 3 | 63  | 24 | 204 | 89  |
| 77,842 | 5  | 8 | 124 | 85 | 7  | 4 | 59  | 40 | 195 | 137 |
| 77,843 | 3  | 8 | 109 | 88 | 6  | 4 | 50  | 39 | 168 | 139 |
| 77,844 | 3  | 8 | 109 | 90 | 6  | 4 | 50  | 42 | 168 | 144 |
| 77,845 | 3  | 8 | 106 | 90 | 6  | 4 | 47  | 42 | 162 | 144 |
| 77,846 | 3  | 9 | 107 | 90 | 6  | 4 | 48  | 42 | 164 | 145 |
| 77,847 | 3  | 9 | 107 | 91 | 6  | 4 | 48  | 42 | 164 | 146 |

|        |    |    |     |     |   |   |    |    |     |     |
|--------|----|----|-----|-----|---|---|----|----|-----|-----|
| 77,848 | 3  | 9  | 105 | 91  | 6 | 4 | 49 | 42 | 163 | 146 |
| 77,849 | 3  | 9  | 119 | 91  | 8 | 4 | 59 | 42 | 189 | 146 |
| 77,850 | 5  | 10 | 125 | 91  | 8 | 4 | 62 | 42 | 200 | 147 |
| 77,851 | 5  | 10 | 125 | 92  | 8 | 4 | 62 | 42 | 200 | 148 |
| 77,852 | 6  | 10 | 138 | 91  | 9 | 4 | 83 | 42 | 236 | 147 |
| 77,853 | 6  | 10 | 134 | 92  | 9 | 4 | 82 | 42 | 231 | 148 |
| 77,854 | 6  | 10 | 134 | 92  | 9 | 4 | 81 | 42 | 230 | 148 |
| 77,855 | 6  | 11 | 135 | 91  | 8 | 4 | 80 | 42 | 229 | 148 |
| 77,856 | 6  | 10 | 131 | 90  | 8 | 4 | 80 | 42 | 225 | 146 |
| 77,857 | 6  | 10 | 128 | 91  | 8 | 4 | 80 | 43 | 222 | 148 |
| 77,858 | 5  | 10 | 124 | 107 | 5 | 5 | 77 | 59 | 211 | 181 |
| 77,859 | 5  | 10 | 97  | 119 | 4 | 5 | 67 | 64 | 173 | 198 |
| 77,860 | 5  | 10 | 94  | 121 | 4 | 5 | 63 | 64 | 166 | 200 |
| 77,861 | 5  | 10 | 84  | 120 | 3 | 5 | 59 | 63 | 151 | 198 |
| 77,862 | 8  | 9  | 116 | 118 | 3 | 5 | 59 | 61 | 186 | 193 |
| 77,863 | 8  | 10 | 100 | 111 | 3 | 5 | 59 | 61 | 170 | 187 |
| 77,864 | 8  | 10 | 100 | 111 | 3 | 5 | 59 | 61 | 170 | 187 |
| 77,865 | 9  | 9  | 138 | 104 | 3 | 5 | 75 | 58 | 225 | 176 |
| 77,866 | 9  | 9  | 138 | 104 | 3 | 5 | 74 | 58 | 224 | 176 |
| 77,867 | 9  | 9  | 139 | 104 | 3 | 5 | 74 | 58 | 225 | 176 |
| 77,868 | 9  | 9  | 147 | 105 | 3 | 5 | 78 | 58 | 237 | 177 |
| 77,869 | 9  | 9  | 147 | 105 | 3 | 5 | 78 | 58 | 237 | 177 |
| 77,870 | 9  | 9  | 148 | 102 | 3 | 5 | 79 | 58 | 239 | 174 |
| 77,871 | 8  | 8  | 150 | 93  | 3 | 5 | 79 | 56 | 240 | 162 |
| 77,872 | 8  | 8  | 150 | 93  | 3 | 5 | 78 | 56 | 239 | 162 |
| 77,873 | 8  | 8  | 150 | 93  | 3 | 5 | 78 | 56 | 239 | 162 |
| 77,874 | 8  | 9  | 151 | 93  | 3 | 5 | 79 | 57 | 241 | 164 |
| 77,875 | 8  | 9  | 151 | 93  | 3 | 5 | 79 | 57 | 241 | 164 |
| 77,876 | 8  | 9  | 151 | 93  | 3 | 5 | 79 | 57 | 241 | 164 |
| 77,877 | 8  | 10 | 152 | 93  | 3 | 5 | 79 | 58 | 242 | 166 |
| 77,878 | 9  | 10 | 152 | 90  | 3 | 5 | 79 | 58 | 243 | 163 |
| 77,879 | 9  | 10 | 153 | 90  | 3 | 7 | 79 | 58 | 244 | 165 |
| 77,880 | 9  | 10 | 154 | 89  | 3 | 7 | 79 | 56 | 245 | 162 |
| 77,881 | 9  | 10 | 154 | 89  | 3 | 7 | 79 | 56 | 245 | 162 |
| 77,882 | 9  | 10 | 154 | 89  | 3 | 7 | 78 | 56 | 244 | 162 |
| 77,883 | 9  | 10 | 154 | 89  | 3 | 7 | 78 | 56 | 244 | 162 |
| 77,884 | 10 | 10 | 156 | 89  | 3 | 7 | 78 | 56 | 247 | 162 |
| 77,885 | 10 | 10 | 156 | 89  | 3 | 7 | 78 | 57 | 247 | 163 |
| 77,886 | 10 | 10 | 156 | 88  | 3 | 7 | 78 | 57 | 247 | 162 |
| 77,887 | 10 | 10 | 156 | 85  | 3 | 7 | 78 | 54 | 247 | 156 |
| 77,888 | 10 | 10 | 156 | 85  | 3 | 7 | 78 | 54 | 247 | 156 |

|        |    |    |     |     |   |    |     |    |     |     |
|--------|----|----|-----|-----|---|----|-----|----|-----|-----|
| 77,889 | 18 | 10 | 220 | 84  | 6 | 6  | 105 | 52 | 349 | 152 |
| 77,890 | 19 | 9  | 233 | 76  | 6 | 4  | 107 | 48 | 365 | 137 |
| 77,891 | 19 | 9  | 239 | 76  | 6 | 4  | 108 | 48 | 372 | 137 |
| 77,892 | 19 | 9  | 238 | 76  | 6 | 4  | 108 | 48 | 371 | 137 |
| 77,893 | 20 | 6  | 239 | 45  | 6 | 3  | 110 | 32 | 375 | 86  |
| 77,894 | 20 | 6  | 239 | 45  | 6 | 3  | 110 | 32 | 375 | 86  |
| 77,895 | 20 | 6  | 239 | 43  | 6 | 3  | 110 | 28 | 375 | 80  |
| 77,896 | 20 | 6  | 240 | 44  | 6 | 4  | 110 | 33 | 376 | 87  |
| 77,897 | 20 | 6  | 239 | 48  | 6 | 4  | 113 | 38 | 378 | 96  |
| 77,898 | 20 | 8  | 239 | 68  | 6 | 6  | 112 | 47 | 377 | 129 |
| 77,899 | 20 | 9  | 225 | 86  | 4 | 8  | 101 | 55 | 350 | 158 |
| 77,900 | 18 | 9  | 221 | 87  | 4 | 8  | 99  | 57 | 342 | 161 |
| 77,901 | 18 | 8  | 219 | 105 | 5 | 8  | 98  | 65 | 340 | 186 |
| 77,902 | 17 | 8  | 204 | 110 | 4 | 8  | 76  | 71 | 301 | 197 |
| 77,903 | 17 | 8  | 203 | 110 | 4 | 8  | 72  | 71 | 296 | 197 |
| 77,904 | 17 | 8  | 201 | 112 | 4 | 8  | 71  | 71 | 293 | 199 |
| 77,905 | 17 | 7  | 200 | 112 | 4 | 8  | 70  | 71 | 291 | 198 |
| 77,906 | 17 | 7  | 198 | 112 | 4 | 8  | 70  | 71 | 289 | 198 |
| 77,907 | 17 | 7  | 198 | 112 | 4 | 8  | 70  | 71 | 289 | 198 |
| 77,908 | 17 | 7  | 198 | 111 | 4 | 8  | 70  | 71 | 289 | 197 |
| 77,909 | 17 | 7  | 195 | 95  | 4 | 7  | 70  | 55 | 286 | 164 |
| 77,910 | 17 | 7  | 195 | 87  | 4 | 7  | 70  | 52 | 286 | 153 |
| 77,911 | 17 | 7  | 195 | 85  | 4 | 7  | 69  | 53 | 285 | 152 |
| 77,912 | 17 | 7  | 193 | 97  | 4 | 10 | 69  | 60 | 283 | 174 |
| 77,913 | 14 | 7  | 148 | 102 | 4 | 10 | 65  | 63 | 231 | 182 |
| 77,914 | 14 | 6  | 148 | 105 | 4 | 10 | 64  | 72 | 230 | 193 |
| 77,915 | 15 | 7  | 143 | 120 | 5 | 11 | 58  | 78 | 221 | 216 |
| 77,916 | 15 | 7  | 131 | 120 | 5 | 11 | 48  | 79 | 199 | 217 |
| 77,917 | 15 | 7  | 131 | 119 | 5 | 11 | 49  | 79 | 200 | 216 |
| 77,918 | 15 | 7  | 138 | 120 | 6 | 13 | 51  | 79 | 210 | 219 |
| 77,919 | 16 | 7  | 136 | 122 | 7 | 13 | 60  | 78 | 219 | 220 |
| 77,920 | 16 | 7  | 135 | 122 | 7 | 13 | 59  | 78 | 217 | 220 |
| 77,921 | 17 | 7  | 135 | 122 | 7 | 13 | 61  | 78 | 220 | 220 |
| 77,922 | 17 | 7  | 135 | 122 | 7 | 13 | 61  | 78 | 220 | 220 |
| 77,923 | 17 | 7  | 136 | 123 | 7 | 13 | 61  | 78 | 221 | 221 |
| 77,924 | 17 | 7  | 135 | 123 | 7 | 13 | 60  | 78 | 219 | 221 |
| 77,925 | 17 | 6  | 135 | 122 | 7 | 13 | 60  | 79 | 219 | 220 |
| 77,926 | 17 | 6  | 135 | 122 | 7 | 13 | 60  | 79 | 219 | 220 |
| 77,927 | 17 | 5  | 134 | 123 | 7 | 13 | 60  | 78 | 218 | 219 |
| 77,928 | 17 | 5  | 139 | 123 | 9 | 13 | 62  | 78 | 227 | 219 |
| 77,929 | 16 | 5  | 149 | 123 | 9 | 13 | 66  | 79 | 240 | 220 |

|        |    |   |     |     |   |    |    |    |     |     |
|--------|----|---|-----|-----|---|----|----|----|-----|-----|
| 77,930 | 17 | 5 | 155 | 123 | 9 | 11 | 71 | 79 | 252 | 218 |
| 77,931 | 17 | 5 | 154 | 123 | 9 | 11 | 71 | 79 | 251 | 218 |
| 77,932 | 17 | 5 | 155 | 123 | 9 | 11 | 71 | 79 | 252 | 218 |
| 77,933 | 17 | 5 | 155 | 123 | 9 | 11 | 71 | 79 | 252 | 218 |
| 77,934 | 16 | 5 | 155 | 123 | 9 | 11 | 71 | 79 | 251 | 218 |
| 77,935 | 16 | 5 | 153 | 123 | 9 | 11 | 71 | 79 | 249 | 218 |
| 77,936 | 16 | 5 | 153 | 123 | 9 | 11 | 71 | 79 | 249 | 218 |
| 77,937 | 13 | 6 | 94  | 126 | 6 | 11 | 49 | 81 | 162 | 224 |
| 77,938 | 13 | 6 | 93  | 124 | 6 | 11 | 48 | 81 | 160 | 222 |
| 77,939 | 13 | 6 | 95  | 124 | 6 | 11 | 48 | 81 | 162 | 222 |
| 77,940 | 8  | 6 | 90  | 125 | 6 | 11 | 45 | 83 | 149 | 225 |
| 77,941 | 7  | 6 | 77  | 125 | 6 | 11 | 43 | 83 | 133 | 225 |
| 77,942 | 7  | 6 | 71  | 125 | 6 | 11 | 41 | 83 | 125 | 225 |
| 77,943 | 7  | 6 | 71  | 125 | 6 | 11 | 40 | 83 | 124 | 225 |
| 77,944 | 6  | 6 | 72  | 125 | 6 | 11 | 40 | 83 | 124 | 225 |
| 77,945 | 6  | 6 | 71  | 124 | 6 | 11 | 41 | 83 | 124 | 224 |
| 77,946 | 6  | 6 | 72  | 124 | 6 | 11 | 43 | 83 | 127 | 224 |
| 77,947 | 7  | 5 | 78  | 118 | 6 | 10 | 43 | 73 | 134 | 206 |
| 77,948 | 7  | 3 | 78  | 98  | 6 | 8  | 43 | 66 | 134 | 175 |
| 77,949 | 7  | 3 | 78  | 98  | 6 | 8  | 43 | 67 | 134 | 176 |
| 77,950 | 7  | 2 | 79  | 81  | 7 | 6  | 46 | 59 | 139 | 148 |
| 77,951 | 7  | 2 | 79  | 80  | 7 | 6  | 47 | 57 | 140 | 145 |
| 77,952 | 7  | 2 | 83  | 57  | 6 | 6  | 49 | 43 | 145 | 108 |
| 77,953 | 7  | 2 | 83  | 58  | 6 | 6  | 49 | 43 | 145 | 109 |
| 77,954 | 7  | 2 | 86  | 58  | 6 | 6  | 49 | 44 | 148 | 110 |
| 77,955 | 7  | 2 | 100 | 55  | 6 | 6  | 52 | 44 | 165 | 107 |
| 77,956 | 7  | 2 | 100 | 55  | 6 | 6  | 52 | 44 | 165 | 107 |
| 77,957 | 7  | 2 | 105 | 55  | 6 | 6  | 54 | 43 | 172 | 106 |
| 77,958 | 7  | 2 | 113 | 55  | 8 | 6  | 57 | 43 | 185 | 106 |
| 77,959 | 7  | 2 | 113 | 56  | 8 | 6  | 57 | 43 | 185 | 107 |
| 77,960 | 7  | 2 | 114 | 56  | 8 | 6  | 59 | 43 | 188 | 107 |
| 77,961 | 8  | 2 | 115 | 52  | 8 | 6  | 59 | 41 | 190 | 101 |
| 77,962 | 8  | 2 | 116 | 51  | 8 | 6  | 60 | 41 | 192 | 100 |
| 77,963 | 8  | 2 | 130 | 36  | 8 | 3  | 68 | 31 | 214 | 72  |
| 77,964 | 8  | 2 | 130 | 36  | 8 | 3  | 69 | 31 | 215 | 72  |
| 77,965 | 8  | 2 | 126 | 34  | 8 | 3  | 68 | 21 | 210 | 60  |
| 77,966 | 6  | 1 | 104 | 21  | 7 | 2  | 63 | 17 | 180 | 41  |
| 77,967 | 6  | 2 | 104 | 29  | 7 | 4  | 62 | 21 | 179 | 56  |
| 77,968 | 6  | 2 | 105 | 38  | 7 | 4  | 62 | 21 | 180 | 65  |
| 77,969 | 6  | 3 | 99  | 42  | 6 | 2  | 58 | 24 | 169 | 71  |
| 77,970 | 6  | 3 | 106 | 38  | 5 | 2  | 51 | 23 | 168 | 66  |

|        |    |   |     |    |   |   |    |    |     |     |
|--------|----|---|-----|----|---|---|----|----|-----|-----|
| 77,971 | 5  | 3 | 105 | 38 | 5 | 2 | 49 | 23 | 164 | 66  |
| 77,972 | 5  | 3 | 113 | 39 | 6 | 2 | 50 | 24 | 174 | 68  |
| 77,973 | 5  | 3 | 112 | 39 | 6 | 2 | 50 | 24 | 173 | 68  |
| 77,974 | 5  | 3 | 114 | 38 | 6 | 2 | 50 | 25 | 175 | 68  |
| 77,975 | 5  | 3 | 115 | 40 | 6 | 2 | 50 | 27 | 176 | 72  |
| 77,976 | 5  | 4 | 118 | 45 | 6 | 2 | 50 | 27 | 179 | 78  |
| 77,977 | 5  | 4 | 118 | 47 | 6 | 3 | 50 | 27 | 179 | 81  |
| 77,978 | 5  | 5 | 119 | 51 | 6 | 3 | 50 | 30 | 180 | 89  |
| 77,979 | 5  | 7 | 121 | 52 | 4 | 4 | 48 | 34 | 178 | 97  |
| 77,980 | 5  | 7 | 115 | 52 | 4 | 4 | 44 | 33 | 168 | 96  |
| 77,981 | 6  | 8 | 116 | 58 | 4 | 4 | 40 | 37 | 166 | 107 |
| 77,982 | 6  | 8 | 115 | 58 | 4 | 5 | 40 | 37 | 165 | 108 |
| 77,983 | 9  | 9 | 134 | 70 | 4 | 5 | 44 | 40 | 191 | 124 |
| 77,984 | 9  | 9 | 134 | 70 | 4 | 5 | 44 | 40 | 191 | 124 |
| 77,985 | 9  | 9 | 136 | 70 | 4 | 5 | 45 | 40 | 194 | 124 |
| 77,986 | 9  | 9 | 138 | 70 | 4 | 5 | 46 | 39 | 197 | 123 |
| 77,987 | 13 | 9 | 180 | 70 | 4 | 5 | 62 | 39 | 259 | 123 |
| 77,988 | 13 | 8 | 181 | 67 | 4 | 5 | 63 | 37 | 261 | 117 |
| 77,989 | 14 | 8 | 181 | 67 | 4 | 5 | 64 | 36 | 263 | 116 |
| 77,990 | 14 | 8 | 179 | 67 | 4 | 5 | 63 | 36 | 260 | 116 |
| 77,991 | 14 | 8 | 180 | 67 | 4 | 5 | 63 | 34 | 261 | 114 |
| 77,992 | 14 | 8 | 180 | 67 | 4 | 5 | 63 | 35 | 261 | 115 |
| 77,993 | 14 | 8 | 180 | 67 | 4 | 5 | 63 | 35 | 261 | 115 |
| 77,994 | 14 | 8 | 180 | 67 | 4 | 5 | 63 | 35 | 261 | 115 |
| 77,995 | 14 | 8 | 180 | 67 | 4 | 5 | 65 | 35 | 263 | 115 |
| 77,996 | 14 | 8 | 180 | 67 | 4 | 5 | 64 | 35 | 262 | 115 |
| 77,997 | 14 | 8 | 178 | 67 | 4 | 5 | 62 | 35 | 258 | 115 |
| 77,998 | 13 | 8 | 172 | 67 | 4 | 5 | 58 | 33 | 247 | 113 |
| 77,999 | 13 | 8 | 172 | 67 | 4 | 5 | 58 | 33 | 247 | 113 |
| 78,000 | 13 | 8 | 171 | 66 | 3 | 5 | 55 | 32 | 242 | 111 |
| 78,001 | 13 | 8 | 171 | 66 | 3 | 5 | 55 | 32 | 242 | 111 |
| 78,002 | 13 | 8 | 171 | 65 | 3 | 5 | 54 | 32 | 241 | 110 |
| 78,003 | 13 | 8 | 167 | 65 | 3 | 5 | 52 | 32 | 235 | 110 |
| 78,004 | 13 | 8 | 164 | 64 | 3 | 5 | 52 | 32 | 232 | 109 |
| 78,005 | 13 | 8 | 150 | 64 | 3 | 5 | 49 | 31 | 215 | 108 |
| 78,006 | 13 | 8 | 153 | 64 | 3 | 5 | 49 | 30 | 218 | 107 |
| 78,007 | 13 | 8 | 151 | 64 | 3 | 5 | 49 | 31 | 216 | 108 |
| 78,008 | 13 | 8 | 148 | 64 | 3 | 5 | 48 | 31 | 212 | 108 |
| 78,009 | 13 | 8 | 141 | 64 | 1 | 5 | 45 | 31 | 200 | 108 |
| 78,010 | 13 | 8 | 140 | 63 | 1 | 5 | 43 | 31 | 197 | 107 |
| 78,011 | 12 | 8 | 140 | 63 | 1 | 5 | 43 | 30 | 196 | 106 |

|        |    |   |     |    |   |   |     |    |     |     |
|--------|----|---|-----|----|---|---|-----|----|-----|-----|
| 78,012 | 12 | 8 | 141 | 63 | 1 | 6 | 42  | 30 | 196 | 107 |
| 78,013 | 12 | 8 | 140 | 63 | 1 | 6 | 40  | 30 | 193 | 107 |
| 78,014 | 12 | 8 | 132 | 61 | 1 | 6 | 37  | 30 | 182 | 105 |
| 78,015 | 11 | 8 | 132 | 61 | 1 | 6 | 36  | 30 | 180 | 105 |
| 78,016 | 11 | 8 | 132 | 60 | 1 | 6 | 35  | 30 | 179 | 104 |
| 78,017 | 14 | 7 | 185 | 50 | 2 | 4 | 45  | 24 | 246 | 85  |
| 78,018 | 15 | 7 | 200 | 50 | 2 | 4 | 48  | 25 | 265 | 86  |
| 78,019 | 17 | 7 | 213 | 41 | 3 | 4 | 53  | 25 | 286 | 77  |
| 78,020 | 20 | 6 | 213 | 36 | 3 | 4 | 56  | 22 | 292 | 68  |
| 78,021 | 27 | 6 | 241 | 37 | 9 | 4 | 92  | 22 | 369 | 69  |
| 78,022 | 27 | 6 | 242 | 37 | 9 | 4 | 92  | 22 | 370 | 69  |
| 78,023 | 27 | 6 | 236 | 36 | 8 | 4 | 92  | 21 | 363 | 67  |
| 78,024 | 27 | 6 | 234 | 36 | 8 | 4 | 92  | 21 | 361 | 67  |
| 78,025 | 29 | 6 | 251 | 38 | 8 | 4 | 98  | 20 | 386 | 68  |
| 78,026 | 29 | 6 | 259 | 36 | 8 | 4 | 105 | 19 | 401 | 65  |
| 78,027 | 29 | 5 | 257 | 30 | 8 | 4 | 105 | 17 | 399 | 56  |
| 78,028 | 30 | 5 | 262 | 28 | 8 | 3 | 106 | 17 | 406 | 53  |
| 78,029 | 30 | 2 | 261 | 22 | 8 | 2 | 106 | 10 | 405 | 36  |
| 78,030 | 30 | 2 | 254 | 23 | 8 | 2 | 106 | 10 | 398 | 37  |
| 78,031 | 30 | 2 | 250 | 23 | 8 | 2 | 106 | 10 | 394 | 37  |
| 78,032 | 29 | 1 | 242 | 18 | 8 | 2 | 105 | 7  | 384 | 28  |
| 78,033 | 27 | 1 | 234 | 18 | 8 | 1 | 105 | 7  | 374 | 27  |
| 78,034 | 26 | 0 | 224 | 6  | 8 | 1 | 101 | 4  | 359 | 11  |
| 78,035 | 26 | 0 | 222 | 6  | 8 | 1 | 100 | 4  | 356 | 11  |
| 78,036 | 26 | 1 | 220 | 6  | 8 | 1 | 99  | 4  | 353 | 12  |
| 78,037 | 22 | 1 | 178 | 7  | 8 | 1 | 83  | 5  | 291 | 14  |
| 78,038 | 22 | 1 | 177 | 7  | 8 | 1 | 82  | 5  | 289 | 14  |
| 78,039 | 22 | 1 | 178 | 8  | 8 | 1 | 81  | 5  | 289 | 15  |
| 78,040 | 22 | 1 | 178 | 8  | 8 | 1 | 81  | 6  | 289 | 16  |
| 78,041 | 22 | 1 | 181 | 9  | 8 | 1 | 82  | 6  | 293 | 17  |
| 78,042 | 22 | 1 | 180 | 9  | 8 | 1 | 82  | 6  | 292 | 17  |
| 78,043 | 22 | 1 | 180 | 9  | 8 | 1 | 82  | 5  | 292 | 16  |
| 78,044 | 22 | 1 | 180 | 11 | 8 | 1 | 82  | 5  | 292 | 18  |
| 78,045 | 22 | 1 | 182 | 11 | 8 | 1 | 83  | 5  | 295 | 18  |
| 78,046 | 22 | 1 | 182 | 11 | 8 | 1 | 81  | 5  | 293 | 18  |
| 78,047 | 22 | 1 | 183 | 12 | 8 | 1 | 81  | 5  | 294 | 19  |
| 78,048 | 22 | 1 | 183 | 12 | 8 | 1 | 81  | 5  | 294 | 19  |
| 78,049 | 22 | 1 | 183 | 12 | 8 | 1 | 81  | 5  | 294 | 19  |
| 78,050 | 22 | 1 | 184 | 12 | 8 | 1 | 81  | 5  | 295 | 19  |
| 78,051 | 22 | 1 | 184 | 12 | 8 | 1 | 81  | 5  | 295 | 19  |
| 78,052 | 22 | 1 | 184 | 13 | 8 | 1 | 82  | 6  | 296 | 21  |



|        |    |   |     |    |    |   |     |   |     |    |
|--------|----|---|-----|----|----|---|-----|---|-----|----|
| 78,053 | 22 | 2 | 184 | 14 | 8  | 1 | 82  | 6 | 296 | 23 |
| 78,054 | 22 | 2 | 184 | 14 | 8  | 1 | 82  | 7 | 296 | 24 |
| 78,055 | 23 | 3 | 191 | 14 | 8  | 1 | 88  | 7 | 310 | 25 |
| 78,056 | 23 | 3 | 191 | 15 | 8  | 1 | 88  | 7 | 310 | 26 |
| 78,057 | 23 | 3 | 188 | 15 | 8  | 1 | 88  | 7 | 307 | 26 |
| 78,058 | 23 | 3 | 189 | 15 | 8  | 1 | 87  | 7 | 307 | 26 |
| 78,059 | 23 | 3 | 189 | 15 | 8  | 1 | 87  | 7 | 307 | 26 |
| 78,060 | 23 | 3 | 188 | 15 | 8  | 1 | 87  | 7 | 306 | 26 |
| 78,061 | 24 | 3 | 188 | 15 | 8  | 1 | 88  | 7 | 308 | 26 |
| 78,062 | 24 | 3 | 187 | 15 | 8  | 1 | 88  | 7 | 307 | 26 |
| 78,063 | 27 | 3 | 208 | 15 | 11 | 0 | 102 | 7 | 348 | 25 |
| 78,064 | 27 | 3 | 206 | 15 | 11 | 0 | 101 | 7 | 345 | 25 |
| 78,065 | 27 | 3 | 208 | 15 | 11 | 0 | 100 | 7 | 346 | 25 |
| 78,066 | 27 | 3 | 205 | 16 | 11 | 0 | 100 | 7 | 343 | 26 |
| 78,067 | 27 | 3 | 194 | 16 | 10 | 0 | 96  | 7 | 327 | 26 |
| 78,068 | 24 | 3 | 155 | 16 | 10 | 0 | 90  | 7 | 279 | 26 |
| 78,069 | 23 | 3 | 140 | 16 | 10 | 0 | 87  | 6 | 260 | 25 |
| 78,070 | 19 | 3 | 113 | 16 | 8  | 0 | 81  | 6 | 221 | 25 |
| 78,071 | 16 | 3 | 108 | 16 | 8  | 0 | 75  | 6 | 207 | 25 |
| 78,072 | 10 | 3 | 83  | 15 | 3  | 0 | 40  | 6 | 136 | 24 |
| 78,073 | 10 | 3 | 81  | 15 | 3  | 0 | 40  | 7 | 134 | 25 |
| 78,074 | 10 | 3 | 79  | 16 | 3  | 0 | 39  | 7 | 131 | 26 |
| 78,075 | 9  | 4 | 67  | 17 | 3  | 0 | 35  | 7 | 114 | 28 |
| 78,076 | 8  | 4 | 61  | 15 | 3  | 0 | 33  | 7 | 105 | 26 |
| 78,077 | 8  | 4 | 52  | 15 | 3  | 0 | 26  | 7 | 89  | 26 |
| 78,078 | 7  | 5 | 47  | 15 | 3  | 0 | 25  | 8 | 82  | 28 |
| 78,079 | 7  | 5 | 47  | 16 | 3  | 0 | 25  | 8 | 82  | 29 |
| 78,080 | 7  | 5 | 47  | 15 | 3  | 0 | 25  | 9 | 82  | 29 |
| 78,081 | 7  | 5 | 47  | 15 | 3  | 0 | 25  | 9 | 82  | 29 |
| 78,082 | 6  | 5 | 48  | 14 | 3  | 0 | 25  | 8 | 82  | 27 |
| 78,083 | 6  | 5 | 48  | 14 | 3  | 0 | 25  | 8 | 82  | 27 |
| 78,084 | 6  | 5 | 48  | 14 | 3  | 0 | 25  | 8 | 82  | 27 |
| 78,085 | 6  | 5 | 47  | 14 | 3  | 0 | 25  | 8 | 81  | 27 |
| 78,086 | 6  | 5 | 47  | 14 | 3  | 0 | 26  | 8 | 82  | 27 |
| 78,087 | 6  | 4 | 49  | 13 | 3  | 0 | 26  | 7 | 84  | 24 |
| 78,088 | 6  | 4 | 50  | 13 | 3  | 0 | 26  | 7 | 85  | 24 |
| 78,089 | 6  | 4 | 50  | 13 | 3  | 1 | 26  | 7 | 85  | 25 |
| 78,090 | 6  | 4 | 50  | 12 | 3  | 1 | 26  | 8 | 85  | 25 |
| 78,091 | 6  | 4 | 47  | 12 | 3  | 1 | 25  | 7 | 81  | 24 |
| 78,092 | 6  | 4 | 47  | 11 | 3  | 1 | 25  | 7 | 81  | 23 |
| 78,093 | 6  | 4 | 49  | 10 | 3  | 1 | 25  | 7 | 83  | 22 |

|        |    |   |     |    |   |   |    |   |     |    |
|--------|----|---|-----|----|---|---|----|---|-----|----|
| 78,094 | 6  | 4 | 48  | 10 | 3 | 1 | 25 | 7 | 82  | 22 |
| 78,095 | 6  | 4 | 48  | 8  | 3 | 1 | 25 | 7 | 82  | 20 |
| 78,096 | 6  | 4 | 48  | 9  | 3 | 1 | 24 | 7 | 81  | 21 |
| 78,097 | 6  | 4 | 48  | 10 | 3 | 1 | 24 | 7 | 81  | 22 |
| 78,098 | 10 | 4 | 61  | 10 | 3 | 1 | 27 | 7 | 101 | 22 |
| 78,099 | 10 | 4 | 61  | 10 | 3 | 1 | 27 | 7 | 101 | 22 |
| 78,100 | 10 | 4 | 61  | 10 | 3 | 1 | 27 | 7 | 101 | 22 |
| 78,101 | 10 | 4 | 60  | 10 | 3 | 1 | 27 | 7 | 100 | 22 |
| 78,102 | 10 | 4 | 62  | 9  | 3 | 1 | 27 | 6 | 102 | 20 |
| 78,103 | 10 | 4 | 63  | 9  | 3 | 1 | 28 | 6 | 104 | 20 |
| 78,104 | 12 | 3 | 82  | 8  | 3 | 1 | 30 | 6 | 127 | 18 |
| 78,105 | 12 | 3 | 81  | 8  | 3 | 1 | 28 | 6 | 124 | 18 |
| 78,106 | 14 | 2 | 96  | 7  | 3 | 1 | 36 | 6 | 149 | 16 |
| 78,107 | 14 | 2 | 98  | 7  | 3 | 1 | 37 | 6 | 152 | 16 |
| 78,108 | 14 | 2 | 100 | 7  | 3 | 1 | 37 | 6 | 154 | 16 |
| 78,109 | 14 | 2 | 102 | 7  | 3 | 1 | 36 | 6 | 155 | 16 |
| 78,110 | 13 | 2 | 104 | 7  | 4 | 1 | 37 | 6 | 158 | 16 |
| 78,111 | 13 | 2 | 107 | 7  | 4 | 1 | 36 | 6 | 160 | 16 |
| 78,112 | 12 | 2 | 107 | 8  | 4 | 1 | 36 | 6 | 159 | 17 |
| 78,113 | 12 | 3 | 106 | 8  | 4 | 1 | 35 | 6 | 157 | 18 |
| 78,114 | 10 | 3 | 85  | 8  | 1 | 1 | 23 | 6 | 119 | 18 |
| 78,115 | 10 | 3 | 80  | 8  | 1 | 1 | 22 | 6 | 113 | 18 |
| 78,116 | 10 | 3 | 80  | 11 | 1 | 1 | 22 | 6 | 113 | 21 |
| 78,117 | 10 | 3 | 80  | 11 | 1 | 1 | 22 | 6 | 113 | 21 |
| 78,118 | 10 | 3 | 80  | 11 | 1 | 1 | 22 | 6 | 113 | 21 |
| 78,119 | 10 | 3 | 80  | 11 | 1 | 1 | 22 | 6 | 113 | 21 |
| 78,120 | 10 | 3 | 80  | 12 | 1 | 1 | 22 | 6 | 113 | 22 |
| 78,121 | 10 | 3 | 80  | 12 | 1 | 1 | 22 | 6 | 113 | 22 |
| 78,122 | 10 | 3 | 80  | 12 | 1 | 1 | 22 | 6 | 113 | 22 |
| 78,123 | 10 | 3 | 80  | 12 | 1 | 1 | 22 | 5 | 113 | 21 |
| 78,124 | 10 | 3 | 80  | 12 | 1 | 1 | 22 | 5 | 113 | 21 |
| 78,125 | 10 | 2 | 80  | 11 | 1 | 1 | 22 | 6 | 113 | 20 |
| 78,126 | 10 | 2 | 80  | 11 | 1 | 1 | 22 | 6 | 113 | 20 |
| 78,127 | 10 | 2 | 81  | 11 | 1 | 1 | 22 | 5 | 114 | 19 |
| 78,128 | 10 | 2 | 81  | 11 | 1 | 1 | 22 | 5 | 114 | 19 |
| 78,129 | 10 | 1 | 82  | 10 | 1 | 1 | 22 | 4 | 115 | 16 |
| 78,130 | 10 | 1 | 82  | 10 | 1 | 1 | 22 | 3 | 115 | 15 |
| 78,131 | 10 | 1 | 82  | 10 | 1 | 1 | 22 | 3 | 115 | 15 |
| 78,132 | 10 | 1 | 82  | 10 | 1 | 1 | 22 | 3 | 115 | 15 |
| 78,133 | 11 | 1 | 82  | 11 | 1 | 1 | 22 | 3 | 116 | 16 |
| 78,134 | 11 | 1 | 82  | 11 | 1 | 1 | 24 | 3 | 118 | 16 |

|        |    |   |    |    |   |   |    |    |     |    |
|--------|----|---|----|----|---|---|----|----|-----|----|
| 78,135 | 12 | 1 | 83 | 11 | 1 | 1 | 24 | 3  | 120 | 16 |
| 78,136 | 12 | 1 | 83 | 11 | 1 | 1 | 23 | 3  | 119 | 16 |
| 78,137 | 12 | 1 | 82 | 12 | 1 | 1 | 23 | 3  | 118 | 17 |
| 78,138 | 12 | 1 | 81 | 12 | 1 | 1 | 23 | 3  | 117 | 17 |
| 78,139 | 12 | 1 | 80 | 12 | 1 | 1 | 23 | 3  | 116 | 17 |
| 78,140 | 11 | 1 | 79 | 12 | 1 | 0 | 23 | 2  | 114 | 15 |
| 78,141 | 11 | 1 | 79 | 12 | 1 | 0 | 23 | 2  | 114 | 15 |
| 78,142 | 11 | 1 | 80 | 12 | 1 | 0 | 23 | 2  | 115 | 15 |
| 78,143 | 11 | 1 | 80 | 15 | 1 | 0 | 23 | 2  | 115 | 18 |
| 78,144 | 11 | 3 | 78 | 26 | 1 | 0 | 23 | 6  | 113 | 35 |
| 78,145 | 11 | 3 | 76 | 26 | 1 | 0 | 23 | 7  | 111 | 36 |
| 78,146 | 11 | 3 | 76 | 28 | 1 | 0 | 23 | 7  | 111 | 38 |
| 78,147 | 11 | 3 | 75 | 27 | 1 | 0 | 23 | 7  | 110 | 37 |
| 78,148 | 8  | 3 | 69 | 26 | 1 | 0 | 25 | 8  | 103 | 37 |
| 78,149 | 7  | 3 | 65 | 25 | 1 | 0 | 23 | 8  | 96  | 36 |
| 78,150 | 7  | 3 | 65 | 25 | 1 | 0 | 23 | 8  | 96  | 36 |
| 78,151 | 7  | 3 | 68 | 25 | 1 | 0 | 24 | 8  | 100 | 36 |
| 78,152 | 7  | 3 | 68 | 25 | 1 | 0 | 24 | 9  | 100 | 37 |
| 78,153 | 7  | 3 | 69 | 25 | 1 | 0 | 26 | 9  | 103 | 37 |
| 78,154 | 7  | 4 | 68 | 26 | 1 | 0 | 25 | 9  | 101 | 39 |
| 78,155 | 4  | 4 | 44 | 27 | 1 | 0 | 19 | 8  | 68  | 39 |
| 78,156 | 3  | 5 | 45 | 28 | 1 | 0 | 18 | 8  | 67  | 41 |
| 78,157 | 2  | 6 | 31 | 31 | 1 | 0 | 11 | 9  | 45  | 46 |
| 78,158 | 2  | 7 | 28 | 33 | 1 | 0 | 10 | 9  | 41  | 49 |
| 78,159 | 2  | 7 | 26 | 33 | 1 | 0 | 10 | 10 | 39  | 50 |
| 78,160 | 2  | 7 | 24 | 33 | 1 | 0 | 10 | 10 | 37  | 50 |
| 78,161 | 2  | 7 | 22 | 33 | 0 | 0 | 9  | 11 | 33  | 51 |
| 78,162 | 2  | 8 | 18 | 33 | 0 | 0 | 9  | 11 | 29  | 52 |
| 78,163 | 2  | 8 | 18 | 33 | 0 | 0 | 9  | 11 | 29  | 52 |
| 78,164 | 2  | 7 | 25 | 33 | 0 | 0 | 11 | 11 | 38  | 51 |
| 78,165 | 2  | 7 | 27 | 33 | 0 | 0 | 11 | 11 | 40  | 51 |
| 78,166 | 2  | 7 | 27 | 30 | 0 | 0 | 11 | 11 | 40  | 48 |
| 78,167 | 2  | 7 | 27 | 29 | 0 | 0 | 11 | 11 | 40  | 47 |
| 78,168 | 2  | 7 | 27 | 29 | 0 | 0 | 11 | 11 | 40  | 47 |
| 78,169 | 2  | 7 | 27 | 29 | 0 | 0 | 11 | 11 | 40  | 47 |
| 78,170 | 2  | 7 | 27 | 30 | 0 | 0 | 12 | 11 | 41  | 48 |
| 78,171 | 2  | 7 | 27 | 30 | 0 | 0 | 12 | 11 | 41  | 48 |
| 78,172 | 2  | 7 | 27 | 30 | 0 | 0 | 14 | 11 | 43  | 48 |
| 78,173 | 2  | 7 | 28 | 30 | 0 | 0 | 14 | 11 | 44  | 48 |
| 78,174 | 3  | 7 | 33 | 30 | 0 | 0 | 17 | 11 | 53  | 48 |
| 78,175 | 4  | 7 | 39 | 29 | 0 | 0 | 19 | 10 | 62  | 46 |

|        |    |   |    |    |   |   |    |    |    |    |
|--------|----|---|----|----|---|---|----|----|----|----|
| 78,176 | 4  | 7 | 39 | 29 | 0 | 0 | 19 | 10 | 62 | 46 |
| 78,177 | 6  | 7 | 40 | 29 | 0 | 0 | 25 | 10 | 71 | 46 |
| 78,178 | 6  | 7 | 40 | 30 | 0 | 0 | 25 | 10 | 71 | 47 |
| 78,179 | 6  | 7 | 40 | 30 | 0 | 0 | 25 | 10 | 71 | 47 |
| 78,180 | 6  | 7 | 39 | 31 | 1 | 0 | 25 | 10 | 71 | 48 |
| 78,181 | 6  | 7 | 39 | 31 | 1 | 0 | 25 | 10 | 71 | 48 |
| 78,182 | 6  | 7 | 39 | 31 | 1 | 0 | 25 | 10 | 71 | 48 |
| 78,183 | 5  | 7 | 38 | 32 | 1 | 0 | 25 | 10 | 69 | 49 |
| 78,184 | 5  | 7 | 38 | 34 | 1 | 0 | 23 | 10 | 67 | 51 |
| 78,185 | 5  | 7 | 37 | 34 | 1 | 0 | 23 | 10 | 66 | 51 |
| 78,186 | 4  | 7 | 37 | 35 | 1 | 0 | 23 | 10 | 65 | 52 |
| 78,187 | 4  | 7 | 37 | 37 | 1 | 0 | 23 | 11 | 65 | 55 |
| 78,188 | 4  | 7 | 37 | 36 | 1 | 0 | 23 | 11 | 65 | 54 |
| 78,189 | 4  | 7 | 39 | 37 | 1 | 0 | 23 | 11 | 67 | 55 |
| 78,190 | 4  | 7 | 39 | 39 | 1 | 0 | 23 | 11 | 67 | 57 |
| 78,191 | 4  | 7 | 39 | 40 | 1 | 0 | 23 | 11 | 67 | 58 |
| 78,192 | 4  | 7 | 39 | 41 | 1 | 0 | 23 | 11 | 67 | 59 |
| 78,193 | 4  | 7 | 39 | 41 | 1 | 0 | 23 | 11 | 67 | 59 |
| 78,194 | 4  | 7 | 39 | 38 | 1 | 0 | 23 | 11 | 67 | 56 |
| 78,195 | 4  | 5 | 39 | 27 | 1 | 0 | 24 | 6  | 68 | 38 |
| 78,196 | 4  | 5 | 39 | 25 | 1 | 0 | 24 | 6  | 68 | 36 |
| 78,197 | 4  | 5 | 40 | 25 | 1 | 0 | 24 | 6  | 69 | 36 |
| 78,198 | 4  | 5 | 41 | 25 | 1 | 0 | 24 | 6  | 70 | 36 |
| 78,199 | 6  | 5 | 39 | 25 | 1 | 0 | 22 | 5  | 68 | 35 |
| 78,200 | 6  | 6 | 41 | 25 | 1 | 0 | 21 | 5  | 69 | 36 |
| 78,201 | 6  | 6 | 38 | 25 | 1 | 0 | 20 | 5  | 65 | 36 |
| 78,202 | 7  | 6 | 41 | 25 | 1 | 0 | 24 | 5  | 73 | 36 |
| 78,203 | 7  | 6 | 46 | 25 | 1 | 0 | 26 | 4  | 80 | 35 |
| 78,204 | 7  | 5 | 44 | 23 | 1 | 0 | 26 | 4  | 78 | 32 |
| 78,205 | 10 | 5 | 51 | 23 | 1 | 0 | 30 | 4  | 92 | 32 |
| 78,206 | 10 | 5 | 51 | 24 | 1 | 0 | 30 | 4  | 92 | 33 |
| 78,207 | 10 | 3 | 51 | 20 | 1 | 0 | 32 | 3  | 94 | 26 |
| 78,208 | 10 | 3 | 51 | 21 | 1 | 0 | 33 | 4  | 95 | 28 |
| 78,209 | 11 | 2 | 51 | 22 | 1 | 0 | 35 | 8  | 98 | 32 |
| 78,210 | 11 | 2 | 52 | 25 | 1 | 0 | 35 | 7  | 99 | 34 |
| 78,211 | 11 | 2 | 52 | 26 | 1 | 0 | 35 | 7  | 99 | 35 |
| 78,212 | 11 | 2 | 51 | 26 | 1 | 0 | 35 | 7  | 98 | 35 |
| 78,213 | 11 | 1 | 48 | 34 | 1 | 0 | 33 | 7  | 93 | 42 |
| 78,214 | 11 | 2 | 45 | 48 | 1 | 0 | 34 | 15 | 91 | 65 |
| 78,215 | 11 | 2 | 43 | 48 | 1 | 0 | 34 | 15 | 89 | 65 |
| 78,216 | 11 | 2 | 47 | 48 | 1 | 0 | 35 | 15 | 94 | 65 |

|        |    |   |     |     |    |   |    |    |     |     |
|--------|----|---|-----|-----|----|---|----|----|-----|-----|
| 78,217 | 12 | 2 | 50  | 48  | 1  | 0 | 36 | 15 | 99  | 65  |
| 78,218 | 12 | 2 | 52  | 48  | 2  | 0 | 36 | 15 | 102 | 65  |
| 78,219 | 13 | 2 | 52  | 48  | 2  | 0 | 36 | 17 | 103 | 67  |
| 78,220 | 13 | 2 | 52  | 49  | 2  | 0 | 36 | 17 | 103 | 68  |
| 78,221 | 13 | 2 | 52  | 47  | 2  | 0 | 36 | 17 | 103 | 66  |
| 78,222 | 13 | 2 | 58  | 48  | 2  | 0 | 36 | 19 | 109 | 69  |
| 78,223 | 13 | 2 | 59  | 51  | 2  | 0 | 35 | 21 | 109 | 74  |
| 78,224 | 13 | 3 | 58  | 54  | 2  | 0 | 35 | 21 | 108 | 78  |
| 78,225 | 12 | 3 | 53  | 54  | 2  | 0 | 32 | 21 | 99  | 78  |
| 78,226 | 11 | 3 | 53  | 54  | 2  | 0 | 32 | 21 | 98  | 78  |
| 78,227 | 12 | 3 | 58  | 54  | 2  | 0 | 33 | 21 | 105 | 78  |
| 78,228 | 10 | 3 | 58  | 54  | 2  | 0 | 28 | 22 | 98  | 79  |
| 78,229 | 10 | 3 | 58  | 57  | 2  | 0 | 28 | 22 | 98  | 82  |
| 78,230 | 10 | 3 | 58  | 57  | 2  | 0 | 28 | 22 | 98  | 82  |
| 78,231 | 11 | 3 | 59  | 57  | 1  | 0 | 30 | 22 | 101 | 82  |
| 78,232 | 11 | 3 | 59  | 59  | 1  | 0 | 30 | 22 | 101 | 84  |
| 78,233 | 11 | 3 | 60  | 60  | 1  | 0 | 30 | 22 | 102 | 85  |
| 78,234 | 11 | 3 | 60  | 60  | 1  | 0 | 30 | 22 | 102 | 85  |
| 78,235 | 11 | 3 | 60  | 61  | 1  | 0 | 30 | 22 | 102 | 86  |
| 78,236 | 11 | 3 | 60  | 62  | 1  | 0 | 30 | 22 | 102 | 87  |
| 78,237 | 11 | 5 | 60  | 72  | 1  | 0 | 30 | 33 | 102 | 110 |
| 78,238 | 11 | 5 | 60  | 73  | 1  | 0 | 30 | 35 | 102 | 113 |
| 78,239 | 11 | 5 | 58  | 75  | 1  | 0 | 30 | 36 | 100 | 116 |
| 78,240 | 11 | 5 | 58  | 76  | 1  | 0 | 30 | 37 | 100 | 118 |
| 78,241 | 11 | 5 | 58  | 75  | 1  | 0 | 30 | 37 | 100 | 117 |
| 78,242 | 12 | 5 | 58  | 77  | 2  | 0 | 30 | 37 | 102 | 119 |
| 78,243 | 12 | 6 | 57  | 83  | 2  | 0 | 30 | 38 | 101 | 127 |
| 78,244 | 12 | 6 | 57  | 87  | 2  | 0 | 30 | 38 | 101 | 131 |
| 78,245 | 12 | 6 | 57  | 97  | 2  | 3 | 29 | 39 | 100 | 145 |
| 78,246 | 12 | 6 | 59  | 98  | 2  | 3 | 29 | 39 | 102 | 146 |
| 78,247 | 12 | 6 | 63  | 98  | 2  | 3 | 31 | 39 | 108 | 146 |
| 78,248 | 12 | 6 | 62  | 98  | 2  | 3 | 31 | 40 | 107 | 147 |
| 78,249 | 12 | 6 | 61  | 98  | 2  | 3 | 31 | 40 | 106 | 147 |
| 78,250 | 10 | 6 | 62  | 98  | 2  | 3 | 32 | 40 | 106 | 147 |
| 78,251 | 15 | 6 | 88  | 98  | 7  | 3 | 63 | 40 | 173 | 147 |
| 78,252 | 16 | 6 | 119 | 98  | 9  | 3 | 79 | 40 | 223 | 147 |
| 78,253 | 15 | 6 | 119 | 98  | 10 | 3 | 78 | 40 | 222 | 147 |
| 78,254 | 15 | 6 | 117 | 98  | 10 | 3 | 76 | 40 | 218 | 147 |
| 78,255 | 16 | 6 | 120 | 100 | 10 | 3 | 75 | 42 | 221 | 151 |
| 78,256 | 15 | 6 | 146 | 100 | 11 | 3 | 89 | 42 | 261 | 151 |
| 78,257 | 15 | 6 | 157 | 101 | 11 | 3 | 94 | 42 | 277 | 152 |

|        |    |   |     |     |    |   |     |    |     |     |
|--------|----|---|-----|-----|----|---|-----|----|-----|-----|
| 78,258 | 15 | 6 | 174 | 100 | 15 | 3 | 119 | 41 | 323 | 150 |
| 78,259 | 15 | 6 | 173 | 100 | 15 | 3 | 117 | 41 | 320 | 150 |
| 78,260 | 14 | 6 | 174 | 94  | 15 | 3 | 116 | 37 | 319 | 140 |
| 78,261 | 14 | 6 | 173 | 94  | 15 | 3 | 116 | 37 | 318 | 140 |
| 78,262 | 14 | 6 | 173 | 93  | 15 | 3 | 120 | 37 | 322 | 139 |
| 78,263 | 14 | 6 | 174 | 93  | 15 | 3 | 122 | 36 | 325 | 138 |
| 78,264 | 14 | 6 | 174 | 87  | 15 | 3 | 122 | 37 | 325 | 133 |
| 78,265 | 15 | 6 | 175 | 72  | 15 | 3 | 122 | 29 | 327 | 110 |
| 78,266 | 15 | 6 | 175 | 72  | 15 | 3 | 122 | 29 | 327 | 110 |
| 78,267 | 15 | 6 | 171 | 72  | 15 | 3 | 121 | 29 | 322 | 110 |
| 78,268 | 14 | 6 | 168 | 72  | 15 | 3 | 121 | 29 | 318 | 110 |
| 78,269 | 16 | 6 | 178 | 72  | 14 | 3 | 134 | 29 | 342 | 110 |
| 78,270 | 15 | 6 | 178 | 72  | 14 | 3 | 134 | 27 | 341 | 108 |
| 78,271 | 15 | 6 | 179 | 71  | 15 | 3 | 135 | 27 | 344 | 107 |
| 78,272 | 15 | 6 | 179 | 73  | 15 | 3 | 136 | 27 | 345 | 109 |
| 78,273 | 15 | 6 | 173 | 69  | 15 | 4 | 137 | 23 | 340 | 102 |
| 78,274 | 15 | 6 | 172 | 70  | 16 | 4 | 138 | 23 | 341 | 103 |
| 78,275 | 15 | 5 | 170 | 67  | 16 | 4 | 138 | 23 | 339 | 99  |
| 78,276 | 15 | 5 | 178 | 67  | 16 | 4 | 139 | 23 | 348 | 99  |
| 78,277 | 15 | 5 | 177 | 66  | 16 | 4 | 138 | 23 | 346 | 98  |
| 78,278 | 14 | 5 | 170 | 66  | 16 | 4 | 136 | 23 | 336 | 98  |
| 78,279 | 16 | 5 | 175 | 64  | 18 | 4 | 148 | 22 | 357 | 95  |
| 78,280 | 16 | 5 | 175 | 64  | 18 | 4 | 147 | 22 | 356 | 95  |
| 78,281 | 15 | 5 | 175 | 64  | 18 | 4 | 149 | 22 | 357 | 95  |
| 78,282 | 15 | 5 | 175 | 63  | 18 | 4 | 148 | 22 | 356 | 94  |
| 78,283 | 15 | 5 | 174 | 62  | 18 | 4 | 148 | 22 | 355 | 93  |
| 78,284 | 15 | 5 | 174 | 61  | 18 | 4 | 148 | 22 | 355 | 92  |
| 78,285 | 16 | 5 | 174 | 61  | 18 | 4 | 148 | 22 | 356 | 92  |
| 78,286 | 16 | 5 | 174 | 57  | 18 | 5 | 148 | 23 | 356 | 90  |
| 78,287 | 16 | 3 | 178 | 42  | 19 | 5 | 154 | 9  | 367 | 59  |
| 78,288 | 16 | 3 | 190 | 42  | 20 | 5 | 162 | 9  | 388 | 59  |
| 78,289 | 16 | 3 | 192 | 42  | 20 | 5 | 163 | 9  | 391 | 59  |
| 78,290 | 17 | 3 | 194 | 44  | 20 | 5 | 164 | 9  | 395 | 61  |
| 78,291 | 17 | 3 | 201 | 42  | 20 | 5 | 174 | 9  | 412 | 59  |
| 78,292 | 22 | 3 | 208 | 41  | 21 | 5 | 187 | 9  | 438 | 58  |
| 78,293 | 21 | 3 | 211 | 38  | 20 | 5 | 189 | 9  | 441 | 55  |
| 78,294 | 21 | 2 | 212 | 27  | 20 | 5 | 192 | 8  | 445 | 42  |
| 78,295 | 21 | 2 | 212 | 17  | 20 | 2 | 192 | 7  | 445 | 28  |
| 78,296 | 21 | 2 | 212 | 16  | 20 | 2 | 192 | 7  | 445 | 27  |
| 78,297 | 21 | 2 | 210 | 16  | 20 | 2 | 192 | 7  | 443 | 27  |
| 78,298 | 21 | 2 | 208 | 16  | 20 | 2 | 190 | 7  | 439 | 27  |

|        |    |   |     |    |    |   |     |    |     |    |
|--------|----|---|-----|----|----|---|-----|----|-----|----|
| 78,299 | 22 | 2 | 223 | 16 | 21 | 2 | 203 | 6  | 469 | 26 |
| 78,300 | 22 | 2 | 220 | 16 | 21 | 2 | 202 | 6  | 465 | 26 |
| 78,301 | 22 | 2 | 217 | 17 | 21 | 2 | 201 | 7  | 461 | 28 |
| 78,302 | 17 | 2 | 192 | 18 | 16 | 2 | 171 | 13 | 396 | 35 |
| 78,303 | 16 | 2 | 161 | 20 | 14 | 2 | 154 | 14 | 345 | 38 |
| 78,304 | 16 | 2 | 160 | 21 | 13 | 2 | 151 | 14 | 340 | 39 |
| 78,305 | 16 | 2 | 156 | 23 | 13 | 2 | 149 | 14 | 334 | 41 |
| 78,306 | 15 | 2 | 157 | 21 | 13 | 2 | 152 | 12 | 337 | 37 |
| 78,307 | 13 | 2 | 124 | 19 | 12 | 2 | 133 | 12 | 282 | 35 |
| 78,308 | 13 | 2 | 113 | 20 | 12 | 2 | 129 | 12 | 267 | 36 |
| 78,309 | 15 | 2 | 97  | 21 | 8  | 2 | 104 | 12 | 224 | 37 |
| 78,310 | 15 | 2 | 97  | 21 | 8  | 2 | 104 | 14 | 224 | 39 |
| 78,311 | 15 | 2 | 96  | 21 | 8  | 2 | 103 | 14 | 222 | 39 |
| 78,312 | 15 | 2 | 98  | 22 | 8  | 2 | 101 | 14 | 222 | 40 |
| 78,313 | 15 | 2 | 97  | 22 | 8  | 2 | 100 | 14 | 220 | 40 |
| 78,314 | 15 | 2 | 101 | 22 | 8  | 2 | 100 | 14 | 224 | 40 |
| 78,315 | 15 | 2 | 108 | 20 | 8  | 2 | 104 | 13 | 235 | 37 |
| 78,316 | 15 | 1 | 118 | 20 | 8  | 2 | 106 | 13 | 247 | 36 |
| 78,317 | 16 | 1 | 122 | 20 | 8  | 2 | 106 | 13 | 252 | 36 |
| 78,318 | 16 | 1 | 121 | 20 | 8  | 2 | 105 | 13 | 250 | 36 |
| 78,319 | 16 | 1 | 124 | 20 | 8  | 2 | 105 | 13 | 253 | 36 |
| 78,320 | 17 | 1 | 173 | 21 | 11 | 2 | 130 | 13 | 331 | 37 |
| 78,321 | 17 | 1 | 173 | 22 | 11 | 2 | 130 | 16 | 331 | 41 |
| 78,322 | 17 | 1 | 172 | 22 | 10 | 2 | 129 | 16 | 328 | 41 |
| 78,323 | 17 | 1 | 175 | 22 | 10 | 2 | 128 | 19 | 330 | 44 |
| 78,324 | 17 | 1 | 175 | 22 | 10 | 1 | 127 | 19 | 329 | 43 |
| 78,325 | 17 | 1 | 180 | 24 | 11 | 1 | 128 | 19 | 336 | 45 |
| 78,326 | 17 | 2 | 188 | 26 | 11 | 1 | 127 | 19 | 343 | 48 |
| 78,327 | 17 | 2 | 182 | 26 | 11 | 1 | 127 | 19 | 337 | 48 |
| 78,328 | 16 | 3 | 184 | 26 | 11 | 1 | 120 | 18 | 331 | 48 |
| 78,329 | 15 | 3 | 184 | 26 | 11 | 1 | 120 | 18 | 330 | 48 |
| 78,330 | 21 | 3 | 253 | 25 | 14 | 1 | 160 | 18 | 448 | 47 |
| 78,331 | 23 | 3 | 277 | 26 | 18 | 1 | 188 | 18 | 506 | 48 |
| 78,332 | 24 | 3 | 277 | 26 | 18 | 1 | 186 | 19 | 505 | 49 |
| 78,333 | 24 | 3 | 277 | 27 | 18 | 1 | 186 | 19 | 505 | 50 |
| 78,334 | 24 | 3 | 281 | 26 | 18 | 1 | 192 | 19 | 515 | 49 |
| 78,335 | 23 | 3 | 281 | 25 | 18 | 1 | 193 | 19 | 515 | 48 |
| 78,336 | 23 | 3 | 281 | 25 | 18 | 0 | 193 | 18 | 515 | 46 |
| 78,337 | 23 | 3 | 281 | 28 | 18 | 0 | 194 | 20 | 516 | 51 |
| 78,338 | 23 | 3 | 280 | 41 | 17 | 1 | 188 | 25 | 508 | 70 |
| 78,339 | 23 | 4 | 268 | 46 | 16 | 1 | 180 | 30 | 487 | 81 |

|        |    |    |     |    |    |   |     |    |     |     |
|--------|----|----|-----|----|----|---|-----|----|-----|-----|
| 78,340 | 23 | 4  | 266 | 51 | 16 | 1 | 179 | 30 | 484 | 86  |
| 78,341 | 25 | 4  | 275 | 48 | 16 | 1 | 183 | 30 | 499 | 83  |
| 78,342 | 26 | 4  | 271 | 48 | 16 | 1 | 174 | 29 | 487 | 82  |
| 78,343 | 23 | 4  | 278 | 48 | 15 | 1 | 173 | 29 | 489 | 82  |
| 78,344 | 23 | 4  | 275 | 48 | 15 | 1 | 171 | 30 | 484 | 83  |
| 78,345 | 26 | 5  | 283 | 52 | 15 | 1 | 189 | 31 | 513 | 89  |
| 78,346 | 26 | 5  | 283 | 53 | 15 | 1 | 189 | 31 | 513 | 90  |
| 78,347 | 27 | 5  | 290 | 54 | 15 | 1 | 197 | 31 | 529 | 91  |
| 78,348 | 27 | 7  | 289 | 63 | 15 | 1 | 204 | 32 | 535 | 103 |
| 78,349 | 27 | 9  | 287 | 65 | 15 | 1 | 202 | 32 | 531 | 107 |
| 78,350 | 26 | 9  | 277 | 67 | 14 | 1 | 194 | 32 | 511 | 109 |
| 78,351 | 26 | 9  | 277 | 69 | 14 | 1 | 194 | 32 | 511 | 111 |
| 78,352 | 26 | 9  | 282 | 68 | 14 | 1 | 195 | 32 | 517 | 110 |
| 78,353 | 26 | 9  | 286 | 65 | 14 | 1 | 195 | 25 | 521 | 100 |
| 78,354 | 26 | 9  | 286 | 67 | 14 | 1 | 195 | 25 | 521 | 102 |
| 78,355 | 26 | 9  | 285 | 67 | 14 | 1 | 195 | 25 | 520 | 102 |
| 78,356 | 26 | 9  | 285 | 66 | 14 | 1 | 195 | 25 | 520 | 101 |
| 78,357 | 26 | 9  | 281 | 66 | 14 | 1 | 191 | 25 | 512 | 101 |
| 78,358 | 26 | 9  | 281 | 64 | 14 | 1 | 191 | 25 | 512 | 99  |
| 78,359 | 26 | 9  | 281 | 67 | 14 | 1 | 189 | 27 | 510 | 104 |
| 78,360 | 24 | 9  | 278 | 67 | 14 | 1 | 189 | 27 | 505 | 104 |
| 78,361 | 24 | 9  | 278 | 69 | 14 | 1 | 189 | 25 | 505 | 104 |
| 78,362 | 24 | 9  | 278 | 69 | 15 | 1 | 189 | 25 | 506 | 104 |
| 78,363 | 24 | 9  | 276 | 68 | 15 | 1 | 186 | 26 | 501 | 104 |
| 78,364 | 24 | 10 | 272 | 69 | 15 | 1 | 186 | 26 | 497 | 106 |
| 78,365 | 24 | 10 | 269 | 69 | 15 | 1 | 186 | 27 | 494 | 107 |
| 78,366 | 24 | 12 | 265 | 71 | 15 | 1 | 182 | 28 | 486 | 112 |
| 78,367 | 23 | 12 | 254 | 71 | 15 | 1 | 180 | 28 | 472 | 112 |
| 78,368 | 23 | 12 | 257 | 71 | 15 | 1 | 181 | 28 | 476 | 112 |
| 78,369 | 24 | 12 | 258 | 71 | 15 | 1 | 183 | 28 | 480 | 112 |
| 78,370 | 24 | 12 | 252 | 71 | 15 | 1 | 182 | 28 | 473 | 112 |
| 78,371 | 21 | 12 | 198 | 70 | 12 | 1 | 145 | 28 | 376 | 111 |
| 78,372 | 21 | 12 | 196 | 69 | 12 | 1 | 145 | 24 | 374 | 106 |
| 78,373 | 22 | 12 | 194 | 67 | 12 | 1 | 147 | 21 | 375 | 101 |
| 78,374 | 22 | 12 | 194 | 67 | 11 | 1 | 146 | 21 | 373 | 101 |
| 78,375 | 23 | 12 | 209 | 70 | 11 | 2 | 147 | 24 | 390 | 108 |
| 78,376 | 23 | 12 | 212 | 72 | 10 | 2 | 149 | 28 | 394 | 114 |
| 78,377 | 23 | 11 | 207 | 70 | 10 | 2 | 150 | 28 | 390 | 111 |
| 78,378 | 24 | 11 | 211 | 72 | 10 | 2 | 152 | 29 | 397 | 114 |
| 78,379 | 24 | 10 | 205 | 72 | 9  | 2 | 152 | 29 | 390 | 113 |
| 78,380 | 18 | 10 | 166 | 74 | 8  | 2 | 133 | 29 | 325 | 115 |



|        |    |    |     |    |    |   |     |    |     |     |
|--------|----|----|-----|----|----|---|-----|----|-----|-----|
| 78,381 | 19 | 10 | 172 | 76 | 5  | 2 | 129 | 33 | 325 | 121 |
| 78,382 | 17 | 10 | 148 | 76 | 1  | 2 | 101 | 34 | 267 | 122 |
| 78,383 | 19 | 10 | 192 | 79 | 2  | 2 | 111 | 34 | 324 | 125 |
| 78,384 | 21 | 10 | 243 | 79 | 10 | 2 | 127 | 34 | 401 | 125 |
| 78,385 | 33 | 10 | 369 | 79 | 16 | 2 | 181 | 34 | 599 | 125 |
| 78,386 | 35 | 10 | 397 | 79 | 18 | 2 | 187 | 34 | 637 | 125 |
| 78,387 | 36 | 10 | 429 | 76 | 21 | 2 | 196 | 33 | 682 | 121 |
| 78,388 | 36 | 10 | 430 | 76 | 21 | 2 | 196 | 33 | 683 | 121 |
| 78,389 | 43 | 9  | 512 | 58 | 22 | 1 | 245 | 23 | 822 | 91  |
| 78,390 | 43 | 9  | 517 | 54 | 22 | 1 | 248 | 23 | 830 | 87  |
| 78,391 | 43 | 9  | 517 | 54 | 22 | 1 | 248 | 23 | 830 | 87  |
| 78,392 | 41 | 9  | 511 | 54 | 22 | 1 | 244 | 23 | 818 | 87  |
| 78,393 | 40 | 9  | 511 | 54 | 22 | 1 | 243 | 23 | 816 | 87  |
| 78,394 | 38 | 9  | 500 | 54 | 22 | 1 | 231 | 23 | 791 | 87  |
| 78,395 | 35 | 8  | 505 | 51 | 23 | 1 | 223 | 21 | 786 | 81  |
| 78,396 | 35 | 8  | 504 | 51 | 23 | 1 | 220 | 21 | 782 | 81  |
| 78,397 | 35 | 8  | 503 | 50 | 23 | 1 | 216 | 21 | 777 | 80  |
| 78,398 | 34 | 6  | 500 | 40 | 23 | 1 | 216 | 20 | 773 | 67  |
| 78,399 | 38 | 4  | 526 | 38 | 25 | 1 | 236 | 20 | 825 | 63  |
| 78,400 | 38 | 4  | 526 | 38 | 25 | 1 | 236 | 21 | 825 | 64  |
| 78,401 | 38 | 4  | 522 | 36 | 25 | 1 | 234 | 21 | 819 | 62  |
| 78,402 | 39 | 4  | 518 | 34 | 25 | 1 | 235 | 21 | 817 | 60  |
| 78,403 | 39 | 5  | 518 | 34 | 25 | 1 | 235 | 20 | 817 | 60  |
| 78,404 | 39 | 4  | 515 | 34 | 25 | 1 | 235 | 20 | 814 | 59  |
| 78,405 | 39 | 4  | 520 | 32 | 25 | 1 | 235 | 20 | 819 | 57  |
| 78,406 | 40 | 4  | 524 | 31 | 25 | 1 | 239 | 20 | 828 | 56  |
| 78,407 | 40 | 4  | 525 | 30 | 25 | 1 | 239 | 21 | 829 | 56  |
| 78,408 | 40 | 4  | 525 | 30 | 25 | 1 | 239 | 21 | 829 | 56  |
| 78,409 | 40 | 4  | 525 | 30 | 25 | 1 | 239 | 21 | 829 | 56  |
| 78,410 | 40 | 4  | 526 | 27 | 25 | 1 | 239 | 19 | 830 | 51  |
| 78,411 | 40 | 4  | 526 | 25 | 25 | 1 | 239 | 20 | 830 | 50  |
| 78,412 | 40 | 4  | 526 | 25 | 25 | 1 | 239 | 21 | 830 | 51  |
| 78,413 | 40 | 4  | 526 | 25 | 24 | 1 | 239 | 21 | 829 | 51  |
| 78,414 | 40 | 4  | 529 | 25 | 24 | 1 | 240 | 20 | 833 | 50  |
| 78,415 | 41 | 3  | 543 | 24 | 24 | 1 | 246 | 20 | 854 | 48  |
| 78,416 | 42 | 1  | 563 | 22 | 24 | 1 | 257 | 18 | 886 | 42  |
| 78,417 | 42 | 1  | 567 | 22 | 24 | 1 | 258 | 18 | 891 | 42  |
| 78,418 | 42 | 1  | 572 | 22 | 24 | 1 | 261 | 18 | 899 | 42  |
| 78,419 | 41 | 1  | 577 | 22 | 24 | 1 | 262 | 18 | 904 | 42  |
| 78,420 | 45 | 1  | 601 | 22 | 24 | 1 | 276 | 18 | 946 | 42  |
| 78,421 | 45 | 1  | 601 | 22 | 24 | 1 | 276 | 18 | 946 | 42  |

|        |    |   |     |    |    |   |     |    |       |     |
|--------|----|---|-----|----|----|---|-----|----|-------|-----|
| 78,422 | 49 | 1 | 667 | 22 | 30 | 1 | 323 | 18 | 1,069 | 42  |
| 78,423 | 50 | 1 | 677 | 24 | 30 | 1 | 328 | 18 | 1,085 | 44  |
| 78,424 | 49 | 2 | 676 | 24 | 30 | 1 | 326 | 22 | 1,081 | 49  |
| 78,425 | 48 | 2 | 664 | 24 | 30 | 1 | 325 | 22 | 1,067 | 49  |
| 78,426 | 63 | 2 | 765 | 22 | 35 | 0 | 409 | 19 | 1,272 | 43  |
| 78,427 | 63 | 2 | 763 | 17 | 35 | 0 | 407 | 15 | 1,268 | 34  |
| 78,428 | 64 | 2 | 765 | 17 | 36 | 0 | 409 | 16 | 1,274 | 35  |
| 78,429 | 63 | 2 | 757 | 15 | 36 | 0 | 405 | 15 | 1,261 | 32  |
| 78,430 | 63 | 2 | 785 | 15 | 38 | 0 | 418 | 15 | 1,304 | 32  |
| 78,431 | 63 | 2 | 780 | 13 | 38 | 0 | 411 | 15 | 1,292 | 30  |
| 78,432 | 62 | 2 | 748 | 11 | 38 | 0 | 394 | 10 | 1,242 | 23  |
| 78,433 | 62 | 3 | 725 | 18 | 37 | 0 | 391 | 15 | 1,215 | 36  |
| 78,434 | 59 | 6 | 705 | 24 | 37 | 1 | 385 | 25 | 1,186 | 56  |
| 78,435 | 62 | 6 | 670 | 28 | 30 | 1 | 368 | 27 | 1,130 | 62  |
| 78,436 | 50 | 6 | 553 | 32 | 24 | 1 | 314 | 28 | 941   | 67  |
| 78,437 | 48 | 6 | 527 | 33 | 22 | 1 | 308 | 28 | 905   | 68  |
| 78,438 | 47 | 8 | 495 | 46 | 19 | 4 | 299 | 33 | 860   | 91  |
| 78,439 | 43 | 9 | 430 | 46 | 18 | 4 | 274 | 33 | 765   | 92  |
| 78,440 | 40 | 9 | 414 | 46 | 18 | 4 | 250 | 33 | 722   | 92  |
| 78,441 | 41 | 9 | 425 | 46 | 18 | 4 | 246 | 34 | 730   | 93  |
| 78,442 | 45 | 9 | 614 | 45 | 18 | 4 | 263 | 35 | 940   | 93  |
| 78,443 | 51 | 9 | 701 | 45 | 29 | 4 | 313 | 35 | 1,094 | 93  |
| 78,444 | 53 | 9 | 715 | 45 | 29 | 4 | 316 | 35 | 1,113 | 93  |
| 78,445 | 57 | 9 | 812 | 45 | 30 | 4 | 334 | 35 | 1,233 | 93  |
| 78,446 | 58 | 9 | 861 | 44 | 30 | 4 | 343 | 35 | 1,292 | 92  |
| 78,447 | 58 | 9 | 866 | 44 | 30 | 4 | 344 | 35 | 1,298 | 92  |
| 78,448 | 59 | 9 | 877 | 44 | 30 | 4 | 350 | 35 | 1,316 | 92  |
| 78,449 | 59 | 9 | 876 | 44 | 30 | 4 | 347 | 35 | 1,312 | 92  |
| 78,450 | 55 | 9 | 853 | 44 | 28 | 4 | 323 | 34 | 1,259 | 91  |
| 78,451 | 55 | 9 | 853 | 44 | 28 | 4 | 322 | 34 | 1,258 | 91  |
| 78,452 | 55 | 9 | 852 | 44 | 28 | 4 | 322 | 34 | 1,257 | 91  |
| 78,453 | 54 | 8 | 862 | 44 | 29 | 4 | 326 | 34 | 1,271 | 90  |
| 78,454 | 54 | 8 | 862 | 44 | 29 | 4 | 326 | 34 | 1,271 | 90  |
| 78,455 | 54 | 8 | 856 | 44 | 29 | 4 | 326 | 34 | 1,265 | 90  |
| 78,456 | 54 | 8 | 857 | 44 | 29 | 4 | 325 | 34 | 1,265 | 90  |
| 78,457 | 54 | 8 | 855 | 44 | 29 | 4 | 325 | 33 | 1,263 | 89  |
| 78,458 | 54 | 8 | 855 | 44 | 29 | 4 | 325 | 32 | 1,263 | 88  |
| 78,459 | 58 | 8 | 874 | 44 | 29 | 4 | 331 | 32 | 1,292 | 88  |
| 78,460 | 58 | 8 | 873 | 45 | 29 | 4 | 331 | 32 | 1,291 | 89  |
| 78,461 | 58 | 8 | 879 | 52 | 30 | 4 | 331 | 37 | 1,298 | 101 |
| 78,462 | 58 | 9 | 882 | 57 | 30 | 5 | 335 | 41 | 1,305 | 112 |

|        |    |    |       |    |    |   |     |    |       |     |
|--------|----|----|-------|----|----|---|-----|----|-------|-----|
| 78,463 | 59 | 9  | 924   | 57 | 30 | 5 | 346 | 43 | 1,359 | 114 |
| 78,464 | 69 | 10 | 1,006 | 73 | 33 | 6 | 371 | 53 | 1,479 | 142 |
| 78,465 | 68 | 10 | 998   | 78 | 33 | 6 | 366 | 55 | 1,465 | 149 |
| 78,466 | 67 | 10 | 979   | 79 | 33 | 6 | 356 | 55 | 1,435 | 150 |
| 78,467 | 67 | 10 | 990   | 82 | 33 | 6 | 359 | 56 | 1,449 | 154 |
| 78,468 | 67 | 10 | 1,027 | 84 | 33 | 6 | 365 | 56 | 1,492 | 156 |
| 78,469 | 67 | 10 | 1,019 | 84 | 33 | 6 | 362 | 56 | 1,481 | 156 |
| 78,470 | 68 | 11 | 1,023 | 85 | 33 | 6 | 361 | 59 | 1,485 | 161 |
| 78,471 | 65 | 11 | 1,085 | 88 | 37 | 6 | 391 | 59 | 1,578 | 164 |
| 78,472 | 62 | 11 | 1,050 | 88 | 32 | 6 | 355 | 59 | 1,499 | 164 |
| 78,473 | 62 | 10 | 1,023 | 86 | 31 | 6 | 344 | 55 | 1,460 | 157 |
| 78,474 | 62 | 10 | 1,013 | 89 | 31 | 6 | 339 | 61 | 1,445 | 166 |
| 78,475 | 52 | 14 | 964   | 94 | 28 | 6 | 288 | 71 | 1,332 | 185 |
| 78,476 | 49 | 14 | 936   | 94 | 27 | 7 | 274 | 73 | 1,286 | 188 |
| 78,477 | 47 | 14 | 908   | 93 | 26 | 7 | 256 | 73 | 1,237 | 187 |
| 78,478 | 48 | 14 | 907   | 93 | 26 | 7 | 256 | 73 | 1,237 | 187 |
| 78,479 | 47 | 14 | 902   | 93 | 25 | 7 | 253 | 72 | 1,227 | 186 |
| 78,480 | 47 | 15 | 873   | 94 | 23 | 7 | 240 | 72 | 1,183 | 188 |
| 78,481 | 47 | 15 | 872   | 94 | 23 | 7 | 241 | 72 | 1,183 | 188 |
| 78,482 | 47 | 15 | 872   | 96 | 23 | 7 | 241 | 72 | 1,183 | 190 |
| 78,483 | 47 | 15 | 872   | 95 | 23 | 7 | 241 | 72 | 1,183 | 189 |
| 78,484 | 47 | 11 | 870   | 79 | 23 | 6 | 241 | 57 | 1,181 | 153 |
| 78,485 | 47 | 11 | 870   | 79 | 23 | 6 | 241 | 57 | 1,181 | 153 |
| 78,486 | 42 | 11 | 850   | 71 | 22 | 6 | 236 | 54 | 1,150 | 142 |
| 78,487 | 42 | 11 | 841   | 71 | 22 | 6 | 235 | 54 | 1,140 | 142 |
| 78,488 | 42 | 11 | 839   | 70 | 22 | 6 | 235 | 53 | 1,138 | 140 |
| 78,489 | 42 | 8  | 834   | 57 | 22 | 3 | 234 | 48 | 1,132 | 116 |
| 78,490 | 42 | 8  | 834   | 58 | 22 | 3 | 234 | 48 | 1,132 | 117 |
| 78,491 | 41 | 8  | 826   | 58 | 22 | 3 | 234 | 48 | 1,123 | 117 |
| 78,492 | 41 | 8  | 818   | 59 | 22 | 3 | 234 | 48 | 1,115 | 118 |
| 78,493 | 37 | 9  | 625   | 66 | 22 | 3 | 216 | 50 | 900   | 128 |
| 78,494 | 30 | 9  | 537   | 69 | 11 | 3 | 166 | 50 | 744   | 131 |
| 78,495 | 28 | 9  | 521   | 70 | 11 | 3 | 163 | 50 | 723   | 132 |
| 78,496 | 24 | 9  | 421   | 70 | 10 | 3 | 144 | 50 | 599   | 132 |
| 78,497 | 23 | 9  | 361   | 70 | 9  | 3 | 127 | 50 | 520   | 132 |
| 78,498 | 23 | 9  | 354   | 70 | 9  | 3 | 125 | 50 | 511   | 132 |
| 78,499 | 22 | 9  | 343   | 70 | 9  | 3 | 119 | 51 | 493   | 133 |
| 78,500 | 22 | 9  | 339   | 70 | 9  | 3 | 118 | 51 | 488   | 133 |
| 78,501 | 22 | 9  | 340   | 70 | 9  | 3 | 117 | 52 | 488   | 134 |
| 78,502 | 22 | 9  | 338   | 70 | 9  | 3 | 117 | 52 | 486   | 134 |
| 78,503 | 22 | 9  | 339   | 71 | 9  | 3 | 117 | 52 | 487   | 135 |

|        |    |   |     |    |    |   |     |    |     |     |
|--------|----|---|-----|----|----|---|-----|----|-----|-----|
| 78,504 | 23 | 9 | 331 | 71 | 9  | 3 | 119 | 52 | 482 | 135 |
| 78,505 | 23 | 9 | 331 | 71 | 9  | 3 | 118 | 52 | 481 | 135 |
| 78,506 | 22 | 9 | 330 | 71 | 9  | 3 | 118 | 52 | 479 | 135 |
| 78,507 | 22 | 9 | 326 | 71 | 9  | 3 | 118 | 52 | 475 | 135 |
| 78,508 | 22 | 9 | 327 | 71 | 9  | 3 | 118 | 52 | 476 | 135 |
| 78,509 | 22 | 9 | 326 | 71 | 9  | 3 | 118 | 52 | 475 | 135 |
| 78,510 | 18 | 9 | 309 | 71 | 9  | 3 | 112 | 52 | 448 | 135 |
| 78,511 | 18 | 9 | 305 | 70 | 8  | 3 | 112 | 52 | 443 | 134 |
| 78,512 | 18 | 8 | 305 | 59 | 9  | 2 | 112 | 43 | 444 | 112 |
| 78,513 | 18 | 8 | 305 | 60 | 9  | 2 | 115 | 48 | 447 | 118 |
| 78,514 | 17 | 8 | 263 | 60 | 9  | 2 | 102 | 46 | 391 | 116 |
| 78,515 | 7  | 7 | 178 | 44 | 6  | 1 | 77  | 36 | 268 | 88  |
| 78,516 | 7  | 7 | 183 | 39 | 6  | 1 | 77  | 34 | 273 | 81  |
| 78,517 | 7  | 7 | 171 | 39 | 6  | 1 | 73  | 34 | 257 | 81  |
| 78,518 | 7  | 7 | 167 | 36 | 6  | 1 | 74  | 33 | 254 | 77  |
| 78,519 | 7  | 7 | 131 | 34 | 6  | 1 | 67  | 33 | 211 | 75  |
| 78,520 | 6  | 6 | 120 | 30 | 6  | 1 | 66  | 30 | 198 | 67  |
| 78,521 | 6  | 6 | 121 | 30 | 7  | 1 | 74  | 30 | 208 | 67  |
| 78,522 | 6  | 6 | 56  | 30 | 4  | 1 | 34  | 30 | 100 | 67  |
| 78,523 | 5  | 6 | 52  | 30 | 4  | 1 | 34  | 31 | 95  | 68  |
| 78,524 | 5  | 6 | 51  | 30 | 4  | 1 | 34  | 32 | 94  | 69  |
| 78,525 | 6  | 6 | 111 | 27 | 9  | 1 | 76  | 26 | 202 | 60  |
| 78,526 | 7  | 2 | 141 | 22 | 12 | 1 | 113 | 16 | 273 | 41  |
| 78,527 | 7  | 2 | 147 | 22 | 12 | 0 | 116 | 14 | 282 | 38  |
| 78,528 | 8  | 2 | 151 | 23 | 13 | 0 | 121 | 14 | 293 | 39  |
| 78,529 | 7  | 2 | 151 | 23 | 13 | 0 | 121 | 14 | 292 | 39  |
| 78,530 | 7  | 2 | 151 | 23 | 13 | 0 | 121 | 14 | 292 | 39  |
| 78,531 | 7  | 1 | 152 | 23 | 13 | 0 | 121 | 14 | 293 | 38  |
| 78,532 | 7  | 1 | 152 | 23 | 13 | 0 | 121 | 14 | 293 | 38  |
| 78,533 | 7  | 1 | 153 | 21 | 13 | 0 | 124 | 14 | 297 | 36  |
| 78,534 | 7  | 1 | 154 | 21 | 13 | 0 | 124 | 14 | 298 | 36  |
| 78,535 | 7  | 1 | 154 | 21 | 13 | 0 | 124 | 14 | 298 | 36  |
| 78,536 | 7  | 1 | 155 | 21 | 13 | 0 | 124 | 14 | 299 | 36  |
| 78,537 | 7  | 1 | 157 | 20 | 13 | 0 | 124 | 14 | 301 | 35  |
| 78,538 | 7  | 1 | 157 | 20 | 13 | 0 | 124 | 14 | 301 | 35  |
| 78,539 | 8  | 1 | 178 | 21 | 13 | 0 | 132 | 14 | 331 | 36  |
| 78,540 | 11 | 1 | 205 | 20 | 13 | 0 | 155 | 14 | 384 | 35  |
| 78,541 | 14 | 1 | 225 | 20 | 14 | 0 | 167 | 14 | 420 | 35  |
| 78,542 | 14 | 1 | 225 | 20 | 14 | 0 | 167 | 14 | 420 | 35  |
| 78,543 | 21 | 1 | 237 | 18 | 14 | 0 | 185 | 13 | 457 | 32  |
| 78,544 | 22 | 0 | 253 | 11 | 16 | 0 | 223 | 10 | 514 | 21  |

|        |    |   |     |    |    |   |     |    |     |     |
|--------|----|---|-----|----|----|---|-----|----|-----|-----|
| 78,545 | 22 | 0 | 256 | 8  | 16 | 0 | 233 | 10 | 527 | 18  |
| 78,546 | 23 | 0 | 268 | 7  | 17 | 0 | 250 | 10 | 558 | 17  |
| 78,547 | 23 | 0 | 277 | 8  | 18 | 0 | 263 | 10 | 581 | 18  |
| 78,548 | 23 | 0 | 275 | 9  | 18 | 0 | 263 | 10 | 579 | 19  |
| 78,549 | 23 | 0 | 275 | 10 | 18 | 0 | 263 | 10 | 579 | 20  |
| 78,550 | 24 | 0 | 280 | 10 | 18 | 0 | 264 | 10 | 586 | 20  |
| 78,551 | 24 | 0 | 282 | 11 | 18 | 0 | 264 | 11 | 588 | 22  |
| 78,552 | 24 | 0 | 289 | 13 | 19 | 0 | 271 | 10 | 603 | 23  |
| 78,553 | 24 | 0 | 291 | 12 | 19 | 0 | 271 | 10 | 605 | 22  |
| 78,554 | 24 | 0 | 297 | 12 | 19 | 0 | 273 | 10 | 613 | 22  |
| 78,555 | 23 | 0 | 301 | 12 | 18 | 0 | 273 | 11 | 615 | 23  |
| 78,556 | 22 | 0 | 301 | 12 | 18 | 0 | 271 | 11 | 612 | 23  |
| 78,557 | 22 | 0 | 301 | 20 | 18 | 1 | 271 | 21 | 612 | 42  |
| 78,558 | 23 | 0 | 301 | 20 | 18 | 1 | 271 | 21 | 613 | 42  |
| 78,559 | 27 | 0 | 316 | 20 | 19 | 1 | 282 | 21 | 644 | 42  |
| 78,560 | 27 | 0 | 316 | 25 | 19 | 1 | 282 | 21 | 644 | 47  |
| 78,561 | 27 | 0 | 315 | 26 | 19 | 1 | 282 | 21 | 643 | 48  |
| 78,562 | 29 | 0 | 320 | 25 | 19 | 1 | 284 | 22 | 652 | 48  |
| 78,563 | 30 | 0 | 325 | 27 | 18 | 1 | 284 | 22 | 657 | 50  |
| 78,564 | 30 | 0 | 324 | 26 | 18 | 1 | 280 | 18 | 652 | 45  |
| 78,565 | 30 | 0 | 323 | 26 | 18 | 1 | 279 | 17 | 650 | 44  |
| 78,566 | 30 | 0 | 315 | 26 | 18 | 1 | 279 | 17 | 642 | 44  |
| 78,567 | 30 | 0 | 317 | 25 | 18 | 1 | 284 | 17 | 649 | 43  |
| 78,568 | 30 | 0 | 317 | 25 | 18 | 1 | 284 | 17 | 649 | 43  |
| 78,569 | 34 | 0 | 343 | 25 | 19 | 1 | 321 | 17 | 717 | 43  |
| 78,570 | 36 | 0 | 345 | 26 | 19 | 2 | 320 | 17 | 720 | 45  |
| 78,571 | 37 | 0 | 349 | 29 | 19 | 3 | 325 | 18 | 730 | 50  |
| 78,572 | 37 | 2 | 331 | 55 | 19 | 5 | 316 | 35 | 703 | 97  |
| 78,573 | 35 | 2 | 325 | 71 | 18 | 5 | 311 | 39 | 689 | 117 |
| 78,574 | 34 | 2 | 316 | 72 | 17 | 5 | 299 | 38 | 666 | 117 |
| 78,575 | 34 | 2 | 266 | 72 | 13 | 6 | 270 | 37 | 583 | 117 |
| 78,576 | 34 | 2 | 257 | 72 | 10 | 6 | 250 | 37 | 551 | 117 |
| 78,577 | 34 | 2 | 251 | 74 | 10 | 6 | 247 | 37 | 542 | 119 |
| 78,578 | 33 | 2 | 247 | 75 | 9  | 6 | 242 | 37 | 531 | 120 |
| 78,579 | 33 | 3 | 248 | 74 | 9  | 6 | 242 | 37 | 532 | 120 |
| 78,580 | 33 | 3 | 254 | 75 | 9  | 6 | 244 | 37 | 540 | 121 |
| 78,581 | 33 | 3 | 254 | 74 | 9  | 6 | 244 | 37 | 540 | 120 |
| 78,582 | 42 | 3 | 279 | 74 | 12 | 6 | 256 | 37 | 589 | 120 |
| 78,583 | 42 | 3 | 279 | 74 | 12 | 6 | 257 | 37 | 590 | 120 |
| 78,584 | 42 | 3 | 278 | 74 | 12 | 6 | 256 | 37 | 588 | 120 |
| 78,585 | 45 | 3 | 287 | 74 | 13 | 6 | 262 | 37 | 607 | 120 |

|        |    |    |     |     |    |    |     |    |       |     |
|--------|----|----|-----|-----|----|----|-----|----|-------|-----|
| 78,586 | 45 | 3  | 286 | 74  | 13 | 6  | 262 | 37 | 606   | 120 |
| 78,587 | 45 | 3  | 293 | 74  | 13 | 6  | 266 | 37 | 617   | 120 |
| 78,588 | 47 | 3  | 314 | 77  | 14 | 6  | 270 | 37 | 645   | 123 |
| 78,589 | 52 | 7  | 369 | 94  | 14 | 9  | 306 | 65 | 741   | 175 |
| 78,590 | 52 | 7  | 356 | 95  | 14 | 10 | 303 | 68 | 725   | 180 |
| 78,591 | 52 | 7  | 353 | 100 | 21 | 11 | 306 | 70 | 732   | 188 |
| 78,592 | 50 | 7  | 334 | 109 | 20 | 11 | 294 | 70 | 698   | 197 |
| 78,593 | 43 | 8  | 328 | 113 | 20 | 11 | 276 | 71 | 667   | 203 |
| 78,594 | 43 | 9  | 318 | 118 | 19 | 11 | 241 | 76 | 621   | 214 |
| 78,595 | 43 | 9  | 315 | 120 | 19 | 11 | 232 | 77 | 609   | 217 |
| 78,596 | 46 | 9  | 347 | 121 | 19 | 12 | 232 | 80 | 644   | 222 |
| 78,597 | 51 | 9  | 399 | 122 | 21 | 12 | 255 | 82 | 726   | 225 |
| 78,598 | 52 | 9  | 405 | 120 | 20 | 12 | 243 | 82 | 720   | 223 |
| 78,599 | 58 | 9  | 465 | 120 | 24 | 12 | 259 | 82 | 806   | 223 |
| 78,600 | 61 | 9  | 517 | 120 | 24 | 12 | 274 | 81 | 876   | 222 |
| 78,601 | 60 | 9  | 525 | 119 | 24 | 12 | 279 | 80 | 888   | 220 |
| 78,602 | 65 | 9  | 547 | 119 | 25 | 12 | 297 | 80 | 934   | 220 |
| 78,603 | 65 | 9  | 541 | 117 | 24 | 12 | 297 | 80 | 927   | 218 |
| 78,604 | 66 | 9  | 539 | 117 | 24 | 12 | 297 | 80 | 926   | 218 |
| 78,605 | 68 | 9  | 566 | 109 | 24 | 11 | 304 | 70 | 962   | 199 |
| 78,606 | 68 | 9  | 569 | 109 | 24 | 11 | 301 | 70 | 962   | 199 |
| 78,607 | 67 | 9  | 568 | 109 | 24 | 11 | 301 | 70 | 960   | 199 |
| 78,608 | 69 | 9  | 582 | 110 | 24 | 11 | 318 | 70 | 993   | 200 |
| 78,609 | 68 | 9  | 577 | 110 | 23 | 11 | 311 | 70 | 979   | 200 |
| 78,610 | 68 | 9  | 571 | 105 | 23 | 11 | 309 | 70 | 971   | 195 |
| 78,611 | 68 | 11 | 570 | 105 | 23 | 11 | 309 | 70 | 970   | 197 |
| 78,612 | 67 | 11 | 563 | 104 | 23 | 11 | 307 | 70 | 960   | 196 |
| 78,613 | 64 | 11 | 563 | 104 | 23 | 11 | 306 | 69 | 956   | 195 |
| 78,614 | 65 | 11 | 558 | 102 | 23 | 11 | 306 | 69 | 952   | 193 |
| 78,615 | 65 | 11 | 559 | 102 | 23 | 11 | 306 | 68 | 953   | 192 |
| 78,616 | 65 | 11 | 559 | 102 | 23 | 11 | 307 | 68 | 954   | 192 |
| 78,617 | 65 | 11 | 558 | 104 | 23 | 11 | 307 | 70 | 953   | 196 |
| 78,618 | 67 | 11 | 576 | 105 | 24 | 11 | 317 | 70 | 984   | 197 |
| 78,619 | 70 | 11 | 613 | 105 | 24 | 11 | 314 | 70 | 1,021 | 197 |
| 78,620 | 68 | 11 | 612 | 102 | 24 | 9  | 299 | 70 | 1,003 | 192 |
| 78,621 | 66 | 11 | 619 | 105 | 26 | 9  | 319 | 70 | 1,030 | 195 |
| 78,622 | 65 | 11 | 616 | 108 | 26 | 10 | 315 | 70 | 1,022 | 199 |
| 78,623 | 65 | 9  | 616 | 66  | 25 | 8  | 314 | 51 | 1,020 | 134 |
| 78,624 | 65 | 9  | 616 | 65  | 25 | 8  | 314 | 51 | 1,020 | 133 |
| 78,625 | 65 | 9  | 623 | 67  | 25 | 8  | 314 | 51 | 1,027 | 135 |
| 78,626 | 67 | 9  | 646 | 68  | 25 | 7  | 323 | 51 | 1,061 | 135 |

|        |     |   |       |    |    |   |     |    |       |     |
|--------|-----|---|-------|----|----|---|-----|----|-------|-----|
| 78,627 | 66  | 9 | 625   | 68 | 25 | 7 | 306 | 51 | 1,022 | 135 |
| 78,628 | 66  | 9 | 628   | 66 | 25 | 7 | 307 | 51 | 1,026 | 133 |
| 78,629 | 75  | 9 | 658   | 65 | 25 | 7 | 351 | 51 | 1,109 | 132 |
| 78,630 | 75  | 8 | 656   | 64 | 25 | 7 | 353 | 51 | 1,109 | 130 |
| 78,631 | 76  | 8 | 665   | 64 | 26 | 7 | 356 | 51 | 1,123 | 130 |
| 78,632 | 76  | 8 | 666   | 64 | 26 | 7 | 356 | 51 | 1,124 | 130 |
| 78,633 | 70  | 8 | 661   | 64 | 24 | 7 | 367 | 51 | 1,122 | 130 |
| 78,634 | 72  | 8 | 667   | 66 | 24 | 8 | 366 | 51 | 1,129 | 133 |
| 78,635 | 74  | 8 | 685   | 67 | 24 | 8 | 367 | 51 | 1,150 | 134 |
| 78,636 | 83  | 8 | 907   | 67 | 26 | 8 | 431 | 52 | 1,447 | 135 |
| 78,637 | 83  | 8 | 905   | 67 | 26 | 8 | 429 | 52 | 1,443 | 135 |
| 78,638 | 100 | 8 | 1,036 | 67 | 41 | 8 | 579 | 52 | 1,756 | 135 |
| 78,639 | 100 | 4 | 1,064 | 46 | 44 | 5 | 565 | 24 | 1,773 | 79  |
| 78,640 | 98  | 4 | 1,042 | 46 | 44 | 5 | 557 | 24 | 1,741 | 79  |
| 78,641 | 100 | 4 | 1,169 | 46 | 43 | 4 | 567 | 21 | 1,879 | 75  |
| 78,642 | 102 | 4 | 1,215 | 41 | 44 | 3 | 582 | 19 | 1,943 | 67  |
| 78,643 | 104 | 4 | 1,296 | 33 | 45 | 3 | 633 | 19 | 2,078 | 59  |
| 78,644 | 105 | 3 | 1,438 | 29 | 48 | 3 | 658 | 18 | 2,249 | 53  |
| 78,645 | 104 | 2 | 1,432 | 25 | 47 | 3 | 655 | 13 | 2,238 | 43  |
| 78,646 | 103 | 2 | 1,417 | 22 | 50 | 2 | 667 | 9  | 2,237 | 35  |
| 78,647 | 103 | 2 | 1,412 | 29 | 49 | 2 | 666 | 12 | 2,230 | 45  |
| 78,648 | 97  | 2 | 1,371 | 28 | 47 | 2 | 638 | 11 | 2,153 | 43  |
| 78,649 | 94  | 2 | 1,365 | 28 | 47 | 2 | 637 | 11 | 2,143 | 43  |
| 78,650 | 88  | 2 | 1,312 | 27 | 43 | 2 | 618 | 12 | 2,061 | 43  |
| 78,651 | 85  | 4 | 1,260 | 32 | 43 | 2 | 604 | 13 | 1,992 | 51  |
| 78,652 | 85  | 4 | 1,247 | 32 | 43 | 2 | 598 | 13 | 1,973 | 51  |
| 78,653 | 82  | 4 | 1,241 | 32 | 42 | 2 | 581 | 15 | 1,946 | 53  |
| 78,654 | 101 | 4 | 1,380 | 33 | 45 | 2 | 628 | 15 | 2,154 | 54  |
| 78,655 | 102 | 4 | 1,392 | 33 | 46 | 2 | 636 | 17 | 2,176 | 56  |
| 78,656 | 100 | 4 | 1,379 | 33 | 46 | 2 | 629 | 16 | 2,154 | 55  |
| 78,657 | 100 | 4 | 1,381 | 33 | 46 | 2 | 628 | 17 | 2,155 | 56  |
| 78,658 | 100 | 4 | 1,384 | 33 | 46 | 2 | 628 | 17 | 2,158 | 56  |
| 78,659 | 96  | 4 | 1,369 | 32 | 46 | 3 | 609 | 17 | 2,120 | 56  |
| 78,660 | 96  | 4 | 1,371 | 32 | 46 | 3 | 609 | 17 | 2,122 | 56  |
| 78,661 | 96  | 4 | 1,371 | 32 | 46 | 3 | 609 | 17 | 2,122 | 56  |
| 78,662 | 96  | 2 | 1,369 | 32 | 46 | 3 | 610 | 17 | 2,121 | 54  |
| 78,663 | 105 | 2 | 1,501 | 32 | 54 | 3 | 682 | 17 | 2,342 | 54  |
| 78,664 | 105 | 2 | 1,503 | 33 | 54 | 3 | 682 | 20 | 2,344 | 58  |
| 78,665 | 105 | 2 | 1,520 | 33 | 54 | 3 | 694 | 21 | 2,373 | 59  |
| 78,666 | 106 | 2 | 1,541 | 37 | 54 | 3 | 705 | 22 | 2,406 | 64  |
| 78,667 | 106 | 2 | 1,543 | 37 | 54 | 3 | 706 | 23 | 2,409 | 65  |

|        |     |   |       |    |    |   |     |    |       |     |
|--------|-----|---|-------|----|----|---|-----|----|-------|-----|
| 78,668 | 107 | 2 | 1,543 | 35 | 54 | 3 | 706 | 21 | 2,410 | 61  |
| 78,669 | 105 | 2 | 1,527 | 34 | 53 | 3 | 695 | 21 | 2,380 | 60  |
| 78,670 | 102 | 2 | 1,498 | 33 | 54 | 3 | 696 | 21 | 2,350 | 59  |
| 78,671 | 101 | 2 | 1,490 | 33 | 53 | 3 | 690 | 23 | 2,334 | 61  |
| 78,672 | 121 | 2 | 1,581 | 33 | 56 | 3 | 756 | 28 | 2,514 | 66  |
| 78,673 | 121 | 2 | 1,580 | 32 | 56 | 2 | 756 | 30 | 2,513 | 66  |
| 78,674 | 121 | 2 | 1,581 | 32 | 56 | 2 | 756 | 28 | 2,514 | 64  |
| 78,675 | 122 | 2 | 1,587 | 32 | 57 | 2 | 767 | 29 | 2,533 | 65  |
| 78,676 | 136 | 2 | 1,661 | 33 | 65 | 2 | 832 | 29 | 2,694 | 66  |
| 78,677 | 133 | 2 | 1,638 | 33 | 65 | 2 | 824 | 31 | 2,660 | 68  |
| 78,678 | 134 | 2 | 1,667 | 34 | 66 | 2 | 831 | 31 | 2,698 | 69  |
| 78,679 | 127 | 2 | 1,646 | 34 | 66 | 2 | 788 | 31 | 2,627 | 69  |
| 78,680 | 128 | 2 | 1,670 | 32 | 66 | 1 | 787 | 31 | 2,651 | 66  |
| 78,681 | 128 | 2 | 1,674 | 32 | 67 | 1 | 789 | 31 | 2,658 | 66  |
| 78,682 | 148 | 2 | 1,777 | 32 | 74 | 1 | 899 | 31 | 2,898 | 66  |
| 78,683 | 148 | 2 | 1,776 | 32 | 74 | 1 | 899 | 31 | 2,897 | 66  |
| 78,684 | 145 | 2 | 1,759 | 32 | 74 | 1 | 878 | 31 | 2,856 | 66  |
| 78,685 | 151 | 2 | 1,790 | 34 | 77 | 1 | 932 | 32 | 2,950 | 69  |
| 78,686 | 149 | 2 | 1,789 | 38 | 77 | 1 | 932 | 35 | 2,947 | 76  |
| 78,687 | 139 | 2 | 1,592 | 38 | 73 | 1 | 868 | 35 | 2,672 | 76  |
| 78,688 | 142 | 3 | 1,615 | 38 | 74 | 1 | 877 | 35 | 2,708 | 77  |
| 78,689 | 142 | 3 | 1,650 | 38 | 74 | 1 | 772 | 40 | 2,638 | 82  |
| 78,690 | 141 | 3 | 1,638 | 38 | 74 | 1 | 786 | 45 | 2,639 | 87  |
| 78,691 | 135 | 3 | 1,576 | 40 | 68 | 2 | 762 | 46 | 2,541 | 91  |
| 78,692 | 135 | 3 | 1,552 | 41 | 71 | 2 | 770 | 58 | 2,528 | 104 |
| 78,693 | 133 | 3 | 1,505 | 41 | 70 | 2 | 755 | 58 | 2,463 | 104 |
| 78,694 | 132 | 3 | 1,422 | 40 | 69 | 2 | 703 | 58 | 2,326 | 103 |
| 78,695 | 131 | 3 | 1,271 | 32 | 66 | 2 | 680 | 54 | 2,148 | 91  |
| 78,696 | 131 | 3 | 1,265 | 32 | 65 | 2 | 672 | 55 | 2,133 | 92  |
| 78,697 | 131 | 3 | 1,245 | 32 | 63 | 2 | 658 | 55 | 2,097 | 92  |
| 78,698 | 131 | 3 | 1,244 | 32 | 63 | 2 | 657 | 55 | 2,095 | 92  |
| 78,699 | 131 | 3 | 1,240 | 32 | 63 | 2 | 656 | 55 | 2,090 | 92  |
| 78,700 | 131 | 3 | 1,231 | 33 | 63 | 2 | 655 | 55 | 2,080 | 93  |
| 78,701 | 131 | 3 | 1,226 | 33 | 63 | 2 | 655 | 54 | 2,075 | 92  |
| 78,702 | 129 | 1 | 1,216 | 28 | 63 | 2 | 657 | 53 | 2,065 | 84  |
| 78,703 | 130 | 1 | 1,219 | 29 | 63 | 2 | 657 | 53 | 2,069 | 85  |
| 78,704 | 111 | 1 | 1,082 | 28 | 60 | 2 | 606 | 52 | 1,859 | 83  |
| 78,705 | 115 | 2 | 1,097 | 28 | 60 | 2 | 614 | 54 | 1,886 | 86  |
| 78,706 | 117 | 2 | 1,104 | 29 | 60 | 2 | 611 | 53 | 1,892 | 86  |
| 78,707 | 122 | 2 | 1,145 | 29 | 61 | 2 | 627 | 52 | 1,955 | 85  |
| 78,708 | 127 | 2 | 1,150 | 30 | 61 | 2 | 636 | 52 | 1,974 | 86  |



|        |     |    |       |    |    |   |     |    |       |     |
|--------|-----|----|-------|----|----|---|-----|----|-------|-----|
| 78,709 | 130 | 2  | 1,163 | 30 | 61 | 2 | 664 | 56 | 2,018 | 90  |
| 78,710 | 127 | 2  | 1,134 | 32 | 58 | 1 | 645 | 58 | 1,964 | 93  |
| 78,711 | 122 | 2  | 1,070 | 32 | 54 | 1 | 596 | 59 | 1,842 | 94  |
| 78,712 | 122 | 3  | 1,065 | 32 | 54 | 1 | 601 | 59 | 1,842 | 95  |
| 78,713 | 121 | 3  | 1,068 | 32 | 54 | 1 | 599 | 59 | 1,842 | 95  |
| 78,714 | 121 | 3  | 1,082 | 31 | 54 | 1 | 607 | 56 | 1,864 | 91  |
| 78,715 | 125 | 3  | 1,078 | 31 | 54 | 1 | 609 | 55 | 1,866 | 90  |
| 78,716 | 125 | 3  | 1,075 | 31 | 54 | 1 | 605 | 55 | 1,859 | 90  |
| 78,717 | 124 | 3  | 1,057 | 27 | 54 | 1 | 597 | 54 | 1,832 | 85  |
| 78,718 | 124 | 3  | 1,059 | 27 | 54 | 1 | 597 | 53 | 1,834 | 84  |
| 78,719 | 123 | 3  | 1,057 | 28 | 54 | 1 | 597 | 53 | 1,831 | 85  |
| 78,720 | 123 | 4  | 1,056 | 29 | 54 | 1 | 596 | 50 | 1,829 | 84  |
| 78,721 | 123 | 4  | 1,032 | 29 | 53 | 1 | 582 | 51 | 1,790 | 85  |
| 78,722 | 105 | 4  | 958   | 29 | 49 | 1 | 511 | 51 | 1,623 | 85  |
| 78,723 | 103 | 4  | 931   | 24 | 48 | 1 | 495 | 44 | 1,577 | 73  |
| 78,724 | 103 | 4  | 933   | 24 | 47 | 1 | 493 | 44 | 1,576 | 73  |
| 78,725 | 102 | 4  | 930   | 24 | 47 | 1 | 492 | 44 | 1,571 | 73  |
| 78,726 | 102 | 4  | 925   | 25 | 47 | 1 | 485 | 43 | 1,559 | 73  |
| 78,727 | 89  | 4  | 848   | 21 | 39 | 1 | 423 | 41 | 1,399 | 67  |
| 78,728 | 89  | 6  | 846   | 21 | 39 | 1 | 421 | 41 | 1,395 | 69  |
| 78,729 | 88  | 6  | 813   | 20 | 38 | 1 | 413 | 41 | 1,352 | 68  |
| 78,730 | 89  | 6  | 806   | 20 | 39 | 1 | 412 | 41 | 1,346 | 68  |
| 78,731 | 92  | 6  | 802   | 20 | 39 | 1 | 423 | 41 | 1,356 | 68  |
| 78,732 | 98  | 7  | 837   | 20 | 38 | 1 | 448 | 41 | 1,421 | 69  |
| 78,733 | 77  | 7  | 735   | 20 | 30 | 1 | 344 | 41 | 1,186 | 69  |
| 78,734 | 77  | 7  | 738   | 20 | 29 | 1 | 355 | 41 | 1,199 | 69  |
| 78,735 | 77  | 7  | 741   | 20 | 29 | 1 | 363 | 41 | 1,210 | 69  |
| 78,736 | 71  | 7  | 711   | 18 | 26 | 1 | 323 | 41 | 1,131 | 67  |
| 78,737 | 71  | 7  | 694   | 16 | 27 | 1 | 320 | 38 | 1,112 | 62  |
| 78,738 | 69  | 7  | 659   | 20 | 27 | 1 | 314 | 37 | 1,069 | 65  |
| 78,739 | 66  | 6  | 630   | 23 | 26 | 1 | 303 | 37 | 1,025 | 67  |
| 78,740 | 47  | 6  | 443   | 31 | 11 | 1 | 252 | 34 | 753   | 72  |
| 78,741 | 43  | 9  | 385   | 54 | 7  | 1 | 221 | 46 | 656   | 110 |
| 78,742 | 43  | 9  | 346   | 58 | 7  | 0 | 217 | 45 | 613   | 112 |
| 78,743 | 43  | 9  | 329   | 58 | 5  | 0 | 206 | 34 | 583   | 101 |
| 78,744 | 43  | 9  | 327   | 60 | 5  | 0 | 206 | 35 | 581   | 104 |
| 78,745 | 43  | 10 | 327   | 60 | 5  | 0 | 206 | 35 | 581   | 105 |
| 78,746 | 43  | 10 | 329   | 62 | 5  | 0 | 208 | 35 | 585   | 107 |
| 78,747 | 43  | 10 | 340   | 63 | 5  | 0 | 208 | 40 | 596   | 113 |
| 78,748 | 44  | 10 | 361   | 70 | 6  | 0 | 224 | 45 | 635   | 125 |
| 78,749 | 44  | 10 | 362   | 70 | 6  | 0 | 225 | 45 | 637   | 125 |

|        |    |    |     |     |    |   |     |    |       |     |
|--------|----|----|-----|-----|----|---|-----|----|-------|-----|
| 78,750 | 46 | 10 | 377 | 69  | 6  | 0 | 238 | 45 | 667   | 124 |
| 78,751 | 48 | 10 | 403 | 69  | 8  | 0 | 260 | 45 | 719   | 124 |
| 78,752 | 48 | 10 | 403 | 69  | 8  | 0 | 258 | 45 | 717   | 124 |
| 78,753 | 47 | 10 | 400 | 68  | 8  | 0 | 260 | 45 | 715   | 123 |
| 78,754 | 53 | 10 | 521 | 68  | 9  | 0 | 329 | 44 | 912   | 122 |
| 78,755 | 53 | 10 | 518 | 68  | 9  | 0 | 331 | 44 | 911   | 122 |
| 78,756 | 49 | 9  | 553 | 69  | 12 | 0 | 350 | 42 | 964   | 120 |
| 78,757 | 46 | 9  | 546 | 68  | 11 | 0 | 357 | 41 | 960   | 118 |
| 78,758 | 58 | 9  | 615 | 67  | 17 | 0 | 499 | 41 | 1,189 | 117 |
| 78,759 | 53 | 10 | 601 | 67  | 17 | 0 | 489 | 41 | 1,160 | 118 |
| 78,760 | 55 | 10 | 619 | 66  | 20 | 0 | 509 | 36 | 1,203 | 112 |
| 78,761 | 59 | 10 | 670 | 66  | 23 | 0 | 574 | 38 | 1,326 | 114 |
| 78,762 | 59 | 10 | 688 | 66  | 24 | 0 | 592 | 38 | 1,363 | 114 |
| 78,763 | 59 | 9  | 685 | 66  | 24 | 0 | 594 | 38 | 1,362 | 113 |
| 78,764 | 61 | 9  | 677 | 67  | 24 | 0 | 597 | 38 | 1,359 | 114 |
| 78,765 | 61 | 9  | 643 | 68  | 24 | 0 | 587 | 39 | 1,315 | 116 |
| 78,766 | 59 | 9  | 645 | 68  | 24 | 0 | 576 | 43 | 1,304 | 120 |
| 78,767 | 59 | 9  | 641 | 68  | 24 | 0 | 575 | 44 | 1,299 | 121 |
| 78,768 | 65 | 9  | 666 | 68  | 24 | 0 | 580 | 44 | 1,335 | 121 |
| 78,769 | 69 | 9  | 673 | 67  | 24 | 0 | 582 | 44 | 1,348 | 120 |
| 78,770 | 69 | 8  | 673 | 66  | 25 | 0 | 582 | 43 | 1,349 | 117 |
| 78,771 | 69 | 8  | 672 | 68  | 25 | 0 | 581 | 43 | 1,347 | 119 |
| 78,772 | 68 | 9  | 669 | 68  | 25 | 0 | 581 | 43 | 1,343 | 120 |
| 78,773 | 72 | 9  | 693 | 68  | 25 | 0 | 589 | 43 | 1,379 | 120 |
| 78,774 | 73 | 9  | 714 | 68  | 25 | 0 | 592 | 43 | 1,404 | 120 |
| 78,775 | 73 | 9  | 712 | 68  | 25 | 0 | 592 | 43 | 1,402 | 120 |
| 78,776 | 74 | 7  | 738 | 68  | 26 | 0 | 602 | 43 | 1,440 | 118 |
| 78,777 | 75 | 7  | 809 | 67  | 29 | 0 | 640 | 43 | 1,553 | 117 |
| 78,778 | 75 | 10 | 807 | 84  | 29 | 0 | 637 | 60 | 1,548 | 154 |
| 78,779 | 73 | 10 | 805 | 86  | 28 | 1 | 637 | 62 | 1,543 | 159 |
| 78,780 | 76 | 10 | 859 | 94  | 30 | 3 | 661 | 63 | 1,626 | 170 |
| 78,781 | 76 | 10 | 863 | 97  | 30 | 4 | 662 | 64 | 1,631 | 175 |
| 78,782 | 72 | 10 | 859 | 100 | 30 | 4 | 655 | 64 | 1,616 | 178 |
| 78,783 | 66 | 9  | 821 | 103 | 29 | 4 | 628 | 65 | 1,544 | 181 |
| 78,784 | 67 | 9  | 818 | 103 | 29 | 4 | 627 | 65 | 1,541 | 181 |
| 78,785 | 67 | 9  | 812 | 103 | 29 | 4 | 616 | 64 | 1,524 | 180 |
| 78,786 | 67 | 9  | 813 | 103 | 29 | 4 | 609 | 64 | 1,518 | 180 |
| 78,787 | 65 | 9  | 808 | 103 | 29 | 4 | 597 | 64 | 1,499 | 180 |
| 78,788 | 65 | 9  | 811 | 100 | 30 | 4 | 599 | 64 | 1,505 | 177 |
| 78,789 | 65 | 10 | 811 | 96  | 30 | 4 | 599 | 64 | 1,505 | 174 |
| 78,790 | 66 | 10 | 812 | 93  | 30 | 4 | 600 | 64 | 1,508 | 171 |

|        |    |    |     |     |    |   |     |    |       |     |
|--------|----|----|-----|-----|----|---|-----|----|-------|-----|
| 78,791 | 66 | 10 | 813 | 85  | 30 | 4 | 600 | 63 | 1,509 | 162 |
| 78,792 | 66 | 7  | 813 | 62  | 30 | 4 | 597 | 47 | 1,506 | 120 |
| 78,793 | 66 | 7  | 813 | 62  | 30 | 4 | 598 | 48 | 1,507 | 121 |
| 78,794 | 70 | 7  | 817 | 66  | 30 | 6 | 601 | 50 | 1,518 | 129 |
| 78,795 | 70 | 7  | 816 | 64  | 30 | 6 | 599 | 49 | 1,515 | 126 |
| 78,796 | 72 | 7  | 821 | 64  | 30 | 6 | 602 | 49 | 1,525 | 126 |
| 78,797 | 73 | 8  | 815 | 60  | 30 | 7 | 602 | 40 | 1,520 | 115 |
| 78,798 | 74 | 9  | 813 | 69  | 30 | 7 | 604 | 40 | 1,521 | 125 |
| 78,799 | 73 | 9  | 797 | 69  | 29 | 7 | 591 | 40 | 1,490 | 125 |
| 78,800 | 73 | 11 | 798 | 70  | 29 | 8 | 597 | 42 | 1,497 | 131 |
| 78,801 | 71 | 11 | 783 | 72  | 29 | 8 | 584 | 44 | 1,467 | 135 |
| 78,802 | 69 | 11 | 756 | 73  | 28 | 8 | 562 | 44 | 1,415 | 136 |
| 78,803 | 69 | 11 | 755 | 73  | 28 | 8 | 562 | 44 | 1,414 | 136 |
| 78,804 | 69 | 11 | 753 | 73  | 28 | 8 | 560 | 44 | 1,410 | 136 |
| 78,805 | 62 | 11 | 626 | 73  | 27 | 8 | 491 | 44 | 1,206 | 136 |
| 78,806 | 62 | 11 | 580 | 72  | 25 | 8 | 464 | 44 | 1,131 | 135 |
| 78,807 | 62 | 11 | 578 | 74  | 24 | 8 | 464 | 44 | 1,128 | 137 |
| 78,808 | 62 | 11 | 560 | 89  | 24 | 8 | 454 | 47 | 1,100 | 155 |
| 78,809 | 45 | 11 | 449 | 91  | 17 | 8 | 296 | 47 | 807   | 157 |
| 78,810 | 42 | 10 | 434 | 92  | 18 | 8 | 280 | 47 | 774   | 157 |
| 78,811 | 40 | 13 | 427 | 96  | 15 | 8 | 250 | 50 | 732   | 167 |
| 78,812 | 36 | 13 | 372 | 96  | 11 | 8 | 183 | 48 | 602   | 165 |
| 78,813 | 36 | 13 | 356 | 96  | 10 | 8 | 164 | 47 | 566   | 164 |
| 78,814 | 36 | 13 | 355 | 96  | 12 | 8 | 158 | 47 | 561   | 164 |
| 78,815 | 34 | 15 | 356 | 95  | 12 | 8 | 156 | 46 | 558   | 164 |
| 78,816 | 34 | 15 | 354 | 95  | 12 | 8 | 156 | 47 | 556   | 165 |
| 78,817 | 32 | 15 | 344 | 95  | 12 | 8 | 154 | 43 | 542   | 161 |
| 78,818 | 32 | 15 | 343 | 95  | 12 | 8 | 154 | 43 | 541   | 161 |
| 78,819 | 26 | 15 | 328 | 95  | 12 | 8 | 157 | 43 | 523   | 161 |
| 78,820 | 22 | 15 | 321 | 96  | 12 | 8 | 156 | 43 | 511   | 162 |
| 78,821 | 23 | 15 | 325 | 94  | 11 | 8 | 157 | 45 | 516   | 162 |
| 78,822 | 23 | 16 | 324 | 96  | 11 | 8 | 157 | 48 | 515   | 168 |
| 78,823 | 19 | 15 | 300 | 99  | 11 | 8 | 149 | 48 | 479   | 170 |
| 78,824 | 18 | 16 | 290 | 100 | 12 | 8 | 148 | 49 | 468   | 173 |
| 78,825 | 18 | 16 | 292 | 102 | 12 | 8 | 154 | 49 | 476   | 175 |
| 78,826 | 16 | 16 | 265 | 102 | 11 | 8 | 145 | 50 | 437   | 176 |
| 78,827 | 15 | 16 | 194 | 104 | 8  | 8 | 107 | 50 | 324   | 178 |
| 78,828 | 13 | 15 | 156 | 89  | 7  | 9 | 96  | 36 | 272   | 149 |
| 78,829 | 13 | 15 | 153 | 89  | 7  | 9 | 94  | 36 | 267   | 149 |
| 78,830 | 12 | 15 | 147 | 89  | 6  | 8 | 88  | 34 | 253   | 146 |
| 78,831 | 12 | 15 | 144 | 82  | 6  | 6 | 89  | 34 | 251   | 137 |

|        |    |    |     |    |    |   |     |    |     |     |
|--------|----|----|-----|----|----|---|-----|----|-----|-----|
| 78,832 | 12 | 15 | 144 | 76 | 6  | 5 | 86  | 33 | 248 | 129 |
| 78,833 | 12 | 15 | 130 | 74 | 7  | 5 | 84  | 33 | 233 | 127 |
| 78,834 | 14 | 15 | 141 | 74 | 7  | 5 | 95  | 33 | 257 | 127 |
| 78,835 | 13 | 15 | 133 | 74 | 7  | 5 | 86  | 33 | 239 | 127 |
| 78,836 | 13 | 15 | 132 | 74 | 7  | 5 | 85  | 33 | 237 | 127 |
| 78,837 | 13 | 15 | 130 | 74 | 7  | 5 | 82  | 33 | 232 | 127 |
| 78,838 | 13 | 15 | 129 | 74 | 7  | 5 | 81  | 33 | 230 | 127 |
| 78,839 | 13 | 15 | 127 | 74 | 6  | 6 | 79  | 33 | 225 | 128 |
| 78,840 | 13 | 14 | 127 | 74 | 6  | 6 | 78  | 33 | 224 | 127 |
| 78,841 | 12 | 14 | 128 | 74 | 6  | 6 | 78  | 33 | 224 | 127 |
| 78,842 | 12 | 14 | 127 | 74 | 6  | 6 | 78  | 31 | 223 | 125 |
| 78,843 | 12 | 14 | 127 | 69 | 6  | 6 | 78  | 30 | 223 | 119 |
| 78,844 | 12 | 14 | 126 | 69 | 6  | 6 | 77  | 30 | 221 | 119 |
| 78,845 | 8  | 13 | 121 | 66 | 6  | 4 | 70  | 30 | 205 | 113 |
| 78,846 | 8  | 13 | 118 | 88 | 6  | 5 | 70  | 38 | 202 | 144 |
| 78,847 | 6  | 13 | 116 | 96 | 6  | 5 | 68  | 41 | 196 | 155 |
| 78,848 | 5  | 12 | 117 | 94 | 6  | 4 | 72  | 40 | 200 | 150 |
| 78,849 | 4  | 11 | 114 | 86 | 6  | 4 | 70  | 42 | 194 | 143 |
| 78,850 | 4  | 11 | 109 | 86 | 6  | 4 | 64  | 42 | 183 | 143 |
| 78,851 | 6  | 9  | 126 | 83 | 7  | 4 | 83  | 38 | 222 | 134 |
| 78,852 | 6  | 9  | 125 | 83 | 7  | 5 | 83  | 38 | 221 | 135 |
| 78,853 | 6  | 9  | 137 | 82 | 6  | 5 | 84  | 38 | 233 | 134 |
| 78,854 | 6  | 9  | 137 | 82 | 6  | 5 | 84  | 38 | 233 | 134 |
| 78,855 | 6  | 9  | 142 | 83 | 6  | 5 | 86  | 38 | 240 | 135 |
| 78,856 | 7  | 9  | 144 | 83 | 6  | 5 | 87  | 38 | 244 | 135 |
| 78,857 | 9  | 9  | 150 | 88 | 7  | 5 | 96  | 40 | 262 | 142 |
| 78,858 | 9  | 9  | 152 | 88 | 7  | 5 | 96  | 40 | 264 | 142 |
| 78,859 | 9  | 9  | 151 | 74 | 8  | 5 | 94  | 37 | 262 | 125 |
| 78,860 | 11 | 9  | 144 | 72 | 8  | 5 | 94  | 38 | 257 | 124 |
| 78,861 | 11 | 9  | 143 | 72 | 7  | 5 | 91  | 38 | 252 | 124 |
| 78,862 | 12 | 6  | 137 | 67 | 7  | 5 | 91  | 34 | 247 | 112 |
| 78,863 | 12 | 6  | 142 | 68 | 7  | 5 | 96  | 34 | 257 | 113 |
| 78,864 | 12 | 6  | 142 | 68 | 5  | 5 | 95  | 34 | 254 | 113 |
| 78,865 | 15 | 6  | 174 | 68 | 6  | 5 | 112 | 34 | 307 | 113 |
| 78,866 | 15 | 4  | 176 | 68 | 6  | 5 | 114 | 34 | 311 | 111 |
| 78,867 | 23 | 4  | 270 | 68 | 11 | 5 | 187 | 33 | 491 | 110 |
| 78,868 | 24 | 4  | 286 | 68 | 13 | 5 | 196 | 32 | 519 | 109 |
| 78,869 | 24 | 4  | 279 | 68 | 13 | 5 | 189 | 32 | 505 | 109 |
| 78,870 | 26 | 4  | 312 | 68 | 14 | 5 | 210 | 32 | 562 | 109 |
| 78,871 | 25 | 4  | 311 | 79 | 14 | 9 | 209 | 53 | 559 | 145 |
| 78,872 | 25 | 4  | 308 | 79 | 14 | 9 | 209 | 51 | 556 | 143 |

|        |    |   |     |     |    |    |     |    |       |     |
|--------|----|---|-----|-----|----|----|-----|----|-------|-----|
| 78,873 | 30 | 3 | 327 | 83  | 14 | 9  | 237 | 50 | 608   | 145 |
| 78,874 | 30 | 3 | 326 | 81  | 14 | 9  | 239 | 50 | 609   | 143 |
| 78,875 | 30 | 2 | 323 | 80  | 13 | 9  | 240 | 49 | 606   | 140 |
| 78,876 | 33 | 2 | 323 | 78  | 13 | 9  | 241 | 48 | 610   | 137 |
| 78,877 | 33 | 2 | 323 | 78  | 13 | 9  | 241 | 50 | 610   | 139 |
| 78,878 | 32 | 0 | 323 | 74  | 13 | 8  | 238 | 48 | 606   | 130 |
| 78,879 | 32 | 0 | 323 | 78  | 13 | 8  | 239 | 53 | 607   | 139 |
| 78,880 | 32 | 0 | 323 | 80  | 13 | 8  | 239 | 55 | 607   | 143 |
| 78,881 | 32 | 0 | 324 | 80  | 13 | 8  | 239 | 60 | 608   | 148 |
| 78,882 | 32 | 1 | 325 | 79  | 13 | 8  | 240 | 59 | 610   | 147 |
| 78,883 | 32 | 1 | 321 | 84  | 13 | 8  | 239 | 62 | 605   | 155 |
| 78,884 | 32 | 1 | 319 | 93  | 12 | 9  | 238 | 78 | 601   | 181 |
| 78,885 | 30 | 1 | 304 | 97  | 12 | 10 | 226 | 84 | 572   | 192 |
| 78,886 | 30 | 2 | 304 | 100 | 12 | 10 | 227 | 88 | 573   | 200 |
| 78,887 | 30 | 2 | 303 | 100 | 12 | 10 | 227 | 88 | 572   | 200 |
| 78,888 | 30 | 2 | 307 | 102 | 12 | 10 | 227 | 91 | 576   | 205 |
| 78,889 | 30 | 2 | 307 | 103 | 12 | 10 | 227 | 91 | 576   | 206 |
| 78,890 | 33 | 2 | 314 | 117 | 12 | 10 | 231 | 99 | 590   | 228 |
| 78,891 | 33 | 2 | 312 | 117 | 12 | 10 | 231 | 99 | 588   | 228 |
| 78,892 | 34 | 2 | 316 | 119 | 12 | 10 | 231 | 99 | 593   | 230 |
| 78,893 | 34 | 2 | 318 | 122 | 13 | 10 | 232 | 99 | 597   | 233 |
| 78,894 | 34 | 2 | 318 | 122 | 13 | 10 | 232 | 99 | 597   | 233 |
| 78,895 | 34 | 2 | 325 | 123 | 13 | 10 | 233 | 97 | 605   | 232 |
| 78,896 | 34 | 2 | 323 | 123 | 13 | 10 | 233 | 97 | 603   | 232 |
| 78,897 | 44 | 2 | 363 | 104 | 15 | 9  | 239 | 91 | 661   | 206 |
| 78,898 | 46 | 2 | 390 | 96  | 15 | 9  | 262 | 88 | 713   | 195 |
| 78,899 | 46 | 3 | 399 | 91  | 16 | 9  | 261 | 85 | 722   | 188 |
| 78,900 | 46 | 3 | 397 | 91  | 16 | 9  | 261 | 85 | 720   | 188 |
| 78,901 | 44 | 3 | 382 | 91  | 16 | 9  | 239 | 85 | 681   | 188 |
| 78,902 | 52 | 3 | 490 | 92  | 24 | 8  | 313 | 86 | 879   | 189 |
| 78,903 | 52 | 3 | 489 | 94  | 24 | 7  | 313 | 89 | 878   | 193 |
| 78,904 | 52 | 3 | 478 | 94  | 24 | 7  | 313 | 89 | 867   | 193 |
| 78,905 | 64 | 3 | 551 | 94  | 30 | 7  | 381 | 89 | 1,026 | 193 |
| 78,906 | 64 | 3 | 550 | 88  | 31 | 7  | 383 | 87 | 1,028 | 185 |
| 78,907 | 63 | 3 | 559 | 88  | 31 | 7  | 386 | 87 | 1,039 | 185 |
| 78,908 | 61 | 4 | 555 | 88  | 30 | 7  | 377 | 87 | 1,023 | 186 |
| 78,909 | 61 | 4 | 551 | 86  | 30 | 7  | 376 | 87 | 1,018 | 184 |
| 78,910 | 61 | 4 | 549 | 86  | 29 | 7  | 375 | 87 | 1,014 | 184 |
| 78,911 | 59 | 4 | 548 | 88  | 29 | 7  | 373 | 87 | 1,009 | 186 |
| 78,912 | 59 | 4 | 543 | 89  | 29 | 7  | 375 | 89 | 1,006 | 189 |
| 78,913 | 58 | 4 | 540 | 91  | 29 | 7  | 375 | 92 | 1,002 | 194 |

|        |    |    |     |     |    |   |     |     |       |     |
|--------|----|----|-----|-----|----|---|-----|-----|-------|-----|
| 78,914 | 58 | 4  | 529 | 99  | 29 | 7 | 372 | 97  | 988   | 207 |
| 78,915 | 56 | 5  | 510 | 108 | 28 | 7 | 364 | 99  | 958   | 219 |
| 78,916 | 55 | 5  | 496 | 109 | 28 | 7 | 355 | 100 | 934   | 221 |
| 78,917 | 55 | 5  | 494 | 118 | 28 | 7 | 355 | 103 | 932   | 233 |
| 78,918 | 47 | 5  | 402 | 118 | 23 | 7 | 281 | 104 | 753   | 234 |
| 78,919 | 46 | 5  | 387 | 119 | 21 | 7 | 276 | 106 | 730   | 237 |
| 78,920 | 45 | 5  | 371 | 119 | 21 | 7 | 255 | 106 | 692   | 237 |
| 78,921 | 44 | 5  | 357 | 119 | 20 | 7 | 254 | 106 | 675   | 237 |
| 78,922 | 42 | 6  | 356 | 108 | 21 | 3 | 244 | 86  | 663   | 203 |
| 78,923 | 39 | 6  | 348 | 109 | 21 | 3 | 224 | 86  | 632   | 204 |
| 78,924 | 39 | 6  | 351 | 107 | 21 | 3 | 224 | 84  | 635   | 200 |
| 78,925 | 39 | 6  | 354 | 106 | 21 | 3 | 223 | 81  | 637   | 196 |
| 78,926 | 39 | 6  | 353 | 107 | 21 | 3 | 223 | 81  | 636   | 197 |
| 78,927 | 36 | 7  | 349 | 107 | 21 | 3 | 216 | 81  | 622   | 198 |
| 78,928 | 36 | 7  | 347 | 107 | 21 | 3 | 214 | 81  | 618   | 198 |
| 78,929 | 36 | 7  | 346 | 103 | 21 | 3 | 214 | 76  | 617   | 189 |
| 78,930 | 36 | 7  | 346 | 103 | 21 | 3 | 214 | 76  | 617   | 189 |
| 78,931 | 36 | 7  | 346 | 103 | 21 | 3 | 214 | 74  | 617   | 187 |
| 78,932 | 36 | 7  | 345 | 101 | 21 | 3 | 212 | 69  | 614   | 180 |
| 78,933 | 40 | 6  | 363 | 96  | 21 | 3 | 213 | 66  | 637   | 171 |
| 78,934 | 42 | 6  | 373 | 86  | 21 | 2 | 214 | 51  | 650   | 145 |
| 78,935 | 42 | 6  | 371 | 86  | 21 | 2 | 213 | 51  | 647   | 145 |
| 78,936 | 45 | 6  | 402 | 82  | 25 | 1 | 234 | 45  | 706   | 134 |
| 78,937 | 50 | 5  | 421 | 79  | 26 | 1 | 258 | 42  | 755   | 127 |
| 78,938 | 50 | 5  | 421 | 79  | 25 | 1 | 258 | 42  | 754   | 127 |
| 78,939 | 60 | 5  | 517 | 62  | 31 | 0 | 321 | 31  | 929   | 98  |
| 78,940 | 66 | 6  | 548 | 62  | 36 | 0 | 335 | 31  | 985   | 99  |
| 78,941 | 63 | 6  | 562 | 60  | 36 | 0 | 341 | 31  | 1,002 | 97  |
| 78,942 | 62 | 6  | 600 | 60  | 38 | 0 | 368 | 31  | 1,068 | 97  |
| 78,943 | 62 | 6  | 598 | 60  | 38 | 0 | 367 | 31  | 1,065 | 97  |
| 78,944 | 63 | 6  | 650 | 56  | 43 | 0 | 419 | 31  | 1,175 | 93  |
| 78,945 | 64 | 6  | 664 | 56  | 43 | 0 | 425 | 31  | 1,196 | 93  |
| 78,946 | 65 | 6  | 655 | 52  | 43 | 0 | 426 | 30  | 1,189 | 88  |
| 78,947 | 65 | 6  | 656 | 52  | 43 | 0 | 425 | 30  | 1,189 | 88  |
| 78,948 | 55 | 6  | 615 | 49  | 41 | 0 | 422 | 28  | 1,133 | 83  |
| 78,949 | 53 | 6  | 587 | 53  | 41 | 0 | 398 | 28  | 1,079 | 87  |
| 78,950 | 53 | 6  | 578 | 59  | 40 | 0 | 395 | 30  | 1,066 | 95  |
| 78,951 | 53 | 7  | 555 | 81  | 40 | 1 | 370 | 40  | 1,018 | 129 |
| 78,952 | 50 | 11 | 547 | 109 | 40 | 2 | 368 | 51  | 1,005 | 173 |
| 78,953 | 45 | 11 | 470 | 114 | 31 | 2 | 317 | 50  | 863   | 177 |
| 78,954 | 36 | 11 | 422 | 115 | 26 | 2 | 256 | 47  | 740   | 175 |

|        |     |    |       |     |    |   |     |    |       |     |
|--------|-----|----|-------|-----|----|---|-----|----|-------|-----|
| 78,955 | 35  | 11 | 427   | 115 | 26 | 2 | 258 | 47 | 746   | 175 |
| 78,956 | 38  | 11 | 422   | 115 | 25 | 2 | 262 | 47 | 747   | 175 |
| 78,957 | 38  | 11 | 418   | 115 | 24 | 2 | 259 | 47 | 739   | 175 |
| 78,958 | 38  | 11 | 408   | 115 | 24 | 2 | 257 | 47 | 727   | 175 |
| 78,959 | 41  | 10 | 521   | 115 | 27 | 2 | 325 | 47 | 914   | 174 |
| 78,960 | 41  | 10 | 521   | 115 | 27 | 2 | 325 | 47 | 914   | 174 |
| 78,961 | 43  | 10 | 528   | 112 | 27 | 2 | 327 | 48 | 925   | 172 |
| 78,962 | 43  | 10 | 528   | 112 | 27 | 2 | 326 | 48 | 924   | 172 |
| 78,963 | 44  | 10 | 534   | 110 | 27 | 2 | 327 | 46 | 932   | 168 |
| 78,964 | 45  | 10 | 540   | 108 | 27 | 2 | 327 | 43 | 939   | 163 |
| 78,965 | 45  | 10 | 541   | 99  | 28 | 2 | 329 | 39 | 943   | 150 |
| 78,966 | 45  | 9  | 541   | 90  | 28 | 2 | 326 | 38 | 940   | 139 |
| 78,967 | 45  | 9  | 544   | 88  | 28 | 2 | 327 | 37 | 944   | 136 |
| 78,968 | 46  | 9  | 549   | 80  | 28 | 2 | 325 | 35 | 948   | 126 |
| 78,969 | 46  | 9  | 550   | 82  | 28 | 2 | 325 | 41 | 949   | 134 |
| 78,970 | 46  | 9  | 546   | 86  | 28 | 3 | 320 | 39 | 940   | 137 |
| 78,971 | 46  | 10 | 541   | 86  | 28 | 3 | 319 | 39 | 934   | 138 |
| 78,972 | 48  | 10 | 543   | 86  | 27 | 3 | 324 | 39 | 942   | 138 |
| 78,973 | 48  | 9  | 554   | 84  | 27 | 3 | 332 | 38 | 961   | 134 |
| 78,974 | 48  | 9  | 554   | 84  | 27 | 3 | 332 | 38 | 961   | 134 |
| 78,975 | 60  | 9  | 594   | 81  | 30 | 3 | 377 | 42 | 1,061 | 135 |
| 78,976 | 60  | 9  | 591   | 81  | 30 | 3 | 377 | 42 | 1,058 | 135 |
| 78,977 | 59  | 9  | 600   | 80  | 30 | 3 | 382 | 42 | 1,071 | 134 |
| 78,978 | 60  | 8  | 618   | 80  | 32 | 3 | 394 | 42 | 1,104 | 133 |
| 78,979 | 75  | 8  | 675   | 80  | 32 | 3 | 417 | 42 | 1,199 | 133 |
| 78,980 | 79  | 8  | 719   | 80  | 34 | 3 | 426 | 42 | 1,258 | 133 |
| 78,981 | 84  | 8  | 858   | 78  | 39 | 3 | 483 | 42 | 1,464 | 131 |
| 78,982 | 102 | 8  | 989   | 78  | 47 | 3 | 590 | 42 | 1,728 | 131 |
| 78,983 | 101 | 8  | 985   | 78  | 47 | 3 | 590 | 42 | 1,723 | 131 |
| 78,984 | 111 | 8  | 1,151 | 78  | 59 | 3 | 713 | 42 | 2,034 | 131 |
| 78,985 | 110 | 9  | 1,143 | 78  | 59 | 3 | 715 | 40 | 2,027 | 130 |
| 78,986 | 109 | 9  | 1,132 | 78  | 58 | 3 | 712 | 40 | 2,011 | 130 |
| 78,987 | 107 | 9  | 1,129 | 82  | 56 | 3 | 707 | 41 | 1,999 | 135 |
| 78,988 | 104 | 9  | 1,139 | 82  | 55 | 3 | 689 | 41 | 1,987 | 135 |
| 78,989 | 100 | 9  | 1,153 | 88  | 51 | 3 | 710 | 42 | 2,014 | 142 |
| 78,990 | 100 | 9  | 1,171 | 88  | 53 | 3 | 712 | 42 | 2,036 | 142 |
| 78,991 | 95  | 8  | 1,208 | 88  | 51 | 3 | 741 | 42 | 2,095 | 141 |
| 78,992 | 97  | 8  | 1,237 | 89  | 53 | 3 | 747 | 42 | 2,134 | 142 |
| 78,993 | 99  | 8  | 1,214 | 89  | 51 | 3 | 729 | 43 | 2,093 | 143 |
| 78,994 | 98  | 9  | 1,166 | 89  | 46 | 3 | 680 | 43 | 1,990 | 144 |
| 78,995 | 97  | 9  | 1,155 | 89  | 46 | 3 | 675 | 43 | 1,973 | 144 |

|        |     |   |       |    |    |   |     |    |       |     |
|--------|-----|---|-------|----|----|---|-----|----|-------|-----|
| 78,996 | 97  | 9 | 1,152 | 90 | 46 | 3 | 676 | 44 | 1,971 | 146 |
| 78,997 | 96  | 9 | 1,153 | 91 | 46 | 3 | 674 | 46 | 1,969 | 149 |
| 78,998 | 96  | 9 | 1,152 | 93 | 46 | 3 | 674 | 47 | 1,968 | 152 |
| 78,999 | 96  | 9 | 1,167 | 93 | 46 | 3 | 674 | 48 | 1,983 | 153 |
| 79,000 | 96  | 9 | 1,167 | 89 | 46 | 3 | 674 | 48 | 1,983 | 149 |
| 79,001 | 102 | 9 | 1,192 | 83 | 47 | 3 | 682 | 47 | 2,023 | 142 |
| 79,002 | 102 | 8 | 1,192 | 61 | 47 | 2 | 682 | 38 | 2,023 | 109 |
| 79,003 | 109 | 4 | 1,216 | 53 | 48 | 2 | 697 | 28 | 2,070 | 87  |
| 79,004 | 109 | 4 | 1,214 | 50 | 48 | 2 | 696 | 29 | 2,067 | 85  |
| 79,005 | 111 | 4 | 1,246 | 53 | 49 | 2 | 719 | 32 | 2,125 | 91  |
| 79,006 | 136 | 4 | 1,297 | 54 | 53 | 2 | 810 | 33 | 2,296 | 93  |
| 79,007 | 134 | 4 | 1,288 | 55 | 53 | 2 | 806 | 35 | 2,281 | 96  |
| 79,008 | 133 | 4 | 1,266 | 66 | 53 | 2 | 792 | 36 | 2,244 | 108 |
| 79,009 | 132 | 5 | 1,244 | 70 | 51 | 3 | 771 | 38 | 2,198 | 116 |
| 79,010 | 132 | 5 | 1,174 | 71 | 50 | 3 | 743 | 38 | 2,099 | 117 |
| 79,011 | 136 | 5 | 1,197 | 74 | 51 | 3 | 766 | 38 | 2,150 | 120 |
| 79,012 | 136 | 6 | 1,196 | 75 | 51 | 3 | 766 | 37 | 2,149 | 121 |
| 79,013 | 136 | 6 | 1,196 | 76 | 51 | 3 | 765 | 37 | 2,148 | 122 |
| 79,014 | 136 | 6 | 1,189 | 76 | 51 | 3 | 765 | 37 | 2,141 | 122 |
| 79,015 | 135 | 6 | 1,187 | 76 | 51 | 3 | 765 | 37 | 2,138 | 122 |
| 79,016 | 134 | 6 | 1,186 | 76 | 50 | 3 | 763 | 36 | 2,133 | 121 |
| 79,017 | 140 | 6 | 1,275 | 76 | 54 | 3 | 807 | 36 | 2,276 | 121 |
| 79,018 | 140 | 6 | 1,275 | 76 | 54 | 3 | 807 | 36 | 2,276 | 121 |
| 79,019 | 146 | 6 | 1,526 | 75 | 68 | 3 | 933 | 36 | 2,673 | 120 |
| 79,020 | 146 | 6 | 1,523 | 74 | 68 | 3 | 933 | 31 | 2,670 | 114 |
| 79,021 | 147 | 6 | 1,630 | 69 | 75 | 2 | 959 | 31 | 2,811 | 108 |
| 79,022 | 147 | 5 | 1,652 | 69 | 75 | 2 | 967 | 31 | 2,841 | 107 |
| 79,023 | 148 | 5 | 1,683 | 68 | 78 | 2 | 984 | 28 | 2,893 | 103 |
| 79,024 | 148 | 5 | 1,670 | 68 | 78 | 2 | 976 | 28 | 2,872 | 103 |
| 79,025 | 136 | 5 | 1,639 | 68 | 76 | 2 | 942 | 28 | 2,793 | 103 |
| 79,026 | 138 | 5 | 1,640 | 68 | 75 | 2 | 948 | 28 | 2,801 | 103 |
| 79,027 | 139 | 5 | 1,647 | 70 | 76 | 2 | 946 | 28 | 2,808 | 105 |
| 79,028 | 139 | 5 | 1,642 | 77 | 76 | 2 | 945 | 30 | 2,802 | 114 |
| 79,029 | 138 | 5 | 1,623 | 81 | 74 | 2 | 934 | 32 | 2,769 | 120 |
| 79,030 | 124 | 5 | 1,566 | 86 | 74 | 2 | 910 | 33 | 2,674 | 126 |
| 79,031 | 120 | 5 | 1,522 | 87 | 72 | 2 | 902 | 35 | 2,616 | 129 |
| 79,032 | 115 | 5 | 1,383 | 87 | 67 | 2 | 844 | 35 | 2,409 | 129 |
| 79,033 | 97  | 6 | 1,254 | 95 | 59 | 2 | 735 | 37 | 2,145 | 140 |
| 79,034 | 87  | 6 | 1,119 | 95 | 48 | 2 | 630 | 37 | 1,884 | 140 |
| 79,035 | 84  | 6 | 1,079 | 99 | 47 | 2 | 612 | 37 | 1,822 | 144 |
| 79,036 | 84  | 6 | 1,088 | 96 | 47 | 2 | 612 | 38 | 1,831 | 142 |



|        |     |   |       |     |    |   |     |    |       |     |
|--------|-----|---|-------|-----|----|---|-----|----|-------|-----|
| 79,037 | 85  | 6 | 1,088 | 123 | 47 | 2 | 610 | 43 | 1,830 | 174 |
| 79,038 | 85  | 6 | 1,095 | 126 | 46 | 2 | 610 | 47 | 1,836 | 181 |
| 79,039 | 93  | 9 | 1,081 | 129 | 46 | 2 | 609 | 46 | 1,829 | 186 |
| 79,040 | 89  | 9 | 997   | 124 | 46 | 2 | 558 | 45 | 1,690 | 180 |
| 79,041 | 90  | 9 | 965   | 124 | 42 | 2 | 526 | 45 | 1,623 | 180 |
| 79,042 | 92  | 9 | 905   | 123 | 39 | 2 | 483 | 45 | 1,519 | 179 |
| 79,043 | 90  | 9 | 863   | 123 | 37 | 2 | 468 | 44 | 1,458 | 178 |
| 79,044 | 88  | 9 | 844   | 123 | 37 | 2 | 459 | 44 | 1,428 | 178 |
| 79,045 | 93  | 8 | 898   | 123 | 39 | 2 | 488 | 44 | 1,518 | 177 |
| 79,046 | 97  | 8 | 952   | 122 | 43 | 2 | 540 | 43 | 1,632 | 175 |
| 79,047 | 99  | 8 | 957   | 121 | 43 | 2 | 543 | 41 | 1,642 | 172 |
| 79,048 | 100 | 8 | 962   | 119 | 43 | 2 | 547 | 40 | 1,652 | 169 |
| 79,049 | 100 | 8 | 961   | 122 | 43 | 2 | 549 | 39 | 1,653 | 171 |
| 79,050 | 100 | 9 | 947   | 123 | 43 | 2 | 550 | 40 | 1,640 | 174 |
| 79,051 | 94  | 9 | 923   | 125 | 43 | 2 | 543 | 40 | 1,603 | 176 |
| 79,052 | 95  | 8 | 929   | 128 | 42 | 2 | 545 | 39 | 1,611 | 177 |
| 79,053 | 94  | 8 | 929   | 128 | 42 | 2 | 546 | 38 | 1,611 | 176 |
| 79,054 | 88  | 8 | 908   | 99  | 41 | 1 | 533 | 33 | 1,570 | 141 |
| 79,055 | 84  | 9 | 874   | 105 | 40 | 1 | 509 | 34 | 1,507 | 149 |
| 79,056 | 60  | 9 | 817   | 107 | 36 | 1 | 419 | 43 | 1,332 | 160 |
| 79,057 | 59  | 9 | 809   | 107 | 36 | 1 | 412 | 43 | 1,316 | 160 |
| 79,058 | 58  | 9 | 811   | 92  | 36 | 0 | 409 | 39 | 1,314 | 140 |
| 79,059 | 58  | 9 | 809   | 94  | 36 | 0 | 402 | 40 | 1,305 | 143 |
| 79,060 | 53  | 9 | 800   | 94  | 36 | 0 | 392 | 40 | 1,281 | 143 |
| 79,061 | 52  | 9 | 801   | 94  | 36 | 0 | 388 | 40 | 1,277 | 143 |
| 79,062 | 51  | 8 | 791   | 90  | 35 | 0 | 380 | 39 | 1,257 | 137 |
| 79,063 | 51  | 8 | 791   | 90  | 35 | 0 | 380 | 39 | 1,257 | 137 |
| 79,064 | 51  | 8 | 791   | 89  | 35 | 0 | 380 | 40 | 1,257 | 137 |
| 79,065 | 52  | 8 | 818   | 89  | 35 | 0 | 397 | 40 | 1,302 | 137 |
| 79,066 | 52  | 8 | 817   | 92  | 35 | 0 | 399 | 40 | 1,303 | 140 |
| 79,067 | 55  | 8 | 809   | 92  | 35 | 0 | 402 | 40 | 1,301 | 140 |
| 79,068 | 49  | 8 | 738   | 94  | 32 | 0 | 373 | 39 | 1,192 | 141 |
| 79,069 | 42  | 8 | 593   | 94  | 23 | 0 | 260 | 38 | 918   | 140 |
| 79,070 | 42  | 8 | 483   | 94  | 18 | 0 | 245 | 36 | 788   | 138 |
| 79,071 | 41  | 8 | 401   | 93  | 11 | 0 | 224 | 36 | 677   | 137 |
| 79,072 | 41  | 8 | 382   | 93  | 11 | 0 | 219 | 36 | 653   | 137 |
| 79,073 | 41  | 9 | 360   | 94  | 11 | 0 | 211 | 36 | 623   | 139 |
| 79,074 | 38  | 9 | 320   | 94  | 8  | 0 | 188 | 35 | 554   | 138 |
| 79,075 | 38  | 9 | 319   | 94  | 8  | 0 | 188 | 35 | 553   | 138 |
| 79,076 | 38  | 9 | 315   | 94  | 8  | 0 | 184 | 35 | 545   | 138 |
| 79,077 | 36  | 9 | 308   | 95  | 8  | 0 | 175 | 38 | 527   | 142 |

|        |    |    |     |    |    |   |     |    |       |     |
|--------|----|----|-----|----|----|---|-----|----|-------|-----|
| 79,078 | 35 | 10 | 296 | 94 | 7  | 0 | 174 | 38 | 512   | 142 |
| 79,079 | 35 | 10 | 297 | 87 | 7  | 0 | 176 | 37 | 515   | 134 |
| 79,080 | 35 | 10 | 297 | 85 | 7  | 0 | 174 | 41 | 513   | 136 |
| 79,081 | 35 | 11 | 297 | 82 | 7  | 0 | 174 | 40 | 513   | 133 |
| 79,082 | 38 | 11 | 345 | 81 | 8  | 0 | 187 | 38 | 578   | 130 |
| 79,083 | 41 | 11 | 357 | 81 | 9  | 0 | 198 | 38 | 605   | 130 |
| 79,084 | 41 | 10 | 366 | 74 | 9  | 0 | 205 | 36 | 621   | 120 |
| 79,085 | 41 | 10 | 362 | 74 | 9  | 0 | 208 | 36 | 620   | 120 |
| 79,086 | 41 | 10 | 363 | 70 | 9  | 0 | 210 | 36 | 623   | 116 |
| 79,087 | 40 | 9  | 351 | 69 | 9  | 0 | 208 | 34 | 608   | 112 |
| 79,088 | 41 | 6  | 348 | 35 | 9  | 0 | 205 | 25 | 603   | 66  |
| 79,089 | 45 | 6  | 352 | 35 | 11 | 0 | 203 | 25 | 611   | 66  |
| 79,090 | 37 | 6  | 365 | 35 | 12 | 0 | 218 | 25 | 632   | 66  |
| 79,091 | 37 | 6  | 364 | 35 | 12 | 0 | 217 | 25 | 630   | 66  |
| 79,092 | 35 | 6  | 383 | 35 | 13 | 0 | 236 | 25 | 667   | 66  |
| 79,093 | 32 | 6  | 373 | 35 | 13 | 0 | 233 | 25 | 651   | 66  |
| 79,094 | 32 | 6  | 381 | 35 | 13 | 0 | 235 | 25 | 661   | 66  |
| 79,095 | 27 | 6  | 327 | 35 | 11 | 0 | 204 | 25 | 569   | 66  |
| 79,096 | 27 | 6  | 328 | 36 | 11 | 0 | 204 | 25 | 570   | 67  |
| 79,097 | 23 | 6  | 275 | 36 | 7  | 0 | 153 | 25 | 458   | 67  |
| 79,098 | 21 | 6  | 273 | 36 | 7  | 0 | 153 | 25 | 454   | 67  |
| 79,099 | 25 | 6  | 300 | 37 | 7  | 0 | 160 | 25 | 492   | 68  |
| 79,100 | 25 | 6  | 305 | 34 | 8  | 0 | 158 | 26 | 496   | 66  |
| 79,101 | 25 | 5  | 305 | 33 | 9  | 0 | 157 | 25 | 496   | 63  |
| 79,102 | 38 | 5  | 473 | 31 | 16 | 0 | 317 | 25 | 844   | 61  |
| 79,103 | 37 | 5  | 470 | 28 | 16 | 0 | 314 | 26 | 837   | 59  |
| 79,104 | 38 | 5  | 475 | 28 | 16 | 0 | 322 | 26 | 851   | 59  |
| 79,105 | 38 | 5  | 475 | 28 | 16 | 0 | 322 | 26 | 851   | 59  |
| 79,106 | 38 | 4  | 487 | 22 | 16 | 0 | 330 | 25 | 871   | 51  |
| 79,107 | 38 | 4  | 489 | 21 | 16 | 0 | 335 | 16 | 878   | 41  |
| 79,108 | 38 | 4  | 489 | 20 | 16 | 0 | 335 | 14 | 878   | 38  |
| 79,109 | 38 | 3  | 492 | 16 | 16 | 0 | 335 | 12 | 881   | 31  |
| 79,110 | 39 | 3  | 497 | 16 | 16 | 0 | 336 | 12 | 888   | 31  |
| 79,111 | 39 | 3  | 493 | 16 | 16 | 0 | 336 | 12 | 884   | 31  |
| 79,112 | 41 | 3  | 500 | 16 | 16 | 0 | 345 | 12 | 902   | 31  |
| 79,113 | 41 | 3  | 507 | 16 | 16 | 0 | 354 | 12 | 918   | 31  |
| 79,114 | 43 | 3  | 519 | 16 | 16 | 0 | 361 | 12 | 939   | 31  |
| 79,115 | 49 | 3  | 557 | 16 | 17 | 0 | 400 | 11 | 1,023 | 30  |
| 79,116 | 49 | 3  | 581 | 14 | 17 | 0 | 394 | 11 | 1,041 | 28  |
| 79,117 | 49 | 3  | 581 | 14 | 17 | 0 | 398 | 11 | 1,045 | 28  |
| 79,118 | 46 | 3  | 567 | 14 | 16 | 0 | 384 | 11 | 1,013 | 28  |

|        |    |   |     |    |    |   |     |    |       |    |
|--------|----|---|-----|----|----|---|-----|----|-------|----|
| 79,119 | 46 | 3 | 575 | 12 | 16 | 0 | 381 | 11 | 1,018 | 26 |
| 79,120 | 46 | 3 | 575 | 12 | 16 | 0 | 381 | 11 | 1,018 | 26 |
| 79,121 | 46 | 3 | 574 | 12 | 16 | 0 | 381 | 11 | 1,017 | 26 |
| 79,122 | 50 | 3 | 603 | 12 | 16 | 0 | 397 | 11 | 1,066 | 26 |
| 79,123 | 51 | 2 | 612 | 11 | 16 | 0 | 404 | 11 | 1,083 | 24 |
| 79,124 | 51 | 3 | 622 | 11 | 16 | 0 | 407 | 11 | 1,096 | 25 |
| 79,125 | 52 | 3 | 640 | 11 | 16 | 0 | 409 | 11 | 1,117 | 25 |
| 79,126 | 52 | 3 | 639 | 11 | 16 | 0 | 409 | 11 | 1,116 | 25 |
| 79,127 | 52 | 3 | 639 | 11 | 16 | 0 | 409 | 12 | 1,116 | 26 |
| 79,128 | 59 | 3 | 689 | 12 | 19 | 0 | 447 | 14 | 1,214 | 29 |
| 79,129 | 59 | 2 | 688 | 15 | 19 | 0 | 445 | 18 | 1,211 | 35 |
| 79,130 | 58 | 2 | 677 | 15 | 18 | 0 | 445 | 17 | 1,198 | 34 |
| 79,131 | 58 | 2 | 662 | 14 | 18 | 0 | 440 | 12 | 1,178 | 28 |
| 79,132 | 56 | 1 | 644 | 12 | 18 | 0 | 431 | 12 | 1,149 | 25 |
| 79,133 | 53 | 1 | 634 | 12 | 17 | 0 | 421 | 12 | 1,125 | 25 |
| 79,134 | 53 | 1 | 625 | 11 | 17 | 0 | 414 | 12 | 1,109 | 24 |
| 79,135 | 53 | 1 | 624 | 12 | 17 | 0 | 410 | 12 | 1,104 | 25 |
| 79,136 | 53 | 1 | 630 | 12 | 17 | 0 | 411 | 12 | 1,111 | 25 |
| 79,137 | 53 | 1 | 646 | 12 | 19 | 0 | 422 | 12 | 1,140 | 25 |
| 79,138 | 53 | 1 | 648 | 12 | 19 | 0 | 425 | 12 | 1,145 | 25 |
| 79,139 | 51 | 1 | 644 | 14 | 19 | 0 | 423 | 13 | 1,137 | 28 |
| 79,140 | 47 | 1 | 627 | 14 | 17 | 0 | 423 | 13 | 1,114 | 28 |
| 79,141 | 46 | 1 | 616 | 15 | 17 | 0 | 420 | 13 | 1,099 | 29 |
| 79,142 | 46 | 1 | 612 | 15 | 16 | 0 | 414 | 13 | 1,088 | 29 |
| 79,143 | 46 | 1 | 595 | 15 | 16 | 0 | 399 | 13 | 1,056 | 29 |
| 79,144 | 46 | 1 | 584 | 15 | 16 | 0 | 398 | 13 | 1,044 | 29 |
| 79,145 | 46 | 1 | 582 | 15 | 16 | 0 | 397 | 13 | 1,041 | 29 |
| 79,146 | 46 | 1 | 578 | 17 | 16 | 0 | 396 | 13 | 1,036 | 31 |
| 79,147 | 46 | 1 | 576 | 17 | 16 | 0 | 395 | 13 | 1,033 | 31 |
| 79,148 | 47 | 1 | 597 | 18 | 18 | 0 | 408 | 13 | 1,070 | 32 |
| 79,149 | 47 | 1 | 597 | 18 | 19 | 0 | 408 | 15 | 1,071 | 34 |
| 79,150 | 42 | 1 | 566 | 21 | 19 | 0 | 397 | 15 | 1,024 | 37 |
| 79,151 | 37 | 1 | 475 | 25 | 15 | 0 | 316 | 15 | 843   | 41 |
| 79,152 | 33 | 1 | 406 | 25 | 12 | 0 | 275 | 15 | 726   | 41 |
| 79,153 | 29 | 1 | 397 | 25 | 10 | 0 | 242 | 16 | 678   | 42 |
| 79,154 | 29 | 1 | 415 | 25 | 10 | 0 | 246 | 16 | 700   | 42 |
| 79,155 | 29 | 1 | 414 | 26 | 10 | 0 | 236 | 16 | 689   | 43 |
| 79,156 | 29 | 1 | 402 | 26 | 10 | 0 | 228 | 16 | 669   | 43 |
| 79,157 | 29 | 1 | 402 | 26 | 10 | 0 | 227 | 16 | 668   | 43 |
| 79,158 | 32 | 1 | 448 | 25 | 10 | 0 | 262 | 16 | 752   | 42 |
| 79,159 | 32 | 1 | 448 | 25 | 10 | 0 | 262 | 16 | 752   | 42 |

|        |    |   |       |    |    |   |     |    |       |     |
|--------|----|---|-------|----|----|---|-----|----|-------|-----|
| 79,160 | 34 | 1 | 472   | 25 | 12 | 0 | 287 | 17 | 805   | 43  |
| 79,161 | 35 | 1 | 471   | 57 | 14 | 0 | 292 | 20 | 812   | 78  |
| 79,162 | 35 | 1 | 509   | 62 | 15 | 0 | 302 | 22 | 861   | 85  |
| 79,163 | 35 | 1 | 529   | 62 | 16 | 0 | 307 | 22 | 887   | 85  |
| 79,164 | 40 | 1 | 607   | 64 | 22 | 0 | 363 | 22 | 1,032 | 87  |
| 79,165 | 39 | 1 | 604   | 64 | 22 | 0 | 360 | 22 | 1,025 | 87  |
| 79,166 | 33 | 1 | 567   | 63 | 22 | 0 | 326 | 22 | 948   | 86  |
| 79,167 | 32 | 1 | 524   | 63 | 22 | 0 | 316 | 22 | 894   | 86  |
| 79,168 | 32 | 1 | 525   | 63 | 22 | 0 | 310 | 22 | 889   | 86  |
| 79,169 | 32 | 1 | 522   | 63 | 22 | 0 | 309 | 22 | 885   | 86  |
| 79,170 | 32 | 1 | 517   | 63 | 22 | 0 | 308 | 23 | 879   | 87  |
| 79,171 | 32 | 1 | 515   | 65 | 22 | 0 | 308 | 23 | 877   | 89  |
| 79,172 | 32 | 1 | 513   | 65 | 22 | 0 | 305 | 26 | 872   | 92  |
| 79,173 | 28 | 1 | 488   | 66 | 22 | 1 | 292 | 26 | 830   | 94  |
| 79,174 | 27 | 1 | 475   | 66 | 22 | 1 | 286 | 27 | 810   | 95  |
| 79,175 | 27 | 0 | 466   | 66 | 22 | 2 | 283 | 27 | 798   | 95  |
| 79,176 | 26 | 0 | 448   | 67 | 22 | 2 | 282 | 26 | 778   | 95  |
| 79,177 | 26 | 1 | 451   | 70 | 23 | 2 | 284 | 26 | 784   | 99  |
| 79,178 | 19 | 1 | 401   | 70 | 20 | 2 | 243 | 28 | 683   | 101 |
| 79,179 | 19 | 1 | 400   | 71 | 20 | 2 | 249 | 26 | 688   | 100 |
| 79,180 | 22 | 1 | 424   | 71 | 20 | 2 | 264 | 25 | 730   | 99  |
| 79,181 | 22 | 1 | 424   | 76 | 20 | 2 | 264 | 27 | 730   | 106 |
| 79,182 | 22 | 3 | 424   | 80 | 20 | 2 | 264 | 28 | 730   | 113 |
| 79,183 | 22 | 3 | 421   | 80 | 20 | 2 | 264 | 28 | 727   | 113 |
| 79,184 | 22 | 6 | 424   | 86 | 20 | 2 | 268 | 33 | 734   | 127 |
| 79,185 | 22 | 6 | 421   | 87 | 20 | 2 | 268 | 33 | 731   | 128 |
| 79,186 | 22 | 6 | 424   | 87 | 21 | 2 | 267 | 34 | 734   | 129 |
| 79,187 | 22 | 6 | 421   | 87 | 21 | 2 | 267 | 34 | 731   | 129 |
| 79,188 | 23 | 6 | 411   | 87 | 21 | 2 | 260 | 34 | 715   | 129 |
| 79,189 | 23 | 6 | 409   | 87 | 21 | 2 | 257 | 34 | 710   | 129 |
| 79,190 | 23 | 6 | 416   | 85 | 24 | 2 | 258 | 33 | 721   | 126 |
| 79,191 | 27 | 6 | 431   | 85 | 26 | 2 | 265 | 34 | 749   | 127 |
| 79,192 | 27 | 6 | 429   | 84 | 25 | 2 | 256 | 34 | 737   | 126 |
| 79,193 | 40 | 6 | 470   | 85 | 25 | 2 | 289 | 34 | 824   | 127 |
| 79,194 | 55 | 6 | 645   | 86 | 31 | 2 | 367 | 38 | 1,098 | 132 |
| 79,195 | 54 | 6 | 633   | 86 | 29 | 2 | 357 | 38 | 1,073 | 132 |
| 79,196 | 89 | 6 | 1,002 | 84 | 48 | 2 | 556 | 38 | 1,695 | 130 |
| 79,197 | 89 | 6 | 1,021 | 83 | 49 | 2 | 575 | 38 | 1,734 | 129 |
| 79,198 | 89 | 6 | 1,022 | 82 | 49 | 2 | 576 | 38 | 1,736 | 128 |
| 79,199 | 89 | 6 | 1,022 | 82 | 49 | 2 | 576 | 38 | 1,736 | 128 |
| 79,200 | 89 | 6 | 1,020 | 82 | 48 | 2 | 573 | 36 | 1,730 | 126 |

|        |    |    |       |    |    |   |     |    |       |     |
|--------|----|----|-------|----|----|---|-----|----|-------|-----|
| 79,201 | 89 | 6  | 1,019 | 78 | 48 | 2 | 573 | 36 | 1,729 | 122 |
| 79,202 | 89 | 6  | 1,016 | 75 | 48 | 2 | 571 | 35 | 1,724 | 118 |
| 79,203 | 89 | 6  | 1,013 | 75 | 48 | 2 | 569 | 35 | 1,719 | 118 |
| 79,204 | 89 | 6  | 1,009 | 78 | 48 | 2 | 565 | 36 | 1,711 | 122 |
| 79,205 | 89 | 6  | 991   | 78 | 48 | 2 | 561 | 36 | 1,689 | 122 |
| 79,206 | 88 | 6  | 987   | 79 | 48 | 2 | 562 | 36 | 1,685 | 123 |
| 79,207 | 88 | 6  | 986   | 81 | 48 | 2 | 561 | 36 | 1,683 | 125 |
| 79,208 | 86 | 8  | 984   | 83 | 48 | 3 | 560 | 40 | 1,678 | 134 |
| 79,209 | 85 | 8  | 940   | 83 | 48 | 3 | 523 | 41 | 1,596 | 135 |
| 79,210 | 83 | 8  | 921   | 96 | 46 | 4 | 507 | 45 | 1,557 | 153 |
| 79,211 | 83 | 8  | 916   | 98 | 46 | 4 | 501 | 44 | 1,546 | 154 |
| 79,212 | 81 | 8  | 911   | 67 | 44 | 4 | 496 | 41 | 1,532 | 120 |
| 79,213 | 79 | 8  | 864   | 60 | 43 | 4 | 478 | 39 | 1,464 | 111 |
| 79,214 | 79 | 8  | 835   | 62 | 42 | 4 | 468 | 39 | 1,424 | 113 |
| 79,215 | 74 | 10 | 756   | 63 | 36 | 4 | 406 | 39 | 1,272 | 116 |
| 79,216 | 73 | 10 | 748   | 63 | 36 | 4 | 402 | 39 | 1,259 | 116 |
| 79,217 | 73 | 10 | 743   | 63 | 35 | 4 | 396 | 39 | 1,247 | 116 |
| 79,218 | 73 | 10 | 738   | 63 | 35 | 4 | 396 | 39 | 1,242 | 116 |
| 79,219 | 73 | 10 | 739   | 63 | 35 | 4 | 396 | 39 | 1,243 | 116 |
| 79,220 | 73 | 10 | 739   | 63 | 35 | 4 | 396 | 39 | 1,243 | 116 |
| 79,221 | 73 | 10 | 739   | 61 | 35 | 4 | 397 | 38 | 1,244 | 113 |
| 79,222 | 73 | 10 | 739   | 61 | 35 | 4 | 397 | 38 | 1,244 | 113 |
| 79,223 | 73 | 10 | 739   | 61 | 35 | 4 | 397 | 35 | 1,244 | 110 |
| 79,224 | 73 | 10 | 739   | 60 | 35 | 3 | 397 | 35 | 1,244 | 108 |
| 79,225 | 74 | 10 | 741   | 60 | 35 | 3 | 399 | 34 | 1,249 | 107 |
| 79,226 | 74 | 10 | 741   | 60 | 35 | 2 | 399 | 34 | 1,249 | 106 |
| 79,227 | 74 | 10 | 745   | 59 | 35 | 2 | 401 | 34 | 1,255 | 105 |
| 79,228 | 74 | 9  | 743   | 56 | 34 | 2 | 399 | 34 | 1,250 | 101 |
| 79,229 | 74 | 9  | 744   | 44 | 34 | 2 | 396 | 24 | 1,248 | 79  |
| 79,230 | 74 | 9  | 744   | 44 | 34 | 2 | 393 | 24 | 1,245 | 79  |
| 79,231 | 71 | 9  | 720   | 42 | 34 | 2 | 377 | 24 | 1,202 | 77  |
| 79,232 | 71 | 7  | 716   | 39 | 34 | 2 | 374 | 23 | 1,195 | 71  |
| 79,233 | 71 | 7  | 718   | 39 | 34 | 2 | 372 | 23 | 1,195 | 71  |
| 79,234 | 71 | 7  | 722   | 40 | 34 | 2 | 373 | 22 | 1,200 | 71  |
| 79,235 | 71 | 4  | 714   | 34 | 33 | 2 | 372 | 17 | 1,190 | 57  |
| 79,236 | 71 | 4  | 711   | 34 | 32 | 2 | 370 | 17 | 1,184 | 57  |
| 79,237 | 72 | 4  | 712   | 34 | 32 | 2 | 371 | 16 | 1,187 | 56  |
| 79,238 | 72 | 4  | 717   | 34 | 32 | 2 | 373 | 16 | 1,194 | 56  |
| 79,239 | 71 | 4  | 729   | 39 | 31 | 2 | 375 | 19 | 1,206 | 64  |
| 79,240 | 75 | 4  | 799   | 46 | 33 | 2 | 431 | 19 | 1,338 | 71  |
| 79,241 | 75 | 4  | 793   | 67 | 32 | 4 | 432 | 30 | 1,332 | 105 |

|        |    |    |       |    |    |   |     |    |       |     |
|--------|----|----|-------|----|----|---|-----|----|-------|-----|
| 79,242 | 73 | 4  | 810   | 81 | 31 | 6 | 474 | 39 | 1,388 | 130 |
| 79,243 | 72 | 4  | 794   | 83 | 31 | 7 | 467 | 40 | 1,364 | 134 |
| 79,244 | 59 | 5  | 746   | 87 | 32 | 7 | 440 | 41 | 1,277 | 140 |
| 79,245 | 43 | 5  | 570   | 87 | 26 | 7 | 360 | 38 | 999   | 137 |
| 79,246 | 11 | 9  | 407   | 90 | 15 | 8 | 242 | 43 | 675   | 150 |
| 79,247 | 8  | 9  | 198   | 91 | 7  | 8 | 158 | 44 | 371   | 152 |
| 79,248 | 8  | 9  | 176   | 92 | 6  | 8 | 137 | 46 | 327   | 155 |
| 79,249 | 8  | 9  | 174   | 93 | 6  | 8 | 137 | 48 | 325   | 158 |
| 79,250 | 8  | 9  | 173   | 93 | 6  | 8 | 137 | 48 | 324   | 158 |
| 79,251 | 9  | 9  | 174   | 94 | 6  | 8 | 138 | 49 | 327   | 160 |
| 79,252 | 9  | 9  | 174   | 95 | 6  | 8 | 138 | 49 | 327   | 161 |
| 79,253 | 9  | 9  | 175   | 94 | 6  | 8 | 138 | 49 | 328   | 160 |
| 79,254 | 9  | 9  | 178   | 91 | 6  | 8 | 138 | 46 | 331   | 154 |
| 79,255 | 9  | 9  | 180   | 92 | 6  | 8 | 139 | 47 | 334   | 156 |
| 79,256 | 10 | 9  | 181   | 94 | 6  | 8 | 142 | 49 | 339   | 160 |
| 79,257 | 12 | 10 | 186   | 92 | 6  | 8 | 145 | 49 | 349   | 159 |
| 79,258 | 12 | 10 | 187   | 92 | 6  | 8 | 147 | 49 | 352   | 159 |
| 79,259 | 12 | 8  | 187   | 91 | 6  | 7 | 146 | 46 | 351   | 152 |
| 79,260 | 12 | 8  | 185   | 91 | 6  | 7 | 145 | 45 | 348   | 151 |
| 79,261 | 14 | 8  | 197   | 80 | 8  | 6 | 152 | 41 | 371   | 135 |
| 79,262 | 14 | 8  | 196   | 76 | 8  | 6 | 151 | 43 | 369   | 133 |
| 79,263 | 15 | 8  | 198   | 75 | 8  | 6 | 153 | 43 | 374   | 132 |
| 79,264 | 15 | 8  | 212   | 81 | 8  | 6 | 155 | 44 | 390   | 139 |
| 79,265 | 15 | 8  | 212   | 79 | 8  | 6 | 155 | 44 | 390   | 137 |
| 79,266 | 15 | 6  | 211   | 78 | 8  | 6 | 155 | 45 | 389   | 135 |
| 79,267 | 15 | 6  | 211   | 79 | 8  | 6 | 155 | 45 | 389   | 136 |
| 79,268 | 22 | 6  | 302   | 80 | 15 | 6 | 192 | 45 | 531   | 137 |
| 79,269 | 22 | 6  | 302   | 80 | 15 | 6 | 192 | 45 | 531   | 137 |
| 79,270 | 22 | 6  | 300   | 80 | 15 | 6 | 193 | 45 | 530   | 137 |
| 79,271 | 32 | 6  | 500   | 81 | 22 | 6 | 277 | 45 | 831   | 138 |
| 79,272 | 33 | 6  | 531   | 82 | 22 | 6 | 282 | 45 | 868   | 139 |
| 79,273 | 33 | 6  | 537   | 82 | 22 | 6 | 286 | 45 | 878   | 139 |
| 79,274 | 44 | 6  | 701   | 82 | 26 | 6 | 354 | 45 | 1,125 | 139 |
| 79,275 | 45 | 6  | 748   | 82 | 27 | 6 | 373 | 45 | 1,193 | 139 |
| 79,276 | 45 | 6  | 758   | 82 | 27 | 6 | 378 | 45 | 1,208 | 139 |
| 79,277 | 52 | 7  | 849   | 82 | 29 | 6 | 437 | 45 | 1,367 | 140 |
| 79,278 | 53 | 7  | 872   | 82 | 29 | 6 | 439 | 45 | 1,393 | 140 |
| 79,279 | 53 | 7  | 871   | 82 | 29 | 6 | 439 | 45 | 1,392 | 140 |
| 79,280 | 53 | 7  | 877   | 82 | 29 | 6 | 442 | 45 | 1,401 | 140 |
| 79,281 | 55 | 7  | 908   | 82 | 31 | 6 | 469 | 45 | 1,463 | 140 |
| 79,282 | 64 | 7  | 1,041 | 82 | 32 | 7 | 524 | 45 | 1,661 | 141 |

|        |    |   |       |    |    |   |     |    |       |     |
|--------|----|---|-------|----|----|---|-----|----|-------|-----|
| 79,283 | 64 | 7 | 1,041 | 82 | 32 | 7 | 524 | 45 | 1,661 | 141 |
| 79,284 | 64 | 7 | 1,038 | 82 | 32 | 7 | 524 | 45 | 1,658 | 141 |
| 79,285 | 65 | 7 | 1,037 | 81 | 32 | 7 | 526 | 45 | 1,660 | 140 |
| 79,286 | 65 | 7 | 1,035 | 79 | 32 | 7 | 526 | 45 | 1,658 | 138 |
| 79,287 | 64 | 7 | 1,037 | 80 | 32 | 7 | 526 | 45 | 1,659 | 139 |
| 79,288 | 64 | 7 | 1,033 | 80 | 32 | 7 | 524 | 45 | 1,653 | 139 |
| 79,289 | 64 | 7 | 1,033 | 83 | 32 | 7 | 524 | 45 | 1,653 | 142 |
| 79,290 | 64 | 7 | 1,021 | 78 | 32 | 7 | 519 | 42 | 1,636 | 134 |
| 79,291 | 60 | 7 | 949   | 34 | 28 | 2 | 463 | 20 | 1,500 | 63  |
| 79,292 | 60 | 7 | 951   | 35 | 28 | 2 | 463 | 20 | 1,502 | 64  |
| 79,293 | 58 | 8 | 915   | 35 | 27 | 2 | 411 | 20 | 1,411 | 65  |
| 79,294 | 58 | 8 | 914   | 35 | 27 | 2 | 411 | 20 | 1,410 | 65  |
| 79,295 | 59 | 7 | 918   | 29 | 26 | 2 | 409 | 19 | 1,412 | 57  |
| 79,296 | 59 | 7 | 921   | 29 | 26 | 2 | 410 | 19 | 1,416 | 57  |
| 79,297 | 59 | 3 | 924   | 25 | 26 | 1 | 410 | 13 | 1,419 | 42  |
| 79,298 | 59 | 3 | 929   | 25 | 26 | 1 | 409 | 11 | 1,423 | 40  |
| 79,299 | 59 | 3 | 931   | 21 | 26 | 1 | 409 | 8  | 1,425 | 33  |
| 79,300 | 61 | 3 | 958   | 21 | 28 | 1 | 426 | 8  | 1,473 | 33  |
| 79,301 | 64 | 3 | 1,000 | 21 | 29 | 1 | 435 | 8  | 1,528 | 33  |
| 79,302 | 64 | 3 | 999   | 21 | 29 | 1 | 435 | 8  | 1,527 | 33  |
| 79,303 | 67 | 3 | 1,001 | 21 | 29 | 1 | 440 | 8  | 1,537 | 33  |
| 79,304 | 67 | 3 | 1,020 | 21 | 29 | 1 | 447 | 8  | 1,563 | 33  |
| 79,305 | 67 | 3 | 1,017 | 21 | 29 | 1 | 447 | 8  | 1,560 | 33  |
| 79,306 | 68 | 3 | 1,037 | 20 | 30 | 1 | 449 | 8  | 1,584 | 32  |
| 79,307 | 67 | 3 | 1,036 | 24 | 30 | 1 | 446 | 5  | 1,579 | 33  |
| 79,308 | 65 | 2 | 1,028 | 24 | 30 | 2 | 442 | 5  | 1,565 | 33  |
| 79,309 | 65 | 2 | 1,026 | 23 | 30 | 2 | 440 | 7  | 1,561 | 34  |
| 79,310 | 65 | 2 | 1,022 | 22 | 29 | 2 | 439 | 7  | 1,555 | 33  |
| 79,311 | 65 | 2 | 1,021 | 22 | 29 | 2 | 437 | 7  | 1,552 | 33  |
| 79,312 | 63 | 2 | 1,013 | 22 | 28 | 2 | 432 | 5  | 1,536 | 31  |
| 79,313 | 62 | 2 | 1,011 | 22 | 28 | 2 | 430 | 5  | 1,531 | 31  |
| 79,314 | 62 | 2 | 1,011 | 22 | 28 | 3 | 432 | 8  | 1,533 | 35  |
| 79,315 | 62 | 2 | 994   | 18 | 28 | 3 | 430 | 7  | 1,514 | 30  |
| 79,316 | 61 | 2 | 988   | 20 | 28 | 3 | 429 | 9  | 1,506 | 34  |
| 79,317 | 60 | 2 | 978   | 20 | 27 | 3 | 427 | 8  | 1,492 | 33  |
| 79,318 | 59 | 2 | 939   | 18 | 24 | 3 | 406 | 8  | 1,428 | 31  |
| 79,319 | 55 | 2 | 903   | 18 | 21 | 3 | 395 | 8  | 1,374 | 31  |
| 79,320 | 54 | 2 | 849   | 18 | 19 | 3 | 374 | 8  | 1,296 | 31  |
| 79,321 | 45 | 2 | 703   | 20 | 14 | 3 | 307 | 8  | 1,069 | 33  |
| 79,322 | 44 | 2 | 675   | 19 | 14 | 3 | 303 | 8  | 1,036 | 32  |
| 79,323 | 44 | 2 | 672   | 18 | 14 | 3 | 303 | 8  | 1,033 | 31  |

|        |    |   |     |    |    |   |     |    |       |    |
|--------|----|---|-----|----|----|---|-----|----|-------|----|
| 79,324 | 44 | 2 | 667 | 18 | 14 | 3 | 300 | 8  | 1,025 | 31 |
| 79,325 | 33 | 2 | 502 | 19 | 10 | 3 | 232 | 8  | 777   | 32 |
| 79,326 | 31 | 2 | 454 | 19 | 9  | 3 | 210 | 8  | 704   | 32 |
| 79,327 | 31 | 2 | 451 | 19 | 9  | 3 | 206 | 8  | 697   | 32 |
| 79,328 | 24 | 1 | 356 | 19 | 7  | 3 | 145 | 9  | 532   | 32 |
| 79,329 | 23 | 1 | 332 | 21 | 7  | 3 | 144 | 9  | 506   | 34 |
| 79,330 | 23 | 1 | 325 | 22 | 7  | 3 | 141 | 9  | 496   | 35 |
| 79,331 | 21 | 1 | 294 | 24 | 5  | 3 | 114 | 11 | 434   | 39 |
| 79,332 | 13 | 1 | 168 | 24 | 4  | 3 | 64  | 11 | 249   | 39 |
| 79,333 | 20 | 1 | 196 | 24 | 7  | 2 | 76  | 11 | 299   | 38 |
| 79,334 | 20 | 1 | 201 | 24 | 7  | 2 | 78  | 11 | 306   | 38 |
| 79,335 | 20 | 1 | 197 | 24 | 7  | 2 | 76  | 11 | 300   | 38 |
| 79,336 | 20 | 1 | 201 | 24 | 7  | 2 | 78  | 11 | 306   | 38 |
| 79,337 | 20 | 2 | 201 | 24 | 7  | 2 | 78  | 11 | 306   | 39 |
| 79,338 | 20 | 2 | 202 | 23 | 7  | 2 | 78  | 11 | 307   | 38 |
| 79,339 | 20 | 2 | 202 | 23 | 7  | 2 | 78  | 11 | 307   | 38 |
| 79,340 | 20 | 2 | 201 | 20 | 7  | 2 | 78  | 12 | 306   | 36 |
| 79,341 | 20 | 2 | 200 | 21 | 7  | 2 | 78  | 12 | 305   | 37 |
| 79,342 | 21 | 2 | 201 | 21 | 7  | 2 | 79  | 12 | 308   | 37 |
| 79,343 | 21 | 1 | 200 | 20 | 7  | 2 | 77  | 12 | 305   | 35 |
| 79,344 | 21 | 1 | 200 | 20 | 7  | 2 | 77  | 12 | 305   | 35 |
| 79,345 | 21 | 1 | 200 | 20 | 7  | 2 | 77  | 12 | 305   | 35 |
| 79,346 | 20 | 1 | 192 | 20 | 7  | 2 | 74  | 12 | 293   | 35 |
| 79,347 | 20 | 1 | 195 | 20 | 7  | 2 | 76  | 12 | 298   | 35 |
| 79,348 | 24 | 1 | 208 | 21 | 10 | 2 | 89  | 12 | 331   | 36 |
| 79,349 | 24 | 1 | 202 | 21 | 10 | 2 | 89  | 13 | 325   | 37 |
| 79,350 | 27 | 1 | 201 | 24 | 10 | 2 | 89  | 14 | 327   | 41 |
| 79,351 | 27 | 1 | 175 | 24 | 8  | 2 | 72  | 14 | 282   | 41 |
| 79,352 | 23 | 1 | 133 | 24 | 7  | 2 | 61  | 14 | 224   | 41 |
| 79,353 | 20 | 1 | 130 | 24 | 7  | 2 | 55  | 14 | 212   | 41 |
| 79,354 | 20 | 1 | 125 | 24 | 7  | 2 | 53  | 14 | 205   | 41 |
| 79,355 | 21 | 1 | 111 | 24 | 7  | 2 | 48  | 14 | 187   | 41 |
| 79,356 | 20 | 1 | 90  | 25 | 6  | 2 | 45  | 14 | 161   | 42 |
| 79,357 | 20 | 1 | 88  | 25 | 6  | 2 | 45  | 13 | 159   | 41 |
| 79,358 | 20 | 1 | 89  | 19 | 6  | 2 | 45  | 14 | 160   | 36 |
| 79,359 | 20 | 1 | 89  | 19 | 6  | 1 | 45  | 14 | 160   | 35 |
| 79,360 | 20 | 1 | 96  | 18 | 6  | 1 | 50  | 12 | 172   | 32 |
| 79,361 | 20 | 1 | 96  | 18 | 6  | 1 | 50  | 12 | 172   | 32 |
| 79,362 | 20 | 1 | 95  | 18 | 6  | 1 | 50  | 12 | 171   | 32 |
| 79,363 | 20 | 1 | 95  | 18 | 6  | 1 | 50  | 12 | 171   | 32 |
| 79,364 | 20 | 1 | 101 | 16 | 6  | 0 | 54  | 9  | 181   | 26 |



|        |    |   |     |    |   |   |    |    |     |    |
|--------|----|---|-----|----|---|---|----|----|-----|----|
| 79,365 | 20 | 1 | 101 | 16 | 6 | 0 | 54 | 9  | 181 | 26 |
| 79,366 | 21 | 1 | 101 | 16 | 6 | 0 | 55 | 10 | 183 | 27 |
| 79,367 | 21 | 1 | 101 | 14 | 6 | 0 | 55 | 8  | 183 | 23 |
| 79,368 | 21 | 1 | 101 | 14 | 6 | 0 | 55 | 8  | 183 | 23 |
| 79,369 | 21 | 1 | 101 | 14 | 6 | 0 | 55 | 8  | 183 | 23 |
| 79,370 | 22 | 1 | 103 | 14 | 6 | 0 | 55 | 8  | 186 | 23 |
| 79,371 | 22 | 1 | 103 | 14 | 6 | 0 | 55 | 8  | 186 | 23 |
| 79,372 | 22 | 1 | 105 | 13 | 6 | 0 | 55 | 8  | 188 | 22 |
| 79,373 | 22 | 1 | 105 | 14 | 6 | 0 | 55 | 8  | 188 | 23 |
| 79,374 | 22 | 1 | 105 | 14 | 6 | 0 | 54 | 8  | 187 | 23 |
| 79,375 | 22 | 1 | 104 | 13 | 6 | 0 | 54 | 8  | 186 | 22 |
| 79,376 | 22 | 1 | 104 | 13 | 6 | 0 | 54 | 8  | 186 | 22 |
| 79,377 | 22 | 1 | 103 | 13 | 6 | 0 | 54 | 8  | 185 | 22 |
| 79,378 | 22 | 1 | 95  | 13 | 6 | 0 | 53 | 7  | 176 | 21 |
| 79,379 | 22 | 1 | 95  | 13 | 6 | 0 | 52 | 7  | 175 | 21 |
| 79,380 | 22 | 1 | 95  | 11 | 6 | 0 | 51 | 7  | 174 | 19 |
| 79,381 | 22 | 1 | 95  | 10 | 6 | 0 | 51 | 7  | 174 | 18 |
| 79,382 | 22 | 1 | 93  | 8  | 6 | 0 | 51 | 5  | 172 | 14 |
| 79,383 | 22 | 1 | 90  | 8  | 5 | 0 | 50 | 5  | 167 | 14 |
| 79,384 | 14 | 1 | 61  | 8  | 3 | 0 | 36 | 5  | 114 | 14 |
| 79,385 | 13 | 1 | 58  | 9  | 3 | 0 | 33 | 5  | 107 | 15 |
| 79,386 | 13 | 1 | 55  | 9  | 3 | 0 | 31 | 5  | 102 | 15 |
| 79,387 | 13 | 0 | 60  | 10 | 3 | 0 | 31 | 5  | 107 | 15 |
| 79,388 | 13 | 0 | 59  | 10 | 3 | 0 | 30 | 5  | 105 | 15 |
| 79,389 | 13 | 0 | 56  | 10 | 3 | 0 | 30 | 5  | 102 | 15 |
| 79,390 | 18 | 0 | 92  | 10 | 6 | 0 | 47 | 4  | 163 | 14 |
| 79,391 | 18 | 0 | 91  | 10 | 6 | 0 | 46 | 4  | 161 | 14 |
| 79,392 | 18 | 0 | 112 | 9  | 6 | 0 | 60 | 4  | 196 | 13 |
| 79,393 | 18 | 0 | 112 | 9  | 6 | 0 | 60 | 4  | 196 | 13 |
| 79,394 | 19 | 0 | 114 | 10 | 7 | 0 | 61 | 4  | 201 | 14 |
| 79,395 | 23 | 0 | 153 | 10 | 7 | 0 | 77 | 4  | 260 | 14 |
| 79,396 | 23 | 0 | 154 | 10 | 7 | 0 | 77 | 4  | 261 | 14 |
| 79,397 | 23 | 0 | 153 | 9  | 7 | 0 | 76 | 4  | 259 | 13 |
| 79,398 | 23 | 0 | 152 | 9  | 7 | 0 | 76 | 4  | 258 | 13 |
| 79,399 | 19 | 0 | 138 | 9  | 4 | 0 | 66 | 4  | 227 | 13 |
| 79,400 | 19 | 0 | 138 | 9  | 4 | 0 | 66 | 3  | 227 | 12 |
| 79,401 | 16 | 0 | 144 | 6  | 4 | 0 | 70 | 2  | 234 | 8  |
| 79,402 | 15 | 0 | 148 | 6  | 4 | 0 | 71 | 2  | 238 | 8  |
| 79,403 | 15 | 0 | 148 | 6  | 4 | 0 | 71 | 2  | 238 | 8  |
| 79,404 | 15 | 0 | 148 | 6  | 4 | 0 | 72 | 2  | 239 | 8  |
| 79,405 | 15 | 0 | 148 | 6  | 4 | 0 | 72 | 2  | 239 | 8  |

|        |    |    |     |     |   |   |     |    |     |     |
|--------|----|----|-----|-----|---|---|-----|----|-----|-----|
| 79,406 | 14 | 1  | 148 | 6   | 4 | 0 | 72  | 2  | 238 | 9   |
| 79,407 | 14 | 1  | 148 | 6   | 4 | 0 | 72  | 2  | 238 | 9   |
| 79,408 | 14 | 1  | 149 | 6   | 4 | 0 | 72  | 1  | 239 | 8   |
| 79,409 | 14 | 2  | 149 | 6   | 4 | 0 | 72  | 1  | 239 | 9   |
| 79,410 | 14 | 2  | 151 | 6   | 4 | 0 | 71  | 1  | 240 | 9   |
| 79,411 | 15 | 2  | 160 | 6   | 5 | 0 | 72  | 2  | 252 | 10  |
| 79,412 | 15 | 2  | 161 | 6   | 5 | 0 | 72  | 2  | 253 | 10  |
| 79,413 | 17 | 2  | 165 | 6   | 6 | 0 | 79  | 2  | 267 | 10  |
| 79,414 | 19 | 2  | 171 | 8   | 6 | 0 | 80  | 2  | 276 | 12  |
| 79,415 | 20 | 2  | 180 | 17  | 6 | 0 | 86  | 6  | 292 | 25  |
| 79,416 | 20 | 7  | 180 | 47  | 6 | 1 | 87  | 28 | 293 | 83  |
| 79,417 | 19 | 7  | 180 | 47  | 6 | 2 | 86  | 29 | 291 | 85  |
| 79,418 | 19 | 7  | 214 | 49  | 6 | 2 | 105 | 30 | 344 | 88  |
| 79,419 | 19 | 7  | 220 | 49  | 7 | 2 | 111 | 31 | 357 | 89  |
| 79,420 | 18 | 7  | 219 | 50  | 7 | 2 | 111 | 32 | 355 | 91  |
| 79,421 | 18 | 8  | 219 | 58  | 7 | 2 | 111 | 37 | 355 | 105 |
| 79,422 | 18 | 8  | 217 | 58  | 7 | 2 | 111 | 37 | 353 | 105 |
| 79,423 | 18 | 8  | 217 | 58  | 7 | 2 | 111 | 37 | 353 | 105 |
| 79,424 | 18 | 8  | 217 | 61  | 7 | 2 | 111 | 38 | 353 | 109 |
| 79,425 | 19 | 8  | 217 | 62  | 7 | 2 | 111 | 38 | 354 | 110 |
| 79,426 | 19 | 8  | 217 | 62  | 7 | 2 | 111 | 40 | 354 | 112 |
| 79,427 | 19 | 8  | 218 | 68  | 7 | 3 | 111 | 41 | 355 | 120 |
| 79,428 | 19 | 8  | 218 | 69  | 7 | 3 | 111 | 42 | 355 | 122 |
| 79,429 | 19 | 8  | 218 | 76  | 7 | 5 | 112 | 46 | 356 | 135 |
| 79,430 | 19 | 8  | 219 | 91  | 7 | 5 | 112 | 51 | 357 | 155 |
| 79,431 | 19 | 8  | 219 | 91  | 7 | 5 | 112 | 51 | 357 | 155 |
| 79,432 | 19 | 9  | 219 | 93  | 7 | 5 | 113 | 51 | 358 | 158 |
| 79,433 | 19 | 9  | 219 | 94  | 7 | 5 | 113 | 51 | 358 | 159 |
| 79,434 | 19 | 12 | 219 | 103 | 7 | 5 | 113 | 62 | 358 | 182 |
| 79,435 | 19 | 12 | 216 | 103 | 7 | 5 | 112 | 63 | 354 | 183 |
| 79,436 | 19 | 12 | 214 | 104 | 7 | 5 | 113 | 64 | 353 | 185 |
| 79,437 | 19 | 12 | 214 | 111 | 7 | 5 | 113 | 69 | 353 | 197 |
| 79,438 | 19 | 12 | 209 | 110 | 7 | 5 | 113 | 69 | 348 | 196 |
| 79,439 | 19 | 12 | 209 | 114 | 7 | 5 | 113 | 75 | 348 | 206 |
| 79,440 | 16 | 12 | 187 | 119 | 4 | 5 | 105 | 75 | 312 | 211 |
| 79,441 | 14 | 12 | 174 | 119 | 4 | 5 | 96  | 77 | 288 | 213 |
| 79,442 | 14 | 13 | 164 | 119 | 4 | 5 | 93  | 77 | 275 | 214 |
| 79,443 | 13 | 13 | 154 | 119 | 4 | 5 | 86  | 77 | 257 | 214 |
| 79,444 | 12 | 13 | 151 | 118 | 3 | 5 | 85  | 77 | 251 | 213 |
| 79,445 | 12 | 13 | 166 | 119 | 4 | 5 | 98  | 78 | 280 | 215 |
| 79,446 | 9  | 13 | 134 | 119 | 4 | 5 | 84  | 78 | 231 | 215 |

|        |    |    |     |     |    |   |     |     |     |     |
|--------|----|----|-----|-----|----|---|-----|-----|-----|-----|
| 79,447 | 9  | 13 | 133 | 122 | 4  | 5 | 84  | 80  | 230 | 220 |
| 79,448 | 9  | 14 | 131 | 123 | 4  | 5 | 83  | 80  | 227 | 222 |
| 79,449 | 9  | 16 | 130 | 125 | 4  | 5 | 82  | 80  | 225 | 226 |
| 79,450 | 9  | 16 | 128 | 133 | 4  | 7 | 79  | 86  | 220 | 242 |
| 79,451 | 9  | 16 | 121 | 134 | 4  | 7 | 75  | 87  | 209 | 244 |
| 79,452 | 9  | 16 | 130 | 138 | 4  | 7 | 81  | 87  | 224 | 248 |
| 79,453 | 9  | 16 | 129 | 138 | 4  | 7 | 80  | 87  | 222 | 248 |
| 79,454 | 10 | 16 | 133 | 145 | 4  | 7 | 82  | 89  | 229 | 257 |
| 79,455 | 10 | 18 | 133 | 149 | 4  | 7 | 81  | 94  | 228 | 268 |
| 79,456 | 10 | 18 | 133 | 149 | 4  | 7 | 80  | 98  | 227 | 272 |
| 79,457 | 12 | 18 | 133 | 156 | 4  | 7 | 81  | 102 | 230 | 283 |
| 79,458 | 12 | 18 | 132 | 155 | 4  | 7 | 81  | 105 | 229 | 285 |
| 79,459 | 15 | 17 | 157 | 155 | 5  | 7 | 93  | 105 | 270 | 284 |
| 79,460 | 16 | 15 | 163 | 119 | 5  | 6 | 95  | 81  | 279 | 221 |
| 79,461 | 18 | 15 | 180 | 121 | 5  | 6 | 109 | 82  | 312 | 224 |
| 79,462 | 17 | 15 | 173 | 128 | 4  | 7 | 105 | 82  | 299 | 232 |
| 79,463 | 17 | 18 | 172 | 136 | 4  | 7 | 105 | 94  | 298 | 255 |
| 79,464 | 15 | 17 | 168 | 138 | 3  | 9 | 98  | 98  | 284 | 262 |
| 79,465 | 14 | 18 | 162 | 149 | 3  | 9 | 97  | 105 | 276 | 281 |
| 79,466 | 13 | 18 | 148 | 156 | 3  | 9 | 87  | 108 | 251 | 291 |
| 79,467 | 13 | 17 | 129 | 153 | 3  | 9 | 79  | 106 | 224 | 285 |
| 79,468 | 14 | 23 | 133 | 165 | 3  | 8 | 76  | 115 | 226 | 311 |
| 79,469 | 14 | 23 | 131 | 179 | 3  | 9 | 68  | 117 | 216 | 328 |
| 79,470 | 19 | 25 | 209 | 181 | 5  | 9 | 85  | 117 | 318 | 332 |
| 79,471 | 19 | 25 | 208 | 180 | 5  | 9 | 84  | 116 | 316 | 330 |
| 79,472 | 26 | 27 | 272 | 173 | 11 | 9 | 96  | 111 | 405 | 320 |
| 79,473 | 26 | 27 | 280 | 172 | 13 | 9 | 106 | 111 | 425 | 319 |
| 79,474 | 26 | 30 | 280 | 179 | 14 | 9 | 106 | 111 | 426 | 329 |
| 79,475 | 26 | 30 | 280 | 181 | 15 | 9 | 106 | 111 | 427 | 331 |
| 79,476 | 26 | 30 | 288 | 180 | 15 | 9 | 115 | 111 | 444 | 330 |
| 79,477 | 26 | 30 | 287 | 174 | 15 | 8 | 115 | 108 | 443 | 320 |
| 79,478 | 26 | 30 | 287 | 173 | 15 | 8 | 115 | 108 | 443 | 319 |
| 79,479 | 26 | 30 | 287 | 166 | 15 | 6 | 115 | 104 | 443 | 306 |
| 79,480 | 26 | 30 | 290 | 152 | 15 | 6 | 116 | 99  | 447 | 287 |
| 79,481 | 26 | 30 | 289 | 151 | 15 | 6 | 117 | 99  | 447 | 286 |
| 79,482 | 26 | 30 | 289 | 151 | 15 | 6 | 116 | 99  | 446 | 286 |
| 79,483 | 26 | 29 | 289 | 149 | 15 | 6 | 116 | 99  | 446 | 283 |
| 79,484 | 26 | 26 | 290 | 140 | 15 | 6 | 117 | 89  | 448 | 261 |
| 79,485 | 27 | 26 | 298 | 140 | 15 | 6 | 124 | 88  | 464 | 260 |
| 79,486 | 27 | 26 | 298 | 140 | 15 | 6 | 123 | 88  | 463 | 260 |
| 79,487 | 30 | 26 | 341 | 122 | 22 | 6 | 163 | 76  | 556 | 230 |

|        |    |    |     |     |    |   |     |    |     |     |
|--------|----|----|-----|-----|----|---|-----|----|-----|-----|
| 79,488 | 35 | 28 | 347 | 122 | 24 | 6 | 172 | 76 | 578 | 232 |
| 79,489 | 38 | 28 | 378 | 122 | 25 | 6 | 187 | 76 | 628 | 232 |
| 79,490 | 38 | 28 | 378 | 125 | 25 | 6 | 187 | 78 | 628 | 237 |
| 79,491 | 38 | 28 | 387 | 129 | 26 | 6 | 193 | 83 | 644 | 246 |
| 79,492 | 43 | 30 | 412 | 140 | 28 | 6 | 224 | 88 | 707 | 264 |
| 79,493 | 43 | 29 | 414 | 145 | 28 | 6 | 224 | 89 | 709 | 269 |
| 79,494 | 43 | 29 | 413 | 146 | 28 | 6 | 224 | 89 | 708 | 270 |
| 79,495 | 43 | 29 | 413 | 149 | 28 | 6 | 224 | 92 | 708 | 276 |
| 79,496 | 42 | 29 | 390 | 149 | 27 | 6 | 211 | 91 | 670 | 275 |
| 79,497 | 42 | 29 | 390 | 149 | 27 | 6 | 209 | 91 | 668 | 275 |
| 79,498 | 42 | 29 | 397 | 148 | 27 | 6 | 210 | 89 | 676 | 272 |
| 79,499 | 42 | 28 | 398 | 147 | 27 | 6 | 211 | 89 | 678 | 270 |
| 79,500 | 55 | 26 | 445 | 137 | 29 | 4 | 252 | 83 | 781 | 250 |
| 79,501 | 58 | 26 | 449 | 137 | 30 | 4 | 265 | 83 | 802 | 250 |
| 79,502 | 59 | 26 | 453 | 132 | 30 | 4 | 263 | 82 | 805 | 244 |
| 79,503 | 59 | 26 | 452 | 132 | 30 | 4 | 262 | 82 | 803 | 244 |
| 79,504 | 61 | 26 | 491 | 132 | 33 | 4 | 294 | 82 | 879 | 244 |
| 79,505 | 61 | 24 | 500 | 123 | 36 | 4 | 303 | 75 | 900 | 226 |
| 79,506 | 61 | 24 | 500 | 124 | 36 | 4 | 303 | 76 | 900 | 228 |
| 79,507 | 59 | 25 | 522 | 126 | 36 | 4 | 311 | 76 | 928 | 231 |
| 79,508 | 59 | 24 | 522 | 119 | 36 | 4 | 310 | 73 | 927 | 220 |
| 79,509 | 56 | 24 | 501 | 122 | 36 | 4 | 303 | 71 | 896 | 221 |
| 79,510 | 56 | 24 | 501 | 122 | 36 | 4 | 301 | 77 | 894 | 227 |
| 79,511 | 55 | 24 | 495 | 128 | 36 | 4 | 300 | 78 | 886 | 234 |
| 79,512 | 53 | 24 | 472 | 126 | 36 | 4 | 286 | 77 | 847 | 231 |
| 79,513 | 54 | 21 | 468 | 112 | 36 | 3 | 288 | 65 | 846 | 201 |
| 79,514 | 54 | 20 | 470 | 113 | 36 | 1 | 292 | 61 | 852 | 195 |
| 79,515 | 54 | 20 | 470 | 113 | 36 | 1 | 292 | 61 | 852 | 195 |
| 79,516 | 53 | 19 | 470 | 101 | 36 | 1 | 292 | 54 | 851 | 175 |
| 79,517 | 53 | 19 | 469 | 95  | 36 | 1 | 292 | 55 | 850 | 170 |
| 79,518 | 53 | 19 | 468 | 97  | 36 | 1 | 292 | 55 | 849 | 172 |
| 79,519 | 52 | 17 | 463 | 101 | 36 | 1 | 290 | 50 | 841 | 169 |
| 79,520 | 52 | 17 | 453 | 94  | 36 | 1 | 291 | 52 | 832 | 164 |
| 79,521 | 47 | 15 | 369 | 98  | 33 | 1 | 268 | 52 | 717 | 166 |
| 79,522 | 41 | 15 | 323 | 99  | 27 | 1 | 259 | 52 | 650 | 167 |
| 79,523 | 40 | 13 | 308 | 98  | 26 | 1 | 257 | 53 | 631 | 165 |
| 79,524 | 40 | 10 | 299 | 87  | 24 | 1 | 246 | 52 | 609 | 150 |
| 79,525 | 40 | 10 | 299 | 85  | 23 | 1 | 246 | 52 | 608 | 148 |
| 79,526 | 40 | 10 | 302 | 85  | 23 | 1 | 247 | 53 | 612 | 149 |
| 79,527 | 39 | 10 | 294 | 85  | 23 | 1 | 239 | 53 | 595 | 149 |
| 79,528 | 39 | 10 | 295 | 85  | 23 | 1 | 239 | 52 | 596 | 148 |

|        |    |    |     |     |    |   |     |    |     |     |
|--------|----|----|-----|-----|----|---|-----|----|-----|-----|
| 79,529 | 39 | 10 | 295 | 85  | 23 | 1 | 239 | 52 | 596 | 148 |
| 79,530 | 39 | 10 | 295 | 85  | 23 | 1 | 239 | 52 | 596 | 148 |
| 79,531 | 39 | 10 | 297 | 85  | 24 | 1 | 239 | 52 | 599 | 148 |
| 79,532 | 39 | 10 | 297 | 85  | 24 | 1 | 238 | 53 | 598 | 149 |
| 79,533 | 39 | 10 | 298 | 88  | 24 | 1 | 240 | 54 | 601 | 153 |
| 79,534 | 39 | 11 | 301 | 114 | 25 | 2 | 240 | 69 | 605 | 196 |
| 79,535 | 39 | 11 | 305 | 117 | 25 | 2 | 243 | 70 | 612 | 200 |
| 79,536 | 38 | 11 | 297 | 117 | 25 | 2 | 237 | 70 | 597 | 200 |
| 79,537 | 41 | 12 | 318 | 124 | 27 | 2 | 268 | 77 | 654 | 215 |
| 79,538 | 38 | 12 | 299 | 140 | 21 | 2 | 234 | 78 | 592 | 232 |
| 79,539 | 34 | 10 | 314 | 140 | 20 | 2 | 241 | 83 | 609 | 235 |
| 79,540 | 32 | 10 | 290 | 141 | 19 | 2 | 232 | 83 | 573 | 236 |
| 79,541 | 32 | 8  | 286 | 118 | 19 | 2 | 227 | 69 | 564 | 197 |
| 79,542 | 32 | 8  | 287 | 118 | 19 | 2 | 226 | 71 | 564 | 199 |
| 79,543 | 30 | 8  | 280 | 118 | 17 | 2 | 202 | 71 | 529 | 199 |
| 79,544 | 30 | 8  | 278 | 118 | 17 | 2 | 200 | 71 | 525 | 199 |
| 79,545 | 30 | 8  | 278 | 117 | 17 | 2 | 197 | 71 | 522 | 198 |
| 79,546 | 30 | 8  | 296 | 114 | 19 | 2 | 198 | 68 | 543 | 192 |
| 79,547 | 33 | 8  | 345 | 113 | 23 | 2 | 215 | 68 | 616 | 191 |
| 79,548 | 33 | 8  | 397 | 111 | 23 | 2 | 227 | 68 | 680 | 189 |
| 79,549 | 33 | 8  | 396 | 111 | 23 | 2 | 227 | 68 | 679 | 189 |
| 79,550 | 22 | 8  | 370 | 111 | 23 | 2 | 190 | 68 | 605 | 189 |
| 79,551 | 21 | 8  | 361 | 111 | 22 | 2 | 190 | 70 | 594 | 191 |
| 79,552 | 18 | 8  | 354 | 111 | 21 | 2 | 179 | 70 | 572 | 191 |
| 79,553 | 16 | 8  | 342 | 111 | 21 | 2 | 177 | 70 | 556 | 191 |
| 79,554 | 16 | 8  | 329 | 111 | 19 | 2 | 169 | 71 | 533 | 192 |
| 79,555 | 13 | 8  | 300 | 111 | 18 | 2 | 145 | 71 | 476 | 192 |
| 79,556 | 13 | 8  | 290 | 108 | 15 | 2 | 134 | 70 | 452 | 188 |
| 79,557 | 13 | 7  | 270 | 106 | 15 | 2 | 128 | 66 | 426 | 181 |
| 79,558 | 13 | 7  | 270 | 106 | 15 | 2 | 128 | 65 | 426 | 180 |
| 79,559 | 13 | 7  | 273 | 106 | 15 | 2 | 131 | 66 | 432 | 181 |
| 79,560 | 13 | 7  | 271 | 106 | 14 | 2 | 129 | 59 | 427 | 174 |
| 79,561 | 15 | 8  | 279 | 107 | 14 | 2 | 130 | 59 | 438 | 176 |
| 79,562 | 16 | 8  | 283 | 104 | 14 | 2 | 132 | 58 | 445 | 172 |
| 79,563 | 16 | 8  | 284 | 105 | 14 | 2 | 131 | 58 | 445 | 173 |
| 79,564 | 15 | 8  | 285 | 109 | 14 | 2 | 130 | 62 | 444 | 181 |
| 79,565 | 15 | 8  | 283 | 108 | 14 | 2 | 127 | 65 | 439 | 183 |
| 79,566 | 15 | 9  | 283 | 111 | 14 | 2 | 127 | 67 | 439 | 189 |
| 79,567 | 18 | 9  | 312 | 113 | 14 | 2 | 131 | 71 | 475 | 195 |
| 79,568 | 18 | 10 | 313 | 124 | 14 | 2 | 132 | 78 | 477 | 214 |
| 79,569 | 22 | 10 | 345 | 130 | 15 | 2 | 149 | 80 | 531 | 222 |

|        |    |    |     |     |    |   |     |    |     |     |
|--------|----|----|-----|-----|----|---|-----|----|-----|-----|
| 79,570 | 22 | 6  | 345 | 113 | 15 | 2 | 149 | 74 | 531 | 195 |
| 79,571 | 24 | 6  | 360 | 108 | 16 | 2 | 166 | 73 | 566 | 189 |
| 79,572 | 30 | 6  | 424 | 106 | 18 | 2 | 206 | 75 | 678 | 189 |
| 79,573 | 30 | 9  | 423 | 109 | 18 | 2 | 205 | 79 | 676 | 199 |
| 79,574 | 30 | 8  | 422 | 111 | 18 | 2 | 205 | 78 | 675 | 199 |
| 79,575 | 30 | 8  | 425 | 111 | 18 | 2 | 210 | 78 | 683 | 199 |
| 79,576 | 30 | 8  | 425 | 112 | 18 | 2 | 210 | 81 | 683 | 203 |
| 79,577 | 30 | 8  | 425 | 118 | 18 | 2 | 209 | 81 | 682 | 209 |
| 79,578 | 30 | 8  | 425 | 120 | 18 | 2 | 209 | 82 | 682 | 212 |
| 79,579 | 30 | 8  | 424 | 122 | 18 | 2 | 209 | 83 | 681 | 215 |
| 79,580 | 30 | 8  | 421 | 122 | 17 | 2 | 209 | 83 | 677 | 215 |
| 79,581 | 30 | 9  | 419 | 123 | 17 | 2 | 209 | 83 | 675 | 217 |
| 79,582 | 30 | 9  | 419 | 123 | 17 | 2 | 208 | 84 | 674 | 218 |
| 79,583 | 30 | 9  | 420 | 120 | 17 | 2 | 206 | 82 | 673 | 213 |
| 79,584 | 30 | 9  | 420 | 120 | 17 | 2 | 206 | 82 | 673 | 213 |
| 79,585 | 30 | 8  | 419 | 95  | 16 | 1 | 206 | 68 | 671 | 172 |
| 79,586 | 31 | 7  | 415 | 87  | 16 | 1 | 202 | 60 | 664 | 155 |
| 79,587 | 31 | 7  | 416 | 92  | 16 | 1 | 201 | 63 | 664 | 163 |
| 79,588 | 28 | 7  | 390 | 98  | 14 | 1 | 167 | 63 | 599 | 169 |
| 79,589 | 28 | 7  | 371 | 82  | 13 | 2 | 163 | 62 | 575 | 153 |
| 79,590 | 27 | 9  | 354 | 92  | 12 | 2 | 149 | 64 | 542 | 167 |
| 79,591 | 26 | 9  | 346 | 91  | 12 | 2 | 143 | 64 | 527 | 166 |
| 79,592 | 26 | 10 | 341 | 91  | 11 | 2 | 143 | 63 | 521 | 166 |
| 79,593 | 26 | 10 | 340 | 91  | 11 | 2 | 142 | 63 | 519 | 166 |
| 79,594 | 23 | 10 | 321 | 93  | 11 | 2 | 136 | 63 | 491 | 168 |
| 79,595 | 23 | 12 | 314 | 110 | 11 | 2 | 136 | 65 | 484 | 189 |
| 79,596 | 23 | 13 | 304 | 121 | 9  | 3 | 135 | 69 | 471 | 206 |
| 79,597 | 23 | 13 | 290 | 121 | 8  | 3 | 129 | 69 | 450 | 206 |
| 79,598 | 20 | 13 | 258 | 124 | 5  | 3 | 120 | 70 | 403 | 210 |
| 79,599 | 20 | 14 | 199 | 125 | 5  | 3 | 107 | 70 | 331 | 212 |
| 79,600 | 19 | 19 | 197 | 130 | 5  | 3 | 106 | 70 | 327 | 222 |
| 79,601 | 19 | 20 | 187 | 134 | 4  | 3 | 102 | 70 | 312 | 227 |
| 79,602 | 19 | 20 | 186 | 134 | 4  | 3 | 100 | 68 | 309 | 225 |
| 79,603 | 19 | 20 | 186 | 135 | 4  | 3 | 97  | 68 | 306 | 226 |
| 79,604 | 19 | 20 | 186 | 136 | 4  | 3 | 97  | 67 | 306 | 226 |
| 79,605 | 19 | 20 | 186 | 138 | 4  | 3 | 97  | 68 | 306 | 229 |
| 79,606 | 19 | 20 | 185 | 141 | 4  | 3 | 97  | 68 | 305 | 232 |
| 79,607 | 19 | 20 | 185 | 141 | 4  | 3 | 97  | 68 | 305 | 232 |
| 79,608 | 19 | 20 | 183 | 142 | 4  | 3 | 94  | 68 | 300 | 233 |
| 79,609 | 19 | 20 | 183 | 148 | 4  | 3 | 94  | 73 | 300 | 244 |
| 79,610 | 19 | 20 | 180 | 151 | 4  | 3 | 91  | 72 | 294 | 246 |

|        |    |    |     |     |   |   |    |    |     |     |
|--------|----|----|-----|-----|---|---|----|----|-----|-----|
| 79,611 | 19 | 21 | 178 | 150 | 4 | 3 | 91 | 76 | 292 | 250 |
| 79,612 | 17 | 20 | 170 | 149 | 4 | 3 | 90 | 76 | 281 | 248 |
| 79,613 | 16 | 20 | 174 | 145 | 4 | 3 | 89 | 77 | 283 | 245 |
| 79,614 | 16 | 20 | 172 | 140 | 4 | 3 | 89 | 73 | 281 | 236 |
| 79,615 | 16 | 20 | 172 | 137 | 4 | 3 | 89 | 70 | 281 | 230 |
| 79,616 | 16 | 20 | 172 | 145 | 4 | 3 | 89 | 72 | 281 | 240 |
| 79,617 | 13 | 19 | 148 | 145 | 4 | 3 | 84 | 70 | 249 | 237 |
| 79,618 | 13 | 19 | 143 | 150 | 4 | 3 | 84 | 69 | 244 | 241 |
| 79,619 | 13 | 20 | 145 | 155 | 4 | 3 | 84 | 77 | 246 | 255 |
| 79,620 | 9  | 22 | 112 | 206 | 3 | 4 | 67 | 96 | 191 | 328 |
| 79,621 | 8  | 23 | 101 | 211 | 2 | 4 | 52 | 98 | 163 | 336 |
| 79,622 | 5  | 24 | 53  | 221 | 0 | 3 | 18 | 98 | 76  | 346 |
| 79,623 | 4  | 21 | 47  | 215 | 0 | 3 | 16 | 93 | 67  | 332 |
| 79,624 | 4  | 22 | 44  | 216 | 0 | 3 | 11 | 93 | 59  | 334 |
| 79,625 | 4  | 22 | 49  | 216 | 1 | 3 | 20 | 94 | 74  | 335 |
| 79,626 | 4  | 23 | 56  | 220 | 1 | 3 | 20 | 94 | 81  | 340 |
| 79,627 | 4  | 23 | 56  | 227 | 1 | 3 | 20 | 96 | 81  | 349 |
| 79,628 | 4  | 23 | 53  | 224 | 1 | 4 | 20 | 95 | 78  | 346 |
| 79,629 | 4  | 23 | 54  | 222 | 1 | 4 | 20 | 95 | 79  | 344 |
| 79,630 | 4  | 23 | 54  | 224 | 1 | 4 | 20 | 95 | 79  | 346 |
| 79,631 | 4  | 22 | 54  | 224 | 1 | 4 | 20 | 95 | 79  | 345 |
| 79,632 | 4  | 22 | 54  | 224 | 1 | 4 | 21 | 95 | 80  | 345 |
| 79,633 | 4  | 22 | 53  | 226 | 1 | 4 | 21 | 95 | 79  | 347 |
| 79,634 | 4  | 22 | 52  | 226 | 1 | 4 | 21 | 95 | 78  | 347 |
| 79,635 | 5  | 22 | 63  | 225 | 1 | 4 | 31 | 95 | 100 | 346 |
| 79,636 | 5  | 22 | 63  | 225 | 1 | 4 | 31 | 95 | 100 | 346 |
| 79,637 | 4  | 22 | 63  | 222 | 1 | 4 | 31 | 94 | 99  | 342 |
| 79,638 | 5  | 22 | 65  | 211 | 1 | 4 | 33 | 91 | 104 | 328 |
| 79,639 | 5  | 22 | 69  | 211 | 1 | 3 | 35 | 90 | 110 | 326 |
| 79,640 | 5  | 22 | 69  | 211 | 1 | 3 | 35 | 90 | 110 | 326 |
| 79,641 | 5  | 20 | 65  | 201 | 1 | 3 | 35 | 83 | 106 | 307 |
| 79,642 | 5  | 20 | 66  | 201 | 1 | 3 | 36 | 83 | 108 | 307 |
| 79,643 | 5  | 19 | 66  | 201 | 1 | 3 | 35 | 83 | 107 | 306 |
| 79,644 | 5  | 19 | 66  | 199 | 1 | 3 | 35 | 84 | 107 | 305 |
| 79,645 | 5  | 20 | 66  | 199 | 1 | 3 | 35 | 84 | 107 | 306 |
| 79,646 | 5  | 17 | 66  | 171 | 1 | 2 | 35 | 78 | 107 | 268 |
| 79,647 | 5  | 16 | 66  | 167 | 1 | 2 | 35 | 77 | 107 | 262 |
| 79,648 | 5  | 16 | 65  | 167 | 1 | 2 | 35 | 77 | 106 | 262 |
| 79,649 | 5  | 16 | 62  | 167 | 1 | 2 | 33 | 77 | 101 | 262 |
| 79,650 | 5  | 11 | 62  | 162 | 1 | 2 | 33 | 77 | 101 | 252 |
| 79,651 | 5  | 10 | 62  | 158 | 1 | 2 | 33 | 77 | 101 | 247 |

|        |   |    |    |     |   |    |    |     |     |     |
|--------|---|----|----|-----|---|----|----|-----|-----|-----|
| 79,652 | 5 | 10 | 62 | 158 | 1 | 2  | 33 | 77  | 101 | 247 |
| 79,653 | 5 | 10 | 61 | 158 | 1 | 2  | 33 | 77  | 100 | 247 |
| 79,654 | 5 | 10 | 61 | 155 | 1 | 2  | 33 | 78  | 100 | 245 |
| 79,655 | 5 | 10 | 61 | 155 | 1 | 2  | 33 | 78  | 100 | 245 |
| 79,656 | 5 | 10 | 61 | 154 | 1 | 2  | 34 | 77  | 101 | 243 |
| 79,657 | 5 | 10 | 61 | 151 | 1 | 2  | 34 | 77  | 101 | 240 |
| 79,658 | 5 | 10 | 61 | 152 | 1 | 2  | 34 | 78  | 101 | 242 |
| 79,659 | 5 | 10 | 61 | 152 | 1 | 3  | 34 | 78  | 101 | 243 |
| 79,660 | 5 | 10 | 61 | 150 | 1 | 3  | 34 | 80  | 101 | 243 |
| 79,661 | 5 | 11 | 61 | 187 | 1 | 8  | 34 | 112 | 101 | 318 |
| 79,662 | 5 | 11 | 61 | 186 | 1 | 8  | 34 | 108 | 101 | 313 |
| 79,663 | 5 | 12 | 61 | 186 | 1 | 8  | 34 | 109 | 101 | 315 |
| 79,664 | 5 | 12 | 53 | 191 | 1 | 8  | 33 | 108 | 92  | 319 |
| 79,665 | 5 | 12 | 53 | 191 | 1 | 9  | 33 | 109 | 92  | 321 |
| 79,666 | 5 | 12 | 53 | 191 | 1 | 10 | 33 | 111 | 92  | 324 |
| 79,667 | 5 | 12 | 53 | 184 | 1 | 10 | 33 | 109 | 92  | 315 |
| 79,668 | 5 | 16 | 53 | 185 | 1 | 10 | 33 | 112 | 92  | 323 |
| 79,669 | 5 | 16 | 53 | 179 | 1 | 10 | 33 | 109 | 92  | 314 |
| 79,670 | 5 | 12 | 50 | 104 | 1 | 9  | 33 | 68  | 89  | 193 |
| 79,671 | 5 | 12 | 50 | 117 | 1 | 9  | 33 | 76  | 89  | 214 |
| 79,672 | 4 | 11 | 46 | 119 | 1 | 9  | 31 | 76  | 82  | 215 |
| 79,673 | 4 | 10 | 39 | 108 | 1 | 9  | 27 | 72  | 71  | 199 |
| 79,674 | 2 | 11 | 37 | 106 | 1 | 9  | 27 | 72  | 67  | 198 |
| 79,675 | 2 | 10 | 32 | 105 | 0 | 9  | 18 | 72  | 52  | 196 |
| 79,676 | 2 | 10 | 31 | 103 | 0 | 9  | 18 | 71  | 51  | 193 |
| 79,677 | 2 | 9  | 25 | 92  | 0 | 9  | 19 | 66  | 46  | 176 |
| 79,678 | 2 | 9  | 25 | 98  | 0 | 9  | 19 | 68  | 46  | 184 |
| 79,679 | 2 | 10 | 26 | 98  | 0 | 8  | 20 | 68  | 48  | 184 |
| 79,680 | 2 | 10 | 25 | 94  | 0 | 8  | 20 | 65  | 47  | 177 |
| 79,681 | 2 | 10 | 26 | 93  | 0 | 8  | 21 | 65  | 49  | 176 |
| 79,682 | 2 | 10 | 26 | 93  | 0 | 8  | 22 | 65  | 50  | 176 |
| 79,683 | 2 | 10 | 27 | 91  | 0 | 8  | 21 | 65  | 50  | 174 |
| 79,684 | 2 | 11 | 24 | 91  | 0 | 8  | 22 | 65  | 48  | 175 |
| 79,685 | 2 | 11 | 24 | 91  | 0 | 8  | 21 | 65  | 47  | 175 |
| 79,686 | 1 | 11 | 17 | 91  | 1 | 8  | 22 | 66  | 41  | 176 |
| 79,687 | 1 | 11 | 18 | 92  | 1 | 8  | 23 | 66  | 43  | 177 |
| 79,688 | 0 | 11 | 17 | 92  | 1 | 8  | 21 | 66  | 39  | 177 |
| 79,689 | 0 | 11 | 15 | 92  | 1 | 8  | 24 | 67  | 40  | 178 |
| 79,690 | 0 | 11 | 11 | 92  | 1 | 8  | 22 | 67  | 34  | 178 |
| 79,691 | 0 | 11 | 11 | 92  | 1 | 8  | 21 | 67  | 33  | 178 |
| 79,692 | 0 | 11 | 11 | 92  | 1 | 8  | 21 | 67  | 33  | 178 |



|        |    |    |     |    |   |   |     |    |     |     |
|--------|----|----|-----|----|---|---|-----|----|-----|-----|
| 79,693 | 0  | 12 | 10  | 93 | 1 | 8 | 20  | 66 | 31  | 179 |
| 79,694 | 0  | 12 | 10  | 94 | 1 | 8 | 20  | 66 | 31  | 180 |
| 79,695 | 0  | 12 | 11  | 94 | 1 | 8 | 20  | 65 | 32  | 179 |
| 79,696 | 0  | 11 | 13  | 94 | 1 | 8 | 21  | 65 | 35  | 178 |
| 79,697 | 0  | 11 | 13  | 94 | 1 | 8 | 21  | 65 | 35  | 178 |
| 79,698 | 0  | 11 | 13  | 94 | 1 | 8 | 21  | 65 | 35  | 178 |
| 79,699 | 0  | 11 | 13  | 94 | 2 | 8 | 21  | 65 | 36  | 178 |
| 79,700 | 0  | 11 | 13  | 94 | 2 | 8 | 21  | 65 | 36  | 178 |
| 79,701 | 0  | 11 | 13  | 94 | 2 | 8 | 21  | 65 | 36  | 178 |
| 79,702 | 0  | 11 | 13  | 94 | 2 | 8 | 21  | 65 | 36  | 178 |
| 79,703 | 0  | 11 | 16  | 94 | 2 | 8 | 26  | 65 | 44  | 178 |
| 79,704 | 0  | 11 | 21  | 94 | 2 | 8 | 27  | 64 | 50  | 177 |
| 79,705 | 0  | 11 | 22  | 94 | 2 | 8 | 27  | 64 | 51  | 177 |
| 79,706 | 1  | 11 | 34  | 94 | 2 | 8 | 37  | 64 | 74  | 177 |
| 79,707 | 1  | 11 | 34  | 94 | 2 | 8 | 36  | 64 | 73  | 177 |
| 79,708 | 2  | 11 | 38  | 95 | 2 | 8 | 39  | 65 | 81  | 179 |
| 79,709 | 2  | 11 | 38  | 94 | 2 | 8 | 39  | 64 | 81  | 177 |
| 79,710 | 2  | 11 | 42  | 93 | 2 | 7 | 42  | 64 | 88  | 175 |
| 79,711 | 2  | 11 | 42  | 89 | 2 | 7 | 42  | 57 | 88  | 164 |
| 79,712 | 2  | 10 | 42  | 49 | 2 | 2 | 42  | 26 | 88  | 87  |
| 79,713 | 5  | 8  | 53  | 48 | 4 | 2 | 58  | 24 | 120 | 82  |
| 79,714 | 5  | 8  | 54  | 43 | 4 | 2 | 58  | 24 | 121 | 77  |
| 79,715 | 5  | 8  | 54  | 43 | 4 | 1 | 58  | 23 | 121 | 75  |
| 79,716 | 5  | 8  | 56  | 43 | 4 | 0 | 58  | 20 | 123 | 71  |
| 79,717 | 5  | 8  | 55  | 43 | 4 | 0 | 58  | 20 | 122 | 71  |
| 79,718 | 5  | 4  | 56  | 38 | 4 | 0 | 60  | 17 | 125 | 59  |
| 79,719 | 5  | 4  | 56  | 38 | 4 | 0 | 60  | 17 | 125 | 59  |
| 79,720 | 5  | 4  | 56  | 37 | 4 | 0 | 60  | 17 | 125 | 58  |
| 79,721 | 5  | 4  | 58  | 36 | 4 | 0 | 61  | 17 | 128 | 57  |
| 79,722 | 5  | 4  | 58  | 24 | 4 | 0 | 61  | 9  | 128 | 37  |
| 79,723 | 6  | 4  | 61  | 18 | 4 | 0 | 66  | 7  | 137 | 29  |
| 79,724 | 7  | 3  | 84  | 16 | 4 | 0 | 71  | 5  | 166 | 24  |
| 79,725 | 16 | 3  | 124 | 16 | 5 | 0 | 106 | 5  | 251 | 24  |
| 79,726 | 16 | 3  | 126 | 17 | 5 | 0 | 107 | 5  | 254 | 25  |
| 79,727 | 16 | 3  | 137 | 16 | 5 | 0 | 114 | 5  | 272 | 24  |
| 79,728 | 16 | 3  | 143 | 10 | 7 | 0 | 114 | 3  | 280 | 16  |
| 79,729 | 17 | 3  | 149 | 10 | 7 | 0 | 117 | 3  | 290 | 16  |
| 79,730 | 17 | 2  | 150 | 7  | 7 | 0 | 116 | 3  | 290 | 12  |
| 79,731 | 18 | 2  | 150 | 7  | 7 | 0 | 116 | 5  | 291 | 14  |
| 79,732 | 18 | 2  | 149 | 7  | 7 | 0 | 115 | 5  | 289 | 14  |
| 79,733 | 18 | 2  | 151 | 11 | 7 | 0 | 116 | 6  | 292 | 19  |

|        |    |   |     |    |    |   |     |    |       |     |
|--------|----|---|-----|----|----|---|-----|----|-------|-----|
| 79,734 | 22 | 2 | 178 | 24 | 7  | 0 | 124 | 17 | 331   | 43  |
| 79,735 | 22 | 1 | 203 | 27 | 7  | 0 | 124 | 19 | 356   | 47  |
| 79,736 | 26 | 1 | 317 | 27 | 12 | 0 | 194 | 20 | 549   | 48  |
| 79,737 | 31 | 1 | 403 | 28 | 12 | 0 | 217 | 24 | 663   | 53  |
| 79,738 | 31 | 1 | 402 | 28 | 12 | 0 | 216 | 24 | 661   | 53  |
| 79,739 | 39 | 1 | 442 | 44 | 13 | 2 | 258 | 29 | 752   | 76  |
| 79,740 | 39 | 1 | 442 | 44 | 13 | 2 | 255 | 29 | 749   | 76  |
| 79,741 | 40 | 1 | 452 | 51 | 13 | 2 | 265 | 32 | 770   | 86  |
| 79,742 | 43 | 3 | 465 | 61 | 13 | 2 | 271 | 34 | 792   | 100 |
| 79,743 | 43 | 2 | 467 | 60 | 13 | 2 | 271 | 34 | 794   | 98  |
| 79,744 | 43 | 2 | 474 | 59 | 13 | 2 | 275 | 34 | 805   | 97  |
| 79,745 | 50 | 2 | 552 | 59 | 18 | 2 | 319 | 36 | 939   | 99  |
| 79,746 | 50 | 2 | 549 | 59 | 19 | 2 | 319 | 36 | 937   | 99  |
| 79,747 | 50 | 2 | 550 | 59 | 19 | 2 | 319 | 36 | 938   | 99  |
| 79,748 | 50 | 2 | 550 | 59 | 19 | 2 | 319 | 36 | 938   | 99  |
| 79,749 | 56 | 2 | 608 | 61 | 22 | 2 | 374 | 36 | 1,060 | 101 |
| 79,750 | 56 | 2 | 608 | 61 | 21 | 2 | 374 | 36 | 1,059 | 101 |
| 79,751 | 56 | 2 | 619 | 61 | 21 | 2 | 377 | 36 | 1,073 | 101 |
| 79,752 | 56 | 2 | 619 | 63 | 21 | 2 | 378 | 36 | 1,074 | 103 |
| 79,753 | 56 | 2 | 616 | 68 | 21 | 2 | 374 | 36 | 1,067 | 108 |
| 79,754 | 56 | 2 | 616 | 68 | 21 | 2 | 373 | 37 | 1,066 | 109 |
| 79,755 | 56 | 2 | 611 | 70 | 21 | 2 | 372 | 38 | 1,060 | 112 |
| 79,756 | 56 | 2 | 610 | 70 | 21 | 2 | 372 | 39 | 1,059 | 113 |
| 79,757 | 55 | 2 | 598 | 70 | 21 | 2 | 362 | 39 | 1,036 | 113 |
| 79,758 | 54 | 2 | 594 | 69 | 21 | 2 | 360 | 38 | 1,029 | 111 |
| 79,759 | 54 | 2 | 595 | 69 | 21 | 3 | 359 | 38 | 1,029 | 112 |
| 79,760 | 54 | 2 | 591 | 69 | 21 | 3 | 356 | 38 | 1,022 | 112 |
| 79,761 | 52 | 2 | 592 | 69 | 21 | 3 | 353 | 39 | 1,018 | 113 |
| 79,762 | 52 | 2 | 593 | 70 | 21 | 3 | 352 | 39 | 1,018 | 114 |
| 79,763 | 53 | 2 | 596 | 73 | 21 | 3 | 353 | 46 | 1,023 | 124 |
| 79,764 | 52 | 2 | 586 | 74 | 19 | 3 | 341 | 46 | 998   | 125 |
| 79,765 | 52 | 2 | 586 | 77 | 19 | 3 | 345 | 46 | 1,002 | 128 |
| 79,766 | 52 | 2 | 586 | 77 | 19 | 3 | 345 | 46 | 1,002 | 128 |
| 79,767 | 52 | 2 | 584 | 77 | 19 | 3 | 345 | 46 | 1,000 | 128 |
| 79,768 | 52 | 2 | 584 | 77 | 19 | 4 | 345 | 49 | 1,000 | 132 |
| 79,769 | 52 | 2 | 583 | 77 | 19 | 4 | 344 | 49 | 998   | 132 |
| 79,770 | 52 | 2 | 583 | 79 | 19 | 4 | 343 | 51 | 997   | 136 |
| 79,771 | 52 | 2 | 583 | 80 | 19 | 4 | 343 | 52 | 997   | 138 |
| 79,772 | 52 | 3 | 589 | 93 | 20 | 4 | 344 | 55 | 1,005 | 155 |
| 79,773 | 51 | 3 | 589 | 94 | 20 | 4 | 343 | 55 | 1,003 | 156 |
| 79,774 | 54 | 3 | 587 | 97 | 20 | 4 | 341 | 57 | 1,002 | 161 |

|        |    |   |     |     |    |   |     |    |       |     |
|--------|----|---|-----|-----|----|---|-----|----|-------|-----|
| 79,775 | 54 | 3 | 575 | 101 | 20 | 5 | 356 | 59 | 1,005 | 168 |
| 79,776 | 45 | 3 | 540 | 101 | 20 | 5 | 321 | 58 | 926   | 167 |
| 79,777 | 45 | 3 | 540 | 100 | 20 | 5 | 324 | 58 | 929   | 166 |
| 79,778 | 45 | 3 | 532 | 100 | 20 | 5 | 321 | 58 | 918   | 166 |
| 79,779 | 45 | 3 | 526 | 100 | 18 | 5 | 320 | 58 | 909   | 166 |
| 79,780 | 44 | 3 | 521 | 100 | 18 | 5 | 318 | 58 | 901   | 166 |
| 79,781 | 44 | 3 | 520 | 100 | 18 | 5 | 318 | 57 | 900   | 165 |
| 79,782 | 44 | 3 | 520 | 100 | 18 | 5 | 318 | 57 | 900   | 165 |
| 79,783 | 44 | 3 | 518 | 100 | 18 | 5 | 316 | 57 | 896   | 165 |
| 79,784 | 44 | 3 | 513 | 96  | 18 | 5 | 315 | 56 | 890   | 160 |
| 79,785 | 40 | 3 | 491 | 86  | 18 | 5 | 308 | 46 | 857   | 140 |
| 79,786 | 40 | 3 | 466 | 84  | 18 | 5 | 307 | 44 | 831   | 136 |
| 79,787 | 36 | 3 | 352 | 84  | 13 | 5 | 238 | 43 | 639   | 135 |
| 79,788 | 31 | 3 | 263 | 82  | 12 | 5 | 205 | 38 | 511   | 128 |
| 79,789 | 24 | 3 | 231 | 66  | 11 | 3 | 166 | 33 | 432   | 105 |
| 79,790 | 23 | 3 | 225 | 66  | 11 | 3 | 162 | 33 | 421   | 105 |
| 79,791 | 23 | 1 | 216 | 49  | 11 | 3 | 154 | 27 | 404   | 80  |
| 79,792 | 23 | 1 | 216 | 51  | 11 | 3 | 152 | 30 | 402   | 85  |
| 79,793 | 20 | 1 | 209 | 52  | 11 | 3 | 150 | 31 | 390   | 87  |
| 79,794 | 20 | 1 | 210 | 52  | 11 | 3 | 151 | 31 | 392   | 87  |
| 79,795 | 21 | 1 | 203 | 52  | 11 | 3 | 147 | 31 | 382   | 87  |
| 79,796 | 14 | 1 | 128 | 54  | 6  | 3 | 103 | 29 | 251   | 87  |
| 79,797 | 17 | 1 | 139 | 54  | 5  | 3 | 106 | 29 | 267   | 87  |
| 79,798 | 21 | 1 | 104 | 54  | 3  | 3 | 55  | 29 | 183   | 87  |
| 79,799 | 21 | 1 | 103 | 54  | 3  | 3 | 53  | 29 | 180   | 87  |
| 79,800 | 21 | 1 | 137 | 52  | 3  | 3 | 70  | 29 | 231   | 85  |
| 79,801 | 22 | 1 | 145 | 52  | 4  | 3 | 74  | 29 | 245   | 85  |
| 79,802 | 23 | 1 | 145 | 50  | 4  | 3 | 74  | 29 | 246   | 83  |
| 79,803 | 24 | 1 | 154 | 45  | 4  | 3 | 76  | 29 | 258   | 78  |
| 79,804 | 24 | 1 | 154 | 46  | 4  | 3 | 76  | 29 | 258   | 79  |
| 79,805 | 48 | 1 | 354 | 44  | 11 | 3 | 155 | 27 | 568   | 75  |
| 79,806 | 52 | 1 | 396 | 44  | 11 | 3 | 175 | 26 | 634   | 74  |
| 79,807 | 54 | 1 | 425 | 44  | 11 | 3 | 192 | 26 | 682   | 74  |
| 79,808 | 54 | 1 | 429 | 44  | 11 | 3 | 195 | 26 | 689   | 74  |
| 79,809 | 54 | 1 | 429 | 47  | 11 | 4 | 195 | 27 | 689   | 79  |
| 79,810 | 56 | 1 | 433 | 52  | 11 | 3 | 195 | 32 | 695   | 88  |
| 79,811 | 56 | 1 | 437 | 53  | 11 | 3 | 196 | 32 | 700   | 89  |
| 79,812 | 56 | 2 | 437 | 55  | 11 | 4 | 195 | 34 | 699   | 95  |
| 79,813 | 56 | 2 | 436 | 56  | 11 | 4 | 195 | 34 | 698   | 96  |
| 79,814 | 55 | 2 | 435 | 53  | 11 | 4 | 194 | 27 | 695   | 86  |
| 79,815 | 56 | 4 | 439 | 69  | 11 | 5 | 191 | 37 | 697   | 115 |

|        |    |    |     |     |    |    |     |     |     |     |
|--------|----|----|-----|-----|----|----|-----|-----|-----|-----|
| 79,816 | 56 | 5  | 439 | 71  | 11 | 5  | 191 | 38  | 697 | 119 |
| 79,817 | 68 | 5  | 571 | 87  | 22 | 5  | 251 | 43  | 912 | 140 |
| 79,818 | 68 | 5  | 572 | 93  | 22 | 6  | 251 | 46  | 913 | 150 |
| 79,819 | 70 | 5  | 586 | 116 | 23 | 5  | 258 | 47  | 937 | 173 |
| 79,820 | 70 | 7  | 587 | 131 | 23 | 5  | 257 | 57  | 937 | 200 |
| 79,821 | 70 | 14 | 586 | 174 | 23 | 10 | 257 | 100 | 936 | 298 |
| 79,822 | 70 | 15 | 581 | 195 | 23 | 11 | 257 | 109 | 931 | 330 |
| 79,823 | 70 | 16 | 580 | 187 | 22 | 11 | 258 | 109 | 930 | 323 |
| 79,824 | 67 | 16 | 580 | 177 | 22 | 10 | 256 | 105 | 925 | 308 |
| 79,825 | 67 | 17 | 579 | 183 | 22 | 11 | 256 | 107 | 924 | 318 |
| 79,826 | 66 | 17 | 569 | 187 | 22 | 11 | 237 | 108 | 894 | 323 |
| 79,827 | 66 | 17 | 564 | 189 | 21 | 12 | 237 | 108 | 888 | 326 |
| 79,828 | 66 | 17 | 562 | 189 | 21 | 12 | 233 | 108 | 882 | 326 |
| 79,829 | 66 | 17 | 567 | 190 | 22 | 12 | 243 | 109 | 898 | 328 |
| 79,830 | 65 | 17 | 567 | 193 | 22 | 12 | 243 | 112 | 897 | 334 |
| 79,831 | 65 | 17 | 565 | 193 | 22 | 12 | 242 | 112 | 894 | 334 |
| 79,832 | 65 | 17 | 565 | 196 | 22 | 12 | 243 | 111 | 895 | 336 |
| 79,833 | 65 | 17 | 565 | 197 | 22 | 12 | 243 | 111 | 895 | 337 |
| 79,834 | 65 | 17 | 570 | 197 | 22 | 12 | 247 | 111 | 904 | 337 |
| 79,835 | 65 | 17 | 570 | 197 | 22 | 12 | 247 | 111 | 904 | 337 |
| 79,836 | 65 | 17 | 570 | 194 | 22 | 12 | 248 | 112 | 905 | 335 |
| 79,837 | 66 | 17 | 570 | 193 | 22 | 12 | 249 | 112 | 907 | 334 |
| 79,838 | 66 | 18 | 570 | 193 | 22 | 12 | 248 | 112 | 906 | 335 |
| 79,839 | 66 | 18 | 570 | 193 | 22 | 12 | 248 | 112 | 906 | 335 |
| 79,840 | 66 | 18 | 569 | 193 | 22 | 12 | 248 | 112 | 905 | 335 |
| 79,841 | 66 | 18 | 571 | 193 | 22 | 12 | 248 | 112 | 907 | 335 |
| 79,842 | 65 | 18 | 572 | 190 | 22 | 12 | 250 | 108 | 909 | 328 |
| 79,843 | 65 | 18 | 569 | 190 | 22 | 12 | 250 | 108 | 906 | 328 |
| 79,844 | 65 | 18 | 566 | 190 | 22 | 12 | 248 | 108 | 901 | 328 |
| 79,845 | 65 | 18 | 565 | 190 | 22 | 12 | 248 | 108 | 900 | 328 |
| 79,846 | 64 | 18 | 565 | 190 | 22 | 12 | 248 | 108 | 899 | 328 |
| 79,847 | 64 | 18 | 562 | 188 | 22 | 12 | 249 | 108 | 897 | 326 |
| 79,848 | 61 | 18 | 549 | 188 | 22 | 12 | 245 | 108 | 877 | 326 |
| 79,849 | 54 | 18 | 530 | 188 | 21 | 12 | 243 | 108 | 848 | 326 |
| 79,850 | 55 | 18 | 530 | 189 | 21 | 13 | 245 | 109 | 851 | 329 |
| 79,851 | 52 | 19 | 500 | 193 | 21 | 13 | 228 | 110 | 801 | 335 |
| 79,852 | 51 | 20 | 482 | 193 | 20 | 13 | 221 | 114 | 774 | 340 |
| 79,853 | 50 | 20 | 486 | 197 | 20 | 13 | 221 | 116 | 777 | 346 |
| 79,854 | 49 | 20 | 478 | 201 | 20 | 14 | 218 | 118 | 765 | 353 |
| 79,855 | 35 | 20 | 374 | 203 | 14 | 14 | 173 | 118 | 596 | 355 |
| 79,856 | 25 | 20 | 289 | 223 | 13 | 14 | 142 | 126 | 469 | 383 |

|        |    |    |     |     |    |    |     |     |     |     |
|--------|----|----|-----|-----|----|----|-----|-----|-----|-----|
| 79,857 | 21 | 20 | 247 | 223 | 13 | 14 | 122 | 127 | 403 | 384 |
| 79,858 | 19 | 20 | 220 | 223 | 13 | 14 | 105 | 127 | 357 | 384 |
| 79,859 | 24 | 20 | 281 | 221 | 13 | 13 | 115 | 126 | 433 | 380 |
| 79,860 | 24 | 20 | 280 | 221 | 13 | 13 | 115 | 126 | 432 | 380 |
| 79,861 | 22 | 20 | 282 | 215 | 13 | 13 | 116 | 122 | 433 | 370 |
| 79,862 | 22 | 20 | 278 | 220 | 13 | 13 | 115 | 124 | 428 | 377 |
| 79,863 | 22 | 20 | 276 | 231 | 13 | 14 | 115 | 140 | 426 | 405 |
| 79,864 | 22 | 20 | 274 | 229 | 13 | 14 | 115 | 141 | 424 | 404 |
| 79,865 | 27 | 21 | 323 | 233 | 16 | 14 | 129 | 146 | 495 | 414 |
| 79,866 | 27 | 19 | 322 | 217 | 16 | 13 | 133 | 136 | 498 | 385 |
| 79,867 | 25 | 18 | 305 | 215 | 16 | 13 | 127 | 143 | 473 | 389 |
| 79,868 | 15 | 19 | 189 | 206 | 5  | 12 | 72  | 140 | 281 | 377 |
| 79,869 | 13 | 19 | 177 | 206 | 4  | 12 | 68  | 140 | 262 | 377 |
| 79,870 | 13 | 8  | 185 | 99  | 4  | 6  | 69  | 68  | 271 | 181 |
| 79,871 | 18 | 7  | 189 | 101 | 4  | 6  | 71  | 68  | 282 | 182 |
| 79,872 | 19 | 7  | 188 | 106 | 4  | 6  | 72  | 70  | 283 | 189 |
| 79,873 | 19 | 7  | 188 | 106 | 4  | 6  | 72  | 70  | 283 | 189 |
| 79,874 | 19 | 7  | 191 | 107 | 4  | 6  | 71  | 70  | 285 | 190 |
| 79,875 | 19 | 7  | 191 | 114 | 4  | 6  | 71  | 70  | 285 | 197 |
| 79,876 | 20 | 6  | 199 | 109 | 4  | 5  | 79  | 68  | 302 | 188 |
| 79,877 | 20 | 6  | 200 | 104 | 4  | 4  | 79  | 69  | 303 | 183 |
| 79,878 | 20 | 6  | 201 | 105 | 4  | 4  | 80  | 69  | 305 | 184 |
| 79,879 | 20 | 6  | 194 | 105 | 3  | 5  | 74  | 69  | 291 | 185 |
| 79,880 | 20 | 6  | 195 | 109 | 3  | 5  | 66  | 71  | 284 | 191 |
| 79,881 | 20 | 6  | 195 | 106 | 3  | 5  | 66  | 69  | 284 | 186 |
| 79,882 | 20 | 6  | 195 | 106 | 3  | 5  | 66  | 70  | 284 | 187 |
| 79,883 | 20 | 7  | 195 | 103 | 3  | 5  | 67  | 72  | 285 | 187 |
| 79,884 | 20 | 8  | 190 | 103 | 3  | 5  | 64  | 72  | 277 | 188 |
| 79,885 | 20 | 8  | 189 | 103 | 3  | 5  | 64  | 72  | 276 | 188 |
| 79,886 | 20 | 8  | 189 | 104 | 3  | 5  | 63  | 72  | 275 | 189 |
| 79,887 | 19 | 8  | 188 | 104 | 3  | 5  | 62  | 71  | 272 | 188 |
| 79,888 | 19 | 8  | 188 | 107 | 3  | 5  | 62  | 72  | 272 | 192 |
| 79,889 | 19 | 8  | 188 | 115 | 3  | 7  | 62  | 76  | 272 | 206 |
| 79,890 | 21 | 9  | 196 | 135 | 3  | 8  | 65  | 81  | 285 | 233 |
| 79,891 | 21 | 9  | 195 | 150 | 3  | 8  | 66  | 90  | 285 | 257 |
| 79,892 | 21 | 10 | 216 | 153 | 3  | 9  | 73  | 90  | 313 | 262 |
| 79,893 | 21 | 10 | 218 | 153 | 4  | 9  | 73  | 90  | 316 | 262 |
| 79,894 | 22 | 12 | 218 | 162 | 4  | 9  | 75  | 96  | 319 | 279 |
| 79,895 | 22 | 12 | 217 | 162 | 4  | 9  | 74  | 96  | 317 | 279 |
| 79,896 | 22 | 12 | 222 | 165 | 4  | 9  | 75  | 97  | 323 | 283 |
| 79,897 | 22 | 12 | 222 | 167 | 4  | 9  | 78  | 101 | 326 | 289 |

|        |    |    |     |     |   |    |     |     |     |     |
|--------|----|----|-----|-----|---|----|-----|-----|-----|-----|
| 79,898 | 22 | 12 | 229 | 182 | 4 | 9  | 77  | 107 | 332 | 310 |
| 79,899 | 22 | 12 | 229 | 186 | 4 | 10 | 77  | 116 | 332 | 324 |
| 79,900 | 22 | 12 | 233 | 201 | 4 | 10 | 79  | 122 | 338 | 345 |
| 79,901 | 21 | 12 | 229 | 212 | 4 | 9  | 79  | 131 | 333 | 364 |
| 79,902 | 21 | 12 | 227 | 213 | 4 | 9  | 79  | 132 | 331 | 366 |
| 79,903 | 21 | 11 | 225 | 214 | 4 | 9  | 79  | 130 | 329 | 364 |
| 79,904 | 21 | 11 | 225 | 206 | 4 | 8  | 80  | 126 | 330 | 351 |
| 79,905 | 21 | 12 | 225 | 209 | 4 | 9  | 80  | 132 | 330 | 362 |
| 79,906 | 21 | 12 | 214 | 208 | 4 | 9  | 77  | 133 | 316 | 362 |
| 79,907 | 24 | 12 | 215 | 189 | 5 | 9  | 77  | 127 | 321 | 337 |
| 79,908 | 24 | 13 | 215 | 194 | 5 | 11 | 79  | 129 | 323 | 347 |
| 79,909 | 24 | 13 | 207 | 194 | 5 | 11 | 79  | 129 | 315 | 347 |
| 79,910 | 19 | 13 | 152 | 194 | 5 | 11 | 66  | 129 | 242 | 347 |
| 79,911 | 19 | 13 | 146 | 194 | 5 | 11 | 65  | 130 | 235 | 348 |
| 79,912 | 14 | 13 | 111 | 189 | 2 | 11 | 54  | 127 | 181 | 340 |
| 79,913 | 14 | 13 | 103 | 190 | 2 | 12 | 52  | 128 | 171 | 343 |
| 79,914 | 14 | 12 | 98  | 177 | 2 | 10 | 52  | 109 | 166 | 308 |
| 79,915 | 14 | 12 | 98  | 177 | 2 | 10 | 52  | 111 | 166 | 310 |
| 79,916 | 14 | 11 | 97  | 175 | 2 | 10 | 52  | 106 | 165 | 302 |
| 79,917 | 13 | 11 | 97  | 174 | 2 | 10 | 48  | 106 | 160 | 301 |
| 79,918 | 15 | 11 | 114 | 171 | 3 | 10 | 53  | 98  | 185 | 290 |
| 79,919 | 15 | 10 | 113 | 158 | 3 | 10 | 54  | 93  | 185 | 271 |
| 79,920 | 15 | 10 | 104 | 155 | 3 | 10 | 52  | 93  | 174 | 268 |
| 79,921 | 15 | 10 | 103 | 155 | 3 | 10 | 52  | 93  | 173 | 268 |
| 79,922 | 16 | 10 | 108 | 148 | 4 | 10 | 63  | 91  | 191 | 259 |
| 79,923 | 15 | 10 | 108 | 148 | 4 | 10 | 62  | 91  | 189 | 259 |
| 79,924 | 15 | 10 | 105 | 148 | 4 | 10 | 62  | 91  | 186 | 259 |
| 79,925 | 18 | 10 | 124 | 147 | 4 | 10 | 71  | 96  | 217 | 263 |
| 79,926 | 18 | 10 | 124 | 140 | 4 | 10 | 70  | 96  | 216 | 256 |
| 79,927 | 18 | 10 | 124 | 139 | 5 | 10 | 65  | 96  | 212 | 255 |
| 79,928 | 18 | 11 | 141 | 137 | 7 | 10 | 73  | 94  | 239 | 252 |
| 79,929 | 18 | 11 | 140 | 137 | 7 | 9  | 72  | 94  | 237 | 251 |
| 79,930 | 22 | 11 | 145 | 132 | 7 | 9  | 87  | 91  | 261 | 243 |
| 79,931 | 22 | 9  | 149 | 131 | 7 | 9  | 90  | 87  | 268 | 236 |
| 79,932 | 24 | 9  | 158 | 131 | 7 | 9  | 100 | 87  | 289 | 236 |
| 79,933 | 24 | 9  | 161 | 131 | 7 | 9  | 101 | 87  | 293 | 236 |
| 79,934 | 24 | 9  | 161 | 131 | 7 | 9  | 101 | 88  | 293 | 237 |
| 79,935 | 25 | 9  | 164 | 131 | 8 | 9  | 102 | 89  | 299 | 238 |
| 79,936 | 25 | 9  | 164 | 131 | 8 | 9  | 102 | 89  | 299 | 238 |
| 79,937 | 28 | 9  | 178 | 130 | 9 | 9  | 103 | 89  | 318 | 237 |
| 79,938 | 29 | 9  | 178 | 130 | 9 | 9  | 105 | 89  | 321 | 237 |

|        |    |   |     |     |    |   |     |    |       |     |
|--------|----|---|-----|-----|----|---|-----|----|-------|-----|
| 79,939 | 29 | 9 | 185 | 127 | 10 | 9 | 114 | 90 | 338   | 235 |
| 79,940 | 31 | 8 | 198 | 119 | 11 | 7 | 128 | 86 | 368   | 220 |
| 79,941 | 32 | 7 | 217 | 84  | 13 | 6 | 137 | 72 | 399   | 169 |
| 79,942 | 32 | 8 | 241 | 85  | 13 | 6 | 160 | 72 | 446   | 171 |
| 79,943 | 32 | 7 | 220 | 83  | 13 | 5 | 154 | 72 | 419   | 167 |
| 79,944 | 33 | 5 | 253 | 74  | 15 | 5 | 188 | 67 | 489   | 151 |
| 79,945 | 32 | 5 | 265 | 74  | 16 | 5 | 199 | 67 | 512   | 151 |
| 79,946 | 32 | 5 | 262 | 74  | 16 | 5 | 201 | 67 | 511   | 151 |
| 79,947 | 32 | 5 | 262 | 71  | 16 | 5 | 198 | 66 | 508   | 147 |
| 79,948 | 32 | 5 | 255 | 55  | 16 | 5 | 199 | 57 | 502   | 122 |
| 79,949 | 32 | 5 | 257 | 55  | 17 | 5 | 200 | 57 | 506   | 122 |
| 79,950 | 32 | 5 | 257 | 51  | 17 | 4 | 200 | 48 | 506   | 108 |
| 79,951 | 32 | 4 | 255 | 20  | 17 | 4 | 201 | 31 | 505   | 59  |
| 79,952 | 32 | 4 | 254 | 19  | 17 | 4 | 200 | 30 | 503   | 57  |
| 79,953 | 33 | 4 | 261 | 18  | 18 | 4 | 200 | 28 | 512   | 54  |
| 79,954 | 34 | 5 | 260 | 18  | 18 | 4 | 202 | 28 | 514   | 55  |
| 79,955 | 35 | 5 | 275 | 18  | 18 | 4 | 205 | 30 | 533   | 57  |
| 79,956 | 40 | 4 | 310 | 16  | 18 | 3 | 242 | 24 | 610   | 47  |
| 79,957 | 39 | 4 | 352 | 15  | 19 | 3 | 278 | 25 | 688   | 47  |
| 79,958 | 39 | 4 | 352 | 14  | 19 | 3 | 277 | 23 | 687   | 44  |
| 79,959 | 40 | 3 | 398 | 9   | 22 | 1 | 351 | 20 | 811   | 33  |
| 79,960 | 40 | 3 | 410 | 11  | 22 | 1 | 353 | 21 | 825   | 36  |
| 79,961 | 40 | 3 | 408 | 10  | 22 | 1 | 354 | 21 | 824   | 35  |
| 79,962 | 40 | 3 | 411 | 14  | 22 | 1 | 354 | 20 | 827   | 38  |
| 79,963 | 40 | 3 | 411 | 15  | 22 | 1 | 354 | 21 | 827   | 40  |
| 79,964 | 40 | 3 | 411 | 15  | 22 | 0 | 353 | 20 | 826   | 38  |
| 79,965 | 40 | 3 | 414 | 16  | 22 | 0 | 357 | 17 | 833   | 36  |
| 79,966 | 41 | 3 | 418 | 14  | 22 | 0 | 363 | 17 | 844   | 34  |
| 79,967 | 41 | 3 | 421 | 15  | 22 | 0 | 366 | 17 | 850   | 35  |
| 79,968 | 42 | 3 | 427 | 17  | 22 | 0 | 373 | 18 | 864   | 38  |
| 79,969 | 41 | 3 | 420 | 17  | 22 | 0 | 372 | 18 | 855   | 38  |
| 79,970 | 49 | 3 | 465 | 19  | 22 | 0 | 386 | 20 | 922   | 42  |
| 79,971 | 49 | 3 | 499 | 19  | 22 | 0 | 392 | 22 | 962   | 44  |
| 79,972 | 47 | 3 | 499 | 19  | 21 | 0 | 385 | 22 | 952   | 44  |
| 79,973 | 54 | 3 | 558 | 19  | 26 | 0 | 432 | 23 | 1,070 | 45  |
| 79,974 | 51 | 3 | 539 | 19  | 26 | 0 | 423 | 23 | 1,039 | 45  |
| 79,975 | 51 | 3 | 550 | 19  | 27 | 0 | 427 | 18 | 1,055 | 40  |
| 79,976 | 51 | 3 | 550 | 19  | 27 | 0 | 427 | 19 | 1,055 | 41  |
| 79,977 | 51 | 3 | 547 | 20  | 26 | 0 | 424 | 19 | 1,048 | 42  |
| 79,978 | 53 | 3 | 619 | 20  | 28 | 0 | 465 | 19 | 1,165 | 42  |
| 79,979 | 54 | 2 | 623 | 21  | 26 | 0 | 474 | 19 | 1,177 | 42  |

|        |    |   |     |    |    |   |     |    |       |    |
|--------|----|---|-----|----|----|---|-----|----|-------|----|
| 79,980 | 54 | 2 | 625 | 21 | 28 | 0 | 475 | 19 | 1,182 | 42 |
| 79,981 | 50 | 2 | 622 | 21 | 28 | 0 | 463 | 20 | 1,163 | 43 |
| 79,982 | 50 | 2 | 616 | 21 | 28 | 0 | 460 | 20 | 1,154 | 43 |
| 79,983 | 48 | 2 | 608 | 21 | 29 | 0 | 451 | 20 | 1,136 | 43 |
| 79,984 | 48 | 2 | 605 | 21 | 29 | 0 | 450 | 19 | 1,132 | 42 |
| 79,985 | 48 | 2 | 604 | 21 | 28 | 0 | 449 | 18 | 1,129 | 41 |
| 79,986 | 47 | 2 | 602 | 21 | 28 | 0 | 449 | 18 | 1,126 | 41 |
| 79,987 | 44 | 2 | 588 | 21 | 27 | 0 | 448 | 18 | 1,107 | 41 |
| 79,988 | 43 | 2 | 590 | 21 | 27 | 0 | 446 | 18 | 1,106 | 41 |
| 79,989 | 43 | 2 | 590 | 21 | 27 | 0 | 446 | 18 | 1,106 | 41 |
| 79,990 | 43 | 2 | 583 | 24 | 26 | 0 | 437 | 16 | 1,089 | 42 |
| 79,991 | 41 | 2 | 571 | 31 | 25 | 0 | 424 | 19 | 1,061 | 52 |
| 79,992 | 38 | 2 | 547 | 31 | 23 | 0 | 412 | 19 | 1,020 | 52 |
| 79,993 | 40 | 1 | 547 | 29 | 24 | 0 | 392 | 19 | 1,003 | 49 |
| 79,994 | 41 | 1 | 549 | 31 | 24 | 0 | 398 | 19 | 1,012 | 51 |
| 79,995 | 40 | 1 | 512 | 31 | 20 | 0 | 361 | 18 | 933   | 50 |
| 79,996 | 41 | 1 | 503 | 31 | 19 | 0 | 356 | 18 | 919   | 50 |
| 79,997 | 41 | 1 | 503 | 30 | 19 | 0 | 357 | 17 | 920   | 48 |
| 79,998 | 42 | 1 | 510 | 30 | 20 | 0 | 365 | 17 | 937   | 48 |
| 79,999 | 42 | 1 | 509 | 30 | 20 | 0 | 367 | 17 | 938   | 48 |
| 80,000 | 42 | 2 | 507 | 30 | 20 | 0 | 368 | 17 | 937   | 49 |
| 80,001 | 44 | 2 | 512 | 30 | 20 | 0 | 373 | 17 | 949   | 49 |
| 80,002 | 45 | 2 | 515 | 30 | 22 | 0 | 377 | 17 | 959   | 49 |
| 80,003 | 45 | 2 | 535 | 31 | 24 | 0 | 381 | 17 | 985   | 50 |
| 80,004 | 45 | 2 | 527 | 33 | 25 | 0 | 381 | 17 | 978   | 52 |
| 80,005 | 44 | 1 | 527 | 36 | 25 | 0 | 379 | 21 | 975   | 58 |
| 80,006 | 43 | 1 | 512 | 39 | 25 | 0 | 376 | 19 | 956   | 59 |
| 80,007 | 38 | 2 | 483 | 38 | 24 | 0 | 341 | 19 | 886   | 59 |
| 80,008 | 36 | 2 | 442 | 37 | 23 | 0 | 305 | 17 | 806   | 56 |
| 80,009 | 35 | 2 | 399 | 37 | 21 | 0 | 231 | 17 | 686   | 56 |
| 80,010 | 47 | 2 | 503 | 35 | 23 | 0 | 281 | 16 | 854   | 53 |
| 80,011 | 47 | 2 | 537 | 35 | 23 | 0 | 300 | 16 | 907   | 53 |
| 80,012 | 47 | 2 | 534 | 35 | 23 | 0 | 300 | 16 | 904   | 53 |
| 80,013 | 51 | 2 | 593 | 31 | 26 | 0 | 343 | 16 | 1,013 | 49 |
| 80,014 | 51 | 2 | 593 | 30 | 26 | 0 | 343 | 15 | 1,013 | 47 |
| 80,015 | 54 | 2 | 678 | 29 | 28 | 1 | 429 | 15 | 1,189 | 47 |
| 80,016 | 54 | 2 | 674 | 28 | 28 | 1 | 425 | 16 | 1,181 | 47 |
| 80,017 | 53 | 2 | 670 | 28 | 28 | 1 | 420 | 16 | 1,171 | 47 |
| 80,018 | 53 | 2 | 665 | 27 | 28 | 1 | 419 | 18 | 1,165 | 48 |
| 80,019 | 51 | 2 | 649 | 25 | 27 | 1 | 408 | 17 | 1,135 | 45 |
| 80,020 | 47 | 2 | 629 | 25 | 27 | 1 | 402 | 17 | 1,105 | 45 |



|        |    |    |     |     |    |   |     |    |       |     |
|--------|----|----|-----|-----|----|---|-----|----|-------|-----|
| 80,021 | 43 | 2  | 606 | 23  | 27 | 1 | 393 | 13 | 1,069 | 39  |
| 80,022 | 44 | 2  | 573 | 23  | 27 | 1 | 386 | 14 | 1,030 | 40  |
| 80,023 | 43 | 2  | 570 | 24  | 27 | 1 | 381 | 16 | 1,021 | 43  |
| 80,024 | 33 | 2  | 508 | 24  | 22 | 1 | 334 | 16 | 897   | 43  |
| 80,025 | 33 | 2  | 509 | 32  | 22 | 1 | 334 | 16 | 898   | 51  |
| 80,026 | 33 | 2  | 501 | 35  | 21 | 1 | 330 | 17 | 885   | 55  |
| 80,027 | 33 | 2  | 469 | 36  | 21 | 1 | 311 | 16 | 834   | 55  |
| 80,028 | 30 | 2  | 463 | 37  | 21 | 1 | 308 | 16 | 822   | 56  |
| 80,029 | 30 | 2  | 425 | 37  | 20 | 1 | 288 | 16 | 763   | 56  |
| 80,030 | 29 | 2  | 417 | 36  | 21 | 1 | 280 | 16 | 747   | 55  |
| 80,031 | 29 | 2  | 415 | 36  | 19 | 1 | 279 | 16 | 742   | 55  |
| 80,032 | 30 | 3  | 419 | 36  | 20 | 1 | 283 | 16 | 752   | 56  |
| 80,033 | 39 | 3  | 442 | 37  | 22 | 1 | 306 | 16 | 809   | 57  |
| 80,034 | 39 | 3  | 441 | 37  | 21 | 1 | 306 | 16 | 807   | 57  |
| 80,035 | 39 | 3  | 445 | 37  | 22 | 1 | 309 | 16 | 815   | 57  |
| 80,036 | 39 | 3  | 452 | 38  | 22 | 1 | 310 | 18 | 823   | 60  |
| 80,037 | 39 | 3  | 451 | 38  | 22 | 1 | 310 | 18 | 822   | 60  |
| 80,038 | 40 | 3  | 453 | 38  | 22 | 1 | 310 | 18 | 825   | 60  |
| 80,039 | 46 | 3  | 482 | 38  | 24 | 1 | 320 | 18 | 872   | 60  |
| 80,040 | 50 | 3  | 508 | 38  | 24 | 1 | 334 | 18 | 916   | 60  |
| 80,041 | 50 | 3  | 508 | 35  | 24 | 1 | 336 | 18 | 918   | 57  |
| 80,042 | 54 | 3  | 529 | 28  | 25 | 1 | 358 | 15 | 966   | 47  |
| 80,043 | 54 | 3  | 529 | 30  | 25 | 1 | 358 | 15 | 966   | 49  |
| 80,044 | 56 | 3  | 523 | 30  | 24 | 1 | 373 | 15 | 976   | 49  |
| 80,045 | 57 | 3  | 560 | 30  | 27 | 1 | 379 | 15 | 1,023 | 49  |
| 80,046 | 59 | 3  | 566 | 31  | 27 | 1 | 384 | 15 | 1,036 | 50  |
| 80,047 | 58 | 3  | 572 | 31  | 27 | 1 | 377 | 17 | 1,034 | 52  |
| 80,048 | 58 | 5  | 570 | 39  | 27 | 1 | 372 | 21 | 1,027 | 66  |
| 80,049 | 57 | 8  | 565 | 72  | 26 | 2 | 366 | 33 | 1,014 | 115 |
| 80,050 | 57 | 12 | 565 | 88  | 26 | 3 | 364 | 42 | 1,012 | 145 |
| 80,051 | 57 | 11 | 565 | 90  | 26 | 3 | 362 | 44 | 1,010 | 148 |
| 80,052 | 55 | 11 | 562 | 111 | 26 | 3 | 357 | 46 | 1,000 | 171 |
| 80,053 | 54 | 12 | 557 | 116 | 24 | 3 | 351 | 46 | 986   | 177 |
| 80,054 | 54 | 12 | 537 | 115 | 22 | 3 | 347 | 46 | 960   | 176 |
| 80,055 | 53 | 12 | 538 | 113 | 20 | 3 | 347 | 46 | 958   | 174 |
| 80,056 | 53 | 14 | 537 | 126 | 20 | 3 | 347 | 45 | 957   | 188 |
| 80,057 | 53 | 14 | 537 | 126 | 20 | 3 | 346 | 47 | 956   | 190 |
| 80,058 | 53 | 13 | 531 | 129 | 20 | 3 | 343 | 50 | 947   | 195 |
| 80,059 | 55 | 14 | 530 | 135 | 20 | 3 | 346 | 53 | 951   | 205 |
| 80,060 | 56 | 14 | 533 | 136 | 19 | 3 | 349 | 55 | 957   | 208 |
| 80,061 | 44 | 16 | 417 | 144 | 17 | 3 | 298 | 59 | 776   | 222 |

|        |    |    |     |     |    |   |     |    |     |     |
|--------|----|----|-----|-----|----|---|-----|----|-----|-----|
| 80,062 | 44 | 16 | 383 | 147 | 17 | 3 | 279 | 65 | 723 | 231 |
| 80,063 | 44 | 16 | 365 | 148 | 15 | 3 | 258 | 66 | 682 | 233 |
| 80,064 | 40 | 16 | 324 | 152 | 14 | 3 | 236 | 66 | 614 | 237 |
| 80,065 | 37 | 16 | 240 | 152 | 12 | 2 | 149 | 66 | 438 | 236 |
| 80,066 | 37 | 16 | 239 | 152 | 12 | 2 | 149 | 65 | 437 | 235 |
| 80,067 | 37 | 16 | 239 | 154 | 12 | 2 | 149 | 65 | 437 | 237 |
| 80,068 | 37 | 16 | 238 | 155 | 12 | 2 | 147 | 63 | 434 | 236 |
| 80,069 | 37 | 16 | 238 | 155 | 12 | 2 | 147 | 63 | 434 | 236 |
| 80,070 | 37 | 16 | 238 | 155 | 12 | 2 | 147 | 63 | 434 | 236 |
| 80,071 | 38 | 17 | 238 | 155 | 12 | 2 | 147 | 64 | 435 | 238 |
| 80,072 | 38 | 17 | 236 | 158 | 12 | 2 | 147 | 63 | 433 | 240 |
| 80,073 | 37 | 17 | 235 | 158 | 12 | 2 | 146 | 63 | 430 | 240 |
| 80,074 | 37 | 17 | 233 | 156 | 12 | 2 | 146 | 60 | 428 | 235 |
| 80,075 | 37 | 17 | 232 | 149 | 12 | 2 | 146 | 60 | 427 | 228 |
| 80,076 | 37 | 17 | 231 | 146 | 12 | 2 | 146 | 59 | 426 | 224 |
| 80,077 | 37 | 17 | 227 | 145 | 12 | 2 | 145 | 59 | 421 | 223 |
| 80,078 | 37 | 17 | 227 | 145 | 11 | 2 | 145 | 59 | 420 | 223 |
| 80,079 | 37 | 17 | 212 | 143 | 11 | 2 | 135 | 59 | 395 | 221 |
| 80,080 | 37 | 17 | 217 | 143 | 11 | 2 | 136 | 60 | 401 | 222 |
| 80,081 | 37 | 17 | 217 | 143 | 11 | 2 | 135 | 60 | 400 | 222 |
| 80,082 | 36 | 16 | 214 | 143 | 10 | 2 | 131 | 59 | 391 | 220 |
| 80,083 | 36 | 16 | 211 | 143 | 10 | 2 | 130 | 59 | 387 | 220 |
| 80,084 | 27 | 16 | 188 | 142 | 8  | 2 | 105 | 59 | 328 | 219 |
| 80,085 | 27 | 16 | 188 | 142 | 8  | 2 | 105 | 60 | 328 | 220 |
| 80,086 | 27 | 16 | 184 | 142 | 7  | 2 | 101 | 60 | 319 | 220 |
| 80,087 | 27 | 16 | 177 | 142 | 8  | 2 | 103 | 58 | 315 | 218 |
| 80,088 | 26 | 16 | 175 | 142 | 8  | 2 | 103 | 58 | 312 | 218 |
| 80,089 | 20 | 16 | 145 | 142 | 6  | 2 | 93  | 59 | 264 | 219 |
| 80,090 | 20 | 16 | 174 | 142 | 6  | 2 | 101 | 60 | 301 | 220 |
| 80,091 | 17 | 16 | 150 | 143 | 6  | 2 | 90  | 60 | 263 | 221 |
| 80,092 | 17 | 18 | 150 | 144 | 6  | 2 | 88  | 63 | 261 | 227 |
| 80,093 | 13 | 18 | 124 | 143 | 5  | 2 | 63  | 68 | 205 | 231 |
| 80,094 | 11 | 19 | 108 | 165 | 5  | 2 | 53  | 81 | 177 | 267 |
| 80,095 | 9  | 19 | 107 | 166 | 5  | 2 | 43  | 81 | 164 | 268 |
| 80,096 | 7  | 21 | 66  | 174 | 2  | 2 | 30  | 87 | 105 | 284 |
| 80,097 | 5  | 21 | 60  | 173 | 2  | 2 | 25  | 89 | 92  | 285 |
| 80,098 | 5  | 21 | 52  | 171 | 2  | 2 | 24  | 85 | 83  | 279 |
| 80,099 | 5  | 19 | 51  | 165 | 2  | 2 | 22  | 79 | 80  | 265 |
| 80,100 | 5  | 16 | 50  | 136 | 2  | 1 | 22  | 71 | 79  | 224 |
| 80,101 | 5  | 12 | 52  | 119 | 2  | 0 | 22  | 64 | 81  | 195 |
| 80,102 | 5  | 12 | 53  | 117 | 2  | 0 | 22  | 62 | 82  | 191 |

|        |   |    |    |     |   |   |    |    |     |     |
|--------|---|----|----|-----|---|---|----|----|-----|-----|
| 80,103 | 5 | 11 | 54 | 93  | 2 | 0 | 23 | 60 | 84  | 164 |
| 80,104 | 5 | 11 | 53 | 95  | 2 | 0 | 23 | 60 | 83  | 166 |
| 80,105 | 5 | 11 | 53 | 95  | 2 | 0 | 23 | 60 | 83  | 166 |
| 80,106 | 6 | 11 | 61 | 97  | 2 | 0 | 25 | 61 | 94  | 169 |
| 80,107 | 6 | 9  | 61 | 84  | 2 | 0 | 25 | 64 | 94  | 157 |
| 80,108 | 6 | 8  | 61 | 73  | 2 | 0 | 25 | 61 | 94  | 142 |
| 80,109 | 5 | 8  | 61 | 74  | 2 | 0 | 25 | 61 | 93  | 143 |
| 80,110 | 4 | 8  | 59 | 76  | 2 | 0 | 23 | 60 | 88  | 144 |
| 80,111 | 4 | 9  | 55 | 81  | 2 | 0 | 19 | 59 | 80  | 149 |
| 80,112 | 4 | 8  | 55 | 84  | 2 | 0 | 18 | 62 | 79  | 154 |
| 80,113 | 4 | 9  | 55 | 81  | 2 | 0 | 18 | 58 | 79  | 148 |
| 80,114 | 6 | 10 | 67 | 80  | 3 | 0 | 28 | 58 | 104 | 148 |
| 80,115 | 6 | 10 | 67 | 76  | 4 | 0 | 28 | 58 | 105 | 144 |
| 80,116 | 6 | 10 | 67 | 76  | 4 | 0 | 28 | 58 | 105 | 144 |
| 80,117 | 6 | 11 | 67 | 81  | 4 | 1 | 28 | 60 | 105 | 153 |
| 80,118 | 6 | 11 | 67 | 79  | 4 | 1 | 28 | 61 | 105 | 152 |
| 80,119 | 6 | 12 | 67 | 78  | 4 | 1 | 28 | 61 | 105 | 152 |
| 80,120 | 6 | 12 | 67 | 78  | 4 | 1 | 28 | 61 | 105 | 152 |
| 80,121 | 6 | 12 | 67 | 78  | 4 | 1 | 28 | 61 | 105 | 152 |
| 80,122 | 5 | 11 | 67 | 78  | 4 | 1 | 28 | 60 | 104 | 150 |
| 80,123 | 5 | 11 | 67 | 75  | 4 | 1 | 28 | 60 | 104 | 147 |
| 80,124 | 5 | 11 | 67 | 75  | 4 | 1 | 28 | 60 | 104 | 147 |
| 80,125 | 5 | 11 | 67 | 75  | 4 | 1 | 28 | 60 | 104 | 147 |
| 80,126 | 5 | 12 | 67 | 75  | 4 | 1 | 28 | 61 | 104 | 149 |
| 80,127 | 5 | 12 | 67 | 77  | 4 | 1 | 28 | 61 | 104 | 151 |
| 80,128 | 5 | 12 | 67 | 77  | 4 | 1 | 28 | 61 | 104 | 151 |
| 80,129 | 5 | 12 | 66 | 78  | 3 | 1 | 27 | 61 | 101 | 152 |
| 80,130 | 5 | 12 | 62 | 78  | 3 | 1 | 27 | 61 | 97  | 152 |
| 80,131 | 5 | 12 | 62 | 78  | 3 | 1 | 27 | 61 | 97  | 152 |
| 80,132 | 5 | 12 | 62 | 78  | 3 | 1 | 27 | 61 | 97  | 152 |
| 80,133 | 5 | 12 | 62 | 78  | 3 | 1 | 27 | 61 | 97  | 152 |
| 80,134 | 6 | 12 | 62 | 78  | 3 | 1 | 25 | 61 | 96  | 152 |
| 80,135 | 6 | 12 | 62 | 78  | 3 | 1 | 25 | 61 | 96  | 152 |
| 80,136 | 6 | 12 | 62 | 85  | 3 | 1 | 25 | 62 | 96  | 160 |
| 80,137 | 6 | 12 | 62 | 88  | 3 | 1 | 25 | 65 | 96  | 166 |
| 80,138 | 6 | 12 | 63 | 87  | 2 | 1 | 24 | 66 | 95  | 166 |
| 80,139 | 6 | 13 | 50 | 94  | 2 | 1 | 23 | 73 | 81  | 181 |
| 80,140 | 5 | 15 | 33 | 102 | 2 | 3 | 17 | 75 | 57  | 195 |
| 80,141 | 5 | 15 | 33 | 103 | 2 | 3 | 16 | 75 | 56  | 196 |
| 80,142 | 6 | 15 | 37 | 103 | 2 | 3 | 20 | 75 | 65  | 196 |
| 80,143 | 9 | 14 | 39 | 104 | 2 | 3 | 21 | 79 | 71  | 200 |

|        |    |    |     |     |    |   |     |    |     |     |
|--------|----|----|-----|-----|----|---|-----|----|-----|-----|
| 80,144 | 9  | 14 | 39  | 104 | 2  | 3 | 21  | 75 | 71  | 196 |
| 80,145 | 9  | 13 | 47  | 85  | 4  | 4 | 21  | 64 | 81  | 166 |
| 80,146 | 17 | 13 | 157 | 87  | 7  | 4 | 53  | 65 | 234 | 169 |
| 80,147 | 23 | 11 | 254 | 77  | 8  | 4 | 74  | 59 | 359 | 151 |
| 80,148 | 23 | 11 | 260 | 76  | 9  | 4 | 80  | 56 | 372 | 147 |
| 80,149 | 23 | 11 | 260 | 76  | 9  | 4 | 80  | 56 | 372 | 147 |
| 80,150 | 23 | 11 | 261 | 73  | 9  | 4 | 80  | 55 | 373 | 143 |
| 80,151 | 24 | 11 | 260 | 73  | 9  | 4 | 81  | 55 | 374 | 143 |
| 80,152 | 24 | 11 | 259 | 73  | 9  | 4 | 81  | 55 | 373 | 143 |
| 80,153 | 24 | 11 | 257 | 73  | 9  | 4 | 80  | 55 | 370 | 143 |
| 80,154 | 24 | 11 | 257 | 71  | 10 | 4 | 81  | 55 | 372 | 141 |
| 80,155 | 24 | 11 | 259 | 71  | 10 | 4 | 82  | 55 | 375 | 141 |
| 80,156 | 23 | 11 | 252 | 69  | 10 | 4 | 80  | 54 | 365 | 138 |
| 80,157 | 23 | 11 | 252 | 69  | 10 | 4 | 80  | 54 | 365 | 138 |
| 80,158 | 24 | 11 | 258 | 69  | 10 | 4 | 82  | 48 | 374 | 132 |
| 80,159 | 24 | 11 | 276 | 70  | 12 | 4 | 86  | 44 | 398 | 129 |
| 80,160 | 24 | 11 | 276 | 69  | 12 | 4 | 86  | 45 | 398 | 129 |
| 80,161 | 24 | 11 | 276 | 68  | 12 | 4 | 86  | 47 | 398 | 130 |
| 80,162 | 23 | 10 | 276 | 62  | 12 | 4 | 85  | 46 | 396 | 122 |
| 80,163 | 21 | 9  | 264 | 55  | 11 | 4 | 77  | 46 | 373 | 114 |
| 80,164 | 21 | 8  | 264 | 55  | 11 | 4 | 75  | 44 | 371 | 111 |
| 80,165 | 21 | 7  | 265 | 55  | 10 | 4 | 75  | 44 | 371 | 110 |
| 80,166 | 21 | 7  | 267 | 56  | 10 | 4 | 75  | 44 | 373 | 111 |
| 80,167 | 21 | 6  | 267 | 51  | 10 | 3 | 78  | 42 | 376 | 102 |
| 80,168 | 21 | 6  | 268 | 51  | 10 | 3 | 78  | 42 | 377 | 102 |
| 80,169 | 21 | 6  | 268 | 51  | 10 | 3 | 78  | 42 | 377 | 102 |
| 80,170 | 21 | 5  | 269 | 51  | 10 | 3 | 79  | 42 | 379 | 101 |
| 80,171 | 22 | 5  | 270 | 52  | 10 | 3 | 80  | 42 | 382 | 102 |
| 80,172 | 22 | 5  | 270 | 52  | 10 | 3 | 80  | 42 | 382 | 102 |
| 80,173 | 22 | 5  | 273 | 52  | 10 | 3 | 83  | 44 | 388 | 104 |
| 80,174 | 22 | 5  | 275 | 52  | 10 | 3 | 83  | 45 | 390 | 105 |
| 80,175 | 26 | 5  | 301 | 54  | 13 | 3 | 117 | 45 | 457 | 107 |
| 80,176 | 26 | 6  | 301 | 54  | 13 | 4 | 117 | 46 | 457 | 110 |
| 80,177 | 26 | 5  | 301 | 54  | 13 | 4 | 117 | 45 | 457 | 108 |
| 80,178 | 26 | 5  | 304 | 53  | 14 | 4 | 120 | 45 | 464 | 107 |
| 80,179 | 26 | 5  | 304 | 54  | 14 | 4 | 120 | 46 | 464 | 109 |
| 80,180 | 26 | 5  | 304 | 54  | 14 | 4 | 120 | 48 | 464 | 111 |
| 80,181 | 26 | 5  | 305 | 55  | 14 | 4 | 122 | 48 | 467 | 112 |
| 80,182 | 26 | 5  | 305 | 55  | 14 | 4 | 122 | 47 | 467 | 111 |
| 80,183 | 26 | 5  | 309 | 55  | 16 | 4 | 130 | 47 | 481 | 111 |
| 80,184 | 26 | 5  | 310 | 55  | 16 | 4 | 133 | 47 | 485 | 111 |

|        |    |    |     |     |    |   |     |    |     |     |
|--------|----|----|-----|-----|----|---|-----|----|-----|-----|
| 80,185 | 25 | 5  | 311 | 60  | 16 | 4 | 133 | 48 | 485 | 117 |
| 80,186 | 25 | 5  | 311 | 61  | 16 | 4 | 133 | 48 | 485 | 118 |
| 80,187 | 25 | 4  | 311 | 44  | 16 | 4 | 135 | 35 | 487 | 87  |
| 80,188 | 25 | 4  | 311 | 44  | 16 | 4 | 135 | 35 | 487 | 87  |
| 80,189 | 25 | 4  | 310 | 44  | 16 | 4 | 136 | 36 | 487 | 88  |
| 80,190 | 25 | 2  | 311 | 36  | 16 | 2 | 136 | 32 | 488 | 72  |
| 80,191 | 25 | 2  | 310 | 38  | 16 | 2 | 135 | 32 | 486 | 74  |
| 80,192 | 25 | 2  | 310 | 41  | 16 | 2 | 135 | 35 | 486 | 80  |
| 80,193 | 24 | 2  | 306 | 49  | 16 | 2 | 131 | 39 | 477 | 92  |
| 80,194 | 21 | 1  | 304 | 50  | 16 | 2 | 130 | 36 | 471 | 89  |
| 80,195 | 21 | 1  | 296 | 66  | 14 | 2 | 130 | 49 | 461 | 118 |
| 80,196 | 13 | 1  | 186 | 64  | 11 | 1 | 98  | 49 | 308 | 115 |
| 80,197 | 7  | 1  | 93  | 67  | 10 | 1 | 81  | 50 | 191 | 119 |
| 80,198 | 7  | 1  | 89  | 68  | 10 | 1 | 77  | 50 | 183 | 120 |
| 80,199 | 7  | 1  | 82  | 67  | 9  | 1 | 70  | 50 | 168 | 119 |
| 80,200 | 7  | 1  | 82  | 67  | 9  | 1 | 70  | 50 | 168 | 119 |
| 80,201 | 7  | 1  | 81  | 67  | 9  | 1 | 70  | 50 | 167 | 119 |
| 80,202 | 6  | 1  | 80  | 67  | 9  | 1 | 70  | 50 | 165 | 119 |
| 80,203 | 6  | 1  | 80  | 67  | 9  | 1 | 70  | 50 | 165 | 119 |
| 80,204 | 6  | 4  | 80  | 81  | 8  | 2 | 70  | 60 | 164 | 147 |
| 80,205 | 6  | 4  | 79  | 87  | 8  | 3 | 69  | 65 | 162 | 159 |
| 80,206 | 6  | 4  | 77  | 89  | 8  | 3 | 68  | 65 | 159 | 161 |
| 80,207 | 6  | 4  | 77  | 102 | 8  | 4 | 68  | 78 | 159 | 188 |
| 80,208 | 5  | 6  | 71  | 108 | 8  | 4 | 67  | 83 | 151 | 201 |
| 80,209 | 5  | 9  | 57  | 131 | 7  | 5 | 64  | 88 | 133 | 233 |
| 80,210 | 5  | 9  | 53  | 130 | 6  | 5 | 63  | 87 | 127 | 231 |
| 80,211 | 5  | 11 | 53  | 133 | 6  | 5 | 63  | 90 | 127 | 239 |
| 80,212 | 5  | 11 | 53  | 132 | 6  | 5 | 64  | 88 | 128 | 236 |
| 80,213 | 5  | 11 | 51  | 129 | 6  | 5 | 64  | 83 | 126 | 228 |
| 80,214 | 5  | 11 | 51  | 130 | 6  | 5 | 64  | 83 | 126 | 229 |
| 80,215 | 5  | 11 | 51  | 132 | 6  | 5 | 64  | 85 | 126 | 233 |
| 80,216 | 5  | 11 | 50  | 131 | 6  | 5 | 64  | 83 | 125 | 230 |
| 80,217 | 5  | 11 | 48  | 138 | 6  | 6 | 64  | 85 | 123 | 240 |
| 80,218 | 5  | 11 | 48  | 138 | 6  | 6 | 61  | 85 | 120 | 240 |
| 80,219 | 5  | 12 | 47  | 138 | 6  | 6 | 61  | 85 | 119 | 241 |
| 80,220 | 5  | 13 | 49  | 149 | 6  | 7 | 63  | 92 | 123 | 261 |
| 80,221 | 7  | 15 | 57  | 152 | 6  | 7 | 67  | 92 | 137 | 266 |
| 80,222 | 6  | 16 | 58  | 153 | 7  | 7 | 80  | 94 | 151 | 270 |
| 80,223 | 6  | 16 | 60  | 156 | 7  | 7 | 81  | 94 | 154 | 273 |
| 80,224 | 6  | 15 | 59  | 154 | 7  | 6 | 81  | 90 | 153 | 265 |
| 80,225 | 6  | 15 | 58  | 156 | 7  | 6 | 84  | 90 | 155 | 267 |

|        |   |    |    |     |   |   |    |    |     |     |
|--------|---|----|----|-----|---|---|----|----|-----|-----|
| 80,226 | 2 | 15 | 32 | 156 | 4 | 6 | 49 | 90 | 87  | 267 |
| 80,227 | 2 | 15 | 30 | 156 | 4 | 6 | 47 | 90 | 83  | 267 |
| 80,228 | 2 | 15 | 30 | 156 | 3 | 6 | 48 | 90 | 83  | 267 |
| 80,229 | 2 | 15 | 35 | 153 | 3 | 6 | 48 | 87 | 88  | 261 |
| 80,230 | 2 | 15 | 39 | 153 | 3 | 6 | 52 | 87 | 96  | 261 |
| 80,231 | 2 | 15 | 38 | 154 | 3 | 6 | 50 | 87 | 93  | 262 |
| 80,232 | 4 | 15 | 62 | 154 | 3 | 6 | 61 | 92 | 130 | 267 |
| 80,233 | 4 | 15 | 61 | 154 | 3 | 6 | 61 | 92 | 129 | 267 |
| 80,234 | 4 | 15 | 57 | 154 | 1 | 6 | 53 | 92 | 115 | 267 |
| 80,235 | 4 | 15 | 56 | 149 | 1 | 6 | 50 | 91 | 111 | 261 |
| 80,236 | 4 | 15 | 55 | 150 | 1 | 6 | 50 | 91 | 110 | 262 |
| 80,237 | 4 | 15 | 55 | 150 | 1 | 6 | 48 | 91 | 108 | 262 |
| 80,238 | 4 | 15 | 55 | 150 | 1 | 6 | 48 | 91 | 108 | 262 |
| 80,239 | 4 | 15 | 56 | 151 | 1 | 6 | 48 | 90 | 109 | 262 |
| 80,240 | 4 | 15 | 56 | 151 | 1 | 6 | 48 | 90 | 109 | 262 |
| 80,241 | 4 | 15 | 55 | 151 | 1 | 6 | 48 | 90 | 108 | 262 |
| 80,242 | 4 | 15 | 56 | 148 | 1 | 6 | 49 | 90 | 110 | 259 |
| 80,243 | 4 | 15 | 57 | 136 | 1 | 6 | 50 | 83 | 112 | 240 |
| 80,244 | 4 | 15 | 59 | 136 | 1 | 6 | 50 | 83 | 114 | 240 |
| 80,245 | 4 | 15 | 61 | 117 | 1 | 6 | 50 | 65 | 116 | 203 |
| 80,246 | 4 | 15 | 61 | 116 | 1 | 6 | 50 | 63 | 116 | 200 |
| 80,247 | 4 | 15 | 61 | 116 | 1 | 6 | 50 | 63 | 116 | 200 |
| 80,248 | 4 | 15 | 61 | 109 | 1 | 6 | 50 | 61 | 116 | 191 |
| 80,249 | 4 | 15 | 61 | 109 | 1 | 6 | 50 | 61 | 116 | 191 |
| 80,250 | 4 | 15 | 61 | 109 | 1 | 6 | 50 | 61 | 116 | 191 |
| 80,251 | 4 | 15 | 65 | 109 | 1 | 6 | 53 | 61 | 123 | 191 |
| 80,252 | 4 | 15 | 67 | 109 | 1 | 7 | 56 | 61 | 128 | 192 |
| 80,253 | 4 | 15 | 67 | 109 | 1 | 7 | 56 | 61 | 128 | 192 |
| 80,254 | 4 | 15 | 68 | 109 | 1 | 7 | 56 | 61 | 129 | 192 |
| 80,255 | 4 | 12 | 69 | 89  | 1 | 5 | 57 | 47 | 131 | 153 |
| 80,256 | 5 | 12 | 71 | 76  | 1 | 4 | 62 | 34 | 139 | 126 |
| 80,257 | 6 | 12 | 71 | 80  | 1 | 4 | 64 | 35 | 142 | 131 |
| 80,258 | 6 | 12 | 71 | 80  | 1 | 4 | 64 | 41 | 142 | 137 |
| 80,259 | 6 | 12 | 73 | 82  | 1 | 7 | 66 | 71 | 146 | 172 |
| 80,260 | 6 | 9  | 73 | 59  | 1 | 6 | 66 | 72 | 146 | 146 |
| 80,261 | 6 | 9  | 74 | 69  | 1 | 8 | 66 | 86 | 147 | 172 |
| 80,262 | 6 | 8  | 77 | 73  | 1 | 8 | 67 | 83 | 151 | 172 |
| 80,263 | 6 | 8  | 77 | 74  | 1 | 8 | 65 | 85 | 149 | 175 |
| 80,264 | 6 | 8  | 76 | 73  | 1 | 8 | 65 | 85 | 148 | 174 |
| 80,265 | 6 | 8  | 77 | 71  | 1 | 8 | 66 | 83 | 150 | 170 |
| 80,266 | 6 | 8  | 77 | 72  | 1 | 8 | 66 | 85 | 150 | 173 |

|        |    |    |     |     |   |    |    |     |     |     |
|--------|----|----|-----|-----|---|----|----|-----|-----|-----|
| 80,267 | 6  | 9  | 78  | 81  | 1 | 9  | 66 | 98  | 151 | 197 |
| 80,268 | 6  | 11 | 89  | 106 | 1 | 10 | 70 | 120 | 166 | 247 |
| 80,269 | 6  | 12 | 89  | 116 | 1 | 11 | 70 | 126 | 166 | 265 |
| 80,270 | 6  | 11 | 90  | 123 | 1 | 11 | 71 | 127 | 168 | 272 |
| 80,271 | 6  | 10 | 93  | 117 | 1 | 10 | 70 | 122 | 170 | 259 |
| 80,272 | 6  | 8  | 95  | 114 | 1 | 10 | 67 | 122 | 169 | 254 |
| 80,273 | 7  | 7  | 100 | 109 | 0 | 10 | 66 | 120 | 173 | 246 |
| 80,274 | 11 | 7  | 127 | 113 | 3 | 10 | 82 | 120 | 223 | 250 |
| 80,275 | 11 | 7  | 127 | 113 | 3 | 10 | 80 | 121 | 221 | 251 |
| 80,276 | 11 | 7  | 147 | 112 | 3 | 10 | 92 | 122 | 253 | 251 |
| 80,277 | 11 | 7  | 147 | 116 | 3 | 10 | 92 | 122 | 253 | 255 |
| 80,278 | 11 | 7  | 147 | 120 | 3 | 10 | 92 | 125 | 253 | 262 |
| 80,279 | 11 | 7  | 147 | 150 | 3 | 11 | 91 | 147 | 252 | 315 |
| 80,280 | 11 | 7  | 141 | 175 | 3 | 11 | 90 | 163 | 245 | 356 |
| 80,281 | 11 | 7  | 137 | 178 | 3 | 11 | 88 | 163 | 239 | 359 |
| 80,282 | 11 | 8  | 119 | 185 | 3 | 14 | 86 | 176 | 219 | 383 |
| 80,283 | 9  | 8  | 113 | 197 | 3 | 14 | 77 | 181 | 202 | 400 |
| 80,284 | 9  | 10 | 113 | 200 | 3 | 15 | 77 | 182 | 202 | 407 |
| 80,285 | 9  | 10 | 113 | 204 | 3 | 15 | 77 | 186 | 202 | 415 |
| 80,286 | 9  | 10 | 113 | 204 | 3 | 15 | 77 | 186 | 202 | 415 |
| 80,287 | 9  | 10 | 113 | 206 | 3 | 15 | 77 | 187 | 202 | 418 |
| 80,288 | 9  | 10 | 113 | 205 | 4 | 15 | 77 | 187 | 203 | 417 |
| 80,289 | 9  | 14 | 112 | 249 | 4 | 17 | 77 | 214 | 202 | 494 |
| 80,290 | 9  | 22 | 113 | 348 | 4 | 28 | 77 | 324 | 203 | 722 |
| 80,291 | 9  | 22 | 113 | 354 | 4 | 28 | 77 | 332 | 203 | 736 |
| 80,292 | 10 | 27 | 120 | 382 | 4 | 33 | 77 | 366 | 211 | 808 |
| 80,293 | 10 | 27 | 120 | 394 | 4 | 35 | 77 | 379 | 211 | 835 |
| 80,294 | 11 | 27 | 124 | 398 | 5 | 35 | 77 | 385 | 217 | 845 |
| 80,295 | 11 | 31 | 122 | 421 | 5 | 37 | 77 | 404 | 215 | 893 |
| 80,296 | 11 | 31 | 120 | 421 | 5 | 37 | 77 | 405 | 213 | 894 |
| 80,297 | 11 | 32 | 120 | 424 | 5 | 37 | 77 | 407 | 213 | 900 |
| 80,298 | 11 | 32 | 122 | 424 | 5 | 37 | 79 | 407 | 217 | 900 |
| 80,299 | 11 | 32 | 124 | 425 | 5 | 37 | 79 | 407 | 219 | 901 |
| 80,300 | 11 | 33 | 124 | 426 | 5 | 37 | 79 | 411 | 219 | 907 |
| 80,301 | 11 | 33 | 120 | 427 | 5 | 37 | 76 | 411 | 212 | 908 |
| 80,302 | 11 | 33 | 120 | 429 | 5 | 37 | 74 | 413 | 210 | 912 |
| 80,303 | 11 | 33 | 118 | 427 | 5 | 36 | 73 | 413 | 207 | 909 |
| 80,304 | 11 | 34 | 120 | 427 | 5 | 36 | 78 | 413 | 214 | 910 |
| 80,305 | 11 | 34 | 119 | 429 | 5 | 36 | 78 | 415 | 213 | 914 |
| 80,306 | 12 | 34 | 122 | 423 | 5 | 37 | 79 | 414 | 218 | 908 |
| 80,307 | 11 | 34 | 129 | 426 | 5 | 37 | 76 | 415 | 221 | 912 |

|        |    |    |     |     |   |    |    |     |     |     |
|--------|----|----|-----|-----|---|----|----|-----|-----|-----|
| 80,308 | 10 | 34 | 136 | 426 | 5 | 37 | 78 | 416 | 229 | 913 |
| 80,309 | 10 | 32 | 136 | 418 | 5 | 34 | 78 | 375 | 229 | 859 |
| 80,310 | 10 | 32 | 141 | 415 | 6 | 34 | 77 | 369 | 234 | 850 |
| 80,311 | 10 | 32 | 141 | 404 | 6 | 32 | 78 | 355 | 235 | 823 |
| 80,312 | 10 | 31 | 138 | 397 | 6 | 32 | 76 | 354 | 230 | 814 |
| 80,313 | 10 | 31 | 138 | 397 | 6 | 32 | 76 | 354 | 230 | 814 |
| 80,314 | 10 | 31 | 138 | 395 | 6 | 32 | 76 | 352 | 230 | 810 |
| 80,315 | 10 | 31 | 139 | 395 | 6 | 32 | 76 | 352 | 231 | 810 |
| 80,316 | 10 | 28 | 138 | 354 | 6 | 29 | 75 | 313 | 229 | 724 |
| 80,317 | 10 | 28 | 137 | 354 | 6 | 29 | 75 | 313 | 228 | 724 |
| 80,318 | 10 | 28 | 128 | 353 | 6 | 29 | 72 | 313 | 216 | 723 |
| 80,319 | 10 | 27 | 127 | 343 | 6 | 28 | 73 | 311 | 216 | 709 |
| 80,320 | 10 | 27 | 127 | 339 | 7 | 28 | 73 | 317 | 217 | 711 |
| 80,321 | 10 | 27 | 127 | 343 | 7 | 28 | 73 | 326 | 217 | 724 |
| 80,322 | 10 | 27 | 121 | 338 | 7 | 28 | 71 | 324 | 209 | 717 |
| 80,323 | 8  | 27 | 111 | 340 | 7 | 28 | 69 | 324 | 195 | 719 |
| 80,324 | 7  | 27 | 104 | 340 | 7 | 29 | 57 | 325 | 175 | 721 |
| 80,325 | 3  | 27 | 73  | 338 | 4 | 29 | 39 | 327 | 119 | 721 |
| 80,326 | 3  | 27 | 56  | 339 | 4 | 29 | 30 | 328 | 93  | 723 |
| 80,327 | 3  | 27 | 52  | 339 | 4 | 29 | 24 | 327 | 83  | 722 |
| 80,328 | 3  | 28 | 52  | 337 | 4 | 29 | 24 | 332 | 83  | 726 |
| 80,329 | 3  | 28 | 52  | 334 | 4 | 29 | 24 | 329 | 83  | 720 |
| 80,330 | 3  | 28 | 52  | 307 | 4 | 28 | 24 | 308 | 83  | 671 |
| 80,331 | 3  | 30 | 52  | 298 | 4 | 33 | 24 | 320 | 83  | 681 |
| 80,332 | 3  | 30 | 52  | 295 | 4 | 33 | 22 | 321 | 81  | 679 |
| 80,333 | 3  | 29 | 52  | 298 | 4 | 31 | 22 | 320 | 81  | 678 |
| 80,334 | 3  | 30 | 53  | 299 | 4 | 34 | 23 | 314 | 83  | 677 |
| 80,335 | 5  | 28 | 54  | 297 | 4 | 33 | 24 | 314 | 87  | 672 |
| 80,336 | 5  | 29 | 55  | 303 | 4 | 33 | 24 | 318 | 88  | 683 |
| 80,337 | 5  | 29 | 55  | 304 | 4 | 33 | 24 | 318 | 88  | 684 |
| 80,338 | 5  | 29 | 57  | 302 | 4 | 33 | 24 | 317 | 90  | 681 |
| 80,339 | 7  | 29 | 70  | 302 | 7 | 33 | 32 | 317 | 116 | 681 |
| 80,340 | 8  | 25 | 77  | 257 | 7 | 31 | 35 | 294 | 127 | 607 |
| 80,341 | 8  | 18 | 76  | 158 | 7 | 20 | 35 | 186 | 126 | 382 |
| 80,342 | 8  | 18 | 77  | 156 | 7 | 20 | 35 | 179 | 127 | 373 |
| 80,343 | 7  | 9  | 74  | 89  | 7 | 13 | 36 | 108 | 124 | 219 |
| 80,344 | 7  | 10 | 75  | 89  | 7 | 14 | 36 | 108 | 125 | 221 |
| 80,345 | 6  | 9  | 72  | 85  | 6 | 14 | 35 | 105 | 119 | 213 |
| 80,346 | 6  | 9  | 72  | 85  | 6 | 14 | 35 | 105 | 119 | 213 |
| 80,347 | 6  | 9  | 72  | 85  | 6 | 14 | 36 | 105 | 120 | 213 |
| 80,348 | 6  | 9  | 75  | 85  | 6 | 14 | 41 | 105 | 128 | 213 |



|        |    |    |     |     |   |    |    |     |     |     |
|--------|----|----|-----|-----|---|----|----|-----|-----|-----|
| 80,349 | 6  | 9  | 75  | 85  | 6 | 14 | 39 | 105 | 126 | 213 |
| 80,350 | 6  | 9  | 73  | 85  | 6 | 14 | 39 | 104 | 124 | 212 |
| 80,351 | 6  | 8  | 73  | 84  | 6 | 14 | 38 | 100 | 123 | 206 |
| 80,352 | 7  | 8  | 76  | 83  | 6 | 14 | 38 | 100 | 127 | 205 |
| 80,353 | 7  | 8  | 89  | 83  | 6 | 14 | 45 | 99  | 147 | 204 |
| 80,354 | 7  | 9  | 90  | 83  | 6 | 14 | 42 | 99  | 145 | 205 |
| 80,355 | 7  | 8  | 93  | 83  | 6 | 14 | 42 | 99  | 148 | 204 |
| 80,356 | 6  | 8  | 101 | 83  | 6 | 14 | 45 | 97  | 158 | 202 |
| 80,357 | 6  | 8  | 100 | 83  | 6 | 13 | 44 | 96  | 156 | 200 |
| 80,358 | 6  | 8  | 91  | 80  | 6 | 13 | 42 | 95  | 145 | 196 |
| 80,359 | 6  | 8  | 84  | 80  | 6 | 13 | 38 | 94  | 134 | 195 |
| 80,360 | 6  | 8  | 83  | 80  | 6 | 13 | 38 | 94  | 133 | 195 |
| 80,361 | 6  | 8  | 79  | 80  | 5 | 13 | 36 | 94  | 126 | 195 |
| 80,362 | 6  | 8  | 78  | 80  | 5 | 13 | 35 | 94  | 124 | 195 |
| 80,363 | 6  | 8  | 78  | 80  | 5 | 13 | 35 | 94  | 124 | 195 |
| 80,364 | 6  | 8  | 79  | 81  | 5 | 13 | 35 | 95  | 125 | 197 |
| 80,365 | 6  | 8  | 78  | 82  | 5 | 13 | 35 | 96  | 124 | 199 |
| 80,366 | 6  | 8  | 78  | 82  | 5 | 13 | 35 | 96  | 124 | 199 |
| 80,367 | 6  | 8  | 78  | 84  | 5 | 13 | 35 | 97  | 124 | 202 |
| 80,368 | 6  | 8  | 78  | 86  | 5 | 13 | 35 | 97  | 124 | 204 |
| 80,369 | 6  | 8  | 77  | 86  | 5 | 13 | 35 | 96  | 123 | 203 |
| 80,370 | 6  | 8  | 76  | 86  | 5 | 13 | 33 | 93  | 120 | 200 |
| 80,371 | 6  | 8  | 76  | 83  | 4 | 13 | 33 | 88  | 119 | 192 |
| 80,372 | 6  | 8  | 76  | 77  | 4 | 14 | 33 | 80  | 119 | 179 |
| 80,373 | 6  | 10 | 78  | 99  | 4 | 15 | 33 | 88  | 121 | 212 |
| 80,374 | 6  | 10 | 78  | 101 | 4 | 15 | 33 | 88  | 121 | 214 |
| 80,375 | 6  | 10 | 78  | 101 | 4 | 14 | 33 | 88  | 121 | 213 |
| 80,376 | 6  | 10 | 78  | 99  | 4 | 14 | 33 | 85  | 121 | 208 |
| 80,377 | 7  | 10 | 79  | 97  | 4 | 14 | 34 | 84  | 124 | 205 |
| 80,378 | 7  | 10 | 79  | 99  | 4 | 14 | 34 | 84  | 124 | 207 |
| 80,379 | 7  | 9  | 79  | 97  | 4 | 14 | 34 | 79  | 124 | 199 |
| 80,380 | 7  | 9  | 83  | 96  | 4 | 14 | 34 | 79  | 128 | 198 |
| 80,381 | 7  | 9  | 83  | 95  | 4 | 14 | 34 | 78  | 128 | 196 |
| 80,382 | 8  | 7  | 85  | 77  | 4 | 9  | 37 | 48  | 134 | 141 |
| 80,383 | 8  | 7  | 85  | 66  | 4 | 8  | 37 | 37  | 134 | 118 |
| 80,384 | 10 | 7  | 89  | 66  | 4 | 8  | 40 | 37  | 143 | 118 |
| 80,385 | 10 | 6  | 88  | 52  | 4 | 5  | 39 | 33  | 141 | 96  |
| 80,386 | 8  | 6  | 87  | 51  | 4 | 5  | 38 | 32  | 137 | 94  |
| 80,387 | 11 | 5  | 88  | 41  | 4 | 5  | 42 | 24  | 145 | 75  |
| 80,388 | 12 | 5  | 86  | 41  | 4 | 5  | 42 | 24  | 144 | 75  |
| 80,389 | 10 | 5  | 74  | 40  | 0 | 5  | 34 | 24  | 118 | 74  |

|        |    |   |     |    |    |   |     |    |     |    |
|--------|----|---|-----|----|----|---|-----|----|-----|----|
| 80,390 | 9  | 5 | 72  | 41 | 0  | 5 | 33  | 20 | 114 | 71 |
| 80,391 | 10 | 4 | 71  | 40 | 1  | 5 | 33  | 18 | 115 | 67 |
| 80,392 | 10 | 4 | 73  | 37 | 1  | 3 | 35  | 16 | 119 | 60 |
| 80,393 | 10 | 4 | 82  | 37 | 1  | 3 | 36  | 16 | 129 | 60 |
| 80,394 | 10 | 4 | 80  | 37 | 1  | 3 | 38  | 16 | 129 | 60 |
| 80,395 | 15 | 3 | 99  | 38 | 1  | 2 | 48  | 16 | 163 | 59 |
| 80,396 | 15 | 3 | 97  | 38 | 1  | 2 | 48  | 16 | 161 | 59 |
| 80,397 | 15 | 3 | 101 | 38 | 1  | 2 | 49  | 16 | 166 | 59 |
| 80,398 | 15 | 3 | 110 | 38 | 1  | 2 | 51  | 17 | 177 | 60 |
| 80,399 | 17 | 3 | 122 | 38 | 3  | 2 | 50  | 18 | 192 | 61 |
| 80,400 | 17 | 3 | 120 | 38 | 3  | 2 | 50  | 17 | 190 | 60 |
| 80,401 | 18 | 3 | 199 | 38 | 5  | 2 | 76  | 19 | 298 | 62 |
| 80,402 | 18 | 3 | 200 | 39 | 5  | 2 | 79  | 20 | 302 | 64 |
| 80,403 | 18 | 5 | 198 | 39 | 5  | 2 | 74  | 20 | 295 | 66 |
| 80,404 | 18 | 5 | 185 | 37 | 5  | 2 | 72  | 19 | 280 | 63 |
| 80,405 | 27 | 4 | 382 | 37 | 11 | 2 | 146 | 19 | 566 | 62 |
| 80,406 | 27 | 4 | 382 | 37 | 11 | 2 | 147 | 21 | 567 | 64 |
| 80,407 | 31 | 4 | 432 | 37 | 20 | 2 | 187 | 21 | 670 | 64 |
| 80,408 | 31 | 4 | 433 | 37 | 20 | 2 | 190 | 21 | 674 | 64 |
| 80,409 | 31 | 4 | 450 | 37 | 20 | 2 | 194 | 21 | 695 | 64 |
| 80,410 | 31 | 4 | 461 | 37 | 20 | 2 | 195 | 21 | 707 | 64 |
| 80,411 | 31 | 4 | 461 | 37 | 20 | 2 | 195 | 21 | 707 | 64 |
| 80,412 | 31 | 4 | 458 | 37 | 20 | 2 | 195 | 21 | 704 | 64 |
| 80,413 | 31 | 4 | 476 | 37 | 20 | 2 | 199 | 21 | 726 | 64 |
| 80,414 | 31 | 4 | 477 | 37 | 20 | 2 | 199 | 21 | 727 | 64 |
| 80,415 | 31 | 4 | 482 | 33 | 20 | 2 | 199 | 20 | 732 | 59 |
| 80,416 | 31 | 4 | 487 | 33 | 20 | 2 | 205 | 20 | 743 | 59 |
| 80,417 | 33 | 4 | 487 | 33 | 21 | 2 | 207 | 20 | 748 | 59 |
| 80,418 | 33 | 4 | 492 | 33 | 21 | 2 | 210 | 20 | 756 | 59 |
| 80,419 | 33 | 4 | 499 | 31 | 22 | 2 | 216 | 20 | 770 | 57 |
| 80,420 | 33 | 4 | 499 | 31 | 22 | 2 | 216 | 20 | 770 | 57 |
| 80,421 | 33 | 4 | 499 | 31 | 22 | 2 | 216 | 19 | 770 | 56 |
| 80,422 | 34 | 5 | 502 | 31 | 22 | 2 | 220 | 19 | 778 | 57 |
| 80,423 | 34 | 3 | 502 | 9  | 22 | 0 | 220 | 10 | 778 | 22 |
| 80,424 | 34 | 3 | 500 | 7  | 22 | 0 | 221 | 10 | 777 | 20 |
| 80,425 | 34 | 3 | 502 | 7  | 22 | 0 | 222 | 9  | 780 | 19 |
| 80,426 | 34 | 3 | 502 | 8  | 22 | 0 | 222 | 9  | 780 | 20 |
| 80,427 | 34 | 3 | 502 | 8  | 22 | 0 | 222 | 9  | 780 | 20 |
| 80,428 | 33 | 3 | 501 | 6  | 22 | 0 | 221 | 9  | 777 | 18 |
| 80,429 | 33 | 3 | 500 | 6  | 22 | 0 | 221 | 9  | 776 | 18 |
| 80,430 | 33 | 3 | 500 | 6  | 22 | 0 | 221 | 9  | 776 | 18 |

|        |    |   |     |    |    |   |     |    |     |    |
|--------|----|---|-----|----|----|---|-----|----|-----|----|
| 80,431 | 33 | 3 | 496 | 6  | 22 | 0 | 221 | 9  | 772 | 18 |
| 80,432 | 34 | 3 | 504 | 6  | 22 | 0 | 222 | 9  | 782 | 18 |
| 80,433 | 33 | 3 | 503 | 6  | 22 | 0 | 219 | 9  | 777 | 18 |
| 80,434 | 33 | 3 | 503 | 6  | 22 | 0 | 219 | 9  | 777 | 18 |
| 80,435 | 31 | 3 | 499 | 6  | 22 | 0 | 216 | 9  | 768 | 18 |
| 80,436 | 31 | 3 | 499 | 6  | 22 | 0 | 216 | 9  | 768 | 18 |
| 80,437 | 28 | 3 | 497 | 6  | 22 | 0 | 213 | 9  | 760 | 18 |
| 80,438 | 28 | 3 | 497 | 6  | 22 | 0 | 213 | 9  | 760 | 18 |
| 80,439 | 27 | 3 | 500 | 6  | 22 | 0 | 213 | 10 | 762 | 19 |
| 80,440 | 27 | 3 | 499 | 7  | 22 | 0 | 213 | 11 | 761 | 21 |
| 80,441 | 27 | 4 | 498 | 6  | 22 | 0 | 212 | 11 | 759 | 21 |
| 80,442 | 26 | 4 | 501 | 6  | 21 | 0 | 213 | 11 | 761 | 21 |
| 80,443 | 27 | 4 | 509 | 7  | 21 | 0 | 214 | 11 | 771 | 22 |
| 80,444 | 27 | 4 | 502 | 7  | 21 | 0 | 213 | 12 | 763 | 23 |
| 80,445 | 27 | 4 | 503 | 7  | 21 | 0 | 212 | 12 | 763 | 23 |
| 80,446 | 22 | 4 | 482 | 6  | 21 | 0 | 202 | 12 | 727 | 22 |
| 80,447 | 22 | 4 | 480 | 7  | 21 | 0 | 201 | 12 | 724 | 23 |
| 80,448 | 22 | 4 | 476 | 7  | 21 | 0 | 200 | 10 | 719 | 21 |
| 80,449 | 22 | 4 | 475 | 7  | 21 | 0 | 199 | 10 | 717 | 21 |
| 80,450 | 21 | 4 | 481 | 7  | 19 | 0 | 196 | 10 | 717 | 21 |
| 80,451 | 20 | 4 | 469 | 10 | 21 | 0 | 205 | 10 | 715 | 24 |
| 80,452 | 19 | 4 | 435 | 9  | 19 | 0 | 180 | 8  | 653 | 21 |
| 80,453 | 20 | 2 | 434 | 9  | 19 | 0 | 180 | 7  | 653 | 18 |
| 80,454 | 20 | 3 | 430 | 13 | 19 | 0 | 180 | 12 | 649 | 28 |
| 80,455 | 11 | 5 | 253 | 17 | 13 | 0 | 112 | 12 | 389 | 34 |
| 80,456 | 11 | 5 | 236 | 18 | 13 | 0 | 104 | 12 | 364 | 35 |
| 80,457 | 11 | 5 | 233 | 18 | 13 | 0 | 104 | 12 | 361 | 35 |
| 80,458 | 7  | 5 | 172 | 19 | 4  | 0 | 60  | 13 | 243 | 37 |
| 80,459 | 7  | 5 | 172 | 19 | 4  | 0 | 58  | 13 | 241 | 37 |
| 80,460 | 7  | 5 | 155 | 21 | 4  | 0 | 54  | 14 | 220 | 40 |
| 80,461 | 7  | 5 | 146 | 21 | 4  | 0 | 53  | 14 | 210 | 40 |
| 80,462 | 8  | 5 | 146 | 21 | 4  | 0 | 54  | 14 | 212 | 40 |
| 80,463 | 8  | 5 | 129 | 21 | 4  | 0 | 51  | 14 | 192 | 40 |
| 80,464 | 8  | 5 | 128 | 21 | 4  | 0 | 51  | 14 | 191 | 40 |
| 80,465 | 8  | 5 | 128 | 21 | 4  | 0 | 51  | 14 | 191 | 40 |
| 80,466 | 8  | 5 | 129 | 21 | 4  | 0 | 53  | 13 | 194 | 39 |
| 80,467 | 8  | 5 | 124 | 21 | 4  | 0 | 47  | 13 | 183 | 39 |
| 80,468 | 6  | 5 | 126 | 21 | 3  | 0 | 51  | 13 | 186 | 39 |
| 80,469 | 6  | 5 | 123 | 21 | 3  | 0 | 51  | 13 | 183 | 39 |
| 80,470 | 7  | 5 | 116 | 21 | 3  | 0 | 45  | 14 | 171 | 40 |
| 80,471 | 7  | 5 | 116 | 22 | 3  | 0 | 45  | 14 | 171 | 41 |

|        |    |   |     |    |   |   |    |    |     |    |
|--------|----|---|-----|----|---|---|----|----|-----|----|
| 80,472 | 6  | 5 | 116 | 22 | 3 | 0 | 43 | 14 | 168 | 41 |
| 80,473 | 7  | 4 | 114 | 22 | 3 | 0 | 41 | 13 | 165 | 39 |
| 80,474 | 9  | 4 | 117 | 22 | 3 | 0 | 44 | 13 | 173 | 39 |
| 80,475 | 9  | 4 | 118 | 22 | 3 | 0 | 43 | 13 | 173 | 39 |
| 80,476 | 9  | 4 | 116 | 22 | 3 | 0 | 42 | 13 | 170 | 39 |
| 80,477 | 9  | 4 | 127 | 21 | 5 | 0 | 45 | 13 | 186 | 38 |
| 80,478 | 9  | 4 | 127 | 21 | 5 | 0 | 46 | 13 | 187 | 38 |
| 80,479 | 11 | 4 | 134 | 21 | 5 | 0 | 54 | 13 | 204 | 38 |
| 80,480 | 13 | 4 | 132 | 21 | 5 | 0 | 56 | 13 | 206 | 38 |
| 80,481 | 13 | 4 | 141 | 21 | 5 | 0 | 58 | 13 | 217 | 38 |
| 80,482 | 12 | 6 | 139 | 21 | 5 | 0 | 57 | 13 | 213 | 40 |
| 80,483 | 12 | 6 | 139 | 21 | 5 | 0 | 57 | 13 | 213 | 40 |
| 80,484 | 12 | 6 | 197 | 21 | 5 | 0 | 80 | 13 | 294 | 40 |
| 80,485 | 14 | 6 | 215 | 20 | 6 | 0 | 87 | 13 | 322 | 39 |
| 80,486 | 14 | 6 | 215 | 20 | 6 | 0 | 88 | 13 | 323 | 39 |
| 80,487 | 14 | 6 | 215 | 20 | 6 | 0 | 88 | 13 | 323 | 39 |
| 80,488 | 14 | 6 | 216 | 21 | 6 | 0 | 88 | 13 | 324 | 40 |
| 80,489 | 14 | 6 | 213 | 22 | 6 | 0 | 88 | 13 | 321 | 41 |
| 80,490 | 14 | 6 | 213 | 23 | 6 | 0 | 88 | 12 | 321 | 41 |
| 80,491 | 14 | 6 | 214 | 23 | 6 | 0 | 89 | 12 | 323 | 41 |
| 80,492 | 14 | 5 | 208 | 23 | 6 | 0 | 87 | 12 | 315 | 40 |
| 80,493 | 13 | 5 | 201 | 23 | 6 | 0 | 85 | 12 | 305 | 40 |
| 80,494 | 13 | 5 | 198 | 22 | 6 | 0 | 84 | 11 | 301 | 38 |
| 80,495 | 13 | 5 | 195 | 23 | 6 | 0 | 84 | 12 | 298 | 40 |
| 80,496 | 13 | 5 | 192 | 24 | 6 | 0 | 81 | 12 | 292 | 41 |
| 80,497 | 13 | 5 | 192 | 25 | 6 | 0 | 81 | 16 | 292 | 46 |
| 80,498 | 13 | 7 | 191 | 27 | 6 | 0 | 81 | 18 | 291 | 52 |
| 80,499 | 13 | 8 | 191 | 29 | 6 | 0 | 81 | 18 | 291 | 55 |
| 80,500 | 13 | 8 | 187 | 29 | 6 | 0 | 80 | 19 | 286 | 56 |
| 80,501 | 12 | 9 | 166 | 31 | 6 | 1 | 80 | 28 | 264 | 69 |
| 80,502 | 12 | 9 | 132 | 29 | 4 | 1 | 68 | 28 | 216 | 67 |
| 80,503 | 11 | 9 | 130 | 32 | 4 | 1 | 66 | 29 | 211 | 71 |
| 80,504 | 11 | 9 | 130 | 28 | 4 | 1 | 66 | 24 | 211 | 62 |
| 80,505 | 11 | 9 | 130 | 28 | 4 | 1 | 66 | 24 | 211 | 62 |
| 80,506 | 11 | 7 | 130 | 29 | 4 | 1 | 66 | 26 | 211 | 63 |
| 80,507 | 11 | 7 | 130 | 28 | 4 | 1 | 66 | 24 | 211 | 60 |
| 80,508 | 11 | 8 | 130 | 29 | 4 | 1 | 66 | 29 | 211 | 67 |
| 80,509 | 11 | 8 | 130 | 28 | 4 | 1 | 66 | 28 | 211 | 65 |
| 80,510 | 11 | 8 | 130 | 28 | 4 | 1 | 65 | 28 | 210 | 65 |
| 80,511 | 11 | 9 | 130 | 26 | 4 | 1 | 65 | 27 | 210 | 63 |
| 80,512 | 11 | 9 | 128 | 26 | 4 | 1 | 65 | 27 | 208 | 63 |

|        |    |    |     |    |   |   |    |    |     |     |
|--------|----|----|-----|----|---|---|----|----|-----|-----|
| 80,513 | 10 | 9  | 127 | 26 | 4 | 1 | 65 | 27 | 206 | 63  |
| 80,514 | 10 | 9  | 127 | 26 | 4 | 1 | 65 | 27 | 206 | 63  |
| 80,515 | 10 | 9  | 127 | 26 | 4 | 1 | 65 | 27 | 206 | 63  |
| 80,516 | 10 | 9  | 127 | 26 | 4 | 1 | 66 | 28 | 207 | 64  |
| 80,517 | 10 | 9  | 122 | 26 | 4 | 1 | 64 | 28 | 200 | 64  |
| 80,518 | 10 | 9  | 123 | 29 | 4 | 2 | 63 | 28 | 200 | 68  |
| 80,519 | 10 | 9  | 121 | 29 | 4 | 2 | 58 | 28 | 193 | 68  |
| 80,520 | 10 | 9  | 120 | 30 | 4 | 2 | 55 | 28 | 189 | 69  |
| 80,521 | 9  | 9  | 120 | 29 | 3 | 2 | 55 | 28 | 187 | 68  |
| 80,522 | 9  | 9  | 119 | 29 | 3 | 2 | 55 | 28 | 186 | 68  |
| 80,523 | 9  | 9  | 119 | 29 | 3 | 2 | 55 | 28 | 186 | 68  |
| 80,524 | 8  | 9  | 121 | 29 | 3 | 2 | 55 | 28 | 187 | 68  |
| 80,525 | 6  | 9  | 120 | 29 | 3 | 2 | 53 | 28 | 182 | 68  |
| 80,526 | 6  | 9  | 126 | 29 | 3 | 2 | 57 | 28 | 192 | 68  |
| 80,527 | 7  | 9  | 125 | 29 | 1 | 2 | 58 | 28 | 191 | 68  |
| 80,528 | 7  | 9  | 131 | 31 | 1 | 2 | 59 | 28 | 198 | 70  |
| 80,529 | 6  | 10 | 130 | 39 | 1 | 2 | 54 | 29 | 191 | 80  |
| 80,530 | 5  | 10 | 123 | 54 | 1 | 2 | 50 | 34 | 179 | 100 |
| 80,531 | 3  | 10 | 122 | 57 | 2 | 2 | 49 | 36 | 176 | 105 |
| 80,532 | 3  | 11 | 115 | 58 | 2 | 2 | 47 | 44 | 167 | 115 |
| 80,533 | 3  | 10 | 115 | 74 | 2 | 2 | 49 | 48 | 169 | 134 |
| 80,534 | 4  | 11 | 130 | 76 | 2 | 2 | 42 | 52 | 178 | 141 |
| 80,535 | 4  | 12 | 76  | 77 | 2 | 2 | 27 | 53 | 109 | 144 |
| 80,536 | 2  | 12 | 58  | 77 | 1 | 2 | 18 | 53 | 79  | 144 |
| 80,537 | 2  | 12 | 58  | 78 | 1 | 2 | 17 | 53 | 78  | 145 |
| 80,538 | 2  | 12 | 58  | 77 | 1 | 3 | 16 | 53 | 77  | 145 |
| 80,539 | 2  | 12 | 58  | 77 | 1 | 3 | 16 | 53 | 77  | 145 |
| 80,540 | 2  | 12 | 58  | 78 | 1 | 3 | 16 | 54 | 77  | 147 |
| 80,541 | 2  | 12 | 58  | 77 | 1 | 3 | 16 | 53 | 77  | 145 |
| 80,542 | 2  | 12 | 59  | 77 | 2 | 3 | 16 | 52 | 79  | 144 |
| 80,543 | 2  | 12 | 59  | 77 | 2 | 3 | 16 | 52 | 79  | 144 |
| 80,544 | 2  | 12 | 61  | 78 | 2 | 3 | 16 | 52 | 81  | 145 |
| 80,545 | 2  | 12 | 61  | 78 | 2 | 3 | 16 | 52 | 81  | 145 |
| 80,546 | 2  | 12 | 61  | 77 | 2 | 3 | 16 | 51 | 81  | 143 |
| 80,547 | 2  | 12 | 61  | 75 | 2 | 3 | 16 | 48 | 81  | 138 |
| 80,548 | 2  | 12 | 61  | 78 | 2 | 3 | 16 | 50 | 81  | 143 |
| 80,549 | 2  | 10 | 61  | 76 | 2 | 3 | 16 | 48 | 81  | 137 |
| 80,550 | 3  | 9  | 61  | 74 | 2 | 3 | 19 | 48 | 85  | 134 |
| 80,551 | 3  | 9  | 61  | 76 | 2 | 3 | 19 | 47 | 85  | 135 |
| 80,552 | 3  | 8  | 60  | 74 | 2 | 2 | 19 | 38 | 84  | 122 |
| 80,553 | 3  | 8  | 60  | 73 | 2 | 2 | 19 | 38 | 84  | 121 |

|        |   |   |     |     |   |   |    |    |     |     |
|--------|---|---|-----|-----|---|---|----|----|-----|-----|
| 80,554 | 3 | 7 | 61  | 69  | 2 | 2 | 19 | 37 | 85  | 115 |
| 80,555 | 3 | 7 | 61  | 69  | 2 | 2 | 19 | 37 | 85  | 115 |
| 80,556 | 4 | 7 | 70  | 70  | 2 | 2 | 19 | 38 | 95  | 117 |
| 80,557 | 4 | 7 | 70  | 65  | 2 | 2 | 19 | 36 | 95  | 110 |
| 80,558 | 4 | 6 | 78  | 65  | 2 | 2 | 25 | 31 | 109 | 104 |
| 80,559 | 4 | 6 | 78  | 65  | 2 | 2 | 25 | 31 | 109 | 104 |
| 80,560 | 5 | 7 | 96  | 65  | 3 | 2 | 36 | 31 | 140 | 105 |
| 80,561 | 5 | 7 | 96  | 65  | 3 | 2 | 36 | 31 | 140 | 105 |
| 80,562 | 5 | 6 | 97  | 65  | 3 | 2 | 37 | 31 | 142 | 104 |
| 80,563 | 5 | 6 | 97  | 65  | 3 | 2 | 36 | 31 | 141 | 104 |
| 80,564 | 5 | 6 | 100 | 65  | 3 | 2 | 36 | 31 | 144 | 104 |
| 80,565 | 5 | 6 | 100 | 67  | 3 | 2 | 36 | 31 | 144 | 106 |
| 80,566 | 5 | 6 | 100 | 67  | 3 | 2 | 36 | 31 | 144 | 106 |
| 80,567 | 5 | 6 | 98  | 67  | 3 | 2 | 35 | 30 | 141 | 105 |
| 80,568 | 5 | 6 | 105 | 64  | 3 | 1 | 36 | 30 | 149 | 101 |
| 80,569 | 5 | 6 | 110 | 64  | 3 | 1 | 37 | 30 | 155 | 101 |
| 80,570 | 5 | 6 | 112 | 64  | 3 | 1 | 38 | 30 | 158 | 101 |
| 80,571 | 7 | 6 | 127 | 63  | 3 | 1 | 52 | 29 | 189 | 99  |
| 80,572 | 7 | 6 | 127 | 63  | 3 | 1 | 52 | 29 | 189 | 99  |
| 80,573 | 7 | 6 | 129 | 63  | 3 | 1 | 53 | 29 | 192 | 99  |
| 80,574 | 7 | 6 | 131 | 63  | 3 | 1 | 53 | 29 | 194 | 99  |
| 80,575 | 7 | 6 | 129 | 63  | 3 | 1 | 53 | 29 | 192 | 99  |
| 80,576 | 7 | 6 | 129 | 65  | 3 | 1 | 52 | 29 | 191 | 101 |
| 80,577 | 7 | 6 | 122 | 65  | 3 | 1 | 48 | 34 | 180 | 106 |
| 80,578 | 6 | 6 | 112 | 65  | 3 | 1 | 44 | 38 | 165 | 110 |
| 80,579 | 6 | 6 | 106 | 66  | 3 | 1 | 42 | 41 | 157 | 114 |
| 80,580 | 6 | 7 | 106 | 123 | 3 | 4 | 42 | 66 | 157 | 200 |
| 80,581 | 6 | 9 | 106 | 117 | 3 | 4 | 42 | 71 | 157 | 201 |
| 80,582 | 6 | 9 | 106 | 122 | 2 | 4 | 42 | 79 | 156 | 214 |
| 80,583 | 6 | 9 | 104 | 124 | 2 | 4 | 42 | 71 | 154 | 208 |
| 80,584 | 6 | 8 | 101 | 118 | 2 | 4 | 40 | 68 | 149 | 198 |
| 80,585 | 5 | 7 | 82  | 115 | 2 | 4 | 39 | 63 | 128 | 189 |
| 80,586 | 5 | 7 | 81  | 115 | 2 | 4 | 39 | 63 | 127 | 189 |
| 80,587 | 5 | 7 | 81  | 115 | 2 | 4 | 40 | 63 | 128 | 189 |
| 80,588 | 5 | 7 | 83  | 114 | 2 | 4 | 40 | 63 | 130 | 188 |
| 80,589 | 5 | 8 | 83  | 115 | 2 | 3 | 40 | 63 | 130 | 189 |
| 80,590 | 5 | 8 | 83  | 115 | 1 | 3 | 40 | 63 | 129 | 189 |
| 80,591 | 5 | 8 | 83  | 113 | 1 | 3 | 40 | 62 | 129 | 186 |
| 80,592 | 5 | 8 | 82  | 112 | 1 | 3 | 40 | 62 | 128 | 185 |
| 80,593 | 5 | 8 | 84  | 112 | 1 | 3 | 41 | 62 | 131 | 185 |
| 80,594 | 5 | 8 | 84  | 112 | 1 | 3 | 41 | 62 | 131 | 185 |

|        |   |   |     |     |   |   |    |    |     |     |
|--------|---|---|-----|-----|---|---|----|----|-----|-----|
| 80,595 | 5 | 8 | 82  | 111 | 1 | 3 | 40 | 62 | 128 | 184 |
| 80,596 | 5 | 8 | 84  | 111 | 1 | 3 | 42 | 62 | 132 | 184 |
| 80,597 | 5 | 8 | 91  | 111 | 1 | 3 | 42 | 62 | 139 | 184 |
| 80,598 | 5 | 8 | 100 | 111 | 1 | 3 | 44 | 62 | 150 | 184 |
| 80,599 | 4 | 8 | 103 | 109 | 1 | 3 | 42 | 67 | 150 | 187 |
| 80,600 | 4 | 8 | 103 | 108 | 1 | 3 | 41 | 67 | 149 | 186 |
| 80,601 | 4 | 8 | 103 | 108 | 1 | 3 | 45 | 67 | 153 | 186 |
| 80,602 | 4 | 9 | 103 | 106 | 1 | 3 | 45 | 67 | 153 | 185 |
| 80,603 | 4 | 9 | 103 | 108 | 1 | 3 | 45 | 67 | 153 | 187 |
| 80,604 | 4 | 9 | 107 | 114 | 1 | 4 | 45 | 70 | 157 | 197 |
| 80,605 | 4 | 9 | 106 | 115 | 1 | 4 | 45 | 70 | 156 | 198 |
| 80,606 | 4 | 9 | 109 | 116 | 1 | 4 | 45 | 71 | 159 | 200 |
| 80,607 | 3 | 9 | 100 | 114 | 1 | 4 | 45 | 70 | 149 | 197 |
| 80,608 | 3 | 9 | 101 | 117 | 1 | 4 | 46 | 70 | 151 | 200 |
| 80,609 | 3 | 9 | 96  | 119 | 1 | 4 | 41 | 70 | 141 | 202 |
| 80,610 | 2 | 9 | 88  | 121 | 0 | 4 | 33 | 70 | 123 | 204 |
| 80,611 | 4 | 8 | 89  | 123 | 0 | 4 | 32 | 70 | 125 | 205 |
| 80,612 | 4 | 8 | 96  | 123 | 0 | 4 | 33 | 70 | 133 | 205 |
| 80,613 | 6 | 8 | 124 | 123 | 4 | 4 | 48 | 70 | 182 | 205 |
| 80,614 | 7 | 8 | 133 | 123 | 4 | 4 | 52 | 70 | 196 | 205 |
| 80,615 | 7 | 8 | 133 | 123 | 4 | 4 | 54 | 71 | 198 | 206 |
| 80,616 | 7 | 8 | 133 | 121 | 4 | 4 | 54 | 71 | 198 | 204 |
| 80,617 | 7 | 8 | 142 | 121 | 6 | 4 | 62 | 71 | 217 | 204 |
| 80,618 | 7 | 8 | 142 | 121 | 6 | 4 | 62 | 71 | 217 | 204 |
| 80,619 | 7 | 8 | 135 | 121 | 6 | 4 | 61 | 71 | 209 | 204 |
| 80,620 | 7 | 8 | 129 | 121 | 6 | 4 | 61 | 71 | 203 | 204 |
| 80,621 | 7 | 8 | 130 | 121 | 6 | 4 | 62 | 71 | 205 | 204 |
| 80,622 | 5 | 8 | 114 | 121 | 6 | 4 | 47 | 71 | 172 | 204 |
| 80,623 | 5 | 8 | 112 | 121 | 6 | 4 | 46 | 72 | 169 | 205 |
| 80,624 | 6 | 8 | 139 | 121 | 6 | 4 | 69 | 72 | 220 | 205 |
| 80,625 | 6 | 8 | 150 | 121 | 6 | 4 | 73 | 72 | 235 | 205 |
| 80,626 | 6 | 8 | 157 | 122 | 6 | 4 | 83 | 72 | 252 | 206 |
| 80,627 | 6 | 8 | 155 | 120 | 6 | 4 | 83 | 72 | 250 | 204 |
| 80,628 | 6 | 8 | 155 | 118 | 6 | 4 | 83 | 67 | 250 | 197 |
| 80,629 | 6 | 8 | 166 | 118 | 6 | 4 | 91 | 63 | 269 | 193 |
| 80,630 | 6 | 8 | 166 | 117 | 6 | 4 | 91 | 61 | 269 | 190 |
| 80,631 | 6 | 6 | 166 | 52  | 6 | 1 | 91 | 35 | 269 | 94  |
| 80,632 | 6 | 4 | 170 | 43  | 6 | 1 | 93 | 26 | 275 | 74  |
| 80,633 | 6 | 3 | 170 | 32  | 6 | 1 | 93 | 16 | 275 | 52  |
| 80,634 | 6 | 3 | 170 | 32  | 6 | 1 | 94 | 17 | 276 | 53  |
| 80,635 | 6 | 2 | 171 | 22  | 6 | 1 | 94 | 16 | 277 | 41  |

|        |    |   |     |    |    |   |     |    |     |    |
|--------|----|---|-----|----|----|---|-----|----|-----|----|
| 80,636 | 6  | 2 | 171 | 26 | 6  | 1 | 94  | 16 | 277 | 45 |
| 80,637 | 6  | 2 | 174 | 29 | 6  | 1 | 93  | 17 | 279 | 49 |
| 80,638 | 6  | 2 | 177 | 30 | 7  | 1 | 93  | 17 | 283 | 50 |
| 80,639 | 10 | 2 | 185 | 30 | 7  | 1 | 100 | 17 | 302 | 50 |
| 80,640 | 10 | 1 | 185 | 29 | 7  | 1 | 100 | 17 | 302 | 48 |
| 80,641 | 10 | 1 | 186 | 34 | 7  | 1 | 102 | 17 | 305 | 53 |
| 80,642 | 13 | 1 | 191 | 36 | 7  | 1 | 104 | 17 | 315 | 55 |
| 80,643 | 14 | 1 | 195 | 39 | 7  | 1 | 113 | 19 | 329 | 60 |
| 80,644 | 14 | 1 | 212 | 39 | 11 | 1 | 135 | 19 | 372 | 60 |
| 80,645 | 14 | 1 | 210 | 42 | 11 | 2 | 135 | 20 | 370 | 65 |
| 80,646 | 14 | 1 | 210 | 43 | 11 | 2 | 134 | 21 | 369 | 67 |
| 80,647 | 16 | 1 | 210 | 47 | 13 | 2 | 166 | 22 | 405 | 72 |
| 80,648 | 16 | 1 | 202 | 47 | 13 | 2 | 164 | 22 | 395 | 72 |
| 80,649 | 17 | 1 | 200 | 49 | 13 | 2 | 165 | 22 | 395 | 74 |
| 80,650 | 17 | 1 | 198 | 48 | 13 | 2 | 165 | 15 | 393 | 66 |
| 80,651 | 17 | 1 | 204 | 48 | 13 | 2 | 164 | 15 | 398 | 66 |
| 80,652 | 17 | 0 | 204 | 48 | 13 | 2 | 164 | 15 | 398 | 65 |
| 80,653 | 17 | 1 | 204 | 51 | 13 | 2 | 164 | 15 | 398 | 69 |
| 80,654 | 17 | 1 | 201 | 49 | 13 | 2 | 164 | 15 | 395 | 67 |
| 80,655 | 17 | 1 | 201 | 41 | 13 | 1 | 164 | 11 | 395 | 54 |
| 80,656 | 17 | 1 | 201 | 41 | 13 | 1 | 164 | 11 | 395 | 54 |
| 80,657 | 17 | 1 | 198 | 41 | 13 | 1 | 164 | 11 | 392 | 54 |
| 80,658 | 17 | 1 | 198 | 41 | 13 | 1 | 164 | 11 | 392 | 54 |
| 80,659 | 17 | 1 | 197 | 38 | 13 | 1 | 163 | 11 | 390 | 51 |
| 80,660 | 17 | 2 | 195 | 32 | 13 | 1 | 165 | 11 | 390 | 46 |
| 80,661 | 17 | 2 | 197 | 33 | 13 | 1 | 165 | 13 | 392 | 49 |
| 80,662 | 16 | 2 | 189 | 33 | 13 | 1 | 164 | 13 | 382 | 49 |
| 80,663 | 16 | 2 | 184 | 34 | 15 | 1 | 166 | 15 | 381 | 52 |
| 80,664 | 15 | 2 | 157 | 37 | 11 | 1 | 155 | 16 | 338 | 56 |
| 80,665 | 15 | 2 | 148 | 37 | 11 | 1 | 150 | 16 | 324 | 56 |
| 80,666 | 15 | 2 | 142 | 39 | 11 | 1 | 148 | 15 | 316 | 57 |
| 80,667 | 15 | 2 | 140 | 39 | 10 | 1 | 147 | 15 | 312 | 57 |
| 80,668 | 15 | 2 | 139 | 39 | 9  | 1 | 143 | 15 | 306 | 57 |
| 80,669 | 15 | 2 | 140 | 39 | 9  | 1 | 143 | 15 | 307 | 57 |
| 80,670 | 15 | 2 | 140 | 39 | 9  | 1 | 143 | 15 | 307 | 57 |
| 80,671 | 15 | 2 | 140 | 39 | 9  | 1 | 142 | 15 | 306 | 57 |
| 80,672 | 15 | 2 | 137 | 39 | 9  | 1 | 142 | 16 | 303 | 58 |
| 80,673 | 15 | 2 | 131 | 41 | 9  | 1 | 144 | 16 | 299 | 60 |
| 80,674 | 14 | 2 | 127 | 47 | 9  | 1 | 142 | 15 | 292 | 65 |
| 80,675 | 14 | 4 | 111 | 49 | 9  | 1 | 121 | 24 | 255 | 78 |
| 80,676 | 14 | 6 | 100 | 50 | 9  | 1 | 118 | 25 | 241 | 82 |



|        |    |    |     |    |    |   |     |    |     |     |
|--------|----|----|-----|----|----|---|-----|----|-----|-----|
| 80,677 | 14 | 6  | 94  | 52 | 9  | 1 | 108 | 25 | 225 | 84  |
| 80,678 | 15 | 6  | 97  | 65 | 10 | 1 | 108 | 25 | 230 | 97  |
| 80,679 | 15 | 6  | 98  | 66 | 10 | 1 | 102 | 27 | 225 | 100 |
| 80,680 | 15 | 6  | 94  | 66 | 10 | 1 | 100 | 27 | 219 | 100 |
| 80,681 | 15 | 6  | 99  | 66 | 10 | 1 | 101 | 26 | 225 | 99  |
| 80,682 | 19 | 7  | 121 | 74 | 11 | 4 | 117 | 27 | 268 | 112 |
| 80,683 | 19 | 7  | 121 | 74 | 11 | 4 | 119 | 27 | 270 | 112 |
| 80,684 | 19 | 8  | 124 | 75 | 11 | 4 | 124 | 27 | 278 | 114 |
| 80,685 | 19 | 8  | 126 | 76 | 11 | 4 | 124 | 26 | 280 | 114 |
| 80,686 | 21 | 8  | 193 | 73 | 12 | 4 | 147 | 26 | 373 | 111 |
| 80,687 | 25 | 8  | 241 | 70 | 12 | 4 | 181 | 25 | 459 | 107 |
| 80,688 | 36 | 8  | 486 | 69 | 22 | 4 | 286 | 25 | 830 | 106 |
| 80,689 | 37 | 8  | 506 | 69 | 22 | 4 | 305 | 25 | 870 | 106 |
| 80,690 | 33 | 8  | 497 | 69 | 22 | 4 | 298 | 25 | 850 | 106 |
| 80,691 | 33 | 8  | 496 | 64 | 22 | 4 | 298 | 25 | 849 | 101 |
| 80,692 | 34 | 8  | 496 | 64 | 22 | 4 | 298 | 25 | 850 | 101 |
| 80,693 | 31 | 8  | 491 | 63 | 22 | 4 | 296 | 27 | 840 | 102 |
| 80,694 | 31 | 8  | 487 | 60 | 22 | 4 | 287 | 25 | 827 | 97  |
| 80,695 | 31 | 8  | 470 | 57 | 18 | 3 | 265 | 24 | 784 | 92  |
| 80,696 | 31 | 8  | 470 | 57 | 18 | 3 | 265 | 24 | 784 | 92  |
| 80,697 | 29 | 10 | 468 | 63 | 16 | 4 | 238 | 30 | 751 | 107 |
| 80,698 | 29 | 10 | 466 | 60 | 16 | 4 | 240 | 29 | 751 | 103 |
| 80,699 | 29 | 10 | 466 | 60 | 16 | 4 | 240 | 29 | 751 | 103 |
| 80,700 | 30 | 10 | 469 | 58 | 16 | 4 | 242 | 29 | 757 | 101 |
| 80,701 | 30 | 10 | 469 | 58 | 16 | 4 | 242 | 29 | 757 | 101 |
| 80,702 | 30 | 10 | 463 | 58 | 16 | 4 | 239 | 29 | 748 | 101 |
| 80,703 | 30 | 10 | 463 | 58 | 16 | 4 | 239 | 29 | 748 | 101 |
| 80,704 | 30 | 9  | 463 | 55 | 16 | 4 | 239 | 29 | 748 | 97  |
| 80,705 | 30 | 9  | 463 | 55 | 16 | 4 | 239 | 29 | 748 | 97  |
| 80,706 | 33 | 9  | 497 | 55 | 18 | 4 | 254 | 29 | 802 | 97  |
| 80,707 | 33 | 9  | 499 | 55 | 18 | 4 | 256 | 29 | 806 | 97  |
| 80,708 | 33 | 9  | 499 | 55 | 18 | 4 | 256 | 29 | 806 | 97  |
| 80,709 | 36 | 9  | 513 | 57 | 18 | 4 | 259 | 29 | 826 | 99  |
| 80,710 | 37 | 9  | 516 | 61 | 18 | 5 | 259 | 29 | 830 | 104 |
| 80,711 | 38 | 8  | 532 | 63 | 18 | 5 | 258 | 29 | 846 | 105 |
| 80,712 | 38 | 8  | 529 | 62 | 18 | 5 | 258 | 28 | 843 | 103 |
| 80,713 | 38 | 8  | 550 | 67 | 18 | 5 | 261 | 28 | 867 | 108 |
| 80,714 | 38 | 8  | 551 | 72 | 16 | 5 | 257 | 26 | 862 | 111 |
| 80,715 | 37 | 8  | 550 | 79 | 16 | 5 | 252 | 27 | 855 | 119 |
| 80,716 | 36 | 8  | 559 | 82 | 16 | 5 | 256 | 27 | 867 | 122 |
| 80,717 | 36 | 8  | 581 | 90 | 16 | 6 | 261 | 35 | 894 | 139 |

|        |     |   |     |     |    |   |     |    |       |     |
|--------|-----|---|-----|-----|----|---|-----|----|-------|-----|
| 80,718 | 36  | 8 | 581 | 92  | 16 | 6 | 261 | 36 | 894   | 142 |
| 80,719 | 53  | 8 | 631 | 98  | 17 | 6 | 305 | 37 | 1,006 | 149 |
| 80,720 | 55  | 8 | 634 | 102 | 17 | 6 | 308 | 38 | 1,014 | 154 |
| 80,721 | 60  | 8 | 661 | 102 | 22 | 6 | 343 | 39 | 1,086 | 155 |
| 80,722 | 66  | 8 | 694 | 100 | 23 | 6 | 375 | 38 | 1,158 | 152 |
| 80,723 | 67  | 8 | 701 | 101 | 24 | 6 | 375 | 38 | 1,167 | 153 |
| 80,724 | 67  | 8 | 700 | 101 | 24 | 6 | 374 | 38 | 1,165 | 153 |
| 80,725 | 70  | 8 | 709 | 96  | 26 | 6 | 383 | 38 | 1,188 | 148 |
| 80,726 | 70  | 6 | 709 | 95  | 26 | 6 | 383 | 31 | 1,188 | 138 |
| 80,727 | 72  | 4 | 748 | 93  | 27 | 6 | 389 | 30 | 1,236 | 133 |
| 80,728 | 73  | 4 | 760 | 93  | 27 | 6 | 389 | 30 | 1,249 | 133 |
| 80,729 | 72  | 5 | 765 | 81  | 26 | 6 | 392 | 28 | 1,255 | 120 |
| 80,730 | 72  | 3 | 763 | 73  | 26 | 3 | 390 | 26 | 1,251 | 105 |
| 80,731 | 72  | 3 | 761 | 73  | 26 | 3 | 391 | 26 | 1,250 | 105 |
| 80,732 | 68  | 3 | 740 | 72  | 25 | 3 | 375 | 26 | 1,208 | 104 |
| 80,733 | 68  | 3 | 738 | 72  | 25 | 3 | 375 | 28 | 1,206 | 106 |
| 80,734 | 68  | 3 | 740 | 73  | 25 | 4 | 370 | 29 | 1,203 | 109 |
| 80,735 | 68  | 3 | 739 | 75  | 26 | 4 | 370 | 31 | 1,203 | 113 |
| 80,736 | 71  | 3 | 734 | 73  | 26 | 4 | 360 | 31 | 1,191 | 111 |
| 80,737 | 83  | 3 | 763 | 73  | 27 | 4 | 362 | 33 | 1,235 | 113 |
| 80,738 | 79  | 3 | 722 | 74  | 27 | 4 | 329 | 33 | 1,157 | 114 |
| 80,739 | 68  | 3 | 475 | 75  | 17 | 4 | 226 | 33 | 786   | 115 |
| 80,740 | 67  | 3 | 452 | 75  | 16 | 4 | 206 | 33 | 741   | 115 |
| 80,741 | 73  | 3 | 467 | 75  | 16 | 4 | 211 | 33 | 767   | 115 |
| 80,742 | 85  | 3 | 562 | 75  | 17 | 4 | 229 | 35 | 893   | 117 |
| 80,743 | 99  | 3 | 619 | 75  | 19 | 4 | 275 | 35 | 1,012 | 117 |
| 80,744 | 99  | 3 | 619 | 75  | 19 | 4 | 275 | 33 | 1,012 | 115 |
| 80,745 | 111 | 3 | 656 | 75  | 21 | 4 | 298 | 34 | 1,086 | 116 |
| 80,746 | 111 | 3 | 654 | 75  | 21 | 4 | 297 | 34 | 1,083 | 116 |
| 80,747 | 112 | 1 | 667 | 68  | 21 | 3 | 298 | 27 | 1,098 | 99  |
| 80,748 | 112 | 1 | 665 | 68  | 21 | 3 | 297 | 27 | 1,095 | 99  |
| 80,749 | 112 | 2 | 710 | 67  | 21 | 3 | 313 | 27 | 1,156 | 99  |
| 80,750 | 113 | 2 | 720 | 67  | 21 | 3 | 317 | 27 | 1,171 | 99  |
| 80,751 | 113 | 2 | 718 | 67  | 21 | 3 | 316 | 27 | 1,168 | 99  |
| 80,752 | 113 | 2 | 707 | 67  | 21 | 3 | 309 | 27 | 1,150 | 99  |
| 80,753 | 113 | 2 | 711 | 67  | 21 | 3 | 310 | 27 | 1,155 | 99  |
| 80,754 | 114 | 2 | 714 | 67  | 21 | 3 | 310 | 27 | 1,159 | 99  |
| 80,755 | 114 | 2 | 737 | 67  | 21 | 3 | 312 | 27 | 1,184 | 99  |
| 80,756 | 114 | 2 | 736 | 67  | 21 | 3 | 310 | 28 | 1,181 | 100 |
| 80,757 | 111 | 2 | 721 | 67  | 19 | 3 | 307 | 28 | 1,158 | 100 |
| 80,758 | 112 | 2 | 727 | 67  | 19 | 3 | 308 | 28 | 1,166 | 100 |

|        |     |   |     |    |    |   |     |    |       |     |
|--------|-----|---|-----|----|----|---|-----|----|-------|-----|
| 80,759 | 109 | 2 | 723 | 67 | 19 | 3 | 308 | 28 | 1,159 | 100 |
| 80,760 | 109 | 2 | 713 | 65 | 19 | 3 | 305 | 28 | 1,146 | 98  |
| 80,761 | 108 | 2 | 768 | 61 | 23 | 2 | 313 | 28 | 1,212 | 93  |
| 80,762 | 107 | 2 | 755 | 59 | 23 | 2 | 312 | 28 | 1,197 | 91  |
| 80,763 | 107 | 2 | 739 | 54 | 23 | 2 | 313 | 27 | 1,182 | 85  |
| 80,764 | 106 | 2 | 733 | 48 | 23 | 2 | 310 | 27 | 1,172 | 79  |
| 80,765 | 107 | 3 | 731 | 38 | 23 | 2 | 313 | 25 | 1,174 | 68  |
| 80,766 | 107 | 3 | 731 | 23 | 23 | 1 | 313 | 16 | 1,174 | 43  |
| 80,767 | 107 | 3 | 719 | 23 | 23 | 1 | 309 | 16 | 1,158 | 43  |
| 80,768 | 107 | 3 | 697 | 17 | 23 | 1 | 304 | 15 | 1,131 | 36  |
| 80,769 | 107 | 3 | 696 | 17 | 23 | 1 | 304 | 16 | 1,130 | 37  |
| 80,770 | 90  | 3 | 649 | 17 | 23 | 1 | 259 | 16 | 1,021 | 37  |
| 80,771 | 88  | 3 | 648 | 13 | 23 | 1 | 258 | 15 | 1,017 | 32  |
| 80,772 | 83  | 3 | 621 | 13 | 18 | 1 | 223 | 14 | 945   | 31  |
| 80,773 | 77  | 3 | 588 | 13 | 17 | 1 | 191 | 14 | 873   | 31  |
| 80,774 | 76  | 3 | 582 | 13 | 16 | 1 | 192 | 14 | 866   | 31  |
| 80,775 | 75  | 3 | 581 | 13 | 14 | 1 | 184 | 14 | 854   | 31  |
| 80,776 | 73  | 3 | 572 | 12 | 14 | 1 | 185 | 15 | 844   | 31  |
| 80,777 | 75  | 3 | 604 | 11 | 15 | 1 | 206 | 13 | 900   | 28  |
| 80,778 | 74  | 3 | 575 | 9  | 14 | 1 | 204 | 13 | 867   | 26  |
| 80,779 | 75  | 3 | 567 | 9  | 14 | 1 | 207 | 13 | 863   | 26  |
| 80,780 | 75  | 2 | 555 | 7  | 14 | 1 | 204 | 13 | 848   | 23  |
| 80,781 | 75  | 2 | 553 | 7  | 14 | 1 | 203 | 13 | 845   | 23  |
| 80,782 | 78  | 2 | 556 | 7  | 14 | 1 | 210 | 13 | 858   | 23  |
| 80,783 | 88  | 2 | 628 | 7  | 14 | 1 | 264 | 13 | 994   | 23  |
| 80,784 | 89  | 2 | 623 | 6  | 14 | 0 | 266 | 10 | 992   | 18  |
| 80,785 | 89  | 2 | 623 | 4  | 14 | 0 | 266 | 8  | 992   | 14  |
| 80,786 | 89  | 2 | 623 | 4  | 14 | 0 | 266 | 8  | 992   | 14  |
| 80,787 | 86  | 2 | 584 | 4  | 13 | 0 | 262 | 8  | 945   | 14  |
| 80,788 | 74  | 2 | 541 | 3  | 12 | 0 | 259 | 6  | 886   | 11  |
| 80,789 | 76  | 2 | 573 | 2  | 13 | 0 | 282 | 6  | 944   | 10  |
| 80,790 | 76  | 2 | 575 | 2  | 13 | 0 | 281 | 6  | 945   | 10  |
| 80,791 | 70  | 2 | 564 | 2  | 15 | 0 | 279 | 6  | 928   | 10  |
| 80,792 | 58  | 2 | 470 | 2  | 14 | 0 | 262 | 4  | 804   | 8   |
| 80,793 | 55  | 2 | 444 | 3  | 14 | 0 | 250 | 4  | 763   | 9   |
| 80,794 | 43  | 2 | 415 | 8  | 12 | 0 | 217 | 9  | 687   | 19  |
| 80,795 | 30  | 2 | 387 | 8  | 11 | 0 | 195 | 9  | 623   | 19  |
| 80,796 | 32  | 2 | 388 | 10 | 10 | 1 | 198 | 10 | 628   | 23  |
| 80,797 | 31  | 2 | 385 | 11 | 10 | 1 | 198 | 11 | 624   | 25  |
| 80,798 | 32  | 2 | 379 | 11 | 13 | 1 | 207 | 11 | 631   | 25  |
| 80,799 | 32  | 2 | 356 | 11 | 13 | 1 | 195 | 11 | 596   | 25  |

|        |    |   |     |    |    |   |     |    |       |    |
|--------|----|---|-----|----|----|---|-----|----|-------|----|
| 80,800 | 31 | 1 | 333 | 11 | 13 | 1 | 189 | 11 | 566   | 24 |
| 80,801 | 29 | 1 | 322 | 11 | 13 | 1 | 186 | 12 | 550   | 25 |
| 80,802 | 29 | 1 | 316 | 11 | 13 | 1 | 185 | 13 | 543   | 26 |
| 80,803 | 39 | 1 | 387 | 11 | 19 | 1 | 227 | 13 | 672   | 26 |
| 80,804 | 38 | 1 | 388 | 11 | 20 | 1 | 227 | 13 | 673   | 26 |
| 80,805 | 38 | 1 | 369 | 12 | 20 | 1 | 224 | 12 | 651   | 26 |
| 80,806 | 38 | 1 | 365 | 14 | 20 | 1 | 224 | 13 | 647   | 29 |
| 80,807 | 38 | 1 | 362 | 15 | 20 | 2 | 223 | 15 | 643   | 33 |
| 80,808 | 38 | 1 | 361 | 15 | 20 | 2 | 222 | 15 | 641   | 33 |
| 80,809 | 42 | 1 | 485 | 17 | 26 | 2 | 337 | 16 | 890   | 36 |
| 80,810 | 61 | 1 | 600 | 17 | 31 | 2 | 438 | 16 | 1,130 | 36 |
| 80,811 | 61 | 1 | 599 | 18 | 31 | 2 | 443 | 16 | 1,134 | 37 |
| 80,812 | 63 | 1 | 563 | 18 | 29 | 2 | 446 | 16 | 1,101 | 37 |
| 80,813 | 63 | 1 | 559 | 18 | 29 | 2 | 445 | 16 | 1,096 | 37 |
| 80,814 | 68 | 1 | 588 | 18 | 30 | 2 | 468 | 16 | 1,154 | 37 |
| 80,815 | 69 | 1 | 593 | 18 | 30 | 2 | 474 | 16 | 1,166 | 37 |
| 80,816 | 68 | 1 | 591 | 20 | 30 | 2 | 470 | 18 | 1,159 | 41 |
| 80,817 | 68 | 1 | 591 | 20 | 30 | 2 | 470 | 18 | 1,159 | 41 |
| 80,818 | 68 | 1 | 598 | 20 | 30 | 2 | 476 | 18 | 1,172 | 41 |
| 80,819 | 69 | 1 | 599 | 20 | 31 | 2 | 478 | 18 | 1,177 | 41 |
| 80,820 | 72 | 2 | 606 | 20 | 31 | 2 | 484 | 17 | 1,193 | 41 |
| 80,821 | 72 | 4 | 605 | 20 | 30 | 2 | 485 | 17 | 1,192 | 43 |
| 80,822 | 72 | 4 | 602 | 20 | 30 | 2 | 484 | 17 | 1,188 | 43 |
| 80,823 | 72 | 4 | 602 | 20 | 30 | 2 | 486 | 17 | 1,190 | 43 |
| 80,824 | 72 | 4 | 605 | 20 | 30 | 2 | 485 | 17 | 1,192 | 43 |
| 80,825 | 72 | 4 | 607 | 19 | 30 | 2 | 484 | 17 | 1,193 | 42 |
| 80,826 | 73 | 4 | 609 | 19 | 30 | 2 | 486 | 16 | 1,198 | 41 |
| 80,827 | 73 | 4 | 611 | 19 | 30 | 2 | 486 | 17 | 1,200 | 42 |
| 80,828 | 72 | 4 | 591 | 20 | 28 | 3 | 473 | 17 | 1,164 | 44 |
| 80,829 | 72 | 4 | 592 | 20 | 28 | 3 | 471 | 18 | 1,163 | 45 |
| 80,830 | 74 | 4 | 592 | 20 | 29 | 3 | 472 | 18 | 1,167 | 45 |
| 80,831 | 74 | 4 | 588 | 20 | 29 | 3 | 470 | 18 | 1,161 | 45 |
| 80,832 | 71 | 4 | 584 | 20 | 29 | 3 | 461 | 18 | 1,145 | 45 |
| 80,833 | 61 | 4 | 514 | 20 | 29 | 3 | 407 | 18 | 1,011 | 45 |
| 80,834 | 60 | 5 | 514 | 20 | 29 | 3 | 407 | 20 | 1,010 | 48 |
| 80,835 | 60 | 5 | 514 | 21 | 29 | 3 | 405 | 20 | 1,008 | 49 |
| 80,836 | 60 | 5 | 516 | 21 | 29 | 3 | 405 | 22 | 1,010 | 51 |
| 80,837 | 60 | 7 | 523 | 21 | 29 | 3 | 406 | 22 | 1,018 | 53 |
| 80,838 | 59 | 7 | 516 | 21 | 29 | 3 | 397 | 22 | 1,001 | 53 |
| 80,839 | 62 | 7 | 523 | 22 | 29 | 3 | 397 | 22 | 1,011 | 54 |
| 80,840 | 60 | 7 | 483 | 22 | 28 | 3 | 369 | 22 | 940   | 54 |

|        |     |   |     |    |    |   |     |    |       |    |
|--------|-----|---|-----|----|----|---|-----|----|-------|----|
| 80,841 | 60  | 7 | 480 | 22 | 28 | 3 | 368 | 22 | 936   | 54 |
| 80,842 | 60  | 8 | 480 | 24 | 27 | 3 | 365 | 22 | 932   | 57 |
| 80,843 | 60  | 8 | 479 | 24 | 27 | 3 | 363 | 22 | 929   | 57 |
| 80,844 | 70  | 8 | 526 | 18 | 29 | 3 | 374 | 17 | 999   | 46 |
| 80,845 | 96  | 8 | 617 | 18 | 36 | 3 | 403 | 17 | 1,152 | 46 |
| 80,846 | 97  | 8 | 617 | 16 | 36 | 2 | 402 | 15 | 1,152 | 41 |
| 80,847 | 102 | 8 | 627 | 15 | 36 | 2 | 407 | 14 | 1,172 | 39 |
| 80,848 | 102 | 8 | 627 | 15 | 36 | 2 | 407 | 14 | 1,172 | 39 |
| 80,849 | 118 | 8 | 759 | 16 | 41 | 2 | 477 | 15 | 1,395 | 41 |
| 80,850 | 118 | 8 | 762 | 16 | 41 | 2 | 479 | 15 | 1,400 | 41 |
| 80,851 | 118 | 8 | 767 | 16 | 43 | 2 | 478 | 14 | 1,406 | 40 |
| 80,852 | 121 | 8 | 778 | 16 | 43 | 2 | 489 | 13 | 1,431 | 39 |
| 80,853 | 121 | 8 | 773 | 16 | 43 | 2 | 488 | 13 | 1,425 | 39 |
| 80,854 | 111 | 8 | 726 | 17 | 37 | 2 | 451 | 13 | 1,325 | 40 |
| 80,855 | 111 | 9 | 721 | 17 | 36 | 2 | 450 | 13 | 1,318 | 41 |
| 80,856 | 111 | 9 | 726 | 16 | 38 | 2 | 450 | 14 | 1,325 | 41 |
| 80,857 | 116 | 9 | 753 | 14 | 39 | 2 | 457 | 13 | 1,365 | 38 |
| 80,858 | 122 | 9 | 755 | 11 | 39 | 1 | 454 | 10 | 1,370 | 31 |
| 80,859 | 125 | 9 | 787 | 12 | 40 | 1 | 456 | 12 | 1,408 | 34 |
| 80,860 | 122 | 9 | 690 | 12 | 36 | 1 | 346 | 12 | 1,194 | 34 |
| 80,861 | 119 | 9 | 707 | 11 | 38 | 1 | 308 | 12 | 1,172 | 33 |
| 80,862 | 119 | 9 | 705 | 11 | 37 | 1 | 302 | 12 | 1,163 | 33 |
| 80,863 | 118 | 9 | 719 | 11 | 37 | 1 | 304 | 12 | 1,178 | 33 |
| 80,864 | 118 | 8 | 736 | 12 | 37 | 1 | 303 | 12 | 1,194 | 33 |
| 80,865 | 113 | 8 | 720 | 12 | 36 | 1 | 288 | 12 | 1,157 | 33 |
| 80,866 | 114 | 8 | 722 | 10 | 36 | 1 | 284 | 10 | 1,156 | 29 |
| 80,867 | 114 | 8 | 720 | 10 | 37 | 1 | 284 | 10 | 1,155 | 29 |
| 80,868 | 114 | 8 | 715 | 10 | 37 | 1 | 277 | 10 | 1,143 | 29 |
| 80,869 | 113 | 7 | 715 | 10 | 37 | 1 | 275 | 10 | 1,140 | 28 |
| 80,870 | 113 | 7 | 714 | 10 | 36 | 1 | 275 | 10 | 1,138 | 28 |
| 80,871 | 110 | 7 | 707 | 10 | 36 | 1 | 269 | 10 | 1,122 | 28 |
| 80,872 | 112 | 5 | 707 | 10 | 36 | 1 | 269 | 10 | 1,124 | 26 |
| 80,873 | 112 | 5 | 707 | 10 | 36 | 1 | 267 | 10 | 1,122 | 26 |
| 80,874 | 112 | 5 | 706 | 10 | 36 | 1 | 267 | 10 | 1,121 | 26 |
| 80,875 | 112 | 5 | 703 | 10 | 36 | 1 | 267 | 10 | 1,118 | 26 |
| 80,876 | 112 | 5 | 701 | 10 | 36 | 1 | 267 | 10 | 1,116 | 26 |
| 80,877 | 111 | 5 | 702 | 10 | 36 | 1 | 265 | 9  | 1,114 | 25 |
| 80,878 | 111 | 5 | 699 | 10 | 36 | 1 | 265 | 9  | 1,111 | 25 |
| 80,879 | 109 | 5 | 677 | 9  | 36 | 0 | 255 | 8  | 1,077 | 22 |
| 80,880 | 109 | 5 | 676 | 9  | 36 | 0 | 255 | 8  | 1,076 | 22 |
| 80,881 | 105 | 5 | 672 | 9  | 35 | 0 | 250 | 8  | 1,062 | 22 |

|        |     |   |     |    |    |   |     |   |       |    |
|--------|-----|---|-----|----|----|---|-----|---|-------|----|
| 80,882 | 105 | 5 | 672 | 9  | 35 | 0 | 250 | 8 | 1,062 | 22 |
| 80,883 | 105 | 5 | 671 | 9  | 35 | 0 | 250 | 8 | 1,061 | 22 |
| 80,884 | 105 | 7 | 670 | 10 | 35 | 0 | 250 | 8 | 1,060 | 25 |
| 80,885 | 106 | 6 | 672 | 10 | 35 | 0 | 250 | 6 | 1,063 | 22 |
| 80,886 | 106 | 6 | 671 | 9  | 35 | 0 | 250 | 4 | 1,062 | 19 |
| 80,887 | 106 | 4 | 672 | 9  | 35 | 0 | 250 | 4 | 1,063 | 17 |
| 80,888 | 106 | 4 | 665 | 9  | 35 | 0 | 249 | 4 | 1,055 | 17 |
| 80,889 | 106 | 4 | 663 | 9  | 35 | 0 | 250 | 4 | 1,054 | 17 |
| 80,890 | 104 | 4 | 703 | 8  | 36 | 0 | 263 | 4 | 1,106 | 16 |
| 80,891 | 107 | 4 | 722 | 8  | 37 | 0 | 275 | 4 | 1,141 | 16 |
| 80,892 | 107 | 3 | 727 | 6  | 36 | 1 | 276 | 4 | 1,146 | 14 |
| 80,893 | 108 | 3 | 735 | 6  | 37 | 1 | 282 | 4 | 1,162 | 14 |
| 80,894 | 110 | 3 | 742 | 7  | 40 | 1 | 303 | 4 | 1,195 | 15 |
| 80,895 | 106 | 3 | 711 | 7  | 38 | 1 | 294 | 4 | 1,149 | 15 |
| 80,896 | 81  | 3 | 620 | 6  | 33 | 1 | 268 | 4 | 1,002 | 14 |
| 80,897 | 82  | 3 | 622 | 6  | 33 | 1 | 273 | 4 | 1,010 | 14 |
| 80,898 | 76  | 3 | 621 | 6  | 33 | 1 | 271 | 4 | 1,001 | 14 |
| 80,899 | 80  | 3 | 646 | 6  | 33 | 1 | 288 | 5 | 1,047 | 15 |
| 80,900 | 65  | 3 | 529 | 5  | 25 | 1 | 213 | 4 | 832   | 13 |
| 80,901 | 65  | 3 | 527 | 7  | 25 | 1 | 209 | 4 | 826   | 15 |
| 80,902 | 65  | 3 | 515 | 7  | 23 | 1 | 208 | 4 | 811   | 15 |
| 80,903 | 71  | 3 | 534 | 7  | 24 | 1 | 201 | 4 | 830   | 15 |
| 80,904 | 71  | 3 | 536 | 7  | 24 | 1 | 201 | 4 | 832   | 15 |
| 80,905 | 72  | 2 | 546 | 6  | 25 | 1 | 216 | 4 | 859   | 13 |
| 80,906 | 72  | 2 | 539 | 6  | 23 | 1 | 218 | 4 | 852   | 13 |
| 80,907 | 74  | 2 | 567 | 6  | 25 | 1 | 243 | 3 | 909   | 12 |
| 80,908 | 74  | 2 | 590 | 6  | 26 | 1 | 270 | 3 | 960   | 12 |
| 80,909 | 67  | 2 | 579 | 6  | 25 | 1 | 272 | 3 | 943   | 12 |
| 80,910 | 64  | 2 | 540 | 5  | 24 | 1 | 269 | 1 | 897   | 9  |
| 80,911 | 63  | 3 | 540 | 6  | 23 | 1 | 268 | 4 | 894   | 14 |
| 80,912 | 47  | 3 | 400 | 6  | 14 | 1 | 210 | 4 | 671   | 14 |
| 80,913 | 51  | 3 | 411 | 8  | 14 | 2 | 222 | 4 | 698   | 17 |
| 80,914 | 51  | 3 | 394 | 8  | 14 | 2 | 211 | 4 | 670   | 17 |
| 80,915 | 65  | 3 | 389 | 7  | 15 | 2 | 220 | 4 | 689   | 16 |
| 80,916 | 65  | 3 | 385 | 7  | 15 | 2 | 217 | 4 | 682   | 16 |
| 80,917 | 63  | 3 | 379 | 7  | 15 | 2 | 216 | 4 | 673   | 16 |
| 80,918 | 66  | 3 | 401 | 7  | 18 | 2 | 227 | 4 | 712   | 16 |
| 80,919 | 66  | 3 | 405 | 7  | 19 | 2 | 232 | 4 | 722   | 16 |
| 80,920 | 71  | 3 | 423 | 8  | 20 | 2 | 247 | 4 | 761   | 17 |
| 80,921 | 71  | 3 | 423 | 8  | 20 | 2 | 247 | 4 | 761   | 17 |
| 80,922 | 71  | 3 | 441 | 9  | 21 | 2 | 262 | 6 | 795   | 20 |

|        |    |   |     |    |    |   |     |    |       |    |
|--------|----|---|-----|----|----|---|-----|----|-------|----|
| 80,923 | 71 | 4 | 453 | 27 | 22 | 3 | 266 | 15 | 812   | 49 |
| 80,924 | 74 | 4 | 468 | 31 | 22 | 3 | 278 | 15 | 842   | 53 |
| 80,925 | 77 | 4 | 479 | 31 | 24 | 3 | 292 | 15 | 872   | 53 |
| 80,926 | 77 | 4 | 498 | 36 | 27 | 3 | 310 | 16 | 912   | 59 |
| 80,927 | 81 | 7 | 523 | 45 | 28 | 4 | 324 | 19 | 956   | 75 |
| 80,928 | 81 | 7 | 520 | 49 | 28 | 4 | 324 | 20 | 953   | 80 |
| 80,929 | 81 | 7 | 520 | 49 | 28 | 4 | 323 | 20 | 952   | 80 |
| 80,930 | 82 | 7 | 523 | 51 | 28 | 4 | 327 | 20 | 960   | 82 |
| 80,931 | 82 | 7 | 557 | 54 | 32 | 4 | 348 | 20 | 1,019 | 85 |
| 80,932 | 83 | 7 | 589 | 54 | 34 | 4 | 377 | 21 | 1,083 | 86 |
| 80,933 | 83 | 7 | 616 | 55 | 35 | 4 | 394 | 21 | 1,128 | 87 |
| 80,934 | 83 | 7 | 615 | 55 | 35 | 4 | 395 | 21 | 1,128 | 87 |
| 80,935 | 84 | 5 | 632 | 56 | 36 | 4 | 413 | 21 | 1,165 | 86 |
| 80,936 | 85 | 5 | 651 | 56 | 38 | 4 | 429 | 21 | 1,203 | 86 |
| 80,937 | 88 | 5 | 667 | 56 | 39 | 4 | 448 | 21 | 1,242 | 86 |
| 80,938 | 88 | 5 | 666 | 56 | 39 | 4 | 450 | 21 | 1,243 | 86 |
| 80,939 | 88 | 5 | 695 | 56 | 42 | 4 | 486 | 21 | 1,311 | 86 |
| 80,940 | 88 | 5 | 652 | 56 | 42 | 3 | 484 | 21 | 1,266 | 85 |
| 80,941 | 88 | 5 | 677 | 56 | 44 | 3 | 498 | 21 | 1,307 | 85 |
| 80,942 | 85 | 5 | 664 | 56 | 43 | 3 | 490 | 21 | 1,282 | 85 |
| 80,943 | 85 | 5 | 670 | 55 | 43 | 3 | 495 | 21 | 1,293 | 84 |
| 80,944 | 95 | 5 | 777 | 56 | 46 | 3 | 584 | 21 | 1,502 | 85 |
| 80,945 | 87 | 5 | 756 | 56 | 43 | 3 | 559 | 21 | 1,445 | 85 |
| 80,946 | 87 | 5 | 755 | 57 | 43 | 3 | 559 | 21 | 1,444 | 86 |
| 80,947 | 85 | 5 | 753 | 57 | 41 | 3 | 554 | 21 | 1,433 | 86 |
| 80,948 | 84 | 5 | 769 | 57 | 41 | 3 | 565 | 21 | 1,459 | 86 |
| 80,949 | 84 | 5 | 755 | 57 | 41 | 3 | 563 | 21 | 1,443 | 86 |
| 80,950 | 78 | 5 | 727 | 58 | 41 | 3 | 542 | 21 | 1,388 | 87 |
| 80,951 | 94 | 5 | 909 | 56 | 56 | 3 | 666 | 21 | 1,725 | 85 |
| 80,952 | 91 | 5 | 903 | 56 | 55 | 3 | 665 | 21 | 1,714 | 85 |
| 80,953 | 87 | 5 | 883 | 56 | 55 | 3 | 664 | 21 | 1,689 | 85 |
| 80,954 | 88 | 5 | 889 | 56 | 56 | 3 | 668 | 21 | 1,701 | 85 |
| 80,955 | 88 | 5 | 888 | 59 | 55 | 3 | 661 | 23 | 1,692 | 90 |
| 80,956 | 89 | 5 | 892 | 59 | 55 | 3 | 677 | 23 | 1,713 | 90 |
| 80,957 | 85 | 5 | 865 | 61 | 54 | 3 | 655 | 23 | 1,659 | 92 |
| 80,958 | 85 | 5 | 851 | 61 | 54 | 3 | 651 | 23 | 1,641 | 92 |
| 80,959 | 83 | 5 | 819 | 61 | 52 | 3 | 623 | 23 | 1,577 | 92 |
| 80,960 | 83 | 5 | 811 | 61 | 52 | 3 | 618 | 23 | 1,564 | 92 |
| 80,961 | 83 | 5 | 811 | 61 | 52 | 3 | 618 | 23 | 1,564 | 92 |
| 80,962 | 84 | 4 | 807 | 64 | 52 | 3 | 618 | 20 | 1,561 | 91 |
| 80,963 | 84 | 4 | 807 | 64 | 52 | 3 | 616 | 20 | 1,559 | 91 |

|        |     |   |       |    |    |   |     |    |       |     |
|--------|-----|---|-------|----|----|---|-----|----|-------|-----|
| 80,964 | 80  | 4 | 793   | 62 | 52 | 2 | 603 | 20 | 1,528 | 88  |
| 80,965 | 79  | 4 | 788   | 62 | 52 | 2 | 603 | 20 | 1,522 | 88  |
| 80,966 | 65  | 4 | 770   | 62 | 51 | 2 | 587 | 20 | 1,473 | 88  |
| 80,967 | 65  | 4 | 769   | 62 | 51 | 2 | 587 | 20 | 1,472 | 88  |
| 80,968 | 62  | 4 | 745   | 61 | 48 | 2 | 579 | 20 | 1,434 | 87  |
| 80,969 | 62  | 4 | 744   | 61 | 48 | 2 | 578 | 20 | 1,432 | 87  |
| 80,970 | 58  | 5 | 740   | 61 | 46 | 2 | 568 | 20 | 1,412 | 88  |
| 80,971 | 57  | 5 | 726   | 64 | 46 | 2 | 560 | 24 | 1,389 | 95  |
| 80,972 | 56  | 5 | 710   | 64 | 45 | 2 | 546 | 24 | 1,357 | 95  |
| 80,973 | 57  | 5 | 701   | 71 | 45 | 2 | 542 | 24 | 1,345 | 102 |
| 80,974 | 57  | 4 | 700   | 53 | 44 | 1 | 543 | 16 | 1,344 | 74  |
| 80,975 | 68  | 4 | 740   | 50 | 50 | 1 | 590 | 16 | 1,448 | 71  |
| 80,976 | 66  | 2 | 734   | 34 | 48 | 0 | 582 | 12 | 1,430 | 48  |
| 80,977 | 66  | 2 | 716   | 34 | 46 | 0 | 568 | 12 | 1,396 | 48  |
| 80,978 | 68  | 2 | 748   | 34 | 48 | 0 | 594 | 13 | 1,458 | 49  |
| 80,979 | 68  | 2 | 750   | 35 | 48 | 0 | 598 | 15 | 1,464 | 52  |
| 80,980 | 84  | 2 | 855   | 35 | 57 | 0 | 717 | 15 | 1,713 | 52  |
| 80,981 | 89  | 2 | 857   | 33 | 55 | 0 | 720 | 15 | 1,721 | 50  |
| 80,982 | 89  | 2 | 838   | 31 | 54 | 0 | 708 | 15 | 1,689 | 48  |
| 80,983 | 113 | 2 | 1,010 | 32 | 68 | 0 | 885 | 16 | 2,076 | 50  |
| 80,984 | 113 | 2 | 984   | 32 | 65 | 0 | 867 | 16 | 2,029 | 50  |
| 80,985 | 120 | 2 | 1,009 | 31 | 66 | 0 | 890 | 17 | 2,085 | 50  |
| 80,986 | 120 | 2 | 1,023 | 31 | 66 | 0 | 894 | 17 | 2,103 | 50  |
| 80,987 | 124 | 3 | 1,016 | 33 | 66 | 0 | 910 | 17 | 2,116 | 53  |
| 80,988 | 124 | 3 | 1,034 | 34 | 66 | 0 | 903 | 18 | 2,127 | 55  |
| 80,989 | 125 | 3 | 1,038 | 36 | 66 | 2 | 912 | 18 | 2,141 | 59  |
| 80,990 | 125 | 3 | 1,013 | 42 | 63 | 2 | 879 | 23 | 2,080 | 70  |
| 80,991 | 123 | 3 | 1,010 | 42 | 63 | 2 | 880 | 23 | 2,076 | 70  |
| 80,992 | 123 | 3 | 985   | 42 | 61 | 2 | 866 | 22 | 2,035 | 69  |
| 80,993 | 124 | 3 | 984   | 42 | 61 | 2 | 864 | 22 | 2,033 | 69  |
| 80,994 | 124 | 3 | 973   | 42 | 61 | 2 | 858 | 22 | 2,016 | 69  |
| 80,995 | 114 | 3 | 856   | 41 | 57 | 4 | 763 | 22 | 1,790 | 70  |
| 80,996 | 114 | 3 | 853   | 41 | 57 | 4 | 763 | 23 | 1,787 | 71  |
| 80,997 | 115 | 3 | 859   | 40 | 57 | 4 | 769 | 23 | 1,800 | 70  |
| 80,998 | 115 | 3 | 858   | 40 | 57 | 4 | 768 | 23 | 1,798 | 70  |
| 80,999 | 117 | 3 | 845   | 40 | 58 | 4 | 757 | 23 | 1,777 | 70  |
| 81,000 | 117 | 3 | 842   | 39 | 58 | 4 | 759 | 23 | 1,776 | 69  |
| 81,001 | 117 | 3 | 832   | 39 | 58 | 4 | 755 | 23 | 1,762 | 69  |
| 81,002 | 101 | 3 | 649   | 39 | 43 | 4 | 630 | 23 | 1,423 | 69  |
| 81,003 | 101 | 3 | 649   | 39 | 43 | 4 | 631 | 23 | 1,424 | 69  |
| 81,004 | 106 | 3 | 654   | 39 | 45 | 4 | 645 | 23 | 1,450 | 69  |



|        |     |   |       |    |     |   |       |    |       |    |
|--------|-----|---|-------|----|-----|---|-------|----|-------|----|
| 81,005 | 105 | 3 | 646   | 36 | 44  | 4 | 639   | 21 | 1,434 | 64 |
| 81,006 | 105 | 3 | 630   | 36 | 44  | 4 | 637   | 21 | 1,416 | 64 |
| 81,007 | 103 | 3 | 626   | 34 | 44  | 4 | 623   | 21 | 1,396 | 62 |
| 81,008 | 102 | 3 | 630   | 35 | 43  | 4 | 621   | 20 | 1,396 | 62 |
| 81,009 | 102 | 3 | 628   | 35 | 43  | 4 | 619   | 20 | 1,392 | 62 |
| 81,010 | 103 | 3 | 642   | 35 | 44  | 4 | 623   | 20 | 1,412 | 62 |
| 81,011 | 103 | 3 | 663   | 35 | 44  | 4 | 623   | 20 | 1,433 | 62 |
| 81,012 | 103 | 3 | 662   | 35 | 44  | 4 | 623   | 20 | 1,432 | 62 |
| 81,013 | 113 | 3 | 769   | 31 | 53  | 4 | 702   | 21 | 1,637 | 59 |
| 81,014 | 113 | 3 | 769   | 31 | 53  | 4 | 702   | 23 | 1,637 | 61 |
| 81,015 | 113 | 3 | 769   | 31 | 53  | 4 | 702   | 23 | 1,637 | 61 |
| 81,016 | 130 | 3 | 864   | 31 | 58  | 4 | 751   | 23 | 1,803 | 61 |
| 81,017 | 135 | 3 | 894   | 31 | 59  | 4 | 766   | 23 | 1,854 | 61 |
| 81,018 | 140 | 3 | 935   | 31 | 64  | 4 | 787   | 23 | 1,926 | 61 |
| 81,019 | 140 | 3 | 934   | 31 | 64  | 4 | 782   | 23 | 1,920 | 61 |
| 81,020 | 146 | 3 | 988   | 33 | 69  | 4 | 800   | 25 | 2,003 | 65 |
| 81,021 | 155 | 2 | 1,089 | 35 | 75  | 4 | 817   | 27 | 2,136 | 68 |
| 81,022 | 195 | 2 | 1,546 | 38 | 111 | 4 | 1,034 | 24 | 2,886 | 68 |
| 81,023 | 201 | 2 | 1,624 | 44 | 116 | 4 | 1,059 | 24 | 3,000 | 74 |
| 81,024 | 204 | 1 | 1,717 | 33 | 122 | 4 | 1,101 | 21 | 3,144 | 59 |
| 81,025 | 207 | 1 | 1,754 | 36 | 126 | 4 | 1,125 | 21 | 3,212 | 62 |
| 81,026 | 192 | 2 | 1,701 | 36 | 121 | 4 | 1,061 | 21 | 3,075 | 63 |
| 81,027 | 192 | 2 | 1,705 | 35 | 123 | 4 | 1,066 | 19 | 3,086 | 60 |
| 81,028 | 192 | 2 | 1,705 | 35 | 123 | 4 | 1,070 | 19 | 3,090 | 60 |
| 81,029 | 186 | 2 | 1,647 | 35 | 120 | 4 | 1,030 | 18 | 2,983 | 59 |
| 81,030 | 186 | 2 | 1,647 | 36 | 120 | 5 | 1,032 | 20 | 2,985 | 63 |
| 81,031 | 170 | 2 | 1,543 | 36 | 111 | 5 | 910   | 20 | 2,734 | 63 |
| 81,032 | 166 | 2 | 1,539 | 35 | 110 | 5 | 907   | 20 | 2,722 | 62 |
| 81,033 | 166 | 2 | 1,531 | 35 | 110 | 5 | 906   | 20 | 2,713 | 62 |
| 81,034 | 141 | 2 | 1,324 | 34 | 93  | 5 | 698   | 18 | 2,256 | 59 |
| 81,035 | 137 | 2 | 1,323 | 32 | 92  | 5 | 682   | 17 | 2,234 | 56 |
| 81,036 | 138 | 1 | 1,314 | 33 | 92  | 5 | 672   | 17 | 2,216 | 56 |
| 81,037 | 138 | 1 | 1,303 | 33 | 92  | 5 | 665   | 17 | 2,198 | 56 |
| 81,038 | 134 | 1 | 1,306 | 33 | 90  | 5 | 636   | 18 | 2,166 | 57 |
| 81,039 | 137 | 1 | 1,292 | 33 | 91  | 5 | 632   | 17 | 2,152 | 56 |
| 81,040 | 136 | 1 | 1,284 | 31 | 91  | 3 | 622   | 17 | 2,133 | 52 |
| 81,041 | 138 | 1 | 1,300 | 25 | 91  | 3 | 644   | 12 | 2,173 | 41 |
| 81,042 | 151 | 1 | 1,390 | 26 | 95  | 3 | 701   | 12 | 2,337 | 42 |
| 81,043 | 151 | 1 | 1,390 | 29 | 95  | 3 | 700   | 13 | 2,336 | 46 |
| 81,044 | 150 | 1 | 1,385 | 28 | 95  | 3 | 698   | 13 | 2,328 | 45 |
| 81,045 | 153 | 1 | 1,399 | 28 | 98  | 3 | 716   | 13 | 2,366 | 45 |

|        |     |   |       |    |     |   |     |    |       |    |
|--------|-----|---|-------|----|-----|---|-----|----|-------|----|
| 81,046 | 152 | 1 | 1,406 | 30 | 97  | 1 | 724 | 12 | 2,379 | 44 |
| 81,047 | 152 | 1 | 1,417 | 31 | 98  | 1 | 727 | 12 | 2,394 | 45 |
| 81,048 | 151 | 1 | 1,438 | 31 | 100 | 1 | 736 | 12 | 2,425 | 45 |
| 81,049 | 163 | 1 | 1,476 | 31 | 103 | 1 | 810 | 12 | 2,552 | 45 |
| 81,050 | 161 | 1 | 1,479 | 31 | 105 | 1 | 831 | 13 | 2,576 | 46 |
| 81,051 | 161 | 1 | 1,483 | 31 | 105 | 1 | 833 | 13 | 2,582 | 46 |
| 81,052 | 161 | 1 | 1,483 | 32 | 105 | 1 | 833 | 13 | 2,582 | 47 |
| 81,053 | 162 | 1 | 1,493 | 32 | 105 | 1 | 846 | 13 | 2,606 | 47 |
| 81,054 | 162 | 2 | 1,494 | 32 | 105 | 1 | 847 | 13 | 2,608 | 48 |
| 81,055 | 155 | 3 | 1,488 | 33 | 103 | 1 | 833 | 13 | 2,579 | 50 |
| 81,056 | 155 | 3 | 1,488 | 34 | 103 | 1 | 833 | 13 | 2,579 | 51 |
| 81,057 | 155 | 4 | 1,489 | 39 | 104 | 1 | 830 | 13 | 2,578 | 57 |
| 81,058 | 155 | 4 | 1,482 | 44 | 104 | 1 | 826 | 16 | 2,567 | 65 |
| 81,059 | 155 | 4 | 1,474 | 46 | 105 | 1 | 826 | 17 | 2,560 | 68 |
| 81,060 | 156 | 4 | 1,482 | 48 | 105 | 1 | 837 | 17 | 2,580 | 70 |
| 81,061 | 155 | 4 | 1,480 | 48 | 104 | 1 | 843 | 17 | 2,582 | 70 |
| 81,062 | 156 | 4 | 1,470 | 48 | 104 | 1 | 850 | 17 | 2,580 | 70 |
| 81,063 | 154 | 4 | 1,501 | 48 | 99  | 1 | 833 | 17 | 2,587 | 70 |
| 81,064 | 168 | 4 | 1,645 | 48 | 105 | 1 | 866 | 14 | 2,784 | 67 |
| 81,065 | 168 | 4 | 1,703 | 48 | 108 | 1 | 910 | 14 | 2,889 | 67 |
| 81,066 | 156 | 4 | 1,664 | 48 | 109 | 1 | 914 | 14 | 2,843 | 67 |
| 81,067 | 157 | 4 | 1,675 | 49 | 110 | 1 | 917 | 15 | 2,859 | 69 |
| 81,068 | 152 | 4 | 1,650 | 49 | 108 | 1 | 904 | 15 | 2,814 | 69 |
| 81,069 | 147 | 4 | 1,610 | 49 | 104 | 1 | 884 | 15 | 2,745 | 69 |
| 81,070 | 141 | 6 | 1,555 | 50 | 98  | 1 | 867 | 16 | 2,661 | 73 |
| 81,071 | 132 | 6 | 1,456 | 50 | 92  | 1 | 851 | 17 | 2,531 | 74 |
| 81,072 | 124 | 6 | 1,386 | 50 | 86  | 1 | 824 | 17 | 2,420 | 74 |
| 81,073 | 92  | 6 | 1,001 | 46 | 57  | 1 | 630 | 18 | 1,780 | 71 |
| 81,074 | 88  | 6 | 930   | 40 | 52  | 1 | 609 | 18 | 1,679 | 65 |
| 81,075 | 86  | 6 | 843   | 37 | 46  | 1 | 565 | 18 | 1,540 | 62 |
| 81,076 | 88  | 5 | 875   | 37 | 43  | 1 | 556 | 18 | 1,562 | 61 |
| 81,077 | 89  | 5 | 882   | 37 | 42  | 1 | 557 | 19 | 1,570 | 62 |
| 81,078 | 89  | 5 | 880   | 37 | 40  | 1 | 553 | 21 | 1,562 | 64 |
| 81,079 | 89  | 5 | 880   | 37 | 40  | 1 | 553 | 25 | 1,562 | 68 |
| 81,080 | 147 | 5 | 1,257 | 38 | 76  | 1 | 880 | 25 | 2,360 | 69 |
| 81,081 | 148 | 5 | 1,272 | 37 | 77  | 1 | 889 | 26 | 2,386 | 69 |
| 81,082 | 148 | 5 | 1,309 | 37 | 82  | 1 | 920 | 26 | 2,459 | 69 |
| 81,083 | 148 | 5 | 1,326 | 37 | 82  | 1 | 923 | 26 | 2,479 | 69 |
| 81,084 | 148 | 5 | 1,324 | 37 | 82  | 1 | 923 | 26 | 2,477 | 69 |
| 81,085 | 148 | 5 | 1,323 | 37 | 82  | 1 | 923 | 26 | 2,476 | 69 |
| 81,086 | 143 | 5 | 1,293 | 36 | 82  | 1 | 913 | 26 | 2,431 | 68 |

|        |     |   |       |    |     |   |       |    |       |    |
|--------|-----|---|-------|----|-----|---|-------|----|-------|----|
| 81,087 | 142 | 5 | 1,293 | 41 | 82  | 1 | 913   | 27 | 2,430 | 74 |
| 81,088 | 142 | 5 | 1,288 | 42 | 82  | 1 | 911   | 36 | 2,423 | 84 |
| 81,089 | 141 | 5 | 1,274 | 41 | 82  | 1 | 905   | 35 | 2,402 | 82 |
| 81,090 | 140 | 5 | 1,280 | 42 | 81  | 1 | 925   | 38 | 2,426 | 86 |
| 81,091 | 138 | 5 | 1,267 | 42 | 81  | 1 | 904   | 39 | 2,390 | 87 |
| 81,092 | 127 | 5 | 1,209 | 40 | 77  | 1 | 859   | 40 | 2,272 | 86 |
| 81,093 | 136 | 5 | 1,231 | 37 | 78  | 1 | 861   | 40 | 2,306 | 83 |
| 81,094 | 135 | 5 | 1,223 | 37 | 78  | 1 | 859   | 40 | 2,295 | 83 |
| 81,095 | 133 | 5 | 1,214 | 37 | 75  | 1 | 845   | 40 | 2,267 | 83 |
| 81,096 | 136 | 5 | 1,260 | 38 | 79  | 1 | 859   | 42 | 2,334 | 86 |
| 81,097 | 137 | 5 | 1,278 | 39 | 80  | 1 | 871   | 42 | 2,366 | 87 |
| 81,098 | 156 | 6 | 1,424 | 39 | 98  | 1 | 1,005 | 43 | 2,683 | 89 |
| 81,099 | 165 | 6 | 1,444 | 40 | 101 | 1 | 1,007 | 44 | 2,717 | 91 |
| 81,100 | 153 | 6 | 1,423 | 40 | 97  | 1 | 949   | 45 | 2,622 | 92 |
| 81,101 | 152 | 6 | 1,500 | 40 | 96  | 1 | 938   | 44 | 2,686 | 91 |
| 81,102 | 157 | 6 | 1,600 | 41 | 101 | 1 | 989   | 44 | 2,847 | 92 |
| 81,103 | 156 | 6 | 1,592 | 41 | 101 | 1 | 978   | 44 | 2,827 | 92 |
| 81,104 | 156 | 6 | 1,592 | 43 | 101 | 1 | 977   | 44 | 2,826 | 94 |
| 81,105 | 164 | 5 | 1,727 | 44 | 117 | 1 | 1,144 | 45 | 3,152 | 95 |
| 81,106 | 169 | 4 | 1,793 | 43 | 120 | 1 | 1,184 | 45 | 3,266 | 93 |
| 81,107 | 172 | 4 | 1,831 | 42 | 124 | 1 | 1,203 | 45 | 3,330 | 92 |
| 81,108 | 180 | 3 | 1,851 | 37 | 129 | 1 | 1,238 | 45 | 3,398 | 86 |
| 81,109 | 180 | 3 | 1,855 | 32 | 129 | 2 | 1,241 | 43 | 3,405 | 80 |
| 81,110 | 179 | 3 | 1,847 | 29 | 129 | 2 | 1,229 | 42 | 3,384 | 76 |
| 81,111 | 181 | 3 | 1,849 | 27 | 132 | 2 | 1,239 | 43 | 3,401 | 75 |
| 81,112 | 184 | 3 | 1,883 | 30 | 132 | 2 | 1,253 | 45 | 3,452 | 80 |
| 81,113 | 184 | 3 | 1,891 | 30 | 132 | 2 | 1,266 | 45 | 3,473 | 80 |
| 81,114 | 177 | 3 | 1,810 | 34 | 132 | 2 | 1,240 | 49 | 3,359 | 88 |
| 81,115 | 169 | 3 | 1,649 | 34 | 122 | 3 | 1,221 | 49 | 3,161 | 89 |
| 81,116 | 172 | 3 | 1,610 | 38 | 122 | 4 | 1,190 | 49 | 3,094 | 94 |
| 81,117 | 167 | 3 | 1,557 | 40 | 116 | 4 | 1,137 | 49 | 2,977 | 96 |
| 81,118 | 167 | 3 | 1,551 | 40 | 116 | 4 | 1,149 | 48 | 2,983 | 95 |
| 81,119 | 167 | 3 | 1,567 | 40 | 116 | 4 | 1,165 | 48 | 3,015 | 95 |
| 81,120 | 167 | 1 | 1,568 | 39 | 115 | 5 | 1,163 | 47 | 3,013 | 92 |
| 81,121 | 192 | 1 | 1,630 | 37 | 121 | 5 | 1,277 | 44 | 3,220 | 87 |
| 81,122 | 192 | 1 | 1,628 | 37 | 121 | 5 | 1,277 | 44 | 3,218 | 87 |
| 81,123 | 204 | 1 | 1,702 | 34 | 127 | 5 | 1,346 | 40 | 3,379 | 80 |
| 81,124 | 206 | 1 | 1,711 | 36 | 127 | 5 | 1,353 | 42 | 3,397 | 84 |
| 81,125 | 207 | 1 | 1,717 | 43 | 127 | 5 | 1,356 | 45 | 3,407 | 94 |
| 81,126 | 213 | 1 | 1,818 | 44 | 129 | 5 | 1,376 | 45 | 3,536 | 95 |
| 81,127 | 210 | 1 | 1,753 | 45 | 128 | 5 | 1,360 | 45 | 3,451 | 96 |

|        |     |   |       |    |     |   |       |    |       |     |
|--------|-----|---|-------|----|-----|---|-------|----|-------|-----|
| 81,128 | 234 | 1 | 2,054 | 47 | 137 | 5 | 1,479 | 47 | 3,904 | 100 |
| 81,129 | 210 | 1 | 2,028 | 47 | 116 | 5 | 1,334 | 45 | 3,688 | 98  |
| 81,130 | 206 | 1 | 1,928 | 47 | 106 | 5 | 1,221 | 41 | 3,461 | 94  |
| 81,131 | 208 | 1 | 1,931 | 47 | 107 | 4 | 1,211 | 38 | 3,457 | 90  |
| 81,132 | 209 | 1 | 1,995 | 47 | 111 | 4 | 1,229 | 39 | 3,544 | 91  |
| 81,133 | 218 | 1 | 2,158 | 48 | 111 | 4 | 1,260 | 39 | 3,747 | 92  |
| 81,134 | 217 | 1 | 2,139 | 48 | 111 | 4 | 1,254 | 39 | 3,721 | 92  |
| 81,135 | 226 | 1 | 2,263 | 48 | 115 | 4 | 1,279 | 39 | 3,883 | 92  |
| 81,136 | 228 | 1 | 2,280 | 48 | 116 | 4 | 1,287 | 39 | 3,911 | 92  |
| 81,137 | 237 | 1 | 2,402 | 43 | 122 | 4 | 1,346 | 39 | 4,107 | 87  |
| 81,138 | 237 | 1 | 2,397 | 43 | 124 | 4 | 1,344 | 39 | 4,102 | 87  |
| 81,139 | 235 | 1 | 2,387 | 42 | 123 | 4 | 1,336 | 29 | 4,081 | 76  |
| 81,140 | 235 | 1 | 2,379 | 39 | 123 | 4 | 1,326 | 25 | 4,063 | 69  |
| 81,141 | 235 | 1 | 2,378 | 39 | 123 | 4 | 1,327 | 24 | 4,063 | 68  |
| 81,142 | 235 | 1 | 2,378 | 39 | 124 | 4 | 1,334 | 24 | 4,071 | 68  |
| 81,143 | 235 | 1 | 2,374 | 39 | 124 | 4 | 1,332 | 24 | 4,065 | 68  |
| 81,144 | 226 | 1 | 2,331 | 39 | 123 | 4 | 1,323 | 24 | 4,003 | 68  |
| 81,145 | 224 | 1 | 2,325 | 39 | 121 | 4 | 1,329 | 24 | 3,999 | 68  |
| 81,146 | 224 | 1 | 2,296 | 38 | 121 | 4 | 1,320 | 22 | 3,961 | 65  |
| 81,147 | 224 | 1 | 2,283 | 37 | 119 | 4 | 1,314 | 22 | 3,940 | 64  |
| 81,148 | 223 | 1 | 2,262 | 37 | 119 | 4 | 1,296 | 24 | 3,900 | 66  |
| 81,149 | 204 | 0 | 2,105 | 36 | 100 | 4 | 1,156 | 23 | 3,565 | 63  |
| 81,150 | 195 | 0 | 2,058 | 36 | 95  | 4 | 1,139 | 22 | 3,487 | 62  |
| 81,151 | 195 | 0 | 2,041 | 37 | 95  | 4 | 1,120 | 22 | 3,451 | 63  |
| 81,152 | 195 | 0 | 1,959 | 38 | 94  | 4 | 1,104 | 22 | 3,352 | 64  |
| 81,153 | 191 | 0 | 1,855 | 40 | 90  | 4 | 1,051 | 22 | 3,187 | 66  |
| 81,154 | 186 | 0 | 1,778 | 40 | 76  | 4 | 905   | 22 | 2,945 | 66  |
| 81,155 | 185 | 1 | 1,733 | 39 | 74  | 4 | 884   | 22 | 2,876 | 66  |
| 81,156 | 183 | 1 | 1,684 | 38 | 71  | 4 | 850   | 21 | 2,788 | 64  |
| 81,157 | 185 | 1 | 1,685 | 38 | 66  | 4 | 844   | 24 | 2,780 | 67  |
| 81,158 | 183 | 1 | 1,673 | 38 | 66  | 4 | 842   | 24 | 2,764 | 67  |
| 81,159 | 227 | 1 | 1,919 | 38 | 69  | 4 | 925   | 24 | 3,140 | 67  |
| 81,160 | 229 | 1 | 1,936 | 38 | 69  | 3 | 939   | 22 | 3,173 | 64  |
| 81,161 | 230 | 1 | 1,956 | 39 | 67  | 3 | 947   | 22 | 3,200 | 65  |
| 81,162 | 236 | 1 | 1,987 | 39 | 70  | 3 | 984   | 22 | 3,277 | 65  |
| 81,163 | 238 | 1 | 1,998 | 36 | 74  | 3 | 996   | 20 | 3,306 | 60  |
| 81,164 | 239 | 1 | 2,001 | 28 | 76  | 1 | 981   | 16 | 3,297 | 46  |
| 81,165 | 240 | 1 | 2,083 | 28 | 78  | 1 | 999   | 16 | 3,400 | 46  |
| 81,166 | 236 | 1 | 2,103 | 28 | 79  | 1 | 965   | 16 | 3,383 | 46  |
| 81,167 | 234 | 1 | 2,092 | 26 | 77  | 1 | 957   | 16 | 3,360 | 44  |
| 81,168 | 237 | 1 | 2,094 | 26 | 77  | 1 | 958   | 16 | 3,366 | 44  |

|        |     |   |       |    |    |   |       |    |       |    |
|--------|-----|---|-------|----|----|---|-------|----|-------|----|
| 81,169 | 236 | 1 | 2,089 | 25 | 76 | 1 | 951   | 16 | 3,352 | 43 |
| 81,170 | 237 | 1 | 2,076 | 25 | 76 | 0 | 933   | 16 | 3,322 | 42 |
| 81,171 | 239 | 1 | 2,090 | 25 | 77 | 0 | 942   | 16 | 3,348 | 42 |
| 81,172 | 215 | 1 | 2,039 | 25 | 71 | 0 | 826   | 16 | 3,151 | 42 |
| 81,173 | 215 | 1 | 2,121 | 24 | 71 | 0 | 815   | 16 | 3,222 | 41 |
| 81,174 | 211 | 1 | 2,104 | 24 | 67 | 0 | 796   | 16 | 3,178 | 41 |
| 81,175 | 211 | 1 | 2,128 | 23 | 69 | 0 | 811   | 14 | 3,219 | 38 |
| 81,176 | 208 | 1 | 2,127 | 17 | 69 | 0 | 812   | 13 | 3,216 | 31 |
| 81,177 | 199 | 1 | 2,022 | 16 | 67 | 0 | 795   | 12 | 3,083 | 29 |
| 81,178 | 198 | 1 | 2,017 | 16 | 67 | 0 | 795   | 12 | 3,077 | 29 |
| 81,179 | 173 | 1 | 1,709 | 15 | 58 | 0 | 671   | 10 | 2,611 | 26 |
| 81,180 | 147 | 1 | 1,495 | 15 | 54 | 0 | 621   | 10 | 2,317 | 26 |
| 81,181 | 143 | 1 | 1,482 | 14 | 52 | 0 | 616   | 10 | 2,293 | 25 |
| 81,182 | 150 | 1 | 1,511 | 17 | 55 | 0 | 643   | 10 | 2,359 | 28 |
| 81,183 | 148 | 1 | 1,435 | 17 | 50 | 0 | 619   | 11 | 2,252 | 29 |
| 81,184 | 138 | 1 | 1,236 | 20 | 45 | 0 | 559   | 13 | 1,978 | 34 |
| 81,185 | 133 | 1 | 1,187 | 23 | 42 | 0 | 547   | 13 | 1,909 | 37 |
| 81,186 | 130 | 1 | 1,161 | 23 | 41 | 0 | 564   | 13 | 1,896 | 37 |
| 81,187 | 128 | 1 | 1,146 | 23 | 42 | 0 | 561   | 13 | 1,877 | 37 |
| 81,188 | 122 | 1 | 1,043 | 23 | 37 | 0 | 513   | 13 | 1,715 | 37 |
| 81,189 | 128 | 1 | 1,056 | 23 | 38 | 0 | 537   | 13 | 1,759 | 37 |
| 81,190 | 128 | 1 | 1,064 | 23 | 39 | 0 | 554   | 14 | 1,785 | 38 |
| 81,191 | 128 | 1 | 1,070 | 24 | 39 | 0 | 559   | 14 | 1,796 | 39 |
| 81,192 | 128 | 1 | 1,072 | 24 | 40 | 0 | 561   | 14 | 1,801 | 39 |
| 81,193 | 134 | 1 | 1,097 | 24 | 40 | 0 | 570   | 14 | 1,841 | 39 |
| 81,194 | 132 | 1 | 1,093 | 24 | 40 | 0 | 568   | 14 | 1,833 | 39 |
| 81,195 | 132 | 1 | 1,089 | 24 | 40 | 0 | 562   | 14 | 1,823 | 39 |
| 81,196 | 135 | 1 | 1,155 | 24 | 42 | 0 | 598   | 14 | 1,930 | 39 |
| 81,197 | 135 | 1 | 1,154 | 24 | 42 | 0 | 596   | 14 | 1,927 | 39 |
| 81,198 | 161 | 1 | 1,441 | 24 | 60 | 0 | 714   | 14 | 2,376 | 39 |
| 81,199 | 161 | 2 | 1,442 | 24 | 60 | 0 | 714   | 12 | 2,377 | 38 |
| 81,200 | 208 | 2 | 1,632 | 23 | 70 | 0 | 877   | 12 | 2,787 | 37 |
| 81,201 | 208 | 2 | 1,642 | 22 | 72 | 0 | 879   | 11 | 2,801 | 35 |
| 81,202 | 219 | 2 | 1,745 | 19 | 76 | 0 | 950   | 11 | 2,990 | 32 |
| 81,203 | 220 | 2 | 1,740 | 19 | 76 | 0 | 950   | 11 | 2,986 | 32 |
| 81,204 | 222 | 2 | 1,766 | 17 | 76 | 0 | 970   | 11 | 3,034 | 30 |
| 81,205 | 232 | 1 | 1,820 | 16 | 82 | 0 | 1,018 | 11 | 3,152 | 28 |
| 81,206 | 232 | 1 | 1,816 | 16 | 82 | 0 | 1,016 | 11 | 3,146 | 28 |
| 81,207 | 255 | 1 | 1,959 | 16 | 93 | 0 | 1,125 | 11 | 3,432 | 28 |
| 81,208 | 264 | 1 | 2,047 | 18 | 99 | 0 | 1,177 | 8  | 3,587 | 27 |
| 81,209 | 207 | 2 | 1,805 | 18 | 91 | 0 | 1,076 | 8  | 3,179 | 28 |

|        |     |   |       |    |    |   |       |    |       |    |
|--------|-----|---|-------|----|----|---|-------|----|-------|----|
| 81,210 | 207 | 2 | 1,795 | 19 | 91 | 0 | 1,064 | 10 | 3,157 | 31 |
| 81,211 | 220 | 2 | 1,898 | 20 | 99 | 0 | 1,126 | 10 | 3,343 | 32 |
| 81,212 | 217 | 4 | 1,890 | 33 | 99 | 2 | 1,112 | 20 | 3,318 | 59 |
| 81,213 | 215 | 4 | 1,873 | 35 | 96 | 2 | 1,088 | 21 | 3,272 | 62 |
| 81,214 | 213 | 4 | 1,849 | 35 | 92 | 2 | 1,077 | 21 | 3,231 | 62 |
| 81,215 | 215 | 4 | 1,841 | 36 | 92 | 2 | 1,092 | 21 | 3,240 | 63 |
| 81,216 | 218 | 4 | 1,780 | 36 | 90 | 2 | 1,094 | 21 | 3,182 | 63 |
| 81,217 | 215 | 4 | 1,736 | 36 | 89 | 2 | 1,082 | 21 | 3,122 | 63 |
| 81,218 | 214 | 4 | 1,728 | 40 | 89 | 2 | 1,080 | 21 | 3,111 | 67 |
| 81,219 | 221 | 4 | 1,783 | 40 | 91 | 2 | 1,116 | 22 | 3,211 | 68 |
| 81,220 | 221 | 4 | 1,784 | 40 | 91 | 2 | 1,117 | 23 | 3,213 | 69 |
| 81,221 | 220 | 4 | 1,777 | 40 | 91 | 2 | 1,121 | 25 | 3,209 | 71 |
| 81,222 | 218 | 4 | 1,760 | 40 | 90 | 2 | 1,112 | 25 | 3,180 | 71 |
| 81,223 | 217 | 4 | 1,748 | 41 | 90 | 2 | 1,110 | 27 | 3,165 | 74 |
| 81,224 | 209 | 4 | 1,606 | 41 | 88 | 2 | 1,069 | 27 | 2,972 | 74 |
| 81,225 | 208 | 4 | 1,584 | 40 | 86 | 2 | 1,047 | 27 | 2,925 | 73 |
| 81,226 | 207 | 4 | 1,573 | 40 | 86 | 2 | 1,047 | 27 | 2,913 | 73 |
| 81,227 | 207 | 4 | 1,560 | 39 | 86 | 2 | 1,039 | 25 | 2,892 | 70 |
| 81,228 | 207 | 4 | 1,559 | 38 | 86 | 2 | 1,037 | 25 | 2,889 | 69 |
| 81,229 | 207 | 4 | 1,558 | 38 | 86 | 2 | 1,033 | 25 | 2,884 | 69 |
| 81,230 | 207 | 4 | 1,550 | 37 | 86 | 2 | 1,031 | 25 | 2,874 | 68 |
| 81,231 | 207 | 4 | 1,546 | 36 | 86 | 2 | 1,028 | 25 | 2,867 | 67 |
| 81,232 | 207 | 4 | 1,533 | 36 | 86 | 2 | 1,024 | 25 | 2,850 | 67 |
| 81,233 | 198 | 4 | 1,497 | 33 | 82 | 2 | 996   | 23 | 2,773 | 62 |
| 81,234 | 197 | 4 | 1,494 | 33 | 82 | 2 | 995   | 23 | 2,768 | 62 |
| 81,235 | 218 | 4 | 1,547 | 29 | 84 | 2 | 1,011 | 21 | 2,860 | 56 |
| 81,236 | 218 | 4 | 1,554 | 28 | 86 | 2 | 1,018 | 21 | 2,876 | 55 |
| 81,237 | 222 | 4 | 1,530 | 29 | 88 | 3 | 1,010 | 22 | 2,850 | 58 |
| 81,238 | 222 | 4 | 1,527 | 29 | 86 | 3 | 1,003 | 22 | 2,838 | 58 |
| 81,239 | 233 | 5 | 1,577 | 33 | 95 | 3 | 1,061 | 22 | 2,966 | 63 |
| 81,240 | 230 | 5 | 1,609 | 35 | 94 | 3 | 1,060 | 22 | 2,993 | 65 |
| 81,241 | 228 | 5 | 1,605 | 34 | 93 | 3 | 1,049 | 21 | 2,975 | 63 |
| 81,242 | 228 | 5 | 1,600 | 34 | 93 | 3 | 1,045 | 22 | 2,966 | 64 |
| 81,243 | 228 | 5 | 1,598 | 34 | 92 | 3 | 1,043 | 22 | 2,961 | 64 |
| 81,244 | 222 | 5 | 1,569 | 34 | 91 | 3 | 1,027 | 23 | 2,909 | 65 |
| 81,245 | 224 | 5 | 1,580 | 34 | 91 | 3 | 1,030 | 23 | 2,925 | 65 |
| 81,246 | 227 | 5 | 1,582 | 34 | 91 | 3 | 1,023 | 23 | 2,923 | 65 |
| 81,247 | 223 | 5 | 1,524 | 34 | 89 | 3 | 988   | 24 | 2,824 | 66 |
| 81,248 | 209 | 4 | 1,311 | 34 | 75 | 3 | 926   | 24 | 2,521 | 65 |
| 81,249 | 206 | 5 | 1,274 | 36 | 75 | 3 | 906   | 24 | 2,461 | 68 |
| 81,250 | 176 | 5 | 1,184 | 36 | 70 | 3 | 817   | 25 | 2,247 | 69 |

|        |     |   |       |    |    |   |     |    |       |     |
|--------|-----|---|-------|----|----|---|-----|----|-------|-----|
| 81,251 | 179 | 5 | 1,157 | 36 | 69 | 3 | 807 | 25 | 2,212 | 69  |
| 81,252 | 179 | 5 | 1,148 | 36 | 67 | 3 | 807 | 25 | 2,201 | 69  |
| 81,253 | 170 | 5 | 1,046 | 36 | 62 | 4 | 738 | 25 | 2,016 | 70  |
| 81,254 | 167 | 5 | 1,033 | 36 | 62 | 4 | 718 | 25 | 1,980 | 70  |
| 81,255 | 167 | 5 | 1,021 | 36 | 62 | 4 | 717 | 25 | 1,967 | 70  |
| 81,256 | 156 | 5 | 969   | 36 | 58 | 4 | 673 | 25 | 1,856 | 70  |
| 81,257 | 143 | 5 | 870   | 36 | 50 | 4 | 602 | 25 | 1,665 | 70  |
| 81,258 | 136 | 5 | 835   | 37 | 49 | 4 | 566 | 25 | 1,586 | 71  |
| 81,259 | 127 | 4 | 728   | 35 | 43 | 4 | 504 | 25 | 1,402 | 68  |
| 81,260 | 127 | 4 | 702   | 34 | 43 | 4 | 498 | 23 | 1,370 | 65  |
| 81,261 | 126 | 4 | 654   | 35 | 42 | 4 | 488 | 22 | 1,310 | 65  |
| 81,262 | 113 | 2 | 590   | 18 | 35 | 2 | 424 | 11 | 1,162 | 33  |
| 81,263 | 112 | 2 | 578   | 19 | 34 | 2 | 419 | 11 | 1,143 | 34  |
| 81,264 | 107 | 3 | 544   | 21 | 34 | 2 | 387 | 11 | 1,072 | 37  |
| 81,265 | 110 | 3 | 569   | 22 | 36 | 2 | 398 | 11 | 1,113 | 38  |
| 81,266 | 126 | 3 | 656   | 21 | 41 | 2 | 417 | 11 | 1,240 | 37  |
| 81,267 | 122 | 3 | 637   | 17 | 41 | 2 | 397 | 11 | 1,197 | 33  |
| 81,268 | 126 | 3 | 679   | 17 | 42 | 2 | 416 | 12 | 1,263 | 34  |
| 81,269 | 116 | 3 | 620   | 17 | 40 | 2 | 380 | 13 | 1,156 | 35  |
| 81,270 | 116 | 3 | 617   | 17 | 40 | 2 | 379 | 12 | 1,152 | 34  |
| 81,271 | 117 | 3 | 644   | 17 | 40 | 2 | 381 | 12 | 1,182 | 34  |
| 81,272 | 118 | 3 | 660   | 17 | 43 | 2 | 388 | 10 | 1,209 | 32  |
| 81,273 | 118 | 3 | 660   | 17 | 43 | 2 | 387 | 10 | 1,208 | 32  |
| 81,274 | 118 | 3 | 664   | 16 | 43 | 2 | 387 | 8  | 1,212 | 29  |
| 81,275 | 118 | 3 | 665   | 16 | 43 | 2 | 389 | 8  | 1,215 | 29  |
| 81,276 | 118 | 3 | 671   | 16 | 43 | 2 | 391 | 8  | 1,223 | 29  |
| 81,277 | 121 | 3 | 675   | 16 | 43 | 2 | 395 | 8  | 1,234 | 29  |
| 81,278 | 125 | 3 | 687   | 16 | 44 | 2 | 410 | 8  | 1,266 | 29  |
| 81,279 | 125 | 3 | 685   | 16 | 44 | 2 | 410 | 8  | 1,264 | 29  |
| 81,280 | 125 | 3 | 689   | 16 | 44 | 2 | 410 | 8  | 1,268 | 29  |
| 81,281 | 125 | 3 | 688   | 16 | 44 | 2 | 410 | 8  | 1,267 | 29  |
| 81,282 | 125 | 4 | 688   | 16 | 44 | 2 | 410 | 8  | 1,267 | 30  |
| 81,283 | 125 | 4 | 687   | 18 | 44 | 2 | 410 | 10 | 1,266 | 34  |
| 81,284 | 125 | 5 | 687   | 56 | 44 | 3 | 410 | 25 | 1,266 | 89  |
| 81,285 | 109 | 6 | 656   | 65 | 43 | 4 | 396 | 43 | 1,204 | 118 |
| 81,286 | 104 | 6 | 631   | 67 | 42 | 4 | 392 | 43 | 1,169 | 120 |
| 81,287 | 107 | 6 | 629   | 69 | 40 | 4 | 384 | 43 | 1,160 | 122 |
| 81,288 | 102 | 7 | 601   | 83 | 38 | 4 | 359 | 50 | 1,100 | 144 |
| 81,289 | 98  | 7 | 588   | 88 | 35 | 4 | 338 | 51 | 1,059 | 150 |
| 81,290 | 89  | 6 | 534   | 90 | 28 | 5 | 288 | 56 | 939   | 157 |
| 81,291 | 86  | 6 | 487   | 90 | 26 | 5 | 261 | 56 | 860   | 157 |

|        |    |   |     |     |    |   |     |    |       |     |
|--------|----|---|-----|-----|----|---|-----|----|-------|-----|
| 81,292 | 85 | 6 | 485 | 90  | 26 | 5 | 258 | 56 | 854   | 157 |
| 81,293 | 85 | 6 | 484 | 91  | 26 | 6 | 257 | 55 | 852   | 158 |
| 81,294 | 85 | 6 | 487 | 91  | 26 | 6 | 257 | 54 | 855   | 157 |
| 81,295 | 85 | 6 | 487 | 92  | 26 | 6 | 257 | 56 | 855   | 160 |
| 81,296 | 83 | 6 | 476 | 92  | 26 | 6 | 254 | 57 | 839   | 161 |
| 81,297 | 85 | 5 | 514 | 90  | 26 | 6 | 263 | 56 | 888   | 157 |
| 81,298 | 84 | 5 | 513 | 90  | 26 | 6 | 263 | 56 | 886   | 157 |
| 81,299 | 76 | 5 | 490 | 90  | 23 | 5 | 239 | 55 | 828   | 155 |
| 81,300 | 76 | 5 | 482 | 90  | 22 | 5 | 232 | 55 | 812   | 155 |
| 81,301 | 63 | 5 | 431 | 91  | 20 | 5 | 180 | 55 | 694   | 156 |
| 81,302 | 60 | 5 | 426 | 92  | 20 | 5 | 176 | 55 | 682   | 157 |
| 81,303 | 65 | 5 | 506 | 94  | 23 | 5 | 207 | 55 | 801   | 159 |
| 81,304 | 73 | 5 | 632 | 94  | 25 | 5 | 253 | 55 | 983   | 159 |
| 81,305 | 73 | 5 | 658 | 95  | 25 | 5 | 271 | 55 | 1,027 | 160 |
| 81,306 | 72 | 5 | 656 | 95  | 23 | 5 | 270 | 55 | 1,021 | 160 |
| 81,307 | 72 | 5 | 655 | 95  | 23 | 5 | 270 | 55 | 1,020 | 160 |
| 81,308 | 66 | 5 | 630 | 94  | 21 | 5 | 264 | 55 | 981   | 159 |
| 81,309 | 66 | 5 | 630 | 95  | 21 | 5 | 264 | 55 | 981   | 160 |
| 81,310 | 65 | 5 | 623 | 96  | 21 | 5 | 264 | 55 | 973   | 161 |
| 81,311 | 65 | 5 | 623 | 96  | 21 | 5 | 264 | 55 | 973   | 161 |
| 81,312 | 64 | 5 | 619 | 95  | 21 | 5 | 264 | 56 | 968   | 161 |
| 81,313 | 64 | 5 | 608 | 94  | 21 | 5 | 259 | 56 | 952   | 160 |
| 81,314 | 64 | 4 | 605 | 92  | 21 | 5 | 258 | 56 | 948   | 157 |
| 81,315 | 64 | 4 | 604 | 92  | 21 | 5 | 258 | 56 | 947   | 157 |
| 81,316 | 61 | 4 | 575 | 92  | 19 | 5 | 245 | 56 | 900   | 157 |
| 81,317 | 42 | 4 | 475 | 92  | 12 | 5 | 205 | 56 | 734   | 157 |
| 81,318 | 42 | 4 | 463 | 92  | 12 | 5 | 197 | 56 | 714   | 157 |
| 81,319 | 38 | 4 | 418 | 92  | 11 | 5 | 176 | 54 | 643   | 155 |
| 81,320 | 38 | 4 | 410 | 92  | 11 | 5 | 174 | 54 | 633   | 155 |
| 81,321 | 37 | 4 | 388 | 92  | 11 | 5 | 166 | 54 | 602   | 155 |
| 81,322 | 37 | 4 | 385 | 93  | 11 | 6 | 164 | 56 | 597   | 159 |
| 81,323 | 36 | 4 | 373 | 93  | 8  | 6 | 156 | 56 | 573   | 159 |
| 81,324 | 37 | 4 | 378 | 93  | 8  | 6 | 159 | 57 | 582   | 160 |
| 81,325 | 37 | 4 | 377 | 93  | 8  | 6 | 157 | 57 | 579   | 160 |
| 81,326 | 37 | 7 | 380 | 97  | 8  | 6 | 157 | 64 | 582   | 174 |
| 81,327 | 35 | 8 | 383 | 104 | 8  | 6 | 156 | 71 | 582   | 189 |
| 81,328 | 34 | 8 | 381 | 105 | 7  | 6 | 142 | 71 | 564   | 190 |
| 81,329 | 34 | 8 | 384 | 107 | 7  | 6 | 144 | 74 | 569   | 195 |
| 81,330 | 33 | 8 | 383 | 110 | 8  | 6 | 146 | 73 | 570   | 197 |
| 81,331 | 33 | 8 | 383 | 110 | 8  | 6 | 146 | 74 | 570   | 198 |
| 81,332 | 45 | 8 | 406 | 110 | 9  | 6 | 157 | 74 | 617   | 198 |



|        |    |   |     |     |    |   |     |    |       |     |
|--------|----|---|-----|-----|----|---|-----|----|-------|-----|
| 81,333 | 49 | 7 | 429 | 110 | 10 | 6 | 172 | 74 | 660   | 197 |
| 81,334 | 55 | 7 | 464 | 109 | 15 | 6 | 192 | 73 | 726   | 195 |
| 81,335 | 58 | 6 | 479 | 71  | 15 | 5 | 202 | 58 | 754   | 140 |
| 81,336 | 63 | 6 | 510 | 62  | 18 | 4 | 233 | 42 | 824   | 114 |
| 81,337 | 63 | 6 | 514 | 59  | 18 | 4 | 234 | 42 | 829   | 111 |
| 81,338 | 60 | 5 | 518 | 42  | 18 | 3 | 238 | 34 | 834   | 84  |
| 81,339 | 60 | 5 | 521 | 42  | 18 | 3 | 239 | 34 | 838   | 84  |
| 81,340 | 60 | 5 | 525 | 31  | 19 | 2 | 240 | 27 | 844   | 65  |
| 81,341 | 61 | 5 | 532 | 29  | 19 | 2 | 245 | 27 | 857   | 63  |
| 81,342 | 61 | 5 | 531 | 29  | 19 | 2 | 244 | 27 | 855   | 63  |
| 81,343 | 70 | 5 | 552 | 29  | 19 | 2 | 249 | 27 | 890   | 63  |
| 81,344 | 70 | 5 | 558 | 28  | 21 | 1 | 249 | 28 | 898   | 62  |
| 81,345 | 70 | 5 | 565 | 27  | 21 | 1 | 254 | 26 | 910   | 59  |
| 81,346 | 81 | 5 | 635 | 27  | 25 | 1 | 294 | 25 | 1,035 | 58  |
| 81,347 | 83 | 5 | 648 | 27  | 25 | 1 | 295 | 25 | 1,051 | 58  |
| 81,348 | 78 | 5 | 613 | 27  | 26 | 1 | 284 | 25 | 1,001 | 58  |
| 81,349 | 78 | 5 | 612 | 27  | 26 | 1 | 287 | 25 | 1,003 | 58  |
| 81,350 | 79 | 5 | 609 | 27  | 26 | 1 | 283 | 25 | 997   | 58  |
| 81,351 | 77 | 5 | 610 | 26  | 26 | 2 | 278 | 23 | 991   | 56  |
| 81,352 | 77 | 5 | 618 | 26  | 26 | 2 | 277 | 25 | 998   | 58  |
| 81,353 | 74 | 5 | 592 | 25  | 25 | 2 | 262 | 25 | 953   | 57  |
| 81,354 | 74 | 5 | 559 | 23  | 23 | 2 | 248 | 26 | 904   | 56  |
| 81,355 | 65 | 5 | 443 | 23  | 22 | 2 | 203 | 26 | 733   | 56  |
| 81,356 | 82 | 5 | 511 | 22  | 24 | 2 | 230 | 26 | 847   | 55  |
| 81,357 | 82 | 5 | 501 | 22  | 24 | 2 | 226 | 26 | 833   | 55  |
| 81,358 | 83 | 5 | 526 | 22  | 24 | 2 | 234 | 26 | 867   | 55  |
| 81,359 | 83 | 5 | 530 | 22  | 24 | 2 | 236 | 27 | 873   | 56  |
| 81,360 | 83 | 5 | 530 | 23  | 24 | 3 | 236 | 27 | 873   | 58  |
| 81,361 | 83 | 5 | 530 | 22  | 24 | 3 | 236 | 27 | 873   | 57  |
| 81,362 | 84 | 5 | 539 | 22  | 25 | 3 | 239 | 27 | 887   | 57  |
| 81,363 | 84 | 5 | 541 | 22  | 25 | 3 | 239 | 26 | 889   | 56  |
| 81,364 | 84 | 5 | 540 | 22  | 25 | 3 | 240 | 27 | 889   | 57  |
| 81,365 | 84 | 5 | 540 | 22  | 25 | 3 | 240 | 27 | 889   | 57  |
| 81,366 | 84 | 5 | 540 | 21  | 25 | 3 | 240 | 27 | 889   | 56  |
| 81,367 | 85 | 5 | 545 | 22  | 25 | 3 | 241 | 27 | 896   | 57  |
| 81,368 | 85 | 5 | 545 | 22  | 25 | 3 | 241 | 27 | 896   | 57  |
| 81,369 | 85 | 5 | 545 | 22  | 25 | 3 | 242 | 27 | 897   | 57  |
| 81,370 | 85 | 5 | 545 | 22  | 25 | 3 | 242 | 27 | 897   | 57  |
| 81,371 | 85 | 5 | 546 | 22  | 25 | 4 | 242 | 28 | 898   | 59  |
| 81,372 | 85 | 5 | 546 | 22  | 25 | 4 | 242 | 28 | 898   | 59  |
| 81,373 | 85 | 5 | 546 | 21  | 25 | 3 | 242 | 26 | 898   | 55  |

|        |    |   |     |    |    |   |     |    |     |    |
|--------|----|---|-----|----|----|---|-----|----|-----|----|
| 81,374 | 85 | 5 | 546 | 21 | 25 | 3 | 242 | 26 | 898 | 55 |
| 81,375 | 84 | 5 | 536 | 21 | 25 | 3 | 239 | 25 | 884 | 54 |
| 81,376 | 84 | 2 | 531 | 17 | 25 | 3 | 239 | 18 | 879 | 40 |
| 81,377 | 84 | 1 | 528 | 11 | 25 | 3 | 238 | 12 | 875 | 27 |
| 81,378 | 83 | 1 | 521 | 11 | 25 | 3 | 235 | 12 | 864 | 27 |
| 81,379 | 80 | 1 | 511 | 11 | 25 | 3 | 234 | 11 | 850 | 26 |
| 81,380 | 80 | 1 | 508 | 15 | 25 | 3 | 234 | 12 | 847 | 31 |
| 81,381 | 80 | 1 | 505 | 17 | 24 | 3 | 234 | 12 | 843 | 33 |
| 81,382 | 71 | 1 | 481 | 19 | 23 | 3 | 220 | 13 | 795 | 36 |
| 81,383 | 65 | 1 | 457 | 19 | 22 | 5 | 207 | 15 | 751 | 40 |
| 81,384 | 59 | 1 | 422 | 20 | 17 | 5 | 186 | 15 | 684 | 41 |
| 81,385 | 58 | 1 | 408 | 37 | 17 | 5 | 176 | 18 | 659 | 61 |
| 81,386 | 53 | 1 | 382 | 39 | 14 | 5 | 147 | 18 | 596 | 63 |
| 81,387 | 53 | 0 | 376 | 39 | 14 | 5 | 145 | 18 | 588 | 62 |
| 81,388 | 53 | 0 | 373 | 39 | 14 | 5 | 143 | 17 | 583 | 61 |
| 81,389 | 53 | 0 | 368 | 39 | 14 | 5 | 142 | 17 | 577 | 61 |
| 81,390 | 54 | 0 | 365 | 39 | 14 | 5 | 149 | 18 | 582 | 62 |
| 81,391 | 54 | 0 | 360 | 39 | 13 | 5 | 149 | 18 | 576 | 62 |
| 81,392 | 53 | 0 | 354 | 39 | 13 | 5 | 145 | 18 | 565 | 62 |
| 81,393 | 45 | 0 | 335 | 39 | 13 | 5 | 140 | 20 | 533 | 64 |
| 81,394 | 45 | 0 | 329 | 40 | 12 | 5 | 140 | 20 | 526 | 65 |
| 81,395 | 47 | 1 | 333 | 40 | 11 | 5 | 145 | 19 | 536 | 65 |
| 81,396 | 47 | 1 | 330 | 49 | 11 | 5 | 140 | 27 | 528 | 82 |
| 81,397 | 58 | 2 | 308 | 50 | 10 | 5 | 141 | 27 | 517 | 84 |
| 81,398 | 57 | 2 | 301 | 51 | 10 | 5 | 144 | 27 | 512 | 85 |
| 81,399 | 57 | 3 | 290 | 51 | 9  | 5 | 142 | 27 | 498 | 86 |
| 81,400 | 57 | 3 | 289 | 51 | 9  | 5 | 140 | 27 | 495 | 86 |
| 81,401 | 56 | 3 | 286 | 52 | 9  | 5 | 141 | 27 | 492 | 87 |
| 81,402 | 56 | 3 | 272 | 53 | 8  | 4 | 140 | 27 | 476 | 87 |
| 81,403 | 68 | 4 | 326 | 53 | 9  | 4 | 173 | 27 | 576 | 88 |
| 81,404 | 77 | 4 | 391 | 54 | 13 | 4 | 207 | 27 | 688 | 89 |
| 81,405 | 77 | 4 | 381 | 54 | 13 | 4 | 207 | 26 | 678 | 88 |
| 81,406 | 79 | 4 | 403 | 56 | 14 | 4 | 212 | 27 | 708 | 91 |
| 81,407 | 70 | 4 | 341 | 56 | 12 | 4 | 194 | 27 | 617 | 91 |
| 81,408 | 69 | 4 | 324 | 56 | 12 | 4 | 190 | 28 | 595 | 92 |
| 81,409 | 69 | 4 | 315 | 56 | 12 | 4 | 187 | 28 | 583 | 92 |
| 81,410 | 77 | 4 | 391 | 56 | 15 | 4 | 227 | 27 | 710 | 91 |
| 81,411 | 77 | 4 | 391 | 54 | 15 | 3 | 227 | 27 | 710 | 88 |
| 81,412 | 76 | 4 | 382 | 54 | 14 | 3 | 225 | 27 | 697 | 88 |
| 81,413 | 76 | 5 | 380 | 54 | 14 | 3 | 225 | 27 | 695 | 89 |
| 81,414 | 76 | 5 | 400 | 54 | 14 | 3 | 240 | 27 | 730 | 89 |

|        |     |   |     |    |    |   |     |    |       |    |
|--------|-----|---|-----|----|----|---|-----|----|-------|----|
| 81,415 | 78  | 5 | 424 | 54 | 18 | 3 | 250 | 26 | 770   | 88 |
| 81,416 | 79  | 5 | 435 | 54 | 20 | 3 | 252 | 27 | 786   | 89 |
| 81,417 | 80  | 5 | 436 | 54 | 20 | 3 | 254 | 27 | 790   | 89 |
| 81,418 | 81  | 5 | 443 | 53 | 20 | 3 | 255 | 27 | 799   | 88 |
| 81,419 | 84  | 5 | 456 | 53 | 20 | 3 | 260 | 27 | 820   | 88 |
| 81,420 | 84  | 5 | 457 | 53 | 20 | 3 | 259 | 26 | 820   | 87 |
| 81,421 | 85  | 5 | 468 | 53 | 20 | 3 | 264 | 27 | 837   | 88 |
| 81,422 | 93  | 6 | 541 | 53 | 26 | 2 | 325 | 26 | 985   | 87 |
| 81,423 | 93  | 6 | 541 | 53 | 26 | 2 | 325 | 26 | 985   | 87 |
| 81,424 | 95  | 6 | 592 | 54 | 30 | 2 | 350 | 26 | 1,067 | 88 |
| 81,425 | 95  | 6 | 592 | 54 | 30 | 2 | 348 | 26 | 1,065 | 88 |
| 81,426 | 95  | 7 | 593 | 54 | 30 | 2 | 354 | 26 | 1,072 | 89 |
| 81,427 | 95  | 7 | 593 | 54 | 30 | 2 | 354 | 26 | 1,072 | 89 |
| 81,428 | 95  | 7 | 594 | 54 | 30 | 2 | 354 | 26 | 1,073 | 89 |
| 81,429 | 95  | 7 | 594 | 54 | 30 | 2 | 355 | 26 | 1,074 | 89 |
| 81,430 | 95  | 7 | 594 | 52 | 30 | 2 | 356 | 26 | 1,075 | 87 |
| 81,431 | 95  | 7 | 594 | 43 | 30 | 2 | 354 | 22 | 1,073 | 74 |
| 81,432 | 99  | 7 | 621 | 39 | 31 | 2 | 368 | 20 | 1,119 | 68 |
| 81,433 | 99  | 7 | 626 | 39 | 32 | 0 | 370 | 18 | 1,127 | 64 |
| 81,434 | 99  | 7 | 635 | 38 | 32 | 0 | 376 | 18 | 1,142 | 63 |
| 81,435 | 99  | 7 | 635 | 39 | 32 | 0 | 376 | 18 | 1,142 | 64 |
| 81,436 | 97  | 7 | 634 | 22 | 32 | 0 | 375 | 15 | 1,138 | 44 |
| 81,437 | 97  | 7 | 634 | 20 | 32 | 0 | 370 | 15 | 1,133 | 42 |
| 81,438 | 97  | 7 | 635 | 20 | 32 | 0 | 370 | 15 | 1,134 | 42 |
| 81,439 | 97  | 7 | 632 | 20 | 32 | 0 | 373 | 15 | 1,134 | 42 |
| 81,440 | 97  | 7 | 635 | 20 | 32 | 0 | 374 | 15 | 1,138 | 42 |
| 81,441 | 97  | 7 | 648 | 22 | 32 | 0 | 372 | 15 | 1,149 | 44 |
| 81,442 | 97  | 7 | 647 | 22 | 32 | 0 | 370 | 15 | 1,146 | 44 |
| 81,443 | 97  | 7 | 647 | 22 | 32 | 0 | 372 | 15 | 1,148 | 44 |
| 81,444 | 101 | 7 | 668 | 22 | 32 | 0 | 378 | 14 | 1,179 | 43 |
| 81,445 | 102 | 7 | 673 | 21 | 32 | 0 | 378 | 14 | 1,185 | 42 |
| 81,446 | 100 | 4 | 671 | 10 | 32 | 0 | 374 | 7  | 1,177 | 21 |
| 81,447 | 103 | 4 | 677 | 10 | 33 | 0 | 386 | 7  | 1,199 | 21 |
| 81,448 | 81  | 4 | 632 | 11 | 31 | 0 | 347 | 7  | 1,091 | 22 |
| 81,449 | 80  | 4 | 625 | 11 | 31 | 0 | 345 | 8  | 1,081 | 23 |
| 81,450 | 78  | 4 | 616 | 9  | 31 | 0 | 344 | 8  | 1,069 | 21 |
| 81,451 | 79  | 4 | 616 | 9  | 31 | 0 | 344 | 8  | 1,070 | 21 |
| 81,452 | 73  | 4 | 589 | 9  | 30 | 0 | 326 | 8  | 1,018 | 21 |
| 81,453 | 72  | 5 | 569 | 15 | 30 | 1 | 323 | 15 | 994   | 36 |
| 81,454 | 67  | 4 | 535 | 19 | 26 | 1 | 302 | 17 | 930   | 41 |
| 81,455 | 63  | 4 | 498 | 18 | 26 | 1 | 287 | 20 | 874   | 43 |

|        |    |   |     |    |    |   |     |    |     |     |
|--------|----|---|-----|----|----|---|-----|----|-----|-----|
| 81,456 | 61 | 4 | 492 | 16 | 26 | 1 | 286 | 19 | 865 | 40  |
| 81,457 | 58 | 4 | 458 | 16 | 24 | 1 | 276 | 19 | 816 | 40  |
| 81,458 | 49 | 4 | 427 | 17 | 24 | 1 | 247 | 19 | 747 | 41  |
| 81,459 | 41 | 4 | 356 | 17 | 21 | 1 | 208 | 18 | 626 | 40  |
| 81,460 | 41 | 4 | 349 | 17 | 21 | 1 | 204 | 18 | 615 | 40  |
| 81,461 | 42 | 4 | 350 | 20 | 21 | 1 | 205 | 18 | 618 | 43  |
| 81,462 | 42 | 4 | 362 | 22 | 21 | 3 | 207 | 19 | 632 | 48  |
| 81,463 | 50 | 4 | 378 | 22 | 21 | 3 | 229 | 19 | 678 | 48  |
| 81,464 | 51 | 3 | 383 | 37 | 21 | 3 | 231 | 19 | 686 | 62  |
| 81,465 | 51 | 3 | 365 | 45 | 22 | 4 | 214 | 20 | 652 | 72  |
| 81,466 | 50 | 3 | 344 | 50 | 18 | 4 | 211 | 23 | 623 | 80  |
| 81,467 | 50 | 3 | 333 | 51 | 16 | 4 | 211 | 22 | 610 | 80  |
| 81,468 | 49 | 4 | 336 | 53 | 16 | 4 | 209 | 23 | 610 | 84  |
| 81,469 | 47 | 5 | 324 | 70 | 16 | 4 | 207 | 25 | 594 | 104 |
| 81,470 | 44 | 5 | 312 | 73 | 16 | 4 | 202 | 25 | 574 | 107 |
| 81,471 | 44 | 5 | 322 | 78 | 16 | 4 | 198 | 25 | 580 | 112 |
| 81,472 | 42 | 5 | 297 | 79 | 15 | 4 | 179 | 25 | 533 | 113 |
| 81,473 | 47 | 4 | 306 | 79 | 10 | 4 | 160 | 25 | 523 | 112 |
| 81,474 | 56 | 4 | 357 | 78 | 13 | 4 | 196 | 25 | 622 | 111 |
| 81,475 | 57 | 4 | 351 | 78 | 12 | 4 | 192 | 25 | 612 | 111 |
| 81,476 | 59 | 5 | 363 | 78 | 15 | 4 | 211 | 25 | 648 | 112 |
| 81,477 | 59 | 4 | 363 | 78 | 15 | 4 | 211 | 25 | 648 | 111 |
| 81,478 | 66 | 4 | 382 | 78 | 19 | 4 | 276 | 25 | 743 | 111 |
| 81,479 | 66 | 4 | 382 | 78 | 19 | 4 | 275 | 25 | 742 | 111 |
| 81,480 | 61 | 4 | 375 | 78 | 20 | 4 | 280 | 25 | 736 | 111 |
| 81,481 | 63 | 4 | 376 | 88 | 21 | 5 | 282 | 30 | 742 | 127 |
| 81,482 | 64 | 4 | 379 | 88 | 21 | 5 | 283 | 30 | 747 | 127 |
| 81,483 | 64 | 4 | 371 | 92 | 21 | 5 | 276 | 32 | 732 | 133 |
| 81,484 | 64 | 5 | 368 | 92 | 20 | 5 | 275 | 33 | 727 | 135 |
| 81,485 | 64 | 5 | 359 | 92 | 20 | 5 | 269 | 33 | 712 | 135 |
| 81,486 | 64 | 7 | 368 | 91 | 20 | 5 | 275 | 34 | 727 | 137 |
| 81,487 | 64 | 7 | 366 | 92 | 20 | 5 | 273 | 34 | 723 | 138 |
| 81,488 | 64 | 7 | 368 | 92 | 20 | 5 | 273 | 33 | 725 | 137 |
| 81,489 | 64 | 7 | 367 | 94 | 20 | 5 | 274 | 33 | 725 | 139 |
| 81,490 | 64 | 7 | 367 | 94 | 20 | 5 | 274 | 33 | 725 | 139 |
| 81,491 | 64 | 7 | 363 | 94 | 20 | 5 | 273 | 33 | 720 | 139 |
| 81,492 | 63 | 7 | 350 | 92 | 20 | 5 | 269 | 33 | 702 | 137 |
| 81,493 | 62 | 7 | 348 | 92 | 20 | 5 | 267 | 33 | 697 | 137 |
| 81,494 | 58 | 7 | 332 | 92 | 20 | 5 | 263 | 32 | 673 | 136 |
| 81,495 | 58 | 7 | 328 | 92 | 20 | 5 | 262 | 32 | 668 | 136 |
| 81,496 | 57 | 7 | 327 | 92 | 22 | 5 | 263 | 31 | 669 | 135 |

|        |    |   |     |    |    |   |     |    |     |     |
|--------|----|---|-----|----|----|---|-----|----|-----|-----|
| 81,497 | 57 | 8 | 326 | 93 | 22 | 5 | 263 | 32 | 668 | 138 |
| 81,498 | 54 | 9 | 319 | 98 | 21 | 5 | 251 | 33 | 645 | 145 |
| 81,499 | 56 | 9 | 315 | 97 | 21 | 5 | 251 | 34 | 643 | 145 |
| 81,500 | 56 | 9 | 313 | 97 | 21 | 5 | 250 | 33 | 640 | 144 |
| 81,501 | 56 | 9 | 307 | 97 | 21 | 5 | 245 | 33 | 629 | 144 |
| 81,502 | 56 | 9 | 307 | 97 | 21 | 5 | 251 | 33 | 635 | 144 |
| 81,503 | 56 | 9 | 307 | 97 | 21 | 5 | 251 | 35 | 635 | 146 |
| 81,504 | 55 | 8 | 306 | 91 | 20 | 4 | 246 | 28 | 627 | 131 |
| 81,505 | 55 | 8 | 306 | 87 | 20 | 4 | 246 | 26 | 627 | 125 |
| 81,506 | 55 | 8 | 306 | 87 | 20 | 4 | 246 | 23 | 627 | 122 |
| 81,507 | 55 | 8 | 304 | 87 | 20 | 4 | 247 | 23 | 626 | 122 |
| 81,508 | 55 | 8 | 304 | 86 | 20 | 4 | 247 | 23 | 626 | 121 |
| 81,509 | 55 | 8 | 302 | 86 | 20 | 4 | 247 | 23 | 624 | 121 |
| 81,510 | 57 | 8 | 300 | 86 | 20 | 4 | 248 | 23 | 625 | 121 |
| 81,511 | 56 | 8 | 298 | 86 | 20 | 4 | 247 | 23 | 621 | 121 |
| 81,512 | 58 | 8 | 303 | 82 | 22 | 2 | 248 | 22 | 631 | 114 |
| 81,513 | 58 | 8 | 304 | 82 | 22 | 2 | 249 | 22 | 633 | 114 |
| 81,514 | 50 | 8 | 288 | 82 | 21 | 2 | 227 | 22 | 586 | 114 |
| 81,515 | 49 | 8 | 281 | 67 | 21 | 2 | 225 | 22 | 576 | 99  |
| 81,516 | 49 | 8 | 280 | 61 | 21 | 1 | 226 | 22 | 576 | 92  |
| 81,517 | 48 | 8 | 278 | 56 | 21 | 1 | 219 | 19 | 566 | 84  |
| 81,518 | 47 | 7 | 278 | 53 | 21 | 1 | 217 | 18 | 563 | 79  |
| 81,519 | 47 | 6 | 277 | 36 | 21 | 1 | 217 | 16 | 562 | 59  |
| 81,520 | 49 | 6 | 279 | 34 | 21 | 1 | 225 | 16 | 574 | 57  |
| 81,521 | 49 | 6 | 281 | 29 | 21 | 1 | 232 | 16 | 583 | 52  |
| 81,522 | 48 | 6 | 261 | 28 | 21 | 1 | 234 | 15 | 564 | 50  |
| 81,523 | 48 | 6 | 259 | 28 | 21 | 1 | 234 | 15 | 562 | 50  |
| 81,524 | 39 | 6 | 213 | 28 | 22 | 1 | 219 | 17 | 493 | 52  |
| 81,525 | 28 | 6 | 123 | 28 | 17 | 1 | 164 | 17 | 332 | 52  |
| 81,526 | 27 | 7 | 123 | 31 | 17 | 2 | 163 | 18 | 330 | 58  |
| 81,527 | 27 | 7 | 120 | 33 | 14 | 2 | 153 | 24 | 314 | 66  |
| 81,528 | 26 | 7 | 150 | 33 | 13 | 2 | 194 | 24 | 383 | 66  |
| 81,529 | 33 | 7 | 211 | 33 | 16 | 2 | 226 | 24 | 486 | 66  |
| 81,530 | 37 | 7 | 263 | 33 | 16 | 2 | 268 | 24 | 584 | 66  |
| 81,531 | 37 | 7 | 281 | 23 | 17 | 1 | 273 | 19 | 608 | 50  |
| 81,532 | 35 | 7 | 279 | 23 | 16 | 5 | 275 | 20 | 605 | 55  |
| 81,533 | 34 | 7 | 273 | 23 | 16 | 6 | 271 | 20 | 594 | 56  |
| 81,534 | 37 | 7 | 281 | 26 | 17 | 7 | 273 | 28 | 608 | 68  |
| 81,535 | 37 | 6 | 282 | 26 | 17 | 7 | 275 | 28 | 611 | 67  |
| 81,536 | 37 | 6 | 275 | 26 | 17 | 7 | 270 | 28 | 599 | 67  |
| 81,537 | 42 | 6 | 284 | 37 | 18 | 7 | 279 | 29 | 623 | 79  |

|        |     |    |       |    |    |   |     |    |       |     |
|--------|-----|----|-------|----|----|---|-----|----|-------|-----|
| 81,538 | 42  | 7  | 281   | 36 | 18 | 7 | 279 | 29 | 620   | 79  |
| 81,539 | 49  | 8  | 303   | 36 | 18 | 7 | 287 | 30 | 657   | 81  |
| 81,540 | 49  | 8  | 317   | 34 | 18 | 7 | 288 | 30 | 672   | 79  |
| 81,541 | 49  | 8  | 319   | 35 | 18 | 7 | 289 | 30 | 675   | 80  |
| 81,542 | 83  | 8  | 528   | 35 | 25 | 7 | 437 | 30 | 1,073 | 80  |
| 81,543 | 87  | 8  | 559   | 35 | 25 | 7 | 454 | 30 | 1,125 | 80  |
| 81,544 | 109 | 9  | 635   | 35 | 27 | 7 | 520 | 30 | 1,291 | 81  |
| 81,545 | 109 | 9  | 635   | 35 | 27 | 7 | 519 | 31 | 1,290 | 82  |
| 81,546 | 164 | 7  | 941   | 30 | 54 | 7 | 679 | 30 | 1,838 | 74  |
| 81,547 | 170 | 7  | 995   | 30 | 57 | 7 | 720 | 30 | 1,942 | 74  |
| 81,548 | 175 | 7  | 1,033 | 30 | 63 | 7 | 766 | 29 | 2,037 | 73  |
| 81,549 | 176 | 8  | 1,071 | 30 | 64 | 7 | 798 | 30 | 2,109 | 75  |
| 81,550 | 174 | 8  | 1,076 | 31 | 63 | 7 | 799 | 30 | 2,112 | 76  |
| 81,551 | 177 | 8  | 1,094 | 32 | 63 | 7 | 824 | 32 | 2,158 | 79  |
| 81,552 | 174 | 8  | 1,092 | 32 | 63 | 7 | 815 | 32 | 2,144 | 79  |
| 81,553 | 177 | 8  | 1,098 | 34 | 63 | 7 | 818 | 32 | 2,156 | 81  |
| 81,554 | 178 | 9  | 1,114 | 34 | 63 | 7 | 831 | 30 | 2,186 | 80  |
| 81,555 | 178 | 9  | 1,118 | 34 | 63 | 7 | 831 | 30 | 2,190 | 80  |
| 81,556 | 178 | 9  | 1,118 | 34 | 63 | 7 | 831 | 30 | 2,190 | 80  |
| 81,557 | 182 | 9  | 1,119 | 34 | 64 | 7 | 845 | 30 | 2,210 | 80  |
| 81,558 | 181 | 9  | 1,124 | 34 | 64 | 7 | 846 | 30 | 2,215 | 80  |
| 81,559 | 181 | 9  | 1,124 | 35 | 64 | 8 | 846 | 31 | 2,215 | 83  |
| 81,560 | 181 | 9  | 1,124 | 39 | 64 | 9 | 849 | 34 | 2,218 | 91  |
| 81,561 | 179 | 9  | 1,124 | 41 | 64 | 9 | 848 | 34 | 2,215 | 93  |
| 81,562 | 177 | 9  | 1,120 | 42 | 63 | 9 | 847 | 35 | 2,207 | 95  |
| 81,563 | 177 | 10 | 1,113 | 41 | 62 | 9 | 846 | 35 | 2,198 | 95  |
| 81,564 | 177 | 10 | 1,108 | 41 | 62 | 9 | 844 | 35 | 2,191 | 95  |
| 81,565 | 177 | 10 | 1,105 | 41 | 62 | 9 | 843 | 35 | 2,187 | 95  |
| 81,566 | 177 | 10 | 1,109 | 41 | 62 | 9 | 843 | 35 | 2,191 | 95  |
| 81,567 | 177 | 10 | 1,109 | 39 | 62 | 9 | 845 | 34 | 2,193 | 92  |
| 81,568 | 177 | 10 | 1,110 | 39 | 62 | 9 | 845 | 34 | 2,194 | 92  |
| 81,569 | 177 | 10 | 1,110 | 38 | 62 | 9 | 845 | 34 | 2,194 | 91  |
| 81,570 | 177 | 10 | 1,108 | 38 | 62 | 9 | 845 | 34 | 2,192 | 91  |
| 81,571 | 176 | 10 | 1,106 | 39 | 62 | 9 | 837 | 34 | 2,181 | 92  |
| 81,572 | 176 | 10 | 1,102 | 39 | 62 | 9 | 830 | 34 | 2,170 | 92  |
| 81,573 | 176 | 10 | 1,101 | 39 | 62 | 9 | 826 | 32 | 2,165 | 90  |
| 81,574 | 176 | 10 | 1,099 | 44 | 62 | 9 | 826 | 33 | 2,163 | 96  |
| 81,575 | 174 | 10 | 1,092 | 49 | 61 | 9 | 819 | 37 | 2,146 | 105 |
| 81,576 | 173 | 11 | 1,085 | 51 | 60 | 9 | 816 | 39 | 2,134 | 110 |
| 81,577 | 174 | 9  | 1,088 | 48 | 60 | 8 | 815 | 32 | 2,137 | 97  |
| 81,578 | 173 | 10 | 1,081 | 61 | 60 | 9 | 807 | 37 | 2,121 | 117 |

|        |     |    |       |     |    |    |     |    |       |     |
|--------|-----|----|-------|-----|----|----|-----|----|-------|-----|
| 81,579 | 172 | 10 | 1,042 | 62  | 60 | 9  | 732 | 37 | 2,006 | 118 |
| 81,580 | 161 | 12 | 971   | 76  | 54 | 10 | 665 | 45 | 1,851 | 143 |
| 81,581 | 157 | 12 | 917   | 84  | 53 | 10 | 621 | 48 | 1,748 | 154 |
| 81,582 | 157 | 12 | 895   | 84  | 51 | 10 | 611 | 48 | 1,714 | 154 |
| 81,583 | 157 | 12 | 891   | 86  | 51 | 6  | 608 | 47 | 1,707 | 151 |
| 81,584 | 157 | 12 | 889   | 89  | 50 | 5  | 608 | 48 | 1,704 | 154 |
| 81,585 | 154 | 12 | 882   | 88  | 50 | 4  | 606 | 38 | 1,692 | 142 |
| 81,586 | 154 | 12 | 880   | 88  | 50 | 4  | 606 | 38 | 1,690 | 142 |
| 81,587 | 149 | 10 | 871   | 79  | 49 | 4  | 599 | 36 | 1,668 | 129 |
| 81,588 | 149 | 10 | 870   | 79  | 49 | 4  | 597 | 37 | 1,665 | 130 |
| 81,589 | 142 | 9  | 848   | 81  | 49 | 4  | 588 | 37 | 1,627 | 131 |
| 81,590 | 142 | 8  | 837   | 81  | 49 | 4  | 588 | 36 | 1,616 | 129 |
| 81,591 | 142 | 8  | 836   | 82  | 49 | 4  | 589 | 36 | 1,616 | 130 |
| 81,592 | 109 | 8  | 627   | 83  | 42 | 4  | 441 | 38 | 1,219 | 133 |
| 81,593 | 106 | 7  | 612   | 84  | 42 | 4  | 431 | 38 | 1,191 | 133 |
| 81,594 | 105 | 7  | 601   | 90  | 42 | 4  | 422 | 40 | 1,170 | 141 |
| 81,595 | 84  | 7  | 535   | 110 | 40 | 6  | 357 | 46 | 1,016 | 169 |
| 81,596 | 69  | 8  | 439   | 118 | 39 | 6  | 314 | 52 | 861   | 184 |
| 81,597 | 29  | 8  | 227   | 118 | 12 | 7  | 195 | 52 | 463   | 185 |
| 81,598 | 25  | 8  | 185   | 118 | 8  | 8  | 152 | 52 | 370   | 186 |
| 81,599 | 21  | 7  | 149   | 118 | 2  | 8  | 114 | 51 | 286   | 184 |
| 81,600 | 22  | 7  | 112   | 116 | 1  | 8  | 81  | 49 | 216   | 180 |
| 81,601 | 22  | 7  | 102   | 117 | 1  | 8  | 78  | 49 | 203   | 181 |
| 81,602 | 19  | 7  | 91    | 117 | 1  | 8  | 52  | 50 | 163   | 182 |
| 81,603 | 16  | 7  | 85    | 117 | 1  | 9  | 49  | 51 | 151   | 184 |
| 81,604 | 16  | 7  | 79    | 115 | 1  | 9  | 48  | 51 | 144   | 182 |
| 81,605 | 16  | 6  | 84    | 115 | 2  | 9  | 45  | 51 | 147   | 181 |
| 81,606 | 16  | 6  | 82    | 119 | 2  | 9  | 45  | 51 | 145   | 185 |
| 81,607 | 13  | 6  | 88    | 119 | 1  | 9  | 33  | 51 | 135   | 185 |
| 81,608 | 13  | 6  | 85    | 119 | 1  | 9  | 31  | 51 | 130   | 185 |
| 81,609 | 13  | 6  | 88    | 118 | 1  | 8  | 36  | 50 | 138   | 182 |
| 81,610 | 13  | 6  | 87    | 118 | 1  | 8  | 36  | 50 | 137   | 182 |
| 81,611 | 13  | 6  | 88    | 114 | 1  | 7  | 35  | 47 | 137   | 174 |
| 81,612 | 13  | 6  | 88    | 112 | 1  | 7  | 35  | 47 | 137   | 172 |
| 81,613 | 13  | 6  | 88    | 112 | 1  | 7  | 35  | 46 | 137   | 171 |
| 81,614 | 13  | 5  | 88    | 112 | 1  | 7  | 35  | 46 | 137   | 170 |
| 81,615 | 14  | 5  | 91    | 112 | 1  | 7  | 36  | 46 | 142   | 170 |
| 81,616 | 15  | 5  | 95    | 112 | 1  | 7  | 37  | 46 | 148   | 170 |
| 81,617 | 23  | 5  | 169   | 112 | 3  | 7  | 48  | 46 | 243   | 170 |
| 81,618 | 26  | 5  | 283   | 112 | 8  | 7  | 83  | 46 | 400   | 170 |
| 81,619 | 26  | 5  | 283   | 112 | 8  | 7  | 83  | 46 | 400   | 170 |

|        |    |   |       |     |    |   |     |    |       |     |
|--------|----|---|-------|-----|----|---|-----|----|-------|-----|
| 81,620 | 41 | 5 | 1,016 | 111 | 25 | 7 | 263 | 46 | 1,345 | 169 |
| 81,621 | 42 | 5 | 1,062 | 111 | 28 | 7 | 283 | 46 | 1,415 | 169 |
| 81,622 | 41 | 5 | 1,061 | 114 | 28 | 7 | 283 | 46 | 1,413 | 172 |
| 81,623 | 41 | 5 | 1,061 | 115 | 28 | 7 | 285 | 47 | 1,415 | 174 |
| 81,624 | 41 | 6 | 1,062 | 118 | 28 | 7 | 286 | 48 | 1,417 | 179 |
| 81,625 | 41 | 6 | 1,063 | 123 | 28 | 7 | 291 | 48 | 1,423 | 184 |
| 81,626 | 41 | 6 | 1,064 | 119 | 28 | 7 | 291 | 44 | 1,424 | 176 |
| 81,627 | 41 | 6 | 1,064 | 122 | 28 | 7 | 291 | 43 | 1,424 | 178 |
| 81,628 | 39 | 6 | 1,058 | 120 | 28 | 8 | 288 | 43 | 1,413 | 177 |
| 81,629 | 39 | 5 | 1,070 | 107 | 28 | 7 | 293 | 39 | 1,430 | 158 |
| 81,630 | 39 | 5 | 1,073 | 106 | 28 | 7 | 294 | 39 | 1,434 | 157 |
| 81,631 | 39 | 3 | 1,074 | 92  | 28 | 6 | 294 | 31 | 1,435 | 132 |
| 81,632 | 39 | 3 | 1,085 | 82  | 28 | 6 | 302 | 28 | 1,454 | 119 |
| 81,633 | 39 | 3 | 1,090 | 82  | 28 | 6 | 304 | 28 | 1,461 | 119 |
| 81,634 | 39 | 3 | 1,091 | 86  | 28 | 6 | 304 | 28 | 1,462 | 123 |
| 81,635 | 39 | 3 | 1,089 | 84  | 28 | 6 | 304 | 27 | 1,460 | 120 |
| 81,636 | 39 | 4 | 1,092 | 78  | 28 | 6 | 304 | 26 | 1,463 | 114 |
| 81,637 | 40 | 4 | 1,094 | 78  | 28 | 6 | 305 | 26 | 1,467 | 114 |
| 81,638 | 40 | 4 | 1,095 | 76  | 28 | 6 | 308 | 26 | 1,471 | 112 |
| 81,639 | 40 | 4 | 1,101 | 76  | 28 | 6 | 313 | 25 | 1,482 | 111 |
| 81,640 | 42 | 4 | 1,125 | 73  | 30 | 6 | 325 | 25 | 1,522 | 108 |
| 81,641 | 42 | 4 | 1,122 | 73  | 30 | 6 | 326 | 25 | 1,520 | 108 |
| 81,642 | 42 | 4 | 1,121 | 72  | 30 | 6 | 324 | 25 | 1,517 | 107 |
| 81,643 | 41 | 4 | 1,123 | 71  | 30 | 6 | 324 | 23 | 1,518 | 104 |
| 81,644 | 42 | 4 | 1,123 | 64  | 30 | 6 | 328 | 21 | 1,523 | 95  |
| 81,645 | 42 | 4 | 1,119 | 64  | 30 | 6 | 328 | 21 | 1,519 | 95  |
| 81,646 | 41 | 3 | 1,110 | 36  | 30 | 4 | 327 | 8  | 1,508 | 51  |
| 81,647 | 41 | 3 | 1,108 | 35  | 30 | 3 | 326 | 7  | 1,505 | 48  |
| 81,648 | 41 | 3 | 1,105 | 35  | 30 | 2 | 326 | 7  | 1,502 | 47  |
| 81,649 | 39 | 3 | 1,093 | 35  | 30 | 2 | 325 | 7  | 1,487 | 47  |
| 81,650 | 38 | 3 | 1,089 | 35  | 30 | 2 | 320 | 7  | 1,477 | 47  |
| 81,651 | 36 | 3 | 1,089 | 34  | 30 | 2 | 319 | 7  | 1,474 | 46  |
| 81,652 | 36 | 3 | 1,089 | 34  | 30 | 2 | 319 | 6  | 1,474 | 45  |
| 81,653 | 35 | 3 | 1,081 | 34  | 30 | 1 | 319 | 5  | 1,465 | 43  |
| 81,654 | 35 | 3 | 1,077 | 35  | 30 | 1 | 315 | 5  | 1,457 | 44  |
| 81,655 | 34 | 3 | 1,068 | 31  | 29 | 1 | 309 | 5  | 1,440 | 40  |
| 81,656 | 34 | 3 | 1,068 | 31  | 29 | 1 | 309 | 5  | 1,440 | 40  |
| 81,657 | 34 | 3 | 1,068 | 31  | 29 | 1 | 309 | 6  | 1,440 | 41  |
| 81,658 | 33 | 3 | 1,061 | 31  | 29 | 1 | 308 | 6  | 1,431 | 41  |
| 81,659 | 33 | 4 | 1,063 | 31  | 29 | 1 | 306 | 6  | 1,431 | 42  |
| 81,660 | 33 | 4 | 1,061 | 31  | 29 | 1 | 305 | 6  | 1,428 | 42  |



|        |    |   |       |    |    |   |     |    |       |     |
|--------|----|---|-------|----|----|---|-----|----|-------|-----|
| 81,661 | 33 | 4 | 1,061 | 31 | 29 | 1 | 305 | 6  | 1,428 | 42  |
| 81,662 | 36 | 4 | 1,075 | 31 | 30 | 1 | 305 | 6  | 1,446 | 42  |
| 81,663 | 36 | 4 | 1,078 | 31 | 30 | 1 | 305 | 6  | 1,449 | 42  |
| 81,664 | 36 | 4 | 1,082 | 33 | 30 | 1 | 306 | 12 | 1,454 | 50  |
| 81,665 | 35 | 4 | 1,090 | 37 | 30 | 2 | 312 | 15 | 1,467 | 58  |
| 81,666 | 35 | 5 | 1,092 | 54 | 30 | 3 | 313 | 27 | 1,470 | 89  |
| 81,667 | 34 | 5 | 1,091 | 61 | 30 | 4 | 314 | 28 | 1,469 | 98  |
| 81,668 | 26 | 5 | 1,022 | 61 | 28 | 4 | 303 | 29 | 1,379 | 99  |
| 81,669 | 23 | 5 | 923   | 62 | 24 | 4 | 270 | 29 | 1,240 | 100 |
| 81,670 | 22 | 5 | 821   | 62 | 21 | 4 | 229 | 29 | 1,093 | 100 |
| 81,671 | 10 | 5 | 216   | 62 | 9  | 4 | 104 | 29 | 339   | 100 |
| 81,672 | 9  | 5 | 171   | 62 | 6  | 4 | 84  | 29 | 270   | 100 |
| 81,673 | 9  | 5 | 186   | 59 | 6  | 4 | 87  | 28 | 288   | 96  |
| 81,674 | 11 | 5 | 205   | 59 | 8  | 4 | 98  | 30 | 322   | 98  |
| 81,675 | 11 | 4 | 212   | 56 | 8  | 4 | 93  | 29 | 324   | 93  |
| 81,676 | 11 | 4 | 226   | 45 | 9  | 4 | 98  | 28 | 344   | 81  |
| 81,677 | 13 | 4 | 247   | 46 | 9  | 4 | 100 | 28 | 369   | 82  |
| 81,678 | 13 | 3 | 265   | 42 | 10 | 3 | 97  | 27 | 385   | 75  |
| 81,679 | 13 | 3 | 259   | 42 | 10 | 3 | 97  | 27 | 379   | 75  |
| 81,680 | 18 | 3 | 353   | 42 | 11 | 3 | 131 | 26 | 513   | 74  |
| 81,681 | 21 | 3 | 397   | 42 | 14 | 3 | 165 | 26 | 597   | 74  |
| 81,682 | 21 | 3 | 402   | 43 | 15 | 3 | 167 | 27 | 605   | 76  |
| 81,683 | 21 | 3 | 400   | 44 | 15 | 3 | 162 | 27 | 598   | 77  |
| 81,684 | 24 | 3 | 431   | 40 | 16 | 3 | 179 | 27 | 650   | 73  |
| 81,685 | 24 | 2 | 430   | 42 | 16 | 3 | 179 | 27 | 649   | 74  |
| 81,686 | 27 | 2 | 458   | 42 | 16 | 3 | 187 | 27 | 688   | 74  |
| 81,687 | 28 | 2 | 467   | 43 | 16 | 3 | 191 | 27 | 702   | 75  |
| 81,688 | 32 | 2 | 500   | 43 | 16 | 3 | 193 | 27 | 741   | 75  |
| 81,689 | 32 | 2 | 494   | 43 | 16 | 4 | 188 | 27 | 730   | 76  |
| 81,690 | 32 | 2 | 501   | 43 | 15 | 4 | 190 | 27 | 738   | 76  |
| 81,691 | 31 | 2 | 517   | 43 | 14 | 4 | 193 | 27 | 755   | 76  |
| 81,692 | 31 | 2 | 542   | 43 | 16 | 4 | 213 | 28 | 802   | 77  |
| 81,693 | 31 | 2 | 540   | 43 | 16 | 4 | 213 | 29 | 800   | 78  |
| 81,694 | 31 | 2 | 578   | 43 | 16 | 4 | 219 | 29 | 844   | 78  |
| 81,695 | 33 | 2 | 591   | 44 | 16 | 4 | 220 | 29 | 860   | 79  |
| 81,696 | 34 | 2 | 597   | 44 | 17 | 4 | 220 | 29 | 868   | 79  |
| 81,697 | 34 | 2 | 597   | 44 | 17 | 4 | 220 | 29 | 868   | 79  |
| 81,698 | 34 | 2 | 607   | 45 | 17 | 4 | 221 | 29 | 879   | 80  |
| 81,699 | 41 | 2 | 679   | 48 | 19 | 4 | 235 | 30 | 974   | 84  |
| 81,700 | 41 | 2 | 679   | 48 | 19 | 4 | 235 | 30 | 974   | 84  |
| 81,701 | 47 | 2 | 758   | 50 | 22 | 4 | 266 | 30 | 1,093 | 86  |

|        |    |   |       |    |    |   |     |    |       |     |
|--------|----|---|-------|----|----|---|-----|----|-------|-----|
| 81,702 | 76 | 3 | 1,129 | 58 | 32 | 5 | 436 | 34 | 1,673 | 100 |
| 81,703 | 80 | 3 | 1,161 | 59 | 38 | 5 | 449 | 37 | 1,728 | 104 |
| 81,704 | 81 | 3 | 1,208 | 62 | 42 | 5 | 485 | 37 | 1,816 | 107 |
| 81,705 | 81 | 3 | 1,207 | 62 | 42 | 5 | 485 | 37 | 1,815 | 107 |
| 81,706 | 81 | 3 | 1,204 | 62 | 42 | 5 | 485 | 37 | 1,812 | 107 |
| 81,707 | 83 | 3 | 1,249 | 62 | 43 | 5 | 507 | 37 | 1,882 | 107 |
| 81,708 | 83 | 3 | 1,248 | 62 | 43 | 5 | 507 | 35 | 1,881 | 105 |
| 81,709 | 83 | 3 | 1,265 | 65 | 43 | 5 | 511 | 35 | 1,902 | 108 |
| 81,710 | 83 | 2 | 1,272 | 68 | 44 | 5 | 512 | 38 | 1,911 | 113 |
| 81,711 | 82 | 2 | 1,274 | 71 | 43 | 5 | 512 | 39 | 1,911 | 117 |
| 81,712 | 82 | 2 | 1,286 | 71 | 43 | 6 | 512 | 39 | 1,923 | 118 |
| 81,713 | 82 | 2 | 1,293 | 71 | 43 | 6 | 515 | 39 | 1,933 | 118 |
| 81,714 | 82 | 2 | 1,308 | 73 | 43 | 6 | 518 | 41 | 1,951 | 122 |
| 81,715 | 82 | 2 | 1,324 | 71 | 43 | 6 | 512 | 36 | 1,961 | 115 |
| 81,716 | 82 | 2 | 1,336 | 70 | 43 | 6 | 512 | 35 | 1,973 | 113 |
| 81,717 | 82 | 1 | 1,330 | 53 | 43 | 5 | 511 | 24 | 1,966 | 83  |
| 81,718 | 82 | 1 | 1,341 | 47 | 43 | 4 | 509 | 25 | 1,975 | 77  |
| 81,719 | 82 | 1 | 1,360 | 47 | 43 | 4 | 508 | 24 | 1,993 | 76  |
| 81,720 | 83 | 1 | 1,358 | 46 | 42 | 4 | 507 | 24 | 1,990 | 75  |
| 81,721 | 84 | 1 | 1,366 | 46 | 43 | 4 | 509 | 24 | 2,002 | 75  |
| 81,722 | 86 | 1 | 1,466 | 47 | 42 | 4 | 549 | 24 | 2,143 | 76  |
| 81,723 | 86 | 1 | 1,467 | 46 | 43 | 4 | 547 | 24 | 2,143 | 75  |
| 81,724 | 86 | 1 | 1,463 | 46 | 43 | 4 | 544 | 24 | 2,136 | 75  |
| 81,725 | 85 | 1 | 1,464 | 47 | 42 | 4 | 535 | 23 | 2,126 | 75  |
| 81,726 | 87 | 1 | 1,461 | 47 | 42 | 4 | 539 | 24 | 2,129 | 76  |
| 81,727 | 87 | 1 | 1,448 | 49 | 41 | 4 | 534 | 24 | 2,110 | 78  |
| 81,728 | 85 | 1 | 1,426 | 48 | 41 | 4 | 532 | 25 | 2,084 | 78  |
| 81,729 | 88 | 1 | 1,468 | 47 | 42 | 4 | 567 | 26 | 2,165 | 78  |
| 81,730 | 83 | 1 | 1,396 | 47 | 41 | 4 | 537 | 26 | 2,057 | 78  |
| 81,731 | 83 | 1 | 1,378 | 47 | 41 | 4 | 533 | 26 | 2,035 | 78  |
| 81,732 | 82 | 1 | 1,366 | 47 | 42 | 4 | 509 | 27 | 1,999 | 79  |
| 81,733 | 83 | 1 | 1,356 | 45 | 41 | 4 | 503 | 26 | 1,983 | 76  |
| 81,734 | 80 | 1 | 1,361 | 45 | 40 | 4 | 502 | 26 | 1,983 | 76  |
| 81,735 | 80 | 1 | 1,344 | 44 | 40 | 4 | 489 | 26 | 1,953 | 75  |
| 81,736 | 79 | 1 | 1,333 | 44 | 40 | 4 | 489 | 26 | 1,941 | 75  |
| 81,737 | 77 | 1 | 1,331 | 43 | 40 | 3 | 483 | 26 | 1,931 | 73  |
| 81,738 | 76 | 1 | 1,326 | 43 | 40 | 3 | 479 | 26 | 1,921 | 73  |
| 81,739 | 73 | 1 | 1,296 | 43 | 40 | 3 | 474 | 26 | 1,883 | 73  |
| 81,740 | 72 | 1 | 1,296 | 43 | 40 | 3 | 473 | 26 | 1,881 | 73  |
| 81,741 | 72 | 1 | 1,288 | 42 | 41 | 3 | 466 | 24 | 1,867 | 70  |
| 81,742 | 72 | 1 | 1,273 | 42 | 41 | 3 | 460 | 24 | 1,846 | 70  |

|        |    |   |       |    |    |   |     |    |       |    |
|--------|----|---|-------|----|----|---|-----|----|-------|----|
| 81,743 | 71 | 1 | 1,258 | 42 | 39 | 3 | 439 | 24 | 1,807 | 70 |
| 81,744 | 72 | 1 | 1,238 | 42 | 39 | 3 | 434 | 24 | 1,783 | 70 |
| 81,745 | 72 | 1 | 1,235 | 41 | 39 | 3 | 431 | 24 | 1,777 | 69 |
| 81,746 | 70 | 1 | 1,230 | 41 | 39 | 3 | 431 | 24 | 1,770 | 69 |
| 81,747 | 69 | 1 | 1,228 | 41 | 38 | 3 | 431 | 24 | 1,766 | 69 |
| 81,748 | 69 | 1 | 1,218 | 41 | 38 | 3 | 430 | 24 | 1,755 | 69 |
| 81,749 | 65 | 1 | 1,202 | 44 | 36 | 4 | 428 | 25 | 1,731 | 74 |
| 81,750 | 62 | 1 | 1,170 | 45 | 37 | 4 | 435 | 26 | 1,704 | 76 |
| 81,751 | 56 | 1 | 1,093 | 46 | 35 | 4 | 404 | 29 | 1,588 | 80 |
| 81,752 | 54 | 1 | 997   | 45 | 32 | 5 | 388 | 29 | 1,471 | 80 |
| 81,753 | 28 | 0 | 748   | 37 | 28 | 4 | 244 | 25 | 1,048 | 66 |
| 81,754 | 24 | 0 | 725   | 33 | 22 | 4 | 232 | 23 | 1,003 | 60 |
| 81,755 | 23 | 0 | 678   | 36 | 18 | 4 | 196 | 23 | 915   | 63 |
| 81,756 | 22 | 0 | 682   | 41 | 19 | 4 | 185 | 26 | 908   | 71 |
| 81,757 | 22 | 0 | 676   | 41 | 18 | 4 | 181 | 26 | 897   | 71 |
| 81,758 | 22 | 0 | 683   | 41 | 19 | 4 | 178 | 30 | 902   | 75 |
| 81,759 | 22 | 0 | 671   | 41 | 19 | 4 | 177 | 31 | 889   | 76 |
| 81,760 | 22 | 0 | 681   | 40 | 19 | 4 | 179 | 31 | 901   | 75 |
| 81,761 | 22 | 0 | 677   | 38 | 18 | 4 | 180 | 29 | 897   | 71 |
| 81,762 | 30 | 0 | 770   | 35 | 23 | 4 | 219 | 28 | 1,042 | 67 |
| 81,763 | 35 | 0 | 834   | 37 | 24 | 3 | 247 | 28 | 1,140 | 68 |
| 81,764 | 35 | 0 | 883   | 31 | 29 | 2 | 253 | 23 | 1,200 | 56 |
| 81,765 | 36 | 0 | 895   | 31 | 31 | 2 | 270 | 23 | 1,232 | 56 |
| 81,766 | 36 | 0 | 887   | 31 | 31 | 2 | 276 | 23 | 1,230 | 56 |
| 81,767 | 36 | 0 | 872   | 31 | 32 | 2 | 275 | 23 | 1,215 | 56 |
| 81,768 | 36 | 0 | 889   | 31 | 32 | 2 | 285 | 23 | 1,242 | 56 |
| 81,769 | 36 | 0 | 897   | 30 | 32 | 2 | 287 | 22 | 1,252 | 54 |
| 81,770 | 37 | 0 | 898   | 30 | 32 | 2 | 293 | 22 | 1,260 | 54 |
| 81,771 | 37 | 0 | 899   | 30 | 32 | 2 | 294 | 22 | 1,262 | 54 |
| 81,772 | 36 | 0 | 886   | 30 | 31 | 2 | 292 | 24 | 1,245 | 56 |
| 81,773 | 32 | 0 | 763   | 29 | 30 | 2 | 238 | 25 | 1,063 | 56 |
| 81,774 | 32 | 0 | 781   | 29 | 29 | 2 | 245 | 25 | 1,087 | 56 |
| 81,775 | 31 | 0 | 778   | 28 | 29 | 2 | 245 | 24 | 1,083 | 54 |
| 81,776 | 31 | 0 | 775   | 26 | 28 | 2 | 246 | 23 | 1,080 | 51 |
| 81,777 | 31 | 0 | 776   | 26 | 28 | 2 | 242 | 23 | 1,077 | 51 |
| 81,778 | 28 | 0 | 774   | 26 | 28 | 2 | 228 | 23 | 1,058 | 51 |
| 81,779 | 26 | 0 | 740   | 26 | 27 | 2 | 214 | 22 | 1,007 | 50 |
| 81,780 | 26 | 0 | 728   | 26 | 27 | 2 | 207 | 22 | 988   | 50 |
| 81,781 | 26 | 0 | 732   | 26 | 27 | 2 | 205 | 22 | 990   | 50 |
| 81,782 | 30 | 0 | 762   | 26 | 27 | 2 | 254 | 22 | 1,073 | 50 |
| 81,783 | 37 | 0 | 817   | 26 | 31 | 2 | 332 | 21 | 1,217 | 49 |

|        |    |   |       |    |    |   |     |    |       |    |
|--------|----|---|-------|----|----|---|-----|----|-------|----|
| 81,784 | 37 | 0 | 824   | 26 | 34 | 2 | 349 | 21 | 1,244 | 49 |
| 81,785 | 37 | 0 | 814   | 26 | 34 | 2 | 346 | 21 | 1,231 | 49 |
| 81,786 | 37 | 0 | 804   | 25 | 34 | 2 | 345 | 21 | 1,220 | 48 |
| 81,787 | 37 | 0 | 807   | 25 | 34 | 2 | 345 | 21 | 1,223 | 48 |
| 81,788 | 37 | 0 | 811   | 24 | 34 | 2 | 347 | 21 | 1,229 | 47 |
| 81,789 | 36 | 0 | 808   | 24 | 34 | 2 | 347 | 21 | 1,225 | 47 |
| 81,790 | 35 | 0 | 811   | 24 | 34 | 2 | 347 | 21 | 1,227 | 47 |
| 81,791 | 35 | 0 | 821   | 24 | 34 | 2 | 348 | 21 | 1,238 | 47 |
| 81,792 | 35 | 0 | 819   | 24 | 33 | 2 | 346 | 21 | 1,233 | 47 |
| 81,793 | 35 | 0 | 834   | 24 | 33 | 2 | 346 | 21 | 1,248 | 47 |
| 81,794 | 34 | 0 | 824   | 24 | 33 | 2 | 345 | 21 | 1,236 | 47 |
| 81,795 | 35 | 0 | 840   | 24 | 33 | 2 | 349 | 21 | 1,257 | 47 |
| 81,796 | 35 | 0 | 846   | 24 | 34 | 2 | 351 | 22 | 1,266 | 48 |
| 81,797 | 37 | 0 | 847   | 24 | 34 | 2 | 350 | 22 | 1,268 | 48 |
| 81,798 | 38 | 0 | 869   | 24 | 34 | 2 | 360 | 22 | 1,301 | 48 |
| 81,799 | 39 | 0 | 880   | 24 | 34 | 2 | 366 | 22 | 1,319 | 48 |
| 81,800 | 39 | 0 | 885   | 23 | 33 | 1 | 352 | 22 | 1,309 | 46 |
| 81,801 | 39 | 0 | 879   | 25 | 33 | 1 | 351 | 20 | 1,302 | 46 |
| 81,802 | 43 | 0 | 965   | 28 | 33 | 2 | 387 | 18 | 1,428 | 48 |
| 81,803 | 42 | 0 | 974   | 27 | 33 | 1 | 388 | 18 | 1,437 | 46 |
| 81,804 | 50 | 0 | 1,132 | 29 | 37 | 1 | 487 | 20 | 1,706 | 50 |
| 81,805 | 50 | 0 | 1,131 | 29 | 38 | 1 | 493 | 24 | 1,712 | 54 |
| 81,806 | 49 | 0 | 1,125 | 27 | 37 | 1 | 493 | 24 | 1,704 | 52 |
| 81,807 | 49 | 0 | 1,102 | 23 | 37 | 1 | 492 | 21 | 1,680 | 45 |
| 81,808 | 49 | 0 | 1,096 | 23 | 36 | 1 | 492 | 22 | 1,673 | 46 |
| 81,809 | 51 | 0 | 1,092 | 23 | 36 | 1 | 493 | 19 | 1,672 | 43 |
| 81,810 | 52 | 0 | 1,087 | 21 | 36 | 1 | 488 | 18 | 1,663 | 40 |
| 81,811 | 52 | 0 | 1,093 | 23 | 36 | 1 | 490 | 18 | 1,671 | 42 |
| 81,812 | 44 | 0 | 1,016 | 22 | 31 | 1 | 455 | 17 | 1,546 | 40 |
| 81,813 | 45 | 0 | 1,028 | 22 | 31 | 1 | 462 | 17 | 1,566 | 40 |
| 81,814 | 44 | 0 | 996   | 20 | 28 | 2 | 461 | 17 | 1,529 | 39 |
| 81,815 | 43 | 0 | 992   | 22 | 27 | 2 | 458 | 18 | 1,520 | 42 |
| 81,816 | 42 | 2 | 962   | 24 | 25 | 3 | 437 | 19 | 1,466 | 48 |
| 81,817 | 42 | 2 | 944   | 24 | 25 | 3 | 431 | 19 | 1,442 | 48 |
| 81,818 | 44 | 2 | 946   | 24 | 28 | 3 | 439 | 18 | 1,457 | 47 |
| 81,819 | 46 | 2 | 939   | 25 | 28 | 3 | 443 | 18 | 1,456 | 48 |
| 81,820 | 46 | 2 | 934   | 25 | 28 | 3 | 441 | 18 | 1,449 | 48 |
| 81,821 | 46 | 2 | 931   | 25 | 28 | 3 | 439 | 18 | 1,444 | 48 |
| 81,822 | 45 | 3 | 931   | 26 | 28 | 3 | 440 | 18 | 1,444 | 50 |
| 81,823 | 45 | 3 | 921   | 26 | 28 | 3 | 439 | 16 | 1,433 | 48 |
| 81,824 | 60 | 3 | 1,012 | 26 | 30 | 3 | 454 | 15 | 1,556 | 47 |

|        |     |   |       |    |     |   |       |    |       |    |
|--------|-----|---|-------|----|-----|---|-------|----|-------|----|
| 81,825 | 60  | 3 | 1,018 | 26 | 30  | 3 | 449   | 15 | 1,557 | 47 |
| 81,826 | 62  | 3 | 1,017 | 26 | 31  | 3 | 449   | 15 | 1,559 | 47 |
| 81,827 | 101 | 3 | 1,220 | 26 | 42  | 3 | 571   | 15 | 1,934 | 47 |
| 81,828 | 103 | 3 | 1,218 | 26 | 42  | 3 | 572   | 15 | 1,935 | 47 |
| 81,829 | 112 | 3 | 1,243 | 26 | 44  | 3 | 593   | 15 | 1,992 | 47 |
| 81,830 | 112 | 3 | 1,236 | 26 | 44  | 3 | 592   | 15 | 1,984 | 47 |
| 81,831 | 118 | 3 | 1,317 | 26 | 56  | 3 | 693   | 16 | 2,184 | 48 |
| 81,832 | 120 | 3 | 1,321 | 27 | 58  | 3 | 702   | 16 | 2,201 | 49 |
| 81,833 | 119 | 3 | 1,316 | 27 | 57  | 3 | 671   | 16 | 2,163 | 49 |
| 81,834 | 110 | 3 | 1,245 | 27 | 51  | 3 | 588   | 16 | 1,994 | 49 |
| 81,835 | 110 | 4 | 1,270 | 27 | 51  | 3 | 586   | 16 | 2,017 | 50 |
| 81,836 | 110 | 4 | 1,267 | 27 | 51  | 3 | 585   | 16 | 2,013 | 50 |
| 81,837 | 111 | 4 | 1,273 | 29 | 51  | 3 | 588   | 16 | 2,023 | 52 |
| 81,838 | 111 | 4 | 1,262 | 29 | 51  | 3 | 584   | 16 | 2,008 | 52 |
| 81,839 | 111 | 4 | 1,270 | 29 | 51  | 3 | 585   | 16 | 2,017 | 52 |
| 81,840 | 113 | 4 | 1,271 | 29 | 51  | 3 | 585   | 16 | 2,020 | 52 |
| 81,841 | 119 | 4 | 1,311 | 29 | 52  | 3 | 590   | 16 | 2,072 | 52 |
| 81,842 | 121 | 4 | 1,347 | 29 | 53  | 3 | 608   | 16 | 2,129 | 52 |
| 81,843 | 121 | 4 | 1,343 | 29 | 54  | 3 | 608   | 16 | 2,126 | 52 |
| 81,844 | 121 | 4 | 1,321 | 29 | 54  | 3 | 607   | 16 | 2,103 | 52 |
| 81,845 | 244 | 4 | 2,134 | 29 | 129 | 3 | 1,385 | 16 | 3,892 | 52 |
| 81,846 | 255 | 4 | 2,204 | 29 | 131 | 3 | 1,437 | 15 | 4,027 | 51 |
| 81,847 | 255 | 4 | 2,194 | 29 | 131 | 3 | 1,437 | 15 | 4,017 | 51 |
| 81,848 | 253 | 4 | 2,191 | 29 | 131 | 3 | 1,436 | 15 | 4,011 | 51 |
| 81,849 | 260 | 4 | 2,193 | 30 | 131 | 3 | 1,440 | 16 | 4,024 | 53 |
| 81,850 | 259 | 4 | 2,175 | 30 | 131 | 3 | 1,433 | 16 | 3,998 | 53 |
| 81,851 | 296 | 4 | 2,272 | 28 | 140 | 3 | 1,496 | 15 | 4,204 | 50 |
| 81,852 | 298 | 4 | 2,286 | 22 | 140 | 3 | 1,491 | 16 | 4,215 | 45 |
| 81,853 | 302 | 4 | 2,260 | 18 | 139 | 2 | 1,479 | 15 | 4,180 | 39 |
| 81,854 | 303 | 4 | 2,275 | 18 | 141 | 2 | 1,486 | 15 | 4,205 | 39 |
| 81,855 | 296 | 4 | 2,118 | 16 | 134 | 2 | 1,387 | 8  | 3,935 | 30 |
| 81,856 | 318 | 4 | 2,218 | 15 | 133 | 2 | 1,457 | 8  | 4,126 | 29 |
| 81,857 | 318 | 4 | 2,217 | 15 | 133 | 2 | 1,456 | 8  | 4,124 | 29 |
| 81,858 | 317 | 4 | 2,215 | 13 | 133 | 2 | 1,458 | 8  | 4,123 | 27 |
| 81,859 | 318 | 4 | 2,228 | 13 | 133 | 2 | 1,460 | 7  | 4,139 | 26 |
| 81,860 | 316 | 4 | 2,224 | 13 | 133 | 2 | 1,460 | 7  | 4,133 | 26 |
| 81,861 | 316 | 4 | 2,224 | 13 | 133 | 2 | 1,462 | 7  | 4,135 | 26 |
| 81,862 | 316 | 4 | 2,210 | 12 | 133 | 2 | 1,459 | 8  | 4,118 | 26 |
| 81,863 | 316 | 4 | 2,184 | 15 | 133 | 2 | 1,455 | 9  | 4,088 | 30 |
| 81,864 | 310 | 4 | 2,095 | 15 | 131 | 2 | 1,419 | 9  | 3,955 | 30 |
| 81,865 | 310 | 4 | 2,096 | 16 | 131 | 1 | 1,418 | 9  | 3,955 | 30 |

|        |     |   |       |    |     |   |       |    |       |    |
|--------|-----|---|-------|----|-----|---|-------|----|-------|----|
| 81,866 | 310 | 4 | 2,084 | 21 | 130 | 1 | 1,418 | 9  | 3,942 | 35 |
| 81,867 | 308 | 2 | 2,071 | 19 | 128 | 0 | 1,403 | 8  | 3,910 | 29 |
| 81,868 | 315 | 2 | 2,083 | 19 | 127 | 0 | 1,410 | 8  | 3,935 | 29 |
| 81,869 | 315 | 2 | 2,073 | 19 | 127 | 0 | 1,410 | 8  | 3,925 | 29 |
| 81,870 | 315 | 2 | 2,067 | 18 | 127 | 0 | 1,404 | 8  | 3,913 | 28 |
| 81,871 | 314 | 3 | 2,060 | 18 | 127 | 0 | 1,403 | 8  | 3,904 | 29 |
| 81,872 | 314 | 2 | 2,068 | 17 | 127 | 0 | 1,406 | 8  | 3,915 | 27 |
| 81,873 | 314 | 2 | 2,058 | 17 | 127 | 0 | 1,403 | 8  | 3,902 | 27 |
| 81,874 | 311 | 2 | 2,022 | 17 | 126 | 0 | 1,400 | 8  | 3,859 | 27 |
| 81,875 | 300 | 2 | 1,961 | 19 | 125 | 0 | 1,389 | 8  | 3,775 | 29 |
| 81,876 | 301 | 2 | 1,973 | 19 | 125 | 0 | 1,400 | 8  | 3,799 | 29 |
| 81,877 | 307 | 2 | 1,997 | 19 | 126 | 0 | 1,411 | 8  | 3,841 | 29 |
| 81,878 | 268 | 2 | 1,800 | 19 | 115 | 0 | 1,295 | 9  | 3,478 | 30 |
| 81,879 | 257 | 2 | 1,765 | 19 | 114 | 0 | 1,284 | 9  | 3,420 | 30 |
| 81,880 | 259 | 2 | 1,767 | 19 | 113 | 0 | 1,278 | 9  | 3,417 | 30 |
| 81,881 | 254 | 2 | 1,700 | 18 | 105 | 0 | 1,190 | 7  | 3,249 | 27 |
| 81,882 | 254 | 2 | 1,685 | 18 | 102 | 0 | 1,176 | 7  | 3,217 | 27 |
| 81,883 | 250 | 2 | 1,665 | 19 | 100 | 0 | 1,161 | 7  | 3,176 | 28 |
| 81,884 | 249 | 1 | 1,673 | 20 | 101 | 0 | 1,151 | 7  | 3,174 | 28 |
| 81,885 | 249 | 1 | 1,667 | 20 | 100 | 0 | 1,146 | 7  | 3,162 | 28 |
| 81,886 | 248 | 1 | 1,631 | 20 | 97  | 0 | 1,131 | 8  | 3,107 | 29 |
| 81,887 | 252 | 1 | 1,671 | 18 | 97  | 0 | 1,131 | 9  | 3,151 | 28 |
| 81,888 | 252 | 1 | 1,682 | 20 | 98  | 0 | 1,131 | 9  | 3,163 | 30 |
| 81,889 | 252 | 2 | 1,673 | 20 | 98  | 0 | 1,131 | 9  | 3,154 | 31 |
| 81,890 | 278 | 2 | 1,939 | 22 | 111 | 1 | 1,361 | 9  | 3,689 | 34 |
| 81,891 | 274 | 2 | 1,966 | 33 | 116 | 1 | 1,420 | 11 | 3,776 | 47 |
| 81,892 | 272 | 2 | 1,926 | 33 | 115 | 1 | 1,403 | 11 | 3,716 | 47 |
| 81,893 | 268 | 2 | 1,792 | 33 | 98  | 1 | 1,298 | 12 | 3,456 | 48 |
| 81,894 | 267 | 2 | 1,723 | 33 | 94  | 1 | 1,270 | 12 | 3,354 | 48 |
| 81,895 | 148 | 2 | 1,106 | 33 | 39  | 1 | 625   | 12 | 1,918 | 48 |
| 81,896 | 142 | 2 | 1,054 | 33 | 37  | 1 | 589   | 12 | 1,822 | 48 |
| 81,897 | 137 | 2 | 1,016 | 33 | 37  | 1 | 569   | 12 | 1,759 | 48 |
| 81,898 | 137 | 2 | 1,016 | 33 | 36  | 1 | 568   | 12 | 1,757 | 48 |
| 81,899 | 137 | 2 | 1,010 | 33 | 36  | 1 | 568   | 13 | 1,751 | 49 |
| 81,900 | 129 | 2 | 983   | 31 | 36  | 1 | 553   | 12 | 1,701 | 46 |
| 81,901 | 129 | 2 | 975   | 31 | 36  | 1 | 551   | 12 | 1,691 | 46 |
| 81,902 | 93  | 2 | 871   | 31 | 27  | 1 | 489   | 13 | 1,480 | 47 |
| 81,903 | 87  | 4 | 824   | 31 | 27  | 1 | 483   | 12 | 1,421 | 48 |
| 81,904 | 83  | 4 | 793   | 31 | 27  | 1 | 469   | 12 | 1,372 | 48 |
| 81,905 | 83  | 4 | 766   | 33 | 26  | 1 | 467   | 13 | 1,342 | 51 |
| 81,906 | 82  | 5 | 750   | 41 | 26  | 2 | 456   | 17 | 1,314 | 65 |

|        |     |    |       |    |    |   |     |    |       |     |
|--------|-----|----|-------|----|----|---|-----|----|-------|-----|
| 81,907 | 60  | 5  | 642   | 42 | 26 | 2 | 378 | 17 | 1,106 | 66  |
| 81,908 | 60  | 5  | 642   | 45 | 26 | 2 | 377 | 17 | 1,105 | 69  |
| 81,909 | 62  | 5  | 657   | 47 | 26 | 2 | 383 | 17 | 1,128 | 71  |
| 81,910 | 62  | 6  | 659   | 48 | 26 | 2 | 383 | 17 | 1,130 | 73  |
| 81,911 | 65  | 6  | 668   | 52 | 26 | 2 | 394 | 17 | 1,153 | 77  |
| 81,912 | 64  | 6  | 662   | 52 | 26 | 2 | 393 | 17 | 1,145 | 77  |
| 81,913 | 75  | 6  | 807   | 51 | 27 | 2 | 446 | 16 | 1,355 | 75  |
| 81,914 | 88  | 6  | 871   | 48 | 32 | 2 | 485 | 15 | 1,476 | 71  |
| 81,915 | 101 | 6  | 934   | 47 | 34 | 2 | 508 | 15 | 1,577 | 70  |
| 81,916 | 105 | 6  | 978   | 40 | 39 | 2 | 517 | 14 | 1,639 | 62  |
| 81,917 | 105 | 6  | 976   | 40 | 39 | 2 | 517 | 14 | 1,637 | 62  |
| 81,918 | 98  | 6  | 973   | 40 | 41 | 2 | 517 | 14 | 1,629 | 62  |
| 81,919 | 99  | 6  | 980   | 40 | 41 | 2 | 523 | 14 | 1,643 | 62  |
| 81,920 | 102 | 6  | 1,011 | 41 | 41 | 2 | 531 | 14 | 1,685 | 63  |
| 81,921 | 100 | 6  | 1,006 | 41 | 41 | 2 | 531 | 14 | 1,678 | 63  |
| 81,922 | 101 | 8  | 1,077 | 48 | 41 | 2 | 557 | 21 | 1,776 | 79  |
| 81,923 | 101 | 9  | 1,069 | 56 | 41 | 2 | 554 | 31 | 1,765 | 98  |
| 81,924 | 101 | 9  | 1,076 | 62 | 42 | 2 | 558 | 37 | 1,777 | 110 |
| 81,925 | 103 | 9  | 1,128 | 62 | 46 | 2 | 585 | 38 | 1,862 | 111 |
| 81,926 | 103 | 9  | 1,123 | 62 | 47 | 3 | 585 | 40 | 1,858 | 114 |
| 81,927 | 102 | 12 | 1,097 | 68 | 47 | 3 | 574 | 46 | 1,820 | 129 |
| 81,928 | 94  | 12 | 1,069 | 68 | 45 | 3 | 564 | 48 | 1,772 | 131 |
| 81,929 | 95  | 12 | 1,058 | 69 | 45 | 3 | 558 | 47 | 1,756 | 131 |
| 81,930 | 96  | 12 | 1,061 | 69 | 45 | 3 | 554 | 47 | 1,756 | 131 |
| 81,931 | 94  | 12 | 1,056 | 70 | 44 | 3 | 553 | 47 | 1,747 | 132 |
| 81,932 | 94  | 12 | 1,050 | 70 | 43 | 3 | 552 | 47 | 1,739 | 132 |
| 81,933 | 94  | 12 | 1,047 | 69 | 43 | 4 | 552 | 47 | 1,736 | 132 |
| 81,934 | 94  | 12 | 1,046 | 72 | 43 | 4 | 553 | 47 | 1,736 | 135 |
| 81,935 | 94  | 12 | 1,021 | 71 | 42 | 4 | 548 | 48 | 1,705 | 135 |
| 81,936 | 94  | 12 | 1,021 | 72 | 42 | 4 | 548 | 52 | 1,705 | 140 |
| 81,937 | 93  | 12 | 1,022 | 73 | 42 | 4 | 548 | 52 | 1,705 | 141 |
| 81,938 | 90  | 11 | 978   | 73 | 42 | 4 | 546 | 51 | 1,656 | 139 |
| 81,939 | 89  | 12 | 954   | 76 | 41 | 4 | 545 | 52 | 1,629 | 144 |
| 81,940 | 62  | 12 | 696   | 77 | 28 | 4 | 325 | 54 | 1,111 | 147 |
| 81,941 | 61  | 12 | 681   | 75 | 28 | 3 | 314 | 55 | 1,084 | 145 |
| 81,942 | 59  | 12 | 604   | 64 | 22 | 3 | 250 | 53 | 935   | 132 |
| 81,943 | 59  | 12 | 599   | 64 | 22 | 3 | 250 | 53 | 930   | 132 |
| 81,944 | 59  | 12 | 597   | 67 | 22 | 3 | 250 | 52 | 928   | 134 |
| 81,945 | 59  | 12 | 594   | 67 | 22 | 3 | 247 | 51 | 922   | 133 |
| 81,946 | 59  | 12 | 595   | 67 | 22 | 3 | 247 | 52 | 923   | 134 |
| 81,947 | 59  | 12 | 598   | 67 | 22 | 3 | 247 | 52 | 926   | 134 |

|        |    |    |     |    |    |   |     |    |     |     |
|--------|----|----|-----|----|----|---|-----|----|-----|-----|
| 81,948 | 59 | 12 | 599 | 68 | 22 | 3 | 247 | 52 | 927 | 135 |
| 81,949 | 59 | 12 | 598 | 68 | 22 | 3 | 247 | 51 | 926 | 134 |
| 81,950 | 59 | 12 | 598 | 68 | 22 | 3 | 247 | 51 | 926 | 134 |
| 81,951 | 59 | 12 | 598 | 68 | 22 | 3 | 247 | 52 | 926 | 135 |
| 81,952 | 58 | 12 | 597 | 68 | 22 | 3 | 247 | 52 | 924 | 135 |
| 81,953 | 58 | 12 | 599 | 68 | 22 | 3 | 247 | 51 | 926 | 134 |
| 81,954 | 58 | 10 | 599 | 68 | 22 | 3 | 247 | 51 | 926 | 132 |
| 81,955 | 59 | 10 | 600 | 68 | 22 | 3 | 247 | 51 | 928 | 132 |
| 81,956 | 58 | 9  | 599 | 58 | 21 | 2 | 242 | 46 | 920 | 115 |
| 81,957 | 59 | 9  | 605 | 57 | 21 | 2 | 263 | 46 | 948 | 114 |
| 81,958 | 59 | 9  | 599 | 54 | 21 | 2 | 263 | 46 | 942 | 111 |
| 81,959 | 59 | 9  | 594 | 54 | 21 | 2 | 261 | 46 | 935 | 111 |
| 81,960 | 58 | 9  | 574 | 53 | 21 | 2 | 254 | 46 | 907 | 110 |
| 81,961 | 58 | 8  | 572 | 52 | 21 | 2 | 254 | 46 | 905 | 108 |
| 81,962 | 55 | 8  | 559 | 48 | 21 | 2 | 242 | 45 | 877 | 103 |
| 81,963 | 44 | 8  | 414 | 48 | 20 | 2 | 188 | 45 | 666 | 103 |
| 81,964 | 36 | 8  | 379 | 48 | 19 | 2 | 167 | 45 | 601 | 103 |
| 81,965 | 31 | 8  | 347 | 48 | 15 | 2 | 146 | 45 | 539 | 103 |
| 81,966 | 18 | 8  | 281 | 48 | 13 | 2 | 123 | 45 | 435 | 103 |
| 81,967 | 14 | 8  | 234 | 48 | 8  | 2 | 114 | 45 | 370 | 103 |
| 81,968 | 14 | 8  | 233 | 48 | 8  | 2 | 112 | 45 | 367 | 103 |
| 81,969 | 14 | 8  | 219 | 48 | 6  | 2 | 104 | 45 | 343 | 103 |
| 81,970 | 13 | 8  | 211 | 48 | 6  | 2 | 100 | 45 | 330 | 103 |
| 81,971 | 10 | 8  | 177 | 47 | 6  | 2 | 91  | 45 | 284 | 102 |
| 81,972 | 9  | 7  | 138 | 47 | 6  | 2 | 81  | 45 | 234 | 101 |
| 81,973 | 9  | 4  | 107 | 26 | 6  | 2 | 64  | 22 | 186 | 54  |
| 81,974 | 9  | 4  | 97  | 26 | 5  | 2 | 60  | 22 | 171 | 54  |
| 81,975 | 6  | 4  | 51  | 26 | 1  | 2 | 38  | 22 | 96  | 54  |
| 81,976 | 6  | 4  | 45  | 24 | 1  | 1 | 36  | 19 | 88  | 48  |
| 81,977 | 6  | 4  | 45  | 24 | 0  | 1 | 36  | 19 | 87  | 48  |
| 81,978 | 5  | 1  | 41  | 18 | 0  | 1 | 36  | 14 | 82  | 34  |
| 81,979 | 4  | 1  | 41  | 17 | 0  | 1 | 34  | 11 | 79  | 30  |
| 81,980 | 5  | 1  | 52  | 16 | 2  | 1 | 62  | 11 | 121 | 29  |
| 81,981 | 5  | 1  | 52  | 16 | 2  | 1 | 61  | 11 | 120 | 29  |
| 81,982 | 5  | 1  | 51  | 15 | 2  | 1 | 60  | 11 | 118 | 28  |
| 81,983 | 5  | 2  | 60  | 16 | 2  | 0 | 63  | 11 | 130 | 29  |
| 81,984 | 5  | 2  | 64  | 16 | 4  | 0 | 64  | 11 | 137 | 29  |
| 81,985 | 5  | 2  | 73  | 13 | 4  | 0 | 73  | 11 | 155 | 26  |
| 81,986 | 7  | 2  | 83  | 13 | 6  | 0 | 109 | 10 | 205 | 25  |
| 81,987 | 7  | 2  | 86  | 12 | 7  | 0 | 112 | 6  | 212 | 20  |
| 81,988 | 7  | 2  | 83  | 12 | 7  | 0 | 112 | 5  | 209 | 19  |



|        |     |   |     |    |    |   |     |   |       |    |
|--------|-----|---|-----|----|----|---|-----|---|-------|----|
| 81,989 | 7   | 1 | 86  | 7  | 7  | 1 | 117 | 4 | 217   | 13 |
| 81,990 | 7   | 1 | 89  | 9  | 7  | 1 | 120 | 4 | 223   | 15 |
| 81,991 | 7   | 2 | 95  | 13 | 7  | 1 | 120 | 4 | 229   | 20 |
| 81,992 | 7   | 2 | 94  | 22 | 7  | 1 | 121 | 6 | 229   | 31 |
| 81,993 | 15  | 2 | 160 | 22 | 8  | 1 | 158 | 6 | 341   | 31 |
| 81,994 | 19  | 2 | 190 | 22 | 9  | 1 | 163 | 6 | 381   | 31 |
| 81,995 | 19  | 2 | 199 | 19 | 9  | 1 | 167 | 6 | 394   | 28 |
| 81,996 | 21  | 2 | 225 | 20 | 9  | 1 | 179 | 6 | 434   | 29 |
| 81,997 | 56  | 2 | 468 | 20 | 40 | 1 | 446 | 6 | 1,010 | 29 |
| 81,998 | 56  | 2 | 468 | 20 | 40 | 1 | 446 | 6 | 1,010 | 29 |
| 81,999 | 68  | 2 | 574 | 19 | 50 | 1 | 537 | 6 | 1,229 | 28 |
| 82,000 | 79  | 2 | 671 | 19 | 54 | 1 | 576 | 6 | 1,380 | 28 |
| 82,001 | 81  | 2 | 736 | 20 | 57 | 1 | 619 | 5 | 1,493 | 28 |
| 82,002 | 81  | 2 | 735 | 20 | 57 | 1 | 619 | 5 | 1,492 | 28 |
| 82,003 | 97  | 2 | 873 | 23 | 74 | 1 | 773 | 5 | 1,817 | 31 |
| 82,004 | 98  | 2 | 879 | 23 | 76 | 1 | 780 | 5 | 1,833 | 31 |
| 82,005 | 98  | 2 | 879 | 24 | 76 | 1 | 780 | 5 | 1,833 | 32 |
| 82,006 | 97  | 2 | 879 | 24 | 76 | 1 | 780 | 5 | 1,832 | 32 |
| 82,007 | 97  | 2 | 879 | 24 | 76 | 1 | 780 | 5 | 1,832 | 32 |
| 82,008 | 96  | 2 | 868 | 24 | 76 | 1 | 758 | 5 | 1,798 | 32 |
| 82,009 | 96  | 2 | 868 | 24 | 76 | 1 | 758 | 5 | 1,798 | 32 |
| 82,010 | 96  | 2 | 869 | 24 | 76 | 1 | 758 | 5 | 1,799 | 32 |
| 82,011 | 95  | 2 | 869 | 23 | 76 | 1 | 758 | 5 | 1,798 | 31 |
| 82,012 | 95  | 2 | 873 | 23 | 77 | 1 | 762 | 5 | 1,807 | 31 |
| 82,013 | 95  | 2 | 875 | 23 | 77 | 1 | 762 | 5 | 1,809 | 31 |
| 82,014 | 95  | 2 | 875 | 23 | 77 | 1 | 762 | 5 | 1,809 | 31 |
| 82,015 | 96  | 2 | 874 | 23 | 77 | 1 | 762 | 5 | 1,809 | 31 |
| 82,016 | 96  | 2 | 874 | 23 | 77 | 1 | 762 | 5 | 1,809 | 31 |
| 82,017 | 96  | 2 | 876 | 23 | 77 | 1 | 762 | 5 | 1,811 | 31 |
| 82,018 | 96  | 2 | 877 | 23 | 78 | 1 | 767 | 5 | 1,818 | 31 |
| 82,019 | 96  | 2 | 875 | 24 | 78 | 1 | 767 | 5 | 1,816 | 32 |
| 82,020 | 96  | 2 | 882 | 24 | 79 | 1 | 768 | 6 | 1,825 | 33 |
| 82,021 | 96  | 2 | 883 | 25 | 79 | 1 | 767 | 6 | 1,825 | 34 |
| 82,022 | 97  | 3 | 895 | 25 | 79 | 1 | 769 | 7 | 1,840 | 36 |
| 82,023 | 98  | 3 | 900 | 25 | 79 | 1 | 769 | 7 | 1,846 | 36 |
| 82,024 | 98  | 3 | 900 | 25 | 79 | 1 | 769 | 7 | 1,846 | 36 |
| 82,025 | 98  | 3 | 900 | 28 | 79 | 1 | 770 | 8 | 1,847 | 40 |
| 82,026 | 98  | 3 | 899 | 28 | 79 | 1 | 765 | 8 | 1,841 | 40 |
| 82,027 | 99  | 3 | 915 | 29 | 79 | 1 | 769 | 8 | 1,862 | 41 |
| 82,028 | 107 | 3 | 962 | 31 | 80 | 1 | 792 | 8 | 1,941 | 43 |
| 82,029 | 107 | 3 | 967 | 31 | 80 | 1 | 799 | 8 | 1,953 | 43 |

|        |     |   |       |    |     |   |       |    |       |    |
|--------|-----|---|-------|----|-----|---|-------|----|-------|----|
| 82,030 | 107 | 3 | 972   | 31 | 82  | 1 | 804   | 9  | 1,965 | 44 |
| 82,031 | 105 | 3 | 959   | 31 | 80  | 1 | 776   | 9  | 1,920 | 44 |
| 82,032 | 129 | 3 | 1,135 | 32 | 90  | 1 | 866   | 10 | 2,220 | 46 |
| 82,033 | 129 | 2 | 1,189 | 38 | 96  | 1 | 889   | 10 | 2,303 | 51 |
| 82,034 | 129 | 2 | 1,182 | 40 | 96  | 1 | 887   | 10 | 2,294 | 53 |
| 82,035 | 204 | 2 | 1,836 | 44 | 138 | 1 | 1,230 | 10 | 3,408 | 57 |
| 82,036 | 206 | 2 | 1,872 | 48 | 142 | 2 | 1,258 | 11 | 3,478 | 63 |
| 82,037 | 205 | 2 | 1,885 | 48 | 144 | 2 | 1,232 | 11 | 3,466 | 63 |
| 82,038 | 205 | 2 | 1,886 | 48 | 143 | 2 | 1,232 | 11 | 3,466 | 63 |
| 82,039 | 205 | 2 | 1,886 | 48 | 143 | 2 | 1,228 | 11 | 3,462 | 63 |
| 82,040 | 205 | 2 | 1,887 | 46 | 143 | 1 | 1,226 | 11 | 3,461 | 60 |
| 82,041 | 205 | 1 | 1,887 | 41 | 143 | 1 | 1,227 | 9  | 3,462 | 52 |
| 82,042 | 205 | 1 | 1,882 | 32 | 143 | 1 | 1,226 | 6  | 3,456 | 40 |
| 82,043 | 205 | 1 | 1,889 | 32 | 143 | 1 | 1,227 | 6  | 3,464 | 40 |
| 82,044 | 197 | 1 | 1,824 | 32 | 142 | 1 | 1,189 | 6  | 3,352 | 40 |
| 82,045 | 196 | 1 | 1,818 | 32 | 142 | 1 | 1,192 | 6  | 3,348 | 40 |
| 82,046 | 196 | 1 | 1,810 | 32 | 142 | 1 | 1,188 | 6  | 3,336 | 40 |
| 82,047 | 196 | 1 | 1,790 | 32 | 143 | 1 | 1,180 | 6  | 3,309 | 40 |
| 82,048 | 161 | 1 | 1,546 | 32 | 112 | 1 | 909   | 6  | 2,728 | 40 |
| 82,049 | 158 | 1 | 1,493 | 34 | 107 | 1 | 860   | 6  | 2,618 | 42 |
| 82,050 | 157 | 1 | 1,472 | 34 | 102 | 1 | 825   | 6  | 2,556 | 42 |
| 82,051 | 146 | 3 | 1,374 | 43 | 98  | 1 | 786   | 11 | 2,404 | 58 |
| 82,052 | 144 | 3 | 1,309 | 44 | 95  | 1 | 747   | 11 | 2,295 | 59 |
| 82,053 | 139 | 3 | 1,279 | 45 | 84  | 1 | 704   | 11 | 2,206 | 60 |
| 82,054 | 134 | 3 | 1,252 | 42 | 78  | 1 | 652   | 11 | 2,116 | 57 |
| 82,055 | 138 | 3 | 1,304 | 41 | 77  | 1 | 672   | 11 | 2,191 | 56 |
| 82,056 | 138 | 3 | 1,304 | 41 | 77  | 1 | 672   | 11 | 2,191 | 56 |
| 82,057 | 138 | 3 | 1,303 | 41 | 77  | 1 | 672   | 12 | 2,190 | 57 |
| 82,058 | 138 | 3 | 1,303 | 44 | 77  | 1 | 672   | 15 | 2,190 | 63 |
| 82,059 | 138 | 3 | 1,303 | 44 | 77  | 1 | 672   | 15 | 2,190 | 63 |
| 82,060 | 154 | 3 | 1,389 | 44 | 80  | 1 | 698   | 15 | 2,321 | 63 |
| 82,061 | 176 | 3 | 1,717 | 46 | 93  | 1 | 839   | 17 | 2,825 | 67 |
| 82,062 | 176 | 3 | 1,715 | 49 | 93  | 3 | 839   | 21 | 2,823 | 76 |
| 82,063 | 176 | 3 | 1,713 | 49 | 92  | 3 | 835   | 21 | 2,816 | 76 |
| 82,064 | 183 | 3 | 1,838 | 50 | 96  | 3 | 867   | 22 | 2,984 | 78 |
| 82,065 | 182 | 3 | 1,892 | 51 | 96  | 3 | 890   | 23 | 3,060 | 80 |
| 82,066 | 182 | 3 | 1,893 | 51 | 96  | 3 | 890   | 23 | 3,061 | 80 |
| 82,067 | 182 | 3 | 1,892 | 51 | 96  | 3 | 890   | 23 | 3,060 | 80 |
| 82,068 | 184 | 3 | 1,892 | 50 | 96  | 3 | 894   | 23 | 3,066 | 79 |
| 82,069 | 184 | 3 | 1,891 | 49 | 95  | 3 | 890   | 24 | 3,060 | 79 |
| 82,070 | 183 | 3 | 1,886 | 51 | 94  | 3 | 889   | 24 | 3,052 | 81 |

|        |     |    |       |     |    |   |     |    |       |     |
|--------|-----|----|-------|-----|----|---|-----|----|-------|-----|
| 82,071 | 184 | 3  | 1,884 | 50  | 94 | 3 | 890 | 23 | 3,052 | 79  |
| 82,072 | 184 | 3  | 1,884 | 50  | 94 | 3 | 890 | 23 | 3,052 | 79  |
| 82,073 | 185 | 2  | 1,875 | 50  | 94 | 3 | 890 | 22 | 3,044 | 77  |
| 82,074 | 185 | 2  | 1,874 | 50  | 94 | 3 | 894 | 22 | 3,047 | 77  |
| 82,075 | 185 | 2  | 1,877 | 47  | 94 | 3 | 899 | 21 | 3,055 | 73  |
| 82,076 | 185 | 2  | 1,877 | 47  | 94 | 3 | 898 | 21 | 3,054 | 73  |
| 82,077 | 184 | 2  | 1,861 | 47  | 94 | 3 | 894 | 21 | 3,033 | 73  |
| 82,078 | 177 | 2  | 1,824 | 46  | 93 | 3 | 875 | 21 | 2,969 | 72  |
| 82,079 | 176 | 3  | 1,817 | 47  | 93 | 3 | 874 | 21 | 2,960 | 74  |
| 82,080 | 176 | 3  | 1,827 | 53  | 96 | 3 | 882 | 20 | 2,981 | 79  |
| 82,081 | 176 | 6  | 1,822 | 61  | 94 | 3 | 877 | 28 | 2,969 | 98  |
| 82,082 | 161 | 7  | 1,706 | 64  | 85 | 2 | 826 | 29 | 2,778 | 102 |
| 82,083 | 153 | 7  | 1,647 | 98  | 85 | 3 | 790 | 43 | 2,675 | 151 |
| 82,084 | 153 | 8  | 1,593 | 103 | 79 | 3 | 769 | 45 | 2,594 | 159 |
| 82,085 | 141 | 8  | 1,546 | 106 | 78 | 4 | 734 | 45 | 2,499 | 163 |
| 82,086 | 77  | 9  | 932   | 107 | 35 | 4 | 419 | 46 | 1,463 | 166 |
| 82,087 | 75  | 9  | 889   | 106 | 31 | 4 | 384 | 46 | 1,379 | 165 |
| 82,088 | 74  | 9  | 869   | 107 | 27 | 4 | 375 | 46 | 1,345 | 166 |
| 82,089 | 74  | 9  | 865   | 109 | 27 | 4 | 373 | 48 | 1,339 | 170 |
| 82,090 | 74  | 9  | 865   | 111 | 27 | 3 | 373 | 50 | 1,339 | 173 |
| 82,091 | 74  | 9  | 861   | 111 | 27 | 3 | 373 | 51 | 1,335 | 174 |
| 82,092 | 76  | 9  | 878   | 111 | 27 | 3 | 378 | 52 | 1,359 | 175 |
| 82,093 | 77  | 9  | 878   | 111 | 27 | 3 | 378 | 52 | 1,360 | 175 |
| 82,094 | 77  | 9  | 878   | 111 | 27 | 3 | 376 | 52 | 1,358 | 175 |
| 82,095 | 77  | 9  | 877   | 111 | 27 | 3 | 376 | 52 | 1,357 | 175 |
| 82,096 | 74  | 9  | 857   | 110 | 26 | 3 | 370 | 52 | 1,327 | 174 |
| 82,097 | 74  | 9  | 856   | 110 | 26 | 3 | 370 | 52 | 1,326 | 174 |
| 82,098 | 72  | 9  | 854   | 111 | 25 | 3 | 373 | 53 | 1,324 | 176 |
| 82,099 | 72  | 10 | 852   | 115 | 25 | 3 | 372 | 54 | 1,321 | 182 |
| 82,100 | 67  | 10 | 841   | 113 | 25 | 4 | 368 | 56 | 1,301 | 183 |
| 82,101 | 66  | 10 | 904   | 115 | 28 | 4 | 389 | 56 | 1,387 | 185 |
| 82,102 | 66  | 8  | 909   | 106 | 28 | 4 | 385 | 51 | 1,388 | 169 |
| 82,103 | 61  | 8  | 888   | 103 | 29 | 4 | 365 | 51 | 1,343 | 166 |
| 82,104 | 61  | 8  | 872   | 103 | 29 | 4 | 356 | 51 | 1,318 | 166 |
| 82,105 | 63  | 8  | 844   | 103 | 30 | 5 | 350 | 51 | 1,287 | 167 |
| 82,106 | 58  | 8  | 786   | 103 | 29 | 5 | 325 | 51 | 1,198 | 167 |
| 82,107 | 56  | 8  | 778   | 103 | 29 | 5 | 325 | 53 | 1,188 | 169 |
| 82,108 | 56  | 8  | 793   | 104 | 29 | 5 | 329 | 53 | 1,207 | 170 |
| 82,109 | 55  | 8  | 791   | 104 | 29 | 5 | 328 | 53 | 1,203 | 170 |
| 82,110 | 42  | 8  | 717   | 108 | 26 | 5 | 303 | 53 | 1,088 | 174 |
| 82,111 | 37  | 8  | 639   | 109 | 22 | 5 | 282 | 53 | 980   | 175 |

|        |    |    |     |     |    |   |     |    |       |     |
|--------|----|----|-----|-----|----|---|-----|----|-------|-----|
| 82,112 | 20 | 8  | 389 | 113 | 13 | 5 | 160 | 55 | 582   | 181 |
| 82,113 | 13 | 12 | 278 | 116 | 9  | 3 | 135 | 56 | 435   | 187 |
| 82,114 | 13 | 12 | 263 | 119 | 9  | 3 | 129 | 58 | 414   | 192 |
| 82,115 | 13 | 12 | 214 | 118 | 9  | 3 | 107 | 58 | 343   | 191 |
| 82,116 | 13 | 12 | 211 | 118 | 9  | 3 | 106 | 58 | 339   | 191 |
| 82,117 | 13 | 12 | 212 | 118 | 9  | 3 | 106 | 58 | 340   | 191 |
| 82,118 | 11 | 12 | 211 | 118 | 9  | 3 | 102 | 57 | 333   | 190 |
| 82,119 | 11 | 12 | 212 | 124 | 9  | 3 | 102 | 67 | 334   | 206 |
| 82,120 | 11 | 12 | 212 | 125 | 9  | 3 | 101 | 68 | 333   | 208 |
| 82,121 | 11 | 12 | 214 | 126 | 9  | 3 | 102 | 68 | 336   | 209 |
| 82,122 | 14 | 12 | 250 | 129 | 10 | 3 | 125 | 68 | 399   | 212 |
| 82,123 | 15 | 12 | 268 | 129 | 10 | 3 | 141 | 68 | 434   | 212 |
| 82,124 | 15 | 12 | 271 | 129 | 10 | 3 | 142 | 68 | 438   | 212 |
| 82,125 | 15 | 15 | 271 | 131 | 10 | 4 | 142 | 72 | 438   | 222 |
| 82,126 | 15 | 15 | 268 | 133 | 10 | 4 | 137 | 73 | 430   | 225 |
| 82,127 | 15 | 15 | 285 | 136 | 10 | 4 | 146 | 73 | 456   | 228 |
| 82,128 | 16 | 15 | 304 | 138 | 11 | 4 | 158 | 74 | 489   | 231 |
| 82,129 | 16 | 15 | 306 | 138 | 11 | 4 | 163 | 75 | 496   | 232 |
| 82,130 | 16 | 14 | 304 | 138 | 11 | 4 | 162 | 77 | 493   | 233 |
| 82,131 | 16 | 13 | 288 | 124 | 8  | 5 | 148 | 70 | 460   | 212 |
| 82,132 | 16 | 13 | 284 | 124 | 8  | 5 | 149 | 71 | 457   | 213 |
| 82,133 | 16 | 12 | 291 | 121 | 8  | 5 | 155 | 71 | 470   | 209 |
| 82,134 | 17 | 12 | 291 | 86  | 7  | 4 | 157 | 56 | 472   | 158 |
| 82,135 | 17 | 11 | 292 | 69  | 7  | 4 | 156 | 55 | 472   | 139 |
| 82,136 | 17 | 11 | 292 | 69  | 7  | 4 | 156 | 55 | 472   | 139 |
| 82,137 | 17 | 10 | 291 | 65  | 7  | 4 | 154 | 54 | 469   | 133 |
| 82,138 | 17 | 10 | 289 | 62  | 7  | 4 | 154 | 54 | 467   | 130 |
| 82,139 | 18 | 10 | 311 | 61  | 7  | 4 | 166 | 54 | 502   | 129 |
| 82,140 | 20 | 10 | 341 | 59  | 8  | 4 | 187 | 52 | 556   | 125 |
| 82,141 | 33 | 10 | 539 | 57  | 15 | 4 | 286 | 49 | 873   | 120 |
| 82,142 | 33 | 10 | 537 | 57  | 15 | 4 | 286 | 49 | 871   | 120 |
| 82,143 | 36 | 10 | 677 | 57  | 23 | 4 | 372 | 48 | 1,108 | 119 |
| 82,144 | 40 | 10 | 738 | 58  | 30 | 4 | 428 | 48 | 1,236 | 120 |
| 82,145 | 40 | 10 | 735 | 58  | 30 | 4 | 431 | 48 | 1,236 | 120 |
| 82,146 | 40 | 10 | 735 | 58  | 30 | 4 | 429 | 48 | 1,234 | 120 |
| 82,147 | 40 | 10 | 732 | 58  | 30 | 4 | 429 | 48 | 1,231 | 120 |
| 82,148 | 43 | 10 | 750 | 58  | 30 | 4 | 437 | 48 | 1,260 | 120 |
| 82,149 | 44 | 10 | 753 | 57  | 31 | 4 | 437 | 47 | 1,265 | 118 |
| 82,150 | 43 | 9  | 758 | 54  | 30 | 4 | 436 | 49 | 1,267 | 116 |
| 82,151 | 63 | 9  | 957 | 54  | 41 | 3 | 605 | 47 | 1,666 | 113 |
| 82,152 | 67 | 9  | 959 | 52  | 41 | 3 | 617 | 47 | 1,684 | 111 |

|        |     |   |       |    |     |   |       |    |       |     |
|--------|-----|---|-------|----|-----|---|-------|----|-------|-----|
| 82,153 | 68  | 9 | 978   | 52 | 43  | 3 | 630   | 48 | 1,719 | 112 |
| 82,154 | 68  | 9 | 976   | 52 | 43  | 2 | 632   | 48 | 1,719 | 111 |
| 82,155 | 68  | 9 | 977   | 52 | 43  | 2 | 630   | 48 | 1,718 | 111 |
| 82,156 | 67  | 9 | 973   | 52 | 42  | 2 | 626   | 48 | 1,708 | 111 |
| 82,157 | 67  | 9 | 961   | 52 | 42  | 2 | 625   | 46 | 1,695 | 109 |
| 82,158 | 67  | 9 | 961   | 52 | 42  | 2 | 625   | 46 | 1,695 | 109 |
| 82,159 | 67  | 9 | 961   | 51 | 42  | 2 | 625   | 45 | 1,695 | 107 |
| 82,160 | 67  | 9 | 965   | 48 | 42  | 2 | 626   | 42 | 1,700 | 101 |
| 82,161 | 67  | 9 | 965   | 45 | 42  | 2 | 626   | 42 | 1,700 | 98  |
| 82,162 | 71  | 9 | 1,023 | 44 | 46  | 2 | 653   | 42 | 1,793 | 97  |
| 82,163 | 80  | 5 | 1,047 | 28 | 47  | 2 | 659   | 29 | 1,833 | 64  |
| 82,164 | 81  | 5 | 1,048 | 28 | 47  | 2 | 660   | 29 | 1,836 | 64  |
| 82,165 | 81  | 5 | 1,103 | 29 | 50  | 2 | 673   | 29 | 1,907 | 65  |
| 82,166 | 84  | 5 | 1,124 | 29 | 52  | 2 | 691   | 29 | 1,951 | 65  |
| 82,167 | 87  | 5 | 1,224 | 29 | 64  | 2 | 754   | 29 | 2,129 | 65  |
| 82,168 | 87  | 6 | 1,222 | 29 | 64  | 2 | 754   | 29 | 2,127 | 66  |
| 82,169 | 87  | 6 | 1,226 | 29 | 64  | 2 | 754   | 29 | 2,131 | 66  |
| 82,170 | 117 | 6 | 1,438 | 22 | 76  | 2 | 890   | 18 | 2,521 | 48  |
| 82,171 | 117 | 6 | 1,436 | 22 | 76  | 2 | 889   | 18 | 2,518 | 48  |
| 82,172 | 119 | 6 | 1,466 | 21 | 76  | 2 | 884   | 18 | 2,545 | 47  |
| 82,173 | 119 | 6 | 1,454 | 18 | 76  | 2 | 876   | 18 | 2,525 | 44  |
| 82,174 | 117 | 6 | 1,433 | 18 | 76  | 2 | 857   | 18 | 2,483 | 44  |
| 82,175 | 129 | 6 | 1,801 | 19 | 85  | 2 | 932   | 19 | 2,947 | 46  |
| 82,176 | 129 | 3 | 1,799 | 17 | 85  | 1 | 925   | 15 | 2,938 | 36  |
| 82,177 | 129 | 3 | 1,784 | 15 | 85  | 1 | 923   | 14 | 2,921 | 33  |
| 82,178 | 128 | 3 | 1,798 | 11 | 86  | 1 | 921   | 12 | 2,933 | 27  |
| 82,179 | 128 | 3 | 1,796 | 12 | 85  | 1 | 919   | 12 | 2,928 | 28  |
| 82,180 | 129 | 3 | 1,820 | 12 | 86  | 1 | 917   | 13 | 2,952 | 29  |
| 82,181 | 134 | 1 | 1,848 | 9  | 88  | 0 | 932   | 10 | 3,002 | 20  |
| 82,182 | 147 | 1 | 1,921 | 9  | 93  | 0 | 978   | 10 | 3,139 | 20  |
| 82,183 | 147 | 2 | 1,936 | 9  | 94  | 0 | 978   | 9  | 3,155 | 20  |
| 82,184 | 146 | 2 | 1,934 | 9  | 94  | 1 | 976   | 8  | 3,150 | 20  |
| 82,185 | 146 | 2 | 1,934 | 9  | 94  | 1 | 977   | 8  | 3,151 | 20  |
| 82,186 | 146 | 2 | 1,930 | 9  | 94  | 1 | 975   | 7  | 3,145 | 19  |
| 82,187 | 151 | 2 | 1,974 | 10 | 95  | 1 | 992   | 7  | 3,212 | 20  |
| 82,188 | 156 | 2 | 2,007 | 9  | 97  | 1 | 1,029 | 7  | 3,289 | 19  |
| 82,189 | 157 | 2 | 2,027 | 9  | 98  | 1 | 1,047 | 6  | 3,329 | 18  |
| 82,190 | 157 | 2 | 2,025 | 11 | 101 | 2 | 1,044 | 7  | 3,327 | 22  |
| 82,191 | 154 | 2 | 1,939 | 11 | 98  | 2 | 1,013 | 7  | 3,204 | 22  |
| 82,192 | 144 | 2 | 1,869 | 11 | 95  | 2 | 986   | 7  | 3,094 | 22  |
| 82,193 | 142 | 2 | 1,766 | 11 | 88  | 2 | 920   | 7  | 2,916 | 22  |

|        |     |   |       |    |    |   |     |    |       |    |
|--------|-----|---|-------|----|----|---|-----|----|-------|----|
| 82,194 | 141 | 2 | 1,749 | 11 | 88 | 2 | 915 | 7  | 2,893 | 22 |
| 82,195 | 136 | 2 | 1,689 | 10 | 81 | 2 | 859 | 7  | 2,765 | 21 |
| 82,196 | 136 | 2 | 1,691 | 10 | 81 | 2 | 856 | 7  | 2,764 | 21 |
| 82,197 | 136 | 2 | 1,691 | 11 | 81 | 2 | 856 | 8  | 2,764 | 23 |
| 82,198 | 133 | 2 | 1,682 | 12 | 81 | 2 | 847 | 9  | 2,743 | 25 |
| 82,199 | 143 | 2 | 1,703 | 25 | 81 | 2 | 856 | 12 | 2,783 | 41 |
| 82,200 | 143 | 2 | 1,719 | 25 | 81 | 2 | 866 | 12 | 2,809 | 41 |
| 82,201 | 152 | 2 | 1,733 | 24 | 83 | 2 | 876 | 9  | 2,844 | 37 |
| 82,202 | 135 | 2 | 1,570 | 24 | 71 | 2 | 721 | 9  | 2,497 | 37 |
| 82,203 | 136 | 2 | 1,521 | 24 | 70 | 2 | 708 | 9  | 2,435 | 37 |
| 82,204 | 134 | 2 | 1,494 | 24 | 68 | 2 | 690 | 10 | 2,386 | 38 |
| 82,205 | 142 | 2 | 1,542 | 25 | 68 | 2 | 743 | 10 | 2,495 | 39 |
| 82,206 | 142 | 2 | 1,547 | 25 | 68 | 2 | 745 | 10 | 2,502 | 39 |
| 82,207 | 148 | 2 | 1,617 | 25 | 76 | 2 | 807 | 10 | 2,648 | 39 |
| 82,208 | 148 | 2 | 1,643 | 26 | 76 | 2 | 806 | 10 | 2,673 | 40 |
| 82,209 | 148 | 2 | 1,641 | 26 | 76 | 2 | 808 | 10 | 2,673 | 40 |
| 82,210 | 146 | 2 | 1,608 | 26 | 73 | 2 | 785 | 10 | 2,612 | 40 |
| 82,211 | 144 | 2 | 1,587 | 25 | 72 | 2 | 781 | 10 | 2,584 | 39 |
| 82,212 | 144 | 2 | 1,583 | 25 | 73 | 2 | 781 | 10 | 2,581 | 39 |
| 82,213 | 135 | 2 | 1,562 | 26 | 73 | 2 | 781 | 10 | 2,551 | 40 |
| 82,214 | 135 | 3 | 1,563 | 26 | 72 | 2 | 779 | 10 | 2,549 | 41 |
| 82,215 | 139 | 3 | 1,660 | 26 | 75 | 2 | 819 | 10 | 2,693 | 41 |
| 82,216 | 139 | 3 | 1,621 | 25 | 72 | 2 | 806 | 10 | 2,638 | 40 |
| 82,217 | 136 | 3 | 1,600 | 25 | 70 | 2 | 792 | 10 | 2,598 | 40 |
| 82,218 | 133 | 2 | 1,500 | 25 | 58 | 2 | 730 | 10 | 2,421 | 39 |
| 82,219 | 133 | 2 | 1,496 | 25 | 58 | 2 | 730 | 13 | 2,417 | 42 |
| 82,220 | 103 | 3 | 1,299 | 34 | 48 | 2 | 596 | 13 | 2,046 | 52 |
| 82,221 | 103 | 3 | 1,293 | 35 | 48 | 2 | 596 | 18 | 2,040 | 58 |
| 82,222 | 102 | 3 | 1,287 | 36 | 47 | 2 | 596 | 18 | 2,032 | 59 |
| 82,223 | 101 | 3 | 1,242 | 35 | 47 | 2 | 593 | 18 | 1,983 | 58 |
| 82,224 | 95  | 3 | 1,168 | 35 | 44 | 2 | 547 | 18 | 1,854 | 58 |
| 82,225 | 89  | 3 | 902   | 34 | 39 | 2 | 520 | 17 | 1,550 | 56 |
| 82,226 | 88  | 3 | 870   | 34 | 39 | 2 | 513 | 17 | 1,510 | 56 |
| 82,227 | 89  | 3 | 889   | 34 | 40 | 2 | 528 | 17 | 1,546 | 56 |
| 82,228 | 89  | 4 | 908   | 33 | 42 | 2 | 547 | 17 | 1,586 | 56 |
| 82,229 | 89  | 4 | 905   | 33 | 41 | 2 | 545 | 17 | 1,580 | 56 |
| 82,230 | 89  | 4 | 920   | 32 | 41 | 2 | 556 | 17 | 1,606 | 55 |
| 82,231 | 88  | 4 | 894   | 32 | 40 | 2 | 554 | 16 | 1,576 | 54 |
| 82,232 | 83  | 4 | 865   | 32 | 38 | 2 | 537 | 16 | 1,523 | 54 |
| 82,233 | 70  | 4 | 792   | 32 | 33 | 2 | 490 | 17 | 1,385 | 55 |
| 82,234 | 70  | 3 | 769   | 32 | 32 | 1 | 481 | 17 | 1,352 | 53 |

|        |    |   |     |    |    |   |     |    |       |    |
|--------|----|---|-----|----|----|---|-----|----|-------|----|
| 82,235 | 70 | 3 | 760 | 33 | 32 | 1 | 481 | 17 | 1,343 | 54 |
| 82,236 | 66 | 3 | 743 | 34 | 32 | 1 | 463 | 17 | 1,304 | 55 |
| 82,237 | 65 | 3 | 722 | 35 | 31 | 1 | 457 | 17 | 1,275 | 56 |
| 82,238 | 65 | 3 | 714 | 35 | 30 | 1 | 456 | 17 | 1,265 | 56 |
| 82,239 | 60 | 3 | 676 | 35 | 29 | 1 | 421 | 17 | 1,186 | 56 |
| 82,240 | 60 | 3 | 654 | 36 | 28 | 1 | 402 | 19 | 1,144 | 59 |
| 82,241 | 58 | 3 | 626 | 35 | 24 | 0 | 385 | 18 | 1,093 | 56 |
| 82,242 | 58 | 3 | 607 | 35 | 24 | 1 | 380 | 19 | 1,069 | 58 |
| 82,243 | 58 | 3 | 582 | 36 | 23 | 1 | 346 | 19 | 1,009 | 59 |
| 82,244 | 56 | 3 | 545 | 36 | 22 | 1 | 323 | 19 | 946   | 59 |
| 82,245 | 56 | 3 | 546 | 36 | 22 | 2 | 324 | 19 | 948   | 60 |
| 82,246 | 56 | 4 | 548 | 35 | 22 | 2 | 324 | 18 | 950   | 59 |
| 82,247 | 56 | 4 | 545 | 38 | 22 | 2 | 324 | 18 | 947   | 62 |
| 82,248 | 47 | 4 | 523 | 38 | 22 | 2 | 314 | 18 | 906   | 62 |
| 82,249 | 47 | 4 | 530 | 37 | 22 | 2 | 315 | 18 | 914   | 61 |
| 82,250 | 46 | 4 | 532 | 24 | 22 | 2 | 316 | 15 | 916   | 45 |
| 82,251 | 44 | 4 | 509 | 24 | 21 | 2 | 301 | 15 | 875   | 45 |
| 82,252 | 36 | 4 | 482 | 24 | 19 | 2 | 285 | 15 | 822   | 45 |
| 82,253 | 32 | 5 | 455 | 24 | 19 | 2 | 272 | 14 | 778   | 45 |
| 82,254 | 27 | 5 | 436 | 24 | 19 | 2 | 258 | 14 | 740   | 45 |
| 82,255 | 19 | 5 | 382 | 24 | 18 | 2 | 200 | 13 | 619   | 44 |
| 82,256 | 23 | 5 | 391 | 23 | 18 | 2 | 199 | 13 | 631   | 43 |
| 82,257 | 22 | 5 | 380 | 23 | 17 | 2 | 194 | 13 | 613   | 43 |
| 82,258 | 21 | 5 | 345 | 23 | 10 | 2 | 163 | 13 | 539   | 43 |
| 82,259 | 21 | 5 | 315 | 22 | 10 | 2 | 161 | 13 | 507   | 42 |
| 82,260 | 22 | 5 | 320 | 22 | 11 | 2 | 160 | 13 | 513   | 42 |
| 82,261 | 22 | 5 | 324 | 22 | 11 | 2 | 164 | 14 | 521   | 43 |
| 82,262 | 33 | 5 | 449 | 24 | 13 | 2 | 200 | 14 | 695   | 45 |
| 82,263 | 36 | 5 | 468 | 30 | 12 | 2 | 210 | 17 | 726   | 54 |
| 82,264 | 42 | 5 | 474 | 30 | 12 | 2 | 209 | 18 | 737   | 55 |
| 82,265 | 37 | 5 | 404 | 36 | 9  | 2 | 194 | 18 | 644   | 61 |
| 82,266 | 37 | 5 | 385 | 36 | 9  | 2 | 170 | 18 | 601   | 61 |
| 82,267 | 37 | 5 | 369 | 36 | 9  | 2 | 169 | 18 | 584   | 61 |
| 82,268 | 38 | 6 | 383 | 36 | 9  | 2 | 166 | 18 | 596   | 62 |
| 82,269 | 40 | 6 | 446 | 36 | 13 | 2 | 181 | 17 | 680   | 61 |
| 82,270 | 40 | 5 | 447 | 27 | 13 | 2 | 184 | 15 | 684   | 49 |
| 82,271 | 40 | 5 | 448 | 27 | 11 | 2 | 183 | 15 | 682   | 49 |
| 82,272 | 42 | 5 | 446 | 26 | 11 | 2 | 183 | 10 | 682   | 43 |
| 82,273 | 45 | 5 | 464 | 26 | 11 | 2 | 185 | 10 | 705   | 43 |
| 82,274 | 46 | 5 | 509 | 27 | 12 | 2 | 188 | 10 | 755   | 44 |
| 82,275 | 46 | 6 | 508 | 31 | 11 | 3 | 187 | 12 | 752   | 52 |

|        |    |    |       |    |    |   |     |    |       |    |
|--------|----|----|-------|----|----|---|-----|----|-------|----|
| 82,276 | 46 | 6  | 503   | 32 | 11 | 3 | 187 | 13 | 747   | 54 |
| 82,277 | 69 | 6  | 874   | 36 | 27 | 3 | 334 | 13 | 1,304 | 58 |
| 82,278 | 74 | 6  | 969   | 36 | 33 | 3 | 379 | 13 | 1,455 | 58 |
| 82,279 | 74 | 5  | 993   | 36 | 36 | 3 | 389 | 13 | 1,492 | 57 |
| 82,280 | 75 | 5  | 973   | 36 | 36 | 3 | 378 | 13 | 1,462 | 57 |
| 82,281 | 75 | 5  | 970   | 36 | 36 | 3 | 376 | 13 | 1,457 | 57 |
| 82,282 | 75 | 5  | 970   | 36 | 36 | 3 | 376 | 13 | 1,457 | 57 |
| 82,283 | 75 | 5  | 970   | 36 | 36 | 3 | 377 | 13 | 1,458 | 57 |
| 82,284 | 75 | 5  | 970   | 36 | 36 | 3 | 377 | 12 | 1,458 | 56 |
| 82,285 | 75 | 5  | 970   | 36 | 36 | 3 | 377 | 12 | 1,458 | 56 |
| 82,286 | 75 | 5  | 970   | 34 | 36 | 3 | 376 | 12 | 1,457 | 54 |
| 82,287 | 75 | 5  | 970   | 34 | 36 | 3 | 376 | 12 | 1,457 | 54 |
| 82,288 | 76 | 5  | 973   | 32 | 36 | 3 | 375 | 12 | 1,460 | 52 |
| 82,289 | 76 | 5  | 973   | 32 | 36 | 3 | 375 | 12 | 1,460 | 52 |
| 82,290 | 75 | 5  | 975   | 32 | 36 | 3 | 376 | 12 | 1,462 | 52 |
| 82,291 | 74 | 5  | 974   | 31 | 36 | 3 | 376 | 10 | 1,460 | 49 |
| 82,292 | 75 | 5  | 982   | 34 | 36 | 3 | 376 | 10 | 1,469 | 52 |
| 82,293 | 75 | 5  | 982   | 37 | 36 | 2 | 373 | 10 | 1,466 | 54 |
| 82,294 | 75 | 5  | 980   | 37 | 36 | 2 | 373 | 10 | 1,464 | 54 |
| 82,295 | 75 | 5  | 985   | 37 | 36 | 2 | 375 | 10 | 1,471 | 54 |
| 82,296 | 75 | 5  | 993   | 41 | 36 | 1 | 376 | 11 | 1,480 | 58 |
| 82,297 | 77 | 4  | 1,000 | 41 | 36 | 1 | 380 | 11 | 1,493 | 57 |
| 82,298 | 78 | 4  | 1,005 | 41 | 36 | 1 | 382 | 11 | 1,501 | 57 |
| 82,299 | 79 | 5  | 1,004 | 41 | 36 | 1 | 384 | 11 | 1,503 | 58 |
| 82,300 | 79 | 6  | 1,006 | 41 | 36 | 1 | 387 | 10 | 1,508 | 58 |
| 82,301 | 84 | 6  | 1,010 | 41 | 37 | 1 | 386 | 10 | 1,517 | 58 |
| 82,302 | 84 | 6  | 1,010 | 41 | 37 | 1 | 385 | 10 | 1,516 | 58 |
| 82,303 | 88 | 5  | 1,030 | 42 | 37 | 1 | 394 | 10 | 1,549 | 58 |
| 82,304 | 88 | 5  | 1,020 | 42 | 37 | 1 | 391 | 10 | 1,536 | 58 |
| 82,305 | 89 | 7  | 1,020 | 42 | 37 | 1 | 391 | 10 | 1,537 | 60 |
| 82,306 | 89 | 7  | 1,019 | 42 | 37 | 1 | 390 | 10 | 1,535 | 60 |
| 82,307 | 87 | 7  | 1,023 | 42 | 37 | 1 | 401 | 10 | 1,548 | 60 |
| 82,308 | 87 | 9  | 1,018 | 49 | 37 | 1 | 399 | 15 | 1,541 | 74 |
| 82,309 | 82 | 9  | 999   | 52 | 37 | 1 | 374 | 15 | 1,492 | 77 |
| 82,310 | 83 | 9  | 1,097 | 53 | 39 | 1 | 411 | 18 | 1,630 | 81 |
| 82,311 | 83 | 9  | 1,100 | 53 | 39 | 1 | 411 | 18 | 1,633 | 81 |
| 82,312 | 73 | 9  | 1,019 | 54 | 39 | 1 | 391 | 17 | 1,522 | 81 |
| 82,313 | 72 | 9  | 998   | 46 | 38 | 1 | 383 | 14 | 1,491 | 70 |
| 82,314 | 69 | 10 | 978   | 46 | 38 | 1 | 373 | 14 | 1,458 | 71 |
| 82,315 | 63 | 10 | 970   | 47 | 38 | 1 | 371 | 16 | 1,442 | 74 |
| 82,316 | 63 | 9  | 960   | 41 | 38 | 1 | 369 | 15 | 1,430 | 66 |



|        |    |    |       |    |    |   |     |    |       |     |
|--------|----|----|-------|----|----|---|-----|----|-------|-----|
| 82,317 | 66 | 9  | 968   | 41 | 38 | 1 | 370 | 15 | 1,442 | 66  |
| 82,318 | 66 | 8  | 961   | 41 | 38 | 1 | 370 | 15 | 1,435 | 65  |
| 82,319 | 67 | 8  | 987   | 41 | 38 | 1 | 375 | 15 | 1,467 | 65  |
| 82,320 | 78 | 8  | 1,031 | 41 | 35 | 1 | 372 | 13 | 1,516 | 63  |
| 82,321 | 78 | 8  | 1,028 | 41 | 35 | 1 | 369 | 13 | 1,510 | 63  |
| 82,322 | 77 | 8  | 1,046 | 41 | 35 | 1 | 369 | 13 | 1,527 | 63  |
| 82,323 | 77 | 8  | 1,054 | 40 | 35 | 1 | 370 | 13 | 1,536 | 62  |
| 82,324 | 82 | 8  | 1,069 | 43 | 36 | 1 | 376 | 15 | 1,563 | 67  |
| 82,325 | 84 | 9  | 1,079 | 50 | 36 | 1 | 385 | 17 | 1,584 | 77  |
| 82,326 | 79 | 8  | 1,022 | 47 | 35 | 0 | 358 | 16 | 1,494 | 71  |
| 82,327 | 67 | 8  | 806   | 48 | 28 | 0 | 274 | 16 | 1,175 | 72  |
| 82,328 | 60 | 8  | 706   | 44 | 20 | 0 | 225 | 16 | 1,011 | 68  |
| 82,329 | 55 | 8  | 599   | 44 | 13 | 0 | 168 | 16 | 835   | 68  |
| 82,330 | 54 | 8  | 564   | 44 | 9  | 0 | 150 | 16 | 777   | 68  |
| 82,331 | 54 | 8  | 562   | 44 | 9  | 0 | 148 | 18 | 773   | 70  |
| 82,332 | 54 | 8  | 562   | 44 | 9  | 0 | 147 | 18 | 772   | 70  |
| 82,333 | 54 | 8  | 565   | 44 | 9  | 0 | 148 | 18 | 776   | 70  |
| 82,334 | 57 | 8  | 585   | 44 | 10 | 0 | 157 | 19 | 809   | 71  |
| 82,335 | 58 | 9  | 609   | 44 | 10 | 0 | 169 | 19 | 846   | 72  |
| 82,336 | 58 | 9  | 611   | 45 | 10 | 0 | 172 | 19 | 851   | 73  |
| 82,337 | 58 | 9  | 611   | 45 | 10 | 0 | 172 | 19 | 851   | 73  |
| 82,338 | 57 | 9  | 612   | 45 | 10 | 0 | 172 | 19 | 851   | 73  |
| 82,339 | 57 | 9  | 612   | 45 | 10 | 0 | 173 | 19 | 852   | 73  |
| 82,340 | 57 | 9  | 611   | 45 | 10 | 0 | 173 | 19 | 851   | 73  |
| 82,341 | 57 | 9  | 611   | 46 | 10 | 0 | 173 | 21 | 851   | 76  |
| 82,342 | 56 | 9  | 607   | 43 | 10 | 0 | 173 | 27 | 846   | 79  |
| 82,343 | 56 | 9  | 604   | 45 | 10 | 0 | 173 | 31 | 843   | 85  |
| 82,344 | 56 | 9  | 609   | 42 | 10 | 1 | 173 | 35 | 848   | 87  |
| 82,345 | 57 | 9  | 614   | 48 | 10 | 2 | 177 | 35 | 858   | 94  |
| 82,346 | 57 | 11 | 611   | 54 | 10 | 3 | 176 | 45 | 854   | 113 |
| 82,347 | 57 | 11 | 603   | 52 | 10 | 3 | 174 | 44 | 844   | 110 |
| 82,348 | 55 | 11 | 593   | 53 | 10 | 3 | 169 | 45 | 827   | 112 |
| 82,349 | 54 | 11 | 596   | 50 | 10 | 3 | 168 | 45 | 828   | 109 |
| 82,350 | 56 | 9  | 616   | 50 | 12 | 3 | 170 | 45 | 854   | 107 |
| 82,351 | 56 | 9  | 612   | 50 | 12 | 3 | 167 | 46 | 847   | 108 |
| 82,352 | 51 | 9  | 601   | 50 | 11 | 3 | 167 | 46 | 830   | 108 |
| 82,353 | 51 | 9  | 597   | 50 | 11 | 3 | 167 | 46 | 826   | 108 |
| 82,354 | 47 | 9  | 575   | 50 | 11 | 3 | 157 | 46 | 790   | 108 |
| 82,355 | 47 | 9  | 575   | 50 | 11 | 3 | 157 | 48 | 790   | 110 |
| 82,356 | 46 | 7  | 571   | 50 | 11 | 3 | 157 | 48 | 785   | 108 |
| 82,357 | 44 | 7  | 562   | 50 | 11 | 3 | 148 | 48 | 765   | 108 |

|        |    |   |     |    |    |   |     |    |     |     |
|--------|----|---|-----|----|----|---|-----|----|-----|-----|
| 82,358 | 44 | 8 | 555 | 52 | 11 | 3 | 146 | 48 | 756 | 111 |
| 82,359 | 43 | 6 | 517 | 48 | 10 | 3 | 143 | 43 | 713 | 100 |
| 82,360 | 42 | 6 | 502 | 45 | 9  | 3 | 133 | 43 | 686 | 97  |
| 82,361 | 42 | 6 | 460 | 43 | 8  | 3 | 114 | 40 | 624 | 92  |
| 82,362 | 42 | 6 | 454 | 43 | 8  | 3 | 110 | 40 | 614 | 92  |
| 82,363 | 42 | 5 | 433 | 43 | 7  | 3 | 102 | 40 | 584 | 91  |
| 82,364 | 42 | 5 | 436 | 44 | 7  | 3 | 103 | 40 | 588 | 92  |
| 82,365 | 41 | 5 | 440 | 44 | 7  | 3 | 104 | 40 | 592 | 92  |
| 82,366 | 41 | 5 | 441 | 43 | 7  | 3 | 110 | 38 | 599 | 89  |
| 82,367 | 41 | 5 | 462 | 43 | 8  | 3 | 116 | 38 | 627 | 89  |
| 82,368 | 38 | 5 | 457 | 43 | 8  | 3 | 115 | 38 | 618 | 89  |
| 82,369 | 38 | 5 | 455 | 43 | 8  | 3 | 115 | 38 | 616 | 89  |
| 82,370 | 38 | 5 | 430 | 43 | 8  | 3 | 110 | 41 | 586 | 92  |
| 82,371 | 25 | 5 | 324 | 43 | 7  | 3 | 97  | 41 | 453 | 92  |
| 82,372 | 25 | 5 | 324 | 46 | 7  | 3 | 97  | 42 | 453 | 96  |
| 82,373 | 25 | 5 | 304 | 48 | 7  | 3 | 94  | 43 | 430 | 99  |
| 82,374 | 24 | 6 | 293 | 48 | 7  | 3 | 93  | 43 | 417 | 100 |
| 82,375 | 16 | 6 | 260 | 45 | 6  | 3 | 85  | 41 | 367 | 95  |
| 82,376 | 9  | 5 | 201 | 37 | 5  | 3 | 69  | 39 | 284 | 84  |
| 82,377 | 9  | 5 | 174 | 34 | 5  | 3 | 62  | 40 | 250 | 82  |
| 82,378 | 9  | 5 | 171 | 34 | 4  | 3 | 62  | 40 | 246 | 82  |
| 82,379 | 9  | 5 | 171 | 34 | 4  | 3 | 62  | 40 | 246 | 82  |
| 82,380 | 9  | 5 | 171 | 37 | 4  | 3 | 62  | 41 | 246 | 86  |
| 82,381 | 9  | 5 | 171 | 41 | 4  | 3 | 63  | 45 | 247 | 94  |
| 82,382 | 9  | 5 | 169 | 45 | 4  | 3 | 63  | 47 | 245 | 100 |
| 82,383 | 9  | 5 | 168 | 46 | 4  | 3 | 62  | 48 | 243 | 102 |
| 82,384 | 8  | 5 | 153 | 49 | 3  | 3 | 59  | 48 | 223 | 105 |
| 82,385 | 6  | 5 | 148 | 50 | 3  | 3 | 52  | 47 | 209 | 105 |
| 82,386 | 5  | 4 | 124 | 49 | 3  | 3 | 40  | 47 | 172 | 103 |
| 82,387 | 5  | 4 | 122 | 49 | 3  | 3 | 37  | 47 | 167 | 103 |
| 82,388 | 5  | 4 | 120 | 49 | 3  | 3 | 37  | 47 | 165 | 103 |
| 82,389 | 5  | 4 | 119 | 49 | 3  | 3 | 37  | 47 | 164 | 103 |
| 82,390 | 5  | 4 | 118 | 49 | 3  | 3 | 37  | 47 | 163 | 103 |
| 82,391 | 5  | 4 | 117 | 49 | 3  | 3 | 37  | 48 | 162 | 104 |
| 82,392 | 5  | 4 | 117 | 48 | 3  | 3 | 37  | 46 | 162 | 101 |
| 82,393 | 5  | 4 | 116 | 47 | 3  | 3 | 37  | 40 | 161 | 94  |
| 82,394 | 5  | 4 | 111 | 46 | 3  | 2 | 36  | 31 | 155 | 83  |
| 82,395 | 6  | 4 | 109 | 47 | 3  | 2 | 36  | 31 | 154 | 84  |
| 82,396 | 6  | 5 | 103 | 52 | 3  | 1 | 31  | 37 | 143 | 95  |
| 82,397 | 6  | 3 | 103 | 46 | 3  | 1 | 31  | 28 | 143 | 78  |
| 82,398 | 6  | 3 | 102 | 44 | 3  | 1 | 31  | 29 | 142 | 77  |

|        |    |   |     |    |    |   |     |    |       |     |
|--------|----|---|-----|----|----|---|-----|----|-------|-----|
| 82,399 | 6  | 4 | 90  | 43 | 3  | 1 | 31  | 28 | 130   | 76  |
| 82,400 | 6  | 4 | 83  | 43 | 3  | 1 | 30  | 28 | 122   | 76  |
| 82,401 | 5  | 4 | 69  | 43 | 1  | 1 | 32  | 27 | 107   | 75  |
| 82,402 | 5  | 4 | 68  | 43 | 1  | 1 | 31  | 27 | 105   | 75  |
| 82,403 | 6  | 4 | 77  | 43 | 1  | 1 | 39  | 27 | 123   | 75  |
| 82,404 | 6  | 4 | 77  | 48 | 1  | 1 | 39  | 28 | 123   | 81  |
| 82,405 | 6  | 4 | 81  | 55 | 1  | 1 | 43  | 30 | 131   | 90  |
| 82,406 | 12 | 4 | 97  | 58 | 2  | 1 | 64  | 32 | 175   | 95  |
| 82,407 | 12 | 4 | 102 | 58 | 3  | 3 | 67  | 32 | 184   | 97  |
| 82,408 | 12 | 3 | 102 | 53 | 3  | 3 | 66  | 32 | 183   | 91  |
| 82,409 | 13 | 3 | 117 | 55 | 5  | 3 | 80  | 32 | 215   | 93  |
| 82,410 | 13 | 3 | 108 | 55 | 5  | 3 | 71  | 32 | 197   | 93  |
| 82,411 | 13 | 3 | 108 | 60 | 5  | 3 | 73  | 34 | 199   | 100 |
| 82,412 | 13 | 3 | 108 | 60 | 5  | 3 | 73  | 34 | 199   | 100 |
| 82,413 | 13 | 3 | 109 | 64 | 5  | 3 | 82  | 34 | 209   | 104 |
| 82,414 | 14 | 3 | 111 | 63 | 5  | 3 | 85  | 34 | 215   | 103 |
| 82,415 | 14 | 3 | 108 | 63 | 5  | 3 | 86  | 34 | 213   | 103 |
| 82,416 | 14 | 3 | 89  | 63 | 6  | 3 | 83  | 34 | 192   | 103 |
| 82,417 | 14 | 3 | 87  | 62 | 5  | 3 | 83  | 34 | 189   | 102 |
| 82,418 | 15 | 3 | 82  | 62 | 5  | 3 | 82  | 34 | 184   | 102 |
| 82,419 | 15 | 3 | 86  | 62 | 5  | 3 | 87  | 34 | 193   | 102 |
| 82,420 | 15 | 3 | 84  | 62 | 5  | 3 | 87  | 34 | 191   | 102 |
| 82,421 | 21 | 3 | 155 | 62 | 6  | 3 | 151 | 31 | 333   | 99  |
| 82,422 | 21 | 3 | 192 | 62 | 6  | 3 | 183 | 31 | 402   | 99  |
| 82,423 | 21 | 3 | 192 | 59 | 6  | 3 | 183 | 30 | 402   | 95  |
| 82,424 | 21 | 3 | 191 | 57 | 6  | 3 | 183 | 29 | 401   | 92  |
| 82,425 | 21 | 2 | 194 | 57 | 6  | 3 | 184 | 29 | 405   | 91  |
| 82,426 | 21 | 2 | 204 | 58 | 9  | 3 | 188 | 29 | 422   | 92  |
| 82,427 | 21 | 2 | 207 | 58 | 10 | 3 | 193 | 29 | 431   | 92  |
| 82,428 | 21 | 2 | 212 | 58 | 10 | 3 | 197 | 28 | 440   | 91  |
| 82,429 | 24 | 2 | 233 | 58 | 11 | 3 | 211 | 28 | 479   | 91  |
| 82,430 | 24 | 2 | 233 | 58 | 11 | 3 | 212 | 28 | 480   | 91  |
| 82,431 | 31 | 2 | 279 | 55 | 13 | 3 | 238 | 27 | 561   | 87  |
| 82,432 | 31 | 2 | 279 | 51 | 13 | 3 | 238 | 23 | 561   | 79  |
| 82,433 | 37 | 2 | 433 | 46 | 26 | 3 | 273 | 18 | 769   | 69  |
| 82,434 | 38 | 2 | 468 | 43 | 29 | 3 | 278 | 18 | 813   | 66  |
| 82,435 | 50 | 2 | 523 | 43 | 35 | 3 | 367 | 18 | 975   | 66  |
| 82,436 | 59 | 2 | 744 | 42 | 46 | 3 | 434 | 18 | 1,283 | 65  |
| 82,437 | 60 | 2 | 761 | 42 | 46 | 3 | 445 | 18 | 1,312 | 65  |
| 82,438 | 60 | 2 | 766 | 44 | 46 | 3 | 446 | 18 | 1,318 | 67  |
| 82,439 | 60 | 2 | 766 | 44 | 46 | 3 | 447 | 18 | 1,319 | 67  |

|        |    |   |     |    |    |   |     |    |       |    |
|--------|----|---|-----|----|----|---|-----|----|-------|----|
| 82,440 | 60 | 3 | 766 | 44 | 46 | 3 | 447 | 18 | 1,319 | 68 |
| 82,441 | 61 | 3 | 773 | 44 | 46 | 3 | 449 | 18 | 1,329 | 68 |
| 82,442 | 61 | 3 | 773 | 44 | 46 | 3 | 449 | 18 | 1,329 | 68 |
| 82,443 | 61 | 3 | 773 | 44 | 46 | 3 | 449 | 18 | 1,329 | 68 |
| 82,444 | 61 | 3 | 775 | 43 | 46 | 3 | 450 | 18 | 1,332 | 67 |
| 82,445 | 61 | 3 | 775 | 43 | 46 | 3 | 450 | 18 | 1,332 | 67 |
| 82,446 | 60 | 4 | 775 | 43 | 46 | 4 | 450 | 18 | 1,331 | 69 |
| 82,447 | 59 | 3 | 775 | 31 | 46 | 4 | 450 | 12 | 1,330 | 50 |
| 82,448 | 59 | 3 | 776 | 31 | 46 | 3 | 452 | 11 | 1,333 | 48 |
| 82,449 | 59 | 3 | 780 | 31 | 46 | 3 | 453 | 10 | 1,338 | 47 |
| 82,450 | 59 | 2 | 781 | 31 | 46 | 3 | 452 | 10 | 1,338 | 46 |
| 82,451 | 59 | 2 | 780 | 31 | 46 | 3 | 450 | 10 | 1,335 | 46 |
| 82,452 | 57 | 2 | 778 | 31 | 46 | 3 | 450 | 10 | 1,331 | 46 |
| 82,453 | 56 | 2 | 773 | 31 | 46 | 3 | 444 | 10 | 1,319 | 46 |
| 82,454 | 56 | 2 | 769 | 18 | 46 | 3 | 442 | 7  | 1,313 | 30 |
| 82,455 | 56 | 2 | 765 | 18 | 46 | 3 | 442 | 8  | 1,309 | 31 |
| 82,456 | 51 | 2 | 749 | 18 | 45 | 3 | 422 | 8  | 1,267 | 31 |
| 82,457 | 50 | 4 | 750 | 15 | 45 | 3 | 425 | 4  | 1,270 | 26 |
| 82,458 | 50 | 4 | 749 | 15 | 45 | 1 | 425 | 4  | 1,269 | 24 |
| 82,459 | 50 | 4 | 747 | 15 | 45 | 1 | 423 | 4  | 1,265 | 24 |
| 82,460 | 50 | 4 | 736 | 13 | 43 | 1 | 410 | 4  | 1,239 | 22 |
| 82,461 | 50 | 4 | 737 | 13 | 44 | 1 | 409 | 4  | 1,240 | 22 |
| 82,462 | 50 | 4 | 745 | 8  | 44 | 1 | 409 | 2  | 1,248 | 15 |
| 82,463 | 50 | 4 | 751 | 8  | 45 | 1 | 407 | 2  | 1,253 | 15 |
| 82,464 | 50 | 4 | 756 | 4  | 45 | 1 | 404 | 2  | 1,255 | 11 |
| 82,465 | 49 | 4 | 753 | 4  | 45 | 1 | 401 | 3  | 1,248 | 12 |
| 82,466 | 50 | 4 | 757 | 4  | 45 | 1 | 404 | 3  | 1,256 | 12 |
| 82,467 | 51 | 4 | 761 | 8  | 44 | 2 | 412 | 5  | 1,268 | 19 |
| 82,468 | 51 | 4 | 762 | 10 | 44 | 3 | 412 | 6  | 1,269 | 23 |
| 82,469 | 50 | 4 | 758 | 10 | 44 | 3 | 409 | 6  | 1,261 | 23 |
| 82,470 | 50 | 4 | 753 | 13 | 44 | 3 | 405 | 6  | 1,252 | 26 |
| 82,471 | 50 | 5 | 733 | 14 | 44 | 4 | 389 | 9  | 1,216 | 32 |
| 82,472 | 43 | 5 | 680 | 15 | 43 | 4 | 340 | 10 | 1,106 | 34 |
| 82,473 | 43 | 5 | 641 | 15 | 43 | 4 | 306 | 10 | 1,033 | 34 |
| 82,474 | 46 | 5 | 660 | 15 | 43 | 4 | 320 | 10 | 1,069 | 34 |
| 82,475 | 46 | 5 | 664 | 15 | 43 | 4 | 319 | 10 | 1,072 | 34 |
| 82,476 | 46 | 5 | 656 | 15 | 42 | 4 | 317 | 10 | 1,061 | 34 |
| 82,477 | 47 | 5 | 669 | 14 | 40 | 4 | 320 | 10 | 1,076 | 33 |
| 82,478 | 48 | 5 | 697 | 14 | 39 | 4 | 321 | 10 | 1,105 | 33 |
| 82,479 | 48 | 5 | 692 | 14 | 39 | 4 | 317 | 10 | 1,096 | 33 |
| 82,480 | 48 | 5 | 705 | 14 | 38 | 4 | 324 | 10 | 1,115 | 33 |

|        |    |   |       |    |    |   |     |    |       |    |
|--------|----|---|-------|----|----|---|-----|----|-------|----|
| 82,481 | 50 | 5 | 727   | 16 | 39 | 6 | 332 | 11 | 1,148 | 38 |
| 82,482 | 45 | 5 | 731   | 18 | 38 | 6 | 323 | 11 | 1,137 | 40 |
| 82,483 | 42 | 6 | 671   | 19 | 30 | 6 | 328 | 11 | 1,071 | 42 |
| 82,484 | 47 | 6 | 664   | 19 | 31 | 7 | 321 | 11 | 1,063 | 43 |
| 82,485 | 58 | 6 | 747   | 21 | 31 | 7 | 379 | 11 | 1,215 | 45 |
| 82,486 | 55 | 6 | 758   | 23 | 28 | 7 | 331 | 11 | 1,172 | 47 |
| 82,487 | 46 | 6 | 570   | 25 | 17 | 7 | 270 | 12 | 903   | 50 |
| 82,488 | 48 | 6 | 621   | 24 | 20 | 7 | 289 | 12 | 978   | 49 |
| 82,489 | 48 | 6 | 616   | 26 | 20 | 7 | 288 | 12 | 972   | 51 |
| 82,490 | 47 | 6 | 611   | 29 | 20 | 7 | 286 | 12 | 964   | 54 |
| 82,491 | 51 | 5 | 667   | 29 | 20 | 8 | 309 | 16 | 1,047 | 58 |
| 82,492 | 51 | 5 | 667   | 29 | 20 | 8 | 309 | 16 | 1,047 | 58 |
| 82,493 | 58 | 5 | 761   | 30 | 22 | 8 | 332 | 15 | 1,173 | 58 |
| 82,494 | 64 | 5 | 928   | 36 | 27 | 8 | 376 | 15 | 1,395 | 64 |
| 82,495 | 64 | 5 | 926   | 35 | 27 | 8 | 375 | 15 | 1,392 | 63 |
| 82,496 | 64 | 5 | 927   | 35 | 27 | 8 | 375 | 15 | 1,393 | 63 |
| 82,497 | 65 | 4 | 939   | 35 | 27 | 7 | 376 | 15 | 1,407 | 61 |
| 82,498 | 66 | 4 | 953   | 35 | 28 | 7 | 387 | 15 | 1,434 | 61 |
| 82,499 | 68 | 4 | 960   | 38 | 28 | 7 | 391 | 15 | 1,447 | 64 |
| 82,500 | 68 | 4 | 959   | 38 | 28 | 7 | 391 | 15 | 1,446 | 64 |
| 82,501 | 71 | 4 | 985   | 39 | 28 | 7 | 398 | 15 | 1,482 | 65 |
| 82,502 | 71 | 5 | 990   | 40 | 28 | 7 | 400 | 16 | 1,489 | 68 |
| 82,503 | 71 | 5 | 988   | 40 | 28 | 7 | 396 | 16 | 1,483 | 68 |
| 82,504 | 75 | 5 | 1,014 | 41 | 30 | 7 | 407 | 17 | 1,526 | 70 |
| 82,505 | 79 | 5 | 1,059 | 41 | 35 | 7 | 440 | 17 | 1,613 | 70 |
| 82,506 | 79 | 5 | 1,059 | 41 | 35 | 7 | 436 | 16 | 1,609 | 69 |
| 82,507 | 80 | 5 | 1,065 | 41 | 36 | 7 | 441 | 16 | 1,622 | 69 |
| 82,508 | 80 | 3 | 1,078 | 41 | 38 | 7 | 441 | 16 | 1,637 | 67 |
| 82,509 | 80 | 4 | 1,071 | 41 | 37 | 7 | 438 | 16 | 1,626 | 68 |
| 82,510 | 80 | 4 | 1,069 | 42 | 37 | 7 | 439 | 16 | 1,625 | 69 |
| 82,511 | 80 | 4 | 1,066 | 42 | 37 | 7 | 439 | 16 | 1,622 | 69 |
| 82,512 | 81 | 4 | 1,069 | 44 | 36 | 7 | 442 | 16 | 1,628 | 71 |
| 82,513 | 82 | 4 | 1,072 | 44 | 36 | 7 | 457 | 16 | 1,647 | 71 |
| 82,514 | 82 | 4 | 1,073 | 47 | 35 | 8 | 460 | 16 | 1,650 | 75 |
| 82,515 | 82 | 4 | 1,069 | 47 | 35 | 8 | 464 | 16 | 1,650 | 75 |
| 82,516 | 81 | 4 | 1,064 | 47 | 35 | 8 | 458 | 16 | 1,638 | 75 |
| 82,517 | 81 | 4 | 1,063 | 47 | 35 | 8 | 457 | 16 | 1,636 | 75 |
| 82,518 | 80 | 4 | 1,069 | 41 | 35 | 6 | 449 | 13 | 1,633 | 64 |
| 82,519 | 80 | 4 | 1,068 | 43 | 35 | 6 | 449 | 13 | 1,632 | 66 |
| 82,520 | 80 | 4 | 1,067 | 43 | 35 | 6 | 449 | 13 | 1,631 | 66 |
| 82,521 | 83 | 4 | 1,087 | 40 | 36 | 6 | 463 | 13 | 1,669 | 63 |

|        |     |    |       |    |     |   |     |    |       |     |
|--------|-----|----|-------|----|-----|---|-----|----|-------|-----|
| 82,522 | 88  | 3  | 1,097 | 40 | 36  | 5 | 467 | 10 | 1,688 | 58  |
| 82,523 | 87  | 3  | 1,096 | 39 | 36  | 5 | 465 | 9  | 1,684 | 56  |
| 82,524 | 87  | 3  | 1,097 | 39 | 36  | 5 | 465 | 9  | 1,685 | 56  |
| 82,525 | 88  | 3  | 1,105 | 39 | 36  | 5 | 471 | 9  | 1,700 | 56  |
| 82,526 | 88  | 3  | 1,098 | 39 | 36  | 5 | 472 | 9  | 1,694 | 56  |
| 82,527 | 88  | 3  | 1,102 | 39 | 36  | 5 | 475 | 9  | 1,701 | 56  |
| 82,528 | 88  | 3  | 1,095 | 39 | 36  | 5 | 475 | 9  | 1,694 | 56  |
| 82,529 | 89  | 3  | 1,110 | 39 | 39  | 5 | 478 | 9  | 1,716 | 56  |
| 82,530 | 89  | 3  | 1,124 | 39 | 39  | 5 | 487 | 12 | 1,739 | 59  |
| 82,531 | 89  | 3  | 1,094 | 52 | 40  | 5 | 468 | 19 | 1,691 | 79  |
| 82,532 | 87  | 5  | 1,072 | 65 | 39  | 4 | 459 | 30 | 1,657 | 104 |
| 82,533 | 85  | 5  | 1,023 | 63 | 38  | 4 | 442 | 31 | 1,588 | 103 |
| 82,534 | 98  | 4  | 1,061 | 64 | 47  | 4 | 460 | 32 | 1,666 | 104 |
| 82,535 | 92  | 5  | 1,040 | 64 | 43  | 3 | 454 | 32 | 1,629 | 104 |
| 82,536 | 90  | 5  | 1,069 | 62 | 50  | 3 | 467 | 32 | 1,676 | 102 |
| 82,537 | 86  | 5  | 1,045 | 58 | 51  | 3 | 445 | 31 | 1,627 | 97  |
| 82,538 | 86  | 5  | 1,012 | 58 | 51  | 3 | 440 | 31 | 1,589 | 97  |
| 82,539 | 113 | 8  | 1,379 | 57 | 77  | 3 | 584 | 33 | 2,153 | 101 |
| 82,540 | 114 | 9  | 1,422 | 52 | 79  | 3 | 608 | 33 | 2,223 | 97  |
| 82,541 | 121 | 9  | 1,526 | 52 | 90  | 3 | 687 | 33 | 2,424 | 97  |
| 82,542 | 120 | 10 | 1,512 | 52 | 92  | 2 | 673 | 29 | 2,397 | 93  |
| 82,543 | 113 | 11 | 1,418 | 57 | 90  | 2 | 653 | 31 | 2,274 | 101 |
| 82,544 | 108 | 11 | 1,266 | 56 | 87  | 2 | 622 | 31 | 2,083 | 100 |
| 82,545 | 108 | 11 | 1,298 | 50 | 89  | 2 | 620 | 31 | 2,115 | 94  |
| 82,546 | 111 | 11 | 1,336 | 50 | 92  | 2 | 643 | 31 | 2,182 | 94  |
| 82,547 | 111 | 11 | 1,401 | 51 | 95  | 2 | 652 | 31 | 2,259 | 95  |
| 82,548 | 111 | 11 | 1,392 | 51 | 95  | 2 | 651 | 31 | 2,249 | 95  |
| 82,549 | 112 | 11 | 1,385 | 51 | 94  | 2 | 642 | 31 | 2,233 | 95  |
| 82,550 | 110 | 11 | 1,377 | 48 | 94  | 2 | 637 | 31 | 2,218 | 92  |
| 82,551 | 110 | 11 | 1,370 | 51 | 94  | 2 | 634 | 31 | 2,208 | 95  |
| 82,552 | 107 | 11 | 1,352 | 53 | 94  | 2 | 630 | 32 | 2,183 | 98  |
| 82,553 | 107 | 11 | 1,350 | 64 | 94  | 2 | 629 | 35 | 2,180 | 112 |
| 82,554 | 103 | 11 | 1,324 | 66 | 92  | 2 | 618 | 38 | 2,137 | 117 |
| 82,555 | 103 | 11 | 1,295 | 66 | 88  | 2 | 595 | 37 | 2,081 | 116 |
| 82,556 | 103 | 11 | 1,305 | 66 | 89  | 2 | 589 | 37 | 2,086 | 116 |
| 82,557 | 103 | 11 | 1,317 | 67 | 89  | 2 | 591 | 37 | 2,100 | 117 |
| 82,558 | 104 | 12 | 1,327 | 74 | 89  | 2 | 590 | 40 | 2,110 | 128 |
| 82,559 | 104 | 12 | 1,324 | 76 | 89  | 2 | 588 | 42 | 2,105 | 132 |
| 82,560 | 116 | 11 | 1,395 | 80 | 97  | 2 | 626 | 43 | 2,234 | 136 |
| 82,561 | 120 | 11 | 1,421 | 84 | 99  | 2 | 668 | 44 | 2,308 | 141 |
| 82,562 | 120 | 12 | 1,438 | 84 | 103 | 2 | 680 | 45 | 2,341 | 143 |

|        |     |    |       |    |     |   |       |    |       |     |
|--------|-----|----|-------|----|-----|---|-------|----|-------|-----|
| 82,563 | 119 | 12 | 1,446 | 82 | 105 | 2 | 692   | 46 | 2,362 | 142 |
| 82,564 | 118 | 12 | 1,440 | 79 | 105 | 1 | 681   | 47 | 2,344 | 139 |
| 82,565 | 118 | 12 | 1,430 | 79 | 105 | 1 | 676   | 47 | 2,329 | 139 |
| 82,566 | 118 | 12 | 1,436 | 79 | 106 | 1 | 678   | 47 | 2,338 | 139 |
| 82,567 | 118 | 12 | 1,440 | 83 | 106 | 1 | 688   | 47 | 2,352 | 143 |
| 82,568 | 118 | 13 | 1,440 | 83 | 106 | 1 | 691   | 47 | 2,355 | 144 |
| 82,569 | 119 | 13 | 1,448 | 83 | 107 | 1 | 702   | 49 | 2,376 | 146 |
| 82,570 | 119 | 13 | 1,448 | 83 | 107 | 1 | 702   | 49 | 2,376 | 146 |
| 82,571 | 117 | 13 | 1,433 | 82 | 106 | 1 | 690   | 49 | 2,346 | 145 |
| 82,572 | 117 | 13 | 1,435 | 82 | 106 | 1 | 692   | 50 | 2,350 | 146 |
| 82,573 | 113 | 13 | 1,440 | 83 | 106 | 1 | 697   | 52 | 2,356 | 149 |
| 82,574 | 115 | 13 | 1,449 | 83 | 107 | 2 | 699   | 53 | 2,370 | 151 |
| 82,575 | 115 | 13 | 1,448 | 83 | 107 | 2 | 698   | 53 | 2,368 | 151 |
| 82,576 | 122 | 13 | 1,628 | 83 | 112 | 2 | 778   | 53 | 2,640 | 151 |
| 82,577 | 150 | 13 | 1,739 | 83 | 115 | 2 | 877   | 53 | 2,881 | 151 |
| 82,578 | 150 | 13 | 1,816 | 83 | 116 | 2 | 884   | 53 | 2,966 | 151 |
| 82,579 | 152 | 13 | 1,824 | 83 | 116 | 2 | 895   | 53 | 2,987 | 151 |
| 82,580 | 157 | 13 | 1,951 | 83 | 122 | 2 | 994   | 50 | 3,224 | 148 |
| 82,581 | 157 | 13 | 1,936 | 83 | 122 | 2 | 985   | 50 | 3,200 | 148 |
| 82,582 | 155 | 11 | 1,977 | 55 | 122 | 1 | 1,003 | 31 | 3,257 | 98  |
| 82,583 | 155 | 11 | 1,987 | 53 | 122 | 1 | 1,012 | 29 | 3,276 | 94  |
| 82,584 | 154 | 11 | 1,982 | 53 | 122 | 1 | 1,012 | 29 | 3,270 | 94  |
| 82,585 | 140 | 11 | 1,904 | 53 | 111 | 1 | 967   | 29 | 3,122 | 94  |
| 82,586 | 140 | 10 | 1,891 | 53 | 111 | 1 | 966   | 30 | 3,108 | 94  |
| 82,587 | 129 | 10 | 1,743 | 56 | 101 | 1 | 887   | 32 | 2,860 | 99  |
| 82,588 | 125 | 10 | 1,703 | 56 | 97  | 1 | 870   | 32 | 2,795 | 99  |
| 82,589 | 110 | 10 | 1,486 | 57 | 74  | 1 | 756   | 32 | 2,426 | 100 |
| 82,590 | 95  | 6  | 1,272 | 58 | 68  | 1 | 695   | 30 | 2,130 | 95  |
| 82,591 | 92  | 6  | 1,222 | 59 | 66  | 1 | 670   | 30 | 2,050 | 96  |
| 82,592 | 85  | 6  | 1,114 | 59 | 55  | 1 | 590   | 30 | 1,844 | 96  |
| 82,593 | 84  | 5  | 1,088 | 59 | 53  | 1 | 586   | 30 | 1,811 | 95  |
| 82,594 | 87  | 4  | 1,105 | 54 | 54  | 1 | 589   | 28 | 1,835 | 87  |
| 82,595 | 86  | 4  | 1,102 | 54 | 50  | 1 | 598   | 28 | 1,836 | 87  |
| 82,596 | 84  | 4  | 1,076 | 55 | 47  | 1 | 582   | 28 | 1,789 | 88  |
| 82,597 | 83  | 4  | 1,023 | 59 | 45  | 1 | 576   | 28 | 1,727 | 92  |
| 82,598 | 92  | 4  | 1,037 | 58 | 44  | 1 | 600   | 28 | 1,773 | 91  |
| 82,599 | 92  | 4  | 1,048 | 58 | 47  | 1 | 612   | 28 | 1,799 | 91  |
| 82,600 | 92  | 4  | 1,047 | 58 | 47  | 1 | 613   | 28 | 1,799 | 91  |
| 82,601 | 92  | 4  | 1,047 | 55 | 47  | 1 | 614   | 28 | 1,800 | 88  |
| 82,602 | 93  | 4  | 1,048 | 52 | 47  | 1 | 614   | 27 | 1,802 | 84  |
| 82,603 | 93  | 3  | 1,050 | 40 | 47  | 1 | 614   | 23 | 1,804 | 67  |

|        |     |   |       |    |    |   |     |    |       |    |
|--------|-----|---|-------|----|----|---|-----|----|-------|----|
| 82,604 | 101 | 3 | 1,081 | 38 | 47 | 1 | 632 | 20 | 1,861 | 62 |
| 82,605 | 101 | 3 | 1,081 | 38 | 47 | 1 | 632 | 20 | 1,861 | 62 |
| 82,606 | 104 | 3 | 1,076 | 37 | 46 | 1 | 636 | 23 | 1,862 | 64 |
| 82,607 | 106 | 3 | 1,079 | 38 | 46 | 1 | 645 | 23 | 1,876 | 65 |
| 82,608 | 105 | 3 | 1,064 | 39 | 45 | 1 | 639 | 23 | 1,853 | 66 |
| 82,609 | 105 | 2 | 1,046 | 34 | 43 | 1 | 640 | 19 | 1,834 | 56 |
| 82,610 | 96  | 2 | 995   | 32 | 37 | 1 | 612 | 17 | 1,740 | 52 |
| 82,611 | 93  | 3 | 972   | 28 | 35 | 1 | 602 | 16 | 1,702 | 48 |
| 82,612 | 88  | 3 | 947   | 23 | 32 | 1 | 561 | 15 | 1,628 | 42 |
| 82,613 | 88  | 2 | 932   | 25 | 32 | 1 | 551 | 17 | 1,603 | 45 |
| 82,614 | 88  | 2 | 921   | 26 | 27 | 1 | 533 | 17 | 1,569 | 46 |
| 82,615 | 90  | 2 | 927   | 34 | 27 | 1 | 535 | 17 | 1,579 | 54 |
| 82,616 | 92  | 2 | 922   | 34 | 26 | 1 | 529 | 17 | 1,569 | 54 |
| 82,617 | 97  | 2 | 938   | 34 | 26 | 1 | 533 | 17 | 1,594 | 54 |
| 82,618 | 97  | 1 | 947   | 30 | 26 | 1 | 523 | 14 | 1,593 | 46 |
| 82,619 | 98  | 1 | 966   | 30 | 26 | 1 | 539 | 14 | 1,629 | 46 |
| 82,620 | 111 | 2 | 1,105 | 33 | 29 | 1 | 605 | 16 | 1,850 | 52 |
| 82,621 | 111 | 2 | 1,102 | 33 | 29 | 1 | 604 | 16 | 1,846 | 52 |
| 82,622 | 111 | 2 | 1,099 | 34 | 29 | 1 | 602 | 17 | 1,841 | 54 |
| 82,623 | 111 | 2 | 1,093 | 34 | 29 | 1 | 601 | 16 | 1,834 | 53 |
| 82,624 | 125 | 2 | 1,132 | 33 | 32 | 0 | 615 | 14 | 1,904 | 49 |
| 82,625 | 130 | 2 | 1,152 | 33 | 31 | 0 | 628 | 14 | 1,941 | 49 |
| 82,626 | 124 | 2 | 1,051 | 33 | 29 | 0 | 603 | 14 | 1,807 | 49 |
| 82,627 | 121 | 2 | 952   | 41 | 25 | 0 | 533 | 15 | 1,631 | 58 |
| 82,628 | 95  | 2 | 868   | 43 | 24 | 0 | 425 | 15 | 1,412 | 60 |
| 82,629 | 92  | 2 | 777   | 43 | 23 | 0 | 418 | 15 | 1,310 | 60 |
| 82,630 | 106 | 3 | 856   | 46 | 25 | 0 | 444 | 17 | 1,431 | 66 |
| 82,631 | 99  | 4 | 707   | 46 | 19 | 0 | 336 | 17 | 1,161 | 67 |
| 82,632 | 99  | 4 | 705   | 47 | 18 | 0 | 331 | 19 | 1,153 | 70 |
| 82,633 | 100 | 4 | 668   | 47 | 18 | 0 | 318 | 19 | 1,104 | 70 |
| 82,634 | 132 | 4 | 697   | 47 | 20 | 0 | 331 | 20 | 1,180 | 71 |
| 82,635 | 137 | 4 | 715   | 47 | 20 | 0 | 336 | 20 | 1,208 | 71 |
| 82,636 | 137 | 4 | 716   | 47 | 20 | 0 | 335 | 19 | 1,208 | 70 |
| 82,637 | 165 | 4 | 908   | 47 | 35 | 0 | 421 | 19 | 1,529 | 70 |
| 82,638 | 165 | 4 | 907   | 44 | 35 | 0 | 421 | 17 | 1,528 | 65 |
| 82,639 | 170 | 4 | 979   | 42 | 37 | 0 | 445 | 17 | 1,631 | 63 |
| 82,640 | 170 | 4 | 982   | 42 | 37 | 0 | 446 | 17 | 1,635 | 63 |
| 82,641 | 170 | 4 | 987   | 41 | 38 | 0 | 448 | 17 | 1,643 | 62 |
| 82,642 | 170 | 4 | 992   | 41 | 38 | 0 | 448 | 17 | 1,648 | 62 |
| 82,643 | 171 | 4 | 1,000 | 42 | 40 | 0 | 458 | 18 | 1,669 | 64 |
| 82,644 | 171 | 4 | 1,000 | 42 | 40 | 0 | 458 | 18 | 1,669 | 64 |



|        |     |   |       |    |    |   |     |    |       |    |
|--------|-----|---|-------|----|----|---|-----|----|-------|----|
| 82,645 | 168 | 4 | 970   | 42 | 39 | 0 | 447 | 18 | 1,624 | 64 |
| 82,646 | 175 | 4 | 966   | 42 | 41 | 0 | 449 | 18 | 1,631 | 64 |
| 82,647 | 174 | 4 | 953   | 37 | 41 | 0 | 444 | 18 | 1,612 | 59 |
| 82,648 | 174 | 4 | 938   | 37 | 40 | 0 | 439 | 18 | 1,591 | 59 |
| 82,649 | 166 | 4 | 928   | 37 | 40 | 0 | 415 | 18 | 1,549 | 59 |
| 82,650 | 166 | 4 | 928   | 37 | 40 | 0 | 415 | 18 | 1,549 | 59 |
| 82,651 | 167 | 4 | 930   | 37 | 40 | 0 | 419 | 18 | 1,556 | 59 |
| 82,652 | 169 | 4 | 942   | 37 | 40 | 0 | 423 | 18 | 1,574 | 59 |
| 82,653 | 172 | 4 | 960   | 37 | 41 | 0 | 429 | 18 | 1,602 | 59 |
| 82,654 | 173 | 4 | 966   | 37 | 42 | 0 | 431 | 18 | 1,612 | 59 |
| 82,655 | 177 | 4 | 1,001 | 37 | 44 | 0 | 449 | 18 | 1,671 | 59 |
| 82,656 | 172 | 4 | 1,004 | 37 | 45 | 0 | 443 | 18 | 1,664 | 59 |
| 82,657 | 171 | 5 | 1,001 | 37 | 46 | 0 | 443 | 15 | 1,661 | 57 |
| 82,658 | 172 | 5 | 1,041 | 34 | 50 | 0 | 466 | 15 | 1,729 | 54 |
| 82,659 | 172 | 5 | 1,039 | 34 | 50 | 0 | 465 | 15 | 1,726 | 54 |
| 82,660 | 171 | 5 | 1,042 | 32 | 50 | 0 | 463 | 15 | 1,726 | 52 |
| 82,661 | 171 | 4 | 1,042 | 32 | 50 | 0 | 464 | 15 | 1,727 | 51 |
| 82,662 | 171 | 4 | 1,043 | 32 | 50 | 0 | 471 | 15 | 1,735 | 51 |
| 82,663 | 171 | 4 | 1,048 | 32 | 51 | 0 | 472 | 16 | 1,742 | 52 |
| 82,664 | 171 | 4 | 1,048 | 30 | 52 | 0 | 477 | 13 | 1,748 | 47 |
| 82,665 | 169 | 4 | 1,037 | 29 | 52 | 0 | 470 | 12 | 1,728 | 45 |
| 82,666 | 169 | 4 | 1,035 | 21 | 52 | 1 | 471 | 11 | 1,727 | 37 |
| 82,667 | 167 | 4 | 1,033 | 21 | 52 | 1 | 470 | 11 | 1,722 | 37 |
| 82,668 | 162 | 4 | 1,016 | 19 | 52 | 1 | 466 | 11 | 1,696 | 35 |
| 82,669 | 163 | 4 | 1,016 | 19 | 53 | 1 | 468 | 11 | 1,700 | 35 |
| 82,670 | 162 | 4 | 1,002 | 19 | 53 | 1 | 453 | 11 | 1,670 | 35 |
| 82,671 | 149 | 3 | 859   | 17 | 49 | 1 | 389 | 9  | 1,446 | 30 |
| 82,672 | 149 | 3 | 862   | 17 | 48 | 1 | 392 | 9  | 1,451 | 30 |
| 82,673 | 147 | 3 | 857   | 16 | 47 | 1 | 401 | 8  | 1,452 | 28 |
| 82,674 | 139 | 3 | 849   | 16 | 47 | 1 | 400 | 8  | 1,435 | 28 |
| 82,675 | 134 | 3 | 822   | 16 | 47 | 1 | 383 | 8  | 1,386 | 28 |
| 82,676 | 127 | 3 | 790   | 16 | 47 | 1 | 370 | 8  | 1,334 | 28 |
| 82,677 | 127 | 3 | 790   | 16 | 47 | 1 | 370 | 8  | 1,334 | 28 |
| 82,678 | 126 | 3 | 785   | 8  | 47 | 1 | 370 | 7  | 1,328 | 19 |
| 82,679 | 124 | 3 | 759   | 5  | 47 | 1 | 372 | 7  | 1,302 | 16 |
| 82,680 | 124 | 3 | 758   | 5  | 47 | 1 | 367 | 7  | 1,296 | 16 |
| 82,681 | 113 | 1 | 683   | 2  | 45 | 1 | 335 | 3  | 1,176 | 7  |
| 82,682 | 112 | 1 | 668   | 2  | 43 | 1 | 341 | 3  | 1,164 | 7  |
| 82,683 | 79  | 1 | 648   | 2  | 42 | 1 | 339 | 3  | 1,108 | 7  |
| 82,684 | 80  | 1 | 667   | 3  | 42 | 1 | 358 | 5  | 1,147 | 10 |
| 82,685 | 75  | 1 | 664   | 3  | 42 | 1 | 363 | 4  | 1,144 | 9  |

|        |    |   |     |    |    |   |     |    |       |    |
|--------|----|---|-----|----|----|---|-----|----|-------|----|
| 82,686 | 75 | 1 | 661 | 3  | 42 | 1 | 364 | 5  | 1,142 | 10 |
| 82,687 | 70 | 1 | 629 | 4  | 35 | 1 | 347 | 6  | 1,081 | 12 |
| 82,688 | 47 | 1 | 467 | 5  | 27 | 1 | 278 | 10 | 819   | 17 |
| 82,689 | 46 | 1 | 449 | 5  | 25 | 1 | 272 | 10 | 792   | 17 |
| 82,690 | 42 | 2 | 397 | 5  | 25 | 1 | 254 | 10 | 718   | 18 |
| 82,691 | 42 | 2 | 394 | 7  | 25 | 1 | 253 | 11 | 714   | 21 |
| 82,692 | 42 | 2 | 385 | 6  | 24 | 1 | 251 | 10 | 702   | 19 |
| 82,693 | 42 | 2 | 380 | 7  | 24 | 1 | 251 | 11 | 697   | 21 |
| 82,694 | 41 | 2 | 370 | 7  | 22 | 1 | 241 | 11 | 674   | 21 |
| 82,695 | 41 | 2 | 367 | 7  | 22 | 1 | 241 | 11 | 671   | 21 |
| 82,696 | 41 | 2 | 363 | 7  | 22 | 1 | 241 | 11 | 667   | 21 |
| 82,697 | 34 | 2 | 342 | 7  | 20 | 1 | 224 | 11 | 620   | 21 |
| 82,698 | 34 | 2 | 345 | 7  | 20 | 1 | 224 | 11 | 623   | 21 |
| 82,699 | 32 | 2 | 326 | 7  | 19 | 1 | 216 | 11 | 593   | 21 |
| 82,700 | 32 | 2 | 326 | 7  | 18 | 1 | 217 | 11 | 593   | 21 |
| 82,701 | 31 | 3 | 326 | 7  | 18 | 1 | 218 | 12 | 593   | 23 |
| 82,702 | 29 | 3 | 313 | 7  | 18 | 1 | 214 | 14 | 574   | 25 |
| 82,703 | 31 | 3 | 337 | 7  | 18 | 1 | 226 | 14 | 612   | 25 |
| 82,704 | 27 | 3 | 319 | 7  | 17 | 1 | 220 | 14 | 583   | 25 |
| 82,705 | 26 | 3 | 310 | 7  | 16 | 1 | 218 | 14 | 570   | 25 |
| 82,706 | 14 | 3 | 246 | 7  | 14 | 1 | 183 | 14 | 457   | 25 |
| 82,707 | 14 | 2 | 237 | 7  | 13 | 1 | 183 | 14 | 447   | 24 |
| 82,708 | 14 | 2 | 231 | 8  | 12 | 1 | 179 | 14 | 436   | 25 |
| 82,709 | 11 | 2 | 184 | 8  | 7  | 1 | 149 | 14 | 351   | 25 |
| 82,710 | 11 | 2 | 182 | 9  | 7  | 1 | 148 | 14 | 348   | 26 |
| 82,711 | 11 | 2 | 182 | 9  | 7  | 1 | 148 | 15 | 348   | 27 |
| 82,712 | 11 | 2 | 183 | 9  | 7  | 1 | 147 | 16 | 348   | 28 |
| 82,713 | 11 | 2 | 180 | 9  | 7  | 1 | 139 | 15 | 337   | 27 |
| 82,714 | 11 | 2 | 175 | 9  | 6  | 1 | 138 | 15 | 330   | 27 |
| 82,715 | 11 | 2 | 174 | 9  | 5  | 1 | 132 | 15 | 322   | 27 |
| 82,716 | 11 | 2 | 177 | 9  | 5  | 1 | 132 | 16 | 325   | 28 |
| 82,717 | 11 | 2 | 177 | 9  | 5  | 0 | 132 | 16 | 325   | 27 |
| 82,718 | 13 | 2 | 194 | 13 | 6  | 0 | 134 | 17 | 347   | 32 |
| 82,719 | 13 | 2 | 208 | 20 | 6  | 0 | 137 | 17 | 364   | 39 |
| 82,720 | 12 | 2 | 200 | 21 | 5  | 0 | 136 | 18 | 353   | 41 |
| 82,721 | 12 | 2 | 198 | 22 | 5  | 0 | 135 | 19 | 350   | 43 |
| 82,722 | 11 | 2 | 197 | 23 | 5  | 0 | 132 | 19 | 345   | 44 |
| 82,723 | 16 | 2 | 209 | 23 | 10 | 0 | 141 | 20 | 376   | 45 |
| 82,724 | 15 | 2 | 208 | 23 | 9  | 0 | 132 | 20 | 364   | 45 |
| 82,725 | 15 | 2 | 204 | 23 | 9  | 0 | 130 | 20 | 358   | 45 |
| 82,726 | 16 | 2 | 207 | 23 | 9  | 0 | 130 | 20 | 362   | 45 |

|        |    |   |     |    |    |   |     |    |       |    |
|--------|----|---|-----|----|----|---|-----|----|-------|----|
| 82,727 | 16 | 2 | 209 | 23 | 9  | 0 | 133 | 20 | 367   | 45 |
| 82,728 | 16 | 2 | 210 | 23 | 9  | 0 | 134 | 20 | 369   | 45 |
| 82,729 | 16 | 2 | 214 | 23 | 8  | 0 | 132 | 22 | 370   | 47 |
| 82,730 | 16 | 2 | 224 | 24 | 8  | 0 | 138 | 22 | 386   | 48 |
| 82,731 | 13 | 5 | 232 | 27 | 8  | 0 | 143 | 27 | 396   | 59 |
| 82,732 | 13 | 6 | 241 | 34 | 8  | 0 | 147 | 29 | 409   | 69 |
| 82,733 | 13 | 6 | 269 | 37 | 10 | 0 | 176 | 29 | 468   | 72 |
| 82,734 | 13 | 6 | 249 | 37 | 9  | 0 | 155 | 30 | 426   | 73 |
| 82,735 | 12 | 6 | 228 | 36 | 9  | 0 | 135 | 29 | 384   | 71 |
| 82,736 | 12 | 7 | 216 | 46 | 9  | 0 | 126 | 29 | 363   | 82 |
| 82,737 | 12 | 7 | 216 | 46 | 9  | 0 | 126 | 29 | 363   | 82 |
| 82,738 | 12 | 7 | 217 | 47 | 9  | 0 | 128 | 28 | 366   | 82 |
| 82,739 | 13 | 7 | 249 | 46 | 11 | 0 | 142 | 24 | 415   | 77 |
| 82,740 | 13 | 7 | 253 | 46 | 11 | 0 | 147 | 24 | 424   | 77 |
| 82,741 | 13 | 6 | 258 | 46 | 11 | 0 | 147 | 24 | 429   | 76 |
| 82,742 | 15 | 6 | 274 | 44 | 11 | 0 | 155 | 23 | 455   | 73 |
| 82,743 | 15 | 6 | 274 | 44 | 11 | 0 | 155 | 23 | 455   | 73 |
| 82,744 | 15 | 6 | 277 | 43 | 11 | 0 | 156 | 22 | 459   | 71 |
| 82,745 | 16 | 6 | 284 | 43 | 12 | 0 | 161 | 22 | 473   | 71 |
| 82,746 | 18 | 6 | 294 | 43 | 14 | 0 | 167 | 22 | 493   | 71 |
| 82,747 | 18 | 6 | 292 | 43 | 14 | 0 | 167 | 22 | 491   | 71 |
| 82,748 | 18 | 6 | 297 | 43 | 14 | 0 | 170 | 22 | 499   | 71 |
| 82,749 | 19 | 7 | 296 | 45 | 14 | 0 | 171 | 22 | 500   | 74 |
| 82,750 | 38 | 7 | 370 | 46 | 16 | 0 | 213 | 22 | 637   | 75 |
| 82,751 | 38 | 7 | 370 | 46 | 16 | 0 | 212 | 22 | 636   | 75 |
| 82,752 | 58 | 6 | 520 | 55 | 22 | 2 | 257 | 24 | 857   | 87 |
| 82,753 | 58 | 6 | 528 | 59 | 22 | 2 | 259 | 23 | 867   | 90 |
| 82,754 | 73 | 6 | 650 | 59 | 33 | 2 | 308 | 24 | 1,064 | 91 |
| 82,755 | 73 | 6 | 652 | 59 | 33 | 2 | 312 | 24 | 1,070 | 91 |
| 82,756 | 78 | 6 | 690 | 60 | 41 | 2 | 324 | 24 | 1,133 | 92 |
| 82,757 | 78 | 6 | 691 | 60 | 42 | 2 | 329 | 24 | 1,140 | 92 |
| 82,758 | 77 | 6 | 688 | 60 | 42 | 2 | 327 | 24 | 1,134 | 92 |
| 82,759 | 78 | 6 | 700 | 59 | 43 | 2 | 340 | 24 | 1,161 | 91 |
| 82,760 | 78 | 6 | 700 | 59 | 43 | 2 | 340 | 24 | 1,161 | 91 |
| 82,761 | 80 | 6 | 716 | 59 | 44 | 2 | 362 | 23 | 1,202 | 90 |
| 82,762 | 80 | 6 | 714 | 60 | 44 | 2 | 362 | 23 | 1,200 | 91 |
| 82,763 | 81 | 6 | 732 | 60 | 44 | 2 | 365 | 22 | 1,222 | 90 |
| 82,764 | 90 | 6 | 808 | 60 | 50 | 2 | 423 | 22 | 1,371 | 90 |
| 82,765 | 91 | 6 | 829 | 60 | 51 | 2 | 435 | 22 | 1,406 | 90 |
| 82,766 | 92 | 6 | 845 | 60 | 51 | 2 | 444 | 21 | 1,432 | 89 |
| 82,767 | 92 | 6 | 842 | 60 | 51 | 2 | 444 | 21 | 1,429 | 89 |

|        |     |   |       |    |    |   |     |    |       |    |
|--------|-----|---|-------|----|----|---|-----|----|-------|----|
| 82,768 | 90  | 6 | 828   | 60 | 50 | 2 | 446 | 21 | 1,414 | 89 |
| 82,769 | 90  | 6 | 827   | 57 | 50 | 2 | 446 | 21 | 1,413 | 86 |
| 82,770 | 90  | 6 | 814   | 50 | 50 | 2 | 443 | 21 | 1,397 | 79 |
| 82,771 | 95  | 6 | 863   | 48 | 50 | 2 | 449 | 19 | 1,457 | 75 |
| 82,772 | 98  | 6 | 890   | 46 | 50 | 2 | 455 | 19 | 1,493 | 73 |
| 82,773 | 98  | 6 | 906   | 46 | 50 | 2 | 449 | 19 | 1,503 | 73 |
| 82,774 | 93  | 6 | 889   | 46 | 45 | 2 | 437 | 18 | 1,464 | 72 |
| 82,775 | 95  | 6 | 898   | 46 | 45 | 2 | 442 | 18 | 1,480 | 72 |
| 82,776 | 95  | 6 | 897   | 47 | 45 | 2 | 442 | 19 | 1,479 | 74 |
| 82,777 | 94  | 6 | 896   | 47 | 45 | 2 | 441 | 19 | 1,476 | 74 |
| 82,778 | 95  | 7 | 906   | 48 | 46 | 2 | 451 | 19 | 1,498 | 76 |
| 82,779 | 95  | 7 | 905   | 48 | 46 | 2 | 450 | 19 | 1,496 | 76 |
| 82,780 | 97  | 7 | 921   | 54 | 47 | 2 | 455 | 18 | 1,520 | 81 |
| 82,781 | 97  | 7 | 908   | 53 | 47 | 2 | 448 | 18 | 1,500 | 80 |
| 82,782 | 97  | 3 | 891   | 40 | 47 | 2 | 440 | 11 | 1,475 | 56 |
| 82,783 | 97  | 3 | 880   | 41 | 47 | 2 | 436 | 11 | 1,460 | 57 |
| 82,784 | 97  | 3 | 840   | 41 | 44 | 2 | 396 | 11 | 1,377 | 57 |
| 82,785 | 97  | 3 | 840   | 42 | 44 | 2 | 396 | 11 | 1,377 | 58 |
| 82,786 | 97  | 3 | 839   | 42 | 44 | 2 | 396 | 11 | 1,376 | 58 |
| 82,787 | 98  | 2 | 847   | 32 | 45 | 2 | 401 | 10 | 1,391 | 46 |
| 82,788 | 98  | 2 | 852   | 33 | 45 | 2 | 406 | 10 | 1,401 | 47 |
| 82,789 | 97  | 3 | 865   | 30 | 44 | 2 | 409 | 10 | 1,415 | 45 |
| 82,790 | 106 | 3 | 904   | 31 | 46 | 2 | 412 | 10 | 1,468 | 46 |
| 82,791 | 106 | 3 | 904   | 31 | 46 | 2 | 413 | 10 | 1,469 | 46 |
| 82,792 | 106 | 3 | 902   | 31 | 46 | 2 | 413 | 10 | 1,467 | 46 |
| 82,793 | 118 | 3 | 952   | 31 | 48 | 2 | 453 | 10 | 1,571 | 46 |
| 82,794 | 118 | 3 | 960   | 31 | 48 | 2 | 453 | 10 | 1,579 | 46 |
| 82,795 | 118 | 3 | 960   | 31 | 48 | 2 | 453 | 10 | 1,579 | 46 |
| 82,796 | 142 | 3 | 1,162 | 31 | 53 | 2 | 547 | 10 | 1,904 | 46 |
| 82,797 | 140 | 3 | 1,152 | 31 | 51 | 2 | 541 | 10 | 1,884 | 46 |
| 82,798 | 148 | 3 | 1,306 | 31 | 54 | 2 | 593 | 10 | 2,101 | 46 |
| 82,799 | 147 | 2 | 1,315 | 31 | 54 | 2 | 596 | 10 | 2,112 | 45 |
| 82,800 | 152 | 2 | 1,340 | 31 | 55 | 2 | 606 | 10 | 2,153 | 45 |
| 82,801 | 132 | 2 | 1,263 | 31 | 53 | 2 | 562 | 12 | 2,010 | 47 |
| 82,802 | 118 | 2 | 1,142 | 30 | 47 | 2 | 522 | 12 | 1,829 | 46 |
| 82,803 | 113 | 2 | 1,180 | 19 | 52 | 0 | 530 | 8  | 1,875 | 29 |
| 82,804 | 113 | 2 | 1,180 | 19 | 52 | 0 | 529 | 8  | 1,874 | 29 |
| 82,805 | 96  | 2 | 1,043 | 19 | 42 | 0 | 470 | 7  | 1,651 | 28 |
| 82,806 | 96  | 2 | 1,047 | 19 | 43 | 0 | 468 | 7  | 1,654 | 28 |
| 82,807 | 91  | 2 | 1,025 | 18 | 35 | 0 | 464 | 7  | 1,615 | 27 |
| 82,808 | 94  | 2 | 1,052 | 18 | 34 | 0 | 495 | 7  | 1,675 | 27 |

|        |     |    |       |    |    |   |     |    |       |     |
|--------|-----|----|-------|----|----|---|-----|----|-------|-----|
| 82,809 | 97  | 2  | 1,098 | 20 | 36 | 0 | 512 | 7  | 1,743 | 29  |
| 82,810 | 97  | 2  | 1,093 | 31 | 35 | 0 | 504 | 8  | 1,729 | 41  |
| 82,811 | 98  | 5  | 1,113 | 54 | 36 | 6 | 518 | 26 | 1,765 | 91  |
| 82,812 | 96  | 5  | 1,103 | 53 | 35 | 6 | 502 | 27 | 1,736 | 91  |
| 82,813 | 97  | 5  | 1,111 | 54 | 35 | 6 | 504 | 28 | 1,747 | 93  |
| 82,814 | 101 | 5  | 1,141 | 57 | 37 | 6 | 522 | 28 | 1,801 | 96  |
| 82,815 | 92  | 6  | 1,125 | 61 | 32 | 6 | 473 | 29 | 1,722 | 102 |
| 82,816 | 91  | 6  | 1,104 | 61 | 31 | 6 | 461 | 29 | 1,687 | 102 |
| 82,817 | 92  | 6  | 1,132 | 62 | 34 | 6 | 470 | 29 | 1,728 | 103 |
| 82,818 | 92  | 7  | 1,130 | 63 | 34 | 6 | 468 | 29 | 1,724 | 105 |
| 82,819 | 92  | 7  | 1,130 | 63 | 34 | 6 | 467 | 29 | 1,723 | 105 |
| 82,820 | 91  | 7  | 1,130 | 62 | 34 | 6 | 471 | 29 | 1,726 | 104 |
| 82,821 | 92  | 7  | 1,132 | 62 | 34 | 6 | 472 | 29 | 1,730 | 104 |
| 82,822 | 88  | 7  | 1,099 | 62 | 34 | 6 | 465 | 29 | 1,686 | 104 |
| 82,823 | 85  | 7  | 1,071 | 63 | 34 | 6 | 463 | 30 | 1,653 | 106 |
| 82,824 | 87  | 7  | 1,054 | 64 | 34 | 6 | 476 | 34 | 1,651 | 111 |
| 82,825 | 87  | 7  | 1,054 | 67 | 34 | 6 | 476 | 44 | 1,651 | 124 |
| 82,826 | 85  | 7  | 1,047 | 74 | 34 | 6 | 476 | 45 | 1,642 | 132 |
| 82,827 | 84  | 7  | 1,032 | 74 | 33 | 6 | 464 | 45 | 1,613 | 132 |
| 82,828 | 84  | 7  | 1,030 | 73 | 33 | 6 | 465 | 45 | 1,612 | 131 |
| 82,829 | 84  | 8  | 1,028 | 76 | 33 | 6 | 463 | 47 | 1,608 | 137 |
| 82,830 | 83  | 8  | 1,015 | 78 | 32 | 6 | 459 | 48 | 1,589 | 140 |
| 82,831 | 112 | 9  | 1,179 | 76 | 38 | 6 | 560 | 49 | 1,889 | 140 |
| 82,832 | 112 | 9  | 1,179 | 76 | 38 | 6 | 559 | 49 | 1,888 | 140 |
| 82,833 | 112 | 9  | 1,183 | 76 | 40 | 6 | 565 | 49 | 1,900 | 140 |
| 82,834 | 112 | 11 | 1,183 | 79 | 40 | 7 | 565 | 49 | 1,900 | 146 |
| 82,835 | 112 | 11 | 1,181 | 79 | 40 | 7 | 565 | 49 | 1,898 | 146 |
| 82,836 | 114 | 11 | 1,209 | 78 | 42 | 7 | 576 | 48 | 1,941 | 144 |
| 82,837 | 114 | 11 | 1,214 | 78 | 42 | 7 | 581 | 47 | 1,951 | 143 |
| 82,838 | 113 | 11 | 1,237 | 77 | 42 | 7 | 582 | 47 | 1,974 | 142 |
| 82,839 | 113 | 10 | 1,236 | 79 | 43 | 7 | 584 | 47 | 1,976 | 143 |
| 82,840 | 114 | 10 | 1,208 | 79 | 42 | 7 | 576 | 48 | 1,940 | 144 |
| 82,841 | 105 | 10 | 1,173 | 79 | 40 | 7 | 567 | 48 | 1,885 | 144 |
| 82,842 | 105 | 10 | 1,178 | 79 | 40 | 7 | 567 | 48 | 1,890 | 144 |
| 82,843 | 119 | 10 | 1,287 | 81 | 48 | 7 | 597 | 51 | 2,051 | 149 |
| 82,844 | 117 | 10 | 1,284 | 81 | 48 | 7 | 595 | 51 | 2,044 | 149 |
| 82,845 | 129 | 10 | 1,356 | 81 | 50 | 8 | 623 | 53 | 2,158 | 152 |
| 82,846 | 124 | 10 | 1,322 | 81 | 50 | 8 | 617 | 53 | 2,113 | 152 |
| 82,847 | 107 | 10 | 1,193 | 81 | 47 | 8 | 547 | 53 | 1,894 | 152 |
| 82,848 | 168 | 10 | 1,435 | 81 | 67 | 8 | 816 | 54 | 2,486 | 153 |
| 82,849 | 165 | 10 | 1,359 | 79 | 67 | 8 | 789 | 54 | 2,380 | 151 |

|        |     |    |       |    |    |   |       |    |       |     |
|--------|-----|----|-------|----|----|---|-------|----|-------|-----|
| 82,850 | 194 | 11 | 1,467 | 79 | 76 | 8 | 925   | 54 | 2,662 | 152 |
| 82,851 | 190 | 11 | 1,441 | 79 | 75 | 8 | 921   | 53 | 2,627 | 151 |
| 82,852 | 190 | 11 | 1,435 | 79 | 75 | 8 | 923   | 54 | 2,623 | 152 |
| 82,853 | 201 | 11 | 1,574 | 80 | 89 | 8 | 1,124 | 54 | 2,988 | 153 |
| 82,854 | 200 | 12 | 1,520 | 78 | 86 | 8 | 1,114 | 56 | 2,920 | 154 |
| 82,855 | 200 | 12 | 1,512 | 78 | 86 | 8 | 1,113 | 57 | 2,911 | 155 |
| 82,856 | 201 | 12 | 1,511 | 79 | 88 | 8 | 1,121 | 58 | 2,921 | 157 |
| 82,857 | 202 | 12 | 1,505 | 80 | 87 | 8 | 1,119 | 60 | 2,913 | 160 |
| 82,858 | 202 | 12 | 1,490 | 80 | 87 | 8 | 1,111 | 60 | 2,890 | 160 |
| 82,859 | 199 | 12 | 1,462 | 80 | 87 | 8 | 1,070 | 60 | 2,818 | 160 |
| 82,860 | 198 | 9  | 1,419 | 44 | 86 | 2 | 1,063 | 40 | 2,766 | 95  |
| 82,861 | 197 | 9  | 1,413 | 45 | 86 | 2 | 1,059 | 41 | 2,755 | 97  |
| 82,862 | 196 | 9  | 1,396 | 45 | 85 | 2 | 1,048 | 43 | 2,725 | 99  |
| 82,863 | 196 | 9  | 1,392 | 50 | 85 | 2 | 1,045 | 43 | 2,718 | 104 |
| 82,864 | 195 | 9  | 1,380 | 50 | 85 | 2 | 1,043 | 42 | 2,703 | 103 |
| 82,865 | 190 | 9  | 1,337 | 47 | 83 | 2 | 1,023 | 42 | 2,633 | 100 |
| 82,866 | 190 | 8  | 1,278 | 45 | 82 | 2 | 1,015 | 42 | 2,565 | 97  |
| 82,867 | 188 | 8  | 1,233 | 45 | 79 | 2 | 996   | 42 | 2,496 | 97  |
| 82,868 | 188 | 8  | 1,230 | 45 | 79 | 2 | 996   | 42 | 2,493 | 97  |
| 82,869 | 188 | 7  | 1,228 | 46 | 79 | 2 | 995   | 44 | 2,490 | 99  |
| 82,870 | 188 | 7  | 1,223 | 46 | 79 | 2 | 992   | 44 | 2,482 | 99  |
| 82,871 | 188 | 7  | 1,221 | 46 | 79 | 2 | 992   | 43 | 2,480 | 98  |
| 82,872 | 187 | 7  | 1,215 | 46 | 79 | 2 | 991   | 43 | 2,472 | 98  |
| 82,873 | 187 | 7  | 1,211 | 41 | 79 | 2 | 989   | 29 | 2,466 | 79  |
| 82,874 | 187 | 7  | 1,205 | 41 | 79 | 2 | 985   | 29 | 2,456 | 79  |
| 82,875 | 185 | 7  | 1,198 | 34 | 79 | 2 | 969   | 28 | 2,431 | 71  |
| 82,876 | 185 | 7  | 1,198 | 34 | 79 | 2 | 969   | 28 | 2,431 | 71  |
| 82,877 | 185 | 7  | 1,194 | 34 | 79 | 2 | 963   | 28 | 2,421 | 71  |
| 82,878 | 185 | 7  | 1,194 | 33 | 79 | 2 | 964   | 27 | 2,422 | 69  |
| 82,879 | 185 | 5  | 1,194 | 28 | 79 | 2 | 964   | 25 | 2,422 | 60  |
| 82,880 | 185 | 5  | 1,178 | 28 | 79 | 2 | 961   | 25 | 2,403 | 60  |
| 82,881 | 169 | 5  | 1,142 | 28 | 76 | 2 | 914   | 25 | 2,301 | 60  |
| 82,882 | 155 | 4  | 1,029 | 24 | 73 | 2 | 862   | 23 | 2,119 | 53  |
| 82,883 | 155 | 4  | 1,026 | 24 | 71 | 2 | 856   | 22 | 2,108 | 52  |
| 82,884 | 155 | 4  | 1,021 | 24 | 69 | 2 | 857   | 22 | 2,102 | 52  |
| 82,885 | 155 | 2  | 1,018 | 20 | 69 | 1 | 854   | 22 | 2,096 | 45  |
| 82,886 | 156 | 2  | 1,009 | 20 | 71 | 1 | 857   | 22 | 2,093 | 45  |
| 82,887 | 156 | 2  | 1,003 | 20 | 71 | 1 | 852   | 22 | 2,082 | 45  |
| 82,888 | 156 | 2  | 992   | 20 | 70 | 1 | 846   | 22 | 2,064 | 45  |
| 82,889 | 156 | 2  | 972   | 20 | 70 | 1 | 845   | 22 | 2,043 | 45  |
| 82,890 | 156 | 2  | 967   | 19 | 69 | 1 | 837   | 22 | 2,029 | 44  |

|        |     |   |       |    |    |   |       |    |       |    |
|--------|-----|---|-------|----|----|---|-------|----|-------|----|
| 82,891 | 157 | 2 | 952   | 19 | 69 | 1 | 840   | 21 | 2,018 | 43 |
| 82,892 | 157 | 2 | 948   | 19 | 69 | 1 | 840   | 21 | 2,014 | 43 |
| 82,893 | 158 | 2 | 953   | 19 | 70 | 2 | 855   | 21 | 2,036 | 44 |
| 82,894 | 133 | 2 | 788   | 17 | 61 | 2 | 783   | 18 | 1,765 | 39 |
| 82,895 | 123 | 2 | 741   | 17 | 59 | 2 | 768   | 18 | 1,691 | 39 |
| 82,896 | 121 | 2 | 715   | 17 | 59 | 1 | 756   | 16 | 1,651 | 36 |
| 82,897 | 119 | 2 | 706   | 17 | 58 | 1 | 739   | 16 | 1,622 | 36 |
| 82,898 | 127 | 2 | 711   | 17 | 57 | 1 | 764   | 17 | 1,659 | 37 |
| 82,899 | 64  | 2 | 440   | 17 | 36 | 1 | 485   | 17 | 1,025 | 37 |
| 82,900 | 61  | 2 | 404   | 17 | 39 | 1 | 483   | 17 | 987   | 37 |
| 82,901 | 36  | 1 | 355   | 17 | 34 | 1 | 381   | 17 | 806   | 36 |
| 82,902 | 36  | 1 | 374   | 17 | 35 | 1 | 390   | 15 | 835   | 34 |
| 82,903 | 36  | 1 | 373   | 17 | 35 | 1 | 390   | 15 | 834   | 34 |
| 82,904 | 35  | 0 | 317   | 16 | 20 | 1 | 246   | 14 | 618   | 31 |
| 82,905 | 34  | 0 | 306   | 16 | 18 | 1 | 236   | 13 | 594   | 30 |
| 82,906 | 35  | 0 | 355   | 16 | 21 | 1 | 270   | 12 | 681   | 29 |
| 82,907 | 43  | 0 | 450   | 14 | 21 | 1 | 346   | 10 | 860   | 25 |
| 82,908 | 48  | 0 | 482   | 14 | 22 | 1 | 387   | 10 | 939   | 25 |
| 82,909 | 52  | 0 | 571   | 14 | 27 | 1 | 442   | 10 | 1,092 | 25 |
| 82,910 | 56  | 0 | 687   | 14 | 35 | 1 | 604   | 10 | 1,382 | 25 |
| 82,911 | 61  | 0 | 728   | 14 | 38 | 1 | 648   | 10 | 1,475 | 25 |
| 82,912 | 61  | 0 | 727   | 13 | 38 | 1 | 646   | 9  | 1,472 | 23 |
| 82,913 | 62  | 0 | 753   | 8  | 39 | 1 | 693   | 6  | 1,547 | 15 |
| 82,914 | 62  | 0 | 753   | 8  | 39 | 1 | 693   | 6  | 1,547 | 15 |
| 82,915 | 62  | 0 | 754   | 7  | 39 | 1 | 694   | 7  | 1,549 | 15 |
| 82,916 | 62  | 0 | 753   | 7  | 39 | 1 | 694   | 7  | 1,548 | 15 |
| 82,917 | 62  | 0 | 753   | 5  | 39 | 1 | 694   | 6  | 1,548 | 12 |
| 82,918 | 73  | 0 | 832   | 4  | 39 | 1 | 746   | 6  | 1,690 | 11 |
| 82,919 | 73  | 0 | 832   | 4  | 39 | 1 | 746   | 6  | 1,690 | 11 |
| 82,920 | 73  | 0 | 833   | 2  | 39 | 1 | 751   | 4  | 1,696 | 7  |
| 82,921 | 74  | 0 | 843   | 2  | 39 | 1 | 754   | 4  | 1,710 | 7  |
| 82,922 | 74  | 0 | 843   | 2  | 39 | 1 | 753   | 4  | 1,709 | 7  |
| 82,923 | 79  | 0 | 919   | 2  | 40 | 1 | 825   | 4  | 1,863 | 7  |
| 82,924 | 79  | 0 | 919   | 2  | 40 | 1 | 827   | 4  | 1,865 | 7  |
| 82,925 | 80  | 0 | 936   | 2  | 41 | 1 | 837   | 4  | 1,894 | 7  |
| 82,926 | 80  | 0 | 936   | 2  | 41 | 1 | 837   | 4  | 1,894 | 7  |
| 82,927 | 102 | 0 | 1,087 | 2  | 44 | 1 | 1,069 | 4  | 2,302 | 7  |
| 82,928 | 103 | 0 | 1,093 | 2  | 44 | 1 | 1,082 | 4  | 2,322 | 7  |
| 82,929 | 119 | 0 | 1,145 | 2  | 47 | 1 | 1,234 | 4  | 2,545 | 7  |
| 82,930 | 127 | 0 | 1,238 | 2  | 52 | 1 | 1,407 | 4  | 2,824 | 7  |
| 82,931 | 127 | 0 | 1,237 | 3  | 52 | 1 | 1,407 | 4  | 2,823 | 8  |

|        |     |   |       |    |     |   |       |    |       |     |
|--------|-----|---|-------|----|-----|---|-------|----|-------|-----|
| 82,932 | 127 | 0 | 1,240 | 8  | 53  | 1 | 1,415 | 4  | 2,835 | 13  |
| 82,933 | 127 | 0 | 1,248 | 10 | 53  | 1 | 1,419 | 6  | 2,847 | 17  |
| 82,934 | 137 | 0 | 1,264 | 10 | 54  | 1 | 1,421 | 6  | 2,876 | 17  |
| 82,935 | 137 | 0 | 1,265 | 11 | 54  | 1 | 1,419 | 6  | 2,875 | 18  |
| 82,936 | 140 | 0 | 1,270 | 11 | 54  | 1 | 1,427 | 6  | 2,891 | 18  |
| 82,937 | 138 | 0 | 1,303 | 11 | 55  | 1 | 1,427 | 6  | 2,923 | 18  |
| 82,938 | 138 | 0 | 1,303 | 13 | 55  | 1 | 1,427 | 9  | 2,923 | 23  |
| 82,939 | 138 | 1 | 1,302 | 13 | 55  | 1 | 1,426 | 9  | 2,921 | 24  |
| 82,940 | 201 | 1 | 1,538 | 13 | 73  | 1 | 1,528 | 9  | 3,340 | 24  |
| 82,941 | 203 | 1 | 1,555 | 12 | 79  | 1 | 1,538 | 9  | 3,375 | 23  |
| 82,942 | 201 | 1 | 1,552 | 12 | 79  | 1 | 1,529 | 9  | 3,361 | 23  |
| 82,943 | 227 | 1 | 1,725 | 13 | 87  | 1 | 1,607 | 9  | 3,646 | 24  |
| 82,944 | 292 | 1 | 2,092 | 21 | 127 | 0 | 1,884 | 9  | 4,395 | 31  |
| 82,945 | 291 | 1 | 2,088 | 22 | 126 | 0 | 1,880 | 8  | 4,385 | 31  |
| 82,946 | 309 | 1 | 2,836 | 24 | 161 | 0 | 2,151 | 10 | 5,457 | 35  |
| 82,947 | 309 | 2 | 2,840 | 26 | 161 | 0 | 2,151 | 11 | 5,461 | 39  |
| 82,948 | 309 | 2 | 2,834 | 32 | 161 | 0 | 2,152 | 12 | 5,456 | 46  |
| 82,949 | 300 | 4 | 2,798 | 51 | 160 | 4 | 2,123 | 21 | 5,381 | 80  |
| 82,950 | 300 | 4 | 2,790 | 61 | 159 | 4 | 2,114 | 23 | 5,363 | 92  |
| 82,951 | 300 | 4 | 2,789 | 67 | 154 | 5 | 2,105 | 24 | 5,348 | 100 |
| 82,952 | 296 | 4 | 2,719 | 67 | 150 | 5 | 2,067 | 24 | 5,232 | 100 |
| 82,953 | 295 | 4 | 2,697 | 67 | 149 | 5 | 2,051 | 24 | 5,192 | 100 |
| 82,954 | 295 | 4 | 2,697 | 67 | 149 | 5 | 2,049 | 24 | 5,190 | 100 |
| 82,955 | 285 | 4 | 2,604 | 67 | 148 | 5 | 1,983 | 24 | 5,020 | 100 |
| 82,956 | 284 | 4 | 2,555 | 67 | 145 | 5 | 1,949 | 24 | 4,933 | 100 |
| 82,957 | 284 | 4 | 2,553 | 67 | 145 | 5 | 1,946 | 24 | 4,928 | 100 |
| 82,958 | 275 | 4 | 2,467 | 67 | 145 | 5 | 1,876 | 24 | 4,763 | 100 |
| 82,959 | 271 | 4 | 2,436 | 67 | 144 | 5 | 1,836 | 24 | 4,687 | 100 |
| 82,960 | 267 | 4 | 2,346 | 67 | 139 | 5 | 1,781 | 24 | 4,533 | 100 |
| 82,961 | 263 | 4 | 2,231 | 67 | 131 | 5 | 1,619 | 24 | 4,244 | 100 |
| 82,962 | 256 | 4 | 2,183 | 67 | 127 | 5 | 1,566 | 24 | 4,132 | 100 |
| 82,963 | 256 | 4 | 2,160 | 68 | 126 | 5 | 1,523 | 24 | 4,065 | 101 |
| 82,964 | 258 | 4 | 2,163 | 68 | 126 | 5 | 1,523 | 24 | 4,070 | 101 |
| 82,965 | 258 | 4 | 2,164 | 73 | 126 | 5 | 1,522 | 27 | 4,070 | 109 |
| 82,966 | 255 | 5 | 2,160 | 73 | 126 | 5 | 1,522 | 26 | 4,063 | 109 |
| 82,967 | 255 | 5 | 2,155 | 73 | 126 | 5 | 1,519 | 26 | 4,055 | 109 |
| 82,968 | 256 | 5 | 2,180 | 73 | 126 | 5 | 1,523 | 26 | 4,085 | 109 |
| 82,969 | 248 | 5 | 2,124 | 73 | 126 | 5 | 1,477 | 26 | 3,975 | 109 |
| 82,970 | 248 | 5 | 2,123 | 73 | 126 | 5 | 1,473 | 28 | 3,970 | 111 |
| 82,971 | 247 | 5 | 2,114 | 73 | 126 | 5 | 1,471 | 28 | 3,958 | 111 |
| 82,972 | 258 | 5 | 2,255 | 74 | 133 | 5 | 1,533 | 28 | 4,179 | 112 |



|        |     |   |       |    |     |   |       |    |       |     |
|--------|-----|---|-------|----|-----|---|-------|----|-------|-----|
| 82,973 | 258 | 5 | 2,255 | 78 | 133 | 5 | 1,533 | 30 | 4,179 | 118 |
| 82,974 | 253 | 5 | 2,179 | 79 | 132 | 5 | 1,460 | 30 | 4,024 | 119 |
| 82,975 | 301 | 5 | 2,617 | 79 | 151 | 5 | 1,687 | 30 | 4,756 | 119 |
| 82,976 | 303 | 5 | 2,638 | 80 | 150 | 5 | 1,682 | 29 | 4,773 | 119 |
| 82,977 | 303 | 5 | 2,752 | 82 | 154 | 5 | 1,697 | 30 | 4,906 | 122 |
| 82,978 | 286 | 5 | 2,665 | 82 | 151 | 5 | 1,505 | 30 | 4,607 | 122 |
| 82,979 | 287 | 5 | 2,785 | 82 | 156 | 6 | 1,532 | 32 | 4,760 | 125 |
| 82,980 | 272 | 5 | 2,745 | 83 | 153 | 6 | 1,382 | 32 | 4,552 | 126 |
| 82,981 | 265 | 5 | 2,664 | 82 | 149 | 6 | 1,218 | 32 | 4,296 | 125 |
| 82,982 | 265 | 5 | 2,668 | 77 | 149 | 6 | 1,217 | 32 | 4,299 | 120 |
| 82,983 | 267 | 5 | 2,669 | 75 | 150 | 6 | 1,212 | 30 | 4,298 | 116 |
| 82,984 | 267 | 5 | 2,661 | 75 | 150 | 6 | 1,210 | 30 | 4,288 | 116 |
| 82,985 | 267 | 5 | 2,695 | 75 | 151 | 6 | 1,219 | 30 | 4,332 | 116 |
| 82,986 | 267 | 5 | 2,691 | 74 | 151 | 6 | 1,219 | 30 | 4,328 | 115 |
| 82,987 | 266 | 5 | 2,703 | 74 | 152 | 6 | 1,223 | 30 | 4,344 | 115 |
| 82,988 | 265 | 5 | 2,668 | 72 | 149 | 6 | 1,217 | 27 | 4,299 | 110 |
| 82,989 | 262 | 5 | 2,629 | 72 | 148 | 6 | 1,209 | 27 | 4,248 | 110 |
| 82,990 | 213 | 4 | 2,481 | 76 | 135 | 7 | 1,133 | 34 | 3,962 | 121 |
| 82,991 | 202 | 4 | 2,438 | 77 | 132 | 7 | 1,118 | 34 | 3,890 | 122 |
| 82,992 | 200 | 4 | 2,423 | 77 | 126 | 7 | 1,107 | 34 | 3,856 | 122 |
| 82,993 | 195 | 4 | 2,381 | 77 | 126 | 7 | 1,084 | 37 | 3,786 | 125 |
| 82,994 | 175 | 4 | 2,248 | 80 | 118 | 7 | 1,027 | 39 | 3,568 | 130 |
| 82,995 | 109 | 4 | 1,866 | 72 | 77  | 7 | 732   | 39 | 2,784 | 122 |
| 82,996 | 93  | 4 | 1,183 | 73 | 52  | 7 | 497   | 37 | 1,825 | 121 |
| 82,997 | 91  | 4 | 1,113 | 73 | 42  | 7 | 457   | 37 | 1,703 | 121 |
| 82,998 | 92  | 3 | 1,113 | 73 | 42  | 7 | 457   | 35 | 1,704 | 118 |
| 82,999 | 92  | 1 | 1,115 | 48 | 42  | 3 | 457   | 25 | 1,706 | 77  |
| 83,000 | 92  | 1 | 1,127 | 38 | 42  | 3 | 460   | 23 | 1,721 | 65  |
| 83,001 | 92  | 1 | 1,127 | 38 | 42  | 3 | 460   | 23 | 1,721 | 65  |
| 83,002 | 92  | 1 | 1,119 | 32 | 42  | 2 | 460   | 22 | 1,713 | 57  |
| 83,003 | 101 | 1 | 1,203 | 32 | 44  | 2 | 477   | 22 | 1,825 | 57  |
| 83,004 | 101 | 1 | 1,203 | 32 | 44  | 2 | 477   | 22 | 1,825 | 57  |
| 83,005 | 113 | 1 | 1,239 | 32 | 46  | 2 | 481   | 22 | 1,879 | 57  |
| 83,006 | 115 | 1 | 1,257 | 32 | 47  | 2 | 488   | 22 | 1,907 | 57  |
| 83,007 | 117 | 1 | 1,269 | 32 | 47  | 2 | 490   | 22 | 1,923 | 57  |
| 83,008 | 117 | 1 | 1,278 | 34 | 50  | 2 | 494   | 22 | 1,939 | 59  |
| 83,009 | 117 | 1 | 1,275 | 35 | 50  | 2 | 494   | 22 | 1,936 | 60  |
| 83,010 | 121 | 1 | 1,317 | 37 | 50  | 2 | 524   | 22 | 2,012 | 62  |
| 83,011 | 123 | 1 | 1,347 | 37 | 51  | 2 | 548   | 22 | 2,069 | 62  |
| 83,012 | 123 | 1 | 1,346 | 36 | 51  | 2 | 552   | 25 | 2,072 | 64  |
| 83,013 | 124 | 1 | 1,348 | 42 | 51  | 2 | 555   | 28 | 2,078 | 73  |

|        |     |   |       |    |    |   |     |    |       |     |
|--------|-----|---|-------|----|----|---|-----|----|-------|-----|
| 83,014 | 121 | 1 | 1,336 | 44 | 51 | 2 | 550 | 28 | 2,058 | 75  |
| 83,015 | 132 | 1 | 1,394 | 44 | 55 | 2 | 579 | 29 | 2,160 | 76  |
| 83,016 | 132 | 1 | 1,394 | 39 | 55 | 2 | 579 | 26 | 2,160 | 68  |
| 83,017 | 144 | 1 | 1,458 | 46 | 61 | 2 | 662 | 30 | 2,325 | 79  |
| 83,018 | 144 | 1 | 1,458 | 47 | 61 | 2 | 663 | 32 | 2,326 | 82  |
| 83,019 | 143 | 1 | 1,431 | 57 | 61 | 2 | 657 | 36 | 2,292 | 96  |
| 83,020 | 143 | 1 | 1,420 | 57 | 61 | 2 | 656 | 36 | 2,280 | 96  |
| 83,021 | 140 | 1 | 1,416 | 58 | 62 | 2 | 681 | 35 | 2,299 | 96  |
| 83,022 | 138 | 1 | 1,364 | 58 | 58 | 2 | 666 | 35 | 2,226 | 96  |
| 83,023 | 134 | 1 | 1,320 | 56 | 56 | 2 | 638 | 40 | 2,148 | 99  |
| 83,024 | 133 | 1 | 1,236 | 63 | 51 | 5 | 605 | 55 | 2,025 | 124 |
| 83,025 | 89  | 3 | 929   | 65 | 39 | 5 | 429 | 58 | 1,486 | 131 |
| 83,026 | 86  | 6 | 890   | 88 | 37 | 6 | 421 | 69 | 1,434 | 169 |
| 83,027 | 83  | 6 | 859   | 89 | 37 | 6 | 420 | 69 | 1,399 | 170 |
| 83,028 | 78  | 6 | 722   | 87 | 33 | 6 | 371 | 68 | 1,204 | 167 |
| 83,029 | 80  | 6 | 690   | 87 | 34 | 6 | 370 | 68 | 1,174 | 167 |
| 83,030 | 78  | 6 | 563   | 88 | 29 | 5 | 333 | 67 | 1,003 | 166 |
| 83,031 | 77  | 6 | 551   | 88 | 29 | 5 | 330 | 69 | 987   | 168 |
| 83,032 | 78  | 6 | 540   | 88 | 28 | 5 | 325 | 70 | 971   | 169 |
| 83,033 | 79  | 6 | 540   | 90 | 28 | 5 | 330 | 72 | 977   | 173 |
| 83,034 | 77  | 6 | 540   | 90 | 27 | 5 | 336 | 72 | 980   | 173 |
| 83,035 | 67  | 6 | 531   | 90 | 26 | 5 | 340 | 72 | 964   | 173 |
| 83,036 | 69  | 6 | 579   | 91 | 33 | 5 | 392 | 72 | 1,073 | 174 |
| 83,037 | 67  | 7 | 572   | 93 | 33 | 5 | 385 | 72 | 1,057 | 177 |
| 83,038 | 67  | 7 | 561   | 93 | 32 | 5 | 380 | 72 | 1,040 | 177 |
| 83,039 | 67  | 7 | 618   | 93 | 34 | 5 | 421 | 72 | 1,140 | 177 |
| 83,040 | 67  | 7 | 620   | 88 | 34 | 4 | 424 | 65 | 1,145 | 164 |
| 83,041 | 68  | 7 | 617   | 88 | 34 | 4 | 427 | 65 | 1,146 | 164 |
| 83,042 | 68  | 7 | 615   | 88 | 33 | 4 | 426 | 65 | 1,142 | 164 |
| 83,043 | 69  | 7 | 621   | 88 | 33 | 4 | 428 | 65 | 1,151 | 164 |
| 83,044 | 69  | 7 | 639   | 88 | 33 | 4 | 434 | 63 | 1,175 | 162 |
| 83,045 | 68  | 7 | 639   | 85 | 33 | 4 | 433 | 61 | 1,173 | 157 |
| 83,046 | 69  | 7 | 649   | 85 | 33 | 4 | 444 | 61 | 1,195 | 157 |
| 83,047 | 69  | 7 | 653   | 81 | 33 | 4 | 450 | 61 | 1,205 | 153 |
| 83,048 | 70  | 7 | 652   | 81 | 33 | 4 | 451 | 61 | 1,206 | 153 |
| 83,049 | 70  | 7 | 647   | 79 | 33 | 4 | 452 | 62 | 1,202 | 152 |
| 83,050 | 70  | 7 | 646   | 79 | 33 | 4 | 451 | 62 | 1,200 | 152 |
| 83,051 | 70  | 7 | 632   | 79 | 33 | 4 | 446 | 63 | 1,181 | 153 |
| 83,052 | 61  | 7 | 548   | 79 | 32 | 4 | 429 | 63 | 1,070 | 153 |
| 83,053 | 61  | 7 | 550   | 79 | 32 | 4 | 430 | 63 | 1,073 | 153 |
| 83,054 | 52  | 7 | 532   | 79 | 31 | 4 | 426 | 63 | 1,041 | 153 |

|        |     |   |       |    |     |   |       |    |       |     |
|--------|-----|---|-------|----|-----|---|-------|----|-------|-----|
| 83,055 | 49  | 7 | 522   | 79 | 30  | 4 | 426   | 64 | 1,027 | 154 |
| 83,056 | 49  | 7 | 519   | 79 | 30  | 4 | 426   | 64 | 1,024 | 154 |
| 83,057 | 58  | 7 | 605   | 79 | 35  | 4 | 467   | 65 | 1,165 | 155 |
| 83,058 | 56  | 7 | 594   | 77 | 35  | 4 | 465   | 65 | 1,150 | 153 |
| 83,059 | 56  | 7 | 587   | 77 | 32  | 4 | 463   | 65 | 1,138 | 153 |
| 83,060 | 84  | 7 | 689   | 74 | 44  | 4 | 575   | 65 | 1,392 | 150 |
| 83,061 | 84  | 7 | 689   | 75 | 44  | 4 | 574   | 65 | 1,391 | 151 |
| 83,062 | 82  | 7 | 659   | 75 | 43  | 4 | 550   | 65 | 1,334 | 151 |
| 83,063 | 83  | 7 | 677   | 69 | 44  | 4 | 562   | 59 | 1,366 | 139 |
| 83,064 | 85  | 7 | 765   | 69 | 50  | 4 | 608   | 59 | 1,508 | 139 |
| 83,065 | 77  | 6 | 772   | 59 | 52  | 4 | 599   | 54 | 1,500 | 123 |
| 83,066 | 79  | 6 | 791   | 59 | 52  | 4 | 606   | 54 | 1,528 | 123 |
| 83,067 | 73  | 6 | 910   | 59 | 56  | 4 | 589   | 54 | 1,628 | 123 |
| 83,068 | 95  | 6 | 1,341 | 59 | 70  | 4 | 701   | 54 | 2,207 | 123 |
| 83,069 | 100 | 6 | 1,646 | 48 | 93  | 4 | 854   | 48 | 2,693 | 106 |
| 83,070 | 101 | 6 | 1,773 | 48 | 100 | 4 | 937   | 48 | 2,911 | 106 |
| 83,071 | 111 | 6 | 2,029 | 47 | 122 | 4 | 1,010 | 47 | 3,272 | 104 |
| 83,072 | 111 | 6 | 2,013 | 47 | 122 | 4 | 998   | 47 | 3,244 | 104 |
| 83,073 | 114 | 6 | 2,044 | 44 | 124 | 4 | 1,014 | 40 | 3,296 | 94  |
| 83,074 | 116 | 6 | 2,070 | 46 | 124 | 4 | 1,025 | 40 | 3,335 | 96  |
| 83,075 | 116 | 6 | 2,082 | 39 | 125 | 1 | 1,024 | 25 | 3,347 | 71  |
| 83,076 | 122 | 4 | 2,126 | 36 | 125 | 1 | 1,071 | 22 | 3,444 | 63  |
| 83,077 | 122 | 1 | 2,125 | 13 | 125 | 0 | 1,070 | 12 | 3,442 | 26  |
| 83,078 | 128 | 1 | 2,217 | 11 | 130 | 0 | 1,096 | 12 | 3,571 | 24  |
| 83,079 | 127 | 1 | 2,216 | 12 | 129 | 0 | 1,092 | 12 | 3,564 | 25  |
| 83,080 | 126 | 1 | 2,216 | 14 | 129 | 0 | 1,092 | 12 | 3,563 | 27  |
| 83,081 | 126 | 1 | 2,230 | 15 | 129 | 0 | 1,096 | 11 | 3,581 | 27  |
| 83,082 | 129 | 1 | 2,234 | 20 | 130 | 0 | 1,096 | 9  | 3,589 | 30  |
| 83,083 | 128 | 1 | 2,234 | 23 | 130 | 0 | 1,096 | 8  | 3,588 | 32  |
| 83,084 | 128 | 1 | 2,232 | 39 | 130 | 0 | 1,098 | 6  | 3,588 | 46  |
| 83,085 | 135 | 4 | 2,267 | 43 | 130 | 0 | 1,114 | 9  | 3,646 | 56  |
| 83,086 | 135 | 4 | 2,231 | 43 | 129 | 0 | 1,100 | 9  | 3,595 | 56  |
| 83,087 | 133 | 4 | 2,220 | 42 | 123 | 0 | 1,092 | 9  | 3,568 | 55  |
| 83,088 | 147 | 3 | 2,302 | 40 | 125 | 0 | 1,192 | 9  | 3,766 | 52  |
| 83,089 | 154 | 3 | 2,327 | 40 | 127 | 0 | 1,238 | 9  | 3,846 | 52  |
| 83,090 | 155 | 3 | 2,323 | 40 | 127 | 1 | 1,249 | 10 | 3,854 | 54  |
| 83,091 | 155 | 3 | 2,321 | 40 | 127 | 1 | 1,247 | 10 | 3,850 | 54  |
| 83,092 | 155 | 3 | 2,322 | 57 | 127 | 1 | 1,248 | 20 | 3,852 | 81  |
| 83,093 | 154 | 3 | 2,325 | 58 | 127 | 1 | 1,253 | 20 | 3,859 | 82  |
| 83,094 | 154 | 3 | 2,323 | 59 | 127 | 1 | 1,254 | 21 | 3,858 | 84  |
| 83,095 | 154 | 4 | 2,305 | 62 | 127 | 1 | 1,249 | 23 | 3,835 | 90  |

|        |     |   |       |    |     |   |       |    |       |     |
|--------|-----|---|-------|----|-----|---|-------|----|-------|-----|
| 83,096 | 153 | 4 | 2,295 | 62 | 127 | 1 | 1,239 | 23 | 3,814 | 90  |
| 83,097 | 155 | 4 | 2,296 | 63 | 127 | 1 | 1,236 | 23 | 3,814 | 91  |
| 83,098 | 154 | 4 | 2,297 | 63 | 127 | 1 | 1,235 | 23 | 3,813 | 91  |
| 83,099 | 156 | 5 | 2,304 | 65 | 128 | 4 | 1,240 | 25 | 3,828 | 99  |
| 83,100 | 159 | 5 | 2,309 | 65 | 130 | 4 | 1,243 | 24 | 3,841 | 98  |
| 83,101 | 159 | 5 | 2,311 | 65 | 129 | 4 | 1,242 | 23 | 3,841 | 97  |
| 83,102 | 159 | 5 | 2,311 | 65 | 130 | 4 | 1,243 | 23 | 3,843 | 97  |
| 83,103 | 159 | 5 | 2,311 | 65 | 129 | 4 | 1,244 | 23 | 3,843 | 97  |
| 83,104 | 159 | 5 | 2,322 | 65 | 129 | 4 | 1,245 | 23 | 3,855 | 97  |
| 83,105 | 164 | 5 | 2,379 | 65 | 132 | 4 | 1,268 | 22 | 3,943 | 96  |
| 83,106 | 165 | 5 | 2,420 | 65 | 133 | 4 | 1,293 | 22 | 4,011 | 96  |
| 83,107 | 190 | 5 | 2,754 | 65 | 142 | 4 | 1,409 | 22 | 4,495 | 96  |
| 83,108 | 185 | 5 | 2,716 | 65 | 141 | 4 | 1,411 | 21 | 4,453 | 95  |
| 83,109 | 185 | 5 | 2,721 | 65 | 143 | 4 | 1,425 | 21 | 4,474 | 95  |
| 83,110 | 185 | 5 | 2,720 | 65 | 143 | 4 | 1,423 | 21 | 4,471 | 95  |
| 83,111 | 152 | 5 | 2,578 | 65 | 131 | 4 | 1,280 | 21 | 4,141 | 95  |
| 83,112 | 151 | 5 | 2,567 | 64 | 131 | 4 | 1,265 | 21 | 4,114 | 94  |
| 83,113 | 151 | 5 | 2,563 | 65 | 131 | 5 | 1,264 | 21 | 4,109 | 96  |
| 83,114 | 151 | 5 | 2,564 | 66 | 130 | 5 | 1,264 | 22 | 4,109 | 98  |
| 83,115 | 149 | 5 | 2,480 | 66 | 124 | 5 | 1,216 | 22 | 3,969 | 98  |
| 83,116 | 149 | 5 | 2,458 | 82 | 118 | 5 | 1,213 | 25 | 3,938 | 117 |
| 83,117 | 147 | 5 | 2,456 | 88 | 119 | 5 | 1,221 | 26 | 3,943 | 124 |
| 83,118 | 141 | 5 | 2,276 | 89 | 109 | 5 | 1,159 | 26 | 3,685 | 125 |
| 83,119 | 120 | 6 | 1,850 | 91 | 95  | 5 | 1,050 | 26 | 3,115 | 128 |
| 83,120 | 115 | 7 | 1,546 | 91 | 71  | 5 | 877   | 26 | 2,609 | 129 |
| 83,121 | 113 | 7 | 1,410 | 93 | 63  | 5 | 786   | 27 | 2,372 | 132 |
| 83,122 | 102 | 7 | 1,156 | 93 | 43  | 5 | 712   | 25 | 2,013 | 130 |
| 83,123 | 102 | 7 | 1,145 | 94 | 40  | 5 | 702   | 25 | 1,989 | 131 |
| 83,124 | 99  | 7 | 1,132 | 94 | 40  | 5 | 701   | 25 | 1,972 | 131 |
| 83,125 | 97  | 7 | 1,110 | 92 | 40  | 5 | 690   | 25 | 1,937 | 129 |
| 83,126 | 98  | 7 | 1,115 | 94 | 39  | 6 | 693   | 25 | 1,945 | 132 |
| 83,127 | 92  | 7 | 1,069 | 94 | 38  | 6 | 630   | 26 | 1,829 | 133 |
| 83,128 | 91  | 7 | 1,015 | 94 | 37  | 6 | 617   | 25 | 1,760 | 132 |
| 83,129 | 86  | 7 | 970   | 93 | 33  | 6 | 600   | 25 | 1,689 | 131 |
| 83,130 | 86  | 7 | 963   | 93 | 33  | 6 | 598   | 25 | 1,680 | 131 |
| 83,131 | 92  | 7 | 981   | 83 | 33  | 6 | 599   | 25 | 1,705 | 121 |
| 83,132 | 94  | 7 | 990   | 84 | 35  | 6 | 598   | 25 | 1,717 | 122 |
| 83,133 | 89  | 7 | 986   | 84 | 34  | 6 | 598   | 25 | 1,707 | 122 |
| 83,134 | 89  | 7 | 984   | 81 | 34  | 6 | 598   | 25 | 1,705 | 119 |
| 83,135 | 100 | 7 | 1,062 | 63 | 37  | 6 | 639   | 25 | 1,838 | 101 |
| 83,136 | 93  | 4 | 1,048 | 59 | 37  | 6 | 620   | 23 | 1,798 | 92  |

|        |    |   |       |    |    |   |     |    |       |     |
|--------|----|---|-------|----|----|---|-----|----|-------|-----|
| 83,137 | 95 | 4 | 1,064 | 59 | 37 | 6 | 625 | 23 | 1,821 | 92  |
| 83,138 | 95 | 4 | 1,031 | 59 | 36 | 6 | 586 | 23 | 1,748 | 92  |
| 83,139 | 98 | 6 | 1,029 | 59 | 36 | 6 | 548 | 23 | 1,711 | 94  |
| 83,140 | 92 | 6 | 1,001 | 59 | 34 | 5 | 493 | 21 | 1,620 | 91  |
| 83,141 | 91 | 6 | 982   | 59 | 34 | 5 | 475 | 21 | 1,582 | 91  |
| 83,142 | 90 | 6 | 992   | 59 | 34 | 5 | 480 | 21 | 1,596 | 91  |
| 83,143 | 93 | 6 | 994   | 42 | 34 | 5 | 480 | 13 | 1,601 | 66  |
| 83,144 | 93 | 6 | 987   | 42 | 34 | 5 | 474 | 13 | 1,588 | 66  |
| 83,145 | 93 | 6 | 993   | 41 | 34 | 5 | 473 | 12 | 1,593 | 64  |
| 83,146 | 94 | 5 | 995   | 38 | 34 | 5 | 472 | 9  | 1,595 | 57  |
| 83,147 | 92 | 5 | 999   | 36 | 35 | 5 | 473 | 9  | 1,599 | 55  |
| 83,148 | 92 | 5 | 998   | 36 | 35 | 5 | 472 | 9  | 1,597 | 55  |
| 83,149 | 89 | 4 | 994   | 34 | 34 | 2 | 468 | 8  | 1,585 | 48  |
| 83,150 | 89 | 4 | 990   | 34 | 34 | 2 | 467 | 8  | 1,580 | 48  |
| 83,151 | 86 | 5 | 985   | 36 | 32 | 2 | 465 | 11 | 1,568 | 54  |
| 83,152 | 86 | 5 | 982   | 37 | 32 | 2 | 465 | 14 | 1,565 | 58  |
| 83,153 | 86 | 5 | 982   | 48 | 32 | 2 | 465 | 23 | 1,565 | 78  |
| 83,154 | 86 | 7 | 981   | 51 | 32 | 2 | 465 | 25 | 1,564 | 85  |
| 83,155 | 86 | 7 | 965   | 58 | 32 | 3 | 463 | 32 | 1,546 | 100 |
| 83,156 | 82 | 7 | 908   | 58 | 29 | 3 | 440 | 32 | 1,459 | 100 |
| 83,157 | 81 | 8 | 861   | 65 | 28 | 3 | 415 | 35 | 1,385 | 111 |
| 83,158 | 51 | 8 | 501   | 65 | 18 | 4 | 283 | 36 | 853   | 113 |
| 83,159 | 50 | 8 | 468   | 65 | 15 | 4 | 249 | 37 | 782   | 114 |
| 83,160 | 50 | 8 | 464   | 65 | 13 | 4 | 235 | 37 | 762   | 114 |
| 83,161 | 50 | 8 | 462   | 65 | 13 | 4 | 235 | 37 | 760   | 114 |
| 83,162 | 50 | 8 | 459   | 66 | 13 | 5 | 235 | 37 | 757   | 116 |
| 83,163 | 50 | 8 | 457   | 66 | 13 | 5 | 235 | 37 | 755   | 116 |
| 83,164 | 50 | 8 | 457   | 65 | 13 | 4 | 235 | 37 | 755   | 114 |
| 83,165 | 50 | 8 | 455   | 64 | 13 | 4 | 235 | 36 | 753   | 112 |
| 83,166 | 49 | 8 | 451   | 64 | 13 | 4 | 236 | 36 | 749   | 112 |
| 83,167 | 46 | 8 | 413   | 48 | 13 | 4 | 219 | 33 | 691   | 93  |
| 83,168 | 52 | 8 | 472   | 41 | 19 | 4 | 244 | 32 | 787   | 85  |
| 83,169 | 52 | 8 | 468   | 42 | 19 | 4 | 241 | 33 | 780   | 87  |
| 83,170 | 51 | 7 | 460   | 40 | 19 | 4 | 236 | 33 | 766   | 84  |
| 83,171 | 51 | 6 | 463   | 40 | 19 | 4 | 239 | 33 | 772   | 83  |
| 83,172 | 51 | 6 | 460   | 39 | 19 | 4 | 239 | 32 | 769   | 81  |
| 83,173 | 51 | 6 | 453   | 40 | 18 | 4 | 236 | 32 | 758   | 82  |
| 83,174 | 58 | 6 | 505   | 41 | 21 | 4 | 254 | 32 | 838   | 83  |
| 83,175 | 59 | 6 | 511   | 41 | 21 | 4 | 254 | 32 | 845   | 83  |
| 83,176 | 59 | 6 | 509   | 41 | 21 | 4 | 253 | 32 | 842   | 83  |
| 83,177 | 58 | 6 | 503   | 39 | 21 | 3 | 253 | 32 | 835   | 80  |

|        |    |   |     |    |    |   |     |    |     |    |
|--------|----|---|-----|----|----|---|-----|----|-----|----|
| 83,178 | 58 | 6 | 500 | 39 | 22 | 3 | 253 | 31 | 833 | 79 |
| 83,179 | 58 | 6 | 499 | 39 | 22 | 3 | 252 | 31 | 831 | 79 |
| 83,180 | 58 | 6 | 499 | 39 | 23 | 3 | 254 | 31 | 834 | 79 |
| 83,181 | 58 | 6 | 498 | 39 | 23 | 3 | 254 | 31 | 833 | 79 |
| 83,182 | 54 | 6 | 484 | 38 | 23 | 3 | 253 | 31 | 814 | 78 |
| 83,183 | 52 | 6 | 469 | 38 | 21 | 3 | 250 | 31 | 792 | 78 |
| 83,184 | 53 | 6 | 472 | 39 | 21 | 3 | 252 | 33 | 798 | 81 |
| 83,185 | 49 | 6 | 418 | 43 | 18 | 3 | 236 | 35 | 721 | 87 |
| 83,186 | 44 | 6 | 395 | 45 | 18 | 3 | 209 | 35 | 666 | 89 |
| 83,187 | 45 | 6 | 377 | 45 | 18 | 3 | 207 | 35 | 647 | 89 |
| 83,188 | 44 | 4 | 403 | 45 | 18 | 3 | 215 | 37 | 680 | 89 |
| 83,189 | 46 | 4 | 407 | 45 | 18 | 3 | 218 | 37 | 689 | 89 |
| 83,190 | 29 | 4 | 325 | 45 | 14 | 3 | 139 | 37 | 507 | 89 |
| 83,191 | 31 | 4 | 302 | 45 | 16 | 3 | 135 | 37 | 484 | 89 |
| 83,192 | 31 | 4 | 292 | 46 | 16 | 3 | 128 | 37 | 467 | 90 |
| 83,193 | 28 | 4 | 290 | 46 | 16 | 3 | 128 | 37 | 462 | 90 |
| 83,194 | 28 | 4 | 287 | 46 | 16 | 3 | 127 | 36 | 458 | 89 |
| 83,195 | 28 | 4 | 286 | 45 | 16 | 3 | 127 | 36 | 457 | 88 |
| 83,196 | 28 | 4 | 310 | 45 | 16 | 3 | 130 | 36 | 484 | 88 |
| 83,197 | 28 | 4 | 307 | 45 | 16 | 3 | 129 | 36 | 480 | 88 |
| 83,198 | 29 | 4 | 308 | 45 | 16 | 3 | 129 | 36 | 482 | 88 |
| 83,199 | 29 | 4 | 308 | 45 | 16 | 3 | 128 | 36 | 481 | 88 |
| 83,200 | 29 | 4 | 308 | 45 | 16 | 3 | 128 | 38 | 481 | 90 |
| 83,201 | 34 | 3 | 334 | 43 | 18 | 3 | 139 | 35 | 525 | 84 |
| 83,202 | 34 | 3 | 348 | 31 | 18 | 3 | 141 | 23 | 541 | 60 |
| 83,203 | 34 | 3 | 367 | 31 | 18 | 3 | 151 | 23 | 570 | 60 |
| 83,204 | 34 | 3 | 367 | 31 | 18 | 3 | 151 | 23 | 570 | 60 |
| 83,205 | 34 | 1 | 367 | 28 | 18 | 3 | 151 | 21 | 570 | 53 |
| 83,206 | 34 | 1 | 368 | 21 | 18 | 2 | 151 | 14 | 571 | 38 |
| 83,207 | 34 | 1 | 378 | 21 | 18 | 2 | 156 | 14 | 586 | 38 |
| 83,208 | 34 | 0 | 384 | 14 | 18 | 2 | 158 | 11 | 594 | 27 |
| 83,209 | 34 | 0 | 388 | 14 | 18 | 1 | 159 | 10 | 599 | 25 |
| 83,210 | 36 | 0 | 411 | 14 | 17 | 1 | 168 | 9  | 632 | 24 |
| 83,211 | 36 | 0 | 413 | 14 | 17 | 1 | 168 | 10 | 634 | 25 |
| 83,212 | 36 | 0 | 413 | 14 | 17 | 1 | 168 | 10 | 634 | 25 |
| 83,213 | 40 | 0 | 440 | 13 | 17 | 0 | 179 | 10 | 676 | 23 |
| 83,214 | 40 | 0 | 465 | 13 | 17 | 0 | 185 | 10 | 707 | 23 |
| 83,215 | 42 | 0 | 474 | 14 | 17 | 0 | 187 | 11 | 720 | 25 |
| 83,216 | 43 | 0 | 482 | 15 | 17 | 0 | 187 | 12 | 729 | 27 |
| 83,217 | 47 | 0 | 537 | 16 | 24 | 0 | 209 | 13 | 817 | 29 |
| 83,218 | 50 | 0 | 605 | 16 | 26 | 0 | 258 | 13 | 939 | 29 |

|        |    |   |     |    |    |   |     |    |       |    |
|--------|----|---|-----|----|----|---|-----|----|-------|----|
| 83,219 | 46 | 0 | 597 | 15 | 20 | 0 | 234 | 12 | 897   | 27 |
| 83,220 | 46 | 0 | 595 | 16 | 20 | 0 | 234 | 13 | 895   | 29 |
| 83,221 | 49 | 0 | 653 | 21 | 23 | 1 | 295 | 14 | 1,020 | 36 |
| 83,222 | 49 | 1 | 652 | 35 | 23 | 1 | 293 | 20 | 1,017 | 57 |
| 83,223 | 48 | 1 | 641 | 35 | 23 | 1 | 292 | 20 | 1,004 | 57 |
| 83,224 | 44 | 1 | 627 | 34 | 22 | 1 | 287 | 21 | 980   | 57 |
| 83,225 | 42 | 1 | 603 | 32 | 20 | 1 | 277 | 21 | 942   | 55 |
| 83,226 | 41 | 1 | 589 | 32 | 19 | 1 | 270 | 21 | 919   | 55 |
| 83,227 | 41 | 1 | 588 | 32 | 19 | 1 | 270 | 21 | 918   | 55 |
| 83,228 | 41 | 1 | 583 | 32 | 19 | 1 | 266 | 21 | 909   | 55 |
| 83,229 | 41 | 1 | 593 | 32 | 19 | 1 | 267 | 21 | 920   | 55 |
| 83,230 | 42 | 1 | 596 | 32 | 18 | 1 | 267 | 21 | 923   | 55 |
| 83,231 | 42 | 1 | 601 | 32 | 18 | 1 | 267 | 21 | 928   | 55 |
| 83,232 | 46 | 1 | 656 | 32 | 20 | 1 | 294 | 21 | 1,016 | 55 |
| 83,233 | 45 | 1 | 648 | 32 | 20 | 1 | 291 | 21 | 1,004 | 55 |
| 83,234 | 45 | 1 | 646 | 32 | 20 | 1 | 290 | 21 | 1,001 | 55 |
| 83,235 | 45 | 1 | 644 | 31 | 20 | 1 | 292 | 20 | 1,001 | 53 |
| 83,236 | 43 | 1 | 644 | 27 | 20 | 1 | 292 | 18 | 999   | 47 |
| 83,237 | 56 | 1 | 791 | 25 | 23 | 1 | 414 | 18 | 1,284 | 45 |
| 83,238 | 55 | 1 | 786 | 26 | 23 | 1 | 413 | 18 | 1,277 | 46 |
| 83,239 | 54 | 1 | 735 | 27 | 23 | 1 | 396 | 16 | 1,208 | 45 |
| 83,240 | 52 | 1 | 728 | 27 | 23 | 1 | 388 | 16 | 1,191 | 45 |
| 83,241 | 52 | 2 | 723 | 27 | 23 | 1 | 385 | 16 | 1,183 | 46 |
| 83,242 | 49 | 2 | 718 | 27 | 21 | 1 | 381 | 16 | 1,169 | 46 |
| 83,243 | 49 | 3 | 718 | 27 | 21 | 1 | 381 | 16 | 1,169 | 47 |
| 83,244 | 49 | 3 | 718 | 27 | 21 | 1 | 381 | 16 | 1,169 | 47 |
| 83,245 | 50 | 3 | 721 | 27 | 21 | 1 | 383 | 16 | 1,175 | 47 |
| 83,246 | 50 | 3 | 717 | 28 | 21 | 1 | 383 | 18 | 1,171 | 50 |
| 83,247 | 49 | 3 | 691 | 29 | 21 | 1 | 380 | 18 | 1,141 | 51 |
| 83,248 | 49 | 3 | 700 | 31 | 22 | 1 | 380 | 18 | 1,151 | 53 |
| 83,249 | 48 | 3 | 697 | 32 | 22 | 1 | 381 | 18 | 1,148 | 54 |
| 83,250 | 47 | 3 | 693 | 32 | 21 | 1 | 380 | 20 | 1,141 | 56 |
| 83,251 | 49 | 4 | 695 | 48 | 21 | 2 | 385 | 21 | 1,150 | 75 |
| 83,252 | 45 | 4 | 682 | 52 | 20 | 2 | 376 | 24 | 1,123 | 82 |
| 83,253 | 45 | 4 | 674 | 56 | 20 | 2 | 374 | 24 | 1,113 | 86 |
| 83,254 | 45 | 4 | 655 | 56 | 20 | 2 | 364 | 24 | 1,084 | 86 |
| 83,255 | 53 | 4 | 748 | 56 | 25 | 2 | 422 | 24 | 1,248 | 86 |
| 83,256 | 53 | 4 | 770 | 56 | 26 | 2 | 425 | 24 | 1,274 | 86 |
| 83,257 | 72 | 4 | 856 | 57 | 35 | 2 | 507 | 24 | 1,470 | 87 |
| 83,258 | 72 | 4 | 901 | 57 | 38 | 2 | 536 | 24 | 1,547 | 87 |
| 83,259 | 76 | 4 | 963 | 60 | 43 | 2 | 619 | 26 | 1,701 | 92 |

|        |     |   |       |    |    |   |       |    |       |     |
|--------|-----|---|-------|----|----|---|-------|----|-------|-----|
| 83,260 | 77  | 4 | 948   | 60 | 43 | 2 | 614   | 26 | 1,682 | 92  |
| 83,261 | 75  | 4 | 940   | 61 | 43 | 2 | 613   | 25 | 1,671 | 92  |
| 83,262 | 75  | 4 | 939   | 61 | 43 | 2 | 612   | 25 | 1,669 | 92  |
| 83,263 | 73  | 4 | 917   | 61 | 43 | 2 | 603   | 25 | 1,636 | 92  |
| 83,264 | 73  | 4 | 919   | 62 | 44 | 2 | 603   | 25 | 1,639 | 93  |
| 83,265 | 71  | 4 | 910   | 62 | 44 | 2 | 601   | 25 | 1,626 | 93  |
| 83,266 | 87  | 4 | 976   | 63 | 46 | 2 | 629   | 24 | 1,738 | 93  |
| 83,267 | 86  | 4 | 980   | 63 | 47 | 2 | 631   | 23 | 1,744 | 92  |
| 83,268 | 87  | 4 | 961   | 65 | 42 | 2 | 643   | 22 | 1,733 | 93  |
| 83,269 | 87  | 4 | 979   | 65 | 40 | 2 | 603   | 22 | 1,709 | 93  |
| 83,270 | 86  | 4 | 945   | 64 | 42 | 2 | 611   | 21 | 1,684 | 91  |
| 83,271 | 86  | 4 | 908   | 64 | 40 | 2 | 576   | 22 | 1,610 | 92  |
| 83,272 | 83  | 4 | 894   | 60 | 39 | 1 | 553   | 21 | 1,569 | 86  |
| 83,273 | 83  | 3 | 890   | 47 | 39 | 1 | 550   | 15 | 1,562 | 66  |
| 83,274 | 83  | 3 | 891   | 46 | 39 | 1 | 551   | 14 | 1,564 | 64  |
| 83,275 | 83  | 3 | 890   | 46 | 39 | 1 | 550   | 14 | 1,562 | 64  |
| 83,276 | 83  | 3 | 889   | 46 | 39 | 1 | 552   | 14 | 1,563 | 64  |
| 83,277 | 83  | 3 | 887   | 46 | 39 | 1 | 554   | 14 | 1,563 | 64  |
| 83,278 | 83  | 3 | 884   | 48 | 39 | 1 | 554   | 14 | 1,560 | 66  |
| 83,279 | 83  | 3 | 880   | 48 | 39 | 1 | 553   | 14 | 1,555 | 66  |
| 83,280 | 83  | 3 | 873   | 58 | 39 | 1 | 553   | 23 | 1,548 | 85  |
| 83,281 | 82  | 4 | 870   | 58 | 39 | 1 | 552   | 25 | 1,543 | 88  |
| 83,282 | 82  | 5 | 866   | 76 | 39 | 2 | 552   | 29 | 1,539 | 112 |
| 83,283 | 77  | 5 | 812   | 79 | 37 | 2 | 524   | 32 | 1,450 | 118 |
| 83,284 | 72  | 5 | 736   | 79 | 35 | 2 | 470   | 33 | 1,313 | 119 |
| 83,285 | 71  | 5 | 707   | 82 | 35 | 2 | 461   | 33 | 1,274 | 122 |
| 83,286 | 63  | 5 | 665   | 83 | 35 | 2 | 402   | 34 | 1,165 | 124 |
| 83,287 | 64  | 5 | 669   | 83 | 37 | 2 | 408   | 34 | 1,178 | 124 |
| 83,288 | 64  | 5 | 674   | 84 | 37 | 2 | 410   | 34 | 1,185 | 125 |
| 83,289 | 64  | 5 | 677   | 83 | 37 | 2 | 411   | 34 | 1,189 | 124 |
| 83,290 | 69  | 5 | 693   | 83 | 37 | 2 | 415   | 34 | 1,214 | 124 |
| 83,291 | 71  | 4 | 695   | 83 | 37 | 2 | 417   | 35 | 1,220 | 124 |
| 83,292 | 71  | 4 | 695   | 83 | 37 | 2 | 417   | 35 | 1,220 | 124 |
| 83,293 | 71  | 5 | 712   | 84 | 37 | 2 | 423   | 35 | 1,243 | 126 |
| 83,294 | 106 | 4 | 926   | 84 | 52 | 2 | 527   | 35 | 1,611 | 125 |
| 83,295 | 106 | 4 | 929   | 84 | 53 | 2 | 534   | 35 | 1,622 | 125 |
| 83,296 | 112 | 4 | 1,039 | 84 | 67 | 2 | 701   | 35 | 1,919 | 125 |
| 83,297 | 119 | 4 | 1,112 | 84 | 76 | 2 | 773   | 34 | 2,080 | 124 |
| 83,298 | 119 | 4 | 1,110 | 83 | 74 | 2 | 773   | 34 | 2,076 | 123 |
| 83,299 | 125 | 4 | 1,182 | 81 | 79 | 2 | 867   | 34 | 2,253 | 121 |
| 83,300 | 140 | 4 | 1,256 | 80 | 93 | 2 | 1,035 | 34 | 2,524 | 120 |



|        |     |   |       |    |     |   |       |    |       |     |
|--------|-----|---|-------|----|-----|---|-------|----|-------|-----|
| 83,301 | 143 | 4 | 1,281 | 80 | 96  | 3 | 1,050 | 32 | 2,570 | 119 |
| 83,302 | 141 | 3 | 1,276 | 60 | 96  | 2 | 1,046 | 26 | 2,559 | 91  |
| 83,303 | 142 | 3 | 1,279 | 56 | 97  | 2 | 1,055 | 27 | 2,573 | 88  |
| 83,304 | 142 | 4 | 1,276 | 56 | 97  | 2 | 1,056 | 27 | 2,571 | 89  |
| 83,305 | 134 | 5 | 1,197 | 58 | 94  | 2 | 1,012 | 31 | 2,437 | 96  |
| 83,306 | 134 | 5 | 1,184 | 58 | 92  | 2 | 1,003 | 32 | 2,413 | 97  |
| 83,307 | 134 | 5 | 1,165 | 58 | 91  | 2 | 1,002 | 33 | 2,392 | 98  |
| 83,308 | 118 | 5 | 1,108 | 57 | 83  | 2 | 950   | 33 | 2,259 | 97  |
| 83,309 | 118 | 5 | 1,057 | 57 | 80  | 2 | 918   | 33 | 2,173 | 97  |
| 83,310 | 114 | 5 | 991   | 54 | 75  | 2 | 842   | 31 | 2,022 | 92  |
| 83,311 | 114 | 5 | 1,006 | 54 | 75  | 2 | 851   | 31 | 2,046 | 92  |
| 83,312 | 120 | 5 | 1,147 | 53 | 80  | 2 | 946   | 31 | 2,293 | 91  |
| 83,313 | 120 | 5 | 1,144 | 53 | 80  | 2 | 947   | 31 | 2,291 | 91  |
| 83,314 | 123 | 5 | 1,183 | 53 | 86  | 2 | 992   | 31 | 2,384 | 91  |
| 83,315 | 123 | 5 | 1,161 | 57 | 85  | 2 | 987   | 32 | 2,356 | 96  |
| 83,316 | 108 | 5 | 1,112 | 70 | 85  | 2 | 970   | 33 | 2,275 | 110 |
| 83,317 | 107 | 6 | 1,104 | 71 | 85  | 2 | 963   | 33 | 2,259 | 112 |
| 83,318 | 107 | 6 | 1,095 | 71 | 84  | 2 | 962   | 33 | 2,248 | 112 |
| 83,319 | 102 | 6 | 1,066 | 72 | 82  | 2 | 927   | 35 | 2,177 | 115 |
| 83,320 | 99  | 6 | 980   | 73 | 82  | 3 | 918   | 36 | 2,079 | 118 |
| 83,321 | 98  | 6 | 943   | 73 | 79  | 3 | 891   | 36 | 2,011 | 118 |
| 83,322 | 109 | 6 | 989   | 76 | 81  | 3 | 917   | 35 | 2,096 | 120 |
| 83,323 | 111 | 6 | 1,026 | 77 | 81  | 3 | 921   | 36 | 2,139 | 122 |
| 83,324 | 111 | 6 | 1,026 | 76 | 81  | 3 | 921   | 36 | 2,139 | 121 |
| 83,325 | 115 | 6 | 1,127 | 76 | 85  | 3 | 963   | 36 | 2,290 | 121 |
| 83,326 | 174 | 8 | 1,712 | 80 | 125 | 3 | 1,230 | 41 | 3,241 | 132 |
| 83,327 | 192 | 8 | 1,819 | 81 | 138 | 3 | 1,312 | 41 | 3,461 | 133 |
| 83,328 | 194 | 8 | 1,835 | 79 | 139 | 3 | 1,312 | 41 | 3,480 | 131 |
| 83,329 | 195 | 8 | 1,847 | 80 | 139 | 3 | 1,315 | 41 | 3,496 | 132 |
| 83,330 | 196 | 8 | 1,858 | 82 | 140 | 3 | 1,323 | 41 | 3,517 | 134 |
| 83,331 | 196 | 8 | 1,856 | 72 | 140 | 3 | 1,323 | 32 | 3,515 | 115 |
| 83,332 | 196 | 7 | 1,861 | 72 | 140 | 3 | 1,325 | 30 | 3,522 | 112 |
| 83,333 | 196 | 6 | 1,860 | 55 | 140 | 3 | 1,329 | 28 | 3,525 | 92  |
| 83,334 | 196 | 6 | 1,858 | 52 | 140 | 3 | 1,329 | 25 | 3,523 | 86  |
| 83,335 | 199 | 6 | 2,004 | 52 | 142 | 3 | 1,365 | 24 | 3,710 | 85  |
| 83,336 | 199 | 6 | 2,010 | 49 | 142 | 3 | 1,367 | 24 | 3,718 | 82  |
| 83,337 | 198 | 6 | 2,005 | 48 | 140 | 3 | 1,358 | 22 | 3,701 | 79  |
| 83,338 | 202 | 6 | 2,022 | 47 | 143 | 3 | 1,370 | 22 | 3,737 | 78  |
| 83,339 | 202 | 6 | 2,019 | 47 | 143 | 3 | 1,369 | 22 | 3,733 | 78  |
| 83,340 | 201 | 6 | 2,070 | 47 | 144 | 3 | 1,383 | 23 | 3,798 | 79  |
| 83,341 | 200 | 6 | 2,063 | 46 | 144 | 3 | 1,383 | 23 | 3,790 | 78  |

|        |     |   |       |    |     |   |       |    |       |    |
|--------|-----|---|-------|----|-----|---|-------|----|-------|----|
| 83,342 | 232 | 6 | 2,510 | 46 | 161 | 3 | 1,677 | 23 | 4,580 | 78 |
| 83,343 | 231 | 5 | 2,501 | 45 | 162 | 3 | 1,677 | 23 | 4,571 | 76 |
| 83,344 | 231 | 5 | 2,499 | 45 | 162 | 3 | 1,678 | 23 | 4,570 | 76 |
| 83,345 | 196 | 5 | 2,281 | 45 | 147 | 3 | 1,573 | 23 | 4,197 | 76 |
| 83,346 | 196 | 5 | 2,279 | 45 | 146 | 3 | 1,566 | 23 | 4,187 | 76 |
| 83,347 | 190 | 5 | 2,168 | 45 | 132 | 3 | 1,398 | 24 | 3,888 | 77 |
| 83,348 | 183 | 5 | 2,083 | 45 | 123 | 3 | 1,321 | 23 | 3,710 | 76 |
| 83,349 | 177 | 5 | 2,012 | 45 | 118 | 3 | 1,226 | 23 | 3,533 | 76 |
| 83,350 | 172 | 5 | 1,977 | 45 | 112 | 3 | 1,157 | 23 | 3,418 | 76 |
| 83,351 | 162 | 5 | 1,938 | 45 | 104 | 3 | 1,052 | 23 | 3,256 | 76 |
| 83,352 | 159 | 6 | 1,913 | 45 | 101 | 2 | 1,043 | 23 | 3,216 | 76 |
| 83,353 | 159 | 6 | 1,910 | 45 | 101 | 2 | 1,043 | 23 | 3,213 | 76 |
| 83,354 | 158 | 6 | 1,903 | 45 | 100 | 2 | 1,033 | 22 | 3,194 | 75 |
| 83,355 | 158 | 5 | 1,901 | 45 | 100 | 2 | 1,033 | 22 | 3,192 | 74 |
| 83,356 | 158 | 4 | 1,901 | 43 | 100 | 2 | 1,033 | 17 | 3,192 | 66 |
| 83,357 | 158 | 4 | 1,900 | 43 | 100 | 2 | 1,031 | 16 | 3,189 | 65 |
| 83,358 | 158 | 4 | 1,896 | 43 | 100 | 2 | 1,029 | 16 | 3,183 | 65 |
| 83,359 | 154 | 4 | 1,856 | 44 | 99  | 2 | 991   | 16 | 3,100 | 66 |
| 83,360 | 153 | 4 | 1,844 | 44 | 99  | 2 | 984   | 16 | 3,080 | 66 |
| 83,361 | 153 | 4 | 1,840 | 45 | 99  | 2 | 979   | 16 | 3,071 | 67 |
| 83,362 | 153 | 4 | 1,832 | 45 | 98  | 2 | 976   | 16 | 3,059 | 67 |
| 83,363 | 147 | 4 | 1,703 | 45 | 94  | 2 | 887   | 16 | 2,831 | 67 |
| 83,364 | 145 | 4 | 1,691 | 46 | 93  | 2 | 867   | 16 | 2,796 | 68 |
| 83,365 | 142 | 5 | 1,664 | 45 | 88  | 2 | 842   | 17 | 2,736 | 69 |
| 83,366 | 142 | 5 | 1,659 | 41 | 88  | 2 | 841   | 16 | 2,730 | 64 |
| 83,367 | 142 | 5 | 1,656 | 28 | 87  | 2 | 839   | 15 | 2,724 | 50 |
| 83,368 | 143 | 4 | 1,653 | 24 | 86  | 2 | 839   | 15 | 2,721 | 45 |
| 83,369 | 144 | 4 | 1,655 | 20 | 86  | 2 | 840   | 13 | 2,725 | 39 |
| 83,370 | 144 | 4 | 1,645 | 19 | 86  | 1 | 843   | 12 | 2,718 | 36 |
| 83,371 | 144 | 4 | 1,641 | 19 | 86  | 1 | 842   | 12 | 2,713 | 36 |
| 83,372 | 134 | 4 | 1,610 | 21 | 84  | 1 | 818   | 11 | 2,646 | 37 |
| 83,373 | 133 | 4 | 1,601 | 19 | 85  | 1 | 820   | 11 | 2,639 | 35 |
| 83,374 | 131 | 4 | 1,572 | 18 | 85  | 1 | 813   | 10 | 2,601 | 33 |
| 83,375 | 127 | 4 | 1,488 | 18 | 81  | 1 | 780   | 10 | 2,476 | 33 |
| 83,376 | 86  | 2 | 1,117 | 15 | 57  | 1 | 657   | 7  | 1,917 | 25 |
| 83,377 | 71  | 2 | 953   | 16 | 44  | 1 | 551   | 7  | 1,619 | 26 |
| 83,378 | 56  | 2 | 851   | 15 | 34  | 1 | 479   | 7  | 1,420 | 25 |
| 83,379 | 54  | 2 | 835   | 15 | 33  | 1 | 476   | 7  | 1,398 | 25 |
| 83,380 | 53  | 2 | 823   | 14 | 33  | 1 | 476   | 7  | 1,385 | 24 |
| 83,381 | 59  | 2 | 838   | 12 | 36  | 1 | 497   | 7  | 1,430 | 22 |
| 83,382 | 64  | 2 | 843   | 13 | 36  | 1 | 508   | 7  | 1,451 | 23 |

|        |     |   |       |    |     |   |       |   |       |    |
|--------|-----|---|-------|----|-----|---|-------|---|-------|----|
| 83,383 | 64  | 2 | 756   | 12 | 35  | 0 | 499   | 5 | 1,354 | 19 |
| 83,384 | 66  | 2 | 738   | 12 | 34  | 0 | 496   | 5 | 1,334 | 19 |
| 83,385 | 67  | 2 | 749   | 12 | 35  | 0 | 519   | 5 | 1,370 | 19 |
| 83,386 | 67  | 2 | 755   | 12 | 36  | 0 | 526   | 5 | 1,384 | 19 |
| 83,387 | 72  | 2 | 768   | 12 | 38  | 0 | 549   | 5 | 1,427 | 19 |
| 83,388 | 79  | 2 | 807   | 12 | 39  | 0 | 584   | 5 | 1,509 | 19 |
| 83,389 | 92  | 2 | 917   | 12 | 40  | 0 | 634   | 5 | 1,683 | 19 |
| 83,390 | 93  | 2 | 887   | 12 | 41  | 0 | 638   | 5 | 1,659 | 19 |
| 83,391 | 114 | 2 | 1,052 | 12 | 51  | 0 | 830   | 4 | 2,047 | 18 |
| 83,392 | 118 | 2 | 1,156 | 12 | 57  | 0 | 881   | 4 | 2,212 | 18 |
| 83,393 | 103 | 2 | 793   | 12 | 53  | 0 | 756   | 3 | 1,705 | 17 |
| 83,394 | 103 | 2 | 789   | 12 | 52  | 0 | 747   | 3 | 1,691 | 17 |
| 83,395 | 103 | 2 | 794   | 12 | 52  | 0 | 757   | 3 | 1,706 | 17 |
| 83,396 | 103 | 2 | 794   | 11 | 52  | 0 | 758   | 3 | 1,707 | 16 |
| 83,397 | 106 | 2 | 832   | 11 | 56  | 0 | 783   | 3 | 1,777 | 16 |
| 83,398 | 106 | 2 | 842   | 10 | 56  | 0 | 785   | 2 | 1,789 | 14 |
| 83,399 | 106 | 2 | 842   | 10 | 56  | 0 | 785   | 2 | 1,789 | 14 |
| 83,400 | 111 | 2 | 849   | 10 | 57  | 0 | 788   | 2 | 1,805 | 14 |
| 83,401 | 113 | 2 | 866   | 10 | 57  | 0 | 789   | 2 | 1,825 | 14 |
| 83,402 | 113 | 2 | 871   | 10 | 57  | 0 | 790   | 2 | 1,831 | 14 |
| 83,403 | 124 | 1 | 939   | 10 | 57  | 0 | 831   | 2 | 1,951 | 13 |
| 83,404 | 124 | 1 | 963   | 10 | 57  | 0 | 839   | 2 | 1,983 | 13 |
| 83,405 | 151 | 1 | 1,127 | 10 | 75  | 0 | 964   | 2 | 2,317 | 13 |
| 83,406 | 167 | 1 | 1,234 | 10 | 86  | 0 | 1,017 | 2 | 2,504 | 13 |
| 83,407 | 182 | 1 | 1,299 | 10 | 90  | 0 | 1,055 | 2 | 2,626 | 13 |
| 83,408 | 191 | 1 | 1,330 | 10 | 94  | 0 | 1,137 | 2 | 2,752 | 13 |
| 83,409 | 191 | 1 | 1,330 | 10 | 94  | 0 | 1,137 | 2 | 2,752 | 13 |
| 83,410 | 204 | 1 | 1,545 | 9  | 101 | 0 | 1,271 | 2 | 3,121 | 12 |
| 83,411 | 207 | 1 | 1,595 | 8  | 102 | 0 | 1,321 | 2 | 3,225 | 11 |
| 83,412 | 212 | 1 | 1,608 | 8  | 104 | 0 | 1,331 | 2 | 3,255 | 11 |
| 83,413 | 212 | 1 | 1,610 | 8  | 105 | 0 | 1,332 | 2 | 3,259 | 11 |
| 83,414 | 212 | 1 | 1,606 | 8  | 105 | 0 | 1,330 | 2 | 3,253 | 11 |
| 83,415 | 212 | 1 | 1,618 | 7  | 105 | 0 | 1,333 | 2 | 3,268 | 10 |
| 83,416 | 212 | 0 | 1,618 | 7  | 105 | 0 | 1,333 | 2 | 3,268 | 9  |
| 83,417 | 218 | 0 | 1,674 | 7  | 107 | 0 | 1,361 | 2 | 3,360 | 9  |
| 83,418 | 218 | 0 | 1,681 | 8  | 107 | 0 | 1,362 | 2 | 3,368 | 10 |
| 83,419 | 217 | 0 | 1,677 | 9  | 107 | 0 | 1,361 | 3 | 3,362 | 12 |
| 83,420 | 251 | 1 | 1,956 | 12 | 113 | 0 | 1,518 | 4 | 3,838 | 17 |
| 83,421 | 251 | 2 | 1,956 | 13 | 113 | 0 | 1,514 | 4 | 3,834 | 19 |
| 83,422 | 251 | 2 | 1,952 | 13 | 113 | 0 | 1,513 | 4 | 3,829 | 19 |
| 83,423 | 277 | 2 | 2,176 | 10 | 135 | 0 | 1,695 | 4 | 4,283 | 16 |

|        |     |   |       |    |     |   |       |    |       |    |
|--------|-----|---|-------|----|-----|---|-------|----|-------|----|
| 83,424 | 278 | 2 | 2,221 | 9  | 134 | 0 | 1,720 | 4  | 4,353 | 15 |
| 83,425 | 282 | 2 | 2,242 | 10 | 135 | 0 | 1,751 | 4  | 4,410 | 16 |
| 83,426 | 282 | 2 | 2,226 | 11 | 135 | 0 | 1,740 | 4  | 4,383 | 17 |
| 83,427 | 283 | 2 | 2,282 | 9  | 136 | 0 | 1,748 | 4  | 4,449 | 15 |
| 83,428 | 283 | 2 | 2,295 | 9  | 136 | 0 | 1,757 | 4  | 4,471 | 15 |
| 83,429 | 280 | 2 | 2,288 | 9  | 133 | 0 | 1,745 | 4  | 4,446 | 15 |
| 83,430 | 276 | 2 | 2,279 | 9  | 132 | 0 | 1,740 | 4  | 4,427 | 15 |
| 83,431 | 277 | 2 | 2,294 | 13 | 134 | 0 | 1,753 | 4  | 4,458 | 19 |
| 83,432 | 275 | 2 | 2,280 | 13 | 131 | 0 | 1,739 | 4  | 4,425 | 19 |
| 83,433 | 271 | 2 | 2,299 | 12 | 133 | 0 | 1,739 | 4  | 4,442 | 18 |
| 83,434 | 271 | 2 | 2,302 | 13 | 133 | 0 | 1,738 | 4  | 4,444 | 19 |
| 83,435 | 280 | 2 | 2,341 | 13 | 134 | 0 | 1,762 | 4  | 4,517 | 19 |
| 83,436 | 277 | 2 | 2,328 | 13 | 133 | 0 | 1,738 | 4  | 4,476 | 19 |
| 83,437 | 277 | 2 | 2,322 | 13 | 132 | 0 | 1,729 | 4  | 4,460 | 19 |
| 83,438 | 276 | 2 | 2,326 | 13 | 133 | 0 | 1,730 | 5  | 4,465 | 20 |
| 83,439 | 270 | 2 | 2,290 | 13 | 132 | 0 | 1,700 | 5  | 4,392 | 20 |
| 83,440 | 264 | 2 | 2,173 | 14 | 129 | 0 | 1,666 | 5  | 4,232 | 21 |
| 83,441 | 260 | 2 | 2,159 | 14 | 127 | 0 | 1,645 | 5  | 4,191 | 21 |
| 83,442 | 240 | 2 | 1,988 | 14 | 118 | 0 | 1,471 | 5  | 3,817 | 21 |
| 83,443 | 236 | 2 | 1,878 | 14 | 112 | 0 | 1,417 | 5  | 3,643 | 21 |
| 83,444 | 222 | 2 | 1,818 | 14 | 101 | 0 | 1,253 | 7  | 3,394 | 23 |
| 83,445 | 223 | 2 | 1,815 | 14 | 101 | 0 | 1,245 | 7  | 3,384 | 23 |
| 83,446 | 224 | 2 | 1,827 | 14 | 103 | 0 | 1,246 | 7  | 3,400 | 23 |
| 83,447 | 225 | 2 | 1,850 | 14 | 102 | 0 | 1,269 | 7  | 3,446 | 23 |
| 83,448 | 224 | 2 | 1,826 | 14 | 100 | 0 | 1,256 | 7  | 3,406 | 23 |
| 83,449 | 224 | 2 | 1,827 | 14 | 100 | 0 | 1,262 | 7  | 3,413 | 23 |
| 83,450 | 219 | 2 | 1,827 | 14 | 99  | 0 | 1,262 | 7  | 3,407 | 23 |
| 83,451 | 219 | 2 | 1,814 | 14 | 101 | 0 | 1,271 | 7  | 3,405 | 23 |
| 83,452 | 219 | 2 | 1,809 | 14 | 101 | 0 | 1,270 | 7  | 3,399 | 23 |
| 83,453 | 213 | 2 | 1,837 | 14 | 107 | 0 | 1,281 | 7  | 3,438 | 23 |
| 83,454 | 215 | 2 | 1,848 | 15 | 108 | 0 | 1,286 | 7  | 3,457 | 24 |
| 83,455 | 215 | 2 | 1,841 | 16 | 109 | 0 | 1,280 | 10 | 3,445 | 28 |
| 83,456 | 196 | 2 | 1,721 | 18 | 91  | 0 | 1,172 | 12 | 3,180 | 32 |
| 83,457 | 180 | 2 | 1,631 | 18 | 80  | 0 | 1,124 | 12 | 3,015 | 32 |
| 83,458 | 173 | 2 | 1,600 | 25 | 76  | 0 | 1,090 | 14 | 2,939 | 41 |
| 83,459 | 164 | 2 | 1,568 | 31 | 72  | 1 | 1,009 | 16 | 2,813 | 50 |
| 83,460 | 151 | 2 | 1,353 | 31 | 65  | 1 | 874   | 16 | 2,443 | 50 |
| 83,461 | 234 | 2 | 1,927 | 31 | 103 | 1 | 1,205 | 16 | 3,469 | 50 |
| 83,462 | 241 | 2 | 1,939 | 31 | 105 | 1 | 1,210 | 18 | 3,495 | 52 |
| 83,463 | 239 | 3 | 1,973 | 39 | 108 | 1 | 1,246 | 20 | 3,566 | 63 |
| 83,464 | 239 | 3 | 1,970 | 39 | 107 | 1 | 1,244 | 20 | 3,560 | 63 |

|        |     |   |       |    |     |   |       |    |       |    |
|--------|-----|---|-------|----|-----|---|-------|----|-------|----|
| 83,465 | 239 | 3 | 1,968 | 42 | 108 | 2 | 1,248 | 24 | 3,563 | 71 |
| 83,466 | 239 | 3 | 1,956 | 42 | 108 | 2 | 1,246 | 24 | 3,549 | 71 |
| 83,467 | 233 | 3 | 1,926 | 42 | 107 | 2 | 1,227 | 24 | 3,493 | 71 |
| 83,468 | 233 | 4 | 1,901 | 41 | 106 | 2 | 1,218 | 24 | 3,458 | 71 |
| 83,469 | 233 | 4 | 1,895 | 41 | 106 | 2 | 1,219 | 24 | 3,453 | 71 |
| 83,470 | 198 | 4 | 1,631 | 41 | 100 | 2 | 1,077 | 23 | 3,006 | 70 |
| 83,471 | 198 | 3 | 1,610 | 38 | 100 | 2 | 1,061 | 22 | 2,969 | 65 |
| 83,472 | 198 | 2 | 1,603 | 37 | 100 | 2 | 1,060 | 22 | 2,961 | 63 |
| 83,473 | 198 | 2 | 1,597 | 37 | 99  | 2 | 1,057 | 22 | 2,951 | 63 |
| 83,474 | 172 | 2 | 1,379 | 37 | 78  | 2 | 876   | 22 | 2,505 | 63 |
| 83,475 | 172 | 2 | 1,332 | 38 | 78  | 2 | 849   | 23 | 2,431 | 65 |
| 83,476 | 168 | 2 | 1,303 | 39 | 77  | 2 | 818   | 24 | 2,366 | 67 |
| 83,477 | 164 | 2 | 1,204 | 38 | 73  | 2 | 768   | 23 | 2,209 | 65 |
| 83,478 | 164 | 3 | 1,196 | 38 | 73  | 2 | 766   | 23 | 2,199 | 66 |
| 83,479 | 164 | 3 | 1,182 | 38 | 73  | 2 | 757   | 23 | 2,176 | 66 |
| 83,480 | 162 | 3 | 1,163 | 39 | 71  | 2 | 737   | 23 | 2,133 | 67 |
| 83,481 | 161 | 3 | 1,144 | 39 | 70  | 2 | 726   | 23 | 2,101 | 67 |
| 83,482 | 161 | 3 | 1,134 | 35 | 69  | 2 | 724   | 24 | 2,088 | 64 |
| 83,483 | 161 | 3 | 1,134 | 35 | 69  | 2 | 724   | 24 | 2,088 | 64 |
| 83,484 | 161 | 3 | 1,128 | 35 | 69  | 2 | 723   | 24 | 2,081 | 64 |
| 83,485 | 153 | 3 | 1,103 | 34 | 70  | 2 | 706   | 24 | 2,032 | 63 |
| 83,486 | 152 | 3 | 1,087 | 34 | 69  | 2 | 693   | 24 | 2,001 | 63 |
| 83,487 | 151 | 3 | 1,054 | 34 | 68  | 2 | 677   | 24 | 1,950 | 63 |
| 83,488 | 151 | 3 | 1,048 | 34 | 68  | 2 | 674   | 24 | 1,941 | 63 |
| 83,489 | 147 | 3 | 1,032 | 33 | 65  | 2 | 653   | 23 | 1,897 | 61 |
| 83,490 | 149 | 3 | 1,029 | 33 | 65  | 2 | 647   | 23 | 1,890 | 61 |
| 83,491 | 138 | 3 | 1,013 | 33 | 64  | 2 | 619   | 23 | 1,834 | 61 |
| 83,492 | 138 | 3 | 1,012 | 33 | 64  | 2 | 619   | 23 | 1,833 | 61 |
| 83,493 | 137 | 3 | 1,004 | 34 | 63  | 2 | 599   | 24 | 1,803 | 63 |
| 83,494 | 132 | 3 | 985   | 34 | 62  | 2 | 591   | 24 | 1,770 | 63 |
| 83,495 | 132 | 3 | 983   | 34 | 61  | 2 | 588   | 22 | 1,764 | 61 |
| 83,496 | 132 | 3 | 982   | 34 | 61  | 2 | 586   | 22 | 1,761 | 61 |
| 83,497 | 132 | 3 | 971   | 34 | 59  | 2 | 584   | 22 | 1,746 | 61 |
| 83,498 | 129 | 3 | 937   | 34 | 58  | 2 | 551   | 22 | 1,675 | 61 |
| 83,499 | 129 | 3 | 935   | 34 | 58  | 2 | 548   | 22 | 1,670 | 61 |
| 83,500 | 129 | 3 | 924   | 36 | 58  | 3 | 541   | 24 | 1,652 | 66 |
| 83,501 | 130 | 3 | 926   | 36 | 58  | 3 | 538   | 24 | 1,652 | 66 |
| 83,502 | 129 | 3 | 928   | 36 | 57  | 3 | 529   | 24 | 1,643 | 66 |
| 83,503 | 128 | 3 | 895   | 36 | 53  | 3 | 511   | 24 | 1,587 | 66 |
| 83,504 | 137 | 3 | 909   | 35 | 56  | 3 | 501   | 24 | 1,603 | 65 |
| 83,505 | 135 | 3 | 874   | 34 | 55  | 3 | 488   | 21 | 1,552 | 61 |

|        |     |   |     |    |    |   |     |    |       |    |
|--------|-----|---|-----|----|----|---|-----|----|-------|----|
| 83,506 | 134 | 3 | 869 | 34 | 54 | 3 | 487 | 21 | 1,544 | 61 |
| 83,507 | 127 | 3 | 837 | 33 | 54 | 3 | 477 | 19 | 1,495 | 58 |
| 83,508 | 127 | 3 | 820 | 33 | 54 | 3 | 472 | 19 | 1,473 | 58 |
| 83,509 | 140 | 3 | 921 | 21 | 61 | 2 | 554 | 15 | 1,676 | 41 |
| 83,510 | 140 | 3 | 907 | 21 | 60 | 2 | 551 | 15 | 1,658 | 41 |
| 83,511 | 122 | 3 | 627 | 21 | 48 | 2 | 453 | 16 | 1,250 | 42 |
| 83,512 | 54  | 3 | 314 | 21 | 21 | 2 | 180 | 16 | 569   | 42 |
| 83,513 | 50  | 3 | 318 | 21 | 20 | 2 | 176 | 14 | 564   | 40 |
| 83,514 | 49  | 2 | 284 | 13 | 17 | 2 | 139 | 12 | 489   | 29 |
| 83,515 | 49  | 2 | 282 | 13 | 17 | 2 | 138 | 12 | 486   | 29 |
| 83,516 | 49  | 2 | 282 | 10 | 17 | 2 | 134 | 8  | 482   | 22 |
| 83,517 | 49  | 2 | 300 | 10 | 18 | 2 | 138 | 8  | 505   | 22 |
| 83,518 | 49  | 2 | 303 | 10 | 18 | 2 | 139 | 7  | 509   | 21 |
| 83,519 | 49  | 1 | 304 | 11 | 18 | 2 | 139 | 7  | 510   | 21 |
| 83,520 | 52  | 1 | 318 | 11 | 18 | 2 | 142 | 7  | 530   | 21 |
| 83,521 | 52  | 1 | 321 | 10 | 18 | 2 | 144 | 7  | 535   | 20 |
| 83,522 | 52  | 1 | 321 | 10 | 18 | 2 | 144 | 7  | 535   | 20 |
| 83,523 | 53  | 1 | 333 | 10 | 18 | 2 | 145 | 7  | 549   | 20 |
| 83,524 | 53  | 1 | 333 | 10 | 18 | 2 | 145 | 7  | 549   | 20 |
| 83,525 | 67  | 1 | 381 | 9  | 20 | 2 | 172 | 6  | 640   | 18 |
| 83,526 | 66  | 1 | 381 | 9  | 20 | 2 | 172 | 6  | 639   | 18 |
| 83,527 | 66  | 1 | 380 | 7  | 20 | 2 | 172 | 5  | 638   | 15 |
| 83,528 | 67  | 0 | 401 | 7  | 20 | 2 | 175 | 5  | 663   | 14 |
| 83,529 | 67  | 0 | 403 | 7  | 20 | 2 | 175 | 5  | 665   | 14 |
| 83,530 | 72  | 0 | 460 | 6  | 25 | 2 | 197 | 5  | 754   | 13 |
| 83,531 | 72  | 0 | 493 | 6  | 25 | 2 | 206 | 5  | 796   | 13 |
| 83,532 | 74  | 0 | 529 | 6  | 27 | 2 | 234 | 4  | 864   | 12 |
| 83,533 | 74  | 0 | 532 | 6  | 27 | 2 | 235 | 4  | 868   | 12 |
| 83,534 | 97  | 0 | 666 | 6  | 44 | 2 | 381 | 4  | 1,188 | 12 |
| 83,535 | 103 | 0 | 700 | 6  | 48 | 2 | 422 | 5  | 1,273 | 13 |
| 83,536 | 103 | 0 | 709 | 10 | 49 | 2 | 427 | 6  | 1,288 | 18 |
| 83,537 | 102 | 0 | 716 | 10 | 50 | 2 | 437 | 7  | 1,305 | 19 |
| 83,538 | 102 | 0 | 718 | 10 | 50 | 2 | 439 | 7  | 1,309 | 19 |
| 83,539 | 102 | 0 | 717 | 10 | 50 | 2 | 441 | 7  | 1,310 | 19 |
| 83,540 | 102 | 0 | 717 | 10 | 50 | 2 | 441 | 7  | 1,310 | 19 |
| 83,541 | 99  | 0 | 720 | 10 | 50 | 2 | 444 | 9  | 1,313 | 21 |
| 83,542 | 99  | 0 | 720 | 10 | 50 | 2 | 444 | 9  | 1,313 | 21 |
| 83,543 | 101 | 0 | 733 | 10 | 50 | 2 | 449 | 9  | 1,333 | 21 |
| 83,544 | 101 | 0 | 732 | 9  | 50 | 2 | 449 | 8  | 1,332 | 19 |
| 83,545 | 101 | 0 | 744 | 9  | 51 | 2 | 456 | 8  | 1,352 | 19 |
| 83,546 | 102 | 0 | 755 | 9  | 51 | 2 | 460 | 8  | 1,368 | 19 |

|        |     |   |     |    |    |   |     |   |       |    |
|--------|-----|---|-----|----|----|---|-----|---|-------|----|
| 83,547 | 102 | 0 | 770 | 9  | 52 | 2 | 477 | 8 | 1,401 | 19 |
| 83,548 | 101 | 0 | 769 | 9  | 52 | 2 | 481 | 8 | 1,403 | 19 |
| 83,549 | 101 | 0 | 768 | 9  | 52 | 2 | 481 | 8 | 1,402 | 19 |
| 83,550 | 102 | 0 | 781 | 9  | 53 | 2 | 490 | 8 | 1,426 | 19 |
| 83,551 | 102 | 0 | 781 | 7  | 53 | 1 | 490 | 6 | 1,426 | 14 |
| 83,552 | 101 | 0 | 772 | 7  | 53 | 1 | 490 | 6 | 1,416 | 14 |
| 83,553 | 100 | 0 | 767 | 7  | 52 | 1 | 492 | 6 | 1,411 | 14 |
| 83,554 | 100 | 0 | 756 | 7  | 52 | 1 | 487 | 6 | 1,395 | 14 |
| 83,555 | 87  | 0 | 693 | 7  | 47 | 1 | 469 | 6 | 1,296 | 14 |
| 83,556 | 85  | 0 | 664 | 7  | 45 | 1 | 457 | 6 | 1,251 | 14 |
| 83,557 | 84  | 0 | 654 | 6  | 45 | 3 | 448 | 6 | 1,231 | 15 |
| 83,558 | 84  | 0 | 651 | 6  | 45 | 3 | 448 | 6 | 1,228 | 15 |
| 83,559 | 67  | 0 | 562 | 6  | 40 | 4 | 387 | 6 | 1,056 | 16 |
| 83,560 | 66  | 0 | 559 | 5  | 40 | 4 | 386 | 6 | 1,051 | 15 |
| 83,561 | 66  | 0 | 559 | 5  | 40 | 4 | 386 | 6 | 1,051 | 15 |
| 83,562 | 66  | 0 | 558 | 6  | 40 | 4 | 387 | 5 | 1,051 | 15 |
| 83,563 | 66  | 0 | 556 | 6  | 40 | 4 | 389 | 5 | 1,051 | 15 |
| 83,564 | 63  | 0 | 527 | 6  | 39 | 4 | 380 | 5 | 1,009 | 15 |
| 83,565 | 62  | 0 | 517 | 6  | 38 | 4 | 371 | 5 | 988   | 15 |
| 83,566 | 62  | 0 | 499 | 6  | 37 | 3 | 368 | 5 | 966   | 14 |
| 83,567 | 62  | 0 | 498 | 7  | 37 | 3 | 367 | 5 | 964   | 15 |
| 83,568 | 62  | 0 | 494 | 7  | 37 | 3 | 366 | 5 | 959   | 15 |
| 83,569 | 62  | 0 | 493 | 9  | 37 | 3 | 368 | 5 | 960   | 17 |
| 83,570 | 59  | 0 | 479 | 8  | 37 | 3 | 365 | 5 | 940   | 16 |
| 83,571 | 60  | 0 | 478 | 8  | 37 | 3 | 365 | 5 | 940   | 16 |
| 83,572 | 60  | 0 | 479 | 9  | 37 | 3 | 365 | 5 | 941   | 17 |
| 83,573 | 59  | 0 | 470 | 9  | 37 | 3 | 364 | 5 | 930   | 17 |
| 83,574 | 59  | 0 | 468 | 9  | 37 | 3 | 364 | 5 | 928   | 17 |
| 83,575 | 47  | 0 | 423 | 9  | 35 | 3 | 337 | 5 | 842   | 17 |
| 83,576 | 45  | 0 | 419 | 9  | 35 | 3 | 337 | 5 | 836   | 17 |
| 83,577 | 45  | 0 | 414 | 9  | 35 | 3 | 337 | 5 | 831   | 17 |
| 83,578 | 44  | 0 | 404 | 9  | 35 | 3 | 337 | 5 | 820   | 17 |
| 83,579 | 44  | 0 | 411 | 12 | 35 | 3 | 337 | 5 | 827   | 20 |
| 83,580 | 43  | 0 | 363 | 14 | 32 | 3 | 325 | 5 | 763   | 22 |
| 83,581 | 40  | 0 | 362 | 17 | 31 | 3 | 318 | 6 | 751   | 26 |
| 83,582 | 40  | 0 | 331 | 17 | 31 | 3 | 310 | 6 | 712   | 26 |
| 83,583 | 40  | 0 | 303 | 17 | 29 | 3 | 286 | 6 | 658   | 26 |
| 83,584 | 41  | 0 | 342 | 22 | 29 | 3 | 329 | 7 | 741   | 32 |
| 83,585 | 36  | 0 | 289 | 23 | 15 | 3 | 256 | 8 | 596   | 34 |
| 83,586 | 30  | 0 | 263 | 23 | 11 | 3 | 230 | 7 | 534   | 33 |
| 83,587 | 30  | 0 | 255 | 21 | 9  | 3 | 226 | 6 | 520   | 30 |

|        |    |   |     |    |    |   |     |   |       |    |
|--------|----|---|-----|----|----|---|-----|---|-------|----|
| 83,588 | 29 | 0 | 246 | 23 | 8  | 3 | 215 | 5 | 498   | 31 |
| 83,589 | 44 | 0 | 313 | 24 | 11 | 3 | 315 | 5 | 683   | 32 |
| 83,590 | 53 | 0 | 378 | 24 | 14 | 3 | 359 | 5 | 804   | 32 |
| 83,591 | 62 | 0 | 480 | 24 | 20 | 3 | 414 | 4 | 976   | 31 |
| 83,592 | 62 | 0 | 480 | 24 | 20 | 3 | 414 | 4 | 976   | 31 |
| 83,593 | 63 | 0 | 527 | 24 | 24 | 3 | 455 | 4 | 1,069 | 31 |
| 83,594 | 62 | 0 | 527 | 24 | 24 | 3 | 457 | 4 | 1,070 | 31 |
| 83,595 | 62 | 0 | 527 | 25 | 24 | 3 | 457 | 4 | 1,070 | 32 |
| 83,596 | 62 | 0 | 519 | 25 | 23 | 3 | 453 | 4 | 1,057 | 32 |
| 83,597 | 61 | 0 | 510 | 25 | 23 | 3 | 450 | 4 | 1,044 | 32 |
| 83,598 | 61 | 0 | 502 | 25 | 22 | 3 | 437 | 4 | 1,022 | 32 |
| 83,599 | 61 | 0 | 497 | 25 | 21 | 3 | 436 | 4 | 1,015 | 32 |
| 83,600 | 60 | 0 | 496 | 26 | 21 | 3 | 429 | 4 | 1,006 | 33 |
| 83,601 | 61 | 0 | 505 | 26 | 21 | 3 | 431 | 4 | 1,018 | 33 |
| 83,602 | 61 | 0 | 505 | 26 | 21 | 3 | 428 | 4 | 1,015 | 33 |
| 83,603 | 61 | 0 | 512 | 26 | 22 | 3 | 432 | 4 | 1,027 | 33 |
| 83,604 | 61 | 0 | 512 | 26 | 22 | 3 | 432 | 4 | 1,027 | 33 |
| 83,605 | 66 | 0 | 535 | 27 | 22 | 3 | 443 | 4 | 1,066 | 34 |
| 83,606 | 85 | 0 | 730 | 27 | 35 | 3 | 620 | 4 | 1,470 | 34 |
| 83,607 | 85 | 0 | 742 | 27 | 37 | 1 | 634 | 4 | 1,498 | 32 |
| 83,608 | 85 | 0 | 772 | 27 | 40 | 1 | 637 | 4 | 1,534 | 32 |
| 83,609 | 85 | 0 | 772 | 27 | 40 | 1 | 637 | 4 | 1,534 | 32 |
| 83,610 | 85 | 0 | 786 | 27 | 40 | 0 | 645 | 4 | 1,556 | 31 |
| 83,611 | 86 | 0 | 818 | 27 | 41 | 0 | 675 | 6 | 1,620 | 33 |
| 83,612 | 90 | 0 | 820 | 26 | 41 | 0 | 677 | 6 | 1,628 | 32 |
| 83,613 | 90 | 0 | 820 | 26 | 41 | 0 | 677 | 6 | 1,628 | 32 |
| 83,614 | 90 | 0 | 817 | 26 | 41 | 0 | 675 | 6 | 1,623 | 32 |
| 83,615 | 90 | 0 | 822 | 26 | 41 | 0 | 673 | 6 | 1,626 | 32 |
| 83,616 | 90 | 0 | 822 | 26 | 40 | 0 | 673 | 6 | 1,625 | 32 |
| 83,617 | 90 | 0 | 821 | 26 | 40 | 0 | 671 | 6 | 1,622 | 32 |
| 83,618 | 91 | 0 | 824 | 25 | 40 | 0 | 672 | 6 | 1,627 | 31 |
| 83,619 | 91 | 0 | 824 | 25 | 40 | 0 | 674 | 6 | 1,629 | 31 |
| 83,620 | 93 | 0 | 829 | 23 | 40 | 0 | 678 | 6 | 1,640 | 29 |
| 83,621 | 94 | 0 | 838 | 23 | 40 | 0 | 681 | 6 | 1,653 | 29 |
| 83,622 | 93 | 0 | 837 | 23 | 41 | 0 | 681 | 6 | 1,652 | 29 |
| 83,623 | 93 | 0 | 836 | 22 | 41 | 0 | 680 | 6 | 1,650 | 28 |
| 83,624 | 93 | 0 | 836 | 22 | 41 | 0 | 679 | 6 | 1,649 | 28 |
| 83,625 | 93 | 0 | 836 | 22 | 41 | 0 | 680 | 6 | 1,650 | 28 |
| 83,626 | 94 | 0 | 840 | 22 | 41 | 0 | 680 | 6 | 1,655 | 28 |
| 83,627 | 94 | 0 | 846 | 22 | 41 | 0 | 683 | 6 | 1,664 | 28 |
| 83,628 | 95 | 0 | 850 | 22 | 41 | 0 | 686 | 6 | 1,672 | 28 |



|        |     |   |       |    |    |   |     |    |       |    |
|--------|-----|---|-------|----|----|---|-----|----|-------|----|
| 83,629 | 99  | 0 | 854   | 17 | 42 | 0 | 692 | 6  | 1,687 | 23 |
| 83,630 | 101 | 0 | 862   | 17 | 42 | 0 | 692 | 6  | 1,697 | 23 |
| 83,631 | 100 | 0 | 860   | 19 | 41 | 0 | 694 | 6  | 1,695 | 25 |
| 83,632 | 100 | 0 | 855   | 16 | 41 | 0 | 693 | 5  | 1,689 | 21 |
| 83,633 | 116 | 0 | 1,011 | 17 | 51 | 0 | 819 | 5  | 1,997 | 22 |
| 83,634 | 114 | 0 | 1,002 | 18 | 51 | 0 | 815 | 5  | 1,982 | 23 |
| 83,635 | 113 | 0 | 960   | 15 | 51 | 0 | 771 | 6  | 1,895 | 21 |
| 83,636 | 95  | 0 | 879   | 13 | 48 | 0 | 689 | 5  | 1,711 | 18 |
| 83,637 | 97  | 0 | 869   | 14 | 48 | 0 | 673 | 5  | 1,687 | 19 |
| 83,638 | 86  | 0 | 825   | 15 | 46 | 0 | 613 | 6  | 1,570 | 21 |
| 83,639 | 83  | 3 | 801   | 14 | 46 | 0 | 568 | 6  | 1,498 | 23 |
| 83,640 | 81  | 4 | 790   | 20 | 44 | 0 | 571 | 10 | 1,486 | 34 |
| 83,641 | 75  | 4 | 739   | 20 | 43 | 0 | 536 | 10 | 1,393 | 34 |
| 83,642 | 66  | 4 | 633   | 22 | 37 | 0 | 478 | 11 | 1,214 | 37 |
| 83,643 | 64  | 4 | 589   | 22 | 34 | 0 | 442 | 11 | 1,129 | 37 |
| 83,644 | 64  | 4 | 582   | 24 | 33 | 0 | 436 | 11 | 1,115 | 39 |
| 83,645 | 64  | 4 | 584   | 25 | 34 | 0 | 437 | 11 | 1,119 | 40 |
| 83,646 | 65  | 4 | 597   | 25 | 36 | 0 | 464 | 11 | 1,162 | 40 |
| 83,647 | 65  | 4 | 594   | 25 | 36 | 0 | 462 | 11 | 1,157 | 40 |
| 83,648 | 65  | 4 | 592   | 25 | 36 | 0 | 461 | 11 | 1,154 | 40 |
| 83,649 | 65  | 4 | 584   | 25 | 36 | 0 | 455 | 11 | 1,140 | 40 |
| 83,650 | 66  | 6 | 580   | 24 | 36 | 0 | 455 | 11 | 1,137 | 41 |
| 83,651 | 66  | 6 | 577   | 24 | 36 | 0 | 456 | 11 | 1,135 | 41 |
| 83,652 | 65  | 6 | 568   | 24 | 36 | 0 | 454 | 11 | 1,123 | 41 |
| 83,653 | 68  | 6 | 579   | 24 | 37 | 0 | 464 | 11 | 1,148 | 41 |
| 83,654 | 68  | 6 | 572   | 24 | 37 | 0 | 463 | 11 | 1,140 | 41 |
| 83,655 | 63  | 6 | 549   | 23 | 37 | 0 | 451 | 11 | 1,100 | 40 |
| 83,656 | 63  | 6 | 548   | 23 | 37 | 0 | 448 | 11 | 1,096 | 40 |
| 83,657 | 44  | 6 | 355   | 23 | 24 | 0 | 271 | 11 | 694   | 40 |
| 83,658 | 44  | 6 | 346   | 23 | 22 | 0 | 257 | 11 | 669   | 40 |
| 83,659 | 44  | 6 | 317   | 23 | 19 | 0 | 254 | 11 | 634   | 40 |
| 83,660 | 45  | 6 | 313   | 23 | 19 | 0 | 252 | 11 | 629   | 40 |
| 83,661 | 45  | 6 | 311   | 23 | 19 | 0 | 253 | 9  | 628   | 38 |
| 83,662 | 44  | 6 | 279   | 23 | 18 | 0 | 225 | 9  | 566   | 38 |
| 83,663 | 42  | 6 | 282   | 23 | 18 | 0 | 225 | 10 | 567   | 39 |
| 83,664 | 42  | 6 | 282   | 23 | 18 | 0 | 225 | 10 | 567   | 39 |
| 83,665 | 42  | 6 | 282   | 23 | 18 | 0 | 225 | 10 | 567   | 39 |
| 83,666 | 48  | 6 | 329   | 23 | 19 | 0 | 232 | 12 | 628   | 41 |
| 83,667 | 59  | 6 | 416   | 23 | 24 | 0 | 296 | 14 | 795   | 43 |
| 83,668 | 66  | 6 | 490   | 23 | 30 | 0 | 348 | 15 | 934   | 44 |
| 83,669 | 71  | 6 | 547   | 23 | 50 | 0 | 438 | 15 | 1,106 | 44 |

|        |     |   |     |    |    |   |     |    |       |     |
|--------|-----|---|-----|----|----|---|-----|----|-------|-----|
| 83,670 | 70  | 6 | 547 | 24 | 50 | 0 | 437 | 15 | 1,104 | 45  |
| 83,671 | 69  | 6 | 544 | 29 | 50 | 1 | 432 | 20 | 1,095 | 56  |
| 83,672 | 68  | 6 | 535 | 32 | 50 | 1 | 429 | 23 | 1,082 | 62  |
| 83,673 | 68  | 6 | 534 | 32 | 49 | 1 | 428 | 23 | 1,079 | 62  |
| 83,674 | 68  | 6 | 537 | 32 | 49 | 1 | 429 | 23 | 1,083 | 62  |
| 83,675 | 68  | 6 | 537 | 32 | 49 | 1 | 429 | 23 | 1,083 | 62  |
| 83,676 | 67  | 6 | 539 | 32 | 49 | 1 | 430 | 23 | 1,085 | 62  |
| 83,677 | 67  | 6 | 536 | 32 | 49 | 1 | 430 | 23 | 1,082 | 62  |
| 83,678 | 102 | 6 | 670 | 35 | 52 | 1 | 504 | 25 | 1,328 | 67  |
| 83,679 | 105 | 6 | 696 | 35 | 52 | 1 | 515 | 25 | 1,368 | 67  |
| 83,680 | 115 | 6 | 820 | 35 | 59 | 1 | 612 | 25 | 1,606 | 67  |
| 83,681 | 135 | 6 | 886 | 33 | 71 | 1 | 701 | 25 | 1,793 | 65  |
| 83,682 | 137 | 6 | 908 | 33 | 80 | 1 | 726 | 25 | 1,851 | 65  |
| 83,683 | 124 | 6 | 768 | 32 | 72 | 1 | 628 | 25 | 1,592 | 64  |
| 83,684 | 124 | 6 | 766 | 31 | 72 | 1 | 623 | 25 | 1,585 | 63  |
| 83,685 | 124 | 6 | 766 | 31 | 72 | 1 | 624 | 25 | 1,586 | 63  |
| 83,686 | 124 | 6 | 766 | 29 | 72 | 1 | 625 | 23 | 1,587 | 59  |
| 83,687 | 124 | 6 | 766 | 28 | 72 | 1 | 625 | 23 | 1,587 | 58  |
| 83,688 | 122 | 6 | 777 | 27 | 73 | 1 | 631 | 23 | 1,603 | 57  |
| 83,689 | 124 | 3 | 805 | 25 | 73 | 1 | 639 | 22 | 1,641 | 51  |
| 83,690 | 123 | 3 | 804 | 25 | 73 | 1 | 639 | 22 | 1,639 | 51  |
| 83,691 | 122 | 2 | 829 | 19 | 72 | 1 | 636 | 18 | 1,659 | 40  |
| 83,692 | 125 | 2 | 841 | 19 | 72 | 1 | 651 | 18 | 1,689 | 40  |
| 83,693 | 125 | 2 | 840 | 18 | 72 | 1 | 653 | 16 | 1,690 | 37  |
| 83,694 | 125 | 2 | 840 | 18 | 72 | 1 | 654 | 16 | 1,691 | 37  |
| 83,695 | 125 | 2 | 840 | 14 | 72 | 1 | 653 | 16 | 1,690 | 33  |
| 83,696 | 125 | 2 | 843 | 14 | 71 | 1 | 653 | 16 | 1,692 | 33  |
| 83,697 | 124 | 2 | 831 | 15 | 69 | 1 | 625 | 16 | 1,649 | 34  |
| 83,698 | 129 | 2 | 856 | 20 | 69 | 1 | 632 | 22 | 1,686 | 45  |
| 83,699 | 129 | 2 | 856 | 23 | 69 | 1 | 632 | 23 | 1,686 | 49  |
| 83,700 | 132 | 4 | 866 | 31 | 70 | 1 | 643 | 26 | 1,711 | 62  |
| 83,701 | 133 | 2 | 878 | 42 | 70 | 3 | 647 | 27 | 1,728 | 74  |
| 83,702 | 133 | 4 | 881 | 46 | 70 | 3 | 650 | 32 | 1,734 | 85  |
| 83,703 | 130 | 4 | 876 | 46 | 69 | 3 | 645 | 32 | 1,720 | 85  |
| 83,704 | 135 | 6 | 898 | 61 | 70 | 4 | 670 | 38 | 1,773 | 109 |
| 83,705 | 135 | 6 | 897 | 61 | 70 | 4 | 669 | 38 | 1,771 | 109 |
| 83,706 | 141 | 6 | 949 | 63 | 71 | 4 | 695 | 38 | 1,856 | 111 |
| 83,707 | 141 | 6 | 951 | 63 | 71 | 4 | 699 | 38 | 1,862 | 111 |
| 83,708 | 141 | 6 | 952 | 63 | 71 | 4 | 699 | 38 | 1,863 | 111 |
| 83,709 | 141 | 6 | 949 | 64 | 71 | 4 | 698 | 38 | 1,859 | 112 |
| 83,710 | 141 | 6 | 948 | 64 | 71 | 4 | 697 | 38 | 1,857 | 112 |

|        |     |    |     |    |    |   |     |    |       |     |
|--------|-----|----|-----|----|----|---|-----|----|-------|-----|
| 83,711 | 140 | 6  | 946 | 64 | 71 | 4 | 694 | 38 | 1,851 | 112 |
| 83,712 | 141 | 6  | 955 | 69 | 71 | 4 | 702 | 40 | 1,869 | 119 |
| 83,713 | 141 | 6  | 955 | 69 | 71 | 4 | 702 | 40 | 1,869 | 119 |
| 83,714 | 140 | 8  | 952 | 74 | 71 | 4 | 700 | 40 | 1,863 | 126 |
| 83,715 | 141 | 8  | 951 | 80 | 71 | 4 | 700 | 44 | 1,863 | 136 |
| 83,716 | 134 | 8  | 903 | 81 | 70 | 4 | 694 | 43 | 1,801 | 136 |
| 83,717 | 127 | 8  | 828 | 81 | 66 | 4 | 632 | 42 | 1,653 | 135 |
| 83,718 | 119 | 8  | 765 | 82 | 60 | 4 | 580 | 39 | 1,524 | 133 |
| 83,719 | 120 | 8  | 786 | 82 | 61 | 4 | 604 | 39 | 1,571 | 133 |
| 83,720 | 116 | 8  | 730 | 81 | 41 | 4 | 514 | 39 | 1,401 | 132 |
| 83,721 | 116 | 8  | 728 | 81 | 41 | 4 | 516 | 39 | 1,401 | 132 |
| 83,722 | 116 | 8  | 730 | 74 | 41 | 3 | 516 | 31 | 1,403 | 116 |
| 83,723 | 116 | 8  | 730 | 73 | 41 | 3 | 517 | 31 | 1,404 | 115 |
| 83,724 | 116 | 8  | 728 | 73 | 41 | 3 | 517 | 31 | 1,402 | 115 |
| 83,725 | 116 | 8  | 727 | 73 | 41 | 3 | 516 | 31 | 1,400 | 115 |
| 83,726 | 116 | 8  | 727 | 74 | 41 | 3 | 516 | 31 | 1,400 | 116 |
| 83,727 | 116 | 8  | 721 | 71 | 41 | 3 | 515 | 29 | 1,393 | 111 |
| 83,728 | 115 | 8  | 710 | 72 | 41 | 3 | 512 | 32 | 1,378 | 115 |
| 83,729 | 82  | 8  | 586 | 73 | 38 | 3 | 437 | 34 | 1,143 | 118 |
| 83,730 | 78  | 8  | 557 | 73 | 38 | 3 | 425 | 36 | 1,098 | 120 |
| 83,731 | 64  | 8  | 425 | 73 | 30 | 3 | 322 | 38 | 841   | 122 |
| 83,732 | 42  | 8  | 342 | 73 | 17 | 3 | 231 | 38 | 632   | 122 |
| 83,733 | 40  | 8  | 321 | 73 | 8  | 4 | 204 | 38 | 573   | 123 |
| 83,734 | 37  | 8  | 304 | 73 | 6  | 4 | 182 | 38 | 529   | 123 |
| 83,735 | 37  | 8  | 301 | 73 | 6  | 4 | 180 | 39 | 524   | 124 |
| 83,736 | 37  | 8  | 301 | 73 | 6  | 4 | 180 | 39 | 524   | 124 |
| 83,737 | 37  | 8  | 299 | 73 | 6  | 4 | 180 | 39 | 522   | 124 |
| 83,738 | 37  | 10 | 296 | 73 | 6  | 4 | 179 | 39 | 518   | 126 |
| 83,739 | 37  | 10 | 293 | 73 | 6  | 4 | 177 | 39 | 513   | 126 |
| 83,740 | 35  | 10 | 265 | 73 | 6  | 4 | 169 | 39 | 475   | 126 |
| 83,741 | 39  | 10 | 276 | 72 | 6  | 4 | 165 | 39 | 486   | 125 |
| 83,742 | 39  | 10 | 263 | 72 | 6  | 4 | 164 | 39 | 472   | 125 |
| 83,743 | 36  | 11 | 255 | 72 | 6  | 4 | 152 | 40 | 449   | 127 |
| 83,744 | 40  | 11 | 254 | 71 | 6  | 4 | 153 | 40 | 453   | 126 |
| 83,745 | 40  | 11 | 254 | 71 | 6  | 4 | 152 | 40 | 452   | 126 |
| 83,746 | 40  | 11 | 253 | 71 | 6  | 4 | 152 | 40 | 451   | 126 |
| 83,747 | 44  | 11 | 262 | 72 | 6  | 4 | 155 | 40 | 467   | 127 |
| 83,748 | 40  | 11 | 293 | 71 | 6  | 4 | 153 | 40 | 492   | 126 |
| 83,749 | 47  | 11 | 453 | 63 | 15 | 4 | 230 | 33 | 745   | 111 |
| 83,750 | 46  | 12 | 449 | 63 | 14 | 4 | 225 | 33 | 734   | 112 |
| 83,751 | 49  | 11 | 620 | 55 | 22 | 4 | 304 | 30 | 995   | 100 |

|        |    |    |     |    |    |   |     |    |     |    |
|--------|----|----|-----|----|----|---|-----|----|-----|----|
| 83,752 | 47 | 11 | 612 | 47 | 22 | 2 | 301 | 31 | 982 | 91 |
| 83,753 | 48 | 9  | 608 | 43 | 23 | 2 | 297 | 26 | 976 | 80 |
| 83,754 | 46 | 9  | 597 | 43 | 25 | 2 | 287 | 26 | 955 | 80 |
| 83,755 | 43 | 7  | 587 | 31 | 24 | 1 | 278 | 20 | 932 | 59 |
| 83,756 | 37 | 7  | 538 | 29 | 23 | 1 | 258 | 20 | 856 | 57 |
| 83,757 | 37 | 8  | 535 | 29 | 23 | 1 | 254 | 20 | 849 | 58 |
| 83,758 | 37 | 8  | 535 | 29 | 23 | 1 | 254 | 20 | 849 | 58 |
| 83,759 | 37 | 8  | 535 | 32 | 23 | 1 | 254 | 20 | 849 | 61 |
| 83,760 | 37 | 8  | 534 | 31 | 23 | 1 | 254 | 20 | 848 | 60 |
| 83,761 | 37 | 6  | 532 | 21 | 23 | 1 | 254 | 17 | 846 | 45 |
| 83,762 | 37 | 6  | 530 | 21 | 23 | 1 | 254 | 17 | 844 | 45 |
| 83,763 | 36 | 7  | 520 | 21 | 23 | 1 | 243 | 17 | 822 | 46 |
| 83,764 | 35 | 7  | 519 | 23 | 23 | 1 | 243 | 17 | 820 | 48 |
| 83,765 | 35 | 7  | 518 | 18 | 23 | 1 | 244 | 13 | 820 | 39 |
| 83,766 | 34 | 7  | 520 | 17 | 24 | 1 | 249 | 13 | 827 | 38 |
| 83,767 | 34 | 7  | 516 | 16 | 24 | 1 | 249 | 13 | 823 | 37 |
| 83,768 | 30 | 7  | 503 | 16 | 23 | 1 | 247 | 13 | 803 | 37 |
| 83,769 | 30 | 7  | 502 | 15 | 23 | 1 | 246 | 13 | 801 | 36 |
| 83,770 | 29 | 7  | 470 | 15 | 22 | 1 | 219 | 13 | 740 | 36 |
| 83,771 | 28 | 7  | 471 | 15 | 22 | 1 | 216 | 13 | 737 | 36 |
| 83,772 | 28 | 7  | 471 | 15 | 22 | 2 | 216 | 13 | 737 | 37 |
| 83,773 | 31 | 7  | 475 | 15 | 22 | 2 | 221 | 13 | 749 | 37 |
| 83,774 | 35 | 7  | 525 | 15 | 23 | 2 | 242 | 13 | 825 | 37 |
| 83,775 | 38 | 7  | 564 | 16 | 24 | 2 | 275 | 13 | 901 | 38 |
| 83,776 | 40 | 7  | 571 | 15 | 24 | 2 | 278 | 13 | 913 | 37 |
| 83,777 | 40 | 7  | 572 | 15 | 24 | 2 | 283 | 13 | 919 | 37 |
| 83,778 | 40 | 7  | 572 | 15 | 24 | 2 | 283 | 13 | 919 | 37 |
| 83,779 | 40 | 7  | 571 | 14 | 24 | 2 | 283 | 10 | 918 | 33 |
| 83,780 | 39 | 7  | 576 | 19 | 24 | 2 | 283 | 9  | 922 | 37 |
| 83,781 | 39 | 7  | 576 | 21 | 24 | 2 | 283 | 8  | 922 | 38 |
| 83,782 | 39 | 7  | 576 | 21 | 24 | 2 | 282 | 6  | 921 | 36 |
| 83,783 | 39 | 7  | 575 | 21 | 23 | 2 | 283 | 6  | 920 | 36 |
| 83,784 | 39 | 7  | 572 | 21 | 23 | 1 | 283 | 6  | 917 | 35 |
| 83,785 | 39 | 7  | 572 | 21 | 23 | 1 | 283 | 6  | 917 | 35 |
| 83,786 | 39 | 7  | 572 | 21 | 23 | 1 | 283 | 6  | 917 | 35 |
| 83,787 | 39 | 7  | 572 | 23 | 23 | 1 | 283 | 6  | 917 | 37 |
| 83,788 | 39 | 7  | 572 | 23 | 23 | 1 | 283 | 6  | 917 | 37 |
| 83,789 | 39 | 5  | 572 | 23 | 23 | 1 | 283 | 7  | 917 | 36 |
| 83,790 | 39 | 5  | 572 | 23 | 23 | 1 | 283 | 7  | 917 | 36 |
| 83,791 | 39 | 5  | 571 | 23 | 23 | 1 | 283 | 7  | 916 | 36 |
| 83,792 | 35 | 5  | 545 | 23 | 23 | 1 | 278 | 7  | 881 | 36 |

|        |     |   |     |    |    |   |     |    |       |    |
|--------|-----|---|-----|----|----|---|-----|----|-------|----|
| 83,793 | 35  | 4 | 549 | 23 | 23 | 1 | 277 | 6  | 884   | 34 |
| 83,794 | 35  | 4 | 546 | 23 | 23 | 1 | 274 | 6  | 878   | 34 |
| 83,795 | 32  | 4 | 551 | 25 | 24 | 1 | 276 | 6  | 883   | 36 |
| 83,796 | 32  | 4 | 553 | 26 | 24 | 1 | 281 | 7  | 890   | 38 |
| 83,797 | 29  | 4 | 562 | 27 | 24 | 1 | 305 | 8  | 920   | 40 |
| 83,798 | 29  | 4 | 555 | 26 | 24 | 1 | 303 | 8  | 911   | 39 |
| 83,799 | 29  | 4 | 515 | 26 | 24 | 1 | 302 | 8  | 870   | 39 |
| 83,800 | 21  | 4 | 339 | 26 | 15 | 1 | 220 | 8  | 595   | 39 |
| 83,801 | 19  | 3 | 287 | 26 | 8  | 1 | 175 | 9  | 489   | 39 |
| 83,802 | 15  | 2 | 165 | 23 | 6  | 1 | 134 | 7  | 320   | 33 |
| 83,803 | 15  | 2 | 165 | 23 | 6  | 1 | 135 | 7  | 321   | 33 |
| 83,804 | 14  | 2 | 164 | 25 | 5  | 1 | 133 | 7  | 316   | 35 |
| 83,805 | 14  | 2 | 161 | 25 | 3  | 1 | 128 | 7  | 306   | 35 |
| 83,806 | 14  | 2 | 159 | 23 | 3  | 1 | 126 | 7  | 302   | 33 |
| 83,807 | 27  | 1 | 239 | 23 | 8  | 1 | 150 | 7  | 424   | 32 |
| 83,808 | 76  | 1 | 584 | 23 | 27 | 1 | 445 | 7  | 1,132 | 32 |
| 83,809 | 76  | 2 | 583 | 23 | 27 | 1 | 445 | 7  | 1,131 | 33 |
| 83,810 | 76  | 2 | 582 | 20 | 27 | 1 | 444 | 7  | 1,129 | 30 |
| 83,811 | 80  | 2 | 618 | 20 | 32 | 1 | 468 | 7  | 1,198 | 30 |
| 83,812 | 80  | 2 | 634 | 20 | 32 | 1 | 472 | 7  | 1,218 | 30 |
| 83,813 | 80  | 1 | 669 | 20 | 32 | 1 | 480 | 7  | 1,261 | 29 |
| 83,814 | 80  | 1 | 671 | 18 | 32 | 1 | 480 | 7  | 1,263 | 27 |
| 83,815 | 81  | 1 | 677 | 18 | 32 | 1 | 480 | 7  | 1,270 | 27 |
| 83,816 | 81  | 1 | 682 | 18 | 32 | 1 | 481 | 7  | 1,276 | 27 |
| 83,817 | 86  | 1 | 723 | 18 | 33 | 1 | 491 | 7  | 1,333 | 27 |
| 83,818 | 87  | 1 | 742 | 18 | 33 | 1 | 492 | 7  | 1,354 | 27 |
| 83,819 | 87  | 1 | 745 | 18 | 33 | 1 | 492 | 7  | 1,357 | 27 |
| 83,820 | 87  | 1 | 743 | 18 | 33 | 1 | 492 | 7  | 1,355 | 27 |
| 83,821 | 95  | 1 | 821 | 19 | 33 | 1 | 526 | 7  | 1,475 | 28 |
| 83,822 | 105 | 1 | 887 | 22 | 40 | 1 | 596 | 8  | 1,628 | 32 |
| 83,823 | 104 | 1 | 906 | 24 | 44 | 0 | 611 | 9  | 1,665 | 34 |
| 83,824 | 104 | 1 | 929 | 28 | 45 | 0 | 628 | 9  | 1,706 | 38 |
| 83,825 | 100 | 2 | 894 | 35 | 44 | 0 | 616 | 13 | 1,654 | 50 |
| 83,826 | 97  | 2 | 855 | 35 | 43 | 0 | 581 | 14 | 1,576 | 51 |
| 83,827 | 95  | 2 | 871 | 36 | 44 | 0 | 595 | 14 | 1,605 | 52 |
| 83,828 | 95  | 2 | 871 | 37 | 44 | 0 | 592 | 13 | 1,602 | 52 |
| 83,829 | 95  | 2 | 878 | 38 | 44 | 0 | 593 | 13 | 1,610 | 53 |
| 83,830 | 95  | 2 | 875 | 33 | 44 | 0 | 593 | 13 | 1,607 | 48 |
| 83,831 | 95  | 2 | 874 | 31 | 44 | 0 | 594 | 12 | 1,607 | 45 |
| 83,832 | 96  | 2 | 879 | 31 | 44 | 0 | 598 | 11 | 1,617 | 44 |
| 83,833 | 96  | 2 | 879 | 31 | 44 | 0 | 596 | 12 | 1,615 | 45 |

|        |     |   |       |    |    |   |     |    |       |     |
|--------|-----|---|-------|----|----|---|-----|----|-------|-----|
| 83,834 | 96  | 2 | 879   | 31 | 44 | 0 | 597 | 12 | 1,616 | 45  |
| 83,835 | 96  | 2 | 883   | 31 | 45 | 0 | 604 | 11 | 1,628 | 44  |
| 83,836 | 96  | 2 | 883   | 31 | 45 | 0 | 604 | 11 | 1,628 | 44  |
| 83,837 | 96  | 2 | 895   | 31 | 46 | 0 | 609 | 11 | 1,646 | 44  |
| 83,838 | 96  | 2 | 895   | 29 | 46 | 0 | 609 | 11 | 1,646 | 42  |
| 83,839 | 96  | 2 | 898   | 29 | 47 | 0 | 611 | 10 | 1,652 | 41  |
| 83,840 | 96  | 3 | 898   | 29 | 47 | 0 | 611 | 10 | 1,652 | 42  |
| 83,841 | 96  | 3 | 899   | 29 | 47 | 0 | 612 | 10 | 1,654 | 42  |
| 83,842 | 97  | 4 | 908   | 37 | 47 | 1 | 620 | 12 | 1,672 | 54  |
| 83,843 | 97  | 5 | 908   | 43 | 47 | 2 | 620 | 13 | 1,672 | 63  |
| 83,844 | 100 | 5 | 913   | 52 | 48 | 2 | 624 | 16 | 1,685 | 75  |
| 83,845 | 100 | 6 | 913   | 59 | 48 | 3 | 622 | 18 | 1,683 | 86  |
| 83,846 | 99  | 6 | 904   | 62 | 47 | 3 | 619 | 19 | 1,669 | 90  |
| 83,847 | 99  | 6 | 905   | 74 | 48 | 3 | 616 | 18 | 1,668 | 101 |
| 83,848 | 99  | 6 | 894   | 74 | 48 | 3 | 591 | 19 | 1,632 | 102 |
| 83,849 | 99  | 6 | 889   | 74 | 48 | 3 | 589 | 19 | 1,625 | 102 |
| 83,850 | 99  | 6 | 895   | 75 | 48 | 3 | 593 | 19 | 1,635 | 103 |
| 83,851 | 99  | 6 | 894   | 76 | 48 | 3 | 593 | 20 | 1,634 | 105 |
| 83,852 | 99  | 6 | 891   | 76 | 48 | 3 | 592 | 19 | 1,630 | 104 |
| 83,853 | 99  | 6 | 898   | 76 | 49 | 3 | 592 | 19 | 1,638 | 104 |
| 83,854 | 99  | 6 | 900   | 78 | 49 | 3 | 591 | 19 | 1,639 | 106 |
| 83,855 | 102 | 6 | 936   | 77 | 50 | 3 | 604 | 19 | 1,692 | 105 |
| 83,856 | 102 | 6 | 978   | 79 | 52 | 3 | 610 | 19 | 1,742 | 107 |
| 83,857 | 100 | 6 | 1,044 | 78 | 53 | 3 | 623 | 19 | 1,820 | 106 |
| 83,858 | 93  | 6 | 1,002 | 78 | 53 | 3 | 619 | 19 | 1,767 | 106 |
| 83,859 | 51  | 6 | 748   | 78 | 36 | 3 | 366 | 19 | 1,201 | 106 |
| 83,860 | 48  | 5 | 725   | 80 | 33 | 4 | 359 | 19 | 1,165 | 108 |
| 83,861 | 48  | 5 | 718   | 80 | 31 | 4 | 351 | 19 | 1,148 | 108 |
| 83,862 | 48  | 6 | 702   | 81 | 31 | 4 | 347 | 19 | 1,128 | 110 |
| 83,863 | 48  | 6 | 693   | 81 | 31 | 4 | 344 | 19 | 1,116 | 110 |
| 83,864 | 49  | 6 | 678   | 81 | 34 | 4 | 341 | 19 | 1,102 | 110 |
| 83,865 | 49  | 6 | 676   | 81 | 34 | 4 | 341 | 19 | 1,100 | 110 |
| 83,866 | 48  | 6 | 671   | 81 | 34 | 4 | 341 | 19 | 1,094 | 110 |
| 83,867 | 48  | 6 | 666   | 81 | 34 | 4 | 340 | 19 | 1,088 | 110 |
| 83,868 | 43  | 6 | 622   | 81 | 33 | 4 | 327 | 19 | 1,025 | 110 |
| 83,869 | 45  | 6 | 626   | 81 | 34 | 4 | 346 | 19 | 1,051 | 110 |
| 83,870 | 45  | 6 | 626   | 83 | 34 | 4 | 349 | 20 | 1,054 | 113 |
| 83,871 | 37  | 6 | 558   | 91 | 35 | 4 | 315 | 24 | 945   | 125 |
| 83,872 | 34  | 8 | 540   | 94 | 33 | 4 | 277 | 27 | 884   | 133 |
| 83,873 | 31  | 9 | 558   | 91 | 33 | 5 | 278 | 27 | 900   | 132 |
| 83,874 | 34  | 9 | 555   | 93 | 32 | 5 | 286 | 31 | 907   | 138 |

|        |    |    |       |    |    |   |     |    |       |     |
|--------|----|----|-------|----|----|---|-----|----|-------|-----|
| 83,875 | 34 | 11 | 526   | 94 | 31 | 5 | 265 | 37 | 856   | 147 |
| 83,876 | 34 | 10 | 517   | 88 | 31 | 6 | 259 | 33 | 841   | 137 |
| 83,877 | 34 | 10 | 504   | 88 | 30 | 6 | 245 | 35 | 813   | 139 |
| 83,878 | 35 | 10 | 534   | 88 | 30 | 6 | 257 | 35 | 856   | 139 |
| 83,879 | 35 | 10 | 533   | 89 | 30 | 6 | 257 | 37 | 855   | 142 |
| 83,880 | 35 | 10 | 526   | 90 | 30 | 6 | 256 | 37 | 847   | 143 |
| 83,881 | 40 | 10 | 554   | 89 | 31 | 7 | 267 | 37 | 892   | 143 |
| 83,882 | 40 | 10 | 557   | 92 | 32 | 7 | 268 | 37 | 897   | 146 |
| 83,883 | 39 | 10 | 552   | 92 | 32 | 7 | 264 | 37 | 887   | 146 |
| 83,884 | 39 | 10 | 559   | 94 | 31 | 7 | 268 | 43 | 897   | 154 |
| 83,885 | 39 | 10 | 594   | 94 | 30 | 7 | 269 | 44 | 932   | 155 |
| 83,886 | 39 | 10 | 622   | 94 | 32 | 7 | 277 | 44 | 970   | 155 |
| 83,887 | 39 | 11 | 610   | 96 | 31 | 7 | 273 | 48 | 953   | 162 |
| 83,888 | 39 | 11 | 611   | 96 | 31 | 7 | 273 | 48 | 954   | 162 |
| 83,889 | 39 | 11 | 611   | 96 | 31 | 7 | 273 | 48 | 954   | 162 |
| 83,890 | 39 | 11 | 635   | 96 | 32 | 7 | 281 | 48 | 987   | 162 |
| 83,891 | 43 | 10 | 647   | 96 | 32 | 7 | 285 | 49 | 1,007 | 162 |
| 83,892 | 43 | 10 | 646   | 97 | 32 | 7 | 284 | 49 | 1,005 | 163 |
| 83,893 | 42 | 8  | 644   | 74 | 32 | 5 | 279 | 44 | 997   | 131 |
| 83,894 | 42 | 8  | 641   | 74 | 31 | 5 | 278 | 44 | 992   | 131 |
| 83,895 | 39 | 8  | 639   | 74 | 31 | 5 | 278 | 44 | 987   | 131 |
| 83,896 | 40 | 7  | 647   | 62 | 31 | 4 | 284 | 41 | 1,002 | 114 |
| 83,897 | 40 | 7  | 651   | 62 | 31 | 4 | 286 | 41 | 1,008 | 114 |
| 83,898 | 54 | 7  | 682   | 52 | 34 | 4 | 308 | 42 | 1,078 | 105 |
| 83,899 | 53 | 7  | 681   | 51 | 34 | 4 | 308 | 40 | 1,076 | 102 |
| 83,900 | 57 | 7  | 784   | 55 | 38 | 4 | 367 | 41 | 1,246 | 107 |
| 83,901 | 57 | 8  | 779   | 56 | 38 | 4 | 363 | 42 | 1,237 | 110 |
| 83,902 | 59 | 8  | 949   | 62 | 46 | 4 | 422 | 42 | 1,476 | 116 |
| 83,903 | 65 | 8  | 1,049 | 64 | 51 | 4 | 479 | 46 | 1,644 | 122 |
| 83,904 | 65 | 8  | 1,058 | 68 | 52 | 4 | 482 | 47 | 1,657 | 127 |
| 83,905 | 64 | 8  | 1,072 | 66 | 51 | 4 | 477 | 47 | 1,664 | 125 |
| 83,906 | 62 | 8  | 1,087 | 65 | 55 | 4 | 483 | 47 | 1,687 | 124 |
| 83,907 | 62 | 8  | 1,047 | 63 | 53 | 4 | 477 | 47 | 1,639 | 122 |
| 83,908 | 58 | 8  | 950   | 63 | 48 | 4 | 443 | 47 | 1,499 | 122 |
| 83,909 | 58 | 8  | 943   | 63 | 47 | 4 | 437 | 47 | 1,485 | 122 |
| 83,910 | 51 | 8  | 851   | 63 | 45 | 4 | 391 | 47 | 1,338 | 122 |
| 83,911 | 50 | 8  | 845   | 61 | 45 | 3 | 384 | 47 | 1,324 | 119 |
| 83,912 | 50 | 8  | 849   | 61 | 45 | 3 | 388 | 47 | 1,332 | 119 |
| 83,913 | 50 | 7  | 851   | 60 | 46 | 3 | 390 | 47 | 1,337 | 117 |
| 83,914 | 50 | 7  | 853   | 60 | 46 | 3 | 391 | 47 | 1,340 | 117 |
| 83,915 | 49 | 7  | 849   | 60 | 43 | 3 | 393 | 47 | 1,334 | 117 |

|        |     |   |       |    |    |   |     |    |       |     |
|--------|-----|---|-------|----|----|---|-----|----|-------|-----|
| 83,916 | 51  | 7 | 852   | 60 | 43 | 3 | 396 | 47 | 1,342 | 117 |
| 83,917 | 51  | 7 | 851   | 61 | 43 | 3 | 396 | 47 | 1,341 | 118 |
| 83,918 | 49  | 7 | 838   | 63 | 42 | 3 | 380 | 47 | 1,309 | 120 |
| 83,919 | 49  | 7 | 837   | 66 | 42 | 3 | 381 | 47 | 1,309 | 123 |
| 83,920 | 52  | 7 | 846   | 66 | 42 | 3 | 382 | 47 | 1,322 | 123 |
| 83,921 | 54  | 7 | 883   | 64 | 42 | 3 | 391 | 46 | 1,370 | 120 |
| 83,922 | 57  | 7 | 877   | 56 | 41 | 3 | 389 | 42 | 1,364 | 108 |
| 83,923 | 52  | 4 | 861   | 49 | 37 | 2 | 383 | 34 | 1,333 | 89  |
| 83,924 | 51  | 4 | 838   | 51 | 37 | 2 | 369 | 34 | 1,295 | 91  |
| 83,925 | 48  | 4 | 821   | 51 | 34 | 2 | 345 | 34 | 1,248 | 91  |
| 83,926 | 53  | 2 | 894   | 46 | 39 | 2 | 395 | 28 | 1,381 | 78  |
| 83,927 | 57  | 2 | 915   | 45 | 40 | 1 | 413 | 28 | 1,425 | 76  |
| 83,928 | 57  | 2 | 915   | 44 | 40 | 1 | 410 | 24 | 1,422 | 71  |
| 83,929 | 57  | 2 | 911   | 41 | 40 | 1 | 406 | 23 | 1,414 | 67  |
| 83,930 | 53  | 2 | 892   | 41 | 38 | 1 | 402 | 23 | 1,385 | 67  |
| 83,931 | 52  | 2 | 885   | 41 | 38 | 1 | 399 | 24 | 1,374 | 68  |
| 83,932 | 52  | 2 | 890   | 42 | 39 | 0 | 405 | 25 | 1,386 | 69  |
| 83,933 | 52  | 2 | 891   | 42 | 38 | 1 | 404 | 27 | 1,385 | 72  |
| 83,934 | 62  | 2 | 1,060 | 40 | 41 | 1 | 448 | 27 | 1,611 | 70  |
| 83,935 | 79  | 2 | 1,225 | 41 | 43 | 1 | 471 | 22 | 1,818 | 66  |
| 83,936 | 80  | 3 | 1,209 | 42 | 44 | 1 | 477 | 22 | 1,810 | 68  |
| 83,937 | 80  | 3 | 1,183 | 42 | 42 | 1 | 466 | 22 | 1,771 | 68  |
| 83,938 | 102 | 2 | 1,433 | 40 | 54 | 1 | 618 | 18 | 2,207 | 61  |
| 83,939 | 112 | 2 | 1,642 | 40 | 62 | 1 | 690 | 18 | 2,506 | 61  |
| 83,940 | 113 | 2 | 1,644 | 40 | 62 | 1 | 691 | 18 | 2,510 | 61  |
| 83,941 | 113 | 2 | 1,639 | 40 | 62 | 1 | 690 | 18 | 2,504 | 61  |
| 83,942 | 110 | 2 | 1,650 | 39 | 63 | 1 | 695 | 17 | 2,518 | 59  |
| 83,943 | 111 | 2 | 1,653 | 39 | 63 | 1 | 697 | 17 | 2,524 | 59  |
| 83,944 | 111 | 2 | 1,647 | 39 | 63 | 1 | 696 | 16 | 2,517 | 58  |
| 83,945 | 111 | 2 | 1,647 | 40 | 63 | 1 | 699 | 16 | 2,520 | 59  |
| 83,946 | 111 | 2 | 1,643 | 40 | 63 | 1 | 696 | 17 | 2,513 | 60  |
| 83,947 | 110 | 2 | 1,638 | 37 | 63 | 1 | 691 | 17 | 2,502 | 57  |
| 83,948 | 110 | 3 | 1,640 | 40 | 63 | 1 | 691 | 17 | 2,504 | 61  |
| 83,949 | 97  | 3 | 1,609 | 41 | 59 | 1 | 671 | 18 | 2,436 | 63  |
| 83,950 | 97  | 3 | 1,591 | 41 | 58 | 1 | 671 | 18 | 2,417 | 63  |
| 83,951 | 94  | 3 | 1,507 | 37 | 55 | 1 | 613 | 17 | 2,269 | 58  |
| 83,952 | 94  | 5 | 1,474 | 43 | 54 | 2 | 595 | 27 | 2,217 | 77  |
| 83,953 | 92  | 5 | 1,336 | 37 | 46 | 2 | 550 | 28 | 2,024 | 72  |
| 83,954 | 86  | 5 | 1,235 | 38 | 41 | 2 | 497 | 25 | 1,859 | 70  |
| 83,955 | 86  | 5 | 1,228 | 34 | 40 | 2 | 498 | 25 | 1,852 | 66  |
| 83,956 | 86  | 5 | 1,201 | 34 | 40 | 2 | 496 | 25 | 1,823 | 66  |



|        |    |   |       |    |    |   |     |    |       |    |
|--------|----|---|-------|----|----|---|-----|----|-------|----|
| 83,957 | 86 | 6 | 1,171 | 34 | 36 | 2 | 490 | 27 | 1,783 | 69 |
| 83,958 | 86 | 6 | 1,167 | 34 | 36 | 2 | 490 | 27 | 1,779 | 69 |
| 83,959 | 86 | 6 | 1,165 | 36 | 36 | 2 | 491 | 27 | 1,778 | 71 |
| 83,960 | 87 | 6 | 1,165 | 36 | 36 | 2 | 492 | 27 | 1,780 | 71 |
| 83,961 | 87 | 6 | 1,166 | 36 | 36 | 2 | 494 | 27 | 1,783 | 71 |
| 83,962 | 87 | 6 | 1,167 | 36 | 36 | 2 | 495 | 27 | 1,785 | 71 |
| 83,963 | 87 | 6 | 1,164 | 36 | 36 | 2 | 494 | 27 | 1,781 | 71 |
| 83,964 | 87 | 6 | 1,164 | 36 | 35 | 2 | 495 | 27 | 1,781 | 71 |
| 83,965 | 87 | 6 | 1,161 | 36 | 35 | 2 | 498 | 27 | 1,781 | 71 |
| 83,966 | 87 | 6 | 1,157 | 36 | 35 | 2 | 496 | 28 | 1,775 | 72 |
| 83,967 | 85 | 6 | 1,163 | 35 | 36 | 2 | 494 | 28 | 1,778 | 71 |
| 83,968 | 85 | 6 | 1,163 | 35 | 36 | 2 | 494 | 28 | 1,778 | 71 |
| 83,969 | 86 | 6 | 1,185 | 30 | 37 | 2 | 499 | 28 | 1,807 | 66 |
| 83,970 | 86 | 6 | 1,185 | 30 | 37 | 2 | 496 | 28 | 1,804 | 66 |
| 83,971 | 82 | 6 | 1,168 | 30 | 37 | 2 | 491 | 28 | 1,778 | 66 |
| 83,972 | 80 | 6 | 1,126 | 32 | 37 | 2 | 479 | 28 | 1,722 | 68 |
| 83,973 | 84 | 6 | 1,179 | 34 | 44 | 2 | 528 | 28 | 1,835 | 70 |
| 83,974 | 85 | 6 | 1,181 | 39 | 43 | 2 | 520 | 28 | 1,829 | 75 |
| 83,975 | 85 | 6 | 1,194 | 38 | 43 | 2 | 529 | 28 | 1,851 | 74 |
| 83,976 | 82 | 6 | 1,145 | 40 | 39 | 2 | 493 | 28 | 1,759 | 76 |
| 83,977 | 81 | 6 | 1,120 | 38 | 38 | 2 | 479 | 28 | 1,718 | 74 |
| 83,978 | 77 | 6 | 1,096 | 38 | 37 | 2 | 461 | 27 | 1,671 | 73 |
| 83,979 | 77 | 6 | 1,092 | 38 | 37 | 2 | 461 | 27 | 1,667 | 73 |
| 83,980 | 76 | 6 | 1,069 | 38 | 37 | 2 | 453 | 27 | 1,635 | 73 |
| 83,981 | 76 | 6 | 1,072 | 37 | 39 | 2 | 454 | 26 | 1,641 | 71 |
| 83,982 | 76 | 6 | 1,068 | 37 | 38 | 2 | 453 | 26 | 1,635 | 71 |
| 83,983 | 76 | 6 | 1,082 | 36 | 38 | 2 | 454 | 25 | 1,650 | 69 |
| 83,984 | 76 | 6 | 1,080 | 33 | 38 | 1 | 455 | 23 | 1,649 | 63 |
| 83,985 | 66 | 6 | 911   | 33 | 35 | 1 | 415 | 23 | 1,427 | 63 |
| 83,986 | 49 | 5 | 743   | 32 | 33 | 1 | 391 | 21 | 1,216 | 59 |
| 83,987 | 52 | 5 | 761   | 33 | 34 | 1 | 417 | 21 | 1,264 | 60 |
| 83,988 | 33 | 5 | 559   | 34 | 25 | 1 | 288 | 21 | 905   | 61 |
| 83,989 | 31 | 5 | 521   | 36 | 22 | 1 | 278 | 22 | 852   | 64 |
| 83,990 | 21 | 5 | 317   | 36 | 14 | 1 | 207 | 22 | 559   | 64 |
| 83,991 | 21 | 5 | 292   | 36 | 14 | 1 | 199 | 22 | 526   | 64 |
| 83,992 | 20 | 5 | 276   | 36 | 13 | 1 | 192 | 23 | 501   | 65 |
| 83,993 | 20 | 5 | 273   | 36 | 13 | 1 | 190 | 23 | 496   | 65 |
| 83,994 | 24 | 5 | 329   | 42 | 14 | 1 | 242 | 23 | 609   | 71 |
| 83,995 | 24 | 5 | 330   | 51 | 14 | 2 | 241 | 24 | 609   | 82 |
| 83,996 | 26 | 5 | 352   | 57 | 16 | 2 | 260 | 27 | 654   | 91 |
| 83,997 | 27 | 5 | 361   | 57 | 17 | 2 | 270 | 26 | 675   | 90 |

|        |    |   |     |     |    |   |     |    |       |     |
|--------|----|---|-----|-----|----|---|-----|----|-------|-----|
| 83,998 | 27 | 5 | 363 | 58  | 18 | 2 | 270 | 25 | 678   | 90  |
| 83,999 | 27 | 4 | 358 | 59  | 18 | 3 | 272 | 26 | 675   | 92  |
| 84,000 | 26 | 5 | 355 | 61  | 18 | 3 | 268 | 30 | 667   | 99  |
| 84,001 | 25 | 5 | 356 | 74  | 18 | 3 | 267 | 32 | 666   | 114 |
| 84,002 | 26 | 5 | 369 | 91  | 18 | 3 | 282 | 37 | 695   | 136 |
| 84,003 | 26 | 2 | 370 | 86  | 18 | 2 | 285 | 26 | 699   | 116 |
| 84,004 | 26 | 2 | 368 | 90  | 18 | 2 | 284 | 24 | 696   | 118 |
| 84,005 | 26 | 2 | 368 | 87  | 18 | 2 | 279 | 24 | 691   | 115 |
| 84,006 | 26 | 2 | 362 | 87  | 18 | 2 | 275 | 23 | 681   | 114 |
| 84,007 | 26 | 2 | 354 | 87  | 18 | 2 | 272 | 23 | 670   | 114 |
| 84,008 | 27 | 1 | 360 | 88  | 19 | 2 | 274 | 21 | 680   | 112 |
| 84,009 | 27 | 1 | 360 | 88  | 19 | 2 | 273 | 21 | 679   | 112 |
| 84,010 | 29 | 1 | 365 | 94  | 19 | 2 | 275 | 27 | 688   | 124 |
| 84,011 | 30 | 1 | 369 | 106 | 19 | 4 | 278 | 30 | 696   | 141 |
| 84,012 | 30 | 1 | 373 | 106 | 19 | 4 | 281 | 30 | 703   | 141 |
| 84,013 | 31 | 1 | 379 | 109 | 19 | 4 | 288 | 30 | 717   | 144 |
| 84,014 | 33 | 1 | 407 | 110 | 19 | 4 | 309 | 31 | 768   | 146 |
| 84,015 | 33 | 1 | 403 | 110 | 19 | 4 | 306 | 31 | 761   | 146 |
| 84,016 | 46 | 2 | 441 | 110 | 19 | 4 | 333 | 31 | 839   | 147 |
| 84,017 | 46 | 2 | 440 | 111 | 18 | 4 | 333 | 30 | 837   | 147 |
| 84,018 | 46 | 2 | 434 | 111 | 18 | 4 | 331 | 30 | 829   | 147 |
| 84,019 | 52 | 2 | 459 | 111 | 22 | 4 | 386 | 30 | 919   | 147 |
| 84,020 | 55 | 2 | 475 | 112 | 22 | 4 | 411 | 30 | 963   | 148 |
| 84,021 | 67 | 3 | 496 | 115 | 22 | 4 | 426 | 44 | 1,011 | 166 |
| 84,022 | 70 | 4 | 525 | 115 | 17 | 4 | 441 | 44 | 1,053 | 167 |
| 84,023 | 69 | 4 | 535 | 113 | 18 | 4 | 447 | 44 | 1,069 | 165 |
| 84,024 | 69 | 4 | 531 | 111 | 18 | 4 | 445 | 44 | 1,063 | 163 |
| 84,025 | 68 | 4 | 504 | 108 | 18 | 4 | 436 | 46 | 1,026 | 162 |
| 84,026 | 78 | 4 | 583 | 108 | 19 | 4 | 473 | 47 | 1,153 | 163 |
| 84,027 | 77 | 4 | 582 | 108 | 19 | 4 | 472 | 47 | 1,150 | 163 |
| 84,028 | 77 | 4 | 584 | 109 | 19 | 4 | 478 | 47 | 1,158 | 164 |
| 84,029 | 81 | 4 | 636 | 109 | 21 | 4 | 524 | 47 | 1,262 | 164 |
| 84,030 | 82 | 4 | 639 | 109 | 19 | 4 | 525 | 48 | 1,265 | 165 |
| 84,031 | 82 | 4 | 673 | 109 | 19 | 4 | 541 | 48 | 1,315 | 165 |
| 84,032 | 84 | 4 | 726 | 109 | 24 | 4 | 602 | 48 | 1,436 | 165 |
| 84,033 | 84 | 4 | 710 | 109 | 24 | 4 | 596 | 48 | 1,414 | 165 |
| 84,034 | 84 | 4 | 717 | 109 | 24 | 4 | 601 | 48 | 1,426 | 165 |
| 84,035 | 89 | 4 | 756 | 109 | 24 | 4 | 626 | 48 | 1,495 | 165 |
| 84,036 | 89 | 4 | 754 | 108 | 24 | 4 | 626 | 48 | 1,493 | 164 |
| 84,037 | 89 | 4 | 750 | 108 | 24 | 4 | 626 | 48 | 1,489 | 164 |
| 84,038 | 90 | 4 | 742 | 107 | 22 | 4 | 609 | 48 | 1,463 | 163 |

|        |     |   |       |     |    |   |     |    |       |     |
|--------|-----|---|-------|-----|----|---|-----|----|-------|-----|
| 84,039 | 89  | 4 | 730   | 106 | 22 | 4 | 593 | 48 | 1,434 | 162 |
| 84,040 | 98  | 5 | 761   | 104 | 22 | 4 | 623 | 47 | 1,504 | 160 |
| 84,041 | 99  | 5 | 766   | 104 | 24 | 4 | 634 | 47 | 1,523 | 160 |
| 84,042 | 98  | 5 | 765   | 104 | 24 | 4 | 633 | 47 | 1,520 | 160 |
| 84,043 | 96  | 5 | 742   | 104 | 23 | 4 | 612 | 46 | 1,473 | 159 |
| 84,044 | 99  | 5 | 761   | 82  | 23 | 3 | 621 | 42 | 1,504 | 132 |
| 84,045 | 99  | 5 | 760   | 82  | 23 | 3 | 623 | 42 | 1,505 | 132 |
| 84,046 | 97  | 6 | 749   | 82  | 21 | 3 | 604 | 42 | 1,471 | 133 |
| 84,047 | 97  | 6 | 738   | 82  | 21 | 3 | 603 | 42 | 1,459 | 133 |
| 84,048 | 96  | 6 | 729   | 82  | 20 | 3 | 593 | 43 | 1,438 | 134 |
| 84,049 | 98  | 6 | 766   | 82  | 19 | 3 | 606 | 43 | 1,489 | 134 |
| 84,050 | 100 | 5 | 833   | 75  | 25 | 2 | 646 | 37 | 1,604 | 119 |
| 84,051 | 100 | 5 | 837   | 75  | 26 | 2 | 651 | 37 | 1,614 | 119 |
| 84,052 | 99  | 5 | 838   | 45  | 26 | 2 | 647 | 30 | 1,610 | 82  |
| 84,053 | 99  | 5 | 834   | 45  | 26 | 2 | 641 | 31 | 1,600 | 83  |
| 84,054 | 99  | 5 | 832   | 37  | 26 | 2 | 639 | 31 | 1,596 | 75  |
| 84,055 | 99  | 5 | 834   | 37  | 26 | 2 | 642 | 30 | 1,601 | 74  |
| 84,056 | 99  | 5 | 833   | 37  | 27 | 2 | 644 | 30 | 1,603 | 74  |
| 84,057 | 99  | 5 | 833   | 37  | 27 | 2 | 644 | 30 | 1,603 | 74  |
| 84,058 | 98  | 5 | 873   | 36  | 27 | 2 | 653 | 30 | 1,651 | 73  |
| 84,059 | 98  | 5 | 872   | 37  | 27 | 2 | 653 | 30 | 1,650 | 74  |
| 84,060 | 97  | 5 | 869   | 37  | 27 | 2 | 651 | 30 | 1,644 | 74  |
| 84,061 | 116 | 5 | 982   | 29  | 35 | 2 | 762 | 24 | 1,895 | 60  |
| 84,062 | 115 | 5 | 992   | 17  | 36 | 0 | 769 | 21 | 1,912 | 43  |
| 84,063 | 122 | 5 | 1,028 | 14  | 37 | 0 | 809 | 21 | 1,996 | 40  |
| 84,064 | 122 | 4 | 1,031 | 13  | 37 | 0 | 812 | 20 | 2,002 | 37  |
| 84,065 | 120 | 4 | 1,061 | 13  | 43 | 0 | 862 | 20 | 2,086 | 37  |
| 84,066 | 108 | 4 | 1,030 | 13  | 43 | 0 | 832 | 20 | 2,013 | 37  |
| 84,067 | 108 | 4 | 1,029 | 13  | 43 | 0 | 830 | 21 | 2,010 | 38  |
| 84,068 | 104 | 4 | 1,007 | 12  | 39 | 1 | 800 | 21 | 1,950 | 38  |
| 84,069 | 105 | 6 | 1,016 | 14  | 39 | 1 | 800 | 22 | 1,960 | 43  |
| 84,070 | 103 | 5 | 1,023 | 10  | 39 | 1 | 777 | 8  | 1,942 | 24  |
| 84,071 | 100 | 6 | 1,000 | 10  | 38 | 1 | 753 | 8  | 1,891 | 25  |
| 84,072 | 90  | 6 | 1,017 | 10  | 38 | 1 | 754 | 8  | 1,899 | 25  |
| 84,073 | 87  | 5 | 1,002 | 10  | 39 | 1 | 717 | 8  | 1,845 | 24  |
| 84,074 | 92  | 5 | 1,012 | 10  | 38 | 1 | 722 | 8  | 1,864 | 24  |
| 84,075 | 95  | 5 | 1,025 | 8   | 40 | 1 | 715 | 6  | 1,875 | 20  |
| 84,076 | 99  | 5 | 1,049 | 8   | 44 | 1 | 726 | 6  | 1,918 | 20  |
| 84,077 | 91  | 5 | 1,027 | 5   | 44 | 1 | 713 | 5  | 1,875 | 16  |
| 84,078 | 100 | 5 | 1,057 | 4   | 48 | 1 | 728 | 5  | 1,933 | 15  |
| 84,079 | 107 | 5 | 1,360 | 5   | 53 | 1 | 797 | 5  | 2,317 | 16  |

|        |     |    |       |     |    |   |       |    |       |     |
|--------|-----|----|-------|-----|----|---|-------|----|-------|-----|
| 84,080 | 110 | 5  | 1,452 | 5   | 61 | 1 | 919   | 5  | 2,542 | 16  |
| 84,081 | 110 | 5  | 1,468 | 5   | 63 | 1 | 930   | 5  | 2,571 | 16  |
| 84,082 | 112 | 5  | 1,439 | 5   | 63 | 1 | 917   | 5  | 2,531 | 16  |
| 84,083 | 111 | 5  | 1,417 | 5   | 59 | 1 | 879   | 5  | 2,466 | 16  |
| 84,084 | 111 | 5  | 1,410 | 5   | 60 | 1 | 874   | 5  | 2,455 | 16  |
| 84,085 | 106 | 5  | 1,472 | 5   | 64 | 1 | 906   | 5  | 2,548 | 16  |
| 84,086 | 110 | 5  | 1,600 | 5   | 68 | 1 | 1,006 | 5  | 2,784 | 16  |
| 84,087 | 113 | 5  | 1,643 | 5   | 69 | 1 | 1,038 | 5  | 2,863 | 16  |
| 84,088 | 108 | 5  | 1,633 | 5   | 69 | 1 | 1,034 | 5  | 2,844 | 16  |
| 84,089 | 108 | 5  | 1,628 | 5   | 69 | 1 | 1,031 | 5  | 2,836 | 16  |
| 84,090 | 158 | 5  | 1,767 | 5   | 82 | 1 | 1,163 | 5  | 3,170 | 16  |
| 84,091 | 157 | 4  | 1,841 | 5   | 86 | 1 | 1,200 | 5  | 3,284 | 15  |
| 84,092 | 156 | 4  | 1,851 | 5   | 85 | 1 | 1,203 | 5  | 3,295 | 15  |
| 84,093 | 152 | 4  | 1,824 | 5   | 85 | 1 | 1,187 | 5  | 3,248 | 15  |
| 84,094 | 152 | 4  | 1,820 | 5   | 85 | 2 | 1,182 | 5  | 3,239 | 16  |
| 84,095 | 150 | 4  | 1,809 | 8   | 85 | 2 | 1,166 | 7  | 3,210 | 21  |
| 84,096 | 150 | 4  | 1,806 | 17  | 85 | 2 | 1,160 | 19 | 3,201 | 42  |
| 84,097 | 151 | 3  | 1,813 | 39  | 87 | 3 | 1,163 | 28 | 3,214 | 73  |
| 84,098 | 151 | 7  | 1,824 | 46  | 88 | 3 | 1,171 | 33 | 3,234 | 89  |
| 84,099 | 153 | 7  | 1,813 | 52  | 88 | 4 | 1,177 | 33 | 3,231 | 96  |
| 84,100 | 151 | 7  | 1,793 | 60  | 88 | 5 | 1,165 | 38 | 3,197 | 110 |
| 84,101 | 149 | 7  | 1,725 | 60  | 82 | 5 | 1,121 | 39 | 3,077 | 111 |
| 84,102 | 149 | 7  | 1,719 | 61  | 81 | 5 | 1,118 | 39 | 3,067 | 112 |
| 84,103 | 149 | 8  | 1,714 | 65  | 81 | 5 | 1,114 | 41 | 3,058 | 119 |
| 84,104 | 149 | 8  | 1,711 | 65  | 81 | 6 | 1,112 | 41 | 3,053 | 120 |
| 84,105 | 149 | 8  | 1,712 | 66  | 81 | 6 | 1,112 | 41 | 3,054 | 121 |
| 84,106 | 152 | 8  | 1,809 | 68  | 81 | 6 | 1,133 | 41 | 3,175 | 123 |
| 84,107 | 152 | 8  | 1,835 | 79  | 81 | 6 | 1,146 | 44 | 3,214 | 137 |
| 84,108 | 152 | 8  | 1,880 | 82  | 82 | 6 | 1,158 | 44 | 3,272 | 140 |
| 84,109 | 152 | 8  | 1,864 | 86  | 82 | 6 | 1,147 | 44 | 3,245 | 144 |
| 84,110 | 152 | 8  | 1,861 | 88  | 82 | 6 | 1,145 | 46 | 3,240 | 148 |
| 84,111 | 149 | 10 | 1,997 | 96  | 86 | 7 | 1,227 | 52 | 3,459 | 165 |
| 84,112 | 149 | 11 | 1,997 | 139 | 86 | 7 | 1,225 | 75 | 3,457 | 232 |
| 84,113 | 152 | 12 | 2,064 | 146 | 90 | 7 | 1,287 | 83 | 3,593 | 248 |
| 84,114 | 146 | 12 | 2,055 | 148 | 89 | 7 | 1,279 | 84 | 3,569 | 251 |
| 84,115 | 146 | 13 | 2,077 | 148 | 93 | 7 | 1,314 | 84 | 3,630 | 252 |
| 84,116 | 146 | 13 | 2,027 | 148 | 87 | 7 | 1,244 | 84 | 3,504 | 252 |
| 84,117 | 145 | 13 | 2,018 | 148 | 87 | 7 | 1,240 | 83 | 3,490 | 251 |
| 84,118 | 144 | 13 | 2,018 | 148 | 87 | 7 | 1,242 | 83 | 3,491 | 251 |
| 84,119 | 144 | 13 | 2,014 | 148 | 88 | 6 | 1,244 | 83 | 3,490 | 250 |
| 84,120 | 143 | 11 | 2,003 | 146 | 88 | 6 | 1,243 | 82 | 3,477 | 245 |

|        |     |    |       |     |     |   |       |     |       |     |
|--------|-----|----|-------|-----|-----|---|-------|-----|-------|-----|
| 84,121 | 148 | 11 | 2,028 | 146 | 89  | 6 | 1,273 | 82  | 3,538 | 245 |
| 84,122 | 198 | 10 | 2,529 | 146 | 116 | 6 | 1,547 | 82  | 4,390 | 244 |
| 84,123 | 198 | 10 | 2,511 | 146 | 117 | 6 | 1,550 | 83  | 4,376 | 245 |
| 84,124 | 193 | 11 | 2,452 | 147 | 116 | 6 | 1,528 | 83  | 4,289 | 247 |
| 84,125 | 188 | 12 | 2,425 | 148 | 115 | 6 | 1,515 | 85  | 4,243 | 251 |
| 84,126 | 185 | 13 | 2,379 | 155 | 112 | 6 | 1,503 | 85  | 4,179 | 259 |
| 84,127 | 181 | 13 | 2,350 | 156 | 108 | 6 | 1,492 | 86  | 4,131 | 261 |
| 84,128 | 180 | 13 | 2,324 | 158 | 108 | 6 | 1,483 | 86  | 4,095 | 263 |
| 84,129 | 171 | 13 | 2,310 | 170 | 107 | 6 | 1,477 | 86  | 4,065 | 275 |
| 84,130 | 164 | 13 | 2,008 | 173 | 102 | 6 | 1,412 | 87  | 3,686 | 279 |
| 84,131 | 157 | 14 | 1,874 | 181 | 92  | 6 | 1,244 | 99  | 3,367 | 300 |
| 84,132 | 156 | 14 | 1,851 | 181 | 90  | 6 | 1,227 | 100 | 3,324 | 301 |
| 84,133 | 159 | 14 | 1,882 | 188 | 91  | 7 | 1,241 | 102 | 3,373 | 311 |
| 84,134 | 158 | 14 | 1,850 | 190 | 90  | 7 | 1,218 | 102 | 3,316 | 313 |
| 84,135 | 158 | 14 | 1,768 | 191 | 85  | 7 | 1,162 | 103 | 3,173 | 315 |
| 84,136 | 158 | 15 | 1,766 | 196 | 85  | 8 | 1,163 | 106 | 3,172 | 325 |
| 84,137 | 155 | 16 | 1,637 | 203 | 81  | 8 | 1,065 | 110 | 2,938 | 337 |
| 84,138 | 152 | 17 | 1,594 | 204 | 80  | 8 | 1,028 | 111 | 2,854 | 340 |
| 84,139 | 152 | 19 | 1,575 | 213 | 80  | 8 | 1,017 | 111 | 2,824 | 351 |
| 84,140 | 119 | 19 | 1,533 | 214 | 72  | 8 | 969   | 111 | 2,693 | 352 |
| 84,141 | 115 | 20 | 1,477 | 214 | 69  | 8 | 932   | 111 | 2,593 | 353 |
| 84,142 | 110 | 20 | 1,391 | 214 | 65  | 8 | 889   | 111 | 2,455 | 353 |
| 84,143 | 110 | 20 | 1,372 | 215 | 64  | 8 | 875   | 111 | 2,421 | 354 |
| 84,144 | 110 | 21 | 1,372 | 215 | 63  | 8 | 874   | 115 | 2,419 | 359 |
| 84,145 | 110 | 21 | 1,366 | 219 | 63  | 7 | 874   | 116 | 2,413 | 363 |
| 84,146 | 110 | 21 | 1,364 | 217 | 63  | 7 | 877   | 116 | 2,414 | 361 |
| 84,147 | 110 | 21 | 1,360 | 207 | 61  | 7 | 876   | 104 | 2,407 | 339 |
| 84,148 | 109 | 21 | 1,358 | 190 | 61  | 6 | 874   | 98  | 2,402 | 315 |
| 84,149 | 109 | 17 | 1,347 | 183 | 60  | 6 | 866   | 93  | 2,382 | 299 |
| 84,150 | 107 | 17 | 1,336 | 170 | 60  | 4 | 859   | 87  | 2,362 | 278 |
| 84,151 | 107 | 17 | 1,336 | 171 | 60  | 4 | 858   | 87  | 2,361 | 279 |
| 84,152 | 107 | 17 | 1,336 | 172 | 60  | 4 | 857   | 87  | 2,360 | 280 |
| 84,153 | 107 | 18 | 1,336 | 179 | 60  | 4 | 857   | 88  | 2,360 | 289 |
| 84,154 | 107 | 17 | 1,333 | 175 | 60  | 4 | 857   | 85  | 2,357 | 281 |
| 84,155 | 107 | 17 | 1,331 | 180 | 60  | 3 | 856   | 89  | 2,354 | 289 |
| 84,156 | 107 | 17 | 1,330 | 179 | 60  | 3 | 853   | 89  | 2,350 | 288 |
| 84,157 | 104 | 17 | 1,233 | 170 | 60  | 3 | 832   | 86  | 2,229 | 276 |
| 84,158 | 104 | 17 | 1,205 | 167 | 59  | 3 | 817   | 86  | 2,185 | 273 |
| 84,159 | 104 | 17 | 1,141 | 162 | 58  | 3 | 806   | 86  | 2,109 | 268 |
| 84,160 | 104 | 17 | 1,129 | 164 | 58  | 4 | 805   | 86  | 2,096 | 271 |
| 84,161 | 90  | 17 | 950   | 166 | 51  | 4 | 687   | 84  | 1,778 | 271 |

|        |    |    |     |     |    |   |     |    |       |     |
|--------|----|----|-----|-----|----|---|-----|----|-------|-----|
| 84,162 | 87 | 15 | 885 | 159 | 45 | 3 | 606 | 79 | 1,623 | 256 |
| 84,163 | 87 | 14 | 877 | 116 | 44 | 3 | 602 | 56 | 1,610 | 189 |
| 84,164 | 85 | 13 | 803 | 107 | 40 | 4 | 539 | 47 | 1,467 | 171 |
| 84,165 | 84 | 13 | 772 | 107 | 40 | 4 | 504 | 48 | 1,400 | 172 |
| 84,166 | 83 | 12 | 740 | 107 | 36 | 4 | 460 | 49 | 1,319 | 172 |
| 84,167 | 83 | 12 | 731 | 107 | 36 | 4 | 456 | 49 | 1,306 | 172 |
| 84,168 | 83 | 13 | 729 | 108 | 36 | 4 | 456 | 49 | 1,304 | 174 |
| 84,169 | 82 | 13 | 714 | 108 | 35 | 4 | 446 | 49 | 1,277 | 174 |
| 84,170 | 80 | 13 | 692 | 109 | 34 | 4 | 432 | 49 | 1,238 | 175 |
| 84,171 | 80 | 13 | 688 | 110 | 34 | 4 | 431 | 49 | 1,233 | 176 |
| 84,172 | 59 | 13 | 619 | 111 | 28 | 4 | 358 | 50 | 1,064 | 178 |
| 84,173 | 30 | 13 | 184 | 111 | 7  | 4 | 153 | 50 | 374   | 178 |
| 84,174 | 28 | 13 | 165 | 111 | 7  | 4 | 135 | 49 | 335   | 177 |
| 84,175 | 28 | 12 | 163 | 111 | 7  | 4 | 134 | 51 | 332   | 178 |
| 84,176 | 27 | 11 | 163 | 110 | 7  | 4 | 133 | 49 | 330   | 174 |
| 84,177 | 27 | 11 | 162 | 103 | 7  | 4 | 132 | 49 | 328   | 167 |
| 84,178 | 27 | 11 | 163 | 100 | 7  | 4 | 132 | 48 | 329   | 163 |
| 84,179 | 27 | 12 | 158 | 100 | 7  | 4 | 131 | 48 | 323   | 164 |
| 84,180 | 27 | 12 | 137 | 88  | 4  | 4 | 119 | 48 | 287   | 152 |
| 84,181 | 27 | 13 | 136 | 84  | 4  | 4 | 117 | 47 | 284   | 148 |
| 84,182 | 27 | 12 | 125 | 76  | 4  | 4 | 120 | 35 | 276   | 127 |
| 84,183 | 24 | 13 | 113 | 76  | 3  | 4 | 107 | 33 | 247   | 126 |
| 84,184 | 22 | 13 | 89  | 67  | 3  | 3 | 104 | 31 | 218   | 114 |
| 84,185 | 22 | 13 | 90  | 66  | 3  | 3 | 105 | 30 | 220   | 112 |
| 84,186 | 22 | 13 | 90  | 66  | 3  | 3 | 105 | 30 | 220   | 112 |
| 84,187 | 24 | 12 | 89  | 61  | 3  | 2 | 114 | 27 | 230   | 102 |
| 84,188 | 24 | 11 | 84  | 54  | 3  | 2 | 117 | 23 | 228   | 90  |
| 84,189 | 24 | 8  | 84  | 43  | 3  | 2 | 117 | 22 | 228   | 75  |
| 84,190 | 25 | 8  | 87  | 43  | 3  | 2 | 121 | 22 | 236   | 75  |
| 84,191 | 9  | 8  | 29  | 43  | 1  | 2 | 58  | 22 | 97    | 75  |
| 84,192 | 9  | 8  | 27  | 43  | 1  | 2 | 55  | 22 | 92    | 75  |
| 84,193 | 11 | 8  | 34  | 42  | 2  | 2 | 55  | 23 | 102   | 75  |
| 84,194 | 11 | 8  | 35  | 42  | 2  | 2 | 58  | 23 | 106   | 75  |
| 84,195 | 11 | 7  | 35  | 42  | 2  | 2 | 58  | 19 | 106   | 70  |
| 84,196 | 11 | 7  | 38  | 38  | 2  | 2 | 58  | 19 | 109   | 66  |
| 84,197 | 11 | 7  | 38  | 37  | 2  | 2 | 58  | 17 | 109   | 63  |
| 84,198 | 11 | 7  | 40  | 37  | 2  | 2 | 67  | 17 | 120   | 63  |
| 84,199 | 24 | 7  | 160 | 34  | 9  | 2 | 159 | 14 | 352   | 57  |
| 84,200 | 24 | 7  | 160 | 35  | 9  | 2 | 159 | 14 | 352   | 58  |
| 84,201 | 24 | 7  | 160 | 33  | 9  | 2 | 159 | 14 | 352   | 56  |
| 84,202 | 34 | 7  | 228 | 32  | 15 | 2 | 229 | 14 | 506   | 55  |

|        |     |   |       |    |     |   |       |    |       |    |
|--------|-----|---|-------|----|-----|---|-------|----|-------|----|
| 84,203 | 113 | 7 | 416   | 31 | 36  | 2 | 565   | 14 | 1,130 | 54 |
| 84,204 | 130 | 6 | 504   | 23 | 45  | 2 | 669   | 13 | 1,348 | 44 |
| 84,205 | 193 | 6 | 925   | 18 | 116 | 2 | 1,405 | 9  | 2,639 | 35 |
| 84,206 | 195 | 6 | 954   | 18 | 121 | 2 | 1,455 | 9  | 2,725 | 35 |
| 84,207 | 195 | 6 | 954   | 18 | 121 | 2 | 1,457 | 9  | 2,727 | 35 |
| 84,208 | 195 | 6 | 954   | 14 | 121 | 2 | 1,457 | 10 | 2,727 | 32 |
| 84,209 | 235 | 6 | 1,789 | 14 | 177 | 2 | 2,260 | 10 | 4,461 | 32 |
| 84,210 | 237 | 6 | 1,855 | 7  | 179 | 1 | 2,303 | 9  | 4,574 | 23 |
| 84,211 | 241 | 6 | 1,906 | 7  | 183 | 1 | 2,405 | 9  | 4,735 | 23 |
| 84,212 | 241 | 6 | 1,908 | 7  | 183 | 1 | 2,409 | 9  | 4,741 | 23 |
| 84,213 | 242 | 6 | 1,916 | 7  | 183 | 1 | 2,414 | 9  | 4,755 | 23 |
| 84,214 | 241 | 6 | 1,916 | 7  | 183 | 1 | 2,412 | 9  | 4,752 | 23 |
| 84,215 | 241 | 6 | 1,926 | 7  | 183 | 0 | 2,414 | 9  | 4,764 | 22 |
| 84,216 | 241 | 6 | 1,926 | 7  | 184 | 0 | 2,415 | 8  | 4,766 | 21 |
| 84,217 | 241 | 6 | 1,926 | 7  | 184 | 0 | 2,416 | 7  | 4,767 | 20 |
| 84,218 | 248 | 6 | 2,066 | 7  | 189 | 0 | 2,522 | 7  | 5,025 | 20 |
| 84,219 | 247 | 5 | 2,078 | 6  | 190 | 0 | 2,550 | 7  | 5,065 | 18 |
| 84,220 | 271 | 5 | 2,291 | 6  | 215 | 0 | 2,898 | 7  | 5,675 | 18 |
| 84,221 | 275 | 5 | 2,318 | 4  | 218 | 0 | 2,915 | 7  | 5,726 | 16 |
| 84,222 | 276 | 5 | 2,324 | 3  | 218 | 0 | 2,921 | 6  | 5,739 | 14 |
| 84,223 | 276 | 5 | 2,324 | 3  | 218 | 0 | 2,922 | 6  | 5,740 | 14 |
| 84,224 | 277 | 5 | 2,337 | 3  | 217 | 0 | 2,934 | 6  | 5,765 | 14 |
| 84,225 | 277 | 5 | 2,337 | 3  | 217 | 0 | 2,934 | 6  | 5,765 | 14 |
| 84,226 | 277 | 5 | 2,336 | 2  | 217 | 0 | 2,934 | 4  | 5,764 | 11 |
| 84,227 | 281 | 5 | 2,404 | 2  | 222 | 0 | 2,972 | 4  | 5,879 | 11 |
| 84,228 | 297 | 4 | 2,633 | 2  | 227 | 0 | 3,037 | 4  | 6,194 | 10 |
| 84,229 | 329 | 4 | 3,846 | 2  | 279 | 0 | 3,573 | 4  | 8,027 | 10 |
| 84,230 | 347 | 3 | 4,048 | 2  | 292 | 0 | 3,739 | 4  | 8,426 | 9  |
| 84,231 | 347 | 3 | 4,049 | 2  | 292 | 0 | 3,738 | 4  | 8,426 | 9  |
| 84,232 | 347 | 2 | 4,048 | 2  | 292 | 0 | 3,732 | 4  | 8,419 | 8  |
| 84,233 | 356 | 2 | 4,231 | 2  | 305 | 0 | 3,813 | 4  | 8,705 | 8  |
| 84,234 | 356 | 1 | 4,242 | 3  | 305 | 0 | 3,812 | 4  | 8,715 | 8  |
| 84,235 | 356 | 1 | 4,254 | 3  | 307 | 0 | 3,823 | 4  | 8,740 | 8  |
| 84,236 | 359 | 1 | 4,276 | 3  | 307 | 0 | 3,839 | 5  | 8,781 | 9  |
| 84,237 | 359 | 1 | 4,275 | 3  | 307 | 0 | 3,840 | 5  | 8,781 | 9  |
| 84,238 | 357 | 1 | 4,275 | 3  | 307 | 0 | 3,835 | 5  | 8,774 | 9  |
| 84,239 | 357 | 0 | 4,280 | 3  | 307 | 0 | 3,832 | 5  | 8,776 | 8  |
| 84,240 | 357 | 0 | 4,290 | 3  | 307 | 0 | 3,839 | 5  | 8,793 | 8  |
| 84,241 | 357 | 0 | 4,372 | 3  | 311 | 0 | 3,848 | 5  | 8,888 | 8  |
| 84,242 | 373 | 0 | 4,497 | 3  | 314 | 0 | 3,886 | 5  | 9,070 | 8  |
| 84,243 | 373 | 0 | 4,496 | 3  | 314 | 0 | 3,880 | 5  | 9,063 | 8  |

|        |     |   |       |    |     |   |       |    |        |    |
|--------|-----|---|-------|----|-----|---|-------|----|--------|----|
| 84,244 | 415 | 1 | 4,829 | 3  | 328 | 0 | 4,130 | 5  | 9,702  | 9  |
| 84,245 | 415 | 1 | 4,829 | 3  | 328 | 0 | 4,127 | 5  | 9,699  | 9  |
| 84,246 | 442 | 1 | 5,031 | 3  | 341 | 0 | 4,283 | 5  | 10,097 | 9  |
| 84,247 | 448 | 1 | 5,092 | 3  | 342 | 0 | 4,324 | 5  | 10,206 | 9  |
| 84,248 | 448 | 1 | 5,105 | 3  | 342 | 0 | 4,321 | 5  | 10,216 | 9  |
| 84,249 | 490 | 1 | 5,587 | 1  | 381 | 0 | 4,678 | 4  | 11,136 | 6  |
| 84,250 | 488 | 1 | 5,573 | 1  | 381 | 0 | 4,679 | 5  | 11,121 | 7  |
| 84,251 | 485 | 1 | 5,543 | 2  | 380 | 0 | 4,635 | 5  | 11,043 | 8  |
| 84,252 | 485 | 2 | 5,581 | 3  | 380 | 0 | 4,653 | 5  | 11,099 | 10 |
| 84,253 | 418 | 2 | 5,591 | 4  | 363 | 0 | 4,469 | 5  | 10,841 | 11 |
| 84,254 | 412 | 2 | 5,651 | 7  | 363 | 0 | 4,459 | 5  | 10,885 | 14 |
| 84,255 | 415 | 2 | 5,686 | 10 | 363 | 1 | 4,464 | 7  | 10,928 | 20 |
| 84,256 | 353 | 4 | 5,282 | 14 | 292 | 1 | 3,730 | 7  | 9,657  | 26 |
| 84,257 | 357 | 4 | 5,298 | 15 | 288 | 1 | 3,712 | 8  | 9,655  | 28 |
| 84,258 | 351 | 7 | 5,116 | 17 | 277 | 1 | 3,612 | 11 | 9,356  | 36 |
| 84,259 | 329 | 7 | 4,645 | 20 | 246 | 1 | 3,169 | 11 | 8,389  | 39 |
| 84,260 | 322 | 7 | 4,509 | 20 | 234 | 1 | 2,932 | 11 | 7,997  | 39 |
| 84,261 | 320 | 7 | 4,443 | 20 | 232 | 1 | 2,889 | 11 | 7,884  | 39 |
| 84,262 | 322 | 7 | 4,416 | 20 | 231 | 1 | 2,812 | 11 | 7,781  | 39 |
| 84,263 | 323 | 7 | 4,423 | 21 | 231 | 1 | 2,827 | 11 | 7,804  | 40 |
| 84,264 | 322 | 7 | 4,419 | 21 | 232 | 1 | 2,824 | 11 | 7,797  | 40 |
| 84,265 | 322 | 7 | 4,409 | 21 | 232 | 1 | 2,822 | 11 | 7,785  | 40 |
| 84,266 | 325 | 7 | 4,395 | 21 | 232 | 1 | 2,814 | 12 | 7,766  | 41 |
| 84,267 | 320 | 7 | 4,342 | 21 | 230 | 1 | 2,776 | 12 | 7,668  | 41 |
| 84,268 | 327 | 7 | 4,330 | 22 | 230 | 1 | 2,754 | 12 | 7,641  | 42 |
| 84,269 | 328 | 7 | 4,334 | 22 | 231 | 1 | 2,738 | 12 | 7,631  | 42 |
| 84,270 | 303 | 7 | 4,157 | 22 | 206 | 1 | 2,431 | 12 | 7,097  | 42 |
| 84,271 | 303 | 7 | 4,135 | 22 | 206 | 1 | 2,404 | 12 | 7,048  | 42 |
| 84,272 | 299 | 7 | 4,115 | 24 | 203 | 1 | 2,391 | 12 | 7,008  | 44 |
| 84,273 | 299 | 7 | 4,121 | 24 | 203 | 1 | 2,385 | 13 | 7,008  | 45 |
| 84,274 | 305 | 7 | 4,181 | 24 | 205 | 1 | 2,409 | 17 | 7,100  | 49 |
| 84,275 | 305 | 7 | 4,178 | 24 | 205 | 1 | 2,400 | 17 | 7,088  | 49 |
| 84,276 | 302 | 7 | 4,178 | 25 | 203 | 1 | 2,414 | 19 | 7,097  | 52 |
| 84,277 | 306 | 7 | 4,204 | 26 | 202 | 2 | 2,411 | 19 | 7,123  | 54 |
| 84,278 | 298 | 7 | 4,005 | 26 | 199 | 2 | 2,375 | 19 | 6,877  | 54 |
| 84,279 | 286 | 7 | 3,813 | 26 | 192 | 2 | 2,176 | 18 | 6,467  | 53 |
| 84,280 | 284 | 7 | 3,042 | 29 | 166 | 2 | 1,961 | 18 | 5,453  | 56 |
| 84,281 | 275 | 7 | 2,986 | 29 | 155 | 2 | 1,879 | 17 | 5,295  | 55 |
| 84,282 | 270 | 7 | 2,857 | 29 | 146 | 2 | 1,839 | 17 | 5,112  | 55 |
| 84,283 | 267 | 7 | 2,830 | 29 | 143 | 2 | 1,815 | 17 | 5,055  | 55 |
| 84,284 | 269 | 7 | 2,823 | 30 | 143 | 2 | 1,816 | 17 | 5,051  | 56 |



|        |     |   |       |    |     |   |       |    |       |    |
|--------|-----|---|-------|----|-----|---|-------|----|-------|----|
| 84,285 | 271 | 7 | 2,816 | 29 | 143 | 2 | 1,807 | 16 | 5,037 | 54 |
| 84,286 | 272 | 7 | 2,827 | 29 | 143 | 2 | 1,809 | 16 | 5,051 | 54 |
| 84,287 | 269 | 7 | 2,806 | 29 | 143 | 2 | 1,792 | 16 | 5,010 | 54 |
| 84,288 | 270 | 9 | 2,849 | 30 | 144 | 2 | 1,796 | 17 | 5,059 | 58 |
| 84,289 | 271 | 9 | 2,849 | 30 | 144 | 2 | 1,790 | 17 | 5,054 | 58 |
| 84,290 | 271 | 9 | 2,844 | 30 | 144 | 2 | 1,790 | 17 | 5,049 | 58 |
| 84,291 | 282 | 9 | 2,886 | 31 | 146 | 2 | 1,809 | 17 | 5,123 | 59 |
| 84,292 | 282 | 9 | 2,826 | 31 | 143 | 2 | 1,797 | 17 | 5,048 | 59 |
| 84,293 | 280 | 9 | 2,968 | 31 | 151 | 2 | 1,881 | 17 | 5,280 | 59 |
| 84,294 | 280 | 9 | 2,942 | 31 | 151 | 2 | 1,872 | 17 | 5,245 | 59 |
| 84,295 | 276 | 8 | 4,112 | 31 | 167 | 2 | 2,059 | 17 | 6,614 | 58 |
| 84,296 | 253 | 8 | 3,993 | 31 | 157 | 2 | 1,927 | 17 | 6,330 | 58 |
| 84,297 | 252 | 8 | 4,007 | 31 | 158 | 2 | 1,943 | 17 | 6,360 | 58 |
| 84,298 | 246 | 8 | 3,946 | 31 | 157 | 2 | 1,902 | 17 | 6,251 | 58 |
| 84,299 | 247 | 8 | 3,947 | 31 | 158 | 2 | 1,900 | 17 | 6,252 | 58 |
| 84,300 | 194 | 8 | 3,362 | 31 | 113 | 2 | 1,453 | 16 | 5,122 | 57 |
| 84,301 | 194 | 8 | 3,364 | 30 | 112 | 2 | 1,451 | 16 | 5,121 | 56 |
| 84,302 | 191 | 8 | 3,373 | 30 | 108 | 2 | 1,445 | 16 | 5,117 | 56 |
| 84,303 | 194 | 7 | 3,389 | 28 | 109 | 2 | 1,445 | 16 | 5,137 | 53 |
| 84,304 | 194 | 7 | 3,318 | 25 | 107 | 2 | 1,320 | 16 | 4,939 | 50 |
| 84,305 | 186 | 7 | 3,187 | 22 | 99  | 1 | 1,255 | 14 | 4,727 | 44 |
| 84,306 | 205 | 5 | 3,250 | 18 | 107 | 1 | 1,342 | 14 | 4,904 | 38 |
| 84,307 | 210 | 5 | 3,275 | 18 | 106 | 1 | 1,356 | 14 | 4,947 | 38 |
| 84,308 | 213 | 6 | 3,342 | 18 | 111 | 1 | 1,363 | 13 | 5,029 | 38 |
| 84,309 | 224 | 3 | 3,415 | 12 | 113 | 1 | 1,391 | 9  | 5,143 | 25 |
| 84,310 | 287 | 4 | 3,790 | 12 | 131 | 2 | 1,678 | 9  | 5,886 | 27 |
| 84,311 | 290 | 4 | 3,913 | 12 | 133 | 2 | 1,704 | 9  | 6,040 | 27 |
| 84,312 | 327 | 4 | 4,074 | 12 | 141 | 2 | 1,774 | 9  | 6,316 | 27 |
| 84,313 | 327 | 4 | 4,077 | 13 | 141 | 2 | 1,772 | 9  | 6,317 | 28 |
| 84,314 | 325 | 4 | 4,066 | 12 | 141 | 3 | 1,752 | 9  | 6,284 | 28 |
| 84,315 | 324 | 4 | 4,061 | 12 | 140 | 3 | 1,751 | 9  | 6,276 | 28 |
| 84,316 | 325 | 4 | 4,075 | 12 | 140 | 3 | 1,750 | 9  | 6,290 | 28 |
| 84,317 | 360 | 4 | 4,439 | 12 | 156 | 3 | 1,827 | 8  | 6,782 | 27 |
| 84,318 | 368 | 4 | 4,472 | 12 | 157 | 3 | 1,818 | 8  | 6,815 | 27 |
| 84,319 | 370 | 4 | 4,506 | 11 | 157 | 3 | 1,827 | 8  | 6,860 | 26 |
| 84,320 | 405 | 4 | 4,652 | 11 | 165 | 3 | 1,901 | 8  | 7,123 | 26 |
| 84,321 | 410 | 4 | 4,733 | 11 | 166 | 3 | 1,924 | 8  | 7,233 | 26 |
| 84,322 | 428 | 4 | 4,777 | 9  | 170 | 3 | 1,966 | 8  | 7,341 | 24 |
| 84,323 | 428 | 4 | 4,770 | 9  | 170 | 3 | 1,960 | 3  | 7,328 | 19 |
| 84,324 | 427 | 4 | 4,758 | 9  | 170 | 3 | 1,960 | 3  | 7,315 | 19 |
| 84,325 | 421 | 4 | 4,699 | 8  | 168 | 3 | 1,936 | 1  | 7,224 | 16 |

|        |     |   |       |    |     |   |       |   |       |    |
|--------|-----|---|-------|----|-----|---|-------|---|-------|----|
| 84,326 | 424 | 4 | 4,701 | 9  | 168 | 3 | 1,939 | 1 | 7,232 | 17 |
| 84,327 | 423 | 4 | 4,687 | 11 | 170 | 3 | 1,916 | 1 | 7,196 | 19 |
| 84,328 | 419 | 4 | 4,607 | 10 | 168 | 2 | 1,893 | 1 | 7,087 | 17 |
| 84,329 | 414 | 4 | 4,588 | 10 | 167 | 2 | 1,874 | 1 | 7,043 | 17 |
| 84,330 | 411 | 4 | 4,475 | 10 | 153 | 2 | 1,815 | 1 | 6,854 | 17 |
| 84,331 | 400 | 4 | 4,348 | 7  | 149 | 3 | 1,755 | 1 | 6,652 | 15 |
| 84,332 | 391 | 4 | 4,200 | 7  | 147 | 3 | 1,672 | 1 | 6,410 | 15 |
| 84,333 | 390 | 4 | 4,176 | 7  | 147 | 3 | 1,660 | 1 | 6,373 | 15 |
| 84,334 | 390 | 4 | 4,174 | 7  | 146 | 3 | 1,657 | 2 | 6,367 | 16 |
| 84,335 | 388 | 4 | 4,178 | 6  | 146 | 3 | 1,658 | 2 | 6,370 | 15 |
| 84,336 | 386 | 4 | 4,179 | 6  | 144 | 3 | 1,658 | 2 | 6,367 | 15 |
| 84,337 | 385 | 4 | 4,166 | 6  | 144 | 3 | 1,656 | 2 | 6,351 | 15 |
| 84,338 | 387 | 2 | 4,182 | 5  | 144 | 3 | 1,664 | 1 | 6,377 | 11 |
| 84,339 | 386 | 2 | 4,147 | 5  | 143 | 3 | 1,662 | 1 | 6,338 | 11 |
| 84,340 | 385 | 2 | 4,140 | 5  | 143 | 3 | 1,660 | 1 | 6,328 | 11 |
| 84,341 | 379 | 2 | 4,126 | 6  | 142 | 3 | 1,671 | 1 | 6,318 | 12 |
| 84,342 | 378 | 2 | 4,123 | 5  | 142 | 3 | 1,670 | 2 | 6,313 | 12 |
| 84,343 | 377 | 2 | 4,099 | 7  | 141 | 3 | 1,668 | 2 | 6,285 | 14 |
| 84,344 | 363 | 3 | 3,834 | 7  | 130 | 3 | 1,543 | 3 | 5,870 | 16 |
| 84,345 | 342 | 3 | 2,663 | 8  | 112 | 3 | 1,305 | 3 | 4,422 | 17 |
| 84,346 | 322 | 3 | 2,351 | 8  | 98  | 3 | 1,108 | 3 | 3,879 | 17 |
| 84,347 | 322 | 3 | 2,272 | 8  | 96  | 3 | 1,080 | 4 | 3,770 | 18 |
| 84,348 | 322 | 3 | 2,262 | 8  | 96  | 3 | 1,075 | 4 | 3,755 | 18 |
| 84,349 | 322 | 3 | 2,260 | 8  | 96  | 3 | 1,075 | 4 | 3,753 | 18 |
| 84,350 | 323 | 4 | 2,248 | 8  | 95  | 3 | 1,072 | 4 | 3,738 | 19 |
| 84,351 | 323 | 4 | 2,244 | 8  | 95  | 3 | 1,072 | 4 | 3,734 | 19 |
| 84,352 | 323 | 4 | 2,250 | 8  | 95  | 3 | 1,076 | 4 | 3,744 | 19 |
| 84,353 | 325 | 4 | 2,225 | 8  | 95  | 3 | 1,072 | 4 | 3,717 | 19 |
| 84,354 | 319 | 4 | 2,158 | 8  | 93  | 3 | 1,046 | 4 | 3,616 | 19 |
| 84,355 | 307 | 4 | 2,035 | 9  | 91  | 3 | 1,017 | 4 | 3,450 | 20 |
| 84,356 | 305 | 4 | 2,020 | 10 | 91  | 3 | 1,010 | 4 | 3,426 | 21 |
| 84,357 | 282 | 4 | 1,920 | 11 | 82  | 3 | 896   | 4 | 3,180 | 22 |
| 84,358 | 276 | 4 | 1,875 | 13 | 82  | 3 | 879   | 6 | 3,112 | 26 |
| 84,359 | 267 | 3 | 1,765 | 13 | 76  | 3 | 841   | 6 | 2,949 | 25 |
| 84,360 | 256 | 3 | 1,690 | 16 | 73  | 3 | 808   | 6 | 2,827 | 28 |
| 84,361 | 193 | 2 | 1,302 | 17 | 55  | 2 | 519   | 7 | 2,069 | 28 |
| 84,362 | 185 | 2 | 1,152 | 17 | 52  | 2 | 477   | 7 | 1,866 | 28 |
| 84,363 | 142 | 3 | 974   | 16 | 41  | 2 | 387   | 7 | 1,544 | 28 |
| 84,364 | 142 | 3 | 967   | 16 | 41  | 1 | 384   | 7 | 1,534 | 27 |
| 84,365 | 142 | 3 | 956   | 16 | 41  | 1 | 384   | 7 | 1,523 | 27 |
| 84,366 | 141 | 3 | 954   | 16 | 41  | 1 | 384   | 7 | 1,520 | 27 |

|        |     |   |     |    |    |   |     |    |       |    |
|--------|-----|---|-----|----|----|---|-----|----|-------|----|
| 84,367 | 129 | 3 | 812 | 16 | 32 | 1 | 335 | 7  | 1,308 | 27 |
| 84,368 | 104 | 3 | 586 | 17 | 25 | 1 | 301 | 7  | 1,016 | 28 |
| 84,369 | 95  | 3 | 521 | 17 | 23 | 1 | 290 | 8  | 929   | 29 |
| 84,370 | 85  | 3 | 463 | 17 | 21 | 1 | 268 | 8  | 837   | 29 |
| 84,371 | 50  | 3 | 303 | 17 | 9  | 1 | 181 | 8  | 543   | 29 |
| 84,372 | 45  | 3 | 212 | 17 | 8  | 1 | 145 | 8  | 410   | 29 |
| 84,373 | 26  | 3 | 164 | 16 | 4  | 1 | 99  | 8  | 293   | 28 |
| 84,374 | 26  | 3 | 164 | 17 | 4  | 1 | 98  | 8  | 292   | 29 |
| 84,375 | 26  | 3 | 164 | 17 | 4  | 1 | 98  | 8  | 292   | 29 |
| 84,376 | 26  | 3 | 163 | 17 | 4  | 1 | 98  | 8  | 291   | 29 |
| 84,377 | 21  | 3 | 149 | 16 | 4  | 1 | 93  | 8  | 267   | 28 |
| 84,378 | 20  | 3 | 143 | 16 | 4  | 1 | 87  | 8  | 254   | 28 |
| 84,379 | 20  | 3 | 142 | 15 | 4  | 1 | 87  | 8  | 253   | 27 |
| 84,380 | 18  | 3 | 138 | 15 | 3  | 1 | 86  | 8  | 245   | 27 |
| 84,381 | 16  | 3 | 130 | 15 | 2  | 1 | 83  | 8  | 231   | 27 |
| 84,382 | 14  | 3 | 128 | 15 | 2  | 0 | 80  | 8  | 224   | 26 |
| 84,383 | 14  | 3 | 130 | 15 | 2  | 0 | 80  | 8  | 226   | 26 |
| 84,384 | 14  | 3 | 129 | 15 | 2  | 0 | 80  | 8  | 225   | 26 |
| 84,385 | 14  | 3 | 124 | 15 | 2  | 0 | 79  | 7  | 219   | 25 |
| 84,386 | 14  | 3 | 122 | 15 | 2  | 0 | 80  | 7  | 218   | 25 |
| 84,387 | 14  | 3 | 120 | 15 | 2  | 0 | 79  | 7  | 215   | 25 |
| 84,388 | 14  | 3 | 118 | 15 | 2  | 0 | 81  | 7  | 215   | 25 |
| 84,389 | 12  | 3 | 95  | 15 | 2  | 0 | 72  | 7  | 181   | 25 |
| 84,390 | 12  | 3 | 94  | 15 | 2  | 0 | 71  | 7  | 179   | 25 |
| 84,391 | 9   | 3 | 59  | 14 | 1  | 0 | 36  | 7  | 105   | 24 |
| 84,392 | 8   | 3 | 59  | 14 | 1  | 0 | 36  | 7  | 104   | 24 |
| 84,393 | 8   | 3 | 60  | 14 | 1  | 0 | 36  | 6  | 105   | 23 |
| 84,394 | 8   | 2 | 58  | 12 | 1  | 0 | 35  | 5  | 102   | 19 |
| 84,395 | 8   | 2 | 54  | 11 | 1  | 0 | 29  | 5  | 92    | 18 |
| 84,396 | 9   | 2 | 55  | 11 | 1  | 0 | 31  | 5  | 96    | 18 |
| 84,397 | 9   | 2 | 53  | 13 | 1  | 0 | 30  | 5  | 93    | 20 |
| 84,398 | 7   | 2 | 50  | 14 | 0  | 0 | 25  | 4  | 82    | 20 |
| 84,399 | 7   | 2 | 54  | 14 | 1  | 0 | 27  | 4  | 89    | 20 |
| 84,400 | 6   | 2 | 54  | 14 | 1  | 0 | 26  | 4  | 87    | 20 |
| 84,401 | 5   | 1 | 53  | 14 | 1  | 0 | 29  | 4  | 88    | 19 |
| 84,402 | 5   | 1 | 51  | 30 | 2  | 0 | 30  | 12 | 88    | 43 |
| 84,403 | 2   | 1 | 47  | 32 | 2  | 0 | 26  | 14 | 77    | 47 |
| 84,404 | 2   | 1 | 59  | 35 | 2  | 0 | 26  | 16 | 89    | 52 |
| 84,405 | 3   | 1 | 65  | 39 | 3  | 0 | 31  | 18 | 102   | 58 |
| 84,406 | 3   | 1 | 68  | 48 | 3  | 0 | 37  | 25 | 111   | 74 |
| 84,407 | 3   | 1 | 68  | 49 | 3  | 1 | 37  | 26 | 111   | 77 |

|        |    |     |     |       |   |    |    |     |     |       |
|--------|----|-----|-----|-------|---|----|----|-----|-----|-------|
| 84,408 | 3  | 1   | 73  | 49    | 3 | 1  | 38 | 29  | 117 | 80    |
| 84,409 | 3  | 1   | 73  | 56    | 3 | 1  | 37 | 30  | 116 | 88    |
| 84,410 | 3  | 7   | 72  | 66    | 3 | 1  | 37 | 33  | 115 | 107   |
| 84,411 | 3  | 7   | 70  | 76    | 3 | 1  | 37 | 40  | 113 | 124   |
| 84,412 | 3  | 17  | 71  | 152   | 4 | 2  | 37 | 121 | 115 | 292   |
| 84,413 | 3  | 17  | 70  | 162   | 4 | 4  | 37 | 130 | 114 | 313   |
| 84,414 | 3  | 18  | 81  | 192   | 5 | 4  | 39 | 150 | 128 | 364   |
| 84,415 | 6  | 18  | 94  | 199   | 6 | 4  | 40 | 152 | 146 | 373   |
| 84,416 | 6  | 18  | 96  | 200   | 6 | 4  | 41 | 152 | 149 | 374   |
| 84,417 | 6  | 19  | 96  | 200   | 6 | 4  | 41 | 155 | 149 | 378   |
| 84,418 | 11 | 27  | 98  | 229   | 6 | 5  | 45 | 174 | 160 | 435   |
| 84,419 | 11 | 28  | 98  | 231   | 6 | 5  | 45 | 174 | 160 | 438   |
| 84,420 | 11 | 28  | 99  | 244   | 6 | 6  | 46 | 178 | 162 | 456   |
| 84,421 | 11 | 28  | 100 | 248   | 6 | 6  | 46 | 181 | 163 | 463   |
| 84,422 | 11 | 32  | 100 | 290   | 6 | 6  | 46 | 202 | 163 | 530   |
| 84,423 | 11 | 32  | 100 | 290   | 6 | 6  | 46 | 202 | 163 | 530   |
| 84,424 | 11 | 32  | 100 | 291   | 6 | 6  | 46 | 203 | 163 | 532   |
| 84,425 | 11 | 33  | 100 | 292   | 6 | 6  | 46 | 203 | 163 | 534   |
| 84,426 | 11 | 33  | 100 | 292   | 6 | 6  | 46 | 203 | 163 | 534   |
| 84,427 | 11 | 33  | 101 | 293   | 6 | 6  | 47 | 203 | 165 | 535   |
| 84,428 | 11 | 33  | 101 | 294   | 6 | 6  | 47 | 203 | 165 | 536   |
| 84,429 | 11 | 33  | 101 | 293   | 6 | 6  | 47 | 203 | 165 | 535   |
| 84,430 | 11 | 33  | 101 | 296   | 6 | 6  | 48 | 203 | 166 | 538   |
| 84,431 | 11 | 33  | 101 | 310   | 6 | 8  | 48 | 213 | 166 | 564   |
| 84,432 | 11 | 33  | 100 | 325   | 6 | 9  | 48 | 223 | 165 | 590   |
| 84,433 | 11 | 38  | 100 | 378   | 6 | 14 | 49 | 282 | 166 | 712   |
| 84,434 | 11 | 42  | 99  | 403   | 6 | 18 | 52 | 301 | 168 | 764   |
| 84,435 | 11 | 82  | 107 | 978   | 7 | 46 | 54 | 587 | 179 | 1,693 |
| 84,436 | 11 | 88  | 107 | 1,066 | 7 | 52 | 53 | 624 | 178 | 1,830 |
| 84,437 | 11 | 91  | 107 | 1,096 | 7 | 54 | 52 | 648 | 177 | 1,889 |
| 84,438 | 13 | 109 | 112 | 1,283 | 7 | 65 | 52 | 765 | 184 | 2,222 |
| 84,439 | 13 | 109 | 112 | 1,309 | 7 | 66 | 49 | 773 | 181 | 2,257 |
| 84,440 | 13 | 109 | 111 | 1,323 | 7 | 66 | 49 | 775 | 180 | 2,273 |
| 84,441 | 13 | 110 | 111 | 1,337 | 7 | 66 | 49 | 780 | 180 | 2,293 |
| 84,442 | 14 | 110 | 113 | 1,341 | 7 | 66 | 49 | 780 | 183 | 2,297 |
| 84,443 | 14 | 112 | 113 | 1,344 | 7 | 67 | 49 | 781 | 183 | 2,304 |
| 84,444 | 14 | 112 | 112 | 1,344 | 7 | 67 | 49 | 781 | 182 | 2,304 |
| 84,445 | 14 | 112 | 112 | 1,344 | 7 | 67 | 50 | 781 | 183 | 2,304 |
| 84,446 | 13 | 112 | 112 | 1,346 | 7 | 67 | 50 | 782 | 182 | 2,307 |
| 84,447 | 12 | 112 | 108 | 1,346 | 7 | 67 | 47 | 782 | 174 | 2,307 |
| 84,448 | 12 | 112 | 109 | 1,343 | 7 | 67 | 48 | 782 | 176 | 2,304 |

|        |    |     |     |       |   |    |    |       |     |       |
|--------|----|-----|-----|-------|---|----|----|-------|-----|-------|
| 84,449 | 12 | 112 | 109 | 1,343 | 7 | 67 | 48 | 782   | 176 | 2,304 |
| 84,450 | 12 | 112 | 105 | 1,344 | 6 | 67 | 47 | 783   | 170 | 2,306 |
| 84,451 | 12 | 113 | 104 | 1,349 | 6 | 67 | 43 | 786   | 165 | 2,315 |
| 84,452 | 12 | 113 | 102 | 1,358 | 6 | 68 | 43 | 789   | 163 | 2,328 |
| 84,453 | 12 | 113 | 93  | 1,363 | 5 | 69 | 37 | 790   | 147 | 2,335 |
| 84,454 | 13 | 113 | 89  | 1,368 | 5 | 69 | 33 | 793   | 140 | 2,343 |
| 84,455 | 12 | 113 | 84  | 1,365 | 5 | 69 | 30 | 790   | 131 | 2,337 |
| 84,456 | 12 | 113 | 83  | 1,367 | 4 | 71 | 29 | 792   | 128 | 2,343 |
| 84,457 | 12 | 113 | 78  | 1,359 | 4 | 72 | 24 | 786   | 118 | 2,330 |
| 84,458 | 12 | 115 | 73  | 1,363 | 4 | 71 | 23 | 786   | 112 | 2,335 |
| 84,459 | 12 | 115 | 73  | 1,362 | 4 | 71 | 23 | 783   | 112 | 2,331 |
| 84,460 | 12 | 109 | 75  | 1,350 | 4 | 71 | 25 | 778   | 116 | 2,308 |
| 84,461 | 12 | 119 | 75  | 1,412 | 4 | 74 | 25 | 819   | 116 | 2,424 |
| 84,462 | 12 | 119 | 75  | 1,412 | 4 | 74 | 25 | 820   | 116 | 2,425 |
| 84,463 | 12 | 109 | 74  | 1,413 | 4 | 74 | 25 | 781   | 115 | 2,377 |
| 84,464 | 12 | 114 | 72  | 1,451 | 4 | 75 | 24 | 792   | 112 | 2,432 |
| 84,465 | 12 | 112 | 61  | 1,444 | 3 | 75 | 23 | 785   | 99  | 2,416 |
| 84,466 | 9  | 115 | 48  | 1,459 | 2 | 78 | 22 | 789   | 81  | 2,441 |
| 84,467 | 9  | 121 | 44  | 1,484 | 2 | 79 | 21 | 812   | 76  | 2,496 |
| 84,468 | 5  | 121 | 41  | 1,512 | 2 | 80 | 18 | 825   | 66  | 2,538 |
| 84,469 | 4  | 114 | 41  | 1,495 | 2 | 81 | 17 | 822   | 64  | 2,512 |
| 84,470 | 4  | 114 | 39  | 1,487 | 2 | 80 | 16 | 819   | 61  | 2,500 |
| 84,471 | 4  | 115 | 38  | 1,496 | 2 | 80 | 16 | 824   | 60  | 2,515 |
| 84,472 | 4  | 115 | 38  | 1,494 | 2 | 80 | 16 | 821   | 60  | 2,510 |
| 84,473 | 4  | 112 | 38  | 1,490 | 2 | 80 | 16 | 805   | 60  | 2,487 |
| 84,474 | 4  | 112 | 38  | 1,489 | 2 | 80 | 16 | 806   | 60  | 2,487 |
| 84,475 | 6  | 112 | 40  | 1,489 | 2 | 80 | 16 | 806   | 64  | 2,487 |
| 84,476 | 6  | 111 | 40  | 1,490 | 2 | 81 | 16 | 806   | 64  | 2,488 |
| 84,477 | 6  | 112 | 40  | 1,508 | 3 | 82 | 16 | 821   | 65  | 2,523 |
| 84,478 | 6  | 112 | 39  | 1,517 | 3 | 82 | 15 | 832   | 63  | 2,543 |
| 84,479 | 6  | 113 | 39  | 1,522 | 3 | 82 | 15 | 838   | 63  | 2,555 |
| 84,480 | 6  | 117 | 39  | 1,644 | 3 | 91 | 14 | 956   | 62  | 2,808 |
| 84,481 | 6  | 120 | 40  | 1,679 | 3 | 92 | 14 | 972   | 63  | 2,863 |
| 84,482 | 6  | 143 | 40  | 1,788 | 3 | 92 | 14 | 1,081 | 63  | 3,104 |
| 84,483 | 6  | 144 | 40  | 1,781 | 3 | 91 | 13 | 1,072 | 62  | 3,088 |
| 84,484 | 6  | 142 | 41  | 1,749 | 3 | 87 | 11 | 1,036 | 61  | 3,014 |
| 84,485 | 6  | 142 | 40  | 1,776 | 3 | 84 | 10 | 1,035 | 59  | 3,037 |
| 84,486 | 6  | 102 | 32  | 1,212 | 2 | 57 | 8  | 758   | 48  | 2,129 |
| 84,487 | 6  | 101 | 33  | 1,159 | 2 | 50 | 8  | 714   | 49  | 2,024 |
| 84,488 | 6  | 101 | 33  | 1,164 | 2 | 50 | 8  | 715   | 49  | 2,030 |
| 84,489 | 4  | 83  | 28  | 963   | 2 | 39 | 8  | 592   | 42  | 1,677 |

|        |   |     |    |       |   |     |    |       |    |       |
|--------|---|-----|----|-------|---|-----|----|-------|----|-------|
| 84,490 | 4 | 83  | 28 | 952   | 2 | 39  | 8  | 590   | 42 | 1,664 |
| 84,491 | 4 | 83  | 28 | 956   | 2 | 39  | 8  | 593   | 42 | 1,671 |
| 84,492 | 4 | 80  | 26 | 945   | 2 | 38  | 8  | 595   | 40 | 1,658 |
| 84,493 | 3 | 81  | 29 | 966   | 3 | 38  | 10 | 602   | 45 | 1,687 |
| 84,494 | 3 | 83  | 29 | 983   | 3 | 39  | 10 | 611   | 45 | 1,716 |
| 84,495 | 3 | 83  | 29 | 983   | 3 | 39  | 11 | 611   | 46 | 1,716 |
| 84,496 | 3 | 83  | 31 | 984   | 3 | 39  | 10 | 612   | 47 | 1,718 |
| 84,497 | 3 | 83  | 31 | 988   | 3 | 39  | 10 | 615   | 47 | 1,725 |
| 84,498 | 3 | 83  | 31 | 991   | 3 | 39  | 9  | 616   | 46 | 1,729 |
| 84,499 | 3 | 90  | 31 | 1,039 | 3 | 42  | 9  | 650   | 46 | 1,821 |
| 84,500 | 3 | 98  | 31 | 1,137 | 3 | 47  | 9  | 724   | 46 | 2,006 |
| 84,501 | 3 | 99  | 29 | 1,171 | 3 | 49  | 7  | 730   | 42 | 2,049 |
| 84,502 | 3 | 100 | 29 | 1,211 | 3 | 51  | 7  | 758   | 42 | 2,120 |
| 84,503 | 3 | 104 | 29 | 1,306 | 3 | 51  | 7  | 765   | 42 | 2,226 |
| 84,504 | 3 | 107 | 29 | 1,310 | 3 | 51  | 7  | 781   | 42 | 2,249 |
| 84,505 | 2 | 112 | 16 | 1,325 | 3 | 53  | 7  | 781   | 28 | 2,271 |
| 84,506 | 2 | 214 | 15 | 1,937 | 3 | 113 | 6  | 1,245 | 26 | 3,509 |
| 84,507 | 2 | 217 | 15 | 2,021 | 3 | 115 | 6  | 1,275 | 26 | 3,628 |
| 84,508 | 2 | 227 | 14 | 2,157 | 3 | 120 | 5  | 1,329 | 24 | 3,833 |
| 84,509 | 2 | 230 | 12 | 2,194 | 3 | 125 | 4  | 1,346 | 21 | 3,895 |
| 84,510 | 2 | 251 | 12 | 2,285 | 3 | 130 | 4  | 1,401 | 21 | 4,067 |
| 84,511 | 2 | 252 | 12 | 2,280 | 3 | 130 | 3  | 1,400 | 20 | 4,062 |
| 84,512 | 2 | 242 | 12 | 2,236 | 3 | 129 | 3  | 1,370 | 20 | 3,977 |
| 84,513 | 2 | 242 | 12 | 2,225 | 2 | 129 | 3  | 1,368 | 19 | 3,964 |
| 84,514 | 2 | 253 | 12 | 2,185 | 2 | 129 | 3  | 1,332 | 19 | 3,899 |
| 84,515 | 2 | 250 | 12 | 2,130 | 2 | 126 | 3  | 1,300 | 19 | 3,806 |
| 84,516 | 2 | 250 | 12 | 2,130 | 2 | 126 | 3  | 1,300 | 19 | 3,806 |
| 84,517 | 2 | 244 | 13 | 2,094 | 2 | 121 | 3  | 1,275 | 20 | 3,734 |
| 84,518 | 2 | 245 | 13 | 2,111 | 2 | 121 | 3  | 1,283 | 20 | 3,760 |
| 84,519 | 2 | 246 | 15 | 2,106 | 2 | 122 | 5  | 1,287 | 24 | 3,761 |
| 84,520 | 2 | 245 | 15 | 2,094 | 2 | 120 | 5  | 1,271 | 24 | 3,730 |
| 84,521 | 2 | 246 | 16 | 2,100 | 2 | 123 | 5  | 1,285 | 25 | 3,754 |
| 84,522 | 2 | 246 | 16 | 2,100 | 2 | 123 | 5  | 1,284 | 25 | 3,753 |
| 84,523 | 2 | 246 | 16 | 2,067 | 2 | 123 | 5  | 1,280 | 25 | 3,716 |
| 84,524 | 2 | 253 | 16 | 2,136 | 2 | 132 | 6  | 1,344 | 26 | 3,865 |
| 84,525 | 0 | 253 | 14 | 2,139 | 2 | 132 | 6  | 1,342 | 22 | 3,866 |
| 84,526 | 0 | 253 | 14 | 2,159 | 2 | 133 | 6  | 1,353 | 22 | 3,898 |
| 84,527 | 0 | 263 | 14 | 2,161 | 2 | 134 | 6  | 1,345 | 22 | 3,903 |
| 84,528 | 0 | 262 | 14 | 2,168 | 1 | 134 | 6  | 1,346 | 21 | 3,910 |
| 84,529 | 0 | 265 | 14 | 2,162 | 1 | 134 | 6  | 1,333 | 21 | 3,894 |
| 84,530 | 0 | 264 | 14 | 2,160 | 1 | 134 | 5  | 1,327 | 20 | 3,885 |

|        |   |     |    |       |   |     |    |       |    |       |
|--------|---|-----|----|-------|---|-----|----|-------|----|-------|
| 84,531 | 0 | 260 | 14 | 2,038 | 1 | 125 | 5  | 1,207 | 20 | 3,630 |
| 84,532 | 0 | 257 | 14 | 2,005 | 1 | 124 | 6  | 1,190 | 21 | 3,576 |
| 84,533 | 0 | 233 | 17 | 1,877 | 1 | 124 | 6  | 1,078 | 24 | 3,312 |
| 84,534 | 0 | 233 | 17 | 1,877 | 1 | 124 | 6  | 1,077 | 24 | 3,311 |
| 84,535 | 0 | 218 | 19 | 1,730 | 1 | 120 | 5  | 1,016 | 25 | 3,084 |
| 84,536 | 0 | 218 | 19 | 1,730 | 1 | 120 | 5  | 1,016 | 25 | 3,084 |
| 84,537 | 1 | 218 | 18 | 1,730 | 1 | 120 | 5  | 1,016 | 25 | 3,084 |
| 84,538 | 1 | 218 | 18 | 1,731 | 1 | 120 | 5  | 1,016 | 25 | 3,085 |
| 84,539 | 1 | 218 | 20 | 1,729 | 1 | 120 | 5  | 1,017 | 27 | 3,084 |
| 84,540 | 1 | 218 | 20 | 1,720 | 1 | 119 | 5  | 1,015 | 27 | 3,072 |
| 84,541 | 3 | 218 | 23 | 1,705 | 1 | 119 | 11 | 1,008 | 38 | 3,050 |
| 84,542 | 3 | 219 | 24 | 1,721 | 1 | 119 | 13 | 1,016 | 41 | 3,075 |
| 84,543 | 3 | 221 | 24 | 1,741 | 1 | 120 | 13 | 1,026 | 41 | 3,108 |
| 84,544 | 3 | 222 | 21 | 1,736 | 0 | 121 | 12 | 1,027 | 36 | 3,106 |
| 84,545 | 3 | 222 | 20 | 1,750 | 0 | 121 | 12 | 1,029 | 35 | 3,122 |
| 84,546 | 3 | 222 | 20 | 1,752 | 0 | 121 | 12 | 1,030 | 35 | 3,125 |
| 84,547 | 5 | 222 | 20 | 1,747 | 0 | 122 | 12 | 1,031 | 37 | 3,122 |
| 84,548 | 5 | 225 | 20 | 1,765 | 0 | 124 | 12 | 1,044 | 37 | 3,158 |
| 84,549 | 5 | 226 | 19 | 1,766 | 0 | 124 | 12 | 1,046 | 36 | 3,162 |
| 84,550 | 5 | 233 | 19 | 1,765 | 0 | 122 | 12 | 1,040 | 36 | 3,160 |
| 84,551 | 5 | 225 | 19 | 1,670 | 0 | 117 | 12 | 969   | 36 | 2,981 |
| 84,552 | 5 | 224 | 19 | 1,636 | 0 | 116 | 12 | 962   | 36 | 2,938 |
| 84,553 | 5 | 228 | 19 | 1,624 | 0 | 116 | 12 | 944   | 36 | 2,912 |
| 84,554 | 5 | 224 | 19 | 1,534 | 0 | 115 | 12 | 933   | 36 | 2,806 |
| 84,555 | 5 | 223 | 20 | 1,517 | 0 | 114 | 12 | 908   | 37 | 2,762 |
| 84,556 | 5 | 115 | 20 | 891   | 0 | 51  | 12 | 455   | 37 | 1,512 |
| 84,557 | 5 | 115 | 20 | 897   | 0 | 51  | 12 | 457   | 37 | 1,520 |
| 84,558 | 5 | 117 | 20 | 848   | 0 | 47  | 12 | 432   | 37 | 1,444 |
| 84,559 | 5 | 126 | 20 | 857   | 0 | 49  | 12 | 417   | 37 | 1,449 |
| 84,560 | 5 | 129 | 20 | 925   | 0 | 50  | 12 | 491   | 37 | 1,595 |
| 84,561 | 5 | 108 | 20 | 834   | 0 | 45  | 12 | 438   | 37 | 1,425 |
| 84,562 | 5 | 112 | 23 | 914   | 0 | 43  | 13 | 446   | 41 | 1,515 |
| 84,563 | 5 | 122 | 24 | 959   | 0 | 47  | 13 | 467   | 42 | 1,595 |
| 84,564 | 5 | 122 | 24 | 965   | 0 | 47  | 13 | 469   | 42 | 1,603 |
| 84,565 | 7 | 111 | 26 | 945   | 0 | 46  | 16 | 461   | 49 | 1,563 |
| 84,566 | 7 | 109 | 29 | 960   | 0 | 49  | 16 | 464   | 52 | 1,582 |
| 84,567 | 7 | 111 | 36 | 997   | 0 | 52  | 22 | 480   | 65 | 1,640 |
| 84,568 | 7 | 110 | 35 | 1,054 | 0 | 54  | 22 | 500   | 64 | 1,718 |
| 84,569 | 7 | 110 | 36 | 1,132 | 0 | 55  | 22 | 514   | 65 | 1,811 |
| 84,570 | 7 | 112 | 34 | 1,165 | 0 | 58  | 20 | 525   | 61 | 1,860 |
| 84,571 | 7 | 141 | 33 | 1,393 | 0 | 74  | 20 | 610   | 60 | 2,218 |

|        |   |     |    |       |   |     |    |       |    |       |
|--------|---|-----|----|-------|---|-----|----|-------|----|-------|
| 84,572 | 7 | 160 | 33 | 1,755 | 0 | 89  | 20 | 684   | 60 | 2,688 |
| 84,573 | 7 | 202 | 33 | 1,988 | 0 | 109 | 20 | 797   | 60 | 3,096 |
| 84,574 | 7 | 214 | 33 | 2,237 | 0 | 115 | 20 | 829   | 60 | 3,395 |
| 84,575 | 7 | 200 | 33 | 2,176 | 0 | 103 | 19 | 753   | 59 | 3,232 |
| 84,576 | 7 | 203 | 33 | 2,207 | 0 | 104 | 19 | 755   | 59 | 3,269 |
| 84,577 | 7 | 203 | 33 | 2,211 | 0 | 104 | 19 | 755   | 59 | 3,273 |
| 84,578 | 7 | 202 | 33 | 2,217 | 0 | 104 | 19 | 756   | 59 | 3,279 |
| 84,579 | 7 | 202 | 33 | 2,220 | 0 | 104 | 19 | 756   | 59 | 3,282 |
| 84,580 | 7 | 201 | 35 | 2,217 | 0 | 105 | 19 | 756   | 61 | 3,279 |
| 84,581 | 7 | 201 | 35 | 2,216 | 0 | 105 | 19 | 757   | 61 | 3,279 |
| 84,582 | 7 | 204 | 35 | 2,219 | 0 | 105 | 19 | 760   | 61 | 3,288 |
| 84,583 | 7 | 204 | 33 | 2,215 | 0 | 105 | 18 | 760   | 58 | 3,284 |
| 84,584 | 7 | 204 | 33 | 2,214 | 0 | 104 | 18 | 756   | 58 | 3,278 |
| 84,585 | 7 | 204 | 33 | 2,217 | 0 | 104 | 18 | 760   | 58 | 3,285 |
| 84,586 | 8 | 205 | 32 | 2,233 | 0 | 105 | 18 | 778   | 58 | 3,321 |
| 84,587 | 8 | 205 | 32 | 2,274 | 0 | 111 | 18 | 832   | 58 | 3,422 |
| 84,588 | 8 | 281 | 41 | 3,436 | 1 | 144 | 21 | 1,285 | 71 | 5,146 |
| 84,589 | 8 | 291 | 41 | 3,500 | 1 | 146 | 21 | 1,316 | 71 | 5,253 |
| 84,590 | 8 | 292 | 43 | 3,502 | 1 | 147 | 23 | 1,316 | 75 | 5,257 |
| 84,591 | 8 | 293 | 50 | 3,511 | 1 | 147 | 23 | 1,318 | 82 | 5,269 |
| 84,592 | 6 | 307 | 48 | 3,580 | 1 | 155 | 18 | 1,347 | 73 | 5,389 |
| 84,593 | 6 | 307 | 47 | 3,585 | 1 | 156 | 16 | 1,345 | 70 | 5,393 |
| 84,594 | 6 | 306 | 55 | 3,581 | 2 | 155 | 18 | 1,342 | 81 | 5,384 |
| 84,595 | 7 | 305 | 55 | 3,568 | 2 | 154 | 18 | 1,332 | 82 | 5,359 |
| 84,596 | 7 | 303 | 55 | 3,544 | 2 | 153 | 18 | 1,320 | 82 | 5,320 |
| 84,597 | 7 | 303 | 56 | 3,538 | 2 | 152 | 18 | 1,312 | 83 | 5,305 |
| 84,598 | 5 | 304 | 55 | 3,544 | 2 | 152 | 18 | 1,316 | 80 | 5,316 |
| 84,599 | 5 | 301 | 55 | 3,533 | 2 | 150 | 18 | 1,304 | 80 | 5,288 |
| 84,600 | 5 | 300 | 55 | 3,534 | 2 | 150 | 18 | 1,304 | 80 | 5,288 |
| 84,601 | 5 | 287 | 55 | 3,488 | 2 | 149 | 18 | 1,278 | 80 | 5,202 |
| 84,602 | 5 | 287 | 55 | 3,483 | 2 | 150 | 18 | 1,277 | 80 | 5,197 |
| 84,603 | 5 | 287 | 56 | 3,493 | 2 | 150 | 18 | 1,291 | 81 | 5,221 |
| 84,604 | 5 | 284 | 56 | 3,469 | 2 | 150 | 18 | 1,285 | 81 | 5,188 |
| 84,605 | 5 | 285 | 55 | 3,460 | 2 | 150 | 18 | 1,288 | 80 | 5,183 |
| 84,606 | 6 | 284 | 55 | 3,448 | 2 | 150 | 18 | 1,282 | 81 | 5,164 |
| 84,607 | 6 | 284 | 55 | 3,450 | 2 | 150 | 18 | 1,285 | 81 | 5,169 |
| 84,608 | 6 | 285 | 59 | 3,464 | 2 | 151 | 24 | 1,292 | 91 | 5,192 |
| 84,609 | 6 | 280 | 59 | 3,429 | 2 | 151 | 24 | 1,288 | 91 | 5,148 |
| 84,610 | 6 | 256 | 59 | 3,196 | 2 | 139 | 24 | 1,163 | 91 | 4,754 |
| 84,611 | 6 | 256 | 59 | 3,200 | 2 | 139 | 24 | 1,167 | 91 | 4,762 |
| 84,612 | 6 | 257 | 58 | 3,209 | 2 | 141 | 23 | 1,194 | 89 | 4,801 |



|        |   |     |    |       |   |     |    |       |    |       |
|--------|---|-----|----|-------|---|-----|----|-------|----|-------|
| 84,613 | 6 | 257 | 56 | 3,150 | 2 | 144 | 23 | 1,210 | 87 | 4,761 |
| 84,614 | 6 | 249 | 55 | 3,109 | 2 | 141 | 23 | 1,188 | 86 | 4,687 |
| 84,615 | 4 | 250 | 53 | 3,107 | 2 | 142 | 20 | 1,186 | 79 | 4,685 |
| 84,616 | 4 | 250 | 50 | 3,096 | 2 | 142 | 20 | 1,189 | 76 | 4,677 |
| 84,617 | 4 | 250 | 45 | 3,066 | 2 | 139 | 14 | 1,184 | 65 | 4,639 |
| 84,618 | 4 | 247 | 44 | 2,963 | 2 | 136 | 14 | 1,148 | 64 | 4,494 |
| 84,619 | 4 | 248 | 45 | 2,964 | 2 | 136 | 14 | 1,148 | 65 | 4,496 |
| 84,620 | 4 | 247 | 47 | 2,872 | 3 | 135 | 15 | 1,129 | 69 | 4,383 |
| 84,621 | 4 | 243 | 47 | 2,819 | 3 | 130 | 15 | 1,105 | 69 | 4,297 |
| 84,622 | 4 | 214 | 47 | 2,596 | 3 | 114 | 15 | 1,021 | 69 | 3,945 |
| 84,623 | 4 | 195 | 47 | 2,241 | 3 | 97  | 15 | 962   | 69 | 3,495 |
| 84,624 | 4 | 152 | 47 | 2,006 | 3 | 77  | 15 | 849   | 69 | 3,084 |
| 84,625 | 4 | 140 | 47 | 1,758 | 3 | 72  | 15 | 823   | 69 | 2,793 |
| 84,626 | 4 | 139 | 47 | 1,723 | 3 | 72  | 15 | 830   | 69 | 2,764 |
| 84,627 | 4 | 136 | 48 | 1,695 | 3 | 71  | 14 | 827   | 69 | 2,729 |
| 84,628 | 4 | 137 | 48 | 1,700 | 3 | 71  | 14 | 834   | 69 | 2,742 |
| 84,629 | 4 | 137 | 48 | 1,691 | 3 | 71  | 14 | 833   | 69 | 2,732 |
| 84,630 | 4 | 137 | 46 | 1,690 | 3 | 70  | 15 | 834   | 68 | 2,731 |
| 84,631 | 4 | 139 | 46 | 1,698 | 3 | 72  | 15 | 849   | 68 | 2,758 |
| 84,632 | 4 | 139 | 46 | 1,698 | 3 | 72  | 15 | 852   | 68 | 2,761 |
| 84,633 | 4 | 137 | 47 | 1,710 | 3 | 72  | 16 | 862   | 70 | 2,781 |
| 84,634 | 4 | 138 | 46 | 1,708 | 3 | 72  | 16 | 863   | 69 | 2,781 |
| 84,635 | 4 | 138 | 48 | 1,708 | 3 | 72  | 16 | 863   | 71 | 2,781 |
| 84,636 | 4 | 138 | 48 | 1,720 | 3 | 72  | 16 | 870   | 71 | 2,800 |
| 84,637 | 3 | 137 | 47 | 1,706 | 3 | 71  | 16 | 854   | 69 | 2,768 |
| 84,638 | 2 | 137 | 64 | 1,669 | 6 | 65  | 24 | 800   | 96 | 2,671 |
| 84,639 | 3 | 51  | 59 | 460   | 6 | 31  | 23 | 325   | 91 | 867   |
| 84,640 | 3 | 54  | 59 | 497   | 6 | 33  | 23 | 351   | 91 | 935   |
| 84,641 | 3 | 53  | 55 | 497   | 6 | 32  | 21 | 355   | 85 | 937   |
| 84,642 | 3 | 57  | 47 | 546   | 6 | 33  | 20 | 382   | 76 | 1,018 |
| 84,643 | 3 | 44  | 47 | 500   | 6 | 27  | 20 | 368   | 76 | 939   |
| 84,644 | 3 | 42  | 39 | 470   | 5 | 26  | 18 | 356   | 65 | 894   |
| 84,645 | 2 | 42  | 39 | 474   | 5 | 26  | 18 | 360   | 64 | 902   |
| 84,646 | 2 | 43  | 40 | 496   | 5 | 26  | 18 | 373   | 65 | 938   |
| 84,647 | 2 | 43  | 41 | 528   | 5 | 27  | 18 | 404   | 66 | 1,002 |
| 84,648 | 2 | 43  | 40 | 527   | 5 | 27  | 18 | 403   | 65 | 1,000 |
| 84,649 | 2 | 46  | 40 | 545   | 5 | 28  | 18 | 399   | 65 | 1,018 |
| 84,650 | 4 | 47  | 53 | 576   | 5 | 29  | 25 | 408   | 87 | 1,060 |
| 84,651 | 4 | 47  | 53 | 582   | 5 | 29  | 25 | 412   | 87 | 1,070 |
| 84,652 | 4 | 47  | 54 | 596   | 5 | 28  | 25 | 422   | 88 | 1,093 |
| 84,653 | 4 | 47  | 54 | 601   | 5 | 28  | 27 | 428   | 90 | 1,104 |

|        |    |    |     |       |   |    |    |     |     |       |
|--------|----|----|-----|-------|---|----|----|-----|-----|-------|
| 84,654 | 5  | 48 | 54  | 603   | 5 | 27 | 27 | 417 | 91  | 1,095 |
| 84,655 | 5  | 45 | 55  | 596   | 5 | 25 | 27 | 412 | 92  | 1,078 |
| 84,656 | 4  | 44 | 56  | 586   | 5 | 26 | 27 | 405 | 92  | 1,061 |
| 84,657 | 4  | 51 | 56  | 635   | 5 | 28 | 27 | 483 | 92  | 1,197 |
| 84,658 | 4  | 53 | 52  | 693   | 5 | 28 | 22 | 512 | 83  | 1,286 |
| 84,659 | 8  | 53 | 70  | 717   | 5 | 28 | 28 | 516 | 111 | 1,314 |
| 84,660 | 8  | 56 | 71  | 745   | 5 | 29 | 29 | 531 | 113 | 1,361 |
| 84,661 | 8  | 56 | 71  | 764   | 5 | 30 | 29 | 538 | 113 | 1,388 |
| 84,662 | 8  | 56 | 71  | 769   | 5 | 30 | 29 | 539 | 113 | 1,394 |
| 84,663 | 8  | 55 | 73  | 764   | 5 | 28 | 29 | 512 | 115 | 1,359 |
| 84,664 | 8  | 50 | 76  | 729   | 5 | 26 | 29 | 482 | 118 | 1,287 |
| 84,665 | 8  | 55 | 76  | 740   | 5 | 26 | 29 | 500 | 118 | 1,321 |
| 84,666 | 8  | 54 | 76  | 740   | 5 | 25 | 29 | 499 | 118 | 1,318 |
| 84,667 | 8  | 60 | 90  | 786   | 6 | 26 | 31 | 518 | 135 | 1,390 |
| 84,668 | 8  | 60 | 89  | 784   | 6 | 24 | 31 | 513 | 134 | 1,381 |
| 84,669 | 8  | 63 | 89  | 837   | 6 | 28 | 35 | 527 | 138 | 1,455 |
| 84,670 | 8  | 62 | 89  | 842   | 6 | 28 | 35 | 531 | 138 | 1,463 |
| 84,671 | 8  | 62 | 86  | 840   | 5 | 28 | 34 | 526 | 133 | 1,456 |
| 84,672 | 8  | 64 | 86  | 842   | 5 | 29 | 34 | 526 | 133 | 1,461 |
| 84,673 | 8  | 65 | 94  | 840   | 6 | 29 | 36 | 526 | 144 | 1,460 |
| 84,674 | 8  | 64 | 95  | 815   | 6 | 28 | 37 | 499 | 146 | 1,406 |
| 84,675 | 8  | 64 | 95  | 816   | 6 | 28 | 37 | 501 | 146 | 1,409 |
| 84,676 | 11 | 60 | 112 | 789   | 7 | 26 | 47 | 476 | 177 | 1,351 |
| 84,677 | 13 | 60 | 135 | 795   | 7 | 26 | 50 | 477 | 205 | 1,358 |
| 84,678 | 13 | 59 | 136 | 784   | 7 | 26 | 50 | 468 | 206 | 1,337 |
| 84,679 | 13 | 59 | 137 | 784   | 7 | 26 | 50 | 468 | 207 | 1,337 |
| 84,680 | 15 | 58 | 143 | 775   | 8 | 26 | 54 | 465 | 220 | 1,324 |
| 84,681 | 15 | 58 | 143 | 775   | 8 | 26 | 53 | 465 | 219 | 1,324 |
| 84,682 | 15 | 57 | 155 | 771   | 9 | 25 | 57 | 452 | 236 | 1,305 |
| 84,683 | 15 | 57 | 154 | 780   | 9 | 28 | 57 | 462 | 235 | 1,327 |
| 84,684 | 15 | 64 | 153 | 1,083 | 9 | 34 | 57 | 573 | 234 | 1,754 |
| 84,685 | 15 | 77 | 155 | 1,211 | 9 | 41 | 58 | 668 | 237 | 1,997 |
| 84,686 | 15 | 79 | 151 | 1,213 | 9 | 41 | 56 | 661 | 231 | 1,994 |
| 84,687 | 15 | 81 | 150 | 1,255 | 7 | 42 | 56 | 679 | 228 | 2,057 |
| 84,688 | 15 | 83 | 139 | 1,269 | 6 | 42 | 50 | 683 | 210 | 2,077 |
| 84,689 | 14 | 88 | 135 | 1,301 | 5 | 43 | 49 | 716 | 203 | 2,148 |
| 84,690 | 14 | 93 | 136 | 1,267 | 5 | 42 | 51 | 697 | 206 | 2,099 |
| 84,691 | 14 | 93 | 136 | 1,267 | 5 | 42 | 51 | 697 | 206 | 2,099 |
| 84,692 | 14 | 94 | 137 | 1,257 | 5 | 43 | 53 | 689 | 209 | 2,083 |
| 84,693 | 14 | 88 | 137 | 1,182 | 5 | 40 | 53 | 646 | 209 | 1,956 |
| 84,694 | 14 | 88 | 137 | 1,177 | 5 | 40 | 53 | 646 | 209 | 1,951 |

|        |    |    |     |       |   |    |    |     |     |       |
|--------|----|----|-----|-------|---|----|----|-----|-----|-------|
| 84,695 | 14 | 88 | 137 | 1,177 | 5 | 40 | 53 | 647 | 209 | 1,952 |
| 84,696 | 14 | 91 | 137 | 1,194 | 5 | 42 | 53 | 661 | 209 | 1,988 |
| 84,697 | 14 | 89 | 136 | 1,171 | 5 | 42 | 53 | 648 | 208 | 1,950 |
| 84,698 | 16 | 89 | 138 | 1,133 | 5 | 41 | 53 | 617 | 212 | 1,880 |
| 84,699 | 16 | 83 | 138 | 1,063 | 5 | 39 | 53 | 596 | 212 | 1,781 |
| 84,700 | 16 | 83 | 138 | 1,063 | 5 | 39 | 53 | 596 | 212 | 1,781 |
| 84,701 | 14 | 83 | 125 | 1,065 | 5 | 39 | 46 | 595 | 190 | 1,782 |
| 84,702 | 14 | 85 | 125 | 1,061 | 5 | 40 | 46 | 594 | 190 | 1,780 |
| 84,703 | 14 | 85 | 124 | 1,077 | 5 | 40 | 46 | 604 | 189 | 1,806 |
| 84,704 | 14 | 86 | 124 | 1,092 | 5 | 40 | 45 | 618 | 188 | 1,836 |
| 84,705 | 13 | 85 | 123 | 1,080 | 5 | 41 | 46 | 616 | 187 | 1,822 |
| 84,706 | 13 | 85 | 122 | 1,082 | 5 | 40 | 47 | 615 | 187 | 1,822 |
| 84,707 | 13 | 85 | 122 | 1,083 | 5 | 40 | 47 | 615 | 187 | 1,823 |
| 84,708 | 9  | 80 | 106 | 985   | 5 | 40 | 40 | 511 | 160 | 1,616 |
| 84,709 | 9  | 80 | 104 | 997   | 5 | 40 | 40 | 516 | 158 | 1,633 |
| 84,710 | 9  | 78 | 104 | 953   | 5 | 39 | 40 | 504 | 158 | 1,574 |
| 84,711 | 9  | 72 | 103 | 886   | 5 | 36 | 39 | 471 | 156 | 1,465 |
| 84,712 | 9  | 73 | 103 | 887   | 5 | 36 | 39 | 471 | 156 | 1,467 |
| 84,713 | 9  | 73 | 101 | 877   | 5 | 36 | 39 | 466 | 154 | 1,452 |
| 84,714 | 11 | 73 | 98  | 875   | 5 | 35 | 39 | 462 | 153 | 1,445 |
| 84,715 | 11 | 73 | 97  | 880   | 7 | 35 | 39 | 465 | 154 | 1,453 |
| 84,716 | 12 | 66 | 97  | 867   | 7 | 34 | 39 | 446 | 155 | 1,413 |
| 84,717 | 12 | 66 | 96  | 864   | 7 | 34 | 39 | 444 | 154 | 1,408 |
| 84,718 | 12 | 60 | 85  | 810   | 6 | 33 | 38 | 420 | 141 | 1,323 |
| 84,719 | 12 | 56 | 93  | 754   | 7 | 29 | 42 | 403 | 154 | 1,242 |
| 84,720 | 12 | 56 | 93  | 749   | 7 | 29 | 40 | 402 | 152 | 1,236 |
| 84,721 | 13 | 56 | 92  | 745   | 7 | 29 | 42 | 401 | 154 | 1,231 |
| 84,722 | 13 | 56 | 92  | 747   | 7 | 29 | 43 | 402 | 155 | 1,234 |
| 84,723 | 13 | 53 | 84  | 743   | 6 | 28 | 41 | 401 | 144 | 1,225 |
| 84,724 | 13 | 53 | 84  | 755   | 6 | 29 | 41 | 408 | 144 | 1,245 |
| 84,725 | 13 | 54 | 83  | 780   | 6 | 30 | 40 | 421 | 142 | 1,285 |
| 84,726 | 11 | 55 | 79  | 817   | 6 | 33 | 36 | 442 | 132 | 1,347 |
| 84,727 | 10 | 56 | 66  | 841   | 5 | 37 | 30 | 459 | 111 | 1,393 |
| 84,728 | 8  | 56 | 48  | 860   | 5 | 39 | 30 | 482 | 91  | 1,437 |
| 84,729 | 8  | 62 | 46  | 908   | 5 | 41 | 31 | 506 | 90  | 1,517 |
| 84,730 | 8  | 65 | 45  | 983   | 5 | 41 | 32 | 537 | 90  | 1,626 |
| 84,731 | 6  | 65 | 39  | 989   | 4 | 41 | 28 | 540 | 77  | 1,635 |
| 84,732 | 6  | 65 | 36  | 992   | 3 | 41 | 28 | 541 | 73  | 1,639 |
| 84,733 | 6  | 65 | 28  | 980   | 3 | 37 | 26 | 526 | 63  | 1,608 |
| 84,734 | 6  | 43 | 28  | 536   | 3 | 24 | 26 | 305 | 63  | 908   |
| 84,735 | 6  | 43 | 27  | 540   | 3 | 25 | 26 | 309 | 62  | 917   |

|        |   |    |    |     |   |    |    |     |    |       |
|--------|---|----|----|-----|---|----|----|-----|----|-------|
| 84,736 | 6 | 43 | 25 | 541 | 3 | 25 | 25 | 310 | 59 | 919   |
| 84,737 | 7 | 41 | 28 | 524 | 4 | 25 | 25 | 307 | 64 | 897   |
| 84,738 | 8 | 37 | 27 | 466 | 4 | 24 | 25 | 282 | 64 | 809   |
| 84,739 | 8 | 24 | 27 | 410 | 4 | 21 | 24 | 237 | 63 | 692   |
| 84,740 | 8 | 24 | 27 | 410 | 4 | 21 | 24 | 238 | 63 | 693   |
| 84,741 | 8 | 24 | 26 | 410 | 4 | 21 | 22 | 238 | 60 | 693   |
| 84,742 | 8 | 24 | 25 | 413 | 4 | 21 | 20 | 239 | 57 | 697   |
| 84,743 | 8 | 23 | 25 | 414 | 4 | 20 | 20 | 243 | 57 | 700   |
| 84,744 | 8 | 25 | 25 | 411 | 4 | 20 | 20 | 251 | 57 | 707   |
| 84,745 | 8 | 26 | 25 | 425 | 4 | 23 | 20 | 261 | 57 | 735   |
| 84,746 | 8 | 26 | 26 | 429 | 4 | 23 | 20 | 265 | 58 | 743   |
| 84,747 | 8 | 23 | 25 | 408 | 4 | 22 | 20 | 249 | 57 | 702   |
| 84,748 | 6 | 23 | 24 | 408 | 4 | 22 | 20 | 247 | 54 | 700   |
| 84,749 | 6 | 23 | 25 | 404 | 4 | 22 | 20 | 247 | 55 | 696   |
| 84,750 | 6 | 23 | 26 | 404 | 4 | 22 | 20 | 247 | 56 | 696   |
| 84,751 | 6 | 23 | 26 | 403 | 4 | 22 | 20 | 250 | 56 | 698   |
| 84,752 | 6 | 23 | 27 | 407 | 4 | 22 | 21 | 255 | 58 | 707   |
| 84,753 | 6 | 38 | 30 | 527 | 5 | 29 | 21 | 397 | 62 | 991   |
| 84,754 | 6 | 39 | 30 | 534 | 5 | 29 | 21 | 401 | 62 | 1,003 |
| 84,755 | 6 | 43 | 30 | 576 | 5 | 29 | 21 | 417 | 62 | 1,065 |
| 84,756 | 6 | 44 | 30 | 593 | 5 | 30 | 20 | 425 | 61 | 1,092 |
| 84,757 | 6 | 45 | 30 | 593 | 5 | 30 | 19 | 430 | 60 | 1,098 |
| 84,758 | 6 | 43 | 29 | 585 | 5 | 29 | 19 | 429 | 59 | 1,086 |
| 84,759 | 6 | 47 | 29 | 581 | 5 | 29 | 19 | 428 | 59 | 1,085 |
| 84,760 | 6 | 47 | 29 | 583 | 5 | 29 | 19 | 429 | 59 | 1,088 |
| 84,761 | 6 | 47 | 29 | 582 | 5 | 29 | 19 | 431 | 59 | 1,089 |
| 84,762 | 6 | 46 | 35 | 578 | 5 | 30 | 29 | 431 | 75 | 1,085 |
| 84,763 | 6 | 46 | 35 | 574 | 5 | 30 | 29 | 430 | 75 | 1,080 |
| 84,764 | 6 | 46 | 38 | 574 | 5 | 32 | 30 | 430 | 79 | 1,082 |
| 84,765 | 4 | 47 | 38 | 577 | 5 | 32 | 30 | 431 | 77 | 1,087 |
| 84,766 | 4 | 50 | 39 | 583 | 3 | 32 | 30 | 439 | 76 | 1,104 |
| 84,767 | 3 | 54 | 38 | 609 | 3 | 32 | 30 | 449 | 74 | 1,144 |
| 84,768 | 3 | 54 | 42 | 624 | 3 | 32 | 31 | 451 | 79 | 1,161 |
| 84,769 | 3 | 54 | 42 | 625 | 4 | 32 | 30 | 451 | 79 | 1,162 |
| 84,770 | 3 | 54 | 35 | 622 | 3 | 32 | 25 | 450 | 66 | 1,158 |
| 84,771 | 3 | 54 | 36 | 625 | 3 | 32 | 26 | 451 | 68 | 1,162 |
| 84,772 | 2 | 54 | 36 | 626 | 3 | 33 | 25 | 451 | 66 | 1,164 |
| 84,773 | 2 | 54 | 36 | 626 | 3 | 33 | 24 | 451 | 65 | 1,164 |
| 84,774 | 2 | 54 | 36 | 627 | 3 | 33 | 24 | 451 | 65 | 1,165 |
| 84,775 | 2 | 54 | 36 | 615 | 3 | 32 | 24 | 444 | 65 | 1,145 |
| 84,776 | 2 | 52 | 36 | 550 | 3 | 28 | 24 | 408 | 65 | 1,038 |

|        |   |    |    |     |   |    |    |     |     |     |
|--------|---|----|----|-----|---|----|----|-----|-----|-----|
| 84,777 | 2 | 51 | 36 | 525 | 3 | 24 | 24 | 390 | 65  | 990 |
| 84,778 | 2 | 51 | 36 | 525 | 3 | 24 | 24 | 391 | 65  | 991 |
| 84,779 | 2 | 51 | 32 | 500 | 3 | 22 | 23 | 367 | 60  | 940 |
| 84,780 | 2 | 45 | 33 | 452 | 3 | 20 | 22 | 343 | 60  | 860 |
| 84,781 | 2 | 42 | 33 | 371 | 3 | 21 | 21 | 309 | 59  | 743 |
| 84,782 | 2 | 42 | 33 | 371 | 3 | 21 | 21 | 309 | 59  | 743 |
| 84,783 | 2 | 42 | 32 | 367 | 3 | 21 | 21 | 310 | 58  | 740 |
| 84,784 | 2 | 42 | 31 | 367 | 3 | 21 | 20 | 311 | 56  | 741 |
| 84,785 | 2 | 42 | 32 | 361 | 3 | 20 | 20 | 306 | 57  | 729 |
| 84,786 | 2 | 42 | 31 | 363 | 3 | 21 | 21 | 307 | 57  | 733 |
| 84,787 | 3 | 42 | 33 | 363 | 3 | 21 | 21 | 307 | 60  | 733 |
| 84,788 | 2 | 42 | 30 | 368 | 2 | 21 | 21 | 307 | 55  | 738 |
| 84,789 | 1 | 42 | 30 | 368 | 2 | 21 | 21 | 307 | 54  | 738 |
| 84,790 | 1 | 42 | 34 | 369 | 3 | 21 | 27 | 306 | 65  | 738 |
| 84,791 | 1 | 44 | 44 | 379 | 3 | 21 | 32 | 306 | 80  | 750 |
| 84,792 | 1 | 44 | 44 | 379 | 3 | 21 | 32 | 305 | 80  | 749 |
| 84,793 | 2 | 44 | 51 | 373 | 3 | 21 | 35 | 299 | 91  | 737 |
| 84,794 | 2 | 44 | 51 | 373 | 3 | 21 | 35 | 299 | 91  | 737 |
| 84,795 | 2 | 41 | 51 | 356 | 3 | 18 | 35 | 279 | 91  | 694 |
| 84,796 | 2 | 41 | 51 | 353 | 3 | 18 | 35 | 277 | 91  | 689 |
| 84,797 | 2 | 41 | 50 | 356 | 3 | 18 | 35 | 277 | 90  | 692 |
| 84,798 | 2 | 42 | 52 | 365 | 3 | 17 | 38 | 277 | 95  | 701 |
| 84,799 | 2 | 47 | 51 | 394 | 3 | 17 | 38 | 288 | 94  | 746 |
| 84,800 | 2 | 50 | 51 | 413 | 3 | 17 | 38 | 299 | 94  | 779 |
| 84,801 | 2 | 51 | 50 | 413 | 3 | 18 | 38 | 300 | 93  | 782 |
| 84,802 | 2 | 55 | 50 | 436 | 3 | 18 | 37 | 315 | 92  | 824 |
| 84,803 | 2 | 57 | 47 | 440 | 3 | 18 | 37 | 311 | 89  | 826 |
| 84,804 | 2 | 45 | 49 | 313 | 2 | 10 | 36 | 142 | 89  | 510 |
| 84,805 | 2 | 45 | 49 | 317 | 2 | 10 | 36 | 144 | 89  | 516 |
| 84,806 | 3 | 41 | 55 | 251 | 2 | 8  | 38 | 108 | 98  | 408 |
| 84,807 | 3 | 41 | 55 | 254 | 2 | 8  | 38 | 109 | 98  | 412 |
| 84,808 | 3 | 39 | 59 | 250 | 3 | 7  | 40 | 102 | 105 | 398 |
| 84,809 | 3 | 39 | 58 | 255 | 3 | 8  | 40 | 102 | 104 | 404 |
| 84,810 | 3 | 35 | 60 | 249 | 3 | 8  | 46 | 99  | 112 | 391 |
| 84,811 | 3 | 35 | 62 | 246 | 3 | 7  | 48 | 95  | 116 | 383 |
| 84,812 | 3 | 35 | 60 | 257 | 3 | 8  | 48 | 99  | 114 | 399 |
| 84,813 | 3 | 36 | 56 | 267 | 3 | 8  | 38 | 105 | 100 | 416 |
| 84,814 | 3 | 37 | 60 | 298 | 3 | 10 | 41 | 109 | 107 | 454 |
| 84,815 | 3 | 39 | 59 | 369 | 3 | 8  | 40 | 139 | 105 | 555 |
| 84,816 | 3 | 40 | 61 | 522 | 3 | 12 | 40 | 153 | 107 | 727 |
| 84,817 | 3 | 42 | 62 | 585 | 3 | 16 | 40 | 170 | 108 | 813 |

|        |   |    |     |     |   |    |    |     |     |       |
|--------|---|----|-----|-----|---|----|----|-----|-----|-------|
| 84,818 | 3 | 42 | 59  | 635 | 3 | 17 | 40 | 188 | 105 | 882   |
| 84,819 | 3 | 43 | 59  | 735 | 3 | 17 | 39 | 214 | 104 | 1,009 |
| 84,820 | 3 | 44 | 59  | 748 | 2 | 18 | 39 | 216 | 103 | 1,026 |
| 84,821 | 3 | 44 | 58  | 754 | 2 | 18 | 38 | 217 | 101 | 1,033 |
| 84,822 | 3 | 45 | 59  | 755 | 2 | 20 | 37 | 217 | 101 | 1,037 |
| 84,823 | 3 | 45 | 59  | 763 | 2 | 19 | 36 | 217 | 100 | 1,044 |
| 84,824 | 3 | 45 | 59  | 764 | 2 | 19 | 36 | 219 | 100 | 1,047 |
| 84,825 | 4 | 45 | 62  | 771 | 2 | 19 | 36 | 225 | 104 | 1,060 |
| 84,826 | 4 | 45 | 62  | 775 | 2 | 20 | 36 | 227 | 104 | 1,067 |
| 84,827 | 7 | 46 | 63  | 778 | 2 | 20 | 36 | 230 | 108 | 1,074 |
| 84,828 | 7 | 46 | 63  | 778 | 2 | 20 | 36 | 229 | 108 | 1,073 |
| 84,829 | 7 | 46 | 65  | 780 | 2 | 20 | 36 | 229 | 110 | 1,075 |
| 84,830 | 7 | 46 | 64  | 780 | 2 | 20 | 34 | 229 | 107 | 1,075 |
| 84,831 | 7 | 46 | 63  | 781 | 2 | 20 | 35 | 229 | 107 | 1,076 |
| 84,832 | 7 | 46 | 63  | 781 | 2 | 19 | 35 | 229 | 107 | 1,075 |
| 84,833 | 7 | 46 | 65  | 782 | 2 | 19 | 34 | 226 | 108 | 1,073 |
| 84,834 | 7 | 46 | 65  | 786 | 2 | 19 | 34 | 227 | 108 | 1,078 |
| 84,835 | 8 | 46 | 66  | 786 | 2 | 19 | 34 | 228 | 110 | 1,079 |
| 84,836 | 8 | 47 | 65  | 783 | 2 | 18 | 33 | 226 | 108 | 1,074 |
| 84,837 | 8 | 47 | 72  | 786 | 2 | 18 | 34 | 227 | 116 | 1,078 |
| 84,838 | 7 | 47 | 74  | 780 | 2 | 18 | 37 | 225 | 120 | 1,070 |
| 84,839 | 8 | 47 | 95  | 784 | 3 | 18 | 43 | 225 | 149 | 1,074 |
| 84,840 | 8 | 47 | 105 | 791 | 4 | 19 | 45 | 229 | 162 | 1,086 |
| 84,841 | 9 | 47 | 108 | 793 | 5 | 19 | 46 | 231 | 168 | 1,090 |
| 84,842 | 9 | 45 | 99  | 787 | 5 | 19 | 42 | 234 | 155 | 1,085 |
| 84,843 | 8 | 45 | 93  | 789 | 5 | 19 | 39 | 234 | 145 | 1,087 |
| 84,844 | 8 | 45 | 92  | 799 | 5 | 19 | 39 | 239 | 144 | 1,102 |
| 84,845 | 8 | 45 | 92  | 802 | 5 | 19 | 39 | 239 | 144 | 1,105 |
| 84,846 | 8 | 50 | 92  | 812 | 5 | 19 | 39 | 246 | 144 | 1,127 |
| 84,847 | 8 | 50 | 92  | 819 | 5 | 19 | 39 | 246 | 144 | 1,134 |
| 84,848 | 8 | 51 | 90  | 824 | 5 | 19 | 36 | 245 | 139 | 1,139 |
| 84,849 | 8 | 51 | 90  | 827 | 5 | 19 | 36 | 245 | 139 | 1,142 |
| 84,850 | 8 | 46 | 90  | 801 | 5 | 19 | 36 | 233 | 139 | 1,099 |
| 84,851 | 8 | 43 | 90  | 785 | 5 | 17 | 36 | 223 | 139 | 1,068 |
| 84,852 | 8 | 43 | 90  | 814 | 5 | 16 | 36 | 228 | 139 | 1,101 |
| 84,853 | 8 | 44 | 90  | 824 | 5 | 18 | 36 | 215 | 139 | 1,101 |
| 84,854 | 8 | 43 | 89  | 831 | 5 | 18 | 36 | 218 | 138 | 1,110 |
| 84,855 | 9 | 35 | 87  | 801 | 5 | 18 | 36 | 214 | 137 | 1,068 |
| 84,856 | 9 | 35 | 86  | 804 | 5 | 19 | 36 | 212 | 136 | 1,070 |
| 84,857 | 8 | 41 | 81  | 859 | 5 | 22 | 35 | 220 | 129 | 1,142 |
| 84,858 | 8 | 45 | 77  | 865 | 4 | 23 | 34 | 221 | 123 | 1,154 |

|        |    |    |    |     |   |    |    |     |     |       |
|--------|----|----|----|-----|---|----|----|-----|-----|-------|
| 84,859 | 8  | 45 | 77 | 863 | 4 | 22 | 33 | 218 | 122 | 1,148 |
| 84,860 | 8  | 46 | 77 | 873 | 4 | 22 | 33 | 224 | 122 | 1,165 |
| 84,861 | 8  | 46 | 75 | 878 | 4 | 22 | 27 | 225 | 114 | 1,171 |
| 84,862 | 8  | 51 | 74 | 896 | 4 | 25 | 25 | 249 | 111 | 1,221 |
| 84,863 | 8  | 51 | 74 | 887 | 4 | 24 | 25 | 245 | 111 | 1,207 |
| 84,864 | 8  | 50 | 74 | 884 | 4 | 25 | 25 | 244 | 111 | 1,203 |
| 84,865 | 8  | 66 | 72 | 870 | 4 | 24 | 22 | 250 | 106 | 1,210 |
| 84,866 | 8  | 67 | 70 | 808 | 4 | 24 | 22 | 236 | 104 | 1,135 |
| 84,867 | 12 | 70 | 70 | 613 | 4 | 23 | 23 | 214 | 109 | 920   |
| 84,868 | 12 | 70 | 68 | 612 | 4 | 23 | 23 | 207 | 107 | 912   |
| 84,869 | 12 | 67 | 68 | 537 | 4 | 22 | 23 | 183 | 107 | 809   |
| 84,870 | 12 | 66 | 71 | 413 | 5 | 21 | 24 | 158 | 112 | 658   |
| 84,871 | 12 | 66 | 71 | 408 | 5 | 21 | 24 | 158 | 112 | 653   |
| 84,872 | 12 | 66 | 72 | 416 | 6 | 21 | 24 | 159 | 114 | 662   |
| 84,873 | 13 | 65 | 71 | 404 | 6 | 20 | 24 | 159 | 114 | 648   |
| 84,874 | 13 | 66 | 73 | 407 | 6 | 20 | 24 | 162 | 116 | 655   |
| 84,875 | 12 | 66 | 73 | 408 | 6 | 20 | 24 | 161 | 115 | 655   |
| 84,876 | 12 | 66 | 70 | 403 | 6 | 20 | 24 | 155 | 112 | 644   |
| 84,877 | 12 | 67 | 74 | 400 | 6 | 19 | 27 | 154 | 119 | 640   |
| 84,878 | 9  | 65 | 73 | 399 | 6 | 19 | 27 | 151 | 115 | 634   |
| 84,879 | 9  | 68 | 73 | 398 | 6 | 19 | 27 | 153 | 115 | 638   |
| 84,880 | 9  | 68 | 71 | 398 | 6 | 19 | 27 | 153 | 113 | 638   |
| 84,881 | 9  | 68 | 71 | 397 | 6 | 19 | 27 | 155 | 113 | 639   |
| 84,882 | 9  | 68 | 71 | 399 | 6 | 19 | 26 | 156 | 112 | 642   |
| 84,883 | 9  | 68 | 71 | 399 | 6 | 19 | 26 | 157 | 112 | 643   |
| 84,884 | 9  | 68 | 69 | 398 | 6 | 19 | 26 | 157 | 110 | 642   |
| 84,885 | 9  | 68 | 69 | 401 | 6 | 20 | 26 | 163 | 110 | 652   |
| 84,886 | 8  | 68 | 69 | 405 | 6 | 20 | 26 | 164 | 109 | 657   |
| 84,887 | 8  | 72 | 69 | 461 | 6 | 30 | 26 | 212 | 109 | 775   |
| 84,888 | 8  | 90 | 62 | 666 | 6 | 41 | 24 | 276 | 100 | 1,073 |
| 84,889 | 8  | 91 | 57 | 694 | 6 | 43 | 21 | 284 | 92  | 1,112 |
| 84,890 | 7  | 91 | 36 | 704 | 5 | 43 | 15 | 291 | 63  | 1,129 |
| 84,891 | 7  | 92 | 23 | 710 | 3 | 43 | 8  | 288 | 41  | 1,133 |
| 84,892 | 6  | 92 | 19 | 707 | 2 | 43 | 6  | 286 | 33  | 1,128 |
| 84,893 | 6  | 94 | 19 | 710 | 2 | 43 | 5  | 286 | 32  | 1,133 |
| 84,894 | 6  | 94 | 20 | 706 | 2 | 43 | 5  | 284 | 33  | 1,127 |
| 84,895 | 6  | 94 | 20 | 707 | 2 | 43 | 5  | 284 | 33  | 1,128 |
| 84,896 | 6  | 94 | 20 | 703 | 2 | 43 | 5  | 284 | 33  | 1,124 |
| 84,897 | 6  | 89 | 20 | 680 | 2 | 43 | 5  | 274 | 33  | 1,086 |
| 84,898 | 7  | 88 | 20 | 676 | 2 | 43 | 5  | 275 | 34  | 1,082 |
| 84,899 | 7  | 87 | 20 | 678 | 2 | 43 | 5  | 275 | 34  | 1,083 |

|        |   |    |    |     |   |    |   |     |    |       |
|--------|---|----|----|-----|---|----|---|-----|----|-------|
| 84,900 | 8 | 87 | 23 | 669 | 2 | 43 | 5 | 272 | 38 | 1,071 |
| 84,901 | 8 | 87 | 23 | 667 | 2 | 43 | 5 | 273 | 38 | 1,070 |
| 84,902 | 8 | 86 | 23 | 665 | 2 | 43 | 5 | 272 | 38 | 1,066 |
| 84,903 | 8 | 85 | 23 | 637 | 2 | 43 | 5 | 267 | 38 | 1,032 |
| 84,904 | 8 | 79 | 22 | 586 | 2 | 41 | 5 | 256 | 37 | 962   |
| 84,905 | 8 | 79 | 22 | 587 | 2 | 41 | 5 | 256 | 37 | 963   |
| 84,906 | 7 | 80 | 23 | 575 | 2 | 40 | 5 | 251 | 37 | 946   |
| 84,907 | 7 | 80 | 23 | 577 | 2 | 40 | 5 | 251 | 37 | 948   |
| 84,908 | 7 | 75 | 23 | 522 | 2 | 37 | 5 | 240 | 37 | 874   |
| 84,909 | 7 | 71 | 23 | 507 | 2 | 36 | 5 | 243 | 37 | 857   |
| 84,910 | 7 | 71 | 23 | 508 | 2 | 36 | 5 | 243 | 37 | 858   |
| 84,911 | 7 | 71 | 23 | 491 | 2 | 36 | 5 | 237 | 37 | 835   |
| 84,912 | 8 | 49 | 26 | 446 | 2 | 31 | 5 | 199 | 41 | 725   |
| 84,913 | 8 | 49 | 26 | 446 | 2 | 31 | 5 | 199 | 41 | 725   |
| 84,914 | 8 | 49 | 25 | 446 | 2 | 31 | 5 | 199 | 40 | 725   |
| 84,915 | 8 | 49 | 24 | 446 | 2 | 31 | 5 | 200 | 39 | 726   |
| 84,916 | 6 | 46 | 22 | 438 | 2 | 31 | 4 | 191 | 34 | 706   |
| 84,917 | 6 | 46 | 22 | 438 | 2 | 31 | 4 | 191 | 34 | 706   |
| 84,918 | 4 | 36 | 22 | 401 | 2 | 26 | 4 | 174 | 32 | 637   |
| 84,919 | 4 | 36 | 22 | 402 | 2 | 26 | 4 | 175 | 32 | 639   |
| 84,920 | 4 | 34 | 20 | 391 | 1 | 26 | 3 | 174 | 28 | 625   |
| 84,921 | 4 | 34 | 18 | 391 | 1 | 26 | 5 | 174 | 28 | 625   |
| 84,922 | 4 | 36 | 18 | 392 | 1 | 26 | 5 | 174 | 28 | 628   |
| 84,923 | 5 | 36 | 17 | 389 | 0 | 26 | 5 | 176 | 27 | 627   |
| 84,924 | 4 | 36 | 17 | 388 | 0 | 25 | 5 | 176 | 26 | 625   |
| 84,925 | 4 | 35 | 16 | 378 | 0 | 25 | 5 | 172 | 25 | 610   |
| 84,926 | 4 | 35 | 16 | 378 | 0 | 25 | 5 | 173 | 25 | 611   |
| 84,927 | 4 | 34 | 16 | 377 | 0 | 25 | 2 | 172 | 22 | 608   |
| 84,928 | 4 | 34 | 12 | 377 | 0 | 25 | 2 | 172 | 18 | 608   |
| 84,929 | 4 | 34 | 12 | 378 | 0 | 25 | 2 | 172 | 18 | 609   |
| 84,930 | 4 | 31 | 12 | 378 | 0 | 25 | 2 | 170 | 18 | 604   |
| 84,931 | 4 | 31 | 12 | 378 | 0 | 25 | 2 | 171 | 18 | 605   |
| 84,932 | 4 | 32 | 12 | 378 | 0 | 26 | 2 | 171 | 18 | 607   |
| 84,933 | 4 | 33 | 12 | 383 | 0 | 26 | 2 | 175 | 18 | 617   |
| 84,934 | 4 | 33 | 12 | 385 | 0 | 26 | 2 | 174 | 18 | 618   |
| 84,935 | 5 | 33 | 13 | 379 | 0 | 25 | 2 | 168 | 20 | 605   |
| 84,936 | 5 | 33 | 13 | 374 | 0 | 25 | 2 | 166 | 20 | 598   |
| 84,937 | 5 | 28 | 12 | 318 | 0 | 15 | 2 | 117 | 19 | 478   |
| 84,938 | 5 | 28 | 12 | 321 | 0 | 15 | 2 | 117 | 19 | 481   |
| 84,939 | 5 | 10 | 14 | 119 | 0 | 4  | 2 | 54  | 21 | 187   |
| 84,940 | 5 | 9  | 14 | 91  | 0 | 2  | 2 | 46  | 21 | 148   |



|        |   |    |    |     |   |    |   |     |    |     |
|--------|---|----|----|-----|---|----|---|-----|----|-----|
| 84,941 | 5 | 6  | 16 | 54  | 0 | 1  | 3 | 33  | 24 | 94  |
| 84,942 | 5 | 6  | 32 | 57  | 0 | 1  | 4 | 33  | 41 | 97  |
| 84,943 | 5 | 6  | 34 | 57  | 1 | 1  | 5 | 33  | 45 | 97  |
| 84,944 | 5 | 6  | 33 | 57  | 1 | 1  | 6 | 33  | 45 | 97  |
| 84,945 | 5 | 6  | 32 | 50  | 1 | 1  | 6 | 30  | 44 | 87  |
| 84,946 | 5 | 6  | 32 | 50  | 1 | 1  | 6 | 30  | 44 | 87  |
| 84,947 | 5 | 6  | 32 | 51  | 1 | 1  | 6 | 30  | 44 | 88  |
| 84,948 | 5 | 6  | 32 | 55  | 1 | 1  | 6 | 33  | 44 | 95  |
| 84,949 | 4 | 6  | 32 | 54  | 1 | 1  | 6 | 33  | 43 | 94  |
| 84,950 | 3 | 6  | 29 | 53  | 1 | 1  | 6 | 35  | 39 | 95  |
| 84,951 | 3 | 6  | 29 | 48  | 1 | 1  | 6 | 32  | 39 | 87  |
| 84,952 | 3 | 6  | 29 | 52  | 1 | 1  | 6 | 32  | 39 | 91  |
| 84,953 | 3 | 6  | 29 | 52  | 1 | 1  | 6 | 32  | 39 | 91  |
| 84,954 | 5 | 6  | 29 | 51  | 1 | 1  | 6 | 31  | 41 | 89  |
| 84,955 | 5 | 6  | 31 | 50  | 1 | 1  | 6 | 31  | 43 | 88  |
| 84,956 | 5 | 6  | 32 | 50  | 1 | 1  | 7 | 31  | 45 | 88  |
| 84,957 | 5 | 5  | 36 | 48  | 1 | 1  | 7 | 30  | 49 | 84  |
| 84,958 | 5 | 5  | 37 | 51  | 1 | 1  | 7 | 31  | 50 | 88  |
| 84,959 | 5 | 5  | 37 | 51  | 1 | 1  | 7 | 31  | 50 | 88  |
| 84,960 | 5 | 5  | 37 | 50  | 1 | 1  | 7 | 26  | 50 | 82  |
| 84,961 | 5 | 4  | 37 | 49  | 1 | 1  | 7 | 25  | 50 | 79  |
| 84,962 | 5 | 4  | 37 | 49  | 1 | 1  | 7 | 25  | 50 | 79  |
| 84,963 | 4 | 4  | 34 | 48  | 1 | 1  | 7 | 25  | 46 | 78  |
| 84,964 | 4 | 4  | 34 | 48  | 1 | 1  | 7 | 25  | 46 | 78  |
| 84,965 | 4 | 4  | 34 | 49  | 1 | 1  | 7 | 27  | 46 | 81  |
| 84,966 | 4 | 4  | 34 | 49  | 1 | 1  | 7 | 26  | 46 | 80  |
| 84,967 | 5 | 4  | 34 | 48  | 1 | 1  | 7 | 26  | 47 | 79  |
| 84,968 | 5 | 4  | 35 | 48  | 1 | 1  | 7 | 25  | 48 | 78  |
| 84,969 | 5 | 4  | 36 | 47  | 1 | 1  | 7 | 23  | 49 | 75  |
| 84,970 | 5 | 4  | 36 | 51  | 1 | 1  | 7 | 24  | 49 | 80  |
| 84,971 | 5 | 4  | 36 | 68  | 1 | 2  | 7 | 35  | 49 | 109 |
| 84,972 | 6 | 25 | 36 | 309 | 1 | 16 | 6 | 155 | 49 | 505 |
| 84,973 | 6 | 23 | 36 | 324 | 1 | 17 | 6 | 161 | 49 | 525 |
| 84,974 | 5 | 25 | 35 | 335 | 1 | 19 | 6 | 172 | 47 | 551 |
| 84,975 | 6 | 27 | 35 | 339 | 1 | 19 | 6 | 175 | 48 | 560 |
| 84,976 | 6 | 27 | 34 | 342 | 1 | 19 | 6 | 175 | 47 | 563 |
| 84,977 | 6 | 27 | 34 | 346 | 1 | 20 | 6 | 178 | 47 | 571 |
| 84,978 | 6 | 27 | 34 | 350 | 1 | 20 | 6 | 179 | 47 | 576 |
| 84,979 | 6 | 33 | 35 | 368 | 1 | 21 | 6 | 191 | 48 | 613 |
| 84,980 | 6 | 33 | 35 | 367 | 1 | 21 | 6 | 191 | 48 | 612 |
| 84,981 | 6 | 43 | 35 | 401 | 1 | 22 | 6 | 195 | 48 | 661 |

|        |   |     |    |       |   |    |   |     |    |       |
|--------|---|-----|----|-------|---|----|---|-----|----|-------|
| 84,982 | 6 | 43  | 36 | 404   | 1 | 22 | 6 | 198 | 49 | 667   |
| 84,983 | 6 | 43  | 36 | 410   | 1 | 22 | 6 | 198 | 49 | 673   |
| 84,984 | 6 | 44  | 36 | 418   | 1 | 22 | 6 | 202 | 49 | 686   |
| 84,985 | 6 | 44  | 36 | 419   | 1 | 22 | 6 | 202 | 49 | 687   |
| 84,986 | 5 | 44  | 37 | 428   | 1 | 22 | 6 | 205 | 49 | 699   |
| 84,987 | 5 | 44  | 37 | 441   | 1 | 22 | 6 | 211 | 49 | 718   |
| 84,988 | 5 | 44  | 40 | 472   | 1 | 23 | 6 | 217 | 52 | 756   |
| 84,989 | 7 | 49  | 40 | 615   | 1 | 31 | 6 | 281 | 54 | 976   |
| 84,990 | 7 | 52  | 38 | 739   | 1 | 39 | 6 | 331 | 52 | 1,161 |
| 84,991 | 7 | 52  | 37 | 751   | 1 | 39 | 6 | 334 | 51 | 1,176 |
| 84,992 | 7 | 53  | 36 | 761   | 1 | 39 | 5 | 337 | 49 | 1,190 |
| 84,993 | 7 | 54  | 21 | 805   | 1 | 40 | 4 | 345 | 33 | 1,244 |
| 84,994 | 7 | 55  | 21 | 843   | 0 | 43 | 4 | 368 | 32 | 1,309 |
| 84,995 | 7 | 57  | 22 | 892   | 0 | 44 | 4 | 399 | 33 | 1,392 |
| 84,996 | 7 | 59  | 22 | 941   | 0 | 45 | 4 | 402 | 33 | 1,447 |
| 84,997 | 7 | 60  | 23 | 948   | 0 | 45 | 4 | 403 | 34 | 1,456 |
| 84,998 | 7 | 60  | 23 | 944   | 0 | 45 | 4 | 402 | 34 | 1,451 |
| 84,999 | 8 | 60  | 23 | 944   | 0 | 45 | 4 | 397 | 35 | 1,446 |
| 85,000 | 8 | 62  | 23 | 949   | 0 | 46 | 4 | 406 | 35 | 1,463 |
| 85,001 | 8 | 66  | 23 | 965   | 0 | 46 | 4 | 411 | 35 | 1,488 |
| 85,002 | 8 | 70  | 23 | 1,027 | 0 | 53 | 4 | 447 | 35 | 1,597 |
| 85,003 | 8 | 91  | 23 | 1,140 | 0 | 60 | 4 | 535 | 35 | 1,826 |
| 85,004 | 8 | 95  | 23 | 1,167 | 0 | 61 | 4 | 548 | 35 | 1,871 |
| 85,005 | 6 | 97  | 23 | 1,180 | 0 | 61 | 4 | 553 | 33 | 1,891 |
| 85,006 | 6 | 99  | 22 | 1,193 | 0 | 64 | 4 | 561 | 32 | 1,917 |
| 85,007 | 6 | 101 | 20 | 1,211 | 0 | 65 | 3 | 569 | 29 | 1,946 |
| 85,008 | 6 | 104 | 16 | 1,227 | 0 | 65 | 3 | 571 | 25 | 1,967 |
| 85,009 | 6 | 104 | 15 | 1,227 | 0 | 65 | 3 | 571 | 24 | 1,967 |
| 85,010 | 6 | 105 | 15 | 1,239 | 0 | 65 | 3 | 575 | 24 | 1,984 |
| 85,011 | 8 | 105 | 21 | 1,240 | 0 | 65 | 6 | 575 | 35 | 1,985 |
| 85,012 | 8 | 105 | 21 | 1,240 | 0 | 65 | 6 | 575 | 35 | 1,985 |
| 85,013 | 8 | 105 | 21 | 1,241 | 0 | 65 | 6 | 576 | 35 | 1,987 |
| 85,014 | 8 | 105 | 21 | 1,244 | 0 | 65 | 6 | 576 | 35 | 1,990 |
| 85,015 | 8 | 106 | 21 | 1,246 | 0 | 65 | 6 | 579 | 35 | 1,996 |
| 85,016 | 8 | 106 | 21 | 1,248 | 0 | 65 | 6 | 581 | 35 | 2,000 |
| 85,017 | 8 | 106 | 21 | 1,249 | 0 | 65 | 6 | 582 | 35 | 2,002 |
| 85,018 | 7 | 106 | 21 | 1,250 | 0 | 65 | 6 | 584 | 34 | 2,005 |
| 85,019 | 7 | 108 | 20 | 1,253 | 0 | 65 | 6 | 584 | 33 | 2,010 |
| 85,020 | 7 | 108 | 19 | 1,249 | 0 | 65 | 6 | 583 | 32 | 2,005 |
| 85,021 | 7 | 109 | 20 | 1,235 | 0 | 64 | 6 | 575 | 33 | 1,983 |
| 85,022 | 6 | 109 | 20 | 1,235 | 0 | 64 | 6 | 575 | 32 | 1,983 |

|        |   |    |    |       |   |    |    |     |    |       |
|--------|---|----|----|-------|---|----|----|-----|----|-------|
| 85,023 | 6 | 86 | 20 | 963   | 0 | 47 | 5  | 438 | 31 | 1,534 |
| 85,024 | 6 | 86 | 21 | 963   | 1 | 47 | 5  | 439 | 33 | 1,535 |
| 85,025 | 6 | 86 | 21 | 967   | 1 | 47 | 5  | 439 | 33 | 1,539 |
| 85,026 | 5 | 86 | 23 | 959   | 1 | 47 | 5  | 436 | 34 | 1,528 |
| 85,027 | 5 | 86 | 23 | 959   | 1 | 47 | 5  | 436 | 34 | 1,528 |
| 85,028 | 6 | 86 | 24 | 952   | 1 | 46 | 7  | 431 | 38 | 1,515 |
| 85,029 | 6 | 86 | 26 | 953   | 1 | 46 | 7  | 431 | 40 | 1,516 |
| 85,030 | 7 | 80 | 27 | 937   | 1 | 45 | 7  | 419 | 42 | 1,481 |
| 85,031 | 7 | 80 | 27 | 941   | 1 | 45 | 7  | 424 | 42 | 1,490 |
| 85,032 | 7 | 77 | 29 | 965   | 1 | 50 | 7  | 519 | 44 | 1,611 |
| 85,033 | 7 | 77 | 28 | 988   | 1 | 51 | 7  | 530 | 43 | 1,646 |
| 85,034 | 7 | 79 | 29 | 1,009 | 1 | 52 | 7  | 556 | 44 | 1,696 |
| 85,035 | 7 | 78 | 29 | 1,004 | 1 | 52 | 7  | 562 | 44 | 1,696 |
| 85,036 | 7 | 78 | 29 | 1,004 | 1 | 52 | 7  | 563 | 44 | 1,697 |
| 85,037 | 7 | 78 | 27 | 1,004 | 1 | 52 | 7  | 567 | 42 | 1,701 |
| 85,038 | 7 | 79 | 24 | 972   | 1 | 51 | 8  | 556 | 40 | 1,658 |
| 85,039 | 5 | 79 | 24 | 972   | 1 | 51 | 8  | 556 | 38 | 1,658 |
| 85,040 | 5 | 74 | 24 | 829   | 1 | 43 | 8  | 496 | 38 | 1,442 |
| 85,041 | 5 | 71 | 24 | 691   | 1 | 35 | 8  | 445 | 38 | 1,242 |
| 85,042 | 5 | 70 | 24 | 681   | 1 | 35 | 8  | 442 | 38 | 1,228 |
| 85,043 | 5 | 70 | 24 | 681   | 1 | 37 | 8  | 442 | 38 | 1,230 |
| 85,044 | 5 | 69 | 23 | 636   | 1 | 36 | 8  | 435 | 37 | 1,176 |
| 85,045 | 5 | 68 | 21 | 601   | 1 | 33 | 7  | 413 | 34 | 1,115 |
| 85,046 | 5 | 63 | 20 | 498   | 1 | 31 | 6  | 378 | 32 | 970   |
| 85,047 | 5 | 63 | 20 | 498   | 1 | 31 | 6  | 378 | 32 | 970   |
| 85,048 | 5 | 64 | 19 | 498   | 1 | 31 | 6  | 378 | 31 | 971   |
| 85,049 | 5 | 64 | 20 | 497   | 1 | 31 | 6  | 378 | 32 | 970   |
| 85,050 | 4 | 62 | 23 | 493   | 1 | 30 | 9  | 371 | 37 | 956   |
| 85,051 | 4 | 62 | 23 | 493   | 1 | 30 | 9  | 371 | 37 | 956   |
| 85,052 | 6 | 58 | 24 | 477   | 1 | 30 | 10 | 366 | 41 | 931   |
| 85,053 | 6 | 34 | 24 | 297   | 1 | 16 | 10 | 243 | 41 | 590   |
| 85,054 | 6 | 30 | 27 | 269   | 1 | 15 | 11 | 230 | 45 | 544   |
| 85,055 | 6 | 28 | 28 | 256   | 1 | 15 | 11 | 225 | 46 | 524   |
| 85,056 | 6 | 28 | 28 | 257   | 1 | 15 | 11 | 225 | 46 | 525   |
| 85,057 | 6 | 26 | 27 | 246   | 1 | 12 | 11 | 217 | 45 | 501   |
| 85,058 | 6 | 24 | 27 | 228   | 1 | 11 | 11 | 210 | 45 | 473   |
| 85,059 | 6 | 21 | 27 | 209   | 1 | 11 | 11 | 207 | 45 | 448   |
| 85,060 | 6 | 21 | 27 | 209   | 1 | 11 | 11 | 207 | 45 | 448   |
| 85,061 | 4 | 20 | 24 | 196   | 1 | 11 | 9  | 204 | 38 | 431   |
| 85,062 | 4 | 20 | 21 | 195   | 1 | 11 | 8  | 204 | 34 | 430   |
| 85,063 | 4 | 20 | 21 | 196   | 1 | 11 | 8  | 203 | 34 | 430   |

|        |   |    |    |     |   |    |    |     |    |       |
|--------|---|----|----|-----|---|----|----|-----|----|-------|
| 85,064 | 4 | 20 | 21 | 196 | 1 | 11 | 8  | 203 | 34 | 430   |
| 85,065 | 4 | 19 | 21 | 190 | 1 | 11 | 8  | 198 | 34 | 418   |
| 85,066 | 4 | 27 | 21 | 204 | 1 | 12 | 8  | 216 | 34 | 459   |
| 85,067 | 4 | 28 | 21 | 214 | 1 | 13 | 8  | 222 | 34 | 477   |
| 85,068 | 4 | 29 | 21 | 267 | 1 | 14 | 8  | 235 | 34 | 545   |
| 85,069 | 4 | 29 | 21 | 351 | 1 | 18 | 8  | 291 | 34 | 689   |
| 85,070 | 4 | 28 | 21 | 378 | 1 | 19 | 8  | 293 | 34 | 718   |
| 85,071 | 4 | 28 | 21 | 411 | 1 | 20 | 8  | 308 | 34 | 767   |
| 85,072 | 4 | 29 | 20 | 443 | 1 | 20 | 8  | 309 | 33 | 801   |
| 85,073 | 4 | 29 | 20 | 450 | 1 | 20 | 8  | 319 | 33 | 818   |
| 85,074 | 4 | 29 | 21 | 470 | 1 | 20 | 10 | 321 | 36 | 840   |
| 85,075 | 4 | 29 | 20 | 472 | 0 | 20 | 10 | 323 | 34 | 844   |
| 85,076 | 4 | 29 | 20 | 485 | 0 | 20 | 10 | 332 | 34 | 866   |
| 85,077 | 4 | 30 | 18 | 507 | 0 | 22 | 10 | 350 | 32 | 909   |
| 85,078 | 3 | 30 | 18 | 522 | 0 | 25 | 8  | 355 | 29 | 932   |
| 85,079 | 3 | 31 | 17 | 533 | 0 | 25 | 8  | 368 | 28 | 957   |
| 85,080 | 3 | 31 | 15 | 555 | 0 | 29 | 8  | 398 | 26 | 1,013 |
| 85,081 | 2 | 32 | 13 | 571 | 0 | 30 | 8  | 413 | 23 | 1,046 |
| 85,082 | 2 | 32 | 13 | 599 | 0 | 30 | 8  | 446 | 23 | 1,107 |
| 85,083 | 2 | 23 | 11 | 538 | 0 | 23 | 8  | 340 | 21 | 924   |
| 85,084 | 2 | 24 | 10 | 517 | 0 | 22 | 8  | 330 | 20 | 893   |
| 85,085 | 2 | 22 | 10 | 487 | 0 | 21 | 8  | 295 | 20 | 825   |
| 85,086 | 2 | 22 | 10 | 484 | 0 | 21 | 8  | 290 | 20 | 817   |
| 85,087 | 2 | 23 | 10 | 497 | 0 | 22 | 8  | 297 | 20 | 839   |
| 85,088 | 2 | 23 | 10 | 508 | 0 | 22 | 8  | 297 | 20 | 850   |
| 85,089 | 3 | 22 | 10 | 496 | 0 | 22 | 7  | 296 | 20 | 836   |
| 85,090 | 3 | 23 | 10 | 498 | 0 | 22 | 7  | 296 | 20 | 839   |
| 85,091 | 3 | 23 | 10 | 494 | 0 | 22 | 8  | 289 | 21 | 828   |
| 85,092 | 3 | 23 | 10 | 494 | 0 | 22 | 8  | 289 | 21 | 828   |
| 85,093 | 3 | 23 | 10 | 496 | 0 | 20 | 8  | 291 | 21 | 830   |
| 85,094 | 3 | 23 | 10 | 496 | 0 | 20 | 8  | 294 | 21 | 833   |
| 85,095 | 3 | 23 | 10 | 490 | 0 | 20 | 9  | 292 | 22 | 825   |
| 85,096 | 3 | 23 | 10 | 491 | 0 | 20 | 9  | 292 | 22 | 826   |
| 85,097 | 3 | 23 | 10 | 491 | 0 | 20 | 9  | 292 | 22 | 826   |
| 85,098 | 3 | 22 | 10 | 491 | 0 | 20 | 9  | 292 | 22 | 825   |
| 85,099 | 3 | 22 | 10 | 503 | 0 | 22 | 9  | 306 | 22 | 853   |
| 85,100 | 3 | 22 | 9  | 506 | 0 | 23 | 9  | 314 | 21 | 865   |
| 85,101 | 3 | 23 | 6  | 518 | 0 | 24 | 6  | 316 | 15 | 881   |
| 85,102 | 2 | 23 | 6  | 539 | 0 | 28 | 6  | 343 | 14 | 933   |
| 85,103 | 1 | 23 | 5  | 556 | 0 | 28 | 5  | 352 | 11 | 959   |
| 85,104 | 1 | 34 | 5  | 613 | 0 | 35 | 6  | 501 | 12 | 1,183 |

|        |   |    |    |     |   |    |    |     |    |       |
|--------|---|----|----|-----|---|----|----|-----|----|-------|
| 85,105 | 1 | 34 | 2  | 615 | 0 | 36 | 5  | 506 | 8  | 1,191 |
| 85,106 | 1 | 37 | 1  | 654 | 0 | 40 | 5  | 590 | 7  | 1,321 |
| 85,107 | 1 | 37 | 1  | 668 | 0 | 42 | 5  | 607 | 7  | 1,354 |
| 85,108 | 1 | 37 | 25 | 691 | 0 | 44 | 9  | 614 | 35 | 1,386 |
| 85,109 | 1 | 37 | 25 | 696 | 0 | 44 | 9  | 616 | 35 | 1,393 |
| 85,110 | 1 | 37 | 25 | 696 | 0 | 44 | 9  | 616 | 35 | 1,393 |
| 85,111 | 1 | 41 | 28 | 703 | 0 | 44 | 9  | 634 | 38 | 1,422 |
| 85,112 | 1 | 41 | 28 | 704 | 0 | 44 | 9  | 633 | 38 | 1,422 |
| 85,113 | 2 | 41 | 43 | 716 | 0 | 44 | 13 | 640 | 58 | 1,441 |
| 85,114 | 2 | 41 | 45 | 719 | 0 | 44 | 13 | 642 | 60 | 1,446 |
| 85,115 | 2 | 41 | 45 | 719 | 0 | 44 | 13 | 642 | 60 | 1,446 |
| 85,116 | 3 | 33 | 45 | 706 | 0 | 43 | 13 | 624 | 61 | 1,406 |
| 85,117 | 3 | 32 | 45 | 694 | 0 | 42 | 13 | 615 | 61 | 1,383 |
| 85,118 | 4 | 31 | 45 | 641 | 0 | 42 | 13 | 600 | 62 | 1,314 |
| 85,119 | 4 | 31 | 45 | 641 | 0 | 42 | 13 | 600 | 62 | 1,314 |
| 85,120 | 4 | 31 | 45 | 556 | 0 | 38 | 13 | 543 | 62 | 1,168 |
| 85,121 | 4 | 30 | 46 | 529 | 0 | 37 | 13 | 540 | 63 | 1,136 |
| 85,122 | 4 | 30 | 47 | 496 | 0 | 36 | 13 | 526 | 64 | 1,088 |
| 85,123 | 4 | 28 | 47 | 462 | 0 | 36 | 13 | 523 | 64 | 1,049 |
| 85,124 | 4 | 28 | 47 | 456 | 0 | 36 | 13 | 517 | 64 | 1,037 |
| 85,125 | 4 | 28 | 46 | 441 | 0 | 36 | 12 | 517 | 62 | 1,022 |
| 85,126 | 4 | 28 | 47 | 447 | 0 | 37 | 12 | 527 | 63 | 1,039 |
| 85,127 | 4 | 26 | 47 | 432 | 0 | 37 | 12 | 522 | 63 | 1,017 |
| 85,128 | 4 | 25 | 47 | 411 | 0 | 37 | 12 | 504 | 63 | 977   |
| 85,129 | 4 | 25 | 47 | 397 | 0 | 34 | 12 | 499 | 63 | 955   |
| 85,130 | 4 | 25 | 47 | 387 | 0 | 34 | 12 | 486 | 63 | 932   |
| 85,131 | 4 | 25 | 47 | 364 | 0 | 30 | 12 | 456 | 63 | 875   |
| 85,132 | 4 | 24 | 49 | 346 | 0 | 29 | 12 | 441 | 65 | 840   |
| 85,133 | 4 | 24 | 49 | 315 | 0 | 29 | 12 | 403 | 65 | 771   |
| 85,134 | 4 | 23 | 49 | 301 | 0 | 29 | 12 | 400 | 65 | 753   |
| 85,135 | 4 | 23 | 49 | 305 | 0 | 30 | 12 | 402 | 65 | 760   |
| 85,136 | 4 | 31 | 49 | 360 | 0 | 33 | 13 | 433 | 66 | 857   |
| 85,137 | 4 | 31 | 49 | 366 | 0 | 33 | 13 | 432 | 66 | 862   |
| 85,138 | 4 | 30 | 49 | 357 | 1 | 32 | 13 | 426 | 67 | 845   |
| 85,139 | 4 | 30 | 50 | 351 | 1 | 32 | 14 | 426 | 69 | 839   |
| 85,140 | 3 | 34 | 51 | 387 | 1 | 33 | 14 | 464 | 69 | 918   |
| 85,141 | 3 | 33 | 51 | 388 | 1 | 33 | 14 | 463 | 69 | 917   |
| 85,142 | 3 | 33 | 51 | 395 | 1 | 33 | 15 | 466 | 70 | 927   |
| 85,143 | 3 | 33 | 51 | 401 | 1 | 33 | 15 | 466 | 70 | 933   |
| 85,144 | 5 | 34 | 54 | 404 | 1 | 33 | 21 | 466 | 81 | 937   |
| 85,145 | 5 | 48 | 60 | 507 | 1 | 41 | 21 | 553 | 87 | 1,149 |

|        |   |    |    |     |   |    |    |     |     |       |
|--------|---|----|----|-----|---|----|----|-----|-----|-------|
| 85,146 | 5 | 48 | 60 | 523 | 1 | 41 | 20 | 559 | 86  | 1,171 |
| 85,147 | 5 | 51 | 60 | 529 | 1 | 43 | 20 | 569 | 86  | 1,192 |
| 85,148 | 5 | 52 | 60 | 537 | 1 | 44 | 18 | 571 | 84  | 1,204 |
| 85,149 | 5 | 52 | 60 | 528 | 1 | 42 | 18 | 555 | 84  | 1,177 |
| 85,150 | 5 | 52 | 60 | 526 | 1 | 41 | 18 | 548 | 84  | 1,167 |
| 85,151 | 5 | 52 | 60 | 528 | 1 | 41 | 18 | 547 | 84  | 1,168 |
| 85,152 | 5 | 51 | 60 | 516 | 1 | 40 | 19 | 547 | 85  | 1,154 |
| 85,153 | 5 | 51 | 60 | 504 | 1 | 36 | 19 | 523 | 85  | 1,114 |
| 85,154 | 5 | 56 | 60 | 544 | 1 | 42 | 20 | 538 | 86  | 1,180 |
| 85,155 | 5 | 45 | 65 | 540 | 1 | 40 | 21 | 426 | 92  | 1,051 |
| 85,156 | 5 | 45 | 68 | 606 | 1 | 46 | 21 | 465 | 95  | 1,162 |
| 85,157 | 5 | 42 | 64 | 604 | 1 | 45 | 21 | 394 | 91  | 1,085 |
| 85,158 | 5 | 43 | 60 | 600 | 1 | 44 | 20 | 387 | 86  | 1,074 |
| 85,159 | 5 | 43 | 45 | 587 | 1 | 43 | 18 | 396 | 69  | 1,069 |
| 85,160 | 5 | 43 | 44 | 582 | 1 | 43 | 18 | 393 | 68  | 1,061 |
| 85,161 | 5 | 43 | 43 | 586 | 1 | 43 | 18 | 397 | 67  | 1,069 |
| 85,162 | 6 | 40 | 42 | 603 | 1 | 44 | 18 | 410 | 67  | 1,097 |
| 85,163 | 5 | 40 | 27 | 599 | 1 | 44 | 17 | 407 | 50  | 1,090 |
| 85,164 | 5 | 40 | 29 | 610 | 1 | 45 | 16 | 419 | 51  | 1,114 |
| 85,165 | 5 | 40 | 27 | 607 | 1 | 45 | 16 | 418 | 49  | 1,110 |
| 85,166 | 4 | 40 | 28 | 609 | 1 | 45 | 16 | 418 | 49  | 1,112 |
| 85,167 | 5 | 40 | 28 | 609 | 1 | 45 | 16 | 418 | 50  | 1,112 |
| 85,168 | 7 | 40 | 39 | 608 | 1 | 44 | 17 | 419 | 64  | 1,111 |
| 85,169 | 6 | 40 | 52 | 608 | 1 | 44 | 17 | 419 | 76  | 1,111 |
| 85,170 | 6 | 40 | 52 | 608 | 1 | 44 | 17 | 419 | 76  | 1,111 |
| 85,171 | 7 | 40 | 60 | 605 | 2 | 44 | 28 | 418 | 97  | 1,107 |
| 85,172 | 7 | 40 | 60 | 605 | 2 | 44 | 29 | 418 | 98  | 1,107 |
| 85,173 | 8 | 40 | 75 | 606 | 4 | 44 | 36 | 419 | 123 | 1,109 |
| 85,174 | 8 | 40 | 75 | 605 | 4 | 44 | 36 | 418 | 123 | 1,107 |
| 85,175 | 8 | 40 | 76 | 603 | 4 | 44 | 36 | 415 | 124 | 1,102 |
| 85,176 | 8 | 40 | 82 | 607 | 4 | 45 | 38 | 412 | 132 | 1,104 |
| 85,177 | 8 | 40 | 81 | 601 | 4 | 44 | 38 | 402 | 131 | 1,087 |
| 85,178 | 8 | 40 | 87 | 601 | 4 | 42 | 38 | 397 | 137 | 1,080 |
| 85,179 | 8 | 40 | 91 | 600 | 4 | 42 | 39 | 397 | 142 | 1,079 |
| 85,180 | 8 | 39 | 92 | 600 | 4 | 42 | 40 | 397 | 144 | 1,078 |
| 85,181 | 8 | 39 | 92 | 600 | 4 | 42 | 40 | 396 | 144 | 1,077 |
| 85,182 | 8 | 39 | 90 | 602 | 4 | 42 | 41 | 396 | 143 | 1,079 |
| 85,183 | 8 | 39 | 90 | 602 | 4 | 42 | 41 | 396 | 143 | 1,079 |
| 85,184 | 8 | 39 | 90 | 602 | 4 | 42 | 41 | 396 | 143 | 1,079 |
| 85,185 | 8 | 39 | 90 | 597 | 4 | 41 | 41 | 394 | 143 | 1,071 |
| 85,186 | 8 | 39 | 91 | 597 | 4 | 41 | 41 | 394 | 144 | 1,071 |

|        |   |    |    |     |   |    |    |     |     |     |
|--------|---|----|----|-----|---|----|----|-----|-----|-----|
| 85,187 | 8 | 31 | 91 | 529 | 4 | 38 | 40 | 359 | 143 | 957 |
| 85,188 | 8 | 31 | 91 | 529 | 3 | 38 | 40 | 361 | 142 | 959 |
| 85,189 | 8 | 31 | 90 | 525 | 3 | 38 | 40 | 360 | 141 | 954 |
| 85,190 | 8 | 32 | 90 | 522 | 3 | 38 | 39 | 360 | 140 | 952 |
| 85,191 | 8 | 28 | 89 | 499 | 3 | 37 | 39 | 332 | 139 | 896 |
| 85,192 | 8 | 28 | 89 | 497 | 3 | 37 | 37 | 332 | 137 | 894 |
| 85,193 | 8 | 29 | 89 | 513 | 3 | 42 | 37 | 352 | 137 | 936 |
| 85,194 | 8 | 31 | 87 | 534 | 3 | 42 | 36 | 355 | 134 | 962 |
| 85,195 | 6 | 30 | 86 | 530 | 4 | 42 | 31 | 355 | 127 | 957 |
| 85,196 | 6 | 16 | 81 | 414 | 4 | 34 | 31 | 260 | 122 | 724 |
| 85,197 | 6 | 13 | 81 | 405 | 4 | 32 | 31 | 253 | 122 | 703 |
| 85,198 | 6 | 12 | 81 | 396 | 4 | 31 | 31 | 249 | 122 | 688 |
| 85,199 | 6 | 12 | 81 | 391 | 4 | 31 | 31 | 248 | 122 | 682 |
| 85,200 | 6 | 12 | 81 | 391 | 4 | 31 | 31 | 248 | 122 | 682 |
| 85,201 | 6 | 12 | 81 | 402 | 4 | 32 | 31 | 264 | 122 | 710 |
| 85,202 | 6 | 12 | 81 | 403 | 4 | 33 | 30 | 266 | 121 | 714 |
| 85,203 | 6 | 14 | 82 | 440 | 5 | 37 | 30 | 308 | 123 | 799 |
| 85,204 | 6 | 14 | 82 | 435 | 5 | 37 | 29 | 310 | 122 | 796 |
| 85,205 | 6 | 8  | 78 | 331 | 5 | 26 | 28 | 251 | 117 | 616 |
| 85,206 | 6 | 7  | 77 | 203 | 5 | 14 | 28 | 173 | 116 | 397 |
| 85,207 | 6 | 7  | 75 | 205 | 5 | 14 | 28 | 176 | 114 | 402 |
| 85,208 | 6 | 7  | 73 | 210 | 5 | 15 | 27 | 179 | 111 | 411 |
| 85,209 | 6 | 7  | 73 | 210 | 5 | 15 | 27 | 179 | 111 | 411 |
| 85,210 | 6 | 8  | 73 | 212 | 5 | 15 | 27 | 179 | 111 | 414 |
| 85,211 | 6 | 9  | 73 | 212 | 5 | 15 | 27 | 179 | 111 | 415 |
| 85,212 | 6 | 8  | 73 | 185 | 5 | 14 | 27 | 145 | 111 | 352 |
| 85,213 | 5 | 8  | 73 | 176 | 5 | 14 | 27 | 141 | 110 | 339 |
| 85,214 | 5 | 8  | 73 | 177 | 5 | 14 | 27 | 141 | 110 | 340 |
| 85,215 | 5 | 8  | 71 | 166 | 5 | 13 | 26 | 129 | 107 | 316 |
| 85,216 | 5 | 8  | 70 | 164 | 5 | 13 | 26 | 128 | 106 | 313 |
| 85,217 | 5 | 8  | 71 | 168 | 5 | 13 | 26 | 129 | 107 | 318 |
| 85,218 | 4 | 8  | 74 | 177 | 5 | 13 | 26 | 131 | 109 | 329 |
| 85,219 | 2 | 8  | 63 | 179 | 5 | 13 | 25 | 131 | 95  | 331 |
| 85,220 | 2 | 9  | 50 | 180 | 5 | 13 | 25 | 131 | 82  | 333 |
| 85,221 | 1 | 9  | 49 | 184 | 5 | 13 | 25 | 131 | 80  | 337 |
| 85,222 | 1 | 9  | 42 | 184 | 4 | 13 | 14 | 131 | 61  | 337 |
| 85,223 | 1 | 9  | 42 | 185 | 4 | 14 | 13 | 131 | 60  | 339 |
| 85,224 | 5 | 9  | 26 | 187 | 2 | 14 | 6  | 130 | 39  | 340 |
| 85,225 | 5 | 9  | 25 | 198 | 2 | 14 | 6  | 148 | 38  | 369 |
| 85,226 | 5 | 9  | 22 | 204 | 2 | 14 | 6  | 148 | 35  | 375 |
| 85,227 | 5 | 9  | 20 | 198 | 2 | 13 | 3  | 147 | 30  | 367 |

|        |    |    |    |     |   |    |    |     |    |     |
|--------|----|----|----|-----|---|----|----|-----|----|-----|
| 85,228 | 5  | 9  | 20 | 202 | 2 | 13 | 3  | 148 | 30 | 372 |
| 85,229 | 5  | 9  | 14 | 199 | 2 | 13 | 3  | 148 | 24 | 369 |
| 85,230 | 5  | 9  | 13 | 199 | 2 | 13 | 3  | 148 | 23 | 369 |
| 85,231 | 5  | 10 | 12 | 202 | 2 | 13 | 2  | 149 | 21 | 374 |
| 85,232 | 5  | 10 | 14 | 203 | 2 | 13 | 2  | 151 | 23 | 377 |
| 85,233 | 5  | 10 | 15 | 201 | 2 | 13 | 1  | 152 | 23 | 376 |
| 85,234 | 5  | 10 | 20 | 208 | 2 | 13 | 2  | 154 | 29 | 385 |
| 85,235 | 5  | 15 | 20 | 218 | 2 | 13 | 2  | 172 | 29 | 418 |
| 85,236 | 5  | 15 | 20 | 232 | 2 | 13 | 2  | 175 | 29 | 435 |
| 85,237 | 7  | 15 | 22 | 233 | 3 | 13 | 4  | 175 | 36 | 436 |
| 85,238 | 7  | 17 | 31 | 237 | 4 | 13 | 9  | 177 | 51 | 444 |
| 85,239 | 7  | 17 | 31 | 238 | 4 | 13 | 9  | 176 | 51 | 444 |
| 85,240 | 11 | 16 | 42 | 238 | 6 | 13 | 14 | 176 | 73 | 443 |
| 85,241 | 11 | 16 | 44 | 226 | 8 | 13 | 17 | 166 | 80 | 421 |
| 85,242 | 11 | 16 | 44 | 232 | 8 | 13 | 17 | 168 | 80 | 429 |
| 85,243 | 11 | 19 | 44 | 232 | 8 | 13 | 17 | 169 | 80 | 433 |
| 85,244 | 11 | 18 | 44 | 208 | 8 | 8  | 17 | 146 | 80 | 380 |
| 85,245 | 11 | 16 | 45 | 181 | 8 | 8  | 17 | 141 | 81 | 346 |
| 85,246 | 11 | 16 | 45 | 177 | 7 | 8  | 17 | 139 | 80 | 340 |
| 85,247 | 11 | 16 | 44 | 177 | 7 | 8  | 17 | 140 | 79 | 341 |
| 85,248 | 11 | 16 | 44 | 177 | 7 | 8  | 17 | 139 | 79 | 340 |
| 85,249 | 11 | 16 | 44 | 178 | 7 | 8  | 17 | 138 | 79 | 340 |
| 85,250 | 11 | 16 | 44 | 178 | 7 | 8  | 17 | 138 | 79 | 340 |
| 85,251 | 11 | 16 | 44 | 167 | 7 | 7  | 17 | 121 | 79 | 311 |
| 85,252 | 11 | 16 | 44 | 164 | 7 | 6  | 17 | 119 | 79 | 305 |
| 85,253 | 11 | 16 | 43 | 164 | 7 | 6  | 17 | 119 | 78 | 305 |
| 85,254 | 11 | 14 | 43 | 123 | 6 | 2  | 17 | 69  | 77 | 208 |
| 85,255 | 11 | 14 | 44 | 124 | 6 | 2  | 17 | 71  | 78 | 211 |
| 85,256 | 11 | 14 | 44 | 120 | 6 | 2  | 17 | 78  | 78 | 214 |
| 85,257 | 11 | 14 | 45 | 126 | 6 | 2  | 17 | 84  | 79 | 226 |
| 85,258 | 11 | 14 | 45 | 142 | 6 | 4  | 17 | 98  | 79 | 258 |
| 85,259 | 11 | 14 | 45 | 155 | 6 | 3  | 17 | 103 | 79 | 275 |
| 85,260 | 12 | 14 | 45 | 180 | 6 | 7  | 17 | 118 | 80 | 319 |
| 85,261 | 12 | 13 | 45 | 185 | 6 | 8  | 17 | 128 | 80 | 334 |
| 85,262 | 12 | 13 | 46 | 203 | 6 | 11 | 17 | 138 | 81 | 365 |
| 85,263 | 12 | 13 | 46 | 203 | 6 | 11 | 17 | 138 | 81 | 365 |
| 85,264 | 12 | 13 | 48 | 207 | 6 | 11 | 17 | 139 | 83 | 370 |
| 85,265 | 12 | 13 | 48 | 206 | 6 | 12 | 17 | 139 | 83 | 370 |
| 85,266 | 12 | 13 | 50 | 208 | 6 | 12 | 17 | 140 | 85 | 373 |
| 85,267 | 12 | 13 | 50 | 201 | 6 | 12 | 17 | 138 | 85 | 364 |
| 85,268 | 12 | 13 | 49 | 201 | 6 | 12 | 17 | 139 | 84 | 365 |



|        |    |    |    |     |   |    |    |     |    |     |
|--------|----|----|----|-----|---|----|----|-----|----|-----|
| 85,269 | 12 | 13 | 46 | 191 | 6 | 12 | 19 | 137 | 83 | 353 |
| 85,270 | 12 | 12 | 46 | 191 | 6 | 12 | 19 | 139 | 83 | 354 |
| 85,271 | 12 | 12 | 46 | 194 | 6 | 12 | 20 | 145 | 84 | 363 |
| 85,272 | 12 | 12 | 47 | 190 | 6 | 12 | 20 | 147 | 85 | 361 |
| 85,273 | 12 | 12 | 46 | 190 | 6 | 11 | 20 | 147 | 84 | 360 |
| 85,274 | 12 | 12 | 46 | 193 | 6 | 11 | 20 | 147 | 84 | 363 |
| 85,275 | 7  | 12 | 46 | 179 | 6 | 11 | 21 | 128 | 80 | 330 |
| 85,276 | 7  | 12 | 46 | 173 | 6 | 11 | 21 | 127 | 80 | 323 |
| 85,277 | 7  | 12 | 46 | 173 | 6 | 11 | 21 | 127 | 80 | 323 |
| 85,278 | 7  | 12 | 45 | 168 | 6 | 11 | 21 | 125 | 79 | 316 |
| 85,279 | 7  | 12 | 45 | 164 | 6 | 11 | 21 | 124 | 79 | 311 |
| 85,280 | 7  | 12 | 45 | 164 | 6 | 11 | 21 | 124 | 79 | 311 |
| 85,281 | 7  | 11 | 42 | 160 | 6 | 11 | 20 | 123 | 75 | 305 |
| 85,282 | 7  | 11 | 40 | 159 | 6 | 11 | 21 | 121 | 74 | 302 |
| 85,283 | 7  | 11 | 39 | 159 | 6 | 11 | 21 | 120 | 73 | 301 |
| 85,284 | 7  | 6  | 45 | 131 | 6 | 11 | 27 | 99  | 85 | 247 |
| 85,285 | 7  | 6  | 40 | 131 | 6 | 11 | 27 | 100 | 80 | 248 |
| 85,286 | 5  | 6  | 37 | 131 | 5 | 11 | 25 | 99  | 72 | 247 |
| 85,287 | 5  | 6  | 37 | 132 | 5 | 11 | 25 | 99  | 72 | 248 |
| 85,288 | 5  | 6  | 34 | 131 | 4 | 11 | 21 | 99  | 64 | 247 |
| 85,289 | 5  | 4  | 28 | 131 | 4 | 11 | 20 | 102 | 57 | 248 |
| 85,290 | 4  | 4  | 24 | 147 | 2 | 11 | 18 | 113 | 48 | 275 |
| 85,291 | 1  | 4  | 19 | 160 | 2 | 11 | 15 | 114 | 37 | 289 |
| 85,292 | 1  | 4  | 19 | 160 | 0 | 11 | 15 | 112 | 35 | 287 |
| 85,293 | 1  | 1  | 21 | 161 | 0 | 11 | 15 | 111 | 37 | 284 |
| 85,294 | 1  | 1  | 20 | 160 | 0 | 11 | 15 | 111 | 36 | 283 |
| 85,295 | 1  | 1  | 20 | 160 | 0 | 11 | 15 | 111 | 36 | 283 |
| 85,296 | 1  | 2  | 20 | 160 | 0 | 11 | 15 | 111 | 36 | 284 |
| 85,297 | 1  | 2  | 20 | 160 | 0 | 11 | 15 | 111 | 36 | 284 |
| 85,298 | 1  | 2  | 20 | 160 | 0 | 11 | 15 | 111 | 36 | 284 |
| 85,299 | 1  | 2  | 20 | 160 | 0 | 11 | 16 | 111 | 37 | 284 |
| 85,300 | 1  | 2  | 20 | 159 | 0 | 11 | 16 | 111 | 37 | 283 |
| 85,301 | 1  | 2  | 21 | 169 | 0 | 11 | 16 | 117 | 38 | 299 |
| 85,302 | 1  | 3  | 21 | 181 | 0 | 12 | 16 | 135 | 38 | 331 |
| 85,303 | 1  | 3  | 21 | 183 | 0 | 12 | 16 | 138 | 38 | 336 |
| 85,304 | 1  | 13 | 21 | 341 | 0 | 16 | 16 | 237 | 38 | 607 |
| 85,305 | 2  | 15 | 21 | 353 | 0 | 17 | 16 | 244 | 39 | 629 |
| 85,306 | 2  | 15 | 20 | 353 | 0 | 17 | 16 | 243 | 38 | 628 |
| 85,307 | 2  | 16 | 20 | 358 | 0 | 18 | 16 | 241 | 38 | 633 |
| 85,308 | 2  | 16 | 19 | 361 | 0 | 20 | 16 | 247 | 37 | 644 |
| 85,309 | 2  | 19 | 19 | 370 | 0 | 18 | 16 | 256 | 37 | 663 |

|        |   |    |    |     |   |    |    |     |    |       |
|--------|---|----|----|-----|---|----|----|-----|----|-------|
| 85,310 | 2 | 19 | 19 | 353 | 0 | 18 | 16 | 246 | 37 | 636   |
| 85,311 | 1 | 19 | 21 | 323 | 0 | 13 | 16 | 221 | 38 | 576   |
| 85,312 | 1 | 19 | 21 | 326 | 0 | 13 | 16 | 229 | 38 | 587   |
| 85,313 | 1 | 18 | 20 | 308 | 0 | 10 | 16 | 220 | 37 | 556   |
| 85,314 | 1 | 18 | 18 | 304 | 0 | 10 | 17 | 219 | 36 | 551   |
| 85,315 | 1 | 18 | 18 | 307 | 0 | 10 | 17 | 222 | 36 | 557   |
| 85,316 | 1 | 18 | 16 | 310 | 0 | 9  | 17 | 224 | 34 | 561   |
| 85,317 | 3 | 18 | 18 | 308 | 0 | 9  | 19 | 224 | 40 | 559   |
| 85,318 | 3 | 18 | 18 | 312 | 0 | 9  | 19 | 224 | 40 | 563   |
| 85,319 | 3 | 18 | 19 | 317 | 0 | 9  | 19 | 231 | 41 | 575   |
| 85,320 | 3 | 18 | 19 | 319 | 0 | 9  | 17 | 232 | 39 | 578   |
| 85,321 | 3 | 18 | 19 | 319 | 0 | 9  | 17 | 230 | 39 | 576   |
| 85,322 | 3 | 18 | 19 | 319 | 0 | 10 | 16 | 231 | 38 | 578   |
| 85,323 | 3 | 18 | 19 | 334 | 0 | 10 | 16 | 231 | 38 | 593   |
| 85,324 | 3 | 19 | 19 | 335 | 0 | 10 | 16 | 233 | 38 | 597   |
| 85,325 | 3 | 19 | 19 | 332 | 0 | 11 | 16 | 233 | 38 | 595   |
| 85,326 | 3 | 19 | 19 | 332 | 0 | 11 | 15 | 233 | 37 | 595   |
| 85,327 | 3 | 19 | 19 | 340 | 0 | 12 | 16 | 238 | 38 | 609   |
| 85,328 | 3 | 19 | 19 | 343 | 0 | 12 | 16 | 241 | 38 | 615   |
| 85,329 | 3 | 20 | 21 | 351 | 0 | 12 | 18 | 248 | 42 | 631   |
| 85,330 | 4 | 22 | 31 | 376 | 0 | 12 | 26 | 275 | 61 | 685   |
| 85,331 | 5 | 23 | 31 | 377 | 0 | 12 | 29 | 277 | 65 | 689   |
| 85,332 | 5 | 23 | 32 | 377 | 0 | 12 | 29 | 277 | 66 | 689   |
| 85,333 | 5 | 23 | 32 | 374 | 0 | 12 | 30 | 276 | 67 | 685   |
| 85,334 | 5 | 23 | 33 | 374 | 0 | 12 | 30 | 276 | 68 | 685   |
| 85,335 | 5 | 24 | 27 | 383 | 0 | 12 | 23 | 284 | 55 | 703   |
| 85,336 | 5 | 24 | 27 | 386 | 0 | 12 | 23 | 283 | 55 | 705   |
| 85,337 | 5 | 24 | 27 | 392 | 0 | 15 | 23 | 290 | 55 | 721   |
| 85,338 | 5 | 27 | 27 | 436 | 0 | 16 | 23 | 303 | 55 | 782   |
| 85,339 | 5 | 28 | 27 | 553 | 0 | 18 | 23 | 330 | 55 | 929   |
| 85,340 | 5 | 29 | 27 | 579 | 0 | 19 | 23 | 336 | 55 | 963   |
| 85,341 | 5 | 32 | 27 | 652 | 0 | 21 | 23 | 360 | 55 | 1,065 |
| 85,342 | 5 | 35 | 25 | 667 | 0 | 21 | 23 | 363 | 53 | 1,086 |
| 85,343 | 5 | 35 | 23 | 669 | 0 | 22 | 20 | 365 | 48 | 1,091 |
| 85,344 | 5 | 35 | 21 | 669 | 0 | 22 | 20 | 366 | 46 | 1,092 |
| 85,345 | 5 | 35 | 21 | 670 | 0 | 22 | 20 | 368 | 46 | 1,095 |
| 85,346 | 5 | 34 | 21 | 670 | 0 | 22 | 20 | 367 | 46 | 1,093 |
| 85,347 | 5 | 34 | 22 | 672 | 0 | 22 | 21 | 367 | 48 | 1,095 |
| 85,348 | 5 | 37 | 22 | 677 | 0 | 23 | 21 | 379 | 48 | 1,116 |
| 85,349 | 5 | 37 | 22 | 678 | 0 | 23 | 20 | 380 | 47 | 1,118 |
| 85,350 | 5 | 37 | 22 | 680 | 0 | 23 | 20 | 380 | 47 | 1,120 |

|        |   |    |    |       |   |    |    |     |    |       |
|--------|---|----|----|-------|---|----|----|-----|----|-------|
| 85,351 | 5 | 37 | 22 | 684   | 0 | 23 | 21 | 380 | 48 | 1,124 |
| 85,352 | 5 | 36 | 28 | 661   | 0 | 22 | 23 | 357 | 56 | 1,076 |
| 85,353 | 5 | 36 | 28 | 661   | 0 | 22 | 23 | 356 | 56 | 1,075 |
| 85,354 | 5 | 36 | 29 | 659   | 0 | 22 | 24 | 356 | 58 | 1,073 |
| 85,355 | 5 | 26 | 30 | 504   | 0 | 18 | 24 | 258 | 59 | 806   |
| 85,356 | 4 | 24 | 30 | 496   | 0 | 17 | 24 | 253 | 58 | 790   |
| 85,357 | 4 | 24 | 29 | 497   | 0 | 17 | 24 | 252 | 57 | 790   |
| 85,358 | 4 | 23 | 29 | 486   | 1 | 16 | 24 | 240 | 58 | 765   |
| 85,359 | 4 | 23 | 29 | 484   | 1 | 14 | 24 | 234 | 58 | 755   |
| 85,360 | 4 | 20 | 29 | 459   | 1 | 14 | 24 | 210 | 58 | 703   |
| 85,361 | 4 | 21 | 29 | 475   | 1 | 14 | 24 | 212 | 58 | 722   |
| 85,362 | 4 | 25 | 28 | 581   | 1 | 16 | 24 | 254 | 57 | 876   |
| 85,363 | 4 | 58 | 28 | 843   | 1 | 26 | 24 | 439 | 57 | 1,366 |
| 85,364 | 4 | 60 | 28 | 896   | 1 | 26 | 24 | 453 | 57 | 1,435 |
| 85,365 | 5 | 65 | 28 | 911   | 1 | 26 | 23 | 476 | 57 | 1,478 |
| 85,366 | 5 | 67 | 28 | 941   | 2 | 26 | 23 | 476 | 58 | 1,510 |
| 85,367 | 3 | 70 | 28 | 972   | 2 | 28 | 21 | 480 | 54 | 1,550 |
| 85,368 | 3 | 70 | 26 | 979   | 2 | 28 | 21 | 480 | 52 | 1,557 |
| 85,369 | 3 | 72 | 26 | 1,040 | 2 | 30 | 21 | 512 | 52 | 1,654 |
| 85,370 | 3 | 73 | 25 | 1,038 | 2 | 30 | 21 | 505 | 51 | 1,646 |
| 85,371 | 3 | 85 | 25 | 1,107 | 2 | 35 | 21 | 512 | 51 | 1,739 |
| 85,372 | 3 | 85 | 25 | 1,109 | 2 | 35 | 21 | 513 | 51 | 1,742 |
| 85,373 | 3 | 86 | 25 | 1,103 | 2 | 34 | 21 | 513 | 51 | 1,736 |
| 85,374 | 3 | 88 | 26 | 1,121 | 2 | 34 | 21 | 526 | 52 | 1,769 |
| 85,375 | 3 | 88 | 26 | 1,122 | 2 | 34 | 21 | 526 | 52 | 1,770 |
| 85,376 | 3 | 88 | 26 | 1,136 | 2 | 34 | 21 | 530 | 52 | 1,788 |
| 85,377 | 3 | 89 | 28 | 1,161 | 2 | 34 | 25 | 531 | 58 | 1,815 |
| 85,378 | 3 | 89 | 28 | 1,160 | 2 | 33 | 24 | 526 | 57 | 1,808 |
| 85,379 | 3 | 89 | 28 | 1,162 | 2 | 33 | 24 | 523 | 57 | 1,807 |
| 85,380 | 3 | 89 | 26 | 1,177 | 2 | 33 | 22 | 520 | 53 | 1,819 |
| 85,381 | 2 | 88 | 16 | 1,164 | 2 | 34 | 14 | 496 | 34 | 1,782 |
| 85,382 | 1 | 87 | 16 | 1,172 | 2 | 35 | 11 | 495 | 30 | 1,789 |
| 85,383 | 1 | 88 | 15 | 1,178 | 2 | 35 | 11 | 495 | 29 | 1,796 |
| 85,384 | 1 | 88 | 15 | 1,178 | 2 | 35 | 9  | 495 | 27 | 1,796 |
| 85,385 | 1 | 88 | 14 | 1,188 | 2 | 35 | 9  | 496 | 26 | 1,807 |
| 85,386 | 1 | 87 | 14 | 1,181 | 2 | 35 | 9  | 488 | 26 | 1,791 |
| 85,387 | 1 | 87 | 14 | 1,181 | 2 | 35 | 9  | 488 | 26 | 1,791 |
| 85,388 | 1 | 87 | 15 | 1,175 | 2 | 32 | 9  | 480 | 27 | 1,774 |
| 85,389 | 2 | 82 | 16 | 985   | 2 | 28 | 12 | 430 | 32 | 1,525 |
| 85,390 | 2 | 82 | 18 | 985   | 2 | 28 | 12 | 430 | 34 | 1,525 |
| 85,391 | 2 | 82 | 18 | 986   | 2 | 28 | 12 | 430 | 34 | 1,526 |

|        |   |    |    |     |   |    |    |     |    |       |
|--------|---|----|----|-----|---|----|----|-----|----|-------|
| 85,392 | 2 | 79 | 21 | 896 | 2 | 26 | 13 | 396 | 38 | 1,397 |
| 85,393 | 2 | 76 | 21 | 863 | 2 | 26 | 15 | 392 | 40 | 1,357 |
| 85,394 | 2 | 76 | 22 | 856 | 2 | 25 | 20 | 390 | 46 | 1,347 |
| 85,395 | 2 | 76 | 22 | 858 | 2 | 25 | 20 | 390 | 46 | 1,349 |
| 85,396 | 2 | 76 | 23 | 857 | 2 | 25 | 20 | 388 | 47 | 1,346 |
| 85,397 | 2 | 76 | 23 | 860 | 2 | 25 | 20 | 391 | 47 | 1,352 |
| 85,398 | 2 | 75 | 22 | 864 | 2 | 24 | 19 | 386 | 45 | 1,349 |
| 85,399 | 2 | 75 | 22 | 873 | 2 | 24 | 19 | 390 | 45 | 1,362 |
| 85,400 | 2 | 75 | 22 | 875 | 2 | 24 | 19 | 393 | 45 | 1,367 |
| 85,401 | 2 | 76 | 21 | 889 | 2 | 24 | 18 | 400 | 43 | 1,389 |
| 85,402 | 2 | 76 | 21 | 887 | 2 | 24 | 18 | 400 | 43 | 1,387 |
| 85,403 | 2 | 76 | 15 | 887 | 2 | 24 | 16 | 400 | 35 | 1,387 |
| 85,404 | 2 | 77 | 14 | 894 | 2 | 24 | 15 | 401 | 33 | 1,396 |
| 85,405 | 2 | 77 | 13 | 897 | 2 | 24 | 15 | 405 | 32 | 1,403 |
| 85,406 | 2 | 78 | 13 | 908 | 2 | 25 | 18 | 412 | 35 | 1,423 |
| 85,407 | 2 | 78 | 13 | 914 | 2 | 25 | 18 | 417 | 35 | 1,434 |
| 85,408 | 2 | 78 | 13 | 912 | 1 | 25 | 18 | 418 | 34 | 1,433 |
| 85,409 | 3 | 78 | 13 | 914 | 2 | 25 | 20 | 416 | 38 | 1,433 |
| 85,410 | 3 | 79 | 13 | 920 | 2 | 25 | 20 | 419 | 38 | 1,443 |
| 85,411 | 3 | 80 | 13 | 919 | 2 | 25 | 20 | 419 | 38 | 1,443 |
| 85,412 | 3 | 83 | 13 | 911 | 2 | 25 | 21 | 429 | 39 | 1,448 |
| 85,413 | 2 | 79 | 13 | 822 | 2 | 23 | 21 | 403 | 38 | 1,327 |
| 85,414 | 2 | 47 | 13 | 561 | 2 | 13 | 21 | 214 | 38 | 835   |
| 85,415 | 2 | 46 | 13 | 526 | 2 | 15 | 21 | 208 | 38 | 795   |
| 85,416 | 2 | 46 | 14 | 547 | 2 | 16 | 21 | 200 | 39 | 809   |
| 85,417 | 2 | 44 | 14 | 518 | 1 | 17 | 21 | 203 | 38 | 782   |
| 85,418 | 2 | 41 | 14 | 487 | 1 | 15 | 21 | 197 | 38 | 740   |
| 85,419 | 2 | 39 | 14 | 417 | 1 | 14 | 21 | 164 | 38 | 634   |
| 85,420 | 2 | 38 | 14 | 416 | 1 | 14 | 21 | 170 | 38 | 638   |
| 85,421 | 2 | 28 | 15 | 347 | 1 | 10 | 23 | 161 | 41 | 546   |
| 85,422 | 2 | 32 | 15 | 520 | 1 | 14 | 23 | 227 | 41 | 793   |
| 85,423 | 2 | 37 | 17 | 589 | 1 | 17 | 23 | 279 | 43 | 922   |
| 85,424 | 2 | 45 | 23 | 628 | 1 | 19 | 26 | 298 | 52 | 990   |
| 85,425 | 2 | 43 | 39 | 630 | 2 | 19 | 33 | 283 | 76 | 975   |
| 85,426 | 2 | 43 | 39 | 628 | 2 | 19 | 33 | 284 | 76 | 974   |
| 85,427 | 3 | 46 | 50 | 657 | 3 | 23 | 37 | 315 | 93 | 1,041 |
| 85,428 | 3 | 45 | 48 | 640 | 3 | 24 | 33 | 314 | 87 | 1,023 |
| 85,429 | 3 | 46 | 51 | 618 | 3 | 24 | 34 | 316 | 91 | 1,004 |
| 85,430 | 3 | 53 | 51 | 658 | 3 | 25 | 34 | 329 | 91 | 1,065 |
| 85,431 | 3 | 54 | 51 | 670 | 3 | 25 | 34 | 335 | 91 | 1,084 |
| 85,432 | 3 | 55 | 51 | 666 | 3 | 23 | 34 | 333 | 91 | 1,077 |

|        |   |    |     |     |   |    |    |     |     |       |
|--------|---|----|-----|-----|---|----|----|-----|-----|-------|
| 85,433 | 3 | 56 | 52  | 681 | 4 | 24 | 34 | 336 | 93  | 1,097 |
| 85,434 | 3 | 58 | 52  | 699 | 4 | 25 | 34 | 342 | 93  | 1,124 |
| 85,435 | 3 | 58 | 52  | 699 | 4 | 25 | 34 | 341 | 93  | 1,123 |
| 85,436 | 4 | 58 | 60  | 701 | 4 | 25 | 34 | 340 | 102 | 1,124 |
| 85,437 | 4 | 58 | 61  | 702 | 4 | 25 | 34 | 341 | 103 | 1,126 |
| 85,438 | 4 | 58 | 65  | 703 | 4 | 25 | 34 | 341 | 107 | 1,127 |
| 85,439 | 4 | 58 | 64  | 708 | 4 | 25 | 34 | 343 | 106 | 1,134 |
| 85,440 | 3 | 58 | 68  | 708 | 4 | 25 | 32 | 343 | 107 | 1,134 |
| 85,441 | 4 | 58 | 66  | 714 | 4 | 25 | 32 | 344 | 106 | 1,141 |
| 85,442 | 4 | 59 | 63  | 715 | 4 | 25 | 32 | 345 | 103 | 1,144 |
| 85,443 | 4 | 59 | 63  | 714 | 4 | 25 | 29 | 344 | 100 | 1,142 |
| 85,444 | 4 | 59 | 64  | 715 | 4 | 25 | 28 | 345 | 100 | 1,144 |
| 85,445 | 4 | 59 | 62  | 713 | 4 | 25 | 24 | 344 | 94  | 1,141 |
| 85,446 | 4 | 59 | 63  | 714 | 5 | 25 | 24 | 344 | 96  | 1,142 |
| 85,447 | 4 | 59 | 63  | 714 | 5 | 25 | 24 | 345 | 96  | 1,143 |
| 85,448 | 4 | 59 | 64  | 711 | 5 | 25 | 24 | 342 | 97  | 1,137 |
| 85,449 | 4 | 57 | 64  | 700 | 5 | 25 | 24 | 335 | 97  | 1,117 |
| 85,450 | 4 | 57 | 64  | 691 | 5 | 25 | 24 | 331 | 97  | 1,104 |
| 85,451 | 5 | 56 | 79  | 672 | 6 | 25 | 37 | 320 | 127 | 1,073 |
| 85,452 | 5 | 56 | 79  | 681 | 6 | 25 | 37 | 326 | 127 | 1,088 |
| 85,453 | 5 | 56 | 80  | 682 | 6 | 25 | 38 | 326 | 129 | 1,089 |
| 85,454 | 5 | 56 | 80  | 682 | 6 | 25 | 38 | 326 | 129 | 1,089 |
| 85,455 | 5 | 55 | 80  | 675 | 6 | 25 | 38 | 322 | 129 | 1,077 |
| 85,456 | 5 | 55 | 80  | 672 | 6 | 25 | 37 | 318 | 128 | 1,070 |
| 85,457 | 5 | 54 | 80  | 658 | 6 | 24 | 35 | 312 | 126 | 1,048 |
| 85,458 | 5 | 54 | 81  | 649 | 6 | 24 | 37 | 306 | 129 | 1,033 |
| 85,459 | 7 | 55 | 83  | 662 | 6 | 24 | 40 | 314 | 136 | 1,055 |
| 85,460 | 6 | 55 | 92  | 667 | 6 | 24 | 40 | 318 | 144 | 1,064 |
| 85,461 | 6 | 53 | 97  | 660 | 6 | 24 | 40 | 315 | 149 | 1,052 |
| 85,462 | 6 | 49 | 98  | 650 | 6 | 24 | 39 | 301 | 149 | 1,024 |
| 85,463 | 6 | 49 | 101 | 633 | 6 | 24 | 41 | 286 | 154 | 992   |
| 85,464 | 6 | 48 | 101 | 628 | 6 | 24 | 41 | 282 | 154 | 982   |
| 85,465 | 6 | 47 | 101 | 607 | 6 | 22 | 41 | 276 | 154 | 952   |
| 85,466 | 6 | 47 | 101 | 607 | 6 | 22 | 41 | 276 | 154 | 952   |
| 85,467 | 6 | 42 | 100 | 569 | 6 | 20 | 41 | 258 | 153 | 889   |
| 85,468 | 6 | 42 | 100 | 567 | 6 | 20 | 41 | 258 | 153 | 887   |
| 85,469 | 6 | 42 | 100 | 565 | 6 | 19 | 41 | 257 | 153 | 883   |
| 85,470 | 6 | 42 | 101 | 567 | 6 | 19 | 42 | 252 | 155 | 880   |
| 85,471 | 6 | 42 | 101 | 580 | 6 | 20 | 42 | 254 | 155 | 896   |
| 85,472 | 6 | 43 | 100 | 600 | 6 | 23 | 40 | 259 | 152 | 925   |
| 85,473 | 6 | 39 | 100 | 434 | 6 | 19 | 40 | 195 | 152 | 687   |

|        |   |    |     |     |   |    |    |     |     |       |
|--------|---|----|-----|-----|---|----|----|-----|-----|-------|
| 85,474 | 6 | 39 | 101 | 503 | 6 | 16 | 40 | 164 | 153 | 722   |
| 85,475 | 6 | 31 | 95  | 472 | 6 | 17 | 37 | 151 | 144 | 671   |
| 85,476 | 6 | 33 | 79  | 574 | 5 | 18 | 31 | 163 | 121 | 788   |
| 85,477 | 5 | 35 | 68  | 584 | 5 | 21 | 27 | 168 | 105 | 808   |
| 85,478 | 5 | 42 | 68  | 656 | 4 | 17 | 27 | 152 | 104 | 867   |
| 85,479 | 5 | 45 | 67  | 656 | 4 | 16 | 26 | 159 | 102 | 876   |
| 85,480 | 5 | 43 | 65  | 643 | 4 | 16 | 26 | 153 | 100 | 855   |
| 85,481 | 5 | 36 | 65  | 611 | 4 | 16 | 26 | 143 | 100 | 806   |
| 85,482 | 5 | 36 | 65  | 599 | 4 | 16 | 26 | 137 | 100 | 788   |
| 85,483 | 5 | 34 | 66  | 576 | 4 | 17 | 26 | 141 | 101 | 768   |
| 85,484 | 5 | 34 | 65  | 585 | 3 | 17 | 26 | 144 | 99  | 780   |
| 85,485 | 5 | 32 | 65  | 578 | 3 | 17 | 26 | 148 | 99  | 775   |
| 85,486 | 5 | 33 | 66  | 587 | 3 | 17 | 26 | 153 | 100 | 790   |
| 85,487 | 4 | 33 | 58  | 571 | 3 | 17 | 26 | 153 | 91  | 774   |
| 85,488 | 4 | 34 | 57  | 577 | 3 | 17 | 26 | 158 | 90  | 786   |
| 85,489 | 4 | 38 | 53  | 585 | 3 | 17 | 25 | 167 | 85  | 807   |
| 85,490 | 4 | 38 | 48  | 580 | 3 | 17 | 24 | 165 | 79  | 800   |
| 85,491 | 4 | 39 | 48  | 583 | 3 | 17 | 24 | 167 | 79  | 806   |
| 85,492 | 3 | 39 | 48  | 583 | 3 | 17 | 24 | 166 | 78  | 805   |
| 85,493 | 3 | 38 | 49  | 586 | 3 | 17 | 24 | 166 | 79  | 807   |
| 85,494 | 3 | 38 | 49  | 591 | 3 | 17 | 24 | 169 | 79  | 815   |
| 85,495 | 3 | 40 | 48  | 627 | 3 | 17 | 24 | 206 | 78  | 890   |
| 85,496 | 3 | 40 | 49  | 658 | 3 | 18 | 24 | 221 | 79  | 937   |
| 85,497 | 4 | 40 | 52  | 722 | 2 | 21 | 24 | 259 | 82  | 1,042 |
| 85,498 | 4 | 41 | 52  | 736 | 2 | 22 | 24 | 266 | 82  | 1,065 |
| 85,499 | 4 | 42 | 53  | 751 | 2 | 23 | 24 | 272 | 83  | 1,088 |
| 85,500 | 4 | 42 | 48  | 751 | 2 | 23 | 20 | 273 | 74  | 1,089 |
| 85,501 | 3 | 43 | 42  | 752 | 1 | 23 | 15 | 274 | 61  | 1,092 |
| 85,502 | 5 | 43 | 49  | 754 | 1 | 23 | 16 | 274 | 71  | 1,094 |
| 85,503 | 5 | 43 | 52  | 745 | 1 | 23 | 17 | 268 | 75  | 1,079 |
| 85,504 | 5 | 43 | 53  | 742 | 1 | 23 | 17 | 268 | 76  | 1,076 |
| 85,505 | 5 | 43 | 53  | 743 | 1 | 23 | 17 | 268 | 76  | 1,077 |
| 85,506 | 5 | 43 | 58  | 747 | 2 | 23 | 18 | 270 | 83  | 1,083 |
| 85,507 | 5 | 43 | 57  | 747 | 2 | 23 | 18 | 270 | 82  | 1,083 |
| 85,508 | 5 | 44 | 57  | 751 | 2 | 23 | 14 | 273 | 78  | 1,091 |
| 85,509 | 5 | 46 | 56  | 786 | 2 | 25 | 14 | 291 | 77  | 1,148 |
| 85,510 | 3 | 47 | 55  | 783 | 2 | 25 | 13 | 291 | 73  | 1,146 |
| 85,511 | 4 | 47 | 46  | 778 | 1 | 25 | 11 | 289 | 62  | 1,139 |
| 85,512 | 4 | 47 | 41  | 778 | 1 | 25 | 11 | 288 | 57  | 1,138 |
| 85,513 | 4 | 47 | 40  | 779 | 1 | 25 | 12 | 287 | 57  | 1,138 |
| 85,514 | 4 | 47 | 37  | 781 | 1 | 26 | 10 | 287 | 52  | 1,141 |

|        |   |    |    |     |   |    |    |     |    |       |
|--------|---|----|----|-----|---|----|----|-----|----|-------|
| 85,515 | 4 | 47 | 37 | 781 | 1 | 26 | 10 | 289 | 52 | 1,143 |
| 85,516 | 4 | 48 | 37 | 783 | 1 | 26 | 10 | 291 | 52 | 1,148 |
| 85,517 | 4 | 48 | 37 | 785 | 1 | 26 | 10 | 291 | 52 | 1,150 |
| 85,518 | 4 | 49 | 48 | 786 | 1 | 26 | 14 | 291 | 67 | 1,152 |
| 85,519 | 4 | 50 | 48 | 788 | 1 | 26 | 15 | 292 | 68 | 1,156 |
| 85,520 | 4 | 53 | 48 | 793 | 1 | 27 | 15 | 295 | 68 | 1,168 |
| 85,521 | 4 | 55 | 47 | 804 | 1 | 30 | 14 | 300 | 66 | 1,189 |
| 85,522 | 4 | 55 | 47 | 794 | 1 | 29 | 14 | 305 | 66 | 1,183 |
| 85,523 | 4 | 54 | 47 | 775 | 1 | 25 | 15 | 297 | 67 | 1,151 |
| 85,524 | 4 | 60 | 47 | 842 | 1 | 30 | 15 | 321 | 67 | 1,253 |
| 85,525 | 4 | 59 | 45 | 736 | 1 | 32 | 15 | 314 | 65 | 1,141 |
| 85,526 | 4 | 66 | 47 | 786 | 1 | 31 | 17 | 323 | 69 | 1,206 |
| 85,527 | 4 | 63 | 46 | 665 | 1 | 30 | 16 | 310 | 67 | 1,068 |
| 85,528 | 4 | 61 | 46 | 677 | 1 | 29 | 16 | 309 | 67 | 1,076 |
| 85,529 | 4 | 54 | 46 | 581 | 1 | 29 | 16 | 295 | 67 | 959   |
| 85,530 | 4 | 55 | 46 | 587 | 1 | 31 | 16 | 297 | 67 | 970   |
| 85,531 | 4 | 55 | 46 | 585 | 1 | 30 | 16 | 295 | 67 | 965   |
| 85,532 | 4 | 56 | 46 | 586 | 1 | 30 | 16 | 295 | 67 | 967   |
| 85,533 | 4 | 52 | 46 | 571 | 1 | 28 | 16 | 288 | 67 | 939   |
| 85,534 | 4 | 53 | 46 | 563 | 1 | 28 | 16 | 284 | 67 | 928   |
| 85,535 | 4 | 62 | 46 | 576 | 1 | 28 | 16 | 290 | 67 | 956   |
| 85,536 | 4 | 63 | 46 | 567 | 1 | 27 | 16 | 280 | 67 | 937   |
| 85,537 | 4 | 62 | 49 | 557 | 1 | 27 | 16 | 276 | 70 | 922   |
| 85,538 | 4 | 61 | 49 | 551 | 1 | 27 | 16 | 272 | 70 | 911   |
| 85,539 | 4 | 61 | 49 | 551 | 1 | 27 | 16 | 272 | 70 | 911   |
| 85,540 | 5 | 59 | 49 | 543 | 2 | 27 | 16 | 263 | 72 | 892   |
| 85,541 | 5 | 57 | 49 | 538 | 2 | 27 | 16 | 260 | 72 | 882   |
| 85,542 | 5 | 57 | 49 | 538 | 2 | 27 | 16 | 259 | 72 | 881   |
| 85,543 | 5 | 57 | 50 | 532 | 2 | 27 | 17 | 258 | 74 | 874   |
| 85,544 | 5 | 57 | 51 | 523 | 2 | 27 | 17 | 254 | 75 | 861   |
| 85,545 | 5 | 55 | 51 | 488 | 2 | 27 | 17 | 218 | 75 | 788   |
| 85,546 | 5 | 57 | 50 | 488 | 2 | 27 | 17 | 219 | 74 | 791   |
| 85,547 | 4 | 57 | 47 | 461 | 2 | 26 | 17 | 207 | 70 | 751   |
| 85,548 | 4 | 56 | 46 | 394 | 2 | 22 | 17 | 167 | 69 | 639   |
| 85,549 | 4 | 57 | 46 | 458 | 2 | 26 | 17 | 195 | 69 | 736   |
| 85,550 | 4 | 57 | 44 | 525 | 2 | 26 | 17 | 225 | 67 | 833   |
| 85,551 | 4 | 58 | 45 | 634 | 2 | 32 | 17 | 235 | 68 | 959   |
| 85,552 | 4 | 59 | 41 | 672 | 2 | 34 | 14 | 256 | 61 | 1,021 |
| 85,553 | 2 | 59 | 34 | 679 | 2 | 34 | 12 | 261 | 50 | 1,033 |
| 85,554 | 2 | 59 | 30 | 684 | 2 | 34 | 11 | 262 | 45 | 1,039 |
| 85,555 | 2 | 62 | 29 | 702 | 2 | 34 | 11 | 273 | 44 | 1,071 |

|        |   |    |    |       |   |    |    |     |    |       |
|--------|---|----|----|-------|---|----|----|-----|----|-------|
| 85,556 | 2 | 75 | 27 | 770   | 2 | 36 | 11 | 293 | 42 | 1,174 |
| 85,557 | 2 | 75 | 24 | 778   | 1 | 36 | 10 | 296 | 37 | 1,185 |
| 85,558 | 3 | 75 | 26 | 785   | 1 | 36 | 10 | 295 | 40 | 1,191 |
| 85,559 | 3 | 73 | 27 | 756   | 1 | 34 | 10 | 279 | 41 | 1,142 |
| 85,560 | 4 | 71 | 30 | 749   | 1 | 34 | 10 | 270 | 45 | 1,124 |
| 85,561 | 4 | 71 | 30 | 746   | 1 | 34 | 10 | 267 | 45 | 1,118 |
| 85,562 | 4 | 72 | 32 | 746   | 1 | 34 | 11 | 267 | 48 | 1,119 |
| 85,563 | 4 | 72 | 32 | 747   | 1 | 34 | 11 | 269 | 48 | 1,122 |
| 85,564 | 4 | 72 | 32 | 745   | 1 | 33 | 10 | 268 | 47 | 1,118 |
| 85,565 | 4 | 71 | 32 | 745   | 1 | 33 | 10 | 265 | 47 | 1,114 |
| 85,566 | 4 | 71 | 30 | 749   | 1 | 33 | 10 | 268 | 45 | 1,121 |
| 85,567 | 4 | 71 | 24 | 750   | 1 | 33 | 8  | 268 | 37 | 1,122 |
| 85,568 | 4 | 71 | 22 | 748   | 1 | 33 | 8  | 268 | 35 | 1,120 |
| 85,569 | 4 | 69 | 22 | 755   | 1 | 34 | 6  | 273 | 33 | 1,131 |
| 85,570 | 4 | 71 | 22 | 807   | 1 | 39 | 5  | 303 | 32 | 1,220 |
| 85,571 | 4 | 79 | 26 | 893   | 1 | 51 | 5  | 417 | 36 | 1,440 |
| 85,572 | 4 | 85 | 29 | 1,017 | 1 | 60 | 6  | 538 | 40 | 1,700 |
| 85,573 | 4 | 88 | 30 | 1,033 | 1 | 61 | 7  | 549 | 42 | 1,731 |
| 85,574 | 4 | 88 | 30 | 1,081 | 1 | 64 | 7  | 569 | 42 | 1,802 |
| 85,575 | 4 | 88 | 30 | 1,022 | 1 | 59 | 7  | 554 | 42 | 1,723 |
| 85,576 | 4 | 84 | 29 | 994   | 1 | 57 | 7  | 541 | 41 | 1,676 |
| 85,577 | 4 | 76 | 26 | 926   | 1 | 55 | 6  | 525 | 37 | 1,582 |
| 85,578 | 4 | 76 | 26 | 926   | 1 | 55 | 6  | 525 | 37 | 1,582 |
| 85,579 | 4 | 72 | 26 | 887   | 1 | 55 | 6  | 509 | 37 | 1,523 |
| 85,580 | 4 | 72 | 26 | 889   | 1 | 55 | 6  | 512 | 37 | 1,528 |
| 85,581 | 4 | 71 | 26 | 883   | 1 | 53 | 6  | 509 | 37 | 1,516 |
| 85,582 | 4 | 71 | 26 | 879   | 1 | 53 | 6  | 509 | 37 | 1,512 |
| 85,583 | 4 | 60 | 26 | 865   | 1 | 54 | 7  | 502 | 38 | 1,481 |
| 85,584 | 4 | 60 | 29 | 865   | 1 | 54 | 7  | 503 | 41 | 1,482 |
| 85,585 | 4 | 60 | 29 | 865   | 1 | 54 | 7  | 502 | 41 | 1,481 |
| 85,586 | 5 | 62 | 30 | 866   | 1 | 55 | 7  | 501 | 43 | 1,484 |
| 85,587 | 5 | 62 | 30 | 866   | 1 | 55 | 7  | 501 | 43 | 1,484 |
| 85,588 | 5 | 62 | 26 | 866   | 1 | 56 | 7  | 504 | 39 | 1,488 |
| 85,589 | 5 | 62 | 28 | 871   | 1 | 57 | 7  | 507 | 41 | 1,497 |
| 85,590 | 4 | 68 | 28 | 991   | 1 | 66 | 7  | 582 | 40 | 1,707 |
| 85,591 | 4 | 71 | 28 | 1,060 | 0 | 71 | 7  | 636 | 39 | 1,838 |
| 85,592 | 4 | 72 | 28 | 1,075 | 0 | 71 | 8  | 649 | 40 | 1,867 |
| 85,593 | 4 | 72 | 26 | 1,075 | 0 | 71 | 7  | 649 | 37 | 1,867 |
| 85,594 | 4 | 73 | 27 | 1,079 | 0 | 71 | 7  | 653 | 38 | 1,876 |
| 85,595 | 4 | 74 | 27 | 1,083 | 0 | 71 | 8  | 660 | 39 | 1,888 |
| 85,596 | 4 | 73 | 27 | 1,083 | 1 | 71 | 8  | 661 | 40 | 1,888 |



|        |   |    |    |       |   |    |    |       |    |       |
|--------|---|----|----|-------|---|----|----|-------|----|-------|
| 85,597 | 4 | 73 | 27 | 1,084 | 1 | 71 | 8  | 661   | 40 | 1,889 |
| 85,598 | 4 | 73 | 27 | 1,080 | 1 | 71 | 8  | 658   | 40 | 1,882 |
| 85,599 | 4 | 72 | 27 | 1,004 | 1 | 67 | 8  | 626   | 40 | 1,769 |
| 85,600 | 4 | 71 | 27 | 922   | 1 | 66 | 8  | 591   | 40 | 1,650 |
| 85,601 | 4 | 71 | 27 | 924   | 1 | 65 | 8  | 591   | 40 | 1,651 |
| 85,602 | 4 | 72 | 26 | 818   | 1 | 60 | 8  | 581   | 39 | 1,531 |
| 85,603 | 4 | 70 | 26 | 785   | 1 | 58 | 8  | 562   | 39 | 1,475 |
| 85,604 | 4 | 67 | 27 | 787   | 1 | 59 | 8  | 566   | 40 | 1,479 |
| 85,605 | 4 | 77 | 28 | 1,024 | 2 | 71 | 8  | 741   | 42 | 1,913 |
| 85,606 | 4 | 78 | 28 | 1,045 | 2 | 73 | 9  | 773   | 43 | 1,969 |
| 85,607 | 4 | 66 | 28 | 1,051 | 2 | 71 | 9  | 812   | 43 | 2,000 |
| 85,608 | 4 | 77 | 26 | 1,115 | 2 | 75 | 9  | 866   | 41 | 2,133 |
| 85,609 | 3 | 94 | 26 | 1,277 | 2 | 77 | 9  | 961   | 40 | 2,409 |
| 85,610 | 3 | 95 | 26 | 1,321 | 2 | 76 | 9  | 986   | 40 | 2,478 |
| 85,611 | 2 | 98 | 24 | 1,328 | 2 | 76 | 9  | 1,004 | 37 | 2,506 |
| 85,612 | 2 | 98 | 28 | 1,342 | 2 | 76 | 11 | 1,010 | 43 | 2,526 |
| 85,613 | 1 | 98 | 26 | 1,356 | 2 | 76 | 10 | 1,012 | 39 | 2,542 |
| 85,614 | 1 | 99 | 26 | 1,364 | 2 | 76 | 10 | 1,013 | 39 | 2,552 |
| 85,615 | 1 | 99 | 26 | 1,366 | 2 | 77 | 10 | 1,013 | 39 | 2,555 |
| 85,616 | 1 | 99 | 26 | 1,364 | 2 | 77 | 10 | 1,013 | 39 | 2,553 |
| 85,617 | 1 | 99 | 26 | 1,368 | 2 | 77 | 10 | 1,011 | 39 | 2,555 |
| 85,618 | 1 | 99 | 26 | 1,370 | 2 | 77 | 10 | 1,011 | 39 | 2,557 |
| 85,619 | 1 | 99 | 25 | 1,369 | 2 | 77 | 10 | 1,010 | 38 | 2,555 |
| 85,620 | 1 | 99 | 27 | 1,359 | 2 | 76 | 10 | 1,003 | 40 | 2,537 |
| 85,621 | 1 | 97 | 24 | 1,307 | 2 | 71 | 10 | 974   | 37 | 2,449 |
| 85,622 | 1 | 78 | 23 | 1,077 | 2 | 47 | 10 | 731   | 36 | 1,933 |
| 85,623 | 1 | 78 | 20 | 1,079 | 2 | 47 | 9  | 732   | 32 | 1,936 |
| 85,624 | 1 | 75 | 19 | 1,061 | 2 | 46 | 7  | 716   | 29 | 1,898 |
| 85,625 | 1 | 73 | 19 | 1,002 | 2 | 43 | 7  | 693   | 29 | 1,811 |
| 85,626 | 1 | 67 | 19 | 982   | 2 | 43 | 7  | 682   | 29 | 1,774 |
| 85,627 | 1 | 67 | 19 | 982   | 2 | 43 | 6  | 681   | 28 | 1,773 |
| 85,628 | 1 | 65 | 19 | 974   | 2 | 40 | 6  | 680   | 28 | 1,759 |
| 85,629 | 1 | 65 | 19 | 974   | 2 | 40 | 6  | 680   | 28 | 1,759 |
| 85,630 | 1 | 65 | 19 | 973   | 2 | 40 | 6  | 680   | 28 | 1,758 |
| 85,631 | 1 | 65 | 19 | 971   | 2 | 40 | 6  | 677   | 28 | 1,753 |
| 85,632 | 1 | 65 | 19 | 969   | 2 | 40 | 6  | 676   | 28 | 1,750 |
| 85,633 | 1 | 65 | 19 | 966   | 2 | 39 | 6  | 676   | 28 | 1,746 |
| 85,634 | 1 | 65 | 19 | 966   | 2 | 39 | 6  | 676   | 28 | 1,746 |
| 85,635 | 1 | 65 | 15 | 966   | 2 | 39 | 6  | 675   | 24 | 1,745 |
| 85,636 | 1 | 65 | 15 | 966   | 2 | 39 | 6  | 675   | 24 | 1,745 |
| 85,637 | 0 | 63 | 14 | 965   | 2 | 38 | 6  | 676   | 22 | 1,742 |

|        |   |    |    |     |   |    |    |     |    |       |
|--------|---|----|----|-----|---|----|----|-----|----|-------|
| 85,638 | 0 | 63 | 16 | 965 | 2 | 37 | 6  | 673 | 24 | 1,738 |
| 85,639 | 0 | 63 | 16 | 965 | 2 | 37 | 6  | 673 | 24 | 1,738 |
| 85,640 | 0 | 63 | 14 | 961 | 2 | 36 | 6  | 672 | 22 | 1,732 |
| 85,641 | 0 | 53 | 14 | 773 | 2 | 22 | 6  | 545 | 22 | 1,393 |
| 85,642 | 0 | 53 | 14 | 777 | 2 | 22 | 6  | 546 | 22 | 1,398 |
| 85,643 | 0 | 52 | 14 | 764 | 2 | 22 | 5  | 541 | 21 | 1,379 |
| 85,644 | 0 | 52 | 14 | 764 | 2 | 22 | 5  | 543 | 21 | 1,381 |
| 85,645 | 0 | 51 | 13 | 761 | 2 | 22 | 5  | 539 | 20 | 1,373 |
| 85,646 | 0 | 49 | 12 | 754 | 2 | 22 | 4  | 529 | 18 | 1,354 |
| 85,647 | 0 | 49 | 15 | 753 | 1 | 22 | 8  | 529 | 24 | 1,353 |
| 85,648 | 0 | 49 | 15 | 753 | 1 | 22 | 8  | 529 | 24 | 1,353 |
| 85,649 | 0 | 49 | 15 | 753 | 1 | 22 | 8  | 529 | 24 | 1,353 |
| 85,650 | 0 | 49 | 16 | 754 | 1 | 22 | 9  | 528 | 26 | 1,353 |
| 85,651 | 0 | 49 | 16 | 755 | 1 | 22 | 9  | 528 | 26 | 1,354 |
| 85,652 | 0 | 49 | 16 | 753 | 1 | 22 | 9  | 528 | 26 | 1,352 |
| 85,653 | 0 | 47 | 17 | 751 | 1 | 22 | 9  | 527 | 27 | 1,347 |
| 85,654 | 0 | 47 | 16 | 711 | 1 | 21 | 9  | 502 | 26 | 1,281 |
| 85,655 | 0 | 37 | 16 | 474 | 1 | 9  | 9  | 327 | 26 | 847   |
| 85,656 | 0 | 35 | 15 | 454 | 0 | 7  | 9  | 296 | 24 | 792   |
| 85,657 | 0 | 35 | 15 | 458 | 0 | 7  | 8  | 301 | 23 | 801   |
| 85,658 | 0 | 35 | 15 | 380 | 0 | 7  | 8  | 244 | 23 | 666   |
| 85,659 | 0 | 23 | 15 | 298 | 0 | 3  | 8  | 183 | 23 | 507   |
| 85,660 | 0 | 6  | 15 | 139 | 0 | 2  | 8  | 90  | 23 | 237   |
| 85,661 | 0 | 5  | 14 | 95  | 0 | 2  | 8  | 64  | 22 | 166   |
| 85,662 | 0 | 1  | 13 | 84  | 0 | 2  | 8  | 46  | 21 | 133   |
| 85,663 | 0 | 1  | 9  | 57  | 0 | 2  | 6  | 38  | 15 | 98    |
| 85,664 | 0 | 0  | 9  | 46  | 0 | 2  | 6  | 35  | 15 | 83    |
| 85,665 | 0 | 0  | 9  | 46  | 0 | 2  | 6  | 35  | 15 | 83    |
| 85,666 | 0 | 0  | 9  | 44  | 0 | 1  | 6  | 35  | 15 | 80    |
| 85,667 | 0 | 0  | 9  | 35  | 0 | 1  | 6  | 34  | 15 | 70    |
| 85,668 | 0 | 0  | 9  | 36  | 0 | 1  | 6  | 36  | 15 | 73    |
| 85,669 | 0 | 0  | 9  | 36  | 0 | 1  | 6  | 36  | 15 | 73    |
| 85,670 | 0 | 0  | 9  | 36  | 0 | 1  | 6  | 36  | 15 | 73    |
| 85,671 | 0 | 0  | 8  | 36  | 0 | 1  | 7  | 35  | 15 | 72    |
| 85,672 | 0 | 0  | 8  | 37  | 0 | 1  | 7  | 36  | 15 | 74    |
| 85,673 | 0 | 0  | 9  | 38  | 0 | 1  | 7  | 40  | 16 | 79    |
| 85,674 | 0 | 0  | 9  | 39  | 0 | 1  | 7  | 40  | 16 | 80    |
| 85,675 | 0 | 0  | 14 | 41  | 0 | 1  | 12 | 39  | 26 | 81    |
| 85,676 | 0 | 2  | 15 | 43  | 0 | 2  | 12 | 39  | 27 | 86    |
| 85,677 | 1 | 2  | 19 | 44  | 1 | 2  | 15 | 45  | 36 | 93    |
| 85,678 | 1 | 2  | 19 | 44  | 1 | 2  | 15 | 45  | 36 | 93    |

|        |    |    |    |       |   |    |    |       |     |       |
|--------|----|----|----|-------|---|----|----|-------|-----|-------|
| 85,679 | 1  | 2  | 19 | 46    | 1 | 4  | 15 | 45    | 36  | 97    |
| 85,680 | 1  | 2  | 19 | 49    | 1 | 5  | 15 | 52    | 36  | 108   |
| 85,681 | 2  | 2  | 19 | 52    | 1 | 6  | 15 | 54    | 37  | 114   |
| 85,682 | 2  | 2  | 19 | 53    | 1 | 6  | 15 | 56    | 37  | 117   |
| 85,683 | 2  | 2  | 19 | 55    | 1 | 6  | 15 | 58    | 37  | 121   |
| 85,684 | 2  | 3  | 19 | 56    | 2 | 6  | 15 | 58    | 38  | 123   |
| 85,685 | 2  | 3  | 19 | 56    | 2 | 6  | 14 | 57    | 37  | 122   |
| 85,686 | 2  | 3  | 19 | 56    | 2 | 6  | 14 | 57    | 37  | 122   |
| 85,687 | 2  | 7  | 19 | 63    | 2 | 8  | 14 | 63    | 37  | 141   |
| 85,688 | 2  | 7  | 19 | 63    | 2 | 9  | 14 | 66    | 37  | 145   |
| 85,689 | 4  | 7  | 27 | 71    | 2 | 9  | 15 | 74    | 48  | 161   |
| 85,690 | 4  | 7  | 28 | 73    | 3 | 9  | 16 | 78    | 51  | 167   |
| 85,691 | 4  | 8  | 28 | 77    | 3 | 10 | 17 | 90    | 52  | 185   |
| 85,692 | 4  | 8  | 32 | 83    | 3 | 10 | 17 | 94    | 56  | 195   |
| 85,693 | 4  | 9  | 32 | 124   | 3 | 12 | 17 | 134   | 56  | 279   |
| 85,694 | 4  | 9  | 32 | 136   | 3 | 12 | 18 | 134   | 57  | 291   |
| 85,695 | 6  | 9  | 46 | 144   | 4 | 12 | 32 | 146   | 88  | 311   |
| 85,696 | 8  | 9  | 57 | 172   | 5 | 12 | 41 | 168   | 111 | 361   |
| 85,697 | 9  | 9  | 59 | 180   | 5 | 12 | 41 | 172   | 114 | 373   |
| 85,698 | 9  | 9  | 56 | 184   | 5 | 12 | 37 | 175   | 107 | 380   |
| 85,699 | 10 | 12 | 56 | 192   | 5 | 14 | 38 | 194   | 109 | 412   |
| 85,700 | 10 | 22 | 56 | 444   | 5 | 41 | 37 | 606   | 108 | 1,113 |
| 85,701 | 10 | 22 | 55 | 482   | 5 | 42 | 37 | 629   | 107 | 1,175 |
| 85,702 | 11 | 31 | 56 | 644   | 5 | 49 | 39 | 797   | 111 | 1,521 |
| 85,703 | 11 | 31 | 56 | 661   | 5 | 49 | 39 | 809   | 111 | 1,550 |
| 85,704 | 11 | 31 | 55 | 683   | 5 | 50 | 39 | 816   | 110 | 1,580 |
| 85,705 | 11 | 31 | 55 | 700   | 5 | 50 | 40 | 824   | 111 | 1,605 |
| 85,706 | 11 | 31 | 55 | 700   | 5 | 50 | 40 | 825   | 111 | 1,606 |
| 85,707 | 11 | 36 | 55 | 795   | 5 | 61 | 40 | 975   | 111 | 1,867 |
| 85,708 | 11 | 36 | 55 | 802   | 5 | 61 | 40 | 974   | 111 | 1,873 |
| 85,709 | 11 | 38 | 56 | 808   | 5 | 61 | 40 | 979   | 112 | 1,886 |
| 85,710 | 11 | 44 | 56 | 883   | 5 | 63 | 40 | 1,009 | 112 | 1,999 |
| 85,711 | 11 | 44 | 56 | 887   | 5 | 63 | 40 | 1,010 | 112 | 2,004 |
| 85,712 | 11 | 46 | 56 | 898   | 5 | 63 | 41 | 1,012 | 113 | 2,019 |
| 85,713 | 11 | 47 | 58 | 918   | 5 | 64 | 44 | 1,020 | 118 | 2,049 |
| 85,714 | 11 | 47 | 58 | 926   | 5 | 64 | 44 | 1,023 | 118 | 2,060 |
| 85,715 | 12 | 47 | 60 | 935   | 5 | 65 | 50 | 1,026 | 127 | 2,073 |
| 85,716 | 12 | 47 | 60 | 935   | 5 | 65 | 50 | 1,026 | 127 | 2,073 |
| 85,717 | 12 | 47 | 61 | 963   | 5 | 68 | 50 | 1,042 | 128 | 2,120 |
| 85,718 | 12 | 51 | 61 | 1,014 | 5 | 69 | 50 | 1,060 | 128 | 2,194 |
| 85,719 | 12 | 53 | 61 | 1,031 | 5 | 72 | 50 | 1,065 | 128 | 2,221 |

|        |    |     |    |       |   |     |    |       |     |       |
|--------|----|-----|----|-------|---|-----|----|-------|-----|-------|
| 85,720 | 12 | 53  | 62 | 1,074 | 5 | 75  | 51 | 1,071 | 130 | 2,273 |
| 85,721 | 12 | 59  | 63 | 1,277 | 5 | 87  | 51 | 1,157 | 131 | 2,580 |
| 85,722 | 12 | 69  | 62 | 1,398 | 5 | 88  | 53 | 1,192 | 132 | 2,747 |
| 85,723 | 12 | 77  | 63 | 1,525 | 5 | 94  | 54 | 1,240 | 134 | 2,936 |
| 85,724 | 13 | 109 | 63 | 1,636 | 5 | 108 | 54 | 1,327 | 135 | 3,180 |
| 85,725 | 13 | 125 | 61 | 1,723 | 5 | 112 | 54 | 1,359 | 133 | 3,319 |
| 85,726 | 13 | 125 | 59 | 1,735 | 5 | 111 | 49 | 1,365 | 126 | 3,336 |
| 85,727 | 13 | 127 | 58 | 1,773 | 5 | 111 | 49 | 1,384 | 125 | 3,395 |
| 85,728 | 12 | 127 | 54 | 1,779 | 4 | 111 | 46 | 1,384 | 116 | 3,401 |
| 85,729 | 12 | 133 | 54 | 1,833 | 4 | 111 | 46 | 1,395 | 116 | 3,472 |
| 85,730 | 12 | 133 | 54 | 1,836 | 4 | 109 | 46 | 1,395 | 116 | 3,473 |
| 85,731 | 12 | 133 | 54 | 1,833 | 4 | 108 | 46 | 1,388 | 116 | 3,462 |
| 85,732 | 11 | 133 | 54 | 1,835 | 4 | 107 | 46 | 1,387 | 115 | 3,462 |
| 85,733 | 11 | 133 | 55 | 1,839 | 4 | 107 | 48 | 1,385 | 118 | 3,464 |
| 85,734 | 11 | 133 | 55 | 1,837 | 3 | 107 | 48 | 1,384 | 117 | 3,461 |
| 85,735 | 10 | 132 | 54 | 1,837 | 3 | 107 | 48 | 1,383 | 115 | 3,459 |
| 85,736 | 10 | 129 | 49 | 1,828 | 3 | 103 | 50 | 1,369 | 112 | 3,429 |
| 85,737 | 10 | 129 | 46 | 1,828 | 3 | 103 | 51 | 1,369 | 110 | 3,429 |
| 85,738 | 9  | 129 | 45 | 1,828 | 3 | 103 | 50 | 1,367 | 107 | 3,427 |
| 85,739 | 9  | 129 | 45 | 1,824 | 3 | 103 | 50 | 1,360 | 107 | 3,416 |
| 85,740 | 9  | 130 | 46 | 1,853 | 3 | 106 | 50 | 1,372 | 108 | 3,461 |
| 85,741 | 9  | 133 | 50 | 1,969 | 2 | 110 | 49 | 1,396 | 110 | 3,608 |
| 85,742 | 9  | 132 | 51 | 2,011 | 2 | 110 | 52 | 1,422 | 114 | 3,675 |
| 85,743 | 9  | 140 | 50 | 2,082 | 2 | 123 | 53 | 1,463 | 114 | 3,808 |
| 85,744 | 9  | 150 | 52 | 2,115 | 2 | 134 | 48 | 1,492 | 111 | 3,891 |
| 85,745 | 7  | 154 | 50 | 2,116 | 1 | 136 | 44 | 1,508 | 102 | 3,914 |
| 85,746 | 6  | 163 | 49 | 2,133 | 1 | 140 | 38 | 1,542 | 94  | 3,978 |
| 85,747 | 6  | 173 | 47 | 2,142 | 0 | 143 | 37 | 1,534 | 90  | 3,992 |
| 85,748 | 5  | 203 | 45 | 2,247 | 0 | 161 | 37 | 1,688 | 87  | 4,299 |
| 85,749 | 5  | 203 | 45 | 2,246 | 0 | 161 | 37 | 1,688 | 87  | 4,298 |
| 85,750 | 4  | 200 | 45 | 2,238 | 0 | 159 | 37 | 1,668 | 86  | 4,265 |
| 85,751 | 4  | 202 | 45 | 2,076 | 0 | 135 | 36 | 1,307 | 85  | 3,720 |
| 85,752 | 4  | 202 | 45 | 2,066 | 0 | 136 | 36 | 1,289 | 85  | 3,693 |
| 85,753 | 3  | 193 | 49 | 1,910 | 0 | 129 | 37 | 1,125 | 89  | 3,357 |
| 85,754 | 3  | 193 | 49 | 1,894 | 0 | 129 | 37 | 1,112 | 89  | 3,328 |
| 85,755 | 3  | 195 | 50 | 1,873 | 0 | 128 | 37 | 1,105 | 90  | 3,301 |
| 85,756 | 3  | 195 | 50 | 1,856 | 0 | 128 | 37 | 1,094 | 90  | 3,273 |
| 85,757 | 3  | 190 | 50 | 1,751 | 0 | 117 | 38 | 944   | 91  | 3,002 |
| 85,758 | 3  | 192 | 51 | 1,767 | 0 | 117 | 40 | 962   | 94  | 3,038 |
| 85,759 | 3  | 192 | 50 | 1,772 | 0 | 117 | 40 | 965   | 93  | 3,046 |
| 85,760 | 3  | 190 | 50 | 1,767 | 0 | 117 | 43 | 956   | 96  | 3,030 |

|        |   |     |    |       |   |     |    |     |     |       |
|--------|---|-----|----|-------|---|-----|----|-----|-----|-------|
| 85,761 | 4 | 188 | 54 | 1,705 | 1 | 115 | 46 | 944 | 105 | 2,952 |
| 85,762 | 4 | 188 | 55 | 1,700 | 1 | 114 | 46 | 941 | 106 | 2,943 |
| 85,763 | 4 | 186 | 55 | 1,691 | 1 | 113 | 47 | 939 | 107 | 2,929 |
| 85,764 | 4 | 185 | 53 | 1,665 | 1 | 113 | 44 | 929 | 102 | 2,892 |
| 85,765 | 3 | 186 | 52 | 1,665 | 1 | 113 | 39 | 930 | 95  | 2,894 |
| 85,766 | 3 | 186 | 54 | 1,658 | 1 | 112 | 38 | 927 | 96  | 2,883 |
| 85,767 | 3 | 186 | 53 | 1,658 | 1 | 112 | 38 | 927 | 95  | 2,883 |
| 85,768 | 3 | 187 | 53 | 1,630 | 1 | 109 | 38 | 914 | 95  | 2,840 |
| 85,769 | 3 | 183 | 53 | 1,579 | 1 | 108 | 38 | 895 | 95  | 2,765 |
| 85,770 | 3 | 181 | 56 | 1,557 | 1 | 105 | 41 | 888 | 101 | 2,731 |
| 85,771 | 3 | 181 | 58 | 1,518 | 1 | 102 | 40 | 880 | 102 | 2,681 |
| 85,772 | 3 | 175 | 58 | 1,316 | 1 | 90  | 41 | 795 | 103 | 2,376 |
| 85,773 | 3 | 165 | 59 | 1,195 | 1 | 89  | 38 | 760 | 101 | 2,209 |
| 85,774 | 3 | 125 | 59 | 953   | 1 | 69  | 37 | 620 | 100 | 1,767 |
| 85,775 | 2 | 125 | 58 | 952   | 1 | 69  | 38 | 620 | 99  | 1,766 |
| 85,776 | 2 | 107 | 57 | 850   | 1 | 65  | 38 | 577 | 98  | 1,599 |
| 85,777 | 2 | 107 | 57 | 852   | 1 | 65  | 39 | 580 | 99  | 1,604 |
| 85,778 | 2 | 105 | 60 | 821   | 1 | 65  | 39 | 563 | 102 | 1,554 |
| 85,779 | 2 | 105 | 60 | 833   | 1 | 66  | 39 | 566 | 102 | 1,570 |
| 85,780 | 2 | 99  | 60 | 783   | 1 | 66  | 39 | 555 | 102 | 1,503 |
| 85,781 | 2 | 99  | 60 | 781   | 1 | 66  | 39 | 555 | 102 | 1,501 |
| 85,782 | 2 | 99  | 60 | 783   | 1 | 67  | 39 | 555 | 102 | 1,504 |
| 85,783 | 2 | 99  | 59 | 773   | 1 | 67  | 37 | 553 | 99  | 1,492 |
| 85,784 | 2 | 99  | 59 | 775   | 1 | 67  | 37 | 553 | 99  | 1,494 |
| 85,785 | 2 | 98  | 59 | 775   | 1 | 67  | 38 | 553 | 100 | 1,493 |
| 85,786 | 2 | 98  | 59 | 775   | 1 | 67  | 38 | 552 | 100 | 1,492 |
| 85,787 | 2 | 98  | 59 | 775   | 1 | 67  | 36 | 550 | 98  | 1,490 |
| 85,788 | 2 | 98  | 59 | 774   | 1 | 67  | 36 | 548 | 98  | 1,487 |
| 85,789 | 2 | 98  | 65 | 770   | 1 | 67  | 38 | 546 | 106 | 1,481 |
| 85,790 | 2 | 98  | 68 | 770   | 1 | 67  | 40 | 546 | 111 | 1,481 |
| 85,791 | 2 | 97  | 68 | 741   | 1 | 64  | 40 | 533 | 111 | 1,435 |
| 85,792 | 2 | 94  | 67 | 639   | 1 | 62  | 41 | 504 | 111 | 1,299 |
| 85,793 | 2 | 94  | 66 | 598   | 1 | 62  | 37 | 468 | 106 | 1,222 |
| 85,794 | 2 | 87  | 63 | 526   | 1 | 51  | 39 | 427 | 105 | 1,091 |
| 85,795 | 2 | 76  | 53 | 448   | 1 | 38  | 35 | 356 | 91  | 918   |
| 85,796 | 2 | 72  | 49 | 434   | 1 | 36  | 33 | 333 | 85  | 875   |
| 85,797 | 2 | 63  | 42 | 412   | 1 | 32  | 31 | 284 | 76  | 791   |
| 85,798 | 1 | 53  | 41 | 374   | 1 | 29  | 30 | 268 | 73  | 724   |
| 85,799 | 1 | 23  | 41 | 264   | 1 | 11  | 30 | 117 | 73  | 415   |
| 85,800 | 1 | 23  | 41 | 262   | 1 | 11  | 29 | 114 | 72  | 410   |
| 85,801 | 1 | 11  | 41 | 172   | 1 | 9   | 29 | 74  | 72  | 266   |

|        |   |    |    |     |   |    |    |     |     |     |
|--------|---|----|----|-----|---|----|----|-----|-----|-----|
| 85,802 | 1 | 11 | 41 | 176 | 1 | 9  | 29 | 75  | 72  | 271 |
| 85,803 | 1 | 11 | 36 | 153 | 1 | 7  | 28 | 68  | 66  | 239 |
| 85,804 | 1 | 11 | 36 | 148 | 1 | 7  | 28 | 67  | 66  | 233 |
| 85,805 | 1 | 14 | 35 | 170 | 1 | 7  | 28 | 91  | 65  | 282 |
| 85,806 | 1 | 12 | 35 | 172 | 1 | 7  | 28 | 91  | 65  | 282 |
| 85,807 | 1 | 13 | 36 | 185 | 1 | 7  | 27 | 104 | 65  | 309 |
| 85,808 | 1 | 13 | 36 | 188 | 1 | 7  | 26 | 107 | 64  | 315 |
| 85,809 | 1 | 12 | 36 | 168 | 1 | 8  | 24 | 86  | 62  | 274 |
| 85,810 | 1 | 14 | 38 | 178 | 1 | 8  | 21 | 90  | 61  | 290 |
| 85,811 | 0 | 14 | 34 | 180 | 0 | 8  | 19 | 90  | 53  | 292 |
| 85,812 | 0 | 10 | 33 | 158 | 0 | 8  | 18 | 72  | 51  | 248 |
| 85,813 | 5 | 10 | 57 | 158 | 1 | 8  | 33 | 72  | 96  | 248 |
| 85,814 | 5 | 10 | 57 | 157 | 1 | 8  | 31 | 72  | 94  | 247 |
| 85,815 | 5 | 10 | 58 | 157 | 2 | 8  | 33 | 72  | 98  | 247 |
| 85,816 | 5 | 9  | 55 | 155 | 2 | 8  | 33 | 70  | 95  | 242 |
| 85,817 | 5 | 10 | 56 | 155 | 2 | 9  | 33 | 70  | 96  | 244 |
| 85,818 | 5 | 10 | 55 | 157 | 2 | 10 | 32 | 70  | 94  | 247 |
| 85,819 | 5 | 9  | 53 | 157 | 2 | 10 | 30 | 68  | 90  | 244 |
| 85,820 | 5 | 9  | 60 | 158 | 2 | 10 | 34 | 69  | 101 | 246 |
| 85,821 | 5 | 9  | 65 | 159 | 3 | 10 | 34 | 72  | 107 | 250 |
| 85,822 | 5 | 9  | 67 | 161 | 3 | 10 | 34 | 74  | 109 | 254 |
| 85,823 | 5 | 9  | 73 | 177 | 3 | 10 | 34 | 74  | 115 | 270 |
| 85,824 | 5 | 9  | 74 | 188 | 3 | 10 | 36 | 76  | 118 | 283 |
| 85,825 | 5 | 9  | 83 | 205 | 3 | 10 | 37 | 81  | 128 | 305 |
| 85,826 | 5 | 9  | 90 | 211 | 3 | 11 | 45 | 83  | 143 | 314 |
| 85,827 | 5 | 9  | 92 | 214 | 3 | 11 | 45 | 85  | 145 | 319 |
| 85,828 | 5 | 9  | 92 | 211 | 3 | 11 | 44 | 83  | 144 | 314 |
| 85,829 | 5 | 9  | 89 | 207 | 3 | 11 | 44 | 82  | 141 | 309 |
| 85,830 | 5 | 9  | 89 | 187 | 3 | 10 | 44 | 79  | 141 | 285 |
| 85,831 | 5 | 9  | 89 | 187 | 3 | 10 | 44 | 79  | 141 | 285 |
| 85,832 | 5 | 9  | 89 | 185 | 3 | 9  | 44 | 78  | 141 | 281 |
| 85,833 | 5 | 9  | 89 | 185 | 3 | 9  | 44 | 78  | 141 | 281 |
| 85,834 | 5 | 9  | 91 | 187 | 3 | 9  | 44 | 78  | 143 | 283 |
| 85,835 | 5 | 9  | 91 | 192 | 3 | 9  | 44 | 79  | 143 | 289 |
| 85,836 | 5 | 10 | 91 | 198 | 3 | 11 | 43 | 91  | 142 | 310 |
| 85,837 | 5 | 10 | 91 | 209 | 3 | 11 | 45 | 94  | 144 | 324 |
| 85,838 | 5 | 24 | 92 | 295 | 3 | 14 | 45 | 143 | 145 | 476 |
| 85,839 | 5 | 42 | 92 | 433 | 3 | 30 | 44 | 201 | 144 | 706 |
| 85,840 | 5 | 47 | 86 | 495 | 3 | 30 | 42 | 212 | 136 | 784 |
| 85,841 | 5 | 50 | 83 | 513 | 3 | 31 | 40 | 216 | 131 | 810 |
| 85,842 | 5 | 53 | 82 | 517 | 3 | 31 | 40 | 216 | 130 | 817 |

|        |   |    |    |     |   |    |    |     |     |       |
|--------|---|----|----|-----|---|----|----|-----|-----|-------|
| 85,843 | 5 | 57 | 78 | 518 | 3 | 28 | 39 | 229 | 125 | 832   |
| 85,844 | 5 | 57 | 78 | 529 | 3 | 28 | 39 | 232 | 125 | 846   |
| 85,845 | 5 | 64 | 78 | 607 | 3 | 33 | 36 | 260 | 122 | 964   |
| 85,846 | 5 | 64 | 78 | 611 | 3 | 33 | 36 | 261 | 122 | 969   |
| 85,847 | 5 | 64 | 79 | 617 | 3 | 33 | 36 | 262 | 123 | 976   |
| 85,848 | 5 | 64 | 79 | 625 | 3 | 33 | 36 | 261 | 123 | 983   |
| 85,849 | 5 | 64 | 79 | 625 | 3 | 33 | 36 | 261 | 123 | 983   |
| 85,850 | 6 | 66 | 79 | 626 | 3 | 34 | 36 | 262 | 124 | 988   |
| 85,851 | 6 | 66 | 79 | 630 | 3 | 34 | 36 | 266 | 124 | 996   |
| 85,852 | 6 | 70 | 80 | 649 | 3 | 34 | 37 | 282 | 126 | 1,035 |
| 85,853 | 6 | 71 | 80 | 657 | 3 | 35 | 37 | 284 | 126 | 1,047 |
| 85,854 | 6 | 71 | 80 | 652 | 3 | 35 | 37 | 284 | 126 | 1,042 |
| 85,855 | 6 | 72 | 80 | 670 | 3 | 35 | 37 | 287 | 126 | 1,064 |
| 85,856 | 7 | 70 | 80 | 649 | 3 | 35 | 37 | 264 | 127 | 1,018 |
| 85,857 | 7 | 69 | 79 | 640 | 3 | 36 | 37 | 252 | 126 | 997   |
| 85,858 | 7 | 69 | 79 | 640 | 3 | 36 | 37 | 252 | 126 | 997   |
| 85,859 | 7 | 69 | 79 | 640 | 3 | 36 | 37 | 249 | 126 | 994   |
| 85,860 | 7 | 66 | 78 | 628 | 3 | 35 | 37 | 245 | 125 | 974   |
| 85,861 | 8 | 67 | 76 | 626 | 3 | 35 | 37 | 245 | 124 | 973   |
| 85,862 | 8 | 67 | 76 | 625 | 3 | 35 | 37 | 244 | 124 | 971   |
| 85,863 | 8 | 67 | 77 | 625 | 3 | 35 | 37 | 244 | 125 | 971   |
| 85,864 | 3 | 67 | 53 | 622 | 2 | 35 | 23 | 243 | 81  | 967   |
| 85,865 | 3 | 67 | 53 | 622 | 2 | 35 | 23 | 243 | 81  | 967   |
| 85,866 | 3 | 67 | 52 | 622 | 1 | 35 | 21 | 243 | 77  | 967   |
| 85,867 | 3 | 67 | 52 | 625 | 1 | 35 | 21 | 243 | 77  | 970   |
| 85,868 | 3 | 66 | 51 | 625 | 1 | 34 | 21 | 243 | 76  | 968   |
| 85,869 | 3 | 66 | 45 | 623 | 1 | 33 | 18 | 246 | 67  | 968   |
| 85,870 | 3 | 67 | 43 | 623 | 1 | 33 | 18 | 245 | 65  | 968   |
| 85,871 | 3 | 68 | 43 | 639 | 1 | 34 | 17 | 260 | 64  | 1,001 |
| 85,872 | 3 | 73 | 39 | 673 | 0 | 35 | 17 | 297 | 59  | 1,078 |
| 85,873 | 3 | 73 | 35 | 712 | 0 | 35 | 17 | 313 | 55  | 1,133 |
| 85,874 | 3 | 73 | 29 | 698 | 0 | 35 | 16 | 314 | 48  | 1,120 |
| 85,875 | 3 | 74 | 27 | 688 | 0 | 35 | 14 | 314 | 44  | 1,111 |
| 85,876 | 3 | 74 | 19 | 671 | 0 | 35 | 13 | 312 | 35  | 1,092 |
| 85,877 | 3 | 74 | 12 | 660 | 0 | 34 | 6  | 307 | 21  | 1,075 |
| 85,878 | 3 | 74 | 10 | 661 | 0 | 34 | 7  | 305 | 20  | 1,074 |
| 85,879 | 3 | 74 | 10 | 660 | 0 | 34 | 7  | 305 | 20  | 1,073 |
| 85,880 | 3 | 74 | 10 | 658 | 0 | 34 | 7  | 305 | 20  | 1,071 |
| 85,881 | 3 | 74 | 10 | 654 | 0 | 34 | 7  | 305 | 20  | 1,067 |
| 85,882 | 3 | 74 | 10 | 654 | 1 | 34 | 7  | 305 | 21  | 1,067 |
| 85,883 | 3 | 74 | 10 | 656 | 1 | 34 | 8  | 305 | 22  | 1,069 |

|        |   |    |    |     |   |    |    |     |    |       |
|--------|---|----|----|-----|---|----|----|-----|----|-------|
| 85,884 | 3 | 75 | 10 | 658 | 1 | 34 | 8  | 306 | 22 | 1,073 |
| 85,885 | 3 | 75 | 8  | 654 | 1 | 34 | 8  | 305 | 20 | 1,068 |
| 85,886 | 3 | 75 | 12 | 650 | 1 | 34 | 12 | 305 | 28 | 1,064 |
| 85,887 | 3 | 74 | 12 | 644 | 1 | 32 | 12 | 293 | 28 | 1,043 |
| 85,888 | 3 | 60 | 12 | 547 | 1 | 29 | 11 | 242 | 27 | 878   |
| 85,889 | 3 | 42 | 11 | 410 | 1 | 13 | 11 | 185 | 26 | 650   |
| 85,890 | 3 | 42 | 11 | 411 | 1 | 13 | 11 | 185 | 26 | 651   |
| 85,891 | 3 | 38 | 11 | 350 | 1 | 13 | 11 | 173 | 26 | 574   |
| 85,892 | 3 | 35 | 13 | 332 | 1 | 12 | 11 | 169 | 28 | 548   |
| 85,893 | 3 | 32 | 24 | 328 | 1 | 12 | 12 | 169 | 40 | 541   |
| 85,894 | 3 | 28 | 36 | 297 | 1 | 12 | 17 | 151 | 57 | 488   |
| 85,895 | 6 | 20 | 45 | 211 | 1 | 5  | 19 | 120 | 71 | 356   |
| 85,896 | 6 | 20 | 45 | 210 | 1 | 5  | 19 | 120 | 71 | 355   |
| 85,897 | 6 | 20 | 48 | 208 | 2 | 5  | 20 | 122 | 76 | 355   |
| 85,898 | 6 | 20 | 50 | 204 | 2 | 5  | 23 | 122 | 81 | 351   |
| 85,899 | 6 | 20 | 51 | 192 | 2 | 5  | 23 | 122 | 82 | 339   |
| 85,900 | 5 | 18 | 51 | 188 | 2 | 4  | 23 | 120 | 81 | 330   |
| 85,901 | 5 | 18 | 51 | 188 | 2 | 4  | 23 | 120 | 81 | 330   |
| 85,902 | 5 | 18 | 50 | 188 | 2 | 4  | 23 | 120 | 80 | 330   |
| 85,903 | 5 | 14 | 50 | 169 | 2 | 4  | 22 | 106 | 79 | 293   |
| 85,904 | 5 | 13 | 50 | 157 | 2 | 3  | 23 | 103 | 80 | 276   |
| 85,905 | 6 | 13 | 51 | 156 | 2 | 3  | 23 | 103 | 82 | 275   |
| 85,906 | 6 | 13 | 54 | 136 | 2 | 3  | 23 | 100 | 85 | 252   |
| 85,907 | 5 | 12 | 55 | 133 | 2 | 2  | 26 | 100 | 88 | 247   |
| 85,908 | 5 | 12 | 55 | 141 | 2 | 2  | 26 | 109 | 88 | 264   |
| 85,909 | 5 | 13 | 55 | 144 | 2 | 2  | 26 | 109 | 88 | 268   |
| 85,910 | 5 | 15 | 58 | 143 | 2 | 2  | 26 | 110 | 91 | 270   |
| 85,911 | 5 | 14 | 58 | 143 | 2 | 3  | 26 | 110 | 91 | 270   |
| 85,912 | 4 | 14 | 58 | 143 | 2 | 3  | 26 | 110 | 90 | 270   |
| 85,913 | 4 | 14 | 59 | 143 | 2 | 3  | 26 | 110 | 91 | 270   |
| 85,914 | 4 | 14 | 58 | 143 | 2 | 3  | 26 | 110 | 90 | 270   |
| 85,915 | 4 | 14 | 58 | 144 | 2 | 3  | 25 | 109 | 89 | 270   |
| 85,916 | 4 | 14 | 59 | 144 | 4 | 3  | 26 | 109 | 93 | 270   |
| 85,917 | 4 | 14 | 60 | 141 | 4 | 3  | 27 | 109 | 95 | 267   |
| 85,918 | 4 | 14 | 60 | 141 | 4 | 3  | 27 | 109 | 95 | 267   |
| 85,919 | 4 | 14 | 62 | 141 | 4 | 3  | 27 | 106 | 97 | 264   |
| 85,920 | 4 | 14 | 62 | 141 | 4 | 3  | 27 | 105 | 97 | 263   |
| 85,921 | 4 | 13 | 62 | 126 | 4 | 2  | 27 | 94  | 97 | 235   |
| 85,922 | 4 | 8  | 62 | 107 | 4 | 3  | 27 | 63  | 97 | 181   |
| 85,923 | 4 | 11 | 61 | 144 | 5 | 4  | 27 | 75  | 97 | 234   |
| 85,924 | 4 | 28 | 61 | 229 | 5 | 8  | 27 | 156 | 97 | 421   |



|        |   |    |    |     |   |    |    |     |     |       |
|--------|---|----|----|-----|---|----|----|-----|-----|-------|
| 85,925 | 4 | 28 | 60 | 238 | 5 | 8  | 27 | 160 | 96  | 434   |
| 85,926 | 4 | 27 | 60 | 246 | 5 | 8  | 27 | 160 | 96  | 441   |
| 85,927 | 4 | 29 | 58 | 277 | 5 | 8  | 27 | 173 | 94  | 487   |
| 85,928 | 4 | 29 | 58 | 282 | 5 | 8  | 25 | 178 | 92  | 497   |
| 85,929 | 4 | 29 | 58 | 283 | 5 | 8  | 24 | 178 | 91  | 498   |
| 85,930 | 4 | 29 | 58 | 286 | 5 | 8  | 24 | 179 | 91  | 502   |
| 85,931 | 4 | 39 | 58 | 352 | 5 | 11 | 24 | 227 | 91  | 629   |
| 85,932 | 4 | 39 | 58 | 358 | 5 | 11 | 24 | 229 | 91  | 637   |
| 85,933 | 4 | 41 | 60 | 405 | 4 | 14 | 24 | 247 | 92  | 707   |
| 85,934 | 6 | 40 | 65 | 409 | 4 | 14 | 26 | 244 | 101 | 707   |
| 85,935 | 6 | 40 | 64 | 410 | 4 | 14 | 25 | 246 | 99  | 710   |
| 85,936 | 6 | 40 | 62 | 409 | 4 | 14 | 24 | 246 | 96  | 709   |
| 85,937 | 6 | 40 | 62 | 410 | 4 | 14 | 27 | 246 | 99  | 710   |
| 85,938 | 7 | 40 | 62 | 411 | 4 | 14 | 30 | 247 | 103 | 712   |
| 85,939 | 7 | 40 | 62 | 427 | 4 | 18 | 29 | 264 | 102 | 749   |
| 85,940 | 7 | 40 | 62 | 435 | 4 | 18 | 29 | 265 | 102 | 758   |
| 85,941 | 7 | 45 | 65 | 491 | 5 | 19 | 30 | 348 | 107 | 903   |
| 85,942 | 7 | 44 | 65 | 574 | 5 | 20 | 30 | 366 | 107 | 1,004 |
| 85,943 | 7 | 45 | 63 | 602 | 5 | 23 | 30 | 384 | 105 | 1,054 |
| 85,944 | 7 | 54 | 52 | 710 | 5 | 27 | 29 | 461 | 93  | 1,252 |
| 85,945 | 7 | 56 | 41 | 786 | 5 | 29 | 24 | 491 | 77  | 1,362 |
| 85,946 | 4 | 57 | 32 | 847 | 5 | 29 | 22 | 509 | 63  | 1,442 |
| 85,947 | 4 | 57 | 28 | 857 | 4 | 29 | 21 | 515 | 57  | 1,458 |
| 85,948 | 4 | 57 | 27 | 858 | 4 | 29 | 18 | 518 | 53  | 1,462 |
| 85,949 | 4 | 57 | 26 | 860 | 4 | 29 | 18 | 520 | 52  | 1,466 |
| 85,950 | 4 | 57 | 27 | 862 | 4 | 29 | 19 | 520 | 54  | 1,468 |
| 85,951 | 4 | 57 | 27 | 868 | 4 | 29 | 19 | 521 | 54  | 1,475 |
| 85,952 | 4 | 57 | 27 | 874 | 4 | 29 | 19 | 527 | 54  | 1,487 |
| 85,953 | 4 | 57 | 27 | 876 | 4 | 29 | 19 | 528 | 54  | 1,490 |
| 85,954 | 4 | 57 | 27 | 876 | 4 | 29 | 18 | 526 | 53  | 1,488 |
| 85,955 | 4 | 57 | 27 | 881 | 4 | 30 | 19 | 527 | 54  | 1,495 |
| 85,956 | 3 | 57 | 26 | 883 | 4 | 30 | 19 | 528 | 52  | 1,498 |
| 85,957 | 3 | 56 | 23 | 883 | 4 | 30 | 19 | 527 | 49  | 1,496 |
| 85,958 | 3 | 56 | 26 | 872 | 4 | 30 | 16 | 514 | 49  | 1,472 |
| 85,959 | 3 | 56 | 26 | 872 | 4 | 30 | 16 | 514 | 49  | 1,472 |
| 85,960 | 3 | 55 | 33 | 869 | 4 | 30 | 18 | 514 | 58  | 1,468 |
| 85,961 | 3 | 53 | 31 | 866 | 4 | 30 | 18 | 512 | 56  | 1,461 |
| 85,962 | 3 | 53 | 32 | 868 | 4 | 30 | 18 | 521 | 57  | 1,472 |
| 85,963 | 3 | 53 | 33 | 870 | 4 | 32 | 18 | 526 | 58  | 1,481 |
| 85,964 | 3 | 53 | 33 | 873 | 4 | 32 | 18 | 526 | 58  | 1,484 |
| 85,965 | 3 | 53 | 34 | 875 | 4 | 32 | 20 | 526 | 61  | 1,486 |

|        |   |    |    |     |   |    |    |     |     |       |
|--------|---|----|----|-----|---|----|----|-----|-----|-------|
| 85,966 | 3 | 55 | 34 | 880 | 4 | 32 | 20 | 529 | 61  | 1,496 |
| 85,967 | 3 | 55 | 34 | 881 | 4 | 32 | 19 | 527 | 60  | 1,495 |
| 85,968 | 3 | 55 | 33 | 886 | 4 | 32 | 18 | 531 | 58  | 1,504 |
| 85,969 | 3 | 55 | 31 | 890 | 4 | 32 | 18 | 534 | 56  | 1,511 |
| 85,970 | 3 | 55 | 31 | 892 | 4 | 32 | 19 | 535 | 57  | 1,514 |
| 85,971 | 3 | 54 | 33 | 895 | 5 | 33 | 20 | 540 | 61  | 1,522 |
| 85,972 | 3 | 54 | 33 | 897 | 5 | 33 | 20 | 537 | 61  | 1,521 |
| 85,973 | 3 | 55 | 33 | 899 | 5 | 31 | 20 | 542 | 61  | 1,527 |
| 85,974 | 3 | 52 | 33 | 862 | 4 | 30 | 20 | 530 | 60  | 1,474 |
| 85,975 | 3 | 37 | 33 | 735 | 4 | 26 | 20 | 441 | 60  | 1,239 |
| 85,976 | 3 | 38 | 33 | 735 | 4 | 26 | 20 | 436 | 60  | 1,235 |
| 85,977 | 3 | 39 | 37 | 735 | 5 | 26 | 29 | 437 | 74  | 1,237 |
| 85,978 | 3 | 37 | 37 | 709 | 5 | 26 | 29 | 424 | 74  | 1,196 |
| 85,979 | 3 | 37 | 37 | 705 | 5 | 26 | 29 | 421 | 74  | 1,189 |
| 85,980 | 3 | 37 | 37 | 702 | 5 | 26 | 29 | 419 | 74  | 1,184 |
| 85,981 | 3 | 27 | 37 | 636 | 5 | 23 | 29 | 373 | 74  | 1,059 |
| 85,982 | 3 | 27 | 41 | 630 | 5 | 23 | 29 | 371 | 78  | 1,051 |
| 85,983 | 3 | 25 | 42 | 583 | 6 | 20 | 30 | 353 | 81  | 981   |
| 85,984 | 3 | 25 | 42 | 583 | 6 | 20 | 32 | 353 | 83  | 981   |
| 85,985 | 1 | 25 | 37 | 574 | 6 | 20 | 29 | 351 | 73  | 970   |
| 85,986 | 1 | 25 | 36 | 577 | 6 | 20 | 29 | 351 | 72  | 973   |
| 85,987 | 1 | 25 | 36 | 579 | 6 | 20 | 29 | 354 | 72  | 978   |
| 85,988 | 1 | 26 | 37 | 567 | 6 | 16 | 25 | 344 | 69  | 953   |
| 85,989 | 0 | 27 | 37 | 572 | 6 | 16 | 22 | 348 | 65  | 963   |
| 85,990 | 0 | 29 | 36 | 600 | 5 | 18 | 22 | 376 | 63  | 1,023 |
| 85,991 | 0 | 30 | 36 | 599 | 5 | 19 | 22 | 389 | 63  | 1,037 |
| 85,992 | 0 | 25 | 34 | 543 | 5 | 18 | 21 | 306 | 60  | 892   |
| 85,993 | 0 | 25 | 34 | 460 | 5 | 17 | 21 | 288 | 60  | 790   |
| 85,994 | 0 | 24 | 34 | 436 | 5 | 14 | 21 | 277 | 60  | 751   |
| 85,995 | 0 | 17 | 34 | 330 | 5 | 10 | 21 | 202 | 60  | 559   |
| 85,996 | 0 | 15 | 33 | 254 | 5 | 8  | 21 | 172 | 59  | 449   |
| 85,997 | 0 | 14 | 33 | 193 | 5 | 8  | 21 | 156 | 59  | 371   |
| 85,998 | 0 | 14 | 36 | 182 | 5 | 8  | 22 | 151 | 63  | 355   |
| 85,999 | 0 | 14 | 37 | 181 | 5 | 10 | 22 | 166 | 64  | 371   |
| 86,000 | 0 | 15 | 37 | 187 | 5 | 10 | 22 | 176 | 64  | 388   |
| 86,001 | 0 | 16 | 35 | 188 | 5 | 10 | 21 | 177 | 61  | 391   |
| 86,002 | 0 | 16 | 35 | 188 | 6 | 10 | 22 | 191 | 63  | 405   |
| 86,003 | 0 | 16 | 35 | 187 | 6 | 11 | 22 | 191 | 63  | 405   |
| 86,004 | 0 | 22 | 35 | 209 | 6 | 17 | 22 | 243 | 63  | 491   |
| 86,005 | 0 | 22 | 35 | 215 | 6 | 17 | 22 | 247 | 63  | 501   |
| 86,006 | 0 | 22 | 60 | 214 | 7 | 16 | 33 | 247 | 100 | 499   |

|        |    |    |     |     |    |    |    |     |     |     |
|--------|----|----|-----|-----|----|----|----|-----|-----|-----|
| 86,007 | 0  | 22 | 70  | 215 | 8  | 16 | 37 | 247 | 115 | 500 |
| 86,008 | 0  | 22 | 69  | 212 | 8  | 16 | 37 | 247 | 114 | 497 |
| 86,009 | 0  | 22 | 67  | 212 | 8  | 16 | 38 | 248 | 113 | 498 |
| 86,010 | 0  | 22 | 68  | 214 | 8  | 16 | 38 | 248 | 114 | 500 |
| 86,011 | 0  | 22 | 60  | 213 | 8  | 16 | 36 | 248 | 104 | 499 |
| 86,012 | 0  | 22 | 60  | 213 | 8  | 16 | 36 | 249 | 104 | 500 |
| 86,013 | 0  | 23 | 60  | 213 | 10 | 15 | 38 | 240 | 108 | 491 |
| 86,014 | 0  | 23 | 59  | 211 | 10 | 13 | 38 | 235 | 107 | 482 |
| 86,015 | 0  | 25 | 58  | 210 | 10 | 13 | 40 | 237 | 108 | 485 |
| 86,016 | 0  | 25 | 56  | 208 | 8  | 13 | 38 | 236 | 102 | 482 |
| 86,017 | 0  | 23 | 65  | 202 | 8  | 13 | 44 | 233 | 117 | 471 |
| 86,018 | 1  | 23 | 74  | 197 | 8  | 13 | 49 | 229 | 132 | 462 |
| 86,019 | 3  | 23 | 76  | 193 | 8  | 13 | 53 | 226 | 140 | 455 |
| 86,020 | 3  | 23 | 80  | 187 | 8  | 12 | 54 | 222 | 145 | 444 |
| 86,021 | 3  | 26 | 81  | 237 | 8  | 13 | 54 | 268 | 146 | 544 |
| 86,022 | 3  | 26 | 79  | 259 | 7  | 13 | 53 | 277 | 142 | 575 |
| 86,023 | 3  | 26 | 79  | 266 | 7  | 13 | 53 | 291 | 142 | 596 |
| 86,024 | 3  | 21 | 79  | 227 | 7  | 13 | 53 | 268 | 142 | 529 |
| 86,025 | 3  | 21 | 79  | 228 | 7  | 13 | 53 | 268 | 142 | 530 |
| 86,026 | 3  | 22 | 76  | 229 | 6  | 13 | 47 | 270 | 132 | 534 |
| 86,027 | 3  | 22 | 75  | 229 | 6  | 13 | 45 | 270 | 129 | 534 |
| 86,028 | 3  | 22 | 75  | 225 | 6  | 13 | 45 | 270 | 129 | 530 |
| 86,029 | 3  | 22 | 75  | 226 | 6  | 13 | 45 | 270 | 129 | 531 |
| 86,030 | 3  | 22 | 75  | 226 | 6  | 13 | 45 | 271 | 129 | 532 |
| 86,031 | 3  | 22 | 75  | 231 | 6  | 14 | 45 | 278 | 129 | 545 |
| 86,032 | 3  | 22 | 77  | 238 | 6  | 14 | 46 | 281 | 132 | 555 |
| 86,033 | 3  | 22 | 74  | 242 | 6  | 14 | 47 | 284 | 130 | 562 |
| 86,034 | 3  | 26 | 72  | 249 | 5  | 17 | 46 | 290 | 126 | 582 |
| 86,035 | 3  | 26 | 71  | 249 | 5  | 17 | 44 | 290 | 123 | 582 |
| 86,036 | 3  | 27 | 71  | 256 | 5  | 17 | 44 | 295 | 123 | 595 |
| 86,037 | 3  | 30 | 71  | 289 | 5  | 17 | 44 | 311 | 123 | 647 |
| 86,038 | 3  | 32 | 72  | 301 | 5  | 18 | 43 | 316 | 123 | 667 |
| 86,039 | 4  | 33 | 73  | 318 | 5  | 18 | 44 | 313 | 126 | 682 |
| 86,040 | 4  | 36 | 77  | 355 | 5  | 23 | 49 | 320 | 135 | 734 |
| 86,041 | 4  | 34 | 77  | 327 | 5  | 21 | 49 | 294 | 135 | 676 |
| 86,042 | 5  | 33 | 84  | 323 | 5  | 22 | 53 | 284 | 147 | 662 |
| 86,043 | 8  | 33 | 86  | 352 | 5  | 23 | 55 | 306 | 154 | 714 |
| 86,044 | 8  | 33 | 86  | 351 | 5  | 23 | 55 | 308 | 154 | 715 |
| 86,045 | 8  | 46 | 86  | 393 | 5  | 24 | 55 | 332 | 154 | 795 |
| 86,046 | 8  | 44 | 86  | 392 | 5  | 24 | 55 | 331 | 154 | 791 |
| 86,047 | 11 | 44 | 120 | 393 | 6  | 24 | 69 | 334 | 206 | 795 |

|        |    |    |     |     |   |    |    |     |     |     |
|--------|----|----|-----|-----|---|----|----|-----|-----|-----|
| 86,048 | 11 | 45 | 129 | 398 | 7 | 24 | 77 | 330 | 224 | 797 |
| 86,049 | 11 | 45 | 127 | 404 | 7 | 24 | 77 | 334 | 222 | 807 |
| 86,050 | 12 | 45 | 147 | 404 | 7 | 22 | 91 | 317 | 257 | 788 |
| 86,051 | 12 | 44 | 147 | 398 | 7 | 22 | 91 | 307 | 257 | 771 |
| 86,052 | 12 | 43 | 150 | 405 | 6 | 23 | 91 | 310 | 259 | 781 |
| 86,053 | 12 | 44 | 151 | 406 | 6 | 23 | 92 | 295 | 261 | 768 |
| 86,054 | 12 | 44 | 151 | 402 | 6 | 22 | 92 | 292 | 261 | 760 |
| 86,055 | 12 | 38 | 148 | 386 | 6 | 17 | 91 | 247 | 257 | 688 |
| 86,056 | 12 | 38 | 126 | 383 | 5 | 18 | 80 | 246 | 223 | 685 |
| 86,057 | 12 | 38 | 118 | 379 | 4 | 18 | 77 | 244 | 211 | 679 |
| 86,058 | 12 | 38 | 116 | 377 | 4 | 18 | 76 | 242 | 208 | 675 |
| 86,059 | 12 | 38 | 115 | 377 | 4 | 18 | 76 | 242 | 207 | 675 |
| 86,060 | 12 | 38 | 115 | 377 | 4 | 18 | 75 | 244 | 206 | 677 |
| 86,061 | 12 | 38 | 113 | 375 | 4 | 18 | 75 | 244 | 204 | 675 |
| 86,062 | 12 | 38 | 114 | 374 | 4 | 18 | 76 | 244 | 206 | 674 |
| 86,063 | 12 | 38 | 114 | 375 | 4 | 18 | 76 | 243 | 206 | 674 |
| 86,064 | 12 | 37 | 114 | 376 | 2 | 18 | 74 | 245 | 202 | 676 |
| 86,065 | 12 | 37 | 114 | 404 | 2 | 19 | 74 | 270 | 202 | 730 |
| 86,066 | 12 | 35 | 116 | 407 | 2 | 20 | 72 | 275 | 202 | 737 |
| 86,067 | 12 | 35 | 107 | 409 | 2 | 21 | 66 | 284 | 187 | 749 |
| 86,068 | 11 | 36 | 98  | 410 | 2 | 21 | 61 | 284 | 172 | 751 |
| 86,069 | 11 | 36 | 98  | 410 | 2 | 21 | 61 | 284 | 172 | 751 |
| 86,070 | 9  | 36 | 96  | 410 | 2 | 21 | 57 | 284 | 164 | 751 |
| 86,071 | 9  | 36 | 92  | 416 | 2 | 21 | 56 | 293 | 159 | 766 |
| 86,072 | 9  | 33 | 91  | 366 | 2 | 20 | 55 | 250 | 157 | 669 |
| 86,073 | 9  | 33 | 91  | 345 | 2 | 20 | 55 | 241 | 157 | 639 |
| 86,074 | 9  | 33 | 91  | 335 | 2 | 20 | 56 | 227 | 158 | 615 |
| 86,075 | 9  | 33 | 91  | 335 | 2 | 20 | 58 | 227 | 160 | 615 |
| 86,076 | 9  | 32 | 91  | 333 | 2 | 20 | 58 | 225 | 160 | 610 |
| 86,077 | 9  | 32 | 91  | 333 | 2 | 20 | 58 | 225 | 160 | 610 |
| 86,078 | 9  | 32 | 91  | 333 | 2 | 20 | 57 | 225 | 159 | 610 |
| 86,079 | 9  | 32 | 91  | 333 | 2 | 20 | 57 | 227 | 159 | 612 |
| 86,080 | 9  | 32 | 92  | 332 | 2 | 20 | 59 | 225 | 162 | 609 |
| 86,081 | 9  | 32 | 93  | 325 | 2 | 19 | 60 | 218 | 164 | 594 |
| 86,082 | 11 | 32 | 111 | 325 | 3 | 19 | 83 | 218 | 208 | 594 |
| 86,083 | 11 | 32 | 110 | 318 | 3 | 19 | 82 | 215 | 206 | 584 |
| 86,084 | 11 | 32 | 109 | 316 | 3 | 19 | 82 | 212 | 205 | 579 |
| 86,085 | 11 | 28 | 109 | 309 | 3 | 16 | 82 | 207 | 205 | 560 |
| 86,086 | 11 | 28 | 109 | 309 | 3 | 16 | 82 | 208 | 205 | 561 |
| 86,087 | 11 | 27 | 109 | 298 | 3 | 16 | 82 | 201 | 205 | 542 |
| 86,088 | 11 | 22 | 108 | 251 | 3 | 15 | 81 | 177 | 203 | 465 |

|        |    |    |     |     |   |    |    |     |     |     |
|--------|----|----|-----|-----|---|----|----|-----|-----|-----|
| 86,089 | 10 | 20 | 107 | 228 | 3 | 15 | 81 | 173 | 201 | 436 |
| 86,090 | 10 | 20 | 106 | 228 | 3 | 15 | 81 | 174 | 200 | 437 |
| 86,091 | 10 | 16 | 103 | 186 | 3 | 10 | 76 | 162 | 192 | 374 |
| 86,092 | 9  | 16 | 95  | 182 | 3 | 8  | 72 | 157 | 179 | 363 |
| 86,093 | 9  | 16 | 95  | 184 | 3 | 8  | 72 | 162 | 179 | 370 |
| 86,094 | 6  | 16 | 95  | 179 | 3 | 8  | 70 | 146 | 174 | 349 |
| 86,095 | 6  | 17 | 87  | 193 | 3 | 8  | 69 | 157 | 165 | 375 |
| 86,096 | 6  | 4  | 83  | 146 | 3 | 7  | 65 | 122 | 157 | 279 |
| 86,097 | 4  | 5  | 81  | 154 | 3 | 7  | 64 | 129 | 152 | 295 |
| 86,098 | 3  | 6  | 64  | 157 | 2 | 7  | 56 | 134 | 125 | 304 |
| 86,099 | 3  | 5  | 54  | 152 | 1 | 7  | 47 | 134 | 105 | 298 |
| 86,100 | 3  | 5  | 45  | 147 | 1 | 7  | 39 | 131 | 88  | 290 |
| 86,101 | 2  | 5  | 33  | 140 | 1 | 7  | 33 | 125 | 69  | 277 |
| 86,102 | 2  | 6  | 32  | 165 | 1 | 7  | 32 | 162 | 67  | 340 |
| 86,103 | 2  | 6  | 30  | 160 | 1 | 6  | 32 | 160 | 65  | 332 |
| 86,104 | 2  | 5  | 29  | 162 | 1 | 6  | 31 | 167 | 63  | 340 |
| 86,105 | 2  | 5  | 29  | 165 | 1 | 6  | 31 | 165 | 63  | 341 |
| 86,106 | 2  | 5  | 29  | 152 | 1 | 5  | 31 | 153 | 63  | 315 |
| 86,107 | 2  | 5  | 29  | 150 | 1 | 4  | 31 | 151 | 63  | 310 |
| 86,108 | 2  | 5  | 29  | 150 | 1 | 4  | 31 | 151 | 63  | 310 |
| 86,109 | 2  | 5  | 29  | 150 | 1 | 4  | 31 | 151 | 63  | 310 |
| 86,110 | 2  | 5  | 29  | 150 | 1 | 4  | 31 | 151 | 63  | 310 |
| 86,111 | 2  | 5  | 29  | 150 | 1 | 4  | 31 | 151 | 63  | 310 |
| 86,112 | 2  | 5  | 29  | 150 | 1 | 4  | 30 | 149 | 62  | 308 |
| 86,113 | 2  | 5  | 29  | 150 | 1 | 4  | 30 | 150 | 62  | 309 |
| 86,114 | 2  | 5  | 29  | 150 | 1 | 4  | 30 | 149 | 62  | 308 |
| 86,115 | 2  | 5  | 29  | 146 | 1 | 4  | 30 | 147 | 62  | 302 |
| 86,116 | 2  | 6  | 29  | 118 | 1 | 3  | 30 | 123 | 62  | 250 |
| 86,117 | 2  | 6  | 33  | 118 | 1 | 3  | 30 | 123 | 66  | 250 |
| 86,118 | 2  | 6  | 32  | 111 | 1 | 1  | 31 | 107 | 66  | 225 |
| 86,119 | 2  | 6  | 32  | 111 | 1 | 1  | 31 | 107 | 66  | 225 |
| 86,120 | 2  | 5  | 32  | 109 | 1 | 1  | 31 | 106 | 66  | 221 |
| 86,121 | 2  | 5  | 32  | 109 | 1 | 1  | 31 | 106 | 66  | 221 |
| 86,122 | 2  | 5  | 32  | 109 | 1 | 1  | 33 | 106 | 68  | 221 |
| 86,123 | 2  | 5  | 32  | 103 | 1 | 1  | 33 | 97  | 68  | 206 |
| 86,124 | 2  | 5  | 32  | 103 | 1 | 1  | 33 | 94  | 68  | 203 |
| 86,125 | 2  | 5  | 33  | 102 | 1 | 1  | 32 | 94  | 68  | 202 |
| 86,126 | 2  | 5  | 34  | 102 | 1 | 1  | 32 | 94  | 69  | 202 |
| 86,127 | 2  | 5  | 36  | 101 | 1 | 1  | 31 | 94  | 70  | 201 |
| 86,128 | 2  | 5  | 36  | 101 | 1 | 1  | 31 | 94  | 70  | 201 |
| 86,129 | 2  | 5  | 37  | 106 | 1 | 1  | 31 | 96  | 71  | 208 |
| 86,129 | 2  | 5  | 39  | 106 | 1 | 1  | 32 | 96  | 74  | 208 |

|        |   |   |    |     |   |   |    |     |     |     |
|--------|---|---|----|-----|---|---|----|-----|-----|-----|
| 86,130 | 2 | 5 | 46 | 106 | 1 | 1 | 35 | 93  | 84  | 205 |
| 86,131 | 3 | 5 | 61 | 105 | 1 | 1 | 36 | 93  | 101 | 204 |
| 86,132 | 3 | 5 | 61 | 106 | 2 | 1 | 36 | 93  | 102 | 205 |
| 86,133 | 1 | 5 | 45 | 107 | 1 | 1 | 14 | 93  | 61  | 206 |
| 86,134 | 1 | 5 | 44 | 107 | 1 | 1 | 14 | 93  | 60  | 206 |
| 86,135 | 1 | 5 | 44 | 105 | 1 | 1 | 13 | 92  | 59  | 203 |
| 86,136 | 1 | 5 | 44 | 105 | 1 | 1 | 13 | 93  | 59  | 204 |
| 86,137 | 2 | 5 | 54 | 105 | 1 | 2 | 17 | 92  | 74  | 204 |
| 86,138 | 2 | 5 | 54 | 105 | 1 | 2 | 17 | 92  | 74  | 204 |
| 86,139 | 2 | 5 | 57 | 105 | 1 | 2 | 17 | 93  | 77  | 205 |
| 86,140 | 2 | 5 | 57 | 106 | 1 | 2 | 17 | 93  | 77  | 206 |
| 86,141 | 2 | 5 | 57 | 106 | 1 | 2 | 17 | 95  | 77  | 208 |
| 86,142 | 2 | 6 | 57 | 123 | 1 | 6 | 17 | 107 | 77  | 242 |
| 86,143 | 2 | 7 | 57 | 126 | 1 | 6 | 18 | 110 | 78  | 249 |
| 86,144 | 3 | 7 | 57 | 132 | 1 | 6 | 18 | 105 | 79  | 250 |
| 86,145 | 3 | 7 | 57 | 112 | 1 | 5 | 19 | 99  | 80  | 223 |
| 86,146 | 3 | 8 | 59 | 109 | 1 | 5 | 19 | 99  | 82  | 221 |
| 86,147 | 3 | 8 | 59 | 111 | 1 | 5 | 19 | 98  | 82  | 222 |
| 86,148 | 3 | 7 | 59 | 108 | 1 | 5 | 19 | 94  | 82  | 214 |
| 86,149 | 3 | 6 | 59 | 105 | 1 | 5 | 19 | 89  | 82  | 205 |
| 86,150 | 4 | 6 | 60 | 106 | 1 | 5 | 19 | 88  | 84  | 205 |
| 86,151 | 4 | 6 | 60 | 104 | 1 | 5 | 19 | 91  | 84  | 206 |
| 86,152 | 4 | 5 | 61 | 80  | 1 | 5 | 19 | 54  | 85  | 144 |
| 86,153 | 4 | 5 | 61 | 77  | 1 | 5 | 19 | 52  | 85  | 139 |
| 86,154 | 4 | 5 | 62 | 79  | 1 | 5 | 19 | 52  | 86  | 141 |
| 86,155 | 5 | 5 | 62 | 74  | 1 | 5 | 20 | 45  | 88  | 129 |
| 86,156 | 5 | 5 | 62 | 70  | 1 | 6 | 20 | 44  | 88  | 125 |
| 86,157 | 5 | 5 | 62 | 70  | 1 | 6 | 20 | 44  | 88  | 125 |
| 86,158 | 5 | 5 | 62 | 69  | 1 | 6 | 23 | 44  | 91  | 124 |
| 86,159 | 5 | 5 | 62 | 69  | 1 | 6 | 23 | 44  | 91  | 124 |
| 86,160 | 5 | 5 | 63 | 69  | 1 | 6 | 24 | 44  | 93  | 124 |
| 86,161 | 5 | 5 | 63 | 69  | 1 | 6 | 24 | 44  | 93  | 124 |
| 86,162 | 6 | 5 | 63 | 70  | 1 | 6 | 24 | 44  | 94  | 125 |
| 86,163 | 6 | 5 | 65 | 75  | 1 | 6 | 26 | 45  | 98  | 131 |
| 86,164 | 6 | 5 | 65 | 76  | 1 | 6 | 26 | 47  | 98  | 134 |
| 86,165 | 6 | 5 | 66 | 82  | 1 | 6 | 28 | 47  | 101 | 140 |
| 86,166 | 6 | 5 | 67 | 82  | 1 | 6 | 28 | 47  | 102 | 140 |
| 86,167 | 6 | 5 | 63 | 82  | 1 | 6 | 28 | 48  | 98  | 141 |
| 86,168 | 6 | 5 | 62 | 82  | 1 | 6 | 27 | 49  | 96  | 142 |
| 86,169 | 6 | 5 | 62 | 83  | 1 | 6 | 27 | 49  | 96  | 143 |
| 86,170 | 6 | 5 | 62 | 84  | 1 | 6 | 27 | 49  | 96  | 144 |

|        |   |   |    |    |   |   |    |    |    |     |
|--------|---|---|----|----|---|---|----|----|----|-----|
| 86,171 | 6 | 5 | 62 | 84 | 1 | 6 | 26 | 50 | 95 | 145 |
| 86,172 | 6 | 5 | 63 | 84 | 1 | 6 | 26 | 50 | 96 | 145 |
| 86,173 | 6 | 5 | 63 | 84 | 1 | 6 | 26 | 50 | 96 | 145 |
| 86,174 | 6 | 5 | 63 | 84 | 1 | 6 | 26 | 50 | 96 | 145 |
| 86,175 | 6 | 5 | 62 | 84 | 1 | 6 | 26 | 51 | 95 | 146 |
| 86,176 | 6 | 5 | 62 | 84 | 1 | 6 | 26 | 51 | 95 | 146 |
| 86,177 | 6 | 5 | 60 | 84 | 1 | 6 | 25 | 51 | 92 | 146 |
| 86,178 | 6 | 5 | 59 | 84 | 1 | 6 | 25 | 51 | 91 | 146 |
| 86,179 | 6 | 5 | 59 | 79 | 1 | 6 | 25 | 49 | 91 | 139 |
| 86,180 | 6 | 5 | 58 | 78 | 1 | 6 | 25 | 49 | 90 | 138 |
| 86,181 | 6 | 5 | 52 | 78 | 1 | 6 | 22 | 51 | 81 | 140 |
| 86,182 | 5 | 5 | 36 | 77 | 1 | 6 | 18 | 52 | 60 | 140 |
| 86,183 | 5 | 5 | 35 | 80 | 0 | 6 | 17 | 53 | 57 | 144 |
| 86,184 | 5 | 5 | 33 | 82 | 0 | 6 | 18 | 54 | 56 | 147 |
| 86,185 | 5 | 5 | 34 | 82 | 0 | 6 | 19 | 54 | 58 | 147 |
| 86,186 | 5 | 5 | 34 | 82 | 0 | 6 | 21 | 54 | 60 | 147 |
| 86,187 | 5 | 5 | 32 | 82 | 0 | 6 | 20 | 52 | 57 | 145 |
| 86,188 | 4 | 5 | 27 | 82 | 0 | 5 | 17 | 52 | 48 | 144 |
| 86,189 | 4 | 5 | 24 | 82 | 0 | 5 | 17 | 50 | 45 | 142 |
| 86,190 | 4 | 5 | 24 | 83 | 0 | 5 | 17 | 50 | 45 | 143 |
| 86,191 | 4 | 5 | 24 | 82 | 0 | 5 | 17 | 51 | 45 | 143 |
| 86,192 | 4 | 5 | 24 | 82 | 0 | 5 | 17 | 48 | 45 | 140 |
| 86,193 | 4 | 3 | 24 | 56 | 0 | 1 | 17 | 33 | 45 | 93  |
| 86,194 | 4 | 3 | 23 | 56 | 0 | 1 | 17 | 33 | 44 | 93  |
| 86,195 | 3 | 3 | 22 | 56 | 0 | 1 | 17 | 33 | 42 | 93  |
| 86,196 | 3 | 3 | 22 | 51 | 0 | 1 | 17 | 33 | 42 | 88  |
| 86,197 | 3 | 1 | 17 | 37 | 0 | 1 | 17 | 22 | 37 | 61  |
| 86,198 | 3 | 1 | 17 | 32 | 0 | 1 | 17 | 19 | 37 | 53  |
| 86,199 | 3 | 1 | 17 | 32 | 0 | 1 | 17 | 19 | 37 | 53  |
| 86,200 | 2 | 1 | 16 | 32 | 0 | 1 | 17 | 19 | 35 | 53  |
| 86,201 | 2 | 1 | 16 | 31 | 0 | 1 | 17 | 19 | 35 | 52  |
| 86,202 | 2 | 1 | 19 | 30 | 0 | 1 | 18 | 15 | 39 | 47  |
| 86,203 | 2 | 1 | 18 | 30 | 0 | 1 | 18 | 15 | 38 | 47  |
| 86,204 | 2 | 1 | 21 | 30 | 0 | 1 | 20 | 15 | 43 | 47  |
| 86,205 | 2 | 1 | 20 | 28 | 0 | 1 | 20 | 15 | 42 | 45  |
| 86,206 | 1 | 1 | 20 | 24 | 0 | 0 | 19 | 15 | 40 | 40  |
| 86,207 | 1 | 1 | 20 | 24 | 0 | 0 | 19 | 15 | 40 | 40  |
| 86,208 | 1 | 1 | 20 | 24 | 0 | 0 | 16 | 15 | 37 | 40  |
| 86,209 | 1 | 1 | 20 | 24 | 0 | 0 | 16 | 14 | 37 | 39  |
| 86,210 | 1 | 1 | 20 | 24 | 0 | 0 | 16 | 15 | 37 | 40  |
| 86,211 | 1 | 1 | 19 | 24 | 0 | 0 | 15 | 15 | 35 | 40  |

|        |   |   |    |    |   |   |    |    |    |    |
|--------|---|---|----|----|---|---|----|----|----|----|
| 86,212 | 1 | 1 | 21 | 23 | 0 | 0 | 17 | 15 | 39 | 39 |
| 86,213 | 1 | 1 | 21 | 23 | 0 | 0 | 17 | 15 | 39 | 39 |
| 86,214 | 1 | 1 | 25 | 18 | 1 | 0 | 16 | 14 | 43 | 33 |
| 86,215 | 1 | 1 | 25 | 11 | 1 | 0 | 14 | 12 | 41 | 24 |
| 86,216 | 1 | 1 | 36 | 12 | 1 | 0 | 18 | 12 | 56 | 25 |
| 86,217 | 1 | 0 | 35 | 12 | 2 | 0 | 21 | 12 | 59 | 24 |
| 86,218 | 1 | 0 | 35 | 12 | 2 | 0 | 22 | 11 | 60 | 23 |
| 86,219 | 1 | 0 | 36 | 11 | 2 | 0 | 25 | 10 | 64 | 21 |
| 86,220 | 1 | 0 | 36 | 11 | 2 | 0 | 25 | 10 | 64 | 21 |
| 86,221 | 1 | 0 | 36 | 10 | 2 | 0 | 24 | 10 | 63 | 20 |
| 86,222 | 1 | 0 | 35 | 10 | 2 | 0 | 24 | 9  | 62 | 19 |
| 86,223 | 1 | 0 | 35 | 10 | 2 | 0 | 24 | 9  | 62 | 19 |
| 86,224 | 1 | 0 | 35 | 10 | 2 | 0 | 24 | 9  | 62 | 19 |
| 86,225 | 1 | 0 | 36 | 10 | 2 | 0 | 24 | 7  | 63 | 17 |
| 86,226 | 1 | 0 | 36 | 10 | 2 | 0 | 24 | 7  | 63 | 17 |
| 86,227 | 1 | 0 | 35 | 10 | 2 | 0 | 24 | 7  | 62 | 17 |
| 86,228 | 1 | 0 | 35 | 10 | 2 | 0 | 26 | 8  | 64 | 18 |
| 86,229 | 1 | 0 | 35 | 10 | 2 | 0 | 25 | 8  | 63 | 18 |
| 86,230 | 1 | 0 | 35 | 11 | 2 | 0 | 25 | 8  | 63 | 19 |
| 86,231 | 1 | 0 | 34 | 11 | 2 | 0 | 25 | 8  | 62 | 19 |
| 86,232 | 1 | 0 | 33 | 11 | 2 | 0 | 26 | 6  | 62 | 17 |
| 86,233 | 1 | 0 | 33 | 7  | 2 | 0 | 26 | 3  | 62 | 10 |
| 86,234 | 1 | 0 | 33 | 8  | 2 | 0 | 26 | 3  | 62 | 11 |
| 86,235 | 1 | 0 | 34 | 8  | 2 | 0 | 24 | 3  | 61 | 11 |
| 86,236 | 1 | 0 | 33 | 8  | 2 | 0 | 23 | 3  | 59 | 11 |
| 86,237 | 1 | 0 | 33 | 8  | 2 | 0 | 21 | 3  | 57 | 11 |
| 86,238 | 1 | 0 | 32 | 8  | 2 | 0 | 21 | 3  | 56 | 11 |
| 86,239 | 1 | 0 | 32 | 8  | 2 | 0 | 21 | 3  | 56 | 11 |
| 86,240 | 1 | 1 | 32 | 8  | 2 | 0 | 21 | 3  | 56 | 12 |
| 86,241 | 1 | 1 | 32 | 7  | 2 | 0 | 21 | 3  | 56 | 11 |
| 86,242 | 1 | 1 | 32 | 7  | 2 | 0 | 21 | 2  | 56 | 10 |
| 86,243 | 1 | 1 | 32 | 6  | 2 | 0 | 21 | 2  | 56 | 9  |
| 86,244 | 1 | 1 | 32 | 6  | 2 | 0 | 21 | 2  | 56 | 9  |
| 86,245 | 1 | 1 | 32 | 6  | 2 | 0 | 21 | 2  | 56 | 9  |
| 86,246 | 1 | 1 | 32 | 6  | 2 | 0 | 21 | 2  | 56 | 9  |
| 86,247 | 1 | 1 | 32 | 6  | 2 | 0 | 20 | 2  | 55 | 9  |
| 86,248 | 1 | 1 | 32 | 6  | 2 | 0 | 20 | 2  | 55 | 9  |
| 86,249 | 1 | 1 | 32 | 6  | 2 | 0 | 20 | 2  | 55 | 9  |
| 86,250 | 1 | 1 | 32 | 7  | 2 | 1 | 20 | 2  | 55 | 11 |
| 86,251 | 1 | 1 | 32 | 7  | 2 | 1 | 19 | 2  | 54 | 11 |
| 86,252 | 1 | 1 | 31 | 7  | 2 | 1 | 19 | 2  | 53 | 11 |



|        |   |   |    |    |   |   |    |    |    |    |
|--------|---|---|----|----|---|---|----|----|----|----|
| 86,253 | 1 | 1 | 30 | 8  | 2 | 1 | 19 | 2  | 52 | 12 |
| 86,254 | 1 | 1 | 27 | 8  | 2 | 1 | 17 | 2  | 47 | 12 |
| 86,255 | 1 | 1 | 27 | 8  | 2 | 1 | 17 | 2  | 47 | 12 |
| 86,256 | 1 | 1 | 27 | 8  | 2 | 1 | 17 | 2  | 47 | 12 |
| 86,257 | 1 | 1 | 27 | 8  | 2 | 1 | 17 | 2  | 47 | 12 |
| 86,258 | 1 | 1 | 29 | 8  | 2 | 1 | 18 | 2  | 50 | 12 |
| 86,259 | 1 | 1 | 29 | 8  | 2 | 1 | 18 | 2  | 50 | 12 |
| 86,260 | 1 | 1 | 29 | 8  | 2 | 1 | 18 | 1  | 50 | 11 |
| 86,261 | 1 | 1 | 29 | 8  | 2 | 1 | 18 | 1  | 50 | 11 |
| 86,262 | 0 | 1 | 27 | 8  | 2 | 1 | 15 | 1  | 44 | 11 |
| 86,263 | 0 | 1 | 27 | 11 | 2 | 1 | 16 | 1  | 45 | 14 |
| 86,264 | 0 | 1 | 27 | 13 | 2 | 1 | 16 | 1  | 45 | 16 |
| 86,265 | 0 | 2 | 21 | 14 | 1 | 1 | 15 | 2  | 37 | 19 |
| 86,266 | 0 | 2 | 21 | 17 | 2 | 1 | 15 | 2  | 38 | 22 |
| 86,267 | 0 | 2 | 10 | 16 | 2 | 1 | 11 | 2  | 23 | 21 |
| 86,268 | 0 | 2 | 10 | 16 | 1 | 1 | 9  | 2  | 20 | 21 |
| 86,269 | 1 | 2 | 10 | 17 | 1 | 1 | 6  | 2  | 18 | 22 |
| 86,270 | 1 | 2 | 10 | 18 | 1 | 1 | 6  | 2  | 18 | 23 |
| 86,271 | 1 | 2 | 11 | 19 | 1 | 1 | 7  | 2  | 20 | 24 |
| 86,272 | 1 | 2 | 11 | 20 | 1 | 1 | 7  | 2  | 20 | 25 |
| 86,273 | 1 | 2 | 14 | 20 | 1 | 1 | 7  | 2  | 23 | 25 |
| 86,274 | 1 | 4 | 14 | 20 | 1 | 1 | 7  | 2  | 23 | 27 |
| 86,275 | 1 | 4 | 14 | 20 | 1 | 1 | 7  | 2  | 23 | 27 |
| 86,276 | 1 | 4 | 13 | 20 | 1 | 1 | 7  | 3  | 22 | 28 |
| 86,277 | 1 | 5 | 13 | 22 | 1 | 1 | 7  | 4  | 22 | 32 |
| 86,278 | 1 | 5 | 13 | 22 | 1 | 2 | 6  | 4  | 21 | 33 |
| 86,279 | 1 | 5 | 13 | 22 | 1 | 2 | 5  | 3  | 20 | 32 |
| 86,280 | 1 | 5 | 13 | 23 | 1 | 2 | 5  | 3  | 20 | 33 |
| 86,281 | 1 | 5 | 13 | 22 | 1 | 2 | 5  | 3  | 20 | 32 |
| 86,282 | 1 | 5 | 13 | 25 | 1 | 2 | 4  | 3  | 19 | 35 |
| 86,283 | 1 | 5 | 13 | 25 | 1 | 2 | 4  | 3  | 19 | 35 |
| 86,284 | 1 | 6 | 15 | 35 | 1 | 3 | 4  | 9  | 21 | 53 |
| 86,285 | 1 | 6 | 15 | 43 | 1 | 4 | 4  | 11 | 21 | 64 |
| 86,286 | 1 | 6 | 14 | 49 | 1 | 4 | 4  | 12 | 20 | 71 |
| 86,287 | 2 | 6 | 15 | 49 | 1 | 4 | 4  | 12 | 22 | 71 |
| 86,288 | 2 | 6 | 17 | 50 | 1 | 5 | 5  | 12 | 25 | 73 |
| 86,289 | 2 | 6 | 17 | 50 | 1 | 5 | 5  | 12 | 25 | 73 |
| 86,290 | 2 | 6 | 17 | 50 | 1 | 5 | 5  | 12 | 25 | 73 |
| 86,291 | 2 | 5 | 17 | 51 | 1 | 5 | 5  | 12 | 25 | 73 |
| 86,292 | 2 | 5 | 18 | 51 | 1 | 5 | 5  | 12 | 26 | 73 |
| 86,293 | 2 | 5 | 18 | 50 | 1 | 5 | 5  | 12 | 26 | 72 |

|        |   |    |    |    |   |   |    |    |    |     |
|--------|---|----|----|----|---|---|----|----|----|-----|
| 86,294 | 2 | 5  | 18 | 50 | 1 | 5 | 5  | 12 | 26 | 72  |
| 86,295 | 2 | 5  | 19 | 50 | 1 | 5 | 7  | 14 | 29 | 74  |
| 86,296 | 2 | 5  | 20 | 52 | 1 | 5 | 10 | 15 | 33 | 77  |
| 86,297 | 2 | 5  | 20 | 52 | 1 | 5 | 11 | 15 | 34 | 77  |
| 86,298 | 2 | 5  | 20 | 57 | 1 | 5 | 11 | 15 | 34 | 82  |
| 86,299 | 2 | 5  | 20 | 57 | 1 | 5 | 11 | 15 | 34 | 82  |
| 86,300 | 3 | 5  | 24 | 56 | 1 | 4 | 13 | 16 | 41 | 81  |
| 86,301 | 3 | 5  | 24 | 56 | 1 | 4 | 13 | 16 | 41 | 81  |
| 86,302 | 3 | 5  | 24 | 56 | 1 | 4 | 13 | 16 | 41 | 81  |
| 86,303 | 4 | 5  | 23 | 55 | 1 | 4 | 13 | 16 | 41 | 80  |
| 86,304 | 4 | 5  | 23 | 55 | 1 | 4 | 13 | 16 | 41 | 80  |
| 86,305 | 4 | 5  | 24 | 57 | 1 | 4 | 13 | 16 | 42 | 82  |
| 86,306 | 4 | 5  | 24 | 57 | 1 | 4 | 13 | 16 | 42 | 82  |
| 86,307 | 4 | 5  | 27 | 58 | 1 | 4 | 13 | 17 | 45 | 84  |
| 86,308 | 4 | 6  | 27 | 58 | 1 | 4 | 12 | 17 | 44 | 85  |
| 86,309 | 4 | 6  | 25 | 58 | 1 | 4 | 12 | 17 | 42 | 85  |
| 86,310 | 4 | 9  | 25 | 60 | 1 | 4 | 12 | 20 | 42 | 93  |
| 86,311 | 4 | 10 | 25 | 64 | 1 | 4 | 12 | 20 | 42 | 98  |
| 86,312 | 6 | 10 | 29 | 64 | 1 | 4 | 16 | 20 | 52 | 98  |
| 86,313 | 6 | 10 | 32 | 66 | 1 | 4 | 18 | 20 | 57 | 100 |
| 86,314 | 6 | 10 | 32 | 63 | 1 | 4 | 18 | 20 | 57 | 97  |
| 86,315 | 6 | 9  | 32 | 60 | 1 | 4 | 18 | 19 | 57 | 92  |
| 86,316 | 6 | 9  | 32 | 57 | 1 | 4 | 18 | 19 | 57 | 89  |
| 86,317 | 6 | 9  | 31 | 57 | 0 | 4 | 18 | 19 | 55 | 89  |
| 86,318 | 6 | 9  | 31 | 64 | 0 | 4 | 18 | 19 | 55 | 96  |
| 86,319 | 6 | 9  | 30 | 76 | 0 | 4 | 17 | 21 | 53 | 110 |
| 86,320 | 5 | 9  | 29 | 83 | 0 | 4 | 17 | 23 | 51 | 119 |
| 86,321 | 5 | 10 | 29 | 82 | 0 | 4 | 17 | 26 | 51 | 122 |
| 86,322 | 5 | 10 | 28 | 82 | 0 | 4 | 16 | 26 | 49 | 122 |
| 86,323 | 5 | 10 | 29 | 81 | 0 | 4 | 16 | 26 | 50 | 121 |
| 86,324 | 5 | 10 | 26 | 82 | 0 | 4 | 16 | 26 | 47 | 122 |
| 86,325 | 5 | 8  | 26 | 82 | 0 | 4 | 16 | 26 | 47 | 120 |
| 86,326 | 5 | 9  | 26 | 86 | 0 | 4 | 16 | 28 | 47 | 127 |
| 86,327 | 5 | 9  | 26 | 86 | 0 | 4 | 16 | 27 | 47 | 126 |
| 86,328 | 5 | 8  | 26 | 84 | 0 | 4 | 16 | 26 | 47 | 122 |
| 86,329 | 5 | 8  | 26 | 84 | 0 | 3 | 16 | 26 | 47 | 121 |
| 86,330 | 5 | 8  | 26 | 83 | 0 | 3 | 16 | 26 | 47 | 120 |
| 86,331 | 5 | 8  | 26 | 83 | 0 | 3 | 16 | 26 | 47 | 120 |
| 86,332 | 5 | 8  | 26 | 83 | 0 | 3 | 16 | 26 | 47 | 120 |
| 86,333 | 5 | 8  | 27 | 80 | 0 | 3 | 17 | 26 | 49 | 117 |
| 86,334 | 5 | 7  | 27 | 68 | 0 | 2 | 17 | 21 | 49 | 98  |

|        |   |   |    |     |   |   |    |    |    |     |
|--------|---|---|----|-----|---|---|----|----|----|-----|
| 86,335 | 5 | 7 | 26 | 68  | 0 | 2 | 17 | 21 | 48 | 98  |
| 86,336 | 5 | 7 | 27 | 59  | 0 | 1 | 17 | 19 | 49 | 86  |
| 86,337 | 5 | 7 | 27 | 54  | 0 | 1 | 17 | 18 | 49 | 80  |
| 86,338 | 4 | 7 | 26 | 55  | 0 | 1 | 17 | 18 | 47 | 81  |
| 86,339 | 4 | 7 | 24 | 60  | 0 | 0 | 16 | 20 | 44 | 87  |
| 86,340 | 4 | 8 | 22 | 60  | 0 | 0 | 16 | 20 | 42 | 88  |
| 86,341 | 4 | 8 | 22 | 60  | 0 | 0 | 16 | 20 | 42 | 88  |
| 86,342 | 4 | 8 | 21 | 76  | 0 | 1 | 16 | 24 | 41 | 109 |
| 86,343 | 4 | 8 | 21 | 76  | 0 | 1 | 16 | 24 | 41 | 109 |
| 86,344 | 4 | 8 | 22 | 80  | 0 | 1 | 16 | 24 | 42 | 113 |
| 86,345 | 4 | 8 | 21 | 80  | 0 | 1 | 16 | 25 | 41 | 114 |
| 86,346 | 4 | 8 | 22 | 86  | 0 | 1 | 14 | 26 | 40 | 121 |
| 86,347 | 4 | 8 | 21 | 86  | 0 | 1 | 11 | 28 | 36 | 123 |
| 86,348 | 4 | 8 | 21 | 87  | 0 | 1 | 10 | 28 | 35 | 124 |
| 86,349 | 4 | 8 | 21 | 83  | 0 | 1 | 11 | 29 | 36 | 121 |
| 86,350 | 4 | 9 | 21 | 84  | 0 | 1 | 11 | 31 | 36 | 125 |
| 86,351 | 4 | 9 | 19 | 87  | 0 | 1 | 9  | 33 | 32 | 130 |
| 86,352 | 4 | 9 | 20 | 92  | 0 | 1 | 10 | 33 | 34 | 135 |
| 86,353 | 4 | 9 | 20 | 95  | 0 | 1 | 10 | 33 | 34 | 138 |
| 86,354 | 4 | 9 | 20 | 96  | 0 | 2 | 10 | 33 | 34 | 140 |
| 86,355 | 4 | 9 | 22 | 94  | 0 | 2 | 10 | 33 | 36 | 138 |
| 86,356 | 4 | 9 | 23 | 94  | 0 | 2 | 11 | 33 | 38 | 138 |
| 86,357 | 4 | 9 | 23 | 95  | 0 | 2 | 11 | 34 | 38 | 140 |
| 86,358 | 4 | 9 | 20 | 95  | 0 | 2 | 11 | 34 | 35 | 140 |
| 86,359 | 4 | 8 | 21 | 97  | 1 | 2 | 12 | 36 | 38 | 143 |
| 86,360 | 4 | 8 | 22 | 100 | 1 | 2 | 12 | 36 | 39 | 146 |
| 86,361 | 2 | 5 | 21 | 98  | 1 | 2 | 7  | 34 | 31 | 139 |
| 86,362 | 2 | 4 | 18 | 92  | 1 | 2 | 7  | 34 | 28 | 132 |
| 86,363 | 2 | 4 | 15 | 92  | 1 | 2 | 5  | 34 | 23 | 132 |
| 86,364 | 2 | 4 | 15 | 93  | 1 | 2 | 5  | 34 | 23 | 133 |
| 86,365 | 2 | 4 | 15 | 93  | 1 | 2 | 5  | 34 | 23 | 133 |
| 86,366 | 2 | 4 | 15 | 93  | 1 | 2 | 5  | 34 | 23 | 133 |
| 86,367 | 2 | 4 | 15 | 93  | 1 | 2 | 5  | 34 | 23 | 133 |
| 86,368 | 2 | 4 | 15 | 93  | 1 | 2 | 5  | 34 | 23 | 133 |
| 86,369 | 2 | 4 | 15 | 87  | 1 | 2 | 5  | 34 | 23 | 127 |
| 86,370 | 2 | 4 | 15 | 77  | 1 | 2 | 5  | 32 | 23 | 115 |
| 86,371 | 2 | 4 | 15 | 70  | 1 | 2 | 5  | 27 | 23 | 103 |
| 86,372 | 2 | 4 | 15 | 70  | 1 | 2 | 5  | 27 | 23 | 103 |
| 86,373 | 2 | 4 | 14 | 69  | 1 | 2 | 5  | 27 | 22 | 102 |
| 86,374 | 2 | 4 | 14 | 69  | 1 | 2 | 5  | 27 | 22 | 102 |
| 86,375 | 2 | 4 | 14 | 68  | 1 | 2 | 6  | 27 | 23 | 101 |

|        |   |   |    |     |   |   |    |    |    |     |
|--------|---|---|----|-----|---|---|----|----|----|-----|
| 86,376 | 2 | 3 | 14 | 64  | 1 | 2 | 6  | 25 | 23 | 94  |
| 86,377 | 2 | 3 | 14 | 64  | 1 | 2 | 6  | 25 | 23 | 94  |
| 86,378 | 2 | 3 | 14 | 67  | 1 | 2 | 6  | 29 | 23 | 101 |
| 86,379 | 2 | 3 | 14 | 67  | 1 | 2 | 6  | 29 | 23 | 101 |
| 86,380 | 2 | 3 | 20 | 68  | 1 | 2 | 14 | 29 | 37 | 102 |
| 86,381 | 5 | 3 | 26 | 68  | 3 | 2 | 25 | 29 | 59 | 102 |
| 86,382 | 5 | 4 | 27 | 68  | 3 | 2 | 25 | 29 | 60 | 103 |
| 86,383 | 5 | 4 | 27 | 69  | 3 | 2 | 25 | 29 | 60 | 104 |
| 86,384 | 5 | 4 | 26 | 69  | 3 | 2 | 25 | 28 | 59 | 103 |
| 86,385 | 5 | 4 | 26 | 69  | 3 | 2 | 25 | 28 | 59 | 103 |
| 86,386 | 5 | 4 | 25 | 69  | 3 | 2 | 25 | 28 | 58 | 103 |
| 86,387 | 5 | 4 | 25 | 69  | 3 | 2 | 25 | 28 | 58 | 103 |
| 86,388 | 5 | 4 | 25 | 68  | 3 | 2 | 25 | 28 | 58 | 102 |
| 86,389 | 5 | 8 | 25 | 97  | 3 | 3 | 25 | 34 | 58 | 142 |
| 86,390 | 5 | 8 | 25 | 92  | 3 | 3 | 25 | 32 | 58 | 135 |
| 86,391 | 5 | 7 | 25 | 97  | 3 | 3 | 25 | 33 | 58 | 140 |
| 86,392 | 5 | 7 | 25 | 101 | 3 | 4 | 25 | 33 | 58 | 145 |
| 86,393 | 5 | 7 | 25 | 73  | 3 | 3 | 25 | 25 | 58 | 108 |
| 86,394 | 6 | 8 | 26 | 73  | 3 | 3 | 25 | 25 | 60 | 109 |
| 86,395 | 6 | 8 | 25 | 77  | 3 | 3 | 25 | 27 | 59 | 115 |
| 86,396 | 6 | 8 | 25 | 80  | 3 | 3 | 25 | 27 | 59 | 118 |
| 86,397 | 7 | 8 | 25 | 81  | 3 | 3 | 25 | 28 | 60 | 120 |
| 86,398 | 6 | 8 | 24 | 78  | 3 | 3 | 25 | 25 | 58 | 114 |
| 86,399 | 7 | 8 | 24 | 77  | 3 | 3 | 26 | 24 | 60 | 112 |
| 86,400 | 7 | 7 | 24 | 76  | 3 | 3 | 25 | 22 | 59 | 108 |
| 86,401 | 7 | 7 | 23 | 73  | 3 | 3 | 25 | 19 | 58 | 102 |
| 86,402 | 7 | 7 | 23 | 74  | 3 | 3 | 25 | 19 | 58 | 103 |
| 86,403 | 7 | 7 | 23 | 67  | 3 | 3 | 24 | 19 | 57 | 96  |
| 86,404 | 7 | 7 | 23 | 67  | 3 | 3 | 24 | 19 | 57 | 96  |
| 86,405 | 6 | 7 | 23 | 66  | 3 | 2 | 24 | 19 | 56 | 94  |
| 86,406 | 6 | 7 | 20 | 66  | 3 | 2 | 24 | 19 | 53 | 94  |
| 86,407 | 6 | 7 | 19 | 65  | 3 | 2 | 23 | 18 | 51 | 92  |
| 86,408 | 6 | 7 | 18 | 65  | 3 | 2 | 23 | 18 | 50 | 92  |
| 86,409 | 6 | 7 | 19 | 62  | 3 | 2 | 23 | 15 | 51 | 86  |
| 86,410 | 6 | 7 | 19 | 62  | 2 | 2 | 22 | 15 | 49 | 86  |
| 86,411 | 6 | 7 | 18 | 59  | 2 | 2 | 22 | 14 | 48 | 82  |
| 86,412 | 6 | 7 | 18 | 59  | 2 | 2 | 22 | 14 | 48 | 82  |
| 86,413 | 6 | 7 | 18 | 59  | 2 | 2 | 22 | 14 | 48 | 82  |
| 86,414 | 6 | 7 | 18 | 58  | 2 | 2 | 22 | 14 | 48 | 81  |
| 86,415 | 6 | 7 | 18 | 57  | 2 | 2 | 22 | 14 | 48 | 80  |
| 86,416 | 6 | 7 | 18 | 58  | 2 | 2 | 22 | 15 | 48 | 82  |

|        |   |   |    |     |   |   |    |    |    |     |
|--------|---|---|----|-----|---|---|----|----|----|-----|
| 86,417 | 6 | 7 | 22 | 58  | 2 | 2 | 22 | 15 | 52 | 82  |
| 86,418 | 6 | 7 | 22 | 58  | 2 | 2 | 22 | 15 | 52 | 82  |
| 86,419 | 6 | 7 | 22 | 58  | 2 | 3 | 22 | 15 | 52 | 83  |
| 86,420 | 6 | 7 | 22 | 58  | 2 | 3 | 22 | 15 | 52 | 83  |
| 86,421 | 6 | 6 | 22 | 56  | 2 | 3 | 22 | 15 | 52 | 80  |
| 86,422 | 6 | 6 | 22 | 56  | 2 | 3 | 22 | 15 | 52 | 80  |
| 86,423 | 6 | 6 | 23 | 60  | 2 | 3 | 22 | 15 | 53 | 84  |
| 86,424 | 6 | 6 | 23 | 60  | 2 | 3 | 22 | 15 | 53 | 84  |
| 86,425 | 6 | 6 | 24 | 60  | 2 | 3 | 23 | 15 | 55 | 84  |
| 86,426 | 6 | 6 | 27 | 68  | 2 | 3 | 24 | 26 | 59 | 103 |
| 86,427 | 6 | 6 | 30 | 101 | 2 | 3 | 25 | 30 | 63 | 140 |
| 86,428 | 6 | 8 | 29 | 118 | 2 | 3 | 26 | 36 | 63 | 165 |
| 86,429 | 6 | 8 | 29 | 120 | 2 | 3 | 26 | 33 | 63 | 164 |
| 86,430 | 6 | 8 | 27 | 120 | 2 | 3 | 23 | 33 | 58 | 164 |
| 86,431 | 7 | 8 | 25 | 119 | 2 | 3 | 18 | 33 | 52 | 163 |
| 86,432 | 4 | 7 | 19 | 119 | 0 | 3 | 7  | 33 | 30 | 162 |
| 86,433 | 4 | 7 | 18 | 127 | 0 | 4 | 7  | 34 | 29 | 172 |
| 86,434 | 4 | 7 | 17 | 127 | 0 | 4 | 6  | 34 | 27 | 172 |
| 86,435 | 4 | 7 | 17 | 127 | 0 | 4 | 6  | 34 | 27 | 172 |
| 86,436 | 4 | 7 | 17 | 128 | 0 | 4 | 6  | 34 | 27 | 173 |
| 86,437 | 4 | 7 | 17 | 128 | 0 | 4 | 6  | 34 | 27 | 173 |
| 86,438 | 4 | 7 | 17 | 128 | 0 | 4 | 6  | 34 | 27 | 173 |
| 86,439 | 4 | 7 | 17 | 128 | 0 | 4 | 6  | 33 | 27 | 172 |
| 86,440 | 4 | 3 | 18 | 99  | 0 | 3 | 6  | 28 | 28 | 133 |
| 86,441 | 4 | 5 | 18 | 126 | 0 | 4 | 6  | 49 | 28 | 184 |
| 86,442 | 4 | 5 | 18 | 124 | 0 | 4 | 6  | 49 | 28 | 182 |
| 86,443 | 4 | 5 | 19 | 120 | 0 | 3 | 6  | 53 | 29 | 181 |
| 86,444 | 4 | 7 | 20 | 122 | 0 | 3 | 7  | 56 | 31 | 188 |
| 86,445 | 3 | 8 | 20 | 132 | 1 | 4 | 7  | 61 | 31 | 205 |
| 86,446 | 3 | 9 | 24 | 128 | 1 | 4 | 10 | 60 | 38 | 201 |
| 86,447 | 3 | 9 | 23 | 124 | 1 | 4 | 12 | 60 | 39 | 197 |
| 86,448 | 2 | 9 | 23 | 125 | 1 | 4 | 13 | 60 | 39 | 198 |
| 86,449 | 2 | 9 | 23 | 126 | 1 | 4 | 13 | 60 | 39 | 199 |
| 86,450 | 1 | 9 | 23 | 126 | 1 | 4 | 12 | 60 | 37 | 199 |
| 86,451 | 1 | 9 | 23 | 126 | 1 | 4 | 12 | 60 | 37 | 199 |
| 86,452 | 1 | 9 | 23 | 126 | 1 | 4 | 12 | 60 | 37 | 199 |
| 86,453 | 1 | 9 | 23 | 126 | 1 | 4 | 12 | 60 | 37 | 199 |
| 86,454 | 1 | 9 | 22 | 126 | 2 | 4 | 15 | 60 | 40 | 199 |
| 86,455 | 2 | 9 | 27 | 126 | 2 | 4 | 17 | 61 | 48 | 200 |
| 86,456 | 2 | 9 | 28 | 126 | 2 | 4 | 18 | 61 | 50 | 200 |
| 86,457 | 2 | 9 | 28 | 126 | 2 | 4 | 18 | 62 | 50 | 201 |

|        |    |    |     |     |   |   |     |    |     |     |
|--------|----|----|-----|-----|---|---|-----|----|-----|-----|
| 86,458 | 2  | 9  | 29  | 127 | 2 | 4 | 20  | 62 | 53  | 202 |
| 86,459 | 2  | 9  | 29  | 127 | 2 | 4 | 22  | 62 | 55  | 202 |
| 86,460 | 3  | 9  | 29  | 127 | 2 | 4 | 23  | 62 | 57  | 202 |
| 86,461 | 3  | 9  | 29  | 127 | 2 | 4 | 23  | 62 | 57  | 202 |
| 86,462 | 3  | 9  | 36  | 127 | 2 | 4 | 27  | 63 | 68  | 203 |
| 86,463 | 3  | 9  | 37  | 128 | 2 | 4 | 27  | 63 | 69  | 204 |
| 86,464 | 3  | 9  | 37  | 128 | 2 | 4 | 27  | 63 | 69  | 204 |
| 86,465 | 6  | 9  | 96  | 131 | 3 | 4 | 57  | 63 | 162 | 207 |
| 86,466 | 6  | 9  | 97  | 131 | 3 | 4 | 58  | 63 | 164 | 207 |
| 86,467 | 6  | 10 | 104 | 131 | 3 | 4 | 61  | 63 | 174 | 208 |
| 86,468 | 6  | 11 | 104 | 131 | 3 | 4 | 61  | 64 | 174 | 210 |
| 86,469 | 6  | 11 | 106 | 132 | 3 | 4 | 62  | 65 | 177 | 212 |
| 86,470 | 6  | 11 | 106 | 131 | 3 | 3 | 63  | 65 | 178 | 210 |
| 86,471 | 6  | 11 | 106 | 131 | 3 | 3 | 63  | 65 | 178 | 210 |
| 86,472 | 7  | 12 | 111 | 133 | 3 | 3 | 71  | 67 | 192 | 215 |
| 86,473 | 7  | 12 | 111 | 135 | 3 | 3 | 71  | 70 | 192 | 220 |
| 86,474 | 8  | 12 | 115 | 131 | 3 | 3 | 79  | 71 | 205 | 217 |
| 86,475 | 8  | 13 | 115 | 139 | 3 | 4 | 79  | 75 | 205 | 231 |
| 86,476 | 8  | 13 | 114 | 139 | 3 | 4 | 78  | 75 | 203 | 231 |
| 86,477 | 8  | 13 | 112 | 131 | 3 | 4 | 76  | 67 | 199 | 215 |
| 86,478 | 8  | 11 | 109 | 86  | 3 | 4 | 75  | 58 | 195 | 159 |
| 86,479 | 8  | 11 | 108 | 87  | 3 | 4 | 74  | 58 | 193 | 160 |
| 86,480 | 10 | 12 | 120 | 81  | 4 | 4 | 76  | 58 | 210 | 155 |
| 86,481 | 10 | 12 | 120 | 81  | 4 | 4 | 76  | 60 | 210 | 157 |
| 86,482 | 9  | 12 | 120 | 81  | 4 | 4 | 77  | 60 | 210 | 157 |
| 86,483 | 12 | 12 | 128 | 81  | 4 | 4 | 85  | 61 | 229 | 158 |
| 86,484 | 13 | 12 | 139 | 73  | 4 | 3 | 93  | 60 | 249 | 148 |
| 86,485 | 13 | 12 | 140 | 73  | 4 | 3 | 94  | 60 | 251 | 148 |
| 86,486 | 13 | 12 | 144 | 73  | 4 | 3 | 96  | 60 | 257 | 148 |
| 86,487 | 13 | 12 | 144 | 72  | 4 | 3 | 96  | 60 | 257 | 147 |
| 86,488 | 13 | 12 | 144 | 72  | 4 | 3 | 96  | 60 | 257 | 147 |
| 86,489 | 14 | 12 | 148 | 72  | 4 | 3 | 99  | 61 | 265 | 148 |
| 86,490 | 14 | 12 | 154 | 72  | 6 | 3 | 103 | 61 | 277 | 148 |
| 86,491 | 14 | 12 | 154 | 72  | 6 | 3 | 103 | 61 | 277 | 148 |
| 86,492 | 15 | 10 | 159 | 45  | 6 | 2 | 107 | 40 | 287 | 97  |
| 86,493 | 15 | 10 | 159 | 42  | 6 | 2 | 107 | 39 | 287 | 93  |
| 86,494 | 16 | 10 | 165 | 42  | 6 | 2 | 109 | 35 | 296 | 89  |
| 86,495 | 20 | 5  | 165 | 30  | 6 | 2 | 108 | 26 | 299 | 63  |
| 86,496 | 20 | 5  | 164 | 30  | 5 | 2 | 108 | 26 | 297 | 63  |
| 86,497 | 20 | 5  | 160 | 32  | 5 | 2 | 105 | 26 | 290 | 65  |
| 86,498 | 20 | 5  | 161 | 32  | 5 | 2 | 103 | 26 | 289 | 65  |

|        |    |   |     |    |   |   |     |    |     |     |
|--------|----|---|-----|----|---|---|-----|----|-----|-----|
| 86,499 | 21 | 5 | 163 | 30 | 5 | 2 | 102 | 26 | 291 | 63  |
| 86,500 | 21 | 5 | 163 | 30 | 5 | 2 | 102 | 26 | 291 | 63  |
| 86,501 | 21 | 5 | 163 | 30 | 5 | 2 | 105 | 26 | 294 | 63  |
| 86,502 | 21 | 5 | 172 | 29 | 6 | 2 | 112 | 26 | 311 | 62  |
| 86,503 | 21 | 5 | 173 | 28 | 5 | 2 | 111 | 26 | 310 | 61  |
| 86,504 | 21 | 5 | 173 | 28 | 5 | 2 | 111 | 26 | 310 | 61  |
| 86,505 | 21 | 5 | 173 | 28 | 5 | 2 | 111 | 26 | 310 | 61  |
| 86,506 | 20 | 5 | 168 | 29 | 5 | 2 | 109 | 25 | 302 | 61  |
| 86,507 | 20 | 5 | 167 | 29 | 5 | 2 | 108 | 24 | 300 | 60  |
| 86,508 | 20 | 5 | 167 | 29 | 5 | 2 | 108 | 24 | 300 | 60  |
| 86,509 | 20 | 6 | 166 | 40 | 5 | 2 | 106 | 43 | 297 | 91  |
| 86,510 | 20 | 6 | 166 | 40 | 5 | 2 | 104 | 43 | 295 | 91  |
| 86,511 | 19 | 6 | 168 | 41 | 5 | 2 | 103 | 46 | 295 | 95  |
| 86,512 | 19 | 7 | 168 | 43 | 5 | 2 | 104 | 49 | 296 | 101 |
| 86,513 | 19 | 7 | 162 | 46 | 5 | 2 | 101 | 49 | 287 | 104 |
| 86,514 | 19 | 7 | 146 | 46 | 4 | 2 | 93  | 49 | 262 | 104 |
| 86,515 | 18 | 7 | 124 | 43 | 4 | 2 | 80  | 49 | 226 | 101 |
| 86,516 | 18 | 7 | 118 | 43 | 5 | 2 | 77  | 49 | 218 | 101 |
| 86,517 | 18 | 7 | 119 | 44 | 5 | 2 | 78  | 49 | 220 | 102 |
| 86,518 | 18 | 5 | 114 | 44 | 5 | 2 | 88  | 47 | 225 | 98  |
| 86,519 | 18 | 6 | 116 | 44 | 5 | 2 | 93  | 48 | 232 | 100 |
| 86,520 | 18 | 6 | 114 | 43 | 5 | 2 | 92  | 47 | 229 | 98  |
| 86,521 | 18 | 5 | 120 | 41 | 5 | 2 | 92  | 45 | 235 | 93  |
| 86,522 | 19 | 5 | 134 | 41 | 5 | 2 | 101 | 45 | 259 | 93  |
| 86,523 | 18 | 5 | 135 | 41 | 5 | 2 | 97  | 45 | 255 | 93  |
| 86,524 | 17 | 5 | 131 | 39 | 5 | 2 | 94  | 41 | 247 | 87  |
| 86,525 | 17 | 5 | 131 | 39 | 5 | 2 | 91  | 41 | 244 | 87  |
| 86,526 | 18 | 4 | 132 | 33 | 5 | 1 | 91  | 37 | 246 | 75  |
| 86,527 | 18 | 4 | 132 | 33 | 5 | 1 | 91  | 37 | 246 | 75  |
| 86,528 | 18 | 4 | 132 | 28 | 5 | 1 | 91  | 34 | 246 | 67  |
| 86,529 | 18 | 4 | 132 | 28 | 5 | 1 | 91  | 34 | 246 | 67  |
| 86,530 | 18 | 4 | 127 | 27 | 4 | 1 | 90  | 35 | 239 | 67  |
| 86,531 | 16 | 3 | 120 | 27 | 4 | 1 | 89  | 34 | 229 | 65  |
| 86,532 | 16 | 3 | 120 | 26 | 4 | 1 | 89  | 32 | 229 | 62  |
| 86,533 | 16 | 3 | 124 | 27 | 4 | 1 | 88  | 32 | 232 | 63  |
| 86,534 | 15 | 3 | 117 | 29 | 4 | 1 | 80  | 31 | 216 | 64  |
| 86,535 | 14 | 3 | 108 | 29 | 4 | 1 | 72  | 31 | 198 | 64  |
| 86,536 | 14 | 3 | 107 | 29 | 4 | 1 | 71  | 31 | 196 | 64  |
| 86,537 | 16 | 3 | 105 | 29 | 4 | 1 | 69  | 31 | 194 | 64  |
| 86,538 | 16 | 3 | 103 | 29 | 4 | 1 | 69  | 31 | 192 | 64  |
| 86,539 | 15 | 3 | 105 | 30 | 5 | 1 | 68  | 30 | 193 | 64  |

|        |    |   |     |    |    |   |     |    |     |    |
|--------|----|---|-----|----|----|---|-----|----|-----|----|
| 86,540 | 23 | 3 | 157 | 30 | 8  | 1 | 96  | 31 | 284 | 65 |
| 86,541 | 28 | 3 | 196 | 30 | 10 | 1 | 123 | 31 | 357 | 65 |
| 86,542 | 28 | 3 | 198 | 29 | 10 | 1 | 124 | 31 | 360 | 64 |
| 86,543 | 27 | 3 | 201 | 28 | 11 | 1 | 124 | 31 | 363 | 63 |
| 86,544 | 27 | 3 | 201 | 28 | 11 | 1 | 124 | 31 | 363 | 63 |
| 86,545 | 26 | 3 | 195 | 28 | 11 | 1 | 122 | 31 | 354 | 63 |
| 86,546 | 22 | 3 | 196 | 28 | 11 | 0 | 122 | 31 | 351 | 62 |
| 86,547 | 22 | 3 | 196 | 28 | 11 | 0 | 122 | 32 | 351 | 63 |
| 86,548 | 22 | 3 | 196 | 26 | 11 | 0 | 122 | 34 | 351 | 63 |
| 86,549 | 22 | 3 | 195 | 26 | 11 | 0 | 122 | 33 | 350 | 62 |
| 86,550 | 21 | 3 | 193 | 30 | 11 | 0 | 122 | 35 | 347 | 68 |
| 86,551 | 21 | 4 | 193 | 30 | 11 | 0 | 119 | 35 | 344 | 69 |
| 86,552 | 21 | 4 | 188 | 30 | 10 | 0 | 112 | 35 | 331 | 69 |
| 86,553 | 21 | 4 | 184 | 31 | 10 | 0 | 112 | 35 | 327 | 70 |
| 86,554 | 21 | 4 | 183 | 32 | 10 | 0 | 112 | 35 | 326 | 71 |
| 86,555 | 22 | 4 | 183 | 32 | 10 | 0 | 110 | 35 | 325 | 71 |
| 86,556 | 22 | 4 | 183 | 32 | 10 | 0 | 109 | 35 | 324 | 71 |
| 86,557 | 22 | 4 | 183 | 32 | 10 | 0 | 110 | 35 | 325 | 71 |
| 86,558 | 22 | 4 | 183 | 32 | 10 | 0 | 110 | 35 | 325 | 71 |
| 86,559 | 22 | 4 | 183 | 32 | 10 | 0 | 110 | 35 | 325 | 71 |
| 86,560 | 22 | 3 | 183 | 20 | 10 | 0 | 110 | 16 | 325 | 39 |
| 86,561 | 22 | 3 | 184 | 24 | 10 | 0 | 110 | 18 | 326 | 45 |
| 86,562 | 22 | 3 | 181 | 24 | 10 | 0 | 110 | 15 | 323 | 42 |
| 86,563 | 22 | 2 | 179 | 19 | 10 | 0 | 107 | 11 | 318 | 32 |
| 86,564 | 22 | 2 | 179 | 20 | 10 | 0 | 107 | 12 | 318 | 34 |
| 86,565 | 20 | 2 | 167 | 19 | 10 | 0 | 106 | 12 | 303 | 33 |
| 86,566 | 20 | 2 | 165 | 20 | 10 | 0 | 102 | 12 | 297 | 34 |
| 86,567 | 20 | 2 | 164 | 20 | 9  | 0 | 101 | 12 | 294 | 34 |
| 86,568 | 20 | 2 | 162 | 22 | 9  | 0 | 100 | 14 | 291 | 38 |
| 86,569 | 20 | 2 | 156 | 22 | 9  | 0 | 86  | 14 | 271 | 38 |
| 86,570 | 20 | 1 | 154 | 23 | 9  | 0 | 82  | 14 | 265 | 38 |
| 86,571 | 20 | 1 | 154 | 23 | 9  | 0 | 82  | 14 | 265 | 38 |
| 86,572 | 20 | 1 | 148 | 24 | 9  | 0 | 81  | 15 | 258 | 40 |
| 86,573 | 19 | 1 | 134 | 24 | 9  | 0 | 72  | 15 | 234 | 40 |
| 86,574 | 19 | 1 | 129 | 24 | 9  | 0 | 68  | 15 | 225 | 40 |
| 86,575 | 19 | 1 | 128 | 30 | 9  | 0 | 66  | 16 | 222 | 47 |
| 86,576 | 19 | 1 | 127 | 30 | 9  | 0 | 66  | 16 | 221 | 47 |
| 86,577 | 18 | 1 | 128 | 30 | 9  | 0 | 66  | 16 | 221 | 47 |
| 86,578 | 19 | 1 | 128 | 30 | 9  | 0 | 66  | 16 | 222 | 47 |
| 86,579 | 19 | 1 | 127 | 30 | 9  | 0 | 66  | 15 | 221 | 46 |
| 86,580 | 19 | 1 | 127 | 31 | 9  | 0 | 66  | 15 | 221 | 47 |



|        |    |    |     |     |   |   |    |    |     |     |
|--------|----|----|-----|-----|---|---|----|----|-----|-----|
| 86,581 | 19 | 1  | 127 | 30  | 9 | 0 | 66 | 14 | 221 | 45  |
| 86,582 | 19 | 1  | 133 | 31  | 9 | 0 | 72 | 14 | 233 | 46  |
| 86,583 | 20 | 1  | 133 | 31  | 9 | 0 | 72 | 14 | 234 | 46  |
| 86,584 | 18 | 1  | 129 | 28  | 9 | 0 | 72 | 14 | 228 | 43  |
| 86,585 | 18 | 1  | 128 | 30  | 9 | 0 | 72 | 14 | 227 | 45  |
| 86,586 | 18 | 1  | 126 | 30  | 9 | 0 | 72 | 16 | 225 | 47  |
| 86,587 | 16 | 1  | 124 | 31  | 9 | 0 | 72 | 16 | 221 | 48  |
| 86,588 | 16 | 2  | 124 | 32  | 9 | 0 | 72 | 20 | 221 | 54  |
| 86,589 | 16 | 3  | 124 | 51  | 9 | 0 | 72 | 24 | 221 | 78  |
| 86,590 | 16 | 6  | 120 | 68  | 8 | 2 | 70 | 34 | 214 | 110 |
| 86,591 | 8  | 6  | 66  | 80  | 5 | 3 | 41 | 37 | 120 | 126 |
| 86,592 | 3  | 7  | 22  | 83  | 1 | 4 | 11 | 38 | 37  | 132 |
| 86,593 | 3  | 11 | 14  | 103 | 1 | 6 | 8  | 42 | 26  | 162 |
| 86,594 | 3  | 11 | 11  | 104 | 0 | 6 | 6  | 45 | 20  | 166 |
| 86,595 | 3  | 11 | 9   | 106 | 0 | 6 | 6  | 45 | 18  | 168 |
| 86,596 | 3  | 11 | 9   | 106 | 0 | 6 | 6  | 45 | 18  | 168 |
| 86,597 | 3  | 12 | 9   | 108 | 0 | 6 | 6  | 45 | 18  | 171 |
| 86,598 | 3  | 12 | 9   | 108 | 0 | 6 | 6  | 42 | 18  | 168 |
| 86,599 | 3  | 12 | 9   | 111 | 0 | 6 | 6  | 42 | 18  | 171 |
| 86,600 | 3  | 12 | 9   | 111 | 0 | 6 | 6  | 42 | 18  | 171 |
| 86,601 | 3  | 12 | 9   | 107 | 0 | 6 | 6  | 40 | 18  | 165 |
| 86,602 | 3  | 11 | 11  | 107 | 0 | 6 | 6  | 40 | 20  | 164 |
| 86,603 | 3  | 11 | 11  | 107 | 0 | 6 | 6  | 40 | 20  | 164 |
| 86,604 | 3  | 11 | 11  | 105 | 0 | 6 | 6  | 40 | 20  | 162 |
| 86,605 | 3  | 11 | 11  | 105 | 0 | 6 | 6  | 40 | 20  | 162 |
| 86,606 | 2  | 12 | 11  | 105 | 0 | 6 | 6  | 42 | 19  | 165 |
| 86,607 | 2  | 12 | 11  | 105 | 0 | 6 | 6  | 42 | 19  | 165 |
| 86,608 | 2  | 12 | 11  | 105 | 0 | 6 | 6  | 42 | 19  | 165 |
| 86,609 | 2  | 12 | 13  | 105 | 0 | 6 | 8  | 42 | 23  | 165 |
| 86,610 | 2  | 12 | 13  | 105 | 0 | 6 | 8  | 42 | 23  | 165 |
| 86,611 | 2  | 12 | 13  | 105 | 0 | 6 | 8  | 42 | 23  | 165 |
| 86,612 | 3  | 12 | 17  | 100 | 0 | 6 | 16 | 40 | 36  | 158 |
| 86,613 | 3  | 12 | 17  | 100 | 0 | 6 | 16 | 40 | 36  | 158 |
| 86,614 | 3  | 12 | 20  | 102 | 0 | 6 | 18 | 40 | 41  | 160 |
| 86,615 | 3  | 13 | 20  | 101 | 0 | 6 | 18 | 39 | 41  | 159 |
| 86,616 | 3  | 13 | 20  | 100 | 0 | 6 | 18 | 39 | 41  | 158 |
| 86,617 | 3  | 13 | 20  | 100 | 0 | 6 | 18 | 39 | 41  | 158 |
| 86,618 | 3  | 13 | 20  | 99  | 0 | 6 | 18 | 39 | 41  | 157 |
| 86,619 | 3  | 13 | 23  | 97  | 0 | 6 | 18 | 37 | 44  | 153 |
| 86,620 | 3  | 13 | 25  | 97  | 0 | 6 | 18 | 37 | 46  | 153 |
| 86,621 | 3  | 13 | 25  | 97  | 0 | 6 | 18 | 37 | 46  | 153 |

|        |   |    |    |    |   |   |    |    |    |     |
|--------|---|----|----|----|---|---|----|----|----|-----|
| 86,622 | 3 | 13 | 25 | 97 | 0 | 6 | 18 | 37 | 46 | 153 |
| 86,623 | 3 | 13 | 25 | 96 | 0 | 6 | 18 | 36 | 46 | 151 |
| 86,624 | 3 | 13 | 24 | 97 | 0 | 6 | 18 | 37 | 45 | 153 |
| 86,625 | 3 | 13 | 24 | 97 | 0 | 6 | 18 | 37 | 45 | 153 |
| 86,626 | 3 | 13 | 24 | 91 | 0 | 6 | 18 | 36 | 45 | 146 |
| 86,627 | 3 | 13 | 24 | 90 | 0 | 6 | 18 | 36 | 45 | 145 |
| 86,628 | 3 | 13 | 23 | 90 | 0 | 6 | 18 | 36 | 44 | 145 |
| 86,629 | 2 | 13 | 23 | 90 | 0 | 6 | 18 | 37 | 43 | 146 |
| 86,630 | 2 | 13 | 23 | 90 | 0 | 6 | 18 | 37 | 43 | 146 |
| 86,631 | 2 | 13 | 23 | 91 | 0 | 6 | 18 | 37 | 43 | 147 |
| 86,632 | 2 | 13 | 17 | 90 | 0 | 6 | 12 | 37 | 31 | 146 |
| 86,633 | 2 | 13 | 17 | 90 | 0 | 6 | 12 | 37 | 31 | 146 |
| 86,634 | 1 | 13 | 17 | 90 | 0 | 6 | 12 | 37 | 30 | 146 |
| 86,635 | 1 | 13 | 17 | 90 | 0 | 6 | 12 | 37 | 30 | 146 |
| 86,636 | 1 | 13 | 20 | 87 | 0 | 6 | 13 | 35 | 34 | 141 |
| 86,637 | 1 | 13 | 20 | 87 | 0 | 6 | 13 | 35 | 34 | 141 |
| 86,638 | 1 | 13 | 20 | 87 | 0 | 6 | 13 | 35 | 34 | 141 |
| 86,639 | 1 | 12 | 21 | 86 | 0 | 6 | 13 | 31 | 35 | 135 |
| 86,640 | 1 | 11 | 25 | 67 | 1 | 7 | 20 | 29 | 47 | 114 |
| 86,641 | 1 | 10 | 25 | 51 | 1 | 5 | 20 | 21 | 47 | 87  |
| 86,642 | 1 | 10 | 25 | 39 | 1 | 4 | 20 | 17 | 47 | 70  |
| 86,643 | 1 | 9  | 26 | 36 | 2 | 3 | 20 | 16 | 49 | 64  |
| 86,644 | 3 | 5  | 41 | 13 | 3 | 1 | 21 | 9  | 68 | 28  |
| 86,645 | 3 | 5  | 41 | 15 | 3 | 1 | 23 | 10 | 70 | 31  |
| 86,646 | 3 | 5  | 41 | 15 | 3 | 1 | 23 | 10 | 70 | 31  |
| 86,647 | 3 | 5  | 41 | 15 | 3 | 1 | 23 | 10 | 70 | 31  |
| 86,648 | 3 | 4  | 41 | 16 | 3 | 1 | 23 | 10 | 70 | 31  |
| 86,649 | 3 | 4  | 41 | 16 | 3 | 1 | 23 | 10 | 70 | 31  |
| 86,650 | 3 | 5  | 41 | 16 | 3 | 1 | 23 | 13 | 70 | 35  |
| 86,651 | 3 | 5  | 41 | 19 | 3 | 1 | 23 | 14 | 70 | 39  |
| 86,652 | 3 | 5  | 41 | 32 | 3 | 3 | 23 | 17 | 70 | 57  |
| 86,653 | 3 | 5  | 39 | 32 | 3 | 3 | 23 | 18 | 68 | 58  |
| 86,654 | 3 | 5  | 39 | 35 | 3 | 3 | 23 | 18 | 68 | 61  |
| 86,655 | 3 | 5  | 39 | 35 | 3 | 3 | 23 | 18 | 68 | 61  |
| 86,656 | 3 | 5  | 39 | 35 | 3 | 3 | 23 | 18 | 68 | 61  |
| 86,657 | 3 | 4  | 39 | 35 | 3 | 3 | 23 | 16 | 68 | 58  |
| 86,658 | 3 | 4  | 39 | 35 | 3 | 3 | 23 | 16 | 68 | 58  |
| 86,659 | 3 | 4  | 37 | 36 | 3 | 3 | 21 | 16 | 64 | 59  |
| 86,660 | 3 | 4  | 37 | 36 | 3 | 3 | 22 | 16 | 65 | 59  |
| 86,661 | 3 | 4  | 39 | 37 | 3 | 3 | 22 | 16 | 67 | 60  |
| 86,662 | 3 | 4  | 39 | 37 | 3 | 3 | 22 | 16 | 67 | 60  |

|        |   |   |    |    |   |   |    |    |    |     |
|--------|---|---|----|----|---|---|----|----|----|-----|
| 86,663 | 2 | 5 | 35 | 35 | 3 | 3 | 15 | 16 | 55 | 59  |
| 86,664 | 2 | 5 | 33 | 35 | 3 | 3 | 13 | 16 | 51 | 59  |
| 86,665 | 2 | 5 | 33 | 35 | 3 | 3 | 13 | 16 | 51 | 59  |
| 86,666 | 2 | 6 | 33 | 37 | 3 | 4 | 13 | 21 | 51 | 68  |
| 86,667 | 2 | 6 | 33 | 37 | 3 | 4 | 13 | 23 | 51 | 70  |
| 86,668 | 2 | 6 | 31 | 38 | 3 | 4 | 13 | 23 | 49 | 71  |
| 86,669 | 2 | 6 | 31 | 39 | 3 | 4 | 13 | 23 | 49 | 72  |
| 86,670 | 3 | 6 | 29 | 40 | 3 | 4 | 14 | 24 | 49 | 74  |
| 86,671 | 3 | 6 | 29 | 40 | 3 | 4 | 14 | 24 | 49 | 74  |
| 86,672 | 3 | 6 | 30 | 39 | 3 | 4 | 15 | 23 | 51 | 72  |
| 86,673 | 3 | 8 | 30 | 39 | 3 | 4 | 15 | 26 | 51 | 77  |
| 86,674 | 3 | 9 | 30 | 39 | 3 | 4 | 15 | 26 | 51 | 78  |
| 86,675 | 3 | 9 | 30 | 38 | 3 | 4 | 15 | 25 | 51 | 76  |
| 86,676 | 3 | 9 | 30 | 39 | 3 | 4 | 15 | 25 | 51 | 77  |
| 86,677 | 3 | 9 | 30 | 40 | 3 | 4 | 15 | 25 | 51 | 78  |
| 86,678 | 3 | 9 | 30 | 40 | 3 | 4 | 15 | 25 | 51 | 78  |
| 86,679 | 3 | 9 | 30 | 40 | 3 | 4 | 15 | 25 | 51 | 78  |
| 86,680 | 3 | 9 | 32 | 40 | 3 | 4 | 15 | 24 | 53 | 77  |
| 86,681 | 4 | 9 | 32 | 38 | 3 | 4 | 15 | 24 | 54 | 75  |
| 86,682 | 4 | 9 | 32 | 38 | 3 | 4 | 15 | 24 | 54 | 75  |
| 86,683 | 4 | 9 | 32 | 38 | 3 | 4 | 15 | 24 | 54 | 75  |
| 86,684 | 4 | 9 | 32 | 38 | 3 | 4 | 15 | 24 | 54 | 75  |
| 86,685 | 4 | 9 | 29 | 38 | 3 | 4 | 14 | 24 | 50 | 75  |
| 86,686 | 4 | 9 | 30 | 38 | 3 | 4 | 14 | 24 | 51 | 75  |
| 86,687 | 4 | 9 | 30 | 40 | 3 | 4 | 14 | 24 | 51 | 77  |
| 86,688 | 4 | 9 | 32 | 40 | 3 | 4 | 15 | 24 | 54 | 77  |
| 86,689 | 4 | 9 | 31 | 40 | 3 | 4 | 15 | 25 | 53 | 78  |
| 86,690 | 4 | 9 | 27 | 41 | 2 | 4 | 8  | 25 | 41 | 79  |
| 86,691 | 4 | 9 | 28 | 45 | 2 | 3 | 9  | 26 | 43 | 83  |
| 86,692 | 4 | 7 | 28 | 46 | 2 | 3 | 9  | 27 | 43 | 83  |
| 86,693 | 5 | 7 | 27 | 49 | 2 | 4 | 9  | 31 | 43 | 91  |
| 86,694 | 5 | 8 | 27 | 65 | 1 | 7 | 9  | 44 | 42 | 124 |
| 86,695 | 3 | 8 | 12 | 67 | 0 | 7 | 8  | 45 | 23 | 127 |
| 86,696 | 3 | 8 | 13 | 67 | 0 | 7 | 6  | 45 | 22 | 127 |
| 86,697 | 3 | 8 | 13 | 70 | 0 | 7 | 6  | 46 | 22 | 131 |
| 86,698 | 3 | 8 | 13 | 70 | 0 | 7 | 6  | 47 | 22 | 132 |
| 86,699 | 3 | 8 | 18 | 70 | 0 | 7 | 7  | 50 | 28 | 135 |
| 86,700 | 3 | 8 | 18 | 70 | 0 | 7 | 7  | 50 | 28 | 135 |
| 86,701 | 3 | 7 | 20 | 69 | 1 | 8 | 8  | 48 | 32 | 132 |
| 86,702 | 3 | 7 | 20 | 66 | 1 | 8 | 8  | 47 | 32 | 128 |
| 86,703 | 3 | 7 | 25 | 54 | 1 | 6 | 8  | 43 | 37 | 110 |

|        |   |   |    |    |   |   |    |    |    |     |
|--------|---|---|----|----|---|---|----|----|----|-----|
| 86,704 | 3 | 7 | 25 | 51 | 1 | 6 | 8  | 44 | 37 | 108 |
| 86,705 | 3 | 7 | 25 | 51 | 1 | 6 | 8  | 44 | 37 | 108 |
| 86,706 | 5 | 8 | 25 | 54 | 1 | 6 | 8  | 45 | 39 | 113 |
| 86,707 | 5 | 8 | 25 | 54 | 1 | 6 | 8  | 45 | 39 | 113 |
| 86,708 | 5 | 8 | 26 | 55 | 1 | 6 | 10 | 45 | 42 | 114 |
| 86,709 | 5 | 8 | 26 | 56 | 1 | 6 | 10 | 46 | 42 | 116 |
| 86,710 | 5 | 8 | 26 | 56 | 1 | 6 | 11 | 46 | 43 | 116 |
| 86,711 | 5 | 8 | 26 | 57 | 1 | 6 | 11 | 46 | 43 | 117 |
| 86,712 | 6 | 8 | 23 | 56 | 1 | 6 | 11 | 46 | 41 | 116 |
| 86,713 | 6 | 6 | 23 | 56 | 1 | 6 | 11 | 46 | 41 | 114 |
| 86,714 | 6 | 6 | 23 | 56 | 1 | 6 | 10 | 46 | 40 | 114 |
| 86,715 | 6 | 6 | 22 | 57 | 1 | 6 | 10 | 47 | 39 | 116 |
| 86,716 | 6 | 7 | 22 | 57 | 1 | 6 | 10 | 47 | 39 | 117 |
| 86,717 | 6 | 7 | 21 | 55 | 1 | 5 | 10 | 42 | 38 | 109 |
| 86,718 | 6 | 7 | 21 | 54 | 1 | 5 | 10 | 40 | 38 | 106 |
| 86,719 | 6 | 7 | 21 | 53 | 1 | 5 | 9  | 40 | 37 | 105 |
| 86,720 | 6 | 7 | 21 | 52 | 1 | 5 | 9  | 39 | 37 | 103 |
| 86,721 | 5 | 7 | 21 | 52 | 1 | 5 | 9  | 39 | 36 | 103 |
| 86,722 | 5 | 7 | 20 | 52 | 1 | 5 | 8  | 39 | 34 | 103 |
| 86,723 | 5 | 7 | 20 | 52 | 1 | 5 | 8  | 39 | 34 | 103 |
| 86,724 | 5 | 5 | 20 | 52 | 1 | 5 | 8  | 36 | 34 | 98  |
| 86,725 | 5 | 4 | 36 | 54 | 1 | 6 | 12 | 36 | 54 | 100 |
| 86,726 | 5 | 4 | 37 | 55 | 1 | 6 | 13 | 37 | 56 | 102 |
| 86,727 | 5 | 6 | 37 | 72 | 1 | 6 | 15 | 50 | 58 | 134 |
| 86,728 | 5 | 6 | 37 | 76 | 1 | 6 | 16 | 52 | 59 | 140 |
| 86,729 | 6 | 6 | 60 | 76 | 1 | 6 | 27 | 52 | 94 | 140 |
| 86,730 | 6 | 6 | 58 | 76 | 1 | 6 | 31 | 55 | 96 | 143 |
| 86,731 | 5 | 6 | 58 | 78 | 1 | 6 | 31 | 58 | 95 | 148 |
| 86,732 | 5 | 6 | 60 | 84 | 1 | 6 | 32 | 63 | 98 | 159 |
| 86,733 | 5 | 6 | 60 | 85 | 1 | 6 | 32 | 63 | 98 | 160 |
| 86,734 | 5 | 6 | 61 | 85 | 1 | 6 | 32 | 63 | 99 | 160 |
| 86,735 | 5 | 6 | 61 | 85 | 1 | 6 | 32 | 63 | 99 | 160 |
| 86,736 | 5 | 6 | 61 | 86 | 1 | 6 | 32 | 68 | 99 | 166 |
| 86,737 | 5 | 6 | 60 | 86 | 1 | 6 | 32 | 68 | 98 | 166 |
| 86,738 | 5 | 6 | 61 | 87 | 1 | 6 | 32 | 68 | 99 | 167 |
| 86,739 | 5 | 6 | 59 | 87 | 1 | 6 | 31 | 68 | 96 | 167 |
| 86,740 | 5 | 6 | 59 | 87 | 1 | 6 | 31 | 67 | 96 | 166 |
| 86,741 | 5 | 6 | 59 | 87 | 1 | 6 | 30 | 67 | 95 | 166 |
| 86,742 | 6 | 6 | 58 | 80 | 1 | 6 | 30 | 61 | 95 | 153 |
| 86,743 | 6 | 6 | 58 | 80 | 1 | 6 | 30 | 61 | 95 | 153 |
| 86,744 | 5 | 6 | 58 | 77 | 1 | 5 | 30 | 57 | 94 | 145 |

|        |   |   |    |    |   |   |    |    |    |     |
|--------|---|---|----|----|---|---|----|----|----|-----|
| 86,745 | 5 | 6 | 58 | 59 | 1 | 2 | 30 | 43 | 94 | 110 |
| 86,746 | 5 | 6 | 58 | 59 | 1 | 2 | 30 | 43 | 94 | 110 |
| 86,747 | 5 | 6 | 57 | 58 | 1 | 2 | 30 | 42 | 93 | 108 |
| 86,748 | 5 | 6 | 56 | 55 | 1 | 2 | 30 | 41 | 92 | 104 |
| 86,749 | 5 | 6 | 54 | 55 | 1 | 2 | 29 | 40 | 89 | 103 |
| 86,750 | 5 | 6 | 52 | 54 | 1 | 2 | 29 | 37 | 87 | 99  |
| 86,751 | 5 | 6 | 52 | 57 | 1 | 2 | 29 | 37 | 87 | 102 |
| 86,752 | 5 | 6 | 50 | 58 | 0 | 1 | 28 | 37 | 83 | 102 |
| 86,753 | 5 | 6 | 49 | 60 | 0 | 1 | 28 | 38 | 82 | 105 |
| 86,754 | 5 | 6 | 45 | 59 | 0 | 1 | 28 | 37 | 78 | 103 |
| 86,755 | 5 | 6 | 45 | 59 | 0 | 1 | 28 | 38 | 78 | 104 |
| 86,756 | 4 | 6 | 45 | 60 | 0 | 1 | 28 | 39 | 77 | 106 |
| 86,757 | 3 | 6 | 45 | 71 | 0 | 1 | 28 | 43 | 76 | 121 |
| 86,758 | 3 | 6 | 45 | 71 | 0 | 1 | 28 | 43 | 76 | 121 |
| 86,759 | 3 | 6 | 44 | 70 | 0 | 1 | 26 | 43 | 73 | 120 |
| 86,760 | 3 | 6 | 44 | 68 | 0 | 1 | 26 | 42 | 73 | 117 |
| 86,761 | 3 | 7 | 45 | 68 | 0 | 1 | 24 | 42 | 72 | 118 |
| 86,762 | 3 | 7 | 45 | 67 | 0 | 1 | 24 | 42 | 72 | 117 |
| 86,763 | 2 | 7 | 45 | 67 | 0 | 1 | 24 | 42 | 71 | 117 |
| 86,764 | 2 | 7 | 45 | 67 | 0 | 1 | 24 | 42 | 71 | 117 |
| 86,765 | 3 | 7 | 46 | 67 | 0 | 1 | 24 | 42 | 73 | 117 |
| 86,766 | 3 | 5 | 46 | 66 | 0 | 1 | 24 | 41 | 73 | 113 |
| 86,767 | 3 | 5 | 46 | 67 | 0 | 1 | 24 | 41 | 73 | 114 |
| 86,768 | 3 | 5 | 46 | 67 | 0 | 1 | 24 | 41 | 73 | 114 |
| 86,769 | 3 | 5 | 46 | 67 | 0 | 1 | 24 | 41 | 73 | 114 |
| 86,770 | 3 | 5 | 46 | 67 | 0 | 1 | 24 | 41 | 73 | 114 |
| 86,771 | 3 | 5 | 46 | 67 | 0 | 1 | 24 | 41 | 73 | 114 |
| 86,772 | 3 | 5 | 47 | 67 | 0 | 1 | 24 | 41 | 74 | 114 |
| 86,773 | 3 | 5 | 47 | 67 | 0 | 1 | 24 | 41 | 74 | 114 |
| 86,774 | 3 | 5 | 47 | 67 | 0 | 1 | 24 | 41 | 74 | 114 |
| 86,775 | 3 | 5 | 33 | 65 | 0 | 0 | 20 | 41 | 56 | 111 |
| 86,776 | 3 | 5 | 32 | 65 | 0 | 0 | 19 | 41 | 54 | 111 |
| 86,777 | 4 | 5 | 39 | 64 | 0 | 0 | 21 | 40 | 64 | 109 |
| 86,778 | 4 | 3 | 41 | 46 | 0 | 0 | 26 | 27 | 71 | 76  |
| 86,779 | 4 | 3 | 41 | 41 | 0 | 0 | 25 | 25 | 70 | 69  |
| 86,780 | 3 | 3 | 18 | 41 | 0 | 0 | 14 | 25 | 35 | 69  |
| 86,781 | 3 | 3 | 23 | 41 | 0 | 0 | 15 | 22 | 41 | 66  |
| 86,782 | 3 | 3 | 22 | 33 | 0 | 0 | 14 | 14 | 39 | 50  |
| 86,783 | 3 | 3 | 21 | 33 | 0 | 0 | 14 | 14 | 38 | 50  |
| 86,784 | 3 | 3 | 20 | 32 | 0 | 0 | 14 | 14 | 37 | 49  |
| 86,785 | 3 | 3 | 20 | 32 | 0 | 0 | 14 | 14 | 37 | 49  |

|        |   |   |    |    |   |   |    |    |    |    |
|--------|---|---|----|----|---|---|----|----|----|----|
| 86,786 | 3 | 3 | 20 | 32 | 0 | 0 | 14 | 14 | 37 | 49 |
| 86,787 | 3 | 3 | 20 | 31 | 0 | 0 | 14 | 9  | 37 | 43 |
| 86,788 | 3 | 3 | 20 | 28 | 0 | 0 | 14 | 9  | 37 | 40 |
| 86,789 | 3 | 3 | 20 | 28 | 0 | 0 | 14 | 9  | 37 | 40 |
| 86,790 | 3 | 3 | 20 | 27 | 0 | 0 | 15 | 9  | 38 | 39 |
| 86,791 | 3 | 3 | 21 | 27 | 0 | 0 | 15 | 9  | 39 | 39 |
| 86,792 | 3 | 3 | 26 | 27 | 0 | 1 | 15 | 9  | 44 | 40 |
| 86,793 | 2 | 3 | 27 | 27 | 0 | 1 | 16 | 9  | 45 | 40 |
| 86,794 | 2 | 3 | 27 | 27 | 0 | 1 | 16 | 9  | 45 | 40 |
| 86,795 | 2 | 3 | 29 | 27 | 0 | 2 | 17 | 9  | 48 | 41 |
| 86,796 | 2 | 2 | 29 | 27 | 0 | 2 | 17 | 9  | 48 | 40 |
| 86,797 | 2 | 2 | 29 | 27 | 0 | 3 | 17 | 10 | 48 | 42 |
| 86,798 | 2 | 2 | 29 | 26 | 0 | 3 | 17 | 10 | 48 | 41 |
| 86,799 | 2 | 2 | 29 | 26 | 0 | 3 | 17 | 10 | 48 | 41 |
| 86,800 | 2 | 2 | 29 | 26 | 0 | 3 | 17 | 10 | 48 | 41 |
| 86,801 | 2 | 2 | 29 | 24 | 0 | 3 | 17 | 10 | 48 | 39 |
| 86,802 | 2 | 2 | 31 | 21 | 0 | 3 | 19 | 10 | 52 | 36 |
| 86,803 | 2 | 2 | 31 | 16 | 0 | 3 | 20 | 8  | 53 | 29 |
| 86,804 | 2 | 2 | 31 | 16 | 0 | 3 | 21 | 8  | 54 | 29 |
| 86,805 | 2 | 2 | 32 | 16 | 0 | 3 | 21 | 7  | 55 | 28 |
| 86,806 | 2 | 2 | 32 | 16 | 0 | 3 | 21 | 7  | 55 | 28 |
| 86,807 | 3 | 1 | 37 | 1  | 0 | 3 | 23 | 1  | 63 | 6  |
| 86,808 | 3 | 1 | 38 | 1  | 0 | 3 | 24 | 1  | 65 | 6  |
| 86,809 | 5 | 1 | 40 | 1  | 0 | 3 | 26 | 2  | 71 | 7  |
| 86,810 | 5 | 1 | 41 | 1  | 0 | 3 | 28 | 2  | 74 | 7  |
| 86,811 | 5 | 1 | 42 | 1  | 0 | 4 | 28 | 2  | 75 | 8  |
| 86,812 | 5 | 0 | 42 | 1  | 0 | 4 | 28 | 2  | 75 | 7  |
| 86,813 | 5 | 0 | 42 | 1  | 0 | 4 | 28 | 2  | 75 | 7  |
| 86,814 | 5 | 0 | 42 | 2  | 0 | 4 | 28 | 2  | 75 | 8  |
| 86,815 | 4 | 0 | 42 | 3  | 0 | 4 | 28 | 2  | 74 | 9  |
| 86,816 | 4 | 0 | 41 | 3  | 0 | 4 | 28 | 2  | 73 | 9  |
| 86,817 | 4 | 0 | 41 | 3  | 0 | 4 | 28 | 2  | 73 | 9  |
| 86,818 | 4 | 0 | 41 | 2  | 0 | 4 | 28 | 2  | 73 | 8  |
| 86,819 | 4 | 0 | 41 | 2  | 0 | 4 | 28 | 2  | 73 | 8  |
| 86,820 | 4 | 0 | 41 | 2  | 0 | 4 | 28 | 2  | 73 | 8  |
| 86,821 | 4 | 0 | 41 | 2  | 0 | 4 | 28 | 2  | 73 | 8  |
| 86,822 | 4 | 0 | 41 | 3  | 0 | 5 | 28 | 4  | 73 | 12 |
| 86,823 | 4 | 0 | 40 | 3  | 0 | 5 | 28 | 4  | 72 | 12 |
| 86,824 | 4 | 0 | 40 | 5  | 0 | 5 | 28 | 5  | 72 | 15 |
| 86,825 | 4 | 0 | 40 | 50 | 0 | 7 | 28 | 15 | 72 | 72 |
| 86,826 | 4 | 0 | 38 | 61 | 0 | 7 | 28 | 20 | 70 | 88 |

|        |   |   |    |     |   |   |    |    |    |     |
|--------|---|---|----|-----|---|---|----|----|----|-----|
| 86,827 | 3 | 0 | 36 | 71  | 0 | 9 | 25 | 21 | 64 | 101 |
| 86,828 | 3 | 0 | 32 | 77  | 0 | 9 | 25 | 21 | 60 | 107 |
| 86,829 | 3 | 0 | 30 | 77  | 0 | 9 | 19 | 21 | 52 | 107 |
| 86,830 | 3 | 0 | 27 | 79  | 0 | 9 | 14 | 21 | 44 | 109 |
| 86,831 | 3 | 0 | 25 | 79  | 0 | 9 | 14 | 21 | 42 | 109 |
| 86,832 | 3 | 0 | 25 | 79  | 0 | 9 | 14 | 21 | 42 | 109 |
| 86,833 | 3 | 0 | 25 | 79  | 0 | 9 | 14 | 21 | 42 | 109 |
| 86,834 | 3 | 0 | 25 | 79  | 0 | 9 | 14 | 21 | 42 | 109 |
| 86,835 | 3 | 0 | 25 | 79  | 0 | 9 | 14 | 21 | 42 | 109 |
| 86,836 | 3 | 0 | 25 | 79  | 0 | 9 | 14 | 21 | 42 | 109 |
| 86,837 | 3 | 0 | 26 | 79  | 0 | 9 | 14 | 22 | 43 | 110 |
| 86,838 | 3 | 0 | 26 | 80  | 0 | 9 | 14 | 22 | 43 | 111 |
| 86,839 | 3 | 0 | 25 | 80  | 0 | 9 | 14 | 23 | 42 | 112 |
| 86,840 | 3 | 0 | 25 | 80  | 0 | 9 | 14 | 23 | 42 | 112 |
| 86,841 | 3 | 0 | 25 | 82  | 0 | 9 | 13 | 23 | 41 | 114 |
| 86,842 | 3 | 0 | 24 | 82  | 0 | 9 | 13 | 23 | 40 | 114 |
| 86,843 | 3 | 0 | 19 | 83  | 0 | 8 | 13 | 25 | 35 | 116 |
| 86,844 | 3 | 0 | 18 | 83  | 0 | 8 | 12 | 25 | 33 | 116 |
| 86,845 | 3 | 0 | 16 | 83  | 0 | 7 | 14 | 25 | 33 | 115 |
| 86,846 | 3 | 0 | 16 | 83  | 0 | 7 | 14 | 26 | 33 | 116 |
| 86,847 | 3 | 0 | 17 | 83  | 0 | 7 | 14 | 26 | 34 | 116 |
| 86,848 | 3 | 0 | 17 | 83  | 0 | 6 | 14 | 25 | 34 | 114 |
| 86,849 | 3 | 0 | 17 | 83  | 0 | 6 | 14 | 25 | 34 | 114 |
| 86,850 | 3 | 0 | 17 | 83  | 0 | 6 | 14 | 25 | 34 | 114 |
| 86,851 | 3 | 0 | 17 | 83  | 0 | 6 | 14 | 25 | 34 | 114 |
| 86,852 | 3 | 0 | 15 | 85  | 0 | 6 | 13 | 25 | 31 | 116 |
| 86,853 | 3 | 0 | 15 | 85  | 0 | 6 | 13 | 25 | 31 | 116 |
| 86,854 | 3 | 0 | 15 | 87  | 0 | 6 | 12 | 25 | 30 | 118 |
| 86,855 | 3 | 2 | 16 | 87  | 0 | 6 | 11 | 25 | 30 | 120 |
| 86,856 | 3 | 2 | 15 | 88  | 0 | 6 | 11 | 25 | 29 | 121 |
| 86,857 | 3 | 2 | 13 | 92  | 0 | 8 | 10 | 28 | 26 | 130 |
| 86,858 | 2 | 2 | 11 | 92  | 0 | 8 | 9  | 30 | 22 | 132 |
| 86,859 | 2 | 2 | 10 | 92  | 0 | 8 | 8  | 30 | 20 | 132 |
| 86,860 | 0 | 2 | 8  | 93  | 0 | 8 | 6  | 31 | 14 | 134 |
| 86,861 | 0 | 2 | 7  | 94  | 0 | 8 | 4  | 31 | 11 | 135 |
| 86,862 | 0 | 2 | 9  | 94  | 1 | 7 | 7  | 32 | 17 | 135 |
| 86,863 | 0 | 2 | 8  | 95  | 1 | 7 | 7  | 32 | 16 | 136 |
| 86,864 | 0 | 2 | 8  | 96  | 1 | 7 | 7  | 32 | 16 | 137 |
| 86,865 | 0 | 2 | 8  | 96  | 1 | 7 | 8  | 33 | 17 | 138 |
| 86,866 | 0 | 2 | 8  | 100 | 1 | 7 | 8  | 33 | 17 | 142 |
| 86,867 | 0 | 2 | 8  | 100 | 1 | 7 | 8  | 32 | 17 | 141 |

|        |   |    |    |     |   |   |    |    |     |     |
|--------|---|----|----|-----|---|---|----|----|-----|-----|
| 86,868 | 0 | 2  | 10 | 100 | 1 | 7 | 9  | 32 | 20  | 141 |
| 86,869 | 0 | 2  | 10 | 100 | 1 | 7 | 9  | 32 | 20  | 141 |
| 86,870 | 0 | 2  | 11 | 100 | 1 | 7 | 10 | 32 | 22  | 141 |
| 86,871 | 0 | 2  | 11 | 100 | 1 | 7 | 10 | 32 | 22  | 141 |
| 86,872 | 0 | 2  | 11 | 100 | 1 | 7 | 10 | 32 | 22  | 141 |
| 86,873 | 2 | 2  | 20 | 99  | 1 | 6 | 13 | 30 | 36  | 137 |
| 86,874 | 2 | 2  | 20 | 99  | 1 | 6 | 13 | 30 | 36  | 137 |
| 86,875 | 2 | 2  | 20 | 97  | 1 | 6 | 13 | 30 | 36  | 135 |
| 86,876 | 2 | 3  | 40 | 41  | 2 | 4 | 16 | 17 | 60  | 65  |
| 86,877 | 2 | 5  | 40 | 41  | 2 | 4 | 16 | 18 | 60  | 68  |
| 86,878 | 2 | 5  | 39 | 31  | 2 | 2 | 16 | 17 | 59  | 55  |
| 86,879 | 2 | 6  | 44 | 25  | 2 | 2 | 16 | 17 | 64  | 50  |
| 86,880 | 2 | 6  | 44 | 23  | 2 | 2 | 17 | 17 | 65  | 48  |
| 86,881 | 2 | 6  | 44 | 25  | 2 | 2 | 17 | 17 | 65  | 50  |
| 86,882 | 2 | 6  | 44 | 26  | 2 | 2 | 17 | 17 | 65  | 51  |
| 86,883 | 2 | 6  | 44 | 26  | 2 | 2 | 17 | 17 | 65  | 51  |
| 86,884 | 2 | 6  | 44 | 26  | 2 | 2 | 17 | 17 | 65  | 51  |
| 86,885 | 2 | 6  | 44 | 26  | 2 | 2 | 17 | 17 | 65  | 51  |
| 86,886 | 2 | 6  | 46 | 26  | 2 | 2 | 18 | 17 | 68  | 51  |
| 86,887 | 2 | 6  | 46 | 26  | 2 | 2 | 18 | 17 | 68  | 51  |
| 86,888 | 2 | 6  | 48 | 26  | 2 | 2 | 19 | 16 | 71  | 50  |
| 86,889 | 2 | 6  | 50 | 25  | 2 | 2 | 20 | 17 | 74  | 50  |
| 86,890 | 2 | 8  | 50 | 25  | 2 | 2 | 21 | 17 | 75  | 52  |
| 86,891 | 2 | 8  | 51 | 25  | 2 | 2 | 22 | 17 | 77  | 52  |
| 86,892 | 2 | 8  | 51 | 23  | 2 | 2 | 22 | 17 | 77  | 50  |
| 86,893 | 2 | 8  | 51 | 23  | 2 | 2 | 22 | 18 | 77  | 51  |
| 86,894 | 2 | 9  | 51 | 22  | 2 | 2 | 20 | 16 | 75  | 49  |
| 86,895 | 2 | 10 | 51 | 22  | 2 | 2 | 19 | 16 | 74  | 50  |
| 86,896 | 2 | 11 | 51 | 22  | 2 | 2 | 19 | 15 | 74  | 50  |
| 86,897 | 2 | 11 | 51 | 23  | 2 | 2 | 19 | 15 | 74  | 51  |
| 86,898 | 3 | 11 | 50 | 24  | 2 | 2 | 19 | 18 | 74  | 55  |
| 86,899 | 3 | 11 | 50 | 24  | 2 | 2 | 19 | 18 | 74  | 55  |
| 86,900 | 3 | 11 | 51 | 26  | 2 | 2 | 19 | 19 | 75  | 58  |
| 86,901 | 3 | 11 | 55 | 26  | 2 | 2 | 20 | 19 | 80  | 58  |
| 86,902 | 3 | 11 | 55 | 24  | 2 | 2 | 19 | 19 | 79  | 56  |
| 86,903 | 3 | 11 | 55 | 24  | 2 | 2 | 19 | 19 | 79  | 56  |
| 86,904 | 3 | 11 | 55 | 24  | 2 | 2 | 19 | 19 | 79  | 56  |
| 86,905 | 3 | 11 | 54 | 22  | 2 | 2 | 20 | 19 | 79  | 54  |
| 86,906 | 3 | 9  | 54 | 22  | 2 | 2 | 20 | 19 | 79  | 52  |
| 86,907 | 3 | 9  | 54 | 21  | 2 | 2 | 20 | 19 | 79  | 51  |
| 86,908 | 3 | 9  | 68 | 17  | 3 | 0 | 29 | 16 | 103 | 42  |



|        |    |    |     |    |   |   |    |    |     |    |
|--------|----|----|-----|----|---|---|----|----|-----|----|
| 86,909 | 4  | 9  | 68  | 17 | 3 | 0 | 29 | 14 | 104 | 40 |
| 86,910 | 4  | 9  | 69  | 15 | 3 | 0 | 29 | 12 | 105 | 36 |
| 86,911 | 4  | 9  | 77  | 15 | 3 | 0 | 32 | 12 | 116 | 36 |
| 86,912 | 4  | 9  | 84  | 15 | 2 | 0 | 31 | 12 | 121 | 36 |
| 86,913 | 4  | 9  | 82  | 14 | 2 | 0 | 32 | 11 | 120 | 34 |
| 86,914 | 4  | 9  | 82  | 14 | 2 | 0 | 32 | 11 | 120 | 34 |
| 86,915 | 4  | 9  | 82  | 12 | 2 | 0 | 32 | 11 | 120 | 32 |
| 86,916 | 4  | 9  | 82  | 7  | 2 | 0 | 31 | 10 | 119 | 26 |
| 86,917 | 4  | 9  | 82  | 7  | 2 | 0 | 31 | 10 | 119 | 26 |
| 86,918 | 4  | 9  | 80  | 7  | 2 | 0 | 30 | 10 | 116 | 26 |
| 86,919 | 4  | 9  | 80  | 7  | 2 | 0 | 30 | 10 | 116 | 26 |
| 86,920 | 4  | 10 | 79  | 7  | 2 | 0 | 29 | 10 | 114 | 27 |
| 86,921 | 4  | 10 | 79  | 7  | 2 | 0 | 29 | 10 | 114 | 27 |
| 86,922 | 4  | 10 | 79  | 9  | 2 | 0 | 29 | 10 | 114 | 29 |
| 86,923 | 2  | 10 | 78  | 9  | 2 | 0 | 29 | 10 | 111 | 29 |
| 86,924 | 2  | 10 | 70  | 9  | 2 | 0 | 26 | 11 | 100 | 30 |
| 86,925 | 2  | 11 | 67  | 13 | 2 | 0 | 25 | 14 | 96  | 38 |
| 86,926 | 2  | 11 | 53  | 17 | 2 | 2 | 23 | 15 | 80  | 45 |
| 86,927 | 2  | 10 | 53  | 22 | 2 | 2 | 23 | 17 | 80  | 51 |
| 86,928 | 2  | 8  | 52  | 22 | 2 | 2 | 23 | 16 | 79  | 48 |
| 86,929 | 2  | 8  | 48  | 22 | 2 | 2 | 23 | 16 | 75  | 48 |
| 86,930 | 2  | 9  | 48  | 25 | 2 | 3 | 22 | 19 | 74  | 56 |
| 86,931 | 2  | 9  | 48  | 25 | 2 | 3 | 22 | 19 | 74  | 56 |
| 86,932 | 4  | 9  | 54  | 24 | 2 | 3 | 26 | 19 | 86  | 55 |
| 86,933 | 4  | 9  | 54  | 26 | 2 | 3 | 26 | 30 | 86  | 68 |
| 86,934 | 4  | 9  | 54  | 26 | 2 | 3 | 26 | 30 | 86  | 68 |
| 86,935 | 7  | 9  | 94  | 35 | 2 | 3 | 34 | 35 | 137 | 82 |
| 86,936 | 8  | 9  | 111 | 36 | 5 | 3 | 36 | 37 | 160 | 85 |
| 86,937 | 8  | 9  | 110 | 37 | 5 | 3 | 36 | 37 | 159 | 86 |
| 86,938 | 9  | 9  | 108 | 37 | 5 | 3 | 36 | 37 | 158 | 86 |
| 86,939 | 9  | 9  | 106 | 37 | 5 | 3 | 35 | 36 | 155 | 85 |
| 86,940 | 9  | 7  | 112 | 37 | 5 | 3 | 35 | 35 | 161 | 82 |
| 86,941 | 9  | 7  | 111 | 37 | 5 | 3 | 34 | 35 | 159 | 82 |
| 86,942 | 12 | 7  | 111 | 37 | 5 | 3 | 34 | 35 | 162 | 82 |
| 86,943 | 12 | 7  | 111 | 37 | 5 | 3 | 34 | 35 | 162 | 82 |
| 86,944 | 12 | 7  | 131 | 37 | 8 | 3 | 34 | 34 | 185 | 81 |
| 86,945 | 12 | 5  | 143 | 37 | 8 | 3 | 34 | 34 | 197 | 79 |
| 86,946 | 12 | 5  | 143 | 38 | 8 | 3 | 34 | 34 | 197 | 80 |
| 86,947 | 12 | 4  | 143 | 38 | 8 | 3 | 34 | 34 | 197 | 79 |
| 86,948 | 14 | 4  | 144 | 36 | 8 | 3 | 34 | 31 | 200 | 74 |
| 86,949 | 13 | 4  | 144 | 36 | 8 | 3 | 34 | 31 | 199 | 74 |

|        |    |   |     |    |   |   |    |    |     |    |
|--------|----|---|-----|----|---|---|----|----|-----|----|
| 86,950 | 13 | 4 | 143 | 34 | 8 | 3 | 34 | 30 | 198 | 71 |
| 86,951 | 13 | 4 | 143 | 34 | 8 | 3 | 34 | 30 | 198 | 71 |
| 86,952 | 13 | 4 | 139 | 34 | 8 | 3 | 33 | 31 | 193 | 72 |
| 86,953 | 13 | 4 | 139 | 34 | 8 | 3 | 33 | 31 | 193 | 72 |
| 86,954 | 13 | 4 | 140 | 35 | 8 | 3 | 33 | 31 | 194 | 73 |
| 86,955 | 13 | 5 | 141 | 35 | 8 | 3 | 33 | 31 | 195 | 74 |
| 86,956 | 13 | 5 | 141 | 35 | 8 | 3 | 33 | 31 | 195 | 74 |
| 86,957 | 13 | 5 | 130 | 35 | 7 | 3 | 24 | 31 | 174 | 74 |
| 86,958 | 13 | 5 | 127 | 36 | 7 | 3 | 24 | 31 | 171 | 75 |
| 86,959 | 13 | 5 | 126 | 36 | 7 | 3 | 24 | 31 | 170 | 75 |
| 86,960 | 12 | 5 | 128 | 36 | 7 | 3 | 25 | 31 | 172 | 75 |
| 86,961 | 12 | 5 | 127 | 36 | 7 | 4 | 26 | 31 | 172 | 76 |
| 86,962 | 12 | 5 | 121 | 36 | 7 | 4 | 23 | 32 | 163 | 77 |
| 86,963 | 12 | 5 | 115 | 36 | 7 | 4 | 22 | 32 | 156 | 77 |
| 86,964 | 12 | 5 | 116 | 36 | 7 | 4 | 21 | 32 | 156 | 77 |
| 86,965 | 12 | 5 | 116 | 36 | 7 | 4 | 21 | 32 | 156 | 77 |
| 86,966 | 12 | 5 | 116 | 36 | 7 | 4 | 21 | 32 | 156 | 77 |
| 86,967 | 12 | 5 | 116 | 36 | 7 | 4 | 21 | 32 | 156 | 77 |
| 86,968 | 12 | 5 | 116 | 36 | 7 | 4 | 21 | 32 | 156 | 77 |
| 86,969 | 12 | 5 | 116 | 36 | 7 | 4 | 21 | 32 | 156 | 77 |
| 86,970 | 12 | 5 | 116 | 36 | 7 | 4 | 21 | 32 | 156 | 77 |
| 86,971 | 12 | 4 | 116 | 36 | 7 | 4 | 21 | 32 | 156 | 76 |
| 86,972 | 12 | 4 | 116 | 36 | 7 | 4 | 21 | 32 | 156 | 76 |
| 86,973 | 12 | 5 | 116 | 35 | 7 | 4 | 21 | 32 | 156 | 76 |
| 86,974 | 12 | 5 | 116 | 35 | 7 | 4 | 21 | 31 | 156 | 75 |
| 86,975 | 12 | 4 | 118 | 31 | 7 | 4 | 21 | 30 | 158 | 69 |
| 86,976 | 12 | 4 | 118 | 31 | 6 | 4 | 21 | 30 | 157 | 69 |
| 86,977 | 12 | 4 | 116 | 27 | 6 | 2 | 21 | 29 | 155 | 62 |
| 86,978 | 12 | 4 | 116 | 23 | 6 | 2 | 21 | 27 | 155 | 56 |
| 86,979 | 12 | 4 | 116 | 23 | 6 | 2 | 21 | 27 | 155 | 56 |
| 86,980 | 12 | 4 | 116 | 24 | 6 | 2 | 21 | 29 | 155 | 59 |
| 86,981 | 12 | 2 | 116 | 21 | 6 | 1 | 21 | 28 | 155 | 52 |
| 86,982 | 10 | 2 | 110 | 22 | 6 | 2 | 17 | 28 | 143 | 54 |
| 86,983 | 10 | 2 | 110 | 21 | 6 | 3 | 16 | 29 | 142 | 55 |
| 86,984 | 7  | 2 | 92  | 18 | 6 | 3 | 12 | 19 | 117 | 42 |
| 86,985 | 7  | 2 | 77  | 9  | 6 | 3 | 12 | 14 | 102 | 28 |
| 86,986 | 7  | 2 | 70  | 9  | 6 | 3 | 9  | 14 | 92  | 28 |
| 86,987 | 6  | 2 | 53  | 7  | 3 | 3 | 8  | 12 | 70  | 24 |
| 86,988 | 6  | 2 | 52  | 7  | 3 | 3 | 7  | 12 | 68  | 24 |
| 86,989 | 5  | 2 | 51  | 7  | 3 | 3 | 6  | 12 | 65  | 24 |
| 86,990 | 5  | 2 | 51  | 7  | 3 | 4 | 6  | 13 | 65  | 26 |

|        |    |   |     |    |   |   |    |    |     |    |
|--------|----|---|-----|----|---|---|----|----|-----|----|
| 86,991 | 5  | 2 | 45  | 7  | 3 | 4 | 5  | 13 | 58  | 26 |
| 86,992 | 5  | 2 | 45  | 8  | 3 | 4 | 5  | 13 | 58  | 27 |
| 86,993 | 2  | 2 | 45  | 9  | 3 | 4 | 5  | 14 | 55  | 29 |
| 86,994 | 2  | 3 | 26  | 10 | 0 | 4 | 5  | 16 | 33  | 33 |
| 86,995 | 2  | 3 | 24  | 10 | 0 | 4 | 5  | 16 | 31  | 33 |
| 86,996 | 2  | 3 | 15  | 9  | 0 | 4 | 5  | 16 | 22  | 32 |
| 86,997 | 0  | 4 | 14  | 9  | 0 | 4 | 5  | 16 | 19  | 33 |
| 86,998 | 0  | 4 | 14  | 9  | 0 | 4 | 5  | 16 | 19  | 33 |
| 86,999 | 1  | 4 | 16  | 9  | 0 | 4 | 6  | 16 | 23  | 33 |
| 87,000 | 1  | 4 | 19  | 9  | 0 | 4 | 7  | 16 | 27  | 33 |
| 87,001 | 1  | 4 | 19  | 9  | 1 | 4 | 7  | 16 | 28  | 33 |
| 87,002 | 1  | 4 | 19  | 9  | 1 | 4 | 7  | 16 | 28  | 33 |
| 87,003 | 2  | 4 | 23  | 9  | 1 | 4 | 11 | 15 | 37  | 32 |
| 87,004 | 2  | 4 | 23  | 9  | 1 | 4 | 11 | 15 | 37  | 32 |
| 87,005 | 2  | 4 | 25  | 10 | 1 | 4 | 11 | 15 | 39  | 33 |
| 87,006 | 3  | 3 | 41  | 10 | 3 | 4 | 13 | 15 | 60  | 32 |
| 87,007 | 3  | 3 | 45  | 10 | 3 | 4 | 13 | 15 | 64  | 32 |
| 87,008 | 3  | 3 | 47  | 9  | 3 | 4 | 13 | 15 | 66  | 31 |
| 87,009 | 3  | 3 | 47  | 9  | 3 | 4 | 13 | 15 | 66  | 31 |
| 87,010 | 3  | 3 | 45  | 9  | 3 | 4 | 12 | 15 | 63  | 31 |
| 87,011 | 5  | 3 | 78  | 9  | 5 | 4 | 24 | 16 | 112 | 32 |
| 87,012 | 5  | 3 | 78  | 11 | 5 | 3 | 23 | 16 | 111 | 33 |
| 87,013 | 11 | 3 | 110 | 11 | 5 | 3 | 30 | 17 | 156 | 34 |
| 87,014 | 11 | 3 | 109 | 12 | 5 | 3 | 29 | 18 | 154 | 36 |
| 87,015 | 11 | 3 | 107 | 12 | 5 | 3 | 29 | 18 | 152 | 36 |
| 87,016 | 12 | 6 | 109 | 22 | 5 | 4 | 32 | 24 | 158 | 56 |
| 87,017 | 12 | 6 | 109 | 22 | 5 | 5 | 32 | 24 | 158 | 57 |
| 87,018 | 12 | 6 | 109 | 22 | 5 | 5 | 32 | 24 | 158 | 57 |
| 87,019 | 12 | 6 | 109 | 22 | 5 | 5 | 32 | 25 | 158 | 58 |
| 87,020 | 12 | 6 | 109 | 24 | 5 | 5 | 32 | 25 | 158 | 60 |
| 87,021 | 12 | 6 | 109 | 24 | 5 | 5 | 32 | 25 | 158 | 60 |
| 87,022 | 12 | 6 | 110 | 24 | 5 | 5 | 32 | 25 | 159 | 60 |
| 87,023 | 12 | 7 | 110 | 24 | 5 | 5 | 32 | 25 | 159 | 61 |
| 87,024 | 12 | 6 | 110 | 23 | 5 | 5 | 32 | 23 | 159 | 57 |
| 87,025 | 12 | 7 | 110 | 23 | 5 | 5 | 32 | 24 | 159 | 59 |
| 87,026 | 12 | 7 | 108 | 23 | 5 | 5 | 32 | 24 | 157 | 59 |
| 87,027 | 12 | 7 | 107 | 23 | 5 | 5 | 32 | 24 | 156 | 59 |
| 87,028 | 12 | 7 | 107 | 22 | 5 | 5 | 32 | 22 | 156 | 56 |
| 87,029 | 12 | 7 | 107 | 22 | 5 | 5 | 32 | 22 | 156 | 56 |
| 87,030 | 12 | 7 | 107 | 22 | 5 | 5 | 32 | 22 | 156 | 56 |
| 87,031 | 12 | 7 | 108 | 21 | 5 | 5 | 32 | 20 | 157 | 53 |

|        |    |   |     |    |   |   |    |    |     |    |
|--------|----|---|-----|----|---|---|----|----|-----|----|
| 87,032 | 12 | 7 | 108 | 20 | 5 | 4 | 32 | 18 | 157 | 49 |
| 87,033 | 12 | 7 | 108 | 20 | 5 | 4 | 32 | 18 | 157 | 49 |
| 87,034 | 12 | 7 | 110 | 20 | 5 | 3 | 32 | 17 | 159 | 47 |
| 87,035 | 12 | 7 | 110 | 20 | 5 | 3 | 32 | 16 | 159 | 46 |
| 87,036 | 12 | 7 | 110 | 20 | 5 | 3 | 32 | 16 | 159 | 46 |
| 87,037 | 12 | 7 | 112 | 20 | 5 | 3 | 32 | 16 | 161 | 46 |
| 87,038 | 13 | 9 | 112 | 20 | 5 | 3 | 33 | 16 | 163 | 48 |
| 87,039 | 13 | 9 | 115 | 20 | 5 | 3 | 35 | 16 | 168 | 48 |
| 87,040 | 16 | 9 | 123 | 20 | 5 | 2 | 42 | 15 | 186 | 46 |
| 87,041 | 16 | 9 | 123 | 20 | 5 | 2 | 42 | 15 | 186 | 46 |
| 87,042 | 16 | 9 | 124 | 20 | 5 | 2 | 43 | 15 | 188 | 46 |
| 87,043 | 16 | 9 | 126 | 19 | 5 | 2 | 44 | 15 | 191 | 45 |
| 87,044 | 16 | 8 | 127 | 18 | 5 | 2 | 44 | 12 | 192 | 40 |
| 87,045 | 16 | 8 | 126 | 18 | 5 | 2 | 44 | 12 | 191 | 40 |
| 87,046 | 16 | 8 | 126 | 18 | 5 | 2 | 44 | 12 | 191 | 40 |
| 87,047 | 16 | 8 | 125 | 18 | 5 | 2 | 44 | 13 | 190 | 41 |
| 87,048 | 16 | 7 | 125 | 18 | 5 | 2 | 44 | 14 | 190 | 41 |
| 87,049 | 16 | 7 | 125 | 18 | 5 | 2 | 44 | 14 | 190 | 41 |
| 87,050 | 15 | 7 | 123 | 18 | 5 | 2 | 43 | 14 | 186 | 41 |
| 87,051 | 15 | 7 | 120 | 18 | 5 | 2 | 42 | 16 | 182 | 43 |
| 87,052 | 15 | 7 | 116 | 21 | 4 | 2 | 40 | 18 | 175 | 48 |
| 87,053 | 15 | 7 | 116 | 25 | 4 | 4 | 40 | 25 | 175 | 61 |
| 87,054 | 14 | 7 | 116 | 25 | 4 | 4 | 38 | 25 | 172 | 61 |
| 87,055 | 14 | 7 | 115 | 24 | 4 | 5 | 38 | 25 | 171 | 61 |
| 87,056 | 14 | 7 | 113 | 23 | 4 | 5 | 38 | 25 | 169 | 60 |
| 87,057 | 13 | 7 | 96  | 23 | 2 | 5 | 36 | 25 | 147 | 60 |
| 87,058 | 13 | 7 | 92  | 23 | 2 | 5 | 35 | 25 | 142 | 60 |
| 87,059 | 13 | 7 | 90  | 23 | 2 | 5 | 35 | 27 | 140 | 62 |
| 87,060 | 11 | 7 | 61  | 23 | 0 | 5 | 26 | 27 | 98  | 62 |
| 87,061 | 11 | 7 | 61  | 23 | 0 | 5 | 26 | 28 | 98  | 63 |
| 87,062 | 11 | 7 | 57  | 23 | 0 | 5 | 23 | 27 | 91  | 62 |
| 87,063 | 11 | 7 | 55  | 21 | 0 | 5 | 21 | 27 | 87  | 60 |
| 87,064 | 5  | 7 | 23  | 20 | 0 | 5 | 16 | 25 | 44  | 57 |
| 87,065 | 4  | 7 | 21  | 21 | 0 | 5 | 13 | 25 | 38  | 58 |
| 87,066 | 4  | 7 | 21  | 21 | 0 | 5 | 13 | 25 | 38  | 58 |
| 87,067 | 4  | 4 | 21  | 11 | 0 | 4 | 13 | 19 | 38  | 38 |
| 87,068 | 4  | 4 | 21  | 11 | 0 | 3 | 14 | 19 | 39  | 37 |
| 87,069 | 4  | 4 | 21  | 11 | 0 | 3 | 14 | 19 | 39  | 37 |
| 87,070 | 4  | 4 | 21  | 11 | 0 | 3 | 15 | 18 | 40  | 36 |
| 87,071 | 4  | 4 | 21  | 9  | 0 | 3 | 15 | 18 | 40  | 34 |
| 87,072 | 4  | 4 | 20  | 10 | 0 | 3 | 15 | 18 | 39  | 35 |

|        |    |   |    |    |   |   |    |    |     |    |
|--------|----|---|----|----|---|---|----|----|-----|----|
| 87,073 | 8  | 4 | 32 | 10 | 0 | 3 | 28 | 18 | 68  | 35 |
| 87,074 | 8  | 3 | 38 | 10 | 0 | 3 | 29 | 18 | 75  | 34 |
| 87,075 | 9  | 2 | 57 | 10 | 2 | 3 | 38 | 17 | 106 | 32 |
| 87,076 | 9  | 2 | 64 | 10 | 2 | 3 | 49 | 17 | 124 | 32 |
| 87,077 | 10 | 2 | 66 | 10 | 2 | 3 | 49 | 17 | 127 | 32 |
| 87,078 | 10 | 2 | 66 | 10 | 2 | 3 | 49 | 17 | 127 | 32 |
| 87,079 | 10 | 2 | 69 | 10 | 2 | 3 | 49 | 17 | 130 | 32 |
| 87,080 | 12 | 2 | 71 | 10 | 2 | 3 | 50 | 17 | 135 | 32 |
| 87,081 | 14 | 2 | 71 | 10 | 2 | 3 | 54 | 17 | 141 | 32 |
| 87,082 | 14 | 2 | 70 | 11 | 2 | 3 | 54 | 17 | 140 | 33 |
| 87,083 | 14 | 2 | 70 | 11 | 2 | 3 | 55 | 18 | 141 | 34 |
| 87,084 | 14 | 2 | 70 | 11 | 2 | 3 | 55 | 18 | 141 | 34 |
| 87,085 | 14 | 2 | 68 | 11 | 2 | 3 | 55 | 18 | 139 | 34 |
| 87,086 | 14 | 2 | 68 | 11 | 2 | 3 | 55 | 18 | 139 | 34 |
| 87,087 | 14 | 2 | 68 | 11 | 2 | 3 | 55 | 18 | 139 | 34 |
| 87,088 | 14 | 0 | 66 | 11 | 2 | 3 | 55 | 18 | 137 | 32 |
| 87,089 | 13 | 0 | 66 | 11 | 2 | 3 | 53 | 18 | 134 | 32 |
| 87,090 | 13 | 0 | 63 | 11 | 2 | 3 | 51 | 18 | 129 | 32 |
| 87,091 | 10 | 0 | 55 | 11 | 2 | 3 | 44 | 18 | 111 | 32 |
| 87,092 | 10 | 0 | 54 | 11 | 2 | 3 | 44 | 18 | 110 | 32 |
| 87,093 | 10 | 0 | 54 | 11 | 2 | 3 | 43 | 18 | 109 | 32 |
| 87,094 | 10 | 0 | 52 | 11 | 2 | 3 | 42 | 18 | 106 | 32 |
| 87,095 | 11 | 0 | 53 | 10 | 2 | 3 | 42 | 18 | 108 | 31 |
| 87,096 | 11 | 0 | 53 | 10 | 2 | 3 | 42 | 18 | 108 | 31 |
| 87,097 | 11 | 0 | 53 | 10 | 2 | 3 | 43 | 18 | 109 | 31 |
| 87,098 | 11 | 0 | 53 | 10 | 2 | 3 | 43 | 17 | 109 | 30 |
| 87,099 | 11 | 0 | 53 | 10 | 2 | 3 | 43 | 16 | 109 | 29 |
| 87,100 | 11 | 0 | 53 | 7  | 2 | 3 | 43 | 12 | 109 | 22 |
| 87,101 | 11 | 0 | 53 | 7  | 2 | 3 | 43 | 12 | 109 | 22 |
| 87,102 | 11 | 0 | 53 | 3  | 2 | 0 | 44 | 5  | 110 | 8  |
| 87,103 | 11 | 0 | 55 | 4  | 2 | 0 | 44 | 5  | 112 | 9  |
| 87,104 | 12 | 0 | 55 | 4  | 2 | 0 | 46 | 5  | 115 | 9  |
| 87,105 | 12 | 0 | 55 | 4  | 2 | 0 | 46 | 5  | 115 | 9  |
| 87,106 | 13 | 0 | 58 | 5  | 2 | 0 | 47 | 6  | 120 | 11 |
| 87,107 | 13 | 1 | 58 | 5  | 2 | 2 | 47 | 7  | 120 | 15 |
| 87,108 | 13 | 1 | 58 | 6  | 2 | 2 | 47 | 7  | 120 | 16 |
| 87,109 | 13 | 1 | 61 | 8  | 2 | 2 | 47 | 7  | 123 | 18 |
| 87,110 | 13 | 1 | 61 | 8  | 2 | 2 | 47 | 5  | 123 | 16 |
| 87,111 | 13 | 1 | 68 | 10 | 2 | 3 | 47 | 7  | 130 | 21 |
| 87,112 | 13 | 1 | 68 | 11 | 2 | 3 | 47 | 6  | 130 | 21 |
| 87,113 | 13 | 1 | 68 | 11 | 2 | 3 | 47 | 6  | 130 | 21 |

|        |    |   |    |    |   |   |    |    |     |    |
|--------|----|---|----|----|---|---|----|----|-----|----|
| 87,114 | 13 | 1 | 69 | 11 | 2 | 3 | 47 | 7  | 131 | 22 |
| 87,115 | 13 | 1 | 69 | 11 | 2 | 3 | 48 | 6  | 132 | 21 |
| 87,116 | 13 | 1 | 69 | 10 | 2 | 3 | 47 | 6  | 131 | 20 |
| 87,117 | 14 | 1 | 69 | 10 | 2 | 3 | 47 | 6  | 132 | 20 |
| 87,118 | 14 | 1 | 69 | 10 | 2 | 3 | 47 | 6  | 132 | 20 |
| 87,119 | 14 | 1 | 69 | 11 | 2 | 3 | 46 | 6  | 131 | 21 |
| 87,120 | 14 | 1 | 69 | 12 | 2 | 3 | 46 | 6  | 131 | 22 |
| 87,121 | 14 | 1 | 69 | 12 | 2 | 3 | 46 | 6  | 131 | 22 |
| 87,122 | 14 | 1 | 69 | 13 | 2 | 3 | 45 | 6  | 130 | 23 |
| 87,123 | 12 | 3 | 69 | 17 | 2 | 3 | 44 | 7  | 127 | 30 |
| 87,124 | 10 | 3 | 57 | 17 | 2 | 3 | 33 | 7  | 102 | 30 |
| 87,125 | 10 | 3 | 51 | 17 | 2 | 3 | 32 | 8  | 95  | 31 |
| 87,126 | 9  | 3 | 32 | 19 | 0 | 3 | 23 | 8  | 64  | 33 |
| 87,127 | 9  | 3 | 25 | 19 | 0 | 3 | 12 | 10 | 46  | 35 |
| 87,128 | 8  | 3 | 23 | 20 | 0 | 3 | 12 | 10 | 43  | 36 |
| 87,129 | 8  | 3 | 20 | 20 | 0 | 3 | 13 | 10 | 41  | 36 |
| 87,130 | 6  | 3 | 18 | 22 | 0 | 3 | 12 | 10 | 36  | 38 |
| 87,131 | 4  | 3 | 19 | 22 | 0 | 3 | 8  | 10 | 31  | 38 |
| 87,132 | 4  | 3 | 19 | 21 | 0 | 3 | 8  | 11 | 31  | 38 |
| 87,133 | 4  | 3 | 19 | 23 | 0 | 3 | 8  | 12 | 31  | 41 |
| 87,134 | 4  | 3 | 19 | 23 | 0 | 3 | 9  | 11 | 32  | 40 |
| 87,135 | 5  | 3 | 21 | 23 | 0 | 3 | 15 | 11 | 41  | 40 |
| 87,136 | 5  | 3 | 21 | 23 | 0 | 3 | 15 | 11 | 41  | 40 |
| 87,137 | 5  | 3 | 21 | 23 | 0 | 3 | 15 | 11 | 41  | 40 |
| 87,138 | 5  | 3 | 21 | 23 | 0 | 3 | 15 | 11 | 41  | 40 |
| 87,139 | 5  | 3 | 21 | 23 | 0 | 3 | 15 | 11 | 41  | 40 |
| 87,140 | 5  | 3 | 21 | 23 | 0 | 3 | 15 | 11 | 41  | 40 |
| 87,141 | 5  | 3 | 21 | 23 | 0 | 3 | 15 | 11 | 41  | 40 |
| 87,142 | 5  | 3 | 31 | 23 | 0 | 3 | 17 | 11 | 53  | 40 |
| 87,143 | 6  | 3 | 36 | 23 | 1 | 3 | 20 | 11 | 63  | 40 |
| 87,144 | 6  | 3 | 35 | 23 | 1 | 3 | 21 | 11 | 63  | 40 |
| 87,145 | 5  | 3 | 34 | 23 | 1 | 3 | 21 | 11 | 61  | 40 |
| 87,146 | 5  | 3 | 34 | 23 | 1 | 3 | 21 | 11 | 61  | 40 |
| 87,147 | 5  | 3 | 36 | 23 | 1 | 3 | 20 | 11 | 62  | 40 |
| 87,148 | 5  | 3 | 36 | 23 | 1 | 3 | 20 | 11 | 62  | 40 |
| 87,149 | 5  | 3 | 36 | 23 | 1 | 3 | 20 | 11 | 62  | 40 |
| 87,150 | 5  | 3 | 36 | 23 | 1 | 3 | 20 | 11 | 62  | 40 |
| 87,151 | 5  | 3 | 35 | 23 | 1 | 3 | 20 | 11 | 61  | 40 |
| 87,152 | 5  | 3 | 36 | 24 | 1 | 3 | 20 | 11 | 62  | 41 |
| 87,153 | 6  | 3 | 36 | 24 | 1 | 3 | 20 | 13 | 63  | 43 |
| 87,154 | 6  | 3 | 35 | 24 | 1 | 3 | 24 | 14 | 66  | 44 |

|        |   |   |    |    |   |   |    |    |     |     |
|--------|---|---|----|----|---|---|----|----|-----|-----|
| 87,155 | 5 | 3 | 41 | 25 | 1 | 4 | 24 | 15 | 71  | 47  |
| 87,156 | 4 | 3 | 44 | 25 | 1 | 4 | 26 | 18 | 75  | 50  |
| 87,157 | 4 | 4 | 44 | 28 | 1 | 5 | 26 | 25 | 75  | 62  |
| 87,158 | 4 | 3 | 41 | 45 | 1 | 5 | 26 | 36 | 72  | 89  |
| 87,159 | 4 | 3 | 34 | 44 | 1 | 5 | 26 | 36 | 65  | 88  |
| 87,160 | 4 | 5 | 34 | 43 | 1 | 5 | 26 | 38 | 65  | 91  |
| 87,161 | 4 | 5 | 34 | 43 | 1 | 5 | 26 | 38 | 65  | 91  |
| 87,162 | 4 | 6 | 37 | 40 | 1 | 4 | 29 | 36 | 71  | 86  |
| 87,163 | 5 | 6 | 41 | 43 | 2 | 4 | 33 | 36 | 81  | 89  |
| 87,164 | 7 | 7 | 56 | 43 | 3 | 4 | 41 | 36 | 107 | 90  |
| 87,165 | 7 | 7 | 58 | 43 | 3 | 4 | 44 | 35 | 112 | 89  |
| 87,166 | 7 | 7 | 61 | 43 | 3 | 4 | 48 | 35 | 119 | 89  |
| 87,167 | 6 | 7 | 62 | 43 | 3 | 4 | 48 | 35 | 119 | 89  |
| 87,168 | 6 | 7 | 62 | 43 | 3 | 4 | 48 | 35 | 119 | 89  |
| 87,169 | 6 | 7 | 62 | 43 | 3 | 4 | 49 | 35 | 120 | 89  |
| 87,170 | 6 | 7 | 62 | 42 | 3 | 4 | 49 | 35 | 120 | 88  |
| 87,171 | 6 | 7 | 62 | 41 | 3 | 4 | 49 | 35 | 120 | 87  |
| 87,172 | 6 | 7 | 62 | 41 | 4 | 4 | 49 | 35 | 121 | 87  |
| 87,173 | 6 | 7 | 62 | 39 | 4 | 4 | 50 | 35 | 122 | 85  |
| 87,174 | 6 | 6 | 62 | 36 | 4 | 4 | 50 | 36 | 122 | 82  |
| 87,175 | 6 | 6 | 62 | 36 | 4 | 4 | 50 | 36 | 122 | 82  |
| 87,176 | 6 | 6 | 62 | 36 | 4 | 4 | 50 | 35 | 122 | 81  |
| 87,177 | 6 | 6 | 63 | 34 | 4 | 4 | 50 | 35 | 123 | 79  |
| 87,178 | 6 | 7 | 63 | 34 | 4 | 4 | 50 | 34 | 123 | 79  |
| 87,179 | 6 | 7 | 64 | 36 | 4 | 4 | 52 | 35 | 126 | 82  |
| 87,180 | 6 | 7 | 64 | 36 | 4 | 4 | 51 | 36 | 125 | 83  |
| 87,181 | 6 | 7 | 64 | 34 | 4 | 4 | 51 | 36 | 125 | 81  |
| 87,182 | 6 | 7 | 63 | 34 | 4 | 4 | 51 | 39 | 124 | 84  |
| 87,183 | 6 | 7 | 64 | 34 | 4 | 4 | 51 | 39 | 125 | 84  |
| 87,184 | 6 | 7 | 64 | 33 | 4 | 4 | 49 | 40 | 123 | 84  |
| 87,185 | 6 | 7 | 64 | 34 | 4 | 4 | 49 | 40 | 123 | 85  |
| 87,186 | 5 | 7 | 63 | 34 | 4 | 4 | 44 | 40 | 116 | 85  |
| 87,187 | 5 | 7 | 63 | 35 | 4 | 4 | 45 | 40 | 117 | 86  |
| 87,188 | 5 | 7 | 63 | 42 | 4 | 5 | 45 | 46 | 117 | 100 |
| 87,189 | 5 | 7 | 59 | 42 | 4 | 5 | 43 | 46 | 111 | 100 |
| 87,190 | 5 | 7 | 59 | 43 | 4 | 5 | 43 | 46 | 111 | 101 |
| 87,191 | 5 | 8 | 53 | 47 | 4 | 5 | 43 | 46 | 105 | 106 |
| 87,192 | 5 | 8 | 54 | 48 | 4 | 5 | 46 | 46 | 109 | 107 |
| 87,193 | 5 | 8 | 50 | 48 | 4 | 5 | 43 | 47 | 102 | 108 |
| 87,194 | 4 | 8 | 49 | 48 | 3 | 5 | 43 | 47 | 99  | 108 |
| 87,195 | 4 | 8 | 50 | 48 | 3 | 5 | 42 | 50 | 99  | 111 |

|        |   |    |    |    |   |   |    |    |     |     |
|--------|---|----|----|----|---|---|----|----|-----|-----|
| 87,196 | 4 | 8  | 51 | 50 | 4 | 5 | 43 | 51 | 102 | 114 |
| 87,197 | 4 | 8  | 60 | 50 | 4 | 5 | 49 | 51 | 117 | 114 |
| 87,198 | 4 | 9  | 58 | 50 | 4 | 5 | 49 | 51 | 115 | 115 |
| 87,199 | 4 | 9  | 58 | 50 | 4 | 5 | 49 | 51 | 115 | 115 |
| 87,200 | 4 | 9  | 60 | 51 | 4 | 5 | 50 | 51 | 118 | 116 |
| 87,201 | 4 | 9  | 60 | 51 | 4 | 5 | 50 | 51 | 118 | 116 |
| 87,202 | 4 | 9  | 61 | 51 | 4 | 5 | 50 | 51 | 119 | 116 |
| 87,203 | 4 | 9  | 62 | 51 | 4 | 5 | 49 | 51 | 119 | 116 |
| 87,204 | 4 | 9  | 64 | 51 | 4 | 5 | 46 | 49 | 118 | 114 |
| 87,205 | 4 | 9  | 62 | 49 | 4 | 4 | 51 | 47 | 121 | 109 |
| 87,206 | 4 | 9  | 72 | 50 | 4 | 4 | 55 | 47 | 135 | 110 |
| 87,207 | 4 | 9  | 69 | 50 | 4 | 4 | 52 | 43 | 129 | 106 |
| 87,208 | 4 | 8  | 69 | 46 | 4 | 3 | 52 | 36 | 129 | 93  |
| 87,209 | 4 | 8  | 71 | 29 | 4 | 1 | 53 | 26 | 132 | 64  |
| 87,210 | 4 | 8  | 71 | 31 | 4 | 1 | 53 | 26 | 132 | 66  |
| 87,211 | 4 | 7  | 76 | 66 | 5 | 4 | 55 | 44 | 140 | 121 |
| 87,212 | 4 | 11 | 77 | 68 | 5 | 5 | 54 | 49 | 140 | 133 |
| 87,213 | 4 | 10 | 83 | 68 | 5 | 5 | 55 | 49 | 147 | 132 |
| 87,214 | 3 | 10 | 81 | 65 | 5 | 5 | 52 | 49 | 141 | 129 |
| 87,215 | 3 | 9  | 69 | 65 | 4 | 5 | 48 | 49 | 124 | 128 |
| 87,216 | 3 | 9  | 68 | 70 | 4 | 5 | 44 | 49 | 119 | 133 |
| 87,217 | 3 | 10 | 65 | 70 | 4 | 5 | 40 | 49 | 112 | 134 |
| 87,218 | 3 | 10 | 65 | 70 | 4 | 5 | 41 | 49 | 113 | 134 |
| 87,219 | 3 | 10 | 65 | 70 | 4 | 5 | 41 | 49 | 113 | 134 |
| 87,220 | 3 | 10 | 65 | 70 | 4 | 5 | 41 | 49 | 113 | 134 |
| 87,221 | 3 | 10 | 65 | 70 | 4 | 5 | 41 | 49 | 113 | 134 |
| 87,222 | 3 | 10 | 65 | 70 | 3 | 5 | 41 | 49 | 112 | 134 |
| 87,223 | 3 | 10 | 65 | 70 | 3 | 5 | 41 | 49 | 112 | 134 |
| 87,224 | 3 | 10 | 65 | 70 | 3 | 5 | 40 | 49 | 111 | 134 |
| 87,225 | 3 | 9  | 65 | 71 | 3 | 6 | 40 | 47 | 111 | 133 |
| 87,226 | 3 | 9  | 65 | 73 | 3 | 6 | 40 | 49 | 111 | 137 |
| 87,227 | 3 | 9  | 64 | 73 | 3 | 6 | 40 | 51 | 110 | 139 |
| 87,228 | 3 | 9  | 64 | 73 | 3 | 6 | 40 | 51 | 110 | 139 |
| 87,229 | 3 | 8  | 64 | 73 | 3 | 6 | 39 | 52 | 109 | 139 |
| 87,230 | 3 | 9  | 63 | 70 | 3 | 6 | 38 | 50 | 107 | 135 |
| 87,231 | 3 | 9  | 63 | 70 | 3 | 6 | 38 | 50 | 107 | 135 |
| 87,232 | 3 | 9  | 63 | 70 | 3 | 6 | 38 | 50 | 107 | 135 |
| 87,233 | 3 | 9  | 64 | 70 | 3 | 6 | 38 | 47 | 108 | 132 |
| 87,234 | 3 | 9  | 63 | 69 | 3 | 6 | 38 | 44 | 107 | 128 |
| 87,235 | 3 | 9  | 63 | 69 | 3 | 6 | 38 | 44 | 107 | 128 |
| 87,236 | 3 | 9  | 63 | 68 | 3 | 6 | 38 | 45 | 107 | 128 |



|        |   |   |    |    |   |   |    |    |     |     |
|--------|---|---|----|----|---|---|----|----|-----|-----|
| 87,237 | 3 | 9 | 62 | 69 | 3 | 6 | 39 | 45 | 107 | 129 |
| 87,238 | 3 | 9 | 63 | 61 | 4 | 5 | 38 | 39 | 108 | 114 |
| 87,239 | 3 | 9 | 63 | 61 | 4 | 5 | 38 | 39 | 108 | 114 |
| 87,240 | 3 | 9 | 63 | 61 | 4 | 5 | 38 | 39 | 108 | 114 |
| 87,241 | 3 | 8 | 63 | 57 | 4 | 5 | 38 | 39 | 108 | 109 |
| 87,242 | 3 | 8 | 63 | 57 | 4 | 5 | 38 | 39 | 108 | 109 |
| 87,243 | 3 | 8 | 62 | 59 | 4 | 5 | 35 | 43 | 104 | 115 |
| 87,244 | 3 | 8 | 62 | 59 | 4 | 5 | 35 | 42 | 104 | 114 |
| 87,245 | 3 | 8 | 68 | 59 | 4 | 5 | 43 | 42 | 118 | 114 |
| 87,246 | 3 | 7 | 69 | 58 | 4 | 5 | 45 | 38 | 121 | 108 |
| 87,247 | 3 | 7 | 68 | 58 | 3 | 5 | 44 | 38 | 118 | 108 |
| 87,248 | 3 | 7 | 59 | 58 | 3 | 5 | 38 | 38 | 103 | 108 |
| 87,249 | 3 | 8 | 60 | 58 | 3 | 5 | 38 | 38 | 104 | 109 |
| 87,250 | 3 | 8 | 58 | 57 | 3 | 5 | 37 | 38 | 101 | 108 |
| 87,251 | 3 | 8 | 58 | 58 | 3 | 5 | 37 | 40 | 101 | 111 |
| 87,252 | 3 | 8 | 58 | 57 | 3 | 5 | 38 | 41 | 102 | 111 |
| 87,253 | 3 | 8 | 58 | 57 | 3 | 5 | 39 | 41 | 103 | 111 |
| 87,254 | 2 | 8 | 57 | 58 | 3 | 5 | 42 | 41 | 104 | 112 |
| 87,255 | 2 | 8 | 55 | 58 | 3 | 6 | 41 | 41 | 101 | 113 |
| 87,256 | 2 | 8 | 53 | 58 | 3 | 6 | 35 | 41 | 93  | 113 |
| 87,257 | 2 | 8 | 41 | 57 | 3 | 6 | 30 | 41 | 76  | 112 |
| 87,258 | 2 | 8 | 42 | 57 | 3 | 6 | 33 | 41 | 80  | 112 |
| 87,259 | 2 | 8 | 40 | 57 | 3 | 6 | 33 | 39 | 78  | 110 |
| 87,260 | 2 | 8 | 41 | 57 | 3 | 6 | 33 | 39 | 79  | 110 |
| 87,261 | 2 | 8 | 39 | 55 | 2 | 6 | 33 | 39 | 76  | 108 |
| 87,262 | 2 | 7 | 38 | 19 | 2 | 3 | 31 | 19 | 73  | 48  |
| 87,263 | 2 | 3 | 44 | 17 | 6 | 2 | 32 | 14 | 84  | 36  |
| 87,264 | 2 | 3 | 36 | 17 | 6 | 2 | 30 | 14 | 74  | 36  |
| 87,265 | 2 | 3 | 34 | 17 | 5 | 2 | 29 | 14 | 70  | 36  |
| 87,266 | 2 | 2 | 33 | 12 | 5 | 2 | 26 | 14 | 66  | 30  |
| 87,267 | 2 | 2 | 32 | 15 | 5 | 2 | 26 | 14 | 65  | 33  |
| 87,268 | 2 | 2 | 31 | 15 | 5 | 2 | 25 | 14 | 63  | 33  |
| 87,269 | 2 | 2 | 31 | 18 | 5 | 2 | 25 | 14 | 63  | 36  |
| 87,270 | 2 | 2 | 33 | 18 | 6 | 2 | 28 | 14 | 69  | 36  |
| 87,271 | 2 | 2 | 34 | 18 | 6 | 2 | 28 | 14 | 70  | 36  |
| 87,272 | 2 | 2 | 34 | 18 | 6 | 2 | 28 | 14 | 70  | 36  |
| 87,273 | 2 | 2 | 34 | 18 | 6 | 2 | 28 | 14 | 70  | 36  |
| 87,274 | 5 | 2 | 46 | 18 | 6 | 2 | 33 | 14 | 90  | 36  |
| 87,275 | 5 | 2 | 46 | 18 | 6 | 2 | 33 | 14 | 90  | 36  |
| 87,276 | 5 | 2 | 46 | 15 | 6 | 1 | 33 | 13 | 90  | 31  |
| 87,277 | 5 | 2 | 46 | 16 | 6 | 1 | 33 | 13 | 90  | 32  |

|        |    |   |     |    |    |   |    |    |     |    |
|--------|----|---|-----|----|----|---|----|----|-----|----|
| 87,278 | 5  | 2 | 46  | 27 | 6  | 1 | 33 | 14 | 90  | 44 |
| 87,279 | 5  | 3 | 46  | 30 | 6  | 1 | 35 | 16 | 92  | 50 |
| 87,280 | 5  | 4 | 47  | 35 | 6  | 1 | 35 | 18 | 93  | 58 |
| 87,281 | 5  | 3 | 47  | 35 | 6  | 1 | 35 | 18 | 93  | 57 |
| 87,282 | 6  | 3 | 49  | 35 | 6  | 1 | 35 | 18 | 96  | 57 |
| 87,283 | 6  | 3 | 48  | 35 | 6  | 1 | 35 | 20 | 95  | 59 |
| 87,284 | 6  | 3 | 48  | 35 | 6  | 1 | 35 | 20 | 95  | 59 |
| 87,285 | 6  | 3 | 51  | 38 | 6  | 1 | 36 | 20 | 99  | 62 |
| 87,286 | 6  | 3 | 51  | 38 | 6  | 1 | 36 | 20 | 99  | 62 |
| 87,287 | 6  | 3 | 51  | 38 | 6  | 1 | 36 | 19 | 99  | 61 |
| 87,288 | 6  | 3 | 57  | 37 | 7  | 1 | 37 | 19 | 107 | 60 |
| 87,289 | 6  | 3 | 56  | 38 | 6  | 1 | 37 | 19 | 105 | 61 |
| 87,290 | 6  | 3 | 55  | 38 | 6  | 1 | 36 | 19 | 103 | 61 |
| 87,291 | 6  | 3 | 56  | 38 | 6  | 1 | 37 | 19 | 105 | 61 |
| 87,292 | 6  | 3 | 59  | 34 | 6  | 1 | 34 | 15 | 105 | 53 |
| 87,293 | 6  | 3 | 60  | 34 | 6  | 1 | 36 | 15 | 108 | 53 |
| 87,294 | 7  | 3 | 60  | 36 | 7  | 1 | 39 | 15 | 113 | 55 |
| 87,295 | 7  | 4 | 58  | 36 | 7  | 1 | 38 | 15 | 110 | 56 |
| 87,296 | 7  | 4 | 58  | 36 | 7  | 1 | 38 | 15 | 110 | 56 |
| 87,297 | 7  | 4 | 62  | 35 | 7  | 1 | 37 | 15 | 113 | 55 |
| 87,298 | 7  | 4 | 62  | 35 | 7  | 1 | 37 | 15 | 113 | 55 |
| 87,299 | 7  | 4 | 62  | 35 | 7  | 1 | 37 | 15 | 113 | 55 |
| 87,300 | 8  | 3 | 63  | 36 | 7  | 1 | 40 | 16 | 118 | 56 |
| 87,301 | 8  | 3 | 64  | 35 | 7  | 1 | 40 | 14 | 119 | 53 |
| 87,302 | 8  | 3 | 71  | 36 | 9  | 1 | 46 | 14 | 134 | 54 |
| 87,303 | 11 | 3 | 75  | 39 | 9  | 1 | 50 | 13 | 145 | 56 |
| 87,304 | 12 | 3 | 96  | 39 | 10 | 1 | 63 | 13 | 181 | 56 |
| 87,305 | 12 | 3 | 96  | 39 | 10 | 1 | 60 | 14 | 178 | 57 |
| 87,306 | 12 | 3 | 95  | 39 | 10 | 1 | 60 | 14 | 177 | 57 |
| 87,307 | 12 | 3 | 121 | 41 | 12 | 1 | 74 | 15 | 219 | 60 |
| 87,308 | 12 | 3 | 119 | 42 | 12 | 1 | 73 | 15 | 216 | 61 |
| 87,309 | 12 | 3 | 117 | 42 | 12 | 1 | 73 | 15 | 214 | 61 |
| 87,310 | 12 | 3 | 117 | 42 | 12 | 2 | 73 | 15 | 214 | 62 |
| 87,311 | 12 | 3 | 116 | 42 | 12 | 2 | 73 | 16 | 213 | 63 |
| 87,312 | 12 | 3 | 114 | 42 | 12 | 2 | 73 | 16 | 211 | 63 |
| 87,313 | 12 | 3 | 114 | 42 | 12 | 2 | 73 | 16 | 211 | 63 |
| 87,314 | 12 | 3 | 107 | 43 | 8  | 2 | 71 | 16 | 198 | 64 |
| 87,315 | 12 | 3 | 107 | 43 | 8  | 2 | 70 | 16 | 197 | 64 |
| 87,316 | 10 | 3 | 105 | 43 | 8  | 2 | 69 | 16 | 192 | 64 |
| 87,317 | 10 | 3 | 103 | 43 | 8  | 2 | 69 | 16 | 190 | 64 |
| 87,318 | 10 | 3 | 105 | 40 | 8  | 2 | 69 | 16 | 192 | 61 |

|        |    |   |     |    |   |   |    |    |     |    |
|--------|----|---|-----|----|---|---|----|----|-----|----|
| 87,319 | 10 | 3 | 103 | 41 | 7 | 2 | 66 | 16 | 186 | 62 |
| 87,320 | 10 | 3 | 103 | 38 | 7 | 2 | 66 | 16 | 186 | 59 |
| 87,321 | 11 | 3 | 106 | 40 | 7 | 2 | 66 | 17 | 190 | 62 |
| 87,322 | 11 | 3 | 105 | 43 | 7 | 2 | 66 | 19 | 189 | 67 |
| 87,323 | 9  | 3 | 99  | 44 | 7 | 2 | 64 | 19 | 179 | 68 |
| 87,324 | 9  | 3 | 97  | 44 | 7 | 2 | 63 | 19 | 176 | 68 |
| 87,325 | 8  | 3 | 96  | 46 | 7 | 2 | 62 | 20 | 173 | 71 |
| 87,326 | 8  | 3 | 96  | 46 | 7 | 2 | 62 | 20 | 173 | 71 |
| 87,327 | 8  | 3 | 104 | 45 | 7 | 2 | 71 | 19 | 190 | 69 |
| 87,328 | 9  | 3 | 112 | 46 | 7 | 2 | 78 | 19 | 206 | 70 |
| 87,329 | 9  | 3 | 112 | 36 | 7 | 2 | 78 | 16 | 206 | 57 |
| 87,330 | 12 | 2 | 114 | 35 | 7 | 2 | 78 | 15 | 211 | 54 |
| 87,331 | 12 | 1 | 114 | 30 | 7 | 2 | 78 | 11 | 211 | 44 |
| 87,332 | 11 | 1 | 112 | 30 | 7 | 2 | 78 | 11 | 208 | 44 |
| 87,333 | 11 | 1 | 112 | 30 | 7 | 2 | 78 | 11 | 208 | 44 |
| 87,334 | 11 | 1 | 111 | 30 | 7 | 2 | 79 | 9  | 208 | 42 |
| 87,335 | 11 | 1 | 111 | 30 | 7 | 2 | 79 | 9  | 208 | 42 |
| 87,336 | 11 | 1 | 111 | 28 | 7 | 2 | 80 | 9  | 209 | 40 |
| 87,337 | 11 | 1 | 111 | 29 | 7 | 2 | 80 | 10 | 209 | 42 |
| 87,338 | 11 | 1 | 109 | 29 | 7 | 2 | 78 | 11 | 205 | 43 |
| 87,339 | 11 | 1 | 105 | 33 | 6 | 2 | 77 | 12 | 199 | 48 |
| 87,340 | 11 | 1 | 105 | 33 | 6 | 2 | 77 | 12 | 199 | 48 |
| 87,341 | 12 | 2 | 104 | 34 | 7 | 2 | 75 | 13 | 198 | 51 |
| 87,342 | 12 | 2 | 104 | 35 | 7 | 2 | 74 | 13 | 197 | 52 |
| 87,343 | 12 | 3 | 100 | 36 | 7 | 2 | 73 | 13 | 192 | 54 |
| 87,344 | 12 | 3 | 99  | 36 | 7 | 2 | 71 | 13 | 189 | 54 |
| 87,345 | 11 | 2 | 98  | 34 | 6 | 3 | 71 | 13 | 186 | 52 |
| 87,346 | 11 | 2 | 113 | 34 | 6 | 3 | 80 | 13 | 210 | 52 |
| 87,347 | 11 | 2 | 113 | 34 | 6 | 3 | 80 | 13 | 210 | 52 |
| 87,348 | 11 | 2 | 108 | 34 | 6 | 3 | 80 | 13 | 205 | 52 |
| 87,349 | 11 | 2 | 108 | 34 | 6 | 3 | 80 | 13 | 205 | 52 |
| 87,350 | 10 | 3 | 106 | 35 | 6 | 3 | 77 | 13 | 199 | 54 |
| 87,351 | 10 | 3 | 106 | 35 | 6 | 3 | 77 | 13 | 199 | 54 |
| 87,352 | 10 | 3 | 106 | 38 | 6 | 3 | 77 | 14 | 199 | 58 |
| 87,353 | 10 | 3 | 98  | 42 | 4 | 3 | 70 | 16 | 182 | 64 |
| 87,354 | 7  | 3 | 94  | 39 | 4 | 3 | 66 | 16 | 171 | 61 |
| 87,355 | 6  | 3 | 72  | 40 | 3 | 3 | 52 | 17 | 133 | 63 |
| 87,356 | 6  | 3 | 62  | 43 | 3 | 3 | 49 | 16 | 120 | 65 |
| 87,357 | 6  | 3 | 46  | 43 | 1 | 3 | 38 | 16 | 91  | 65 |
| 87,358 | 6  | 3 | 46  | 41 | 1 | 3 | 36 | 15 | 89  | 62 |
| 87,359 | 6  | 3 | 47  | 40 | 1 | 3 | 35 | 15 | 89  | 61 |

|        |    |   |    |    |   |   |    |    |     |    |
|--------|----|---|----|----|---|---|----|----|-----|----|
| 87,360 | 7  | 4 | 47 | 40 | 1 | 2 | 35 | 15 | 90  | 61 |
| 87,361 | 7  | 4 | 47 | 41 | 1 | 2 | 35 | 16 | 90  | 63 |
| 87,362 | 7  | 4 | 47 | 41 | 1 | 2 | 35 | 15 | 90  | 62 |
| 87,363 | 7  | 4 | 48 | 41 | 1 | 2 | 38 | 15 | 94  | 62 |
| 87,364 | 7  | 4 | 48 | 40 | 1 | 2 | 38 | 15 | 94  | 61 |
| 87,365 | 7  | 4 | 48 | 40 | 1 | 2 | 39 | 15 | 95  | 61 |
| 87,366 | 7  | 4 | 48 | 41 | 1 | 2 | 39 | 15 | 95  | 62 |
| 87,367 | 9  | 4 | 49 | 41 | 1 | 2 | 45 | 15 | 104 | 62 |
| 87,368 | 9  | 4 | 52 | 41 | 1 | 2 | 46 | 15 | 108 | 62 |
| 87,369 | 9  | 4 | 52 | 41 | 1 | 2 | 46 | 15 | 108 | 62 |
| 87,370 | 10 | 4 | 53 | 40 | 1 | 2 | 47 | 15 | 111 | 61 |
| 87,371 | 10 | 4 | 51 | 40 | 1 | 2 | 47 | 15 | 109 | 61 |
| 87,372 | 9  | 4 | 50 | 38 | 1 | 2 | 47 | 14 | 107 | 58 |
| 87,373 | 9  | 4 | 50 | 35 | 1 | 2 | 47 | 12 | 107 | 53 |
| 87,374 | 9  | 4 | 54 | 34 | 1 | 2 | 47 | 12 | 111 | 52 |
| 87,375 | 9  | 4 | 54 | 32 | 1 | 2 | 48 | 13 | 112 | 51 |
| 87,376 | 9  | 4 | 53 | 32 | 1 | 2 | 47 | 14 | 110 | 52 |
| 87,377 | 9  | 4 | 48 | 35 | 1 | 2 | 39 | 14 | 97  | 55 |
| 87,378 | 9  | 5 | 46 | 36 | 1 | 2 | 39 | 14 | 95  | 57 |
| 87,379 | 8  | 5 | 40 | 31 | 1 | 2 | 32 | 13 | 81  | 51 |
| 87,380 | 8  | 6 | 41 | 35 | 1 | 2 | 32 | 15 | 82  | 58 |
| 87,381 | 5  | 6 | 39 | 35 | 1 | 2 | 30 | 15 | 75  | 58 |
| 87,382 | 5  | 6 | 38 | 37 | 1 | 2 | 30 | 16 | 74  | 61 |
| 87,383 | 5  | 6 | 40 | 37 | 1 | 2 | 30 | 17 | 76  | 62 |
| 87,384 | 5  | 6 | 38 | 37 | 1 | 2 | 28 | 17 | 72  | 62 |
| 87,385 | 5  | 6 | 38 | 39 | 1 | 2 | 28 | 18 | 72  | 65 |
| 87,386 | 5  | 6 | 41 | 39 | 1 | 2 | 28 | 18 | 75  | 65 |
| 87,387 | 5  | 6 | 41 | 37 | 1 | 2 | 28 | 17 | 75  | 62 |
| 87,388 | 5  | 6 | 60 | 37 | 2 | 2 | 31 | 16 | 98  | 61 |
| 87,389 | 5  | 6 | 60 | 37 | 2 | 2 | 31 | 16 | 98  | 61 |
| 87,390 | 5  | 6 | 61 | 32 | 2 | 2 | 37 | 15 | 105 | 55 |
| 87,391 | 5  | 6 | 61 | 33 | 2 | 2 | 37 | 16 | 105 | 57 |
| 87,392 | 4  | 5 | 61 | 36 | 1 | 2 | 43 | 15 | 109 | 58 |
| 87,393 | 4  | 5 | 64 | 36 | 2 | 2 | 45 | 15 | 115 | 58 |
| 87,394 | 4  | 4 | 63 | 36 | 2 | 2 | 45 | 15 | 114 | 57 |
| 87,395 | 5  | 4 | 65 | 36 | 3 | 1 | 44 | 15 | 117 | 56 |
| 87,396 | 5  | 4 | 65 | 36 | 3 | 1 | 42 | 15 | 115 | 56 |
| 87,397 | 5  | 4 | 51 | 37 | 3 | 1 | 32 | 15 | 91  | 57 |
| 87,398 | 5  | 4 | 51 | 37 | 3 | 2 | 32 | 15 | 91  | 58 |
| 87,399 | 5  | 4 | 51 | 37 | 3 | 2 | 32 | 15 | 91  | 58 |
| 87,400 | 5  | 3 | 53 | 36 | 3 | 2 | 32 | 15 | 93  | 56 |

|        |   |   |    |    |   |   |    |    |     |    |
|--------|---|---|----|----|---|---|----|----|-----|----|
| 87,401 | 5 | 3 | 53 | 35 | 3 | 2 | 32 | 14 | 93  | 54 |
| 87,402 | 5 | 3 | 53 | 32 | 3 | 2 | 32 | 13 | 93  | 50 |
| 87,403 | 5 | 3 | 53 | 32 | 3 | 2 | 32 | 13 | 93  | 50 |
| 87,404 | 5 | 3 | 53 | 27 | 3 | 2 | 32 | 11 | 93  | 43 |
| 87,405 | 5 | 3 | 54 | 25 | 3 | 2 | 32 | 10 | 94  | 40 |
| 87,406 | 5 | 3 | 54 | 22 | 3 | 2 | 32 | 10 | 94  | 37 |
| 87,407 | 5 | 3 | 55 | 22 | 3 | 1 | 32 | 10 | 95  | 36 |
| 87,408 | 5 | 3 | 55 | 22 | 3 | 1 | 32 | 10 | 95  | 36 |
| 87,409 | 5 | 3 | 54 | 22 | 3 | 1 | 32 | 10 | 94  | 36 |
| 87,410 | 5 | 2 | 66 | 22 | 3 | 1 | 35 | 10 | 109 | 35 |
| 87,411 | 4 | 2 | 66 | 23 | 3 | 1 | 35 | 10 | 108 | 36 |
| 87,412 | 4 | 2 | 69 | 22 | 3 | 1 | 37 | 9  | 113 | 34 |
| 87,413 | 4 | 2 | 69 | 22 | 3 | 1 | 42 | 9  | 118 | 34 |
| 87,414 | 4 | 2 | 68 | 22 | 3 | 1 | 39 | 9  | 114 | 34 |
| 87,415 | 4 | 2 | 68 | 23 | 3 | 1 | 39 | 9  | 114 | 35 |
| 87,416 | 4 | 2 | 68 | 22 | 3 | 1 | 38 | 10 | 113 | 35 |
| 87,417 | 4 | 2 | 68 | 22 | 3 | 1 | 39 | 10 | 114 | 35 |
| 87,418 | 2 | 2 | 68 | 23 | 3 | 1 | 33 | 10 | 106 | 36 |
| 87,419 | 2 | 2 | 65 | 23 | 3 | 1 | 33 | 10 | 103 | 36 |
| 87,420 | 1 | 2 | 64 | 23 | 3 | 1 | 32 | 10 | 100 | 36 |
| 87,421 | 1 | 2 | 61 | 23 | 3 | 1 | 31 | 10 | 96  | 36 |
| 87,422 | 1 | 2 | 61 | 23 | 3 | 1 | 31 | 10 | 96  | 36 |
| 87,423 | 1 | 2 | 60 | 23 | 3 | 1 | 31 | 10 | 95  | 36 |
| 87,424 | 1 | 2 | 60 | 23 | 3 | 1 | 31 | 10 | 95  | 36 |
| 87,425 | 1 | 2 | 60 | 23 | 3 | 1 | 30 | 8  | 94  | 34 |
| 87,426 | 1 | 2 | 59 | 23 | 3 | 1 | 30 | 8  | 93  | 34 |
| 87,427 | 1 | 2 | 58 | 23 | 3 | 1 | 30 | 7  | 92  | 33 |
| 87,428 | 1 | 2 | 57 | 20 | 3 | 1 | 30 | 7  | 91  | 30 |
| 87,429 | 1 | 1 | 57 | 19 | 3 | 2 | 30 | 7  | 91  | 29 |
| 87,430 | 1 | 1 | 57 | 19 | 3 | 2 | 30 | 7  | 91  | 29 |
| 87,431 | 1 | 1 | 56 | 15 | 3 | 2 | 30 | 5  | 90  | 23 |
| 87,432 | 1 | 1 | 56 | 13 | 3 | 2 | 30 | 4  | 90  | 20 |
| 87,433 | 1 | 1 | 56 | 13 | 3 | 2 | 30 | 3  | 90  | 19 |
| 87,434 | 1 | 1 | 56 | 11 | 3 | 2 | 31 | 2  | 91  | 16 |
| 87,435 | 2 | 1 | 56 | 11 | 3 | 2 | 31 | 2  | 92  | 16 |
| 87,436 | 2 | 1 | 55 | 11 | 3 | 2 | 31 | 2  | 91  | 16 |
| 87,437 | 2 | 1 | 55 | 11 | 3 | 2 | 31 | 2  | 91  | 16 |
| 87,438 | 2 | 1 | 56 | 11 | 3 | 2 | 30 | 2  | 91  | 16 |
| 87,439 | 2 | 1 | 39 | 11 | 2 | 2 | 26 | 2  | 69  | 16 |
| 87,440 | 2 | 2 | 39 | 12 | 2 | 2 | 25 | 4  | 68  | 20 |
| 87,441 | 2 | 2 | 38 | 12 | 2 | 2 | 20 | 4  | 62  | 20 |

|        |   |   |    |    |   |   |    |    |    |    |
|--------|---|---|----|----|---|---|----|----|----|----|
| 87,442 | 2 | 2 | 38 | 11 | 2 | 2 | 20 | 4  | 62 | 19 |
| 87,443 | 2 | 2 | 38 | 7  | 2 | 2 | 15 | 4  | 57 | 15 |
| 87,444 | 2 | 3 | 35 | 5  | 1 | 2 | 14 | 4  | 52 | 14 |
| 87,445 | 2 | 3 | 35 | 5  | 1 | 2 | 14 | 4  | 52 | 14 |
| 87,446 | 1 | 3 | 34 | 5  | 0 | 2 | 14 | 4  | 49 | 14 |
| 87,447 | 1 | 3 | 34 | 6  | 0 | 2 | 14 | 4  | 49 | 15 |
| 87,448 | 1 | 3 | 33 | 5  | 0 | 2 | 14 | 4  | 48 | 14 |
| 87,449 | 1 | 3 | 34 | 5  | 0 | 1 | 17 | 5  | 52 | 14 |
| 87,450 | 1 | 3 | 34 | 6  | 0 | 1 | 17 | 5  | 52 | 15 |
| 87,451 | 1 | 3 | 32 | 6  | 0 | 1 | 17 | 5  | 50 | 15 |
| 87,452 | 2 | 4 | 33 | 6  | 0 | 1 | 18 | 5  | 53 | 16 |
| 87,453 | 2 | 4 | 33 | 6  | 0 | 1 | 18 | 5  | 53 | 16 |
| 87,454 | 2 | 4 | 33 | 6  | 0 | 1 | 18 | 5  | 53 | 16 |
| 87,455 | 2 | 4 | 33 | 6  | 0 | 1 | 18 | 5  | 53 | 16 |
| 87,456 | 2 | 4 | 32 | 6  | 0 | 1 | 18 | 5  | 52 | 16 |
| 87,457 | 2 | 4 | 33 | 7  | 0 | 1 | 18 | 6  | 53 | 18 |
| 87,458 | 2 | 4 | 32 | 9  | 0 | 1 | 18 | 6  | 52 | 20 |
| 87,459 | 2 | 4 | 32 | 9  | 0 | 1 | 20 | 6  | 54 | 20 |
| 87,460 | 2 | 4 | 31 | 9  | 0 | 1 | 20 | 6  | 53 | 20 |
| 87,461 | 2 | 4 | 20 | 8  | 0 | 1 | 17 | 6  | 39 | 19 |
| 87,462 | 2 | 4 | 17 | 8  | 0 | 1 | 15 | 6  | 34 | 19 |
| 87,463 | 2 | 4 | 17 | 8  | 0 | 1 | 10 | 6  | 29 | 19 |
| 87,464 | 2 | 4 | 17 | 8  | 0 | 1 | 10 | 6  | 29 | 19 |
| 87,465 | 2 | 4 | 17 | 8  | 0 | 1 | 10 | 6  | 29 | 19 |
| 87,466 | 3 | 4 | 17 | 9  | 0 | 1 | 10 | 6  | 30 | 20 |
| 87,467 | 3 | 4 | 17 | 11 | 0 | 3 | 10 | 6  | 30 | 24 |
| 87,468 | 3 | 4 | 16 | 21 | 0 | 3 | 9  | 8  | 28 | 36 |
| 87,469 | 3 | 4 | 15 | 20 | 0 | 3 | 9  | 8  | 27 | 35 |
| 87,470 | 3 | 4 | 14 | 31 | 0 | 5 | 8  | 16 | 25 | 56 |
| 87,471 | 3 | 4 | 13 | 34 | 0 | 5 | 8  | 18 | 24 | 61 |
| 87,472 | 3 | 4 | 13 | 35 | 0 | 5 | 8  | 18 | 24 | 62 |
| 87,473 | 3 | 4 | 13 | 36 | 0 | 5 | 8  | 18 | 24 | 63 |
| 87,474 | 3 | 4 | 12 | 36 | 0 | 5 | 8  | 18 | 23 | 63 |
| 87,475 | 3 | 4 | 12 | 37 | 0 | 5 | 9  | 18 | 24 | 64 |
| 87,476 | 3 | 4 | 12 | 37 | 0 | 5 | 9  | 18 | 24 | 64 |
| 87,477 | 3 | 4 | 13 | 40 | 0 | 5 | 11 | 19 | 27 | 68 |
| 87,478 | 3 | 4 | 13 | 40 | 0 | 5 | 11 | 19 | 27 | 68 |
| 87,479 | 3 | 4 | 13 | 40 | 0 | 4 | 12 | 19 | 28 | 67 |
| 87,480 | 3 | 5 | 15 | 40 | 0 | 4 | 14 | 19 | 32 | 68 |
| 87,481 | 3 | 5 | 15 | 40 | 0 | 4 | 15 | 19 | 33 | 68 |
| 87,482 | 3 | 4 | 18 | 40 | 0 | 4 | 16 | 19 | 37 | 67 |

|        |   |   |    |    |   |   |    |    |    |    |
|--------|---|---|----|----|---|---|----|----|----|----|
| 87,483 | 3 | 4 | 18 | 40 | 0 | 4 | 16 | 19 | 37 | 67 |
| 87,484 | 3 | 4 | 17 | 42 | 0 | 4 | 16 | 19 | 36 | 69 |
| 87,485 | 3 | 4 | 16 | 42 | 0 | 4 | 15 | 19 | 34 | 69 |
| 87,486 | 2 | 4 | 16 | 42 | 0 | 4 | 15 | 19 | 33 | 69 |
| 87,487 | 2 | 4 | 14 | 43 | 0 | 4 | 15 | 19 | 31 | 70 |
| 87,488 | 2 | 4 | 14 | 43 | 0 | 4 | 15 | 19 | 31 | 70 |
| 87,489 | 2 | 4 | 13 | 43 | 0 | 4 | 15 | 19 | 30 | 70 |
| 87,490 | 2 | 3 | 11 | 42 | 0 | 4 | 15 | 17 | 28 | 66 |
| 87,491 | 2 | 3 | 11 | 42 | 0 | 4 | 15 | 16 | 28 | 65 |
| 87,492 | 2 | 3 | 12 | 42 | 0 | 4 | 15 | 16 | 29 | 65 |
| 87,493 | 2 | 3 | 13 | 42 | 0 | 4 | 15 | 16 | 30 | 65 |
| 87,494 | 2 | 3 | 15 | 42 | 0 | 4 | 15 | 16 | 32 | 65 |
| 87,495 | 2 | 2 | 15 | 42 | 0 | 4 | 14 | 16 | 31 | 64 |
| 87,496 | 2 | 2 | 15 | 42 | 0 | 4 | 14 | 16 | 31 | 64 |
| 87,497 | 2 | 3 | 16 | 42 | 0 | 4 | 14 | 16 | 32 | 65 |
| 87,498 | 2 | 3 | 15 | 42 | 0 | 4 | 12 | 16 | 29 | 65 |
| 87,499 | 2 | 3 | 15 | 43 | 0 | 4 | 11 | 15 | 28 | 65 |
| 87,500 | 2 | 3 | 15 | 42 | 0 | 4 | 11 | 15 | 28 | 64 |
| 87,501 | 2 | 3 | 15 | 42 | 0 | 4 | 11 | 15 | 28 | 64 |
| 87,502 | 2 | 3 | 15 | 42 | 0 | 4 | 11 | 15 | 28 | 64 |
| 87,503 | 1 | 2 | 14 | 42 | 0 | 4 | 10 | 15 | 25 | 63 |
| 87,504 | 1 | 2 | 14 | 42 | 0 | 4 | 10 | 15 | 25 | 63 |
| 87,505 | 1 | 2 | 14 | 42 | 0 | 4 | 10 | 15 | 25 | 63 |
| 87,506 | 1 | 2 | 19 | 42 | 2 | 4 | 12 | 15 | 34 | 63 |
| 87,507 | 1 | 2 | 19 | 42 | 2 | 4 | 12 | 16 | 34 | 64 |
| 87,508 | 1 | 2 | 18 | 39 | 2 | 4 | 12 | 15 | 33 | 60 |
| 87,509 | 1 | 2 | 18 | 40 | 2 | 4 | 13 | 15 | 34 | 61 |
| 87,510 | 1 | 2 | 19 | 40 | 2 | 4 | 12 | 15 | 34 | 61 |
| 87,511 | 1 | 2 | 19 | 40 | 2 | 4 | 12 | 15 | 34 | 61 |
| 87,512 | 1 | 2 | 19 | 40 | 2 | 4 | 12 | 15 | 34 | 61 |
| 87,513 | 1 | 2 | 19 | 40 | 2 | 4 | 12 | 15 | 34 | 61 |
| 87,514 | 1 | 2 | 19 | 40 | 2 | 4 | 12 | 15 | 34 | 61 |
| 87,515 | 1 | 2 | 19 | 40 | 2 | 4 | 12 | 15 | 34 | 61 |
| 87,516 | 0 | 3 | 19 | 40 | 2 | 4 | 12 | 15 | 33 | 62 |
| 87,517 | 0 | 3 | 19 | 36 | 2 | 2 | 12 | 14 | 33 | 55 |
| 87,518 | 0 | 3 | 19 | 26 | 2 | 2 | 12 | 12 | 33 | 43 |
| 87,519 | 0 | 3 | 19 | 26 | 2 | 2 | 12 | 12 | 33 | 43 |
| 87,520 | 0 | 3 | 21 | 15 | 3 | 0 | 13 | 4  | 37 | 22 |
| 87,521 | 0 | 3 | 28 | 12 | 5 | 0 | 20 | 2  | 53 | 17 |
| 87,522 | 4 | 3 | 38 | 11 | 6 | 0 | 34 | 2  | 82 | 16 |
| 87,523 | 4 | 3 | 38 | 11 | 6 | 1 | 34 | 2  | 82 | 17 |

|        |    |   |     |    |    |   |     |    |     |    |
|--------|----|---|-----|----|----|---|-----|----|-----|----|
| 87,524 | 5  | 3 | 49  | 10 | 8  | 1 | 50  | 2  | 112 | 16 |
| 87,525 | 5  | 3 | 49  | 10 | 8  | 1 | 49  | 2  | 111 | 16 |
| 87,526 | 5  | 3 | 49  | 10 | 8  | 1 | 49  | 2  | 111 | 16 |
| 87,527 | 5  | 3 | 49  | 11 | 8  | 1 | 48  | 2  | 110 | 17 |
| 87,528 | 5  | 3 | 49  | 9  | 8  | 1 | 47  | 1  | 109 | 14 |
| 87,529 | 5  | 3 | 49  | 9  | 8  | 1 | 47  | 1  | 109 | 14 |
| 87,530 | 5  | 3 | 50  | 9  | 9  | 1 | 46  | 1  | 110 | 14 |
| 87,531 | 5  | 2 | 53  | 9  | 9  | 1 | 46  | 1  | 113 | 13 |
| 87,532 | 5  | 2 | 55  | 10 | 9  | 1 | 46  | 1  | 115 | 14 |
| 87,533 | 5  | 3 | 52  | 11 | 9  | 1 | 45  | 2  | 111 | 17 |
| 87,534 | 5  | 3 | 52  | 11 | 9  | 1 | 45  | 2  | 111 | 17 |
| 87,535 | 5  | 3 | 58  | 9  | 9  | 1 | 47  | 2  | 119 | 15 |
| 87,536 | 5  | 3 | 70  | 9  | 10 | 1 | 47  | 2  | 132 | 15 |
| 87,537 | 8  | 3 | 96  | 10 | 12 | 1 | 69  | 2  | 185 | 16 |
| 87,538 | 8  | 3 | 96  | 9  | 12 | 2 | 69  | 2  | 185 | 16 |
| 87,539 | 8  | 3 | 96  | 13 | 12 | 2 | 69  | 4  | 185 | 22 |
| 87,540 | 11 | 4 | 127 | 15 | 14 | 2 | 91  | 6  | 243 | 27 |
| 87,541 | 11 | 4 | 130 | 21 | 14 | 2 | 94  | 9  | 249 | 36 |
| 87,542 | 11 | 4 | 134 | 21 | 14 | 2 | 94  | 9  | 253 | 36 |
| 87,543 | 11 | 5 | 133 | 23 | 14 | 2 | 94  | 10 | 252 | 40 |
| 87,544 | 11 | 6 | 131 | 30 | 14 | 2 | 94  | 11 | 250 | 49 |
| 87,545 | 11 | 6 | 129 | 30 | 14 | 2 | 94  | 13 | 248 | 51 |
| 87,546 | 13 | 6 | 131 | 30 | 14 | 2 | 96  | 13 | 254 | 51 |
| 87,547 | 13 | 6 | 139 | 30 | 14 | 2 | 97  | 13 | 263 | 51 |
| 87,548 | 13 | 5 | 142 | 31 | 14 | 2 | 97  | 13 | 266 | 51 |
| 87,549 | 13 | 5 | 142 | 30 | 14 | 2 | 97  | 13 | 266 | 50 |
| 87,550 | 16 | 5 | 160 | 30 | 15 | 2 | 103 | 14 | 294 | 51 |
| 87,551 | 16 | 5 | 163 | 31 | 15 | 2 | 103 | 14 | 297 | 52 |
| 87,552 | 17 | 5 | 198 | 40 | 16 | 2 | 115 | 19 | 346 | 66 |
| 87,553 | 17 | 5 | 199 | 41 | 16 | 2 | 115 | 19 | 347 | 67 |
| 87,554 | 17 | 5 | 203 | 41 | 16 | 2 | 116 | 19 | 352 | 67 |
| 87,555 | 17 | 5 | 203 | 44 | 16 | 2 | 118 | 22 | 354 | 73 |
| 87,556 | 17 | 5 | 198 | 44 | 14 | 2 | 116 | 22 | 345 | 73 |
| 87,557 | 17 | 5 | 198 | 46 | 14 | 2 | 116 | 25 | 345 | 78 |
| 87,558 | 17 | 5 | 198 | 50 | 14 | 2 | 116 | 28 | 345 | 85 |
| 87,559 | 17 | 5 | 198 | 51 | 14 | 3 | 116 | 28 | 345 | 87 |
| 87,560 | 17 | 5 | 199 | 50 | 14 | 3 | 116 | 28 | 346 | 86 |
| 87,561 | 17 | 5 | 201 | 51 | 14 | 3 | 115 | 28 | 347 | 87 |
| 87,562 | 17 | 5 | 203 | 52 | 14 | 3 | 116 | 28 | 350 | 88 |
| 87,563 | 18 | 5 | 213 | 52 | 14 | 4 | 123 | 28 | 368 | 89 |
| 87,564 | 18 | 5 | 214 | 52 | 14 | 4 | 123 | 28 | 369 | 89 |



|        |    |   |     |    |    |   |     |    |     |     |
|--------|----|---|-----|----|----|---|-----|----|-----|-----|
| 87,565 | 18 | 5 | 214 | 52 | 14 | 4 | 124 | 28 | 370 | 89  |
| 87,566 | 18 | 4 | 214 | 52 | 14 | 4 | 124 | 28 | 370 | 88  |
| 87,567 | 18 | 4 | 214 | 52 | 14 | 4 | 124 | 28 | 370 | 88  |
| 87,568 | 18 | 4 | 216 | 56 | 14 | 4 | 125 | 30 | 373 | 94  |
| 87,569 | 18 | 4 | 218 | 58 | 14 | 4 | 125 | 32 | 375 | 98  |
| 87,570 | 18 | 5 | 218 | 75 | 14 | 4 | 126 | 34 | 376 | 118 |
| 87,571 | 18 | 5 | 217 | 79 | 13 | 4 | 125 | 37 | 373 | 125 |
| 87,572 | 19 | 5 | 210 | 80 | 11 | 4 | 118 | 38 | 358 | 127 |
| 87,573 | 16 | 5 | 206 | 81 | 10 | 4 | 106 | 38 | 338 | 128 |
| 87,574 | 15 | 5 | 200 | 81 | 8  | 3 | 91  | 38 | 314 | 127 |
| 87,575 | 15 | 5 | 206 | 81 | 8  | 3 | 95  | 38 | 324 | 127 |
| 87,576 | 15 | 5 | 206 | 81 | 8  | 3 | 95  | 38 | 324 | 127 |
| 87,577 | 15 | 5 | 208 | 80 | 8  | 3 | 103 | 38 | 334 | 126 |
| 87,578 | 15 | 5 | 208 | 79 | 8  | 3 | 104 | 38 | 335 | 125 |
| 87,579 | 15 | 5 | 208 | 78 | 8  | 3 | 104 | 38 | 335 | 124 |
| 87,580 | 15 | 5 | 208 | 78 | 8  | 3 | 105 | 38 | 336 | 124 |
| 87,581 | 15 | 5 | 207 | 78 | 7  | 3 | 105 | 38 | 334 | 124 |
| 87,582 | 15 | 5 | 202 | 77 | 7  | 3 | 103 | 38 | 327 | 123 |
| 87,583 | 15 | 5 | 200 | 77 | 7  | 3 | 102 | 38 | 324 | 123 |
| 87,584 | 16 | 4 | 198 | 81 | 7  | 3 | 101 | 40 | 322 | 128 |
| 87,585 | 17 | 4 | 198 | 81 | 7  | 3 | 101 | 40 | 323 | 128 |
| 87,586 | 17 | 4 | 199 | 81 | 7  | 3 | 101 | 41 | 324 | 129 |
| 87,587 | 17 | 4 | 194 | 81 | 6  | 3 | 104 | 41 | 321 | 129 |
| 87,588 | 14 | 4 | 168 | 80 | 4  | 2 | 82  | 41 | 268 | 127 |
| 87,589 | 14 | 4 | 164 | 81 | 4  | 2 | 81  | 41 | 263 | 128 |
| 87,590 | 11 | 4 | 137 | 78 | 2  | 2 | 60  | 40 | 210 | 124 |
| 87,591 | 11 | 3 | 138 | 70 | 2  | 2 | 59  | 36 | 210 | 111 |
| 87,592 | 11 | 3 | 138 | 70 | 2  | 2 | 59  | 37 | 210 | 112 |
| 87,593 | 11 | 2 | 134 | 68 | 2  | 2 | 60  | 36 | 207 | 108 |
| 87,594 | 11 | 1 | 138 | 61 | 2  | 2 | 64  | 35 | 215 | 99  |
| 87,595 | 11 | 1 | 138 | 61 | 2  | 2 | 64  | 35 | 215 | 99  |
| 87,596 | 9  | 1 | 136 | 61 | 2  | 2 | 62  | 33 | 209 | 97  |
| 87,597 | 9  | 1 | 129 | 61 | 2  | 2 | 61  | 33 | 201 | 97  |
| 87,598 | 9  | 1 | 130 | 61 | 2  | 2 | 61  | 34 | 202 | 98  |
| 87,599 | 9  | 1 | 126 | 60 | 2  | 2 | 61  | 34 | 198 | 97  |
| 87,600 | 6  | 1 | 108 | 61 | 1  | 2 | 55  | 34 | 170 | 98  |
| 87,601 | 6  | 1 | 105 | 60 | 1  | 2 | 55  | 33 | 167 | 96  |
| 87,602 | 6  | 2 | 90  | 60 | 0  | 2 | 48  | 35 | 144 | 99  |
| 87,603 | 5  | 2 | 71  | 51 | 0  | 2 | 43  | 31 | 119 | 86  |
| 87,604 | 5  | 2 | 70  | 51 | 0  | 2 | 43  | 31 | 118 | 86  |
| 87,605 | 5  | 2 | 67  | 49 | 0  | 2 | 42  | 28 | 114 | 81  |

|        |   |    |    |    |   |   |    |    |     |     |
|--------|---|----|----|----|---|---|----|----|-----|-----|
| 87,606 | 5 | 2  | 69 | 49 | 0 | 2 | 40 | 28 | 114 | 81  |
| 87,607 | 5 | 2  | 69 | 47 | 0 | 2 | 40 | 25 | 114 | 76  |
| 87,608 | 5 | 2  | 69 | 47 | 0 | 2 | 40 | 25 | 114 | 76  |
| 87,609 | 6 | 2  | 73 | 43 | 0 | 2 | 42 | 21 | 121 | 68  |
| 87,610 | 6 | 2  | 72 | 42 | 1 | 1 | 43 | 21 | 122 | 66  |
| 87,611 | 6 | 2  | 74 | 41 | 1 | 1 | 44 | 21 | 125 | 65  |
| 87,612 | 6 | 2  | 71 | 40 | 1 | 1 | 44 | 21 | 122 | 64  |
| 87,613 | 6 | 2  | 71 | 41 | 1 | 1 | 45 | 21 | 123 | 65  |
| 87,614 | 5 | 2  | 61 | 41 | 1 | 0 | 38 | 21 | 105 | 64  |
| 87,615 | 5 | 2  | 61 | 41 | 1 | 0 | 38 | 21 | 105 | 64  |
| 87,616 | 5 | 2  | 61 | 41 | 1 | 0 | 37 | 21 | 104 | 64  |
| 87,617 | 5 | 2  | 62 | 41 | 1 | 0 | 37 | 21 | 105 | 64  |
| 87,618 | 5 | 2  | 63 | 41 | 1 | 0 | 39 | 21 | 108 | 64  |
| 87,619 | 5 | 2  | 62 | 36 | 1 | 0 | 38 | 19 | 106 | 57  |
| 87,620 | 5 | 2  | 60 | 36 | 1 | 0 | 38 | 19 | 104 | 57  |
| 87,621 | 5 | 1  | 60 | 19 | 1 | 0 | 38 | 17 | 104 | 37  |
| 87,622 | 5 | 1  | 59 | 24 | 1 | 0 | 38 | 16 | 103 | 41  |
| 87,623 | 4 | 1  | 59 | 25 | 1 | 0 | 38 | 16 | 102 | 42  |
| 87,624 | 3 | 1  | 53 | 24 | 1 | 0 | 36 | 17 | 93  | 42  |
| 87,625 | 3 | 1  | 50 | 29 | 1 | 0 | 35 | 20 | 89  | 50  |
| 87,626 | 3 | 1  | 48 | 33 | 1 | 0 | 33 | 22 | 85  | 56  |
| 87,627 | 3 | 1  | 46 | 33 | 1 | 0 | 25 | 23 | 75  | 57  |
| 87,628 | 3 | 1  | 46 | 34 | 1 | 0 | 24 | 23 | 74  | 58  |
| 87,629 | 4 | 1  | 48 | 38 | 1 | 1 | 28 | 23 | 81  | 63  |
| 87,630 | 4 | 1  | 48 | 39 | 1 | 1 | 28 | 23 | 81  | 64  |
| 87,631 | 4 | 2  | 48 | 39 | 1 | 1 | 27 | 24 | 80  | 66  |
| 87,632 | 4 | 2  | 50 | 44 | 2 | 2 | 27 | 28 | 83  | 76  |
| 87,633 | 4 | 3  | 50 | 54 | 2 | 2 | 27 | 39 | 83  | 98  |
| 87,634 | 6 | 3  | 56 | 60 | 2 | 2 | 30 | 42 | 94  | 107 |
| 87,635 | 5 | 3  | 55 | 57 | 2 | 2 | 31 | 40 | 93  | 102 |
| 87,636 | 4 | 3  | 55 | 57 | 2 | 3 | 31 | 40 | 92  | 103 |
| 87,637 | 4 | 3  | 52 | 58 | 3 | 3 | 30 | 39 | 89  | 103 |
| 87,638 | 4 | 3  | 45 | 58 | 3 | 3 | 27 | 39 | 79  | 103 |
| 87,639 | 4 | 3  | 44 | 62 | 3 | 3 | 26 | 43 | 77  | 111 |
| 87,640 | 4 | 5  | 44 | 62 | 3 | 3 | 26 | 43 | 77  | 113 |
| 87,641 | 4 | 5  | 42 | 68 | 3 | 5 | 25 | 44 | 74  | 122 |
| 87,642 | 4 | 5  | 41 | 73 | 3 | 7 | 25 | 48 | 73  | 133 |
| 87,643 | 4 | 5  | 41 | 76 | 3 | 7 | 25 | 47 | 73  | 135 |
| 87,644 | 4 | 12 | 41 | 84 | 3 | 7 | 24 | 52 | 72  | 155 |
| 87,645 | 4 | 12 | 37 | 84 | 3 | 8 | 20 | 52 | 64  | 156 |
| 87,646 | 4 | 12 | 38 | 85 | 3 | 8 | 21 | 52 | 66  | 157 |

|        |   |    |    |    |   |   |    |    |    |     |
|--------|---|----|----|----|---|---|----|----|----|-----|
| 87,647 | 4 | 12 | 38 | 85 | 3 | 8 | 21 | 52 | 66 | 157 |
| 87,648 | 4 | 13 | 38 | 86 | 3 | 8 | 21 | 52 | 66 | 159 |
| 87,649 | 4 | 13 | 37 | 86 | 3 | 8 | 21 | 52 | 65 | 159 |
| 87,650 | 4 | 13 | 37 | 86 | 3 | 9 | 21 | 53 | 65 | 161 |
| 87,651 | 4 | 13 | 38 | 86 | 3 | 9 | 21 | 53 | 66 | 161 |
| 87,652 | 4 | 13 | 38 | 86 | 3 | 9 | 21 | 54 | 66 | 162 |
| 87,653 | 4 | 12 | 37 | 84 | 3 | 9 | 21 | 52 | 65 | 157 |
| 87,654 | 5 | 12 | 37 | 83 | 3 | 9 | 22 | 52 | 67 | 156 |
| 87,655 | 5 | 12 | 38 | 83 | 3 | 9 | 22 | 53 | 68 | 157 |
| 87,656 | 5 | 12 | 37 | 83 | 3 | 9 | 23 | 53 | 68 | 157 |
| 87,657 | 5 | 12 | 36 | 83 | 3 | 9 | 24 | 53 | 68 | 157 |
| 87,658 | 5 | 12 | 36 | 83 | 3 | 9 | 24 | 53 | 68 | 157 |
| 87,659 | 5 | 12 | 33 | 83 | 3 | 9 | 21 | 53 | 62 | 157 |
| 87,660 | 5 | 12 | 33 | 83 | 2 | 9 | 20 | 53 | 60 | 157 |
| 87,661 | 5 | 12 | 33 | 83 | 2 | 9 | 19 | 53 | 59 | 157 |
| 87,662 | 5 | 12 | 34 | 83 | 2 | 9 | 20 | 54 | 61 | 158 |
| 87,663 | 7 | 12 | 38 | 82 | 2 | 9 | 31 | 54 | 78 | 157 |
| 87,664 | 7 | 13 | 41 | 82 | 2 | 9 | 29 | 54 | 79 | 158 |
| 87,665 | 7 | 13 | 41 | 82 | 2 | 9 | 29 | 54 | 79 | 158 |
| 87,666 | 7 | 13 | 40 | 82 | 2 | 9 | 29 | 54 | 78 | 158 |
| 87,667 | 7 | 13 | 40 | 82 | 2 | 9 | 29 | 54 | 78 | 158 |
| 87,668 | 7 | 13 | 39 | 82 | 2 | 9 | 29 | 54 | 77 | 158 |
| 87,669 | 7 | 13 | 38 | 81 | 2 | 9 | 27 | 52 | 74 | 155 |
| 87,670 | 7 | 13 | 37 | 81 | 2 | 9 | 27 | 52 | 73 | 155 |
| 87,671 | 7 | 13 | 37 | 81 | 2 | 9 | 26 | 52 | 72 | 155 |
| 87,672 | 7 | 13 | 37 | 81 | 2 | 9 | 26 | 52 | 72 | 155 |
| 87,673 | 7 | 13 | 37 | 72 | 2 | 9 | 26 | 50 | 72 | 144 |
| 87,674 | 7 | 13 | 37 | 70 | 2 | 9 | 26 | 49 | 72 | 141 |
| 87,675 | 7 | 13 | 37 | 70 | 2 | 9 | 26 | 48 | 72 | 140 |
| 87,676 | 7 | 13 | 36 | 65 | 2 | 9 | 26 | 45 | 71 | 132 |
| 87,677 | 7 | 13 | 32 | 61 | 2 | 9 | 24 | 42 | 65 | 125 |
| 87,678 | 6 | 13 | 29 | 60 | 2 | 9 | 20 | 41 | 57 | 123 |
| 87,679 | 6 | 13 | 29 | 65 | 2 | 9 | 20 | 41 | 57 | 128 |
| 87,680 | 6 | 13 | 29 | 63 | 2 | 8 | 22 | 41 | 59 | 125 |
| 87,681 | 6 | 13 | 29 | 62 | 2 | 8 | 23 | 41 | 60 | 124 |
| 87,682 | 6 | 12 | 27 | 59 | 1 | 7 | 23 | 36 | 57 | 114 |
| 87,683 | 6 | 12 | 27 | 44 | 1 | 7 | 23 | 23 | 57 | 86  |
| 87,684 | 6 | 12 | 27 | 44 | 1 | 7 | 23 | 23 | 57 | 86  |
| 87,685 | 6 | 12 | 31 | 44 | 1 | 7 | 23 | 23 | 61 | 86  |
| 87,686 | 6 | 12 | 30 | 42 | 1 | 7 | 22 | 23 | 59 | 84  |
| 87,687 | 6 | 12 | 30 | 42 | 1 | 6 | 22 | 23 | 59 | 83  |

|        |   |    |    |    |   |   |    |    |     |    |
|--------|---|----|----|----|---|---|----|----|-----|----|
| 87,688 | 7 | 12 | 39 | 48 | 1 | 6 | 27 | 24 | 74  | 90 |
| 87,689 | 7 | 12 | 39 | 49 | 1 | 6 | 27 | 24 | 74  | 91 |
| 87,690 | 9 | 12 | 61 | 46 | 3 | 6 | 43 | 20 | 116 | 84 |
| 87,691 | 9 | 10 | 61 | 45 | 3 | 6 | 43 | 20 | 116 | 81 |
| 87,692 | 9 | 10 | 65 | 33 | 4 | 2 | 51 | 14 | 129 | 59 |
| 87,693 | 9 | 10 | 65 | 30 | 4 | 2 | 51 | 14 | 129 | 56 |
| 87,694 | 9 | 10 | 65 | 30 | 4 | 2 | 51 | 14 | 129 | 56 |
| 87,695 | 9 | 3  | 63 | 22 | 4 | 1 | 51 | 9  | 127 | 35 |
| 87,696 | 9 | 3  | 63 | 22 | 4 | 1 | 50 | 9  | 126 | 35 |
| 87,697 | 9 | 3  | 65 | 21 | 4 | 1 | 51 | 9  | 129 | 34 |
| 87,698 | 9 | 2  | 71 | 20 | 4 | 1 | 55 | 8  | 139 | 31 |
| 87,699 | 9 | 2  | 79 | 20 | 4 | 1 | 57 | 8  | 149 | 31 |
| 87,700 | 9 | 2  | 79 | 20 | 4 | 1 | 57 | 8  | 149 | 31 |
| 87,701 | 9 | 2  | 79 | 20 | 4 | 0 | 60 | 7  | 152 | 29 |
| 87,702 | 9 | 2  | 79 | 19 | 4 | 0 | 60 | 7  | 152 | 28 |
| 87,703 | 9 | 2  | 79 | 19 | 4 | 0 | 61 | 6  | 153 | 27 |
| 87,704 | 9 | 2  | 80 | 19 | 4 | 0 | 61 | 5  | 154 | 26 |
| 87,705 | 8 | 2  | 80 | 19 | 4 | 0 | 60 | 5  | 152 | 26 |
| 87,706 | 8 | 2  | 79 | 19 | 4 | 0 | 60 | 4  | 151 | 25 |
| 87,707 | 8 | 2  | 79 | 19 | 4 | 0 | 59 | 5  | 150 | 26 |
| 87,708 | 8 | 2  | 78 | 19 | 4 | 0 | 58 | 5  | 148 | 26 |
| 87,709 | 8 | 3  | 78 | 21 | 4 | 0 | 58 | 8  | 148 | 32 |
| 87,710 | 7 | 3  | 77 | 22 | 4 | 0 | 58 | 8  | 146 | 33 |
| 87,711 | 7 | 3  | 77 | 22 | 4 | 0 | 58 | 9  | 146 | 34 |
| 87,712 | 7 | 3  | 75 | 22 | 4 | 0 | 58 | 8  | 144 | 33 |
| 87,713 | 7 | 3  | 74 | 25 | 4 | 0 | 57 | 8  | 142 | 36 |
| 87,714 | 5 | 2  | 70 | 26 | 4 | 0 | 46 | 8  | 125 | 36 |
| 87,715 | 5 | 2  | 65 | 26 | 4 | 0 | 46 | 8  | 120 | 36 |
| 87,716 | 5 | 2  | 65 | 26 | 4 | 0 | 46 | 8  | 120 | 36 |
| 87,717 | 5 | 2  | 67 | 28 | 5 | 0 | 47 | 8  | 124 | 38 |
| 87,718 | 5 | 2  | 67 | 28 | 5 | 1 | 47 | 8  | 124 | 39 |
| 87,719 | 5 | 2  | 67 | 28 | 5 | 1 | 47 | 8  | 124 | 39 |
| 87,720 | 5 | 2  | 69 | 29 | 5 | 1 | 47 | 8  | 126 | 40 |
| 87,721 | 5 | 2  | 69 | 29 | 5 | 1 | 47 | 8  | 126 | 40 |
| 87,722 | 5 | 2  | 69 | 29 | 5 | 1 | 48 | 8  | 127 | 40 |
| 87,723 | 5 | 2  | 69 | 29 | 5 | 1 | 48 | 8  | 127 | 40 |
| 87,724 | 5 | 2  | 69 | 29 | 5 | 1 | 48 | 10 | 127 | 42 |
| 87,725 | 5 | 2  | 69 | 29 | 5 | 1 | 50 | 10 | 129 | 42 |
| 87,726 | 5 | 2  | 68 | 29 | 5 | 1 | 52 | 10 | 130 | 42 |
| 87,727 | 5 | 2  | 70 | 29 | 5 | 1 | 52 | 10 | 132 | 42 |
| 87,728 | 5 | 2  | 70 | 29 | 5 | 1 | 52 | 10 | 132 | 42 |

|        |   |   |     |    |   |   |    |    |     |    |
|--------|---|---|-----|----|---|---|----|----|-----|----|
| 87,729 | 5 | 2 | 72  | 24 | 5 | 1 | 52 | 9  | 134 | 36 |
| 87,730 | 5 | 2 | 72  | 22 | 5 | 1 | 52 | 9  | 134 | 34 |
| 87,731 | 5 | 2 | 72  | 22 | 5 | 1 | 50 | 9  | 132 | 34 |
| 87,732 | 5 | 2 | 73  | 23 | 5 | 1 | 49 | 9  | 132 | 35 |
| 87,733 | 5 | 2 | 74  | 21 | 6 | 1 | 49 | 9  | 134 | 33 |
| 87,734 | 5 | 1 | 74  | 20 | 6 | 1 | 49 | 8  | 134 | 30 |
| 87,735 | 5 | 1 | 74  | 25 | 6 | 1 | 49 | 8  | 134 | 35 |
| 87,736 | 3 | 1 | 68  | 27 | 6 | 1 | 46 | 7  | 123 | 36 |
| 87,737 | 3 | 1 | 71  | 35 | 5 | 1 | 47 | 13 | 126 | 50 |
| 87,738 | 3 | 1 | 74  | 41 | 5 | 1 | 48 | 15 | 130 | 58 |
| 87,739 | 2 | 1 | 71  | 39 | 5 | 1 | 44 | 17 | 122 | 58 |
| 87,740 | 2 | 1 | 68  | 39 | 5 | 1 | 40 | 18 | 115 | 59 |
| 87,741 | 0 | 1 | 57  | 40 | 3 | 1 | 34 | 18 | 94  | 60 |
| 87,742 | 0 | 1 | 55  | 42 | 3 | 1 | 36 | 19 | 94  | 63 |
| 87,743 | 0 | 1 | 54  | 42 | 2 | 1 | 30 | 19 | 86  | 63 |
| 87,744 | 0 | 1 | 55  | 42 | 2 | 1 | 30 | 19 | 87  | 63 |
| 87,745 | 0 | 1 | 58  | 48 | 2 | 1 | 35 | 20 | 95  | 70 |
| 87,746 | 0 | 1 | 58  | 54 | 2 | 1 | 35 | 20 | 95  | 76 |
| 87,747 | 0 | 1 | 58  | 54 | 2 | 1 | 35 | 20 | 95  | 76 |
| 87,748 | 0 | 1 | 56  | 54 | 2 | 1 | 34 | 21 | 92  | 77 |
| 87,749 | 1 | 1 | 50  | 59 | 2 | 1 | 30 | 22 | 83  | 83 |
| 87,750 | 1 | 1 | 42  | 61 | 2 | 1 | 28 | 22 | 73  | 85 |
| 87,751 | 1 | 1 | 41  | 62 | 2 | 1 | 25 | 24 | 69  | 88 |
| 87,752 | 1 | 1 | 41  | 62 | 2 | 1 | 25 | 24 | 69  | 88 |
| 87,753 | 1 | 1 | 42  | 62 | 2 | 1 | 24 | 24 | 69  | 88 |
| 87,754 | 1 | 1 | 43  | 63 | 2 | 2 | 25 | 24 | 71  | 90 |
| 87,755 | 1 | 1 | 43  | 63 | 2 | 2 | 26 | 24 | 72  | 90 |
| 87,756 | 1 | 1 | 43  | 65 | 2 | 2 | 26 | 24 | 72  | 92 |
| 87,757 | 1 | 1 | 43  | 65 | 2 | 2 | 26 | 24 | 72  | 92 |
| 87,758 | 2 | 1 | 43  | 65 | 2 | 2 | 26 | 23 | 73  | 91 |
| 87,759 | 3 | 0 | 62  | 63 | 2 | 2 | 34 | 20 | 101 | 85 |
| 87,760 | 3 | 0 | 62  | 63 | 2 | 2 | 34 | 20 | 101 | 85 |
| 87,761 | 3 | 0 | 66  | 62 | 2 | 2 | 37 | 19 | 108 | 83 |
| 87,762 | 3 | 0 | 66  | 62 | 2 | 2 | 37 | 19 | 108 | 83 |
| 87,763 | 3 | 0 | 84  | 62 | 3 | 2 | 38 | 19 | 128 | 83 |
| 87,764 | 4 | 0 | 96  | 61 | 6 | 3 | 41 | 21 | 147 | 85 |
| 87,765 | 4 | 1 | 104 | 60 | 7 | 3 | 44 | 22 | 159 | 86 |
| 87,766 | 4 | 1 | 107 | 59 | 7 | 3 | 44 | 22 | 162 | 85 |
| 87,767 | 4 | 1 | 107 | 59 | 7 | 3 | 44 | 22 | 162 | 85 |
| 87,768 | 4 | 1 | 105 | 59 | 6 | 3 | 43 | 22 | 158 | 85 |
| 87,769 | 4 | 1 | 105 | 59 | 6 | 2 | 43 | 22 | 158 | 84 |

|        |   |    |     |    |   |   |    |    |     |     |
|--------|---|----|-----|----|---|---|----|----|-----|-----|
| 87,770 | 4 | 1  | 105 | 59 | 6 | 2 | 43 | 23 | 158 | 85  |
| 87,771 | 4 | 2  | 103 | 62 | 6 | 2 | 43 | 25 | 156 | 91  |
| 87,772 | 4 | 2  | 103 | 65 | 6 | 2 | 43 | 27 | 156 | 96  |
| 87,773 | 5 | 2  | 104 | 74 | 7 | 2 | 43 | 28 | 159 | 106 |
| 87,774 | 5 | 3  | 104 | 75 | 7 | 3 | 42 | 29 | 158 | 110 |
| 87,775 | 5 | 3  | 104 | 78 | 7 | 3 | 41 | 31 | 157 | 115 |
| 87,776 | 5 | 5  | 104 | 93 | 7 | 3 | 39 | 41 | 155 | 142 |
| 87,777 | 5 | 5  | 102 | 94 | 7 | 4 | 39 | 43 | 153 | 146 |
| 87,778 | 5 | 7  | 102 | 98 | 7 | 5 | 39 | 43 | 153 | 153 |
| 87,779 | 5 | 7  | 102 | 98 | 7 | 5 | 39 | 43 | 153 | 153 |
| 87,780 | 5 | 7  | 100 | 98 | 7 | 5 | 39 | 44 | 151 | 154 |
| 87,781 | 6 | 7  | 100 | 98 | 7 | 5 | 39 | 44 | 152 | 154 |
| 87,782 | 6 | 7  | 101 | 99 | 7 | 5 | 40 | 45 | 154 | 156 |
| 87,783 | 6 | 8  | 100 | 99 | 7 | 5 | 40 | 45 | 153 | 157 |
| 87,784 | 6 | 8  | 99  | 99 | 6 | 5 | 40 | 45 | 151 | 157 |
| 87,785 | 6 | 8  | 101 | 99 | 6 | 5 | 41 | 45 | 154 | 157 |
| 87,786 | 6 | 8  | 101 | 93 | 6 | 5 | 41 | 45 | 154 | 151 |
| 87,787 | 6 | 8  | 97  | 94 | 6 | 5 | 41 | 45 | 150 | 152 |
| 87,788 | 6 | 8  | 90  | 87 | 6 | 5 | 40 | 39 | 142 | 139 |
| 87,789 | 6 | 8  | 88  | 81 | 6 | 5 | 38 | 37 | 138 | 131 |
| 87,790 | 6 | 8  | 88  | 75 | 6 | 5 | 40 | 34 | 140 | 122 |
| 87,791 | 6 | 8  | 88  | 75 | 6 | 5 | 40 | 34 | 140 | 122 |
| 87,792 | 6 | 8  | 82  | 73 | 6 | 5 | 34 | 34 | 128 | 120 |
| 87,793 | 6 | 9  | 80  | 73 | 6 | 5 | 30 | 34 | 122 | 121 |
| 87,794 | 6 | 9  | 79  | 74 | 6 | 5 | 30 | 35 | 121 | 123 |
| 87,795 | 6 | 9  | 76  | 68 | 6 | 5 | 27 | 34 | 115 | 116 |
| 87,796 | 6 | 9  | 77  | 57 | 6 | 5 | 26 | 32 | 115 | 103 |
| 87,797 | 6 | 9  | 78  | 57 | 6 | 5 | 28 | 33 | 118 | 104 |
| 87,798 | 6 | 10 | 78  | 59 | 6 | 5 | 28 | 33 | 118 | 107 |
| 87,799 | 6 | 11 | 78  | 60 | 6 | 5 | 28 | 33 | 118 | 109 |
| 87,800 | 5 | 11 | 78  | 59 | 6 | 5 | 28 | 33 | 117 | 108 |
| 87,801 | 5 | 11 | 78  | 56 | 6 | 5 | 29 | 31 | 118 | 103 |
| 87,802 | 5 | 11 | 78  | 57 | 6 | 6 | 29 | 31 | 118 | 105 |
| 87,803 | 5 | 11 | 78  | 57 | 6 | 6 | 29 | 31 | 118 | 105 |
| 87,804 | 5 | 11 | 77  | 57 | 6 | 6 | 29 | 31 | 117 | 105 |
| 87,805 | 5 | 11 | 75  | 56 | 6 | 5 | 28 | 31 | 114 | 103 |
| 87,806 | 5 | 11 | 75  | 54 | 6 | 5 | 27 | 31 | 113 | 101 |
| 87,807 | 6 | 11 | 75  | 54 | 6 | 5 | 27 | 31 | 114 | 101 |
| 87,808 | 5 | 11 | 75  | 54 | 6 | 5 | 27 | 31 | 113 | 101 |
| 87,809 | 5 | 11 | 75  | 55 | 6 | 5 | 27 | 31 | 113 | 102 |
| 87,810 | 4 | 11 | 56  | 57 | 6 | 5 | 19 | 34 | 85  | 107 |

|        |   |    |    |    |   |   |    |    |    |     |
|--------|---|----|----|----|---|---|----|----|----|-----|
| 87,811 | 4 | 11 | 53 | 64 | 6 | 5 | 18 | 37 | 81 | 117 |
| 87,812 | 5 | 11 | 52 | 71 | 6 | 7 | 16 | 48 | 79 | 137 |
| 87,813 | 5 | 11 | 34 | 74 | 5 | 7 | 15 | 49 | 59 | 141 |
| 87,814 | 4 | 11 | 22 | 74 | 2 | 7 | 12 | 49 | 40 | 141 |
| 87,815 | 4 | 11 | 14 | 73 | 1 | 6 | 9  | 48 | 28 | 138 |
| 87,816 | 4 | 10 | 14 | 74 | 1 | 6 | 10 | 47 | 29 | 137 |
| 87,817 | 4 | 10 | 11 | 73 | 1 | 6 | 10 | 47 | 26 | 136 |
| 87,818 | 4 | 10 | 11 | 73 | 1 | 6 | 10 | 47 | 26 | 136 |
| 87,819 | 4 | 10 | 15 | 74 | 1 | 6 | 10 | 47 | 30 | 137 |
| 87,820 | 4 | 10 | 16 | 75 | 1 | 6 | 10 | 47 | 31 | 138 |
| 87,821 | 5 | 11 | 23 | 76 | 1 | 6 | 12 | 46 | 41 | 139 |
| 87,822 | 5 | 10 | 23 | 72 | 1 | 6 | 12 | 44 | 41 | 132 |
| 87,823 | 5 | 10 | 23 | 69 | 1 | 6 | 12 | 42 | 41 | 127 |
| 87,824 | 4 | 9  | 27 | 59 | 1 | 5 | 11 | 40 | 43 | 113 |
| 87,825 | 4 | 9  | 33 | 56 | 1 | 5 | 12 | 36 | 50 | 106 |
| 87,826 | 4 | 9  | 36 | 56 | 1 | 6 | 12 | 36 | 53 | 107 |
| 87,827 | 6 | 7  | 36 | 41 | 3 | 5 | 12 | 24 | 57 | 77  |
| 87,828 | 6 | 5  | 37 | 38 | 3 | 4 | 12 | 24 | 58 | 71  |
| 87,829 | 6 | 5  | 37 | 40 | 3 | 4 | 12 | 24 | 58 | 73  |
| 87,830 | 6 | 5  | 37 | 41 | 3 | 5 | 12 | 25 | 58 | 76  |
| 87,831 | 6 | 5  | 37 | 41 | 3 | 5 | 12 | 24 | 58 | 75  |
| 87,832 | 5 | 5  | 40 | 41 | 3 | 5 | 12 | 24 | 60 | 75  |
| 87,833 | 5 | 4  | 39 | 39 | 3 | 5 | 11 | 23 | 58 | 71  |
| 87,834 | 5 | 4  | 39 | 39 | 3 | 5 | 11 | 23 | 58 | 71  |
| 87,835 | 5 | 4  | 37 | 39 | 3 | 5 | 10 | 23 | 55 | 71  |
| 87,836 | 5 | 4  | 37 | 39 | 3 | 5 | 10 | 23 | 55 | 71  |
| 87,837 | 5 | 4  | 37 | 38 | 3 | 5 | 10 | 23 | 55 | 70  |
| 87,838 | 5 | 4  | 38 | 37 | 3 | 5 | 10 | 23 | 56 | 69  |
| 87,839 | 5 | 4  | 38 | 36 | 3 | 5 | 10 | 23 | 56 | 68  |
| 87,840 | 5 | 4  | 37 | 36 | 3 | 6 | 10 | 23 | 55 | 69  |
| 87,841 | 5 | 4  | 35 | 36 | 3 | 7 | 8  | 23 | 51 | 70  |
| 87,842 | 5 | 4  | 35 | 36 | 3 | 7 | 8  | 23 | 51 | 70  |
| 87,843 | 5 | 4  | 33 | 36 | 3 | 8 | 9  | 24 | 50 | 72  |
| 87,844 | 5 | 3  | 33 | 34 | 3 | 8 | 9  | 23 | 50 | 68  |
| 87,845 | 5 | 4  | 33 | 33 | 3 | 9 | 8  | 22 | 49 | 68  |
| 87,846 | 5 | 5  | 33 | 33 | 3 | 9 | 8  | 22 | 49 | 69  |
| 87,847 | 5 | 5  | 32 | 35 | 3 | 9 | 8  | 25 | 48 | 74  |
| 87,848 | 5 | 5  | 33 | 35 | 3 | 9 | 6  | 24 | 47 | 73  |
| 87,849 | 5 | 4  | 33 | 33 | 3 | 9 | 7  | 24 | 48 | 70  |
| 87,850 | 5 | 3  | 34 | 32 | 3 | 9 | 7  | 24 | 49 | 68  |
| 87,851 | 5 | 3  | 34 | 32 | 3 | 9 | 6  | 24 | 48 | 68  |

|        |   |   |    |    |   |   |   |    |    |    |
|--------|---|---|----|----|---|---|---|----|----|----|
| 87,852 | 5 | 3 | 34 | 33 | 3 | 8 | 6 | 24 | 48 | 68 |
| 87,853 | 5 | 3 | 34 | 33 | 3 | 8 | 6 | 24 | 48 | 68 |
| 87,854 | 5 | 3 | 34 | 33 | 3 | 8 | 6 | 24 | 48 | 68 |
| 87,855 | 5 | 3 | 34 | 33 | 3 | 8 | 6 | 24 | 48 | 68 |
| 87,856 | 5 | 3 | 34 | 34 | 3 | 8 | 6 | 24 | 48 | 69 |
| 87,857 | 5 | 3 | 35 | 34 | 3 | 8 | 6 | 24 | 49 | 69 |
| 87,858 | 4 | 3 | 35 | 35 | 3 | 8 | 6 | 24 | 48 | 70 |
| 87,859 | 4 | 3 | 35 | 36 | 3 | 8 | 6 | 24 | 48 | 71 |
| 87,860 | 4 | 6 | 35 | 43 | 3 | 8 | 6 | 27 | 48 | 84 |
| 87,861 | 4 | 6 | 35 | 41 | 3 | 8 | 6 | 25 | 48 | 80 |
| 87,862 | 4 | 6 | 35 | 35 | 3 | 8 | 6 | 22 | 48 | 71 |
| 87,863 | 3 | 7 | 36 | 29 | 3 | 6 | 6 | 16 | 48 | 58 |
| 87,864 | 3 | 7 | 36 | 26 | 3 | 7 | 6 | 15 | 48 | 55 |
| 87,865 | 3 | 7 | 36 | 28 | 3 | 7 | 6 | 17 | 48 | 59 |
| 87,866 | 3 | 7 | 36 | 27 | 3 | 7 | 6 | 16 | 48 | 57 |
| 87,867 | 3 | 7 | 36 | 26 | 3 | 7 | 5 | 17 | 47 | 57 |
| 87,868 | 3 | 7 | 40 | 26 | 3 | 7 | 5 | 17 | 51 | 57 |
| 87,869 | 3 | 7 | 36 | 25 | 3 | 7 | 5 | 17 | 47 | 56 |
| 87,870 | 3 | 7 | 35 | 24 | 3 | 7 | 5 | 17 | 46 | 55 |
| 87,871 | 3 | 7 | 35 | 24 | 3 | 7 | 5 | 17 | 46 | 55 |
| 87,872 | 2 | 6 | 28 | 23 | 3 | 7 | 3 | 17 | 36 | 53 |
| 87,873 | 2 | 6 | 28 | 25 | 3 | 7 | 3 | 17 | 36 | 55 |
| 87,874 | 2 | 6 | 27 | 25 | 2 | 7 | 3 | 17 | 34 | 55 |
| 87,875 | 2 | 6 | 23 | 25 | 2 | 7 | 3 | 17 | 30 | 55 |
| 87,876 | 2 | 6 | 17 | 25 | 2 | 6 | 2 | 17 | 23 | 54 |
| 87,877 | 2 | 6 | 15 | 25 | 2 | 6 | 2 | 17 | 21 | 54 |
| 87,878 | 0 | 6 | 15 | 23 | 0 | 6 | 2 | 17 | 17 | 52 |
| 87,879 | 1 | 6 | 14 | 22 | 0 | 6 | 2 | 17 | 17 | 51 |
| 87,880 | 2 | 6 | 15 | 21 | 0 | 5 | 3 | 16 | 20 | 48 |
| 87,881 | 2 | 6 | 15 | 21 | 0 | 5 | 3 | 16 | 20 | 48 |
| 87,882 | 2 | 6 | 20 | 21 | 0 | 5 | 5 | 16 | 27 | 48 |
| 87,883 | 2 | 6 | 19 | 22 | 0 | 5 | 7 | 16 | 28 | 49 |
| 87,884 | 2 | 6 | 30 | 22 | 0 | 5 | 7 | 16 | 39 | 49 |
| 87,885 | 2 | 6 | 34 | 22 | 0 | 5 | 7 | 16 | 43 | 49 |
| 87,886 | 2 | 6 | 34 | 22 | 1 | 5 | 8 | 16 | 45 | 49 |
| 87,887 | 2 | 6 | 37 | 23 | 1 | 5 | 8 | 16 | 48 | 50 |
| 87,888 | 2 | 6 | 37 | 23 | 1 | 5 | 8 | 16 | 48 | 50 |
| 87,889 | 3 | 6 | 47 | 23 | 1 | 5 | 9 | 16 | 60 | 50 |
| 87,890 | 3 | 6 | 47 | 23 | 1 | 5 | 9 | 16 | 60 | 50 |
| 87,891 | 3 | 6 | 47 | 23 | 1 | 3 | 9 | 16 | 60 | 48 |
| 87,892 | 3 | 6 | 47 | 24 | 1 | 3 | 9 | 16 | 60 | 49 |



|        |    |   |    |    |   |   |    |    |     |    |
|--------|----|---|----|----|---|---|----|----|-----|----|
| 87,893 | 3  | 6 | 47 | 24 | 1 | 3 | 9  | 16 | 60  | 49 |
| 87,894 | 3  | 6 | 47 | 25 | 1 | 2 | 8  | 15 | 59  | 48 |
| 87,895 | 3  | 6 | 47 | 25 | 1 | 2 | 8  | 15 | 59  | 48 |
| 87,896 | 3  | 5 | 47 | 26 | 1 | 1 | 8  | 15 | 59  | 47 |
| 87,897 | 3  | 4 | 47 | 26 | 1 | 1 | 8  | 15 | 59  | 46 |
| 87,898 | 3  | 8 | 47 | 24 | 1 | 1 | 8  | 12 | 59  | 45 |
| 87,899 | 3  | 8 | 45 | 24 | 1 | 1 | 8  | 12 | 57  | 45 |
| 87,900 | 3  | 8 | 46 | 26 | 1 | 1 | 7  | 12 | 57  | 47 |
| 87,901 | 3  | 8 | 45 | 26 | 1 | 1 | 7  | 12 | 56  | 47 |
| 87,902 | 8  | 8 | 53 | 25 | 1 | 1 | 12 | 12 | 74  | 46 |
| 87,903 | 8  | 8 | 53 | 25 | 1 | 1 | 12 | 12 | 74  | 46 |
| 87,904 | 8  | 8 | 63 | 25 | 1 | 1 | 15 | 12 | 87  | 46 |
| 87,905 | 10 | 8 | 66 | 26 | 1 | 1 | 15 | 12 | 92  | 47 |
| 87,906 | 10 | 8 | 75 | 26 | 1 | 1 | 19 | 12 | 105 | 47 |
| 87,907 | 10 | 8 | 76 | 27 | 1 | 1 | 19 | 12 | 106 | 48 |
| 87,908 | 10 | 8 | 75 | 27 | 1 | 1 | 19 | 12 | 105 | 48 |
| 87,909 | 10 | 8 | 76 | 26 | 1 | 1 | 19 | 12 | 106 | 47 |
| 87,910 | 10 | 8 | 76 | 25 | 1 | 1 | 19 | 12 | 106 | 46 |
| 87,911 | 10 | 5 | 76 | 17 | 1 | 1 | 19 | 8  | 106 | 31 |
| 87,912 | 10 | 5 | 76 | 16 | 1 | 1 | 19 | 8  | 106 | 30 |
| 87,913 | 10 | 5 | 76 | 16 | 1 | 1 | 19 | 9  | 106 | 31 |
| 87,914 | 10 | 4 | 76 | 15 | 1 | 1 | 19 | 4  | 106 | 24 |
| 87,915 | 10 | 5 | 76 | 15 | 1 | 0 | 19 | 4  | 106 | 24 |
| 87,916 | 10 | 5 | 78 | 13 | 1 | 0 | 19 | 2  | 108 | 20 |
| 87,917 | 10 | 5 | 78 | 13 | 1 | 0 | 21 | 2  | 110 | 20 |
| 87,918 | 10 | 5 | 78 | 13 | 1 | 0 | 21 | 1  | 110 | 19 |
| 87,919 | 10 | 5 | 74 | 14 | 1 | 0 | 21 | 1  | 106 | 20 |
| 87,920 | 10 | 5 | 74 | 14 | 1 | 0 | 21 | 1  | 106 | 20 |
| 87,921 | 10 | 5 | 74 | 14 | 1 | 0 | 21 | 1  | 106 | 20 |
| 87,922 | 10 | 5 | 74 | 14 | 1 | 0 | 21 | 2  | 106 | 21 |
| 87,923 | 10 | 5 | 74 | 12 | 1 | 0 | 21 | 2  | 106 | 19 |
| 87,924 | 10 | 5 | 74 | 12 | 1 | 0 | 21 | 2  | 106 | 19 |
| 87,925 | 10 | 5 | 74 | 12 | 1 | 0 | 21 | 2  | 106 | 19 |
| 87,926 | 10 | 5 | 78 | 12 | 1 | 0 | 23 | 3  | 112 | 20 |
| 87,927 | 10 | 5 | 78 | 12 | 1 | 0 | 23 | 3  | 112 | 20 |
| 87,928 | 10 | 5 | 77 | 12 | 1 | 0 | 24 | 3  | 112 | 20 |
| 87,929 | 10 | 5 | 79 | 13 | 2 | 0 | 25 | 3  | 116 | 21 |
| 87,930 | 9  | 5 | 84 | 14 | 2 | 0 | 28 | 4  | 123 | 23 |
| 87,931 | 8  | 5 | 83 | 15 | 2 | 0 | 27 | 5  | 120 | 25 |
| 87,932 | 8  | 5 | 83 | 17 | 2 | 0 | 27 | 6  | 120 | 28 |
| 87,933 | 8  | 5 | 78 | 19 | 2 | 0 | 25 | 8  | 113 | 32 |

|        |    |   |    |    |   |   |    |    |     |    |
|--------|----|---|----|----|---|---|----|----|-----|----|
| 87,934 | 8  | 5 | 77 | 20 | 2 | 0 | 23 | 9  | 110 | 34 |
| 87,935 | 9  | 5 | 66 | 21 | 2 | 1 | 23 | 9  | 100 | 36 |
| 87,936 | 9  | 6 | 67 | 25 | 2 | 1 | 26 | 13 | 104 | 45 |
| 87,937 | 9  | 6 | 66 | 31 | 1 | 1 | 26 | 13 | 102 | 51 |
| 87,938 | 9  | 6 | 63 | 35 | 1 | 1 | 26 | 13 | 99  | 55 |
| 87,939 | 8  | 6 | 56 | 35 | 1 | 1 | 26 | 13 | 91  | 55 |
| 87,940 | 8  | 6 | 54 | 35 | 1 | 1 | 26 | 13 | 89  | 55 |
| 87,941 | 8  | 6 | 55 | 36 | 1 | 1 | 27 | 13 | 91  | 56 |
| 87,942 | 8  | 6 | 55 | 35 | 1 | 1 | 27 | 13 | 91  | 55 |
| 87,943 | 8  | 7 | 55 | 35 | 1 | 1 | 27 | 13 | 91  | 56 |
| 87,944 | 8  | 7 | 55 | 35 | 1 | 1 | 27 | 13 | 91  | 56 |
| 87,945 | 8  | 7 | 55 | 34 | 1 | 1 | 27 | 13 | 91  | 55 |
| 87,946 | 8  | 7 | 55 | 33 | 1 | 1 | 27 | 13 | 91  | 54 |
| 87,947 | 8  | 7 | 55 | 33 | 1 | 1 | 27 | 13 | 91  | 54 |
| 87,948 | 8  | 3 | 55 | 33 | 1 | 1 | 27 | 13 | 91  | 50 |
| 87,949 | 8  | 3 | 54 | 34 | 1 | 1 | 27 | 13 | 90  | 51 |
| 87,950 | 7  | 3 | 50 | 34 | 1 | 1 | 25 | 13 | 83  | 51 |
| 87,951 | 10 | 3 | 50 | 32 | 1 | 1 | 25 | 13 | 86  | 49 |
| 87,952 | 10 | 3 | 50 | 32 | 1 | 2 | 25 | 14 | 86  | 51 |
| 87,953 | 6  | 3 | 46 | 32 | 1 | 2 | 22 | 14 | 75  | 51 |
| 87,954 | 6  | 3 | 36 | 32 | 1 | 2 | 19 | 14 | 62  | 51 |
| 87,955 | 4  | 3 | 34 | 29 | 1 | 2 | 19 | 14 | 58  | 48 |
| 87,956 | 4  | 3 | 35 | 29 | 1 | 2 | 20 | 14 | 60  | 48 |
| 87,957 | 4  | 3 | 29 | 29 | 1 | 2 | 17 | 14 | 51  | 48 |
| 87,958 | 4  | 3 | 28 | 29 | 1 | 2 | 17 | 14 | 50  | 48 |
| 87,959 | 4  | 3 | 27 | 29 | 1 | 2 | 17 | 14 | 49  | 48 |
| 87,960 | 4  | 3 | 27 | 29 | 1 | 2 | 17 | 14 | 49  | 48 |
| 87,961 | 4  | 3 | 27 | 29 | 1 | 2 | 17 | 14 | 49  | 48 |
| 87,962 | 4  | 3 | 27 | 32 | 1 | 2 | 17 | 14 | 49  | 51 |
| 87,963 | 4  | 3 | 27 | 49 | 1 | 3 | 17 | 21 | 49  | 76 |
| 87,964 | 5  | 4 | 26 | 51 | 1 | 3 | 17 | 20 | 49  | 78 |
| 87,965 | 5  | 4 | 26 | 54 | 1 | 3 | 17 | 20 | 49  | 81 |
| 87,966 | 5  | 3 | 26 | 55 | 1 | 3 | 17 | 20 | 49  | 81 |
| 87,967 | 5  | 3 | 24 | 55 | 1 | 3 | 17 | 20 | 47  | 81 |
| 87,968 | 5  | 3 | 24 | 55 | 1 | 4 | 14 | 20 | 44  | 82 |
| 87,969 | 5  | 3 | 24 | 54 | 1 | 4 | 14 | 20 | 44  | 81 |
| 87,970 | 5  | 3 | 24 | 54 | 1 | 4 | 14 | 20 | 44  | 81 |
| 87,971 | 5  | 3 | 24 | 54 | 1 | 4 | 14 | 20 | 44  | 81 |
| 87,972 | 5  | 3 | 24 | 54 | 1 | 4 | 14 | 19 | 44  | 80 |
| 87,973 | 5  | 3 | 24 | 61 | 1 | 4 | 14 | 24 | 44  | 92 |
| 87,974 | 5  | 3 | 24 | 61 | 1 | 4 | 14 | 24 | 44  | 92 |

|        |   |   |    |    |   |   |    |    |    |    |
|--------|---|---|----|----|---|---|----|----|----|----|
| 87,975 | 5 | 3 | 24 | 61 | 1 | 4 | 14 | 24 | 44 | 92 |
| 87,976 | 5 | 3 | 25 | 61 | 1 | 4 | 13 | 24 | 44 | 92 |
| 87,977 | 5 | 3 | 21 | 61 | 1 | 4 | 12 | 23 | 39 | 91 |
| 87,978 | 5 | 3 | 21 | 63 | 1 | 4 | 12 | 23 | 39 | 93 |
| 87,979 | 5 | 3 | 19 | 63 | 0 | 5 | 11 | 24 | 35 | 95 |
| 87,980 | 5 | 3 | 17 | 64 | 0 | 5 | 14 | 24 | 36 | 96 |
| 87,981 | 5 | 3 | 14 | 61 | 0 | 5 | 11 | 22 | 30 | 91 |
| 87,982 | 5 | 3 | 15 | 59 | 0 | 5 | 14 | 21 | 34 | 88 |
| 87,983 | 5 | 3 | 15 | 57 | 0 | 5 | 14 | 19 | 34 | 84 |
| 87,984 | 5 | 3 | 15 | 55 | 0 | 5 | 14 | 18 | 34 | 81 |
| 87,985 | 5 | 3 | 14 | 54 | 0 | 4 | 14 | 18 | 33 | 79 |
| 87,986 | 4 | 3 | 14 | 54 | 0 | 4 | 14 | 18 | 32 | 79 |
| 87,987 | 4 | 2 | 9  | 51 | 0 | 4 | 11 | 14 | 24 | 71 |
| 87,988 | 4 | 2 | 9  | 45 | 0 | 4 | 10 | 14 | 23 | 65 |
| 87,989 | 4 | 2 | 9  | 28 | 0 | 3 | 10 | 9  | 23 | 42 |
| 87,990 | 4 | 2 | 10 | 35 | 0 | 4 | 9  | 14 | 23 | 55 |
| 87,991 | 4 | 2 | 9  | 39 | 0 | 4 | 8  | 15 | 21 | 60 |
| 87,992 | 4 | 2 | 10 | 39 | 0 | 4 | 8  | 15 | 22 | 60 |
| 87,993 | 4 | 1 | 10 | 39 | 0 | 4 | 8  | 15 | 22 | 59 |
| 87,994 | 4 | 1 | 10 | 39 | 0 | 4 | 8  | 15 | 22 | 59 |
| 87,995 | 4 | 1 | 10 | 39 | 0 | 4 | 8  | 15 | 22 | 59 |
| 87,996 | 4 | 1 | 10 | 39 | 0 | 4 | 8  | 15 | 22 | 59 |
| 87,997 | 4 | 1 | 12 | 40 | 0 | 4 | 8  | 15 | 24 | 60 |
| 87,998 | 4 | 1 | 14 | 40 | 0 | 3 | 9  | 14 | 27 | 58 |
| 87,999 | 4 | 1 | 14 | 39 | 0 | 3 | 9  | 14 | 27 | 57 |
| 88,000 | 4 | 1 | 14 | 39 | 0 | 3 | 9  | 14 | 27 | 57 |
| 88,001 | 4 | 1 | 14 | 39 | 0 | 3 | 9  | 14 | 27 | 57 |
| 88,002 | 1 | 1 | 14 | 40 | 0 | 3 | 9  | 14 | 24 | 58 |
| 88,003 | 1 | 1 | 14 | 40 | 0 | 4 | 9  | 14 | 24 | 59 |
| 88,004 | 3 | 1 | 18 | 40 | 0 | 4 | 12 | 14 | 33 | 59 |
| 88,005 | 3 | 1 | 25 | 40 | 2 | 4 | 15 | 14 | 45 | 59 |
| 88,006 | 4 | 1 | 30 | 40 | 3 | 4 | 16 | 14 | 53 | 59 |
| 88,007 | 4 | 1 | 28 | 40 | 3 | 4 | 14 | 14 | 49 | 59 |
| 88,008 | 4 | 1 | 46 | 40 | 3 | 4 | 18 | 14 | 71 | 59 |
| 88,009 | 4 | 1 | 46 | 40 | 3 | 4 | 18 | 14 | 71 | 59 |
| 88,010 | 4 | 2 | 46 | 40 | 3 | 5 | 18 | 14 | 71 | 61 |
| 88,011 | 4 | 2 | 52 | 39 | 4 | 5 | 20 | 13 | 80 | 59 |
| 88,012 | 4 | 2 | 52 | 36 | 4 | 5 | 21 | 13 | 81 | 56 |
| 88,013 | 4 | 2 | 52 | 27 | 4 | 5 | 21 | 12 | 81 | 46 |
| 88,014 | 4 | 3 | 52 | 28 | 4 | 5 | 21 | 12 | 81 | 48 |
| 88,015 | 3 | 2 | 52 | 23 | 4 | 5 | 21 | 8  | 80 | 38 |

|        |   |    |     |    |   |   |    |    |     |     |
|--------|---|----|-----|----|---|---|----|----|-----|-----|
| 88,016 | 3 | 2  | 52  | 17 | 4 | 5 | 22 | 8  | 81  | 32  |
| 88,017 | 3 | 2  | 55  | 15 | 4 | 5 | 24 | 8  | 86  | 30  |
| 88,018 | 3 | 3  | 55  | 15 | 4 | 5 | 24 | 8  | 86  | 31  |
| 88,019 | 3 | 3  | 55  | 16 | 4 | 5 | 24 | 8  | 86  | 32  |
| 88,020 | 3 | 3  | 56  | 16 | 4 | 4 | 24 | 8  | 87  | 31  |
| 88,021 | 3 | 3  | 61  | 16 | 5 | 4 | 26 | 9  | 95  | 32  |
| 88,022 | 3 | 3  | 67  | 16 | 6 | 4 | 30 | 9  | 106 | 32  |
| 88,023 | 4 | 3  | 68  | 10 | 6 | 4 | 30 | 6  | 108 | 23  |
| 88,024 | 4 | 3  | 68  | 10 | 6 | 4 | 30 | 6  | 108 | 23  |
| 88,025 | 4 | 3  | 75  | 10 | 7 | 4 | 36 | 5  | 122 | 22  |
| 88,026 | 5 | 3  | 77  | 10 | 7 | 4 | 37 | 4  | 126 | 21  |
| 88,027 | 5 | 3  | 77  | 11 | 7 | 4 | 38 | 6  | 127 | 24  |
| 88,028 | 5 | 3  | 79  | 14 | 7 | 4 | 39 | 7  | 130 | 28  |
| 88,029 | 5 | 3  | 80  | 13 | 7 | 4 | 39 | 7  | 131 | 27  |
| 88,030 | 5 | 3  | 80  | 13 | 7 | 3 | 36 | 6  | 128 | 25  |
| 88,031 | 5 | 4  | 87  | 20 | 7 | 5 | 44 | 7  | 143 | 36  |
| 88,032 | 5 | 4  | 87  | 22 | 7 | 5 | 44 | 12 | 143 | 43  |
| 88,033 | 5 | 4  | 87  | 25 | 7 | 5 | 41 | 14 | 140 | 48  |
| 88,034 | 5 | 4  | 87  | 25 | 7 | 5 | 41 | 15 | 140 | 49  |
| 88,035 | 6 | 4  | 89  | 26 | 7 | 5 | 42 | 15 | 144 | 50  |
| 88,036 | 6 | 5  | 90  | 35 | 7 | 5 | 42 | 18 | 145 | 63  |
| 88,037 | 6 | 5  | 90  | 35 | 7 | 5 | 42 | 18 | 145 | 63  |
| 88,038 | 6 | 6  | 91  | 37 | 7 | 5 | 42 | 18 | 146 | 66  |
| 88,039 | 6 | 6  | 91  | 40 | 7 | 5 | 42 | 20 | 146 | 71  |
| 88,040 | 6 | 7  | 90  | 41 | 7 | 5 | 42 | 19 | 145 | 72  |
| 88,041 | 6 | 8  | 94  | 48 | 7 | 6 | 42 | 23 | 149 | 85  |
| 88,042 | 6 | 8  | 94  | 48 | 7 | 6 | 42 | 23 | 149 | 85  |
| 88,043 | 6 | 8  | 93  | 48 | 7 | 6 | 42 | 23 | 148 | 85  |
| 88,044 | 6 | 8  | 93  | 48 | 7 | 6 | 42 | 24 | 148 | 86  |
| 88,045 | 6 | 8  | 95  | 49 | 7 | 6 | 42 | 24 | 150 | 87  |
| 88,046 | 6 | 8  | 95  | 49 | 7 | 6 | 42 | 24 | 150 | 87  |
| 88,047 | 6 | 8  | 98  | 50 | 7 | 6 | 43 | 25 | 154 | 89  |
| 88,048 | 7 | 8  | 99  | 50 | 7 | 6 | 43 | 25 | 156 | 89  |
| 88,049 | 7 | 8  | 97  | 50 | 7 | 6 | 42 | 25 | 153 | 89  |
| 88,050 | 7 | 8  | 101 | 54 | 7 | 6 | 44 | 25 | 159 | 93  |
| 88,051 | 6 | 8  | 109 | 57 | 9 | 6 | 45 | 26 | 169 | 97  |
| 88,052 | 5 | 8  | 108 | 59 | 9 | 6 | 42 | 26 | 164 | 99  |
| 88,053 | 5 | 8  | 107 | 59 | 9 | 6 | 42 | 26 | 163 | 99  |
| 88,054 | 5 | 8  | 113 | 67 | 9 | 5 | 46 | 27 | 173 | 107 |
| 88,055 | 5 | 9  | 113 | 74 | 9 | 5 | 46 | 28 | 173 | 116 |
| 88,056 | 5 | 10 | 107 | 82 | 7 | 7 | 44 | 33 | 163 | 132 |

|        |   |    |     |    |   |   |    |    |     |     |
|--------|---|----|-----|----|---|---|----|----|-----|-----|
| 88,057 | 5 | 12 | 103 | 92 | 6 | 7 | 43 | 36 | 157 | 147 |
| 88,058 | 5 | 12 | 103 | 92 | 6 | 7 | 44 | 36 | 158 | 147 |
| 88,059 | 5 | 12 | 87  | 96 | 6 | 8 | 40 | 36 | 138 | 152 |
| 88,060 | 5 | 11 | 84  | 96 | 6 | 7 | 39 | 36 | 134 | 150 |
| 88,061 | 5 | 11 | 81  | 96 | 5 | 7 | 39 | 36 | 130 | 150 |
| 88,062 | 5 | 11 | 81  | 96 | 5 | 7 | 38 | 36 | 129 | 150 |
| 88,063 | 5 | 11 | 81  | 96 | 5 | 7 | 39 | 36 | 130 | 150 |
| 88,064 | 5 | 11 | 82  | 97 | 5 | 6 | 39 | 36 | 131 | 150 |
| 88,065 | 5 | 10 | 82  | 96 | 5 | 6 | 38 | 36 | 130 | 148 |
| 88,066 | 5 | 10 | 83  | 97 | 5 | 6 | 38 | 36 | 131 | 149 |
| 88,067 | 5 | 10 | 83  | 97 | 5 | 6 | 38 | 36 | 131 | 149 |
| 88,068 | 5 | 9  | 81  | 97 | 5 | 6 | 37 | 36 | 128 | 148 |
| 88,069 | 5 | 9  | 83  | 96 | 5 | 6 | 37 | 36 | 130 | 147 |
| 88,070 | 5 | 9  | 109 | 96 | 5 | 6 | 43 | 37 | 162 | 148 |
| 88,071 | 5 | 9  | 108 | 98 | 5 | 6 | 41 | 38 | 159 | 151 |
| 88,072 | 5 | 9  | 104 | 98 | 4 | 6 | 41 | 37 | 154 | 150 |
| 88,073 | 5 | 9  | 108 | 98 | 3 | 6 | 41 | 37 | 157 | 150 |
| 88,074 | 4 | 10 | 107 | 98 | 3 | 6 | 41 | 37 | 155 | 151 |
| 88,075 | 4 | 10 | 100 | 98 | 2 | 6 | 35 | 38 | 141 | 152 |
| 88,076 | 4 | 10 | 113 | 98 | 6 | 6 | 40 | 38 | 163 | 152 |
| 88,077 | 6 | 10 | 142 | 96 | 6 | 6 | 53 | 37 | 207 | 149 |
| 88,078 | 6 | 10 | 142 | 97 | 6 | 6 | 52 | 37 | 206 | 150 |
| 88,079 | 6 | 10 | 143 | 94 | 6 | 6 | 51 | 36 | 206 | 146 |
| 88,080 | 6 | 9  | 143 | 85 | 6 | 4 | 51 | 35 | 206 | 133 |
| 88,081 | 6 | 9  | 142 | 86 | 6 | 4 | 50 | 37 | 204 | 136 |
| 88,082 | 6 | 9  | 137 | 86 | 6 | 4 | 43 | 37 | 192 | 136 |
| 88,083 | 6 | 9  | 137 | 85 | 6 | 4 | 43 | 32 | 192 | 130 |
| 88,084 | 7 | 10 | 136 | 85 | 6 | 4 | 43 | 34 | 192 | 133 |
| 88,085 | 6 | 10 | 135 | 89 | 6 | 5 | 43 | 36 | 190 | 140 |
| 88,086 | 6 | 11 | 136 | 94 | 6 | 5 | 42 | 43 | 190 | 153 |
| 88,087 | 6 | 11 | 135 | 88 | 6 | 5 | 42 | 42 | 189 | 146 |
| 88,088 | 6 | 11 | 135 | 88 | 6 | 5 | 42 | 42 | 189 | 146 |
| 88,089 | 6 | 10 | 137 | 87 | 6 | 6 | 42 | 42 | 191 | 145 |
| 88,090 | 6 | 9  | 135 | 85 | 6 | 6 | 47 | 40 | 194 | 140 |
| 88,091 | 6 | 9  | 135 | 85 | 6 | 6 | 47 | 39 | 194 | 139 |
| 88,092 | 6 | 8  | 136 | 81 | 6 | 5 | 47 | 35 | 195 | 129 |
| 88,093 | 7 | 8  | 138 | 82 | 6 | 6 | 47 | 38 | 198 | 134 |
| 88,094 | 7 | 8  | 138 | 86 | 6 | 6 | 47 | 38 | 198 | 138 |
| 88,095 | 7 | 8  | 136 | 86 | 6 | 6 | 47 | 37 | 196 | 137 |
| 88,096 | 7 | 9  | 137 | 86 | 6 | 6 | 47 | 38 | 197 | 139 |
| 88,097 | 7 | 9  | 137 | 87 | 6 | 6 | 46 | 40 | 196 | 142 |

|        |   |    |     |    |   |   |    |    |     |     |
|--------|---|----|-----|----|---|---|----|----|-----|-----|
| 88,098 | 7 | 9  | 134 | 87 | 6 | 6 | 46 | 39 | 193 | 141 |
| 88,099 | 6 | 12 | 131 | 88 | 6 | 6 | 46 | 40 | 189 | 146 |
| 88,100 | 6 | 12 | 127 | 88 | 6 | 6 | 44 | 40 | 183 | 146 |
| 88,101 | 6 | 12 | 126 | 84 | 6 | 6 | 44 | 40 | 182 | 142 |
| 88,102 | 6 | 12 | 118 | 80 | 4 | 6 | 43 | 39 | 171 | 137 |
| 88,103 | 6 | 12 | 115 | 79 | 4 | 6 | 42 | 39 | 167 | 136 |
| 88,104 | 6 | 12 | 115 | 79 | 4 | 6 | 42 | 40 | 167 | 137 |
| 88,105 | 6 | 10 | 115 | 57 | 4 | 4 | 41 | 35 | 166 | 106 |
| 88,106 | 8 | 10 | 115 | 59 | 4 | 4 | 41 | 36 | 168 | 109 |
| 88,107 | 8 | 10 | 114 | 59 | 4 | 4 | 40 | 36 | 166 | 109 |
| 88,108 | 7 | 8  | 112 | 51 | 4 | 4 | 41 | 33 | 164 | 96  |
| 88,109 | 7 | 8  | 111 | 51 | 4 | 4 | 40 | 33 | 162 | 96  |
| 88,110 | 7 | 8  | 108 | 47 | 4 | 3 | 40 | 33 | 159 | 91  |
| 88,111 | 7 | 8  | 110 | 47 | 4 | 3 | 39 | 33 | 160 | 91  |
| 88,112 | 7 | 8  | 110 | 47 | 4 | 3 | 39 | 33 | 160 | 91  |
| 88,113 | 7 | 8  | 111 | 47 | 4 | 3 | 38 | 33 | 160 | 91  |
| 88,114 | 7 | 8  | 111 | 46 | 4 | 3 | 38 | 32 | 160 | 89  |
| 88,115 | 7 | 8  | 111 | 46 | 4 | 3 | 39 | 32 | 161 | 89  |
| 88,116 | 7 | 8  | 110 | 45 | 4 | 3 | 39 | 32 | 160 | 88  |
| 88,117 | 7 | 8  | 110 | 45 | 4 | 3 | 39 | 32 | 160 | 88  |
| 88,118 | 7 | 8  | 109 | 45 | 4 | 3 | 39 | 32 | 159 | 88  |
| 88,119 | 7 | 8  | 110 | 46 | 4 | 3 | 39 | 32 | 160 | 89  |
| 88,120 | 7 | 8  | 108 | 46 | 4 | 3 | 39 | 32 | 158 | 89  |
| 88,121 | 7 | 8  | 81  | 46 | 4 | 3 | 33 | 31 | 125 | 88  |
| 88,122 | 7 | 8  | 81  | 44 | 4 | 3 | 33 | 30 | 125 | 85  |
| 88,123 | 7 | 8  | 75  | 45 | 4 | 3 | 29 | 30 | 115 | 86  |
| 88,124 | 7 | 9  | 72  | 50 | 4 | 3 | 29 | 34 | 112 | 96  |
| 88,125 | 7 | 9  | 71  | 52 | 0 | 3 | 25 | 38 | 103 | 102 |
| 88,126 | 7 | 9  | 64  | 52 | 0 | 3 | 23 | 38 | 94  | 102 |
| 88,127 | 7 | 9  | 55  | 53 | 0 | 3 | 21 | 39 | 83  | 104 |
| 88,128 | 5 | 9  | 36  | 53 | 0 | 3 | 10 | 38 | 51  | 103 |
| 88,129 | 5 | 10 | 33  | 52 | 0 | 3 | 10 | 38 | 48  | 103 |
| 88,130 | 5 | 10 | 32  | 52 | 0 | 3 | 10 | 38 | 47  | 103 |
| 88,131 | 5 | 10 | 34  | 52 | 0 | 3 | 11 | 38 | 50  | 103 |
| 88,132 | 5 | 10 | 34  | 51 | 0 | 3 | 11 | 36 | 50  | 100 |
| 88,133 | 5 | 10 | 33  | 54 | 0 | 3 | 11 | 36 | 49  | 103 |
| 88,134 | 5 | 10 | 33  | 52 | 0 | 3 | 11 | 37 | 49  | 102 |
| 88,135 | 4 | 9  | 33  | 51 | 0 | 3 | 11 | 33 | 48  | 96  |
| 88,136 | 4 | 8  | 31  | 41 | 0 | 2 | 11 | 24 | 46  | 75  |
| 88,137 | 4 | 8  | 33  | 41 | 0 | 2 | 11 | 28 | 48  | 79  |
| 88,138 | 4 | 7  | 35  | 47 | 0 | 2 | 15 | 35 | 54  | 91  |

|        |   |   |    |    |   |   |    |    |     |    |
|--------|---|---|----|----|---|---|----|----|-----|----|
| 88,139 | 4 | 8 | 34 | 49 | 0 | 2 | 15 | 36 | 53  | 95 |
| 88,140 | 4 | 8 | 36 | 50 | 0 | 1 | 16 | 38 | 56  | 97 |
| 88,141 | 4 | 8 | 33 | 47 | 0 | 1 | 11 | 38 | 48  | 94 |
| 88,142 | 5 | 8 | 32 | 48 | 0 | 1 | 12 | 39 | 49  | 96 |
| 88,143 | 4 | 8 | 32 | 45 | 0 | 1 | 12 | 42 | 48  | 96 |
| 88,144 | 4 | 8 | 30 | 45 | 0 | 0 | 12 | 40 | 46  | 93 |
| 88,145 | 4 | 8 | 32 | 43 | 0 | 0 | 12 | 41 | 48  | 92 |
| 88,146 | 4 | 8 | 31 | 43 | 0 | 0 | 12 | 41 | 47  | 92 |
| 88,147 | 4 | 7 | 31 | 44 | 0 | 1 | 12 | 40 | 47  | 92 |
| 88,148 | 4 | 7 | 31 | 44 | 0 | 1 | 12 | 40 | 47  | 92 |
| 88,149 | 4 | 7 | 31 | 43 | 0 | 1 | 12 | 40 | 47  | 91 |
| 88,150 | 4 | 4 | 31 | 41 | 0 | 1 | 12 | 39 | 47  | 85 |
| 88,151 | 4 | 4 | 31 | 41 | 0 | 1 | 12 | 39 | 47  | 85 |
| 88,152 | 4 | 4 | 32 | 41 | 0 | 1 | 12 | 39 | 48  | 85 |
| 88,153 | 4 | 4 | 32 | 40 | 0 | 1 | 12 | 39 | 48  | 84 |
| 88,154 | 4 | 4 | 36 | 39 | 0 | 1 | 13 | 37 | 53  | 81 |
| 88,155 | 4 | 4 | 42 | 39 | 0 | 1 | 17 | 37 | 63  | 81 |
| 88,156 | 4 | 4 | 39 | 39 | 0 | 1 | 15 | 37 | 58  | 81 |
| 88,157 | 2 | 4 | 39 | 37 | 0 | 1 | 17 | 36 | 58  | 78 |
| 88,158 | 2 | 4 | 39 | 37 | 0 | 1 | 17 | 36 | 58  | 78 |
| 88,159 | 2 | 4 | 39 | 35 | 0 | 1 | 16 | 36 | 57  | 76 |
| 88,160 | 2 | 4 | 39 | 35 | 0 | 1 | 16 | 36 | 57  | 76 |
| 88,161 | 2 | 4 | 40 | 35 | 0 | 1 | 16 | 36 | 58  | 76 |
| 88,162 | 2 | 4 | 40 | 35 | 0 | 1 | 16 | 36 | 58  | 76 |
| 88,163 | 2 | 4 | 40 | 35 | 0 | 1 | 16 | 36 | 58  | 76 |
| 88,164 | 2 | 4 | 42 | 35 | 0 | 1 | 16 | 36 | 60  | 76 |
| 88,165 | 2 | 4 | 42 | 35 | 0 | 1 | 16 | 36 | 60  | 76 |
| 88,166 | 3 | 4 | 43 | 35 | 0 | 1 | 16 | 36 | 62  | 76 |
| 88,167 | 3 | 4 | 43 | 35 | 0 | 1 | 16 | 36 | 62  | 76 |
| 88,168 | 3 | 4 | 43 | 35 | 0 | 1 | 16 | 36 | 62  | 76 |
| 88,169 | 3 | 4 | 43 | 35 | 0 | 1 | 16 | 36 | 62  | 76 |
| 88,170 | 3 | 4 | 42 | 34 | 0 | 1 | 15 | 36 | 60  | 75 |
| 88,171 | 3 | 4 | 46 | 34 | 0 | 1 | 18 | 36 | 67  | 75 |
| 88,172 | 5 | 4 | 61 | 34 | 0 | 1 | 21 | 36 | 87  | 75 |
| 88,173 | 5 | 4 | 68 | 35 | 0 | 1 | 24 | 36 | 97  | 76 |
| 88,174 | 5 | 4 | 74 | 34 | 1 | 1 | 27 | 36 | 107 | 75 |
| 88,175 | 5 | 3 | 90 | 32 | 1 | 1 | 32 | 32 | 128 | 68 |
| 88,176 | 5 | 2 | 87 | 31 | 1 | 1 | 32 | 28 | 125 | 62 |
| 88,177 | 5 | 2 | 84 | 32 | 1 | 1 | 32 | 27 | 122 | 62 |
| 88,178 | 5 | 2 | 84 | 31 | 1 | 1 | 32 | 26 | 122 | 60 |
| 88,179 | 5 | 2 | 83 | 31 | 1 | 1 | 32 | 26 | 121 | 60 |

|        |    |   |     |    |   |   |    |    |     |    |
|--------|----|---|-----|----|---|---|----|----|-----|----|
| 88,180 | 5  | 1 | 81  | 31 | 1 | 1 | 31 | 26 | 118 | 59 |
| 88,181 | 5  | 2 | 80  | 31 | 1 | 1 | 31 | 26 | 117 | 60 |
| 88,182 | 6  | 2 | 86  | 31 | 1 | 1 | 35 | 26 | 128 | 60 |
| 88,183 | 7  | 2 | 91  | 31 | 1 | 1 | 35 | 26 | 134 | 60 |
| 88,184 | 7  | 2 | 97  | 28 | 1 | 1 | 36 | 26 | 141 | 57 |
| 88,185 | 7  | 2 | 98  | 28 | 1 | 1 | 36 | 25 | 142 | 56 |
| 88,186 | 7  | 2 | 101 | 26 | 1 | 1 | 38 | 24 | 147 | 53 |
| 88,187 | 7  | 2 | 103 | 17 | 2 | 1 | 40 | 11 | 152 | 31 |
| 88,188 | 7  | 2 | 101 | 17 | 2 | 1 | 42 | 11 | 152 | 31 |
| 88,189 | 7  | 2 | 99  | 17 | 2 | 1 | 39 | 11 | 147 | 31 |
| 88,190 | 7  | 1 | 100 | 15 | 2 | 1 | 40 | 10 | 149 | 27 |
| 88,191 | 7  | 1 | 96  | 13 | 2 | 1 | 39 | 8  | 144 | 23 |
| 88,192 | 7  | 1 | 96  | 13 | 2 | 1 | 39 | 8  | 144 | 23 |
| 88,193 | 6  | 1 | 99  | 12 | 2 | 1 | 38 | 7  | 145 | 21 |
| 88,194 | 6  | 1 | 99  | 12 | 2 | 1 | 38 | 4  | 145 | 18 |
| 88,195 | 6  | 1 | 97  | 11 | 2 | 1 | 39 | 3  | 144 | 16 |
| 88,196 | 6  | 1 | 103 | 9  | 2 | 1 | 41 | 2  | 152 | 13 |
| 88,197 | 6  | 1 | 110 | 9  | 2 | 1 | 46 | 2  | 164 | 13 |
| 88,198 | 6  | 1 | 112 | 6  | 2 | 0 | 46 | 0  | 166 | 7  |
| 88,199 | 6  | 1 | 114 | 6  | 2 | 0 | 52 | 0  | 174 | 7  |
| 88,200 | 6  | 1 | 114 | 6  | 2 | 0 | 52 | 0  | 174 | 7  |
| 88,201 | 6  | 1 | 114 | 6  | 2 | 0 | 52 | 0  | 174 | 7  |
| 88,202 | 6  | 1 | 114 | 6  | 2 | 0 | 53 | 1  | 175 | 8  |
| 88,203 | 6  | 1 | 113 | 8  | 2 | 0 | 53 | 2  | 174 | 11 |
| 88,204 | 6  | 1 | 113 | 8  | 2 | 0 | 53 | 3  | 174 | 12 |
| 88,205 | 6  | 1 | 108 | 8  | 2 | 0 | 52 | 3  | 168 | 12 |
| 88,206 | 6  | 1 | 102 | 8  | 2 | 0 | 47 | 3  | 157 | 12 |
| 88,207 | 6  | 1 | 102 | 8  | 2 | 0 | 47 | 3  | 157 | 12 |
| 88,208 | 7  | 1 | 102 | 10 | 2 | 0 | 45 | 3  | 156 | 14 |
| 88,209 | 7  | 1 | 102 | 11 | 2 | 0 | 45 | 3  | 156 | 15 |
| 88,210 | 7  | 1 | 103 | 13 | 2 | 0 | 45 | 3  | 157 | 17 |
| 88,211 | 7  | 1 | 103 | 13 | 2 | 0 | 45 | 3  | 157 | 17 |
| 88,212 | 7  | 1 | 101 | 13 | 2 | 0 | 45 | 3  | 155 | 17 |
| 88,213 | 7  | 1 | 101 | 13 | 2 | 0 | 45 | 3  | 155 | 17 |
| 88,214 | 7  | 1 | 101 | 13 | 2 | 0 | 45 | 3  | 155 | 17 |
| 88,215 | 7  | 1 | 98  | 13 | 2 | 0 | 45 | 3  | 152 | 17 |
| 88,216 | 6  | 1 | 96  | 14 | 2 | 0 | 44 | 3  | 148 | 18 |
| 88,217 | 6  | 1 | 104 | 14 | 2 | 0 | 46 | 3  | 158 | 18 |
| 88,218 | 6  | 1 | 104 | 14 | 2 | 0 | 46 | 3  | 158 | 18 |
| 88,219 | 10 | 1 | 115 | 19 | 3 | 0 | 52 | 3  | 180 | 23 |
| 88,220 | 10 | 2 | 114 | 20 | 3 | 1 | 52 | 4  | 179 | 27 |



|        |    |   |     |    |   |   |    |    |     |    |
|--------|----|---|-----|----|---|---|----|----|-----|----|
| 88,221 | 10 | 4 | 115 | 27 | 3 | 1 | 51 | 6  | 179 | 38 |
| 88,222 | 8  | 4 | 114 | 27 | 4 | 1 | 51 | 7  | 177 | 39 |
| 88,223 | 9  | 4 | 105 | 27 | 4 | 1 | 50 | 7  | 168 | 39 |
| 88,224 | 9  | 4 | 102 | 26 | 4 | 1 | 48 | 7  | 163 | 38 |
| 88,225 | 12 | 4 | 112 | 26 | 6 | 1 | 62 | 7  | 192 | 38 |
| 88,226 | 13 | 4 | 117 | 22 | 6 | 1 | 63 | 7  | 199 | 34 |
| 88,227 | 13 | 4 | 117 | 22 | 6 | 1 | 63 | 7  | 199 | 34 |
| 88,228 | 12 | 4 | 121 | 21 | 6 | 1 | 65 | 7  | 204 | 33 |
| 88,229 | 12 | 4 | 120 | 21 | 6 | 1 | 65 | 7  | 203 | 33 |
| 88,230 | 12 | 5 | 120 | 21 | 6 | 1 | 65 | 8  | 203 | 35 |
| 88,231 | 12 | 5 | 120 | 21 | 6 | 1 | 65 | 8  | 203 | 35 |
| 88,232 | 11 | 5 | 119 | 23 | 6 | 1 | 64 | 9  | 200 | 38 |
| 88,233 | 11 | 5 | 114 | 23 | 6 | 1 | 61 | 10 | 192 | 39 |
| 88,234 | 10 | 6 | 109 | 26 | 6 | 1 | 62 | 12 | 187 | 45 |
| 88,235 | 10 | 6 | 103 | 26 | 6 | 1 | 61 | 12 | 180 | 45 |
| 88,236 | 10 | 6 | 102 | 26 | 6 | 1 | 61 | 12 | 179 | 45 |
| 88,237 | 10 | 6 | 100 | 26 | 6 | 1 | 60 | 12 | 176 | 45 |
| 88,238 | 10 | 6 | 98  | 26 | 5 | 1 | 58 | 12 | 171 | 45 |
| 88,239 | 10 | 6 | 98  | 26 | 5 | 1 | 57 | 12 | 170 | 45 |
| 88,240 | 10 | 6 | 98  | 26 | 5 | 1 | 56 | 12 | 169 | 45 |
| 88,241 | 10 | 6 | 97  | 26 | 5 | 1 | 55 | 12 | 167 | 45 |
| 88,242 | 10 | 6 | 97  | 26 | 5 | 1 | 55 | 12 | 167 | 45 |
| 88,243 | 10 | 6 | 96  | 26 | 5 | 1 | 59 | 12 | 170 | 45 |
| 88,244 | 10 | 6 | 96  | 26 | 5 | 1 | 60 | 12 | 171 | 45 |
| 88,245 | 10 | 6 | 96  | 26 | 5 | 1 | 59 | 12 | 170 | 45 |
| 88,246 | 10 | 7 | 90  | 27 | 5 | 1 | 57 | 12 | 162 | 47 |
| 88,247 | 10 | 7 | 90  | 27 | 5 | 1 | 57 | 13 | 162 | 48 |
| 88,248 | 11 | 7 | 84  | 29 | 5 | 1 | 52 | 14 | 152 | 51 |
| 88,249 | 11 | 7 | 82  | 29 | 5 | 1 | 52 | 14 | 150 | 51 |
| 88,250 | 11 | 8 | 81  | 35 | 5 | 1 | 46 | 17 | 143 | 61 |
| 88,251 | 11 | 9 | 85  | 41 | 5 | 2 | 48 | 19 | 149 | 71 |
| 88,252 | 11 | 9 | 85  | 41 | 5 | 3 | 48 | 19 | 149 | 72 |
| 88,253 | 11 | 9 | 85  | 39 | 5 | 3 | 47 | 17 | 148 | 68 |
| 88,254 | 11 | 9 | 89  | 39 | 5 | 3 | 47 | 16 | 152 | 67 |
| 88,255 | 12 | 9 | 89  | 39 | 5 | 3 | 48 | 16 | 154 | 67 |
| 88,256 | 12 | 9 | 89  | 39 | 5 | 3 | 48 | 16 | 154 | 67 |
| 88,257 | 12 | 9 | 90  | 39 | 5 | 3 | 48 | 16 | 155 | 67 |
| 88,258 | 13 | 9 | 93  | 39 | 5 | 3 | 51 | 16 | 162 | 67 |
| 88,259 | 13 | 9 | 93  | 37 | 5 | 3 | 51 | 16 | 162 | 65 |
| 88,260 | 13 | 9 | 94  | 36 | 5 | 3 | 51 | 16 | 163 | 64 |
| 88,261 | 13 | 9 | 93  | 34 | 5 | 3 | 51 | 16 | 162 | 62 |

|        |    |   |    |    |   |   |    |    |     |    |
|--------|----|---|----|----|---|---|----|----|-----|----|
| 88,262 | 13 | 9 | 93 | 34 | 5 | 3 | 51 | 16 | 162 | 62 |
| 88,263 | 13 | 9 | 92 | 34 | 5 | 3 | 51 | 16 | 161 | 62 |
| 88,264 | 13 | 9 | 92 | 34 | 5 | 3 | 51 | 16 | 161 | 62 |
| 88,265 | 13 | 9 | 92 | 34 | 5 | 3 | 51 | 16 | 161 | 62 |
| 88,266 | 13 | 9 | 93 | 34 | 5 | 3 | 51 | 16 | 162 | 62 |
| 88,267 | 13 | 9 | 93 | 33 | 5 | 3 | 51 | 16 | 162 | 61 |
| 88,268 | 13 | 9 | 88 | 33 | 5 | 3 | 50 | 15 | 156 | 60 |
| 88,269 | 13 | 9 | 82 | 33 | 5 | 3 | 48 | 14 | 148 | 59 |
| 88,270 | 9  | 8 | 77 | 27 | 4 | 2 | 45 | 14 | 135 | 51 |
| 88,271 | 9  | 6 | 76 | 20 | 4 | 2 | 44 | 12 | 133 | 40 |
| 88,272 | 9  | 6 | 74 | 20 | 4 | 2 | 47 | 12 | 134 | 40 |
| 88,273 | 10 | 6 | 71 | 20 | 3 | 2 | 46 | 11 | 130 | 39 |
| 88,274 | 10 | 6 | 77 | 21 | 4 | 3 | 46 | 11 | 137 | 41 |
| 88,275 | 10 | 7 | 74 | 24 | 4 | 3 | 46 | 11 | 134 | 45 |
| 88,276 | 7  | 7 | 58 | 25 | 1 | 3 | 29 | 11 | 95  | 46 |
| 88,277 | 6  | 7 | 37 | 25 | 1 | 3 | 24 | 12 | 68  | 47 |
| 88,278 | 7  | 7 | 37 | 26 | 1 | 3 | 25 | 12 | 70  | 48 |
| 88,279 | 7  | 7 | 37 | 26 | 1 | 3 | 26 | 12 | 71  | 48 |
| 88,280 | 7  | 7 | 37 | 26 | 1 | 3 | 26 | 12 | 71  | 48 |
| 88,281 | 8  | 7 | 38 | 26 | 1 | 3 | 26 | 12 | 73  | 48 |
| 88,282 | 8  | 7 | 38 | 26 | 1 | 3 | 26 | 12 | 73  | 48 |
| 88,283 | 8  | 6 | 38 | 24 | 1 | 3 | 26 | 11 | 73  | 44 |
| 88,284 | 8  | 5 | 38 | 21 | 1 | 3 | 26 | 9  | 73  | 38 |
| 88,285 | 8  | 5 | 38 | 22 | 1 | 3 | 25 | 9  | 72  | 39 |
| 88,286 | 8  | 5 | 40 | 22 | 1 | 3 | 25 | 9  | 74  | 39 |
| 88,287 | 8  | 5 | 40 | 23 | 1 | 3 | 25 | 9  | 74  | 40 |
| 88,288 | 8  | 5 | 40 | 23 | 1 | 3 | 24 | 9  | 73  | 40 |
| 88,289 | 8  | 5 | 40 | 23 | 1 | 3 | 24 | 9  | 73  | 40 |
| 88,290 | 8  | 5 | 40 | 23 | 1 | 3 | 23 | 9  | 72  | 40 |
| 88,291 | 8  | 5 | 41 | 23 | 1 | 3 | 23 | 9  | 73  | 40 |
| 88,292 | 8  | 5 | 42 | 23 | 1 | 3 | 23 | 9  | 74  | 40 |
| 88,293 | 8  | 5 | 42 | 23 | 1 | 3 | 23 | 9  | 74  | 40 |
| 88,294 | 8  | 6 | 40 | 23 | 1 | 3 | 20 | 9  | 69  | 41 |
| 88,295 | 8  | 6 | 40 | 24 | 1 | 3 | 19 | 9  | 68  | 42 |
| 88,296 | 8  | 6 | 51 | 24 | 1 | 3 | 23 | 9  | 83  | 42 |
| 88,297 | 8  | 5 | 51 | 23 | 1 | 3 | 23 | 9  | 83  | 40 |
| 88,298 | 8  | 5 | 51 | 21 | 1 | 3 | 23 | 7  | 83  | 36 |
| 88,299 | 7  | 5 | 50 | 21 | 1 | 3 | 23 | 7  | 81  | 36 |
| 88,300 | 7  | 3 | 51 | 10 | 1 | 2 | 23 | 3  | 82  | 18 |
| 88,301 | 8  | 3 | 57 | 17 | 1 | 3 | 25 | 5  | 91  | 28 |
| 88,302 | 8  | 4 | 57 | 21 | 1 | 3 | 23 | 5  | 89  | 33 |

|        |   |    |    |    |   |   |    |    |     |     |
|--------|---|----|----|----|---|---|----|----|-----|-----|
| 88,303 | 8 | 5  | 57 | 27 | 1 | 2 | 23 | 8  | 89  | 42  |
| 88,304 | 8 | 5  | 59 | 35 | 1 | 2 | 24 | 9  | 92  | 51  |
| 88,305 | 8 | 6  | 61 | 51 | 1 | 3 | 24 | 13 | 94  | 73  |
| 88,306 | 8 | 6  | 65 | 53 | 1 | 3 | 23 | 13 | 97  | 75  |
| 88,307 | 7 | 6  | 65 | 54 | 1 | 4 | 23 | 13 | 96  | 77  |
| 88,308 | 6 | 6  | 62 | 55 | 1 | 4 | 20 | 13 | 89  | 78  |
| 88,309 | 6 | 6  | 66 | 57 | 1 | 4 | 21 | 14 | 94  | 81  |
| 88,310 | 7 | 6  | 66 | 57 | 1 | 4 | 21 | 14 | 95  | 81  |
| 88,311 | 7 | 6  | 66 | 58 | 1 | 4 | 21 | 15 | 95  | 83  |
| 88,312 | 7 | 11 | 66 | 63 | 1 | 4 | 21 | 15 | 95  | 93  |
| 88,313 | 7 | 11 | 66 | 63 | 1 | 4 | 21 | 15 | 95  | 93  |
| 88,314 | 8 | 11 | 77 | 63 | 1 | 4 | 21 | 15 | 107 | 93  |
| 88,315 | 8 | 11 | 77 | 63 | 1 | 4 | 21 | 15 | 107 | 93  |
| 88,316 | 8 | 11 | 78 | 63 | 1 | 4 | 21 | 15 | 108 | 93  |
| 88,317 | 8 | 11 | 78 | 63 | 1 | 4 | 21 | 15 | 108 | 93  |
| 88,318 | 9 | 11 | 79 | 63 | 1 | 4 | 21 | 15 | 110 | 93  |
| 88,319 | 9 | 11 | 77 | 63 | 1 | 4 | 20 | 15 | 107 | 93  |
| 88,320 | 9 | 11 | 77 | 63 | 1 | 4 | 19 | 15 | 106 | 93  |
| 88,321 | 9 | 11 | 78 | 63 | 1 | 4 | 19 | 14 | 107 | 92  |
| 88,322 | 9 | 11 | 77 | 63 | 1 | 4 | 19 | 14 | 106 | 92  |
| 88,323 | 9 | 11 | 78 | 63 | 1 | 4 | 16 | 14 | 104 | 92  |
| 88,324 | 8 | 11 | 78 | 63 | 1 | 4 | 16 | 15 | 103 | 93  |
| 88,325 | 7 | 11 | 71 | 62 | 0 | 3 | 16 | 15 | 94  | 91  |
| 88,326 | 7 | 10 | 70 | 59 | 0 | 3 | 15 | 16 | 92  | 88  |
| 88,327 | 7 | 10 | 69 | 58 | 0 | 3 | 14 | 16 | 90  | 87  |
| 88,328 | 7 | 10 | 68 | 58 | 0 | 3 | 14 | 15 | 89  | 86  |
| 88,329 | 6 | 10 | 70 | 57 | 0 | 4 | 13 | 15 | 89  | 86  |
| 88,330 | 6 | 10 | 69 | 57 | 0 | 4 | 11 | 15 | 86  | 86  |
| 88,331 | 5 | 9  | 70 | 57 | 0 | 4 | 14 | 15 | 89  | 85  |
| 88,332 | 5 | 9  | 70 | 57 | 0 | 4 | 14 | 15 | 89  | 85  |
| 88,333 | 5 | 9  | 70 | 58 | 0 | 4 | 14 | 15 | 89  | 86  |
| 88,334 | 5 | 9  | 73 | 58 | 0 | 4 | 15 | 15 | 93  | 86  |
| 88,335 | 5 | 9  | 73 | 58 | 0 | 4 | 15 | 15 | 93  | 86  |
| 88,336 | 5 | 9  | 74 | 57 | 0 | 4 | 16 | 15 | 95  | 85  |
| 88,337 | 5 | 9  | 74 | 57 | 0 | 4 | 16 | 15 | 95  | 85  |
| 88,338 | 5 | 9  | 75 | 56 | 0 | 4 | 16 | 15 | 96  | 84  |
| 88,339 | 5 | 9  | 75 | 56 | 0 | 4 | 16 | 15 | 96  | 84  |
| 88,340 | 5 | 9  | 75 | 61 | 0 | 4 | 16 | 18 | 96  | 92  |
| 88,341 | 5 | 9  | 75 | 61 | 0 | 4 | 16 | 18 | 96  | 92  |
| 88,342 | 5 | 9  | 75 | 61 | 0 | 4 | 16 | 18 | 96  | 92  |
| 88,343 | 5 | 9  | 74 | 69 | 0 | 4 | 16 | 18 | 95  | 100 |

|        |   |    |    |    |   |   |    |    |    |     |
|--------|---|----|----|----|---|---|----|----|----|-----|
| 88,344 | 5 | 8  | 74 | 70 | 0 | 4 | 16 | 23 | 95 | 105 |
| 88,345 | 5 | 9  | 74 | 78 | 0 | 5 | 15 | 33 | 94 | 125 |
| 88,346 | 5 | 9  | 65 | 78 | 0 | 5 | 12 | 33 | 82 | 125 |
| 88,347 | 5 | 12 | 63 | 82 | 0 | 6 | 11 | 37 | 79 | 137 |
| 88,348 | 5 | 12 | 63 | 87 | 0 | 6 | 11 | 38 | 79 | 143 |
| 88,349 | 5 | 12 | 64 | 88 | 0 | 6 | 13 | 38 | 82 | 144 |
| 88,350 | 5 | 12 | 63 | 87 | 0 | 6 | 13 | 37 | 81 | 142 |
| 88,351 | 5 | 12 | 63 | 87 | 0 | 6 | 14 | 38 | 82 | 143 |
| 88,352 | 4 | 11 | 56 | 80 | 0 | 5 | 12 | 36 | 72 | 132 |
| 88,353 | 4 | 10 | 52 | 74 | 0 | 5 | 12 | 33 | 68 | 122 |
| 88,354 | 4 | 10 | 52 | 75 | 0 | 5 | 12 | 35 | 68 | 125 |
| 88,355 | 4 | 11 | 50 | 68 | 0 | 5 | 11 | 36 | 65 | 120 |
| 88,356 | 4 | 10 | 44 | 52 | 0 | 4 | 11 | 34 | 59 | 100 |
| 88,357 | 3 | 10 | 40 | 49 | 0 | 3 | 11 | 34 | 54 | 96  |
| 88,358 | 3 | 10 | 39 | 51 | 0 | 3 | 11 | 35 | 53 | 99  |
| 88,359 | 3 | 11 | 35 | 51 | 0 | 3 | 10 | 35 | 48 | 100 |
| 88,360 | 3 | 13 | 37 | 49 | 0 | 3 | 11 | 34 | 51 | 99  |
| 88,361 | 2 | 13 | 37 | 48 | 0 | 3 | 11 | 33 | 50 | 97  |
| 88,362 | 2 | 8  | 38 | 43 | 0 | 3 | 11 | 33 | 51 | 87  |
| 88,363 | 4 | 8  | 40 | 43 | 1 | 3 | 14 | 33 | 59 | 87  |
| 88,364 | 3 | 8  | 32 | 43 | 1 | 3 | 14 | 33 | 50 | 87  |
| 88,365 | 3 | 8  | 36 | 43 | 2 | 3 | 21 | 33 | 62 | 87  |
| 88,366 | 3 | 8  | 36 | 43 | 2 | 3 | 22 | 33 | 63 | 87  |
| 88,367 | 3 | 8  | 34 | 43 | 2 | 3 | 22 | 33 | 61 | 87  |
| 88,368 | 3 | 8  | 33 | 43 | 2 | 3 | 22 | 33 | 60 | 87  |
| 88,369 | 2 | 8  | 33 | 43 | 2 | 3 | 22 | 33 | 59 | 87  |
| 88,370 | 2 | 8  | 32 | 43 | 2 | 3 | 22 | 33 | 58 | 87  |
| 88,371 | 2 | 8  | 32 | 43 | 2 | 3 | 22 | 33 | 58 | 87  |
| 88,372 | 2 | 9  | 32 | 43 | 2 | 3 | 22 | 33 | 58 | 88  |
| 88,373 | 2 | 9  | 32 | 44 | 2 | 3 | 22 | 33 | 58 | 89  |
| 88,374 | 2 | 9  | 31 | 44 | 2 | 3 | 22 | 34 | 57 | 90  |
| 88,375 | 2 | 9  | 30 | 44 | 2 | 3 | 21 | 34 | 55 | 90  |
| 88,376 | 2 | 9  | 30 | 45 | 2 | 3 | 22 | 35 | 56 | 92  |
| 88,377 | 2 | 9  | 30 | 45 | 2 | 3 | 22 | 35 | 56 | 92  |
| 88,378 | 2 | 10 | 28 | 47 | 2 | 3 | 21 | 35 | 53 | 95  |
| 88,379 | 2 | 10 | 26 | 47 | 2 | 3 | 21 | 36 | 51 | 96  |
| 88,380 | 2 | 10 | 26 | 52 | 2 | 2 | 21 | 36 | 51 | 100 |
| 88,381 | 2 | 10 | 25 | 52 | 4 | 2 | 23 | 36 | 54 | 100 |
| 88,382 | 2 | 10 | 25 | 52 | 4 | 2 | 21 | 36 | 52 | 100 |
| 88,383 | 2 | 10 | 25 | 52 | 6 | 2 | 22 | 37 | 55 | 101 |
| 88,384 | 3 | 10 | 26 | 51 | 6 | 2 | 22 | 37 | 57 | 100 |

|        |   |    |    |    |   |   |    |    |    |     |
|--------|---|----|----|----|---|---|----|----|----|-----|
| 88,385 | 3 | 10 | 23 | 52 | 6 | 2 | 21 | 37 | 53 | 101 |
| 88,386 | 3 | 10 | 23 | 52 | 6 | 2 | 22 | 37 | 54 | 101 |
| 88,387 | 3 | 10 | 20 | 52 | 6 | 2 | 21 | 37 | 50 | 101 |
| 88,388 | 5 | 10 | 23 | 52 | 6 | 2 | 22 | 37 | 56 | 101 |
| 88,389 | 5 | 10 | 22 | 48 | 6 | 2 | 22 | 34 | 55 | 94  |
| 88,390 | 5 | 10 | 22 | 47 | 6 | 2 | 22 | 34 | 55 | 93  |
| 88,391 | 6 | 10 | 23 | 47 | 6 | 2 | 22 | 34 | 57 | 93  |
| 88,392 | 6 | 11 | 23 | 47 | 6 | 2 | 22 | 34 | 57 | 94  |
| 88,393 | 6 | 11 | 22 | 47 | 6 | 2 | 22 | 34 | 56 | 94  |
| 88,394 | 7 | 11 | 23 | 38 | 6 | 2 | 22 | 29 | 58 | 80  |
| 88,395 | 8 | 11 | 23 | 44 | 6 | 2 | 22 | 30 | 59 | 87  |
| 88,396 | 8 | 10 | 23 | 43 | 6 | 2 | 22 | 26 | 59 | 81  |
| 88,397 | 8 | 10 | 23 | 42 | 6 | 2 | 22 | 26 | 59 | 80  |
| 88,398 | 8 | 7  | 28 | 38 | 6 | 1 | 24 | 23 | 66 | 69  |
| 88,399 | 8 | 7  | 33 | 34 | 6 | 1 | 23 | 22 | 70 | 64  |
| 88,400 | 8 | 7  | 33 | 33 | 6 | 1 | 23 | 22 | 70 | 63  |
| 88,401 | 8 | 7  | 33 | 34 | 6 | 1 | 23 | 22 | 70 | 64  |
| 88,402 | 8 | 7  | 33 | 34 | 6 | 1 | 22 | 21 | 69 | 63  |
| 88,403 | 8 | 6  | 33 | 28 | 6 | 1 | 22 | 17 | 69 | 52  |
| 88,404 | 8 | 6  | 33 | 30 | 6 | 1 | 22 | 17 | 69 | 54  |
| 88,405 | 8 | 6  | 33 | 31 | 6 | 1 | 22 | 15 | 69 | 53  |
| 88,406 | 8 | 6  | 33 | 31 | 6 | 1 | 22 | 15 | 69 | 53  |
| 88,407 | 8 | 6  | 33 | 31 | 6 | 1 | 22 | 15 | 69 | 53  |
| 88,408 | 9 | 6  | 34 | 29 | 7 | 1 | 25 | 14 | 75 | 50  |
| 88,409 | 9 | 3  | 34 | 29 | 7 | 1 | 25 | 14 | 75 | 47  |
| 88,410 | 9 | 3  | 36 | 29 | 7 | 1 | 26 | 14 | 78 | 47  |
| 88,411 | 9 | 3  | 34 | 29 | 7 | 2 | 25 | 14 | 75 | 48  |
| 88,412 | 9 | 3  | 33 | 29 | 7 | 2 | 24 | 14 | 73 | 48  |
| 88,413 | 9 | 3  | 32 | 29 | 7 | 2 | 24 | 14 | 72 | 48  |
| 88,414 | 7 | 3  | 32 | 29 | 6 | 2 | 21 | 14 | 66 | 48  |
| 88,415 | 7 | 3  | 31 | 29 | 6 | 2 | 21 | 14 | 65 | 48  |
| 88,416 | 7 | 3  | 25 | 29 | 5 | 2 | 14 | 14 | 51 | 48  |
| 88,417 | 8 | 3  | 25 | 29 | 5 | 2 | 20 | 14 | 58 | 48  |
| 88,418 | 8 | 3  | 25 | 29 | 5 | 2 | 20 | 14 | 58 | 48  |
| 88,419 | 8 | 3  | 25 | 29 | 5 | 2 | 20 | 14 | 58 | 48  |
| 88,420 | 8 | 3  | 25 | 29 | 5 | 2 | 20 | 14 | 58 | 48  |
| 88,421 | 8 | 3  | 25 | 29 | 5 | 2 | 20 | 14 | 58 | 48  |
| 88,422 | 8 | 3  | 28 | 29 | 5 | 2 | 20 | 14 | 61 | 48  |
| 88,423 | 8 | 2  | 28 | 29 | 5 | 2 | 20 | 14 | 61 | 47  |
| 88,424 | 8 | 2  | 29 | 29 | 5 | 2 | 21 | 14 | 63 | 47  |
| 88,425 | 8 | 2  | 29 | 29 | 5 | 2 | 21 | 14 | 63 | 47  |

|        |   |   |    |    |   |   |    |    |    |    |
|--------|---|---|----|----|---|---|----|----|----|----|
| 88,426 | 8 | 2 | 29 | 29 | 5 | 2 | 20 | 13 | 62 | 46 |
| 88,427 | 8 | 2 | 29 | 28 | 5 | 2 | 20 | 11 | 62 | 43 |
| 88,428 | 8 | 3 | 30 | 30 | 6 | 2 | 20 | 11 | 64 | 46 |
| 88,429 | 8 | 3 | 30 | 28 | 6 | 2 | 20 | 10 | 64 | 43 |
| 88,430 | 8 | 3 | 30 | 23 | 6 | 2 | 20 | 10 | 64 | 38 |
| 88,431 | 8 | 3 | 30 | 23 | 6 | 2 | 20 | 10 | 64 | 38 |
| 88,432 | 8 | 3 | 30 | 23 | 4 | 2 | 18 | 10 | 60 | 38 |
| 88,433 | 8 | 3 | 30 | 23 | 4 | 2 | 17 | 9  | 59 | 37 |
| 88,434 | 8 | 3 | 30 | 23 | 2 | 2 | 16 | 9  | 56 | 37 |
| 88,435 | 7 | 3 | 30 | 22 | 2 | 2 | 16 | 9  | 55 | 36 |
| 88,436 | 7 | 3 | 30 | 22 | 2 | 2 | 16 | 9  | 55 | 36 |
| 88,437 | 7 | 3 | 30 | 22 | 2 | 2 | 15 | 9  | 54 | 36 |
| 88,438 | 7 | 3 | 30 | 23 | 3 | 2 | 16 | 9  | 56 | 37 |
| 88,439 | 5 | 3 | 27 | 23 | 3 | 2 | 15 | 9  | 50 | 37 |
| 88,440 | 5 | 3 | 26 | 23 | 3 | 2 | 15 | 9  | 49 | 37 |
| 88,441 | 5 | 3 | 26 | 23 | 3 | 2 | 15 | 9  | 49 | 37 |
| 88,442 | 4 | 3 | 25 | 23 | 3 | 2 | 15 | 9  | 47 | 37 |
| 88,443 | 4 | 2 | 25 | 23 | 3 | 2 | 15 | 9  | 47 | 36 |
| 88,444 | 3 | 2 | 25 | 23 | 3 | 2 | 15 | 9  | 46 | 36 |
| 88,445 | 3 | 2 | 24 | 23 | 3 | 2 | 15 | 9  | 45 | 36 |
| 88,446 | 2 | 2 | 24 | 17 | 3 | 2 | 15 | 8  | 44 | 29 |
| 88,447 | 2 | 2 | 24 | 10 | 3 | 1 | 15 | 2  | 44 | 15 |
| 88,448 | 2 | 2 | 18 | 10 | 3 | 1 | 12 | 1  | 35 | 14 |
| 88,449 | 2 | 2 | 16 | 11 | 3 | 1 | 12 | 1  | 33 | 15 |
| 88,450 | 2 | 2 | 13 | 10 | 3 | 1 | 12 | 1  | 30 | 14 |
| 88,451 | 2 | 2 | 13 | 10 | 3 | 1 | 12 | 1  | 30 | 14 |
| 88,452 | 2 | 2 | 13 | 9  | 3 | 1 | 12 | 1  | 30 | 13 |
| 88,453 | 2 | 2 | 13 | 9  | 3 | 1 | 12 | 1  | 30 | 13 |
| 88,454 | 2 | 2 | 13 | 9  | 3 | 1 | 12 | 1  | 30 | 13 |
| 88,455 | 2 | 4 | 13 | 8  | 3 | 2 | 12 | 2  | 30 | 16 |
| 88,456 | 2 | 4 | 13 | 9  | 3 | 2 | 12 | 5  | 30 | 20 |
| 88,457 | 2 | 4 | 13 | 12 | 3 | 3 | 12 | 5  | 30 | 24 |
| 88,458 | 2 | 4 | 14 | 12 | 3 | 3 | 12 | 5  | 31 | 24 |
| 88,459 | 1 | 4 | 13 | 11 | 2 | 3 | 9  | 5  | 25 | 23 |
| 88,460 | 1 | 4 | 15 | 11 | 2 | 3 | 11 | 5  | 29 | 23 |
| 88,461 | 1 | 4 | 13 | 11 | 2 | 2 | 10 | 5  | 26 | 22 |
| 88,462 | 1 | 4 | 13 | 11 | 2 | 2 | 11 | 5  | 27 | 22 |
| 88,463 | 1 | 4 | 13 | 11 | 2 | 2 | 11 | 5  | 27 | 22 |
| 88,464 | 1 | 4 | 13 | 11 | 2 | 3 | 11 | 5  | 27 | 23 |
| 88,465 | 1 | 4 | 11 | 11 | 2 | 3 | 13 | 5  | 27 | 23 |
| 88,466 | 1 | 4 | 11 | 12 | 2 | 3 | 13 | 5  | 27 | 24 |

|        |   |   |     |    |   |   |    |   |     |    |
|--------|---|---|-----|----|---|---|----|---|-----|----|
| 88,467 | 1 | 4 | 12  | 12 | 2 | 3 | 14 | 5 | 29  | 24 |
| 88,468 | 0 | 4 | 12  | 12 | 2 | 3 | 8  | 5 | 22  | 24 |
| 88,469 | 0 | 4 | 12  | 12 | 2 | 3 | 9  | 5 | 23  | 24 |
| 88,470 | 1 | 4 | 14  | 12 | 2 | 3 | 9  | 5 | 26  | 24 |
| 88,471 | 1 | 4 | 15  | 12 | 2 | 3 | 9  | 5 | 27  | 24 |
| 88,472 | 1 | 4 | 14  | 12 | 2 | 3 | 9  | 6 | 26  | 25 |
| 88,473 | 1 | 4 | 14  | 12 | 2 | 3 | 9  | 6 | 26  | 25 |
| 88,474 | 1 | 4 | 14  | 12 | 2 | 3 | 9  | 6 | 26  | 25 |
| 88,475 | 1 | 4 | 14  | 11 | 2 | 3 | 8  | 6 | 25  | 24 |
| 88,476 | 1 | 5 | 14  | 11 | 2 | 3 | 9  | 5 | 26  | 24 |
| 88,477 | 1 | 5 | 14  | 11 | 2 | 3 | 9  | 5 | 26  | 24 |
| 88,478 | 1 | 5 | 14  | 11 | 2 | 3 | 9  | 5 | 26  | 24 |
| 88,479 | 1 | 4 | 13  | 10 | 1 | 3 | 9  | 5 | 24  | 22 |
| 88,480 | 1 | 3 | 19  | 10 | 1 | 3 | 9  | 5 | 30  | 21 |
| 88,481 | 1 | 3 | 20  | 10 | 1 | 3 | 10 | 5 | 32  | 21 |
| 88,482 | 1 | 3 | 20  | 10 | 1 | 3 | 11 | 5 | 33  | 21 |
| 88,483 | 1 | 3 | 20  | 10 | 1 | 3 | 11 | 5 | 33  | 21 |
| 88,484 | 1 | 3 | 19  | 10 | 1 | 3 | 12 | 5 | 33  | 21 |
| 88,485 | 1 | 3 | 18  | 10 | 1 | 3 | 12 | 5 | 32  | 21 |
| 88,486 | 1 | 3 | 18  | 10 | 1 | 3 | 12 | 5 | 32  | 21 |
| 88,487 | 1 | 3 | 18  | 10 | 1 | 3 | 12 | 5 | 32  | 21 |
| 88,488 | 1 | 3 | 18  | 10 | 1 | 3 | 12 | 5 | 32  | 21 |
| 88,489 | 1 | 3 | 19  | 9  | 0 | 3 | 11 | 5 | 31  | 20 |
| 88,490 | 1 | 3 | 19  | 9  | 0 | 3 | 11 | 5 | 31  | 20 |
| 88,491 | 4 | 3 | 39  | 9  | 0 | 3 | 16 | 5 | 59  | 20 |
| 88,492 | 4 | 3 | 39  | 9  | 0 | 3 | 16 | 5 | 59  | 20 |
| 88,493 | 4 | 3 | 39  | 9  | 0 | 3 | 16 | 5 | 59  | 20 |
| 88,494 | 4 | 3 | 56  | 9  | 0 | 3 | 20 | 5 | 80  | 20 |
| 88,495 | 4 | 3 | 56  | 9  | 0 | 3 | 20 | 5 | 80  | 20 |
| 88,496 | 4 | 3 | 56  | 9  | 0 | 3 | 20 | 5 | 80  | 20 |
| 88,497 | 8 | 3 | 71  | 9  | 1 | 3 | 27 | 5 | 107 | 20 |
| 88,498 | 8 | 3 | 81  | 9  | 1 | 3 | 32 | 5 | 122 | 20 |
| 88,499 | 8 | 3 | 81  | 9  | 1 | 3 | 32 | 5 | 122 | 20 |
| 88,500 | 9 | 3 | 99  | 8  | 2 | 3 | 35 | 5 | 145 | 19 |
| 88,501 | 9 | 3 | 103 | 8  | 2 | 3 | 40 | 5 | 154 | 19 |
| 88,502 | 9 | 3 | 103 | 8  | 2 | 3 | 40 | 5 | 154 | 19 |
| 88,503 | 9 | 3 | 105 | 8  | 2 | 3 | 43 | 6 | 159 | 20 |
| 88,504 | 9 | 3 | 108 | 8  | 2 | 3 | 44 | 6 | 163 | 20 |
| 88,505 | 9 | 1 | 108 | 7  | 2 | 2 | 44 | 5 | 163 | 15 |
| 88,506 | 9 | 1 | 111 | 5  | 2 | 2 | 45 | 2 | 167 | 10 |
| 88,507 | 9 | 1 | 111 | 2  | 2 | 1 | 45 | 2 | 167 | 6  |

|        |    |   |     |    |   |   |    |    |     |    |
|--------|----|---|-----|----|---|---|----|----|-----|----|
| 88,508 | 9  | 1 | 112 | 2  | 2 | 1 | 46 | 2  | 169 | 6  |
| 88,509 | 10 | 1 | 113 | 2  | 2 | 1 | 46 | 2  | 171 | 6  |
| 88,510 | 10 | 1 | 113 | 2  | 2 | 1 | 46 | 2  | 171 | 6  |
| 88,511 | 10 | 1 | 111 | 2  | 2 | 1 | 44 | 2  | 167 | 6  |
| 88,512 | 10 | 1 | 115 | 2  | 3 | 1 | 50 | 2  | 178 | 6  |
| 88,513 | 10 | 1 | 116 | 2  | 3 | 1 | 50 | 2  | 179 | 6  |
| 88,514 | 10 | 1 | 116 | 3  | 3 | 2 | 50 | 2  | 179 | 8  |
| 88,515 | 11 | 2 | 118 | 8  | 3 | 1 | 49 | 3  | 181 | 14 |
| 88,516 | 11 | 2 | 118 | 8  | 3 | 1 | 49 | 3  | 181 | 14 |
| 88,517 | 11 | 2 | 119 | 9  | 3 | 1 | 52 | 4  | 185 | 16 |
| 88,518 | 11 | 2 | 120 | 11 | 3 | 1 | 51 | 4  | 185 | 18 |
| 88,519 | 11 | 2 | 122 | 11 | 3 | 1 | 51 | 5  | 187 | 19 |
| 88,520 | 11 | 2 | 122 | 12 | 3 | 1 | 50 | 5  | 186 | 20 |
| 88,521 | 10 | 2 | 119 | 12 | 3 | 1 | 50 | 5  | 182 | 20 |
| 88,522 | 10 | 2 | 121 | 12 | 3 | 1 | 52 | 4  | 186 | 19 |
| 88,523 | 10 | 2 | 121 | 12 | 3 | 1 | 52 | 4  | 186 | 19 |
| 88,524 | 10 | 2 | 122 | 12 | 3 | 1 | 53 | 4  | 188 | 19 |
| 88,525 | 10 | 2 | 124 | 12 | 3 | 1 | 53 | 5  | 190 | 20 |
| 88,526 | 10 | 2 | 124 | 12 | 3 | 1 | 53 | 6  | 190 | 21 |
| 88,527 | 10 | 1 | 124 | 12 | 3 | 1 | 52 | 6  | 189 | 20 |
| 88,528 | 10 | 1 | 124 | 12 | 3 | 1 | 52 | 7  | 189 | 21 |
| 88,529 | 10 | 1 | 122 | 12 | 3 | 2 | 54 | 8  | 189 | 23 |
| 88,530 | 10 | 1 | 122 | 11 | 3 | 2 | 54 | 11 | 189 | 25 |
| 88,531 | 10 | 1 | 121 | 12 | 3 | 2 | 53 | 11 | 187 | 26 |
| 88,532 | 10 | 1 | 127 | 13 | 3 | 2 | 59 | 11 | 199 | 27 |
| 88,533 | 12 | 2 | 132 | 13 | 3 | 2 | 60 | 11 | 207 | 28 |
| 88,534 | 12 | 2 | 132 | 15 | 3 | 2 | 60 | 11 | 207 | 30 |
| 88,535 | 12 | 2 | 132 | 15 | 3 | 2 | 59 | 11 | 206 | 30 |
| 88,536 | 12 | 2 | 132 | 16 | 3 | 2 | 59 | 11 | 206 | 31 |
| 88,537 | 12 | 2 | 133 | 16 | 3 | 2 | 60 | 14 | 208 | 34 |
| 88,538 | 12 | 2 | 136 | 27 | 4 | 2 | 60 | 20 | 212 | 51 |
| 88,539 | 13 | 2 | 138 | 27 | 5 | 2 | 62 | 21 | 218 | 52 |
| 88,540 | 13 | 2 | 138 | 27 | 5 | 2 | 63 | 22 | 219 | 53 |
| 88,541 | 10 | 2 | 126 | 27 | 6 | 2 | 60 | 23 | 202 | 54 |
| 88,542 | 10 | 2 | 121 | 27 | 6 | 2 | 58 | 23 | 195 | 54 |
| 88,543 | 10 | 2 | 119 | 27 | 6 | 2 | 56 | 23 | 191 | 54 |
| 88,544 | 10 | 2 | 107 | 27 | 6 | 2 | 56 | 23 | 179 | 54 |
| 88,545 | 10 | 2 | 104 | 27 | 6 | 2 | 55 | 23 | 175 | 54 |
| 88,546 | 7  | 2 | 98  | 27 | 6 | 2 | 49 | 23 | 160 | 54 |
| 88,547 | 6  | 2 | 89  | 27 | 6 | 2 | 48 | 23 | 149 | 54 |
| 88,548 | 6  | 2 | 90  | 30 | 5 | 2 | 48 | 23 | 149 | 57 |



|        |   |    |    |     |   |    |    |    |     |     |
|--------|---|----|----|-----|---|----|----|----|-----|-----|
| 88,549 | 6 | 2  | 80 | 30  | 5 | 2  | 43 | 23 | 134 | 57  |
| 88,550 | 5 | 2  | 62 | 33  | 4 | 2  | 40 | 23 | 111 | 60  |
| 88,551 | 5 | 2  | 59 | 33  | 4 | 2  | 35 | 23 | 103 | 60  |
| 88,552 | 5 | 2  | 60 | 34  | 4 | 3  | 35 | 23 | 104 | 62  |
| 88,553 | 5 | 2  | 62 | 36  | 4 | 3  | 37 | 23 | 108 | 64  |
| 88,554 | 5 | 2  | 62 | 36  | 4 | 3  | 36 | 23 | 107 | 64  |
| 88,555 | 5 | 2  | 59 | 36  | 4 | 3  | 36 | 23 | 104 | 64  |
| 88,556 | 5 | 2  | 59 | 38  | 4 | 3  | 36 | 23 | 104 | 66  |
| 88,557 | 5 | 2  | 56 | 39  | 4 | 3  | 35 | 23 | 100 | 67  |
| 88,558 | 5 | 2  | 56 | 39  | 4 | 3  | 35 | 24 | 100 | 68  |
| 88,559 | 5 | 2  | 55 | 40  | 4 | 3  | 34 | 25 | 98  | 70  |
| 88,560 | 4 | 2  | 53 | 40  | 4 | 3  | 34 | 25 | 95  | 70  |
| 88,561 | 4 | 2  | 51 | 40  | 3 | 3  | 31 | 26 | 89  | 71  |
| 88,562 | 4 | 2  | 49 | 42  | 3 | 3  | 28 | 26 | 84  | 73  |
| 88,563 | 4 | 2  | 49 | 42  | 3 | 3  | 28 | 26 | 84  | 73  |
| 88,564 | 4 | 2  | 48 | 42  | 3 | 3  | 26 | 26 | 81  | 73  |
| 88,565 | 3 | 2  | 49 | 41  | 3 | 2  | 26 | 26 | 81  | 71  |
| 88,566 | 3 | 1  | 52 | 39  | 3 | 2  | 28 | 25 | 86  | 67  |
| 88,567 | 3 | 1  | 52 | 37  | 3 | 2  | 26 | 24 | 84  | 64  |
| 88,568 | 3 | 1  | 52 | 42  | 3 | 2  | 26 | 25 | 84  | 70  |
| 88,569 | 3 | 1  | 51 | 47  | 3 | 2  | 27 | 29 | 84  | 79  |
| 88,570 | 3 | 1  | 49 | 47  | 3 | 2  | 27 | 29 | 82  | 79  |
| 88,571 | 3 | 3  | 50 | 70  | 3 | 3  | 27 | 40 | 83  | 116 |
| 88,572 | 3 | 4  | 50 | 78  | 3 | 3  | 27 | 41 | 83  | 126 |
| 88,573 | 3 | 6  | 47 | 80  | 3 | 3  | 25 | 44 | 78  | 133 |
| 88,574 | 3 | 6  | 45 | 80  | 3 | 3  | 24 | 44 | 75  | 133 |
| 88,575 | 3 | 6  | 44 | 80  | 3 | 3  | 24 | 43 | 74  | 132 |
| 88,576 | 3 | 6  | 42 | 82  | 3 | 4  | 24 | 47 | 72  | 139 |
| 88,577 | 3 | 6  | 41 | 82  | 3 | 4  | 24 | 46 | 71  | 138 |
| 88,578 | 3 | 6  | 43 | 84  | 3 | 4  | 27 | 46 | 76  | 140 |
| 88,579 | 3 | 6  | 43 | 85  | 3 | 4  | 27 | 45 | 76  | 140 |
| 88,580 | 3 | 6  | 41 | 84  | 3 | 3  | 26 | 41 | 73  | 134 |
| 88,581 | 3 | 6  | 41 | 85  | 3 | 3  | 25 | 41 | 72  | 135 |
| 88,582 | 3 | 6  | 38 | 85  | 3 | 3  | 24 | 41 | 68  | 135 |
| 88,583 | 3 | 6  | 36 | 84  | 3 | 3  | 21 | 42 | 63  | 135 |
| 88,584 | 1 | 5  | 31 | 82  | 3 | 3  | 20 | 43 | 55  | 133 |
| 88,585 | 1 | 5  | 31 | 89  | 3 | 4  | 20 | 47 | 55  | 145 |
| 88,586 | 2 | 5  | 34 | 97  | 3 | 6  | 22 | 53 | 61  | 161 |
| 88,587 | 2 | 7  | 34 | 106 | 3 | 8  | 21 | 60 | 60  | 181 |
| 88,588 | 2 | 12 | 35 | 139 | 3 | 9  | 21 | 68 | 61  | 228 |
| 88,589 | 2 | 14 | 33 | 141 | 2 | 10 | 21 | 66 | 58  | 231 |

|        |   |    |    |     |   |    |    |     |    |     |
|--------|---|----|----|-----|---|----|----|-----|----|-----|
| 88,590 | 1 | 19 | 31 | 156 | 1 | 11 | 21 | 69  | 54 | 255 |
| 88,591 | 1 | 19 | 30 | 160 | 1 | 11 | 21 | 69  | 53 | 259 |
| 88,592 | 1 | 20 | 28 | 163 | 0 | 11 | 22 | 69  | 51 | 263 |
| 88,593 | 1 | 22 | 27 | 166 | 0 | 12 | 22 | 69  | 50 | 269 |
| 88,594 | 1 | 22 | 27 | 168 | 0 | 12 | 22 | 69  | 50 | 271 |
| 88,595 | 1 | 22 | 27 | 168 | 0 | 12 | 22 | 71  | 50 | 273 |
| 88,596 | 1 | 22 | 27 | 166 | 0 | 12 | 22 | 71  | 50 | 271 |
| 88,597 | 1 | 22 | 27 | 169 | 0 | 12 | 22 | 71  | 50 | 274 |
| 88,598 | 1 | 22 | 27 | 172 | 0 | 12 | 22 | 71  | 50 | 277 |
| 88,599 | 1 | 22 | 26 | 177 | 0 | 12 | 22 | 77  | 49 | 288 |
| 88,600 | 1 | 22 | 26 | 176 | 0 | 14 | 22 | 80  | 49 | 292 |
| 88,601 | 1 | 22 | 28 | 180 | 1 | 14 | 22 | 83  | 52 | 299 |
| 88,602 | 1 | 22 | 28 | 189 | 1 | 14 | 22 | 84  | 52 | 309 |
| 88,603 | 1 | 23 | 26 | 191 | 1 | 13 | 22 | 87  | 50 | 314 |
| 88,604 | 1 | 23 | 24 | 192 | 1 | 13 | 19 | 87  | 45 | 315 |
| 88,605 | 1 | 23 | 23 | 193 | 1 | 14 | 18 | 87  | 43 | 317 |
| 88,606 | 1 | 23 | 26 | 191 | 2 | 14 | 19 | 87  | 48 | 315 |
| 88,607 | 2 | 23 | 27 | 190 | 2 | 14 | 21 | 88  | 52 | 315 |
| 88,608 | 2 | 23 | 30 | 190 | 2 | 14 | 23 | 88  | 57 | 315 |
| 88,609 | 2 | 23 | 31 | 191 | 2 | 14 | 24 | 88  | 59 | 316 |
| 88,610 | 2 | 23 | 31 | 191 | 2 | 14 | 24 | 87  | 59 | 315 |
| 88,611 | 2 | 23 | 34 | 192 | 2 | 14 | 25 | 87  | 63 | 316 |
| 88,612 | 2 | 24 | 34 | 195 | 2 | 14 | 25 | 86  | 63 | 319 |
| 88,613 | 2 | 24 | 35 | 193 | 3 | 14 | 25 | 86  | 65 | 317 |
| 88,614 | 2 | 26 | 35 | 195 | 3 | 16 | 26 | 92  | 66 | 329 |
| 88,615 | 2 | 30 | 33 | 202 | 3 | 16 | 26 | 96  | 64 | 344 |
| 88,616 | 2 | 31 | 30 | 202 | 3 | 16 | 23 | 97  | 58 | 346 |
| 88,617 | 2 | 32 | 30 | 202 | 3 | 16 | 23 | 101 | 58 | 351 |
| 88,618 | 2 | 32 | 29 | 202 | 3 | 16 | 23 | 101 | 57 | 351 |
| 88,619 | 2 | 33 | 34 | 191 | 3 | 16 | 25 | 96  | 64 | 336 |
| 88,620 | 2 | 33 | 34 | 191 | 3 | 16 | 25 | 96  | 64 | 336 |
| 88,621 | 2 | 34 | 33 | 191 | 3 | 16 | 25 | 96  | 63 | 337 |
| 88,622 | 2 | 32 | 33 | 167 | 3 | 15 | 25 | 85  | 63 | 299 |
| 88,623 | 2 | 31 | 39 | 160 | 5 | 15 | 32 | 84  | 78 | 290 |
| 88,624 | 3 | 29 | 40 | 158 | 5 | 15 | 40 | 81  | 88 | 283 |
| 88,625 | 3 | 29 | 42 | 156 | 5 | 14 | 41 | 77  | 91 | 276 |
| 88,626 | 3 | 29 | 43 | 156 | 5 | 14 | 41 | 77  | 92 | 276 |
| 88,627 | 3 | 29 | 41 | 158 | 5 | 14 | 38 | 77  | 87 | 278 |
| 88,628 | 3 | 29 | 42 | 161 | 5 | 14 | 39 | 77  | 89 | 281 |
| 88,629 | 3 | 29 | 42 | 159 | 5 | 14 | 39 | 77  | 89 | 279 |
| 88,630 | 3 | 29 | 46 | 158 | 5 | 14 | 40 | 77  | 94 | 278 |

|        |   |    |     |     |   |    |    |    |     |     |
|--------|---|----|-----|-----|---|----|----|----|-----|-----|
| 88,631 | 3 | 29 | 44  | 158 | 5 | 14 | 39 | 78 | 91  | 279 |
| 88,632 | 4 | 29 | 47  | 157 | 5 | 14 | 44 | 78 | 100 | 278 |
| 88,633 | 4 | 29 | 47  | 157 | 5 | 14 | 46 | 78 | 102 | 278 |
| 88,634 | 4 | 29 | 46  | 157 | 5 | 14 | 44 | 77 | 99  | 277 |
| 88,635 | 6 | 29 | 48  | 157 | 5 | 14 | 47 | 76 | 106 | 276 |
| 88,636 | 6 | 29 | 48  | 155 | 5 | 13 | 46 | 76 | 105 | 273 |
| 88,637 | 5 | 29 | 45  | 148 | 5 | 11 | 45 | 70 | 100 | 258 |
| 88,638 | 5 | 27 | 45  | 138 | 5 | 9  | 45 | 64 | 100 | 238 |
| 88,639 | 5 | 22 | 50  | 105 | 6 | 8  | 46 | 53 | 107 | 188 |
| 88,640 | 5 | 20 | 52  | 92  | 6 | 7  | 48 | 49 | 111 | 168 |
| 88,641 | 5 | 15 | 52  | 79  | 6 | 6  | 46 | 45 | 109 | 145 |
| 88,642 | 5 | 15 | 52  | 75  | 6 | 6  | 45 | 44 | 108 | 140 |
| 88,643 | 5 | 14 | 62  | 72  | 6 | 6  | 48 | 43 | 121 | 135 |
| 88,644 | 5 | 12 | 62  | 69  | 6 | 5  | 49 | 43 | 122 | 129 |
| 88,645 | 5 | 12 | 62  | 65  | 6 | 5  | 49 | 43 | 122 | 125 |
| 88,646 | 5 | 12 | 62  | 65  | 6 | 5  | 48 | 41 | 121 | 123 |
| 88,647 | 5 | 12 | 62  | 65  | 6 | 5  | 48 | 41 | 121 | 123 |
| 88,648 | 5 | 12 | 66  | 52  | 7 | 3  | 50 | 32 | 128 | 99  |
| 88,649 | 5 | 12 | 67  | 52  | 7 | 3  | 50 | 32 | 129 | 99  |
| 88,650 | 5 | 12 | 76  | 52  | 6 | 3  | 53 | 32 | 140 | 99  |
| 88,651 | 5 | 12 | 77  | 52  | 6 | 3  | 53 | 33 | 141 | 100 |
| 88,652 | 5 | 12 | 77  | 47  | 6 | 3  | 56 | 30 | 144 | 92  |
| 88,653 | 5 | 12 | 79  | 38  | 6 | 3  | 56 | 29 | 146 | 82  |
| 88,654 | 5 | 11 | 79  | 35  | 6 | 3  | 56 | 26 | 146 | 75  |
| 88,655 | 5 | 11 | 78  | 32  | 6 | 3  | 56 | 26 | 145 | 72  |
| 88,656 | 7 | 11 | 82  | 35  | 6 | 2  | 61 | 25 | 156 | 73  |
| 88,657 | 7 | 11 | 80  | 36  | 5 | 2  | 60 | 25 | 152 | 74  |
| 88,658 | 6 | 11 | 79  | 36  | 5 | 2  | 58 | 24 | 148 | 73  |
| 88,659 | 6 | 11 | 76  | 37  | 5 | 2  | 56 | 24 | 143 | 74  |
| 88,660 | 6 | 11 | 77  | 37  | 5 | 2  | 56 | 27 | 144 | 77  |
| 88,661 | 6 | 11 | 74  | 37  | 5 | 2  | 55 | 27 | 140 | 77  |
| 88,662 | 6 | 11 | 74  | 36  | 5 | 2  | 55 | 27 | 140 | 76  |
| 88,663 | 7 | 10 | 85  | 33  | 6 | 2  | 58 | 27 | 156 | 72  |
| 88,664 | 7 | 10 | 88  | 33  | 6 | 2  | 63 | 27 | 164 | 72  |
| 88,665 | 7 | 4  | 92  | 24  | 6 | 0  | 65 | 17 | 170 | 45  |
| 88,666 | 7 | 3  | 92  | 24  | 7 | 0  | 66 | 16 | 172 | 43  |
| 88,667 | 9 | 3  | 109 | 26  | 8 | 0  | 78 | 17 | 204 | 46  |
| 88,668 | 9 | 2  | 105 | 23  | 8 | 0  | 75 | 14 | 197 | 39  |
| 88,669 | 9 | 1  | 103 | 22  | 8 | 0  | 75 | 14 | 195 | 37  |
| 88,670 | 9 | 1  | 103 | 24  | 8 | 0  | 75 | 15 | 195 | 40  |
| 88,671 | 9 | 2  | 102 | 24  | 8 | 0  | 74 | 18 | 193 | 44  |

|        |    |   |     |    |    |   |     |    |     |    |
|--------|----|---|-----|----|----|---|-----|----|-----|----|
| 88,672 | 9  | 1 | 106 | 26 | 8  | 0 | 73  | 17 | 196 | 44 |
| 88,673 | 9  | 1 | 104 | 26 | 6  | 0 | 71  | 18 | 190 | 45 |
| 88,674 | 10 | 1 | 118 | 25 | 6  | 0 | 77  | 18 | 211 | 44 |
| 88,675 | 9  | 1 | 117 | 25 | 6  | 0 | 70  | 19 | 202 | 45 |
| 88,676 | 11 | 1 | 132 | 26 | 9  | 0 | 91  | 19 | 243 | 46 |
| 88,677 | 11 | 1 | 167 | 24 | 9  | 0 | 104 | 19 | 291 | 44 |
| 88,678 | 14 | 1 | 171 | 24 | 9  | 0 | 110 | 19 | 304 | 44 |
| 88,679 | 14 | 1 | 184 | 21 | 10 | 0 | 114 | 19 | 322 | 41 |
| 88,680 | 14 | 1 | 188 | 21 | 10 | 0 | 119 | 19 | 331 | 41 |
| 88,681 | 15 | 1 | 194 | 21 | 10 | 0 | 119 | 18 | 338 | 40 |
| 88,682 | 15 | 1 | 196 | 21 | 10 | 0 | 119 | 18 | 340 | 40 |
| 88,683 | 14 | 1 | 194 | 21 | 10 | 0 | 115 | 18 | 333 | 40 |
| 88,684 | 14 | 1 | 194 | 21 | 10 | 0 | 113 | 18 | 331 | 40 |
| 88,685 | 12 | 1 | 193 | 21 | 10 | 0 | 111 | 18 | 326 | 40 |
| 88,686 | 12 | 1 | 195 | 21 | 10 | 0 | 112 | 18 | 329 | 40 |
| 88,687 | 12 | 1 | 195 | 17 | 10 | 0 | 112 | 16 | 329 | 34 |
| 88,688 | 12 | 1 | 194 | 16 | 10 | 0 | 112 | 16 | 328 | 33 |
| 88,689 | 12 | 1 | 199 | 16 | 11 | 0 | 113 | 16 | 335 | 33 |
| 88,690 | 12 | 1 | 194 | 17 | 10 | 0 | 113 | 16 | 329 | 34 |
| 88,691 | 12 | 1 | 191 | 17 | 10 | 0 | 111 | 16 | 324 | 34 |
| 88,692 | 12 | 1 | 183 | 21 | 10 | 0 | 107 | 21 | 312 | 43 |
| 88,693 | 12 | 1 | 181 | 21 | 10 | 0 | 107 | 21 | 310 | 43 |
| 88,694 | 12 | 1 | 181 | 21 | 10 | 0 | 107 | 21 | 310 | 43 |
| 88,695 | 12 | 1 | 182 | 21 | 10 | 0 | 106 | 21 | 310 | 43 |
| 88,696 | 12 | 1 | 182 | 21 | 10 | 0 | 106 | 21 | 310 | 43 |
| 88,697 | 12 | 3 | 182 | 21 | 10 | 0 | 106 | 27 | 310 | 51 |
| 88,698 | 12 | 3 | 180 | 21 | 9  | 0 | 106 | 27 | 307 | 51 |
| 88,699 | 12 | 3 | 178 | 22 | 9  | 0 | 106 | 28 | 305 | 53 |
| 88,700 | 12 | 3 | 178 | 22 | 9  | 0 | 107 | 28 | 306 | 53 |
| 88,701 | 12 | 4 | 167 | 23 | 9  | 0 | 104 | 28 | 292 | 55 |
| 88,702 | 12 | 4 | 166 | 24 | 9  | 0 | 104 | 28 | 291 | 56 |
| 88,703 | 12 | 4 | 166 | 24 | 9  | 0 | 101 | 28 | 288 | 56 |
| 88,704 | 12 | 4 | 164 | 24 | 9  | 0 | 101 | 29 | 286 | 57 |
| 88,705 | 10 | 4 | 164 | 24 | 9  | 0 | 103 | 29 | 286 | 57 |
| 88,706 | 10 | 4 | 162 | 20 | 9  | 0 | 99  | 29 | 280 | 53 |
| 88,707 | 10 | 4 | 162 | 21 | 9  | 0 | 98  | 30 | 279 | 55 |
| 88,708 | 10 | 4 | 161 | 21 | 9  | 0 | 97  | 30 | 277 | 55 |
| 88,709 | 11 | 4 | 169 | 22 | 9  | 0 | 100 | 30 | 289 | 56 |
| 88,710 | 13 | 4 | 185 | 21 | 10 | 0 | 105 | 30 | 313 | 55 |
| 88,711 | 13 | 4 | 185 | 20 | 10 | 0 | 104 | 26 | 312 | 50 |
| 88,712 | 13 | 6 | 182 | 20 | 10 | 0 | 102 | 26 | 307 | 52 |

|        |    |   |     |    |   |   |     |    |     |     |
|--------|----|---|-----|----|---|---|-----|----|-----|-----|
| 88,713 | 12 | 6 | 174 | 20 | 9 | 0 | 101 | 26 | 296 | 52  |
| 88,714 | 12 | 6 | 171 | 21 | 9 | 0 | 101 | 30 | 293 | 57  |
| 88,715 | 12 | 6 | 170 | 24 | 8 | 0 | 96  | 31 | 286 | 61  |
| 88,716 | 12 | 6 | 166 | 24 | 8 | 0 | 93  | 31 | 279 | 61  |
| 88,717 | 12 | 6 | 165 | 24 | 7 | 0 | 92  | 31 | 276 | 61  |
| 88,718 | 10 | 6 | 148 | 23 | 6 | 0 | 80  | 29 | 244 | 58  |
| 88,719 | 10 | 6 | 148 | 24 | 6 | 0 | 80  | 32 | 244 | 62  |
| 88,720 | 10 | 6 | 148 | 24 | 6 | 0 | 80  | 32 | 244 | 62  |
| 88,721 | 10 | 6 | 150 | 22 | 6 | 0 | 81  | 31 | 247 | 59  |
| 88,722 | 20 | 5 | 164 | 22 | 9 | 0 | 104 | 28 | 297 | 55  |
| 88,723 | 20 | 5 | 161 | 20 | 9 | 0 | 106 | 27 | 296 | 52  |
| 88,724 | 20 | 6 | 162 | 23 | 9 | 0 | 106 | 29 | 297 | 58  |
| 88,725 | 19 | 6 | 147 | 29 | 9 | 0 | 97  | 30 | 272 | 65  |
| 88,726 | 18 | 6 | 140 | 43 | 7 | 2 | 82  | 30 | 247 | 81  |
| 88,727 | 19 | 6 | 134 | 52 | 6 | 2 | 79  | 33 | 238 | 93  |
| 88,728 | 19 | 6 | 99  | 55 | 6 | 2 | 66  | 34 | 190 | 97  |
| 88,729 | 16 | 6 | 95  | 55 | 6 | 2 | 60  | 34 | 177 | 97  |
| 88,730 | 16 | 6 | 81  | 55 | 5 | 2 | 55  | 34 | 157 | 97  |
| 88,731 | 16 | 6 | 77  | 55 | 5 | 2 | 50  | 34 | 148 | 97  |
| 88,732 | 15 | 6 | 68  | 56 | 5 | 2 | 49  | 34 | 137 | 98  |
| 88,733 | 15 | 6 | 66  | 57 | 5 | 3 | 49  | 34 | 135 | 100 |
| 88,734 | 16 | 6 | 66  | 57 | 5 | 3 | 48  | 34 | 135 | 100 |
| 88,735 | 16 | 6 | 67  | 60 | 5 | 3 | 48  | 34 | 136 | 103 |
| 88,736 | 16 | 6 | 67  | 60 | 5 | 3 | 47  | 34 | 135 | 103 |
| 88,737 | 16 | 6 | 64  | 60 | 5 | 3 | 49  | 34 | 134 | 103 |
| 88,738 | 16 | 8 | 64  | 63 | 5 | 3 | 50  | 35 | 135 | 109 |
| 88,739 | 16 | 8 | 59  | 64 | 4 | 3 | 49  | 36 | 128 | 111 |
| 88,740 | 16 | 8 | 59  | 65 | 4 | 3 | 50  | 35 | 129 | 111 |
| 88,741 | 16 | 8 | 58  | 65 | 4 | 3 | 50  | 35 | 128 | 111 |
| 88,742 | 16 | 8 | 58  | 61 | 4 | 3 | 50  | 30 | 128 | 102 |
| 88,743 | 16 | 8 | 58  | 61 | 4 | 3 | 50  | 30 | 128 | 102 |
| 88,744 | 16 | 8 | 58  | 61 | 4 | 3 | 50  | 30 | 128 | 102 |
| 88,745 | 16 | 8 | 57  | 61 | 4 | 3 | 50  | 30 | 127 | 102 |
| 88,746 | 16 | 8 | 57  | 61 | 4 | 3 | 50  | 30 | 127 | 102 |
| 88,747 | 16 | 8 | 57  | 61 | 4 | 3 | 49  | 30 | 126 | 102 |
| 88,748 | 16 | 6 | 57  | 61 | 4 | 3 | 49  | 24 | 126 | 94  |
| 88,749 | 16 | 6 | 57  | 61 | 4 | 3 | 49  | 24 | 126 | 94  |
| 88,750 | 16 | 6 | 57  | 60 | 4 | 3 | 48  | 23 | 125 | 92  |
| 88,751 | 16 | 6 | 56  | 60 | 4 | 3 | 47  | 23 | 123 | 92  |
| 88,752 | 16 | 5 | 59  | 58 | 4 | 3 | 47  | 22 | 126 | 88  |
| 88,753 | 16 | 5 | 59  | 58 | 4 | 3 | 47  | 22 | 126 | 88  |

|        |    |   |     |    |   |   |    |    |     |    |
|--------|----|---|-----|----|---|---|----|----|-----|----|
| 88,754 | 16 | 5 | 64  | 59 | 5 | 3 | 50 | 22 | 135 | 89 |
| 88,755 | 16 | 5 | 64  | 60 | 5 | 3 | 50 | 23 | 135 | 91 |
| 88,756 | 17 | 5 | 63  | 60 | 5 | 3 | 53 | 23 | 138 | 91 |
| 88,757 | 17 | 5 | 66  | 60 | 5 | 3 | 54 | 23 | 142 | 91 |
| 88,758 | 16 | 5 | 68  | 59 | 5 | 3 | 53 | 22 | 142 | 89 |
| 88,759 | 16 | 5 | 61  | 57 | 5 | 3 | 52 | 22 | 134 | 87 |
| 88,760 | 16 | 5 | 65  | 57 | 5 | 3 | 54 | 22 | 140 | 87 |
| 88,761 | 14 | 5 | 49  | 57 | 4 | 3 | 48 | 22 | 115 | 87 |
| 88,762 | 16 | 3 | 65  | 59 | 4 | 3 | 61 | 22 | 146 | 87 |
| 88,763 | 16 | 3 | 69  | 59 | 4 | 3 | 66 | 22 | 155 | 87 |
| 88,764 | 16 | 3 | 69  | 59 | 4 | 3 | 66 | 22 | 155 | 87 |
| 88,765 | 16 | 3 | 69  | 55 | 4 | 3 | 66 | 17 | 155 | 78 |
| 88,766 | 16 | 3 | 69  | 55 | 4 | 3 | 66 | 17 | 155 | 78 |
| 88,767 | 16 | 3 | 69  | 55 | 4 | 3 | 67 | 17 | 156 | 78 |
| 88,768 | 16 | 3 | 70  | 55 | 4 | 3 | 68 | 17 | 158 | 78 |
| 88,769 | 16 | 3 | 70  | 54 | 4 | 3 | 68 | 17 | 158 | 77 |
| 88,770 | 16 | 3 | 69  | 53 | 4 | 3 | 67 | 14 | 156 | 73 |
| 88,771 | 16 | 3 | 70  | 53 | 4 | 3 | 69 | 14 | 159 | 73 |
| 88,772 | 6  | 4 | 58  | 53 | 1 | 3 | 49 | 14 | 114 | 74 |
| 88,773 | 6  | 4 | 57  | 53 | 1 | 3 | 46 | 14 | 110 | 74 |
| 88,774 | 6  | 4 | 57  | 53 | 1 | 3 | 46 | 14 | 110 | 74 |
| 88,775 | 7  | 3 | 56  | 50 | 1 | 3 | 46 | 12 | 110 | 68 |
| 88,776 | 7  | 3 | 56  | 30 | 1 | 1 | 46 | 10 | 110 | 44 |
| 88,777 | 6  | 3 | 54  | 30 | 1 | 1 | 43 | 10 | 104 | 44 |
| 88,778 | 5  | 3 | 58  | 17 | 1 | 1 | 43 | 6  | 107 | 27 |
| 88,779 | 5  | 3 | 58  | 17 | 1 | 1 | 43 | 6  | 107 | 27 |
| 88,780 | 5  | 3 | 59  | 17 | 1 | 1 | 43 | 6  | 108 | 27 |
| 88,781 | 5  | 3 | 60  | 17 | 1 | 1 | 44 | 6  | 110 | 27 |
| 88,782 | 5  | 3 | 65  | 16 | 1 | 1 | 45 | 6  | 116 | 26 |
| 88,783 | 5  | 3 | 64  | 17 | 1 | 1 | 45 | 6  | 115 | 27 |
| 88,784 | 5  | 3 | 72  | 16 | 3 | 0 | 55 | 8  | 135 | 27 |
| 88,785 | 6  | 3 | 75  | 19 | 3 | 0 | 57 | 9  | 141 | 31 |
| 88,786 | 6  | 3 | 75  | 17 | 3 | 0 | 57 | 10 | 141 | 30 |
| 88,787 | 8  | 3 | 81  | 18 | 3 | 0 | 60 | 10 | 152 | 31 |
| 88,788 | 8  | 3 | 82  | 18 | 3 | 0 | 57 | 10 | 150 | 31 |
| 88,789 | 8  | 1 | 82  | 14 | 3 | 0 | 56 | 7  | 149 | 22 |
| 88,790 | 8  | 2 | 82  | 22 | 3 | 0 | 55 | 10 | 148 | 34 |
| 88,791 | 8  | 2 | 82  | 21 | 3 | 0 | 55 | 11 | 148 | 34 |
| 88,792 | 11 | 2 | 106 | 20 | 4 | 0 | 65 | 11 | 186 | 33 |
| 88,793 | 11 | 2 | 106 | 20 | 4 | 0 | 65 | 11 | 186 | 33 |
| 88,794 | 11 | 2 | 106 | 20 | 4 | 0 | 65 | 11 | 186 | 33 |

|        |    |   |     |    |    |   |     |    |     |    |
|--------|----|---|-----|----|----|---|-----|----|-----|----|
| 88,795 | 12 | 2 | 126 | 31 | 6  | 0 | 75  | 13 | 219 | 46 |
| 88,796 | 12 | 2 | 126 | 31 | 6  | 0 | 75  | 13 | 219 | 46 |
| 88,797 | 12 | 2 | 127 | 31 | 6  | 0 | 75  | 13 | 220 | 46 |
| 88,798 | 13 | 2 | 131 | 32 | 6  | 0 | 76  | 13 | 226 | 47 |
| 88,799 | 14 | 2 | 135 | 32 | 6  | 0 | 80  | 13 | 235 | 47 |
| 88,800 | 14 | 2 | 148 | 32 | 6  | 0 | 83  | 13 | 251 | 47 |
| 88,801 | 14 | 2 | 153 | 32 | 6  | 0 | 85  | 13 | 258 | 47 |
| 88,802 | 14 | 2 | 154 | 33 | 6  | 0 | 87  | 13 | 261 | 48 |
| 88,803 | 15 | 2 | 175 | 33 | 7  | 0 | 106 | 13 | 303 | 48 |
| 88,804 | 15 | 2 | 171 | 32 | 6  | 0 | 103 | 13 | 295 | 47 |
| 88,805 | 15 | 2 | 171 | 31 | 6  | 0 | 104 | 11 | 296 | 44 |
| 88,806 | 15 | 2 | 171 | 31 | 6  | 0 | 104 | 11 | 296 | 44 |
| 88,807 | 14 | 2 | 171 | 32 | 6  | 0 | 99  | 11 | 290 | 45 |
| 88,808 | 14 | 2 | 170 | 32 | 6  | 0 | 99  | 11 | 289 | 45 |
| 88,809 | 14 | 2 | 168 | 32 | 6  | 0 | 100 | 11 | 288 | 45 |
| 88,810 | 16 | 2 | 184 | 32 | 6  | 0 | 113 | 11 | 319 | 45 |
| 88,811 | 18 | 2 | 188 | 32 | 6  | 0 | 118 | 11 | 330 | 45 |
| 88,812 | 17 | 2 | 172 | 28 | 6  | 0 | 107 | 11 | 302 | 41 |
| 88,813 | 16 | 2 | 170 | 28 | 6  | 0 | 106 | 11 | 298 | 41 |
| 88,814 | 16 | 2 | 174 | 30 | 8  | 0 | 110 | 11 | 308 | 43 |
| 88,815 | 16 | 2 | 175 | 30 | 8  | 0 | 110 | 11 | 309 | 43 |
| 88,816 | 16 | 2 | 175 | 30 | 8  | 0 | 110 | 11 | 309 | 43 |
| 88,817 | 16 | 2 | 177 | 30 | 9  | 0 | 110 | 11 | 312 | 43 |
| 88,818 | 16 | 2 | 176 | 30 | 9  | 0 | 109 | 11 | 310 | 43 |
| 88,819 | 16 | 2 | 176 | 30 | 9  | 0 | 109 | 11 | 310 | 43 |
| 88,820 | 16 | 2 | 176 | 30 | 9  | 0 | 109 | 11 | 310 | 43 |
| 88,821 | 16 | 2 | 176 | 30 | 9  | 0 | 109 | 11 | 310 | 43 |
| 88,822 | 16 | 2 | 175 | 30 | 9  | 0 | 107 | 11 | 307 | 43 |
| 88,823 | 16 | 1 | 172 | 30 | 9  | 0 | 104 | 11 | 301 | 42 |
| 88,824 | 16 | 1 | 180 | 30 | 9  | 0 | 104 | 11 | 309 | 42 |
| 88,825 | 16 | 1 | 192 | 30 | 10 | 0 | 113 | 11 | 331 | 42 |
| 88,826 | 15 | 1 | 193 | 30 | 10 | 0 | 118 | 11 | 336 | 42 |
| 88,827 | 15 | 1 | 195 | 30 | 10 | 0 | 118 | 11 | 338 | 42 |
| 88,828 | 15 | 1 | 195 | 30 | 10 | 0 | 118 | 11 | 338 | 42 |
| 88,829 | 15 | 1 | 194 | 30 | 11 | 0 | 125 | 11 | 345 | 42 |
| 88,830 | 15 | 1 | 194 | 30 | 11 | 0 | 126 | 11 | 346 | 42 |
| 88,831 | 15 | 1 | 193 | 30 | 11 | 0 | 126 | 11 | 345 | 42 |
| 88,832 | 15 | 1 | 192 | 30 | 11 | 0 | 125 | 11 | 343 | 42 |
| 88,833 | 15 | 1 | 187 | 29 | 11 | 0 | 124 | 11 | 337 | 41 |
| 88,834 | 15 | 1 | 186 | 29 | 11 | 0 | 125 | 11 | 337 | 41 |
| 88,835 | 14 | 1 | 178 | 26 | 9  | 0 | 115 | 8  | 316 | 35 |

|        |    |    |     |     |   |   |     |    |     |     |
|--------|----|----|-----|-----|---|---|-----|----|-----|-----|
| 88,836 | 13 | 1  | 174 | 25  | 9 | 0 | 113 | 7  | 309 | 33  |
| 88,837 | 13 | 1  | 174 | 25  | 9 | 0 | 113 | 7  | 309 | 33  |
| 88,838 | 11 | 1  | 168 | 25  | 9 | 0 | 110 | 7  | 298 | 33  |
| 88,839 | 11 | 1  | 167 | 25  | 9 | 0 | 110 | 7  | 297 | 33  |
| 88,840 | 11 | 1  | 160 | 27  | 8 | 0 | 108 | 7  | 287 | 35  |
| 88,841 | 9  | 0  | 155 | 18  | 8 | 0 | 107 | 4  | 279 | 22  |
| 88,842 | 8  | 0  | 146 | 18  | 8 | 0 | 103 | 3  | 265 | 21  |
| 88,843 | 7  | 0  | 127 | 18  | 7 | 0 | 96  | 3  | 237 | 21  |
| 88,844 | 7  | 0  | 126 | 18  | 6 | 0 | 93  | 3  | 232 | 21  |
| 88,845 | 7  | 0  | 126 | 20  | 6 | 0 | 93  | 3  | 232 | 23  |
| 88,846 | 7  | 0  | 126 | 9   | 6 | 0 | 93  | 1  | 232 | 10  |
| 88,847 | 7  | 0  | 127 | 9   | 6 | 0 | 97  | 1  | 237 | 10  |
| 88,848 | 7  | 0  | 126 | 9   | 6 | 0 | 100 | 2  | 239 | 11  |
| 88,849 | 6  | 1  | 126 | 9   | 6 | 0 | 99  | 3  | 237 | 13  |
| 88,850 | 7  | 1  | 131 | 13  | 6 | 0 | 96  | 4  | 240 | 18  |
| 88,851 | 7  | 1  | 119 | 12  | 6 | 0 | 93  | 4  | 225 | 17  |
| 88,852 | 7  | 1  | 125 | 12  | 6 | 0 | 91  | 4  | 229 | 17  |
| 88,853 | 7  | 1  | 123 | 12  | 6 | 0 | 89  | 4  | 225 | 17  |
| 88,854 | 6  | 1  | 100 | 12  | 5 | 0 | 70  | 4  | 181 | 17  |
| 88,855 | 6  | 1  | 100 | 12  | 5 | 0 | 71  | 4  | 182 | 17  |
| 88,856 | 6  | 1  | 100 | 12  | 5 | 0 | 70  | 4  | 181 | 17  |
| 88,857 | 6  | 1  | 100 | 17  | 5 | 0 | 70  | 4  | 181 | 22  |
| 88,858 | 6  | 1  | 100 | 16  | 5 | 0 | 70  | 4  | 181 | 21  |
| 88,859 | 7  | 1  | 106 | 16  | 6 | 0 | 73  | 4  | 192 | 21  |
| 88,860 | 7  | 1  | 107 | 16  | 6 | 0 | 73  | 4  | 193 | 21  |
| 88,861 | 7  | 2  | 118 | 21  | 6 | 0 | 62  | 10 | 193 | 33  |
| 88,862 | 7  | 5  | 139 | 47  | 8 | 0 | 67  | 20 | 221 | 72  |
| 88,863 | 7  | 15 | 139 | 62  | 8 | 0 | 66  | 28 | 220 | 105 |
| 88,864 | 7  | 16 | 132 | 70  | 8 | 0 | 58  | 32 | 205 | 118 |
| 88,865 | 10 | 16 | 166 | 70  | 8 | 1 | 73  | 32 | 257 | 119 |
| 88,866 | 10 | 17 | 165 | 77  | 8 | 1 | 73  | 35 | 256 | 130 |
| 88,867 | 10 | 17 | 165 | 77  | 8 | 1 | 73  | 35 | 256 | 130 |
| 88,868 | 10 | 17 | 163 | 81  | 8 | 1 | 73  | 35 | 254 | 134 |
| 88,869 | 10 | 17 | 163 | 82  | 8 | 1 | 74  | 35 | 255 | 135 |
| 88,870 | 10 | 17 | 165 | 82  | 8 | 1 | 75  | 35 | 258 | 135 |
| 88,871 | 10 | 17 | 170 | 86  | 8 | 1 | 75  | 37 | 263 | 141 |
| 88,872 | 11 | 17 | 173 | 86  | 8 | 1 | 82  | 37 | 274 | 141 |
| 88,873 | 11 | 18 | 171 | 88  | 8 | 1 | 82  | 39 | 272 | 146 |
| 88,874 | 11 | 18 | 163 | 89  | 8 | 2 | 82  | 40 | 264 | 149 |
| 88,875 | 11 | 18 | 152 | 91  | 7 | 2 | 73  | 41 | 243 | 152 |
| 88,876 | 11 | 18 | 152 | 104 | 7 | 2 | 73  | 49 | 243 | 173 |



|        |    |    |     |     |    |   |    |    |     |     |
|--------|----|----|-----|-----|----|---|----|----|-----|-----|
| 88,877 | 11 | 20 | 154 | 109 | 7  | 2 | 70 | 52 | 242 | 183 |
| 88,878 | 11 | 20 | 152 | 109 | 7  | 2 | 71 | 53 | 241 | 184 |
| 88,879 | 11 | 20 | 152 | 113 | 6  | 2 | 67 | 54 | 236 | 189 |
| 88,880 | 11 | 20 | 154 | 115 | 7  | 2 | 65 | 55 | 237 | 192 |
| 88,881 | 11 | 20 | 153 | 116 | 7  | 2 | 64 | 55 | 235 | 193 |
| 88,882 | 11 | 20 | 157 | 116 | 7  | 2 | 65 | 56 | 240 | 194 |
| 88,883 | 11 | 20 | 165 | 116 | 8  | 2 | 67 | 56 | 251 | 194 |
| 88,884 | 11 | 20 | 173 | 116 | 8  | 2 | 70 | 56 | 262 | 194 |
| 88,885 | 11 | 20 | 173 | 116 | 8  | 2 | 70 | 56 | 262 | 194 |
| 88,886 | 11 | 21 | 174 | 115 | 8  | 2 | 70 | 57 | 263 | 195 |
| 88,887 | 11 | 21 | 174 | 116 | 8  | 2 | 70 | 57 | 263 | 196 |
| 88,888 | 11 | 21 | 178 | 116 | 8  | 2 | 70 | 57 | 267 | 196 |
| 88,889 | 11 | 21 | 178 | 117 | 8  | 2 | 70 | 57 | 267 | 197 |
| 88,890 | 11 | 21 | 180 | 117 | 8  | 2 | 71 | 57 | 270 | 197 |
| 88,891 | 14 | 21 | 196 | 115 | 8  | 2 | 77 | 56 | 295 | 194 |
| 88,892 | 14 | 21 | 210 | 116 | 8  | 2 | 78 | 56 | 310 | 195 |
| 88,893 | 14 | 21 | 210 | 116 | 8  | 2 | 75 | 56 | 307 | 195 |
| 88,894 | 15 | 21 | 226 | 114 | 8  | 2 | 80 | 58 | 329 | 195 |
| 88,895 | 15 | 22 | 257 | 114 | 8  | 2 | 79 | 59 | 359 | 197 |
| 88,896 | 15 | 22 | 257 | 114 | 8  | 2 | 79 | 59 | 359 | 197 |
| 88,897 | 16 | 22 | 283 | 114 | 10 | 2 | 85 | 59 | 394 | 197 |
| 88,898 | 16 | 21 | 283 | 115 | 10 | 2 | 85 | 57 | 394 | 195 |
| 88,899 | 16 | 21 | 283 | 115 | 10 | 2 | 84 | 57 | 393 | 195 |
| 88,900 | 17 | 21 | 293 | 116 | 10 | 2 | 86 | 57 | 406 | 196 |
| 88,901 | 16 | 21 | 289 | 113 | 10 | 2 | 88 | 56 | 403 | 192 |
| 88,902 | 16 | 21 | 288 | 113 | 10 | 2 | 88 | 56 | 402 | 192 |
| 88,903 | 16 | 21 | 280 | 112 | 10 | 2 | 88 | 56 | 394 | 191 |
| 88,904 | 16 | 21 | 280 | 112 | 10 | 2 | 88 | 56 | 394 | 191 |
| 88,905 | 16 | 21 | 286 | 115 | 10 | 2 | 90 | 56 | 402 | 194 |
| 88,906 | 16 | 21 | 286 | 115 | 10 | 2 | 90 | 56 | 402 | 194 |
| 88,907 | 17 | 21 | 287 | 110 | 10 | 2 | 91 | 56 | 405 | 189 |
| 88,908 | 17 | 21 | 286 | 110 | 10 | 2 | 91 | 56 | 404 | 189 |
| 88,909 | 17 | 21 | 286 | 110 | 10 | 2 | 91 | 56 | 404 | 189 |
| 88,910 | 16 | 21 | 280 | 110 | 9  | 3 | 87 | 56 | 392 | 190 |
| 88,911 | 16 | 21 | 278 | 111 | 9  | 3 | 86 | 56 | 389 | 191 |
| 88,912 | 14 | 21 | 252 | 106 | 8  | 3 | 83 | 50 | 357 | 180 |
| 88,913 | 12 | 18 | 224 | 80  | 6  | 3 | 70 | 42 | 312 | 143 |
| 88,914 | 10 | 7  | 195 | 58  | 4  | 3 | 58 | 30 | 267 | 98  |
| 88,915 | 9  | 7  | 194 | 58  | 4  | 3 | 55 | 31 | 262 | 99  |
| 88,916 | 12 | 7  | 212 | 49  | 5  | 2 | 76 | 28 | 305 | 86  |
| 88,917 | 12 | 7  | 212 | 49  | 5  | 2 | 76 | 28 | 305 | 86  |

|        |    |   |     |    |    |   |     |    |     |    |
|--------|----|---|-----|----|----|---|-----|----|-----|----|
| 88,918 | 12 | 7 | 212 | 49 | 5  | 2 | 76  | 28 | 305 | 86 |
| 88,919 | 12 | 7 | 213 | 45 | 5  | 2 | 75  | 28 | 305 | 82 |
| 88,920 | 15 | 7 | 220 | 44 | 6  | 2 | 78  | 28 | 319 | 81 |
| 88,921 | 15 | 7 | 219 | 40 | 6  | 2 | 80  | 26 | 320 | 75 |
| 88,922 | 18 | 7 | 242 | 40 | 8  | 2 | 94  | 26 | 362 | 75 |
| 88,923 | 17 | 7 | 239 | 40 | 8  | 2 | 89  | 26 | 353 | 75 |
| 88,924 | 17 | 6 | 239 | 39 | 8  | 2 | 89  | 24 | 353 | 71 |
| 88,925 | 18 | 6 | 250 | 36 | 8  | 1 | 90  | 22 | 366 | 65 |
| 88,926 | 19 | 6 | 259 | 36 | 8  | 1 | 90  | 22 | 376 | 65 |
| 88,927 | 22 | 6 | 271 | 23 | 8  | 1 | 89  | 15 | 390 | 45 |
| 88,928 | 23 | 4 | 268 | 18 | 8  | 1 | 87  | 12 | 386 | 35 |
| 88,929 | 40 | 4 | 354 | 18 | 12 | 1 | 131 | 11 | 537 | 34 |
| 88,930 | 41 | 4 | 352 | 14 | 13 | 1 | 131 | 10 | 537 | 29 |
| 88,931 | 41 | 4 | 349 | 13 | 12 | 1 | 132 | 10 | 534 | 28 |
| 88,932 | 41 | 4 | 345 | 12 | 12 | 1 | 131 | 10 | 529 | 27 |
| 88,933 | 41 | 4 | 348 | 12 | 13 | 1 | 135 | 9  | 537 | 26 |
| 88,934 | 41 | 4 | 342 | 12 | 13 | 1 | 133 | 9  | 529 | 26 |
| 88,935 | 41 | 4 | 334 | 15 | 13 | 1 | 130 | 9  | 518 | 29 |
| 88,936 | 41 | 6 | 334 | 16 | 13 | 1 | 130 | 10 | 518 | 33 |
| 88,937 | 41 | 5 | 333 | 16 | 13 | 1 | 130 | 9  | 517 | 31 |
| 88,938 | 41 | 5 | 340 | 16 | 13 | 1 | 131 | 9  | 525 | 31 |
| 88,939 | 41 | 5 | 340 | 18 | 13 | 1 | 131 | 10 | 525 | 34 |
| 88,940 | 41 | 5 | 339 | 20 | 13 | 2 | 130 | 10 | 523 | 37 |
| 88,941 | 41 | 6 | 339 | 20 | 13 | 2 | 130 | 10 | 523 | 38 |
| 88,942 | 38 | 6 | 323 | 21 | 13 | 2 | 125 | 11 | 499 | 40 |
| 88,943 | 38 | 6 | 310 | 20 | 13 | 2 | 125 | 11 | 486 | 39 |
| 88,944 | 38 | 6 | 308 | 22 | 13 | 2 | 125 | 12 | 484 | 42 |
| 88,945 | 37 | 6 | 293 | 22 | 13 | 2 | 119 | 10 | 462 | 40 |
| 88,946 | 37 | 5 | 261 | 22 | 13 | 2 | 116 | 10 | 427 | 39 |
| 88,947 | 36 | 5 | 238 | 22 | 11 | 2 | 110 | 10 | 395 | 39 |
| 88,948 | 36 | 5 | 237 | 23 | 11 | 2 | 114 | 10 | 398 | 40 |
| 88,949 | 37 | 5 | 239 | 22 | 11 | 2 | 116 | 11 | 403 | 40 |
| 88,950 | 37 | 5 | 242 | 26 | 11 | 2 | 121 | 12 | 411 | 45 |
| 88,951 | 36 | 5 | 231 | 26 | 11 | 2 | 121 | 12 | 399 | 45 |
| 88,952 | 36 | 5 | 227 | 25 | 11 | 2 | 121 | 12 | 395 | 44 |
| 88,953 | 36 | 5 | 227 | 25 | 11 | 2 | 122 | 12 | 396 | 44 |
| 88,954 | 36 | 5 | 224 | 25 | 11 | 2 | 122 | 12 | 393 | 44 |
| 88,955 | 36 | 6 | 223 | 25 | 11 | 2 | 122 | 12 | 392 | 45 |
| 88,956 | 36 | 6 | 217 | 22 | 11 | 2 | 119 | 12 | 383 | 42 |
| 88,957 | 35 | 6 | 217 | 22 | 11 | 3 | 118 | 12 | 381 | 43 |
| 88,958 | 35 | 6 | 220 | 22 | 11 | 3 | 118 | 12 | 384 | 43 |

|        |    |    |     |    |    |   |     |    |     |    |
|--------|----|----|-----|----|----|---|-----|----|-----|----|
| 88,959 | 35 | 6  | 222 | 22 | 11 | 3 | 118 | 12 | 386 | 43 |
| 88,960 | 35 | 6  | 222 | 22 | 11 | 2 | 118 | 12 | 386 | 42 |
| 88,961 | 35 | 6  | 220 | 22 | 11 | 2 | 118 | 12 | 384 | 42 |
| 88,962 | 35 | 6  | 220 | 21 | 11 | 2 | 118 | 12 | 384 | 41 |
| 88,963 | 35 | 5  | 219 | 21 | 11 | 2 | 118 | 12 | 383 | 40 |
| 88,964 | 35 | 5  | 226 | 21 | 11 | 2 | 123 | 10 | 395 | 38 |
| 88,965 | 35 | 5  | 225 | 21 | 11 | 2 | 123 | 10 | 394 | 38 |
| 88,966 | 35 | 5  | 224 | 21 | 11 | 2 | 122 | 10 | 392 | 38 |
| 88,967 | 34 | 4  | 221 | 21 | 10 | 2 | 111 | 10 | 376 | 37 |
| 88,968 | 34 | 4  | 222 | 23 | 10 | 2 | 112 | 11 | 378 | 40 |
| 88,969 | 34 | 4  | 222 | 23 | 10 | 2 | 112 | 12 | 378 | 41 |
| 88,970 | 34 | 4  | 234 | 23 | 11 | 2 | 121 | 12 | 400 | 41 |
| 88,971 | 33 | 6  | 230 | 24 | 10 | 2 | 119 | 13 | 392 | 45 |
| 88,972 | 33 | 6  | 230 | 24 | 10 | 2 | 118 | 13 | 391 | 45 |
| 88,973 | 30 | 6  | 206 | 24 | 8  | 2 | 104 | 15 | 348 | 47 |
| 88,974 | 30 | 7  | 206 | 28 | 8  | 2 | 102 | 16 | 346 | 53 |
| 88,975 | 29 | 7  | 204 | 33 | 8  | 2 | 102 | 24 | 343 | 66 |
| 88,976 | 29 | 9  | 195 | 36 | 8  | 2 | 101 | 25 | 333 | 72 |
| 88,977 | 28 | 9  | 186 | 38 | 8  | 2 | 101 | 25 | 323 | 74 |
| 88,978 | 26 | 10 | 174 | 43 | 8  | 2 | 101 | 27 | 309 | 82 |
| 88,979 | 9  | 10 | 137 | 46 | 5  | 2 | 69  | 28 | 220 | 86 |
| 88,980 | 8  | 10 | 89  | 46 | 4  | 2 | 56  | 28 | 157 | 86 |
| 88,981 | 7  | 10 | 87  | 45 | 3  | 2 | 55  | 27 | 152 | 84 |
| 88,982 | 7  | 10 | 87  | 45 | 3  | 2 | 54  | 27 | 151 | 84 |
| 88,983 | 7  | 10 | 89  | 45 | 1  | 2 | 53  | 27 | 150 | 84 |
| 88,984 | 7  | 10 | 87  | 45 | 1  | 2 | 51  | 27 | 146 | 84 |
| 88,985 | 7  | 10 | 87  | 42 | 1  | 2 | 51  | 27 | 146 | 81 |
| 88,986 | 7  | 10 | 87  | 43 | 1  | 2 | 51  | 28 | 146 | 83 |
| 88,987 | 7  | 8  | 79  | 42 | 1  | 2 | 50  | 27 | 137 | 79 |
| 88,988 | 7  | 8  | 79  | 42 | 1  | 2 | 50  | 27 | 137 | 79 |
| 88,989 | 7  | 8  | 76  | 42 | 1  | 2 | 50  | 27 | 134 | 79 |
| 88,990 | 7  | 8  | 76  | 40 | 1  | 2 | 50  | 26 | 134 | 76 |
| 88,991 | 8  | 8  | 75  | 36 | 1  | 1 | 50  | 26 | 134 | 71 |
| 88,992 | 9  | 7  | 75  | 36 | 1  | 1 | 51  | 26 | 136 | 70 |
| 88,993 | 9  | 7  | 75  | 33 | 1  | 1 | 50  | 24 | 135 | 65 |
| 88,994 | 9  | 7  | 73  | 33 | 1  | 1 | 49  | 24 | 132 | 65 |
| 88,995 | 9  | 7  | 74  | 33 | 1  | 1 | 49  | 24 | 133 | 65 |
| 88,996 | 9  | 7  | 74  | 34 | 1  | 1 | 49  | 26 | 133 | 68 |
| 88,997 | 9  | 7  | 73  | 35 | 1  | 1 | 45  | 25 | 128 | 68 |
| 88,998 | 9  | 7  | 73  | 35 | 1  | 1 | 45  | 26 | 128 | 69 |
| 88,999 | 9  | 7  | 73  | 34 | 1  | 1 | 46  | 26 | 129 | 68 |

|        |    |    |     |    |   |   |    |    |     |    |
|--------|----|----|-----|----|---|---|----|----|-----|----|
| 89,000 | 8  | 7  | 70  | 34 | 1 | 1 | 44 | 25 | 123 | 67 |
| 89,001 | 9  | 7  | 67  | 29 | 2 | 1 | 39 | 25 | 117 | 62 |
| 89,002 | 10 | 8  | 67  | 36 | 3 | 1 | 37 | 27 | 117 | 72 |
| 89,003 | 14 | 9  | 99  | 38 | 4 | 1 | 38 | 28 | 155 | 76 |
| 89,004 | 14 | 9  | 99  | 38 | 4 | 1 | 37 | 28 | 154 | 76 |
| 89,005 | 15 | 9  | 125 | 38 | 6 | 1 | 57 | 28 | 203 | 76 |
| 89,006 | 18 | 9  | 126 | 38 | 6 | 1 | 58 | 29 | 208 | 77 |
| 89,007 | 18 | 9  | 126 | 39 | 6 | 1 | 58 | 29 | 208 | 78 |
| 89,008 | 18 | 10 | 129 | 39 | 6 | 0 | 59 | 29 | 212 | 78 |
| 89,009 | 18 | 10 | 127 | 41 | 7 | 0 | 59 | 29 | 211 | 80 |
| 89,010 | 18 | 10 | 125 | 42 | 7 | 0 | 59 | 29 | 209 | 81 |
| 89,011 | 18 | 10 | 123 | 42 | 7 | 0 | 58 | 29 | 206 | 81 |
| 89,012 | 18 | 10 | 122 | 42 | 7 | 0 | 58 | 29 | 205 | 81 |
| 89,013 | 18 | 10 | 121 | 42 | 7 | 0 | 57 | 29 | 203 | 81 |
| 89,014 | 18 | 10 | 119 | 42 | 7 | 0 | 56 | 29 | 200 | 81 |
| 89,015 | 18 | 10 | 117 | 42 | 7 | 0 | 54 | 28 | 196 | 80 |
| 89,016 | 18 | 10 | 117 | 44 | 7 | 0 | 54 | 28 | 196 | 82 |
| 89,017 | 18 | 10 | 117 | 47 | 7 | 0 | 54 | 30 | 196 | 87 |
| 89,018 | 16 | 10 | 99  | 47 | 7 | 0 | 44 | 30 | 166 | 87 |
| 89,019 | 16 | 10 | 98  | 46 | 7 | 0 | 43 | 29 | 164 | 85 |
| 89,020 | 16 | 10 | 97  | 46 | 7 | 0 | 40 | 29 | 160 | 85 |
| 89,021 | 16 | 10 | 85  | 47 | 6 | 0 | 34 | 29 | 141 | 86 |
| 89,022 | 14 | 8  | 80  | 46 | 6 | 0 | 32 | 28 | 132 | 82 |
| 89,023 | 14 | 8  | 77  | 46 | 6 | 0 | 31 | 28 | 128 | 82 |
| 89,024 | 14 | 7  | 77  | 42 | 6 | 0 | 31 | 25 | 128 | 74 |
| 89,025 | 14 | 7  | 77  | 43 | 6 | 0 | 31 | 25 | 128 | 75 |
| 89,026 | 15 | 5  | 78  | 34 | 6 | 0 | 31 | 16 | 130 | 55 |
| 89,027 | 15 | 5  | 78  | 34 | 6 | 0 | 32 | 16 | 131 | 55 |
| 89,028 | 15 | 5  | 78  | 35 | 6 | 1 | 32 | 16 | 131 | 57 |
| 89,029 | 14 | 4  | 77  | 30 | 6 | 1 | 32 | 14 | 129 | 49 |
| 89,030 | 14 | 4  | 77  | 29 | 6 | 2 | 32 | 21 | 129 | 56 |
| 89,031 | 14 | 4  | 76  | 29 | 6 | 2 | 32 | 22 | 128 | 57 |
| 89,032 | 14 | 4  | 77  | 29 | 6 | 2 | 31 | 22 | 128 | 57 |
| 89,033 | 14 | 4  | 76  | 29 | 6 | 2 | 33 | 22 | 129 | 57 |
| 89,034 | 14 | 4  | 74  | 29 | 6 | 2 | 33 | 22 | 127 | 57 |
| 89,035 | 14 | 4  | 74  | 29 | 6 | 2 | 33 | 22 | 127 | 57 |
| 89,036 | 14 | 4  | 74  | 30 | 6 | 2 | 33 | 22 | 127 | 58 |
| 89,037 | 14 | 4  | 74  | 29 | 6 | 2 | 33 | 21 | 127 | 56 |
| 89,038 | 14 | 4  | 74  | 30 | 6 | 2 | 33 | 21 | 127 | 57 |
| 89,039 | 14 | 4  | 74  | 30 | 6 | 2 | 34 | 21 | 128 | 57 |
| 89,040 | 14 | 4  | 74  | 30 | 6 | 2 | 34 | 21 | 128 | 57 |

|        |    |   |    |    |   |   |    |    |     |    |
|--------|----|---|----|----|---|---|----|----|-----|----|
| 89,041 | 13 | 4 | 74 | 30 | 6 | 2 | 34 | 21 | 127 | 57 |
| 89,042 | 12 | 4 | 74 | 31 | 6 | 2 | 33 | 21 | 125 | 58 |
| 89,043 | 12 | 4 | 74 | 32 | 6 | 2 | 33 | 23 | 125 | 61 |
| 89,044 | 12 | 4 | 74 | 32 | 6 | 2 | 33 | 23 | 125 | 61 |
| 89,045 | 12 | 4 | 74 | 32 | 6 | 2 | 33 | 23 | 125 | 61 |
| 89,046 | 12 | 4 | 73 | 32 | 6 | 2 | 33 | 23 | 124 | 61 |
| 89,047 | 12 | 4 | 72 | 32 | 6 | 2 | 33 | 21 | 123 | 59 |
| 89,048 | 12 | 4 | 71 | 31 | 6 | 2 | 33 | 21 | 122 | 58 |
| 89,049 | 12 | 4 | 71 | 31 | 6 | 2 | 33 | 20 | 122 | 57 |
| 89,050 | 12 | 4 | 73 | 31 | 6 | 2 | 32 | 20 | 123 | 57 |
| 89,051 | 13 | 4 | 73 | 31 | 6 | 2 | 32 | 20 | 124 | 57 |
| 89,052 | 12 | 4 | 73 | 31 | 5 | 3 | 31 | 19 | 121 | 57 |
| 89,053 | 11 | 3 | 72 | 24 | 4 | 3 | 31 | 17 | 118 | 47 |
| 89,054 | 6  | 2 | 39 | 23 | 3 | 3 | 27 | 16 | 75  | 44 |
| 89,055 | 5  | 4 | 15 | 25 | 1 | 3 | 8  | 17 | 29  | 49 |
| 89,056 | 6  | 4 | 19 | 27 | 1 | 3 | 8  | 17 | 34  | 51 |
| 89,057 | 4  | 4 | 28 | 27 | 2 | 3 | 9  | 16 | 43  | 50 |
| 89,058 | 4  | 4 | 25 | 27 | 2 | 3 | 8  | 17 | 39  | 51 |
| 89,059 | 4  | 3 | 24 | 27 | 2 | 3 | 8  | 17 | 38  | 50 |
| 89,060 | 6  | 4 | 55 | 25 | 1 | 3 | 28 | 18 | 90  | 50 |
| 89,061 | 6  | 4 | 55 | 25 | 1 | 3 | 28 | 18 | 90  | 50 |
| 89,062 | 6  | 4 | 55 | 25 | 1 | 3 | 28 | 18 | 90  | 50 |
| 89,063 | 6  | 4 | 55 | 25 | 1 | 3 | 29 | 18 | 91  | 50 |
| 89,064 | 6  | 4 | 55 | 25 | 1 | 3 | 29 | 18 | 91  | 50 |
| 89,065 | 6  | 4 | 55 | 26 | 1 | 3 | 29 | 18 | 91  | 51 |
| 89,066 | 6  | 4 | 56 | 26 | 1 | 3 | 29 | 18 | 92  | 51 |
| 89,067 | 6  | 4 | 56 | 25 | 1 | 3 | 29 | 18 | 92  | 50 |
| 89,068 | 6  | 4 | 56 | 22 | 1 | 3 | 29 | 16 | 92  | 45 |
| 89,069 | 6  | 4 | 56 | 22 | 1 | 3 | 28 | 16 | 91  | 45 |
| 89,070 | 6  | 4 | 56 | 21 | 1 | 3 | 28 | 15 | 91  | 43 |
| 89,071 | 6  | 4 | 57 | 20 | 1 | 3 | 29 | 15 | 93  | 42 |
| 89,072 | 6  | 4 | 58 | 20 | 1 | 3 | 29 | 15 | 94  | 42 |
| 89,073 | 6  | 4 | 58 | 20 | 1 | 3 | 30 | 15 | 95  | 42 |
| 89,074 | 6  | 4 | 59 | 20 | 1 | 3 | 30 | 15 | 96  | 42 |
| 89,075 | 6  | 4 | 59 | 20 | 1 | 3 | 30 | 15 | 96  | 42 |
| 89,076 | 6  | 4 | 59 | 19 | 1 | 3 | 31 | 15 | 97  | 41 |
| 89,077 | 5  | 4 | 58 | 19 | 1 | 3 | 31 | 15 | 95  | 41 |
| 89,078 | 5  | 4 | 58 | 16 | 1 | 2 | 31 | 14 | 95  | 36 |
| 89,079 | 5  | 4 | 60 | 18 | 1 | 2 | 31 | 14 | 97  | 38 |
| 89,080 | 5  | 4 | 60 | 22 | 1 | 4 | 31 | 25 | 97  | 55 |
| 89,081 | 5  | 4 | 60 | 23 | 1 | 3 | 31 | 17 | 97  | 47 |

|        |    |   |     |    |   |   |    |    |     |    |
|--------|----|---|-----|----|---|---|----|----|-----|----|
| 89,082 | 6  | 4 | 76  | 24 | 1 | 3 | 38 | 17 | 121 | 48 |
| 89,083 | 7  | 4 | 109 | 26 | 2 | 3 | 49 | 17 | 167 | 50 |
| 89,084 | 8  | 4 | 128 | 26 | 3 | 3 | 64 | 18 | 203 | 51 |
| 89,085 | 8  | 4 | 128 | 27 | 3 | 3 | 64 | 18 | 203 | 52 |
| 89,086 | 8  | 4 | 128 | 28 | 3 | 3 | 64 | 18 | 203 | 53 |
| 89,087 | 8  | 4 | 128 | 27 | 3 | 3 | 64 | 18 | 203 | 52 |
| 89,088 | 8  | 4 | 128 | 27 | 3 | 3 | 64 | 18 | 203 | 52 |
| 89,089 | 8  | 4 | 131 | 26 | 3 | 3 | 64 | 18 | 206 | 51 |
| 89,090 | 8  | 4 | 131 | 26 | 3 | 3 | 63 | 18 | 205 | 51 |
| 89,091 | 9  | 4 | 131 | 26 | 3 | 3 | 64 | 18 | 207 | 51 |
| 89,092 | 10 | 4 | 132 | 26 | 3 | 3 | 66 | 18 | 211 | 51 |
| 89,093 | 10 | 4 | 132 | 24 | 3 | 3 | 70 | 16 | 215 | 47 |
| 89,094 | 10 | 4 | 132 | 24 | 3 | 3 | 71 | 17 | 216 | 48 |
| 89,095 | 11 | 5 | 132 | 24 | 3 | 3 | 71 | 17 | 217 | 49 |
| 89,096 | 11 | 5 | 132 | 24 | 3 | 3 | 71 | 17 | 217 | 49 |
| 89,097 | 11 | 5 | 132 | 24 | 3 | 3 | 71 | 17 | 217 | 49 |
| 89,098 | 11 | 5 | 133 | 23 | 3 | 3 | 73 | 17 | 220 | 48 |
| 89,099 | 11 | 6 | 133 | 23 | 3 | 3 | 74 | 17 | 221 | 49 |
| 89,100 | 11 | 6 | 131 | 23 | 3 | 3 | 74 | 17 | 219 | 49 |
| 89,101 | 10 | 6 | 131 | 23 | 3 | 2 | 74 | 17 | 218 | 48 |
| 89,102 | 10 | 6 | 130 | 23 | 3 | 2 | 74 | 17 | 217 | 48 |
| 89,103 | 10 | 6 | 130 | 23 | 3 | 2 | 74 | 18 | 217 | 49 |
| 89,104 | 10 | 6 | 130 | 22 | 3 | 2 | 74 | 18 | 217 | 48 |
| 89,105 | 10 | 6 | 130 | 25 | 3 | 2 | 74 | 18 | 217 | 51 |
| 89,106 | 10 | 4 | 128 | 33 | 3 | 3 | 74 | 20 | 215 | 60 |
| 89,107 | 9  | 3 | 124 | 31 | 3 | 3 | 73 | 22 | 209 | 59 |
| 89,108 | 8  | 3 | 114 | 32 | 2 | 3 | 71 | 23 | 195 | 61 |
| 89,109 | 8  | 3 | 108 | 32 | 2 | 3 | 68 | 22 | 186 | 60 |
| 89,110 | 6  | 3 | 88  | 35 | 2 | 3 | 55 | 28 | 151 | 69 |
| 89,111 | 6  | 2 | 82  | 35 | 2 | 3 | 51 | 27 | 141 | 67 |
| 89,112 | 6  | 3 | 82  | 36 | 2 | 3 | 51 | 27 | 141 | 69 |
| 89,113 | 6  | 3 | 82  | 38 | 2 | 3 | 50 | 28 | 140 | 72 |
| 89,114 | 6  | 3 | 82  | 38 | 2 | 3 | 50 | 28 | 140 | 72 |
| 89,115 | 6  | 3 | 82  | 38 | 2 | 3 | 50 | 28 | 140 | 72 |
| 89,116 | 6  | 3 | 82  | 37 | 2 | 3 | 50 | 28 | 140 | 71 |
| 89,117 | 6  | 3 | 81  | 38 | 2 | 3 | 50 | 29 | 139 | 73 |
| 89,118 | 6  | 3 | 81  | 37 | 2 | 3 | 50 | 29 | 139 | 72 |
| 89,119 | 6  | 3 | 81  | 37 | 2 | 3 | 50 | 29 | 139 | 72 |
| 89,120 | 6  | 3 | 81  | 38 | 2 | 3 | 50 | 29 | 139 | 73 |
| 89,121 | 6  | 3 | 81  | 39 | 2 | 3 | 50 | 30 | 139 | 75 |
| 89,122 | 6  | 3 | 80  | 40 | 2 | 3 | 49 | 32 | 137 | 78 |

|        |   |   |    |    |   |   |    |    |     |    |
|--------|---|---|----|----|---|---|----|----|-----|----|
| 89,123 | 6 | 3 | 79 | 44 | 2 | 3 | 49 | 34 | 136 | 84 |
| 89,124 | 6 | 3 | 79 | 44 | 2 | 3 | 48 | 34 | 135 | 84 |
| 89,125 | 6 | 3 | 79 | 45 | 2 | 3 | 48 | 34 | 135 | 85 |
| 89,126 | 6 | 3 | 79 | 45 | 3 | 3 | 48 | 34 | 136 | 85 |
| 89,127 | 6 | 3 | 79 | 45 | 3 | 3 | 47 | 34 | 135 | 85 |
| 89,128 | 6 | 3 | 79 | 45 | 3 | 3 | 47 | 34 | 135 | 85 |
| 89,129 | 6 | 3 | 81 | 46 | 3 | 3 | 46 | 35 | 136 | 87 |
| 89,130 | 6 | 3 | 80 | 49 | 3 | 3 | 46 | 36 | 135 | 91 |
| 89,131 | 6 | 3 | 80 | 46 | 3 | 1 | 46 | 25 | 135 | 75 |
| 89,132 | 6 | 3 | 76 | 43 | 3 | 1 | 44 | 26 | 129 | 73 |
| 89,133 | 5 | 3 | 65 | 42 | 3 | 1 | 39 | 25 | 112 | 71 |
| 89,134 | 4 | 3 | 30 | 40 | 2 | 1 | 28 | 24 | 64  | 68 |
| 89,135 | 4 | 3 | 11 | 39 | 1 | 1 | 11 | 24 | 27  | 67 |
| 89,136 | 4 | 3 | 9  | 39 | 1 | 1 | 11 | 24 | 25  | 67 |
| 89,137 | 4 | 3 | 9  | 38 | 1 | 1 | 11 | 24 | 25  | 66 |
| 89,138 | 5 | 3 | 17 | 38 | 2 | 1 | 13 | 24 | 37  | 66 |
| 89,139 | 5 | 3 | 15 | 38 | 2 | 1 | 13 | 24 | 35  | 66 |
| 89,140 | 5 | 4 | 23 | 38 | 3 | 1 | 17 | 24 | 48  | 67 |
| 89,141 | 4 | 4 | 24 | 38 | 4 | 1 | 16 | 24 | 48  | 67 |
| 89,142 | 3 | 4 | 23 | 38 | 4 | 1 | 14 | 24 | 44  | 67 |
| 89,143 | 3 | 4 | 25 | 38 | 4 | 1 | 12 | 24 | 44  | 67 |
| 89,144 | 3 | 3 | 25 | 38 | 4 | 1 | 12 | 23 | 44  | 65 |
| 89,145 | 3 | 3 | 26 | 38 | 4 | 1 | 12 | 23 | 45  | 65 |
| 89,146 | 2 | 3 | 27 | 38 | 4 | 2 | 12 | 23 | 45  | 66 |
| 89,147 | 2 | 3 | 26 | 38 | 4 | 2 | 11 | 23 | 43  | 66 |
| 89,148 | 2 | 3 | 26 | 38 | 4 | 2 | 10 | 23 | 42  | 66 |
| 89,149 | 2 | 2 | 26 | 38 | 4 | 2 | 9  | 23 | 41  | 65 |
| 89,150 | 2 | 2 | 26 | 38 | 4 | 2 | 9  | 23 | 41  | 65 |
| 89,151 | 2 | 2 | 26 | 38 | 4 | 2 | 9  | 22 | 41  | 64 |
| 89,152 | 2 | 2 | 26 | 38 | 4 | 2 | 9  | 22 | 41  | 64 |
| 89,153 | 2 | 2 | 26 | 38 | 4 | 2 | 9  | 22 | 41  | 64 |
| 89,154 | 2 | 2 | 40 | 38 | 4 | 2 | 19 | 22 | 65  | 64 |
| 89,155 | 2 | 2 | 44 | 35 | 4 | 2 | 21 | 22 | 71  | 61 |
| 89,156 | 2 | 2 | 44 | 36 | 4 | 2 | 21 | 23 | 71  | 63 |
| 89,157 | 2 | 2 | 44 | 26 | 4 | 1 | 21 | 20 | 71  | 49 |
| 89,158 | 2 | 2 | 44 | 26 | 4 | 1 | 21 | 18 | 71  | 47 |
| 89,159 | 2 | 2 | 44 | 26 | 4 | 1 | 21 | 17 | 71  | 46 |
| 89,160 | 2 | 2 | 44 | 25 | 4 | 2 | 22 | 17 | 72  | 46 |
| 89,161 | 2 | 2 | 44 | 22 | 4 | 2 | 22 | 11 | 72  | 37 |
| 89,162 | 3 | 2 | 47 | 21 | 4 | 2 | 23 | 11 | 77  | 36 |
| 89,163 | 3 | 1 | 47 | 19 | 4 | 2 | 23 | 10 | 77  | 32 |

|        |   |    |    |    |   |   |    |    |     |    |
|--------|---|----|----|----|---|---|----|----|-----|----|
| 89,164 | 3 | 1  | 47 | 19 | 4 | 2 | 23 | 10 | 77  | 32 |
| 89,165 | 3 | 1  | 47 | 19 | 4 | 2 | 23 | 11 | 77  | 33 |
| 89,166 | 3 | 1  | 48 | 19 | 4 | 2 | 23 | 11 | 78  | 33 |
| 89,167 | 6 | 1  | 73 | 19 | 4 | 2 | 49 | 11 | 132 | 33 |
| 89,168 | 6 | 1  | 74 | 20 | 5 | 2 | 52 | 10 | 137 | 33 |
| 89,169 | 6 | 1  | 74 | 20 | 5 | 2 | 52 | 10 | 137 | 33 |
| 89,170 | 6 | 1  | 74 | 20 | 5 | 2 | 52 | 10 | 137 | 33 |
| 89,171 | 6 | 1  | 74 | 19 | 5 | 2 | 52 | 10 | 137 | 32 |
| 89,172 | 6 | 1  | 76 | 18 | 5 | 2 | 53 | 9  | 140 | 30 |
| 89,173 | 6 | 1  | 76 | 17 | 5 | 2 | 53 | 7  | 140 | 27 |
| 89,174 | 6 | 1  | 76 | 13 | 5 | 2 | 53 | 6  | 140 | 22 |
| 89,175 | 6 | 1  | 76 | 15 | 5 | 2 | 53 | 6  | 140 | 24 |
| 89,176 | 6 | 1  | 75 | 14 | 5 | 2 | 56 | 6  | 142 | 23 |
| 89,177 | 6 | 1  | 75 | 14 | 4 | 2 | 56 | 6  | 141 | 23 |
| 89,178 | 6 | 1  | 75 | 16 | 5 | 2 | 56 | 6  | 142 | 25 |
| 89,179 | 6 | 1  | 73 | 17 | 5 | 2 | 56 | 5  | 140 | 25 |
| 89,180 | 6 | 1  | 73 | 12 | 5 | 2 | 56 | 4  | 140 | 19 |
| 89,181 | 6 | 1  | 72 | 12 | 5 | 2 | 56 | 4  | 139 | 19 |
| 89,182 | 6 | 1  | 72 | 12 | 5 | 2 | 56 | 4  | 139 | 19 |
| 89,183 | 6 | 1  | 73 | 12 | 5 | 2 | 56 | 3  | 140 | 18 |
| 89,184 | 6 | 1  | 74 | 12 | 6 | 2 | 56 | 3  | 142 | 18 |
| 89,185 | 6 | 1  | 74 | 12 | 6 | 2 | 56 | 3  | 142 | 18 |
| 89,186 | 5 | 1  | 74 | 12 | 6 | 2 | 56 | 3  | 141 | 18 |
| 89,187 | 5 | 1  | 75 | 12 | 6 | 2 | 56 | 4  | 142 | 19 |
| 89,188 | 5 | 1  | 76 | 12 | 5 | 2 | 57 | 4  | 143 | 19 |
| 89,189 | 4 | 1  | 68 | 12 | 5 | 2 | 55 | 4  | 132 | 19 |
| 89,190 | 4 | 1  | 73 | 12 | 6 | 2 | 56 | 4  | 139 | 19 |
| 89,191 | 4 | 0  | 69 | 12 | 6 | 2 | 55 | 4  | 134 | 18 |
| 89,192 | 4 | 0  | 69 | 15 | 5 | 2 | 55 | 4  | 133 | 21 |
| 89,193 | 4 | 0  | 67 | 15 | 5 | 2 | 54 | 4  | 130 | 21 |
| 89,194 | 4 | 0  | 69 | 15 | 5 | 2 | 56 | 4  | 134 | 21 |
| 89,195 | 4 | 0  | 72 | 15 | 5 | 2 | 55 | 4  | 136 | 21 |
| 89,196 | 4 | 0  | 71 | 15 | 5 | 2 | 54 | 4  | 134 | 21 |
| 89,197 | 4 | 0  | 70 | 15 | 5 | 1 | 54 | 4  | 133 | 20 |
| 89,198 | 4 | 0  | 70 | 15 | 5 | 1 | 54 | 4  | 133 | 20 |
| 89,199 | 4 | 5  | 70 | 33 | 5 | 4 | 54 | 9  | 133 | 51 |
| 89,200 | 4 | 10 | 70 | 41 | 5 | 4 | 54 | 17 | 133 | 72 |
| 89,201 | 4 | 10 | 70 | 44 | 5 | 6 | 54 | 23 | 133 | 83 |
| 89,202 | 4 | 11 | 73 | 45 | 5 | 6 | 54 | 26 | 136 | 88 |
| 89,203 | 4 | 13 | 73 | 47 | 5 | 6 | 54 | 26 | 136 | 92 |
| 89,204 | 4 | 13 | 59 | 47 | 5 | 6 | 44 | 25 | 112 | 91 |



|        |    |    |     |    |   |   |    |    |     |     |
|--------|----|----|-----|----|---|---|----|----|-----|-----|
| 89,205 | 4  | 14 | 55  | 54 | 5 | 6 | 44 | 26 | 108 | 100 |
| 89,206 | 4  | 14 | 55  | 54 | 5 | 7 | 42 | 27 | 106 | 102 |
| 89,207 | 4  | 14 | 55  | 54 | 5 | 7 | 42 | 27 | 106 | 102 |
| 89,208 | 4  | 15 | 57  | 54 | 5 | 7 | 42 | 27 | 108 | 103 |
| 89,209 | 5  | 15 | 71  | 53 | 5 | 7 | 46 | 27 | 127 | 102 |
| 89,210 | 6  | 15 | 80  | 54 | 5 | 6 | 51 | 27 | 142 | 102 |
| 89,211 | 6  | 15 | 80  | 54 | 5 | 6 | 51 | 27 | 142 | 102 |
| 89,212 | 5  | 15 | 78  | 54 | 5 | 6 | 50 | 27 | 138 | 102 |
| 89,213 | 5  | 15 | 78  | 54 | 5 | 6 | 50 | 27 | 138 | 102 |
| 89,214 | 5  | 15 | 78  | 53 | 5 | 6 | 50 | 27 | 138 | 101 |
| 89,215 | 5  | 15 | 78  | 53 | 5 | 6 | 50 | 26 | 138 | 100 |
| 89,216 | 5  | 15 | 79  | 54 | 5 | 6 | 50 | 26 | 139 | 101 |
| 89,217 | 3  | 15 | 56  | 54 | 5 | 6 | 24 | 26 | 88  | 101 |
| 89,218 | 3  | 15 | 55  | 52 | 5 | 6 | 24 | 26 | 87  | 99  |
| 89,219 | 6  | 15 | 55  | 52 | 4 | 6 | 21 | 26 | 86  | 99  |
| 89,220 | 6  | 15 | 55  | 52 | 4 | 6 | 22 | 26 | 87  | 99  |
| 89,221 | 6  | 15 | 58  | 53 | 4 | 6 | 23 | 26 | 91  | 100 |
| 89,222 | 6  | 15 | 57  | 54 | 4 | 6 | 23 | 26 | 90  | 101 |
| 89,223 | 6  | 15 | 59  | 55 | 4 | 6 | 23 | 26 | 92  | 102 |
| 89,224 | 6  | 15 | 59  | 55 | 4 | 6 | 23 | 26 | 92  | 102 |
| 89,225 | 6  | 15 | 59  | 53 | 4 | 6 | 23 | 25 | 92  | 99  |
| 89,226 | 6  | 15 | 60  | 53 | 4 | 6 | 22 | 25 | 92  | 99  |
| 89,227 | 6  | 15 | 61  | 53 | 4 | 6 | 20 | 25 | 91  | 99  |
| 89,228 | 6  | 15 | 61  | 55 | 4 | 6 | 20 | 28 | 91  | 104 |
| 89,229 | 6  | 15 | 61  | 56 | 3 | 6 | 20 | 30 | 90  | 107 |
| 89,230 | 6  | 15 | 62  | 56 | 3 | 6 | 20 | 30 | 91  | 107 |
| 89,231 | 6  | 15 | 62  | 56 | 3 | 6 | 20 | 30 | 91  | 107 |
| 89,232 | 6  | 15 | 62  | 60 | 3 | 6 | 20 | 30 | 91  | 111 |
| 89,233 | 6  | 15 | 62  | 59 | 3 | 6 | 20 | 30 | 91  | 110 |
| 89,234 | 6  | 15 | 61  | 59 | 3 | 6 | 20 | 30 | 90  | 110 |
| 89,235 | 6  | 15 | 62  | 59 | 2 | 6 | 21 | 30 | 91  | 110 |
| 89,236 | 6  | 15 | 66  | 59 | 2 | 6 | 21 | 30 | 95  | 110 |
| 89,237 | 7  | 15 | 70  | 62 | 2 | 6 | 22 | 30 | 101 | 113 |
| 89,238 | 7  | 15 | 77  | 65 | 2 | 6 | 24 | 29 | 110 | 115 |
| 89,239 | 7  | 15 | 88  | 70 | 2 | 6 | 26 | 32 | 123 | 123 |
| 89,240 | 7  | 15 | 103 | 75 | 3 | 6 | 32 | 33 | 145 | 129 |
| 89,241 | 8  | 15 | 110 | 80 | 3 | 6 | 33 | 37 | 154 | 138 |
| 89,242 | 8  | 18 | 108 | 89 | 2 | 6 | 31 | 40 | 149 | 153 |
| 89,243 | 8  | 18 | 118 | 87 | 3 | 6 | 35 | 40 | 164 | 151 |
| 89,244 | 10 | 18 | 145 | 87 | 3 | 6 | 41 | 40 | 199 | 151 |
| 89,245 | 10 | 18 | 147 | 90 | 3 | 6 | 45 | 40 | 205 | 154 |

|        |    |    |     |    |   |   |    |    |     |     |
|--------|----|----|-----|----|---|---|----|----|-----|-----|
| 89,246 | 10 | 18 | 147 | 90 | 3 | 6 | 45 | 40 | 205 | 154 |
| 89,247 | 10 | 18 | 150 | 90 | 3 | 6 | 47 | 40 | 210 | 154 |
| 89,248 | 10 | 18 | 151 | 90 | 3 | 6 | 47 | 39 | 211 | 153 |
| 89,249 | 10 | 18 | 151 | 90 | 3 | 6 | 47 | 39 | 211 | 153 |
| 89,250 | 10 | 13 | 151 | 72 | 3 | 3 | 47 | 34 | 211 | 122 |
| 89,251 | 10 | 8  | 151 | 61 | 3 | 1 | 47 | 21 | 211 | 91  |
| 89,252 | 10 | 7  | 151 | 60 | 3 | 1 | 47 | 18 | 211 | 86  |
| 89,253 | 10 | 5  | 148 | 58 | 3 | 1 | 47 | 18 | 208 | 82  |
| 89,254 | 10 | 5  | 148 | 58 | 3 | 1 | 47 | 18 | 208 | 82  |
| 89,255 | 10 | 6  | 148 | 60 | 3 | 1 | 47 | 26 | 208 | 93  |
| 89,256 | 10 | 5  | 148 | 62 | 3 | 2 | 47 | 30 | 208 | 99  |
| 89,257 | 10 | 5  | 152 | 65 | 3 | 1 | 49 | 31 | 214 | 102 |
| 89,258 | 11 | 5  | 151 | 64 | 3 | 1 | 51 | 31 | 216 | 101 |
| 89,259 | 11 | 4  | 150 | 64 | 3 | 1 | 51 | 31 | 215 | 100 |
| 89,260 | 10 | 4  | 136 | 64 | 3 | 1 | 48 | 31 | 197 | 100 |
| 89,261 | 9  | 4  | 127 | 63 | 3 | 1 | 42 | 31 | 181 | 99  |
| 89,262 | 9  | 4  | 126 | 63 | 3 | 1 | 42 | 31 | 180 | 99  |
| 89,263 | 9  | 4  | 126 | 69 | 3 | 1 | 43 | 33 | 181 | 107 |
| 89,264 | 9  | 5  | 126 | 71 | 3 | 1 | 43 | 39 | 181 | 116 |
| 89,265 | 9  | 5  | 126 | 71 | 3 | 1 | 43 | 39 | 181 | 116 |
| 89,266 | 9  | 5  | 133 | 72 | 3 | 2 | 45 | 41 | 190 | 120 |
| 89,267 | 9  | 5  | 132 | 72 | 3 | 2 | 45 | 41 | 189 | 120 |
| 89,268 | 8  | 6  | 132 | 79 | 3 | 4 | 45 | 52 | 188 | 141 |
| 89,269 | 8  | 6  | 132 | 81 | 3 | 4 | 45 | 52 | 188 | 143 |
| 89,270 | 5  | 8  | 137 | 82 | 5 | 4 | 52 | 60 | 199 | 154 |
| 89,271 | 5  | 11 | 144 | 83 | 5 | 4 | 61 | 60 | 215 | 158 |
| 89,272 | 5  | 11 | 141 | 81 | 5 | 4 | 61 | 60 | 212 | 156 |
| 89,273 | 5  | 11 | 139 | 80 | 5 | 4 | 61 | 60 | 210 | 155 |
| 89,274 | 5  | 11 | 139 | 80 | 5 | 4 | 61 | 60 | 210 | 155 |
| 89,275 | 5  | 12 | 139 | 80 | 5 | 4 | 61 | 62 | 210 | 158 |
| 89,276 | 5  | 12 | 139 | 80 | 5 | 4 | 61 | 64 | 210 | 160 |
| 89,277 | 5  | 12 | 139 | 81 | 5 | 4 | 62 | 66 | 211 | 163 |
| 89,278 | 5  | 12 | 138 | 86 | 5 | 4 | 62 | 68 | 210 | 170 |
| 89,279 | 5  | 12 | 137 | 87 | 5 | 4 | 62 | 68 | 209 | 171 |
| 89,280 | 5  | 12 | 137 | 84 | 5 | 4 | 62 | 67 | 209 | 167 |
| 89,281 | 6  | 12 | 137 | 82 | 5 | 4 | 62 | 67 | 210 | 165 |
| 89,282 | 6  | 12 | 137 | 82 | 5 | 4 | 62 | 68 | 210 | 166 |
| 89,283 | 6  | 12 | 137 | 78 | 5 | 4 | 62 | 69 | 210 | 163 |
| 89,284 | 6  | 12 | 137 | 80 | 5 | 4 | 62 | 69 | 210 | 165 |
| 89,285 | 6  | 12 | 135 | 82 | 5 | 4 | 61 | 69 | 207 | 167 |
| 89,286 | 6  | 12 | 134 | 82 | 5 | 4 | 61 | 69 | 206 | 167 |

|        |   |    |     |    |   |   |    |    |     |     |
|--------|---|----|-----|----|---|---|----|----|-----|-----|
| 89,287 | 6 | 12 | 131 | 76 | 5 | 4 | 61 | 68 | 203 | 160 |
| 89,288 | 5 | 12 | 127 | 76 | 5 | 4 | 60 | 68 | 197 | 160 |
| 89,289 | 5 | 12 | 119 | 77 | 5 | 4 | 58 | 71 | 187 | 164 |
| 89,290 | 5 | 12 | 107 | 78 | 5 | 5 | 55 | 76 | 172 | 171 |
| 89,291 | 5 | 12 | 92  | 80 | 4 | 5 | 49 | 87 | 150 | 184 |
| 89,292 | 4 | 12 | 80  | 75 | 3 | 5 | 45 | 83 | 132 | 175 |
| 89,293 | 4 | 9  | 78  | 66 | 3 | 5 | 45 | 80 | 130 | 160 |
| 89,294 | 4 | 9  | 67  | 66 | 2 | 5 | 41 | 80 | 114 | 160 |
| 89,295 | 2 | 9  | 38  | 63 | 2 | 5 | 32 | 80 | 74  | 157 |
| 89,296 | 2 | 9  | 33  | 63 | 2 | 5 | 29 | 80 | 66  | 157 |
| 89,297 | 2 | 9  | 30  | 63 | 2 | 5 | 27 | 80 | 61  | 157 |
| 89,298 | 2 | 9  | 29  | 63 | 2 | 5 | 27 | 80 | 60  | 157 |
| 89,299 | 2 | 9  | 44  | 63 | 2 | 5 | 38 | 80 | 86  | 157 |
| 89,300 | 2 | 9  | 44  | 63 | 2 | 5 | 38 | 80 | 86  | 157 |
| 89,301 | 2 | 9  | 45  | 63 | 2 | 5 | 38 | 80 | 87  | 157 |
| 89,302 | 2 | 9  | 45  | 63 | 2 | 5 | 38 | 80 | 87  | 157 |
| 89,303 | 2 | 9  | 45  | 63 | 2 | 5 | 38 | 80 | 87  | 157 |
| 89,304 | 2 | 9  | 45  | 63 | 2 | 5 | 38 | 80 | 87  | 157 |
| 89,305 | 3 | 9  | 45  | 63 | 2 | 5 | 38 | 80 | 88  | 157 |
| 89,306 | 3 | 8  | 45  | 52 | 2 | 4 | 38 | 67 | 88  | 131 |
| 89,307 | 3 | 8  | 45  | 49 | 2 | 4 | 38 | 65 | 88  | 126 |
| 89,308 | 3 | 8  | 41  | 49 | 2 | 4 | 36 | 65 | 82  | 126 |
| 89,309 | 2 | 8  | 41  | 49 | 2 | 4 | 34 | 65 | 79  | 126 |
| 89,310 | 2 | 11 | 42  | 53 | 2 | 4 | 34 | 65 | 80  | 133 |
| 89,311 | 2 | 12 | 42  | 53 | 2 | 4 | 34 | 65 | 80  | 134 |
| 89,312 | 2 | 13 | 42  | 55 | 2 | 4 | 34 | 66 | 80  | 138 |
| 89,313 | 2 | 13 | 42  | 49 | 2 | 4 | 33 | 64 | 79  | 130 |
| 89,314 | 2 | 12 | 43  | 48 | 2 | 3 | 35 | 56 | 82  | 119 |
| 89,315 | 2 | 12 | 45  | 50 | 2 | 3 | 37 | 57 | 86  | 122 |
| 89,316 | 2 | 12 | 39  | 55 | 2 | 3 | 35 | 57 | 78  | 127 |
| 89,317 | 2 | 12 | 40  | 57 | 2 | 3 | 38 | 58 | 82  | 130 |
| 89,318 | 2 | 9  | 40  | 49 | 2 | 1 | 38 | 39 | 82  | 98  |
| 89,319 | 2 | 9  | 38  | 49 | 2 | 1 | 38 | 39 | 80  | 98  |
| 89,320 | 2 | 6  | 37  | 48 | 1 | 1 | 35 | 39 | 75  | 94  |
| 89,321 | 2 | 6  | 33  | 48 | 0 | 1 | 31 | 39 | 66  | 94  |
| 89,322 | 3 | 6  | 26  | 48 | 0 | 1 | 21 | 39 | 50  | 94  |
| 89,323 | 3 | 6  | 25  | 48 | 0 | 1 | 19 | 39 | 47  | 94  |
| 89,324 | 3 | 7  | 24  | 48 | 0 | 1 | 18 | 39 | 45  | 95  |
| 89,325 | 3 | 6  | 25  | 48 | 0 | 2 | 20 | 37 | 48  | 93  |
| 89,326 | 3 | 6  | 25  | 48 | 0 | 2 | 20 | 37 | 48  | 93  |
| 89,327 | 3 | 6  | 25  | 48 | 0 | 2 | 20 | 35 | 48  | 91  |

|        |   |    |    |    |   |   |    |    |     |     |
|--------|---|----|----|----|---|---|----|----|-----|-----|
| 89,328 | 3 | 6  | 45 | 47 | 0 | 2 | 23 | 33 | 71  | 88  |
| 89,329 | 3 | 6  | 57 | 42 | 1 | 2 | 42 | 31 | 103 | 81  |
| 89,330 | 3 | 6  | 63 | 39 | 2 | 2 | 46 | 28 | 114 | 75  |
| 89,331 | 3 | 6  | 66 | 39 | 2 | 2 | 47 | 28 | 118 | 75  |
| 89,332 | 2 | 6  | 66 | 39 | 2 | 2 | 47 | 28 | 117 | 75  |
| 89,333 | 3 | 6  | 72 | 39 | 2 | 2 | 47 | 26 | 124 | 73  |
| 89,334 | 3 | 6  | 72 | 39 | 2 | 2 | 47 | 26 | 124 | 73  |
| 89,335 | 3 | 6  | 72 | 37 | 2 | 2 | 47 | 26 | 124 | 71  |
| 89,336 | 3 | 12 | 73 | 51 | 2 | 2 | 48 | 38 | 126 | 103 |
| 89,337 | 3 | 12 | 73 | 52 | 2 | 2 | 48 | 38 | 126 | 104 |
| 89,338 | 3 | 12 | 72 | 57 | 2 | 2 | 48 | 38 | 125 | 109 |
| 89,339 | 3 | 12 | 72 | 60 | 2 | 2 | 48 | 38 | 125 | 112 |
| 89,340 | 3 | 12 | 72 | 59 | 2 | 2 | 48 | 35 | 125 | 108 |
| 89,341 | 3 | 12 | 74 | 46 | 2 | 1 | 48 | 16 | 127 | 75  |
| 89,342 | 3 | 12 | 74 | 46 | 2 | 1 | 48 | 16 | 127 | 75  |
| 89,343 | 3 | 12 | 74 | 46 | 2 | 1 | 48 | 16 | 127 | 75  |
| 89,344 | 3 | 12 | 74 | 47 | 2 | 1 | 48 | 16 | 127 | 76  |
| 89,345 | 3 | 12 | 79 | 49 | 2 | 1 | 49 | 18 | 133 | 80  |
| 89,346 | 3 | 12 | 81 | 49 | 2 | 1 | 49 | 18 | 135 | 80  |
| 89,347 | 4 | 12 | 83 | 49 | 2 | 1 | 50 | 18 | 139 | 80  |
| 89,348 | 4 | 12 | 79 | 50 | 2 | 1 | 43 | 18 | 128 | 81  |
| 89,349 | 4 | 12 | 79 | 50 | 2 | 1 | 41 | 18 | 126 | 81  |
| 89,350 | 4 | 12 | 71 | 50 | 2 | 1 | 40 | 18 | 117 | 81  |
| 89,351 | 4 | 12 | 71 | 50 | 2 | 1 | 40 | 18 | 117 | 81  |
| 89,352 | 4 | 12 | 70 | 50 | 2 | 1 | 41 | 18 | 117 | 81  |
| 89,353 | 4 | 12 | 70 | 50 | 2 | 1 | 41 | 18 | 117 | 81  |
| 89,354 | 4 | 12 | 71 | 50 | 2 | 1 | 41 | 18 | 118 | 81  |
| 89,355 | 4 | 12 | 71 | 50 | 2 | 1 | 41 | 18 | 118 | 81  |
| 89,356 | 3 | 12 | 71 | 50 | 2 | 1 | 41 | 18 | 117 | 81  |
| 89,357 | 3 | 12 | 71 | 50 | 2 | 1 | 43 | 18 | 119 | 81  |
| 89,358 | 3 | 12 | 71 | 50 | 2 | 1 | 43 | 18 | 119 | 81  |
| 89,359 | 3 | 12 | 71 | 50 | 2 | 1 | 43 | 18 | 119 | 81  |
| 89,360 | 3 | 12 | 71 | 51 | 2 | 1 | 43 | 19 | 119 | 83  |
| 89,361 | 3 | 9  | 70 | 47 | 2 | 1 | 43 | 19 | 118 | 76  |
| 89,362 | 4 | 8  | 70 | 47 | 2 | 1 | 43 | 19 | 119 | 75  |
| 89,363 | 4 | 7  | 72 | 45 | 2 | 1 | 45 | 18 | 123 | 71  |
| 89,364 | 4 | 7  | 72 | 45 | 2 | 1 | 45 | 18 | 123 | 71  |
| 89,365 | 4 | 7  | 71 | 43 | 2 | 1 | 45 | 18 | 122 | 69  |
| 89,366 | 4 | 7  | 70 | 36 | 2 | 1 | 43 | 17 | 119 | 61  |
| 89,367 | 4 | 7  | 73 | 36 | 2 | 1 | 44 | 17 | 123 | 61  |
| 89,368 | 4 | 7  | 75 | 32 | 2 | 1 | 50 | 16 | 131 | 56  |

|        |    |   |     |    |    |   |     |    |     |    |
|--------|----|---|-----|----|----|---|-----|----|-----|----|
| 89,369 | 4  | 7 | 79  | 32 | 2  | 1 | 53  | 16 | 138 | 56 |
| 89,370 | 4  | 7 | 80  | 32 | 2  | 1 | 56  | 16 | 142 | 56 |
| 89,371 | 4  | 7 | 90  | 32 | 5  | 1 | 62  | 16 | 161 | 56 |
| 89,372 | 4  | 7 | 92  | 32 | 5  | 1 | 64  | 16 | 165 | 56 |
| 89,373 | 3  | 7 | 92  | 32 | 5  | 1 | 64  | 16 | 164 | 56 |
| 89,374 | 3  | 7 | 92  | 32 | 5  | 1 | 63  | 16 | 163 | 56 |
| 89,375 | 12 | 6 | 133 | 32 | 7  | 1 | 104 | 16 | 256 | 55 |
| 89,376 | 14 | 6 | 137 | 32 | 8  | 0 | 110 | 16 | 269 | 54 |
| 89,377 | 14 | 6 | 128 | 32 | 8  | 0 | 109 | 15 | 259 | 53 |
| 89,378 | 14 | 6 | 117 | 32 | 8  | 0 | 108 | 15 | 247 | 53 |
| 89,379 | 14 | 6 | 105 | 32 | 7  | 0 | 90  | 15 | 216 | 53 |
| 89,380 | 14 | 6 | 99  | 32 | 6  | 0 | 86  | 16 | 205 | 54 |
| 89,381 | 14 | 6 | 98  | 32 | 6  | 0 | 86  | 16 | 204 | 54 |
| 89,382 | 14 | 6 | 98  | 32 | 6  | 0 | 85  | 16 | 203 | 54 |
| 89,383 | 14 | 6 | 103 | 32 | 6  | 0 | 86  | 16 | 209 | 54 |
| 89,384 | 13 | 6 | 100 | 32 | 6  | 0 | 92  | 16 | 211 | 54 |
| 89,385 | 15 | 6 | 106 | 32 | 6  | 0 | 92  | 16 | 219 | 54 |
| 89,386 | 15 | 0 | 106 | 16 | 6  | 0 | 92  | 4  | 219 | 20 |
| 89,387 | 15 | 0 | 106 | 16 | 6  | 0 | 92  | 4  | 219 | 20 |
| 89,388 | 15 | 0 | 106 | 15 | 6  | 0 | 92  | 4  | 219 | 19 |
| 89,389 | 15 | 0 | 106 | 10 | 6  | 0 | 92  | 4  | 219 | 14 |
| 89,390 | 15 | 0 | 114 | 7  | 6  | 0 | 100 | 4  | 235 | 11 |
| 89,391 | 15 | 0 | 114 | 7  | 6  | 0 | 100 | 4  | 235 | 11 |
| 89,392 | 15 | 0 | 112 | 8  | 6  | 0 | 101 | 4  | 234 | 12 |
| 89,393 | 15 | 0 | 119 | 9  | 6  | 0 | 105 | 4  | 245 | 13 |
| 89,394 | 16 | 0 | 124 | 9  | 7  | 0 | 110 | 4  | 257 | 13 |
| 89,395 | 16 | 0 | 125 | 9  | 7  | 0 | 116 | 4  | 264 | 13 |
| 89,396 | 17 | 1 | 135 | 6  | 7  | 0 | 120 | 2  | 279 | 9  |
| 89,397 | 17 | 1 | 135 | 8  | 7  | 1 | 124 | 5  | 283 | 15 |
| 89,398 | 16 | 1 | 133 | 10 | 7  | 1 | 123 | 5  | 279 | 17 |
| 89,399 | 16 | 1 | 133 | 9  | 7  | 1 | 123 | 5  | 279 | 16 |
| 89,400 | 16 | 2 | 133 | 12 | 7  | 1 | 123 | 6  | 279 | 21 |
| 89,401 | 16 | 2 | 130 | 12 | 7  | 1 | 122 | 6  | 275 | 21 |
| 89,402 | 16 | 2 | 144 | 12 | 10 | 1 | 126 | 6  | 296 | 21 |
| 89,403 | 18 | 2 | 156 | 14 | 10 | 1 | 135 | 6  | 319 | 23 |
| 89,404 | 19 | 2 | 172 | 14 | 10 | 1 | 136 | 6  | 337 | 23 |
| 89,405 | 19 | 2 | 182 | 14 | 10 | 1 | 146 | 6  | 357 | 23 |
| 89,406 | 19 | 2 | 182 | 14 | 10 | 1 | 147 | 6  | 358 | 23 |
| 89,407 | 19 | 2 | 183 | 14 | 10 | 1 | 147 | 7  | 359 | 24 |
| 89,408 | 19 | 2 | 185 | 14 | 10 | 1 | 145 | 7  | 359 | 24 |
| 89,409 | 19 | 2 | 185 | 14 | 10 | 1 | 145 | 7  | 359 | 24 |

|        |    |    |     |    |    |   |     |    |     |     |
|--------|----|----|-----|----|----|---|-----|----|-----|-----|
| 89,410 | 18 | 2  | 191 | 15 | 10 | 1 | 145 | 7  | 364 | 25  |
| 89,411 | 18 | 2  | 191 | 14 | 10 | 1 | 145 | 6  | 364 | 23  |
| 89,412 | 18 | 2  | 195 | 14 | 10 | 1 | 145 | 6  | 368 | 23  |
| 89,413 | 19 | 2  | 202 | 14 | 10 | 1 | 145 | 6  | 376 | 23  |
| 89,414 | 19 | 2  | 202 | 15 | 11 | 1 | 145 | 6  | 377 | 24  |
| 89,415 | 19 | 2  | 202 | 15 | 11 | 1 | 145 | 7  | 377 | 25  |
| 89,416 | 25 | 2  | 218 | 15 | 11 | 1 | 147 | 8  | 401 | 26  |
| 89,417 | 25 | 2  | 226 | 15 | 11 | 1 | 151 | 8  | 413 | 26  |
| 89,418 | 29 | 2  | 225 | 15 | 11 | 1 | 156 | 8  | 421 | 26  |
| 89,419 | 29 | 2  | 244 | 15 | 12 | 1 | 158 | 8  | 443 | 26  |
| 89,420 | 33 | 2  | 243 | 15 | 13 | 1 | 159 | 8  | 448 | 26  |
| 89,421 | 34 | 2  | 257 | 15 | 15 | 1 | 162 | 10 | 468 | 28  |
| 89,422 | 34 | 2  | 255 | 15 | 12 | 1 | 156 | 10 | 457 | 28  |
| 89,423 | 34 | 2  | 260 | 16 | 12 | 1 | 158 | 12 | 464 | 31  |
| 89,424 | 34 | 2  | 257 | 18 | 12 | 1 | 152 | 13 | 455 | 34  |
| 89,425 | 33 | 5  | 239 | 19 | 12 | 1 | 139 | 15 | 423 | 40  |
| 89,426 | 28 | 5  | 222 | 23 | 10 | 1 | 117 | 16 | 377 | 45  |
| 89,427 | 26 | 7  | 217 | 25 | 9  | 1 | 112 | 16 | 364 | 49  |
| 89,428 | 26 | 7  | 219 | 27 | 9  | 1 | 112 | 18 | 366 | 53  |
| 89,429 | 26 | 7  | 219 | 27 | 9  | 1 | 113 | 18 | 367 | 53  |
| 89,430 | 26 | 7  | 219 | 29 | 9  | 1 | 112 | 18 | 366 | 55  |
| 89,431 | 26 | 7  | 219 | 41 | 9  | 1 | 111 | 21 | 365 | 70  |
| 89,432 | 26 | 7  | 218 | 43 | 9  | 1 | 111 | 21 | 364 | 72  |
| 89,433 | 26 | 7  | 218 | 53 | 9  | 1 | 111 | 22 | 364 | 83  |
| 89,434 | 26 | 10 | 214 | 61 | 9  | 1 | 110 | 26 | 359 | 98  |
| 89,435 | 26 | 11 | 211 | 63 | 9  | 1 | 104 | 28 | 350 | 103 |
| 89,436 | 24 | 11 | 204 | 67 | 9  | 1 | 103 | 30 | 340 | 109 |
| 89,437 | 24 | 11 | 213 | 69 | 10 | 1 | 105 | 30 | 352 | 111 |
| 89,438 | 24 | 11 | 220 | 69 | 12 | 1 | 108 | 32 | 364 | 113 |
| 89,439 | 24 | 11 | 216 | 69 | 12 | 1 | 103 | 32 | 355 | 113 |
| 89,440 | 27 | 11 | 286 | 70 | 17 | 1 | 129 | 34 | 459 | 116 |
| 89,441 | 27 | 12 | 290 | 71 | 17 | 1 | 129 | 35 | 463 | 119 |
| 89,442 | 27 | 13 | 293 | 74 | 17 | 1 | 129 | 37 | 466 | 125 |
| 89,443 | 27 | 13 | 292 | 73 | 17 | 1 | 126 | 38 | 462 | 125 |
| 89,444 | 27 | 13 | 286 | 72 | 17 | 1 | 125 | 38 | 455 | 124 |
| 89,445 | 26 | 13 | 281 | 73 | 16 | 1 | 120 | 38 | 443 | 125 |
| 89,446 | 26 | 13 | 277 | 72 | 16 | 1 | 114 | 38 | 433 | 124 |
| 89,447 | 25 | 12 | 265 | 70 | 16 | 0 | 110 | 35 | 416 | 117 |
| 89,448 | 25 | 12 | 263 | 70 | 16 | 0 | 106 | 36 | 410 | 118 |
| 89,449 | 25 | 12 | 263 | 68 | 16 | 0 | 106 | 37 | 410 | 117 |
| 89,450 | 25 | 14 | 263 | 74 | 16 | 0 | 106 | 39 | 410 | 127 |

|        |    |    |     |     |    |   |     |    |     |     |
|--------|----|----|-----|-----|----|---|-----|----|-----|-----|
| 89,451 | 25 | 14 | 262 | 76  | 16 | 0 | 107 | 42 | 410 | 132 |
| 89,452 | 25 | 14 | 262 | 78  | 15 | 0 | 110 | 45 | 412 | 137 |
| 89,453 | 25 | 14 | 254 | 79  | 13 | 2 | 106 | 49 | 398 | 144 |
| 89,454 | 23 | 15 | 242 | 78  | 13 | 2 | 97  | 49 | 375 | 144 |
| 89,455 | 22 | 17 | 226 | 84  | 13 | 2 | 96  | 53 | 357 | 156 |
| 89,456 | 22 | 17 | 215 | 86  | 13 | 2 | 86  | 53 | 336 | 158 |
| 89,457 | 22 | 17 | 217 | 86  | 13 | 2 | 86  | 54 | 338 | 159 |
| 89,458 | 22 | 17 | 216 | 86  | 13 | 2 | 86  | 53 | 337 | 158 |
| 89,459 | 22 | 17 | 214 | 88  | 14 | 2 | 87  | 53 | 337 | 160 |
| 89,460 | 22 | 17 | 214 | 87  | 14 | 2 | 89  | 53 | 339 | 159 |
| 89,461 | 22 | 17 | 209 | 87  | 14 | 2 | 89  | 53 | 334 | 159 |
| 89,462 | 22 | 17 | 208 | 87  | 14 | 2 | 89  | 53 | 333 | 159 |
| 89,463 | 22 | 17 | 205 | 88  | 14 | 2 | 89  | 53 | 330 | 160 |
| 89,464 | 21 | 17 | 198 | 88  | 14 | 2 | 89  | 53 | 322 | 160 |
| 89,465 | 21 | 18 | 196 | 87  | 13 | 2 | 87  | 53 | 317 | 160 |
| 89,466 | 19 | 19 | 195 | 87  | 13 | 2 | 87  | 54 | 314 | 162 |
| 89,467 | 15 | 19 | 184 | 86  | 13 | 2 | 84  | 54 | 296 | 161 |
| 89,468 | 15 | 19 | 176 | 87  | 13 | 2 | 82  | 54 | 286 | 162 |
| 89,469 | 11 | 19 | 174 | 87  | 13 | 2 | 76  | 54 | 274 | 162 |
| 89,470 | 11 | 19 | 152 | 87  | 12 | 2 | 65  | 54 | 240 | 162 |
| 89,471 | 7  | 19 | 148 | 88  | 11 | 2 | 61  | 55 | 227 | 164 |
| 89,472 | 6  | 19 | 136 | 97  | 9  | 4 | 56  | 57 | 207 | 177 |
| 89,473 | 6  | 20 | 127 | 108 | 9  | 6 | 56  | 69 | 198 | 203 |
| 89,474 | 6  | 20 | 120 | 112 | 9  | 6 | 52  | 71 | 187 | 209 |
| 89,475 | 6  | 20 | 121 | 123 | 9  | 6 | 54  | 77 | 190 | 226 |
| 89,476 | 6  | 17 | 119 | 131 | 9  | 6 | 53  | 75 | 187 | 229 |
| 89,477 | 3  | 17 | 118 | 132 | 9  | 6 | 54  | 74 | 184 | 229 |
| 89,478 | 3  | 15 | 118 | 130 | 9  | 6 | 53  | 74 | 183 | 225 |
| 89,479 | 3  | 15 | 117 | 128 | 9  | 6 | 51  | 72 | 180 | 221 |
| 89,480 | 3  | 15 | 117 | 128 | 9  | 6 | 51  | 72 | 180 | 221 |
| 89,481 | 3  | 15 | 116 | 112 | 9  | 6 | 52  | 68 | 180 | 201 |
| 89,482 | 3  | 15 | 116 | 113 | 9  | 6 | 52  | 68 | 180 | 202 |
| 89,483 | 3  | 15 | 116 | 113 | 9  | 6 | 52  | 68 | 180 | 202 |
| 89,484 | 3  | 12 | 117 | 96  | 9  | 6 | 52  | 63 | 181 | 177 |
| 89,485 | 3  | 12 | 117 | 98  | 9  | 6 | 52  | 65 | 181 | 181 |
| 89,486 | 3  | 11 | 119 | 99  | 9  | 7 | 53  | 65 | 184 | 182 |
| 89,487 | 3  | 11 | 119 | 99  | 9  | 7 | 53  | 68 | 184 | 185 |
| 89,488 | 3  | 11 | 108 | 101 | 8  | 7 | 49  | 70 | 168 | 189 |
| 89,489 | 3  | 11 | 101 | 105 | 6  | 7 | 47  | 74 | 157 | 197 |
| 89,490 | 2  | 11 | 86  | 106 | 5  | 7 | 42  | 77 | 135 | 201 |
| 89,491 | 0  | 11 | 29  | 109 | 1  | 8 | 22  | 75 | 52  | 203 |

|        |   |    |     |     |   |   |    |    |     |     |
|--------|---|----|-----|-----|---|---|----|----|-----|-----|
| 89,492 | 0 | 11 | 25  | 108 | 1 | 8 | 21 | 74 | 47  | 201 |
| 89,493 | 1 | 10 | 24  | 105 | 1 | 8 | 21 | 72 | 47  | 195 |
| 89,494 | 1 | 10 | 24  | 105 | 1 | 8 | 21 | 71 | 47  | 194 |
| 89,495 | 1 | 10 | 24  | 105 | 1 | 8 | 21 | 71 | 47  | 194 |
| 89,496 | 1 | 12 | 24  | 105 | 1 | 8 | 21 | 72 | 47  | 197 |
| 89,497 | 1 | 12 | 24  | 105 | 1 | 8 | 21 | 72 | 47  | 197 |
| 89,498 | 1 | 12 | 24  | 105 | 1 | 8 | 22 | 72 | 48  | 197 |
| 89,499 | 1 | 12 | 24  | 106 | 1 | 8 | 22 | 71 | 48  | 197 |
| 89,500 | 1 | 12 | 27  | 108 | 1 | 8 | 22 | 71 | 51  | 199 |
| 89,501 | 1 | 10 | 29  | 102 | 1 | 8 | 22 | 71 | 53  | 191 |
| 89,502 | 1 | 9  | 28  | 96  | 1 | 8 | 21 | 67 | 51  | 180 |
| 89,503 | 1 | 9  | 28  | 95  | 1 | 8 | 19 | 64 | 49  | 176 |
| 89,504 | 1 | 10 | 29  | 97  | 1 | 6 | 21 | 61 | 52  | 174 |
| 89,505 | 1 | 9  | 29  | 96  | 1 | 6 | 21 | 60 | 52  | 171 |
| 89,506 | 3 | 7  | 31  | 93  | 1 | 6 | 23 | 57 | 58  | 163 |
| 89,507 | 3 | 7  | 30  | 91  | 1 | 6 | 22 | 56 | 56  | 160 |
| 89,508 | 3 | 7  | 30  | 89  | 1 | 6 | 22 | 56 | 56  | 158 |
| 89,509 | 3 | 7  | 31  | 90  | 1 | 6 | 22 | 58 | 57  | 161 |
| 89,510 | 3 | 7  | 31  | 91  | 0 | 6 | 21 | 59 | 55  | 163 |
| 89,511 | 3 | 7  | 30  | 91  | 0 | 6 | 19 | 59 | 52  | 163 |
| 89,512 | 3 | 7  | 30  | 91  | 0 | 6 | 19 | 59 | 52  | 163 |
| 89,513 | 3 | 7  | 30  | 91  | 0 | 6 | 19 | 59 | 52  | 163 |
| 89,514 | 3 | 7  | 29  | 90  | 0 | 6 | 19 | 59 | 51  | 162 |
| 89,515 | 3 | 7  | 41  | 90  | 0 | 6 | 32 | 59 | 76  | 162 |
| 89,516 | 4 | 5  | 48  | 90  | 0 | 6 | 36 | 57 | 88  | 158 |
| 89,517 | 4 | 5  | 48  | 90  | 0 | 6 | 36 | 57 | 88  | 158 |
| 89,518 | 4 | 5  | 56  | 90  | 0 | 6 | 44 | 56 | 104 | 157 |
| 89,519 | 4 | 5  | 73  | 89  | 1 | 6 | 63 | 56 | 141 | 156 |
| 89,520 | 4 | 5  | 73  | 94  | 1 | 6 | 66 | 56 | 144 | 161 |
| 89,521 | 4 | 5  | 75  | 94  | 1 | 6 | 67 | 56 | 147 | 161 |
| 89,522 | 4 | 5  | 81  | 93  | 1 | 6 | 71 | 55 | 157 | 159 |
| 89,523 | 4 | 4  | 86  | 73  | 3 | 2 | 79 | 39 | 172 | 118 |
| 89,524 | 5 | 4  | 86  | 68  | 3 | 2 | 82 | 35 | 176 | 109 |
| 89,525 | 5 | 4  | 88  | 55  | 3 | 2 | 86 | 28 | 182 | 89  |
| 89,526 | 5 | 4  | 88  | 55  | 3 | 2 | 86 | 29 | 182 | 90  |
| 89,527 | 5 | 4  | 95  | 46  | 3 | 2 | 89 | 30 | 192 | 82  |
| 89,528 | 6 | 4  | 98  | 41  | 3 | 2 | 90 | 33 | 197 | 80  |
| 89,529 | 6 | 4  | 98  | 41  | 3 | 2 | 90 | 35 | 197 | 82  |
| 89,530 | 6 | 4  | 98  | 41  | 3 | 2 | 90 | 35 | 197 | 82  |
| 89,531 | 6 | 4  | 99  | 42  | 3 | 2 | 91 | 35 | 199 | 83  |
| 89,532 | 6 | 4  | 100 | 41  | 3 | 2 | 90 | 36 | 199 | 83  |



|        |   |   |     |    |    |   |     |    |     |    |
|--------|---|---|-----|----|----|---|-----|----|-----|----|
| 89,533 | 6 | 4 | 100 | 35 | 3  | 1 | 90  | 34 | 199 | 74 |
| 89,534 | 6 | 4 | 100 | 35 | 3  | 1 | 91  | 34 | 200 | 74 |
| 89,535 | 6 | 4 | 98  | 35 | 3  | 1 | 92  | 34 | 199 | 74 |
| 89,536 | 6 | 4 | 98  | 35 | 3  | 1 | 91  | 34 | 198 | 74 |
| 89,537 | 9 | 3 | 103 | 31 | 3  | 1 | 94  | 29 | 209 | 64 |
| 89,538 | 9 | 3 | 103 | 32 | 3  | 1 | 94  | 29 | 209 | 65 |
| 89,539 | 9 | 4 | 103 | 31 | 3  | 1 | 94  | 27 | 209 | 63 |
| 89,540 | 9 | 4 | 103 | 26 | 3  | 1 | 93  | 21 | 208 | 52 |
| 89,541 | 9 | 4 | 107 | 25 | 4  | 1 | 93  | 18 | 213 | 48 |
| 89,542 | 8 | 4 | 105 | 21 | 4  | 0 | 93  | 18 | 210 | 43 |
| 89,543 | 8 | 4 | 106 | 21 | 4  | 0 | 94  | 18 | 212 | 43 |
| 89,544 | 8 | 4 | 108 | 22 | 4  | 0 | 95  | 18 | 215 | 44 |
| 89,545 | 8 | 4 | 108 | 24 | 4  | 0 | 95  | 18 | 215 | 46 |
| 89,546 | 8 | 4 | 109 | 24 | 4  | 0 | 96  | 18 | 217 | 46 |
| 89,547 | 8 | 2 | 114 | 23 | 7  | 0 | 101 | 17 | 230 | 42 |
| 89,548 | 8 | 2 | 115 | 20 | 7  | 0 | 101 | 15 | 231 | 37 |
| 89,549 | 8 | 2 | 115 | 20 | 7  | 0 | 102 | 15 | 232 | 37 |
| 89,550 | 8 | 2 | 117 | 20 | 8  | 0 | 103 | 16 | 236 | 38 |
| 89,551 | 8 | 2 | 114 | 23 | 8  | 0 | 103 | 16 | 233 | 41 |
| 89,552 | 8 | 2 | 127 | 24 | 11 | 0 | 114 | 17 | 260 | 43 |
| 89,553 | 8 | 2 | 128 | 27 | 11 | 0 | 115 | 17 | 262 | 46 |
| 89,554 | 8 | 1 | 130 | 24 | 11 | 0 | 114 | 17 | 263 | 42 |
| 89,555 | 8 | 1 | 128 | 24 | 11 | 0 | 112 | 17 | 259 | 42 |
| 89,556 | 7 | 1 | 128 | 24 | 11 | 0 | 112 | 17 | 258 | 42 |
| 89,557 | 6 | 1 | 126 | 21 | 11 | 0 | 110 | 15 | 253 | 37 |
| 89,558 | 6 | 2 | 126 | 25 | 11 | 0 | 113 | 16 | 256 | 43 |
| 89,559 | 6 | 2 | 126 | 25 | 11 | 0 | 113 | 16 | 256 | 43 |
| 89,560 | 6 | 2 | 125 | 24 | 11 | 0 | 113 | 15 | 255 | 41 |
| 89,561 | 6 | 2 | 124 | 23 | 11 | 0 | 110 | 14 | 251 | 39 |
| 89,562 | 6 | 2 | 124 | 23 | 11 | 0 | 107 | 14 | 248 | 39 |
| 89,563 | 6 | 2 | 124 | 23 | 11 | 0 | 106 | 14 | 247 | 39 |
| 89,564 | 6 | 2 | 115 | 23 | 11 | 0 | 100 | 14 | 232 | 39 |
| 89,565 | 7 | 3 | 113 | 24 | 11 | 0 | 100 | 15 | 231 | 42 |
| 89,566 | 7 | 3 | 112 | 24 | 11 | 1 | 99  | 15 | 229 | 43 |
| 89,567 | 6 | 3 | 106 | 25 | 11 | 1 | 96  | 15 | 219 | 44 |
| 89,568 | 6 | 3 | 95  | 25 | 11 | 1 | 87  | 15 | 199 | 44 |
| 89,569 | 6 | 3 | 93  | 30 | 11 | 1 | 86  | 15 | 196 | 49 |
| 89,570 | 6 | 3 | 77  | 33 | 10 | 1 | 67  | 16 | 160 | 53 |
| 89,571 | 7 | 3 | 76  | 30 | 11 | 1 | 64  | 17 | 158 | 51 |
| 89,572 | 7 | 3 | 75  | 32 | 11 | 1 | 64  | 18 | 157 | 54 |
| 89,573 | 7 | 3 | 69  | 34 | 11 | 1 | 60  | 18 | 147 | 56 |

|        |   |   |    |    |    |   |    |    |     |     |
|--------|---|---|----|----|----|---|----|----|-----|-----|
| 89,574 | 7 | 3 | 61 | 47 | 9  | 2 | 51 | 21 | 128 | 73  |
| 89,575 | 6 | 3 | 61 | 51 | 9  | 4 | 47 | 21 | 123 | 79  |
| 89,576 | 6 | 3 | 58 | 60 | 9  | 4 | 43 | 25 | 116 | 92  |
| 89,577 | 7 | 3 | 53 | 60 | 9  | 4 | 40 | 24 | 109 | 91  |
| 89,578 | 7 | 3 | 51 | 60 | 9  | 4 | 40 | 23 | 107 | 90  |
| 89,579 | 6 | 3 | 48 | 60 | 9  | 4 | 38 | 18 | 101 | 85  |
| 89,580 | 6 | 3 | 47 | 61 | 9  | 4 | 38 | 18 | 100 | 86  |
| 89,581 | 6 | 3 | 47 | 60 | 9  | 4 | 38 | 18 | 100 | 85  |
| 89,582 | 6 | 3 | 47 | 60 | 9  | 4 | 37 | 18 | 99  | 85  |
| 89,583 | 6 | 4 | 46 | 61 | 9  | 4 | 37 | 21 | 98  | 90  |
| 89,584 | 6 | 4 | 46 | 62 | 9  | 4 | 37 | 19 | 98  | 89  |
| 89,585 | 7 | 4 | 46 | 64 | 9  | 4 | 37 | 22 | 99  | 94  |
| 89,586 | 7 | 4 | 46 | 64 | 9  | 4 | 36 | 24 | 98  | 96  |
| 89,587 | 6 | 5 | 42 | 64 | 9  | 4 | 35 | 24 | 92  | 97  |
| 89,588 | 4 | 5 | 41 | 65 | 9  | 4 | 33 | 24 | 87  | 98  |
| 89,589 | 4 | 5 | 41 | 64 | 9  | 4 | 33 | 24 | 87  | 97  |
| 89,590 | 4 | 5 | 41 | 64 | 9  | 4 | 33 | 26 | 87  | 99  |
| 89,591 | 4 | 5 | 41 | 64 | 9  | 4 | 33 | 26 | 87  | 99  |
| 89,592 | 4 | 5 | 40 | 64 | 8  | 4 | 32 | 26 | 84  | 99  |
| 89,593 | 7 | 5 | 63 | 64 | 8  | 4 | 48 | 26 | 126 | 99  |
| 89,594 | 7 | 5 | 75 | 63 | 10 | 4 | 60 | 26 | 152 | 98  |
| 89,595 | 7 | 5 | 74 | 61 | 10 | 4 | 60 | 26 | 151 | 96  |
| 89,596 | 7 | 5 | 75 | 61 | 10 | 4 | 59 | 26 | 151 | 96  |
| 89,597 | 7 | 5 | 77 | 61 | 10 | 4 | 61 | 26 | 155 | 96  |
| 89,598 | 7 | 5 | 72 | 61 | 7  | 4 | 58 | 26 | 144 | 96  |
| 89,599 | 7 | 5 | 71 | 61 | 7  | 4 | 58 | 29 | 143 | 99  |
| 89,600 | 7 | 5 | 71 | 62 | 7  | 4 | 57 | 30 | 142 | 101 |
| 89,601 | 7 | 5 | 69 | 62 | 6  | 4 | 56 | 29 | 138 | 100 |
| 89,602 | 7 | 5 | 54 | 60 | 4  | 5 | 47 | 30 | 112 | 100 |
| 89,603 | 7 | 5 | 56 | 61 | 3  | 5 | 45 | 29 | 111 | 100 |
| 89,604 | 7 | 5 | 55 | 61 | 3  | 5 | 43 | 29 | 108 | 100 |
| 89,605 | 8 | 5 | 71 | 61 | 3  | 5 | 53 | 29 | 135 | 100 |
| 89,606 | 8 | 5 | 74 | 61 | 3  | 5 | 53 | 29 | 138 | 100 |
| 89,607 | 8 | 5 | 74 | 61 | 3  | 5 | 51 | 29 | 136 | 100 |
| 89,608 | 8 | 4 | 76 | 57 | 3  | 5 | 53 | 28 | 140 | 94  |
| 89,609 | 8 | 4 | 76 | 57 | 3  | 5 | 53 | 28 | 140 | 94  |
| 89,610 | 8 | 4 | 76 | 57 | 3  | 5 | 53 | 28 | 140 | 94  |
| 89,611 | 8 | 4 | 77 | 57 | 4  | 5 | 53 | 28 | 142 | 94  |
| 89,612 | 8 | 4 | 77 | 57 | 4  | 5 | 53 | 28 | 142 | 94  |
| 89,613 | 8 | 4 | 79 | 57 | 4  | 5 | 53 | 28 | 144 | 94  |
| 89,614 | 8 | 3 | 79 | 50 | 4  | 4 | 53 | 27 | 144 | 84  |

|        |   |   |     |    |   |   |    |    |     |    |
|--------|---|---|-----|----|---|---|----|----|-----|----|
| 89,615 | 8 | 3 | 79  | 50 | 4 | 4 | 54 | 27 | 145 | 84 |
| 89,616 | 7 | 3 | 81  | 50 | 4 | 4 | 54 | 27 | 146 | 84 |
| 89,617 | 7 | 3 | 81  | 50 | 4 | 4 | 54 | 27 | 146 | 84 |
| 89,618 | 7 | 3 | 82  | 50 | 4 | 4 | 54 | 27 | 147 | 84 |
| 89,619 | 7 | 3 | 85  | 51 | 4 | 4 | 54 | 27 | 150 | 85 |
| 89,620 | 7 | 3 | 85  | 51 | 4 | 4 | 54 | 27 | 150 | 85 |
| 89,621 | 7 | 4 | 94  | 48 | 5 | 4 | 53 | 26 | 159 | 82 |
| 89,622 | 6 | 4 | 97  | 46 | 4 | 4 | 54 | 25 | 161 | 79 |
| 89,623 | 6 | 4 | 96  | 44 | 4 | 4 | 53 | 24 | 159 | 76 |
| 89,624 | 6 | 4 | 96  | 29 | 4 | 3 | 54 | 21 | 160 | 57 |
| 89,625 | 6 | 4 | 96  | 29 | 4 | 3 | 54 | 21 | 160 | 57 |
| 89,626 | 6 | 4 | 96  | 27 | 4 | 1 | 53 | 21 | 159 | 53 |
| 89,627 | 6 | 5 | 97  | 18 | 4 | 1 | 53 | 17 | 160 | 41 |
| 89,628 | 5 | 5 | 105 | 18 | 4 | 1 | 57 | 17 | 171 | 41 |
| 89,629 | 6 | 5 | 111 | 18 | 4 | 1 | 61 | 17 | 182 | 41 |
| 89,630 | 7 | 5 | 143 | 17 | 4 | 1 | 64 | 17 | 218 | 40 |
| 89,631 | 7 | 5 | 145 | 17 | 4 | 1 | 64 | 17 | 220 | 40 |
| 89,632 | 7 | 5 | 146 | 17 | 4 | 1 | 66 | 17 | 223 | 40 |
| 89,633 | 7 | 5 | 146 | 17 | 4 | 1 | 65 | 17 | 222 | 40 |
| 89,634 | 7 | 4 | 146 | 16 | 4 | 1 | 65 | 13 | 222 | 34 |
| 89,635 | 7 | 4 | 146 | 15 | 4 | 1 | 65 | 13 | 222 | 33 |
| 89,636 | 7 | 4 | 146 | 13 | 4 | 1 | 65 | 10 | 222 | 28 |
| 89,637 | 7 | 3 | 146 | 13 | 4 | 1 | 65 | 8  | 222 | 25 |
| 89,638 | 7 | 3 | 146 | 13 | 4 | 1 | 65 | 8  | 222 | 25 |
| 89,639 | 7 | 3 | 145 | 12 | 4 | 1 | 65 | 8  | 221 | 24 |
| 89,640 | 7 | 3 | 142 | 12 | 4 | 1 | 65 | 8  | 218 | 24 |
| 89,641 | 8 | 2 | 142 | 10 | 4 | 1 | 65 | 7  | 219 | 20 |
| 89,642 | 8 | 2 | 143 | 10 | 4 | 1 | 65 | 9  | 220 | 22 |
| 89,643 | 8 | 2 | 141 | 14 | 4 | 1 | 65 | 9  | 218 | 26 |
| 89,644 | 5 | 2 | 123 | 17 | 4 | 1 | 48 | 12 | 180 | 32 |
| 89,645 | 5 | 2 | 110 | 23 | 2 | 2 | 35 | 13 | 152 | 40 |
| 89,646 | 5 | 3 | 114 | 23 | 2 | 2 | 35 | 13 | 156 | 41 |
| 89,647 | 5 | 3 | 113 | 27 | 2 | 2 | 35 | 15 | 155 | 47 |
| 89,648 | 5 | 3 | 111 | 27 | 2 | 2 | 33 | 15 | 151 | 47 |
| 89,649 | 7 | 3 | 155 | 27 | 3 | 2 | 53 | 14 | 218 | 46 |
| 89,650 | 7 | 3 | 161 | 27 | 3 | 2 | 54 | 11 | 225 | 43 |
| 89,651 | 7 | 3 | 163 | 26 | 3 | 2 | 54 | 10 | 227 | 41 |
| 89,652 | 7 | 3 | 164 | 26 | 3 | 2 | 54 | 12 | 228 | 43 |
| 89,653 | 7 | 3 | 163 | 25 | 3 | 1 | 54 | 13 | 227 | 42 |
| 89,654 | 7 | 3 | 162 | 28 | 3 | 2 | 54 | 21 | 226 | 54 |
| 89,655 | 6 | 3 | 155 | 37 | 3 | 4 | 52 | 32 | 216 | 76 |

|        |   |   |     |    |   |   |    |    |     |     |
|--------|---|---|-----|----|---|---|----|----|-----|-----|
| 89,656 | 6 | 3 | 142 | 38 | 3 | 4 | 43 | 32 | 194 | 77  |
| 89,657 | 6 | 3 | 144 | 39 | 3 | 4 | 43 | 32 | 196 | 78  |
| 89,658 | 7 | 3 | 143 | 39 | 3 | 4 | 43 | 32 | 196 | 78  |
| 89,659 | 7 | 3 | 141 | 40 | 3 | 4 | 41 | 32 | 192 | 79  |
| 89,660 | 7 | 3 | 141 | 40 | 3 | 4 | 42 | 32 | 193 | 79  |
| 89,661 | 7 | 3 | 141 | 40 | 3 | 4 | 42 | 32 | 193 | 79  |
| 89,662 | 7 | 3 | 143 | 40 | 2 | 4 | 44 | 32 | 196 | 79  |
| 89,663 | 7 | 3 | 143 | 40 | 2 | 4 | 44 | 32 | 196 | 79  |
| 89,664 | 7 | 3 | 141 | 40 | 2 | 4 | 44 | 32 | 194 | 79  |
| 89,665 | 7 | 3 | 141 | 42 | 2 | 4 | 44 | 37 | 194 | 86  |
| 89,666 | 7 | 3 | 141 | 42 | 2 | 4 | 43 | 38 | 193 | 87  |
| 89,667 | 7 | 4 | 139 | 49 | 2 | 4 | 43 | 40 | 191 | 97  |
| 89,668 | 7 | 4 | 139 | 50 | 2 | 4 | 43 | 40 | 191 | 98  |
| 89,669 | 7 | 4 | 138 | 50 | 2 | 4 | 43 | 40 | 190 | 98  |
| 89,670 | 7 | 4 | 135 | 49 | 2 | 4 | 43 | 40 | 187 | 97  |
| 89,671 | 7 | 4 | 126 | 50 | 1 | 4 | 43 | 40 | 177 | 98  |
| 89,672 | 8 | 3 | 123 | 50 | 1 | 4 | 42 | 40 | 174 | 97  |
| 89,673 | 8 | 3 | 123 | 50 | 1 | 4 | 42 | 40 | 174 | 97  |
| 89,674 | 8 | 3 | 123 | 50 | 1 | 4 | 42 | 40 | 174 | 97  |
| 89,675 | 8 | 3 | 123 | 50 | 1 | 4 | 41 | 40 | 173 | 97  |
| 89,676 | 8 | 3 | 123 | 50 | 1 | 4 | 41 | 40 | 173 | 97  |
| 89,677 | 9 | 3 | 124 | 48 | 1 | 4 | 41 | 41 | 175 | 96  |
| 89,678 | 9 | 2 | 123 | 48 | 1 | 4 | 41 | 44 | 174 | 98  |
| 89,679 | 9 | 2 | 116 | 48 | 1 | 4 | 36 | 45 | 162 | 99  |
| 89,680 | 8 | 2 | 110 | 48 | 1 | 4 | 32 | 45 | 151 | 99  |
| 89,681 | 7 | 2 | 78  | 48 | 1 | 4 | 31 | 45 | 117 | 99  |
| 89,682 | 7 | 2 | 76  | 48 | 1 | 4 | 31 | 45 | 115 | 99  |
| 89,683 | 7 | 2 | 75  | 48 | 1 | 4 | 31 | 45 | 114 | 99  |
| 89,684 | 8 | 2 | 80  | 48 | 1 | 4 | 32 | 45 | 121 | 99  |
| 89,685 | 8 | 3 | 80  | 49 | 1 | 4 | 32 | 45 | 121 | 101 |
| 89,686 | 7 | 3 | 80  | 49 | 1 | 4 | 32 | 45 | 120 | 101 |
| 89,687 | 7 | 3 | 80  | 49 | 1 | 4 | 33 | 45 | 121 | 101 |
| 89,688 | 7 | 3 | 81  | 49 | 1 | 4 | 33 | 45 | 122 | 101 |
| 89,689 | 7 | 3 | 80  | 49 | 1 | 4 | 35 | 45 | 123 | 101 |
| 89,690 | 7 | 3 | 81  | 45 | 1 | 4 | 35 | 42 | 124 | 94  |
| 89,691 | 6 | 3 | 81  | 45 | 1 | 4 | 35 | 42 | 123 | 94  |
| 89,692 | 6 | 3 | 81  | 45 | 1 | 4 | 35 | 42 | 123 | 94  |
| 89,693 | 6 | 3 | 80  | 45 | 1 | 4 | 35 | 42 | 122 | 94  |
| 89,694 | 6 | 3 | 80  | 45 | 1 | 4 | 35 | 42 | 122 | 94  |
| 89,695 | 7 | 2 | 81  | 36 | 1 | 3 | 38 | 38 | 127 | 79  |
| 89,696 | 8 | 3 | 84  | 36 | 1 | 3 | 38 | 38 | 131 | 80  |

|        |    |   |     |    |   |   |     |    |     |    |
|--------|----|---|-----|----|---|---|-----|----|-----|----|
| 89,697 | 8  | 3 | 88  | 36 | 1 | 3 | 43  | 38 | 140 | 80 |
| 89,698 | 8  | 3 | 140 | 32 | 4 | 3 | 64  | 36 | 216 | 74 |
| 89,699 | 6  | 3 | 105 | 32 | 4 | 3 | 65  | 36 | 180 | 74 |
| 89,700 | 6  | 3 | 100 | 32 | 4 | 3 | 64  | 36 | 174 | 74 |
| 89,701 | 6  | 3 | 98  | 32 | 4 | 3 | 64  | 36 | 172 | 74 |
| 89,702 | 6  | 3 | 97  | 32 | 4 | 3 | 65  | 34 | 172 | 72 |
| 89,703 | 6  | 3 | 97  | 32 | 4 | 3 | 65  | 34 | 172 | 72 |
| 89,704 | 6  | 3 | 98  | 32 | 4 | 3 | 67  | 33 | 175 | 71 |
| 89,705 | 6  | 3 | 98  | 27 | 4 | 2 | 69  | 27 | 177 | 59 |
| 89,706 | 6  | 3 | 98  | 15 | 4 | 0 | 69  | 16 | 177 | 34 |
| 89,707 | 6  | 3 | 98  | 19 | 4 | 0 | 69  | 18 | 177 | 40 |
| 89,708 | 6  | 3 | 92  | 19 | 4 | 0 | 69  | 18 | 171 | 40 |
| 89,709 | 5  | 3 | 92  | 19 | 4 | 0 | 69  | 17 | 170 | 39 |
| 89,710 | 5  | 3 | 92  | 21 | 4 | 0 | 70  | 17 | 171 | 41 |
| 89,711 | 5  | 3 | 92  | 22 | 4 | 0 | 69  | 17 | 170 | 42 |
| 89,712 | 5  | 3 | 92  | 22 | 4 | 0 | 68  | 18 | 169 | 43 |
| 89,713 | 5  | 3 | 90  | 23 | 4 | 0 | 67  | 18 | 166 | 44 |
| 89,714 | 6  | 4 | 106 | 21 | 5 | 1 | 73  | 12 | 190 | 38 |
| 89,715 | 7  | 4 | 123 | 21 | 6 | 1 | 82  | 12 | 218 | 38 |
| 89,716 | 8  | 4 | 125 | 21 | 6 | 1 | 89  | 12 | 228 | 38 |
| 89,717 | 8  | 3 | 126 | 14 | 6 | 1 | 91  | 10 | 231 | 28 |
| 89,718 | 8  | 3 | 126 | 14 | 6 | 1 | 91  | 10 | 231 | 28 |
| 89,719 | 9  | 3 | 130 | 13 | 6 | 1 | 91  | 10 | 236 | 27 |
| 89,720 | 9  | 3 | 133 | 13 | 7 | 1 | 91  | 10 | 240 | 27 |
| 89,721 | 9  | 3 | 137 | 16 | 7 | 1 | 91  | 11 | 244 | 31 |
| 89,722 | 9  | 3 | 137 | 15 | 7 | 1 | 91  | 11 | 244 | 30 |
| 89,723 | 9  | 3 | 139 | 17 | 7 | 1 | 92  | 11 | 247 | 32 |
| 89,724 | 9  | 3 | 145 | 18 | 7 | 1 | 94  | 11 | 255 | 33 |
| 89,725 | 9  | 3 | 149 | 18 | 7 | 1 | 104 | 11 | 269 | 33 |
| 89,726 | 9  | 3 | 160 | 18 | 7 | 1 | 112 | 11 | 288 | 33 |
| 89,727 | 12 | 3 | 192 | 19 | 7 | 1 | 126 | 11 | 337 | 34 |
| 89,728 | 12 | 3 | 193 | 19 | 7 | 1 | 127 | 7  | 339 | 30 |
| 89,729 | 12 | 3 | 194 | 19 | 7 | 1 | 129 | 6  | 342 | 29 |
| 89,730 | 12 | 3 | 193 | 19 | 7 | 1 | 129 | 6  | 341 | 29 |
| 89,731 | 12 | 3 | 204 | 20 | 7 | 1 | 133 | 7  | 356 | 31 |
| 89,732 | 12 | 3 | 204 | 20 | 7 | 1 | 131 | 7  | 354 | 31 |
| 89,733 | 12 | 3 | 207 | 20 | 7 | 1 | 131 | 7  | 357 | 31 |
| 89,734 | 12 | 3 | 207 | 20 | 7 | 1 | 131 | 7  | 357 | 31 |
| 89,735 | 11 | 3 | 202 | 20 | 7 | 1 | 130 | 7  | 350 | 31 |
| 89,736 | 11 | 2 | 209 | 19 | 7 | 1 | 132 | 7  | 359 | 29 |
| 89,737 | 12 | 2 | 210 | 19 | 7 | 1 | 133 | 7  | 362 | 29 |

|        |    |   |     |    |   |   |     |    |     |    |
|--------|----|---|-----|----|---|---|-----|----|-----|----|
| 89,738 | 12 | 2 | 209 | 20 | 7 | 1 | 133 | 7  | 361 | 30 |
| 89,739 | 12 | 2 | 209 | 20 | 7 | 1 | 131 | 7  | 359 | 30 |
| 89,740 | 15 | 3 | 253 | 20 | 8 | 1 | 160 | 7  | 436 | 31 |
| 89,741 | 15 | 3 | 252 | 20 | 8 | 1 | 161 | 7  | 436 | 31 |
| 89,742 | 15 | 3 | 252 | 20 | 8 | 1 | 161 | 7  | 436 | 31 |
| 89,743 | 15 | 3 | 255 | 20 | 8 | 1 | 161 | 7  | 439 | 31 |
| 89,744 | 16 | 3 | 255 | 21 | 8 | 1 | 162 | 8  | 441 | 33 |
| 89,745 | 16 | 3 | 253 | 21 | 8 | 1 | 159 | 9  | 436 | 34 |
| 89,746 | 16 | 3 | 254 | 21 | 8 | 1 | 159 | 9  | 437 | 34 |
| 89,747 | 15 | 2 | 251 | 21 | 8 | 1 | 159 | 9  | 433 | 33 |
| 89,748 | 15 | 2 | 243 | 21 | 8 | 2 | 154 | 9  | 420 | 34 |
| 89,749 | 15 | 2 | 189 | 25 | 5 | 3 | 133 | 14 | 342 | 44 |
| 89,750 | 15 | 2 | 181 | 25 | 4 | 3 | 111 | 14 | 311 | 44 |
| 89,751 | 15 | 3 | 183 | 28 | 4 | 3 | 112 | 13 | 314 | 47 |
| 89,752 | 17 | 3 | 194 | 29 | 5 | 3 | 118 | 14 | 334 | 49 |
| 89,753 | 17 | 3 | 197 | 30 | 5 | 3 | 117 | 14 | 336 | 50 |
| 89,754 | 17 | 3 | 196 | 30 | 5 | 3 | 116 | 14 | 334 | 50 |
| 89,755 | 17 | 3 | 197 | 32 | 5 | 3 | 115 | 17 | 334 | 55 |
| 89,756 | 17 | 3 | 197 | 32 | 5 | 3 | 113 | 16 | 332 | 54 |
| 89,757 | 17 | 4 | 197 | 47 | 5 | 3 | 113 | 16 | 332 | 70 |
| 89,758 | 17 | 4 | 196 | 43 | 5 | 3 | 111 | 14 | 329 | 64 |
| 89,759 | 17 | 4 | 197 | 42 | 5 | 3 | 112 | 14 | 331 | 63 |
| 89,760 | 17 | 4 | 197 | 42 | 5 | 3 | 112 | 14 | 331 | 63 |
| 89,761 | 17 | 4 | 197 | 39 | 5 | 3 | 112 | 14 | 331 | 60 |
| 89,762 | 17 | 4 | 196 | 38 | 5 | 3 | 112 | 14 | 330 | 59 |
| 89,763 | 17 | 4 | 196 | 39 | 5 | 3 | 112 | 13 | 330 | 59 |
| 89,764 | 17 | 4 | 194 | 38 | 5 | 3 | 112 | 15 | 328 | 60 |
| 89,765 | 16 | 3 | 180 | 38 | 4 | 2 | 107 | 15 | 307 | 58 |
| 89,766 | 15 | 5 | 164 | 49 | 3 | 2 | 98  | 15 | 280 | 71 |
| 89,767 | 14 | 5 | 162 | 52 | 3 | 4 | 91  | 20 | 270 | 81 |
| 89,768 | 14 | 5 | 161 | 58 | 3 | 4 | 89  | 21 | 267 | 88 |
| 89,769 | 14 | 5 | 159 | 62 | 3 | 4 | 89  | 23 | 265 | 94 |
| 89,770 | 13 | 5 | 157 | 63 | 3 | 5 | 89  | 24 | 262 | 97 |
| 89,771 | 13 | 5 | 154 | 63 | 2 | 5 | 89  | 25 | 258 | 98 |
| 89,772 | 13 | 5 | 151 | 62 | 2 | 5 | 89  | 24 | 255 | 96 |
| 89,773 | 12 | 5 | 150 | 61 | 2 | 5 | 88  | 24 | 252 | 95 |
| 89,774 | 12 | 5 | 149 | 64 | 2 | 5 | 88  | 24 | 251 | 98 |
| 89,775 | 12 | 5 | 143 | 64 | 2 | 5 | 86  | 24 | 243 | 98 |
| 89,776 | 12 | 5 | 139 | 64 | 2 | 5 | 78  | 24 | 231 | 98 |
| 89,777 | 12 | 5 | 128 | 64 | 2 | 5 | 68  | 24 | 210 | 98 |
| 89,778 | 8  | 5 | 96  | 63 | 2 | 5 | 54  | 24 | 160 | 97 |

|        |   |   |    |    |   |   |    |    |     |     |
|--------|---|---|----|----|---|---|----|----|-----|-----|
| 89,779 | 8 | 5 | 95 | 63 | 2 | 5 | 53 | 24 | 158 | 97  |
| 89,780 | 8 | 5 | 96 | 63 | 2 | 5 | 54 | 24 | 160 | 97  |
| 89,781 | 8 | 5 | 91 | 63 | 2 | 5 | 52 | 24 | 153 | 97  |
| 89,782 | 8 | 5 | 88 | 62 | 2 | 5 | 50 | 23 | 148 | 95  |
| 89,783 | 8 | 5 | 88 | 67 | 2 | 5 | 50 | 23 | 148 | 100 |
| 89,784 | 8 | 5 | 85 | 69 | 2 | 5 | 50 | 23 | 145 | 102 |
| 89,785 | 8 | 5 | 86 | 74 | 2 | 5 | 49 | 23 | 145 | 107 |
| 89,786 | 8 | 5 | 88 | 74 | 2 | 5 | 50 | 24 | 148 | 108 |
| 89,787 | 8 | 5 | 82 | 75 | 2 | 5 | 49 | 24 | 141 | 109 |
| 89,788 | 7 | 5 | 82 | 75 | 2 | 5 | 47 | 24 | 138 | 109 |
| 89,789 | 6 | 4 | 70 | 74 | 2 | 5 | 45 | 24 | 123 | 107 |
| 89,790 | 7 | 4 | 69 | 74 | 1 | 5 | 46 | 24 | 123 | 107 |
| 89,791 | 5 | 4 | 40 | 75 | 1 | 5 | 21 | 24 | 67  | 108 |
| 89,792 | 5 | 4 | 41 | 75 | 1 | 5 | 20 | 24 | 67  | 108 |
| 89,793 | 5 | 4 | 41 | 75 | 1 | 5 | 20 | 24 | 67  | 108 |
| 89,794 | 6 | 4 | 45 | 74 | 1 | 5 | 20 | 23 | 72  | 106 |
| 89,795 | 5 | 4 | 45 | 75 | 1 | 5 | 19 | 23 | 70  | 107 |
| 89,796 | 4 | 4 | 44 | 75 | 1 | 5 | 19 | 23 | 68  | 107 |
| 89,797 | 4 | 4 | 48 | 75 | 1 | 5 | 23 | 23 | 76  | 107 |
| 89,798 | 4 | 4 | 49 | 75 | 1 | 4 | 23 | 23 | 77  | 106 |
| 89,799 | 4 | 4 | 48 | 71 | 1 | 3 | 23 | 18 | 76  | 96  |
| 89,800 | 7 | 3 | 54 | 68 | 1 | 3 | 26 | 18 | 88  | 92  |
| 89,801 | 7 | 3 | 54 | 68 | 2 | 3 | 24 | 18 | 87  | 92  |
| 89,802 | 5 | 3 | 50 | 68 | 1 | 3 | 21 | 18 | 77  | 92  |
| 89,803 | 5 | 3 | 42 | 67 | 1 | 3 | 18 | 17 | 66  | 90  |
| 89,804 | 5 | 3 | 41 | 66 | 1 | 3 | 20 | 17 | 67  | 89  |
| 89,805 | 5 | 3 | 41 | 66 | 1 | 3 | 20 | 17 | 67  | 89  |
| 89,806 | 5 | 3 | 44 | 64 | 1 | 3 | 20 | 14 | 70  | 84  |
| 89,807 | 5 | 2 | 49 | 49 | 1 | 3 | 21 | 14 | 76  | 68  |
| 89,808 | 5 | 2 | 49 | 49 | 1 | 3 | 21 | 14 | 76  | 68  |
| 89,809 | 5 | 2 | 52 | 48 | 1 | 3 | 23 | 14 | 81  | 67  |
| 89,810 | 5 | 2 | 52 | 48 | 1 | 3 | 23 | 14 | 81  | 67  |
| 89,811 | 5 | 2 | 52 | 48 | 1 | 3 | 23 | 14 | 81  | 67  |
| 89,812 | 5 | 2 | 54 | 48 | 1 | 3 | 25 | 14 | 85  | 67  |
| 89,813 | 5 | 2 | 62 | 47 | 1 | 3 | 33 | 14 | 101 | 66  |
| 89,814 | 5 | 2 | 62 | 47 | 1 | 3 | 32 | 14 | 100 | 66  |
| 89,815 | 5 | 0 | 62 | 36 | 1 | 3 | 33 | 12 | 101 | 51  |
| 89,816 | 5 | 0 | 62 | 36 | 1 | 3 | 33 | 12 | 101 | 51  |
| 89,817 | 5 | 0 | 61 | 36 | 1 | 3 | 33 | 12 | 100 | 51  |
| 89,818 | 5 | 0 | 61 | 33 | 1 | 1 | 33 | 7  | 100 | 41  |
| 89,819 | 5 | 0 | 61 | 24 | 1 | 1 | 33 | 4  | 100 | 29  |

|        |   |   |    |    |   |   |    |   |     |    |
|--------|---|---|----|----|---|---|----|---|-----|----|
| 89,820 | 6 | 0 | 61 | 23 | 1 | 0 | 34 | 4 | 102 | 27 |
| 89,821 | 6 | 0 | 61 | 23 | 1 | 0 | 35 | 4 | 103 | 27 |
| 89,822 | 6 | 0 | 61 | 23 | 1 | 0 | 35 | 3 | 103 | 26 |
| 89,823 | 6 | 0 | 61 | 20 | 1 | 0 | 35 | 3 | 103 | 23 |
| 89,824 | 6 | 0 | 61 | 17 | 1 | 0 | 35 | 3 | 103 | 20 |
| 89,825 | 6 | 0 | 61 | 16 | 1 | 0 | 35 | 3 | 103 | 19 |
| 89,826 | 6 | 0 | 61 | 16 | 1 | 0 | 35 | 3 | 103 | 19 |
| 89,827 | 6 | 0 | 61 | 16 | 1 | 0 | 35 | 3 | 103 | 19 |
| 89,828 | 6 | 0 | 62 | 16 | 1 | 0 | 35 | 3 | 104 | 19 |
| 89,829 | 6 | 0 | 62 | 17 | 1 | 0 | 35 | 3 | 104 | 20 |
| 89,830 | 6 | 0 | 61 | 18 | 1 | 0 | 35 | 3 | 103 | 21 |
| 89,831 | 6 | 0 | 59 | 18 | 1 | 0 | 33 | 3 | 99  | 21 |
| 89,832 | 6 | 1 | 56 | 19 | 1 | 0 | 33 | 3 | 96  | 23 |
| 89,833 | 6 | 1 | 58 | 19 | 1 | 0 | 33 | 3 | 98  | 23 |
| 89,834 | 6 | 1 | 57 | 15 | 1 | 0 | 34 | 3 | 98  | 19 |
| 89,835 | 6 | 1 | 57 | 13 | 1 | 0 | 33 | 3 | 97  | 17 |
| 89,836 | 6 | 2 | 57 | 8  | 1 | 0 | 33 | 4 | 97  | 14 |
| 89,837 | 6 | 2 | 55 | 9  | 1 | 0 | 33 | 3 | 95  | 14 |
| 89,838 | 6 | 2 | 54 | 8  | 1 | 0 | 32 | 3 | 93  | 13 |
| 89,839 | 8 | 2 | 55 | 8  | 1 | 0 | 32 | 3 | 96  | 13 |
| 89,840 | 9 | 2 | 55 | 11 | 1 | 0 | 32 | 4 | 97  | 17 |
| 89,841 | 8 | 2 | 53 | 10 | 1 | 0 | 29 | 4 | 91  | 16 |
| 89,842 | 8 | 2 | 52 | 10 | 1 | 0 | 32 | 4 | 93  | 16 |
| 89,843 | 8 | 2 | 52 | 10 | 1 | 0 | 32 | 4 | 93  | 16 |
| 89,844 | 7 | 2 | 45 | 10 | 1 | 0 | 32 | 4 | 85  | 16 |
| 89,845 | 7 | 2 | 45 | 9  | 2 | 0 | 32 | 4 | 86  | 15 |
| 89,846 | 7 | 3 | 44 | 9  | 2 | 0 | 32 | 3 | 85  | 15 |
| 89,847 | 7 | 3 | 45 | 9  | 2 | 0 | 32 | 3 | 86  | 15 |
| 89,848 | 7 | 3 | 40 | 9  | 2 | 0 | 28 | 3 | 77  | 15 |
| 89,849 | 8 | 3 | 42 | 9  | 2 | 0 | 31 | 3 | 83  | 15 |
| 89,850 | 9 | 3 | 43 | 9  | 2 | 0 | 30 | 3 | 84  | 15 |
| 89,851 | 6 | 3 | 37 | 9  | 2 | 0 | 26 | 3 | 71  | 15 |
| 89,852 | 6 | 3 | 34 | 9  | 1 | 0 | 26 | 3 | 67  | 15 |
| 89,853 | 7 | 3 | 36 | 9  | 1 | 0 | 29 | 3 | 73  | 15 |
| 89,854 | 7 | 3 | 36 | 9  | 1 | 0 | 29 | 3 | 73  | 15 |
| 89,855 | 7 | 3 | 34 | 9  | 1 | 0 | 29 | 3 | 71  | 15 |
| 89,856 | 7 | 3 | 32 | 9  | 1 | 0 | 29 | 3 | 69  | 15 |
| 89,857 | 7 | 3 | 29 | 9  | 1 | 0 | 28 | 3 | 65  | 15 |
| 89,858 | 7 | 3 | 27 | 9  | 1 | 0 | 28 | 3 | 63  | 15 |
| 89,859 | 7 | 3 | 24 | 10 | 1 | 0 | 27 | 3 | 59  | 16 |
| 89,860 | 7 | 3 | 25 | 14 | 1 | 0 | 28 | 3 | 61  | 20 |



|        |   |   |    |    |   |   |    |    |    |    |
|--------|---|---|----|----|---|---|----|----|----|----|
| 89,861 | 7 | 3 | 25 | 16 | 1 | 0 | 28 | 5  | 61 | 24 |
| 89,862 | 7 | 3 | 24 | 17 | 1 | 0 | 25 | 5  | 57 | 25 |
| 89,863 | 7 | 4 | 17 | 18 | 1 | 0 | 17 | 6  | 42 | 28 |
| 89,864 | 7 | 4 | 16 | 18 | 1 | 0 | 17 | 7  | 41 | 29 |
| 89,865 | 7 | 4 | 17 | 18 | 1 | 0 | 18 | 7  | 43 | 29 |
| 89,866 | 7 | 4 | 17 | 18 | 1 | 0 | 18 | 7  | 43 | 29 |
| 89,867 | 7 | 4 | 17 | 19 | 1 | 0 | 18 | 7  | 43 | 30 |
| 89,868 | 7 | 4 | 17 | 19 | 1 | 0 | 18 | 7  | 43 | 30 |
| 89,869 | 7 | 4 | 17 | 19 | 1 | 0 | 18 | 7  | 43 | 30 |
| 89,870 | 7 | 4 | 17 | 18 | 1 | 0 | 19 | 6  | 44 | 28 |
| 89,871 | 6 | 4 | 17 | 18 | 1 | 1 | 18 | 6  | 42 | 29 |
| 89,872 | 6 | 4 | 17 | 18 | 1 | 1 | 18 | 6  | 42 | 29 |
| 89,873 | 6 | 4 | 17 | 18 | 1 | 1 | 18 | 6  | 42 | 29 |
| 89,874 | 6 | 4 | 18 | 18 | 1 | 1 | 18 | 6  | 43 | 29 |
| 89,875 | 6 | 4 | 18 | 19 | 1 | 1 | 18 | 6  | 43 | 30 |
| 89,876 | 6 | 4 | 27 | 19 | 1 | 1 | 28 | 8  | 62 | 32 |
| 89,877 | 6 | 4 | 27 | 19 | 1 | 1 | 28 | 8  | 62 | 32 |
| 89,878 | 6 | 4 | 27 | 19 | 1 | 1 | 28 | 8  | 62 | 32 |
| 89,879 | 6 | 4 | 26 | 19 | 1 | 1 | 27 | 8  | 60 | 32 |
| 89,880 | 6 | 4 | 26 | 17 | 1 | 2 | 27 | 8  | 60 | 31 |
| 89,881 | 6 | 4 | 26 | 17 | 1 | 2 | 27 | 8  | 60 | 31 |
| 89,882 | 6 | 3 | 25 | 17 | 2 | 2 | 27 | 8  | 60 | 30 |
| 89,883 | 6 | 3 | 24 | 17 | 2 | 2 | 27 | 8  | 59 | 30 |
| 89,884 | 6 | 3 | 24 | 16 | 2 | 2 | 26 | 8  | 58 | 29 |
| 89,885 | 6 | 3 | 25 | 17 | 2 | 2 | 26 | 8  | 59 | 30 |
| 89,886 | 6 | 2 | 25 | 18 | 2 | 2 | 26 | 7  | 59 | 29 |
| 89,887 | 6 | 2 | 25 | 14 | 2 | 2 | 26 | 6  | 59 | 24 |
| 89,888 | 6 | 2 | 26 | 14 | 2 | 2 | 26 | 6  | 60 | 24 |
| 89,889 | 5 | 2 | 26 | 14 | 2 | 2 | 26 | 6  | 59 | 24 |
| 89,890 | 4 | 2 | 26 | 16 | 2 | 2 | 26 | 6  | 58 | 26 |
| 89,891 | 3 | 2 | 28 | 16 | 2 | 2 | 27 | 6  | 60 | 26 |
| 89,892 | 3 | 2 | 29 | 16 | 2 | 2 | 27 | 6  | 61 | 26 |
| 89,893 | 3 | 2 | 29 | 16 | 2 | 2 | 26 | 6  | 60 | 26 |
| 89,894 | 3 | 2 | 29 | 16 | 2 | 2 | 26 | 6  | 60 | 26 |
| 89,895 | 3 | 2 | 31 | 17 | 2 | 2 | 27 | 6  | 63 | 27 |
| 89,896 | 4 | 2 | 33 | 21 | 2 | 2 | 28 | 6  | 67 | 31 |
| 89,897 | 4 | 2 | 36 | 26 | 2 | 2 | 28 | 11 | 70 | 41 |
| 89,898 | 4 | 6 | 35 | 44 | 2 | 2 | 31 | 16 | 72 | 68 |
| 89,899 | 4 | 8 | 36 | 49 | 2 | 3 | 31 | 18 | 73 | 78 |
| 89,900 | 3 | 8 | 33 | 63 | 2 | 3 | 28 | 20 | 66 | 94 |
| 89,901 | 2 | 8 | 32 | 63 | 2 | 3 | 28 | 20 | 64 | 94 |

|        |   |   |    |    |   |   |    |    |     |     |
|--------|---|---|----|----|---|---|----|----|-----|-----|
| 89,902 | 1 | 8 | 30 | 63 | 2 | 3 | 23 | 20 | 56  | 94  |
| 89,903 | 1 | 8 | 30 | 63 | 2 | 3 | 23 | 21 | 56  | 95  |
| 89,904 | 1 | 8 | 30 | 63 | 2 | 3 | 23 | 21 | 56  | 95  |
| 89,905 | 1 | 8 | 30 | 63 | 2 | 3 | 23 | 21 | 56  | 95  |
| 89,906 | 1 | 8 | 30 | 64 | 2 | 3 | 23 | 21 | 56  | 96  |
| 89,907 | 1 | 8 | 29 | 65 | 2 | 3 | 23 | 21 | 55  | 97  |
| 89,908 | 1 | 8 | 31 | 66 | 2 | 4 | 23 | 22 | 57  | 100 |
| 89,909 | 1 | 8 | 31 | 65 | 3 | 4 | 25 | 22 | 60  | 99  |
| 89,910 | 1 | 8 | 31 | 66 | 3 | 4 | 26 | 22 | 61  | 100 |
| 89,911 | 1 | 8 | 30 | 62 | 3 | 4 | 25 | 22 | 59  | 96  |
| 89,912 | 1 | 8 | 30 | 60 | 3 | 5 | 25 | 21 | 59  | 94  |
| 89,913 | 1 | 7 | 29 | 58 | 3 | 5 | 25 | 20 | 58  | 90  |
| 89,914 | 1 | 7 | 29 | 58 | 3 | 5 | 23 | 20 | 56  | 90  |
| 89,915 | 1 | 7 | 28 | 58 | 3 | 5 | 23 | 19 | 55  | 89  |
| 89,916 | 1 | 7 | 28 | 58 | 3 | 5 | 23 | 20 | 55  | 90  |
| 89,917 | 1 | 7 | 30 | 57 | 3 | 5 | 23 | 20 | 57  | 89  |
| 89,918 | 1 | 7 | 30 | 57 | 3 | 5 | 23 | 20 | 57  | 89  |
| 89,919 | 1 | 7 | 38 | 57 | 5 | 5 | 27 | 20 | 71  | 89  |
| 89,920 | 1 | 7 | 38 | 57 | 5 | 5 | 27 | 20 | 71  | 89  |
| 89,921 | 2 | 7 | 71 | 57 | 6 | 4 | 34 | 20 | 113 | 88  |
| 89,922 | 2 | 7 | 74 | 59 | 6 | 4 | 37 | 20 | 119 | 90  |
| 89,923 | 2 | 7 | 73 | 59 | 6 | 4 | 40 | 20 | 121 | 90  |
| 89,924 | 3 | 7 | 84 | 60 | 6 | 4 | 42 | 21 | 135 | 92  |
| 89,925 | 3 | 7 | 86 | 60 | 6 | 4 | 44 | 21 | 139 | 92  |
| 89,926 | 3 | 7 | 81 | 59 | 7 | 4 | 40 | 21 | 131 | 91  |
| 89,927 | 3 | 7 | 81 | 59 | 7 | 4 | 37 | 19 | 128 | 89  |
| 89,928 | 3 | 7 | 81 | 59 | 7 | 4 | 37 | 19 | 128 | 89  |
| 89,929 | 3 | 7 | 81 | 59 | 7 | 4 | 37 | 19 | 128 | 89  |
| 89,930 | 3 | 7 | 82 | 59 | 7 | 4 | 37 | 20 | 129 | 90  |
| 89,931 | 3 | 7 | 82 | 59 | 7 | 3 | 37 | 20 | 129 | 89  |
| 89,932 | 3 | 7 | 83 | 58 | 6 | 3 | 38 | 20 | 130 | 88  |
| 89,933 | 3 | 7 | 83 | 58 | 6 | 3 | 38 | 20 | 130 | 88  |
| 89,934 | 3 | 7 | 83 | 59 | 6 | 3 | 38 | 21 | 130 | 90  |
| 89,935 | 3 | 7 | 83 | 59 | 6 | 3 | 38 | 21 | 130 | 90  |
| 89,936 | 3 | 7 | 83 | 58 | 6 | 3 | 38 | 21 | 130 | 89  |
| 89,937 | 3 | 7 | 83 | 58 | 6 | 3 | 40 | 21 | 132 | 89  |
| 89,938 | 3 | 9 | 85 | 56 | 6 | 3 | 40 | 21 | 134 | 89  |
| 89,939 | 4 | 9 | 85 | 56 | 6 | 3 | 40 | 21 | 135 | 89  |
| 89,940 | 7 | 9 | 85 | 56 | 6 | 3 | 47 | 21 | 145 | 89  |
| 89,941 | 7 | 9 | 85 | 56 | 6 | 3 | 46 | 22 | 144 | 90  |
| 89,942 | 7 | 9 | 84 | 56 | 6 | 3 | 46 | 22 | 143 | 90  |

|        |    |   |     |    |   |   |    |    |     |    |
|--------|----|---|-----|----|---|---|----|----|-----|----|
| 89,943 | 7  | 9 | 84  | 57 | 6 | 3 | 46 | 22 | 143 | 91 |
| 89,944 | 7  | 9 | 88  | 57 | 6 | 3 | 45 | 22 | 146 | 91 |
| 89,945 | 8  | 9 | 97  | 59 | 7 | 3 | 51 | 22 | 163 | 93 |
| 89,946 | 7  | 9 | 102 | 58 | 6 | 3 | 57 | 22 | 172 | 92 |
| 89,947 | 9  | 8 | 125 | 49 | 6 | 3 | 76 | 17 | 216 | 77 |
| 89,948 | 10 | 8 | 131 | 49 | 6 | 3 | 79 | 17 | 226 | 77 |
| 89,949 | 10 | 4 | 133 | 31 | 6 | 3 | 81 | 12 | 230 | 50 |
| 89,950 | 10 | 2 | 132 | 26 | 6 | 2 | 81 | 10 | 229 | 40 |
| 89,951 | 10 | 2 | 132 | 12 | 6 | 2 | 81 | 8  | 229 | 24 |
| 89,952 | 11 | 2 | 133 | 14 | 6 | 2 | 81 | 9  | 231 | 27 |
| 89,953 | 11 | 2 | 133 | 14 | 6 | 2 | 81 | 8  | 231 | 26 |
| 89,954 | 11 | 2 | 133 | 14 | 6 | 2 | 81 | 8  | 231 | 26 |
| 89,955 | 11 | 2 | 133 | 15 | 6 | 2 | 82 | 8  | 232 | 27 |
| 89,956 | 11 | 2 | 133 | 15 | 6 | 2 | 82 | 8  | 232 | 27 |
| 89,957 | 11 | 2 | 133 | 14 | 6 | 2 | 82 | 8  | 232 | 26 |
| 89,958 | 11 | 2 | 132 | 13 | 6 | 2 | 82 | 8  | 231 | 25 |
| 89,959 | 11 | 2 | 131 | 13 | 6 | 1 | 82 | 7  | 230 | 23 |
| 89,960 | 11 | 3 | 131 | 13 | 5 | 1 | 80 | 7  | 227 | 24 |
| 89,961 | 11 | 3 | 131 | 12 | 5 | 1 | 79 | 7  | 226 | 23 |
| 89,962 | 11 | 3 | 131 | 12 | 5 | 0 | 79 | 6  | 226 | 21 |
| 89,963 | 11 | 3 | 133 | 12 | 5 | 0 | 80 | 6  | 229 | 21 |
| 89,964 | 13 | 3 | 148 | 12 | 5 | 0 | 87 | 6  | 253 | 21 |
| 89,965 | 13 | 3 | 148 | 12 | 5 | 0 | 87 | 6  | 253 | 21 |
| 89,966 | 13 | 3 | 148 | 12 | 5 | 0 | 87 | 6  | 253 | 21 |
| 89,967 | 13 | 3 | 148 | 13 | 5 | 0 | 87 | 5  | 253 | 21 |
| 89,968 | 13 | 3 | 148 | 13 | 5 | 0 | 88 | 6  | 254 | 22 |
| 89,969 | 14 | 3 | 150 | 21 | 5 | 0 | 89 | 7  | 258 | 31 |
| 89,970 | 14 | 3 | 142 | 26 | 3 | 0 | 85 | 11 | 244 | 40 |
| 89,971 | 13 | 3 | 111 | 27 | 2 | 0 | 81 | 11 | 207 | 41 |
| 89,972 | 13 | 3 | 109 | 28 | 2 | 0 | 78 | 11 | 202 | 42 |
| 89,973 | 13 | 3 | 107 | 26 | 2 | 0 | 75 | 12 | 197 | 41 |
| 89,974 | 13 | 3 | 108 | 26 | 2 | 1 | 72 | 14 | 195 | 44 |
| 89,975 | 13 | 3 | 100 | 25 | 2 | 1 | 70 | 13 | 185 | 42 |
| 89,976 | 13 | 3 | 98  | 25 | 2 | 1 | 68 | 13 | 181 | 42 |
| 89,977 | 13 | 3 | 94  | 25 | 1 | 1 | 65 | 13 | 173 | 42 |
| 89,978 | 13 | 3 | 94  | 25 | 1 | 1 | 65 | 13 | 173 | 42 |
| 89,979 | 14 | 3 | 99  | 25 | 1 | 1 | 66 | 13 | 180 | 42 |
| 89,980 | 14 | 3 | 108 | 27 | 1 | 1 | 72 | 13 | 195 | 44 |
| 89,981 | 14 | 3 | 109 | 27 | 1 | 1 | 72 | 12 | 196 | 43 |
| 89,982 | 14 | 3 | 116 | 27 | 1 | 1 | 74 | 12 | 205 | 43 |
| 89,983 | 14 | 3 | 118 | 27 | 1 | 1 | 74 | 12 | 207 | 43 |

|        |    |    |     |    |   |   |    |    |     |     |
|--------|----|----|-----|----|---|---|----|----|-----|-----|
| 89,984 | 14 | 3  | 118 | 26 | 1 | 2 | 74 | 11 | 207 | 42  |
| 89,985 | 14 | 3  | 136 | 26 | 1 | 2 | 82 | 11 | 233 | 42  |
| 89,986 | 14 | 3  | 148 | 25 | 1 | 2 | 85 | 11 | 248 | 41  |
| 89,987 | 14 | 3  | 179 | 26 | 1 | 2 | 89 | 11 | 283 | 42  |
| 89,988 | 14 | 3  | 179 | 26 | 1 | 2 | 87 | 11 | 281 | 42  |
| 89,989 | 14 | 1  | 177 | 26 | 1 | 2 | 87 | 11 | 279 | 40  |
| 89,990 | 13 | 1  | 176 | 27 | 1 | 2 | 87 | 11 | 277 | 41  |
| 89,991 | 10 | 1  | 174 | 27 | 1 | 2 | 80 | 11 | 265 | 41  |
| 89,992 | 10 | 1  | 173 | 30 | 1 | 3 | 80 | 14 | 264 | 48  |
| 89,993 | 10 | 1  | 173 | 31 | 1 | 3 | 80 | 15 | 264 | 50  |
| 89,994 | 10 | 3  | 172 | 43 | 1 | 3 | 80 | 23 | 263 | 72  |
| 89,995 | 10 | 6  | 168 | 50 | 1 | 5 | 79 | 26 | 258 | 87  |
| 89,996 | 9  | 7  | 159 | 56 | 0 | 5 | 73 | 29 | 241 | 97  |
| 89,997 | 9  | 7  | 152 | 58 | 0 | 6 | 66 | 29 | 227 | 100 |
| 89,998 | 7  | 7  | 126 | 59 | 0 | 6 | 47 | 32 | 180 | 104 |
| 89,999 | 6  | 7  | 120 | 59 | 0 | 6 | 41 | 32 | 167 | 104 |
| 90,000 | 7  | 7  | 118 | 60 | 0 | 6 | 40 | 32 | 165 | 105 |
| 90,001 | 7  | 7  | 118 | 62 | 0 | 6 | 40 | 32 | 165 | 107 |
| 90,002 | 6  | 7  | 117 | 62 | 0 | 6 | 40 | 32 | 163 | 107 |
| 90,003 | 6  | 7  | 117 | 62 | 0 | 6 | 40 | 31 | 163 | 106 |
| 90,004 | 6  | 7  | 117 | 63 | 0 | 6 | 40 | 32 | 163 | 108 |
| 90,005 | 6  | 7  | 117 | 64 | 0 | 6 | 39 | 32 | 162 | 109 |
| 90,006 | 6  | 8  | 117 | 63 | 0 | 6 | 39 | 32 | 162 | 109 |
| 90,007 | 6  | 8  | 117 | 63 | 0 | 6 | 39 | 32 | 162 | 109 |
| 90,008 | 6  | 8  | 117 | 63 | 0 | 6 | 39 | 32 | 162 | 109 |
| 90,009 | 6  | 8  | 117 | 64 | 0 | 6 | 39 | 32 | 162 | 110 |
| 90,010 | 6  | 8  | 117 | 63 | 0 | 6 | 38 | 32 | 161 | 109 |
| 90,011 | 6  | 7  | 117 | 64 | 0 | 6 | 38 | 32 | 161 | 109 |
| 90,012 | 6  | 7  | 117 | 64 | 0 | 6 | 38 | 32 | 161 | 109 |
| 90,013 | 6  | 7  | 117 | 64 | 0 | 6 | 38 | 33 | 161 | 110 |
| 90,014 | 6  | 11 | 115 | 68 | 0 | 6 | 37 | 35 | 158 | 120 |
| 90,015 | 4  | 11 | 100 | 68 | 0 | 6 | 30 | 38 | 134 | 123 |
| 90,016 | 4  | 11 | 100 | 69 | 0 | 6 | 30 | 38 | 134 | 124 |
| 90,017 | 4  | 11 | 100 | 69 | 0 | 6 | 30 | 38 | 134 | 124 |
| 90,018 | 4  | 11 | 100 | 72 | 0 | 6 | 29 | 41 | 133 | 130 |
| 90,019 | 4  | 11 | 98  | 73 | 0 | 6 | 29 | 40 | 131 | 130 |
| 90,020 | 3  | 16 | 96  | 80 | 0 | 7 | 28 | 50 | 127 | 153 |
| 90,021 | 3  | 16 | 96  | 76 | 0 | 7 | 28 | 46 | 127 | 145 |
| 90,022 | 3  | 16 | 96  | 76 | 2 | 7 | 27 | 46 | 128 | 145 |
| 90,023 | 3  | 16 | 97  | 75 | 2 | 7 | 27 | 46 | 129 | 144 |
| 90,024 | 3  | 16 | 97  | 76 | 2 | 6 | 27 | 44 | 129 | 142 |

|        |   |    |     |    |   |   |    |    |     |     |
|--------|---|----|-----|----|---|---|----|----|-----|-----|
| 90,025 | 3 | 17 | 96  | 76 | 2 | 6 | 27 | 45 | 128 | 144 |
| 90,026 | 2 | 17 | 92  | 78 | 2 | 6 | 28 | 45 | 124 | 146 |
| 90,027 | 2 | 17 | 99  | 78 | 2 | 6 | 31 | 45 | 134 | 146 |
| 90,028 | 3 | 17 | 102 | 78 | 2 | 6 | 36 | 45 | 143 | 146 |
| 90,029 | 3 | 17 | 99  | 78 | 2 | 6 | 35 | 45 | 139 | 146 |
| 90,030 | 3 | 17 | 98  | 79 | 2 | 6 | 35 | 45 | 138 | 147 |
| 90,031 | 3 | 17 | 89  | 77 | 2 | 6 | 29 | 45 | 123 | 145 |
| 90,032 | 3 | 17 | 87  | 77 | 2 | 6 | 29 | 46 | 121 | 146 |
| 90,033 | 3 | 17 | 79  | 78 | 2 | 6 | 28 | 47 | 112 | 148 |
| 90,034 | 3 | 17 | 77  | 78 | 2 | 6 | 28 | 49 | 110 | 150 |
| 90,035 | 3 | 17 | 78  | 78 | 2 | 5 | 29 | 49 | 112 | 149 |
| 90,036 | 3 | 17 | 60  | 78 | 2 | 5 | 21 | 49 | 86  | 149 |
| 90,037 | 3 | 17 | 47  | 79 | 2 | 5 | 18 | 49 | 70  | 150 |
| 90,038 | 3 | 17 | 16  | 78 | 2 | 5 | 14 | 49 | 35  | 149 |
| 90,039 | 3 | 17 | 16  | 78 | 2 | 5 | 14 | 49 | 35  | 149 |
| 90,040 | 3 | 19 | 16  | 78 | 2 | 5 | 15 | 49 | 36  | 151 |
| 90,041 | 3 | 19 | 16  | 77 | 2 | 5 | 15 | 49 | 36  | 150 |
| 90,042 | 3 | 19 | 16  | 74 | 2 | 4 | 15 | 45 | 36  | 142 |
| 90,043 | 3 | 19 | 18  | 72 | 2 | 4 | 15 | 44 | 38  | 139 |
| 90,044 | 3 | 19 | 18  | 74 | 2 | 4 | 15 | 44 | 38  | 141 |
| 90,045 | 3 | 17 | 18  | 62 | 2 | 4 | 15 | 36 | 38  | 119 |
| 90,046 | 3 | 14 | 18  | 55 | 2 | 2 | 15 | 33 | 38  | 104 |
| 90,047 | 3 | 13 | 16  | 47 | 2 | 2 | 14 | 30 | 35  | 92  |
| 90,048 | 3 | 14 | 16  | 45 | 2 | 1 | 14 | 30 | 35  | 90  |
| 90,049 | 2 | 14 | 20  | 44 | 2 | 1 | 13 | 27 | 37  | 86  |
| 90,050 | 2 | 14 | 20  | 44 | 2 | 1 | 13 | 28 | 37  | 87  |
| 90,051 | 2 | 14 | 20  | 43 | 2 | 1 | 13 | 28 | 37  | 86  |
| 90,052 | 2 | 14 | 24  | 44 | 2 | 1 | 14 | 28 | 42  | 87  |
| 90,053 | 2 | 14 | 24  | 45 | 2 | 1 | 14 | 28 | 42  | 88  |
| 90,054 | 2 | 14 | 24  | 43 | 2 | 1 | 14 | 28 | 42  | 86  |
| 90,055 | 3 | 14 | 25  | 42 | 2 | 1 | 14 | 27 | 44  | 84  |
| 90,056 | 4 | 14 | 26  | 46 | 2 | 1 | 18 | 28 | 50  | 89  |
| 90,057 | 4 | 13 | 26  | 47 | 2 | 1 | 18 | 28 | 50  | 89  |
| 90,058 | 8 | 14 | 41  | 53 | 2 | 1 | 21 | 28 | 72  | 96  |
| 90,059 | 9 | 14 | 41  | 53 | 2 | 1 | 21 | 29 | 73  | 97  |
| 90,060 | 9 | 14 | 41  | 52 | 2 | 1 | 21 | 29 | 73  | 96  |
| 90,061 | 9 | 14 | 41  | 52 | 2 | 1 | 21 | 29 | 73  | 96  |
| 90,062 | 9 | 14 | 41  | 54 | 2 | 1 | 23 | 31 | 75  | 100 |
| 90,063 | 9 | 14 | 42  | 54 | 2 | 1 | 23 | 31 | 76  | 100 |
| 90,064 | 9 | 14 | 42  | 54 | 2 | 1 | 23 | 30 | 76  | 99  |
| 90,065 | 9 | 10 | 42  | 51 | 2 | 1 | 23 | 28 | 76  | 90  |

|        |    |    |    |    |   |   |    |    |     |    |
|--------|----|----|----|----|---|---|----|----|-----|----|
| 90,066 | 9  | 10 | 42 | 54 | 2 | 1 | 23 | 26 | 76  | 91 |
| 90,067 | 9  | 10 | 46 | 58 | 2 | 1 | 23 | 27 | 80  | 96 |
| 90,068 | 9  | 10 | 46 | 58 | 2 | 1 | 23 | 27 | 80  | 96 |
| 90,069 | 10 | 10 | 50 | 54 | 2 | 1 | 26 | 24 | 88  | 89 |
| 90,070 | 10 | 10 | 50 | 54 | 2 | 3 | 26 | 24 | 88  | 91 |
| 90,071 | 10 | 5  | 50 | 38 | 0 | 2 | 25 | 13 | 85  | 58 |
| 90,072 | 10 | 5  | 50 | 38 | 0 | 2 | 25 | 15 | 85  | 60 |
| 90,073 | 10 | 5  | 50 | 37 | 0 | 2 | 25 | 15 | 85  | 59 |
| 90,074 | 11 | 5  | 51 | 39 | 0 | 2 | 28 | 16 | 90  | 62 |
| 90,075 | 11 | 4  | 51 | 38 | 0 | 2 | 28 | 15 | 90  | 59 |
| 90,076 | 11 | 4  | 52 | 39 | 0 | 2 | 25 | 15 | 88  | 60 |
| 90,077 | 19 | 4  | 68 | 37 | 0 | 2 | 34 | 15 | 121 | 58 |
| 90,078 | 19 | 4  | 65 | 37 | 0 | 2 | 28 | 15 | 112 | 58 |
| 90,079 | 19 | 4  | 67 | 37 | 0 | 2 | 30 | 15 | 116 | 58 |
| 90,080 | 19 | 4  | 67 | 37 | 0 | 2 | 30 | 15 | 116 | 58 |
| 90,081 | 19 | 4  | 70 | 36 | 0 | 2 | 36 | 15 | 125 | 57 |
| 90,082 | 19 | 4  | 78 | 36 | 0 | 2 | 39 | 15 | 136 | 57 |
| 90,083 | 20 | 4  | 88 | 36 | 0 | 2 | 45 | 14 | 153 | 56 |
| 90,084 | 20 | 4  | 91 | 37 | 0 | 2 | 44 | 14 | 155 | 57 |
| 90,085 | 20 | 4  | 91 | 38 | 0 | 2 | 44 | 13 | 155 | 57 |
| 90,086 | 20 | 4  | 90 | 38 | 0 | 2 | 43 | 13 | 153 | 57 |
| 90,087 | 20 | 4  | 94 | 38 | 0 | 2 | 47 | 13 | 161 | 57 |
| 90,088 | 20 | 4  | 94 | 38 | 0 | 2 | 47 | 14 | 161 | 58 |
| 90,089 | 20 | 4  | 94 | 38 | 0 | 2 | 47 | 14 | 161 | 58 |
| 90,090 | 20 | 4  | 94 | 38 | 0 | 2 | 47 | 14 | 161 | 58 |
| 90,091 | 20 | 2  | 94 | 38 | 0 | 2 | 47 | 14 | 161 | 56 |
| 90,092 | 20 | 2  | 94 | 38 | 0 | 2 | 47 | 14 | 161 | 56 |
| 90,093 | 20 | 2  | 94 | 39 | 0 | 2 | 48 | 14 | 162 | 57 |
| 90,094 | 20 | 2  | 92 | 42 | 0 | 2 | 48 | 15 | 160 | 61 |
| 90,095 | 20 | 2  | 92 | 42 | 0 | 2 | 48 | 15 | 160 | 61 |
| 90,096 | 20 | 3  | 93 | 45 | 0 | 2 | 49 | 18 | 162 | 68 |
| 90,097 | 20 | 3  | 93 | 46 | 0 | 2 | 49 | 18 | 162 | 69 |
| 90,098 | 20 | 3  | 93 | 46 | 0 | 2 | 49 | 18 | 162 | 69 |
| 90,099 | 20 | 2  | 89 | 46 | 0 | 2 | 51 | 20 | 160 | 70 |
| 90,100 | 20 | 2  | 89 | 46 | 0 | 2 | 51 | 19 | 160 | 69 |
| 90,101 | 20 | 2  | 90 | 43 | 0 | 2 | 51 | 19 | 161 | 66 |
| 90,102 | 21 | 2  | 89 | 46 | 0 | 2 | 51 | 19 | 161 | 69 |
| 90,103 | 21 | 2  | 86 | 53 | 0 | 2 | 50 | 27 | 157 | 84 |
| 90,104 | 21 | 3  | 86 | 55 | 0 | 2 | 50 | 29 | 157 | 89 |
| 90,105 | 21 | 3  | 87 | 56 | 0 | 2 | 50 | 29 | 158 | 90 |
| 90,106 | 20 | 3  | 86 | 56 | 0 | 2 | 50 | 30 | 156 | 91 |

|        |    |   |     |    |   |   |    |    |     |     |
|--------|----|---|-----|----|---|---|----|----|-----|-----|
| 90,107 | 19 | 3 | 85  | 51 | 0 | 2 | 46 | 29 | 150 | 85  |
| 90,108 | 15 | 3 | 72  | 50 | 0 | 2 | 43 | 29 | 130 | 84  |
| 90,109 | 15 | 3 | 76  | 54 | 0 | 2 | 45 | 38 | 136 | 97  |
| 90,110 | 14 | 3 | 76  | 54 | 0 | 2 | 45 | 37 | 135 | 96  |
| 90,111 | 14 | 3 | 76  | 67 | 0 | 2 | 46 | 40 | 136 | 112 |
| 90,112 | 14 | 3 | 84  | 68 | 0 | 2 | 47 | 41 | 145 | 114 |
| 90,113 | 14 | 3 | 85  | 67 | 0 | 2 | 45 | 39 | 144 | 111 |
| 90,114 | 14 | 3 | 84  | 68 | 0 | 2 | 45 | 39 | 143 | 112 |
| 90,115 | 14 | 3 | 84  | 69 | 0 | 2 | 45 | 39 | 143 | 113 |
| 90,116 | 14 | 3 | 85  | 68 | 0 | 2 | 45 | 39 | 144 | 112 |
| 90,117 | 15 | 3 | 88  | 65 | 1 | 2 | 49 | 38 | 153 | 108 |
| 90,118 | 15 | 3 | 105 | 59 | 6 | 2 | 79 | 37 | 205 | 101 |
| 90,119 | 16 | 3 | 113 | 59 | 6 | 2 | 89 | 37 | 224 | 101 |
| 90,120 | 15 | 3 | 110 | 59 | 6 | 0 | 86 | 37 | 217 | 99  |
| 90,121 | 15 | 3 | 116 | 59 | 6 | 0 | 86 | 37 | 223 | 99  |
| 90,122 | 15 | 3 | 126 | 59 | 6 | 0 | 95 | 35 | 242 | 97  |
| 90,123 | 15 | 3 | 138 | 59 | 6 | 0 | 96 | 35 | 255 | 97  |
| 90,124 | 15 | 3 | 136 | 57 | 6 | 0 | 94 | 33 | 251 | 93  |
| 90,125 | 15 | 3 | 136 | 59 | 6 | 0 | 95 | 33 | 252 | 95  |
| 90,126 | 15 | 3 | 137 | 58 | 6 | 0 | 97 | 33 | 255 | 94  |
| 90,127 | 15 | 3 | 136 | 58 | 6 | 0 | 97 | 33 | 254 | 94  |
| 90,128 | 6  | 3 | 113 | 58 | 6 | 0 | 86 | 34 | 211 | 95  |
| 90,129 | 6  | 3 | 113 | 58 | 6 | 0 | 86 | 34 | 211 | 95  |
| 90,130 | 5  | 3 | 110 | 58 | 6 | 0 | 84 | 34 | 205 | 95  |
| 90,131 | 5  | 3 | 107 | 58 | 6 | 0 | 78 | 34 | 196 | 95  |
| 90,132 | 5  | 3 | 99  | 60 | 6 | 0 | 75 | 35 | 185 | 98  |
| 90,133 | 4  | 3 | 90  | 60 | 6 | 0 | 70 | 35 | 170 | 98  |
| 90,134 | 6  | 3 | 100 | 60 | 6 | 0 | 73 | 34 | 185 | 97  |
| 90,135 | 6  | 3 | 98  | 59 | 6 | 0 | 75 | 34 | 185 | 96  |
| 90,136 | 6  | 3 | 98  | 58 | 6 | 0 | 75 | 33 | 185 | 94  |
| 90,137 | 7  | 3 | 100 | 58 | 6 | 0 | 77 | 33 | 190 | 94  |
| 90,138 | 8  | 4 | 101 | 57 | 6 | 0 | 78 | 32 | 193 | 93  |
| 90,139 | 8  | 4 | 101 | 57 | 6 | 0 | 78 | 32 | 193 | 93  |
| 90,140 | 8  | 4 | 102 | 57 | 6 | 0 | 79 | 32 | 195 | 93  |
| 90,141 | 8  | 4 | 102 | 57 | 6 | 0 | 79 | 32 | 195 | 93  |
| 90,142 | 8  | 4 | 103 | 56 | 6 | 0 | 79 | 32 | 196 | 92  |
| 90,143 | 8  | 4 | 103 | 57 | 6 | 0 | 79 | 32 | 196 | 93  |
| 90,144 | 8  | 4 | 103 | 57 | 6 | 0 | 79 | 32 | 196 | 93  |
| 90,145 | 8  | 4 | 104 | 54 | 6 | 0 | 79 | 31 | 197 | 89  |
| 90,146 | 8  | 4 | 105 | 52 | 6 | 0 | 79 | 32 | 198 | 88  |
| 90,147 | 8  | 3 | 105 | 52 | 6 | 0 | 79 | 29 | 198 | 84  |

|        |    |   |     |    |   |   |    |    |     |     |
|--------|----|---|-----|----|---|---|----|----|-----|-----|
| 90,148 | 8  | 3 | 107 | 52 | 6 | 0 | 79 | 31 | 200 | 86  |
| 90,149 | 8  | 3 | 107 | 52 | 6 | 0 | 79 | 31 | 200 | 86  |
| 90,150 | 8  | 3 | 107 | 52 | 6 | 0 | 77 | 29 | 198 | 84  |
| 90,151 | 8  | 4 | 107 | 62 | 6 | 0 | 77 | 31 | 198 | 97  |
| 90,152 | 8  | 4 | 106 | 63 | 6 | 0 | 77 | 32 | 197 | 99  |
| 90,153 | 7  | 5 | 107 | 60 | 6 | 0 | 77 | 32 | 197 | 97  |
| 90,154 | 7  | 4 | 107 | 50 | 6 | 0 | 77 | 22 | 197 | 76  |
| 90,155 | 7  | 4 | 106 | 50 | 6 | 0 | 77 | 23 | 196 | 77  |
| 90,156 | 8  | 5 | 112 | 62 | 6 | 0 | 77 | 25 | 203 | 92  |
| 90,157 | 9  | 5 | 118 | 63 | 7 | 0 | 81 | 24 | 215 | 92  |
| 90,158 | 9  | 6 | 118 | 65 | 7 | 0 | 81 | 24 | 215 | 95  |
| 90,159 | 11 | 6 | 117 | 65 | 7 | 0 | 81 | 24 | 216 | 95  |
| 90,160 | 14 | 5 | 124 | 55 | 8 | 0 | 87 | 15 | 233 | 75  |
| 90,161 | 14 | 5 | 132 | 40 | 8 | 0 | 87 | 11 | 241 | 56  |
| 90,162 | 16 | 5 | 134 | 40 | 8 | 0 | 87 | 11 | 245 | 56  |
| 90,163 | 16 | 5 | 126 | 40 | 8 | 0 | 86 | 11 | 236 | 56  |
| 90,164 | 16 | 5 | 161 | 39 | 9 | 0 | 92 | 12 | 278 | 56  |
| 90,165 | 16 | 5 | 161 | 37 | 9 | 0 | 93 | 13 | 279 | 55  |
| 90,166 | 16 | 5 | 161 | 45 | 9 | 0 | 93 | 14 | 279 | 64  |
| 90,167 | 15 | 5 | 158 | 49 | 8 | 0 | 89 | 15 | 270 | 69  |
| 90,168 | 16 | 5 | 149 | 52 | 6 | 0 | 73 | 16 | 244 | 73  |
| 90,169 | 16 | 5 | 139 | 53 | 3 | 0 | 59 | 16 | 217 | 74  |
| 90,170 | 15 | 5 | 131 | 57 | 3 | 0 | 49 | 16 | 198 | 78  |
| 90,171 | 15 | 5 | 130 | 59 | 3 | 0 | 49 | 16 | 197 | 80  |
| 90,172 | 15 | 6 | 124 | 74 | 3 | 1 | 49 | 16 | 191 | 97  |
| 90,173 | 15 | 6 | 114 | 75 | 3 | 1 | 40 | 16 | 172 | 98  |
| 90,174 | 15 | 6 | 102 | 75 | 3 | 1 | 38 | 16 | 158 | 98  |
| 90,175 | 14 | 6 | 103 | 73 | 3 | 1 | 38 | 15 | 158 | 95  |
| 90,176 | 14 | 6 | 103 | 73 | 3 | 1 | 37 | 15 | 157 | 95  |
| 90,177 | 16 | 6 | 109 | 75 | 4 | 1 | 42 | 15 | 171 | 97  |
| 90,178 | 16 | 6 | 109 | 75 | 4 | 1 | 42 | 15 | 171 | 97  |
| 90,179 | 16 | 6 | 110 | 75 | 4 | 1 | 42 | 15 | 172 | 97  |
| 90,180 | 16 | 6 | 111 | 75 | 4 | 1 | 42 | 15 | 173 | 97  |
| 90,181 | 16 | 6 | 131 | 75 | 4 | 1 | 50 | 15 | 201 | 97  |
| 90,182 | 17 | 6 | 156 | 73 | 4 | 1 | 62 | 14 | 239 | 94  |
| 90,183 | 17 | 6 | 156 | 72 | 4 | 1 | 65 | 14 | 242 | 93  |
| 90,184 | 17 | 6 | 156 | 72 | 5 | 1 | 68 | 15 | 246 | 94  |
| 90,185 | 15 | 6 | 156 | 72 | 6 | 1 | 69 | 15 | 246 | 94  |
| 90,186 | 15 | 6 | 159 | 73 | 6 | 1 | 68 | 15 | 248 | 95  |
| 90,187 | 15 | 6 | 158 | 82 | 6 | 1 | 68 | 17 | 247 | 106 |
| 90,188 | 14 | 7 | 156 | 84 | 6 | 1 | 62 | 17 | 238 | 109 |



|        |    |   |     |    |    |   |     |    |     |     |
|--------|----|---|-----|----|----|---|-----|----|-----|-----|
| 90,189 | 15 | 6 | 171 | 85 | 7  | 1 | 76  | 19 | 269 | 111 |
| 90,190 | 15 | 6 | 170 | 85 | 7  | 1 | 75  | 19 | 267 | 111 |
| 90,191 | 15 | 6 | 170 | 86 | 7  | 1 | 75  | 19 | 267 | 112 |
| 90,192 | 15 | 6 | 170 | 86 | 7  | 1 | 75  | 19 | 267 | 112 |
| 90,193 | 15 | 6 | 179 | 87 | 7  | 1 | 84  | 19 | 285 | 113 |
| 90,194 | 15 | 6 | 179 | 86 | 7  | 1 | 84  | 19 | 285 | 112 |
| 90,195 | 15 | 6 | 178 | 86 | 7  | 1 | 85  | 19 | 285 | 112 |
| 90,196 | 15 | 6 | 178 | 83 | 8  | 1 | 85  | 18 | 286 | 108 |
| 90,197 | 15 | 6 | 179 | 83 | 8  | 1 | 85  | 18 | 287 | 108 |
| 90,198 | 15 | 6 | 179 | 83 | 8  | 1 | 84  | 18 | 286 | 108 |
| 90,199 | 15 | 6 | 178 | 82 | 8  | 1 | 85  | 16 | 286 | 105 |
| 90,200 | 15 | 6 | 178 | 82 | 8  | 1 | 85  | 16 | 286 | 105 |
| 90,201 | 15 | 6 | 178 | 82 | 8  | 1 | 85  | 16 | 286 | 105 |
| 90,202 | 15 | 5 | 180 | 72 | 8  | 1 | 85  | 14 | 288 | 92  |
| 90,203 | 15 | 5 | 180 | 71 | 8  | 1 | 85  | 13 | 288 | 90  |
| 90,204 | 15 | 4 | 179 | 71 | 8  | 1 | 85  | 13 | 287 | 89  |
| 90,205 | 20 | 4 | 215 | 71 | 11 | 1 | 117 | 12 | 363 | 88  |
| 90,206 | 20 | 4 | 215 | 71 | 11 | 1 | 117 | 12 | 363 | 88  |
| 90,207 | 19 | 3 | 209 | 59 | 11 | 1 | 118 | 11 | 357 | 74  |
| 90,208 | 18 | 3 | 203 | 59 | 10 | 1 | 114 | 11 | 345 | 74  |
| 90,209 | 18 | 2 | 203 | 58 | 10 | 1 | 114 | 12 | 345 | 73  |
| 90,210 | 16 | 2 | 203 | 58 | 10 | 1 | 114 | 13 | 343 | 74  |
| 90,211 | 13 | 2 | 191 | 58 | 9  | 1 | 106 | 13 | 319 | 74  |
| 90,212 | 13 | 2 | 183 | 58 | 9  | 1 | 105 | 13 | 310 | 74  |
| 90,213 | 11 | 2 | 181 | 58 | 9  | 1 | 105 | 13 | 306 | 74  |
| 90,214 | 11 | 2 | 150 | 58 | 8  | 1 | 103 | 12 | 272 | 73  |
| 90,215 | 11 | 2 | 145 | 58 | 8  | 1 | 99  | 11 | 263 | 72  |
| 90,216 | 11 | 2 | 146 | 58 | 8  | 1 | 98  | 11 | 263 | 72  |
| 90,217 | 11 | 2 | 145 | 46 | 8  | 1 | 98  | 9  | 262 | 58  |
| 90,218 | 11 | 2 | 146 | 43 | 8  | 1 | 98  | 8  | 263 | 54  |
| 90,219 | 10 | 2 | 146 | 42 | 8  | 1 | 98  | 8  | 262 | 53  |
| 90,220 | 10 | 2 | 145 | 38 | 8  | 1 | 98  | 8  | 261 | 49  |
| 90,221 | 10 | 2 | 152 | 36 | 8  | 1 | 99  | 8  | 269 | 47  |
| 90,222 | 10 | 2 | 152 | 36 | 8  | 1 | 99  | 8  | 269 | 47  |
| 90,223 | 10 | 1 | 152 | 21 | 8  | 1 | 99  | 8  | 269 | 31  |
| 90,224 | 10 | 1 | 154 | 20 | 8  | 1 | 99  | 8  | 271 | 30  |
| 90,225 | 10 | 1 | 157 | 20 | 8  | 1 | 100 | 8  | 275 | 30  |
| 90,226 | 10 | 1 | 159 | 18 | 8  | 1 | 100 | 8  | 277 | 28  |
| 90,227 | 10 | 1 | 160 | 18 | 8  | 1 | 100 | 8  | 278 | 28  |
| 90,228 | 10 | 1 | 176 | 18 | 7  | 1 | 107 | 8  | 300 | 28  |
| 90,229 | 13 | 1 | 190 | 19 | 7  | 1 | 110 | 8  | 320 | 29  |

|        |    |   |     |    |    |   |     |    |     |    |
|--------|----|---|-----|----|----|---|-----|----|-----|----|
| 90,230 | 14 | 2 | 203 | 19 | 7  | 1 | 113 | 8  | 337 | 30 |
| 90,231 | 14 | 2 | 198 | 19 | 10 | 1 | 116 | 9  | 338 | 31 |
| 90,232 | 14 | 2 | 215 | 19 | 10 | 1 | 130 | 9  | 369 | 31 |
| 90,233 | 13 | 2 | 197 | 19 | 10 | 1 | 121 | 10 | 341 | 32 |
| 90,234 | 13 | 2 | 196 | 19 | 10 | 2 | 118 | 10 | 337 | 33 |
| 90,235 | 14 | 2 | 202 | 19 | 9  | 2 | 121 | 9  | 346 | 32 |
| 90,236 | 14 | 2 | 198 | 20 | 8  | 2 | 116 | 9  | 336 | 33 |
| 90,237 | 14 | 1 | 194 | 8  | 8  | 2 | 115 | 9  | 331 | 20 |
| 90,238 | 14 | 1 | 194 | 9  | 8  | 2 | 116 | 9  | 332 | 21 |
| 90,239 | 14 | 1 | 193 | 9  | 8  | 2 | 116 | 9  | 331 | 21 |
| 90,240 | 12 | 1 | 176 | 8  | 7  | 2 | 101 | 7  | 296 | 18 |
| 90,241 | 12 | 1 | 174 | 7  | 7  | 2 | 99  | 7  | 292 | 17 |
| 90,242 | 12 | 1 | 173 | 7  | 7  | 2 | 96  | 7  | 288 | 17 |
| 90,243 | 13 | 1 | 178 | 6  | 8  | 2 | 96  | 7  | 295 | 16 |
| 90,244 | 13 | 1 | 178 | 6  | 8  | 2 | 96  | 7  | 295 | 16 |
| 90,245 | 13 | 1 | 178 | 6  | 8  | 2 | 95  | 7  | 294 | 16 |
| 90,246 | 14 | 1 | 180 | 6  | 8  | 2 | 100 | 7  | 302 | 16 |
| 90,247 | 14 | 1 | 183 | 6  | 7  | 2 | 104 | 7  | 308 | 16 |
| 90,248 | 15 | 1 | 188 | 6  | 7  | 2 | 106 | 7  | 316 | 16 |
| 90,249 | 15 | 1 | 187 | 6  | 7  | 2 | 106 | 7  | 315 | 16 |
| 90,250 | 15 | 2 | 195 | 7  | 7  | 2 | 107 | 8  | 324 | 19 |
| 90,251 | 15 | 2 | 195 | 10 | 7  | 2 | 107 | 8  | 324 | 22 |
| 90,252 | 18 | 2 | 207 | 12 | 7  | 2 | 108 | 10 | 340 | 26 |
| 90,253 | 18 | 2 | 207 | 19 | 7  | 3 | 113 | 11 | 345 | 35 |
| 90,254 | 17 | 2 | 205 | 19 | 7  | 3 | 110 | 11 | 339 | 35 |
| 90,255 | 13 | 2 | 175 | 19 | 4  | 3 | 85  | 11 | 277 | 35 |
| 90,256 | 13 | 2 | 175 | 19 | 4  | 3 | 82  | 11 | 274 | 35 |
| 90,257 | 13 | 2 | 176 | 20 | 4  | 3 | 81  | 11 | 274 | 36 |
| 90,258 | 13 | 2 | 176 | 18 | 4  | 3 | 81  | 10 | 274 | 33 |
| 90,259 | 13 | 2 | 176 | 18 | 4  | 3 | 81  | 10 | 274 | 33 |
| 90,260 | 13 | 2 | 178 | 17 | 4  | 3 | 84  | 9  | 279 | 31 |
| 90,261 | 13 | 2 | 178 | 17 | 4  | 3 | 84  | 8  | 279 | 30 |
| 90,262 | 13 | 2 | 179 | 17 | 4  | 3 | 84  | 8  | 280 | 30 |
| 90,263 | 13 | 2 | 179 | 18 | 4  | 3 | 84  | 8  | 280 | 31 |
| 90,264 | 13 | 2 | 179 | 18 | 4  | 3 | 84  | 8  | 280 | 31 |
| 90,265 | 13 | 2 | 179 | 18 | 4  | 3 | 84  | 8  | 280 | 31 |
| 90,266 | 13 | 2 | 179 | 18 | 4  | 3 | 84  | 8  | 280 | 31 |
| 90,267 | 14 | 2 | 182 | 18 | 4  | 3 | 86  | 8  | 286 | 31 |
| 90,268 | 14 | 3 | 182 | 18 | 4  | 3 | 86  | 8  | 286 | 32 |
| 90,269 | 14 | 3 | 181 | 18 | 4  | 3 | 86  | 8  | 285 | 32 |
| 90,270 | 14 | 3 | 181 | 18 | 4  | 3 | 86  | 8  | 285 | 32 |

|        |    |    |     |     |   |   |    |    |     |     |
|--------|----|----|-----|-----|---|---|----|----|-----|-----|
| 90,271 | 14 | 3  | 181 | 18  | 4 | 3 | 86 | 8  | 285 | 32  |
| 90,272 | 14 | 3  | 174 | 18  | 4 | 3 | 85 | 8  | 277 | 32  |
| 90,273 | 14 | 3  | 174 | 18  | 4 | 3 | 86 | 8  | 278 | 32  |
| 90,274 | 14 | 3  | 173 | 18  | 4 | 2 | 86 | 8  | 277 | 31  |
| 90,275 | 14 | 3  | 172 | 20  | 4 | 2 | 86 | 8  | 276 | 33  |
| 90,276 | 14 | 3  | 169 | 21  | 4 | 2 | 85 | 9  | 272 | 35  |
| 90,277 | 14 | 3  | 166 | 40  | 4 | 2 | 85 | 21 | 269 | 66  |
| 90,278 | 14 | 3  | 165 | 50  | 4 | 2 | 85 | 25 | 268 | 80  |
| 90,279 | 12 | 4  | 141 | 51  | 4 | 3 | 71 | 27 | 228 | 85  |
| 90,280 | 9  | 6  | 126 | 59  | 4 | 3 | 68 | 44 | 207 | 112 |
| 90,281 | 8  | 8  | 112 | 68  | 4 | 6 | 65 | 47 | 189 | 129 |
| 90,282 | 8  | 8  | 104 | 69  | 1 | 8 | 55 | 48 | 168 | 133 |
| 90,283 | 8  | 8  | 80  | 70  | 1 | 8 | 40 | 47 | 129 | 133 |
| 90,284 | 8  | 8  | 73  | 70  | 1 | 8 | 37 | 47 | 119 | 133 |
| 90,285 | 7  | 8  | 63  | 70  | 1 | 7 | 31 | 47 | 102 | 132 |
| 90,286 | 7  | 8  | 61  | 71  | 1 | 7 | 31 | 45 | 100 | 131 |
| 90,287 | 8  | 8  | 61  | 70  | 1 | 7 | 31 | 45 | 101 | 130 |
| 90,288 | 8  | 8  | 61  | 70  | 1 | 7 | 31 | 45 | 101 | 130 |
| 90,289 | 8  | 8  | 61  | 70  | 1 | 7 | 31 | 46 | 101 | 131 |
| 90,290 | 8  | 8  | 62  | 70  | 1 | 7 | 31 | 46 | 102 | 131 |
| 90,291 | 8  | 8  | 61  | 72  | 1 | 7 | 31 | 46 | 101 | 133 |
| 90,292 | 8  | 9  | 60  | 82  | 1 | 7 | 31 | 48 | 100 | 146 |
| 90,293 | 8  | 9  | 58  | 83  | 1 | 7 | 28 | 49 | 95  | 148 |
| 90,294 | 7  | 9  | 56  | 83  | 0 | 7 | 28 | 51 | 91  | 150 |
| 90,295 | 8  | 11 | 74  | 88  | 0 | 7 | 39 | 52 | 121 | 158 |
| 90,296 | 7  | 11 | 81  | 96  | 0 | 7 | 43 | 54 | 131 | 168 |
| 90,297 | 7  | 12 | 81  | 99  | 0 | 7 | 42 | 55 | 130 | 173 |
| 90,298 | 7  | 12 | 77  | 101 | 0 | 7 | 38 | 57 | 122 | 177 |
| 90,299 | 6  | 12 | 72  | 104 | 0 | 7 | 38 | 59 | 116 | 182 |
| 90,300 | 6  | 12 | 72  | 106 | 0 | 7 | 38 | 59 | 116 | 184 |
| 90,301 | 6  | 11 | 63  | 107 | 0 | 8 | 36 | 58 | 105 | 184 |
| 90,302 | 6  | 12 | 51  | 97  | 0 | 8 | 35 | 56 | 92  | 173 |
| 90,303 | 3  | 13 | 51  | 99  | 0 | 8 | 35 | 56 | 89  | 176 |
| 90,304 | 3  | 13 | 49  | 98  | 0 | 8 | 30 | 56 | 82  | 175 |
| 90,305 | 3  | 13 | 46  | 99  | 0 | 8 | 31 | 57 | 80  | 177 |
| 90,306 | 3  | 13 | 46  | 99  | 0 | 8 | 32 | 57 | 81  | 177 |
| 90,307 | 3  | 13 | 47  | 98  | 0 | 8 | 32 | 57 | 82  | 176 |
| 90,308 | 3  | 13 | 47  | 98  | 0 | 8 | 32 | 57 | 82  | 176 |
| 90,309 | 3  | 13 | 48  | 98  | 0 | 8 | 32 | 57 | 83  | 176 |
| 90,310 | 3  | 13 | 46  | 98  | 0 | 8 | 30 | 57 | 79  | 176 |
| 90,311 | 3  | 13 | 46  | 98  | 0 | 8 | 29 | 57 | 78  | 176 |

|        |   |    |    |     |   |   |    |    |     |     |
|--------|---|----|----|-----|---|---|----|----|-----|-----|
| 90,312 | 3 | 13 | 46 | 98  | 0 | 8 | 29 | 57 | 78  | 176 |
| 90,313 | 3 | 13 | 46 | 98  | 0 | 8 | 29 | 58 | 78  | 177 |
| 90,314 | 3 | 15 | 46 | 97  | 0 | 8 | 29 | 61 | 78  | 181 |
| 90,315 | 3 | 15 | 46 | 97  | 0 | 8 | 29 | 61 | 78  | 181 |
| 90,316 | 3 | 15 | 46 | 99  | 0 | 9 | 31 | 63 | 80  | 186 |
| 90,317 | 3 | 15 | 45 | 103 | 0 | 9 | 31 | 63 | 79  | 190 |
| 90,318 | 2 | 14 | 42 | 104 | 0 | 9 | 27 | 66 | 71  | 193 |
| 90,319 | 2 | 14 | 42 | 104 | 0 | 9 | 27 | 66 | 71  | 193 |
| 90,320 | 2 | 14 | 41 | 104 | 0 | 9 | 27 | 66 | 70  | 193 |
| 90,321 | 2 | 14 | 41 | 104 | 0 | 9 | 27 | 66 | 70  | 193 |
| 90,322 | 2 | 14 | 43 | 104 | 0 | 9 | 28 | 66 | 73  | 193 |
| 90,323 | 3 | 14 | 49 | 104 | 1 | 9 | 33 | 66 | 86  | 193 |
| 90,324 | 3 | 14 | 60 | 104 | 2 | 9 | 44 | 66 | 109 | 193 |
| 90,325 | 3 | 14 | 61 | 104 | 2 | 9 | 46 | 66 | 112 | 193 |
| 90,326 | 4 | 14 | 62 | 102 | 2 | 9 | 51 | 66 | 119 | 191 |
| 90,327 | 4 | 14 | 62 | 82  | 2 | 9 | 51 | 53 | 119 | 158 |
| 90,328 | 4 | 14 | 63 | 73  | 2 | 9 | 51 | 49 | 120 | 145 |
| 90,329 | 4 | 16 | 63 | 73  | 2 | 9 | 51 | 49 | 120 | 147 |
| 90,330 | 4 | 13 | 64 | 62  | 2 | 8 | 52 | 30 | 122 | 113 |
| 90,331 | 4 | 13 | 64 | 62  | 2 | 8 | 52 | 30 | 122 | 113 |
| 90,332 | 4 | 10 | 64 | 54  | 2 | 5 | 55 | 28 | 125 | 97  |
| 90,333 | 4 | 10 | 64 | 53  | 2 | 3 | 54 | 26 | 124 | 92  |
| 90,334 | 4 | 10 | 64 | 52  | 2 | 3 | 55 | 26 | 125 | 91  |
| 90,335 | 4 | 10 | 64 | 52  | 2 | 3 | 55 | 26 | 125 | 91  |
| 90,336 | 4 | 10 | 65 | 52  | 2 | 3 | 57 | 26 | 128 | 91  |
| 90,337 | 4 | 10 | 76 | 52  | 2 | 3 | 61 | 26 | 143 | 91  |
| 90,338 | 3 | 10 | 86 | 53  | 2 | 3 | 66 | 27 | 157 | 93  |
| 90,339 | 3 | 10 | 88 | 53  | 2 | 3 | 66 | 28 | 159 | 94  |
| 90,340 | 3 | 10 | 88 | 53  | 2 | 3 | 66 | 28 | 159 | 94  |
| 90,341 | 3 | 11 | 88 | 63  | 2 | 4 | 69 | 33 | 162 | 111 |
| 90,342 | 4 | 11 | 88 | 64  | 2 | 4 | 69 | 34 | 163 | 113 |
| 90,343 | 5 | 10 | 87 | 54  | 2 | 4 | 69 | 32 | 163 | 100 |
| 90,344 | 5 | 10 | 85 | 54  | 2 | 4 | 70 | 32 | 162 | 100 |
| 90,345 | 9 | 10 | 88 | 54  | 2 | 4 | 73 | 30 | 172 | 98  |
| 90,346 | 8 | 8  | 71 | 49  | 2 | 4 | 62 | 29 | 143 | 90  |
| 90,347 | 8 | 8  | 63 | 41  | 2 | 4 | 54 | 27 | 127 | 80  |
| 90,348 | 8 | 7  | 64 | 36  | 2 | 4 | 55 | 24 | 129 | 71  |
| 90,349 | 8 | 7  | 64 | 36  | 2 | 4 | 55 | 24 | 129 | 71  |
| 90,350 | 8 | 7  | 69 | 31  | 2 | 4 | 59 | 22 | 138 | 64  |
| 90,351 | 8 | 7  | 69 | 31  | 2 | 4 | 59 | 23 | 138 | 65  |
| 90,352 | 8 | 7  | 69 | 29  | 2 | 3 | 59 | 23 | 138 | 62  |

|        |    |   |     |    |    |   |     |    |     |    |
|--------|----|---|-----|----|----|---|-----|----|-----|----|
| 90,353 | 9  | 6 | 96  | 27 | 2  | 2 | 66  | 22 | 173 | 57 |
| 90,354 | 14 | 5 | 118 | 25 | 5  | 2 | 89  | 22 | 226 | 54 |
| 90,355 | 18 | 5 | 233 | 25 | 11 | 2 | 170 | 22 | 432 | 54 |
| 90,356 | 18 | 5 | 244 | 26 | 12 | 2 | 182 | 21 | 456 | 54 |
| 90,357 | 18 | 6 | 243 | 26 | 12 | 2 | 181 | 21 | 454 | 55 |
| 90,358 | 18 | 6 | 242 | 27 | 12 | 2 | 181 | 21 | 453 | 56 |
| 90,359 | 18 | 6 | 241 | 27 | 12 | 2 | 181 | 21 | 452 | 56 |
| 90,360 | 19 | 6 | 242 | 27 | 12 | 2 | 181 | 21 | 454 | 56 |
| 90,361 | 19 | 7 | 242 | 28 | 12 | 2 | 183 | 27 | 456 | 64 |
| 90,362 | 19 | 7 | 242 | 31 | 12 | 2 | 184 | 28 | 457 | 68 |
| 90,363 | 19 | 9 | 244 | 33 | 12 | 2 | 188 | 32 | 463 | 76 |
| 90,364 | 20 | 9 | 251 | 33 | 13 | 2 | 189 | 31 | 473 | 75 |
| 90,365 | 20 | 7 | 253 | 32 | 13 | 1 | 189 | 26 | 475 | 66 |
| 90,366 | 20 | 7 | 253 | 32 | 13 | 1 | 188 | 26 | 474 | 66 |
| 90,367 | 20 | 7 | 254 | 32 | 13 | 1 | 187 | 26 | 474 | 66 |
| 90,368 | 20 | 7 | 255 | 30 | 13 | 1 | 187 | 28 | 475 | 66 |
| 90,369 | 20 | 7 | 255 | 31 | 13 | 1 | 187 | 28 | 475 | 67 |
| 90,370 | 20 | 7 | 279 | 31 | 15 | 1 | 203 | 28 | 517 | 67 |
| 90,371 | 21 | 8 | 293 | 31 | 15 | 1 | 208 | 29 | 537 | 69 |
| 90,372 | 25 | 8 | 304 | 32 | 16 | 1 | 220 | 29 | 565 | 70 |
| 90,373 | 26 | 8 | 319 | 32 | 15 | 1 | 225 | 29 | 585 | 70 |
| 90,374 | 26 | 8 | 311 | 32 | 14 | 1 | 215 | 29 | 566 | 70 |
| 90,375 | 26 | 8 | 333 | 32 | 17 | 1 | 236 | 29 | 612 | 70 |
| 90,376 | 26 | 8 | 335 | 34 | 17 | 1 | 239 | 29 | 617 | 72 |
| 90,377 | 25 | 8 | 334 | 34 | 17 | 1 | 236 | 30 | 612 | 73 |
| 90,378 | 25 | 8 | 337 | 34 | 17 | 1 | 238 | 29 | 617 | 72 |
| 90,379 | 25 | 6 | 337 | 34 | 19 | 1 | 239 | 30 | 620 | 71 |
| 90,380 | 25 | 6 | 343 | 34 | 19 | 1 | 241 | 30 | 628 | 71 |
| 90,381 | 25 | 6 | 344 | 34 | 21 | 1 | 241 | 30 | 631 | 71 |
| 90,382 | 25 | 6 | 344 | 34 | 21 | 1 | 239 | 30 | 629 | 71 |
| 90,383 | 25 | 6 | 344 | 33 | 21 | 1 | 241 | 29 | 631 | 69 |
| 90,384 | 26 | 6 | 354 | 33 | 21 | 1 | 244 | 29 | 645 | 69 |
| 90,385 | 27 | 6 | 356 | 33 | 21 | 1 | 245 | 29 | 649 | 69 |
| 90,386 | 27 | 6 | 355 | 33 | 21 | 1 | 243 | 29 | 646 | 69 |
| 90,387 | 27 | 6 | 345 | 32 | 21 | 1 | 239 | 29 | 632 | 68 |
| 90,388 | 27 | 6 | 339 | 31 | 22 | 1 | 238 | 28 | 626 | 66 |
| 90,389 | 27 | 6 | 337 | 30 | 22 | 1 | 236 | 26 | 622 | 63 |
| 90,390 | 27 | 6 | 337 | 30 | 22 | 1 | 236 | 26 | 622 | 63 |
| 90,391 | 27 | 5 | 340 | 19 | 22 | 0 | 235 | 21 | 624 | 45 |
| 90,392 | 27 | 5 | 342 | 16 | 23 | 0 | 238 | 20 | 630 | 41 |
| 90,393 | 26 | 5 | 342 | 17 | 23 | 0 | 238 | 20 | 629 | 42 |

|        |    |   |     |    |    |   |     |    |     |    |
|--------|----|---|-----|----|----|---|-----|----|-----|----|
| 90,394 | 25 | 5 | 342 | 16 | 23 | 0 | 238 | 19 | 628 | 40 |
| 90,395 | 25 | 5 | 342 | 16 | 23 | 0 | 238 | 19 | 628 | 40 |
| 90,396 | 21 | 5 | 338 | 17 | 23 | 0 | 236 | 19 | 618 | 41 |
| 90,397 | 21 | 5 | 342 | 17 | 23 | 0 | 237 | 19 | 623 | 41 |
| 90,398 | 21 | 5 | 343 | 17 | 23 | 0 | 236 | 19 | 623 | 41 |
| 90,399 | 21 | 5 | 341 | 17 | 23 | 0 | 235 | 19 | 620 | 41 |
| 90,400 | 24 | 5 | 362 | 17 | 25 | 0 | 243 | 19 | 654 | 41 |
| 90,401 | 24 | 5 | 362 | 28 | 25 | 0 | 241 | 24 | 652 | 57 |
| 90,402 | 24 | 5 | 363 | 31 | 26 | 0 | 244 | 23 | 657 | 59 |
| 90,403 | 28 | 5 | 400 | 32 | 27 | 0 | 292 | 24 | 747 | 61 |
| 90,404 | 28 | 5 | 383 | 33 | 27 | 0 | 289 | 24 | 727 | 62 |
| 90,405 | 23 | 5 | 362 | 33 | 24 | 0 | 267 | 24 | 676 | 62 |
| 90,406 | 19 | 5 | 247 | 33 | 18 | 0 | 185 | 25 | 469 | 63 |
| 90,407 | 19 | 5 | 236 | 33 | 17 | 0 | 171 | 25 | 443 | 63 |
| 90,408 | 19 | 4 | 236 | 34 | 17 | 0 | 171 | 25 | 443 | 63 |
| 90,409 | 19 | 4 | 236 | 33 | 17 | 0 | 171 | 25 | 443 | 62 |
| 90,410 | 19 | 4 | 238 | 33 | 17 | 0 | 175 | 26 | 449 | 63 |
| 90,411 | 18 | 3 | 237 | 33 | 17 | 0 | 175 | 21 | 447 | 57 |
| 90,412 | 18 | 3 | 237 | 33 | 17 | 0 | 175 | 21 | 447 | 57 |
| 90,413 | 18 | 3 | 234 | 30 | 17 | 0 | 170 | 19 | 439 | 52 |
| 90,414 | 18 | 1 | 234 | 27 | 17 | 0 | 170 | 15 | 439 | 43 |
| 90,415 | 17 | 1 | 227 | 27 | 16 | 0 | 169 | 16 | 429 | 44 |
| 90,416 | 17 | 1 | 226 | 26 | 16 | 0 | 170 | 16 | 429 | 43 |
| 90,417 | 17 | 1 | 226 | 26 | 16 | 0 | 170 | 16 | 429 | 43 |
| 90,418 | 16 | 1 | 212 | 26 | 15 | 0 | 161 | 16 | 404 | 43 |
| 90,419 | 16 | 1 | 207 | 25 | 14 | 0 | 155 | 14 | 392 | 40 |
| 90,420 | 16 | 2 | 202 | 24 | 14 | 0 | 154 | 11 | 386 | 37 |
| 90,421 | 16 | 2 | 200 | 25 | 14 | 0 | 154 | 11 | 384 | 38 |
| 90,422 | 15 | 1 | 187 | 26 | 14 | 1 | 149 | 10 | 365 | 38 |
| 90,423 | 12 | 1 | 174 | 25 | 13 | 1 | 136 | 10 | 335 | 37 |
| 90,424 | 10 | 1 | 153 | 25 | 13 | 1 | 126 | 10 | 302 | 37 |
| 90,425 | 10 | 1 | 151 | 25 | 13 | 1 | 125 | 10 | 299 | 37 |
| 90,426 | 10 | 1 | 128 | 23 | 10 | 1 | 101 | 10 | 249 | 35 |
| 90,427 | 11 | 1 | 125 | 23 | 10 | 1 | 98  | 10 | 244 | 35 |
| 90,428 | 11 | 1 | 138 | 23 | 10 | 1 | 96  | 9  | 255 | 34 |
| 90,429 | 11 | 1 | 136 | 23 | 10 | 1 | 94  | 9  | 251 | 34 |
| 90,430 | 11 | 1 | 141 | 23 | 8  | 1 | 94  | 9  | 254 | 34 |
| 90,431 | 13 | 1 | 146 | 23 | 9  | 1 | 110 | 9  | 278 | 34 |
| 90,432 | 13 | 1 | 145 | 23 | 7  | 1 | 112 | 9  | 277 | 34 |
| 90,433 | 13 | 1 | 148 | 23 | 7  | 1 | 110 | 9  | 278 | 34 |
| 90,434 | 13 | 1 | 148 | 23 | 7  | 1 | 109 | 9  | 277 | 34 |

|        |    |   |     |    |   |   |     |   |     |    |
|--------|----|---|-----|----|---|---|-----|---|-----|----|
| 90,435 | 12 | 1 | 139 | 23 | 7 | 1 | 109 | 9 | 267 | 34 |
| 90,436 | 11 | 1 | 137 | 23 | 7 | 1 | 108 | 9 | 263 | 34 |
| 90,437 | 11 | 1 | 140 | 23 | 7 | 1 | 108 | 9 | 266 | 34 |
| 90,438 | 11 | 1 | 140 | 23 | 7 | 1 | 108 | 9 | 266 | 34 |
| 90,439 | 11 | 1 | 142 | 23 | 6 | 1 | 108 | 9 | 267 | 34 |
| 90,440 | 11 | 1 | 141 | 23 | 6 | 1 | 107 | 9 | 265 | 34 |
| 90,441 | 15 | 1 | 152 | 23 | 6 | 1 | 115 | 9 | 288 | 34 |
| 90,442 | 15 | 1 | 148 | 23 | 6 | 1 | 113 | 9 | 282 | 34 |
| 90,443 | 15 | 1 | 148 | 23 | 5 | 1 | 112 | 9 | 280 | 34 |
| 90,444 | 15 | 1 | 149 | 23 | 5 | 1 | 112 | 9 | 281 | 34 |
| 90,445 | 15 | 1 | 149 | 23 | 5 | 1 | 112 | 9 | 281 | 34 |
| 90,446 | 15 | 1 | 152 | 22 | 5 | 1 | 115 | 9 | 287 | 33 |
| 90,447 | 15 | 1 | 150 | 22 | 5 | 1 | 113 | 9 | 283 | 33 |
| 90,448 | 15 | 1 | 146 | 22 | 5 | 1 | 112 | 9 | 278 | 33 |
| 90,449 | 15 | 1 | 146 | 22 | 5 | 1 | 111 | 9 | 277 | 33 |
| 90,450 | 12 | 1 | 131 | 22 | 4 | 1 | 104 | 9 | 251 | 33 |
| 90,451 | 12 | 1 | 120 | 11 | 3 | 1 | 101 | 4 | 236 | 17 |
| 90,452 | 12 | 1 | 119 | 6  | 3 | 1 | 101 | 3 | 235 | 11 |
| 90,453 | 12 | 1 | 115 | 6  | 2 | 1 | 98  | 3 | 227 | 11 |
| 90,454 | 8  | 1 | 73  | 6  | 1 | 1 | 50  | 3 | 132 | 11 |
| 90,455 | 7  | 1 | 72  | 7  | 1 | 1 | 46  | 3 | 126 | 12 |
| 90,456 | 7  | 1 | 73  | 5  | 1 | 1 | 44  | 2 | 125 | 9  |
| 90,457 | 7  | 1 | 73  | 5  | 1 | 1 | 43  | 2 | 124 | 9  |
| 90,458 | 7  | 1 | 73  | 5  | 1 | 1 | 46  | 2 | 127 | 9  |
| 90,459 | 7  | 1 | 72  | 5  | 1 | 1 | 46  | 2 | 126 | 9  |
| 90,460 | 7  | 1 | 75  | 5  | 1 | 1 | 47  | 1 | 130 | 8  |
| 90,461 | 7  | 1 | 75  | 5  | 1 | 1 | 48  | 1 | 131 | 8  |
| 90,462 | 7  | 1 | 75  | 5  | 1 | 1 | 48  | 1 | 131 | 8  |
| 90,463 | 7  | 1 | 78  | 5  | 1 | 1 | 49  | 1 | 135 | 8  |
| 90,464 | 7  | 1 | 78  | 5  | 1 | 1 | 49  | 1 | 135 | 8  |
| 90,465 | 7  | 1 | 78  | 5  | 1 | 1 | 49  | 1 | 135 | 8  |
| 90,466 | 7  | 1 | 78  | 5  | 1 | 1 | 49  | 0 | 135 | 7  |
| 90,467 | 7  | 1 | 77  | 6  | 1 | 1 | 48  | 1 | 133 | 9  |
| 90,468 | 7  | 1 | 77  | 6  | 1 | 1 | 48  | 1 | 133 | 9  |
| 90,469 | 7  | 1 | 78  | 6  | 1 | 1 | 48  | 1 | 134 | 9  |
| 90,470 | 7  | 1 | 79  | 6  | 1 | 1 | 48  | 1 | 135 | 9  |
| 90,471 | 8  | 1 | 79  | 6  | 1 | 1 | 48  | 1 | 136 | 9  |
| 90,472 | 8  | 1 | 79  | 5  | 1 | 1 | 48  | 1 | 136 | 8  |
| 90,473 | 8  | 1 | 79  | 4  | 1 | 0 | 48  | 1 | 136 | 6  |
| 90,474 | 8  | 1 | 79  | 4  | 1 | 0 | 48  | 1 | 136 | 6  |
| 90,475 | 8  | 1 | 78  | 4  | 1 | 0 | 48  | 1 | 135 | 6  |

|        |    |    |     |    |    |   |    |    |     |    |
|--------|----|----|-----|----|----|---|----|----|-----|----|
| 90,476 | 8  | 1  | 78  | 4  | 1  | 0 | 47 | 1  | 134 | 6  |
| 90,477 | 8  | 1  | 78  | 4  | 1  | 0 | 47 | 1  | 134 | 6  |
| 90,478 | 7  | 1  | 80  | 4  | 1  | 0 | 47 | 1  | 135 | 6  |
| 90,479 | 7  | 1  | 70  | 4  | 1  | 0 | 47 | 1  | 125 | 6  |
| 90,480 | 7  | 1  | 66  | 4  | 2  | 0 | 46 | 1  | 121 | 6  |
| 90,481 | 7  | 1  | 65  | 4  | 2  | 0 | 46 | 1  | 120 | 6  |
| 90,482 | 6  | 1  | 58  | 4  | 1  | 0 | 28 | 1  | 93  | 6  |
| 90,483 | 6  | 1  | 58  | 4  | 1  | 0 | 26 | 1  | 91  | 6  |
| 90,484 | 6  | 1  | 55  | 4  | 1  | 0 | 26 | 1  | 88  | 6  |
| 90,485 | 6  | 1  | 56  | 4  | 1  | 0 | 26 | 1  | 89  | 6  |
| 90,486 | 6  | 1  | 55  | 4  | 1  | 0 | 23 | 1  | 85  | 6  |
| 90,487 | 6  | 1  | 52  | 6  | 1  | 0 | 23 | 1  | 82  | 8  |
| 90,488 | 6  | 1  | 53  | 10 | 1  | 0 | 23 | 4  | 83  | 15 |
| 90,489 | 6  | 1  | 52  | 10 | 1  | 0 | 23 | 4  | 82  | 15 |
| 90,490 | 6  | 1  | 54  | 11 | 1  | 0 | 28 | 5  | 89  | 17 |
| 90,491 | 7  | 2  | 65  | 12 | 2  | 0 | 36 | 6  | 110 | 20 |
| 90,492 | 3  | 2  | 52  | 13 | 2  | 0 | 28 | 8  | 85  | 23 |
| 90,493 | 3  | 2  | 50  | 14 | 2  | 0 | 26 | 9  | 81  | 25 |
| 90,494 | 8  | 2  | 95  | 23 | 6  | 0 | 59 | 9  | 168 | 34 |
| 90,495 | 8  | 6  | 94  | 23 | 6  | 0 | 59 | 10 | 167 | 39 |
| 90,496 | 8  | 6  | 92  | 23 | 6  | 0 | 58 | 10 | 164 | 39 |
| 90,497 | 8  | 6  | 92  | 23 | 7  | 0 | 56 | 10 | 163 | 39 |
| 90,498 | 8  | 6  | 92  | 24 | 7  | 0 | 56 | 10 | 163 | 40 |
| 90,499 | 8  | 6  | 91  | 24 | 7  | 0 | 56 | 10 | 162 | 40 |
| 90,500 | 8  | 6  | 92  | 24 | 7  | 0 | 59 | 10 | 166 | 40 |
| 90,501 | 8  | 6  | 92  | 24 | 7  | 0 | 59 | 10 | 166 | 40 |
| 90,502 | 8  | 6  | 92  | 24 | 7  | 0 | 59 | 10 | 166 | 40 |
| 90,503 | 9  | 8  | 92  | 26 | 7  | 0 | 59 | 11 | 167 | 45 |
| 90,504 | 9  | 8  | 91  | 26 | 7  | 0 | 59 | 11 | 166 | 45 |
| 90,505 | 9  | 8  | 92  | 26 | 7  | 0 | 59 | 11 | 167 | 45 |
| 90,506 | 9  | 8  | 106 | 25 | 8  | 0 | 60 | 11 | 183 | 44 |
| 90,507 | 9  | 8  | 112 | 25 | 11 | 0 | 64 | 11 | 196 | 44 |
| 90,508 | 9  | 9  | 112 | 26 | 11 | 0 | 64 | 17 | 196 | 52 |
| 90,509 | 9  | 9  | 111 | 29 | 11 | 0 | 60 | 17 | 191 | 55 |
| 90,510 | 10 | 10 | 128 | 30 | 11 | 0 | 60 | 17 | 209 | 57 |
| 90,511 | 10 | 10 | 129 | 30 | 11 | 0 | 57 | 17 | 207 | 57 |
| 90,512 | 10 | 11 | 128 | 30 | 11 | 0 | 56 | 17 | 205 | 58 |
| 90,513 | 10 | 11 | 127 | 30 | 11 | 0 | 56 | 17 | 204 | 58 |
| 90,514 | 10 | 11 | 133 | 30 | 11 | 0 | 56 | 17 | 210 | 58 |
| 90,515 | 10 | 11 | 133 | 30 | 11 | 0 | 56 | 17 | 210 | 58 |
| 90,516 | 10 | 11 | 146 | 30 | 11 | 0 | 59 | 17 | 226 | 58 |



|        |    |    |     |    |    |   |     |    |     |     |
|--------|----|----|-----|----|----|---|-----|----|-----|-----|
| 90,517 | 10 | 11 | 150 | 30 | 11 | 0 | 59  | 17 | 230 | 58  |
| 90,518 | 10 | 11 | 150 | 32 | 11 | 0 | 60  | 18 | 231 | 61  |
| 90,519 | 10 | 11 | 148 | 32 | 11 | 0 | 60  | 18 | 229 | 61  |
| 90,520 | 21 | 11 | 212 | 31 | 16 | 0 | 122 | 18 | 371 | 60  |
| 90,521 | 21 | 11 | 212 | 31 | 16 | 0 | 122 | 18 | 371 | 60  |
| 90,522 | 21 | 10 | 216 | 30 | 16 | 0 | 124 | 18 | 377 | 58  |
| 90,523 | 22 | 10 | 238 | 30 | 16 | 0 | 134 | 18 | 410 | 58  |
| 90,524 | 22 | 10 | 238 | 30 | 16 | 0 | 134 | 18 | 410 | 58  |
| 90,525 | 23 | 10 | 240 | 31 | 16 | 0 | 135 | 18 | 414 | 59  |
| 90,526 | 24 | 10 | 251 | 32 | 16 | 0 | 137 | 18 | 428 | 60  |
| 90,527 | 24 | 10 | 251 | 33 | 16 | 0 | 137 | 20 | 428 | 63  |
| 90,528 | 24 | 10 | 252 | 33 | 16 | 0 | 140 | 20 | 432 | 63  |
| 90,529 | 24 | 10 | 250 | 34 | 16 | 0 | 140 | 20 | 430 | 64  |
| 90,530 | 24 | 10 | 248 | 40 | 16 | 0 | 142 | 24 | 430 | 74  |
| 90,531 | 24 | 10 | 250 | 45 | 15 | 0 | 142 | 25 | 431 | 80  |
| 90,532 | 24 | 12 | 249 | 47 | 15 | 0 | 142 | 27 | 430 | 86  |
| 90,533 | 23 | 12 | 245 | 47 | 15 | 0 | 142 | 29 | 425 | 88  |
| 90,534 | 23 | 12 | 246 | 47 | 15 | 0 | 148 | 29 | 432 | 88  |
| 90,535 | 23 | 12 | 246 | 47 | 15 | 0 | 148 | 29 | 432 | 88  |
| 90,536 | 23 | 12 | 245 | 47 | 15 | 0 | 148 | 29 | 431 | 88  |
| 90,537 | 23 | 12 | 245 | 47 | 15 | 0 | 148 | 29 | 431 | 88  |
| 90,538 | 23 | 13 | 245 | 45 | 15 | 0 | 148 | 29 | 431 | 87  |
| 90,539 | 23 | 13 | 247 | 42 | 15 | 0 | 148 | 27 | 433 | 82  |
| 90,540 | 23 | 13 | 250 | 46 | 15 | 0 | 151 | 29 | 439 | 88  |
| 90,541 | 23 | 13 | 251 | 46 | 16 | 0 | 146 | 28 | 436 | 87  |
| 90,542 | 22 | 12 | 241 | 46 | 15 | 1 | 138 | 29 | 416 | 88  |
| 90,543 | 19 | 13 | 203 | 46 | 12 | 1 | 108 | 29 | 342 | 89  |
| 90,544 | 19 | 13 | 203 | 47 | 11 | 1 | 107 | 28 | 340 | 89  |
| 90,545 | 17 | 9  | 196 | 41 | 11 | 1 | 105 | 29 | 329 | 80  |
| 90,546 | 17 | 9  | 195 | 41 | 11 | 1 | 104 | 29 | 327 | 80  |
| 90,547 | 17 | 9  | 195 | 45 | 10 | 2 | 104 | 31 | 326 | 87  |
| 90,548 | 17 | 9  | 194 | 47 | 10 | 2 | 104 | 31 | 325 | 89  |
| 90,549 | 17 | 9  | 195 | 47 | 10 | 2 | 103 | 31 | 325 | 89  |
| 90,550 | 17 | 9  | 195 | 49 | 10 | 2 | 103 | 33 | 325 | 93  |
| 90,551 | 17 | 9  | 194 | 49 | 10 | 2 | 102 | 33 | 323 | 93  |
| 90,552 | 17 | 9  | 194 | 52 | 10 | 2 | 105 | 35 | 326 | 98  |
| 90,553 | 17 | 9  | 194 | 54 | 10 | 2 | 105 | 38 | 326 | 103 |
| 90,554 | 16 | 7  | 194 | 52 | 10 | 2 | 105 | 37 | 325 | 98  |
| 90,555 | 16 | 7  | 193 | 52 | 10 | 2 | 105 | 38 | 324 | 99  |
| 90,556 | 16 | 7  | 179 | 52 | 9  | 2 | 104 | 39 | 308 | 100 |
| 90,557 | 16 | 7  | 175 | 54 | 9  | 2 | 103 | 41 | 303 | 104 |

|        |    |   |     |    |   |   |     |    |     |     |
|--------|----|---|-----|----|---|---|-----|----|-----|-----|
| 90,558 | 16 | 7 | 171 | 57 | 6 | 2 | 101 | 42 | 294 | 108 |
| 90,559 | 16 | 6 | 167 | 56 | 6 | 2 | 101 | 36 | 290 | 100 |
| 90,560 | 16 | 6 | 167 | 54 | 6 | 2 | 101 | 36 | 290 | 98  |
| 90,561 | 15 | 5 | 152 | 53 | 6 | 2 | 101 | 36 | 274 | 96  |
| 90,562 | 15 | 5 | 150 | 53 | 6 | 2 | 101 | 36 | 272 | 96  |
| 90,563 | 15 | 4 | 150 | 53 | 6 | 2 | 101 | 36 | 272 | 95  |
| 90,564 | 15 | 4 | 148 | 53 | 6 | 2 | 100 | 36 | 269 | 95  |
| 90,565 | 16 | 4 | 143 | 53 | 6 | 2 | 101 | 36 | 266 | 95  |
| 90,566 | 16 | 4 | 130 | 53 | 6 | 2 | 98  | 36 | 250 | 95  |
| 90,567 | 16 | 4 | 130 | 53 | 6 | 3 | 98  | 34 | 250 | 94  |
| 90,568 | 16 | 6 | 126 | 61 | 6 | 3 | 98  | 36 | 246 | 106 |
| 90,569 | 7  | 6 | 79  | 62 | 1 | 3 | 40  | 37 | 127 | 108 |
| 90,570 | 6  | 6 | 63  | 75 | 1 | 3 | 35  | 41 | 105 | 125 |
| 90,571 | 5  | 6 | 62  | 78 | 1 | 3 | 35  | 41 | 103 | 128 |
| 90,572 | 5  | 6 | 62  | 85 | 1 | 5 | 35  | 41 | 103 | 137 |
| 90,573 | 4  | 6 | 58  | 85 | 1 | 5 | 34  | 41 | 97  | 137 |
| 90,574 | 3  | 7 | 36  | 87 | 1 | 5 | 24  | 41 | 64  | 140 |
| 90,575 | 2  | 7 | 34  | 87 | 1 | 5 | 24  | 41 | 61  | 140 |
| 90,576 | 2  | 7 | 34  | 87 | 1 | 5 | 23  | 41 | 60  | 140 |
| 90,577 | 1  | 7 | 23  | 85 | 1 | 5 | 21  | 39 | 46  | 136 |
| 90,578 | 1  | 7 | 24  | 88 | 1 | 5 | 21  | 40 | 47  | 140 |
| 90,579 | 1  | 7 | 23  | 88 | 1 | 5 | 18  | 40 | 43  | 140 |
| 90,580 | 2  | 7 | 22  | 91 | 1 | 5 | 19  | 42 | 44  | 145 |
| 90,581 | 2  | 6 | 25  | 80 | 1 | 5 | 20  | 39 | 48  | 130 |
| 90,582 | 2  | 6 | 27  | 80 | 1 | 5 | 20  | 39 | 50  | 130 |
| 90,583 | 2  | 5 | 29  | 78 | 1 | 5 | 21  | 38 | 53  | 126 |
| 90,584 | 2  | 5 | 27  | 78 | 1 | 5 | 16  | 36 | 46  | 124 |
| 90,585 | 2  | 5 | 28  | 78 | 1 | 5 | 16  | 36 | 47  | 124 |
| 90,586 | 2  | 5 | 28  | 79 | 1 | 5 | 17  | 36 | 48  | 125 |
| 90,587 | 2  | 5 | 35  | 80 | 1 | 5 | 18  | 36 | 56  | 126 |
| 90,588 | 2  | 5 | 34  | 80 | 1 | 5 | 18  | 36 | 55  | 126 |
| 90,589 | 2  | 4 | 35  | 81 | 1 | 5 | 19  | 36 | 57  | 126 |
| 90,590 | 4  | 5 | 33  | 77 | 1 | 5 | 19  | 33 | 57  | 120 |
| 90,591 | 4  | 5 | 30  | 78 | 1 | 5 | 16  | 36 | 51  | 124 |
| 90,592 | 4  | 5 | 24  | 77 | 0 | 5 | 16  | 36 | 44  | 123 |
| 90,593 | 4  | 4 | 24  | 76 | 0 | 4 | 16  | 32 | 44  | 116 |
| 90,594 | 4  | 5 | 24  | 77 | 0 | 4 | 16  | 32 | 44  | 118 |
| 90,595 | 4  | 5 | 24  | 75 | 0 | 4 | 16  | 34 | 44  | 118 |
| 90,596 | 4  | 8 | 25  | 72 | 0 | 4 | 16  | 32 | 45  | 116 |
| 90,597 | 4  | 8 | 24  | 72 | 0 | 4 | 16  | 32 | 44  | 116 |
| 90,598 | 4  | 8 | 24  | 67 | 0 | 3 | 17  | 30 | 45  | 108 |

|        |    |    |     |    |   |   |    |    |     |     |
|--------|----|----|-----|----|---|---|----|----|-----|-----|
| 90,599 | 4  | 8  | 24  | 65 | 0 | 3 | 18 | 30 | 46  | 106 |
| 90,600 | 4  | 8  | 23  | 64 | 0 | 3 | 17 | 29 | 44  | 104 |
| 90,601 | 4  | 8  | 33  | 65 | 1 | 3 | 18 | 30 | 56  | 106 |
| 90,602 | 4  | 8  | 35  | 65 | 1 | 3 | 16 | 30 | 56  | 106 |
| 90,603 | 4  | 8  | 35  | 60 | 1 | 3 | 16 | 25 | 56  | 96  |
| 90,604 | 4  | 8  | 35  | 60 | 1 | 3 | 16 | 25 | 56  | 96  |
| 90,605 | 4  | 9  | 35  | 60 | 1 | 3 | 16 | 25 | 56  | 97  |
| 90,606 | 4  | 9  | 35  | 60 | 1 | 3 | 16 | 24 | 56  | 96  |
| 90,607 | 4  | 9  | 40  | 60 | 1 | 3 | 18 | 23 | 63  | 95  |
| 90,608 | 4  | 9  | 40  | 58 | 1 | 3 | 18 | 21 | 63  | 91  |
| 90,609 | 4  | 9  | 40  | 55 | 1 | 3 | 18 | 20 | 63  | 87  |
| 90,610 | 7  | 9  | 55  | 54 | 1 | 3 | 23 | 20 | 86  | 86  |
| 90,611 | 9  | 9  | 73  | 54 | 1 | 3 | 31 | 20 | 114 | 86  |
| 90,612 | 10 | 9  | 87  | 54 | 3 | 3 | 34 | 20 | 134 | 86  |
| 90,613 | 10 | 9  | 87  | 55 | 3 | 3 | 34 | 20 | 134 | 87  |
| 90,614 | 12 | 9  | 96  | 55 | 3 | 3 | 37 | 20 | 148 | 87  |
| 90,615 | 12 | 10 | 96  | 60 | 3 | 3 | 37 | 26 | 148 | 99  |
| 90,616 | 12 | 10 | 96  | 60 | 3 | 3 | 37 | 26 | 148 | 99  |
| 90,617 | 12 | 10 | 100 | 60 | 3 | 3 | 39 | 26 | 154 | 99  |
| 90,618 | 12 | 8  | 101 | 49 | 3 | 2 | 39 | 24 | 155 | 83  |
| 90,619 | 12 | 8  | 101 | 49 | 3 | 2 | 39 | 25 | 155 | 84  |
| 90,620 | 12 | 8  | 100 | 35 | 3 | 2 | 39 | 20 | 154 | 65  |
| 90,621 | 12 | 8  | 100 | 32 | 3 | 2 | 39 | 20 | 154 | 62  |
| 90,622 | 12 | 8  | 100 | 32 | 3 | 2 | 39 | 20 | 154 | 62  |
| 90,623 | 12 | 8  | 100 | 25 | 3 | 0 | 39 | 18 | 154 | 51  |
| 90,624 | 12 | 7  | 100 | 23 | 3 | 0 | 39 | 18 | 154 | 48  |
| 90,625 | 12 | 7  | 100 | 23 | 3 | 0 | 39 | 18 | 154 | 48  |
| 90,626 | 12 | 7  | 100 | 22 | 3 | 0 | 39 | 18 | 154 | 47  |
| 90,627 | 12 | 7  | 100 | 22 | 3 | 0 | 39 | 18 | 154 | 47  |
| 90,628 | 12 | 7  | 100 | 22 | 3 | 0 | 39 | 18 | 154 | 47  |
| 90,629 | 12 | 7  | 100 | 19 | 3 | 0 | 39 | 17 | 154 | 43  |
| 90,630 | 12 | 7  | 100 | 18 | 3 | 0 | 39 | 17 | 154 | 42  |
| 90,631 | 11 | 7  | 100 | 15 | 3 | 0 | 37 | 15 | 151 | 37  |
| 90,632 | 11 | 7  | 97  | 15 | 3 | 0 | 35 | 14 | 146 | 36  |
| 90,633 | 11 | 7  | 93  | 16 | 3 | 0 | 35 | 16 | 142 | 39  |
| 90,634 | 11 | 7  | 91  | 16 | 3 | 0 | 33 | 16 | 138 | 39  |
| 90,635 | 11 | 7  | 91  | 21 | 3 | 0 | 33 | 21 | 138 | 49  |
| 90,636 | 11 | 7  | 91  | 21 | 3 | 0 | 32 | 22 | 137 | 50  |
| 90,637 | 11 | 7  | 86  | 19 | 3 | 0 | 32 | 22 | 132 | 48  |
| 90,638 | 11 | 7  | 84  | 19 | 3 | 0 | 31 | 22 | 129 | 48  |
| 90,639 | 11 | 7  | 85  | 19 | 3 | 0 | 30 | 22 | 129 | 48  |

|        |    |    |     |    |   |   |    |    |     |    |
|--------|----|----|-----|----|---|---|----|----|-----|----|
| 90,640 | 11 | 6  | 84  | 18 | 3 | 0 | 30 | 26 | 128 | 50 |
| 90,641 | 9  | 6  | 84  | 19 | 3 | 0 | 30 | 26 | 126 | 51 |
| 90,642 | 9  | 6  | 83  | 18 | 3 | 0 | 30 | 23 | 125 | 47 |
| 90,643 | 10 | 6  | 83  | 19 | 3 | 0 | 30 | 23 | 126 | 48 |
| 90,644 | 10 | 5  | 83  | 18 | 3 | 0 | 30 | 23 | 126 | 46 |
| 90,645 | 10 | 5  | 83  | 19 | 3 | 0 | 30 | 21 | 126 | 45 |
| 90,646 | 10 | 2  | 82  | 19 | 3 | 0 | 31 | 21 | 126 | 42 |
| 90,647 | 10 | 2  | 82  | 19 | 3 | 0 | 31 | 21 | 126 | 42 |
| 90,648 | 10 | 2  | 82  | 19 | 3 | 0 | 30 | 21 | 125 | 42 |
| 90,649 | 10 | 2  | 85  | 19 | 3 | 0 | 30 | 21 | 128 | 42 |
| 90,650 | 18 | 2  | 167 | 18 | 3 | 0 | 42 | 20 | 230 | 40 |
| 90,651 | 18 | 2  | 167 | 18 | 3 | 0 | 42 | 20 | 230 | 40 |
| 90,652 | 18 | 2  | 157 | 17 | 2 | 0 | 40 | 19 | 217 | 38 |
| 90,653 | 25 | 2  | 188 | 17 | 6 | 0 | 48 | 19 | 267 | 38 |
| 90,654 | 26 | 2  | 189 | 17 | 6 | 0 | 51 | 19 | 272 | 38 |
| 90,655 | 30 | 2  | 207 | 17 | 6 | 0 | 57 | 19 | 300 | 38 |
| 90,656 | 31 | 2  | 219 | 17 | 8 | 0 | 62 | 19 | 320 | 38 |
| 90,657 | 31 | 3  | 239 | 17 | 8 | 0 | 67 | 19 | 345 | 39 |
| 90,658 | 31 | 4  | 239 | 17 | 8 | 0 | 67 | 21 | 345 | 42 |
| 90,659 | 29 | 9  | 246 | 20 | 8 | 0 | 67 | 25 | 350 | 54 |
| 90,660 | 30 | 9  | 252 | 21 | 8 | 0 | 70 | 30 | 360 | 60 |
| 90,661 | 29 | 10 | 244 | 32 | 8 | 1 | 69 | 33 | 350 | 76 |
| 90,662 | 27 | 12 | 226 | 35 | 8 | 1 | 61 | 39 | 322 | 87 |
| 90,663 | 25 | 12 | 211 | 35 | 6 | 1 | 57 | 38 | 299 | 86 |
| 90,664 | 23 | 12 | 204 | 34 | 7 | 1 | 58 | 38 | 292 | 85 |
| 90,665 | 23 | 13 | 205 | 37 | 7 | 1 | 58 | 42 | 293 | 93 |
| 90,666 | 23 | 12 | 205 | 32 | 7 | 1 | 57 | 40 | 292 | 85 |
| 90,667 | 23 | 12 | 201 | 32 | 7 | 1 | 56 | 41 | 287 | 86 |
| 90,668 | 23 | 12 | 203 | 33 | 7 | 1 | 57 | 41 | 290 | 87 |
| 90,669 | 23 | 12 | 202 | 34 | 7 | 1 | 57 | 41 | 289 | 88 |
| 90,670 | 23 | 12 | 202 | 34 | 7 | 1 | 56 | 40 | 288 | 87 |
| 90,671 | 23 | 12 | 202 | 34 | 8 | 1 | 56 | 40 | 289 | 87 |
| 90,672 | 24 | 13 | 202 | 34 | 9 | 1 | 56 | 40 | 291 | 88 |
| 90,673 | 24 | 13 | 202 | 34 | 9 | 1 | 56 | 40 | 291 | 88 |
| 90,674 | 24 | 13 | 202 | 34 | 9 | 1 | 56 | 40 | 291 | 88 |
| 90,675 | 24 | 13 | 202 | 34 | 9 | 1 | 56 | 40 | 291 | 88 |
| 90,676 | 24 | 13 | 202 | 34 | 9 | 1 | 56 | 40 | 291 | 88 |
| 90,677 | 24 | 13 | 202 | 34 | 9 | 1 | 56 | 40 | 291 | 88 |
| 90,678 | 24 | 13 | 202 | 34 | 9 | 1 | 56 | 40 | 291 | 88 |
| 90,679 | 24 | 13 | 201 | 35 | 9 | 1 | 56 | 40 | 290 | 89 |
| 90,680 | 24 | 13 | 201 | 35 | 9 | 1 | 56 | 40 | 290 | 89 |

|        |    |    |     |    |    |   |    |    |     |    |
|--------|----|----|-----|----|----|---|----|----|-----|----|
| 90,681 | 24 | 13 | 201 | 35 | 9  | 1 | 56 | 40 | 290 | 89 |
| 90,682 | 24 | 13 | 201 | 35 | 9  | 1 | 56 | 40 | 290 | 89 |
| 90,683 | 24 | 13 | 201 | 35 | 9  | 1 | 56 | 40 | 290 | 89 |
| 90,684 | 24 | 13 | 201 | 34 | 9  | 1 | 56 | 38 | 290 | 86 |
| 90,685 | 24 | 13 | 200 | 34 | 9  | 1 | 56 | 38 | 289 | 86 |
| 90,686 | 24 | 13 | 201 | 30 | 9  | 1 | 57 | 33 | 291 | 77 |
| 90,687 | 24 | 14 | 201 | 30 | 9  | 1 | 57 | 32 | 291 | 77 |
| 90,688 | 24 | 14 | 202 | 30 | 9  | 1 | 57 | 32 | 292 | 77 |
| 90,689 | 24 | 14 | 202 | 30 | 9  | 1 | 57 | 32 | 292 | 77 |
| 90,690 | 24 | 14 | 202 | 30 | 10 | 1 | 58 | 32 | 294 | 77 |
| 90,691 | 24 | 14 | 202 | 28 | 10 | 1 | 58 | 28 | 294 | 71 |
| 90,692 | 24 | 14 | 202 | 28 | 10 | 1 | 58 | 28 | 294 | 71 |
| 90,693 | 23 | 14 | 202 | 27 | 11 | 1 | 58 | 28 | 294 | 70 |
| 90,694 | 23 | 14 | 204 | 26 | 11 | 1 | 58 | 28 | 296 | 69 |
| 90,695 | 23 | 14 | 204 | 25 | 11 | 1 | 58 | 28 | 296 | 68 |
| 90,696 | 23 | 14 | 204 | 25 | 11 | 2 | 58 | 28 | 296 | 69 |
| 90,697 | 23 | 14 | 205 | 25 | 11 | 2 | 59 | 28 | 298 | 69 |
| 90,698 | 23 | 14 | 205 | 25 | 11 | 2 | 60 | 28 | 299 | 69 |
| 90,699 | 23 | 14 | 204 | 25 | 11 | 2 | 63 | 28 | 301 | 69 |
| 90,700 | 23 | 14 | 199 | 25 | 11 | 2 | 62 | 28 | 295 | 69 |
| 90,701 | 14 | 14 | 117 | 25 | 11 | 2 | 51 | 28 | 193 | 69 |
| 90,702 | 15 | 14 | 118 | 29 | 11 | 3 | 49 | 31 | 193 | 77 |
| 90,703 | 10 | 14 | 99  | 40 | 9  | 3 | 44 | 36 | 162 | 93 |
| 90,704 | 10 | 14 | 98  | 42 | 10 | 3 | 51 | 37 | 169 | 96 |
| 90,705 | 9  | 14 | 95  | 44 | 10 | 3 | 49 | 37 | 163 | 98 |
| 90,706 | 5  | 14 | 78  | 44 | 10 | 3 | 43 | 38 | 136 | 99 |
| 90,707 | 4  | 13 | 65  | 44 | 8  | 3 | 36 | 38 | 113 | 98 |
| 90,708 | 4  | 11 | 42  | 45 | 8  | 3 | 31 | 36 | 85  | 95 |
| 90,709 | 4  | 6  | 30  | 42 | 8  | 3 | 27 | 32 | 69  | 83 |
| 90,710 | 4  | 6  | 30  | 42 | 8  | 3 | 27 | 32 | 69  | 83 |
| 90,711 | 3  | 5  | 24  | 30 | 8  | 2 | 24 | 24 | 59  | 61 |
| 90,712 | 3  | 3  | 22  | 27 | 8  | 2 | 24 | 18 | 57  | 50 |
| 90,713 | 3  | 3  | 22  | 28 | 7  | 2 | 24 | 18 | 56  | 51 |
| 90,714 | 3  | 4  | 21  | 28 | 7  | 2 | 21 | 19 | 52  | 53 |
| 90,715 | 3  | 5  | 20  | 28 | 7  | 2 | 21 | 19 | 51  | 54 |
| 90,716 | 3  | 4  | 19  | 25 | 7  | 2 | 20 | 12 | 49  | 43 |
| 90,717 | 3  | 4  | 19  | 25 | 7  | 2 | 20 | 12 | 49  | 43 |
| 90,718 | 3  | 4  | 17  | 26 | 7  | 2 | 19 | 11 | 46  | 43 |
| 90,719 | 3  | 4  | 17  | 26 | 7  | 2 | 19 | 11 | 46  | 43 |
| 90,720 | 3  | 4  | 17  | 25 | 7  | 2 | 19 | 11 | 46  | 42 |
| 90,721 | 3  | 4  | 17  | 25 | 7  | 2 | 20 | 11 | 47  | 42 |

|        |   |    |    |     |   |    |    |     |    |     |
|--------|---|----|----|-----|---|----|----|-----|----|-----|
| 90,722 | 2 | 3  | 17 | 25  | 6 | 2  | 21 | 11  | 46 | 41  |
| 90,723 | 2 | 3  | 17 | 25  | 5 | 2  | 22 | 11  | 46 | 41  |
| 90,724 | 2 | 3  | 17 | 25  | 5 | 2  | 22 | 11  | 46 | 41  |
| 90,725 | 2 | 3  | 17 | 25  | 5 | 2  | 22 | 11  | 46 | 41  |
| 90,726 | 2 | 3  | 17 | 25  | 5 | 2  | 22 | 11  | 46 | 41  |
| 90,727 | 2 | 3  | 17 | 25  | 5 | 2  | 22 | 11  | 46 | 41  |
| 90,728 | 2 | 3  | 17 | 25  | 5 | 2  | 22 | 11  | 46 | 41  |
| 90,729 | 2 | 4  | 17 | 24  | 5 | 2  | 22 | 11  | 46 | 41  |
| 90,730 | 2 | 4  | 17 | 24  | 5 | 2  | 22 | 11  | 46 | 41  |
| 90,731 | 2 | 4  | 17 | 24  | 5 | 2  | 22 | 11  | 46 | 41  |
| 90,732 | 2 | 4  | 17 | 24  | 5 | 2  | 22 | 11  | 46 | 41  |
| 90,733 | 2 | 4  | 17 | 24  | 5 | 2  | 22 | 12  | 46 | 42  |
| 90,734 | 2 | 4  | 17 | 24  | 5 | 2  | 22 | 12  | 46 | 42  |
| 90,735 | 2 | 4  | 17 | 24  | 5 | 2  | 22 | 12  | 46 | 42  |
| 90,736 | 2 | 4  | 16 | 23  | 5 | 2  | 21 | 12  | 44 | 41  |
| 90,737 | 2 | 4  | 16 | 23  | 5 | 2  | 21 | 12  | 44 | 41  |
| 90,738 | 2 | 3  | 16 | 23  | 5 | 2  | 21 | 13  | 44 | 41  |
| 90,739 | 2 | 3  | 15 | 23  | 5 | 2  | 22 | 13  | 44 | 41  |
| 90,740 | 2 | 3  | 15 | 23  | 5 | 2  | 22 | 13  | 44 | 41  |
| 90,741 | 2 | 3  | 14 | 23  | 4 | 2  | 21 | 13  | 41 | 41  |
| 90,742 | 2 | 3  | 14 | 23  | 4 | 2  | 21 | 13  | 41 | 41  |
| 90,743 | 2 | 3  | 14 | 23  | 4 | 2  | 21 | 13  | 41 | 41  |
| 90,744 | 2 | 3  | 13 | 23  | 4 | 2  | 21 | 13  | 40 | 41  |
| 90,745 | 2 | 3  | 12 | 23  | 4 | 2  | 21 | 13  | 39 | 41  |
| 90,746 | 2 | 4  | 12 | 24  | 4 | 2  | 21 | 13  | 39 | 43  |
| 90,747 | 2 | 4  | 12 | 25  | 4 | 1  | 21 | 14  | 39 | 44  |
| 90,748 | 2 | 4  | 11 | 25  | 4 | 1  | 19 | 15  | 36 | 45  |
| 90,749 | 2 | 12 | 11 | 100 | 4 | 7  | 18 | 58  | 35 | 177 |
| 90,750 | 2 | 15 | 9  | 157 | 4 | 7  | 16 | 72  | 31 | 251 |
| 90,751 | 2 | 16 | 9  | 171 | 4 | 7  | 17 | 78  | 32 | 272 |
| 90,752 | 1 | 17 | 9  | 180 | 4 | 7  | 16 | 82  | 30 | 286 |
| 90,753 | 0 | 18 | 5  | 179 | 3 | 6  | 15 | 80  | 23 | 283 |
| 90,754 | 0 | 21 | 4  | 185 | 3 | 6  | 15 | 83  | 22 | 295 |
| 90,755 | 0 | 43 | 0  | 293 | 1 | 18 | 8  | 144 | 9  | 498 |
| 90,756 | 0 | 43 | 0  | 302 | 1 | 19 | 6  | 146 | 7  | 510 |
| 90,757 | 0 | 48 | 0  | 348 | 1 | 19 | 6  | 159 | 7  | 574 |
| 90,758 | 0 | 55 | 0  | 373 | 1 | 19 | 6  | 166 | 7  | 613 |
| 90,759 | 0 | 61 | 0  | 386 | 1 | 19 | 6  | 169 | 7  | 635 |
| 90,760 | 0 | 61 | 0  | 393 | 1 | 19 | 6  | 169 | 7  | 642 |
| 90,761 | 0 | 61 | 0  | 397 | 1 | 19 | 6  | 169 | 7  | 646 |
| 90,762 | 0 | 61 | 1  | 398 | 1 | 19 | 6  | 169 | 8  | 647 |

|        |   |    |    |     |   |    |    |     |    |     |
|--------|---|----|----|-----|---|----|----|-----|----|-----|
| 90,763 | 0 | 61 | 1  | 398 | 1 | 19 | 6  | 169 | 8  | 647 |
| 90,764 | 0 | 61 | 1  | 400 | 1 | 19 | 6  | 169 | 8  | 649 |
| 90,765 | 0 | 60 | 3  | 405 | 1 | 19 | 6  | 168 | 10 | 652 |
| 90,766 | 0 | 60 | 3  | 406 | 1 | 19 | 6  | 168 | 10 | 653 |
| 90,767 | 0 | 60 | 8  | 406 | 1 | 19 | 12 | 168 | 21 | 653 |
| 90,768 | 0 | 60 | 8  | 406 | 1 | 19 | 12 | 168 | 21 | 653 |
| 90,769 | 0 | 60 | 8  | 406 | 1 | 19 | 12 | 168 | 21 | 653 |
| 90,770 | 0 | 60 | 8  | 405 | 1 | 19 | 11 | 168 | 20 | 652 |
| 90,771 | 0 | 61 | 8  | 405 | 1 | 19 | 11 | 168 | 20 | 653 |
| 90,772 | 0 | 61 | 8  | 405 | 1 | 19 | 11 | 168 | 20 | 653 |
| 90,773 | 0 | 61 | 8  | 406 | 1 | 19 | 10 | 170 | 19 | 656 |
| 90,774 | 0 | 61 | 8  | 406 | 1 | 20 | 9  | 170 | 18 | 657 |
| 90,775 | 0 | 61 | 8  | 406 | 1 | 20 | 9  | 170 | 18 | 657 |
| 90,776 | 0 | 61 | 8  | 406 | 1 | 20 | 10 | 170 | 19 | 657 |
| 90,777 | 0 | 61 | 8  | 406 | 1 | 20 | 10 | 171 | 19 | 658 |
| 90,778 | 0 | 61 | 9  | 407 | 1 | 20 | 11 | 171 | 21 | 659 |
| 90,779 | 0 | 60 | 9  | 407 | 1 | 20 | 11 | 171 | 21 | 658 |
| 90,780 | 0 | 60 | 9  | 407 | 1 | 20 | 11 | 171 | 21 | 658 |
| 90,781 | 0 | 60 | 9  | 407 | 1 | 20 | 11 | 171 | 21 | 658 |
| 90,782 | 0 | 60 | 9  | 407 | 1 | 20 | 11 | 172 | 21 | 659 |
| 90,783 | 0 | 60 | 10 | 407 | 1 | 20 | 12 | 171 | 23 | 658 |
| 90,784 | 0 | 60 | 10 | 407 | 1 | 20 | 12 | 171 | 23 | 658 |
| 90,785 | 0 | 60 | 11 | 408 | 1 | 20 | 12 | 171 | 24 | 659 |
| 90,786 | 0 | 60 | 11 | 408 | 1 | 20 | 12 | 171 | 24 | 659 |
| 90,787 | 0 | 60 | 11 | 408 | 1 | 20 | 12 | 171 | 24 | 659 |
| 90,788 | 0 | 60 | 11 | 408 | 1 | 20 | 12 | 172 | 24 | 660 |
| 90,789 | 0 | 61 | 11 | 410 | 1 | 20 | 11 | 174 | 23 | 665 |
| 90,790 | 0 | 62 | 11 | 413 | 1 | 20 | 11 | 177 | 23 | 672 |
| 90,791 | 0 | 62 | 11 | 429 | 1 | 22 | 11 | 181 | 23 | 694 |
| 90,792 | 0 | 65 | 11 | 453 | 1 | 22 | 11 | 195 | 23 | 735 |
| 90,793 | 0 | 65 | 11 | 465 | 1 | 22 | 11 | 197 | 23 | 749 |
| 90,794 | 0 | 66 | 11 | 473 | 0 | 22 | 11 | 202 | 22 | 763 |
| 90,795 | 0 | 66 | 11 | 477 | 0 | 22 | 11 | 204 | 22 | 769 |
| 90,796 | 1 | 70 | 11 | 492 | 0 | 22 | 11 | 215 | 23 | 799 |
| 90,797 | 1 | 69 | 11 | 494 | 0 | 22 | 11 | 217 | 23 | 802 |
| 90,798 | 1 | 69 | 11 | 497 | 0 | 22 | 11 | 217 | 23 | 805 |
| 90,799 | 1 | 61 | 12 | 422 | 0 | 16 | 11 | 173 | 24 | 672 |
| 90,800 | 1 | 61 | 13 | 425 | 0 | 16 | 11 | 177 | 25 | 679 |
| 90,801 | 1 | 59 | 13 | 369 | 0 | 16 | 10 | 166 | 24 | 610 |
| 90,802 | 1 | 57 | 13 | 346 | 0 | 16 | 9  | 156 | 23 | 575 |
| 90,803 | 1 | 57 | 13 | 347 | 0 | 16 | 9  | 156 | 23 | 576 |

|        |   |    |    |     |   |    |    |     |    |     |
|--------|---|----|----|-----|---|----|----|-----|----|-----|
| 90,804 | 1 | 56 | 14 | 344 | 0 | 16 | 9  | 155 | 24 | 571 |
| 90,805 | 1 | 55 | 14 | 346 | 0 | 16 | 12 | 163 | 27 | 580 |
| 90,806 | 1 | 33 | 14 | 239 | 0 | 4  | 12 | 103 | 27 | 379 |
| 90,807 | 1 | 33 | 16 | 231 | 0 | 3  | 12 | 101 | 29 | 368 |
| 90,808 | 1 | 28 | 16 | 184 | 0 | 3  | 12 | 87  | 29 | 302 |
| 90,809 | 3 | 21 | 20 | 158 | 0 | 3  | 12 | 81  | 35 | 263 |
| 90,810 | 3 | 15 | 21 | 139 | 1 | 3  | 12 | 78  | 37 | 235 |
| 90,811 | 3 | 15 | 21 | 139 | 1 | 3  | 12 | 78  | 37 | 235 |
| 90,812 | 3 | 15 | 21 | 135 | 1 | 3  | 13 | 78  | 38 | 231 |
| 90,813 | 3 | 15 | 21 | 134 | 1 | 3  | 13 | 78  | 38 | 230 |
| 90,814 | 5 | 15 | 21 | 132 | 2 | 3  | 15 | 78  | 43 | 228 |
| 90,815 | 5 | 14 | 19 | 127 | 2 | 3  | 15 | 78  | 41 | 222 |
| 90,816 | 5 | 14 | 19 | 128 | 2 | 3  | 15 | 78  | 41 | 223 |
| 90,817 | 5 | 14 | 15 | 128 | 2 | 3  | 9  | 78  | 31 | 223 |
| 90,818 | 5 | 14 | 14 | 128 | 2 | 3  | 9  | 78  | 30 | 223 |
| 90,819 | 5 | 14 | 14 | 128 | 2 | 3  | 9  | 78  | 30 | 223 |
| 90,820 | 5 | 14 | 14 | 131 | 2 | 3  | 9  | 82  | 30 | 230 |
| 90,821 | 5 | 13 | 14 | 132 | 2 | 3  | 9  | 82  | 30 | 230 |
| 90,822 | 5 | 13 | 14 | 132 | 2 | 3  | 9  | 83  | 30 | 231 |
| 90,823 | 5 | 13 | 14 | 131 | 2 | 3  | 9  | 81  | 30 | 228 |
| 90,824 | 5 | 13 | 14 | 131 | 2 | 2  | 9  | 81  | 30 | 227 |
| 90,825 | 5 | 13 | 14 | 131 | 2 | 2  | 9  | 81  | 30 | 227 |
| 90,826 | 5 | 13 | 14 | 131 | 2 | 2  | 9  | 81  | 30 | 227 |
| 90,827 | 5 | 13 | 17 | 134 | 2 | 2  | 12 | 81  | 36 | 230 |
| 90,828 | 5 | 13 | 16 | 136 | 2 | 2  | 12 | 81  | 35 | 232 |
| 90,829 | 5 | 13 | 20 | 140 | 2 | 2  | 13 | 86  | 40 | 241 |
| 90,830 | 5 | 16 | 20 | 152 | 2 | 2  | 14 | 99  | 41 | 269 |
| 90,831 | 5 | 17 | 20 | 162 | 2 | 2  | 14 | 101 | 41 | 282 |
| 90,832 | 5 | 22 | 20 | 169 | 2 | 2  | 14 | 108 | 41 | 301 |
| 90,833 | 5 | 22 | 20 | 169 | 2 | 2  | 14 | 108 | 41 | 301 |
| 90,834 | 5 | 25 | 19 | 175 | 2 | 2  | 13 | 111 | 39 | 313 |
| 90,835 | 5 | 26 | 19 | 186 | 2 | 2  | 13 | 113 | 39 | 327 |
| 90,836 | 5 | 26 | 19 | 187 | 2 | 2  | 13 | 114 | 39 | 329 |
| 90,837 | 5 | 26 | 19 | 189 | 2 | 2  | 13 | 114 | 39 | 331 |
| 90,838 | 5 | 27 | 19 | 189 | 2 | 2  | 13 | 114 | 39 | 332 |
| 90,839 | 5 | 27 | 20 | 189 | 2 | 2  | 13 | 113 | 40 | 331 |
| 90,840 | 5 | 25 | 20 | 184 | 2 | 2  | 13 | 107 | 40 | 318 |
| 90,841 | 5 | 25 | 20 | 184 | 2 | 2  | 13 | 107 | 40 | 318 |
| 90,842 | 5 | 22 | 21 | 146 | 2 | 0  | 14 | 89  | 42 | 257 |
| 90,843 | 5 | 22 | 21 | 148 | 2 | 0  | 14 | 89  | 42 | 259 |
| 90,844 | 5 | 22 | 21 | 139 | 2 | 0  | 14 | 88  | 42 | 249 |



|        |   |    |    |     |   |   |    |     |    |     |
|--------|---|----|----|-----|---|---|----|-----|----|-----|
| 90,845 | 5 | 21 | 22 | 132 | 2 | 0 | 14 | 85  | 43 | 238 |
| 90,846 | 5 | 22 | 22 | 128 | 2 | 0 | 14 | 84  | 43 | 234 |
| 90,847 | 4 | 18 | 22 | 113 | 2 | 0 | 14 | 73  | 42 | 204 |
| 90,848 | 4 | 18 | 22 | 106 | 2 | 0 | 14 | 70  | 42 | 194 |
| 90,849 | 4 | 18 | 22 | 106 | 2 | 0 | 14 | 70  | 42 | 194 |
| 90,850 | 4 | 18 | 21 | 106 | 2 | 0 | 14 | 70  | 41 | 194 |
| 90,851 | 4 | 20 | 20 | 105 | 2 | 0 | 14 | 67  | 40 | 192 |
| 90,852 | 4 | 19 | 20 | 104 | 2 | 0 | 14 | 64  | 40 | 187 |
| 90,853 | 4 | 19 | 21 | 106 | 2 | 0 | 16 | 66  | 43 | 191 |
| 90,854 | 4 | 19 | 21 | 107 | 2 | 0 | 17 | 67  | 44 | 193 |
| 90,855 | 4 | 19 | 21 | 107 | 2 | 0 | 16 | 67  | 43 | 193 |
| 90,856 | 5 | 17 | 21 | 85  | 2 | 0 | 14 | 49  | 42 | 151 |
| 90,857 | 5 | 17 | 21 | 82  | 2 | 0 | 14 | 49  | 42 | 148 |
| 90,858 | 5 | 17 | 19 | 83  | 2 | 0 | 14 | 48  | 40 | 148 |
| 90,859 | 5 | 20 | 20 | 91  | 2 | 2 | 14 | 54  | 41 | 167 |
| 90,860 | 3 | 27 | 16 | 131 | 2 | 3 | 14 | 78  | 35 | 239 |
| 90,861 | 3 | 27 | 15 | 131 | 1 | 4 | 14 | 79  | 33 | 241 |
| 90,862 | 3 | 28 | 16 | 136 | 1 | 4 | 13 | 81  | 33 | 249 |
| 90,863 | 3 | 29 | 16 | 143 | 1 | 5 | 13 | 87  | 33 | 264 |
| 90,864 | 1 | 42 | 16 | 168 | 1 | 6 | 12 | 100 | 30 | 316 |
| 90,865 | 1 | 42 | 16 | 172 | 0 | 6 | 11 | 101 | 28 | 321 |
| 90,866 | 1 | 44 | 16 | 192 | 0 | 6 | 11 | 103 | 28 | 345 |
| 90,867 | 1 | 44 | 16 | 198 | 0 | 6 | 11 | 103 | 28 | 351 |
| 90,868 | 1 | 44 | 16 | 197 | 0 | 6 | 11 | 104 | 28 | 351 |
| 90,869 | 1 | 45 | 16 | 198 | 0 | 6 | 11 | 104 | 28 | 353 |
| 90,870 | 1 | 45 | 16 | 198 | 0 | 6 | 11 | 104 | 28 | 353 |
| 90,871 | 1 | 45 | 16 | 193 | 0 | 6 | 11 | 99  | 28 | 343 |
| 90,872 | 1 | 45 | 16 | 193 | 0 | 6 | 11 | 99  | 28 | 343 |
| 90,873 | 1 | 45 | 16 | 193 | 0 | 6 | 11 | 100 | 28 | 344 |
| 90,874 | 1 | 46 | 17 | 215 | 0 | 7 | 11 | 116 | 29 | 384 |
| 90,875 | 1 | 46 | 17 | 219 | 0 | 7 | 11 | 123 | 29 | 395 |
| 90,876 | 1 | 47 | 17 | 224 | 0 | 8 | 11 | 127 | 29 | 406 |
| 90,877 | 1 | 48 | 17 | 229 | 0 | 8 | 11 | 128 | 29 | 413 |
| 90,878 | 1 | 49 | 14 | 230 | 0 | 8 | 7  | 130 | 22 | 417 |
| 90,879 | 1 | 50 | 14 | 233 | 0 | 8 | 7  | 130 | 22 | 421 |
| 90,880 | 1 | 51 | 10 | 233 | 0 | 8 | 5  | 129 | 16 | 421 |
| 90,881 | 1 | 48 | 10 | 220 | 0 | 8 | 4  | 117 | 15 | 393 |
| 90,882 | 1 | 47 | 10 | 211 | 0 | 8 | 4  | 115 | 15 | 381 |
| 90,883 | 1 | 43 | 10 | 205 | 0 | 9 | 4  | 108 | 15 | 365 |
| 90,884 | 1 | 45 | 10 | 205 | 0 | 9 | 4  | 108 | 15 | 367 |
| 90,885 | 1 | 42 | 9  | 200 | 0 | 9 | 4  | 105 | 14 | 356 |

|        |   |    |   |     |   |    |   |     |    |     |
|--------|---|----|---|-----|---|----|---|-----|----|-----|
| 90,886 | 1 | 41 | 9 | 189 | 0 | 9  | 4 | 103 | 14 | 342 |
| 90,887 | 1 | 41 | 9 | 190 | 0 | 9  | 4 | 103 | 14 | 343 |
| 90,888 | 1 | 42 | 9 | 194 | 0 | 9  | 4 | 107 | 14 | 352 |
| 90,889 | 1 | 41 | 8 | 194 | 0 | 9  | 4 | 107 | 13 | 351 |
| 90,890 | 1 | 41 | 8 | 194 | 0 | 9  | 4 | 108 | 13 | 352 |
| 90,891 | 1 | 41 | 8 | 195 | 0 | 9  | 4 | 108 | 13 | 353 |
| 90,892 | 1 | 41 | 7 | 196 | 0 | 9  | 3 | 111 | 11 | 357 |
| 90,893 | 1 | 41 | 7 | 196 | 0 | 10 | 3 | 111 | 11 | 358 |
| 90,894 | 1 | 41 | 7 | 191 | 0 | 10 | 3 | 110 | 11 | 352 |
| 90,895 | 1 | 41 | 7 | 191 | 0 | 10 | 3 | 110 | 11 | 352 |
| 90,896 | 1 | 41 | 6 | 191 | 0 | 10 | 3 | 108 | 10 | 350 |
| 90,897 | 1 | 40 | 6 | 193 | 0 | 10 | 3 | 107 | 10 | 350 |
| 90,898 | 1 | 40 | 6 | 193 | 0 | 10 | 3 | 107 | 10 | 350 |
| 90,899 | 1 | 40 | 6 | 194 | 0 | 10 | 3 | 108 | 10 | 352 |
| 90,900 | 1 | 40 | 6 | 194 | 0 | 10 | 3 | 108 | 10 | 352 |
| 90,901 | 1 | 40 | 6 | 195 | 0 | 11 | 2 | 108 | 9  | 354 |
| 90,902 | 1 | 38 | 6 | 193 | 0 | 11 | 2 | 107 | 9  | 349 |
| 90,903 | 1 | 38 | 6 | 191 | 0 | 11 | 1 | 105 | 8  | 345 |
| 90,904 | 1 | 38 | 5 | 193 | 0 | 11 | 1 | 105 | 7  | 347 |
| 90,905 | 1 | 39 | 5 | 193 | 0 | 11 | 0 | 104 | 6  | 347 |
| 90,906 | 0 | 39 | 5 | 200 | 0 | 11 | 0 | 105 | 5  | 355 |
| 90,907 | 0 | 44 | 5 | 219 | 0 | 11 | 0 | 112 | 5  | 386 |
| 90,908 | 0 | 48 | 6 | 246 | 0 | 14 | 0 | 121 | 6  | 429 |
| 90,909 | 2 | 48 | 6 | 281 | 0 | 17 | 0 | 132 | 8  | 478 |
| 90,910 | 2 | 45 | 5 | 282 | 0 | 15 | 0 | 126 | 7  | 468 |
| 90,911 | 2 | 38 | 5 | 245 | 0 | 14 | 0 | 102 | 7  | 399 |
| 90,912 | 2 | 40 | 3 | 246 | 0 | 13 | 0 | 101 | 5  | 400 |
| 90,913 | 2 | 41 | 3 | 243 | 0 | 13 | 0 | 101 | 5  | 398 |
| 90,914 | 2 | 40 | 3 | 236 | 0 | 12 | 0 | 95  | 5  | 383 |
| 90,915 | 2 | 27 | 3 | 211 | 0 | 11 | 2 | 82  | 7  | 331 |
| 90,916 | 2 | 28 | 5 | 208 | 0 | 11 | 2 | 81  | 9  | 328 |
| 90,917 | 2 | 26 | 5 | 188 | 0 | 11 | 2 | 79  | 9  | 304 |
| 90,918 | 2 | 26 | 5 | 182 | 0 | 11 | 2 | 78  | 9  | 297 |
| 90,919 | 2 | 26 | 5 | 182 | 0 | 11 | 2 | 77  | 9  | 296 |
| 90,920 | 2 | 25 | 5 | 181 | 0 | 11 | 2 | 77  | 9  | 294 |
| 90,921 | 2 | 25 | 5 | 185 | 0 | 11 | 2 | 77  | 9  | 298 |
| 90,922 | 2 | 25 | 5 | 186 | 0 | 11 | 2 | 77  | 9  | 299 |
| 90,923 | 2 | 25 | 5 | 186 | 0 | 11 | 2 | 77  | 9  | 299 |
| 90,924 | 2 | 25 | 5 | 186 | 0 | 11 | 2 | 77  | 9  | 299 |
| 90,925 | 2 | 24 | 5 | 155 | 0 | 9  | 2 | 50  | 9  | 238 |
| 90,926 | 2 | 24 | 5 | 155 | 0 | 9  | 2 | 50  | 9  | 238 |

|        |   |    |   |     |   |   |   |    |    |     |
|--------|---|----|---|-----|---|---|---|----|----|-----|
| 90,927 | 2 | 24 | 5 | 155 | 0 | 9 | 4 | 50 | 11 | 238 |
| 90,928 | 2 | 22 | 5 | 150 | 0 | 9 | 4 | 50 | 11 | 231 |
| 90,929 | 2 | 21 | 5 | 146 | 0 | 9 | 4 | 47 | 11 | 223 |
| 90,930 | 2 | 19 | 5 | 136 | 0 | 9 | 4 | 44 | 11 | 208 |
| 90,931 | 2 | 19 | 5 | 136 | 0 | 9 | 4 | 42 | 11 | 206 |
| 90,932 | 2 | 19 | 5 | 136 | 0 | 9 | 4 | 42 | 11 | 206 |
| 90,933 | 2 | 18 | 5 | 135 | 0 | 8 | 4 | 41 | 11 | 202 |
| 90,934 | 2 | 18 | 5 | 135 | 0 | 8 | 4 | 41 | 11 | 202 |
| 90,935 | 2 | 16 | 5 | 135 | 0 | 8 | 4 | 41 | 11 | 200 |
| 90,936 | 2 | 16 | 5 | 134 | 0 | 8 | 4 | 41 | 11 | 199 |
| 90,937 | 2 | 16 | 5 | 134 | 0 | 8 | 4 | 41 | 11 | 199 |
| 90,938 | 2 | 16 | 6 | 130 | 0 | 8 | 4 | 40 | 12 | 194 |
| 90,939 | 2 | 15 | 6 | 125 | 0 | 8 | 4 | 36 | 12 | 184 |
| 90,940 | 2 | 15 | 6 | 125 | 0 | 9 | 4 | 37 | 12 | 186 |
| 90,941 | 2 | 15 | 6 | 126 | 0 | 9 | 4 | 36 | 12 | 186 |
| 90,942 | 2 | 15 | 7 | 125 | 0 | 9 | 4 | 36 | 13 | 185 |
| 90,943 | 2 | 15 | 7 | 123 | 0 | 8 | 4 | 33 | 13 | 179 |
| 90,944 | 2 | 15 | 7 | 125 | 0 | 8 | 4 | 33 | 13 | 181 |
| 90,945 | 2 | 15 | 7 | 125 | 0 | 8 | 4 | 33 | 13 | 181 |
| 90,946 | 2 | 15 | 7 | 125 | 0 | 8 | 4 | 33 | 13 | 181 |
| 90,947 | 2 | 15 | 7 | 124 | 0 | 8 | 4 | 33 | 13 | 180 |
| 90,948 | 2 | 15 | 7 | 122 | 0 | 8 | 4 | 33 | 13 | 178 |
| 90,949 | 2 | 15 | 7 | 123 | 0 | 8 | 4 | 33 | 13 | 179 |
| 90,950 | 2 | 15 | 7 | 122 | 0 | 8 | 4 | 32 | 13 | 177 |
| 90,951 | 2 | 15 | 7 | 122 | 0 | 8 | 4 | 32 | 13 | 177 |
| 90,952 | 2 | 15 | 8 | 121 | 0 | 7 | 4 | 32 | 14 | 175 |
| 90,953 | 2 | 15 | 8 | 122 | 0 | 7 | 4 | 32 | 14 | 176 |
| 90,954 | 2 | 15 | 8 | 120 | 0 | 7 | 4 | 32 | 14 | 174 |
| 90,955 | 2 | 15 | 8 | 120 | 0 | 7 | 4 | 32 | 14 | 174 |
| 90,956 | 2 | 13 | 7 | 110 | 0 | 7 | 4 | 30 | 13 | 160 |
| 90,957 | 2 | 13 | 7 | 110 | 0 | 7 | 4 | 30 | 13 | 160 |
| 90,958 | 2 | 6  | 7 | 66  | 0 | 4 | 4 | 15 | 13 | 91  |
| 90,959 | 2 | 6  | 6 | 68  | 0 | 4 | 4 | 15 | 12 | 93  |
| 90,960 | 0 | 6  | 7 | 32  | 0 | 1 | 4 | 13 | 11 | 52  |
| 90,961 | 0 | 6  | 7 | 37  | 0 | 2 | 4 | 16 | 11 | 61  |
| 90,962 | 0 | 7  | 7 | 37  | 0 | 2 | 4 | 18 | 11 | 64  |
| 90,963 | 0 | 8  | 7 | 44  | 0 | 4 | 4 | 27 | 11 | 83  |
| 90,964 | 0 | 6  | 7 | 44  | 0 | 4 | 4 | 25 | 11 | 79  |
| 90,965 | 0 | 6  | 7 | 55  | 0 | 4 | 2 | 28 | 9  | 93  |
| 90,966 | 0 | 6  | 5 | 54  | 0 | 4 | 2 | 28 | 7  | 92  |
| 90,967 | 0 | 7  | 5 | 63  | 0 | 4 | 2 | 31 | 7  | 105 |

|        |   |    |    |     |   |    |   |     |    |     |
|--------|---|----|----|-----|---|----|---|-----|----|-----|
| 90,968 | 0 | 7  | 5  | 63  | 0 | 4  | 2 | 31  | 7  | 105 |
| 90,969 | 2 | 7  | 5  | 62  | 0 | 4  | 2 | 31  | 9  | 104 |
| 90,970 | 2 | 7  | 5  | 63  | 0 | 4  | 2 | 31  | 9  | 105 |
| 90,971 | 2 | 7  | 5  | 63  | 0 | 4  | 2 | 31  | 9  | 105 |
| 90,972 | 2 | 7  | 6  | 58  | 0 | 4  | 2 | 32  | 10 | 101 |
| 90,973 | 2 | 7  | 6  | 58  | 0 | 4  | 2 | 32  | 10 | 101 |
| 90,974 | 2 | 8  | 6  | 64  | 0 | 4  | 2 | 35  | 10 | 111 |
| 90,975 | 2 | 11 | 8  | 105 | 0 | 6  | 3 | 47  | 13 | 169 |
| 90,976 | 2 | 15 | 8  | 162 | 0 | 7  | 6 | 55  | 16 | 239 |
| 90,977 | 2 | 16 | 8  | 184 | 0 | 8  | 7 | 60  | 17 | 268 |
| 90,978 | 2 | 34 | 8  | 373 | 0 | 26 | 5 | 138 | 15 | 571 |
| 90,979 | 2 | 42 | 8  | 407 | 0 | 26 | 5 | 152 | 15 | 627 |
| 90,980 | 4 | 43 | 8  | 410 | 0 | 26 | 5 | 154 | 17 | 633 |
| 90,981 | 4 | 43 | 8  | 413 | 0 | 26 | 5 | 154 | 17 | 636 |
| 90,982 | 4 | 43 | 8  | 423 | 0 | 27 | 5 | 159 | 17 | 652 |
| 90,983 | 4 | 43 | 8  | 426 | 0 | 27 | 5 | 162 | 17 | 658 |
| 90,984 | 4 | 43 | 8  | 429 | 0 | 27 | 5 | 166 | 17 | 665 |
| 90,985 | 4 | 43 | 10 | 432 | 0 | 27 | 5 | 170 | 19 | 672 |
| 90,986 | 4 | 43 | 11 | 433 | 1 | 27 | 5 | 170 | 21 | 673 |
| 90,987 | 4 | 43 | 11 | 433 | 1 | 27 | 5 | 170 | 21 | 673 |
| 90,988 | 4 | 43 | 11 | 434 | 1 | 28 | 5 | 172 | 21 | 677 |
| 90,989 | 4 | 43 | 10 | 442 | 1 | 28 | 5 | 173 | 20 | 686 |
| 90,990 | 4 | 44 | 10 | 455 | 1 | 30 | 5 | 180 | 20 | 709 |
| 90,991 | 4 | 44 | 10 | 469 | 1 | 29 | 5 | 184 | 20 | 726 |
| 90,992 | 4 | 44 | 10 | 468 | 1 | 29 | 5 | 186 | 20 | 727 |
| 90,993 | 4 | 44 | 9  | 469 | 1 | 29 | 5 | 188 | 19 | 730 |
| 90,994 | 4 | 46 | 9  | 489 | 1 | 31 | 5 | 201 | 19 | 767 |
| 90,995 | 4 | 48 | 9  | 507 | 1 | 31 | 5 | 205 | 19 | 791 |
| 90,996 | 4 | 50 | 9  | 523 | 1 | 33 | 5 | 213 | 19 | 819 |
| 90,997 | 4 | 50 | 9  | 523 | 1 | 33 | 5 | 217 | 19 | 823 |
| 90,998 | 5 | 50 | 11 | 526 | 1 | 35 | 6 | 218 | 23 | 829 |
| 90,999 | 5 | 50 | 11 | 550 | 1 | 36 | 6 | 230 | 23 | 866 |
| 91,000 | 5 | 51 | 11 | 556 | 1 | 38 | 6 | 234 | 23 | 879 |
| 91,001 | 5 | 52 | 11 | 566 | 1 | 38 | 6 | 237 | 23 | 893 |
| 91,002 | 5 | 52 | 11 | 570 | 1 | 38 | 6 | 238 | 23 | 898 |
| 91,003 | 5 | 52 | 10 | 572 | 1 | 38 | 6 | 239 | 22 | 901 |
| 91,004 | 5 | 53 | 10 | 572 | 1 | 38 | 6 | 239 | 22 | 902 |
| 91,005 | 5 | 53 | 10 | 576 | 1 | 38 | 6 | 240 | 22 | 907 |
| 91,006 | 5 | 53 | 10 | 579 | 1 | 38 | 6 | 240 | 22 | 910 |
| 91,007 | 5 | 53 | 11 | 579 | 1 | 38 | 6 | 240 | 23 | 910 |
| 91,008 | 5 | 52 | 11 | 578 | 1 | 38 | 6 | 240 | 23 | 908 |

|        |   |    |    |     |   |    |   |     |    |     |
|--------|---|----|----|-----|---|----|---|-----|----|-----|
| 91,009 | 5 | 52 | 12 | 576 | 1 | 38 | 6 | 240 | 24 | 906 |
| 91,010 | 5 | 52 | 11 | 578 | 1 | 38 | 6 | 240 | 23 | 908 |
| 91,011 | 5 | 52 | 11 | 561 | 1 | 37 | 6 | 228 | 23 | 878 |
| 91,012 | 5 | 51 | 11 | 562 | 1 | 37 | 6 | 226 | 23 | 876 |
| 91,013 | 5 | 48 | 11 | 554 | 1 | 35 | 6 | 217 | 23 | 854 |
| 91,014 | 5 | 48 | 11 | 554 | 1 | 35 | 8 | 217 | 25 | 854 |
| 91,015 | 5 | 48 | 11 | 541 | 1 | 35 | 8 | 214 | 25 | 838 |
| 91,016 | 5 | 48 | 11 | 541 | 1 | 35 | 8 | 214 | 25 | 838 |
| 91,017 | 5 | 46 | 11 | 531 | 1 | 35 | 8 | 211 | 25 | 823 |
| 91,018 | 5 | 46 | 11 | 531 | 1 | 35 | 8 | 211 | 25 | 823 |
| 91,019 | 4 | 46 | 11 | 531 | 1 | 35 | 8 | 212 | 24 | 824 |
| 91,020 | 3 | 46 | 11 | 532 | 1 | 35 | 8 | 212 | 23 | 825 |
| 91,021 | 3 | 47 | 11 | 541 | 1 | 35 | 8 | 216 | 23 | 839 |
| 91,022 | 3 | 49 | 10 | 568 | 1 | 36 | 8 | 222 | 22 | 875 |
| 91,023 | 3 | 50 | 10 | 610 | 1 | 40 | 8 | 235 | 22 | 935 |
| 91,024 | 3 | 50 | 10 | 613 | 1 | 40 | 8 | 236 | 22 | 939 |
| 91,025 | 3 | 49 | 9  | 610 | 1 | 40 | 8 | 233 | 21 | 932 |
| 91,026 | 3 | 46 | 8  | 568 | 1 | 38 | 7 | 220 | 19 | 872 |
| 91,027 | 3 | 41 | 7  | 490 | 1 | 36 | 4 | 206 | 15 | 773 |
| 91,028 | 3 | 23 | 7  | 301 | 1 | 18 | 3 | 131 | 14 | 473 |
| 91,029 | 3 | 23 | 7  | 301 | 1 | 18 | 3 | 130 | 14 | 472 |
| 91,030 | 3 | 14 | 7  | 264 | 1 | 18 | 3 | 114 | 14 | 410 |
| 91,031 | 1 | 14 | 7  | 267 | 1 | 18 | 3 | 115 | 12 | 414 |
| 91,032 | 1 | 14 | 7  | 270 | 1 | 18 | 3 | 119 | 12 | 421 |
| 91,033 | 1 | 14 | 7  | 261 | 1 | 17 | 3 | 115 | 12 | 407 |
| 91,034 | 1 | 14 | 7  | 258 | 1 | 17 | 3 | 112 | 12 | 401 |
| 91,035 | 1 | 14 | 6  | 257 | 1 | 17 | 3 | 108 | 11 | 396 |
| 91,036 | 1 | 14 | 5  | 254 | 1 | 17 | 3 | 105 | 10 | 390 |
| 91,037 | 1 | 14 | 4  | 253 | 0 | 17 | 3 | 105 | 8  | 389 |
| 91,038 | 1 | 14 | 4  | 253 | 0 | 17 | 3 | 105 | 8  | 389 |
| 91,039 | 1 | 14 | 4  | 252 | 0 | 16 | 3 | 103 | 8  | 385 |
| 91,040 | 1 | 14 | 4  | 244 | 0 | 16 | 3 | 102 | 8  | 376 |
| 91,041 | 1 | 13 | 4  | 232 | 0 | 14 | 3 | 95  | 8  | 354 |
| 91,042 | 1 | 13 | 4  | 218 | 0 | 14 | 3 | 90  | 8  | 335 |
| 91,043 | 1 | 13 | 4  | 218 | 0 | 13 | 3 | 88  | 8  | 332 |
| 91,044 | 1 | 11 | 4  | 194 | 0 | 12 | 3 | 73  | 8  | 290 |
| 91,045 | 1 | 9  | 4  | 176 | 0 | 12 | 3 | 69  | 8  | 266 |
| 91,046 | 1 | 7  | 5  | 160 | 0 | 10 | 3 | 58  | 9  | 235 |
| 91,047 | 1 | 7  | 5  | 161 | 0 | 10 | 3 | 58  | 9  | 236 |
| 91,048 | 1 | 7  | 3  | 161 | 0 | 10 | 2 | 58  | 6  | 236 |
| 91,049 | 1 | 7  | 3  | 158 | 0 | 8  | 2 | 57  | 6  | 230 |

|        |   |   |   |     |   |   |   |    |    |     |
|--------|---|---|---|-----|---|---|---|----|----|-----|
| 91,050 | 1 | 7 | 3 | 135 | 0 | 7 | 2 | 46 | 6  | 195 |
| 91,051 | 1 | 6 | 3 | 128 | 0 | 5 | 2 | 42 | 6  | 181 |
| 91,052 | 1 | 5 | 3 | 118 | 0 | 5 | 2 | 39 | 6  | 167 |
| 91,053 | 1 | 5 | 3 | 116 | 0 | 5 | 2 | 38 | 6  | 164 |
| 91,054 | 1 | 5 | 3 | 113 | 0 | 5 | 2 | 37 | 6  | 160 |
| 91,055 | 1 | 4 | 3 | 114 | 0 | 5 | 2 | 37 | 6  | 160 |
| 91,056 | 3 | 5 | 2 | 108 | 0 | 5 | 2 | 36 | 7  | 154 |
| 91,057 | 3 | 5 | 2 | 108 | 0 | 5 | 2 | 36 | 7  | 154 |
| 91,058 | 3 | 5 | 2 | 108 | 0 | 5 | 2 | 36 | 7  | 154 |
| 91,059 | 3 | 5 | 2 | 108 | 0 | 5 | 2 | 36 | 7  | 154 |
| 91,060 | 3 | 6 | 1 | 106 | 0 | 5 | 2 | 36 | 6  | 153 |
| 91,061 | 3 | 6 | 1 | 107 | 0 | 5 | 2 | 37 | 6  | 155 |
| 91,062 | 3 | 6 | 2 | 106 | 0 | 5 | 2 | 37 | 7  | 154 |
| 91,063 | 3 | 6 | 2 | 106 | 0 | 5 | 2 | 37 | 7  | 154 |
| 91,064 | 3 | 6 | 2 | 106 | 0 | 5 | 4 | 37 | 9  | 154 |
| 91,065 | 3 | 6 | 2 | 107 | 0 | 5 | 2 | 37 | 7  | 155 |
| 91,066 | 3 | 6 | 2 | 107 | 0 | 5 | 2 | 37 | 7  | 155 |
| 91,067 | 3 | 6 | 2 | 107 | 1 | 5 | 2 | 37 | 8  | 155 |
| 91,068 | 3 | 6 | 2 | 108 | 1 | 5 | 2 | 38 | 8  | 157 |
| 91,069 | 3 | 6 | 2 | 109 | 1 | 5 | 2 | 37 | 8  | 157 |
| 91,070 | 3 | 6 | 2 | 109 | 1 | 5 | 2 | 37 | 8  | 157 |
| 91,071 | 3 | 6 | 2 | 107 | 1 | 5 | 2 | 37 | 8  | 155 |
| 91,072 | 3 | 2 | 2 | 27  | 1 | 0 | 2 | 12 | 8  | 41  |
| 91,073 | 3 | 2 | 2 | 27  | 1 | 0 | 2 | 12 | 8  | 41  |
| 91,074 | 3 | 2 | 2 | 24  | 1 | 0 | 2 | 13 | 8  | 39  |
| 91,075 | 3 | 2 | 3 | 24  | 1 | 0 | 2 | 13 | 9  | 39  |
| 91,076 | 3 | 2 | 3 | 24  | 1 | 0 | 2 | 13 | 9  | 39  |
| 91,077 | 3 | 2 | 4 | 25  | 1 | 0 | 2 | 13 | 10 | 40  |
| 91,078 | 3 | 2 | 4 | 25  | 1 | 0 | 2 | 13 | 10 | 40  |
| 91,079 | 3 | 2 | 4 | 25  | 1 | 0 | 2 | 12 | 10 | 39  |
| 91,080 | 3 | 2 | 4 | 26  | 1 | 0 | 2 | 12 | 10 | 40  |
| 91,081 | 3 | 2 | 4 | 23  | 1 | 0 | 2 | 11 | 10 | 36  |
| 91,082 | 3 | 2 | 5 | 17  | 1 | 0 | 2 | 7  | 11 | 26  |
| 91,083 | 3 | 2 | 5 | 17  | 1 | 0 | 2 | 7  | 11 | 26  |
| 91,084 | 3 | 2 | 5 | 16  | 1 | 0 | 2 | 6  | 11 | 24  |
| 91,085 | 3 | 2 | 5 | 14  | 1 | 0 | 2 | 6  | 11 | 22  |
| 91,086 | 3 | 2 | 5 | 14  | 1 | 0 | 2 | 6  | 11 | 22  |
| 91,087 | 3 | 2 | 5 | 14  | 1 | 0 | 2 | 5  | 11 | 21  |
| 91,088 | 3 | 2 | 5 | 14  | 1 | 0 | 2 | 5  | 11 | 21  |
| 91,089 | 3 | 2 | 5 | 14  | 1 | 0 | 2 | 5  | 11 | 21  |
| 91,090 | 3 | 2 | 5 | 14  | 1 | 0 | 2 | 5  | 11 | 21  |

|        |   |    |    |     |   |    |   |     |    |     |
|--------|---|----|----|-----|---|----|---|-----|----|-----|
| 91,091 | 4 | 2  | 5  | 13  | 1 | 0  | 3 | 5   | 13 | 20  |
| 91,092 | 4 | 2  | 5  | 14  | 1 | 0  | 3 | 5   | 13 | 21  |
| 91,093 | 4 | 3  | 5  | 22  | 1 | 0  | 3 | 11  | 13 | 36  |
| 91,094 | 4 | 5  | 5  | 41  | 1 | 5  | 3 | 61  | 13 | 112 |
| 91,095 | 4 | 6  | 5  | 47  | 1 | 5  | 3 | 81  | 13 | 139 |
| 91,096 | 4 | 11 | 5  | 100 | 1 | 10 | 3 | 141 | 13 | 262 |
| 91,097 | 4 | 16 | 4  | 130 | 1 | 11 | 3 | 160 | 12 | 317 |
| 91,098 | 4 | 25 | 4  | 155 | 1 | 12 | 3 | 182 | 12 | 374 |
| 91,099 | 3 | 25 | 4  | 156 | 1 | 12 | 3 | 182 | 11 | 375 |
| 91,100 | 3 | 25 | 10 | 160 | 1 | 13 | 3 | 183 | 17 | 381 |
| 91,101 | 4 | 26 | 10 | 160 | 1 | 13 | 3 | 182 | 18 | 381 |
| 91,102 | 4 | 26 | 10 | 161 | 1 | 13 | 3 | 182 | 18 | 382 |
| 91,103 | 4 | 27 | 10 | 175 | 1 | 13 | 4 | 186 | 19 | 401 |
| 91,104 | 4 | 27 | 10 | 178 | 1 | 13 | 4 | 186 | 19 | 404 |
| 91,105 | 4 | 27 | 10 | 178 | 1 | 13 | 4 | 188 | 19 | 406 |
| 91,106 | 2 | 26 | 10 | 177 | 1 | 13 | 4 | 188 | 17 | 404 |
| 91,107 | 2 | 26 | 10 | 177 | 1 | 13 | 5 | 188 | 18 | 404 |
| 91,108 | 2 | 26 | 10 | 177 | 1 | 13 | 5 | 188 | 18 | 404 |
| 91,109 | 2 | 26 | 12 | 177 | 1 | 13 | 5 | 188 | 20 | 404 |
| 91,110 | 2 | 26 | 12 | 178 | 1 | 13 | 5 | 189 | 20 | 406 |
| 91,111 | 2 | 26 | 13 | 182 | 1 | 14 | 5 | 189 | 21 | 411 |
| 91,112 | 2 | 26 | 13 | 181 | 1 | 14 | 5 | 188 | 21 | 409 |
| 91,113 | 2 | 26 | 12 | 181 | 1 | 14 | 5 | 188 | 20 | 409 |
| 91,114 | 2 | 26 | 12 | 181 | 1 | 14 | 5 | 189 | 20 | 410 |
| 91,115 | 2 | 26 | 14 | 182 | 1 | 14 | 4 | 189 | 21 | 411 |
| 91,116 | 2 | 26 | 14 | 181 | 1 | 14 | 4 | 189 | 21 | 410 |
| 91,117 | 2 | 26 | 14 | 181 | 0 | 14 | 4 | 190 | 20 | 411 |
| 91,118 | 2 | 26 | 14 | 181 | 0 | 14 | 4 | 189 | 20 | 410 |
| 91,119 | 2 | 26 | 15 | 180 | 0 | 14 | 4 | 189 | 21 | 409 |
| 91,120 | 2 | 26 | 16 | 179 | 0 | 14 | 4 | 189 | 22 | 408 |
| 91,121 | 2 | 26 | 16 | 179 | 0 | 14 | 4 | 189 | 22 | 408 |
| 91,122 | 2 | 26 | 16 | 179 | 0 | 14 | 4 | 189 | 22 | 408 |
| 91,123 | 2 | 26 | 16 | 178 | 0 | 14 | 4 | 189 | 22 | 407 |
| 91,124 | 2 | 26 | 16 | 178 | 0 | 14 | 4 | 189 | 22 | 407 |
| 91,125 | 2 | 26 | 16 | 179 | 0 | 14 | 5 | 188 | 23 | 407 |
| 91,126 | 2 | 26 | 16 | 180 | 0 | 14 | 5 | 188 | 23 | 408 |
| 91,127 | 2 | 28 | 15 | 179 | 0 | 14 | 5 | 188 | 22 | 409 |
| 91,128 | 3 | 28 | 15 | 180 | 0 | 14 | 5 | 189 | 23 | 411 |
| 91,129 | 3 | 28 | 15 | 180 | 0 | 14 | 5 | 190 | 23 | 412 |
| 91,130 | 3 | 32 | 15 | 198 | 0 | 16 | 5 | 198 | 23 | 444 |
| 91,131 | 3 | 32 | 15 | 200 | 0 | 17 | 5 | 198 | 23 | 447 |

|        |   |    |    |     |   |    |    |     |    |     |
|--------|---|----|----|-----|---|----|----|-----|----|-----|
| 91,132 | 3 | 32 | 15 | 205 | 0 | 17 | 6  | 201 | 24 | 455 |
| 91,133 | 3 | 36 | 14 | 211 | 0 | 17 | 6  | 203 | 23 | 467 |
| 91,134 | 3 | 36 | 14 | 211 | 0 | 17 | 6  | 203 | 23 | 467 |
| 91,135 | 3 | 36 | 14 | 215 | 0 | 17 | 8  | 208 | 25 | 476 |
| 91,136 | 3 | 36 | 14 | 216 | 0 | 17 | 8  | 209 | 25 | 478 |
| 91,137 | 3 | 36 | 15 | 218 | 0 | 17 | 8  | 210 | 26 | 481 |
| 91,138 | 3 | 36 | 15 | 219 | 0 | 17 | 8  | 210 | 26 | 482 |
| 91,139 | 3 | 36 | 16 | 219 | 0 | 17 | 8  | 209 | 27 | 481 |
| 91,140 | 3 | 36 | 16 | 219 | 0 | 17 | 8  | 209 | 27 | 481 |
| 91,141 | 3 | 36 | 16 | 219 | 0 | 17 | 8  | 209 | 27 | 481 |
| 91,142 | 2 | 36 | 18 | 218 | 0 | 17 | 7  | 208 | 27 | 479 |
| 91,143 | 2 | 36 | 18 | 218 | 0 | 17 | 7  | 208 | 27 | 479 |
| 91,144 | 2 | 35 | 18 | 210 | 0 | 17 | 7  | 202 | 27 | 464 |
| 91,145 | 2 | 33 | 29 | 191 | 0 | 12 | 12 | 152 | 43 | 388 |
| 91,146 | 2 | 27 | 31 | 132 | 0 | 7  | 14 | 76  | 47 | 242 |
| 91,147 | 2 | 22 | 32 | 105 | 0 | 6  | 15 | 56  | 49 | 189 |
| 91,148 | 2 | 22 | 35 | 105 | 0 | 6  | 15 | 57  | 52 | 190 |
| 91,149 | 2 | 13 | 30 | 79  | 0 | 5  | 15 | 36  | 47 | 133 |
| 91,150 | 2 | 13 | 30 | 78  | 0 | 5  | 15 | 36  | 47 | 132 |
| 91,151 | 2 | 13 | 29 | 74  | 0 | 4  | 15 | 35  | 46 | 126 |
| 91,152 | 1 | 12 | 29 | 73  | 0 | 4  | 15 | 35  | 45 | 124 |
| 91,153 | 1 | 14 | 29 | 81  | 0 | 5  | 16 | 40  | 46 | 140 |
| 91,154 | 1 | 13 | 29 | 65  | 0 | 5  | 15 | 36  | 45 | 119 |
| 91,155 | 3 | 13 | 29 | 61  | 0 | 5  | 15 | 34  | 47 | 113 |
| 91,156 | 3 | 14 | 29 | 61  | 0 | 5  | 15 | 34  | 47 | 114 |
| 91,157 | 3 | 14 | 29 | 62  | 0 | 5  | 15 | 34  | 47 | 115 |
| 91,158 | 3 | 14 | 29 | 62  | 0 | 5  | 15 | 34  | 47 | 115 |
| 91,159 | 3 | 14 | 29 | 62  | 0 | 5  | 15 | 34  | 47 | 115 |
| 91,160 | 3 | 15 | 27 | 61  | 0 | 5  | 15 | 33  | 45 | 114 |
| 91,161 | 3 | 15 | 27 | 61  | 0 | 5  | 15 | 33  | 45 | 114 |
| 91,162 | 3 | 14 | 26 | 57  | 0 | 4  | 16 | 33  | 45 | 108 |
| 91,163 | 4 | 14 | 26 | 57  | 0 | 4  | 16 | 33  | 46 | 108 |
| 91,164 | 4 | 14 | 26 | 56  | 0 | 4  | 16 | 32  | 46 | 106 |
| 91,165 | 4 | 14 | 26 | 56  | 0 | 4  | 16 | 32  | 46 | 106 |
| 91,166 | 4 | 14 | 24 | 56  | 0 | 4  | 15 | 32  | 43 | 106 |
| 91,167 | 4 | 14 | 24 | 57  | 0 | 4  | 15 | 33  | 43 | 108 |
| 91,168 | 5 | 14 | 24 | 57  | 0 | 4  | 15 | 32  | 44 | 107 |
| 91,169 | 5 | 14 | 23 | 57  | 0 | 4  | 15 | 32  | 43 | 107 |
| 91,170 | 5 | 14 | 22 | 57  | 0 | 4  | 15 | 32  | 42 | 107 |
| 91,171 | 5 | 14 | 22 | 57  | 0 | 4  | 15 | 32  | 42 | 107 |
| 91,172 | 5 | 14 | 24 | 57  | 0 | 4  | 15 | 32  | 44 | 107 |



|        |   |    |    |    |   |   |    |    |    |     |
|--------|---|----|----|----|---|---|----|----|----|-----|
| 91,173 | 5 | 14 | 24 | 57 | 0 | 4 | 15 | 32 | 44 | 107 |
| 91,174 | 5 | 14 | 24 | 57 | 0 | 4 | 15 | 32 | 44 | 107 |
| 91,175 | 5 | 14 | 24 | 57 | 0 | 4 | 15 | 32 | 44 | 107 |
| 91,176 | 5 | 14 | 23 | 55 | 0 | 4 | 14 | 32 | 42 | 105 |
| 91,177 | 5 | 12 | 23 | 55 | 0 | 4 | 14 | 32 | 42 | 103 |
| 91,178 | 5 | 13 | 23 | 54 | 0 | 4 | 14 | 31 | 42 | 102 |
| 91,179 | 4 | 13 | 24 | 54 | 0 | 4 | 15 | 32 | 43 | 103 |
| 91,180 | 4 | 9  | 24 | 34 | 0 | 1 | 16 | 23 | 44 | 67  |
| 91,181 | 4 | 9  | 24 | 37 | 0 | 1 | 16 | 24 | 44 | 71  |
| 91,182 | 4 | 10 | 24 | 38 | 0 | 1 | 17 | 27 | 45 | 76  |
| 91,183 | 4 | 10 | 24 | 35 | 0 | 1 | 16 | 26 | 44 | 72  |
| 91,184 | 4 | 6  | 24 | 33 | 0 | 1 | 17 | 25 | 45 | 65  |
| 91,185 | 4 | 6  | 24 | 38 | 0 | 1 | 17 | 30 | 45 | 75  |
| 91,186 | 4 | 6  | 24 | 38 | 0 | 1 | 16 | 25 | 44 | 70  |
| 91,187 | 4 | 7  | 23 | 38 | 0 | 1 | 16 | 25 | 43 | 71  |
| 91,188 | 4 | 7  | 23 | 35 | 0 | 1 | 16 | 23 | 43 | 66  |
| 91,189 | 4 | 7  | 24 | 35 | 0 | 1 | 17 | 23 | 45 | 66  |
| 91,190 | 4 | 7  | 23 | 35 | 0 | 1 | 17 | 23 | 44 | 66  |
| 91,191 | 4 | 7  | 23 | 36 | 0 | 1 | 17 | 23 | 44 | 67  |
| 91,192 | 4 | 7  | 23 | 36 | 0 | 1 | 18 | 24 | 45 | 68  |
| 91,193 | 4 | 8  | 21 | 37 | 0 | 1 | 18 | 24 | 43 | 70  |
| 91,194 | 4 | 8  | 21 | 37 | 0 | 1 | 18 | 24 | 43 | 70  |
| 91,195 | 4 | 8  | 10 | 37 | 0 | 1 | 13 | 25 | 27 | 71  |
| 91,196 | 4 | 8  | 10 | 37 | 0 | 1 | 13 | 25 | 27 | 71  |
| 91,197 | 4 | 8  | 8  | 41 | 0 | 1 | 12 | 25 | 24 | 75  |
| 91,198 | 4 | 8  | 7  | 38 | 0 | 1 | 10 | 25 | 21 | 72  |
| 91,199 | 4 | 9  | 4  | 40 | 0 | 1 | 10 | 24 | 18 | 74  |
| 91,200 | 5 | 9  | 6  | 59 | 2 | 1 | 12 | 29 | 25 | 98  |
| 91,201 | 5 | 10 | 6  | 72 | 2 | 2 | 13 | 36 | 26 | 120 |
| 91,202 | 5 | 10 | 6  | 82 | 2 | 2 | 13 | 43 | 26 | 137 |
| 91,203 | 4 | 10 | 6  | 83 | 2 | 2 | 13 | 47 | 25 | 142 |
| 91,204 | 4 | 8  | 6  | 74 | 2 | 1 | 13 | 44 | 25 | 127 |
| 91,205 | 3 | 8  | 6  | 75 | 2 | 2 | 13 | 46 | 24 | 131 |
| 91,206 | 3 | 7  | 6  | 75 | 2 | 2 | 13 | 46 | 24 | 130 |
| 91,207 | 3 | 7  | 6  | 74 | 2 | 2 | 13 | 47 | 24 | 130 |
| 91,208 | 3 | 7  | 6  | 74 | 2 | 2 | 13 | 48 | 24 | 131 |
| 91,209 | 3 | 7  | 6  | 75 | 2 | 3 | 12 | 50 | 23 | 135 |
| 91,210 | 3 | 7  | 6  | 75 | 2 | 3 | 13 | 51 | 24 | 136 |
| 91,211 | 3 | 7  | 6  | 79 | 2 | 3 | 13 | 54 | 24 | 143 |
| 91,212 | 3 | 7  | 6  | 80 | 2 | 3 | 12 | 54 | 23 | 144 |
| 91,213 | 3 | 7  | 7  | 80 | 2 | 3 | 12 | 56 | 24 | 146 |

|        |   |   |    |    |   |   |    |    |    |     |
|--------|---|---|----|----|---|---|----|----|----|-----|
| 91,214 | 2 | 7 | 9  | 82 | 2 | 3 | 13 | 56 | 26 | 148 |
| 91,215 | 2 | 7 | 9  | 82 | 2 | 3 | 13 | 57 | 26 | 149 |
| 91,216 | 2 | 7 | 9  | 81 | 2 | 3 | 13 | 56 | 26 | 147 |
| 91,217 | 2 | 7 | 9  | 82 | 2 | 3 | 13 | 56 | 26 | 148 |
| 91,218 | 2 | 7 | 9  | 83 | 2 | 3 | 13 | 56 | 26 | 149 |
| 91,219 | 1 | 7 | 9  | 83 | 2 | 3 | 13 | 56 | 25 | 149 |
| 91,220 | 1 | 7 | 10 | 83 | 2 | 3 | 13 | 56 | 26 | 149 |
| 91,221 | 1 | 7 | 11 | 83 | 2 | 3 | 13 | 56 | 27 | 149 |
| 91,222 | 1 | 7 | 11 | 83 | 2 | 3 | 13 | 56 | 27 | 149 |
| 91,223 | 1 | 7 | 10 | 83 | 2 | 3 | 13 | 56 | 26 | 149 |
| 91,224 | 2 | 8 | 10 | 83 | 2 | 3 | 13 | 56 | 27 | 150 |
| 91,225 | 3 | 8 | 10 | 83 | 2 | 3 | 13 | 56 | 28 | 150 |
| 91,226 | 3 | 8 | 10 | 83 | 2 | 3 | 13 | 56 | 28 | 150 |
| 91,227 | 3 | 8 | 10 | 84 | 2 | 3 | 13 | 56 | 28 | 151 |
| 91,228 | 3 | 7 | 10 | 84 | 2 | 3 | 13 | 56 | 28 | 150 |
| 91,229 | 3 | 7 | 10 | 84 | 2 | 3 | 13 | 56 | 28 | 150 |
| 91,230 | 3 | 7 | 9  | 83 | 3 | 3 | 12 | 55 | 27 | 148 |
| 91,231 | 3 | 7 | 9  | 80 | 3 | 3 | 11 | 54 | 26 | 144 |
| 91,232 | 3 | 7 | 9  | 80 | 3 | 3 | 11 | 54 | 26 | 144 |
| 91,233 | 3 | 6 | 9  | 77 | 3 | 3 | 10 | 49 | 25 | 135 |
| 91,234 | 3 | 6 | 9  | 77 | 3 | 3 | 10 | 49 | 25 | 135 |
| 91,235 | 3 | 6 | 9  | 67 | 3 | 3 | 8  | 43 | 23 | 119 |
| 91,236 | 3 | 6 | 9  | 67 | 3 | 3 | 8  | 43 | 23 | 119 |
| 91,237 | 3 | 5 | 9  | 63 | 3 | 3 | 8  | 42 | 23 | 113 |
| 91,238 | 3 | 5 | 9  | 63 | 3 | 3 | 8  | 42 | 23 | 113 |
| 91,239 | 3 | 5 | 9  | 63 | 3 | 3 | 8  | 42 | 23 | 113 |
| 91,240 | 3 | 5 | 8  | 64 | 3 | 3 | 7  | 43 | 21 | 115 |
| 91,241 | 3 | 5 | 8  | 64 | 3 | 3 | 7  | 43 | 21 | 115 |
| 91,242 | 4 | 5 | 11 | 64 | 3 | 3 | 7  | 42 | 25 | 114 |
| 91,243 | 4 | 4 | 11 | 63 | 3 | 3 | 6  | 42 | 24 | 112 |
| 91,244 | 4 | 4 | 11 | 63 | 3 | 3 | 6  | 42 | 24 | 112 |
| 91,245 | 4 | 4 | 11 | 63 | 3 | 3 | 6  | 41 | 24 | 111 |
| 91,246 | 4 | 4 | 11 | 65 | 3 | 3 | 6  | 41 | 24 | 113 |
| 91,247 | 4 | 5 | 11 | 68 | 3 | 3 | 6  | 50 | 24 | 126 |
| 91,248 | 4 | 5 | 11 | 65 | 3 | 3 | 5  | 50 | 23 | 123 |
| 91,249 | 5 | 5 | 11 | 44 | 3 | 3 | 6  | 45 | 25 | 97  |
| 91,250 | 5 | 6 | 12 | 47 | 3 | 3 | 6  | 47 | 26 | 103 |
| 91,251 | 4 | 6 | 10 | 47 | 1 | 3 | 4  | 48 | 19 | 104 |
| 91,252 | 4 | 5 | 10 | 24 | 1 | 2 | 3  | 35 | 18 | 66  |
| 91,253 | 4 | 5 | 10 | 25 | 1 | 2 | 3  | 35 | 18 | 67  |
| 91,254 | 4 | 5 | 10 | 24 | 1 | 2 | 3  | 29 | 18 | 60  |

|        |   |    |    |     |   |    |   |     |    |     |
|--------|---|----|----|-----|---|----|---|-----|----|-----|
| 91,255 | 4 | 5  | 10 | 24  | 1 | 2  | 3 | 30  | 18 | 61  |
| 91,256 | 4 | 5  | 11 | 23  | 1 | 1  | 3 | 28  | 19 | 57  |
| 91,257 | 4 | 6  | 15 | 28  | 1 | 2  | 3 | 36  | 23 | 72  |
| 91,258 | 4 | 6  | 15 | 37  | 1 | 3  | 3 | 39  | 23 | 85  |
| 91,259 | 4 | 6  | 16 | 77  | 1 | 5  | 3 | 56  | 24 | 144 |
| 91,260 | 4 | 6  | 16 | 114 | 1 | 6  | 3 | 69  | 24 | 195 |
| 91,261 | 4 | 12 | 16 | 206 | 1 | 7  | 2 | 90  | 23 | 315 |
| 91,262 | 4 | 12 | 16 | 292 | 1 | 13 | 2 | 134 | 23 | 451 |
| 91,263 | 4 | 16 | 16 | 508 | 1 | 14 | 2 | 159 | 23 | 697 |
| 91,264 | 4 | 16 | 14 | 516 | 1 | 15 | 2 | 161 | 21 | 708 |
| 91,265 | 6 | 20 | 15 | 540 | 1 | 15 | 1 | 164 | 23 | 739 |
| 91,266 | 6 | 22 | 15 | 543 | 1 | 15 | 1 | 164 | 23 | 744 |
| 91,267 | 6 | 22 | 17 | 545 | 1 | 15 | 1 | 164 | 25 | 746 |
| 91,268 | 6 | 23 | 17 | 545 | 1 | 15 | 1 | 164 | 25 | 747 |
| 91,269 | 6 | 23 | 17 | 545 | 1 | 15 | 1 | 164 | 25 | 747 |
| 91,270 | 6 | 24 | 17 | 545 | 1 | 15 | 1 | 164 | 25 | 748 |
| 91,271 | 6 | 24 | 16 | 545 | 1 | 15 | 1 | 164 | 24 | 748 |
| 91,272 | 6 | 24 | 15 | 545 | 1 | 15 | 1 | 164 | 23 | 748 |
| 91,273 | 6 | 24 | 14 | 545 | 1 | 15 | 1 | 165 | 22 | 749 |
| 91,274 | 5 | 24 | 14 | 545 | 1 | 15 | 1 | 166 | 21 | 750 |
| 91,275 | 4 | 23 | 14 | 547 | 1 | 15 | 1 | 172 | 20 | 757 |
| 91,276 | 4 | 25 | 14 | 549 | 1 | 16 | 1 | 175 | 20 | 765 |
| 91,277 | 4 | 25 | 14 | 549 | 1 | 16 | 1 | 175 | 20 | 765 |
| 91,278 | 4 | 25 | 14 | 550 | 1 | 16 | 1 | 178 | 20 | 769 |
| 91,279 | 4 | 27 | 14 | 568 | 1 | 17 | 1 | 186 | 20 | 798 |
| 91,280 | 4 | 27 | 14 | 582 | 0 | 17 | 1 | 193 | 19 | 819 |
| 91,281 | 5 | 28 | 14 | 582 | 1 | 17 | 1 | 194 | 21 | 821 |
| 91,282 | 5 | 28 | 14 | 585 | 1 | 17 | 1 | 195 | 21 | 825 |
| 91,283 | 5 | 29 | 14 | 590 | 1 | 17 | 1 | 200 | 21 | 836 |
| 91,284 | 5 | 31 | 14 | 596 | 1 | 17 | 1 | 203 | 21 | 847 |
| 91,285 | 5 | 31 | 14 | 599 | 1 | 17 | 1 | 207 | 21 | 854 |
| 91,286 | 5 | 31 | 14 | 601 | 1 | 17 | 1 | 207 | 21 | 856 |
| 91,287 | 5 | 31 | 14 | 604 | 1 | 17 | 1 | 207 | 21 | 859 |
| 91,288 | 6 | 31 | 14 | 604 | 1 | 17 | 2 | 207 | 23 | 859 |
| 91,289 | 6 | 31 | 14 | 604 | 1 | 17 | 2 | 208 | 23 | 860 |
| 91,290 | 6 | 31 | 14 | 605 | 1 | 17 | 2 | 208 | 23 | 861 |
| 91,291 | 6 | 31 | 14 | 604 | 1 | 17 | 2 | 207 | 23 | 859 |
| 91,292 | 6 | 31 | 12 | 609 | 1 | 17 | 2 | 207 | 21 | 864 |
| 91,293 | 5 | 31 | 11 | 610 | 1 | 17 | 2 | 207 | 19 | 865 |
| 91,294 | 5 | 31 | 11 | 611 | 1 | 17 | 2 | 211 | 19 | 870 |
| 91,295 | 5 | 31 | 11 | 612 | 1 | 17 | 2 | 211 | 19 | 871 |

|        |   |    |    |     |   |    |   |     |    |     |
|--------|---|----|----|-----|---|----|---|-----|----|-----|
| 91,296 | 5 | 31 | 11 | 612 | 1 | 17 | 1 | 212 | 18 | 872 |
| 91,297 | 5 | 31 | 13 | 610 | 1 | 17 | 2 | 212 | 21 | 870 |
| 91,298 | 4 | 30 | 13 | 606 | 1 | 17 | 2 | 203 | 20 | 856 |
| 91,299 | 4 | 28 | 13 | 602 | 1 | 17 | 2 | 199 | 20 | 846 |
| 91,300 | 4 | 29 | 13 | 602 | 1 | 17 | 2 | 199 | 20 | 847 |
| 91,301 | 4 | 29 | 12 | 603 | 1 | 17 | 2 | 199 | 19 | 848 |
| 91,302 | 4 | 29 | 12 | 603 | 1 | 17 | 2 | 197 | 19 | 846 |
| 91,303 | 4 | 29 | 12 | 604 | 1 | 17 | 2 | 196 | 19 | 846 |
| 91,304 | 5 | 29 | 12 | 605 | 1 | 17 | 2 | 197 | 20 | 848 |
| 91,305 | 5 | 29 | 12 | 611 | 1 | 17 | 2 | 197 | 20 | 854 |
| 91,306 | 5 | 29 | 11 | 624 | 1 | 17 | 2 | 200 | 19 | 870 |
| 91,307 | 5 | 30 | 11 | 657 | 1 | 18 | 3 | 211 | 20 | 916 |
| 91,308 | 5 | 29 | 7  | 654 | 1 | 17 | 3 | 208 | 16 | 908 |
| 91,309 | 5 | 29 | 7  | 615 | 1 | 14 | 3 | 191 | 16 | 849 |
| 91,310 | 5 | 29 | 7  | 616 | 1 | 14 | 3 | 191 | 16 | 850 |
| 91,311 | 5 | 29 | 7  | 581 | 1 | 12 | 3 | 177 | 16 | 799 |
| 91,312 | 5 | 23 | 7  | 493 | 1 | 11 | 3 | 155 | 16 | 682 |
| 91,313 | 5 | 23 | 7  | 403 | 1 | 5  | 3 | 107 | 16 | 538 |
| 91,314 | 5 | 19 | 6  | 179 | 1 | 3  | 3 | 81  | 15 | 282 |
| 91,315 | 5 | 19 | 6  | 181 | 1 | 3  | 3 | 81  | 15 | 284 |
| 91,316 | 3 | 13 | 5  | 153 | 1 | 6  | 3 | 78  | 12 | 250 |
| 91,317 | 3 | 16 | 5  | 166 | 1 | 6  | 3 | 90  | 12 | 278 |
| 91,318 | 3 | 15 | 3  | 177 | 1 | 7  | 3 | 103 | 10 | 302 |
| 91,319 | 3 | 15 | 3  | 180 | 1 | 8  | 3 | 105 | 10 | 308 |
| 91,320 | 3 | 18 | 3  | 202 | 2 | 11 | 3 | 125 | 11 | 356 |
| 91,321 | 3 | 17 | 3  | 219 | 2 | 12 | 3 | 139 | 11 | 387 |
| 91,322 | 3 | 17 | 3  | 219 | 2 | 12 | 3 | 139 | 11 | 387 |
| 91,323 | 4 | 19 | 3  | 221 | 2 | 12 | 3 | 142 | 12 | 394 |
| 91,324 | 4 | 19 | 3  | 225 | 2 | 12 | 3 | 142 | 12 | 398 |
| 91,325 | 4 | 19 | 3  | 232 | 2 | 12 | 3 | 143 | 12 | 406 |
| 91,326 | 4 | 19 | 3  | 231 | 2 | 12 | 3 | 137 | 12 | 399 |
| 91,327 | 5 | 17 | 3  | 229 | 2 | 11 | 3 | 135 | 13 | 392 |
| 91,328 | 5 | 17 | 3  | 229 | 2 | 11 | 3 | 135 | 13 | 392 |
| 91,329 | 5 | 15 | 3  | 209 | 2 | 11 | 3 | 123 | 13 | 358 |
| 91,330 | 5 | 15 | 3  | 195 | 2 | 11 | 3 | 116 | 13 | 337 |
| 91,331 | 5 | 15 | 3  | 196 | 2 | 11 | 3 | 116 | 13 | 338 |
| 91,332 | 4 | 14 | 3  | 197 | 1 | 11 | 3 | 116 | 11 | 338 |
| 91,333 | 4 | 14 | 3  | 195 | 1 | 11 | 3 | 115 | 11 | 335 |
| 91,334 | 4 | 13 | 3  | 190 | 1 | 11 | 3 | 110 | 11 | 324 |
| 91,335 | 4 | 11 | 3  | 179 | 1 | 11 | 3 | 104 | 11 | 305 |
| 91,336 | 4 | 11 | 5  | 179 | 1 | 11 | 4 | 104 | 14 | 305 |

|        |   |    |    |     |   |    |   |     |    |     |
|--------|---|----|----|-----|---|----|---|-----|----|-----|
| 91,337 | 4 | 11 | 5  | 179 | 1 | 11 | 4 | 104 | 14 | 305 |
| 91,338 | 3 | 11 | 5  | 176 | 1 | 11 | 3 | 104 | 12 | 302 |
| 91,339 | 3 | 11 | 5  | 176 | 1 | 11 | 3 | 103 | 12 | 301 |
| 91,340 | 3 | 11 | 5  | 175 | 1 | 11 | 3 | 103 | 12 | 300 |
| 91,341 | 3 | 11 | 5  | 175 | 1 | 11 | 3 | 103 | 12 | 300 |
| 91,342 | 3 | 11 | 5  | 169 | 1 | 11 | 3 | 103 | 12 | 294 |
| 91,343 | 3 | 11 | 6  | 170 | 1 | 11 | 3 | 103 | 13 | 295 |
| 91,344 | 3 | 11 | 7  | 169 | 1 | 11 | 3 | 103 | 14 | 294 |
| 91,345 | 3 | 11 | 7  | 168 | 1 | 11 | 3 | 99  | 14 | 289 |
| 91,346 | 3 | 11 | 9  | 167 | 1 | 11 | 3 | 98  | 16 | 287 |
| 91,347 | 3 | 12 | 10 | 167 | 1 | 11 | 3 | 98  | 17 | 288 |
| 91,348 | 3 | 12 | 8  | 167 | 1 | 11 | 2 | 98  | 14 | 288 |
| 91,349 | 3 | 12 | 8  | 167 | 1 | 11 | 3 | 98  | 15 | 288 |
| 91,350 | 3 | 11 | 9  | 167 | 1 | 11 | 3 | 98  | 16 | 287 |
| 91,351 | 3 | 11 | 9  | 166 | 1 | 11 | 3 | 98  | 16 | 286 |
| 91,352 | 3 | 11 | 9  | 166 | 1 | 11 | 3 | 98  | 16 | 286 |
| 91,353 | 3 | 11 | 11 | 165 | 1 | 11 | 4 | 98  | 19 | 285 |
| 91,354 | 3 | 11 | 13 | 163 | 2 | 11 | 4 | 97  | 22 | 282 |
| 91,355 | 2 | 11 | 13 | 159 | 2 | 11 | 4 | 97  | 21 | 278 |
| 91,356 | 2 | 11 | 13 | 159 | 2 | 11 | 4 | 99  | 21 | 280 |
| 91,357 | 2 | 11 | 18 | 169 | 2 | 11 | 4 | 106 | 26 | 297 |
| 91,358 | 2 | 10 | 18 | 147 | 2 | 10 | 3 | 107 | 25 | 274 |
| 91,359 | 2 | 10 | 18 | 150 | 2 | 10 | 3 | 105 | 25 | 275 |
| 91,360 | 2 | 10 | 17 | 143 | 2 | 11 | 3 | 104 | 24 | 268 |
| 91,361 | 2 | 10 | 17 | 145 | 2 | 11 | 3 | 104 | 24 | 270 |
| 91,362 | 3 | 10 | 18 | 142 | 2 | 11 | 3 | 103 | 26 | 266 |
| 91,363 | 3 | 9  | 18 | 139 | 2 | 11 | 3 | 103 | 26 | 262 |
| 91,364 | 3 | 9  | 18 | 138 | 2 | 11 | 4 | 102 | 27 | 260 |
| 91,365 | 3 | 11 | 19 | 148 | 2 | 11 | 4 | 114 | 28 | 284 |
| 91,366 | 3 | 11 | 19 | 150 | 2 | 11 | 4 | 117 | 28 | 289 |
| 91,367 | 3 | 11 | 19 | 152 | 2 | 8  | 4 | 117 | 28 | 288 |
| 91,368 | 3 | 8  | 19 | 145 | 2 | 8  | 4 | 112 | 28 | 273 |
| 91,369 | 3 | 8  | 19 | 141 | 2 | 7  | 4 | 104 | 28 | 260 |
| 91,370 | 4 | 8  | 19 | 150 | 2 | 6  | 4 | 111 | 29 | 275 |
| 91,371 | 4 | 5  | 19 | 128 | 1 | 3  | 4 | 92  | 28 | 228 |
| 91,372 | 4 | 5  | 19 | 118 | 1 | 2  | 4 | 80  | 28 | 205 |
| 91,373 | 3 | 5  | 19 | 121 | 1 | 2  | 4 | 80  | 27 | 208 |
| 91,374 | 3 | 3  | 22 | 108 | 1 | 2  | 4 | 74  | 30 | 187 |
| 91,375 | 3 | 3  | 23 | 112 | 1 | 2  | 4 | 74  | 31 | 191 |
| 91,376 | 2 | 3  | 23 | 113 | 1 | 2  | 4 | 74  | 30 | 192 |
| 91,377 | 3 | 3  | 23 | 114 | 1 | 3  | 4 | 74  | 31 | 194 |

|        |   |    |    |     |   |   |   |     |    |     |
|--------|---|----|----|-----|---|---|---|-----|----|-----|
| 91,378 | 3 | 3  | 23 | 114 | 1 | 3 | 4 | 76  | 31 | 196 |
| 91,379 | 3 | 3  | 23 | 115 | 1 | 3 | 4 | 76  | 31 | 197 |
| 91,380 | 3 | 3  | 23 | 115 | 1 | 2 | 4 | 76  | 31 | 196 |
| 91,381 | 3 | 3  | 23 | 116 | 1 | 2 | 4 | 78  | 31 | 199 |
| 91,382 | 3 | 3  | 23 | 120 | 1 | 2 | 4 | 80  | 31 | 205 |
| 91,383 | 3 | 3  | 23 | 122 | 1 | 2 | 4 | 83  | 31 | 210 |
| 91,384 | 3 | 3  | 23 | 121 | 1 | 2 | 4 | 84  | 31 | 210 |
| 91,385 | 3 | 3  | 23 | 122 | 1 | 2 | 4 | 86  | 31 | 213 |
| 91,386 | 3 | 3  | 23 | 123 | 1 | 2 | 4 | 85  | 31 | 213 |
| 91,387 | 3 | 3  | 21 | 123 | 1 | 2 | 3 | 85  | 28 | 213 |
| 91,388 | 3 | 3  | 21 | 123 | 1 | 2 | 3 | 86  | 28 | 214 |
| 91,389 | 3 | 3  | 21 | 125 | 1 | 2 | 3 | 86  | 28 | 216 |
| 91,390 | 3 | 3  | 21 | 125 | 1 | 2 | 3 | 86  | 28 | 216 |
| 91,391 | 3 | 3  | 21 | 127 | 1 | 2 | 3 | 86  | 28 | 218 |
| 91,392 | 3 | 4  | 21 | 128 | 1 | 2 | 4 | 89  | 29 | 223 |
| 91,393 | 3 | 4  | 21 | 128 | 1 | 2 | 4 | 89  | 29 | 223 |
| 91,394 | 3 | 4  | 20 | 127 | 1 | 2 | 6 | 90  | 30 | 223 |
| 91,395 | 3 | 5  | 19 | 127 | 1 | 2 | 6 | 90  | 29 | 224 |
| 91,396 | 3 | 6  | 19 | 130 | 1 | 2 | 6 | 91  | 29 | 229 |
| 91,397 | 3 | 6  | 17 | 130 | 1 | 2 | 6 | 91  | 27 | 229 |
| 91,398 | 3 | 5  | 16 | 130 | 1 | 2 | 6 | 92  | 26 | 229 |
| 91,399 | 3 | 7  | 16 | 132 | 1 | 2 | 6 | 92  | 26 | 233 |
| 91,400 | 3 | 7  | 16 | 134 | 1 | 2 | 4 | 94  | 24 | 237 |
| 91,401 | 3 | 7  | 15 | 134 | 1 | 2 | 5 | 94  | 24 | 237 |
| 91,402 | 3 | 7  | 15 | 135 | 1 | 2 | 5 | 97  | 24 | 241 |
| 91,403 | 3 | 7  | 13 | 134 | 1 | 2 | 5 | 99  | 22 | 242 |
| 91,404 | 3 | 7  | 13 | 139 | 1 | 2 | 5 | 101 | 22 | 249 |
| 91,405 | 3 | 7  | 11 | 140 | 0 | 2 | 4 | 101 | 18 | 250 |
| 91,406 | 4 | 7  | 11 | 139 | 0 | 2 | 4 | 99  | 19 | 247 |
| 91,407 | 4 | 7  | 11 | 142 | 0 | 3 | 4 | 107 | 19 | 259 |
| 91,408 | 4 | 7  | 6  | 110 | 0 | 3 | 4 | 85  | 14 | 205 |
| 91,409 | 4 | 10 | 7  | 116 | 0 | 3 | 4 | 95  | 15 | 224 |
| 91,410 | 4 | 10 | 7  | 119 | 0 | 3 | 4 | 97  | 15 | 229 |
| 91,411 | 4 | 10 | 7  | 116 | 0 | 2 | 4 | 95  | 15 | 223 |
| 91,412 | 5 | 10 | 8  | 113 | 0 | 2 | 4 | 94  | 17 | 219 |
| 91,413 | 4 | 13 | 7  | 113 | 0 | 2 | 4 | 96  | 15 | 224 |
| 91,414 | 4 | 13 | 7  | 115 | 0 | 2 | 4 | 98  | 15 | 228 |
| 91,415 | 4 | 13 | 7  | 115 | 0 | 2 | 3 | 98  | 14 | 228 |
| 91,416 | 4 | 11 | 6  | 105 | 0 | 2 | 3 | 86  | 13 | 204 |
| 91,417 | 4 | 11 | 12 | 101 | 0 | 2 | 4 | 82  | 20 | 196 |
| 91,418 | 4 | 11 | 13 | 92  | 0 | 2 | 5 | 74  | 22 | 179 |

|        |   |    |    |     |   |    |   |     |    |     |
|--------|---|----|----|-----|---|----|---|-----|----|-----|
| 91,419 | 4 | 11 | 16 | 81  | 0 | 2  | 5 | 70  | 25 | 164 |
| 91,420 | 4 | 11 | 16 | 81  | 0 | 2  | 5 | 70  | 25 | 164 |
| 91,421 | 3 | 11 | 18 | 70  | 0 | 2  | 5 | 61  | 26 | 144 |
| 91,422 | 3 | 11 | 19 | 63  | 0 | 2  | 6 | 59  | 28 | 135 |
| 91,423 | 3 | 11 | 19 | 63  | 0 | 2  | 6 | 59  | 28 | 135 |
| 91,424 | 3 | 11 | 19 | 60  | 0 | 2  | 7 | 59  | 29 | 132 |
| 91,425 | 3 | 11 | 16 | 56  | 0 | 2  | 7 | 59  | 26 | 128 |
| 91,426 | 3 | 11 | 15 | 56  | 0 | 2  | 7 | 59  | 25 | 128 |
| 91,427 | 2 | 11 | 15 | 55  | 0 | 2  | 7 | 59  | 24 | 127 |
| 91,428 | 2 | 11 | 16 | 53  | 0 | 1  | 7 | 60  | 25 | 125 |
| 91,429 | 2 | 11 | 16 | 52  | 0 | 1  | 7 | 58  | 25 | 122 |
| 91,430 | 2 | 11 | 16 | 52  | 0 | 1  | 7 | 58  | 25 | 122 |
| 91,431 | 2 | 11 | 16 | 52  | 0 | 1  | 7 | 58  | 25 | 122 |
| 91,432 | 3 | 11 | 17 | 45  | 0 | 1  | 7 | 54  | 27 | 111 |
| 91,433 | 3 | 11 | 17 | 45  | 0 | 1  | 7 | 54  | 27 | 111 |
| 91,434 | 3 | 11 | 17 | 43  | 0 | 1  | 7 | 51  | 27 | 106 |
| 91,435 | 3 | 11 | 17 | 42  | 1 | 1  | 9 | 48  | 30 | 102 |
| 91,436 | 3 | 11 | 17 | 42  | 1 | 1  | 9 | 48  | 30 | 102 |
| 91,437 | 3 | 11 | 17 | 41  | 1 | 1  | 9 | 48  | 30 | 101 |
| 91,438 | 4 | 11 | 17 | 41  | 1 | 1  | 9 | 47  | 31 | 100 |
| 91,439 | 4 | 11 | 17 | 39  | 1 | 1  | 9 | 47  | 31 | 98  |
| 91,440 | 4 | 11 | 17 | 41  | 1 | 1  | 9 | 49  | 31 | 102 |
| 91,441 | 4 | 11 | 18 | 55  | 1 | 1  | 9 | 51  | 32 | 118 |
| 91,442 | 4 | 12 | 18 | 62  | 1 | 1  | 9 | 63  | 32 | 138 |
| 91,443 | 4 | 11 | 19 | 74  | 1 | 2  | 8 | 66  | 32 | 153 |
| 91,444 | 4 | 11 | 19 | 79  | 1 | 3  | 6 | 90  | 30 | 183 |
| 91,445 | 4 | 11 | 19 | 80  | 1 | 3  | 6 | 90  | 30 | 184 |
| 91,446 | 4 | 13 | 19 | 97  | 1 | 8  | 6 | 133 | 30 | 251 |
| 91,447 | 4 | 15 | 19 | 139 | 1 | 9  | 6 | 149 | 30 | 312 |
| 91,448 | 4 | 28 | 19 | 219 | 1 | 11 | 6 | 205 | 30 | 463 |
| 91,449 | 4 | 28 | 19 | 227 | 1 | 11 | 6 | 205 | 30 | 471 |
| 91,450 | 5 | 26 | 19 | 233 | 1 | 11 | 6 | 209 | 31 | 479 |
| 91,451 | 5 | 27 | 19 | 234 | 1 | 11 | 6 | 209 | 31 | 481 |
| 91,452 | 5 | 27 | 19 | 234 | 1 | 11 | 6 | 209 | 31 | 481 |
| 91,453 | 5 | 27 | 19 | 234 | 1 | 11 | 6 | 206 | 31 | 478 |
| 91,454 | 5 | 28 | 20 | 234 | 1 | 11 | 6 | 209 | 32 | 482 |
| 91,455 | 5 | 30 | 20 | 233 | 1 | 12 | 6 | 222 | 32 | 497 |
| 91,456 | 5 | 30 | 20 | 252 | 1 | 12 | 6 | 231 | 32 | 525 |
| 91,457 | 4 | 33 | 20 | 276 | 1 | 12 | 6 | 243 | 31 | 564 |
| 91,458 | 4 | 34 | 20 | 280 | 1 | 11 | 6 | 237 | 31 | 562 |
| 91,459 | 4 | 34 | 20 | 280 | 1 | 12 | 6 | 236 | 31 | 562 |

|        |   |    |    |     |   |    |   |     |    |     |
|--------|---|----|----|-----|---|----|---|-----|----|-----|
| 91,460 | 4 | 31 | 19 | 276 | 1 | 12 | 6 | 228 | 30 | 547 |
| 91,461 | 4 | 31 | 18 | 268 | 1 | 12 | 6 | 222 | 29 | 533 |
| 91,462 | 4 | 31 | 18 | 269 | 1 | 12 | 6 | 222 | 29 | 534 |
| 91,463 | 3 | 31 | 18 | 271 | 1 | 12 | 6 | 222 | 28 | 536 |
| 91,464 | 3 | 28 | 20 | 271 | 1 | 12 | 6 | 220 | 30 | 531 |
| 91,465 | 3 | 28 | 20 | 276 | 1 | 12 | 7 | 218 | 31 | 534 |
| 91,466 | 3 | 28 | 20 | 301 | 1 | 13 | 7 | 232 | 31 | 574 |
| 91,467 | 3 | 29 | 14 | 319 | 1 | 13 | 7 | 235 | 25 | 596 |
| 91,468 | 4 | 29 | 14 | 336 | 1 | 13 | 7 | 262 | 26 | 640 |
| 91,469 | 4 | 30 | 13 | 339 | 1 | 13 | 6 | 261 | 24 | 643 |
| 91,470 | 4 | 30 | 10 | 348 | 1 | 16 | 6 | 269 | 21 | 663 |
| 91,471 | 4 | 30 | 10 | 350 | 1 | 16 | 6 | 269 | 21 | 665 |
| 91,472 | 4 | 30 | 14 | 359 | 1 | 16 | 6 | 276 | 25 | 681 |
| 91,473 | 4 | 30 | 13 | 361 | 1 | 16 | 5 | 280 | 23 | 687 |
| 91,474 | 4 | 30 | 25 | 369 | 1 | 16 | 5 | 281 | 35 | 696 |
| 91,475 | 4 | 31 | 27 | 384 | 1 | 16 | 4 | 289 | 36 | 720 |
| 91,476 | 4 | 31 | 27 | 384 | 1 | 16 | 4 | 289 | 36 | 720 |
| 91,477 | 4 | 31 | 29 | 384 | 1 | 16 | 5 | 289 | 39 | 720 |
| 91,478 | 4 | 31 | 31 | 390 | 1 | 16 | 6 | 290 | 42 | 727 |
| 91,479 | 4 | 31 | 30 | 391 | 1 | 16 | 6 | 289 | 41 | 727 |
| 91,480 | 4 | 31 | 30 | 393 | 1 | 16 | 7 | 290 | 42 | 730 |
| 91,481 | 4 | 31 | 31 | 394 | 1 | 16 | 7 | 291 | 43 | 732 |
| 91,482 | 4 | 31 | 31 | 395 | 1 | 16 | 7 | 291 | 43 | 733 |
| 91,483 | 3 | 31 | 30 | 396 | 1 | 16 | 8 | 290 | 42 | 733 |
| 91,484 | 3 | 31 | 30 | 396 | 0 | 16 | 8 | 290 | 41 | 733 |
| 91,485 | 3 | 31 | 30 | 397 | 0 | 16 | 8 | 291 | 41 | 735 |
| 91,486 | 3 | 31 | 30 | 397 | 0 | 16 | 6 | 291 | 39 | 735 |
| 91,487 | 3 | 31 | 30 | 397 | 0 | 16 | 6 | 291 | 39 | 735 |
| 91,488 | 2 | 31 | 30 | 397 | 0 | 16 | 6 | 291 | 38 | 735 |
| 91,489 | 2 | 32 | 30 | 400 | 0 | 16 | 6 | 293 | 38 | 741 |
| 91,490 | 2 | 32 | 30 | 400 | 0 | 16 | 6 | 293 | 38 | 741 |
| 91,491 | 2 | 32 | 30 | 399 | 0 | 16 | 6 | 291 | 38 | 738 |
| 91,492 | 2 | 31 | 28 | 376 | 0 | 16 | 6 | 277 | 36 | 700 |
| 91,493 | 2 | 31 | 29 | 364 | 0 | 15 | 6 | 271 | 37 | 681 |
| 91,494 | 2 | 31 | 28 | 359 | 0 | 14 | 7 | 247 | 37 | 651 |
| 91,495 | 2 | 31 | 28 | 359 | 0 | 13 | 7 | 246 | 37 | 649 |
| 91,496 | 2 | 25 | 28 | 298 | 0 | 9  | 7 | 186 | 37 | 518 |
| 91,497 | 2 | 25 | 28 | 299 | 0 | 9  | 7 | 186 | 37 | 519 |
| 91,498 | 1 | 26 | 28 | 315 | 0 | 9  | 7 | 198 | 36 | 548 |
| 91,499 | 1 | 14 | 28 | 248 | 0 | 7  | 7 | 155 | 36 | 424 |
| 91,500 | 1 | 14 | 28 | 240 | 0 | 7  | 7 | 154 | 36 | 415 |



|        |   |    |    |     |   |    |   |     |    |     |
|--------|---|----|----|-----|---|----|---|-----|----|-----|
| 91,501 | 1 | 15 | 28 | 242 | 0 | 7  | 7 | 152 | 36 | 416 |
| 91,502 | 1 | 14 | 28 | 244 | 0 | 7  | 7 | 153 | 36 | 418 |
| 91,503 | 1 | 16 | 28 | 261 | 0 | 12 | 7 | 168 | 36 | 457 |
| 91,504 | 1 | 16 | 28 | 262 | 0 | 12 | 7 | 173 | 36 | 463 |
| 91,505 | 1 | 15 | 28 | 263 | 0 | 12 | 7 | 168 | 36 | 458 |
| 91,506 | 1 | 13 | 28 | 262 | 0 | 11 | 7 | 154 | 36 | 440 |
| 91,507 | 1 | 13 | 28 | 220 | 0 | 11 | 7 | 137 | 36 | 381 |
| 91,508 | 1 | 12 | 28 | 214 | 0 | 11 | 7 | 136 | 36 | 373 |
| 91,509 | 1 | 12 | 28 | 215 | 0 | 10 | 7 | 139 | 36 | 376 |
| 91,510 | 1 | 14 | 28 | 217 | 0 | 10 | 7 | 142 | 36 | 383 |
| 91,511 | 1 | 14 | 28 | 222 | 0 | 10 | 7 | 143 | 36 | 389 |
| 91,512 | 1 | 14 | 28 | 229 | 0 | 10 | 7 | 144 | 36 | 397 |
| 91,513 | 1 | 14 | 28 | 230 | 0 | 10 | 7 | 144 | 36 | 398 |
| 91,514 | 1 | 14 | 26 | 229 | 0 | 10 | 7 | 144 | 34 | 397 |
| 91,515 | 1 | 14 | 26 | 231 | 0 | 10 | 6 | 145 | 33 | 400 |
| 91,516 | 1 | 14 | 26 | 200 | 0 | 9  | 6 | 131 | 33 | 354 |
| 91,517 | 1 | 14 | 26 | 201 | 0 | 9  | 6 | 132 | 33 | 356 |
| 91,518 | 1 | 15 | 26 | 185 | 0 | 9  | 5 | 133 | 32 | 342 |
| 91,519 | 0 | 15 | 26 | 172 | 0 | 9  | 5 | 108 | 31 | 304 |
| 91,520 | 0 | 14 | 26 | 177 | 0 | 10 | 7 | 114 | 33 | 315 |
| 91,521 | 0 | 14 | 27 | 183 | 0 | 8  | 7 | 111 | 34 | 316 |
| 91,522 | 0 | 15 | 26 | 190 | 0 | 9  | 7 | 113 | 33 | 327 |
| 91,523 | 0 | 15 | 22 | 192 | 0 | 9  | 7 | 106 | 29 | 322 |
| 91,524 | 0 | 15 | 22 | 205 | 0 | 10 | 8 | 111 | 30 | 341 |
| 91,525 | 1 | 15 | 12 | 223 | 0 | 11 | 8 | 116 | 21 | 365 |
| 91,526 | 1 | 17 | 12 | 219 | 0 | 12 | 9 | 116 | 22 | 364 |
| 91,527 | 1 | 29 | 12 | 277 | 0 | 17 | 9 | 162 | 22 | 485 |
| 91,528 | 1 | 29 | 10 | 293 | 0 | 17 | 8 | 165 | 19 | 504 |
| 91,529 | 1 | 29 | 17 | 306 | 0 | 18 | 8 | 170 | 26 | 523 |
| 91,530 | 1 | 29 | 19 | 306 | 0 | 18 | 8 | 170 | 28 | 523 |
| 91,531 | 1 | 29 | 21 | 306 | 0 | 18 | 7 | 169 | 29 | 522 |
| 91,532 | 1 | 29 | 20 | 310 | 0 | 18 | 7 | 168 | 28 | 525 |
| 91,533 | 1 | 29 | 20 | 314 | 0 | 18 | 7 | 169 | 28 | 530 |
| 91,534 | 1 | 29 | 22 | 316 | 0 | 18 | 6 | 170 | 29 | 533 |
| 91,535 | 1 | 29 | 22 | 320 | 0 | 18 | 6 | 170 | 29 | 537 |
| 91,536 | 1 | 29 | 22 | 320 | 0 | 18 | 6 | 169 | 29 | 536 |
| 91,537 | 1 | 29 | 22 | 320 | 0 | 18 | 6 | 169 | 29 | 536 |
| 91,538 | 1 | 30 | 22 | 320 | 0 | 18 | 6 | 169 | 29 | 537 |
| 91,539 | 1 | 30 | 22 | 325 | 0 | 18 | 6 | 172 | 29 | 545 |
| 91,540 | 1 | 36 | 22 | 337 | 0 | 20 | 6 | 186 | 29 | 579 |
| 91,541 | 1 | 36 | 22 | 339 | 0 | 20 | 6 | 187 | 29 | 582 |

|        |   |    |    |     |   |    |    |     |    |       |
|--------|---|----|----|-----|---|----|----|-----|----|-------|
| 91,542 | 1 | 36 | 40 | 339 | 0 | 20 | 12 | 188 | 53 | 583   |
| 91,543 | 1 | 36 | 42 | 346 | 0 | 20 | 12 | 190 | 55 | 592   |
| 91,544 | 1 | 36 | 42 | 347 | 0 | 22 | 12 | 190 | 55 | 595   |
| 91,545 | 1 | 36 | 42 | 352 | 0 | 22 | 11 | 193 | 54 | 603   |
| 91,546 | 2 | 36 | 43 | 353 | 0 | 21 | 12 | 195 | 57 | 605   |
| 91,547 | 2 | 36 | 43 | 359 | 0 | 21 | 12 | 197 | 57 | 613   |
| 91,548 | 2 | 37 | 46 | 375 | 0 | 21 | 12 | 210 | 60 | 643   |
| 91,549 | 2 | 36 | 47 | 364 | 0 | 23 | 13 | 201 | 62 | 624   |
| 91,550 | 2 | 54 | 47 | 428 | 0 | 32 | 13 | 249 | 62 | 763   |
| 91,551 | 2 | 64 | 47 | 517 | 0 | 36 | 13 | 283 | 62 | 900   |
| 91,552 | 3 | 64 | 51 | 517 | 1 | 36 | 14 | 289 | 69 | 906   |
| 91,553 | 3 | 69 | 51 | 530 | 1 | 36 | 14 | 293 | 69 | 928   |
| 91,554 | 3 | 67 | 50 | 514 | 1 | 31 | 14 | 278 | 68 | 890   |
| 91,555 | 3 | 75 | 50 | 533 | 1 | 32 | 14 | 278 | 68 | 918   |
| 91,556 | 3 | 75 | 50 | 536 | 1 | 32 | 14 | 284 | 68 | 927   |
| 91,557 | 3 | 75 | 50 | 535 | 1 | 32 | 14 | 285 | 68 | 927   |
| 91,558 | 3 | 86 | 50 | 587 | 1 | 36 | 14 | 307 | 68 | 1,016 |
| 91,559 | 3 | 86 | 50 | 589 | 1 | 36 | 14 | 307 | 68 | 1,018 |
| 91,560 | 3 | 84 | 50 | 584 | 1 | 36 | 14 | 301 | 68 | 1,005 |
| 91,561 | 3 | 85 | 50 | 571 | 1 | 36 | 14 | 298 | 68 | 990   |
| 91,562 | 3 | 85 | 50 | 571 | 1 | 36 | 14 | 298 | 68 | 990   |
| 91,563 | 3 | 85 | 50 | 572 | 1 | 36 | 14 | 298 | 68 | 991   |
| 91,564 | 3 | 85 | 50 | 574 | 1 | 36 | 14 | 298 | 68 | 993   |
| 91,565 | 3 | 88 | 50 | 587 | 1 | 36 | 14 | 311 | 68 | 1,022 |
| 91,566 | 3 | 89 | 50 | 589 | 1 | 36 | 14 | 311 | 68 | 1,025 |
| 91,567 | 3 | 89 | 50 | 588 | 1 | 36 | 14 | 311 | 68 | 1,024 |
| 91,568 | 3 | 89 | 50 | 587 | 1 | 36 | 14 | 310 | 68 | 1,022 |
| 91,569 | 3 | 87 | 50 | 585 | 1 | 36 | 14 | 306 | 68 | 1,014 |
| 91,570 | 3 | 87 | 50 | 574 | 1 | 35 | 12 | 297 | 66 | 993   |
| 91,571 | 3 | 87 | 50 | 574 | 1 | 35 | 12 | 297 | 66 | 993   |
| 91,572 | 3 | 87 | 51 | 560 | 1 | 34 | 12 | 292 | 67 | 973   |
| 91,573 | 3 | 86 | 53 | 540 | 1 | 33 | 12 | 289 | 69 | 948   |
| 91,574 | 3 | 90 | 53 | 566 | 1 | 33 | 12 | 300 | 69 | 989   |
| 91,575 | 3 | 92 | 53 | 599 | 1 | 34 | 11 | 301 | 68 | 1,026 |
| 91,576 | 2 | 93 | 53 | 578 | 1 | 33 | 11 | 296 | 67 | 1,000 |
| 91,577 | 2 | 92 | 54 | 584 | 1 | 34 | 14 | 299 | 71 | 1,009 |
| 91,578 | 2 | 81 | 61 | 531 | 1 | 29 | 19 | 254 | 83 | 895   |
| 91,579 | 2 | 91 | 59 | 569 | 1 | 31 | 18 | 279 | 80 | 970   |
| 91,580 | 2 | 91 | 53 | 551 | 1 | 31 | 18 | 273 | 74 | 946   |
| 91,581 | 2 | 91 | 54 | 552 | 2 | 31 | 21 | 274 | 79 | 948   |
| 91,582 | 2 | 91 | 54 | 545 | 2 | 31 | 21 | 274 | 79 | 941   |

|        |   |    |    |     |   |    |    |     |    |       |
|--------|---|----|----|-----|---|----|----|-----|----|-------|
| 91,583 | 2 | 91 | 56 | 546 | 2 | 31 | 21 | 275 | 81 | 943   |
| 91,584 | 2 | 93 | 57 | 541 | 2 | 31 | 22 | 273 | 83 | 938   |
| 91,585 | 2 | 93 | 57 | 543 | 2 | 31 | 22 | 275 | 83 | 942   |
| 91,586 | 3 | 93 | 57 | 540 | 3 | 31 | 22 | 276 | 85 | 940   |
| 91,587 | 3 | 93 | 57 | 540 | 3 | 31 | 22 | 277 | 85 | 941   |
| 91,588 | 3 | 92 | 57 | 543 | 3 | 31 | 22 | 277 | 85 | 943   |
| 91,589 | 3 | 92 | 54 | 542 | 3 | 31 | 22 | 276 | 82 | 941   |
| 91,590 | 3 | 94 | 54 | 559 | 3 | 32 | 22 | 282 | 82 | 967   |
| 91,591 | 3 | 89 | 41 | 564 | 3 | 30 | 16 | 272 | 63 | 955   |
| 91,592 | 3 | 89 | 40 | 569 | 3 | 30 | 16 | 271 | 62 | 959   |
| 91,593 | 3 | 89 | 40 | 568 | 3 | 30 | 16 | 276 | 62 | 963   |
| 91,594 | 3 | 89 | 38 | 561 | 3 | 30 | 16 | 273 | 60 | 953   |
| 91,595 | 3 | 90 | 39 | 575 | 3 | 28 | 16 | 281 | 61 | 974   |
| 91,596 | 2 | 90 | 39 | 576 | 3 | 28 | 16 | 283 | 60 | 977   |
| 91,597 | 2 | 90 | 39 | 576 | 3 | 28 | 15 | 282 | 59 | 976   |
| 91,598 | 6 | 90 | 37 | 582 | 4 | 28 | 17 | 291 | 64 | 991   |
| 91,599 | 6 | 91 | 37 | 592 | 4 | 32 | 17 | 282 | 64 | 997   |
| 91,600 | 6 | 93 | 36 | 624 | 4 | 31 | 18 | 297 | 64 | 1,045 |
| 91,601 | 6 | 87 | 34 | 619 | 3 | 30 | 17 | 304 | 60 | 1,040 |
| 91,602 | 5 | 78 | 32 | 534 | 3 | 26 | 17 | 272 | 57 | 910   |
| 91,603 | 5 | 79 | 32 | 551 | 3 | 26 | 17 | 282 | 57 | 938   |
| 91,604 | 5 | 74 | 32 | 539 | 3 | 28 | 17 | 280 | 57 | 921   |
| 91,605 | 5 | 74 | 32 | 541 | 3 | 28 | 17 | 280 | 57 | 923   |
| 91,606 | 5 | 71 | 32 | 530 | 3 | 29 | 17 | 279 | 57 | 909   |
| 91,607 | 5 | 71 | 32 | 530 | 3 | 29 | 17 | 274 | 57 | 904   |
| 91,608 | 5 | 71 | 32 | 534 | 3 | 29 | 17 | 273 | 57 | 907   |
| 91,609 | 5 | 57 | 35 | 485 | 3 | 25 | 17 | 249 | 60 | 816   |
| 91,610 | 5 | 57 | 36 | 488 | 3 | 25 | 17 | 262 | 61 | 832   |
| 91,611 | 5 | 57 | 36 | 488 | 3 | 25 | 17 | 261 | 61 | 831   |
| 91,612 | 5 | 57 | 38 | 485 | 4 | 25 | 17 | 259 | 64 | 826   |
| 91,613 | 5 | 57 | 42 | 482 | 4 | 25 | 19 | 259 | 70 | 823   |
| 91,614 | 5 | 57 | 42 | 482 | 4 | 25 | 19 | 263 | 70 | 827   |
| 91,615 | 5 | 58 | 42 | 485 | 4 | 25 | 19 | 265 | 70 | 833   |
| 91,616 | 5 | 57 | 43 | 488 | 4 | 26 | 23 | 265 | 75 | 836   |
| 91,617 | 5 | 61 | 44 | 558 | 4 | 28 | 23 | 303 | 76 | 950   |
| 91,618 | 5 | 63 | 44 | 564 | 4 | 28 | 23 | 303 | 76 | 958   |
| 91,619 | 5 | 65 | 44 | 586 | 4 | 32 | 23 | 317 | 76 | 1,000 |
| 91,620 | 5 | 66 | 45 | 592 | 4 | 33 | 24 | 318 | 78 | 1,009 |
| 91,621 | 5 | 66 | 45 | 595 | 4 | 33 | 25 | 325 | 79 | 1,019 |
| 91,622 | 5 | 66 | 43 | 595 | 4 | 33 | 25 | 326 | 77 | 1,020 |
| 91,623 | 5 | 69 | 44 | 604 | 4 | 34 | 26 | 328 | 79 | 1,035 |

|        |   |    |    |     |   |    |    |     |    |       |
|--------|---|----|----|-----|---|----|----|-----|----|-------|
| 91,624 | 5 | 72 | 43 | 611 | 5 | 34 | 27 | 331 | 80 | 1,048 |
| 91,625 | 5 | 68 | 42 | 591 | 5 | 34 | 27 | 323 | 79 | 1,016 |
| 91,626 | 5 | 66 | 42 | 543 | 5 | 32 | 27 | 315 | 79 | 956   |
| 91,627 | 5 | 63 | 47 | 521 | 5 | 30 | 27 | 304 | 84 | 918   |
| 91,628 | 5 | 63 | 46 | 522 | 5 | 30 | 23 | 306 | 79 | 921   |
| 91,629 | 5 | 62 | 38 | 521 | 5 | 30 | 18 | 308 | 66 | 921   |
| 91,630 | 5 | 58 | 38 | 503 | 5 | 40 | 17 | 329 | 65 | 930   |
| 91,631 | 5 | 59 | 35 | 504 | 5 | 40 | 17 | 333 | 62 | 936   |
| 91,632 | 5 | 59 | 35 | 504 | 4 | 40 | 15 | 335 | 59 | 938   |
| 91,633 | 5 | 59 | 34 | 504 | 4 | 40 | 15 | 335 | 58 | 938   |
| 91,634 | 5 | 58 | 34 | 502 | 4 | 40 | 15 | 334 | 58 | 934   |
| 91,635 | 5 | 58 | 33 | 500 | 4 | 40 | 14 | 332 | 56 | 930   |
| 91,636 | 4 | 59 | 34 | 500 | 4 | 40 | 14 | 332 | 56 | 931   |
| 91,637 | 4 | 59 | 34 | 499 | 3 | 40 | 14 | 332 | 55 | 930   |
| 91,638 | 4 | 59 | 34 | 498 | 3 | 40 | 14 | 331 | 55 | 928   |
| 91,639 | 4 | 59 | 35 | 491 | 3 | 40 | 14 | 329 | 56 | 919   |
| 91,640 | 4 | 57 | 35 | 474 | 3 | 39 | 14 | 324 | 56 | 894   |
| 91,641 | 4 | 55 | 35 | 454 | 3 | 39 | 14 | 317 | 56 | 865   |
| 91,642 | 4 | 55 | 34 | 447 | 3 | 39 | 14 | 315 | 55 | 856   |
| 91,643 | 4 | 55 | 34 | 448 | 3 | 39 | 14 | 318 | 55 | 860   |
| 91,644 | 4 | 56 | 33 | 494 | 3 | 49 | 14 | 363 | 54 | 962   |
| 91,645 | 4 | 61 | 33 | 506 | 3 | 53 | 14 | 397 | 54 | 1,017 |
| 91,646 | 4 | 64 | 33 | 507 | 3 | 55 | 14 | 407 | 54 | 1,033 |
| 91,647 | 4 | 65 | 32 | 525 | 3 | 57 | 14 | 418 | 53 | 1,065 |
| 91,648 | 4 | 66 | 32 | 547 | 2 | 57 | 13 | 429 | 51 | 1,099 |
| 91,649 | 0 | 72 | 31 | 548 | 2 | 57 | 12 | 423 | 45 | 1,100 |
| 91,650 | 0 | 70 | 31 | 523 | 2 | 53 | 12 | 423 | 45 | 1,069 |
| 91,651 | 0 | 56 | 32 | 420 | 2 | 45 | 10 | 349 | 44 | 870   |
| 91,652 | 0 | 56 | 32 | 423 | 2 | 45 | 10 | 354 | 44 | 878   |
| 91,653 | 0 | 57 | 32 | 420 | 2 | 50 | 11 | 362 | 45 | 889   |
| 91,654 | 0 | 57 | 32 | 424 | 2 | 50 | 11 | 366 | 45 | 897   |
| 91,655 | 0 | 58 | 32 | 422 | 2 | 48 | 11 | 361 | 45 | 889   |
| 91,656 | 0 | 58 | 32 | 419 | 2 | 49 | 11 | 361 | 45 | 887   |
| 91,657 | 0 | 54 | 32 | 411 | 2 | 49 | 11 | 361 | 45 | 875   |
| 91,658 | 0 | 54 | 32 | 414 | 2 | 50 | 11 | 362 | 45 | 880   |
| 91,659 | 0 | 54 | 32 | 410 | 2 | 50 | 11 | 366 | 45 | 880   |
| 91,660 | 0 | 57 | 29 | 407 | 2 | 52 | 12 | 378 | 43 | 894   |
| 91,661 | 0 | 58 | 29 | 409 | 2 | 52 | 12 | 370 | 43 | 889   |
| 91,662 | 0 | 58 | 29 | 409 | 1 | 52 | 12 | 371 | 42 | 890   |
| 91,663 | 0 | 57 | 27 | 407 | 1 | 52 | 12 | 371 | 40 | 887   |
| 91,664 | 0 | 57 | 23 | 407 | 1 | 52 | 10 | 367 | 34 | 883   |

|        |   |    |    |     |   |    |    |     |     |     |
|--------|---|----|----|-----|---|----|----|-----|-----|-----|
| 91,665 | 0 | 57 | 23 | 407 | 1 | 52 | 10 | 367 | 34  | 883 |
| 91,666 | 0 | 54 | 22 | 389 | 1 | 51 | 6  | 356 | 29  | 850 |
| 91,667 | 0 | 54 | 21 | 389 | 1 | 51 | 6  | 356 | 28  | 850 |
| 91,668 | 0 | 49 | 21 | 317 | 1 | 49 | 6  | 318 | 28  | 733 |
| 91,669 | 0 | 47 | 21 | 312 | 1 | 49 | 6  | 318 | 28  | 726 |
| 91,670 | 0 | 45 | 21 | 290 | 1 | 45 | 6  | 304 | 28  | 684 |
| 91,671 | 0 | 44 | 21 | 280 | 1 | 44 | 5  | 297 | 27  | 665 |
| 91,672 | 0 | 44 | 21 | 280 | 1 | 44 | 4  | 297 | 26  | 665 |
| 91,673 | 0 | 44 | 22 | 282 | 1 | 44 | 5  | 298 | 28  | 668 |
| 91,674 | 0 | 41 | 22 | 273 | 1 | 43 | 4  | 295 | 27  | 652 |
| 91,675 | 0 | 38 | 21 | 268 | 0 | 44 | 3  | 293 | 24  | 643 |
| 91,676 | 0 | 38 | 21 | 262 | 0 | 44 | 3  | 290 | 24  | 634 |
| 91,677 | 0 | 38 | 19 | 264 | 0 | 44 | 3  | 292 | 22  | 638 |
| 91,678 | 0 | 38 | 35 | 264 | 1 | 44 | 3  | 289 | 39  | 635 |
| 91,679 | 0 | 38 | 32 | 264 | 1 | 44 | 3  | 288 | 36  | 634 |
| 91,680 | 1 | 39 | 38 | 261 | 1 | 44 | 7  | 287 | 47  | 631 |
| 91,681 | 1 | 33 | 40 | 225 | 2 | 32 | 7  | 244 | 50  | 534 |
| 91,682 | 1 | 32 | 40 | 227 | 2 | 31 | 7  | 242 | 50  | 532 |
| 91,683 | 1 | 32 | 40 | 232 | 2 | 31 | 7  | 242 | 50  | 537 |
| 91,684 | 1 | 32 | 39 | 239 | 2 | 31 | 7  | 242 | 49  | 544 |
| 91,685 | 1 | 31 | 39 | 241 | 2 | 31 | 7  | 243 | 49  | 546 |
| 91,686 | 1 | 31 | 37 | 243 | 2 | 31 | 7  | 243 | 47  | 548 |
| 91,687 | 1 | 30 | 36 | 243 | 2 | 31 | 7  | 245 | 46  | 549 |
| 91,688 | 1 | 40 | 36 | 274 | 2 | 32 | 7  | 279 | 46  | 625 |
| 91,689 | 1 | 40 | 36 | 276 | 2 | 32 | 7  | 280 | 46  | 628 |
| 91,690 | 1 | 41 | 38 | 298 | 2 | 32 | 7  | 287 | 48  | 658 |
| 91,691 | 1 | 41 | 39 | 298 | 2 | 32 | 7  | 286 | 49  | 657 |
| 91,692 | 1 | 41 | 39 | 298 | 2 | 32 | 7  | 286 | 49  | 657 |
| 91,693 | 1 | 41 | 40 | 299 | 2 | 32 | 10 | 288 | 53  | 660 |
| 91,694 | 1 | 41 | 40 | 298 | 2 | 32 | 10 | 284 | 53  | 655 |
| 91,695 | 1 | 40 | 42 | 251 | 3 | 22 | 12 | 234 | 58  | 547 |
| 91,696 | 1 | 35 | 42 | 239 | 3 | 18 | 12 | 201 | 58  | 493 |
| 91,697 | 1 | 31 | 44 | 224 | 3 | 16 | 13 | 183 | 61  | 454 |
| 91,698 | 1 | 35 | 44 | 209 | 3 | 15 | 13 | 182 | 61  | 441 |
| 91,699 | 1 | 34 | 44 | 184 | 3 | 15 | 13 | 170 | 61  | 403 |
| 91,700 | 1 | 28 | 70 | 172 | 3 | 15 | 22 | 165 | 96  | 380 |
| 91,701 | 1 | 28 | 72 | 170 | 3 | 15 | 22 | 161 | 98  | 374 |
| 91,702 | 1 | 27 | 71 | 163 | 3 | 14 | 22 | 149 | 97  | 353 |
| 91,703 | 1 | 23 | 71 | 136 | 3 | 9  | 25 | 121 | 100 | 289 |
| 91,704 | 1 | 23 | 71 | 136 | 3 | 9  | 24 | 121 | 99  | 289 |
| 91,705 | 1 | 23 | 71 | 132 | 3 | 9  | 24 | 117 | 99  | 281 |

|        |   |    |    |     |   |    |    |     |     |     |
|--------|---|----|----|-----|---|----|----|-----|-----|-----|
| 91,706 | 1 | 22 | 71 | 128 | 3 | 9  | 24 | 117 | 99  | 276 |
| 91,707 | 1 | 22 | 71 | 128 | 3 | 8  | 24 | 118 | 99  | 276 |
| 91,708 | 1 | 21 | 73 | 120 | 3 | 5  | 24 | 112 | 101 | 258 |
| 91,709 | 1 | 21 | 73 | 120 | 3 | 5  | 24 | 112 | 101 | 258 |
| 91,710 | 1 | 21 | 75 | 118 | 4 | 5  | 27 | 107 | 107 | 251 |
| 91,711 | 1 | 18 | 75 | 112 | 4 | 4  | 26 | 91  | 106 | 225 |
| 91,712 | 1 | 17 | 74 | 107 | 4 | 4  | 26 | 87  | 105 | 215 |
| 91,713 | 1 | 18 | 76 | 107 | 4 | 4  | 26 | 87  | 107 | 216 |
| 91,714 | 1 | 18 | 76 | 107 | 4 | 4  | 26 | 87  | 107 | 216 |
| 91,715 | 1 | 18 | 77 | 107 | 4 | 4  | 27 | 87  | 109 | 216 |
| 91,716 | 1 | 18 | 77 | 106 | 4 | 4  | 27 | 85  | 109 | 213 |
| 91,717 | 1 | 18 | 77 | 107 | 4 | 4  | 28 | 84  | 110 | 213 |
| 91,718 | 1 | 18 | 77 | 113 | 4 | 4  | 28 | 84  | 110 | 219 |
| 91,719 | 1 | 18 | 77 | 113 | 4 | 4  | 28 | 83  | 110 | 218 |
| 91,720 | 1 | 18 | 78 | 114 | 4 | 4  | 28 | 84  | 111 | 220 |
| 91,721 | 1 | 18 | 78 | 114 | 4 | 4  | 28 | 84  | 111 | 220 |
| 91,722 | 1 | 18 | 77 | 114 | 4 | 4  | 28 | 83  | 110 | 219 |
| 91,723 | 1 | 19 | 77 | 112 | 4 | 4  | 28 | 82  | 110 | 217 |
| 91,724 | 1 | 19 | 76 | 114 | 4 | 4  | 27 | 82  | 108 | 219 |
| 91,725 | 1 | 19 | 75 | 121 | 4 | 6  | 27 | 87  | 107 | 233 |
| 91,726 | 1 | 21 | 75 | 129 | 5 | 5  | 27 | 102 | 108 | 257 |
| 91,727 | 1 | 26 | 74 | 170 | 5 | 8  | 27 | 116 | 107 | 320 |
| 91,728 | 1 | 28 | 73 | 183 | 5 | 10 | 27 | 123 | 106 | 344 |
| 91,729 | 1 | 28 | 55 | 183 | 4 | 11 | 27 | 123 | 87  | 345 |
| 91,730 | 0 | 28 | 50 | 183 | 4 | 11 | 25 | 122 | 79  | 344 |
| 91,731 | 0 | 28 | 50 | 184 | 4 | 11 | 24 | 121 | 78  | 344 |
| 91,732 | 0 | 28 | 48 | 186 | 3 | 11 | 24 | 114 | 75  | 339 |
| 91,733 | 0 | 28 | 48 | 186 | 3 | 11 | 24 | 114 | 75  | 339 |
| 91,734 | 0 | 28 | 48 | 179 | 3 | 11 | 24 | 112 | 75  | 330 |
| 91,735 | 0 | 28 | 48 | 172 | 3 | 11 | 24 | 115 | 75  | 326 |
| 91,736 | 0 | 28 | 46 | 170 | 3 | 11 | 25 | 115 | 74  | 324 |
| 91,737 | 0 | 28 | 46 | 171 | 3 | 11 | 25 | 115 | 74  | 325 |
| 91,738 | 0 | 28 | 46 | 175 | 3 | 11 | 25 | 117 | 74  | 331 |
| 91,739 | 0 | 18 | 43 | 145 | 3 | 10 | 25 | 83  | 71  | 256 |
| 91,740 | 0 | 18 | 43 | 143 | 3 | 10 | 26 | 82  | 72  | 253 |
| 91,741 | 0 | 17 | 43 | 125 | 3 | 10 | 26 | 76  | 72  | 228 |
| 91,742 | 0 | 17 | 42 | 126 | 3 | 10 | 26 | 78  | 71  | 231 |
| 91,743 | 0 | 17 | 42 | 126 | 3 | 10 | 26 | 79  | 71  | 232 |
| 91,744 | 0 | 17 | 41 | 125 | 3 | 10 | 23 | 77  | 67  | 229 |
| 91,745 | 0 | 17 | 39 | 128 | 2 | 10 | 21 | 79  | 62  | 234 |
| 91,746 | 0 | 19 | 39 | 137 | 2 | 10 | 21 | 83  | 62  | 249 |

|        |   |    |    |     |   |    |    |     |    |     |
|--------|---|----|----|-----|---|----|----|-----|----|-----|
| 91,747 | 0 | 20 | 39 | 152 | 2 | 10 | 20 | 92  | 61 | 274 |
| 91,748 | 0 | 21 | 37 | 156 | 2 | 10 | 19 | 94  | 58 | 281 |
| 91,749 | 0 | 16 | 32 | 154 | 2 | 9  | 18 | 84  | 52 | 263 |
| 91,750 | 0 | 16 | 16 | 153 | 2 | 9  | 11 | 84  | 29 | 262 |
| 91,751 | 0 | 16 | 11 | 152 | 3 | 9  | 10 | 84  | 24 | 261 |
| 91,752 | 0 | 16 | 9  | 152 | 3 | 9  | 10 | 84  | 22 | 261 |
| 91,753 | 0 | 16 | 9  | 152 | 3 | 9  | 11 | 85  | 23 | 262 |
| 91,754 | 0 | 16 | 9  | 151 | 3 | 9  | 9  | 85  | 21 | 261 |
| 91,755 | 0 | 16 | 9  | 152 | 3 | 9  | 9  | 85  | 21 | 262 |
| 91,756 | 0 | 16 | 9  | 153 | 3 | 9  | 9  | 85  | 21 | 263 |
| 91,757 | 0 | 16 | 9  | 152 | 3 | 9  | 9  | 85  | 21 | 262 |
| 91,758 | 2 | 16 | 9  | 152 | 3 | 9  | 9  | 84  | 23 | 261 |
| 91,759 | 2 | 16 | 7  | 158 | 3 | 10 | 9  | 84  | 21 | 268 |
| 91,760 | 2 | 20 | 7  | 191 | 3 | 11 | 9  | 94  | 21 | 316 |
| 91,761 | 2 | 21 | 5  | 205 | 2 | 12 | 6  | 95  | 15 | 333 |
| 91,762 | 2 | 30 | 5  | 264 | 2 | 14 | 6  | 110 | 15 | 418 |
| 91,763 | 2 | 31 | 5  | 279 | 2 | 14 | 6  | 111 | 15 | 435 |
| 91,764 | 2 | 38 | 4  | 310 | 2 | 14 | 6  | 117 | 14 | 479 |
| 91,765 | 2 | 40 | 4  | 321 | 2 | 19 | 6  | 122 | 14 | 502 |
| 91,766 | 2 | 40 | 3  | 327 | 2 | 19 | 5  | 123 | 12 | 509 |
| 91,767 | 2 | 45 | 3  | 366 | 2 | 26 | 5  | 147 | 12 | 584 |
| 91,768 | 2 | 45 | 3  | 371 | 2 | 27 | 4  | 148 | 11 | 591 |
| 91,769 | 2 | 46 | 3  | 372 | 2 | 27 | 4  | 151 | 11 | 596 |
| 91,770 | 2 | 47 | 2  | 380 | 2 | 29 | 4  | 159 | 10 | 615 |
| 91,771 | 2 | 47 | 2  | 382 | 2 | 29 | 4  | 159 | 10 | 617 |
| 91,772 | 2 | 47 | 2  | 383 | 2 | 29 | 4  | 159 | 10 | 618 |
| 91,773 | 2 | 47 | 3  | 383 | 2 | 29 | 4  | 159 | 11 | 618 |
| 91,774 | 2 | 46 | 3  | 385 | 2 | 29 | 4  | 158 | 11 | 618 |
| 91,775 | 2 | 46 | 3  | 377 | 2 | 27 | 4  | 153 | 11 | 603 |
| 91,776 | 2 | 46 | 3  | 377 | 2 | 27 | 4  | 153 | 11 | 603 |
| 91,777 | 2 | 39 | 3  | 328 | 1 | 24 | 4  | 123 | 10 | 514 |
| 91,778 | 2 | 37 | 3  | 313 | 1 | 22 | 4  | 113 | 10 | 485 |
| 91,779 | 3 | 37 | 3  | 314 | 1 | 21 | 4  | 113 | 11 | 485 |
| 91,780 | 3 | 37 | 3  | 317 | 1 | 22 | 4  | 115 | 11 | 491 |
| 91,781 | 3 | 37 | 3  | 319 | 1 | 23 | 4  | 118 | 11 | 497 |
| 91,782 | 3 | 36 | 2  | 321 | 1 | 23 | 4  | 119 | 10 | 499 |
| 91,783 | 3 | 36 | 3  | 316 | 1 | 23 | 4  | 123 | 11 | 498 |
| 91,784 | 3 | 36 | 3  | 318 | 1 | 23 | 4  | 125 | 11 | 502 |
| 91,785 | 3 | 38 | 3  | 325 | 1 | 24 | 4  | 127 | 11 | 514 |
| 91,786 | 3 | 38 | 3  | 327 | 1 | 24 | 4  | 127 | 11 | 516 |
| 91,787 | 3 | 38 | 3  | 320 | 1 | 24 | 3  | 122 | 10 | 504 |

|        |   |    |   |     |   |    |   |     |    |     |
|--------|---|----|---|-----|---|----|---|-----|----|-----|
| 91,788 | 3 | 41 | 3 | 328 | 1 | 24 | 3 | 126 | 10 | 519 |
| 91,789 | 3 | 41 | 4 | 340 | 1 | 25 | 2 | 129 | 10 | 535 |
| 91,790 | 3 | 41 | 4 | 339 | 1 | 25 | 2 | 130 | 10 | 535 |
| 91,791 | 3 | 41 | 7 | 339 | 1 | 25 | 2 | 130 | 13 | 535 |
| 91,792 | 3 | 41 | 8 | 336 | 1 | 25 | 2 | 129 | 14 | 531 |
| 91,793 | 3 | 41 | 8 | 335 | 1 | 25 | 2 | 127 | 14 | 528 |
| 91,794 | 3 | 41 | 8 | 335 | 1 | 25 | 2 | 126 | 14 | 527 |
| 91,795 | 3 | 41 | 8 | 331 | 1 | 25 | 2 | 125 | 14 | 522 |
| 91,796 | 3 | 41 | 8 | 331 | 1 | 25 | 2 | 125 | 14 | 522 |
| 91,797 | 3 | 39 | 8 | 307 | 1 | 25 | 2 | 111 | 14 | 482 |
| 91,798 | 3 | 39 | 8 | 307 | 1 | 25 | 2 | 111 | 14 | 482 |
| 91,799 | 3 | 38 | 8 | 302 | 1 | 25 | 2 | 109 | 14 | 474 |
| 91,800 | 3 | 38 | 8 | 296 | 1 | 25 | 2 | 104 | 14 | 463 |
| 91,801 | 3 | 38 | 8 | 296 | 1 | 25 | 2 | 104 | 14 | 463 |
| 91,802 | 4 | 38 | 8 | 296 | 0 | 25 | 2 | 104 | 14 | 463 |
| 91,803 | 4 | 38 | 8 | 296 | 0 | 25 | 2 | 104 | 14 | 463 |
| 91,804 | 4 | 40 | 8 | 297 | 0 | 25 | 1 | 103 | 13 | 465 |
| 91,805 | 4 | 40 | 8 | 297 | 0 | 25 | 1 | 103 | 13 | 465 |
| 91,806 | 2 | 40 | 8 | 298 | 0 | 25 | 1 | 103 | 11 | 466 |
| 91,807 | 2 | 40 | 8 | 305 | 0 | 25 | 1 | 107 | 11 | 477 |
| 91,808 | 2 | 40 | 8 | 306 | 0 | 25 | 1 | 107 | 11 | 478 |
| 91,809 | 2 | 40 | 8 | 307 | 0 | 25 | 1 | 107 | 11 | 479 |
| 91,810 | 2 | 40 | 8 | 301 | 0 | 24 | 1 | 106 | 11 | 471 |
| 91,811 | 2 | 36 | 8 | 268 | 0 | 23 | 1 | 95  | 11 | 422 |
| 91,812 | 2 | 28 | 8 | 197 | 0 | 19 | 1 | 80  | 11 | 324 |
| 91,813 | 2 | 28 | 8 | 199 | 0 | 19 | 1 | 81  | 11 | 327 |
| 91,814 | 2 | 27 | 8 | 186 | 0 | 19 | 1 | 82  | 11 | 314 |
| 91,815 | 2 | 21 | 7 | 158 | 0 | 19 | 1 | 77  | 10 | 275 |
| 91,816 | 2 | 19 | 7 | 147 | 0 | 14 | 1 | 73  | 10 | 253 |
| 91,817 | 2 | 19 | 7 | 141 | 0 | 14 | 1 | 72  | 10 | 246 |
| 91,818 | 2 | 14 | 7 | 102 | 0 | 7  | 1 | 48  | 10 | 171 |
| 91,819 | 2 | 13 | 7 | 89  | 0 | 6  | 2 | 45  | 11 | 153 |
| 91,820 | 2 | 13 | 7 | 89  | 0 | 6  | 2 | 45  | 11 | 153 |
| 91,821 | 2 | 12 | 7 | 85  | 0 | 4  | 2 | 37  | 11 | 138 |
| 91,822 | 2 | 12 | 7 | 81  | 0 | 4  | 2 | 37  | 11 | 134 |
| 91,823 | 2 | 12 | 6 | 83  | 0 | 5  | 2 | 40  | 10 | 140 |
| 91,824 | 2 | 12 | 6 | 83  | 0 | 5  | 2 | 40  | 10 | 140 |
| 91,825 | 3 | 12 | 6 | 81  | 0 | 5  | 2 | 40  | 11 | 138 |
| 91,826 | 3 | 12 | 6 | 79  | 0 | 5  | 2 | 40  | 11 | 136 |
| 91,827 | 3 | 12 | 6 | 79  | 0 | 5  | 2 | 40  | 11 | 136 |
| 91,828 | 3 | 12 | 6 | 79  | 0 | 5  | 2 | 44  | 11 | 140 |



|        |   |    |   |     |   |   |   |     |    |     |
|--------|---|----|---|-----|---|---|---|-----|----|-----|
| 91,829 | 3 | 12 | 6 | 79  | 0 | 5 | 2 | 44  | 11 | 140 |
| 91,830 | 2 | 12 | 7 | 77  | 0 | 5 | 2 | 44  | 11 | 138 |
| 91,831 | 2 | 12 | 7 | 74  | 0 | 4 | 2 | 42  | 11 | 132 |
| 91,832 | 2 | 12 | 7 | 72  | 0 | 3 | 1 | 39  | 10 | 126 |
| 91,833 | 2 | 13 | 7 | 75  | 0 | 3 | 1 | 38  | 10 | 129 |
| 91,834 | 2 | 13 | 6 | 74  | 0 | 3 | 1 | 39  | 9  | 129 |
| 91,835 | 2 | 15 | 6 | 84  | 0 | 5 | 1 | 48  | 9  | 152 |
| 91,836 | 2 | 15 | 6 | 123 | 0 | 8 | 1 | 88  | 9  | 234 |
| 91,837 | 2 | 21 | 6 | 140 | 0 | 8 | 1 | 108 | 9  | 277 |
| 91,838 | 2 | 21 | 6 | 149 | 0 | 8 | 1 | 108 | 9  | 286 |
| 91,839 | 2 | 20 | 6 | 142 | 0 | 9 | 1 | 108 | 9  | 279 |
| 91,840 | 2 | 20 | 5 | 133 | 0 | 8 | 1 | 106 | 8  | 267 |
| 91,841 | 2 | 20 | 2 | 134 | 0 | 8 | 1 | 105 | 5  | 267 |
| 91,842 | 2 | 20 | 1 | 134 | 0 | 8 | 1 | 105 | 4  | 267 |
| 91,843 | 2 | 20 | 1 | 133 | 0 | 8 | 1 | 105 | 4  | 266 |
| 91,844 | 2 | 20 | 1 | 133 | 0 | 8 | 1 | 106 | 4  | 267 |
| 91,845 | 2 | 20 | 1 | 133 | 0 | 8 | 1 | 106 | 4  | 267 |
| 91,846 | 2 | 21 | 1 | 133 | 0 | 8 | 1 | 107 | 4  | 269 |
| 91,847 | 2 | 21 | 1 | 134 | 0 | 8 | 1 | 108 | 4  | 271 |
| 91,848 | 2 | 20 | 2 | 134 | 0 | 8 | 1 | 108 | 5  | 270 |
| 91,849 | 2 | 21 | 2 | 136 | 0 | 9 | 2 | 115 | 6  | 281 |
| 91,850 | 2 | 21 | 2 | 136 | 0 | 9 | 2 | 115 | 6  | 281 |
| 91,851 | 2 | 21 | 2 | 136 | 0 | 9 | 2 | 116 | 6  | 282 |
| 91,852 | 2 | 23 | 2 | 136 | 0 | 9 | 2 | 117 | 6  | 285 |
| 91,853 | 1 | 23 | 2 | 136 | 0 | 9 | 2 | 117 | 5  | 285 |
| 91,854 | 1 | 23 | 2 | 138 | 0 | 9 | 2 | 117 | 5  | 287 |
| 91,855 | 1 | 21 | 2 | 138 | 0 | 9 | 2 | 117 | 5  | 285 |
| 91,856 | 1 | 21 | 2 | 138 | 0 | 9 | 2 | 117 | 5  | 285 |
| 91,857 | 2 | 21 | 2 | 137 | 0 | 9 | 2 | 117 | 6  | 284 |
| 91,858 | 2 | 21 | 2 | 130 | 0 | 9 | 2 | 113 | 6  | 273 |
| 91,859 | 2 | 21 | 3 | 129 | 1 | 9 | 2 | 113 | 8  | 272 |
| 91,860 | 2 | 21 | 3 | 128 | 1 | 9 | 2 | 113 | 8  | 271 |
| 91,861 | 2 | 18 | 3 | 126 | 1 | 9 | 2 | 112 | 8  | 265 |
| 91,862 | 2 | 18 | 3 | 127 | 1 | 9 | 2 | 112 | 8  | 266 |
| 91,863 | 3 | 18 | 3 | 127 | 1 | 9 | 2 | 112 | 9  | 266 |
| 91,864 | 3 | 18 | 3 | 125 | 1 | 9 | 2 | 112 | 9  | 264 |
| 91,865 | 3 | 18 | 3 | 123 | 1 | 9 | 2 | 110 | 9  | 260 |
| 91,866 | 3 | 18 | 3 | 121 | 1 | 9 | 3 | 109 | 10 | 257 |
| 91,867 | 3 | 18 | 3 | 121 | 1 | 9 | 3 | 108 | 10 | 256 |
| 91,868 | 3 | 18 | 4 | 123 | 1 | 9 | 3 | 109 | 11 | 259 |
| 91,869 | 4 | 18 | 4 | 123 | 1 | 9 | 3 | 109 | 12 | 259 |

|        |   |    |    |     |   |   |    |     |    |     |
|--------|---|----|----|-----|---|---|----|-----|----|-----|
| 91,870 | 4 | 18 | 5  | 123 | 1 | 9 | 2  | 108 | 12 | 258 |
| 91,871 | 4 | 18 | 5  | 119 | 1 | 9 | 4  | 108 | 14 | 254 |
| 91,872 | 4 | 18 | 5  | 119 | 1 | 8 | 4  | 108 | 14 | 253 |
| 91,873 | 4 | 18 | 5  | 116 | 1 | 8 | 4  | 105 | 14 | 247 |
| 91,874 | 6 | 18 | 6  | 116 | 1 | 8 | 7  | 105 | 20 | 247 |
| 91,875 | 5 | 18 | 8  | 116 | 1 | 8 | 7  | 105 | 21 | 247 |
| 91,876 | 5 | 18 | 9  | 117 | 1 | 8 | 8  | 105 | 23 | 248 |
| 91,877 | 5 | 18 | 9  | 117 | 1 | 8 | 9  | 105 | 24 | 248 |
| 91,878 | 5 | 18 | 9  | 114 | 1 | 8 | 9  | 101 | 24 | 241 |
| 91,879 | 5 | 18 | 9  | 114 | 1 | 8 | 11 | 101 | 26 | 241 |
| 91,880 | 5 | 18 | 8  | 114 | 1 | 8 | 11 | 100 | 25 | 240 |
| 91,881 | 5 | 18 | 8  | 114 | 1 | 8 | 11 | 100 | 25 | 240 |
| 91,882 | 5 | 17 | 10 | 107 | 1 | 8 | 12 | 100 | 28 | 232 |
| 91,883 | 5 | 17 | 10 | 107 | 1 | 8 | 13 | 100 | 29 | 232 |
| 91,884 | 5 | 17 | 10 | 108 | 1 | 8 | 14 | 100 | 30 | 233 |
| 91,885 | 6 | 15 | 10 | 96  | 1 | 6 | 14 | 84  | 31 | 201 |
| 91,886 | 6 | 15 | 10 | 97  | 1 | 6 | 14 | 84  | 31 | 202 |
| 91,887 | 6 | 13 | 10 | 52  | 1 | 2 | 14 | 40  | 31 | 107 |
| 91,888 | 6 | 7  | 11 | 34  | 1 | 2 | 14 | 21  | 32 | 64  |
| 91,889 | 6 | 7  | 13 | 25  | 1 | 2 | 14 | 21  | 34 | 55  |
| 91,890 | 6 | 5  | 14 | 24  | 1 | 1 | 14 | 17  | 35 | 47  |
| 91,891 | 6 | 5  | 14 | 21  | 1 | 1 | 14 | 16  | 35 | 43  |
| 91,892 | 6 | 5  | 14 | 23  | 1 | 1 | 14 | 16  | 35 | 45  |
| 91,893 | 6 | 5  | 14 | 25  | 1 | 1 | 14 | 16  | 35 | 47  |
| 91,894 | 6 | 5  | 14 | 25  | 1 | 1 | 14 | 16  | 35 | 47  |
| 91,895 | 6 | 6  | 14 | 30  | 1 | 1 | 14 | 18  | 35 | 55  |
| 91,896 | 6 | 6  | 14 | 30  | 1 | 1 | 14 | 19  | 35 | 56  |
| 91,897 | 6 | 5  | 14 | 31  | 1 | 1 | 14 | 18  | 35 | 55  |
| 91,898 | 6 | 5  | 14 | 32  | 1 | 1 | 14 | 18  | 35 | 56  |
| 91,899 | 6 | 5  | 13 | 36  | 1 | 1 | 14 | 17  | 34 | 59  |
| 91,900 | 6 | 4  | 13 | 35  | 1 | 0 | 13 | 12  | 33 | 51  |
| 91,901 | 6 | 4  | 14 | 40  | 1 | 0 | 14 | 13  | 35 | 57  |
| 91,902 | 6 | 4  | 14 | 42  | 1 | 0 | 14 | 12  | 35 | 58  |
| 91,903 | 6 | 2  | 14 | 48  | 1 | 2 | 14 | 13  | 35 | 65  |
| 91,904 | 6 | 7  | 15 | 77  | 1 | 4 | 14 | 33  | 36 | 121 |
| 91,905 | 6 | 9  | 15 | 87  | 1 | 5 | 14 | 40  | 36 | 141 |
| 91,906 | 5 | 10 | 15 | 96  | 1 | 7 | 14 | 51  | 35 | 164 |
| 91,907 | 6 | 13 | 15 | 112 | 1 | 7 | 14 | 58  | 36 | 190 |
| 91,908 | 6 | 16 | 16 | 135 | 1 | 9 | 14 | 63  | 37 | 223 |
| 91,909 | 6 | 16 | 15 | 134 | 0 | 9 | 14 | 63  | 35 | 222 |
| 91,910 | 6 | 18 | 15 | 134 | 0 | 9 | 14 | 63  | 35 | 224 |

|        |   |    |    |     |   |    |    |     |    |     |
|--------|---|----|----|-----|---|----|----|-----|----|-----|
| 91,911 | 6 | 18 | 15 | 135 | 0 | 9  | 14 | 63  | 35 | 225 |
| 91,912 | 6 | 18 | 15 | 135 | 0 | 9  | 14 | 63  | 35 | 225 |
| 91,913 | 6 | 18 | 15 | 137 | 0 | 9  | 14 | 63  | 35 | 227 |
| 91,914 | 5 | 18 | 15 | 138 | 0 | 9  | 14 | 63  | 34 | 228 |
| 91,915 | 6 | 18 | 15 | 140 | 1 | 9  | 15 | 62  | 37 | 229 |
| 91,916 | 6 | 17 | 16 | 139 | 1 | 9  | 15 | 62  | 38 | 227 |
| 91,917 | 6 | 17 | 16 | 139 | 1 | 9  | 14 | 62  | 37 | 227 |
| 91,918 | 6 | 20 | 16 | 144 | 1 | 9  | 14 | 72  | 37 | 245 |
| 91,919 | 6 | 20 | 15 | 145 | 1 | 9  | 14 | 71  | 36 | 245 |
| 91,920 | 5 | 20 | 15 | 147 | 1 | 9  | 14 | 78  | 35 | 254 |
| 91,921 | 5 | 20 | 14 | 148 | 1 | 10 | 14 | 78  | 34 | 256 |
| 91,922 | 5 | 20 | 14 | 171 | 1 | 10 | 13 | 86  | 33 | 287 |
| 91,923 | 5 | 20 | 14 | 180 | 1 | 10 | 13 | 89  | 33 | 299 |
| 91,924 | 5 | 21 | 14 | 180 | 1 | 10 | 13 | 89  | 33 | 300 |
| 91,925 | 3 | 21 | 13 | 180 | 1 | 11 | 10 | 91  | 27 | 303 |
| 91,926 | 3 | 21 | 12 | 180 | 1 | 11 | 10 | 91  | 26 | 303 |
| 91,927 | 3 | 21 | 11 | 179 | 1 | 11 | 9  | 92  | 24 | 303 |
| 91,928 | 3 | 21 | 11 | 179 | 1 | 11 | 8  | 93  | 23 | 304 |
| 91,929 | 3 | 21 | 11 | 183 | 1 | 12 | 8  | 105 | 23 | 321 |
| 91,930 | 3 | 25 | 11 | 188 | 1 | 12 | 6  | 116 | 21 | 341 |
| 91,931 | 3 | 25 | 11 | 191 | 1 | 12 | 6  | 117 | 21 | 345 |
| 91,932 | 3 | 25 | 14 | 192 | 1 | 12 | 6  | 117 | 24 | 346 |
| 91,933 | 3 | 25 | 12 | 192 | 1 | 12 | 5  | 117 | 21 | 346 |
| 91,934 | 3 | 25 | 12 | 192 | 1 | 12 | 4  | 117 | 20 | 346 |
| 91,935 | 3 | 25 | 12 | 192 | 1 | 12 | 3  | 117 | 19 | 346 |
| 91,936 | 2 | 25 | 12 | 191 | 1 | 12 | 3  | 117 | 18 | 345 |
| 91,937 | 2 | 25 | 11 | 190 | 1 | 12 | 3  | 117 | 17 | 344 |
| 91,938 | 2 | 25 | 11 | 188 | 1 | 12 | 3  | 116 | 17 | 341 |
| 91,939 | 2 | 25 | 9  | 187 | 1 | 12 | 3  | 116 | 15 | 340 |
| 91,940 | 2 | 25 | 9  | 187 | 1 | 12 | 3  | 116 | 15 | 340 |
| 91,941 | 2 | 25 | 8  | 188 | 1 | 13 | 3  | 115 | 14 | 341 |
| 91,942 | 2 | 25 | 8  | 188 | 1 | 13 | 3  | 115 | 14 | 341 |
| 91,943 | 3 | 25 | 8  | 183 | 1 | 13 | 3  | 115 | 15 | 336 |
| 91,944 | 4 | 25 | 10 | 183 | 1 | 13 | 5  | 115 | 20 | 336 |
| 91,945 | 4 | 25 | 10 | 183 | 1 | 13 | 5  | 115 | 20 | 336 |
| 91,946 | 4 | 24 | 14 | 181 | 1 | 14 | 5  | 118 | 24 | 337 |
| 91,947 | 4 | 24 | 14 | 185 | 1 | 14 | 5  | 125 | 24 | 348 |
| 91,948 | 4 | 25 | 14 | 191 | 1 | 14 | 6  | 126 | 25 | 356 |
| 91,949 | 5 | 25 | 17 | 192 | 1 | 14 | 8  | 131 | 31 | 362 |
| 91,950 | 5 | 25 | 19 | 188 | 1 | 14 | 15 | 131 | 40 | 358 |
| 91,951 | 5 | 25 | 21 | 189 | 1 | 14 | 14 | 130 | 41 | 358 |

|        |   |    |    |     |   |    |    |     |    |     |
|--------|---|----|----|-----|---|----|----|-----|----|-----|
| 91,952 | 5 | 25 | 20 | 187 | 1 | 15 | 14 | 135 | 40 | 362 |
| 91,953 | 5 | 25 | 20 | 188 | 1 | 15 | 14 | 135 | 40 | 363 |
| 91,954 | 5 | 25 | 20 | 184 | 1 | 13 | 14 | 136 | 40 | 358 |
| 91,955 | 5 | 20 | 19 | 158 | 1 | 11 | 14 | 116 | 39 | 305 |
| 91,956 | 5 | 18 | 19 | 150 | 1 | 10 | 14 | 112 | 39 | 290 |
| 91,957 | 5 | 17 | 19 | 140 | 1 | 9  | 14 | 102 | 39 | 268 |
| 91,958 | 5 | 15 | 19 | 126 | 1 | 9  | 14 | 96  | 39 | 246 |
| 91,959 | 5 | 13 | 18 | 102 | 2 | 7  | 14 | 91  | 39 | 213 |
| 91,960 | 5 | 13 | 18 | 102 | 2 | 7  | 14 | 91  | 39 | 213 |
| 91,961 | 5 | 11 | 22 | 101 | 2 | 7  | 14 | 96  | 43 | 215 |
| 91,962 | 5 | 11 | 22 | 101 | 2 | 7  | 14 | 96  | 43 | 215 |
| 91,963 | 5 | 11 | 22 | 98  | 2 | 7  | 14 | 98  | 43 | 214 |
| 91,964 | 5 | 11 | 22 | 99  | 2 | 7  | 14 | 100 | 43 | 217 |
| 91,965 | 4 | 11 | 22 | 97  | 1 | 7  | 15 | 102 | 42 | 217 |
| 91,966 | 4 | 11 | 22 | 99  | 1 | 7  | 15 | 104 | 42 | 221 |
| 91,967 | 4 | 11 | 21 | 99  | 1 | 7  | 15 | 104 | 41 | 221 |
| 91,968 | 4 | 8  | 21 | 94  | 1 | 7  | 15 | 94  | 41 | 203 |
| 91,969 | 4 | 8  | 21 | 97  | 1 | 7  | 15 | 97  | 41 | 209 |
| 91,970 | 4 | 8  | 21 | 95  | 1 | 7  | 15 | 97  | 41 | 207 |
| 91,971 | 4 | 9  | 21 | 94  | 1 | 7  | 14 | 91  | 40 | 201 |
| 91,972 | 4 | 9  | 21 | 93  | 1 | 6  | 14 | 91  | 40 | 199 |
| 91,973 | 4 | 9  | 21 | 72  | 1 | 6  | 14 | 85  | 40 | 172 |
| 91,974 | 4 | 9  | 21 | 63  | 1 | 6  | 14 | 83  | 40 | 161 |
| 91,975 | 4 | 8  | 21 | 65  | 1 | 6  | 14 | 86  | 40 | 165 |
| 91,976 | 4 | 14 | 21 | 83  | 1 | 7  | 14 | 112 | 40 | 216 |
| 91,977 | 4 | 14 | 20 | 87  | 1 | 7  | 14 | 112 | 39 | 220 |
| 91,978 | 4 | 17 | 20 | 95  | 1 | 7  | 15 | 117 | 40 | 236 |
| 91,979 | 4 | 21 | 20 | 103 | 1 | 7  | 15 | 117 | 40 | 248 |
| 91,980 | 4 | 21 | 20 | 99  | 1 | 6  | 15 | 105 | 40 | 231 |
| 91,981 | 4 | 17 | 20 | 94  | 1 | 6  | 15 | 95  | 40 | 212 |
| 91,982 | 4 | 17 | 19 | 91  | 1 | 6  | 15 | 94  | 39 | 208 |
| 91,983 | 4 | 17 | 17 | 90  | 1 | 6  | 16 | 94  | 38 | 207 |
| 91,984 | 4 | 17 | 17 | 90  | 1 | 6  | 16 | 95  | 38 | 208 |
| 91,985 | 4 | 17 | 17 | 89  | 1 | 6  | 16 | 95  | 38 | 207 |
| 91,986 | 4 | 17 | 17 | 90  | 1 | 6  | 16 | 95  | 38 | 208 |
| 91,987 | 4 | 17 | 17 | 90  | 1 | 6  | 16 | 95  | 38 | 208 |
| 91,988 | 4 | 17 | 17 | 90  | 1 | 6  | 16 | 96  | 38 | 209 |
| 91,989 | 4 | 17 | 17 | 89  | 1 | 6  | 16 | 95  | 38 | 207 |
| 91,990 | 4 | 17 | 17 | 89  | 1 | 6  | 16 | 95  | 38 | 207 |
| 91,991 | 4 | 17 | 18 | 89  | 1 | 5  | 16 | 95  | 39 | 206 |
| 91,992 | 4 | 17 | 18 | 89  | 1 | 5  | 16 | 95  | 39 | 206 |

|        |   |    |    |     |   |    |    |     |    |     |
|--------|---|----|----|-----|---|----|----|-----|----|-----|
| 91,993 | 3 | 18 | 18 | 93  | 1 | 5  | 16 | 97  | 38 | 213 |
| 91,994 | 3 | 18 | 18 | 138 | 1 | 8  | 16 | 106 | 38 | 270 |
| 91,995 | 2 | 19 | 16 | 147 | 1 | 8  | 14 | 112 | 33 | 286 |
| 91,996 | 2 | 29 | 14 | 197 | 1 | 10 | 14 | 132 | 31 | 368 |
| 91,997 | 2 | 32 | 12 | 207 | 1 | 9  | 14 | 127 | 29 | 375 |
| 91,998 | 2 | 34 | 12 | 218 | 1 | 10 | 13 | 124 | 28 | 386 |
| 91,999 | 2 | 33 | 11 | 217 | 1 | 10 | 13 | 123 | 27 | 383 |
| 92,000 | 1 | 34 | 9  | 224 | 1 | 10 | 12 | 119 | 23 | 387 |
| 92,001 | 1 | 37 | 7  | 228 | 1 | 11 | 5  | 120 | 14 | 396 |
| 92,002 | 1 | 37 | 5  | 228 | 1 | 11 | 5  | 120 | 12 | 396 |
| 92,003 | 2 | 37 | 7  | 222 | 1 | 10 | 5  | 114 | 15 | 383 |
| 92,004 | 2 | 37 | 7  | 220 | 1 | 10 | 5  | 112 | 15 | 379 |
| 92,005 | 2 | 38 | 7  | 220 | 1 | 10 | 5  | 112 | 15 | 380 |
| 92,006 | 2 | 38 | 7  | 219 | 1 | 10 | 5  | 115 | 15 | 382 |
| 92,007 | 2 | 40 | 7  | 222 | 1 | 11 | 5  | 115 | 15 | 388 |
| 92,008 | 2 | 40 | 7  | 221 | 1 | 10 | 5  | 117 | 15 | 388 |
| 92,009 | 1 | 39 | 10 | 219 | 1 | 10 | 7  | 117 | 19 | 385 |
| 92,010 | 1 | 39 | 12 | 226 | 0 | 11 | 11 | 123 | 24 | 399 |
| 92,011 | 1 | 43 | 10 | 241 | 0 | 11 | 11 | 133 | 22 | 428 |
| 92,012 | 1 | 43 | 8  | 242 | 0 | 11 | 11 | 128 | 20 | 424 |
| 92,013 | 1 | 44 | 9  | 245 | 0 | 11 | 11 | 132 | 21 | 432 |
| 92,014 | 1 | 44 | 9  | 248 | 0 | 11 | 11 | 130 | 21 | 433 |
| 92,015 | 3 | 45 | 16 | 250 | 0 | 11 | 11 | 130 | 30 | 436 |
| 92,016 | 3 | 45 | 16 | 247 | 0 | 11 | 9  | 126 | 28 | 429 |
| 92,017 | 3 | 45 | 16 | 248 | 0 | 11 | 9  | 126 | 28 | 430 |
| 92,018 | 3 | 47 | 16 | 249 | 0 | 11 | 9  | 127 | 28 | 434 |
| 92,019 | 3 | 47 | 16 | 248 | 0 | 11 | 9  | 127 | 28 | 433 |
| 92,020 | 3 | 47 | 16 | 244 | 0 | 11 | 9  | 125 | 28 | 427 |
| 92,021 | 3 | 47 | 16 | 244 | 0 | 11 | 9  | 125 | 28 | 427 |
| 92,022 | 3 | 46 | 16 | 244 | 0 | 11 | 9  | 124 | 28 | 425 |
| 92,023 | 3 | 46 | 16 | 245 | 0 | 11 | 9  | 124 | 28 | 426 |
| 92,024 | 3 | 46 | 18 | 245 | 0 | 11 | 9  | 121 | 30 | 423 |
| 92,025 | 3 | 49 | 18 | 252 | 0 | 15 | 9  | 130 | 30 | 446 |
| 92,026 | 3 | 60 | 18 | 294 | 0 | 20 | 8  | 176 | 29 | 550 |
| 92,027 | 3 | 54 | 18 | 276 | 0 | 18 | 8  | 148 | 29 | 496 |
| 92,028 | 3 | 54 | 18 | 273 | 0 | 18 | 8  | 149 | 29 | 494 |
| 92,029 | 3 | 49 | 19 | 269 | 0 | 19 | 9  | 143 | 31 | 480 |
| 92,030 | 3 | 48 | 19 | 264 | 0 | 19 | 9  | 143 | 31 | 474 |
| 92,031 | 3 | 48 | 19 | 265 | 0 | 19 | 9  | 143 | 31 | 475 |
| 92,032 | 4 | 48 | 21 | 265 | 0 | 19 | 8  | 142 | 33 | 474 |
| 92,033 | 4 | 48 | 21 | 266 | 0 | 19 | 9  | 142 | 34 | 475 |

|        |   |    |    |     |   |    |    |     |    |     |
|--------|---|----|----|-----|---|----|----|-----|----|-----|
| 92,034 | 5 | 48 | 25 | 266 | 0 | 19 | 12 | 142 | 42 | 475 |
| 92,035 | 6 | 48 | 25 | 265 | 0 | 19 | 12 | 141 | 43 | 473 |
| 92,036 | 6 | 48 | 27 | 265 | 0 | 19 | 17 | 141 | 50 | 473 |
| 92,037 | 6 | 48 | 27 | 265 | 0 | 19 | 17 | 141 | 50 | 473 |
| 92,038 | 6 | 48 | 27 | 265 | 0 | 19 | 18 | 143 | 51 | 475 |
| 92,039 | 6 | 48 | 30 | 265 | 0 | 19 | 20 | 142 | 56 | 474 |
| 92,040 | 6 | 48 | 30 | 265 | 0 | 19 | 20 | 142 | 56 | 474 |
| 92,041 | 6 | 48 | 30 | 269 | 0 | 19 | 20 | 145 | 56 | 481 |
| 92,042 | 6 | 48 | 29 | 269 | 0 | 19 | 20 | 145 | 55 | 481 |
| 92,043 | 6 | 46 | 29 | 211 | 0 | 16 | 20 | 128 | 55 | 401 |
| 92,044 | 6 | 46 | 29 | 211 | 0 | 16 | 20 | 128 | 55 | 401 |
| 92,045 | 6 | 46 | 29 | 211 | 0 | 16 | 20 | 129 | 55 | 402 |
| 92,046 | 6 | 36 | 29 | 161 | 0 | 14 | 20 | 109 | 55 | 320 |
| 92,047 | 6 | 36 | 29 | 164 | 0 | 14 | 20 | 109 | 55 | 323 |
| 92,048 | 6 | 33 | 29 | 151 | 0 | 14 | 20 | 107 | 55 | 305 |
| 92,049 | 6 | 31 | 29 | 136 | 0 | 13 | 20 | 103 | 55 | 283 |
| 92,050 | 6 | 31 | 29 | 130 | 0 | 13 | 20 | 102 | 55 | 276 |
| 92,051 | 6 | 27 | 30 | 115 | 0 | 12 | 19 | 99  | 55 | 253 |
| 92,052 | 6 | 28 | 30 | 117 | 0 | 12 | 19 | 101 | 55 | 258 |
| 92,053 | 5 | 28 | 30 | 120 | 0 | 12 | 19 | 101 | 54 | 261 |
| 92,054 | 5 | 29 | 30 | 132 | 0 | 12 | 19 | 103 | 54 | 276 |
| 92,055 | 5 | 30 | 31 | 136 | 0 | 12 | 19 | 105 | 55 | 283 |
| 92,056 | 5 | 29 | 31 | 139 | 0 | 13 | 19 | 105 | 55 | 286 |
| 92,057 | 5 | 29 | 33 | 144 | 0 | 13 | 24 | 106 | 62 | 292 |
| 92,058 | 5 | 27 | 32 | 141 | 0 | 12 | 22 | 104 | 59 | 284 |
| 92,059 | 6 | 27 | 36 | 151 | 1 | 12 | 29 | 104 | 72 | 294 |
| 92,060 | 6 | 31 | 36 | 170 | 1 | 13 | 27 | 112 | 70 | 326 |
| 92,061 | 6 | 31 | 35 | 172 | 1 | 13 | 25 | 112 | 67 | 328 |
| 92,062 | 6 | 29 | 34 | 180 | 1 | 14 | 25 | 118 | 66 | 341 |
| 92,063 | 6 | 34 | 32 | 196 | 1 | 16 | 25 | 137 | 64 | 383 |
| 92,064 | 4 | 33 | 30 | 201 | 1 | 17 | 25 | 137 | 60 | 388 |
| 92,065 | 4 | 33 | 28 | 199 | 1 | 17 | 25 | 137 | 58 | 386 |
| 92,066 | 4 | 32 | 27 | 200 | 1 | 17 | 25 | 135 | 57 | 384 |
| 92,067 | 4 | 39 | 27 | 212 | 1 | 17 | 25 | 140 | 57 | 408 |
| 92,068 | 4 | 39 | 27 | 219 | 1 | 17 | 25 | 140 | 57 | 415 |
| 92,069 | 4 | 38 | 27 | 223 | 1 | 17 | 25 | 139 | 57 | 417 |
| 92,070 | 4 | 38 | 27 | 223 | 1 | 17 | 25 | 139 | 57 | 417 |
| 92,071 | 4 | 38 | 27 | 223 | 1 | 17 | 26 | 138 | 58 | 416 |
| 92,072 | 4 | 38 | 28 | 222 | 1 | 17 | 27 | 138 | 60 | 415 |
| 92,073 | 4 | 38 | 28 | 224 | 1 | 17 | 27 | 141 | 60 | 420 |
| 92,074 | 4 | 38 | 28 | 224 | 1 | 17 | 27 | 141 | 60 | 420 |

|        |   |    |    |     |   |    |    |     |     |     |
|--------|---|----|----|-----|---|----|----|-----|-----|-----|
| 92,075 | 4 | 38 | 27 | 225 | 1 | 17 | 27 | 141 | 59  | 421 |
| 92,076 | 4 | 24 | 27 | 174 | 1 | 8  | 27 | 84  | 59  | 290 |
| 92,077 | 4 | 24 | 28 | 174 | 1 | 8  | 27 | 84  | 60  | 290 |
| 92,078 | 4 | 24 | 28 | 173 | 1 | 8  | 28 | 83  | 61  | 288 |
| 92,079 | 4 | 24 | 28 | 169 | 1 | 7  | 28 | 83  | 61  | 283 |
| 92,080 | 4 | 23 | 27 | 167 | 1 | 7  | 27 | 83  | 59  | 280 |
| 92,081 | 4 | 23 | 27 | 167 | 1 | 7  | 27 | 85  | 59  | 282 |
| 92,082 | 4 | 23 | 25 | 168 | 1 | 7  | 27 | 85  | 57  | 283 |
| 92,083 | 4 | 24 | 27 | 182 | 1 | 7  | 27 | 97  | 59  | 310 |
| 92,084 | 3 | 26 | 46 | 206 | 3 | 12 | 31 | 115 | 83  | 359 |
| 92,085 | 3 | 27 | 48 | 219 | 4 | 12 | 33 | 117 | 88  | 375 |
| 92,086 | 2 | 27 | 49 | 228 | 6 | 15 | 36 | 133 | 93  | 403 |
| 92,087 | 3 | 28 | 48 | 234 | 6 | 16 | 32 | 138 | 89  | 416 |
| 92,088 | 3 | 28 | 48 | 236 | 6 | 16 | 31 | 139 | 88  | 419 |
| 92,089 | 3 | 28 | 47 | 236 | 6 | 16 | 29 | 138 | 85  | 418 |
| 92,090 | 3 | 28 | 45 | 236 | 6 | 16 | 29 | 138 | 83  | 418 |
| 92,091 | 3 | 29 | 45 | 240 | 6 | 16 | 29 | 139 | 83  | 424 |
| 92,092 | 3 | 29 | 45 | 236 | 6 | 16 | 29 | 136 | 83  | 417 |
| 92,093 | 3 | 29 | 45 | 236 | 6 | 16 | 30 | 136 | 84  | 417 |
| 92,094 | 3 | 29 | 45 | 236 | 6 | 16 | 30 | 136 | 84  | 417 |
| 92,095 | 3 | 29 | 45 | 237 | 6 | 16 | 30 | 136 | 84  | 418 |
| 92,096 | 3 | 29 | 46 | 237 | 6 | 16 | 30 | 135 | 85  | 417 |
| 92,097 | 3 | 29 | 46 | 234 | 6 | 16 | 30 | 135 | 85  | 414 |
| 92,098 | 3 | 29 | 46 | 234 | 6 | 16 | 30 | 135 | 85  | 414 |
| 92,099 | 3 | 29 | 47 | 233 | 6 | 16 | 30 | 135 | 86  | 413 |
| 92,100 | 3 | 28 | 46 | 228 | 6 | 16 | 30 | 133 | 85  | 405 |
| 92,101 | 3 | 28 | 46 | 228 | 6 | 16 | 30 | 133 | 85  | 405 |
| 92,102 | 3 | 28 | 47 | 228 | 6 | 16 | 31 | 133 | 87  | 405 |
| 92,103 | 3 | 28 | 47 | 228 | 6 | 16 | 31 | 133 | 87  | 405 |
| 92,104 | 4 | 28 | 46 | 239 | 6 | 16 | 31 | 137 | 87  | 420 |
| 92,105 | 4 | 29 | 51 | 245 | 6 | 20 | 35 | 149 | 96  | 443 |
| 92,106 | 5 | 28 | 56 | 254 | 7 | 20 | 36 | 154 | 104 | 456 |
| 92,107 | 5 | 30 | 59 | 269 | 7 | 20 | 44 | 164 | 115 | 483 |
| 92,108 | 5 | 30 | 58 | 266 | 8 | 20 | 42 | 160 | 113 | 476 |
| 92,109 | 4 | 30 | 56 | 262 | 7 | 21 | 39 | 160 | 106 | 473 |
| 92,110 | 4 | 27 | 55 | 240 | 7 | 20 | 39 | 153 | 105 | 440 |
| 92,111 | 4 | 27 | 54 | 242 | 7 | 21 | 39 | 156 | 104 | 446 |
| 92,112 | 4 | 26 | 54 | 236 | 7 | 20 | 39 | 149 | 104 | 431 |
| 92,113 | 4 | 24 | 54 | 213 | 7 | 19 | 39 | 134 | 104 | 390 |
| 92,114 | 4 | 19 | 55 | 197 | 7 | 17 | 39 | 116 | 105 | 349 |
| 92,115 | 4 | 19 | 55 | 187 | 7 | 16 | 39 | 112 | 105 | 334 |

|        |   |    |    |     |   |    |    |     |     |     |
|--------|---|----|----|-----|---|----|----|-----|-----|-----|
| 92,116 | 4 | 19 | 55 | 184 | 7 | 16 | 39 | 113 | 105 | 332 |
| 92,117 | 4 | 19 | 55 | 184 | 7 | 16 | 39 | 113 | 105 | 332 |
| 92,118 | 4 | 12 | 55 | 164 | 7 | 16 | 39 | 108 | 105 | 300 |
| 92,119 | 4 | 12 | 55 | 164 | 7 | 16 | 39 | 109 | 105 | 301 |
| 92,120 | 4 | 11 | 55 | 159 | 7 | 16 | 39 | 109 | 105 | 295 |
| 92,121 | 4 | 11 | 57 | 159 | 7 | 16 | 38 | 109 | 106 | 295 |
| 92,122 | 4 | 11 | 57 | 159 | 7 | 16 | 38 | 109 | 106 | 295 |
| 92,123 | 4 | 11 | 58 | 157 | 7 | 16 | 37 | 106 | 106 | 290 |
| 92,124 | 4 | 11 | 58 | 159 | 7 | 16 | 37 | 106 | 106 | 292 |
| 92,125 | 4 | 11 | 57 | 156 | 7 | 16 | 41 | 106 | 109 | 289 |
| 92,126 | 4 | 11 | 57 | 156 | 7 | 16 | 41 | 106 | 109 | 289 |
| 92,127 | 4 | 11 | 57 | 156 | 7 | 16 | 41 | 106 | 109 | 289 |
| 92,128 | 4 | 11 | 56 | 156 | 7 | 16 | 41 | 106 | 108 | 289 |
| 92,129 | 5 | 11 | 56 | 156 | 7 | 16 | 40 | 106 | 108 | 289 |
| 92,130 | 5 | 11 | 56 | 156 | 7 | 16 | 40 | 106 | 108 | 289 |
| 92,131 | 5 | 11 | 56 | 157 | 7 | 16 | 40 | 105 | 108 | 289 |
| 92,132 | 5 | 11 | 56 | 162 | 7 | 17 | 40 | 107 | 108 | 297 |
| 92,133 | 4 | 12 | 56 | 198 | 7 | 19 | 40 | 123 | 107 | 352 |
| 92,134 | 4 | 21 | 54 | 246 | 7 | 28 | 39 | 150 | 104 | 445 |
| 92,135 | 4 | 19 | 32 | 230 | 5 | 23 | 33 | 135 | 74  | 407 |
| 92,136 | 4 | 19 | 29 | 231 | 5 | 26 | 30 | 147 | 68  | 423 |
| 92,137 | 4 | 19 | 28 | 239 | 3 | 23 | 27 | 141 | 62  | 422 |
| 92,138 | 3 | 20 | 27 | 236 | 3 | 22 | 26 | 141 | 59  | 419 |
| 92,139 | 3 | 56 | 27 | 344 | 3 | 29 | 26 | 234 | 59  | 663 |
| 92,140 | 3 | 57 | 27 | 351 | 3 | 29 | 26 | 236 | 59  | 673 |
| 92,141 | 3 | 57 | 27 | 354 | 3 | 29 | 26 | 236 | 59  | 676 |
| 92,142 | 3 | 57 | 29 | 358 | 3 | 30 | 26 | 236 | 61  | 681 |
| 92,143 | 3 | 58 | 29 | 364 | 3 | 30 | 25 | 236 | 60  | 688 |
| 92,144 | 3 | 58 | 29 | 367 | 3 | 31 | 25 | 239 | 60  | 695 |
| 92,145 | 3 | 58 | 30 | 372 | 3 | 31 | 25 | 240 | 61  | 701 |
| 92,146 | 3 | 58 | 29 | 372 | 4 | 31 | 25 | 242 | 61  | 703 |
| 92,147 | 3 | 58 | 29 | 372 | 4 | 31 | 25 | 242 | 61  | 703 |
| 92,148 | 3 | 58 | 29 | 373 | 4 | 31 | 25 | 242 | 61  | 704 |
| 92,149 | 3 | 58 | 30 | 376 | 4 | 31 | 25 | 242 | 62  | 707 |
| 92,150 | 3 | 58 | 29 | 376 | 4 | 31 | 25 | 242 | 61  | 707 |
| 92,151 | 3 | 58 | 29 | 376 | 4 | 31 | 25 | 242 | 61  | 707 |
| 92,152 | 3 | 58 | 30 | 383 | 4 | 32 | 26 | 246 | 63  | 719 |
| 92,153 | 3 | 58 | 30 | 408 | 4 | 32 | 25 | 250 | 62  | 748 |
| 92,154 | 2 | 58 | 29 | 413 | 4 | 32 | 27 | 263 | 62  | 766 |
| 92,155 | 2 | 58 | 25 | 413 | 4 | 33 | 25 | 268 | 56  | 772 |
| 92,156 | 2 | 56 | 24 | 408 | 4 | 30 | 23 | 265 | 53  | 759 |



|        |   |    |    |     |   |    |    |     |    |     |
|--------|---|----|----|-----|---|----|----|-----|----|-----|
| 92,157 | 2 | 59 | 19 | 401 | 3 | 29 | 24 | 261 | 48 | 750 |
| 92,158 | 2 | 57 | 16 | 405 | 3 | 30 | 15 | 265 | 36 | 757 |
| 92,159 | 2 | 57 | 14 | 409 | 2 | 30 | 11 | 265 | 29 | 761 |
| 92,160 | 2 | 57 | 12 | 411 | 2 | 29 | 11 | 267 | 27 | 764 |
| 92,161 | 2 | 56 | 12 | 402 | 2 | 28 | 9  | 259 | 25 | 745 |
| 92,162 | 3 | 56 | 12 | 399 | 2 | 28 | 9  | 258 | 26 | 741 |
| 92,163 | 3 | 56 | 12 | 401 | 2 | 28 | 9  | 258 | 26 | 743 |
| 92,164 | 3 | 56 | 12 | 404 | 2 | 28 | 9  | 259 | 26 | 747 |
| 92,165 | 3 | 56 | 11 | 403 | 2 | 28 | 9  | 258 | 25 | 745 |
| 92,166 | 3 | 56 | 11 | 403 | 2 | 28 | 9  | 258 | 25 | 745 |
| 92,167 | 3 | 56 | 11 | 402 | 2 | 28 | 9  | 257 | 25 | 743 |
| 92,168 | 3 | 56 | 11 | 402 | 2 | 28 | 9  | 257 | 25 | 743 |
| 92,169 | 3 | 56 | 11 | 402 | 2 | 28 | 9  | 256 | 25 | 742 |
| 92,170 | 3 | 56 | 11 | 402 | 2 | 28 | 9  | 256 | 25 | 742 |
| 92,171 | 3 | 56 | 11 | 403 | 2 | 28 | 9  | 256 | 25 | 743 |
| 92,172 | 3 | 56 | 9  | 403 | 2 | 28 | 9  | 256 | 23 | 743 |
| 92,173 | 4 | 56 | 7  | 403 | 2 | 28 | 9  | 256 | 22 | 743 |
| 92,174 | 4 | 56 | 7  | 403 | 2 | 28 | 9  | 256 | 22 | 743 |
| 92,175 | 4 | 56 | 7  | 401 | 2 | 28 | 9  | 256 | 22 | 741 |
| 92,176 | 4 | 56 | 7  | 401 | 2 | 28 | 5  | 256 | 18 | 741 |
| 92,177 | 4 | 56 | 7  | 401 | 2 | 28 | 5  | 256 | 18 | 741 |
| 92,178 | 4 | 56 | 7  | 401 | 2 | 28 | 5  | 256 | 18 | 741 |
| 92,179 | 4 | 56 | 7  | 402 | 2 | 28 | 5  | 256 | 18 | 742 |
| 92,180 | 3 | 56 | 7  | 399 | 2 | 28 | 5  | 256 | 17 | 739 |
| 92,181 | 3 | 56 | 7  | 400 | 2 | 30 | 5  | 258 | 17 | 744 |
| 92,182 | 3 | 56 | 7  | 404 | 2 | 30 | 5  | 259 | 17 | 749 |
| 92,183 | 3 | 56 | 7  | 402 | 2 | 29 | 5  | 255 | 17 | 742 |
| 92,184 | 3 | 56 | 7  | 371 | 2 | 27 | 5  | 241 | 17 | 695 |
| 92,185 | 3 | 47 | 7  | 309 | 1 | 18 | 5  | 202 | 16 | 576 |
| 92,186 | 3 | 47 | 7  | 302 | 1 | 18 | 5  | 199 | 16 | 566 |
| 92,187 | 3 | 46 | 7  | 288 | 1 | 15 | 5  | 185 | 16 | 534 |
| 92,188 | 3 | 46 | 7  | 271 | 1 | 16 | 5  | 175 | 16 | 508 |
| 92,189 | 3 | 44 | 7  | 267 | 1 | 16 | 5  | 170 | 16 | 497 |
| 92,190 | 3 | 8  | 7  | 157 | 1 | 9  | 5  | 77  | 16 | 251 |
| 92,191 | 3 | 7  | 8  | 151 | 1 | 9  | 5  | 74  | 17 | 241 |
| 92,192 | 3 | 7  | 8  | 148 | 1 | 9  | 5  | 74  | 17 | 238 |
| 92,193 | 3 | 5  | 6  | 134 | 1 | 8  | 5  | 73  | 15 | 220 |
| 92,194 | 3 | 5  | 6  | 134 | 1 | 8  | 5  | 73  | 15 | 220 |
| 92,195 | 3 | 5  | 5  | 126 | 1 | 8  | 5  | 67  | 14 | 206 |
| 92,196 | 3 | 5  | 5  | 126 | 1 | 9  | 5  | 71  | 14 | 211 |
| 92,197 | 3 | 7  | 5  | 127 | 0 | 9  | 5  | 83  | 13 | 226 |

|        |   |    |    |     |   |   |    |    |    |     |
|--------|---|----|----|-----|---|---|----|----|----|-----|
| 92,198 | 3 | 7  | 5  | 127 | 0 | 9 | 5  | 83 | 13 | 226 |
| 92,199 | 3 | 7  | 5  | 127 | 0 | 9 | 5  | 85 | 13 | 228 |
| 92,200 | 3 | 8  | 5  | 119 | 0 | 8 | 5  | 83 | 13 | 218 |
| 92,201 | 3 | 8  | 5  | 120 | 0 | 8 | 5  | 84 | 13 | 220 |
| 92,202 | 3 | 8  | 4  | 120 | 0 | 8 | 4  | 84 | 11 | 220 |
| 92,203 | 3 | 8  | 4  | 121 | 0 | 8 | 4  | 85 | 11 | 222 |
| 92,204 | 3 | 8  | 3  | 92  | 0 | 8 | 4  | 69 | 10 | 177 |
| 92,205 | 3 | 8  | 4  | 81  | 0 | 7 | 4  | 60 | 11 | 156 |
| 92,206 | 3 | 8  | 4  | 68  | 0 | 6 | 4  | 49 | 11 | 131 |
| 92,207 | 3 | 8  | 5  | 68  | 0 | 6 | 5  | 49 | 13 | 131 |
| 92,208 | 2 | 5  | 4  | 59  | 0 | 6 | 3  | 46 | 9  | 116 |
| 92,209 | 2 | 5  | 4  | 39  | 0 | 5 | 3  | 32 | 9  | 81  |
| 92,210 | 2 | 5  | 5  | 34  | 0 | 5 | 7  | 32 | 14 | 76  |
| 92,211 | 2 | 5  | 7  | 32  | 0 | 5 | 8  | 30 | 17 | 72  |
| 92,212 | 2 | 5  | 7  | 32  | 0 | 5 | 8  | 30 | 17 | 72  |
| 92,213 | 1 | 5  | 7  | 30  | 0 | 5 | 8  | 30 | 16 | 70  |
| 92,214 | 1 | 5  | 7  | 30  | 0 | 5 | 8  | 30 | 16 | 70  |
| 92,215 | 1 | 5  | 7  | 27  | 0 | 5 | 8  | 29 | 16 | 66  |
| 92,216 | 1 | 5  | 7  | 27  | 0 | 5 | 8  | 29 | 16 | 66  |
| 92,217 | 1 | 5  | 7  | 27  | 0 | 5 | 10 | 29 | 18 | 66  |
| 92,218 | 1 | 5  | 7  | 27  | 0 | 5 | 10 | 29 | 18 | 66  |
| 92,219 | 1 | 5  | 7  | 27  | 0 | 5 | 10 | 29 | 18 | 66  |
| 92,220 | 1 | 5  | 7  | 27  | 0 | 5 | 10 | 29 | 18 | 66  |
| 92,221 | 1 | 5  | 7  | 27  | 0 | 5 | 10 | 29 | 18 | 66  |
| 92,222 | 1 | 5  | 13 | 26  | 0 | 5 | 12 | 29 | 26 | 65  |
| 92,223 | 1 | 5  | 14 | 26  | 0 | 5 | 13 | 29 | 28 | 65  |
| 92,224 | 0 | 5  | 14 | 28  | 0 | 5 | 13 | 29 | 27 | 67  |
| 92,225 | 0 | 5  | 14 | 28  | 0 | 5 | 13 | 29 | 27 | 67  |
| 92,226 | 4 | 5  | 33 | 28  | 1 | 5 | 24 | 31 | 62 | 69  |
| 92,227 | 6 | 5  | 35 | 30  | 1 | 5 | 26 | 31 | 68 | 71  |
| 92,228 | 6 | 5  | 38 | 30  | 1 | 5 | 28 | 31 | 73 | 71  |
| 92,229 | 6 | 10 | 38 | 85  | 2 | 8 | 29 | 55 | 75 | 158 |
| 92,230 | 6 | 11 | 38 | 95  | 2 | 8 | 29 | 58 | 75 | 172 |
| 92,231 | 6 | 13 | 38 | 100 | 2 | 8 | 29 | 63 | 75 | 184 |
| 92,232 | 6 | 13 | 38 | 99  | 2 | 6 | 29 | 60 | 75 | 178 |
| 92,233 | 6 | 13 | 40 | 98  | 2 | 6 | 29 | 60 | 77 | 177 |
| 92,234 | 6 | 12 | 40 | 89  | 2 | 6 | 29 | 59 | 77 | 166 |
| 92,235 | 6 | 12 | 40 | 89  | 2 | 6 | 29 | 60 | 77 | 167 |
| 92,236 | 6 | 11 | 41 | 91  | 2 | 6 | 31 | 60 | 80 | 168 |
| 92,237 | 6 | 13 | 41 | 91  | 2 | 6 | 31 | 60 | 80 | 170 |
| 92,238 | 6 | 13 | 44 | 93  | 3 | 5 | 34 | 61 | 87 | 172 |

|        |   |    |    |     |   |   |    |     |    |     |
|--------|---|----|----|-----|---|---|----|-----|----|-----|
| 92,239 | 6 | 13 | 45 | 95  | 3 | 5 | 36 | 62  | 90 | 175 |
| 92,240 | 6 | 13 | 45 | 96  | 3 | 5 | 36 | 62  | 90 | 176 |
| 92,241 | 6 | 13 | 44 | 97  | 3 | 5 | 36 | 62  | 89 | 177 |
| 92,242 | 6 | 13 | 44 | 95  | 3 | 4 | 36 | 62  | 89 | 174 |
| 92,243 | 6 | 13 | 44 | 95  | 3 | 4 | 36 | 62  | 89 | 174 |
| 92,244 | 6 | 13 | 44 | 95  | 3 | 4 | 36 | 62  | 89 | 174 |
| 92,245 | 6 | 13 | 44 | 95  | 3 | 4 | 36 | 62  | 89 | 174 |
| 92,246 | 6 | 13 | 44 | 95  | 3 | 4 | 36 | 62  | 89 | 174 |
| 92,247 | 6 | 13 | 45 | 95  | 3 | 3 | 36 | 58  | 90 | 169 |
| 92,248 | 6 | 11 | 45 | 94  | 3 | 3 | 36 | 46  | 90 | 154 |
| 92,249 | 6 | 11 | 45 | 93  | 3 | 3 | 36 | 44  | 90 | 151 |
| 92,250 | 6 | 10 | 45 | 91  | 3 | 3 | 36 | 42  | 90 | 146 |
| 92,251 | 6 | 10 | 44 | 90  | 3 | 3 | 36 | 41  | 89 | 144 |
| 92,252 | 6 | 10 | 44 | 90  | 3 | 3 | 36 | 41  | 89 | 144 |
| 92,253 | 6 | 10 | 44 | 90  | 3 | 4 | 36 | 41  | 89 | 145 |
| 92,254 | 6 | 10 | 44 | 88  | 3 | 4 | 36 | 40  | 89 | 142 |
| 92,255 | 6 | 10 | 44 | 88  | 3 | 4 | 36 | 42  | 89 | 144 |
| 92,256 | 6 | 10 | 44 | 89  | 3 | 4 | 35 | 42  | 88 | 145 |
| 92,257 | 6 | 10 | 44 | 90  | 3 | 4 | 36 | 42  | 89 | 146 |
| 92,258 | 6 | 10 | 43 | 90  | 3 | 4 | 37 | 42  | 89 | 146 |
| 92,259 | 6 | 11 | 43 | 89  | 3 | 4 | 37 | 42  | 89 | 146 |
| 92,260 | 6 | 11 | 42 | 89  | 3 | 4 | 33 | 42  | 84 | 146 |
| 92,261 | 6 | 11 | 40 | 89  | 3 | 4 | 32 | 42  | 81 | 146 |
| 92,262 | 6 | 11 | 40 | 89  | 3 | 4 | 32 | 42  | 81 | 146 |
| 92,263 | 6 | 11 | 40 | 89  | 3 | 4 | 32 | 42  | 81 | 146 |
| 92,264 | 6 | 11 | 40 | 89  | 3 | 4 | 32 | 42  | 81 | 146 |
| 92,265 | 6 | 11 | 40 | 89  | 3 | 4 | 32 | 42  | 81 | 146 |
| 92,266 | 6 | 11 | 40 | 92  | 3 | 4 | 32 | 43  | 81 | 150 |
| 92,267 | 6 | 11 | 40 | 94  | 3 | 4 | 31 | 43  | 80 | 152 |
| 92,268 | 6 | 11 | 40 | 95  | 3 | 4 | 30 | 43  | 79 | 153 |
| 92,269 | 6 | 11 | 39 | 98  | 3 | 4 | 30 | 45  | 78 | 158 |
| 92,270 | 6 | 11 | 37 | 99  | 3 | 4 | 28 | 45  | 74 | 159 |
| 92,271 | 6 | 12 | 37 | 100 | 3 | 4 | 28 | 47  | 74 | 163 |
| 92,272 | 6 | 14 | 34 | 104 | 3 | 4 | 28 | 52  | 71 | 174 |
| 92,273 | 6 | 15 | 34 | 113 | 3 | 4 | 28 | 53  | 71 | 185 |
| 92,274 | 6 | 27 | 33 | 116 | 3 | 6 | 27 | 62  | 69 | 211 |
| 92,275 | 6 | 29 | 33 | 146 | 3 | 8 | 27 | 87  | 69 | 270 |
| 92,276 | 3 | 29 | 18 | 150 | 2 | 8 | 18 | 86  | 41 | 273 |
| 92,277 | 2 | 38 | 14 | 167 | 2 | 8 | 16 | 101 | 34 | 314 |
| 92,278 | 0 | 38 | 12 | 166 | 2 | 8 | 14 | 101 | 28 | 313 |
| 92,279 | 0 | 35 | 9  | 112 | 2 | 5 | 12 | 80  | 23 | 232 |

|        |   |    |    |     |   |    |    |     |    |     |
|--------|---|----|----|-----|---|----|----|-----|----|-----|
| 92,280 | 0 | 35 | 9  | 113 | 1 | 5  | 11 | 81  | 21 | 234 |
| 92,281 | 0 | 34 | 9  | 106 | 1 | 5  | 11 | 78  | 21 | 223 |
| 92,282 | 0 | 32 | 10 | 103 | 1 | 5  | 11 | 74  | 22 | 214 |
| 92,283 | 0 | 32 | 10 | 105 | 1 | 5  | 11 | 77  | 22 | 219 |
| 92,284 | 1 | 35 | 9  | 115 | 1 | 6  | 11 | 79  | 22 | 235 |
| 92,285 | 1 | 35 | 14 | 129 | 1 | 6  | 13 | 82  | 29 | 252 |
| 92,286 | 1 | 38 | 14 | 137 | 1 | 7  | 13 | 85  | 29 | 267 |
| 92,287 | 1 | 38 | 13 | 147 | 1 | 9  | 12 | 86  | 27 | 280 |
| 92,288 | 1 | 46 | 13 | 176 | 0 | 10 | 13 | 98  | 27 | 330 |
| 92,289 | 1 | 46 | 11 | 176 | 0 | 10 | 11 | 97  | 23 | 329 |
| 92,290 | 1 | 48 | 10 | 175 | 0 | 10 | 10 | 99  | 21 | 332 |
| 92,291 | 1 | 48 | 10 | 174 | 0 | 10 | 10 | 99  | 21 | 331 |
| 92,292 | 1 | 48 | 10 | 179 | 0 | 10 | 10 | 99  | 21 | 336 |
| 92,293 | 1 | 48 | 10 | 179 | 0 | 10 | 10 | 99  | 21 | 336 |
| 92,294 | 1 | 48 | 10 | 179 | 0 | 10 | 10 | 99  | 21 | 336 |
| 92,295 | 1 | 48 | 10 | 183 | 0 | 11 | 10 | 99  | 21 | 341 |
| 92,296 | 1 | 48 | 10 | 183 | 0 | 11 | 10 | 99  | 21 | 341 |
| 92,297 | 1 | 48 | 10 | 183 | 0 | 11 | 10 | 99  | 21 | 341 |
| 92,298 | 1 | 48 | 10 | 184 | 0 | 11 | 10 | 99  | 21 | 342 |
| 92,299 | 1 | 48 | 12 | 184 | 0 | 11 | 10 | 100 | 23 | 343 |
| 92,300 | 2 | 50 | 12 | 184 | 0 | 11 | 10 | 100 | 24 | 345 |
| 92,301 | 2 | 50 | 16 | 185 | 1 | 11 | 10 | 102 | 29 | 348 |
| 92,302 | 2 | 53 | 16 | 203 | 1 | 15 | 10 | 124 | 29 | 395 |
| 92,303 | 2 | 53 | 16 | 208 | 1 | 16 | 10 | 124 | 29 | 401 |
| 92,304 | 4 | 54 | 43 | 225 | 3 | 16 | 37 | 140 | 87 | 435 |
| 92,305 | 4 | 55 | 43 | 237 | 3 | 16 | 37 | 144 | 87 | 452 |
| 92,306 | 4 | 55 | 42 | 237 | 3 | 16 | 36 | 143 | 85 | 451 |
| 92,307 | 5 | 57 | 42 | 243 | 3 | 17 | 37 | 146 | 87 | 463 |
| 92,308 | 5 | 59 | 42 | 250 | 3 | 18 | 37 | 148 | 87 | 475 |
| 92,309 | 5 | 60 | 41 | 256 | 3 | 18 | 35 | 149 | 84 | 483 |
| 92,310 | 5 | 59 | 42 | 257 | 3 | 18 | 35 | 149 | 85 | 483 |
| 92,311 | 5 | 59 | 44 | 257 | 3 | 18 | 35 | 149 | 87 | 483 |
| 92,312 | 5 | 59 | 44 | 258 | 3 | 18 | 35 | 149 | 87 | 484 |
| 92,313 | 5 | 59 | 44 | 258 | 3 | 18 | 35 | 149 | 87 | 484 |
| 92,314 | 5 | 59 | 44 | 263 | 3 | 18 | 35 | 151 | 87 | 491 |
| 92,315 | 5 | 59 | 44 | 267 | 3 | 18 | 35 | 151 | 87 | 495 |
| 92,316 | 5 | 59 | 44 | 273 | 4 | 19 | 35 | 157 | 88 | 508 |
| 92,317 | 5 | 59 | 44 | 282 | 4 | 19 | 35 | 158 | 88 | 518 |
| 92,318 | 5 | 59 | 44 | 280 | 4 | 19 | 35 | 158 | 88 | 516 |
| 92,319 | 5 | 59 | 44 | 279 | 4 | 19 | 35 | 158 | 88 | 515 |
| 92,320 | 5 | 59 | 44 | 275 | 4 | 19 | 35 | 156 | 88 | 509 |

|        |   |    |    |     |   |    |    |     |    |     |
|--------|---|----|----|-----|---|----|----|-----|----|-----|
| 92,321 | 5 | 58 | 44 | 278 | 4 | 19 | 35 | 155 | 88 | 510 |
| 92,322 | 5 | 58 | 44 | 281 | 4 | 19 | 35 | 156 | 88 | 514 |
| 92,323 | 5 | 55 | 44 | 278 | 4 | 19 | 35 | 153 | 88 | 505 |
| 92,324 | 5 | 57 | 44 | 299 | 4 | 21 | 35 | 169 | 88 | 546 |
| 92,325 | 5 | 47 | 44 | 299 | 4 | 19 | 35 | 163 | 88 | 528 |
| 92,326 | 5 | 45 | 44 | 269 | 4 | 18 | 35 | 142 | 88 | 474 |
| 92,327 | 5 | 46 | 49 | 302 | 4 | 19 | 35 | 155 | 93 | 522 |
| 92,328 | 5 | 37 | 49 | 285 | 4 | 19 | 35 | 139 | 93 | 480 |
| 92,329 | 5 | 37 | 49 | 286 | 4 | 20 | 35 | 141 | 93 | 484 |
| 92,330 | 5 | 35 | 49 | 285 | 4 | 20 | 35 | 139 | 93 | 479 |
| 92,331 | 5 | 35 | 49 | 291 | 4 | 20 | 35 | 143 | 93 | 489 |
| 92,332 | 5 | 35 | 49 | 290 | 4 | 20 | 35 | 145 | 93 | 490 |
| 92,333 | 5 | 35 | 48 | 294 | 4 | 20 | 35 | 149 | 92 | 498 |
| 92,334 | 5 | 39 | 48 | 341 | 4 | 28 | 35 | 200 | 92 | 608 |
| 92,335 | 4 | 37 | 47 | 340 | 4 | 29 | 35 | 210 | 90 | 616 |
| 92,336 | 4 | 37 | 42 | 328 | 4 | 29 | 34 | 211 | 84 | 605 |
| 92,337 | 4 | 35 | 44 | 320 | 4 | 28 | 33 | 209 | 85 | 592 |
| 92,338 | 4 | 35 | 45 | 308 | 4 | 26 | 34 | 209 | 87 | 578 |
| 92,339 | 4 | 25 | 44 | 284 | 4 | 25 | 31 | 197 | 83 | 531 |
| 92,340 | 4 | 25 | 44 | 284 | 4 | 25 | 31 | 203 | 83 | 537 |
| 92,341 | 4 | 23 | 44 | 286 | 4 | 25 | 31 | 200 | 83 | 534 |
| 92,342 | 4 | 25 | 44 | 297 | 4 | 27 | 31 | 208 | 83 | 557 |
| 92,343 | 4 | 25 | 44 | 292 | 4 | 27 | 31 | 208 | 83 | 552 |
| 92,344 | 4 | 25 | 44 | 296 | 4 | 27 | 31 | 208 | 83 | 556 |
| 92,345 | 4 | 25 | 44 | 292 | 4 | 26 | 31 | 208 | 83 | 551 |
| 92,346 | 4 | 25 | 44 | 293 | 4 | 27 | 31 | 208 | 83 | 553 |
| 92,347 | 4 | 25 | 43 | 294 | 4 | 27 | 31 | 208 | 82 | 554 |
| 92,348 | 4 | 25 | 43 | 295 | 4 | 27 | 31 | 208 | 82 | 555 |
| 92,349 | 4 | 26 | 42 | 311 | 4 | 28 | 31 | 223 | 81 | 588 |
| 92,350 | 4 | 29 | 41 | 319 | 4 | 30 | 31 | 234 | 80 | 612 |
| 92,351 | 3 | 28 | 41 | 327 | 4 | 31 | 31 | 242 | 79 | 628 |
| 92,352 | 3 | 26 | 37 | 317 | 3 | 27 | 31 | 224 | 74 | 594 |
| 92,353 | 3 | 26 | 37 | 318 | 3 | 27 | 31 | 226 | 74 | 597 |
| 92,354 | 1 | 26 | 11 | 319 | 1 | 27 | 6  | 227 | 19 | 599 |
| 92,355 | 1 | 60 | 10 | 396 | 1 | 28 | 4  | 307 | 16 | 791 |
| 92,356 | 1 | 59 | 10 | 397 | 1 | 29 | 4  | 307 | 16 | 792 |
| 92,357 | 0 | 59 | 11 | 398 | 1 | 29 | 2  | 306 | 14 | 792 |
| 92,358 | 0 | 57 | 11 | 395 | 1 | 28 | 2  | 304 | 14 | 784 |
| 92,359 | 0 | 57 | 11 | 384 | 1 | 27 | 2  | 304 | 14 | 772 |
| 92,360 | 0 | 60 | 12 | 393 | 1 | 28 | 2  | 306 | 15 | 787 |
| 92,361 | 0 | 61 | 10 | 394 | 1 | 28 | 2  | 307 | 13 | 790 |

|        |   |    |    |     |   |    |   |     |    |       |
|--------|---|----|----|-----|---|----|---|-----|----|-------|
| 92,362 | 0 | 61 | 10 | 394 | 1 | 29 | 2 | 309 | 13 | 793   |
| 92,363 | 0 | 62 | 11 | 401 | 1 | 29 | 2 | 311 | 14 | 803   |
| 92,364 | 0 | 63 | 11 | 403 | 1 | 29 | 2 | 311 | 14 | 806   |
| 92,365 | 0 | 64 | 11 | 403 | 1 | 29 | 2 | 316 | 14 | 812   |
| 92,366 | 0 | 64 | 11 | 407 | 0 | 29 | 2 | 317 | 13 | 817   |
| 92,367 | 0 | 64 | 11 | 401 | 0 | 28 | 2 | 311 | 13 | 804   |
| 92,368 | 0 | 64 | 11 | 391 | 0 | 28 | 2 | 310 | 13 | 793   |
| 92,369 | 0 | 64 | 11 | 392 | 0 | 28 | 2 | 311 | 13 | 795   |
| 92,370 | 0 | 64 | 11 | 393 | 0 | 28 | 2 | 311 | 13 | 796   |
| 92,371 | 0 | 64 | 11 | 393 | 0 | 28 | 2 | 311 | 13 | 796   |
| 92,372 | 0 | 64 | 11 | 389 | 0 | 28 | 3 | 310 | 14 | 791   |
| 92,373 | 0 | 65 | 11 | 387 | 0 | 28 | 3 | 310 | 14 | 790   |
| 92,374 | 0 | 65 | 12 | 378 | 0 | 30 | 3 | 323 | 15 | 796   |
| 92,375 | 0 | 70 | 12 | 408 | 0 | 33 | 3 | 364 | 15 | 875   |
| 92,376 | 0 | 75 | 12 | 433 | 0 | 39 | 3 | 398 | 15 | 945   |
| 92,377 | 0 | 83 | 7  | 493 | 0 | 41 | 3 | 438 | 10 | 1,055 |
| 92,378 | 0 | 94 | 7  | 494 | 0 | 46 | 3 | 463 | 10 | 1,097 |
| 92,379 | 0 | 94 | 7  | 495 | 0 | 46 | 3 | 462 | 10 | 1,097 |
| 92,380 | 0 | 94 | 7  | 499 | 0 | 47 | 3 | 468 | 10 | 1,108 |
| 92,381 | 0 | 94 | 7  | 502 | 0 | 47 | 3 | 473 | 10 | 1,116 |
| 92,382 | 0 | 99 | 7  | 532 | 0 | 49 | 3 | 507 | 10 | 1,187 |
| 92,383 | 0 | 99 | 7  | 533 | 0 | 49 | 3 | 507 | 10 | 1,188 |
| 92,384 | 0 | 99 | 7  | 531 | 0 | 49 | 3 | 504 | 10 | 1,183 |
| 92,385 | 1 | 96 | 7  | 488 | 0 | 42 | 3 | 460 | 11 | 1,086 |
| 92,386 | 1 | 95 | 7  | 479 | 0 | 40 | 3 | 447 | 11 | 1,061 |
| 92,387 | 1 | 95 | 7  | 479 | 0 | 40 | 2 | 444 | 10 | 1,058 |
| 92,388 | 1 | 94 | 6  | 481 | 0 | 41 | 2 | 443 | 9  | 1,059 |
| 92,389 | 1 | 94 | 5  | 480 | 0 | 41 | 1 | 442 | 7  | 1,057 |
| 92,390 | 1 | 94 | 6  | 473 | 0 | 42 | 2 | 441 | 9  | 1,050 |
| 92,391 | 1 | 95 | 6  | 470 | 0 | 42 | 2 | 441 | 9  | 1,048 |
| 92,392 | 1 | 97 | 6  | 470 | 0 | 42 | 2 | 441 | 9  | 1,050 |
| 92,393 | 1 | 95 | 6  | 459 | 0 | 40 | 2 | 433 | 9  | 1,027 |
| 92,394 | 1 | 95 | 6  | 461 | 0 | 40 | 2 | 434 | 9  | 1,030 |
| 92,395 | 1 | 95 | 6  | 457 | 0 | 40 | 2 | 434 | 9  | 1,026 |
| 92,396 | 1 | 95 | 6  | 457 | 0 | 40 | 2 | 434 | 9  | 1,026 |
| 92,397 | 1 | 95 | 6  | 456 | 0 | 39 | 2 | 434 | 9  | 1,024 |
| 92,398 | 2 | 95 | 7  | 456 | 0 | 39 | 3 | 434 | 12 | 1,024 |
| 92,399 | 2 | 91 | 8  | 431 | 0 | 36 | 3 | 409 | 13 | 967   |
| 92,400 | 2 | 91 | 8  | 431 | 0 | 36 | 3 | 408 | 13 | 966   |
| 92,401 | 2 | 91 | 8  | 432 | 0 | 36 | 3 | 409 | 13 | 968   |
| 92,402 | 2 | 90 | 8  | 425 | 0 | 35 | 3 | 404 | 13 | 954   |

|        |   |    |    |     |   |    |    |     |    |     |
|--------|---|----|----|-----|---|----|----|-----|----|-----|
| 92,403 | 2 | 89 | 12 | 420 | 0 | 35 | 3  | 401 | 17 | 945 |
| 92,404 | 2 | 89 | 12 | 419 | 0 | 35 | 3  | 399 | 17 | 942 |
| 92,405 | 5 | 89 | 17 | 415 | 0 | 34 | 9  | 397 | 31 | 935 |
| 92,406 | 5 | 54 | 17 | 323 | 0 | 32 | 9  | 302 | 31 | 711 |
| 92,407 | 5 | 54 | 16 | 310 | 0 | 31 | 9  | 297 | 30 | 692 |
| 92,408 | 5 | 54 | 16 | 309 | 1 | 31 | 9  | 297 | 31 | 691 |
| 92,409 | 5 | 54 | 16 | 305 | 1 | 31 | 9  | 296 | 31 | 686 |
| 92,410 | 5 | 51 | 16 | 300 | 1 | 31 | 9  | 294 | 31 | 676 |
| 92,411 | 5 | 48 | 16 | 291 | 1 | 30 | 12 | 292 | 34 | 661 |
| 92,412 | 5 | 47 | 17 | 290 | 1 | 30 | 14 | 292 | 37 | 659 |
| 92,413 | 5 | 47 | 16 | 290 | 1 | 29 | 14 | 289 | 36 | 655 |
| 92,414 | 5 | 45 | 16 | 281 | 1 | 29 | 14 | 288 | 36 | 643 |
| 92,415 | 5 | 44 | 16 | 276 | 1 | 29 | 14 | 281 | 36 | 630 |
| 92,416 | 5 | 44 | 16 | 277 | 1 | 29 | 14 | 282 | 36 | 632 |
| 92,417 | 5 | 44 | 16 | 270 | 1 | 29 | 14 | 281 | 36 | 624 |
| 92,418 | 5 | 44 | 16 | 274 | 1 | 29 | 14 | 286 | 36 | 633 |
| 92,419 | 5 | 44 | 16 | 274 | 1 | 29 | 14 | 286 | 36 | 633 |
| 92,420 | 5 | 45 | 16 | 274 | 1 | 29 | 14 | 287 | 36 | 635 |
| 92,421 | 5 | 45 | 16 | 280 | 1 | 29 | 14 | 290 | 36 | 644 |
| 92,422 | 5 | 45 | 16 | 280 | 1 | 29 | 13 | 290 | 35 | 644 |
| 92,423 | 5 | 46 | 16 | 289 | 1 | 29 | 13 | 293 | 35 | 657 |
| 92,424 | 5 | 45 | 15 | 291 | 1 | 29 | 13 | 292 | 34 | 657 |
| 92,425 | 5 | 45 | 15 | 290 | 1 | 27 | 13 | 275 | 34 | 637 |
| 92,426 | 5 | 36 | 15 | 236 | 1 | 22 | 13 | 217 | 34 | 511 |
| 92,427 | 5 | 31 | 15 | 213 | 1 | 16 | 13 | 182 | 34 | 442 |
| 92,428 | 5 | 23 | 16 | 155 | 1 | 13 | 13 | 138 | 35 | 329 |
| 92,429 | 5 | 11 | 16 | 121 | 1 | 8  | 13 | 103 | 35 | 243 |
| 92,430 | 5 | 11 | 16 | 120 | 1 | 8  | 13 | 101 | 35 | 240 |
| 92,431 | 5 | 11 | 16 | 114 | 1 | 6  | 13 | 93  | 35 | 224 |
| 92,432 | 5 | 5  | 16 | 55  | 1 | 3  | 13 | 35  | 35 | 98  |
| 92,433 | 5 | 5  | 16 | 57  | 1 | 3  | 13 | 37  | 35 | 102 |
| 92,434 | 5 | 5  | 17 | 66  | 1 | 3  | 13 | 39  | 36 | 113 |
| 92,435 | 5 | 5  | 17 | 71  | 1 | 3  | 13 | 44  | 36 | 123 |
| 92,436 | 4 | 7  | 19 | 81  | 1 | 4  | 13 | 60  | 37 | 152 |
| 92,437 | 5 | 7  | 20 | 100 | 1 | 5  | 13 | 67  | 39 | 179 |
| 92,438 | 5 | 9  | 20 | 103 | 1 | 6  | 13 | 70  | 39 | 188 |
| 92,439 | 5 | 12 | 19 | 104 | 1 | 5  | 13 | 72  | 38 | 193 |
| 92,440 | 5 | 14 | 19 | 124 | 1 | 5  | 14 | 78  | 39 | 221 |
| 92,441 | 5 | 15 | 18 | 127 | 1 | 4  | 13 | 75  | 37 | 221 |
| 92,442 | 6 | 14 | 19 | 126 | 1 | 4  | 13 | 75  | 39 | 219 |
| 92,443 | 6 | 12 | 19 | 127 | 1 | 4  | 13 | 78  | 39 | 221 |

|        |   |    |    |     |   |   |    |    |    |     |
|--------|---|----|----|-----|---|---|----|----|----|-----|
| 92,444 | 6 | 12 | 19 | 126 | 1 | 4 | 16 | 79 | 42 | 221 |
| 92,445 | 6 | 12 | 20 | 128 | 1 | 4 | 16 | 79 | 43 | 223 |
| 92,446 | 6 | 12 | 22 | 128 | 1 | 4 | 20 | 81 | 49 | 225 |
| 92,447 | 6 | 12 | 22 | 128 | 1 | 4 | 20 | 81 | 49 | 225 |
| 92,448 | 5 | 12 | 21 | 128 | 1 | 4 | 19 | 85 | 46 | 229 |
| 92,449 | 5 | 14 | 21 | 129 | 1 | 4 | 19 | 88 | 46 | 235 |
| 92,450 | 5 | 14 | 20 | 128 | 1 | 4 | 19 | 87 | 45 | 233 |
| 92,451 | 5 | 15 | 23 | 129 | 1 | 5 | 19 | 87 | 48 | 236 |
| 92,452 | 5 | 15 | 22 | 128 | 1 | 5 | 19 | 86 | 47 | 234 |
| 92,453 | 3 | 15 | 23 | 121 | 1 | 5 | 18 | 80 | 45 | 221 |
| 92,454 | 3 | 15 | 23 | 122 | 1 | 5 | 18 | 80 | 45 | 222 |
| 92,455 | 2 | 15 | 19 | 122 | 1 | 5 | 14 | 80 | 36 | 222 |
| 92,456 | 2 | 15 | 19 | 122 | 1 | 5 | 13 | 80 | 35 | 222 |
| 92,457 | 2 | 15 | 19 | 123 | 1 | 5 | 13 | 81 | 35 | 224 |
| 92,458 | 2 | 15 | 19 | 125 | 0 | 5 | 13 | 84 | 34 | 229 |
| 92,459 | 2 | 15 | 19 | 126 | 0 | 5 | 13 | 84 | 34 | 230 |
| 92,460 | 2 | 15 | 20 | 127 | 0 | 5 | 11 | 84 | 33 | 231 |
| 92,461 | 2 | 15 | 20 | 127 | 0 | 5 | 11 | 84 | 33 | 231 |
| 92,462 | 2 | 15 | 19 | 127 | 0 | 5 | 9  | 84 | 30 | 231 |
| 92,463 | 2 | 15 | 19 | 127 | 0 | 5 | 9  | 84 | 30 | 231 |
| 92,464 | 4 | 15 | 23 | 127 | 1 | 5 | 9  | 84 | 37 | 231 |
| 92,465 | 4 | 15 | 24 | 129 | 1 | 5 | 10 | 84 | 39 | 233 |
| 92,466 | 4 | 15 | 24 | 129 | 1 | 5 | 10 | 84 | 39 | 233 |
| 92,467 | 4 | 15 | 25 | 128 | 2 | 5 | 10 | 83 | 41 | 231 |
| 92,468 | 5 | 15 | 31 | 127 | 2 | 5 | 15 | 83 | 53 | 230 |
| 92,469 | 5 | 15 | 39 | 124 | 2 | 5 | 16 | 78 | 62 | 222 |
| 92,470 | 5 | 15 | 41 | 123 | 2 | 5 | 18 | 77 | 66 | 220 |
| 92,471 | 5 | 14 | 41 | 115 | 2 | 5 | 18 | 72 | 66 | 206 |
| 92,472 | 5 | 14 | 48 | 116 | 2 | 5 | 21 | 72 | 76 | 207 |
| 92,473 | 5 | 14 | 48 | 116 | 2 | 5 | 21 | 72 | 76 | 207 |
| 92,474 | 5 | 13 | 49 | 106 | 3 | 5 | 22 | 69 | 79 | 193 |
| 92,475 | 5 | 13 | 49 | 106 | 3 | 5 | 22 | 69 | 79 | 193 |
| 92,476 | 5 | 13 | 49 | 106 | 3 | 5 | 22 | 69 | 79 | 193 |
| 92,477 | 5 | 13 | 49 | 106 | 3 | 5 | 22 | 69 | 79 | 193 |
| 92,478 | 5 | 13 | 49 | 104 | 3 | 5 | 22 | 69 | 79 | 191 |
| 92,479 | 5 | 13 | 48 | 96  | 3 | 4 | 22 | 69 | 78 | 182 |
| 92,480 | 5 | 13 | 48 | 96  | 3 | 4 | 22 | 69 | 78 | 182 |
| 92,481 | 5 | 13 | 48 | 97  | 3 | 4 | 23 | 69 | 79 | 183 |
| 92,482 | 5 | 13 | 49 | 97  | 3 | 4 | 25 | 69 | 82 | 183 |
| 92,483 | 6 | 13 | 51 | 95  | 3 | 4 | 26 | 67 | 86 | 179 |
| 92,484 | 6 | 13 | 51 | 95  | 3 | 4 | 26 | 67 | 86 | 179 |



|        |   |    |    |     |   |    |    |     |    |     |
|--------|---|----|----|-----|---|----|----|-----|----|-----|
| 92,485 | 6 | 13 | 51 | 82  | 3 | 4  | 26 | 61  | 86 | 160 |
| 92,486 | 6 | 13 | 49 | 82  | 3 | 4  | 26 | 60  | 84 | 159 |
| 92,487 | 6 | 11 | 50 | 54  | 3 | 2  | 28 | 37  | 87 | 104 |
| 92,488 | 5 | 9  | 49 | 51  | 3 | 1  | 28 | 34  | 85 | 95  |
| 92,489 | 5 | 9  | 49 | 55  | 3 | 1  | 30 | 38  | 87 | 103 |
| 92,490 | 5 | 6  | 49 | 55  | 3 | 1  | 30 | 38  | 87 | 100 |
| 92,491 | 5 | 7  | 49 | 55  | 3 | 2  | 29 | 50  | 86 | 114 |
| 92,492 | 4 | 6  | 48 | 53  | 3 | 2  | 29 | 48  | 84 | 109 |
| 92,493 | 4 | 7  | 48 | 58  | 3 | 2  | 29 | 48  | 84 | 115 |
| 92,494 | 4 | 7  | 48 | 57  | 3 | 2  | 29 | 45  | 84 | 111 |
| 92,495 | 4 | 7  | 48 | 55  | 3 | 2  | 26 | 43  | 81 | 107 |
| 92,496 | 4 | 7  | 47 | 57  | 3 | 2  | 26 | 43  | 80 | 109 |
| 92,497 | 4 | 9  | 45 | 59  | 3 | 2  | 22 | 43  | 74 | 113 |
| 92,498 | 4 | 9  | 45 | 66  | 3 | 2  | 22 | 42  | 74 | 119 |
| 92,499 | 4 | 9  | 45 | 74  | 3 | 4  | 22 | 49  | 74 | 136 |
| 92,500 | 4 | 9  | 44 | 106 | 3 | 4  | 22 | 78  | 73 | 197 |
| 92,501 | 4 | 9  | 42 | 108 | 4 | 4  | 22 | 81  | 72 | 202 |
| 92,502 | 4 | 11 | 41 | 151 | 4 | 6  | 22 | 112 | 71 | 280 |
| 92,503 | 4 | 11 | 39 | 165 | 4 | 6  | 22 | 121 | 69 | 303 |
| 92,504 | 4 | 11 | 37 | 165 | 4 | 6  | 22 | 121 | 67 | 303 |
| 92,505 | 4 | 12 | 37 | 174 | 4 | 6  | 22 | 123 | 67 | 315 |
| 92,506 | 4 | 13 | 37 | 179 | 4 | 6  | 23 | 127 | 68 | 325 |
| 92,507 | 4 | 13 | 49 | 178 | 4 | 6  | 23 | 132 | 80 | 329 |
| 92,508 | 4 | 13 | 49 | 178 | 4 | 6  | 23 | 132 | 80 | 329 |
| 92,509 | 4 | 13 | 50 | 175 | 4 | 6  | 24 | 129 | 82 | 323 |
| 92,510 | 4 | 19 | 50 | 180 | 4 | 6  | 24 | 134 | 82 | 339 |
| 92,511 | 4 | 19 | 49 | 181 | 4 | 6  | 24 | 134 | 81 | 340 |
| 92,512 | 4 | 19 | 53 | 183 | 4 | 6  | 29 | 134 | 90 | 342 |
| 92,513 | 4 | 19 | 53 | 183 | 4 | 7  | 29 | 133 | 90 | 342 |
| 92,514 | 4 | 19 | 51 | 186 | 4 | 7  | 29 | 134 | 88 | 346 |
| 92,515 | 2 | 19 | 49 | 184 | 3 | 7  | 29 | 134 | 83 | 344 |
| 92,516 | 2 | 19 | 51 | 186 | 3 | 7  | 28 | 134 | 84 | 346 |
| 92,517 | 2 | 19 | 59 | 186 | 2 | 8  | 29 | 134 | 92 | 347 |
| 92,518 | 2 | 19 | 62 | 190 | 2 | 8  | 25 | 136 | 91 | 353 |
| 92,519 | 2 | 19 | 58 | 188 | 3 | 8  | 24 | 138 | 87 | 353 |
| 92,520 | 2 | 19 | 59 | 193 | 3 | 8  | 25 | 143 | 89 | 363 |
| 92,521 | 2 | 19 | 59 | 203 | 3 | 10 | 23 | 156 | 87 | 388 |
| 92,522 | 2 | 19 | 62 | 205 | 3 | 10 | 24 | 157 | 91 | 391 |
| 92,523 | 2 | 19 | 55 | 204 | 3 | 10 | 21 | 157 | 81 | 390 |
| 92,524 | 2 | 19 | 55 | 202 | 2 | 10 | 20 | 157 | 79 | 388 |
| 92,525 | 2 | 19 | 54 | 203 | 2 | 10 | 20 | 157 | 78 | 389 |

|        |   |    |    |     |   |    |    |     |    |     |
|--------|---|----|----|-----|---|----|----|-----|----|-----|
| 92,526 | 2 | 19 | 54 | 203 | 2 | 10 | 20 | 157 | 78 | 389 |
| 92,527 | 2 | 19 | 54 | 203 | 2 | 10 | 21 | 157 | 79 | 389 |
| 92,528 | 2 | 19 | 54 | 203 | 2 | 10 | 21 | 157 | 79 | 389 |
| 92,529 | 2 | 19 | 54 | 203 | 2 | 10 | 21 | 157 | 79 | 389 |
| 92,530 | 2 | 19 | 54 | 203 | 2 | 10 | 21 | 155 | 79 | 387 |
| 92,531 | 2 | 19 | 54 | 203 | 2 | 10 | 20 | 155 | 78 | 387 |
| 92,532 | 2 | 19 | 53 | 204 | 2 | 10 | 18 | 155 | 75 | 388 |
| 92,533 | 2 | 19 | 53 | 206 | 2 | 10 | 19 | 156 | 76 | 391 |
| 92,534 | 1 | 19 | 51 | 206 | 2 | 10 | 18 | 156 | 72 | 391 |
| 92,535 | 1 | 19 | 51 | 206 | 2 | 10 | 18 | 156 | 72 | 391 |
| 92,536 | 1 | 19 | 50 | 205 | 2 | 10 | 18 | 156 | 71 | 390 |
| 92,537 | 1 | 19 | 50 | 205 | 2 | 10 | 18 | 156 | 71 | 390 |
| 92,538 | 1 | 19 | 49 | 204 | 2 | 10 | 16 | 158 | 68 | 391 |
| 92,539 | 1 | 19 | 49 | 204 | 2 | 10 | 16 | 158 | 68 | 391 |
| 92,540 | 1 | 19 | 49 | 200 | 2 | 10 | 14 | 154 | 66 | 383 |
| 92,541 | 1 | 19 | 50 | 197 | 2 | 10 | 15 | 151 | 68 | 377 |
| 92,542 | 1 | 16 | 50 | 176 | 2 | 9  | 15 | 133 | 68 | 334 |
| 92,543 | 1 | 15 | 50 | 171 | 2 | 9  | 15 | 133 | 68 | 328 |
| 92,544 | 1 | 15 | 51 | 171 | 2 | 9  | 15 | 133 | 69 | 328 |
| 92,545 | 1 | 15 | 55 | 172 | 2 | 9  | 16 | 133 | 74 | 329 |
| 92,546 | 1 | 15 | 55 | 171 | 2 | 9  | 16 | 131 | 74 | 326 |
| 92,547 | 1 | 15 | 56 | 169 | 2 | 9  | 16 | 131 | 75 | 324 |
| 92,548 | 1 | 13 | 57 | 167 | 2 | 9  | 16 | 131 | 76 | 320 |
| 92,549 | 1 | 13 | 57 | 162 | 2 | 9  | 17 | 128 | 77 | 312 |
| 92,550 | 1 | 13 | 57 | 155 | 2 | 7  | 17 | 121 | 77 | 296 |
| 92,551 | 1 | 11 | 58 | 121 | 2 | 7  | 17 | 89  | 78 | 228 |
| 92,552 | 1 | 11 | 60 | 122 | 1 | 7  | 17 | 86  | 79 | 226 |
| 92,553 | 1 | 8  | 60 | 79  | 1 | 4  | 17 | 58  | 79 | 149 |
| 92,554 | 3 | 8  | 64 | 73  | 1 | 4  | 18 | 53  | 86 | 138 |
| 92,555 | 4 | 15 | 72 | 104 | 1 | 5  | 22 | 82  | 99 | 206 |
| 92,556 | 4 | 15 | 72 | 105 | 1 | 6  | 22 | 84  | 99 | 210 |
| 92,557 | 4 | 14 | 72 | 104 | 1 | 6  | 21 | 81  | 98 | 205 |
| 92,558 | 4 | 14 | 60 | 102 | 1 | 6  | 21 | 74  | 86 | 196 |
| 92,559 | 4 | 15 | 59 | 102 | 1 | 6  | 19 | 73  | 83 | 196 |
| 92,560 | 4 | 15 | 58 | 102 | 1 | 6  | 19 | 73  | 82 | 196 |
| 92,561 | 4 | 9  | 54 | 95  | 1 | 6  | 14 | 70  | 73 | 180 |
| 92,562 | 4 | 9  | 54 | 95  | 1 | 6  | 14 | 70  | 73 | 180 |
| 92,563 | 4 | 9  | 54 | 93  | 1 | 6  | 14 | 72  | 73 | 180 |
| 92,564 | 4 | 9  | 55 | 95  | 1 | 6  | 14 | 75  | 74 | 185 |
| 92,565 | 4 | 9  | 55 | 92  | 1 | 6  | 14 | 74  | 74 | 181 |
| 92,566 | 4 | 9  | 55 | 102 | 1 | 6  | 15 | 76  | 75 | 193 |

|        |   |    |    |     |   |    |    |     |     |     |
|--------|---|----|----|-----|---|----|----|-----|-----|-----|
| 92,567 | 4 | 9  | 55 | 111 | 2 | 7  | 18 | 82  | 79  | 209 |
| 92,568 | 4 | 13 | 46 | 145 | 2 | 7  | 15 | 92  | 67  | 257 |
| 92,569 | 3 | 15 | 38 | 151 | 2 | 7  | 18 | 102 | 61  | 275 |
| 92,570 | 3 | 15 | 34 | 158 | 1 | 7  | 21 | 101 | 59  | 281 |
| 92,571 | 3 | 15 | 36 | 164 | 1 | 9  | 22 | 103 | 62  | 291 |
| 92,572 | 3 | 15 | 35 | 183 | 1 | 8  | 22 | 100 | 61  | 306 |
| 92,573 | 3 | 16 | 32 | 186 | 1 | 8  | 21 | 102 | 57  | 312 |
| 92,574 | 3 | 17 | 32 | 192 | 1 | 8  | 21 | 104 | 57  | 321 |
| 92,575 | 3 | 18 | 32 | 197 | 1 | 8  | 22 | 104 | 58  | 327 |
| 92,576 | 3 | 18 | 32 | 198 | 1 | 8  | 22 | 104 | 58  | 328 |
| 92,577 | 3 | 18 | 32 | 199 | 1 | 8  | 22 | 105 | 58  | 330 |
| 92,578 | 3 | 18 | 32 | 203 | 1 | 8  | 22 | 105 | 58  | 334 |
| 92,579 | 3 | 18 | 32 | 204 | 1 | 9  | 23 | 109 | 59  | 340 |
| 92,580 | 3 | 18 | 32 | 204 | 1 | 9  | 23 | 109 | 59  | 340 |
| 92,581 | 3 | 18 | 32 | 205 | 1 | 9  | 23 | 109 | 59  | 341 |
| 92,582 | 3 | 18 | 32 | 204 | 1 | 9  | 23 | 109 | 59  | 340 |
| 92,583 | 3 | 18 | 33 | 207 | 1 | 9  | 24 | 113 | 61  | 347 |
| 92,584 | 3 | 18 | 33 | 213 | 1 | 9  | 24 | 116 | 61  | 356 |
| 92,585 | 3 | 19 | 33 | 216 | 1 | 9  | 24 | 118 | 61  | 362 |
| 92,586 | 4 | 19 | 34 | 218 | 2 | 9  | 24 | 119 | 64  | 365 |
| 92,587 | 4 | 20 | 42 | 229 | 2 | 10 | 28 | 132 | 76  | 391 |
| 92,588 | 4 | 21 | 46 | 234 | 2 | 11 | 28 | 140 | 80  | 406 |
| 92,589 | 4 | 22 | 47 | 244 | 2 | 11 | 28 | 140 | 81  | 417 |
| 92,590 | 4 | 23 | 47 | 249 | 2 | 13 | 28 | 146 | 81  | 431 |
| 92,591 | 4 | 23 | 47 | 251 | 2 | 13 | 28 | 147 | 81  | 434 |
| 92,592 | 4 | 23 | 46 | 251 | 2 | 13 | 27 | 150 | 79  | 437 |
| 92,593 | 4 | 24 | 48 | 255 | 2 | 13 | 27 | 151 | 81  | 443 |
| 92,594 | 4 | 24 | 48 | 257 | 2 | 13 | 27 | 151 | 81  | 445 |
| 92,595 | 5 | 24 | 51 | 258 | 2 | 13 | 28 | 151 | 86  | 446 |
| 92,596 | 5 | 24 | 47 | 257 | 2 | 13 | 27 | 151 | 81  | 445 |
| 92,597 | 5 | 24 | 50 | 257 | 2 | 13 | 30 | 153 | 87  | 447 |
| 92,598 | 5 | 24 | 49 | 261 | 2 | 13 | 30 | 153 | 86  | 451 |
| 92,599 | 5 | 27 | 63 | 289 | 2 | 20 | 35 | 187 | 105 | 523 |
| 92,600 | 6 | 31 | 73 | 362 | 2 | 27 | 41 | 245 | 122 | 665 |
| 92,601 | 9 | 33 | 84 | 405 | 4 | 32 | 55 | 269 | 152 | 739 |
| 92,602 | 9 | 34 | 87 | 414 | 4 | 32 | 56 | 279 | 156 | 759 |
| 92,603 | 9 | 34 | 85 | 418 | 4 | 32 | 56 | 282 | 154 | 766 |
| 92,604 | 7 | 36 | 81 | 446 | 4 | 32 | 55 | 293 | 147 | 807 |
| 92,605 | 6 | 36 | 75 | 443 | 4 | 32 | 52 | 293 | 137 | 804 |
| 92,606 | 6 | 29 | 74 | 411 | 4 | 31 | 51 | 269 | 135 | 740 |
| 92,607 | 6 | 31 | 74 | 409 | 4 | 30 | 51 | 268 | 135 | 738 |

|        |   |    |    |     |   |    |    |     |     |       |
|--------|---|----|----|-----|---|----|----|-----|-----|-------|
| 92,608 | 6 | 32 | 74 | 405 | 4 | 30 | 51 | 267 | 135 | 734   |
| 92,609 | 6 | 33 | 74 | 409 | 4 | 30 | 51 | 271 | 135 | 743   |
| 92,610 | 6 | 32 | 74 | 412 | 4 | 30 | 51 | 273 | 135 | 747   |
| 92,611 | 6 | 32 | 74 | 417 | 4 | 30 | 51 | 274 | 135 | 753   |
| 92,612 | 6 | 33 | 74 | 427 | 4 | 32 | 51 | 277 | 135 | 769   |
| 92,613 | 6 | 33 | 74 | 435 | 4 | 32 | 51 | 285 | 135 | 785   |
| 92,614 | 6 | 33 | 74 | 462 | 4 | 32 | 52 | 290 | 136 | 817   |
| 92,615 | 6 | 33 | 73 | 462 | 4 | 31 | 52 | 288 | 135 | 814   |
| 92,616 | 6 | 36 | 73 | 493 | 4 | 32 | 52 | 317 | 135 | 878   |
| 92,617 | 6 | 45 | 74 | 558 | 4 | 33 | 51 | 380 | 135 | 1,016 |
| 92,618 | 6 | 41 | 71 | 518 | 3 | 31 | 48 | 365 | 128 | 955   |
| 92,619 | 6 | 41 | 72 | 520 | 3 | 31 | 49 | 367 | 130 | 959   |
| 92,620 | 6 | 39 | 71 | 514 | 3 | 31 | 45 | 355 | 125 | 939   |
| 92,621 | 6 | 39 | 71 | 509 | 3 | 31 | 42 | 354 | 122 | 933   |
| 92,622 | 6 | 42 | 67 | 471 | 3 | 28 | 40 | 338 | 116 | 879   |
| 92,623 | 6 | 42 | 67 | 471 | 3 | 28 | 40 | 338 | 116 | 879   |
| 92,624 | 6 | 41 | 68 | 468 | 3 | 28 | 40 | 336 | 117 | 873   |
| 92,625 | 6 | 40 | 68 | 464 | 3 | 28 | 40 | 335 | 117 | 867   |
| 92,626 | 6 | 39 | 68 | 458 | 3 | 28 | 39 | 335 | 116 | 860   |
| 92,627 | 6 | 39 | 68 | 460 | 3 | 28 | 39 | 338 | 116 | 865   |
| 92,628 | 6 | 39 | 68 | 459 | 3 | 28 | 39 | 337 | 116 | 863   |
| 92,629 | 6 | 39 | 68 | 455 | 3 | 28 | 39 | 337 | 116 | 859   |
| 92,630 | 6 | 39 | 68 | 454 | 3 | 27 | 38 | 333 | 115 | 853   |
| 92,631 | 6 | 39 | 68 | 454 | 3 | 27 | 38 | 333 | 115 | 853   |
| 92,632 | 6 | 39 | 68 | 453 | 3 | 27 | 38 | 333 | 115 | 852   |
| 92,633 | 6 | 39 | 68 | 453 | 3 | 27 | 39 | 333 | 116 | 852   |
| 92,634 | 6 | 39 | 68 | 449 | 3 | 27 | 39 | 331 | 116 | 846   |
| 92,635 | 6 | 39 | 68 | 441 | 3 | 27 | 39 | 327 | 116 | 834   |
| 92,636 | 5 | 36 | 67 | 420 | 2 | 25 | 39 | 303 | 113 | 784   |
| 92,637 | 5 | 36 | 68 | 420 | 2 | 25 | 42 | 303 | 117 | 784   |
| 92,638 | 5 | 36 | 60 | 420 | 2 | 25 | 38 | 303 | 105 | 784   |
| 92,639 | 5 | 35 | 57 | 410 | 2 | 25 | 38 | 302 | 102 | 772   |
| 92,640 | 5 | 35 | 56 | 410 | 2 | 25 | 38 | 302 | 101 | 772   |
| 92,641 | 7 | 34 | 65 | 407 | 4 | 23 | 45 | 296 | 121 | 760   |
| 92,642 | 7 | 34 | 65 | 406 | 4 | 23 | 45 | 295 | 121 | 758   |
| 92,643 | 7 | 34 | 69 | 406 | 7 | 23 | 47 | 292 | 130 | 755   |
| 92,644 | 7 | 33 | 68 | 400 | 7 | 23 | 49 | 292 | 131 | 748   |
| 92,645 | 7 | 33 | 67 | 402 | 7 | 25 | 49 | 295 | 130 | 755   |
| 92,646 | 6 | 34 | 65 | 414 | 7 | 26 | 50 | 311 | 128 | 785   |
| 92,647 | 6 | 39 | 65 | 488 | 7 | 27 | 51 | 348 | 129 | 902   |
| 92,648 | 6 | 54 | 62 | 568 | 7 | 31 | 48 | 390 | 123 | 1,043 |

|        |   |    |    |     |   |    |    |     |     |       |
|--------|---|----|----|-----|---|----|----|-----|-----|-------|
| 92,649 | 6 | 54 | 62 | 572 | 7 | 32 | 48 | 395 | 123 | 1,053 |
| 92,650 | 6 | 52 | 47 | 557 | 7 | 26 | 42 | 367 | 102 | 1,002 |
| 92,651 | 5 | 53 | 37 | 502 | 7 | 19 | 37 | 323 | 86  | 897   |
| 92,652 | 2 | 51 | 25 | 459 | 5 | 14 | 23 | 299 | 55  | 823   |
| 92,653 | 2 | 50 | 23 | 451 | 5 | 14 | 22 | 290 | 52  | 805   |
| 92,654 | 2 | 50 | 23 | 444 | 5 | 14 | 22 | 287 | 52  | 795   |
| 92,655 | 2 | 49 | 23 | 420 | 5 | 14 | 22 | 277 | 52  | 760   |
| 92,656 | 2 | 49 | 22 | 418 | 5 | 14 | 22 | 272 | 51  | 753   |
| 92,657 | 2 | 49 | 22 | 418 | 5 | 14 | 24 | 268 | 53  | 749   |
| 92,658 | 2 | 46 | 22 | 412 | 5 | 14 | 24 | 265 | 53  | 737   |
| 92,659 | 2 | 45 | 22 | 412 | 5 | 14 | 24 | 266 | 53  | 737   |
| 92,660 | 2 | 43 | 23 | 382 | 5 | 12 | 24 | 247 | 54  | 684   |
| 92,661 | 2 | 43 | 23 | 382 | 5 | 12 | 24 | 247 | 54  | 684   |
| 92,662 | 2 | 43 | 24 | 382 | 5 | 12 | 24 | 247 | 55  | 684   |
| 92,663 | 2 | 43 | 24 | 382 | 5 | 12 | 24 | 247 | 55  | 684   |
| 92,664 | 2 | 43 | 24 | 353 | 5 | 12 | 23 | 239 | 54  | 647   |
| 92,665 | 2 | 43 | 24 | 355 | 5 | 12 | 23 | 239 | 54  | 649   |
| 92,666 | 2 | 43 | 24 | 355 | 5 | 12 | 23 | 239 | 54  | 649   |
| 92,667 | 2 | 31 | 24 | 249 | 5 | 10 | 23 | 144 | 54  | 434   |
| 92,668 | 2 | 31 | 23 | 244 | 5 | 10 | 23 | 143 | 53  | 428   |
| 92,669 | 2 | 31 | 23 | 244 | 5 | 10 | 23 | 143 | 53  | 428   |
| 92,670 | 2 | 33 | 22 | 244 | 5 | 10 | 22 | 150 | 51  | 437   |
| 92,671 | 2 | 33 | 22 | 241 | 5 | 10 | 22 | 152 | 51  | 436   |
| 92,672 | 2 | 31 | 22 | 244 | 5 | 10 | 22 | 155 | 51  | 440   |
| 92,673 | 2 | 31 | 22 | 247 | 5 | 10 | 22 | 156 | 51  | 444   |
| 92,674 | 2 | 32 | 22 | 251 | 5 | 10 | 22 | 158 | 51  | 451   |
| 92,675 | 2 | 32 | 21 | 250 | 5 | 11 | 22 | 165 | 50  | 458   |
| 92,676 | 2 | 32 | 21 | 254 | 5 | 11 | 22 | 165 | 50  | 462   |
| 92,677 | 2 | 33 | 21 | 262 | 5 | 12 | 22 | 168 | 50  | 475   |
| 92,678 | 2 | 33 | 21 | 269 | 5 | 12 | 22 | 165 | 50  | 479   |
| 92,679 | 3 | 34 | 21 | 287 | 5 | 13 | 22 | 171 | 51  | 505   |
| 92,680 | 3 | 37 | 21 | 297 | 5 | 15 | 22 | 173 | 51  | 522   |
| 92,681 | 3 | 37 | 21 | 301 | 5 | 15 | 22 | 180 | 51  | 533   |
| 92,682 | 3 | 37 | 20 | 301 | 5 | 15 | 22 | 178 | 50  | 531   |
| 92,683 | 3 | 37 | 20 | 301 | 5 | 15 | 20 | 179 | 48  | 532   |
| 92,684 | 3 | 37 | 20 | 301 | 5 | 15 | 20 | 175 | 48  | 528   |
| 92,685 | 3 | 37 | 20 | 302 | 5 | 15 | 20 | 175 | 48  | 529   |
| 92,686 | 3 | 37 | 20 | 304 | 5 | 15 | 20 | 177 | 48  | 533   |
| 92,687 | 3 | 37 | 20 | 304 | 5 | 15 | 20 | 177 | 48  | 533   |
| 92,688 | 3 | 39 | 19 | 306 | 5 | 15 | 17 | 182 | 44  | 542   |
| 92,689 | 3 | 39 | 19 | 306 | 5 | 15 | 17 | 182 | 44  | 542   |

|        |   |    |    |     |   |    |    |     |    |     |
|--------|---|----|----|-----|---|----|----|-----|----|-----|
| 92,690 | 9 | 40 | 23 | 308 | 5 | 15 | 17 | 181 | 54 | 544 |
| 92,691 | 9 | 40 | 22 | 308 | 5 | 15 | 17 | 183 | 53 | 546 |
| 92,692 | 7 | 40 | 14 | 306 | 3 | 15 | 10 | 182 | 34 | 543 |
| 92,693 | 7 | 40 | 23 | 306 | 1 | 15 | 10 | 183 | 41 | 544 |
| 92,694 | 7 | 40 | 20 | 308 | 1 | 15 | 10 | 184 | 38 | 547 |
| 92,695 | 7 | 40 | 23 | 306 | 1 | 13 | 9  | 179 | 40 | 538 |
| 92,696 | 7 | 40 | 22 | 308 | 1 | 13 | 7  | 180 | 37 | 541 |
| 92,697 | 7 | 39 | 25 | 295 | 1 | 12 | 7  | 166 | 40 | 512 |
| 92,698 | 7 | 34 | 25 | 222 | 1 | 11 | 6  | 130 | 39 | 397 |
| 92,699 | 7 | 19 | 24 | 147 | 1 | 8  | 6  | 93  | 38 | 267 |
| 92,700 | 7 | 20 | 24 | 139 | 1 | 7  | 6  | 89  | 38 | 255 |
| 92,701 | 7 | 19 | 24 | 127 | 1 | 6  | 6  | 85  | 38 | 237 |
| 92,702 | 7 | 15 | 24 | 110 | 1 | 7  | 5  | 73  | 37 | 205 |
| 92,703 | 7 | 15 | 24 | 113 | 1 | 7  | 5  | 75  | 37 | 210 |
| 92,704 | 7 | 15 | 25 | 121 | 1 | 7  | 5  | 80  | 38 | 223 |
| 92,705 | 7 | 15 | 25 | 121 | 1 | 7  | 3  | 80  | 36 | 223 |
| 92,706 | 7 | 14 | 25 | 120 | 1 | 7  | 3  | 77  | 36 | 218 |
| 92,707 | 7 | 14 | 25 | 121 | 1 | 7  | 3  | 78  | 36 | 220 |
| 92,708 | 7 | 14 | 25 | 121 | 1 | 7  | 3  | 78  | 36 | 220 |
| 92,709 | 7 | 14 | 24 | 118 | 1 | 7  | 3  | 78  | 35 | 217 |
| 92,710 | 7 | 14 | 24 | 118 | 1 | 7  | 3  | 77  | 35 | 216 |
| 92,711 | 7 | 14 | 24 | 118 | 1 | 7  | 4  | 77  | 36 | 216 |
| 92,712 | 7 | 14 | 24 | 118 | 1 | 7  | 4  | 77  | 36 | 216 |
| 92,713 | 7 | 14 | 23 | 118 | 1 | 7  | 4  | 78  | 35 | 217 |
| 92,714 | 7 | 14 | 23 | 119 | 1 | 7  | 4  | 78  | 35 | 218 |
| 92,715 | 7 | 14 | 23 | 119 | 1 | 7  | 4  | 80  | 35 | 220 |
| 92,716 | 7 | 14 | 23 | 117 | 1 | 7  | 4  | 80  | 35 | 218 |
| 92,717 | 7 | 14 | 24 | 117 | 1 | 7  | 4  | 80  | 36 | 218 |
| 92,718 | 7 | 14 | 24 | 117 | 1 | 7  | 4  | 80  | 36 | 218 |
| 92,719 | 7 | 14 | 24 | 117 | 1 | 7  | 4  | 80  | 36 | 218 |
| 92,720 | 7 | 12 | 26 | 115 | 1 | 7  | 5  | 71  | 39 | 205 |
| 92,721 | 7 | 12 | 26 | 115 | 1 | 7  | 5  | 71  | 39 | 205 |
| 92,722 | 7 | 12 | 26 | 116 | 1 | 7  | 5  | 69  | 39 | 204 |
| 92,723 | 7 | 10 | 30 | 104 | 1 | 7  | 5  | 65  | 43 | 186 |
| 92,724 | 8 | 10 | 37 | 107 | 1 | 7  | 5  | 66  | 51 | 190 |
| 92,725 | 8 | 11 | 37 | 112 | 1 | 8  | 5  | 70  | 51 | 201 |
| 92,726 | 8 | 11 | 37 | 112 | 1 | 8  | 5  | 62  | 51 | 193 |
| 92,727 | 8 | 11 | 38 | 109 | 1 | 8  | 6  | 61  | 53 | 189 |
| 92,728 | 8 | 10 | 39 | 102 | 1 | 7  | 8  | 58  | 56 | 177 |
| 92,729 | 7 | 9  | 39 | 75  | 1 | 6  | 8  | 52  | 55 | 142 |
| 92,730 | 7 | 9  | 39 | 81  | 1 | 6  | 8  | 52  | 55 | 148 |

|        |   |    |    |     |   |   |   |     |    |     |
|--------|---|----|----|-----|---|---|---|-----|----|-----|
| 92,731 | 7 | 6  | 39 | 67  | 1 | 4 | 8 | 43  | 55 | 120 |
| 92,732 | 7 | 6  | 39 | 67  | 1 | 4 | 8 | 42  | 55 | 119 |
| 92,733 | 7 | 6  | 39 | 67  | 1 | 4 | 8 | 42  | 55 | 119 |
| 92,734 | 7 | 6  | 39 | 67  | 1 | 4 | 8 | 42  | 55 | 119 |
| 92,735 | 7 | 6  | 39 | 67  | 1 | 4 | 8 | 42  | 55 | 119 |
| 92,736 | 7 | 6  | 39 | 66  | 1 | 4 | 8 | 42  | 55 | 118 |
| 92,737 | 7 | 4  | 39 | 62  | 1 | 4 | 8 | 38  | 55 | 108 |
| 92,738 | 7 | 4  | 39 | 63  | 1 | 4 | 8 | 39  | 55 | 110 |
| 92,739 | 2 | 4  | 36 | 64  | 1 | 4 | 8 | 40  | 47 | 112 |
| 92,740 | 2 | 4  | 36 | 69  | 1 | 4 | 8 | 45  | 47 | 122 |
| 92,741 | 1 | 3  | 34 | 96  | 1 | 4 | 8 | 49  | 44 | 152 |
| 92,742 | 1 | 5  | 34 | 101 | 1 | 4 | 8 | 57  | 44 | 167 |
| 92,743 | 1 | 9  | 34 | 193 | 1 | 5 | 8 | 98  | 44 | 305 |
| 92,744 | 1 | 9  | 23 | 204 | 0 | 6 | 7 | 102 | 31 | 321 |
| 92,745 | 1 | 9  | 24 | 202 | 0 | 6 | 6 | 103 | 31 | 320 |
| 92,746 | 1 | 9  | 21 | 202 | 0 | 6 | 5 | 103 | 27 | 320 |
| 92,747 | 1 | 9  | 21 | 200 | 0 | 6 | 5 | 103 | 27 | 318 |
| 92,748 | 1 | 9  | 18 | 200 | 0 | 6 | 5 | 104 | 24 | 319 |
| 92,749 | 1 | 9  | 18 | 200 | 0 | 6 | 5 | 104 | 24 | 319 |
| 92,750 | 1 | 9  | 18 | 196 | 0 | 5 | 5 | 98  | 24 | 308 |
| 92,751 | 1 | 8  | 18 | 196 | 0 | 5 | 5 | 97  | 24 | 306 |
| 92,752 | 1 | 7  | 18 | 189 | 0 | 4 | 5 | 96  | 24 | 296 |
| 92,753 | 1 | 7  | 18 | 189 | 1 | 4 | 5 | 97  | 25 | 297 |
| 92,754 | 1 | 8  | 18 | 196 | 1 | 4 | 5 | 105 | 25 | 313 |
| 92,755 | 1 | 8  | 17 | 198 | 1 | 6 | 5 | 103 | 24 | 315 |
| 92,756 | 1 | 8  | 17 | 200 | 1 | 6 | 5 | 105 | 24 | 319 |
| 92,757 | 1 | 8  | 17 | 196 | 1 | 6 | 5 | 104 | 24 | 314 |
| 92,758 | 1 | 8  | 17 | 193 | 1 | 6 | 5 | 103 | 24 | 310 |
| 92,759 | 1 | 10 | 17 | 200 | 1 | 6 | 5 | 105 | 24 | 321 |
| 92,760 | 1 | 10 | 17 | 200 | 1 | 6 | 5 | 105 | 24 | 321 |
| 92,761 | 2 | 10 | 17 | 200 | 1 | 6 | 4 | 105 | 24 | 321 |
| 92,762 | 2 | 10 | 17 | 204 | 1 | 6 | 4 | 106 | 24 | 326 |
| 92,763 | 2 | 10 | 17 | 204 | 1 | 6 | 4 | 107 | 24 | 327 |
| 92,764 | 2 | 10 | 18 | 205 | 1 | 6 | 4 | 111 | 25 | 332 |
| 92,765 | 2 | 10 | 18 | 205 | 1 | 6 | 4 | 111 | 25 | 332 |
| 92,766 | 2 | 10 | 18 | 210 | 1 | 6 | 4 | 109 | 25 | 335 |
| 92,767 | 2 | 10 | 18 | 211 | 1 | 6 | 4 | 110 | 25 | 337 |
| 92,768 | 2 | 10 | 17 | 213 | 1 | 6 | 4 | 111 | 24 | 340 |
| 92,769 | 2 | 10 | 17 | 218 | 1 | 6 | 4 | 116 | 24 | 350 |
| 92,770 | 2 | 15 | 17 | 278 | 1 | 8 | 4 | 166 | 24 | 467 |
| 92,771 | 2 | 15 | 15 | 280 | 1 | 8 | 3 | 168 | 21 | 471 |

|        |   |    |    |     |   |    |    |     |    |     |
|--------|---|----|----|-----|---|----|----|-----|----|-----|
| 92,772 | 2 | 16 | 15 | 294 | 1 | 9  | 3  | 191 | 21 | 510 |
| 92,773 | 2 | 19 | 12 | 334 | 1 | 10 | 3  | 214 | 18 | 577 |
| 92,774 | 2 | 21 | 11 | 335 | 1 | 10 | 3  | 211 | 17 | 577 |
| 92,775 | 1 | 21 | 4  | 335 | 1 | 10 | 3  | 210 | 9  | 576 |
| 92,776 | 1 | 20 | 3  | 331 | 1 | 9  | 2  | 206 | 7  | 566 |
| 92,777 | 1 | 20 | 5  | 327 | 1 | 8  | 3  | 207 | 10 | 562 |
| 92,778 | 1 | 21 | 4  | 328 | 1 | 8  | 1  | 207 | 7  | 564 |
| 92,779 | 1 | 21 | 10 | 328 | 1 | 8  | 4  | 208 | 16 | 565 |
| 92,780 | 1 | 21 | 10 | 325 | 1 | 8  | 4  | 212 | 16 | 566 |
| 92,781 | 1 | 21 | 10 | 326 | 1 | 8  | 4  | 212 | 16 | 567 |
| 92,782 | 1 | 21 | 10 | 326 | 1 | 8  | 4  | 212 | 16 | 567 |
| 92,783 | 1 | 21 | 10 | 328 | 1 | 9  | 4  | 215 | 16 | 573 |
| 92,784 | 1 | 22 | 11 | 328 | 1 | 9  | 4  | 215 | 17 | 574 |
| 92,785 | 1 | 22 | 11 | 329 | 1 | 9  | 4  | 216 | 17 | 576 |
| 92,786 | 1 | 22 | 11 | 329 | 1 | 9  | 4  | 216 | 17 | 576 |
| 92,787 | 1 | 22 | 13 | 330 | 1 | 9  | 4  | 216 | 19 | 577 |
| 92,788 | 1 | 22 | 13 | 329 | 1 | 9  | 4  | 214 | 19 | 574 |
| 92,789 | 1 | 22 | 15 | 328 | 1 | 9  | 5  | 213 | 22 | 572 |
| 92,790 | 1 | 22 | 16 | 328 | 1 | 9  | 5  | 214 | 23 | 573 |
| 92,791 | 1 | 22 | 16 | 323 | 1 | 9  | 5  | 209 | 23 | 563 |
| 92,792 | 1 | 22 | 17 | 294 | 1 | 9  | 5  | 206 | 24 | 531 |
| 92,793 | 1 | 20 | 17 | 294 | 1 | 9  | 5  | 198 | 24 | 521 |
| 92,794 | 1 | 16 | 17 | 192 | 1 | 7  | 6  | 153 | 25 | 368 |
| 92,795 | 1 | 16 | 17 | 191 | 1 | 7  | 6  | 153 | 25 | 367 |
| 92,796 | 1 | 16 | 17 | 190 | 1 | 7  | 6  | 152 | 25 | 365 |
| 92,797 | 1 | 16 | 17 | 191 | 1 | 7  | 6  | 152 | 25 | 366 |
| 92,798 | 1 | 16 | 17 | 192 | 1 | 7  | 6  | 153 | 25 | 368 |
| 92,799 | 1 | 16 | 17 | 196 | 1 | 8  | 6  | 152 | 25 | 372 |
| 92,800 | 1 | 16 | 17 | 196 | 1 | 8  | 10 | 152 | 29 | 372 |
| 92,801 | 1 | 16 | 17 | 196 | 1 | 8  | 10 | 156 | 29 | 376 |
| 92,802 | 1 | 16 | 17 | 199 | 2 | 8  | 10 | 156 | 30 | 379 |
| 92,803 | 1 | 24 | 17 | 229 | 3 | 9  | 13 | 165 | 34 | 427 |
| 92,804 | 1 | 24 | 17 | 229 | 2 | 9  | 13 | 165 | 33 | 427 |
| 92,805 | 1 | 24 | 17 | 230 | 2 | 9  | 13 | 157 | 33 | 420 |
| 92,806 | 1 | 22 | 17 | 211 | 2 | 7  | 13 | 149 | 33 | 389 |
| 92,807 | 1 | 22 | 17 | 223 | 2 | 8  | 13 | 150 | 33 | 403 |
| 92,808 | 1 | 22 | 17 | 224 | 2 | 8  | 13 | 149 | 33 | 403 |
| 92,809 | 1 | 22 | 17 | 224 | 2 | 8  | 13 | 149 | 33 | 403 |
| 92,810 | 1 | 22 | 17 | 230 | 2 | 8  | 13 | 150 | 33 | 410 |
| 92,811 | 0 | 23 | 17 | 230 | 2 | 8  | 13 | 150 | 32 | 411 |
| 92,812 | 0 | 23 | 17 | 228 | 2 | 8  | 13 | 148 | 32 | 407 |



|        |   |    |    |     |   |    |    |     |    |     |
|--------|---|----|----|-----|---|----|----|-----|----|-----|
| 92,813 | 0 | 24 | 17 | 229 | 2 | 8  | 13 | 150 | 32 | 411 |
| 92,814 | 0 | 26 | 17 | 229 | 2 | 8  | 13 | 150 | 32 | 413 |
| 92,815 | 0 | 26 | 16 | 227 | 2 | 8  | 13 | 147 | 31 | 408 |
| 92,816 | 0 | 26 | 16 | 227 | 2 | 8  | 13 | 147 | 31 | 408 |
| 92,817 | 0 | 28 | 16 | 226 | 2 | 8  | 13 | 155 | 31 | 417 |
| 92,818 | 0 | 28 | 16 | 225 | 2 | 8  | 13 | 154 | 31 | 415 |
| 92,819 | 0 | 28 | 16 | 223 | 2 | 8  | 13 | 153 | 31 | 412 |
| 92,820 | 0 | 28 | 18 | 218 | 2 | 8  | 15 | 148 | 35 | 402 |
| 92,821 | 0 | 23 | 18 | 156 | 2 | 6  | 15 | 96  | 35 | 281 |
| 92,822 | 0 | 23 | 18 | 159 | 2 | 7  | 15 | 98  | 35 | 287 |
| 92,823 | 0 | 22 | 19 | 154 | 2 | 6  | 16 | 81  | 37 | 263 |
| 92,824 | 0 | 20 | 19 | 147 | 2 | 11 | 16 | 81  | 37 | 259 |
| 92,825 | 0 | 18 | 19 | 165 | 2 | 13 | 17 | 97  | 38 | 293 |
| 92,826 | 0 | 18 | 20 | 170 | 2 | 14 | 17 | 100 | 39 | 302 |
| 92,827 | 0 | 18 | 21 | 183 | 2 | 14 | 18 | 105 | 41 | 320 |
| 92,828 | 0 | 21 | 20 | 190 | 2 | 14 | 17 | 105 | 39 | 330 |
| 92,829 | 2 | 20 | 18 | 191 | 2 | 14 | 14 | 106 | 36 | 331 |
| 92,830 | 2 | 20 | 18 | 185 | 2 | 14 | 14 | 101 | 36 | 320 |
| 92,831 | 2 | 20 | 18 | 185 | 2 | 14 | 14 | 101 | 36 | 320 |
| 92,832 | 2 | 21 | 18 | 186 | 2 | 14 | 14 | 102 | 36 | 323 |
| 92,833 | 2 | 21 | 18 | 186 | 2 | 14 | 14 | 104 | 36 | 325 |
| 92,834 | 2 | 20 | 18 | 186 | 2 | 14 | 14 | 102 | 36 | 322 |
| 92,835 | 2 | 20 | 17 | 186 | 2 | 14 | 14 | 103 | 35 | 323 |
| 92,836 | 2 | 20 | 17 | 187 | 2 | 14 | 14 | 102 | 35 | 323 |
| 92,837 | 2 | 20 | 17 | 187 | 2 | 14 | 14 | 102 | 35 | 323 |
| 92,838 | 2 | 20 | 16 | 188 | 2 | 14 | 16 | 102 | 36 | 324 |
| 92,839 | 3 | 20 | 18 | 189 | 2 | 14 | 16 | 103 | 39 | 326 |
| 92,840 | 3 | 20 | 17 | 189 | 2 | 14 | 15 | 102 | 37 | 325 |
| 92,841 | 3 | 20 | 17 | 190 | 2 | 15 | 15 | 102 | 37 | 327 |
| 92,842 | 3 | 20 | 17 | 190 | 2 | 15 | 15 | 102 | 37 | 327 |
| 92,843 | 3 | 20 | 16 | 190 | 2 | 15 | 15 | 100 | 36 | 325 |
| 92,844 | 4 | 20 | 16 | 185 | 2 | 15 | 15 | 99  | 37 | 319 |
| 92,845 | 4 | 20 | 16 | 186 | 2 | 15 | 14 | 99  | 36 | 320 |
| 92,846 | 4 | 20 | 16 | 186 | 2 | 15 | 14 | 98  | 36 | 319 |
| 92,847 | 4 | 20 | 19 | 186 | 2 | 15 | 14 | 97  | 39 | 318 |
| 92,848 | 4 | 20 | 19 | 188 | 2 | 16 | 15 | 99  | 40 | 323 |
| 92,849 | 4 | 21 | 21 | 189 | 2 | 17 | 15 | 100 | 42 | 327 |
| 92,850 | 5 | 24 | 23 | 193 | 2 | 18 | 13 | 103 | 43 | 338 |
| 92,851 | 5 | 24 | 23 | 198 | 2 | 18 | 13 | 104 | 43 | 344 |
| 92,852 | 5 | 26 | 26 | 226 | 2 | 20 | 15 | 114 | 48 | 386 |
| 92,853 | 5 | 33 | 26 | 252 | 0 | 22 | 14 | 128 | 45 | 435 |

|        |   |    |    |     |   |    |    |     |    |     |
|--------|---|----|----|-----|---|----|----|-----|----|-----|
| 92,854 | 5 | 25 | 26 | 230 | 0 | 22 | 13 | 114 | 44 | 391 |
| 92,855 | 5 | 25 | 33 | 235 | 2 | 22 | 15 | 114 | 55 | 396 |
| 92,856 | 5 | 24 | 33 | 227 | 2 | 22 | 15 | 114 | 55 | 387 |
| 92,857 | 5 | 28 | 34 | 228 | 2 | 21 | 15 | 117 | 56 | 394 |
| 92,858 | 5 | 29 | 34 | 231 | 2 | 21 | 15 | 120 | 56 | 401 |
| 92,859 | 5 | 29 | 39 | 238 | 2 | 21 | 17 | 121 | 63 | 409 |
| 92,860 | 5 | 29 | 39 | 239 | 2 | 21 | 17 | 121 | 63 | 410 |
| 92,861 | 6 | 28 | 39 | 235 | 2 | 21 | 17 | 120 | 64 | 404 |
| 92,862 | 6 | 28 | 39 | 233 | 2 | 21 | 17 | 120 | 64 | 402 |
| 92,863 | 6 | 27 | 39 | 232 | 2 | 21 | 17 | 118 | 64 | 398 |
| 92,864 | 6 | 25 | 40 | 232 | 2 | 21 | 17 | 118 | 65 | 396 |
| 92,865 | 6 | 25 | 40 | 232 | 2 | 21 | 17 | 118 | 65 | 396 |
| 92,866 | 6 | 25 | 40 | 232 | 2 | 22 | 17 | 117 | 65 | 396 |
| 92,867 | 6 | 25 | 44 | 233 | 2 | 22 | 17 | 117 | 69 | 397 |
| 92,868 | 6 | 23 | 45 | 230 | 2 | 22 | 19 | 110 | 72 | 385 |
| 92,869 | 6 | 23 | 45 | 230 | 2 | 22 | 19 | 110 | 72 | 385 |
| 92,870 | 6 | 23 | 43 | 230 | 3 | 22 | 18 | 112 | 70 | 387 |
| 92,871 | 6 | 23 | 43 | 218 | 3 | 21 | 17 | 104 | 69 | 366 |
| 92,872 | 6 | 23 | 43 | 221 | 3 | 21 | 17 | 104 | 69 | 369 |
| 92,873 | 6 | 23 | 42 | 221 | 3 | 21 | 16 | 104 | 67 | 369 |
| 92,874 | 6 | 24 | 44 | 221 | 3 | 21 | 16 | 104 | 69 | 370 |
| 92,875 | 6 | 23 | 44 | 188 | 3 | 15 | 16 | 81  | 69 | 307 |
| 92,876 | 6 | 23 | 52 | 169 | 3 | 13 | 20 | 65  | 81 | 270 |
| 92,877 | 6 | 23 | 52 | 161 | 3 | 12 | 22 | 62  | 83 | 258 |
| 92,878 | 6 | 20 | 52 | 139 | 3 | 12 | 21 | 57  | 82 | 228 |
| 92,879 | 6 | 20 | 51 | 141 | 3 | 12 | 21 | 57  | 81 | 230 |
| 92,880 | 4 | 20 | 47 | 141 | 3 | 12 | 21 | 56  | 75 | 229 |
| 92,881 | 4 | 20 | 47 | 141 | 3 | 12 | 21 | 56  | 75 | 229 |
| 92,882 | 4 | 20 | 47 | 141 | 3 | 12 | 21 | 57  | 75 | 230 |
| 92,883 | 5 | 19 | 47 | 143 | 3 | 12 | 21 | 57  | 76 | 231 |
| 92,884 | 5 | 19 | 47 | 144 | 3 | 12 | 21 | 55  | 76 | 230 |
| 92,885 | 5 | 19 | 47 | 141 | 3 | 11 | 21 | 55  | 76 | 226 |
| 92,886 | 5 | 19 | 47 | 142 | 3 | 11 | 21 | 56  | 76 | 228 |
| 92,887 | 5 | 19 | 47 | 140 | 3 | 11 | 21 | 56  | 76 | 226 |
| 92,888 | 5 | 19 | 47 | 140 | 3 | 11 | 21 | 56  | 76 | 226 |
| 92,889 | 5 | 19 | 46 | 139 | 3 | 11 | 20 | 58  | 74 | 227 |
| 92,890 | 4 | 19 | 44 | 138 | 3 | 11 | 20 | 57  | 71 | 225 |
| 92,891 | 4 | 20 | 43 | 137 | 3 | 10 | 20 | 57  | 70 | 224 |
| 92,892 | 4 | 21 | 42 | 137 | 3 | 10 | 20 | 56  | 69 | 224 |
| 92,893 | 4 | 21 | 42 | 137 | 3 | 10 | 20 | 56  | 69 | 224 |
| 92,894 | 4 | 21 | 42 | 137 | 3 | 10 | 20 | 57  | 69 | 225 |

|        |   |    |    |     |   |    |    |    |    |     |
|--------|---|----|----|-----|---|----|----|----|----|-----|
| 92,895 | 3 | 21 | 42 | 138 | 3 | 10 | 20 | 57 | 68 | 226 |
| 92,896 | 3 | 21 | 42 | 137 | 3 | 11 | 20 | 57 | 68 | 226 |
| 92,897 | 3 | 21 | 42 | 139 | 3 | 11 | 20 | 57 | 68 | 228 |
| 92,898 | 3 | 21 | 38 | 130 | 5 | 9  | 20 | 54 | 66 | 214 |
| 92,899 | 3 | 20 | 38 | 129 | 5 | 8  | 19 | 53 | 65 | 210 |
| 92,900 | 3 | 20 | 36 | 129 | 5 | 10 | 19 | 53 | 63 | 212 |
| 92,901 | 2 | 15 | 34 | 92  | 5 | 7  | 17 | 35 | 58 | 149 |
| 92,902 | 2 | 15 | 34 | 93  | 5 | 7  | 17 | 35 | 58 | 150 |
| 92,903 | 2 | 15 | 31 | 98  | 5 | 8  | 14 | 38 | 52 | 159 |
| 92,904 | 2 | 8  | 33 | 70  | 5 | 6  | 14 | 24 | 54 | 108 |
| 92,905 | 2 | 8  | 30 | 62  | 5 | 5  | 12 | 24 | 49 | 99  |
| 92,906 | 2 | 8  | 28 | 57  | 3 | 5  | 12 | 24 | 45 | 94  |
| 92,907 | 3 | 4  | 28 | 43  | 3 | 5  | 12 | 20 | 46 | 72  |
| 92,908 | 3 | 4  | 28 | 47  | 3 | 5  | 12 | 23 | 46 | 79  |
| 92,909 | 3 | 3  | 23 | 36  | 3 | 5  | 10 | 20 | 39 | 64  |
| 92,910 | 3 | 4  | 23 | 46  | 3 | 5  | 10 | 21 | 39 | 76  |
| 92,911 | 2 | 6  | 23 | 48  | 3 | 5  | 10 | 30 | 38 | 89  |
| 92,912 | 2 | 6  | 23 | 46  | 3 | 6  | 10 | 30 | 38 | 88  |
| 92,913 | 2 | 7  | 24 | 48  | 3 | 7  | 10 | 31 | 39 | 93  |
| 92,914 | 2 | 7  | 24 | 54  | 3 | 7  | 10 | 36 | 39 | 104 |
| 92,915 | 2 | 9  | 23 | 57  | 3 | 8  | 10 | 42 | 38 | 116 |
| 92,916 | 2 | 11 | 19 | 63  | 3 | 9  | 10 | 46 | 34 | 129 |
| 92,917 | 2 | 11 | 21 | 63  | 3 | 8  | 11 | 45 | 37 | 127 |
| 92,918 | 2 | 12 | 20 | 63  | 3 | 8  | 10 | 45 | 35 | 128 |
| 92,919 | 2 | 12 | 21 | 63  | 3 | 8  | 9  | 45 | 35 | 128 |
| 92,920 | 2 | 12 | 21 | 64  | 3 | 8  | 9  | 43 | 35 | 127 |
| 92,921 | 2 | 12 | 22 | 65  | 2 | 8  | 9  | 45 | 35 | 130 |
| 92,922 | 2 | 12 | 22 | 67  | 2 | 8  | 9  | 45 | 35 | 132 |
| 92,923 | 2 | 12 | 22 | 68  | 2 | 8  | 9  | 45 | 35 | 133 |
| 92,924 | 2 | 12 | 24 | 68  | 2 | 8  | 10 | 45 | 38 | 133 |
| 92,925 | 2 | 12 | 22 | 69  | 2 | 8  | 10 | 45 | 36 | 134 |
| 92,926 | 2 | 12 | 22 | 67  | 2 | 8  | 10 | 45 | 36 | 132 |
| 92,927 | 2 | 12 | 14 | 66  | 2 | 8  | 5  | 45 | 23 | 131 |
| 92,928 | 3 | 12 | 17 | 68  | 2 | 8  | 5  | 45 | 27 | 133 |
| 92,929 | 3 | 12 | 16 | 67  | 2 | 8  | 5  | 43 | 26 | 130 |
| 92,930 | 3 | 12 | 16 | 65  | 3 | 8  | 6  | 43 | 28 | 128 |
| 92,931 | 3 | 12 | 16 | 65  | 3 | 8  | 6  | 42 | 28 | 127 |
| 92,932 | 3 | 12 | 17 | 65  | 3 | 8  | 8  | 42 | 31 | 127 |
| 92,933 | 3 | 12 | 17 | 65  | 3 | 8  | 8  | 42 | 31 | 127 |
| 92,934 | 2 | 12 | 17 | 62  | 3 | 8  | 10 | 42 | 32 | 124 |
| 92,935 | 2 | 12 | 17 | 61  | 3 | 8  | 10 | 42 | 32 | 123 |

|        |   |    |    |     |   |   |    |    |    |     |
|--------|---|----|----|-----|---|---|----|----|----|-----|
| 92,936 | 3 | 12 | 17 | 61  | 3 | 8 | 11 | 42 | 34 | 123 |
| 92,937 | 3 | 12 | 19 | 60  | 3 | 8 | 13 | 40 | 38 | 120 |
| 92,938 | 3 | 12 | 19 | 63  | 3 | 8 | 13 | 40 | 38 | 123 |
| 92,939 | 3 | 12 | 19 | 63  | 3 | 8 | 12 | 40 | 37 | 123 |
| 92,940 | 3 | 12 | 19 | 63  | 3 | 8 | 12 | 38 | 37 | 121 |
| 92,941 | 3 | 11 | 21 | 63  | 3 | 8 | 13 | 38 | 40 | 120 |
| 92,942 | 3 | 11 | 22 | 63  | 3 | 8 | 13 | 38 | 41 | 120 |
| 92,943 | 3 | 10 | 22 | 63  | 3 | 8 | 13 | 38 | 41 | 119 |
| 92,944 | 3 | 10 | 22 | 63  | 3 | 8 | 13 | 38 | 41 | 119 |
| 92,945 | 5 | 10 | 25 | 61  | 3 | 8 | 15 | 37 | 48 | 116 |
| 92,946 | 5 | 10 | 25 | 61  | 3 | 8 | 15 | 37 | 48 | 116 |
| 92,947 | 5 | 10 | 25 | 62  | 3 | 7 | 15 | 37 | 48 | 116 |
| 92,948 | 5 | 11 | 27 | 60  | 3 | 7 | 16 | 38 | 51 | 116 |
| 92,949 | 5 | 11 | 27 | 61  | 1 | 8 | 16 | 38 | 49 | 118 |
| 92,950 | 5 | 11 | 28 | 63  | 1 | 6 | 16 | 38 | 50 | 118 |
| 92,951 | 6 | 11 | 28 | 63  | 1 | 6 | 16 | 38 | 51 | 118 |
| 92,952 | 6 | 11 | 28 | 63  | 1 | 6 | 16 | 38 | 51 | 118 |
| 92,953 | 6 | 11 | 28 | 67  | 1 | 6 | 16 | 46 | 51 | 130 |
| 92,954 | 6 | 11 | 28 | 68  | 1 | 5 | 16 | 43 | 51 | 127 |
| 92,955 | 6 | 13 | 36 | 71  | 1 | 5 | 17 | 49 | 60 | 138 |
| 92,956 | 6 | 14 | 38 | 95  | 1 | 7 | 17 | 61 | 62 | 177 |
| 92,957 | 6 | 16 | 36 | 105 | 1 | 7 | 17 | 66 | 60 | 194 |
| 92,958 | 5 | 16 | 35 | 107 | 1 | 7 | 17 | 67 | 58 | 197 |
| 92,959 | 5 | 16 | 35 | 103 | 1 | 7 | 17 | 63 | 58 | 189 |
| 92,960 | 5 | 16 | 35 | 103 | 1 | 7 | 17 | 63 | 58 | 189 |
| 92,961 | 5 | 13 | 35 | 96  | 1 | 7 | 17 | 55 | 58 | 171 |
| 92,962 | 5 | 13 | 35 | 96  | 1 | 7 | 17 | 55 | 58 | 171 |
| 92,963 | 5 | 12 | 34 | 94  | 1 | 5 | 17 | 54 | 57 | 165 |
| 92,964 | 5 | 12 | 34 | 94  | 1 | 5 | 17 | 54 | 57 | 165 |
| 92,965 | 5 | 10 | 34 | 85  | 1 | 4 | 17 | 43 | 57 | 142 |
| 92,966 | 5 | 8  | 35 | 81  | 1 | 3 | 18 | 39 | 59 | 131 |
| 92,967 | 5 | 8  | 35 | 83  | 1 | 3 | 18 | 39 | 59 | 133 |
| 92,968 | 5 | 8  | 33 | 82  | 1 | 3 | 17 | 39 | 56 | 132 |
| 92,969 | 5 | 7  | 34 | 94  | 1 | 3 | 18 | 41 | 58 | 145 |
| 92,970 | 5 | 10 | 34 | 98  | 2 | 4 | 18 | 41 | 59 | 153 |
| 92,971 | 5 | 10 | 35 | 99  | 2 | 4 | 18 | 45 | 60 | 158 |
| 92,972 | 6 | 11 | 34 | 108 | 2 | 4 | 18 | 47 | 60 | 170 |
| 92,973 | 7 | 11 | 34 | 107 | 2 | 4 | 18 | 47 | 61 | 169 |
| 92,974 | 7 | 11 | 36 | 106 | 2 | 4 | 18 | 47 | 63 | 168 |
| 92,975 | 7 | 12 | 34 | 108 | 2 | 5 | 17 | 49 | 60 | 174 |
| 92,976 | 7 | 11 | 34 | 111 | 2 | 5 | 17 | 49 | 60 | 176 |

|        |   |    |    |     |   |    |    |    |    |     |
|--------|---|----|----|-----|---|----|----|----|----|-----|
| 92,977 | 7 | 12 | 34 | 113 | 2 | 5  | 17 | 50 | 60 | 180 |
| 92,978 | 6 | 12 | 33 | 110 | 2 | 5  | 15 | 50 | 56 | 177 |
| 92,979 | 6 | 12 | 31 | 110 | 2 | 5  | 15 | 50 | 54 | 177 |
| 92,980 | 6 | 12 | 31 | 112 | 2 | 5  | 15 | 50 | 54 | 179 |
| 92,981 | 6 | 12 | 31 | 112 | 1 | 5  | 14 | 50 | 52 | 179 |
| 92,982 | 6 | 12 | 31 | 112 | 1 | 5  | 14 | 51 | 52 | 180 |
| 92,983 | 6 | 12 | 30 | 114 | 1 | 5  | 12 | 51 | 49 | 182 |
| 92,984 | 6 | 12 | 30 | 114 | 1 | 5  | 13 | 50 | 50 | 181 |
| 92,985 | 6 | 12 | 30 | 114 | 1 | 5  | 11 | 50 | 48 | 181 |
| 92,986 | 6 | 12 | 30 | 115 | 1 | 5  | 10 | 50 | 47 | 182 |
| 92,987 | 5 | 12 | 30 | 115 | 1 | 5  | 10 | 50 | 46 | 182 |
| 92,988 | 5 | 12 | 28 | 112 | 1 | 5  | 8  | 51 | 42 | 180 |
| 92,989 | 5 | 14 | 28 | 118 | 1 | 5  | 8  | 52 | 42 | 189 |
| 92,990 | 5 | 14 | 28 | 128 | 1 | 6  | 8  | 56 | 42 | 204 |
| 92,991 | 5 | 22 | 28 | 171 | 1 | 6  | 8  | 72 | 42 | 271 |
| 92,992 | 5 | 23 | 26 | 173 | 1 | 6  | 7  | 72 | 39 | 274 |
| 92,993 | 5 | 24 | 25 | 174 | 1 | 6  | 7  | 74 | 38 | 278 |
| 92,994 | 5 | 25 | 25 | 182 | 1 | 6  | 7  | 74 | 38 | 287 |
| 92,995 | 3 | 26 | 22 | 185 | 1 | 6  | 6  | 74 | 32 | 291 |
| 92,996 | 3 | 26 | 22 | 187 | 1 | 6  | 5  | 74 | 31 | 293 |
| 92,997 | 3 | 26 | 20 | 187 | 1 | 6  | 5  | 74 | 29 | 293 |
| 92,998 | 3 | 26 | 21 | 186 | 1 | 6  | 4  | 75 | 29 | 293 |
| 92,999 | 3 | 25 | 21 | 185 | 1 | 5  | 4  | 74 | 29 | 289 |
| 93,000 | 3 | 26 | 21 | 190 | 1 | 6  | 4  | 77 | 29 | 299 |
| 93,001 | 3 | 28 | 20 | 231 | 1 | 10 | 4  | 94 | 28 | 363 |
| 93,002 | 2 | 28 | 21 | 248 | 1 | 12 | 4  | 96 | 28 | 384 |
| 93,003 | 2 | 29 | 21 | 252 | 1 | 12 | 4  | 96 | 28 | 389 |
| 93,004 | 3 | 32 | 23 | 249 | 1 | 12 | 5  | 91 | 32 | 384 |
| 93,005 | 3 | 33 | 23 | 264 | 1 | 12 | 5  | 94 | 32 | 403 |
| 93,006 | 3 | 31 | 16 | 259 | 1 | 12 | 5  | 88 | 25 | 390 |
| 93,007 | 3 | 30 | 16 | 235 | 2 | 10 | 5  | 75 | 26 | 350 |
| 93,008 | 3 | 28 | 21 | 224 | 2 | 10 | 6  | 70 | 32 | 332 |
| 93,009 | 3 | 28 | 22 | 225 | 2 | 10 | 10 | 71 | 37 | 334 |
| 93,010 | 3 | 29 | 22 | 227 | 2 | 10 | 11 | 71 | 38 | 337 |
| 93,011 | 3 | 29 | 22 | 228 | 2 | 10 | 11 | 71 | 38 | 338 |
| 93,012 | 3 | 29 | 27 | 223 | 2 | 10 | 12 | 69 | 44 | 331 |
| 93,013 | 3 | 29 | 27 | 224 | 2 | 10 | 13 | 69 | 45 | 332 |
| 93,014 | 3 | 29 | 27 | 224 | 2 | 10 | 13 | 69 | 45 | 332 |
| 93,015 | 3 | 29 | 28 | 224 | 2 | 10 | 13 | 69 | 46 | 332 |
| 93,016 | 3 | 29 | 28 | 228 | 2 | 10 | 13 | 70 | 46 | 337 |
| 93,017 | 3 | 30 | 27 | 226 | 2 | 10 | 12 | 70 | 44 | 336 |

|        |   |    |    |     |   |    |    |     |    |     |
|--------|---|----|----|-----|---|----|----|-----|----|-----|
| 93,018 | 3 | 30 | 27 | 224 | 2 | 10 | 12 | 70  | 44 | 334 |
| 93,019 | 3 | 30 | 28 | 225 | 2 | 10 | 12 | 72  | 45 | 337 |
| 93,020 | 3 | 31 | 27 | 220 | 2 | 10 | 12 | 72  | 44 | 333 |
| 93,021 | 3 | 29 | 26 | 218 | 1 | 9  | 12 | 72  | 42 | 328 |
| 93,022 | 3 | 29 | 25 | 216 | 1 | 9  | 12 | 68  | 41 | 322 |
| 93,023 | 2 | 28 | 25 | 202 | 1 | 9  | 12 | 64  | 40 | 303 |
| 93,024 | 1 | 29 | 25 | 202 | 1 | 9  | 12 | 65  | 39 | 305 |
| 93,025 | 1 | 29 | 23 | 204 | 1 | 8  | 12 | 63  | 37 | 304 |
| 93,026 | 1 | 29 | 24 | 200 | 1 | 8  | 12 | 63  | 38 | 300 |
| 93,027 | 1 | 30 | 24 | 200 | 1 | 8  | 12 | 63  | 38 | 301 |
| 93,028 | 1 | 29 | 24 | 199 | 1 | 8  | 12 | 62  | 38 | 298 |
| 93,029 | 1 | 29 | 24 | 199 | 1 | 8  | 12 | 62  | 38 | 298 |
| 93,030 | 1 | 29 | 23 | 197 | 1 | 8  | 12 | 62  | 37 | 296 |
| 93,031 | 1 | 29 | 23 | 198 | 1 | 8  | 12 | 62  | 37 | 297 |
| 93,032 | 1 | 52 | 23 | 274 | 1 | 11 | 12 | 117 | 37 | 454 |
| 93,033 | 1 | 52 | 23 | 278 | 1 | 11 | 12 | 119 | 37 | 460 |
| 93,034 | 1 | 52 | 23 | 278 | 1 | 11 | 12 | 120 | 37 | 461 |
| 93,035 | 1 | 52 | 23 | 278 | 1 | 11 | 12 | 120 | 37 | 461 |
| 93,036 | 1 | 53 | 23 | 279 | 1 | 11 | 12 | 121 | 37 | 464 |
| 93,037 | 1 | 53 | 23 | 278 | 1 | 11 | 12 | 121 | 37 | 463 |
| 93,038 | 1 | 54 | 23 | 279 | 1 | 11 | 12 | 121 | 37 | 465 |
| 93,039 | 1 | 54 | 23 | 282 | 1 | 11 | 12 | 120 | 37 | 467 |
| 93,040 | 1 | 54 | 23 | 266 | 1 | 10 | 12 | 115 | 37 | 445 |
| 93,041 | 1 | 54 | 23 | 266 | 1 | 10 | 12 | 115 | 37 | 445 |
| 93,042 | 1 | 46 | 24 | 221 | 1 | 10 | 12 | 99  | 38 | 376 |
| 93,043 | 1 | 46 | 25 | 221 | 1 | 10 | 12 | 99  | 39 | 376 |
| 93,044 | 1 | 46 | 25 | 223 | 1 | 10 | 12 | 99  | 39 | 378 |
| 93,045 | 1 | 45 | 25 | 215 | 1 | 10 | 12 | 99  | 39 | 369 |
| 93,046 | 1 | 45 | 25 | 213 | 1 | 10 | 12 | 100 | 39 | 368 |
| 93,047 | 1 | 45 | 25 | 213 | 1 | 10 | 12 | 101 | 39 | 369 |
| 93,048 | 1 | 45 | 26 | 213 | 1 | 10 | 12 | 100 | 40 | 368 |
| 93,049 | 2 | 45 | 25 | 214 | 1 | 10 | 12 | 100 | 40 | 369 |
| 93,050 | 2 | 45 | 25 | 214 | 1 | 10 | 12 | 100 | 40 | 369 |
| 93,051 | 2 | 44 | 25 | 167 | 1 | 5  | 12 | 81  | 40 | 297 |
| 93,052 | 2 | 44 | 25 | 150 | 1 | 3  | 12 | 79  | 40 | 276 |
| 93,053 | 2 | 39 | 24 | 125 | 1 | 3  | 12 | 74  | 39 | 241 |
| 93,054 | 2 | 40 | 24 | 134 | 1 | 3  | 12 | 82  | 39 | 259 |
| 93,055 | 2 | 40 | 20 | 139 | 1 | 3  | 10 | 83  | 33 | 265 |
| 93,056 | 2 | 40 | 19 | 166 | 1 | 3  | 10 | 97  | 32 | 306 |
| 93,057 | 3 | 41 | 18 | 187 | 0 | 3  | 10 | 101 | 31 | 332 |
| 93,058 | 3 | 41 | 16 | 197 | 0 | 3  | 10 | 103 | 29 | 344 |

|        |   |    |    |     |   |   |    |     |    |     |
|--------|---|----|----|-----|---|---|----|-----|----|-----|
| 93,059 | 3 | 53 | 13 | 271 | 0 | 4 | 10 | 136 | 26 | 464 |
| 93,060 | 3 | 53 | 12 | 273 | 0 | 4 | 6  | 135 | 21 | 465 |
| 93,061 | 3 | 53 | 13 | 274 | 0 | 4 | 5  | 137 | 21 | 468 |
| 93,062 | 3 | 59 | 12 | 282 | 0 | 5 | 4  | 145 | 19 | 491 |
| 93,063 | 3 | 59 | 8  | 283 | 0 | 5 | 4  | 147 | 15 | 494 |
| 93,064 | 4 | 66 | 8  | 300 | 0 | 8 | 3  | 149 | 15 | 523 |
| 93,065 | 4 | 66 | 8  | 304 | 0 | 8 | 3  | 150 | 15 | 528 |
| 93,066 | 5 | 67 | 8  | 306 | 0 | 8 | 3  | 151 | 16 | 532 |
| 93,067 | 5 | 66 | 9  | 306 | 0 | 8 | 4  | 150 | 18 | 530 |
| 93,068 | 5 | 66 | 9  | 306 | 0 | 8 | 4  | 150 | 18 | 530 |
| 93,069 | 5 | 66 | 8  | 304 | 0 | 8 | 4  | 148 | 17 | 526 |
| 93,070 | 5 | 66 | 11 | 297 | 0 | 9 | 3  | 146 | 19 | 518 |
| 93,071 | 5 | 66 | 11 | 297 | 0 | 9 | 3  | 146 | 19 | 518 |
| 93,072 | 5 | 66 | 13 | 296 | 0 | 9 | 3  | 146 | 21 | 517 |
| 93,073 | 5 | 66 | 14 | 297 | 0 | 9 | 3  | 146 | 22 | 518 |
| 93,074 | 5 | 65 | 14 | 297 | 0 | 9 | 3  | 145 | 22 | 516 |
| 93,075 | 5 | 65 | 14 | 297 | 0 | 9 | 3  | 145 | 22 | 516 |
| 93,076 | 5 | 64 | 14 | 294 | 0 | 9 | 3  | 145 | 22 | 512 |
| 93,077 | 5 | 63 | 13 | 294 | 0 | 9 | 3  | 145 | 21 | 511 |
| 93,078 | 5 | 63 | 13 | 296 | 0 | 9 | 3  | 145 | 21 | 513 |
| 93,079 | 5 | 63 | 13 | 295 | 0 | 9 | 3  | 145 | 21 | 512 |
| 93,080 | 5 | 63 | 15 | 296 | 0 | 9 | 3  | 146 | 23 | 514 |
| 93,081 | 5 | 63 | 15 | 296 | 0 | 9 | 3  | 146 | 23 | 514 |
| 93,082 | 5 | 40 | 16 | 219 | 0 | 6 | 3  | 91  | 24 | 356 |
| 93,083 | 5 | 40 | 17 | 215 | 0 | 6 | 4  | 88  | 26 | 349 |
| 93,084 | 5 | 40 | 17 | 215 | 0 | 6 | 4  | 88  | 26 | 349 |
| 93,085 | 5 | 40 | 17 | 213 | 0 | 6 | 3  | 87  | 25 | 346 |
| 93,086 | 5 | 40 | 17 | 213 | 0 | 6 | 3  | 87  | 25 | 346 |
| 93,087 | 5 | 39 | 17 | 213 | 0 | 6 | 3  | 86  | 25 | 344 |
| 93,088 | 5 | 40 | 17 | 213 | 0 | 6 | 3  | 86  | 25 | 345 |
| 93,089 | 5 | 39 | 17 | 212 | 0 | 6 | 3  | 86  | 25 | 343 |
| 93,090 | 5 | 39 | 17 | 210 | 0 | 6 | 3  | 87  | 25 | 342 |
| 93,091 | 5 | 37 | 18 | 210 | 0 | 6 | 3  | 91  | 26 | 344 |
| 93,092 | 5 | 36 | 17 | 222 | 0 | 6 | 3  | 96  | 25 | 360 |
| 93,093 | 5 | 36 | 17 | 222 | 0 | 6 | 3  | 95  | 25 | 359 |
| 93,094 | 5 | 35 | 16 | 219 | 0 | 6 | 4  | 94  | 25 | 354 |
| 93,095 | 5 | 35 | 16 | 222 | 0 | 7 | 4  | 101 | 25 | 365 |
| 93,096 | 5 | 34 | 17 | 223 | 0 | 8 | 4  | 100 | 26 | 365 |
| 93,097 | 5 | 34 | 17 | 233 | 0 | 8 | 4  | 109 | 26 | 384 |
| 93,098 | 5 | 34 | 17 | 233 | 0 | 8 | 4  | 108 | 26 | 383 |
| 93,099 | 6 | 36 | 16 | 234 | 0 | 8 | 7  | 108 | 29 | 386 |

|        |   |    |    |     |   |    |    |     |    |     |
|--------|---|----|----|-----|---|----|----|-----|----|-----|
| 93,100 | 5 | 36 | 16 | 234 | 0 | 8  | 7  | 108 | 28 | 386 |
| 93,101 | 5 | 35 | 16 | 233 | 0 | 8  | 7  | 107 | 28 | 383 |
| 93,102 | 5 | 36 | 16 | 238 | 0 | 10 | 7  | 109 | 28 | 393 |
| 93,103 | 5 | 36 | 16 | 240 | 0 | 10 | 7  | 110 | 28 | 396 |
| 93,104 | 5 | 36 | 16 | 224 | 0 | 10 | 7  | 104 | 28 | 374 |
| 93,105 | 5 | 36 | 16 | 226 | 0 | 10 | 7  | 106 | 28 | 378 |
| 93,106 | 4 | 37 | 16 | 238 | 0 | 10 | 7  | 111 | 27 | 396 |
| 93,107 | 4 | 39 | 16 | 224 | 0 | 10 | 7  | 120 | 27 | 393 |
| 93,108 | 3 | 38 | 15 | 205 | 0 | 10 | 7  | 116 | 25 | 369 |
| 93,109 | 3 | 38 | 15 | 196 | 0 | 10 | 6  | 115 | 24 | 359 |
| 93,110 | 3 | 26 | 15 | 139 | 0 | 9  | 6  | 87  | 24 | 261 |
| 93,111 | 3 | 26 | 14 | 138 | 0 | 10 | 6  | 87  | 23 | 261 |
| 93,112 | 3 | 25 | 16 | 138 | 0 | 10 | 7  | 85  | 26 | 258 |
| 93,113 | 3 | 19 | 16 | 127 | 0 | 9  | 7  | 75  | 26 | 230 |
| 93,114 | 3 | 19 | 16 | 127 | 0 | 9  | 8  | 75  | 27 | 230 |
| 93,115 | 2 | 12 | 16 | 106 | 0 | 6  | 8  | 73  | 26 | 197 |
| 93,116 | 1 | 11 | 18 | 107 | 0 | 6  | 8  | 73  | 27 | 197 |
| 93,117 | 1 | 11 | 17 | 111 | 0 | 7  | 9  | 77  | 27 | 206 |
| 93,118 | 1 | 11 | 16 | 123 | 0 | 9  | 8  | 92  | 25 | 235 |
| 93,119 | 1 | 11 | 16 | 141 | 0 | 10 | 8  | 95  | 25 | 257 |
| 93,120 | 1 | 11 | 16 | 152 | 0 | 11 | 8  | 100 | 25 | 274 |
| 93,121 | 1 | 10 | 13 | 163 | 0 | 10 | 8  | 103 | 22 | 286 |
| 93,122 | 1 | 10 | 11 | 172 | 0 | 11 | 8  | 106 | 20 | 299 |
| 93,123 | 1 | 12 | 11 | 180 | 0 | 13 | 8  | 114 | 20 | 319 |
| 93,124 | 1 | 12 | 10 | 179 | 0 | 13 | 8  | 114 | 19 | 318 |
| 93,125 | 1 | 14 | 18 | 202 | 0 | 13 | 10 | 126 | 29 | 355 |
| 93,126 | 1 | 14 | 18 | 215 | 0 | 14 | 10 | 141 | 29 | 384 |
| 93,127 | 1 | 14 | 18 | 221 | 0 | 14 | 10 | 143 | 29 | 392 |
| 93,128 | 2 | 15 | 19 | 232 | 0 | 17 | 12 | 159 | 33 | 423 |
| 93,129 | 2 | 15 | 19 | 230 | 0 | 17 | 12 | 160 | 33 | 422 |
| 93,130 | 2 | 15 | 20 | 250 | 0 | 17 | 12 | 167 | 34 | 449 |
| 93,131 | 2 | 16 | 18 | 258 | 0 | 17 | 12 | 167 | 32 | 458 |
| 93,132 | 2 | 16 | 18 | 259 | 0 | 17 | 12 | 167 | 32 | 459 |
| 93,133 | 2 | 16 | 18 | 259 | 0 | 17 | 12 | 168 | 32 | 460 |
| 93,134 | 2 | 16 | 17 | 259 | 0 | 17 | 11 | 168 | 30 | 460 |
| 93,135 | 3 | 16 | 17 | 259 | 0 | 17 | 11 | 168 | 31 | 460 |
| 93,136 | 3 | 16 | 17 | 259 | 0 | 17 | 11 | 168 | 31 | 460 |
| 93,137 | 3 | 16 | 17 | 259 | 0 | 17 | 11 | 168 | 31 | 460 |
| 93,138 | 3 | 16 | 17 | 258 | 0 | 17 | 11 | 168 | 31 | 459 |
| 93,139 | 3 | 15 | 17 | 258 | 0 | 17 | 11 | 168 | 31 | 458 |
| 93,140 | 3 | 15 | 18 | 258 | 0 | 17 | 11 | 168 | 32 | 458 |



|        |   |    |    |     |   |    |    |     |    |     |
|--------|---|----|----|-----|---|----|----|-----|----|-----|
| 93,141 | 3 | 15 | 18 | 258 | 0 | 17 | 11 | 167 | 32 | 457 |
| 93,142 | 3 | 15 | 17 | 247 | 0 | 17 | 11 | 162 | 31 | 441 |
| 93,143 | 3 | 15 | 17 | 247 | 0 | 17 | 11 | 164 | 31 | 443 |
| 93,144 | 3 | 15 | 17 | 250 | 0 | 17 | 10 | 167 | 30 | 449 |
| 93,145 | 3 | 15 | 17 | 262 | 0 | 17 | 10 | 172 | 30 | 466 |
| 93,146 | 3 | 15 | 17 | 264 | 0 | 16 | 10 | 165 | 30 | 460 |
| 93,147 | 3 | 15 | 16 | 261 | 0 | 15 | 10 | 165 | 29 | 456 |
| 93,148 | 2 | 15 | 16 | 251 | 0 | 15 | 9  | 156 | 27 | 437 |
| 93,149 | 2 | 13 | 16 | 250 | 0 | 15 | 9  | 156 | 27 | 434 |
| 93,150 | 2 | 13 | 16 | 250 | 0 | 15 | 7  | 156 | 25 | 434 |
| 93,151 | 2 | 13 | 16 | 249 | 0 | 15 | 7  | 156 | 25 | 433 |
| 93,152 | 2 | 12 | 16 | 249 | 0 | 15 | 7  | 156 | 25 | 432 |
| 93,153 | 2 | 11 | 16 | 244 | 0 | 13 | 7  | 154 | 25 | 422 |
| 93,154 | 2 | 11 | 16 | 242 | 0 | 13 | 7  | 153 | 25 | 419 |
| 93,155 | 2 | 10 | 16 | 240 | 0 | 13 | 7  | 147 | 25 | 410 |
| 93,156 | 2 | 10 | 18 | 228 | 0 | 13 | 7  | 142 | 27 | 393 |
| 93,157 | 2 | 10 | 18 | 229 | 0 | 13 | 7  | 142 | 27 | 394 |
| 93,158 | 2 | 9  | 18 | 215 | 0 | 13 | 7  | 120 | 27 | 357 |
| 93,159 | 2 | 9  | 18 | 220 | 0 | 13 | 7  | 122 | 27 | 364 |
| 93,160 | 2 | 9  | 18 | 223 | 0 | 13 | 7  | 124 | 27 | 369 |
| 93,161 | 2 | 9  | 18 | 205 | 0 | 13 | 7  | 121 | 27 | 348 |
| 93,162 | 2 | 9  | 18 | 204 | 0 | 12 | 8  | 122 | 28 | 347 |
| 93,163 | 2 | 10 | 16 | 204 | 0 | 12 | 7  | 125 | 25 | 351 |
| 93,164 | 2 | 10 | 16 | 207 | 0 | 12 | 7  | 128 | 25 | 357 |
| 93,165 | 2 | 10 | 16 | 206 | 0 | 12 | 6  | 127 | 24 | 355 |
| 93,166 | 2 | 10 | 16 | 206 | 0 | 12 | 6  | 127 | 24 | 355 |
| 93,167 | 2 | 10 | 14 | 183 | 0 | 9  | 6  | 107 | 22 | 309 |
| 93,168 | 2 | 10 | 14 | 184 | 0 | 9  | 5  | 108 | 21 | 311 |
| 93,169 | 2 | 10 | 14 | 186 | 0 | 9  | 5  | 110 | 21 | 315 |
| 93,170 | 2 | 10 | 14 | 171 | 0 | 8  | 5  | 108 | 21 | 297 |
| 93,171 | 2 | 10 | 14 | 171 | 0 | 7  | 5  | 120 | 21 | 308 |
| 93,172 | 2 | 13 | 14 | 166 | 0 | 7  | 5  | 127 | 21 | 313 |
| 93,173 | 2 | 13 | 14 | 166 | 0 | 6  | 5  | 127 | 21 | 312 |
| 93,174 | 2 | 10 | 14 | 159 | 0 | 5  | 5  | 121 | 21 | 295 |
| 93,175 | 2 | 10 | 14 | 161 | 0 | 5  | 5  | 124 | 21 | 300 |
| 93,176 | 2 | 8  | 8  | 152 | 0 | 5  | 3  | 117 | 13 | 282 |
| 93,177 | 1 | 9  | 7  | 143 | 0 | 4  | 1  | 107 | 9  | 263 |
| 93,178 | 1 | 9  | 7  | 136 | 0 | 4  | 1  | 105 | 9  | 254 |
| 93,179 | 1 | 9  | 7  | 132 | 0 | 2  | 1  | 94  | 9  | 237 |
| 93,180 | 1 | 12 | 7  | 144 | 0 | 2  | 1  | 96  | 9  | 254 |
| 93,181 | 1 | 11 | 6  | 116 | 0 | 2  | 1  | 88  | 8  | 217 |

|        |   |    |    |     |   |    |    |     |    |     |
|--------|---|----|----|-----|---|----|----|-----|----|-----|
| 93,182 | 1 | 12 | 6  | 134 | 0 | 2  | 1  | 99  | 8  | 247 |
| 93,183 | 1 | 12 | 6  | 139 | 0 | 2  | 1  | 104 | 8  | 257 |
| 93,184 | 1 | 13 | 5  | 142 | 0 | 2  | 1  | 109 | 7  | 266 |
| 93,185 | 1 | 14 | 5  | 151 | 0 | 2  | 1  | 112 | 7  | 279 |
| 93,186 | 0 | 14 | 5  | 151 | 0 | 2  | 1  | 113 | 6  | 280 |
| 93,187 | 0 | 17 | 5  | 161 | 0 | 2  | 1  | 118 | 6  | 298 |
| 93,188 | 0 | 17 | 5  | 169 | 0 | 2  | 1  | 120 | 6  | 308 |
| 93,189 | 0 | 17 | 7  | 171 | 0 | 2  | 1  | 121 | 8  | 311 |
| 93,190 | 0 | 17 | 6  | 176 | 0 | 2  | 2  | 121 | 8  | 316 |
| 93,191 | 0 | 18 | 6  | 181 | 0 | 2  | 2  | 124 | 8  | 325 |
| 93,192 | 0 | 18 | 6  | 180 | 0 | 2  | 2  | 124 | 8  | 324 |
| 93,193 | 0 | 20 | 7  | 189 | 0 | 3  | 3  | 121 | 10 | 333 |
| 93,194 | 0 | 20 | 7  | 189 | 0 | 3  | 3  | 121 | 10 | 333 |
| 93,195 | 0 | 20 | 7  | 187 | 0 | 3  | 3  | 118 | 10 | 328 |
| 93,196 | 0 | 20 | 7  | 175 | 0 | 3  | 3  | 113 | 10 | 311 |
| 93,197 | 0 | 20 | 20 | 169 | 0 | 3  | 7  | 113 | 27 | 305 |
| 93,198 | 0 | 20 | 20 | 169 | 0 | 3  | 7  | 113 | 27 | 305 |
| 93,199 | 0 | 21 | 20 | 169 | 0 | 3  | 7  | 113 | 27 | 306 |
| 93,200 | 0 | 21 | 20 | 169 | 0 | 3  | 7  | 113 | 27 | 306 |
| 93,201 | 0 | 21 | 20 | 170 | 0 | 3  | 7  | 113 | 27 | 307 |
| 93,202 | 0 | 22 | 20 | 178 | 0 | 4  | 7  | 114 | 27 | 318 |
| 93,203 | 0 | 23 | 20 | 236 | 0 | 5  | 7  | 127 | 27 | 391 |
| 93,204 | 0 | 23 | 20 | 249 | 0 | 6  | 7  | 142 | 27 | 420 |
| 93,205 | 0 | 32 | 21 | 311 | 0 | 13 | 7  | 186 | 28 | 542 |
| 93,206 | 1 | 36 | 23 | 352 | 0 | 14 | 8  | 192 | 32 | 594 |
| 93,207 | 1 | 40 | 23 | 381 | 0 | 14 | 9  | 199 | 33 | 634 |
| 93,208 | 1 | 40 | 25 | 384 | 0 | 14 | 9  | 199 | 35 | 637 |
| 93,209 | 1 | 53 | 27 | 434 | 0 | 20 | 10 | 238 | 38 | 745 |
| 93,210 | 1 | 54 | 27 | 439 | 0 | 24 | 10 | 243 | 38 | 760 |
| 93,211 | 1 | 54 | 27 | 439 | 0 | 24 | 9  | 246 | 37 | 763 |
| 93,212 | 1 | 57 | 28 | 448 | 0 | 24 | 9  | 248 | 38 | 777 |
| 93,213 | 1 | 57 | 29 | 447 | 0 | 24 | 9  | 246 | 39 | 774 |
| 93,214 | 1 | 57 | 29 | 442 | 0 | 25 | 9  | 243 | 39 | 767 |
| 93,215 | 1 | 57 | 29 | 443 | 0 | 25 | 9  | 243 | 39 | 768 |
| 93,216 | 1 | 57 | 30 | 443 | 0 | 25 | 9  | 243 | 40 | 768 |
| 93,217 | 1 | 57 | 30 | 443 | 0 | 25 | 9  | 244 | 40 | 769 |
| 93,218 | 1 | 57 | 30 | 443 | 0 | 25 | 9  | 244 | 40 | 769 |
| 93,219 | 1 | 57 | 30 | 442 | 0 | 25 | 9  | 245 | 40 | 769 |
| 93,220 | 1 | 57 | 30 | 441 | 0 | 25 | 9  | 243 | 40 | 766 |
| 93,221 | 1 | 57 | 30 | 440 | 0 | 25 | 9  | 242 | 40 | 764 |
| 93,222 | 1 | 57 | 30 | 429 | 0 | 26 | 9  | 225 | 40 | 737 |

|        |   |    |    |     |   |    |    |     |    |     |
|--------|---|----|----|-----|---|----|----|-----|----|-----|
| 93,223 | 1 | 54 | 30 | 424 | 0 | 26 | 9  | 215 | 40 | 719 |
| 93,224 | 2 | 54 | 30 | 415 | 0 | 26 | 11 | 212 | 43 | 707 |
| 93,225 | 2 | 54 | 30 | 411 | 0 | 25 | 11 | 208 | 43 | 698 |
| 93,226 | 2 | 54 | 30 | 413 | 0 | 25 | 11 | 209 | 43 | 701 |
| 93,227 | 2 | 54 | 30 | 401 | 0 | 25 | 11 | 205 | 43 | 685 |
| 93,228 | 2 | 53 | 30 | 397 | 0 | 25 | 11 | 200 | 43 | 675 |
| 93,229 | 2 | 53 | 30 | 398 | 0 | 25 | 11 | 200 | 43 | 676 |
| 93,230 | 2 | 49 | 30 | 380 | 0 | 24 | 11 | 192 | 43 | 645 |
| 93,231 | 2 | 50 | 30 | 380 | 0 | 24 | 11 | 192 | 43 | 646 |
| 93,232 | 2 | 51 | 30 | 383 | 0 | 24 | 11 | 192 | 43 | 650 |
| 93,233 | 2 | 50 | 30 | 366 | 0 | 24 | 11 | 181 | 43 | 621 |
| 93,234 | 2 | 50 | 30 | 360 | 0 | 24 | 11 | 176 | 43 | 610 |
| 93,235 | 2 | 49 | 30 | 357 | 0 | 24 | 11 | 170 | 43 | 600 |
| 93,236 | 2 | 48 | 30 | 348 | 0 | 24 | 11 | 167 | 43 | 587 |
| 93,237 | 2 | 48 | 30 | 348 | 0 | 24 | 11 | 166 | 43 | 586 |
| 93,238 | 2 | 45 | 31 | 338 | 0 | 24 | 11 | 161 | 44 | 568 |
| 93,239 | 2 | 45 | 30 | 328 | 0 | 24 | 11 | 158 | 43 | 555 |
| 93,240 | 2 | 45 | 31 | 329 | 0 | 24 | 12 | 158 | 45 | 556 |
| 93,241 | 2 | 44 | 31 | 321 | 0 | 24 | 11 | 155 | 44 | 544 |
| 93,242 | 2 | 44 | 31 | 324 | 0 | 24 | 11 | 156 | 44 | 548 |
| 93,243 | 2 | 44 | 31 | 348 | 0 | 24 | 11 | 163 | 44 | 579 |
| 93,244 | 3 | 42 | 43 | 393 | 1 | 24 | 22 | 176 | 69 | 635 |
| 93,245 | 3 | 47 | 43 | 405 | 1 | 25 | 22 | 184 | 69 | 661 |
| 93,246 | 3 | 47 | 43 | 412 | 1 | 25 | 22 | 186 | 69 | 670 |
| 93,247 | 3 | 47 | 44 | 419 | 2 | 25 | 22 | 191 | 71 | 682 |
| 93,248 | 3 | 47 | 32 | 423 | 2 | 25 | 17 | 191 | 54 | 686 |
| 93,249 | 3 | 47 | 32 | 424 | 2 | 25 | 17 | 191 | 54 | 687 |
| 93,250 | 3 | 46 | 32 | 424 | 2 | 25 | 17 | 191 | 54 | 686 |
| 93,251 | 3 | 46 | 32 | 423 | 2 | 25 | 18 | 191 | 55 | 685 |
| 93,252 | 3 | 46 | 32 | 424 | 2 | 25 | 18 | 191 | 55 | 686 |
| 93,253 | 3 | 44 | 32 | 361 | 2 | 23 | 18 | 177 | 55 | 605 |
| 93,254 | 3 | 44 | 32 | 362 | 2 | 23 | 19 | 177 | 56 | 606 |
| 93,255 | 3 | 44 | 32 | 349 | 2 | 22 | 19 | 163 | 56 | 578 |
| 93,256 | 3 | 34 | 31 | 286 | 2 | 15 | 19 | 119 | 55 | 454 |
| 93,257 | 2 | 26 | 29 | 218 | 2 | 14 | 18 | 106 | 51 | 364 |
| 93,258 | 2 | 26 | 29 | 220 | 2 | 14 | 18 | 108 | 51 | 368 |
| 93,259 | 2 | 12 | 27 | 166 | 2 | 8  | 18 | 67  | 49 | 253 |
| 93,260 | 2 | 12 | 25 | 173 | 2 | 8  | 18 | 67  | 47 | 260 |
| 93,261 | 2 | 8  | 26 | 156 | 2 | 4  | 18 | 54  | 48 | 222 |
| 93,262 | 2 | 8  | 26 | 157 | 2 | 4  | 19 | 54  | 49 | 223 |
| 93,263 | 4 | 8  | 25 | 159 | 2 | 4  | 19 | 54  | 50 | 225 |

|        |   |    |    |     |   |   |    |    |    |     |
|--------|---|----|----|-----|---|---|----|----|----|-----|
| 93,264 | 4 | 8  | 24 | 160 | 2 | 4 | 19 | 56 | 49 | 228 |
| 93,265 | 4 | 7  | 24 | 158 | 2 | 3 | 19 | 53 | 49 | 221 |
| 93,266 | 4 | 10 | 23 | 166 | 2 | 3 | 19 | 59 | 48 | 238 |
| 93,267 | 4 | 10 | 23 | 166 | 2 | 3 | 19 | 59 | 48 | 238 |
| 93,268 | 4 | 10 | 23 | 166 | 2 | 3 | 19 | 58 | 48 | 237 |
| 93,269 | 4 | 10 | 23 | 167 | 2 | 3 | 20 | 58 | 49 | 238 |
| 93,270 | 4 | 10 | 24 | 165 | 2 | 3 | 20 | 56 | 50 | 234 |
| 93,271 | 4 | 10 | 24 | 165 | 2 | 3 | 21 | 58 | 51 | 236 |
| 93,272 | 4 | 10 | 24 | 166 | 2 | 3 | 21 | 60 | 51 | 239 |
| 93,273 | 4 | 12 | 25 | 185 | 2 | 2 | 21 | 72 | 52 | 271 |
| 93,274 | 3 | 17 | 26 | 193 | 2 | 2 | 22 | 78 | 53 | 290 |
| 93,275 | 3 | 17 | 26 | 194 | 2 | 2 | 20 | 77 | 51 | 290 |
| 93,276 | 3 | 17 | 26 | 194 | 3 | 2 | 20 | 77 | 52 | 290 |
| 93,277 | 5 | 18 | 26 | 196 | 3 | 2 | 20 | 77 | 54 | 293 |
| 93,278 | 5 | 18 | 24 | 194 | 3 | 2 | 20 | 76 | 52 | 290 |
| 93,279 | 5 | 18 | 25 | 193 | 3 | 3 | 20 | 76 | 53 | 290 |
| 93,280 | 5 | 18 | 25 | 193 | 3 | 3 | 20 | 76 | 53 | 290 |
| 93,281 | 5 | 18 | 25 | 193 | 3 | 3 | 20 | 77 | 53 | 291 |
| 93,282 | 5 | 17 | 26 | 193 | 3 | 3 | 20 | 78 | 54 | 291 |
| 93,283 | 5 | 16 | 27 | 190 | 3 | 3 | 20 | 78 | 55 | 287 |
| 93,284 | 5 | 16 | 27 | 189 | 3 | 3 | 20 | 78 | 55 | 286 |
| 93,285 | 5 | 16 | 27 | 189 | 3 | 3 | 20 | 78 | 55 | 286 |
| 93,286 | 5 | 16 | 39 | 189 | 3 | 3 | 22 | 78 | 69 | 286 |
| 93,287 | 5 | 16 | 39 | 190 | 3 | 3 | 22 | 78 | 69 | 287 |
| 93,288 | 5 | 16 | 45 | 190 | 3 | 3 | 24 | 78 | 77 | 287 |
| 93,289 | 5 | 16 | 45 | 190 | 3 | 3 | 24 | 78 | 77 | 287 |
| 93,290 | 5 | 16 | 49 | 192 | 3 | 3 | 24 | 78 | 81 | 289 |
| 93,291 | 5 | 16 | 48 | 194 | 3 | 3 | 23 | 82 | 79 | 295 |
| 93,292 | 5 | 16 | 49 | 195 | 3 | 3 | 25 | 85 | 82 | 299 |
| 93,293 | 5 | 16 | 50 | 169 | 3 | 3 | 25 | 79 | 83 | 267 |
| 93,294 | 5 | 16 | 50 | 169 | 3 | 3 | 25 | 79 | 83 | 267 |
| 93,295 | 4 | 17 | 37 | 114 | 2 | 2 | 12 | 64 | 55 | 197 |
| 93,296 | 4 | 16 | 37 | 121 | 2 | 2 | 12 | 70 | 55 | 209 |
| 93,297 | 4 | 16 | 37 | 120 | 2 | 2 | 12 | 76 | 55 | 214 |
| 93,298 | 5 | 16 | 35 | 114 | 1 | 2 | 12 | 72 | 53 | 204 |
| 93,299 | 5 | 17 | 35 | 111 | 1 | 2 | 13 | 71 | 54 | 201 |
| 93,300 | 5 | 18 | 35 | 110 | 1 | 2 | 13 | 71 | 54 | 201 |
| 93,301 | 6 | 20 | 35 | 114 | 1 | 2 | 13 | 77 | 55 | 213 |
| 93,302 | 6 | 20 | 35 | 114 | 1 | 2 | 12 | 77 | 54 | 213 |
| 93,303 | 6 | 20 | 35 | 113 | 1 | 2 | 12 | 77 | 54 | 212 |
| 93,304 | 6 | 20 | 35 | 111 | 1 | 2 | 12 | 77 | 54 | 210 |

|        |   |    |    |     |   |    |    |     |    |     |
|--------|---|----|----|-----|---|----|----|-----|----|-----|
| 93,305 | 6 | 20 | 36 | 111 | 1 | 2  | 13 | 77  | 56 | 210 |
| 93,306 | 6 | 20 | 41 | 111 | 1 | 2  | 16 | 77  | 64 | 210 |
| 93,307 | 6 | 20 | 41 | 110 | 1 | 2  | 17 | 78  | 65 | 210 |
| 93,308 | 6 | 20 | 41 | 116 | 1 | 2  | 17 | 81  | 65 | 219 |
| 93,309 | 6 | 20 | 40 | 117 | 1 | 3  | 16 | 82  | 63 | 222 |
| 93,310 | 6 | 20 | 40 | 109 | 1 | 3  | 16 | 81  | 63 | 213 |
| 93,311 | 6 | 20 | 40 | 120 | 1 | 5  | 16 | 88  | 63 | 233 |
| 93,312 | 6 | 20 | 39 | 114 | 1 | 5  | 16 | 87  | 62 | 226 |
| 93,313 | 7 | 21 | 39 | 114 | 1 | 6  | 15 | 87  | 62 | 228 |
| 93,314 | 5 | 21 | 39 | 113 | 1 | 6  | 15 | 87  | 60 | 227 |
| 93,315 | 5 | 21 | 39 | 113 | 1 | 6  | 15 | 85  | 60 | 225 |
| 93,316 | 5 | 19 | 40 | 113 | 1 | 6  | 15 | 81  | 61 | 219 |
| 93,317 | 5 | 19 | 40 | 113 | 1 | 6  | 15 | 81  | 61 | 219 |
| 93,318 | 5 | 19 | 40 | 113 | 1 | 6  | 15 | 82  | 61 | 220 |
| 93,319 | 5 | 19 | 40 | 115 | 1 | 6  | 15 | 82  | 61 | 222 |
| 93,320 | 5 | 19 | 40 | 118 | 1 | 6  | 14 | 79  | 60 | 222 |
| 93,321 | 5 | 19 | 39 | 119 | 1 | 6  | 14 | 79  | 59 | 223 |
| 93,322 | 5 | 19 | 39 | 119 | 1 | 6  | 13 | 79  | 58 | 223 |
| 93,323 | 5 | 19 | 39 | 119 | 1 | 6  | 13 | 80  | 58 | 224 |
| 93,324 | 5 | 12 | 44 | 93  | 1 | 6  | 15 | 62  | 65 | 173 |
| 93,325 | 5 | 12 | 43 | 99  | 1 | 6  | 14 | 82  | 63 | 199 |
| 93,326 | 5 | 12 | 45 | 104 | 1 | 6  | 15 | 96  | 66 | 218 |
| 93,327 | 5 | 14 | 45 | 107 | 0 | 8  | 16 | 103 | 66 | 232 |
| 93,328 | 3 | 14 | 46 | 123 | 0 | 10 | 16 | 107 | 65 | 254 |
| 93,329 | 3 | 14 | 47 | 124 | 0 | 11 | 18 | 108 | 68 | 257 |
| 93,330 | 3 | 14 | 46 | 124 | 0 | 10 | 18 | 108 | 67 | 256 |
| 93,331 | 3 | 14 | 46 | 124 | 0 | 10 | 18 | 108 | 67 | 256 |
| 93,332 | 3 | 14 | 45 | 124 | 0 | 10 | 18 | 106 | 66 | 254 |
| 93,333 | 3 | 14 | 45 | 124 | 0 | 10 | 18 | 110 | 66 | 258 |
| 93,334 | 3 | 14 | 44 | 125 | 0 | 10 | 18 | 111 | 65 | 260 |
| 93,335 | 3 | 15 | 44 | 132 | 0 | 17 | 18 | 116 | 65 | 280 |
| 93,336 | 3 | 15 | 44 | 133 | 1 | 17 | 18 | 118 | 66 | 283 |
| 93,337 | 3 | 15 | 31 | 133 | 1 | 17 | 16 | 118 | 51 | 283 |
| 93,338 | 3 | 16 | 31 | 141 | 1 | 18 | 17 | 123 | 52 | 298 |
| 93,339 | 3 | 16 | 25 | 149 | 1 | 18 | 15 | 123 | 44 | 306 |
| 93,340 | 3 | 16 | 24 | 157 | 1 | 18 | 15 | 125 | 43 | 316 |
| 93,341 | 3 | 17 | 20 | 149 | 1 | 18 | 15 | 116 | 39 | 300 |
| 93,342 | 3 | 18 | 20 | 149 | 1 | 18 | 15 | 116 | 39 | 301 |
| 93,343 | 3 | 18 | 19 | 148 | 2 | 18 | 13 | 116 | 37 | 300 |
| 93,344 | 3 | 19 | 19 | 148 | 2 | 18 | 13 | 116 | 37 | 301 |
| 93,345 | 3 | 18 | 19 | 149 | 2 | 18 | 13 | 115 | 37 | 300 |

|        |    |    |    |     |   |    |    |     |     |     |
|--------|----|----|----|-----|---|----|----|-----|-----|-----|
| 93,346 | 3  | 18 | 19 | 150 | 2 | 18 | 13 | 116 | 37  | 302 |
| 93,347 | 2  | 14 | 19 | 131 | 2 | 17 | 13 | 102 | 36  | 264 |
| 93,348 | 2  | 14 | 19 | 124 | 2 | 17 | 13 | 95  | 36  | 250 |
| 93,349 | 2  | 13 | 19 | 122 | 2 | 17 | 13 | 94  | 36  | 246 |
| 93,350 | 2  | 10 | 19 | 116 | 2 | 17 | 12 | 88  | 35  | 231 |
| 93,351 | 2  | 11 | 19 | 116 | 2 | 17 | 12 | 88  | 35  | 232 |
| 93,352 | 1  | 11 | 19 | 116 | 2 | 17 | 12 | 88  | 34  | 232 |
| 93,353 | 1  | 11 | 19 | 116 | 2 | 17 | 12 | 88  | 34  | 232 |
| 93,354 | 1  | 11 | 19 | 116 | 2 | 17 | 12 | 88  | 34  | 232 |
| 93,355 | 1  | 12 | 19 | 117 | 2 | 17 | 12 | 89  | 34  | 235 |
| 93,356 | 1  | 12 | 18 | 120 | 2 | 17 | 11 | 89  | 32  | 238 |
| 93,357 | 1  | 12 | 13 | 120 | 2 | 18 | 8  | 87  | 24  | 237 |
| 93,358 | 1  | 12 | 13 | 128 | 2 | 18 | 7  | 90  | 23  | 248 |
| 93,359 | 1  | 12 | 13 | 124 | 2 | 18 | 7  | 87  | 23  | 241 |
| 93,360 | 1  | 12 | 12 | 122 | 2 | 17 | 7  | 84  | 22  | 235 |
| 93,361 | 1  | 17 | 12 | 142 | 2 | 17 | 7  | 99  | 22  | 275 |
| 93,362 | 1  | 17 | 12 | 132 | 2 | 15 | 7  | 94  | 22  | 258 |
| 93,363 | 0  | 19 | 14 | 171 | 2 | 16 | 7  | 107 | 23  | 313 |
| 93,364 | 0  | 18 | 14 | 170 | 2 | 15 | 7  | 110 | 23  | 313 |
| 93,365 | 0  | 18 | 14 | 172 | 2 | 15 | 7  | 111 | 23  | 316 |
| 93,366 | 1  | 17 | 13 | 164 | 2 | 15 | 8  | 109 | 24  | 305 |
| 93,367 | 1  | 17 | 13 | 164 | 2 | 15 | 8  | 109 | 24  | 305 |
| 93,368 | 1  | 18 | 13 | 172 | 2 | 16 | 10 | 115 | 26  | 321 |
| 93,369 | 1  | 18 | 13 | 172 | 2 | 16 | 10 | 114 | 26  | 320 |
| 93,370 | 1  | 18 | 15 | 171 | 2 | 16 | 10 | 114 | 28  | 319 |
| 93,371 | 1  | 18 | 15 | 167 | 2 | 16 | 10 | 113 | 28  | 314 |
| 93,372 | 3  | 18 | 19 | 166 | 2 | 16 | 12 | 113 | 36  | 313 |
| 93,373 | 9  | 18 | 42 | 166 | 2 | 16 | 23 | 112 | 76  | 312 |
| 93,374 | 9  | 18 | 45 | 166 | 2 | 16 | 25 | 112 | 81  | 312 |
| 93,375 | 11 | 18 | 43 | 164 | 2 | 16 | 25 | 114 | 81  | 312 |
| 93,376 | 11 | 18 | 43 | 155 | 2 | 16 | 25 | 96  | 81  | 285 |
| 93,377 | 11 | 18 | 41 | 150 | 2 | 16 | 24 | 82  | 78  | 266 |
| 93,378 | 11 | 15 | 41 | 128 | 2 | 11 | 23 | 69  | 77  | 223 |
| 93,379 | 12 | 15 | 40 | 128 | 2 | 11 | 25 | 69  | 79  | 223 |
| 93,380 | 12 | 15 | 43 | 128 | 2 | 11 | 25 | 69  | 82  | 223 |
| 93,381 | 12 | 15 | 43 | 128 | 2 | 11 | 25 | 69  | 82  | 223 |
| 93,382 | 12 | 15 | 46 | 128 | 3 | 11 | 29 | 69  | 90  | 223 |
| 93,383 | 12 | 15 | 49 | 127 | 4 | 11 | 29 | 69  | 94  | 222 |
| 93,384 | 12 | 15 | 54 | 127 | 4 | 11 | 31 | 65  | 101 | 218 |
| 93,385 | 12 | 14 | 54 | 118 | 4 | 4  | 31 | 59  | 101 | 195 |
| 93,386 | 12 | 14 | 54 | 117 | 4 | 4  | 31 | 57  | 101 | 192 |

|        |    |    |     |     |   |   |    |    |     |     |
|--------|----|----|-----|-----|---|---|----|----|-----|-----|
| 93,387 | 12 | 14 | 54  | 116 | 3 | 4 | 31 | 57 | 100 | 191 |
| 93,388 | 13 | 13 | 54  | 108 | 3 | 3 | 32 | 53 | 102 | 177 |
| 93,389 | 13 | 13 | 54  | 100 | 3 | 3 | 31 | 53 | 101 | 169 |
| 93,390 | 13 | 13 | 55  | 100 | 3 | 3 | 31 | 53 | 102 | 169 |
| 93,391 | 13 | 13 | 55  | 97  | 3 | 3 | 31 | 53 | 102 | 166 |
| 93,392 | 13 | 12 | 55  | 96  | 3 | 3 | 31 | 53 | 102 | 164 |
| 93,393 | 14 | 11 | 58  | 96  | 3 | 3 | 31 | 54 | 106 | 164 |
| 93,394 | 14 | 10 | 60  | 96  | 2 | 3 | 31 | 54 | 107 | 163 |
| 93,395 | 14 | 10 | 59  | 96  | 2 | 3 | 31 | 54 | 106 | 163 |
| 93,396 | 14 | 10 | 60  | 97  | 2 | 3 | 32 | 54 | 108 | 164 |
| 93,397 | 14 | 10 | 60  | 97  | 2 | 3 | 32 | 53 | 108 | 163 |
| 93,398 | 14 | 10 | 64  | 101 | 2 | 3 | 32 | 53 | 112 | 167 |
| 93,399 | 14 | 11 | 70  | 101 | 2 | 3 | 35 | 52 | 121 | 167 |
| 93,400 | 14 | 11 | 70  | 101 | 2 | 3 | 35 | 52 | 121 | 167 |
| 93,401 | 14 | 10 | 70  | 101 | 2 | 3 | 36 | 53 | 122 | 167 |
| 93,402 | 14 | 10 | 70  | 101 | 2 | 3 | 37 | 53 | 123 | 167 |
| 93,403 | 14 | 10 | 76  | 101 | 3 | 3 | 39 | 53 | 132 | 167 |
| 93,404 | 15 | 10 | 90  | 101 | 3 | 3 | 48 | 53 | 156 | 167 |
| 93,405 | 16 | 10 | 98  | 103 | 4 | 3 | 52 | 54 | 170 | 170 |
| 93,406 | 16 | 10 | 98  | 104 | 4 | 3 | 52 | 54 | 170 | 171 |
| 93,407 | 16 | 10 | 105 | 109 | 4 | 2 | 56 | 61 | 181 | 182 |
| 93,408 | 16 | 10 | 105 | 110 | 4 | 2 | 56 | 67 | 181 | 189 |
| 93,409 | 16 | 11 | 105 | 105 | 4 | 2 | 56 | 64 | 181 | 182 |
| 93,410 | 16 | 11 | 105 | 105 | 4 | 2 | 56 | 64 | 181 | 182 |
| 93,411 | 16 | 11 | 105 | 104 | 4 | 3 | 56 | 65 | 181 | 183 |
| 93,412 | 16 | 6  | 104 | 90  | 4 | 3 | 56 | 52 | 180 | 151 |
| 93,413 | 16 | 6  | 106 | 94  | 4 | 3 | 56 | 56 | 182 | 159 |
| 93,414 | 16 | 4  | 105 | 63  | 4 | 2 | 56 | 48 | 181 | 117 |
| 93,415 | 16 | 4  | 105 | 62  | 4 | 2 | 56 | 45 | 181 | 113 |
| 93,416 | 16 | 4  | 106 | 58  | 4 | 2 | 58 | 45 | 184 | 109 |
| 93,417 | 15 | 4  | 106 | 57  | 4 | 2 | 57 | 46 | 182 | 109 |
| 93,418 | 15 | 4  | 106 | 59  | 4 | 2 | 57 | 47 | 182 | 112 |
| 93,419 | 15 | 3  | 106 | 59  | 4 | 1 | 55 | 45 | 180 | 108 |
| 93,420 | 15 | 6  | 104 | 90  | 4 | 2 | 55 | 74 | 178 | 172 |
| 93,421 | 15 | 6  | 104 | 91  | 4 | 3 | 55 | 74 | 178 | 174 |
| 93,422 | 13 | 6  | 103 | 99  | 4 | 3 | 54 | 74 | 174 | 182 |
| 93,423 | 13 | 6  | 100 | 101 | 4 | 3 | 53 | 76 | 170 | 186 |
| 93,424 | 7  | 6  | 77  | 101 | 4 | 3 | 42 | 76 | 130 | 186 |
| 93,425 | 7  | 6  | 74  | 101 | 4 | 3 | 40 | 77 | 125 | 187 |
| 93,426 | 5  | 6  | 70  | 101 | 4 | 3 | 38 | 74 | 117 | 184 |
| 93,427 | 5  | 6  | 70  | 102 | 4 | 3 | 38 | 75 | 117 | 186 |

|        |   |    |    |     |   |    |    |     |     |     |
|--------|---|----|----|-----|---|----|----|-----|-----|-----|
| 93,428 | 5 | 6  | 70 | 110 | 4 | 3  | 38 | 81  | 117 | 200 |
| 93,429 | 5 | 7  | 70 | 113 | 4 | 3  | 38 | 87  | 117 | 210 |
| 93,430 | 4 | 10 | 70 | 115 | 4 | 4  | 36 | 91  | 114 | 220 |
| 93,431 | 4 | 14 | 66 | 131 | 4 | 6  | 35 | 117 | 109 | 268 |
| 93,432 | 4 | 15 | 63 | 138 | 3 | 9  | 32 | 129 | 102 | 291 |
| 93,433 | 4 | 29 | 60 | 197 | 2 | 10 | 33 | 165 | 99  | 401 |
| 93,434 | 4 | 29 | 56 | 202 | 2 | 11 | 32 | 175 | 94  | 417 |
| 93,435 | 4 | 29 | 55 | 203 | 2 | 11 | 31 | 176 | 92  | 419 |
| 93,436 | 4 | 29 | 56 | 205 | 2 | 11 | 31 | 176 | 93  | 421 |
| 93,437 | 4 | 30 | 59 | 209 | 2 | 11 | 32 | 181 | 97  | 431 |
| 93,438 | 4 | 31 | 63 | 221 | 3 | 11 | 32 | 183 | 102 | 446 |
| 93,439 | 3 | 31 | 63 | 229 | 3 | 11 | 31 | 185 | 100 | 456 |
| 93,440 | 3 | 32 | 64 | 233 | 3 | 12 | 31 | 186 | 101 | 463 |
| 93,441 | 3 | 32 | 65 | 235 | 3 | 12 | 32 | 190 | 103 | 469 |
| 93,442 | 3 | 32 | 65 | 232 | 3 | 12 | 32 | 192 | 103 | 468 |
| 93,443 | 3 | 32 | 63 | 236 | 3 | 12 | 32 | 194 | 101 | 474 |
| 93,444 | 3 | 33 | 62 | 236 | 3 | 12 | 32 | 197 | 100 | 478 |
| 93,445 | 3 | 34 | 60 | 236 | 3 | 12 | 32 | 197 | 98  | 479 |
| 93,446 | 3 | 35 | 61 | 230 | 3 | 12 | 32 | 197 | 99  | 474 |
| 93,447 | 3 | 35 | 61 | 231 | 3 | 12 | 33 | 197 | 100 | 475 |
| 93,448 | 3 | 34 | 58 | 231 | 3 | 13 | 33 | 197 | 97  | 475 |
| 93,449 | 3 | 34 | 57 | 240 | 3 | 13 | 33 | 198 | 96  | 485 |
| 93,450 | 3 | 34 | 51 | 250 | 3 | 13 | 30 | 201 | 87  | 498 |
| 93,451 | 3 | 34 | 52 | 280 | 3 | 17 | 32 | 220 | 90  | 551 |
| 93,452 | 3 | 36 | 54 | 328 | 3 | 17 | 32 | 232 | 92  | 613 |
| 93,453 | 3 | 36 | 54 | 336 | 3 | 17 | 31 | 234 | 91  | 623 |
| 93,454 | 3 | 36 | 48 | 337 | 2 | 17 | 30 | 234 | 83  | 624 |
| 93,455 | 2 | 36 | 34 | 337 | 2 | 17 | 22 | 234 | 60  | 624 |
| 93,456 | 2 | 36 | 27 | 334 | 1 | 17 | 18 | 233 | 48  | 620 |
| 93,457 | 2 | 35 | 23 | 326 | 1 | 17 | 16 | 226 | 42  | 604 |
| 93,458 | 2 | 35 | 20 | 329 | 1 | 17 | 14 | 227 | 37  | 608 |
| 93,459 | 2 | 38 | 23 | 367 | 1 | 18 | 19 | 236 | 45  | 659 |
| 93,460 | 2 | 37 | 23 | 366 | 1 | 18 | 19 | 240 | 45  | 661 |
| 93,461 | 2 | 37 | 23 | 362 | 1 | 17 | 19 | 238 | 45  | 654 |
| 93,462 | 2 | 39 | 23 | 367 | 1 | 17 | 19 | 238 | 45  | 661 |
| 93,463 | 2 | 41 | 22 | 385 | 1 | 17 | 19 | 246 | 44  | 689 |
| 93,464 | 2 | 41 | 21 | 384 | 1 | 17 | 17 | 242 | 41  | 684 |
| 93,465 | 2 | 41 | 21 | 376 | 1 | 17 | 17 | 236 | 41  | 670 |
| 93,466 | 4 | 41 | 27 | 377 | 3 | 17 | 29 | 235 | 63  | 670 |
| 93,467 | 4 | 41 | 27 | 378 | 3 | 17 | 29 | 235 | 63  | 671 |
| 93,468 | 4 | 41 | 27 | 379 | 3 | 17 | 29 | 233 | 63  | 670 |



|        |   |    |    |     |   |    |    |     |    |     |
|--------|---|----|----|-----|---|----|----|-----|----|-----|
| 93,469 | 4 | 41 | 27 | 379 | 3 | 17 | 29 | 235 | 63 | 672 |
| 93,470 | 4 | 42 | 29 | 375 | 3 | 17 | 29 | 233 | 65 | 667 |
| 93,471 | 4 | 39 | 31 | 347 | 3 | 16 | 29 | 213 | 67 | 615 |
| 93,472 | 4 | 39 | 31 | 347 | 3 | 15 | 29 | 214 | 67 | 615 |
| 93,473 | 4 | 39 | 31 | 355 | 3 | 16 | 29 | 215 | 67 | 625 |
| 93,474 | 4 | 39 | 35 | 354 | 3 | 16 | 29 | 216 | 71 | 625 |
| 93,475 | 4 | 39 | 35 | 354 | 3 | 16 | 29 | 215 | 71 | 624 |
| 93,476 | 5 | 40 | 42 | 359 | 3 | 18 | 30 | 218 | 80 | 635 |
| 93,477 | 5 | 40 | 42 | 367 | 3 | 19 | 30 | 233 | 80 | 659 |
| 93,478 | 5 | 40 | 43 | 378 | 3 | 20 | 32 | 241 | 83 | 679 |
| 93,479 | 5 | 40 | 43 | 376 | 3 | 21 | 32 | 237 | 83 | 674 |
| 93,480 | 5 | 44 | 43 | 420 | 3 | 27 | 32 | 270 | 83 | 761 |
| 93,481 | 5 | 41 | 43 | 431 | 3 | 27 | 32 | 276 | 83 | 775 |
| 93,482 | 5 | 37 | 43 | 417 | 3 | 25 | 31 | 249 | 82 | 728 |
| 93,483 | 5 | 41 | 43 | 444 | 3 | 23 | 30 | 291 | 81 | 799 |
| 93,484 | 5 | 28 | 43 | 397 | 3 | 22 | 29 | 267 | 80 | 714 |
| 93,485 | 5 | 33 | 43 | 469 | 3 | 23 | 29 | 294 | 80 | 819 |
| 93,486 | 6 | 34 | 43 | 485 | 3 | 23 | 31 | 306 | 83 | 848 |
| 93,487 | 6 | 34 | 42 | 498 | 3 | 24 | 31 | 315 | 82 | 871 |
| 93,488 | 6 | 33 | 39 | 503 | 3 | 24 | 30 | 316 | 78 | 876 |
| 93,489 | 6 | 32 | 36 | 483 | 2 | 24 | 30 | 311 | 74 | 850 |
| 93,490 | 6 | 32 | 35 | 485 | 2 | 23 | 30 | 311 | 73 | 851 |
| 93,491 | 6 | 32 | 35 | 486 | 2 | 23 | 30 | 311 | 73 | 852 |
| 93,492 | 6 | 32 | 33 | 487 | 2 | 24 | 29 | 308 | 70 | 851 |
| 93,493 | 5 | 32 | 33 | 487 | 2 | 24 | 29 | 307 | 69 | 850 |
| 93,494 | 6 | 32 | 35 | 485 | 2 | 24 | 30 | 305 | 73 | 846 |
| 93,495 | 6 | 31 | 35 | 489 | 2 | 24 | 30 | 307 | 73 | 851 |
| 93,496 | 6 | 30 | 34 | 489 | 2 | 24 | 30 | 307 | 72 | 850 |
| 93,497 | 6 | 29 | 33 | 493 | 2 | 26 | 29 | 311 | 70 | 859 |
| 93,498 | 6 | 29 | 33 | 494 | 2 | 26 | 28 | 313 | 69 | 862 |
| 93,499 | 6 | 29 | 33 | 496 | 2 | 25 | 28 | 315 | 69 | 865 |
| 93,500 | 6 | 29 | 35 | 448 | 2 | 21 | 28 | 293 | 71 | 791 |
| 93,501 | 6 | 29 | 35 | 453 | 2 | 21 | 28 | 293 | 71 | 796 |
| 93,502 | 6 | 29 | 34 | 460 | 2 | 21 | 26 | 298 | 68 | 808 |
| 93,503 | 6 | 27 | 32 | 412 | 2 | 21 | 25 | 287 | 65 | 747 |
| 93,504 | 6 | 27 | 32 | 404 | 2 | 21 | 25 | 288 | 65 | 740 |
| 93,505 | 6 | 27 | 32 | 411 | 2 | 21 | 24 | 290 | 64 | 749 |
| 93,506 | 6 | 27 | 32 | 411 | 2 | 21 | 23 | 290 | 63 | 749 |
| 93,507 | 5 | 28 | 33 | 411 | 2 | 22 | 25 | 290 | 65 | 751 |
| 93,508 | 5 | 28 | 34 | 410 | 2 | 22 | 27 | 288 | 68 | 748 |
| 93,509 | 5 | 28 | 32 | 410 | 2 | 22 | 24 | 288 | 63 | 748 |

|        |   |    |    |     |   |    |    |     |    |     |
|--------|---|----|----|-----|---|----|----|-----|----|-----|
| 93,510 | 5 | 25 | 32 | 369 | 2 | 21 | 22 | 270 | 61 | 685 |
| 93,511 | 5 | 25 | 32 | 371 | 2 | 21 | 22 | 269 | 61 | 686 |
| 93,512 | 5 | 25 | 32 | 367 | 2 | 21 | 22 | 268 | 61 | 681 |
| 93,513 | 5 | 23 | 31 | 362 | 2 | 21 | 22 | 269 | 60 | 675 |
| 93,514 | 5 | 21 | 31 | 341 | 2 | 21 | 22 | 260 | 60 | 643 |
| 93,515 | 5 | 21 | 31 | 343 | 2 | 21 | 22 | 262 | 60 | 647 |
| 93,516 | 3 | 21 | 25 | 343 | 0 | 21 | 10 | 262 | 38 | 647 |
| 93,517 | 3 | 21 | 25 | 342 | 0 | 21 | 10 | 262 | 38 | 646 |
| 93,518 | 3 | 21 | 25 | 341 | 0 | 21 | 10 | 262 | 38 | 645 |
| 93,519 | 4 | 21 | 25 | 338 | 0 | 21 | 10 | 262 | 39 | 642 |
| 93,520 | 4 | 20 | 23 | 334 | 0 | 21 | 10 | 258 | 37 | 633 |
| 93,521 | 4 | 20 | 21 | 334 | 0 | 21 | 10 | 258 | 35 | 633 |
| 93,522 | 4 | 20 | 28 | 330 | 1 | 21 | 15 | 250 | 48 | 621 |
| 93,523 | 4 | 20 | 29 | 328 | 1 | 21 | 17 | 249 | 51 | 618 |
| 93,524 | 4 | 20 | 27 | 311 | 1 | 20 | 19 | 245 | 51 | 596 |
| 93,525 | 4 | 20 | 26 | 311 | 1 | 19 | 22 | 245 | 53 | 595 |
| 93,526 | 4 | 20 | 26 | 311 | 1 | 19 | 22 | 246 | 53 | 596 |
| 93,527 | 3 | 19 | 22 | 308 | 2 | 17 | 24 | 241 | 51 | 585 |
| 93,528 | 3 | 19 | 24 | 301 | 2 | 16 | 26 | 226 | 55 | 562 |
| 93,529 | 3 | 19 | 25 | 291 | 2 | 15 | 25 | 217 | 55 | 542 |
| 93,530 | 3 | 19 | 25 | 285 | 2 | 14 | 25 | 215 | 55 | 533 |
| 93,531 | 3 | 14 | 27 | 238 | 2 | 8  | 25 | 176 | 57 | 436 |
| 93,532 | 3 | 14 | 36 | 225 | 2 | 7  | 35 | 166 | 76 | 412 |
| 93,533 | 3 | 9  | 37 | 189 | 2 | 6  | 36 | 111 | 78 | 315 |
| 93,534 | 3 | 9  | 37 | 189 | 2 | 6  | 36 | 111 | 78 | 315 |
| 93,535 | 3 | 8  | 42 | 177 | 2 | 6  | 36 | 100 | 83 | 291 |
| 93,536 | 3 | 2  | 45 | 83  | 2 | 5  | 36 | 50  | 86 | 140 |
| 93,537 | 2 | 4  | 52 | 68  | 2 | 4  | 38 | 41  | 94 | 117 |
| 93,538 | 2 | 4  | 53 | 59  | 2 | 4  | 41 | 35  | 98 | 102 |
| 93,539 | 2 | 4  | 53 | 59  | 2 | 4  | 41 | 35  | 98 | 102 |
| 93,540 | 2 | 4  | 52 | 60  | 2 | 4  | 41 | 35  | 97 | 103 |
| 93,541 | 1 | 3  | 50 | 57  | 2 | 4  | 40 | 34  | 93 | 98  |
| 93,542 | 1 | 3  | 50 | 56  | 2 | 4  | 40 | 34  | 93 | 97  |
| 93,543 | 1 | 3  | 50 | 53  | 2 | 3  | 40 | 33  | 93 | 92  |
| 93,544 | 1 | 3  | 50 | 50  | 2 | 3  | 40 | 31  | 93 | 87  |
| 93,545 | 1 | 3  | 50 | 53  | 2 | 3  | 40 | 31  | 93 | 90  |
| 93,546 | 1 | 3  | 50 | 51  | 2 | 3  | 40 | 27  | 93 | 84  |
| 93,547 | 1 | 4  | 50 | 62  | 2 | 3  | 40 | 34  | 93 | 103 |
| 93,548 | 1 | 4  | 50 | 58  | 2 | 1  | 40 | 31  | 93 | 94  |
| 93,549 | 1 | 4  | 48 | 56  | 2 | 1  | 40 | 30  | 91 | 91  |
| 93,550 | 1 | 4  | 48 | 55  | 2 | 1  | 40 | 27  | 91 | 87  |

|        |   |   |    |     |   |   |    |    |     |     |
|--------|---|---|----|-----|---|---|----|----|-----|-----|
| 93,551 | 2 | 4 | 49 | 51  | 2 | 1 | 40 | 27 | 93  | 83  |
| 93,552 | 2 | 4 | 49 | 52  | 2 | 1 | 40 | 28 | 93  | 85  |
| 93,553 | 2 | 4 | 49 | 45  | 2 | 1 | 40 | 25 | 93  | 75  |
| 93,554 | 3 | 4 | 49 | 48  | 2 | 1 | 40 | 24 | 94  | 77  |
| 93,555 | 3 | 4 | 50 | 56  | 2 | 1 | 40 | 24 | 95  | 85  |
| 93,556 | 3 | 4 | 50 | 51  | 2 | 1 | 40 | 22 | 95  | 78  |
| 93,557 | 3 | 4 | 50 | 51  | 2 | 1 | 40 | 23 | 95  | 79  |
| 93,558 | 3 | 3 | 48 | 51  | 2 | 0 | 38 | 23 | 91  | 77  |
| 93,559 | 4 | 3 | 47 | 48  | 2 | 0 | 36 | 23 | 89  | 74  |
| 93,560 | 4 | 3 | 46 | 48  | 2 | 0 | 36 | 23 | 88  | 74  |
| 93,561 | 4 | 3 | 46 | 48  | 2 | 0 | 36 | 23 | 88  | 74  |
| 93,562 | 4 | 3 | 46 | 46  | 2 | 0 | 36 | 23 | 88  | 72  |
| 93,563 | 4 | 3 | 47 | 47  | 2 | 0 | 36 | 23 | 89  | 73  |
| 93,564 | 4 | 3 | 47 | 47  | 2 | 0 | 36 | 23 | 89  | 73  |
| 93,565 | 4 | 3 | 47 | 45  | 2 | 0 | 36 | 22 | 89  | 70  |
| 93,566 | 4 | 3 | 47 | 47  | 2 | 0 | 36 | 23 | 89  | 73  |
| 93,567 | 4 | 3 | 47 | 47  | 2 | 0 | 36 | 23 | 89  | 73  |
| 93,568 | 4 | 3 | 47 | 47  | 2 | 0 | 36 | 24 | 89  | 74  |
| 93,569 | 4 | 3 | 47 | 48  | 2 | 0 | 37 | 27 | 90  | 78  |
| 93,570 | 3 | 3 | 47 | 48  | 2 | 0 | 37 | 27 | 89  | 78  |
| 93,571 | 3 | 3 | 48 | 49  | 2 | 0 | 37 | 28 | 90  | 80  |
| 93,572 | 3 | 3 | 44 | 49  | 1 | 0 | 37 | 28 | 85  | 80  |
| 93,573 | 3 | 3 | 41 | 49  | 1 | 0 | 33 | 27 | 78  | 79  |
| 93,574 | 3 | 3 | 61 | 51  | 3 | 0 | 46 | 27 | 113 | 81  |
| 93,575 | 4 | 3 | 68 | 51  | 3 | 0 | 47 | 27 | 122 | 81  |
| 93,576 | 4 | 3 | 77 | 53  | 3 | 0 | 48 | 27 | 132 | 83  |
| 93,577 | 4 | 5 | 81 | 54  | 3 | 0 | 52 | 30 | 140 | 89  |
| 93,578 | 4 | 5 | 79 | 52  | 2 | 0 | 50 | 30 | 135 | 87  |
| 93,579 | 4 | 5 | 77 | 57  | 2 | 0 | 48 | 33 | 131 | 95  |
| 93,580 | 4 | 5 | 75 | 56  | 2 | 0 | 47 | 33 | 128 | 94  |
| 93,581 | 4 | 5 | 73 | 59  | 2 | 0 | 47 | 33 | 126 | 97  |
| 93,582 | 4 | 7 | 73 | 68  | 2 | 1 | 47 | 37 | 126 | 113 |
| 93,583 | 4 | 7 | 64 | 69  | 2 | 1 | 37 | 38 | 107 | 115 |
| 93,584 | 4 | 7 | 63 | 86  | 2 | 2 | 36 | 42 | 105 | 137 |
| 93,585 | 4 | 7 | 62 | 87  | 2 | 2 | 36 | 43 | 104 | 139 |
| 93,586 | 4 | 8 | 58 | 98  | 2 | 3 | 36 | 44 | 100 | 153 |
| 93,587 | 4 | 8 | 55 | 99  | 2 | 3 | 35 | 45 | 96  | 155 |
| 93,588 | 4 | 6 | 48 | 100 | 2 | 3 | 32 | 46 | 86  | 155 |
| 93,589 | 4 | 6 | 52 | 101 | 2 | 3 | 32 | 46 | 90  | 156 |
| 93,590 | 4 | 6 | 52 | 101 | 2 | 3 | 32 | 46 | 90  | 156 |
| 93,591 | 4 | 6 | 53 | 97  | 2 | 3 | 32 | 46 | 91  | 152 |

|        |   |    |    |     |   |    |    |     |     |     |
|--------|---|----|----|-----|---|----|----|-----|-----|-----|
| 93,592 | 4 | 6  | 53 | 98  | 2 | 3  | 32 | 46  | 91  | 153 |
| 93,593 | 4 | 7  | 53 | 100 | 2 | 3  | 33 | 47  | 92  | 157 |
| 93,594 | 4 | 8  | 53 | 104 | 2 | 3  | 33 | 50  | 92  | 165 |
| 93,595 | 4 | 9  | 53 | 126 | 2 | 4  | 33 | 69  | 92  | 208 |
| 93,596 | 4 | 10 | 62 | 121 | 2 | 4  | 33 | 71  | 101 | 206 |
| 93,597 | 4 | 18 | 62 | 135 | 2 | 6  | 33 | 76  | 101 | 235 |
| 93,598 | 4 | 17 | 62 | 125 | 2 | 6  | 33 | 70  | 101 | 218 |
| 93,599 | 4 | 17 | 62 | 128 | 2 | 6  | 34 | 70  | 102 | 221 |
| 93,600 | 4 | 18 | 62 | 132 | 2 | 7  | 34 | 73  | 102 | 230 |
| 93,601 | 4 | 18 | 62 | 131 | 2 | 7  | 34 | 73  | 102 | 229 |
| 93,602 | 4 | 18 | 61 | 133 | 2 | 7  | 34 | 73  | 101 | 231 |
| 93,603 | 4 | 18 | 61 | 137 | 2 | 7  | 34 | 81  | 101 | 243 |
| 93,604 | 3 | 18 | 61 | 140 | 2 | 10 | 34 | 81  | 100 | 249 |
| 93,605 | 3 | 18 | 61 | 141 | 2 | 10 | 34 | 84  | 100 | 253 |
| 93,606 | 5 | 18 | 60 | 134 | 2 | 10 | 34 | 83  | 101 | 245 |
| 93,607 | 5 | 18 | 60 | 146 | 2 | 12 | 34 | 90  | 101 | 266 |
| 93,608 | 5 | 19 | 60 | 148 | 2 | 12 | 34 | 90  | 101 | 269 |
| 93,609 | 5 | 19 | 60 | 147 | 2 | 12 | 34 | 89  | 101 | 267 |
| 93,610 | 4 | 19 | 61 | 147 | 2 | 13 | 34 | 90  | 101 | 269 |
| 93,611 | 4 | 19 | 61 | 148 | 2 | 14 | 34 | 91  | 101 | 272 |
| 93,612 | 4 | 20 | 61 | 150 | 2 | 14 | 35 | 91  | 102 | 275 |
| 93,613 | 4 | 20 | 60 | 151 | 2 | 14 | 35 | 91  | 101 | 276 |
| 93,614 | 4 | 20 | 60 | 150 | 2 | 14 | 35 | 90  | 101 | 274 |
| 93,615 | 4 | 20 | 60 | 150 | 2 | 14 | 35 | 90  | 101 | 274 |
| 93,616 | 4 | 20 | 61 | 148 | 2 | 14 | 35 | 88  | 102 | 270 |
| 93,617 | 4 | 20 | 61 | 149 | 2 | 14 | 35 | 88  | 102 | 271 |
| 93,618 | 4 | 20 | 61 | 149 | 2 | 14 | 35 | 84  | 102 | 267 |
| 93,619 | 4 | 20 | 61 | 149 | 2 | 14 | 34 | 84  | 101 | 267 |
| 93,620 | 4 | 20 | 61 | 151 | 2 | 14 | 34 | 86  | 101 | 271 |
| 93,621 | 4 | 20 | 61 | 171 | 2 | 14 | 34 | 95  | 101 | 300 |
| 93,622 | 4 | 22 | 60 | 179 | 2 | 14 | 34 | 102 | 100 | 317 |
| 93,623 | 4 | 22 | 60 | 196 | 2 | 14 | 33 | 107 | 99  | 339 |
| 93,624 | 4 | 22 | 45 | 204 | 0 | 14 | 27 | 110 | 76  | 350 |
| 93,625 | 4 | 22 | 39 | 209 | 0 | 15 | 18 | 112 | 61  | 358 |
| 93,626 | 3 | 23 | 31 | 209 | 0 | 15 | 15 | 112 | 49  | 359 |
| 93,627 | 3 | 28 | 22 | 213 | 0 | 15 | 11 | 124 | 36  | 380 |
| 93,628 | 3 | 26 | 18 | 217 | 0 | 15 | 7  | 125 | 28  | 383 |
| 93,629 | 3 | 26 | 19 | 210 | 0 | 15 | 6  | 124 | 28  | 375 |
| 93,630 | 3 | 26 | 19 | 213 | 0 | 17 | 6  | 125 | 28  | 381 |
| 93,631 | 3 | 27 | 19 | 222 | 0 | 18 | 6  | 127 | 28  | 394 |
| 93,632 | 3 | 26 | 19 | 210 | 0 | 17 | 6  | 123 | 28  | 376 |

|        |   |    |    |     |   |    |    |     |    |     |
|--------|---|----|----|-----|---|----|----|-----|----|-----|
| 93,633 | 3 | 26 | 19 | 210 | 0 | 17 | 6  | 123 | 28 | 376 |
| 93,634 | 3 | 27 | 19 | 209 | 0 | 17 | 6  | 122 | 28 | 375 |
| 93,635 | 3 | 27 | 19 | 194 | 0 | 16 | 6  | 118 | 28 | 355 |
| 93,636 | 3 | 27 | 19 | 193 | 0 | 16 | 7  | 117 | 29 | 353 |
| 93,637 | 3 | 26 | 19 | 181 | 0 | 15 | 7  | 116 | 29 | 338 |
| 93,638 | 3 | 26 | 24 | 180 | 0 | 15 | 7  | 115 | 34 | 336 |
| 93,639 | 3 | 26 | 21 | 179 | 0 | 15 | 5  | 115 | 29 | 335 |
| 93,640 | 3 | 26 | 21 | 178 | 0 | 15 | 4  | 115 | 28 | 334 |
| 93,641 | 3 | 26 | 23 | 178 | 0 | 15 | 4  | 115 | 30 | 334 |
| 93,642 | 3 | 26 | 23 | 177 | 0 | 15 | 5  | 115 | 31 | 333 |
| 93,643 | 3 | 26 | 25 | 177 | 0 | 15 | 5  | 115 | 33 | 333 |
| 93,644 | 3 | 24 | 27 | 171 | 0 | 15 | 4  | 112 | 34 | 322 |
| 93,645 | 3 | 23 | 27 | 149 | 0 | 14 | 5  | 92  | 35 | 278 |
| 93,646 | 3 | 23 | 27 | 150 | 0 | 14 | 6  | 92  | 36 | 279 |
| 93,647 | 3 | 14 | 18 | 134 | 0 | 12 | 6  | 83  | 27 | 243 |
| 93,648 | 3 | 14 | 18 | 134 | 0 | 12 | 5  | 83  | 26 | 243 |
| 93,649 | 3 | 14 | 18 | 130 | 0 | 12 | 5  | 81  | 26 | 237 |
| 93,650 | 3 | 14 | 18 | 130 | 0 | 12 | 5  | 81  | 26 | 237 |
| 93,651 | 3 | 13 | 18 | 126 | 0 | 11 | 5  | 78  | 26 | 228 |
| 93,652 | 3 | 13 | 21 | 127 | 0 | 11 | 5  | 78  | 29 | 229 |
| 93,653 | 2 | 13 | 21 | 126 | 0 | 11 | 6  | 78  | 29 | 228 |
| 93,654 | 2 | 13 | 21 | 121 | 0 | 11 | 6  | 69  | 29 | 214 |
| 93,655 | 2 | 13 | 21 | 115 | 0 | 8  | 8  | 66  | 31 | 202 |
| 93,656 | 0 | 13 | 22 | 115 | 0 | 8  | 9  | 63  | 31 | 199 |
| 93,657 | 0 | 14 | 22 | 113 | 0 | 8  | 9  | 61  | 31 | 196 |
| 93,658 | 0 | 14 | 25 | 98  | 0 | 6  | 12 | 54  | 37 | 172 |
| 93,659 | 0 | 13 | 29 | 98  | 0 | 6  | 16 | 53  | 45 | 170 |
| 93,660 | 0 | 13 | 29 | 98  | 0 | 6  | 16 | 53  | 45 | 170 |
| 93,661 | 0 | 13 | 28 | 98  | 0 | 5  | 16 | 53  | 44 | 169 |
| 93,662 | 0 | 14 | 28 | 101 | 0 | 4  | 15 | 54  | 43 | 173 |
| 93,663 | 0 | 13 | 28 | 101 | 0 | 4  | 15 | 56  | 43 | 174 |
| 93,664 | 0 | 13 | 28 | 101 | 0 | 4  | 15 | 56  | 43 | 174 |
| 93,665 | 0 | 13 | 28 | 101 | 0 | 4  | 15 | 56  | 43 | 174 |
| 93,666 | 0 | 13 | 28 | 102 | 0 | 4  | 15 | 57  | 43 | 176 |
| 93,667 | 0 | 13 | 27 | 102 | 0 | 4  | 15 | 57  | 42 | 176 |
| 93,668 | 0 | 14 | 30 | 102 | 0 | 4  | 16 | 58  | 46 | 178 |
| 93,669 | 0 | 14 | 30 | 104 | 0 | 4  | 16 | 58  | 46 | 180 |
| 93,670 | 0 | 14 | 30 | 104 | 0 | 4  | 16 | 58  | 46 | 180 |
| 93,671 | 0 | 14 | 30 | 82  | 0 | 4  | 16 | 47  | 46 | 147 |
| 93,672 | 0 | 12 | 30 | 73  | 0 | 4  | 16 | 39  | 46 | 128 |
| 93,673 | 0 | 12 | 30 | 75  | 0 | 4  | 16 | 39  | 46 | 130 |

|        |   |    |    |    |   |   |    |    |    |     |
|--------|---|----|----|----|---|---|----|----|----|-----|
| 93,674 | 0 | 12 | 30 | 53 | 0 | 4 | 16 | 33 | 46 | 102 |
| 93,675 | 0 | 12 | 30 | 53 | 0 | 4 | 16 | 33 | 46 | 102 |
| 93,676 | 0 | 12 | 30 | 58 | 0 | 4 | 16 | 41 | 46 | 115 |
| 93,677 | 0 | 12 | 30 | 72 | 0 | 4 | 16 | 58 | 46 | 146 |
| 93,678 | 0 | 8  | 30 | 67 | 0 | 5 | 16 | 43 | 46 | 123 |
| 93,679 | 0 | 8  | 30 | 78 | 0 | 5 | 16 | 49 | 46 | 140 |
| 93,680 | 0 | 9  | 28 | 83 | 0 | 5 | 16 | 52 | 44 | 149 |
| 93,681 | 0 | 9  | 28 | 80 | 0 | 3 | 16 | 56 | 44 | 148 |
| 93,682 | 0 | 7  | 28 | 72 | 0 | 2 | 16 | 54 | 44 | 135 |
| 93,683 | 0 | 7  | 28 | 72 | 0 | 2 | 16 | 55 | 44 | 136 |
| 93,684 | 0 | 7  | 28 | 72 | 0 | 3 | 16 | 58 | 44 | 140 |
| 93,685 | 0 | 6  | 28 | 72 | 0 | 3 | 16 | 58 | 44 | 139 |
| 93,686 | 0 | 6  | 29 | 71 | 0 | 3 | 15 | 58 | 44 | 138 |
| 93,687 | 0 | 6  | 29 | 71 | 0 | 3 | 15 | 58 | 44 | 138 |
| 93,688 | 0 | 8  | 29 | 72 | 0 | 4 | 15 | 61 | 44 | 145 |
| 93,689 | 0 | 8  | 24 | 72 | 0 | 4 | 15 | 62 | 39 | 146 |
| 93,690 | 0 | 9  | 24 | 79 | 0 | 4 | 15 | 63 | 39 | 155 |
| 93,691 | 0 | 9  | 23 | 85 | 0 | 4 | 15 | 66 | 38 | 164 |
| 93,692 | 0 | 9  | 20 | 85 | 0 | 4 | 15 | 66 | 35 | 164 |
| 93,693 | 0 | 9  | 21 | 85 | 0 | 4 | 14 | 66 | 35 | 164 |
| 93,694 | 0 | 9  | 19 | 85 | 0 | 4 | 14 | 66 | 33 | 164 |
| 93,695 | 0 | 9  | 17 | 85 | 0 | 4 | 14 | 66 | 31 | 164 |
| 93,696 | 0 | 9  | 17 | 85 | 0 | 4 | 13 | 66 | 30 | 164 |
| 93,697 | 0 | 9  | 17 | 85 | 0 | 4 | 12 | 66 | 29 | 164 |
| 93,698 | 0 | 9  | 17 | 85 | 0 | 4 | 12 | 66 | 29 | 164 |
| 93,699 | 0 | 9  | 17 | 85 | 0 | 4 | 12 | 66 | 29 | 164 |
| 93,700 | 0 | 9  | 17 | 85 | 0 | 4 | 12 | 66 | 29 | 164 |
| 93,701 | 0 | 9  | 17 | 85 | 0 | 4 | 12 | 67 | 29 | 165 |
| 93,702 | 0 | 9  | 14 | 84 | 0 | 4 | 12 | 68 | 26 | 165 |
| 93,703 | 0 | 9  | 14 | 83 | 0 | 4 | 11 | 68 | 25 | 164 |
| 93,704 | 1 | 9  | 14 | 83 | 0 | 4 | 11 | 68 | 26 | 164 |
| 93,705 | 1 | 9  | 14 | 83 | 0 | 4 | 11 | 68 | 26 | 164 |
| 93,706 | 1 | 9  | 14 | 83 | 0 | 4 | 9  | 69 | 24 | 165 |
| 93,707 | 1 | 9  | 13 | 83 | 0 | 4 | 8  | 69 | 22 | 165 |
| 93,708 | 1 | 8  | 13 | 83 | 0 | 4 | 8  | 69 | 22 | 164 |
| 93,709 | 1 | 8  | 10 | 83 | 0 | 4 | 5  | 69 | 16 | 164 |
| 93,710 | 1 | 8  | 7  | 81 | 0 | 4 | 1  | 69 | 9  | 162 |
| 93,711 | 1 | 8  | 7  | 81 | 0 | 4 | 1  | 69 | 9  | 162 |
| 93,712 | 1 | 7  | 8  | 78 | 0 | 4 | 1  | 67 | 10 | 156 |
| 93,713 | 1 | 7  | 8  | 80 | 0 | 4 | 1  | 69 | 10 | 160 |
| 93,714 | 1 | 7  | 8  | 87 | 0 | 4 | 1  | 73 | 10 | 171 |

|        |   |    |   |     |   |   |   |     |    |     |
|--------|---|----|---|-----|---|---|---|-----|----|-----|
| 93,715 | 1 | 7  | 8 | 88  | 0 | 6 | 1 | 75  | 10 | 176 |
| 93,716 | 1 | 8  | 8 | 96  | 0 | 6 | 1 | 77  | 10 | 187 |
| 93,717 | 1 | 9  | 8 | 100 | 0 | 6 | 1 | 77  | 10 | 192 |
| 93,718 | 1 | 11 | 8 | 124 | 0 | 8 | 0 | 95  | 9  | 238 |
| 93,719 | 1 | 10 | 5 | 126 | 0 | 8 | 0 | 95  | 6  | 239 |
| 93,720 | 1 | 10 | 5 | 132 | 0 | 8 | 0 | 98  | 6  | 248 |
| 93,721 | 1 | 12 | 5 | 136 | 0 | 8 | 0 | 99  | 6  | 255 |
| 93,722 | 1 | 12 | 5 | 137 | 0 | 8 | 0 | 99  | 6  | 256 |
| 93,723 | 1 | 12 | 5 | 142 | 0 | 8 | 0 | 99  | 6  | 261 |
| 93,724 | 1 | 14 | 5 | 143 | 0 | 8 | 0 | 100 | 6  | 265 |
| 93,725 | 1 | 14 | 5 | 140 | 0 | 8 | 0 | 98  | 6  | 260 |
| 93,726 | 1 | 14 | 5 | 140 | 0 | 8 | 0 | 98  | 6  | 260 |
| 93,727 | 1 | 13 | 5 | 115 | 0 | 7 | 0 | 72  | 6  | 207 |
| 93,728 | 1 | 13 | 5 | 116 | 0 | 7 | 0 | 73  | 6  | 209 |
| 93,729 | 1 | 12 | 5 | 113 | 0 | 6 | 0 | 72  | 6  | 203 |
| 93,730 | 1 | 12 | 6 | 110 | 0 | 6 | 1 | 68  | 8  | 196 |
| 93,731 | 1 | 11 | 6 | 105 | 0 | 6 | 1 | 65  | 8  | 187 |
| 93,732 | 1 | 12 | 7 | 104 | 0 | 6 | 1 | 60  | 9  | 182 |
| 93,733 | 1 | 12 | 7 | 104 | 0 | 6 | 1 | 61  | 9  | 183 |
| 93,734 | 1 | 11 | 6 | 105 | 0 | 6 | 1 | 61  | 8  | 183 |
| 93,735 | 1 | 11 | 6 | 105 | 0 | 5 | 2 | 58  | 9  | 179 |
| 93,736 | 1 | 13 | 6 | 105 | 0 | 5 | 2 | 58  | 9  | 181 |
| 93,737 | 1 | 13 | 6 | 105 | 0 | 5 | 2 | 58  | 9  | 181 |
| 93,738 | 1 | 13 | 6 | 105 | 0 | 5 | 2 | 58  | 9  | 181 |
| 93,739 | 1 | 13 | 6 | 105 | 1 | 4 | 2 | 54  | 10 | 176 |
| 93,740 | 1 | 13 | 5 | 106 | 1 | 4 | 2 | 54  | 9  | 177 |
| 93,741 | 1 | 13 | 5 | 102 | 1 | 4 | 2 | 52  | 9  | 171 |
| 93,742 | 1 | 13 | 6 | 96  | 1 | 4 | 2 | 49  | 10 | 162 |
| 93,743 | 1 | 13 | 6 | 96  | 1 | 4 | 2 | 49  | 10 | 162 |
| 93,744 | 1 | 13 | 5 | 97  | 1 | 4 | 2 | 49  | 9  | 163 |
| 93,745 | 1 | 13 | 6 | 97  | 1 | 4 | 2 | 49  | 10 | 163 |
| 93,746 | 1 | 13 | 6 | 98  | 1 | 4 | 2 | 50  | 10 | 165 |
| 93,747 | 1 | 13 | 6 | 98  | 1 | 4 | 2 | 50  | 10 | 165 |
| 93,748 | 1 | 14 | 6 | 99  | 1 | 4 | 2 | 56  | 10 | 173 |
| 93,749 | 1 | 14 | 6 | 100 | 1 | 4 | 2 | 56  | 10 | 174 |
| 93,750 | 1 | 14 | 6 | 102 | 1 | 4 | 3 | 60  | 11 | 180 |
| 93,751 | 1 | 18 | 6 | 109 | 1 | 5 | 3 | 73  | 11 | 205 |
| 93,752 | 1 | 18 | 6 | 110 | 1 | 5 | 3 | 73  | 11 | 206 |
| 93,753 | 1 | 18 | 6 | 110 | 1 | 5 | 3 | 72  | 11 | 205 |
| 93,754 | 1 | 18 | 6 | 111 | 1 | 5 | 4 | 73  | 12 | 207 |
| 93,755 | 0 | 18 | 6 | 111 | 1 | 5 | 4 | 72  | 11 | 206 |

|        |   |    |    |     |   |    |    |     |    |     |
|--------|---|----|----|-----|---|----|----|-----|----|-----|
| 93,756 | 0 | 18 | 6  | 114 | 1 | 5  | 4  | 71  | 11 | 208 |
| 93,757 | 0 | 18 | 6  | 115 | 1 | 5  | 4  | 73  | 11 | 211 |
| 93,758 | 0 | 18 | 6  | 120 | 1 | 6  | 5  | 76  | 12 | 220 |
| 93,759 | 0 | 19 | 6  | 141 | 1 | 7  | 5  | 88  | 12 | 255 |
| 93,760 | 0 | 20 | 5  | 144 | 1 | 7  | 5  | 89  | 11 | 260 |
| 93,761 | 0 | 20 | 5  | 144 | 1 | 7  | 5  | 90  | 11 | 261 |
| 93,762 | 0 | 20 | 5  | 145 | 1 | 7  | 5  | 92  | 11 | 264 |
| 93,763 | 0 | 24 | 4  | 160 | 1 | 8  | 5  | 107 | 10 | 299 |
| 93,764 | 0 | 24 | 4  | 166 | 1 | 8  | 5  | 109 | 10 | 307 |
| 93,765 | 0 | 24 | 4  | 172 | 1 | 8  | 5  | 116 | 10 | 320 |
| 93,766 | 0 | 27 | 4  | 183 | 1 | 9  | 5  | 129 | 10 | 348 |
| 93,767 | 0 | 26 | 4  | 181 | 1 | 9  | 5  | 135 | 10 | 351 |
| 93,768 | 0 | 25 | 4  | 181 | 1 | 9  | 5  | 134 | 10 | 349 |
| 93,769 | 0 | 23 | 4  | 173 | 1 | 9  | 5  | 146 | 10 | 351 |
| 93,770 | 0 | 23 | 4  | 170 | 1 | 9  | 5  | 147 | 10 | 349 |
| 93,771 | 0 | 23 | 4  | 164 | 1 | 9  | 5  | 144 | 10 | 340 |
| 93,772 | 0 | 22 | 6  | 159 | 1 | 9  | 5  | 144 | 12 | 334 |
| 93,773 | 0 | 29 | 6  | 182 | 1 | 11 | 5  | 157 | 12 | 379 |
| 93,774 | 0 | 28 | 6  | 183 | 1 | 11 | 5  | 159 | 12 | 381 |
| 93,775 | 0 | 26 | 7  | 183 | 1 | 11 | 6  | 158 | 14 | 378 |
| 93,776 | 0 | 26 | 7  | 183 | 1 | 11 | 6  | 158 | 14 | 378 |
| 93,777 | 0 | 26 | 9  | 185 | 1 | 11 | 6  | 158 | 16 | 380 |
| 93,778 | 0 | 26 | 9  | 183 | 1 | 11 | 6  | 156 | 16 | 376 |
| 93,779 | 0 | 26 | 9  | 183 | 1 | 11 | 6  | 156 | 16 | 376 |
| 93,780 | 0 | 26 | 8  | 180 | 1 | 11 | 5  | 154 | 14 | 371 |
| 93,781 | 0 | 26 | 9  | 172 | 1 | 11 | 6  | 152 | 16 | 361 |
| 93,782 | 0 | 25 | 12 | 172 | 1 | 11 | 8  | 151 | 21 | 359 |
| 93,783 | 1 | 25 | 30 | 172 | 3 | 11 | 17 | 150 | 51 | 358 |
| 93,784 | 1 | 25 | 31 | 176 | 3 | 11 | 19 | 155 | 54 | 367 |
| 93,785 | 1 | 25 | 32 | 177 | 3 | 12 | 21 | 158 | 57 | 372 |
| 93,786 | 2 | 25 | 32 | 179 | 3 | 12 | 21 | 159 | 58 | 375 |
| 93,787 | 2 | 24 | 32 | 184 | 3 | 12 | 21 | 162 | 58 | 382 |
| 93,788 | 2 | 24 | 32 | 184 | 3 | 12 | 21 | 162 | 58 | 382 |
| 93,789 | 2 | 24 | 34 | 187 | 3 | 13 | 21 | 162 | 60 | 386 |
| 93,790 | 2 | 22 | 34 | 190 | 2 | 13 | 21 | 162 | 59 | 387 |
| 93,791 | 2 | 23 | 34 | 189 | 2 | 13 | 21 | 162 | 59 | 387 |
| 93,792 | 2 | 22 | 34 | 186 | 2 | 13 | 21 | 163 | 59 | 384 |
| 93,793 | 2 | 22 | 33 | 187 | 2 | 13 | 21 | 163 | 58 | 385 |
| 93,794 | 2 | 22 | 33 | 187 | 2 | 13 | 21 | 164 | 58 | 386 |
| 93,795 | 2 | 22 | 33 | 187 | 2 | 13 | 21 | 164 | 58 | 386 |
| 93,796 | 2 | 22 | 32 | 185 | 2 | 13 | 21 | 157 | 57 | 377 |



|        |   |    |     |     |   |    |    |     |     |     |
|--------|---|----|-----|-----|---|----|----|-----|-----|-----|
| 93,797 | 2 | 22 | 32  | 185 | 2 | 13 | 21 | 157 | 57  | 377 |
| 93,798 | 2 | 22 | 32  | 184 | 2 | 13 | 22 | 157 | 58  | 376 |
| 93,799 | 3 | 22 | 42  | 184 | 2 | 13 | 24 | 157 | 71  | 376 |
| 93,800 | 3 | 22 | 42  | 184 | 2 | 13 | 23 | 153 | 70  | 372 |
| 93,801 | 5 | 22 | 42  | 184 | 2 | 13 | 26 | 153 | 75  | 372 |
| 93,802 | 5 | 18 | 45  | 175 | 2 | 12 | 27 | 138 | 79  | 343 |
| 93,803 | 5 | 18 | 47  | 175 | 2 | 12 | 29 | 138 | 83  | 343 |
| 93,804 | 5 | 19 | 47  | 175 | 2 | 12 | 29 | 138 | 83  | 344 |
| 93,805 | 5 | 19 | 47  | 177 | 2 | 12 | 28 | 138 | 82  | 346 |
| 93,806 | 5 | 19 | 47  | 177 | 2 | 12 | 28 | 137 | 82  | 345 |
| 93,807 | 5 | 19 | 47  | 176 | 2 | 12 | 28 | 137 | 82  | 344 |
| 93,808 | 5 | 19 | 47  | 176 | 2 | 12 | 27 | 135 | 81  | 342 |
| 93,809 | 5 | 19 | 49  | 170 | 2 | 11 | 27 | 133 | 83  | 333 |
| 93,810 | 5 | 21 | 49  | 150 | 2 | 10 | 27 | 124 | 83  | 305 |
| 93,811 | 5 | 21 | 49  | 147 | 2 | 11 | 27 | 125 | 83  | 304 |
| 93,812 | 5 | 22 | 52  | 148 | 2 | 11 | 28 | 125 | 87  | 306 |
| 93,813 | 5 | 22 | 52  | 148 | 2 | 11 | 28 | 127 | 87  | 308 |
| 93,814 | 6 | 18 | 59  | 131 | 2 | 10 | 36 | 110 | 103 | 269 |
| 93,815 | 6 | 24 | 59  | 145 | 2 | 12 | 36 | 119 | 103 | 300 |
| 93,816 | 6 | 24 | 60  | 133 | 2 | 12 | 36 | 108 | 104 | 277 |
| 93,817 | 7 | 21 | 63  | 120 | 4 | 9  | 48 | 94  | 122 | 244 |
| 93,818 | 7 | 21 | 63  | 114 | 4 | 9  | 48 | 87  | 122 | 231 |
| 93,819 | 7 | 22 | 63  | 109 | 4 | 9  | 48 | 86  | 122 | 226 |
| 93,820 | 7 | 22 | 67  | 95  | 4 | 7  | 48 | 57  | 126 | 181 |
| 93,821 | 7 | 22 | 67  | 94  | 4 | 7  | 48 | 55  | 126 | 178 |
| 93,822 | 7 | 23 | 67  | 98  | 4 | 8  | 48 | 61  | 126 | 190 |
| 93,823 | 7 | 23 | 65  | 98  | 4 | 8  | 48 | 63  | 124 | 192 |
| 93,824 | 7 | 16 | 66  | 76  | 4 | 6  | 48 | 50  | 125 | 148 |
| 93,825 | 8 | 16 | 77  | 68  | 4 | 6  | 54 | 49  | 143 | 139 |
| 93,826 | 8 | 16 | 80  | 67  | 4 | 6  | 55 | 49  | 147 | 138 |
| 93,827 | 8 | 16 | 80  | 71  | 4 | 6  | 55 | 50  | 147 | 143 |
| 93,828 | 8 | 17 | 78  | 70  | 4 | 6  | 55 | 53  | 145 | 146 |
| 93,829 | 8 | 17 | 99  | 85  | 4 | 8  | 67 | 62  | 178 | 172 |
| 93,830 | 8 | 17 | 99  | 89  | 4 | 10 | 68 | 68  | 179 | 184 |
| 93,831 | 8 | 17 | 99  | 98  | 4 | 11 | 67 | 74  | 178 | 200 |
| 93,832 | 8 | 18 | 100 | 98  | 4 | 11 | 67 | 74  | 179 | 201 |
| 93,833 | 8 | 18 | 97  | 99  | 4 | 11 | 65 | 74  | 174 | 202 |
| 93,834 | 7 | 18 | 78  | 95  | 2 | 11 | 56 | 69  | 143 | 193 |
| 93,835 | 7 | 18 | 77  | 94  | 2 | 10 | 54 | 66  | 140 | 188 |
| 93,836 | 7 | 20 | 76  | 96  | 2 | 10 | 51 | 70  | 136 | 196 |
| 93,837 | 6 | 20 | 76  | 94  | 2 | 10 | 51 | 69  | 135 | 193 |

|        |   |    |     |     |   |    |    |     |     |     |
|--------|---|----|-----|-----|---|----|----|-----|-----|-----|
| 93,838 | 6 | 20 | 75  | 89  | 2 | 10 | 51 | 66  | 134 | 185 |
| 93,839 | 6 | 20 | 74  | 89  | 2 | 10 | 51 | 66  | 133 | 185 |
| 93,840 | 6 | 20 | 74  | 86  | 2 | 9  | 51 | 66  | 133 | 181 |
| 93,841 | 6 | 19 | 76  | 83  | 2 | 9  | 52 | 66  | 136 | 177 |
| 93,842 | 6 | 19 | 76  | 83  | 2 | 9  | 52 | 66  | 136 | 177 |
| 93,843 | 6 | 19 | 76  | 82  | 2 | 9  | 52 | 65  | 136 | 175 |
| 93,844 | 6 | 19 | 76  | 80  | 2 | 9  | 52 | 65  | 136 | 173 |
| 93,845 | 6 | 19 | 76  | 80  | 2 | 9  | 52 | 65  | 136 | 173 |
| 93,846 | 6 | 18 | 76  | 80  | 2 | 9  | 52 | 65  | 136 | 172 |
| 93,847 | 6 | 18 | 77  | 80  | 2 | 9  | 52 | 65  | 137 | 172 |
| 93,848 | 6 | 18 | 77  | 78  | 2 | 9  | 52 | 65  | 137 | 170 |
| 93,849 | 6 | 18 | 77  | 78  | 2 | 9  | 51 | 65  | 136 | 170 |
| 93,850 | 5 | 18 | 67  | 78  | 2 | 9  | 49 | 66  | 123 | 171 |
| 93,851 | 5 | 19 | 68  | 78  | 2 | 9  | 49 | 68  | 124 | 174 |
| 93,852 | 3 | 19 | 68  | 78  | 2 | 9  | 46 | 69  | 119 | 175 |
| 93,853 | 3 | 19 | 66  | 79  | 2 | 9  | 46 | 69  | 117 | 176 |
| 93,854 | 3 | 20 | 65  | 81  | 2 | 9  | 44 | 70  | 114 | 180 |
| 93,855 | 3 | 19 | 65  | 81  | 2 | 9  | 44 | 70  | 114 | 179 |
| 93,856 | 3 | 19 | 67  | 79  | 2 | 9  | 46 | 70  | 118 | 177 |
| 93,857 | 3 | 19 | 72  | 80  | 2 | 9  | 46 | 72  | 123 | 180 |
| 93,858 | 3 | 20 | 72  | 80  | 2 | 9  | 45 | 72  | 122 | 181 |
| 93,859 | 3 | 20 | 78  | 80  | 2 | 9  | 47 | 72  | 130 | 181 |
| 93,860 | 3 | 20 | 82  | 83  | 2 | 9  | 49 | 77  | 136 | 189 |
| 93,861 | 3 | 21 | 91  | 133 | 3 | 13 | 62 | 117 | 159 | 284 |
| 93,862 | 4 | 20 | 102 | 153 | 3 | 12 | 73 | 131 | 182 | 316 |
| 93,863 | 4 | 21 | 102 | 161 | 3 | 14 | 73 | 133 | 182 | 329 |
| 93,864 | 3 | 22 | 103 | 163 | 3 | 14 | 72 | 131 | 181 | 330 |
| 93,865 | 3 | 22 | 103 | 165 | 3 | 14 | 70 | 131 | 179 | 332 |
| 93,866 | 2 | 17 | 101 | 147 | 1 | 12 | 58 | 126 | 162 | 302 |
| 93,867 | 2 | 17 | 101 | 151 | 1 | 12 | 58 | 128 | 162 | 308 |
| 93,868 | 2 | 17 | 101 | 152 | 1 | 12 | 58 | 130 | 162 | 311 |
| 93,869 | 2 | 18 | 102 | 152 | 1 | 12 | 58 | 130 | 163 | 312 |
| 93,870 | 2 | 17 | 98  | 150 | 1 | 12 | 58 | 129 | 159 | 308 |
| 93,871 | 2 | 17 | 98  | 152 | 1 | 12 | 58 | 129 | 159 | 310 |
| 93,872 | 2 | 16 | 97  | 146 | 1 | 11 | 58 | 123 | 158 | 296 |
| 93,873 | 2 | 16 | 96  | 148 | 1 | 11 | 58 | 121 | 157 | 296 |
| 93,874 | 2 | 17 | 96  | 151 | 1 | 11 | 57 | 123 | 156 | 302 |
| 93,875 | 1 | 18 | 86  | 150 | 1 | 11 | 54 | 123 | 142 | 302 |
| 93,876 | 1 | 18 | 85  | 150 | 1 | 11 | 51 | 122 | 138 | 301 |
| 93,877 | 1 | 18 | 82  | 150 | 1 | 11 | 51 | 122 | 135 | 301 |
| 93,878 | 1 | 18 | 63  | 146 | 1 | 11 | 40 | 121 | 105 | 296 |

|        |    |    |     |     |    |   |     |     |     |     |
|--------|----|----|-----|-----|----|---|-----|-----|-----|-----|
| 93,879 | 1  | 17 | 62  | 130 | 1  | 9 | 38  | 109 | 102 | 265 |
| 93,880 | 1  | 17 | 61  | 130 | 1  | 9 | 38  | 109 | 101 | 265 |
| 93,881 | 1  | 17 | 65  | 127 | 1  | 7 | 38  | 103 | 105 | 254 |
| 93,882 | 1  | 16 | 63  | 118 | 1  | 6 | 38  | 97  | 103 | 237 |
| 93,883 | 1  | 16 | 74  | 117 | 1  | 6 | 39  | 97  | 115 | 236 |
| 93,884 | 1  | 16 | 78  | 116 | 1  | 6 | 42  | 97  | 122 | 235 |
| 93,885 | 2  | 14 | 85  | 114 | 3  | 6 | 49  | 93  | 139 | 227 |
| 93,886 | 2  | 14 | 85  | 114 | 3  | 6 | 49  | 93  | 139 | 227 |
| 93,887 | 6  | 14 | 87  | 114 | 5  | 6 | 53  | 93  | 151 | 227 |
| 93,888 | 6  | 14 | 87  | 114 | 5  | 6 | 53  | 93  | 151 | 227 |
| 93,889 | 8  | 14 | 104 | 114 | 9  | 6 | 68  | 93  | 189 | 227 |
| 93,890 | 9  | 14 | 130 | 114 | 19 | 6 | 91  | 93  | 249 | 227 |
| 93,891 | 9  | 14 | 135 | 113 | 19 | 6 | 96  | 93  | 259 | 226 |
| 93,892 | 9  | 14 | 134 | 113 | 19 | 6 | 96  | 94  | 258 | 227 |
| 93,893 | 10 | 14 | 148 | 113 | 20 | 6 | 116 | 94  | 294 | 227 |
| 93,894 | 10 | 15 | 149 | 113 | 20 | 6 | 117 | 94  | 296 | 228 |
| 93,895 | 10 | 15 | 149 | 114 | 20 | 6 | 117 | 94  | 296 | 229 |
| 93,896 | 10 | 15 | 149 | 114 | 20 | 6 | 117 | 94  | 296 | 229 |
| 93,897 | 10 | 15 | 151 | 116 | 20 | 6 | 119 | 95  | 300 | 232 |
| 93,898 | 10 | 15 | 150 | 116 | 20 | 6 | 119 | 95  | 299 | 232 |
| 93,899 | 10 | 14 | 151 | 120 | 20 | 6 | 120 | 92  | 301 | 232 |
| 93,900 | 10 | 14 | 152 | 121 | 20 | 6 | 120 | 97  | 302 | 238 |
| 93,901 | 10 | 14 | 159 | 121 | 20 | 6 | 121 | 97  | 310 | 238 |
| 93,902 | 10 | 15 | 158 | 124 | 20 | 6 | 121 | 97  | 309 | 242 |
| 93,903 | 10 | 14 | 167 | 121 | 20 | 6 | 135 | 95  | 332 | 236 |
| 93,904 | 11 | 14 | 169 | 121 | 20 | 6 | 135 | 95  | 335 | 236 |
| 93,905 | 11 | 14 | 168 | 122 | 20 | 6 | 135 | 95  | 334 | 237 |
| 93,906 | 11 | 14 | 167 | 125 | 20 | 6 | 133 | 96  | 331 | 241 |
| 93,907 | 11 | 15 | 165 | 134 | 20 | 6 | 133 | 103 | 329 | 258 |
| 93,908 | 11 | 15 | 162 | 131 | 20 | 6 | 133 | 101 | 326 | 253 |
| 93,909 | 11 | 14 | 168 | 131 | 21 | 6 | 156 | 101 | 356 | 252 |
| 93,910 | 11 | 14 | 168 | 134 | 21 | 6 | 157 | 102 | 357 | 256 |
| 93,911 | 11 | 10 | 163 | 80  | 20 | 2 | 153 | 52  | 347 | 144 |
| 93,912 | 11 | 10 | 162 | 83  | 20 | 2 | 147 | 53  | 340 | 148 |
| 93,913 | 10 | 10 | 149 | 67  | 20 | 3 | 136 | 40  | 315 | 120 |
| 93,914 | 10 | 8  | 148 | 64  | 20 | 1 | 136 | 37  | 314 | 110 |
| 93,915 | 10 | 7  | 145 | 59  | 20 | 1 | 136 | 36  | 311 | 103 |
| 93,916 | 10 | 6  | 139 | 56  | 20 | 1 | 131 | 30  | 300 | 93  |
| 93,917 | 10 | 6  | 138 | 53  | 20 | 1 | 131 | 28  | 299 | 88  |
| 93,918 | 10 | 6  | 138 | 52  | 20 | 1 | 131 | 26  | 299 | 85  |
| 93,919 | 10 | 5  | 137 | 52  | 20 | 1 | 131 | 25  | 298 | 83  |

|        |    |   |     |    |    |   |     |    |     |     |
|--------|----|---|-----|----|----|---|-----|----|-----|-----|
| 93,920 | 10 | 5 | 137 | 53 | 20 | 1 | 131 | 25 | 298 | 84  |
| 93,921 | 11 | 5 | 142 | 54 | 20 | 1 | 133 | 25 | 306 | 85  |
| 93,922 | 11 | 5 | 142 | 52 | 20 | 1 | 133 | 25 | 306 | 83  |
| 93,923 | 11 | 5 | 142 | 52 | 20 | 2 | 133 | 25 | 306 | 84  |
| 93,924 | 11 | 5 | 142 | 50 | 20 | 2 | 133 | 24 | 306 | 81  |
| 93,925 | 11 | 4 | 143 | 48 | 20 | 2 | 133 | 22 | 307 | 76  |
| 93,926 | 11 | 3 | 143 | 47 | 20 | 2 | 136 | 22 | 310 | 74  |
| 93,927 | 14 | 3 | 159 | 47 | 21 | 2 | 144 | 22 | 338 | 74  |
| 93,928 | 14 | 3 | 159 | 48 | 21 | 2 | 144 | 22 | 338 | 75  |
| 93,929 | 14 | 3 | 159 | 48 | 21 | 2 | 144 | 22 | 338 | 75  |
| 93,930 | 14 | 3 | 159 | 48 | 21 | 2 | 145 | 22 | 339 | 75  |
| 93,931 | 14 | 3 | 157 | 49 | 21 | 2 | 144 | 22 | 336 | 76  |
| 93,932 | 14 | 3 | 157 | 48 | 21 | 2 | 145 | 22 | 337 | 75  |
| 93,933 | 14 | 3 | 157 | 48 | 21 | 2 | 145 | 22 | 337 | 75  |
| 93,934 | 14 | 3 | 146 | 50 | 21 | 2 | 144 | 22 | 325 | 77  |
| 93,935 | 14 | 3 | 142 | 51 | 21 | 2 | 141 | 22 | 318 | 78  |
| 93,936 | 13 | 3 | 136 | 54 | 19 | 2 | 134 | 22 | 302 | 81  |
| 93,937 | 13 | 5 | 137 | 64 | 19 | 3 | 134 | 39 | 303 | 111 |
| 93,938 | 9  | 5 | 135 | 71 | 17 | 4 | 130 | 45 | 291 | 125 |
| 93,939 | 7  | 5 | 129 | 71 | 14 | 4 | 118 | 46 | 268 | 126 |
| 93,940 | 7  | 5 | 119 | 72 | 13 | 4 | 117 | 46 | 256 | 127 |
| 93,941 | 6  | 5 | 93  | 73 | 3  | 4 | 94  | 48 | 196 | 130 |
| 93,942 | 6  | 6 | 87  | 78 | 3  | 4 | 88  | 50 | 184 | 138 |
| 93,943 | 5  | 7 | 73  | 81 | 2  | 5 | 68  | 55 | 148 | 148 |
| 93,944 | 5  | 7 | 72  | 83 | 2  | 5 | 67  | 56 | 146 | 151 |
| 93,945 | 5  | 6 | 72  | 84 | 2  | 5 | 66  | 57 | 145 | 152 |
| 93,946 | 5  | 6 | 79  | 83 | 2  | 5 | 67  | 59 | 153 | 153 |
| 93,947 | 5  | 6 | 79  | 82 | 2  | 5 | 68  | 58 | 154 | 151 |
| 93,948 | 5  | 6 | 79  | 82 | 2  | 5 | 68  | 58 | 154 | 151 |
| 93,949 | 5  | 6 | 79  | 82 | 2  | 5 | 67  | 58 | 153 | 151 |
| 93,950 | 5  | 6 | 78  | 78 | 2  | 5 | 67  | 58 | 152 | 147 |
| 93,951 | 5  | 6 | 80  | 77 | 2  | 5 | 68  | 54 | 155 | 142 |
| 93,952 | 5  | 5 | 75  | 75 | 2  | 5 | 68  | 54 | 150 | 139 |
| 93,953 | 5  | 5 | 75  | 76 | 2  | 5 | 68  | 54 | 150 | 140 |
| 93,954 | 5  | 5 | 67  | 76 | 2  | 5 | 54  | 55 | 128 | 141 |
| 93,955 | 4  | 5 | 64  | 76 | 2  | 5 | 53  | 55 | 123 | 141 |
| 93,956 | 4  | 5 | 64  | 76 | 2  | 5 | 53  | 55 | 123 | 141 |
| 93,957 | 4  | 4 | 54  | 64 | 1  | 5 | 42  | 48 | 101 | 121 |
| 93,958 | 5  | 4 | 57  | 65 | 1  | 5 | 42  | 47 | 105 | 121 |
| 93,959 | 5  | 4 | 55  | 65 | 1  | 5 | 30  | 47 | 91  | 121 |
| 93,960 | 5  | 6 | 52  | 71 | 1  | 5 | 28  | 51 | 86  | 133 |

|        |   |    |    |     |   |   |    |     |     |     |
|--------|---|----|----|-----|---|---|----|-----|-----|-----|
| 93,961 | 5 | 6  | 52 | 69  | 1 | 5 | 28 | 50  | 86  | 130 |
| 93,962 | 5 | 6  | 49 | 65  | 1 | 5 | 24 | 49  | 79  | 125 |
| 93,963 | 5 | 6  | 49 | 65  | 1 | 5 | 24 | 49  | 79  | 125 |
| 93,964 | 5 | 10 | 49 | 62  | 1 | 4 | 24 | 49  | 79  | 125 |
| 93,965 | 5 | 10 | 49 | 64  | 1 | 5 | 24 | 49  | 79  | 128 |
| 93,966 | 5 | 10 | 50 | 65  | 1 | 5 | 25 | 49  | 81  | 129 |
| 93,967 | 5 | 10 | 50 | 64  | 1 | 5 | 25 | 49  | 81  | 128 |
| 93,968 | 6 | 10 | 53 | 64  | 2 | 5 | 29 | 50  | 90  | 129 |
| 93,969 | 6 | 10 | 53 | 64  | 2 | 5 | 29 | 50  | 90  | 129 |
| 93,970 | 6 | 10 | 55 | 63  | 2 | 5 | 29 | 50  | 92  | 128 |
| 93,971 | 6 | 10 | 55 | 63  | 2 | 5 | 29 | 52  | 92  | 130 |
| 93,972 | 5 | 10 | 50 | 62  | 2 | 5 | 27 | 53  | 84  | 130 |
| 93,973 | 5 | 10 | 50 | 67  | 2 | 5 | 27 | 63  | 84  | 145 |
| 93,974 | 5 | 12 | 52 | 89  | 2 | 8 | 29 | 98  | 88  | 207 |
| 93,975 | 6 | 12 | 60 | 90  | 4 | 8 | 39 | 98  | 109 | 208 |
| 93,976 | 6 | 12 | 74 | 92  | 6 | 8 | 46 | 100 | 132 | 212 |
| 93,977 | 4 | 14 | 60 | 95  | 5 | 8 | 38 | 102 | 107 | 219 |
| 93,978 | 3 | 14 | 58 | 98  | 5 | 8 | 38 | 106 | 104 | 226 |
| 93,979 | 3 | 16 | 75 | 102 | 5 | 8 | 40 | 118 | 123 | 244 |
| 93,980 | 3 | 16 | 75 | 109 | 5 | 8 | 40 | 122 | 123 | 255 |
| 93,981 | 3 | 16 | 78 | 115 | 6 | 8 | 39 | 122 | 126 | 261 |
| 93,982 | 3 | 16 | 78 | 115 | 6 | 8 | 39 | 122 | 126 | 261 |
| 93,983 | 3 | 17 | 77 | 117 | 6 | 8 | 38 | 123 | 124 | 265 |
| 93,984 | 3 | 17 | 77 | 118 | 6 | 8 | 38 | 123 | 124 | 266 |
| 93,985 | 3 | 19 | 77 | 120 | 6 | 8 | 38 | 127 | 124 | 274 |
| 93,986 | 3 | 19 | 77 | 120 | 6 | 8 | 38 | 128 | 124 | 275 |
| 93,987 | 3 | 17 | 76 | 100 | 6 | 6 | 39 | 105 | 124 | 228 |
| 93,988 | 3 | 17 | 75 | 100 | 6 | 6 | 39 | 105 | 123 | 228 |
| 93,989 | 3 | 17 | 75 | 100 | 6 | 6 | 40 | 105 | 124 | 228 |
| 93,990 | 3 | 17 | 74 | 100 | 6 | 6 | 38 | 106 | 121 | 229 |
| 93,991 | 3 | 17 | 74 | 100 | 6 | 6 | 38 | 106 | 121 | 229 |
| 93,992 | 3 | 17 | 74 | 99  | 6 | 6 | 38 | 104 | 121 | 226 |
| 93,993 | 4 | 16 | 74 | 94  | 6 | 6 | 38 | 102 | 122 | 218 |
| 93,994 | 5 | 15 | 74 | 89  | 6 | 5 | 39 | 97  | 124 | 206 |
| 93,995 | 5 | 15 | 72 | 89  | 6 | 5 | 39 | 96  | 122 | 205 |
| 93,996 | 5 | 15 | 72 | 89  | 6 | 5 | 38 | 96  | 121 | 205 |
| 93,997 | 5 | 16 | 65 | 89  | 6 | 5 | 37 | 94  | 113 | 204 |
| 93,998 | 5 | 16 | 65 | 88  | 6 | 5 | 36 | 94  | 112 | 203 |
| 93,999 | 5 | 16 | 65 | 88  | 6 | 5 | 36 | 93  | 112 | 202 |
| 94,000 | 5 | 16 | 65 | 88  | 6 | 5 | 36 | 93  | 112 | 202 |
| 94,001 | 5 | 16 | 65 | 88  | 6 | 5 | 38 | 93  | 114 | 202 |

|        |   |    |    |     |   |   |    |     |     |     |
|--------|---|----|----|-----|---|---|----|-----|-----|-----|
| 94,002 | 5 | 16 | 62 | 89  | 6 | 5 | 37 | 93  | 110 | 203 |
| 94,003 | 5 | 17 | 60 | 88  | 6 | 5 | 36 | 93  | 107 | 203 |
| 94,004 | 5 | 17 | 59 | 90  | 6 | 5 | 36 | 100 | 106 | 212 |
| 94,005 | 5 | 17 | 59 | 92  | 6 | 5 | 36 | 101 | 106 | 215 |
| 94,006 | 5 | 17 | 60 | 93  | 6 | 5 | 36 | 104 | 107 | 219 |
| 94,007 | 5 | 17 | 61 | 94  | 6 | 5 | 37 | 104 | 109 | 220 |
| 94,008 | 5 | 17 | 60 | 95  | 6 | 5 | 37 | 104 | 108 | 221 |
| 94,009 | 4 | 17 | 57 | 94  | 6 | 5 | 37 | 104 | 104 | 220 |
| 94,010 | 4 | 17 | 56 | 95  | 6 | 5 | 37 | 104 | 103 | 221 |
| 94,011 | 4 | 15 | 56 | 88  | 6 | 5 | 36 | 101 | 102 | 209 |
| 94,012 | 4 | 15 | 55 | 88  | 6 | 5 | 36 | 101 | 101 | 209 |
| 94,013 | 4 | 15 | 55 | 88  | 6 | 5 | 36 | 101 | 101 | 209 |
| 94,014 | 4 | 15 | 55 | 89  | 6 | 5 | 36 | 101 | 101 | 210 |
| 94,015 | 4 | 11 | 55 | 81  | 6 | 5 | 36 | 98  | 101 | 195 |
| 94,016 | 4 | 11 | 54 | 77  | 6 | 4 | 35 | 97  | 99  | 189 |
| 94,017 | 4 | 12 | 55 | 77  | 6 | 4 | 35 | 97  | 100 | 190 |
| 94,018 | 3 | 12 | 52 | 77  | 5 | 4 | 31 | 95  | 91  | 188 |
| 94,019 | 3 | 12 | 52 | 77  | 5 | 4 | 31 | 95  | 91  | 188 |
| 94,020 | 3 | 12 | 52 | 77  | 5 | 4 | 31 | 95  | 91  | 188 |
| 94,021 | 3 | 12 | 50 | 77  | 5 | 4 | 31 | 95  | 89  | 188 |
| 94,022 | 3 | 12 | 50 | 81  | 6 | 4 | 31 | 97  | 90  | 194 |
| 94,023 | 3 | 12 | 50 | 99  | 6 | 4 | 31 | 105 | 90  | 220 |
| 94,024 | 3 | 12 | 51 | 101 | 6 | 4 | 31 | 97  | 91  | 214 |
| 94,025 | 3 | 12 | 49 | 83  | 6 | 0 | 29 | 64  | 87  | 159 |
| 94,026 | 2 | 12 | 40 | 82  | 4 | 0 | 19 | 64  | 65  | 158 |
| 94,027 | 2 | 12 | 26 | 80  | 2 | 0 | 9  | 62  | 39  | 154 |
| 94,028 | 2 | 10 | 9  | 74  | 2 | 0 | 7  | 56  | 20  | 140 |
| 94,029 | 2 | 9  | 7  | 69  | 1 | 0 | 7  | 45  | 17  | 123 |
| 94,030 | 2 | 9  | 7  | 69  | 1 | 0 | 7  | 45  | 17  | 123 |
| 94,031 | 2 | 9  | 7  | 62  | 2 | 0 | 7  | 41  | 18  | 112 |
| 94,032 | 2 | 10 | 6  | 55  | 2 | 0 | 7  | 41  | 17  | 106 |
| 94,033 | 2 | 10 | 8  | 55  | 2 | 0 | 8  | 41  | 20  | 106 |
| 94,034 | 2 | 9  | 7  | 53  | 2 | 0 | 8  | 40  | 19  | 102 |
| 94,035 | 2 | 7  | 7  | 48  | 2 | 0 | 9  | 36  | 20  | 91  |
| 94,036 | 2 | 7  | 7  | 48  | 2 | 0 | 9  | 36  | 20  | 91  |
| 94,037 | 2 | 7  | 8  | 48  | 2 | 0 | 8  | 35  | 20  | 90  |
| 94,038 | 2 | 7  | 8  | 48  | 2 | 0 | 8  | 35  | 20  | 90  |
| 94,039 | 2 | 7  | 8  | 48  | 2 | 0 | 8  | 35  | 20  | 90  |
| 94,040 | 2 | 7  | 15 | 47  | 2 | 0 | 7  | 33  | 26  | 87  |
| 94,041 | 2 | 7  | 18 | 47  | 2 | 0 | 7  | 33  | 29  | 87  |
| 94,042 | 6 | 7  | 23 | 47  | 3 | 0 | 12 | 33  | 44  | 87  |

|        |    |    |     |     |    |   |     |    |     |     |
|--------|----|----|-----|-----|----|---|-----|----|-----|-----|
| 94,043 | 7  | 7  | 49  | 46  | 7  | 0 | 16  | 31 | 79  | 84  |
| 94,044 | 7  | 7  | 54  | 46  | 10 | 0 | 19  | 31 | 90  | 84  |
| 94,045 | 7  | 7  | 61  | 46  | 10 | 0 | 23  | 31 | 101 | 84  |
| 94,046 | 9  | 7  | 149 | 46  | 13 | 0 | 51  | 31 | 222 | 84  |
| 94,047 | 9  | 7  | 162 | 46  | 13 | 0 | 53  | 31 | 237 | 84  |
| 94,048 | 10 | 6  | 163 | 46  | 13 | 0 | 57  | 31 | 243 | 83  |
| 94,049 | 10 | 6  | 163 | 46  | 13 | 1 | 57  | 31 | 243 | 84  |
| 94,050 | 12 | 6  | 174 | 48  | 14 | 1 | 63  | 31 | 263 | 86  |
| 94,051 | 12 | 6  | 174 | 49  | 14 | 1 | 61  | 32 | 261 | 88  |
| 94,052 | 12 | 6  | 175 | 50  | 14 | 1 | 61  | 32 | 262 | 89  |
| 94,053 | 12 | 6  | 175 | 75  | 14 | 2 | 63  | 39 | 264 | 122 |
| 94,054 | 12 | 6  | 176 | 82  | 14 | 2 | 64  | 46 | 266 | 136 |
| 94,055 | 12 | 6  | 176 | 84  | 14 | 2 | 64  | 39 | 266 | 131 |
| 94,056 | 13 | 6  | 176 | 92  | 14 | 2 | 65  | 44 | 268 | 144 |
| 94,057 | 13 | 6  | 175 | 92  | 14 | 2 | 65  | 41 | 267 | 141 |
| 94,058 | 15 | 6  | 175 | 94  | 14 | 2 | 64  | 43 | 268 | 145 |
| 94,059 | 15 | 6  | 175 | 93  | 14 | 2 | 63  | 43 | 267 | 144 |
| 94,060 | 18 | 6  | 191 | 93  | 14 | 2 | 88  | 43 | 311 | 144 |
| 94,061 | 21 | 6  | 204 | 93  | 14 | 2 | 101 | 43 | 340 | 144 |
| 94,062 | 21 | 7  | 204 | 95  | 14 | 2 | 101 | 43 | 340 | 147 |
| 94,063 | 22 | 8  | 212 | 108 | 15 | 2 | 110 | 48 | 359 | 166 |
| 94,064 | 22 | 8  | 212 | 108 | 15 | 2 | 110 | 48 | 359 | 166 |
| 94,065 | 23 | 8  | 213 | 108 | 15 | 2 | 117 | 48 | 368 | 166 |
| 94,066 | 24 | 9  | 217 | 114 | 15 | 3 | 120 | 52 | 376 | 178 |
| 94,067 | 24 | 10 | 219 | 126 | 15 | 3 | 121 | 54 | 379 | 193 |
| 94,068 | 24 | 9  | 218 | 126 | 15 | 3 | 122 | 54 | 379 | 192 |
| 94,069 | 26 | 9  | 223 | 130 | 15 | 3 | 130 | 54 | 394 | 196 |
| 94,070 | 30 | 10 | 242 | 130 | 15 | 3 | 135 | 54 | 422 | 197 |
| 94,071 | 30 | 10 | 252 | 130 | 14 | 3 | 140 | 56 | 436 | 199 |
| 94,072 | 33 | 10 | 284 | 127 | 14 | 3 | 156 | 54 | 487 | 194 |
| 94,073 | 33 | 10 | 318 | 109 | 16 | 3 | 168 | 45 | 535 | 167 |
| 94,074 | 34 | 10 | 344 | 109 | 16 | 3 | 176 | 45 | 570 | 167 |
| 94,075 | 34 | 8  | 349 | 98  | 16 | 3 | 180 | 43 | 579 | 152 |
| 94,076 | 34 | 8  | 353 | 98  | 16 | 3 | 184 | 43 | 587 | 152 |
| 94,077 | 34 | 8  | 353 | 98  | 16 | 3 | 184 | 43 | 587 | 152 |
| 94,078 | 34 | 8  | 353 | 99  | 16 | 3 | 184 | 43 | 587 | 153 |
| 94,079 | 34 | 7  | 355 | 100 | 16 | 3 | 184 | 42 | 589 | 152 |
| 94,080 | 34 | 7  | 355 | 100 | 16 | 3 | 184 | 42 | 589 | 152 |
| 94,081 | 34 | 7  | 355 | 100 | 15 | 3 | 184 | 42 | 588 | 152 |
| 94,082 | 34 | 7  | 355 | 100 | 15 | 3 | 184 | 42 | 588 | 152 |
| 94,083 | 34 | 6  | 355 | 101 | 15 | 3 | 184 | 42 | 588 | 152 |

|        |    |    |     |     |    |   |     |     |     |     |
|--------|----|----|-----|-----|----|---|-----|-----|-----|-----|
| 94,084 | 34 | 6  | 353 | 101 | 15 | 3 | 183 | 42  | 585 | 152 |
| 94,085 | 34 | 6  | 353 | 100 | 15 | 3 | 183 | 42  | 585 | 151 |
| 94,086 | 34 | 6  | 353 | 100 | 15 | 3 | 182 | 42  | 584 | 151 |
| 94,087 | 34 | 6  | 352 | 100 | 15 | 3 | 182 | 42  | 583 | 151 |
| 94,088 | 34 | 6  | 352 | 100 | 15 | 3 | 182 | 42  | 583 | 151 |
| 94,089 | 34 | 6  | 352 | 100 | 15 | 3 | 182 | 43  | 583 | 152 |
| 94,090 | 34 | 6  | 352 | 101 | 15 | 4 | 182 | 43  | 583 | 154 |
| 94,091 | 34 | 6  | 345 | 108 | 15 | 4 | 182 | 46  | 576 | 164 |
| 94,092 | 35 | 6  | 342 | 119 | 15 | 4 | 182 | 51  | 574 | 180 |
| 94,093 | 31 | 7  | 337 | 147 | 14 | 5 | 178 | 76  | 560 | 235 |
| 94,094 | 29 | 7  | 311 | 151 | 9  | 6 | 174 | 78  | 523 | 242 |
| 94,095 | 29 | 7  | 307 | 151 | 7  | 6 | 171 | 78  | 514 | 242 |
| 94,096 | 28 | 10 | 300 | 158 | 7  | 6 | 166 | 82  | 501 | 256 |
| 94,097 | 26 | 10 | 212 | 159 | 4  | 6 | 138 | 83  | 380 | 258 |
| 94,098 | 26 | 10 | 202 | 163 | 4  | 6 | 136 | 87  | 368 | 266 |
| 94,099 | 25 | 11 | 202 | 186 | 4  | 6 | 132 | 131 | 363 | 334 |
| 94,100 | 23 | 11 | 191 | 189 | 3  | 5 | 127 | 131 | 344 | 336 |
| 94,101 | 23 | 11 | 191 | 192 | 3  | 5 | 126 | 133 | 343 | 341 |
| 94,102 | 23 | 11 | 190 | 191 | 3  | 5 | 126 | 132 | 342 | 339 |
| 94,103 | 23 | 11 | 190 | 165 | 3  | 4 | 126 | 124 | 342 | 304 |
| 94,104 | 23 | 10 | 195 | 160 | 3  | 4 | 127 | 119 | 348 | 293 |
| 94,105 | 23 | 10 | 194 | 161 | 3  | 4 | 126 | 119 | 346 | 294 |
| 94,106 | 28 | 10 | 224 | 156 | 7  | 4 | 153 | 119 | 412 | 289 |
| 94,107 | 30 | 10 | 235 | 147 | 9  | 4 | 159 | 113 | 433 | 274 |
| 94,108 | 30 | 12 | 235 | 143 | 9  | 4 | 159 | 110 | 433 | 269 |
| 94,109 | 28 | 12 | 234 | 144 | 9  | 4 | 159 | 110 | 430 | 270 |
| 94,110 | 25 | 12 | 219 | 143 | 9  | 4 | 133 | 110 | 386 | 269 |
| 94,111 | 25 | 12 | 219 | 147 | 9  | 4 | 131 | 110 | 384 | 273 |
| 94,112 | 22 | 12 | 209 | 147 | 9  | 4 | 120 | 110 | 360 | 273 |
| 94,113 | 21 | 10 | 205 | 133 | 8  | 4 | 111 | 105 | 345 | 252 |
| 94,114 | 21 | 10 | 205 | 132 | 8  | 4 | 113 | 105 | 347 | 251 |
| 94,115 | 20 | 11 | 204 | 132 | 8  | 4 | 106 | 105 | 338 | 252 |
| 94,116 | 19 | 11 | 203 | 131 | 8  | 4 | 106 | 105 | 336 | 251 |
| 94,117 | 19 | 9  | 201 | 113 | 8  | 3 | 103 | 98  | 331 | 223 |
| 94,118 | 19 | 9  | 205 | 113 | 8  | 3 | 109 | 98  | 341 | 223 |
| 94,119 | 17 | 9  | 200 | 118 | 8  | 3 | 101 | 104 | 326 | 234 |
| 94,120 | 13 | 9  | 181 | 116 | 8  | 3 | 96  | 105 | 298 | 233 |
| 94,121 | 17 | 8  | 199 | 117 | 11 | 3 | 102 | 106 | 329 | 234 |
| 94,122 | 18 | 8  | 191 | 118 | 11 | 3 | 104 | 105 | 324 | 234 |
| 94,123 | 15 | 9  | 159 | 117 | 11 | 3 | 88  | 103 | 273 | 232 |
| 94,124 | 15 | 9  | 125 | 117 | 9  | 3 | 76  | 103 | 225 | 232 |



|        |    |    |     |     |    |   |    |     |     |     |
|--------|----|----|-----|-----|----|---|----|-----|-----|-----|
| 94,125 | 14 | 9  | 99  | 118 | 9  | 3 | 68 | 104 | 190 | 234 |
| 94,126 | 14 | 11 | 93  | 118 | 9  | 3 | 64 | 108 | 180 | 240 |
| 94,127 | 14 | 13 | 89  | 129 | 9  | 5 | 60 | 123 | 172 | 270 |
| 94,128 | 14 | 13 | 89  | 129 | 9  | 5 | 60 | 123 | 172 | 270 |
| 94,129 | 15 | 13 | 89  | 129 | 9  | 5 | 62 | 123 | 175 | 270 |
| 94,130 | 15 | 14 | 90  | 136 | 9  | 5 | 62 | 125 | 176 | 280 |
| 94,131 | 15 | 15 | 91  | 138 | 9  | 5 | 64 | 124 | 179 | 282 |
| 94,132 | 15 | 15 | 90  | 138 | 9  | 5 | 64 | 124 | 178 | 282 |
| 94,133 | 15 | 15 | 91  | 138 | 9  | 5 | 65 | 124 | 180 | 282 |
| 94,134 | 16 | 15 | 96  | 137 | 9  | 5 | 67 | 124 | 188 | 281 |
| 94,135 | 16 | 15 | 96  | 140 | 9  | 5 | 67 | 124 | 188 | 284 |
| 94,136 | 16 | 15 | 97  | 140 | 9  | 5 | 67 | 124 | 189 | 284 |
| 94,137 | 16 | 15 | 98  | 140 | 9  | 5 | 68 | 124 | 191 | 284 |
| 94,138 | 16 | 15 | 100 | 140 | 9  | 5 | 69 | 125 | 194 | 285 |
| 94,139 | 16 | 15 | 101 | 140 | 9  | 5 | 69 | 124 | 195 | 284 |
| 94,140 | 16 | 15 | 102 | 139 | 9  | 4 | 69 | 124 | 196 | 282 |
| 94,141 | 16 | 15 | 102 | 140 | 9  | 4 | 69 | 124 | 196 | 283 |
| 94,142 | 16 | 15 | 102 | 133 | 9  | 4 | 69 | 121 | 196 | 273 |
| 94,143 | 15 | 14 | 103 | 98  | 9  | 2 | 69 | 94  | 196 | 208 |
| 94,144 | 16 | 14 | 108 | 104 | 11 | 3 | 74 | 94  | 209 | 215 |
| 94,145 | 16 | 14 | 110 | 108 | 11 | 4 | 75 | 96  | 212 | 222 |
| 94,146 | 16 | 14 | 109 | 109 | 11 | 4 | 75 | 97  | 211 | 224 |
| 94,147 | 16 | 11 | 110 | 105 | 11 | 4 | 75 | 93  | 212 | 213 |
| 94,148 | 16 | 11 | 107 | 100 | 11 | 4 | 75 | 88  | 209 | 203 |
| 94,149 | 16 | 10 | 107 | 78  | 11 | 4 | 75 | 44  | 209 | 136 |
| 94,150 | 16 | 10 | 107 | 75  | 11 | 4 | 76 | 44  | 210 | 133 |
| 94,151 | 16 | 10 | 107 | 79  | 11 | 4 | 76 | 44  | 210 | 137 |
| 94,152 | 16 | 11 | 107 | 91  | 11 | 5 | 76 | 48  | 210 | 155 |
| 94,153 | 16 | 11 | 107 | 92  | 11 | 5 | 76 | 55  | 210 | 163 |
| 94,154 | 16 | 11 | 107 | 97  | 11 | 5 | 76 | 56  | 210 | 169 |
| 94,155 | 16 | 11 | 105 | 98  | 11 | 5 | 73 | 54  | 205 | 168 |
| 94,156 | 13 | 11 | 93  | 96  | 11 | 5 | 67 | 54  | 184 | 166 |
| 94,157 | 11 | 11 | 74  | 97  | 7  | 6 | 46 | 56  | 138 | 170 |
| 94,158 | 8  | 11 | 62  | 98  | 5  | 6 | 39 | 55  | 114 | 170 |
| 94,159 | 8  | 9  | 62  | 100 | 5  | 6 | 39 | 58  | 114 | 173 |
| 94,160 | 8  | 9  | 62  | 104 | 5  | 6 | 39 | 60  | 114 | 179 |
| 94,161 | 8  | 9  | 61  | 114 | 5  | 6 | 38 | 63  | 112 | 192 |
| 94,162 | 8  | 9  | 59  | 112 | 5  | 6 | 39 | 63  | 111 | 190 |
| 94,163 | 9  | 9  | 64  | 112 | 5  | 6 | 39 | 63  | 117 | 190 |
| 94,164 | 9  | 9  | 60  | 112 | 5  | 6 | 40 | 63  | 114 | 190 |
| 94,165 | 9  | 8  | 61  | 112 | 5  | 6 | 39 | 63  | 114 | 189 |

|        |   |    |    |     |   |   |    |    |     |     |
|--------|---|----|----|-----|---|---|----|----|-----|-----|
| 94,166 | 9 | 8  | 62 | 112 | 6 | 6 | 39 | 63 | 116 | 189 |
| 94,167 | 9 | 8  | 62 | 117 | 6 | 6 | 40 | 66 | 117 | 197 |
| 94,168 | 9 | 8  | 62 | 121 | 6 | 6 | 41 | 67 | 118 | 202 |
| 94,169 | 9 | 8  | 59 | 125 | 6 | 7 | 37 | 70 | 111 | 210 |
| 94,170 | 9 | 8  | 52 | 119 | 6 | 7 | 35 | 63 | 102 | 197 |
| 94,171 | 7 | 11 | 51 | 143 | 6 | 7 | 35 | 76 | 99  | 237 |
| 94,172 | 5 | 11 | 39 | 143 | 3 | 7 | 27 | 76 | 74  | 237 |
| 94,173 | 4 | 11 | 38 | 142 | 3 | 7 | 23 | 75 | 68  | 235 |
| 94,174 | 5 | 10 | 40 | 143 | 3 | 7 | 25 | 74 | 73  | 234 |
| 94,175 | 5 | 10 | 40 | 143 | 3 | 7 | 25 | 74 | 73  | 234 |
| 94,176 | 5 | 8  | 40 | 144 | 3 | 7 | 28 | 72 | 76  | 231 |
| 94,177 | 5 | 8  | 40 | 144 | 3 | 7 | 27 | 72 | 75  | 231 |
| 94,178 | 5 | 6  | 40 | 135 | 3 | 5 | 27 | 58 | 75  | 204 |
| 94,179 | 5 | 7  | 40 | 139 | 3 | 5 | 27 | 61 | 75  | 212 |
| 94,180 | 4 | 6  | 38 | 132 | 3 | 5 | 27 | 61 | 72  | 204 |
| 94,181 | 4 | 5  | 38 | 132 | 3 | 5 | 27 | 61 | 72  | 203 |
| 94,182 | 4 | 5  | 38 | 132 | 3 | 5 | 25 | 61 | 70  | 203 |
| 94,183 | 4 | 5  | 39 | 133 | 3 | 5 | 27 | 61 | 73  | 204 |
| 94,184 | 3 | 5  | 36 | 134 | 3 | 5 | 25 | 62 | 67  | 206 |
| 94,185 | 3 | 5  | 36 | 134 | 3 | 5 | 25 | 62 | 67  | 206 |
| 94,186 | 3 | 5  | 36 | 131 | 3 | 5 | 25 | 62 | 67  | 203 |
| 94,187 | 3 | 5  | 40 | 131 | 3 | 5 | 26 | 62 | 72  | 203 |
| 94,188 | 3 | 5  | 43 | 131 | 3 | 5 | 27 | 61 | 76  | 202 |
| 94,189 | 3 | 5  | 42 | 131 | 3 | 5 | 27 | 61 | 75  | 202 |
| 94,190 | 3 | 5  | 43 | 131 | 3 | 5 | 27 | 61 | 76  | 202 |
| 94,191 | 4 | 5  | 48 | 131 | 3 | 5 | 27 | 61 | 82  | 202 |
| 94,192 | 4 | 5  | 48 | 130 | 3 | 5 | 27 | 61 | 82  | 201 |
| 94,193 | 4 | 5  | 48 | 116 | 3 | 4 | 27 | 57 | 82  | 182 |
| 94,194 | 4 | 5  | 49 | 117 | 3 | 4 | 29 | 57 | 85  | 183 |
| 94,195 | 3 | 5  | 44 | 117 | 1 | 4 | 23 | 57 | 71  | 183 |
| 94,196 | 3 | 5  | 42 | 114 | 1 | 3 | 22 | 55 | 68  | 177 |
| 94,197 | 4 | 5  | 52 | 110 | 2 | 3 | 24 | 54 | 82  | 172 |
| 94,198 | 4 | 5  | 51 | 110 | 2 | 3 | 24 | 54 | 81  | 172 |
| 94,199 | 4 | 5  | 51 | 110 | 2 | 3 | 25 | 54 | 82  | 172 |
| 94,200 | 4 | 5  | 52 | 109 | 2 | 3 | 26 | 54 | 84  | 171 |
| 94,201 | 4 | 5  | 52 | 106 | 2 | 3 | 26 | 54 | 84  | 168 |
| 94,202 | 4 | 5  | 52 | 107 | 2 | 3 | 26 | 54 | 84  | 169 |
| 94,203 | 4 | 4  | 52 | 90  | 2 | 2 | 26 | 48 | 84  | 144 |
| 94,204 | 4 | 4  | 52 | 88  | 2 | 3 | 26 | 41 | 84  | 136 |
| 94,205 | 4 | 4  | 52 | 83  | 2 | 3 | 26 | 40 | 84  | 130 |
| 94,206 | 4 | 4  | 49 | 82  | 2 | 3 | 26 | 40 | 81  | 129 |

|        |   |    |    |     |   |   |    |    |    |     |
|--------|---|----|----|-----|---|---|----|----|----|-----|
| 94,207 | 4 | 4  | 49 | 83  | 2 | 3 | 26 | 40 | 81 | 130 |
| 94,208 | 4 | 4  | 49 | 82  | 2 | 2 | 26 | 38 | 81 | 126 |
| 94,209 | 4 | 4  | 49 | 77  | 2 | 2 | 26 | 35 | 81 | 118 |
| 94,210 | 4 | 4  | 49 | 77  | 2 | 2 | 26 | 35 | 81 | 118 |
| 94,211 | 4 | 5  | 50 | 76  | 2 | 2 | 26 | 34 | 82 | 117 |
| 94,212 | 6 | 5  | 53 | 95  | 2 | 2 | 26 | 44 | 87 | 146 |
| 94,213 | 6 | 5  | 52 | 98  | 3 | 2 | 25 | 44 | 86 | 149 |
| 94,214 | 6 | 5  | 48 | 99  | 3 | 2 | 25 | 46 | 82 | 152 |
| 94,215 | 6 | 5  | 49 | 104 | 3 | 4 | 25 | 47 | 83 | 160 |
| 94,216 | 6 | 5  | 48 | 108 | 3 | 4 | 24 | 47 | 81 | 164 |
| 94,217 | 6 | 5  | 46 | 107 | 2 | 4 | 24 | 45 | 78 | 161 |
| 94,218 | 6 | 5  | 45 | 108 | 2 | 4 | 23 | 45 | 76 | 162 |
| 94,219 | 6 | 5  | 45 | 105 | 2 | 4 | 22 | 44 | 75 | 158 |
| 94,220 | 6 | 5  | 43 | 102 | 2 | 4 | 21 | 44 | 72 | 155 |
| 94,221 | 7 | 2  | 43 | 78  | 2 | 4 | 21 | 35 | 73 | 119 |
| 94,222 | 7 | 3  | 43 | 80  | 2 | 4 | 21 | 42 | 73 | 129 |
| 94,223 | 7 | 3  | 43 | 87  | 2 | 4 | 21 | 48 | 73 | 142 |
| 94,224 | 6 | 5  | 42 | 86  | 2 | 4 | 19 | 49 | 69 | 144 |
| 94,225 | 6 | 5  | 41 | 87  | 2 | 4 | 19 | 50 | 68 | 146 |
| 94,226 | 6 | 5  | 41 | 95  | 2 | 4 | 16 | 53 | 65 | 157 |
| 94,227 | 6 | 5  | 41 | 98  | 2 | 4 | 16 | 53 | 65 | 160 |
| 94,228 | 6 | 5  | 41 | 103 | 2 | 4 | 15 | 53 | 64 | 165 |
| 94,229 | 6 | 5  | 41 | 103 | 2 | 5 | 15 | 57 | 64 | 170 |
| 94,230 | 6 | 4  | 43 | 102 | 2 | 5 | 15 | 55 | 66 | 166 |
| 94,231 | 6 | 4  | 43 | 103 | 2 | 5 | 15 | 58 | 66 | 170 |
| 94,232 | 6 | 4  | 43 | 103 | 2 | 5 | 15 | 58 | 66 | 170 |
| 94,233 | 7 | 7  | 43 | 110 | 2 | 5 | 15 | 60 | 67 | 182 |
| 94,234 | 7 | 8  | 41 | 113 | 2 | 5 | 12 | 66 | 62 | 192 |
| 94,235 | 7 | 8  | 39 | 121 | 2 | 5 | 12 | 76 | 60 | 210 |
| 94,236 | 7 | 8  | 37 | 128 | 2 | 5 | 11 | 79 | 57 | 220 |
| 94,237 | 7 | 9  | 34 | 128 | 2 | 7 | 10 | 79 | 53 | 223 |
| 94,238 | 7 | 9  | 30 | 127 | 2 | 7 | 8  | 79 | 47 | 222 |
| 94,239 | 7 | 9  | 30 | 127 | 2 | 7 | 8  | 79 | 47 | 222 |
| 94,240 | 7 | 9  | 30 | 129 | 2 | 7 | 8  | 79 | 47 | 224 |
| 94,241 | 7 | 9  | 29 | 129 | 2 | 7 | 8  | 79 | 46 | 224 |
| 94,242 | 6 | 9  | 23 | 129 | 2 | 7 | 8  | 82 | 39 | 227 |
| 94,243 | 6 | 9  | 23 | 130 | 2 | 7 | 8  | 82 | 39 | 228 |
| 94,244 | 6 | 10 | 23 | 131 | 2 | 7 | 9  | 82 | 40 | 230 |
| 94,245 | 6 | 10 | 22 | 130 | 2 | 7 | 7  | 83 | 37 | 230 |
| 94,246 | 6 | 10 | 15 | 131 | 2 | 7 | 7  | 83 | 30 | 231 |
| 94,247 | 6 | 10 | 12 | 132 | 2 | 7 | 6  | 83 | 26 | 232 |

|        |   |    |    |     |   |    |    |    |    |     |
|--------|---|----|----|-----|---|----|----|----|----|-----|
| 94,248 | 5 | 10 | 12 | 135 | 1 | 8  | 5  | 85 | 23 | 238 |
| 94,249 | 5 | 10 | 12 | 136 | 1 | 9  | 4  | 89 | 22 | 244 |
| 94,250 | 5 | 10 | 12 | 136 | 1 | 9  | 4  | 89 | 22 | 244 |
| 94,251 | 5 | 10 | 11 | 135 | 1 | 9  | 3  | 89 | 20 | 243 |
| 94,252 | 5 | 10 | 11 | 134 | 1 | 9  | 2  | 89 | 19 | 242 |
| 94,253 | 5 | 10 | 11 | 134 | 1 | 9  | 2  | 89 | 19 | 242 |
| 94,254 | 5 | 10 | 11 | 134 | 1 | 9  | 2  | 89 | 19 | 242 |
| 94,255 | 5 | 10 | 11 | 134 | 1 | 8  | 2  | 89 | 19 | 241 |
| 94,256 | 5 | 10 | 11 | 133 | 1 | 8  | 2  | 89 | 19 | 240 |
| 94,257 | 5 | 10 | 11 | 133 | 1 | 8  | 2  | 89 | 19 | 240 |
| 94,258 | 5 | 10 | 11 | 135 | 1 | 8  | 2  | 89 | 19 | 242 |
| 94,259 | 5 | 10 | 11 | 140 | 1 | 8  | 2  | 91 | 19 | 249 |
| 94,260 | 5 | 10 | 11 | 140 | 1 | 8  | 2  | 91 | 19 | 249 |
| 94,261 | 5 | 10 | 10 | 141 | 1 | 10 | 2  | 93 | 18 | 254 |
| 94,262 | 3 | 9  | 8  | 139 | 1 | 12 | 2  | 94 | 14 | 254 |
| 94,263 | 3 | 10 | 15 | 114 | 1 | 12 | 2  | 82 | 21 | 218 |
| 94,264 | 3 | 10 | 15 | 111 | 0 | 12 | 2  | 82 | 20 | 215 |
| 94,265 | 2 | 10 | 14 | 110 | 0 | 12 | 1  | 80 | 17 | 212 |
| 94,266 | 2 | 10 | 14 | 105 | 0 | 10 | 10 | 79 | 26 | 204 |
| 94,267 | 2 | 10 | 19 | 100 | 0 | 10 | 14 | 79 | 35 | 199 |
| 94,268 | 2 | 10 | 19 | 101 | 0 | 10 | 14 | 79 | 35 | 200 |
| 94,269 | 2 | 10 | 20 | 103 | 0 | 10 | 15 | 79 | 37 | 202 |
| 94,270 | 2 | 10 | 20 | 102 | 0 | 11 | 15 | 80 | 37 | 203 |
| 94,271 | 2 | 10 | 20 | 101 | 0 | 10 | 15 | 77 | 37 | 198 |
| 94,272 | 1 | 9  | 23 | 90  | 0 | 10 | 16 | 59 | 40 | 168 |
| 94,273 | 1 | 9  | 23 | 90  | 0 | 10 | 16 | 60 | 40 | 169 |
| 94,274 | 1 | 9  | 23 | 90  | 0 | 10 | 16 | 60 | 40 | 169 |
| 94,275 | 1 | 7  | 23 | 91  | 0 | 10 | 16 | 62 | 40 | 170 |
| 94,276 | 1 | 9  | 23 | 93  | 0 | 10 | 16 | 68 | 40 | 180 |
| 94,277 | 1 | 9  | 23 | 86  | 0 | 10 | 16 | 65 | 40 | 170 |
| 94,278 | 1 | 9  | 24 | 86  | 0 | 10 | 17 | 64 | 42 | 169 |
| 94,279 | 1 | 9  | 25 | 85  | 0 | 10 | 17 | 66 | 43 | 170 |
| 94,280 | 1 | 10 | 27 | 88  | 0 | 9  | 17 | 66 | 45 | 173 |
| 94,281 | 1 | 10 | 26 | 82  | 0 | 9  | 17 | 61 | 44 | 162 |
| 94,282 | 1 | 10 | 26 | 82  | 0 | 9  | 17 | 61 | 44 | 162 |
| 94,283 | 0 | 7  | 26 | 77  | 0 | 9  | 17 | 59 | 43 | 152 |
| 94,284 | 0 | 6  | 27 | 73  | 0 | 9  | 17 | 53 | 44 | 141 |
| 94,285 | 0 | 6  | 27 | 62  | 0 | 9  | 17 | 42 | 44 | 119 |
| 94,286 | 0 | 7  | 27 | 64  | 0 | 9  | 18 | 42 | 45 | 122 |
| 94,287 | 0 | 6  | 28 | 56  | 0 | 7  | 20 | 39 | 48 | 108 |
| 94,288 | 0 | 6  | 28 | 56  | 0 | 7  | 21 | 39 | 49 | 108 |

|        |    |    |     |     |    |   |     |    |     |     |
|--------|----|----|-----|-----|----|---|-----|----|-----|-----|
| 94,289 | 0  | 6  | 29  | 56  | 1  | 7 | 23  | 39 | 53  | 108 |
| 94,290 | 0  | 6  | 28  | 56  | 1  | 7 | 23  | 39 | 52  | 108 |
| 94,291 | 0  | 6  | 28  | 56  | 1  | 7 | 23  | 39 | 52  | 108 |
| 94,292 | 0  | 6  | 28  | 57  | 1  | 7 | 23  | 39 | 52  | 109 |
| 94,293 | 0  | 6  | 28  | 57  | 1  | 7 | 23  | 36 | 52  | 106 |
| 94,294 | 0  | 6  | 28  | 56  | 1  | 7 | 24  | 36 | 53  | 105 |
| 94,295 | 0  | 5  | 28  | 55  | 1  | 7 | 24  | 36 | 53  | 103 |
| 94,296 | 1  | 5  | 28  | 55  | 1  | 7 | 24  | 35 | 54  | 102 |
| 94,297 | 1  | 5  | 28  | 52  | 1  | 7 | 24  | 35 | 54  | 99  |
| 94,298 | 1  | 5  | 28  | 52  | 1  | 7 | 24  | 35 | 54  | 99  |
| 94,299 | 1  | 5  | 29  | 49  | 1  | 6 | 25  | 33 | 56  | 93  |
| 94,300 | 1  | 5  | 29  | 48  | 1  | 5 | 28  | 29 | 59  | 87  |
| 94,301 | 1  | 5  | 29  | 48  | 1  | 5 | 28  | 30 | 59  | 88  |
| 94,302 | 1  | 5  | 29  | 49  | 1  | 5 | 28  | 30 | 59  | 89  |
| 94,303 | 1  | 5  | 31  | 49  | 1  | 5 | 28  | 30 | 61  | 89  |
| 94,304 | 1  | 5  | 32  | 49  | 1  | 5 | 28  | 30 | 62  | 89  |
| 94,305 | 1  | 5  | 37  | 49  | 1  | 5 | 32  | 30 | 71  | 89  |
| 94,306 | 1  | 6  | 38  | 49  | 1  | 5 | 33  | 30 | 73  | 90  |
| 94,307 | 1  | 6  | 38  | 49  | 1  | 5 | 33  | 30 | 73  | 90  |
| 94,308 | 3  | 6  | 46  | 51  | 1  | 5 | 36  | 31 | 86  | 93  |
| 94,309 | 6  | 6  | 48  | 48  | 1  | 5 | 38  | 31 | 93  | 90  |
| 94,310 | 6  | 6  | 49  | 50  | 1  | 5 | 38  | 31 | 94  | 92  |
| 94,311 | 7  | 8  | 61  | 80  | 3  | 8 | 55  | 56 | 126 | 152 |
| 94,312 | 7  | 9  | 61  | 107 | 3  | 6 | 55  | 63 | 126 | 185 |
| 94,313 | 9  | 10 | 67  | 111 | 3  | 4 | 55  | 62 | 134 | 187 |
| 94,314 | 9  | 9  | 60  | 108 | 3  | 4 | 58  | 61 | 130 | 182 |
| 94,315 | 11 | 9  | 70  | 108 | 3  | 4 | 57  | 62 | 141 | 183 |
| 94,316 | 15 | 9  | 133 | 108 | 9  | 4 | 92  | 62 | 249 | 183 |
| 94,317 | 17 | 9  | 159 | 105 | 9  | 4 | 100 | 60 | 285 | 178 |
| 94,318 | 18 | 9  | 194 | 106 | 9  | 4 | 106 | 60 | 327 | 179 |
| 94,319 | 18 | 9  | 193 | 106 | 9  | 4 | 105 | 60 | 325 | 179 |
| 94,320 | 23 | 9  | 255 | 103 | 15 | 4 | 126 | 60 | 419 | 176 |
| 94,321 | 26 | 9  | 298 | 103 | 17 | 3 | 148 | 59 | 489 | 174 |
| 94,322 | 26 | 9  | 302 | 103 | 18 | 3 | 152 | 59 | 498 | 174 |
| 94,323 | 27 | 9  | 310 | 103 | 18 | 3 | 155 | 58 | 510 | 173 |
| 94,324 | 27 | 9  | 310 | 104 | 18 | 3 | 155 | 58 | 510 | 174 |
| 94,325 | 27 | 9  | 310 | 105 | 19 | 3 | 157 | 58 | 513 | 175 |
| 94,326 | 27 | 9  | 310 | 104 | 19 | 3 | 157 | 56 | 513 | 172 |
| 94,327 | 27 | 7  | 310 | 95  | 19 | 3 | 157 | 48 | 513 | 153 |
| 94,328 | 27 | 9  | 311 | 98  | 19 | 3 | 157 | 48 | 514 | 158 |
| 94,329 | 27 | 9  | 311 | 101 | 19 | 3 | 157 | 48 | 514 | 161 |

|        |    |   |     |     |    |   |     |    |     |     |
|--------|----|---|-----|-----|----|---|-----|----|-----|-----|
| 94,330 | 27 | 9 | 310 | 99  | 19 | 3 | 157 | 48 | 513 | 159 |
| 94,331 | 27 | 8 | 308 | 94  | 19 | 3 | 157 | 44 | 511 | 149 |
| 94,332 | 29 | 8 | 310 | 94  | 21 | 3 | 167 | 43 | 527 | 148 |
| 94,333 | 30 | 8 | 322 | 92  | 21 | 3 | 170 | 43 | 543 | 146 |
| 94,334 | 30 | 8 | 322 | 94  | 21 | 3 | 170 | 43 | 543 | 148 |
| 94,335 | 30 | 8 | 320 | 95  | 21 | 3 | 170 | 43 | 541 | 149 |
| 94,336 | 30 | 8 | 320 | 95  | 21 | 3 | 170 | 43 | 541 | 149 |
| 94,337 | 31 | 7 | 331 | 93  | 22 | 3 | 176 | 43 | 560 | 146 |
| 94,338 | 32 | 7 | 343 | 97  | 23 | 3 | 183 | 46 | 581 | 153 |
| 94,339 | 32 | 7 | 381 | 101 | 23 | 3 | 187 | 48 | 623 | 159 |
| 94,340 | 32 | 7 | 385 | 103 | 22 | 3 | 188 | 48 | 627 | 161 |
| 94,341 | 32 | 7 | 386 | 103 | 22 | 4 | 186 | 48 | 626 | 162 |
| 94,342 | 32 | 7 | 386 | 104 | 22 | 4 | 186 | 48 | 626 | 163 |
| 94,343 | 32 | 7 | 386 | 103 | 22 | 4 | 186 | 48 | 626 | 162 |
| 94,344 | 32 | 7 | 386 | 103 | 22 | 4 | 187 | 49 | 627 | 163 |
| 94,345 | 32 | 7 | 385 | 103 | 22 | 4 | 188 | 50 | 627 | 164 |
| 94,346 | 34 | 7 | 389 | 103 | 22 | 4 | 191 | 50 | 636 | 164 |
| 94,347 | 33 | 7 | 389 | 103 | 22 | 4 | 191 | 50 | 635 | 164 |
| 94,348 | 33 | 8 | 393 | 103 | 22 | 4 | 192 | 50 | 640 | 165 |
| 94,349 | 33 | 8 | 393 | 102 | 22 | 4 | 192 | 50 | 640 | 164 |
| 94,350 | 33 | 8 | 393 | 102 | 22 | 4 | 191 | 50 | 639 | 164 |
| 94,351 | 34 | 8 | 394 | 103 | 22 | 4 | 188 | 49 | 638 | 164 |
| 94,352 | 34 | 8 | 394 | 103 | 22 | 4 | 188 | 49 | 638 | 164 |
| 94,353 | 34 | 8 | 393 | 104 | 22 | 4 | 188 | 49 | 637 | 165 |
| 94,354 | 34 | 8 | 393 | 104 | 22 | 4 | 189 | 49 | 638 | 165 |
| 94,355 | 34 | 8 | 393 | 104 | 22 | 4 | 189 | 49 | 638 | 165 |
| 94,356 | 34 | 8 | 388 | 104 | 22 | 4 | 185 | 49 | 629 | 165 |
| 94,357 | 34 | 7 | 392 | 104 | 22 | 4 | 187 | 49 | 635 | 164 |
| 94,358 | 32 | 7 | 384 | 104 | 22 | 4 | 184 | 49 | 622 | 164 |
| 94,359 | 29 | 7 | 384 | 102 | 22 | 4 | 182 | 48 | 617 | 161 |
| 94,360 | 29 | 7 | 383 | 102 | 22 | 4 | 182 | 48 | 616 | 161 |
| 94,361 | 28 | 7 | 371 | 95  | 20 | 4 | 165 | 45 | 584 | 151 |
| 94,362 | 28 | 4 | 374 | 37  | 20 | 1 | 166 | 12 | 588 | 54  |
| 94,363 | 28 | 4 | 374 | 37  | 20 | 1 | 166 | 12 | 588 | 54  |
| 94,364 | 26 | 3 | 377 | 31  | 20 | 1 | 172 | 11 | 595 | 46  |
| 94,365 | 26 | 3 | 380 | 28  | 20 | 1 | 172 | 10 | 598 | 42  |
| 94,366 | 26 | 3 | 389 | 28  | 21 | 1 | 178 | 10 | 614 | 42  |
| 94,367 | 23 | 3 | 329 | 28  | 15 | 1 | 142 | 10 | 509 | 42  |
| 94,368 | 22 | 4 | 306 | 31  | 15 | 3 | 133 | 13 | 476 | 51  |
| 94,369 | 21 | 4 | 269 | 30  | 15 | 3 | 126 | 13 | 431 | 50  |
| 94,370 | 18 | 5 | 239 | 37  | 15 | 3 | 122 | 14 | 394 | 59  |

|        |    |   |     |    |   |   |     |    |     |    |
|--------|----|---|-----|----|---|---|-----|----|-----|----|
| 94,371 | 16 | 5 | 207 | 36 | 9 | 3 | 103 | 14 | 335 | 58 |
| 94,372 | 13 | 8 | 164 | 40 | 7 | 3 | 82  | 18 | 266 | 69 |
| 94,373 | 13 | 8 | 157 | 40 | 6 | 3 | 78  | 18 | 254 | 69 |
| 94,374 | 12 | 8 | 149 | 40 | 6 | 3 | 75  | 18 | 242 | 69 |
| 94,375 | 12 | 8 | 149 | 39 | 5 | 3 | 73  | 19 | 239 | 69 |
| 94,376 | 12 | 8 | 149 | 38 | 5 | 3 | 73  | 19 | 239 | 68 |
| 94,377 | 12 | 8 | 149 | 38 | 5 | 3 | 73  | 19 | 239 | 68 |
| 94,378 | 12 | 8 | 149 | 39 | 5 | 3 | 73  | 19 | 239 | 69 |
| 94,379 | 12 | 6 | 148 | 36 | 5 | 3 | 73  | 19 | 238 | 64 |
| 94,380 | 12 | 6 | 147 | 33 | 5 | 3 | 72  | 19 | 236 | 61 |
| 94,381 | 12 | 6 | 147 | 31 | 4 | 3 | 71  | 18 | 234 | 58 |
| 94,382 | 13 | 6 | 147 | 35 | 4 | 3 | 71  | 22 | 235 | 66 |
| 94,383 | 12 | 6 | 145 | 36 | 3 | 3 | 61  | 23 | 221 | 68 |
| 94,384 | 11 | 6 | 133 | 34 | 3 | 3 | 59  | 23 | 206 | 66 |
| 94,385 | 11 | 6 | 133 | 34 | 3 | 3 | 59  | 23 | 206 | 66 |
| 94,386 | 10 | 6 | 127 | 33 | 2 | 3 | 53  | 23 | 192 | 65 |
| 94,387 | 10 | 6 | 126 | 34 | 2 | 3 | 53  | 23 | 191 | 66 |
| 94,388 | 10 | 7 | 122 | 40 | 2 | 3 | 52  | 25 | 186 | 75 |
| 94,389 | 9  | 7 | 110 | 40 | 1 | 3 | 43  | 23 | 163 | 73 |
| 94,390 | 11 | 7 | 75  | 34 | 1 | 3 | 39  | 21 | 126 | 65 |
| 94,391 | 11 | 7 | 70  | 34 | 1 | 2 | 37  | 21 | 119 | 64 |
| 94,392 | 11 | 7 | 69  | 34 | 1 | 2 | 38  | 21 | 119 | 64 |
| 94,393 | 13 | 7 | 77  | 34 | 2 | 2 | 48  | 21 | 140 | 64 |
| 94,394 | 13 | 7 | 77  | 34 | 2 | 2 | 49  | 19 | 141 | 62 |
| 94,395 | 13 | 7 | 78  | 35 | 2 | 2 | 49  | 19 | 142 | 63 |
| 94,396 | 13 | 7 | 79  | 35 | 2 | 2 | 49  | 19 | 143 | 63 |
| 94,397 | 11 | 6 | 75  | 35 | 2 | 2 | 46  | 19 | 134 | 62 |
| 94,398 | 11 | 6 | 75  | 35 | 2 | 2 | 46  | 19 | 134 | 62 |
| 94,399 | 11 | 6 | 71  | 35 | 2 | 2 | 45  | 19 | 129 | 62 |
| 94,400 | 11 | 6 | 70  | 35 | 2 | 2 | 45  | 19 | 128 | 62 |
| 94,401 | 11 | 6 | 71  | 35 | 2 | 3 | 45  | 19 | 129 | 63 |
| 94,402 | 10 | 6 | 69  | 35 | 2 | 3 | 45  | 19 | 126 | 63 |
| 94,403 | 10 | 6 | 69  | 35 | 2 | 3 | 45  | 19 | 126 | 63 |
| 94,404 | 10 | 6 | 75  | 33 | 2 | 3 | 46  | 19 | 133 | 61 |
| 94,405 | 10 | 6 | 74  | 33 | 2 | 3 | 45  | 19 | 131 | 61 |
| 94,406 | 11 | 6 | 83  | 33 | 2 | 3 | 47  | 19 | 143 | 61 |
| 94,407 | 11 | 6 | 83  | 33 | 2 | 3 | 46  | 19 | 142 | 61 |
| 94,408 | 12 | 6 | 81  | 33 | 3 | 3 | 52  | 19 | 148 | 61 |
| 94,409 | 12 | 6 | 81  | 37 | 3 | 3 | 52  | 20 | 148 | 66 |
| 94,410 | 12 | 6 | 79  | 37 | 3 | 3 | 52  | 20 | 146 | 66 |
| 94,411 | 12 | 6 | 79  | 42 | 3 | 3 | 53  | 21 | 147 | 72 |

|        |    |    |    |    |   |   |    |    |     |     |
|--------|----|----|----|----|---|---|----|----|-----|-----|
| 94,412 | 12 | 6  | 79 | 58 | 3 | 3 | 53 | 34 | 147 | 101 |
| 94,413 | 12 | 6  | 76 | 60 | 3 | 3 | 52 | 35 | 143 | 104 |
| 94,414 | 12 | 7  | 76 | 73 | 3 | 3 | 52 | 39 | 143 | 122 |
| 94,415 | 12 | 10 | 66 | 93 | 3 | 3 | 46 | 50 | 127 | 156 |
| 94,416 | 12 | 10 | 63 | 95 | 3 | 3 | 43 | 50 | 121 | 158 |
| 94,417 | 10 | 10 | 45 | 95 | 2 | 3 | 34 | 50 | 91  | 158 |
| 94,418 | 9  | 9  | 42 | 93 | 2 | 1 | 30 | 50 | 83  | 153 |
| 94,419 | 8  | 9  | 40 | 93 | 2 | 1 | 29 | 51 | 79  | 154 |
| 94,420 | 8  | 9  | 37 | 93 | 2 | 1 | 28 | 51 | 75  | 154 |
| 94,421 | 9  | 8  | 39 | 86 | 2 | 1 | 29 | 50 | 79  | 145 |
| 94,422 | 9  | 8  | 46 | 86 | 2 | 1 | 30 | 50 | 87  | 145 |
| 94,423 | 9  | 5  | 46 | 82 | 2 | 1 | 30 | 46 | 87  | 134 |
| 94,424 | 10 | 5  | 52 | 82 | 2 | 1 | 38 | 46 | 102 | 134 |
| 94,425 | 10 | 5  | 53 | 82 | 2 | 1 | 40 | 45 | 105 | 133 |
| 94,426 | 10 | 5  | 53 | 82 | 2 | 1 | 40 | 45 | 105 | 133 |
| 94,427 | 10 | 5  | 54 | 82 | 2 | 1 | 40 | 45 | 106 | 133 |
| 94,428 | 10 | 5  | 55 | 82 | 2 | 1 | 41 | 44 | 108 | 132 |
| 94,429 | 10 | 5  | 55 | 80 | 2 | 1 | 41 | 45 | 108 | 131 |
| 94,430 | 10 | 5  | 55 | 80 | 2 | 1 | 41 | 45 | 108 | 131 |
| 94,431 | 11 | 5  | 61 | 80 | 2 | 1 | 46 | 44 | 120 | 130 |
| 94,432 | 10 | 5  | 61 | 80 | 2 | 1 | 46 | 44 | 119 | 130 |
| 94,433 | 10 | 5  | 65 | 76 | 2 | 1 | 50 | 39 | 127 | 121 |
| 94,434 | 10 | 5  | 68 | 76 | 2 | 1 | 50 | 39 | 130 | 121 |
| 94,435 | 10 | 5  | 69 | 76 | 2 | 1 | 50 | 39 | 131 | 121 |
| 94,436 | 10 | 5  | 70 | 76 | 2 | 1 | 50 | 40 | 132 | 122 |
| 94,437 | 10 | 5  | 70 | 75 | 2 | 1 | 50 | 40 | 132 | 121 |
| 94,438 | 10 | 4  | 70 | 69 | 2 | 1 | 50 | 38 | 132 | 112 |
| 94,439 | 10 | 4  | 70 | 65 | 2 | 1 | 50 | 37 | 132 | 107 |
| 94,440 | 10 | 4  | 69 | 65 | 2 | 1 | 50 | 37 | 131 | 107 |
| 94,441 | 8  | 4  | 66 | 65 | 2 | 1 | 49 | 38 | 125 | 108 |
| 94,442 | 8  | 4  | 67 | 65 | 3 | 1 | 50 | 38 | 128 | 108 |
| 94,443 | 8  | 4  | 67 | 65 | 3 | 1 | 49 | 38 | 127 | 108 |
| 94,444 | 6  | 4  | 58 | 65 | 2 | 1 | 39 | 38 | 105 | 108 |
| 94,445 | 6  | 4  | 61 | 66 | 2 | 1 | 38 | 42 | 107 | 113 |
| 94,446 | 6  | 4  | 60 | 65 | 2 | 1 | 37 | 42 | 105 | 112 |
| 94,447 | 8  | 4  | 63 | 65 | 2 | 1 | 50 | 42 | 123 | 112 |
| 94,448 | 11 | 4  | 67 | 65 | 2 | 1 | 50 | 42 | 130 | 112 |
| 94,449 | 11 | 4  | 67 | 65 | 2 | 1 | 55 | 42 | 135 | 112 |
| 94,450 | 11 | 4  | 69 | 65 | 2 | 1 | 56 | 43 | 138 | 113 |
| 94,451 | 11 | 4  | 69 | 65 | 2 | 0 | 56 | 43 | 138 | 112 |
| 94,452 | 11 | 4  | 71 | 66 | 2 | 0 | 56 | 45 | 140 | 115 |



|        |    |    |    |     |   |    |    |    |     |     |
|--------|----|----|----|-----|---|----|----|----|-----|-----|
| 94,453 | 11 | 5  | 71 | 81  | 2 | 2  | 56 | 51 | 140 | 139 |
| 94,454 | 11 | 5  | 65 | 91  | 2 | 3  | 56 | 54 | 134 | 153 |
| 94,455 | 11 | 7  | 65 | 96  | 2 | 3  | 55 | 58 | 133 | 164 |
| 94,456 | 11 | 9  | 64 | 111 | 2 | 11 | 55 | 68 | 132 | 199 |
| 94,457 | 10 | 12 | 56 | 122 | 2 | 11 | 53 | 86 | 121 | 231 |
| 94,458 | 10 | 12 | 54 | 129 | 1 | 11 | 46 | 90 | 111 | 242 |
| 94,459 | 9  | 12 | 53 | 128 | 1 | 11 | 47 | 90 | 110 | 241 |
| 94,460 | 9  | 13 | 53 | 137 | 1 | 12 | 47 | 93 | 110 | 255 |
| 94,461 | 9  | 13 | 53 | 138 | 1 | 12 | 46 | 93 | 109 | 256 |
| 94,462 | 9  | 13 | 53 | 117 | 1 | 12 | 46 | 79 | 109 | 221 |
| 94,463 | 9  | 13 | 53 | 117 | 1 | 12 | 46 | 79 | 109 | 221 |
| 94,464 | 9  | 13 | 55 | 118 | 1 | 12 | 46 | 78 | 111 | 221 |
| 94,465 | 9  | 12 | 55 | 107 | 1 | 12 | 46 | 75 | 111 | 206 |
| 94,466 | 9  | 9  | 55 | 87  | 1 | 12 | 46 | 64 | 111 | 172 |
| 94,467 | 9  | 9  | 55 | 87  | 1 | 12 | 47 | 64 | 112 | 172 |
| 94,468 | 9  | 9  | 54 | 88  | 1 | 12 | 47 | 64 | 111 | 173 |
| 94,469 | 9  | 9  | 53 | 89  | 1 | 12 | 47 | 63 | 110 | 173 |
| 94,470 | 9  | 9  | 52 | 92  | 1 | 12 | 47 | 62 | 109 | 175 |
| 94,471 | 8  | 9  | 50 | 95  | 1 | 12 | 46 | 62 | 105 | 178 |
| 94,472 | 9  | 9  | 43 | 95  | 1 | 12 | 45 | 62 | 98  | 178 |
| 94,473 | 9  | 10 | 43 | 98  | 1 | 12 | 45 | 62 | 98  | 182 |
| 94,474 | 8  | 10 | 39 | 100 | 1 | 12 | 38 | 62 | 86  | 184 |
| 94,475 | 8  | 10 | 37 | 100 | 1 | 12 | 37 | 62 | 83  | 184 |
| 94,476 | 8  | 10 | 36 | 100 | 1 | 12 | 36 | 62 | 81  | 184 |
| 94,477 | 8  | 10 | 35 | 100 | 1 | 12 | 36 | 62 | 80  | 184 |
| 94,478 | 8  | 10 | 38 | 100 | 1 | 12 | 36 | 63 | 83  | 185 |
| 94,479 | 8  | 10 | 37 | 100 | 1 | 12 | 35 | 63 | 81  | 185 |
| 94,480 | 9  | 10 | 38 | 101 | 1 | 12 | 35 | 62 | 83  | 185 |
| 94,481 | 8  | 10 | 38 | 101 | 1 | 12 | 33 | 62 | 80  | 185 |
| 94,482 | 8  | 10 | 33 | 101 | 1 | 12 | 30 | 62 | 72  | 185 |
| 94,483 | 8  | 10 | 33 | 101 | 1 | 12 | 30 | 62 | 72  | 185 |
| 94,484 | 7  | 10 | 29 | 102 | 1 | 12 | 26 | 62 | 63  | 186 |
| 94,485 | 7  | 11 | 25 | 102 | 1 | 12 | 26 | 62 | 59  | 187 |
| 94,486 | 7  | 11 | 24 | 102 | 1 | 12 | 26 | 62 | 58  | 187 |
| 94,487 | 7  | 11 | 23 | 102 | 1 | 12 | 26 | 61 | 57  | 186 |
| 94,488 | 7  | 11 | 23 | 102 | 1 | 12 | 26 | 61 | 57  | 186 |
| 94,489 | 7  | 11 | 23 | 102 | 1 | 12 | 26 | 61 | 57  | 186 |
| 94,490 | 7  | 11 | 23 | 102 | 1 | 12 | 26 | 61 | 57  | 186 |
| 94,491 | 7  | 11 | 23 | 101 | 1 | 12 | 26 | 61 | 57  | 185 |
| 94,492 | 7  | 11 | 25 | 101 | 1 | 12 | 28 | 61 | 61  | 185 |
| 94,493 | 7  | 11 | 26 | 102 | 0 | 12 | 29 | 61 | 62  | 186 |

|        |   |    |    |     |   |    |    |    |    |     |
|--------|---|----|----|-----|---|----|----|----|----|-----|
| 94,494 | 7 | 11 | 26 | 102 | 0 | 12 | 29 | 62 | 62 | 187 |
| 94,495 | 7 | 11 | 25 | 102 | 0 | 12 | 29 | 62 | 61 | 187 |
| 94,496 | 7 | 11 | 23 | 102 | 0 | 12 | 30 | 58 | 60 | 183 |
| 94,497 | 5 | 11 | 20 | 102 | 0 | 12 | 17 | 58 | 42 | 183 |
| 94,498 | 2 | 14 | 19 | 121 | 1 | 12 | 20 | 66 | 42 | 213 |
| 94,499 | 2 | 14 | 24 | 126 | 1 | 13 | 18 | 68 | 45 | 221 |
| 94,500 | 3 | 14 | 34 | 127 | 1 | 13 | 20 | 68 | 58 | 222 |
| 94,501 | 3 | 14 | 34 | 127 | 1 | 13 | 19 | 67 | 57 | 221 |
| 94,502 | 3 | 14 | 34 | 126 | 1 | 13 | 19 | 67 | 57 | 220 |
| 94,503 | 3 | 14 | 31 | 111 | 3 | 11 | 19 | 61 | 56 | 197 |
| 94,504 | 3 | 14 | 31 | 111 | 3 | 11 | 20 | 61 | 57 | 197 |
| 94,505 | 3 | 13 | 31 | 101 | 3 | 10 | 20 | 59 | 57 | 183 |
| 94,506 | 3 | 11 | 31 | 96  | 3 | 10 | 20 | 56 | 57 | 173 |
| 94,507 | 3 | 7  | 31 | 70  | 3 | 2  | 21 | 28 | 58 | 107 |
| 94,508 | 3 | 7  | 31 | 63  | 3 | 2  | 21 | 24 | 58 | 96  |
| 94,509 | 3 | 7  | 31 | 63  | 3 | 2  | 22 | 24 | 59 | 96  |
| 94,510 | 3 | 7  | 31 | 60  | 3 | 2  | 20 | 23 | 57 | 92  |
| 94,511 | 3 | 6  | 31 | 51  | 3 | 1  | 20 | 20 | 57 | 78  |
| 94,512 | 3 | 6  | 31 | 50  | 3 | 1  | 20 | 20 | 57 | 77  |
| 94,513 | 3 | 6  | 31 | 50  | 3 | 1  | 21 | 20 | 58 | 77  |
| 94,514 | 3 | 6  | 31 | 51  | 3 | 1  | 21 | 20 | 58 | 78  |
| 94,515 | 3 | 6  | 29 | 48  | 3 | 1  | 22 | 21 | 57 | 76  |
| 94,516 | 3 | 6  | 29 | 46  | 3 | 1  | 22 | 20 | 57 | 73  |
| 94,517 | 3 | 6  | 29 | 46  | 3 | 1  | 21 | 20 | 56 | 73  |
| 94,518 | 3 | 6  | 29 | 43  | 3 | 1  | 21 | 20 | 56 | 70  |
| 94,519 | 3 | 6  | 29 | 41  | 3 | 1  | 22 | 18 | 57 | 66  |
| 94,520 | 3 | 6  | 29 | 41  | 3 | 1  | 22 | 18 | 57 | 66  |
| 94,521 | 3 | 6  | 29 | 35  | 3 | 1  | 22 | 18 | 57 | 60  |
| 94,522 | 2 | 6  | 29 | 35  | 3 | 1  | 22 | 18 | 56 | 60  |
| 94,523 | 2 | 5  | 30 | 32  | 3 | 1  | 22 | 18 | 57 | 56  |
| 94,524 | 2 | 5  | 32 | 32  | 3 | 1  | 24 | 18 | 61 | 56  |
| 94,525 | 2 | 6  | 32 | 30  | 3 | 1  | 24 | 20 | 61 | 57  |
| 94,526 | 2 | 6  | 32 | 30  | 3 | 1  | 24 | 20 | 61 | 57  |
| 94,527 | 2 | 6  | 33 | 31  | 3 | 1  | 24 | 23 | 62 | 61  |
| 94,528 | 2 | 6  | 33 | 40  | 3 | 2  | 24 | 29 | 62 | 77  |
| 94,529 | 2 | 6  | 30 | 41  | 3 | 2  | 24 | 29 | 59 | 78  |
| 94,530 | 1 | 7  | 29 | 42  | 3 | 2  | 24 | 29 | 57 | 80  |
| 94,531 | 1 | 8  | 29 | 53  | 3 | 3  | 24 | 39 | 57 | 103 |
| 94,532 | 1 | 11 | 28 | 55  | 3 | 3  | 24 | 40 | 56 | 109 |
| 94,533 | 1 | 11 | 28 | 55  | 3 | 3  | 24 | 40 | 56 | 109 |
| 94,534 | 1 | 11 | 36 | 56  | 3 | 3  | 26 | 40 | 66 | 110 |

|        |    |    |    |    |   |   |    |    |     |     |
|--------|----|----|----|----|---|---|----|----|-----|-----|
| 94,535 | 1  | 10 | 36 | 55 | 3 | 3 | 26 | 40 | 66  | 108 |
| 94,536 | 1  | 10 | 39 | 55 | 3 | 3 | 26 | 40 | 69  | 108 |
| 94,537 | 1  | 10 | 39 | 55 | 3 | 3 | 26 | 40 | 69  | 108 |
| 94,538 | 5  | 10 | 41 | 55 | 3 | 3 | 33 | 41 | 82  | 109 |
| 94,539 | 5  | 10 | 41 | 55 | 3 | 3 | 33 | 41 | 82  | 109 |
| 94,540 | 5  | 10 | 41 | 55 | 3 | 3 | 34 | 41 | 83  | 109 |
| 94,541 | 5  | 10 | 41 | 55 | 3 | 3 | 34 | 41 | 83  | 109 |
| 94,542 | 5  | 10 | 41 | 55 | 3 | 3 | 34 | 40 | 83  | 108 |
| 94,543 | 5  | 10 | 39 | 55 | 3 | 3 | 32 | 40 | 79  | 108 |
| 94,544 | 5  | 10 | 37 | 54 | 2 | 3 | 29 | 39 | 73  | 106 |
| 94,545 | 5  | 10 | 37 | 54 | 2 | 3 | 28 | 39 | 72  | 106 |
| 94,546 | 5  | 10 | 37 | 54 | 2 | 3 | 28 | 39 | 72  | 106 |
| 94,547 | 5  | 10 | 38 | 53 | 2 | 3 | 26 | 39 | 71  | 105 |
| 94,548 | 5  | 10 | 37 | 53 | 2 | 3 | 26 | 38 | 70  | 104 |
| 94,549 | 5  | 7  | 35 | 35 | 1 | 3 | 23 | 30 | 64  | 75  |
| 94,550 | 5  | 7  | 30 | 30 | 1 | 2 | 22 | 28 | 58  | 67  |
| 94,551 | 4  | 7  | 20 | 29 | 1 | 2 | 17 | 28 | 42  | 66  |
| 94,552 | 4  | 7  | 18 | 29 | 1 | 2 | 17 | 28 | 40  | 66  |
| 94,553 | 4  | 7  | 18 | 29 | 1 | 2 | 17 | 27 | 40  | 65  |
| 94,554 | 4  | 6  | 18 | 29 | 0 | 2 | 17 | 27 | 39  | 64  |
| 94,555 | 4  | 6  | 18 | 29 | 0 | 2 | 17 | 27 | 39  | 64  |
| 94,556 | 4  | 6  | 18 | 29 | 0 | 2 | 17 | 26 | 39  | 63  |
| 94,557 | 4  | 6  | 20 | 29 | 0 | 2 | 19 | 25 | 43  | 62  |
| 94,558 | 4  | 6  | 20 | 29 | 0 | 2 | 20 | 25 | 44  | 62  |
| 94,559 | 4  | 6  | 20 | 31 | 0 | 2 | 20 | 28 | 44  | 67  |
| 94,560 | 4  | 6  | 20 | 32 | 0 | 2 | 20 | 29 | 44  | 69  |
| 94,561 | 4  | 6  | 25 | 35 | 0 | 2 | 22 | 29 | 51  | 72  |
| 94,562 | 4  | 8  | 25 | 37 | 0 | 2 | 23 | 29 | 52  | 76  |
| 94,563 | 4  | 8  | 25 | 39 | 0 | 2 | 24 | 29 | 53  | 78  |
| 94,564 | 4  | 9  | 29 | 51 | 0 | 2 | 29 | 31 | 62  | 93  |
| 94,565 | 4  | 9  | 29 | 52 | 0 | 2 | 29 | 31 | 62  | 94  |
| 94,566 | 6  | 9  | 36 | 52 | 1 | 2 | 37 | 30 | 80  | 93  |
| 94,567 | 6  | 9  | 38 | 53 | 1 | 2 | 42 | 30 | 87  | 94  |
| 94,568 | 6  | 9  | 39 | 53 | 1 | 2 | 42 | 30 | 88  | 94  |
| 94,569 | 6  | 9  | 39 | 55 | 1 | 2 | 42 | 29 | 88  | 95  |
| 94,570 | 6  | 9  | 39 | 55 | 1 | 2 | 41 | 29 | 87  | 95  |
| 94,571 | 6  | 9  | 39 | 57 | 1 | 2 | 41 | 30 | 87  | 98  |
| 94,572 | 6  | 10 | 54 | 58 | 1 | 2 | 50 | 33 | 111 | 103 |
| 94,573 | 9  | 10 | 61 | 58 | 2 | 2 | 55 | 33 | 127 | 103 |
| 94,574 | 10 | 10 | 72 | 58 | 4 | 2 | 66 | 33 | 152 | 103 |
| 94,575 | 10 | 11 | 75 | 58 | 4 | 2 | 66 | 34 | 155 | 105 |

|        |    |    |     |    |   |   |     |    |     |     |
|--------|----|----|-----|----|---|---|-----|----|-----|-----|
| 94,576 | 10 | 10 | 74  | 58 | 4 | 2 | 65  | 32 | 153 | 102 |
| 94,577 | 10 | 10 | 74  | 58 | 4 | 2 | 65  | 32 | 153 | 102 |
| 94,578 | 10 | 10 | 99  | 57 | 7 | 2 | 78  | 27 | 194 | 96  |
| 94,579 | 11 | 10 | 102 | 48 | 7 | 1 | 80  | 24 | 200 | 83  |
| 94,580 | 11 | 10 | 103 | 47 | 7 | 1 | 80  | 23 | 201 | 81  |
| 94,581 | 11 | 8  | 114 | 36 | 7 | 0 | 82  | 15 | 214 | 59  |
| 94,582 | 11 | 8  | 114 | 39 | 7 | 1 | 82  | 17 | 214 | 65  |
| 94,583 | 11 | 5  | 114 | 37 | 7 | 2 | 82  | 16 | 214 | 60  |
| 94,584 | 11 | 5  | 112 | 37 | 7 | 2 | 81  | 16 | 211 | 60  |
| 94,585 | 12 | 5  | 107 | 38 | 7 | 2 | 81  | 16 | 207 | 61  |
| 94,586 | 12 | 5  | 110 | 38 | 7 | 2 | 81  | 16 | 210 | 61  |
| 94,587 | 12 | 5  | 120 | 39 | 7 | 3 | 83  | 15 | 222 | 62  |
| 94,588 | 13 | 5  | 126 | 40 | 7 | 3 | 88  | 15 | 234 | 63  |
| 94,589 | 11 | 5  | 137 | 41 | 8 | 3 | 94  | 17 | 250 | 66  |
| 94,590 | 13 | 5  | 138 | 41 | 8 | 3 | 94  | 19 | 253 | 68  |
| 94,591 | 13 | 5  | 139 | 41 | 8 | 3 | 95  | 19 | 255 | 68  |
| 94,592 | 14 | 5  | 142 | 41 | 8 | 3 | 97  | 20 | 261 | 69  |
| 94,593 | 14 | 5  | 142 | 41 | 8 | 4 | 99  | 20 | 263 | 70  |
| 94,594 | 14 | 6  | 142 | 41 | 8 | 4 | 98  | 20 | 262 | 71  |
| 94,595 | 14 | 7  | 146 | 41 | 8 | 4 | 99  | 20 | 267 | 72  |
| 94,596 | 14 | 7  | 146 | 41 | 8 | 4 | 99  | 20 | 267 | 72  |
| 94,597 | 14 | 7  | 146 | 41 | 8 | 4 | 99  | 20 | 267 | 72  |
| 94,598 | 14 | 7  | 145 | 41 | 8 | 4 | 99  | 20 | 266 | 72  |
| 94,599 | 14 | 7  | 145 | 41 | 8 | 4 | 99  | 20 | 266 | 72  |
| 94,600 | 14 | 7  | 145 | 40 | 8 | 4 | 99  | 20 | 266 | 71  |
| 94,601 | 14 | 7  | 145 | 42 | 8 | 4 | 99  | 20 | 266 | 73  |
| 94,602 | 14 | 7  | 146 | 42 | 8 | 4 | 100 | 20 | 268 | 73  |
| 94,603 | 14 | 7  | 146 | 42 | 8 | 4 | 100 | 20 | 268 | 73  |
| 94,604 | 15 | 7  | 147 | 42 | 8 | 4 | 100 | 20 | 270 | 73  |
| 94,605 | 16 | 7  | 147 | 42 | 8 | 4 | 101 | 20 | 272 | 73  |
| 94,606 | 16 | 7  | 148 | 42 | 8 | 4 | 101 | 20 | 273 | 73  |
| 94,607 | 16 | 7  | 148 | 42 | 8 | 4 | 101 | 20 | 273 | 73  |
| 94,608 | 16 | 7  | 149 | 43 | 8 | 4 | 102 | 20 | 275 | 74  |
| 94,609 | 16 | 7  | 153 | 41 | 8 | 4 | 101 | 17 | 278 | 69  |
| 94,610 | 16 | 8  | 154 | 38 | 8 | 4 | 101 | 17 | 279 | 67  |
| 94,611 | 16 | 8  | 153 | 38 | 8 | 4 | 100 | 17 | 277 | 67  |
| 94,612 | 16 | 8  | 155 | 40 | 8 | 4 | 101 | 17 | 280 | 69  |
| 94,613 | 16 | 5  | 155 | 25 | 8 | 4 | 101 | 15 | 280 | 49  |
| 94,614 | 16 | 5  | 155 | 25 | 8 | 4 | 99  | 15 | 278 | 49  |
| 94,615 | 16 | 5  | 151 | 26 | 8 | 4 | 94  | 16 | 269 | 51  |
| 94,616 | 15 | 5  | 144 | 24 | 7 | 4 | 86  | 17 | 252 | 50  |

|        |    |   |     |    |   |   |    |    |     |     |
|--------|----|---|-----|----|---|---|----|----|-----|-----|
| 94,617 | 15 | 5 | 142 | 24 | 7 | 4 | 84 | 17 | 248 | 50  |
| 94,618 | 15 | 5 | 142 | 23 | 7 | 4 | 81 | 19 | 245 | 51  |
| 94,619 | 15 | 5 | 141 | 24 | 7 | 4 | 81 | 19 | 244 | 52  |
| 94,620 | 15 | 5 | 141 | 22 | 7 | 4 | 81 | 19 | 244 | 50  |
| 94,621 | 15 | 5 | 141 | 23 | 7 | 4 | 81 | 20 | 244 | 52  |
| 94,622 | 15 | 5 | 139 | 26 | 7 | 5 | 81 | 16 | 242 | 52  |
| 94,623 | 15 | 5 | 126 | 31 | 7 | 5 | 73 | 16 | 221 | 57  |
| 94,624 | 12 | 6 | 118 | 36 | 6 | 5 | 68 | 20 | 204 | 67  |
| 94,625 | 11 | 7 | 107 | 45 | 4 | 6 | 57 | 22 | 179 | 80  |
| 94,626 | 11 | 6 | 102 | 47 | 4 | 6 | 55 | 24 | 172 | 83  |
| 94,627 | 11 | 9 | 89  | 70 | 4 | 7 | 51 | 45 | 155 | 131 |
| 94,628 | 11 | 9 | 77  | 71 | 1 | 7 | 42 | 45 | 131 | 132 |
| 94,629 | 10 | 9 | 74  | 75 | 1 | 7 | 40 | 47 | 125 | 138 |
| 94,630 | 10 | 9 | 73  | 80 | 1 | 7 | 40 | 47 | 124 | 143 |
| 94,631 | 10 | 9 | 66  | 80 | 1 | 7 | 38 | 47 | 115 | 143 |
| 94,632 | 10 | 9 | 62  | 78 | 1 | 6 | 38 | 44 | 111 | 137 |
| 94,633 | 10 | 9 | 62  | 78 | 1 | 6 | 38 | 44 | 111 | 137 |
| 94,634 | 10 | 9 | 62  | 78 | 1 | 5 | 38 | 44 | 111 | 136 |
| 94,635 | 10 | 9 | 61  | 80 | 1 | 5 | 38 | 44 | 110 | 138 |
| 94,636 | 9  | 9 | 61  | 78 | 1 | 5 | 37 | 44 | 108 | 136 |
| 94,637 | 9  | 9 | 58  | 78 | 1 | 5 | 37 | 44 | 105 | 136 |
| 94,638 | 9  | 9 | 45  | 76 | 1 | 4 | 35 | 44 | 90  | 133 |
| 94,639 | 8  | 9 | 37  | 76 | 1 | 4 | 29 | 44 | 75  | 133 |
| 94,640 | 6  | 9 | 26  | 76 | 0 | 4 | 17 | 42 | 49  | 131 |
| 94,641 | 4  | 9 | 25  | 77 | 0 | 4 | 16 | 42 | 45  | 132 |
| 94,642 | 4  | 9 | 24  | 77 | 0 | 4 | 15 | 43 | 43  | 133 |
| 94,643 | 3  | 9 | 21  | 79 | 0 | 4 | 13 | 42 | 37  | 134 |
| 94,644 | 3  | 9 | 21  | 79 | 0 | 3 | 11 | 43 | 35  | 134 |
| 94,645 | 3  | 8 | 17  | 79 | 0 | 3 | 10 | 43 | 30  | 133 |
| 94,646 | 3  | 7 | 17  | 79 | 0 | 3 | 10 | 43 | 30  | 132 |
| 94,647 | 3  | 7 | 17  | 79 | 0 | 3 | 10 | 45 | 30  | 134 |
| 94,648 | 3  | 7 | 17  | 79 | 0 | 3 | 10 | 45 | 30  | 134 |
| 94,649 | 3  | 7 | 17  | 79 | 0 | 3 | 10 | 45 | 30  | 134 |
| 94,650 | 3  | 7 | 17  | 79 | 0 | 3 | 10 | 45 | 30  | 134 |
| 94,651 | 3  | 7 | 17  | 77 | 0 | 3 | 10 | 45 | 30  | 132 |
| 94,652 | 3  | 7 | 17  | 77 | 0 | 3 | 10 | 45 | 30  | 132 |
| 94,653 | 3  | 7 | 16  | 78 | 0 | 3 | 9  | 45 | 28  | 133 |
| 94,654 | 2  | 7 | 15  | 78 | 0 | 3 | 9  | 45 | 26  | 133 |
| 94,655 | 2  | 7 | 15  | 78 | 0 | 3 | 9  | 45 | 26  | 133 |
| 94,656 | 1  | 7 | 15  | 78 | 0 | 3 | 8  | 45 | 24  | 133 |
| 94,657 | 1  | 7 | 14  | 78 | 0 | 3 | 8  | 45 | 23  | 133 |

|        |   |    |    |     |   |   |    |    |    |     |
|--------|---|----|----|-----|---|---|----|----|----|-----|
| 94,658 | 1 | 7  | 13 | 78  | 0 | 3 | 7  | 45 | 21 | 133 |
| 94,659 | 1 | 7  | 11 | 77  | 0 | 3 | 5  | 45 | 17 | 132 |
| 94,660 | 1 | 7  | 7  | 77  | 0 | 3 | 4  | 46 | 12 | 133 |
| 94,661 | 1 | 6  | 7  | 77  | 0 | 3 | 4  | 45 | 12 | 131 |
| 94,662 | 1 | 6  | 5  | 76  | 0 | 3 | 4  | 45 | 10 | 130 |
| 94,663 | 1 | 6  | 1  | 74  | 0 | 3 | 2  | 45 | 4  | 128 |
| 94,664 | 1 | 6  | 4  | 73  | 1 | 3 | 2  | 45 | 8  | 127 |
| 94,665 | 1 | 6  | 4  | 73  | 1 | 3 | 2  | 45 | 8  | 127 |
| 94,666 | 1 | 6  | 4  | 72  | 1 | 3 | 2  | 44 | 8  | 125 |
| 94,667 | 0 | 6  | 4  | 72  | 1 | 3 | 2  | 43 | 7  | 124 |
| 94,668 | 0 | 6  | 4  | 72  | 1 | 3 | 2  | 41 | 7  | 122 |
| 94,669 | 0 | 6  | 4  | 71  | 1 | 3 | 2  | 41 | 7  | 121 |
| 94,670 | 0 | 6  | 4  | 71  | 1 | 3 | 2  | 41 | 7  | 121 |
| 94,671 | 0 | 6  | 4  | 71  | 1 | 3 | 2  | 41 | 7  | 121 |
| 94,672 | 0 | 6  | 4  | 71  | 1 | 3 | 1  | 40 | 6  | 120 |
| 94,673 | 0 | 5  | 4  | 65  | 1 | 2 | 1  | 40 | 6  | 112 |
| 94,674 | 0 | 6  | 4  | 55  | 1 | 2 | 2  | 36 | 7  | 99  |
| 94,675 | 0 | 6  | 4  | 56  | 1 | 2 | 2  | 36 | 7  | 100 |
| 94,676 | 0 | 5  | 5  | 45  | 1 | 1 | 2  | 31 | 8  | 82  |
| 94,677 | 0 | 5  | 5  | 45  | 1 | 1 | 2  | 31 | 8  | 82  |
| 94,678 | 0 | 2  | 8  | 21  | 1 | 0 | 2  | 10 | 11 | 33  |
| 94,679 | 0 | 2  | 8  | 21  | 1 | 0 | 2  | 10 | 11 | 33  |
| 94,680 | 0 | 2  | 8  | 17  | 1 | 0 | 2  | 8  | 11 | 27  |
| 94,681 | 0 | 2  | 8  | 12  | 1 | 0 | 2  | 8  | 11 | 22  |
| 94,682 | 0 | 3  | 8  | 9   | 1 | 0 | 2  | 7  | 11 | 19  |
| 94,683 | 0 | 3  | 8  | 15  | 1 | 0 | 2  | 16 | 11 | 34  |
| 94,684 | 0 | 7  | 12 | 59  | 1 | 4 | 3  | 44 | 16 | 114 |
| 94,685 | 1 | 7  | 38 | 62  | 1 | 4 | 14 | 51 | 54 | 124 |
| 94,686 | 2 | 9  | 43 | 80  | 1 | 4 | 15 | 72 | 61 | 165 |
| 94,687 | 2 | 12 | 43 | 100 | 1 | 5 | 15 | 92 | 61 | 209 |
| 94,688 | 2 | 12 | 43 | 102 | 1 | 5 | 15 | 92 | 61 | 211 |
| 94,689 | 2 | 12 | 45 | 104 | 1 | 5 | 16 | 92 | 64 | 213 |
| 94,690 | 2 | 15 | 45 | 106 | 1 | 5 | 16 | 90 | 64 | 216 |
| 94,691 | 2 | 16 | 46 | 107 | 1 | 5 | 17 | 91 | 66 | 219 |
| 94,692 | 2 | 16 | 46 | 108 | 1 | 5 | 17 | 91 | 66 | 220 |
| 94,693 | 3 | 16 | 46 | 106 | 1 | 5 | 17 | 91 | 67 | 218 |
| 94,694 | 4 | 16 | 47 | 109 | 1 | 5 | 18 | 91 | 70 | 221 |
| 94,695 | 4 | 16 | 47 | 110 | 1 | 5 | 18 | 90 | 70 | 221 |
| 94,696 | 4 | 16 | 47 | 110 | 1 | 5 | 18 | 90 | 70 | 221 |
| 94,697 | 4 | 16 | 48 | 111 | 1 | 5 | 18 | 88 | 71 | 220 |
| 94,698 | 4 | 16 | 50 | 111 | 1 | 5 | 21 | 88 | 76 | 220 |

|        |   |    |    |     |   |   |    |     |     |     |
|--------|---|----|----|-----|---|---|----|-----|-----|-----|
| 94,699 | 4 | 16 | 50 | 111 | 1 | 5 | 21 | 88  | 76  | 220 |
| 94,700 | 4 | 16 | 51 | 111 | 1 | 5 | 21 | 88  | 77  | 220 |
| 94,701 | 4 | 16 | 52 | 111 | 1 | 5 | 21 | 88  | 78  | 220 |
| 94,702 | 4 | 17 | 52 | 114 | 1 | 5 | 21 | 89  | 78  | 225 |
| 94,703 | 4 | 17 | 52 | 114 | 1 | 5 | 21 | 89  | 78  | 225 |
| 94,704 | 4 | 17 | 52 | 113 | 1 | 5 | 21 | 89  | 78  | 224 |
| 94,705 | 4 | 17 | 52 | 113 | 1 | 5 | 21 | 89  | 78  | 224 |
| 94,706 | 4 | 17 | 52 | 113 | 1 | 5 | 21 | 89  | 78  | 224 |
| 94,707 | 4 | 17 | 52 | 113 | 1 | 5 | 21 | 89  | 78  | 224 |
| 94,708 | 4 | 18 | 52 | 113 | 1 | 5 | 21 | 89  | 78  | 225 |
| 94,709 | 4 | 18 | 52 | 114 | 1 | 5 | 21 | 91  | 78  | 228 |
| 94,710 | 4 | 18 | 52 | 116 | 1 | 5 | 21 | 92  | 78  | 231 |
| 94,711 | 4 | 18 | 52 | 119 | 1 | 5 | 21 | 95  | 78  | 237 |
| 94,712 | 4 | 18 | 51 | 121 | 1 | 5 | 21 | 95  | 77  | 239 |
| 94,713 | 4 | 18 | 51 | 123 | 0 | 6 | 21 | 99  | 76  | 246 |
| 94,714 | 4 | 18 | 49 | 123 | 0 | 6 | 20 | 99  | 73  | 246 |
| 94,715 | 4 | 18 | 49 | 123 | 0 | 6 | 20 | 99  | 73  | 246 |
| 94,716 | 4 | 18 | 49 | 124 | 0 | 6 | 20 | 100 | 73  | 248 |
| 94,717 | 4 | 18 | 49 | 124 | 0 | 6 | 20 | 100 | 73  | 248 |
| 94,718 | 4 | 18 | 49 | 124 | 0 | 6 | 20 | 100 | 73  | 248 |
| 94,719 | 4 | 18 | 49 | 124 | 0 | 6 | 20 | 100 | 73  | 248 |
| 94,720 | 4 | 18 | 49 | 124 | 0 | 6 | 20 | 100 | 73  | 248 |
| 94,721 | 4 | 18 | 57 | 124 | 0 | 6 | 21 | 100 | 82  | 248 |
| 94,722 | 4 | 18 | 57 | 126 | 0 | 6 | 21 | 101 | 82  | 251 |
| 94,723 | 4 | 18 | 57 | 125 | 0 | 6 | 20 | 102 | 81  | 251 |
| 94,724 | 4 | 19 | 57 | 132 | 0 | 6 | 20 | 108 | 81  | 265 |
| 94,725 | 5 | 22 | 63 | 151 | 2 | 8 | 27 | 119 | 97  | 300 |
| 94,726 | 5 | 22 | 63 | 150 | 2 | 8 | 27 | 119 | 97  | 299 |
| 94,727 | 5 | 22 | 62 | 150 | 2 | 8 | 28 | 121 | 97  | 301 |
| 94,728 | 5 | 22 | 62 | 156 | 2 | 8 | 28 | 122 | 97  | 308 |
| 94,729 | 5 | 23 | 61 | 161 | 2 | 8 | 29 | 123 | 97  | 315 |
| 94,730 | 5 | 23 | 61 | 161 | 2 | 8 | 29 | 123 | 97  | 315 |
| 94,731 | 5 | 23 | 69 | 162 | 2 | 8 | 30 | 123 | 106 | 316 |
| 94,732 | 5 | 23 | 78 | 168 | 3 | 8 | 35 | 123 | 121 | 322 |
| 94,733 | 5 | 22 | 85 | 174 | 3 | 8 | 35 | 124 | 128 | 328 |
| 94,734 | 5 | 22 | 85 | 174 | 3 | 8 | 35 | 118 | 128 | 322 |
| 94,735 | 5 | 18 | 83 | 130 | 3 | 4 | 34 | 90  | 125 | 242 |
| 94,736 | 5 | 18 | 59 | 127 | 3 | 4 | 23 | 82  | 90  | 231 |
| 94,737 | 4 | 13 | 54 | 87  | 3 | 3 | 22 | 43  | 83  | 146 |
| 94,738 | 4 | 13 | 58 | 90  | 3 | 3 | 23 | 43  | 88  | 149 |
| 94,739 | 4 | 13 | 57 | 89  | 3 | 3 | 23 | 43  | 87  | 148 |

|        |   |    |    |    |   |   |    |    |    |     |
|--------|---|----|----|----|---|---|----|----|----|-----|
| 94,740 | 4 | 13 | 60 | 87 | 3 | 3 | 22 | 43 | 89 | 146 |
| 94,741 | 4 | 9  | 60 | 83 | 3 | 3 | 23 | 42 | 90 | 137 |
| 94,742 | 4 | 9  | 59 | 82 | 3 | 3 | 22 | 42 | 88 | 136 |
| 94,743 | 4 | 9  | 60 | 82 | 3 | 3 | 22 | 41 | 89 | 135 |
| 94,744 | 4 | 9  | 60 | 82 | 3 | 3 | 22 | 41 | 89 | 135 |
| 94,745 | 3 | 9  | 59 | 79 | 3 | 3 | 21 | 41 | 86 | 132 |
| 94,746 | 3 | 9  | 63 | 78 | 3 | 3 | 23 | 41 | 92 | 131 |
| 94,747 | 3 | 9  | 62 | 78 | 3 | 3 | 23 | 41 | 91 | 131 |
| 94,748 | 3 | 9  | 62 | 78 | 3 | 3 | 23 | 41 | 91 | 131 |
| 94,749 | 3 | 9  | 60 | 79 | 3 | 3 | 20 | 41 | 86 | 132 |
| 94,750 | 4 | 9  | 64 | 80 | 3 | 3 | 21 | 41 | 92 | 133 |
| 94,751 | 5 | 9  | 65 | 83 | 3 | 3 | 21 | 42 | 94 | 137 |
| 94,752 | 5 | 9  | 64 | 84 | 3 | 3 | 21 | 42 | 93 | 138 |
| 94,753 | 5 | 8  | 64 | 81 | 3 | 3 | 22 | 41 | 94 | 133 |
| 94,754 | 5 | 8  | 64 | 81 | 3 | 3 | 22 | 41 | 94 | 133 |
| 94,755 | 5 | 8  | 64 | 81 | 3 | 3 | 22 | 41 | 94 | 133 |
| 94,756 | 5 | 8  | 64 | 81 | 3 | 3 | 22 | 41 | 94 | 133 |
| 94,757 | 5 | 8  | 64 | 81 | 3 | 3 | 22 | 41 | 94 | 133 |
| 94,758 | 5 | 8  | 64 | 81 | 3 | 3 | 22 | 41 | 94 | 133 |
| 94,759 | 5 | 7  | 64 | 83 | 3 | 3 | 22 | 43 | 94 | 136 |
| 94,760 | 5 | 7  | 64 | 84 | 3 | 3 | 22 | 41 | 94 | 135 |
| 94,761 | 5 | 7  | 64 | 82 | 3 | 3 | 24 | 40 | 96 | 132 |
| 94,762 | 5 | 7  | 64 | 77 | 3 | 3 | 24 | 36 | 96 | 123 |
| 94,763 | 5 | 7  | 64 | 77 | 3 | 3 | 24 | 36 | 96 | 123 |
| 94,764 | 5 | 7  | 63 | 75 | 3 | 2 | 24 | 32 | 95 | 116 |
| 94,765 | 5 | 7  | 63 | 75 | 3 | 2 | 24 | 32 | 95 | 116 |
| 94,766 | 5 | 7  | 63 | 75 | 3 | 2 | 24 | 32 | 95 | 116 |
| 94,767 | 5 | 7  | 64 | 74 | 3 | 2 | 25 | 31 | 97 | 114 |
| 94,768 | 5 | 7  | 65 | 74 | 3 | 2 | 25 | 31 | 98 | 114 |
| 94,769 | 5 | 7  | 65 | 74 | 3 | 2 | 25 | 31 | 98 | 114 |
| 94,770 | 5 | 7  | 65 | 74 | 3 | 2 | 25 | 31 | 98 | 114 |
| 94,771 | 5 | 7  | 57 | 75 | 3 | 2 | 24 | 31 | 89 | 115 |
| 94,772 | 5 | 7  | 57 | 75 | 3 | 2 | 24 | 31 | 89 | 115 |
| 94,773 | 5 | 7  | 57 | 73 | 3 | 2 | 24 | 30 | 89 | 112 |
| 94,774 | 5 | 6  | 57 | 66 | 3 | 2 | 24 | 23 | 89 | 97  |
| 94,775 | 6 | 6  | 57 | 66 | 3 | 2 | 24 | 23 | 90 | 97  |
| 94,776 | 5 | 1  | 51 | 47 | 1 | 0 | 17 | 12 | 74 | 60  |
| 94,777 | 5 | 1  | 51 | 47 | 1 | 0 | 16 | 12 | 73 | 60  |
| 94,778 | 5 | 1  | 52 | 49 | 1 | 0 | 16 | 12 | 74 | 62  |
| 94,779 | 5 | 1  | 55 | 45 | 1 | 0 | 17 | 12 | 78 | 58  |
| 94,780 | 5 | 0  | 53 | 41 | 1 | 0 | 16 | 12 | 75 | 53  |



|        |    |   |    |    |    |   |    |    |     |    |
|--------|----|---|----|----|----|---|----|----|-----|----|
| 94,781 | 5  | 0 | 47 | 41 | 1  | 0 | 16 | 12 | 69  | 53 |
| 94,782 | 5  | 0 | 43 | 41 | 1  | 0 | 11 | 12 | 60  | 53 |
| 94,783 | 5  | 0 | 39 | 37 | 0  | 0 | 11 | 12 | 55  | 49 |
| 94,784 | 5  | 0 | 32 | 31 | 0  | 0 | 11 | 11 | 48  | 42 |
| 94,785 | 5  | 0 | 32 | 25 | 0  | 0 | 11 | 8  | 48  | 33 |
| 94,786 | 5  | 0 | 31 | 25 | 0  | 0 | 11 | 10 | 47  | 35 |
| 94,787 | 7  | 0 | 33 | 26 | 0  | 0 | 12 | 10 | 52  | 36 |
| 94,788 | 7  | 0 | 33 | 27 | 0  | 0 | 12 | 10 | 52  | 37 |
| 94,789 | 7  | 0 | 29 | 23 | 0  | 0 | 11 | 11 | 47  | 34 |
| 94,790 | 7  | 0 | 30 | 24 | 0  | 0 | 11 | 12 | 48  | 36 |
| 94,791 | 8  | 0 | 30 | 26 | 0  | 0 | 15 | 12 | 53  | 38 |
| 94,792 | 8  | 0 | 30 | 25 | 0  | 0 | 14 | 12 | 52  | 37 |
| 94,793 | 9  | 0 | 52 | 25 | 3  | 0 | 32 | 12 | 96  | 37 |
| 94,794 | 8  | 0 | 52 | 25 | 3  | 0 | 32 | 12 | 95  | 37 |
| 94,795 | 8  | 1 | 52 | 27 | 3  | 0 | 31 | 14 | 94  | 42 |
| 94,796 | 8  | 1 | 48 | 28 | 3  | 0 | 30 | 14 | 89  | 43 |
| 94,797 | 9  | 1 | 49 | 29 | 3  | 0 | 31 | 14 | 92  | 44 |
| 94,798 | 9  | 1 | 49 | 28 | 3  | 0 | 31 | 14 | 92  | 43 |
| 94,799 | 8  | 1 | 46 | 28 | 3  | 0 | 31 | 14 | 88  | 43 |
| 94,800 | 8  | 1 | 46 | 23 | 4  | 0 | 34 | 13 | 92  | 37 |
| 94,801 | 8  | 1 | 46 | 25 | 4  | 0 | 33 | 14 | 91  | 40 |
| 94,802 | 7  | 1 | 44 | 26 | 4  | 0 | 33 | 14 | 88  | 41 |
| 94,803 | 7  | 1 | 44 | 25 | 4  | 1 | 33 | 14 | 88  | 41 |
| 94,804 | 7  | 1 | 44 | 25 | 4  | 1 | 34 | 14 | 89  | 41 |
| 94,805 | 7  | 1 | 44 | 25 | 4  | 1 | 34 | 14 | 89  | 41 |
| 94,806 | 7  | 1 | 45 | 25 | 4  | 1 | 35 | 14 | 91  | 41 |
| 94,807 | 7  | 1 | 46 | 25 | 4  | 1 | 35 | 14 | 92  | 41 |
| 94,808 | 7  | 1 | 46 | 25 | 4  | 1 | 35 | 14 | 92  | 41 |
| 94,809 | 7  | 1 | 46 | 23 | 4  | 1 | 36 | 12 | 93  | 37 |
| 94,810 | 7  | 1 | 46 | 23 | 4  | 1 | 36 | 12 | 93  | 37 |
| 94,811 | 7  | 1 | 49 | 21 | 5  | 1 | 37 | 12 | 98  | 35 |
| 94,812 | 7  | 1 | 49 | 21 | 5  | 1 | 36 | 12 | 97  | 35 |
| 94,813 | 7  | 1 | 49 | 21 | 5  | 1 | 36 | 12 | 97  | 35 |
| 94,814 | 11 | 1 | 60 | 21 | 8  | 1 | 44 | 12 | 123 | 35 |
| 94,815 | 12 | 1 | 60 | 21 | 9  | 1 | 45 | 12 | 126 | 35 |
| 94,816 | 12 | 1 | 63 | 21 | 9  | 1 | 45 | 12 | 129 | 35 |
| 94,817 | 12 | 1 | 63 | 22 | 9  | 1 | 44 | 12 | 128 | 36 |
| 94,818 | 12 | 1 | 62 | 22 | 9  | 1 | 44 | 12 | 127 | 36 |
| 94,819 | 12 | 1 | 73 | 22 | 9  | 1 | 44 | 12 | 138 | 36 |
| 94,820 | 12 | 1 | 73 | 22 | 9  | 1 | 44 | 12 | 138 | 36 |
| 94,821 | 12 | 1 | 84 | 21 | 11 | 1 | 46 | 12 | 153 | 35 |

|        |    |   |     |    |    |   |    |    |     |    |
|--------|----|---|-----|----|----|---|----|----|-----|----|
| 94,822 | 12 | 1 | 84  | 21 | 11 | 1 | 46 | 12 | 153 | 35 |
| 94,823 | 16 | 1 | 123 | 21 | 15 | 1 | 55 | 12 | 209 | 35 |
| 94,824 | 16 | 1 | 123 | 21 | 15 | 1 | 55 | 12 | 209 | 35 |
| 94,825 | 16 | 1 | 123 | 21 | 15 | 1 | 55 | 12 | 209 | 35 |
| 94,826 | 15 | 2 | 123 | 21 | 15 | 1 | 55 | 12 | 208 | 36 |
| 94,827 | 15 | 2 | 123 | 21 | 15 | 1 | 55 | 11 | 208 | 35 |
| 94,828 | 16 | 2 | 125 | 21 | 15 | 1 | 59 | 11 | 215 | 35 |
| 94,829 | 16 | 2 | 125 | 19 | 15 | 1 | 59 | 10 | 215 | 32 |
| 94,830 | 16 | 2 | 123 | 15 | 15 | 1 | 58 | 8  | 212 | 26 |
| 94,831 | 16 | 2 | 123 | 15 | 15 | 1 | 58 | 8  | 212 | 26 |
| 94,832 | 16 | 2 | 121 | 15 | 15 | 1 | 57 | 8  | 209 | 26 |
| 94,833 | 16 | 2 | 120 | 15 | 15 | 1 | 57 | 8  | 208 | 26 |
| 94,834 | 16 | 2 | 120 | 13 | 15 | 1 | 57 | 8  | 208 | 24 |
| 94,835 | 16 | 2 | 120 | 13 | 15 | 1 | 57 | 8  | 208 | 24 |
| 94,836 | 16 | 2 | 120 | 13 | 15 | 1 | 57 | 6  | 208 | 22 |
| 94,837 | 16 | 3 | 119 | 15 | 15 | 2 | 57 | 7  | 207 | 27 |
| 94,838 | 13 | 3 | 115 | 14 | 15 | 3 | 56 | 6  | 199 | 26 |
| 94,839 | 13 | 3 | 116 | 18 | 15 | 3 | 56 | 8  | 200 | 32 |
| 94,840 | 13 | 3 | 116 | 19 | 15 | 3 | 56 | 8  | 200 | 33 |
| 94,841 | 13 | 3 | 115 | 18 | 15 | 3 | 57 | 7  | 200 | 31 |
| 94,842 | 12 | 4 | 111 | 24 | 15 | 3 | 54 | 12 | 192 | 43 |
| 94,843 | 12 | 4 | 97  | 24 | 12 | 3 | 53 | 16 | 174 | 47 |
| 94,844 | 11 | 4 | 91  | 24 | 12 | 3 | 40 | 16 | 154 | 47 |
| 94,845 | 11 | 4 | 90  | 27 | 12 | 3 | 40 | 16 | 153 | 50 |
| 94,846 | 11 | 3 | 90  | 25 | 12 | 3 | 41 | 14 | 154 | 45 |
| 94,847 | 10 | 3 | 90  | 24 | 12 | 3 | 40 | 14 | 152 | 44 |
| 94,848 | 10 | 4 | 89  | 24 | 12 | 3 | 40 | 14 | 151 | 45 |
| 94,849 | 10 | 4 | 89  | 24 | 11 | 3 | 38 | 14 | 148 | 45 |
| 94,850 | 10 | 4 | 89  | 24 | 11 | 3 | 37 | 14 | 147 | 45 |
| 94,851 | 10 | 4 | 90  | 22 | 11 | 3 | 38 | 13 | 149 | 42 |
| 94,852 | 10 | 4 | 90  | 22 | 11 | 3 | 38 | 13 | 149 | 42 |
| 94,853 | 10 | 4 | 90  | 21 | 11 | 3 | 37 | 13 | 148 | 41 |
| 94,854 | 15 | 4 | 105 | 21 | 11 | 2 | 52 | 13 | 183 | 40 |
| 94,855 | 15 | 4 | 107 | 21 | 11 | 2 | 51 | 13 | 184 | 40 |
| 94,856 | 15 | 4 | 108 | 21 | 11 | 2 | 53 | 13 | 187 | 40 |
| 94,857 | 15 | 4 | 107 | 21 | 11 | 2 | 52 | 13 | 185 | 40 |
| 94,858 | 15 | 4 | 106 | 21 | 11 | 2 | 52 | 13 | 184 | 40 |
| 94,859 | 15 | 4 | 106 | 21 | 11 | 2 | 52 | 14 | 184 | 41 |
| 94,860 | 15 | 4 | 106 | 21 | 11 | 2 | 51 | 14 | 183 | 41 |
| 94,861 | 15 | 4 | 116 | 21 | 11 | 2 | 58 | 14 | 200 | 41 |
| 94,862 | 15 | 4 | 113 | 21 | 10 | 2 | 57 | 14 | 195 | 41 |

|        |    |    |     |    |    |   |    |    |     |     |
|--------|----|----|-----|----|----|---|----|----|-----|-----|
| 94,863 | 15 | 4  | 113 | 21 | 10 | 2 | 57 | 14 | 195 | 41  |
| 94,864 | 11 | 4  | 103 | 21 | 7  | 2 | 49 | 14 | 170 | 41  |
| 94,865 | 11 | 4  | 102 | 21 | 7  | 2 | 49 | 14 | 169 | 41  |
| 94,866 | 10 | 4  | 102 | 21 | 6  | 2 | 48 | 14 | 166 | 41  |
| 94,867 | 10 | 4  | 99  | 20 | 6  | 2 | 48 | 14 | 163 | 40  |
| 94,868 | 10 | 7  | 99  | 28 | 6  | 3 | 48 | 24 | 163 | 62  |
| 94,869 | 10 | 8  | 94  | 36 | 6  | 3 | 48 | 27 | 158 | 74  |
| 94,870 | 10 | 10 | 87  | 58 | 6  | 3 | 48 | 31 | 151 | 102 |
| 94,871 | 10 | 12 | 79  | 81 | 6  | 4 | 49 | 44 | 144 | 141 |
| 94,872 | 10 | 12 | 76  | 83 | 4  | 4 | 47 | 46 | 137 | 145 |
| 94,873 | 8  | 12 | 67  | 83 | 0  | 4 | 43 | 46 | 118 | 145 |
| 94,874 | 6  | 14 | 37  | 86 | 0  | 4 | 38 | 46 | 81  | 150 |
| 94,875 | 5  | 14 | 34  | 86 | 0  | 4 | 34 | 46 | 73  | 150 |
| 94,876 | 5  | 14 | 34  | 86 | 0  | 4 | 34 | 46 | 73  | 150 |
| 94,877 | 5  | 14 | 34  | 88 | 0  | 4 | 34 | 46 | 73  | 152 |
| 94,878 | 5  | 14 | 34  | 90 | 0  | 4 | 34 | 47 | 73  | 155 |
| 94,879 | 5  | 14 | 35  | 90 | 0  | 4 | 34 | 47 | 74  | 155 |
| 94,880 | 5  | 14 | 36  | 90 | 0  | 4 | 34 | 47 | 75  | 155 |
| 94,881 | 5  | 14 | 35  | 90 | 0  | 4 | 36 | 47 | 76  | 155 |
| 94,882 | 5  | 14 | 35  | 90 | 0  | 4 | 36 | 47 | 76  | 155 |
| 94,883 | 5  | 14 | 37  | 91 | 0  | 4 | 37 | 47 | 79  | 156 |
| 94,884 | 5  | 14 | 40  | 91 | 0  | 4 | 40 | 47 | 85  | 156 |
| 94,885 | 5  | 14 | 40  | 91 | 0  | 4 | 41 | 47 | 86  | 156 |
| 94,886 | 5  | 14 | 40  | 91 | 0  | 4 | 41 | 47 | 86  | 156 |
| 94,887 | 5  | 13 | 42  | 89 | 0  | 3 | 43 | 46 | 90  | 151 |
| 94,888 | 5  | 13 | 42  | 89 | 0  | 2 | 43 | 46 | 90  | 150 |
| 94,889 | 5  | 13 | 42  | 89 | 0  | 2 | 43 | 46 | 90  | 150 |
| 94,890 | 5  | 13 | 47  | 83 | 1  | 2 | 44 | 43 | 97  | 141 |
| 94,891 | 5  | 13 | 54  | 83 | 1  | 2 | 46 | 43 | 106 | 141 |
| 94,892 | 5  | 12 | 78  | 75 | 2  | 2 | 53 | 38 | 138 | 127 |
| 94,893 | 8  | 12 | 108 | 75 | 2  | 2 | 71 | 38 | 189 | 127 |
| 94,894 | 8  | 12 | 113 | 75 | 2  | 3 | 71 | 34 | 194 | 124 |
| 94,895 | 8  | 12 | 114 | 73 | 2  | 3 | 75 | 34 | 199 | 122 |
| 94,896 | 8  | 12 | 114 | 73 | 2  | 3 | 75 | 34 | 199 | 122 |
| 94,897 | 9  | 12 | 115 | 74 | 2  | 3 | 76 | 35 | 202 | 124 |
| 94,898 | 9  | 12 | 115 | 74 | 2  | 3 | 76 | 35 | 202 | 124 |
| 94,899 | 9  | 11 | 115 | 74 | 2  | 3 | 76 | 35 | 202 | 123 |
| 94,900 | 9  | 11 | 114 | 74 | 2  | 3 | 76 | 35 | 201 | 123 |
| 94,901 | 9  | 11 | 115 | 75 | 2  | 3 | 76 | 35 | 202 | 124 |
| 94,902 | 9  | 11 | 115 | 75 | 2  | 3 | 75 | 35 | 201 | 124 |
| 94,903 | 9  | 11 | 109 | 75 | 2  | 3 | 71 | 36 | 191 | 125 |

|        |   |    |     |    |   |   |    |    |     |     |
|--------|---|----|-----|----|---|---|----|----|-----|-----|
| 94,904 | 9 | 12 | 109 | 81 | 2 | 3 | 75 | 38 | 195 | 134 |
| 94,905 | 4 | 12 | 103 | 85 | 3 | 3 | 67 | 38 | 177 | 138 |
| 94,906 | 4 | 12 | 105 | 86 | 3 | 3 | 68 | 39 | 180 | 140 |
| 94,907 | 4 | 12 | 104 | 86 | 3 | 3 | 67 | 40 | 178 | 141 |
| 94,908 | 5 | 12 | 107 | 86 | 3 | 3 | 68 | 40 | 183 | 141 |
| 94,909 | 5 | 12 | 107 | 86 | 4 | 3 | 75 | 39 | 191 | 140 |
| 94,910 | 5 | 12 | 106 | 86 | 4 | 3 | 72 | 39 | 187 | 140 |
| 94,911 | 5 | 12 | 105 | 86 | 4 | 3 | 72 | 39 | 186 | 140 |
| 94,912 | 5 | 13 | 106 | 86 | 4 | 3 | 72 | 39 | 187 | 141 |
| 94,913 | 5 | 13 | 109 | 86 | 6 | 3 | 75 | 39 | 195 | 141 |
| 94,914 | 5 | 13 | 112 | 86 | 6 | 3 | 80 | 39 | 203 | 141 |
| 94,915 | 5 | 13 | 112 | 86 | 6 | 3 | 80 | 39 | 203 | 141 |
| 94,916 | 5 | 13 | 115 | 86 | 6 | 3 | 80 | 39 | 206 | 141 |
| 94,917 | 5 | 13 | 116 | 86 | 6 | 3 | 82 | 39 | 209 | 141 |
| 94,918 | 5 | 10 | 116 | 78 | 6 | 2 | 82 | 29 | 209 | 119 |
| 94,919 | 5 | 10 | 116 | 78 | 6 | 2 | 82 | 29 | 209 | 119 |
| 94,920 | 5 | 9  | 116 | 70 | 6 | 2 | 82 | 26 | 209 | 107 |
| 94,921 | 5 | 7  | 116 | 48 | 6 | 2 | 82 | 23 | 209 | 80  |
| 94,922 | 5 | 5  | 122 | 25 | 6 | 1 | 84 | 10 | 217 | 41  |
| 94,923 | 5 | 5  | 123 | 23 | 6 | 1 | 85 | 8  | 219 | 37  |
| 94,924 | 5 | 5  | 125 | 23 | 6 | 1 | 87 | 8  | 223 | 37  |
| 94,925 | 5 | 3  | 126 | 20 | 6 | 1 | 89 | 8  | 226 | 32  |
| 94,926 | 5 | 3  | 126 | 20 | 6 | 1 | 89 | 9  | 226 | 33  |
| 94,927 | 5 | 2  | 126 | 18 | 6 | 1 | 89 | 9  | 226 | 30  |
| 94,928 | 5 | 2  | 126 | 16 | 6 | 1 | 89 | 8  | 226 | 27  |
| 94,929 | 5 | 2  | 125 | 16 | 6 | 1 | 90 | 8  | 226 | 27  |
| 94,930 | 5 | 2  | 124 | 21 | 6 | 1 | 90 | 9  | 225 | 33  |
| 94,931 | 5 | 2  | 123 | 23 | 6 | 1 | 88 | 11 | 222 | 37  |
| 94,932 | 5 | 3  | 123 | 24 | 6 | 1 | 88 | 15 | 222 | 43  |
| 94,933 | 5 | 3  | 121 | 25 | 6 | 1 | 87 | 15 | 219 | 44  |
| 94,934 | 5 | 3  | 118 | 25 | 6 | 1 | 85 | 15 | 214 | 44  |
| 94,935 | 5 | 3  | 120 | 25 | 6 | 1 | 84 | 15 | 215 | 44  |
| 94,936 | 5 | 3  | 121 | 25 | 6 | 1 | 83 | 15 | 215 | 44  |
| 94,937 | 5 | 3  | 121 | 27 | 6 | 2 | 82 | 16 | 214 | 48  |
| 94,938 | 5 | 3  | 120 | 28 | 6 | 3 | 81 | 16 | 212 | 50  |
| 94,939 | 6 | 3  | 122 | 38 | 6 | 4 | 86 | 18 | 220 | 63  |
| 94,940 | 6 | 3  | 122 | 53 | 6 | 6 | 86 | 26 | 220 | 88  |
| 94,941 | 6 | 4  | 117 | 70 | 5 | 6 | 85 | 33 | 213 | 113 |
| 94,942 | 6 | 4  | 117 | 74 | 6 | 6 | 89 | 33 | 218 | 117 |
| 94,943 | 6 | 4  | 98  | 85 | 5 | 6 | 85 | 37 | 194 | 132 |
| 94,944 | 3 | 5  | 68  | 91 | 5 | 7 | 65 | 44 | 141 | 147 |

|        |   |    |    |    |   |   |    |    |     |     |
|--------|---|----|----|----|---|---|----|----|-----|-----|
| 94,945 | 3 | 5  | 61 | 92 | 5 | 6 | 61 | 45 | 130 | 148 |
| 94,946 | 4 | 5  | 72 | 93 | 8 | 6 | 61 | 45 | 145 | 149 |
| 94,947 | 4 | 5  | 75 | 93 | 8 | 6 | 66 | 45 | 153 | 149 |
| 94,948 | 3 | 9  | 74 | 94 | 8 | 6 | 65 | 50 | 150 | 159 |
| 94,949 | 3 | 9  | 74 | 94 | 8 | 6 | 65 | 50 | 150 | 159 |
| 94,950 | 3 | 9  | 75 | 94 | 8 | 6 | 66 | 50 | 152 | 159 |
| 94,951 | 3 | 9  | 75 | 94 | 8 | 6 | 66 | 50 | 152 | 159 |
| 94,952 | 3 | 9  | 75 | 93 | 8 | 6 | 66 | 50 | 152 | 158 |
| 94,953 | 3 | 9  | 74 | 93 | 8 | 6 | 66 | 49 | 151 | 157 |
| 94,954 | 3 | 9  | 74 | 93 | 8 | 6 | 66 | 49 | 151 | 157 |
| 94,955 | 3 | 8  | 71 | 88 | 8 | 6 | 60 | 48 | 142 | 150 |
| 94,956 | 3 | 8  | 71 | 83 | 7 | 6 | 59 | 49 | 140 | 146 |
| 94,957 | 3 | 8  | 67 | 83 | 7 | 6 | 58 | 47 | 135 | 144 |
| 94,958 | 3 | 8  | 67 | 83 | 7 | 6 | 57 | 47 | 134 | 144 |
| 94,959 | 2 | 8  | 60 | 83 | 7 | 6 | 52 | 47 | 121 | 144 |
| 94,960 | 2 | 8  | 57 | 83 | 6 | 6 | 44 | 47 | 109 | 144 |
| 94,961 | 2 | 9  | 57 | 83 | 6 | 6 | 44 | 47 | 109 | 145 |
| 94,962 | 2 | 9  | 56 | 83 | 6 | 6 | 44 | 47 | 108 | 145 |
| 94,963 | 2 | 8  | 53 | 83 | 4 | 6 | 41 | 47 | 100 | 144 |
| 94,964 | 2 | 8  | 53 | 83 | 4 | 6 | 40 | 47 | 99  | 144 |
| 94,965 | 2 | 8  | 55 | 86 | 4 | 6 | 37 | 47 | 98  | 147 |
| 94,966 | 5 | 8  | 64 | 88 | 4 | 7 | 44 | 47 | 117 | 150 |
| 94,967 | 6 | 8  | 68 | 88 | 5 | 7 | 47 | 47 | 126 | 150 |
| 94,968 | 8 | 9  | 71 | 89 | 5 | 7 | 47 | 47 | 131 | 152 |
| 94,969 | 8 | 9  | 68 | 89 | 5 | 7 | 47 | 48 | 128 | 153 |
| 94,970 | 8 | 9  | 65 | 89 | 5 | 7 | 44 | 48 | 122 | 153 |
| 94,971 | 8 | 10 | 65 | 91 | 5 | 7 | 44 | 48 | 122 | 156 |
| 94,972 | 8 | 10 | 65 | 91 | 5 | 7 | 44 | 47 | 122 | 155 |
| 94,973 | 8 | 10 | 65 | 91 | 5 | 7 | 44 | 47 | 122 | 155 |
| 94,974 | 8 | 10 | 63 | 92 | 5 | 7 | 42 | 47 | 118 | 156 |
| 94,975 | 8 | 10 | 63 | 92 | 5 | 7 | 40 | 47 | 116 | 156 |
| 94,976 | 8 | 10 | 65 | 93 | 5 | 7 | 42 | 47 | 120 | 157 |
| 94,977 | 8 | 10 | 73 | 93 | 5 | 7 | 44 | 46 | 130 | 156 |
| 94,978 | 8 | 10 | 75 | 93 | 6 | 7 | 52 | 46 | 141 | 156 |
| 94,979 | 8 | 10 | 75 | 93 | 6 | 7 | 52 | 46 | 141 | 156 |
| 94,980 | 8 | 10 | 78 | 88 | 6 | 7 | 53 | 45 | 145 | 150 |
| 94,981 | 8 | 10 | 78 | 88 | 6 | 7 | 53 | 45 | 145 | 150 |
| 94,982 | 8 | 9  | 78 | 85 | 6 | 7 | 53 | 39 | 145 | 140 |
| 94,983 | 8 | 9  | 78 | 85 | 6 | 7 | 53 | 39 | 145 | 140 |
| 94,984 | 8 | 9  | 78 | 84 | 6 | 7 | 53 | 39 | 145 | 139 |
| 94,985 | 8 | 9  | 78 | 84 | 6 | 7 | 53 | 39 | 145 | 139 |

|        |   |    |    |    |   |   |    |    |     |     |
|--------|---|----|----|----|---|---|----|----|-----|-----|
| 94,986 | 9 | 9  | 76 | 84 | 6 | 7 | 56 | 39 | 147 | 139 |
| 94,987 | 9 | 9  | 75 | 84 | 6 | 7 | 56 | 40 | 146 | 140 |
| 94,988 | 9 | 9  | 75 | 82 | 6 | 6 | 57 | 39 | 147 | 136 |
| 94,989 | 9 | 10 | 72 | 84 | 6 | 5 | 56 | 39 | 143 | 138 |
| 94,990 | 8 | 10 | 72 | 74 | 6 | 4 | 52 | 37 | 138 | 125 |
| 94,991 | 8 | 9  | 72 | 42 | 6 | 2 | 52 | 22 | 138 | 75  |
| 94,992 | 8 | 10 | 72 | 50 | 6 | 3 | 52 | 29 | 138 | 92  |
| 94,993 | 8 | 12 | 65 | 52 | 5 | 3 | 46 | 29 | 124 | 96  |
| 94,994 | 8 | 12 | 60 | 41 | 5 | 4 | 42 | 25 | 115 | 82  |
| 94,995 | 8 | 11 | 57 | 36 | 4 | 3 | 41 | 18 | 110 | 68  |
| 94,996 | 8 | 11 | 55 | 35 | 4 | 3 | 41 | 17 | 108 | 66  |
| 94,997 | 7 | 12 | 48 | 36 | 2 | 3 | 38 | 19 | 95  | 70  |
| 94,998 | 7 | 12 | 45 | 36 | 2 | 3 | 33 | 20 | 87  | 71  |
| 94,999 | 7 | 8  | 44 | 35 | 2 | 3 | 34 | 21 | 87  | 67  |
| 95,000 | 7 | 8  | 44 | 38 | 2 | 3 | 34 | 21 | 87  | 70  |
| 95,001 | 7 | 8  | 44 | 39 | 2 | 3 | 33 | 22 | 86  | 72  |
| 95,002 | 7 | 8  | 46 | 39 | 2 | 3 | 34 | 22 | 89  | 72  |
| 95,003 | 7 | 8  | 46 | 39 | 2 | 3 | 34 | 22 | 89  | 72  |
| 95,004 | 7 | 8  | 46 | 41 | 2 | 3 | 34 | 22 | 89  | 74  |
| 95,005 | 7 | 9  | 46 | 41 | 2 | 3 | 34 | 22 | 89  | 75  |
| 95,006 | 7 | 9  | 46 | 46 | 2 | 3 | 34 | 21 | 89  | 79  |
| 95,007 | 7 | 9  | 48 | 45 | 2 | 3 | 34 | 20 | 91  | 77  |
| 95,008 | 7 | 9  | 50 | 45 | 2 | 3 | 35 | 20 | 94  | 77  |
| 95,009 | 7 | 9  | 50 | 45 | 2 | 3 | 35 | 20 | 94  | 77  |
| 95,010 | 7 | 9  | 52 | 46 | 2 | 3 | 42 | 20 | 103 | 78  |
| 95,011 | 7 | 8  | 55 | 46 | 3 | 3 | 44 | 20 | 109 | 77  |
| 95,012 | 7 | 8  | 55 | 46 | 3 | 3 | 44 | 21 | 109 | 78  |
| 95,013 | 7 | 8  | 56 | 46 | 3 | 3 | 46 | 23 | 112 | 80  |
| 95,014 | 7 | 8  | 56 | 46 | 3 | 3 | 46 | 23 | 112 | 80  |
| 95,015 | 7 | 8  | 52 | 46 | 3 | 3 | 45 | 24 | 107 | 81  |
| 95,016 | 7 | 8  | 53 | 47 | 3 | 3 | 49 | 25 | 112 | 83  |
| 95,017 | 4 | 8  | 44 | 46 | 3 | 2 | 42 | 25 | 93  | 81  |
| 95,018 | 3 | 8  | 37 | 47 | 2 | 2 | 39 | 25 | 81  | 82  |
| 95,019 | 1 | 7  | 38 | 46 | 2 | 2 | 38 | 24 | 79  | 79  |
| 95,020 | 1 | 7  | 38 | 46 | 2 | 2 | 38 | 24 | 79  | 79  |
| 95,021 | 1 | 7  | 38 | 46 | 2 | 2 | 37 | 24 | 78  | 79  |
| 95,022 | 1 | 6  | 37 | 44 | 2 | 2 | 37 | 24 | 77  | 76  |
| 95,023 | 1 | 6  | 37 | 44 | 2 | 2 | 37 | 24 | 77  | 76  |
| 95,024 | 1 | 6  | 38 | 44 | 2 | 2 | 37 | 25 | 78  | 77  |
| 95,025 | 2 | 6  | 38 | 44 | 2 | 2 | 37 | 29 | 79  | 81  |
| 95,026 | 2 | 6  | 38 | 44 | 2 | 2 | 37 | 29 | 79  | 81  |

|        |   |    |    |     |   |   |    |    |     |     |
|--------|---|----|----|-----|---|---|----|----|-----|-----|
| 95,027 | 2 | 6  | 36 | 43  | 2 | 2 | 35 | 29 | 75  | 80  |
| 95,028 | 2 | 6  | 28 | 43  | 2 | 2 | 33 | 29 | 65  | 80  |
| 95,029 | 2 | 6  | 27 | 43  | 1 | 2 | 24 | 29 | 54  | 80  |
| 95,030 | 2 | 6  | 24 | 43  | 1 | 2 | 23 | 29 | 50  | 80  |
| 95,031 | 2 | 6  | 24 | 43  | 1 | 2 | 22 | 29 | 49  | 80  |
| 95,032 | 5 | 7  | 27 | 48  | 1 | 2 | 22 | 30 | 55  | 87  |
| 95,033 | 5 | 7  | 28 | 51  | 1 | 2 | 23 | 34 | 57  | 94  |
| 95,034 | 5 | 7  | 29 | 53  | 1 | 2 | 23 | 34 | 58  | 96  |
| 95,035 | 5 | 9  | 46 | 84  | 1 | 2 | 28 | 50 | 80  | 145 |
| 95,036 | 4 | 9  | 46 | 87  | 1 | 3 | 29 | 51 | 80  | 150 |
| 95,037 | 6 | 9  | 52 | 95  | 1 | 3 | 29 | 51 | 88  | 158 |
| 95,038 | 6 | 9  | 53 | 99  | 1 | 3 | 29 | 56 | 89  | 167 |
| 95,039 | 6 | 9  | 53 | 99  | 1 | 3 | 29 | 56 | 89  | 167 |
| 95,040 | 6 | 9  | 53 | 101 | 1 | 3 | 30 | 60 | 90  | 173 |
| 95,041 | 6 | 9  | 53 | 102 | 1 | 3 | 30 | 60 | 90  | 174 |
| 95,042 | 6 | 10 | 81 | 101 | 1 | 3 | 34 | 61 | 122 | 175 |
| 95,043 | 6 | 9  | 81 | 93  | 1 | 2 | 34 | 54 | 122 | 158 |
| 95,044 | 6 | 7  | 82 | 88  | 1 | 1 | 34 | 55 | 123 | 151 |
| 95,045 | 6 | 7  | 82 | 88  | 1 | 1 | 34 | 55 | 123 | 151 |
| 95,046 | 6 | 7  | 82 | 87  | 1 | 1 | 34 | 55 | 123 | 150 |
| 95,047 | 6 | 7  | 83 | 87  | 1 | 1 | 34 | 55 | 124 | 150 |
| 95,048 | 6 | 6  | 83 | 84  | 1 | 1 | 34 | 53 | 124 | 144 |
| 95,049 | 6 | 6  | 83 | 84  | 1 | 1 | 33 | 52 | 123 | 143 |
| 95,050 | 6 | 6  | 85 | 83  | 1 | 1 | 33 | 45 | 125 | 135 |
| 95,051 | 6 | 6  | 85 | 80  | 1 | 1 | 33 | 45 | 125 | 132 |
| 95,052 | 6 | 6  | 84 | 79  | 1 | 2 | 32 | 44 | 123 | 131 |
| 95,053 | 6 | 6  | 82 | 80  | 1 | 2 | 32 | 44 | 121 | 132 |
| 95,054 | 6 | 6  | 82 | 80  | 1 | 2 | 32 | 44 | 121 | 132 |
| 95,055 | 6 | 5  | 82 | 78  | 1 | 2 | 32 | 44 | 121 | 129 |
| 95,056 | 6 | 5  | 82 | 73  | 1 | 2 | 32 | 44 | 121 | 124 |
| 95,057 | 6 | 5  | 82 | 74  | 1 | 2 | 33 | 44 | 122 | 125 |
| 95,058 | 6 | 5  | 80 | 74  | 1 | 2 | 34 | 44 | 121 | 125 |
| 95,059 | 6 | 5  | 78 | 73  | 1 | 2 | 33 | 44 | 118 | 124 |
| 95,060 | 7 | 5  | 81 | 73  | 1 | 2 | 33 | 44 | 122 | 124 |
| 95,061 | 7 | 5  | 80 | 73  | 1 | 2 | 26 | 44 | 114 | 124 |
| 95,062 | 7 | 5  | 76 | 73  | 0 | 2 | 24 | 44 | 107 | 124 |
| 95,063 | 7 | 5  | 76 | 73  | 0 | 2 | 24 | 43 | 107 | 123 |
| 95,064 | 7 | 5  | 75 | 73  | 1 | 2 | 24 | 40 | 107 | 120 |
| 95,065 | 7 | 5  | 74 | 73  | 1 | 2 | 25 | 40 | 107 | 120 |
| 95,066 | 7 | 5  | 74 | 73  | 1 | 2 | 23 | 40 | 105 | 120 |
| 95,067 | 7 | 5  | 72 | 69  | 1 | 2 | 23 | 39 | 103 | 115 |

|        |   |   |    |    |   |   |    |    |     |     |
|--------|---|---|----|----|---|---|----|----|-----|-----|
| 95,068 | 7 | 5 | 72 | 68 | 1 | 2 | 23 | 39 | 103 | 114 |
| 95,069 | 7 | 5 | 68 | 68 | 1 | 2 | 23 | 39 | 99  | 114 |
| 95,070 | 7 | 5 | 67 | 68 | 1 | 2 | 22 | 39 | 97  | 114 |
| 95,071 | 7 | 6 | 67 | 68 | 1 | 2 | 22 | 39 | 97  | 115 |
| 95,072 | 7 | 6 | 67 | 68 | 1 | 2 | 22 | 39 | 97  | 115 |
| 95,073 | 7 | 6 | 67 | 68 | 1 | 2 | 22 | 39 | 97  | 115 |
| 95,074 | 7 | 6 | 67 | 68 | 1 | 2 | 22 | 39 | 97  | 115 |
| 95,075 | 7 | 6 | 67 | 68 | 1 | 2 | 22 | 38 | 97  | 114 |
| 95,076 | 6 | 6 | 67 | 67 | 1 | 2 | 22 | 35 | 96  | 110 |
| 95,077 | 6 | 6 | 67 | 67 | 1 | 2 | 22 | 35 | 96  | 110 |
| 95,078 | 6 | 6 | 66 | 68 | 1 | 2 | 22 | 35 | 95  | 111 |
| 95,079 | 6 | 6 | 66 | 68 | 1 | 2 | 22 | 35 | 95  | 111 |
| 95,080 | 6 | 6 | 65 | 68 | 1 | 2 | 22 | 35 | 94  | 111 |
| 95,081 | 6 | 6 | 66 | 68 | 1 | 2 | 22 | 35 | 95  | 111 |
| 95,082 | 3 | 6 | 65 | 68 | 1 | 2 | 22 | 35 | 91  | 111 |
| 95,083 | 3 | 5 | 66 | 63 | 1 | 2 | 23 | 34 | 93  | 104 |
| 95,084 | 4 | 5 | 65 | 59 | 1 | 2 | 22 | 31 | 92  | 97  |
| 95,085 | 4 | 5 | 64 | 60 | 1 | 2 | 22 | 34 | 91  | 101 |
| 95,086 | 4 | 3 | 47 | 25 | 1 | 1 | 17 | 17 | 69  | 46  |
| 95,087 | 4 | 3 | 48 | 34 | 1 | 2 | 16 | 32 | 69  | 71  |
| 95,088 | 4 | 3 | 44 | 36 | 1 | 2 | 15 | 37 | 64  | 78  |
| 95,089 | 4 | 3 | 43 | 32 | 1 | 2 | 13 | 33 | 61  | 70  |
| 95,090 | 4 | 3 | 41 | 32 | 1 | 2 | 15 | 33 | 61  | 70  |
| 95,091 | 4 | 2 | 42 | 28 | 1 | 2 | 13 | 29 | 60  | 61  |
| 95,092 | 4 | 1 | 27 | 28 | 1 | 2 | 11 | 28 | 43  | 59  |
| 95,093 | 4 | 1 | 17 | 29 | 1 | 2 | 11 | 28 | 33  | 60  |
| 95,094 | 4 | 1 | 16 | 29 | 1 | 2 | 11 | 28 | 32  | 60  |
| 95,095 | 4 | 1 | 16 | 29 | 1 | 2 | 11 | 27 | 32  | 59  |
| 95,096 | 4 | 1 | 16 | 29 | 1 | 2 | 11 | 28 | 32  | 60  |
| 95,097 | 4 | 1 | 15 | 29 | 1 | 2 | 11 | 28 | 31  | 60  |
| 95,098 | 4 | 2 | 15 | 29 | 1 | 2 | 11 | 28 | 31  | 61  |
| 95,099 | 4 | 2 | 15 | 29 | 1 | 2 | 11 | 28 | 31  | 61  |
| 95,100 | 4 | 2 | 15 | 29 | 1 | 2 | 11 | 28 | 31  | 61  |
| 95,101 | 4 | 2 | 13 | 28 | 1 | 2 | 11 | 28 | 29  | 60  |
| 95,102 | 4 | 2 | 14 | 28 | 1 | 1 | 12 | 28 | 31  | 59  |
| 95,103 | 4 | 2 | 14 | 28 | 1 | 1 | 12 | 28 | 31  | 59  |
| 95,104 | 4 | 2 | 15 | 27 | 1 | 1 | 12 | 28 | 32  | 58  |
| 95,105 | 4 | 2 | 16 | 27 | 1 | 1 | 14 | 28 | 35  | 58  |
| 95,106 | 4 | 2 | 18 | 27 | 1 | 1 | 14 | 28 | 37  | 58  |
| 95,107 | 4 | 2 | 21 | 26 | 1 | 1 | 16 | 28 | 42  | 57  |
| 95,108 | 4 | 2 | 28 | 26 | 1 | 1 | 15 | 28 | 48  | 57  |



|        |   |   |     |    |   |   |     |    |     |    |
|--------|---|---|-----|----|---|---|-----|----|-----|----|
| 95,109 | 4 | 2 | 28  | 26 | 1 | 1 | 14  | 28 | 47  | 57 |
| 95,110 | 4 | 2 | 28  | 26 | 1 | 1 | 14  | 28 | 47  | 57 |
| 95,111 | 3 | 2 | 25  | 26 | 1 | 1 | 14  | 28 | 43  | 57 |
| 95,112 | 3 | 2 | 25  | 26 | 1 | 1 | 15  | 29 | 44  | 58 |
| 95,113 | 3 | 2 | 25  | 26 | 1 | 1 | 15  | 29 | 44  | 58 |
| 95,114 | 3 | 2 | 30  | 26 | 1 | 1 | 17  | 29 | 51  | 58 |
| 95,115 | 3 | 2 | 31  | 26 | 0 | 1 | 16  | 29 | 50  | 58 |
| 95,116 | 3 | 2 | 31  | 30 | 0 | 1 | 14  | 29 | 48  | 62 |
| 95,117 | 3 | 2 | 31  | 30 | 0 | 1 | 14  | 29 | 48  | 62 |
| 95,118 | 3 | 2 | 31  | 30 | 0 | 1 | 14  | 29 | 48  | 62 |
| 95,119 | 3 | 2 | 34  | 31 | 0 | 1 | 14  | 29 | 51  | 63 |
| 95,120 | 3 | 2 | 36  | 30 | 1 | 1 | 14  | 29 | 54  | 62 |
| 95,121 | 3 | 2 | 36  | 30 | 1 | 1 | 14  | 29 | 54  | 62 |
| 95,122 | 3 | 3 | 36  | 30 | 1 | 1 | 14  | 29 | 54  | 63 |
| 95,123 | 3 | 3 | 36  | 30 | 1 | 1 | 14  | 29 | 54  | 63 |
| 95,124 | 3 | 3 | 41  | 30 | 1 | 1 | 22  | 29 | 67  | 63 |
| 95,125 | 3 | 3 | 41  | 30 | 1 | 1 | 22  | 29 | 67  | 63 |
| 95,126 | 3 | 3 | 42  | 31 | 1 | 1 | 25  | 30 | 71  | 65 |
| 95,127 | 3 | 3 | 42  | 31 | 1 | 1 | 25  | 30 | 71  | 65 |
| 95,128 | 4 | 3 | 47  | 31 | 1 | 1 | 27  | 30 | 79  | 65 |
| 95,129 | 4 | 3 | 50  | 30 | 1 | 1 | 29  | 31 | 84  | 65 |
| 95,130 | 4 | 3 | 114 | 30 | 2 | 1 | 50  | 34 | 170 | 68 |
| 95,131 | 4 | 3 | 130 | 30 | 2 | 1 | 66  | 34 | 202 | 68 |
| 95,132 | 4 | 3 | 129 | 30 | 2 | 1 | 66  | 36 | 201 | 70 |
| 95,133 | 4 | 3 | 126 | 33 | 2 | 1 | 65  | 36 | 197 | 73 |
| 95,134 | 3 | 3 | 127 | 33 | 2 | 1 | 65  | 36 | 197 | 73 |
| 95,135 | 4 | 3 | 127 | 35 | 2 | 1 | 67  | 33 | 200 | 72 |
| 95,136 | 4 | 3 | 128 | 38 | 2 | 1 | 67  | 39 | 201 | 81 |
| 95,137 | 4 | 3 | 129 | 38 | 2 | 2 | 68  | 40 | 203 | 83 |
| 95,138 | 4 | 3 | 139 | 29 | 2 | 1 | 76  | 25 | 221 | 58 |
| 95,139 | 3 | 3 | 142 | 19 | 2 | 1 | 96  | 18 | 243 | 41 |
| 95,140 | 3 | 5 | 142 | 19 | 2 | 1 | 96  | 18 | 243 | 43 |
| 95,141 | 3 | 5 | 142 | 19 | 2 | 1 | 94  | 19 | 241 | 44 |
| 95,142 | 3 | 5 | 144 | 18 | 3 | 1 | 100 | 19 | 250 | 43 |
| 95,143 | 3 | 5 | 144 | 16 | 3 | 1 | 100 | 19 | 250 | 41 |
| 95,144 | 3 | 5 | 144 | 16 | 3 | 1 | 100 | 19 | 250 | 41 |
| 95,145 | 3 | 5 | 144 | 16 | 3 | 1 | 100 | 19 | 250 | 41 |
| 95,146 | 3 | 5 | 144 | 16 | 3 | 1 | 102 | 19 | 252 | 41 |
| 95,147 | 3 | 5 | 146 | 16 | 3 | 1 | 103 | 18 | 255 | 40 |
| 95,148 | 3 | 5 | 146 | 16 | 3 | 1 | 103 | 18 | 255 | 40 |
| 95,149 | 3 | 4 | 150 | 16 | 3 | 1 | 103 | 18 | 259 | 39 |

|        |   |   |     |    |   |   |     |    |     |    |
|--------|---|---|-----|----|---|---|-----|----|-----|----|
| 95,150 | 5 | 4 | 178 | 17 | 3 | 1 | 132 | 22 | 318 | 44 |
| 95,151 | 5 | 4 | 190 | 18 | 3 | 1 | 136 | 27 | 334 | 50 |
| 95,152 | 5 | 4 | 189 | 19 | 3 | 1 | 136 | 27 | 333 | 51 |
| 95,153 | 5 | 4 | 192 | 24 | 4 | 1 | 141 | 27 | 342 | 56 |
| 95,154 | 5 | 4 | 192 | 30 | 4 | 1 | 141 | 28 | 342 | 63 |
| 95,155 | 5 | 4 | 191 | 31 | 4 | 1 | 141 | 28 | 341 | 64 |
| 95,156 | 5 | 4 | 190 | 34 | 4 | 1 | 139 | 28 | 338 | 67 |
| 95,157 | 5 | 4 | 188 | 34 | 4 | 1 | 139 | 29 | 336 | 68 |
| 95,158 | 5 | 4 | 185 | 34 | 4 | 1 | 137 | 29 | 331 | 68 |
| 95,159 | 5 | 4 | 179 | 34 | 4 | 1 | 137 | 29 | 325 | 68 |
| 95,160 | 5 | 4 | 179 | 34 | 4 | 1 | 139 | 29 | 327 | 68 |
| 95,161 | 5 | 4 | 179 | 36 | 4 | 1 | 139 | 29 | 327 | 70 |
| 95,162 | 5 | 4 | 178 | 36 | 4 | 1 | 139 | 29 | 326 | 70 |
| 95,163 | 5 | 4 | 178 | 36 | 4 | 1 | 138 | 28 | 325 | 69 |
| 95,164 | 5 | 4 | 179 | 36 | 4 | 1 | 140 | 28 | 328 | 69 |
| 95,165 | 5 | 4 | 174 | 36 | 4 | 1 | 138 | 28 | 321 | 69 |
| 95,166 | 5 | 5 | 173 | 36 | 4 | 1 | 137 | 28 | 319 | 70 |
| 95,167 | 5 | 5 | 174 | 32 | 4 | 1 | 136 | 28 | 319 | 66 |
| 95,168 | 5 | 5 | 174 | 32 | 4 | 1 | 136 | 28 | 319 | 66 |
| 95,169 | 6 | 5 | 171 | 32 | 4 | 1 | 139 | 28 | 320 | 66 |
| 95,170 | 6 | 5 | 169 | 31 | 3 | 1 | 139 | 28 | 317 | 65 |
| 95,171 | 6 | 5 | 169 | 31 | 3 | 1 | 139 | 28 | 317 | 65 |
| 95,172 | 6 | 5 | 167 | 31 | 3 | 1 | 138 | 28 | 314 | 65 |
| 95,173 | 6 | 3 | 166 | 32 | 3 | 1 | 133 | 28 | 308 | 64 |
| 95,174 | 7 | 3 | 167 | 32 | 3 | 1 | 133 | 28 | 310 | 64 |
| 95,175 | 7 | 3 | 166 | 32 | 3 | 1 | 133 | 28 | 309 | 64 |
| 95,176 | 7 | 3 | 182 | 31 | 6 | 1 | 162 | 27 | 357 | 62 |
| 95,177 | 7 | 3 | 181 | 36 | 6 | 1 | 159 | 27 | 353 | 67 |
| 95,178 | 6 | 3 | 176 | 37 | 6 | 1 | 163 | 26 | 351 | 67 |
| 95,179 | 6 | 3 | 173 | 37 | 6 | 1 | 161 | 26 | 346 | 67 |
| 95,180 | 6 | 3 | 168 | 37 | 6 | 1 | 160 | 25 | 340 | 66 |
| 95,181 | 6 | 3 | 110 | 37 | 5 | 1 | 140 | 22 | 261 | 63 |
| 95,182 | 6 | 3 | 94  | 37 | 5 | 1 | 124 | 20 | 229 | 61 |
| 95,183 | 6 | 3 | 93  | 34 | 5 | 1 | 124 | 20 | 228 | 58 |
| 95,184 | 6 | 3 | 93  | 34 | 5 | 1 | 124 | 20 | 228 | 58 |
| 95,185 | 6 | 3 | 98  | 36 | 5 | 1 | 123 | 22 | 232 | 62 |
| 95,186 | 5 | 3 | 101 | 30 | 6 | 1 | 125 | 15 | 237 | 49 |
| 95,187 | 5 | 3 | 102 | 30 | 6 | 0 | 125 | 14 | 238 | 47 |
| 95,188 | 5 | 3 | 101 | 33 | 6 | 0 | 124 | 14 | 236 | 50 |
| 95,189 | 5 | 3 | 90  | 37 | 6 | 0 | 117 | 21 | 218 | 61 |
| 95,190 | 4 | 3 | 85  | 41 | 6 | 0 | 95  | 21 | 190 | 65 |

|        |    |   |     |    |    |   |     |    |     |     |
|--------|----|---|-----|----|----|---|-----|----|-----|-----|
| 95,191 | 5  | 1 | 84  | 41 | 6  | 0 | 97  | 22 | 192 | 64  |
| 95,192 | 6  | 1 | 81  | 41 | 5  | 0 | 91  | 21 | 183 | 63  |
| 95,193 | 6  | 1 | 81  | 41 | 5  | 0 | 91  | 21 | 183 | 63  |
| 95,194 | 6  | 1 | 82  | 41 | 5  | 0 | 91  | 21 | 184 | 63  |
| 95,195 | 6  | 1 | 82  | 43 | 5  | 0 | 91  | 22 | 184 | 66  |
| 95,196 | 7  | 1 | 85  | 46 | 5  | 1 | 91  | 30 | 188 | 78  |
| 95,197 | 7  | 1 | 85  | 53 | 5  | 1 | 89  | 35 | 186 | 90  |
| 95,198 | 7  | 2 | 83  | 62 | 5  | 1 | 89  | 42 | 184 | 107 |
| 95,199 | 7  | 2 | 79  | 64 | 5  | 1 | 89  | 43 | 180 | 110 |
| 95,200 | 7  | 2 | 77  | 64 | 5  | 1 | 82  | 43 | 171 | 110 |
| 95,201 | 5  | 2 | 54  | 62 | 5  | 1 | 60  | 36 | 124 | 101 |
| 95,202 | 5  | 2 | 42  | 63 | 5  | 2 | 56  | 36 | 108 | 103 |
| 95,203 | 5  | 2 | 39  | 64 | 4  | 2 | 51  | 36 | 99  | 104 |
| 95,204 | 5  | 2 | 39  | 60 | 4  | 2 | 51  | 36 | 99  | 100 |
| 95,205 | 5  | 2 | 42  | 54 | 5  | 2 | 52  | 36 | 104 | 94  |
| 95,206 | 5  | 2 | 42  | 56 | 5  | 4 | 52  | 38 | 104 | 100 |
| 95,207 | 5  | 2 | 42  | 53 | 5  | 4 | 52  | 38 | 104 | 97  |
| 95,208 | 5  | 2 | 56  | 57 | 6  | 4 | 54  | 41 | 121 | 104 |
| 95,209 | 5  | 2 | 55  | 57 | 6  | 4 | 54  | 41 | 120 | 104 |
| 95,210 | 5  | 2 | 58  | 58 | 6  | 4 | 55  | 41 | 124 | 105 |
| 95,211 | 5  | 2 | 58  | 60 | 7  | 4 | 60  | 41 | 130 | 107 |
| 95,212 | 5  | 2 | 58  | 58 | 7  | 4 | 60  | 41 | 130 | 105 |
| 95,213 | 5  | 2 | 64  | 59 | 7  | 4 | 62  | 41 | 138 | 106 |
| 95,214 | 5  | 4 | 65  | 60 | 7  | 4 | 62  | 41 | 139 | 109 |
| 95,215 | 13 | 4 | 113 | 60 | 10 | 4 | 147 | 43 | 283 | 111 |
| 95,216 | 13 | 4 | 113 | 60 | 10 | 4 | 147 | 43 | 283 | 111 |
| 95,217 | 13 | 3 | 114 | 60 | 10 | 4 | 150 | 43 | 287 | 110 |
| 95,218 | 14 | 3 | 115 | 60 | 10 | 4 | 152 | 43 | 291 | 110 |
| 95,219 | 14 | 3 | 115 | 60 | 10 | 4 | 151 | 43 | 290 | 110 |
| 95,220 | 14 | 3 | 117 | 60 | 11 | 4 | 152 | 43 | 294 | 110 |
| 95,221 | 14 | 3 | 117 | 60 | 11 | 4 | 152 | 43 | 294 | 110 |
| 95,222 | 14 | 3 | 120 | 60 | 11 | 4 | 152 | 43 | 297 | 110 |
| 95,223 | 14 | 3 | 141 | 60 | 12 | 4 | 165 | 44 | 332 | 111 |
| 95,224 | 14 | 3 | 141 | 61 | 12 | 4 | 165 | 45 | 332 | 113 |
| 95,225 | 13 | 4 | 141 | 63 | 12 | 4 | 166 | 45 | 332 | 116 |
| 95,226 | 13 | 4 | 143 | 64 | 12 | 4 | 164 | 45 | 332 | 117 |
| 95,227 | 13 | 5 | 130 | 64 | 9  | 4 | 137 | 45 | 289 | 118 |
| 95,228 | 14 | 5 | 136 | 59 | 10 | 4 | 163 | 45 | 323 | 113 |
| 95,229 | 15 | 5 | 139 | 59 | 11 | 4 | 162 | 45 | 327 | 113 |
| 95,230 | 15 | 5 | 141 | 59 | 13 | 4 | 165 | 45 | 334 | 113 |
| 95,231 | 15 | 7 | 141 | 73 | 14 | 4 | 165 | 50 | 335 | 134 |

|        |    |    |     |    |    |   |     |    |     |     |
|--------|----|----|-----|----|----|---|-----|----|-----|-----|
| 95,232 | 15 | 7  | 140 | 77 | 14 | 4 | 165 | 53 | 334 | 141 |
| 95,233 | 15 | 7  | 150 | 86 | 14 | 4 | 171 | 59 | 350 | 156 |
| 95,234 | 15 | 7  | 150 | 87 | 14 | 4 | 171 | 61 | 350 | 159 |
| 95,235 | 15 | 7  | 146 | 87 | 14 | 5 | 171 | 63 | 346 | 162 |
| 95,236 | 15 | 7  | 145 | 87 | 13 | 5 | 170 | 63 | 343 | 162 |
| 95,237 | 15 | 7  | 143 | 86 | 13 | 5 | 168 | 63 | 339 | 161 |
| 95,238 | 15 | 8  | 146 | 91 | 13 | 5 | 170 | 65 | 344 | 169 |
| 95,239 | 19 | 10 | 154 | 95 | 13 | 5 | 174 | 66 | 360 | 176 |
| 95,240 | 19 | 10 | 154 | 91 | 13 | 5 | 173 | 59 | 359 | 165 |
| 95,241 | 19 | 10 | 155 | 87 | 13 | 5 | 173 | 59 | 360 | 161 |
| 95,242 | 20 | 10 | 161 | 87 | 13 | 5 | 175 | 58 | 369 | 160 |
| 95,243 | 19 | 10 | 162 | 89 | 13 | 5 | 178 | 57 | 372 | 161 |
| 95,244 | 19 | 10 | 189 | 89 | 14 | 5 | 198 | 58 | 420 | 162 |
| 95,245 | 19 | 10 | 188 | 88 | 14 | 5 | 198 | 57 | 419 | 160 |
| 95,246 | 20 | 10 | 190 | 90 | 15 | 5 | 201 | 57 | 426 | 162 |
| 95,247 | 19 | 10 | 187 | 80 | 15 | 4 | 201 | 44 | 422 | 138 |
| 95,248 | 19 | 9  | 187 | 71 | 15 | 4 | 202 | 37 | 423 | 121 |
| 95,249 | 19 | 9  | 187 | 71 | 15 | 4 | 202 | 37 | 423 | 121 |
| 95,250 | 19 | 9  | 190 | 69 | 15 | 4 | 202 | 36 | 426 | 118 |
| 95,251 | 19 | 9  | 190 | 69 | 15 | 4 | 203 | 34 | 427 | 116 |
| 95,252 | 19 | 9  | 187 | 70 | 15 | 4 | 203 | 34 | 424 | 117 |
| 95,253 | 19 | 9  | 187 | 69 | 15 | 3 | 203 | 34 | 424 | 115 |
| 95,254 | 19 | 9  | 187 | 67 | 15 | 3 | 202 | 34 | 423 | 113 |
| 95,255 | 19 | 9  | 185 | 66 | 14 | 3 | 201 | 34 | 419 | 112 |
| 95,256 | 19 | 9  | 185 | 66 | 13 | 3 | 200 | 33 | 417 | 111 |
| 95,257 | 19 | 9  | 178 | 63 | 13 | 1 | 200 | 31 | 410 | 104 |
| 95,258 | 19 | 9  | 176 | 60 | 13 | 1 | 200 | 28 | 408 | 98  |
| 95,259 | 19 | 9  | 182 | 59 | 13 | 1 | 199 | 29 | 413 | 98  |
| 95,260 | 21 | 9  | 202 | 60 | 15 | 1 | 214 | 29 | 452 | 99  |
| 95,261 | 22 | 9  | 203 | 61 | 15 | 1 | 207 | 30 | 447 | 101 |
| 95,262 | 23 | 9  | 206 | 59 | 15 | 1 | 214 | 30 | 458 | 99  |
| 95,263 | 23 | 9  | 207 | 59 | 15 | 1 | 214 | 30 | 459 | 99  |
| 95,264 | 23 | 7  | 201 | 57 | 15 | 1 | 212 | 28 | 451 | 93  |
| 95,265 | 23 | 7  | 201 | 57 | 15 | 1 | 213 | 28 | 452 | 93  |
| 95,266 | 15 | 7  | 152 | 57 | 12 | 1 | 126 | 28 | 305 | 93  |
| 95,267 | 15 | 7  | 150 | 57 | 12 | 1 | 123 | 28 | 300 | 93  |
| 95,268 | 14 | 7  | 150 | 57 | 12 | 1 | 121 | 28 | 297 | 93  |
| 95,269 | 14 | 7  | 149 | 57 | 12 | 1 | 122 | 28 | 297 | 93  |
| 95,270 | 14 | 7  | 149 | 57 | 12 | 1 | 122 | 29 | 297 | 94  |
| 95,271 | 13 | 7  | 147 | 57 | 11 | 1 | 119 | 29 | 290 | 94  |
| 95,272 | 14 | 7  | 147 | 57 | 11 | 1 | 126 | 29 | 298 | 94  |

|        |    |   |     |    |    |   |     |    |     |    |
|--------|----|---|-----|----|----|---|-----|----|-----|----|
| 95,273 | 14 | 7 | 146 | 58 | 11 | 1 | 126 | 29 | 297 | 95 |
| 95,274 | 16 | 7 | 128 | 56 | 10 | 1 | 113 | 27 | 267 | 91 |
| 95,275 | 16 | 7 | 128 | 56 | 10 | 1 | 113 | 27 | 267 | 91 |
| 95,276 | 19 | 6 | 139 | 55 | 10 | 1 | 113 | 28 | 281 | 90 |
| 95,277 | 19 | 6 | 140 | 54 | 10 | 1 | 116 | 29 | 285 | 90 |
| 95,278 | 19 | 5 | 137 | 54 | 10 | 1 | 116 | 29 | 282 | 89 |
| 95,279 | 18 | 5 | 134 | 53 | 9  | 1 | 92  | 29 | 253 | 88 |
| 95,280 | 17 | 5 | 131 | 53 | 8  | 1 | 87  | 29 | 243 | 88 |
| 95,281 | 17 | 5 | 131 | 53 | 6  | 1 | 84  | 29 | 238 | 88 |
| 95,282 | 17 | 3 | 123 | 26 | 6  | 1 | 78  | 15 | 224 | 45 |
| 95,283 | 17 | 3 | 125 | 28 | 6  | 1 | 81  | 15 | 229 | 47 |
| 95,284 | 17 | 3 | 123 | 28 | 6  | 1 | 81  | 15 | 227 | 47 |
| 95,285 | 17 | 3 | 123 | 27 | 6  | 1 | 81  | 13 | 227 | 44 |
| 95,286 | 17 | 3 | 122 | 25 | 6  | 0 | 82  | 9  | 227 | 37 |
| 95,287 | 17 | 3 | 122 | 25 | 6  | 0 | 82  | 9  | 227 | 37 |
| 95,288 | 17 | 2 | 123 | 20 | 6  | 0 | 81  | 7  | 227 | 29 |
| 95,289 | 17 | 2 | 119 | 20 | 6  | 0 | 80  | 7  | 222 | 29 |
| 95,290 | 14 | 0 | 111 | 13 | 6  | 0 | 76  | 6  | 207 | 19 |
| 95,291 | 14 | 0 | 110 | 13 | 6  | 0 | 78  | 6  | 208 | 19 |
| 95,292 | 12 | 0 | 105 | 13 | 6  | 1 | 77  | 6  | 200 | 20 |
| 95,293 | 12 | 0 | 107 | 11 | 6  | 1 | 77  | 6  | 202 | 18 |
| 95,294 | 12 | 0 | 107 | 11 | 6  | 1 | 75  | 5  | 200 | 17 |
| 95,295 | 12 | 0 | 81  | 10 | 5  | 1 | 57  | 5  | 155 | 16 |
| 95,296 | 12 | 0 | 81  | 10 | 5  | 1 | 57  | 5  | 155 | 16 |
| 95,297 | 11 | 0 | 79  | 8  | 4  | 1 | 54  | 5  | 148 | 14 |
| 95,298 | 11 | 0 | 79  | 8  | 4  | 1 | 54  | 5  | 148 | 14 |
| 95,299 | 11 | 0 | 78  | 8  | 4  | 1 | 53  | 5  | 146 | 14 |
| 95,300 | 11 | 0 | 76  | 8  | 4  | 1 | 53  | 5  | 144 | 14 |
| 95,301 | 11 | 0 | 76  | 8  | 4  | 1 | 52  | 5  | 143 | 14 |
| 95,302 | 11 | 0 | 76  | 8  | 4  | 1 | 52  | 5  | 143 | 14 |
| 95,303 | 11 | 0 | 76  | 7  | 4  | 1 | 52  | 5  | 143 | 13 |
| 95,304 | 11 | 0 | 76  | 7  | 4  | 1 | 52  | 5  | 143 | 13 |
| 95,305 | 11 | 0 | 76  | 8  | 4  | 1 | 52  | 9  | 143 | 18 |
| 95,306 | 11 | 0 | 75  | 8  | 4  | 1 | 52  | 12 | 142 | 21 |
| 95,307 | 11 | 0 | 72  | 15 | 4  | 1 | 53  | 14 | 140 | 30 |
| 95,308 | 11 | 0 | 72  | 17 | 4  | 1 | 53  | 16 | 140 | 34 |
| 95,309 | 11 | 1 | 71  | 22 | 4  | 1 | 53  | 19 | 139 | 43 |
| 95,310 | 11 | 1 | 64  | 22 | 4  | 1 | 53  | 18 | 132 | 42 |
| 95,311 | 9  | 1 | 41  | 21 | 2  | 1 | 37  | 17 | 89  | 40 |
| 95,312 | 8  | 1 | 40  | 21 | 2  | 1 | 37  | 18 | 87  | 41 |
| 95,313 | 7  | 1 | 37  | 21 | 1  | 1 | 30  | 18 | 75  | 41 |

|        |   |   |    |     |   |   |    |    |    |     |
|--------|---|---|----|-----|---|---|----|----|----|-----|
| 95,314 | 7 | 1 | 36 | 21  | 1 | 1 | 30 | 18 | 74 | 41  |
| 95,315 | 7 | 1 | 40 | 21  | 1 | 1 | 30 | 18 | 78 | 41  |
| 95,316 | 7 | 1 | 40 | 21  | 1 | 1 | 29 | 18 | 77 | 41  |
| 95,317 | 7 | 1 | 40 | 21  | 1 | 1 | 29 | 18 | 77 | 41  |
| 95,318 | 7 | 1 | 40 | 21  | 1 | 1 | 29 | 18 | 77 | 41  |
| 95,319 | 8 | 1 | 41 | 21  | 1 | 1 | 30 | 18 | 80 | 41  |
| 95,320 | 8 | 1 | 41 | 21  | 1 | 1 | 30 | 18 | 80 | 41  |
| 95,321 | 8 | 1 | 41 | 32  | 1 | 2 | 30 | 28 | 80 | 63  |
| 95,322 | 8 | 1 | 43 | 46  | 1 | 2 | 33 | 36 | 85 | 85  |
| 95,323 | 8 | 4 | 40 | 71  | 1 | 4 | 25 | 73 | 74 | 152 |
| 95,324 | 8 | 4 | 40 | 77  | 1 | 4 | 24 | 76 | 73 | 161 |
| 95,325 | 6 | 4 | 37 | 79  | 1 | 4 | 22 | 76 | 66 | 163 |
| 95,326 | 6 | 8 | 35 | 114 | 1 | 4 | 22 | 84 | 64 | 210 |
| 95,327 | 3 | 8 | 25 | 115 | 1 | 4 | 21 | 84 | 50 | 211 |
| 95,328 | 3 | 8 | 22 | 122 | 1 | 5 | 18 | 84 | 44 | 219 |
| 95,329 | 3 | 8 | 22 | 124 | 1 | 5 | 17 | 85 | 43 | 222 |
| 95,330 | 3 | 8 | 19 | 124 | 0 | 5 | 15 | 85 | 37 | 222 |
| 95,331 | 3 | 8 | 19 | 125 | 0 | 5 | 15 | 85 | 37 | 223 |
| 95,332 | 3 | 8 | 17 | 125 | 0 | 5 | 15 | 85 | 35 | 223 |
| 95,333 | 3 | 8 | 17 | 125 | 1 | 5 | 15 | 85 | 36 | 223 |
| 95,334 | 4 | 8 | 15 | 123 | 1 | 5 | 14 | 85 | 34 | 221 |
| 95,335 | 4 | 8 | 15 | 123 | 1 | 5 | 14 | 85 | 34 | 221 |
| 95,336 | 4 | 8 | 15 | 126 | 1 | 5 | 14 | 85 | 34 | 224 |
| 95,337 | 4 | 8 | 15 | 126 | 1 | 5 | 13 | 85 | 33 | 224 |
| 95,338 | 4 | 8 | 15 | 126 | 1 | 5 | 13 | 85 | 33 | 224 |
| 95,339 | 4 | 8 | 13 | 126 | 1 | 5 | 13 | 85 | 31 | 224 |
| 95,340 | 4 | 8 | 14 | 126 | 1 | 5 | 13 | 85 | 32 | 224 |
| 95,341 | 3 | 8 | 16 | 126 | 1 | 5 | 13 | 85 | 33 | 224 |
| 95,342 | 3 | 8 | 16 | 126 | 1 | 5 | 11 | 85 | 31 | 224 |
| 95,343 | 3 | 8 | 15 | 129 | 1 | 4 | 9  | 85 | 28 | 226 |
| 95,344 | 3 | 8 | 13 | 129 | 1 | 4 | 8  | 86 | 25 | 227 |
| 95,345 | 3 | 8 | 13 | 129 | 1 | 4 | 10 | 86 | 27 | 227 |
| 95,346 | 3 | 8 | 12 | 129 | 1 | 4 | 8  | 86 | 24 | 227 |
| 95,347 | 3 | 8 | 12 | 129 | 1 | 4 | 8  | 86 | 24 | 227 |
| 95,348 | 3 | 8 | 12 | 129 | 1 | 4 | 8  | 86 | 24 | 227 |
| 95,349 | 3 | 8 | 13 | 129 | 1 | 4 | 8  | 86 | 25 | 227 |
| 95,350 | 3 | 8 | 14 | 129 | 1 | 4 | 8  | 86 | 26 | 227 |
| 95,351 | 3 | 8 | 14 | 129 | 1 | 4 | 8  | 86 | 26 | 227 |
| 95,352 | 3 | 8 | 40 | 129 | 1 | 4 | 14 | 86 | 58 | 227 |
| 95,353 | 3 | 8 | 41 | 129 | 1 | 4 | 14 | 86 | 59 | 227 |
| 95,354 | 3 | 8 | 41 | 129 | 1 | 4 | 14 | 86 | 59 | 227 |

|        |   |   |    |     |   |   |    |    |     |     |
|--------|---|---|----|-----|---|---|----|----|-----|-----|
| 95,355 | 3 | 8 | 41 | 129 | 1 | 4 | 14 | 86 | 59  | 227 |
| 95,356 | 3 | 8 | 41 | 128 | 1 | 4 | 14 | 82 | 59  | 222 |
| 95,357 | 3 | 8 | 51 | 128 | 1 | 4 | 15 | 79 | 70  | 219 |
| 95,358 | 3 | 8 | 52 | 121 | 1 | 4 | 15 | 77 | 71  | 210 |
| 95,359 | 3 | 9 | 52 | 119 | 1 | 4 | 15 | 75 | 71  | 207 |
| 95,360 | 3 | 8 | 52 | 112 | 1 | 4 | 15 | 72 | 71  | 196 |
| 95,361 | 3 | 8 | 52 | 112 | 1 | 4 | 15 | 72 | 71  | 196 |
| 95,362 | 3 | 8 | 52 | 112 | 1 | 4 | 14 | 72 | 70  | 196 |
| 95,363 | 3 | 8 | 52 | 112 | 1 | 4 | 14 | 71 | 70  | 195 |
| 95,364 | 3 | 8 | 52 | 112 | 1 | 4 | 14 | 71 | 70  | 195 |
| 95,365 | 3 | 8 | 51 | 112 | 1 | 4 | 14 | 71 | 69  | 195 |
| 95,366 | 3 | 8 | 49 | 112 | 1 | 4 | 14 | 71 | 67  | 195 |
| 95,367 | 3 | 8 | 48 | 112 | 1 | 4 | 14 | 71 | 66  | 195 |
| 95,368 | 3 | 8 | 48 | 112 | 1 | 4 | 14 | 71 | 66  | 195 |
| 95,369 | 2 | 8 | 48 | 112 | 1 | 4 | 13 | 71 | 64  | 195 |
| 95,370 | 2 | 8 | 47 | 113 | 1 | 4 | 13 | 70 | 63  | 195 |
| 95,371 | 2 | 8 | 47 | 113 | 1 | 4 | 14 | 70 | 64  | 195 |
| 95,372 | 2 | 8 | 47 | 88  | 1 | 3 | 14 | 52 | 64  | 151 |
| 95,373 | 2 | 5 | 45 | 54  | 1 | 1 | 11 | 12 | 59  | 72  |
| 95,374 | 1 | 5 | 46 | 54  | 1 | 1 | 11 | 12 | 59  | 72  |
| 95,375 | 1 | 5 | 46 | 54  | 1 | 1 | 11 | 12 | 59  | 72  |
| 95,376 | 1 | 5 | 46 | 54  | 1 | 1 | 11 | 12 | 59  | 72  |
| 95,377 | 1 | 1 | 46 | 19  | 1 | 2 | 11 | 4  | 59  | 26  |
| 95,378 | 2 | 1 | 46 | 10  | 1 | 1 | 12 | 2  | 61  | 14  |
| 95,379 | 2 | 1 | 46 | 10  | 1 | 1 | 12 | 2  | 61  | 14  |
| 95,380 | 2 | 2 | 46 | 9   | 1 | 1 | 12 | 1  | 61  | 13  |
| 95,381 | 2 | 2 | 46 | 9   | 1 | 1 | 12 | 1  | 61  | 13  |
| 95,382 | 4 | 3 | 46 | 8   | 1 | 1 | 13 | 1  | 64  | 13  |
| 95,383 | 4 | 3 | 48 | 8   | 1 | 1 | 18 | 1  | 71  | 13  |
| 95,384 | 4 | 3 | 49 | 8   | 0 | 1 | 19 | 1  | 72  | 13  |
| 95,385 | 3 | 3 | 49 | 8   | 0 | 1 | 19 | 1  | 71  | 13  |
| 95,386 | 3 | 3 | 49 | 8   | 0 | 1 | 20 | 1  | 72  | 13  |
| 95,387 | 3 | 3 | 49 | 5   | 0 | 1 | 20 | 1  | 72  | 10  |
| 95,388 | 4 | 3 | 55 | 5   | 1 | 1 | 23 | 1  | 83  | 10  |
| 95,389 | 4 | 3 | 54 | 5   | 1 | 1 | 23 | 1  | 82  | 10  |
| 95,390 | 4 | 3 | 56 | 7   | 2 | 1 | 30 | 2  | 92  | 13  |
| 95,391 | 4 | 3 | 60 | 11  | 2 | 1 | 39 | 8  | 105 | 23  |
| 95,392 | 4 | 4 | 60 | 11  | 2 | 1 | 39 | 8  | 105 | 24  |
| 95,393 | 4 | 4 | 60 | 12  | 2 | 1 | 40 | 8  | 106 | 25  |
| 95,394 | 4 | 4 | 60 | 10  | 2 | 1 | 40 | 9  | 106 | 24  |
| 95,395 | 4 | 4 | 60 | 10  | 2 | 1 | 39 | 8  | 105 | 23  |

|        |    |    |    |     |   |   |    |    |     |     |
|--------|----|----|----|-----|---|---|----|----|-----|-----|
| 95,396 | 4  | 4  | 59 | 14  | 2 | 1 | 38 | 9  | 103 | 28  |
| 95,397 | 4  | 5  | 59 | 14  | 2 | 1 | 38 | 9  | 103 | 29  |
| 95,398 | 4  | 5  | 59 | 14  | 2 | 1 | 38 | 9  | 103 | 29  |
| 95,399 | 4  | 5  | 60 | 25  | 2 | 1 | 38 | 13 | 104 | 44  |
| 95,400 | 4  | 5  | 59 | 26  | 2 | 1 | 38 | 13 | 103 | 45  |
| 95,401 | 4  | 5  | 58 | 27  | 2 | 1 | 38 | 13 | 102 | 46  |
| 95,402 | 4  | 5  | 48 | 29  | 2 | 1 | 36 | 14 | 90  | 49  |
| 95,403 | 4  | 5  | 35 | 35  | 3 | 1 | 35 | 15 | 77  | 56  |
| 95,404 | 4  | 12 | 34 | 106 | 3 | 2 | 35 | 48 | 76  | 168 |
| 95,405 | 4  | 13 | 32 | 109 | 3 | 2 | 33 | 49 | 72  | 173 |
| 95,406 | 4  | 13 | 28 | 109 | 3 | 2 | 36 | 49 | 71  | 173 |
| 95,407 | 4  | 14 | 29 | 111 | 3 | 2 | 36 | 49 | 72  | 176 |
| 95,408 | 4  | 17 | 28 | 125 | 3 | 2 | 37 | 55 | 72  | 199 |
| 95,409 | 4  | 17 | 27 | 129 | 3 | 2 | 37 | 55 | 71  | 203 |
| 95,410 | 4  | 16 | 27 | 129 | 3 | 2 | 37 | 55 | 71  | 202 |
| 95,411 | 4  | 16 | 36 | 132 | 3 | 2 | 48 | 55 | 91  | 205 |
| 95,412 | 6  | 16 | 41 | 133 | 3 | 2 | 54 | 56 | 104 | 207 |
| 95,413 | 6  | 16 | 52 | 133 | 3 | 2 | 65 | 56 | 126 | 207 |
| 95,414 | 6  | 16 | 57 | 135 | 3 | 2 | 65 | 56 | 131 | 209 |
| 95,415 | 6  | 16 | 57 | 135 | 3 | 2 | 65 | 56 | 131 | 209 |
| 95,416 | 10 | 16 | 66 | 136 | 4 | 2 | 75 | 58 | 155 | 212 |
| 95,417 | 10 | 16 | 67 | 138 | 4 | 2 | 75 | 59 | 156 | 215 |
| 95,418 | 10 | 16 | 67 | 138 | 4 | 2 | 75 | 60 | 156 | 216 |
| 95,419 | 10 | 16 | 68 | 139 | 4 | 2 | 76 | 62 | 158 | 219 |
| 95,420 | 10 | 16 | 69 | 139 | 4 | 2 | 76 | 63 | 159 | 220 |
| 95,421 | 10 | 16 | 70 | 141 | 4 | 2 | 77 | 64 | 161 | 223 |
| 95,422 | 10 | 17 | 71 | 142 | 4 | 2 | 76 | 66 | 161 | 227 |
| 95,423 | 10 | 17 | 72 | 142 | 4 | 2 | 76 | 67 | 162 | 228 |
| 95,424 | 10 | 17 | 74 | 142 | 4 | 2 | 76 | 67 | 164 | 228 |
| 95,425 | 10 | 17 | 75 | 142 | 4 | 2 | 76 | 67 | 165 | 228 |
| 95,426 | 10 | 17 | 75 | 142 | 5 | 2 | 76 | 67 | 166 | 228 |
| 95,427 | 9  | 18 | 75 | 149 | 5 | 2 | 76 | 68 | 165 | 237 |
| 95,428 | 9  | 18 | 75 | 149 | 5 | 1 | 77 | 68 | 166 | 236 |
| 95,429 | 9  | 18 | 79 | 149 | 5 | 1 | 77 | 68 | 170 | 236 |
| 95,430 | 9  | 18 | 79 | 149 | 5 | 1 | 77 | 68 | 170 | 236 |
| 95,431 | 9  | 17 | 79 | 149 | 5 | 1 | 77 | 68 | 170 | 235 |
| 95,432 | 7  | 16 | 83 | 149 | 5 | 1 | 77 | 68 | 172 | 234 |
| 95,433 | 7  | 16 | 85 | 149 | 6 | 1 | 79 | 68 | 177 | 234 |
| 95,434 | 7  | 16 | 85 | 149 | 6 | 1 | 76 | 70 | 174 | 236 |
| 95,435 | 7  | 16 | 84 | 149 | 6 | 1 | 75 | 70 | 172 | 236 |
| 95,436 | 8  | 16 | 92 | 150 | 6 | 1 | 80 | 71 | 186 | 238 |



|        |    |    |     |     |   |   |    |    |     |     |
|--------|----|----|-----|-----|---|---|----|----|-----|-----|
| 95,437 | 8  | 16 | 98  | 152 | 6 | 1 | 83 | 71 | 195 | 240 |
| 95,438 | 10 | 17 | 100 | 154 | 6 | 1 | 84 | 75 | 200 | 247 |
| 95,439 | 9  | 17 | 105 | 154 | 5 | 1 | 89 | 76 | 208 | 248 |
| 95,440 | 9  | 17 | 103 | 152 | 4 | 1 | 83 | 75 | 199 | 245 |
| 95,441 | 9  | 17 | 103 | 153 | 4 | 1 | 83 | 76 | 199 | 247 |
| 95,442 | 9  | 17 | 97  | 149 | 4 | 1 | 74 | 70 | 184 | 237 |
| 95,443 | 9  | 16 | 97  | 150 | 4 | 1 | 74 | 71 | 184 | 238 |
| 95,444 | 9  | 16 | 97  | 149 | 4 | 1 | 74 | 73 | 184 | 239 |
| 95,445 | 9  | 16 | 97  | 148 | 4 | 1 | 74 | 72 | 184 | 237 |
| 95,446 | 9  | 16 | 97  | 148 | 4 | 1 | 74 | 72 | 184 | 237 |
| 95,447 | 9  | 16 | 97  | 145 | 4 | 1 | 74 | 71 | 184 | 233 |
| 95,448 | 9  | 15 | 98  | 145 | 4 | 1 | 74 | 72 | 185 | 233 |
| 95,449 | 9  | 15 | 98  | 145 | 4 | 1 | 74 | 73 | 185 | 234 |
| 95,450 | 9  | 15 | 97  | 134 | 4 | 1 | 74 | 69 | 184 | 219 |
| 95,451 | 9  | 15 | 97  | 132 | 4 | 1 | 75 | 69 | 185 | 217 |
| 95,452 | 9  | 15 | 97  | 123 | 4 | 1 | 75 | 67 | 185 | 206 |
| 95,453 | 9  | 15 | 95  | 123 | 3 | 1 | 74 | 67 | 181 | 206 |
| 95,454 | 9  | 15 | 94  | 123 | 3 | 1 | 72 | 67 | 178 | 206 |
| 95,455 | 9  | 8  | 94  | 53  | 3 | 0 | 72 | 34 | 178 | 95  |
| 95,456 | 9  | 7  | 94  | 51  | 3 | 0 | 71 | 33 | 177 | 91  |
| 95,457 | 9  | 7  | 99  | 52  | 3 | 0 | 72 | 34 | 183 | 93  |
| 95,458 | 9  | 6  | 98  | 50  | 3 | 0 | 73 | 34 | 183 | 90  |
| 95,459 | 9  | 3  | 95  | 33  | 3 | 0 | 72 | 28 | 179 | 64  |
| 95,460 | 9  | 3  | 97  | 33  | 3 | 0 | 73 | 28 | 182 | 64  |
| 95,461 | 13 | 3  | 108 | 34  | 4 | 0 | 84 | 28 | 209 | 65  |
| 95,462 | 14 | 3  | 117 | 28  | 5 | 0 | 98 | 27 | 234 | 58  |
| 95,463 | 14 | 3  | 117 | 30  | 5 | 0 | 98 | 27 | 234 | 60  |
| 95,464 | 14 | 3  | 107 | 29  | 5 | 0 | 93 | 25 | 219 | 57  |
| 95,465 | 14 | 3  | 104 | 29  | 5 | 0 | 93 | 25 | 216 | 57  |
| 95,466 | 10 | 3  | 94  | 29  | 4 | 0 | 84 | 25 | 192 | 57  |
| 95,467 | 10 | 3  | 96  | 29  | 4 | 0 | 87 | 25 | 197 | 57  |
| 95,468 | 10 | 3  | 95  | 27  | 4 | 0 | 87 | 23 | 196 | 53  |
| 95,469 | 10 | 3  | 94  | 27  | 4 | 0 | 86 | 23 | 194 | 53  |
| 95,470 | 11 | 3  | 93  | 26  | 4 | 0 | 87 | 20 | 195 | 49  |
| 95,471 | 11 | 3  | 93  | 26  | 4 | 0 | 87 | 20 | 195 | 49  |
| 95,472 | 11 | 2  | 92  | 23  | 4 | 0 | 86 | 17 | 193 | 42  |
| 95,473 | 11 | 2  | 91  | 23  | 4 | 0 | 86 | 17 | 192 | 42  |
| 95,474 | 13 | 2  | 90  | 23  | 4 | 0 | 86 | 16 | 193 | 41  |
| 95,475 | 13 | 2  | 88  | 23  | 4 | 0 | 86 | 16 | 191 | 41  |
| 95,476 | 13 | 2  | 86  | 23  | 4 | 0 | 86 | 16 | 189 | 41  |
| 95,477 | 13 | 1  | 86  | 16  | 3 | 0 | 86 | 16 | 188 | 33  |

|        |    |   |     |    |   |   |    |    |     |    |
|--------|----|---|-----|----|---|---|----|----|-----|----|
| 95,478 | 13 | 1 | 86  | 17 | 3 | 0 | 86 | 17 | 188 | 35 |
| 95,479 | 13 | 1 | 82  | 17 | 3 | 0 | 85 | 17 | 183 | 35 |
| 95,480 | 13 | 1 | 82  | 17 | 3 | 0 | 85 | 17 | 183 | 35 |
| 95,481 | 13 | 1 | 82  | 17 | 3 | 0 | 85 | 17 | 183 | 35 |
| 95,482 | 13 | 1 | 81  | 16 | 3 | 0 | 85 | 17 | 182 | 34 |
| 95,483 | 13 | 1 | 78  | 16 | 3 | 0 | 84 | 17 | 178 | 34 |
| 95,484 | 13 | 1 | 76  | 20 | 2 | 0 | 82 | 18 | 173 | 39 |
| 95,485 | 13 | 2 | 74  | 38 | 2 | 0 | 80 | 24 | 169 | 64 |
| 95,486 | 13 | 2 | 68  | 42 | 2 | 0 | 79 | 30 | 162 | 74 |
| 95,487 | 12 | 2 | 66  | 43 | 2 | 0 | 74 | 31 | 154 | 76 |
| 95,488 | 12 | 2 | 60  | 42 | 2 | 0 | 71 | 31 | 145 | 75 |
| 95,489 | 10 | 1 | 60  | 41 | 2 | 0 | 70 | 32 | 142 | 74 |
| 95,490 | 10 | 1 | 49  | 41 | 2 | 0 | 62 | 31 | 123 | 73 |
| 95,491 | 10 | 1 | 49  | 41 | 2 | 0 | 61 | 31 | 122 | 73 |
| 95,492 | 10 | 1 | 49  | 40 | 2 | 0 | 60 | 29 | 121 | 70 |
| 95,493 | 10 | 1 | 49  | 40 | 2 | 0 | 60 | 29 | 121 | 70 |
| 95,494 | 10 | 1 | 49  | 41 | 2 | 0 | 60 | 28 | 121 | 70 |
| 95,495 | 10 | 1 | 49  | 41 | 2 | 0 | 61 | 26 | 122 | 68 |
| 95,496 | 10 | 1 | 49  | 41 | 2 | 0 | 61 | 26 | 122 | 68 |
| 95,497 | 10 | 1 | 49  | 41 | 2 | 0 | 61 | 26 | 122 | 68 |
| 95,498 | 10 | 1 | 48  | 42 | 2 | 0 | 61 | 25 | 121 | 68 |
| 95,499 | 10 | 1 | 48  | 42 | 2 | 0 | 61 | 24 | 121 | 67 |
| 95,500 | 10 | 1 | 49  | 42 | 2 | 0 | 62 | 24 | 123 | 67 |
| 95,501 | 11 | 1 | 57  | 42 | 2 | 0 | 63 | 24 | 133 | 67 |
| 95,502 | 11 | 1 | 57  | 42 | 2 | 0 | 62 | 24 | 132 | 67 |
| 95,503 | 11 | 1 | 57  | 42 | 2 | 0 | 62 | 24 | 132 | 67 |
| 95,504 | 19 | 1 | 77  | 42 | 3 | 0 | 73 | 24 | 172 | 67 |
| 95,505 | 19 | 1 | 77  | 42 | 3 | 0 | 73 | 24 | 172 | 67 |
| 95,506 | 19 | 1 | 75  | 42 | 3 | 0 | 72 | 24 | 169 | 67 |
| 95,507 | 19 | 1 | 72  | 41 | 3 | 0 | 70 | 24 | 164 | 66 |
| 95,508 | 19 | 1 | 72  | 40 | 3 | 0 | 70 | 24 | 164 | 65 |
| 95,509 | 21 | 1 | 85  | 40 | 4 | 0 | 85 | 24 | 195 | 65 |
| 95,510 | 21 | 1 | 87  | 39 | 4 | 0 | 86 | 24 | 198 | 64 |
| 95,511 | 24 | 1 | 96  | 40 | 5 | 0 | 90 | 24 | 215 | 65 |
| 95,512 | 24 | 1 | 88  | 39 | 4 | 0 | 78 | 24 | 194 | 64 |
| 95,513 | 21 | 1 | 83  | 38 | 4 | 0 | 62 | 24 | 170 | 63 |
| 95,514 | 24 | 1 | 109 | 38 | 5 | 0 | 79 | 27 | 217 | 66 |
| 95,515 | 24 | 2 | 108 | 43 | 5 | 0 | 73 | 30 | 210 | 75 |
| 95,516 | 24 | 2 | 106 | 44 | 5 | 0 | 73 | 31 | 208 | 77 |
| 95,517 | 24 | 2 | 106 | 45 | 5 | 0 | 70 | 31 | 205 | 78 |
| 95,518 | 24 | 2 | 104 | 45 | 5 | 0 | 68 | 31 | 201 | 78 |

|        |    |   |     |    |   |   |    |    |     |    |
|--------|----|---|-----|----|---|---|----|----|-----|----|
| 95,519 | 24 | 2 | 105 | 45 | 5 | 0 | 68 | 32 | 202 | 79 |
| 95,520 | 23 | 2 | 105 | 45 | 5 | 0 | 68 | 32 | 201 | 79 |
| 95,521 | 23 | 2 | 105 | 45 | 5 | 0 | 68 | 32 | 201 | 79 |
| 95,522 | 23 | 2 | 105 | 45 | 5 | 0 | 67 | 32 | 200 | 79 |
| 95,523 | 23 | 2 | 105 | 45 | 5 | 0 | 67 | 32 | 200 | 79 |
| 95,524 | 21 | 2 | 105 | 46 | 5 | 0 | 67 | 32 | 198 | 80 |
| 95,525 | 21 | 2 | 105 | 46 | 5 | 0 | 67 | 33 | 198 | 81 |
| 95,526 | 21 | 2 | 105 | 46 | 5 | 0 | 67 | 33 | 198 | 81 |
| 95,527 | 21 | 2 | 105 | 46 | 5 | 0 | 68 | 32 | 199 | 80 |
| 95,528 | 21 | 2 | 107 | 46 | 5 | 0 | 70 | 32 | 203 | 80 |
| 95,529 | 21 | 2 | 111 | 45 | 5 | 0 | 72 | 31 | 209 | 78 |
| 95,530 | 21 | 2 | 111 | 45 | 5 | 0 | 72 | 31 | 209 | 78 |
| 95,531 | 21 | 2 | 111 | 45 | 5 | 0 | 72 | 31 | 209 | 78 |
| 95,532 | 21 | 2 | 111 | 45 | 5 | 0 | 72 | 31 | 209 | 78 |
| 95,533 | 21 | 2 | 111 | 45 | 5 | 0 | 72 | 31 | 209 | 78 |
| 95,534 | 21 | 2 | 109 | 45 | 5 | 0 | 72 | 31 | 207 | 78 |
| 95,535 | 21 | 2 | 112 | 41 | 5 | 0 | 72 | 30 | 210 | 73 |
| 95,536 | 21 | 2 | 112 | 23 | 5 | 0 | 72 | 22 | 210 | 47 |
| 95,537 | 21 | 2 | 112 | 20 | 5 | 0 | 72 | 16 | 210 | 38 |
| 95,538 | 22 | 2 | 113 | 18 | 5 | 0 | 72 | 14 | 212 | 34 |
| 95,539 | 22 | 2 | 113 | 17 | 5 | 0 | 72 | 14 | 212 | 33 |
| 95,540 | 22 | 2 | 111 | 16 | 5 | 0 | 72 | 9  | 210 | 27 |
| 95,541 | 22 | 2 | 111 | 16 | 5 | 0 | 72 | 9  | 210 | 27 |
| 95,542 | 22 | 2 | 111 | 16 | 5 | 0 | 72 | 10 | 210 | 28 |
| 95,543 | 22 | 2 | 111 | 16 | 5 | 0 | 71 | 10 | 209 | 28 |
| 95,544 | 22 | 2 | 111 | 14 | 5 | 0 | 71 | 10 | 209 | 26 |
| 95,545 | 22 | 2 | 111 | 14 | 5 | 0 | 71 | 10 | 209 | 26 |
| 95,546 | 22 | 2 | 111 | 14 | 5 | 0 | 71 | 10 | 209 | 26 |
| 95,547 | 22 | 2 | 111 | 14 | 5 | 0 | 71 | 10 | 209 | 26 |
| 95,548 | 22 | 2 | 111 | 12 | 5 | 0 | 71 | 10 | 209 | 24 |
| 95,549 | 22 | 2 | 111 | 12 | 5 | 0 | 71 | 10 | 209 | 24 |
| 95,550 | 22 | 3 | 111 | 12 | 5 | 0 | 71 | 10 | 209 | 25 |
| 95,551 | 22 | 3 | 110 | 12 | 5 | 0 | 70 | 10 | 207 | 25 |
| 95,552 | 21 | 3 | 104 | 13 | 5 | 0 | 69 | 10 | 199 | 26 |
| 95,553 | 15 | 3 | 83  | 13 | 4 | 0 | 59 | 11 | 161 | 27 |
| 95,554 | 14 | 3 | 83  | 13 | 4 | 0 | 58 | 11 | 159 | 27 |
| 95,555 | 13 | 3 | 83  | 13 | 4 | 0 | 60 | 12 | 160 | 28 |
| 95,556 | 13 | 3 | 83  | 13 | 4 | 0 | 59 | 12 | 159 | 28 |
| 95,557 | 12 | 4 | 74  | 14 | 4 | 0 | 53 | 17 | 143 | 35 |
| 95,558 | 12 | 4 | 74  | 14 | 4 | 0 | 52 | 19 | 142 | 37 |
| 95,559 | 11 | 4 | 73  | 14 | 6 | 0 | 52 | 19 | 142 | 37 |

|        |    |   |     |    |    |   |    |    |     |    |
|--------|----|---|-----|----|----|---|----|----|-----|----|
| 95,560 | 11 | 4 | 71  | 15 | 6  | 0 | 51 | 21 | 139 | 40 |
| 95,561 | 11 | 4 | 70  | 26 | 5  | 0 | 50 | 32 | 136 | 62 |
| 95,562 | 8  | 4 | 60  | 26 | 5  | 0 | 46 | 32 | 119 | 62 |
| 95,563 | 4  | 4 | 48  | 27 | 5  | 0 | 35 | 32 | 92  | 63 |
| 95,564 | 4  | 4 | 40  | 29 | 4  | 0 | 32 | 33 | 80  | 66 |
| 95,565 | 1  | 3 | 14  | 24 | 3  | 0 | 15 | 27 | 33  | 54 |
| 95,566 | 1  | 4 | 15  | 22 | 3  | 0 | 15 | 26 | 34  | 52 |
| 95,567 | 1  | 4 | 15  | 24 | 3  | 0 | 15 | 26 | 34  | 54 |
| 95,568 | 1  | 4 | 17  | 24 | 3  | 0 | 15 | 27 | 36  | 55 |
| 95,569 | 1  | 5 | 16  | 24 | 3  | 0 | 15 | 27 | 35  | 56 |
| 95,570 | 1  | 5 | 19  | 24 | 3  | 0 | 19 | 26 | 42  | 55 |
| 95,571 | 1  | 5 | 19  | 24 | 3  | 0 | 19 | 26 | 42  | 55 |
| 95,572 | 1  | 5 | 19  | 25 | 3  | 0 | 20 | 27 | 43  | 57 |
| 95,573 | 1  | 5 | 19  | 29 | 3  | 0 | 20 | 27 | 43  | 61 |
| 95,574 | 1  | 5 | 19  | 31 | 3  | 0 | 20 | 27 | 43  | 63 |
| 95,575 | 1  | 5 | 19  | 31 | 3  | 0 | 20 | 28 | 43  | 64 |
| 95,576 | 1  | 5 | 19  | 31 | 3  | 0 | 19 | 27 | 42  | 63 |
| 95,577 | 1  | 5 | 27  | 31 | 4  | 0 | 19 | 27 | 51  | 63 |
| 95,578 | 1  | 5 | 25  | 31 | 4  | 0 | 17 | 27 | 47  | 63 |
| 95,579 | 1  | 7 | 21  | 33 | 4  | 0 | 16 | 28 | 42  | 68 |
| 95,580 | 1  | 7 | 21  | 33 | 4  | 0 | 16 | 28 | 42  | 68 |
| 95,581 | 2  | 7 | 42  | 33 | 5  | 0 | 24 | 28 | 73  | 68 |
| 95,582 | 2  | 7 | 49  | 34 | 5  | 0 | 27 | 29 | 83  | 70 |
| 95,583 | 4  | 7 | 59  | 36 | 7  | 0 | 33 | 29 | 103 | 72 |
| 95,584 | 7  | 7 | 76  | 36 | 7  | 0 | 41 | 29 | 131 | 72 |
| 95,585 | 8  | 7 | 86  | 36 | 8  | 0 | 46 | 29 | 148 | 72 |
| 95,586 | 8  | 7 | 94  | 36 | 8  | 0 | 50 | 29 | 160 | 72 |
| 95,587 | 8  | 6 | 95  | 36 | 8  | 1 | 51 | 29 | 162 | 72 |
| 95,588 | 7  | 6 | 95  | 35 | 8  | 1 | 51 | 29 | 161 | 71 |
| 95,589 | 7  | 6 | 95  | 35 | 8  | 1 | 51 | 29 | 161 | 71 |
| 95,590 | 7  | 6 | 95  | 35 | 8  | 1 | 51 | 29 | 161 | 71 |
| 95,591 | 8  | 6 | 97  | 35 | 8  | 2 | 51 | 29 | 164 | 72 |
| 95,592 | 8  | 6 | 98  | 38 | 8  | 2 | 51 | 32 | 165 | 78 |
| 95,593 | 8  | 7 | 98  | 39 | 8  | 2 | 51 | 33 | 165 | 81 |
| 95,594 | 8  | 7 | 98  | 40 | 8  | 2 | 51 | 33 | 165 | 82 |
| 95,595 | 8  | 7 | 99  | 43 | 8  | 2 | 53 | 33 | 168 | 85 |
| 95,596 | 10 | 7 | 100 | 44 | 8  | 2 | 54 | 34 | 172 | 87 |
| 95,597 | 10 | 7 | 100 | 44 | 8  | 2 | 54 | 35 | 172 | 88 |
| 95,598 | 10 | 7 | 100 | 44 | 8  | 2 | 54 | 35 | 172 | 88 |
| 95,599 | 10 | 7 | 107 | 44 | 8  | 2 | 57 | 35 | 182 | 88 |
| 95,600 | 12 | 6 | 120 | 44 | 10 | 2 | 59 | 35 | 201 | 87 |

|        |    |   |     |    |    |   |    |    |     |     |
|--------|----|---|-----|----|----|---|----|----|-----|-----|
| 95,601 | 12 | 6 | 136 | 44 | 10 | 2 | 69 | 35 | 227 | 87  |
| 95,602 | 12 | 6 | 141 | 44 | 10 | 2 | 72 | 37 | 235 | 89  |
| 95,603 | 12 | 6 | 142 | 50 | 10 | 2 | 73 | 39 | 237 | 97  |
| 95,604 | 12 | 6 | 142 | 50 | 10 | 3 | 73 | 38 | 237 | 97  |
| 95,605 | 12 | 6 | 142 | 50 | 10 | 3 | 71 | 39 | 235 | 98  |
| 95,606 | 13 | 6 | 141 | 50 | 10 | 3 | 71 | 42 | 235 | 101 |
| 95,607 | 13 | 6 | 140 | 50 | 10 | 3 | 71 | 42 | 234 | 101 |
| 95,608 | 13 | 5 | 138 | 49 | 9  | 3 | 65 | 35 | 225 | 92  |
| 95,609 | 13 | 5 | 138 | 49 | 9  | 3 | 64 | 35 | 224 | 92  |
| 95,610 | 13 | 5 | 138 | 49 | 7  | 3 | 63 | 35 | 221 | 92  |
| 95,611 | 13 | 5 | 138 | 48 | 7  | 3 | 63 | 33 | 221 | 89  |
| 95,612 | 13 | 5 | 139 | 36 | 7  | 3 | 64 | 23 | 223 | 67  |
| 95,613 | 13 | 5 | 139 | 36 | 7  | 3 | 64 | 23 | 223 | 67  |
| 95,614 | 13 | 5 | 140 | 34 | 7  | 3 | 64 | 23 | 224 | 65  |
| 95,615 | 13 | 5 | 140 | 36 | 7  | 3 | 65 | 25 | 225 | 69  |
| 95,616 | 13 | 5 | 139 | 36 | 7  | 3 | 65 | 25 | 224 | 69  |
| 95,617 | 13 | 4 | 138 | 43 | 7  | 3 | 65 | 29 | 223 | 79  |
| 95,618 | 13 | 4 | 138 | 41 | 7  | 3 | 65 | 29 | 223 | 77  |
| 95,619 | 13 | 7 | 136 | 48 | 8  | 3 | 65 | 32 | 222 | 90  |
| 95,620 | 13 | 6 | 135 | 57 | 8  | 4 | 64 | 34 | 220 | 101 |
| 95,621 | 13 | 6 | 137 | 57 | 8  | 4 | 62 | 34 | 220 | 101 |
| 95,622 | 13 | 6 | 139 | 56 | 8  | 4 | 66 | 33 | 226 | 99  |
| 95,623 | 13 | 6 | 139 | 56 | 8  | 4 | 65 | 33 | 225 | 99  |
| 95,624 | 13 | 7 | 139 | 49 | 8  | 4 | 65 | 33 | 225 | 93  |
| 95,625 | 14 | 7 | 139 | 48 | 8  | 4 | 67 | 32 | 228 | 91  |
| 95,626 | 14 | 7 | 139 | 48 | 8  | 4 | 67 | 32 | 228 | 91  |
| 95,627 | 14 | 7 | 139 | 48 | 8  | 4 | 67 | 32 | 228 | 91  |
| 95,628 | 14 | 7 | 132 | 48 | 7  | 4 | 67 | 32 | 220 | 91  |
| 95,629 | 14 | 5 | 132 | 46 | 7  | 4 | 67 | 31 | 220 | 86  |
| 95,630 | 14 | 5 | 132 | 46 | 7  | 4 | 66 | 32 | 219 | 87  |
| 95,631 | 13 | 6 | 126 | 47 | 7  | 4 | 65 | 32 | 211 | 89  |
| 95,632 | 13 | 6 | 111 | 48 | 6  | 4 | 58 | 34 | 188 | 92  |
| 95,633 | 13 | 6 | 104 | 47 | 6  | 4 | 54 | 34 | 177 | 91  |
| 95,634 | 12 | 6 | 99  | 45 | 4  | 4 | 52 | 34 | 167 | 89  |
| 95,635 | 9  | 9 | 84  | 46 | 5  | 4 | 45 | 36 | 143 | 95  |
| 95,636 | 8  | 9 | 73  | 47 | 4  | 4 | 40 | 38 | 125 | 98  |
| 95,637 | 8  | 9 | 65  | 49 | 4  | 4 | 36 | 39 | 113 | 101 |
| 95,638 | 8  | 9 | 64  | 49 | 4  | 3 | 36 | 39 | 112 | 100 |
| 95,639 | 8  | 9 | 66  | 50 | 4  | 3 | 37 | 39 | 115 | 101 |
| 95,640 | 8  | 9 | 66  | 51 | 4  | 3 | 37 | 40 | 115 | 103 |
| 95,641 | 8  | 9 | 67  | 51 | 4  | 2 | 40 | 39 | 119 | 101 |

|        |    |    |     |     |    |   |     |    |     |     |
|--------|----|----|-----|-----|----|---|-----|----|-----|-----|
| 95,642 | 7  | 9  | 67  | 52  | 4  | 2 | 40  | 39 | 118 | 102 |
| 95,643 | 7  | 9  | 67  | 49  | 4  | 2 | 40  | 36 | 118 | 96  |
| 95,644 | 7  | 8  | 67  | 47  | 4  | 2 | 40  | 35 | 118 | 92  |
| 95,645 | 7  | 9  | 67  | 43  | 4  | 2 | 40  | 34 | 118 | 88  |
| 95,646 | 7  | 9  | 67  | 47  | 4  | 2 | 39  | 35 | 117 | 93  |
| 95,647 | 5  | 9  | 66  | 50  | 4  | 2 | 38  | 35 | 113 | 96  |
| 95,648 | 5  | 9  | 59  | 53  | 4  | 2 | 36  | 34 | 104 | 98  |
| 95,649 | 5  | 9  | 59  | 61  | 4  | 2 | 35  | 35 | 103 | 107 |
| 95,650 | 5  | 9  | 59  | 62  | 4  | 2 | 34  | 35 | 102 | 108 |
| 95,651 | 3  | 9  | 49  | 69  | 2  | 2 | 34  | 35 | 88  | 115 |
| 95,652 | 3  | 9  | 42  | 70  | 2  | 2 | 46  | 36 | 93  | 117 |
| 95,653 | 3  | 9  | 37  | 70  | 2  | 2 | 43  | 34 | 85  | 115 |
| 95,654 | 3  | 9  | 39  | 64  | 2  | 2 | 43  | 32 | 87  | 107 |
| 95,655 | 2  | 9  | 41  | 64  | 2  | 1 | 44  | 31 | 89  | 105 |
| 95,656 | 2  | 9  | 41  | 64  | 2  | 1 | 45  | 27 | 90  | 101 |
| 95,657 | 2  | 9  | 41  | 66  | 2  | 2 | 45  | 27 | 90  | 104 |
| 95,658 | 3  | 9  | 41  | 67  | 3  | 2 | 45  | 27 | 92  | 105 |
| 95,659 | 4  | 9  | 41  | 67  | 3  | 2 | 45  | 29 | 93  | 107 |
| 95,660 | 4  | 11 | 43  | 95  | 3  | 3 | 47  | 35 | 97  | 144 |
| 95,661 | 5  | 12 | 43  | 105 | 3  | 3 | 47  | 39 | 98  | 159 |
| 95,662 | 5  | 14 | 42  | 116 | 3  | 3 | 46  | 41 | 96  | 174 |
| 95,663 | 5  | 17 | 42  | 120 | 3  | 3 | 46  | 40 | 96  | 180 |
| 95,664 | 6  | 20 | 41  | 123 | 3  | 3 | 46  | 40 | 96  | 186 |
| 95,665 | 6  | 20 | 41  | 124 | 3  | 3 | 46  | 40 | 96  | 187 |
| 95,666 | 6  | 20 | 41  | 126 | 3  | 3 | 45  | 39 | 95  | 188 |
| 95,667 | 6  | 20 | 41  | 144 | 2  | 4 | 45  | 46 | 94  | 214 |
| 95,668 | 6  | 24 | 41  | 168 | 2  | 5 | 47  | 54 | 96  | 251 |
| 95,669 | 6  | 24 | 42  | 172 | 2  | 5 | 47  | 59 | 97  | 260 |
| 95,670 | 6  | 21 | 42  | 168 | 2  | 5 | 47  | 55 | 97  | 249 |
| 95,671 | 6  | 21 | 42  | 159 | 2  | 5 | 48  | 53 | 98  | 238 |
| 95,672 | 6  | 21 | 42  | 159 | 3  | 6 | 47  | 53 | 98  | 239 |
| 95,673 | 6  | 21 | 42  | 159 | 3  | 6 | 43  | 53 | 94  | 239 |
| 95,674 | 7  | 21 | 42  | 159 | 3  | 7 | 43  | 53 | 95  | 240 |
| 95,675 | 7  | 20 | 46  | 159 | 3  | 7 | 43  | 53 | 99  | 239 |
| 95,676 | 7  | 20 | 48  | 159 | 3  | 7 | 42  | 53 | 100 | 239 |
| 95,677 | 11 | 20 | 85  | 159 | 5  | 7 | 56  | 53 | 157 | 239 |
| 95,678 | 10 | 20 | 85  | 160 | 5  | 7 | 56  | 58 | 156 | 245 |
| 95,679 | 10 | 20 | 84  | 160 | 5  | 7 | 56  | 58 | 155 | 245 |
| 95,680 | 13 | 20 | 129 | 164 | 12 | 7 | 81  | 58 | 235 | 249 |
| 95,681 | 13 | 20 | 129 | 167 | 12 | 7 | 81  | 57 | 235 | 251 |
| 95,682 | 15 | 20 | 164 | 166 | 12 | 7 | 115 | 57 | 306 | 250 |

|        |    |    |     |     |    |   |     |    |     |     |
|--------|----|----|-----|-----|----|---|-----|----|-----|-----|
| 95,683 | 15 | 20 | 172 | 165 | 12 | 7 | 121 | 54 | 320 | 246 |
| 95,684 | 15 | 20 | 172 | 168 | 12 | 7 | 121 | 54 | 320 | 249 |
| 95,685 | 14 | 20 | 175 | 172 | 12 | 7 | 121 | 54 | 322 | 253 |
| 95,686 | 14 | 17 | 173 | 171 | 11 | 7 | 120 | 52 | 318 | 247 |
| 95,687 | 14 | 17 | 173 | 170 | 11 | 7 | 119 | 52 | 317 | 246 |
| 95,688 | 14 | 17 | 174 | 170 | 11 | 7 | 121 | 54 | 320 | 248 |
| 95,689 | 14 | 17 | 172 | 172 | 11 | 7 | 120 | 55 | 317 | 251 |
| 95,690 | 14 | 17 | 172 | 172 | 11 | 8 | 120 | 56 | 317 | 253 |
| 95,691 | 14 | 18 | 172 | 175 | 11 | 8 | 120 | 57 | 317 | 258 |
| 95,692 | 14 | 18 | 169 | 176 | 11 | 8 | 117 | 58 | 311 | 260 |
| 95,693 | 14 | 18 | 169 | 175 | 11 | 8 | 117 | 59 | 311 | 260 |
| 95,694 | 14 | 18 | 172 | 175 | 11 | 8 | 118 | 59 | 315 | 260 |
| 95,695 | 14 | 18 | 172 | 177 | 11 | 8 | 118 | 60 | 315 | 263 |
| 95,696 | 14 | 17 | 172 | 177 | 11 | 8 | 118 | 60 | 315 | 262 |
| 95,697 | 14 | 17 | 182 | 173 | 12 | 8 | 128 | 59 | 336 | 257 |
| 95,698 | 14 | 17 | 182 | 172 | 12 | 8 | 128 | 59 | 336 | 256 |
| 95,699 | 14 | 17 | 182 | 169 | 12 | 8 | 128 | 59 | 336 | 253 |
| 95,700 | 16 | 17 | 206 | 162 | 14 | 8 | 144 | 58 | 380 | 245 |
| 95,701 | 16 | 17 | 206 | 161 | 15 | 8 | 146 | 58 | 383 | 244 |
| 95,702 | 16 | 17 | 206 | 155 | 15 | 8 | 146 | 58 | 383 | 238 |
| 95,703 | 16 | 17 | 202 | 154 | 15 | 8 | 128 | 57 | 361 | 236 |
| 95,704 | 16 | 17 | 199 | 155 | 15 | 8 | 127 | 57 | 357 | 237 |
| 95,705 | 16 | 17 | 198 | 155 | 15 | 8 | 127 | 57 | 356 | 237 |
| 95,706 | 16 | 17 | 199 | 155 | 15 | 8 | 127 | 56 | 357 | 236 |
| 95,707 | 16 | 17 | 200 | 153 | 15 | 7 | 129 | 56 | 360 | 233 |
| 95,708 | 15 | 17 | 202 | 153 | 15 | 7 | 129 | 54 | 361 | 231 |
| 95,709 | 15 | 17 | 203 | 154 | 14 | 7 | 129 | 55 | 361 | 233 |
| 95,710 | 14 | 17 | 209 | 154 | 14 | 7 | 130 | 54 | 367 | 232 |
| 95,711 | 14 | 16 | 207 | 127 | 14 | 6 | 128 | 50 | 363 | 199 |
| 95,712 | 13 | 15 | 207 | 117 | 14 | 6 | 128 | 48 | 362 | 186 |
| 95,713 | 14 | 13 | 213 | 106 | 14 | 6 | 134 | 48 | 375 | 173 |
| 95,714 | 14 | 10 | 213 | 102 | 14 | 6 | 134 | 48 | 375 | 166 |
| 95,715 | 13 | 7  | 213 | 99  | 14 | 6 | 134 | 48 | 374 | 160 |
| 95,716 | 16 | 7  | 231 | 98  | 16 | 6 | 160 | 48 | 423 | 159 |
| 95,717 | 16 | 7  | 231 | 92  | 16 | 6 | 160 | 46 | 423 | 151 |
| 95,718 | 16 | 7  | 231 | 74  | 16 | 5 | 160 | 39 | 423 | 125 |
| 95,719 | 17 | 3  | 249 | 43  | 16 | 5 | 180 | 28 | 462 | 79  |
| 95,720 | 20 | 3  | 266 | 39  | 20 | 5 | 204 | 24 | 510 | 71  |
| 95,721 | 21 | 3  | 281 | 36  | 20 | 4 | 218 | 24 | 540 | 67  |
| 95,722 | 21 | 3  | 281 | 36  | 20 | 4 | 217 | 24 | 539 | 67  |
| 95,723 | 20 | 3  | 277 | 36  | 19 | 3 | 217 | 24 | 533 | 66  |

|        |    |   |     |    |    |   |     |    |     |     |
|--------|----|---|-----|----|----|---|-----|----|-----|-----|
| 95,724 | 20 | 3 | 275 | 37 | 19 | 2 | 217 | 24 | 531 | 66  |
| 95,725 | 20 | 3 | 271 | 37 | 20 | 2 | 219 | 24 | 530 | 66  |
| 95,726 | 20 | 3 | 271 | 37 | 20 | 2 | 218 | 24 | 529 | 66  |
| 95,727 | 20 | 3 | 269 | 38 | 20 | 2 | 218 | 24 | 527 | 67  |
| 95,728 | 16 | 4 | 232 | 41 | 18 | 2 | 204 | 26 | 470 | 73  |
| 95,729 | 16 | 4 | 220 | 43 | 18 | 2 | 203 | 28 | 457 | 77  |
| 95,730 | 15 | 6 | 203 | 68 | 14 | 3 | 187 | 50 | 419 | 127 |
| 95,731 | 13 | 6 | 187 | 68 | 11 | 3 | 181 | 51 | 392 | 128 |
| 95,732 | 11 | 6 | 170 | 68 | 11 | 3 | 174 | 51 | 366 | 128 |
| 95,733 | 13 | 5 | 170 | 68 | 11 | 3 | 154 | 51 | 348 | 127 |
| 95,734 | 13 | 5 | 170 | 62 | 11 | 3 | 148 | 51 | 342 | 121 |
| 95,735 | 28 | 5 | 235 | 62 | 14 | 3 | 185 | 53 | 462 | 123 |
| 95,736 | 28 | 5 | 229 | 62 | 14 | 3 | 182 | 53 | 453 | 123 |
| 95,737 | 29 | 5 | 235 | 62 | 14 | 3 | 197 | 53 | 475 | 123 |
| 95,738 | 29 | 5 | 237 | 62 | 14 | 3 | 198 | 52 | 478 | 122 |
| 95,739 | 30 | 5 | 236 | 58 | 15 | 3 | 198 | 49 | 479 | 115 |
| 95,740 | 30 | 5 | 239 | 56 | 15 | 2 | 200 | 47 | 484 | 110 |
| 95,741 | 30 | 4 | 242 | 52 | 15 | 2 | 202 | 45 | 489 | 103 |
| 95,742 | 30 | 4 | 243 | 52 | 15 | 2 | 202 | 45 | 490 | 103 |
| 95,743 | 30 | 4 | 239 | 52 | 15 | 2 | 201 | 45 | 485 | 103 |
| 95,744 | 31 | 4 | 241 | 53 | 15 | 2 | 201 | 44 | 488 | 103 |
| 95,745 | 31 | 4 | 244 | 55 | 15 | 3 | 202 | 45 | 492 | 107 |
| 95,746 | 33 | 4 | 245 | 66 | 16 | 3 | 202 | 46 | 496 | 119 |
| 95,747 | 33 | 4 | 235 | 71 | 15 | 3 | 193 | 47 | 476 | 125 |
| 95,748 | 33 | 4 | 238 | 72 | 15 | 3 | 196 | 47 | 482 | 126 |
| 95,749 | 33 | 4 | 235 | 75 | 14 | 3 | 194 | 47 | 476 | 129 |
| 95,750 | 33 | 4 | 222 | 79 | 14 | 3 | 189 | 47 | 458 | 133 |
| 95,751 | 31 | 4 | 218 | 78 | 13 | 3 | 186 | 47 | 448 | 132 |
| 95,752 | 38 | 4 | 235 | 78 | 12 | 3 | 198 | 47 | 483 | 132 |
| 95,753 | 38 | 4 | 232 | 77 | 12 | 3 | 197 | 47 | 479 | 131 |
| 95,754 | 38 | 4 | 227 | 75 | 12 | 3 | 192 | 47 | 469 | 129 |
| 95,755 | 38 | 4 | 227 | 75 | 12 | 3 | 191 | 47 | 468 | 129 |
| 95,756 | 38 | 4 | 225 | 75 | 12 | 3 | 191 | 47 | 466 | 129 |
| 95,757 | 38 | 4 | 226 | 75 | 12 | 3 | 191 | 47 | 467 | 129 |
| 95,758 | 38 | 4 | 226 | 75 | 12 | 3 | 189 | 47 | 465 | 129 |
| 95,759 | 38 | 4 | 224 | 75 | 12 | 3 | 189 | 47 | 463 | 129 |
| 95,760 | 38 | 4 | 223 | 74 | 12 | 3 | 190 | 46 | 463 | 127 |
| 95,761 | 38 | 3 | 217 | 73 | 12 | 3 | 189 | 44 | 456 | 123 |
| 95,762 | 38 | 3 | 214 | 73 | 12 | 3 | 187 | 40 | 451 | 119 |
| 95,763 | 37 | 3 | 211 | 73 | 13 | 3 | 183 | 40 | 444 | 119 |
| 95,764 | 35 | 3 | 195 | 73 | 12 | 3 | 160 | 40 | 402 | 119 |



|        |    |   |     |     |    |   |     |    |     |     |
|--------|----|---|-----|-----|----|---|-----|----|-----|-----|
| 95,765 | 35 | 3 | 196 | 75  | 12 | 3 | 160 | 43 | 403 | 124 |
| 95,766 | 34 | 3 | 194 | 75  | 11 | 3 | 157 | 44 | 396 | 125 |
| 95,767 | 34 | 3 | 194 | 81  | 11 | 3 | 157 | 46 | 396 | 133 |
| 95,768 | 34 | 4 | 192 | 84  | 11 | 4 | 152 | 52 | 389 | 144 |
| 95,769 | 32 | 4 | 176 | 84  | 11 | 4 | 137 | 52 | 356 | 144 |
| 95,770 | 30 | 4 | 158 | 84  | 7  | 3 | 114 | 52 | 309 | 143 |
| 95,771 | 30 | 4 | 148 | 84  | 7  | 3 | 108 | 53 | 293 | 144 |
| 95,772 | 30 | 4 | 145 | 84  | 7  | 3 | 101 | 53 | 283 | 144 |
| 95,773 | 30 | 4 | 145 | 84  | 7  | 3 | 102 | 53 | 284 | 144 |
| 95,774 | 30 | 4 | 145 | 84  | 7  | 3 | 102 | 53 | 284 | 144 |
| 95,775 | 30 | 4 | 151 | 84  | 7  | 3 | 104 | 53 | 292 | 144 |
| 95,776 | 30 | 4 | 151 | 84  | 6  | 3 | 102 | 53 | 289 | 144 |
| 95,777 | 30 | 4 | 152 | 83  | 6  | 3 | 102 | 53 | 290 | 143 |
| 95,778 | 30 | 3 | 152 | 79  | 6  | 3 | 102 | 51 | 290 | 136 |
| 95,779 | 30 | 3 | 152 | 79  | 6  | 3 | 102 | 51 | 290 | 136 |
| 95,780 | 30 | 3 | 152 | 77  | 6  | 3 | 101 | 44 | 289 | 127 |
| 95,781 | 30 | 1 | 152 | 52  | 6  | 2 | 101 | 22 | 289 | 77  |
| 95,782 | 30 | 1 | 153 | 48  | 6  | 3 | 99  | 20 | 288 | 72  |
| 95,783 | 30 | 1 | 153 | 48  | 6  | 3 | 99  | 20 | 288 | 72  |
| 95,784 | 28 | 1 | 135 | 66  | 6  | 4 | 92  | 29 | 261 | 100 |
| 95,785 | 28 | 2 | 127 | 81  | 6  | 4 | 92  | 38 | 253 | 125 |
| 95,786 | 12 | 2 | 61  | 86  | 3  | 4 | 54  | 36 | 130 | 128 |
| 95,787 | 13 | 2 | 58  | 87  | 3  | 4 | 45  | 36 | 119 | 129 |
| 95,788 | 14 | 2 | 61  | 88  | 3  | 4 | 44  | 39 | 122 | 133 |
| 95,789 | 14 | 2 | 61  | 90  | 3  | 4 | 43  | 38 | 121 | 134 |
| 95,790 | 13 | 4 | 61  | 93  | 2  | 4 | 43  | 38 | 119 | 139 |
| 95,791 | 13 | 5 | 56  | 100 | 2  | 4 | 41  | 40 | 112 | 149 |
| 95,792 | 13 | 5 | 53  | 101 | 2  | 4 | 42  | 41 | 110 | 151 |
| 95,793 | 13 | 5 | 62  | 101 | 2  | 4 | 44  | 41 | 121 | 151 |
| 95,794 | 12 | 5 | 69  | 100 | 3  | 4 | 51  | 41 | 135 | 150 |
| 95,795 | 12 | 5 | 71  | 101 | 3  | 5 | 53  | 42 | 139 | 153 |
| 95,796 | 13 | 5 | 69  | 98  | 3  | 4 | 52  | 40 | 137 | 147 |
| 95,797 | 11 | 5 | 70  | 82  | 2  | 4 | 52  | 38 | 135 | 129 |
| 95,798 | 11 | 6 | 69  | 83  | 2  | 4 | 52  | 44 | 134 | 137 |
| 95,799 | 11 | 7 | 64  | 82  | 2  | 4 | 44  | 45 | 121 | 138 |
| 95,800 | 11 | 7 | 64  | 74  | 2  | 4 | 43  | 46 | 120 | 131 |
| 95,801 | 11 | 7 | 65  | 74  | 2  | 4 | 42  | 46 | 120 | 131 |
| 95,802 | 5  | 7 | 52  | 76  | 2  | 4 | 33  | 47 | 92  | 134 |
| 95,803 | 4  | 7 | 51  | 76  | 2  | 4 | 30  | 47 | 87  | 134 |
| 95,804 | 4  | 7 | 51  | 76  | 2  | 4 | 31  | 47 | 88  | 134 |
| 95,805 | 5  | 7 | 51  | 77  | 2  | 4 | 31  | 50 | 89  | 138 |

|        |    |    |    |     |   |   |    |    |     |     |
|--------|----|----|----|-----|---|---|----|----|-----|-----|
| 95,806 | 5  | 7  | 51 | 79  | 2 | 4 | 31 | 50 | 89  | 140 |
| 95,807 | 5  | 7  | 51 | 79  | 2 | 4 | 32 | 50 | 90  | 140 |
| 95,808 | 7  | 7  | 53 | 79  | 2 | 4 | 35 | 50 | 97  | 140 |
| 95,809 | 9  | 7  | 59 | 78  | 2 | 4 | 36 | 50 | 106 | 139 |
| 95,810 | 9  | 7  | 59 | 80  | 2 | 4 | 36 | 51 | 106 | 142 |
| 95,811 | 9  | 7  | 59 | 81  | 2 | 4 | 35 | 51 | 105 | 143 |
| 95,812 | 9  | 7  | 64 | 81  | 2 | 4 | 37 | 51 | 112 | 143 |
| 95,813 | 9  | 7  | 68 | 81  | 2 | 4 | 42 | 51 | 121 | 143 |
| 95,814 | 10 | 7  | 70 | 83  | 1 | 4 | 45 | 51 | 126 | 145 |
| 95,815 | 10 | 7  | 70 | 83  | 1 | 4 | 45 | 51 | 126 | 145 |
| 95,816 | 10 | 7  | 70 | 81  | 1 | 4 | 48 | 47 | 129 | 139 |
| 95,817 | 10 | 7  | 70 | 81  | 1 | 4 | 48 | 47 | 129 | 139 |
| 95,818 | 10 | 6  | 70 | 72  | 1 | 3 | 48 | 39 | 129 | 120 |
| 95,819 | 10 | 7  | 70 | 85  | 1 | 4 | 48 | 51 | 129 | 147 |
| 95,820 | 10 | 7  | 70 | 93  | 1 | 4 | 47 | 56 | 128 | 160 |
| 95,821 | 10 | 9  | 74 | 128 | 1 | 4 | 49 | 73 | 134 | 214 |
| 95,822 | 9  | 9  | 75 | 128 | 1 | 4 | 48 | 74 | 133 | 215 |
| 95,823 | 9  | 9  | 73 | 128 | 1 | 4 | 48 | 74 | 131 | 215 |
| 95,824 | 9  | 9  | 73 | 129 | 1 | 4 | 47 | 74 | 130 | 216 |
| 95,825 | 9  | 10 | 71 | 132 | 1 | 4 | 45 | 75 | 126 | 221 |
| 95,826 | 9  | 10 | 67 | 132 | 1 | 4 | 45 | 75 | 122 | 221 |
| 95,827 | 10 | 11 | 67 | 132 | 1 | 4 | 48 | 75 | 126 | 222 |
| 95,828 | 10 | 11 | 66 | 135 | 1 | 5 | 48 | 76 | 125 | 227 |
| 95,829 | 10 | 11 | 66 | 135 | 1 | 5 | 48 | 76 | 125 | 227 |
| 95,830 | 10 | 11 | 67 | 135 | 2 | 5 | 49 | 76 | 128 | 227 |
| 95,831 | 10 | 11 | 68 | 135 | 2 | 5 | 49 | 76 | 129 | 227 |
| 95,832 | 10 | 11 | 67 | 135 | 2 | 5 | 49 | 76 | 128 | 227 |
| 95,833 | 10 | 11 | 67 | 135 | 2 | 4 | 49 | 78 | 128 | 228 |
| 95,834 | 10 | 11 | 67 | 132 | 2 | 4 | 49 | 78 | 128 | 225 |
| 95,835 | 10 | 11 | 67 | 114 | 2 | 3 | 49 | 71 | 128 | 199 |
| 95,836 | 12 | 10 | 68 | 102 | 2 | 3 | 49 | 62 | 131 | 177 |
| 95,837 | 12 | 10 | 67 | 97  | 2 | 3 | 48 | 62 | 129 | 172 |
| 95,838 | 11 | 10 | 64 | 96  | 2 | 3 | 44 | 62 | 121 | 171 |
| 95,839 | 10 | 10 | 62 | 95  | 2 | 3 | 45 | 61 | 119 | 169 |
| 95,840 | 10 | 10 | 60 | 95  | 2 | 3 | 44 | 61 | 116 | 169 |
| 95,841 | 11 | 9  | 60 | 97  | 2 | 4 | 43 | 62 | 116 | 172 |
| 95,842 | 11 | 8  | 60 | 91  | 2 | 4 | 42 | 61 | 115 | 164 |
| 95,843 | 11 | 8  | 56 | 90  | 2 | 4 | 41 | 60 | 110 | 162 |
| 95,844 | 11 | 8  | 50 | 92  | 2 | 4 | 40 | 60 | 103 | 164 |
| 95,845 | 11 | 8  | 41 | 91  | 1 | 3 | 33 | 59 | 86  | 161 |
| 95,846 | 11 | 8  | 39 | 90  | 1 | 3 | 31 | 59 | 82  | 160 |

|        |    |    |    |     |   |   |    |    |    |     |
|--------|----|----|----|-----|---|---|----|----|----|-----|
| 95,847 | 10 | 8  | 39 | 90  | 1 | 3 | 31 | 59 | 81 | 160 |
| 95,848 | 10 | 8  | 37 | 90  | 1 | 3 | 33 | 60 | 81 | 161 |
| 95,849 | 10 | 6  | 37 | 89  | 1 | 3 | 33 | 53 | 81 | 151 |
| 95,850 | 10 | 6  | 37 | 89  | 1 | 3 | 33 | 53 | 81 | 151 |
| 95,851 | 10 | 6  | 35 | 88  | 1 | 3 | 33 | 52 | 79 | 149 |
| 95,852 | 10 | 6  | 34 | 88  | 1 | 3 | 34 | 52 | 79 | 149 |
| 95,853 | 11 | 6  | 31 | 86  | 1 | 3 | 33 | 52 | 76 | 147 |
| 95,854 | 11 | 6  | 31 | 86  | 1 | 3 | 32 | 52 | 75 | 147 |
| 95,855 | 11 | 6  | 31 | 89  | 1 | 3 | 32 | 52 | 75 | 150 |
| 95,856 | 10 | 6  | 31 | 88  | 1 | 3 | 31 | 50 | 73 | 147 |
| 95,857 | 10 | 6  | 31 | 86  | 1 | 3 | 30 | 50 | 72 | 145 |
| 95,858 | 10 | 6  | 31 | 88  | 1 | 3 | 30 | 51 | 72 | 148 |
| 95,859 | 8  | 8  | 30 | 95  | 1 | 6 | 29 | 57 | 68 | 166 |
| 95,860 | 6  | 8  | 23 | 99  | 1 | 6 | 28 | 59 | 58 | 172 |
| 95,861 | 6  | 11 | 18 | 101 | 1 | 6 | 27 | 62 | 52 | 180 |
| 95,862 | 6  | 11 | 18 | 100 | 1 | 6 | 26 | 62 | 51 | 179 |
| 95,863 | 6  | 12 | 14 | 100 | 1 | 6 | 23 | 63 | 44 | 181 |
| 95,864 | 6  | 12 | 14 | 101 | 1 | 7 | 22 | 63 | 43 | 183 |
| 95,865 | 5  | 12 | 12 | 100 | 1 | 7 | 19 | 63 | 37 | 182 |
| 95,866 | 5  | 16 | 11 | 110 | 1 | 9 | 18 | 78 | 35 | 213 |
| 95,867 | 5  | 16 | 11 | 111 | 1 | 9 | 16 | 78 | 33 | 214 |
| 95,868 | 5  | 16 | 11 | 111 | 1 | 9 | 18 | 79 | 35 | 215 |
| 95,869 | 5  | 15 | 12 | 90  | 1 | 8 | 18 | 62 | 36 | 175 |
| 95,870 | 5  | 15 | 12 | 90  | 1 | 8 | 18 | 62 | 36 | 175 |
| 95,871 | 5  | 15 | 8  | 91  | 1 | 8 | 15 | 62 | 29 | 176 |
| 95,872 | 5  | 13 | 8  | 56  | 1 | 8 | 15 | 45 | 29 | 122 |
| 95,873 | 5  | 13 | 7  | 56  | 1 | 8 | 15 | 43 | 28 | 120 |
| 95,874 | 5  | 13 | 7  | 56  | 1 | 8 | 15 | 43 | 28 | 120 |
| 95,875 | 5  | 13 | 7  | 57  | 1 | 8 | 15 | 43 | 28 | 121 |
| 95,876 | 5  | 12 | 7  | 54  | 1 | 8 | 15 | 42 | 28 | 116 |
| 95,877 | 5  | 12 | 7  | 53  | 1 | 8 | 12 | 42 | 25 | 115 |
| 95,878 | 5  | 11 | 7  | 53  | 1 | 8 | 12 | 43 | 25 | 115 |
| 95,879 | 5  | 11 | 8  | 50  | 1 | 7 | 14 | 42 | 28 | 110 |
| 95,880 | 5  | 11 | 8  | 50  | 1 | 7 | 14 | 42 | 28 | 110 |
| 95,881 | 5  | 11 | 7  | 50  | 0 | 7 | 13 | 42 | 25 | 110 |
| 95,882 | 5  | 11 | 11 | 51  | 0 | 7 | 15 | 42 | 31 | 111 |
| 95,883 | 5  | 11 | 12 | 51  | 0 | 7 | 16 | 40 | 33 | 109 |
| 95,884 | 6  | 11 | 12 | 52  | 0 | 7 | 16 | 40 | 34 | 110 |
| 95,885 | 10 | 11 | 30 | 48  | 0 | 7 | 54 | 38 | 94 | 104 |
| 95,886 | 9  | 11 | 31 | 48  | 0 | 7 | 55 | 38 | 95 | 104 |
| 95,887 | 8  | 11 | 30 | 48  | 0 | 7 | 55 | 38 | 93 | 104 |

|        |    |    |     |    |   |   |     |    |     |     |
|--------|----|----|-----|----|---|---|-----|----|-----|-----|
| 95,888 | 8  | 11 | 29  | 48 | 0 | 7 | 54  | 38 | 91  | 104 |
| 95,889 | 8  | 11 | 29  | 46 | 0 | 7 | 57  | 35 | 94  | 99  |
| 95,890 | 8  | 11 | 29  | 46 | 0 | 7 | 57  | 35 | 94  | 99  |
| 95,891 | 7  | 11 | 29  | 46 | 0 | 7 | 57  | 35 | 93  | 99  |
| 95,892 | 7  | 10 | 29  | 41 | 0 | 6 | 57  | 34 | 93  | 91  |
| 95,893 | 7  | 10 | 32  | 40 | 0 | 6 | 59  | 33 | 98  | 89  |
| 95,894 | 7  | 10 | 35  | 41 | 0 | 7 | 60  | 33 | 102 | 91  |
| 95,895 | 7  | 10 | 40  | 39 | 0 | 7 | 60  | 33 | 107 | 89  |
| 95,896 | 7  | 10 | 46  | 39 | 0 | 7 | 60  | 33 | 113 | 89  |
| 95,897 | 7  | 10 | 46  | 39 | 0 | 7 | 60  | 34 | 113 | 90  |
| 95,898 | 9  | 11 | 156 | 49 | 7 | 8 | 126 | 40 | 298 | 108 |
| 95,899 | 10 | 11 | 172 | 53 | 7 | 8 | 131 | 44 | 320 | 116 |
| 95,900 | 10 | 11 | 172 | 54 | 7 | 8 | 131 | 44 | 320 | 117 |
| 95,901 | 10 | 11 | 175 | 55 | 7 | 8 | 134 | 46 | 326 | 120 |
| 95,902 | 10 | 12 | 178 | 55 | 7 | 8 | 134 | 46 | 329 | 121 |
| 95,903 | 10 | 12 | 179 | 55 | 7 | 8 | 133 | 46 | 329 | 121 |
| 95,904 | 9  | 12 | 179 | 55 | 7 | 8 | 133 | 46 | 328 | 121 |
| 95,905 | 9  | 12 | 179 | 53 | 7 | 8 | 133 | 46 | 328 | 119 |
| 95,906 | 9  | 12 | 179 | 53 | 7 | 8 | 133 | 46 | 328 | 119 |
| 95,907 | 9  | 12 | 180 | 53 | 7 | 8 | 134 | 47 | 330 | 120 |
| 95,908 | 9  | 12 | 181 | 53 | 7 | 8 | 134 | 48 | 331 | 121 |
| 95,909 | 9  | 12 | 181 | 51 | 7 | 8 | 134 | 47 | 331 | 118 |
| 95,910 | 9  | 10 | 180 | 40 | 7 | 5 | 133 | 39 | 329 | 94  |
| 95,911 | 9  | 10 | 180 | 40 | 7 | 5 | 133 | 39 | 329 | 94  |
| 95,912 | 9  | 7  | 182 | 36 | 7 | 5 | 133 | 35 | 331 | 83  |
| 95,913 | 9  | 7  | 182 | 36 | 7 | 5 | 133 | 35 | 331 | 83  |
| 95,914 | 9  | 6  | 183 | 36 | 7 | 5 | 134 | 34 | 333 | 81  |
| 95,915 | 9  | 2  | 183 | 24 | 7 | 2 | 134 | 19 | 333 | 47  |
| 95,916 | 9  | 2  | 183 | 24 | 7 | 2 | 134 | 19 | 333 | 47  |
| 95,917 | 9  | 2  | 186 | 24 | 7 | 2 | 135 | 19 | 337 | 47  |
| 95,918 | 9  | 2  | 186 | 23 | 7 | 2 | 135 | 18 | 337 | 45  |
| 95,919 | 9  | 2  | 189 | 23 | 7 | 2 | 134 | 18 | 339 | 45  |
| 95,920 | 9  | 2  | 188 | 22 | 7 | 2 | 134 | 18 | 338 | 44  |
| 95,921 | 9  | 2  | 188 | 22 | 7 | 2 | 134 | 18 | 338 | 44  |
| 95,922 | 9  | 2  | 188 | 22 | 7 | 2 | 134 | 18 | 338 | 44  |
| 95,923 | 9  | 2  | 188 | 23 | 7 | 2 | 134 | 18 | 338 | 45  |
| 95,924 | 9  | 2  | 188 | 23 | 7 | 2 | 134 | 18 | 338 | 45  |
| 95,925 | 9  | 2  | 188 | 23 | 7 | 2 | 134 | 18 | 338 | 45  |
| 95,926 | 9  | 2  | 188 | 21 | 7 | 2 | 134 | 18 | 338 | 43  |
| 95,927 | 9  | 2  | 188 | 21 | 7 | 2 | 134 | 18 | 338 | 43  |
| 95,928 | 8  | 2  | 189 | 21 | 7 | 2 | 134 | 18 | 338 | 43  |

|        |    |   |     |    |   |   |     |    |     |    |
|--------|----|---|-----|----|---|---|-----|----|-----|----|
| 95,929 | 8  | 2 | 188 | 21 | 7 | 2 | 135 | 17 | 338 | 42 |
| 95,930 | 8  | 2 | 188 | 21 | 7 | 2 | 133 | 17 | 336 | 42 |
| 95,931 | 8  | 2 | 188 | 20 | 7 | 2 | 133 | 18 | 336 | 42 |
| 95,932 | 8  | 2 | 188 | 20 | 7 | 2 | 134 | 18 | 337 | 42 |
| 95,933 | 8  | 2 | 183 | 20 | 7 | 2 | 132 | 18 | 330 | 42 |
| 95,934 | 8  | 2 | 182 | 19 | 8 | 2 | 136 | 18 | 334 | 41 |
| 95,935 | 7  | 2 | 182 | 19 | 8 | 2 | 137 | 18 | 334 | 41 |
| 95,936 | 3  | 2 | 164 | 19 | 8 | 2 | 99  | 18 | 274 | 41 |
| 95,937 | 3  | 2 | 163 | 19 | 8 | 2 | 98  | 18 | 272 | 41 |
| 95,938 | 3  | 2 | 163 | 19 | 8 | 2 | 95  | 18 | 269 | 41 |
| 95,939 | 3  | 2 | 163 | 19 | 8 | 2 | 95  | 18 | 269 | 41 |
| 95,940 | 5  | 2 | 168 | 19 | 9 | 2 | 102 | 18 | 284 | 41 |
| 95,941 | 5  | 2 | 169 | 19 | 9 | 2 | 103 | 18 | 286 | 41 |
| 95,942 | 5  | 2 | 170 | 19 | 9 | 2 | 103 | 18 | 287 | 41 |
| 95,943 | 8  | 2 | 188 | 19 | 9 | 2 | 121 | 18 | 326 | 41 |
| 95,944 | 9  | 2 | 190 | 19 | 9 | 2 | 120 | 17 | 328 | 40 |
| 95,945 | 9  | 2 | 189 | 18 | 9 | 1 | 120 | 17 | 327 | 38 |
| 95,946 | 9  | 2 | 184 | 20 | 9 | 1 | 120 | 17 | 322 | 40 |
| 95,947 | 9  | 2 | 178 | 21 | 9 | 1 | 120 | 17 | 316 | 41 |
| 95,948 | 8  | 2 | 155 | 21 | 9 | 1 | 116 | 17 | 288 | 41 |
| 95,949 | 7  | 1 | 67  | 11 | 2 | 0 | 49  | 12 | 125 | 24 |
| 95,950 | 6  | 1 | 52  | 7  | 2 | 0 | 45  | 7  | 105 | 15 |
| 95,951 | 6  | 1 | 52  | 6  | 2 | 0 | 43  | 7  | 103 | 14 |
| 95,952 | 6  | 1 | 49  | 5  | 2 | 0 | 42  | 5  | 99  | 11 |
| 95,953 | 6  | 0 | 46  | 5  | 2 | 0 | 45  | 5  | 99  | 10 |
| 95,954 | 6  | 0 | 45  | 5  | 2 | 0 | 45  | 5  | 98  | 10 |
| 95,955 | 8  | 0 | 47  | 6  | 3 | 0 | 47  | 5  | 105 | 11 |
| 95,956 | 8  | 0 | 47  | 15 | 3 | 0 | 48  | 5  | 106 | 20 |
| 95,957 | 9  | 1 | 46  | 22 | 3 | 0 | 48  | 9  | 106 | 32 |
| 95,958 | 9  | 1 | 46  | 23 | 3 | 0 | 48  | 8  | 106 | 32 |
| 95,959 | 9  | 1 | 45  | 24 | 3 | 0 | 48  | 8  | 105 | 33 |
| 95,960 | 9  | 1 | 45  | 25 | 3 | 0 | 48  | 8  | 105 | 34 |
| 95,961 | 9  | 1 | 44  | 25 | 3 | 0 | 47  | 8  | 103 | 34 |
| 95,962 | 9  | 1 | 44  | 26 | 3 | 0 | 48  | 8  | 104 | 35 |
| 95,963 | 9  | 1 | 44  | 28 | 3 | 0 | 48  | 8  | 104 | 37 |
| 95,964 | 12 | 1 | 50  | 29 | 3 | 0 | 49  | 9  | 114 | 39 |
| 95,965 | 12 | 1 | 50  | 29 | 3 | 0 | 49  | 9  | 114 | 39 |
| 95,966 | 12 | 2 | 55  | 31 | 4 | 0 | 54  | 11 | 125 | 44 |
| 95,967 | 12 | 2 | 56  | 32 | 4 | 0 | 54  | 11 | 126 | 45 |
| 95,968 | 12 | 2 | 53  | 32 | 4 | 0 | 53  | 11 | 122 | 45 |
| 95,969 | 12 | 2 | 53  | 33 | 4 | 0 | 53  | 11 | 122 | 46 |

|        |    |   |    |    |   |   |    |    |     |    |
|--------|----|---|----|----|---|---|----|----|-----|----|
| 95,970 | 12 | 2 | 51 | 33 | 4 | 0 | 53 | 11 | 120 | 46 |
| 95,971 | 13 | 2 | 51 | 33 | 4 | 0 | 53 | 11 | 121 | 46 |
| 95,972 | 13 | 2 | 51 | 33 | 4 | 0 | 53 | 11 | 121 | 46 |
| 95,973 | 14 | 2 | 52 | 34 | 4 | 0 | 54 | 11 | 124 | 47 |
| 95,974 | 14 | 2 | 52 | 33 | 4 | 0 | 54 | 11 | 124 | 46 |
| 95,975 | 14 | 2 | 52 | 33 | 5 | 0 | 54 | 11 | 125 | 46 |
| 95,976 | 14 | 2 | 52 | 33 | 5 | 0 | 54 | 11 | 125 | 46 |
| 95,977 | 14 | 2 | 52 | 33 | 5 | 0 | 54 | 11 | 125 | 46 |
| 95,978 | 14 | 2 | 52 | 33 | 5 | 0 | 54 | 11 | 125 | 46 |
| 95,979 | 14 | 2 | 51 | 33 | 5 | 0 | 54 | 11 | 124 | 46 |
| 95,980 | 14 | 2 | 51 | 33 | 5 | 0 | 53 | 11 | 123 | 46 |
| 95,981 | 14 | 2 | 51 | 36 | 5 | 0 | 53 | 12 | 123 | 50 |
| 95,982 | 14 | 2 | 51 | 36 | 5 | 0 | 54 | 11 | 124 | 49 |
| 95,983 | 14 | 2 | 51 | 38 | 5 | 0 | 54 | 12 | 124 | 52 |
| 95,984 | 14 | 2 | 52 | 38 | 5 | 0 | 55 | 12 | 126 | 52 |
| 95,985 | 14 | 2 | 52 | 38 | 4 | 0 | 50 | 12 | 120 | 52 |
| 95,986 | 14 | 2 | 52 | 38 | 4 | 0 | 49 | 13 | 119 | 53 |
| 95,987 | 14 | 2 | 52 | 38 | 4 | 0 | 49 | 13 | 119 | 53 |
| 95,988 | 14 | 4 | 52 | 39 | 4 | 0 | 49 | 13 | 119 | 56 |
| 95,989 | 14 | 5 | 52 | 50 | 4 | 0 | 50 | 15 | 120 | 70 |
| 95,990 | 13 | 5 | 47 | 51 | 3 | 0 | 43 | 17 | 106 | 73 |
| 95,991 | 14 | 5 | 48 | 53 | 3 | 0 | 43 | 17 | 108 | 75 |
| 95,992 | 14 | 5 | 47 | 54 | 3 | 0 | 42 | 17 | 106 | 76 |
| 95,993 | 14 | 5 | 49 | 57 | 3 | 0 | 44 | 17 | 110 | 79 |
| 95,994 | 11 | 5 | 31 | 57 | 3 | 0 | 25 | 18 | 70  | 80 |
| 95,995 | 10 | 5 | 26 | 58 | 3 | 0 | 24 | 18 | 63  | 81 |
| 95,996 | 10 | 5 | 24 | 58 | 3 | 0 | 24 | 18 | 61  | 81 |
| 95,997 | 11 | 5 | 24 | 56 | 3 | 0 | 25 | 17 | 63  | 78 |
| 95,998 | 11 | 5 | 26 | 55 | 3 | 0 | 26 | 17 | 66  | 77 |
| 95,999 | 11 | 5 | 26 | 55 | 3 | 0 | 26 | 16 | 66  | 76 |
| 96,000 | 11 | 6 | 26 | 57 | 3 | 0 | 26 | 18 | 66  | 81 |
| 96,001 | 11 | 6 | 26 | 57 | 3 | 0 | 26 | 19 | 66  | 82 |
| 96,002 | 11 | 6 | 27 | 62 | 3 | 0 | 23 | 25 | 64  | 93 |
| 96,003 | 12 | 6 | 27 | 63 | 3 | 0 | 23 | 25 | 65  | 94 |
| 96,004 | 12 | 6 | 27 | 63 | 3 | 0 | 23 | 25 | 65  | 94 |
| 96,005 | 10 | 6 | 27 | 63 | 3 | 0 | 21 | 25 | 61  | 94 |
| 96,006 | 10 | 6 | 25 | 52 | 2 | 0 | 22 | 25 | 59  | 83 |
| 96,007 | 10 | 5 | 25 | 45 | 2 | 0 | 21 | 21 | 58  | 71 |
| 96,008 | 9  | 5 | 25 | 45 | 2 | 0 | 21 | 21 | 57  | 71 |
| 96,009 | 9  | 5 | 26 | 45 | 2 | 0 | 23 | 21 | 60  | 71 |
| 96,010 | 9  | 5 | 26 | 44 | 2 | 0 | 23 | 20 | 60  | 69 |

|        |    |    |    |     |   |   |    |    |    |     |
|--------|----|----|----|-----|---|---|----|----|----|-----|
| 96,011 | 9  | 5  | 26 | 44  | 2 | 0 | 23 | 20 | 60 | 69  |
| 96,012 | 10 | 5  | 24 | 45  | 2 | 0 | 23 | 20 | 59 | 70  |
| 96,013 | 10 | 5  | 24 | 51  | 2 | 0 | 22 | 20 | 58 | 76  |
| 96,014 | 10 | 5  | 21 | 53  | 2 | 1 | 22 | 20 | 55 | 79  |
| 96,015 | 7  | 5  | 17 | 55  | 2 | 1 | 19 | 19 | 45 | 80  |
| 96,016 | 7  | 7  | 13 | 92  | 1 | 1 | 15 | 27 | 36 | 127 |
| 96,017 | 7  | 7  | 12 | 115 | 1 | 1 | 14 | 29 | 34 | 152 |
| 96,018 | 7  | 11 | 11 | 124 | 1 | 2 | 14 | 37 | 33 | 174 |
| 96,019 | 7  | 11 | 11 | 129 | 1 | 3 | 14 | 42 | 33 | 185 |
| 96,020 | 7  | 11 | 10 | 132 | 1 | 3 | 13 | 42 | 31 | 188 |
| 96,021 | 7  | 14 | 10 | 134 | 1 | 3 | 13 | 43 | 31 | 194 |
| 96,022 | 6  | 14 | 9  | 136 | 1 | 3 | 13 | 43 | 29 | 196 |
| 96,023 | 5  | 20 | 9  | 146 | 1 | 4 | 12 | 49 | 27 | 219 |
| 96,024 | 5  | 20 | 9  | 145 | 1 | 4 | 12 | 49 | 27 | 218 |
| 96,025 | 5  | 20 | 9  | 145 | 0 | 4 | 12 | 49 | 26 | 218 |
| 96,026 | 5  | 20 | 12 | 145 | 0 | 4 | 12 | 50 | 29 | 219 |
| 96,027 | 5  | 20 | 12 | 145 | 0 | 4 | 12 | 50 | 29 | 219 |
| 96,028 | 5  | 20 | 12 | 148 | 0 | 4 | 12 | 53 | 29 | 225 |
| 96,029 | 5  | 20 | 12 | 149 | 0 | 4 | 12 | 55 | 29 | 228 |
| 96,030 | 5  | 20 | 17 | 149 | 0 | 4 | 13 | 58 | 35 | 231 |
| 96,031 | 5  | 20 | 22 | 153 | 0 | 4 | 13 | 60 | 40 | 237 |
| 96,032 | 5  | 20 | 25 | 151 | 0 | 4 | 16 | 61 | 46 | 236 |
| 96,033 | 6  | 20 | 33 | 153 | 0 | 4 | 15 | 62 | 54 | 239 |
| 96,034 | 6  | 20 | 34 | 151 | 0 | 4 | 15 | 61 | 55 | 236 |
| 96,035 | 6  | 20 | 33 | 151 | 0 | 4 | 16 | 63 | 55 | 238 |
| 96,036 | 6  | 20 | 33 | 152 | 0 | 5 | 16 | 63 | 55 | 240 |
| 96,037 | 6  | 20 | 33 | 152 | 0 | 5 | 16 | 62 | 55 | 239 |
| 96,038 | 6  | 18 | 33 | 151 | 0 | 5 | 16 | 62 | 55 | 236 |
| 96,039 | 6  | 18 | 33 | 154 | 0 | 5 | 16 | 65 | 55 | 242 |
| 96,040 | 6  | 17 | 33 | 142 | 0 | 5 | 15 | 63 | 54 | 227 |
| 96,041 | 5  | 17 | 34 | 141 | 0 | 5 | 15 | 63 | 54 | 226 |
| 96,042 | 4  | 17 | 33 | 140 | 0 | 5 | 17 | 63 | 54 | 225 |
| 96,043 | 4  | 17 | 34 | 140 | 0 | 5 | 19 | 63 | 57 | 225 |
| 96,044 | 4  | 17 | 33 | 136 | 0 | 5 | 19 | 62 | 56 | 220 |
| 96,045 | 4  | 17 | 34 | 136 | 0 | 5 | 20 | 62 | 58 | 220 |
| 96,046 | 5  | 17 | 37 | 136 | 1 | 5 | 19 | 62 | 62 | 220 |
| 96,047 | 4  | 17 | 38 | 136 | 1 | 5 | 18 | 62 | 61 | 220 |
| 96,048 | 4  | 17 | 40 | 136 | 1 | 5 | 23 | 62 | 68 | 220 |
| 96,049 | 4  | 17 | 40 | 136 | 1 | 5 | 25 | 62 | 70 | 220 |
| 96,050 | 4  | 17 | 40 | 136 | 1 | 5 | 27 | 62 | 72 | 220 |
| 96,051 | 4  | 16 | 40 | 134 | 1 | 5 | 27 | 60 | 72 | 215 |

|        |    |    |     |     |   |   |    |    |     |     |
|--------|----|----|-----|-----|---|---|----|----|-----|-----|
| 96,052 | 6  | 16 | 43  | 129 | 1 | 5 | 31 | 53 | 81  | 203 |
| 96,053 | 6  | 16 | 43  | 129 | 1 | 5 | 31 | 53 | 81  | 203 |
| 96,054 | 10 | 16 | 51  | 128 | 1 | 5 | 34 | 53 | 96  | 202 |
| 96,055 | 10 | 16 | 51  | 128 | 1 | 5 | 34 | 53 | 96  | 202 |
| 96,056 | 13 | 16 | 63  | 128 | 1 | 5 | 40 | 53 | 117 | 202 |
| 96,057 | 13 | 16 | 63  | 128 | 1 | 5 | 39 | 53 | 116 | 202 |
| 96,058 | 13 | 16 | 63  | 128 | 1 | 5 | 39 | 53 | 116 | 202 |
| 96,059 | 14 | 16 | 71  | 128 | 1 | 5 | 39 | 53 | 125 | 202 |
| 96,060 | 15 | 16 | 91  | 127 | 1 | 5 | 48 | 54 | 155 | 202 |
| 96,061 | 15 | 16 | 93  | 127 | 2 | 5 | 48 | 54 | 158 | 202 |
| 96,062 | 15 | 16 | 94  | 129 | 2 | 5 | 48 | 54 | 159 | 204 |
| 96,063 | 14 | 16 | 94  | 128 | 2 | 5 | 48 | 55 | 158 | 204 |
| 96,064 | 14 | 16 | 94  | 120 | 2 | 5 | 48 | 55 | 158 | 196 |
| 96,065 | 14 | 16 | 94  | 118 | 2 | 4 | 48 | 55 | 158 | 193 |
| 96,066 | 14 | 16 | 94  | 114 | 2 | 4 | 48 | 55 | 158 | 189 |
| 96,067 | 14 | 13 | 96  | 53  | 2 | 4 | 48 | 43 | 160 | 113 |
| 96,068 | 14 | 13 | 96  | 54  | 2 | 4 | 48 | 43 | 160 | 114 |
| 96,069 | 15 | 9  | 97  | 39  | 2 | 2 | 50 | 30 | 164 | 80  |
| 96,070 | 15 | 9  | 97  | 40  | 2 | 2 | 50 | 30 | 164 | 81  |
| 96,071 | 15 | 9  | 97  | 36  | 2 | 2 | 50 | 31 | 164 | 78  |
| 96,072 | 15 | 6  | 97  | 34  | 2 | 2 | 50 | 30 | 164 | 72  |
| 96,073 | 15 | 6  | 98  | 32  | 3 | 2 | 52 | 30 | 168 | 70  |
| 96,074 | 15 | 0  | 99  | 23  | 3 | 1 | 52 | 24 | 169 | 48  |
| 96,075 | 15 | 0  | 115 | 24  | 3 | 1 | 55 | 24 | 188 | 49  |
| 96,076 | 16 | 0  | 141 | 24  | 3 | 1 | 67 | 25 | 227 | 50  |
| 96,077 | 16 | 1  | 144 | 25  | 4 | 1 | 70 | 25 | 234 | 52  |
| 96,078 | 16 | 1  | 144 | 25  | 4 | 1 | 73 | 25 | 237 | 52  |
| 96,079 | 16 | 1  | 146 | 24  | 4 | 1 | 74 | 22 | 240 | 48  |
| 96,080 | 17 | 1  | 151 | 26  | 4 | 1 | 77 | 20 | 249 | 48  |
| 96,081 | 17 | 1  | 146 | 26  | 4 | 1 | 79 | 17 | 246 | 45  |
| 96,082 | 17 | 1  | 144 | 24  | 4 | 1 | 76 | 16 | 241 | 42  |
| 96,083 | 18 | 1  | 147 | 33  | 5 | 1 | 77 | 16 | 247 | 51  |
| 96,084 | 18 | 1  | 145 | 31  | 6 | 1 | 81 | 15 | 250 | 48  |
| 96,085 | 20 | 1  | 151 | 32  | 6 | 1 | 84 | 15 | 261 | 49  |
| 96,086 | 20 | 1  | 154 | 32  | 6 | 0 | 85 | 13 | 265 | 46  |
| 96,087 | 20 | 1  | 156 | 33  | 7 | 0 | 93 | 13 | 276 | 47  |
| 96,088 | 20 | 1  | 156 | 33  | 7 | 0 | 93 | 13 | 276 | 47  |
| 96,089 | 20 | 1  | 156 | 37  | 7 | 0 | 93 | 14 | 276 | 52  |
| 96,090 | 20 | 1  | 156 | 34  | 7 | 0 | 93 | 11 | 276 | 46  |
| 96,091 | 20 | 1  | 157 | 35  | 7 | 0 | 94 | 9  | 278 | 45  |
| 96,092 | 20 | 1  | 157 | 34  | 7 | 0 | 94 | 9  | 278 | 44  |



|        |    |   |     |    |   |   |    |    |     |     |
|--------|----|---|-----|----|---|---|----|----|-----|-----|
| 96,093 | 20 | 1 | 160 | 34 | 7 | 0 | 93 | 9  | 280 | 44  |
| 96,094 | 20 | 1 | 163 | 34 | 7 | 0 | 94 | 9  | 284 | 44  |
| 96,095 | 20 | 1 | 163 | 34 | 7 | 0 | 92 | 9  | 282 | 44  |
| 96,096 | 21 | 1 | 164 | 37 | 7 | 0 | 91 | 9  | 283 | 47  |
| 96,097 | 20 | 1 | 161 | 37 | 6 | 0 | 92 | 10 | 279 | 48  |
| 96,098 | 21 | 1 | 160 | 38 | 6 | 0 | 92 | 10 | 279 | 49  |
| 96,099 | 21 | 1 | 160 | 38 | 6 | 0 | 86 | 11 | 273 | 50  |
| 96,100 | 21 | 1 | 161 | 38 | 6 | 0 | 84 | 11 | 272 | 50  |
| 96,101 | 23 | 1 | 172 | 38 | 7 | 0 | 93 | 11 | 295 | 50  |
| 96,102 | 23 | 1 | 171 | 38 | 7 | 0 | 91 | 11 | 292 | 50  |
| 96,103 | 21 | 1 | 168 | 38 | 7 | 0 | 89 | 11 | 285 | 50  |
| 96,104 | 16 | 1 | 168 | 38 | 7 | 0 | 87 | 11 | 278 | 50  |
| 96,105 | 17 | 1 | 166 | 38 | 7 | 0 | 87 | 11 | 277 | 50  |
| 96,106 | 17 | 1 | 166 | 38 | 7 | 0 | 87 | 15 | 277 | 54  |
| 96,107 | 14 | 1 | 154 | 39 | 7 | 0 | 81 | 16 | 256 | 56  |
| 96,108 | 14 | 1 | 151 | 41 | 7 | 0 | 80 | 19 | 252 | 61  |
| 96,109 | 13 | 1 | 145 | 45 | 7 | 0 | 79 | 19 | 244 | 65  |
| 96,110 | 12 | 1 | 124 | 45 | 7 | 0 | 70 | 18 | 213 | 64  |
| 96,111 | 13 | 1 | 122 | 45 | 6 | 0 | 70 | 18 | 211 | 64  |
| 96,112 | 13 | 1 | 122 | 42 | 6 | 0 | 70 | 18 | 211 | 61  |
| 96,113 | 13 | 1 | 122 | 42 | 6 | 0 | 71 | 17 | 212 | 60  |
| 96,114 | 14 | 1 | 122 | 42 | 6 | 0 | 71 | 17 | 213 | 60  |
| 96,115 | 14 | 1 | 122 | 41 | 6 | 0 | 71 | 17 | 213 | 59  |
| 96,116 | 14 | 1 | 122 | 42 | 6 | 0 | 71 | 17 | 213 | 60  |
| 96,117 | 14 | 1 | 120 | 42 | 6 | 0 | 71 | 17 | 211 | 60  |
| 96,118 | 14 | 1 | 120 | 42 | 6 | 0 | 71 | 17 | 211 | 60  |
| 96,119 | 14 | 1 | 120 | 42 | 6 | 0 | 71 | 17 | 211 | 60  |
| 96,120 | 13 | 1 | 119 | 42 | 6 | 0 | 69 | 18 | 207 | 61  |
| 96,121 | 13 | 1 | 120 | 41 | 6 | 0 | 69 | 17 | 208 | 59  |
| 96,122 | 13 | 1 | 121 | 45 | 6 | 0 | 69 | 23 | 209 | 69  |
| 96,123 | 14 | 2 | 120 | 67 | 5 | 0 | 67 | 50 | 206 | 119 |
| 96,124 | 14 | 3 | 121 | 77 | 5 | 0 | 68 | 50 | 208 | 130 |
| 96,125 | 14 | 3 | 119 | 76 | 5 | 0 | 66 | 50 | 204 | 129 |
| 96,126 | 14 | 3 | 106 | 75 | 5 | 0 | 65 | 50 | 190 | 128 |
| 96,127 | 13 | 2 | 77  | 74 | 5 | 0 | 53 | 48 | 148 | 124 |
| 96,128 | 13 | 2 | 71  | 74 | 4 | 0 | 49 | 48 | 137 | 124 |
| 96,129 | 13 | 2 | 69  | 72 | 4 | 0 | 46 | 48 | 132 | 122 |
| 96,130 | 13 | 2 | 67  | 72 | 4 | 0 | 45 | 48 | 129 | 122 |
| 96,131 | 12 | 2 | 62  | 69 | 4 | 0 | 42 | 48 | 120 | 119 |
| 96,132 | 12 | 2 | 62  | 67 | 4 | 0 | 42 | 47 | 120 | 116 |
| 96,133 | 12 | 2 | 62  | 69 | 4 | 0 | 44 | 49 | 122 | 120 |

|        |    |    |    |    |   |   |    |    |     |     |
|--------|----|----|----|----|---|---|----|----|-----|-----|
| 96,134 | 11 | 2  | 58 | 59 | 3 | 0 | 43 | 48 | 115 | 109 |
| 96,135 | 10 | 2  | 52 | 59 | 2 | 0 | 39 | 48 | 103 | 109 |
| 96,136 | 8  | 3  | 45 | 57 | 2 | 0 | 35 | 48 | 90  | 108 |
| 96,137 | 9  | 3  | 42 | 57 | 3 | 0 | 32 | 48 | 86  | 108 |
| 96,138 | 9  | 3  | 40 | 57 | 2 | 0 | 26 | 48 | 77  | 108 |
| 96,139 | 9  | 3  | 39 | 57 | 2 | 0 | 25 | 48 | 75  | 108 |
| 96,140 | 9  | 3  | 39 | 53 | 2 | 0 | 25 | 47 | 75  | 103 |
| 96,141 | 9  | 3  | 39 | 53 | 2 | 0 | 25 | 47 | 75  | 103 |
| 96,142 | 9  | 3  | 38 | 53 | 3 | 0 | 25 | 47 | 75  | 103 |
| 96,143 | 9  | 3  | 37 | 53 | 3 | 0 | 25 | 47 | 74  | 103 |
| 96,144 | 9  | 3  | 35 | 54 | 3 | 0 | 24 | 47 | 71  | 104 |
| 96,145 | 9  | 3  | 30 | 54 | 3 | 0 | 21 | 47 | 63  | 104 |
| 96,146 | 9  | 3  | 30 | 54 | 3 | 0 | 21 | 47 | 63  | 104 |
| 96,147 | 8  | 3  | 29 | 51 | 3 | 0 | 21 | 48 | 61  | 102 |
| 96,148 | 8  | 3  | 29 | 52 | 3 | 0 | 20 | 50 | 60  | 105 |
| 96,149 | 7  | 3  | 27 | 58 | 3 | 0 | 21 | 52 | 58  | 113 |
| 96,150 | 7  | 9  | 25 | 59 | 3 | 0 | 21 | 53 | 56  | 121 |
| 96,151 | 7  | 9  | 24 | 59 | 3 | 0 | 21 | 53 | 55  | 121 |
| 96,152 | 6  | 9  | 14 | 59 | 2 | 0 | 12 | 53 | 34  | 121 |
| 96,153 | 6  | 9  | 13 | 59 | 2 | 0 | 12 | 53 | 33  | 121 |
| 96,154 | 6  | 9  | 10 | 59 | 2 | 0 | 12 | 53 | 30  | 121 |
| 96,155 | 6  | 9  | 10 | 59 | 2 | 0 | 13 | 53 | 31  | 121 |
| 96,156 | 7  | 9  | 19 | 60 | 2 | 0 | 22 | 53 | 50  | 122 |
| 96,157 | 7  | 9  | 19 | 60 | 2 | 1 | 22 | 49 | 50  | 119 |
| 96,158 | 7  | 9  | 20 | 58 | 2 | 1 | 22 | 45 | 51  | 113 |
| 96,159 | 7  | 9  | 22 | 59 | 2 | 1 | 25 | 46 | 56  | 115 |
| 96,160 | 7  | 10 | 22 | 60 | 2 | 3 | 25 | 53 | 56  | 126 |
| 96,161 | 7  | 10 | 22 | 60 | 2 | 3 | 25 | 53 | 56  | 126 |
| 96,162 | 6  | 10 | 24 | 62 | 2 | 3 | 26 | 53 | 58  | 128 |
| 96,163 | 6  | 11 | 24 | 62 | 2 | 3 | 26 | 53 | 58  | 129 |
| 96,164 | 6  | 11 | 28 | 63 | 2 | 3 | 27 | 54 | 63  | 131 |
| 96,165 | 5  | 11 | 28 | 63 | 2 | 3 | 27 | 54 | 62  | 131 |
| 96,166 | 5  | 11 | 28 | 65 | 2 | 3 | 27 | 54 | 62  | 133 |
| 96,167 | 5  | 11 | 28 | 64 | 2 | 3 | 27 | 54 | 62  | 132 |
| 96,168 | 5  | 11 | 28 | 64 | 2 | 3 | 27 | 54 | 62  | 132 |
| 96,169 | 5  | 11 | 28 | 64 | 2 | 3 | 27 | 54 | 62  | 132 |
| 96,170 | 5  | 11 | 28 | 66 | 2 | 3 | 27 | 54 | 62  | 134 |
| 96,171 | 5  | 11 | 27 | 66 | 2 | 3 | 27 | 53 | 61  | 133 |
| 96,172 | 5  | 11 | 27 | 67 | 2 | 3 | 27 | 53 | 61  | 134 |
| 96,173 | 5  | 10 | 28 | 45 | 2 | 3 | 27 | 20 | 62  | 78  |
| 96,174 | 4  | 10 | 31 | 45 | 2 | 3 | 27 | 20 | 64  | 78  |

|        |   |    |    |     |   |   |    |    |     |     |
|--------|---|----|----|-----|---|---|----|----|-----|-----|
| 96,175 | 4 | 9  | 29 | 36  | 2 | 3 | 26 | 20 | 61  | 68  |
| 96,176 | 4 | 9  | 28 | 36  | 3 | 3 | 30 | 20 | 65  | 68  |
| 96,177 | 4 | 9  | 41 | 36  | 3 | 3 | 41 | 20 | 89  | 68  |
| 96,178 | 4 | 9  | 44 | 38  | 4 | 3 | 42 | 21 | 94  | 71  |
| 96,179 | 4 | 9  | 44 | 38  | 4 | 3 | 42 | 21 | 94  | 71  |
| 96,180 | 4 | 10 | 50 | 39  | 6 | 3 | 46 | 21 | 106 | 73  |
| 96,181 | 4 | 10 | 52 | 39  | 6 | 3 | 46 | 21 | 108 | 73  |
| 96,182 | 4 | 10 | 52 | 39  | 6 | 3 | 44 | 21 | 106 | 73  |
| 96,183 | 4 | 12 | 54 | 39  | 6 | 3 | 44 | 22 | 108 | 76  |
| 96,184 | 4 | 13 | 54 | 39  | 6 | 3 | 42 | 20 | 106 | 75  |
| 96,185 | 4 | 13 | 54 | 40  | 6 | 3 | 42 | 20 | 106 | 76  |
| 96,186 | 4 | 13 | 59 | 42  | 6 | 3 | 42 | 20 | 111 | 78  |
| 96,187 | 4 | 12 | 64 | 46  | 6 | 4 | 44 | 21 | 118 | 83  |
| 96,188 | 3 | 12 | 64 | 50  | 5 | 5 | 44 | 23 | 116 | 90  |
| 96,189 | 3 | 12 | 64 | 50  | 5 | 5 | 42 | 23 | 114 | 90  |
| 96,190 | 3 | 12 | 67 | 50  | 5 | 5 | 42 | 23 | 117 | 90  |
| 96,191 | 3 | 12 | 75 | 52  | 5 | 5 | 44 | 24 | 127 | 93  |
| 96,192 | 3 | 12 | 76 | 52  | 4 | 5 | 47 | 24 | 130 | 93  |
| 96,193 | 3 | 13 | 76 | 52  | 4 | 5 | 47 | 28 | 130 | 98  |
| 96,194 | 3 | 14 | 82 | 67  | 4 | 7 | 50 | 48 | 139 | 136 |
| 96,195 | 3 | 14 | 81 | 67  | 4 | 7 | 50 | 48 | 138 | 136 |
| 96,196 | 4 | 15 | 83 | 68  | 4 | 7 | 53 | 49 | 144 | 139 |
| 96,197 | 4 | 15 | 82 | 69  | 4 | 7 | 53 | 51 | 143 | 142 |
| 96,198 | 4 | 17 | 82 | 79  | 4 | 7 | 53 | 49 | 143 | 152 |
| 96,199 | 4 | 17 | 82 | 80  | 4 | 7 | 53 | 49 | 143 | 153 |
| 96,200 | 4 | 19 | 82 | 75  | 4 | 7 | 51 | 51 | 141 | 152 |
| 96,201 | 4 | 14 | 81 | 99  | 4 | 7 | 52 | 57 | 141 | 177 |
| 96,202 | 4 | 14 | 81 | 100 | 4 | 7 | 52 | 57 | 141 | 178 |
| 96,203 | 3 | 14 | 85 | 102 | 4 | 7 | 54 | 58 | 146 | 181 |
| 96,204 | 3 | 14 | 87 | 102 | 4 | 7 | 57 | 58 | 151 | 181 |
| 96,205 | 3 | 14 | 87 | 102 | 4 | 7 | 55 | 58 | 149 | 181 |
| 96,206 | 3 | 14 | 89 | 105 | 4 | 7 | 56 | 58 | 152 | 184 |
| 96,207 | 1 | 14 | 79 | 104 | 4 | 7 | 47 | 58 | 131 | 183 |
| 96,208 | 1 | 15 | 79 | 104 | 4 | 6 | 47 | 58 | 131 | 183 |
| 96,209 | 1 | 15 | 78 | 103 | 4 | 7 | 47 | 58 | 130 | 183 |
| 96,210 | 1 | 14 | 92 | 97  | 5 | 5 | 60 | 51 | 158 | 167 |
| 96,211 | 1 | 14 | 91 | 97  | 5 | 5 | 60 | 51 | 157 | 167 |
| 96,212 | 1 | 14 | 94 | 97  | 7 | 6 | 65 | 51 | 167 | 168 |
| 96,213 | 1 | 14 | 93 | 95  | 7 | 6 | 64 | 51 | 165 | 166 |
| 96,214 | 1 | 13 | 92 | 95  | 7 | 6 | 63 | 51 | 163 | 165 |
| 96,215 | 1 | 13 | 92 | 94  | 7 | 6 | 63 | 51 | 163 | 164 |

|        |   |    |    |     |   |    |    |    |     |     |
|--------|---|----|----|-----|---|----|----|----|-----|-----|
| 96,216 | 1 | 13 | 92 | 96  | 7 | 6  | 63 | 51 | 163 | 166 |
| 96,217 | 1 | 13 | 92 | 102 | 7 | 6  | 63 | 53 | 163 | 174 |
| 96,218 | 1 | 13 | 92 | 102 | 7 | 6  | 63 | 53 | 163 | 174 |
| 96,219 | 1 | 13 | 92 | 103 | 7 | 7  | 63 | 53 | 163 | 176 |
| 96,220 | 1 | 13 | 92 | 100 | 7 | 7  | 65 | 53 | 165 | 173 |
| 96,221 | 1 | 13 | 92 | 100 | 7 | 7  | 65 | 53 | 165 | 173 |
| 96,222 | 1 | 13 | 92 | 100 | 7 | 7  | 65 | 53 | 165 | 173 |
| 96,223 | 1 | 13 | 90 | 99  | 7 | 7  | 65 | 54 | 163 | 173 |
| 96,224 | 1 | 13 | 90 | 98  | 7 | 7  | 65 | 54 | 163 | 172 |
| 96,225 | 1 | 14 | 87 | 117 | 7 | 9  | 65 | 61 | 160 | 201 |
| 96,226 | 1 | 14 | 87 | 121 | 7 | 9  | 65 | 65 | 160 | 209 |
| 96,227 | 1 | 15 | 87 | 134 | 6 | 10 | 62 | 76 | 156 | 235 |
| 96,228 | 1 | 15 | 74 | 135 | 6 | 10 | 51 | 76 | 132 | 236 |
| 96,229 | 1 | 14 | 71 | 135 | 5 | 10 | 50 | 76 | 127 | 235 |
| 96,230 | 1 | 14 | 70 | 137 | 5 | 10 | 50 | 76 | 126 | 237 |
| 96,231 | 1 | 14 | 65 | 137 | 3 | 10 | 46 | 76 | 115 | 237 |
| 96,232 | 1 | 14 | 63 | 138 | 3 | 10 | 46 | 76 | 113 | 238 |
| 96,233 | 1 | 14 | 63 | 138 | 3 | 10 | 46 | 76 | 113 | 238 |
| 96,234 | 1 | 12 | 62 | 137 | 3 | 10 | 46 | 74 | 112 | 233 |
| 96,235 | 1 | 12 | 62 | 137 | 3 | 10 | 46 | 74 | 112 | 233 |
| 96,236 | 1 | 12 | 61 | 129 | 3 | 8  | 46 | 74 | 111 | 223 |
| 96,237 | 1 | 12 | 58 | 129 | 3 | 8  | 46 | 74 | 108 | 223 |
| 96,238 | 1 | 12 | 53 | 129 | 3 | 8  | 43 | 74 | 100 | 223 |
| 96,239 | 1 | 12 | 53 | 129 | 3 | 8  | 43 | 74 | 100 | 223 |
| 96,240 | 1 | 12 | 52 | 129 | 3 | 8  | 45 | 74 | 101 | 223 |
| 96,241 | 3 | 12 | 52 | 128 | 5 | 8  | 51 | 74 | 111 | 222 |
| 96,242 | 3 | 12 | 52 | 128 | 5 | 8  | 51 | 74 | 111 | 222 |
| 96,243 | 3 | 12 | 51 | 139 | 5 | 8  | 48 | 74 | 107 | 233 |
| 96,244 | 3 | 11 | 54 | 140 | 6 | 8  | 54 | 70 | 117 | 229 |
| 96,245 | 3 | 9  | 53 | 124 | 6 | 6  | 53 | 47 | 115 | 186 |
| 96,246 | 3 | 9  | 55 | 124 | 6 | 6  | 57 | 47 | 121 | 186 |
| 96,247 | 2 | 9  | 53 | 125 | 6 | 6  | 55 | 47 | 116 | 187 |
| 96,248 | 2 | 7  | 54 | 115 | 6 | 6  | 55 | 45 | 117 | 173 |
| 96,249 | 2 | 7  | 54 | 115 | 6 | 6  | 54 | 45 | 116 | 173 |
| 96,250 | 3 | 7  | 56 | 116 | 6 | 6  | 58 | 45 | 123 | 174 |
| 96,251 | 3 | 5  | 59 | 114 | 6 | 6  | 58 | 41 | 126 | 166 |
| 96,252 | 3 | 4  | 60 | 89  | 6 | 6  | 58 | 33 | 127 | 132 |
| 96,253 | 3 | 4  | 60 | 88  | 7 | 6  | 58 | 33 | 128 | 131 |
| 96,254 | 3 | 4  | 56 | 88  | 7 | 6  | 57 | 32 | 123 | 130 |
| 96,255 | 3 | 4  | 55 | 88  | 7 | 6  | 54 | 32 | 119 | 130 |
| 96,256 | 3 | 4  | 54 | 88  | 7 | 6  | 54 | 32 | 118 | 130 |

|        |    |   |     |    |   |   |    |    |     |     |
|--------|----|---|-----|----|---|---|----|----|-----|-----|
| 96,257 | 3  | 4 | 58  | 85 | 7 | 6 | 54 | 32 | 122 | 127 |
| 96,258 | 3  | 4 | 63  | 85 | 7 | 6 | 56 | 32 | 129 | 127 |
| 96,259 | 7  | 3 | 105 | 85 | 7 | 6 | 70 | 32 | 189 | 126 |
| 96,260 | 7  | 3 | 93  | 85 | 7 | 5 | 63 | 32 | 170 | 125 |
| 96,261 | 7  | 3 | 91  | 85 | 6 | 5 | 58 | 31 | 162 | 124 |
| 96,262 | 8  | 3 | 91  | 86 | 6 | 5 | 58 | 33 | 163 | 127 |
| 96,263 | 8  | 3 | 92  | 86 | 4 | 4 | 53 | 33 | 157 | 126 |
| 96,264 | 8  | 3 | 107 | 86 | 4 | 4 | 55 | 33 | 174 | 126 |
| 96,265 | 10 | 3 | 113 | 86 | 4 | 4 | 59 | 35 | 186 | 128 |
| 96,266 | 10 | 3 | 115 | 86 | 4 | 4 | 59 | 35 | 188 | 128 |
| 96,267 | 12 | 6 | 120 | 88 | 5 | 5 | 61 | 38 | 198 | 137 |
| 96,268 | 12 | 6 | 120 | 80 | 5 | 5 | 61 | 36 | 198 | 127 |
| 96,269 | 12 | 6 | 124 | 82 | 5 | 5 | 61 | 38 | 202 | 131 |
| 96,270 | 12 | 6 | 129 | 81 | 5 | 4 | 63 | 38 | 209 | 129 |
| 96,271 | 12 | 6 | 130 | 81 | 5 | 4 | 62 | 38 | 209 | 129 |
| 96,272 | 12 | 6 | 130 | 81 | 5 | 4 | 62 | 39 | 209 | 130 |
| 96,273 | 12 | 6 | 130 | 81 | 5 | 4 | 62 | 39 | 209 | 130 |
| 96,274 | 12 | 6 | 131 | 79 | 5 | 4 | 67 | 38 | 215 | 127 |
| 96,275 | 12 | 6 | 131 | 80 | 5 | 4 | 67 | 38 | 215 | 128 |
| 96,276 | 12 | 5 | 131 | 61 | 5 | 3 | 70 | 31 | 218 | 100 |
| 96,277 | 12 | 5 | 131 | 58 | 5 | 3 | 70 | 27 | 218 | 93  |
| 96,278 | 12 | 4 | 131 | 45 | 5 | 2 | 69 | 16 | 217 | 67  |
| 96,279 | 12 | 4 | 131 | 45 | 5 | 2 | 69 | 17 | 217 | 68  |
| 96,280 | 12 | 4 | 131 | 42 | 5 | 2 | 69 | 16 | 217 | 64  |
| 96,281 | 12 | 4 | 134 | 40 | 5 | 2 | 70 | 16 | 221 | 62  |
| 96,282 | 12 | 4 | 136 | 39 | 5 | 2 | 70 | 16 | 223 | 61  |
| 96,283 | 12 | 4 | 136 | 40 | 5 | 2 | 72 | 16 | 225 | 62  |
| 96,284 | 12 | 4 | 136 | 40 | 5 | 2 | 72 | 16 | 225 | 62  |
| 96,285 | 12 | 3 | 136 | 39 | 5 | 2 | 72 | 16 | 225 | 60  |
| 96,286 | 12 | 3 | 136 | 39 | 5 | 2 | 72 | 16 | 225 | 60  |
| 96,287 | 12 | 3 | 136 | 35 | 5 | 2 | 72 | 13 | 225 | 53  |
| 96,288 | 16 | 3 | 150 | 35 | 7 | 3 | 82 | 13 | 255 | 54  |
| 96,289 | 24 | 3 | 153 | 35 | 7 | 3 | 89 | 13 | 273 | 54  |
| 96,290 | 24 | 3 | 175 | 36 | 7 | 3 | 93 | 13 | 299 | 55  |
| 96,291 | 24 | 3 | 173 | 36 | 7 | 3 | 91 | 13 | 295 | 55  |
| 96,292 | 22 | 3 | 165 | 35 | 5 | 3 | 83 | 12 | 275 | 53  |
| 96,293 | 22 | 3 | 171 | 24 | 5 | 3 | 86 | 13 | 284 | 43  |
| 96,294 | 22 | 3 | 171 | 24 | 5 | 3 | 86 | 14 | 284 | 44  |
| 96,295 | 22 | 3 | 167 | 24 | 4 | 3 | 79 | 14 | 272 | 44  |
| 96,296 | 22 | 3 | 163 | 22 | 4 | 3 | 78 | 14 | 267 | 42  |
| 96,297 | 22 | 3 | 161 | 22 | 4 | 3 | 73 | 14 | 260 | 42  |

|        |    |    |     |    |   |   |    |    |     |    |
|--------|----|----|-----|----|---|---|----|----|-----|----|
| 96,298 | 22 | 4  | 161 | 24 | 4 | 3 | 73 | 15 | 260 | 46 |
| 96,299 | 22 | 4  | 160 | 24 | 4 | 3 | 73 | 15 | 259 | 46 |
| 96,300 | 21 | 4  | 158 | 22 | 4 | 3 | 69 | 15 | 252 | 44 |
| 96,301 | 21 | 4  | 157 | 22 | 4 | 3 | 69 | 15 | 251 | 44 |
| 96,302 | 21 | 4  | 157 | 23 | 5 | 3 | 69 | 15 | 252 | 45 |
| 96,303 | 21 | 4  | 159 | 23 | 5 | 3 | 69 | 15 | 254 | 45 |
| 96,304 | 21 | 4  | 159 | 24 | 4 | 3 | 69 | 15 | 253 | 46 |
| 96,305 | 21 | 4  | 160 | 23 | 4 | 3 | 70 | 15 | 255 | 45 |
| 96,306 | 21 | 4  | 162 | 24 | 4 | 3 | 70 | 17 | 257 | 48 |
| 96,307 | 21 | 4  | 164 | 26 | 4 | 3 | 72 | 19 | 261 | 52 |
| 96,308 | 21 | 4  | 163 | 28 | 4 | 3 | 70 | 19 | 258 | 54 |
| 96,309 | 21 | 4  | 159 | 29 | 4 | 3 | 68 | 20 | 252 | 56 |
| 96,310 | 17 | 4  | 117 | 29 | 4 | 3 | 53 | 21 | 191 | 57 |
| 96,311 | 17 | 4  | 117 | 29 | 4 | 3 | 51 | 22 | 189 | 58 |
| 96,312 | 17 | 4  | 115 | 29 | 4 | 3 | 50 | 22 | 186 | 58 |
| 96,313 | 16 | 5  | 114 | 28 | 4 | 3 | 49 | 21 | 183 | 57 |
| 96,314 | 16 | 5  | 110 | 29 | 4 | 3 | 49 | 21 | 179 | 58 |
| 96,315 | 16 | 6  | 94  | 34 | 4 | 3 | 47 | 22 | 161 | 65 |
| 96,316 | 14 | 3  | 90  | 35 | 4 | 2 | 43 | 16 | 151 | 56 |
| 96,317 | 14 | 3  | 92  | 35 | 4 | 2 | 44 | 16 | 154 | 56 |
| 96,318 | 12 | 3  | 90  | 35 | 3 | 2 | 43 | 16 | 148 | 56 |
| 96,319 | 12 | 3  | 92  | 40 | 3 | 2 | 44 | 19 | 151 | 64 |
| 96,320 | 12 | 3  | 90  | 38 | 3 | 2 | 44 | 17 | 149 | 60 |
| 96,321 | 12 | 8  | 85  | 43 | 3 | 2 | 42 | 24 | 142 | 77 |
| 96,322 | 12 | 9  | 84  | 45 | 3 | 2 | 41 | 24 | 140 | 80 |
| 96,323 | 12 | 9  | 84  | 45 | 3 | 2 | 38 | 23 | 137 | 79 |
| 96,324 | 12 | 9  | 85  | 44 | 3 | 2 | 36 | 23 | 136 | 78 |
| 96,325 | 12 | 10 | 84  | 46 | 3 | 2 | 36 | 25 | 135 | 83 |
| 96,326 | 12 | 10 | 84  | 47 | 3 | 2 | 34 | 25 | 133 | 84 |
| 96,327 | 12 | 10 | 84  | 47 | 3 | 1 | 34 | 25 | 133 | 83 |
| 96,328 | 12 | 10 | 84  | 47 | 3 | 1 | 34 | 25 | 133 | 83 |
| 96,329 | 12 | 10 | 85  | 47 | 3 | 1 | 34 | 24 | 134 | 82 |
| 96,330 | 12 | 10 | 85  | 47 | 3 | 1 | 34 | 24 | 134 | 82 |
| 96,331 | 12 | 10 | 82  | 46 | 3 | 1 | 33 | 24 | 130 | 81 |
| 96,332 | 12 | 10 | 80  | 47 | 3 | 1 | 33 | 24 | 128 | 82 |
| 96,333 | 12 | 10 | 79  | 47 | 3 | 1 | 33 | 24 | 127 | 82 |
| 96,334 | 12 | 10 | 79  | 47 | 3 | 1 | 31 | 24 | 125 | 82 |
| 96,335 | 12 | 10 | 79  | 48 | 3 | 1 | 31 | 24 | 125 | 83 |
| 96,336 | 8  | 10 | 73  | 50 | 2 | 1 | 27 | 24 | 110 | 85 |
| 96,337 | 8  | 10 | 72  | 50 | 2 | 1 | 27 | 25 | 109 | 86 |
| 96,338 | 8  | 10 | 67  | 50 | 1 | 1 | 21 | 26 | 97  | 87 |

|        |   |    |    |    |   |   |    |    |     |    |
|--------|---|----|----|----|---|---|----|----|-----|----|
| 96,339 | 8 | 10 | 65 | 52 | 1 | 1 | 21 | 28 | 95  | 91 |
| 96,340 | 0 | 10 | 62 | 52 | 1 | 1 | 14 | 28 | 77  | 91 |
| 96,341 | 0 | 10 | 40 | 51 | 1 | 1 | 10 | 28 | 51  | 90 |
| 96,342 | 0 | 10 | 35 | 52 | 1 | 1 | 10 | 30 | 46  | 93 |
| 96,343 | 0 | 10 | 35 | 52 | 1 | 1 | 8  | 30 | 44  | 93 |
| 96,344 | 0 | 10 | 34 | 50 | 1 | 1 | 8  | 29 | 43  | 90 |
| 96,345 | 0 | 10 | 34 | 50 | 1 | 1 | 8  | 28 | 43  | 89 |
| 96,346 | 0 | 10 | 38 | 50 | 1 | 1 | 9  | 28 | 48  | 89 |
| 96,347 | 0 | 10 | 38 | 51 | 1 | 1 | 9  | 28 | 48  | 90 |
| 96,348 | 0 | 10 | 46 | 50 | 1 | 1 | 16 | 28 | 63  | 89 |
| 96,349 | 0 | 9  | 54 | 48 | 1 | 1 | 16 | 27 | 71  | 85 |
| 96,350 | 0 | 9  | 57 | 48 | 1 | 1 | 17 | 27 | 75  | 85 |
| 96,351 | 0 | 9  | 76 | 48 | 2 | 1 | 22 | 27 | 100 | 85 |
| 96,352 | 0 | 9  | 85 | 49 | 2 | 1 | 27 | 30 | 114 | 89 |
| 96,353 | 0 | 9  | 85 | 49 | 1 | 1 | 30 | 30 | 116 | 89 |
| 96,354 | 0 | 9  | 82 | 49 | 1 | 1 | 30 | 30 | 113 | 89 |
| 96,355 | 0 | 9  | 88 | 48 | 1 | 1 | 29 | 30 | 118 | 88 |
| 96,356 | 0 | 12 | 85 | 51 | 1 | 1 | 29 | 31 | 115 | 95 |
| 96,357 | 1 | 12 | 89 | 51 | 1 | 1 | 29 | 30 | 120 | 94 |
| 96,358 | 1 | 12 | 86 | 48 | 1 | 1 | 27 | 28 | 115 | 89 |
| 96,359 | 1 | 12 | 82 | 48 | 1 | 1 | 27 | 28 | 111 | 89 |
| 96,360 | 1 | 12 | 81 | 47 | 1 | 1 | 27 | 26 | 110 | 86 |
| 96,361 | 1 | 12 | 81 | 47 | 1 | 1 | 28 | 25 | 111 | 85 |
| 96,362 | 1 | 12 | 81 | 47 | 1 | 1 | 28 | 25 | 111 | 85 |
| 96,363 | 1 | 12 | 81 | 48 | 1 | 1 | 28 | 25 | 111 | 86 |
| 96,364 | 1 | 11 | 81 | 50 | 1 | 1 | 28 | 24 | 111 | 86 |
| 96,365 | 1 | 10 | 80 | 49 | 1 | 1 | 28 | 24 | 110 | 84 |
| 96,366 | 2 | 11 | 80 | 47 | 1 | 1 | 28 | 25 | 111 | 84 |
| 96,367 | 2 | 11 | 78 | 51 | 1 | 1 | 28 | 25 | 109 | 88 |
| 96,368 | 2 | 11 | 74 | 52 | 1 | 2 | 27 | 25 | 104 | 90 |
| 96,369 | 2 | 11 | 71 | 55 | 1 | 2 | 26 | 27 | 100 | 95 |
| 96,370 | 2 | 11 | 67 | 50 | 1 | 2 | 25 | 25 | 95  | 88 |
| 96,371 | 2 | 6  | 67 | 45 | 1 | 2 | 25 | 18 | 95  | 71 |
| 96,372 | 2 | 5  | 67 | 43 | 1 | 2 | 25 | 18 | 95  | 68 |
| 96,373 | 2 | 5  | 67 | 43 | 1 | 2 | 25 | 18 | 95  | 68 |
| 96,374 | 2 | 5  | 67 | 43 | 1 | 3 | 25 | 18 | 95  | 69 |
| 96,375 | 3 | 4  | 66 | 40 | 1 | 3 | 25 | 17 | 95  | 64 |
| 96,376 | 3 | 4  | 66 | 40 | 1 | 3 | 25 | 17 | 95  | 64 |
| 96,377 | 3 | 4  | 66 | 40 | 1 | 3 | 25 | 17 | 95  | 64 |
| 96,378 | 3 | 5  | 66 | 41 | 1 | 3 | 25 | 19 | 95  | 68 |
| 96,379 | 3 | 5  | 66 | 40 | 1 | 3 | 25 | 19 | 95  | 67 |

|        |   |    |     |    |   |   |    |    |     |     |
|--------|---|----|-----|----|---|---|----|----|-----|-----|
| 96,380 | 3 | 5  | 65  | 40 | 1 | 3 | 25 | 20 | 94  | 68  |
| 96,381 | 3 | 5  | 65  | 40 | 1 | 3 | 25 | 20 | 94  | 68  |
| 96,382 | 3 | 5  | 66  | 41 | 1 | 3 | 25 | 20 | 95  | 69  |
| 96,383 | 3 | 5  | 66  | 42 | 1 | 3 | 25 | 20 | 95  | 70  |
| 96,384 | 3 | 5  | 73  | 48 | 1 | 3 | 31 | 20 | 108 | 76  |
| 96,385 | 3 | 5  | 73  | 49 | 1 | 3 | 31 | 20 | 108 | 77  |
| 96,386 | 3 | 5  | 73  | 49 | 1 | 3 | 32 | 21 | 109 | 78  |
| 96,387 | 3 | 5  | 74  | 51 | 1 | 3 | 32 | 23 | 110 | 82  |
| 96,388 | 3 | 6  | 75  | 52 | 1 | 3 | 33 | 22 | 112 | 83  |
| 96,389 | 3 | 6  | 76  | 53 | 1 | 2 | 35 | 21 | 115 | 82  |
| 96,390 | 3 | 6  | 77  | 51 | 1 | 2 | 35 | 19 | 116 | 78  |
| 96,391 | 3 | 6  | 77  | 51 | 1 | 2 | 34 | 19 | 115 | 78  |
| 96,392 | 3 | 6  | 81  | 58 | 1 | 2 | 35 | 22 | 120 | 88  |
| 96,393 | 3 | 6  | 79  | 59 | 1 | 2 | 35 | 20 | 118 | 87  |
| 96,394 | 3 | 6  | 82  | 64 | 2 | 3 | 41 | 24 | 128 | 97  |
| 96,395 | 4 | 6  | 83  | 67 | 2 | 3 | 41 | 24 | 130 | 100 |
| 96,396 | 4 | 6  | 82  | 67 | 2 | 3 | 41 | 25 | 129 | 101 |
| 96,397 | 4 | 6  | 82  | 70 | 2 | 3 | 40 | 26 | 128 | 105 |
| 96,398 | 4 | 6  | 74  | 69 | 2 | 3 | 33 | 27 | 113 | 105 |
| 96,399 | 4 | 6  | 67  | 74 | 2 | 3 | 34 | 28 | 107 | 111 |
| 96,400 | 4 | 6  | 63  | 74 | 2 | 3 | 34 | 28 | 103 | 111 |
| 96,401 | 5 | 6  | 49  | 73 | 1 | 3 | 30 | 28 | 85  | 110 |
| 96,402 | 5 | 6  | 49  | 76 | 1 | 3 | 29 | 32 | 84  | 117 |
| 96,403 | 5 | 6  | 40  | 75 | 1 | 3 | 24 | 29 | 70  | 113 |
| 96,404 | 5 | 10 | 38  | 79 | 1 | 3 | 21 | 36 | 65  | 128 |
| 96,405 | 5 | 10 | 38  | 79 | 1 | 3 | 21 | 36 | 65  | 128 |
| 96,406 | 5 | 10 | 31  | 80 | 1 | 3 | 20 | 36 | 57  | 129 |
| 96,407 | 5 | 9  | 31  | 82 | 1 | 3 | 20 | 36 | 57  | 130 |
| 96,408 | 4 | 9  | 27  | 81 | 1 | 3 | 20 | 35 | 52  | 128 |
| 96,409 | 4 | 9  | 27  | 82 | 1 | 3 | 20 | 36 | 52  | 130 |
| 96,410 | 4 | 9  | 27  | 83 | 1 | 3 | 20 | 36 | 52  | 131 |
| 96,411 | 4 | 9  | 29  | 83 | 2 | 3 | 20 | 36 | 55  | 131 |
| 96,412 | 5 | 9  | 33  | 83 | 2 | 3 | 21 | 36 | 61  | 131 |
| 96,413 | 6 | 9  | 73  | 84 | 3 | 3 | 36 | 37 | 118 | 133 |
| 96,414 | 6 | 9  | 73  | 83 | 3 | 3 | 36 | 37 | 118 | 132 |
| 96,415 | 6 | 9  | 83  | 81 | 3 | 3 | 45 | 37 | 137 | 130 |
| 96,416 | 6 | 9  | 83  | 82 | 3 | 3 | 45 | 38 | 137 | 132 |
| 96,417 | 5 | 8  | 83  | 79 | 3 | 3 | 45 | 36 | 136 | 126 |
| 96,418 | 8 | 8  | 100 | 72 | 3 | 3 | 70 | 36 | 181 | 119 |
| 96,419 | 8 | 8  | 100 | 68 | 3 | 2 | 70 | 34 | 181 | 112 |
| 96,420 | 9 | 8  | 100 | 68 | 3 | 2 | 70 | 33 | 182 | 111 |



|        |    |   |     |    |   |   |     |    |     |     |
|--------|----|---|-----|----|---|---|-----|----|-----|-----|
| 96,421 | 9  | 8 | 101 | 68 | 3 | 2 | 70  | 33 | 183 | 111 |
| 96,422 | 10 | 8 | 111 | 68 | 3 | 2 | 80  | 33 | 204 | 111 |
| 96,423 | 10 | 8 | 116 | 68 | 3 | 2 | 86  | 33 | 215 | 111 |
| 96,424 | 10 | 8 | 116 | 70 | 3 | 2 | 86  | 33 | 215 | 113 |
| 96,425 | 9  | 8 | 116 | 70 | 5 | 1 | 90  | 33 | 220 | 112 |
| 96,426 | 10 | 8 | 117 | 69 | 5 | 1 | 91  | 32 | 223 | 110 |
| 96,427 | 10 | 8 | 117 | 69 | 5 | 1 | 91  | 32 | 223 | 110 |
| 96,428 | 10 | 8 | 117 | 69 | 5 | 1 | 91  | 32 | 223 | 110 |
| 96,429 | 10 | 7 | 117 | 67 | 5 | 1 | 91  | 30 | 223 | 105 |
| 96,430 | 10 | 7 | 117 | 67 | 5 | 1 | 91  | 30 | 223 | 105 |
| 96,431 | 10 | 7 | 122 | 67 | 6 | 1 | 95  | 29 | 233 | 104 |
| 96,432 | 10 | 7 | 122 | 67 | 6 | 1 | 95  | 29 | 233 | 104 |
| 96,433 | 10 | 7 | 121 | 66 | 6 | 1 | 96  | 29 | 233 | 103 |
| 96,434 | 10 | 7 | 119 | 66 | 6 | 1 | 95  | 29 | 230 | 103 |
| 96,435 | 10 | 7 | 115 | 60 | 6 | 1 | 90  | 29 | 221 | 97  |
| 96,436 | 10 | 7 | 115 | 59 | 6 | 1 | 89  | 29 | 220 | 96  |
| 96,437 | 10 | 7 | 115 | 58 | 6 | 1 | 89  | 28 | 220 | 94  |
| 96,438 | 13 | 7 | 127 | 54 | 6 | 1 | 92  | 26 | 238 | 88  |
| 96,439 | 13 | 6 | 126 | 53 | 6 | 1 | 91  | 26 | 236 | 86  |
| 96,440 | 18 | 6 | 207 | 53 | 8 | 1 | 113 | 26 | 346 | 86  |
| 96,441 | 19 | 6 | 210 | 54 | 8 | 1 | 114 | 26 | 351 | 87  |
| 96,442 | 19 | 6 | 206 | 55 | 8 | 1 | 113 | 26 | 346 | 88  |
| 96,443 | 19 | 6 | 211 | 48 | 9 | 1 | 113 | 23 | 352 | 78  |
| 96,444 | 19 | 6 | 211 | 48 | 9 | 1 | 112 | 23 | 351 | 78  |
| 96,445 | 19 | 6 | 208 | 43 | 8 | 0 | 107 | 19 | 342 | 68  |
| 96,446 | 18 | 6 | 208 | 43 | 8 | 0 | 107 | 18 | 341 | 67  |
| 96,447 | 18 | 6 | 208 | 43 | 8 | 0 | 107 | 18 | 341 | 67  |
| 96,448 | 18 | 6 | 208 | 40 | 8 | 0 | 107 | 17 | 341 | 63  |
| 96,449 | 18 | 6 | 208 | 35 | 8 | 0 | 106 | 15 | 340 | 56  |
| 96,450 | 18 | 6 | 208 | 35 | 8 | 0 | 106 | 15 | 340 | 56  |
| 96,451 | 18 | 6 | 214 | 35 | 8 | 0 | 106 | 15 | 346 | 56  |
| 96,452 | 17 | 6 | 209 | 35 | 8 | 0 | 106 | 15 | 340 | 56  |
| 96,453 | 17 | 6 | 218 | 32 | 9 | 0 | 112 | 11 | 356 | 49  |
| 96,454 | 17 | 2 | 218 | 27 | 9 | 0 | 112 | 4  | 356 | 33  |
| 96,455 | 17 | 2 | 221 | 27 | 9 | 0 | 113 | 4  | 360 | 33  |
| 96,456 | 18 | 2 | 239 | 26 | 9 | 0 | 119 | 4  | 385 | 32  |
| 96,457 | 18 | 0 | 242 | 20 | 9 | 0 | 120 | 3  | 389 | 23  |
| 96,458 | 18 | 0 | 242 | 20 | 9 | 0 | 120 | 3  | 389 | 23  |
| 96,459 | 18 | 0 | 242 | 20 | 9 | 0 | 120 | 3  | 389 | 23  |
| 96,460 | 18 | 0 | 242 | 18 | 9 | 0 | 120 | 2  | 389 | 20  |
| 96,461 | 18 | 0 | 242 | 18 | 9 | 0 | 121 | 3  | 390 | 21  |

|        |    |   |     |    |   |   |     |    |     |    |
|--------|----|---|-----|----|---|---|-----|----|-----|----|
| 96,462 | 18 | 2 | 240 | 19 | 8 | 1 | 122 | 3  | 388 | 25 |
| 96,463 | 17 | 3 | 236 | 19 | 8 | 1 | 121 | 3  | 382 | 26 |
| 96,464 | 16 | 3 | 196 | 18 | 7 | 1 | 105 | 2  | 324 | 24 |
| 96,465 | 16 | 3 | 186 | 18 | 7 | 1 | 97  | 2  | 306 | 24 |
| 96,466 | 14 | 3 | 172 | 18 | 7 | 1 | 73  | 1  | 266 | 23 |
| 96,467 | 14 | 3 | 169 | 16 | 7 | 1 | 73  | 1  | 263 | 21 |
| 96,468 | 13 | 3 | 170 | 16 | 7 | 1 | 72  | 1  | 262 | 21 |
| 96,469 | 13 | 3 | 170 | 16 | 7 | 1 | 72  | 1  | 262 | 21 |
| 96,470 | 13 | 3 | 170 | 16 | 7 | 1 | 72  | 1  | 262 | 21 |
| 96,471 | 12 | 3 | 170 | 16 | 7 | 1 | 72  | 1  | 261 | 21 |
| 96,472 | 12 | 3 | 169 | 16 | 7 | 1 | 72  | 1  | 260 | 21 |
| 96,473 | 11 | 3 | 159 | 17 | 7 | 1 | 62  | 1  | 239 | 22 |
| 96,474 | 11 | 3 | 154 | 17 | 7 | 1 | 56  | 1  | 228 | 22 |
| 96,475 | 12 | 3 | 154 | 15 | 5 | 1 | 52  | 1  | 223 | 20 |
| 96,476 | 12 | 3 | 154 | 15 | 5 | 1 | 52  | 1  | 223 | 20 |
| 96,477 | 12 | 3 | 155 | 15 | 5 | 1 | 56  | 1  | 228 | 20 |
| 96,478 | 12 | 3 | 155 | 15 | 5 | 1 | 55  | 1  | 227 | 20 |
| 96,479 | 12 | 3 | 155 | 15 | 5 | 1 | 54  | 1  | 226 | 20 |
| 96,480 | 13 | 3 | 154 | 15 | 4 | 1 | 53  | 1  | 224 | 20 |
| 96,481 | 13 | 3 | 154 | 15 | 4 | 1 | 53  | 1  | 224 | 20 |
| 96,482 | 13 | 3 | 152 | 14 | 4 | 1 | 54  | 1  | 223 | 19 |
| 96,483 | 13 | 3 | 152 | 12 | 4 | 1 | 54  | 1  | 223 | 17 |
| 96,484 | 13 | 3 | 152 | 13 | 4 | 1 | 53  | 1  | 222 | 18 |
| 96,485 | 16 | 3 | 152 | 17 | 4 | 2 | 53  | 5  | 225 | 27 |
| 96,486 | 16 | 3 | 151 | 20 | 4 | 3 | 53  | 11 | 224 | 37 |
| 96,487 | 13 | 3 | 138 | 22 | 4 | 3 | 50  | 13 | 205 | 41 |
| 96,488 | 12 | 3 | 119 | 22 | 4 | 5 | 40  | 13 | 175 | 43 |
| 96,489 | 8  | 7 | 94  | 23 | 3 | 5 | 32  | 13 | 137 | 48 |
| 96,490 | 8  | 7 | 73  | 24 | 2 | 5 | 27  | 14 | 110 | 50 |
| 96,491 | 8  | 7 | 58  | 23 | 2 | 5 | 26  | 14 | 94  | 49 |
| 96,492 | 9  | 7 | 62  | 23 | 2 | 5 | 27  | 15 | 100 | 50 |
| 96,493 | 9  | 7 | 62  | 22 | 2 | 5 | 27  | 15 | 100 | 49 |
| 96,494 | 11 | 7 | 86  | 20 | 1 | 5 | 35  | 15 | 133 | 47 |
| 96,495 | 11 | 7 | 87  | 20 | 2 | 5 | 42  | 15 | 142 | 47 |
| 96,496 | 11 | 7 | 87  | 17 | 2 | 5 | 42  | 15 | 142 | 44 |
| 96,497 | 11 | 7 | 86  | 17 | 2 | 5 | 42  | 15 | 141 | 44 |
| 96,498 | 11 | 7 | 86  | 18 | 2 | 5 | 42  | 15 | 141 | 45 |
| 96,499 | 11 | 7 | 86  | 18 | 2 | 5 | 42  | 15 | 141 | 45 |
| 96,500 | 11 | 7 | 86  | 18 | 2 | 5 | 42  | 15 | 141 | 45 |
| 96,501 | 11 | 7 | 107 | 18 | 4 | 5 | 52  | 15 | 174 | 45 |
| 96,502 | 11 | 7 | 110 | 19 | 4 | 5 | 52  | 15 | 177 | 46 |

|        |    |   |     |    |   |   |    |    |     |    |
|--------|----|---|-----|----|---|---|----|----|-----|----|
| 96,503 | 11 | 7 | 109 | 19 | 4 | 5 | 49 | 15 | 173 | 46 |
| 96,504 | 11 | 7 | 102 | 19 | 3 | 5 | 46 | 15 | 162 | 46 |
| 96,505 | 11 | 7 | 102 | 19 | 3 | 5 | 46 | 15 | 162 | 46 |
| 96,506 | 11 | 7 | 100 | 19 | 3 | 5 | 45 | 15 | 159 | 46 |
| 96,507 | 10 | 7 | 82  | 19 | 3 | 5 | 40 | 15 | 135 | 46 |
| 96,508 | 10 | 7 | 79  | 19 | 3 | 5 | 39 | 15 | 131 | 46 |
| 96,509 | 10 | 7 | 79  | 19 | 3 | 5 | 39 | 15 | 131 | 46 |
| 96,510 | 10 | 7 | 79  | 19 | 3 | 5 | 39 | 15 | 131 | 46 |
| 96,511 | 11 | 7 | 79  | 18 | 3 | 5 | 39 | 14 | 132 | 44 |
| 96,512 | 11 | 7 | 79  | 18 | 3 | 5 | 38 | 14 | 131 | 44 |
| 96,513 | 11 | 5 | 79  | 17 | 3 | 4 | 37 | 14 | 130 | 40 |
| 96,514 | 11 | 4 | 79  | 17 | 3 | 5 | 36 | 14 | 129 | 40 |
| 96,515 | 11 | 4 | 79  | 16 | 3 | 5 | 36 | 14 | 129 | 39 |
| 96,516 | 11 | 4 | 79  | 16 | 3 | 5 | 36 | 14 | 129 | 39 |
| 96,517 | 11 | 4 | 79  | 16 | 3 | 5 | 36 | 14 | 129 | 39 |
| 96,518 | 11 | 4 | 79  | 16 | 3 | 5 | 36 | 14 | 129 | 39 |
| 96,519 | 11 | 4 | 78  | 17 | 3 | 5 | 36 | 14 | 128 | 40 |
| 96,520 | 11 | 4 | 79  | 17 | 3 | 5 | 36 | 14 | 129 | 40 |
| 96,521 | 11 | 4 | 79  | 17 | 3 | 5 | 36 | 14 | 129 | 40 |
| 96,522 | 11 | 4 | 80  | 17 | 3 | 5 | 36 | 14 | 130 | 40 |
| 96,523 | 11 | 4 | 80  | 17 | 3 | 6 | 36 | 14 | 130 | 41 |
| 96,524 | 11 | 4 | 80  | 17 | 3 | 6 | 36 | 14 | 130 | 41 |
| 96,525 | 11 | 4 | 80  | 17 | 3 | 6 | 36 | 14 | 130 | 41 |
| 96,526 | 10 | 4 | 80  | 18 | 3 | 6 | 36 | 14 | 129 | 42 |
| 96,527 | 9  | 4 | 78  | 18 | 3 | 6 | 32 | 14 | 122 | 42 |
| 96,528 | 9  | 4 | 78  | 18 | 3 | 6 | 30 | 14 | 120 | 42 |
| 96,529 | 9  | 4 | 78  | 18 | 3 | 6 | 30 | 14 | 120 | 42 |
| 96,530 | 10 | 4 | 78  | 18 | 3 | 6 | 30 | 14 | 121 | 42 |
| 96,531 | 9  | 4 | 78  | 18 | 3 | 6 | 30 | 15 | 120 | 43 |
| 96,532 | 9  | 4 | 76  | 18 | 3 | 6 | 29 | 15 | 117 | 43 |
| 96,533 | 9  | 4 | 81  | 18 | 3 | 6 | 29 | 16 | 122 | 44 |
| 96,534 | 9  | 4 | 81  | 18 | 3 | 6 | 29 | 16 | 122 | 44 |
| 96,535 | 6  | 4 | 92  | 13 | 3 | 5 | 36 | 12 | 137 | 34 |
| 96,536 | 6  | 4 | 92  | 10 | 3 | 4 | 36 | 6  | 137 | 24 |
| 96,537 | 6  | 4 | 93  | 8  | 3 | 4 | 38 | 4  | 140 | 20 |
| 96,538 | 6  | 4 | 95  | 8  | 3 | 2 | 39 | 4  | 143 | 18 |
| 96,539 | 6  | 0 | 100 | 7  | 3 | 2 | 39 | 4  | 148 | 13 |
| 96,540 | 8  | 0 | 105 | 7  | 3 | 2 | 46 | 4  | 162 | 13 |
| 96,541 | 6  | 0 | 97  | 6  | 3 | 2 | 44 | 3  | 150 | 11 |
| 96,542 | 6  | 0 | 101 | 6  | 4 | 2 | 45 | 3  | 156 | 11 |
| 96,543 | 5  | 0 | 98  | 5  | 4 | 2 | 45 | 2  | 152 | 9  |

|        |   |    |     |    |   |   |    |    |     |     |
|--------|---|----|-----|----|---|---|----|----|-----|-----|
| 96,544 | 5 | 1  | 103 | 6  | 5 | 2 | 44 | 2  | 157 | 11  |
| 96,545 | 4 | 1  | 89  | 7  | 5 | 2 | 38 | 2  | 136 | 12  |
| 96,546 | 4 | 1  | 88  | 10 | 4 | 2 | 31 | 6  | 127 | 19  |
| 96,547 | 4 | 4  | 88  | 36 | 4 | 2 | 31 | 8  | 127 | 50  |
| 96,548 | 4 | 6  | 88  | 51 | 4 | 5 | 31 | 16 | 127 | 78  |
| 96,549 | 4 | 8  | 88  | 58 | 4 | 6 | 31 | 17 | 127 | 89  |
| 96,550 | 4 | 10 | 89  | 60 | 4 | 6 | 31 | 18 | 128 | 94  |
| 96,551 | 4 | 10 | 85  | 64 | 2 | 6 | 29 | 19 | 120 | 99  |
| 96,552 | 4 | 10 | 62  | 66 | 2 | 6 | 20 | 24 | 88  | 106 |
| 96,553 | 4 | 10 | 59  | 68 | 2 | 6 | 20 | 25 | 85  | 109 |
| 96,554 | 4 | 10 | 59  | 68 | 2 | 6 | 20 | 27 | 85  | 111 |
| 96,555 | 4 | 10 | 61  | 73 | 2 | 6 | 20 | 27 | 87  | 116 |
| 96,556 | 4 | 10 | 61  | 73 | 2 | 6 | 20 | 27 | 87  | 116 |
| 96,557 | 4 | 10 | 60  | 73 | 2 | 6 | 20 | 27 | 86  | 116 |
| 96,558 | 4 | 10 | 76  | 73 | 2 | 6 | 24 | 28 | 106 | 117 |
| 96,559 | 4 | 10 | 76  | 73 | 2 | 6 | 24 | 29 | 106 | 118 |
| 96,560 | 4 | 10 | 77  | 73 | 2 | 6 | 24 | 29 | 107 | 118 |
| 96,561 | 4 | 10 | 77  | 80 | 2 | 6 | 24 | 32 | 107 | 128 |
| 96,562 | 3 | 10 | 77  | 81 | 2 | 6 | 24 | 32 | 106 | 129 |
| 96,563 | 5 | 10 | 93  | 81 | 3 | 6 | 33 | 32 | 134 | 129 |
| 96,564 | 5 | 10 | 93  | 81 | 3 | 5 | 33 | 32 | 134 | 128 |
| 96,565 | 5 | 10 | 93  | 81 | 3 | 5 | 33 | 32 | 134 | 128 |
| 96,566 | 5 | 10 | 97  | 81 | 3 | 5 | 36 | 32 | 141 | 128 |
| 96,567 | 5 | 10 | 98  | 81 | 4 | 5 | 36 | 32 | 143 | 128 |
| 96,568 | 5 | 10 | 99  | 82 | 4 | 5 | 36 | 32 | 144 | 129 |
| 96,569 | 5 | 10 | 101 | 82 | 4 | 5 | 36 | 32 | 146 | 129 |
| 96,570 | 5 | 10 | 104 | 81 | 5 | 5 | 39 | 32 | 153 | 128 |
| 96,571 | 5 | 10 | 103 | 81 | 5 | 5 | 39 | 32 | 152 | 128 |
| 96,572 | 5 | 10 | 102 | 81 | 5 | 5 | 39 | 32 | 151 | 128 |
| 96,573 | 5 | 10 | 102 | 81 | 5 | 5 | 39 | 32 | 151 | 128 |
| 96,574 | 5 | 10 | 102 | 80 | 5 | 4 | 39 | 32 | 151 | 126 |
| 96,575 | 5 | 10 | 102 | 80 | 5 | 4 | 39 | 32 | 151 | 126 |
| 96,576 | 5 | 10 | 102 | 80 | 5 | 4 | 39 | 32 | 151 | 126 |
| 96,577 | 5 | 10 | 102 | 79 | 5 | 4 | 39 | 33 | 151 | 126 |
| 96,578 | 5 | 10 | 102 | 79 | 5 | 4 | 39 | 33 | 151 | 126 |
| 96,579 | 5 | 10 | 102 | 79 | 5 | 4 | 39 | 33 | 151 | 126 |
| 96,580 | 4 | 10 | 102 | 79 | 5 | 4 | 39 | 33 | 150 | 126 |
| 96,581 | 4 | 10 | 102 | 79 | 5 | 4 | 39 | 33 | 150 | 126 |
| 96,582 | 4 | 10 | 102 | 79 | 5 | 4 | 39 | 32 | 150 | 125 |
| 96,583 | 4 | 10 | 101 | 79 | 5 | 4 | 39 | 31 | 149 | 124 |
| 96,584 | 4 | 10 | 97  | 79 | 5 | 4 | 39 | 31 | 145 | 124 |

|        |   |    |    |    |   |   |    |    |     |     |
|--------|---|----|----|----|---|---|----|----|-----|-----|
| 96,585 | 4 | 10 | 94 | 79 | 5 | 4 | 39 | 31 | 142 | 124 |
| 96,586 | 6 | 10 | 86 | 79 | 5 | 4 | 32 | 32 | 129 | 125 |
| 96,587 | 7 | 10 | 86 | 79 | 5 | 4 | 32 | 32 | 130 | 125 |
| 96,588 | 7 | 10 | 85 | 79 | 5 | 4 | 30 | 32 | 127 | 125 |
| 96,589 | 7 | 10 | 83 | 79 | 5 | 4 | 29 | 32 | 124 | 125 |
| 96,590 | 8 | 10 | 77 | 79 | 5 | 4 | 29 | 32 | 119 | 125 |
| 96,591 | 6 | 10 | 70 | 79 | 5 | 4 | 22 | 32 | 103 | 125 |
| 96,592 | 6 | 10 | 70 | 79 | 5 | 4 | 22 | 32 | 103 | 125 |
| 96,593 | 6 | 10 | 65 | 79 | 4 | 4 | 21 | 32 | 96  | 125 |
| 96,594 | 6 | 10 | 57 | 79 | 4 | 4 | 20 | 32 | 87  | 125 |
| 96,595 | 6 | 9  | 49 | 77 | 3 | 4 | 20 | 32 | 78  | 122 |
| 96,596 | 6 | 9  | 49 | 79 | 3 | 4 | 20 | 32 | 78  | 124 |
| 96,597 | 6 | 9  | 49 | 76 | 3 | 4 | 20 | 29 | 78  | 118 |
| 96,598 | 6 | 2  | 49 | 30 | 3 | 1 | 20 | 19 | 78  | 52  |
| 96,599 | 6 | 2  | 49 | 29 | 3 | 1 | 20 | 20 | 78  | 52  |
| 96,600 | 6 | 2  | 49 | 31 | 3 | 1 | 20 | 21 | 78  | 55  |
| 96,601 | 6 | 0  | 47 | 26 | 3 | 1 | 20 | 19 | 76  | 46  |
| 96,602 | 6 | 0  | 47 | 26 | 3 | 1 | 20 | 19 | 76  | 46  |
| 96,603 | 6 | 2  | 47 | 25 | 3 | 1 | 20 | 18 | 76  | 46  |
| 96,604 | 6 | 2  | 47 | 22 | 3 | 1 | 20 | 17 | 76  | 42  |
| 96,605 | 6 | 2  | 47 | 22 | 3 | 1 | 20 | 15 | 76  | 40  |
| 96,606 | 6 | 2  | 44 | 17 | 3 | 1 | 20 | 15 | 73  | 35  |
| 96,607 | 6 | 2  | 44 | 19 | 3 | 1 | 20 | 15 | 73  | 37  |
| 96,608 | 6 | 2  | 31 | 19 | 3 | 1 | 18 | 15 | 58  | 37  |
| 96,609 | 6 | 2  | 29 | 19 | 3 | 1 | 15 | 13 | 53  | 35  |
| 96,610 | 6 | 2  | 28 | 19 | 3 | 1 | 15 | 13 | 52  | 35  |
| 96,611 | 4 | 2  | 20 | 21 | 2 | 1 | 9  | 16 | 35  | 40  |
| 96,612 | 4 | 2  | 20 | 15 | 2 | 1 | 8  | 14 | 34  | 32  |
| 96,613 | 4 | 2  | 20 | 15 | 2 | 1 | 8  | 14 | 34  | 32  |
| 96,614 | 4 | 2  | 13 | 16 | 2 | 1 | 6  | 14 | 25  | 33  |
| 96,615 | 4 | 2  | 13 | 17 | 2 | 1 | 6  | 14 | 25  | 34  |
| 96,616 | 4 | 2  | 7  | 17 | 2 | 1 | 3  | 14 | 16  | 34  |
| 96,617 | 4 | 2  | 6  | 17 | 1 | 1 | 3  | 15 | 14  | 35  |
| 96,618 | 4 | 2  | 4  | 17 | 1 | 1 | 1  | 15 | 10  | 35  |
| 96,619 | 4 | 2  | 4  | 16 | 1 | 2 | 1  | 15 | 10  | 35  |
| 96,620 | 4 | 2  | 4  | 17 | 0 | 2 | 1  | 15 | 9   | 36  |
| 96,621 | 4 | 2  | 2  | 20 | 0 | 2 | 0  | 15 | 6   | 39  |
| 96,622 | 4 | 2  | 2  | 20 | 0 | 2 | 0  | 15 | 6   | 39  |
| 96,623 | 4 | 2  | 3  | 20 | 0 | 2 | 0  | 15 | 7   | 39  |
| 96,624 | 4 | 2  | 3  | 20 | 0 | 2 | 0  | 15 | 7   | 39  |
| 96,625 | 4 | 4  | 3  | 22 | 0 | 2 | 1  | 15 | 8   | 43  |

|        |   |    |    |     |   |   |    |    |    |     |
|--------|---|----|----|-----|---|---|----|----|----|-----|
| 96,626 | 4 | 4  | 3  | 22  | 0 | 2 | 1  | 15 | 8  | 43  |
| 96,627 | 4 | 4  | 4  | 22  | 0 | 2 | 1  | 15 | 9  | 43  |
| 96,628 | 4 | 4  | 4  | 22  | 0 | 2 | 1  | 14 | 9  | 42  |
| 96,629 | 4 | 4  | 5  | 22  | 0 | 2 | 1  | 14 | 10 | 42  |
| 96,630 | 4 | 4  | 5  | 22  | 0 | 2 | 1  | 14 | 10 | 42  |
| 96,631 | 4 | 5  | 5  | 22  | 0 | 2 | 1  | 14 | 10 | 43  |
| 96,632 | 4 | 5  | 5  | 22  | 0 | 2 | 2  | 15 | 11 | 44  |
| 96,633 | 4 | 5  | 5  | 22  | 0 | 2 | 2  | 16 | 11 | 45  |
| 96,634 | 5 | 5  | 5  | 22  | 0 | 2 | 2  | 16 | 12 | 45  |
| 96,635 | 5 | 5  | 5  | 22  | 0 | 2 | 2  | 16 | 12 | 45  |
| 96,636 | 3 | 5  | 5  | 22  | 0 | 2 | 2  | 17 | 10 | 46  |
| 96,637 | 3 | 5  | 5  | 22  | 0 | 2 | 2  | 16 | 10 | 45  |
| 96,638 | 2 | 5  | 5  | 23  | 0 | 2 | 2  | 16 | 9  | 46  |
| 96,639 | 3 | 5  | 10 | 23  | 0 | 2 | 2  | 16 | 15 | 46  |
| 96,640 | 3 | 5  | 10 | 24  | 0 | 2 | 2  | 16 | 15 | 47  |
| 96,641 | 2 | 5  | 10 | 25  | 0 | 2 | 2  | 16 | 14 | 48  |
| 96,642 | 2 | 5  | 10 | 32  | 0 | 2 | 2  | 18 | 14 | 57  |
| 96,643 | 2 | 7  | 10 | 36  | 0 | 2 | 4  | 20 | 16 | 65  |
| 96,644 | 2 | 7  | 11 | 40  | 0 | 2 | 8  | 20 | 21 | 69  |
| 96,645 | 2 | 8  | 11 | 51  | 0 | 3 | 8  | 37 | 21 | 99  |
| 96,646 | 2 | 9  | 11 | 56  | 0 | 3 | 8  | 42 | 21 | 110 |
| 96,647 | 2 | 9  | 11 | 54  | 0 | 3 | 8  | 42 | 21 | 108 |
| 96,648 | 2 | 9  | 11 | 57  | 0 | 3 | 8  | 42 | 21 | 111 |
| 96,649 | 2 | 9  | 12 | 60  | 0 | 2 | 8  | 41 | 22 | 112 |
| 96,650 | 2 | 10 | 12 | 90  | 0 | 8 | 8  | 53 | 22 | 161 |
| 96,651 | 2 | 13 | 12 | 173 | 0 | 8 | 8  | 62 | 22 | 256 |
| 96,652 | 2 | 14 | 12 | 183 | 0 | 9 | 9  | 71 | 23 | 277 |
| 96,653 | 2 | 16 | 12 | 196 | 0 | 9 | 10 | 71 | 24 | 292 |
| 96,654 | 2 | 14 | 12 | 198 | 0 | 9 | 10 | 67 | 24 | 288 |
| 96,655 | 2 | 14 | 13 | 199 | 0 | 9 | 12 | 67 | 27 | 289 |
| 96,656 | 2 | 14 | 13 | 200 | 0 | 9 | 12 | 67 | 27 | 290 |
| 96,657 | 2 | 14 | 13 | 200 | 0 | 9 | 12 | 67 | 27 | 290 |
| 96,658 | 2 | 14 | 13 | 206 | 0 | 9 | 12 | 69 | 27 | 298 |
| 96,659 | 2 | 14 | 13 | 207 | 0 | 9 | 12 | 69 | 27 | 299 |
| 96,660 | 2 | 14 | 13 | 209 | 0 | 9 | 12 | 70 | 27 | 302 |
| 96,661 | 2 | 14 | 13 | 210 | 0 | 9 | 14 | 70 | 29 | 303 |
| 96,662 | 2 | 14 | 13 | 207 | 0 | 9 | 14 | 66 | 29 | 296 |
| 96,663 | 2 | 14 | 13 | 212 | 0 | 9 | 14 | 72 | 29 | 307 |
| 96,664 | 2 | 14 | 13 | 211 | 0 | 9 | 14 | 73 | 29 | 307 |
| 96,665 | 2 | 14 | 14 | 210 | 0 | 9 | 14 | 74 | 30 | 307 |
| 96,666 | 2 | 14 | 14 | 209 | 0 | 9 | 14 | 74 | 30 | 306 |

|        |   |    |    |     |   |   |    |     |    |     |
|--------|---|----|----|-----|---|---|----|-----|----|-----|
| 96,667 | 2 | 14 | 14 | 209 | 0 | 9 | 14 | 73  | 30 | 305 |
| 96,668 | 2 | 14 | 14 | 210 | 0 | 9 | 14 | 73  | 30 | 306 |
| 96,669 | 2 | 14 | 14 | 210 | 0 | 9 | 14 | 73  | 30 | 306 |
| 96,670 | 3 | 14 | 14 | 210 | 0 | 8 | 14 | 73  | 31 | 305 |
| 96,671 | 3 | 15 | 15 | 214 | 0 | 8 | 14 | 80  | 32 | 317 |
| 96,672 | 3 | 16 | 15 | 216 | 0 | 8 | 14 | 86  | 32 | 326 |
| 96,673 | 3 | 16 | 14 | 222 | 0 | 8 | 14 | 88  | 31 | 334 |
| 96,674 | 3 | 17 | 16 | 231 | 0 | 8 | 14 | 100 | 33 | 356 |
| 96,675 | 3 | 17 | 16 | 234 | 0 | 8 | 14 | 100 | 33 | 359 |
| 96,676 | 3 | 15 | 17 | 232 | 0 | 8 | 14 | 100 | 34 | 355 |
| 96,677 | 3 | 15 | 17 | 232 | 0 | 8 | 16 | 102 | 36 | 357 |
| 96,678 | 3 | 15 | 17 | 233 | 0 | 8 | 16 | 103 | 36 | 359 |
| 96,679 | 3 | 15 | 17 | 235 | 0 | 8 | 17 | 103 | 37 | 361 |
| 96,680 | 3 | 15 | 17 | 235 | 0 | 8 | 17 | 103 | 37 | 361 |
| 96,681 | 3 | 15 | 17 | 235 | 0 | 8 | 17 | 103 | 37 | 361 |
| 96,682 | 3 | 14 | 17 | 235 | 0 | 8 | 17 | 104 | 37 | 361 |
| 96,683 | 3 | 14 | 17 | 235 | 0 | 8 | 16 | 102 | 36 | 359 |
| 96,684 | 3 | 14 | 17 | 235 | 0 | 8 | 16 | 102 | 36 | 359 |
| 96,685 | 2 | 14 | 17 | 237 | 0 | 8 | 16 | 102 | 35 | 361 |
| 96,686 | 2 | 14 | 20 | 239 | 0 | 8 | 16 | 101 | 38 | 362 |
| 96,687 | 2 | 14 | 20 | 239 | 0 | 8 | 17 | 100 | 39 | 361 |
| 96,688 | 2 | 14 | 23 | 238 | 0 | 8 | 18 | 100 | 43 | 360 |
| 96,689 | 3 | 14 | 24 | 238 | 0 | 8 | 18 | 100 | 45 | 360 |
| 96,690 | 2 | 14 | 19 | 237 | 0 | 8 | 18 | 100 | 39 | 359 |
| 96,691 | 2 | 14 | 19 | 237 | 0 | 8 | 18 | 100 | 39 | 359 |
| 96,692 | 2 | 14 | 19 | 237 | 0 | 8 | 18 | 100 | 39 | 359 |
| 96,693 | 2 | 14 | 19 | 231 | 0 | 8 | 18 | 97  | 39 | 350 |
| 96,694 | 2 | 13 | 19 | 227 | 0 | 8 | 16 | 96  | 37 | 344 |
| 96,695 | 2 | 12 | 19 | 212 | 0 | 7 | 13 | 79  | 34 | 310 |
| 96,696 | 2 | 12 | 19 | 212 | 0 | 7 | 13 | 79  | 34 | 310 |
| 96,697 | 2 | 11 | 19 | 208 | 0 | 7 | 12 | 74  | 33 | 300 |
| 96,698 | 2 | 11 | 19 | 208 | 0 | 7 | 12 | 74  | 33 | 300 |
| 96,699 | 2 | 12 | 19 | 198 | 0 | 7 | 12 | 72  | 33 | 289 |
| 96,700 | 2 | 12 | 18 | 198 | 0 | 7 | 12 | 71  | 32 | 288 |
| 96,701 | 2 | 11 | 18 | 168 | 0 | 1 | 13 | 61  | 33 | 241 |
| 96,702 | 2 | 8  | 18 | 85  | 0 | 1 | 13 | 52  | 33 | 146 |
| 96,703 | 2 | 5  | 18 | 61  | 0 | 0 | 12 | 44  | 32 | 110 |
| 96,704 | 2 | 5  | 19 | 63  | 0 | 2 | 12 | 44  | 33 | 114 |
| 96,705 | 2 | 5  | 19 | 64  | 0 | 2 | 12 | 47  | 33 | 118 |
| 96,706 | 2 | 6  | 19 | 72  | 0 | 2 | 10 | 48  | 31 | 128 |
| 96,707 | 2 | 6  | 19 | 73  | 0 | 2 | 10 | 48  | 31 | 129 |

|        |   |   |    |    |   |   |    |    |    |     |
|--------|---|---|----|----|---|---|----|----|----|-----|
| 96,708 | 2 | 6 | 18 | 74 | 0 | 2 | 10 | 50 | 30 | 132 |
| 96,709 | 2 | 6 | 24 | 67 | 0 | 2 | 12 | 50 | 38 | 125 |
| 96,710 | 2 | 7 | 26 | 70 | 0 | 2 | 12 | 50 | 40 | 129 |
| 96,711 | 2 | 7 | 27 | 89 | 1 | 2 | 11 | 65 | 41 | 163 |
| 96,712 | 2 | 7 | 27 | 89 | 1 | 2 | 10 | 65 | 40 | 163 |
| 96,713 | 2 | 7 | 29 | 90 | 2 | 2 | 14 | 68 | 47 | 167 |
| 96,714 | 2 | 7 | 28 | 86 | 2 | 2 | 15 | 61 | 47 | 156 |
| 96,715 | 2 | 7 | 29 | 86 | 2 | 2 | 15 | 60 | 48 | 155 |
| 96,716 | 3 | 7 | 29 | 88 | 2 | 2 | 16 | 60 | 50 | 157 |
| 96,717 | 3 | 7 | 29 | 88 | 2 | 2 | 16 | 60 | 50 | 157 |
| 96,718 | 3 | 7 | 29 | 88 | 2 | 2 | 16 | 60 | 50 | 157 |
| 96,719 | 4 | 7 | 30 | 87 | 2 | 2 | 16 | 60 | 52 | 156 |
| 96,720 | 3 | 7 | 30 | 89 | 2 | 2 | 16 | 60 | 51 | 158 |
| 96,721 | 3 | 6 | 30 | 84 | 2 | 2 | 16 | 53 | 51 | 145 |
| 96,722 | 3 | 6 | 30 | 84 | 2 | 2 | 16 | 54 | 51 | 146 |
| 96,723 | 3 | 5 | 30 | 79 | 2 | 2 | 16 | 48 | 51 | 134 |
| 96,724 | 3 | 5 | 31 | 77 | 2 | 2 | 16 | 48 | 52 | 132 |
| 96,725 | 4 | 4 | 36 | 72 | 2 | 2 | 16 | 36 | 58 | 114 |
| 96,726 | 4 | 4 | 37 | 70 | 2 | 2 | 16 | 36 | 59 | 112 |
| 96,727 | 4 | 5 | 36 | 70 | 2 | 2 | 15 | 37 | 57 | 114 |
| 96,728 | 4 | 5 | 35 | 72 | 2 | 2 | 13 | 36 | 54 | 115 |
| 96,729 | 4 | 5 | 41 | 71 | 2 | 2 | 15 | 35 | 62 | 113 |
| 96,730 | 4 | 5 | 40 | 69 | 2 | 2 | 15 | 35 | 61 | 111 |
| 96,731 | 4 | 5 | 42 | 70 | 3 | 2 | 16 | 34 | 65 | 111 |
| 96,732 | 4 | 5 | 42 | 70 | 3 | 2 | 18 | 34 | 67 | 111 |
| 96,733 | 5 | 5 | 42 | 70 | 5 | 2 | 19 | 34 | 71 | 111 |
| 96,734 | 5 | 5 | 42 | 70 | 5 | 2 | 19 | 34 | 71 | 111 |
| 96,735 | 5 | 5 | 42 | 70 | 5 | 2 | 20 | 34 | 72 | 111 |
| 96,736 | 5 | 5 | 45 | 68 | 5 | 2 | 23 | 34 | 78 | 109 |
| 96,737 | 5 | 5 | 42 | 66 | 5 | 2 | 23 | 34 | 75 | 107 |
| 96,738 | 5 | 5 | 42 | 66 | 6 | 2 | 24 | 34 | 77 | 107 |
| 96,739 | 5 | 5 | 39 | 68 | 6 | 2 | 23 | 34 | 73 | 109 |
| 96,740 | 4 | 5 | 38 | 68 | 6 | 2 | 23 | 35 | 71 | 110 |
| 96,741 | 4 | 5 | 38 | 68 | 6 | 2 | 23 | 36 | 71 | 111 |
| 96,742 | 4 | 5 | 38 | 68 | 6 | 2 | 23 | 36 | 71 | 111 |
| 96,743 | 4 | 5 | 38 | 67 | 6 | 2 | 23 | 36 | 71 | 110 |
| 96,744 | 4 | 4 | 38 | 66 | 6 | 2 | 22 | 36 | 70 | 108 |
| 96,745 | 4 | 4 | 38 | 66 | 6 | 2 | 22 | 36 | 70 | 108 |
| 96,746 | 4 | 4 | 38 | 66 | 6 | 2 | 22 | 36 | 70 | 108 |
| 96,747 | 4 | 4 | 38 | 66 | 6 | 2 | 22 | 36 | 70 | 108 |
| 96,748 | 5 | 4 | 41 | 65 | 6 | 2 | 27 | 36 | 79 | 107 |



|        |   |   |    |    |   |   |    |    |     |     |
|--------|---|---|----|----|---|---|----|----|-----|-----|
| 96,749 | 5 | 3 | 44 | 67 | 6 | 2 | 28 | 34 | 83  | 106 |
| 96,750 | 5 | 3 | 44 | 67 | 6 | 2 | 28 | 34 | 83  | 106 |
| 96,751 | 5 | 3 | 48 | 67 | 6 | 2 | 30 | 33 | 89  | 105 |
| 96,752 | 5 | 3 | 51 | 67 | 6 | 2 | 31 | 33 | 93  | 105 |
| 96,753 | 5 | 3 | 54 | 67 | 6 | 2 | 35 | 33 | 100 | 105 |
| 96,754 | 5 | 3 | 56 | 65 | 6 | 0 | 35 | 33 | 102 | 101 |
| 96,755 | 5 | 3 | 55 | 65 | 6 | 0 | 35 | 33 | 101 | 101 |
| 96,756 | 5 | 3 | 56 | 61 | 6 | 0 | 35 | 30 | 102 | 94  |
| 96,757 | 5 | 2 | 55 | 50 | 6 | 0 | 35 | 28 | 101 | 80  |
| 96,758 | 5 | 2 | 55 | 51 | 6 | 0 | 35 | 29 | 101 | 82  |
| 96,759 | 5 | 2 | 54 | 53 | 6 | 0 | 35 | 30 | 100 | 85  |
| 96,760 | 5 | 2 | 49 | 52 | 6 | 0 | 34 | 31 | 94  | 85  |
| 96,761 | 6 | 1 | 48 | 52 | 5 | 0 | 35 | 30 | 94  | 83  |
| 96,762 | 6 | 1 | 47 | 31 | 5 | 0 | 35 | 15 | 93  | 47  |
| 96,763 | 6 | 1 | 47 | 30 | 5 | 0 | 34 | 15 | 92  | 46  |
| 96,764 | 6 | 3 | 45 | 41 | 4 | 0 | 32 | 18 | 87  | 62  |
| 96,765 | 6 | 3 | 45 | 43 | 4 | 0 | 31 | 18 | 86  | 64  |
| 96,766 | 6 | 4 | 45 | 42 | 4 | 0 | 31 | 19 | 86  | 65  |
| 96,767 | 5 | 4 | 45 | 43 | 4 | 0 | 30 | 19 | 84  | 66  |
| 96,768 | 5 | 4 | 50 | 43 | 4 | 1 | 32 | 20 | 91  | 68  |
| 96,769 | 4 | 4 | 53 | 46 | 4 | 1 | 33 | 24 | 94  | 75  |
| 96,770 | 4 | 4 | 53 | 47 | 4 | 1 | 33 | 25 | 94  | 77  |
| 96,771 | 4 | 5 | 57 | 54 | 4 | 1 | 34 | 30 | 99  | 90  |
| 96,772 | 4 | 5 | 56 | 57 | 4 | 2 | 35 | 32 | 99  | 96  |
| 96,773 | 4 | 5 | 56 | 57 | 4 | 2 | 35 | 31 | 99  | 95  |
| 96,774 | 4 | 6 | 57 | 58 | 4 | 2 | 35 | 31 | 100 | 97  |
| 96,775 | 4 | 7 | 56 | 60 | 4 | 2 | 35 | 33 | 99  | 102 |
| 96,776 | 3 | 7 | 49 | 58 | 4 | 3 | 35 | 34 | 91  | 102 |
| 96,777 | 4 | 7 | 48 | 57 | 4 | 3 | 35 | 34 | 91  | 101 |
| 96,778 | 4 | 6 | 49 | 57 | 4 | 3 | 35 | 33 | 92  | 99  |
| 96,779 | 4 | 6 | 47 | 55 | 4 | 3 | 36 | 32 | 91  | 96  |
| 96,780 | 6 | 6 | 47 | 55 | 4 | 3 | 34 | 32 | 91  | 96  |
| 96,781 | 6 | 6 | 53 | 58 | 4 | 3 | 36 | 33 | 99  | 100 |
| 96,782 | 7 | 6 | 56 | 57 | 3 | 3 | 34 | 33 | 100 | 99  |
| 96,783 | 7 | 6 | 56 | 59 | 3 | 3 | 33 | 34 | 99  | 102 |
| 96,784 | 6 | 6 | 57 | 59 | 1 | 3 | 32 | 34 | 96  | 102 |
| 96,785 | 6 | 6 | 57 | 59 | 1 | 3 | 32 | 34 | 96  | 102 |
| 96,786 | 6 | 6 | 57 | 59 | 1 | 3 | 32 | 34 | 96  | 102 |
| 96,787 | 6 | 6 | 56 | 59 | 1 | 3 | 30 | 34 | 93  | 102 |
| 96,788 | 6 | 6 | 56 | 59 | 1 | 3 | 30 | 35 | 93  | 103 |
| 96,789 | 6 | 6 | 56 | 59 | 0 | 3 | 28 | 35 | 90  | 103 |

|        |   |    |    |     |   |   |    |    |     |     |
|--------|---|----|----|-----|---|---|----|----|-----|-----|
| 96,790 | 7 | 6  | 59 | 57  | 0 | 3 | 29 | 35 | 95  | 101 |
| 96,791 | 7 | 7  | 59 | 57  | 0 | 3 | 29 | 35 | 95  | 102 |
| 96,792 | 7 | 7  | 59 | 57  | 0 | 3 | 29 | 34 | 95  | 101 |
| 96,793 | 7 | 7  | 59 | 57  | 0 | 3 | 29 | 34 | 95  | 101 |
| 96,794 | 7 | 7  | 59 | 58  | 0 | 3 | 29 | 34 | 95  | 102 |
| 96,795 | 7 | 7  | 64 | 65  | 0 | 4 | 33 | 37 | 104 | 113 |
| 96,796 | 7 | 8  | 66 | 72  | 0 | 4 | 35 | 39 | 108 | 123 |
| 96,797 | 7 | 12 | 67 | 81  | 0 | 4 | 36 | 46 | 110 | 143 |
| 96,798 | 6 | 12 | 67 | 83  | 0 | 4 | 35 | 47 | 108 | 146 |
| 96,799 | 6 | 13 | 65 | 87  | 0 | 4 | 32 | 56 | 103 | 160 |
| 96,800 | 6 | 13 | 62 | 93  | 0 | 4 | 31 | 59 | 99  | 169 |
| 96,801 | 6 | 13 | 64 | 111 | 0 | 5 | 33 | 64 | 103 | 193 |
| 96,802 | 6 | 16 | 61 | 115 | 0 | 5 | 30 | 66 | 97  | 202 |
| 96,803 | 6 | 16 | 58 | 118 | 0 | 5 | 29 | 66 | 93  | 205 |
| 96,804 | 9 | 16 | 63 | 119 | 1 | 5 | 35 | 66 | 108 | 206 |
| 96,805 | 9 | 16 | 61 | 120 | 1 | 6 | 35 | 67 | 106 | 209 |
| 96,806 | 9 | 16 | 61 | 121 | 1 | 6 | 35 | 67 | 106 | 210 |
| 96,807 | 9 | 16 | 60 | 121 | 1 | 6 | 35 | 67 | 105 | 210 |
| 96,808 | 9 | 16 | 60 | 119 | 1 | 6 | 35 | 65 | 105 | 206 |
| 96,809 | 9 | 16 | 60 | 119 | 1 | 6 | 35 | 65 | 105 | 206 |
| 96,810 | 9 | 16 | 60 | 113 | 1 | 6 | 34 | 62 | 104 | 197 |
| 96,811 | 9 | 16 | 63 | 113 | 1 | 6 | 34 | 62 | 107 | 197 |
| 96,812 | 8 | 16 | 62 | 113 | 1 | 6 | 33 | 62 | 104 | 197 |
| 96,813 | 8 | 16 | 61 | 114 | 1 | 6 | 33 | 62 | 103 | 198 |
| 96,814 | 8 | 16 | 61 | 114 | 1 | 6 | 32 | 62 | 102 | 198 |
| 96,815 | 8 | 14 | 61 | 109 | 1 | 6 | 32 | 60 | 102 | 189 |
| 96,816 | 8 | 14 | 61 | 106 | 1 | 6 | 32 | 61 | 102 | 187 |
| 96,817 | 8 | 13 | 60 | 105 | 1 | 6 | 32 | 60 | 101 | 184 |
| 96,818 | 8 | 14 | 60 | 105 | 1 | 6 | 32 | 61 | 101 | 186 |
| 96,819 | 8 | 14 | 55 | 105 | 1 | 5 | 30 | 60 | 94  | 184 |
| 96,820 | 9 | 14 | 52 | 105 | 1 | 5 | 29 | 55 | 91  | 179 |
| 96,821 | 9 | 15 | 52 | 109 | 1 | 5 | 29 | 56 | 91  | 185 |
| 96,822 | 9 | 15 | 48 | 100 | 1 | 5 | 28 | 51 | 86  | 171 |
| 96,823 | 9 | 15 | 48 | 97  | 2 | 4 | 27 | 49 | 86  | 165 |
| 96,824 | 9 | 15 | 50 | 96  | 2 | 4 | 28 | 49 | 89  | 164 |
| 96,825 | 9 | 16 | 50 | 96  | 2 | 4 | 28 | 49 | 89  | 165 |
| 96,826 | 9 | 15 | 50 | 90  | 2 | 4 | 28 | 45 | 89  | 154 |
| 96,827 | 8 | 15 | 54 | 88  | 3 | 3 | 28 | 45 | 93  | 151 |
| 96,828 | 9 | 15 | 61 | 88  | 3 | 3 | 32 | 45 | 105 | 151 |
| 96,829 | 9 | 15 | 61 | 88  | 3 | 3 | 37 | 45 | 110 | 151 |
| 96,830 | 9 | 15 | 62 | 88  | 4 | 3 | 37 | 45 | 112 | 151 |

|        |   |    |    |    |   |   |    |    |     |     |
|--------|---|----|----|----|---|---|----|----|-----|-----|
| 96,831 | 7 | 15 | 58 | 85 | 4 | 3 | 36 | 45 | 105 | 148 |
| 96,832 | 7 | 15 | 52 | 85 | 4 | 3 | 34 | 45 | 97  | 148 |
| 96,833 | 6 | 15 | 47 | 85 | 4 | 3 | 34 | 45 | 91  | 148 |
| 96,834 | 6 | 15 | 47 | 83 | 4 | 3 | 33 | 44 | 90  | 145 |
| 96,835 | 6 | 15 | 46 | 84 | 4 | 3 | 33 | 46 | 89  | 148 |
| 96,836 | 6 | 15 | 46 | 84 | 4 | 3 | 33 | 47 | 89  | 149 |
| 96,837 | 6 | 15 | 46 | 84 | 4 | 3 | 33 | 47 | 89  | 149 |
| 96,838 | 6 | 15 | 44 | 84 | 5 | 3 | 32 | 47 | 87  | 149 |
| 96,839 | 6 | 15 | 44 | 84 | 5 | 3 | 32 | 46 | 87  | 148 |
| 96,840 | 5 | 15 | 42 | 84 | 5 | 3 | 32 | 45 | 84  | 147 |
| 96,841 | 5 | 15 | 41 | 84 | 5 | 3 | 31 | 45 | 82  | 147 |
| 96,842 | 5 | 14 | 41 | 84 | 5 | 3 | 31 | 45 | 82  | 146 |
| 96,843 | 5 | 14 | 41 | 84 | 5 | 3 | 31 | 45 | 82  | 146 |
| 96,844 | 5 | 14 | 41 | 83 | 5 | 3 | 31 | 45 | 82  | 145 |
| 96,845 | 5 | 14 | 40 | 83 | 5 | 3 | 31 | 45 | 81  | 145 |
| 96,846 | 5 | 14 | 37 | 76 | 5 | 2 | 27 | 42 | 74  | 134 |
| 96,847 | 5 | 13 | 37 | 72 | 5 | 2 | 25 | 41 | 72  | 128 |
| 96,848 | 5 | 9  | 36 | 66 | 5 | 2 | 24 | 36 | 70  | 113 |
| 96,849 | 5 | 11 | 35 | 86 | 5 | 5 | 23 | 57 | 68  | 159 |
| 96,850 | 5 | 12 | 35 | 87 | 5 | 6 | 22 | 53 | 67  | 158 |
| 96,851 | 5 | 12 | 33 | 85 | 5 | 6 | 22 | 50 | 65  | 153 |
| 96,852 | 5 | 12 | 33 | 67 | 5 | 5 | 21 | 45 | 64  | 129 |
| 96,853 | 4 | 9  | 28 | 63 | 5 | 5 | 17 | 43 | 54  | 120 |
| 96,854 | 3 | 9  | 26 | 62 | 5 | 5 | 12 | 43 | 46  | 119 |
| 96,855 | 2 | 9  | 26 | 62 | 4 | 5 | 11 | 43 | 43  | 119 |
| 96,856 | 2 | 9  | 26 | 61 | 4 | 4 | 11 | 42 | 43  | 116 |
| 96,857 | 2 | 9  | 26 | 60 | 4 | 4 | 11 | 43 | 43  | 116 |
| 96,858 | 2 | 9  | 26 | 61 | 4 | 4 | 11 | 43 | 43  | 117 |
| 96,859 | 2 | 9  | 26 | 61 | 4 | 4 | 11 | 43 | 43  | 117 |
| 96,860 | 2 | 9  | 26 | 61 | 4 | 4 | 11 | 43 | 43  | 117 |
| 96,861 | 2 | 9  | 26 | 61 | 4 | 4 | 11 | 43 | 43  | 117 |
| 96,862 | 2 | 9  | 23 | 61 | 4 | 4 | 11 | 43 | 40  | 117 |
| 96,863 | 2 | 9  | 23 | 61 | 4 | 4 | 11 | 43 | 40  | 117 |
| 96,864 | 2 | 9  | 23 | 60 | 4 | 4 | 11 | 43 | 40  | 116 |
| 96,865 | 2 | 9  | 23 | 60 | 4 | 4 | 11 | 43 | 40  | 116 |
| 96,866 | 2 | 9  | 23 | 53 | 4 | 4 | 11 | 38 | 40  | 104 |
| 96,867 | 2 | 9  | 24 | 53 | 4 | 4 | 11 | 38 | 41  | 104 |
| 96,868 | 2 | 9  | 24 | 53 | 4 | 4 | 11 | 38 | 41  | 104 |
| 96,869 | 1 | 8  | 24 | 52 | 4 | 4 | 11 | 37 | 40  | 101 |
| 96,870 | 1 | 8  | 24 | 52 | 4 | 4 | 11 | 37 | 40  | 101 |
| 96,871 | 1 | 7  | 23 | 44 | 4 | 4 | 12 | 36 | 40  | 91  |

|        |   |   |    |    |   |   |    |    |    |     |
|--------|---|---|----|----|---|---|----|----|----|-----|
| 96,872 | 1 | 6 | 23 | 45 | 4 | 4 | 12 | 36 | 40 | 91  |
| 96,873 | 1 | 6 | 23 | 45 | 3 | 4 | 12 | 36 | 39 | 91  |
| 96,874 | 1 | 6 | 23 | 46 | 3 | 4 | 12 | 39 | 39 | 95  |
| 96,875 | 1 | 5 | 20 | 46 | 3 | 4 | 11 | 39 | 35 | 94  |
| 96,876 | 1 | 4 | 17 | 47 | 2 | 4 | 12 | 41 | 32 | 96  |
| 96,877 | 1 | 4 | 17 | 47 | 2 | 4 | 12 | 41 | 32 | 96  |
| 96,878 | 0 | 4 | 10 | 46 | 2 | 4 | 8  | 40 | 20 | 94  |
| 96,879 | 0 | 4 | 9  | 49 | 2 | 4 | 3  | 40 | 14 | 97  |
| 96,880 | 0 | 4 | 8  | 52 | 1 | 4 | 2  | 40 | 11 | 100 |
| 96,881 | 0 | 4 | 8  | 52 | 1 | 4 | 2  | 39 | 11 | 99  |
| 96,882 | 2 | 4 | 8  | 52 | 1 | 4 | 2  | 39 | 13 | 99  |
| 96,883 | 3 | 4 | 21 | 52 | 3 | 4 | 15 | 39 | 42 | 99  |
| 96,884 | 3 | 4 | 21 | 52 | 3 | 4 | 17 | 39 | 44 | 99  |
| 96,885 | 3 | 5 | 21 | 51 | 3 | 4 | 17 | 37 | 44 | 97  |
| 96,886 | 3 | 5 | 21 | 51 | 3 | 4 | 17 | 37 | 44 | 97  |
| 96,887 | 4 | 5 | 22 | 52 | 3 | 4 | 18 | 36 | 47 | 97  |
| 96,888 | 5 | 5 | 22 | 52 | 3 | 4 | 18 | 36 | 48 | 97  |
| 96,889 | 5 | 5 | 25 | 53 | 2 | 4 | 18 | 36 | 50 | 98  |
| 96,890 | 5 | 5 | 25 | 53 | 2 | 4 | 18 | 36 | 50 | 98  |
| 96,891 | 5 | 5 | 25 | 53 | 2 | 4 | 19 | 36 | 51 | 98  |
| 96,892 | 5 | 5 | 26 | 55 | 2 | 4 | 19 | 36 | 52 | 100 |
| 96,893 | 5 | 5 | 26 | 64 | 2 | 4 | 19 | 39 | 52 | 112 |
| 96,894 | 5 | 7 | 26 | 80 | 2 | 4 | 19 | 45 | 52 | 136 |
| 96,895 | 5 | 8 | 26 | 83 | 2 | 4 | 19 | 48 | 52 | 143 |
| 96,896 | 6 | 9 | 26 | 92 | 2 | 4 | 19 | 49 | 53 | 154 |
| 96,897 | 6 | 9 | 25 | 95 | 2 | 4 | 19 | 49 | 52 | 157 |
| 96,898 | 6 | 9 | 23 | 92 | 2 | 4 | 19 | 48 | 50 | 153 |
| 96,899 | 6 | 9 | 22 | 87 | 2 | 4 | 19 | 45 | 49 | 145 |
| 96,900 | 6 | 7 | 22 | 67 | 2 | 1 | 21 | 24 | 51 | 99  |
| 96,901 | 7 | 5 | 26 | 56 | 2 | 0 | 27 | 19 | 62 | 80  |
| 96,902 | 7 | 5 | 25 | 56 | 2 | 0 | 27 | 19 | 61 | 80  |
| 96,903 | 7 | 5 | 25 | 56 | 2 | 0 | 27 | 19 | 61 | 80  |
| 96,904 | 7 | 5 | 25 | 56 | 2 | 0 | 27 | 19 | 61 | 80  |
| 96,905 | 7 | 7 | 24 | 57 | 2 | 0 | 27 | 19 | 60 | 83  |
| 96,906 | 7 | 7 | 24 | 57 | 2 | 0 | 27 | 19 | 60 | 83  |
| 96,907 | 7 | 7 | 24 | 58 | 2 | 0 | 27 | 19 | 60 | 84  |
| 96,908 | 7 | 7 | 27 | 58 | 2 | 0 | 27 | 18 | 63 | 83  |
| 96,909 | 7 | 7 | 27 | 57 | 2 | 0 | 27 | 18 | 63 | 82  |
| 96,910 | 7 | 7 | 27 | 61 | 2 | 1 | 27 | 19 | 63 | 88  |
| 96,911 | 7 | 8 | 27 | 61 | 2 | 1 | 27 | 19 | 63 | 89  |
| 96,912 | 7 | 8 | 27 | 61 | 2 | 1 | 27 | 19 | 63 | 89  |

|        |   |    |    |     |   |    |    |    |    |     |
|--------|---|----|----|-----|---|----|----|----|----|-----|
| 96,913 | 7 | 8  | 27 | 61  | 2 | 1  | 27 | 19 | 63 | 89  |
| 96,914 | 7 | 8  | 27 | 61  | 2 | 1  | 27 | 19 | 63 | 89  |
| 96,915 | 7 | 8  | 27 | 61  | 2 | 1  | 27 | 21 | 63 | 91  |
| 96,916 | 7 | 8  | 27 | 61  | 2 | 1  | 27 | 21 | 63 | 91  |
| 96,917 | 7 | 8  | 27 | 61  | 2 | 1  | 27 | 21 | 63 | 91  |
| 96,918 | 7 | 8  | 26 | 61  | 2 | 1  | 27 | 21 | 62 | 91  |
| 96,919 | 7 | 9  | 27 | 61  | 2 | 1  | 27 | 21 | 63 | 92  |
| 96,920 | 7 | 9  | 27 | 61  | 2 | 1  | 27 | 21 | 63 | 92  |
| 96,921 | 7 | 9  | 27 | 62  | 2 | 1  | 27 | 21 | 63 | 93  |
| 96,922 | 7 | 9  | 27 | 63  | 2 | 1  | 26 | 20 | 62 | 93  |
| 96,923 | 8 | 9  | 27 | 63  | 2 | 1  | 26 | 20 | 63 | 93  |
| 96,924 | 8 | 9  | 28 | 61  | 2 | 1  | 27 | 17 | 65 | 88  |
| 96,925 | 8 | 9  | 28 | 61  | 2 | 1  | 28 | 17 | 66 | 88  |
| 96,926 | 8 | 9  | 28 | 61  | 2 | 1  | 29 | 17 | 67 | 88  |
| 96,927 | 8 | 9  | 27 | 60  | 2 | 1  | 28 | 16 | 65 | 86  |
| 96,928 | 8 | 9  | 27 | 60  | 2 | 1  | 28 | 16 | 65 | 86  |
| 96,929 | 8 | 9  | 27 | 67  | 2 | 1  | 28 | 24 | 65 | 101 |
| 96,930 | 8 | 9  | 27 | 65  | 2 | 1  | 28 | 24 | 65 | 99  |
| 96,931 | 8 | 9  | 35 | 66  | 3 | 2  | 32 | 25 | 78 | 102 |
| 96,932 | 8 | 9  | 40 | 67  | 3 | 2  | 36 | 25 | 87 | 103 |
| 96,933 | 6 | 9  | 42 | 68  | 3 | 2  | 37 | 25 | 88 | 104 |
| 96,934 | 5 | 9  | 29 | 72  | 1 | 3  | 24 | 25 | 59 | 109 |
| 96,935 | 5 | 9  | 29 | 72  | 1 | 3  | 22 | 25 | 57 | 109 |
| 96,936 | 5 | 8  | 30 | 76  | 2 | 3  | 23 | 25 | 60 | 112 |
| 96,937 | 4 | 8  | 29 | 76  | 2 | 4  | 22 | 25 | 57 | 113 |
| 96,938 | 3 | 8  | 30 | 76  | 2 | 4  | 23 | 25 | 58 | 113 |
| 96,939 | 3 | 8  | 30 | 77  | 2 | 4  | 24 | 26 | 59 | 115 |
| 96,940 | 3 | 8  | 27 | 76  | 2 | 4  | 25 | 26 | 57 | 114 |
| 96,941 | 3 | 8  | 27 | 77  | 2 | 4  | 25 | 26 | 57 | 115 |
| 96,942 | 3 | 8  | 27 | 77  | 2 | 4  | 24 | 26 | 56 | 115 |
| 96,943 | 3 | 8  | 26 | 66  | 2 | 4  | 25 | 23 | 56 | 101 |
| 96,944 | 3 | 6  | 26 | 50  | 2 | 4  | 25 | 17 | 56 | 77  |
| 96,945 | 3 | 6  | 26 | 52  | 2 | 4  | 25 | 18 | 56 | 80  |
| 96,946 | 3 | 5  | 26 | 50  | 2 | 5  | 25 | 15 | 56 | 75  |
| 96,947 | 2 | 4  | 26 | 41  | 2 | 5  | 25 | 14 | 55 | 64  |
| 96,948 | 1 | 3  | 6  | 20  | 0 | 0  | 13 | 6  | 20 | 29  |
| 96,949 | 2 | 5  | 27 | 49  | 2 | 5  | 26 | 19 | 57 | 78  |
| 96,950 | 2 | 6  | 27 | 57  | 2 | 7  | 24 | 20 | 55 | 90  |
| 96,951 | 1 | 10 | 24 | 101 | 2 | 9  | 22 | 25 | 49 | 145 |
| 96,952 | 1 | 10 | 23 | 126 | 2 | 10 | 18 | 31 | 44 | 177 |
| 96,953 | 1 | 14 | 23 | 157 | 2 | 10 | 18 | 36 | 44 | 217 |

|        |   |    |    |     |   |    |    |    |    |     |
|--------|---|----|----|-----|---|----|----|----|----|-----|
| 96,954 | 1 | 15 | 23 | 187 | 2 | 12 | 18 | 44 | 44 | 258 |
| 96,955 | 1 | 15 | 23 | 189 | 2 | 12 | 18 | 45 | 44 | 261 |
| 96,956 | 1 | 13 | 23 | 194 | 2 | 13 | 18 | 49 | 44 | 269 |
| 96,957 | 1 | 13 | 22 | 193 | 2 | 13 | 18 | 49 | 43 | 268 |
| 96,958 | 1 | 13 | 22 | 194 | 2 | 13 | 18 | 50 | 43 | 270 |
| 96,959 | 1 | 13 | 22 | 194 | 2 | 13 | 18 | 50 | 43 | 270 |
| 96,960 | 1 | 13 | 20 | 194 | 2 | 13 | 18 | 50 | 41 | 270 |
| 96,961 | 1 | 14 | 20 | 197 | 2 | 12 | 18 | 49 | 41 | 272 |
| 96,962 | 1 | 14 | 20 | 197 | 2 | 12 | 18 | 49 | 41 | 272 |
| 96,963 | 1 | 13 | 20 | 197 | 2 | 12 | 18 | 49 | 41 | 271 |
| 96,964 | 1 | 13 | 20 | 197 | 2 | 12 | 18 | 49 | 41 | 271 |
| 96,965 | 1 | 13 | 20 | 197 | 2 | 12 | 18 | 50 | 41 | 272 |
| 96,966 | 1 | 13 | 20 | 197 | 2 | 12 | 18 | 50 | 41 | 272 |
| 96,967 | 1 | 13 | 20 | 197 | 2 | 12 | 18 | 48 | 41 | 270 |
| 96,968 | 1 | 13 | 19 | 197 | 2 | 12 | 18 | 48 | 40 | 270 |
| 96,969 | 1 | 13 | 19 | 197 | 2 | 12 | 18 | 48 | 40 | 270 |
| 96,970 | 2 | 12 | 20 | 197 | 3 | 12 | 19 | 48 | 44 | 269 |
| 96,971 | 2 | 12 | 20 | 197 | 3 | 12 | 19 | 48 | 44 | 269 |
| 96,972 | 2 | 12 | 20 | 197 | 3 | 12 | 19 | 48 | 44 | 269 |
| 96,973 | 2 | 12 | 20 | 197 | 3 | 12 | 19 | 48 | 44 | 269 |
| 96,974 | 2 | 12 | 20 | 197 | 3 | 13 | 19 | 48 | 44 | 270 |
| 96,975 | 1 | 12 | 19 | 197 | 3 | 13 | 19 | 48 | 42 | 270 |
| 96,976 | 1 | 12 | 19 | 197 | 3 | 13 | 18 | 47 | 41 | 269 |
| 96,977 | 1 | 12 | 25 | 197 | 3 | 13 | 18 | 47 | 47 | 269 |
| 96,978 | 1 | 12 | 25 | 197 | 3 | 13 | 17 | 47 | 46 | 269 |
| 96,979 | 1 | 12 | 25 | 198 | 3 | 13 | 17 | 47 | 46 | 270 |
| 96,980 | 2 | 12 | 25 | 201 | 3 | 13 | 17 | 49 | 47 | 275 |
| 96,981 | 2 | 12 | 26 | 193 | 3 | 13 | 16 | 44 | 47 | 262 |
| 96,982 | 2 | 12 | 27 | 193 | 3 | 13 | 18 | 44 | 50 | 262 |
| 96,983 | 2 | 13 | 21 | 193 | 2 | 12 | 14 | 45 | 39 | 263 |
| 96,984 | 2 | 13 | 16 | 191 | 2 | 12 | 11 | 45 | 31 | 261 |
| 96,985 | 3 | 15 | 20 | 191 | 2 | 13 | 11 | 49 | 36 | 268 |
| 96,986 | 3 | 15 | 20 | 194 | 2 | 13 | 10 | 50 | 35 | 272 |
| 96,987 | 4 | 15 | 29 | 196 | 1 | 13 | 11 | 52 | 45 | 276 |
| 96,988 | 4 | 15 | 28 | 195 | 1 | 13 | 11 | 52 | 44 | 275 |
| 96,989 | 5 | 15 | 29 | 195 | 1 | 12 | 8  | 51 | 43 | 273 |
| 96,990 | 5 | 15 | 29 | 195 | 1 | 12 | 8  | 51 | 43 | 273 |
| 96,991 | 5 | 15 | 34 | 197 | 1 | 12 | 11 | 57 | 51 | 281 |
| 96,992 | 5 | 15 | 34 | 197 | 1 | 12 | 11 | 59 | 51 | 283 |
| 96,993 | 9 | 15 | 50 | 199 | 3 | 12 | 16 | 60 | 78 | 286 |
| 96,994 | 9 | 15 | 50 | 200 | 3 | 12 | 15 | 62 | 77 | 289 |

|        |    |    |     |     |   |    |    |    |     |     |
|--------|----|----|-----|-----|---|----|----|----|-----|-----|
| 96,995 | 12 | 15 | 66  | 204 | 3 | 12 | 29 | 63 | 110 | 294 |
| 96,996 | 12 | 15 | 66  | 206 | 3 | 12 | 29 | 64 | 110 | 297 |
| 96,997 | 12 | 15 | 66  | 217 | 3 | 12 | 30 | 89 | 111 | 333 |
| 96,998 | 12 | 15 | 66  | 217 | 3 | 11 | 30 | 89 | 111 | 332 |
| 96,999 | 14 | 15 | 69  | 213 | 3 | 11 | 36 | 85 | 122 | 324 |
| 97,000 | 14 | 14 | 70  | 199 | 3 | 9  | 36 | 84 | 123 | 306 |
| 97,001 | 14 | 10 | 70  | 155 | 3 | 7  | 36 | 79 | 123 | 251 |
| 97,002 | 14 | 10 | 70  | 155 | 3 | 7  | 36 | 79 | 123 | 251 |
| 97,003 | 14 | 10 | 70  | 130 | 3 | 6  | 36 | 73 | 123 | 219 |
| 97,004 | 14 | 6  | 70  | 101 | 3 | 6  | 36 | 70 | 123 | 183 |
| 97,005 | 14 | 5  | 70  | 72  | 3 | 4  | 36 | 62 | 123 | 143 |
| 97,006 | 14 | 5  | 70  | 70  | 3 | 4  | 36 | 61 | 123 | 140 |
| 97,007 | 15 | 5  | 73  | 61  | 3 | 3  | 36 | 57 | 127 | 126 |
| 97,008 | 15 | 5  | 73  | 61  | 3 | 3  | 36 | 57 | 127 | 126 |
| 97,009 | 18 | 5  | 75  | 62  | 5 | 4  | 36 | 56 | 134 | 127 |
| 97,010 | 18 | 5  | 75  | 63  | 5 | 4  | 36 | 60 | 134 | 132 |
| 97,011 | 18 | 4  | 81  | 56  | 5 | 4  | 37 | 62 | 141 | 126 |
| 97,012 | 18 | 6  | 81  | 58  | 5 | 4  | 37 | 65 | 141 | 133 |
| 97,013 | 18 | 6  | 83  | 58  | 5 | 5  | 38 | 65 | 144 | 134 |
| 97,014 | 18 | 8  | 101 | 58  | 5 | 5  | 40 | 65 | 164 | 136 |
| 97,015 | 18 | 8  | 101 | 58  | 5 | 5  | 40 | 65 | 164 | 136 |
| 97,016 | 18 | 8  | 102 | 59  | 5 | 6  | 41 | 66 | 166 | 139 |
| 97,017 | 18 | 8  | 109 | 60  | 5 | 6  | 41 | 67 | 173 | 141 |
| 97,018 | 18 | 8  | 109 | 60  | 5 | 7  | 41 | 67 | 173 | 142 |
| 97,019 | 18 | 10 | 111 | 64  | 5 | 7  | 41 | 74 | 175 | 155 |
| 97,020 | 17 | 11 | 110 | 73  | 4 | 8  | 40 | 78 | 171 | 170 |
| 97,021 | 17 | 11 | 110 | 83  | 4 | 8  | 40 | 84 | 171 | 186 |
| 97,022 | 17 | 13 | 110 | 86  | 4 | 8  | 40 | 86 | 171 | 193 |
| 97,023 | 17 | 13 | 110 | 89  | 4 | 8  | 40 | 86 | 171 | 196 |
| 97,024 | 17 | 13 | 110 | 93  | 4 | 7  | 41 | 89 | 172 | 202 |
| 97,025 | 17 | 14 | 110 | 94  | 4 | 7  | 41 | 89 | 172 | 204 |
| 97,026 | 18 | 14 | 110 | 94  | 4 | 8  | 41 | 89 | 173 | 205 |
| 97,027 | 18 | 14 | 110 | 94  | 4 | 8  | 41 | 89 | 173 | 205 |
| 97,028 | 18 | 14 | 104 | 90  | 4 | 8  | 40 | 88 | 166 | 200 |
| 97,029 | 18 | 14 | 108 | 91  | 4 | 8  | 43 | 88 | 173 | 201 |
| 97,030 | 17 | 14 | 106 | 91  | 4 | 8  | 43 | 88 | 170 | 201 |
| 97,031 | 17 | 14 | 106 | 91  | 4 | 8  | 43 | 88 | 170 | 201 |
| 97,032 | 17 | 14 | 105 | 93  | 4 | 8  | 43 | 88 | 169 | 203 |
| 97,033 | 17 | 14 | 104 | 96  | 4 | 9  | 41 | 92 | 166 | 211 |
| 97,034 | 17 | 13 | 103 | 95  | 4 | 9  | 42 | 90 | 166 | 207 |
| 97,035 | 16 | 11 | 99  | 90  | 4 | 7  | 41 | 86 | 160 | 194 |

|        |    |    |    |     |   |    |    |     |     |     |
|--------|----|----|----|-----|---|----|----|-----|-----|-----|
| 97,036 | 16 | 11 | 98 | 91  | 4 | 7  | 41 | 86  | 159 | 195 |
| 97,037 | 16 | 13 | 94 | 88  | 4 | 7  | 41 | 85  | 155 | 193 |
| 97,038 | 16 | 13 | 94 | 85  | 4 | 7  | 43 | 83  | 157 | 188 |
| 97,039 | 16 | 13 | 94 | 85  | 4 | 7  | 43 | 83  | 157 | 188 |
| 97,040 | 15 | 13 | 95 | 84  | 4 | 7  | 45 | 84  | 159 | 188 |
| 97,041 | 15 | 13 | 95 | 78  | 4 | 7  | 44 | 75  | 158 | 173 |
| 97,042 | 15 | 13 | 91 | 80  | 4 | 7  | 42 | 75  | 152 | 175 |
| 97,043 | 11 | 13 | 75 | 80  | 2 | 7  | 37 | 76  | 125 | 176 |
| 97,044 | 11 | 13 | 75 | 80  | 2 | 7  | 37 | 76  | 125 | 176 |
| 97,045 | 8  | 13 | 59 | 81  | 2 | 7  | 23 | 75  | 92  | 176 |
| 97,046 | 8  | 14 | 59 | 75  | 2 | 7  | 22 | 73  | 91  | 169 |
| 97,047 | 8  | 14 | 59 | 77  | 2 | 7  | 22 | 74  | 91  | 172 |
| 97,048 | 8  | 14 | 59 | 66  | 2 | 7  | 20 | 50  | 89  | 137 |
| 97,049 | 7  | 14 | 58 | 69  | 2 | 7  | 17 | 52  | 84  | 142 |
| 97,050 | 6  | 13 | 59 | 69  | 2 | 7  | 16 | 53  | 83  | 142 |
| 97,051 | 6  | 13 | 58 | 69  | 2 | 7  | 17 | 52  | 83  | 141 |
| 97,052 | 6  | 13 | 63 | 68  | 2 | 7  | 17 | 52  | 88  | 140 |
| 97,053 | 6  | 13 | 64 | 68  | 2 | 9  | 17 | 53  | 89  | 143 |
| 97,054 | 6  | 13 | 64 | 66  | 2 | 9  | 17 | 51  | 89  | 139 |
| 97,055 | 6  | 13 | 64 | 66  | 2 | 9  | 17 | 51  | 89  | 139 |
| 97,056 | 6  | 13 | 64 | 66  | 2 | 9  | 17 | 51  | 89  | 139 |
| 97,057 | 5  | 13 | 66 | 66  | 2 | 9  | 17 | 51  | 90  | 139 |
| 97,058 | 5  | 13 | 65 | 66  | 2 | 9  | 17 | 51  | 89  | 139 |
| 97,059 | 5  | 16 | 64 | 82  | 2 | 11 | 17 | 76  | 88  | 185 |
| 97,060 | 2  | 16 | 63 | 91  | 0 | 10 | 17 | 91  | 82  | 208 |
| 97,061 | 2  | 16 | 58 | 91  | 0 | 10 | 16 | 93  | 76  | 210 |
| 97,062 | 2  | 16 | 59 | 98  | 0 | 10 | 19 | 95  | 80  | 219 |
| 97,063 | 2  | 14 | 61 | 97  | 0 | 10 | 19 | 93  | 82  | 214 |
| 97,064 | 2  | 16 | 62 | 99  | 0 | 9  | 22 | 96  | 86  | 220 |
| 97,065 | 3  | 14 | 48 | 100 | 0 | 9  | 24 | 98  | 75  | 221 |
| 97,066 | 3  | 15 | 50 | 104 | 0 | 9  | 23 | 101 | 76  | 229 |
| 97,067 | 3  | 15 | 43 | 104 | 0 | 8  | 23 | 99  | 69  | 226 |
| 97,068 | 3  | 13 | 43 | 99  | 0 | 7  | 24 | 91  | 70  | 210 |
| 97,069 | 3  | 13 | 43 | 99  | 0 | 7  | 24 | 92  | 70  | 211 |
| 97,070 | 3  | 13 | 41 | 99  | 0 | 7  | 24 | 92  | 68  | 211 |
| 97,071 | 3  | 11 | 45 | 82  | 0 | 6  | 24 | 83  | 72  | 182 |
| 97,072 | 3  | 11 | 45 | 82  | 0 | 6  | 24 | 84  | 72  | 183 |
| 97,073 | 3  | 10 | 49 | 75  | 0 | 6  | 24 | 82  | 76  | 173 |
| 97,074 | 3  | 10 | 51 | 75  | 0 | 6  | 28 | 82  | 82  | 173 |
| 97,075 | 3  | 11 | 61 | 69  | 1 | 6  | 32 | 80  | 97  | 166 |
| 97,076 | 3  | 11 | 61 | 69  | 1 | 6  | 32 | 80  | 97  | 166 |



|        |   |    |    |    |   |   |    |     |     |     |
|--------|---|----|----|----|---|---|----|-----|-----|-----|
| 97,077 | 2 | 11 | 67 | 69 | 1 | 5 | 34 | 80  | 104 | 165 |
| 97,078 | 2 | 11 | 68 | 70 | 1 | 5 | 34 | 80  | 105 | 166 |
| 97,079 | 2 | 11 | 68 | 70 | 1 | 5 | 34 | 80  | 105 | 166 |
| 97,080 | 2 | 11 | 64 | 70 | 1 | 5 | 31 | 80  | 98  | 166 |
| 97,081 | 2 | 11 | 64 | 70 | 1 | 5 | 31 | 80  | 98  | 166 |
| 97,082 | 2 | 11 | 64 | 65 | 1 | 4 | 31 | 74  | 98  | 154 |
| 97,083 | 2 | 11 | 64 | 65 | 1 | 4 | 30 | 74  | 97  | 154 |
| 97,084 | 2 | 11 | 68 | 67 | 2 | 4 | 31 | 75  | 103 | 157 |
| 97,085 | 2 | 11 | 68 | 66 | 2 | 4 | 31 | 78  | 103 | 159 |
| 97,086 | 2 | 13 | 68 | 71 | 2 | 4 | 31 | 80  | 103 | 168 |
| 97,087 | 2 | 13 | 69 | 70 | 2 | 5 | 31 | 80  | 104 | 168 |
| 97,088 | 2 | 11 | 68 | 70 | 2 | 5 | 31 | 80  | 103 | 166 |
| 97,089 | 3 | 11 | 75 | 69 | 2 | 5 | 38 | 79  | 118 | 164 |
| 97,090 | 3 | 11 | 74 | 69 | 2 | 5 | 36 | 79  | 115 | 164 |
| 97,091 | 7 | 13 | 82 | 70 | 4 | 5 | 42 | 80  | 135 | 168 |
| 97,092 | 7 | 13 | 82 | 73 | 4 | 5 | 42 | 82  | 135 | 173 |
| 97,093 | 7 | 13 | 81 | 71 | 4 | 5 | 42 | 81  | 134 | 170 |
| 97,094 | 7 | 13 | 91 | 71 | 4 | 5 | 42 | 81  | 144 | 170 |
| 97,095 | 7 | 13 | 91 | 69 | 4 | 5 | 45 | 80  | 147 | 167 |
| 97,096 | 7 | 12 | 91 | 69 | 4 | 5 | 45 | 81  | 147 | 167 |
| 97,097 | 7 | 12 | 94 | 67 | 4 | 5 | 48 | 80  | 153 | 164 |
| 97,098 | 7 | 12 | 95 | 67 | 4 | 5 | 48 | 80  | 154 | 164 |
| 97,099 | 7 | 12 | 93 | 64 | 4 | 5 | 48 | 78  | 152 | 159 |
| 97,100 | 7 | 12 | 92 | 60 | 4 | 5 | 49 | 75  | 152 | 152 |
| 97,101 | 7 | 12 | 91 | 60 | 4 | 5 | 49 | 75  | 151 | 152 |
| 97,102 | 7 | 12 | 91 | 61 | 4 | 5 | 48 | 75  | 150 | 153 |
| 97,103 | 7 | 13 | 86 | 61 | 4 | 5 | 48 | 79  | 145 | 158 |
| 97,104 | 7 | 13 | 85 | 69 | 4 | 5 | 48 | 109 | 144 | 196 |
| 97,105 | 7 | 13 | 85 | 73 | 4 | 5 | 48 | 112 | 144 | 203 |
| 97,106 | 7 | 13 | 85 | 77 | 4 | 5 | 48 | 120 | 144 | 215 |
| 97,107 | 7 | 13 | 85 | 82 | 4 | 5 | 48 | 127 | 144 | 227 |
| 97,108 | 7 | 13 | 82 | 82 | 4 | 5 | 48 | 129 | 141 | 229 |
| 97,109 | 7 | 13 | 82 | 83 | 4 | 5 | 48 | 129 | 141 | 230 |
| 97,110 | 7 | 10 | 82 | 71 | 4 | 4 | 48 | 108 | 141 | 193 |
| 97,111 | 7 | 10 | 82 | 60 | 4 | 4 | 48 | 93  | 141 | 167 |
| 97,112 | 7 | 10 | 82 | 59 | 4 | 4 | 48 | 87  | 141 | 160 |
| 97,113 | 8 | 10 | 83 | 52 | 4 | 4 | 46 | 83  | 141 | 149 |
| 97,114 | 8 | 8  | 82 | 49 | 4 | 4 | 46 | 79  | 140 | 140 |
| 97,115 | 8 | 9  | 79 | 50 | 4 | 4 | 42 | 80  | 133 | 143 |
| 97,116 | 7 | 9  | 80 | 49 | 4 | 4 | 38 | 78  | 129 | 140 |
| 97,117 | 7 | 8  | 80 | 44 | 4 | 4 | 38 | 75  | 129 | 131 |

|        |    |   |    |    |   |   |    |    |     |     |
|--------|----|---|----|----|---|---|----|----|-----|-----|
| 97,118 | 8  | 8 | 80 | 44 | 5 | 4 | 42 | 76 | 135 | 132 |
| 97,119 | 10 | 8 | 82 | 44 | 5 | 4 | 43 | 76 | 140 | 132 |
| 97,120 | 10 | 8 | 82 | 46 | 5 | 4 | 43 | 76 | 140 | 134 |
| 97,121 | 10 | 9 | 84 | 49 | 5 | 4 | 45 | 86 | 144 | 148 |
| 97,122 | 10 | 9 | 80 | 49 | 5 | 5 | 45 | 92 | 140 | 155 |
| 97,123 | 10 | 9 | 82 | 50 | 5 | 5 | 45 | 94 | 142 | 158 |
| 97,124 | 10 | 9 | 80 | 54 | 5 | 6 | 45 | 97 | 140 | 166 |
| 97,125 | 10 | 9 | 78 | 54 | 5 | 6 | 41 | 97 | 134 | 166 |
| 97,126 | 10 | 7 | 68 | 56 | 4 | 6 | 36 | 96 | 118 | 165 |
| 97,127 | 10 | 7 | 62 | 56 | 4 | 6 | 36 | 96 | 112 | 165 |
| 97,128 | 10 | 7 | 64 | 56 | 4 | 6 | 35 | 96 | 113 | 165 |
| 97,129 | 10 | 7 | 63 | 55 | 4 | 6 | 35 | 96 | 112 | 164 |
| 97,130 | 10 | 7 | 63 | 55 | 4 | 6 | 35 | 96 | 112 | 164 |
| 97,131 | 12 | 7 | 64 | 54 | 4 | 6 | 35 | 96 | 115 | 163 |
| 97,132 | 12 | 7 | 67 | 54 | 4 | 6 | 37 | 96 | 120 | 163 |
| 97,133 | 12 | 7 | 69 | 54 | 4 | 6 | 37 | 96 | 122 | 163 |
| 97,134 | 12 | 7 | 70 | 54 | 4 | 6 | 40 | 96 | 126 | 163 |
| 97,135 | 13 | 7 | 67 | 51 | 2 | 6 | 39 | 92 | 121 | 156 |
| 97,136 | 13 | 7 | 67 | 51 | 2 | 6 | 39 | 92 | 121 | 156 |
| 97,137 | 13 | 6 | 68 | 46 | 2 | 6 | 39 | 90 | 122 | 148 |
| 97,138 | 13 | 6 | 70 | 46 | 2 | 5 | 40 | 90 | 125 | 147 |
| 97,139 | 13 | 7 | 70 | 46 | 2 | 5 | 39 | 90 | 124 | 148 |
| 97,140 | 11 | 7 | 61 | 46 | 2 | 5 | 30 | 90 | 104 | 148 |
| 97,141 | 11 | 7 | 61 | 47 | 2 | 5 | 30 | 90 | 104 | 149 |
| 97,142 | 7  | 5 | 51 | 46 | 1 | 5 | 26 | 89 | 85  | 145 |
| 97,143 | 7  | 5 | 50 | 43 | 1 | 5 | 27 | 87 | 85  | 140 |
| 97,144 | 7  | 5 | 50 | 45 | 1 | 5 | 27 | 87 | 85  | 142 |
| 97,145 | 7  | 5 | 43 | 48 | 1 | 5 | 27 | 87 | 78  | 145 |
| 97,146 | 7  | 5 | 43 | 48 | 1 | 5 | 24 | 85 | 75  | 143 |
| 97,147 | 8  | 5 | 44 | 49 | 1 | 5 | 24 | 86 | 77  | 145 |
| 97,148 | 8  | 5 | 42 | 49 | 1 | 5 | 21 | 88 | 72  | 147 |
| 97,149 | 8  | 5 | 41 | 51 | 1 | 5 | 21 | 88 | 71  | 149 |
| 97,150 | 11 | 5 | 52 | 52 | 1 | 5 | 37 | 89 | 101 | 151 |
| 97,151 | 11 | 5 | 52 | 52 | 1 | 5 | 36 | 89 | 100 | 151 |
| 97,152 | 11 | 5 | 52 | 53 | 1 | 5 | 36 | 90 | 100 | 153 |
| 97,153 | 11 | 5 | 53 | 52 | 1 | 5 | 41 | 90 | 106 | 152 |
| 97,154 | 11 | 4 | 53 | 52 | 1 | 5 | 41 | 85 | 106 | 146 |
| 97,155 | 13 | 5 | 54 | 45 | 1 | 3 | 42 | 54 | 110 | 107 |
| 97,156 | 13 | 5 | 54 | 42 | 1 | 3 | 42 | 51 | 110 | 101 |
| 97,157 | 13 | 5 | 54 | 38 | 1 | 3 | 42 | 43 | 110 | 89  |
| 97,158 | 13 | 5 | 54 | 33 | 1 | 3 | 42 | 37 | 110 | 78  |

|        |    |   |     |    |   |   |    |    |     |    |
|--------|----|---|-----|----|---|---|----|----|-----|----|
| 97,159 | 14 | 5 | 56  | 32 | 1 | 3 | 42 | 35 | 113 | 75 |
| 97,160 | 14 | 5 | 58  | 28 | 1 | 2 | 42 | 32 | 115 | 67 |
| 97,161 | 14 | 5 | 58  | 28 | 1 | 2 | 42 | 32 | 115 | 67 |
| 97,162 | 16 | 5 | 74  | 28 | 1 | 2 | 55 | 32 | 146 | 67 |
| 97,163 | 16 | 5 | 73  | 28 | 1 | 2 | 55 | 32 | 145 | 67 |
| 97,164 | 15 | 5 | 73  | 29 | 1 | 2 | 54 | 32 | 143 | 68 |
| 97,165 | 15 | 4 | 75  | 29 | 1 | 2 | 56 | 31 | 147 | 66 |
| 97,166 | 15 | 4 | 78  | 32 | 1 | 2 | 57 | 32 | 151 | 70 |
| 97,167 | 15 | 4 | 73  | 33 | 1 | 2 | 60 | 32 | 149 | 71 |
| 97,168 | 15 | 4 | 70  | 38 | 1 | 2 | 60 | 33 | 146 | 77 |
| 97,169 | 14 | 4 | 70  | 39 | 0 | 2 | 56 | 31 | 140 | 76 |
| 97,170 | 12 | 4 | 68  | 37 | 0 | 2 | 54 | 30 | 134 | 73 |
| 97,171 | 12 | 4 | 68  | 38 | 0 | 2 | 54 | 30 | 134 | 74 |
| 97,172 | 12 | 3 | 66  | 37 | 0 | 2 | 52 | 21 | 130 | 63 |
| 97,173 | 12 | 3 | 66  | 36 | 0 | 1 | 53 | 14 | 131 | 54 |
| 97,174 | 12 | 3 | 64  | 35 | 0 | 1 | 53 | 11 | 129 | 50 |
| 97,175 | 12 | 3 | 62  | 31 | 0 | 0 | 53 | 8  | 127 | 42 |
| 97,176 | 12 | 3 | 62  | 31 | 0 | 0 | 53 | 8  | 127 | 42 |
| 97,177 | 12 | 3 | 61  | 29 | 0 | 0 | 53 | 8  | 126 | 40 |
| 97,178 | 12 | 3 | 62  | 29 | 0 | 0 | 52 | 8  | 126 | 40 |
| 97,179 | 12 | 3 | 63  | 29 | 0 | 0 | 53 | 8  | 128 | 40 |
| 97,180 | 12 | 3 | 63  | 29 | 0 | 0 | 53 | 8  | 128 | 40 |
| 97,181 | 10 | 3 | 63  | 30 | 0 | 0 | 54 | 7  | 127 | 40 |
| 97,182 | 10 | 3 | 62  | 30 | 0 | 0 | 53 | 7  | 125 | 40 |
| 97,183 | 10 | 3 | 60  | 30 | 0 | 0 | 52 | 8  | 122 | 41 |
| 97,184 | 10 | 3 | 58  | 30 | 0 | 0 | 52 | 8  | 120 | 41 |
| 97,185 | 10 | 3 | 57  | 30 | 0 | 1 | 49 | 8  | 116 | 42 |
| 97,186 | 9  | 3 | 59  | 30 | 0 | 1 | 49 | 8  | 117 | 42 |
| 97,187 | 9  | 1 | 60  | 30 | 0 | 1 | 49 | 8  | 118 | 40 |
| 97,188 | 9  | 1 | 60  | 30 | 0 | 1 | 49 | 9  | 118 | 41 |
| 97,189 | 9  | 1 | 57  | 30 | 0 | 1 | 48 | 9  | 114 | 41 |
| 97,190 | 9  | 1 | 58  | 30 | 0 | 1 | 49 | 9  | 116 | 41 |
| 97,191 | 9  | 1 | 59  | 27 | 0 | 1 | 49 | 9  | 117 | 38 |
| 97,192 | 10 | 1 | 59  | 27 | 0 | 1 | 49 | 9  | 118 | 38 |
| 97,193 | 10 | 1 | 75  | 27 | 0 | 1 | 49 | 9  | 134 | 38 |
| 97,194 | 10 | 1 | 73  | 27 | 0 | 1 | 47 | 9  | 130 | 38 |
| 97,195 | 18 | 1 | 86  | 27 | 0 | 1 | 49 | 10 | 153 | 39 |
| 97,196 | 18 | 1 | 100 | 24 | 0 | 1 | 55 | 10 | 173 | 36 |
| 97,197 | 18 | 2 | 100 | 23 | 0 | 1 | 55 | 9  | 173 | 35 |
| 97,198 | 17 | 2 | 99  | 20 | 0 | 1 | 55 | 6  | 171 | 29 |
| 97,199 | 17 | 2 | 98  | 20 | 0 | 1 | 56 | 6  | 171 | 29 |

|        |    |   |    |    |   |   |    |    |     |    |
|--------|----|---|----|----|---|---|----|----|-----|----|
| 97,200 | 14 | 2 | 87 | 20 | 0 | 1 | 40 | 7  | 141 | 30 |
| 97,201 | 14 | 2 | 86 | 20 | 0 | 1 | 40 | 7  | 140 | 30 |
| 97,202 | 14 | 2 | 86 | 20 | 0 | 1 | 36 | 7  | 136 | 30 |
| 97,203 | 14 | 2 | 88 | 19 | 0 | 1 | 35 | 6  | 137 | 28 |
| 97,204 | 14 | 2 | 88 | 19 | 0 | 1 | 35 | 6  | 137 | 28 |
| 97,205 | 14 | 2 | 88 | 19 | 0 | 1 | 34 | 6  | 136 | 28 |
| 97,206 | 12 | 1 | 87 | 17 | 0 | 1 | 34 | 7  | 133 | 26 |
| 97,207 | 12 | 1 | 87 | 17 | 0 | 1 | 34 | 7  | 133 | 26 |
| 97,208 | 12 | 1 | 86 | 17 | 0 | 1 | 34 | 7  | 132 | 26 |
| 97,209 | 12 | 1 | 85 | 18 | 0 | 1 | 34 | 7  | 131 | 27 |
| 97,210 | 11 | 1 | 85 | 20 | 0 | 1 | 35 | 9  | 131 | 31 |
| 97,211 | 11 | 1 | 83 | 20 | 0 | 1 | 35 | 10 | 129 | 32 |
| 97,212 | 9  | 1 | 82 | 22 | 0 | 1 | 31 | 11 | 122 | 35 |
| 97,213 | 9  | 1 | 66 | 22 | 0 | 1 | 22 | 11 | 97  | 35 |
| 97,214 | 9  | 1 | 64 | 26 | 0 | 1 | 22 | 11 | 95  | 39 |
| 97,215 | 9  | 1 | 64 | 24 | 0 | 1 | 20 | 12 | 93  | 38 |
| 97,216 | 11 | 1 | 63 | 21 | 1 | 1 | 22 | 12 | 97  | 35 |
| 97,217 | 11 | 3 | 60 | 23 | 1 | 1 | 21 | 12 | 93  | 39 |
| 97,218 | 11 | 3 | 60 | 22 | 1 | 1 | 18 | 12 | 90  | 38 |
| 97,219 | 12 | 3 | 60 | 17 | 1 | 1 | 22 | 11 | 95  | 32 |
| 97,220 | 12 | 3 | 60 | 17 | 1 | 1 | 22 | 11 | 95  | 32 |
| 97,221 | 12 | 3 | 60 | 18 | 1 | 1 | 22 | 11 | 95  | 33 |
| 97,222 | 12 | 3 | 60 | 17 | 1 | 1 | 22 | 11 | 95  | 32 |
| 97,223 | 12 | 3 | 60 | 14 | 1 | 1 | 22 | 11 | 95  | 29 |
| 97,224 | 12 | 3 | 60 | 14 | 1 | 1 | 21 | 11 | 94  | 29 |
| 97,225 | 12 | 3 | 60 | 15 | 2 | 1 | 21 | 11 | 95  | 30 |
| 97,226 | 12 | 3 | 60 | 15 | 2 | 1 | 21 | 11 | 95  | 30 |
| 97,227 | 12 | 3 | 60 | 15 | 2 | 1 | 21 | 11 | 95  | 30 |
| 97,228 | 12 | 3 | 59 | 15 | 2 | 1 | 21 | 11 | 94  | 30 |
| 97,229 | 12 | 3 | 58 | 16 | 2 | 1 | 21 | 11 | 93  | 31 |
| 97,230 | 12 | 3 | 57 | 16 | 2 | 1 | 20 | 11 | 91  | 31 |
| 97,231 | 12 | 3 | 57 | 16 | 2 | 1 | 20 | 11 | 91  | 31 |
| 97,232 | 12 | 3 | 57 | 17 | 3 | 1 | 19 | 12 | 91  | 33 |
| 97,233 | 13 | 3 | 57 | 17 | 3 | 1 | 19 | 12 | 92  | 33 |
| 97,234 | 13 | 3 | 57 | 17 | 3 | 1 | 19 | 11 | 92  | 32 |
| 97,235 | 13 | 3 | 57 | 17 | 3 | 1 | 19 | 11 | 92  | 32 |
| 97,236 | 13 | 3 | 57 | 17 | 3 | 0 | 19 | 11 | 92  | 31 |
| 97,237 | 13 | 3 | 56 | 17 | 3 | 0 | 19 | 11 | 91  | 31 |
| 97,238 | 13 | 3 | 55 | 17 | 3 | 0 | 19 | 10 | 90  | 30 |
| 97,239 | 13 | 3 | 54 | 17 | 3 | 0 | 19 | 10 | 89  | 30 |
| 97,240 | 13 | 3 | 55 | 17 | 3 | 0 | 19 | 10 | 90  | 30 |

|        |    |     |    |     |   |    |    |     |    |       |
|--------|----|-----|----|-----|---|----|----|-----|----|-------|
| 97,241 | 13 | 3   | 54 | 17  | 3 | 0  | 18 | 10  | 88 | 30    |
| 97,242 | 13 | 3   | 51 | 18  | 3 | 0  | 18 | 10  | 85 | 31    |
| 97,243 | 12 | 3   | 51 | 19  | 3 | 0  | 18 | 10  | 84 | 32    |
| 97,244 | 12 | 3   | 35 | 19  | 3 | 0  | 16 | 10  | 66 | 32    |
| 97,245 | 4  | 3   | 22 | 19  | 3 | 0  | 14 | 9   | 43 | 31    |
| 97,246 | 4  | 3   | 22 | 19  | 3 | 0  | 14 | 9   | 43 | 31    |
| 97,247 | 4  | 2   | 8  | 19  | 3 | 0  | 8  | 9   | 23 | 30    |
| 97,248 | 4  | 2   | 8  | 19  | 3 | 0  | 8  | 9   | 23 | 30    |
| 97,249 | 4  | 2   | 8  | 19  | 3 | 0  | 8  | 9   | 23 | 30    |
| 97,250 | 4  | 2   | 9  | 19  | 3 | 0  | 7  | 8   | 23 | 29    |
| 97,251 | 4  | 2   | 9  | 19  | 3 | 0  | 7  | 8   | 23 | 29    |
| 97,252 | 4  | 2   | 7  | 19  | 3 | 0  | 7  | 8   | 21 | 29    |
| 97,253 | 4  | 2   | 7  | 19  | 3 | 0  | 7  | 8   | 21 | 29    |
| 97,254 | 4  | 3   | 7  | 19  | 3 | 0  | 7  | 8   | 21 | 30    |
| 97,255 | 4  | 3   | 7  | 19  | 3 | 0  | 7  | 8   | 21 | 30    |
| 97,256 | 4  | 3   | 7  | 19  | 3 | 0  | 7  | 8   | 21 | 30    |
| 97,257 | 4  | 3   | 7  | 19  | 3 | 0  | 7  | 7   | 21 | 29    |
| 97,258 | 4  | 3   | 7  | 19  | 3 | 0  | 8  | 7   | 22 | 29    |
| 97,259 | 4  | 3   | 7  | 19  | 3 | 0  | 8  | 8   | 22 | 30    |
| 97,260 | 4  | 3   | 8  | 17  | 3 | 0  | 9  | 6   | 24 | 26    |
| 97,261 | 4  | 3   | 8  | 17  | 3 | 0  | 8  | 6   | 23 | 26    |
| 97,262 | 4  | 3   | 10 | 17  | 3 | 0  | 8  | 5   | 25 | 25    |
| 97,263 | 4  | 6   | 10 | 20  | 3 | 1  | 8  | 8   | 25 | 35    |
| 97,264 | 4  | 16  | 10 | 114 | 3 | 2  | 8  | 59  | 25 | 191   |
| 97,265 | 4  | 44  | 10 | 407 | 3 | 11 | 8  | 235 | 25 | 697   |
| 97,266 | 4  | 69  | 10 | 556 | 3 | 24 | 8  | 340 | 25 | 989   |
| 97,267 | 2  | 76  | 9  | 628 | 2 | 24 | 6  | 357 | 19 | 1,085 |
| 97,268 | 1  | 81  | 9  | 661 | 2 | 24 | 3  | 375 | 15 | 1,141 |
| 97,269 | 1  | 98  | 9  | 713 | 2 | 26 | 3  | 406 | 15 | 1,243 |
| 97,270 | 1  | 107 | 9  | 794 | 2 | 28 | 2  | 436 | 14 | 1,365 |
| 97,271 | 1  | 110 | 9  | 843 | 2 | 28 | 2  | 464 | 14 | 1,445 |
| 97,272 | 1  | 110 | 9  | 852 | 2 | 28 | 2  | 464 | 14 | 1,454 |
| 97,273 | 1  | 110 | 9  | 858 | 2 | 28 | 2  | 464 | 14 | 1,460 |
| 97,274 | 1  | 111 | 9  | 868 | 2 | 28 | 2  | 465 | 14 | 1,472 |
| 97,275 | 1  | 111 | 9  | 878 | 2 | 28 | 2  | 472 | 14 | 1,489 |
| 97,276 | 1  | 112 | 9  | 885 | 1 | 28 | 2  | 472 | 13 | 1,497 |
| 97,277 | 1  | 112 | 9  | 885 | 1 | 28 | 2  | 472 | 13 | 1,497 |
| 97,278 | 1  | 112 | 9  | 886 | 1 | 28 | 2  | 472 | 13 | 1,498 |
| 97,279 | 1  | 112 | 10 | 887 | 1 | 28 | 2  | 472 | 14 | 1,499 |
| 97,280 | 1  | 112 | 10 | 886 | 2 | 28 | 2  | 472 | 15 | 1,498 |
| 97,281 | 1  | 112 | 10 | 886 | 2 | 29 | 2  | 471 | 15 | 1,498 |

|        |   |     |    |       |   |    |   |     |    |       |
|--------|---|-----|----|-------|---|----|---|-----|----|-------|
| 97,282 | 1 | 112 | 10 | 886   | 2 | 29 | 2 | 471 | 15 | 1,498 |
| 97,283 | 1 | 112 | 10 | 886   | 1 | 29 | 2 | 472 | 14 | 1,499 |
| 97,284 | 0 | 112 | 10 | 887   | 1 | 29 | 2 | 481 | 13 | 1,509 |
| 97,285 | 0 | 112 | 16 | 888   | 1 | 29 | 2 | 481 | 19 | 1,510 |
| 97,286 | 0 | 112 | 16 | 889   | 1 | 29 | 2 | 484 | 19 | 1,514 |
| 97,287 | 0 | 113 | 16 | 896   | 1 | 29 | 2 | 487 | 19 | 1,525 |
| 97,288 | 0 | 113 | 14 | 899   | 1 | 29 | 2 | 487 | 17 | 1,528 |
| 97,289 | 0 | 113 | 14 | 902   | 1 | 29 | 3 | 492 | 18 | 1,536 |
| 97,290 | 0 | 113 | 13 | 909   | 1 | 29 | 3 | 495 | 17 | 1,546 |
| 97,291 | 0 | 114 | 13 | 919   | 1 | 29 | 3 | 498 | 17 | 1,560 |
| 97,292 | 0 | 114 | 13 | 925   | 1 | 29 | 3 | 509 | 17 | 1,577 |
| 97,293 | 0 | 114 | 13 | 933   | 1 | 29 | 3 | 512 | 17 | 1,588 |
| 97,294 | 0 | 122 | 13 | 951   | 1 | 30 | 3 | 517 | 17 | 1,620 |
| 97,295 | 0 | 122 | 13 | 958   | 1 | 30 | 3 | 519 | 17 | 1,629 |
| 97,296 | 0 | 122 | 13 | 958   | 1 | 30 | 3 | 520 | 17 | 1,630 |
| 97,297 | 0 | 122 | 13 | 959   | 1 | 30 | 3 | 521 | 17 | 1,632 |
| 97,298 | 0 | 122 | 13 | 964   | 1 | 30 | 3 | 523 | 17 | 1,639 |
| 97,299 | 0 | 123 | 13 | 987   | 1 | 30 | 3 | 531 | 17 | 1,671 |
| 97,300 | 0 | 123 | 13 | 989   | 1 | 30 | 3 | 533 | 17 | 1,675 |
| 97,301 | 0 | 123 | 12 | 988   | 1 | 30 | 3 | 533 | 16 | 1,674 |
| 97,302 | 0 | 124 | 12 | 994   | 1 | 30 | 3 | 531 | 16 | 1,679 |
| 97,303 | 0 | 124 | 15 | 999   | 1 | 31 | 3 | 534 | 19 | 1,688 |
| 97,304 | 0 | 123 | 15 | 1,002 | 1 | 31 | 3 | 537 | 19 | 1,693 |
| 97,305 | 0 | 127 | 15 | 1,036 | 1 | 33 | 3 | 557 | 19 | 1,753 |
| 97,306 | 0 | 132 | 16 | 1,081 | 1 | 36 | 3 | 582 | 20 | 1,831 |
| 97,307 | 0 | 133 | 16 | 1,107 | 1 | 43 | 3 | 599 | 20 | 1,882 |
| 97,308 | 0 | 134 | 16 | 1,128 | 1 | 45 | 3 | 618 | 20 | 1,925 |
| 97,309 | 0 | 134 | 16 | 1,142 | 1 | 46 | 2 | 622 | 19 | 1,944 |
| 97,310 | 0 | 151 | 15 | 1,325 | 1 | 54 | 2 | 769 | 18 | 2,299 |
| 97,311 | 0 | 152 | 14 | 1,399 | 1 | 54 | 1 | 784 | 16 | 2,389 |
| 97,312 | 0 | 154 | 12 | 1,440 | 1 | 54 | 1 | 807 | 14 | 2,455 |
| 97,313 | 0 | 155 | 12 | 1,542 | 1 | 55 | 2 | 824 | 15 | 2,576 |
| 97,314 | 0 | 152 | 13 | 1,546 | 1 | 55 | 2 | 823 | 16 | 2,576 |
| 97,315 | 0 | 92  | 13 | 1,020 | 1 | 33 | 2 | 494 | 16 | 1,639 |
| 97,316 | 0 | 93  | 13 | 1,039 | 1 | 33 | 2 | 501 | 16 | 1,666 |
| 97,317 | 0 | 96  | 13 | 1,094 | 1 | 34 | 2 | 532 | 16 | 1,756 |
| 97,318 | 0 | 89  | 13 | 1,025 | 1 | 34 | 2 | 514 | 16 | 1,662 |
| 97,319 | 0 | 84  | 13 | 1,013 | 1 | 34 | 2 | 504 | 16 | 1,635 |
| 97,320 | 0 | 67  | 13 | 993   | 1 | 32 | 2 | 475 | 16 | 1,567 |
| 97,321 | 0 | 58  | 13 | 913   | 1 | 30 | 2 | 447 | 16 | 1,448 |
| 97,322 | 0 | 55  | 13 | 886   | 1 | 32 | 2 | 427 | 16 | 1,400 |

|        |   |    |    |       |   |    |   |     |    |       |
|--------|---|----|----|-------|---|----|---|-----|----|-------|
| 97,323 | 0 | 56 | 13 | 909   | 1 | 35 | 2 | 442 | 16 | 1,442 |
| 97,324 | 0 | 64 | 13 | 1,032 | 1 | 39 | 2 | 490 | 16 | 1,625 |
| 97,325 | 0 | 81 | 13 | 1,288 | 1 | 52 | 2 | 601 | 16 | 2,022 |
| 97,326 | 0 | 89 | 13 | 1,347 | 1 | 57 | 2 | 638 | 16 | 2,131 |
| 97,327 | 0 | 88 | 13 | 1,405 | 1 | 57 | 2 | 651 | 16 | 2,201 |
| 97,328 | 0 | 88 | 13 | 1,415 | 1 | 57 | 2 | 656 | 16 | 2,216 |
| 97,329 | 0 | 89 | 12 | 1,426 | 1 | 57 | 2 | 659 | 15 | 2,231 |
| 97,330 | 0 | 90 | 12 | 1,430 | 1 | 57 | 2 | 663 | 15 | 2,240 |
| 97,331 | 0 | 90 | 12 | 1,433 | 0 | 57 | 2 | 664 | 14 | 2,244 |
| 97,332 | 0 | 90 | 12 | 1,432 | 0 | 56 | 2 | 664 | 14 | 2,242 |
| 97,333 | 0 | 90 | 12 | 1,434 | 0 | 56 | 2 | 664 | 14 | 2,244 |
| 97,334 | 0 | 90 | 11 | 1,434 | 0 | 56 | 2 | 654 | 13 | 2,234 |
| 97,335 | 0 | 90 | 11 | 1,435 | 0 | 56 | 3 | 655 | 14 | 2,236 |
| 97,336 | 0 | 90 | 5  | 1,438 | 0 | 56 | 3 | 656 | 8  | 2,240 |
| 97,337 | 0 | 90 | 5  | 1,438 | 0 | 56 | 3 | 653 | 8  | 2,237 |
| 97,338 | 0 | 89 | 5  | 1,431 | 0 | 56 | 3 | 650 | 8  | 2,226 |
| 97,339 | 0 | 89 | 5  | 1,427 | 0 | 56 | 3 | 650 | 8  | 2,222 |
| 97,340 | 0 | 89 | 6  | 1,418 | 1 | 56 | 3 | 642 | 10 | 2,205 |
| 97,341 | 0 | 89 | 6  | 1,418 | 1 | 56 | 3 | 642 | 10 | 2,205 |
| 97,342 | 0 | 88 | 6  | 1,408 | 1 | 56 | 3 | 640 | 10 | 2,192 |
| 97,343 | 0 | 88 | 6  | 1,394 | 1 | 56 | 3 | 626 | 10 | 2,164 |
| 97,344 | 0 | 88 | 6  | 1,395 | 1 | 56 | 3 | 626 | 10 | 2,165 |
| 97,345 | 0 | 80 | 7  | 1,369 | 1 | 55 | 3 | 619 | 11 | 2,123 |
| 97,346 | 0 | 80 | 7  | 1,369 | 1 | 55 | 3 | 619 | 11 | 2,123 |
| 97,347 | 0 | 80 | 7  | 1,368 | 1 | 55 | 3 | 617 | 11 | 2,120 |
| 97,348 | 0 | 80 | 7  | 1,369 | 1 | 55 | 3 | 618 | 11 | 2,122 |
| 97,349 | 0 | 79 | 7  | 1,341 | 1 | 55 | 3 | 609 | 11 | 2,084 |
| 97,350 | 0 | 79 | 7  | 1,341 | 1 | 55 | 3 | 607 | 11 | 2,082 |
| 97,351 | 0 | 79 | 7  | 1,343 | 1 | 55 | 3 | 609 | 11 | 2,086 |
| 97,352 | 0 | 79 | 7  | 1,343 | 1 | 55 | 3 | 609 | 11 | 2,086 |
| 97,353 | 0 | 78 | 6  | 1,337 | 1 | 55 | 3 | 608 | 10 | 2,078 |
| 97,354 | 0 | 78 | 4  | 1,329 | 1 | 54 | 3 | 603 | 8  | 2,064 |
| 97,355 | 0 | 78 | 4  | 1,329 | 1 | 54 | 3 | 603 | 8  | 2,064 |
| 97,356 | 0 | 74 | 4  | 1,297 | 1 | 53 | 4 | 585 | 9  | 2,009 |
| 97,357 | 0 | 69 | 3  | 1,256 | 1 | 51 | 4 | 564 | 8  | 1,940 |
| 97,358 | 0 | 69 | 3  | 1,231 | 1 | 43 | 4 | 540 | 8  | 1,883 |
| 97,359 | 0 | 69 | 3  | 1,236 | 1 | 43 | 4 | 546 | 8  | 1,894 |
| 97,360 | 0 | 69 | 3  | 1,225 | 1 | 42 | 4 | 544 | 8  | 1,880 |
| 97,361 | 0 | 53 | 3  | 1,045 | 1 | 34 | 4 | 399 | 8  | 1,531 |
| 97,362 | 0 | 52 | 3  | 972   | 1 | 34 | 4 | 384 | 8  | 1,442 |
| 97,363 | 0 | 52 | 3  | 959   | 1 | 34 | 3 | 388 | 7  | 1,433 |

|        |   |    |    |     |   |    |    |     |     |       |
|--------|---|----|----|-----|---|----|----|-----|-----|-------|
| 97,364 | 0 | 51 | 3  | 860 | 1 | 33 | 3  | 371 | 7   | 1,315 |
| 97,365 | 0 | 51 | 2  | 851 | 1 | 32 | 3  | 368 | 6   | 1,302 |
| 97,366 | 0 | 49 | 2  | 839 | 1 | 31 | 3  | 366 | 6   | 1,285 |
| 97,367 | 0 | 44 | 4  | 777 | 1 | 30 | 3  | 330 | 8   | 1,181 |
| 97,368 | 0 | 45 | 4  | 816 | 1 | 33 | 3  | 360 | 8   | 1,254 |
| 97,369 | 0 | 46 | 4  | 862 | 1 | 36 | 4  | 388 | 9   | 1,332 |
| 97,370 | 0 | 44 | 12 | 847 | 4 | 36 | 9  | 381 | 25  | 1,308 |
| 97,371 | 1 | 44 | 16 | 813 | 4 | 36 | 10 | 377 | 31  | 1,270 |
| 97,372 | 3 | 46 | 34 | 767 | 4 | 32 | 18 | 360 | 59  | 1,205 |
| 97,373 | 3 | 50 | 38 | 793 | 4 | 32 | 19 | 381 | 64  | 1,256 |
| 97,374 | 3 | 50 | 38 | 797 | 4 | 32 | 19 | 381 | 64  | 1,260 |
| 97,375 | 3 | 56 | 38 | 752 | 4 | 30 | 19 | 423 | 64  | 1,261 |
| 97,376 | 3 | 49 | 38 | 607 | 4 | 21 | 19 | 405 | 64  | 1,082 |
| 97,377 | 4 | 46 | 50 | 588 | 4 | 16 | 39 | 383 | 97  | 1,033 |
| 97,378 | 4 | 48 | 50 | 533 | 4 | 16 | 39 | 374 | 97  | 971   |
| 97,379 | 4 | 51 | 51 | 564 | 4 | 17 | 39 | 390 | 98  | 1,022 |
| 97,380 | 4 | 50 | 51 | 560 | 4 | 17 | 39 | 398 | 98  | 1,025 |
| 97,381 | 5 | 55 | 51 | 596 | 4 | 18 | 39 | 417 | 99  | 1,086 |
| 97,382 | 5 | 55 | 51 | 599 | 4 | 18 | 40 | 418 | 100 | 1,090 |
| 97,383 | 5 | 55 | 51 | 614 | 4 | 18 | 40 | 423 | 100 | 1,110 |
| 97,384 | 5 | 55 | 52 | 642 | 4 | 18 | 40 | 439 | 101 | 1,154 |
| 97,385 | 6 | 58 | 53 | 680 | 4 | 19 | 40 | 482 | 103 | 1,239 |
| 97,386 | 6 | 63 | 53 | 717 | 4 | 21 | 40 | 536 | 103 | 1,337 |
| 97,387 | 6 | 64 | 54 | 721 | 4 | 21 | 41 | 543 | 105 | 1,349 |
| 97,388 | 6 | 64 | 59 | 737 | 4 | 21 | 44 | 555 | 113 | 1,377 |
| 97,389 | 6 | 66 | 60 | 755 | 4 | 22 | 48 | 580 | 118 | 1,423 |
| 97,390 | 6 | 67 | 59 | 762 | 3 | 22 | 48 | 586 | 116 | 1,437 |
| 97,391 | 6 | 71 | 61 | 782 | 3 | 23 | 52 | 605 | 122 | 1,481 |
| 97,392 | 6 | 72 | 61 | 790 | 3 | 23 | 52 | 609 | 122 | 1,494 |
| 97,393 | 6 | 72 | 61 | 792 | 3 | 23 | 52 | 611 | 122 | 1,498 |
| 97,394 | 6 | 72 | 61 | 792 | 3 | 24 | 52 | 612 | 122 | 1,500 |
| 97,395 | 6 | 77 | 60 | 800 | 3 | 30 | 52 | 625 | 121 | 1,532 |
| 97,396 | 6 | 77 | 60 | 801 | 3 | 30 | 52 | 626 | 121 | 1,534 |
| 97,397 | 6 | 86 | 60 | 822 | 3 | 33 | 52 | 658 | 121 | 1,599 |
| 97,398 | 6 | 86 | 60 | 831 | 3 | 33 | 52 | 669 | 121 | 1,619 |
| 97,399 | 6 | 86 | 60 | 848 | 3 | 33 | 52 | 680 | 121 | 1,647 |
| 97,400 | 6 | 86 | 60 | 848 | 3 | 33 | 52 | 678 | 121 | 1,645 |
| 97,401 | 6 | 86 | 62 | 850 | 3 | 33 | 53 | 677 | 124 | 1,646 |
| 97,402 | 6 | 89 | 63 | 870 | 3 | 35 | 53 | 710 | 125 | 1,704 |
| 97,403 | 6 | 89 | 63 | 871 | 3 | 35 | 53 | 712 | 125 | 1,707 |
| 97,404 | 6 | 90 | 63 | 880 | 3 | 35 | 53 | 714 | 125 | 1,719 |



|        |   |     |    |       |   |     |    |       |     |       |
|--------|---|-----|----|-------|---|-----|----|-------|-----|-------|
| 97,405 | 6 | 97  | 63 | 893   | 3 | 37  | 54 | 737   | 126 | 1,764 |
| 97,406 | 6 | 97  | 63 | 894   | 3 | 37  | 53 | 742   | 125 | 1,770 |
| 97,407 | 7 | 97  | 70 | 889   | 3 | 35  | 57 | 740   | 137 | 1,761 |
| 97,408 | 7 | 97  | 74 | 890   | 3 | 36  | 57 | 743   | 141 | 1,766 |
| 97,409 | 7 | 95  | 75 | 871   | 3 | 35  | 57 | 741   | 142 | 1,742 |
| 97,410 | 7 | 95  | 75 | 866   | 3 | 35  | 57 | 734   | 142 | 1,730 |
| 97,411 | 7 | 96  | 77 | 862   | 3 | 35  | 59 | 733   | 146 | 1,726 |
| 97,412 | 8 | 95  | 84 | 865   | 3 | 36  | 62 | 737   | 157 | 1,733 |
| 97,413 | 8 | 96  | 84 | 866   | 3 | 36  | 61 | 736   | 156 | 1,734 |
| 97,414 | 8 | 94  | 84 | 844   | 3 | 38  | 61 | 714   | 156 | 1,690 |
| 97,415 | 8 | 94  | 86 | 842   | 3 | 38  | 61 | 714   | 158 | 1,688 |
| 97,416 | 8 | 94  | 86 | 850   | 3 | 40  | 61 | 728   | 158 | 1,712 |
| 97,417 | 8 | 98  | 85 | 918   | 3 | 51  | 61 | 857   | 157 | 1,924 |
| 97,418 | 8 | 98  | 84 | 920   | 3 | 53  | 61 | 862   | 156 | 1,933 |
| 97,419 | 8 | 104 | 86 | 915   | 3 | 52  | 61 | 879   | 158 | 1,950 |
| 97,420 | 8 | 104 | 86 | 878   | 3 | 52  | 60 | 872   | 157 | 1,906 |
| 97,421 | 8 | 118 | 79 | 1,080 | 0 | 87  | 55 | 1,204 | 142 | 2,489 |
| 97,422 | 7 | 149 | 75 | 1,389 | 0 | 106 | 54 | 1,418 | 136 | 3,062 |
| 97,423 | 5 | 144 | 57 | 1,399 | 0 | 106 | 45 | 1,400 | 107 | 3,049 |
| 97,424 | 5 | 146 | 53 | 1,439 | 0 | 108 | 45 | 1,412 | 103 | 3,105 |
| 97,425 | 5 | 132 | 42 | 1,372 | 0 | 107 | 26 | 1,335 | 73  | 2,946 |
| 97,426 | 4 | 123 | 42 | 1,259 | 0 | 103 | 27 | 1,251 | 73  | 2,736 |
| 97,427 | 4 | 121 | 43 | 1,207 | 0 | 103 | 27 | 1,237 | 74  | 2,668 |
| 97,428 | 4 | 120 | 43 | 1,191 | 0 | 105 | 27 | 1,231 | 74  | 2,647 |
| 97,429 | 4 | 120 | 43 | 1,191 | 0 | 105 | 27 | 1,231 | 74  | 2,647 |
| 97,430 | 4 | 117 | 42 | 1,165 | 0 | 104 | 28 | 1,215 | 74  | 2,601 |
| 97,431 | 4 | 111 | 42 | 1,113 | 0 | 103 | 28 | 1,180 | 74  | 2,507 |
| 97,432 | 3 | 111 | 42 | 1,112 | 0 | 103 | 28 | 1,181 | 73  | 2,507 |
| 97,433 | 3 | 126 | 42 | 1,226 | 0 | 113 | 28 | 1,413 | 73  | 2,878 |
| 97,434 | 3 | 128 | 41 | 1,224 | 0 | 113 | 28 | 1,411 | 72  | 2,876 |
| 97,435 | 2 | 128 | 47 | 1,228 | 1 | 113 | 29 | 1,439 | 79  | 2,908 |
| 97,436 | 2 | 125 | 49 | 1,188 | 1 | 112 | 30 | 1,394 | 82  | 2,819 |
| 97,437 | 2 | 120 | 51 | 1,155 | 1 | 110 | 31 | 1,341 | 85  | 2,726 |
| 97,438 | 2 | 120 | 50 | 1,159 | 1 | 111 | 30 | 1,342 | 83  | 2,732 |
| 97,439 | 2 | 120 | 45 | 1,147 | 1 | 111 | 27 | 1,338 | 75  | 2,716 |
| 97,440 | 2 | 117 | 44 | 1,137 | 1 | 111 | 23 | 1,314 | 70  | 2,679 |
| 97,441 | 2 | 117 | 42 | 1,160 | 1 | 113 | 22 | 1,338 | 67  | 2,728 |
| 97,442 | 2 | 112 | 42 | 1,137 | 1 | 112 | 19 | 1,318 | 64  | 2,679 |
| 97,443 | 2 | 114 | 42 | 1,134 | 1 | 112 | 19 | 1,315 | 64  | 2,675 |
| 97,444 | 2 | 114 | 42 | 1,134 | 1 | 111 | 20 | 1,314 | 65  | 2,673 |
| 97,445 | 2 | 114 | 42 | 1,134 | 1 | 111 | 20 | 1,314 | 65  | 2,673 |

|        |   |     |    |       |   |     |    |       |    |       |
|--------|---|-----|----|-------|---|-----|----|-------|----|-------|
| 97,446 | 2 | 109 | 42 | 1,126 | 1 | 105 | 20 | 1,303 | 65 | 2,643 |
| 97,447 | 2 | 109 | 42 | 1,125 | 1 | 105 | 20 | 1,303 | 65 | 2,642 |
| 97,448 | 2 | 102 | 42 | 1,107 | 1 | 103 | 20 | 1,274 | 65 | 2,586 |
| 97,449 | 2 | 102 | 42 | 1,100 | 1 | 103 | 20 | 1,267 | 65 | 2,572 |
| 97,450 | 2 | 102 | 42 | 1,082 | 1 | 103 | 21 | 1,255 | 66 | 2,542 |
| 97,451 | 2 | 102 | 42 | 1,077 | 1 | 103 | 22 | 1,254 | 67 | 2,536 |
| 97,452 | 2 | 102 | 42 | 1,078 | 1 | 103 | 21 | 1,255 | 66 | 2,538 |
| 97,453 | 2 | 100 | 41 | 1,067 | 1 | 103 | 21 | 1,228 | 65 | 2,498 |
| 97,454 | 2 | 100 | 41 | 1,068 | 1 | 103 | 21 | 1,230 | 65 | 2,501 |
| 97,455 | 2 | 99  | 41 | 1,065 | 1 | 103 | 21 | 1,229 | 65 | 2,496 |
| 97,456 | 2 | 94  | 42 | 1,123 | 1 | 104 | 20 | 1,246 | 65 | 2,567 |
| 97,457 | 2 | 97  | 42 | 1,177 | 1 | 106 | 20 | 1,287 | 65 | 2,667 |
| 97,458 | 2 | 115 | 39 | 1,305 | 1 | 117 | 16 | 1,372 | 58 | 2,909 |
| 97,459 | 2 | 115 | 35 | 1,384 | 1 | 121 | 18 | 1,406 | 56 | 3,026 |
| 97,460 | 2 | 121 | 37 | 1,515 | 1 | 127 | 18 | 1,442 | 58 | 3,205 |
| 97,461 | 2 | 124 | 37 | 1,586 | 1 | 127 | 18 | 1,459 | 58 | 3,296 |
| 97,462 | 1 | 124 | 29 | 1,599 | 1 | 127 | 15 | 1,457 | 46 | 3,307 |
| 97,463 | 1 | 124 | 30 | 1,616 | 1 | 126 | 15 | 1,459 | 47 | 3,325 |
| 97,464 | 1 | 124 | 33 | 1,643 | 1 | 128 | 16 | 1,477 | 51 | 3,372 |
| 97,465 | 1 | 124 | 32 | 1,643 | 1 | 127 | 16 | 1,473 | 50 | 3,367 |
| 97,466 | 1 | 127 | 54 | 1,694 | 2 | 128 | 20 | 1,484 | 77 | 3,433 |
| 97,467 | 1 | 127 | 54 | 1,691 | 2 | 126 | 20 | 1,469 | 77 | 3,413 |
| 97,468 | 1 | 123 | 55 | 1,630 | 2 | 115 | 20 | 1,342 | 78 | 3,210 |
| 97,469 | 1 | 118 | 55 | 1,585 | 2 | 111 | 20 | 1,294 | 78 | 3,108 |
| 97,470 | 1 | 117 | 53 | 1,571 | 2 | 108 | 20 | 1,275 | 76 | 3,071 |
| 97,471 | 1 | 117 | 53 | 1,580 | 2 | 108 | 20 | 1,281 | 76 | 3,086 |
| 97,472 | 1 | 104 | 52 | 1,389 | 2 | 73  | 20 | 957   | 75 | 2,523 |
| 97,473 | 1 | 96  | 52 | 1,181 | 2 | 62  | 20 | 882   | 75 | 2,221 |
| 97,474 | 1 | 94  | 52 | 1,145 | 2 | 63  | 20 | 886   | 75 | 2,188 |
| 97,475 | 2 | 98  | 52 | 1,248 | 2 | 65  | 20 | 933   | 76 | 2,344 |
| 97,476 | 2 | 98  | 51 | 1,242 | 2 | 64  | 19 | 923   | 74 | 2,327 |
| 97,477 | 2 | 96  | 51 | 1,238 | 2 | 64  | 18 | 915   | 73 | 2,313 |
| 97,478 | 2 | 94  | 50 | 1,236 | 2 | 62  | 17 | 903   | 71 | 2,295 |
| 97,479 | 2 | 94  | 50 | 1,240 | 2 | 62  | 17 | 904   | 71 | 2,300 |
| 97,480 | 2 | 94  | 50 | 1,242 | 2 | 63  | 16 | 907   | 70 | 2,306 |
| 97,481 | 2 | 94  | 50 | 1,239 | 2 | 63  | 17 | 909   | 71 | 2,305 |
| 97,482 | 2 | 94  | 50 | 1,240 | 2 | 63  | 17 | 909   | 71 | 2,306 |
| 97,483 | 2 | 94  | 50 | 1,238 | 2 | 63  | 17 | 906   | 71 | 2,301 |
| 97,484 | 2 | 80  | 49 | 1,112 | 2 | 53  | 17 | 676   | 70 | 1,921 |
| 97,485 | 2 | 80  | 47 | 1,080 | 1 | 53  | 16 | 635   | 66 | 1,848 |
| 97,486 | 2 | 80  | 44 | 1,081 | 1 | 53  | 16 | 635   | 63 | 1,849 |

|        |   |     |    |       |   |    |    |     |    |       |
|--------|---|-----|----|-------|---|----|----|-----|----|-------|
| 97,487 | 2 | 80  | 41 | 1,081 | 1 | 53 | 15 | 635 | 59 | 1,849 |
| 97,488 | 2 | 79  | 39 | 1,070 | 1 | 52 | 13 | 625 | 55 | 1,826 |
| 97,489 | 2 | 79  | 39 | 1,068 | 1 | 52 | 13 | 625 | 55 | 1,824 |
| 97,490 | 2 | 81  | 39 | 1,048 | 1 | 51 | 13 | 614 | 55 | 1,794 |
| 97,491 | 2 | 81  | 39 | 1,048 | 1 | 51 | 13 | 614 | 55 | 1,794 |
| 97,492 | 2 | 81  | 39 | 1,026 | 1 | 49 | 14 | 592 | 56 | 1,748 |
| 97,493 | 2 | 79  | 40 | 1,024 | 1 | 49 | 14 | 591 | 57 | 1,743 |
| 97,494 | 2 | 81  | 40 | 1,037 | 1 | 49 | 14 | 598 | 57 | 1,765 |
| 97,495 | 2 | 83  | 41 | 1,056 | 1 | 49 | 13 | 613 | 57 | 1,801 |
| 97,496 | 2 | 85  | 41 | 1,069 | 1 | 50 | 13 | 623 | 57 | 1,827 |
| 97,497 | 2 | 88  | 41 | 1,108 | 1 | 52 | 13 | 630 | 57 | 1,878 |
| 97,498 | 2 | 93  | 41 | 1,194 | 1 | 59 | 12 | 735 | 56 | 2,081 |
| 97,499 | 2 | 91  | 41 | 1,196 | 1 | 58 | 12 | 732 | 56 | 2,077 |
| 97,500 | 2 | 95  | 41 | 1,212 | 1 | 59 | 12 | 743 | 56 | 2,109 |
| 97,501 | 2 | 98  | 41 | 1,221 | 1 | 59 | 12 | 750 | 56 | 2,128 |
| 97,502 | 2 | 98  | 39 | 1,222 | 1 | 58 | 11 | 749 | 53 | 2,127 |
| 97,503 | 2 | 97  | 39 | 1,215 | 1 | 56 | 11 | 743 | 53 | 2,111 |
| 97,504 | 2 | 97  | 39 | 1,220 | 1 | 57 | 11 | 751 | 53 | 2,125 |
| 97,505 | 2 | 102 | 39 | 1,246 | 1 | 58 | 11 | 766 | 53 | 2,172 |
| 97,506 | 2 | 102 | 38 | 1,244 | 1 | 58 | 11 | 766 | 52 | 2,170 |
| 97,507 | 2 | 104 | 38 | 1,174 | 1 | 55 | 11 | 732 | 52 | 2,065 |
| 97,508 | 3 | 102 | 38 | 1,129 | 1 | 53 | 11 | 686 | 53 | 1,970 |
| 97,509 | 2 | 86  | 34 | 932   | 1 | 37 | 11 | 567 | 48 | 1,622 |
| 97,510 | 2 | 86  | 34 | 942   | 1 | 37 | 9  | 568 | 46 | 1,633 |
| 97,511 | 2 | 81  | 31 | 811   | 1 | 32 | 10 | 523 | 44 | 1,447 |
| 97,512 | 2 | 78  | 29 | 729   | 1 | 33 | 8  | 511 | 40 | 1,351 |
| 97,513 | 2 | 81  | 29 | 771   | 1 | 34 | 8  | 547 | 40 | 1,433 |
| 97,514 | 2 | 82  | 29 | 775   | 1 | 36 | 8  | 559 | 40 | 1,452 |
| 97,515 | 2 | 87  | 26 | 807   | 1 | 34 | 7  | 553 | 36 | 1,481 |
| 97,516 | 2 | 92  | 13 | 818   | 0 | 34 | 4  | 555 | 19 | 1,499 |
| 97,517 | 2 | 89  | 4  | 768   | 0 | 34 | 3  | 543 | 9  | 1,434 |
| 97,518 | 2 | 90  | 6  | 756   | 0 | 34 | 4  | 541 | 12 | 1,421 |
| 97,519 | 2 | 90  | 5  | 756   | 0 | 34 | 4  | 541 | 11 | 1,421 |
| 97,520 | 2 | 88  | 5  | 764   | 0 | 34 | 4  | 540 | 11 | 1,426 |
| 97,521 | 2 | 88  | 5  | 770   | 0 | 34 | 4  | 541 | 11 | 1,433 |
| 97,522 | 2 | 89  | 5  | 761   | 0 | 34 | 4  | 535 | 11 | 1,419 |
| 97,523 | 2 | 88  | 7  | 744   | 0 | 34 | 5  | 526 | 14 | 1,392 |
| 97,524 | 1 | 59  | 7  | 494   | 0 | 20 | 6  | 318 | 14 | 891   |
| 97,525 | 1 | 59  | 7  | 495   | 0 | 20 | 6  | 317 | 14 | 891   |
| 97,526 | 1 | 59  | 7  | 497   | 0 | 20 | 6  | 318 | 14 | 894   |
| 97,527 | 1 | 59  | 7  | 483   | 0 | 21 | 6  | 316 | 14 | 879   |

|        |   |     |    |       |   |     |    |       |    |       |
|--------|---|-----|----|-------|---|-----|----|-------|----|-------|
| 97,528 | 1 | 59  | 7  | 483   | 0 | 21  | 6  | 317   | 14 | 880   |
| 97,529 | 1 | 57  | 7  | 478   | 0 | 21  | 6  | 317   | 14 | 873   |
| 97,530 | 1 | 57  | 8  | 477   | 0 | 20  | 6  | 312   | 15 | 866   |
| 97,531 | 1 | 58  | 8  | 477   | 0 | 20  | 5  | 311   | 14 | 866   |
| 97,532 | 1 | 59  | 8  | 477   | 0 | 20  | 5  | 311   | 14 | 867   |
| 97,533 | 3 | 59  | 8  | 480   | 0 | 20  | 7  | 311   | 18 | 870   |
| 97,534 | 3 | 63  | 8  | 500   | 1 | 20  | 8  | 323   | 20 | 906   |
| 97,535 | 3 | 61  | 11 | 506   | 1 | 20  | 8  | 326   | 23 | 913   |
| 97,536 | 3 | 61  | 11 | 507   | 1 | 20  | 8  | 327   | 23 | 915   |
| 97,537 | 3 | 63  | 12 | 534   | 1 | 24  | 9  | 354   | 25 | 975   |
| 97,538 | 3 | 75  | 13 | 696   | 1 | 32  | 10 | 466   | 27 | 1,269 |
| 97,539 | 3 | 83  | 13 | 897   | 1 | 60  | 10 | 618   | 27 | 1,658 |
| 97,540 | 3 | 83  | 13 | 911   | 1 | 60  | 10 | 632   | 27 | 1,686 |
| 97,541 | 3 | 88  | 13 | 947   | 1 | 71  | 10 | 697   | 27 | 1,803 |
| 97,542 | 3 | 153 | 13 | 1,439 | 1 | 94  | 9  | 932   | 26 | 2,618 |
| 97,543 | 3 | 211 | 12 | 1,776 | 1 | 122 | 9  | 1,229 | 25 | 3,338 |
| 97,544 | 3 | 212 | 12 | 1,778 | 1 | 123 | 9  | 1,229 | 25 | 3,342 |
| 97,545 | 3 | 216 | 12 | 1,798 | 1 | 128 | 10 | 1,242 | 26 | 3,384 |
| 97,546 | 3 | 227 | 14 | 1,826 | 1 | 131 | 10 | 1,234 | 28 | 3,418 |
| 97,547 | 3 | 224 | 14 | 1,794 | 1 | 129 | 10 | 1,228 | 28 | 3,375 |
| 97,548 | 3 | 221 | 14 | 1,708 | 1 | 122 | 10 | 1,124 | 28 | 3,175 |
| 97,549 | 3 | 225 | 14 | 1,730 | 1 | 122 | 10 | 1,130 | 28 | 3,207 |
| 97,550 | 3 | 226 | 14 | 1,731 | 1 | 122 | 10 | 1,130 | 28 | 3,209 |
| 97,551 | 5 | 220 | 14 | 1,716 | 1 | 121 | 10 | 1,112 | 30 | 3,169 |
| 97,552 | 5 | 219 | 14 | 1,716 | 1 | 121 | 10 | 1,112 | 30 | 3,168 |
| 97,553 | 5 | 219 | 16 | 1,720 | 1 | 122 | 10 | 1,111 | 32 | 3,172 |
| 97,554 | 5 | 220 | 16 | 1,718 | 1 | 122 | 10 | 1,112 | 32 | 3,172 |
| 97,555 | 5 | 220 | 17 | 1,714 | 1 | 121 | 10 | 1,103 | 33 | 3,158 |
| 97,556 | 5 | 215 | 17 | 1,690 | 1 | 120 | 10 | 1,083 | 33 | 3,108 |
| 97,557 | 5 | 215 | 17 | 1,686 | 1 | 120 | 10 | 1,081 | 33 | 3,102 |
| 97,558 | 5 | 211 | 17 | 1,683 | 1 | 120 | 10 | 1,077 | 33 | 3,091 |
| 97,559 | 4 | 210 | 18 | 1,675 | 1 | 120 | 11 | 1,076 | 34 | 3,081 |
| 97,560 | 4 | 208 | 18 | 1,656 | 1 | 120 | 11 | 1,070 | 34 | 3,054 |
| 97,561 | 4 | 208 | 18 | 1,656 | 1 | 120 | 11 | 1,070 | 34 | 3,054 |
| 97,562 | 4 | 207 | 18 | 1,653 | 1 | 120 | 10 | 1,068 | 33 | 3,048 |
| 97,563 | 4 | 206 | 18 | 1,650 | 1 | 119 | 10 | 1,063 | 33 | 3,038 |
| 97,564 | 4 | 202 | 18 | 1,576 | 1 | 116 | 11 | 1,008 | 34 | 2,902 |
| 97,565 | 4 | 197 | 17 | 1,520 | 1 | 116 | 11 | 997   | 33 | 2,830 |
| 97,566 | 4 | 191 | 17 | 1,505 | 1 | 116 | 12 | 991   | 34 | 2,803 |
| 97,567 | 4 | 190 | 18 | 1,505 | 1 | 115 | 12 | 990   | 35 | 2,800 |
| 97,568 | 4 | 190 | 18 | 1,519 | 2 | 115 | 12 | 1,004 | 36 | 2,828 |

|        |   |     |    |       |   |     |    |       |    |       |
|--------|---|-----|----|-------|---|-----|----|-------|----|-------|
| 97,569 | 4 | 191 | 16 | 1,528 | 2 | 115 | 12 | 1,016 | 34 | 2,850 |
| 97,570 | 5 | 204 | 16 | 1,587 | 2 | 118 | 12 | 1,072 | 35 | 2,981 |
| 97,571 | 5 | 204 | 17 | 1,642 | 2 | 118 | 12 | 1,120 | 36 | 3,084 |
| 97,572 | 5 | 205 | 17 | 1,664 | 2 | 118 | 12 | 1,122 | 36 | 3,109 |
| 97,573 | 5 | 206 | 16 | 1,681 | 2 | 118 | 12 | 1,126 | 35 | 3,131 |
| 97,574 | 5 | 206 | 15 | 1,689 | 2 | 118 | 11 | 1,128 | 33 | 3,141 |
| 97,575 | 5 | 208 | 15 | 1,697 | 2 | 118 | 10 | 1,130 | 32 | 3,153 |
| 97,576 | 5 | 208 | 15 | 1,698 | 2 | 118 | 10 | 1,130 | 32 | 3,154 |
| 97,577 | 5 | 211 | 15 | 1,701 | 2 | 119 | 10 | 1,134 | 32 | 3,165 |
| 97,578 | 5 | 212 | 15 | 1,701 | 2 | 118 | 10 | 1,133 | 32 | 3,164 |
| 97,579 | 5 | 212 | 15 | 1,701 | 2 | 118 | 10 | 1,133 | 32 | 3,164 |
| 97,580 | 5 | 212 | 15 | 1,697 | 2 | 118 | 10 | 1,137 | 32 | 3,164 |
| 97,581 | 5 | 210 | 14 | 1,702 | 2 | 119 | 10 | 1,141 | 31 | 3,172 |
| 97,582 | 5 | 213 | 14 | 1,784 | 2 | 124 | 10 | 1,208 | 31 | 3,329 |
| 97,583 | 3 | 216 | 14 | 1,821 | 2 | 128 | 8  | 1,260 | 27 | 3,425 |
| 97,584 | 3 | 221 | 14 | 1,854 | 1 | 130 | 7  | 1,307 | 25 | 3,512 |
| 97,585 | 3 | 218 | 14 | 1,895 | 1 | 130 | 7  | 1,323 | 25 | 3,566 |
| 97,586 | 3 | 217 | 11 | 1,889 | 1 | 130 | 7  | 1,321 | 22 | 3,557 |
| 97,587 | 3 | 217 | 10 | 1,859 | 1 | 126 | 6  | 1,292 | 20 | 3,494 |
| 97,588 | 3 | 205 | 9  | 1,702 | 1 | 118 | 5  | 1,181 | 18 | 3,206 |
| 97,589 | 3 | 197 | 9  | 1,497 | 1 | 91  | 5  | 1,028 | 18 | 2,813 |
| 97,590 | 3 | 197 | 9  | 1,507 | 1 | 91  | 5  | 1,036 | 18 | 2,831 |
| 97,591 | 3 | 197 | 9  | 1,493 | 1 | 91  | 5  | 1,021 | 18 | 2,802 |
| 97,592 | 3 | 190 | 9  | 1,458 | 1 | 80  | 5  | 954   | 18 | 2,682 |
| 97,593 | 3 | 68  | 9  | 633   | 1 | 29  | 5  | 422   | 18 | 1,152 |
| 97,594 | 3 | 68  | 9  | 632   | 1 | 29  | 5  | 423   | 18 | 1,152 |
| 97,595 | 3 | 60  | 10 | 594   | 1 | 23  | 4  | 401   | 18 | 1,078 |
| 97,596 | 3 | 60  | 10 | 598   | 1 | 24  | 4  | 401   | 18 | 1,083 |
| 97,597 | 3 | 45  | 7  | 530   | 1 | 20  | 4  | 381   | 15 | 976   |
| 97,598 | 3 | 45  | 7  | 530   | 1 | 20  | 4  | 381   | 15 | 976   |
| 97,599 | 3 | 39  | 7  | 502   | 1 | 20  | 4  | 375   | 15 | 936   |
| 97,600 | 3 | 38  | 7  | 501   | 1 | 20  | 4  | 375   | 15 | 934   |
| 97,601 | 2 | 37  | 7  | 489   | 1 | 20  | 4  | 372   | 14 | 918   |
| 97,602 | 1 | 37  | 8  | 491   | 1 | 22  | 4  | 378   | 14 | 928   |
| 97,603 | 1 | 37  | 6  | 490   | 1 | 21  | 4  | 379   | 12 | 927   |
| 97,604 | 1 | 37  | 6  | 494   | 1 | 21  | 4  | 386   | 12 | 938   |
| 97,605 | 1 | 37  | 5  | 493   | 1 | 21  | 4  | 384   | 11 | 935   |
| 97,606 | 1 | 37  | 5  | 491   | 1 | 21  | 4  | 384   | 11 | 933   |
| 97,607 | 1 | 37  | 5  | 492   | 1 | 21  | 6  | 388   | 13 | 938   |
| 97,608 | 1 | 37  | 4  | 491   | 1 | 21  | 6  | 388   | 12 | 937   |
| 97,609 | 1 | 37  | 4  | 491   | 1 | 21  | 5  | 389   | 11 | 938   |

|        |   |    |    |     |   |    |    |     |    |       |
|--------|---|----|----|-----|---|----|----|-----|----|-------|
| 97,610 | 1 | 37 | 4  | 493 | 1 | 21 | 5  | 390 | 11 | 941   |
| 97,611 | 1 | 37 | 4  | 495 | 1 | 21 | 5  | 393 | 11 | 946   |
| 97,612 | 1 | 37 | 4  | 495 | 1 | 21 | 5  | 394 | 11 | 947   |
| 97,613 | 1 | 37 | 4  | 495 | 1 | 21 | 5  | 394 | 11 | 947   |
| 97,614 | 1 | 37 | 4  | 495 | 1 | 21 | 6  | 394 | 12 | 947   |
| 97,615 | 1 | 37 | 4  | 495 | 1 | 22 | 5  | 394 | 11 | 948   |
| 97,616 | 1 | 37 | 4  | 495 | 1 | 22 | 5  | 394 | 11 | 948   |
| 97,617 | 1 | 37 | 6  | 493 | 1 | 21 | 4  | 392 | 12 | 943   |
| 97,618 | 1 | 37 | 5  | 492 | 1 | 21 | 4  | 392 | 11 | 942   |
| 97,619 | 1 | 37 | 5  | 478 | 0 | 21 | 3  | 378 | 9  | 914   |
| 97,620 | 1 | 36 | 5  | 469 | 0 | 21 | 3  | 366 | 9  | 892   |
| 97,621 | 0 | 23 | 5  | 400 | 0 | 18 | 3  | 309 | 8  | 750   |
| 97,622 | 0 | 21 | 4  | 317 | 0 | 18 | 3  | 257 | 7  | 613   |
| 97,623 | 0 | 21 | 4  | 316 | 0 | 18 | 3  | 257 | 7  | 612   |
| 97,624 | 0 | 20 | 4  | 299 | 0 | 19 | 3  | 255 | 7  | 593   |
| 97,625 | 0 | 20 | 4  | 296 | 0 | 19 | 3  | 256 | 7  | 591   |
| 97,626 | 0 | 18 | 5  | 288 | 0 | 19 | 3  | 256 | 8  | 581   |
| 97,627 | 0 | 18 | 5  | 293 | 0 | 19 | 4  | 267 | 9  | 597   |
| 97,628 | 0 | 18 | 5  | 308 | 0 | 18 | 4  | 296 | 9  | 640   |
| 97,629 | 0 | 17 | 6  | 319 | 0 | 19 | 4  | 313 | 10 | 668   |
| 97,630 | 0 | 17 | 6  | 320 | 0 | 20 | 4  | 312 | 10 | 669   |
| 97,631 | 0 | 17 | 7  | 321 | 0 | 20 | 5  | 314 | 12 | 672   |
| 97,632 | 0 | 24 | 7  | 331 | 0 | 20 | 5  | 319 | 12 | 694   |
| 97,633 | 0 | 22 | 7  | 258 | 0 | 16 | 6  | 258 | 13 | 554   |
| 97,634 | 0 | 19 | 7  | 225 | 0 | 12 | 6  | 206 | 13 | 462   |
| 97,635 | 0 | 14 | 7  | 192 | 0 | 10 | 6  | 161 | 13 | 377   |
| 97,636 | 0 | 13 | 8  | 134 | 1 | 10 | 6  | 137 | 15 | 294   |
| 97,637 | 0 | 15 | 8  | 178 | 1 | 12 | 6  | 163 | 15 | 368   |
| 97,638 | 0 | 17 | 8  | 276 | 1 | 16 | 6  | 193 | 15 | 502   |
| 97,639 | 0 | 20 | 8  | 354 | 1 | 21 | 6  | 219 | 15 | 614   |
| 97,640 | 1 | 30 | 8  | 434 | 1 | 24 | 6  | 245 | 16 | 733   |
| 97,641 | 1 | 31 | 8  | 441 | 1 | 25 | 6  | 241 | 16 | 738   |
| 97,642 | 1 | 35 | 8  | 481 | 1 | 31 | 6  | 280 | 16 | 827   |
| 97,643 | 1 | 35 | 8  | 481 | 1 | 31 | 6  | 280 | 16 | 827   |
| 97,644 | 1 | 48 | 8  | 611 | 1 | 34 | 6  | 351 | 16 | 1,044 |
| 97,645 | 1 | 48 | 8  | 610 | 1 | 34 | 6  | 350 | 16 | 1,042 |
| 97,646 | 1 | 50 | 10 | 613 | 1 | 33 | 8  | 351 | 20 | 1,047 |
| 97,647 | 1 | 61 | 22 | 645 | 1 | 34 | 19 | 367 | 43 | 1,107 |
| 97,648 | 1 | 61 | 22 | 653 | 1 | 34 | 19 | 368 | 43 | 1,116 |
| 97,649 | 1 | 66 | 25 | 713 | 1 | 36 | 20 | 395 | 47 | 1,210 |
| 97,650 | 1 | 67 | 25 | 731 | 1 | 36 | 20 | 405 | 47 | 1,239 |

|        |   |     |     |       |    |    |    |     |     |       |
|--------|---|-----|-----|-------|----|----|----|-----|-----|-------|
| 97,651 | 1 | 70  | 34  | 845   | 3  | 44 | 23 | 450 | 61  | 1,409 |
| 97,652 | 1 | 81  | 58  | 991   | 7  | 48 | 46 | 509 | 112 | 1,629 |
| 97,653 | 1 | 85  | 60  | 1,247 | 7  | 49 | 49 | 561 | 117 | 1,942 |
| 97,654 | 1 | 93  | 61  | 1,279 | 7  | 52 | 50 | 590 | 119 | 2,014 |
| 97,655 | 1 | 98  | 61  | 1,309 | 7  | 55 | 51 | 602 | 120 | 2,064 |
| 97,656 | 1 | 102 | 61  | 1,321 | 7  | 56 | 52 | 607 | 121 | 2,086 |
| 97,657 | 1 | 103 | 61  | 1,343 | 7  | 59 | 52 | 613 | 121 | 2,118 |
| 97,658 | 1 | 114 | 61  | 1,425 | 7  | 65 | 50 | 694 | 119 | 2,298 |
| 97,659 | 1 | 114 | 61  | 1,444 | 7  | 66 | 50 | 697 | 119 | 2,321 |
| 97,660 | 1 | 124 | 61  | 1,476 | 7  | 66 | 50 | 711 | 119 | 2,377 |
| 97,661 | 1 | 124 | 61  | 1,475 | 7  | 66 | 50 | 711 | 119 | 2,376 |
| 97,662 | 1 | 126 | 61  | 1,486 | 7  | 66 | 52 | 712 | 121 | 2,390 |
| 97,663 | 1 | 129 | 61  | 1,496 | 7  | 67 | 52 | 718 | 121 | 2,410 |
| 97,664 | 1 | 129 | 61  | 1,501 | 7  | 67 | 52 | 718 | 121 | 2,415 |
| 97,665 | 2 | 129 | 61  | 1,505 | 7  | 67 | 51 | 718 | 121 | 2,419 |
| 97,666 | 2 | 129 | 61  | 1,507 | 7  | 66 | 51 | 719 | 121 | 2,421 |
| 97,667 | 2 | 129 | 64  | 1,508 | 7  | 66 | 51 | 720 | 124 | 2,423 |
| 97,668 | 2 | 129 | 63  | 1,507 | 7  | 66 | 55 | 721 | 127 | 2,423 |
| 97,669 | 2 | 129 | 63  | 1,508 | 7  | 66 | 55 | 723 | 127 | 2,426 |
| 97,670 | 2 | 129 | 75  | 1,511 | 9  | 66 | 66 | 723 | 152 | 2,429 |
| 97,671 | 2 | 129 | 75  | 1,512 | 10 | 66 | 66 | 722 | 153 | 2,429 |
| 97,672 | 2 | 129 | 77  | 1,513 | 11 | 66 | 68 | 722 | 158 | 2,430 |
| 97,673 | 2 | 129 | 77  | 1,513 | 11 | 66 | 68 | 722 | 158 | 2,430 |
| 97,674 | 2 | 129 | 78  | 1,513 | 11 | 65 | 68 | 720 | 159 | 2,427 |
| 97,675 | 2 | 130 | 78  | 1,521 | 11 | 65 | 68 | 742 | 159 | 2,458 |
| 97,676 | 2 | 130 | 77  | 1,517 | 11 | 66 | 68 | 741 | 158 | 2,454 |
| 97,677 | 2 | 133 | 82  | 1,549 | 11 | 68 | 72 | 771 | 167 | 2,521 |
| 97,678 | 2 | 133 | 82  | 1,545 | 11 | 68 | 71 | 763 | 166 | 2,509 |
| 97,679 | 2 | 133 | 82  | 1,530 | 12 | 68 | 71 | 730 | 167 | 2,461 |
| 97,680 | 2 | 133 | 82  | 1,517 | 12 | 67 | 71 | 717 | 167 | 2,434 |
| 97,681 | 2 | 133 | 82  | 1,516 | 12 | 66 | 70 | 715 | 166 | 2,430 |
| 97,682 | 2 | 126 | 81  | 1,496 | 13 | 65 | 71 | 700 | 167 | 2,387 |
| 97,683 | 2 | 126 | 82  | 1,497 | 13 | 65 | 71 | 702 | 168 | 2,390 |
| 97,684 | 2 | 126 | 82  | 1,484 | 13 | 64 | 70 | 698 | 167 | 2,372 |
| 97,685 | 2 | 135 | 85  | 1,532 | 13 | 67 | 70 | 724 | 170 | 2,458 |
| 97,686 | 2 | 135 | 85  | 1,535 | 13 | 67 | 70 | 730 | 170 | 2,467 |
| 97,687 | 3 | 131 | 101 | 1,383 | 14 | 61 | 74 | 671 | 192 | 2,246 |
| 97,688 | 3 | 131 | 114 | 1,390 | 16 | 61 | 93 | 675 | 226 | 2,257 |
| 97,689 | 3 | 133 | 121 | 1,411 | 17 | 61 | 94 | 693 | 235 | 2,298 |
| 97,690 | 3 | 130 | 121 | 1,335 | 17 | 56 | 94 | 667 | 235 | 2,188 |
| 97,691 | 2 | 120 | 126 | 1,271 | 17 | 53 | 99 | 641 | 244 | 2,085 |

|        |   |     |     |       |    |    |     |     |     |       |
|--------|---|-----|-----|-------|----|----|-----|-----|-----|-------|
| 97,692 | 2 | 120 | 128 | 1,259 | 17 | 52 | 101 | 638 | 248 | 2,069 |
| 97,693 | 2 | 116 | 128 | 1,237 | 17 | 46 | 101 | 603 | 248 | 2,002 |
| 97,694 | 2 | 116 | 128 | 1,237 | 17 | 46 | 101 | 602 | 248 | 2,001 |
| 97,695 | 2 | 103 | 128 | 1,107 | 17 | 43 | 105 | 531 | 252 | 1,784 |
| 97,696 | 2 | 101 | 125 | 1,100 | 17 | 43 | 103 | 530 | 247 | 1,774 |
| 97,697 | 3 | 102 | 125 | 1,124 | 17 | 46 | 104 | 532 | 249 | 1,804 |
| 97,698 | 3 | 92  | 113 | 1,127 | 17 | 46 | 93  | 517 | 226 | 1,782 |
| 97,699 | 3 | 102 | 112 | 1,203 | 17 | 49 | 93  | 542 | 225 | 1,896 |
| 97,700 | 3 | 104 | 110 | 1,223 | 17 | 47 | 93  | 533 | 223 | 1,907 |
| 97,701 | 3 | 107 | 110 | 1,306 | 16 | 47 | 91  | 544 | 220 | 2,004 |
| 97,702 | 3 | 108 | 102 | 1,359 | 15 | 43 | 92  | 531 | 212 | 2,041 |
| 97,703 | 3 | 103 | 78  | 1,272 | 11 | 40 | 70  | 487 | 162 | 1,902 |
| 97,704 | 3 | 99  | 75  | 1,028 | 11 | 38 | 67  | 439 | 156 | 1,604 |
| 97,705 | 4 | 92  | 79  | 1,004 | 11 | 36 | 74  | 411 | 168 | 1,543 |
| 97,706 | 4 | 89  | 79  | 982   | 11 | 33 | 73  | 398 | 167 | 1,502 |
| 97,707 | 4 | 89  | 80  | 970   | 11 | 31 | 74  | 403 | 169 | 1,493 |
| 97,708 | 4 | 89  | 80  | 981   | 11 | 31 | 74  | 416 | 169 | 1,517 |
| 97,709 | 4 | 82  | 80  | 964   | 11 | 26 | 75  | 352 | 170 | 1,424 |
| 97,710 | 4 | 93  | 82  | 1,097 | 11 | 27 | 75  | 400 | 172 | 1,617 |
| 97,711 | 4 | 91  | 82  | 1,193 | 11 | 29 | 75  | 414 | 172 | 1,727 |
| 97,712 | 4 | 91  | 82  | 1,199 | 11 | 29 | 74  | 414 | 171 | 1,733 |
| 97,713 | 4 | 90  | 82  | 1,196 | 11 | 29 | 74  | 411 | 171 | 1,726 |
| 97,714 | 3 | 87  | 82  | 1,196 | 11 | 28 | 74  | 404 | 170 | 1,715 |
| 97,715 | 3 | 87  | 82  | 1,191 | 11 | 28 | 74  | 405 | 170 | 1,711 |
| 97,716 | 3 | 87  | 82  | 1,187 | 11 | 28 | 74  | 407 | 170 | 1,709 |
| 97,717 | 3 | 87  | 82  | 1,187 | 11 | 28 | 74  | 408 | 170 | 1,710 |
| 97,718 | 3 | 87  | 79  | 1,189 | 11 | 28 | 74  | 411 | 167 | 1,715 |
| 97,719 | 3 | 87  | 78  | 1,192 | 11 | 28 | 70  | 410 | 162 | 1,717 |
| 97,720 | 3 | 87  | 79  | 1,200 | 11 | 28 | 70  | 415 | 163 | 1,730 |
| 97,721 | 3 | 87  | 67  | 1,206 | 9  | 28 | 59  | 416 | 138 | 1,737 |
| 97,722 | 3 | 87  | 67  | 1,207 | 8  | 28 | 59  | 418 | 137 | 1,740 |
| 97,723 | 3 | 87  | 65  | 1,206 | 7  | 28 | 57  | 417 | 132 | 1,738 |
| 97,724 | 3 | 87  | 65  | 1,207 | 7  | 28 | 57  | 414 | 132 | 1,736 |
| 97,725 | 3 | 88  | 66  | 1,210 | 7  | 28 | 57  | 416 | 133 | 1,742 |
| 97,726 | 3 | 87  | 61  | 1,201 | 7  | 27 | 53  | 394 | 124 | 1,709 |
| 97,727 | 4 | 87  | 61  | 1,204 | 8  | 27 | 53  | 394 | 126 | 1,712 |
| 97,728 | 4 | 85  | 62  | 1,169 | 8  | 25 | 53  | 358 | 127 | 1,637 |
| 97,729 | 4 | 82  | 63  | 1,162 | 7  | 25 | 55  | 357 | 129 | 1,626 |
| 97,730 | 4 | 82  | 63  | 1,161 | 7  | 25 | 55  | 352 | 129 | 1,620 |
| 97,731 | 5 | 82  | 64  | 1,161 | 7  | 25 | 57  | 352 | 133 | 1,620 |
| 97,732 | 5 | 82  | 64  | 1,162 | 9  | 25 | 56  | 351 | 134 | 1,620 |



|        |   |     |    |       |   |    |    |     |     |       |
|--------|---|-----|----|-------|---|----|----|-----|-----|-------|
| 97,733 | 5 | 82  | 64 | 1,160 | 9 | 25 | 56 | 351 | 134 | 1,618 |
| 97,734 | 5 | 82  | 64 | 1,163 | 9 | 26 | 56 | 349 | 134 | 1,620 |
| 97,735 | 5 | 81  | 64 | 1,176 | 9 | 29 | 56 | 360 | 134 | 1,646 |
| 97,736 | 5 | 77  | 61 | 1,459 | 9 | 32 | 56 | 399 | 131 | 1,967 |
| 97,737 | 5 | 91  | 59 | 1,541 | 9 | 40 | 56 | 470 | 129 | 2,142 |
| 97,738 | 4 | 98  | 44 | 1,572 | 7 | 43 | 52 | 473 | 107 | 2,186 |
| 97,739 | 4 | 106 | 30 | 1,622 | 5 | 51 | 33 | 492 | 72  | 2,271 |
| 97,740 | 4 | 112 | 24 | 1,676 | 4 | 55 | 32 | 505 | 64  | 2,348 |
| 97,741 | 4 | 123 | 19 | 1,735 | 4 | 59 | 27 | 552 | 54  | 2,469 |
| 97,742 | 4 | 123 | 17 | 1,739 | 4 | 59 | 25 | 556 | 50  | 2,477 |
| 97,743 | 4 | 161 | 18 | 1,821 | 4 | 68 | 22 | 606 | 48  | 2,656 |
| 97,744 | 4 | 161 | 18 | 1,823 | 4 | 69 | 22 | 611 | 48  | 2,664 |
| 97,745 | 4 | 162 | 18 | 1,827 | 4 | 69 | 21 | 612 | 47  | 2,670 |
| 97,746 | 4 | 162 | 21 | 1,831 | 4 | 70 | 21 | 611 | 50  | 2,674 |
| 97,747 | 4 | 162 | 21 | 1,838 | 4 | 72 | 21 | 615 | 50  | 2,687 |
| 97,748 | 3 | 161 | 22 | 1,819 | 4 | 69 | 20 | 612 | 49  | 2,661 |
| 97,749 | 3 | 150 | 22 | 1,706 | 4 | 65 | 20 | 590 | 49  | 2,511 |
| 97,750 | 3 | 152 | 22 | 1,714 | 4 | 65 | 20 | 590 | 49  | 2,521 |
| 97,751 | 3 | 146 | 22 | 1,639 | 4 | 65 | 19 | 577 | 48  | 2,427 |
| 97,752 | 3 | 145 | 22 | 1,546 | 4 | 67 | 19 | 561 | 48  | 2,319 |
| 97,753 | 3 | 161 | 22 | 1,548 | 4 | 70 | 18 | 622 | 47  | 2,401 |
| 97,754 | 3 | 157 | 23 | 1,493 | 4 | 69 | 17 | 608 | 47  | 2,327 |
| 97,755 | 3 | 157 | 22 | 1,501 | 4 | 69 | 13 | 611 | 42  | 2,338 |
| 97,756 | 2 | 162 | 19 | 1,552 | 4 | 70 | 10 | 620 | 35  | 2,404 |
| 97,757 | 2 | 163 | 20 | 1,554 | 4 | 71 | 10 | 617 | 36  | 2,405 |
| 97,758 | 2 | 185 | 19 | 1,602 | 4 | 71 | 9  | 631 | 34  | 2,489 |
| 97,759 | 2 | 185 | 19 | 1,609 | 4 | 71 | 8  | 633 | 33  | 2,498 |
| 97,760 | 2 | 182 | 19 | 1,569 | 4 | 71 | 8  | 623 | 33  | 2,445 |
| 97,761 | 2 | 173 | 20 | 1,427 | 4 | 71 | 7  | 574 | 33  | 2,245 |
| 97,762 | 2 | 166 | 21 | 1,295 | 4 | 69 | 7  | 546 | 34  | 2,076 |
| 97,763 | 2 | 177 | 21 | 1,330 | 4 | 70 | 7  | 558 | 34  | 2,135 |
| 97,764 | 2 | 177 | 21 | 1,341 | 4 | 71 | 7  | 559 | 34  | 2,148 |
| 97,765 | 2 | 178 | 21 | 1,330 | 4 | 71 | 7  | 559 | 34  | 2,138 |
| 97,766 | 2 | 178 | 21 | 1,333 | 4 | 71 | 7  | 558 | 34  | 2,140 |
| 97,767 | 2 | 180 | 21 | 1,338 | 4 | 71 | 7  | 554 | 34  | 2,143 |
| 97,768 | 2 | 180 | 21 | 1,340 | 4 | 71 | 7  | 554 | 34  | 2,145 |
| 97,769 | 2 | 180 | 21 | 1,337 | 4 | 71 | 8  | 551 | 35  | 2,139 |
| 97,770 | 2 | 180 | 21 | 1,332 | 4 | 71 | 8  | 549 | 35  | 2,132 |
| 97,771 | 2 | 180 | 20 | 1,324 | 4 | 71 | 9  | 544 | 35  | 2,119 |
| 97,772 | 2 | 180 | 21 | 1,315 | 5 | 71 | 10 | 543 | 38  | 2,109 |
| 97,773 | 2 | 179 | 21 | 1,310 | 5 | 71 | 10 | 539 | 38  | 2,099 |

|        |   |     |    |       |   |    |    |     |    |       |
|--------|---|-----|----|-------|---|----|----|-----|----|-------|
| 97,774 | 2 | 179 | 21 | 1,312 | 5 | 71 | 10 | 539 | 38 | 2,101 |
| 97,775 | 2 | 179 | 20 | 1,313 | 5 | 71 | 10 | 540 | 37 | 2,103 |
| 97,776 | 2 | 179 | 19 | 1,319 | 5 | 71 | 10 | 544 | 36 | 2,113 |
| 97,777 | 2 | 186 | 19 | 1,376 | 5 | 73 | 10 | 608 | 36 | 2,243 |
| 97,778 | 1 | 187 | 19 | 1,429 | 4 | 73 | 10 | 618 | 34 | 2,307 |
| 97,779 | 1 | 189 | 18 | 1,453 | 4 | 74 | 10 | 625 | 33 | 2,341 |
| 97,780 | 1 | 194 | 17 | 1,483 | 4 | 75 | 8  | 663 | 30 | 2,415 |
| 97,781 | 1 | 194 | 16 | 1,483 | 4 | 75 | 8  | 664 | 29 | 2,416 |
| 97,782 | 0 | 194 | 17 | 1,493 | 4 | 75 | 6  | 682 | 27 | 2,444 |
| 97,783 | 0 | 195 | 17 | 1,502 | 1 | 76 | 6  | 684 | 24 | 2,457 |
| 97,784 | 0 | 196 | 16 | 1,512 | 1 | 77 | 7  | 688 | 24 | 2,473 |
| 97,785 | 0 | 199 | 16 | 1,533 | 1 | 76 | 7  | 696 | 24 | 2,504 |
| 97,786 | 0 | 199 | 16 | 1,517 | 1 | 73 | 7  | 690 | 24 | 2,479 |
| 97,787 | 0 | 194 | 18 | 1,203 | 1 | 67 | 7  | 628 | 26 | 2,092 |
| 97,788 | 0 | 181 | 18 | 1,127 | 1 | 59 | 7  | 556 | 26 | 1,923 |
| 97,789 | 0 | 170 | 19 | 1,078 | 1 | 56 | 7  | 539 | 27 | 1,843 |
| 97,790 | 0 | 162 | 19 | 1,026 | 1 | 48 | 8  | 516 | 28 | 1,752 |
| 97,791 | 0 | 156 | 19 | 966   | 1 | 44 | 8  | 496 | 28 | 1,662 |
| 97,792 | 0 | 145 | 18 | 912   | 1 | 40 | 8  | 455 | 27 | 1,552 |
| 97,793 | 0 | 149 | 18 | 997   | 1 | 43 | 8  | 559 | 27 | 1,748 |
| 97,794 | 0 | 111 | 18 | 919   | 1 | 34 | 8  | 511 | 27 | 1,575 |
| 97,795 | 0 | 112 | 18 | 923   | 1 | 36 | 9  | 522 | 28 | 1,593 |
| 97,796 | 0 | 117 | 15 | 1,004 | 1 | 36 | 9  | 548 | 25 | 1,705 |
| 97,797 | 0 | 118 | 15 | 1,007 | 1 | 35 | 9  | 553 | 25 | 1,713 |
| 97,798 | 0 | 119 | 14 | 1,015 | 1 | 34 | 10 | 555 | 25 | 1,723 |
| 97,799 | 0 | 119 | 16 | 1,005 | 1 | 34 | 10 | 550 | 27 | 1,708 |
| 97,800 | 2 | 130 | 21 | 1,044 | 1 | 34 | 12 | 568 | 36 | 1,776 |
| 97,801 | 2 | 127 | 20 | 1,031 | 1 | 34 | 12 | 565 | 35 | 1,757 |
| 97,802 | 2 | 127 | 22 | 1,041 | 2 | 35 | 12 | 567 | 38 | 1,770 |
| 97,803 | 2 | 125 | 22 | 1,042 | 2 | 33 | 12 | 568 | 38 | 1,768 |
| 97,804 | 2 | 105 | 26 | 890   | 2 | 28 | 13 | 483 | 43 | 1,506 |
| 97,805 | 2 | 106 | 25 | 936   | 2 | 31 | 13 | 517 | 42 | 1,590 |
| 97,806 | 2 | 106 | 24 | 930   | 2 | 31 | 12 | 513 | 40 | 1,580 |
| 97,807 | 2 | 100 | 25 | 874   | 3 | 29 | 15 | 504 | 45 | 1,507 |
| 97,808 | 2 | 96  | 24 | 863   | 3 | 28 | 15 | 501 | 44 | 1,488 |
| 97,809 | 2 | 70  | 24 | 772   | 3 | 27 | 14 | 453 | 43 | 1,322 |
| 97,810 | 2 | 70  | 25 | 776   | 3 | 27 | 14 | 453 | 44 | 1,326 |
| 97,811 | 2 | 69  | 22 | 757   | 3 | 26 | 14 | 451 | 41 | 1,303 |
| 97,812 | 2 | 54  | 22 | 692   | 3 | 22 | 14 | 435 | 41 | 1,203 |
| 97,813 | 2 | 54  | 21 | 693   | 3 | 22 | 14 | 437 | 40 | 1,206 |
| 97,814 | 2 | 54  | 21 | 693   | 3 | 22 | 14 | 437 | 40 | 1,206 |

|        |   |    |    |       |   |    |    |     |    |       |
|--------|---|----|----|-------|---|----|----|-----|----|-------|
| 97,815 | 2 | 53 | 21 | 694   | 3 | 22 | 14 | 437 | 40 | 1,206 |
| 97,816 | 2 | 53 | 23 | 694   | 3 | 22 | 14 | 437 | 42 | 1,206 |
| 97,817 | 2 | 51 | 23 | 690   | 3 | 23 | 16 | 439 | 44 | 1,203 |
| 97,818 | 2 | 52 | 23 | 691   | 3 | 23 | 17 | 439 | 45 | 1,205 |
| 97,819 | 2 | 52 | 25 | 692   | 3 | 23 | 22 | 439 | 52 | 1,206 |
| 97,820 | 2 | 57 | 25 | 743   | 3 | 27 | 22 | 490 | 52 | 1,317 |
| 97,821 | 2 | 59 | 25 | 803   | 3 | 32 | 21 | 525 | 51 | 1,419 |
| 97,822 | 2 | 63 | 25 | 963   | 2 | 36 | 20 | 555 | 49 | 1,617 |
| 97,823 | 2 | 66 | 26 | 1,002 | 2 | 41 | 20 | 573 | 50 | 1,682 |
| 97,824 | 2 | 70 | 29 | 1,057 | 2 | 42 | 20 | 586 | 53 | 1,755 |
| 97,825 | 2 | 73 | 29 | 1,074 | 2 | 42 | 20 | 591 | 53 | 1,780 |
| 97,826 | 2 | 73 | 29 | 1,073 | 2 | 42 | 20 | 592 | 53 | 1,780 |
| 97,827 | 2 | 74 | 30 | 1,069 | 2 | 42 | 20 | 588 | 54 | 1,773 |
| 97,828 | 2 | 66 | 30 | 1,011 | 2 | 40 | 20 | 523 | 54 | 1,640 |
| 97,829 | 2 | 65 | 31 | 959   | 2 | 40 | 20 | 513 | 55 | 1,577 |
| 97,830 | 2 | 63 | 32 | 935   | 2 | 39 | 20 | 506 | 56 | 1,543 |
| 97,831 | 2 | 58 | 32 | 906   | 2 | 38 | 20 | 468 | 56 | 1,470 |
| 97,832 | 2 | 58 | 31 | 906   | 2 | 38 | 20 | 467 | 55 | 1,469 |
| 97,833 | 2 | 57 | 30 | 886   | 2 | 37 | 20 | 447 | 54 | 1,427 |
| 97,834 | 2 | 57 | 30 | 887   | 2 | 37 | 20 | 448 | 54 | 1,429 |
| 97,835 | 2 | 53 | 30 | 855   | 2 | 36 | 19 | 433 | 53 | 1,377 |
| 97,836 | 2 | 53 | 30 | 861   | 2 | 36 | 19 | 436 | 53 | 1,386 |
| 97,837 | 2 | 53 | 29 | 874   | 2 | 36 | 19 | 434 | 52 | 1,397 |
| 97,838 | 2 | 53 | 28 | 860   | 2 | 36 | 19 | 431 | 51 | 1,380 |
| 97,839 | 2 | 53 | 27 | 863   | 2 | 37 | 20 | 440 | 51 | 1,393 |
| 97,840 | 2 | 53 | 27 | 861   | 2 | 38 | 19 | 442 | 50 | 1,394 |
| 97,841 | 2 | 54 | 27 | 872   | 2 | 38 | 19 | 448 | 50 | 1,412 |
| 97,842 | 2 | 55 | 27 | 897   | 2 | 38 | 19 | 452 | 50 | 1,442 |
| 97,843 | 2 | 57 | 27 | 894   | 2 | 38 | 19 | 451 | 50 | 1,440 |
| 97,844 | 2 | 53 | 27 | 789   | 2 | 35 | 19 | 343 | 50 | 1,220 |
| 97,845 | 3 | 52 | 28 | 779   | 2 | 35 | 19 | 343 | 52 | 1,209 |
| 97,846 | 3 | 46 | 28 | 672   | 2 | 32 | 18 | 296 | 51 | 1,046 |
| 97,847 | 3 | 46 | 28 | 671   | 2 | 32 | 18 | 297 | 51 | 1,046 |
| 97,848 | 3 | 45 | 29 | 666   | 2 | 32 | 17 | 292 | 51 | 1,035 |
| 97,849 | 5 | 44 | 30 | 653   | 2 | 31 | 19 | 286 | 56 | 1,014 |
| 97,850 | 5 | 45 | 32 | 666   | 2 | 31 | 22 | 299 | 61 | 1,041 |
| 97,851 | 3 | 35 | 28 | 637   | 2 | 31 | 20 | 281 | 53 | 984   |
| 97,852 | 3 | 35 | 33 | 666   | 2 | 31 | 20 | 317 | 58 | 1,049 |
| 97,853 | 3 | 34 | 36 | 652   | 1 | 29 | 22 | 324 | 62 | 1,039 |
| 97,854 | 3 | 44 | 36 | 873   | 1 | 35 | 22 | 419 | 62 | 1,371 |
| 97,855 | 3 | 44 | 33 | 911   | 1 | 36 | 20 | 430 | 57 | 1,421 |

|        |   |    |    |       |   |    |    |     |    |       |
|--------|---|----|----|-------|---|----|----|-----|----|-------|
| 97,856 | 3 | 41 | 35 | 866   | 1 | 32 | 20 | 401 | 59 | 1,340 |
| 97,857 | 3 | 43 | 35 | 926   | 1 | 35 | 20 | 426 | 59 | 1,430 |
| 97,858 | 3 | 45 | 34 | 955   | 0 | 37 | 17 | 449 | 54 | 1,486 |
| 97,859 | 3 | 45 | 35 | 971   | 0 | 37 | 17 | 453 | 55 | 1,506 |
| 97,860 | 3 | 45 | 36 | 972   | 0 | 36 | 17 | 452 | 56 | 1,505 |
| 97,861 | 3 | 46 | 35 | 969   | 0 | 36 | 17 | 450 | 55 | 1,501 |
| 97,862 | 3 | 46 | 35 | 970   | 0 | 36 | 17 | 450 | 55 | 1,502 |
| 97,863 | 3 | 46 | 35 | 964   | 0 | 36 | 18 | 445 | 56 | 1,491 |
| 97,864 | 3 | 46 | 35 | 964   | 0 | 36 | 18 | 445 | 56 | 1,491 |
| 97,865 | 3 | 46 | 35 | 966   | 0 | 36 | 18 | 447 | 56 | 1,495 |
| 97,866 | 3 | 46 | 35 | 966   | 0 | 36 | 18 | 447 | 56 | 1,495 |
| 97,867 | 3 | 46 | 33 | 958   | 0 | 35 | 18 | 445 | 54 | 1,484 |
| 97,868 | 3 | 45 | 33 | 956   | 0 | 35 | 16 | 445 | 52 | 1,481 |
| 97,869 | 3 | 45 | 33 | 959   | 0 | 35 | 15 | 445 | 51 | 1,484 |
| 97,870 | 3 | 45 | 31 | 968   | 0 | 36 | 9  | 451 | 43 | 1,500 |
| 97,871 | 3 | 40 | 30 | 925   | 0 | 32 | 9  | 401 | 42 | 1,398 |
| 97,872 | 3 | 38 | 32 | 897   | 0 | 28 | 9  | 372 | 44 | 1,335 |
| 97,873 | 3 | 39 | 32 | 788   | 0 | 35 | 9  | 363 | 44 | 1,225 |
| 97,874 | 3 | 38 | 31 | 849   | 0 | 35 | 9  | 370 | 43 | 1,292 |
| 97,875 | 3 | 34 | 28 | 815   | 0 | 35 | 9  | 362 | 40 | 1,246 |
| 97,876 | 3 | 31 | 29 | 814   | 0 | 37 | 9  | 365 | 41 | 1,247 |
| 97,877 | 3 | 36 | 28 | 830   | 0 | 37 | 9  | 365 | 40 | 1,268 |
| 97,878 | 3 | 35 | 28 | 829   | 0 | 37 | 10 | 365 | 41 | 1,266 |
| 97,879 | 3 | 35 | 29 | 825   | 0 | 37 | 10 | 367 | 42 | 1,264 |
| 97,880 | 3 | 35 | 28 | 829   | 0 | 38 | 10 | 368 | 41 | 1,270 |
| 97,881 | 3 | 35 | 28 | 832   | 0 | 38 | 10 | 369 | 41 | 1,274 |
| 97,882 | 3 | 36 | 31 | 840   | 0 | 38 | 11 | 380 | 45 | 1,294 |
| 97,883 | 3 | 36 | 31 | 857   | 0 | 38 | 11 | 394 | 45 | 1,325 |
| 97,884 | 3 | 53 | 31 | 999   | 0 | 54 | 11 | 528 | 45 | 1,634 |
| 97,885 | 3 | 54 | 31 | 1,025 | 0 | 54 | 11 | 540 | 45 | 1,673 |
| 97,886 | 3 | 57 | 31 | 1,086 | 0 | 56 | 11 | 571 | 45 | 1,770 |
| 97,887 | 4 | 83 | 31 | 1,296 | 0 | 62 | 11 | 636 | 46 | 2,077 |
| 97,888 | 4 | 92 | 31 | 1,364 | 0 | 66 | 11 | 679 | 46 | 2,201 |
| 97,889 | 4 | 91 | 31 | 1,363 | 0 | 66 | 11 | 674 | 46 | 2,194 |
| 97,890 | 4 | 91 | 31 | 1,371 | 0 | 65 | 10 | 672 | 45 | 2,199 |
| 97,891 | 4 | 90 | 31 | 1,366 | 0 | 65 | 10 | 665 | 45 | 2,186 |
| 97,892 | 4 | 94 | 31 | 1,358 | 0 | 66 | 10 | 661 | 45 | 2,179 |
| 97,893 | 4 | 94 | 31 | 1,358 | 0 | 66 | 10 | 660 | 45 | 2,178 |
| 97,894 | 4 | 92 | 31 | 1,360 | 0 | 66 | 10 | 657 | 45 | 2,175 |
| 97,895 | 3 | 92 | 30 | 1,367 | 0 | 66 | 10 | 660 | 43 | 2,185 |
| 97,896 | 3 | 93 | 30 | 1,386 | 0 | 69 | 10 | 665 | 43 | 2,213 |

|        |   |     |    |       |   |     |    |       |    |       |
|--------|---|-----|----|-------|---|-----|----|-------|----|-------|
| 97,897 | 3 | 125 | 30 | 1,682 | 0 | 83  | 10 | 912   | 43 | 2,802 |
| 97,898 | 3 | 125 | 29 | 1,697 | 0 | 84  | 10 | 917   | 42 | 2,823 |
| 97,899 | 2 | 126 | 28 | 1,735 | 0 | 86  | 8  | 945   | 38 | 2,892 |
| 97,900 | 2 | 129 | 27 | 1,816 | 0 | 98  | 7  | 1,040 | 36 | 3,083 |
| 97,901 | 2 | 135 | 24 | 1,917 | 0 | 104 | 5  | 1,062 | 31 | 3,218 |
| 97,902 | 2 | 138 | 23 | 1,978 | 0 | 107 | 5  | 1,093 | 30 | 3,316 |
| 97,903 | 2 | 142 | 18 | 1,978 | 0 | 109 | 5  | 1,069 | 25 | 3,298 |
| 97,904 | 2 | 142 | 13 | 1,971 | 0 | 108 | 3  | 1,051 | 18 | 3,272 |
| 97,905 | 2 | 132 | 13 | 1,713 | 0 | 101 | 3  | 948   | 18 | 2,894 |
| 97,906 | 2 | 131 | 13 | 1,635 | 0 | 98  | 3  | 911   | 18 | 2,775 |
| 97,907 | 2 | 133 | 11 | 1,663 | 0 | 100 | 3  | 934   | 16 | 2,830 |
| 97,908 | 2 | 133 | 11 | 1,692 | 0 | 101 | 3  | 952   | 16 | 2,878 |
| 97,909 | 2 | 131 | 10 | 1,665 | 0 | 100 | 3  | 933   | 15 | 2,829 |
| 97,910 | 2 | 133 | 9  | 1,689 | 1 | 104 | 3  | 981   | 15 | 2,907 |
| 97,911 | 2 | 141 | 9  | 1,712 | 1 | 107 | 3  | 1,016 | 15 | 2,976 |
| 97,912 | 2 | 140 | 9  | 1,705 | 1 | 107 | 3  | 1,016 | 15 | 2,968 |
| 97,913 | 2 | 142 | 9  | 1,719 | 1 | 107 | 3  | 1,020 | 15 | 2,988 |
| 97,914 | 2 | 148 | 9  | 1,735 | 1 | 107 | 2  | 1,026 | 14 | 3,016 |
| 97,915 | 2 | 149 | 9  | 1,737 | 1 | 107 | 2  | 1,028 | 14 | 3,021 |
| 97,916 | 2 | 149 | 9  | 1,740 | 1 | 107 | 2  | 1,028 | 14 | 3,024 |
| 97,917 | 3 | 153 | 9  | 1,736 | 1 | 108 | 2  | 1,029 | 15 | 3,026 |
| 97,918 | 3 | 153 | 9  | 1,738 | 1 | 108 | 2  | 1,031 | 15 | 3,030 |
| 97,919 | 3 | 153 | 10 | 1,739 | 1 | 108 | 2  | 1,031 | 16 | 3,031 |
| 97,920 | 3 | 153 | 10 | 1,741 | 1 | 108 | 2  | 1,031 | 16 | 3,033 |
| 97,921 | 3 | 153 | 13 | 1,742 | 1 | 108 | 2  | 1,032 | 19 | 3,035 |
| 97,922 | 3 | 153 | 11 | 1,704 | 1 | 107 | 2  | 1,026 | 17 | 2,990 |
| 97,923 | 3 | 153 | 11 | 1,703 | 1 | 107 | 2  | 1,026 | 17 | 2,989 |
| 97,924 | 3 | 146 | 12 | 1,553 | 1 | 91  | 2  | 981   | 18 | 2,771 |
| 97,925 | 3 | 146 | 12 | 1,554 | 1 | 91  | 3  | 981   | 19 | 2,772 |
| 97,926 | 3 | 147 | 12 | 1,535 | 1 | 90  | 3  | 976   | 19 | 2,748 |
| 97,927 | 3 | 142 | 14 | 1,502 | 2 | 88  | 4  | 967   | 23 | 2,699 |
| 97,928 | 3 | 142 | 14 | 1,503 | 2 | 88  | 4  | 967   | 23 | 2,700 |
| 97,929 | 3 | 142 | 26 | 1,502 | 3 | 88  | 4  | 968   | 36 | 2,700 |
| 97,930 | 4 | 142 | 27 | 1,498 | 3 | 87  | 5  | 965   | 39 | 2,692 |
| 97,931 | 4 | 142 | 27 | 1,495 | 3 | 87  | 5  | 964   | 39 | 2,688 |
| 97,932 | 4 | 142 | 32 | 1,495 | 3 | 87  | 6  | 964   | 45 | 2,688 |
| 97,933 | 4 | 141 | 30 | 1,469 | 3 | 87  | 9  | 940   | 46 | 2,637 |
| 97,934 | 4 | 124 | 31 | 1,327 | 3 | 71  | 9  | 806   | 47 | 2,328 |
| 97,935 | 4 | 124 | 31 | 1,327 | 3 | 71  | 9  | 806   | 47 | 2,328 |
| 97,936 | 4 | 123 | 31 | 1,301 | 3 | 71  | 9  | 792   | 47 | 2,287 |
| 97,937 | 4 | 120 | 31 | 1,240 | 3 | 69  | 9  | 761   | 47 | 2,190 |

|        |   |     |    |       |   |    |    |     |    |       |
|--------|---|-----|----|-------|---|----|----|-----|----|-------|
| 97,938 | 3 | 85  | 35 | 943   | 3 | 60 | 9  | 649 | 50 | 1,737 |
| 97,939 | 3 | 85  | 35 | 943   | 3 | 60 | 9  | 649 | 50 | 1,737 |
| 97,940 | 3 | 85  | 36 | 938   | 3 | 60 | 9  | 649 | 51 | 1,732 |
| 97,941 | 3 | 85  | 36 | 915   | 3 | 58 | 9  | 639 | 51 | 1,697 |
| 97,942 | 3 | 80  | 37 | 897   | 3 | 57 | 9  | 635 | 52 | 1,669 |
| 97,943 | 3 | 80  | 38 | 898   | 4 | 57 | 9  | 635 | 54 | 1,670 |
| 97,944 | 3 | 80  | 38 | 899   | 4 | 57 | 9  | 639 | 54 | 1,675 |
| 97,945 | 3 | 80  | 39 | 895   | 4 | 57 | 9  | 640 | 55 | 1,672 |
| 97,946 | 3 | 80  | 39 | 892   | 4 | 58 | 9  | 640 | 55 | 1,670 |
| 97,947 | 2 | 79  | 39 | 873   | 4 | 55 | 9  | 634 | 54 | 1,641 |
| 97,948 | 2 | 46  | 39 | 567   | 4 | 40 | 10 | 387 | 55 | 1,040 |
| 97,949 | 2 | 46  | 39 | 569   | 4 | 40 | 10 | 393 | 55 | 1,048 |
| 97,950 | 2 | 43  | 39 | 447   | 4 | 27 | 10 | 269 | 55 | 786   |
| 97,951 | 2 | 43  | 39 | 447   | 4 | 27 | 10 | 273 | 55 | 790   |
| 97,952 | 2 | 30  | 39 | 244   | 4 | 18 | 10 | 212 | 55 | 504   |
| 97,953 | 2 | 66  | 39 | 635   | 4 | 50 | 10 | 527 | 55 | 1,278 |
| 97,954 | 2 | 68  | 39 | 672   | 4 | 51 | 10 | 540 | 55 | 1,331 |
| 97,955 | 2 | 73  | 39 | 763   | 4 | 53 | 10 | 591 | 55 | 1,480 |
| 97,956 | 2 | 81  | 39 | 804   | 4 | 53 | 10 | 619 | 55 | 1,557 |
| 97,957 | 2 | 82  | 38 | 802   | 4 | 53 | 10 | 619 | 54 | 1,556 |
| 97,958 | 2 | 135 | 38 | 967   | 4 | 63 | 10 | 726 | 54 | 1,891 |
| 97,959 | 2 | 142 | 37 | 1,046 | 4 | 67 | 10 | 770 | 53 | 2,025 |
| 97,960 | 2 | 142 | 39 | 1,084 | 3 | 67 | 10 | 778 | 54 | 2,071 |
| 97,961 | 2 | 140 | 40 | 1,054 | 4 | 64 | 10 | 740 | 56 | 1,998 |
| 97,962 | 3 | 133 | 42 | 1,067 | 4 | 63 | 11 | 716 | 60 | 1,979 |
| 97,963 | 3 | 138 | 42 | 1,112 | 4 | 63 | 12 | 742 | 61 | 2,055 |
| 97,964 | 3 | 136 | 42 | 1,098 | 4 | 63 | 12 | 738 | 61 | 2,035 |
| 97,965 | 3 | 131 | 42 | 1,107 | 4 | 63 | 12 | 737 | 61 | 2,038 |
| 97,966 | 3 | 130 | 44 | 1,104 | 4 | 63 | 12 | 735 | 63 | 2,032 |
| 97,967 | 2 | 130 | 49 | 1,103 | 4 | 63 | 15 | 738 | 70 | 2,034 |
| 97,968 | 2 | 127 | 49 | 1,100 | 4 | 61 | 15 | 730 | 70 | 2,018 |
| 97,969 | 2 | 127 | 49 | 1,098 | 4 | 61 | 15 | 728 | 70 | 2,014 |
| 97,970 | 2 | 127 | 49 | 1,099 | 4 | 61 | 15 | 728 | 70 | 2,015 |
| 97,971 | 2 | 127 | 47 | 1,096 | 4 | 61 | 15 | 727 | 68 | 2,011 |
| 97,972 | 3 | 127 | 47 | 1,093 | 4 | 61 | 15 | 727 | 69 | 2,008 |
| 97,973 | 3 | 127 | 47 | 1,093 | 4 | 61 | 15 | 727 | 69 | 2,008 |
| 97,974 | 3 | 127 | 46 | 1,092 | 4 | 61 | 15 | 726 | 68 | 2,006 |
| 97,975 | 3 | 127 | 46 | 1,093 | 4 | 61 | 15 | 728 | 68 | 2,009 |
| 97,976 | 3 | 126 | 46 | 1,096 | 4 | 61 | 14 | 730 | 67 | 2,013 |
| 97,977 | 3 | 126 | 46 | 1,115 | 4 | 61 | 14 | 743 | 67 | 2,045 |
| 97,978 | 3 | 127 | 43 | 1,157 | 3 | 62 | 13 | 818 | 62 | 2,164 |

|        |   |     |    |       |   |    |    |     |    |       |
|--------|---|-----|----|-------|---|----|----|-----|----|-------|
| 97,979 | 3 | 127 | 35 | 1,164 | 2 | 62 | 12 | 826 | 52 | 2,179 |
| 97,980 | 3 | 130 | 32 | 1,223 | 2 | 70 | 12 | 858 | 49 | 2,281 |
| 97,981 | 2 | 130 | 30 | 1,233 | 2 | 70 | 11 | 859 | 45 | 2,292 |
| 97,982 | 2 | 131 | 29 | 1,236 | 2 | 71 | 11 | 862 | 44 | 2,300 |
| 97,983 | 2 | 131 | 24 | 1,242 | 2 | 71 | 10 | 863 | 38 | 2,307 |
| 97,984 | 2 | 131 | 23 | 1,246 | 2 | 71 | 6  | 868 | 33 | 2,316 |
| 97,985 | 2 | 133 | 22 | 1,310 | 2 | 75 | 6  | 898 | 32 | 2,416 |
| 97,986 | 2 | 134 | 22 | 1,334 | 2 | 77 | 6  | 919 | 32 | 2,464 |
| 97,987 | 2 | 135 | 22 | 1,340 | 2 | 77 | 6  | 920 | 32 | 2,472 |
| 97,988 | 2 | 137 | 21 | 1,341 | 2 | 77 | 6  | 920 | 31 | 2,475 |
| 97,989 | 2 | 137 | 18 | 1,343 | 2 | 76 | 6  | 920 | 28 | 2,476 |
| 97,990 | 2 | 137 | 18 | 1,348 | 2 | 76 | 6  | 921 | 28 | 2,482 |
| 97,991 | 2 | 137 | 17 | 1,348 | 2 | 76 | 6  | 921 | 27 | 2,482 |
| 97,992 | 2 | 137 | 17 | 1,355 | 2 | 76 | 7  | 924 | 28 | 2,492 |
| 97,993 | 2 | 137 | 16 | 1,359 | 2 | 76 | 7  | 926 | 27 | 2,498 |
| 97,994 | 2 | 137 | 15 | 1,360 | 1 | 75 | 7  | 925 | 25 | 2,497 |
| 97,995 | 2 | 138 | 14 | 1,359 | 1 | 75 | 7  | 921 | 24 | 2,493 |
| 97,996 | 3 | 138 | 14 | 1,355 | 1 | 74 | 7  | 915 | 25 | 2,482 |
| 97,997 | 3 | 138 | 14 | 1,357 | 1 | 74 | 7  | 910 | 25 | 2,479 |
| 97,998 | 3 | 138 | 14 | 1,352 | 1 | 74 | 6  | 908 | 24 | 2,472 |
| 97,999 | 4 | 138 | 14 | 1,349 | 1 | 74 | 6  | 908 | 25 | 2,469 |
| 98,000 | 4 | 138 | 14 | 1,349 | 1 | 74 | 6  | 904 | 25 | 2,465 |
| 98,001 | 4 | 137 | 14 | 1,345 | 1 | 73 | 9  | 901 | 28 | 2,456 |
| 98,002 | 4 | 137 | 14 | 1,345 | 2 | 73 | 9  | 897 | 29 | 2,452 |
| 98,003 | 4 | 135 | 18 | 1,331 | 3 | 71 | 15 | 877 | 40 | 2,414 |
| 98,004 | 5 | 97  | 24 | 905   | 3 | 39 | 17 | 552 | 49 | 1,593 |
| 98,005 | 5 | 97  | 24 | 906   | 3 | 39 | 17 | 552 | 49 | 1,594 |
| 98,006 | 5 | 92  | 25 | 806   | 3 | 37 | 18 | 500 | 51 | 1,435 |
| 98,007 | 5 | 84  | 26 | 763   | 4 | 37 | 19 | 473 | 54 | 1,357 |
| 98,008 | 5 | 83  | 31 | 766   | 4 | 37 | 23 | 471 | 63 | 1,357 |
| 98,009 | 5 | 28  | 31 | 576   | 4 | 25 | 23 | 354 | 63 | 983   |
| 98,010 | 5 | 21  | 30 | 425   | 4 | 21 | 23 | 289 | 62 | 756   |
| 98,011 | 5 | 21  | 29 | 425   | 3 | 21 | 23 | 289 | 60 | 756   |
| 98,012 | 4 | 21  | 28 | 423   | 3 | 20 | 23 | 283 | 58 | 747   |
| 98,013 | 4 | 16  | 27 | 341   | 3 | 18 | 23 | 246 | 57 | 621   |
| 98,014 | 4 | 18  | 27 | 347   | 3 | 19 | 22 | 247 | 56 | 631   |
| 98,015 | 4 | 20  | 27 | 350   | 3 | 19 | 22 | 252 | 56 | 641   |
| 98,016 | 4 | 19  | 25 | 332   | 3 | 19 | 22 | 254 | 54 | 624   |
| 98,017 | 4 | 20  | 20 | 333   | 3 | 19 | 19 | 255 | 46 | 627   |
| 98,018 | 4 | 20  | 20 | 331   | 3 | 19 | 19 | 252 | 46 | 622   |
| 98,019 | 4 | 20  | 20 | 328   | 3 | 19 | 19 | 256 | 46 | 623   |

|        |   |     |    |       |   |    |    |     |    |       |
|--------|---|-----|----|-------|---|----|----|-----|----|-------|
| 98,020 | 4 | 20  | 19 | 329   | 3 | 19 | 19 | 256 | 45 | 624   |
| 98,021 | 4 | 20  | 20 | 335   | 3 | 19 | 19 | 256 | 46 | 630   |
| 98,022 | 4 | 20  | 21 | 335   | 3 | 19 | 19 | 256 | 47 | 630   |
| 98,023 | 3 | 20  | 20 | 336   | 3 | 19 | 19 | 256 | 45 | 631   |
| 98,024 | 3 | 23  | 20 | 336   | 3 | 19 | 19 | 259 | 45 | 637   |
| 98,025 | 3 | 23  | 20 | 336   | 3 | 19 | 19 | 259 | 45 | 637   |
| 98,026 | 3 | 23  | 20 | 339   | 3 | 19 | 19 | 259 | 45 | 640   |
| 98,027 | 3 | 23  | 20 | 334   | 3 | 19 | 19 | 255 | 45 | 631   |
| 98,028 | 3 | 22  | 20 | 274   | 3 | 18 | 19 | 172 | 45 | 486   |
| 98,029 | 3 | 22  | 20 | 266   | 3 | 18 | 19 | 163 | 45 | 469   |
| 98,030 | 3 | 19  | 19 | 209   | 3 | 10 | 19 | 133 | 44 | 371   |
| 98,031 | 3 | 19  | 19 | 200   | 3 | 10 | 19 | 134 | 44 | 363   |
| 98,032 | 3 | 19  | 19 | 201   | 3 | 10 | 19 | 134 | 44 | 364   |
| 98,033 | 3 | 18  | 22 | 200   | 3 | 9  | 20 | 133 | 48 | 360   |
| 98,034 | 3 | 21  | 22 | 227   | 3 | 10 | 20 | 161 | 48 | 419   |
| 98,035 | 3 | 21  | 22 | 229   | 3 | 10 | 20 | 159 | 48 | 419   |
| 98,036 | 3 | 19  | 22 | 184   | 3 | 8  | 20 | 138 | 48 | 349   |
| 98,037 | 3 | 20  | 22 | 199   | 3 | 6  | 20 | 171 | 48 | 396   |
| 98,038 | 3 | 20  | 22 | 229   | 3 | 7  | 20 | 189 | 48 | 445   |
| 98,039 | 3 | 18  | 23 | 231   | 3 | 7  | 20 | 193 | 49 | 449   |
| 98,040 | 3 | 18  | 23 | 224   | 3 | 7  | 21 | 193 | 50 | 442   |
| 98,041 | 3 | 18  | 23 | 228   | 3 | 7  | 21 | 194 | 50 | 447   |
| 98,042 | 3 | 18  | 23 | 230   | 3 | 7  | 21 | 195 | 50 | 450   |
| 98,043 | 3 | 18  | 24 | 224   | 3 | 7  | 20 | 191 | 50 | 440   |
| 98,044 | 3 | 18  | 24 | 227   | 3 | 7  | 20 | 195 | 50 | 447   |
| 98,045 | 3 | 18  | 24 | 226   | 3 | 7  | 20 | 195 | 50 | 446   |
| 98,046 | 3 | 17  | 24 | 228   | 3 | 7  | 22 | 194 | 52 | 446   |
| 98,047 | 2 | 17  | 24 | 233   | 3 | 7  | 22 | 194 | 51 | 451   |
| 98,048 | 2 | 17  | 24 | 251   | 3 | 7  | 22 | 198 | 51 | 473   |
| 98,049 | 1 | 17  | 24 | 253   | 3 | 8  | 22 | 200 | 50 | 478   |
| 98,050 | 1 | 22  | 24 | 296   | 3 | 8  | 22 | 214 | 50 | 540   |
| 98,051 | 1 | 24  | 24 | 318   | 3 | 9  | 19 | 226 | 47 | 577   |
| 98,052 | 1 | 30  | 25 | 466   | 2 | 14 | 19 | 254 | 47 | 764   |
| 98,053 | 1 | 68  | 23 | 702   | 2 | 32 | 18 | 473 | 44 | 1,275 |
| 98,054 | 1 | 75  | 21 | 784   | 1 | 39 | 13 | 497 | 36 | 1,395 |
| 98,055 | 1 | 79  | 38 | 851   | 1 | 42 | 16 | 512 | 56 | 1,484 |
| 98,056 | 1 | 84  | 38 | 911   | 2 | 43 | 15 | 533 | 56 | 1,571 |
| 98,057 | 1 | 100 | 37 | 933   | 1 | 46 | 14 | 559 | 53 | 1,638 |
| 98,058 | 1 | 103 | 34 | 964   | 1 | 52 | 11 | 580 | 47 | 1,699 |
| 98,059 | 3 | 107 | 36 | 1,005 | 2 | 55 | 11 | 599 | 52 | 1,766 |
| 98,060 | 3 | 113 | 36 | 1,050 | 2 | 58 | 11 | 626 | 52 | 1,847 |



|        |   |     |    |       |   |    |    |     |    |       |
|--------|---|-----|----|-------|---|----|----|-----|----|-------|
| 98,061 | 3 | 115 | 36 | 1,052 | 2 | 56 | 11 | 621 | 52 | 1,844 |
| 98,062 | 3 | 115 | 36 | 1,053 | 2 | 56 | 10 | 622 | 51 | 1,846 |
| 98,063 | 3 | 121 | 36 | 1,086 | 2 | 61 | 10 | 645 | 51 | 1,913 |
| 98,064 | 3 | 121 | 36 | 1,087 | 2 | 61 | 10 | 649 | 51 | 1,918 |
| 98,065 | 3 | 119 | 36 | 1,104 | 2 | 60 | 10 | 652 | 51 | 1,935 |
| 98,066 | 3 | 117 | 36 | 1,107 | 2 | 60 | 10 | 652 | 51 | 1,936 |
| 98,067 | 4 | 116 | 37 | 1,101 | 2 | 60 | 14 | 643 | 57 | 1,920 |
| 98,068 | 4 | 116 | 37 | 1,100 | 2 | 60 | 14 | 644 | 57 | 1,920 |
| 98,069 | 4 | 115 | 37 | 1,097 | 2 | 60 | 15 | 639 | 58 | 1,911 |
| 98,070 | 4 | 115 | 37 | 1,097 | 2 | 60 | 16 | 639 | 59 | 1,911 |
| 98,071 | 4 | 115 | 36 | 1,098 | 2 | 60 | 16 | 640 | 58 | 1,913 |
| 98,072 | 4 | 115 | 35 | 1,098 | 2 | 60 | 17 | 639 | 58 | 1,912 |
| 98,073 | 4 | 115 | 36 | 1,106 | 2 | 60 | 22 | 642 | 64 | 1,923 |
| 98,074 | 4 | 115 | 36 | 1,107 | 2 | 60 | 22 | 642 | 64 | 1,924 |
| 98,075 | 4 | 112 | 37 | 1,123 | 2 | 60 | 22 | 646 | 65 | 1,941 |
| 98,076 | 4 | 112 | 40 | 1,136 | 2 | 61 | 22 | 650 | 68 | 1,959 |
| 98,077 | 4 | 114 | 40 | 1,170 | 2 | 61 | 23 | 670 | 69 | 2,015 |
| 98,078 | 4 | 114 | 40 | 1,177 | 2 | 61 | 23 | 671 | 69 | 2,023 |
| 98,079 | 5 | 115 | 42 | 1,190 | 2 | 61 | 24 | 680 | 73 | 2,046 |
| 98,080 | 5 | 115 | 42 | 1,195 | 2 | 61 | 25 | 682 | 74 | 2,053 |
| 98,081 | 5 | 115 | 42 | 1,198 | 2 | 61 | 25 | 683 | 74 | 2,057 |
| 98,082 | 5 | 115 | 42 | 1,206 | 2 | 61 | 25 | 686 | 74 | 2,068 |
| 98,083 | 5 | 116 | 42 | 1,214 | 2 | 61 | 25 | 697 | 74 | 2,088 |
| 98,084 | 5 | 113 | 39 | 1,186 | 2 | 60 | 25 | 667 | 71 | 2,026 |
| 98,085 | 5 | 113 | 39 | 1,205 | 2 | 60 | 25 | 679 | 71 | 2,057 |
| 98,086 | 5 | 113 | 39 | 1,205 | 2 | 60 | 25 | 678 | 71 | 2,056 |
| 98,087 | 5 | 119 | 39 | 1,231 | 2 | 60 | 25 | 721 | 71 | 2,131 |
| 98,088 | 5 | 117 | 39 | 1,197 | 2 | 60 | 25 | 671 | 71 | 2,045 |
| 98,089 | 5 | 127 | 38 | 1,266 | 2 | 66 | 25 | 765 | 70 | 2,224 |
| 98,090 | 5 | 130 | 40 | 1,268 | 2 | 67 | 25 | 773 | 72 | 2,238 |
| 98,091 | 5 | 130 | 42 | 1,270 | 2 | 67 | 24 | 771 | 73 | 2,238 |
| 98,092 | 5 | 130 | 42 | 1,276 | 2 | 67 | 24 | 776 | 73 | 2,249 |
| 98,093 | 5 | 130 | 42 | 1,279 | 3 | 67 | 25 | 776 | 75 | 2,252 |
| 98,094 | 5 | 130 | 41 | 1,276 | 3 | 67 | 25 | 770 | 74 | 2,243 |
| 98,095 | 5 | 130 | 41 | 1,276 | 3 | 67 | 25 | 771 | 74 | 2,244 |
| 98,096 | 5 | 130 | 41 | 1,278 | 3 | 67 | 23 | 771 | 72 | 2,246 |
| 98,097 | 5 | 130 | 41 | 1,274 | 3 | 67 | 23 | 770 | 72 | 2,241 |
| 98,098 | 5 | 130 | 41 | 1,249 | 3 | 67 | 23 | 765 | 72 | 2,211 |
| 98,099 | 5 | 130 | 41 | 1,247 | 3 | 66 | 23 | 763 | 72 | 2,206 |
| 98,100 | 5 | 130 | 41 | 1,250 | 3 | 66 | 23 | 763 | 72 | 2,209 |
| 98,101 | 5 | 125 | 42 | 1,208 | 3 | 67 | 23 | 746 | 73 | 2,146 |

|        |   |     |    |       |   |    |    |     |    |       |
|--------|---|-----|----|-------|---|----|----|-----|----|-------|
| 98,102 | 5 | 123 | 42 | 1,195 | 3 | 67 | 24 | 737 | 74 | 2,122 |
| 98,103 | 5 | 117 | 41 | 1,049 | 3 | 62 | 24 | 710 | 73 | 1,938 |
| 98,104 | 5 | 80  | 38 | 820   | 3 | 44 | 24 | 500 | 70 | 1,444 |
| 98,105 | 4 | 69  | 23 | 673   | 3 | 34 | 23 | 464 | 53 | 1,240 |
| 98,106 | 4 | 65  | 19 | 654   | 3 | 34 | 22 | 468 | 48 | 1,221 |
| 98,107 | 4 | 75  | 18 | 700   | 2 | 39 | 22 | 499 | 46 | 1,313 |
| 98,108 | 3 | 59  | 15 | 691   | 1 | 36 | 21 | 481 | 40 | 1,267 |
| 98,109 | 5 | 56  | 14 | 662   | 1 | 30 | 22 | 461 | 42 | 1,209 |
| 98,110 | 4 | 53  | 14 | 626   | 1 | 29 | 23 | 449 | 42 | 1,157 |
| 98,111 | 4 | 46  | 15 | 590   | 1 | 26 | 23 | 428 | 43 | 1,090 |
| 98,112 | 4 | 46  | 15 | 592   | 1 | 26 | 23 | 428 | 43 | 1,092 |
| 98,113 | 4 | 48  | 15 | 606   | 1 | 26 | 24 | 429 | 44 | 1,109 |
| 98,114 | 4 | 42  | 16 | 568   | 1 | 21 | 28 | 399 | 49 | 1,030 |
| 98,115 | 4 | 41  | 16 | 544   | 1 | 21 | 28 | 392 | 49 | 998   |
| 98,116 | 4 | 42  | 16 | 535   | 1 | 21 | 29 | 388 | 50 | 986   |
| 98,117 | 4 | 42  | 16 | 538   | 1 | 21 | 29 | 388 | 50 | 989   |
| 98,118 | 3 | 42  | 18 | 538   | 1 | 21 | 25 | 388 | 47 | 989   |
| 98,119 | 3 | 42  | 18 | 539   | 1 | 21 | 25 | 387 | 47 | 989   |
| 98,120 | 3 | 42  | 18 | 539   | 1 | 21 | 24 | 391 | 46 | 993   |
| 98,121 | 3 | 43  | 18 | 553   | 1 | 22 | 23 | 401 | 45 | 1,019 |
| 98,122 | 3 | 51  | 23 | 669   | 2 | 35 | 31 | 463 | 59 | 1,218 |
| 98,123 | 3 | 51  | 22 | 673   | 2 | 38 | 26 | 485 | 53 | 1,247 |
| 98,124 | 3 | 53  | 22 | 727   | 2 | 38 | 26 | 533 | 53 | 1,351 |
| 98,125 | 3 | 67  | 22 | 934   | 2 | 62 | 25 | 715 | 52 | 1,778 |
| 98,126 | 3 | 67  | 21 | 955   | 2 | 62 | 25 | 710 | 51 | 1,794 |
| 98,127 | 3 | 73  | 20 | 993   | 2 | 62 | 26 | 722 | 51 | 1,850 |
| 98,128 | 3 | 72  | 20 | 975   | 3 | 62 | 25 | 702 | 51 | 1,811 |
| 98,129 | 3 | 72  | 19 | 1,017 | 3 | 64 | 25 | 720 | 50 | 1,873 |
| 98,130 | 2 | 71  | 18 | 1,017 | 3 | 65 | 24 | 716 | 47 | 1,869 |
| 98,131 | 2 | 72  | 18 | 1,018 | 3 | 65 | 23 | 717 | 46 | 1,872 |
| 98,132 | 2 | 75  | 18 | 1,038 | 3 | 65 | 23 | 734 | 46 | 1,912 |
| 98,133 | 2 | 77  | 19 | 1,055 | 3 | 65 | 25 | 738 | 49 | 1,935 |
| 98,134 | 2 | 76  | 19 | 1,054 | 3 | 65 | 25 | 729 | 49 | 1,924 |
| 98,135 | 2 | 76  | 19 | 1,028 | 3 | 65 | 25 | 715 | 49 | 1,884 |
| 98,136 | 2 | 70  | 19 | 976   | 3 | 63 | 25 | 662 | 49 | 1,771 |
| 98,137 | 2 | 72  | 19 | 988   | 3 | 63 | 25 | 666 | 49 | 1,789 |
| 98,138 | 2 | 72  | 19 | 992   | 3 | 63 | 25 | 666 | 49 | 1,793 |
| 98,139 | 2 | 58  | 19 | 880   | 3 | 55 | 25 | 541 | 49 | 1,534 |
| 98,140 | 2 | 59  | 19 | 900   | 3 | 57 | 26 | 556 | 50 | 1,572 |
| 98,141 | 2 | 59  | 17 | 914   | 3 | 57 | 26 | 563 | 48 | 1,593 |
| 98,142 | 2 | 59  | 15 | 911   | 3 | 57 | 26 | 564 | 46 | 1,591 |

|        |   |    |    |     |   |    |    |     |    |       |
|--------|---|----|----|-----|---|----|----|-----|----|-------|
| 98,143 | 2 | 59 | 15 | 901 | 3 | 57 | 26 | 558 | 46 | 1,575 |
| 98,144 | 2 | 59 | 15 | 895 | 2 | 57 | 25 | 558 | 44 | 1,569 |
| 98,145 | 2 | 59 | 15 | 901 | 2 | 57 | 25 | 568 | 44 | 1,585 |
| 98,146 | 2 | 59 | 15 | 902 | 2 | 57 | 25 | 569 | 44 | 1,587 |
| 98,147 | 2 | 59 | 15 | 899 | 2 | 57 | 25 | 571 | 44 | 1,586 |
| 98,148 | 3 | 60 | 15 | 904 | 2 | 57 | 25 | 579 | 45 | 1,600 |
| 98,149 | 3 | 61 | 15 | 905 | 2 | 57 | 25 | 581 | 45 | 1,604 |
| 98,150 | 3 | 61 | 15 | 903 | 2 | 57 | 25 | 581 | 45 | 1,602 |
| 98,151 | 3 | 61 | 15 | 903 | 2 | 56 | 25 | 575 | 45 | 1,595 |
| 98,152 | 3 | 61 | 14 | 894 | 2 | 55 | 25 | 571 | 44 | 1,581 |
| 98,153 | 3 | 61 | 14 | 892 | 2 | 55 | 24 | 571 | 43 | 1,579 |
| 98,154 | 3 | 61 | 14 | 891 | 2 | 55 | 24 | 571 | 43 | 1,578 |
| 98,155 | 3 | 60 | 14 | 881 | 2 | 55 | 24 | 564 | 43 | 1,560 |
| 98,156 | 3 | 60 | 14 | 881 | 2 | 55 | 22 | 565 | 41 | 1,561 |
| 98,157 | 3 | 61 | 13 | 841 | 2 | 54 | 21 | 540 | 39 | 1,496 |
| 98,158 | 3 | 51 | 13 | 783 | 2 | 49 | 21 | 502 | 39 | 1,385 |
| 98,159 | 3 | 51 | 13 | 784 | 2 | 49 | 21 | 504 | 39 | 1,388 |
| 98,160 | 1 | 51 | 13 | 784 | 2 | 49 | 20 | 502 | 36 | 1,386 |
| 98,161 | 1 | 50 | 13 | 812 | 2 | 48 | 19 | 512 | 35 | 1,422 |
| 98,162 | 1 | 48 | 12 | 800 | 2 | 48 | 19 | 505 | 34 | 1,401 |
| 98,163 | 1 | 46 | 12 | 792 | 2 | 48 | 18 | 503 | 33 | 1,389 |
| 98,164 | 1 | 46 | 12 | 817 | 2 | 54 | 18 | 536 | 33 | 1,453 |
| 98,165 | 1 | 47 | 12 | 855 | 2 | 54 | 14 | 547 | 29 | 1,503 |
| 98,166 | 1 | 48 | 12 | 868 | 2 | 54 | 14 | 564 | 29 | 1,534 |
| 98,167 | 1 | 47 | 12 | 870 | 2 | 54 | 13 | 568 | 28 | 1,539 |
| 98,168 | 1 | 47 | 10 | 867 | 2 | 54 | 13 | 566 | 26 | 1,534 |
| 98,169 | 1 | 47 | 9  | 868 | 2 | 54 | 13 | 566 | 25 | 1,535 |
| 98,170 | 1 | 46 | 9  | 856 | 2 | 53 | 13 | 554 | 25 | 1,509 |
| 98,171 | 1 | 46 | 9  | 856 | 2 | 53 | 13 | 554 | 25 | 1,509 |
| 98,172 | 1 | 46 | 4  | 856 | 1 | 53 | 4  | 554 | 10 | 1,509 |
| 98,173 | 2 | 38 | 4  | 739 | 1 | 40 | 4  | 493 | 11 | 1,310 |
| 98,174 | 2 | 38 | 4  | 728 | 1 | 37 | 4  | 470 | 11 | 1,273 |
| 98,175 | 2 | 36 | 5  | 667 | 1 | 37 | 4  | 418 | 12 | 1,158 |
| 98,176 | 2 | 22 | 5  | 459 | 1 | 13 | 4  | 236 | 12 | 730   |
| 98,177 | 2 | 16 | 4  | 369 | 1 | 12 | 3  | 215 | 10 | 612   |
| 98,178 | 2 | 16 | 3  | 371 | 1 | 12 | 3  | 216 | 9  | 615   |
| 98,179 | 2 | 15 | 3  | 351 | 0 | 12 | 3  | 214 | 8  | 592   |
| 98,180 | 2 | 15 | 3  | 307 | 0 | 11 | 3  | 197 | 8  | 530   |
| 98,181 | 2 | 15 | 5  | 293 | 0 | 10 | 3  | 190 | 10 | 508   |
| 98,182 | 2 | 9  | 5  | 236 | 1 | 10 | 3  | 159 | 11 | 414   |
| 98,183 | 2 | 9  | 5  | 236 | 1 | 10 | 3  | 159 | 11 | 414   |

|        |   |    |    |     |   |    |    |     |    |       |
|--------|---|----|----|-----|---|----|----|-----|----|-------|
| 98,184 | 2 | 9  | 4  | 236 | 1 | 10 | 1  | 159 | 8  | 414   |
| 98,185 | 2 | 9  | 4  | 229 | 1 | 10 | 1  | 158 | 8  | 406   |
| 98,186 | 2 | 9  | 4  | 229 | 1 | 10 | 1  | 158 | 8  | 406   |
| 98,187 | 2 | 9  | 4  | 229 | 1 | 10 | 1  | 157 | 8  | 405   |
| 98,188 | 2 | 7  | 4  | 216 | 1 | 10 | 0  | 155 | 7  | 388   |
| 98,189 | 2 | 7  | 4  | 216 | 1 | 10 | 0  | 154 | 7  | 387   |
| 98,190 | 2 | 6  | 4  | 194 | 1 | 8  | 0  | 138 | 7  | 346   |
| 98,191 | 2 | 6  | 4  | 195 | 1 | 9  | 0  | 139 | 7  | 349   |
| 98,192 | 2 | 6  | 5  | 179 | 1 | 9  | 4  | 132 | 12 | 326   |
| 98,193 | 2 | 6  | 5  | 179 | 1 | 9  | 4  | 135 | 12 | 329   |
| 98,194 | 2 | 6  | 6  | 182 | 1 | 9  | 4  | 138 | 13 | 335   |
| 98,195 | 2 | 6  | 7  | 177 | 1 | 9  | 4  | 128 | 14 | 320   |
| 98,196 | 2 | 12 | 7  | 266 | 1 | 10 | 4  | 167 | 14 | 455   |
| 98,197 | 2 | 12 | 7  | 266 | 1 | 10 | 4  | 165 | 14 | 453   |
| 98,198 | 2 | 12 | 7  | 271 | 1 | 10 | 4  | 170 | 14 | 463   |
| 98,199 | 1 | 11 | 7  | 270 | 1 | 11 | 5  | 163 | 14 | 455   |
| 98,200 | 1 | 10 | 7  | 281 | 1 | 11 | 5  | 164 | 14 | 466   |
| 98,201 | 1 | 10 | 7  | 290 | 1 | 11 | 6  | 166 | 15 | 477   |
| 98,202 | 1 | 10 | 7  | 294 | 1 | 11 | 6  | 166 | 15 | 481   |
| 98,203 | 1 | 10 | 7  | 298 | 1 | 11 | 6  | 167 | 15 | 486   |
| 98,204 | 1 | 10 | 7  | 298 | 1 | 12 | 6  | 167 | 15 | 487   |
| 98,205 | 1 | 10 | 7  | 299 | 1 | 12 | 6  | 169 | 15 | 490   |
| 98,206 | 1 | 10 | 7  | 332 | 1 | 14 | 6  | 193 | 15 | 549   |
| 98,207 | 1 | 52 | 7  | 766 | 1 | 35 | 6  | 624 | 15 | 1,477 |
| 98,208 | 1 | 50 | 7  | 822 | 1 | 38 | 6  | 655 | 15 | 1,565 |
| 98,209 | 2 | 51 | 14 | 849 | 1 | 39 | 15 | 674 | 32 | 1,613 |
| 98,210 | 2 | 52 | 14 | 855 | 1 | 39 | 15 | 675 | 32 | 1,621 |
| 98,211 | 2 | 54 | 14 | 857 | 1 | 39 | 15 | 676 | 32 | 1,626 |
| 98,212 | 2 | 58 | 14 | 871 | 1 | 40 | 15 | 705 | 32 | 1,674 |
| 98,213 | 2 | 59 | 14 | 894 | 1 | 44 | 15 | 715 | 32 | 1,712 |
| 98,214 | 2 | 60 | 14 | 910 | 1 | 44 | 15 | 740 | 32 | 1,754 |
| 98,215 | 2 | 62 | 14 | 930 | 1 | 39 | 15 | 769 | 32 | 1,800 |
| 98,216 | 2 | 63 | 13 | 896 | 1 | 40 | 15 | 763 | 31 | 1,762 |
| 98,217 | 2 | 62 | 13 | 881 | 1 | 40 | 15 | 746 | 31 | 1,729 |
| 98,218 | 2 | 65 | 13 | 890 | 1 | 42 | 15 | 755 | 31 | 1,752 |
| 98,219 | 2 | 65 | 13 | 900 | 1 | 42 | 15 | 755 | 31 | 1,762 |
| 98,220 | 2 | 65 | 14 | 900 | 1 | 42 | 15 | 754 | 32 | 1,761 |
| 98,221 | 2 | 65 | 15 | 904 | 1 | 42 | 15 | 756 | 33 | 1,767 |
| 98,222 | 2 | 65 | 15 | 904 | 1 | 42 | 15 | 756 | 33 | 1,767 |
| 98,223 | 2 | 65 | 16 | 912 | 1 | 42 | 15 | 758 | 34 | 1,777 |
| 98,224 | 1 | 66 | 17 | 926 | 1 | 42 | 15 | 765 | 34 | 1,799 |

|        |   |    |    |       |   |    |    |       |     |       |
|--------|---|----|----|-------|---|----|----|-------|-----|-------|
| 98,225 | 1 | 66 | 20 | 929   | 1 | 43 | 18 | 765   | 40  | 1,803 |
| 98,226 | 1 | 68 | 19 | 951   | 1 | 43 | 18 | 789   | 39  | 1,851 |
| 98,227 | 1 | 68 | 19 | 951   | 1 | 43 | 18 | 789   | 39  | 1,851 |
| 98,228 | 1 | 70 | 20 | 952   | 1 | 43 | 19 | 791   | 41  | 1,856 |
| 98,229 | 1 | 70 | 40 | 953   | 2 | 43 | 35 | 791   | 78  | 1,857 |
| 98,230 | 2 | 70 | 46 | 948   | 3 | 42 | 46 | 789   | 97  | 1,849 |
| 98,231 | 3 | 71 | 47 | 949   | 3 | 42 | 48 | 793   | 101 | 1,855 |
| 98,232 | 3 | 71 | 45 | 951   | 3 | 42 | 48 | 793   | 99  | 1,857 |
| 98,233 | 6 | 71 | 45 | 952   | 3 | 42 | 53 | 793   | 107 | 1,858 |
| 98,234 | 6 | 71 | 45 | 956   | 3 | 42 | 53 | 797   | 107 | 1,866 |
| 98,235 | 6 | 71 | 45 | 957   | 3 | 42 | 53 | 797   | 107 | 1,867 |
| 98,236 | 6 | 71 | 46 | 961   | 3 | 42 | 54 | 797   | 109 | 1,871 |
| 98,237 | 6 | 75 | 47 | 998   | 3 | 44 | 54 | 826   | 110 | 1,943 |
| 98,238 | 6 | 75 | 47 | 1,003 | 3 | 44 | 54 | 831   | 110 | 1,953 |
| 98,239 | 7 | 75 | 47 | 1,010 | 3 | 44 | 54 | 839   | 111 | 1,968 |
| 98,240 | 8 | 75 | 48 | 1,016 | 3 | 44 | 59 | 844   | 118 | 1,979 |
| 98,241 | 8 | 81 | 51 | 1,299 | 3 | 53 | 68 | 964   | 130 | 2,397 |
| 98,242 | 8 | 86 | 51 | 1,464 | 3 | 58 | 65 | 1,079 | 127 | 2,687 |
| 98,243 | 8 | 86 | 50 | 1,486 | 3 | 58 | 64 | 1,085 | 125 | 2,715 |
| 98,244 | 8 | 86 | 51 | 1,499 | 3 | 58 | 64 | 1,089 | 126 | 2,732 |
| 98,245 | 8 | 89 | 50 | 1,548 | 3 | 60 | 64 | 1,115 | 125 | 2,812 |
| 98,246 | 8 | 86 | 49 | 1,487 | 3 | 60 | 64 | 1,089 | 124 | 2,722 |
| 98,247 | 8 | 87 | 49 | 1,498 | 3 | 60 | 64 | 1,098 | 124 | 2,743 |
| 98,248 | 8 | 87 | 49 | 1,507 | 3 | 60 | 64 | 1,099 | 124 | 2,753 |
| 98,249 | 8 | 87 | 50 | 1,509 | 3 | 60 | 66 | 1,092 | 127 | 2,748 |
| 98,250 | 8 | 87 | 50 | 1,493 | 3 | 59 | 66 | 1,088 | 127 | 2,727 |
| 98,251 | 8 | 87 | 51 | 1,483 | 3 | 59 | 66 | 1,087 | 128 | 2,716 |
| 98,252 | 8 | 87 | 51 | 1,479 | 3 | 59 | 65 | 1,087 | 127 | 2,712 |
| 98,253 | 8 | 87 | 51 | 1,482 | 3 | 59 | 65 | 1,090 | 127 | 2,718 |
| 98,254 | 8 | 91 | 51 | 1,523 | 4 | 63 | 65 | 1,134 | 128 | 2,811 |
| 98,255 | 8 | 91 | 51 | 1,525 | 4 | 62 | 65 | 1,135 | 128 | 2,813 |
| 98,256 | 8 | 96 | 51 | 1,560 | 4 | 66 | 64 | 1,167 | 127 | 2,889 |
| 98,257 | 8 | 95 | 51 | 1,537 | 4 | 64 | 65 | 1,148 | 128 | 2,844 |
| 98,258 | 7 | 54 | 51 | 1,045 | 4 | 40 | 63 | 688   | 125 | 1,827 |
| 98,259 | 7 | 54 | 54 | 1,047 | 4 | 40 | 64 | 688   | 129 | 1,829 |
| 98,260 | 7 | 52 | 49 | 1,014 | 4 | 39 | 60 | 664   | 120 | 1,769 |
| 98,261 | 7 | 51 | 49 | 1,009 | 4 | 39 | 60 | 664   | 120 | 1,763 |
| 98,262 | 7 | 51 | 49 | 1,009 | 4 | 39 | 60 | 664   | 120 | 1,763 |
| 98,263 | 8 | 47 | 49 | 959   | 4 | 37 | 60 | 611   | 121 | 1,654 |
| 98,264 | 8 | 46 | 50 | 931   | 4 | 33 | 62 | 599   | 124 | 1,609 |
| 98,265 | 8 | 45 | 50 | 906   | 4 | 33 | 62 | 574   | 124 | 1,558 |

|        |   |    |    |       |   |    |    |     |     |       |
|--------|---|----|----|-------|---|----|----|-----|-----|-------|
| 98,266 | 8 | 43 | 50 | 860   | 4 | 32 | 62 | 512 | 124 | 1,447 |
| 98,267 | 8 | 42 | 50 | 851   | 4 | 31 | 62 | 506 | 124 | 1,430 |
| 98,268 | 8 | 39 | 50 | 837   | 4 | 29 | 62 | 492 | 124 | 1,397 |
| 98,269 | 8 | 39 | 49 | 827   | 4 | 29 | 63 | 490 | 124 | 1,385 |
| 98,270 | 8 | 39 | 49 | 827   | 4 | 29 | 63 | 490 | 124 | 1,385 |
| 98,271 | 8 | 39 | 48 | 826   | 4 | 29 | 63 | 490 | 123 | 1,384 |
| 98,272 | 8 | 39 | 48 | 821   | 4 | 29 | 63 | 488 | 123 | 1,377 |
| 98,273 | 8 | 39 | 48 | 813   | 4 | 29 | 63 | 486 | 123 | 1,367 |
| 98,274 | 8 | 38 | 47 | 808   | 4 | 29 | 63 | 485 | 122 | 1,360 |
| 98,275 | 8 | 43 | 46 | 905   | 4 | 29 | 63 | 547 | 121 | 1,524 |
| 98,276 | 8 | 41 | 43 | 904   | 4 | 28 | 60 | 525 | 115 | 1,498 |
| 98,277 | 8 | 42 | 43 | 952   | 4 | 29 | 60 | 565 | 115 | 1,588 |
| 98,278 | 8 | 47 | 42 | 1,073 | 4 | 34 | 60 | 619 | 114 | 1,773 |
| 98,279 | 8 | 50 | 42 | 1,130 | 4 | 38 | 59 | 636 | 113 | 1,854 |
| 98,280 | 8 | 52 | 22 | 1,138 | 3 | 38 | 43 | 643 | 76  | 1,871 |
| 98,281 | 7 | 52 | 16 | 1,147 | 2 | 38 | 33 | 644 | 58  | 1,881 |
| 98,282 | 6 | 52 | 15 | 1,149 | 2 | 38 | 31 | 645 | 54  | 1,884 |
| 98,283 | 3 | 52 | 15 | 1,150 | 2 | 38 | 26 | 646 | 46  | 1,886 |
| 98,284 | 3 | 52 | 15 | 1,149 | 1 | 39 | 26 | 644 | 45  | 1,884 |
| 98,285 | 3 | 52 | 15 | 1,154 | 1 | 39 | 26 | 646 | 45  | 1,891 |
| 98,286 | 3 | 53 | 15 | 1,162 | 1 | 39 | 26 | 647 | 45  | 1,901 |
| 98,287 | 3 | 53 | 14 | 1,190 | 1 | 39 | 25 | 653 | 43  | 1,935 |
| 98,288 | 3 | 49 | 13 | 1,168 | 1 | 38 | 25 | 630 | 42  | 1,885 |
| 98,289 | 2 | 49 | 13 | 1,174 | 1 | 38 | 25 | 631 | 41  | 1,892 |
| 98,290 | 1 | 49 | 12 | 1,156 | 1 | 38 | 20 | 614 | 34  | 1,857 |
| 98,291 | 1 | 49 | 12 | 1,161 | 1 | 38 | 20 | 614 | 34  | 1,862 |
| 98,292 | 1 | 44 | 9  | 882   | 1 | 29 | 11 | 497 | 22  | 1,452 |
| 98,293 | 1 | 39 | 9  | 718   | 1 | 23 | 11 | 384 | 22  | 1,164 |
| 98,294 | 1 | 39 | 8  | 683   | 1 | 24 | 11 | 375 | 21  | 1,121 |
| 98,295 | 1 | 39 | 8  | 690   | 1 | 24 | 11 | 382 | 21  | 1,135 |
| 98,296 | 1 | 36 | 8  | 637   | 1 | 22 | 11 | 355 | 21  | 1,050 |
| 98,297 | 1 | 35 | 8  | 637   | 1 | 22 | 12 | 374 | 22  | 1,068 |
| 98,298 | 1 | 35 | 8  | 645   | 1 | 22 | 12 | 381 | 22  | 1,083 |
| 98,299 | 1 | 35 | 9  | 641   | 1 | 23 | 12 | 392 | 23  | 1,091 |
| 98,300 | 1 | 35 | 8  | 648   | 1 | 23 | 10 | 393 | 20  | 1,099 |
| 98,301 | 1 | 35 | 8  | 652   | 1 | 23 | 9  | 392 | 19  | 1,102 |
| 98,302 | 1 | 35 | 7  | 652   | 1 | 23 | 9  | 393 | 18  | 1,103 |
| 98,303 | 1 | 35 | 7  | 653   | 1 | 23 | 9  | 393 | 18  | 1,104 |
| 98,304 | 2 | 37 | 8  | 668   | 0 | 25 | 10 | 423 | 20  | 1,153 |
| 98,305 | 2 | 33 | 8  | 625   | 0 | 21 | 10 | 379 | 20  | 1,058 |
| 98,306 | 3 | 33 | 9  | 625   | 0 | 21 | 10 | 379 | 22  | 1,058 |

|        |    |     |    |       |   |    |    |     |    |       |
|--------|----|-----|----|-------|---|----|----|-----|----|-------|
| 98,307 | 3  | 28  | 10 | 586   | 0 | 17 | 10 | 340 | 23 | 971   |
| 98,308 | 3  | 28  | 13 | 598   | 0 | 17 | 13 | 348 | 29 | 991   |
| 98,309 | 3  | 30  | 16 | 617   | 0 | 17 | 12 | 367 | 31 | 1,031 |
| 98,310 | 3  | 31  | 16 | 622   | 0 | 18 | 13 | 373 | 32 | 1,044 |
| 98,311 | 3  | 31  | 19 | 627   | 0 | 18 | 14 | 379 | 36 | 1,055 |
| 98,312 | 4  | 30  | 20 | 634   | 1 | 18 | 14 | 380 | 39 | 1,062 |
| 98,313 | 3  | 30  | 21 | 651   | 1 | 18 | 15 | 385 | 40 | 1,084 |
| 98,314 | 3  | 30  | 22 | 652   | 1 | 18 | 15 | 385 | 41 | 1,085 |
| 98,315 | 3  | 31  | 22 | 658   | 1 | 18 | 15 | 394 | 41 | 1,101 |
| 98,316 | 3  | 31  | 22 | 661   | 1 | 18 | 15 | 396 | 41 | 1,106 |
| 98,317 | 3  | 31  | 22 | 673   | 1 | 18 | 15 | 404 | 41 | 1,126 |
| 98,318 | 3  | 30  | 23 | 673   | 1 | 18 | 15 | 404 | 42 | 1,125 |
| 98,319 | 3  | 30  | 23 | 673   | 1 | 18 | 15 | 404 | 42 | 1,125 |
| 98,320 | 3  | 30  | 23 | 678   | 1 | 18 | 14 | 409 | 41 | 1,135 |
| 98,321 | 3  | 30  | 23 | 680   | 1 | 18 | 14 | 415 | 41 | 1,143 |
| 98,322 | 3  | 31  | 23 | 703   | 1 | 19 | 14 | 429 | 41 | 1,182 |
| 98,323 | 3  | 31  | 23 | 705   | 1 | 19 | 14 | 429 | 41 | 1,184 |
| 98,324 | 4  | 31  | 24 | 705   | 2 | 19 | 15 | 429 | 45 | 1,184 |
| 98,325 | 4  | 31  | 28 | 697   | 2 | 19 | 18 | 423 | 52 | 1,170 |
| 98,326 | 4  | 26  | 28 | 577   | 2 | 19 | 18 | 362 | 52 | 984   |
| 98,327 | 4  | 31  | 28 | 572   | 2 | 18 | 19 | 366 | 53 | 987   |
| 98,328 | 4  | 31  | 28 | 598   | 2 | 18 | 19 | 390 | 53 | 1,037 |
| 98,329 | 9  | 26  | 34 | 484   | 2 | 13 | 23 | 341 | 68 | 864   |
| 98,330 | 9  | 24  | 34 | 460   | 2 | 9  | 23 | 357 | 68 | 850   |
| 98,331 | 9  | 24  | 34 | 486   | 2 | 10 | 25 | 370 | 70 | 890   |
| 98,332 | 9  | 34  | 35 | 746   | 2 | 22 | 25 | 533 | 71 | 1,335 |
| 98,333 | 9  | 34  | 35 | 760   | 2 | 22 | 25 | 538 | 71 | 1,354 |
| 98,334 | 9  | 39  | 38 | 795   | 2 | 22 | 27 | 558 | 76 | 1,414 |
| 98,335 | 9  | 46  | 38 | 904   | 2 | 22 | 30 | 577 | 79 | 1,549 |
| 98,336 | 9  | 49  | 38 | 920   | 2 | 23 | 30 | 582 | 79 | 1,574 |
| 98,337 | 9  | 73  | 38 | 1,121 | 2 | 30 | 30 | 699 | 79 | 1,923 |
| 98,338 | 9  | 73  | 38 | 1,107 | 2 | 30 | 30 | 703 | 79 | 1,913 |
| 98,339 | 9  | 74  | 38 | 1,101 | 2 | 31 | 30 | 702 | 79 | 1,908 |
| 98,340 | 9  | 77  | 38 | 1,119 | 2 | 31 | 30 | 720 | 79 | 1,947 |
| 98,341 | 9  | 77  | 38 | 1,119 | 2 | 31 | 30 | 720 | 79 | 1,947 |
| 98,342 | 9  | 101 | 38 | 1,199 | 2 | 31 | 30 | 760 | 79 | 2,091 |
| 98,343 | 9  | 101 | 38 | 1,201 | 2 | 31 | 30 | 761 | 79 | 2,094 |
| 98,344 | 9  | 101 | 40 | 1,211 | 2 | 30 | 30 | 759 | 81 | 2,101 |
| 98,345 | 9  | 105 | 40 | 1,219 | 2 | 29 | 30 | 760 | 81 | 2,113 |
| 98,346 | 9  | 105 | 40 | 1,217 | 2 | 30 | 30 | 755 | 81 | 2,107 |
| 98,347 | 10 | 105 | 45 | 1,223 | 2 | 30 | 34 | 754 | 91 | 2,112 |

|        |    |     |    |       |   |    |    |     |     |       |
|--------|----|-----|----|-------|---|----|----|-----|-----|-------|
| 98,348 | 10 | 103 | 45 | 1,194 | 2 | 30 | 33 | 723 | 90  | 2,050 |
| 98,349 | 10 | 102 | 46 | 1,179 | 2 | 30 | 33 | 708 | 91  | 2,019 |
| 98,350 | 10 | 102 | 45 | 1,175 | 2 | 29 | 33 | 697 | 90  | 2,003 |
| 98,351 | 10 | 102 | 45 | 1,158 | 2 | 29 | 33 | 701 | 90  | 1,990 |
| 98,352 | 10 | 102 | 45 | 1,159 | 2 | 29 | 33 | 701 | 90  | 1,991 |
| 98,353 | 10 | 103 | 47 | 1,171 | 2 | 29 | 35 | 703 | 94  | 2,006 |
| 98,354 | 10 | 103 | 47 | 1,174 | 2 | 29 | 35 | 703 | 94  | 2,009 |
| 98,355 | 9  | 101 | 47 | 1,177 | 2 | 27 | 34 | 676 | 92  | 1,981 |
| 98,356 | 8  | 101 | 46 | 1,182 | 3 | 27 | 35 | 678 | 92  | 1,988 |
| 98,357 | 8  | 101 | 50 | 1,173 | 3 | 27 | 36 | 676 | 97  | 1,977 |
| 98,358 | 8  | 102 | 50 | 1,180 | 4 | 27 | 38 | 683 | 100 | 1,992 |
| 98,359 | 8  | 103 | 47 | 1,185 | 4 | 29 | 34 | 690 | 93  | 2,007 |
| 98,360 | 9  | 101 | 47 | 1,199 | 4 | 30 | 38 | 684 | 98  | 2,014 |
| 98,361 | 9  | 100 | 45 | 1,202 | 4 | 30 | 37 | 690 | 95  | 2,022 |
| 98,362 | 9  | 100 | 46 | 1,201 | 4 | 30 | 35 | 681 | 94  | 2,012 |
| 98,363 | 8  | 101 | 45 | 1,206 | 3 | 30 | 36 | 683 | 92  | 2,020 |
| 98,364 | 8  | 100 | 45 | 1,183 | 3 | 30 | 36 | 669 | 92  | 1,982 |
| 98,365 | 8  | 100 | 43 | 1,183 | 3 | 30 | 36 | 669 | 90  | 1,982 |
| 98,366 | 8  | 100 | 43 | 1,184 | 3 | 30 | 34 | 669 | 88  | 1,983 |
| 98,367 | 8  | 101 | 43 | 1,183 | 3 | 30 | 34 | 662 | 88  | 1,976 |
| 98,368 | 8  | 101 | 43 | 1,183 | 3 | 30 | 34 | 663 | 88  | 1,977 |
| 98,369 | 8  | 102 | 43 | 1,182 | 3 | 30 | 37 | 662 | 91  | 1,976 |
| 98,370 | 8  | 102 | 44 | 1,177 | 3 | 30 | 38 | 658 | 93  | 1,967 |
| 98,371 | 7  | 102 | 45 | 1,176 | 3 | 30 | 38 | 652 | 93  | 1,960 |
| 98,372 | 7  | 101 | 50 | 1,153 | 3 | 29 | 40 | 638 | 100 | 1,921 |
| 98,373 | 7  | 101 | 54 | 1,151 | 2 | 29 | 44 | 638 | 107 | 1,919 |
| 98,374 | 7  | 101 | 53 | 1,151 | 2 | 29 | 44 | 638 | 106 | 1,919 |
| 98,375 | 7  | 101 | 50 | 1,151 | 2 | 29 | 41 | 638 | 100 | 1,919 |
| 98,376 | 7  | 101 | 64 | 1,150 | 2 | 29 | 46 | 635 | 119 | 1,915 |
| 98,377 | 7  | 95  | 80 | 1,115 | 3 | 29 | 47 | 597 | 137 | 1,836 |
| 98,378 | 7  | 95  | 84 | 1,127 | 3 | 29 | 47 | 603 | 141 | 1,854 |
| 98,379 | 2  | 96  | 81 | 1,107 | 3 | 29 | 45 | 582 | 131 | 1,814 |
| 98,380 | 2  | 98  | 81 | 1,106 | 3 | 29 | 45 | 580 | 131 | 1,813 |
| 98,381 | 2  | 95  | 81 | 1,072 | 3 | 29 | 45 | 548 | 131 | 1,744 |
| 98,382 | 3  | 103 | 94 | 1,133 | 5 | 29 | 49 | 579 | 151 | 1,844 |
| 98,383 | 3  | 93  | 93 | 902   | 5 | 17 | 48 | 423 | 149 | 1,435 |
| 98,384 | 3  | 93  | 91 | 906   | 5 | 17 | 47 | 418 | 146 | 1,434 |
| 98,385 | 3  | 94  | 92 | 896   | 5 | 17 | 46 | 407 | 146 | 1,414 |
| 98,386 | 3  | 90  | 93 | 791   | 5 | 16 | 45 | 387 | 146 | 1,284 |
| 98,387 | 3  | 88  | 93 | 780   | 5 | 15 | 45 | 383 | 146 | 1,266 |
| 98,388 | 3  | 63  | 93 | 574   | 5 | 8  | 45 | 270 | 146 | 915   |



|        |   |     |     |       |   |    |    |     |     |       |
|--------|---|-----|-----|-------|---|----|----|-----|-----|-------|
| 98,389 | 3 | 67  | 94  | 581   | 5 | 8  | 46 | 274 | 148 | 930   |
| 98,390 | 3 | 78  | 94  | 666   | 5 | 9  | 46 | 348 | 148 | 1,101 |
| 98,391 | 3 | 75  | 94  | 638   | 5 | 9  | 46 | 324 | 148 | 1,046 |
| 98,392 | 3 | 77  | 94  | 661   | 5 | 10 | 47 | 332 | 149 | 1,080 |
| 98,393 | 3 | 54  | 94  | 601   | 5 | 10 | 48 | 300 | 150 | 965   |
| 98,394 | 3 | 54  | 94  | 601   | 5 | 10 | 48 | 302 | 150 | 967   |
| 98,395 | 3 | 51  | 93  | 587   | 5 | 10 | 45 | 298 | 146 | 946   |
| 98,396 | 2 | 51  | 91  | 587   | 5 | 10 | 45 | 299 | 143 | 947   |
| 98,397 | 2 | 51  | 91  | 577   | 5 | 10 | 45 | 298 | 143 | 936   |
| 98,398 | 2 | 51  | 108 | 577   | 6 | 10 | 50 | 300 | 166 | 938   |
| 98,399 | 2 | 52  | 108 | 590   | 6 | 10 | 50 | 308 | 166 | 960   |
| 98,400 | 2 | 64  | 108 | 621   | 6 | 12 | 50 | 356 | 166 | 1,053 |
| 98,401 | 2 | 64  | 108 | 628   | 6 | 12 | 50 | 356 | 166 | 1,060 |
| 98,402 | 6 | 65  | 117 | 648   | 7 | 12 | 55 | 367 | 185 | 1,092 |
| 98,403 | 6 | 65  | 117 | 654   | 7 | 12 | 55 | 370 | 185 | 1,101 |
| 98,404 | 6 | 66  | 117 | 658   | 8 | 14 | 54 | 375 | 185 | 1,113 |
| 98,405 | 6 | 66  | 117 | 655   | 8 | 14 | 54 | 376 | 185 | 1,111 |
| 98,406 | 6 | 66  | 123 | 653   | 8 | 17 | 55 | 388 | 192 | 1,124 |
| 98,407 | 6 | 72  | 125 | 732   | 7 | 20 | 57 | 440 | 195 | 1,264 |
| 98,408 | 6 | 78  | 120 | 773   | 7 | 25 | 56 | 499 | 189 | 1,375 |
| 98,409 | 6 | 80  | 120 | 820   | 6 | 25 | 54 | 492 | 186 | 1,417 |
| 98,410 | 6 | 81  | 120 | 860   | 6 | 27 | 54 | 516 | 186 | 1,484 |
| 98,411 | 5 | 81  | 115 | 851   | 6 | 26 | 50 | 505 | 176 | 1,463 |
| 98,412 | 5 | 85  | 115 | 871   | 6 | 27 | 49 | 507 | 175 | 1,490 |
| 98,413 | 5 | 89  | 113 | 891   | 6 | 28 | 49 | 519 | 173 | 1,527 |
| 98,414 | 5 | 88  | 113 | 891   | 6 | 28 | 48 | 517 | 172 | 1,524 |
| 98,415 | 5 | 88  | 116 | 893   | 6 | 28 | 49 | 521 | 176 | 1,530 |
| 98,416 | 5 | 89  | 116 | 908   | 6 | 28 | 49 | 526 | 176 | 1,551 |
| 98,417 | 6 | 90  | 116 | 908   | 6 | 28 | 49 | 525 | 177 | 1,551 |
| 98,418 | 6 | 89  | 116 | 895   | 6 | 28 | 49 | 521 | 177 | 1,533 |
| 98,419 | 6 | 89  | 115 | 896   | 6 | 28 | 49 | 521 | 176 | 1,534 |
| 98,420 | 6 | 88  | 115 | 896   | 6 | 28 | 47 | 521 | 174 | 1,533 |
| 98,421 | 6 | 88  | 114 | 896   | 6 | 28 | 46 | 522 | 172 | 1,534 |
| 98,422 | 6 | 90  | 114 | 903   | 6 | 28 | 46 | 523 | 172 | 1,544 |
| 98,423 | 6 | 90  | 109 | 911   | 6 | 28 | 44 | 525 | 165 | 1,554 |
| 98,424 | 6 | 90  | 106 | 927   | 6 | 28 | 39 | 534 | 157 | 1,579 |
| 98,425 | 6 | 91  | 95  | 930   | 6 | 30 | 36 | 530 | 143 | 1,581 |
| 98,426 | 6 | 92  | 94  | 936   | 6 | 30 | 37 | 532 | 143 | 1,590 |
| 98,427 | 6 | 96  | 91  | 982   | 6 | 35 | 35 | 578 | 138 | 1,691 |
| 98,428 | 6 | 98  | 75  | 1,031 | 5 | 35 | 34 | 623 | 120 | 1,787 |
| 98,429 | 6 | 100 | 71  | 1,031 | 5 | 35 | 33 | 624 | 115 | 1,790 |

|        |    |    |    |       |   |    |    |     |     |       |
|--------|----|----|----|-------|---|----|----|-----|-----|-------|
| 98,430 | 6  | 99 | 70 | 1,032 | 5 | 35 | 34 | 621 | 115 | 1,787 |
| 98,431 | 6  | 87 | 66 | 935   | 4 | 34 | 34 | 575 | 110 | 1,631 |
| 98,432 | 6  | 89 | 63 | 948   | 4 | 36 | 33 | 590 | 106 | 1,663 |
| 98,433 | 5  | 92 | 60 | 971   | 3 | 36 | 30 | 615 | 98  | 1,714 |
| 98,434 | 5  | 95 | 60 | 941   | 3 | 36 | 29 | 617 | 97  | 1,689 |
| 98,435 | 5  | 92 | 59 | 900   | 3 | 36 | 29 | 607 | 96  | 1,635 |
| 98,436 | 5  | 88 | 59 | 886   | 3 | 35 | 28 | 602 | 95  | 1,611 |
| 98,437 | 5  | 87 | 59 | 877   | 3 | 35 | 28 | 597 | 95  | 1,596 |
| 98,438 | 5  | 87 | 62 | 877   | 3 | 35 | 35 | 598 | 105 | 1,597 |
| 98,439 | 5  | 87 | 61 | 879   | 3 | 35 | 34 | 598 | 103 | 1,599 |
| 98,440 | 5  | 71 | 66 | 762   | 3 | 32 | 36 | 510 | 110 | 1,375 |
| 98,441 | 5  | 71 | 66 | 761   | 3 | 32 | 36 | 510 | 110 | 1,374 |
| 98,442 | 6  | 69 | 73 | 736   | 3 | 31 | 37 | 502 | 119 | 1,338 |
| 98,443 | 6  | 69 | 75 | 736   | 3 | 31 | 37 | 502 | 121 | 1,338 |
| 98,444 | 6  | 67 | 81 | 708   | 3 | 31 | 36 | 492 | 126 | 1,298 |
| 98,445 | 6  | 67 | 79 | 711   | 3 | 31 | 36 | 496 | 124 | 1,305 |
| 98,446 | 8  | 66 | 80 | 713   | 4 | 31 | 42 | 502 | 134 | 1,312 |
| 98,447 | 9  | 66 | 84 | 722   | 6 | 32 | 45 | 503 | 144 | 1,323 |
| 98,448 | 9  | 66 | 87 | 721   | 8 | 32 | 46 | 501 | 150 | 1,320 |
| 98,449 | 11 | 65 | 83 | 707   | 8 | 32 | 44 | 489 | 146 | 1,293 |
| 98,450 | 11 | 67 | 86 | 735   | 8 | 33 | 44 | 519 | 149 | 1,354 |
| 98,451 | 8  | 62 | 78 | 733   | 7 | 34 | 39 | 507 | 132 | 1,336 |
| 98,452 | 8  | 64 | 79 | 776   | 7 | 34 | 39 | 524 | 133 | 1,398 |
| 98,453 | 8  | 63 | 78 | 765   | 6 | 34 | 39 | 516 | 131 | 1,378 |
| 98,454 | 8  | 63 | 80 | 758   | 6 | 34 | 40 | 513 | 134 | 1,368 |
| 98,455 | 8  | 61 | 79 | 742   | 6 | 32 | 39 | 504 | 132 | 1,339 |
| 98,456 | 8  | 55 | 72 | 637   | 6 | 27 | 38 | 434 | 124 | 1,153 |
| 98,457 | 9  | 55 | 72 | 637   | 6 | 27 | 38 | 434 | 125 | 1,153 |
| 98,458 | 9  | 55 | 70 | 639   | 6 | 29 | 35 | 440 | 120 | 1,163 |
| 98,459 | 9  | 63 | 70 | 828   | 6 | 34 | 35 | 594 | 120 | 1,519 |
| 98,460 | 9  | 60 | 70 | 853   | 6 | 36 | 35 | 641 | 120 | 1,590 |
| 98,461 | 9  | 65 | 71 | 866   | 6 | 35 | 36 | 653 | 122 | 1,619 |
| 98,462 | 9  | 66 | 71 | 911   | 6 | 36 | 36 | 657 | 122 | 1,670 |
| 98,463 | 9  | 70 | 70 | 915   | 6 | 34 | 36 | 666 | 121 | 1,685 |
| 98,464 | 9  | 66 | 68 | 908   | 6 | 33 | 36 | 663 | 119 | 1,670 |
| 98,465 | 9  | 68 | 64 | 912   | 6 | 33 | 34 | 663 | 113 | 1,676 |
| 98,466 | 9  | 68 | 64 | 925   | 6 | 33 | 34 | 667 | 113 | 1,693 |
| 98,467 | 9  | 67 | 65 | 913   | 6 | 33 | 34 | 662 | 114 | 1,675 |
| 98,468 | 8  | 66 | 66 | 911   | 6 | 33 | 34 | 663 | 114 | 1,673 |
| 98,469 | 8  | 66 | 69 | 910   | 6 | 33 | 34 | 664 | 117 | 1,673 |
| 98,470 | 9  | 66 | 70 | 918   | 6 | 36 | 35 | 671 | 120 | 1,691 |

|        |    |     |    |       |   |    |    |       |     |       |
|--------|----|-----|----|-------|---|----|----|-------|-----|-------|
| 98,471 | 10 | 66  | 77 | 921   | 6 | 36 | 39 | 676   | 132 | 1,699 |
| 98,472 | 10 | 67  | 79 | 942   | 6 | 37 | 39 | 694   | 134 | 1,740 |
| 98,473 | 10 | 65  | 78 | 943   | 6 | 37 | 39 | 699   | 133 | 1,744 |
| 98,474 | 10 | 65  | 81 | 924   | 6 | 37 | 41 | 688   | 138 | 1,714 |
| 98,475 | 10 | 63  | 80 | 931   | 6 | 37 | 41 | 697   | 137 | 1,728 |
| 98,476 | 10 | 65  | 80 | 1,006 | 6 | 41 | 41 | 745   | 137 | 1,857 |
| 98,477 | 10 | 67  | 82 | 1,019 | 6 | 42 | 40 | 774   | 138 | 1,902 |
| 98,478 | 10 | 94  | 82 | 1,193 | 6 | 61 | 40 | 979   | 138 | 2,327 |
| 98,479 | 10 | 93  | 82 | 1,152 | 6 | 61 | 40 | 943   | 138 | 2,249 |
| 98,480 | 10 | 93  | 82 | 1,178 | 6 | 62 | 40 | 938   | 138 | 2,271 |
| 98,481 | 10 | 105 | 80 | 1,214 | 6 | 69 | 37 | 978   | 133 | 2,366 |
| 98,482 | 10 | 105 | 77 | 1,212 | 6 | 69 | 35 | 970   | 128 | 2,356 |
| 98,483 | 10 | 106 | 78 | 1,267 | 6 | 72 | 35 | 968   | 129 | 2,413 |
| 98,484 | 10 | 107 | 78 | 1,300 | 6 | 74 | 35 | 997   | 129 | 2,478 |
| 98,485 | 10 | 104 | 78 | 1,303 | 6 | 74 | 35 | 991   | 129 | 2,472 |
| 98,486 | 10 | 105 | 77 | 1,317 | 6 | 74 | 35 | 997   | 128 | 2,493 |
| 98,487 | 10 | 104 | 79 | 1,327 | 6 | 76 | 36 | 1,003 | 131 | 2,510 |
| 98,488 | 10 | 104 | 78 | 1,334 | 6 | 76 | 36 | 1,008 | 130 | 2,522 |
| 98,489 | 10 | 104 | 75 | 1,334 | 6 | 76 | 29 | 1,008 | 120 | 2,522 |
| 98,490 | 10 | 104 | 70 | 1,329 | 6 | 76 | 27 | 1,007 | 113 | 2,516 |
| 98,491 | 10 | 104 | 70 | 1,334 | 6 | 76 | 27 | 1,008 | 113 | 2,522 |
| 98,492 | 10 | 104 | 68 | 1,334 | 6 | 76 | 25 | 1,008 | 109 | 2,522 |
| 98,493 | 9  | 104 | 63 | 1,336 | 7 | 76 | 25 | 1,006 | 104 | 2,522 |
| 98,494 | 9  | 104 | 61 | 1,336 | 7 | 76 | 25 | 1,005 | 102 | 2,521 |
| 98,495 | 9  | 104 | 55 | 1,343 | 7 | 76 | 25 | 1,013 | 96  | 2,536 |
| 98,496 | 8  | 105 | 53 | 1,333 | 6 | 76 | 19 | 1,011 | 86  | 2,525 |
| 98,497 | 7  | 107 | 53 | 1,336 | 6 | 76 | 19 | 1,024 | 85  | 2,543 |
| 98,498 | 6  | 108 | 48 | 1,375 | 4 | 75 | 16 | 1,074 | 74  | 2,632 |
| 98,499 | 7  | 115 | 45 | 1,443 | 2 | 76 | 15 | 1,142 | 69  | 2,776 |
| 98,500 | 5  | 123 | 32 | 1,491 | 1 | 79 | 10 | 1,181 | 48  | 2,874 |
| 98,501 | 5  | 121 | 28 | 1,485 | 1 | 78 | 10 | 1,178 | 44  | 2,862 |
| 98,502 | 4  | 114 | 27 | 1,459 | 1 | 75 | 10 | 1,144 | 42  | 2,792 |
| 98,503 | 4  | 112 | 26 | 1,423 | 1 | 76 | 11 | 1,135 | 42  | 2,746 |
| 98,504 | 4  | 112 | 26 | 1,414 | 1 | 76 | 11 | 1,130 | 42  | 2,732 |
| 98,505 | 4  | 112 | 24 | 1,414 | 1 | 76 | 11 | 1,130 | 40  | 2,732 |
| 98,506 | 4  | 112 | 24 | 1,414 | 1 | 76 | 11 | 1,132 | 40  | 2,734 |
| 98,507 | 4  | 112 | 26 | 1,415 | 1 | 75 | 11 | 1,130 | 42  | 2,732 |
| 98,508 | 3  | 112 | 26 | 1,423 | 1 | 75 | 11 | 1,133 | 41  | 2,743 |
| 98,509 | 3  | 112 | 26 | 1,425 | 1 | 73 | 11 | 1,131 | 41  | 2,741 |
| 98,510 | 3  | 98  | 26 | 1,195 | 1 | 63 | 11 | 918   | 41  | 2,274 |
| 98,511 | 3  | 98  | 26 | 1,104 | 1 | 60 | 11 | 860   | 41  | 2,122 |

|        |   |    |    |     |   |    |    |     |     |       |
|--------|---|----|----|-----|---|----|----|-----|-----|-------|
| 98,512 | 3 | 91 | 25 | 982 | 1 | 58 | 10 | 821 | 39  | 1,952 |
| 98,513 | 3 | 83 | 30 | 948 | 1 | 58 | 11 | 798 | 45  | 1,887 |
| 98,514 | 3 | 85 | 30 | 949 | 1 | 58 | 11 | 798 | 45  | 1,890 |
| 98,515 | 3 | 85 | 30 | 925 | 1 | 58 | 11 | 790 | 45  | 1,858 |
| 98,516 | 4 | 84 | 31 | 916 | 1 | 58 | 11 | 788 | 47  | 1,846 |
| 98,517 | 4 | 84 | 31 | 905 | 1 | 58 | 11 | 785 | 47  | 1,832 |
| 98,518 | 6 | 84 | 36 | 916 | 2 | 58 | 18 | 801 | 62  | 1,859 |
| 98,519 | 6 | 85 | 36 | 936 | 2 | 58 | 19 | 821 | 63  | 1,900 |
| 98,520 | 6 | 86 | 34 | 925 | 2 | 55 | 19 | 808 | 61  | 1,874 |
| 98,521 | 5 | 86 | 39 | 931 | 2 | 55 | 25 | 812 | 71  | 1,884 |
| 98,522 | 4 | 86 | 47 | 939 | 2 | 55 | 22 | 812 | 75  | 1,892 |
| 98,523 | 4 | 85 | 50 | 923 | 2 | 54 | 26 | 797 | 82  | 1,859 |
| 98,524 | 4 | 85 | 49 | 915 | 2 | 54 | 25 | 793 | 80  | 1,847 |
| 98,525 | 4 | 85 | 48 | 918 | 2 | 54 | 25 | 795 | 79  | 1,852 |
| 98,526 | 4 | 85 | 49 | 906 | 2 | 52 | 25 | 790 | 80  | 1,833 |
| 98,527 | 4 | 83 | 49 | 836 | 2 | 48 | 25 | 744 | 80  | 1,711 |
| 98,528 | 4 | 81 | 47 | 826 | 2 | 46 | 25 | 716 | 78  | 1,669 |
| 98,529 | 4 | 51 | 47 | 606 | 2 | 23 | 25 | 464 | 78  | 1,144 |
| 98,530 | 4 | 50 | 49 | 593 | 2 | 23 | 25 | 449 | 80  | 1,115 |
| 98,531 | 4 | 36 | 49 | 510 | 2 | 15 | 25 | 405 | 80  | 966   |
| 98,532 | 4 | 36 | 49 | 513 | 2 | 15 | 25 | 405 | 80  | 969   |
| 98,533 | 4 | 36 | 49 | 515 | 2 | 15 | 25 | 405 | 80  | 971   |
| 98,534 | 4 | 32 | 48 | 455 | 2 | 11 | 27 | 372 | 81  | 870   |
| 98,535 | 4 | 34 | 48 | 473 | 2 | 9  | 27 | 362 | 81  | 878   |
| 98,536 | 4 | 34 | 48 | 485 | 2 | 9  | 27 | 357 | 81  | 885   |
| 98,537 | 4 | 33 | 50 | 476 | 2 | 9  | 29 | 351 | 85  | 869   |
| 98,538 | 4 | 32 | 48 | 462 | 2 | 7  | 28 | 342 | 82  | 843   |
| 98,539 | 4 | 34 | 48 | 457 | 2 | 7  | 28 | 335 | 82  | 833   |
| 98,540 | 4 | 34 | 48 | 452 | 2 | 7  | 29 | 335 | 83  | 828   |
| 98,541 | 4 | 35 | 48 | 461 | 2 | 8  | 29 | 341 | 83  | 845   |
| 98,542 | 4 | 35 | 48 | 463 | 2 | 8  | 29 | 341 | 83  | 847   |
| 98,543 | 4 | 35 | 51 | 463 | 1 | 8  | 35 | 341 | 91  | 847   |
| 98,544 | 4 | 36 | 52 | 461 | 2 | 8  | 39 | 341 | 97  | 846   |
| 98,545 | 4 | 36 | 52 | 462 | 2 | 8  | 39 | 341 | 97  | 847   |
| 98,546 | 4 | 35 | 52 | 455 | 3 | 8  | 39 | 325 | 98  | 823   |
| 98,547 | 4 | 35 | 52 | 456 | 3 | 8  | 39 | 325 | 98  | 824   |
| 98,548 | 4 | 33 | 52 | 458 | 3 | 8  | 39 | 317 | 98  | 816   |
| 98,549 | 4 | 32 | 53 | 418 | 3 | 8  | 42 | 270 | 102 | 728   |
| 98,550 | 3 | 27 | 57 | 357 | 3 | 7  | 43 | 209 | 106 | 600   |
| 98,551 | 3 | 20 | 57 | 310 | 3 | 5  | 43 | 171 | 106 | 506   |
| 98,552 | 3 | 27 | 57 | 322 | 3 | 7  | 42 | 159 | 105 | 515   |

|        |   |    |    |     |   |    |    |     |     |       |
|--------|---|----|----|-----|---|----|----|-----|-----|-------|
| 98,553 | 3 | 28 | 57 | 320 | 3 | 7  | 42 | 161 | 105 | 516   |
| 98,554 | 3 | 28 | 57 | 308 | 3 | 7  | 42 | 152 | 105 | 495   |
| 98,555 | 3 | 28 | 57 | 310 | 3 | 7  | 42 | 153 | 105 | 498   |
| 98,556 | 3 | 28 | 57 | 315 | 3 | 7  | 42 | 154 | 105 | 504   |
| 98,557 | 3 | 28 | 55 | 317 | 3 | 7  | 42 | 155 | 103 | 507   |
| 98,558 | 3 | 28 | 55 | 317 | 3 | 7  | 42 | 155 | 103 | 507   |
| 98,559 | 3 | 28 | 55 | 310 | 3 | 7  | 42 | 152 | 103 | 497   |
| 98,560 | 3 | 29 | 55 | 306 | 3 | 7  | 42 | 149 | 103 | 491   |
| 98,561 | 3 | 29 | 55 | 306 | 3 | 7  | 42 | 147 | 103 | 489   |
| 98,562 | 3 | 29 | 55 | 304 | 3 | 6  | 42 | 144 | 103 | 483   |
| 98,563 | 3 | 29 | 55 | 308 | 3 | 6  | 42 | 145 | 103 | 488   |
| 98,564 | 3 | 29 | 50 | 310 | 3 | 7  | 41 | 145 | 97  | 491   |
| 98,565 | 2 | 30 | 49 | 337 | 3 | 7  | 41 | 153 | 95  | 527   |
| 98,566 | 2 | 31 | 48 | 365 | 3 | 8  | 41 | 161 | 94  | 565   |
| 98,567 | 1 | 35 | 45 | 398 | 3 | 9  | 38 | 172 | 87  | 614   |
| 98,568 | 1 | 38 | 45 | 442 | 3 | 10 | 38 | 195 | 87  | 685   |
| 98,569 | 0 | 41 | 44 | 461 | 2 | 11 | 34 | 209 | 80  | 722   |
| 98,570 | 0 | 47 | 43 | 574 | 2 | 26 | 33 | 294 | 78  | 941   |
| 98,571 | 0 | 51 | 43 | 680 | 2 | 30 | 33 | 306 | 78  | 1,067 |
| 98,572 | 0 | 54 | 37 | 700 | 2 | 30 | 26 | 312 | 65  | 1,096 |
| 98,573 | 0 | 56 | 21 | 706 | 2 | 31 | 24 | 309 | 47  | 1,102 |
| 98,574 | 1 | 61 | 25 | 703 | 2 | 31 | 25 | 306 | 53  | 1,101 |
| 98,575 | 1 | 61 | 24 | 700 | 2 | 31 | 25 | 306 | 52  | 1,098 |
| 98,576 | 1 | 61 | 25 | 698 | 2 | 31 | 26 | 300 | 54  | 1,090 |
| 98,577 | 1 | 61 | 26 | 693 | 2 | 31 | 28 | 298 | 57  | 1,083 |
| 98,578 | 1 | 61 | 26 | 694 | 2 | 31 | 28 | 298 | 57  | 1,084 |
| 98,579 | 4 | 60 | 34 | 691 | 3 | 31 | 34 | 297 | 75  | 1,079 |
| 98,580 | 4 | 60 | 34 | 691 | 3 | 31 | 34 | 297 | 75  | 1,079 |
| 98,581 | 4 | 60 | 33 | 689 | 3 | 31 | 34 | 297 | 74  | 1,077 |
| 98,582 | 4 | 60 | 33 | 687 | 3 | 31 | 36 | 297 | 76  | 1,075 |
| 98,583 | 4 | 60 | 33 | 685 | 3 | 31 | 36 | 297 | 76  | 1,073 |
| 98,584 | 4 | 60 | 35 | 683 | 3 | 31 | 36 | 296 | 78  | 1,070 |
| 98,585 | 4 | 56 | 35 | 600 | 3 | 30 | 37 | 270 | 79  | 956   |
| 98,586 | 4 | 55 | 35 | 571 | 3 | 30 | 38 | 263 | 80  | 919   |
| 98,587 | 5 | 55 | 35 | 571 | 3 | 30 | 38 | 263 | 81  | 919   |
| 98,588 | 5 | 55 | 33 | 571 | 3 | 30 | 36 | 263 | 77  | 919   |
| 98,589 | 5 | 55 | 33 | 571 | 3 | 30 | 36 | 267 | 77  | 923   |
| 98,590 | 5 | 53 | 33 | 569 | 3 | 30 | 36 | 267 | 77  | 919   |
| 98,591 | 5 | 52 | 33 | 560 | 3 | 29 | 35 | 264 | 76  | 905   |
| 98,592 | 5 | 52 | 33 | 562 | 3 | 29 | 35 | 266 | 76  | 909   |
| 98,593 | 5 | 53 | 31 | 564 | 3 | 29 | 29 | 268 | 68  | 914   |

|        |   |    |    |     |   |    |    |     |    |       |
|--------|---|----|----|-----|---|----|----|-----|----|-------|
| 98,594 | 5 | 54 | 30 | 588 | 3 | 29 | 29 | 280 | 67 | 951   |
| 98,595 | 5 | 54 | 31 | 590 | 2 | 29 | 26 | 282 | 64 | 955   |
| 98,596 | 5 | 55 | 31 | 633 | 2 | 29 | 27 | 303 | 65 | 1,020 |
| 98,597 | 5 | 58 | 31 | 649 | 1 | 31 | 27 | 310 | 64 | 1,048 |
| 98,598 | 6 | 62 | 39 | 656 | 1 | 31 | 28 | 310 | 74 | 1,059 |
| 98,599 | 6 | 69 | 38 | 695 | 1 | 34 | 26 | 337 | 71 | 1,135 |
| 98,600 | 6 | 69 | 34 | 698 | 1 | 34 | 25 | 339 | 66 | 1,140 |
| 98,601 | 6 | 72 | 34 | 716 | 1 | 36 | 25 | 352 | 66 | 1,176 |
| 98,602 | 6 | 71 | 34 | 717 | 1 | 35 | 25 | 352 | 66 | 1,175 |
| 98,603 | 6 | 64 | 34 | 689 | 1 | 33 | 25 | 341 | 66 | 1,127 |
| 98,604 | 6 | 63 | 34 | 685 | 1 | 34 | 25 | 336 | 66 | 1,118 |
| 98,605 | 6 | 63 | 34 | 695 | 1 | 34 | 25 | 347 | 66 | 1,139 |
| 98,606 | 6 | 71 | 34 | 787 | 1 | 38 | 25 | 423 | 66 | 1,319 |
| 98,607 | 6 | 82 | 34 | 844 | 1 | 38 | 25 | 491 | 66 | 1,455 |
| 98,608 | 6 | 84 | 34 | 867 | 1 | 41 | 25 | 511 | 66 | 1,503 |
| 98,609 | 6 | 85 | 34 | 878 | 1 | 41 | 26 | 515 | 67 | 1,519 |
| 98,610 | 6 | 85 | 35 | 881 | 1 | 41 | 26 | 515 | 68 | 1,522 |
| 98,611 | 6 | 85 | 35 | 905 | 1 | 40 | 26 | 519 | 68 | 1,549 |
| 98,612 | 6 | 85 | 35 | 905 | 1 | 40 | 26 | 520 | 68 | 1,550 |
| 98,613 | 6 | 84 | 35 | 905 | 1 | 40 | 26 | 519 | 68 | 1,548 |
| 98,614 | 7 | 84 | 35 | 901 | 1 | 40 | 26 | 518 | 69 | 1,543 |
| 98,615 | 7 | 84 | 35 | 897 | 1 | 39 | 26 | 517 | 69 | 1,537 |
| 98,616 | 7 | 79 | 38 | 839 | 1 | 38 | 26 | 499 | 72 | 1,455 |
| 98,617 | 8 | 79 | 40 | 839 | 1 | 38 | 29 | 499 | 78 | 1,455 |
| 98,618 | 8 | 73 | 40 | 760 | 1 | 36 | 29 | 463 | 78 | 1,332 |
| 98,619 | 8 | 73 | 40 | 760 | 1 | 36 | 29 | 463 | 78 | 1,332 |
| 98,620 | 8 | 70 | 40 | 727 | 1 | 35 | 29 | 433 | 78 | 1,265 |
| 98,621 | 8 | 57 | 40 | 487 | 1 | 17 | 29 | 316 | 78 | 877   |
| 98,622 | 8 | 55 | 39 | 461 | 2 | 17 | 29 | 306 | 78 | 839   |
| 98,623 | 8 | 53 | 39 | 442 | 2 | 16 | 29 | 304 | 78 | 815   |
| 98,624 | 8 | 53 | 39 | 443 | 2 | 20 | 29 | 304 | 78 | 820   |
| 98,625 | 7 | 48 | 31 | 444 | 2 | 20 | 24 | 304 | 64 | 816   |
| 98,626 | 7 | 51 | 31 | 446 | 2 | 20 | 23 | 304 | 63 | 821   |
| 98,627 | 7 | 51 | 30 | 445 | 2 | 20 | 22 | 304 | 61 | 820   |
| 98,628 | 8 | 51 | 29 | 454 | 2 | 20 | 20 | 310 | 59 | 835   |
| 98,629 | 8 | 51 | 27 | 458 | 2 | 20 | 19 | 314 | 56 | 843   |
| 98,630 | 5 | 57 | 21 | 497 | 1 | 23 | 14 | 353 | 41 | 930   |
| 98,631 | 5 | 57 | 20 | 500 | 1 | 23 | 14 | 359 | 40 | 939   |
| 98,632 | 5 | 57 | 20 | 506 | 2 | 24 | 12 | 362 | 39 | 949   |
| 98,633 | 5 | 57 | 23 | 508 | 2 | 25 | 12 | 364 | 42 | 954   |
| 98,634 | 5 | 57 | 21 | 514 | 2 | 25 | 10 | 370 | 38 | 966   |

|        |   |    |    |     |   |    |    |     |    |       |
|--------|---|----|----|-----|---|----|----|-----|----|-------|
| 98,635 | 5 | 61 | 22 | 534 | 2 | 25 | 9  | 381 | 38 | 1,001 |
| 98,636 | 5 | 60 | 22 | 538 | 2 | 25 | 9  | 384 | 38 | 1,007 |
| 98,637 | 5 | 60 | 22 | 552 | 2 | 26 | 9  | 385 | 38 | 1,023 |
| 98,638 | 4 | 60 | 22 | 552 | 2 | 26 | 9  | 387 | 37 | 1,025 |
| 98,639 | 4 | 60 | 22 | 552 | 2 | 26 | 9  | 383 | 37 | 1,021 |
| 98,640 | 4 | 60 | 22 | 552 | 2 | 26 | 9  | 383 | 37 | 1,021 |
| 98,641 | 4 | 60 | 24 | 565 | 2 | 26 | 11 | 386 | 41 | 1,037 |
| 98,642 | 4 | 61 | 24 | 567 | 2 | 26 | 11 | 385 | 41 | 1,039 |
| 98,643 | 4 | 61 | 25 | 608 | 2 | 32 | 11 | 412 | 42 | 1,113 |
| 98,644 | 4 | 61 | 25 | 623 | 2 | 34 | 11 | 426 | 42 | 1,144 |
| 98,645 | 4 | 60 | 25 | 619 | 2 | 35 | 11 | 425 | 42 | 1,139 |
| 98,646 | 4 | 61 | 23 | 633 | 2 | 35 | 10 | 427 | 39 | 1,156 |
| 98,647 | 4 | 61 | 23 | 605 | 2 | 36 | 9  | 409 | 38 | 1,111 |
| 98,648 | 4 | 60 | 18 | 594 | 2 | 34 | 9  | 408 | 33 | 1,096 |
| 98,649 | 3 | 57 | 16 | 595 | 2 | 34 | 8  | 421 | 29 | 1,107 |
| 98,650 | 3 | 50 | 16 | 555 | 2 | 31 | 7  | 393 | 28 | 1,029 |
| 98,651 | 3 | 45 | 17 | 534 | 2 | 28 | 7  | 373 | 29 | 980   |
| 98,652 | 3 | 45 | 17 | 541 | 2 | 28 | 7  | 374 | 29 | 988   |
| 98,653 | 3 | 46 | 17 | 549 | 2 | 29 | 7  | 377 | 29 | 1,001 |
| 98,654 | 3 | 47 | 17 | 547 | 2 | 31 | 7  | 382 | 29 | 1,007 |
| 98,655 | 3 | 48 | 17 | 557 | 2 | 31 | 7  | 391 | 29 | 1,027 |
| 98,656 | 3 | 42 | 17 | 479 | 2 | 27 | 7  | 315 | 29 | 863   |
| 98,657 | 3 | 43 | 17 | 496 | 2 | 30 | 7  | 320 | 29 | 889   |
| 98,658 | 3 | 33 | 18 | 444 | 2 | 29 | 7  | 255 | 30 | 761   |
| 98,659 | 3 | 30 | 18 | 419 | 2 | 26 | 7  | 232 | 30 | 707   |
| 98,660 | 3 | 30 | 18 | 412 | 2 | 27 | 6  | 240 | 29 | 709   |
| 98,661 | 3 | 30 | 17 | 412 | 2 | 27 | 6  | 243 | 28 | 712   |
| 98,662 | 3 | 30 | 17 | 404 | 2 | 28 | 6  | 241 | 28 | 703   |
| 98,663 | 3 | 30 | 17 | 406 | 2 | 28 | 6  | 240 | 28 | 704   |
| 98,664 | 2 | 30 | 28 | 403 | 4 | 28 | 7  | 240 | 41 | 701   |
| 98,665 | 2 | 30 | 30 | 403 | 4 | 28 | 7  | 241 | 43 | 702   |
| 98,666 | 2 | 32 | 27 | 404 | 4 | 28 | 7  | 243 | 40 | 707   |
| 98,667 | 2 | 33 | 27 | 404 | 4 | 28 | 7  | 244 | 40 | 709   |
| 98,668 | 1 | 33 | 25 | 406 | 4 | 28 | 5  | 247 | 35 | 714   |
| 98,669 | 1 | 33 | 26 | 408 | 4 | 28 | 5  | 248 | 36 | 717   |
| 98,670 | 1 | 33 | 26 | 408 | 4 | 28 | 5  | 249 | 36 | 718   |
| 98,671 | 1 | 33 | 26 | 408 | 4 | 28 | 5  | 249 | 36 | 718   |
| 98,672 | 1 | 33 | 27 | 410 | 4 | 28 | 5  | 249 | 37 | 720   |
| 98,673 | 1 | 33 | 27 | 410 | 3 | 28 | 5  | 247 | 36 | 718   |
| 98,674 | 1 | 33 | 27 | 410 | 3 | 28 | 5  | 247 | 36 | 718   |
| 98,675 | 2 | 33 | 27 | 409 | 3 | 24 | 5  | 247 | 37 | 713   |

|        |   |    |    |     |   |    |    |     |    |     |
|--------|---|----|----|-----|---|----|----|-----|----|-----|
| 98,676 | 4 | 30 | 32 | 404 | 4 | 24 | 10 | 246 | 50 | 704 |
| 98,677 | 5 | 30 | 37 | 405 | 4 | 24 | 11 | 246 | 57 | 705 |
| 98,678 | 4 | 30 | 39 | 392 | 4 | 24 | 15 | 240 | 62 | 686 |
| 98,679 | 4 | 30 | 39 | 388 | 4 | 24 | 16 | 236 | 63 | 678 |
| 98,680 | 4 | 30 | 39 | 388 | 5 | 24 | 17 | 236 | 65 | 678 |
| 98,681 | 4 | 24 | 40 | 349 | 5 | 21 | 17 | 197 | 66 | 591 |
| 98,682 | 4 | 24 | 40 | 346 | 5 | 21 | 17 | 193 | 66 | 584 |
| 98,683 | 4 | 24 | 40 | 340 | 4 | 20 | 17 | 190 | 65 | 574 |
| 98,684 | 4 | 24 | 37 | 328 | 4 | 19 | 17 | 181 | 62 | 552 |
| 98,685 | 4 | 20 | 36 | 308 | 4 | 19 | 17 | 170 | 61 | 517 |
| 98,686 | 4 | 20 | 36 | 308 | 4 | 19 | 17 | 170 | 61 | 517 |
| 98,687 | 4 | 20 | 36 | 305 | 4 | 19 | 16 | 168 | 60 | 512 |
| 98,688 | 4 | 21 | 36 | 300 | 4 | 19 | 16 | 174 | 60 | 514 |
| 98,689 | 4 | 21 | 36 | 311 | 4 | 19 | 16 | 173 | 60 | 524 |
| 98,690 | 4 | 25 | 36 | 364 | 4 | 23 | 16 | 228 | 60 | 640 |
| 98,691 | 4 | 25 | 35 | 383 | 4 | 25 | 14 | 238 | 57 | 671 |
| 98,692 | 4 | 26 | 34 | 456 | 4 | 25 | 14 | 267 | 56 | 774 |
| 98,693 | 4 | 26 | 33 | 471 | 4 | 25 | 14 | 266 | 55 | 788 |
| 98,694 | 4 | 26 | 33 | 436 | 4 | 19 | 14 | 239 | 55 | 720 |
| 98,695 | 4 | 25 | 33 | 434 | 4 | 18 | 14 | 235 | 55 | 712 |
| 98,696 | 4 | 25 | 33 | 414 | 4 | 17 | 14 | 224 | 55 | 680 |
| 98,697 | 4 | 25 | 33 | 419 | 4 | 18 | 14 | 232 | 55 | 694 |
| 98,698 | 4 | 26 | 33 | 442 | 4 | 17 | 14 | 243 | 55 | 728 |
| 98,699 | 4 | 25 | 32 | 450 | 4 | 17 | 14 | 238 | 54 | 730 |
| 98,700 | 4 | 24 | 33 | 443 | 4 | 17 | 14 | 223 | 55 | 707 |
| 98,701 | 4 | 24 | 32 | 426 | 4 | 17 | 14 | 216 | 54 | 683 |
| 98,702 | 4 | 24 | 33 | 419 | 4 | 17 | 14 | 214 | 55 | 674 |
| 98,703 | 4 | 23 | 33 | 411 | 4 | 16 | 14 | 211 | 55 | 661 |
| 98,704 | 4 | 22 | 33 | 409 | 4 | 15 | 15 | 205 | 56 | 651 |
| 98,705 | 4 | 22 | 33 | 409 | 4 | 15 | 15 | 207 | 56 | 653 |
| 98,706 | 5 | 22 | 34 | 398 | 4 | 14 | 15 | 216 | 58 | 650 |
| 98,707 | 5 | 20 | 34 | 372 | 4 | 14 | 15 | 207 | 58 | 613 |
| 98,708 | 5 | 19 | 34 | 373 | 4 | 13 | 15 | 217 | 58 | 622 |
| 98,709 | 5 | 23 | 33 | 389 | 4 | 15 | 15 | 236 | 57 | 663 |
| 98,710 | 5 | 23 | 29 | 389 | 2 | 15 | 15 | 236 | 51 | 663 |
| 98,711 | 5 | 22 | 29 | 390 | 2 | 15 | 15 | 227 | 51 | 654 |
| 98,712 | 5 | 22 | 27 | 391 | 2 | 15 | 14 | 225 | 48 | 653 |
| 98,713 | 5 | 23 | 23 | 374 | 2 | 15 | 14 | 222 | 44 | 634 |
| 98,714 | 5 | 23 | 22 | 376 | 2 | 15 | 14 | 225 | 43 | 639 |
| 98,715 | 5 | 25 | 22 | 390 | 2 | 16 | 15 | 228 | 44 | 659 |
| 98,716 | 5 | 25 | 22 | 391 | 2 | 17 | 15 | 236 | 44 | 669 |



|        |   |    |    |     |   |    |    |     |    |       |
|--------|---|----|----|-----|---|----|----|-----|----|-------|
| 98,717 | 6 | 22 | 22 | 390 | 2 | 17 | 15 | 233 | 45 | 662   |
| 98,718 | 6 | 22 | 22 | 391 | 2 | 17 | 15 | 230 | 45 | 660   |
| 98,719 | 6 | 21 | 23 | 389 | 2 | 17 | 14 | 229 | 45 | 656   |
| 98,720 | 6 | 21 | 21 | 390 | 2 | 17 | 14 | 228 | 43 | 656   |
| 98,721 | 6 | 21 | 21 | 390 | 2 | 17 | 14 | 228 | 43 | 656   |
| 98,722 | 6 | 21 | 21 | 391 | 2 | 17 | 14 | 228 | 43 | 657   |
| 98,723 | 6 | 21 | 20 | 394 | 2 | 17 | 14 | 237 | 42 | 669   |
| 98,724 | 6 | 21 | 20 | 403 | 2 | 17 | 14 | 241 | 42 | 682   |
| 98,725 | 5 | 28 | 20 | 553 | 2 | 21 | 14 | 331 | 41 | 933   |
| 98,726 | 3 | 28 | 19 | 582 | 2 | 22 | 13 | 342 | 37 | 974   |
| 98,727 | 3 | 30 | 15 | 586 | 1 | 22 | 9  | 346 | 28 | 984   |
| 98,728 | 2 | 32 | 10 | 601 | 1 | 23 | 8  | 363 | 21 | 1,019 |
| 98,729 | 2 | 34 | 8  | 658 | 1 | 26 | 4  | 389 | 15 | 1,107 |
| 98,730 | 2 | 37 | 7  | 696 | 1 | 28 | 3  | 412 | 13 | 1,173 |
| 98,731 | 2 | 37 | 7  | 699 | 0 | 28 | 2  | 414 | 11 | 1,178 |
| 98,732 | 2 | 41 | 6  | 660 | 0 | 25 | 2  | 356 | 10 | 1,082 |
| 98,733 | 2 | 46 | 6  | 697 | 0 | 26 | 2  | 370 | 10 | 1,139 |
| 98,734 | 2 | 47 | 6  | 708 | 0 | 26 | 2  | 377 | 10 | 1,158 |
| 98,735 | 2 | 47 | 6  | 724 | 0 | 27 | 2  | 386 | 10 | 1,184 |
| 98,736 | 2 | 55 | 6  | 754 | 0 | 28 | 2  | 397 | 10 | 1,234 |
| 98,737 | 2 | 55 | 6  | 763 | 0 | 29 | 2  | 399 | 10 | 1,246 |
| 98,738 | 2 | 54 | 6  | 760 | 0 | 28 | 2  | 392 | 10 | 1,234 |
| 98,739 | 2 | 55 | 7  | 751 | 0 | 28 | 2  | 390 | 11 | 1,224 |
| 98,740 | 2 | 56 | 7  | 755 | 0 | 28 | 2  | 393 | 11 | 1,232 |
| 98,741 | 2 | 56 | 7  | 755 | 0 | 28 | 2  | 391 | 11 | 1,230 |
| 98,742 | 2 | 57 | 8  | 672 | 0 | 28 | 3  | 362 | 13 | 1,119 |
| 98,743 | 2 | 58 | 8  | 672 | 0 | 28 | 3  | 362 | 13 | 1,120 |
| 98,744 | 2 | 57 | 8  | 653 | 0 | 28 | 3  | 359 | 13 | 1,097 |
| 98,745 | 2 | 57 | 9  | 644 | 0 | 28 | 3  | 359 | 14 | 1,088 |
| 98,746 | 2 | 57 | 9  | 630 | 0 | 27 | 3  | 349 | 14 | 1,063 |
| 98,747 | 2 | 57 | 9  | 630 | 0 | 27 | 3  | 350 | 14 | 1,064 |
| 98,748 | 2 | 56 | 10 | 607 | 0 | 26 | 4  | 338 | 16 | 1,027 |
| 98,749 | 2 | 56 | 12 | 569 | 0 | 26 | 5  | 328 | 19 | 979   |
| 98,750 | 2 | 56 | 14 | 553 | 0 | 26 | 9  | 330 | 25 | 965   |
| 98,751 | 2 | 60 | 14 | 570 | 0 | 26 | 9  | 349 | 25 | 1,005 |
| 98,752 | 2 | 63 | 14 | 588 | 0 | 27 | 9  | 369 | 25 | 1,047 |
| 98,753 | 2 | 63 | 13 | 590 | 0 | 27 | 9  | 370 | 24 | 1,050 |
| 98,754 | 2 | 63 | 15 | 590 | 0 | 27 | 10 | 370 | 27 | 1,050 |
| 98,755 | 2 | 63 | 15 | 587 | 0 | 27 | 9  | 367 | 26 | 1,044 |
| 98,756 | 2 | 62 | 14 | 586 | 0 | 27 | 9  | 350 | 25 | 1,025 |
| 98,757 | 1 | 62 | 14 | 586 | 0 | 27 | 9  | 350 | 24 | 1,025 |

|        |   |    |    |     |   |    |    |     |    |       |
|--------|---|----|----|-----|---|----|----|-----|----|-------|
| 98,758 | 1 | 62 | 14 | 586 | 0 | 27 | 9  | 351 | 24 | 1,026 |
| 98,759 | 1 | 62 | 14 | 568 | 0 | 25 | 9  | 336 | 24 | 991   |
| 98,760 | 1 | 58 | 15 | 541 | 0 | 23 | 9  | 314 | 25 | 936   |
| 98,761 | 1 | 58 | 15 | 532 | 0 | 22 | 9  | 312 | 25 | 924   |
| 98,762 | 1 | 58 | 15 | 531 | 0 | 22 | 9  | 311 | 25 | 922   |
| 98,763 | 1 | 54 | 16 | 514 | 0 | 20 | 9  | 305 | 26 | 893   |
| 98,764 | 1 | 54 | 16 | 514 | 0 | 20 | 9  | 305 | 26 | 893   |
| 98,765 | 1 | 55 | 16 | 514 | 0 | 20 | 11 | 305 | 28 | 894   |
| 98,766 | 1 | 56 | 21 | 517 | 0 | 20 | 13 | 308 | 35 | 901   |
| 98,767 | 1 | 56 | 22 | 516 | 0 | 19 | 13 | 299 | 36 | 890   |
| 98,768 | 0 | 56 | 22 | 513 | 0 | 19 | 13 | 299 | 35 | 887   |
| 98,769 | 0 | 56 | 22 | 514 | 0 | 20 | 13 | 301 | 35 | 891   |
| 98,770 | 0 | 56 | 22 | 514 | 0 | 20 | 13 | 301 | 35 | 891   |
| 98,771 | 0 | 57 | 24 | 516 | 0 | 20 | 16 | 301 | 40 | 894   |
| 98,772 | 0 | 57 | 24 | 516 | 0 | 20 | 16 | 301 | 40 | 894   |
| 98,773 | 0 | 57 | 24 | 510 | 0 | 20 | 16 | 293 | 40 | 880   |
| 98,774 | 0 | 57 | 24 | 510 | 0 | 20 | 16 | 293 | 40 | 880   |
| 98,775 | 0 | 57 | 27 | 501 | 0 | 20 | 19 | 289 | 46 | 867   |
| 98,776 | 0 | 50 | 27 | 351 | 0 | 16 | 19 | 201 | 46 | 618   |
| 98,777 | 0 | 50 | 27 | 322 | 0 | 15 | 19 | 191 | 46 | 578   |
| 98,778 | 0 | 46 | 29 | 303 | 0 | 14 | 21 | 168 | 50 | 531   |
| 98,779 | 0 | 44 | 31 | 246 | 0 | 11 | 22 | 143 | 53 | 444   |
| 98,780 | 0 | 41 | 31 | 207 | 0 | 9  | 22 | 120 | 53 | 377   |
| 98,781 | 0 | 42 | 35 | 204 | 0 | 9  | 23 | 118 | 58 | 373   |
| 98,782 | 0 | 34 | 35 | 171 | 0 | 6  | 24 | 111 | 59 | 322   |
| 98,783 | 0 | 29 | 35 | 134 | 0 | 5  | 24 | 97  | 59 | 265   |
| 98,784 | 0 | 28 | 35 | 126 | 1 | 5  | 25 | 92  | 61 | 251   |
| 98,785 | 0 | 28 | 35 | 127 | 1 | 5  | 25 | 93  | 61 | 253   |
| 98,786 | 0 | 20 | 37 | 82  | 1 | 3  | 26 | 74  | 64 | 179   |
| 98,787 | 0 | 21 | 37 | 84  | 1 | 3  | 26 | 74  | 64 | 182   |
| 98,788 | 0 | 21 | 37 | 85  | 1 | 2  | 26 | 89  | 64 | 197   |
| 98,789 | 0 | 21 | 37 | 84  | 1 | 2  | 26 | 90  | 64 | 197   |
| 98,790 | 0 | 20 | 39 | 89  | 1 | 2  | 27 | 93  | 67 | 204   |
| 98,791 | 0 | 19 | 39 | 90  | 1 | 2  | 27 | 92  | 67 | 203   |
| 98,792 | 0 | 19 | 41 | 100 | 1 | 3  | 30 | 100 | 72 | 222   |
| 98,793 | 0 | 17 | 40 | 97  | 1 | 3  | 29 | 101 | 70 | 218   |
| 98,794 | 0 | 16 | 40 | 100 | 1 | 3  | 29 | 104 | 70 | 223   |
| 98,795 | 0 | 17 | 40 | 124 | 1 | 4  | 29 | 112 | 70 | 257   |
| 98,796 | 0 | 17 | 39 | 130 | 1 | 4  | 28 | 119 | 68 | 270   |
| 98,797 | 0 | 17 | 39 | 154 | 1 | 5  | 28 | 127 | 68 | 303   |
| 98,798 | 0 | 29 | 39 | 256 | 1 | 15 | 28 | 233 | 68 | 533   |

|        |   |    |    |     |   |    |    |     |    |       |
|--------|---|----|----|-----|---|----|----|-----|----|-------|
| 98,799 | 0 | 32 | 37 | 277 | 1 | 19 | 27 | 260 | 65 | 588   |
| 98,800 | 0 | 30 | 37 | 283 | 1 | 19 | 27 | 255 | 65 | 587   |
| 98,801 | 0 | 29 | 35 | 288 | 1 | 19 | 23 | 259 | 59 | 595   |
| 98,802 | 0 | 25 | 34 | 273 | 1 | 19 | 23 | 238 | 58 | 555   |
| 98,803 | 0 | 48 | 33 | 335 | 1 | 26 | 22 | 296 | 56 | 705   |
| 98,804 | 0 | 49 | 32 | 359 | 1 | 27 | 22 | 309 | 55 | 744   |
| 98,805 | 0 | 51 | 32 | 365 | 1 | 27 | 23 | 310 | 56 | 753   |
| 98,806 | 0 | 51 | 32 | 366 | 1 | 27 | 23 | 310 | 56 | 754   |
| 98,807 | 0 | 51 | 33 | 361 | 1 | 27 | 25 | 310 | 59 | 749   |
| 98,808 | 0 | 51 | 33 | 361 | 1 | 27 | 25 | 308 | 59 | 747   |
| 98,809 | 0 | 51 | 33 | 366 | 1 | 27 | 25 | 309 | 59 | 753   |
| 98,810 | 0 | 51 | 33 | 366 | 1 | 27 | 25 | 310 | 59 | 754   |
| 98,811 | 0 | 51 | 33 | 368 | 1 | 27 | 25 | 310 | 59 | 756   |
| 98,812 | 0 | 53 | 33 | 392 | 1 | 30 | 25 | 343 | 59 | 818   |
| 98,813 | 0 | 56 | 34 | 461 | 1 | 33 | 26 | 403 | 61 | 953   |
| 98,814 | 0 | 57 | 33 | 464 | 1 | 33 | 26 | 407 | 60 | 961   |
| 98,815 | 1 | 58 | 33 | 528 | 1 | 37 | 26 | 451 | 61 | 1,074 |
| 98,816 | 2 | 58 | 38 | 560 | 1 | 37 | 23 | 469 | 64 | 1,124 |
| 98,817 | 2 | 57 | 34 | 559 | 1 | 37 | 22 | 467 | 59 | 1,120 |
| 98,818 | 2 | 57 | 34 | 559 | 1 | 37 | 22 | 467 | 59 | 1,120 |
| 98,819 | 3 | 57 | 36 | 560 | 1 | 37 | 29 | 469 | 69 | 1,123 |
| 98,820 | 3 | 57 | 35 | 559 | 1 | 36 | 29 | 467 | 68 | 1,119 |
| 98,821 | 3 | 56 | 33 | 556 | 1 | 36 | 28 | 467 | 65 | 1,115 |
| 98,822 | 3 | 56 | 33 | 558 | 1 | 36 | 28 | 467 | 65 | 1,117 |
| 98,823 | 3 | 56 | 34 | 558 | 1 | 36 | 29 | 466 | 67 | 1,116 |
| 98,824 | 3 | 56 | 38 | 561 | 1 | 37 | 30 | 468 | 72 | 1,122 |
| 98,825 | 3 | 56 | 35 | 561 | 1 | 37 | 27 | 471 | 66 | 1,125 |
| 98,826 | 3 | 56 | 35 | 561 | 1 | 37 | 27 | 471 | 66 | 1,125 |
| 98,827 | 3 | 56 | 34 | 561 | 1 | 37 | 26 | 469 | 64 | 1,123 |
| 98,828 | 3 | 56 | 38 | 563 | 2 | 37 | 28 | 468 | 71 | 1,124 |
| 98,829 | 3 | 56 | 38 | 563 | 2 | 38 | 28 | 469 | 71 | 1,126 |
| 98,830 | 3 | 56 | 36 | 564 | 2 | 38 | 27 | 469 | 68 | 1,127 |
| 98,831 | 3 | 56 | 36 | 565 | 2 | 38 | 27 | 469 | 68 | 1,128 |
| 98,832 | 3 | 55 | 32 | 565 | 2 | 38 | 26 | 469 | 63 | 1,127 |
| 98,833 | 3 | 55 | 32 | 566 | 2 | 38 | 24 | 469 | 61 | 1,128 |
| 98,834 | 3 | 55 | 32 | 571 | 2 | 38 | 24 | 474 | 61 | 1,138 |
| 98,835 | 3 | 55 | 32 | 573 | 1 | 38 | 24 | 472 | 60 | 1,138 |
| 98,836 | 3 | 56 | 31 | 583 | 1 | 40 | 27 | 490 | 62 | 1,169 |
| 98,837 | 3 | 56 | 30 | 585 | 1 | 40 | 28 | 482 | 62 | 1,163 |
| 98,838 | 3 | 58 | 31 | 605 | 1 | 40 | 28 | 491 | 63 | 1,194 |
| 98,839 | 3 | 66 | 28 | 737 | 1 | 48 | 27 | 579 | 59 | 1,430 |

|        |   |    |    |     |   |    |    |     |    |       |
|--------|---|----|----|-----|---|----|----|-----|----|-------|
| 98,840 | 3 | 71 | 29 | 785 | 2 | 52 | 29 | 593 | 63 | 1,501 |
| 98,841 | 4 | 72 | 31 | 791 | 2 | 52 | 29 | 596 | 66 | 1,511 |
| 98,842 | 5 | 72 | 36 | 777 | 2 | 51 | 30 | 585 | 73 | 1,485 |
| 98,843 | 5 | 72 | 43 | 778 | 2 | 51 | 35 | 584 | 85 | 1,485 |
| 98,844 | 5 | 72 | 47 | 776 | 2 | 51 | 36 | 581 | 90 | 1,480 |
| 98,845 | 5 | 72 | 47 | 777 | 2 | 51 | 36 | 581 | 90 | 1,481 |
| 98,846 | 5 | 71 | 46 | 760 | 2 | 50 | 36 | 575 | 89 | 1,456 |
| 98,847 | 5 | 71 | 46 | 754 | 2 | 50 | 36 | 568 | 89 | 1,443 |
| 98,848 | 5 | 71 | 49 | 732 | 2 | 49 | 36 | 558 | 92 | 1,410 |
| 98,849 | 5 | 55 | 49 | 609 | 2 | 35 | 36 | 425 | 92 | 1,124 |
| 98,850 | 5 | 55 | 49 | 603 | 2 | 35 | 36 | 423 | 92 | 1,116 |
| 98,851 | 5 | 55 | 49 | 600 | 2 | 35 | 36 | 418 | 92 | 1,108 |
| 98,852 | 5 | 55 | 49 | 608 | 2 | 35 | 36 | 426 | 92 | 1,124 |
| 98,853 | 5 | 55 | 49 | 605 | 2 | 35 | 36 | 427 | 92 | 1,122 |
| 98,854 | 5 | 29 | 50 | 522 | 2 | 27 | 36 | 355 | 93 | 933   |
| 98,855 | 5 | 30 | 50 | 503 | 2 | 27 | 35 | 341 | 92 | 901   |
| 98,856 | 5 | 28 | 50 | 499 | 2 | 28 | 35 | 346 | 92 | 901   |
| 98,857 | 5 | 28 | 49 | 501 | 2 | 29 | 35 | 351 | 91 | 909   |
| 98,858 | 6 | 28 | 49 | 505 | 2 | 30 | 33 | 353 | 90 | 916   |
| 98,859 | 6 | 28 | 49 | 500 | 2 | 30 | 33 | 352 | 90 | 910   |
| 98,860 | 6 | 28 | 49 | 500 | 2 | 30 | 33 | 351 | 90 | 909   |
| 98,861 | 6 | 28 | 49 | 498 | 2 | 30 | 33 | 351 | 90 | 907   |
| 98,862 | 6 | 26 | 49 | 474 | 2 | 27 | 33 | 318 | 90 | 845   |
| 98,863 | 6 | 26 | 49 | 474 | 2 | 27 | 33 | 320 | 90 | 847   |
| 98,864 | 6 | 23 | 48 | 405 | 2 | 24 | 32 | 260 | 88 | 712   |
| 98,865 | 5 | 22 | 48 | 401 | 2 | 24 | 32 | 256 | 87 | 703   |
| 98,866 | 5 | 22 | 49 | 341 | 2 | 20 | 32 | 212 | 88 | 595   |
| 98,867 | 4 | 21 | 42 | 306 | 2 | 20 | 32 | 193 | 80 | 540   |
| 98,868 | 4 | 21 | 41 | 307 | 2 | 20 | 31 | 194 | 78 | 542   |
| 98,869 | 4 | 21 | 40 | 307 | 2 | 20 | 32 | 194 | 78 | 542   |
| 98,870 | 3 | 21 | 38 | 306 | 2 | 20 | 25 | 192 | 68 | 539   |
| 98,871 | 4 | 21 | 38 | 306 | 2 | 20 | 25 | 192 | 69 | 539   |
| 98,872 | 4 | 21 | 38 | 304 | 2 | 20 | 25 | 192 | 69 | 537   |
| 98,873 | 4 | 21 | 40 | 304 | 2 | 20 | 25 | 193 | 71 | 538   |
| 98,874 | 4 | 21 | 39 | 304 | 2 | 20 | 24 | 194 | 69 | 539   |
| 98,875 | 4 | 21 | 35 | 305 | 2 | 19 | 23 | 193 | 64 | 538   |
| 98,876 | 4 | 21 | 35 | 305 | 2 | 19 | 24 | 190 | 65 | 535   |
| 98,877 | 4 | 22 | 35 | 302 | 2 | 19 | 24 | 191 | 65 | 534   |
| 98,878 | 4 | 22 | 35 | 303 | 2 | 19 | 25 | 191 | 66 | 535   |
| 98,879 | 4 | 22 | 30 | 303 | 1 | 19 | 22 | 190 | 57 | 534   |
| 98,880 | 4 | 22 | 31 | 303 | 1 | 18 | 22 | 189 | 58 | 532   |

|        |   |     |    |       |   |    |    |     |    |       |
|--------|---|-----|----|-------|---|----|----|-----|----|-------|
| 98,881 | 4 | 22  | 31 | 311   | 1 | 18 | 22 | 190 | 58 | 541   |
| 98,882 | 4 | 22  | 31 | 313   | 1 | 18 | 22 | 191 | 58 | 544   |
| 98,883 | 5 | 22  | 31 | 316   | 1 | 18 | 22 | 191 | 59 | 547   |
| 98,884 | 5 | 22  | 31 | 311   | 1 | 18 | 22 | 186 | 59 | 537   |
| 98,885 | 5 | 20  | 31 | 280   | 1 | 16 | 22 | 158 | 59 | 474   |
| 98,886 | 5 | 20  | 31 | 280   | 1 | 16 | 24 | 158 | 61 | 474   |
| 98,887 | 6 | 10  | 31 | 134   | 1 | 8  | 20 | 61  | 58 | 213   |
| 98,888 | 6 | 10  | 31 | 138   | 1 | 8  | 19 | 62  | 57 | 218   |
| 98,889 | 6 | 10  | 30 | 169   | 1 | 8  | 19 | 64  | 56 | 251   |
| 98,890 | 6 | 11  | 30 | 258   | 1 | 12 | 19 | 79  | 56 | 360   |
| 98,891 | 6 | 8   | 30 | 225   | 0 | 8  | 18 | 67  | 54 | 308   |
| 98,892 | 6 | 10  | 28 | 312   | 1 | 10 | 22 | 89  | 57 | 421   |
| 98,893 | 5 | 26  | 22 | 420   | 1 | 15 | 20 | 104 | 48 | 565   |
| 98,894 | 5 | 36  | 14 | 504   | 1 | 19 | 13 | 123 | 33 | 682   |
| 98,895 | 5 | 75  | 10 | 686   | 1 | 38 | 12 | 214 | 28 | 1,013 |
| 98,896 | 5 | 82  | 10 | 733   | 1 | 39 | 12 | 232 | 28 | 1,086 |
| 98,897 | 5 | 98  | 11 | 830   | 1 | 40 | 13 | 261 | 30 | 1,229 |
| 98,898 | 5 | 100 | 8  | 853   | 1 | 41 | 15 | 269 | 29 | 1,263 |
| 98,899 | 5 | 102 | 11 | 855   | 1 | 41 | 17 | 269 | 34 | 1,267 |
| 98,900 | 5 | 102 | 12 | 874   | 1 | 42 | 17 | 268 | 35 | 1,286 |
| 98,901 | 5 | 108 | 12 | 898   | 1 | 42 | 17 | 271 | 35 | 1,319 |
| 98,902 | 5 | 110 | 12 | 898   | 1 | 42 | 17 | 273 | 35 | 1,323 |
| 98,903 | 5 | 111 | 13 | 903   | 1 | 43 | 17 | 272 | 36 | 1,329 |
| 98,904 | 5 | 113 | 12 | 931   | 1 | 45 | 17 | 291 | 35 | 1,380 |
| 98,905 | 5 | 115 | 12 | 958   | 1 | 46 | 17 | 304 | 35 | 1,423 |
| 98,906 | 5 | 113 | 12 | 957   | 1 | 46 | 17 | 307 | 35 | 1,423 |
| 98,907 | 4 | 113 | 12 | 957   | 1 | 45 | 17 | 304 | 34 | 1,419 |
| 98,908 | 4 | 113 | 12 | 958   | 1 | 45 | 17 | 299 | 34 | 1,415 |
| 98,909 | 4 | 125 | 13 | 1,060 | 1 | 51 | 17 | 352 | 35 | 1,588 |
| 98,910 | 4 | 125 | 13 | 1,064 | 1 | 51 | 17 | 352 | 35 | 1,592 |
| 98,911 | 4 | 126 | 15 | 1,084 | 1 | 51 | 17 | 356 | 37 | 1,617 |
| 98,912 | 4 | 131 | 16 | 1,136 | 1 | 51 | 18 | 371 | 39 | 1,689 |
| 98,913 | 4 | 132 | 16 | 1,145 | 1 | 52 | 18 | 374 | 39 | 1,703 |
| 98,914 | 4 | 137 | 20 | 1,153 | 1 | 52 | 19 | 374 | 44 | 1,716 |
| 98,915 | 4 | 138 | 20 | 1,159 | 1 | 52 | 20 | 378 | 45 | 1,727 |
| 98,916 | 4 | 138 | 19 | 1,167 | 1 | 52 | 20 | 380 | 44 | 1,737 |
| 98,917 | 5 | 139 | 21 | 1,170 | 1 | 52 | 20 | 381 | 47 | 1,742 |
| 98,918 | 5 | 139 | 21 | 1,170 | 1 | 52 | 21 | 381 | 48 | 1,742 |
| 98,919 | 5 | 139 | 21 | 1,174 | 1 | 52 | 21 | 382 | 48 | 1,747 |
| 98,920 | 5 | 143 | 21 | 1,221 | 1 | 52 | 20 | 415 | 47 | 1,831 |
| 98,921 | 5 | 144 | 21 | 1,234 | 1 | 53 | 20 | 418 | 47 | 1,849 |

|        |   |     |    |       |   |    |    |     |    |       |
|--------|---|-----|----|-------|---|----|----|-----|----|-------|
| 98,922 | 4 | 148 | 21 | 1,249 | 1 | 55 | 20 | 424 | 46 | 1,876 |
| 98,923 | 4 | 149 | 21 | 1,253 | 1 | 56 | 19 | 426 | 45 | 1,884 |
| 98,924 | 4 | 150 | 20 | 1,255 | 1 | 56 | 21 | 427 | 46 | 1,888 |
| 98,925 | 4 | 169 | 21 | 1,292 | 1 | 58 | 21 | 446 | 47 | 1,965 |
| 98,926 | 4 | 175 | 21 | 1,310 | 1 | 59 | 21 | 451 | 47 | 1,995 |
| 98,927 | 4 | 176 | 21 | 1,322 | 1 | 62 | 20 | 460 | 46 | 2,020 |
| 98,928 | 4 | 175 | 21 | 1,322 | 1 | 62 | 20 | 461 | 46 | 2,020 |
| 98,929 | 4 | 175 | 21 | 1,324 | 1 | 62 | 20 | 465 | 46 | 2,026 |
| 98,930 | 4 | 197 | 23 | 1,408 | 1 | 65 | 20 | 513 | 48 | 2,183 |
| 98,931 | 4 | 201 | 23 | 1,441 | 1 | 69 | 20 | 526 | 48 | 2,237 |
| 98,932 | 4 | 202 | 23 | 1,451 | 1 | 69 | 21 | 523 | 49 | 2,245 |
| 98,933 | 4 | 202 | 23 | 1,448 | 1 | 69 | 21 | 522 | 49 | 2,241 |
| 98,934 | 3 | 203 | 23 | 1,446 | 1 | 69 | 21 | 522 | 48 | 2,240 |
| 98,935 | 3 | 203 | 24 | 1,446 | 1 | 69 | 21 | 522 | 49 | 2,240 |
| 98,936 | 3 | 204 | 24 | 1,455 | 1 | 70 | 21 | 526 | 49 | 2,255 |
| 98,937 | 3 | 204 | 24 | 1,457 | 1 | 70 | 19 | 525 | 47 | 2,256 |
| 98,938 | 2 | 204 | 24 | 1,456 | 1 | 70 | 19 | 525 | 46 | 2,255 |
| 98,939 | 2 | 204 | 25 | 1,452 | 1 | 70 | 19 | 524 | 47 | 2,250 |
| 98,940 | 2 | 203 | 25 | 1,329 | 1 | 66 | 19 | 508 | 47 | 2,106 |
| 98,941 | 2 | 198 | 25 | 1,211 | 1 | 64 | 19 | 476 | 47 | 1,949 |
| 98,942 | 2 | 198 | 24 | 1,211 | 1 | 64 | 18 | 476 | 45 | 1,949 |
| 98,943 | 1 | 198 | 24 | 1,211 | 0 | 65 | 14 | 477 | 39 | 1,951 |
| 98,944 | 1 | 182 | 24 | 1,100 | 0 | 60 | 14 | 462 | 39 | 1,804 |
| 98,945 | 1 | 172 | 24 | 1,020 | 0 | 57 | 14 | 443 | 39 | 1,692 |
| 98,946 | 1 | 133 | 24 | 869   | 0 | 40 | 14 | 361 | 39 | 1,403 |
| 98,947 | 1 | 125 | 24 | 828   | 0 | 39 | 14 | 345 | 39 | 1,337 |
| 98,948 | 1 | 111 | 23 | 733   | 0 | 38 | 13 | 320 | 37 | 1,202 |
| 98,949 | 1 | 109 | 23 | 711   | 0 | 37 | 11 | 312 | 35 | 1,169 |
| 98,950 | 1 | 107 | 20 | 709   | 0 | 37 | 9  | 312 | 30 | 1,165 |
| 98,951 | 1 | 109 | 19 | 717   | 0 | 37 | 9  | 317 | 29 | 1,180 |
| 98,952 | 1 | 103 | 19 | 694   | 0 | 37 | 9  | 315 | 29 | 1,149 |
| 98,953 | 1 | 104 | 18 | 705   | 0 | 37 | 9  | 313 | 28 | 1,159 |
| 98,954 | 1 | 103 | 18 | 693   | 0 | 36 | 9  | 307 | 28 | 1,139 |
| 98,955 | 2 | 99  | 18 | 636   | 0 | 32 | 9  | 268 | 29 | 1,035 |
| 98,956 | 2 | 100 | 18 | 638   | 0 | 32 | 9  | 269 | 29 | 1,039 |
| 98,957 | 2 | 100 | 18 | 638   | 0 | 32 | 9  | 270 | 29 | 1,040 |
| 98,958 | 2 | 100 | 18 | 637   | 0 | 32 | 9  | 268 | 29 | 1,037 |
| 98,959 | 2 | 100 | 17 | 633   | 0 | 31 | 9  | 268 | 28 | 1,032 |
| 98,960 | 2 | 88  | 17 | 523   | 0 | 24 | 10 | 213 | 29 | 848   |
| 98,961 | 2 | 87  | 16 | 503   | 0 | 24 | 10 | 209 | 28 | 823   |
| 98,962 | 2 | 87  | 15 | 503   | 0 | 24 | 11 | 210 | 28 | 824   |

|        |   |     |    |       |   |    |    |     |    |       |
|--------|---|-----|----|-------|---|----|----|-----|----|-------|
| 98,963 | 2 | 82  | 13 | 451   | 0 | 24 | 12 | 198 | 27 | 755   |
| 98,964 | 2 | 83  | 12 | 445   | 0 | 23 | 12 | 197 | 26 | 748   |
| 98,965 | 2 | 79  | 10 | 443   | 0 | 23 | 11 | 195 | 23 | 740   |
| 98,966 | 3 | 78  | 13 | 437   | 0 | 23 | 10 | 191 | 26 | 729   |
| 98,967 | 3 | 76  | 18 | 423   | 0 | 23 | 12 | 188 | 33 | 710   |
| 98,968 | 2 | 76  | 17 | 423   | 0 | 23 | 12 | 189 | 31 | 711   |
| 98,969 | 2 | 73  | 17 | 383   | 0 | 23 | 11 | 156 | 30 | 635   |
| 98,970 | 2 | 73  | 17 | 393   | 0 | 23 | 11 | 157 | 30 | 646   |
| 98,971 | 2 | 73  | 17 | 403   | 0 | 23 | 11 | 159 | 30 | 658   |
| 98,972 | 2 | 72  | 17 | 398   | 0 | 22 | 11 | 159 | 30 | 651   |
| 98,973 | 2 | 66  | 17 | 377   | 0 | 19 | 11 | 149 | 30 | 611   |
| 98,974 | 2 | 66  | 17 | 382   | 0 | 19 | 10 | 150 | 29 | 617   |
| 98,975 | 2 | 67  | 16 | 389   | 0 | 19 | 8  | 158 | 26 | 633   |
| 98,976 | 2 | 48  | 16 | 364   | 0 | 17 | 8  | 159 | 26 | 588   |
| 98,977 | 2 | 42  | 16 | 387   | 0 | 17 | 8  | 184 | 26 | 630   |
| 98,978 | 2 | 41  | 16 | 410   | 0 | 14 | 8  | 179 | 26 | 644   |
| 98,979 | 2 | 48  | 16 | 430   | 0 | 15 | 7  | 188 | 25 | 681   |
| 98,980 | 2 | 54  | 14 | 529   | 0 | 17 | 7  | 215 | 23 | 815   |
| 98,981 | 2 | 32  | 13 | 487   | 0 | 15 | 7  | 182 | 22 | 716   |
| 98,982 | 2 | 32  | 13 | 493   | 0 | 14 | 7  | 188 | 22 | 727   |
| 98,983 | 2 | 42  | 13 | 646   | 0 | 23 | 7  | 309 | 22 | 1,020 |
| 98,984 | 2 | 42  | 13 | 658   | 0 | 23 | 7  | 313 | 22 | 1,036 |
| 98,985 | 2 | 41  | 13 | 703   | 0 | 29 | 7  | 326 | 22 | 1,099 |
| 98,986 | 2 | 44  | 12 | 731   | 0 | 31 | 7  | 335 | 21 | 1,141 |
| 98,987 | 2 | 47  | 12 | 737   | 0 | 31 | 7  | 351 | 21 | 1,166 |
| 98,988 | 2 | 48  | 12 | 744   | 0 | 32 | 7  | 361 | 21 | 1,185 |
| 98,989 | 2 | 49  | 12 | 778   | 0 | 34 | 7  | 397 | 21 | 1,258 |
| 98,990 | 2 | 66  | 12 | 1,070 | 0 | 49 | 7  | 587 | 21 | 1,772 |
| 98,991 | 2 | 78  | 13 | 1,147 | 1 | 56 | 7  | 650 | 23 | 1,931 |
| 98,992 | 2 | 87  | 13 | 1,202 | 2 | 59 | 7  | 684 | 24 | 2,032 |
| 98,993 | 2 | 91  | 13 | 1,280 | 2 | 64 | 7  | 710 | 24 | 2,145 |
| 98,994 | 2 | 104 | 14 | 1,396 | 2 | 70 | 8  | 765 | 26 | 2,335 |
| 98,995 | 2 | 104 | 14 | 1,388 | 2 | 70 | 8  | 761 | 26 | 2,323 |
| 98,996 | 2 | 106 | 14 | 1,410 | 2 | 69 | 8  | 772 | 26 | 2,357 |
| 98,997 | 2 | 106 | 14 | 1,382 | 2 | 67 | 8  | 765 | 26 | 2,320 |
| 98,998 | 2 | 106 | 14 | 1,375 | 2 | 67 | 8  | 764 | 26 | 2,312 |
| 98,999 | 2 | 105 | 14 | 1,370 | 2 | 67 | 8  | 762 | 26 | 2,304 |
| 99,000 | 2 | 105 | 14 | 1,368 | 2 | 67 | 8  | 762 | 26 | 2,302 |
| 99,001 | 2 | 105 | 14 | 1,371 | 2 | 67 | 8  | 762 | 26 | 2,305 |
| 99,002 | 2 | 103 | 14 | 1,346 | 2 | 66 | 8  | 757 | 26 | 2,272 |
| 99,003 | 2 | 103 | 14 | 1,348 | 2 | 66 | 8  | 756 | 26 | 2,273 |

|        |   |     |    |       |   |    |   |     |    |       |
|--------|---|-----|----|-------|---|----|---|-----|----|-------|
| 99,004 | 2 | 101 | 14 | 1,334 | 2 | 66 | 8 | 754 | 26 | 2,255 |
| 99,005 | 1 | 102 | 14 | 1,336 | 2 | 66 | 8 | 754 | 25 | 2,258 |
| 99,006 | 1 | 103 | 14 | 1,343 | 2 | 66 | 8 | 758 | 25 | 2,270 |
| 99,007 | 1 | 103 | 15 | 1,345 | 3 | 66 | 8 | 759 | 27 | 2,273 |
| 99,008 | 1 | 104 | 15 | 1,346 | 3 | 66 | 9 | 760 | 28 | 2,276 |
| 99,009 | 1 | 104 | 15 | 1,362 | 3 | 66 | 9 | 770 | 28 | 2,302 |
| 99,010 | 1 | 104 | 15 | 1,364 | 3 | 66 | 8 | 771 | 27 | 2,305 |
| 99,011 | 1 | 104 | 16 | 1,368 | 3 | 66 | 8 | 772 | 28 | 2,310 |
| 99,012 | 1 | 104 | 16 | 1,388 | 3 | 67 | 8 | 780 | 28 | 2,339 |
| 99,013 | 1 | 104 | 16 | 1,391 | 3 | 67 | 8 | 783 | 28 | 2,345 |
| 99,014 | 1 | 105 | 16 | 1,405 | 3 | 67 | 6 | 795 | 26 | 2,372 |
| 99,015 | 1 | 115 | 15 | 1,589 | 3 | 73 | 6 | 902 | 25 | 2,679 |
| 99,016 | 1 | 115 | 15 | 1,653 | 3 | 76 | 6 | 968 | 25 | 2,812 |
| 99,017 | 0 | 116 | 12 | 1,670 | 3 | 76 | 6 | 978 | 21 | 2,840 |
| 99,018 | 0 | 116 | 8  | 1,668 | 3 | 77 | 4 | 979 | 15 | 2,840 |
| 99,019 | 0 | 115 | 8  | 1,663 | 3 | 77 | 4 | 979 | 15 | 2,834 |
| 99,020 | 0 | 115 | 8  | 1,654 | 3 | 77 | 4 | 980 | 15 | 2,826 |
| 99,021 | 0 | 115 | 8  | 1,645 | 3 | 77 | 4 | 978 | 15 | 2,815 |
| 99,022 | 0 | 116 | 9  | 1,646 | 3 | 77 | 4 | 979 | 16 | 2,818 |
| 99,023 | 0 | 117 | 9  | 1,637 | 3 | 77 | 4 | 976 | 16 | 2,807 |
| 99,024 | 0 | 117 | 9  | 1,639 | 3 | 77 | 4 | 976 | 16 | 2,809 |
| 99,025 | 1 | 116 | 10 | 1,627 | 3 | 77 | 4 | 967 | 18 | 2,787 |
| 99,026 | 1 | 116 | 10 | 1,613 | 3 | 77 | 4 | 944 | 18 | 2,750 |
| 99,027 | 1 | 116 | 9  | 1,572 | 3 | 76 | 4 | 916 | 17 | 2,680 |
| 99,028 | 1 | 120 | 9  | 1,583 | 3 | 77 | 4 | 928 | 17 | 2,708 |
| 99,029 | 1 | 120 | 10 | 1,551 | 3 | 77 | 4 | 928 | 18 | 2,676 |
| 99,030 | 1 | 113 | 10 | 1,527 | 3 | 76 | 4 | 917 | 18 | 2,633 |
| 99,031 | 1 | 108 | 11 | 1,440 | 3 | 74 | 4 | 896 | 19 | 2,518 |
| 99,032 | 1 | 116 | 11 | 1,434 | 3 | 75 | 4 | 962 | 19 | 2,587 |
| 99,033 | 1 | 110 | 11 | 1,445 | 3 | 76 | 3 | 961 | 18 | 2,592 |
| 99,034 | 3 | 101 | 11 | 1,280 | 3 | 67 | 3 | 847 | 20 | 2,295 |
| 99,035 | 3 | 101 | 12 | 1,267 | 3 | 67 | 3 | 841 | 21 | 2,276 |
| 99,036 | 3 | 101 | 16 | 1,228 | 3 | 61 | 4 | 829 | 26 | 2,219 |
| 99,037 | 3 | 94  | 18 | 1,186 | 3 | 58 | 4 | 804 | 28 | 2,142 |
| 99,038 | 3 | 92  | 18 | 1,180 | 3 | 58 | 4 | 796 | 28 | 2,126 |
| 99,039 | 3 | 94  | 18 | 1,184 | 3 | 59 | 4 | 798 | 28 | 2,135 |
| 99,040 | 3 | 94  | 20 | 1,156 | 3 | 57 | 5 | 779 | 31 | 2,086 |
| 99,041 | 3 | 78  | 24 | 879   | 3 | 42 | 5 | 603 | 35 | 1,602 |
| 99,042 | 3 | 68  | 29 | 816   | 2 | 34 | 5 | 550 | 39 | 1,468 |
| 99,043 | 5 | 55  | 34 | 685   | 1 | 28 | 7 | 492 | 47 | 1,260 |
| 99,044 | 5 | 55  | 35 | 685   | 1 | 28 | 7 | 492 | 48 | 1,260 |



|        |   |    |    |     |   |    |   |     |    |       |
|--------|---|----|----|-----|---|----|---|-----|----|-------|
| 99,045 | 5 | 40 | 34 | 551 | 1 | 21 | 7 | 430 | 47 | 1,042 |
| 99,046 | 5 | 43 | 34 | 567 | 1 | 22 | 7 | 445 | 47 | 1,077 |
| 99,047 | 5 | 43 | 34 | 570 | 1 | 22 | 7 | 448 | 47 | 1,083 |
| 99,048 | 5 | 43 | 34 | 569 | 1 | 22 | 7 | 447 | 47 | 1,081 |
| 99,049 | 5 | 43 | 34 | 569 | 1 | 22 | 7 | 446 | 47 | 1,080 |
| 99,050 | 5 | 43 | 34 | 565 | 1 | 22 | 7 | 443 | 47 | 1,073 |
| 99,051 | 5 | 43 | 34 | 565 | 2 | 22 | 7 | 444 | 48 | 1,074 |
| 99,052 | 5 | 43 | 34 | 565 | 2 | 22 | 7 | 444 | 48 | 1,074 |
| 99,053 | 5 | 44 | 34 | 565 | 2 | 22 | 7 | 444 | 48 | 1,075 |
| 99,054 | 5 | 44 | 34 | 565 | 2 | 22 | 7 | 443 | 48 | 1,074 |
| 99,055 | 5 | 44 | 34 | 567 | 2 | 22 | 7 | 449 | 48 | 1,082 |
| 99,056 | 5 | 42 | 34 | 569 | 2 | 23 | 7 | 458 | 48 | 1,092 |
| 99,057 | 5 | 42 | 34 | 577 | 2 | 25 | 7 | 462 | 48 | 1,106 |
| 99,058 | 5 | 43 | 33 | 596 | 1 | 26 | 7 | 473 | 46 | 1,138 |
| 99,059 | 5 | 42 | 40 | 606 | 1 | 26 | 6 | 475 | 52 | 1,149 |
| 99,060 | 5 | 42 | 43 | 590 | 1 | 26 | 6 | 465 | 55 | 1,123 |
| 99,061 | 5 | 42 | 44 | 589 | 1 | 27 | 8 | 464 | 58 | 1,122 |
| 99,062 | 5 | 44 | 43 | 572 | 1 | 27 | 8 | 456 | 57 | 1,099 |
| 99,063 | 5 | 44 | 43 | 574 | 1 | 27 | 7 | 457 | 56 | 1,102 |
| 99,064 | 5 | 43 | 43 | 560 | 1 | 27 | 7 | 441 | 56 | 1,071 |
| 99,065 | 5 | 43 | 43 | 568 | 1 | 28 | 7 | 446 | 56 | 1,085 |
| 99,066 | 5 | 31 | 43 | 386 | 1 | 22 | 7 | 338 | 56 | 777   |
| 99,067 | 5 | 30 | 43 | 318 | 1 | 19 | 7 | 275 | 56 | 642   |
| 99,068 | 5 | 30 | 43 | 314 | 1 | 19 | 7 | 276 | 56 | 639   |
| 99,069 | 5 | 30 | 41 | 311 | 1 | 18 | 7 | 273 | 54 | 632   |
| 99,070 | 5 | 30 | 41 | 311 | 1 | 18 | 7 | 275 | 54 | 634   |
| 99,071 | 5 | 31 | 41 | 315 | 1 | 18 | 7 | 279 | 54 | 643   |
| 99,072 | 5 | 31 | 41 | 316 | 1 | 18 | 7 | 281 | 54 | 646   |
| 99,073 | 5 | 29 | 40 | 315 | 1 | 18 | 7 | 280 | 53 | 642   |
| 99,074 | 5 | 29 | 40 | 313 | 1 | 18 | 7 | 280 | 53 | 640   |
| 99,075 | 5 | 29 | 40 | 313 | 1 | 18 | 7 | 280 | 53 | 640   |
| 99,076 | 4 | 29 | 39 | 313 | 1 | 18 | 7 | 279 | 51 | 639   |
| 99,077 | 4 | 29 | 39 | 312 | 1 | 18 | 7 | 277 | 51 | 636   |
| 99,078 | 4 | 25 | 39 | 301 | 1 | 17 | 7 | 266 | 51 | 609   |
| 99,079 | 4 | 25 | 39 | 301 | 1 | 17 | 7 | 267 | 51 | 610   |
| 99,080 | 4 | 25 | 38 | 301 | 1 | 17 | 7 | 264 | 50 | 607   |
| 99,081 | 4 | 25 | 38 | 324 | 1 | 19 | 7 | 280 | 50 | 648   |
| 99,082 | 4 | 24 | 37 | 314 | 1 | 19 | 7 | 271 | 49 | 628   |
| 99,083 | 4 | 18 | 37 | 291 | 1 | 18 | 7 | 201 | 49 | 528   |
| 99,084 | 3 | 18 | 37 | 246 | 1 | 14 | 7 | 182 | 48 | 460   |
| 99,085 | 3 | 18 | 36 | 251 | 1 | 14 | 7 | 180 | 47 | 463   |

|        |   |    |    |     |   |    |    |     |    |     |
|--------|---|----|----|-----|---|----|----|-----|----|-----|
| 99,086 | 3 | 19 | 36 | 260 | 1 | 16 | 6  | 194 | 46 | 489 |
| 99,087 | 3 | 20 | 32 | 258 | 1 | 16 | 6  | 193 | 42 | 487 |
| 99,088 | 3 | 21 | 31 | 265 | 1 | 16 | 6  | 192 | 41 | 494 |
| 99,089 | 3 | 23 | 31 | 276 | 1 | 16 | 6  | 204 | 41 | 519 |
| 99,090 | 3 | 21 | 30 | 276 | 1 | 15 | 6  | 205 | 40 | 517 |
| 99,091 | 3 | 20 | 31 | 269 | 1 | 15 | 5  | 187 | 40 | 491 |
| 99,092 | 3 | 18 | 25 | 248 | 1 | 14 | 5  | 168 | 34 | 448 |
| 99,093 | 3 | 18 | 22 | 249 | 1 | 14 | 4  | 168 | 30 | 449 |
| 99,094 | 2 | 18 | 17 | 249 | 1 | 14 | 3  | 168 | 23 | 449 |
| 99,095 | 2 | 18 | 17 | 249 | 1 | 14 | 3  | 168 | 23 | 449 |
| 99,096 | 2 | 15 | 19 | 232 | 1 | 13 | 4  | 152 | 26 | 412 |
| 99,097 | 2 | 15 | 19 | 232 | 1 | 13 | 5  | 152 | 27 | 412 |
| 99,098 | 2 | 15 | 19 | 226 | 1 | 13 | 7  | 149 | 29 | 403 |
| 99,099 | 2 | 15 | 19 | 226 | 1 | 13 | 7  | 149 | 29 | 403 |
| 99,100 | 2 | 16 | 21 | 226 | 1 | 13 | 7  | 149 | 31 | 404 |
| 99,101 | 2 | 16 | 30 | 226 | 1 | 13 | 12 | 148 | 45 | 403 |
| 99,102 | 2 | 16 | 30 | 221 | 0 | 13 | 12 | 147 | 44 | 397 |
| 99,103 | 2 | 16 | 30 | 221 | 0 | 13 | 12 | 147 | 44 | 397 |
| 99,104 | 3 | 15 | 30 | 220 | 0 | 13 | 12 | 147 | 45 | 395 |
| 99,105 | 3 | 15 | 30 | 220 | 0 | 13 | 12 | 147 | 45 | 395 |
| 99,106 | 4 | 15 | 30 | 218 | 0 | 13 | 15 | 143 | 49 | 389 |
| 99,107 | 4 | 13 | 31 | 220 | 1 | 12 | 16 | 141 | 52 | 386 |
| 99,108 | 4 | 15 | 36 | 216 | 1 | 10 | 18 | 140 | 59 | 381 |
| 99,109 | 4 | 14 | 41 | 200 | 1 | 10 | 19 | 131 | 65 | 355 |
| 99,110 | 4 | 15 | 39 | 190 | 1 | 10 | 19 | 128 | 63 | 343 |
| 99,111 | 4 | 15 | 36 | 189 | 1 | 10 | 19 | 128 | 60 | 342 |
| 99,112 | 4 | 13 | 35 | 181 | 1 | 8  | 17 | 126 | 57 | 328 |
| 99,113 | 4 | 13 | 35 | 181 | 1 | 8  | 17 | 126 | 57 | 328 |
| 99,114 | 4 | 13 | 36 | 177 | 1 | 8  | 17 | 122 | 58 | 320 |
| 99,115 | 4 | 13 | 36 | 178 | 1 | 8  | 17 | 122 | 58 | 321 |
| 99,116 | 4 | 13 | 37 | 173 | 1 | 7  | 18 | 119 | 60 | 312 |
| 99,117 | 4 | 13 | 37 | 172 | 1 | 7  | 18 | 120 | 60 | 312 |
| 99,118 | 4 | 14 | 37 | 175 | 1 | 7  | 18 | 119 | 60 | 315 |
| 99,119 | 4 | 13 | 37 | 163 | 1 | 7  | 18 | 110 | 60 | 293 |
| 99,120 | 4 | 14 | 39 | 189 | 1 | 7  | 21 | 126 | 65 | 336 |
| 99,121 | 4 | 14 | 39 | 187 | 1 | 7  | 21 | 123 | 65 | 331 |
| 99,122 | 4 | 13 | 40 | 182 | 1 | 7  | 21 | 115 | 66 | 317 |
| 99,123 | 4 | 15 | 40 | 187 | 1 | 7  | 21 | 120 | 66 | 329 |
| 99,124 | 5 | 15 | 40 | 189 | 2 | 7  | 21 | 119 | 68 | 330 |
| 99,125 | 5 | 15 | 45 | 190 | 2 | 7  | 22 | 121 | 74 | 333 |
| 99,126 | 5 | 15 | 45 | 196 | 2 | 8  | 23 | 122 | 75 | 341 |

|        |   |    |    |     |   |   |    |     |    |     |
|--------|---|----|----|-----|---|---|----|-----|----|-----|
| 99,127 | 5 | 20 | 47 | 218 | 2 | 8 | 24 | 122 | 78 | 368 |
| 99,128 | 5 | 20 | 47 | 231 | 2 | 8 | 24 | 125 | 78 | 384 |
| 99,129 | 5 | 21 | 48 | 244 | 2 | 8 | 24 | 124 | 79 | 397 |
| 99,130 | 5 | 22 | 48 | 323 | 2 | 8 | 24 | 139 | 79 | 492 |
| 99,131 | 5 | 22 | 48 | 323 | 2 | 8 | 24 | 139 | 79 | 492 |
| 99,132 | 5 | 25 | 49 | 296 | 2 | 5 | 24 | 114 | 80 | 440 |
| 99,133 | 5 | 25 | 50 | 298 | 2 | 5 | 24 | 114 | 81 | 442 |
| 99,134 | 5 | 25 | 52 | 291 | 2 | 5 | 26 | 113 | 85 | 434 |
| 99,135 | 5 | 25 | 55 | 299 | 2 | 6 | 26 | 116 | 88 | 446 |
| 99,136 | 5 | 25 | 55 | 299 | 2 | 6 | 26 | 114 | 88 | 444 |
| 99,137 | 5 | 24 | 55 | 293 | 2 | 5 | 26 | 104 | 88 | 426 |
| 99,138 | 5 | 23 | 55 | 291 | 2 | 5 | 26 | 105 | 88 | 424 |
| 99,139 | 5 | 20 | 58 | 267 | 2 | 4 | 29 | 92  | 94 | 383 |
| 99,140 | 5 | 20 | 58 | 270 | 2 | 4 | 29 | 92  | 94 | 386 |
| 99,141 | 5 | 20 | 56 | 266 | 2 | 4 | 29 | 88  | 92 | 378 |
| 99,142 | 5 | 20 | 54 | 259 | 2 | 4 | 29 | 87  | 90 | 370 |
| 99,143 | 5 | 20 | 54 | 259 | 2 | 4 | 29 | 88  | 90 | 371 |
| 99,144 | 5 | 20 | 54 | 259 | 2 | 4 | 29 | 88  | 90 | 371 |
| 99,145 | 4 | 20 | 53 | 259 | 2 | 4 | 29 | 88  | 88 | 371 |
| 99,146 | 4 | 20 | 55 | 259 | 2 | 4 | 29 | 88  | 90 | 371 |
| 99,147 | 4 | 20 | 53 | 261 | 2 | 4 | 27 | 88  | 86 | 373 |
| 99,148 | 4 | 21 | 54 | 267 | 2 | 5 | 26 | 94  | 86 | 387 |
| 99,149 | 4 | 21 | 55 | 273 | 2 | 5 | 24 | 97  | 85 | 396 |
| 99,150 | 4 | 21 | 60 | 277 | 2 | 5 | 24 | 99  | 90 | 402 |
| 99,151 | 4 | 20 | 59 | 276 | 2 | 5 | 24 | 99  | 89 | 400 |
| 99,152 | 4 | 20 | 50 | 275 | 2 | 5 | 19 | 99  | 75 | 399 |
| 99,153 | 4 | 20 | 50 | 277 | 2 | 5 | 19 | 99  | 75 | 401 |
| 99,154 | 3 | 20 | 50 | 298 | 2 | 5 | 19 | 115 | 74 | 438 |
| 99,155 | 3 | 20 | 50 | 302 | 2 | 5 | 19 | 120 | 74 | 447 |
| 99,156 | 2 | 20 | 50 | 306 | 2 | 7 | 16 | 120 | 70 | 453 |
| 99,157 | 2 | 20 | 50 | 307 | 1 | 7 | 15 | 121 | 68 | 455 |
| 99,158 | 2 | 21 | 49 | 288 | 1 | 7 | 15 | 110 | 67 | 426 |
| 99,159 | 2 | 23 | 44 | 289 | 1 | 7 | 13 | 113 | 60 | 432 |
| 99,160 | 2 | 23 | 35 | 289 | 1 | 7 | 12 | 113 | 50 | 432 |
| 99,161 | 2 | 22 | 34 | 291 | 1 | 7 | 11 | 115 | 48 | 435 |
| 99,162 | 2 | 23 | 34 | 306 | 1 | 7 | 11 | 126 | 48 | 462 |
| 99,163 | 2 | 23 | 34 | 309 | 1 | 7 | 11 | 127 | 48 | 466 |
| 99,164 | 2 | 23 | 33 | 309 | 1 | 7 | 12 | 127 | 48 | 466 |
| 99,165 | 2 | 24 | 37 | 311 | 1 | 7 | 12 | 129 | 52 | 471 |
| 99,166 | 2 | 25 | 45 | 311 | 1 | 7 | 15 | 127 | 63 | 470 |
| 99,167 | 2 | 25 | 48 | 308 | 1 | 7 | 17 | 125 | 68 | 465 |

|        |   |    |    |     |   |    |    |     |    |     |
|--------|---|----|----|-----|---|----|----|-----|----|-----|
| 99,168 | 2 | 24 | 49 | 302 | 2 | 7  | 19 | 122 | 72 | 455 |
| 99,169 | 2 | 24 | 51 | 303 | 2 | 7  | 19 | 124 | 74 | 458 |
| 99,170 | 2 | 24 | 55 | 303 | 2 | 7  | 17 | 125 | 76 | 459 |
| 99,171 | 2 | 23 | 54 | 282 | 2 | 8  | 17 | 118 | 75 | 431 |
| 99,172 | 2 | 23 | 54 | 284 | 2 | 8  | 17 | 119 | 75 | 434 |
| 99,173 | 2 | 24 | 54 | 299 | 2 | 8  | 17 | 126 | 75 | 457 |
| 99,174 | 2 | 22 | 54 | 296 | 2 | 8  | 17 | 121 | 75 | 447 |
| 99,175 | 1 | 22 | 55 | 301 | 1 | 8  | 17 | 125 | 74 | 456 |
| 99,176 | 1 | 22 | 49 | 303 | 1 | 8  | 16 | 127 | 67 | 460 |
| 99,177 | 1 | 22 | 49 | 299 | 1 | 7  | 16 | 126 | 67 | 454 |
| 99,178 | 1 | 17 | 49 | 264 | 1 | 7  | 16 | 124 | 67 | 412 |
| 99,179 | 1 | 17 | 49 | 264 | 1 | 8  | 16 | 126 | 67 | 415 |
| 99,180 | 1 | 16 | 48 | 250 | 1 | 8  | 15 | 123 | 65 | 397 |
| 99,181 | 1 | 15 | 48 | 173 | 1 | 9  | 15 | 112 | 65 | 309 |
| 99,182 | 1 | 28 | 48 | 251 | 1 | 20 | 15 | 196 | 65 | 495 |
| 99,183 | 1 | 39 | 48 | 337 | 1 | 28 | 17 | 313 | 67 | 717 |
| 99,184 | 1 | 40 | 46 | 410 | 1 | 36 | 16 | 360 | 64 | 846 |
| 99,185 | 0 | 43 | 45 | 434 | 1 | 38 | 16 | 369 | 62 | 884 |
| 99,186 | 0 | 43 | 42 | 430 | 1 | 37 | 16 | 366 | 59 | 876 |
| 99,187 | 0 | 49 | 41 | 445 | 1 | 37 | 13 | 371 | 55 | 902 |
| 99,188 | 0 | 49 | 40 | 439 | 1 | 36 | 13 | 367 | 54 | 891 |
| 99,189 | 0 | 49 | 38 | 438 | 1 | 36 | 12 | 367 | 51 | 890 |
| 99,190 | 0 | 49 | 38 | 438 | 1 | 36 | 12 | 365 | 51 | 888 |
| 99,191 | 0 | 49 | 38 | 435 | 1 | 36 | 13 | 365 | 52 | 885 |
| 99,192 | 0 | 50 | 38 | 435 | 1 | 36 | 13 | 366 | 52 | 887 |
| 99,193 | 0 | 50 | 38 | 438 | 1 | 36 | 13 | 367 | 52 | 891 |
| 99,194 | 0 | 50 | 38 | 452 | 1 | 36 | 13 | 375 | 52 | 913 |
| 99,195 | 0 | 50 | 38 | 457 | 1 | 36 | 13 | 382 | 52 | 925 |
| 99,196 | 0 | 50 | 38 | 458 | 1 | 36 | 13 | 382 | 52 | 926 |
| 99,197 | 0 | 51 | 36 | 475 | 1 | 36 | 13 | 397 | 50 | 959 |
| 99,198 | 0 | 51 | 36 | 475 | 1 | 36 | 13 | 401 | 50 | 963 |
| 99,199 | 0 | 50 | 35 | 478 | 1 | 35 | 13 | 400 | 49 | 963 |
| 99,200 | 1 | 50 | 34 | 479 | 1 | 36 | 13 | 399 | 49 | 964 |
| 99,201 | 1 | 50 | 29 | 476 | 1 | 36 | 13 | 397 | 44 | 959 |
| 99,202 | 1 | 50 | 28 | 476 | 1 | 36 | 13 | 399 | 43 | 961 |
| 99,203 | 1 | 50 | 28 | 476 | 1 | 36 | 13 | 401 | 43 | 963 |
| 99,204 | 1 | 50 | 28 | 457 | 1 | 36 | 13 | 390 | 43 | 933 |
| 99,205 | 1 | 50 | 28 | 456 | 1 | 36 | 13 | 386 | 43 | 928 |
| 99,206 | 1 | 50 | 28 | 456 | 1 | 36 | 13 | 386 | 43 | 928 |
| 99,207 | 1 | 45 | 28 | 440 | 1 | 33 | 13 | 374 | 43 | 892 |
| 99,208 | 1 | 45 | 28 | 442 | 1 | 33 | 13 | 374 | 43 | 894 |

|        |   |    |    |     |   |    |    |     |    |       |
|--------|---|----|----|-----|---|----|----|-----|----|-------|
| 99,209 | 1 | 45 | 28 | 442 | 1 | 33 | 13 | 374 | 43 | 894   |
| 99,210 | 1 | 45 | 28 | 443 | 1 | 33 | 13 | 375 | 43 | 896   |
| 99,211 | 1 | 45 | 28 | 447 | 1 | 33 | 13 | 378 | 43 | 903   |
| 99,212 | 1 | 45 | 28 | 447 | 1 | 35 | 13 | 382 | 43 | 909   |
| 99,213 | 1 | 44 | 28 | 437 | 1 | 35 | 13 | 374 | 43 | 890   |
| 99,214 | 1 | 47 | 28 | 483 | 1 | 37 | 14 | 389 | 44 | 956   |
| 99,215 | 1 | 48 | 28 | 490 | 1 | 38 | 13 | 397 | 43 | 973   |
| 99,216 | 1 | 47 | 25 | 494 | 1 | 39 | 13 | 401 | 40 | 981   |
| 99,217 | 1 | 48 | 16 | 505 | 1 | 39 | 9  | 417 | 27 | 1,009 |
| 99,218 | 1 | 51 | 13 | 565 | 1 | 42 | 7  | 449 | 22 | 1,107 |
| 99,219 | 1 | 54 | 12 | 577 | 0 | 43 | 5  | 462 | 18 | 1,136 |
| 99,220 | 1 | 56 | 10 | 579 | 0 | 43 | 5  | 464 | 16 | 1,142 |
| 99,221 | 1 | 56 | 6  | 588 | 0 | 43 | 5  | 465 | 12 | 1,152 |
| 99,222 | 1 | 62 | 6  | 618 | 0 | 43 | 5  | 490 | 12 | 1,213 |
| 99,223 | 1 | 62 | 6  | 622 | 0 | 44 | 5  | 491 | 12 | 1,219 |
| 99,224 | 1 | 61 | 5  | 606 | 0 | 44 | 5  | 484 | 11 | 1,195 |
| 99,225 | 1 | 61 | 5  | 606 | 0 | 44 | 5  | 484 | 11 | 1,195 |
| 99,226 | 1 | 61 | 4  | 600 | 0 | 43 | 5  | 477 | 10 | 1,181 |
| 99,227 | 1 | 61 | 4  | 598 | 0 | 44 | 5  | 476 | 10 | 1,179 |
| 99,228 | 1 | 61 | 4  | 598 | 0 | 44 | 5  | 479 | 10 | 1,182 |
| 99,229 | 2 | 62 | 3  | 603 | 0 | 44 | 4  | 481 | 9  | 1,190 |
| 99,230 | 2 | 62 | 3  | 602 | 0 | 43 | 4  | 479 | 9  | 1,186 |
| 99,231 | 2 | 62 | 3  | 603 | 0 | 43 | 4  | 478 | 9  | 1,186 |
| 99,232 | 2 | 48 | 3  | 524 | 0 | 31 | 4  | 392 | 9  | 995   |
| 99,233 | 2 | 48 | 3  | 524 | 0 | 31 | 4  | 392 | 9  | 995   |
| 99,234 | 2 | 33 | 3  | 420 | 0 | 23 | 3  | 275 | 8  | 751   |
| 99,235 | 2 | 32 | 2  | 349 | 0 | 16 | 3  | 227 | 7  | 624   |
| 99,236 | 2 | 29 | 2  | 323 | 0 | 14 | 3  | 225 | 7  | 591   |
| 99,237 | 2 | 29 | 2  | 324 | 0 | 14 | 3  | 226 | 7  | 593   |
| 99,238 | 2 | 23 | 2  | 310 | 0 | 14 | 3  | 221 | 7  | 568   |
| 99,239 | 2 | 23 | 2  | 310 | 0 | 14 | 3  | 220 | 7  | 567   |
| 99,240 | 2 | 23 | 2  | 310 | 0 | 14 | 3  | 220 | 7  | 567   |
| 99,241 | 2 | 23 | 2  | 310 | 0 | 14 | 2  | 221 | 6  | 568   |
| 99,242 | 2 | 23 | 2  | 310 | 0 | 14 | 2  | 221 | 6  | 568   |
| 99,243 | 2 | 22 | 2  | 310 | 0 | 14 | 2  | 220 | 6  | 566   |
| 99,244 | 2 | 22 | 2  | 307 | 0 | 14 | 2  | 219 | 6  | 562   |
| 99,245 | 2 | 22 | 2  | 292 | 0 | 14 | 2  | 209 | 6  | 537   |
| 99,246 | 2 | 22 | 2  | 287 | 0 | 14 | 2  | 202 | 6  | 525   |
| 99,247 | 2 | 22 | 2  | 286 | 0 | 14 | 2  | 202 | 6  | 524   |
| 99,248 | 2 | 21 | 2  | 258 | 0 | 14 | 2  | 179 | 6  | 472   |
| 99,249 | 2 | 21 | 2  | 258 | 0 | 14 | 2  | 179 | 6  | 472   |

|        |   |    |    |     |   |    |   |     |    |     |
|--------|---|----|----|-----|---|----|---|-----|----|-----|
| 99,250 | 1 | 21 | 2  | 258 | 0 | 16 | 2 | 179 | 5  | 474 |
| 99,251 | 1 | 21 | 2  | 252 | 0 | 15 | 3 | 177 | 6  | 465 |
| 99,252 | 1 | 23 | 2  | 254 | 0 | 15 | 3 | 180 | 6  | 472 |
| 99,253 | 1 | 23 | 3  | 259 | 0 | 15 | 3 | 182 | 7  | 479 |
| 99,254 | 1 | 23 | 3  | 259 | 0 | 15 | 3 | 181 | 7  | 478 |
| 99,255 | 1 | 23 | 3  | 254 | 0 | 15 | 3 | 175 | 7  | 467 |
| 99,256 | 1 | 23 | 3  | 253 | 0 | 16 | 3 | 178 | 7  | 470 |
| 99,257 | 1 | 23 | 3  | 254 | 0 | 16 | 3 | 177 | 7  | 470 |
| 99,258 | 1 | 23 | 4  | 254 | 0 | 16 | 3 | 178 | 8  | 471 |
| 99,259 | 1 | 23 | 4  | 252 | 0 | 16 | 3 | 178 | 8  | 469 |
| 99,260 | 1 | 23 | 4  | 252 | 1 | 16 | 3 | 181 | 9  | 472 |
| 99,261 | 1 | 23 | 4  | 252 | 1 | 16 | 3 | 181 | 9  | 472 |
| 99,262 | 1 | 23 | 6  | 248 | 1 | 16 | 4 | 179 | 12 | 466 |
| 99,263 | 1 | 24 | 6  | 245 | 1 | 14 | 4 | 172 | 12 | 455 |
| 99,264 | 1 | 24 | 7  | 239 | 1 | 14 | 3 | 171 | 12 | 448 |
| 99,265 | 1 | 21 | 7  | 191 | 1 | 12 | 3 | 154 | 12 | 378 |
| 99,266 | 1 | 20 | 7  | 185 | 1 | 11 | 3 | 149 | 12 | 365 |
| 99,267 | 1 | 20 | 6  | 179 | 1 | 10 | 3 | 143 | 11 | 352 |
| 99,268 | 1 | 18 | 8  | 162 | 1 | 10 | 3 | 125 | 13 | 315 |
| 99,269 | 1 | 15 | 8  | 103 | 1 | 8  | 3 | 93  | 13 | 219 |
| 99,270 | 1 | 10 | 8  | 88  | 1 | 7  | 3 | 77  | 13 | 182 |
| 99,271 | 1 | 10 | 8  | 79  | 1 | 7  | 3 | 75  | 13 | 171 |
| 99,272 | 3 | 4  | 12 | 44  | 1 | 6  | 5 | 40  | 21 | 94  |
| 99,273 | 3 | 4  | 14 | 44  | 1 | 6  | 5 | 40  | 23 | 94  |
| 99,274 | 3 | 4  | 16 | 38  | 1 | 5  | 6 | 38  | 26 | 85  |
| 99,275 | 3 | 4  | 16 | 35  | 1 | 5  | 6 | 38  | 26 | 82  |
| 99,276 | 3 | 4  | 16 | 31  | 2 | 5  | 6 | 37  | 27 | 77  |
| 99,277 | 3 | 4  | 16 | 31  | 2 | 4  | 6 | 33  | 27 | 72  |
| 99,278 | 3 | 4  | 16 | 31  | 2 | 4  | 6 | 33  | 27 | 72  |
| 99,279 | 3 | 4  | 16 | 32  | 2 | 4  | 6 | 33  | 27 | 73  |
| 99,280 | 2 | 3  | 16 | 27  | 2 | 4  | 6 | 31  | 26 | 65  |
| 99,281 | 2 | 3  | 16 | 27  | 2 | 4  | 6 | 31  | 26 | 65  |
| 99,282 | 2 | 3  | 16 | 27  | 2 | 4  | 6 | 31  | 26 | 65  |
| 99,283 | 2 | 3  | 16 | 27  | 2 | 4  | 6 | 31  | 26 | 65  |
| 99,284 | 2 | 7  | 16 | 36  | 2 | 4  | 6 | 38  | 26 | 85  |
| 99,285 | 2 | 7  | 16 | 44  | 2 | 4  | 6 | 45  | 26 | 100 |
| 99,286 | 2 | 9  | 16 | 66  | 2 | 5  | 6 | 55  | 26 | 135 |
| 99,287 | 2 | 11 | 16 | 84  | 2 | 5  | 6 | 72  | 26 | 172 |
| 99,288 | 2 | 14 | 16 | 106 | 2 | 5  | 6 | 77  | 26 | 202 |
| 99,289 | 2 | 14 | 16 | 106 | 2 | 5  | 6 | 77  | 26 | 202 |
| 99,290 | 2 | 15 | 16 | 111 | 2 | 5  | 6 | 81  | 26 | 212 |

|        |   |    |    |     |   |   |    |     |    |     |
|--------|---|----|----|-----|---|---|----|-----|----|-----|
| 99,291 | 2 | 15 | 16 | 111 | 2 | 5 | 6  | 81  | 26 | 212 |
| 99,292 | 2 | 15 | 16 | 111 | 2 | 5 | 6  | 81  | 26 | 212 |
| 99,293 | 2 | 19 | 16 | 120 | 2 | 5 | 6  | 83  | 26 | 227 |
| 99,294 | 2 | 19 | 16 | 122 | 2 | 5 | 6  | 87  | 26 | 233 |
| 99,295 | 2 | 22 | 16 | 143 | 2 | 5 | 6  | 101 | 26 | 271 |
| 99,296 | 2 | 23 | 16 | 150 | 2 | 5 | 6  | 106 | 26 | 284 |
| 99,297 | 2 | 23 | 16 | 151 | 2 | 5 | 6  | 106 | 26 | 285 |
| 99,298 | 2 | 24 | 16 | 151 | 2 | 5 | 6  | 106 | 26 | 286 |
| 99,299 | 2 | 25 | 16 | 154 | 2 | 5 | 6  | 108 | 26 | 292 |
| 99,300 | 2 | 25 | 16 | 155 | 2 | 5 | 6  | 109 | 26 | 294 |
| 99,301 | 2 | 25 | 16 | 158 | 2 | 3 | 8  | 110 | 28 | 296 |
| 99,302 | 2 | 25 | 16 | 157 | 2 | 3 | 7  | 109 | 27 | 294 |
| 99,303 | 2 | 23 | 16 | 156 | 2 | 3 | 7  | 108 | 27 | 290 |
| 99,304 | 2 | 26 | 15 | 159 | 2 | 3 | 7  | 113 | 26 | 301 |
| 99,305 | 2 | 27 | 15 | 159 | 2 | 3 | 7  | 112 | 26 | 301 |
| 99,306 | 2 | 27 | 15 | 172 | 2 | 3 | 7  | 120 | 26 | 322 |
| 99,307 | 2 | 27 | 15 | 175 | 2 | 2 | 7  | 116 | 26 | 320 |
| 99,308 | 2 | 27 | 14 | 174 | 2 | 2 | 7  | 118 | 25 | 321 |
| 99,309 | 2 | 27 | 14 | 175 | 2 | 2 | 7  | 119 | 25 | 323 |
| 99,310 | 2 | 28 | 14 | 177 | 2 | 2 | 7  | 116 | 25 | 323 |
| 99,311 | 2 | 31 | 14 | 181 | 1 | 2 | 7  | 127 | 24 | 341 |
| 99,312 | 2 | 31 | 12 | 185 | 1 | 2 | 6  | 131 | 21 | 349 |
| 99,313 | 3 | 30 | 15 | 186 | 1 | 2 | 8  | 131 | 27 | 349 |
| 99,314 | 3 | 30 | 17 | 186 | 1 | 2 | 8  | 131 | 29 | 349 |
| 99,315 | 3 | 30 | 16 | 186 | 1 | 2 | 8  | 130 | 28 | 348 |
| 99,316 | 4 | 30 | 27 | 186 | 1 | 2 | 11 | 127 | 43 | 345 |
| 99,317 | 4 | 30 | 27 | 188 | 1 | 2 | 11 | 131 | 43 | 351 |
| 99,318 | 5 | 30 | 30 | 191 | 1 | 2 | 14 | 132 | 50 | 355 |
| 99,319 | 7 | 33 | 50 | 196 | 1 | 2 | 20 | 138 | 78 | 369 |
| 99,320 | 7 | 35 | 58 | 205 | 2 | 1 | 21 | 138 | 88 | 379 |
| 99,321 | 7 | 35 | 61 | 207 | 2 | 1 | 21 | 139 | 91 | 382 |
| 99,322 | 7 | 35 | 61 | 208 | 2 | 1 | 21 | 139 | 91 | 383 |
| 99,323 | 5 | 35 | 57 | 209 | 2 | 1 | 18 | 138 | 82 | 383 |
| 99,324 | 5 | 35 | 55 | 210 | 2 | 1 | 18 | 138 | 80 | 384 |
| 99,325 | 5 | 35 | 54 | 212 | 2 | 1 | 17 | 138 | 78 | 386 |
| 99,326 | 5 | 35 | 54 | 221 | 2 | 1 | 17 | 141 | 78 | 398 |
| 99,327 | 5 | 38 | 54 | 227 | 1 | 1 | 17 | 147 | 77 | 413 |
| 99,328 | 5 | 38 | 54 | 241 | 1 | 1 | 17 | 155 | 77 | 435 |
| 99,329 | 5 | 40 | 54 | 254 | 1 | 2 | 17 | 167 | 77 | 463 |
| 99,330 | 5 | 41 | 54 | 263 | 1 | 3 | 17 | 174 | 77 | 481 |
| 99,331 | 5 | 41 | 54 | 263 | 1 | 3 | 17 | 174 | 77 | 481 |

|        |    |    |    |     |   |    |    |     |     |       |
|--------|----|----|----|-----|---|----|----|-----|-----|-------|
| 99,332 | 6  | 41 | 61 | 264 | 1 | 4  | 20 | 176 | 88  | 485   |
| 99,333 | 6  | 41 | 62 | 266 | 1 | 4  | 20 | 176 | 89  | 487   |
| 99,334 | 6  | 42 | 62 | 270 | 1 | 4  | 20 | 181 | 89  | 497   |
| 99,335 | 6  | 38 | 62 | 264 | 1 | 4  | 21 | 175 | 90  | 481   |
| 99,336 | 9  | 38 | 69 | 256 | 2 | 4  | 24 | 170 | 104 | 468   |
| 99,337 | 10 | 31 | 73 | 186 | 4 | 3  | 26 | 129 | 113 | 349   |
| 99,338 | 10 | 31 | 73 | 186 | 4 | 3  | 26 | 129 | 113 | 349   |
| 99,339 | 10 | 31 | 75 | 188 | 5 | 3  | 28 | 131 | 118 | 353   |
| 99,340 | 10 | 31 | 75 | 187 | 5 | 3  | 28 | 131 | 118 | 352   |
| 99,341 | 10 | 30 | 76 | 182 | 5 | 3  | 28 | 128 | 119 | 343   |
| 99,342 | 10 | 30 | 76 | 182 | 5 | 3  | 30 | 128 | 121 | 343   |
| 99,343 | 10 | 30 | 80 | 182 | 5 | 3  | 31 | 127 | 126 | 342   |
| 99,344 | 10 | 26 | 84 | 170 | 5 | 3  | 32 | 122 | 131 | 321   |
| 99,345 | 10 | 26 | 84 | 170 | 5 | 3  | 32 | 122 | 131 | 321   |
| 99,346 | 10 | 22 | 84 | 157 | 5 | 3  | 33 | 107 | 132 | 289   |
| 99,347 | 10 | 22 | 84 | 170 | 5 | 4  | 33 | 119 | 132 | 315   |
| 99,348 | 10 | 24 | 84 | 196 | 5 | 8  | 33 | 128 | 132 | 356   |
| 99,349 | 10 | 23 | 84 | 212 | 5 | 8  | 33 | 133 | 132 | 376   |
| 99,350 | 10 | 22 | 84 | 220 | 6 | 10 | 33 | 134 | 133 | 386   |
| 99,351 | 10 | 26 | 85 | 255 | 6 | 10 | 32 | 139 | 133 | 430   |
| 99,352 | 10 | 29 | 85 | 265 | 6 | 10 | 32 | 140 | 133 | 444   |
| 99,353 | 10 | 30 | 85 | 306 | 6 | 13 | 32 | 168 | 133 | 517   |
| 99,354 | 10 | 31 | 85 | 331 | 6 | 13 | 32 | 183 | 133 | 558   |
| 99,355 | 10 | 37 | 85 | 574 | 6 | 27 | 32 | 233 | 133 | 871   |
| 99,356 | 10 | 43 | 85 | 667 | 6 | 28 | 32 | 288 | 133 | 1,026 |
| 99,357 | 10 | 46 | 86 | 684 | 6 | 29 | 32 | 292 | 134 | 1,051 |
| 99,358 | 10 | 47 | 86 | 704 | 6 | 29 | 32 | 297 | 134 | 1,077 |
| 99,359 | 11 | 48 | 87 | 710 | 6 | 29 | 32 | 299 | 136 | 1,086 |
| 99,360 | 11 | 48 | 87 | 714 | 6 | 29 | 32 | 301 | 136 | 1,092 |
| 99,361 | 11 | 48 | 87 | 715 | 6 | 29 | 32 | 301 | 136 | 1,093 |
| 99,362 | 12 | 45 | 90 | 708 | 6 | 29 | 33 | 285 | 141 | 1,067 |
| 99,363 | 12 | 46 | 90 | 722 | 6 | 29 | 33 | 288 | 141 | 1,085 |
| 99,364 | 11 | 46 | 87 | 725 | 6 | 29 | 31 | 292 | 135 | 1,092 |
| 99,365 | 11 | 47 | 85 | 749 | 6 | 32 | 32 | 316 | 134 | 1,144 |
| 99,366 | 12 | 50 | 90 | 795 | 6 | 33 | 36 | 343 | 144 | 1,221 |
| 99,367 | 11 | 53 | 77 | 819 | 6 | 33 | 33 | 348 | 127 | 1,253 |
| 99,368 | 10 | 53 | 74 | 819 | 6 | 33 | 30 | 344 | 120 | 1,249 |
| 99,369 | 10 | 55 | 73 | 827 | 6 | 36 | 30 | 348 | 119 | 1,266 |
| 99,370 | 8  | 58 | 54 | 867 | 6 | 38 | 23 | 368 | 91  | 1,331 |
| 99,371 | 8  | 57 | 47 | 861 | 5 | 38 | 26 | 372 | 86  | 1,328 |
| 99,372 | 8  | 60 | 44 | 881 | 5 | 40 | 26 | 382 | 83  | 1,363 |



|        |   |    |    |     |   |    |    |     |    |       |
|--------|---|----|----|-----|---|----|----|-----|----|-------|
| 99,373 | 8 | 60 | 44 | 881 | 5 | 40 | 26 | 383 | 83 | 1,364 |
| 99,374 | 8 | 60 | 43 | 880 | 5 | 40 | 28 | 383 | 84 | 1,363 |
| 99,375 | 8 | 60 | 42 | 877 | 5 | 40 | 28 | 383 | 83 | 1,360 |
| 99,376 | 8 | 60 | 42 | 877 | 5 | 40 | 28 | 383 | 83 | 1,360 |
| 99,377 | 8 | 57 | 42 | 865 | 5 | 40 | 28 | 376 | 83 | 1,338 |
| 99,378 | 8 | 57 | 42 | 865 | 5 | 40 | 28 | 377 | 83 | 1,339 |
| 99,379 | 8 | 55 | 43 | 840 | 5 | 39 | 28 | 358 | 84 | 1,292 |
| 99,380 | 8 | 55 | 43 | 841 | 5 | 39 | 28 | 360 | 84 | 1,295 |
| 99,381 | 8 | 55 | 43 | 832 | 5 | 38 | 28 | 356 | 84 | 1,281 |
| 99,382 | 8 | 55 | 39 | 832 | 5 | 38 | 27 | 356 | 79 | 1,281 |
| 99,383 | 7 | 55 | 36 | 828 | 5 | 37 | 26 | 354 | 74 | 1,274 |
| 99,384 | 7 | 55 | 35 | 828 | 5 | 37 | 26 | 354 | 73 | 1,274 |
| 99,385 | 4 | 54 | 32 | 824 | 5 | 37 | 23 | 349 | 64 | 1,264 |
| 99,386 | 4 | 54 | 31 | 820 | 4 | 37 | 24 | 347 | 63 | 1,258 |
| 99,387 | 4 | 54 | 31 | 821 | 4 | 37 | 24 | 348 | 63 | 1,260 |
| 99,388 | 3 | 54 | 28 | 822 | 2 | 37 | 22 | 348 | 55 | 1,261 |
| 99,389 | 3 | 54 | 28 | 824 | 2 | 38 | 22 | 356 | 55 | 1,272 |
| 99,390 | 3 | 54 | 26 | 840 | 1 | 39 | 20 | 362 | 50 | 1,295 |
| 99,391 | 3 | 56 | 25 | 862 | 1 | 40 | 20 | 375 | 49 | 1,333 |
| 99,392 | 3 | 56 | 25 | 863 | 1 | 40 | 18 | 375 | 47 | 1,334 |
| 99,393 | 3 | 56 | 23 | 869 | 1 | 40 | 17 | 380 | 44 | 1,345 |
| 99,394 | 3 | 56 | 24 | 873 | 1 | 40 | 19 | 380 | 47 | 1,349 |
| 99,395 | 3 | 59 | 20 | 907 | 1 | 40 | 18 | 399 | 42 | 1,405 |
| 99,396 | 3 | 60 | 20 | 924 | 1 | 41 | 18 | 422 | 42 | 1,447 |
| 99,397 | 3 | 61 | 20 | 924 | 1 | 45 | 17 | 430 | 41 | 1,460 |
| 99,398 | 3 | 63 | 20 | 921 | 1 | 44 | 17 | 427 | 41 | 1,455 |
| 99,399 | 4 | 62 | 20 | 899 | 2 | 42 | 17 | 424 | 43 | 1,427 |
| 99,400 | 4 | 69 | 20 | 937 | 2 | 45 | 17 | 448 | 43 | 1,499 |
| 99,401 | 4 | 70 | 20 | 939 | 1 | 44 | 17 | 446 | 42 | 1,499 |
| 99,402 | 4 | 66 | 19 | 903 | 1 | 44 | 18 | 440 | 42 | 1,453 |
| 99,403 | 4 | 62 | 19 | 853 | 1 | 41 | 18 | 410 | 42 | 1,366 |
| 99,404 | 4 | 62 | 19 | 854 | 1 | 41 | 18 | 410 | 42 | 1,367 |
| 99,405 | 4 | 56 | 19 | 586 | 1 | 27 | 18 | 336 | 42 | 1,005 |
| 99,406 | 4 | 49 | 19 | 505 | 1 | 27 | 18 | 290 | 42 | 871   |
| 99,407 | 4 | 49 | 19 | 506 | 1 | 27 | 18 | 290 | 42 | 872   |
| 99,408 | 4 | 46 | 18 | 477 | 1 | 26 | 18 | 278 | 41 | 827   |
| 99,409 | 4 | 44 | 18 | 446 | 1 | 26 | 18 | 268 | 41 | 784   |
| 99,410 | 3 | 43 | 17 | 439 | 1 | 26 | 18 | 266 | 39 | 774   |
| 99,411 | 3 | 43 | 17 | 439 | 1 | 26 | 18 | 266 | 39 | 774   |
| 99,412 | 3 | 43 | 15 | 441 | 1 | 27 | 17 | 270 | 36 | 781   |
| 99,413 | 2 | 43 | 14 | 438 | 1 | 27 | 17 | 270 | 34 | 778   |

|        |   |    |    |     |   |    |    |     |    |     |
|--------|---|----|----|-----|---|----|----|-----|----|-----|
| 99,414 | 2 | 42 | 14 | 426 | 1 | 27 | 21 | 267 | 38 | 762 |
| 99,415 | 2 | 42 | 14 | 400 | 1 | 24 | 20 | 239 | 37 | 705 |
| 99,416 | 2 | 42 | 14 | 402 | 1 | 24 | 20 | 240 | 37 | 708 |
| 99,417 | 1 | 36 | 9  | 332 | 1 | 23 | 16 | 216 | 27 | 607 |
| 99,418 | 1 | 36 | 9  | 332 | 1 | 23 | 16 | 216 | 27 | 607 |
| 99,419 | 1 | 36 | 10 | 332 | 1 | 23 | 16 | 226 | 28 | 617 |
| 99,420 | 3 | 35 | 10 | 325 | 1 | 20 | 16 | 222 | 30 | 602 |
| 99,421 | 3 | 29 | 10 | 281 | 1 | 18 | 16 | 196 | 30 | 524 |
| 99,422 | 5 | 25 | 11 | 257 | 1 | 16 | 13 | 181 | 30 | 479 |
| 99,423 | 5 | 25 | 11 | 259 | 1 | 16 | 13 | 183 | 30 | 483 |
| 99,424 | 5 | 27 | 11 | 311 | 1 | 20 | 11 | 225 | 28 | 583 |
| 99,425 | 6 | 30 | 13 | 325 | 1 | 21 | 13 | 235 | 33 | 611 |
| 99,426 | 6 | 30 | 13 | 332 | 1 | 21 | 13 | 237 | 33 | 620 |
| 99,427 | 6 | 30 | 13 | 339 | 1 | 21 | 14 | 239 | 34 | 629 |
| 99,428 | 7 | 30 | 13 | 339 | 1 | 21 | 14 | 241 | 35 | 631 |
| 99,429 | 7 | 30 | 12 | 342 | 1 | 21 | 14 | 242 | 34 | 635 |
| 99,430 | 7 | 30 | 13 | 340 | 1 | 21 | 15 | 242 | 36 | 633 |
| 99,431 | 7 | 30 | 23 | 340 | 1 | 21 | 26 | 240 | 57 | 631 |
| 99,432 | 7 | 29 | 26 | 339 | 1 | 21 | 28 | 237 | 62 | 626 |
| 99,433 | 7 | 29 | 26 | 339 | 1 | 21 | 27 | 237 | 61 | 626 |
| 99,434 | 7 | 29 | 26 | 339 | 1 | 21 | 27 | 238 | 61 | 627 |
| 99,435 | 7 | 29 | 25 | 339 | 1 | 21 | 27 | 237 | 60 | 626 |
| 99,436 | 7 | 30 | 24 | 340 | 1 | 22 | 26 | 241 | 58 | 633 |
| 99,437 | 7 | 30 | 24 | 352 | 1 | 22 | 25 | 245 | 57 | 649 |
| 99,438 | 7 | 30 | 24 | 351 | 1 | 22 | 25 | 248 | 57 | 651 |
| 99,439 | 7 | 30 | 23 | 350 | 1 | 21 | 25 | 241 | 56 | 642 |
| 99,440 | 7 | 31 | 23 | 333 | 1 | 20 | 25 | 232 | 56 | 616 |
| 99,441 | 7 | 29 | 23 | 311 | 1 | 19 | 25 | 219 | 56 | 578 |
| 99,442 | 7 | 29 | 23 | 310 | 1 | 19 | 25 | 218 | 56 | 576 |
| 99,443 | 7 | 29 | 23 | 304 | 1 | 19 | 25 | 213 | 56 | 565 |
| 99,444 | 7 | 29 | 23 | 304 | 1 | 19 | 25 | 213 | 56 | 565 |
| 99,445 | 7 | 26 | 20 | 265 | 1 | 19 | 23 | 192 | 51 | 502 |
| 99,446 | 7 | 25 | 20 | 249 | 1 | 18 | 23 | 169 | 51 | 461 |
| 99,447 | 7 | 25 | 20 | 249 | 1 | 18 | 23 | 171 | 51 | 463 |
| 99,448 | 7 | 24 | 20 | 238 | 1 | 14 | 23 | 160 | 51 | 436 |
| 99,449 | 7 | 22 | 20 | 228 | 1 | 14 | 23 | 152 | 51 | 416 |
| 99,450 | 6 | 13 | 20 | 158 | 0 | 8  | 24 | 117 | 50 | 296 |
| 99,451 | 7 | 13 | 20 | 158 | 0 | 8  | 24 | 117 | 51 | 296 |
| 99,452 | 7 | 13 | 20 | 158 | 0 | 8  | 23 | 118 | 50 | 297 |
| 99,453 | 7 | 13 | 20 | 160 | 0 | 8  | 23 | 128 | 50 | 309 |
| 99,454 | 7 | 13 | 20 | 155 | 0 | 8  | 23 | 128 | 50 | 304 |

|        |   |    |    |     |   |   |    |     |    |     |
|--------|---|----|----|-----|---|---|----|-----|----|-----|
| 99,455 | 7 | 13 | 20 | 154 | 0 | 8 | 23 | 128 | 50 | 303 |
| 99,456 | 7 | 10 | 20 | 148 | 0 | 9 | 23 | 128 | 50 | 295 |
| 99,457 | 7 | 10 | 20 | 135 | 0 | 8 | 23 | 120 | 50 | 273 |
| 99,458 | 7 | 10 | 20 | 136 | 0 | 8 | 23 | 126 | 50 | 280 |
| 99,459 | 7 | 10 | 20 | 138 | 0 | 8 | 23 | 126 | 50 | 282 |
| 99,460 | 7 | 10 | 20 | 138 | 0 | 8 | 24 | 126 | 51 | 282 |
| 99,461 | 7 | 10 | 20 | 138 | 0 | 8 | 24 | 126 | 51 | 282 |
| 99,462 | 7 | 10 | 22 | 137 | 0 | 8 | 25 | 127 | 54 | 282 |
| 99,463 | 7 | 9  | 22 | 130 | 0 | 7 | 25 | 123 | 54 | 269 |
| 99,464 | 7 | 9  | 22 | 130 | 0 | 7 | 25 | 126 | 54 | 272 |
| 99,465 | 7 | 9  | 22 | 130 | 0 | 7 | 21 | 127 | 50 | 273 |
| 99,466 | 7 | 9  | 22 | 130 | 0 | 7 | 21 | 127 | 50 | 273 |
| 99,467 | 7 | 10 | 23 | 130 | 0 | 7 | 22 | 127 | 52 | 274 |
| 99,468 | 7 | 10 | 23 | 128 | 0 | 7 | 22 | 119 | 52 | 264 |
| 99,469 | 7 | 9  | 23 | 121 | 0 | 7 | 22 | 108 | 52 | 245 |
| 99,470 | 7 | 9  | 22 | 121 | 0 | 7 | 22 | 108 | 51 | 245 |
| 99,471 | 5 | 9  | 22 | 121 | 0 | 7 | 22 | 108 | 49 | 245 |
| 99,472 | 5 | 9  | 22 | 121 | 0 | 7 | 22 | 109 | 49 | 246 |
| 99,473 | 3 | 9  | 20 | 118 | 0 | 8 | 21 | 107 | 44 | 242 |
| 99,474 | 3 | 7  | 20 | 65  | 0 | 4 | 21 | 64  | 44 | 140 |
| 99,475 | 3 | 7  | 20 | 68  | 0 | 4 | 21 | 67  | 44 | 146 |
| 99,476 | 4 | 4  | 18 | 51  | 0 | 3 | 19 | 57  | 41 | 115 |
| 99,477 | 4 | 5  | 19 | 53  | 0 | 3 | 19 | 64  | 42 | 125 |
| 99,478 | 4 | 5  | 19 | 46  | 0 | 3 | 18 | 63  | 41 | 117 |
| 99,479 | 3 | 5  | 21 | 43  | 0 | 3 | 19 | 59  | 43 | 110 |
| 99,480 | 3 | 5  | 23 | 43  | 1 | 3 | 20 | 57  | 47 | 108 |
| 99,481 | 3 | 5  | 16 | 42  | 1 | 3 | 11 | 58  | 31 | 108 |
| 99,482 | 3 | 5  | 14 | 42  | 1 | 3 | 11 | 58  | 29 | 108 |
| 99,483 | 3 | 5  | 13 | 42  | 1 | 3 | 9  | 58  | 26 | 108 |
| 99,484 | 3 | 6  | 14 | 42  | 1 | 3 | 12 | 58  | 30 | 109 |
| 99,485 | 3 | 7  | 14 | 42  | 1 | 3 | 12 | 57  | 30 | 109 |
| 99,486 | 3 | 7  | 15 | 43  | 1 | 3 | 12 | 57  | 31 | 110 |
| 99,487 | 3 | 6  | 16 | 30  | 1 | 2 | 12 | 48  | 32 | 86  |
| 99,488 | 3 | 6  | 16 | 30  | 1 | 2 | 12 | 48  | 32 | 86  |
| 99,489 | 3 | 5  | 16 | 27  | 1 | 2 | 12 | 44  | 32 | 78  |
| 99,490 | 3 | 5  | 16 | 27  | 1 | 2 | 12 | 44  | 32 | 78  |
| 99,491 | 3 | 5  | 16 | 27  | 1 | 2 | 12 | 44  | 32 | 78  |
| 99,492 | 3 | 5  | 16 | 28  | 1 | 2 | 12 | 45  | 32 | 80  |
| 99,493 | 3 | 5  | 16 | 28  | 1 | 2 | 12 | 45  | 32 | 80  |
| 99,494 | 3 | 5  | 17 | 28  | 1 | 3 | 12 | 45  | 33 | 81  |
| 99,495 | 3 | 5  | 17 | 28  | 1 | 3 | 12 | 45  | 33 | 81  |

|        |   |   |    |    |   |   |    |    |    |     |
|--------|---|---|----|----|---|---|----|----|----|-----|
| 99,496 | 3 | 5 | 17 | 29 | 1 | 3 | 12 | 45 | 33 | 82  |
| 99,497 | 3 | 5 | 17 | 29 | 1 | 3 | 12 | 43 | 33 | 80  |
| 99,498 | 3 | 5 | 17 | 25 | 1 | 3 | 12 | 43 | 33 | 76  |
| 99,499 | 5 | 5 | 22 | 25 | 1 | 3 | 16 | 43 | 44 | 76  |
| 99,500 | 5 | 5 | 24 | 25 | 1 | 3 | 17 | 43 | 47 | 76  |
| 99,501 | 5 | 5 | 24 | 25 | 1 | 3 | 16 | 43 | 46 | 76  |
| 99,502 | 4 | 5 | 24 | 25 | 1 | 3 | 16 | 42 | 45 | 75  |
| 99,503 | 4 | 5 | 24 | 25 | 1 | 3 | 16 | 42 | 45 | 75  |
| 99,504 | 4 | 5 | 24 | 23 | 1 | 3 | 16 | 33 | 45 | 64  |
| 99,505 | 4 | 5 | 24 | 25 | 1 | 3 | 16 | 33 | 45 | 66  |
| 99,506 | 4 | 7 | 24 | 26 | 1 | 3 | 16 | 33 | 45 | 69  |
| 99,507 | 4 | 6 | 24 | 33 | 1 | 3 | 16 | 44 | 45 | 86  |
| 99,508 | 4 | 6 | 24 | 36 | 1 | 3 | 16 | 45 | 45 | 90  |
| 99,509 | 4 | 6 | 24 | 42 | 2 | 3 | 16 | 49 | 46 | 100 |
| 99,510 | 4 | 6 | 24 | 41 | 2 | 3 | 15 | 50 | 45 | 100 |
| 99,511 | 4 | 6 | 24 | 42 | 2 | 3 | 15 | 49 | 45 | 100 |
| 99,512 | 4 | 6 | 24 | 46 | 2 | 4 | 15 | 54 | 45 | 110 |
| 99,513 | 4 | 6 | 22 | 46 | 2 | 4 | 14 | 54 | 42 | 110 |
| 99,514 | 4 | 6 | 22 | 47 | 2 | 4 | 14 | 51 | 42 | 108 |
| 99,515 | 4 | 6 | 22 | 48 | 2 | 4 | 14 | 50 | 42 | 108 |
| 99,516 | 4 | 6 | 22 | 50 | 2 | 4 | 14 | 50 | 42 | 110 |
| 99,517 | 4 | 6 | 22 | 52 | 2 | 5 | 14 | 50 | 42 | 113 |
| 99,518 | 4 | 5 | 21 | 53 | 2 | 7 | 13 | 52 | 40 | 117 |
| 99,519 | 4 | 5 | 21 | 54 | 2 | 7 | 13 | 54 | 40 | 120 |
| 99,520 | 4 | 5 | 21 | 54 | 2 | 7 | 13 | 55 | 40 | 121 |
| 99,521 | 4 | 5 | 21 | 54 | 2 | 7 | 13 | 55 | 40 | 121 |
| 99,522 | 4 | 5 | 21 | 54 | 2 | 7 | 13 | 56 | 40 | 122 |
| 99,523 | 4 | 5 | 21 | 54 | 2 | 7 | 13 | 56 | 40 | 122 |
| 99,524 | 4 | 5 | 21 | 56 | 2 | 6 | 14 | 56 | 41 | 123 |
| 99,525 | 4 | 5 | 21 | 56 | 2 | 6 | 14 | 56 | 41 | 123 |
| 99,526 | 2 | 5 | 21 | 53 | 2 | 6 | 14 | 54 | 39 | 118 |
| 99,527 | 2 | 4 | 20 | 50 | 2 | 6 | 14 | 46 | 38 | 106 |
| 99,528 | 2 | 5 | 20 | 50 | 2 | 6 | 14 | 47 | 38 | 108 |
| 99,529 | 2 | 5 | 20 | 58 | 2 | 6 | 15 | 48 | 39 | 117 |
| 99,530 | 3 | 7 | 18 | 61 | 2 | 6 | 14 | 50 | 37 | 124 |
| 99,531 | 4 | 7 | 18 | 62 | 1 | 6 | 12 | 51 | 35 | 126 |
| 99,532 | 4 | 8 | 17 | 72 | 1 | 6 | 10 | 55 | 32 | 141 |
| 99,533 | 4 | 9 | 17 | 80 | 1 | 7 | 10 | 63 | 32 | 159 |
| 99,534 | 4 | 9 | 23 | 84 | 2 | 8 | 14 | 64 | 43 | 165 |
| 99,535 | 4 | 7 | 25 | 85 | 2 | 8 | 14 | 64 | 45 | 164 |
| 99,536 | 5 | 7 | 39 | 92 | 2 | 8 | 20 | 76 | 66 | 183 |

|        |    |    |    |     |   |    |     |     |     |     |
|--------|----|----|----|-----|---|----|-----|-----|-----|-----|
| 99,537 | 5  | 7  | 39 | 98  | 2 | 10 | 23  | 77  | 69  | 192 |
| 99,538 | 5  | 11 | 38 | 102 | 2 | 10 | 23  | 84  | 68  | 207 |
| 99,539 | 5  | 11 | 38 | 105 | 2 | 10 | 23  | 90  | 68  | 216 |
| 99,540 | 12 | 11 | 67 | 107 | 5 | 10 | 72  | 90  | 156 | 218 |
| 99,541 | 12 | 11 | 69 | 108 | 5 | 10 | 74  | 93  | 160 | 222 |
| 99,542 | 12 | 11 | 69 | 108 | 5 | 10 | 74  | 93  | 160 | 222 |
| 99,543 | 12 | 11 | 70 | 110 | 5 | 10 | 75  | 92  | 162 | 223 |
| 99,544 | 12 | 11 | 69 | 110 | 5 | 10 | 75  | 92  | 161 | 223 |
| 99,545 | 12 | 12 | 72 | 117 | 5 | 9  | 78  | 93  | 167 | 231 |
| 99,546 | 12 | 13 | 72 | 123 | 5 | 9  | 78  | 109 | 167 | 254 |
| 99,547 | 12 | 13 | 72 | 126 | 5 | 9  | 78  | 119 | 167 | 267 |
| 99,548 | 14 | 14 | 74 | 145 | 5 | 10 | 81  | 127 | 174 | 296 |
| 99,549 | 14 | 14 | 74 | 149 | 5 | 10 | 81  | 130 | 174 | 303 |
| 99,550 | 12 | 16 | 69 | 155 | 5 | 11 | 77  | 142 | 163 | 324 |
| 99,551 | 12 | 16 | 67 | 156 | 5 | 11 | 76  | 142 | 160 | 325 |
| 99,552 | 12 | 16 | 68 | 156 | 5 | 11 | 76  | 142 | 161 | 325 |
| 99,553 | 12 | 16 | 72 | 156 | 5 | 11 | 79  | 142 | 168 | 325 |
| 99,554 | 12 | 16 | 73 | 156 | 5 | 11 | 79  | 141 | 169 | 324 |
| 99,555 | 12 | 16 | 73 | 156 | 5 | 11 | 79  | 142 | 169 | 325 |
| 99,556 | 12 | 16 | 73 | 154 | 5 | 11 | 79  | 142 | 169 | 323 |
| 99,557 | 13 | 14 | 80 | 144 | 7 | 10 | 95  | 130 | 195 | 298 |
| 99,558 | 13 | 14 | 81 | 144 | 7 | 10 | 99  | 130 | 200 | 298 |
| 99,559 | 13 | 14 | 91 | 141 | 8 | 10 | 113 | 128 | 225 | 293 |
| 99,560 | 13 | 14 | 91 | 131 | 8 | 10 | 113 | 120 | 225 | 275 |
| 99,561 | 13 | 15 | 91 | 132 | 8 | 10 | 113 | 120 | 225 | 277 |
| 99,562 | 13 | 15 | 91 | 131 | 8 | 10 | 113 | 120 | 225 | 276 |
| 99,563 | 13 | 15 | 91 | 127 | 8 | 9  | 113 | 115 | 225 | 266 |
| 99,564 | 13 | 15 | 91 | 127 | 8 | 9  | 113 | 115 | 225 | 266 |
| 99,565 | 13 | 15 | 91 | 127 | 8 | 9  | 113 | 115 | 225 | 266 |
| 99,566 | 13 | 15 | 91 | 126 | 8 | 9  | 113 | 115 | 225 | 265 |
| 99,567 | 13 | 15 | 91 | 124 | 8 | 10 | 113 | 115 | 225 | 264 |
| 99,568 | 13 | 15 | 93 | 122 | 8 | 9  | 113 | 116 | 227 | 262 |
| 99,569 | 13 | 15 | 93 | 121 | 8 | 6  | 113 | 113 | 227 | 255 |
| 99,570 | 13 | 15 | 93 | 120 | 8 | 6  | 114 | 111 | 228 | 252 |
| 99,571 | 13 | 15 | 93 | 120 | 8 | 6  | 114 | 111 | 228 | 252 |
| 99,572 | 13 | 15 | 93 | 122 | 8 | 6  | 114 | 111 | 228 | 254 |
| 99,573 | 13 | 16 | 93 | 122 | 8 | 6  | 114 | 109 | 228 | 253 |
| 99,574 | 13 | 16 | 93 | 122 | 8 | 6  | 113 | 109 | 227 | 253 |
| 99,575 | 13 | 16 | 93 | 121 | 8 | 6  | 116 | 109 | 230 | 252 |
| 99,576 | 13 | 16 | 94 | 121 | 8 | 6  | 116 | 108 | 231 | 251 |
| 99,577 | 13 | 16 | 94 | 123 | 8 | 6  | 116 | 106 | 231 | 251 |

|        |    |    |    |     |    |   |     |     |     |     |
|--------|----|----|----|-----|----|---|-----|-----|-----|-----|
| 99,578 | 13 | 15 | 94 | 120 | 8  | 6 | 116 | 104 | 231 | 245 |
| 99,579 | 13 | 15 | 95 | 112 | 8  | 6 | 115 | 103 | 231 | 236 |
| 99,580 | 13 | 13 | 96 | 109 | 8  | 6 | 115 | 101 | 232 | 229 |
| 99,581 | 12 | 13 | 96 | 105 | 8  | 6 | 115 | 100 | 231 | 224 |
| 99,582 | 11 | 12 | 93 | 95  | 8  | 6 | 115 | 95  | 227 | 208 |
| 99,583 | 11 | 12 | 91 | 95  | 8  | 6 | 115 | 95  | 225 | 208 |
| 99,584 | 11 | 11 | 87 | 87  | 7  | 4 | 110 | 87  | 215 | 189 |
| 99,585 | 11 | 11 | 84 | 83  | 7  | 3 | 109 | 85  | 211 | 182 |
| 99,586 | 11 | 11 | 84 | 82  | 8  | 3 | 110 | 85  | 213 | 181 |
| 99,587 | 14 | 11 | 81 | 68  | 12 | 3 | 108 | 73  | 215 | 155 |
| 99,588 | 16 | 11 | 93 | 68  | 13 | 3 | 111 | 73  | 233 | 155 |
| 99,589 | 9  | 7  | 69 | 64  | 10 | 3 | 63  | 67  | 151 | 141 |
| 99,590 | 9  | 7  | 68 | 59  | 10 | 3 | 62  | 61  | 149 | 130 |
| 99,591 | 9  | 7  | 67 | 59  | 10 | 3 | 62  | 61  | 148 | 130 |
| 99,592 | 9  | 7  | 66 | 58  | 10 | 3 | 60  | 57  | 145 | 125 |
| 99,593 | 9  | 7  | 65 | 58  | 10 | 3 | 59  | 57  | 143 | 125 |
| 99,594 | 9  | 7  | 65 | 54  | 10 | 3 | 59  | 56  | 143 | 120 |
| 99,595 | 9  | 7  | 62 | 48  | 10 | 3 | 56  | 52  | 137 | 110 |
| 99,596 | 9  | 6  | 62 | 42  | 10 | 3 | 56  | 38  | 137 | 89  |
| 99,597 | 9  | 7  | 62 | 42  | 10 | 3 | 56  | 37  | 137 | 89  |
| 99,598 | 7  | 7  | 60 | 38  | 10 | 3 | 53  | 27  | 130 | 75  |
| 99,599 | 8  | 6  | 60 | 19  | 10 | 2 | 53  | 19  | 131 | 46  |
| 99,600 | 8  | 4  | 62 | 9   | 10 | 1 | 53  | 5   | 133 | 19  |
| 99,601 | 8  | 4  | 62 | 9   | 10 | 1 | 53  | 5   | 133 | 19  |
| 99,602 | 8  | 4  | 62 | 10  | 10 | 1 | 53  | 7   | 133 | 22  |
| 99,603 | 8  | 4  | 62 | 10  | 10 | 1 | 50  | 7   | 130 | 22  |
| 99,604 | 8  | 4  | 59 | 11  | 10 | 1 | 50  | 7   | 127 | 23  |
| 99,605 | 8  | 4  | 58 | 11  | 10 | 1 | 50  | 7   | 126 | 23  |
| 99,606 | 8  | 4  | 57 | 14  | 10 | 1 | 49  | 8   | 124 | 27  |
| 99,607 | 8  | 4  | 54 | 16  | 10 | 2 | 38  | 11  | 110 | 33  |
| 99,608 | 7  | 4  | 51 | 16  | 8  | 2 | 34  | 11  | 100 | 33  |
| 99,609 | 7  | 4  | 50 | 17  | 8  | 2 | 30  | 11  | 95  | 34  |
| 99,610 | 7  | 4  | 41 | 17  | 6  | 2 | 16  | 11  | 70  | 34  |
| 99,611 | 7  | 3  | 41 | 16  | 6  | 2 | 16  | 11  | 70  | 32  |
| 99,612 | 8  | 3  | 41 | 16  | 7  | 2 | 16  | 11  | 72  | 32  |
| 99,613 | 8  | 3  | 41 | 16  | 7  | 2 | 16  | 12  | 72  | 33  |
| 99,614 | 8  | 3  | 41 | 16  | 7  | 2 | 16  | 12  | 72  | 33  |
| 99,615 | 8  | 3  | 41 | 16  | 7  | 2 | 16  | 12  | 72  | 33  |
| 99,616 | 8  | 3  | 41 | 15  | 7  | 2 | 16  | 11  | 72  | 31  |
| 99,617 | 8  | 3  | 41 | 16  | 7  | 1 | 16  | 10  | 72  | 30  |
| 99,618 | 8  | 3  | 39 | 16  | 7  | 1 | 16  | 10  | 70  | 30  |

|        |    |   |    |    |    |   |    |    |     |     |
|--------|----|---|----|----|----|---|----|----|-----|-----|
| 99,619 | 8  | 3 | 39 | 16 | 7  | 1 | 15 | 10 | 69  | 30  |
| 99,620 | 8  | 3 | 39 | 16 | 7  | 1 | 15 | 10 | 69  | 30  |
| 99,621 | 8  | 3 | 39 | 16 | 7  | 1 | 15 | 8  | 69  | 28  |
| 99,622 | 8  | 3 | 39 | 16 | 7  | 1 | 14 | 8  | 68  | 28  |
| 99,623 | 8  | 2 | 39 | 14 | 7  | 1 | 14 | 8  | 68  | 25  |
| 99,624 | 8  | 2 | 39 | 14 | 7  | 1 | 14 | 8  | 68  | 25  |
| 99,625 | 8  | 2 | 40 | 13 | 7  | 1 | 12 | 8  | 67  | 24  |
| 99,626 | 8  | 2 | 39 | 13 | 7  | 1 | 12 | 8  | 66  | 24  |
| 99,627 | 8  | 2 | 39 | 12 | 7  | 1 | 12 | 8  | 66  | 23  |
| 99,628 | 8  | 2 | 39 | 12 | 7  | 1 | 12 | 8  | 66  | 23  |
| 99,629 | 8  | 2 | 39 | 12 | 7  | 1 | 12 | 8  | 66  | 23  |
| 99,630 | 9  | 2 | 39 | 12 | 7  | 1 | 13 | 8  | 68  | 23  |
| 99,631 | 9  | 2 | 38 | 12 | 7  | 1 | 13 | 9  | 67  | 24  |
| 99,632 | 9  | 2 | 38 | 23 | 7  | 1 | 15 | 11 | 69  | 37  |
| 99,633 | 9  | 2 | 38 | 24 | 7  | 1 | 15 | 14 | 69  | 41  |
| 99,634 | 10 | 3 | 47 | 30 | 8  | 1 | 23 | 20 | 88  | 54  |
| 99,635 | 10 | 5 | 53 | 35 | 10 | 1 | 43 | 24 | 116 | 65  |
| 99,636 | 10 | 5 | 51 | 42 | 10 | 1 | 42 | 32 | 113 | 80  |
| 99,637 | 10 | 5 | 51 | 46 | 9  | 2 | 41 | 35 | 111 | 88  |
| 99,638 | 6  | 9 | 40 | 66 | 5  | 3 | 37 | 54 | 88  | 132 |
| 99,639 | 4  | 9 | 26 | 69 | 4  | 5 | 31 | 54 | 65  | 137 |
| 99,640 | 4  | 9 | 23 | 69 | 4  | 5 | 31 | 55 | 62  | 138 |
| 99,641 | 4  | 9 | 22 | 69 | 4  | 5 | 31 | 55 | 61  | 138 |
| 99,642 | 4  | 9 | 22 | 71 | 4  | 5 | 31 | 57 | 61  | 142 |
| 99,643 | 4  | 9 | 22 | 74 | 4  | 5 | 31 | 59 | 61  | 147 |
| 99,644 | 4  | 9 | 22 | 74 | 4  | 5 | 31 | 59 | 61  | 147 |
| 99,645 | 4  | 9 | 22 | 74 | 4  | 5 | 31 | 59 | 61  | 147 |
| 99,646 | 4  | 8 | 22 | 73 | 4  | 5 | 31 | 59 | 61  | 145 |
| 99,647 | 4  | 7 | 22 | 73 | 4  | 5 | 31 | 59 | 61  | 144 |
| 99,648 | 4  | 7 | 22 | 73 | 4  | 5 | 31 | 59 | 61  | 144 |
| 99,649 | 4  | 7 | 22 | 74 | 4  | 5 | 31 | 59 | 61  | 145 |
| 99,650 | 3  | 7 | 22 | 75 | 4  | 5 | 31 | 59 | 60  | 146 |
| 99,651 | 3  | 7 | 20 | 78 | 4  | 5 | 33 | 62 | 60  | 152 |
| 99,652 | 3  | 7 | 20 | 79 | 4  | 5 | 33 | 62 | 60  | 153 |
| 99,653 | 3  | 7 | 19 | 79 | 4  | 6 | 33 | 61 | 59  | 153 |
| 99,654 | 3  | 7 | 18 | 80 | 4  | 6 | 33 | 61 | 58  | 154 |
| 99,655 | 3  | 7 | 19 | 79 | 4  | 6 | 33 | 62 | 59  | 154 |
| 99,656 | 3  | 7 | 19 | 80 | 4  | 6 | 33 | 63 | 59  | 156 |
| 99,657 | 4  | 8 | 20 | 90 | 4  | 8 | 35 | 71 | 63  | 177 |
| 99,658 | 4  | 8 | 20 | 88 | 4  | 7 | 35 | 68 | 63  | 171 |
| 99,659 | 4  | 8 | 22 | 88 | 4  | 7 | 35 | 68 | 65  | 171 |

|        |   |    |    |     |   |    |    |    |    |     |
|--------|---|----|----|-----|---|----|----|----|----|-----|
| 99,660 | 4 | 8  | 22 | 87  | 5 | 7  | 35 | 68 | 66 | 170 |
| 99,661 | 4 | 8  | 21 | 87  | 5 | 7  | 35 | 68 | 65 | 170 |
| 99,662 | 4 | 9  | 21 | 88  | 5 | 7  | 35 | 68 | 65 | 172 |
| 99,663 | 3 | 10 | 21 | 88  | 4 | 7  | 35 | 68 | 63 | 173 |
| 99,664 | 3 | 10 | 21 | 90  | 4 | 7  | 35 | 67 | 63 | 174 |
| 99,665 | 3 | 10 | 21 | 90  | 4 | 7  | 35 | 67 | 63 | 174 |
| 99,666 | 4 | 10 | 22 | 90  | 4 | 7  | 37 | 67 | 67 | 174 |
| 99,667 | 4 | 10 | 24 | 89  | 4 | 7  | 41 | 67 | 73 | 173 |
| 99,668 | 4 | 10 | 24 | 89  | 4 | 7  | 41 | 67 | 73 | 173 |
| 99,669 | 4 | 10 | 24 | 89  | 4 | 7  | 41 | 67 | 73 | 173 |
| 99,670 | 4 | 10 | 24 | 89  | 4 | 7  | 41 | 67 | 73 | 173 |
| 99,671 | 4 | 10 | 24 | 89  | 4 | 7  | 41 | 67 | 73 | 173 |
| 99,672 | 4 | 10 | 24 | 89  | 5 | 7  | 43 | 67 | 76 | 173 |
| 99,673 | 4 | 10 | 24 | 89  | 5 | 7  | 43 | 67 | 76 | 173 |
| 99,674 | 4 | 11 | 24 | 89  | 5 | 7  | 43 | 67 | 76 | 174 |
| 99,675 | 4 | 11 | 25 | 90  | 5 | 7  | 44 | 67 | 78 | 175 |
| 99,676 | 4 | 11 | 24 | 90  | 5 | 7  | 44 | 67 | 77 | 175 |
| 99,677 | 4 | 11 | 24 | 90  | 5 | 7  | 44 | 67 | 77 | 175 |
| 99,678 | 4 | 11 | 25 | 90  | 5 | 7  | 44 | 67 | 78 | 175 |
| 99,679 | 4 | 11 | 25 | 91  | 5 | 8  | 44 | 67 | 78 | 177 |
| 99,680 | 4 | 12 | 28 | 105 | 5 | 10 | 45 | 79 | 82 | 206 |
| 99,681 | 3 | 15 | 27 | 125 | 5 | 11 | 44 | 95 | 79 | 246 |
| 99,682 | 3 | 15 | 28 | 130 | 5 | 11 | 44 | 95 | 80 | 251 |
| 99,683 | 3 | 15 | 28 | 119 | 5 | 11 | 42 | 95 | 78 | 240 |
| 99,684 | 2 | 15 | 19 | 118 | 4 | 11 | 34 | 92 | 59 | 236 |
| 99,685 | 2 | 12 | 14 | 107 | 2 | 11 | 14 | 82 | 32 | 212 |
| 99,686 | 2 | 12 | 13 | 109 | 2 | 11 | 14 | 82 | 31 | 214 |
| 99,687 | 2 | 12 | 13 | 104 | 2 | 11 | 14 | 77 | 31 | 204 |
| 99,688 | 2 | 12 | 13 | 100 | 2 | 10 | 14 | 75 | 31 | 197 |
| 99,689 | 2 | 8  | 13 | 81  | 2 | 9  | 16 | 56 | 33 | 154 |
| 99,690 | 2 | 8  | 13 | 78  | 2 | 7  | 16 | 55 | 33 | 148 |
| 99,691 | 2 | 8  | 13 | 78  | 2 | 7  | 16 | 55 | 33 | 148 |
| 99,692 | 2 | 8  | 13 | 78  | 2 | 7  | 16 | 55 | 33 | 148 |
| 99,693 | 2 | 8  | 13 | 73  | 2 | 7  | 16 | 51 | 33 | 139 |
| 99,694 | 2 | 8  | 13 | 73  | 2 | 7  | 16 | 51 | 33 | 139 |
| 99,695 | 2 | 8  | 13 | 73  | 2 | 7  | 16 | 53 | 33 | 141 |
| 99,696 | 2 | 8  | 13 | 73  | 2 | 7  | 16 | 53 | 33 | 141 |
| 99,697 | 2 | 8  | 13 | 73  | 2 | 7  | 16 | 53 | 33 | 141 |
| 99,698 | 2 | 8  | 13 | 73  | 2 | 7  | 16 | 53 | 33 | 141 |
| 99,699 | 2 | 8  | 13 | 72  | 2 | 7  | 16 | 53 | 33 | 140 |
| 99,700 | 2 | 8  | 13 | 71  | 2 | 7  | 15 | 53 | 32 | 139 |



|        |   |   |    |    |   |   |    |    |    |     |
|--------|---|---|----|----|---|---|----|----|----|-----|
| 99,701 | 2 | 8 | 13 | 71 | 2 | 7 | 15 | 54 | 32 | 140 |
| 99,702 | 2 | 9 | 13 | 68 | 2 | 7 | 15 | 52 | 32 | 136 |
| 99,703 | 2 | 9 | 13 | 68 | 2 | 7 | 15 | 52 | 32 | 136 |
| 99,704 | 2 | 9 | 13 | 68 | 2 | 6 | 16 | 52 | 33 | 135 |
| 99,705 | 2 | 9 | 13 | 67 | 2 | 6 | 16 | 51 | 33 | 133 |
| 99,706 | 2 | 9 | 12 | 69 | 2 | 6 | 17 | 52 | 33 | 136 |
| 99,707 | 1 | 9 | 11 | 71 | 2 | 6 | 17 | 52 | 31 | 138 |
| 99,708 | 1 | 8 | 11 | 58 | 2 | 4 | 15 | 42 | 29 | 112 |
| 99,709 | 1 | 8 | 11 | 59 | 2 | 4 | 15 | 42 | 29 | 113 |
| 99,710 | 1 | 8 | 9  | 60 | 2 | 4 | 15 | 47 | 27 | 119 |
| 99,711 | 1 | 8 | 9  | 61 | 1 | 4 | 15 | 47 | 26 | 120 |
| 99,712 | 1 | 8 | 9  | 68 | 1 | 5 | 15 | 49 | 26 | 130 |
| 99,713 | 0 | 7 | 9  | 68 | 2 | 5 | 15 | 52 | 26 | 132 |
| 99,714 | 0 | 6 | 9  | 70 | 2 | 5 | 15 | 56 | 26 | 137 |
| 99,715 | 0 | 6 | 9  | 69 | 2 | 5 | 14 | 59 | 25 | 139 |
| 99,716 | 0 | 6 | 8  | 69 | 2 | 5 | 13 | 59 | 23 | 139 |
| 99,717 | 0 | 6 | 8  | 69 | 2 | 5 | 13 | 60 | 23 | 140 |
| 99,718 | 0 | 6 | 6  | 70 | 2 | 5 | 9  | 60 | 17 | 141 |
| 99,719 | 0 | 6 | 6  | 70 | 2 | 5 | 9  | 60 | 17 | 141 |
| 99,720 | 0 | 6 | 6  | 70 | 2 | 5 | 10 | 60 | 18 | 141 |
| 99,721 | 0 | 6 | 8  | 70 | 2 | 5 | 10 | 60 | 20 | 141 |
| 99,722 | 0 | 6 | 8  | 70 | 1 | 5 | 9  | 60 | 18 | 141 |
| 99,723 | 0 | 6 | 8  | 70 | 1 | 5 | 8  | 60 | 17 | 141 |
| 99,724 | 0 | 5 | 8  | 70 | 1 | 5 | 8  | 60 | 17 | 140 |
| 99,725 | 0 | 5 | 9  | 69 | 1 | 5 | 11 | 60 | 21 | 139 |
| 99,726 | 0 | 5 | 8  | 69 | 1 | 5 | 10 | 60 | 19 | 139 |
| 99,727 | 0 | 5 | 8  | 69 | 1 | 5 | 11 | 60 | 20 | 139 |
| 99,728 | 0 | 5 | 8  | 68 | 1 | 5 | 11 | 60 | 20 | 138 |
| 99,729 | 0 | 5 | 7  | 68 | 1 | 5 | 11 | 60 | 19 | 138 |
| 99,730 | 0 | 5 | 7  | 67 | 1 | 4 | 11 | 60 | 19 | 136 |
| 99,731 | 0 | 1 | 4  | 33 | 1 | 1 | 10 | 32 | 15 | 67  |
| 99,732 | 0 | 1 | 4  | 33 | 1 | 1 | 10 | 32 | 15 | 67  |
| 99,733 | 0 | 1 | 3  | 29 | 1 | 1 | 10 | 31 | 14 | 62  |
| 99,734 | 0 | 1 | 3  | 29 | 1 | 1 | 9  | 29 | 13 | 60  |
| 99,735 | 0 | 1 | 3  | 30 | 1 | 1 | 9  | 28 | 13 | 60  |
| 99,736 | 0 | 1 | 3  | 25 | 1 | 1 | 9  | 26 | 13 | 53  |
| 99,737 | 0 | 1 | 3  | 25 | 1 | 1 | 9  | 26 | 13 | 53  |
| 99,738 | 0 | 1 | 3  | 25 | 1 | 1 | 8  | 26 | 12 | 53  |
| 99,739 | 0 | 1 | 3  | 25 | 1 | 1 | 8  | 26 | 12 | 53  |
| 99,740 | 0 | 1 | 3  | 25 | 1 | 1 | 11 | 26 | 15 | 53  |
| 99,741 | 0 | 1 | 3  | 25 | 1 | 1 | 11 | 26 | 15 | 53  |

|        |   |   |    |    |   |   |    |    |    |    |
|--------|---|---|----|----|---|---|----|----|----|----|
| 99,742 | 0 | 1 | 4  | 25 | 1 | 1 | 12 | 25 | 17 | 52 |
| 99,743 | 0 | 1 | 4  | 25 | 1 | 1 | 12 | 25 | 17 | 52 |
| 99,744 | 0 | 1 | 9  | 25 | 1 | 1 | 14 | 25 | 24 | 52 |
| 99,745 | 0 | 1 | 9  | 25 | 1 | 1 | 14 | 25 | 24 | 52 |
| 99,746 | 4 | 1 | 31 | 26 | 5 | 1 | 27 | 23 | 67 | 51 |
| 99,747 | 4 | 1 | 31 | 26 | 5 | 1 | 27 | 23 | 67 | 51 |
| 99,748 | 5 | 1 | 43 | 26 | 6 | 1 | 34 | 23 | 88 | 51 |
| 99,749 | 5 | 1 | 46 | 26 | 6 | 1 | 34 | 23 | 91 | 51 |
| 99,750 | 5 | 1 | 46 | 26 | 6 | 1 | 34 | 23 | 91 | 51 |
| 99,751 | 5 | 1 | 46 | 26 | 6 | 1 | 33 | 22 | 90 | 50 |
| 99,752 | 5 | 1 | 46 | 26 | 6 | 1 | 33 | 22 | 90 | 50 |
| 99,753 | 5 | 0 | 46 | 26 | 6 | 1 | 33 | 21 | 90 | 48 |
| 99,754 | 5 | 0 | 46 | 24 | 6 | 1 | 33 | 21 | 90 | 46 |
| 99,755 | 5 | 0 | 46 | 23 | 6 | 1 | 32 | 20 | 89 | 44 |
| 99,756 | 5 | 0 | 46 | 23 | 6 | 1 | 32 | 20 | 89 | 44 |
| 99,757 | 5 | 0 | 46 | 18 | 6 | 1 | 31 | 18 | 88 | 37 |
| 99,758 | 5 | 0 | 46 | 18 | 6 | 1 | 31 | 18 | 88 | 37 |
| 99,759 | 5 | 0 | 46 | 18 | 6 | 1 | 31 | 18 | 88 | 37 |
| 99,760 | 5 | 0 | 46 | 18 | 6 | 1 | 31 | 18 | 88 | 37 |
| 99,761 | 5 | 0 | 46 | 17 | 6 | 1 | 31 | 13 | 88 | 31 |
| 99,762 | 5 | 0 | 46 | 16 | 6 | 1 | 31 | 13 | 88 | 30 |
| 99,763 | 5 | 0 | 46 | 8  | 6 | 0 | 31 | 9  | 88 | 17 |
| 99,764 | 5 | 0 | 46 | 6  | 5 | 0 | 31 | 5  | 87 | 11 |
| 99,765 | 5 | 0 | 46 | 6  | 5 | 0 | 31 | 5  | 87 | 11 |
| 99,766 | 5 | 0 | 46 | 5  | 5 | 0 | 32 | 2  | 88 | 7  |
| 99,767 | 5 | 0 | 46 | 5  | 5 | 0 | 32 | 1  | 88 | 6  |
| 99,768 | 5 | 0 | 46 | 5  | 5 | 0 | 32 | 1  | 88 | 6  |
| 99,769 | 5 | 0 | 46 | 4  | 5 | 0 | 32 | 1  | 88 | 5  |
| 99,770 | 5 | 0 | 46 | 4  | 5 | 0 | 32 | 1  | 88 | 5  |
| 99,771 | 5 | 0 | 47 | 4  | 5 | 0 | 34 | 1  | 91 | 5  |
| 99,772 | 5 | 0 | 45 | 5  | 5 | 0 | 34 | 2  | 89 | 7  |
| 99,773 | 5 | 4 | 45 | 6  | 5 | 1 | 34 | 2  | 89 | 13 |
| 99,774 | 5 | 4 | 46 | 6  | 5 | 1 | 34 | 2  | 90 | 13 |
| 99,775 | 5 | 4 | 47 | 6  | 5 | 1 | 34 | 2  | 91 | 13 |
| 99,776 | 5 | 4 | 46 | 7  | 5 | 1 | 31 | 1  | 87 | 13 |
| 99,777 | 5 | 4 | 46 | 7  | 5 | 1 | 30 | 1  | 86 | 13 |
| 99,778 | 5 | 4 | 47 | 8  | 5 | 1 | 30 | 1  | 87 | 14 |
| 99,779 | 5 | 4 | 47 | 8  | 5 | 1 | 30 | 1  | 87 | 14 |
| 99,780 | 5 | 4 | 47 | 8  | 5 | 1 | 30 | 1  | 87 | 14 |
| 99,781 | 6 | 4 | 47 | 9  | 5 | 1 | 31 | 1  | 89 | 15 |
| 99,782 | 6 | 4 | 47 | 8  | 5 | 1 | 31 | 1  | 89 | 14 |

|        |   |    |    |    |   |   |    |    |    |    |
|--------|---|----|----|----|---|---|----|----|----|----|
| 99,783 | 6 | 4  | 47 | 8  | 5 | 1 | 31 | 1  | 89 | 14 |
| 99,784 | 6 | 4  | 47 | 8  | 5 | 1 | 31 | 1  | 89 | 14 |
| 99,785 | 7 | 4  | 47 | 8  | 5 | 1 | 31 | 1  | 90 | 14 |
| 99,786 | 7 | 4  | 50 | 7  | 5 | 1 | 32 | 1  | 94 | 13 |
| 99,787 | 8 | 4  | 50 | 7  | 5 | 1 | 32 | 1  | 95 | 13 |
| 99,788 | 9 | 4  | 51 | 8  | 5 | 1 | 34 | 1  | 99 | 14 |
| 99,789 | 9 | 4  | 51 | 8  | 5 | 1 | 34 | 1  | 99 | 14 |
| 99,790 | 9 | 4  | 51 | 9  | 5 | 1 | 31 | 1  | 96 | 15 |
| 99,791 | 9 | 5  | 51 | 9  | 5 | 1 | 31 | 2  | 96 | 17 |
| 99,792 | 9 | 5  | 50 | 11 | 5 | 2 | 30 | 2  | 94 | 20 |
| 99,793 | 9 | 6  | 50 | 14 | 5 | 2 | 30 | 7  | 94 | 29 |
| 99,794 | 9 | 7  | 50 | 20 | 5 | 3 | 30 | 7  | 94 | 37 |
| 99,795 | 9 | 7  | 45 | 25 | 5 | 5 | 28 | 10 | 87 | 47 |
| 99,796 | 9 | 8  | 45 | 33 | 4 | 6 | 28 | 12 | 86 | 59 |
| 99,797 | 5 | 8  | 23 | 36 | 1 | 6 | 15 | 13 | 44 | 63 |
| 99,798 | 5 | 8  | 16 | 37 | 1 | 6 | 15 | 13 | 37 | 64 |
| 99,799 | 4 | 8  | 11 | 37 | 0 | 6 | 8  | 13 | 23 | 64 |
| 99,800 | 4 | 8  | 8  | 37 | 0 | 6 | 8  | 13 | 20 | 64 |
| 99,801 | 4 | 9  | 9  | 47 | 0 | 6 | 8  | 14 | 21 | 76 |
| 99,802 | 4 | 9  | 9  | 47 | 0 | 6 | 8  | 14 | 21 | 76 |
| 99,803 | 4 | 10 | 9  | 51 | 0 | 6 | 8  | 14 | 21 | 81 |
| 99,804 | 4 | 10 | 9  | 51 | 0 | 6 | 8  | 14 | 21 | 81 |
| 99,805 | 4 | 11 | 9  | 52 | 0 | 6 | 8  | 14 | 21 | 83 |
| 99,806 | 4 | 11 | 9  | 52 | 0 | 6 | 8  | 14 | 21 | 83 |
| 99,807 | 4 | 11 | 9  | 52 | 0 | 6 | 8  | 14 | 21 | 83 |
| 99,808 | 4 | 11 | 10 | 52 | 0 | 6 | 8  | 14 | 22 | 83 |
| 99,809 | 4 | 11 | 10 | 52 | 0 | 6 | 8  | 14 | 22 | 83 |
| 99,810 | 4 | 11 | 10 | 51 | 0 | 6 | 8  | 14 | 22 | 82 |
| 99,811 | 4 | 11 | 10 | 51 | 0 | 6 | 8  | 14 | 22 | 82 |
| 99,812 | 4 | 11 | 10 | 51 | 0 | 6 | 8  | 14 | 22 | 82 |
| 99,813 | 4 | 11 | 12 | 51 | 0 | 6 | 8  | 14 | 24 | 82 |
| 99,814 | 4 | 11 | 12 | 51 | 0 | 6 | 9  | 14 | 25 | 82 |
| 99,815 | 4 | 11 | 12 | 51 | 0 | 6 | 9  | 15 | 25 | 83 |
| 99,816 | 4 | 11 | 12 | 51 | 0 | 6 | 9  | 15 | 25 | 83 |
| 99,817 | 4 | 11 | 13 | 51 | 0 | 6 | 8  | 15 | 25 | 83 |
| 99,818 | 4 | 11 | 13 | 51 | 0 | 6 | 11 | 15 | 28 | 83 |
| 99,819 | 4 | 11 | 16 | 51 | 0 | 6 | 11 | 15 | 31 | 83 |
| 99,820 | 4 | 11 | 16 | 51 | 0 | 6 | 11 | 15 | 31 | 83 |
| 99,821 | 4 | 11 | 16 | 51 | 0 | 6 | 11 | 15 | 31 | 83 |
| 99,822 | 4 | 11 | 16 | 51 | 0 | 6 | 8  | 14 | 28 | 82 |
| 99,823 | 4 | 7  | 16 | 49 | 0 | 5 | 8  | 14 | 28 | 75 |

|        |   |   |    |    |   |   |   |    |    |     |
|--------|---|---|----|----|---|---|---|----|----|-----|
| 99,824 | 4 | 7 | 16 | 49 | 0 | 5 | 8 | 14 | 28 | 75  |
| 99,825 | 4 | 7 | 16 | 50 | 0 | 5 | 8 | 15 | 28 | 77  |
| 99,826 | 4 | 7 | 20 | 49 | 0 | 5 | 8 | 15 | 32 | 76  |
| 99,827 | 4 | 7 | 21 | 49 | 0 | 5 | 9 | 15 | 34 | 76  |
| 99,828 | 4 | 7 | 22 | 50 | 0 | 5 | 9 | 16 | 35 | 78  |
| 99,829 | 4 | 7 | 21 | 49 | 0 | 5 | 9 | 16 | 34 | 77  |
| 99,830 | 4 | 7 | 21 | 50 | 0 | 5 | 9 | 16 | 34 | 78  |
| 99,831 | 3 | 7 | 21 | 51 | 0 | 5 | 9 | 16 | 33 | 79  |
| 99,832 | 3 | 7 | 21 | 52 | 0 | 5 | 8 | 16 | 32 | 80  |
| 99,833 | 3 | 8 | 21 | 60 | 0 | 5 | 8 | 20 | 32 | 93  |
| 99,834 | 3 | 9 | 21 | 68 | 0 | 5 | 8 | 27 | 32 | 109 |
| 99,835 | 2 | 9 | 20 | 71 | 0 | 5 | 8 | 27 | 30 | 112 |
| 99,836 | 2 | 9 | 18 | 71 | 0 | 5 | 7 | 27 | 27 | 112 |
| 99,837 | 1 | 9 | 18 | 71 | 0 | 5 | 7 | 27 | 26 | 112 |
| 99,838 | 0 | 9 | 18 | 70 | 0 | 5 | 7 | 27 | 25 | 111 |
| 99,839 | 0 | 9 | 17 | 70 | 0 | 5 | 5 | 27 | 22 | 111 |
| 99,840 | 0 | 9 | 18 | 69 | 0 | 5 | 5 | 29 | 23 | 112 |
| 99,841 | 0 | 9 | 18 | 69 | 0 | 5 | 5 | 29 | 23 | 112 |
| 99,842 | 0 | 6 | 18 | 53 | 0 | 1 | 5 | 21 | 23 | 81  |
| 99,843 | 0 | 6 | 18 | 53 | 0 | 1 | 5 | 21 | 23 | 81  |
| 99,844 | 0 | 6 | 18 | 53 | 0 | 1 | 5 | 20 | 23 | 80  |
| 99,845 | 0 | 6 | 18 | 53 | 0 | 1 | 5 | 20 | 23 | 80  |
| 99,846 | 0 | 6 | 18 | 54 | 0 | 1 | 5 | 20 | 23 | 81  |
| 99,847 | 0 | 5 | 18 | 46 | 0 | 0 | 5 | 18 | 23 | 69  |
| 99,848 | 0 | 5 | 18 | 42 | 0 | 0 | 5 | 17 | 23 | 64  |
| 99,849 | 0 | 5 | 18 | 41 | 0 | 0 | 5 | 17 | 23 | 63  |
| 99,850 | 0 | 5 | 18 | 41 | 0 | 0 | 5 | 17 | 23 | 63  |
| 99,851 | 0 | 5 | 17 | 41 | 0 | 0 | 5 | 17 | 22 | 63  |
| 99,852 | 1 | 5 | 18 | 31 | 0 | 0 | 5 | 16 | 24 | 52  |
| 99,853 | 1 | 5 | 18 | 31 | 0 | 0 | 5 | 16 | 24 | 52  |
| 99,854 | 1 | 4 | 18 | 27 | 0 | 0 | 5 | 16 | 24 | 47  |
| 99,855 | 1 | 3 | 18 | 27 | 0 | 0 | 8 | 16 | 27 | 46  |
| 99,856 | 1 | 3 | 18 | 27 | 0 | 0 | 8 | 16 | 27 | 46  |
| 99,857 | 1 | 3 | 18 | 27 | 0 | 0 | 8 | 16 | 27 | 46  |
| 99,858 | 1 | 3 | 18 | 27 | 1 | 2 | 8 | 18 | 28 | 50  |
| 99,859 | 1 | 3 | 17 | 28 | 1 | 2 | 8 | 19 | 27 | 52  |
| 99,860 | 1 | 3 | 17 | 29 | 1 | 2 | 8 | 19 | 27 | 53  |
| 99,861 | 1 | 3 | 17 | 41 | 1 | 3 | 8 | 26 | 27 | 73  |
| 99,862 | 1 | 3 | 17 | 44 | 1 | 3 | 8 | 26 | 27 | 76  |
| 99,863 | 1 | 4 | 17 | 60 | 1 | 6 | 8 | 34 | 27 | 104 |
| 99,864 | 1 | 4 | 15 | 76 | 1 | 6 | 8 | 36 | 25 | 122 |

|        |   |    |    |     |   |   |    |    |    |     |
|--------|---|----|----|-----|---|---|----|----|----|-----|
| 99,865 | 1 | 6  | 17 | 85  | 1 | 7 | 7  | 49 | 26 | 147 |
| 99,866 | 1 | 7  | 16 | 90  | 1 | 8 | 7  | 49 | 25 | 154 |
| 99,867 | 1 | 7  | 16 | 93  | 1 | 8 | 7  | 54 | 25 | 162 |
| 99,868 | 1 | 7  | 16 | 93  | 1 | 8 | 4  | 54 | 22 | 162 |
| 99,869 | 1 | 7  | 13 | 93  | 1 | 8 | 4  | 54 | 19 | 162 |
| 99,870 | 1 | 10 | 13 | 102 | 1 | 8 | 4  | 56 | 19 | 176 |
| 99,871 | 1 | 10 | 13 | 102 | 1 | 8 | 4  | 56 | 19 | 176 |
| 99,872 | 1 | 10 | 12 | 102 | 1 | 8 | 4  | 56 | 18 | 176 |
| 99,873 | 1 | 10 | 12 | 103 | 1 | 8 | 4  | 58 | 18 | 179 |
| 99,874 | 1 | 10 | 12 | 105 | 1 | 8 | 4  | 58 | 18 | 181 |
| 99,875 | 1 | 10 | 12 | 106 | 1 | 8 | 4  | 58 | 18 | 182 |
| 99,876 | 1 | 10 | 11 | 106 | 1 | 8 | 4  | 57 | 17 | 181 |
| 99,877 | 1 | 10 | 6  | 106 | 1 | 8 | 4  | 58 | 12 | 182 |
| 99,878 | 1 | 10 | 5  | 106 | 1 | 8 | 3  | 58 | 10 | 182 |
| 99,879 | 1 | 10 | 5  | 106 | 1 | 8 | 4  | 57 | 11 | 181 |
| 99,880 | 1 | 10 | 5  | 105 | 1 | 8 | 4  | 57 | 11 | 180 |
| 99,881 | 1 | 10 | 5  | 103 | 1 | 8 | 4  | 57 | 11 | 178 |
| 99,882 | 1 | 10 | 5  | 103 | 1 | 8 | 4  | 57 | 11 | 178 |
| 99,883 | 1 | 9  | 9  | 94  | 1 | 8 | 4  | 53 | 15 | 164 |
| 99,884 | 1 | 9  | 9  | 94  | 1 | 8 | 4  | 53 | 15 | 164 |
| 99,885 | 1 | 8  | 9  | 86  | 1 | 9 | 4  | 46 | 15 | 149 |
| 99,886 | 1 | 8  | 10 | 83  | 1 | 9 | 4  | 46 | 16 | 146 |
| 99,887 | 1 | 8  | 11 | 83  | 1 | 9 | 4  | 47 | 17 | 147 |
| 99,888 | 1 | 8  | 11 | 83  | 1 | 9 | 4  | 47 | 17 | 147 |
| 99,889 | 1 | 8  | 14 | 83  | 1 | 9 | 4  | 48 | 20 | 148 |
| 99,890 | 1 | 8  | 17 | 83  | 1 | 9 | 6  | 48 | 25 | 148 |
| 99,891 | 1 | 8  | 17 | 83  | 1 | 9 | 6  | 46 | 25 | 146 |
| 99,892 | 1 | 8  | 17 | 83  | 1 | 9 | 8  | 46 | 27 | 146 |
| 99,893 | 1 | 8  | 17 | 83  | 1 | 9 | 8  | 46 | 27 | 146 |
| 99,894 | 2 | 8  | 20 | 84  | 1 | 9 | 10 | 46 | 33 | 147 |
| 99,895 | 3 | 8  | 27 | 84  | 1 | 9 | 11 | 46 | 42 | 147 |
| 99,896 | 3 | 8  | 27 | 84  | 1 | 9 | 11 | 46 | 42 | 147 |
| 99,897 | 3 | 8  | 29 | 83  | 1 | 9 | 12 | 46 | 45 | 146 |
| 99,898 | 3 | 8  | 30 | 83  | 1 | 9 | 12 | 46 | 46 | 146 |
| 99,899 | 3 | 8  | 30 | 84  | 1 | 9 | 12 | 46 | 46 | 147 |
| 99,900 | 3 | 8  | 30 | 85  | 1 | 9 | 12 | 46 | 46 | 148 |
| 99,901 | 3 | 9  | 30 | 85  | 1 | 9 | 12 | 46 | 46 | 149 |
| 99,902 | 2 | 9  | 29 | 85  | 1 | 9 | 12 | 46 | 44 | 149 |
| 99,903 | 2 | 8  | 29 | 85  | 1 | 9 | 12 | 46 | 44 | 148 |
| 99,904 | 2 | 8  | 29 | 85  | 1 | 9 | 12 | 46 | 44 | 148 |
| 99,905 | 2 | 8  | 29 | 86  | 1 | 9 | 12 | 47 | 44 | 150 |

|        |   |   |    |    |   |   |    |    |    |     |
|--------|---|---|----|----|---|---|----|----|----|-----|
| 99,906 | 2 | 8 | 29 | 85 | 1 | 9 | 9  | 47 | 41 | 149 |
| 99,907 | 2 | 8 | 29 | 85 | 1 | 9 | 9  | 47 | 41 | 149 |
| 99,908 | 2 | 8 | 29 | 85 | 1 | 7 | 9  | 45 | 41 | 145 |
| 99,909 | 2 | 8 | 29 | 84 | 0 | 7 | 10 | 44 | 41 | 143 |
| 99,910 | 2 | 8 | 29 | 83 | 0 | 7 | 10 | 44 | 41 | 142 |
| 99,911 | 2 | 8 | 29 | 71 | 0 | 6 | 10 | 37 | 41 | 122 |
| 99,912 | 2 | 8 | 29 | 71 | 0 | 6 | 10 | 37 | 41 | 122 |
| 99,913 | 2 | 9 | 29 | 69 | 0 | 6 | 10 | 38 | 41 | 122 |
| 99,914 | 2 | 8 | 29 | 53 | 0 | 3 | 10 | 30 | 41 | 94  |
| 99,915 | 2 | 8 | 29 | 37 | 0 | 3 | 10 | 28 | 41 | 76  |
| 99,916 | 2 | 6 | 27 | 28 | 0 | 2 | 10 | 15 | 39 | 51  |
| 99,917 | 2 | 5 | 27 | 20 | 0 | 1 | 10 | 9  | 39 | 35  |
| 99,918 | 2 | 5 | 27 | 20 | 0 | 1 | 10 | 9  | 39 | 35  |
| 99,919 | 2 | 5 | 27 | 20 | 0 | 1 | 10 | 9  | 39 | 35  |
| 99,920 | 2 | 5 | 27 | 20 | 0 | 1 | 10 | 9  | 39 | 35  |
| 99,921 | 2 | 2 | 27 | 11 | 0 | 1 | 10 | 7  | 39 | 21  |
| 99,922 | 2 | 2 | 27 | 11 | 0 | 1 | 10 | 7  | 39 | 21  |
| 99,923 | 2 | 2 | 27 | 11 | 0 | 1 | 10 | 7  | 39 | 21  |
| 99,924 | 2 | 2 | 27 | 11 | 0 | 1 | 10 | 5  | 39 | 19  |
| 99,925 | 2 | 2 | 27 | 9  | 0 | 1 | 10 | 5  | 39 | 17  |
| 99,926 | 2 | 2 | 27 | 8  | 0 | 1 | 10 | 5  | 39 | 16  |
| 99,927 | 2 | 2 | 27 | 7  | 0 | 1 | 10 | 5  | 39 | 15  |
| 99,928 | 2 | 2 | 29 | 7  | 0 | 1 | 11 | 4  | 42 | 14  |
| 99,929 | 2 | 2 | 29 | 7  | 0 | 1 | 11 | 4  | 42 | 14  |
| 99,930 | 2 | 2 | 29 | 6  | 0 | 1 | 10 | 4  | 41 | 13  |
| 99,931 | 2 | 2 | 29 | 6  | 0 | 1 | 10 | 4  | 41 | 13  |
| 99,932 | 2 | 2 | 29 | 9  | 0 | 1 | 10 | 4  | 41 | 16  |
| 99,933 | 2 | 2 | 25 | 9  | 0 | 1 | 10 | 4  | 37 | 16  |
| 99,934 | 3 | 2 | 25 | 9  | 0 | 1 | 10 | 4  | 38 | 16  |
| 99,935 | 3 | 2 | 24 | 9  | 0 | 1 | 10 | 5  | 37 | 17  |
| 99,936 | 3 | 2 | 24 | 9  | 0 | 0 | 10 | 5  | 37 | 16  |
| 99,937 | 3 | 2 | 24 | 9  | 0 | 0 | 10 | 5  | 37 | 16  |
| 99,938 | 3 | 2 | 23 | 9  | 0 | 0 | 10 | 4  | 36 | 15  |
| 99,939 | 3 | 2 | 23 | 9  | 0 | 0 | 10 | 4  | 36 | 15  |
| 99,940 | 3 | 2 | 20 | 9  | 0 | 0 | 10 | 3  | 33 | 14  |
| 99,941 | 3 | 2 | 18 | 10 | 0 | 0 | 8  | 3  | 29 | 15  |
| 99,942 | 3 | 2 | 17 | 11 | 0 | 0 | 8  | 3  | 28 | 16  |
| 99,943 | 3 | 2 | 18 | 11 | 0 | 0 | 6  | 4  | 27 | 17  |
| 99,944 | 2 | 2 | 15 | 11 | 0 | 0 | 4  | 6  | 21 | 19  |
| 99,945 | 1 | 2 | 8  | 10 | 0 | 0 | 3  | 6  | 12 | 18  |
| 99,946 | 1 | 2 | 9  | 10 | 0 | 0 | 3  | 6  | 13 | 18  |

|        |   |    |    |    |   |   |    |    |    |     |
|--------|---|----|----|----|---|---|----|----|----|-----|
| 99,947 | 1 | 2  | 9  | 10 | 0 | 0 | 3  | 6  | 13 | 18  |
| 99,948 | 1 | 2  | 7  | 10 | 0 | 0 | 5  | 6  | 13 | 18  |
| 99,949 | 1 | 2  | 6  | 10 | 0 | 0 | 5  | 6  | 12 | 18  |
| 99,950 | 1 | 2  | 6  | 10 | 0 | 0 | 5  | 8  | 12 | 20  |
| 99,951 | 1 | 1  | 6  | 9  | 0 | 0 | 5  | 9  | 12 | 19  |
| 99,952 | 1 | 1  | 6  | 9  | 0 | 0 | 5  | 9  | 12 | 19  |
| 99,953 | 1 | 1  | 6  | 10 | 0 | 0 | 5  | 10 | 12 | 21  |
| 99,954 | 1 | 1  | 7  | 11 | 0 | 0 | 5  | 10 | 13 | 22  |
| 99,955 | 1 | 9  | 7  | 40 | 0 | 1 | 5  | 44 | 13 | 94  |
| 99,956 | 1 | 9  | 7  | 40 | 0 | 1 | 5  | 43 | 13 | 93  |
| 99,957 | 1 | 9  | 9  | 42 | 0 | 1 | 6  | 44 | 16 | 96  |
| 99,958 | 1 | 9  | 9  | 42 | 0 | 1 | 7  | 44 | 17 | 96  |
| 99,959 | 1 | 9  | 9  | 42 | 0 | 1 | 7  | 44 | 17 | 96  |
| 99,960 | 1 | 10 | 9  | 42 | 0 | 1 | 6  | 48 | 16 | 101 |
| 99,961 | 1 | 11 | 9  | 42 | 0 | 1 | 6  | 48 | 16 | 102 |
| 99,962 | 1 | 12 | 9  | 44 | 0 | 1 | 6  | 50 | 16 | 107 |
| 99,963 | 1 | 12 | 9  | 44 | 0 | 1 | 6  | 50 | 16 | 107 |
| 99,964 | 2 | 11 | 13 | 43 | 0 | 1 | 8  | 49 | 23 | 104 |
| 99,965 | 2 | 11 | 14 | 43 | 0 | 1 | 8  | 49 | 24 | 104 |
| 99,966 | 2 | 11 | 15 | 43 | 0 | 1 | 8  | 50 | 25 | 105 |
| 99,967 | 2 | 11 | 15 | 43 | 0 | 1 | 8  | 50 | 25 | 105 |
| 99,968 | 2 | 11 | 15 | 44 | 0 | 1 | 8  | 50 | 25 | 106 |
| 99,969 | 2 | 11 | 15 | 44 | 0 | 1 | 8  | 50 | 25 | 106 |
| 99,970 | 2 | 11 | 16 | 44 | 0 | 1 | 8  | 50 | 26 | 106 |
| 99,971 | 2 | 11 | 16 | 45 | 0 | 1 | 8  | 50 | 26 | 107 |
| 99,972 | 2 | 11 | 16 | 45 | 0 | 1 | 8  | 50 | 26 | 107 |
| 99,973 | 2 | 11 | 17 | 45 | 0 | 1 | 8  | 50 | 27 | 107 |
| 99,974 | 2 | 11 | 17 | 45 | 0 | 1 | 8  | 50 | 27 | 107 |
| 99,975 | 2 | 11 | 18 | 44 | 0 | 1 | 10 | 50 | 30 | 106 |
| 99,976 | 2 | 11 | 20 | 45 | 0 | 1 | 10 | 50 | 32 | 107 |
| 99,977 | 2 | 11 | 29 | 45 | 1 | 1 | 10 | 50 | 42 | 107 |
| 99,978 | 2 | 11 | 37 | 47 | 3 | 1 | 18 | 50 | 60 | 109 |
| 99,979 | 2 | 11 | 37 | 48 | 3 | 1 | 18 | 50 | 60 | 110 |
| 99,980 | 5 | 11 | 39 | 49 | 3 | 1 | 18 | 50 | 65 | 111 |
| 99,981 | 5 | 11 | 38 | 49 | 3 | 1 | 18 | 50 | 64 | 111 |
| 99,982 | 5 | 11 | 38 | 49 | 3 | 1 | 18 | 50 | 64 | 111 |
| 99,983 | 5 | 11 | 38 | 46 | 3 | 1 | 18 | 50 | 64 | 108 |
| 99,984 | 5 | 11 | 38 | 46 | 3 | 1 | 18 | 49 | 64 | 107 |
| 99,985 | 4 | 11 | 38 | 46 | 3 | 1 | 18 | 49 | 63 | 107 |
| 99,986 | 4 | 11 | 38 | 46 | 3 | 1 | 19 | 49 | 64 | 107 |
| 99,987 | 4 | 12 | 38 | 46 | 3 | 1 | 19 | 50 | 64 | 109 |

|         |   |    |    |    |   |   |    |    |     |     |
|---------|---|----|----|----|---|---|----|----|-----|-----|
| 99,988  | 4 | 12 | 38 | 46 | 3 | 1 | 19 | 50 | 64  | 109 |
| 99,989  | 4 | 12 | 38 | 46 | 3 | 1 | 19 | 50 | 64  | 109 |
| 99,990  | 4 | 12 | 38 | 46 | 3 | 1 | 19 | 50 | 64  | 109 |
| 99,991  | 4 | 12 | 38 | 45 | 3 | 1 | 19 | 50 | 64  | 108 |
| 99,992  | 4 | 12 | 37 | 45 | 3 | 1 | 19 | 50 | 63  | 108 |
| 99,993  | 4 | 12 | 37 | 44 | 3 | 1 | 19 | 50 | 63  | 107 |
| 99,994  | 4 | 12 | 36 | 44 | 3 | 1 | 20 | 47 | 63  | 104 |
| 99,995  | 4 | 12 | 36 | 45 | 3 | 1 | 20 | 47 | 63  | 105 |
| 99,996  | 4 | 12 | 36 | 45 | 3 | 1 | 20 | 47 | 63  | 105 |
| 99,997  | 4 | 12 | 35 | 45 | 3 | 1 | 20 | 47 | 62  | 105 |
| 99,998  | 4 | 12 | 35 | 45 | 3 | 1 | 19 | 47 | 61  | 105 |
| 99,999  | 4 | 12 | 36 | 45 | 3 | 1 | 17 | 47 | 60  | 105 |
| 100,000 | 5 | 12 | 37 | 45 | 4 | 1 | 17 | 47 | 63  | 105 |
| 100,001 | 5 | 12 | 40 | 44 | 4 | 1 | 18 | 44 | 67  | 101 |
| 100,002 | 5 | 12 | 50 | 44 | 4 | 1 | 20 | 44 | 79  | 101 |
| 100,003 | 5 | 12 | 50 | 43 | 4 | 1 | 20 | 43 | 79  | 99  |
| 100,004 | 5 | 13 | 52 | 42 | 4 | 1 | 20 | 43 | 81  | 99  |
| 100,005 | 6 | 5  | 54 | 14 | 4 | 0 | 22 | 9  | 86  | 28  |
| 100,006 | 6 | 5  | 54 | 15 | 4 | 0 | 23 | 9  | 87  | 29  |
| 100,007 | 6 | 5  | 57 | 14 | 4 | 0 | 24 | 9  | 91  | 28  |
| 100,008 | 6 | 5  | 57 | 12 | 4 | 0 | 24 | 8  | 91  | 25  |
| 100,009 | 7 | 5  | 68 | 12 | 4 | 0 | 25 | 8  | 104 | 25  |
| 100,010 | 7 | 5  | 69 | 12 | 4 | 0 | 26 | 10 | 106 | 27  |
| 100,011 | 7 | 5  | 67 | 15 | 4 | 0 | 26 | 9  | 104 | 29  |
| 100,012 | 7 | 4  | 67 | 16 | 4 | 0 | 26 | 9  | 104 | 29  |
| 100,013 | 7 | 3  | 67 | 14 | 4 | 0 | 26 | 7  | 104 | 24  |
| 100,014 | 7 | 3  | 66 | 14 | 4 | 0 | 25 | 7  | 102 | 24  |
| 100,015 | 6 | 3  | 65 | 14 | 4 | 0 | 24 | 7  | 99  | 24  |
| 100,016 | 6 | 3  | 64 | 15 | 4 | 0 | 24 | 7  | 98  | 25  |
| 100,017 | 6 | 3  | 63 | 15 | 4 | 0 | 24 | 7  | 97  | 25  |
| 100,018 | 6 | 3  | 63 | 15 | 4 | 0 | 24 | 7  | 97  | 25  |
| 100,019 | 6 | 3  | 63 | 14 | 4 | 0 | 24 | 7  | 97  | 24  |
| 100,020 | 6 | 3  | 62 | 14 | 4 | 0 | 24 | 7  | 96  | 24  |
| 100,021 | 6 | 3  | 62 | 13 | 4 | 0 | 24 | 7  | 96  | 23  |
| 100,022 | 6 | 3  | 62 | 13 | 4 | 0 | 24 | 7  | 96  | 23  |
| 100,023 | 6 | 3  | 61 | 14 | 4 | 0 | 24 | 7  | 95  | 24  |
| 100,024 | 6 | 3  | 61 | 14 | 4 | 0 | 24 | 8  | 95  | 25  |
| 100,025 | 6 | 4  | 60 | 15 | 4 | 0 | 22 | 9  | 92  | 28  |
| 100,026 | 6 | 4  | 60 | 15 | 4 | 1 | 22 | 12 | 92  | 32  |
| 100,027 | 6 | 4  | 58 | 15 | 4 | 1 | 22 | 12 | 90  | 32  |
| 100,028 | 6 | 4  | 50 | 15 | 3 | 2 | 23 | 12 | 82  | 33  |



|         |   |   |    |    |   |   |    |    |     |    |
|---------|---|---|----|----|---|---|----|----|-----|----|
| 100,029 | 6 | 4 | 40 | 12 | 1 | 2 | 14 | 12 | 61  | 30 |
| 100,030 | 3 | 4 | 38 | 11 | 1 | 2 | 14 | 12 | 56  | 29 |
| 100,031 | 3 | 4 | 39 | 11 | 1 | 2 | 14 | 12 | 57  | 29 |
| 100,032 | 3 | 4 | 39 | 11 | 1 | 2 | 14 | 13 | 57  | 30 |
| 100,033 | 3 | 4 | 39 | 11 | 1 | 2 | 14 | 13 | 57  | 30 |
| 100,034 | 3 | 4 | 39 | 11 | 2 | 2 | 14 | 16 | 58  | 33 |
| 100,035 | 3 | 4 | 39 | 11 | 2 | 2 | 14 | 17 | 58  | 34 |
| 100,036 | 3 | 4 | 39 | 12 | 2 | 3 | 13 | 18 | 57  | 37 |
| 100,037 | 3 | 4 | 39 | 12 | 2 | 3 | 13 | 18 | 57  | 37 |
| 100,038 | 3 | 3 | 39 | 13 | 2 | 3 | 13 | 17 | 57  | 36 |
| 100,039 | 3 | 3 | 39 | 13 | 2 | 3 | 13 | 17 | 57  | 36 |
| 100,040 | 3 | 3 | 39 | 13 | 2 | 3 | 13 | 19 | 57  | 38 |
| 100,041 | 3 | 3 | 39 | 13 | 2 | 3 | 13 | 19 | 57  | 38 |
| 100,042 | 3 | 3 | 39 | 13 | 2 | 3 | 13 | 19 | 57  | 38 |
| 100,043 | 3 | 3 | 39 | 12 | 2 | 3 | 13 | 19 | 57  | 37 |
| 100,044 | 3 | 3 | 39 | 12 | 3 | 3 | 13 | 19 | 58  | 37 |
| 100,045 | 3 | 3 | 39 | 13 | 3 | 3 | 13 | 19 | 58  | 38 |
| 100,046 | 3 | 3 | 39 | 13 | 3 | 3 | 13 | 19 | 58  | 38 |
| 100,047 | 3 | 3 | 39 | 18 | 3 | 4 | 13 | 22 | 58  | 47 |
| 100,048 | 3 | 3 | 38 | 18 | 3 | 4 | 13 | 23 | 57  | 48 |
| 100,049 | 4 | 3 | 39 | 19 | 3 | 4 | 13 | 23 | 59  | 49 |
| 100,050 | 3 | 3 | 38 | 19 | 2 | 4 | 13 | 24 | 56  | 50 |
| 100,051 | 3 | 3 | 43 | 19 | 2 | 4 | 19 | 25 | 67  | 51 |
| 100,052 | 4 | 3 | 43 | 20 | 2 | 4 | 19 | 26 | 68  | 53 |
| 100,053 | 4 | 3 | 37 | 20 | 2 | 4 | 21 | 26 | 64  | 53 |
| 100,054 | 4 | 2 | 39 | 20 | 2 | 4 | 21 | 26 | 66  | 52 |
| 100,055 | 6 | 2 | 42 | 22 | 3 | 4 | 27 | 28 | 78  | 56 |
| 100,056 | 5 | 3 | 48 | 27 | 3 | 4 | 28 | 32 | 84  | 66 |
| 100,057 | 5 | 3 | 54 | 28 | 4 | 4 | 26 | 32 | 89  | 67 |
| 100,058 | 5 | 3 | 52 | 28 | 4 | 4 | 25 | 32 | 86  | 67 |
| 100,059 | 7 | 3 | 58 | 28 | 5 | 4 | 33 | 32 | 103 | 67 |
| 100,060 | 6 | 3 | 52 | 29 | 6 | 4 | 36 | 29 | 100 | 65 |
| 100,061 | 6 | 3 | 51 | 29 | 6 | 4 | 35 | 29 | 98  | 65 |
| 100,062 | 6 | 3 | 51 | 27 | 6 | 4 | 35 | 26 | 98  | 60 |
| 100,063 | 7 | 3 | 51 | 26 | 6 | 4 | 35 | 26 | 99  | 59 |
| 100,064 | 7 | 3 | 51 | 26 | 6 | 4 | 35 | 26 | 99  | 59 |
| 100,065 | 7 | 4 | 51 | 26 | 6 | 4 | 35 | 26 | 99  | 60 |
| 100,066 | 7 | 4 | 51 | 26 | 6 | 4 | 35 | 27 | 99  | 61 |
| 100,067 | 7 | 6 | 51 | 38 | 6 | 7 | 35 | 35 | 99  | 86 |
| 100,068 | 7 | 6 | 51 | 38 | 6 | 7 | 35 | 35 | 99  | 86 |
| 100,069 | 7 | 6 | 51 | 38 | 6 | 7 | 35 | 35 | 99  | 86 |

|         |   |   |    |    |   |   |    |    |     |    |
|---------|---|---|----|----|---|---|----|----|-----|----|
| 100,070 | 7 | 6 | 51 | 39 | 6 | 7 | 35 | 35 | 99  | 87 |
| 100,071 | 7 | 6 | 51 | 39 | 6 | 7 | 35 | 36 | 99  | 88 |
| 100,072 | 7 | 6 | 51 | 39 | 6 | 7 | 35 | 36 | 99  | 88 |
| 100,073 | 7 | 6 | 51 | 39 | 6 | 7 | 35 | 36 | 99  | 88 |
| 100,074 | 7 | 6 | 51 | 43 | 6 | 7 | 35 | 36 | 99  | 92 |
| 100,075 | 7 | 6 | 51 | 43 | 6 | 7 | 35 | 35 | 99  | 91 |
| 100,076 | 7 | 5 | 52 | 43 | 6 | 7 | 35 | 33 | 100 | 88 |
| 100,077 | 7 | 5 | 51 | 42 | 6 | 5 | 35 | 31 | 99  | 83 |
| 100,078 | 7 | 5 | 51 | 42 | 6 | 5 | 35 | 31 | 99  | 83 |
| 100,079 | 7 | 5 | 51 | 42 | 6 | 5 | 34 | 31 | 98  | 83 |
| 100,080 | 7 | 5 | 51 | 42 | 6 | 5 | 34 | 31 | 98  | 83 |
| 100,081 | 7 | 5 | 52 | 42 | 6 | 5 | 34 | 31 | 99  | 83 |
| 100,082 | 8 | 5 | 51 | 42 | 6 | 5 | 34 | 31 | 99  | 83 |
| 100,083 | 8 | 5 | 51 | 42 | 6 | 5 | 34 | 30 | 99  | 82 |
| 100,084 | 8 | 5 | 50 | 42 | 5 | 5 | 34 | 30 | 97  | 82 |
| 100,085 | 8 | 5 | 51 | 44 | 5 | 5 | 35 | 27 | 99  | 81 |
| 100,086 | 8 | 5 | 51 | 44 | 5 | 5 | 35 | 27 | 99  | 81 |
| 100,087 | 8 | 5 | 51 | 45 | 5 | 4 | 35 | 26 | 99  | 80 |
| 100,088 | 8 | 5 | 51 | 46 | 5 | 4 | 35 | 26 | 99  | 81 |
| 100,089 | 8 | 5 | 51 | 47 | 5 | 4 | 35 | 26 | 99  | 82 |
| 100,090 | 8 | 5 | 51 | 49 | 5 | 4 | 35 | 28 | 99  | 86 |
| 100,091 | 8 | 5 | 51 | 49 | 5 | 4 | 34 | 26 | 98  | 84 |
| 100,092 | 8 | 5 | 51 | 49 | 5 | 4 | 34 | 26 | 98  | 84 |
| 100,093 | 8 | 5 | 51 | 49 | 5 | 4 | 34 | 26 | 98  | 84 |
| 100,094 | 8 | 5 | 51 | 49 | 5 | 4 | 34 | 26 | 98  | 84 |
| 100,095 | 8 | 5 | 51 | 49 | 4 | 4 | 34 | 26 | 97  | 84 |
| 100,096 | 8 | 5 | 51 | 48 | 4 | 4 | 34 | 26 | 97  | 83 |
| 100,097 | 8 | 5 | 51 | 47 | 4 | 4 | 34 | 26 | 97  | 82 |
| 100,098 | 8 | 5 | 51 | 42 | 4 | 3 | 34 | 23 | 97  | 73 |
| 100,099 | 8 | 5 | 51 | 42 | 4 | 3 | 34 | 22 | 97  | 72 |
| 100,100 | 7 | 5 | 50 | 41 | 4 | 3 | 34 | 22 | 95  | 71 |
| 100,101 | 7 | 5 | 50 | 41 | 4 | 3 | 34 | 21 | 95  | 70 |
| 100,102 | 7 | 5 | 45 | 40 | 5 | 3 | 27 | 17 | 84  | 65 |
| 100,103 | 6 | 5 | 42 | 40 | 5 | 3 | 27 | 17 | 80  | 65 |
| 100,104 | 6 | 5 | 38 | 40 | 5 | 3 | 23 | 17 | 72  | 65 |
| 100,105 | 6 | 5 | 37 | 40 | 5 | 3 | 24 | 17 | 72  | 65 |
| 100,106 | 4 | 5 | 31 | 39 | 4 | 3 | 18 | 15 | 57  | 62 |
| 100,107 | 4 | 4 | 22 | 35 | 4 | 3 | 15 | 11 | 45  | 53 |
| 100,108 | 4 | 4 | 14 | 33 | 3 | 3 | 15 | 11 | 36  | 51 |
| 100,109 | 4 | 4 | 14 | 34 | 3 | 3 | 14 | 12 | 35  | 53 |
| 100,110 | 2 | 4 | 4  | 34 | 2 | 3 | 5  | 12 | 13  | 53 |

|         |   |   |   |    |   |   |   |    |    |    |
|---------|---|---|---|----|---|---|---|----|----|----|
| 100,111 | 2 | 4 | 3 | 33 | 1 | 3 | 2 | 12 | 8  | 52 |
| 100,112 | 2 | 3 | 3 | 33 | 1 | 3 | 2 | 13 | 8  | 52 |
| 100,113 | 2 | 3 | 3 | 33 | 1 | 3 | 2 | 13 | 8  | 52 |
| 100,114 | 1 | 3 | 3 | 33 | 1 | 3 | 2 | 13 | 7  | 52 |
| 100,115 | 1 | 3 | 3 | 33 | 1 | 3 | 2 | 13 | 7  | 52 |
| 100,116 | 1 | 2 | 3 | 33 | 1 | 3 | 2 | 13 | 7  | 51 |
| 100,117 | 1 | 0 | 3 | 20 | 1 | 0 | 2 | 6  | 7  | 26 |
| 100,118 | 1 | 0 | 4 | 21 | 1 | 0 | 2 | 6  | 8  | 27 |
| 100,119 | 1 | 0 | 4 | 21 | 1 | 0 | 2 | 6  | 8  | 27 |
| 100,120 | 1 | 0 | 4 | 21 | 1 | 0 | 2 | 6  | 8  | 27 |
| 100,121 | 1 | 0 | 4 | 20 | 1 | 0 | 2 | 6  | 8  | 26 |
| 100,122 | 1 | 0 | 3 | 20 | 1 | 0 | 3 | 5  | 8  | 25 |
| 100,123 | 1 | 0 | 3 | 20 | 1 | 0 | 3 | 5  | 8  | 25 |
| 100,124 | 1 | 0 | 3 | 15 | 1 | 0 | 3 | 5  | 8  | 20 |
| 100,125 | 1 | 0 | 3 | 15 | 1 | 0 | 3 | 5  | 8  | 20 |
| 100,126 | 1 | 0 | 3 | 14 | 1 | 0 | 3 | 5  | 8  | 19 |
| 100,127 | 1 | 0 | 3 | 14 | 1 | 0 | 3 | 5  | 8  | 19 |
| 100,128 | 1 | 0 | 3 | 14 | 1 | 0 | 3 | 5  | 8  | 19 |
| 100,129 | 1 | 0 | 3 | 14 | 1 | 0 | 3 | 5  | 8  | 19 |
| 100,130 | 1 | 0 | 3 | 14 | 1 | 0 | 3 | 5  | 8  | 19 |
| 100,131 | 1 | 0 | 2 | 14 | 1 | 0 | 3 | 5  | 7  | 19 |
| 100,132 | 0 | 0 | 2 | 14 | 1 | 0 | 3 | 5  | 6  | 19 |
| 100,133 | 1 | 0 | 2 | 14 | 1 | 0 | 3 | 5  | 7  | 19 |
| 100,134 | 1 | 0 | 2 | 14 | 1 | 0 | 4 | 5  | 8  | 19 |
| 100,135 | 1 | 0 | 2 | 14 | 1 | 0 | 3 | 5  | 7  | 19 |
| 100,136 | 1 | 0 | 5 | 12 | 1 | 0 | 3 | 5  | 10 | 17 |
| 100,137 | 1 | 0 | 5 | 12 | 1 | 0 | 3 | 5  | 10 | 17 |
| 100,138 | 1 | 0 | 5 | 10 | 1 | 0 | 3 | 5  | 10 | 15 |
| 100,139 | 1 | 0 | 5 | 9  | 1 | 0 | 3 | 5  | 10 | 14 |
| 100,140 | 1 | 0 | 5 | 7  | 1 | 0 | 3 | 5  | 10 | 12 |
| 100,141 | 2 | 0 | 6 | 5  | 1 | 0 | 4 | 3  | 13 | 8  |
| 100,142 | 2 | 0 | 7 | 6  | 1 | 0 | 6 | 3  | 16 | 9  |
| 100,143 | 2 | 0 | 7 | 7  | 1 | 1 | 6 | 4  | 16 | 12 |
| 100,144 | 2 | 0 | 7 | 7  | 1 | 1 | 6 | 4  | 16 | 12 |
| 100,145 | 2 | 0 | 7 | 12 | 1 | 1 | 6 | 5  | 16 | 18 |
| 100,146 | 2 | 1 | 7 | 14 | 1 | 1 | 6 | 6  | 16 | 22 |
| 100,147 | 2 | 1 | 7 | 16 | 1 | 1 | 6 | 6  | 16 | 24 |
| 100,148 | 2 | 1 | 7 | 16 | 1 | 1 | 6 | 7  | 16 | 25 |
| 100,149 | 2 | 1 | 7 | 16 | 1 | 1 | 6 | 7  | 16 | 25 |
| 100,150 | 2 | 1 | 7 | 17 | 1 | 1 | 6 | 11 | 16 | 30 |
| 100,151 | 2 | 1 | 7 | 17 | 1 | 1 | 6 | 12 | 16 | 31 |

|         |   |   |   |    |   |   |   |    |    |    |
|---------|---|---|---|----|---|---|---|----|----|----|
| 100,152 | 2 | 1 | 7 | 17 | 1 | 1 | 6 | 12 | 16 | 31 |
| 100,153 | 2 | 1 | 7 | 18 | 0 | 1 | 6 | 12 | 15 | 32 |
| 100,154 | 2 | 1 | 7 | 20 | 0 | 1 | 6 | 14 | 15 | 36 |
| 100,155 | 2 | 1 | 7 | 20 | 0 | 1 | 6 | 14 | 15 | 36 |
| 100,156 | 2 | 1 | 7 | 19 | 0 | 1 | 5 | 14 | 14 | 35 |
| 100,157 | 2 | 1 | 7 | 20 | 0 | 1 | 5 | 14 | 14 | 36 |
| 100,158 | 2 | 1 | 7 | 21 | 0 | 1 | 5 | 14 | 14 | 37 |
| 100,159 | 2 | 1 | 7 | 21 | 0 | 1 | 5 | 15 | 14 | 38 |
| 100,160 | 2 | 1 | 6 | 20 | 0 | 1 | 5 | 14 | 13 | 36 |
| 100,161 | 2 | 2 | 6 | 25 | 0 | 1 | 5 | 14 | 13 | 42 |
| 100,162 | 2 | 2 | 6 | 26 | 0 | 1 | 5 | 15 | 13 | 44 |
| 100,163 | 2 | 2 | 6 | 25 | 0 | 1 | 5 | 14 | 13 | 42 |
| 100,164 | 3 | 2 | 6 | 25 | 0 | 1 | 6 | 14 | 15 | 42 |
| 100,165 | 3 | 2 | 6 | 25 | 0 | 1 | 6 | 14 | 15 | 42 |
| 100,166 | 3 | 2 | 7 | 25 | 0 | 1 | 6 | 14 | 16 | 42 |
| 100,167 | 3 | 2 | 7 | 25 | 0 | 1 | 6 | 14 | 16 | 42 |
| 100,168 | 3 | 2 | 7 | 24 | 0 | 1 | 6 | 14 | 16 | 41 |
| 100,169 | 3 | 2 | 6 | 24 | 0 | 1 | 6 | 14 | 15 | 41 |
| 100,170 | 3 | 3 | 6 | 24 | 0 | 1 | 6 | 14 | 15 | 42 |
| 100,171 | 3 | 4 | 6 | 24 | 0 | 1 | 6 | 14 | 15 | 43 |
| 100,172 | 3 | 4 | 7 | 24 | 0 | 1 | 6 | 14 | 16 | 43 |
| 100,173 | 3 | 4 | 7 | 24 | 0 | 1 | 5 | 14 | 15 | 43 |
| 100,174 | 3 | 4 | 8 | 24 | 0 | 1 | 5 | 14 | 16 | 43 |
| 100,175 | 3 | 4 | 8 | 25 | 0 | 1 | 5 | 14 | 16 | 44 |
| 100,176 | 3 | 4 | 8 | 25 | 0 | 1 | 6 | 14 | 17 | 44 |
| 100,177 | 3 | 4 | 8 | 25 | 0 | 1 | 7 | 14 | 18 | 44 |
| 100,178 | 3 | 4 | 8 | 25 | 0 | 1 | 7 | 14 | 18 | 44 |
| 100,179 | 3 | 4 | 8 | 25 | 0 | 1 | 7 | 14 | 18 | 44 |
| 100,180 | 3 | 4 | 8 | 25 | 0 | 1 | 7 | 15 | 18 | 45 |
| 100,181 | 3 | 4 | 8 | 25 | 0 | 1 | 7 | 15 | 18 | 45 |
| 100,182 | 3 | 4 | 8 | 26 | 0 | 1 | 7 | 15 | 18 | 46 |
| 100,183 | 3 | 4 | 8 | 26 | 0 | 1 | 7 | 15 | 18 | 46 |
| 100,184 | 2 | 4 | 8 | 26 | 0 | 1 | 7 | 15 | 17 | 46 |
| 100,185 | 2 | 4 | 8 | 26 | 0 | 1 | 6 | 16 | 16 | 47 |
| 100,186 | 2 | 4 | 8 | 26 | 0 | 1 | 6 | 16 | 16 | 47 |
| 100,187 | 2 | 5 | 7 | 26 | 0 | 1 | 6 | 15 | 15 | 47 |
| 100,188 | 2 | 5 | 7 | 26 | 0 | 1 | 6 | 16 | 15 | 48 |
| 100,189 | 1 | 5 | 8 | 27 | 0 | 1 | 7 | 16 | 16 | 49 |
| 100,190 | 1 | 5 | 8 | 27 | 0 | 1 | 7 | 18 | 16 | 51 |
| 100,191 | 1 | 5 | 7 | 28 | 0 | 1 | 6 | 19 | 14 | 53 |
| 100,192 | 1 | 5 | 8 | 28 | 0 | 2 | 6 | 19 | 15 | 54 |

|         |   |   |    |    |   |   |    |    |    |    |
|---------|---|---|----|----|---|---|----|----|----|----|
| 100,193 | 1 | 5 | 8  | 29 | 0 | 2 | 6  | 19 | 15 | 55 |
| 100,194 | 1 | 5 | 8  | 28 | 1 | 1 | 6  | 18 | 16 | 52 |
| 100,195 | 1 | 5 | 8  | 28 | 1 | 1 | 8  | 18 | 18 | 52 |
| 100,196 | 1 | 5 | 8  | 24 | 1 | 1 | 8  | 17 | 18 | 47 |
| 100,197 | 1 | 4 | 8  | 22 | 1 | 1 | 8  | 17 | 18 | 44 |
| 100,198 | 1 | 4 | 8  | 20 | 1 | 1 | 9  | 18 | 19 | 43 |
| 100,199 | 2 | 4 | 8  | 21 | 1 | 1 | 9  | 18 | 20 | 44 |
| 100,200 | 2 | 4 | 9  | 21 | 1 | 1 | 9  | 18 | 21 | 44 |
| 100,201 | 2 | 4 | 9  | 24 | 1 | 1 | 9  | 19 | 21 | 48 |
| 100,202 | 2 | 5 | 9  | 26 | 1 | 1 | 9  | 18 | 21 | 50 |
| 100,203 | 2 | 5 | 11 | 26 | 1 | 1 | 9  | 18 | 23 | 50 |
| 100,204 | 2 | 5 | 11 | 27 | 1 | 1 | 9  | 18 | 23 | 51 |
| 100,205 | 2 | 5 | 11 | 25 | 1 | 1 | 9  | 16 | 23 | 47 |
| 100,206 | 2 | 6 | 12 | 29 | 1 | 2 | 10 | 22 | 25 | 59 |
| 100,207 | 2 | 6 | 12 | 30 | 1 | 2 | 10 | 23 | 25 | 61 |
| 100,208 | 2 | 6 | 14 | 29 | 1 | 2 | 10 | 23 | 27 | 60 |
| 100,209 | 2 | 6 | 14 | 28 | 1 | 2 | 10 | 23 | 27 | 59 |
| 100,210 | 2 | 6 | 14 | 32 | 1 | 2 | 10 | 24 | 27 | 64 |
| 100,211 | 2 | 6 | 14 | 33 | 1 | 2 | 10 | 24 | 27 | 65 |
| 100,212 | 2 | 5 | 14 | 28 | 1 | 2 | 10 | 24 | 27 | 59 |
| 100,213 | 2 | 5 | 14 | 27 | 1 | 2 | 9  | 23 | 26 | 57 |
| 100,214 | 1 | 5 | 16 | 27 | 1 | 2 | 10 | 23 | 28 | 57 |
| 100,215 | 1 | 5 | 16 | 27 | 1 | 2 | 10 | 23 | 28 | 57 |
| 100,216 | 1 | 5 | 16 | 27 | 1 | 2 | 10 | 23 | 28 | 57 |
| 100,217 | 1 | 5 | 15 | 27 | 1 | 2 | 10 | 23 | 27 | 57 |
| 100,218 | 1 | 5 | 16 | 27 | 1 | 2 | 10 | 23 | 28 | 57 |
| 100,219 | 1 | 5 | 16 | 27 | 2 | 2 | 10 | 23 | 29 | 57 |
| 100,220 | 2 | 4 | 16 | 27 | 2 | 2 | 10 | 23 | 30 | 56 |
| 100,221 | 2 | 4 | 16 | 27 | 2 | 2 | 10 | 23 | 30 | 56 |
| 100,222 | 2 | 3 | 15 | 27 | 2 | 2 | 11 | 23 | 30 | 55 |
| 100,223 | 2 | 3 | 15 | 27 | 2 | 2 | 11 | 23 | 30 | 55 |
| 100,224 | 2 | 3 | 18 | 27 | 3 | 2 | 16 | 23 | 39 | 55 |
| 100,225 | 2 | 3 | 17 | 26 | 3 | 2 | 16 | 23 | 38 | 54 |
| 100,226 | 2 | 3 | 17 | 28 | 3 | 2 | 16 | 23 | 38 | 56 |
| 100,227 | 2 | 3 | 17 | 29 | 3 | 2 | 15 | 23 | 37 | 57 |
| 100,228 | 2 | 3 | 17 | 29 | 3 | 2 | 14 | 23 | 36 | 57 |
| 100,229 | 2 | 3 | 17 | 29 | 3 | 2 | 14 | 26 | 36 | 60 |
| 100,230 | 2 | 4 | 17 | 30 | 3 | 2 | 14 | 27 | 36 | 63 |
| 100,231 | 2 | 4 | 17 | 30 | 3 | 2 | 14 | 28 | 36 | 64 |
| 100,232 | 2 | 4 | 17 | 30 | 3 | 2 | 14 | 29 | 36 | 65 |
| 100,233 | 3 | 4 | 17 | 30 | 3 | 2 | 14 | 29 | 37 | 65 |

|         |   |   |    |    |   |   |    |    |    |    |
|---------|---|---|----|----|---|---|----|----|----|----|
| 100,234 | 3 | 4 | 18 | 30 | 3 | 2 | 14 | 29 | 38 | 65 |
| 100,235 | 3 | 4 | 18 | 32 | 3 | 2 | 14 | 28 | 38 | 66 |
| 100,236 | 3 | 4 | 22 | 32 | 3 | 2 | 14 | 28 | 42 | 66 |
| 100,237 | 3 | 3 | 22 | 32 | 3 | 2 | 14 | 28 | 42 | 65 |
| 100,238 | 3 | 3 | 20 | 32 | 3 | 2 | 14 | 27 | 40 | 64 |
| 100,239 | 3 | 3 | 20 | 31 | 3 | 2 | 13 | 27 | 39 | 63 |
| 100,240 | 3 | 3 | 19 | 31 | 3 | 2 | 14 | 25 | 39 | 61 |
| 100,241 | 3 | 3 | 17 | 30 | 3 | 2 | 14 | 25 | 37 | 60 |
| 100,242 | 3 | 3 | 17 | 30 | 3 | 2 | 14 | 26 | 37 | 61 |
| 100,243 | 3 | 3 | 17 | 31 | 3 | 1 | 12 | 25 | 35 | 60 |
| 100,244 | 3 | 3 | 17 | 30 | 3 | 1 | 12 | 25 | 35 | 59 |
| 100,245 | 3 | 3 | 17 | 31 | 2 | 1 | 12 | 25 | 34 | 60 |
| 100,246 | 3 | 3 | 18 | 31 | 2 | 1 | 10 | 25 | 33 | 60 |
| 100,247 | 3 | 3 | 18 | 31 | 2 | 1 | 10 | 26 | 33 | 61 |
| 100,248 | 3 | 5 | 18 | 32 | 2 | 1 | 9  | 27 | 32 | 65 |
| 100,249 | 2 | 5 | 18 | 32 | 2 | 1 | 9  | 27 | 31 | 65 |
| 100,250 | 2 | 5 | 17 | 31 | 2 | 1 | 9  | 26 | 30 | 63 |
| 100,251 | 2 | 5 | 17 | 28 | 2 | 1 | 9  | 21 | 30 | 55 |
| 100,252 | 2 | 5 | 15 | 28 | 2 | 1 | 9  | 22 | 28 | 56 |
| 100,253 | 2 | 4 | 15 | 30 | 2 | 1 | 9  | 25 | 28 | 60 |
| 100,254 | 2 | 4 | 14 | 30 | 2 | 1 | 9  | 27 | 27 | 62 |
| 100,255 | 2 | 4 | 14 | 28 | 2 | 1 | 8  | 28 | 26 | 61 |
| 100,256 | 2 | 4 | 14 | 28 | 2 | 1 | 8  | 28 | 26 | 61 |
| 100,257 | 2 | 3 | 14 | 22 | 2 | 0 | 8  | 21 | 26 | 46 |
| 100,258 | 2 | 3 | 12 | 23 | 2 | 0 | 8  | 21 | 24 | 47 |
| 100,259 | 2 | 3 | 12 | 23 | 2 | 0 | 8  | 21 | 24 | 47 |
| 100,260 | 2 | 3 | 12 | 23 | 2 | 0 | 8  | 21 | 24 | 47 |
| 100,261 | 2 | 3 | 12 | 19 | 2 | 0 | 8  | 19 | 24 | 41 |
| 100,262 | 2 | 3 | 12 | 18 | 2 | 0 | 8  | 19 | 24 | 40 |
| 100,263 | 2 | 3 | 13 | 19 | 2 | 0 | 8  | 19 | 25 | 41 |
| 100,264 | 2 | 3 | 13 | 19 | 2 | 0 | 8  | 19 | 25 | 41 |
| 100,265 | 2 | 3 | 11 | 19 | 2 | 0 | 7  | 19 | 22 | 41 |
| 100,266 | 3 | 3 | 11 | 20 | 2 | 0 | 8  | 19 | 24 | 42 |
| 100,267 | 3 | 3 | 11 | 20 | 2 | 0 | 8  | 19 | 24 | 42 |
| 100,268 | 3 | 3 | 11 | 20 | 2 | 0 | 8  | 19 | 24 | 42 |
| 100,269 | 3 | 3 | 10 | 20 | 2 | 0 | 8  | 19 | 23 | 42 |
| 100,270 | 3 | 3 | 10 | 21 | 1 | 0 | 8  | 19 | 22 | 43 |
| 100,271 | 2 | 3 | 10 | 21 | 1 | 0 | 8  | 19 | 21 | 43 |
| 100,272 | 2 | 3 | 10 | 21 | 1 | 0 | 7  | 19 | 20 | 43 |
| 100,273 | 2 | 3 | 10 | 21 | 1 | 0 | 7  | 19 | 20 | 43 |
| 100,274 | 2 | 3 | 10 | 21 | 2 | 0 | 7  | 19 | 21 | 43 |

|         |   |   |    |    |   |   |    |    |     |    |
|---------|---|---|----|----|---|---|----|----|-----|----|
| 100,275 | 2 | 3 | 7  | 21 | 1 | 0 | 2  | 19 | 12  | 43 |
| 100,276 | 2 | 4 | 7  | 21 | 1 | 0 | 2  | 19 | 12  | 44 |
| 100,277 | 2 | 4 | 7  | 19 | 1 | 0 | 2  | 19 | 12  | 42 |
| 100,278 | 2 | 4 | 7  | 18 | 1 | 0 | 2  | 19 | 12  | 41 |
| 100,279 | 2 | 4 | 7  | 18 | 1 | 0 | 2  | 16 | 12  | 38 |
| 100,280 | 2 | 4 | 7  | 19 | 1 | 0 | 2  | 16 | 12  | 39 |
| 100,281 | 2 | 3 | 7  | 18 | 2 | 0 | 2  | 15 | 13  | 36 |
| 100,282 | 2 | 3 | 7  | 18 | 2 | 0 | 2  | 13 | 13  | 34 |
| 100,283 | 1 | 3 | 7  | 18 | 2 | 0 | 2  | 13 | 12  | 34 |
| 100,284 | 1 | 3 | 6  | 16 | 2 | 0 | 2  | 14 | 11  | 33 |
| 100,285 | 1 | 3 | 6  | 24 | 2 | 0 | 2  | 17 | 11  | 44 |
| 100,286 | 1 | 3 | 7  | 30 | 2 | 0 | 2  | 19 | 12  | 52 |
| 100,287 | 1 | 4 | 3  | 35 | 2 | 0 | 2  | 21 | 8   | 60 |
| 100,288 | 1 | 4 | 3  | 37 | 2 | 0 | 3  | 21 | 9   | 62 |
| 100,289 | 1 | 4 | 3  | 37 | 2 | 0 | 3  | 21 | 9   | 62 |
| 100,290 | 1 | 4 | 3  | 40 | 2 | 0 | 3  | 21 | 9   | 65 |
| 100,291 | 1 | 4 | 3  | 40 | 2 | 0 | 2  | 21 | 8   | 65 |
| 100,292 | 1 | 4 | 3  | 42 | 2 | 0 | 2  | 20 | 8   | 66 |
| 100,293 | 1 | 4 | 3  | 42 | 2 | 0 | 3  | 19 | 9   | 65 |
| 100,294 | 1 | 4 | 3  | 52 | 2 | 1 | 3  | 24 | 9   | 81 |
| 100,295 | 1 | 4 | 3  | 56 | 2 | 1 | 3  | 27 | 9   | 88 |
| 100,296 | 1 | 5 | 2  | 55 | 2 | 1 | 3  | 28 | 8   | 89 |
| 100,297 | 1 | 5 | 2  | 56 | 2 | 1 | 4  | 28 | 9   | 90 |
| 100,298 | 1 | 5 | 3  | 58 | 2 | 2 | 6  | 29 | 12  | 94 |
| 100,299 | 1 | 3 | 4  | 59 | 2 | 2 | 6  | 27 | 13  | 91 |
| 100,300 | 1 | 3 | 7  | 60 | 3 | 2 | 10 | 27 | 21  | 92 |
| 100,301 | 2 | 3 | 13 | 60 | 3 | 2 | 12 | 27 | 30  | 92 |
| 100,302 | 3 | 3 | 28 | 60 | 3 | 2 | 25 | 26 | 59  | 91 |
| 100,303 | 3 | 3 | 27 | 56 | 3 | 2 | 25 | 20 | 58  | 81 |
| 100,304 | 3 | 3 | 33 | 56 | 3 | 2 | 34 | 20 | 73  | 81 |
| 100,305 | 5 | 3 | 38 | 56 | 3 | 2 | 36 | 20 | 82  | 81 |
| 100,306 | 5 | 3 | 38 | 56 | 3 | 2 | 36 | 20 | 82  | 81 |
| 100,307 | 5 | 3 | 38 | 56 | 3 | 2 | 36 | 20 | 82  | 81 |
| 100,308 | 5 | 3 | 47 | 55 | 5 | 2 | 39 | 20 | 96  | 80 |
| 100,309 | 5 | 3 | 47 | 55 | 5 | 2 | 39 | 20 | 96  | 80 |
| 100,310 | 5 | 3 | 50 | 55 | 5 | 2 | 40 | 20 | 100 | 80 |
| 100,311 | 5 | 3 | 52 | 55 | 5 | 2 | 40 | 20 | 102 | 80 |
| 100,312 | 5 | 3 | 53 | 54 | 5 | 2 | 41 | 20 | 104 | 79 |
| 100,313 | 5 | 3 | 53 | 54 | 5 | 2 | 42 | 20 | 105 | 79 |
| 100,314 | 5 | 3 | 52 | 54 | 5 | 2 | 42 | 20 | 104 | 79 |
| 100,315 | 5 | 3 | 55 | 54 | 6 | 2 | 42 | 20 | 108 | 79 |

|         |   |   |    |    |    |   |    |    |     |    |
|---------|---|---|----|----|----|---|----|----|-----|----|
| 100,316 | 4 | 3 | 62 | 54 | 6  | 2 | 47 | 20 | 119 | 79 |
| 100,317 | 4 | 3 | 63 | 54 | 6  | 2 | 46 | 20 | 119 | 79 |
| 100,318 | 4 | 3 | 63 | 54 | 6  | 2 | 46 | 20 | 119 | 79 |
| 100,319 | 4 | 3 | 64 | 54 | 7  | 2 | 47 | 20 | 122 | 79 |
| 100,320 | 4 | 3 | 64 | 54 | 7  | 2 | 47 | 20 | 122 | 79 |
| 100,321 | 4 | 3 | 65 | 53 | 7  | 2 | 47 | 20 | 123 | 78 |
| 100,322 | 4 | 3 | 67 | 53 | 7  | 2 | 48 | 20 | 126 | 78 |
| 100,323 | 4 | 3 | 69 | 53 | 7  | 2 | 49 | 20 | 129 | 78 |
| 100,324 | 4 | 3 | 81 | 53 | 10 | 2 | 58 | 20 | 153 | 78 |
| 100,325 | 4 | 3 | 81 | 53 | 9  | 2 | 58 | 20 | 152 | 78 |
| 100,326 | 4 | 2 | 81 | 53 | 9  | 2 | 58 | 20 | 152 | 77 |
| 100,327 | 4 | 2 | 82 | 53 | 9  | 2 | 59 | 20 | 154 | 77 |
| 100,328 | 4 | 2 | 82 | 53 | 9  | 2 | 59 | 20 | 154 | 77 |
| 100,329 | 4 | 2 | 82 | 53 | 9  | 2 | 59 | 20 | 154 | 77 |
| 100,330 | 4 | 2 | 82 | 53 | 9  | 2 | 59 | 20 | 154 | 77 |
| 100,331 | 4 | 2 | 82 | 52 | 8  | 2 | 59 | 20 | 153 | 76 |
| 100,332 | 4 | 2 | 82 | 52 | 8  | 2 | 59 | 20 | 153 | 76 |
| 100,333 | 4 | 2 | 82 | 52 | 8  | 2 | 59 | 20 | 153 | 76 |
| 100,334 | 4 | 2 | 82 | 52 | 8  | 2 | 59 | 19 | 153 | 75 |
| 100,335 | 4 | 2 | 82 | 51 | 8  | 2 | 59 | 18 | 153 | 73 |
| 100,336 | 4 | 2 | 82 | 43 | 8  | 2 | 59 | 15 | 153 | 62 |
| 100,337 | 4 | 2 | 81 | 37 | 8  | 2 | 59 | 13 | 152 | 54 |
| 100,338 | 4 | 1 | 82 | 32 | 8  | 2 | 59 | 11 | 153 | 46 |
| 100,339 | 4 | 1 | 82 | 30 | 8  | 2 | 58 | 10 | 152 | 43 |
| 100,340 | 4 | 1 | 82 | 29 | 8  | 2 | 58 | 11 | 152 | 43 |
| 100,341 | 4 | 1 | 82 | 26 | 8  | 2 | 58 | 10 | 152 | 39 |
| 100,342 | 4 | 1 | 82 | 25 | 8  | 2 | 58 | 11 | 152 | 39 |
| 100,343 | 4 | 1 | 82 | 25 | 8  | 2 | 57 | 11 | 151 | 39 |
| 100,344 | 4 | 1 | 82 | 14 | 8  | 1 | 57 | 7  | 151 | 23 |
| 100,345 | 4 | 1 | 82 | 14 | 8  | 1 | 57 | 7  | 151 | 23 |
| 100,346 | 4 | 1 | 82 | 9  | 8  | 1 | 56 | 3  | 150 | 14 |
| 100,347 | 4 | 0 | 82 | 9  | 8  | 1 | 57 | 2  | 151 | 12 |
| 100,348 | 4 | 0 | 82 | 6  | 8  | 0 | 57 | 1  | 151 | 7  |
| 100,349 | 4 | 0 | 82 | 3  | 8  | 1 | 57 | 2  | 151 | 6  |
| 100,350 | 4 | 0 | 80 | 2  | 8  | 1 | 57 | 2  | 149 | 5  |
| 100,351 | 3 | 0 | 75 | 2  | 7  | 1 | 50 | 2  | 135 | 5  |
| 100,352 | 3 | 0 | 72 | 2  | 7  | 1 | 47 | 2  | 129 | 5  |
| 100,353 | 2 | 0 | 57 | 1  | 7  | 1 | 36 | 2  | 102 | 4  |
| 100,354 | 2 | 0 | 57 | 1  | 7  | 1 | 36 | 2  | 102 | 4  |
| 100,355 | 2 | 0 | 51 | 2  | 7  | 1 | 28 | 2  | 88  | 5  |
| 100,356 | 0 | 0 | 47 | 2  | 7  | 1 | 27 | 2  | 81  | 5  |



|         |   |   |    |    |   |   |    |   |    |    |
|---------|---|---|----|----|---|---|----|---|----|----|
| 100,357 | 0 | 0 | 44 | 2  | 6 | 1 | 25 | 2 | 75 | 5  |
| 100,358 | 0 | 1 | 39 | 3  | 5 | 1 | 24 | 2 | 68 | 7  |
| 100,359 | 0 | 1 | 38 | 3  | 5 | 1 | 24 | 3 | 67 | 8  |
| 100,360 | 0 | 1 | 37 | 3  | 5 | 1 | 23 | 3 | 65 | 8  |
| 100,361 | 0 | 2 | 35 | 11 | 5 | 1 | 23 | 6 | 63 | 20 |
| 100,362 | 0 | 2 | 33 | 11 | 5 | 1 | 23 | 6 | 61 | 20 |
| 100,363 | 0 | 2 | 32 | 12 | 5 | 1 | 23 | 6 | 60 | 21 |
| 100,364 | 0 | 2 | 32 | 12 | 5 | 1 | 22 | 6 | 59 | 21 |
| 100,365 | 0 | 2 | 29 | 12 | 4 | 1 | 22 | 6 | 55 | 21 |
| 100,366 | 0 | 2 | 29 | 12 | 4 | 1 | 22 | 6 | 55 | 21 |
| 100,367 | 0 | 2 | 22 | 12 | 4 | 1 | 18 | 6 | 44 | 21 |
| 100,368 | 0 | 2 | 21 | 11 | 4 | 1 | 18 | 6 | 43 | 20 |
| 100,369 | 0 | 2 | 20 | 11 | 4 | 1 | 18 | 6 | 42 | 20 |
| 100,370 | 0 | 2 | 20 | 11 | 3 | 1 | 17 | 6 | 40 | 20 |
| 100,371 | 0 | 2 | 19 | 11 | 3 | 1 | 17 | 6 | 39 | 20 |
| 100,372 | 0 | 2 | 17 | 11 | 3 | 1 | 16 | 6 | 36 | 20 |
| 100,373 | 0 | 2 | 8  | 11 | 0 | 1 | 7  | 6 | 15 | 20 |
| 100,374 | 0 | 2 | 7  | 11 | 0 | 1 | 5  | 6 | 12 | 20 |
| 100,375 | 0 | 2 | 3  | 11 | 0 | 1 | 5  | 6 | 8  | 20 |
| 100,376 | 0 | 2 | 5  | 11 | 0 | 1 | 5  | 6 | 10 | 20 |
| 100,377 | 0 | 2 | 5  | 11 | 0 | 1 | 5  | 6 | 10 | 20 |
| 100,378 | 0 | 2 | 5  | 11 | 0 | 1 | 5  | 6 | 10 | 20 |
| 100,379 | 0 | 2 | 6  | 12 | 0 | 1 | 5  | 6 | 11 | 21 |
| 100,380 | 0 | 2 | 6  | 13 | 0 | 1 | 5  | 6 | 11 | 22 |
| 100,381 | 0 | 2 | 6  | 13 | 0 | 2 | 5  | 6 | 11 | 23 |
| 100,382 | 0 | 2 | 9  | 13 | 0 | 2 | 6  | 6 | 15 | 23 |
| 100,383 | 0 | 2 | 10 | 13 | 0 | 2 | 6  | 6 | 16 | 23 |
| 100,384 | 0 | 2 | 11 | 13 | 0 | 2 | 8  | 6 | 19 | 23 |
| 100,385 | 0 | 2 | 11 | 13 | 0 | 2 | 8  | 6 | 19 | 23 |
| 100,386 | 0 | 2 | 11 | 13 | 0 | 2 | 8  | 6 | 19 | 23 |
| 100,387 | 0 | 2 | 11 | 13 | 0 | 2 | 8  | 6 | 19 | 23 |
| 100,388 | 0 | 2 | 10 | 13 | 0 | 2 | 8  | 6 | 18 | 23 |
| 100,389 | 0 | 2 | 10 | 13 | 0 | 2 | 8  | 6 | 18 | 23 |
| 100,390 | 0 | 2 | 10 | 13 | 0 | 2 | 8  | 6 | 18 | 23 |
| 100,391 | 0 | 2 | 10 | 13 | 0 | 2 | 8  | 6 | 18 | 23 |
| 100,392 | 0 | 2 | 10 | 13 | 0 | 2 | 8  | 6 | 18 | 23 |
| 100,393 | 0 | 2 | 10 | 13 | 0 | 2 | 8  | 6 | 18 | 23 |
| 100,394 | 0 | 2 | 10 | 14 | 0 | 2 | 8  | 6 | 18 | 24 |
| 100,395 | 0 | 2 | 10 | 14 | 0 | 2 | 8  | 6 | 18 | 24 |
| 100,396 | 0 | 2 | 10 | 16 | 0 | 2 | 8  | 6 | 18 | 26 |
| 100,397 | 0 | 2 | 10 | 16 | 0 | 2 | 8  | 6 | 18 | 26 |

|         |   |   |   |    |   |   |   |   |    |    |
|---------|---|---|---|----|---|---|---|---|----|----|
| 100,398 | 0 | 4 | 9 | 18 | 0 | 4 | 6 | 8 | 15 | 34 |
| 100,399 | 0 | 4 | 9 | 21 | 0 | 4 | 6 | 8 | 15 | 37 |
| 100,400 | 0 | 4 | 9 | 23 | 0 | 4 | 6 | 8 | 15 | 39 |
| 100,401 | 0 | 4 | 9 | 27 | 0 | 4 | 6 | 8 | 15 | 43 |
| 100,402 | 0 | 4 | 9 | 27 | 0 | 4 | 6 | 8 | 15 | 43 |
| 100,403 | 1 | 4 | 9 | 30 | 0 | 4 | 5 | 8 | 15 | 46 |
| 100,404 | 1 | 4 | 9 | 30 | 0 | 4 | 5 | 8 | 15 | 46 |
| 100,405 | 1 | 4 | 9 | 32 | 0 | 4 | 5 | 8 | 15 | 48 |
| 100,406 | 1 | 4 | 9 | 31 | 0 | 4 | 4 | 8 | 14 | 47 |
| 100,407 | 1 | 4 | 9 | 31 | 0 | 4 | 4 | 8 | 14 | 47 |
| 100,408 | 1 | 4 | 9 | 31 | 0 | 4 | 4 | 8 | 14 | 47 |
| 100,409 | 1 | 3 | 9 | 30 | 0 | 4 | 4 | 8 | 14 | 45 |
| 100,410 | 1 | 3 | 9 | 30 | 0 | 4 | 4 | 7 | 14 | 44 |
| 100,411 | 1 | 2 | 9 | 22 | 0 | 4 | 4 | 4 | 14 | 32 |
| 100,412 | 1 | 2 | 9 | 22 | 0 | 4 | 4 | 4 | 14 | 32 |
| 100,413 | 1 | 2 | 9 | 22 | 0 | 4 | 4 | 4 | 14 | 32 |
| 100,414 | 1 | 2 | 9 | 22 | 0 | 4 | 4 | 5 | 14 | 33 |
| 100,415 | 1 | 2 | 9 | 22 | 0 | 4 | 4 | 5 | 14 | 33 |
| 100,416 | 1 | 2 | 9 | 22 | 0 | 4 | 4 | 5 | 14 | 33 |
| 100,417 | 1 | 2 | 9 | 22 | 0 | 4 | 4 | 5 | 14 | 33 |
| 100,418 | 1 | 2 | 9 | 22 | 0 | 4 | 4 | 5 | 14 | 33 |
| 100,419 | 1 | 2 | 9 | 22 | 0 | 4 | 4 | 6 | 14 | 34 |
| 100,420 | 1 | 2 | 9 | 22 | 0 | 4 | 4 | 6 | 14 | 34 |
| 100,421 | 1 | 2 | 9 | 25 | 0 | 4 | 4 | 7 | 14 | 38 |
| 100,422 | 1 | 2 | 9 | 25 | 0 | 4 | 4 | 7 | 14 | 38 |
| 100,423 | 1 | 2 | 9 | 25 | 0 | 4 | 4 | 7 | 14 | 38 |
| 100,424 | 1 | 2 | 9 | 25 | 0 | 4 | 4 | 7 | 14 | 38 |
| 100,425 | 1 | 2 | 9 | 25 | 0 | 4 | 4 | 7 | 14 | 38 |
| 100,426 | 1 | 2 | 9 | 25 | 0 | 4 | 4 | 7 | 14 | 38 |
| 100,427 | 1 | 2 | 7 | 25 | 0 | 4 | 4 | 7 | 12 | 38 |
| 100,428 | 1 | 2 | 7 | 25 | 0 | 5 | 5 | 7 | 13 | 39 |
| 100,429 | 1 | 2 | 7 | 25 | 0 | 5 | 5 | 8 | 13 | 40 |
| 100,430 | 2 | 2 | 7 | 25 | 0 | 5 | 6 | 8 | 15 | 40 |
| 100,431 | 2 | 3 | 6 | 25 | 0 | 5 | 6 | 8 | 14 | 41 |
| 100,432 | 2 | 3 | 6 | 25 | 0 | 5 | 6 | 8 | 14 | 41 |
| 100,433 | 2 | 3 | 4 | 26 | 0 | 6 | 5 | 8 | 11 | 43 |
| 100,434 | 2 | 3 | 3 | 27 | 0 | 6 | 5 | 8 | 10 | 44 |
| 100,435 | 2 | 3 | 2 | 27 | 0 | 6 | 3 | 8 | 7  | 44 |
| 100,436 | 2 | 3 | 2 | 27 | 0 | 6 | 3 | 8 | 7  | 44 |
| 100,437 | 2 | 3 | 2 | 27 | 0 | 6 | 3 | 8 | 7  | 44 |
| 100,438 | 2 | 3 | 2 | 27 | 0 | 6 | 3 | 9 | 7  | 45 |

|         |   |   |   |    |   |   |   |    |    |    |
|---------|---|---|---|----|---|---|---|----|----|----|
| 100,439 | 2 | 3 | 2 | 27 | 0 | 6 | 3 | 9  | 7  | 45 |
| 100,440 | 2 | 3 | 2 | 27 | 0 | 6 | 3 | 9  | 7  | 45 |
| 100,441 | 2 | 3 | 2 | 27 | 0 | 6 | 3 | 9  | 7  | 45 |
| 100,442 | 2 | 3 | 2 | 27 | 0 | 6 | 3 | 9  | 7  | 45 |
| 100,443 | 2 | 3 | 2 | 27 | 0 | 6 | 3 | 9  | 7  | 45 |
| 100,444 | 2 | 4 | 2 | 27 | 0 | 6 | 3 | 9  | 7  | 46 |
| 100,445 | 2 | 4 | 2 | 26 | 0 | 6 | 3 | 9  | 7  | 45 |
| 100,446 | 2 | 4 | 2 | 26 | 0 | 6 | 3 | 9  | 7  | 45 |
| 100,447 | 2 | 4 | 2 | 24 | 0 | 6 | 3 | 9  | 7  | 43 |
| 100,448 | 2 | 4 | 3 | 24 | 0 | 6 | 3 | 9  | 8  | 43 |
| 100,449 | 2 | 2 | 3 | 22 | 0 | 4 | 3 | 8  | 8  | 36 |
| 100,450 | 2 | 2 | 3 | 19 | 0 | 4 | 3 | 8  | 8  | 33 |
| 100,451 | 2 | 2 | 3 | 17 | 0 | 3 | 3 | 7  | 8  | 29 |
| 100,452 | 2 | 2 | 3 | 13 | 1 | 3 | 3 | 6  | 9  | 24 |
| 100,453 | 1 | 2 | 3 | 13 | 1 | 3 | 3 | 6  | 8  | 24 |
| 100,454 | 1 | 2 | 3 | 10 | 1 | 3 | 3 | 7  | 8  | 22 |
| 100,455 | 1 | 2 | 3 | 10 | 1 | 3 | 3 | 7  | 8  | 22 |
| 100,456 | 1 | 2 | 3 | 8  | 1 | 3 | 3 | 7  | 8  | 20 |
| 100,457 | 1 | 2 | 3 | 8  | 1 | 3 | 3 | 7  | 8  | 20 |
| 100,458 | 1 | 2 | 5 | 8  | 1 | 3 | 3 | 7  | 10 | 20 |
| 100,459 | 1 | 2 | 5 | 8  | 1 | 3 | 3 | 7  | 10 | 20 |
| 100,460 | 1 | 2 | 5 | 8  | 1 | 3 | 3 | 7  | 10 | 20 |
| 100,461 | 1 | 2 | 5 | 8  | 1 | 3 | 3 | 7  | 10 | 20 |
| 100,462 | 1 | 2 | 5 | 8  | 1 | 3 | 3 | 7  | 10 | 20 |
| 100,463 | 3 | 2 | 5 | 8  | 1 | 3 | 3 | 7  | 12 | 20 |
| 100,464 | 3 | 2 | 5 | 7  | 1 | 3 | 2 | 7  | 11 | 19 |
| 100,465 | 3 | 2 | 5 | 7  | 1 | 3 | 2 | 6  | 11 | 18 |
| 100,466 | 3 | 2 | 5 | 7  | 1 | 3 | 2 | 6  | 11 | 18 |
| 100,467 | 3 | 2 | 6 | 7  | 1 | 3 | 2 | 6  | 12 | 18 |
| 100,468 | 3 | 2 | 6 | 7  | 1 | 3 | 2 | 7  | 12 | 19 |
| 100,469 | 3 | 2 | 6 | 7  | 1 | 3 | 2 | 7  | 12 | 19 |
| 100,470 | 3 | 2 | 6 | 7  | 1 | 3 | 2 | 6  | 12 | 18 |
| 100,471 | 3 | 2 | 6 | 4  | 1 | 3 | 2 | 5  | 12 | 14 |
| 100,472 | 3 | 2 | 6 | 4  | 1 | 3 | 2 | 5  | 12 | 14 |
| 100,473 | 3 | 2 | 6 | 5  | 1 | 3 | 2 | 6  | 12 | 16 |
| 100,474 | 3 | 2 | 6 | 5  | 1 | 3 | 2 | 6  | 12 | 16 |
| 100,475 | 3 | 2 | 6 | 5  | 1 | 3 | 2 | 6  | 12 | 16 |
| 100,476 | 3 | 2 | 6 | 5  | 1 | 4 | 2 | 7  | 12 | 18 |
| 100,477 | 3 | 2 | 6 | 7  | 1 | 4 | 2 | 10 | 12 | 23 |
| 100,478 | 3 | 3 | 6 | 15 | 1 | 4 | 1 | 13 | 11 | 35 |
| 100,479 | 3 | 3 | 6 | 16 | 1 | 3 | 1 | 13 | 11 | 35 |

|         |   |   |   |    |   |   |   |    |    |    |
|---------|---|---|---|----|---|---|---|----|----|----|
| 100,480 | 3 | 3 | 5 | 16 | 1 | 3 | 1 | 12 | 10 | 34 |
| 100,481 | 2 | 3 | 4 | 15 | 1 | 3 | 0 | 12 | 7  | 33 |
| 100,482 | 2 | 2 | 5 | 15 | 1 | 2 | 0 | 14 | 8  | 33 |
| 100,483 | 2 | 2 | 5 | 15 | 1 | 2 | 0 | 14 | 8  | 33 |
| 100,484 | 2 | 2 | 6 | 15 | 1 | 1 | 0 | 14 | 9  | 32 |
| 100,485 | 2 | 2 | 6 | 14 | 1 | 1 | 0 | 14 | 9  | 31 |
| 100,486 | 2 | 2 | 6 | 14 | 1 | 1 | 0 | 14 | 9  | 31 |
| 100,487 | 2 | 2 | 6 | 14 | 1 | 1 | 0 | 15 | 9  | 32 |
| 100,488 | 2 | 2 | 6 | 14 | 1 | 1 | 0 | 14 | 9  | 31 |
| 100,489 | 2 | 2 | 6 | 14 | 1 | 1 | 0 | 14 | 9  | 31 |
| 100,490 | 2 | 2 | 6 | 14 | 1 | 1 | 0 | 14 | 9  | 31 |
| 100,491 | 2 | 2 | 6 | 14 | 1 | 1 | 0 | 14 | 9  | 31 |
| 100,492 | 2 | 2 | 6 | 14 | 1 | 1 | 0 | 14 | 9  | 31 |
| 100,493 | 2 | 2 | 6 | 14 | 1 | 1 | 0 | 14 | 9  | 31 |
| 100,494 | 2 | 2 | 6 | 14 | 1 | 1 | 0 | 14 | 9  | 31 |
| 100,495 | 2 | 1 | 6 | 14 | 1 | 1 | 0 | 14 | 9  | 30 |
| 100,496 | 2 | 1 | 6 | 14 | 1 | 1 | 0 | 14 | 9  | 30 |
| 100,497 | 2 | 1 | 7 | 14 | 1 | 1 | 0 | 14 | 10 | 30 |
| 100,498 | 2 | 1 | 7 | 15 | 1 | 1 | 0 | 14 | 10 | 31 |
| 100,499 | 2 | 1 | 6 | 15 | 1 | 1 | 0 | 14 | 9  | 31 |
| 100,500 | 2 | 1 | 6 | 16 | 1 | 1 | 0 | 13 | 9  | 31 |
| 100,501 | 2 | 1 | 6 | 16 | 1 | 1 | 0 | 13 | 9  | 31 |
| 100,502 | 2 | 1 | 6 | 16 | 1 | 1 | 0 | 14 | 9  | 32 |
| 100,503 | 2 | 1 | 6 | 16 | 0 | 1 | 0 | 15 | 8  | 33 |
| 100,504 | 2 | 1 | 6 | 16 | 0 | 1 | 0 | 15 | 8  | 33 |
| 100,505 | 3 | 1 | 7 | 16 | 0 | 1 | 0 | 14 | 10 | 32 |
| 100,506 | 3 | 1 | 7 | 16 | 0 | 1 | 0 | 14 | 10 | 32 |
| 100,507 | 3 | 2 | 7 | 17 | 1 | 1 | 0 | 14 | 11 | 34 |
| 100,508 | 3 | 2 | 5 | 17 | 1 | 1 | 0 | 14 | 9  | 34 |
| 100,509 | 3 | 2 | 5 | 17 | 1 | 1 | 0 | 14 | 9  | 34 |
| 100,510 | 3 | 2 | 5 | 17 | 1 | 1 | 0 | 14 | 9  | 34 |
| 100,511 | 3 | 2 | 5 | 17 | 1 | 1 | 0 | 14 | 9  | 34 |
| 100,512 | 3 | 2 | 5 | 17 | 1 | 1 | 1 | 14 | 10 | 34 |
| 100,513 | 3 | 2 | 5 | 17 | 1 | 1 | 1 | 14 | 10 | 34 |
| 100,514 | 1 | 2 | 5 | 17 | 1 | 1 | 1 | 14 | 8  | 34 |
| 100,515 | 2 | 2 | 5 | 17 | 1 | 1 | 1 | 14 | 9  | 34 |
| 100,516 | 2 | 2 | 5 | 17 | 1 | 1 | 1 | 14 | 9  | 34 |
| 100,517 | 3 | 2 | 5 | 18 | 1 | 1 | 1 | 15 | 10 | 36 |
| 100,518 | 3 | 2 | 4 | 18 | 1 | 1 | 1 | 15 | 9  | 36 |
| 100,519 | 3 | 2 | 5 | 18 | 1 | 1 | 1 | 16 | 10 | 37 |
| 100,520 | 3 | 2 | 5 | 20 | 1 | 1 | 1 | 16 | 10 | 39 |

|         |   |   |   |    |   |   |   |    |    |     |
|---------|---|---|---|----|---|---|---|----|----|-----|
| 100,521 | 3 | 2 | 5 | 20 | 1 | 1 | 1 | 16 | 10 | 39  |
| 100,522 | 3 | 2 | 5 | 20 | 1 | 1 | 1 | 17 | 10 | 40  |
| 100,523 | 3 | 2 | 5 | 19 | 1 | 1 | 1 | 16 | 10 | 38  |
| 100,524 | 3 | 2 | 5 | 19 | 1 | 1 | 1 | 16 | 10 | 38  |
| 100,525 | 3 | 2 | 8 | 19 | 1 | 1 | 2 | 16 | 14 | 38  |
| 100,526 | 3 | 2 | 8 | 19 | 1 | 0 | 2 | 16 | 14 | 37  |
| 100,527 | 3 | 2 | 8 | 19 | 1 | 0 | 2 | 16 | 14 | 37  |
| 100,528 | 3 | 2 | 8 | 18 | 1 | 0 | 2 | 14 | 14 | 34  |
| 100,529 | 3 | 1 | 8 | 10 | 1 | 0 | 2 | 11 | 14 | 22  |
| 100,530 | 3 | 1 | 8 | 9  | 1 | 0 | 2 | 12 | 14 | 22  |
| 100,531 | 3 | 1 | 8 | 13 | 1 | 1 | 2 | 13 | 14 | 28  |
| 100,532 | 4 | 1 | 8 | 17 | 1 | 1 | 2 | 14 | 15 | 33  |
| 100,533 | 4 | 1 | 7 | 16 | 1 | 1 | 2 | 13 | 14 | 31  |
| 100,534 | 4 | 1 | 6 | 16 | 1 | 1 | 2 | 14 | 13 | 32  |
| 100,535 | 4 | 1 | 7 | 16 | 1 | 1 | 2 | 14 | 14 | 32  |
| 100,536 | 4 | 1 | 7 | 18 | 1 | 1 | 2 | 17 | 14 | 37  |
| 100,537 | 4 | 1 | 7 | 23 | 1 | 1 | 2 | 17 | 14 | 42  |
| 100,538 | 4 | 1 | 7 | 30 | 1 | 1 | 2 | 18 | 14 | 50  |
| 100,539 | 4 | 1 | 7 | 30 | 1 | 1 | 2 | 18 | 14 | 50  |
| 100,540 | 4 | 1 | 7 | 30 | 1 | 1 | 2 | 18 | 14 | 50  |
| 100,541 | 4 | 1 | 7 | 30 | 1 | 1 | 2 | 18 | 14 | 50  |
| 100,542 | 4 | 1 | 7 | 30 | 1 | 1 | 2 | 18 | 14 | 50  |
| 100,543 | 4 | 1 | 7 | 30 | 1 | 1 | 2 | 18 | 14 | 50  |
| 100,544 | 4 | 1 | 7 | 30 | 1 | 1 | 2 | 18 | 14 | 50  |
| 100,545 | 4 | 1 | 7 | 31 | 1 | 1 | 2 | 18 | 14 | 51  |
| 100,546 | 4 | 1 | 7 | 31 | 1 | 1 | 2 | 18 | 14 | 51  |
| 100,547 | 4 | 1 | 7 | 31 | 1 | 1 | 2 | 18 | 14 | 51  |
| 100,548 | 4 | 1 | 6 | 31 | 1 | 1 | 2 | 18 | 13 | 51  |
| 100,549 | 4 | 1 | 6 | 30 | 1 | 1 | 2 | 18 | 13 | 50  |
| 100,550 | 4 | 1 | 6 | 30 | 1 | 1 | 2 | 18 | 13 | 50  |
| 100,551 | 4 | 1 | 6 | 30 | 1 | 1 | 2 | 18 | 13 | 50  |
| 100,552 | 4 | 1 | 6 | 31 | 1 | 1 | 2 | 18 | 13 | 51  |
| 100,553 | 6 | 1 | 6 | 31 | 2 | 1 | 2 | 16 | 16 | 49  |
| 100,554 | 6 | 1 | 6 | 31 | 2 | 1 | 2 | 16 | 16 | 49  |
| 100,555 | 5 | 1 | 5 | 31 | 2 | 1 | 2 | 17 | 14 | 50  |
| 100,556 | 5 | 1 | 5 | 32 | 2 | 1 | 2 | 17 | 14 | 51  |
| 100,557 | 5 | 1 | 5 | 40 | 2 | 1 | 2 | 22 | 14 | 64  |
| 100,558 | 5 | 0 | 6 | 50 | 1 | 1 | 2 | 31 | 14 | 82  |
| 100,559 | 5 | 5 | 7 | 69 | 1 | 1 | 2 | 43 | 15 | 118 |
| 100,560 | 5 | 5 | 8 | 70 | 1 | 1 | 2 | 45 | 16 | 121 |
| 100,561 | 5 | 5 | 8 | 73 | 1 | 1 | 2 | 47 | 16 | 126 |

|         |   |   |    |    |   |   |    |    |    |     |
|---------|---|---|----|----|---|---|----|----|----|-----|
| 100,562 | 5 | 5 | 8  | 75 | 1 | 1 | 2  | 50 | 16 | 131 |
| 100,563 | 5 | 5 | 8  | 75 | 1 | 1 | 1  | 50 | 15 | 131 |
| 100,564 | 5 | 7 | 8  | 84 | 1 | 2 | 1  | 54 | 15 | 147 |
| 100,565 | 5 | 7 | 8  | 84 | 1 | 2 | 1  | 54 | 15 | 147 |
| 100,566 | 4 | 7 | 8  | 84 | 1 | 2 | 2  | 54 | 15 | 147 |
| 100,567 | 4 | 7 | 8  | 83 | 1 | 2 | 2  | 53 | 15 | 145 |
| 100,568 | 4 | 7 | 8  | 83 | 1 | 2 | 2  | 52 | 15 | 144 |
| 100,569 | 4 | 7 | 8  | 83 | 1 | 2 | 2  | 52 | 15 | 144 |
| 100,570 | 4 | 7 | 7  | 83 | 1 | 2 | 2  | 51 | 14 | 143 |
| 100,571 | 4 | 7 | 7  | 82 | 1 | 2 | 2  | 51 | 14 | 142 |
| 100,572 | 5 | 7 | 7  | 82 | 1 | 2 | 2  | 51 | 15 | 142 |
| 100,573 | 5 | 7 | 7  | 84 | 1 | 2 | 2  | 50 | 15 | 143 |
| 100,574 | 5 | 7 | 7  | 84 | 1 | 2 | 2  | 50 | 15 | 143 |
| 100,575 | 5 | 7 | 4  | 86 | 1 | 2 | 1  | 50 | 11 | 145 |
| 100,576 | 5 | 7 | 4  | 86 | 1 | 2 | 1  | 50 | 11 | 145 |
| 100,577 | 5 | 7 | 4  | 86 | 1 | 2 | 1  | 49 | 11 | 144 |
| 100,578 | 5 | 7 | 4  | 86 | 1 | 2 | 1  | 48 | 11 | 143 |
| 100,579 | 5 | 7 | 5  | 85 | 1 | 2 | 1  | 48 | 12 | 142 |
| 100,580 | 5 | 7 | 5  | 85 | 1 | 2 | 1  | 48 | 12 | 142 |
| 100,581 | 5 | 7 | 5  | 85 | 1 | 2 | 1  | 47 | 12 | 141 |
| 100,582 | 6 | 7 | 5  | 81 | 1 | 1 | 1  | 46 | 13 | 135 |
| 100,583 | 5 | 7 | 8  | 77 | 1 | 1 | 1  | 45 | 15 | 130 |
| 100,584 | 5 | 7 | 8  | 78 | 1 | 1 | 1  | 43 | 15 | 129 |
| 100,585 | 5 | 7 | 8  | 78 | 1 | 1 | 1  | 43 | 15 | 129 |
| 100,586 | 5 | 7 | 7  | 77 | 1 | 1 | 1  | 44 | 14 | 129 |
| 100,587 | 5 | 7 | 7  | 75 | 1 | 1 | 1  | 41 | 14 | 124 |
| 100,588 | 6 | 7 | 16 | 70 | 2 | 2 | 11 | 41 | 35 | 120 |
| 100,589 | 6 | 7 | 16 | 63 | 2 | 2 | 11 | 39 | 35 | 111 |
| 100,590 | 6 | 7 | 16 | 63 | 2 | 2 | 12 | 39 | 36 | 111 |
| 100,591 | 6 | 7 | 16 | 63 | 2 | 2 | 12 | 39 | 36 | 111 |
| 100,592 | 6 | 7 | 16 | 63 | 2 | 2 | 12 | 39 | 36 | 111 |
| 100,593 | 6 | 7 | 16 | 63 | 2 | 2 | 12 | 39 | 36 | 111 |
| 100,594 | 6 | 7 | 16 | 63 | 2 | 2 | 12 | 39 | 36 | 111 |
| 100,595 | 6 | 7 | 16 | 63 | 2 | 2 | 12 | 39 | 36 | 111 |
| 100,596 | 6 | 7 | 16 | 62 | 2 | 2 | 12 | 39 | 36 | 110 |
| 100,597 | 6 | 7 | 16 | 63 | 2 | 2 | 12 | 39 | 36 | 111 |
| 100,598 | 6 | 7 | 16 | 66 | 2 | 2 | 12 | 39 | 36 | 114 |
| 100,599 | 6 | 7 | 16 | 66 | 2 | 2 | 12 | 39 | 36 | 114 |
| 100,600 | 6 | 7 | 17 | 66 | 2 | 2 | 12 | 39 | 37 | 114 |
| 100,601 | 6 | 7 | 19 | 66 | 1 | 2 | 13 | 39 | 39 | 114 |
| 100,602 | 6 | 7 | 19 | 64 | 1 | 2 | 14 | 39 | 40 | 112 |

|         |   |   |    |    |   |   |    |    |    |     |
|---------|---|---|----|----|---|---|----|----|----|-----|
| 100,603 | 6 | 7 | 19 | 64 | 1 | 2 | 14 | 39 | 40 | 112 |
| 100,604 | 5 | 7 | 19 | 64 | 1 | 2 | 14 | 38 | 39 | 111 |
| 100,605 | 5 | 7 | 19 | 65 | 1 | 2 | 14 | 38 | 39 | 112 |
| 100,606 | 5 | 7 | 19 | 65 | 1 | 2 | 14 | 37 | 39 | 111 |
| 100,607 | 5 | 7 | 19 | 64 | 1 | 2 | 14 | 37 | 39 | 110 |
| 100,608 | 5 | 8 | 18 | 62 | 1 | 2 | 14 | 34 | 38 | 106 |
| 100,609 | 5 | 8 | 18 | 51 | 1 | 2 | 14 | 26 | 38 | 87  |
| 100,610 | 6 | 3 | 17 | 32 | 1 | 2 | 15 | 14 | 39 | 51  |
| 100,611 | 6 | 3 | 16 | 32 | 1 | 2 | 15 | 14 | 38 | 51  |
| 100,612 | 6 | 3 | 16 | 32 | 1 | 2 | 15 | 14 | 38 | 51  |
| 100,613 | 6 | 3 | 16 | 32 | 1 | 2 | 15 | 13 | 38 | 50  |
| 100,614 | 6 | 3 | 16 | 32 | 1 | 2 | 14 | 14 | 37 | 51  |
| 100,615 | 6 | 1 | 16 | 23 | 1 | 1 | 14 | 10 | 37 | 35  |
| 100,616 | 6 | 1 | 16 | 23 | 1 | 1 | 14 | 10 | 37 | 35  |
| 100,617 | 6 | 1 | 16 | 23 | 1 | 1 | 14 | 10 | 37 | 35  |
| 100,618 | 6 | 1 | 16 | 23 | 1 | 1 | 14 | 10 | 37 | 35  |
| 100,619 | 5 | 2 | 16 | 23 | 1 | 1 | 14 | 10 | 36 | 36  |
| 100,620 | 5 | 2 | 16 | 23 | 1 | 1 | 14 | 10 | 36 | 36  |
| 100,621 | 5 | 2 | 16 | 25 | 1 | 1 | 14 | 10 | 36 | 38  |
| 100,622 | 5 | 2 | 16 | 25 | 1 | 1 | 14 | 10 | 36 | 38  |
| 100,623 | 4 | 2 | 16 | 24 | 1 | 1 | 14 | 10 | 35 | 37  |
| 100,624 | 4 | 2 | 16 | 25 | 1 | 1 | 14 | 10 | 35 | 38  |
| 100,625 | 4 | 2 | 16 | 23 | 1 | 1 | 14 | 10 | 35 | 36  |
| 100,626 | 4 | 2 | 19 | 23 | 1 | 1 | 15 | 11 | 39 | 37  |
| 100,627 | 4 | 2 | 19 | 23 | 1 | 1 | 15 | 12 | 39 | 38  |
| 100,628 | 4 | 2 | 19 | 23 | 1 | 1 | 15 | 12 | 39 | 38  |
| 100,629 | 5 | 2 | 21 | 23 | 1 | 1 | 15 | 12 | 42 | 38  |
| 100,630 | 5 | 2 | 20 | 23 | 1 | 1 | 15 | 12 | 41 | 38  |
| 100,631 | 5 | 2 | 22 | 24 | 1 | 1 | 15 | 12 | 43 | 39  |
| 100,632 | 4 | 2 | 22 | 25 | 1 | 1 | 15 | 12 | 42 | 40  |
| 100,633 | 5 | 2 | 23 | 27 | 1 | 1 | 21 | 12 | 50 | 42  |
| 100,634 | 5 | 2 | 20 | 29 | 1 | 1 | 21 | 13 | 47 | 45  |
| 100,635 | 4 | 2 | 17 | 28 | 1 | 1 | 19 | 13 | 41 | 44  |
| 100,636 | 4 | 2 | 16 | 28 | 1 | 2 | 18 | 13 | 39 | 45  |
| 100,637 | 4 | 2 | 16 | 29 | 1 | 2 | 18 | 12 | 39 | 45  |
| 100,638 | 4 | 4 | 18 | 35 | 0 | 2 | 16 | 13 | 38 | 54  |
| 100,639 | 4 | 4 | 15 | 35 | 0 | 1 | 11 | 13 | 30 | 53  |
| 100,640 | 4 | 7 | 16 | 43 | 0 | 1 | 11 | 19 | 31 | 70  |
| 100,641 | 4 | 7 | 16 | 44 | 0 | 1 | 10 | 19 | 30 | 71  |
| 100,642 | 4 | 7 | 16 | 44 | 1 | 1 | 10 | 19 | 31 | 71  |
| 100,643 | 5 | 7 | 16 | 46 | 1 | 1 | 10 | 19 | 32 | 73  |

|         |   |   |    |    |   |   |    |    |    |     |
|---------|---|---|----|----|---|---|----|----|----|-----|
| 100,644 | 5 | 7 | 16 | 46 | 1 | 1 | 10 | 19 | 32 | 73  |
| 100,645 | 5 | 7 | 17 | 47 | 1 | 1 | 10 | 19 | 33 | 74  |
| 100,646 | 5 | 7 | 17 | 47 | 1 | 1 | 10 | 19 | 33 | 74  |
| 100,647 | 5 | 7 | 19 | 47 | 1 | 1 | 10 | 19 | 35 | 74  |
| 100,648 | 5 | 7 | 20 | 50 | 1 | 1 | 11 | 19 | 37 | 77  |
| 100,649 | 5 | 7 | 19 | 47 | 1 | 1 | 11 | 19 | 36 | 74  |
| 100,650 | 5 | 7 | 19 | 48 | 1 | 1 | 11 | 19 | 36 | 75  |
| 100,651 | 5 | 7 | 17 | 49 | 1 | 1 | 10 | 19 | 33 | 76  |
| 100,652 | 4 | 7 | 17 | 49 | 1 | 1 | 9  | 20 | 31 | 77  |
| 100,653 | 4 | 7 | 17 | 49 | 1 | 1 | 9  | 20 | 31 | 77  |
| 100,654 | 4 | 7 | 17 | 49 | 1 | 1 | 9  | 20 | 31 | 77  |
| 100,655 | 4 | 7 | 17 | 48 | 1 | 1 | 9  | 20 | 31 | 76  |
| 100,656 | 4 | 7 | 17 | 48 | 1 | 1 | 9  | 20 | 31 | 76  |
| 100,657 | 4 | 7 | 17 | 49 | 1 | 1 | 9  | 20 | 31 | 77  |
| 100,658 | 4 | 7 | 17 | 49 | 1 | 1 | 9  | 20 | 31 | 77  |
| 100,659 | 3 | 6 | 17 | 43 | 1 | 2 | 9  | 17 | 30 | 68  |
| 100,660 | 3 | 6 | 17 | 43 | 1 | 2 | 8  | 17 | 29 | 68  |
| 100,661 | 3 | 6 | 17 | 42 | 1 | 2 | 8  | 15 | 29 | 65  |
| 100,662 | 3 | 6 | 17 | 39 | 1 | 2 | 8  | 14 | 29 | 61  |
| 100,663 | 3 | 7 | 17 | 39 | 1 | 2 | 8  | 14 | 29 | 62  |
| 100,664 | 3 | 7 | 18 | 37 | 1 | 2 | 8  | 12 | 30 | 58  |
| 100,665 | 3 | 7 | 18 | 37 | 1 | 2 | 8  | 11 | 30 | 57  |
| 100,666 | 3 | 7 | 18 | 37 | 1 | 2 | 8  | 11 | 30 | 57  |
| 100,667 | 3 | 7 | 18 | 37 | 1 | 2 | 8  | 11 | 30 | 57  |
| 100,668 | 3 | 7 | 18 | 37 | 1 | 2 | 8  | 11 | 30 | 57  |
| 100,669 | 3 | 7 | 18 | 37 | 1 | 2 | 8  | 11 | 30 | 57  |
| 100,670 | 3 | 6 | 18 | 37 | 1 | 2 | 8  | 11 | 30 | 56  |
| 100,671 | 3 | 6 | 18 | 35 | 1 | 2 | 8  | 11 | 30 | 54  |
| 100,672 | 3 | 6 | 18 | 35 | 1 | 2 | 8  | 11 | 30 | 54  |
| 100,673 | 3 | 6 | 18 | 34 | 1 | 2 | 8  | 11 | 30 | 53  |
| 100,674 | 3 | 6 | 18 | 33 | 1 | 2 | 8  | 11 | 30 | 52  |
| 100,675 | 3 | 7 | 18 | 34 | 1 | 3 | 8  | 10 | 30 | 54  |
| 100,676 | 3 | 7 | 18 | 48 | 1 | 3 | 8  | 12 | 30 | 70  |
| 100,677 | 3 | 7 | 15 | 51 | 1 | 3 | 7  | 13 | 26 | 74  |
| 100,678 | 3 | 7 | 15 | 64 | 1 | 3 | 7  | 13 | 26 | 87  |
| 100,679 | 2 | 7 | 14 | 75 | 1 | 3 | 7  | 13 | 24 | 98  |
| 100,680 | 2 | 7 | 13 | 82 | 1 | 3 | 7  | 13 | 23 | 105 |
| 100,681 | 2 | 7 | 13 | 84 | 1 | 3 | 7  | 13 | 23 | 107 |
| 100,682 | 2 | 7 | 11 | 81 | 1 | 3 | 7  | 15 | 21 | 106 |
| 100,683 | 2 | 7 | 11 | 85 | 1 | 3 | 7  | 15 | 21 | 110 |
| 100,684 | 1 | 7 | 10 | 86 | 1 | 3 | 1  | 15 | 13 | 111 |



|         |   |   |    |    |   |   |   |    |    |     |
|---------|---|---|----|----|---|---|---|----|----|-----|
| 100,685 | 1 | 7 | 10 | 85 | 1 | 3 | 2 | 14 | 14 | 109 |
| 100,686 | 1 | 8 | 9  | 85 | 1 | 3 | 2 | 14 | 13 | 110 |
| 100,687 | 1 | 8 | 9  | 85 | 1 | 2 | 2 | 14 | 13 | 109 |
| 100,688 | 1 | 8 | 9  | 84 | 1 | 2 | 2 | 14 | 13 | 108 |
| 100,689 | 1 | 6 | 7  | 78 | 1 | 2 | 2 | 13 | 11 | 99  |
| 100,690 | 1 | 6 | 8  | 78 | 1 | 2 | 2 | 13 | 12 | 99  |
| 100,691 | 1 | 3 | 7  | 70 | 1 | 2 | 2 | 7  | 11 | 82  |
| 100,692 | 1 | 3 | 8  | 70 | 1 | 2 | 3 | 7  | 13 | 82  |
| 100,693 | 1 | 4 | 8  | 70 | 0 | 2 | 3 | 7  | 12 | 83  |
| 100,694 | 0 | 4 | 8  | 68 | 0 | 2 | 3 | 7  | 11 | 81  |
| 100,695 | 0 | 4 | 7  | 68 | 1 | 2 | 4 | 7  | 12 | 81  |
| 100,696 | 0 | 4 | 7  | 68 | 1 | 2 | 4 | 7  | 12 | 81  |
| 100,697 | 0 | 4 | 7  | 68 | 1 | 2 | 4 | 7  | 12 | 81  |
| 100,698 | 0 | 4 | 7  | 68 | 1 | 2 | 4 | 7  | 12 | 81  |
| 100,699 | 0 | 4 | 6  | 64 | 1 | 2 | 3 | 7  | 10 | 77  |
| 100,700 | 0 | 4 | 6  | 64 | 1 | 2 | 3 | 8  | 10 | 78  |
| 100,701 | 1 | 4 | 8  | 63 | 1 | 2 | 3 | 8  | 13 | 77  |
| 100,702 | 1 | 4 | 8  | 62 | 1 | 2 | 3 | 8  | 13 | 76  |
| 100,703 | 1 | 4 | 8  | 63 | 1 | 2 | 3 | 7  | 13 | 76  |
| 100,704 | 1 | 4 | 8  | 63 | 1 | 2 | 3 | 7  | 13 | 76  |
| 100,705 | 1 | 4 | 8  | 63 | 1 | 2 | 4 | 7  | 14 | 76  |
| 100,706 | 1 | 4 | 8  | 63 | 1 | 2 | 4 | 7  | 14 | 76  |
| 100,707 | 1 | 4 | 8  | 63 | 1 | 2 | 4 | 7  | 14 | 76  |
| 100,708 | 1 | 5 | 8  | 63 | 1 | 2 | 4 | 7  | 14 | 77  |
| 100,709 | 1 | 5 | 8  | 63 | 1 | 2 | 4 | 7  | 14 | 77  |
| 100,710 | 1 | 6 | 8  | 63 | 1 | 1 | 4 | 7  | 14 | 77  |
| 100,711 | 1 | 8 | 8  | 64 | 1 | 1 | 4 | 8  | 14 | 81  |
| 100,712 | 1 | 8 | 8  | 64 | 1 | 1 | 4 | 8  | 14 | 81  |
| 100,713 | 1 | 8 | 8  | 65 | 1 | 1 | 4 | 9  | 14 | 83  |
| 100,714 | 1 | 8 | 7  | 66 | 1 | 1 | 4 | 12 | 13 | 87  |
| 100,715 | 1 | 8 | 7  | 66 | 1 | 1 | 4 | 12 | 13 | 87  |
| 100,716 | 1 | 8 | 7  | 68 | 1 | 1 | 4 | 12 | 13 | 89  |
| 100,717 | 1 | 8 | 7  | 69 | 1 | 1 | 4 | 12 | 13 | 90  |
| 100,718 | 1 | 8 | 7  | 69 | 1 | 1 | 4 | 12 | 13 | 90  |
| 100,719 | 1 | 8 | 7  | 69 | 1 | 1 | 4 | 12 | 13 | 90  |
| 100,720 | 1 | 8 | 7  | 69 | 1 | 1 | 4 | 13 | 13 | 91  |
| 100,721 | 1 | 8 | 7  | 71 | 1 | 2 | 4 | 15 | 13 | 96  |
| 100,722 | 1 | 8 | 7  | 71 | 1 | 2 | 4 | 15 | 13 | 96  |
| 100,723 | 1 | 8 | 7  | 72 | 1 | 2 | 4 | 16 | 13 | 98  |
| 100,724 | 1 | 8 | 7  | 72 | 1 | 2 | 4 | 16 | 13 | 98  |
| 100,725 | 1 | 7 | 7  | 71 | 1 | 1 | 4 | 17 | 13 | 96  |

|         |   |   |     |    |    |   |    |    |     |    |
|---------|---|---|-----|----|----|---|----|----|-----|----|
| 100,726 | 1 | 7 | 7   | 71 | 1  | 1 | 4  | 17 | 13  | 96 |
| 100,727 | 1 | 7 | 7   | 59 | 1  | 1 | 4  | 16 | 13  | 83 |
| 100,728 | 2 | 7 | 7   | 57 | 1  | 1 | 4  | 16 | 14  | 81 |
| 100,729 | 2 | 7 | 7   | 44 | 1  | 1 | 4  | 15 | 14  | 67 |
| 100,730 | 2 | 7 | 7   | 27 | 1  | 2 | 4  | 15 | 14  | 51 |
| 100,731 | 2 | 7 | 7   | 28 | 1  | 2 | 4  | 16 | 14  | 53 |
| 100,732 | 2 | 7 | 10  | 27 | 1  | 2 | 4  | 16 | 17  | 52 |
| 100,733 | 2 | 7 | 10  | 27 | 1  | 2 | 4  | 15 | 17  | 51 |
| 100,734 | 2 | 7 | 11  | 25 | 1  | 2 | 4  | 15 | 18  | 49 |
| 100,735 | 2 | 7 | 13  | 28 | 2  | 2 | 5  | 16 | 22  | 53 |
| 100,736 | 2 | 6 | 13  | 27 | 2  | 2 | 4  | 17 | 21  | 52 |
| 100,737 | 2 | 6 | 10  | 33 | 2  | 2 | 4  | 17 | 18  | 58 |
| 100,738 | 2 | 6 | 12  | 33 | 2  | 2 | 5  | 17 | 21  | 58 |
| 100,739 | 2 | 6 | 27  | 37 | 4  | 2 | 14 | 17 | 47  | 62 |
| 100,740 | 2 | 6 | 28  | 39 | 5  | 2 | 17 | 17 | 52  | 64 |
| 100,741 | 2 | 6 | 28  | 38 | 6  | 2 | 17 | 17 | 53  | 63 |
| 100,742 | 5 | 6 | 52  | 39 | 6  | 2 | 25 | 17 | 88  | 64 |
| 100,743 | 5 | 6 | 53  | 39 | 6  | 2 | 26 | 17 | 90  | 64 |
| 100,744 | 5 | 5 | 56  | 38 | 6  | 2 | 30 | 17 | 97  | 62 |
| 100,745 | 5 | 5 | 56  | 39 | 6  | 2 | 30 | 17 | 97  | 63 |
| 100,746 | 6 | 5 | 62  | 39 | 5  | 2 | 37 | 17 | 110 | 63 |
| 100,747 | 6 | 5 | 66  | 39 | 5  | 2 | 38 | 17 | 115 | 63 |
| 100,748 | 6 | 5 | 68  | 40 | 5  | 2 | 38 | 17 | 117 | 64 |
| 100,749 | 6 | 5 | 68  | 40 | 5  | 2 | 38 | 17 | 117 | 64 |
| 100,750 | 7 | 5 | 74  | 40 | 5  | 2 | 40 | 17 | 126 | 64 |
| 100,751 | 6 | 5 | 82  | 40 | 5  | 2 | 44 | 16 | 137 | 63 |
| 100,752 | 6 | 5 | 86  | 40 | 5  | 2 | 45 | 16 | 142 | 63 |
| 100,753 | 6 | 5 | 86  | 40 | 5  | 2 | 45 | 16 | 142 | 63 |
| 100,754 | 6 | 5 | 104 | 39 | 8  | 2 | 66 | 16 | 184 | 62 |
| 100,755 | 6 | 5 | 113 | 39 | 10 | 2 | 72 | 16 | 201 | 62 |
| 100,756 | 6 | 6 | 113 | 39 | 10 | 2 | 71 | 16 | 200 | 63 |
| 100,757 | 6 | 6 | 113 | 39 | 10 | 3 | 71 | 16 | 200 | 64 |
| 100,758 | 6 | 6 | 131 | 39 | 10 | 3 | 86 | 16 | 233 | 64 |
| 100,759 | 6 | 6 | 133 | 38 | 10 | 3 | 88 | 16 | 237 | 63 |
| 100,760 | 6 | 6 | 135 | 38 | 10 | 3 | 88 | 16 | 239 | 63 |
| 100,761 | 6 | 2 | 135 | 36 | 10 | 3 | 88 | 14 | 239 | 55 |
| 100,762 | 6 | 2 | 135 | 36 | 10 | 3 | 88 | 14 | 239 | 55 |
| 100,763 | 6 | 2 | 135 | 37 | 10 | 3 | 88 | 14 | 239 | 56 |
| 100,764 | 6 | 2 | 135 | 37 | 10 | 3 | 88 | 14 | 239 | 56 |
| 100,765 | 6 | 2 | 135 | 36 | 10 | 3 | 88 | 11 | 239 | 52 |
| 100,766 | 6 | 2 | 135 | 36 | 10 | 3 | 88 | 11 | 239 | 52 |

|         |    |   |     |    |    |   |     |    |     |    |
|---------|----|---|-----|----|----|---|-----|----|-----|----|
| 100,767 | 6  | 2 | 137 | 35 | 10 | 3 | 92  | 11 | 245 | 51 |
| 100,768 | 6  | 2 | 137 | 34 | 10 | 3 | 94  | 11 | 247 | 50 |
| 100,769 | 6  | 2 | 137 | 34 | 10 | 3 | 94  | 11 | 247 | 50 |
| 100,770 | 6  | 2 | 137 | 34 | 10 | 3 | 94  | 12 | 247 | 51 |
| 100,771 | 6  | 2 | 137 | 36 | 10 | 3 | 94  | 11 | 247 | 52 |
| 100,772 | 6  | 3 | 138 | 37 | 10 | 4 | 94  | 11 | 248 | 55 |
| 100,773 | 6  | 3 | 141 | 42 | 10 | 4 | 94  | 11 | 251 | 60 |
| 100,774 | 6  | 3 | 143 | 42 | 10 | 4 | 94  | 11 | 253 | 60 |
| 100,775 | 6  | 3 | 143 | 42 | 10 | 4 | 94  | 11 | 253 | 60 |
| 100,776 | 6  | 3 | 143 | 41 | 10 | 4 | 94  | 10 | 253 | 58 |
| 100,777 | 6  | 3 | 143 | 39 | 10 | 4 | 94  | 9  | 253 | 55 |
| 100,778 | 5  | 3 | 143 | 40 | 10 | 5 | 94  | 9  | 252 | 57 |
| 100,779 | 5  | 3 | 143 | 39 | 10 | 5 | 94  | 8  | 252 | 55 |
| 100,780 | 5  | 3 | 144 | 39 | 10 | 5 | 95  | 8  | 254 | 55 |
| 100,781 | 5  | 3 | 156 | 38 | 10 | 4 | 99  | 8  | 270 | 53 |
| 100,782 | 5  | 3 | 156 | 37 | 10 | 4 | 99  | 7  | 270 | 51 |
| 100,783 | 6  | 3 | 155 | 35 | 10 | 4 | 102 | 6  | 273 | 48 |
| 100,784 | 6  | 3 | 154 | 33 | 10 | 4 | 102 | 6  | 272 | 46 |
| 100,785 | 6  | 3 | 154 | 33 | 10 | 4 | 102 | 6  | 272 | 46 |
| 100,786 | 6  | 3 | 158 | 29 | 9  | 5 | 103 | 5  | 276 | 42 |
| 100,787 | 6  | 3 | 161 | 29 | 9  | 5 | 106 | 4  | 282 | 41 |
| 100,788 | 6  | 3 | 161 | 23 | 9  | 5 | 106 | 4  | 282 | 35 |
| 100,789 | 7  | 3 | 178 | 24 | 10 | 5 | 107 | 4  | 302 | 36 |
| 100,790 | 7  | 3 | 163 | 20 | 8  | 5 | 98  | 4  | 276 | 32 |
| 100,791 | 8  | 3 | 176 | 19 | 9  | 5 | 108 | 4  | 301 | 31 |
| 100,792 | 9  | 3 | 199 | 20 | 11 | 5 | 112 | 4  | 331 | 32 |
| 100,793 | 6  | 3 | 179 | 19 | 11 | 5 | 104 | 4  | 300 | 31 |
| 100,794 | 6  | 3 | 178 | 19 | 11 | 5 | 102 | 4  | 297 | 31 |
| 100,795 | 6  | 3 | 190 | 18 | 11 | 5 | 99  | 4  | 306 | 30 |
| 100,796 | 6  | 3 | 189 | 18 | 11 | 5 | 98  | 4  | 304 | 30 |
| 100,797 | 5  | 3 | 184 | 18 | 11 | 5 | 91  | 4  | 291 | 30 |
| 100,798 | 9  | 3 | 223 | 18 | 13 | 5 | 111 | 4  | 356 | 30 |
| 100,799 | 11 | 3 | 245 | 17 | 13 | 5 | 119 | 4  | 388 | 29 |
| 100,800 | 12 | 3 | 250 | 18 | 14 | 5 | 121 | 4  | 397 | 30 |
| 100,801 | 11 | 3 | 246 | 18 | 14 | 5 | 121 | 4  | 392 | 30 |
| 100,802 | 11 | 3 | 243 | 18 | 14 | 5 | 119 | 4  | 387 | 30 |
| 100,803 | 11 | 3 | 243 | 18 | 14 | 6 | 119 | 4  | 387 | 31 |
| 100,804 | 15 | 3 | 233 | 19 | 13 | 6 | 101 | 4  | 362 | 32 |
| 100,805 | 15 | 3 | 230 | 19 | 13 | 6 | 101 | 6  | 359 | 34 |
| 100,806 | 16 | 4 | 227 | 21 | 11 | 6 | 96  | 7  | 350 | 38 |
| 100,807 | 16 | 3 | 221 | 25 | 11 | 6 | 85  | 8  | 333 | 42 |

|         |    |   |     |    |    |   |     |    |     |    |
|---------|----|---|-----|----|----|---|-----|----|-----|----|
| 100,808 | 16 | 3 | 223 | 25 | 12 | 5 | 84  | 10 | 335 | 43 |
| 100,809 | 16 | 2 | 222 | 26 | 12 | 5 | 85  | 10 | 335 | 43 |
| 100,810 | 17 | 2 | 225 | 26 | 13 | 5 | 89  | 11 | 344 | 44 |
| 100,811 | 17 | 2 | 223 | 26 | 13 | 5 | 89  | 11 | 342 | 44 |
| 100,812 | 18 | 2 | 235 | 27 | 13 | 5 | 90  | 11 | 356 | 45 |
| 100,813 | 18 | 2 | 235 | 27 | 13 | 5 | 90  | 11 | 356 | 45 |
| 100,814 | 18 | 2 | 237 | 26 | 13 | 5 | 90  | 11 | 358 | 44 |
| 100,815 | 18 | 2 | 237 | 26 | 13 | 5 | 91  | 11 | 359 | 44 |
| 100,816 | 19 | 2 | 242 | 26 | 13 | 5 | 98  | 11 | 372 | 44 |
| 100,817 | 19 | 2 | 245 | 26 | 13 | 5 | 100 | 11 | 377 | 44 |
| 100,818 | 19 | 2 | 247 | 25 | 13 | 5 | 96  | 11 | 375 | 43 |
| 100,819 | 19 | 2 | 247 | 25 | 14 | 5 | 94  | 12 | 374 | 44 |
| 100,820 | 19 | 3 | 247 | 25 | 14 | 5 | 94  | 16 | 374 | 49 |
| 100,821 | 19 | 3 | 247 | 27 | 14 | 5 | 94  | 15 | 374 | 50 |
| 100,822 | 19 | 3 | 249 | 26 | 14 | 5 | 95  | 15 | 377 | 49 |
| 100,823 | 19 | 2 | 260 | 23 | 14 | 3 | 97  | 13 | 390 | 41 |
| 100,824 | 19 | 2 | 257 | 18 | 14 | 3 | 97  | 13 | 387 | 36 |
| 100,825 | 20 | 3 | 258 | 17 | 14 | 3 | 98  | 13 | 390 | 36 |
| 100,826 | 20 | 3 | 258 | 17 | 14 | 3 | 98  | 13 | 390 | 36 |
| 100,827 | 20 | 3 | 258 | 18 | 14 | 4 | 98  | 17 | 390 | 42 |
| 100,828 | 20 | 3 | 258 | 18 | 14 | 4 | 98  | 18 | 390 | 43 |
| 100,829 | 20 | 3 | 258 | 17 | 14 | 3 | 98  | 19 | 390 | 42 |
| 100,830 | 20 | 5 | 259 | 17 | 14 | 3 | 98  | 19 | 391 | 44 |
| 100,831 | 20 | 5 | 258 | 17 | 14 | 3 | 97  | 19 | 389 | 44 |
| 100,832 | 20 | 5 | 246 | 18 | 14 | 3 | 93  | 19 | 373 | 45 |
| 100,833 | 20 | 5 | 246 | 18 | 14 | 3 | 93  | 19 | 373 | 45 |
| 100,834 | 19 | 5 | 244 | 19 | 14 | 3 | 91  | 19 | 368 | 46 |
| 100,835 | 19 | 5 | 244 | 19 | 14 | 3 | 91  | 19 | 368 | 46 |
| 100,836 | 19 | 5 | 241 | 19 | 14 | 2 | 90  | 19 | 364 | 45 |
| 100,837 | 19 | 5 | 238 | 19 | 14 | 2 | 90  | 19 | 361 | 45 |
| 100,838 | 19 | 5 | 235 | 19 | 14 | 2 | 87  | 19 | 355 | 45 |
| 100,839 | 18 | 5 | 221 | 18 | 13 | 2 | 85  | 19 | 337 | 44 |
| 100,840 | 18 | 5 | 218 | 18 | 13 | 2 | 85  | 19 | 334 | 44 |
| 100,841 | 18 | 5 | 216 | 19 | 11 | 2 | 84  | 19 | 329 | 45 |
| 100,842 | 17 | 5 | 205 | 18 | 11 | 2 | 72  | 19 | 305 | 44 |
| 100,843 | 16 | 5 | 181 | 17 | 8  | 2 | 68  | 19 | 273 | 43 |
| 100,844 | 16 | 5 | 177 | 17 | 8  | 2 | 67  | 19 | 268 | 43 |
| 100,845 | 16 | 5 | 176 | 17 | 8  | 2 | 67  | 19 | 267 | 43 |
| 100,846 | 16 | 5 | 161 | 17 | 8  | 2 | 66  | 19 | 251 | 43 |
| 100,847 | 16 | 5 | 159 | 17 | 7  | 2 | 65  | 19 | 247 | 43 |
| 100,848 | 12 | 5 | 118 | 17 | 6  | 2 | 45  | 19 | 181 | 43 |

|         |    |    |    |     |   |    |    |     |     |     |
|---------|----|----|----|-----|---|----|----|-----|-----|-----|
| 100,849 | 10 | 5  | 92 | 17  | 6 | 2  | 37 | 19  | 145 | 43  |
| 100,850 | 10 | 5  | 92 | 17  | 6 | 2  | 37 | 19  | 145 | 43  |
| 100,851 | 9  | 5  | 87 | 16  | 5 | 2  | 34 | 19  | 135 | 42  |
| 100,852 | 9  | 5  | 85 | 16  | 6 | 2  | 33 | 19  | 133 | 42  |
| 100,853 | 9  | 5  | 78 | 16  | 6 | 1  | 31 | 19  | 124 | 41  |
| 100,854 | 9  | 5  | 73 | 16  | 6 | 1  | 30 | 19  | 118 | 41  |
| 100,855 | 5  | 4  | 66 | 13  | 4 | 1  | 27 | 16  | 102 | 34  |
| 100,856 | 5  | 4  | 65 | 13  | 4 | 1  | 26 | 16  | 100 | 34  |
| 100,857 | 4  | 4  | 63 | 13  | 4 | 1  | 26 | 16  | 97  | 34  |
| 100,858 | 4  | 4  | 56 | 9   | 4 | 1  | 25 | 13  | 89  | 27  |
| 100,859 | 4  | 4  | 53 | 8   | 3 | 1  | 25 | 13  | 85  | 26  |
| 100,860 | 4  | 4  | 50 | 8   | 3 | 1  | 23 | 13  | 80  | 26  |
| 100,861 | 3  | 4  | 45 | 8   | 2 | 1  | 17 | 12  | 67  | 25  |
| 100,862 | 2  | 4  | 34 | 13  | 2 | 1  | 16 | 12  | 54  | 30  |
| 100,863 | 2  | 4  | 33 | 12  | 2 | 1  | 16 | 12  | 53  | 29  |
| 100,864 | 2  | 4  | 31 | 12  | 2 | 1  | 16 | 12  | 51  | 29  |
| 100,865 | 2  | 4  | 31 | 12  | 2 | 1  | 15 | 12  | 50  | 29  |
| 100,866 | 2  | 4  | 28 | 12  | 2 | 2  | 12 | 12  | 44  | 30  |
| 100,867 | 1  | 4  | 26 | 12  | 2 | 2  | 8  | 12  | 37  | 30  |
| 100,868 | 1  | 4  | 23 | 12  | 2 | 2  | 6  | 12  | 32  | 30  |
| 100,869 | 1  | 4  | 19 | 12  | 2 | 2  | 6  | 11  | 28  | 29  |
| 100,870 | 1  | 4  | 19 | 12  | 1 | 2  | 6  | 11  | 27  | 29  |
| 100,871 | 0  | 3  | 15 | 12  | 1 | 2  | 4  | 7   | 20  | 24  |
| 100,872 | 0  | 3  | 14 | 10  | 1 | 2  | 4  | 7   | 19  | 22  |
| 100,873 | 0  | 3  | 9  | 9   | 1 | 2  | 4  | 7   | 14  | 21  |
| 100,874 | 0  | 3  | 2  | 9   | 1 | 2  | 2  | 7   | 5   | 21  |
| 100,875 | 0  | 2  | 2  | 9   | 1 | 2  | 5  | 6   | 8   | 19  |
| 100,876 | 0  | 2  | 2  | 9   | 1 | 2  | 5  | 6   | 8   | 19  |
| 100,877 | 0  | 2  | 2  | 8   | 1 | 1  | 5  | 2   | 8   | 13  |
| 100,878 | 0  | 3  | 2  | 11  | 1 | 3  | 5  | 3   | 8   | 20  |
| 100,879 | 0  | 6  | 2  | 51  | 1 | 5  | 5  | 27  | 8   | 89  |
| 100,880 | 0  | 18 | 2  | 358 | 1 | 14 | 5  | 134 | 8   | 524 |
| 100,881 | 0  | 25 | 1  | 400 | 1 | 17 | 5  | 159 | 7   | 601 |
| 100,882 | 0  | 26 | 1  | 407 | 1 | 17 | 5  | 162 | 7   | 612 |
| 100,883 | 0  | 30 | 1  | 429 | 1 | 17 | 5  | 177 | 7   | 653 |
| 100,884 | 0  | 44 | 1  | 537 | 1 | 20 | 3  | 209 | 5   | 810 |
| 100,885 | 0  | 44 | 1  | 538 | 1 | 20 | 3  | 210 | 5   | 812 |
| 100,886 | 0  | 47 | 1  | 558 | 1 | 20 | 3  | 212 | 5   | 837 |
| 100,887 | 0  | 47 | 1  | 571 | 1 | 20 | 3  | 214 | 5   | 852 |
| 100,888 | 0  | 48 | 1  | 572 | 1 | 20 | 3  | 218 | 5   | 858 |
| 100,889 | 0  | 49 | 1  | 574 | 1 | 20 | 3  | 219 | 5   | 862 |

|         |   |     |   |       |   |    |   |     |    |       |
|---------|---|-----|---|-------|---|----|---|-----|----|-------|
| 100,890 | 0 | 49  | 1 | 574   | 1 | 20 | 3 | 220 | 5  | 863   |
| 100,891 | 0 | 49  | 1 | 575   | 1 | 20 | 3 | 220 | 5  | 864   |
| 100,892 | 0 | 51  | 0 | 574   | 1 | 20 | 3 | 222 | 4  | 867   |
| 100,893 | 0 | 52  | 0 | 575   | 1 | 20 | 3 | 224 | 4  | 871   |
| 100,894 | 1 | 52  | 0 | 581   | 1 | 20 | 3 | 225 | 5  | 878   |
| 100,895 | 1 | 52  | 0 | 586   | 1 | 20 | 3 | 233 | 5  | 891   |
| 100,896 | 1 | 52  | 0 | 586   | 1 | 20 | 3 | 234 | 5  | 892   |
| 100,897 | 1 | 54  | 0 | 587   | 1 | 20 | 3 | 234 | 5  | 895   |
| 100,898 | 1 | 54  | 1 | 590   | 1 | 21 | 3 | 234 | 6  | 899   |
| 100,899 | 1 | 54  | 1 | 594   | 1 | 21 | 3 | 234 | 6  | 903   |
| 100,900 | 1 | 54  | 2 | 594   | 1 | 21 | 3 | 234 | 7  | 903   |
| 100,901 | 1 | 54  | 2 | 596   | 1 | 21 | 4 | 234 | 8  | 905   |
| 100,902 | 1 | 54  | 5 | 596   | 1 | 21 | 5 | 234 | 12 | 905   |
| 100,903 | 1 | 54  | 5 | 596   | 0 | 21 | 5 | 234 | 11 | 905   |
| 100,904 | 1 | 54  | 5 | 599   | 0 | 21 | 5 | 234 | 11 | 908   |
| 100,905 | 1 | 54  | 5 | 599   | 0 | 21 | 5 | 234 | 11 | 908   |
| 100,906 | 1 | 54  | 7 | 602   | 0 | 21 | 6 | 234 | 14 | 911   |
| 100,907 | 1 | 54  | 7 | 603   | 0 | 21 | 6 | 234 | 14 | 912   |
| 100,908 | 1 | 54  | 7 | 604   | 0 | 21 | 6 | 237 | 14 | 916   |
| 100,909 | 1 | 55  | 7 | 610   | 0 | 22 | 6 | 254 | 14 | 941   |
| 100,910 | 1 | 56  | 7 | 612   | 0 | 22 | 6 | 254 | 14 | 944   |
| 100,911 | 1 | 57  | 7 | 631   | 0 | 23 | 6 | 262 | 14 | 973   |
| 100,912 | 1 | 59  | 7 | 639   | 0 | 24 | 6 | 268 | 14 | 990   |
| 100,913 | 2 | 68  | 7 | 650   | 0 | 24 | 6 | 294 | 15 | 1,036 |
| 100,914 | 2 | 69  | 7 | 669   | 0 | 24 | 6 | 304 | 15 | 1,066 |
| 100,915 | 2 | 72  | 7 | 684   | 0 | 24 | 6 | 314 | 15 | 1,094 |
| 100,916 | 2 | 74  | 8 | 701   | 0 | 23 | 7 | 331 | 17 | 1,129 |
| 100,917 | 2 | 74  | 8 | 703   | 0 | 23 | 7 | 331 | 17 | 1,131 |
| 100,918 | 2 | 75  | 8 | 715   | 0 | 24 | 7 | 336 | 17 | 1,150 |
| 100,919 | 2 | 75  | 8 | 718   | 0 | 25 | 7 | 339 | 17 | 1,157 |
| 100,920 | 2 | 76  | 8 | 732   | 0 | 25 | 7 | 349 | 17 | 1,182 |
| 100,921 | 2 | 76  | 8 | 776   | 0 | 25 | 7 | 359 | 17 | 1,236 |
| 100,922 | 2 | 76  | 8 | 787   | 0 | 25 | 7 | 373 | 17 | 1,261 |
| 100,923 | 2 | 78  | 8 | 811   | 0 | 29 | 7 | 382 | 17 | 1,300 |
| 100,924 | 2 | 80  | 8 | 813   | 0 | 30 | 7 | 385 | 17 | 1,308 |
| 100,925 | 2 | 81  | 8 | 818   | 0 | 30 | 5 | 389 | 15 | 1,318 |
| 100,926 | 2 | 92  | 8 | 861   | 0 | 41 | 4 | 491 | 14 | 1,485 |
| 100,927 | 2 | 94  | 8 | 891   | 0 | 41 | 4 | 528 | 14 | 1,554 |
| 100,928 | 2 | 110 | 8 | 1,057 | 0 | 63 | 4 | 729 | 14 | 1,959 |
| 100,929 | 2 | 115 | 8 | 1,119 | 0 | 68 | 4 | 807 | 14 | 2,109 |
| 100,930 | 2 | 157 | 8 | 1,439 | 0 | 79 | 4 | 972 | 14 | 2,647 |

|         |   |     |   |       |   |     |   |       |    |       |
|---------|---|-----|---|-------|---|-----|---|-------|----|-------|
| 100,931 | 2 | 147 | 8 | 1,171 | 0 | 74  | 4 | 891   | 14 | 2,283 |
| 100,932 | 2 | 138 | 8 | 1,134 | 0 | 71  | 4 | 874   | 14 | 2,217 |
| 100,933 | 2 | 138 | 8 | 1,140 | 0 | 72  | 4 | 884   | 14 | 2,234 |
| 100,934 | 3 | 159 | 8 | 1,410 | 0 | 89  | 4 | 1,111 | 15 | 2,769 |
| 100,935 | 3 | 145 | 8 | 1,309 | 0 | 86  | 4 | 1,083 | 15 | 2,623 |
| 100,936 | 3 | 145 | 8 | 1,354 | 0 | 86  | 4 | 1,091 | 15 | 2,676 |
| 100,937 | 3 | 142 | 8 | 1,356 | 0 | 87  | 4 | 1,097 | 15 | 2,682 |
| 100,938 | 3 | 145 | 8 | 1,363 | 0 | 88  | 4 | 1,106 | 15 | 2,702 |
| 100,939 | 3 | 145 | 8 | 1,378 | 0 | 88  | 4 | 1,120 | 15 | 2,731 |
| 100,940 | 3 | 154 | 8 | 1,465 | 0 | 91  | 4 | 1,176 | 15 | 2,886 |
| 100,941 | 3 | 154 | 8 | 1,490 | 0 | 91  | 4 | 1,184 | 15 | 2,919 |
| 100,942 | 3 | 154 | 8 | 1,496 | 0 | 91  | 4 | 1,187 | 15 | 2,928 |
| 100,943 | 3 | 153 | 8 | 1,513 | 0 | 93  | 4 | 1,198 | 15 | 2,957 |
| 100,944 | 2 | 153 | 8 | 1,513 | 0 | 94  | 4 | 1,203 | 14 | 2,963 |
| 100,945 | 2 | 154 | 8 | 1,509 | 0 | 94  | 4 | 1,204 | 14 | 2,961 |
| 100,946 | 2 | 154 | 8 | 1,505 | 0 | 94  | 4 | 1,198 | 14 | 2,951 |
| 100,947 | 2 | 154 | 8 | 1,506 | 0 | 94  | 4 | 1,202 | 14 | 2,956 |
| 100,948 | 2 | 152 | 8 | 1,509 | 0 | 94  | 4 | 1,215 | 14 | 2,970 |
| 100,949 | 2 | 153 | 7 | 1,513 | 0 | 93  | 4 | 1,224 | 13 | 2,983 |
| 100,950 | 3 | 153 | 6 | 1,544 | 0 | 93  | 4 | 1,281 | 13 | 3,071 |
| 100,951 | 3 | 164 | 6 | 1,658 | 0 | 96  | 4 | 1,447 | 13 | 3,365 |
| 100,952 | 3 | 167 | 4 | 1,707 | 0 | 100 | 3 | 1,504 | 10 | 3,478 |
| 100,953 | 3 | 168 | 3 | 1,713 | 0 | 100 | 3 | 1,514 | 9  | 3,495 |
| 100,954 | 3 | 169 | 3 | 1,730 | 0 | 101 | 3 | 1,530 | 9  | 3,530 |
| 100,955 | 3 | 180 | 3 | 1,774 | 0 | 105 | 3 | 1,619 | 9  | 3,678 |
| 100,956 | 3 | 180 | 1 | 1,777 | 0 | 105 | 1 | 1,625 | 5  | 3,687 |
| 100,957 | 3 | 180 | 3 | 1,777 | 0 | 105 | 1 | 1,629 | 7  | 3,691 |
| 100,958 | 3 | 180 | 3 | 1,782 | 0 | 105 | 1 | 1,633 | 7  | 3,700 |
| 100,959 | 3 | 185 | 3 | 1,804 | 0 | 105 | 2 | 1,659 | 8  | 3,753 |
| 100,960 | 3 | 183 | 5 | 1,807 | 1 | 104 | 3 | 1,643 | 12 | 3,737 |
| 100,961 | 3 | 182 | 7 | 1,788 | 1 | 103 | 4 | 1,636 | 15 | 3,709 |
| 100,962 | 3 | 184 | 7 | 1,789 | 1 | 103 | 4 | 1,636 | 15 | 3,712 |
| 100,963 | 3 | 173 | 7 | 1,764 | 1 | 102 | 4 | 1,602 | 15 | 3,641 |
| 100,964 | 2 | 172 | 7 | 1,747 | 1 | 102 | 5 | 1,594 | 15 | 3,615 |
| 100,965 | 3 | 169 | 9 | 1,733 | 2 | 102 | 5 | 1,585 | 19 | 3,589 |
| 100,966 | 3 | 172 | 9 | 1,735 | 2 | 102 | 5 | 1,592 | 19 | 3,601 |
| 100,967 | 3 | 170 | 8 | 1,731 | 2 | 102 | 5 | 1,585 | 18 | 3,588 |
| 100,968 | 3 | 176 | 8 | 1,738 | 2 | 100 | 5 | 1,630 | 18 | 3,644 |
| 100,969 | 3 | 178 | 8 | 1,754 | 2 | 101 | 5 | 1,669 | 18 | 3,702 |
| 100,970 | 3 | 182 | 8 | 1,773 | 2 | 106 | 5 | 1,722 | 18 | 3,783 |
| 100,971 | 3 | 182 | 8 | 1,727 | 2 | 106 | 6 | 1,709 | 19 | 3,724 |

|         |   |     |   |       |   |     |   |       |    |       |
|---------|---|-----|---|-------|---|-----|---|-------|----|-------|
| 100,972 | 3 | 191 | 8 | 1,753 | 2 | 106 | 6 | 1,743 | 19 | 3,793 |
| 100,973 | 3 | 191 | 8 | 1,750 | 2 | 106 | 6 | 1,741 | 19 | 3,788 |
| 100,974 | 3 | 190 | 8 | 1,740 | 2 | 102 | 6 | 1,749 | 19 | 3,781 |
| 100,975 | 3 | 194 | 8 | 1,767 | 2 | 101 | 6 | 1,786 | 19 | 3,848 |
| 100,976 | 3 | 194 | 8 | 1,767 | 2 | 101 | 6 | 1,785 | 19 | 3,847 |
| 100,977 | 3 | 184 | 8 | 1,725 | 2 | 90  | 7 | 1,687 | 20 | 3,686 |
| 100,978 | 3 | 182 | 8 | 1,697 | 2 | 90  | 7 | 1,649 | 20 | 3,618 |
| 100,979 | 3 | 160 | 8 | 1,469 | 2 | 61  | 7 | 1,372 | 20 | 3,062 |
| 100,980 | 3 | 160 | 8 | 1,470 | 2 | 61  | 7 | 1,372 | 20 | 3,063 |
| 100,981 | 3 | 116 | 8 | 1,117 | 2 | 49  | 7 | 1,198 | 20 | 2,480 |
| 100,982 | 3 | 113 | 8 | 1,079 | 2 | 45  | 7 | 1,172 | 20 | 2,409 |
| 100,983 | 3 | 113 | 8 | 1,065 | 3 | 45  | 7 | 1,161 | 21 | 2,384 |
| 100,984 | 2 | 116 | 8 | 1,109 | 4 | 47  | 7 | 1,216 | 21 | 2,488 |
| 100,985 | 2 | 91  | 8 | 819   | 4 | 30  | 7 | 980   | 21 | 1,920 |
| 100,986 | 2 | 91  | 8 | 818   | 4 | 30  | 7 | 982   | 21 | 1,921 |
| 100,987 | 2 | 91  | 8 | 772   | 4 | 30  | 7 | 976   | 21 | 1,869 |
| 100,988 | 2 | 93  | 8 | 751   | 4 | 29  | 7 | 973   | 21 | 1,846 |
| 100,989 | 2 | 89  | 8 | 731   | 4 | 28  | 7 | 959   | 21 | 1,807 |
| 100,990 | 2 | 79  | 8 | 629   | 4 | 25  | 7 | 888   | 21 | 1,621 |
| 100,991 | 2 | 79  | 8 | 608   | 4 | 25  | 8 | 882   | 22 | 1,594 |
| 100,992 | 2 | 79  | 8 | 608   | 4 | 25  | 8 | 881   | 22 | 1,593 |
| 100,993 | 2 | 77  | 8 | 582   | 4 | 23  | 8 | 865   | 22 | 1,547 |
| 100,994 | 2 | 77  | 8 | 583   | 4 | 23  | 8 | 866   | 22 | 1,549 |
| 100,995 | 2 | 77  | 8 | 584   | 4 | 22  | 8 | 862   | 22 | 1,545 |
| 100,996 | 2 | 76  | 8 | 584   | 4 | 22  | 8 | 860   | 22 | 1,542 |
| 100,997 | 2 | 76  | 9 | 584   | 4 | 22  | 8 | 857   | 23 | 1,539 |
| 100,998 | 2 | 76  | 9 | 585   | 4 | 22  | 8 | 852   | 23 | 1,535 |
| 100,999 | 1 | 79  | 9 | 626   | 4 | 28  | 8 | 872   | 22 | 1,605 |
| 101,000 | 1 | 82  | 9 | 646   | 4 | 30  | 8 | 907   | 22 | 1,665 |
| 101,001 | 1 | 83  | 9 | 622   | 4 | 31  | 8 | 868   | 22 | 1,604 |
| 101,002 | 1 | 72  | 9 | 523   | 4 | 29  | 7 | 711   | 21 | 1,335 |
| 101,003 | 1 | 69  | 9 | 479   | 4 | 25  | 7 | 664   | 21 | 1,237 |
| 101,004 | 1 | 69  | 9 | 479   | 4 | 26  | 7 | 660   | 21 | 1,234 |
| 101,005 | 1 | 68  | 9 | 464   | 4 | 26  | 7 | 644   | 21 | 1,202 |
| 101,006 | 1 | 57  | 8 | 427   | 4 | 22  | 7 | 564   | 20 | 1,070 |
| 101,007 | 1 | 57  | 8 | 453   | 4 | 24  | 7 | 612   | 20 | 1,146 |
| 101,008 | 1 | 57  | 8 | 499   | 4 | 29  | 7 | 651   | 20 | 1,236 |
| 101,009 | 1 | 58  | 8 | 542   | 4 | 37  | 8 | 715   | 21 | 1,352 |
| 101,010 | 1 | 61  | 8 | 718   | 4 | 43  | 8 | 822   | 21 | 1,644 |
| 101,011 | 1 | 63  | 7 | 774   | 3 | 45  | 7 | 855   | 18 | 1,737 |
| 101,012 | 1 | 63  | 7 | 784   | 3 | 46  | 8 | 865   | 19 | 1,758 |



|         |   |     |    |       |   |    |    |       |    |       |
|---------|---|-----|----|-------|---|----|----|-------|----|-------|
| 101,013 | 1 | 61  | 7  | 793   | 3 | 46 | 8  | 884   | 19 | 1,784 |
| 101,014 | 1 | 60  | 7  | 793   | 3 | 46 | 8  | 880   | 19 | 1,779 |
| 101,015 | 1 | 60  | 7  | 799   | 3 | 46 | 7  | 882   | 18 | 1,787 |
| 101,016 | 0 | 60  | 5  | 792   | 2 | 46 | 8  | 877   | 15 | 1,775 |
| 101,017 | 0 | 63  | 5  | 799   | 2 | 46 | 8  | 881   | 15 | 1,789 |
| 101,018 | 0 | 64  | 5  | 811   | 2 | 45 | 8  | 894   | 15 | 1,814 |
| 101,019 | 0 | 57  | 5  | 776   | 2 | 45 | 8  | 837   | 15 | 1,715 |
| 101,020 | 0 | 55  | 6  | 771   | 2 | 44 | 9  | 803   | 17 | 1,673 |
| 101,021 | 0 | 51  | 6  | 753   | 2 | 42 | 9  | 750   | 17 | 1,596 |
| 101,022 | 0 | 50  | 7  | 747   | 2 | 42 | 8  | 745   | 17 | 1,584 |
| 101,023 | 0 | 41  | 7  | 725   | 2 | 42 | 11 | 712   | 20 | 1,520 |
| 101,024 | 0 | 41  | 8  | 722   | 2 | 43 | 11 | 702   | 21 | 1,508 |
| 101,025 | 0 | 40  | 8  | 713   | 2 | 43 | 13 | 685   | 23 | 1,481 |
| 101,026 | 0 | 34  | 8  | 686   | 2 | 43 | 12 | 648   | 22 | 1,411 |
| 101,027 | 0 | 35  | 8  | 698   | 2 | 45 | 12 | 672   | 22 | 1,450 |
| 101,028 | 0 | 34  | 8  | 698   | 2 | 45 | 12 | 668   | 22 | 1,445 |
| 101,029 | 0 | 37  | 8  | 708   | 2 | 49 | 13 | 687   | 23 | 1,481 |
| 101,030 | 0 | 49  | 8  | 802   | 2 | 56 | 13 | 754   | 23 | 1,661 |
| 101,031 | 0 | 56  | 8  | 871   | 2 | 56 | 13 | 781   | 23 | 1,764 |
| 101,032 | 0 | 60  | 8  | 887   | 1 | 56 | 13 | 802   | 22 | 1,805 |
| 101,033 | 0 | 61  | 8  | 887   | 1 | 56 | 13 | 802   | 22 | 1,806 |
| 101,034 | 1 | 114 | 9  | 1,353 | 0 | 88 | 13 | 1,112 | 23 | 2,667 |
| 101,035 | 1 | 112 | 9  | 1,367 | 0 | 85 | 13 | 1,055 | 23 | 2,619 |
| 101,036 | 1 | 114 | 13 | 1,384 | 0 | 87 | 15 | 1,062 | 29 | 2,647 |
| 101,037 | 1 | 114 | 14 | 1,382 | 0 | 87 | 15 | 1,057 | 30 | 2,640 |
| 101,038 | 1 | 114 | 14 | 1,401 | 0 | 87 | 18 | 1,064 | 33 | 2,666 |
| 101,039 | 1 | 113 | 14 | 1,415 | 0 | 87 | 18 | 1,060 | 33 | 2,675 |
| 101,040 | 1 | 115 | 17 | 1,446 | 0 | 87 | 18 | 1,071 | 36 | 2,719 |
| 101,041 | 1 | 115 | 17 | 1,446 | 0 | 87 | 18 | 1,071 | 36 | 2,719 |
| 101,042 | 1 | 115 | 19 | 1,446 | 0 | 87 | 17 | 1,071 | 37 | 2,719 |
| 101,043 | 1 | 115 | 19 | 1,450 | 0 | 87 | 18 | 1,069 | 38 | 2,721 |
| 101,044 | 1 | 115 | 20 | 1,451 | 0 | 87 | 18 | 1,071 | 39 | 2,724 |
| 101,045 | 1 | 115 | 20 | 1,452 | 0 | 87 | 21 | 1,073 | 42 | 2,727 |
| 101,046 | 1 | 117 | 20 | 1,453 | 0 | 87 | 21 | 1,078 | 42 | 2,735 |
| 101,047 | 1 | 117 | 19 | 1,453 | 0 | 87 | 21 | 1,078 | 41 | 2,735 |
| 101,048 | 1 | 117 | 20 | 1,454 | 0 | 87 | 23 | 1,078 | 44 | 2,736 |
| 101,049 | 1 | 113 | 20 | 1,403 | 0 | 81 | 23 | 1,037 | 44 | 2,634 |
| 101,050 | 1 | 113 | 20 | 1,404 | 0 | 81 | 24 | 1,038 | 45 | 2,636 |
| 101,051 | 1 | 111 | 20 | 1,383 | 0 | 79 | 24 | 1,001 | 45 | 2,574 |
| 101,052 | 1 | 110 | 20 | 1,372 | 0 | 78 | 24 | 985   | 45 | 2,545 |
| 101,053 | 1 | 110 | 20 | 1,357 | 0 | 77 | 24 | 978   | 45 | 2,522 |

|         |   |     |    |       |   |    |    |     |    |       |
|---------|---|-----|----|-------|---|----|----|-----|----|-------|
| 101,054 | 1 | 111 | 22 | 1,350 | 0 | 77 | 24 | 969 | 47 | 2,507 |
| 101,055 | 1 | 110 | 22 | 1,344 | 0 | 75 | 24 | 971 | 47 | 2,500 |
| 101,056 | 1 | 110 | 22 | 1,345 | 0 | 76 | 24 | 973 | 47 | 2,504 |
| 101,057 | 1 | 110 | 24 | 1,363 | 0 | 76 | 30 | 978 | 55 | 2,527 |
| 101,058 | 1 | 112 | 24 | 1,362 | 0 | 75 | 30 | 942 | 55 | 2,491 |
| 101,059 | 1 | 113 | 24 | 1,316 | 0 | 70 | 30 | 894 | 55 | 2,393 |
| 101,060 | 1 | 112 | 24 | 1,274 | 0 | 62 | 29 | 831 | 54 | 2,279 |
| 101,061 | 1 | 102 | 24 | 999   | 0 | 53 | 28 | 653 | 53 | 1,807 |
| 101,062 | 1 | 102 | 23 | 999   | 0 | 53 | 28 | 654 | 52 | 1,808 |
| 101,063 | 1 | 102 | 21 | 1,001 | 0 | 53 | 26 | 654 | 48 | 1,810 |
| 101,064 | 1 | 102 | 21 | 994   | 0 | 53 | 26 | 634 | 48 | 1,783 |
| 101,065 | 1 | 100 | 22 | 999   | 0 | 53 | 26 | 636 | 49 | 1,788 |
| 101,066 | 1 | 100 | 22 | 995   | 0 | 53 | 26 | 633 | 49 | 1,781 |
| 101,067 | 1 | 97  | 22 | 985   | 0 | 54 | 25 | 623 | 48 | 1,759 |
| 101,068 | 1 | 98  | 23 | 994   | 0 | 54 | 25 | 632 | 49 | 1,778 |
| 101,069 | 1 | 101 | 23 | 1,095 | 0 | 56 | 28 | 680 | 52 | 1,932 |
| 101,070 | 1 | 105 | 23 | 1,120 | 0 | 56 | 28 | 689 | 52 | 1,970 |
| 101,071 | 1 | 105 | 24 | 1,119 | 1 | 56 | 28 | 689 | 54 | 1,969 |
| 101,072 | 1 | 105 | 23 | 1,127 | 1 | 55 | 28 | 694 | 53 | 1,981 |
| 101,073 | 1 | 105 | 23 | 1,125 | 1 | 55 | 25 | 694 | 50 | 1,979 |
| 101,074 | 1 | 105 | 22 | 1,129 | 1 | 55 | 25 | 692 | 49 | 1,981 |
| 101,075 | 1 | 105 | 22 | 1,132 | 1 | 55 | 23 | 692 | 47 | 1,984 |
| 101,076 | 1 | 105 | 22 | 1,127 | 1 | 55 | 23 | 690 | 47 | 1,977 |
| 101,077 | 1 | 105 | 22 | 1,124 | 1 | 55 | 23 | 688 | 47 | 1,972 |
| 101,078 | 1 | 103 | 23 | 1,107 | 1 | 53 | 23 | 660 | 48 | 1,923 |
| 101,079 | 2 | 100 | 23 | 1,091 | 1 | 49 | 23 | 638 | 49 | 1,878 |
| 101,080 | 2 | 100 | 23 | 1,091 | 1 | 49 | 23 | 641 | 49 | 1,881 |
| 101,081 | 2 | 87  | 23 | 991   | 1 | 41 | 23 | 560 | 49 | 1,679 |
| 101,082 | 2 | 80  | 28 | 921   | 1 | 41 | 25 | 534 | 56 | 1,576 |
| 101,083 | 3 | 76  | 28 | 911   | 1 | 41 | 25 | 516 | 57 | 1,544 |
| 101,084 | 2 | 75  | 28 | 911   | 1 | 41 | 25 | 515 | 56 | 1,542 |
| 101,085 | 2 | 22  | 27 | 448   | 1 | 9  | 27 | 205 | 57 | 684   |
| 101,086 | 2 | 21  | 23 | 387   | 1 | 9  | 25 | 204 | 51 | 621   |
| 101,087 | 2 | 19  | 22 | 369   | 1 | 7  | 25 | 195 | 50 | 590   |
| 101,088 | 3 | 21  | 24 | 378   | 1 | 7  | 23 | 200 | 51 | 606   |
| 101,089 | 3 | 23  | 24 | 362   | 1 | 10 | 23 | 197 | 51 | 592   |
| 101,090 | 3 | 22  | 24 | 376   | 1 | 16 | 23 | 205 | 51 | 619   |
| 101,091 | 3 | 20  | 21 | 345   | 1 | 16 | 23 | 194 | 48 | 575   |
| 101,092 | 3 | 21  | 19 | 342   | 1 | 16 | 24 | 191 | 47 | 570   |
| 101,093 | 3 | 21  | 19 | 343   | 1 | 16 | 24 | 192 | 47 | 572   |
| 101,094 | 3 | 22  | 19 | 349   | 1 | 16 | 23 | 193 | 46 | 580   |

|         |   |    |    |     |   |    |    |     |    |       |
|---------|---|----|----|-----|---|----|----|-----|----|-------|
| 101,095 | 3 | 26 | 18 | 387 | 1 | 18 | 23 | 206 | 45 | 637   |
| 101,096 | 3 | 26 | 18 | 392 | 1 | 18 | 20 | 207 | 42 | 643   |
| 101,097 | 4 | 24 | 18 | 394 | 1 | 18 | 20 | 201 | 43 | 637   |
| 101,098 | 4 | 24 | 20 | 393 | 1 | 18 | 22 | 202 | 47 | 637   |
| 101,099 | 4 | 24 | 19 | 393 | 1 | 18 | 20 | 201 | 44 | 636   |
| 101,100 | 4 | 24 | 19 | 394 | 1 | 18 | 19 | 202 | 43 | 638   |
| 101,101 | 4 | 24 | 19 | 393 | 1 | 18 | 19 | 200 | 43 | 635   |
| 101,102 | 4 | 23 | 19 | 394 | 1 | 18 | 19 | 201 | 43 | 636   |
| 101,103 | 4 | 24 | 19 | 432 | 1 | 18 | 19 | 228 | 43 | 702   |
| 101,104 | 4 | 36 | 17 | 784 | 1 | 24 | 19 | 324 | 41 | 1,168 |
| 101,105 | 4 | 39 | 17 | 797 | 1 | 26 | 19 | 342 | 41 | 1,204 |
| 101,106 | 4 | 42 | 16 | 822 | 1 | 26 | 19 | 337 | 40 | 1,227 |
| 101,107 | 4 | 44 | 15 | 838 | 1 | 25 | 16 | 338 | 36 | 1,245 |
| 101,108 | 4 | 51 | 14 | 867 | 1 | 26 | 13 | 343 | 32 | 1,287 |
| 101,109 | 4 | 50 | 14 | 842 | 1 | 25 | 13 | 328 | 32 | 1,245 |
| 101,110 | 4 | 49 | 14 | 842 | 1 | 25 | 13 | 326 | 32 | 1,242 |
| 101,111 | 4 | 49 | 14 | 839 | 1 | 25 | 13 | 326 | 32 | 1,239 |
| 101,112 | 4 | 49 | 15 | 838 | 1 | 25 | 13 | 325 | 33 | 1,237 |
| 101,113 | 4 | 49 | 16 | 836 | 1 | 25 | 13 | 323 | 34 | 1,233 |
| 101,114 | 4 | 51 | 16 | 845 | 1 | 25 | 13 | 331 | 34 | 1,252 |
| 101,115 | 4 | 51 | 16 | 842 | 1 | 25 | 13 | 334 | 34 | 1,252 |
| 101,116 | 4 | 52 | 15 | 835 | 1 | 25 | 14 | 329 | 34 | 1,241 |
| 101,117 | 5 | 55 | 15 | 841 | 1 | 25 | 15 | 333 | 36 | 1,254 |
| 101,118 | 5 | 54 | 15 | 828 | 1 | 23 | 15 | 324 | 36 | 1,229 |
| 101,119 | 5 | 53 | 14 | 821 | 1 | 23 | 15 | 318 | 35 | 1,215 |
| 101,120 | 5 | 50 | 13 | 723 | 1 | 21 | 11 | 270 | 30 | 1,064 |
| 101,121 | 5 | 46 | 13 | 697 | 1 | 21 | 11 | 260 | 30 | 1,024 |
| 101,122 | 5 | 46 | 12 | 688 | 0 | 21 | 11 | 256 | 28 | 1,011 |
| 101,123 | 5 | 46 | 12 | 689 | 0 | 21 | 11 | 256 | 28 | 1,012 |
| 101,124 | 5 | 46 | 12 | 674 | 0 | 20 | 11 | 253 | 28 | 993   |
| 101,125 | 5 | 47 | 12 | 691 | 0 | 20 | 11 | 259 | 28 | 1,017 |
| 101,126 | 5 | 51 | 12 | 763 | 0 | 19 | 11 | 274 | 28 | 1,107 |
| 101,127 | 5 | 51 | 12 | 764 | 0 | 19 | 11 | 276 | 28 | 1,110 |
| 101,128 | 5 | 52 | 12 | 766 | 0 | 19 | 11 | 276 | 28 | 1,113 |
| 101,129 | 5 | 52 | 11 | 766 | 0 | 19 | 11 | 276 | 27 | 1,113 |
| 101,130 | 4 | 52 | 13 | 767 | 0 | 19 | 10 | 274 | 27 | 1,112 |
| 101,131 | 4 | 52 | 12 | 766 | 0 | 19 | 10 | 277 | 26 | 1,114 |
| 101,132 | 4 | 53 | 10 | 767 | 0 | 19 | 9  | 278 | 23 | 1,117 |
| 101,133 | 4 | 53 | 13 | 768 | 0 | 19 | 8  | 277 | 25 | 1,117 |
| 101,134 | 3 | 53 | 13 | 761 | 0 | 19 | 8  | 270 | 24 | 1,103 |
| 101,135 | 3 | 53 | 13 | 761 | 0 | 19 | 8  | 270 | 24 | 1,103 |

|         |   |    |    |     |   |    |   |     |    |       |
|---------|---|----|----|-----|---|----|---|-----|----|-------|
| 101,136 | 3 | 53 | 13 | 761 | 0 | 19 | 6 | 270 | 22 | 1,103 |
| 101,137 | 3 | 55 | 12 | 765 | 0 | 19 | 6 | 276 | 21 | 1,115 |
| 101,138 | 2 | 55 | 11 | 763 | 0 | 19 | 5 | 274 | 18 | 1,111 |
| 101,139 | 2 | 55 | 11 | 752 | 0 | 19 | 5 | 268 | 18 | 1,094 |
| 101,140 | 2 | 52 | 11 | 707 | 0 | 11 | 5 | 250 | 18 | 1,020 |
| 101,141 | 2 | 52 | 11 | 707 | 0 | 11 | 5 | 250 | 18 | 1,020 |
| 101,142 | 2 | 52 | 11 | 707 | 0 | 11 | 6 | 247 | 19 | 1,017 |
| 101,143 | 2 | 52 | 11 | 708 | 0 | 11 | 5 | 252 | 18 | 1,023 |
| 101,144 | 2 | 52 | 12 | 713 | 0 | 14 | 5 | 270 | 19 | 1,049 |
| 101,145 | 2 | 51 | 12 | 711 | 0 | 14 | 5 | 268 | 19 | 1,044 |
| 101,146 | 2 | 53 | 13 | 705 | 0 | 16 | 5 | 296 | 20 | 1,070 |
| 101,147 | 2 | 53 | 13 | 700 | 0 | 16 | 5 | 294 | 20 | 1,063 |
| 101,148 | 1 | 53 | 17 | 708 | 0 | 17 | 5 | 295 | 23 | 1,073 |
| 101,149 | 1 | 56 | 16 | 745 | 0 | 19 | 5 | 334 | 22 | 1,154 |
| 101,150 | 1 | 57 | 16 | 746 | 0 | 19 | 5 | 335 | 22 | 1,157 |
| 101,151 | 1 | 65 | 16 | 786 | 0 | 22 | 5 | 352 | 22 | 1,225 |
| 101,152 | 1 | 65 | 16 | 793 | 0 | 22 | 5 | 355 | 22 | 1,235 |
| 101,153 | 1 | 68 | 18 | 760 | 0 | 22 | 7 | 331 | 26 | 1,181 |
| 101,154 | 1 | 68 | 18 | 762 | 0 | 22 | 7 | 335 | 26 | 1,187 |
| 101,155 | 1 | 57 | 19 | 414 | 0 | 16 | 7 | 241 | 27 | 728   |
| 101,156 | 1 | 53 | 19 | 422 | 0 | 14 | 7 | 232 | 27 | 721   |
| 101,157 | 1 | 50 | 19 | 395 | 0 | 14 | 7 | 228 | 27 | 687   |
| 101,158 | 1 | 48 | 21 | 383 | 0 | 14 | 8 | 226 | 30 | 671   |
| 101,159 | 1 | 40 | 21 | 324 | 0 | 13 | 8 | 210 | 30 | 587   |
| 101,160 | 1 | 40 | 22 | 317 | 0 | 13 | 8 | 212 | 31 | 582   |
| 101,161 | 1 | 42 | 23 | 343 | 0 | 14 | 8 | 225 | 32 | 624   |
| 101,162 | 1 | 45 | 22 | 353 | 0 | 15 | 8 | 236 | 31 | 649   |
| 101,163 | 1 | 47 | 21 | 359 | 0 | 15 | 8 | 250 | 30 | 671   |
| 101,164 | 1 | 47 | 21 | 359 | 0 | 15 | 8 | 250 | 30 | 671   |
| 101,165 | 1 | 45 | 22 | 357 | 0 | 17 | 7 | 247 | 30 | 666   |
| 101,166 | 1 | 51 | 22 | 415 | 0 | 19 | 7 | 266 | 30 | 751   |
| 101,167 | 0 | 50 | 22 | 413 | 0 | 19 | 6 | 265 | 28 | 747   |
| 101,168 | 0 | 47 | 22 | 415 | 0 | 19 | 6 | 261 | 28 | 742   |
| 101,169 | 0 | 47 | 22 | 418 | 0 | 19 | 6 | 260 | 28 | 744   |
| 101,170 | 0 | 48 | 22 | 416 | 0 | 19 | 6 | 259 | 28 | 742   |
| 101,171 | 0 | 48 | 22 | 417 | 0 | 19 | 6 | 259 | 28 | 743   |
| 101,172 | 1 | 48 | 22 | 426 | 0 | 19 | 7 | 264 | 30 | 757   |
| 101,173 | 1 | 49 | 22 | 425 | 0 | 19 | 7 | 266 | 30 | 759   |
| 101,174 | 1 | 49 | 22 | 427 | 0 | 19 | 7 | 266 | 30 | 761   |
| 101,175 | 1 | 53 | 22 | 459 | 0 | 21 | 7 | 305 | 30 | 838   |
| 101,176 | 1 | 52 | 22 | 456 | 0 | 22 | 7 | 305 | 30 | 835   |

|         |   |    |    |       |   |    |   |     |    |       |
|---------|---|----|----|-------|---|----|---|-----|----|-------|
| 101,177 | 1 | 53 | 22 | 552   | 0 | 38 | 7 | 452 | 30 | 1,095 |
| 101,178 | 1 | 53 | 22 | 608   | 0 | 38 | 7 | 508 | 30 | 1,207 |
| 101,179 | 1 | 64 | 22 | 1,150 | 0 | 69 | 7 | 764 | 30 | 2,047 |
| 101,180 | 1 | 64 | 22 | 1,266 | 0 | 71 | 7 | 800 | 30 | 2,201 |
| 101,181 | 1 | 65 | 20 | 1,274 | 0 | 72 | 7 | 800 | 28 | 2,211 |
| 101,182 | 1 | 65 | 18 | 1,277 | 0 | 72 | 7 | 796 | 26 | 2,210 |
| 101,183 | 1 | 69 | 17 | 1,294 | 0 | 73 | 7 | 808 | 25 | 2,244 |
| 101,184 | 1 | 69 | 15 | 1,298 | 0 | 73 | 7 | 810 | 23 | 2,250 |
| 101,185 | 2 | 70 | 15 | 1,308 | 0 | 73 | 8 | 817 | 25 | 2,268 |
| 101,186 | 2 | 71 | 15 | 1,309 | 0 | 73 | 8 | 817 | 25 | 2,270 |
| 101,187 | 2 | 72 | 15 | 1,318 | 0 | 73 | 8 | 821 | 25 | 2,284 |
| 101,188 | 2 | 74 | 15 | 1,329 | 0 | 73 | 8 | 828 | 25 | 2,304 |
| 101,189 | 2 | 72 | 15 | 1,339 | 0 | 73 | 8 | 829 | 25 | 2,313 |
| 101,190 | 2 | 74 | 15 | 1,343 | 0 | 73 | 8 | 829 | 25 | 2,319 |
| 101,191 | 2 | 74 | 15 | 1,344 | 0 | 73 | 8 | 829 | 25 | 2,320 |
| 101,192 | 2 | 74 | 15 | 1,347 | 0 | 73 | 8 | 829 | 25 | 2,323 |
| 101,193 | 2 | 75 | 15 | 1,350 | 0 | 73 | 7 | 829 | 24 | 2,327 |
| 101,194 | 2 | 75 | 15 | 1,382 | 0 | 70 | 7 | 831 | 24 | 2,358 |
| 101,195 | 2 | 78 | 14 | 1,514 | 0 | 76 | 8 | 919 | 24 | 2,587 |
| 101,196 | 2 | 82 | 14 | 1,546 | 0 | 76 | 8 | 942 | 24 | 2,646 |
| 101,197 | 2 | 78 | 13 | 1,571 | 0 | 75 | 8 | 915 | 23 | 2,639 |
| 101,198 | 2 | 80 | 13 | 1,575 | 1 | 75 | 8 | 930 | 24 | 2,660 |
| 101,199 | 2 | 81 | 9  | 1,576 | 1 | 74 | 8 | 933 | 20 | 2,664 |
| 101,200 | 2 | 78 | 8  | 1,549 | 1 | 72 | 6 | 897 | 17 | 2,596 |
| 101,201 | 2 | 77 | 7  | 1,548 | 1 | 72 | 5 | 896 | 15 | 2,593 |
| 101,202 | 3 | 69 | 8  | 1,507 | 1 | 69 | 5 | 878 | 17 | 2,523 |
| 101,203 | 3 | 65 | 8  | 1,492 | 1 | 69 | 5 | 868 | 17 | 2,494 |
| 101,204 | 3 | 67 | 9  | 1,502 | 1 | 70 | 5 | 872 | 18 | 2,511 |
| 101,205 | 3 | 67 | 8  | 1,507 | 1 | 70 | 5 | 879 | 17 | 2,523 |
| 101,206 | 3 | 66 | 8  | 1,485 | 1 | 70 | 5 | 871 | 17 | 2,492 |
| 101,207 | 3 | 66 | 9  | 1,486 | 1 | 70 | 5 | 871 | 18 | 2,493 |
| 101,208 | 3 | 66 | 7  | 1,487 | 1 | 70 | 4 | 873 | 15 | 2,496 |
| 101,209 | 3 | 66 | 7  | 1,485 | 1 | 70 | 4 | 880 | 15 | 2,501 |
| 101,210 | 3 | 67 | 7  | 1,492 | 1 | 71 | 4 | 891 | 15 | 2,521 |
| 101,211 | 3 | 67 | 6  | 1,497 | 1 | 71 | 4 | 892 | 14 | 2,527 |
| 101,212 | 3 | 65 | 5  | 1,472 | 1 | 70 | 4 | 880 | 13 | 2,487 |
| 101,213 | 3 | 62 | 6  | 1,463 | 1 | 69 | 4 | 869 | 14 | 2,463 |
| 101,214 | 3 | 61 | 6  | 1,458 | 1 | 69 | 4 | 855 | 14 | 2,443 |
| 101,215 | 3 | 61 | 6  | 1,458 | 1 | 69 | 4 | 854 | 14 | 2,442 |
| 101,216 | 3 | 62 | 5  | 1,452 | 1 | 67 | 4 | 847 | 13 | 2,428 |
| 101,217 | 3 | 56 | 5  | 1,394 | 1 | 65 | 4 | 825 | 13 | 2,340 |

|         |   |    |    |       |   |    |   |     |    |       |
|---------|---|----|----|-------|---|----|---|-----|----|-------|
| 101,218 | 4 | 56 | 6  | 1,397 | 1 | 67 | 4 | 825 | 15 | 2,345 |
| 101,219 | 4 | 56 | 6  | 1,389 | 1 | 68 | 4 | 827 | 15 | 2,340 |
| 101,220 | 4 | 56 | 6  | 1,386 | 1 | 68 | 4 | 826 | 15 | 2,336 |
| 101,221 | 5 | 55 | 7  | 1,385 | 1 | 68 | 4 | 822 | 17 | 2,330 |
| 101,222 | 5 | 55 | 7  | 1,385 | 1 | 68 | 4 | 822 | 17 | 2,330 |
| 101,223 | 4 | 55 | 7  | 1,376 | 1 | 68 | 3 | 819 | 15 | 2,318 |
| 101,224 | 4 | 54 | 7  | 1,375 | 1 | 68 | 3 | 815 | 15 | 2,312 |
| 101,225 | 4 | 54 | 7  | 1,372 | 1 | 68 | 3 | 815 | 15 | 2,309 |
| 101,226 | 4 | 50 | 7  | 1,338 | 1 | 66 | 4 | 776 | 16 | 2,230 |
| 101,227 | 4 | 45 | 7  | 1,154 | 1 | 49 | 4 | 608 | 16 | 1,856 |
| 101,228 | 4 | 45 | 7  | 1,097 | 1 | 49 | 4 | 550 | 16 | 1,741 |
| 101,229 | 4 | 45 | 7  | 1,100 | 1 | 49 | 4 | 553 | 16 | 1,747 |
| 101,230 | 4 | 33 | 8  | 570   | 1 | 21 | 4 | 329 | 17 | 953   |
| 101,231 | 4 | 33 | 8  | 467   | 1 | 19 | 4 | 320 | 17 | 839   |
| 101,232 | 4 | 34 | 8  | 477   | 1 | 18 | 5 | 334 | 18 | 863   |
| 101,233 | 4 | 34 | 8  | 500   | 1 | 19 | 5 | 358 | 18 | 911   |
| 101,234 | 4 | 30 | 8  | 494   | 1 | 18 | 5 | 351 | 18 | 893   |
| 101,235 | 3 | 31 | 8  | 514   | 1 | 18 | 4 | 363 | 16 | 926   |
| 101,236 | 3 | 30 | 8  | 503   | 1 | 18 | 4 | 356 | 16 | 907   |
| 101,237 | 3 | 28 | 8  | 495   | 1 | 18 | 4 | 352 | 16 | 893   |
| 101,238 | 3 | 24 | 8  | 480   | 1 | 18 | 4 | 341 | 16 | 863   |
| 101,239 | 3 | 24 | 8  | 481   | 1 | 18 | 4 | 340 | 16 | 863   |
| 101,240 | 3 | 22 | 8  | 466   | 1 | 18 | 4 | 339 | 16 | 845   |
| 101,241 | 3 | 22 | 8  | 469   | 1 | 19 | 4 | 339 | 16 | 849   |
| 101,242 | 3 | 21 | 10 | 423   | 1 | 19 | 4 | 314 | 18 | 777   |
| 101,243 | 3 | 21 | 10 | 423   | 1 | 19 | 4 | 315 | 18 | 778   |
| 101,244 | 3 | 21 | 10 | 423   | 1 | 19 | 4 | 315 | 18 | 778   |
| 101,245 | 3 | 17 | 10 | 292   | 1 | 13 | 5 | 227 | 19 | 549   |
| 101,246 | 3 | 13 | 10 | 255   | 1 | 13 | 4 | 203 | 18 | 484   |
| 101,247 | 3 | 12 | 11 | 198   | 1 | 10 | 4 | 189 | 19 | 409   |
| 101,248 | 3 | 10 | 12 | 189   | 1 | 10 | 5 | 175 | 21 | 384   |
| 101,249 | 3 | 9  | 12 | 180   | 0 | 10 | 6 | 177 | 21 | 376   |
| 101,250 | 3 | 10 | 13 | 188   | 0 | 10 | 7 | 183 | 23 | 391   |
| 101,251 | 2 | 10 | 12 | 189   | 0 | 11 | 6 | 187 | 20 | 397   |
| 101,252 | 2 | 26 | 12 | 255   | 0 | 14 | 6 | 300 | 20 | 595   |
| 101,253 | 2 | 27 | 12 | 273   | 0 | 14 | 6 | 310 | 20 | 624   |
| 101,254 | 2 | 28 | 12 | 299   | 0 | 14 | 6 | 315 | 20 | 656   |
| 101,255 | 2 | 26 | 11 | 286   | 0 | 13 | 6 | 307 | 19 | 632   |
| 101,256 | 2 | 26 | 11 | 296   | 0 | 13 | 6 | 310 | 19 | 645   |
| 101,257 | 2 | 26 | 11 | 295   | 0 | 13 | 6 | 309 | 19 | 643   |
| 101,258 | 2 | 26 | 10 | 295   | 0 | 13 | 6 | 309 | 18 | 643   |

|         |   |     |    |       |   |     |   |     |    |       |
|---------|---|-----|----|-------|---|-----|---|-----|----|-------|
| 101,259 | 2 | 26  | 10 | 298   | 0 | 14  | 6 | 309 | 18 | 647   |
| 101,260 | 2 | 26  | 10 | 304   | 0 | 14  | 6 | 309 | 18 | 653   |
| 101,261 | 2 | 27  | 10 | 332   | 0 | 17  | 6 | 341 | 18 | 717   |
| 101,262 | 2 | 29  | 10 | 357   | 0 | 22  | 6 | 354 | 18 | 762   |
| 101,263 | 2 | 31  | 10 | 373   | 0 | 22  | 6 | 357 | 18 | 783   |
| 101,264 | 2 | 70  | 10 | 690   | 0 | 54  | 6 | 552 | 18 | 1,366 |
| 101,265 | 2 | 74  | 10 | 735   | 0 | 68  | 6 | 625 | 18 | 1,502 |
| 101,266 | 2 | 74  | 10 | 739   | 0 | 69  | 6 | 632 | 18 | 1,514 |
| 101,267 | 1 | 91  | 10 | 852   | 0 | 97  | 6 | 783 | 17 | 1,823 |
| 101,268 | 1 | 91  | 9  | 863   | 0 | 97  | 6 | 788 | 16 | 1,839 |
| 101,269 | 1 | 121 | 11 | 1,090 | 0 | 106 | 6 | 904 | 18 | 2,221 |
| 101,270 | 1 | 123 | 11 | 1,119 | 0 | 106 | 6 | 916 | 18 | 2,264 |
| 101,271 | 1 | 127 | 12 | 1,177 | 0 | 107 | 6 | 928 | 19 | 2,339 |
| 101,272 | 0 | 130 | 11 | 1,267 | 0 | 110 | 6 | 947 | 17 | 2,454 |
| 101,273 | 0 | 130 | 11 | 1,275 | 0 | 111 | 6 | 948 | 17 | 2,464 |
| 101,274 | 0 | 130 | 11 | 1,283 | 0 | 112 | 6 | 949 | 17 | 2,474 |
| 101,275 | 0 | 130 | 11 | 1,297 | 0 | 112 | 7 | 956 | 18 | 2,495 |
| 101,276 | 0 | 130 | 11 | 1,303 | 0 | 112 | 6 | 956 | 17 | 2,501 |
| 101,277 | 0 | 130 | 11 | 1,311 | 0 | 113 | 6 | 958 | 17 | 2,512 |
| 101,278 | 0 | 130 | 11 | 1,312 | 0 | 113 | 6 | 961 | 17 | 2,516 |
| 101,279 | 0 | 131 | 11 | 1,320 | 0 | 113 | 6 | 965 | 17 | 2,529 |
| 101,280 | 0 | 131 | 11 | 1,319 | 0 | 113 | 6 | 962 | 17 | 2,525 |
| 101,281 | 0 | 131 | 13 | 1,306 | 0 | 110 | 6 | 935 | 19 | 2,482 |
| 101,282 | 0 | 131 | 13 | 1,293 | 0 | 110 | 6 | 909 | 19 | 2,443 |
| 101,283 | 0 | 130 | 13 | 1,273 | 0 | 110 | 5 | 896 | 18 | 2,409 |
| 101,284 | 0 | 129 | 13 | 1,239 | 0 | 110 | 5 | 880 | 18 | 2,358 |
| 101,285 | 0 | 131 | 13 | 1,239 | 0 | 111 | 5 | 889 | 18 | 2,370 |
| 101,286 | 0 | 130 | 14 | 1,221 | 0 | 111 | 5 | 889 | 19 | 2,351 |
| 101,287 | 0 | 131 | 14 | 1,224 | 0 | 111 | 6 | 894 | 20 | 2,360 |
| 101,288 | 0 | 137 | 14 | 1,229 | 0 | 112 | 6 | 917 | 20 | 2,395 |
| 101,289 | 0 | 138 | 14 | 1,232 | 0 | 112 | 6 | 916 | 20 | 2,398 |
| 101,290 | 0 | 138 | 14 | 1,232 | 0 | 112 | 6 | 917 | 20 | 2,399 |
| 101,291 | 0 | 138 | 14 | 1,231 | 0 | 112 | 6 | 917 | 20 | 2,398 |
| 101,292 | 0 | 138 | 14 | 1,229 | 0 | 111 | 6 | 918 | 20 | 2,396 |
| 101,293 | 0 | 138 | 12 | 1,233 | 0 | 111 | 6 | 919 | 18 | 2,401 |
| 101,294 | 0 | 138 | 12 | 1,233 | 0 | 111 | 6 | 919 | 18 | 2,401 |
| 101,295 | 0 | 138 | 12 | 1,244 | 0 | 111 | 6 | 923 | 18 | 2,416 |
| 101,296 | 0 | 138 | 12 | 1,251 | 1 | 111 | 5 | 932 | 18 | 2,432 |
| 101,297 | 0 | 138 | 12 | 1,255 | 1 | 111 | 5 | 935 | 18 | 2,439 |
| 101,298 | 0 | 138 | 11 | 1,259 | 1 | 111 | 5 | 938 | 17 | 2,446 |
| 101,299 | 0 | 139 | 10 | 1,254 | 1 | 111 | 4 | 930 | 15 | 2,434 |

|         |   |     |    |       |   |     |   |     |    |       |
|---------|---|-----|----|-------|---|-----|---|-----|----|-------|
| 101,300 | 0 | 140 | 10 | 1,263 | 1 | 111 | 3 | 932 | 14 | 2,446 |
| 101,301 | 0 | 139 | 9  | 1,259 | 1 | 111 | 2 | 927 | 12 | 2,436 |
| 101,302 | 0 | 121 | 8  | 1,149 | 1 | 107 | 3 | 791 | 12 | 2,168 |
| 101,303 | 0 | 121 | 11 | 1,149 | 1 | 107 | 3 | 791 | 15 | 2,168 |
| 101,304 | 0 | 121 | 11 | 1,148 | 1 | 107 | 3 | 790 | 15 | 2,166 |
| 101,305 | 1 | 121 | 12 | 1,147 | 1 | 107 | 3 | 790 | 17 | 2,165 |
| 101,306 | 1 | 121 | 12 | 1,147 | 1 | 107 | 3 | 790 | 17 | 2,165 |
| 101,307 | 1 | 121 | 12 | 1,137 | 1 | 107 | 3 | 784 | 17 | 2,149 |
| 101,308 | 1 | 122 | 12 | 1,147 | 1 | 111 | 3 | 800 | 17 | 2,180 |
| 101,309 | 1 | 122 | 12 | 1,146 | 1 | 111 | 3 | 801 | 17 | 2,180 |
| 101,310 | 1 | 124 | 16 | 1,183 | 1 | 116 | 5 | 831 | 23 | 2,254 |
| 101,311 | 1 | 127 | 16 | 1,207 | 1 | 118 | 7 | 840 | 25 | 2,292 |
| 101,312 | 1 | 125 | 17 | 1,179 | 1 | 114 | 7 | 804 | 26 | 2,222 |
| 101,313 | 1 | 123 | 17 | 1,154 | 1 | 110 | 7 | 790 | 26 | 2,177 |
| 101,314 | 1 | 121 | 16 | 1,146 | 1 | 111 | 7 | 790 | 25 | 2,168 |
| 101,315 | 1 | 82  | 18 | 840   | 1 | 79  | 9 | 603 | 29 | 1,604 |
| 101,316 | 1 | 77  | 18 | 794   | 1 | 65  | 9 | 530 | 29 | 1,466 |
| 101,317 | 1 | 77  | 21 | 793   | 1 | 64  | 9 | 523 | 32 | 1,457 |
| 101,318 | 1 | 60  | 22 | 679   | 1 | 36  | 9 | 373 | 33 | 1,148 |
| 101,319 | 1 | 29  | 20 | 428   | 1 | 24  | 9 | 246 | 31 | 727   |
| 101,320 | 1 | 35  | 20 | 492   | 1 | 28  | 9 | 278 | 31 | 833   |
| 101,321 | 1 | 50  | 19 | 610   | 1 | 43  | 9 | 364 | 30 | 1,067 |
| 101,322 | 1 | 46  | 19 | 560   | 1 | 42  | 9 | 351 | 30 | 999   |
| 101,323 | 1 | 48  | 19 | 625   | 1 | 44  | 9 | 364 | 30 | 1,081 |
| 101,324 | 1 | 53  | 20 | 684   | 1 | 45  | 9 | 416 | 31 | 1,198 |
| 101,325 | 1 | 53  | 20 | 685   | 1 | 44  | 9 | 416 | 31 | 1,198 |
| 101,326 | 1 | 57  | 20 | 793   | 1 | 48  | 8 | 444 | 30 | 1,342 |
| 101,327 | 2 | 60  | 20 | 824   | 1 | 49  | 8 | 471 | 31 | 1,404 |
| 101,328 | 2 | 79  | 20 | 950   | 1 | 57  | 8 | 577 | 31 | 1,663 |
| 101,329 | 2 | 78  | 20 | 963   | 1 | 58  | 8 | 579 | 31 | 1,678 |
| 101,330 | 3 | 79  | 20 | 967   | 1 | 58  | 8 | 575 | 32 | 1,679 |
| 101,331 | 3 | 84  | 20 | 976   | 1 | 58  | 8 | 582 | 32 | 1,700 |
| 101,332 | 3 | 84  | 17 | 978   | 1 | 58  | 8 | 584 | 29 | 1,704 |
| 101,333 | 3 | 89  | 17 | 996   | 1 | 58  | 8 | 593 | 29 | 1,736 |
| 101,334 | 3 | 89  | 17 | 1,019 | 1 | 60  | 8 | 598 | 29 | 1,766 |
| 101,335 | 3 | 89  | 17 | 1,016 | 1 | 59  | 8 | 585 | 29 | 1,749 |
| 101,336 | 3 | 87  | 17 | 1,009 | 1 | 58  | 8 | 565 | 29 | 1,719 |
| 101,337 | 3 | 88  | 16 | 1,009 | 2 | 58  | 8 | 567 | 29 | 1,722 |
| 101,338 | 4 | 81  | 16 | 999   | 2 | 57  | 7 | 539 | 29 | 1,676 |
| 101,339 | 4 | 80  | 16 | 997   | 2 | 57  | 7 | 543 | 29 | 1,677 |
| 101,340 | 4 | 81  | 16 | 998   | 2 | 57  | 7 | 543 | 29 | 1,679 |



|         |   |     |    |       |   |    |    |     |    |       |
|---------|---|-----|----|-------|---|----|----|-----|----|-------|
| 101,341 | 4 | 81  | 16 | 1,004 | 2 | 58 | 7  | 546 | 29 | 1,689 |
| 101,342 | 4 | 81  | 17 | 1,004 | 2 | 58 | 7  | 546 | 30 | 1,689 |
| 101,343 | 4 | 81  | 17 | 1,003 | 2 | 58 | 7  | 546 | 30 | 1,688 |
| 101,344 | 4 | 81  | 17 | 999   | 2 | 58 | 7  | 544 | 30 | 1,682 |
| 101,345 | 4 | 81  | 17 | 1,005 | 2 | 58 | 7  | 548 | 30 | 1,692 |
| 101,346 | 4 | 82  | 17 | 1,008 | 2 | 59 | 7  | 561 | 30 | 1,710 |
| 101,347 | 4 | 82  | 17 | 1,003 | 1 | 60 | 7  | 555 | 29 | 1,700 |
| 101,348 | 4 | 82  | 17 | 1,018 | 1 | 61 | 8  | 579 | 30 | 1,740 |
| 101,349 | 4 | 82  | 17 | 1,014 | 1 | 61 | 8  | 577 | 30 | 1,734 |
| 101,350 | 4 | 81  | 25 | 1,017 | 1 | 61 | 11 | 579 | 41 | 1,738 |
| 101,351 | 4 | 81  | 27 | 1,022 | 1 | 61 | 12 | 580 | 44 | 1,744 |
| 101,352 | 4 | 82  | 27 | 1,022 | 1 | 61 | 12 | 580 | 44 | 1,745 |
| 101,353 | 4 | 82  | 29 | 1,024 | 1 | 61 | 11 | 581 | 45 | 1,748 |
| 101,354 | 4 | 83  | 26 | 1,026 | 1 | 61 | 11 | 584 | 42 | 1,754 |
| 101,355 | 4 | 83  | 26 | 1,047 | 1 | 62 | 11 | 600 | 42 | 1,792 |
| 101,356 | 3 | 83  | 25 | 1,048 | 1 | 62 | 11 | 601 | 40 | 1,794 |
| 101,357 | 3 | 83  | 25 | 1,050 | 1 | 62 | 11 | 603 | 40 | 1,798 |
| 101,358 | 4 | 85  | 25 | 1,056 | 1 | 62 | 11 | 607 | 41 | 1,810 |
| 101,359 | 4 | 86  | 23 | 1,073 | 1 | 60 | 9  | 614 | 37 | 1,833 |
| 101,360 | 4 | 85  | 21 | 1,042 | 1 | 54 | 9  | 591 | 35 | 1,772 |
| 101,361 | 4 | 87  | 21 | 1,101 | 1 | 56 | 9  | 628 | 35 | 1,872 |
| 101,362 | 4 | 85  | 21 | 1,085 | 1 | 54 | 7  | 624 | 33 | 1,848 |
| 101,363 | 4 | 96  | 20 | 1,210 | 1 | 60 | 7  | 669 | 32 | 2,035 |
| 101,364 | 4 | 114 | 20 | 1,291 | 1 | 70 | 7  | 784 | 32 | 2,259 |
| 101,365 | 4 | 118 | 20 | 1,309 | 1 | 70 | 7  | 798 | 32 | 2,295 |
| 101,366 | 4 | 140 | 18 | 1,488 | 1 | 78 | 5  | 877 | 28 | 2,583 |
| 101,367 | 4 | 148 | 15 | 1,566 | 1 | 81 | 5  | 931 | 25 | 2,726 |
| 101,368 | 4 | 149 | 14 | 1,578 | 1 | 81 | 5  | 941 | 24 | 2,749 |
| 101,369 | 4 | 151 | 14 | 1,579 | 1 | 81 | 5  | 942 | 24 | 2,753 |
| 101,370 | 4 | 155 | 14 | 1,605 | 1 | 82 | 5  | 957 | 24 | 2,799 |
| 101,371 | 4 | 149 | 14 | 1,547 | 1 | 78 | 5  | 926 | 24 | 2,700 |
| 101,372 | 4 | 135 | 14 | 1,437 | 1 | 63 | 5  | 849 | 24 | 2,484 |
| 101,373 | 4 | 137 | 14 | 1,447 | 1 | 63 | 5  | 861 | 24 | 2,508 |
| 101,374 | 4 | 132 | 14 | 1,316 | 1 | 58 | 6  | 839 | 25 | 2,345 |
| 101,375 | 4 | 127 | 13 | 1,249 | 1 | 56 | 6  | 789 | 24 | 2,221 |
| 101,376 | 4 | 120 | 13 | 1,086 | 1 | 51 | 6  | 725 | 24 | 1,982 |
| 101,377 | 3 | 119 | 13 | 1,086 | 1 | 51 | 6  | 725 | 23 | 1,981 |
| 101,378 | 2 | 121 | 14 | 1,136 | 1 | 53 | 6  | 773 | 23 | 2,083 |
| 101,379 | 2 | 103 | 14 | 1,008 | 1 | 45 | 6  | 681 | 23 | 1,837 |
| 101,380 | 2 | 109 | 14 | 1,035 | 1 | 47 | 6  | 718 | 23 | 1,909 |
| 101,381 | 2 | 111 | 14 | 1,044 | 1 | 47 | 6  | 726 | 23 | 1,928 |

|         |   |     |    |       |   |    |   |     |    |       |
|---------|---|-----|----|-------|---|----|---|-----|----|-------|
| 101,382 | 2 | 101 | 14 | 1,014 | 1 | 49 | 6 | 707 | 23 | 1,871 |
| 101,383 | 2 | 101 | 14 | 1,027 | 1 | 49 | 6 | 708 | 23 | 1,885 |
| 101,384 | 2 | 101 | 14 | 1,037 | 1 | 49 | 6 | 714 | 23 | 1,901 |
| 101,385 | 2 | 100 | 14 | 1,014 | 1 | 47 | 6 | 708 | 23 | 1,869 |
| 101,386 | 2 | 100 | 15 | 1,013 | 1 | 47 | 6 | 706 | 24 | 1,866 |
| 101,387 | 2 | 100 | 15 | 1,016 | 1 | 47 | 6 | 705 | 24 | 1,868 |
| 101,388 | 2 | 99  | 15 | 1,029 | 0 | 47 | 6 | 707 | 23 | 1,882 |
| 101,389 | 1 | 99  | 15 | 1,032 | 0 | 47 | 6 | 708 | 22 | 1,886 |
| 101,390 | 1 | 98  | 15 | 1,030 | 0 | 48 | 6 | 711 | 22 | 1,887 |
| 101,391 | 1 | 98  | 15 | 1,030 | 0 | 48 | 6 | 711 | 22 | 1,887 |
| 101,392 | 1 | 100 | 15 | 1,040 | 0 | 47 | 6 | 718 | 22 | 1,905 |
| 101,393 | 1 | 100 | 14 | 1,045 | 0 | 47 | 7 | 719 | 22 | 1,911 |
| 101,394 | 1 | 100 | 14 | 1,045 | 0 | 47 | 7 | 718 | 22 | 1,910 |
| 101,395 | 1 | 100 | 14 | 1,046 | 0 | 47 | 7 | 718 | 22 | 1,911 |
| 101,396 | 1 | 99  | 14 | 1,030 | 0 | 45 | 7 | 699 | 22 | 1,873 |
| 101,397 | 1 | 100 | 15 | 1,062 | 0 | 45 | 7 | 712 | 23 | 1,919 |
| 101,398 | 1 | 101 | 15 | 1,098 | 0 | 45 | 7 | 721 | 23 | 1,965 |
| 101,399 | 1 | 101 | 15 | 1,084 | 0 | 44 | 7 | 696 | 23 | 1,925 |
| 101,400 | 1 | 102 | 11 | 1,087 | 0 | 44 | 6 | 695 | 18 | 1,928 |
| 101,401 | 1 | 101 | 7  | 1,072 | 0 | 44 | 4 | 693 | 12 | 1,910 |
| 101,402 | 1 | 104 | 5  | 1,092 | 0 | 46 | 4 | 707 | 10 | 1,949 |
| 101,403 | 1 | 103 | 3  | 1,095 | 0 | 46 | 4 | 706 | 8  | 1,950 |
| 101,404 | 1 | 103 | 4  | 1,106 | 0 | 46 | 4 | 711 | 9  | 1,966 |
| 101,405 | 1 | 103 | 5  | 1,110 | 0 | 46 | 4 | 713 | 10 | 1,972 |
| 101,406 | 1 | 105 | 5  | 1,102 | 0 | 45 | 4 | 703 | 10 | 1,955 |
| 101,407 | 1 | 105 | 5  | 1,117 | 0 | 48 | 4 | 729 | 10 | 1,999 |
| 101,408 | 0 | 105 | 5  | 1,126 | 0 | 48 | 4 | 729 | 9  | 2,008 |
| 101,409 | 0 | 103 | 5  | 1,124 | 0 | 48 | 5 | 731 | 10 | 2,006 |
| 101,410 | 0 | 111 | 5  | 1,139 | 0 | 47 | 5 | 713 | 10 | 2,010 |
| 101,411 | 0 | 112 | 5  | 1,132 | 0 | 47 | 5 | 703 | 10 | 1,994 |
| 101,412 | 0 | 110 | 5  | 1,072 | 0 | 45 | 5 | 666 | 10 | 1,893 |
| 101,413 | 0 | 98  | 5  | 922   | 0 | 39 | 5 | 598 | 10 | 1,657 |
| 101,414 | 0 | 98  | 5  | 926   | 0 | 40 | 4 | 597 | 9  | 1,661 |
| 101,415 | 0 | 76  | 5  | 810   | 0 | 28 | 4 | 471 | 9  | 1,385 |
| 101,416 | 0 | 76  | 5  | 810   | 0 | 28 | 4 | 470 | 9  | 1,384 |
| 101,417 | 0 | 54  | 5  | 621   | 0 | 20 | 5 | 387 | 10 | 1,082 |
| 101,418 | 0 | 46  | 5  | 546   | 0 | 17 | 5 | 332 | 10 | 941   |
| 101,419 | 0 | 43  | 5  | 529   | 0 | 17 | 5 | 321 | 10 | 910   |
| 101,420 | 0 | 43  | 5  | 529   | 0 | 17 | 5 | 321 | 10 | 910   |
| 101,421 | 0 | 37  | 5  | 487   | 0 | 16 | 5 | 299 | 10 | 839   |
| 101,422 | 0 | 37  | 6  | 477   | 0 | 16 | 7 | 298 | 13 | 828   |

|         |   |    |    |     |   |    |    |     |    |     |
|---------|---|----|----|-----|---|----|----|-----|----|-----|
| 101,423 | 0 | 34 | 6  | 454 | 0 | 16 | 7  | 275 | 13 | 779 |
| 101,424 | 0 | 34 | 6  | 429 | 0 | 16 | 7  | 264 | 13 | 743 |
| 101,425 | 0 | 34 | 6  | 428 | 0 | 16 | 7  | 264 | 13 | 742 |
| 101,426 | 0 | 34 | 6  | 427 | 0 | 16 | 7  | 261 | 13 | 738 |
| 101,427 | 1 | 32 | 8  | 368 | 0 | 13 | 7  | 202 | 16 | 615 |
| 101,428 | 1 | 32 | 8  | 368 | 0 | 13 | 7  | 201 | 16 | 614 |
| 101,429 | 1 | 32 | 7  | 368 | 0 | 13 | 8  | 201 | 16 | 614 |
| 101,430 | 3 | 26 | 7  | 326 | 0 | 10 | 9  | 159 | 19 | 521 |
| 101,431 | 3 | 26 | 7  | 326 | 0 | 10 | 9  | 159 | 19 | 521 |
| 101,432 | 4 | 23 | 13 | 304 | 1 | 8  | 17 | 151 | 35 | 486 |
| 101,433 | 5 | 23 | 13 | 291 | 2 | 8  | 22 | 150 | 42 | 472 |
| 101,434 | 5 | 23 | 13 | 291 | 2 | 8  | 22 | 150 | 42 | 472 |
| 101,435 | 5 | 23 | 13 | 281 | 2 | 8  | 22 | 144 | 42 | 456 |
| 101,436 | 5 | 23 | 12 | 281 | 2 | 8  | 22 | 144 | 41 | 456 |
| 101,437 | 5 | 24 | 12 | 285 | 2 | 8  | 22 | 146 | 41 | 463 |
| 101,438 | 5 | 24 | 12 | 282 | 2 | 8  | 22 | 146 | 41 | 460 |
| 101,439 | 6 | 24 | 12 | 269 | 2 | 8  | 22 | 142 | 42 | 443 |
| 101,440 | 6 | 24 | 12 | 265 | 2 | 8  | 22 | 141 | 42 | 438 |
| 101,441 | 6 | 24 | 12 | 265 | 2 | 7  | 22 | 133 | 42 | 429 |
| 101,442 | 6 | 24 | 12 | 265 | 2 | 7  | 22 | 135 | 42 | 431 |
| 101,443 | 6 | 22 | 12 | 249 | 2 | 7  | 22 | 124 | 42 | 402 |
| 101,444 | 6 | 22 | 12 | 245 | 2 | 7  | 21 | 124 | 41 | 398 |
| 101,445 | 7 | 22 | 12 | 247 | 2 | 7  | 21 | 124 | 42 | 400 |
| 101,446 | 7 | 22 | 12 | 241 | 2 | 7  | 21 | 118 | 42 | 388 |
| 101,447 | 7 | 22 | 12 | 209 | 2 | 7  | 21 | 105 | 42 | 343 |
| 101,448 | 7 | 22 | 11 | 173 | 2 | 7  | 21 | 97  | 41 | 299 |
| 101,449 | 7 | 22 | 12 | 178 | 2 | 7  | 21 | 104 | 42 | 311 |
| 101,450 | 9 | 22 | 14 | 173 | 2 | 7  | 20 | 102 | 45 | 304 |
| 101,451 | 9 | 27 | 15 | 236 | 2 | 14 | 20 | 201 | 46 | 478 |
| 101,452 | 9 | 27 | 15 | 237 | 2 | 14 | 20 | 200 | 46 | 478 |
| 101,453 | 9 | 27 | 19 | 216 | 2 | 13 | 19 | 193 | 49 | 449 |
| 101,454 | 9 | 35 | 18 | 239 | 2 | 13 | 19 | 208 | 48 | 495 |
| 101,455 | 9 | 36 | 18 | 237 | 2 | 15 | 19 | 206 | 48 | 494 |
| 101,456 | 9 | 55 | 18 | 420 | 2 | 22 | 19 | 291 | 48 | 788 |
| 101,457 | 9 | 53 | 18 | 413 | 2 | 22 | 19 | 286 | 48 | 774 |
| 101,458 | 9 | 54 | 21 | 404 | 2 | 19 | 20 | 257 | 52 | 734 |
| 101,459 | 9 | 56 | 27 | 415 | 2 | 19 | 24 | 261 | 62 | 751 |
| 101,460 | 9 | 46 | 38 | 369 | 2 | 18 | 28 | 248 | 77 | 681 |
| 101,461 | 9 | 44 | 40 | 368 | 2 | 18 | 28 | 248 | 79 | 678 |
| 101,462 | 9 | 44 | 40 | 368 | 2 | 18 | 28 | 248 | 79 | 678 |
| 101,463 | 9 | 44 | 44 | 369 | 2 | 18 | 30 | 247 | 85 | 678 |

|         |   |    |    |     |   |    |    |     |    |     |
|---------|---|----|----|-----|---|----|----|-----|----|-----|
| 101,464 | 9 | 45 | 44 | 369 | 2 | 17 | 31 | 244 | 86 | 675 |
| 101,465 | 9 | 45 | 44 | 372 | 2 | 17 | 31 | 246 | 86 | 680 |
| 101,466 | 9 | 45 | 44 | 378 | 2 | 17 | 31 | 246 | 86 | 686 |
| 101,467 | 9 | 45 | 44 | 380 | 2 | 17 | 30 | 247 | 85 | 689 |
| 101,468 | 9 | 45 | 44 | 380 | 2 | 17 | 30 | 248 | 85 | 690 |
| 101,469 | 9 | 45 | 44 | 380 | 2 | 17 | 30 | 248 | 85 | 690 |
| 101,470 | 9 | 45 | 44 | 380 | 2 | 17 | 30 | 248 | 85 | 690 |
| 101,471 | 9 | 45 | 44 | 378 | 2 | 17 | 30 | 247 | 85 | 687 |
| 101,472 | 9 | 45 | 44 | 378 | 2 | 17 | 30 | 247 | 85 | 687 |
| 101,473 | 9 | 45 | 43 | 378 | 2 | 17 | 28 | 247 | 82 | 687 |
| 101,474 | 9 | 45 | 43 | 378 | 2 | 17 | 28 | 247 | 82 | 687 |
| 101,475 | 9 | 45 | 43 | 378 | 2 | 17 | 28 | 247 | 82 | 687 |
| 101,476 | 9 | 45 | 43 | 378 | 2 | 17 | 28 | 247 | 82 | 687 |
| 101,477 | 9 | 45 | 43 | 378 | 2 | 17 | 29 | 250 | 83 | 690 |
| 101,478 | 8 | 45 | 41 | 387 | 2 | 17 | 29 | 254 | 80 | 703 |
| 101,479 | 8 | 45 | 42 | 396 | 2 | 17 | 29 | 260 | 81 | 718 |
| 101,480 | 8 | 46 | 42 | 396 | 2 | 17 | 29 | 262 | 81 | 721 |
| 101,481 | 6 | 47 | 42 | 399 | 2 | 17 | 28 | 263 | 78 | 726 |
| 101,482 | 6 | 48 | 40 | 407 | 1 | 17 | 22 | 268 | 69 | 740 |
| 101,483 | 5 | 48 | 36 | 410 | 1 | 19 | 20 | 270 | 62 | 747 |
| 101,484 | 4 | 48 | 36 | 411 | 0 | 19 | 15 | 271 | 55 | 749 |
| 101,485 | 4 | 48 | 36 | 411 | 0 | 19 | 15 | 271 | 55 | 749 |
| 101,486 | 4 | 48 | 37 | 417 | 0 | 19 | 15 | 271 | 56 | 755 |
| 101,487 | 4 | 48 | 37 | 417 | 0 | 19 | 15 | 271 | 56 | 755 |
| 101,488 | 4 | 47 | 37 | 412 | 0 | 19 | 15 | 269 | 56 | 747 |
| 101,489 | 3 | 47 | 37 | 413 | 0 | 19 | 15 | 268 | 55 | 747 |
| 101,490 | 3 | 47 | 37 | 413 | 0 | 19 | 15 | 268 | 55 | 747 |
| 101,491 | 3 | 47 | 37 | 413 | 0 | 19 | 15 | 268 | 55 | 747 |
| 101,492 | 3 | 47 | 38 | 414 | 0 | 19 | 15 | 263 | 56 | 743 |
| 101,493 | 3 | 47 | 38 | 417 | 0 | 19 | 15 | 266 | 56 | 749 |
| 101,494 | 3 | 48 | 38 | 435 | 0 | 20 | 15 | 275 | 56 | 778 |
| 101,495 | 3 | 56 | 38 | 484 | 0 | 22 | 15 | 305 | 56 | 867 |
| 101,496 | 2 | 57 | 38 | 496 | 0 | 22 | 15 | 313 | 55 | 888 |
| 101,497 | 2 | 60 | 38 | 513 | 0 | 23 | 15 | 330 | 55 | 926 |
| 101,498 | 2 | 60 | 38 | 534 | 0 | 23 | 15 | 332 | 55 | 949 |
| 101,499 | 2 | 60 | 38 | 540 | 0 | 23 | 15 | 332 | 55 | 955 |
| 101,500 | 2 | 63 | 37 | 550 | 0 | 23 | 15 | 325 | 54 | 961 |
| 101,501 | 0 | 63 | 35 | 551 | 0 | 23 | 15 | 324 | 50 | 961 |
| 101,502 | 0 | 58 | 34 | 489 | 0 | 16 | 15 | 231 | 49 | 794 |
| 101,503 | 0 | 55 | 32 | 479 | 0 | 15 | 15 | 222 | 47 | 771 |
| 101,504 | 0 | 55 | 30 | 483 | 0 | 15 | 15 | 223 | 45 | 776 |

|         |   |    |    |     |   |    |    |     |    |     |
|---------|---|----|----|-----|---|----|----|-----|----|-----|
| 101,505 | 0 | 47 | 30 | 465 | 0 | 17 | 15 | 215 | 45 | 744 |
| 101,506 | 0 | 26 | 29 | 273 | 0 | 9  | 15 | 131 | 44 | 439 |
| 101,507 | 0 | 26 | 29 | 297 | 0 | 11 | 15 | 156 | 44 | 490 |
| 101,508 | 0 | 26 | 26 | 298 | 0 | 11 | 14 | 162 | 40 | 497 |
| 101,509 | 0 | 35 | 26 | 402 | 0 | 23 | 14 | 224 | 40 | 684 |
| 101,510 | 0 | 35 | 21 | 436 | 0 | 24 | 10 | 240 | 31 | 735 |
| 101,511 | 0 | 38 | 10 | 467 | 0 | 28 | 5  | 252 | 15 | 785 |
| 101,512 | 0 | 52 | 8  | 544 | 0 | 30 | 5  | 276 | 13 | 902 |
| 101,513 | 0 | 52 | 7  | 546 | 0 | 31 | 3  | 277 | 10 | 906 |
| 101,514 | 0 | 52 | 5  | 545 | 0 | 31 | 3  | 277 | 8  | 905 |
| 101,515 | 0 | 52 | 6  | 544 | 0 | 31 | 2  | 276 | 8  | 903 |
| 101,516 | 0 | 52 | 7  | 540 | 0 | 32 | 2  | 278 | 9  | 902 |
| 101,517 | 0 | 52 | 7  | 543 | 0 | 33 | 2  | 280 | 9  | 908 |
| 101,518 | 1 | 52 | 7  | 543 | 0 | 33 | 2  | 278 | 10 | 906 |
| 101,519 | 1 | 52 | 7  | 543 | 0 | 33 | 2  | 279 | 10 | 907 |
| 101,520 | 1 | 52 | 7  | 546 | 0 | 33 | 2  | 280 | 10 | 911 |
| 101,521 | 1 | 52 | 7  | 546 | 0 | 33 | 2  | 280 | 10 | 911 |
| 101,522 | 1 | 53 | 8  | 552 | 0 | 33 | 2  | 284 | 11 | 922 |
| 101,523 | 1 | 53 | 8  | 554 | 0 | 33 | 2  | 285 | 11 | 925 |
| 101,524 | 1 | 53 | 8  | 555 | 0 | 33 | 2  | 286 | 11 | 927 |
| 101,525 | 1 | 53 | 8  | 555 | 0 | 33 | 2  | 286 | 11 | 927 |
| 101,526 | 1 | 53 | 8  | 555 | 0 | 33 | 2  | 284 | 11 | 925 |
| 101,527 | 1 | 56 | 8  | 566 | 0 | 35 | 2  | 299 | 11 | 956 |
| 101,528 | 1 | 56 | 8  | 567 | 0 | 35 | 1  | 299 | 10 | 957 |
| 101,529 | 1 | 56 | 9  | 559 | 0 | 35 | 1  | 296 | 11 | 946 |
| 101,530 | 1 | 56 | 8  | 550 | 1 | 35 | 2  | 290 | 12 | 931 |
| 101,531 | 1 | 54 | 11 | 547 | 1 | 35 | 4  | 287 | 17 | 923 |
| 101,532 | 1 | 53 | 11 | 539 | 1 | 35 | 5  | 282 | 18 | 909 |
| 101,533 | 1 | 53 | 11 | 539 | 1 | 35 | 5  | 282 | 18 | 909 |
| 101,534 | 1 | 53 | 11 | 535 | 1 | 33 | 5  | 279 | 18 | 900 |
| 101,535 | 1 | 53 | 11 | 535 | 1 | 33 | 5  | 279 | 18 | 900 |
| 101,536 | 1 | 53 | 10 | 538 | 1 | 33 | 5  | 279 | 17 | 903 |
| 101,537 | 1 | 53 | 10 | 532 | 1 | 33 | 5  | 279 | 17 | 897 |
| 101,538 | 1 | 53 | 11 | 532 | 1 | 33 | 5  | 279 | 18 | 897 |
| 101,539 | 1 | 53 | 11 | 533 | 1 | 33 | 5  | 279 | 18 | 898 |
| 101,540 | 1 | 54 | 11 | 532 | 1 | 33 | 5  | 279 | 18 | 898 |
| 101,541 | 1 | 54 | 11 | 529 | 1 | 33 | 5  | 278 | 18 | 894 |
| 101,542 | 2 | 54 | 10 | 533 | 1 | 33 | 5  | 279 | 18 | 899 |
| 101,543 | 2 | 54 | 10 | 532 | 2 | 33 | 5  | 279 | 19 | 898 |
| 101,544 | 2 | 54 | 10 | 530 | 2 | 33 | 5  | 277 | 19 | 894 |
| 101,545 | 2 | 53 | 11 | 518 | 2 | 32 | 5  | 269 | 20 | 872 |

|         |   |     |    |       |   |     |    |       |    |       |
|---------|---|-----|----|-------|---|-----|----|-------|----|-------|
| 101,546 | 2 | 50  | 13 | 482   | 2 | 32  | 7  | 249   | 24 | 813   |
| 101,547 | 2 | 49  | 13 | 470   | 2 | 33  | 7  | 246   | 24 | 798   |
| 101,548 | 2 | 52  | 13 | 521   | 2 | 39  | 7  | 290   | 24 | 902   |
| 101,549 | 3 | 55  | 13 | 539   | 2 | 41  | 7  | 313   | 25 | 948   |
| 101,550 | 3 | 55  | 13 | 547   | 2 | 41  | 7  | 317   | 25 | 960   |
| 101,551 | 3 | 54  | 13 | 550   | 2 | 45  | 7  | 328   | 25 | 977   |
| 101,552 | 3 | 54  | 13 | 550   | 2 | 46  | 7  | 328   | 25 | 978   |
| 101,553 | 3 | 82  | 15 | 655   | 2 | 54  | 7  | 436   | 27 | 1,227 |
| 101,554 | 3 | 82  | 15 | 682   | 2 | 56  | 7  | 445   | 27 | 1,265 |
| 101,555 | 3 | 82  | 15 | 704   | 2 | 56  | 8  | 445   | 28 | 1,287 |
| 101,556 | 3 | 82  | 15 | 725   | 2 | 56  | 8  | 451   | 28 | 1,314 |
| 101,557 | 3 | 82  | 15 | 693   | 2 | 53  | 8  | 425   | 28 | 1,253 |
| 101,558 | 3 | 82  | 15 | 698   | 2 | 53  | 8  | 424   | 28 | 1,257 |
| 101,559 | 3 | 83  | 15 | 711   | 2 | 53  | 8  | 430   | 28 | 1,277 |
| 101,560 | 3 | 74  | 15 | 681   | 2 | 46  | 8  | 418   | 28 | 1,219 |
| 101,561 | 3 | 73  | 14 | 734   | 2 | 52  | 8  | 435   | 27 | 1,294 |
| 101,562 | 3 | 88  | 14 | 843   | 2 | 67  | 8  | 581   | 27 | 1,579 |
| 101,563 | 3 | 74  | 14 | 772   | 2 | 66  | 8  | 558   | 27 | 1,470 |
| 101,564 | 3 | 110 | 15 | 1,173 | 2 | 90  | 8  | 777   | 28 | 2,150 |
| 101,565 | 3 | 115 | 14 | 1,202 | 2 | 92  | 8  | 812   | 27 | 2,221 |
| 101,566 | 3 | 115 | 13 | 1,201 | 2 | 92  | 8  | 811   | 26 | 2,219 |
| 101,567 | 3 | 119 | 12 | 1,228 | 2 | 93  | 8  | 822   | 25 | 2,262 |
| 101,568 | 3 | 120 | 12 | 1,249 | 2 | 93  | 8  | 831   | 25 | 2,293 |
| 101,569 | 3 | 125 | 12 | 1,267 | 2 | 97  | 8  | 839   | 25 | 2,328 |
| 101,570 | 3 | 125 | 12 | 1,278 | 2 | 97  | 8  | 846   | 25 | 2,346 |
| 101,571 | 3 | 125 | 12 | 1,276 | 2 | 97  | 9  | 846   | 26 | 2,344 |
| 101,572 | 3 | 125 | 12 | 1,287 | 2 | 97  | 9  | 848   | 26 | 2,357 |
| 101,573 | 3 | 124 | 11 | 1,285 | 2 | 98  | 9  | 843   | 25 | 2,350 |
| 101,574 | 3 | 125 | 11 | 1,289 | 2 | 98  | 9  | 846   | 25 | 2,358 |
| 101,575 | 3 | 125 | 11 | 1,325 | 2 | 100 | 9  | 882   | 25 | 2,432 |
| 101,576 | 3 | 128 | 11 | 1,436 | 2 | 112 | 11 | 948   | 27 | 2,624 |
| 101,577 | 3 | 144 | 12 | 1,652 | 3 | 126 | 13 | 1,136 | 31 | 3,058 |
| 101,578 | 3 | 143 | 12 | 1,785 | 3 | 131 | 13 | 1,251 | 31 | 3,310 |
| 101,579 | 3 | 143 | 11 | 1,811 | 3 | 131 | 13 | 1,259 | 30 | 3,344 |
| 101,580 | 3 | 143 | 11 | 1,810 | 2 | 131 | 12 | 1,263 | 28 | 3,347 |
| 101,581 | 3 | 143 | 9  | 1,815 | 2 | 131 | 10 | 1,263 | 24 | 3,352 |
| 101,582 | 3 | 143 | 8  | 1,816 | 2 | 131 | 9  | 1,264 | 22 | 3,354 |
| 101,583 | 3 | 143 | 8  | 1,820 | 2 | 131 | 8  | 1,268 | 21 | 3,362 |
| 101,584 | 3 | 143 | 8  | 1,820 | 2 | 131 | 8  | 1,268 | 21 | 3,362 |
| 101,585 | 3 | 143 | 8  | 1,820 | 2 | 131 | 8  | 1,270 | 21 | 3,364 |
| 101,586 | 3 | 143 | 8  | 1,820 | 2 | 131 | 8  | 1,270 | 21 | 3,364 |

|         |   |     |   |       |   |     |   |       |    |       |
|---------|---|-----|---|-------|---|-----|---|-------|----|-------|
| 101,587 | 3 | 143 | 8 | 1,817 | 2 | 131 | 8 | 1,271 | 21 | 3,362 |
| 101,588 | 3 | 143 | 8 | 1,817 | 2 | 131 | 8 | 1,271 | 21 | 3,362 |
| 101,589 | 3 | 143 | 7 | 1,819 | 2 | 131 | 8 | 1,271 | 20 | 3,364 |
| 101,590 | 3 | 142 | 7 | 1,819 | 2 | 131 | 8 | 1,271 | 20 | 3,363 |
| 101,591 | 3 | 142 | 7 | 1,819 | 2 | 131 | 8 | 1,271 | 20 | 3,363 |
| 101,592 | 2 | 142 | 7 | 1,819 | 2 | 131 | 8 | 1,272 | 19 | 3,364 |
| 101,593 | 2 | 142 | 7 | 1,819 | 1 | 131 | 8 | 1,272 | 18 | 3,364 |
| 101,594 | 2 | 142 | 8 | 1,813 | 1 | 131 | 8 | 1,272 | 19 | 3,358 |
| 101,595 | 2 | 142 | 7 | 1,813 | 1 | 131 | 8 | 1,271 | 18 | 3,357 |
| 101,596 | 2 | 142 | 7 | 1,813 | 1 | 131 | 6 | 1,271 | 16 | 3,357 |
| 101,597 | 2 | 137 | 5 | 1,801 | 1 | 129 | 6 | 1,259 | 14 | 3,326 |
| 101,598 | 2 | 129 | 5 | 1,702 | 1 | 121 | 7 | 1,190 | 15 | 3,142 |
| 101,599 | 2 | 129 | 5 | 1,704 | 1 | 121 | 7 | 1,188 | 15 | 3,142 |
| 101,600 | 1 | 126 | 5 | 1,686 | 1 | 119 | 7 | 1,167 | 14 | 3,098 |
| 101,601 | 1 | 126 | 5 | 1,678 | 1 | 120 | 7 | 1,164 | 14 | 3,088 |
| 101,602 | 1 | 124 | 3 | 1,660 | 1 | 116 | 7 | 1,147 | 12 | 3,047 |
| 101,603 | 1 | 95  | 4 | 1,522 | 1 | 105 | 7 | 1,025 | 13 | 2,747 |
| 101,604 | 1 | 95  | 4 | 1,524 | 1 | 105 | 7 | 1,026 | 13 | 2,750 |
| 101,605 | 1 | 95  | 4 | 1,524 | 1 | 105 | 7 | 1,026 | 13 | 2,750 |
| 101,606 | 1 | 95  | 4 | 1,469 | 1 | 103 | 6 | 1,013 | 12 | 2,680 |
| 101,607 | 1 | 95  | 4 | 1,468 | 1 | 103 | 6 | 1,013 | 12 | 2,679 |
| 101,608 | 1 | 94  | 4 | 1,441 | 1 | 103 | 6 | 1,001 | 12 | 2,639 |
| 101,609 | 1 | 94  | 4 | 1,441 | 1 | 104 | 6 | 1,002 | 12 | 2,641 |
| 101,610 | 1 | 96  | 4 | 1,450 | 1 | 104 | 6 | 1,015 | 12 | 2,665 |
| 101,611 | 1 | 96  | 4 | 1,376 | 1 | 99  | 6 | 965   | 12 | 2,536 |
| 101,612 | 1 | 95  | 4 | 1,271 | 1 | 92  | 6 | 935   | 12 | 2,393 |
| 101,613 | 1 | 77  | 4 | 1,142 | 1 | 73  | 6 | 780   | 12 | 2,072 |
| 101,614 | 1 | 77  | 4 | 1,136 | 1 | 72  | 6 | 782   | 12 | 2,067 |
| 101,615 | 2 | 36  | 3 | 704   | 1 | 45  | 6 | 533   | 12 | 1,318 |
| 101,616 | 2 | 36  | 3 | 707   | 1 | 45  | 6 | 533   | 12 | 1,321 |
| 101,617 | 2 | 37  | 3 | 723   | 1 | 45  | 6 | 539   | 12 | 1,344 |
| 101,618 | 2 | 33  | 3 | 698   | 1 | 43  | 6 | 530   | 12 | 1,304 |
| 101,619 | 1 | 27  | 3 | 657   | 1 | 38  | 6 | 511   | 11 | 1,233 |
| 101,620 | 1 | 27  | 4 | 646   | 1 | 38  | 6 | 504   | 12 | 1,215 |
| 101,621 | 1 | 27  | 7 | 654   | 1 | 39  | 7 | 506   | 16 | 1,226 |
| 101,622 | 1 | 27  | 7 | 648   | 1 | 39  | 6 | 506   | 15 | 1,220 |
| 101,623 | 1 | 29  | 7 | 669   | 1 | 39  | 7 | 514   | 16 | 1,251 |
| 101,624 | 1 | 29  | 7 | 667   | 1 | 38  | 7 | 514   | 16 | 1,248 |
| 101,625 | 1 | 28  | 7 | 664   | 1 | 38  | 8 | 510   | 17 | 1,240 |
| 101,626 | 1 | 28  | 7 | 628   | 1 | 36  | 6 | 474   | 15 | 1,166 |
| 101,627 | 1 | 9   | 6 | 301   | 0 | 10  | 5 | 221   | 12 | 541   |

|         |   |     |    |     |   |    |    |     |    |       |
|---------|---|-----|----|-----|---|----|----|-----|----|-------|
| 101,628 | 1 | 7   | 6  | 157 | 0 | 3  | 4  | 92  | 11 | 259   |
| 101,629 | 1 | 7   | 6  | 157 | 0 | 3  | 4  | 93  | 11 | 260   |
| 101,630 | 1 | 11  | 6  | 164 | 0 | 5  | 4  | 117 | 11 | 297   |
| 101,631 | 1 | 11  | 6  | 167 | 0 | 6  | 4  | 113 | 11 | 297   |
| 101,632 | 1 | 11  | 7  | 171 | 0 | 6  | 9  | 119 | 17 | 307   |
| 101,633 | 1 | 12  | 7  | 171 | 0 | 6  | 9  | 119 | 17 | 308   |
| 101,634 | 1 | 12  | 7  | 167 | 0 | 6  | 9  | 114 | 17 | 299   |
| 101,635 | 1 | 12  | 7  | 174 | 0 | 6  | 9  | 118 | 17 | 310   |
| 101,636 | 1 | 13  | 7  | 175 | 0 | 6  | 9  | 117 | 17 | 311   |
| 101,637 | 1 | 14  | 7  | 187 | 0 | 6  | 9  | 121 | 17 | 328   |
| 101,638 | 1 | 19  | 7  | 196 | 0 | 6  | 9  | 134 | 17 | 355   |
| 101,639 | 1 | 20  | 7  | 212 | 0 | 7  | 10 | 147 | 18 | 386   |
| 101,640 | 1 | 20  | 7  | 223 | 0 | 7  | 10 | 157 | 18 | 407   |
| 101,641 | 1 | 26  | 7  | 272 | 0 | 11 | 10 | 192 | 18 | 501   |
| 101,642 | 1 | 26  | 7  | 273 | 0 | 11 | 10 | 193 | 18 | 503   |
| 101,643 | 1 | 26  | 9  | 287 | 0 | 12 | 10 | 212 | 20 | 537   |
| 101,644 | 1 | 26  | 9  | 298 | 0 | 12 | 10 | 217 | 20 | 553   |
| 101,645 | 1 | 32  | 8  | 358 | 0 | 15 | 11 | 271 | 20 | 676   |
| 101,646 | 1 | 35  | 8  | 405 | 0 | 15 | 11 | 316 | 20 | 771   |
| 101,647 | 1 | 37  | 9  | 423 | 0 | 16 | 11 | 342 | 21 | 818   |
| 101,648 | 1 | 66  | 9  | 567 | 0 | 24 | 11 | 462 | 21 | 1,119 |
| 101,649 | 1 | 84  | 9  | 660 | 0 | 24 | 10 | 552 | 20 | 1,320 |
| 101,650 | 1 | 85  | 9  | 669 | 0 | 24 | 10 | 553 | 20 | 1,331 |
| 101,651 | 1 | 90  | 9  | 718 | 0 | 25 | 10 | 581 | 20 | 1,414 |
| 101,652 | 1 | 90  | 9  | 726 | 0 | 24 | 10 | 583 | 20 | 1,423 |
| 101,653 | 1 | 93  | 9  | 751 | 0 | 27 | 10 | 600 | 20 | 1,471 |
| 101,654 | 1 | 93  | 8  | 756 | 0 | 27 | 11 | 603 | 20 | 1,479 |
| 101,655 | 1 | 93  | 8  | 764 | 0 | 28 | 12 | 609 | 21 | 1,494 |
| 101,656 | 1 | 96  | 8  | 834 | 0 | 31 | 12 | 677 | 21 | 1,638 |
| 101,657 | 1 | 96  | 8  | 849 | 0 | 32 | 12 | 683 | 21 | 1,660 |
| 101,658 | 1 | 96  | 8  | 853 | 0 | 32 | 12 | 685 | 21 | 1,666 |
| 101,659 | 1 | 97  | 10 | 859 | 0 | 32 | 12 | 686 | 23 | 1,674 |
| 101,660 | 1 | 98  | 10 | 873 | 0 | 31 | 11 | 690 | 22 | 1,692 |
| 101,661 | 1 | 102 | 10 | 919 | 0 | 37 | 11 | 769 | 22 | 1,827 |
| 101,662 | 1 | 101 | 10 | 915 | 0 | 37 | 11 | 771 | 22 | 1,824 |
| 101,663 | 1 | 103 | 10 | 965 | 0 | 39 | 11 | 805 | 22 | 1,912 |
| 101,664 | 1 | 104 | 10 | 956 | 0 | 39 | 11 | 805 | 22 | 1,904 |
| 101,665 | 1 | 104 | 11 | 948 | 0 | 39 | 11 | 796 | 23 | 1,887 |
| 101,666 | 0 | 104 | 11 | 946 | 0 | 39 | 11 | 796 | 22 | 1,885 |
| 101,667 | 0 | 103 | 13 | 933 | 0 | 39 | 11 | 788 | 24 | 1,863 |
| 101,668 | 0 | 104 | 13 | 942 | 0 | 40 | 11 | 802 | 24 | 1,888 |



|         |   |     |    |     |   |    |    |     |    |       |
|---------|---|-----|----|-----|---|----|----|-----|----|-------|
| 101,669 | 0 | 105 | 13 | 959 | 0 | 41 | 11 | 814 | 24 | 1,919 |
| 101,670 | 0 | 106 | 13 | 977 | 0 | 41 | 11 | 816 | 24 | 1,940 |
| 101,671 | 0 | 106 | 12 | 978 | 0 | 41 | 11 | 816 | 23 | 1,941 |
| 101,672 | 0 | 105 | 9  | 946 | 0 | 40 | 10 | 809 | 19 | 1,900 |
| 101,673 | 0 | 105 | 9  | 950 | 0 | 40 | 10 | 816 | 19 | 1,911 |
| 101,674 | 0 | 105 | 9  | 950 | 0 | 40 | 9  | 816 | 18 | 1,911 |
| 101,675 | 0 | 105 | 9  | 946 | 0 | 40 | 9  | 821 | 18 | 1,912 |
| 101,676 | 0 | 105 | 9  | 947 | 0 | 40 | 9  | 821 | 18 | 1,913 |
| 101,677 | 1 | 107 | 11 | 960 | 0 | 40 | 10 | 830 | 22 | 1,937 |
| 101,678 | 1 | 107 | 11 | 961 | 0 | 40 | 10 | 830 | 22 | 1,938 |
| 101,679 | 1 | 107 | 15 | 962 | 0 | 40 | 12 | 837 | 28 | 1,946 |
| 101,680 | 1 | 108 | 15 | 964 | 0 | 40 | 12 | 836 | 28 | 1,948 |
| 101,681 | 1 | 105 | 14 | 930 | 0 | 37 | 8  | 798 | 23 | 1,870 |
| 101,682 | 1 | 105 | 14 | 930 | 0 | 38 | 7  | 799 | 22 | 1,872 |
| 101,683 | 2 | 106 | 14 | 922 | 1 | 38 | 7  | 795 | 24 | 1,861 |
| 101,684 | 2 | 105 | 18 | 921 | 1 | 38 | 8  | 794 | 29 | 1,858 |
| 101,685 | 2 | 105 | 18 | 921 | 1 | 38 | 8  | 795 | 29 | 1,859 |
| 101,686 | 2 | 105 | 18 | 914 | 1 | 38 | 8  | 791 | 29 | 1,848 |
| 101,687 | 2 | 104 | 23 | 914 | 1 | 38 | 10 | 789 | 36 | 1,845 |
| 101,688 | 2 | 104 | 30 | 904 | 1 | 38 | 21 | 787 | 54 | 1,833 |
| 101,689 | 2 | 99  | 30 | 897 | 1 | 38 | 19 | 775 | 52 | 1,809 |
| 101,690 | 2 | 98  | 30 | 881 | 1 | 37 | 20 | 762 | 53 | 1,778 |
| 101,691 | 2 | 98  | 30 | 868 | 1 | 37 | 20 | 754 | 53 | 1,757 |
| 101,692 | 2 | 92  | 30 | 823 | 1 | 33 | 20 | 719 | 53 | 1,667 |
| 101,693 | 2 | 92  | 30 | 822 | 1 | 33 | 20 | 718 | 53 | 1,665 |
| 101,694 | 2 | 93  | 30 | 809 | 1 | 32 | 20 | 698 | 53 | 1,632 |
| 101,695 | 2 | 93  | 30 | 797 | 1 | 32 | 20 | 693 | 53 | 1,615 |
| 101,696 | 2 | 87  | 33 | 737 | 1 | 29 | 19 | 637 | 55 | 1,490 |
| 101,697 | 2 | 84  | 32 | 691 | 1 | 29 | 19 | 596 | 54 | 1,400 |
| 101,698 | 2 | 53  | 32 | 525 | 1 | 20 | 19 | 450 | 54 | 1,048 |
| 101,699 | 2 | 53  | 32 | 525 | 1 | 20 | 19 | 450 | 54 | 1,048 |
| 101,700 | 2 | 35  | 32 | 434 | 1 | 20 | 19 | 359 | 54 | 848   |
| 101,701 | 2 | 29  | 32 | 374 | 2 | 19 | 21 | 329 | 57 | 751   |
| 101,702 | 2 | 29  | 33 | 368 | 2 | 19 | 21 | 329 | 58 | 745   |
| 101,703 | 2 | 29  | 33 | 371 | 2 | 19 | 21 | 330 | 58 | 749   |
| 101,704 | 2 | 27  | 33 | 354 | 2 | 16 | 21 | 320 | 58 | 717   |
| 101,705 | 2 | 28  | 34 | 389 | 2 | 17 | 21 | 351 | 59 | 785   |
| 101,706 | 2 | 29  | 34 | 381 | 2 | 16 | 20 | 350 | 58 | 776   |
| 101,707 | 2 | 26  | 35 | 324 | 2 | 14 | 21 | 297 | 60 | 661   |
| 101,708 | 2 | 26  | 35 | 306 | 2 | 13 | 21 | 289 | 60 | 634   |
| 101,709 | 2 | 26  | 35 | 311 | 2 | 13 | 21 | 291 | 60 | 641   |

|         |   |    |    |     |   |    |    |     |     |       |
|---------|---|----|----|-----|---|----|----|-----|-----|-------|
| 101,710 | 2 | 16 | 33 | 186 | 2 | 5  | 21 | 149 | 58  | 356   |
| 101,711 | 2 | 16 | 33 | 186 | 2 | 5  | 21 | 149 | 58  | 356   |
| 101,712 | 2 | 16 | 33 | 185 | 2 | 5  | 21 | 149 | 58  | 355   |
| 101,713 | 2 | 16 | 33 | 187 | 2 | 5  | 21 | 149 | 58  | 357   |
| 101,714 | 2 | 15 | 34 | 183 | 2 | 5  | 21 | 148 | 59  | 351   |
| 101,715 | 2 | 16 | 34 | 187 | 2 | 6  | 21 | 153 | 59  | 362   |
| 101,716 | 2 | 16 | 33 | 196 | 2 | 6  | 21 | 156 | 58  | 374   |
| 101,717 | 2 | 18 | 33 | 208 | 2 | 7  | 21 | 167 | 58  | 400   |
| 101,718 | 2 | 18 | 31 | 204 | 2 | 7  | 21 | 169 | 56  | 398   |
| 101,719 | 2 | 16 | 31 | 173 | 2 | 5  | 21 | 138 | 56  | 332   |
| 101,720 | 2 | 17 | 32 | 180 | 2 | 5  | 21 | 140 | 57  | 342   |
| 101,721 | 2 | 16 | 32 | 165 | 2 | 5  | 21 | 142 | 57  | 328   |
| 101,722 | 2 | 15 | 32 | 163 | 2 | 5  | 21 | 142 | 57  | 325   |
| 101,723 | 2 | 15 | 32 | 170 | 2 | 5  | 21 | 147 | 57  | 337   |
| 101,724 | 2 | 19 | 62 | 204 | 3 | 5  | 35 | 166 | 102 | 394   |
| 101,725 | 2 | 19 | 64 | 212 | 3 | 5  | 36 | 165 | 105 | 401   |
| 101,726 | 3 | 25 | 67 | 252 | 3 | 10 | 36 | 203 | 109 | 490   |
| 101,727 | 2 | 27 | 65 | 284 | 3 | 10 | 36 | 218 | 106 | 539   |
| 101,728 | 2 | 26 | 68 | 278 | 3 | 12 | 37 | 217 | 110 | 533   |
| 101,729 | 2 | 26 | 64 | 277 | 3 | 12 | 36 | 219 | 105 | 534   |
| 101,730 | 2 | 24 | 66 | 271 | 3 | 12 | 37 | 212 | 108 | 519   |
| 101,731 | 2 | 24 | 69 | 285 | 3 | 12 | 37 | 227 | 111 | 548   |
| 101,732 | 2 | 24 | 69 | 285 | 3 | 12 | 37 | 227 | 111 | 548   |
| 101,733 | 2 | 26 | 70 | 299 | 2 | 11 | 39 | 230 | 113 | 566   |
| 101,734 | 1 | 25 | 70 | 300 | 2 | 11 | 39 | 230 | 112 | 566   |
| 101,735 | 1 | 25 | 66 | 304 | 2 | 11 | 38 | 230 | 107 | 570   |
| 101,736 | 1 | 25 | 72 | 307 | 3 | 11 | 42 | 232 | 118 | 575   |
| 101,737 | 1 | 25 | 73 | 319 | 3 | 12 | 41 | 235 | 118 | 591   |
| 101,738 | 1 | 26 | 71 | 326 | 3 | 12 | 42 | 242 | 117 | 606   |
| 101,739 | 1 | 30 | 67 | 355 | 3 | 12 | 32 | 269 | 103 | 666   |
| 101,740 | 1 | 32 | 67 | 375 | 3 | 12 | 31 | 297 | 102 | 716   |
| 101,741 | 1 | 32 | 67 | 382 | 3 | 12 | 31 | 299 | 102 | 725   |
| 101,742 | 1 | 32 | 67 | 383 | 3 | 12 | 31 | 299 | 102 | 726   |
| 101,743 | 1 | 32 | 66 | 379 | 3 | 13 | 31 | 299 | 101 | 723   |
| 101,744 | 1 | 35 | 65 | 399 | 3 | 16 | 31 | 322 | 100 | 772   |
| 101,745 | 1 | 36 | 63 | 428 | 3 | 16 | 31 | 332 | 98  | 812   |
| 101,746 | 1 | 42 | 66 | 608 | 3 | 23 | 31 | 485 | 101 | 1,158 |
| 101,747 | 1 | 51 | 67 | 723 | 3 | 29 | 33 | 564 | 104 | 1,367 |
| 101,748 | 1 | 52 | 70 | 741 | 4 | 30 | 33 | 569 | 108 | 1,392 |
| 101,749 | 1 | 53 | 71 | 747 | 4 | 31 | 34 | 570 | 110 | 1,401 |
| 101,750 | 1 | 63 | 71 | 773 | 4 | 34 | 34 | 578 | 110 | 1,448 |

|         |   |    |     |     |   |    |    |     |     |       |
|---------|---|----|-----|-----|---|----|----|-----|-----|-------|
| 101,751 | 1 | 65 | 72  | 782 | 4 | 35 | 32 | 587 | 109 | 1,469 |
| 101,752 | 1 | 65 | 72  | 789 | 3 | 37 | 31 | 591 | 107 | 1,482 |
| 101,753 | 2 | 66 | 82  | 798 | 3 | 37 | 40 | 592 | 127 | 1,493 |
| 101,754 | 2 | 67 | 83  | 799 | 3 | 37 | 40 | 591 | 128 | 1,494 |
| 101,755 | 2 | 66 | 83  | 793 | 3 | 37 | 40 | 584 | 128 | 1,480 |
| 101,756 | 2 | 65 | 82  | 754 | 3 | 36 | 40 | 548 | 127 | 1,403 |
| 101,757 | 2 | 64 | 97  | 776 | 4 | 41 | 54 | 563 | 157 | 1,444 |
| 101,758 | 2 | 65 | 96  | 797 | 4 | 43 | 54 | 581 | 156 | 1,486 |
| 101,759 | 2 | 65 | 116 | 833 | 4 | 43 | 60 | 587 | 182 | 1,528 |
| 101,760 | 2 | 65 | 117 | 832 | 4 | 43 | 60 | 587 | 183 | 1,527 |
| 101,761 | 2 | 65 | 117 | 827 | 4 | 43 | 60 | 588 | 183 | 1,523 |
| 101,762 | 2 | 65 | 120 | 827 | 5 | 43 | 61 | 588 | 188 | 1,523 |
| 101,763 | 2 | 67 | 120 | 836 | 5 | 43 | 61 | 589 | 188 | 1,535 |
| 101,764 | 2 | 67 | 119 | 836 | 5 | 43 | 61 | 589 | 187 | 1,535 |
| 101,765 | 2 | 67 | 119 | 836 | 5 | 43 | 61 | 589 | 187 | 1,535 |
| 101,766 | 2 | 67 | 119 | 832 | 5 | 42 | 62 | 584 | 188 | 1,525 |
| 101,767 | 2 | 64 | 119 | 810 | 5 | 41 | 62 | 571 | 188 | 1,486 |
| 101,768 | 2 | 64 | 119 | 813 | 5 | 41 | 62 | 574 | 188 | 1,492 |
| 101,769 | 2 | 65 | 119 | 814 | 5 | 41 | 62 | 574 | 188 | 1,494 |
| 101,770 | 3 | 66 | 126 | 821 | 5 | 41 | 65 | 576 | 199 | 1,504 |
| 101,771 | 3 | 65 | 125 | 819 | 5 | 41 | 66 | 575 | 199 | 1,500 |
| 101,772 | 3 | 65 | 125 | 807 | 5 | 42 | 66 | 565 | 199 | 1,479 |
| 101,773 | 3 | 65 | 125 | 815 | 5 | 42 | 66 | 569 | 199 | 1,491 |
| 101,774 | 3 | 65 | 105 | 820 | 4 | 42 | 60 | 572 | 172 | 1,499 |
| 101,775 | 3 | 61 | 94  | 784 | 4 | 42 | 54 | 546 | 155 | 1,433 |
| 101,776 | 3 | 57 | 92  | 736 | 4 | 37 | 53 | 503 | 152 | 1,333 |
| 101,777 | 2 | 57 | 90  | 736 | 4 | 37 | 52 | 503 | 148 | 1,333 |
| 101,778 | 2 | 54 | 90  | 696 | 4 | 35 | 52 | 480 | 148 | 1,265 |
| 101,779 | 2 | 54 | 87  | 696 | 4 | 35 | 51 | 480 | 144 | 1,265 |
| 101,780 | 2 | 54 | 85  | 696 | 4 | 35 | 50 | 478 | 141 | 1,263 |
| 101,781 | 2 | 54 | 85  | 697 | 4 | 35 | 49 | 477 | 140 | 1,263 |
| 101,782 | 2 | 55 | 82  | 685 | 4 | 36 | 49 | 465 | 137 | 1,241 |
| 101,783 | 2 | 53 | 81  | 676 | 4 | 36 | 47 | 464 | 134 | 1,229 |
| 101,784 | 2 | 53 | 81  | 686 | 4 | 36 | 47 | 470 | 134 | 1,245 |
| 101,785 | 2 | 54 | 79  | 684 | 4 | 36 | 47 | 468 | 132 | 1,242 |
| 101,786 | 2 | 54 | 79  | 686 | 4 | 36 | 47 | 475 | 132 | 1,251 |
| 101,787 | 2 | 54 | 75  | 691 | 3 | 36 | 43 | 474 | 123 | 1,255 |
| 101,788 | 2 | 56 | 72  | 680 | 3 | 35 | 42 | 471 | 119 | 1,242 |
| 101,789 | 4 | 56 | 71  | 680 | 3 | 36 | 41 | 486 | 119 | 1,258 |
| 101,790 | 4 | 51 | 68  | 649 | 3 | 36 | 40 | 456 | 115 | 1,192 |
| 101,791 | 4 | 57 | 68  | 739 | 3 | 47 | 40 | 523 | 115 | 1,366 |

|         |   |    |    |     |   |    |    |     |     |       |
|---------|---|----|----|-----|---|----|----|-----|-----|-------|
| 101,792 | 5 | 57 | 68 | 753 | 3 | 47 | 40 | 524 | 116 | 1,381 |
| 101,793 | 5 | 57 | 69 | 752 | 3 | 47 | 40 | 523 | 117 | 1,379 |
| 101,794 | 5 | 59 | 68 | 762 | 3 | 47 | 40 | 524 | 116 | 1,392 |
| 101,795 | 5 | 57 | 68 | 743 | 3 | 44 | 40 | 503 | 116 | 1,347 |
| 101,796 | 5 | 49 | 65 | 537 | 3 | 37 | 40 | 344 | 113 | 967   |
| 101,797 | 5 | 49 | 65 | 537 | 3 | 37 | 40 | 344 | 113 | 967   |
| 101,798 | 5 | 40 | 67 | 422 | 3 | 31 | 39 | 266 | 114 | 759   |
| 101,799 | 5 | 39 | 64 | 403 | 2 | 30 | 39 | 259 | 110 | 731   |
| 101,800 | 5 | 28 | 63 | 370 | 2 | 26 | 38 | 249 | 108 | 673   |
| 101,801 | 5 | 26 | 63 | 361 | 2 | 25 | 38 | 240 | 108 | 652   |
| 101,802 | 5 | 26 | 62 | 361 | 2 | 25 | 38 | 240 | 107 | 652   |
| 101,803 | 4 | 24 | 52 | 344 | 2 | 23 | 29 | 235 | 87  | 626   |
| 101,804 | 4 | 24 | 52 | 352 | 2 | 23 | 29 | 239 | 87  | 638   |
| 101,805 | 4 | 24 | 51 | 352 | 2 | 23 | 29 | 239 | 86  | 638   |
| 101,806 | 4 | 24 | 51 | 323 | 2 | 18 | 27 | 215 | 84  | 580   |
| 101,807 | 4 | 24 | 47 | 324 | 2 | 18 | 26 | 215 | 79  | 581   |
| 101,808 | 4 | 25 | 36 | 340 | 1 | 18 | 15 | 221 | 56  | 604   |
| 101,809 | 4 | 24 | 25 | 312 | 1 | 16 | 11 | 192 | 41  | 544   |
| 101,810 | 4 | 24 | 16 | 280 | 1 | 16 | 9  | 191 | 30  | 511   |
| 101,811 | 4 | 24 | 16 | 285 | 2 | 16 | 10 | 190 | 32  | 515   |
| 101,812 | 4 | 27 | 16 | 292 | 2 | 16 | 10 | 191 | 32  | 526   |
| 101,813 | 4 | 27 | 13 | 292 | 1 | 16 | 9  | 191 | 27  | 526   |
| 101,814 | 4 | 28 | 13 | 288 | 1 | 16 | 9  | 190 | 27  | 522   |
| 101,815 | 3 | 28 | 7  | 293 | 1 | 16 | 7  | 190 | 18  | 527   |
| 101,816 | 3 | 29 | 10 | 300 | 1 | 16 | 7  | 191 | 21  | 536   |
| 101,817 | 3 | 28 | 10 | 302 | 1 | 16 | 7  | 193 | 21  | 539   |
| 101,818 | 3 | 29 | 11 | 300 | 1 | 17 | 10 | 187 | 25  | 533   |
| 101,819 | 3 | 28 | 11 | 301 | 1 | 17 | 10 | 187 | 25  | 533   |
| 101,820 | 3 | 27 | 14 | 293 | 1 | 17 | 9  | 185 | 27  | 522   |
| 101,821 | 3 | 27 | 14 | 288 | 1 | 17 | 9  | 185 | 27  | 517   |
| 101,822 | 3 | 27 | 15 | 287 | 1 | 16 | 8  | 182 | 27  | 512   |
| 101,823 | 3 | 27 | 15 | 279 | 1 | 16 | 8  | 177 | 27  | 499   |
| 101,824 | 3 | 27 | 15 | 280 | 1 | 16 | 8  | 177 | 27  | 500   |
| 101,825 | 3 | 27 | 15 | 275 | 1 | 16 | 6  | 177 | 25  | 495   |
| 101,826 | 3 | 27 | 15 | 278 | 1 | 16 | 6  | 177 | 25  | 498   |
| 101,827 | 3 | 29 | 15 | 305 | 1 | 17 | 6  | 215 | 25  | 566   |
| 101,828 | 3 | 29 | 15 | 307 | 1 | 17 | 6  | 217 | 25  | 570   |
| 101,829 | 3 | 29 | 15 | 308 | 1 | 17 | 6  | 219 | 25  | 573   |
| 101,830 | 3 | 29 | 15 | 312 | 1 | 17 | 6  | 221 | 25  | 579   |
| 101,831 | 3 | 29 | 15 | 317 | 1 | 17 | 6  | 224 | 25  | 587   |
| 101,832 | 3 | 30 | 15 | 325 | 1 | 17 | 6  | 230 | 25  | 602   |

|         |   |    |    |     |   |    |   |     |    |       |
|---------|---|----|----|-----|---|----|---|-----|----|-------|
| 101,833 | 3 | 29 | 15 | 323 | 1 | 16 | 6 | 227 | 25 | 595   |
| 101,834 | 3 | 30 | 15 | 314 | 1 | 16 | 6 | 218 | 25 | 578   |
| 101,835 | 3 | 29 | 15 | 314 | 1 | 16 | 6 | 218 | 25 | 577   |
| 101,836 | 3 | 29 | 15 | 308 | 1 | 16 | 6 | 211 | 25 | 564   |
| 101,837 | 3 | 29 | 15 | 301 | 1 | 16 | 6 | 210 | 25 | 556   |
| 101,838 | 3 | 27 | 15 | 298 | 1 | 16 | 6 | 208 | 25 | 549   |
| 101,839 | 3 | 27 | 15 | 298 | 1 | 16 | 6 | 208 | 25 | 549   |
| 101,840 | 1 | 27 | 15 | 294 | 1 | 15 | 6 | 188 | 23 | 524   |
| 101,841 | 1 | 19 | 15 | 190 | 1 | 4  | 6 | 97  | 23 | 310   |
| 101,842 | 1 | 19 | 15 | 201 | 1 | 5  | 6 | 106 | 23 | 331   |
| 101,843 | 0 | 19 | 15 | 228 | 1 | 5  | 6 | 105 | 22 | 357   |
| 101,844 | 0 | 24 | 14 | 288 | 1 | 10 | 6 | 139 | 21 | 461   |
| 101,845 | 0 | 37 | 14 | 387 | 1 | 11 | 6 | 167 | 21 | 602   |
| 101,846 | 0 | 37 | 14 | 410 | 1 | 11 | 6 | 172 | 21 | 630   |
| 101,847 | 0 | 37 | 14 | 408 | 1 | 11 | 6 | 170 | 21 | 626   |
| 101,848 | 0 | 44 | 12 | 426 | 1 | 11 | 5 | 182 | 18 | 663   |
| 101,849 | 0 | 45 | 11 | 430 | 1 | 11 | 5 | 182 | 17 | 668   |
| 101,850 | 0 | 46 | 11 | 441 | 1 | 12 | 5 | 190 | 17 | 689   |
| 101,851 | 0 | 47 | 11 | 453 | 1 | 13 | 5 | 208 | 17 | 721   |
| 101,852 | 0 | 47 | 11 | 461 | 1 | 13 | 5 | 211 | 17 | 732   |
| 101,853 | 0 | 48 | 10 | 461 | 1 | 13 | 5 | 207 | 16 | 729   |
| 101,854 | 0 | 48 | 10 | 462 | 1 | 13 | 5 | 209 | 16 | 732   |
| 101,855 | 1 | 50 | 10 | 470 | 1 | 13 | 5 | 228 | 17 | 761   |
| 101,856 | 1 | 50 | 10 | 471 | 1 | 13 | 5 | 228 | 17 | 762   |
| 101,857 | 1 | 50 | 10 | 482 | 1 | 13 | 5 | 228 | 17 | 773   |
| 101,858 | 1 | 50 | 10 | 481 | 1 | 13 | 5 | 229 | 17 | 773   |
| 101,859 | 1 | 49 | 10 | 465 | 1 | 13 | 5 | 224 | 17 | 751   |
| 101,860 | 1 | 49 | 10 | 467 | 1 | 13 | 5 | 222 | 17 | 751   |
| 101,861 | 1 | 51 | 9  | 466 | 0 | 13 | 5 | 218 | 15 | 748   |
| 101,862 | 1 | 51 | 9  | 457 | 0 | 13 | 4 | 217 | 14 | 738   |
| 101,863 | 1 | 48 | 9  | 450 | 0 | 13 | 4 | 215 | 14 | 726   |
| 101,864 | 1 | 45 | 8  | 446 | 0 | 13 | 3 | 215 | 12 | 719   |
| 101,865 | 1 | 45 | 7  | 450 | 0 | 13 | 3 | 215 | 11 | 723   |
| 101,866 | 1 | 44 | 6  | 441 | 0 | 13 | 3 | 217 | 10 | 715   |
| 101,867 | 1 | 46 | 8  | 448 | 0 | 13 | 3 | 220 | 12 | 727   |
| 101,868 | 1 | 47 | 7  | 462 | 0 | 13 | 2 | 232 | 10 | 754   |
| 101,869 | 1 | 46 | 7  | 460 | 0 | 12 | 0 | 235 | 8  | 753   |
| 101,870 | 1 | 48 | 7  | 467 | 0 | 12 | 0 | 235 | 8  | 762   |
| 101,871 | 1 | 48 | 3  | 473 | 0 | 12 | 0 | 242 | 4  | 775   |
| 101,872 | 1 | 48 | 3  | 486 | 0 | 12 | 0 | 253 | 4  | 799   |
| 101,873 | 1 | 57 | 2  | 570 | 0 | 17 | 0 | 366 | 3  | 1,010 |

|         |   |     |    |     |   |    |   |     |    |       |
|---------|---|-----|----|-----|---|----|---|-----|----|-------|
| 101,874 | 1 | 57  | 2  | 572 | 0 | 17 | 0 | 368 | 3  | 1,014 |
| 101,875 | 1 | 57  | 2  | 577 | 0 | 17 | 0 | 373 | 3  | 1,024 |
| 101,876 | 1 | 57  | 2  | 575 | 0 | 17 | 0 | 370 | 3  | 1,019 |
| 101,877 | 1 | 53  | 2  | 542 | 0 | 16 | 0 | 330 | 3  | 941   |
| 101,878 | 1 | 53  | 2  | 543 | 0 | 16 | 0 | 329 | 3  | 941   |
| 101,879 | 1 | 53  | 2  | 543 | 0 | 16 | 0 | 330 | 3  | 942   |
| 101,880 | 1 | 57  | 2  | 569 | 0 | 16 | 0 | 349 | 3  | 991   |
| 101,881 | 1 | 57  | 2  | 567 | 0 | 16 | 0 | 347 | 3  | 987   |
| 101,882 | 1 | 58  | 2  | 566 | 0 | 16 | 0 | 346 | 3  | 986   |
| 101,883 | 1 | 57  | 2  | 557 | 0 | 16 | 0 | 341 | 3  | 971   |
| 101,884 | 1 | 57  | 2  | 557 | 0 | 16 | 0 | 341 | 3  | 971   |
| 101,885 | 1 | 58  | 2  | 561 | 0 | 21 | 0 | 351 | 3  | 991   |
| 101,886 | 1 | 58  | 2  | 564 | 0 | 21 | 0 | 354 | 3  | 997   |
| 101,887 | 1 | 61  | 2  | 600 | 0 | 25 | 0 | 374 | 3  | 1,060 |
| 101,888 | 1 | 66  | 2  | 656 | 0 | 31 | 0 | 396 | 3  | 1,149 |
| 101,889 | 1 | 71  | 2  | 701 | 0 | 38 | 0 | 432 | 3  | 1,242 |
| 101,890 | 1 | 74  | 2  | 717 | 0 | 40 | 0 | 442 | 3  | 1,273 |
| 101,891 | 1 | 74  | 2  | 728 | 0 | 45 | 0 | 451 | 3  | 1,298 |
| 101,892 | 1 | 84  | 2  | 779 | 0 | 52 | 0 | 502 | 3  | 1,417 |
| 101,893 | 1 | 84  | 2  | 770 | 0 | 51 | 0 | 492 | 3  | 1,397 |
| 101,894 | 1 | 85  | 2  | 723 | 0 | 52 | 0 | 493 | 3  | 1,353 |
| 101,895 | 1 | 96  | 4  | 706 | 0 | 50 | 0 | 467 | 5  | 1,319 |
| 101,896 | 1 | 81  | 4  | 603 | 0 | 48 | 0 | 441 | 5  | 1,173 |
| 101,897 | 1 | 151 | 5  | 855 | 0 | 65 | 2 | 563 | 8  | 1,634 |
| 101,898 | 1 | 151 | 5  | 859 | 0 | 65 | 2 | 566 | 8  | 1,641 |
| 101,899 | 1 | 143 | 10 | 829 | 0 | 63 | 2 | 532 | 13 | 1,567 |
| 101,900 | 1 | 148 | 11 | 849 | 0 | 63 | 2 | 537 | 14 | 1,597 |
| 101,901 | 1 | 148 | 11 | 849 | 0 | 63 | 2 | 538 | 14 | 1,598 |
| 101,902 | 1 | 149 | 11 | 862 | 0 | 63 | 2 | 542 | 14 | 1,616 |
| 101,903 | 1 | 149 | 11 | 862 | 0 | 63 | 2 | 543 | 14 | 1,617 |
| 101,904 | 1 | 149 | 11 | 864 | 0 | 64 | 2 | 547 | 14 | 1,624 |
| 101,905 | 1 | 150 | 11 | 872 | 0 | 64 | 2 | 545 | 14 | 1,631 |
| 101,906 | 0 | 148 | 11 | 856 | 0 | 64 | 2 | 523 | 13 | 1,591 |
| 101,907 | 0 | 151 | 11 | 862 | 0 | 67 | 2 | 526 | 13 | 1,606 |
| 101,908 | 0 | 151 | 11 | 852 | 0 | 67 | 2 | 526 | 13 | 1,596 |
| 101,909 | 1 | 152 | 12 | 853 | 0 | 67 | 2 | 525 | 15 | 1,597 |
| 101,910 | 2 | 152 | 14 | 855 | 0 | 67 | 2 | 524 | 18 | 1,598 |
| 101,911 | 2 | 150 | 14 | 843 | 0 | 66 | 2 | 523 | 18 | 1,582 |
| 101,912 | 2 | 150 | 17 | 843 | 0 | 66 | 4 | 523 | 23 | 1,582 |
| 101,913 | 2 | 150 | 19 | 842 | 0 | 66 | 6 | 523 | 27 | 1,581 |
| 101,914 | 2 | 150 | 19 | 842 | 0 | 66 | 6 | 524 | 27 | 1,582 |

|         |   |     |    |       |   |     |   |     |    |       |
|---------|---|-----|----|-------|---|-----|---|-----|----|-------|
| 101,915 | 2 | 150 | 19 | 842   | 0 | 66  | 6 | 524 | 27 | 1,582 |
| 101,916 | 2 | 151 | 19 | 839   | 0 | 66  | 6 | 524 | 27 | 1,580 |
| 101,917 | 2 | 150 | 19 | 829   | 0 | 66  | 6 | 518 | 27 | 1,563 |
| 101,918 | 2 | 150 | 17 | 829   | 0 | 66  | 6 | 518 | 25 | 1,563 |
| 101,919 | 2 | 149 | 17 | 813   | 0 | 66  | 6 | 500 | 25 | 1,528 |
| 101,920 | 2 | 149 | 17 | 812   | 0 | 66  | 6 | 497 | 25 | 1,524 |
| 101,921 | 2 | 147 | 17 | 811   | 0 | 66  | 6 | 497 | 25 | 1,521 |
| 101,922 | 2 | 147 | 17 | 808   | 0 | 66  | 6 | 492 | 25 | 1,513 |
| 101,923 | 2 | 147 | 17 | 800   | 0 | 67  | 6 | 480 | 25 | 1,494 |
| 101,924 | 2 | 138 | 17 | 716   | 0 | 62  | 6 | 370 | 25 | 1,286 |
| 101,925 | 2 | 138 | 17 | 708   | 0 | 62  | 6 | 363 | 25 | 1,271 |
| 101,926 | 2 | 140 | 17 | 738   | 0 | 64  | 6 | 380 | 25 | 1,322 |
| 101,927 | 2 | 140 | 17 | 740   | 0 | 65  | 6 | 382 | 25 | 1,327 |
| 101,928 | 2 | 140 | 17 | 755   | 0 | 66  | 6 | 396 | 25 | 1,357 |
| 101,929 | 2 | 140 | 17 | 755   | 0 | 66  | 6 | 396 | 25 | 1,357 |
| 101,930 | 2 | 143 | 17 | 768   | 0 | 67  | 6 | 398 | 25 | 1,376 |
| 101,931 | 2 | 143 | 17 | 753   | 0 | 67  | 6 | 388 | 25 | 1,351 |
| 101,932 | 2 | 143 | 17 | 760   | 0 | 67  | 6 | 390 | 25 | 1,360 |
| 101,933 | 2 | 154 | 17 | 855   | 0 | 75  | 6 | 457 | 25 | 1,541 |
| 101,934 | 2 | 156 | 17 | 909   | 0 | 80  | 6 | 488 | 25 | 1,633 |
| 101,935 | 2 | 200 | 17 | 1,595 | 0 | 111 | 6 | 824 | 25 | 2,730 |
| 101,936 | 2 | 202 | 17 | 1,648 | 0 | 113 | 6 | 857 | 25 | 2,820 |
| 101,937 | 2 | 204 | 17 | 1,701 | 0 | 114 | 6 | 869 | 25 | 2,888 |
| 101,938 | 2 | 204 | 17 | 1,685 | 0 | 112 | 6 | 872 | 25 | 2,873 |
| 101,939 | 2 | 199 | 17 | 1,633 | 0 | 106 | 6 | 854 | 25 | 2,792 |
| 101,940 | 2 | 205 | 17 | 1,648 | 0 | 105 | 6 | 895 | 25 | 2,853 |
| 101,941 | 2 | 202 | 18 | 1,641 | 0 | 103 | 7 | 887 | 27 | 2,833 |
| 101,942 | 2 | 205 | 18 | 1,647 | 0 | 98  | 7 | 893 | 27 | 2,843 |
| 101,943 | 2 | 195 | 18 | 1,592 | 0 | 92  | 8 | 841 | 28 | 2,720 |
| 101,944 | 2 | 179 | 18 | 1,545 | 0 | 88  | 8 | 838 | 28 | 2,650 |
| 101,945 | 2 | 179 | 18 | 1,588 | 0 | 92  | 8 | 868 | 28 | 2,727 |
| 101,946 | 2 | 179 | 16 | 1,588 | 0 | 92  | 8 | 875 | 26 | 2,734 |
| 101,947 | 2 | 185 | 15 | 1,648 | 0 | 93  | 8 | 921 | 25 | 2,847 |
| 101,948 | 2 | 114 | 15 | 1,375 | 0 | 76  | 6 | 793 | 23 | 2,358 |
| 101,949 | 2 | 112 | 10 | 1,357 | 0 | 76  | 6 | 786 | 18 | 2,331 |
| 101,950 | 2 | 112 | 10 | 1,358 | 0 | 76  | 6 | 789 | 18 | 2,335 |
| 101,951 | 2 | 107 | 9  | 1,338 | 0 | 76  | 6 | 784 | 17 | 2,305 |
| 101,952 | 2 | 106 | 9  | 1,321 | 0 | 76  | 6 | 776 | 17 | 2,279 |
| 101,953 | 2 | 106 | 9  | 1,319 | 0 | 76  | 6 | 776 | 17 | 2,277 |
| 101,954 | 2 | 106 | 9  | 1,319 | 0 | 76  | 6 | 775 | 17 | 2,276 |
| 101,955 | 2 | 105 | 9  | 1,312 | 0 | 75  | 6 | 771 | 17 | 2,263 |

|         |   |     |    |       |   |    |    |       |    |       |
|---------|---|-----|----|-------|---|----|----|-------|----|-------|
| 101,956 | 2 | 104 | 9  | 1,304 | 0 | 75 | 6  | 772   | 17 | 2,255 |
| 101,957 | 2 | 101 | 9  | 1,300 | 1 | 72 | 6  | 775   | 18 | 2,248 |
| 101,958 | 2 | 101 | 9  | 1,305 | 1 | 72 | 6  | 779   | 18 | 2,257 |
| 101,959 | 1 | 102 | 9  | 1,307 | 1 | 72 | 6  | 779   | 17 | 2,260 |
| 101,960 | 1 | 101 | 9  | 1,307 | 1 | 72 | 7  | 780   | 18 | 2,260 |
| 101,961 | 0 | 103 | 7  | 1,317 | 1 | 72 | 7  | 785   | 15 | 2,277 |
| 101,962 | 0 | 104 | 8  | 1,334 | 1 | 74 | 7  | 809   | 16 | 2,321 |
| 101,963 | 0 | 107 | 5  | 1,352 | 1 | 74 | 5  | 845   | 11 | 2,378 |
| 101,964 | 0 | 111 | 3  | 1,367 | 1 | 74 | 3  | 874   | 7  | 2,426 |
| 101,965 | 0 | 111 | 3  | 1,377 | 1 | 74 | 5  | 874   | 9  | 2,436 |
| 101,966 | 0 | 111 | 3  | 1,377 | 1 | 74 | 7  | 876   | 11 | 2,438 |
| 101,967 | 0 | 112 | 3  | 1,382 | 1 | 75 | 7  | 880   | 11 | 2,449 |
| 101,968 | 0 | 113 | 3  | 1,429 | 1 | 77 | 8  | 918   | 12 | 2,537 |
| 101,969 | 0 | 113 | 3  | 1,430 | 1 | 78 | 8  | 917   | 12 | 2,538 |
| 101,970 | 0 | 113 | 3  | 1,435 | 1 | 79 | 8  | 928   | 12 | 2,555 |
| 101,971 | 0 | 113 | 3  | 1,477 | 1 | 79 | 9  | 948   | 13 | 2,617 |
| 101,972 | 0 | 116 | 5  | 1,488 | 1 | 79 | 10 | 956   | 16 | 2,639 |
| 101,973 | 0 | 117 | 6  | 1,500 | 1 | 80 | 12 | 969   | 19 | 2,666 |
| 101,974 | 0 | 117 | 6  | 1,501 | 1 | 80 | 12 | 970   | 19 | 2,668 |
| 101,975 | 0 | 122 | 8  | 1,519 | 1 | 80 | 13 | 982   | 22 | 2,703 |
| 101,976 | 0 | 121 | 9  | 1,495 | 1 | 78 | 13 | 969   | 23 | 2,663 |
| 101,977 | 0 | 121 | 9  | 1,498 | 1 | 78 | 13 | 969   | 23 | 2,666 |
| 101,978 | 1 | 122 | 20 | 1,502 | 2 | 78 | 24 | 969   | 47 | 2,671 |
| 101,979 | 2 | 122 | 26 | 1,488 | 3 | 78 | 32 | 961   | 63 | 2,649 |
| 101,980 | 2 | 119 | 26 | 1,475 | 3 | 78 | 32 | 957   | 63 | 2,629 |
| 101,981 | 2 | 119 | 26 | 1,485 | 3 | 79 | 32 | 988   | 63 | 2,671 |
| 101,982 | 2 | 119 | 26 | 1,531 | 3 | 81 | 32 | 1,033 | 63 | 2,764 |
| 101,983 | 2 | 126 | 28 | 1,752 | 3 | 91 | 33 | 1,184 | 66 | 3,153 |
| 101,984 | 2 | 114 | 28 | 1,682 | 3 | 84 | 33 | 1,128 | 66 | 3,008 |
| 101,985 | 2 | 119 | 28 | 1,686 | 3 | 81 | 33 | 1,112 | 66 | 2,998 |
| 101,986 | 2 | 97  | 28 | 1,148 | 3 | 72 | 34 | 1,051 | 67 | 2,368 |
| 101,987 | 2 | 94  | 28 | 1,142 | 3 | 66 | 34 | 1,053 | 67 | 2,355 |
| 101,988 | 2 | 131 | 29 | 1,450 | 3 | 93 | 34 | 1,397 | 68 | 3,071 |
| 101,989 | 2 | 131 | 29 | 1,490 | 3 | 94 | 41 | 1,397 | 75 | 3,112 |
| 101,990 | 2 | 137 | 31 | 1,533 | 3 | 94 | 44 | 1,416 | 80 | 3,180 |
| 101,991 | 2 | 126 | 31 | 1,480 | 3 | 88 | 44 | 1,340 | 80 | 3,034 |
| 101,992 | 2 | 123 | 30 | 1,477 | 3 | 88 | 43 | 1,337 | 78 | 3,025 |
| 101,993 | 2 | 127 | 30 | 1,533 | 3 | 95 | 43 | 1,420 | 78 | 3,175 |
| 101,994 | 2 | 127 | 30 | 1,540 | 3 | 94 | 42 | 1,422 | 77 | 3,183 |
| 101,995 | 2 | 126 | 31 | 1,552 | 3 | 94 | 43 | 1,421 | 79 | 3,193 |
| 101,996 | 2 | 127 | 31 | 1,510 | 3 | 90 | 43 | 1,391 | 79 | 3,118 |



|         |   |     |    |       |   |     |    |       |     |       |
|---------|---|-----|----|-------|---|-----|----|-------|-----|-------|
| 101,997 | 2 | 121 | 31 | 1,444 | 3 | 89  | 43 | 1,334 | 79  | 2,988 |
| 101,998 | 2 | 121 | 31 | 1,446 | 3 | 89  | 43 | 1,336 | 79  | 2,992 |
| 101,999 | 2 | 121 | 31 | 1,451 | 3 | 90  | 43 | 1,342 | 79  | 3,004 |
| 102,000 | 2 | 121 | 31 | 1,450 | 3 | 90  | 43 | 1,343 | 79  | 3,004 |
| 102,001 | 2 | 121 | 35 | 1,448 | 4 | 90  | 51 | 1,340 | 92  | 2,999 |
| 102,002 | 2 | 121 | 37 | 1,448 | 4 | 90  | 53 | 1,340 | 96  | 2,999 |
| 102,003 | 2 | 121 | 37 | 1,446 | 4 | 90  | 53 | 1,340 | 96  | 2,997 |
| 102,004 | 2 | 121 | 37 | 1,448 | 4 | 90  | 53 | 1,344 | 96  | 3,003 |
| 102,005 | 2 | 123 | 37 | 1,481 | 4 | 95  | 54 | 1,388 | 97  | 3,087 |
| 102,006 | 2 | 125 | 37 | 1,496 | 4 | 95  | 54 | 1,397 | 97  | 3,113 |
| 102,007 | 2 | 132 | 37 | 1,592 | 4 | 107 | 54 | 1,509 | 97  | 3,340 |
| 102,008 | 2 | 139 | 37 | 1,737 | 3 | 116 | 56 | 1,612 | 98  | 3,604 |
| 102,009 | 2 | 142 | 37 | 1,761 | 3 | 119 | 56 | 1,624 | 98  | 3,646 |
| 102,010 | 2 | 148 | 36 | 1,809 | 3 | 121 | 56 | 1,665 | 97  | 3,743 |
| 102,011 | 2 | 152 | 36 | 1,835 | 3 | 128 | 55 | 1,694 | 96  | 3,809 |
| 102,012 | 2 | 168 | 37 | 1,991 | 3 | 142 | 56 | 1,878 | 98  | 4,179 |
| 102,013 | 2 | 168 | 36 | 1,976 | 3 | 140 | 56 | 1,854 | 97  | 4,138 |
| 102,014 | 2 | 171 | 36 | 2,072 | 3 | 143 | 57 | 1,876 | 98  | 4,262 |
| 102,015 | 2 | 231 | 36 | 2,660 | 3 | 168 | 57 | 2,076 | 98  | 5,135 |
| 102,016 | 2 | 235 | 36 | 2,787 | 3 | 180 | 55 | 2,148 | 96  | 5,350 |
| 102,017 | 2 | 248 | 36 | 2,872 | 3 | 184 | 57 | 2,199 | 98  | 5,503 |
| 102,018 | 2 | 249 | 36 | 2,899 | 3 | 185 | 57 | 2,223 | 98  | 5,556 |
| 102,019 | 2 | 253 | 36 | 3,011 | 3 | 189 | 56 | 2,227 | 97  | 5,680 |
| 102,020 | 2 | 255 | 39 | 3,012 | 3 | 188 | 57 | 2,227 | 101 | 5,682 |
| 102,021 | 2 | 255 | 43 | 2,965 | 4 | 187 | 59 | 2,197 | 108 | 5,604 |
| 102,022 | 2 | 260 | 43 | 3,003 | 4 | 189 | 58 | 2,270 | 107 | 5,722 |
| 102,023 | 2 | 257 | 41 | 2,999 | 4 | 189 | 58 | 2,269 | 105 | 5,714 |
| 102,024 | 2 | 258 | 41 | 3,019 | 4 | 192 | 68 | 2,298 | 115 | 5,767 |
| 102,025 | 2 | 259 | 40 | 3,020 | 4 | 190 | 69 | 2,302 | 115 | 5,771 |
| 102,026 | 2 | 254 | 39 | 3,007 | 4 | 190 | 68 | 2,293 | 113 | 5,744 |
| 102,027 | 2 | 253 | 38 | 3,001 | 4 | 190 | 68 | 2,289 | 112 | 5,733 |
| 102,028 | 1 | 253 | 27 | 3,000 | 3 | 191 | 56 | 2,296 | 87  | 5,740 |
| 102,029 | 1 | 254 | 26 | 3,013 | 3 | 193 | 55 | 2,317 | 85  | 5,777 |
| 102,030 | 0 | 254 | 21 | 3,019 | 2 | 192 | 48 | 2,315 | 71  | 5,780 |
| 102,031 | 0 | 254 | 22 | 3,020 | 2 | 191 | 48 | 2,325 | 72  | 5,790 |
| 102,032 | 0 | 250 | 22 | 2,998 | 2 | 190 | 48 | 2,286 | 72  | 5,724 |
| 102,033 | 0 | 252 | 21 | 2,962 | 2 | 189 | 47 | 2,264 | 70  | 5,667 |
| 102,034 | 0 | 246 | 20 | 2,735 | 2 | 180 | 47 | 2,117 | 69  | 5,278 |
| 102,035 | 0 | 254 | 20 | 2,764 | 2 | 184 | 47 | 2,143 | 69  | 5,345 |
| 102,036 | 0 | 277 | 20 | 2,812 | 2 | 197 | 47 | 2,227 | 69  | 5,513 |
| 102,037 | 0 | 259 | 20 | 2,695 | 2 | 179 | 47 | 1,967 | 69  | 5,100 |

|         |   |     |    |       |   |     |    |       |     |       |
|---------|---|-----|----|-------|---|-----|----|-------|-----|-------|
| 102,038 | 0 | 259 | 20 | 2,644 | 2 | 179 | 47 | 1,928 | 69  | 5,010 |
| 102,039 | 0 | 221 | 20 | 2,333 | 2 | 153 | 47 | 1,590 | 69  | 4,297 |
| 102,040 | 0 | 220 | 20 | 2,343 | 2 | 151 | 40 | 1,578 | 62  | 4,292 |
| 102,041 | 0 | 231 | 18 | 2,369 | 2 | 158 | 37 | 1,635 | 57  | 4,393 |
| 102,042 | 0 | 233 | 18 | 2,386 | 2 | 159 | 37 | 1,637 | 57  | 4,415 |
| 102,043 | 0 | 233 | 18 | 2,382 | 2 | 160 | 37 | 1,638 | 57  | 4,413 |
| 102,044 | 1 | 231 | 19 | 2,370 | 2 | 156 | 39 | 1,565 | 61  | 4,322 |
| 102,045 | 1 | 232 | 18 | 2,388 | 2 | 156 | 38 | 1,568 | 59  | 4,344 |
| 102,046 | 1 | 233 | 16 | 2,391 | 1 | 156 | 38 | 1,566 | 56  | 4,346 |
| 102,047 | 2 | 240 | 20 | 2,496 | 1 | 159 | 35 | 1,589 | 58  | 4,484 |
| 102,048 | 2 | 242 | 20 | 2,544 | 1 | 160 | 32 | 1,601 | 55  | 4,547 |
| 102,049 | 2 | 244 | 20 | 2,592 | 1 | 162 | 32 | 1,629 | 55  | 4,627 |
| 102,050 | 2 | 274 | 27 | 2,712 | 1 | 166 | 40 | 1,672 | 70  | 4,824 |
| 102,051 | 2 | 276 | 38 | 2,726 | 2 | 166 | 51 | 1,675 | 93  | 4,843 |
| 102,052 | 2 | 276 | 36 | 2,732 | 2 | 166 | 51 | 1,680 | 91  | 4,854 |
| 102,053 | 2 | 266 | 37 | 2,590 | 3 | 149 | 56 | 1,514 | 98  | 4,519 |
| 102,054 | 2 | 266 | 37 | 2,596 | 3 | 149 | 57 | 1,514 | 99  | 4,525 |
| 102,055 | 2 | 266 | 37 | 2,599 | 3 | 149 | 56 | 1,516 | 98  | 4,530 |
| 102,056 | 2 | 266 | 37 | 2,599 | 3 | 149 | 56 | 1,515 | 98  | 4,529 |
| 102,057 | 2 | 269 | 37 | 2,604 | 3 | 149 | 56 | 1,516 | 98  | 4,538 |
| 102,058 | 2 | 269 | 37 | 2,601 | 3 | 149 | 56 | 1,516 | 98  | 4,535 |
| 102,059 | 2 | 261 | 39 | 2,431 | 4 | 136 | 55 | 1,396 | 100 | 4,224 |
| 102,060 | 2 | 261 | 39 | 2,432 | 4 | 136 | 55 | 1,396 | 100 | 4,225 |
| 102,061 | 2 | 254 | 39 | 2,383 | 4 | 134 | 54 | 1,354 | 99  | 4,125 |
| 102,062 | 2 | 232 | 38 | 2,187 | 4 | 113 | 54 | 1,134 | 98  | 3,666 |
| 102,063 | 3 | 232 | 39 | 2,188 | 4 | 113 | 54 | 1,134 | 100 | 3,667 |
| 102,064 | 3 | 225 | 39 | 2,075 | 4 | 110 | 53 | 1,075 | 99  | 3,485 |
| 102,065 | 3 | 226 | 39 | 2,075 | 4 | 110 | 53 | 1,075 | 99  | 3,486 |
| 102,066 | 3 | 164 | 39 | 1,481 | 4 | 85  | 53 | 861   | 99  | 2,591 |
| 102,067 | 3 | 162 | 39 | 1,368 | 4 | 73  | 53 | 795   | 99  | 2,398 |
| 102,068 | 3 | 149 | 39 | 1,327 | 4 | 72  | 49 | 767   | 95  | 2,315 |
| 102,069 | 3 | 149 | 39 | 1,310 | 4 | 71  | 49 | 749   | 95  | 2,279 |
| 102,070 | 3 | 143 | 39 | 1,165 | 4 | 66  | 49 | 716   | 95  | 2,090 |
| 102,071 | 3 | 141 | 36 | 1,172 | 4 | 67  | 48 | 718   | 91  | 2,098 |
| 102,072 | 3 | 144 | 32 | 1,181 | 3 | 67  | 45 | 726   | 83  | 2,118 |
| 102,073 | 3 | 140 | 31 | 1,143 | 3 | 65  | 34 | 655   | 71  | 2,003 |
| 102,074 | 3 | 137 | 35 | 1,111 | 3 | 62  | 35 | 604   | 76  | 1,914 |
| 102,075 | 3 | 139 | 38 | 1,118 | 3 | 62  | 36 | 603   | 80  | 1,922 |
| 102,076 | 3 | 139 | 38 | 1,117 | 3 | 62  | 35 | 602   | 79  | 1,920 |
| 102,077 | 3 | 140 | 38 | 1,117 | 3 | 62  | 36 | 599   | 80  | 1,918 |
| 102,078 | 3 | 140 | 38 | 1,127 | 3 | 62  | 36 | 606   | 80  | 1,935 |

|         |   |     |    |       |   |    |    |     |    |       |
|---------|---|-----|----|-------|---|----|----|-----|----|-------|
| 102,079 | 3 | 139 | 38 | 1,132 | 3 | 61 | 37 | 599 | 81 | 1,931 |
| 102,080 | 3 | 138 | 38 | 1,119 | 3 | 59 | 37 | 578 | 81 | 1,894 |
| 102,081 | 4 | 139 | 38 | 1,120 | 3 | 59 | 38 | 579 | 83 | 1,897 |
| 102,082 | 4 | 140 | 39 | 1,124 | 5 | 59 | 42 | 571 | 90 | 1,894 |
| 102,083 | 4 | 141 | 40 | 1,126 | 5 | 57 | 42 | 555 | 91 | 1,879 |
| 102,084 | 4 | 140 | 40 | 1,130 | 5 | 56 | 42 | 555 | 91 | 1,881 |
| 102,085 | 4 | 145 | 40 | 1,193 | 6 | 55 | 44 | 562 | 94 | 1,955 |
| 102,086 | 5 | 136 | 41 | 1,139 | 6 | 49 | 44 | 523 | 96 | 1,847 |
| 102,087 | 5 | 103 | 41 | 1,006 | 7 | 31 | 44 | 417 | 97 | 1,557 |
| 102,088 | 5 | 103 | 41 | 1,001 | 7 | 31 | 44 | 413 | 97 | 1,548 |
| 102,089 | 5 | 103 | 41 | 1,001 | 7 | 31 | 44 | 413 | 97 | 1,548 |
| 102,090 | 5 | 102 | 40 | 954   | 7 | 30 | 44 | 400 | 96 | 1,486 |
| 102,091 | 5 | 100 | 40 | 882   | 7 | 29 | 44 | 388 | 96 | 1,399 |
| 102,092 | 6 | 83  | 40 | 809   | 7 | 21 | 45 | 312 | 98 | 1,225 |
| 102,093 | 6 | 81  | 40 | 786   | 7 | 21 | 45 | 308 | 98 | 1,196 |
| 102,094 | 5 | 78  | 39 | 720   | 7 | 17 | 45 | 283 | 96 | 1,098 |
| 102,095 | 5 | 77  | 42 | 692   | 7 | 17 | 43 | 277 | 97 | 1,063 |
| 102,096 | 5 | 76  | 42 | 676   | 7 | 17 | 43 | 274 | 97 | 1,043 |
| 102,097 | 4 | 76  | 40 | 678   | 7 | 17 | 43 | 276 | 94 | 1,047 |
| 102,098 | 4 | 68  | 36 | 583   | 7 | 14 | 43 | 260 | 90 | 925   |
| 102,099 | 4 | 65  | 36 | 497   | 7 | 11 | 42 | 217 | 89 | 790   |
| 102,100 | 4 | 65  | 36 | 516   | 7 | 12 | 42 | 230 | 89 | 823   |
| 102,101 | 4 | 35  | 29 | 389   | 7 | 8  | 34 | 182 | 74 | 614   |
| 102,102 | 4 | 33  | 19 | 379   | 6 | 8  | 23 | 180 | 52 | 600   |
| 102,103 | 4 | 33  | 19 | 384   | 6 | 8  | 21 | 180 | 50 | 605   |
| 102,104 | 4 | 32  | 18 | 382   | 5 | 8  | 16 | 179 | 43 | 601   |
| 102,105 | 4 | 32  | 19 | 385   | 4 | 8  | 17 | 184 | 44 | 609   |
| 102,106 | 5 | 31  | 19 | 384   | 4 | 8  | 17 | 183 | 45 | 606   |
| 102,107 | 5 | 31  | 19 | 389   | 4 | 8  | 17 | 185 | 45 | 613   |
| 102,108 | 5 | 31  | 18 | 390   | 4 | 8  | 17 | 185 | 44 | 614   |
| 102,109 | 5 | 29  | 17 | 383   | 4 | 8  | 17 | 182 | 43 | 602   |
| 102,110 | 6 | 29  | 17 | 382   | 4 | 8  | 17 | 182 | 44 | 601   |
| 102,111 | 6 | 29  | 17 | 381   | 4 | 8  | 17 | 182 | 44 | 600   |
| 102,112 | 6 | 29  | 17 | 381   | 4 | 8  | 17 | 181 | 44 | 599   |
| 102,113 | 6 | 29  | 17 | 381   | 4 | 8  | 18 | 183 | 45 | 601   |
| 102,114 | 5 | 29  | 16 | 380   | 4 | 8  | 18 | 184 | 43 | 601   |
| 102,115 | 6 | 28  | 16 | 380   | 4 | 8  | 18 | 184 | 44 | 600   |
| 102,116 | 6 | 28  | 16 | 380   | 4 | 8  | 18 | 186 | 44 | 602   |
| 102,117 | 6 | 27  | 16 | 384   | 4 | 8  | 18 | 176 | 44 | 595   |
| 102,118 | 6 | 24  | 16 | 369   | 4 | 8  | 19 | 174 | 45 | 575   |
| 102,119 | 6 | 23  | 16 | 320   | 4 | 4  | 19 | 146 | 45 | 493   |

|         |   |     |    |       |   |    |    |     |    |       |
|---------|---|-----|----|-------|---|----|----|-----|----|-------|
| 102,120 | 6 | 26  | 16 | 387   | 4 | 8  | 19 | 180 | 45 | 601   |
| 102,121 | 6 | 33  | 16 | 506   | 4 | 14 | 19 | 257 | 45 | 810   |
| 102,122 | 6 | 33  | 16 | 503   | 4 | 13 | 19 | 252 | 45 | 801   |
| 102,123 | 6 | 37  | 18 | 649   | 4 | 16 | 19 | 315 | 47 | 1,017 |
| 102,124 | 6 | 41  | 17 | 715   | 4 | 19 | 19 | 329 | 46 | 1,104 |
| 102,125 | 6 | 44  | 15 | 718   | 4 | 20 | 20 | 344 | 45 | 1,126 |
| 102,126 | 6 | 42  | 12 | 722   | 4 | 20 | 18 | 346 | 40 | 1,130 |
| 102,127 | 6 | 47  | 12 | 747   | 4 | 20 | 18 | 352 | 40 | 1,166 |
| 102,128 | 6 | 54  | 12 | 868   | 4 | 21 | 19 | 388 | 41 | 1,331 |
| 102,129 | 6 | 64  | 12 | 929   | 4 | 27 | 18 | 414 | 40 | 1,434 |
| 102,130 | 6 | 113 | 12 | 1,468 | 4 | 56 | 18 | 611 | 40 | 2,248 |
| 102,131 | 6 | 121 | 12 | 1,523 | 4 | 59 | 18 | 652 | 40 | 2,355 |
| 102,132 | 5 | 124 | 13 | 1,615 | 4 | 63 | 18 | 669 | 40 | 2,471 |
| 102,133 | 5 | 123 | 11 | 1,613 | 2 | 64 | 14 | 667 | 32 | 2,467 |
| 102,134 | 5 | 127 | 12 | 1,622 | 2 | 64 | 14 | 655 | 33 | 2,468 |
| 102,135 | 5 | 141 | 12 | 1,669 | 1 | 67 | 14 | 682 | 32 | 2,559 |
| 102,136 | 5 | 135 | 12 | 1,624 | 1 | 67 | 12 | 674 | 30 | 2,500 |
| 102,137 | 4 | 135 | 11 | 1,626 | 1 | 68 | 12 | 675 | 28 | 2,504 |
| 102,138 | 5 | 137 | 11 | 1,628 | 0 | 68 | 12 | 678 | 28 | 2,511 |
| 102,139 | 4 | 136 | 11 | 1,632 | 0 | 68 | 12 | 678 | 27 | 2,514 |
| 102,140 | 4 | 136 | 11 | 1,635 | 0 | 68 | 11 | 678 | 26 | 2,517 |
| 102,141 | 4 | 142 | 11 | 1,645 | 0 | 71 | 11 | 684 | 26 | 2,542 |
| 102,142 | 4 | 143 | 11 | 1,647 | 0 | 71 | 11 | 695 | 26 | 2,556 |
| 102,143 | 4 | 143 | 11 | 1,651 | 0 | 71 | 13 | 700 | 28 | 2,565 |
| 102,144 | 4 | 145 | 11 | 1,667 | 0 | 71 | 15 | 714 | 30 | 2,597 |
| 102,145 | 4 | 162 | 11 | 1,727 | 0 | 72 | 15 | 776 | 30 | 2,737 |
| 102,146 | 4 | 162 | 8  | 1,730 | 0 | 72 | 15 | 782 | 27 | 2,746 |
| 102,147 | 4 | 162 | 8  | 1,734 | 0 | 72 | 15 | 788 | 27 | 2,756 |
| 102,148 | 4 | 164 | 8  | 1,788 | 0 | 73 | 15 | 798 | 27 | 2,823 |
| 102,149 | 4 | 164 | 8  | 1,778 | 0 | 73 | 15 | 791 | 27 | 2,806 |
| 102,150 | 4 | 164 | 12 | 1,754 | 0 | 73 | 17 | 779 | 33 | 2,770 |
| 102,151 | 4 | 165 | 12 | 1,762 | 0 | 73 | 18 | 781 | 34 | 2,781 |
| 102,152 | 4 | 168 | 12 | 1,795 | 0 | 73 | 17 | 796 | 33 | 2,832 |
| 102,153 | 4 | 168 | 11 | 1,793 | 0 | 73 | 16 | 795 | 31 | 2,829 |
| 102,154 | 4 | 168 | 14 | 1,786 | 0 | 73 | 17 | 789 | 35 | 2,816 |
| 102,155 | 4 | 168 | 15 | 1,797 | 0 | 73 | 18 | 792 | 37 | 2,830 |
| 102,156 | 4 | 168 | 15 | 1,792 | 0 | 73 | 17 | 787 | 36 | 2,820 |
| 102,157 | 3 | 170 | 18 | 1,785 | 1 | 73 | 20 | 786 | 42 | 2,814 |
| 102,158 | 3 | 170 | 18 | 1,786 | 1 | 73 | 20 | 786 | 42 | 2,815 |
| 102,159 | 3 | 170 | 20 | 1,793 | 2 | 73 | 21 | 791 | 46 | 2,827 |
| 102,160 | 4 | 171 | 20 | 1,802 | 2 | 73 | 21 | 791 | 47 | 2,837 |

|         |    |     |     |       |   |    |     |     |     |       |
|---------|----|-----|-----|-------|---|----|-----|-----|-----|-------|
| 102,161 | 3  | 172 | 20  | 1,810 | 2 | 74 | 21  | 793 | 46  | 2,849 |
| 102,162 | 3  | 172 | 20  | 1,824 | 2 | 74 | 21  | 794 | 46  | 2,864 |
| 102,163 | 3  | 172 | 21  | 1,828 | 2 | 74 | 22  | 797 | 48  | 2,871 |
| 102,164 | 3  | 172 | 22  | 1,832 | 2 | 74 | 24  | 796 | 51  | 2,874 |
| 102,165 | 3  | 173 | 23  | 1,842 | 2 | 75 | 28  | 801 | 56  | 2,891 |
| 102,166 | 2  | 173 | 24  | 1,840 | 2 | 75 | 28  | 801 | 56  | 2,889 |
| 102,167 | 2  | 173 | 27  | 1,827 | 2 | 75 | 35  | 801 | 66  | 2,876 |
| 102,168 | 2  | 173 | 27  | 1,828 | 2 | 75 | 36  | 801 | 67  | 2,877 |
| 102,169 | 2  | 173 | 27  | 1,826 | 2 | 75 | 35  | 800 | 66  | 2,874 |
| 102,170 | 2  | 173 | 27  | 1,827 | 2 | 75 | 35  | 801 | 66  | 2,876 |
| 102,171 | 3  | 169 | 34  | 1,749 | 3 | 71 | 38  | 759 | 78  | 2,748 |
| 102,172 | 3  | 162 | 35  | 1,622 | 4 | 64 | 38  | 689 | 80  | 2,537 |
| 102,173 | 3  | 164 | 35  | 1,727 | 4 | 68 | 38  | 736 | 80  | 2,695 |
| 102,174 | 6  | 160 | 38  | 1,723 | 4 | 65 | 39  | 701 | 87  | 2,649 |
| 102,175 | 6  | 157 | 39  | 1,658 | 4 | 62 | 39  | 690 | 88  | 2,567 |
| 102,176 | 6  | 155 | 40  | 1,652 | 4 | 65 | 39  | 671 | 89  | 2,543 |
| 102,177 | 6  | 174 | 41  | 1,814 | 4 | 73 | 40  | 756 | 91  | 2,817 |
| 102,178 | 6  | 178 | 41  | 1,928 | 4 | 77 | 39  | 825 | 90  | 3,008 |
| 102,179 | 6  | 163 | 41  | 1,800 | 4 | 73 | 38  | 827 | 89  | 2,863 |
| 102,180 | 6  | 163 | 41  | 1,803 | 4 | 73 | 38  | 827 | 89  | 2,866 |
| 102,181 | 6  | 116 | 51  | 1,367 | 4 | 46 | 40  | 674 | 101 | 2,203 |
| 102,182 | 9  | 109 | 52  | 1,320 | 4 | 43 | 43  | 639 | 108 | 2,111 |
| 102,183 | 9  | 113 | 54  | 1,260 | 6 | 39 | 49  | 637 | 118 | 2,049 |
| 102,184 | 9  | 113 | 54  | 1,278 | 6 | 39 | 49  | 637 | 118 | 2,067 |
| 102,185 | 10 | 107 | 61  | 1,260 | 7 | 40 | 50  | 632 | 128 | 2,039 |
| 102,186 | 10 | 94  | 71  | 1,272 | 8 | 37 | 54  | 614 | 143 | 2,017 |
| 102,187 | 10 | 94  | 111 | 1,253 | 8 | 38 | 81  | 611 | 210 | 1,996 |
| 102,188 | 9  | 93  | 136 | 1,258 | 8 | 37 | 86  | 608 | 239 | 1,996 |
| 102,189 | 9  | 100 | 136 | 1,302 | 8 | 42 | 86  | 630 | 239 | 2,074 |
| 102,190 | 9  | 101 | 136 | 1,315 | 8 | 42 | 86  | 636 | 239 | 2,094 |
| 102,191 | 9  | 101 | 147 | 1,324 | 8 | 42 | 92  | 638 | 256 | 2,105 |
| 102,192 | 9  | 95  | 150 | 1,309 | 8 | 39 | 92  | 632 | 259 | 2,075 |
| 102,193 | 9  | 94  | 150 | 1,307 | 8 | 39 | 90  | 620 | 257 | 2,060 |
| 102,194 | 10 | 94  | 166 | 1,340 | 8 | 39 | 93  | 664 | 277 | 2,137 |
| 102,195 | 10 | 75  | 167 | 1,275 | 8 | 38 | 91  | 598 | 276 | 1,986 |
| 102,196 | 13 | 75  | 177 | 1,344 | 8 | 41 | 94  | 628 | 292 | 2,088 |
| 102,197 | 13 | 76  | 179 | 1,420 | 8 | 44 | 95  | 658 | 295 | 2,198 |
| 102,198 | 15 | 79  | 179 | 1,472 | 8 | 45 | 95  | 669 | 297 | 2,265 |
| 102,199 | 15 | 78  | 179 | 1,478 | 8 | 45 | 95  | 665 | 297 | 2,266 |
| 102,200 | 20 | 78  | 197 | 1,499 | 9 | 47 | 114 | 669 | 340 | 2,293 |
| 102,201 | 20 | 77  | 199 | 1,465 | 9 | 46 | 117 | 653 | 345 | 2,241 |

|         |    |    |     |       |    |    |     |     |     |       |
|---------|----|----|-----|-------|----|----|-----|-----|-----|-------|
| 102,202 | 20 | 77 | 200 | 1,473 | 9  | 46 | 117 | 655 | 346 | 2,251 |
| 102,203 | 22 | 77 | 212 | 1,466 | 10 | 46 | 138 | 656 | 382 | 2,245 |
| 102,204 | 23 | 77 | 215 | 1,466 | 11 | 46 | 140 | 661 | 389 | 2,250 |
| 102,205 | 24 | 77 | 222 | 1,467 | 11 | 47 | 144 | 664 | 401 | 2,255 |
| 102,206 | 25 | 78 | 225 | 1,501 | 11 | 49 | 145 | 674 | 406 | 2,302 |
| 102,207 | 25 | 78 | 223 | 1,501 | 11 | 49 | 143 | 674 | 402 | 2,302 |
| 102,208 | 25 | 74 | 223 | 1,496 | 10 | 49 | 142 | 669 | 400 | 2,288 |
| 102,209 | 25 | 74 | 227 | 1,497 | 9  | 49 | 144 | 670 | 405 | 2,290 |
| 102,210 | 25 | 73 | 229 | 1,481 | 9  | 49 | 142 | 669 | 405 | 2,272 |
| 102,211 | 24 | 73 | 229 | 1,484 | 9  | 49 | 142 | 674 | 404 | 2,280 |
| 102,212 | 24 | 72 | 228 | 1,480 | 8  | 48 | 141 | 674 | 401 | 2,274 |
| 102,213 | 26 | 73 | 242 | 1,483 | 12 | 49 | 155 | 675 | 435 | 2,280 |
| 102,214 | 26 | 74 | 241 | 1,478 | 12 | 49 | 156 | 672 | 435 | 2,273 |
| 102,215 | 26 | 73 | 240 | 1,466 | 12 | 48 | 149 | 665 | 427 | 2,252 |
| 102,216 | 26 | 73 | 240 | 1,504 | 12 | 48 | 149 | 676 | 427 | 2,301 |
| 102,217 | 25 | 74 | 233 | 1,516 | 12 | 48 | 142 | 677 | 412 | 2,315 |
| 102,218 | 25 | 74 | 232 | 1,531 | 12 | 50 | 142 | 681 | 411 | 2,336 |
| 102,219 | 25 | 74 | 232 | 1,543 | 12 | 50 | 141 | 685 | 410 | 2,352 |
| 102,220 | 25 | 77 | 231 | 1,566 | 12 | 50 | 143 | 688 | 411 | 2,381 |
| 102,221 | 23 | 86 | 234 | 1,639 | 12 | 52 | 146 | 717 | 415 | 2,494 |
| 102,222 | 22 | 86 | 231 | 1,663 | 12 | 52 | 144 | 727 | 409 | 2,528 |
| 102,223 | 22 | 88 | 231 | 1,686 | 12 | 54 | 144 | 712 | 409 | 2,540 |
| 102,224 | 22 | 86 | 229 | 1,585 | 12 | 50 | 144 | 665 | 407 | 2,386 |
| 102,225 | 22 | 75 | 229 | 1,373 | 12 | 46 | 144 | 613 | 407 | 2,107 |
| 102,226 | 22 | 74 | 228 | 1,380 | 12 | 46 | 144 | 615 | 406 | 2,115 |
| 102,227 | 22 | 75 | 226 | 1,386 | 12 | 47 | 142 | 618 | 402 | 2,126 |
| 102,228 | 22 | 57 | 225 | 1,223 | 12 | 39 | 141 | 534 | 400 | 1,853 |
| 102,229 | 22 | 53 | 225 | 1,114 | 12 | 35 | 141 | 465 | 400 | 1,667 |
| 102,230 | 22 | 50 | 225 | 1,046 | 12 | 32 | 141 | 394 | 400 | 1,522 |
| 102,231 | 22 | 48 | 221 | 932   | 12 | 30 | 141 | 349 | 396 | 1,359 |
| 102,232 | 22 | 49 | 215 | 936   | 12 | 34 | 139 | 354 | 388 | 1,373 |
| 102,233 | 19 | 48 | 215 | 932   | 12 | 35 | 136 | 357 | 382 | 1,372 |
| 102,234 | 19 | 40 | 213 | 933   | 10 | 44 | 129 | 387 | 371 | 1,404 |
| 102,235 | 18 | 42 | 206 | 941   | 9  | 46 | 131 | 402 | 364 | 1,431 |
| 102,236 | 18 | 42 | 201 | 948   | 9  | 45 | 128 | 409 | 356 | 1,444 |
| 102,237 | 18 | 42 | 197 | 889   | 8  | 45 | 127 | 400 | 350 | 1,376 |
| 102,238 | 18 | 41 | 157 | 872   | 8  | 44 | 100 | 395 | 283 | 1,352 |
| 102,239 | 18 | 34 | 132 | 828   | 8  | 40 | 96  | 374 | 254 | 1,276 |
| 102,240 | 18 | 34 | 129 | 828   | 8  | 40 | 94  | 374 | 249 | 1,276 |
| 102,241 | 18 | 33 | 124 | 800   | 8  | 40 | 90  | 366 | 240 | 1,239 |
| 102,242 | 18 | 33 | 127 | 800   | 8  | 40 | 91  | 368 | 244 | 1,241 |

|         |    |    |     |     |   |    |     |     |     |       |
|---------|----|----|-----|-----|---|----|-----|-----|-----|-------|
| 102,243 | 18 | 33 | 124 | 795 | 8 | 40 | 92  | 366 | 242 | 1,234 |
| 102,244 | 18 | 33 | 130 | 762 | 8 | 40 | 94  | 323 | 250 | 1,158 |
| 102,245 | 17 | 33 | 114 | 752 | 8 | 40 | 91  | 313 | 230 | 1,138 |
| 102,246 | 17 | 33 | 119 | 752 | 8 | 40 | 94  | 313 | 238 | 1,138 |
| 102,247 | 16 | 32 | 116 | 604 | 8 | 34 | 92  | 248 | 232 | 918   |
| 102,248 | 19 | 29 | 118 | 549 | 8 | 33 | 93  | 231 | 238 | 842   |
| 102,249 | 18 | 28 | 129 | 474 | 9 | 30 | 102 | 224 | 258 | 756   |
| 102,250 | 18 | 28 | 130 | 479 | 9 | 30 | 102 | 226 | 259 | 763   |
| 102,251 | 13 | 31 | 108 | 488 | 8 | 30 | 81  | 230 | 210 | 779   |
| 102,252 | 13 | 29 | 105 | 454 | 8 | 29 | 78  | 214 | 204 | 726   |
| 102,253 | 13 | 29 | 104 | 454 | 8 | 29 | 77  | 214 | 202 | 726   |
| 102,254 | 11 | 29 | 90  | 454 | 7 | 29 | 55  | 216 | 163 | 728   |
| 102,255 | 10 | 28 | 87  | 416 | 7 | 26 | 53  | 203 | 157 | 673   |
| 102,256 | 10 | 28 | 80  | 416 | 7 | 26 | 48  | 206 | 145 | 676   |
| 102,257 | 9  | 28 | 75  | 416 | 7 | 26 | 47  | 206 | 138 | 676   |
| 102,258 | 9  | 29 | 76  | 418 | 7 | 27 | 48  | 209 | 140 | 683   |
| 102,259 | 10 | 32 | 75  | 455 | 7 | 28 | 48  | 222 | 140 | 737   |
| 102,260 | 10 | 32 | 71  | 456 | 7 | 28 | 46  | 223 | 134 | 739   |
| 102,261 | 10 | 32 | 68  | 465 | 7 | 28 | 46  | 219 | 131 | 744   |
| 102,262 | 8  | 32 | 66  | 469 | 5 | 28 | 36  | 215 | 115 | 744   |
| 102,263 | 8  | 31 | 57  | 450 | 3 | 27 | 34  | 211 | 102 | 719   |
| 102,264 | 8  | 30 | 69  | 449 | 4 | 27 | 37  | 211 | 118 | 717   |
| 102,265 | 8  | 30 | 72  | 447 | 4 | 27 | 37  | 212 | 121 | 716   |
| 102,266 | 8  | 31 | 84  | 459 | 4 | 27 | 43  | 218 | 139 | 735   |
| 102,267 | 8  | 30 | 84  | 414 | 4 | 27 | 45  | 209 | 141 | 680   |
| 102,268 | 8  | 30 | 84  | 421 | 4 | 28 | 46  | 214 | 142 | 693   |
| 102,269 | 8  | 29 | 85  | 410 | 4 | 26 | 46  | 207 | 143 | 672   |
| 102,270 | 8  | 29 | 86  | 398 | 4 | 26 | 45  | 203 | 143 | 656   |
| 102,271 | 8  | 26 | 87  | 368 | 4 | 26 | 44  | 198 | 143 | 618   |
| 102,272 | 8  | 17 | 85  | 270 | 4 | 24 | 41  | 163 | 138 | 474   |
| 102,273 | 8  | 17 | 85  | 271 | 3 | 24 | 41  | 163 | 137 | 475   |
| 102,274 | 9  | 17 | 91  | 254 | 4 | 22 | 43  | 168 | 147 | 461   |
| 102,275 | 10 | 21 | 93  | 281 | 4 | 22 | 45  | 184 | 152 | 508   |
| 102,276 | 10 | 21 | 93  | 282 | 4 | 22 | 45  | 185 | 152 | 510   |
| 102,277 | 10 | 21 | 94  | 280 | 4 | 22 | 47  | 183 | 155 | 506   |
| 102,278 | 10 | 20 | 95  | 274 | 4 | 22 | 47  | 180 | 156 | 496   |
| 102,279 | 10 | 20 | 95  | 274 | 4 | 22 | 47  | 178 | 156 | 494   |
| 102,280 | 10 | 20 | 95  | 273 | 4 | 22 | 48  | 178 | 157 | 493   |
| 102,281 | 10 | 20 | 95  | 273 | 4 | 22 | 48  | 178 | 157 | 493   |
| 102,282 | 10 | 20 | 95  | 271 | 4 | 22 | 48  | 178 | 157 | 491   |
| 102,283 | 10 | 19 | 94  | 267 | 4 | 18 | 48  | 170 | 156 | 474   |

|         |    |    |     |     |   |    |    |     |     |     |
|---------|----|----|-----|-----|---|----|----|-----|-----|-----|
| 102,284 | 10 | 16 | 95  | 175 | 4 | 4  | 48 | 86  | 157 | 281 |
| 102,285 | 10 | 16 | 95  | 175 | 4 | 4  | 49 | 86  | 158 | 281 |
| 102,286 | 10 | 15 | 93  | 175 | 4 | 4  | 46 | 86  | 153 | 280 |
| 102,287 | 10 | 15 | 93  | 176 | 4 | 4  | 46 | 86  | 153 | 281 |
| 102,288 | 10 | 15 | 92  | 177 | 4 | 4  | 46 | 86  | 152 | 282 |
| 102,289 | 10 | 15 | 92  | 177 | 4 | 4  | 46 | 87  | 152 | 283 |
| 102,290 | 10 | 15 | 92  | 177 | 4 | 4  | 45 | 87  | 151 | 283 |
| 102,291 | 10 | 15 | 89  | 177 | 4 | 4  | 45 | 87  | 148 | 283 |
| 102,292 | 10 | 15 | 89  | 178 | 4 | 4  | 46 | 88  | 149 | 285 |
| 102,293 | 10 | 15 | 86  | 191 | 4 | 4  | 45 | 92  | 145 | 302 |
| 102,294 | 10 | 19 | 89  | 271 | 4 | 6  | 44 | 148 | 147 | 444 |
| 102,295 | 11 | 21 | 84  | 288 | 4 | 7  | 42 | 154 | 141 | 470 |
| 102,296 | 11 | 23 | 84  | 311 | 4 | 7  | 42 | 164 | 141 | 505 |
| 102,297 | 11 | 23 | 78  | 329 | 4 | 8  | 39 | 178 | 132 | 538 |
| 102,298 | 9  | 23 | 94  | 358 | 5 | 8  | 41 | 181 | 149 | 570 |
| 102,299 | 6  | 27 | 90  | 407 | 5 | 10 | 39 | 237 | 140 | 681 |
| 102,300 | 5  | 27 | 78  | 400 | 4 | 10 | 30 | 237 | 117 | 674 |
| 102,301 | 7  | 27 | 106 | 404 | 6 | 10 | 38 | 243 | 157 | 684 |
| 102,302 | 8  | 23 | 127 | 403 | 6 | 10 | 40 | 240 | 181 | 676 |
| 102,303 | 8  | 23 | 127 | 406 | 6 | 12 | 40 | 242 | 181 | 683 |
| 102,304 | 9  | 23 | 179 | 409 | 6 | 12 | 47 | 242 | 241 | 686 |
| 102,305 | 9  | 23 | 179 | 410 | 6 | 12 | 47 | 240 | 241 | 685 |
| 102,306 | 9  | 24 | 179 | 413 | 5 | 12 | 47 | 238 | 240 | 687 |
| 102,307 | 8  | 24 | 179 | 413 | 5 | 12 | 47 | 238 | 239 | 687 |
| 102,308 | 8  | 23 | 178 | 411 | 5 | 11 | 46 | 236 | 237 | 681 |
| 102,309 | 8  | 23 | 178 | 410 | 5 | 11 | 46 | 238 | 237 | 682 |
| 102,310 | 7  | 21 | 179 | 373 | 5 | 10 | 46 | 225 | 237 | 629 |
| 102,311 | 7  | 21 | 179 | 375 | 5 | 10 | 46 | 224 | 237 | 630 |
| 102,312 | 7  | 21 | 179 | 366 | 5 | 11 | 46 | 232 | 237 | 630 |
| 102,313 | 8  | 22 | 178 | 374 | 5 | 11 | 46 | 246 | 237 | 653 |
| 102,314 | 8  | 22 | 177 | 380 | 5 | 11 | 45 | 257 | 235 | 670 |
| 102,315 | 8  | 22 | 166 | 377 | 4 | 12 | 41 | 257 | 219 | 668 |
| 102,316 | 8  | 22 | 163 | 380 | 4 | 13 | 41 | 260 | 216 | 675 |
| 102,317 | 8  | 22 | 151 | 400 | 4 | 13 | 35 | 265 | 198 | 700 |
| 102,318 | 8  | 22 | 150 | 396 | 4 | 13 | 33 | 262 | 195 | 693 |
| 102,319 | 8  | 23 | 151 | 387 | 4 | 13 | 32 | 258 | 195 | 681 |
| 102,320 | 8  | 23 | 150 | 387 | 4 | 13 | 32 | 258 | 194 | 681 |
| 102,321 | 8  | 23 | 152 | 387 | 4 | 13 | 32 | 258 | 196 | 681 |
| 102,322 | 8  | 23 | 153 | 391 | 4 | 13 | 32 | 249 | 197 | 676 |
| 102,323 | 8  | 23 | 146 | 391 | 3 | 13 | 31 | 249 | 188 | 676 |
| 102,324 | 7  | 23 | 146 | 390 | 3 | 13 | 29 | 249 | 185 | 675 |



|         |   |    |     |     |   |    |    |     |     |     |
|---------|---|----|-----|-----|---|----|----|-----|-----|-----|
| 102,325 | 6 | 21 | 145 | 372 | 3 | 13 | 27 | 243 | 181 | 649 |
| 102,326 | 6 | 17 | 146 | 346 | 3 | 13 | 27 | 227 | 182 | 603 |
| 102,327 | 6 | 17 | 145 | 340 | 3 | 13 | 25 | 226 | 179 | 596 |
| 102,328 | 6 | 17 | 145 | 339 | 3 | 12 | 25 | 226 | 179 | 594 |
| 102,329 | 6 | 17 | 146 | 339 | 3 | 12 | 25 | 226 | 180 | 594 |
| 102,330 | 6 | 17 | 149 | 339 | 4 | 12 | 25 | 226 | 184 | 594 |
| 102,331 | 6 | 18 | 151 | 338 | 4 | 12 | 25 | 227 | 186 | 595 |
| 102,332 | 6 | 18 | 151 | 339 | 4 | 12 | 25 | 228 | 186 | 597 |
| 102,333 | 6 | 18 | 163 | 341 | 4 | 12 | 30 | 228 | 203 | 599 |
| 102,334 | 6 | 18 | 163 | 341 | 4 | 13 | 30 | 228 | 203 | 600 |
| 102,335 | 6 | 18 | 161 | 341 | 4 | 13 | 30 | 227 | 201 | 599 |
| 102,336 | 6 | 18 | 161 | 343 | 4 | 13 | 29 | 227 | 200 | 601 |
| 102,337 | 6 | 18 | 161 | 346 | 4 | 13 | 29 | 228 | 200 | 605 |
| 102,338 | 6 | 18 | 161 | 346 | 4 | 13 | 29 | 228 | 200 | 605 |
| 102,339 | 6 | 18 | 161 | 345 | 4 | 13 | 29 | 230 | 200 | 606 |
| 102,340 | 6 | 18 | 161 | 351 | 4 | 14 | 29 | 232 | 200 | 615 |
| 102,341 | 6 | 18 | 161 | 352 | 4 | 14 | 29 | 232 | 200 | 616 |
| 102,342 | 7 | 18 | 161 | 352 | 4 | 14 | 29 | 232 | 201 | 616 |
| 102,343 | 7 | 18 | 162 | 351 | 4 | 14 | 29 | 229 | 202 | 612 |
| 102,344 | 7 | 18 | 162 | 338 | 4 | 14 | 29 | 222 | 202 | 592 |
| 102,345 | 7 | 14 | 159 | 256 | 4 | 12 | 29 | 165 | 199 | 447 |
| 102,346 | 6 | 10 | 158 | 217 | 5 | 11 | 29 | 150 | 198 | 388 |
| 102,347 | 6 | 10 | 162 | 217 | 5 | 12 | 30 | 150 | 203 | 389 |
| 102,348 | 7 | 10 | 171 | 199 | 5 | 11 | 34 | 136 | 217 | 356 |
| 102,349 | 7 | 10 | 163 | 171 | 4 | 11 | 41 | 135 | 215 | 327 |
| 102,350 | 7 | 7  | 167 | 122 | 4 | 9  | 47 | 86  | 225 | 224 |
| 102,351 | 6 | 7  | 159 | 123 | 2 | 9  | 44 | 82  | 211 | 221 |
| 102,352 | 5 | 7  | 142 | 118 | 2 | 9  | 40 | 80  | 189 | 214 |
| 102,353 | 4 | 7  | 121 | 112 | 2 | 9  | 38 | 80  | 165 | 208 |
| 102,354 | 3 | 7  | 104 | 110 | 2 | 8  | 31 | 78  | 140 | 203 |
| 102,355 | 3 | 7  | 69  | 107 | 2 | 8  | 31 | 78  | 105 | 200 |
| 102,356 | 4 | 6  | 68  | 102 | 2 | 8  | 31 | 78  | 105 | 194 |
| 102,357 | 4 | 6  | 68  | 101 | 2 | 8  | 31 | 78  | 105 | 193 |
| 102,358 | 4 | 6  | 68  | 101 | 2 | 8  | 31 | 77  | 105 | 192 |
| 102,359 | 4 | 6  | 79  | 101 | 3 | 8  | 35 | 77  | 121 | 192 |
| 102,360 | 4 | 6  | 79  | 101 | 3 | 8  | 35 | 77  | 121 | 192 |
| 102,361 | 4 | 5  | 79  | 101 | 3 | 8  | 39 | 77  | 125 | 191 |
| 102,362 | 4 | 5  | 80  | 98  | 4 | 8  | 40 | 76  | 128 | 187 |
| 102,363 | 4 | 5  | 79  | 96  | 4 | 7  | 40 | 69  | 127 | 177 |
| 102,364 | 3 | 4  | 83  | 74  | 4 | 7  | 42 | 45  | 132 | 130 |
| 102,365 | 3 | 4  | 83  | 74  | 4 | 8  | 42 | 45  | 132 | 131 |

|         |   |   |    |    |   |   |    |    |     |     |
|---------|---|---|----|----|---|---|----|----|-----|-----|
| 102,366 | 3 | 3 | 90 | 65 | 5 | 7 | 47 | 38 | 145 | 113 |
| 102,367 | 3 | 3 | 90 | 64 | 5 | 6 | 47 | 35 | 145 | 108 |
| 102,368 | 3 | 3 | 91 | 43 | 5 | 6 | 49 | 30 | 148 | 82  |
| 102,369 | 3 | 3 | 91 | 42 | 5 | 6 | 49 | 29 | 148 | 80  |
| 102,370 | 3 | 2 | 92 | 40 | 5 | 5 | 51 | 26 | 151 | 73  |
| 102,371 | 3 | 2 | 91 | 42 | 5 | 5 | 51 | 27 | 150 | 76  |
| 102,372 | 3 | 2 | 91 | 42 | 5 | 5 | 51 | 28 | 150 | 77  |
| 102,373 | 3 | 2 | 90 | 36 | 5 | 5 | 51 | 27 | 149 | 70  |
| 102,374 | 3 | 2 | 90 | 36 | 5 | 5 | 51 | 27 | 149 | 70  |
| 102,375 | 3 | 2 | 89 | 36 | 5 | 5 | 54 | 27 | 151 | 70  |
| 102,376 | 3 | 2 | 88 | 32 | 5 | 5 | 55 | 27 | 151 | 66  |
| 102,377 | 3 | 2 | 87 | 32 | 5 | 5 | 55 | 27 | 150 | 66  |
| 102,378 | 3 | 3 | 87 | 33 | 5 | 5 | 55 | 27 | 150 | 68  |
| 102,379 | 3 | 3 | 86 | 33 | 5 | 5 | 55 | 27 | 149 | 68  |
| 102,380 | 3 | 3 | 85 | 33 | 5 | 5 | 55 | 27 | 148 | 68  |
| 102,381 | 3 | 3 | 82 | 35 | 4 | 5 | 54 | 28 | 143 | 71  |
| 102,382 | 3 | 3 | 80 | 36 | 4 | 6 | 54 | 36 | 141 | 81  |
| 102,383 | 3 | 3 | 71 | 35 | 4 | 6 | 49 | 35 | 127 | 79  |
| 102,384 | 3 | 3 | 68 | 34 | 4 | 6 | 50 | 35 | 125 | 78  |
| 102,385 | 3 | 3 | 68 | 34 | 4 | 5 | 50 | 35 | 125 | 77  |
| 102,386 | 3 | 5 | 68 | 32 | 4 | 5 | 50 | 36 | 125 | 78  |
| 102,387 | 3 | 5 | 68 | 33 | 4 | 5 | 50 | 37 | 125 | 80  |
| 102,388 | 3 | 5 | 68 | 30 | 4 | 5 | 50 | 36 | 125 | 76  |
| 102,389 | 3 | 5 | 68 | 33 | 4 | 5 | 50 | 37 | 125 | 80  |
| 102,390 | 3 | 5 | 68 | 33 | 4 | 5 | 50 | 35 | 125 | 78  |
| 102,391 | 3 | 5 | 68 | 26 | 4 | 4 | 50 | 32 | 125 | 67  |
| 102,392 | 3 | 5 | 69 | 26 | 4 | 4 | 50 | 32 | 126 | 67  |
| 102,393 | 2 | 5 | 69 | 26 | 4 | 4 | 50 | 32 | 125 | 67  |
| 102,394 | 2 | 5 | 68 | 27 | 4 | 4 | 49 | 34 | 123 | 70  |
| 102,395 | 2 | 5 | 68 | 29 | 3 | 4 | 49 | 34 | 122 | 72  |
| 102,396 | 2 | 5 | 68 | 34 | 3 | 5 | 50 | 36 | 123 | 80  |
| 102,397 | 2 | 5 | 68 | 43 | 3 | 5 | 50 | 37 | 123 | 90  |
| 102,398 | 2 | 5 | 64 | 44 | 3 | 4 | 49 | 37 | 118 | 90  |
| 102,399 | 2 | 5 | 53 | 44 | 4 | 4 | 45 | 36 | 104 | 89  |
| 102,400 | 2 | 5 | 41 | 44 | 4 | 4 | 36 | 34 | 83  | 87  |
| 102,401 | 3 | 4 | 37 | 43 | 4 | 4 | 32 | 30 | 76  | 81  |
| 102,402 | 3 | 4 | 37 | 38 | 4 | 4 | 32 | 24 | 76  | 70  |
| 102,403 | 3 | 4 | 36 | 38 | 4 | 4 | 32 | 24 | 75  | 70  |
| 102,404 | 3 | 4 | 37 | 34 | 4 | 4 | 38 | 23 | 82  | 65  |
| 102,405 | 5 | 4 | 41 | 33 | 4 | 3 | 38 | 23 | 88  | 63  |
| 102,406 | 5 | 4 | 41 | 33 | 4 | 3 | 38 | 22 | 88  | 62  |

|         |   |   |    |    |   |   |    |    |    |    |
|---------|---|---|----|----|---|---|----|----|----|----|
| 102,407 | 4 | 4 | 41 | 33 | 4 | 3 | 38 | 22 | 87 | 62 |
| 102,408 | 4 | 4 | 41 | 33 | 4 | 3 | 38 | 22 | 87 | 62 |
| 102,409 | 4 | 4 | 40 | 33 | 4 | 3 | 38 | 22 | 86 | 62 |
| 102,410 | 4 | 4 | 30 | 33 | 3 | 3 | 34 | 21 | 71 | 61 |
| 102,411 | 4 | 4 | 30 | 33 | 3 | 3 | 34 | 21 | 71 | 61 |
| 102,412 | 4 | 4 | 29 | 34 | 3 | 3 | 31 | 21 | 67 | 62 |
| 102,413 | 4 | 4 | 27 | 34 | 2 | 3 | 30 | 21 | 63 | 62 |
| 102,414 | 4 | 4 | 25 | 34 | 2 | 2 | 29 | 20 | 60 | 60 |
| 102,415 | 4 | 4 | 26 | 34 | 2 | 2 | 28 | 20 | 60 | 60 |
| 102,416 | 4 | 4 | 24 | 34 | 2 | 2 | 23 | 20 | 53 | 60 |
| 102,417 | 4 | 4 | 18 | 33 | 1 | 2 | 22 | 20 | 45 | 59 |
| 102,418 | 4 | 4 | 18 | 33 | 1 | 2 | 21 | 20 | 44 | 59 |
| 102,419 | 4 | 4 | 18 | 33 | 1 | 2 | 19 | 19 | 42 | 58 |
| 102,420 | 4 | 4 | 17 | 33 | 1 | 2 | 17 | 19 | 39 | 58 |
| 102,421 | 4 | 4 | 16 | 33 | 1 | 2 | 17 | 18 | 38 | 57 |
| 102,422 | 4 | 4 | 14 | 31 | 1 | 2 | 17 | 10 | 36 | 47 |
| 102,423 | 4 | 4 | 16 | 30 | 1 | 2 | 17 | 10 | 38 | 46 |
| 102,424 | 4 | 4 | 16 | 30 | 1 | 2 | 17 | 10 | 38 | 46 |
| 102,425 | 4 | 4 | 18 | 30 | 1 | 2 | 17 | 10 | 40 | 46 |
| 102,426 | 4 | 4 | 18 | 30 | 1 | 2 | 14 | 10 | 37 | 46 |
| 102,427 | 4 | 4 | 18 | 30 | 1 | 2 | 13 | 10 | 36 | 46 |
| 102,428 | 4 | 4 | 20 | 30 | 1 | 2 | 14 | 10 | 39 | 46 |
| 102,429 | 4 | 3 | 22 | 29 | 1 | 2 | 15 | 10 | 42 | 44 |
| 102,430 | 4 | 3 | 22 | 29 | 1 | 2 | 15 | 9  | 42 | 43 |
| 102,431 | 4 | 4 | 22 | 29 | 1 | 2 | 15 | 9  | 42 | 44 |
| 102,432 | 4 | 4 | 23 | 27 | 1 | 2 | 16 | 9  | 44 | 42 |
| 102,433 | 4 | 3 | 23 | 26 | 1 | 1 | 15 | 6  | 43 | 36 |
| 102,434 | 4 | 3 | 23 | 26 | 1 | 1 | 15 | 6  | 43 | 36 |
| 102,435 | 4 | 3 | 27 | 26 | 2 | 1 | 21 | 6  | 54 | 36 |
| 102,436 | 4 | 2 | 30 | 25 | 2 | 1 | 22 | 6  | 58 | 34 |
| 102,437 | 4 | 1 | 31 | 24 | 2 | 1 | 22 | 6  | 59 | 32 |
| 102,438 | 4 | 1 | 31 | 24 | 2 | 1 | 22 | 6  | 59 | 32 |
| 102,439 | 4 | 1 | 32 | 24 | 2 | 1 | 22 | 6  | 60 | 32 |
| 102,440 | 5 | 1 | 36 | 21 | 2 | 1 | 23 | 5  | 66 | 28 |
| 102,441 | 5 | 1 | 36 | 21 | 2 | 1 | 23 | 5  | 66 | 28 |
| 102,442 | 7 | 1 | 42 | 21 | 2 | 1 | 24 | 5  | 75 | 28 |
| 102,443 | 7 | 1 | 41 | 20 | 2 | 1 | 24 | 3  | 74 | 25 |
| 102,444 | 7 | 1 | 42 | 20 | 2 | 1 | 24 | 4  | 75 | 26 |
| 102,445 | 7 | 1 | 42 | 20 | 2 | 1 | 24 | 4  | 75 | 26 |
| 102,446 | 7 | 1 | 42 | 19 | 2 | 1 | 24 | 4  | 75 | 25 |
| 102,447 | 7 | 1 | 42 | 15 | 2 | 0 | 23 | 2  | 74 | 18 |

|         |   |   |    |    |   |   |    |   |    |    |
|---------|---|---|----|----|---|---|----|---|----|----|
| 102,448 | 7 | 1 | 42 | 6  | 2 | 0 | 23 | 2 | 74 | 9  |
| 102,449 | 8 | 3 | 44 | 10 | 2 | 1 | 23 | 4 | 77 | 18 |
| 102,450 | 7 | 3 | 44 | 14 | 1 | 1 | 23 | 4 | 75 | 22 |
| 102,451 | 8 | 3 | 43 | 14 | 1 | 1 | 23 | 5 | 75 | 23 |
| 102,452 | 7 | 3 | 41 | 14 | 1 | 1 | 22 | 5 | 71 | 23 |
| 102,453 | 7 | 3 | 42 | 13 | 1 | 1 | 21 | 5 | 71 | 22 |
| 102,454 | 7 | 3 | 43 | 14 | 1 | 1 | 22 | 5 | 73 | 23 |
| 102,455 | 7 | 3 | 42 | 14 | 1 | 1 | 16 | 5 | 66 | 23 |
| 102,456 | 5 | 3 | 38 | 14 | 1 | 1 | 16 | 5 | 60 | 23 |
| 102,457 | 5 | 3 | 39 | 14 | 1 | 1 | 16 | 5 | 61 | 23 |
| 102,458 | 5 | 3 | 39 | 14 | 1 | 1 | 16 | 5 | 61 | 23 |
| 102,459 | 5 | 3 | 39 | 14 | 1 | 1 | 16 | 5 | 61 | 23 |
| 102,460 | 5 | 3 | 39 | 14 | 1 | 1 | 16 | 5 | 61 | 23 |
| 102,461 | 5 | 3 | 39 | 14 | 1 | 1 | 16 | 5 | 61 | 23 |
| 102,462 | 5 | 3 | 39 | 14 | 1 | 1 | 16 | 5 | 61 | 23 |
| 102,463 | 5 | 3 | 39 | 13 | 1 | 1 | 16 | 5 | 61 | 22 |
| 102,464 | 6 | 3 | 40 | 13 | 2 | 1 | 17 | 5 | 65 | 22 |
| 102,465 | 6 | 3 | 39 | 13 | 2 | 1 | 17 | 5 | 64 | 22 |
| 102,466 | 6 | 3 | 41 | 13 | 2 | 1 | 18 | 5 | 67 | 22 |
| 102,467 | 6 | 3 | 43 | 13 | 2 | 1 | 18 | 5 | 69 | 22 |
| 102,468 | 6 | 3 | 43 | 13 | 2 | 1 | 18 | 5 | 69 | 22 |
| 102,469 | 6 | 3 | 48 | 13 | 2 | 1 | 19 | 6 | 75 | 23 |
| 102,470 | 6 | 3 | 48 | 13 | 2 | 1 | 19 | 6 | 75 | 23 |
| 102,471 | 6 | 3 | 48 | 14 | 3 | 1 | 22 | 6 | 79 | 24 |
| 102,472 | 6 | 3 | 48 | 15 | 3 | 1 | 22 | 6 | 79 | 25 |
| 102,473 | 6 | 3 | 52 | 15 | 3 | 1 | 24 | 6 | 85 | 25 |
| 102,474 | 6 | 3 | 52 | 15 | 3 | 1 | 27 | 7 | 88 | 26 |
| 102,475 | 7 | 3 | 52 | 16 | 3 | 1 | 27 | 8 | 89 | 28 |
| 102,476 | 8 | 3 | 50 | 16 | 3 | 1 | 27 | 8 | 88 | 28 |
| 102,477 | 8 | 3 | 50 | 16 | 3 | 1 | 27 | 8 | 88 | 28 |
| 102,478 | 8 | 3 | 50 | 17 | 3 | 1 | 27 | 9 | 88 | 30 |
| 102,479 | 8 | 3 | 48 | 17 | 3 | 1 | 26 | 9 | 85 | 30 |
| 102,480 | 8 | 3 | 46 | 17 | 3 | 1 | 25 | 9 | 82 | 30 |
| 102,481 | 8 | 2 | 46 | 16 | 3 | 1 | 25 | 9 | 82 | 28 |
| 102,482 | 8 | 2 | 45 | 16 | 3 | 1 | 24 | 9 | 80 | 28 |
| 102,483 | 8 | 2 | 43 | 16 | 3 | 1 | 22 | 9 | 76 | 28 |
| 102,484 | 8 | 2 | 43 | 16 | 3 | 1 | 22 | 9 | 76 | 28 |
| 102,485 | 8 | 2 | 41 | 16 | 2 | 1 | 20 | 9 | 71 | 28 |
| 102,486 | 8 | 2 | 41 | 16 | 2 | 1 | 18 | 9 | 69 | 28 |
| 102,487 | 8 | 2 | 38 | 16 | 2 | 1 | 17 | 9 | 65 | 28 |
| 102,488 | 8 | 2 | 37 | 16 | 2 | 1 | 17 | 9 | 64 | 28 |

|         |   |   |    |    |   |   |    |   |    |    |
|---------|---|---|----|----|---|---|----|---|----|----|
| 102,489 | 8 | 2 | 36 | 16 | 2 | 1 | 17 | 9 | 63 | 28 |
| 102,490 | 7 | 2 | 32 | 16 | 2 | 1 | 16 | 9 | 57 | 28 |
| 102,491 | 7 | 2 | 32 | 16 | 2 | 1 | 16 | 9 | 57 | 28 |
| 102,492 | 7 | 2 | 27 | 16 | 2 | 1 | 15 | 9 | 51 | 28 |
| 102,493 | 5 | 3 | 26 | 16 | 2 | 1 | 15 | 9 | 48 | 29 |
| 102,494 | 5 | 3 | 26 | 16 | 2 | 1 | 15 | 9 | 48 | 29 |
| 102,495 | 5 | 3 | 25 | 16 | 2 | 1 | 15 | 8 | 47 | 28 |
| 102,496 | 5 | 3 | 25 | 16 | 2 | 1 | 15 | 8 | 47 | 28 |
| 102,497 | 5 | 3 | 25 | 15 | 2 | 1 | 15 | 8 | 47 | 27 |
| 102,498 | 5 | 3 | 25 | 14 | 2 | 2 | 15 | 8 | 47 | 27 |
| 102,499 | 5 | 3 | 23 | 14 | 2 | 2 | 15 | 7 | 45 | 26 |
| 102,500 | 4 | 1 | 23 | 9  | 2 | 1 | 15 | 5 | 44 | 16 |
| 102,501 | 4 | 1 | 23 | 5  | 2 | 1 | 15 | 5 | 44 | 12 |
| 102,502 | 3 | 1 | 23 | 5  | 2 | 1 | 14 | 4 | 42 | 11 |
| 102,503 | 3 | 1 | 23 | 5  | 2 | 1 | 13 | 4 | 41 | 11 |
| 102,504 | 3 | 1 | 22 | 5  | 2 | 1 | 13 | 4 | 40 | 11 |
| 102,505 | 3 | 1 | 22 | 4  | 2 | 1 | 12 | 4 | 39 | 10 |
| 102,506 | 3 | 1 | 22 | 4  | 2 | 1 | 14 | 4 | 41 | 10 |
| 102,507 | 3 | 1 | 23 | 4  | 2 | 1 | 14 | 4 | 42 | 10 |
| 102,508 | 3 | 2 | 22 | 4  | 2 | 1 | 14 | 4 | 41 | 11 |
| 102,509 | 3 | 2 | 23 | 4  | 2 | 1 | 15 | 4 | 43 | 11 |
| 102,510 | 3 | 2 | 23 | 4  | 2 | 1 | 15 | 4 | 43 | 11 |
| 102,511 | 3 | 2 | 23 | 4  | 2 | 1 | 15 | 4 | 43 | 11 |
| 102,512 | 3 | 2 | 23 | 4  | 2 | 1 | 14 | 4 | 42 | 11 |
| 102,513 | 4 | 2 | 23 | 4  | 2 | 1 | 14 | 4 | 43 | 11 |
| 102,514 | 4 | 2 | 26 | 4  | 2 | 1 | 14 | 4 | 46 | 11 |
| 102,515 | 3 | 2 | 25 | 4  | 1 | 1 | 13 | 4 | 42 | 11 |
| 102,516 | 3 | 3 | 24 | 4  | 1 | 1 | 15 | 4 | 43 | 12 |
| 102,517 | 3 | 3 | 29 | 4  | 1 | 1 | 21 | 4 | 54 | 12 |
| 102,518 | 3 | 3 | 28 | 4  | 1 | 1 | 21 | 4 | 53 | 12 |
| 102,519 | 3 | 3 | 23 | 4  | 1 | 1 | 20 | 4 | 47 | 12 |
| 102,520 | 3 | 3 | 22 | 4  | 1 | 1 | 20 | 3 | 46 | 11 |
| 102,521 | 3 | 3 | 22 | 4  | 1 | 1 | 20 | 3 | 46 | 11 |
| 102,522 | 3 | 3 | 23 | 3  | 0 | 1 | 17 | 3 | 43 | 10 |
| 102,523 | 3 | 3 | 21 | 2  | 0 | 1 | 16 | 3 | 40 | 9  |
| 102,524 | 3 | 3 | 21 | 2  | 0 | 1 | 16 | 3 | 40 | 9  |
| 102,525 | 3 | 3 | 21 | 2  | 0 | 1 | 13 | 2 | 37 | 8  |
| 102,526 | 2 | 3 | 21 | 1  | 0 | 1 | 15 | 1 | 38 | 6  |
| 102,527 | 1 | 3 | 21 | 1  | 0 | 1 | 15 | 1 | 37 | 6  |
| 102,528 | 1 | 3 | 21 | 1  | 0 | 1 | 15 | 1 | 37 | 6  |
| 102,529 | 1 | 3 | 21 | 0  | 0 | 1 | 15 | 0 | 37 | 4  |

|         |   |   |    |    |   |   |    |    |    |    |
|---------|---|---|----|----|---|---|----|----|----|----|
| 102,530 | 1 | 3 | 23 | 0  | 0 | 1 | 16 | 0  | 40 | 4  |
| 102,531 | 1 | 4 | 23 | 0  | 0 | 1 | 16 | 0  | 40 | 5  |
| 102,532 | 1 | 4 | 24 | 0  | 0 | 1 | 17 | 0  | 42 | 5  |
| 102,533 | 1 | 4 | 28 | 0  | 0 | 1 | 17 | 0  | 46 | 5  |
| 102,534 | 1 | 4 | 30 | 0  | 0 | 1 | 17 | 0  | 48 | 5  |
| 102,535 | 1 | 4 | 32 | 1  | 0 | 1 | 19 | 1  | 52 | 7  |
| 102,536 | 1 | 4 | 32 | 1  | 0 | 1 | 19 | 1  | 52 | 7  |
| 102,537 | 1 | 4 | 33 | 1  | 0 | 1 | 19 | 1  | 53 | 7  |
| 102,538 | 1 | 5 | 33 | 1  | 0 | 1 | 19 | 1  | 53 | 8  |
| 102,539 | 1 | 5 | 33 | 1  | 0 | 1 | 19 | 3  | 53 | 10 |
| 102,540 | 1 | 5 | 33 | 1  | 0 | 1 | 19 | 4  | 53 | 11 |
| 102,541 | 1 | 5 | 33 | 3  | 0 | 1 | 19 | 8  | 53 | 17 |
| 102,542 | 1 | 5 | 33 | 3  | 0 | 1 | 19 | 8  | 53 | 17 |
| 102,543 | 2 | 4 | 34 | 5  | 0 | 1 | 19 | 8  | 55 | 18 |
| 102,544 | 2 | 4 | 34 | 5  | 0 | 1 | 19 | 9  | 55 | 19 |
| 102,545 | 2 | 4 | 34 | 5  | 0 | 1 | 19 | 9  | 55 | 19 |
| 102,546 | 2 | 4 | 35 | 5  | 0 | 1 | 19 | 9  | 56 | 19 |
| 102,547 | 2 | 4 | 35 | 5  | 0 | 1 | 19 | 9  | 56 | 19 |
| 102,548 | 2 | 4 | 36 | 6  | 0 | 1 | 19 | 9  | 57 | 20 |
| 102,549 | 2 | 4 | 36 | 7  | 0 | 0 | 19 | 9  | 57 | 20 |
| 102,550 | 2 | 4 | 36 | 7  | 0 | 0 | 19 | 9  | 57 | 20 |
| 102,551 | 2 | 4 | 36 | 8  | 0 | 0 | 19 | 9  | 57 | 21 |
| 102,552 | 2 | 4 | 37 | 9  | 0 | 0 | 20 | 10 | 59 | 23 |
| 102,553 | 2 | 5 | 37 | 9  | 0 | 0 | 20 | 10 | 59 | 24 |
| 102,554 | 2 | 5 | 37 | 9  | 0 | 0 | 20 | 10 | 59 | 24 |
| 102,555 | 2 | 5 | 42 | 9  | 1 | 0 | 20 | 10 | 65 | 24 |
| 102,556 | 2 | 6 | 41 | 11 | 1 | 0 | 20 | 10 | 64 | 27 |
| 102,557 | 2 | 6 | 47 | 11 | 1 | 0 | 20 | 11 | 70 | 28 |
| 102,558 | 2 | 6 | 54 | 12 | 1 | 0 | 21 | 12 | 78 | 30 |
| 102,559 | 2 | 5 | 53 | 14 | 1 | 0 | 20 | 12 | 76 | 31 |
| 102,560 | 2 | 5 | 58 | 17 | 1 | 0 | 20 | 12 | 81 | 34 |
| 102,561 | 2 | 7 | 60 | 21 | 1 | 0 | 20 | 14 | 83 | 42 |
| 102,562 | 4 | 7 | 60 | 30 | 1 | 0 | 21 | 14 | 86 | 51 |
| 102,563 | 3 | 7 | 63 | 31 | 1 | 0 | 21 | 14 | 88 | 52 |
| 102,564 | 3 | 7 | 60 | 32 | 1 | 0 | 21 | 14 | 85 | 53 |
| 102,565 | 3 | 7 | 60 | 32 | 1 | 0 | 21 | 14 | 85 | 53 |
| 102,566 | 3 | 6 | 59 | 32 | 1 | 1 | 19 | 14 | 82 | 53 |
| 102,567 | 3 | 6 | 59 | 32 | 1 | 1 | 18 | 14 | 81 | 53 |
| 102,568 | 3 | 6 | 55 | 32 | 1 | 1 | 12 | 14 | 71 | 53 |
| 102,569 | 3 | 6 | 54 | 32 | 1 | 1 | 13 | 14 | 71 | 53 |
| 102,570 | 3 | 6 | 54 | 32 | 1 | 1 | 13 | 14 | 71 | 53 |

|         |   |   |    |    |   |   |    |    |    |    |
|---------|---|---|----|----|---|---|----|----|----|----|
| 102,571 | 3 | 6 | 59 | 32 | 1 | 1 | 13 | 14 | 76 | 53 |
| 102,572 | 3 | 6 | 59 | 32 | 1 | 1 | 13 | 14 | 76 | 53 |
| 102,573 | 3 | 6 | 58 | 32 | 1 | 1 | 13 | 14 | 75 | 53 |
| 102,574 | 3 | 6 | 60 | 32 | 1 | 1 | 16 | 14 | 80 | 53 |
| 102,575 | 3 | 6 | 57 | 32 | 1 | 1 | 15 | 14 | 76 | 53 |
| 102,576 | 3 | 6 | 56 | 32 | 1 | 1 | 15 | 14 | 75 | 53 |
| 102,577 | 3 | 6 | 56 | 32 | 1 | 1 | 13 | 14 | 73 | 53 |
| 102,578 | 3 | 6 | 63 | 32 | 1 | 1 | 14 | 14 | 81 | 53 |
| 102,579 | 4 | 6 | 64 | 32 | 1 | 1 | 15 | 14 | 84 | 53 |
| 102,580 | 4 | 6 | 64 | 32 | 1 | 1 | 16 | 15 | 85 | 54 |
| 102,581 | 4 | 5 | 62 | 32 | 1 | 1 | 15 | 15 | 82 | 53 |
| 102,582 | 4 | 5 | 62 | 32 | 1 | 1 | 15 | 15 | 82 | 53 |
| 102,583 | 4 | 5 | 61 | 32 | 1 | 1 | 14 | 15 | 80 | 53 |
| 102,584 | 4 | 5 | 57 | 32 | 1 | 1 | 14 | 15 | 76 | 53 |
| 102,585 | 4 | 5 | 55 | 31 | 1 | 1 | 14 | 14 | 74 | 51 |
| 102,586 | 4 | 5 | 53 | 31 | 1 | 1 | 12 | 14 | 70 | 51 |
| 102,587 | 4 | 5 | 55 | 31 | 1 | 1 | 12 | 14 | 72 | 51 |
| 102,588 | 4 | 5 | 54 | 31 | 1 | 1 | 12 | 14 | 71 | 51 |
| 102,589 | 4 | 4 | 54 | 31 | 1 | 1 | 12 | 14 | 71 | 50 |
| 102,590 | 4 | 4 | 55 | 31 | 1 | 1 | 12 | 12 | 72 | 48 |
| 102,591 | 4 | 4 | 55 | 29 | 1 | 1 | 12 | 7  | 72 | 41 |
| 102,592 | 4 | 4 | 55 | 29 | 1 | 1 | 12 | 8  | 72 | 42 |
| 102,593 | 3 | 4 | 55 | 29 | 1 | 1 | 12 | 8  | 71 | 42 |
| 102,594 | 3 | 4 | 54 | 27 | 1 | 1 | 12 | 8  | 70 | 40 |
| 102,595 | 3 | 4 | 54 | 27 | 1 | 1 | 12 | 7  | 70 | 39 |
| 102,596 | 3 | 4 | 54 | 27 | 1 | 1 | 12 | 7  | 70 | 39 |
| 102,597 | 3 | 4 | 53 | 27 | 1 | 1 | 12 | 7  | 69 | 39 |
| 102,598 | 3 | 4 | 53 | 27 | 1 | 1 | 12 | 7  | 69 | 39 |
| 102,599 | 3 | 4 | 52 | 25 | 1 | 1 | 12 | 7  | 68 | 37 |
| 102,600 | 3 | 4 | 52 | 25 | 1 | 1 | 12 | 7  | 68 | 37 |
| 102,601 | 3 | 4 | 52 | 25 | 1 | 1 | 12 | 7  | 68 | 37 |
| 102,602 | 3 | 4 | 52 | 24 | 1 | 1 | 12 | 7  | 68 | 36 |
| 102,603 | 3 | 4 | 51 | 23 | 1 | 1 | 11 | 6  | 66 | 34 |
| 102,604 | 3 | 3 | 51 | 23 | 1 | 1 | 11 | 6  | 66 | 33 |
| 102,605 | 3 | 3 | 52 | 23 | 1 | 1 | 11 | 6  | 67 | 33 |
| 102,606 | 3 | 3 | 47 | 23 | 0 | 1 | 11 | 6  | 61 | 33 |
| 102,607 | 3 | 2 | 47 | 22 | 0 | 1 | 11 | 7  | 61 | 32 |
| 102,608 | 3 | 2 | 41 | 22 | 0 | 1 | 10 | 7  | 54 | 32 |
| 102,609 | 3 | 2 | 33 | 21 | 0 | 1 | 9  | 7  | 45 | 31 |
| 102,610 | 3 | 2 | 33 | 19 | 0 | 1 | 9  | 7  | 45 | 29 |
| 102,611 | 4 | 2 | 29 | 16 | 0 | 1 | 9  | 7  | 42 | 26 |

|         |    |   |    |    |   |   |    |   |     |    |
|---------|----|---|----|----|---|---|----|---|-----|----|
| 102,612 | 4  | 0 | 27 | 12 | 0 | 1 | 11 | 5 | 42  | 18 |
| 102,613 | 2  | 0 | 27 | 3  | 0 | 1 | 10 | 5 | 39  | 9  |
| 102,614 | 3  | 0 | 27 | 1  | 0 | 1 | 10 | 6 | 40  | 8  |
| 102,615 | 3  | 0 | 27 | 1  | 0 | 1 | 10 | 6 | 40  | 8  |
| 102,616 | 3  | 0 | 27 | 1  | 0 | 0 | 10 | 6 | 40  | 7  |
| 102,617 | 3  | 0 | 26 | 1  | 0 | 0 | 10 | 6 | 39  | 7  |
| 102,618 | 3  | 0 | 25 | 1  | 0 | 0 | 10 | 6 | 38  | 7  |
| 102,619 | 3  | 0 | 24 | 2  | 0 | 0 | 10 | 6 | 37  | 8  |
| 102,620 | 3  | 0 | 24 | 2  | 0 | 0 | 9  | 7 | 36  | 9  |
| 102,621 | 3  | 0 | 21 | 2  | 0 | 0 | 9  | 7 | 33  | 9  |
| 102,622 | 4  | 0 | 20 | 3  | 1 | 0 | 10 | 8 | 35  | 11 |
| 102,623 | 4  | 0 | 20 | 3  | 1 | 0 | 10 | 8 | 35  | 11 |
| 102,624 | 4  | 0 | 21 | 4  | 1 | 0 | 11 | 8 | 37  | 12 |
| 102,625 | 4  | 0 | 18 | 4  | 1 | 0 | 8  | 8 | 31  | 12 |
| 102,626 | 4  | 0 | 18 | 4  | 1 | 0 | 8  | 8 | 31  | 12 |
| 102,627 | 7  | 0 | 21 | 4  | 1 | 0 | 8  | 8 | 37  | 12 |
| 102,628 | 7  | 0 | 21 | 4  | 1 | 0 | 8  | 8 | 37  | 12 |
| 102,629 | 7  | 0 | 14 | 4  | 1 | 0 | 8  | 8 | 30  | 12 |
| 102,630 | 6  | 0 | 13 | 4  | 1 | 0 | 7  | 8 | 27  | 12 |
| 102,631 | 11 | 1 | 17 | 5  | 2 | 0 | 11 | 7 | 41  | 13 |
| 102,632 | 11 | 1 | 19 | 5  | 2 | 0 | 12 | 7 | 44  | 13 |
| 102,633 | 11 | 1 | 24 | 5  | 3 | 0 | 13 | 7 | 51  | 13 |
| 102,634 | 11 | 1 | 28 | 5  | 3 | 1 | 13 | 7 | 55  | 14 |
| 102,635 | 12 | 1 | 37 | 5  | 3 | 1 | 17 | 7 | 69  | 14 |
| 102,636 | 12 | 1 | 38 | 5  | 3 | 1 | 17 | 8 | 70  | 15 |
| 102,637 | 12 | 1 | 38 | 5  | 3 | 1 | 17 | 8 | 70  | 15 |
| 102,638 | 12 | 1 | 36 | 5  | 3 | 1 | 17 | 8 | 68  | 15 |
| 102,639 | 12 | 1 | 36 | 5  | 3 | 1 | 17 | 8 | 68  | 15 |
| 102,640 | 12 | 1 | 36 | 5  | 3 | 1 | 17 | 8 | 68  | 15 |
| 102,641 | 12 | 1 | 35 | 5  | 3 | 1 | 17 | 8 | 67  | 15 |
| 102,642 | 12 | 1 | 35 | 5  | 3 | 1 | 17 | 8 | 67  | 15 |
| 102,643 | 12 | 1 | 35 | 5  | 3 | 1 | 17 | 7 | 67  | 14 |
| 102,644 | 12 | 1 | 35 | 6  | 3 | 1 | 17 | 7 | 67  | 15 |
| 102,645 | 12 | 1 | 36 | 6  | 3 | 1 | 17 | 7 | 68  | 15 |
| 102,646 | 12 | 1 | 38 | 6  | 3 | 1 | 19 | 7 | 72  | 15 |
| 102,647 | 14 | 1 | 61 | 6  | 4 | 1 | 25 | 7 | 104 | 15 |
| 102,648 | 14 | 1 | 61 | 6  | 4 | 1 | 25 | 7 | 104 | 15 |
| 102,649 | 14 | 1 | 80 | 6  | 6 | 1 | 37 | 7 | 137 | 15 |
| 102,650 | 14 | 1 | 81 | 6  | 6 | 1 | 37 | 7 | 138 | 15 |
| 102,651 | 14 | 1 | 80 | 6  | 6 | 1 | 37 | 7 | 137 | 15 |
| 102,652 | 15 | 1 | 80 | 6  | 6 | 1 | 37 | 7 | 138 | 15 |



|         |    |   |     |   |    |   |    |   |     |    |
|---------|----|---|-----|---|----|---|----|---|-----|----|
| 102,653 | 15 | 1 | 81  | 6 | 6  | 1 | 38 | 7 | 140 | 15 |
| 102,654 | 15 | 1 | 81  | 6 | 6  | 1 | 38 | 7 | 140 | 15 |
| 102,655 | 15 | 1 | 81  | 6 | 6  | 1 | 38 | 7 | 140 | 15 |
| 102,656 | 15 | 1 | 82  | 6 | 6  | 1 | 38 | 7 | 141 | 15 |
| 102,657 | 15 | 1 | 92  | 5 | 8  | 1 | 41 | 4 | 156 | 11 |
| 102,658 | 15 | 1 | 94  | 5 | 8  | 1 | 41 | 5 | 158 | 12 |
| 102,659 | 15 | 2 | 98  | 5 | 8  | 1 | 44 | 5 | 165 | 13 |
| 102,660 | 15 | 2 | 98  | 6 | 8  | 1 | 44 | 6 | 165 | 15 |
| 102,661 | 15 | 2 | 99  | 6 | 8  | 1 | 44 | 6 | 166 | 15 |
| 102,662 | 17 | 2 | 109 | 6 | 10 | 1 | 47 | 6 | 183 | 15 |
| 102,663 | 17 | 2 | 112 | 6 | 11 | 1 | 46 | 6 | 186 | 15 |
| 102,664 | 16 | 2 | 111 | 6 | 12 | 1 | 46 | 6 | 185 | 15 |
| 102,665 | 16 | 2 | 125 | 6 | 14 | 1 | 53 | 5 | 208 | 14 |
| 102,666 | 16 | 2 | 127 | 6 | 14 | 1 | 56 | 5 | 213 | 14 |
| 102,667 | 17 | 2 | 129 | 6 | 14 | 1 | 59 | 5 | 219 | 14 |
| 102,668 | 17 | 2 | 130 | 6 | 14 | 1 | 63 | 5 | 224 | 14 |
| 102,669 | 17 | 2 | 133 | 5 | 14 | 1 | 63 | 4 | 227 | 12 |
| 102,670 | 17 | 2 | 133 | 5 | 14 | 1 | 63 | 4 | 227 | 12 |
| 102,671 | 17 | 2 | 133 | 5 | 14 | 1 | 62 | 4 | 226 | 12 |
| 102,672 | 17 | 2 | 133 | 5 | 14 | 1 | 62 | 4 | 226 | 12 |
| 102,673 | 16 | 2 | 133 | 4 | 13 | 1 | 62 | 3 | 224 | 10 |
| 102,674 | 16 | 2 | 133 | 4 | 13 | 1 | 62 | 3 | 224 | 10 |
| 102,675 | 16 | 2 | 133 | 3 | 13 | 1 | 61 | 3 | 223 | 9  |
| 102,676 | 16 | 2 | 138 | 3 | 13 | 1 | 63 | 3 | 230 | 9  |
| 102,677 | 16 | 2 | 138 | 3 | 13 | 1 | 63 | 3 | 230 | 9  |
| 102,678 | 13 | 2 | 134 | 3 | 13 | 1 | 63 | 3 | 223 | 9  |
| 102,679 | 14 | 2 | 150 | 3 | 14 | 1 | 70 | 3 | 248 | 9  |
| 102,680 | 14 | 2 | 149 | 3 | 14 | 1 | 69 | 3 | 246 | 9  |
| 102,681 | 9  | 1 | 145 | 2 | 13 | 1 | 66 | 3 | 233 | 7  |
| 102,682 | 9  | 1 | 144 | 4 | 13 | 1 | 65 | 4 | 231 | 10 |
| 102,683 | 9  | 1 | 139 | 4 | 12 | 1 | 64 | 4 | 224 | 10 |
| 102,684 | 9  | 2 | 137 | 4 | 12 | 1 | 64 | 5 | 222 | 12 |
| 102,685 | 9  | 2 | 135 | 4 | 12 | 0 | 65 | 5 | 221 | 11 |
| 102,686 | 8  | 2 | 126 | 5 | 12 | 0 | 61 | 7 | 207 | 14 |
| 102,687 | 8  | 2 | 126 | 6 | 12 | 0 | 61 | 9 | 207 | 17 |
| 102,688 | 8  | 2 | 125 | 6 | 12 | 0 | 61 | 9 | 206 | 17 |
| 102,689 | 8  | 2 | 125 | 7 | 12 | 0 | 63 | 9 | 208 | 18 |
| 102,690 | 8  | 2 | 125 | 7 | 12 | 0 | 63 | 9 | 208 | 18 |
| 102,691 | 8  | 2 | 125 | 8 | 12 | 0 | 63 | 9 | 208 | 19 |
| 102,692 | 8  | 2 | 128 | 8 | 12 | 0 | 64 | 9 | 212 | 19 |
| 102,693 | 8  | 2 | 127 | 8 | 12 | 0 | 64 | 9 | 211 | 19 |

|         |   |   |     |    |    |   |    |    |     |    |
|---------|---|---|-----|----|----|---|----|----|-----|----|
| 102,694 | 6 | 2 | 123 | 7  | 12 | 0 | 64 | 9  | 205 | 18 |
| 102,695 | 7 | 2 | 123 | 7  | 12 | 0 | 64 | 9  | 206 | 18 |
| 102,696 | 7 | 2 | 127 | 7  | 12 | 0 | 68 | 9  | 214 | 18 |
| 102,697 | 7 | 2 | 127 | 7  | 11 | 0 | 71 | 10 | 216 | 19 |
| 102,698 | 7 | 2 | 112 | 9  | 10 | 0 | 65 | 10 | 194 | 21 |
| 102,699 | 7 | 2 | 103 | 9  | 9  | 0 | 55 | 10 | 174 | 21 |
| 102,700 | 7 | 2 | 92  | 9  | 8  | 0 | 55 | 10 | 162 | 21 |
| 102,701 | 7 | 2 | 91  | 9  | 8  | 0 | 55 | 10 | 161 | 21 |
| 102,702 | 7 | 2 | 91  | 10 | 8  | 0 | 55 | 10 | 161 | 22 |
| 102,703 | 6 | 2 | 91  | 10 | 8  | 0 | 55 | 10 | 160 | 22 |
| 102,704 | 6 | 2 | 91  | 10 | 8  | 0 | 54 | 10 | 159 | 22 |
| 102,705 | 6 | 2 | 91  | 10 | 8  | 0 | 55 | 10 | 160 | 22 |
| 102,706 | 6 | 2 | 93  | 10 | 8  | 0 | 57 | 10 | 164 | 22 |
| 102,707 | 6 | 2 | 91  | 10 | 8  | 0 | 58 | 10 | 163 | 22 |
| 102,708 | 5 | 2 | 85  | 10 | 6  | 0 | 59 | 10 | 155 | 22 |
| 102,709 | 5 | 2 | 83  | 10 | 6  | 0 | 59 | 9  | 153 | 21 |
| 102,710 | 5 | 1 | 83  | 9  | 6  | 0 | 55 | 8  | 149 | 18 |
| 102,711 | 6 | 1 | 81  | 9  | 6  | 0 | 55 | 8  | 148 | 18 |
| 102,712 | 6 | 1 | 80  | 9  | 6  | 0 | 55 | 8  | 147 | 18 |
| 102,713 | 4 | 1 | 74  | 9  | 4  | 0 | 51 | 8  | 133 | 18 |
| 102,714 | 4 | 1 | 68  | 9  | 3  | 0 | 50 | 8  | 125 | 18 |
| 102,715 | 4 | 1 | 65  | 9  | 3  | 0 | 47 | 10 | 119 | 20 |
| 102,716 | 3 | 1 | 52  | 10 | 1  | 0 | 42 | 10 | 98  | 21 |
| 102,717 | 3 | 1 | 51  | 10 | 1  | 0 | 41 | 10 | 96  | 21 |
| 102,718 | 2 | 1 | 49  | 12 | 1  | 0 | 40 | 10 | 92  | 23 |
| 102,719 | 2 | 1 | 48  | 13 | 1  | 0 | 37 | 10 | 88  | 24 |
| 102,720 | 2 | 1 | 46  | 13 | 1  | 0 | 37 | 10 | 86  | 24 |
| 102,721 | 2 | 1 | 46  | 13 | 1  | 0 | 37 | 10 | 86  | 24 |
| 102,722 | 2 | 1 | 45  | 13 | 1  | 0 | 37 | 10 | 85  | 24 |
| 102,723 | 2 | 1 | 45  | 13 | 1  | 0 | 37 | 10 | 85  | 24 |
| 102,724 | 2 | 1 | 50  | 14 | 1  | 0 | 43 | 10 | 96  | 25 |
| 102,725 | 3 | 1 | 50  | 15 | 1  | 0 | 43 | 10 | 97  | 26 |
| 102,726 | 3 | 1 | 46  | 15 | 1  | 0 | 41 | 10 | 91  | 26 |
| 102,727 | 2 | 1 | 39  | 15 | 1  | 0 | 41 | 10 | 83  | 26 |
| 102,728 | 2 | 1 | 40  | 15 | 0  | 0 | 40 | 10 | 82  | 26 |
| 102,729 | 2 | 1 | 38  | 15 | 0  | 0 | 40 | 10 | 80  | 26 |
| 102,730 | 2 | 1 | 34  | 15 | 0  | 0 | 38 | 10 | 74  | 26 |
| 102,731 | 2 | 1 | 35  | 15 | 0  | 0 | 40 | 11 | 77  | 27 |
| 102,732 | 2 | 1 | 35  | 15 | 0  | 0 | 38 | 11 | 75  | 27 |
| 102,733 | 2 | 1 | 35  | 13 | 0  | 0 | 38 | 10 | 75  | 24 |
| 102,734 | 2 | 1 | 35  | 14 | 0  | 0 | 38 | 10 | 75  | 25 |

|         |   |   |    |    |   |   |    |    |    |    |
|---------|---|---|----|----|---|---|----|----|----|----|
| 102,735 | 2 | 0 | 35 | 14 | 0 | 0 | 39 | 9  | 76 | 23 |
| 102,736 | 2 | 0 | 35 | 14 | 0 | 0 | 38 | 9  | 75 | 23 |
| 102,737 | 2 | 1 | 35 | 12 | 0 | 0 | 38 | 5  | 75 | 18 |
| 102,738 | 2 | 1 | 35 | 12 | 0 | 0 | 38 | 5  | 75 | 18 |
| 102,739 | 2 | 1 | 35 | 12 | 0 | 0 | 37 | 5  | 74 | 18 |
| 102,740 | 2 | 1 | 35 | 11 | 0 | 0 | 36 | 5  | 73 | 17 |
| 102,741 | 2 | 1 | 38 | 10 | 0 | 0 | 36 | 5  | 76 | 16 |
| 102,742 | 4 | 1 | 40 | 10 | 0 | 0 | 36 | 6  | 80 | 17 |
| 102,743 | 4 | 1 | 37 | 11 | 0 | 0 | 35 | 6  | 76 | 18 |
| 102,744 | 4 | 1 | 44 | 13 | 0 | 0 | 42 | 6  | 90 | 20 |
| 102,745 | 4 | 1 | 45 | 14 | 0 | 0 | 42 | 6  | 91 | 21 |
| 102,746 | 3 | 1 | 46 | 16 | 0 | 0 | 42 | 6  | 91 | 23 |
| 102,747 | 3 | 1 | 42 | 16 | 0 | 0 | 37 | 7  | 82 | 24 |
| 102,748 | 3 | 1 | 39 | 16 | 0 | 1 | 34 | 6  | 76 | 24 |
| 102,749 | 3 | 1 | 43 | 14 | 0 | 1 | 38 | 6  | 84 | 22 |
| 102,750 | 3 | 1 | 43 | 14 | 0 | 1 | 36 | 6  | 82 | 22 |
| 102,751 | 3 | 1 | 49 | 14 | 0 | 1 | 36 | 6  | 88 | 22 |
| 102,752 | 3 | 1 | 49 | 14 | 0 | 1 | 36 | 6  | 88 | 22 |
| 102,753 | 3 | 2 | 49 | 14 | 0 | 1 | 36 | 6  | 88 | 23 |
| 102,754 | 3 | 2 | 49 | 17 | 0 | 1 | 36 | 7  | 88 | 27 |
| 102,755 | 3 | 2 | 49 | 17 | 0 | 1 | 36 | 7  | 88 | 27 |
| 102,756 | 3 | 2 | 48 | 19 | 0 | 1 | 35 | 8  | 86 | 30 |
| 102,757 | 3 | 2 | 46 | 20 | 0 | 1 | 33 | 8  | 82 | 31 |
| 102,758 | 3 | 2 | 44 | 20 | 1 | 1 | 32 | 8  | 80 | 31 |
| 102,759 | 3 | 2 | 43 | 21 | 1 | 1 | 28 | 9  | 75 | 33 |
| 102,760 | 4 | 2 | 43 | 21 | 1 | 1 | 28 | 9  | 76 | 33 |
| 102,761 | 4 | 2 | 40 | 21 | 1 | 1 | 28 | 9  | 73 | 33 |
| 102,762 | 4 | 2 | 40 | 21 | 1 | 1 | 28 | 9  | 73 | 33 |
| 102,763 | 4 | 2 | 43 | 21 | 1 | 1 | 30 | 9  | 78 | 33 |
| 102,764 | 4 | 2 | 43 | 21 | 1 | 1 | 30 | 10 | 78 | 34 |
| 102,765 | 4 | 2 | 43 | 21 | 1 | 1 | 30 | 10 | 78 | 34 |
| 102,766 | 4 | 2 | 44 | 21 | 1 | 1 | 31 | 8  | 80 | 32 |
| 102,767 | 4 | 2 | 44 | 20 | 1 | 1 | 31 | 8  | 80 | 31 |
| 102,768 | 4 | 2 | 44 | 18 | 1 | 1 | 29 | 8  | 78 | 29 |
| 102,769 | 4 | 2 | 44 | 18 | 1 | 1 | 27 | 8  | 76 | 29 |
| 102,770 | 4 | 2 | 44 | 18 | 1 | 1 | 27 | 8  | 76 | 29 |
| 102,771 | 4 | 2 | 43 | 18 | 1 | 1 | 28 | 9  | 76 | 30 |
| 102,772 | 4 | 2 | 44 | 18 | 1 | 1 | 28 | 9  | 77 | 30 |
| 102,773 | 4 | 2 | 44 | 17 | 1 | 1 | 28 | 9  | 77 | 29 |
| 102,774 | 6 | 2 | 47 | 18 | 1 | 1 | 28 | 9  | 82 | 30 |
| 102,775 | 6 | 2 | 43 | 18 | 1 | 1 | 22 | 9  | 72 | 30 |

|         |   |   |    |    |   |   |    |    |    |    |
|---------|---|---|----|----|---|---|----|----|----|----|
| 102,776 | 7 | 2 | 45 | 17 | 1 | 1 | 22 | 9  | 75 | 29 |
| 102,777 | 7 | 2 | 46 | 17 | 2 | 1 | 22 | 10 | 77 | 30 |
| 102,778 | 7 | 2 | 44 | 17 | 2 | 1 | 18 | 10 | 71 | 30 |
| 102,779 | 8 | 2 | 51 | 17 | 2 | 1 | 19 | 11 | 80 | 31 |
| 102,780 | 8 | 2 | 50 | 17 | 2 | 1 | 20 | 11 | 80 | 31 |
| 102,781 | 8 | 2 | 50 | 17 | 2 | 1 | 19 | 10 | 79 | 30 |
| 102,782 | 8 | 2 | 50 | 18 | 2 | 1 | 18 | 11 | 78 | 32 |
| 102,783 | 8 | 2 | 50 | 18 | 2 | 1 | 18 | 11 | 78 | 32 |
| 102,784 | 8 | 2 | 50 | 18 | 2 | 1 | 18 | 11 | 78 | 32 |
| 102,785 | 8 | 2 | 50 | 17 | 2 | 1 | 17 | 11 | 77 | 31 |
| 102,786 | 8 | 2 | 50 | 17 | 2 | 1 | 17 | 11 | 77 | 31 |
| 102,787 | 8 | 2 | 50 | 17 | 2 | 1 | 17 | 11 | 77 | 31 |
| 102,788 | 8 | 1 | 53 | 17 | 2 | 1 | 18 | 10 | 81 | 29 |
| 102,789 | 8 | 2 | 53 | 18 | 2 | 2 | 18 | 12 | 81 | 34 |
| 102,790 | 8 | 2 | 54 | 18 | 2 | 2 | 18 | 12 | 82 | 34 |
| 102,791 | 8 | 2 | 54 | 18 | 2 | 2 | 20 | 12 | 84 | 34 |
| 102,792 | 8 | 2 | 51 | 18 | 2 | 2 | 20 | 13 | 81 | 35 |
| 102,793 | 6 | 2 | 49 | 18 | 2 | 2 | 20 | 12 | 77 | 34 |
| 102,794 | 7 | 2 | 43 | 16 | 2 | 2 | 15 | 13 | 67 | 33 |
| 102,795 | 7 | 2 | 42 | 16 | 2 | 2 | 14 | 13 | 65 | 33 |
| 102,796 | 7 | 2 | 41 | 13 | 2 | 2 | 14 | 12 | 64 | 29 |
| 102,797 | 7 | 2 | 39 | 13 | 2 | 2 | 14 | 12 | 62 | 29 |
| 102,798 | 7 | 2 | 39 | 13 | 2 | 2 | 17 | 12 | 65 | 29 |
| 102,799 | 7 | 2 | 44 | 13 | 2 | 1 | 18 | 12 | 71 | 28 |
| 102,800 | 7 | 2 | 40 | 13 | 2 | 1 | 14 | 12 | 63 | 28 |
| 102,801 | 7 | 2 | 39 | 13 | 2 | 1 | 15 | 12 | 63 | 28 |
| 102,802 | 7 | 2 | 39 | 13 | 2 | 1 | 15 | 12 | 63 | 28 |
| 102,803 | 7 | 2 | 39 | 13 | 2 | 1 | 15 | 12 | 63 | 28 |
| 102,804 | 7 | 1 | 42 | 12 | 2 | 1 | 16 | 12 | 67 | 26 |
| 102,805 | 7 | 1 | 43 | 9  | 2 | 1 | 17 | 11 | 69 | 22 |
| 102,806 | 7 | 1 | 43 | 7  | 2 | 1 | 17 | 10 | 69 | 19 |
| 102,807 | 7 | 1 | 43 | 6  | 2 | 1 | 17 | 10 | 69 | 18 |
| 102,808 | 7 | 1 | 43 | 6  | 2 | 1 | 17 | 10 | 69 | 18 |
| 102,809 | 7 | 1 | 43 | 6  | 1 | 1 | 17 | 10 | 68 | 18 |
| 102,810 | 7 | 1 | 43 | 5  | 1 | 1 | 17 | 9  | 68 | 16 |
| 102,811 | 6 | 1 | 42 | 5  | 1 | 1 | 17 | 9  | 66 | 16 |
| 102,812 | 6 | 1 | 42 | 5  | 1 | 1 | 17 | 9  | 66 | 16 |
| 102,813 | 6 | 1 | 41 | 5  | 1 | 1 | 16 | 9  | 64 | 16 |
| 102,814 | 6 | 1 | 39 | 5  | 1 | 1 | 15 | 9  | 61 | 16 |
| 102,815 | 6 | 1 | 39 | 5  | 1 | 1 | 15 | 8  | 61 | 15 |
| 102,816 | 6 | 1 | 38 | 5  | 1 | 1 | 14 | 8  | 59 | 15 |

|         |   |    |    |    |   |    |    |     |    |     |
|---------|---|----|----|----|---|----|----|-----|----|-----|
| 102,817 | 6 | 1  | 39 | 5  | 1 | 1  | 14 | 8   | 60 | 15  |
| 102,818 | 6 | 1  | 40 | 5  | 1 | 1  | 14 | 8   | 61 | 15  |
| 102,819 | 6 | 1  | 40 | 5  | 1 | 1  | 14 | 8   | 61 | 15  |
| 102,820 | 6 | 1  | 40 | 5  | 1 | 1  | 14 | 8   | 61 | 15  |
| 102,821 | 6 | 1  | 41 | 4  | 2 | 1  | 14 | 9   | 63 | 15  |
| 102,822 | 6 | 1  | 41 | 5  | 2 | 1  | 14 | 8   | 63 | 15  |
| 102,823 | 6 | 1  | 41 | 5  | 2 | 1  | 15 | 8   | 64 | 15  |
| 102,824 | 6 | 1  | 41 | 5  | 2 | 1  | 16 | 8   | 65 | 15  |
| 102,825 | 4 | 1  | 38 | 4  | 2 | 1  | 16 | 8   | 60 | 14  |
| 102,826 | 4 | 2  | 37 | 4  | 2 | 1  | 16 | 7   | 59 | 14  |
| 102,827 | 2 | 3  | 35 | 4  | 2 | 1  | 16 | 7   | 55 | 15  |
| 102,828 | 2 | 3  | 35 | 4  | 1 | 1  | 17 | 7   | 55 | 15  |
| 102,829 | 1 | 3  | 27 | 4  | 2 | 1  | 19 | 7   | 49 | 15  |
| 102,830 | 1 | 3  | 27 | 4  | 2 | 1  | 18 | 6   | 48 | 14  |
| 102,831 | 1 | 3  | 27 | 3  | 2 | 1  | 17 | 6   | 47 | 13  |
| 102,832 | 1 | 3  | 29 | 3  | 2 | 1  | 17 | 5   | 49 | 12  |
| 102,833 | 1 | 3  | 29 | 3  | 2 | 1  | 17 | 5   | 49 | 12  |
| 102,834 | 1 | 3  | 29 | 3  | 2 | 2  | 17 | 5   | 49 | 13  |
| 102,835 | 1 | 3  | 29 | 3  | 2 | 2  | 17 | 5   | 49 | 13  |
| 102,836 | 1 | 3  | 29 | 3  | 2 | 2  | 17 | 5   | 49 | 13  |
| 102,837 | 1 | 3  | 30 | 3  | 2 | 2  | 17 | 5   | 50 | 13  |
| 102,838 | 1 | 3  | 28 | 3  | 2 | 2  | 16 | 5   | 47 | 13  |
| 102,839 | 1 | 3  | 26 | 3  | 2 | 2  | 17 | 5   | 46 | 13  |
| 102,840 | 1 | 2  | 26 | 2  | 2 | 1  | 16 | 3   | 45 | 8   |
| 102,841 | 2 | 2  | 26 | 2  | 2 | 1  | 15 | 3   | 45 | 8   |
| 102,842 | 2 | 2  | 27 | 2  | 2 | 1  | 15 | 3   | 46 | 8   |
| 102,843 | 2 | 2  | 29 | 1  | 2 | 1  | 15 | 1   | 48 | 5   |
| 102,844 | 2 | 2  | 29 | 2  | 2 | 1  | 15 | 3   | 48 | 8   |
| 102,845 | 1 | 2  | 29 | 4  | 2 | 2  | 14 | 7   | 46 | 15  |
| 102,846 | 1 | 2  | 29 | 5  | 2 | 3  | 14 | 7   | 46 | 17  |
| 102,847 | 1 | 6  | 29 | 21 | 2 | 9  | 14 | 21  | 46 | 57  |
| 102,848 | 2 | 7  | 29 | 24 | 2 | 9  | 14 | 26  | 47 | 66  |
| 102,849 | 2 | 8  | 29 | 29 | 2 | 9  | 12 | 33  | 45 | 79  |
| 102,850 | 2 | 21 | 24 | 41 | 2 | 21 | 12 | 81  | 40 | 164 |
| 102,851 | 2 | 21 | 20 | 42 | 2 | 21 | 11 | 83  | 35 | 167 |
| 102,852 | 2 | 22 | 19 | 47 | 2 | 26 | 10 | 97  | 33 | 192 |
| 102,853 | 2 | 22 | 19 | 52 | 2 | 26 | 10 | 98  | 33 | 198 |
| 102,854 | 2 | 25 | 18 | 55 | 2 | 27 | 9  | 101 | 31 | 208 |
| 102,855 | 2 | 24 | 13 | 50 | 1 | 26 | 7  | 95  | 23 | 195 |
| 102,856 | 2 | 25 | 15 | 56 | 2 | 27 | 8  | 101 | 27 | 209 |
| 102,857 | 2 | 25 | 15 | 57 | 2 | 27 | 8  | 101 | 27 | 210 |

|         |   |    |    |    |   |    |   |     |    |     |
|---------|---|----|----|----|---|----|---|-----|----|-----|
| 102,858 | 2 | 25 | 15 | 57 | 2 | 28 | 8 | 102 | 27 | 212 |
| 102,859 | 2 | 25 | 15 | 57 | 2 | 28 | 8 | 102 | 27 | 212 |
| 102,860 | 2 | 25 | 15 | 57 | 2 | 28 | 8 | 102 | 27 | 212 |
| 102,861 | 2 | 26 | 15 | 57 | 2 | 28 | 8 | 102 | 27 | 213 |
| 102,862 | 2 | 26 | 15 | 58 | 2 | 28 | 8 | 102 | 27 | 214 |
| 102,863 | 2 | 26 | 15 | 58 | 2 | 28 | 8 | 102 | 27 | 214 |
| 102,864 | 2 | 26 | 15 | 59 | 2 | 28 | 8 | 102 | 27 | 215 |
| 102,865 | 2 | 26 | 15 | 59 | 2 | 28 | 8 | 102 | 27 | 215 |
| 102,866 | 2 | 27 | 14 | 59 | 2 | 28 | 8 | 102 | 26 | 216 |
| 102,867 | 2 | 27 | 13 | 59 | 2 | 29 | 8 | 102 | 25 | 217 |
| 102,868 | 2 | 27 | 13 | 59 | 2 | 29 | 8 | 102 | 25 | 217 |
| 102,869 | 2 | 27 | 12 | 60 | 2 | 29 | 8 | 104 | 24 | 220 |
| 102,870 | 2 | 27 | 12 | 60 | 2 | 29 | 8 | 104 | 24 | 220 |
| 102,871 | 2 | 27 | 12 | 60 | 2 | 29 | 8 | 104 | 24 | 220 |
| 102,872 | 2 | 27 | 12 | 60 | 2 | 29 | 8 | 103 | 24 | 219 |
| 102,873 | 2 | 27 | 12 | 60 | 1 | 29 | 8 | 103 | 23 | 219 |
| 102,874 | 2 | 28 | 11 | 60 | 1 | 29 | 8 | 103 | 22 | 220 |
| 102,875 | 2 | 28 | 11 | 61 | 1 | 29 | 7 | 104 | 21 | 222 |
| 102,876 | 2 | 28 | 11 | 61 | 1 | 29 | 7 | 104 | 21 | 222 |
| 102,877 | 2 | 27 | 11 | 61 | 1 | 29 | 7 | 104 | 21 | 221 |
| 102,878 | 2 | 27 | 11 | 63 | 1 | 29 | 7 | 105 | 21 | 224 |
| 102,879 | 2 | 27 | 11 | 63 | 1 | 29 | 6 | 106 | 20 | 225 |
| 102,880 | 2 | 27 | 9  | 64 | 1 | 29 | 4 | 106 | 16 | 226 |
| 102,881 | 2 | 27 | 9  | 64 | 1 | 29 | 4 | 106 | 16 | 226 |
| 102,882 | 2 | 27 | 8  | 64 | 1 | 29 | 4 | 106 | 15 | 226 |
| 102,883 | 2 | 27 | 6  | 64 | 1 | 29 | 4 | 106 | 13 | 226 |
| 102,884 | 2 | 27 | 6  | 64 | 1 | 28 | 4 | 106 | 13 | 225 |
| 102,885 | 2 | 27 | 6  | 64 | 1 | 28 | 4 | 106 | 13 | 225 |
| 102,886 | 2 | 27 | 6  | 64 | 1 | 28 | 4 | 106 | 13 | 225 |
| 102,887 | 2 | 27 | 6  | 64 | 1 | 28 | 5 | 106 | 14 | 225 |
| 102,888 | 2 | 27 | 6  | 64 | 1 | 28 | 5 | 106 | 14 | 225 |
| 102,889 | 2 | 27 | 5  | 64 | 1 | 28 | 5 | 106 | 13 | 225 |
| 102,890 | 2 | 27 | 5  | 64 | 1 | 28 | 5 | 105 | 13 | 224 |
| 102,891 | 2 | 27 | 5  | 64 | 1 | 28 | 4 | 105 | 12 | 224 |
| 102,892 | 1 | 27 | 5  | 64 | 1 | 27 | 4 | 105 | 11 | 223 |
| 102,893 | 2 | 27 | 3  | 64 | 1 | 28 | 4 | 104 | 10 | 223 |
| 102,894 | 2 | 27 | 2  | 65 | 1 | 28 | 4 | 105 | 9  | 225 |
| 102,895 | 2 | 22 | 2  | 51 | 1 | 25 | 3 | 94  | 8  | 192 |
| 102,896 | 2 | 24 | 2  | 59 | 1 | 24 | 4 | 97  | 9  | 204 |
| 102,897 | 1 | 27 | 2  | 60 | 1 | 23 | 4 | 99  | 8  | 209 |
| 102,898 | 1 | 23 | 2  | 46 | 1 | 21 | 4 | 84  | 8  | 174 |

|         |   |    |   |    |   |    |   |    |   |     |
|---------|---|----|---|----|---|----|---|----|---|-----|
| 102,899 | 1 | 22 | 2 | 40 | 1 | 20 | 4 | 80 | 8 | 162 |
| 102,900 | 1 | 15 | 2 | 35 | 1 | 18 | 4 | 65 | 8 | 133 |
| 102,901 | 1 | 9  | 1 | 25 | 1 | 7  | 2 | 31 | 5 | 72  |
| 102,902 | 1 | 8  | 1 | 23 | 1 | 6  | 2 | 23 | 5 | 60  |
| 102,903 | 1 | 7  | 1 | 20 | 1 | 3  | 2 | 14 | 5 | 44  |
| 102,904 | 1 | 7  | 1 | 16 | 1 | 3  | 2 | 10 | 5 | 36  |
| 102,905 | 1 | 7  | 1 | 12 | 1 | 3  | 2 | 10 | 5 | 32  |
| 102,906 | 1 | 6  | 1 | 11 | 1 | 3  | 2 | 8  | 5 | 28  |
| 102,907 | 1 | 4  | 1 | 11 | 1 | 3  | 2 | 8  | 5 | 26  |
| 102,908 | 1 | 4  | 1 | 9  | 1 | 2  | 2 | 8  | 5 | 23  |
| 102,909 | 1 | 4  | 1 | 10 | 1 | 2  | 2 | 8  | 5 | 24  |
| 102,910 | 1 | 4  | 1 | 10 | 1 | 1  | 2 | 8  | 5 | 23  |
| 102,911 | 1 | 4  | 1 | 10 | 1 | 1  | 2 | 8  | 5 | 23  |
| 102,912 | 1 | 4  | 1 | 10 | 1 | 1  | 2 | 8  | 5 | 23  |
| 102,913 | 1 | 3  | 1 | 10 | 1 | 1  | 2 | 9  | 5 | 23  |
| 102,914 | 1 | 3  | 1 | 9  | 1 | 1  | 2 | 9  | 5 | 22  |
| 102,915 | 1 | 3  | 1 | 9  | 1 | 1  | 2 | 9  | 5 | 22  |
| 102,916 | 1 | 2  | 1 | 9  | 1 | 1  | 2 | 9  | 5 | 21  |
| 102,917 | 1 | 2  | 1 | 8  | 1 | 1  | 2 | 9  | 5 | 20  |
| 102,918 | 1 | 2  | 1 | 8  | 1 | 0  | 2 | 9  | 5 | 19  |
| 102,919 | 1 | 2  | 1 | 7  | 1 | 0  | 2 | 8  | 5 | 17  |
| 102,920 | 1 | 2  | 1 | 7  | 1 | 0  | 2 | 9  | 5 | 18  |
| 102,921 | 1 | 2  | 1 | 7  | 1 | 0  | 2 | 9  | 5 | 18  |
| 102,922 | 1 | 2  | 1 | 7  | 1 | 0  | 2 | 10 | 5 | 19  |
| 102,923 | 1 | 2  | 0 | 7  | 1 | 0  | 2 | 10 | 4 | 19  |
| 102,924 | 1 | 0  | 0 | 6  | 1 | 0  | 1 | 9  | 3 | 15  |
| 102,925 | 1 | 0  | 0 | 6  | 1 | 0  | 1 | 9  | 3 | 15  |
| 102,926 | 1 | 0  | 0 | 6  | 1 | 0  | 1 | 9  | 3 | 15  |
| 102,927 | 1 | 0  | 0 | 5  | 1 | 0  | 1 | 9  | 3 | 14  |
| 102,928 | 1 | 0  | 0 | 5  | 1 | 0  | 1 | 9  | 3 | 14  |
| 102,929 | 1 | 0  | 0 | 5  | 1 | 0  | 1 | 9  | 3 | 14  |
| 102,930 | 1 | 0  | 0 | 3  | 1 | 0  | 1 | 8  | 3 | 11  |
| 102,931 | 0 | 0  | 1 | 5  | 0 | 0  | 2 | 6  | 3 | 11  |
| 102,932 | 1 | 0  | 1 | 6  | 0 | 0  | 2 | 6  | 4 | 12  |
| 102,933 | 1 | 0  | 1 | 7  | 0 | 0  | 2 | 7  | 4 | 14  |
| 102,934 | 1 | 1  | 1 | 7  | 0 | 0  | 2 | 8  | 4 | 16  |
| 102,935 | 1 | 1  | 1 | 10 | 0 | 0  | 2 | 8  | 4 | 19  |
| 102,936 | 1 | 1  | 1 | 14 | 1 | 0  | 2 | 8  | 5 | 23  |
| 102,937 | 1 | 1  | 1 | 14 | 1 | 0  | 2 | 8  | 5 | 23  |
| 102,938 | 2 | 1  | 1 | 18 | 1 | 0  | 2 | 8  | 6 | 27  |
| 102,939 | 2 | 1  | 1 | 19 | 1 | 0  | 1 | 8  | 5 | 28  |

|         |   |   |   |    |   |   |   |    |    |    |
|---------|---|---|---|----|---|---|---|----|----|----|
| 102,940 | 2 | 1 | 1 | 19 | 1 | 0 | 1 | 8  | 5  | 28 |
| 102,941 | 3 | 1 | 1 | 20 | 1 | 0 | 1 | 9  | 6  | 30 |
| 102,942 | 3 | 1 | 1 | 20 | 1 | 0 | 1 | 9  | 6  | 30 |
| 102,943 | 4 | 1 | 1 | 20 | 1 | 0 | 1 | 9  | 7  | 30 |
| 102,944 | 4 | 1 | 1 | 20 | 1 | 0 | 1 | 9  | 7  | 30 |
| 102,945 | 3 | 1 | 1 | 19 | 1 | 0 | 1 | 8  | 6  | 28 |
| 102,946 | 3 | 1 | 1 | 21 | 1 | 0 | 1 | 9  | 6  | 31 |
| 102,947 | 4 | 1 | 1 | 20 | 1 | 1 | 1 | 9  | 7  | 31 |
| 102,948 | 5 | 1 | 1 | 21 | 1 | 2 | 1 | 8  | 8  | 32 |
| 102,949 | 5 | 1 | 1 | 22 | 1 | 2 | 1 | 8  | 8  | 33 |
| 102,950 | 5 | 1 | 1 | 27 | 1 | 2 | 1 | 8  | 8  | 38 |
| 102,951 | 5 | 1 | 1 | 28 | 1 | 2 | 2 | 8  | 9  | 39 |
| 102,952 | 5 | 3 | 1 | 28 | 1 | 2 | 2 | 8  | 9  | 41 |
| 102,953 | 5 | 3 | 1 | 28 | 1 | 2 | 2 | 8  | 9  | 41 |
| 102,954 | 5 | 3 | 1 | 30 | 1 | 2 | 2 | 8  | 9  | 43 |
| 102,955 | 5 | 3 | 1 | 33 | 1 | 2 | 2 | 8  | 9  | 46 |
| 102,956 | 5 | 3 | 1 | 33 | 1 | 2 | 2 | 8  | 9  | 46 |
| 102,957 | 5 | 3 | 1 | 34 | 1 | 2 | 2 | 9  | 9  | 48 |
| 102,958 | 5 | 3 | 1 | 36 | 1 | 2 | 2 | 9  | 9  | 50 |
| 102,959 | 5 | 3 | 1 | 36 | 1 | 2 | 2 | 9  | 9  | 50 |
| 102,960 | 5 | 3 | 1 | 35 | 1 | 2 | 2 | 8  | 9  | 48 |
| 102,961 | 5 | 4 | 1 | 35 | 1 | 2 | 2 | 9  | 9  | 50 |
| 102,962 | 5 | 4 | 1 | 36 | 1 | 2 | 2 | 9  | 9  | 51 |
| 102,963 | 5 | 4 | 1 | 36 | 1 | 2 | 2 | 8  | 9  | 50 |
| 102,964 | 5 | 4 | 1 | 37 | 1 | 2 | 2 | 9  | 9  | 52 |
| 102,965 | 5 | 4 | 1 | 37 | 1 | 2 | 2 | 10 | 9  | 53 |
| 102,966 | 5 | 4 | 1 | 38 | 1 | 2 | 2 | 10 | 9  | 54 |
| 102,967 | 5 | 4 | 1 | 39 | 1 | 3 | 2 | 10 | 9  | 56 |
| 102,968 | 5 | 4 | 1 | 41 | 1 | 3 | 2 | 10 | 9  | 58 |
| 102,969 | 5 | 4 | 1 | 41 | 1 | 3 | 2 | 10 | 9  | 58 |
| 102,970 | 5 | 4 | 1 | 43 | 1 | 3 | 2 | 11 | 9  | 61 |
| 102,971 | 5 | 4 | 1 | 43 | 2 | 3 | 2 | 10 | 10 | 60 |
| 102,972 | 5 | 4 | 1 | 43 | 2 | 3 | 2 | 10 | 10 | 60 |
| 102,973 | 5 | 4 | 1 | 43 | 2 | 3 | 2 | 9  | 10 | 59 |
| 102,974 | 5 | 6 | 1 | 43 | 2 | 3 | 3 | 9  | 11 | 61 |
| 102,975 | 5 | 6 | 1 | 43 | 2 | 3 | 3 | 9  | 11 | 61 |
| 102,976 | 5 | 6 | 1 | 43 | 2 | 3 | 3 | 9  | 11 | 61 |
| 102,977 | 5 | 6 | 1 | 45 | 2 | 3 | 3 | 10 | 11 | 64 |
| 102,978 | 5 | 6 | 1 | 46 | 2 | 3 | 3 | 10 | 11 | 65 |
| 102,979 | 5 | 6 | 1 | 47 | 2 | 3 | 3 | 10 | 11 | 66 |
| 102,980 | 5 | 6 | 1 | 49 | 2 | 3 | 3 | 11 | 11 | 69 |



|         |   |    |   |     |   |    |   |     |    |     |
|---------|---|----|---|-----|---|----|---|-----|----|-----|
| 102,981 | 5 | 6  | 1 | 50  | 2 | 3  | 3 | 11  | 11 | 70  |
| 102,982 | 5 | 6  | 0 | 49  | 2 | 3  | 2 | 11  | 9  | 69  |
| 102,983 | 5 | 6  | 2 | 54  | 2 | 3  | 2 | 13  | 11 | 76  |
| 102,984 | 5 | 6  | 2 | 58  | 2 | 3  | 2 | 12  | 11 | 79  |
| 102,985 | 5 | 5  | 3 | 55  | 2 | 3  | 2 | 11  | 12 | 74  |
| 102,986 | 5 | 5  | 3 | 56  | 2 | 3  | 2 | 12  | 12 | 76  |
| 102,987 | 5 | 5  | 3 | 50  | 1 | 3  | 2 | 12  | 11 | 70  |
| 102,988 | 5 | 5  | 3 | 50  | 1 | 3  | 2 | 14  | 11 | 72  |
| 102,989 | 4 | 5  | 3 | 50  | 1 | 3  | 2 | 14  | 10 | 72  |
| 102,990 | 4 | 6  | 3 | 50  | 1 | 3  | 2 | 15  | 10 | 74  |
| 102,991 | 3 | 8  | 3 | 50  | 1 | 3  | 2 | 19  | 9  | 80  |
| 102,992 | 3 | 9  | 3 | 52  | 2 | 3  | 2 | 19  | 10 | 83  |
| 102,993 | 2 | 9  | 3 | 52  | 2 | 3  | 2 | 19  | 9  | 83  |
| 102,994 | 2 | 9  | 3 | 52  | 2 | 3  | 2 | 19  | 9  | 83  |
| 102,995 | 2 | 9  | 3 | 51  | 2 | 2  | 2 | 19  | 9  | 81  |
| 102,996 | 2 | 9  | 4 | 53  | 2 | 2  | 2 | 19  | 10 | 83  |
| 102,997 | 2 | 9  | 4 | 53  | 2 | 2  | 2 | 19  | 10 | 83  |
| 102,998 | 1 | 9  | 5 | 53  | 2 | 2  | 2 | 19  | 10 | 83  |
| 102,999 | 0 | 9  | 5 | 52  | 2 | 1  | 2 | 19  | 9  | 81  |
| 103,000 | 0 | 10 | 5 | 53  | 2 | 1  | 2 | 19  | 9  | 83  |
| 103,001 | 0 | 10 | 5 | 48  | 2 | 1  | 2 | 19  | 9  | 78  |
| 103,002 | 0 | 10 | 5 | 47  | 2 | 1  | 1 | 19  | 8  | 77  |
| 103,003 | 0 | 8  | 5 | 47  | 2 | 1  | 1 | 19  | 8  | 75  |
| 103,004 | 0 | 8  | 5 | 47  | 2 | 1  | 1 | 19  | 8  | 75  |
| 103,005 | 0 | 8  | 5 | 45  | 2 | 1  | 1 | 20  | 8  | 74  |
| 103,006 | 0 | 8  | 5 | 42  | 2 | 1  | 1 | 20  | 8  | 71  |
| 103,007 | 0 | 8  | 6 | 43  | 2 | 1  | 1 | 20  | 9  | 72  |
| 103,008 | 0 | 8  | 6 | 40  | 2 | 1  | 1 | 19  | 9  | 68  |
| 103,009 | 0 | 8  | 6 | 41  | 2 | 1  | 1 | 19  | 9  | 69  |
| 103,010 | 0 | 8  | 6 | 41  | 2 | 1  | 1 | 19  | 9  | 69  |
| 103,011 | 0 | 7  | 6 | 41  | 2 | 1  | 1 | 18  | 9  | 67  |
| 103,012 | 0 | 7  | 6 | 40  | 2 | 1  | 1 | 18  | 9  | 66  |
| 103,013 | 0 | 7  | 6 | 44  | 2 | 1  | 1 | 20  | 9  | 72  |
| 103,014 | 0 | 8  | 6 | 51  | 2 | 2  | 1 | 21  | 9  | 82  |
| 103,015 | 0 | 8  | 6 | 56  | 2 | 2  | 1 | 27  | 9  | 93  |
| 103,016 | 0 | 8  | 6 | 58  | 2 | 2  | 1 | 29  | 9  | 97  |
| 103,017 | 0 | 10 | 6 | 74  | 2 | 4  | 1 | 35  | 9  | 123 |
| 103,018 | 0 | 17 | 6 | 133 | 2 | 4  | 1 | 76  | 9  | 230 |
| 103,019 | 0 | 27 | 6 | 221 | 2 | 13 | 1 | 143 | 9  | 404 |
| 103,020 | 0 | 33 | 6 | 292 | 2 | 16 | 1 | 207 | 9  | 548 |
| 103,021 | 0 | 37 | 6 | 361 | 2 | 21 | 1 | 265 | 9  | 684 |

|         |   |    |   |     |   |    |   |     |    |       |
|---------|---|----|---|-----|---|----|---|-----|----|-------|
| 103,022 | 0 | 52 | 6 | 462 | 1 | 22 | 1 | 294 | 8  | 830   |
| 103,023 | 0 | 71 | 6 | 518 | 1 | 25 | 1 | 326 | 8  | 940   |
| 103,024 | 0 | 72 | 6 | 529 | 1 | 25 | 1 | 329 | 8  | 955   |
| 103,025 | 1 | 71 | 6 | 530 | 1 | 25 | 0 | 330 | 8  | 956   |
| 103,026 | 1 | 71 | 6 | 531 | 1 | 25 | 0 | 330 | 8  | 957   |
| 103,027 | 1 | 71 | 6 | 531 | 1 | 25 | 0 | 330 | 8  | 957   |
| 103,028 | 1 | 75 | 6 | 532 | 1 | 25 | 0 | 330 | 8  | 962   |
| 103,029 | 1 | 76 | 6 | 533 | 1 | 25 | 0 | 330 | 8  | 964   |
| 103,030 | 1 | 76 | 6 | 536 | 1 | 25 | 0 | 330 | 8  | 967   |
| 103,031 | 1 | 76 | 8 | 534 | 1 | 25 | 0 | 329 | 10 | 964   |
| 103,032 | 1 | 76 | 8 | 535 | 1 | 25 | 0 | 329 | 10 | 965   |
| 103,033 | 1 | 76 | 8 | 536 | 1 | 25 | 0 | 329 | 10 | 966   |
| 103,034 | 1 | 76 | 6 | 524 | 1 | 25 | 0 | 327 | 8  | 952   |
| 103,035 | 1 | 76 | 6 | 525 | 1 | 25 | 0 | 327 | 8  | 953   |
| 103,036 | 2 | 76 | 5 | 525 | 1 | 25 | 0 | 327 | 8  | 953   |
| 103,037 | 2 | 76 | 5 | 524 | 1 | 25 | 0 | 327 | 8  | 952   |
| 103,038 | 2 | 76 | 6 | 523 | 1 | 25 | 0 | 325 | 9  | 949   |
| 103,039 | 2 | 76 | 7 | 523 | 1 | 25 | 0 | 326 | 10 | 950   |
| 103,040 | 2 | 76 | 8 | 523 | 1 | 25 | 0 | 327 | 11 | 951   |
| 103,041 | 2 | 72 | 8 | 522 | 1 | 25 | 0 | 323 | 11 | 942   |
| 103,042 | 2 | 72 | 8 | 530 | 1 | 26 | 0 | 328 | 11 | 956   |
| 103,043 | 2 | 72 | 8 | 532 | 0 | 26 | 0 | 329 | 10 | 959   |
| 103,044 | 2 | 76 | 9 | 596 | 0 | 28 | 0 | 366 | 11 | 1,066 |
| 103,045 | 2 | 76 | 9 | 610 | 0 | 31 | 0 | 374 | 11 | 1,091 |
| 103,046 | 2 | 76 | 9 | 615 | 0 | 31 | 0 | 375 | 11 | 1,097 |
| 103,047 | 2 | 76 | 8 | 621 | 0 | 31 | 0 | 378 | 10 | 1,106 |
| 103,048 | 2 | 76 | 8 | 626 | 1 | 31 | 0 | 378 | 11 | 1,111 |
| 103,049 | 2 | 76 | 7 | 628 | 1 | 32 | 0 | 380 | 10 | 1,116 |
| 103,050 | 2 | 76 | 7 | 628 | 1 | 32 | 0 | 383 | 10 | 1,119 |
| 103,051 | 2 | 75 | 7 | 627 | 1 | 32 | 0 | 383 | 10 | 1,117 |
| 103,052 | 2 | 75 | 7 | 627 | 1 | 32 | 0 | 383 | 10 | 1,117 |
| 103,053 | 2 | 75 | 7 | 627 | 1 | 32 | 0 | 384 | 10 | 1,118 |
| 103,054 | 2 | 75 | 7 | 628 | 1 | 32 | 0 | 386 | 10 | 1,121 |
| 103,055 | 2 | 75 | 7 | 631 | 1 | 32 | 0 | 395 | 10 | 1,133 |
| 103,056 | 2 | 75 | 7 | 633 | 1 | 32 | 0 | 397 | 10 | 1,137 |
| 103,057 | 2 | 76 | 6 | 661 | 1 | 32 | 0 | 406 | 9  | 1,175 |
| 103,058 | 2 | 76 | 6 | 661 | 1 | 33 | 0 | 410 | 9  | 1,180 |
| 103,059 | 2 | 76 | 6 | 663 | 1 | 34 | 0 | 413 | 9  | 1,186 |
| 103,060 | 2 | 81 | 6 | 669 | 1 | 35 | 0 | 434 | 9  | 1,219 |
| 103,061 | 2 | 81 | 6 | 669 | 1 | 35 | 0 | 435 | 9  | 1,220 |
| 103,062 | 2 | 81 | 6 | 674 | 1 | 35 | 0 | 439 | 9  | 1,229 |

|         |   |    |    |     |   |    |   |     |    |       |
|---------|---|----|----|-----|---|----|---|-----|----|-------|
| 103,063 | 2 | 81 | 6  | 670 | 1 | 36 | 0 | 437 | 9  | 1,224 |
| 103,064 | 2 | 84 | 6  | 674 | 1 | 37 | 1 | 440 | 10 | 1,235 |
| 103,065 | 2 | 83 | 6  | 670 | 1 | 36 | 1 | 441 | 10 | 1,230 |
| 103,066 | 2 | 74 | 6  | 588 | 1 | 33 | 1 | 386 | 10 | 1,081 |
| 103,067 | 2 | 74 | 6  | 588 | 1 | 33 | 1 | 386 | 10 | 1,081 |
| 103,068 | 2 | 74 | 6  | 586 | 1 | 33 | 1 | 386 | 10 | 1,079 |
| 103,069 | 2 | 64 | 6  | 497 | 1 | 24 | 1 | 321 | 10 | 906   |
| 103,070 | 2 | 58 | 8  | 426 | 1 | 21 | 1 | 257 | 12 | 762   |
| 103,071 | 2 | 39 | 8  | 254 | 1 | 15 | 1 | 170 | 12 | 478   |
| 103,072 | 2 | 42 | 8  | 261 | 1 | 16 | 1 | 178 | 12 | 497   |
| 103,073 | 2 | 45 | 8  | 266 | 1 | 17 | 2 | 186 | 13 | 514   |
| 103,074 | 1 | 25 | 8  | 209 | 1 | 14 | 2 | 165 | 12 | 413   |
| 103,075 | 1 | 40 | 8  | 350 | 1 | 31 | 2 | 269 | 12 | 690   |
| 103,076 | 1 | 42 | 8  | 364 | 1 | 32 | 3 | 276 | 13 | 714   |
| 103,077 | 1 | 45 | 10 | 402 | 1 | 35 | 3 | 291 | 15 | 773   |
| 103,078 | 1 | 45 | 11 | 410 | 2 | 35 | 3 | 300 | 17 | 790   |
| 103,079 | 1 | 40 | 12 | 408 | 3 | 35 | 3 | 299 | 19 | 782   |
| 103,080 | 1 | 41 | 12 | 420 | 3 | 37 | 3 | 326 | 19 | 824   |
| 103,081 | 1 | 41 | 10 | 420 | 3 | 37 | 3 | 327 | 17 | 825   |
| 103,082 | 1 | 41 | 10 | 426 | 3 | 37 | 4 | 333 | 18 | 837   |
| 103,083 | 1 | 41 | 10 | 428 | 3 | 37 | 4 | 336 | 18 | 842   |
| 103,084 | 1 | 42 | 10 | 428 | 3 | 37 | 4 | 337 | 18 | 844   |
| 103,085 | 1 | 42 | 10 | 428 | 3 | 37 | 4 | 337 | 18 | 844   |
| 103,086 | 1 | 43 | 10 | 430 | 4 | 38 | 4 | 338 | 19 | 849   |
| 103,087 | 0 | 43 | 10 | 429 | 4 | 38 | 4 | 337 | 18 | 847   |
| 103,088 | 0 | 43 | 10 | 428 | 4 | 38 | 4 | 337 | 18 | 846   |
| 103,089 | 0 | 43 | 9  | 430 | 4 | 38 | 4 | 340 | 17 | 851   |
| 103,090 | 0 | 44 | 8  | 440 | 4 | 41 | 4 | 346 | 16 | 871   |
| 103,091 | 0 | 44 | 7  | 441 | 4 | 41 | 4 | 345 | 15 | 871   |
| 103,092 | 0 | 44 | 7  | 439 | 4 | 41 | 4 | 343 | 15 | 867   |
| 103,093 | 0 | 44 | 7  | 431 | 4 | 40 | 4 | 338 | 15 | 853   |
| 103,094 | 0 | 40 | 6  | 366 | 4 | 38 | 4 | 300 | 14 | 744   |
| 103,095 | 0 | 40 | 6  | 365 | 4 | 38 | 4 | 300 | 14 | 743   |
| 103,096 | 0 | 40 | 6  | 352 | 4 | 35 | 4 | 292 | 14 | 719   |
| 103,097 | 0 | 40 | 6  | 346 | 4 | 35 | 4 | 290 | 14 | 711   |
| 103,098 | 0 | 40 | 6  | 338 | 4 | 35 | 4 | 287 | 14 | 700   |
| 103,099 | 0 | 40 | 6  | 345 | 3 | 35 | 5 | 288 | 14 | 708   |
| 103,100 | 0 | 41 | 6  | 346 | 3 | 34 | 5 | 289 | 14 | 710   |
| 103,101 | 0 | 41 | 6  | 349 | 3 | 34 | 5 | 286 | 14 | 710   |
| 103,102 | 0 | 42 | 6  | 355 | 3 | 36 | 5 | 291 | 14 | 724   |
| 103,103 | 0 | 42 | 6  | 361 | 3 | 37 | 5 | 295 | 14 | 735   |

|         |   |    |   |     |   |    |   |     |    |     |
|---------|---|----|---|-----|---|----|---|-----|----|-----|
| 103,104 | 0 | 42 | 6 | 364 | 3 | 38 | 5 | 295 | 14 | 739 |
| 103,105 | 0 | 42 | 6 | 365 | 3 | 38 | 5 | 292 | 14 | 737 |
| 103,106 | 0 | 42 | 6 | 364 | 3 | 39 | 5 | 284 | 14 | 729 |
| 103,107 | 0 | 43 | 6 | 364 | 3 | 40 | 5 | 287 | 14 | 734 |
| 103,108 | 0 | 42 | 6 | 336 | 3 | 40 | 5 | 278 | 14 | 696 |
| 103,109 | 0 | 42 | 6 | 338 | 3 | 39 | 6 | 275 | 15 | 694 |
| 103,110 | 0 | 41 | 6 | 337 | 3 | 38 | 6 | 273 | 15 | 689 |
| 103,111 | 0 | 37 | 6 | 330 | 3 | 37 | 6 | 252 | 15 | 656 |
| 103,112 | 0 | 38 | 6 | 330 | 3 | 37 | 6 | 251 | 15 | 656 |
| 103,113 | 0 | 38 | 6 | 326 | 3 | 37 | 6 | 247 | 15 | 648 |
| 103,114 | 0 | 38 | 6 | 326 | 3 | 36 | 6 | 248 | 15 | 648 |
| 103,115 | 0 | 35 | 6 | 322 | 3 | 35 | 5 | 244 | 14 | 636 |
| 103,116 | 0 | 35 | 6 | 319 | 3 | 36 | 5 | 241 | 14 | 631 |
| 103,117 | 0 | 35 | 6 | 321 | 3 | 36 | 5 | 241 | 14 | 633 |
| 103,118 | 0 | 35 | 6 | 332 | 3 | 36 | 5 | 246 | 14 | 649 |
| 103,119 | 0 | 35 | 6 | 335 | 3 | 36 | 5 | 257 | 14 | 663 |
| 103,120 | 0 | 36 | 6 | 354 | 3 | 37 | 5 | 278 | 14 | 705 |
| 103,121 | 0 | 36 | 4 | 364 | 3 | 39 | 5 | 285 | 12 | 724 |
| 103,122 | 0 | 37 | 4 | 394 | 3 | 40 | 5 | 307 | 12 | 778 |
| 103,123 | 0 | 38 | 4 | 406 | 3 | 41 | 5 | 338 | 12 | 823 |
| 103,124 | 0 | 35 | 4 | 403 | 3 | 40 | 4 | 331 | 11 | 809 |
| 103,125 | 0 | 34 | 5 | 403 | 3 | 44 | 4 | 328 | 12 | 809 |
| 103,126 | 0 | 21 | 5 | 279 | 3 | 31 | 4 | 238 | 12 | 569 |
| 103,127 | 1 | 21 | 6 | 268 | 3 | 32 | 3 | 235 | 13 | 556 |
| 103,128 | 1 | 18 | 4 | 233 | 3 | 29 | 3 | 226 | 11 | 506 |
| 103,129 | 1 | 18 | 3 | 222 | 2 | 29 | 3 | 216 | 9  | 485 |
| 103,130 | 1 | 18 | 2 | 223 | 1 | 29 | 3 | 217 | 7  | 487 |
| 103,131 | 1 | 17 | 2 | 207 | 1 | 27 | 3 | 190 | 7  | 441 |
| 103,132 | 1 | 17 | 2 | 208 | 1 | 27 | 2 | 190 | 6  | 442 |
| 103,133 | 1 | 17 | 3 | 198 | 1 | 27 | 3 | 182 | 8  | 424 |
| 103,134 | 1 | 17 | 3 | 197 | 1 | 27 | 3 | 182 | 8  | 423 |
| 103,135 | 1 | 16 | 3 | 197 | 1 | 27 | 5 | 181 | 10 | 421 |
| 103,136 | 1 | 16 | 3 | 197 | 1 | 27 | 5 | 181 | 10 | 421 |
| 103,137 | 2 | 15 | 3 | 194 | 0 | 26 | 5 | 180 | 10 | 415 |
| 103,138 | 2 | 15 | 4 | 193 | 0 | 26 | 6 | 180 | 12 | 414 |
| 103,139 | 2 | 15 | 4 | 194 | 0 | 26 | 6 | 180 | 12 | 415 |
| 103,140 | 2 | 15 | 4 | 194 | 0 | 26 | 6 | 177 | 12 | 412 |
| 103,141 | 3 | 14 | 5 | 185 | 0 | 23 | 6 | 170 | 14 | 392 |
| 103,142 | 3 | 14 | 5 | 184 | 0 | 23 | 6 | 170 | 14 | 391 |
| 103,143 | 3 | 14 | 5 | 184 | 0 | 23 | 6 | 170 | 14 | 391 |
| 103,144 | 3 | 14 | 5 | 187 | 0 | 23 | 6 | 170 | 14 | 394 |

|         |   |    |   |     |   |    |   |     |    |     |
|---------|---|----|---|-----|---|----|---|-----|----|-----|
| 103,145 | 3 | 14 | 5 | 187 | 0 | 23 | 6 | 170 | 14 | 394 |
| 103,146 | 3 | 14 | 5 | 187 | 0 | 23 | 6 | 170 | 14 | 394 |
| 103,147 | 3 | 14 | 5 | 187 | 0 | 23 | 6 | 170 | 14 | 394 |
| 103,148 | 3 | 14 | 5 | 187 | 0 | 23 | 6 | 170 | 14 | 394 |
| 103,149 | 3 | 14 | 5 | 187 | 0 | 23 | 5 | 170 | 13 | 394 |
| 103,150 | 3 | 13 | 5 | 169 | 0 | 23 | 5 | 166 | 13 | 371 |
| 103,151 | 3 | 13 | 5 | 169 | 0 | 23 | 5 | 166 | 13 | 371 |
| 103,152 | 3 | 14 | 5 | 169 | 0 | 23 | 5 | 166 | 13 | 372 |
| 103,153 | 3 | 13 | 5 | 158 | 0 | 20 | 5 | 157 | 13 | 348 |
| 103,154 | 3 | 13 | 5 | 158 | 0 | 20 | 5 | 159 | 13 | 350 |
| 103,155 | 3 | 13 | 5 | 155 | 0 | 19 | 5 | 158 | 13 | 345 |
| 103,156 | 3 | 12 | 5 | 149 | 0 | 17 | 5 | 150 | 13 | 328 |
| 103,157 | 3 | 12 | 5 | 149 | 0 | 17 | 5 | 150 | 13 | 328 |
| 103,158 | 3 | 12 | 5 | 151 | 0 | 17 | 5 | 150 | 13 | 330 |
| 103,159 | 3 | 12 | 5 | 147 | 0 | 17 | 4 | 149 | 12 | 325 |
| 103,160 | 3 | 12 | 5 | 148 | 0 | 17 | 4 | 149 | 12 | 326 |
| 103,161 | 3 | 12 | 5 | 147 | 0 | 17 | 4 | 148 | 12 | 324 |
| 103,162 | 3 | 11 | 5 | 146 | 0 | 17 | 4 | 149 | 12 | 323 |
| 103,163 | 3 | 11 | 5 | 146 | 0 | 17 | 4 | 150 | 12 | 324 |
| 103,164 | 3 | 11 | 5 | 146 | 0 | 17 | 4 | 151 | 12 | 325 |
| 103,165 | 3 | 11 | 5 | 146 | 0 | 17 | 4 | 150 | 12 | 324 |
| 103,166 | 3 | 11 | 5 | 146 | 0 | 17 | 5 | 150 | 13 | 324 |
| 103,167 | 3 | 11 | 5 | 143 | 0 | 16 | 5 | 149 | 13 | 319 |
| 103,168 | 3 | 11 | 5 | 132 | 0 | 16 | 5 | 143 | 13 | 302 |
| 103,169 | 3 | 11 | 5 | 133 | 0 | 16 | 5 | 143 | 13 | 303 |
| 103,170 | 3 | 10 | 5 | 101 | 0 | 13 | 5 | 105 | 13 | 229 |
| 103,171 | 3 | 10 | 5 | 101 | 0 | 13 | 5 | 105 | 13 | 229 |
| 103,172 | 3 | 12 | 5 | 105 | 0 | 13 | 5 | 106 | 13 | 236 |
| 103,173 | 3 | 11 | 5 | 76  | 0 | 12 | 5 | 83  | 13 | 182 |
| 103,174 | 3 | 7  | 7 | 57  | 0 | 10 | 5 | 45  | 15 | 119 |
| 103,175 | 3 | 7  | 7 | 55  | 0 | 10 | 5 | 44  | 15 | 116 |
| 103,176 | 3 | 5  | 6 | 29  | 0 | 2  | 5 | 20  | 14 | 56  |
| 103,177 | 3 | 5  | 6 | 29  | 0 | 2  | 5 | 20  | 14 | 56  |
| 103,178 | 2 | 3  | 5 | 26  | 0 | 0  | 5 | 16  | 12 | 45  |
| 103,179 | 2 | 3  | 5 | 22  | 0 | 0  | 5 | 10  | 12 | 35  |
| 103,180 | 2 | 3  | 5 | 22  | 0 | 0  | 5 | 10  | 12 | 35  |
| 103,181 | 2 | 3  | 5 | 20  | 0 | 0  | 5 | 9   | 12 | 32  |
| 103,182 | 2 | 3  | 5 | 19  | 0 | 0  | 5 | 9   | 12 | 31  |
| 103,183 | 2 | 3  | 5 | 19  | 0 | 0  | 5 | 9   | 12 | 31  |
| 103,184 | 1 | 3  | 4 | 19  | 0 | 0  | 4 | 8   | 9  | 30  |
| 103,185 | 1 | 3  | 4 | 19  | 0 | 0  | 5 | 8   | 10 | 30  |

|         |   |   |    |    |   |   |    |    |    |    |
|---------|---|---|----|----|---|---|----|----|----|----|
| 103,186 | 1 | 3 | 4  | 18 | 0 | 0 | 3  | 8  | 8  | 29 |
| 103,187 | 1 | 3 | 4  | 18 | 0 | 0 | 3  | 8  | 8  | 29 |
| 103,188 | 1 | 3 | 4  | 18 | 0 | 0 | 3  | 8  | 8  | 29 |
| 103,189 | 1 | 3 | 3  | 19 | 0 | 0 | 2  | 8  | 6  | 30 |
| 103,190 | 1 | 3 | 3  | 18 | 0 | 0 | 2  | 8  | 6  | 29 |
| 103,191 | 0 | 3 | 3  | 17 | 0 | 0 | 2  | 8  | 5  | 28 |
| 103,192 | 1 | 3 | 2  | 16 | 0 | 0 | 2  | 8  | 5  | 27 |
| 103,193 | 1 | 3 | 3  | 16 | 0 | 0 | 3  | 8  | 7  | 27 |
| 103,194 | 1 | 3 | 4  | 13 | 0 | 0 | 4  | 8  | 9  | 24 |
| 103,195 | 1 | 3 | 4  | 13 | 0 | 0 | 4  | 8  | 9  | 24 |
| 103,196 | 1 | 3 | 6  | 13 | 0 | 0 | 7  | 8  | 14 | 24 |
| 103,197 | 1 | 3 | 7  | 13 | 0 | 0 | 7  | 8  | 15 | 24 |
| 103,198 | 1 | 3 | 8  | 13 | 0 | 0 | 8  | 8  | 17 | 24 |
| 103,199 | 1 | 3 | 11 | 14 | 0 | 0 | 8  | 9  | 20 | 26 |
| 103,200 | 2 | 3 | 11 | 14 | 0 | 0 | 8  | 9  | 21 | 26 |
| 103,201 | 2 | 3 | 11 | 15 | 0 | 0 | 8  | 9  | 21 | 27 |
| 103,202 | 2 | 3 | 12 | 15 | 0 | 0 | 9  | 9  | 23 | 27 |
| 103,203 | 2 | 2 | 12 | 16 | 0 | 0 | 9  | 9  | 23 | 27 |
| 103,204 | 2 | 2 | 12 | 16 | 0 | 0 | 9  | 11 | 23 | 29 |
| 103,205 | 2 | 2 | 12 | 17 | 0 | 0 | 9  | 11 | 23 | 30 |
| 103,206 | 2 | 2 | 12 | 18 | 0 | 0 | 9  | 11 | 23 | 31 |
| 103,207 | 2 | 2 | 12 | 18 | 0 | 0 | 9  | 11 | 23 | 31 |
| 103,208 | 2 | 2 | 12 | 18 | 0 | 0 | 9  | 14 | 23 | 34 |
| 103,209 | 2 | 2 | 12 | 16 | 0 | 0 | 9  | 14 | 23 | 32 |
| 103,210 | 2 | 2 | 12 | 19 | 0 | 0 | 9  | 19 | 23 | 40 |
| 103,211 | 2 | 2 | 12 | 18 | 0 | 0 | 9  | 19 | 23 | 39 |
| 103,212 | 2 | 2 | 12 | 19 | 1 | 0 | 11 | 21 | 26 | 42 |
| 103,213 | 2 | 2 | 13 | 20 | 1 | 0 | 11 | 20 | 27 | 42 |
| 103,214 | 2 | 2 | 15 | 22 | 1 | 0 | 12 | 20 | 30 | 44 |
| 103,215 | 2 | 2 | 15 | 23 | 1 | 0 | 12 | 19 | 30 | 44 |
| 103,216 | 2 | 2 | 15 | 23 | 1 | 0 | 12 | 19 | 30 | 44 |
| 103,217 | 2 | 2 | 15 | 23 | 1 | 0 | 11 | 19 | 29 | 44 |
| 103,218 | 2 | 2 | 15 | 22 | 1 | 0 | 11 | 19 | 29 | 43 |
| 103,219 | 2 | 2 | 15 | 22 | 1 | 0 | 11 | 19 | 29 | 43 |
| 103,220 | 2 | 2 | 15 | 21 | 1 | 0 | 11 | 18 | 29 | 41 |
| 103,221 | 2 | 2 | 16 | 21 | 1 | 0 | 11 | 18 | 30 | 41 |
| 103,222 | 2 | 2 | 16 | 21 | 1 | 0 | 11 | 19 | 30 | 42 |
| 103,223 | 2 | 0 | 17 | 18 | 1 | 0 | 11 | 18 | 31 | 36 |
| 103,224 | 2 | 0 | 17 | 17 | 1 | 0 | 11 | 18 | 31 | 35 |
| 103,225 | 2 | 0 | 15 | 20 | 1 | 0 | 11 | 17 | 29 | 37 |
| 103,226 | 2 | 0 | 15 | 20 | 1 | 0 | 11 | 17 | 29 | 37 |

|         |   |   |    |    |   |   |    |    |    |    |
|---------|---|---|----|----|---|---|----|----|----|----|
| 103,227 | 2 | 0 | 16 | 20 | 1 | 0 | 11 | 17 | 30 | 37 |
| 103,228 | 2 | 0 | 16 | 20 | 1 | 0 | 11 | 17 | 30 | 37 |
| 103,229 | 2 | 0 | 16 | 19 | 1 | 0 | 12 | 18 | 31 | 37 |
| 103,230 | 2 | 0 | 16 | 19 | 1 | 0 | 12 | 18 | 31 | 37 |
| 103,231 | 2 | 0 | 17 | 19 | 1 | 0 | 13 | 18 | 33 | 37 |
| 103,232 | 2 | 0 | 17 | 20 | 1 | 0 | 14 | 18 | 34 | 38 |
| 103,233 | 2 | 0 | 17 | 20 | 1 | 0 | 14 | 18 | 34 | 38 |
| 103,234 | 2 | 0 | 17 | 21 | 1 | 1 | 14 | 18 | 34 | 40 |
| 103,235 | 2 | 0 | 18 | 22 | 1 | 1 | 14 | 18 | 35 | 41 |
| 103,236 | 2 | 1 | 18 | 22 | 1 | 1 | 13 | 18 | 34 | 42 |
| 103,237 | 2 | 1 | 18 | 23 | 1 | 1 | 13 | 18 | 34 | 43 |
| 103,238 | 2 | 1 | 18 | 23 | 1 | 1 | 13 | 18 | 34 | 43 |
| 103,239 | 2 | 1 | 18 | 23 | 1 | 1 | 13 | 19 | 34 | 44 |
| 103,240 | 2 | 1 | 18 | 23 | 1 | 1 | 13 | 19 | 34 | 44 |
| 103,241 | 2 | 1 | 18 | 25 | 1 | 1 | 13 | 19 | 34 | 46 |
| 103,242 | 2 | 1 | 18 | 26 | 1 | 1 | 13 | 20 | 34 | 48 |
| 103,243 | 1 | 1 | 18 | 26 | 1 | 1 | 13 | 20 | 33 | 48 |
| 103,244 | 1 | 1 | 17 | 26 | 1 | 1 | 12 | 20 | 31 | 48 |
| 103,245 | 1 | 1 | 16 | 27 | 2 | 1 | 12 | 19 | 31 | 48 |
| 103,246 | 1 | 1 | 16 | 27 | 2 | 1 | 12 | 19 | 31 | 48 |
| 103,247 | 1 | 1 | 14 | 27 | 2 | 1 | 9  | 19 | 26 | 48 |
| 103,248 | 1 | 1 | 13 | 27 | 2 | 1 | 8  | 19 | 24 | 48 |
| 103,249 | 1 | 1 | 12 | 27 | 2 | 1 | 7  | 20 | 22 | 49 |
| 103,250 | 1 | 1 | 9  | 26 | 2 | 1 | 7  | 19 | 19 | 47 |
| 103,251 | 0 | 1 | 9  | 26 | 2 | 1 | 7  | 19 | 18 | 47 |
| 103,252 | 0 | 1 | 11 | 25 | 2 | 1 | 7  | 18 | 20 | 45 |
| 103,253 | 0 | 1 | 10 | 25 | 2 | 1 | 7  | 18 | 19 | 45 |
| 103,254 | 0 | 1 | 10 | 25 | 2 | 1 | 7  | 18 | 19 | 45 |
| 103,255 | 1 | 1 | 10 | 24 | 2 | 1 | 7  | 15 | 20 | 41 |
| 103,256 | 1 | 1 | 10 | 24 | 2 | 1 | 7  | 15 | 20 | 41 |
| 103,257 | 1 | 1 | 11 | 23 | 2 | 1 | 7  | 15 | 21 | 40 |
| 103,258 | 1 | 1 | 11 | 23 | 2 | 1 | 7  | 12 | 21 | 37 |
| 103,259 | 1 | 1 | 12 | 25 | 2 | 1 | 7  | 13 | 22 | 40 |
| 103,260 | 1 | 1 | 12 | 26 | 2 | 1 | 7  | 17 | 22 | 45 |
| 103,261 | 1 | 1 | 13 | 25 | 2 | 1 | 7  | 14 | 23 | 41 |
| 103,262 | 1 | 1 | 14 | 30 | 1 | 1 | 5  | 14 | 21 | 46 |
| 103,263 | 1 | 1 | 14 | 30 | 1 | 1 | 6  | 13 | 22 | 45 |
| 103,264 | 2 | 1 | 13 | 29 | 1 | 1 | 7  | 12 | 23 | 43 |
| 103,265 | 2 | 1 | 11 | 27 | 1 | 1 | 6  | 10 | 20 | 39 |
| 103,266 | 2 | 1 | 12 | 27 | 1 | 1 | 8  | 10 | 23 | 39 |
| 103,267 | 2 | 1 | 16 | 28 | 1 | 1 | 9  | 10 | 28 | 40 |

|         |   |    |    |     |   |    |   |     |    |     |
|---------|---|----|----|-----|---|----|---|-----|----|-----|
| 103,268 | 2 | 1  | 16 | 28  | 1 | 1  | 9 | 10  | 28 | 40  |
| 103,269 | 2 | 1  | 16 | 28  | 1 | 1  | 9 | 10  | 28 | 40  |
| 103,270 | 2 | 1  | 16 | 29  | 1 | 1  | 9 | 10  | 28 | 41  |
| 103,271 | 2 | 2  | 16 | 29  | 1 | 1  | 9 | 10  | 28 | 42  |
| 103,272 | 2 | 2  | 15 | 29  | 1 | 1  | 9 | 12  | 27 | 44  |
| 103,273 | 2 | 2  | 15 | 29  | 1 | 1  | 9 | 15  | 27 | 47  |
| 103,274 | 2 | 2  | 14 | 30  | 1 | 1  | 9 | 16  | 26 | 49  |
| 103,275 | 2 | 2  | 14 | 30  | 1 | 1  | 9 | 16  | 26 | 49  |
| 103,276 | 2 | 2  | 14 | 27  | 1 | 1  | 9 | 16  | 26 | 46  |
| 103,277 | 2 | 2  | 14 | 27  | 1 | 1  | 9 | 17  | 26 | 47  |
| 103,278 | 2 | 2  | 13 | 26  | 1 | 1  | 9 | 17  | 25 | 46  |
| 103,279 | 2 | 2  | 13 | 27  | 1 | 1  | 9 | 17  | 25 | 47  |
| 103,280 | 2 | 2  | 13 | 27  | 1 | 1  | 8 | 16  | 24 | 46  |
| 103,281 | 2 | 2  | 13 | 27  | 1 | 1  | 8 | 16  | 24 | 46  |
| 103,282 | 2 | 2  | 12 | 27  | 1 | 1  | 7 | 16  | 22 | 46  |
| 103,283 | 2 | 2  | 14 | 27  | 1 | 1  | 6 | 16  | 23 | 46  |
| 103,284 | 2 | 2  | 15 | 27  | 1 | 1  | 6 | 17  | 24 | 47  |
| 103,285 | 2 | 2  | 16 | 28  | 1 | 0  | 7 | 19  | 26 | 49  |
| 103,286 | 2 | 4  | 17 | 30  | 1 | 1  | 8 | 22  | 28 | 57  |
| 103,287 | 2 | 3  | 17 | 31  | 1 | 1  | 8 | 24  | 28 | 59  |
| 103,288 | 2 | 3  | 17 | 32  | 1 | 1  | 8 | 25  | 28 | 61  |
| 103,289 | 2 | 10 | 17 | 39  | 1 | 2  | 8 | 39  | 28 | 90  |
| 103,290 | 2 | 10 | 17 | 43  | 1 | 3  | 8 | 45  | 28 | 101 |
| 103,291 | 2 | 10 | 17 | 83  | 1 | 5  | 8 | 75  | 28 | 173 |
| 103,292 | 2 | 14 | 17 | 103 | 1 | 5  | 8 | 101 | 28 | 223 |
| 103,293 | 2 | 14 | 17 | 117 | 1 | 6  | 8 | 108 | 28 | 245 |
| 103,294 | 2 | 17 | 17 | 147 | 1 | 13 | 8 | 142 | 28 | 319 |
| 103,295 | 2 | 18 | 17 | 174 | 1 | 16 | 8 | 160 | 28 | 368 |
| 103,296 | 2 | 18 | 17 | 191 | 0 | 18 | 7 | 171 | 26 | 398 |
| 103,297 | 2 | 19 | 18 | 199 | 0 | 20 | 7 | 183 | 27 | 421 |
| 103,298 | 2 | 19 | 18 | 219 | 0 | 22 | 8 | 189 | 28 | 449 |
| 103,299 | 2 | 19 | 18 | 229 | 0 | 22 | 8 | 191 | 28 | 461 |
| 103,300 | 2 | 19 | 18 | 246 | 1 | 26 | 8 | 208 | 29 | 499 |
| 103,301 | 2 | 23 | 18 | 265 | 1 | 28 | 8 | 230 | 29 | 546 |
| 103,302 | 2 | 26 | 18 | 296 | 1 | 30 | 8 | 262 | 29 | 614 |
| 103,303 | 2 | 27 | 16 | 309 | 1 | 30 | 8 | 275 | 27 | 641 |
| 103,304 | 2 | 33 | 16 | 385 | 1 | 38 | 8 | 344 | 27 | 800 |
| 103,305 | 2 | 34 | 16 | 411 | 1 | 38 | 8 | 353 | 27 | 836 |
| 103,306 | 1 | 35 | 16 | 426 | 1 | 41 | 8 | 365 | 26 | 867 |
| 103,307 | 1 | 36 | 15 | 437 | 1 | 42 | 8 | 380 | 25 | 895 |
| 103,308 | 1 | 36 | 15 | 441 | 1 | 42 | 8 | 381 | 25 | 900 |



|         |   |     |    |       |   |     |    |       |    |       |
|---------|---|-----|----|-------|---|-----|----|-------|----|-------|
| 103,309 | 1 | 37  | 15 | 457   | 1 | 44  | 8  | 394   | 25 | 932   |
| 103,310 | 1 | 37  | 14 | 458   | 1 | 45  | 8  | 392   | 24 | 932   |
| 103,311 | 1 | 37  | 14 | 459   | 1 | 45  | 9  | 388   | 25 | 929   |
| 103,312 | 1 | 37  | 13 | 457   | 1 | 45  | 10 | 390   | 25 | 929   |
| 103,313 | 1 | 37  | 13 | 453   | 1 | 45  | 10 | 391   | 25 | 926   |
| 103,314 | 1 | 37  | 13 | 457   | 1 | 45  | 10 | 393   | 25 | 932   |
| 103,315 | 0 | 37  | 16 | 463   | 1 | 46  | 9  | 399   | 26 | 945   |
| 103,316 | 0 | 37  | 16 | 472   | 1 | 46  | 9  | 408   | 26 | 963   |
| 103,317 | 0 | 39  | 15 | 485   | 1 | 46  | 7  | 423   | 23 | 993   |
| 103,318 | 0 | 39  | 11 | 495   | 1 | 46  | 6  | 431   | 18 | 1,011 |
| 103,319 | 0 | 39  | 11 | 498   | 1 | 46  | 6  | 436   | 18 | 1,019 |
| 103,320 | 0 | 39  | 11 | 497   | 1 | 46  | 6  | 437   | 18 | 1,019 |
| 103,321 | 0 | 40  | 11 | 520   | 1 | 48  | 6  | 457   | 18 | 1,065 |
| 103,322 | 0 | 49  | 11 | 584   | 1 | 50  | 6  | 518   | 18 | 1,201 |
| 103,323 | 0 | 51  | 11 | 598   | 1 | 51  | 6  | 533   | 18 | 1,233 |
| 103,324 | 1 | 52  | 12 | 639   | 1 | 53  | 6  | 551   | 20 | 1,295 |
| 103,325 | 1 | 52  | 12 | 649   | 1 | 53  | 6  | 554   | 20 | 1,308 |
| 103,326 | 1 | 52  | 12 | 669   | 1 | 55  | 6  | 568   | 20 | 1,344 |
| 103,327 | 1 | 52  | 12 | 675   | 1 | 55  | 6  | 568   | 20 | 1,350 |
| 103,328 | 1 | 52  | 12 | 676   | 1 | 55  | 6  | 569   | 20 | 1,352 |
| 103,329 | 1 | 52  | 12 | 679   | 1 | 55  | 6  | 573   | 20 | 1,359 |
| 103,330 | 1 | 53  | 12 | 723   | 1 | 65  | 6  | 621   | 20 | 1,462 |
| 103,331 | 1 | 61  | 12 | 851   | 1 | 74  | 6  | 745   | 20 | 1,731 |
| 103,332 | 1 | 67  | 12 | 1,043 | 1 | 84  | 6  | 865   | 20 | 2,059 |
| 103,333 | 1 | 77  | 12 | 1,192 | 1 | 98  | 7  | 1,021 | 21 | 2,388 |
| 103,334 | 1 | 77  | 10 | 1,255 | 1 | 106 | 7  | 1,058 | 19 | 2,496 |
| 103,335 | 1 | 76  | 9  | 1,254 | 1 | 107 | 7  | 1,055 | 18 | 2,492 |
| 103,336 | 1 | 77  | 8  | 1,263 | 1 | 108 | 6  | 1,061 | 16 | 2,509 |
| 103,337 | 1 | 86  | 6  | 1,326 | 1 | 119 | 5  | 1,161 | 13 | 2,692 |
| 103,338 | 1 | 86  | 6  | 1,344 | 1 | 124 | 5  | 1,176 | 13 | 2,730 |
| 103,339 | 1 | 87  | 10 | 1,375 | 1 | 129 | 5  | 1,217 | 17 | 2,808 |
| 103,340 | 1 | 80  | 10 | 1,391 | 1 | 131 | 5  | 1,218 | 17 | 2,820 |
| 103,341 | 1 | 82  | 10 | 1,364 | 1 | 130 | 5  | 1,192 | 17 | 2,768 |
| 103,342 | 1 | 79  | 10 | 1,346 | 1 | 130 | 5  | 1,168 | 17 | 2,723 |
| 103,343 | 1 | 80  | 10 | 1,448 | 1 | 143 | 5  | 1,286 | 17 | 2,957 |
| 103,344 | 1 | 84  | 10 | 1,698 | 1 | 160 | 7  | 1,434 | 19 | 3,376 |
| 103,345 | 1 | 96  | 11 | 1,756 | 2 | 167 | 7  | 1,525 | 21 | 3,544 |
| 103,346 | 1 | 104 | 11 | 1,828 | 2 | 185 | 7  | 1,590 | 21 | 3,707 |
| 103,347 | 1 | 105 | 11 | 1,819 | 2 | 183 | 7  | 1,586 | 21 | 3,693 |
| 103,348 | 1 | 128 | 10 | 2,039 | 2 | 208 | 16 | 1,848 | 29 | 4,223 |
| 103,349 | 1 | 129 | 10 | 2,037 | 2 | 207 | 15 | 1,858 | 28 | 4,231 |

|         |   |     |    |       |   |     |    |       |     |       |
|---------|---|-----|----|-------|---|-----|----|-------|-----|-------|
| 103,350 | 1 | 141 | 10 | 2,137 | 2 | 215 | 15 | 1,949 | 28  | 4,442 |
| 103,351 | 1 | 170 | 10 | 2,336 | 1 | 243 | 15 | 2,280 | 27  | 5,029 |
| 103,352 | 1 | 170 | 10 | 2,376 | 1 | 245 | 15 | 2,311 | 27  | 5,102 |
| 103,353 | 1 | 213 | 10 | 2,541 | 2 | 264 | 16 | 2,602 | 29  | 5,620 |
| 103,354 | 1 | 215 | 10 | 2,541 | 2 | 266 | 16 | 2,603 | 29  | 5,625 |
| 103,355 | 1 | 220 | 10 | 2,608 | 2 | 281 | 20 | 2,700 | 33  | 5,809 |
| 103,356 | 1 | 219 | 10 | 2,589 | 2 | 282 | 20 | 2,693 | 33  | 5,783 |
| 103,357 | 1 | 220 | 10 | 2,604 | 2 | 281 | 23 | 2,705 | 36  | 5,810 |
| 103,358 | 1 | 236 | 10 | 2,658 | 2 | 300 | 23 | 2,835 | 36  | 6,029 |
| 103,359 | 1 | 236 | 10 | 2,657 | 2 | 300 | 23 | 2,835 | 36  | 6,028 |
| 103,360 | 1 | 246 | 10 | 3,013 | 2 | 348 | 24 | 3,362 | 37  | 6,969 |
| 103,361 | 1 | 246 | 10 | 3,032 | 2 | 349 | 24 | 3,376 | 37  | 7,003 |
| 103,362 | 4 | 249 | 17 | 3,165 | 2 | 350 | 37 | 3,400 | 60  | 7,164 |
| 103,363 | 4 | 253 | 20 | 3,221 | 3 | 359 | 38 | 3,445 | 65  | 7,278 |
| 103,364 | 4 | 255 | 24 | 3,235 | 3 | 359 | 43 | 3,450 | 74  | 7,299 |
| 103,365 | 4 | 255 | 26 | 3,266 | 3 | 362 | 42 | 3,463 | 75  | 7,346 |
| 103,366 | 4 | 255 | 23 | 3,268 | 3 | 362 | 42 | 3,470 | 72  | 7,355 |
| 103,367 | 4 | 255 | 24 | 3,300 | 3 | 362 | 45 | 3,475 | 76  | 7,392 |
| 103,368 | 4 | 254 | 24 | 3,302 | 3 | 363 | 45 | 3,500 | 76  | 7,419 |
| 103,369 | 4 | 255 | 24 | 3,322 | 3 | 365 | 45 | 3,512 | 76  | 7,454 |
| 103,370 | 4 | 256 | 24 | 3,348 | 3 | 372 | 45 | 3,540 | 76  | 7,516 |
| 103,371 | 4 | 256 | 24 | 3,357 | 3 | 373 | 45 | 3,556 | 76  | 7,542 |
| 103,372 | 4 | 255 | 24 | 3,347 | 3 | 373 | 45 | 3,545 | 76  | 7,520 |
| 103,373 | 3 | 246 | 23 | 3,284 | 3 | 371 | 45 | 3,484 | 74  | 7,385 |
| 103,374 | 4 | 245 | 24 | 3,284 | 4 | 372 | 49 | 3,486 | 81  | 7,387 |
| 103,375 | 4 | 244 | 25 | 3,248 | 4 | 372 | 49 | 3,475 | 82  | 7,339 |
| 103,376 | 4 | 244 | 25 | 3,237 | 4 | 372 | 49 | 3,471 | 82  | 7,324 |
| 103,377 | 4 | 244 | 28 | 3,222 | 4 | 371 | 55 | 3,460 | 91  | 7,297 |
| 103,378 | 4 | 244 | 28 | 3,214 | 4 | 371 | 55 | 3,462 | 91  | 7,291 |
| 103,379 | 4 | 245 | 29 | 3,227 | 4 | 371 | 55 | 3,468 | 92  | 7,311 |
| 103,380 | 5 | 245 | 30 | 3,242 | 4 | 373 | 57 | 3,472 | 96  | 7,332 |
| 103,381 | 5 | 244 | 30 | 3,198 | 4 | 363 | 57 | 3,426 | 96  | 7,231 |
| 103,382 | 5 | 237 | 30 | 3,072 | 4 | 354 | 58 | 3,312 | 97  | 6,975 |
| 103,383 | 5 | 230 | 34 | 2,898 | 5 | 344 | 62 | 3,198 | 106 | 6,670 |
| 103,384 | 5 | 224 | 34 | 2,810 | 5 | 335 | 62 | 3,147 | 106 | 6,516 |
| 103,385 | 5 | 236 | 34 | 2,944 | 5 | 355 | 62 | 3,395 | 106 | 6,930 |
| 103,386 | 5 | 239 | 35 | 3,012 | 5 | 357 | 62 | 3,482 | 107 | 7,090 |
| 103,387 | 5 | 242 | 38 | 3,023 | 5 | 356 | 66 | 3,481 | 114 | 7,102 |
| 103,388 | 5 | 235 | 36 | 2,967 | 5 | 345 | 66 | 3,392 | 112 | 6,939 |
| 103,389 | 5 | 238 | 36 | 2,969 | 6 | 344 | 67 | 3,414 | 114 | 6,965 |
| 103,390 | 5 | 237 | 34 | 2,942 | 6 | 340 | 67 | 3,379 | 112 | 6,898 |

|         |   |     |    |       |   |     |    |       |     |       |
|---------|---|-----|----|-------|---|-----|----|-------|-----|-------|
| 103,391 | 5 | 237 | 36 | 2,930 | 6 | 337 | 68 | 3,368 | 115 | 6,872 |
| 103,392 | 5 | 235 | 38 | 2,920 | 6 | 335 | 68 | 3,359 | 117 | 6,849 |
| 103,393 | 5 | 238 | 38 | 2,938 | 6 | 336 | 68 | 3,379 | 117 | 6,891 |
| 103,394 | 5 | 234 | 38 | 2,796 | 6 | 316 | 68 | 3,230 | 117 | 6,576 |
| 103,395 | 6 | 231 | 46 | 2,590 | 6 | 299 | 73 | 3,098 | 131 | 6,218 |
| 103,396 | 6 | 210 | 50 | 2,455 | 5 | 271 | 73 | 2,937 | 134 | 5,873 |
| 103,397 | 6 | 215 | 51 | 2,528 | 5 | 274 | 73 | 3,013 | 135 | 6,030 |
| 103,398 | 6 | 223 | 53 | 2,607 | 5 | 285 | 67 | 3,100 | 131 | 6,215 |
| 103,399 | 6 | 212 | 57 | 2,593 | 5 | 265 | 68 | 2,948 | 136 | 6,018 |
| 103,400 | 6 | 211 | 58 | 2,595 | 5 | 264 | 68 | 2,937 | 137 | 6,007 |
| 103,401 | 6 | 199 | 61 | 2,489 | 5 | 257 | 68 | 2,849 | 140 | 5,794 |
| 103,402 | 6 | 173 | 61 | 2,301 | 5 | 230 | 68 | 2,524 | 140 | 5,228 |
| 103,403 | 6 | 169 | 61 | 2,244 | 5 | 226 | 67 | 2,471 | 139 | 5,110 |
| 103,404 | 6 | 123 | 62 | 2,052 | 5 | 205 | 67 | 2,151 | 140 | 4,531 |
| 103,405 | 6 | 120 | 62 | 2,051 | 5 | 203 | 66 | 2,144 | 139 | 4,518 |
| 103,406 | 6 | 109 | 63 | 1,915 | 5 | 180 | 65 | 1,980 | 139 | 4,184 |
| 103,407 | 6 | 110 | 66 | 1,910 | 5 | 179 | 63 | 1,980 | 140 | 4,179 |
| 103,408 | 6 | 91  | 66 | 1,822 | 5 | 159 | 63 | 1,815 | 140 | 3,887 |
| 103,409 | 6 | 93  | 66 | 1,837 | 5 | 160 | 64 | 1,828 | 141 | 3,918 |
| 103,410 | 3 | 102 | 61 | 1,905 | 5 | 170 | 51 | 1,900 | 120 | 4,077 |
| 103,411 | 3 | 95  | 62 | 1,597 | 5 | 129 | 55 | 1,459 | 125 | 3,280 |
| 103,412 | 3 | 107 | 61 | 1,689 | 5 | 138 | 56 | 1,581 | 125 | 3,515 |
| 103,413 | 3 | 114 | 61 | 1,795 | 5 | 162 | 56 | 1,760 | 125 | 3,831 |
| 103,414 | 3 | 110 | 58 | 1,781 | 4 | 154 | 55 | 1,759 | 120 | 3,804 |
| 103,415 | 3 | 113 | 54 | 1,851 | 4 | 160 | 50 | 1,801 | 111 | 3,925 |
| 103,416 | 3 | 113 | 52 | 1,830 | 4 | 157 | 50 | 1,811 | 109 | 3,911 |
| 103,417 | 3 | 115 | 54 | 1,871 | 4 | 157 | 51 | 1,809 | 112 | 3,952 |
| 103,418 | 3 | 116 | 54 | 1,859 | 4 | 158 | 49 | 1,801 | 110 | 3,934 |
| 103,419 | 3 | 116 | 54 | 1,855 | 4 | 157 | 49 | 1,773 | 110 | 3,901 |
| 103,420 | 3 | 124 | 57 | 1,900 | 4 | 171 | 51 | 1,921 | 115 | 4,116 |
| 103,421 | 3 | 123 | 57 | 1,874 | 4 | 164 | 51 | 1,892 | 115 | 4,053 |
| 103,422 | 3 | 129 | 62 | 2,028 | 4 | 180 | 54 | 2,049 | 123 | 4,386 |
| 103,423 | 3 | 129 | 63 | 2,129 | 4 | 181 | 54 | 2,079 | 124 | 4,518 |
| 103,424 | 3 | 129 | 64 | 2,137 | 4 | 181 | 53 | 2,082 | 124 | 4,529 |
| 103,425 | 2 | 130 | 63 | 2,121 | 3 | 177 | 50 | 2,056 | 118 | 4,484 |
| 103,426 | 2 | 131 | 62 | 2,124 | 3 | 177 | 51 | 2,059 | 118 | 4,491 |
| 103,427 | 2 | 131 | 62 | 2,129 | 3 | 177 | 51 | 2,066 | 118 | 4,503 |
| 103,428 | 2 | 131 | 59 | 2,125 | 3 | 176 | 45 | 2,060 | 109 | 4,492 |
| 103,429 | 2 | 131 | 60 | 2,128 | 3 | 176 | 45 | 2,061 | 110 | 4,496 |
| 103,430 | 2 | 130 | 59 | 2,116 | 3 | 176 | 46 | 2,050 | 110 | 4,472 |
| 103,431 | 1 | 130 | 58 | 2,097 | 3 | 174 | 44 | 2,043 | 106 | 4,444 |

|         |   |     |    |       |   |     |    |       |     |       |
|---------|---|-----|----|-------|---|-----|----|-------|-----|-------|
| 103,432 | 1 | 130 | 61 | 2,103 | 3 | 174 | 47 | 2,042 | 112 | 4,449 |
| 103,433 | 2 | 132 | 62 | 2,127 | 3 | 176 | 52 | 2,074 | 119 | 4,509 |
| 103,434 | 3 | 134 | 60 | 2,131 | 2 | 176 | 48 | 2,090 | 113 | 4,531 |
| 103,435 | 3 | 130 | 61 | 2,083 | 2 | 171 | 49 | 1,991 | 115 | 4,375 |
| 103,436 | 3 | 118 | 61 | 1,887 | 2 | 143 | 49 | 1,712 | 115 | 3,860 |
| 103,437 | 3 | 114 | 61 | 1,836 | 2 | 140 | 49 | 1,638 | 115 | 3,728 |
| 103,438 | 3 | 110 | 58 | 1,821 | 2 | 140 | 45 | 1,633 | 108 | 3,704 |
| 103,439 | 3 | 108 | 63 | 1,825 | 2 | 140 | 47 | 1,626 | 115 | 3,699 |
| 103,440 | 3 | 107 | 64 | 1,816 | 2 | 136 | 47 | 1,594 | 116 | 3,653 |
| 103,441 | 3 | 108 | 63 | 1,837 | 2 | 136 | 46 | 1,611 | 114 | 3,692 |
| 103,442 | 3 | 108 | 61 | 1,843 | 2 | 136 | 45 | 1,612 | 111 | 3,699 |
| 103,443 | 2 | 108 | 60 | 1,838 | 2 | 136 | 42 | 1,611 | 106 | 3,693 |
| 103,444 | 4 | 104 | 60 | 1,830 | 2 | 135 | 41 | 1,595 | 107 | 3,664 |
| 103,445 | 4 | 104 | 58 | 1,832 | 2 | 134 | 42 | 1,583 | 106 | 3,653 |
| 103,446 | 4 | 115 | 55 | 1,871 | 2 | 144 | 39 | 1,621 | 100 | 3,751 |
| 103,447 | 4 | 115 | 50 | 1,853 | 2 | 144 | 39 | 1,611 | 95  | 3,723 |
| 103,448 | 5 | 110 | 49 | 1,783 | 3 | 141 | 40 | 1,541 | 97  | 3,575 |
| 103,449 | 5 | 103 | 47 | 1,697 | 3 | 130 | 37 | 1,447 | 92  | 3,377 |
| 103,450 | 5 | 91  | 44 | 1,490 | 4 | 123 | 38 | 1,329 | 91  | 3,033 |
| 103,451 | 5 | 95  | 43 | 1,495 | 4 | 124 | 38 | 1,353 | 90  | 3,067 |
| 103,452 | 5 | 95  | 40 | 1,500 | 4 | 123 | 37 | 1,350 | 86  | 3,068 |
| 103,453 | 5 | 93  | 46 | 1,478 | 3 | 118 | 40 | 1,333 | 94  | 3,022 |
| 103,454 | 5 | 93  | 46 | 1,480 | 3 | 118 | 40 | 1,334 | 94  | 3,025 |
| 103,455 | 5 | 93  | 46 | 1,464 | 3 | 118 | 40 | 1,326 | 94  | 3,001 |
| 103,456 | 5 | 94  | 47 | 1,469 | 3 | 119 | 39 | 1,330 | 94  | 3,012 |
| 103,457 | 5 | 95  | 46 | 1,489 | 3 | 123 | 39 | 1,359 | 93  | 3,066 |
| 103,458 | 5 | 96  | 43 | 1,566 | 3 | 128 | 36 | 1,442 | 87  | 3,232 |
| 103,459 | 5 | 97  | 43 | 1,568 | 3 | 128 | 37 | 1,447 | 88  | 3,240 |
| 103,460 | 5 | 95  | 44 | 1,561 | 3 | 127 | 36 | 1,439 | 88  | 3,222 |
| 103,461 | 5 | 86  | 43 | 1,505 | 3 | 118 | 36 | 1,395 | 87  | 3,104 |
| 103,462 | 5 | 82  | 43 | 1,441 | 3 | 109 | 32 | 1,297 | 83  | 2,929 |
| 103,463 | 5 | 79  | 42 | 1,352 | 3 | 101 | 31 | 1,205 | 81  | 2,737 |
| 103,464 | 5 | 69  | 42 | 1,115 | 3 | 76  | 31 | 1,007 | 81  | 2,267 |
| 103,465 | 5 | 68  | 42 | 1,075 | 3 | 75  | 32 | 969   | 82  | 2,187 |
| 103,466 | 5 | 64  | 41 | 1,007 | 3 | 71  | 32 | 930   | 81  | 2,072 |
| 103,467 | 5 | 64  | 40 | 1,003 | 3 | 71  | 32 | 906   | 80  | 2,044 |
| 103,468 | 5 | 62  | 39 | 961   | 3 | 70  | 31 | 899   | 78  | 1,992 |
| 103,469 | 5 | 61  | 38 | 933   | 3 | 69  | 30 | 894   | 76  | 1,957 |
| 103,470 | 5 | 60  | 36 | 921   | 3 | 69  | 28 | 881   | 72  | 1,931 |
| 103,471 | 5 | 51  | 36 | 846   | 3 | 53  | 28 | 712   | 72  | 1,662 |
| 103,472 | 5 | 52  | 32 | 847   | 3 | 54  | 26 | 714   | 66  | 1,667 |

|         |   |    |    |       |   |    |    |       |     |       |
|---------|---|----|----|-------|---|----|----|-------|-----|-------|
| 103,473 | 5 | 46 | 32 | 697   | 3 | 38 | 26 | 549   | 66  | 1,330 |
| 103,474 | 5 | 45 | 33 | 591   | 3 | 35 | 34 | 511   | 75  | 1,182 |
| 103,475 | 5 | 43 | 38 | 580   | 3 | 35 | 35 | 506   | 81  | 1,164 |
| 103,476 | 5 | 42 | 38 | 577   | 3 | 35 | 34 | 503   | 80  | 1,157 |
| 103,477 | 5 | 42 | 38 | 572   | 3 | 35 | 33 | 497   | 79  | 1,146 |
| 103,478 | 5 | 42 | 38 | 571   | 3 | 35 | 33 | 500   | 79  | 1,148 |
| 103,479 | 5 | 42 | 38 | 581   | 3 | 38 | 36 | 510   | 82  | 1,171 |
| 103,480 | 5 | 44 | 37 | 629   | 3 | 43 | 36 | 544   | 81  | 1,260 |
| 103,481 | 5 | 44 | 37 | 641   | 3 | 43 | 35 | 550   | 80  | 1,278 |
| 103,482 | 5 | 45 | 38 | 756   | 3 | 45 | 36 | 600   | 82  | 1,446 |
| 103,483 | 5 | 45 | 36 | 825   | 3 | 48 | 34 | 608   | 78  | 1,526 |
| 103,484 | 4 | 44 | 37 | 900   | 3 | 53 | 28 | 661   | 72  | 1,658 |
| 103,485 | 3 | 54 | 39 | 1,013 | 3 | 59 | 28 | 734   | 73  | 1,860 |
| 103,486 | 3 | 63 | 47 | 1,081 | 3 | 66 | 31 | 829   | 84  | 2,039 |
| 103,487 | 3 | 65 | 47 | 1,131 | 3 | 70 | 31 | 871   | 84  | 2,137 |
| 103,488 | 3 | 67 | 48 | 1,123 | 3 | 69 | 31 | 876   | 85  | 2,135 |
| 103,489 | 3 | 68 | 46 | 1,121 | 3 | 69 | 29 | 876   | 81  | 2,134 |
| 103,490 | 3 | 69 | 45 | 1,147 | 2 | 69 | 29 | 886   | 79  | 2,171 |
| 103,491 | 3 | 67 | 45 | 1,113 | 2 | 70 | 28 | 857   | 78  | 2,107 |
| 103,492 | 3 | 67 | 45 | 1,114 | 2 | 70 | 28 | 857   | 78  | 2,108 |
| 103,493 | 3 | 67 | 45 | 1,097 | 2 | 70 | 28 | 849   | 78  | 2,083 |
| 103,494 | 1 | 67 | 46 | 1,081 | 2 | 70 | 30 | 844   | 79  | 2,062 |
| 103,495 | 1 | 70 | 46 | 1,114 | 2 | 73 | 30 | 888   | 79  | 2,145 |
| 103,496 | 1 | 71 | 44 | 1,143 | 2 | 73 | 29 | 908   | 76  | 2,195 |
| 103,497 | 1 | 72 | 44 | 1,151 | 2 | 71 | 30 | 968   | 77  | 2,262 |
| 103,498 | 1 | 75 | 44 | 1,223 | 1 | 74 | 29 | 1,006 | 75  | 2,378 |
| 103,499 | 0 | 80 | 54 | 1,259 | 2 | 75 | 32 | 1,017 | 88  | 2,431 |
| 103,500 | 1 | 81 | 56 | 1,275 | 2 | 75 | 35 | 1,022 | 94  | 2,453 |
| 103,501 | 1 | 80 | 63 | 1,271 | 1 | 75 | 38 | 1,021 | 103 | 2,447 |
| 103,502 | 1 | 77 | 64 | 1,239 | 1 | 74 | 35 | 991   | 101 | 2,381 |
| 103,503 | 1 | 78 | 63 | 1,248 | 1 | 75 | 34 | 991   | 99  | 2,392 |
| 103,504 | 1 | 78 | 63 | 1,256 | 1 | 76 | 34 | 993   | 99  | 2,403 |
| 103,505 | 1 | 81 | 63 | 1,307 | 1 | 81 | 35 | 1,026 | 100 | 2,495 |
| 103,506 | 1 | 83 | 65 | 1,356 | 1 | 82 | 36 | 1,035 | 103 | 2,556 |
| 103,507 | 1 | 83 | 67 | 1,384 | 1 | 82 | 36 | 1,041 | 105 | 2,590 |
| 103,508 | 1 | 87 | 70 | 1,493 | 1 | 87 | 37 | 1,079 | 109 | 2,746 |
| 103,509 | 1 | 88 | 71 | 1,448 | 1 | 83 | 37 | 1,012 | 110 | 2,631 |
| 103,510 | 2 | 92 | 74 | 1,533 | 1 | 87 | 36 | 1,063 | 113 | 2,775 |
| 103,511 | 2 | 93 | 74 | 1,543 | 1 | 88 | 36 | 1,069 | 113 | 2,793 |
| 103,512 | 2 | 86 | 75 | 1,518 | 2 | 85 | 37 | 1,017 | 116 | 2,706 |
| 103,513 | 2 | 89 | 77 | 1,583 | 2 | 93 | 37 | 1,066 | 118 | 2,831 |

|         |   |    |    |       |   |    |    |       |     |       |
|---------|---|----|----|-------|---|----|----|-------|-----|-------|
| 103,514 | 2 | 91 | 84 | 1,615 | 2 | 94 | 39 | 1,100 | 127 | 2,900 |
| 103,515 | 2 | 91 | 91 | 1,615 | 2 | 94 | 42 | 1,098 | 137 | 2,898 |
| 103,516 | 2 | 91 | 91 | 1,613 | 2 | 94 | 42 | 1,092 | 137 | 2,890 |
| 103,517 | 2 | 91 | 91 | 1,590 | 2 | 92 | 42 | 1,085 | 137 | 2,858 |
| 103,518 | 2 | 92 | 91 | 1,591 | 2 | 92 | 42 | 1,088 | 137 | 2,863 |
| 103,519 | 2 | 92 | 92 | 1,586 | 2 | 93 | 42 | 1,092 | 138 | 2,863 |
| 103,520 | 2 | 92 | 92 | 1,593 | 2 | 93 | 42 | 1,106 | 138 | 2,884 |
| 103,521 | 2 | 93 | 92 | 1,598 | 2 | 94 | 42 | 1,116 | 138 | 2,901 |
| 103,522 | 2 | 93 | 91 | 1,599 | 2 | 94 | 42 | 1,117 | 137 | 2,903 |
| 103,523 | 2 | 92 | 91 | 1,576 | 2 | 92 | 42 | 1,101 | 137 | 2,861 |
| 103,524 | 2 | 95 | 90 | 1,593 | 2 | 94 | 43 | 1,124 | 137 | 2,906 |
| 103,525 | 2 | 96 | 88 | 1,595 | 2 | 94 | 35 | 1,130 | 127 | 2,915 |
| 103,526 | 2 | 97 | 82 | 1,605 | 2 | 94 | 34 | 1,153 | 120 | 2,949 |
| 103,527 | 2 | 98 | 82 | 1,604 | 2 | 94 | 34 | 1,154 | 120 | 2,950 |
| 103,528 | 2 | 98 | 82 | 1,612 | 2 | 94 | 35 | 1,161 | 121 | 2,965 |
| 103,529 | 2 | 98 | 83 | 1,621 | 2 | 94 | 35 | 1,168 | 122 | 2,981 |
| 103,530 | 2 | 98 | 83 | 1,611 | 2 | 91 | 32 | 1,160 | 119 | 2,960 |
| 103,531 | 2 | 97 | 86 | 1,565 | 2 | 86 | 33 | 1,132 | 123 | 2,880 |
| 103,532 | 2 | 97 | 91 | 1,564 | 2 | 87 | 40 | 1,136 | 135 | 2,884 |
| 103,533 | 2 | 96 | 93 | 1,453 | 2 | 85 | 39 | 1,088 | 136 | 2,722 |
| 103,534 | 2 | 96 | 96 | 1,377 | 2 | 82 | 39 | 1,075 | 139 | 2,630 |
| 103,535 | 2 | 95 | 97 | 1,281 | 2 | 75 | 40 | 997   | 141 | 2,448 |
| 103,536 | 3 | 83 | 93 | 1,155 | 2 | 69 | 40 | 901   | 138 | 2,208 |
| 103,537 | 3 | 72 | 84 | 1,022 | 2 | 58 | 37 | 759   | 126 | 1,911 |
| 103,538 | 3 | 72 | 84 | 1,024 | 2 | 58 | 37 | 759   | 126 | 1,913 |
| 103,539 | 3 | 70 | 82 | 1,013 | 2 | 58 | 37 | 739   | 124 | 1,880 |
| 103,540 | 3 | 69 | 79 | 999   | 2 | 58 | 37 | 737   | 121 | 1,863 |
| 103,541 | 3 | 67 | 81 | 969   | 2 | 56 | 37 | 725   | 123 | 1,817 |
| 103,542 | 3 | 67 | 81 | 1,005 | 2 | 56 | 37 | 755   | 123 | 1,883 |
| 103,543 | 3 | 67 | 81 | 1,052 | 2 | 56 | 40 | 772   | 126 | 1,947 |
| 103,544 | 3 | 67 | 82 | 1,077 | 2 | 58 | 39 | 792   | 126 | 1,994 |
| 103,545 | 3 | 63 | 81 | 1,014 | 2 | 56 | 38 | 738   | 124 | 1,871 |
| 103,546 | 4 | 64 | 81 | 1,126 | 2 | 56 | 37 | 758   | 124 | 2,004 |
| 103,547 | 4 | 64 | 80 | 1,134 | 2 | 56 | 37 | 768   | 123 | 2,022 |
| 103,548 | 4 | 52 | 79 | 1,061 | 1 | 48 | 37 | 659   | 121 | 1,820 |
| 103,549 | 4 | 51 | 79 | 993   | 1 | 45 | 36 | 622   | 120 | 1,711 |
| 103,550 | 4 | 46 | 71 | 966   | 1 | 46 | 34 | 616   | 110 | 1,674 |
| 103,551 | 3 | 43 | 72 | 947   | 1 | 46 | 31 | 609   | 107 | 1,645 |
| 103,552 | 3 | 43 | 64 | 948   | 1 | 46 | 27 | 609   | 95  | 1,646 |
| 103,553 | 3 | 42 | 61 | 948   | 1 | 46 | 27 | 612   | 92  | 1,648 |
| 103,554 | 3 | 41 | 58 | 935   | 1 | 45 | 27 | 608   | 89  | 1,629 |

|         |   |    |    |       |   |    |    |       |    |       |
|---------|---|----|----|-------|---|----|----|-------|----|-------|
| 103,555 | 3 | 38 | 57 | 873   | 1 | 39 | 26 | 570   | 87 | 1,520 |
| 103,556 | 3 | 38 | 57 | 872   | 1 | 39 | 26 | 571   | 87 | 1,520 |
| 103,557 | 3 | 36 | 56 | 829   | 1 | 38 | 25 | 566   | 85 | 1,469 |
| 103,558 | 3 | 35 | 54 | 791   | 1 | 37 | 25 | 550   | 83 | 1,413 |
| 103,559 | 3 | 27 | 55 | 625   | 1 | 26 | 24 | 464   | 83 | 1,142 |
| 103,560 | 3 | 27 | 55 | 645   | 1 | 26 | 26 | 469   | 85 | 1,167 |
| 103,561 | 2 | 22 | 53 | 556   | 1 | 21 | 26 | 416   | 82 | 1,015 |
| 103,562 | 2 | 21 | 54 | 543   | 1 | 20 | 28 | 405   | 85 | 989   |
| 103,563 | 2 | 20 | 53 | 533   | 0 | 19 | 28 | 389   | 83 | 961   |
| 103,564 | 2 | 17 | 54 | 471   | 0 | 11 | 30 | 347   | 86 | 846   |
| 103,565 | 2 | 15 | 47 | 455   | 0 | 15 | 29 | 337   | 78 | 822   |
| 103,566 | 2 | 15 | 40 | 459   | 0 | 15 | 26 | 336   | 68 | 825   |
| 103,567 | 2 | 16 | 41 | 460   | 0 | 15 | 26 | 339   | 69 | 830   |
| 103,568 | 2 | 16 | 42 | 461   | 0 | 16 | 26 | 337   | 70 | 830   |
| 103,569 | 3 | 15 | 41 | 507   | 0 | 20 | 26 | 378   | 70 | 920   |
| 103,570 | 3 | 15 | 43 | 517   | 0 | 22 | 29 | 397   | 75 | 951   |
| 103,571 | 3 | 15 | 43 | 513   | 0 | 22 | 29 | 387   | 75 | 937   |
| 103,572 | 4 | 36 | 48 | 757   | 0 | 31 | 31 | 565   | 83 | 1,389 |
| 103,573 | 5 | 36 | 50 | 777   | 0 | 31 | 31 | 573   | 86 | 1,417 |
| 103,574 | 6 | 34 | 51 | 767   | 0 | 29 | 30 | 555   | 87 | 1,385 |
| 103,575 | 6 | 33 | 51 | 772   | 0 | 29 | 31 | 544   | 88 | 1,378 |
| 103,576 | 6 | 36 | 52 | 865   | 0 | 33 | 31 | 601   | 89 | 1,535 |
| 103,577 | 6 | 37 | 52 | 877   | 0 | 33 | 31 | 624   | 89 | 1,571 |
| 103,578 | 6 | 36 | 54 | 889   | 0 | 37 | 32 | 628   | 92 | 1,590 |
| 103,579 | 6 | 39 | 54 | 938   | 0 | 38 | 32 | 699   | 92 | 1,714 |
| 103,580 | 6 | 39 | 54 | 960   | 0 | 38 | 33 | 705   | 93 | 1,742 |
| 103,581 | 6 | 42 | 52 | 1,008 | 0 | 49 | 33 | 862   | 91 | 1,961 |
| 103,582 | 6 | 42 | 52 | 1,050 | 0 | 51 | 33 | 892   | 91 | 2,035 |
| 103,583 | 6 | 42 | 47 | 1,062 | 0 | 52 | 26 | 913   | 79 | 2,069 |
| 103,584 | 6 | 43 | 44 | 1,076 | 0 | 53 | 26 | 918   | 76 | 2,090 |
| 103,585 | 6 | 45 | 42 | 1,098 | 0 | 56 | 26 | 950   | 74 | 2,149 |
| 103,586 | 6 | 45 | 39 | 1,108 | 0 | 57 | 25 | 964   | 70 | 2,174 |
| 103,587 | 6 | 45 | 41 | 1,109 | 0 | 58 | 25 | 985   | 72 | 2,197 |
| 103,588 | 6 | 46 | 42 | 1,133 | 0 | 60 | 25 | 1,035 | 73 | 2,274 |
| 103,589 | 6 | 46 | 42 | 1,150 | 0 | 62 | 25 | 1,094 | 73 | 2,352 |
| 103,590 | 6 | 46 | 42 | 1,184 | 0 | 62 | 25 | 1,102 | 73 | 2,394 |
| 103,591 | 6 | 47 | 42 | 1,217 | 0 | 66 | 25 | 1,140 | 73 | 2,470 |
| 103,592 | 6 | 47 | 40 | 1,248 | 0 | 68 | 25 | 1,174 | 71 | 2,537 |
| 103,593 | 6 | 48 | 40 | 1,261 | 0 | 68 | 24 | 1,168 | 70 | 2,545 |
| 103,594 | 6 | 48 | 40 | 1,217 | 0 | 68 | 22 | 1,157 | 68 | 2,490 |
| 103,595 | 6 | 47 | 39 | 1,073 | 0 | 65 | 22 | 1,112 | 67 | 2,297 |

|         |   |    |    |       |   |     |    |       |    |       |
|---------|---|----|----|-------|---|-----|----|-------|----|-------|
| 103,596 | 6 | 47 | 39 | 1,088 | 0 | 65  | 22 | 1,117 | 67 | 2,317 |
| 103,597 | 5 | 47 | 40 | 1,100 | 0 | 65  | 22 | 1,128 | 67 | 2,340 |
| 103,598 | 5 | 55 | 40 | 1,340 | 0 | 96  | 23 | 1,435 | 68 | 2,926 |
| 103,599 | 5 | 54 | 40 | 1,360 | 0 | 97  | 23 | 1,451 | 68 | 2,962 |
| 103,600 | 5 | 53 | 40 | 1,391 | 0 | 99  | 23 | 1,489 | 68 | 3,032 |
| 103,601 | 5 | 53 | 40 | 1,388 | 0 | 97  | 23 | 1,478 | 68 | 3,016 |
| 103,602 | 5 | 53 | 37 | 1,389 | 0 | 98  | 23 | 1,481 | 65 | 3,021 |
| 103,603 | 5 | 55 | 37 | 1,408 | 0 | 99  | 23 | 1,508 | 65 | 3,070 |
| 103,604 | 5 | 55 | 37 | 1,407 | 0 | 99  | 23 | 1,505 | 65 | 3,066 |
| 103,605 | 5 | 54 | 37 | 1,407 | 0 | 99  | 23 | 1,509 | 65 | 3,069 |
| 103,606 | 6 | 54 | 37 | 1,417 | 0 | 101 | 24 | 1,516 | 67 | 3,088 |
| 103,607 | 6 | 54 | 37 | 1,421 | 0 | 101 | 24 | 1,520 | 67 | 3,096 |
| 103,608 | 6 | 54 | 36 | 1,422 | 0 | 101 | 24 | 1,518 | 66 | 3,095 |
| 103,609 | 6 | 54 | 35 | 1,428 | 0 | 101 | 24 | 1,519 | 65 | 3,102 |
| 103,610 | 6 | 54 | 31 | 1,436 | 0 | 101 | 24 | 1,524 | 61 | 3,115 |
| 103,611 | 6 | 54 | 30 | 1,410 | 0 | 102 | 22 | 1,516 | 58 | 3,082 |
| 103,612 | 6 | 54 | 29 | 1,412 | 0 | 102 | 22 | 1,516 | 57 | 3,084 |
| 103,613 | 6 | 55 | 27 | 1,415 | 0 | 102 | 21 | 1,521 | 54 | 3,093 |
| 103,614 | 6 | 54 | 28 | 1,415 | 0 | 102 | 20 | 1,518 | 54 | 3,089 |
| 103,615 | 6 | 54 | 25 | 1,416 | 0 | 104 | 19 | 1,515 | 50 | 3,089 |
| 103,616 | 6 | 54 | 25 | 1,406 | 0 | 99  | 19 | 1,496 | 50 | 3,055 |
| 103,617 | 6 | 54 | 25 | 1,401 | 0 | 99  | 18 | 1,496 | 49 | 3,050 |
| 103,618 | 6 | 53 | 25 | 1,401 | 0 | 99  | 18 | 1,494 | 49 | 3,047 |
| 103,619 | 6 | 53 | 26 | 1,401 | 0 | 98  | 18 | 1,495 | 50 | 3,047 |
| 103,620 | 6 | 56 | 26 | 1,383 | 0 | 94  | 19 | 1,485 | 51 | 3,018 |
| 103,621 | 6 | 60 | 24 | 1,396 | 0 | 91  | 16 | 1,462 | 46 | 3,009 |
| 103,622 | 5 | 60 | 20 | 1,395 | 0 | 91  | 16 | 1,457 | 41 | 3,003 |
| 103,623 | 5 | 38 | 19 | 1,147 | 0 | 81  | 14 | 1,270 | 38 | 2,536 |
| 103,624 | 4 | 37 | 17 | 1,118 | 0 | 81  | 14 | 1,254 | 35 | 2,490 |
| 103,625 | 3 | 36 | 16 | 1,102 | 0 | 81  | 13 | 1,232 | 32 | 2,451 |
| 103,626 | 3 | 33 | 16 | 1,009 | 0 | 77  | 11 | 1,175 | 30 | 2,294 |
| 103,627 | 3 | 32 | 15 | 998   | 0 | 77  | 11 | 1,154 | 29 | 2,261 |
| 103,628 | 3 | 32 | 15 | 998   | 0 | 77  | 11 | 1,161 | 29 | 2,268 |
| 103,629 | 3 | 29 | 13 | 930   | 0 | 73  | 10 | 1,080 | 26 | 2,112 |
| 103,630 | 3 | 29 | 13 | 935   | 0 | 73  | 9  | 1,083 | 25 | 2,120 |
| 103,631 | 3 | 30 | 12 | 923   | 0 | 75  | 8  | 1,080 | 23 | 2,108 |
| 103,632 | 3 | 26 | 12 | 884   | 0 | 63  | 8  | 938   | 23 | 1,911 |
| 103,633 | 3 | 26 | 11 | 844   | 0 | 62  | 8  | 909   | 22 | 1,841 |
| 103,634 | 3 | 26 | 11 | 846   | 0 | 65  | 8  | 918   | 22 | 1,855 |
| 103,635 | 3 | 26 | 14 | 860   | 0 | 68  | 8  | 932   | 25 | 1,886 |
| 103,636 | 3 | 24 | 12 | 851   | 0 | 66  | 8  | 919   | 23 | 1,860 |



|         |    |    |    |     |    |    |    |     |     |       |
|---------|----|----|----|-----|----|----|----|-----|-----|-------|
| 103,637 | 2  | 24 | 10 | 845 | 0  | 66 | 8  | 906 | 20  | 1,841 |
| 103,638 | 2  | 25 | 9  | 851 | 0  | 68 | 7  | 894 | 18  | 1,838 |
| 103,639 | 2  | 27 | 9  | 774 | 0  | 64 | 7  | 779 | 18  | 1,644 |
| 103,640 | 2  | 27 | 9  | 783 | 0  | 65 | 6  | 785 | 17  | 1,660 |
| 103,641 | 2  | 31 | 9  | 817 | 0  | 73 | 7  | 834 | 18  | 1,755 |
| 103,642 | 2  | 31 | 8  | 803 | 0  | 72 | 7  | 810 | 17  | 1,716 |
| 103,643 | 3  | 50 | 8  | 906 | 0  | 76 | 8  | 838 | 19  | 1,870 |
| 103,644 | 3  | 51 | 8  | 893 | 0  | 76 | 8  | 836 | 19  | 1,856 |
| 103,645 | 3  | 54 | 8  | 919 | 0  | 78 | 8  | 870 | 19  | 1,921 |
| 103,646 | 3  | 54 | 7  | 927 | 0  | 78 | 8  | 873 | 18  | 1,932 |
| 103,647 | 3  | 54 | 8  | 907 | 0  | 78 | 8  | 859 | 19  | 1,898 |
| 103,648 | 3  | 55 | 8  | 918 | 0  | 79 | 8  | 869 | 19  | 1,921 |
| 103,649 | 3  | 48 | 8  | 700 | 1  | 50 | 8  | 583 | 20  | 1,381 |
| 103,650 | 3  | 49 | 8  | 662 | 1  | 49 | 8  | 565 | 20  | 1,325 |
| 103,651 | 5  | 48 | 16 | 643 | 1  | 50 | 13 | 555 | 35  | 1,296 |
| 103,652 | 5  | 49 | 16 | 674 | 1  | 55 | 13 | 567 | 35  | 1,345 |
| 103,653 | 5  | 52 | 16 | 695 | 1  | 59 | 15 | 586 | 37  | 1,392 |
| 103,654 | 5  | 50 | 18 | 698 | 1  | 58 | 15 | 580 | 39  | 1,386 |
| 103,655 | 5  | 50 | 21 | 705 | 2  | 58 | 17 | 582 | 45  | 1,395 |
| 103,656 | 5  | 50 | 21 | 710 | 2  | 58 | 16 | 579 | 44  | 1,397 |
| 103,657 | 4  | 50 | 22 | 704 | 2  | 56 | 17 | 572 | 45  | 1,382 |
| 103,658 | 4  | 50 | 22 | 715 | 2  | 57 | 17 | 592 | 45  | 1,414 |
| 103,659 | 4  | 50 | 22 | 712 | 2  | 57 | 17 | 593 | 45  | 1,412 |
| 103,660 | 5  | 50 | 22 | 717 | 2  | 58 | 20 | 597 | 49  | 1,422 |
| 103,661 | 5  | 50 | 22 | 711 | 2  | 58 | 22 | 594 | 51  | 1,413 |
| 103,662 | 5  | 50 | 22 | 724 | 2  | 57 | 24 | 595 | 53  | 1,426 |
| 103,663 | 5  | 50 | 22 | 727 | 2  | 58 | 24 | 596 | 53  | 1,431 |
| 103,664 | 5  | 49 | 22 | 728 | 2  | 58 | 23 | 595 | 52  | 1,430 |
| 103,665 | 6  | 51 | 27 | 737 | 4  | 58 | 26 | 600 | 63  | 1,446 |
| 103,666 | 6  | 51 | 29 | 744 | 4  | 56 | 31 | 600 | 70  | 1,451 |
| 103,667 | 6  | 51 | 31 | 744 | 5  | 56 | 34 | 598 | 76  | 1,449 |
| 103,668 | 6  | 51 | 31 | 755 | 6  | 56 | 36 | 601 | 79  | 1,463 |
| 103,669 | 6  | 53 | 30 | 757 | 6  | 56 | 36 | 609 | 78  | 1,475 |
| 103,670 | 6  | 53 | 28 | 751 | 6  | 56 | 36 | 609 | 76  | 1,469 |
| 103,671 | 5  | 50 | 30 | 724 | 6  | 56 | 35 | 576 | 76  | 1,406 |
| 103,672 | 5  | 46 | 31 | 706 | 6  | 58 | 36 | 576 | 78  | 1,386 |
| 103,673 | 6  | 53 | 40 | 768 | 8  | 68 | 40 | 662 | 94  | 1,551 |
| 103,674 | 8  | 62 | 43 | 811 | 9  | 75 | 43 | 721 | 103 | 1,669 |
| 103,675 | 9  | 64 | 50 | 842 | 10 | 78 | 48 | 752 | 117 | 1,736 |
| 103,676 | 10 | 65 | 57 | 845 | 10 | 78 | 59 | 754 | 136 | 1,742 |
| 103,677 | 10 | 65 | 57 | 851 | 10 | 79 | 59 | 756 | 136 | 1,751 |

|         |    |    |    |     |    |    |    |     |     |       |
|---------|----|----|----|-----|----|----|----|-----|-----|-------|
| 103,678 | 10 | 66 | 65 | 852 | 10 | 81 | 60 | 760 | 145 | 1,759 |
| 103,679 | 10 | 66 | 65 | 854 | 10 | 81 | 60 | 759 | 145 | 1,760 |
| 103,680 | 10 | 70 | 65 | 866 | 10 | 81 | 60 | 775 | 145 | 1,792 |
| 103,681 | 10 | 70 | 65 | 867 | 10 | 81 | 60 | 775 | 145 | 1,793 |
| 103,682 | 10 | 69 | 69 | 851 | 10 | 80 | 67 | 763 | 156 | 1,763 |
| 103,683 | 10 | 70 | 69 | 827 | 10 | 81 | 67 | 733 | 156 | 1,711 |
| 103,684 | 10 | 70 | 69 | 825 | 10 | 80 | 67 | 732 | 156 | 1,707 |
| 103,685 | 10 | 70 | 69 | 811 | 10 | 77 | 67 | 702 | 156 | 1,660 |
| 103,686 | 10 | 69 | 66 | 779 | 10 | 73 | 67 | 678 | 153 | 1,599 |
| 103,687 | 10 | 69 | 66 | 766 | 10 | 72 | 66 | 659 | 152 | 1,566 |
| 103,688 | 10 | 69 | 66 | 769 | 10 | 72 | 66 | 672 | 152 | 1,582 |
| 103,689 | 10 | 68 | 66 | 759 | 10 | 69 | 66 | 666 | 152 | 1,562 |
| 103,690 | 10 | 65 | 66 | 771 | 10 | 69 | 68 | 674 | 154 | 1,579 |
| 103,691 | 10 | 65 | 66 | 767 | 10 | 69 | 69 | 669 | 155 | 1,570 |
| 103,692 | 10 | 61 | 66 | 741 | 10 | 61 | 68 | 621 | 154 | 1,484 |
| 103,693 | 10 | 60 | 66 | 723 | 10 | 58 | 68 | 606 | 154 | 1,447 |
| 103,694 | 9  | 39 | 68 | 554 | 10 | 51 | 69 | 520 | 156 | 1,164 |
| 103,695 | 9  | 37 | 68 | 517 | 10 | 49 | 71 | 474 | 158 | 1,077 |
| 103,696 | 9  | 37 | 69 | 526 | 10 | 50 | 71 | 477 | 159 | 1,090 |
| 103,697 | 9  | 37 | 68 | 527 | 10 | 50 | 73 | 477 | 160 | 1,091 |
| 103,698 | 9  | 36 | 70 | 507 | 10 | 49 | 73 | 465 | 162 | 1,057 |
| 103,699 | 9  | 35 | 70 | 459 | 10 | 46 | 73 | 407 | 162 | 947   |
| 103,700 | 9  | 35 | 70 | 485 | 9  | 46 | 73 | 412 | 161 | 978   |
| 103,701 | 7  | 35 | 62 | 493 | 9  | 46 | 68 | 412 | 146 | 986   |
| 103,702 | 7  | 36 | 63 | 503 | 9  | 46 | 68 | 415 | 147 | 1,000 |
| 103,703 | 7  | 35 | 63 | 464 | 9  | 41 | 67 | 400 | 146 | 940   |
| 103,704 | 7  | 33 | 63 | 451 | 9  | 36 | 65 | 378 | 144 | 898   |
| 103,705 | 7  | 34 | 61 | 470 | 9  | 39 | 65 | 382 | 142 | 925   |
| 103,706 | 7  | 34 | 58 | 463 | 8  | 39 | 63 | 380 | 136 | 916   |
| 103,707 | 7  | 39 | 58 | 481 | 8  | 40 | 64 | 387 | 137 | 947   |
| 103,708 | 7  | 39 | 57 | 482 | 8  | 40 | 63 | 387 | 135 | 948   |
| 103,709 | 7  | 39 | 57 | 463 | 8  | 39 | 60 | 359 | 132 | 900   |
| 103,710 | 6  | 39 | 57 | 457 | 8  | 38 | 61 | 352 | 132 | 886   |
| 103,711 | 6  | 39 | 57 | 462 | 8  | 38 | 61 | 352 | 132 | 891   |
| 103,712 | 6  | 39 | 57 | 470 | 8  | 39 | 59 | 358 | 130 | 906   |
| 103,713 | 6  | 39 | 59 | 480 | 9  | 39 | 57 | 358 | 131 | 916   |
| 103,714 | 6  | 39 | 59 | 479 | 9  | 38 | 57 | 358 | 131 | 914   |
| 103,715 | 6  | 40 | 59 | 479 | 9  | 38 | 57 | 356 | 131 | 913   |
| 103,716 | 6  | 38 | 53 | 469 | 7  | 38 | 54 | 351 | 120 | 896   |
| 103,717 | 6  | 38 | 51 | 458 | 7  | 38 | 48 | 350 | 112 | 884   |
| 103,718 | 6  | 38 | 49 | 439 | 6  | 38 | 45 | 344 | 106 | 859   |

|         |   |    |    |     |   |    |    |     |     |       |
|---------|---|----|----|-----|---|----|----|-----|-----|-------|
| 103,719 | 6 | 38 | 49 | 442 | 5 | 38 | 43 | 346 | 103 | 864   |
| 103,720 | 6 | 36 | 49 | 446 | 5 | 38 | 45 | 346 | 105 | 866   |
| 103,721 | 6 | 36 | 49 | 451 | 5 | 38 | 45 | 346 | 105 | 871   |
| 103,722 | 6 | 29 | 47 | 380 | 5 | 26 | 45 | 259 | 103 | 694   |
| 103,723 | 6 | 29 | 46 | 380 | 5 | 26 | 44 | 261 | 101 | 696   |
| 103,724 | 5 | 29 | 37 | 458 | 3 | 29 | 40 | 322 | 85  | 838   |
| 103,725 | 3 | 20 | 37 | 420 | 2 | 23 | 38 | 265 | 80  | 728   |
| 103,726 | 3 | 19 | 36 | 396 | 1 | 20 | 33 | 244 | 73  | 679   |
| 103,727 | 2 | 18 | 36 | 401 | 1 | 20 | 24 | 246 | 63  | 685   |
| 103,728 | 2 | 21 | 40 | 414 | 1 | 23 | 29 | 284 | 72  | 742   |
| 103,729 | 3 | 27 | 34 | 448 | 1 | 23 | 28 | 325 | 66  | 823   |
| 103,730 | 3 | 27 | 31 | 457 | 1 | 23 | 23 | 330 | 58  | 837   |
| 103,731 | 3 | 24 | 32 | 463 | 1 | 24 | 21 | 318 | 57  | 829   |
| 103,732 | 3 | 24 | 35 | 461 | 2 | 24 | 22 | 316 | 62  | 825   |
| 103,733 | 3 | 26 | 37 | 483 | 2 | 24 | 22 | 334 | 64  | 867   |
| 103,734 | 3 | 25 | 37 | 481 | 2 | 23 | 22 | 329 | 64  | 858   |
| 103,735 | 3 | 25 | 38 | 486 | 2 | 23 | 22 | 329 | 65  | 863   |
| 103,736 | 3 | 25 | 38 | 492 | 2 | 22 | 22 | 331 | 65  | 870   |
| 103,737 | 3 | 25 | 40 | 503 | 2 | 22 | 27 | 332 | 72  | 882   |
| 103,738 | 3 | 27 | 40 | 516 | 2 | 24 | 27 | 344 | 72  | 911   |
| 103,739 | 3 | 28 | 40 | 512 | 2 | 23 | 27 | 336 | 72  | 899   |
| 103,740 | 3 | 28 | 42 | 530 | 2 | 23 | 27 | 338 | 74  | 919   |
| 103,741 | 3 | 29 | 45 | 522 | 2 | 23 | 29 | 340 | 79  | 914   |
| 103,742 | 3 | 29 | 49 | 538 | 3 | 22 | 30 | 341 | 85  | 930   |
| 103,743 | 3 | 29 | 52 | 531 | 3 | 22 | 30 | 340 | 88  | 922   |
| 103,744 | 4 | 30 | 59 | 542 | 3 | 22 | 31 | 341 | 97  | 935   |
| 103,745 | 4 | 30 | 57 | 557 | 3 | 24 | 30 | 358 | 94  | 969   |
| 103,746 | 4 | 29 | 57 | 560 | 3 | 24 | 28 | 363 | 92  | 976   |
| 103,747 | 4 | 29 | 58 | 555 | 3 | 23 | 31 | 362 | 96  | 969   |
| 103,748 | 4 | 29 | 62 | 557 | 3 | 23 | 34 | 366 | 103 | 975   |
| 103,749 | 4 | 31 | 60 | 558 | 3 | 24 | 34 | 371 | 101 | 984   |
| 103,750 | 4 | 30 | 60 | 558 | 3 | 23 | 34 | 369 | 101 | 980   |
| 103,751 | 4 | 30 | 66 | 524 | 3 | 23 | 41 | 365 | 114 | 942   |
| 103,752 | 4 | 30 | 66 | 524 | 3 | 24 | 41 | 366 | 114 | 944   |
| 103,753 | 4 | 29 | 65 | 515 | 3 | 25 | 41 | 366 | 113 | 935   |
| 103,754 | 4 | 29 | 65 | 523 | 3 | 26 | 41 | 377 | 113 | 955   |
| 103,755 | 4 | 32 | 66 | 564 | 3 | 30 | 41 | 430 | 114 | 1,056 |
| 103,756 | 4 | 33 | 67 | 552 | 3 | 27 | 41 | 444 | 115 | 1,056 |
| 103,757 | 4 | 35 | 68 | 575 | 3 | 29 | 42 | 479 | 117 | 1,118 |
| 103,758 | 4 | 31 | 68 | 565 | 3 | 30 | 41 | 492 | 116 | 1,118 |
| 103,759 | 4 | 31 | 69 | 562 | 3 | 34 | 42 | 496 | 118 | 1,123 |

|         |   |    |    |     |   |    |    |     |     |       |
|---------|---|----|----|-----|---|----|----|-----|-----|-------|
| 103,760 | 4 | 43 | 69 | 707 | 3 | 48 | 42 | 658 | 118 | 1,456 |
| 103,761 | 4 | 43 | 69 | 708 | 3 | 49 | 41 | 659 | 117 | 1,459 |
| 103,762 | 4 | 45 | 70 | 712 | 3 | 53 | 48 | 678 | 125 | 1,488 |
| 103,763 | 4 | 47 | 71 | 713 | 4 | 53 | 50 | 689 | 129 | 1,502 |
| 103,764 | 4 | 47 | 69 | 689 | 3 | 53 | 50 | 688 | 126 | 1,477 |
| 103,765 | 4 | 51 | 72 | 712 | 3 | 54 | 52 | 731 | 131 | 1,548 |
| 103,766 | 4 | 52 | 73 | 725 | 3 | 57 | 52 | 760 | 132 | 1,594 |
| 103,767 | 3 | 54 | 73 | 747 | 3 | 58 | 52 | 768 | 131 | 1,627 |
| 103,768 | 3 | 54 | 75 | 750 | 3 | 59 | 52 | 773 | 133 | 1,636 |
| 103,769 | 3 | 55 | 77 | 749 | 3 | 59 | 51 | 775 | 134 | 1,638 |
| 103,770 | 4 | 55 | 80 | 744 | 3 | 59 | 54 | 766 | 141 | 1,624 |
| 103,771 | 4 | 55 | 91 | 738 | 3 | 59 | 53 | 760 | 151 | 1,612 |
| 103,772 | 4 | 55 | 93 | 748 | 3 | 59 | 53 | 767 | 153 | 1,629 |
| 103,773 | 4 | 55 | 93 | 749 | 3 | 59 | 53 | 767 | 153 | 1,630 |
| 103,774 | 4 | 55 | 93 | 756 | 3 | 59 | 55 | 768 | 155 | 1,638 |
| 103,775 | 4 | 55 | 94 | 687 | 3 | 56 | 55 | 710 | 156 | 1,508 |
| 103,776 | 4 | 55 | 93 | 691 | 3 | 55 | 54 | 712 | 154 | 1,513 |
| 103,777 | 3 | 54 | 87 | 682 | 3 | 55 | 54 | 704 | 147 | 1,495 |
| 103,778 | 3 | 54 | 85 | 674 | 3 | 55 | 54 | 701 | 145 | 1,484 |
| 103,779 | 3 | 51 | 80 | 656 | 3 | 51 | 49 | 665 | 135 | 1,423 |
| 103,780 | 2 | 44 | 78 | 621 | 3 | 49 | 49 | 612 | 132 | 1,326 |
| 103,781 | 3 | 44 | 76 | 614 | 3 | 49 | 49 | 607 | 131 | 1,314 |
| 103,782 | 3 | 43 | 76 | 599 | 3 | 47 | 49 | 602 | 131 | 1,291 |
| 103,783 | 3 | 43 | 73 | 596 | 2 | 47 | 52 | 601 | 130 | 1,287 |
| 103,784 | 3 | 41 | 72 | 571 | 2 | 46 | 52 | 582 | 129 | 1,240 |
| 103,785 | 3 | 41 | 71 | 559 | 2 | 46 | 52 | 578 | 128 | 1,224 |
| 103,786 | 4 | 41 | 75 | 559 | 2 | 46 | 53 | 578 | 134 | 1,224 |
| 103,787 | 5 | 41 | 78 | 558 | 2 | 46 | 53 | 578 | 138 | 1,223 |
| 103,788 | 5 | 41 | 82 | 551 | 3 | 46 | 58 | 574 | 148 | 1,212 |
| 103,789 | 5 | 39 | 82 | 538 | 3 | 44 | 57 | 560 | 147 | 1,181 |
| 103,790 | 5 | 38 | 81 | 533 | 3 | 44 | 57 | 553 | 146 | 1,168 |
| 103,791 | 5 | 37 | 80 | 484 | 3 | 44 | 57 | 531 | 145 | 1,096 |
| 103,792 | 5 | 37 | 77 | 486 | 3 | 44 | 54 | 531 | 139 | 1,098 |
| 103,793 | 5 | 37 | 73 | 487 | 2 | 44 | 52 | 531 | 132 | 1,099 |
| 103,794 | 5 | 37 | 70 | 491 | 2 | 44 | 52 | 532 | 129 | 1,104 |
| 103,795 | 4 | 39 | 63 | 490 | 2 | 45 | 51 | 541 | 120 | 1,115 |
| 103,796 | 4 | 39 | 63 | 488 | 2 | 43 | 51 | 540 | 120 | 1,110 |
| 103,797 | 4 | 42 | 62 | 497 | 2 | 43 | 51 | 541 | 119 | 1,123 |
| 103,798 | 4 | 42 | 61 | 497 | 2 | 43 | 49 | 539 | 116 | 1,121 |
| 103,799 | 4 | 41 | 57 | 497 | 2 | 42 | 44 | 528 | 107 | 1,108 |
| 103,800 | 4 | 41 | 55 | 497 | 2 | 42 | 44 | 528 | 105 | 1,108 |

|         |   |     |    |       |   |    |    |       |    |       |
|---------|---|-----|----|-------|---|----|----|-------|----|-------|
| 103,801 | 4 | 41  | 51 | 498   | 2 | 42 | 37 | 528   | 94 | 1,109 |
| 103,802 | 4 | 41  | 51 | 500   | 2 | 42 | 37 | 529   | 94 | 1,112 |
| 103,803 | 4 | 41  | 51 | 510   | 2 | 41 | 37 | 538   | 94 | 1,130 |
| 103,804 | 4 | 41  | 51 | 517   | 2 | 41 | 37 | 538   | 94 | 1,137 |
| 103,805 | 4 | 42  | 51 | 508   | 2 | 40 | 37 | 527   | 94 | 1,117 |
| 103,806 | 4 | 38  | 50 | 483   | 2 | 37 | 37 | 506   | 93 | 1,064 |
| 103,807 | 4 | 36  | 49 | 560   | 2 | 37 | 37 | 486   | 92 | 1,119 |
| 103,808 | 4 | 35  | 48 | 593   | 2 | 37 | 36 | 498   | 90 | 1,163 |
| 103,809 | 4 | 36  | 48 | 914   | 2 | 38 | 36 | 563   | 90 | 1,551 |
| 103,810 | 4 | 46  | 47 | 1,020 | 2 | 40 | 36 | 649   | 89 | 1,755 |
| 103,811 | 4 | 36  | 47 | 903   | 2 | 27 | 35 | 501   | 88 | 1,467 |
| 103,812 | 4 | 32  | 46 | 885   | 2 | 21 | 30 | 470   | 82 | 1,408 |
| 103,813 | 4 | 39  | 46 | 984   | 2 | 25 | 30 | 538   | 82 | 1,586 |
| 103,814 | 4 | 62  | 45 | 1,169 | 1 | 38 | 28 | 791   | 78 | 2,060 |
| 103,815 | 4 | 62  | 42 | 1,171 | 1 | 38 | 26 | 793   | 73 | 2,064 |
| 103,816 | 4 | 72  | 43 | 1,299 | 1 | 42 | 26 | 861   | 74 | 2,274 |
| 103,817 | 4 | 129 | 42 | 1,568 | 1 | 52 | 26 | 1,135 | 73 | 2,884 |
| 103,818 | 4 | 127 | 42 | 1,576 | 1 | 51 | 26 | 1,138 | 73 | 2,892 |
| 103,819 | 4 | 127 | 41 | 1,582 | 1 | 50 | 26 | 1,138 | 72 | 2,897 |
| 103,820 | 4 | 126 | 39 | 1,616 | 1 | 51 | 26 | 1,145 | 70 | 2,938 |
| 103,821 | 3 | 126 | 36 | 1,635 | 1 | 52 | 23 | 1,151 | 63 | 2,964 |
| 103,822 | 3 | 126 | 26 | 1,623 | 1 | 52 | 22 | 1,143 | 52 | 2,944 |
| 103,823 | 3 | 126 | 24 | 1,625 | 1 | 52 | 22 | 1,143 | 50 | 2,946 |
| 103,824 | 3 | 126 | 24 | 1,625 | 1 | 52 | 22 | 1,145 | 50 | 2,948 |
| 103,825 | 3 | 126 | 24 | 1,618 | 1 | 52 | 20 | 1,142 | 48 | 2,938 |
| 103,826 | 3 | 126 | 23 | 1,608 | 1 | 52 | 20 | 1,139 | 47 | 2,925 |
| 103,827 | 3 | 126 | 21 | 1,600 | 1 | 52 | 20 | 1,132 | 45 | 2,910 |
| 103,828 | 3 | 126 | 21 | 1,600 | 1 | 52 | 20 | 1,131 | 45 | 2,909 |
| 103,829 | 3 | 126 | 16 | 1,597 | 1 | 52 | 18 | 1,128 | 38 | 2,903 |
| 103,830 | 3 | 126 | 16 | 1,594 | 1 | 52 | 18 | 1,128 | 38 | 2,900 |
| 103,831 | 3 | 126 | 17 | 1,593 | 1 | 52 | 18 | 1,127 | 39 | 2,898 |
| 103,832 | 2 | 126 | 17 | 1,590 | 1 | 52 | 18 | 1,125 | 38 | 2,893 |
| 103,833 | 2 | 126 | 17 | 1,590 | 1 | 52 | 18 | 1,127 | 38 | 2,895 |
| 103,834 | 2 | 126 | 17 | 1,590 | 1 | 52 | 14 | 1,127 | 34 | 2,895 |
| 103,835 | 2 | 126 | 17 | 1,591 | 1 | 52 | 14 | 1,128 | 34 | 2,897 |
| 103,836 | 2 | 126 | 17 | 1,591 | 1 | 53 | 14 | 1,128 | 34 | 2,898 |
| 103,837 | 1 | 126 | 13 | 1,591 | 1 | 53 | 14 | 1,128 | 29 | 2,898 |
| 103,838 | 0 | 126 | 8  | 1,590 | 1 | 53 | 9  | 1,128 | 18 | 2,897 |
| 103,839 | 0 | 126 | 4  | 1,585 | 0 | 53 | 3  | 1,128 | 7  | 2,892 |
| 103,840 | 0 | 126 | 4  | 1,587 | 0 | 53 | 3  | 1,128 | 7  | 2,894 |
| 103,841 | 0 | 127 | 4  | 1,587 | 0 | 53 | 3  | 1,128 | 7  | 2,895 |

|         |   |     |    |       |   |    |    |       |    |       |
|---------|---|-----|----|-------|---|----|----|-------|----|-------|
| 103,842 | 0 | 127 | 4  | 1,585 | 0 | 53 | 3  | 1,128 | 7  | 2,893 |
| 103,843 | 0 | 127 | 4  | 1,586 | 0 | 53 | 3  | 1,128 | 7  | 2,894 |
| 103,844 | 0 | 127 | 5  | 1,588 | 0 | 53 | 3  | 1,128 | 8  | 2,896 |
| 103,845 | 0 | 127 | 5  | 1,585 | 0 | 53 | 3  | 1,126 | 8  | 2,891 |
| 103,846 | 0 | 124 | 5  | 1,560 | 0 | 52 | 3  | 1,102 | 8  | 2,838 |
| 103,847 | 0 | 125 | 5  | 1,568 | 0 | 52 | 3  | 1,109 | 8  | 2,854 |
| 103,848 | 0 | 122 | 5  | 1,578 | 0 | 54 | 3  | 1,123 | 8  | 2,877 |
| 103,849 | 0 | 129 | 7  | 1,659 | 0 | 58 | 4  | 1,209 | 11 | 3,055 |
| 103,850 | 0 | 139 | 8  | 1,767 | 0 | 66 | 5  | 1,303 | 13 | 3,275 |
| 103,851 | 0 | 141 | 8  | 1,787 | 0 | 66 | 5  | 1,312 | 13 | 3,306 |
| 103,852 | 0 | 142 | 8  | 1,790 | 0 | 66 | 6  | 1,312 | 14 | 3,310 |
| 103,853 | 0 | 142 | 8  | 1,796 | 0 | 66 | 6  | 1,317 | 14 | 3,321 |
| 103,854 | 0 | 142 | 8  | 1,786 | 0 | 66 | 6  | 1,308 | 14 | 3,302 |
| 103,855 | 0 | 142 | 8  | 1,786 | 0 | 65 | 6  | 1,308 | 14 | 3,301 |
| 103,856 | 0 | 142 | 8  | 1,789 | 0 | 65 | 6  | 1,310 | 14 | 3,306 |
| 103,857 | 0 | 142 | 9  | 1,766 | 0 | 64 | 6  | 1,278 | 15 | 3,250 |
| 103,858 | 0 | 142 | 9  | 1,708 | 0 | 67 | 6  | 1,297 | 15 | 3,214 |
| 103,859 | 0 | 139 | 10 | 1,381 | 0 | 62 | 7  | 1,177 | 17 | 2,759 |
| 103,860 | 0 | 143 | 10 | 1,437 | 0 | 64 | 8  | 1,237 | 18 | 2,881 |
| 103,861 | 0 | 135 | 10 | 1,370 | 0 | 59 | 7  | 1,161 | 17 | 2,725 |
| 103,862 | 0 | 135 | 10 | 1,405 | 0 | 58 | 7  | 1,163 | 17 | 2,761 |
| 103,863 | 0 | 139 | 10 | 1,551 | 0 | 62 | 7  | 1,215 | 17 | 2,967 |
| 103,864 | 0 | 132 | 10 | 1,574 | 0 | 59 | 6  | 1,163 | 16 | 2,928 |
| 103,865 | 0 | 117 | 10 | 1,597 | 0 | 56 | 7  | 1,021 | 17 | 2,791 |
| 103,866 | 0 | 124 | 10 | 1,666 | 0 | 57 | 7  | 1,043 | 17 | 2,890 |
| 103,867 | 0 | 51  | 10 | 1,235 | 0 | 39 | 7  | 632   | 17 | 1,957 |
| 103,868 | 0 | 54  | 14 | 1,292 | 0 | 39 | 7  | 663   | 21 | 2,048 |
| 103,869 | 0 | 54  | 13 | 1,242 | 0 | 39 | 7  | 645   | 20 | 1,980 |
| 103,870 | 0 | 56  | 13 | 1,385 | 0 | 42 | 7  | 669   | 20 | 2,152 |
| 103,871 | 1 | 66  | 13 | 1,534 | 0 | 49 | 7  | 731   | 21 | 2,380 |
| 103,872 | 1 | 67  | 13 | 1,574 | 0 | 48 | 7  | 738   | 21 | 2,427 |
| 103,873 | 1 | 67  | 14 | 1,619 | 0 | 49 | 8  | 755   | 23 | 2,490 |
| 103,874 | 1 | 67  | 21 | 1,623 | 0 | 49 | 14 | 763   | 36 | 2,502 |
| 103,875 | 1 | 67  | 22 | 1,628 | 0 | 49 | 19 | 761   | 42 | 2,505 |
| 103,876 | 2 | 68  | 28 | 1,665 | 0 | 56 | 22 | 804   | 52 | 2,593 |
| 103,877 | 2 | 69  | 30 | 1,763 | 0 | 56 | 23 | 846   | 55 | 2,734 |
| 103,878 | 2 | 75  | 30 | 1,813 | 0 | 59 | 23 | 901   | 55 | 2,848 |
| 103,879 | 2 | 76  | 33 | 1,822 | 0 | 60 | 24 | 903   | 59 | 2,861 |
| 103,880 | 2 | 76  | 35 | 1,825 | 1 | 60 | 28 | 904   | 66 | 2,865 |
| 103,881 | 2 | 78  | 37 | 1,830 | 2 | 62 | 29 | 919   | 70 | 2,889 |
| 103,882 | 2 | 78  | 36 | 1,834 | 2 | 62 | 29 | 919   | 69 | 2,893 |

|         |   |    |    |       |   |    |    |       |     |       |
|---------|---|----|----|-------|---|----|----|-------|-----|-------|
| 103,883 | 2 | 86 | 36 | 1,865 | 2 | 65 | 29 | 957   | 69  | 2,973 |
| 103,884 | 2 | 86 | 36 | 1,872 | 2 | 66 | 29 | 956   | 69  | 2,980 |
| 103,885 | 2 | 87 | 38 | 1,871 | 2 | 66 | 31 | 959   | 73  | 2,983 |
| 103,886 | 2 | 88 | 39 | 1,882 | 3 | 66 | 31 | 963   | 75  | 2,999 |
| 103,887 | 2 | 88 | 39 | 1,885 | 3 | 65 | 31 | 964   | 75  | 3,002 |
| 103,888 | 2 | 88 | 45 | 1,895 | 3 | 65 | 30 | 967   | 80  | 3,015 |
| 103,889 | 2 | 89 | 45 | 1,908 | 3 | 66 | 31 | 975   | 81  | 3,038 |
| 103,890 | 2 | 89 | 47 | 1,914 | 3 | 66 | 33 | 979   | 85  | 3,048 |
| 103,891 | 3 | 90 | 47 | 1,916 | 3 | 66 | 34 | 985   | 87  | 3,057 |
| 103,892 | 4 | 89 | 52 | 1,927 | 4 | 68 | 49 | 1,009 | 109 | 3,093 |
| 103,893 | 4 | 89 | 54 | 1,946 | 5 | 68 | 54 | 1,011 | 117 | 3,114 |
| 103,894 | 7 | 89 | 58 | 1,975 | 6 | 68 | 54 | 1,028 | 125 | 3,160 |
| 103,895 | 7 | 89 | 59 | 2,007 | 6 | 68 | 54 | 1,034 | 126 | 3,198 |
| 103,896 | 7 | 89 | 59 | 2,046 | 6 | 69 | 54 | 1,061 | 126 | 3,265 |
| 103,897 | 7 | 89 | 59 | 2,061 | 6 | 69 | 54 | 1,066 | 126 | 3,285 |
| 103,898 | 7 | 88 | 58 | 2,059 | 6 | 69 | 54 | 1,059 | 125 | 3,275 |
| 103,899 | 7 | 89 | 58 | 2,053 | 6 | 67 | 54 | 1,049 | 125 | 3,258 |
| 103,900 | 7 | 82 | 58 | 1,971 | 6 | 63 | 53 | 962   | 124 | 3,078 |
| 103,901 | 8 | 69 | 58 | 1,839 | 6 | 55 | 52 | 858   | 124 | 2,821 |
| 103,902 | 8 | 69 | 59 | 1,845 | 6 | 55 | 52 | 864   | 125 | 2,833 |
| 103,903 | 8 | 69 | 60 | 1,852 | 6 | 55 | 51 | 869   | 125 | 2,845 |
| 103,904 | 8 | 69 | 61 | 1,863 | 6 | 55 | 52 | 884   | 127 | 2,871 |
| 103,905 | 8 | 68 | 62 | 1,864 | 6 | 55 | 52 | 889   | 128 | 2,876 |
| 103,906 | 8 | 68 | 63 | 1,869 | 6 | 55 | 52 | 891   | 129 | 2,883 |
| 103,907 | 9 | 68 | 66 | 1,874 | 6 | 55 | 53 | 894   | 134 | 2,891 |
| 103,908 | 9 | 69 | 68 | 1,882 | 6 | 55 | 53 | 907   | 136 | 2,913 |
| 103,909 | 9 | 69 | 68 | 1,835 | 6 | 52 | 53 | 871   | 136 | 2,827 |
| 103,910 | 9 | 69 | 68 | 1,826 | 6 | 53 | 52 | 883   | 135 | 2,831 |
| 103,911 | 9 | 65 | 68 | 1,726 | 6 | 51 | 51 | 813   | 134 | 2,655 |
| 103,912 | 9 | 61 | 68 | 1,632 | 6 | 51 | 51 | 798   | 134 | 2,542 |
| 103,913 | 9 | 61 | 68 | 1,655 | 6 | 53 | 51 | 841   | 134 | 2,610 |
| 103,914 | 9 | 58 | 69 | 1,612 | 6 | 52 | 51 | 808   | 135 | 2,530 |
| 103,915 | 9 | 61 | 69 | 1,525 | 6 | 54 | 51 | 847   | 135 | 2,487 |
| 103,916 | 9 | 54 | 69 | 1,330 | 6 | 44 | 50 | 749   | 134 | 2,177 |
| 103,917 | 9 | 47 | 68 | 1,247 | 6 | 43 | 50 | 719   | 133 | 2,056 |
| 103,918 | 9 | 47 | 69 | 1,250 | 6 | 43 | 51 | 724   | 135 | 2,064 |
| 103,919 | 9 | 48 | 69 | 1,212 | 6 | 46 | 52 | 718   | 136 | 2,024 |
| 103,920 | 9 | 48 | 69 | 1,185 | 6 | 46 | 52 | 707   | 136 | 1,986 |
| 103,921 | 9 | 46 | 70 | 1,043 | 6 | 43 | 53 | 686   | 138 | 1,818 |
| 103,922 | 8 | 36 | 70 | 907   | 6 | 37 | 53 | 636   | 137 | 1,616 |
| 103,923 | 8 | 35 | 72 | 850   | 6 | 37 | 55 | 630   | 141 | 1,552 |

|         |   |    |    |       |   |    |    |       |     |       |
|---------|---|----|----|-------|---|----|----|-------|-----|-------|
| 103,924 | 8 | 36 | 70 | 811   | 6 | 36 | 55 | 624   | 139 | 1,507 |
| 103,925 | 8 | 36 | 63 | 803   | 6 | 36 | 50 | 619   | 127 | 1,494 |
| 103,926 | 8 | 36 | 63 | 806   | 6 | 36 | 46 | 626   | 123 | 1,504 |
| 103,927 | 7 | 36 | 59 | 799   | 6 | 29 | 48 | 611   | 120 | 1,475 |
| 103,928 | 7 | 35 | 57 | 719   | 6 | 29 | 47 | 571   | 117 | 1,354 |
| 103,929 | 7 | 30 | 57 | 691   | 6 | 27 | 47 | 530   | 117 | 1,278 |
| 103,930 | 7 | 30 | 54 | 705   | 6 | 27 | 46 | 550   | 113 | 1,312 |
| 103,931 | 7 | 34 | 52 | 724   | 5 | 27 | 42 | 554   | 106 | 1,339 |
| 103,932 | 7 | 32 | 51 | 734   | 4 | 27 | 41 | 565   | 103 | 1,358 |
| 103,933 | 7 | 24 | 49 | 705   | 4 | 24 | 40 | 529   | 100 | 1,282 |
| 103,934 | 7 | 24 | 50 | 710   | 4 | 24 | 39 | 535   | 100 | 1,293 |
| 103,935 | 7 | 23 | 50 | 703   | 4 | 23 | 39 | 532   | 100 | 1,281 |
| 103,936 | 7 | 22 | 50 | 691   | 3 | 23 | 39 | 527   | 99  | 1,263 |
| 103,937 | 7 | 22 | 49 | 689   | 3 | 23 | 39 | 526   | 98  | 1,260 |
| 103,938 | 7 | 22 | 49 | 698   | 3 | 23 | 39 | 536   | 98  | 1,279 |
| 103,939 | 7 | 21 | 47 | 696   | 4 | 22 | 45 | 532   | 103 | 1,271 |
| 103,940 | 7 | 26 | 47 | 727   | 4 | 24 | 44 | 561   | 102 | 1,338 |
| 103,941 | 7 | 26 | 46 | 743   | 4 | 22 | 42 | 549   | 99  | 1,340 |
| 103,942 | 6 | 30 | 46 | 857   | 4 | 26 | 41 | 597   | 97  | 1,510 |
| 103,943 | 5 | 34 | 41 | 945   | 3 | 27 | 26 | 628   | 75  | 1,634 |
| 103,944 | 5 | 37 | 39 | 974   | 2 | 30 | 21 | 651   | 67  | 1,692 |
| 103,945 | 2 | 39 | 37 | 1,020 | 1 | 33 | 21 | 705   | 61  | 1,797 |
| 103,946 | 2 | 39 | 35 | 985   | 1 | 33 | 21 | 699   | 59  | 1,756 |
| 103,947 | 2 | 39 | 35 | 967   | 1 | 32 | 21 | 677   | 59  | 1,715 |
| 103,948 | 2 | 44 | 35 | 1,043 | 1 | 33 | 21 | 715   | 59  | 1,835 |
| 103,949 | 2 | 44 | 34 | 1,038 | 1 | 33 | 21 | 710   | 58  | 1,825 |
| 103,950 | 2 | 43 | 36 | 1,022 | 1 | 33 | 22 | 698   | 61  | 1,796 |
| 103,951 | 3 | 43 | 38 | 1,038 | 1 | 35 | 25 | 739   | 67  | 1,855 |
| 103,952 | 2 | 43 | 39 | 1,056 | 2 | 37 | 25 | 745   | 68  | 1,881 |
| 103,953 | 2 | 46 | 42 | 1,162 | 2 | 45 | 28 | 842   | 74  | 2,095 |
| 103,954 | 2 | 50 | 43 | 1,305 | 2 | 51 | 29 | 969   | 76  | 2,375 |
| 103,955 | 2 | 50 | 46 | 1,349 | 3 | 54 | 30 | 978   | 81  | 2,431 |
| 103,956 | 2 | 50 | 45 | 1,347 | 3 | 54 | 30 | 973   | 80  | 2,424 |
| 103,957 | 2 | 51 | 44 | 1,358 | 3 | 54 | 30 | 971   | 79  | 2,434 |
| 103,958 | 1 | 52 | 40 | 1,391 | 3 | 55 | 29 | 996   | 73  | 2,494 |
| 103,959 | 1 | 51 | 38 | 1,388 | 3 | 57 | 29 | 994   | 71  | 2,490 |
| 103,960 | 1 | 52 | 37 | 1,389 | 4 | 56 | 29 | 986   | 71  | 2,483 |
| 103,961 | 1 | 52 | 37 | 1,404 | 4 | 56 | 29 | 992   | 71  | 2,504 |
| 103,962 | 1 | 52 | 37 | 1,374 | 4 | 54 | 29 | 937   | 71  | 2,417 |
| 103,963 | 1 | 52 | 37 | 1,383 | 4 | 54 | 29 | 943   | 71  | 2,432 |
| 103,964 | 1 | 55 | 39 | 1,419 | 4 | 56 | 30 | 1,000 | 74  | 2,530 |



|         |   |    |    |       |   |    |    |       |    |       |
|---------|---|----|----|-------|---|----|----|-------|----|-------|
| 103,965 | 1 | 54 | 38 | 1,336 | 4 | 53 | 30 | 990   | 73 | 2,433 |
| 103,966 | 1 | 52 | 40 | 1,342 | 4 | 51 | 30 | 991   | 75 | 2,436 |
| 103,967 | 1 | 56 | 40 | 1,724 | 4 | 57 | 31 | 1,166 | 76 | 3,003 |
| 103,968 | 1 | 56 | 43 | 1,740 | 4 | 57 | 31 | 1,171 | 79 | 3,024 |
| 103,969 | 1 | 58 | 42 | 1,757 | 4 | 57 | 32 | 1,170 | 79 | 3,042 |
| 103,970 | 1 | 55 | 38 | 1,762 | 4 | 53 | 31 | 1,154 | 74 | 3,024 |
| 103,971 | 1 | 55 | 37 | 1,773 | 4 | 53 | 31 | 1,157 | 73 | 3,038 |
| 103,972 | 1 | 55 | 37 | 1,775 | 4 | 52 | 31 | 1,151 | 73 | 3,033 |
| 103,973 | 1 | 55 | 38 | 1,792 | 5 | 52 | 31 | 1,160 | 75 | 3,059 |
| 103,974 | 1 | 55 | 36 | 1,836 | 5 | 52 | 30 | 1,169 | 72 | 3,112 |
| 103,975 | 1 | 54 | 36 | 1,830 | 5 | 52 | 29 | 1,158 | 71 | 3,094 |
| 103,976 | 1 | 54 | 38 | 1,804 | 5 | 53 | 28 | 1,123 | 72 | 3,034 |
| 103,977 | 1 | 55 | 42 | 1,814 | 5 | 53 | 31 | 1,134 | 79 | 3,056 |
| 103,978 | 1 | 56 | 40 | 1,818 | 5 | 53 | 26 | 1,138 | 72 | 3,065 |
| 103,979 | 1 | 67 | 40 | 1,888 | 5 | 57 | 26 | 1,266 | 72 | 3,278 |
| 103,980 | 1 | 66 | 40 | 1,869 | 5 | 56 | 26 | 1,252 | 72 | 3,243 |
| 103,981 | 1 | 67 | 47 | 1,849 | 5 | 55 | 28 | 1,230 | 81 | 3,201 |
| 103,982 | 1 | 64 | 50 | 1,835 | 5 | 55 | 30 | 1,227 | 86 | 3,181 |
| 103,983 | 1 | 65 | 49 | 1,820 | 5 | 53 | 30 | 1,202 | 85 | 3,140 |
| 103,984 | 1 | 65 | 49 | 1,821 | 5 | 53 | 30 | 1,203 | 85 | 3,142 |
| 103,985 | 1 | 65 | 48 | 1,817 | 5 | 53 | 30 | 1,193 | 84 | 3,128 |
| 103,986 | 1 | 65 | 48 | 1,821 | 5 | 53 | 30 | 1,194 | 84 | 3,133 |
| 103,987 | 1 | 65 | 49 | 1,823 | 5 | 53 | 32 | 1,194 | 87 | 3,135 |
| 103,988 | 1 | 65 | 49 | 1,798 | 5 | 53 | 32 | 1,180 | 87 | 3,096 |
| 103,989 | 1 | 65 | 49 | 1,802 | 5 | 53 | 32 | 1,181 | 87 | 3,101 |
| 103,990 | 1 | 65 | 45 | 1,802 | 4 | 53 | 26 | 1,181 | 76 | 3,101 |
| 103,991 | 1 | 59 | 45 | 1,733 | 4 | 51 | 26 | 1,131 | 76 | 2,974 |
| 103,992 | 1 | 55 | 44 | 1,620 | 4 | 47 | 26 | 1,083 | 75 | 2,805 |
| 103,993 | 1 | 51 | 44 | 1,533 | 4 | 46 | 26 | 1,051 | 75 | 2,681 |
| 103,994 | 1 | 48 | 44 | 1,485 | 4 | 43 | 26 | 1,027 | 75 | 2,603 |
| 103,995 | 1 | 48 | 44 | 1,485 | 4 | 43 | 26 | 1,027 | 75 | 2,603 |
| 103,996 | 1 | 46 | 41 | 1,410 | 4 | 40 | 26 | 956   | 72 | 2,452 |
| 103,997 | 1 | 46 | 41 | 1,414 | 4 | 40 | 26 | 959   | 72 | 2,459 |
| 103,998 | 1 | 46 | 41 | 1,404 | 4 | 40 | 27 | 956   | 73 | 2,446 |
| 103,999 | 1 | 45 | 41 | 1,389 | 4 | 42 | 27 | 970   | 73 | 2,446 |
| 104,000 | 1 | 46 | 39 | 1,405 | 4 | 43 | 26 | 978   | 70 | 2,472 |
| 104,001 | 1 | 47 | 38 | 1,421 | 4 | 44 | 24 | 984   | 67 | 2,496 |
| 104,002 | 0 | 56 | 38 | 1,525 | 4 | 45 | 23 | 997   | 65 | 2,623 |
| 104,003 | 0 | 66 | 37 | 1,630 | 3 | 58 | 25 | 1,108 | 65 | 2,862 |
| 104,004 | 0 | 71 | 34 | 1,577 | 3 | 52 | 22 | 1,040 | 59 | 2,740 |
| 104,005 | 0 | 69 | 35 | 1,490 | 3 | 50 | 22 | 960   | 60 | 2,569 |

|         |   |    |    |       |   |    |    |       |    |       |
|---------|---|----|----|-------|---|----|----|-------|----|-------|
| 104,006 | 0 | 69 | 33 | 1,430 | 2 | 48 | 20 | 936   | 55 | 2,483 |
| 104,007 | 0 | 68 | 33 | 1,418 | 2 | 49 | 20 | 936   | 55 | 2,471 |
| 104,008 | 0 | 67 | 37 | 1,374 | 2 | 46 | 20 | 897   | 59 | 2,384 |
| 104,009 | 1 | 67 | 38 | 1,378 | 2 | 47 | 20 | 898   | 61 | 2,390 |
| 104,010 | 1 | 68 | 38 | 1,393 | 3 | 47 | 22 | 903   | 64 | 2,411 |
| 104,011 | 1 | 68 | 38 | 1,415 | 2 | 49 | 22 | 913   | 63 | 2,445 |
| 104,012 | 1 | 70 | 38 | 1,492 | 2 | 50 | 22 | 931   | 63 | 2,543 |
| 104,013 | 1 | 74 | 38 | 1,582 | 2 | 62 | 22 | 1,043 | 63 | 2,761 |
| 104,014 | 1 | 75 | 38 | 1,650 | 2 | 63 | 24 | 1,070 | 65 | 2,858 |
| 104,015 | 1 | 74 | 40 | 1,718 | 3 | 67 | 31 | 1,136 | 75 | 2,995 |
| 104,016 | 1 | 75 | 44 | 1,702 | 3 | 67 | 38 | 1,125 | 86 | 2,969 |
| 104,017 | 1 | 69 | 48 | 1,271 | 3 | 60 | 40 | 884   | 92 | 2,284 |
| 104,018 | 1 | 69 | 48 | 1,273 | 3 | 60 | 40 | 888   | 92 | 2,290 |
| 104,019 | 1 | 69 | 45 | 1,259 | 3 | 60 | 40 | 884   | 89 | 2,272 |
| 104,020 | 1 | 66 | 45 | 1,213 | 3 | 61 | 38 | 871   | 87 | 2,211 |
| 104,021 | 1 | 66 | 45 | 1,214 | 3 | 61 | 38 | 875   | 87 | 2,216 |
| 104,022 | 2 | 66 | 46 | 1,214 | 3 | 61 | 42 | 869   | 93 | 2,210 |
| 104,023 | 2 | 66 | 46 | 1,202 | 3 | 61 | 42 | 864   | 93 | 2,193 |
| 104,024 | 2 | 66 | 47 | 1,142 | 2 | 61 | 43 | 841   | 94 | 2,110 |
| 104,025 | 2 | 66 | 48 | 1,141 | 2 | 61 | 44 | 840   | 96 | 2,108 |
| 104,026 | 2 | 65 | 48 | 1,130 | 2 | 60 | 44 | 837   | 96 | 2,092 |
| 104,027 | 2 | 65 | 46 | 1,131 | 2 | 60 | 44 | 837   | 94 | 2,093 |
| 104,028 | 2 | 64 | 42 | 1,118 | 2 | 60 | 40 | 820   | 86 | 2,062 |
| 104,029 | 2 | 64 | 45 | 1,118 | 2 | 61 | 40 | 823   | 89 | 2,066 |
| 104,030 | 2 | 53 | 43 | 1,029 | 2 | 57 | 40 | 698   | 87 | 1,837 |
| 104,031 | 2 | 54 | 40 | 1,063 | 2 | 60 | 38 | 712   | 82 | 1,889 |
| 104,032 | 2 | 52 | 38 | 1,069 | 2 | 60 | 38 | 722   | 80 | 1,903 |
| 104,033 | 2 | 52 | 35 | 1,118 | 2 | 61 | 36 | 745   | 75 | 1,976 |
| 104,034 | 2 | 52 | 35 | 1,180 | 2 | 64 | 36 | 777   | 75 | 2,073 |
| 104,035 | 2 | 53 | 35 | 1,194 | 2 | 65 | 37 | 782   | 76 | 2,094 |
| 104,036 | 2 | 59 | 35 | 1,245 | 2 | 66 | 37 | 796   | 76 | 2,166 |
| 104,037 | 2 | 60 | 35 | 1,278 | 2 | 68 | 37 | 803   | 76 | 2,209 |
| 104,038 | 2 | 60 | 34 | 1,309 | 2 | 71 | 35 | 841   | 73 | 2,281 |
| 104,039 | 2 | 60 | 34 | 1,307 | 2 | 71 | 35 | 844   | 73 | 2,282 |
| 104,040 | 2 | 62 | 34 | 1,320 | 2 | 72 | 35 | 888   | 73 | 2,342 |
| 104,041 | 2 | 67 | 34 | 1,348 | 2 | 74 | 35 | 963   | 73 | 2,452 |
| 104,042 | 2 | 67 | 34 | 1,348 | 2 | 74 | 35 | 970   | 73 | 2,459 |
| 104,043 | 2 | 74 | 34 | 1,381 | 2 | 79 | 35 | 1,022 | 73 | 2,556 |
| 104,044 | 2 | 86 | 34 | 1,473 | 2 | 94 | 35 | 1,217 | 73 | 2,870 |
| 104,045 | 2 | 86 | 34 | 1,490 | 2 | 94 | 35 | 1,226 | 73 | 2,896 |
| 104,046 | 2 | 86 | 34 | 1,509 | 2 | 95 | 35 | 1,250 | 73 | 2,940 |

|         |   |    |    |       |   |     |    |       |     |       |
|---------|---|----|----|-------|---|-----|----|-------|-----|-------|
| 104,047 | 2 | 88 | 36 | 1,548 | 2 | 96  | 35 | 1,305 | 75  | 3,037 |
| 104,048 | 2 | 88 | 37 | 1,562 | 2 | 99  | 35 | 1,324 | 76  | 3,073 |
| 104,049 | 2 | 88 | 37 | 1,590 | 2 | 101 | 33 | 1,329 | 74  | 3,108 |
| 104,050 | 2 | 86 | 37 | 1,522 | 2 | 99  | 33 | 1,277 | 74  | 2,984 |
| 104,051 | 2 | 85 | 39 | 1,509 | 2 | 98  | 34 | 1,271 | 77  | 2,963 |
| 104,052 | 2 | 75 | 41 | 1,371 | 2 | 94  | 36 | 1,212 | 81  | 2,752 |
| 104,053 | 2 | 75 | 40 | 1,382 | 2 | 94  | 36 | 1,225 | 80  | 2,776 |
| 104,054 | 2 | 65 | 39 | 1,261 | 2 | 79  | 34 | 1,131 | 77  | 2,536 |
| 104,055 | 2 | 57 | 39 | 1,217 | 2 | 77  | 34 | 1,111 | 77  | 2,462 |
| 104,056 | 2 | 55 | 36 | 1,145 | 2 | 74  | 34 | 1,056 | 74  | 2,330 |
| 104,057 | 2 | 55 | 34 | 1,146 | 2 | 73  | 35 | 1,059 | 73  | 2,333 |
| 104,058 | 2 | 55 | 36 | 1,143 | 2 | 72  | 36 | 1,059 | 76  | 2,329 |
| 104,059 | 2 | 54 | 32 | 1,118 | 2 | 71  | 36 | 1,052 | 72  | 2,295 |
| 104,060 | 1 | 54 | 34 | 1,121 | 2 | 72  | 38 | 1,053 | 75  | 2,300 |
| 104,061 | 1 | 55 | 34 | 1,121 | 1 | 72  | 36 | 1,053 | 72  | 2,301 |
| 104,062 | 1 | 54 | 34 | 1,089 | 1 | 70  | 36 | 1,049 | 72  | 2,262 |
| 104,063 | 1 | 52 | 34 | 998   | 1 | 69  | 36 | 1,031 | 72  | 2,150 |
| 104,064 | 1 | 48 | 35 | 905   | 1 | 56  | 38 | 917   | 75  | 1,926 |
| 104,065 | 1 | 47 | 36 | 831   | 1 | 55  | 37 | 886   | 75  | 1,819 |
| 104,066 | 1 | 45 | 32 | 726   | 0 | 49  | 31 | 763   | 64  | 1,583 |
| 104,067 | 1 | 44 | 27 | 718   | 0 | 49  | 27 | 761   | 55  | 1,572 |
| 104,068 | 1 | 44 | 23 | 716   | 0 | 49  | 24 | 758   | 48  | 1,567 |
| 104,069 | 1 | 44 | 23 | 716   | 0 | 49  | 24 | 758   | 48  | 1,567 |
| 104,070 | 1 | 44 | 28 | 716   | 0 | 49  | 28 | 761   | 57  | 1,570 |
| 104,071 | 2 | 44 | 29 | 715   | 0 | 48  | 32 | 759   | 63  | 1,566 |
| 104,072 | 1 | 44 | 29 | 715   | 0 | 48  | 32 | 756   | 62  | 1,563 |
| 104,073 | 1 | 44 | 29 | 700   | 0 | 48  | 29 | 755   | 59  | 1,547 |
| 104,074 | 1 | 44 | 29 | 701   | 0 | 48  | 30 | 756   | 60  | 1,549 |
| 104,075 | 1 | 44 | 27 | 701   | 0 | 48  | 30 | 756   | 58  | 1,549 |
| 104,076 | 1 | 44 | 27 | 712   | 1 | 48  | 31 | 760   | 60  | 1,564 |
| 104,077 | 2 | 44 | 34 | 722   | 4 | 48  | 60 | 768   | 100 | 1,582 |
| 104,078 | 2 | 45 | 35 | 733   | 4 | 48  | 61 | 773   | 102 | 1,599 |
| 104,079 | 2 | 45 | 35 | 750   | 4 | 49  | 61 | 789   | 102 | 1,633 |
| 104,080 | 2 | 48 | 32 | 775   | 4 | 49  | 62 | 810   | 100 | 1,682 |
| 104,081 | 2 | 56 | 32 | 818   | 4 | 54  | 62 | 873   | 100 | 1,801 |
| 104,082 | 2 | 57 | 32 | 821   | 4 | 52  | 62 | 896   | 100 | 1,826 |
| 104,083 | 4 | 57 | 35 | 829   | 4 | 52  | 68 | 894   | 111 | 1,832 |
| 104,084 | 4 | 58 | 39 | 822   | 4 | 55  | 68 | 888   | 115 | 1,823 |
| 104,085 | 4 | 57 | 40 | 782   | 4 | 52  | 68 | 855   | 116 | 1,746 |
| 104,086 | 4 | 57 | 47 | 781   | 4 | 52  | 68 | 864   | 123 | 1,754 |
| 104,087 | 4 | 58 | 51 | 812   | 4 | 56  | 69 | 938   | 128 | 1,864 |

|         |   |    |     |     |    |    |    |     |     |       |
|---------|---|----|-----|-----|----|----|----|-----|-----|-------|
| 104,088 | 4 | 57 | 51  | 780 | 4  | 54 | 69 | 941 | 128 | 1,832 |
| 104,089 | 4 | 59 | 55  | 789 | 4  | 53 | 71 | 929 | 134 | 1,830 |
| 104,090 | 4 | 59 | 55  | 792 | 4  | 53 | 71 | 929 | 134 | 1,833 |
| 104,091 | 4 | 57 | 55  | 786 | 4  | 52 | 71 | 889 | 134 | 1,784 |
| 104,092 | 4 | 53 | 55  | 782 | 4  | 52 | 71 | 832 | 134 | 1,719 |
| 104,093 | 4 | 53 | 55  | 784 | 4  | 52 | 71 | 826 | 134 | 1,715 |
| 104,094 | 4 | 46 | 55  | 760 | 4  | 47 | 71 | 783 | 134 | 1,636 |
| 104,095 | 4 | 34 | 55  | 673 | 4  | 32 | 71 | 592 | 134 | 1,331 |
| 104,096 | 4 | 34 | 55  | 661 | 4  | 32 | 71 | 596 | 134 | 1,323 |
| 104,097 | 4 | 34 | 58  | 660 | 4  | 32 | 71 | 579 | 137 | 1,305 |
| 104,098 | 4 | 32 | 60  | 621 | 5  | 31 | 77 | 527 | 146 | 1,211 |
| 104,099 | 4 | 32 | 60  | 607 | 5  | 29 | 80 | 507 | 149 | 1,175 |
| 104,100 | 4 | 32 | 60  | 572 | 5  | 27 | 80 | 499 | 149 | 1,130 |
| 104,101 | 4 | 30 | 59  | 565 | 5  | 26 | 80 | 495 | 148 | 1,116 |
| 104,102 | 4 | 30 | 58  | 563 | 5  | 26 | 79 | 492 | 146 | 1,111 |
| 104,103 | 4 | 30 | 56  | 562 | 5  | 26 | 77 | 494 | 142 | 1,112 |
| 104,104 | 4 | 30 | 56  | 563 | 5  | 27 | 78 | 493 | 143 | 1,113 |
| 104,105 | 4 | 30 | 56  | 563 | 5  | 26 | 78 | 476 | 143 | 1,095 |
| 104,106 | 4 | 30 | 56  | 594 | 5  | 28 | 78 | 496 | 143 | 1,148 |
| 104,107 | 4 | 30 | 56  | 597 | 5  | 28 | 77 | 501 | 142 | 1,156 |
| 104,108 | 4 | 30 | 56  | 600 | 5  | 28 | 76 | 503 | 141 | 1,161 |
| 104,109 | 4 | 30 | 55  | 603 | 5  | 28 | 77 | 505 | 141 | 1,166 |
| 104,110 | 4 | 30 | 55  | 609 | 5  | 30 | 78 | 511 | 142 | 1,180 |
| 104,111 | 5 | 32 | 60  | 640 | 6  | 29 | 84 | 529 | 155 | 1,230 |
| 104,112 | 5 | 31 | 60  | 647 | 6  | 29 | 84 | 534 | 155 | 1,241 |
| 104,113 | 5 | 34 | 61  | 654 | 6  | 29 | 86 | 524 | 158 | 1,241 |
| 104,114 | 6 | 36 | 68  | 669 | 6  | 29 | 87 | 553 | 167 | 1,287 |
| 104,115 | 6 | 36 | 67  | 668 | 6  | 29 | 85 | 556 | 164 | 1,289 |
| 104,116 | 6 | 36 | 71  | 673 | 6  | 30 | 88 | 567 | 171 | 1,306 |
| 104,117 | 6 | 39 | 72  | 702 | 6  | 31 | 90 | 626 | 174 | 1,398 |
| 104,118 | 6 | 39 | 71  | 705 | 6  | 31 | 87 | 626 | 170 | 1,401 |
| 104,119 | 6 | 39 | 74  | 709 | 6  | 31 | 88 | 628 | 174 | 1,407 |
| 104,120 | 6 | 39 | 76  | 709 | 6  | 31 | 85 | 627 | 173 | 1,406 |
| 104,121 | 6 | 39 | 74  | 711 | 6  | 31 | 84 | 627 | 170 | 1,408 |
| 104,122 | 5 | 39 | 79  | 712 | 8  | 31 | 80 | 629 | 172 | 1,411 |
| 104,123 | 5 | 39 | 79  | 732 | 8  | 33 | 79 | 645 | 171 | 1,449 |
| 104,124 | 5 | 40 | 78  | 737 | 8  | 33 | 78 | 649 | 169 | 1,459 |
| 104,125 | 7 | 40 | 109 | 739 | 9  | 33 | 84 | 648 | 209 | 1,460 |
| 104,126 | 7 | 39 | 110 | 708 | 9  | 34 | 83 | 633 | 209 | 1,414 |
| 104,127 | 8 | 39 | 136 | 713 | 10 | 35 | 98 | 634 | 252 | 1,421 |
| 104,128 | 8 | 39 | 129 | 712 | 8  | 35 | 71 | 634 | 216 | 1,420 |

|         |    |    |     |     |    |    |     |     |     |       |
|---------|----|----|-----|-----|----|----|-----|-----|-----|-------|
| 104,129 | 8  | 39 | 137 | 713 | 8  | 35 | 74  | 634 | 227 | 1,421 |
| 104,130 | 8  | 26 | 143 | 595 | 8  | 28 | 76  | 498 | 235 | 1,147 |
| 104,131 | 8  | 26 | 148 | 596 | 8  | 27 | 79  | 495 | 243 | 1,144 |
| 104,132 | 14 | 27 | 179 | 618 | 9  | 28 | 113 | 541 | 315 | 1,214 |
| 104,133 | 14 | 28 | 180 | 685 | 9  | 28 | 113 | 561 | 316 | 1,302 |
| 104,134 | 12 | 28 | 185 | 705 | 10 | 30 | 110 | 593 | 317 | 1,356 |
| 104,135 | 12 | 26 | 181 | 663 | 10 | 26 | 110 | 576 | 313 | 1,291 |
| 104,136 | 12 | 29 | 180 | 651 | 10 | 29 | 112 | 589 | 314 | 1,298 |
| 104,137 | 12 | 28 | 180 | 655 | 10 | 31 | 112 | 606 | 314 | 1,320 |
| 104,138 | 12 | 21 | 176 | 572 | 10 | 26 | 111 | 520 | 309 | 1,139 |
| 104,139 | 12 | 21 | 177 | 568 | 10 | 26 | 112 | 518 | 311 | 1,133 |
| 104,140 | 12 | 19 | 205 | 529 | 11 | 24 | 114 | 494 | 342 | 1,066 |
| 104,141 | 12 | 19 | 206 | 512 | 11 | 24 | 115 | 484 | 344 | 1,039 |
| 104,142 | 12 | 19 | 206 | 512 | 11 | 24 | 115 | 484 | 344 | 1,039 |
| 104,143 | 12 | 20 | 207 | 519 | 11 | 33 | 116 | 568 | 346 | 1,140 |
| 104,144 | 12 | 21 | 208 | 541 | 11 | 37 | 116 | 622 | 347 | 1,221 |
| 104,145 | 12 | 21 | 210 | 553 | 11 | 38 | 116 | 637 | 349 | 1,249 |
| 104,146 | 12 | 23 | 211 | 640 | 11 | 46 | 118 | 768 | 352 | 1,477 |
| 104,147 | 12 | 23 | 212 | 659 | 11 | 47 | 119 | 769 | 354 | 1,498 |
| 104,148 | 12 | 28 | 209 | 708 | 11 | 46 | 119 | 802 | 351 | 1,584 |
| 104,149 | 13 | 33 | 207 | 761 | 10 | 47 | 114 | 873 | 344 | 1,714 |
| 104,150 | 13 | 33 | 206 | 762 | 10 | 47 | 111 | 882 | 340 | 1,724 |
| 104,151 | 13 | 38 | 207 | 772 | 10 | 48 | 112 | 902 | 342 | 1,760 |
| 104,152 | 13 | 38 | 207 | 772 | 10 | 48 | 113 | 900 | 343 | 1,758 |
| 104,153 | 13 | 39 | 208 | 774 | 10 | 48 | 114 | 902 | 345 | 1,763 |
| 104,154 | 13 | 40 | 208 | 779 | 10 | 48 | 114 | 909 | 345 | 1,776 |
| 104,155 | 13 | 40 | 208 | 767 | 10 | 47 | 113 | 900 | 344 | 1,754 |
| 104,156 | 13 | 40 | 211 | 767 | 10 | 47 | 113 | 902 | 347 | 1,756 |
| 104,157 | 13 | 40 | 211 | 722 | 10 | 45 | 113 | 869 | 347 | 1,676 |
| 104,158 | 13 | 39 | 213 | 716 | 10 | 45 | 115 | 861 | 351 | 1,661 |
| 104,159 | 13 | 39 | 214 | 709 | 10 | 45 | 116 | 854 | 353 | 1,647 |
| 104,160 | 13 | 37 | 215 | 667 | 10 | 43 | 114 | 829 | 352 | 1,576 |
| 104,161 | 14 | 38 | 220 | 668 | 10 | 43 | 115 | 829 | 359 | 1,578 |
| 104,162 | 13 | 38 | 218 | 669 | 9  | 43 | 113 | 831 | 353 | 1,581 |
| 104,163 | 13 | 38 | 223 | 666 | 9  | 43 | 120 | 827 | 365 | 1,574 |
| 104,164 | 13 | 35 | 222 | 659 | 9  | 43 | 119 | 826 | 363 | 1,563 |
| 104,165 | 12 | 33 | 215 | 645 | 9  | 43 | 118 | 799 | 354 | 1,520 |
| 104,166 | 12 | 34 | 215 | 652 | 9  | 42 | 118 | 787 | 354 | 1,515 |
| 104,167 | 12 | 34 | 210 | 659 | 9  | 41 | 115 | 789 | 346 | 1,523 |
| 104,168 | 13 | 31 | 211 | 634 | 9  | 41 | 111 | 732 | 344 | 1,438 |
| 104,169 | 13 | 31 | 208 | 634 | 9  | 41 | 111 | 730 | 341 | 1,436 |

|         |    |    |     |     |   |    |     |     |     |       |
|---------|----|----|-----|-----|---|----|-----|-----|-----|-------|
| 104,170 | 13 | 31 | 208 | 633 | 9 | 41 | 111 | 730 | 341 | 1,435 |
| 104,171 | 13 | 32 | 204 | 658 | 9 | 41 | 111 | 735 | 337 | 1,466 |
| 104,172 | 13 | 32 | 200 | 659 | 8 | 41 | 111 | 736 | 332 | 1,468 |
| 104,173 | 13 | 33 | 198 | 662 | 7 | 41 | 111 | 736 | 329 | 1,472 |
| 104,174 | 12 | 33 | 193 | 643 | 6 | 39 | 107 | 721 | 318 | 1,436 |
| 104,175 | 11 | 32 | 183 | 635 | 6 | 39 | 109 | 717 | 309 | 1,423 |
| 104,176 | 11 | 32 | 174 | 632 | 6 | 38 | 109 | 715 | 300 | 1,417 |
| 104,177 | 11 | 32 | 175 | 632 | 6 | 38 | 113 | 715 | 305 | 1,417 |
| 104,178 | 10 | 32 | 149 | 626 | 4 | 37 | 95  | 713 | 258 | 1,408 |
| 104,179 | 9  | 32 | 149 | 626 | 3 | 37 | 93  | 714 | 254 | 1,409 |
| 104,180 | 9  | 32 | 140 | 626 | 3 | 37 | 89  | 715 | 241 | 1,410 |
| 104,181 | 9  | 30 | 134 | 581 | 3 | 37 | 87  | 656 | 233 | 1,304 |
| 104,182 | 9  | 30 | 132 | 581 | 3 | 37 | 84  | 656 | 228 | 1,304 |
| 104,183 | 3  | 30 | 99  | 581 | 2 | 37 | 49  | 655 | 153 | 1,303 |
| 104,184 | 3  | 30 | 100 | 493 | 2 | 35 | 50  | 603 | 155 | 1,161 |
| 104,185 | 3  | 30 | 95  | 485 | 1 | 35 | 49  | 601 | 148 | 1,151 |
| 104,186 | 3  | 30 | 95  | 486 | 1 | 35 | 49  | 601 | 148 | 1,152 |
| 104,187 | 3  | 27 | 95  | 473 | 1 | 32 | 47  | 587 | 146 | 1,119 |
| 104,188 | 3  | 27 | 88  | 455 | 1 | 29 | 46  | 556 | 138 | 1,067 |
| 104,189 | 3  | 27 | 88  | 458 | 1 | 29 | 46  | 554 | 138 | 1,068 |
| 104,190 | 3  | 27 | 83  | 462 | 1 | 29 | 44  | 546 | 131 | 1,064 |
| 104,191 | 3  | 27 | 55  | 482 | 0 | 29 | 41  | 546 | 99  | 1,084 |
| 104,192 | 3  | 27 | 54  | 490 | 0 | 29 | 40  | 550 | 97  | 1,096 |
| 104,193 | 3  | 28 | 53  | 509 | 0 | 29 | 39  | 562 | 95  | 1,128 |
| 104,194 | 3  | 27 | 53  | 493 | 0 | 18 | 39  | 462 | 95  | 1,000 |
| 104,195 | 3  | 26 | 52  | 478 | 0 | 14 | 39  | 409 | 94  | 927   |
| 104,196 | 3  | 26 | 52  | 467 | 0 | 13 | 39  | 386 | 94  | 892   |
| 104,197 | 3  | 24 | 51  | 379 | 0 | 5  | 37  | 253 | 91  | 661   |
| 104,198 | 3  | 14 | 49  | 230 | 0 | 2  | 36  | 112 | 88  | 358   |
| 104,199 | 4  | 14 | 50  | 231 | 0 | 2  | 36  | 113 | 90  | 360   |
| 104,200 | 3  | 9  | 48  | 216 | 0 | 1  | 35  | 93  | 86  | 319   |
| 104,201 | 3  | 9  | 48  | 216 | 0 | 1  | 35  | 94  | 86  | 320   |
| 104,202 | 3  | 8  | 47  | 219 | 0 | 1  | 36  | 95  | 86  | 323   |
| 104,203 | 3  | 8  | 48  | 218 | 0 | 0  | 35  | 96  | 86  | 322   |
| 104,204 | 3  | 8  | 48  | 218 | 0 | 0  | 34  | 94  | 85  | 320   |
| 104,205 | 3  | 7  | 44  | 211 | 0 | 0  | 34  | 85  | 81  | 303   |
| 104,206 | 3  | 7  | 45  | 208 | 0 | 0  | 34  | 78  | 82  | 293   |
| 104,207 | 3  | 7  | 45  | 209 | 0 | 0  | 34  | 78  | 82  | 294   |
| 104,208 | 3  | 7  | 43  | 209 | 0 | 0  | 33  | 77  | 79  | 293   |
| 104,209 | 3  | 7  | 43  | 209 | 0 | 0  | 33  | 77  | 79  | 293   |
| 104,210 | 3  | 7  | 42  | 210 | 0 | 0  | 32  | 77  | 77  | 294   |

|         |   |    |    |     |   |    |    |     |    |     |
|---------|---|----|----|-----|---|----|----|-----|----|-----|
| 104,211 | 3 | 7  | 40 | 210 | 0 | 0  | 32 | 75  | 75 | 292 |
| 104,212 | 2 | 6  | 35 | 202 | 0 | 0  | 30 | 71  | 67 | 279 |
| 104,213 | 2 | 6  | 29 | 203 | 0 | 0  | 24 | 71  | 55 | 280 |
| 104,214 | 2 | 6  | 24 | 213 | 0 | 0  | 16 | 78  | 42 | 297 |
| 104,215 | 2 | 7  | 24 | 209 | 0 | 0  | 16 | 74  | 42 | 290 |
| 104,216 | 2 | 7  | 24 | 209 | 0 | 0  | 16 | 74  | 42 | 290 |
| 104,217 | 2 | 6  | 24 | 171 | 0 | 0  | 16 | 62  | 42 | 239 |
| 104,218 | 3 | 6  | 25 | 171 | 0 | 0  | 16 | 62  | 44 | 239 |
| 104,219 | 2 | 6  | 23 | 174 | 0 | 0  | 17 | 61  | 42 | 241 |
| 104,220 | 2 | 6  | 23 | 174 | 0 | 0  | 17 | 61  | 42 | 241 |
| 104,221 | 2 | 5  | 29 | 148 | 0 | 0  | 16 | 53  | 47 | 206 |
| 104,222 | 2 | 5  | 28 | 151 | 0 | 1  | 16 | 55  | 46 | 212 |
| 104,223 | 2 | 5  | 28 | 148 | 0 | 1  | 16 | 54  | 46 | 208 |
| 104,224 | 2 | 4  | 32 | 146 | 0 | 1  | 16 | 51  | 50 | 202 |
| 104,225 | 2 | 4  | 31 | 147 | 0 | 1  | 17 | 50  | 50 | 202 |
| 104,226 | 2 | 4  | 26 | 148 | 0 | 1  | 13 | 48  | 41 | 201 |
| 104,227 | 2 | 4  | 26 | 150 | 0 | 1  | 14 | 48  | 42 | 203 |
| 104,228 | 2 | 4  | 26 | 151 | 0 | 1  | 11 | 47  | 39 | 203 |
| 104,229 | 2 | 4  | 25 | 165 | 0 | 3  | 11 | 49  | 38 | 221 |
| 104,230 | 2 | 4  | 25 | 167 | 0 | 3  | 11 | 52  | 38 | 226 |
| 104,231 | 2 | 4  | 25 | 171 | 0 | 3  | 11 | 53  | 38 | 231 |
| 104,232 | 2 | 4  | 24 | 192 | 0 | 3  | 11 | 60  | 37 | 259 |
| 104,233 | 2 | 5  | 21 | 202 | 0 | 3  | 10 | 62  | 33 | 272 |
| 104,234 | 2 | 5  | 22 | 211 | 0 | 3  | 10 | 62  | 34 | 281 |
| 104,235 | 2 | 4  | 20 | 212 | 0 | 3  | 9  | 62  | 31 | 281 |
| 104,236 | 3 | 4  | 21 | 212 | 0 | 3  | 8  | 62  | 32 | 281 |
| 104,237 | 3 | 5  | 22 | 208 | 0 | 3  | 8  | 62  | 33 | 278 |
| 104,238 | 3 | 5  | 23 | 207 | 0 | 3  | 9  | 63  | 35 | 278 |
| 104,239 | 3 | 5  | 27 | 201 | 0 | 3  | 10 | 64  | 40 | 273 |
| 104,240 | 3 | 5  | 31 | 226 | 0 | 4  | 10 | 72  | 44 | 307 |
| 104,241 | 3 | 6  | 35 | 286 | 0 | 4  | 14 | 96  | 52 | 392 |
| 104,242 | 3 | 7  | 35 | 268 | 0 | 4  | 14 | 95  | 52 | 374 |
| 104,243 | 3 | 8  | 35 | 268 | 0 | 4  | 14 | 95  | 52 | 375 |
| 104,244 | 3 | 6  | 35 | 225 | 0 | 4  | 14 | 79  | 52 | 314 |
| 104,245 | 3 | 7  | 35 | 225 | 0 | 4  | 14 | 79  | 52 | 315 |
| 104,246 | 3 | 8  | 35 | 230 | 0 | 4  | 14 | 80  | 52 | 322 |
| 104,247 | 3 | 8  | 33 | 239 | 0 | 5  | 14 | 82  | 50 | 334 |
| 104,248 | 3 | 34 | 33 | 451 | 0 | 12 | 14 | 206 | 50 | 703 |
| 104,249 | 3 | 34 | 33 | 474 | 0 | 12 | 14 | 210 | 50 | 730 |
| 104,250 | 2 | 39 | 36 | 559 | 0 | 14 | 15 | 248 | 53 | 860 |
| 104,251 | 2 | 39 | 37 | 565 | 0 | 14 | 15 | 251 | 54 | 869 |

|         |   |     |    |       |   |    |    |       |    |       |
|---------|---|-----|----|-------|---|----|----|-------|----|-------|
| 104,252 | 2 | 39  | 37 | 573   | 0 | 14 | 15 | 254   | 54 | 880   |
| 104,253 | 2 | 50  | 37 | 778   | 0 | 26 | 13 | 359   | 52 | 1,213 |
| 104,254 | 2 | 50  | 36 | 779   | 0 | 27 | 13 | 358   | 51 | 1,214 |
| 104,255 | 2 | 57  | 39 | 918   | 0 | 33 | 13 | 415   | 54 | 1,423 |
| 104,256 | 2 | 62  | 40 | 945   | 0 | 33 | 13 | 427   | 55 | 1,467 |
| 104,257 | 2 | 66  | 40 | 950   | 0 | 33 | 12 | 427   | 54 | 1,476 |
| 104,258 | 2 | 68  | 40 | 973   | 0 | 33 | 12 | 432   | 54 | 1,506 |
| 104,259 | 2 | 69  | 41 | 972   | 0 | 34 | 12 | 432   | 55 | 1,507 |
| 104,260 | 2 | 71  | 41 | 991   | 0 | 35 | 12 | 436   | 55 | 1,533 |
| 104,261 | 2 | 73  | 41 | 995   | 0 | 35 | 12 | 437   | 55 | 1,540 |
| 104,262 | 2 | 73  | 41 | 1,010 | 0 | 35 | 12 | 439   | 55 | 1,557 |
| 104,263 | 2 | 73  | 41 | 1,018 | 0 | 35 | 12 | 440   | 55 | 1,566 |
| 104,264 | 2 | 73  | 41 | 1,023 | 0 | 35 | 12 | 441   | 55 | 1,572 |
| 104,265 | 2 | 73  | 41 | 1,014 | 0 | 35 | 12 | 430   | 55 | 1,552 |
| 104,266 | 2 | 73  | 41 | 1,014 | 0 | 35 | 12 | 429   | 55 | 1,551 |
| 104,267 | 2 | 73  | 41 | 1,013 | 0 | 35 | 12 | 429   | 55 | 1,550 |
| 104,268 | 2 | 73  | 41 | 1,013 | 0 | 35 | 12 | 431   | 55 | 1,552 |
| 104,269 | 1 | 74  | 40 | 1,018 | 0 | 36 | 12 | 445   | 53 | 1,573 |
| 104,270 | 1 | 74  | 41 | 1,020 | 0 | 36 | 11 | 453   | 53 | 1,583 |
| 104,271 | 1 | 74  | 41 | 1,035 | 0 | 37 | 11 | 485   | 53 | 1,631 |
| 104,272 | 1 | 77  | 35 | 1,086 | 0 | 38 | 11 | 574   | 47 | 1,775 |
| 104,273 | 1 | 80  | 34 | 1,134 | 0 | 40 | 11 | 626   | 46 | 1,880 |
| 104,274 | 1 | 91  | 33 | 1,275 | 0 | 45 | 11 | 803   | 45 | 2,214 |
| 104,275 | 1 | 93  | 31 | 1,336 | 0 | 47 | 12 | 834   | 44 | 2,310 |
| 104,276 | 1 | 95  | 30 | 1,395 | 0 | 48 | 11 | 856   | 42 | 2,394 |
| 104,277 | 1 | 95  | 30 | 1,409 | 0 | 49 | 10 | 860   | 41 | 2,413 |
| 104,278 | 1 | 95  | 30 | 1,416 | 0 | 49 | 9  | 867   | 40 | 2,427 |
| 104,279 | 1 | 103 | 28 | 1,491 | 0 | 51 | 8  | 911   | 37 | 2,556 |
| 104,280 | 1 | 103 | 28 | 1,485 | 0 | 49 | 8  | 917   | 37 | 2,554 |
| 104,281 | 1 | 103 | 29 | 1,497 | 0 | 49 | 8  | 915   | 38 | 2,564 |
| 104,282 | 1 | 104 | 30 | 1,498 | 0 | 49 | 9  | 918   | 40 | 2,569 |
| 104,283 | 1 | 103 | 30 | 1,469 | 0 | 49 | 9  | 911   | 40 | 2,532 |
| 104,284 | 1 | 103 | 30 | 1,475 | 0 | 49 | 9  | 927   | 40 | 2,554 |
| 104,285 | 1 | 105 | 29 | 1,513 | 0 | 49 | 9  | 942   | 39 | 2,609 |
| 104,286 | 1 | 107 | 28 | 1,626 | 0 | 50 | 9  | 966   | 38 | 2,749 |
| 104,287 | 0 | 109 | 28 | 1,696 | 0 | 51 | 9  | 1,025 | 37 | 2,881 |
| 104,288 | 0 | 109 | 27 | 1,724 | 0 | 52 | 9  | 1,035 | 36 | 2,920 |
| 104,289 | 0 | 109 | 27 | 1,740 | 0 | 52 | 8  | 1,045 | 35 | 2,946 |
| 104,290 | 0 | 109 | 25 | 1,715 | 0 | 51 | 7  | 1,038 | 32 | 2,913 |
| 104,291 | 0 | 109 | 23 | 1,720 | 0 | 51 | 7  | 1,044 | 30 | 2,924 |
| 104,292 | 0 | 108 | 19 | 1,656 | 0 | 51 | 4  | 1,019 | 23 | 2,834 |



|         |   |     |    |       |   |    |    |       |     |       |
|---------|---|-----|----|-------|---|----|----|-------|-----|-------|
| 104,293 | 0 | 108 | 19 | 1,658 | 0 | 51 | 4  | 1,020 | 23  | 2,837 |
| 104,294 | 0 | 107 | 19 | 1,664 | 0 | 53 | 5  | 1,023 | 24  | 2,847 |
| 104,295 | 0 | 107 | 19 | 1,664 | 0 | 53 | 5  | 1,024 | 24  | 2,848 |
| 104,296 | 0 | 106 | 19 | 1,672 | 0 | 54 | 7  | 1,032 | 26  | 2,864 |
| 104,297 | 0 | 109 | 19 | 1,684 | 0 | 55 | 7  | 1,043 | 26  | 2,891 |
| 104,298 | 0 | 109 | 20 | 1,670 | 0 | 55 | 7  | 1,041 | 27  | 2,875 |
| 104,299 | 0 | 83  | 20 | 1,471 | 0 | 48 | 7  | 923   | 27  | 2,525 |
| 104,300 | 0 | 83  | 19 | 1,459 | 0 | 48 | 7  | 933   | 26  | 2,523 |
| 104,301 | 0 | 78  | 20 | 1,379 | 0 | 46 | 6  | 895   | 26  | 2,398 |
| 104,302 | 0 | 80  | 20 | 1,423 | 0 | 50 | 7  | 917   | 27  | 2,470 |
| 104,303 | 0 | 80  | 22 | 1,419 | 0 | 50 | 8  | 916   | 30  | 2,465 |
| 104,304 | 0 | 69  | 22 | 1,214 | 0 | 38 | 8  | 811   | 30  | 2,132 |
| 104,305 | 0 | 69  | 19 | 1,217 | 0 | 37 | 8  | 816   | 27  | 2,139 |
| 104,306 | 0 | 62  | 19 | 1,080 | 0 | 31 | 8  | 760   | 27  | 1,933 |
| 104,307 | 0 | 57  | 19 | 1,071 | 0 | 35 | 8  | 763   | 27  | 1,926 |
| 104,308 | 0 | 54  | 18 | 1,063 | 0 | 35 | 8  | 764   | 26  | 1,916 |
| 104,309 | 0 | 52  | 20 | 1,041 | 0 | 35 | 12 | 760   | 32  | 1,888 |
| 104,310 | 0 | 51  | 19 | 1,042 | 0 | 34 | 12 | 762   | 31  | 1,889 |
| 104,311 | 0 | 47  | 19 | 1,001 | 0 | 33 | 13 | 753   | 32  | 1,834 |
| 104,312 | 2 | 47  | 24 | 1,003 | 0 | 33 | 15 | 753   | 41  | 1,836 |
| 104,313 | 2 | 47  | 24 | 1,004 | 0 | 33 | 15 | 753   | 41  | 1,837 |
| 104,314 | 2 | 47  | 24 | 996   | 0 | 33 | 15 | 753   | 41  | 1,829 |
| 104,315 | 2 | 47  | 30 | 1,022 | 0 | 34 | 15 | 770   | 47  | 1,873 |
| 104,316 | 2 | 46  | 35 | 1,029 | 0 | 34 | 16 | 772   | 53  | 1,881 |
| 104,317 | 2 | 46  | 37 | 1,033 | 0 | 34 | 16 | 772   | 55  | 1,885 |
| 104,318 | 3 | 46  | 37 | 1,036 | 0 | 34 | 18 | 772   | 58  | 1,888 |
| 104,319 | 3 | 46  | 39 | 1,040 | 0 | 34 | 18 | 778   | 60  | 1,898 |
| 104,320 | 3 | 46  | 40 | 1,050 | 0 | 34 | 18 | 788   | 61  | 1,918 |
| 104,321 | 4 | 48  | 43 | 1,067 | 2 | 36 | 23 | 804   | 72  | 1,955 |
| 104,322 | 4 | 50  | 43 | 1,058 | 2 | 36 | 23 | 778   | 72  | 1,922 |
| 104,323 | 4 | 33  | 43 | 823   | 2 | 27 | 23 | 461   | 72  | 1,344 |
| 104,324 | 5 | 34  | 44 | 824   | 2 | 27 | 27 | 468   | 78  | 1,353 |
| 104,325 | 5 | 34  | 46 | 825   | 2 | 27 | 27 | 467   | 80  | 1,353 |
| 104,326 | 5 | 33  | 58 | 760   | 3 | 26 | 29 | 445   | 95  | 1,264 |
| 104,327 | 5 | 31  | 58 | 699   | 3 | 24 | 29 | 429   | 95  | 1,183 |
| 104,328 | 5 | 31  | 58 | 701   | 3 | 24 | 29 | 430   | 95  | 1,186 |
| 104,329 | 5 | 31  | 61 | 697   | 3 | 24 | 32 | 425   | 101 | 1,177 |
| 104,330 | 5 | 23  | 62 | 600   | 3 | 22 | 32 | 373   | 102 | 1,018 |
| 104,331 | 5 | 25  | 67 | 612   | 3 | 23 | 34 | 391   | 109 | 1,051 |
| 104,332 | 5 | 27  | 66 | 618   | 3 | 23 | 34 | 399   | 108 | 1,067 |
| 104,333 | 5 | 29  | 85 | 656   | 4 | 25 | 39 | 419   | 133 | 1,129 |

|         |   |    |    |       |   |    |    |       |     |       |
|---------|---|----|----|-------|---|----|----|-------|-----|-------|
| 104,334 | 5 | 38 | 85 | 726   | 4 | 41 | 39 | 633   | 133 | 1,438 |
| 104,335 | 5 | 38 | 85 | 732   | 4 | 43 | 39 | 632   | 133 | 1,445 |
| 104,336 | 6 | 40 | 97 | 753   | 4 | 52 | 44 | 680   | 151 | 1,525 |
| 104,337 | 6 | 42 | 97 | 734   | 4 | 56 | 46 | 727   | 153 | 1,559 |
| 104,338 | 6 | 40 | 96 | 688   | 4 | 56 | 47 | 677   | 153 | 1,461 |
| 104,339 | 6 | 41 | 96 | 674   | 4 | 56 | 47 | 682   | 153 | 1,453 |
| 104,340 | 6 | 40 | 95 | 666   | 4 | 56 | 47 | 674   | 152 | 1,436 |
| 104,341 | 6 | 45 | 93 | 691   | 4 | 57 | 47 | 688   | 150 | 1,481 |
| 104,342 | 6 | 45 | 91 | 701   | 4 | 57 | 47 | 694   | 148 | 1,497 |
| 104,343 | 6 | 45 | 92 | 701   | 4 | 57 | 46 | 698   | 148 | 1,501 |
| 104,344 | 6 | 45 | 92 | 685   | 4 | 55 | 46 | 690   | 148 | 1,475 |
| 104,345 | 6 | 46 | 92 | 690   | 4 | 55 | 45 | 694   | 147 | 1,485 |
| 104,346 | 6 | 49 | 92 | 695   | 4 | 55 | 44 | 722   | 146 | 1,521 |
| 104,347 | 6 | 46 | 92 | 731   | 4 | 59 | 43 | 762   | 145 | 1,598 |
| 104,348 | 6 | 48 | 92 | 797   | 4 | 65 | 43 | 870   | 145 | 1,780 |
| 104,349 | 6 | 52 | 91 | 856   | 4 | 65 | 43 | 957   | 144 | 1,930 |
| 104,350 | 6 | 57 | 92 | 919   | 4 | 69 | 43 | 982   | 145 | 2,027 |
| 104,351 | 6 | 57 | 91 | 917   | 4 | 71 | 43 | 989   | 144 | 2,034 |
| 104,352 | 6 | 58 | 89 | 916   | 4 | 71 | 43 | 988   | 142 | 2,033 |
| 104,353 | 6 | 56 | 90 | 868   | 4 | 69 | 44 | 965   | 144 | 1,958 |
| 104,354 | 7 | 56 | 88 | 865   | 4 | 69 | 43 | 963   | 142 | 1,953 |
| 104,355 | 7 | 56 | 88 | 890   | 4 | 74 | 43 | 991   | 142 | 2,011 |
| 104,356 | 7 | 56 | 88 | 895   | 4 | 75 | 43 | 986   | 142 | 2,012 |
| 104,357 | 7 | 57 | 88 | 901   | 4 | 76 | 44 | 993   | 143 | 2,027 |
| 104,358 | 7 | 60 | 87 | 891   | 4 | 72 | 45 | 1,008 | 143 | 2,031 |
| 104,359 | 7 | 60 | 86 | 896   | 4 | 74 | 45 | 1,013 | 142 | 2,043 |
| 104,360 | 7 | 60 | 85 | 910   | 4 | 75 | 41 | 1,023 | 137 | 2,068 |
| 104,361 | 7 | 62 | 85 | 1,021 | 4 | 81 | 41 | 1,108 | 137 | 2,272 |
| 104,362 | 7 | 62 | 85 | 1,035 | 4 | 82 | 40 | 1,126 | 136 | 2,305 |
| 104,363 | 5 | 62 | 80 | 1,062 | 4 | 88 | 38 | 1,182 | 127 | 2,394 |
| 104,364 | 5 | 63 | 81 | 1,145 | 4 | 93 | 39 | 1,259 | 129 | 2,560 |
| 104,365 | 5 | 63 | 81 | 1,155 | 4 | 93 | 39 | 1,265 | 129 | 2,576 |
| 104,366 | 5 | 63 | 75 | 1,137 | 4 | 92 | 39 | 1,258 | 123 | 2,550 |
| 104,367 | 5 | 63 | 70 | 1,123 | 4 | 92 | 38 | 1,254 | 117 | 2,532 |
| 104,368 | 5 | 63 | 68 | 1,131 | 4 | 92 | 39 | 1,255 | 116 | 2,541 |
| 104,369 | 4 | 63 | 68 | 1,131 | 4 | 92 | 37 | 1,255 | 113 | 2,541 |
| 104,370 | 4 | 62 | 66 | 1,112 | 4 | 91 | 37 | 1,225 | 111 | 2,490 |
| 104,371 | 4 | 62 | 65 | 1,114 | 4 | 92 | 37 | 1,231 | 110 | 2,499 |
| 104,372 | 3 | 60 | 61 | 1,094 | 2 | 90 | 32 | 1,211 | 98  | 2,455 |
| 104,373 | 3 | 58 | 61 | 1,085 | 2 | 89 | 32 | 1,206 | 98  | 2,438 |
| 104,374 | 3 | 58 | 61 | 1,084 | 2 | 89 | 32 | 1,209 | 98  | 2,440 |

|         |   |    |    |       |   |     |    |       |    |       |
|---------|---|----|----|-------|---|-----|----|-------|----|-------|
| 104,375 | 2 | 56 | 60 | 1,063 | 2 | 88  | 28 | 1,183 | 92 | 2,390 |
| 104,376 | 2 | 56 | 58 | 1,063 | 2 | 88  | 28 | 1,183 | 90 | 2,390 |
| 104,377 | 2 | 56 | 46 | 1,063 | 1 | 88  | 25 | 1,182 | 74 | 2,389 |
| 104,378 | 2 | 56 | 46 | 1,065 | 1 | 88  | 25 | 1,184 | 74 | 2,393 |
| 104,379 | 2 | 56 | 45 | 1,058 | 1 | 88  | 22 | 1,183 | 70 | 2,385 |
| 104,380 | 2 | 57 | 43 | 1,064 | 1 | 88  | 22 | 1,190 | 68 | 2,399 |
| 104,381 | 2 | 58 | 42 | 1,076 | 1 | 88  | 22 | 1,205 | 67 | 2,427 |
| 104,382 | 2 | 56 | 36 | 1,068 | 1 | 87  | 20 | 1,189 | 59 | 2,400 |
| 104,383 | 2 | 54 | 31 | 1,064 | 1 | 87  | 17 | 1,184 | 51 | 2,389 |
| 104,384 | 2 | 52 | 17 | 1,025 | 0 | 85  | 14 | 1,169 | 33 | 2,331 |
| 104,385 | 2 | 45 | 16 | 965   | 0 | 69  | 13 | 977   | 31 | 2,056 |
| 104,386 | 1 | 50 | 7  | 1,039 | 0 | 74  | 9  | 1,165 | 17 | 2,328 |
| 104,387 | 1 | 46 | 5  | 992   | 0 | 65  | 9  | 1,106 | 15 | 2,209 |
| 104,388 | 1 | 42 | 5  | 906   | 0 | 60  | 7  | 1,042 | 13 | 2,050 |
| 104,389 | 1 | 43 | 5  | 907   | 0 | 59  | 6  | 1,046 | 12 | 2,055 |
| 104,390 | 1 | 41 | 5  | 919   | 0 | 59  | 6  | 1,055 | 12 | 2,074 |
| 104,391 | 1 | 41 | 5  | 913   | 1 | 59  | 6  | 1,047 | 13 | 2,060 |
| 104,392 | 1 | 36 | 5  | 896   | 1 | 60  | 6  | 1,055 | 13 | 2,047 |
| 104,393 | 1 | 36 | 5  | 906   | 1 | 60  | 6  | 1,065 | 13 | 2,067 |
| 104,394 | 1 | 36 | 4  | 957   | 1 | 62  | 6  | 1,101 | 12 | 2,156 |
| 104,395 | 1 | 36 | 4  | 971   | 1 | 63  | 6  | 1,116 | 12 | 2,186 |
| 104,396 | 1 | 32 | 5  | 968   | 1 | 62  | 6  | 1,078 | 13 | 2,140 |
| 104,397 | 1 | 33 | 5  | 982   | 1 | 67  | 6  | 1,102 | 13 | 2,184 |
| 104,398 | 1 | 32 | 5  | 935   | 1 | 62  | 6  | 1,057 | 13 | 2,086 |
| 104,399 | 1 | 31 | 5  | 879   | 1 | 56  | 6  | 966   | 13 | 1,932 |
| 104,400 | 1 | 28 | 5  | 831   | 1 | 55  | 6  | 892   | 13 | 1,806 |
| 104,401 | 1 | 26 | 4  | 771   | 1 | 49  | 6  | 871   | 12 | 1,717 |
| 104,402 | 1 | 27 | 4  | 794   | 1 | 50  | 6  | 897   | 12 | 1,768 |
| 104,403 | 1 | 26 | 2  | 798   | 1 | 50  | 4  | 903   | 8  | 1,777 |
| 104,404 | 0 | 26 | 4  | 797   | 1 | 48  | 6  | 898   | 11 | 1,769 |
| 104,405 | 1 | 26 | 5  | 803   | 1 | 48  | 6  | 897   | 13 | 1,774 |
| 104,406 | 1 | 26 | 5  | 778   | 1 | 43  | 6  | 871   | 13 | 1,718 |
| 104,407 | 1 | 26 | 5  | 783   | 1 | 44  | 6  | 899   | 13 | 1,752 |
| 104,408 | 1 | 27 | 5  | 830   | 1 | 49  | 5  | 941   | 12 | 1,847 |
| 104,409 | 1 | 88 | 7  | 1,578 | 1 | 130 | 6  | 1,765 | 15 | 3,561 |
| 104,410 | 1 | 92 | 10 | 1,797 | 1 | 139 | 8  | 1,909 | 20 | 3,937 |
| 104,411 | 2 | 94 | 10 | 1,974 | 1 | 146 | 9  | 1,980 | 22 | 4,194 |
| 104,412 | 2 | 94 | 12 | 1,897 | 1 | 141 | 9  | 1,906 | 24 | 4,038 |
| 104,413 | 2 | 94 | 12 | 1,894 | 1 | 140 | 9  | 1,889 | 24 | 4,017 |
| 104,414 | 2 | 93 | 12 | 1,788 | 1 | 129 | 9  | 1,765 | 24 | 3,775 |
| 104,415 | 2 | 93 | 11 | 1,827 | 1 | 130 | 8  | 1,778 | 22 | 3,828 |

|         |   |     |    |       |   |     |    |       |    |       |
|---------|---|-----|----|-------|---|-----|----|-------|----|-------|
| 104,416 | 2 | 93  | 11 | 1,834 | 1 | 131 | 8  | 1,785 | 22 | 3,843 |
| 104,417 | 2 | 93  | 11 | 1,835 | 1 | 131 | 8  | 1,786 | 22 | 3,845 |
| 104,418 | 2 | 95  | 11 | 1,951 | 1 | 142 | 8  | 1,864 | 22 | 4,052 |
| 104,419 | 2 | 95  | 11 | 1,944 | 1 | 142 | 7  | 1,866 | 21 | 4,047 |
| 104,420 | 2 | 95  | 11 | 2,076 | 1 | 153 | 7  | 1,955 | 21 | 4,279 |
| 104,421 | 2 | 95  | 11 | 2,151 | 1 | 153 | 7  | 1,970 | 21 | 4,369 |
| 104,422 | 2 | 101 | 11 | 2,215 | 1 | 154 | 7  | 2,007 | 21 | 4,477 |
| 104,423 | 2 | 101 | 11 | 2,223 | 1 | 154 | 7  | 2,007 | 21 | 4,485 |
| 104,424 | 2 | 102 | 12 | 2,232 | 2 | 154 | 9  | 2,014 | 25 | 4,502 |
| 104,425 | 2 | 105 | 12 | 2,303 | 2 | 155 | 9  | 2,048 | 25 | 4,611 |
| 104,426 | 2 | 106 | 12 | 2,310 | 2 | 155 | 9  | 2,051 | 25 | 4,622 |
| 104,427 | 2 | 112 | 12 | 2,484 | 2 | 168 | 10 | 2,174 | 26 | 4,938 |
| 104,428 | 2 | 112 | 12 | 2,486 | 2 | 169 | 10 | 2,176 | 26 | 4,943 |
| 104,429 | 2 | 112 | 12 | 2,503 | 2 | 171 | 11 | 2,177 | 27 | 4,963 |
| 104,430 | 2 | 114 | 12 | 2,528 | 2 | 173 | 11 | 2,190 | 27 | 5,005 |
| 104,431 | 2 | 113 | 12 | 2,529 | 2 | 173 | 11 | 2,185 | 27 | 5,000 |
| 104,432 | 2 | 121 | 13 | 2,576 | 2 | 176 | 11 | 2,247 | 28 | 5,120 |
| 104,433 | 2 | 121 | 13 | 2,574 | 2 | 177 | 11 | 2,244 | 28 | 5,116 |
| 104,434 | 3 | 121 | 13 | 2,589 | 2 | 177 | 14 | 2,246 | 32 | 5,133 |
| 104,435 | 3 | 120 | 14 | 2,588 | 2 | 178 | 19 | 2,239 | 38 | 5,125 |
| 104,436 | 3 | 113 | 14 | 2,470 | 2 | 172 | 19 | 2,018 | 38 | 4,773 |
| 104,437 | 4 | 115 | 15 | 2,527 | 2 | 176 | 19 | 2,046 | 40 | 4,864 |
| 104,438 | 4 | 119 | 15 | 2,600 | 2 | 183 | 19 | 2,095 | 40 | 4,997 |
| 104,439 | 4 | 121 | 16 | 2,741 | 2 | 198 | 19 | 2,178 | 41 | 5,238 |
| 104,440 | 4 | 127 | 18 | 2,984 | 2 | 216 | 22 | 2,296 | 46 | 5,623 |
| 104,441 | 4 | 142 | 18 | 3,162 | 2 | 228 | 24 | 2,389 | 48 | 5,921 |
| 104,442 | 4 | 146 | 18 | 3,190 | 1 | 231 | 24 | 2,417 | 47 | 5,984 |
| 104,443 | 4 | 156 | 18 | 3,365 | 1 | 252 | 24 | 2,528 | 47 | 6,301 |
| 104,444 | 4 | 157 | 18 | 3,388 | 1 | 253 | 24 | 2,542 | 47 | 6,340 |
| 104,445 | 4 | 157 | 18 | 3,339 | 1 | 251 | 24 | 2,503 | 47 | 6,250 |
| 104,446 | 4 | 157 | 19 | 3,325 | 1 | 250 | 25 | 2,489 | 49 | 6,221 |
| 104,447 | 4 | 157 | 18 | 3,312 | 1 | 251 | 25 | 2,484 | 48 | 6,204 |
| 104,448 | 4 | 156 | 24 | 3,296 | 1 | 246 | 24 | 2,455 | 53 | 6,153 |
| 104,449 | 4 | 156 | 24 | 3,303 | 1 | 246 | 24 | 2,476 | 53 | 6,181 |
| 104,450 | 4 | 175 | 27 | 3,448 | 1 | 266 | 26 | 2,696 | 58 | 6,585 |
| 104,451 | 4 | 174 | 27 | 3,448 | 1 | 269 | 26 | 2,697 | 58 | 6,588 |
| 104,452 | 4 | 181 | 28 | 3,545 | 1 | 272 | 26 | 2,799 | 59 | 6,797 |
| 104,453 | 4 | 190 | 28 | 3,569 | 1 | 273 | 26 | 2,826 | 59 | 6,858 |
| 104,454 | 4 | 190 | 28 | 3,570 | 1 | 273 | 26 | 2,831 | 59 | 6,864 |
| 104,455 | 4 | 206 | 26 | 3,735 | 1 | 296 | 23 | 3,231 | 54 | 7,468 |
| 104,456 | 3 | 206 | 25 | 3,743 | 1 | 296 | 22 | 3,227 | 51 | 7,472 |

|         |    |     |     |       |    |     |    |       |     |       |
|---------|----|-----|-----|-------|----|-----|----|-------|-----|-------|
| 104,457 | 3  | 208 | 26  | 3,788 | 1  | 303 | 22 | 3,293 | 52  | 7,592 |
| 104,458 | 3  | 215 | 26  | 3,843 | 1  | 303 | 22 | 3,331 | 52  | 7,692 |
| 104,459 | 3  | 213 | 25  | 3,831 | 0  | 296 | 22 | 3,295 | 50  | 7,635 |
| 104,460 | 3  | 151 | 24  | 3,084 | 0  | 217 | 22 | 2,467 | 49  | 5,919 |
| 104,461 | 3  | 147 | 23  | 2,886 | 0  | 207 | 21 | 2,325 | 47  | 5,565 |
| 104,462 | 2  | 145 | 23  | 2,700 | 0  | 199 | 20 | 2,248 | 45  | 5,292 |
| 104,463 | 2  | 143 | 22  | 2,681 | 0  | 203 | 20 | 2,263 | 44  | 5,290 |
| 104,464 | 4  | 143 | 32  | 2,684 | 0  | 203 | 21 | 2,263 | 57  | 5,293 |
| 104,465 | 4  | 144 | 39  | 2,697 | 0  | 206 | 21 | 2,266 | 64  | 5,313 |
| 104,466 | 4  | 144 | 46  | 2,668 | 1  | 205 | 23 | 2,252 | 74  | 5,269 |
| 104,467 | 4  | 144 | 46  | 2,651 | 1  | 204 | 23 | 2,238 | 74  | 5,237 |
| 104,468 | 4  | 142 | 46  | 2,522 | 1  | 193 | 23 | 2,153 | 74  | 5,010 |
| 104,469 | 4  | 142 | 46  | 2,524 | 1  | 193 | 23 | 2,153 | 74  | 5,012 |
| 104,470 | 4  | 143 | 48  | 2,525 | 1  | 193 | 25 | 2,156 | 78  | 5,017 |
| 104,471 | 4  | 143 | 49  | 2,397 | 1  | 182 | 25 | 2,068 | 79  | 4,790 |
| 104,472 | 4  | 143 | 49  | 2,322 | 1  | 182 | 25 | 2,052 | 79  | 4,699 |
| 104,473 | 10 | 132 | 70  | 2,160 | 1  | 179 | 41 | 1,958 | 122 | 4,429 |
| 104,474 | 10 | 132 | 76  | 2,161 | 1  | 179 | 42 | 1,959 | 129 | 4,431 |
| 104,475 | 10 | 132 | 81  | 2,162 | 4  | 179 | 42 | 1,958 | 137 | 4,431 |
| 104,476 | 10 | 132 | 81  | 2,161 | 4  | 179 | 42 | 1,959 | 137 | 4,431 |
| 104,477 | 10 | 133 | 83  | 2,163 | 4  | 179 | 44 | 1,960 | 141 | 4,435 |
| 104,478 | 10 | 128 | 85  | 1,990 | 5  | 165 | 45 | 1,846 | 145 | 4,129 |
| 104,479 | 10 | 128 | 85  | 1,991 | 5  | 165 | 45 | 1,845 | 145 | 4,129 |
| 104,480 | 10 | 128 | 86  | 1,973 | 5  | 164 | 44 | 1,845 | 145 | 4,110 |
| 104,481 | 10 | 119 | 85  | 1,883 | 5  | 158 | 44 | 1,756 | 144 | 3,916 |
| 104,482 | 10 | 119 | 86  | 1,886 | 5  | 158 | 43 | 1,757 | 144 | 3,920 |
| 104,483 | 11 | 119 | 91  | 1,886 | 5  | 158 | 43 | 1,756 | 150 | 3,919 |
| 104,484 | 11 | 121 | 91  | 1,891 | 5  | 168 | 43 | 1,790 | 150 | 3,970 |
| 104,485 | 10 | 122 | 96  | 1,914 | 6  | 169 | 44 | 1,856 | 156 | 4,061 |
| 104,486 | 10 | 122 | 99  | 1,928 | 9  | 170 | 45 | 1,889 | 163 | 4,109 |
| 104,487 | 10 | 146 | 99  | 2,111 | 9  | 192 | 45 | 2,341 | 163 | 4,790 |
| 104,488 | 9  | 145 | 98  | 2,072 | 9  | 188 | 45 | 2,328 | 161 | 4,733 |
| 104,489 | 9  | 141 | 106 | 2,012 | 10 | 181 | 47 | 2,293 | 172 | 4,627 |
| 104,490 | 9  | 133 | 106 | 1,598 | 10 | 148 | 47 | 2,072 | 172 | 3,951 |
| 104,491 | 9  | 133 | 104 | 1,601 | 10 | 148 | 44 | 2,075 | 167 | 3,957 |
| 104,492 | 9  | 114 | 104 | 1,364 | 10 | 132 | 42 | 1,931 | 165 | 3,541 |
| 104,493 | 9  | 114 | 104 | 1,364 | 10 | 132 | 42 | 1,933 | 165 | 3,543 |
| 104,494 | 12 | 105 | 108 | 1,179 | 11 | 111 | 45 | 1,814 | 176 | 3,209 |
| 104,495 | 12 | 138 | 108 | 1,609 | 11 | 183 | 46 | 2,470 | 177 | 4,400 |
| 104,496 | 12 | 139 | 107 | 1,825 | 11 | 196 | 45 | 2,645 | 175 | 4,805 |
| 104,497 | 12 | 153 | 108 | 2,226 | 11 | 238 | 45 | 3,125 | 176 | 5,742 |

|         |    |     |     |       |    |     |    |       |     |        |
|---------|----|-----|-----|-------|----|-----|----|-------|-----|--------|
| 104,498 | 12 | 160 | 109 | 2,412 | 11 | 258 | 46 | 3,253 | 178 | 6,083  |
| 104,499 | 12 | 161 | 103 | 2,423 | 11 | 258 | 46 | 3,254 | 172 | 6,096  |
| 104,500 | 12 | 161 | 101 | 2,439 | 11 | 258 | 44 | 3,240 | 168 | 6,098  |
| 104,501 | 12 | 144 | 101 | 2,339 | 11 | 244 | 44 | 3,061 | 168 | 5,788  |
| 104,502 | 12 | 145 | 100 | 2,376 | 11 | 244 | 44 | 3,087 | 167 | 5,852  |
| 104,503 | 12 | 261 | 100 | 3,262 | 11 | 390 | 45 | 4,474 | 168 | 8,387  |
| 104,504 | 12 | 254 | 100 | 3,279 | 11 | 388 | 45 | 4,445 | 168 | 8,366  |
| 104,505 | 12 | 260 | 107 | 3,465 | 11 | 394 | 47 | 4,496 | 177 | 8,615  |
| 104,506 | 12 | 247 | 107 | 3,328 | 11 | 373 | 48 | 4,118 | 178 | 8,066  |
| 104,507 | 12 | 247 | 107 | 3,323 | 11 | 373 | 48 | 4,121 | 178 | 8,064  |
| 104,508 | 12 | 238 | 107 | 3,223 | 11 | 365 | 48 | 4,006 | 178 | 7,832  |
| 104,509 | 12 | 239 | 107 | 3,241 | 11 | 365 | 48 | 4,021 | 178 | 7,866  |
| 104,510 | 12 | 240 | 107 | 3,321 | 11 | 385 | 48 | 4,383 | 178 | 8,329  |
| 104,511 | 12 | 238 | 107 | 3,354 | 11 | 393 | 48 | 4,452 | 178 | 8,437  |
| 104,512 | 12 | 255 | 106 | 4,024 | 11 | 421 | 50 | 4,966 | 179 | 9,666  |
| 104,513 | 12 | 257 | 108 | 4,079 | 11 | 425 | 50 | 5,028 | 181 | 9,789  |
| 104,514 | 12 | 257 | 107 | 4,077 | 11 | 421 | 50 | 5,026 | 180 | 9,781  |
| 104,515 | 10 | 257 | 97  | 4,079 | 11 | 422 | 49 | 5,019 | 167 | 9,777  |
| 104,516 | 10 | 256 | 90  | 4,069 | 11 | 419 | 49 | 5,017 | 160 | 9,761  |
| 104,517 | 10 | 258 | 88  | 4,083 | 10 | 421 | 46 | 5,045 | 154 | 9,807  |
| 104,518 | 10 | 258 | 88  | 4,091 | 10 | 422 | 46 | 5,045 | 154 | 9,816  |
| 104,519 | 10 | 258 | 88  | 4,110 | 10 | 423 | 46 | 5,062 | 154 | 9,853  |
| 104,520 | 10 | 259 | 90  | 4,110 | 10 | 423 | 46 | 5,069 | 156 | 9,861  |
| 104,521 | 10 | 259 | 90  | 4,110 | 10 | 423 | 47 | 5,072 | 157 | 9,864  |
| 104,522 | 10 | 260 | 90  | 4,155 | 10 | 425 | 51 | 5,117 | 161 | 9,957  |
| 104,523 | 9  | 261 | 81  | 4,181 | 10 | 426 | 46 | 5,126 | 146 | 9,994  |
| 104,524 | 4  | 261 | 71  | 4,202 | 10 | 429 | 36 | 5,159 | 121 | 10,051 |
| 104,525 | 4  | 262 | 66  | 4,215 | 10 | 431 | 35 | 5,172 | 115 | 10,080 |
| 104,526 | 4  | 263 | 60  | 4,220 | 7  | 432 | 33 | 5,188 | 104 | 10,103 |
| 104,527 | 4  | 262 | 58  | 4,218 | 7  | 432 | 34 | 5,191 | 103 | 10,103 |
| 104,528 | 4  | 269 | 58  | 4,248 | 7  | 438 | 32 | 5,249 | 101 | 10,204 |
| 104,529 | 4  | 278 | 56  | 4,410 | 6  | 465 | 31 | 5,770 | 97  | 10,923 |
| 104,530 | 4  | 278 | 55  | 4,435 | 6  | 470 | 31 | 5,795 | 96  | 10,978 |
| 104,531 | 4  | 278 | 61  | 4,449 | 6  | 470 | 33 | 5,820 | 104 | 11,017 |
| 104,532 | 4  | 281 | 64  | 4,533 | 6  | 475 | 33 | 5,917 | 107 | 11,206 |
| 104,533 | 4  | 282 | 66  | 4,567 | 6  | 476 | 33 | 5,967 | 109 | 11,292 |
| 104,534 | 3  | 283 | 61  | 4,575 | 6  | 477 | 31 | 5,968 | 101 | 11,303 |
| 104,535 | 3  | 283 | 61  | 4,636 | 6  | 469 | 31 | 6,011 | 101 | 11,399 |
| 104,536 | 3  | 284 | 57  | 4,708 | 5  | 469 | 30 | 5,963 | 95  | 11,424 |
| 104,537 | 3  | 284 | 55  | 4,724 | 2  | 471 | 23 | 5,953 | 83  | 11,432 |
| 104,538 | 3  | 265 | 53  | 4,618 | 2  | 449 | 23 | 5,528 | 81  | 10,860 |

|         |   |     |    |       |   |     |    |       |    |        |
|---------|---|-----|----|-------|---|-----|----|-------|----|--------|
| 104,539 | 3 | 266 | 52 | 4,658 | 2 | 450 | 25 | 5,545 | 82 | 10,919 |
| 104,540 | 3 | 269 | 47 | 4,697 | 1 | 452 | 23 | 5,590 | 74 | 11,008 |
| 104,541 | 3 | 268 | 46 | 4,712 | 1 | 453 | 23 | 5,607 | 73 | 11,040 |
| 104,542 | 3 | 269 | 46 | 4,718 | 1 | 455 | 25 | 5,608 | 75 | 11,050 |
| 104,543 | 3 | 278 | 46 | 4,806 | 1 | 461 | 25 | 5,754 | 75 | 11,299 |
| 104,544 | 0 | 279 | 43 | 4,824 | 0 | 461 | 21 | 5,760 | 64 | 11,324 |
| 104,545 | 0 | 278 | 44 | 4,833 | 1 | 459 | 22 | 5,765 | 67 | 11,335 |
| 104,546 | 0 | 245 | 48 | 4,372 | 1 | 386 | 26 | 5,094 | 75 | 10,097 |
| 104,547 | 0 | 234 | 47 | 3,852 | 1 | 344 | 25 | 4,564 | 73 | 8,994  |
| 104,548 | 0 | 233 | 47 | 3,816 | 1 | 337 | 25 | 4,536 | 73 | 8,922  |
| 104,549 | 0 | 226 | 46 | 3,629 | 1 | 316 | 25 | 4,410 | 72 | 8,581  |
| 104,550 | 0 | 225 | 46 | 3,630 | 1 | 319 | 27 | 4,440 | 74 | 8,614  |
| 104,551 | 0 | 224 | 46 | 3,626 | 1 | 319 | 27 | 4,456 | 74 | 8,625  |
| 104,552 | 0 | 222 | 45 | 3,652 | 1 | 319 | 27 | 4,444 | 73 | 8,637  |
| 104,553 | 0 | 222 | 44 | 3,610 | 1 | 317 | 26 | 4,433 | 71 | 8,582  |
| 104,554 | 0 | 97  | 39 | 2,605 | 1 | 169 | 26 | 2,933 | 66 | 5,804  |
| 104,555 | 0 | 95  | 39 | 2,625 | 1 | 178 | 26 | 2,965 | 66 | 5,863  |
| 104,556 | 0 | 89  | 37 | 2,452 | 1 | 174 | 25 | 2,928 | 63 | 5,643  |
| 104,557 | 0 | 87  | 37 | 2,446 | 1 | 175 | 24 | 2,929 | 62 | 5,637  |
| 104,558 | 0 | 87  | 37 | 2,441 | 1 | 175 | 23 | 2,928 | 61 | 5,631  |
| 104,559 | 0 | 92  | 41 | 2,464 | 2 | 177 | 23 | 2,932 | 66 | 5,665  |
| 104,560 | 0 | 92  | 41 | 2,489 | 2 | 180 | 23 | 2,971 | 66 | 5,732  |
| 104,561 | 0 | 90  | 41 | 2,344 | 2 | 154 | 23 | 2,538 | 66 | 5,126  |
| 104,562 | 0 | 90  | 41 | 2,356 | 2 | 154 | 22 | 2,552 | 65 | 5,152  |
| 104,563 | 0 | 73  | 40 | 1,670 | 2 | 126 | 22 | 2,041 | 64 | 3,910  |
| 104,564 | 0 | 72  | 38 | 1,591 | 2 | 121 | 22 | 1,955 | 62 | 3,739  |
| 104,565 | 0 | 72  | 38 | 1,580 | 2 | 120 | 22 | 1,954 | 62 | 3,726  |
| 104,566 | 0 | 73  | 38 | 1,584 | 2 | 120 | 22 | 1,958 | 62 | 3,735  |
| 104,567 | 0 | 73  | 39 | 1,594 | 2 | 120 | 23 | 1,978 | 64 | 3,765  |
| 104,568 | 0 | 74  | 34 | 1,614 | 2 | 120 | 23 | 2,041 | 59 | 3,849  |
| 104,569 | 0 | 77  | 34 | 1,658 | 2 | 123 | 23 | 2,133 | 59 | 3,991  |
| 104,570 | 0 | 77  | 34 | 1,653 | 2 | 123 | 23 | 2,123 | 59 | 3,976  |
| 104,571 | 1 | 77  | 32 | 1,673 | 2 | 123 | 23 | 2,159 | 58 | 4,032  |
| 104,572 | 1 | 78  | 30 | 1,674 | 3 | 123 | 20 | 2,153 | 54 | 4,028  |
| 104,573 | 1 | 77  | 29 | 1,641 | 3 | 123 | 16 | 2,141 | 49 | 3,982  |
| 104,574 | 1 | 76  | 27 | 1,615 | 3 | 122 | 15 | 2,134 | 46 | 3,947  |
| 104,575 | 1 | 77  | 27 | 1,621 | 3 | 120 | 15 | 2,139 | 46 | 3,957  |
| 104,576 | 1 | 76  | 26 | 1,609 | 3 | 118 | 15 | 2,129 | 45 | 3,932  |
| 104,577 | 1 | 75  | 27 | 1,603 | 3 | 118 | 15 | 2,117 | 46 | 3,913  |
| 104,578 | 1 | 76  | 27 | 1,618 | 3 | 118 | 14 | 2,137 | 45 | 3,949  |
| 104,579 | 1 | 69  | 27 | 1,591 | 3 | 112 | 14 | 2,079 | 45 | 3,851  |

|         |   |    |    |       |   |    |    |       |     |       |
|---------|---|----|----|-------|---|----|----|-------|-----|-------|
| 104,580 | 1 | 59 | 25 | 1,427 | 3 | 85 | 13 | 1,554 | 42  | 3,125 |
| 104,581 | 1 | 59 | 28 | 1,401 | 3 | 80 | 12 | 1,530 | 44  | 3,070 |
| 104,582 | 1 | 59 | 28 | 1,389 | 4 | 79 | 13 | 1,498 | 46  | 3,025 |
| 104,583 | 1 | 54 | 26 | 1,304 | 4 | 74 | 15 | 1,400 | 46  | 2,832 |
| 104,584 | 1 | 53 | 26 | 1,267 | 4 | 73 | 17 | 1,350 | 48  | 2,743 |
| 104,585 | 1 | 52 | 30 | 1,258 | 4 | 72 | 19 | 1,346 | 54  | 2,728 |
| 104,586 | 1 | 50 | 31 | 1,171 | 5 | 69 | 19 | 1,261 | 56  | 2,551 |
| 104,587 | 1 | 48 | 36 | 1,077 | 5 | 68 | 36 | 1,242 | 78  | 2,435 |
| 104,588 | 1 | 42 | 37 | 935   | 5 | 64 | 40 | 1,150 | 83  | 2,191 |
| 104,589 | 1 | 42 | 40 | 935   | 5 | 64 | 44 | 1,150 | 90  | 2,191 |
| 104,590 | 1 | 41 | 43 | 896   | 5 | 63 | 44 | 1,133 | 93  | 2,133 |
| 104,591 | 1 | 38 | 43 | 857   | 5 | 61 | 46 | 1,086 | 95  | 2,042 |
| 104,592 | 1 | 38 | 43 | 837   | 5 | 60 | 46 | 1,067 | 95  | 2,002 |
| 104,593 | 1 | 37 | 46 | 829   | 5 | 58 | 46 | 1,061 | 98  | 1,985 |
| 104,594 | 1 | 27 | 50 | 705   | 4 | 51 | 45 | 874   | 100 | 1,657 |
| 104,595 | 1 | 27 | 52 | 710   | 4 | 51 | 47 | 874   | 104 | 1,662 |
| 104,596 | 1 | 28 | 50 | 718   | 4 | 51 | 47 | 885   | 102 | 1,682 |
| 104,597 | 1 | 27 | 49 | 725   | 4 | 51 | 44 | 883   | 98  | 1,686 |
| 104,598 | 3 | 27 | 50 | 723   | 4 | 51 | 45 | 887   | 102 | 1,688 |
| 104,599 | 3 | 24 | 51 | 662   | 4 | 44 | 45 | 788   | 103 | 1,518 |
| 104,600 | 3 | 24 | 51 | 661   | 4 | 44 | 46 | 784   | 104 | 1,513 |
| 104,601 | 5 | 24 | 51 | 625   | 4 | 41 | 48 | 724   | 108 | 1,414 |
| 104,602 | 5 | 24 | 51 | 625   | 4 | 41 | 48 | 724   | 108 | 1,414 |
| 104,603 | 7 | 24 | 53 | 545   | 4 | 35 | 50 | 681   | 114 | 1,285 |
| 104,604 | 7 | 23 | 60 | 530   | 4 | 33 | 61 | 652   | 132 | 1,238 |
| 104,605 | 7 | 22 | 61 | 525   | 4 | 32 | 64 | 643   | 136 | 1,222 |
| 104,606 | 7 | 21 | 64 | 441   | 4 | 23 | 64 | 585   | 139 | 1,070 |
| 104,607 | 7 | 21 | 69 | 417   | 6 | 21 | 66 | 557   | 148 | 1,016 |
| 104,608 | 7 | 20 | 70 | 394   | 6 | 18 | 66 | 531   | 149 | 963   |
| 104,609 | 7 | 20 | 69 | 391   | 5 | 18 | 67 | 527   | 148 | 956   |
| 104,610 | 7 | 14 | 77 | 312   | 5 | 12 | 73 | 449   | 162 | 787   |
| 104,611 | 7 | 14 | 77 | 274   | 5 | 11 | 76 | 419   | 165 | 718   |
| 104,612 | 7 | 14 | 81 | 275   | 5 | 11 | 78 | 420   | 171 | 720   |
| 104,613 | 7 | 14 | 81 | 277   | 5 | 11 | 85 | 420   | 178 | 722   |
| 104,614 | 7 | 14 | 81 | 281   | 5 | 13 | 88 | 429   | 181 | 737   |
| 104,615 | 7 | 16 | 84 | 438   | 5 | 18 | 90 | 489   | 186 | 961   |
| 104,616 | 7 | 24 | 85 | 564   | 6 | 23 | 92 | 571   | 190 | 1,182 |
| 104,617 | 7 | 25 | 87 | 599   | 6 | 24 | 92 | 579   | 192 | 1,227 |
| 104,618 | 8 | 26 | 86 | 612   | 6 | 24 | 92 | 561   | 192 | 1,223 |
| 104,619 | 9 | 23 | 94 | 569   | 6 | 21 | 93 | 470   | 202 | 1,083 |
| 104,620 | 9 | 20 | 95 | 521   | 6 | 18 | 93 | 378   | 203 | 937   |



|         |   |    |     |       |    |    |     |     |     |       |
|---------|---|----|-----|-------|----|----|-----|-----|-----|-------|
| 104,621 | 8 | 22 | 102 | 497   | 6  | 18 | 94  | 357 | 210 | 894   |
| 104,622 | 8 | 22 | 102 | 498   | 6  | 18 | 94  | 358 | 210 | 896   |
| 104,623 | 8 | 21 | 104 | 503   | 5  | 19 | 94  | 361 | 211 | 904   |
| 104,624 | 8 | 22 | 104 | 492   | 5  | 17 | 95  | 326 | 212 | 857   |
| 104,625 | 8 | 21 | 104 | 465   | 5  | 16 | 95  | 285 | 212 | 787   |
| 104,626 | 8 | 21 | 106 | 462   | 6  | 15 | 97  | 276 | 217 | 774   |
| 104,627 | 8 | 21 | 106 | 466   | 7  | 15 | 98  | 277 | 219 | 779   |
| 104,628 | 8 | 21 | 106 | 467   | 7  | 16 | 98  | 280 | 219 | 784   |
| 104,629 | 8 | 20 | 106 | 451   | 7  | 16 | 98  | 254 | 219 | 741   |
| 104,630 | 8 | 20 | 109 | 450   | 7  | 16 | 104 | 253 | 228 | 739   |
| 104,631 | 9 | 20 | 117 | 446   | 10 | 16 | 118 | 250 | 254 | 732   |
| 104,632 | 9 | 20 | 114 | 451   | 10 | 16 | 118 | 252 | 251 | 739   |
| 104,633 | 9 | 20 | 112 | 453   | 9  | 16 | 118 | 256 | 248 | 745   |
| 104,634 | 9 | 20 | 113 | 460   | 9  | 16 | 119 | 256 | 250 | 752   |
| 104,635 | 9 | 20 | 110 | 463   | 9  | 16 | 117 | 258 | 245 | 757   |
| 104,636 | 9 | 20 | 106 | 464   | 9  | 16 | 115 | 261 | 239 | 761   |
| 104,637 | 9 | 21 | 105 | 475   | 8  | 16 | 115 | 265 | 237 | 777   |
| 104,638 | 9 | 21 | 100 | 481   | 8  | 16 | 98  | 266 | 215 | 784   |
| 104,639 | 9 | 21 | 97  | 486   | 8  | 16 | 94  | 267 | 208 | 790   |
| 104,640 | 9 | 21 | 94  | 493   | 8  | 17 | 91  | 275 | 202 | 806   |
| 104,641 | 9 | 23 | 94  | 499   | 8  | 18 | 93  | 281 | 204 | 821   |
| 104,642 | 9 | 23 | 100 | 504   | 8  | 18 | 101 | 282 | 218 | 827   |
| 104,643 | 9 | 23 | 100 | 516   | 8  | 18 | 101 | 301 | 218 | 858   |
| 104,644 | 9 | 23 | 98  | 519   | 8  | 18 | 100 | 304 | 215 | 864   |
| 104,645 | 9 | 23 | 94  | 537   | 8  | 20 | 100 | 308 | 211 | 888   |
| 104,646 | 9 | 23 | 92  | 594   | 8  | 22 | 98  | 328 | 207 | 967   |
| 104,647 | 9 | 22 | 92  | 590   | 9  | 22 | 99  | 318 | 209 | 952   |
| 104,648 | 9 | 22 | 90  | 586   | 9  | 22 | 98  | 327 | 206 | 957   |
| 104,649 | 7 | 33 | 91  | 757   | 9  | 36 | 97  | 486 | 204 | 1,312 |
| 104,650 | 7 | 33 | 90  | 781   | 9  | 36 | 97  | 499 | 203 | 1,349 |
| 104,651 | 7 | 52 | 91  | 1,050 | 9  | 42 | 96  | 594 | 203 | 1,738 |
| 104,652 | 5 | 60 | 93  | 1,185 | 9  | 48 | 95  | 693 | 202 | 1,986 |
| 104,653 | 3 | 66 | 91  | 1,249 | 9  | 49 | 93  | 725 | 196 | 2,089 |
| 104,654 | 3 | 67 | 91  | 1,265 | 9  | 50 | 81  | 732 | 184 | 2,114 |
| 104,655 | 3 | 67 | 97  | 1,269 | 9  | 50 | 80  | 732 | 189 | 2,118 |
| 104,656 | 3 | 67 | 96  | 1,271 | 9  | 50 | 79  | 731 | 187 | 2,119 |
| 104,657 | 3 | 67 | 94  | 1,275 | 9  | 50 | 79  | 733 | 185 | 2,125 |
| 104,658 | 3 | 67 | 90  | 1,279 | 7  | 50 | 77  | 735 | 177 | 2,131 |
| 104,659 | 3 | 67 | 89  | 1,283 | 7  | 50 | 77  | 739 | 176 | 2,139 |
| 104,660 | 3 | 67 | 87  | 1,314 | 7  | 52 | 76  | 771 | 173 | 2,204 |
| 104,661 | 3 | 71 | 79  | 1,383 | 7  | 54 | 71  | 791 | 160 | 2,299 |

|         |   |     |    |       |   |     |    |       |     |       |
|---------|---|-----|----|-------|---|-----|----|-------|-----|-------|
| 104,662 | 3 | 71  | 79 | 1,396 | 7 | 54  | 68 | 798   | 157 | 2,319 |
| 104,663 | 3 | 81  | 76 | 1,592 | 7 | 64  | 66 | 1,051 | 152 | 2,788 |
| 104,664 | 3 | 81  | 76 | 1,602 | 7 | 64  | 59 | 1,054 | 145 | 2,801 |
| 104,665 | 3 | 81  | 76 | 1,669 | 7 | 69  | 56 | 1,108 | 142 | 2,927 |
| 104,666 | 3 | 84  | 76 | 1,827 | 7 | 68  | 55 | 1,152 | 141 | 3,131 |
| 104,667 | 3 | 76  | 75 | 1,699 | 6 | 63  | 53 | 1,071 | 137 | 2,909 |
| 104,668 | 3 | 74  | 75 | 1,705 | 6 | 63  | 55 | 1,078 | 139 | 2,920 |
| 104,669 | 2 | 76  | 75 | 1,718 | 6 | 63  | 54 | 1,081 | 137 | 2,938 |
| 104,670 | 1 | 76  | 68 | 1,731 | 6 | 63  | 53 | 1,082 | 128 | 2,952 |
| 104,671 | 1 | 79  | 67 | 1,738 | 6 | 63  | 53 | 1,084 | 127 | 2,964 |
| 104,672 | 1 | 77  | 60 | 1,730 | 6 | 62  | 52 | 1,058 | 119 | 2,927 |
| 104,673 | 1 | 76  | 58 | 1,731 | 6 | 61  | 52 | 1,059 | 117 | 2,927 |
| 104,674 | 1 | 76  | 58 | 1,732 | 6 | 61  | 52 | 1,065 | 117 | 2,934 |
| 104,675 | 1 | 76  | 58 | 1,737 | 6 | 61  | 51 | 1,068 | 116 | 2,942 |
| 104,676 | 1 | 78  | 58 | 1,787 | 6 | 65  | 51 | 1,120 | 116 | 3,050 |
| 104,677 | 1 | 80  | 55 | 1,828 | 5 | 67  | 49 | 1,129 | 110 | 3,104 |
| 104,678 | 1 | 81  | 55 | 1,851 | 4 | 67  | 48 | 1,145 | 108 | 3,144 |
| 104,679 | 1 | 83  | 55 | 1,910 | 4 | 68  | 47 | 1,158 | 107 | 3,219 |
| 104,680 | 1 | 87  | 51 | 1,933 | 4 | 71  | 42 | 1,172 | 98  | 3,263 |
| 104,681 | 1 | 89  | 51 | 1,948 | 2 | 71  | 37 | 1,176 | 91  | 3,284 |
| 104,682 | 0 | 91  | 43 | 1,962 | 1 | 71  | 28 | 1,187 | 72  | 3,311 |
| 104,683 | 0 | 91  | 43 | 1,964 | 1 | 71  | 28 | 1,189 | 72  | 3,315 |
| 104,684 | 0 | 91  | 42 | 1,971 | 1 | 71  | 27 | 1,184 | 70  | 3,317 |
| 104,685 | 0 | 91  | 40 | 1,978 | 1 | 72  | 24 | 1,193 | 65  | 3,334 |
| 104,686 | 0 | 91  | 40 | 1,978 | 1 | 72  | 24 | 1,190 | 65  | 3,331 |
| 104,687 | 0 | 91  | 40 | 1,985 | 1 | 72  | 24 | 1,190 | 65  | 3,338 |
| 104,688 | 0 | 90  | 40 | 1,989 | 1 | 72  | 24 | 1,197 | 65  | 3,348 |
| 104,689 | 0 | 95  | 39 | 2,129 | 1 | 79  | 24 | 1,296 | 64  | 3,599 |
| 104,690 | 0 | 95  | 39 | 2,144 | 1 | 79  | 24 | 1,303 | 64  | 3,621 |
| 104,691 | 0 | 102 | 39 | 2,323 | 1 | 84  | 23 | 1,346 | 63  | 3,855 |
| 104,692 | 0 | 124 | 36 | 2,613 | 1 | 91  | 19 | 1,460 | 56  | 4,288 |
| 104,693 | 0 | 127 | 29 | 2,646 | 1 | 92  | 9  | 1,472 | 39  | 4,337 |
| 104,694 | 0 | 142 | 29 | 2,812 | 1 | 103 | 9  | 1,525 | 39  | 4,582 |
| 104,695 | 0 | 142 | 28 | 2,809 | 1 | 103 | 8  | 1,526 | 37  | 4,580 |
| 104,696 | 0 | 142 | 28 | 2,751 | 1 | 99  | 8  | 1,506 | 37  | 4,498 |
| 104,697 | 0 | 142 | 29 | 2,757 | 1 | 99  | 9  | 1,505 | 39  | 4,503 |
| 104,698 | 0 | 134 | 31 | 2,585 | 0 | 85  | 8  | 1,328 | 39  | 4,132 |
| 104,699 | 0 | 140 | 32 | 2,631 | 1 | 86  | 9  | 1,353 | 42  | 4,210 |
| 104,700 | 0 | 140 | 31 | 2,645 | 1 | 87  | 9  | 1,359 | 41  | 4,231 |
| 104,701 | 0 | 121 | 33 | 2,381 | 1 | 81  | 10 | 1,267 | 44  | 3,850 |
| 104,702 | 0 | 125 | 40 | 2,444 | 1 | 84  | 12 | 1,359 | 53  | 4,012 |

|         |   |     |     |       |   |    |    |       |     |       |
|---------|---|-----|-----|-------|---|----|----|-------|-----|-------|
| 104,703 | 0 | 117 | 38  | 2,340 | 1 | 81 | 10 | 1,281 | 49  | 3,819 |
| 104,704 | 0 | 111 | 38  | 2,279 | 1 | 80 | 10 | 1,257 | 49  | 3,727 |
| 104,705 | 0 | 112 | 31  | 2,301 | 1 | 80 | 10 | 1,288 | 42  | 3,781 |
| 104,706 | 0 | 112 | 25  | 2,309 | 1 | 81 | 10 | 1,291 | 36  | 3,793 |
| 104,707 | 0 | 112 | 26  | 2,310 | 1 | 81 | 10 | 1,292 | 37  | 3,795 |
| 104,708 | 1 | 112 | 26  | 2,336 | 1 | 82 | 10 | 1,292 | 38  | 3,822 |
| 104,709 | 2 | 112 | 38  | 2,338 | 1 | 82 | 14 | 1,292 | 55  | 3,824 |
| 104,710 | 2 | 111 | 57  | 2,334 | 2 | 82 | 19 | 1,288 | 80  | 3,815 |
| 104,711 | 2 | 107 | 63  | 2,221 | 3 | 78 | 28 | 1,228 | 96  | 3,634 |
| 104,712 | 2 | 107 | 63  | 2,240 | 3 | 78 | 31 | 1,232 | 99  | 3,657 |
| 104,713 | 2 | 107 | 64  | 2,248 | 3 | 79 | 33 | 1,246 | 102 | 3,680 |
| 104,714 | 2 | 97  | 63  | 2,056 | 3 | 69 | 33 | 997   | 101 | 3,219 |
| 104,715 | 2 | 97  | 63  | 2,046 | 3 | 69 | 33 | 994   | 101 | 3,206 |
| 104,716 | 2 | 97  | 63  | 1,966 | 3 | 62 | 33 | 923   | 101 | 3,048 |
| 104,717 | 2 | 91  | 61  | 1,658 | 3 | 58 | 32 | 818   | 98  | 2,625 |
| 104,718 | 2 | 91  | 60  | 1,655 | 3 | 58 | 31 | 817   | 96  | 2,621 |
| 104,719 | 2 | 91  | 64  | 1,610 | 4 | 57 | 31 | 796   | 101 | 2,554 |
| 104,720 | 2 | 88  | 64  | 1,577 | 4 | 57 | 31 | 793   | 101 | 2,515 |
| 104,721 | 3 | 88  | 64  | 1,560 | 4 | 57 | 31 | 789   | 102 | 2,494 |
| 104,722 | 3 | 84  | 64  | 1,550 | 4 | 57 | 31 | 787   | 102 | 2,478 |
| 104,723 | 3 | 84  | 64  | 1,552 | 4 | 57 | 31 | 787   | 102 | 2,480 |
| 104,724 | 3 | 83  | 64  | 1,536 | 4 | 57 | 31 | 775   | 102 | 2,451 |
| 104,725 | 3 | 83  | 64  | 1,534 | 4 | 57 | 31 | 770   | 102 | 2,444 |
| 104,726 | 3 | 83  | 64  | 1,530 | 4 | 57 | 31 | 767   | 102 | 2,437 |
| 104,727 | 3 | 79  | 65  | 1,441 | 4 | 51 | 31 | 705   | 103 | 2,276 |
| 104,728 | 3 | 80  | 65  | 1,450 | 4 | 51 | 31 | 712   | 103 | 2,293 |
| 104,729 | 3 | 79  | 65  | 1,440 | 4 | 52 | 31 | 710   | 103 | 2,281 |
| 104,730 | 3 | 77  | 65  | 1,410 | 4 | 50 | 31 | 710   | 103 | 2,247 |
| 104,731 | 3 | 73  | 65  | 1,392 | 4 | 47 | 32 | 697   | 104 | 2,209 |
| 104,732 | 3 | 72  | 67  | 1,382 | 4 | 47 | 33 | 693   | 107 | 2,194 |
| 104,733 | 3 | 71  | 68  | 1,368 | 4 | 48 | 34 | 682   | 109 | 2,169 |
| 104,734 | 3 | 71  | 68  | 1,365 | 4 | 48 | 34 | 680   | 109 | 2,164 |
| 104,735 | 3 | 72  | 69  | 1,349 | 4 | 47 | 34 | 672   | 110 | 2,140 |
| 104,736 | 3 | 72  | 69  | 1,350 | 4 | 47 | 34 | 673   | 110 | 2,142 |
| 104,737 | 3 | 72  | 70  | 1,352 | 6 | 47 | 34 | 676   | 113 | 2,147 |
| 104,738 | 3 | 73  | 77  | 1,346 | 6 | 47 | 35 | 672   | 121 | 2,138 |
| 104,739 | 3 | 68  | 81  | 1,167 | 6 | 40 | 38 | 555   | 128 | 1,830 |
| 104,740 | 3 | 68  | 85  | 1,170 | 6 | 40 | 38 | 555   | 132 | 1,833 |
| 104,741 | 3 | 68  | 94  | 1,169 | 6 | 40 | 44 | 556   | 147 | 1,833 |
| 104,742 | 4 | 61  | 101 | 983   | 7 | 34 | 44 | 505   | 156 | 1,583 |
| 104,743 | 4 | 37  | 103 | 689   | 7 | 26 | 45 | 382   | 159 | 1,134 |

|         |   |    |     |     |   |    |    |     |     |       |
|---------|---|----|-----|-----|---|----|----|-----|-----|-------|
| 104,744 | 4 | 34 | 103 | 654 | 7 | 25 | 45 | 370 | 159 | 1,083 |
| 104,745 | 4 | 18 | 107 | 475 | 7 | 14 | 49 | 297 | 167 | 804   |
| 104,746 | 4 | 18 | 122 | 472 | 7 | 14 | 55 | 293 | 188 | 797   |
| 104,747 | 4 | 18 | 128 | 459 | 7 | 14 | 57 | 298 | 196 | 789   |
| 104,748 | 4 | 18 | 128 | 454 | 7 | 14 | 56 | 300 | 195 | 786   |
| 104,749 | 4 | 15 | 128 | 461 | 7 | 14 | 57 | 303 | 196 | 793   |
| 104,750 | 4 | 10 | 126 | 422 | 6 | 13 | 56 | 280 | 192 | 725   |
| 104,751 | 4 | 10 | 126 | 411 | 6 | 12 | 56 | 275 | 192 | 708   |
| 104,752 | 4 | 10 | 124 | 383 | 6 | 12 | 55 | 260 | 189 | 665   |
| 104,753 | 4 | 6  | 119 | 289 | 6 | 6  | 54 | 148 | 183 | 449   |
| 104,754 | 6 | 6  | 120 | 288 | 6 | 6  | 55 | 145 | 187 | 445   |
| 104,755 | 6 | 6  | 120 | 288 | 6 | 6  | 55 | 145 | 187 | 445   |
| 104,756 | 6 | 5  | 122 | 238 | 6 | 4  | 55 | 101 | 189 | 348   |
| 104,757 | 6 | 5  | 122 | 240 | 6 | 4  | 56 | 106 | 190 | 355   |
| 104,758 | 5 | 5  | 123 | 246 | 6 | 4  | 56 | 108 | 190 | 363   |
| 104,759 | 5 | 5  | 127 | 221 | 6 | 3  | 60 | 107 | 198 | 336   |
| 104,760 | 4 | 5  | 116 | 213 | 6 | 3  | 59 | 102 | 185 | 323   |
| 104,761 | 4 | 5  | 99  | 213 | 5 | 3  | 57 | 102 | 165 | 323   |
| 104,762 | 4 | 5  | 97  | 194 | 4 | 3  | 49 | 98  | 154 | 300   |
| 104,763 | 4 | 5  | 104 | 185 | 4 | 2  | 53 | 84  | 165 | 276   |
| 104,764 | 4 | 6  | 104 | 181 | 4 | 2  | 52 | 80  | 164 | 269   |
| 104,765 | 4 | 6  | 104 | 182 | 4 | 2  | 52 | 81  | 164 | 271   |
| 104,766 | 4 | 6  | 104 | 181 | 4 | 3  | 53 | 86  | 165 | 276   |
| 104,767 | 4 | 6  | 104 | 191 | 4 | 4  | 53 | 90  | 165 | 291   |
| 104,768 | 4 | 7  | 104 | 189 | 4 | 4  | 53 | 89  | 165 | 289   |
| 104,769 | 4 | 7  | 102 | 191 | 3 | 4  | 54 | 89  | 163 | 291   |
| 104,770 | 4 | 7  | 100 | 190 | 3 | 4  | 53 | 90  | 160 | 291   |
| 104,771 | 4 | 8  | 106 | 197 | 3 | 6  | 53 | 88  | 166 | 299   |
| 104,772 | 3 | 8  | 105 | 197 | 3 | 6  | 53 | 88  | 164 | 299   |
| 104,773 | 3 | 8  | 109 | 201 | 3 | 6  | 53 | 90  | 168 | 305   |
| 104,774 | 3 | 8  | 109 | 208 | 3 | 7  | 53 | 96  | 168 | 319   |
| 104,775 | 3 | 9  | 111 | 221 | 3 | 9  | 53 | 102 | 170 | 341   |
| 104,776 | 3 | 9  | 113 | 229 | 3 | 9  | 53 | 109 | 172 | 356   |
| 104,777 | 3 | 18 | 114 | 493 | 3 | 22 | 57 | 209 | 177 | 742   |
| 104,778 | 4 | 23 | 113 | 612 | 3 | 24 | 57 | 250 | 177 | 909   |
| 104,779 | 4 | 24 | 113 | 662 | 3 | 28 | 59 | 282 | 179 | 996   |
| 104,780 | 4 | 27 | 113 | 721 | 3 | 30 | 59 | 307 | 179 | 1,085 |
| 104,781 | 4 | 32 | 113 | 790 | 3 | 38 | 59 | 331 | 179 | 1,191 |
| 104,782 | 4 | 41 | 114 | 864 | 3 | 48 | 58 | 399 | 179 | 1,352 |
| 104,783 | 4 | 40 | 112 | 882 | 3 | 51 | 57 | 413 | 176 | 1,386 |
| 104,784 | 4 | 42 | 111 | 989 | 3 | 55 | 56 | 507 | 174 | 1,593 |

|         |   |     |     |       |   |     |    |       |     |       |
|---------|---|-----|-----|-------|---|-----|----|-------|-----|-------|
| 104,785 | 4 | 65  | 112 | 1,222 | 3 | 76  | 56 | 687   | 175 | 2,050 |
| 104,786 | 4 | 81  | 111 | 1,532 | 3 | 88  | 56 | 826   | 174 | 2,527 |
| 104,787 | 4 | 81  | 110 | 1,534 | 1 | 88  | 56 | 829   | 171 | 2,532 |
| 104,788 | 4 | 86  | 110 | 1,593 | 1 | 89  | 56 | 856   | 171 | 2,624 |
| 104,789 | 4 | 87  | 103 | 1,610 | 1 | 91  | 55 | 859   | 163 | 2,647 |
| 104,790 | 4 | 90  | 99  | 1,637 | 1 | 91  | 52 | 876   | 156 | 2,694 |
| 104,791 | 4 | 96  | 95  | 1,835 | 1 | 98  | 52 | 981   | 152 | 3,010 |
| 104,792 | 4 | 97  | 86  | 1,877 | 1 | 103 | 46 | 1,004 | 137 | 3,081 |
| 104,793 | 3 | 111 | 79  | 1,996 | 0 | 107 | 47 | 1,070 | 129 | 3,284 |
| 104,794 | 3 | 111 | 78  | 2,006 | 0 | 107 | 46 | 1,080 | 127 | 3,304 |
| 104,795 | 3 | 117 | 78  | 2,065 | 0 | 110 | 48 | 1,139 | 129 | 3,431 |
| 104,796 | 3 | 132 | 74  | 2,153 | 0 | 124 | 45 | 1,324 | 122 | 3,733 |
| 104,797 | 3 | 133 | 59  | 2,157 | 0 | 125 | 39 | 1,327 | 101 | 3,742 |
| 104,798 | 3 | 141 | 53  | 2,264 | 0 | 130 | 37 | 1,368 | 93  | 3,903 |
| 104,799 | 3 | 155 | 52  | 2,425 | 0 | 135 | 37 | 1,441 | 92  | 4,156 |
| 104,800 | 3 | 155 | 50  | 2,410 | 0 | 135 | 36 | 1,438 | 89  | 4,138 |
| 104,801 | 3 | 156 | 50  | 2,432 | 0 | 136 | 37 | 1,443 | 90  | 4,167 |
| 104,802 | 3 | 174 | 50  | 2,549 | 0 | 143 | 36 | 1,472 | 89  | 4,338 |
| 104,803 | 3 | 174 | 49  | 2,566 | 0 | 143 | 36 | 1,474 | 88  | 4,357 |
| 104,804 | 3 | 174 | 47  | 2,584 | 0 | 144 | 35 | 1,474 | 85  | 4,376 |
| 104,805 | 1 | 174 | 46  | 2,599 | 0 | 144 | 34 | 1,475 | 81  | 4,392 |
| 104,806 | 1 | 174 | 45  | 2,670 | 0 | 147 | 34 | 1,495 | 80  | 4,486 |
| 104,807 | 1 | 177 | 43  | 2,773 | 0 | 150 | 34 | 1,537 | 78  | 4,637 |
| 104,808 | 1 | 177 | 43  | 2,876 | 0 | 151 | 33 | 1,549 | 77  | 4,753 |
| 104,809 | 1 | 183 | 43  | 2,990 | 0 | 157 | 34 | 1,646 | 78  | 4,976 |
| 104,810 | 2 | 191 | 39  | 3,063 | 0 | 158 | 30 | 1,661 | 71  | 5,073 |
| 104,811 | 2 | 214 | 38  | 3,430 | 0 | 175 | 27 | 1,859 | 67  | 5,678 |
| 104,812 | 2 | 215 | 37  | 3,453 | 0 | 175 | 24 | 1,864 | 63  | 5,707 |
| 104,813 | 2 | 217 | 33  | 3,512 | 0 | 175 | 22 | 1,887 | 57  | 5,791 |
| 104,814 | 2 | 220 | 25  | 3,585 | 0 | 177 | 15 | 1,922 | 42  | 5,904 |
| 104,815 | 2 | 220 | 24  | 3,596 | 0 | 177 | 14 | 1,924 | 40  | 5,917 |
| 104,816 | 2 | 225 | 24  | 3,621 | 0 | 179 | 13 | 1,940 | 39  | 5,965 |
| 104,817 | 2 | 226 | 24  | 3,629 | 0 | 179 | 13 | 1,945 | 39  | 5,979 |
| 104,818 | 2 | 227 | 24  | 3,632 | 0 | 178 | 13 | 1,958 | 39  | 5,995 |
| 104,819 | 2 | 228 | 23  | 3,637 | 0 | 178 | 14 | 1,963 | 39  | 6,006 |
| 104,820 | 2 | 228 | 24  | 3,635 | 0 | 179 | 13 | 1,966 | 39  | 6,008 |
| 104,821 | 2 | 228 | 24  | 3,660 | 0 | 179 | 13 | 1,979 | 39  | 6,046 |
| 104,822 | 2 | 227 | 18  | 3,660 | 0 | 177 | 13 | 1,985 | 33  | 6,049 |
| 104,823 | 2 | 227 | 15  | 3,656 | 0 | 177 | 15 | 1,981 | 32  | 6,041 |
| 104,824 | 2 | 227 | 21  | 3,669 | 0 | 178 | 17 | 1,991 | 40  | 6,065 |
| 104,825 | 2 | 227 | 20  | 3,663 | 0 | 176 | 17 | 1,985 | 39  | 6,051 |

|         |   |     |     |       |    |     |    |       |     |       |
|---------|---|-----|-----|-------|----|-----|----|-------|-----|-------|
| 104,826 | 2 | 226 | 21  | 3,652 | 0  | 175 | 18 | 1,978 | 41  | 6,031 |
| 104,827 | 2 | 226 | 19  | 3,651 | 0  | 175 | 18 | 1,978 | 39  | 6,030 |
| 104,828 | 3 | 218 | 25  | 3,410 | 0  | 164 | 21 | 1,883 | 49  | 5,675 |
| 104,829 | 2 | 215 | 30  | 3,312 | 0  | 164 | 26 | 1,862 | 58  | 5,553 |
| 104,830 | 2 | 213 | 30  | 3,284 | 0  | 160 | 25 | 1,839 | 57  | 5,496 |
| 104,831 | 3 | 212 | 56  | 3,225 | 1  | 157 | 40 | 1,810 | 100 | 5,404 |
| 104,832 | 3 | 207 | 58  | 3,140 | 1  | 149 | 41 | 1,775 | 103 | 5,271 |
| 104,833 | 3 | 195 | 58  | 2,928 | 2  | 131 | 42 | 1,597 | 105 | 4,851 |
| 104,834 | 3 | 195 | 61  | 2,933 | 2  | 131 | 44 | 1,597 | 110 | 4,856 |
| 104,835 | 3 | 195 | 62  | 2,945 | 2  | 132 | 44 | 1,610 | 111 | 4,882 |
| 104,836 | 3 | 173 | 61  | 2,718 | 2  | 111 | 44 | 1,433 | 110 | 4,435 |
| 104,837 | 3 | 156 | 62  | 2,407 | 2  | 99  | 44 | 1,296 | 111 | 3,958 |
| 104,838 | 3 | 151 | 62  | 2,346 | 3  | 98  | 46 | 1,267 | 114 | 3,862 |
| 104,839 | 3 | 150 | 62  | 2,346 | 3  | 98  | 46 | 1,269 | 114 | 3,863 |
| 104,840 | 3 | 149 | 65  | 2,324 | 3  | 96  | 46 | 1,263 | 117 | 3,832 |
| 104,841 | 3 | 150 | 79  | 2,355 | 4  | 101 | 57 | 1,289 | 143 | 3,895 |
| 104,842 | 3 | 144 | 79  | 2,165 | 4  | 96  | 57 | 1,193 | 143 | 3,598 |
| 104,843 | 3 | 145 | 94  | 2,147 | 5  | 92  | 57 | 1,201 | 159 | 3,585 |
| 104,844 | 3 | 134 | 95  | 2,047 | 5  | 88  | 57 | 1,140 | 160 | 3,409 |
| 104,845 | 3 | 134 | 97  | 2,061 | 6  | 89  | 58 | 1,165 | 164 | 3,449 |
| 104,846 | 3 | 128 | 100 | 2,009 | 6  | 86  | 59 | 1,105 | 168 | 3,328 |
| 104,847 | 3 | 113 | 100 | 1,939 | 6  | 72  | 58 | 934   | 167 | 3,058 |
| 104,848 | 3 | 114 | 102 | 1,947 | 6  | 73  | 59 | 939   | 170 | 3,073 |
| 104,849 | 3 | 112 | 102 | 1,914 | 6  | 73  | 59 | 1,000 | 170 | 3,099 |
| 104,850 | 3 | 98  | 102 | 1,754 | 6  | 68  | 59 | 923   | 170 | 2,843 |
| 104,851 | 4 | 99  | 131 | 1,753 | 8  | 70  | 74 | 924   | 217 | 2,846 |
| 104,852 | 4 | 98  | 143 | 1,724 | 9  | 69  | 80 | 919   | 236 | 2,810 |
| 104,853 | 4 | 80  | 144 | 1,606 | 9  | 62  | 81 | 891   | 238 | 2,639 |
| 104,854 | 4 | 80  | 144 | 1,574 | 10 | 61  | 81 | 890   | 239 | 2,605 |
| 104,855 | 4 | 80  | 144 | 1,574 | 10 | 61  | 81 | 890   | 239 | 2,605 |
| 104,856 | 4 | 80  | 145 | 1,491 | 10 | 58  | 81 | 872   | 240 | 2,501 |
| 104,857 | 4 | 81  | 145 | 1,521 | 10 | 61  | 82 | 923   | 241 | 2,586 |
| 104,858 | 4 | 78  | 148 | 1,445 | 10 | 60  | 82 | 912   | 244 | 2,495 |
| 104,859 | 4 | 79  | 150 | 1,366 | 10 | 61  | 84 | 923   | 248 | 2,429 |
| 104,860 | 4 | 73  | 150 | 1,243 | 10 | 56  | 83 | 830   | 247 | 2,202 |
| 104,861 | 3 | 65  | 154 | 1,164 | 10 | 56  | 83 | 813   | 250 | 2,098 |
| 104,862 | 3 | 43  | 153 | 822   | 10 | 42  | 83 | 639   | 249 | 1,546 |
| 104,863 | 3 | 43  | 152 | 816   | 10 | 42  | 83 | 638   | 248 | 1,539 |
| 104,864 | 3 | 72  | 152 | 851   | 10 | 50  | 84 | 715   | 249 | 1,688 |
| 104,865 | 3 | 71  | 152 | 810   | 10 | 49  | 84 | 693   | 249 | 1,623 |
| 104,866 | 3 | 71  | 155 | 857   | 10 | 50  | 87 | 727   | 255 | 1,705 |

|         |   |     |     |       |    |    |    |       |     |       |
|---------|---|-----|-----|-------|----|----|----|-------|-----|-------|
| 104,867 | 3 | 67  | 155 | 847   | 10 | 47 | 88 | 716   | 256 | 1,677 |
| 104,868 | 3 | 66  | 156 | 878   | 10 | 48 | 89 | 735   | 258 | 1,727 |
| 104,869 | 3 | 67  | 156 | 877   | 10 | 48 | 89 | 728   | 258 | 1,720 |
| 104,870 | 3 | 100 | 156 | 1,060 | 10 | 72 | 88 | 984   | 257 | 2,216 |
| 104,871 | 3 | 103 | 154 | 1,190 | 10 | 75 | 88 | 1,015 | 255 | 2,383 |
| 104,872 | 3 | 103 | 158 | 1,183 | 10 | 75 | 88 | 1,015 | 259 | 2,376 |
| 104,873 | 3 | 105 | 160 | 1,243 | 10 | 76 | 88 | 1,034 | 261 | 2,458 |
| 104,874 | 3 | 105 | 159 | 1,244 | 10 | 76 | 86 | 1,034 | 258 | 2,459 |
| 104,875 | 3 | 106 | 154 | 1,228 | 10 | 75 | 84 | 1,024 | 251 | 2,433 |
| 104,876 | 3 | 106 | 153 | 1,227 | 10 | 75 | 84 | 1,025 | 250 | 2,433 |
| 104,877 | 3 | 106 | 152 | 1,220 | 10 | 75 | 83 | 1,018 | 248 | 2,419 |
| 104,878 | 3 | 107 | 152 | 1,222 | 10 | 75 | 83 | 1,022 | 248 | 2,426 |
| 104,879 | 3 | 105 | 145 | 1,205 | 10 | 73 | 76 | 1,025 | 234 | 2,408 |
| 104,880 | 3 | 104 | 140 | 1,156 | 10 | 71 | 71 | 996   | 224 | 2,327 |
| 104,881 | 3 | 105 | 140 | 1,161 | 10 | 75 | 70 | 1,004 | 223 | 2,345 |
| 104,882 | 2 | 103 | 115 | 1,140 | 8  | 75 | 55 | 994   | 180 | 2,312 |
| 104,883 | 2 | 105 | 115 | 1,148 | 8  | 75 | 54 | 1,001 | 179 | 2,329 |
| 104,884 | 3 | 105 | 114 | 1,141 | 7  | 75 | 53 | 1,000 | 177 | 2,321 |
| 104,885 | 3 | 106 | 113 | 1,133 | 7  | 75 | 52 | 1,003 | 175 | 2,317 |
| 104,886 | 3 | 106 | 112 | 1,136 | 7  | 75 | 52 | 1,004 | 174 | 2,321 |
| 104,887 | 3 | 105 | 112 | 1,139 | 7  | 75 | 52 | 1,003 | 174 | 2,322 |
| 104,888 | 3 | 106 | 112 | 1,141 | 7  | 77 | 53 | 1,015 | 175 | 2,339 |
| 104,889 | 3 | 106 | 112 | 1,138 | 6  | 77 | 51 | 1,013 | 172 | 2,334 |
| 104,890 | 3 | 110 | 112 | 1,177 | 6  | 78 | 51 | 1,059 | 172 | 2,424 |
| 104,891 | 3 | 110 | 109 | 1,190 | 6  | 78 | 51 | 1,069 | 169 | 2,447 |
| 104,892 | 3 | 106 | 95  | 1,144 | 5  | 73 | 41 | 1,019 | 144 | 2,342 |
| 104,893 | 3 | 106 | 91  | 1,145 | 4  | 71 | 41 | 1,019 | 139 | 2,341 |
| 104,894 | 3 | 101 | 80  | 1,095 | 4  | 70 | 41 | 971   | 128 | 2,237 |
| 104,895 | 3 | 101 | 79  | 1,087 | 4  | 69 | 40 | 954   | 126 | 2,211 |
| 104,896 | 3 | 102 | 76  | 1,155 | 4  | 72 | 39 | 1,022 | 122 | 2,351 |
| 104,897 | 3 | 103 | 73  | 1,188 | 4  | 75 | 36 | 1,051 | 116 | 2,417 |
| 104,898 | 3 | 105 | 73  | 1,216 | 4  | 78 | 36 | 1,089 | 116 | 2,488 |
| 104,899 | 3 | 103 | 71  | 1,211 | 4  | 76 | 35 | 1,083 | 113 | 2,473 |
| 104,900 | 3 | 97  | 67  | 1,148 | 4  | 71 | 34 | 978   | 108 | 2,294 |
| 104,901 | 2 | 98  | 50  | 1,170 | 4  | 71 | 26 | 986   | 82  | 2,325 |
| 104,902 | 2 | 97  | 41  | 1,164 | 2  | 69 | 19 | 984   | 64  | 2,314 |
| 104,903 | 2 | 99  | 30  | 1,196 | 1  | 71 | 11 | 1,009 | 44  | 2,375 |
| 104,904 | 2 | 99  | 29  | 1,203 | 1  | 72 | 10 | 1,013 | 42  | 2,387 |
| 104,905 | 2 | 99  | 29  | 1,211 | 0  | 72 | 10 | 1,029 | 41  | 2,411 |
| 104,906 | 2 | 99  | 28  | 1,220 | 0  | 73 | 10 | 1,039 | 40  | 2,431 |
| 104,907 | 2 | 99  | 29  | 1,226 | 0  | 73 | 10 | 1,036 | 41  | 2,434 |

|         |   |     |    |       |   |    |    |       |    |       |
|---------|---|-----|----|-------|---|----|----|-------|----|-------|
| 104,908 | 2 | 99  | 30 | 1,213 | 0 | 70 | 11 | 1,002 | 43 | 2,384 |
| 104,909 | 2 | 99  | 27 | 1,211 | 0 | 70 | 11 | 992   | 40 | 2,372 |
| 104,910 | 2 | 100 | 27 | 1,217 | 0 | 69 | 9  | 975   | 38 | 2,361 |
| 104,911 | 2 | 109 | 26 | 1,345 | 0 | 76 | 9  | 1,105 | 37 | 2,635 |
| 104,912 | 2 | 112 | 22 | 1,365 | 0 | 75 | 10 | 1,111 | 34 | 2,663 |
| 104,913 | 2 | 115 | 22 | 1,376 | 0 | 75 | 10 | 1,101 | 34 | 2,667 |
| 104,914 | 2 | 114 | 22 | 1,373 | 0 | 76 | 10 | 1,108 | 34 | 2,671 |
| 104,915 | 2 | 85  | 19 | 1,294 | 0 | 71 | 8  | 1,037 | 29 | 2,487 |
| 104,916 | 2 | 84  | 20 | 1,270 | 0 | 70 | 8  | 1,036 | 30 | 2,460 |
| 104,917 | 2 | 87  | 20 | 1,232 | 0 | 70 | 8  | 1,008 | 30 | 2,397 |
| 104,918 | 2 | 101 | 20 | 1,265 | 0 | 71 | 7  | 1,062 | 29 | 2,499 |
| 104,919 | 2 | 101 | 19 | 1,228 | 0 | 70 | 7  | 1,038 | 28 | 2,437 |
| 104,920 | 2 | 116 | 20 | 1,334 | 0 | 73 | 7  | 1,106 | 29 | 2,629 |
| 104,921 | 2 | 87  | 20 | 1,205 | 0 | 50 | 7  | 879   | 29 | 2,221 |
| 104,922 | 2 | 104 | 16 | 1,147 | 0 | 48 | 7  | 892   | 25 | 2,191 |
| 104,923 | 2 | 104 | 15 | 1,140 | 0 | 50 | 7  | 883   | 24 | 2,177 |
| 104,924 | 2 | 102 | 14 | 1,067 | 0 | 49 | 8  | 857   | 24 | 2,075 |
| 104,925 | 2 | 103 | 14 | 1,080 | 0 | 50 | 8  | 862   | 24 | 2,095 |
| 104,926 | 2 | 103 | 13 | 1,080 | 0 | 50 | 8  | 862   | 23 | 2,095 |
| 104,927 | 2 | 104 | 13 | 1,102 | 0 | 50 | 8  | 870   | 23 | 2,126 |
| 104,928 | 2 | 104 | 13 | 1,114 | 0 | 50 | 8  | 870   | 23 | 2,138 |
| 104,929 | 2 | 103 | 13 | 1,116 | 0 | 50 | 8  | 867   | 23 | 2,136 |
| 104,930 | 2 | 104 | 13 | 1,125 | 0 | 53 | 8  | 864   | 23 | 2,146 |
| 104,931 | 2 | 103 | 13 | 1,120 | 0 | 53 | 8  | 858   | 23 | 2,134 |
| 104,932 | 2 | 103 | 13 | 1,134 | 0 | 49 | 8  | 859   | 23 | 2,145 |
| 104,933 | 2 | 103 | 12 | 1,132 | 0 | 49 | 8  | 861   | 22 | 2,145 |
| 104,934 | 2 | 100 | 11 | 1,117 | 0 | 49 | 8  | 840   | 21 | 2,106 |
| 104,935 | 1 | 102 | 11 | 1,157 | 0 | 51 | 8  | 864   | 20 | 2,174 |
| 104,936 | 1 | 102 | 10 | 1,162 | 0 | 52 | 7  | 870   | 18 | 2,186 |
| 104,937 | 1 | 101 | 10 | 1,146 | 0 | 50 | 7  | 854   | 18 | 2,151 |
| 104,938 | 1 | 102 | 15 | 1,165 | 0 | 51 | 8  | 862   | 24 | 2,180 |
| 104,939 | 1 | 102 | 16 | 1,170 | 0 | 51 | 7  | 866   | 24 | 2,189 |
| 104,940 | 1 | 103 | 16 | 1,176 | 0 | 52 | 6  | 876   | 23 | 2,207 |
| 104,941 | 1 | 100 | 16 | 1,145 | 0 | 51 | 6  | 832   | 23 | 2,128 |
| 104,942 | 1 | 100 | 18 | 1,131 | 0 | 51 | 7  | 824   | 26 | 2,106 |
| 104,943 | 1 | 101 | 18 | 1,119 | 0 | 52 | 7  | 834   | 26 | 2,106 |
| 104,944 | 1 | 102 | 18 | 1,115 | 0 | 52 | 7  | 832   | 26 | 2,101 |
| 104,945 | 1 | 102 | 20 | 1,114 | 0 | 53 | 11 | 831   | 32 | 2,100 |
| 104,946 | 1 | 102 | 20 | 1,110 | 0 | 53 | 11 | 826   | 32 | 2,091 |
| 104,947 | 1 | 101 | 20 | 1,047 | 0 | 50 | 12 | 760   | 33 | 1,958 |
| 104,948 | 2 | 101 | 40 | 1,015 | 1 | 47 | 16 | 741   | 59 | 1,904 |



|         |    |     |     |       |    |     |     |       |     |       |
|---------|----|-----|-----|-------|----|-----|-----|-------|-----|-------|
| 104,949 | 2  | 99  | 40  | 967   | 1  | 44  | 16  | 691   | 59  | 1,801 |
| 104,950 | 2  | 100 | 101 | 966   | 3  | 44  | 89  | 690   | 195 | 1,800 |
| 104,951 | 2  | 100 | 105 | 951   | 5  | 44  | 97  | 685   | 209 | 1,780 |
| 104,952 | 2  | 99  | 106 | 928   | 5  | 44  | 98  | 676   | 211 | 1,747 |
| 104,953 | 2  | 99  | 106 | 934   | 5  | 45  | 98  | 682   | 211 | 1,760 |
| 104,954 | 2  | 97  | 106 | 908   | 5  | 43  | 98  | 664   | 211 | 1,712 |
| 104,955 | 2  | 97  | 116 | 914   | 7  | 42  | 105 | 674   | 230 | 1,727 |
| 104,956 | 2  | 104 | 116 | 1,266 | 7  | 49  | 106 | 835   | 231 | 2,254 |
| 104,957 | 2  | 260 | 116 | 2,350 | 7  | 171 | 106 | 2,245 | 231 | 5,026 |
| 104,958 | 2  | 285 | 115 | 2,645 | 7  | 182 | 106 | 2,379 | 230 | 5,491 |
| 104,959 | 2  | 297 | 125 | 2,918 | 9  | 198 | 113 | 2,461 | 249 | 5,874 |
| 104,960 | 2  | 302 | 125 | 2,933 | 9  | 196 | 114 | 2,448 | 250 | 5,879 |
| 104,961 | 2  | 302 | 123 | 2,936 | 10 | 195 | 115 | 2,447 | 250 | 5,880 |
| 104,962 | 2  | 292 | 124 | 2,823 | 10 | 188 | 120 | 2,320 | 256 | 5,623 |
| 104,963 | 2  | 306 | 123 | 2,973 | 10 | 211 | 119 | 2,468 | 254 | 5,958 |
| 104,964 | 2  | 304 | 123 | 2,998 | 10 | 209 | 118 | 2,472 | 253 | 5,983 |
| 104,965 | 4  | 305 | 138 | 3,028 | 10 | 208 | 126 | 2,484 | 278 | 6,025 |
| 104,966 | 9  | 303 | 175 | 3,051 | 12 | 205 | 149 | 2,480 | 345 | 6,039 |
| 104,967 | 13 | 303 | 203 | 3,057 | 18 | 207 | 197 | 2,485 | 431 | 6,052 |
| 104,968 | 15 | 301 | 210 | 3,065 | 18 | 207 | 198 | 2,485 | 441 | 6,058 |
| 104,969 | 15 | 291 | 210 | 3,065 | 18 | 207 | 198 | 2,489 | 441 | 6,052 |
| 104,970 | 15 | 291 | 210 | 3,067 | 18 | 207 | 198 | 2,490 | 441 | 6,055 |
| 104,971 | 15 | 274 | 228 | 2,953 | 18 | 205 | 212 | 2,419 | 473 | 5,851 |
| 104,972 | 16 | 268 | 260 | 2,988 | 18 | 206 | 226 | 2,400 | 520 | 5,862 |
| 104,973 | 16 | 252 | 263 | 2,973 | 18 | 209 | 233 | 2,430 | 530 | 5,864 |
| 104,974 | 16 | 252 | 275 | 2,992 | 18 | 207 | 236 | 2,434 | 545 | 5,885 |
| 104,975 | 16 | 254 | 286 | 3,005 | 18 | 209 | 243 | 2,453 | 563 | 5,921 |
| 104,976 | 16 | 254 | 294 | 3,002 | 19 | 208 | 254 | 2,454 | 583 | 5,918 |
| 104,977 | 16 | 254 | 300 | 3,002 | 20 | 208 | 254 | 2,454 | 590 | 5,918 |
| 104,978 | 16 | 253 | 308 | 2,969 | 20 | 208 | 256 | 2,444 | 600 | 5,874 |
| 104,979 | 16 | 254 | 319 | 2,974 | 20 | 209 | 262 | 2,449 | 617 | 5,886 |
| 104,980 | 15 | 254 | 319 | 2,976 | 20 | 209 | 262 | 2,452 | 616 | 5,891 |
| 104,981 | 15 | 253 | 324 | 2,965 | 20 | 207 | 264 | 2,447 | 623 | 5,872 |
| 104,982 | 15 | 253 | 334 | 2,970 | 20 | 207 | 268 | 2,450 | 637 | 5,880 |
| 104,983 | 15 | 255 | 334 | 2,955 | 20 | 208 | 273 | 2,456 | 642 | 5,874 |
| 104,984 | 15 | 255 | 334 | 2,951 | 20 | 208 | 273 | 2,455 | 642 | 5,869 |
| 104,985 | 15 | 254 | 337 | 2,919 | 20 | 205 | 274 | 2,429 | 646 | 5,807 |
| 104,986 | 15 | 254 | 337 | 2,916 | 20 | 204 | 274 | 2,425 | 646 | 5,799 |
| 104,987 | 15 | 254 | 336 | 2,914 | 20 | 204 | 276 | 2,424 | 647 | 5,796 |
| 104,988 | 15 | 254 | 337 | 2,915 | 20 | 204 | 276 | 2,425 | 648 | 5,798 |
| 104,989 | 15 | 253 | 333 | 2,897 | 20 | 203 | 278 | 2,420 | 646 | 5,773 |

|         |    |     |     |       |    |     |     |       |     |       |
|---------|----|-----|-----|-------|----|-----|-----|-------|-----|-------|
| 104,990 | 15 | 252 | 331 | 2,884 | 20 | 202 | 279 | 2,405 | 645 | 5,743 |
| 104,991 | 15 | 252 | 331 | 2,884 | 20 | 202 | 278 | 2,405 | 644 | 5,743 |
| 104,992 | 15 | 251 | 329 | 2,882 | 20 | 202 | 278 | 2,410 | 642 | 5,745 |
| 104,993 | 15 | 250 | 329 | 2,886 | 20 | 201 | 278 | 2,407 | 642 | 5,744 |
| 104,994 | 15 | 250 | 329 | 2,889 | 20 | 201 | 276 | 2,414 | 640 | 5,754 |
| 104,995 | 15 | 249 | 332 | 2,950 | 20 | 211 | 277 | 2,486 | 644 | 5,896 |
| 104,996 | 15 | 249 | 337 | 2,979 | 20 | 212 | 282 | 2,513 | 654 | 5,953 |
| 104,997 | 14 | 255 | 317 | 3,020 | 19 | 216 | 279 | 2,547 | 629 | 6,038 |
| 104,998 | 14 | 262 | 313 | 3,096 | 18 | 223 | 270 | 2,624 | 615 | 6,205 |
| 104,999 | 14 | 262 | 300 | 3,123 | 18 | 224 | 251 | 2,631 | 583 | 6,240 |
| 105,000 | 14 | 274 | 273 | 3,239 | 17 | 229 | 242 | 2,700 | 546 | 6,442 |
| 105,001 | 14 | 274 | 262 | 3,283 | 17 | 230 | 212 | 2,727 | 505 | 6,514 |
| 105,002 | 14 | 274 | 258 | 3,290 | 15 | 231 | 204 | 2,729 | 491 | 6,524 |
| 105,003 | 14 | 274 | 258 | 3,297 | 15 | 233 | 202 | 2,739 | 489 | 6,543 |
| 105,004 | 14 | 274 | 253 | 3,288 | 13 | 232 | 197 | 2,728 | 477 | 6,522 |
| 105,005 | 14 | 275 | 251 | 3,307 | 13 | 233 | 197 | 2,745 | 475 | 6,560 |
| 105,006 | 14 | 268 | 248 | 2,939 | 13 | 226 | 197 | 2,555 | 472 | 5,988 |
| 105,007 | 14 | 270 | 248 | 2,958 | 13 | 227 | 198 | 2,570 | 473 | 6,025 |
| 105,008 | 14 | 74  | 243 | 1,248 | 13 | 78  | 197 | 918   | 467 | 2,318 |
| 105,009 | 14 | 74  | 238 | 1,248 | 12 | 78  | 198 | 922   | 462 | 2,322 |
| 105,010 | 14 | 74  | 242 | 1,249 | 11 | 78  | 194 | 922   | 461 | 2,323 |
| 105,011 | 14 | 73  | 245 | 1,218 | 11 | 77  | 195 | 906   | 465 | 2,274 |
| 105,012 | 14 | 54  | 249 | 977   | 11 | 54  | 196 | 730   | 470 | 1,815 |
| 105,013 | 14 | 54  | 248 | 974   | 11 | 54  | 195 | 730   | 468 | 1,812 |
| 105,014 | 13 | 53  | 238 | 897   | 11 | 53  | 186 | 689   | 448 | 1,692 |
| 105,015 | 13 | 53  | 233 | 898   | 11 | 53  | 186 | 691   | 443 | 1,695 |
| 105,016 | 9  | 53  | 208 | 886   | 9  | 51  | 169 | 676   | 395 | 1,666 |
| 105,017 | 8  | 54  | 195 | 892   | 9  | 51  | 163 | 676   | 375 | 1,673 |
| 105,018 | 4  | 55  | 167 | 898   | 3  | 51  | 114 | 684   | 288 | 1,688 |
| 105,019 | 2  | 53  | 162 | 878   | 3  | 51  | 113 | 679   | 280 | 1,661 |
| 105,020 | 2  | 48  | 152 | 836   | 3  | 51  | 105 | 614   | 262 | 1,549 |
| 105,021 | 2  | 48  | 144 | 906   | 3  | 53  | 100 | 623   | 249 | 1,630 |
| 105,022 | 1  | 53  | 144 | 1,037 | 3  | 58  | 99  | 659   | 247 | 1,807 |
| 105,023 | 1  | 55  | 121 | 972   | 3  | 56  | 95  | 645   | 220 | 1,728 |
| 105,024 | 1  | 51  | 122 | 941   | 4  | 51  | 89  | 573   | 216 | 1,616 |
| 105,025 | 1  | 53  | 112 | 949   | 4  | 52  | 87  | 590   | 204 | 1,644 |
| 105,026 | 1  | 52  | 107 | 957   | 7  | 50  | 86  | 577   | 201 | 1,636 |
| 105,027 | 2  | 51  | 115 | 987   | 7  | 53  | 85  | 579   | 209 | 1,670 |
| 105,028 | 3  | 51  | 115 | 1,002 | 6  | 54  | 87  | 594   | 211 | 1,701 |
| 105,029 | 4  | 52  | 128 | 1,013 | 6  | 54  | 128 | 612   | 266 | 1,731 |
| 105,030 | 5  | 51  | 123 | 1,010 | 6  | 53  | 125 | 608   | 259 | 1,722 |

|         |    |    |     |       |    |    |     |     |     |       |
|---------|----|----|-----|-------|----|----|-----|-----|-----|-------|
| 105,031 | 6  | 51 | 121 | 1,005 | 6  | 52 | 131 | 605 | 264 | 1,713 |
| 105,032 | 7  | 54 | 125 | 1,013 | 6  | 54 | 134 | 610 | 272 | 1,731 |
| 105,033 | 7  | 54 | 116 | 1,018 | 6  | 56 | 130 | 607 | 259 | 1,735 |
| 105,034 | 7  | 53 | 122 | 1,025 | 6  | 56 | 125 | 605 | 260 | 1,739 |
| 105,035 | 7  | 53 | 120 | 1,033 | 6  | 58 | 125 | 631 | 258 | 1,775 |
| 105,036 | 7  | 52 | 118 | 1,030 | 6  | 59 | 124 | 632 | 255 | 1,773 |
| 105,037 | 8  | 52 | 141 | 1,030 | 9  | 59 | 143 | 636 | 301 | 1,777 |
| 105,038 | 8  | 55 | 143 | 1,035 | 9  | 60 | 141 | 638 | 301 | 1,788 |
| 105,039 | 8  | 56 | 146 | 1,044 | 9  | 60 | 154 | 638 | 317 | 1,798 |
| 105,040 | 8  | 56 | 145 | 1,047 | 9  | 60 | 152 | 640 | 314 | 1,803 |
| 105,041 | 8  | 59 | 145 | 1,148 | 9  | 67 | 151 | 724 | 313 | 1,998 |
| 105,042 | 8  | 59 | 145 | 1,156 | 9  | 68 | 151 | 726 | 313 | 2,009 |
| 105,043 | 8  | 60 | 146 | 1,199 | 9  | 69 | 152 | 758 | 315 | 2,086 |
| 105,044 | 9  | 61 | 148 | 1,229 | 9  | 71 | 152 | 771 | 318 | 2,132 |
| 105,045 | 9  | 64 | 152 | 1,246 | 9  | 74 | 153 | 788 | 323 | 2,172 |
| 105,046 | 9  | 65 | 166 | 1,190 | 10 | 64 | 172 | 718 | 357 | 2,037 |
| 105,047 | 9  | 54 | 161 | 1,045 | 10 | 51 | 167 | 584 | 347 | 1,734 |
| 105,048 | 9  | 54 | 164 | 1,059 | 10 | 52 | 165 | 591 | 348 | 1,756 |
| 105,049 | 9  | 54 | 161 | 1,068 | 11 | 53 | 160 | 602 | 341 | 1,777 |
| 105,050 | 9  | 55 | 160 | 1,041 | 11 | 52 | 160 | 588 | 340 | 1,736 |
| 105,051 | 9  | 43 | 160 | 926   | 11 | 47 | 160 | 520 | 340 | 1,536 |
| 105,052 | 9  | 42 | 163 | 881   | 11 | 47 | 162 | 496 | 345 | 1,466 |
| 105,053 | 9  | 43 | 163 | 874   | 11 | 46 | 162 | 495 | 345 | 1,458 |
| 105,054 | 9  | 43 | 163 | 870   | 12 | 44 | 168 | 488 | 352 | 1,445 |
| 105,055 | 9  | 43 | 163 | 866   | 12 | 44 | 167 | 487 | 351 | 1,440 |
| 105,056 | 9  | 43 | 166 | 870   | 12 | 46 | 169 | 495 | 356 | 1,454 |
| 105,057 | 9  | 44 | 168 | 964   | 12 | 50 | 169 | 552 | 358 | 1,610 |
| 105,058 | 9  | 43 | 169 | 1,044 | 12 | 61 | 170 | 607 | 360 | 1,755 |
| 105,059 | 9  | 43 | 172 | 1,135 | 12 | 63 | 176 | 676 | 369 | 1,917 |
| 105,060 | 12 | 43 | 193 | 1,143 | 13 | 64 | 223 | 677 | 441 | 1,927 |
| 105,061 | 12 | 44 | 190 | 1,163 | 13 | 64 | 220 | 686 | 435 | 1,957 |
| 105,062 | 12 | 47 | 187 | 1,173 | 13 | 65 | 219 | 689 | 431 | 1,974 |
| 105,063 | 12 | 48 | 187 | 1,175 | 12 | 65 | 219 | 694 | 430 | 1,982 |
| 105,064 | 12 | 48 | 187 | 1,177 | 12 | 65 | 217 | 694 | 428 | 1,984 |
| 105,065 | 11 | 51 | 191 | 1,191 | 13 | 65 | 222 | 701 | 437 | 2,008 |
| 105,066 | 11 | 55 | 197 | 1,249 | 13 | 65 | 226 | 740 | 447 | 2,109 |
| 105,067 | 11 | 54 | 197 | 1,250 | 13 | 65 | 226 | 739 | 447 | 2,108 |
| 105,068 | 11 | 54 | 198 | 1,308 | 13 | 67 | 226 | 768 | 448 | 2,197 |
| 105,069 | 11 | 55 | 199 | 1,382 | 13 | 70 | 226 | 772 | 449 | 2,279 |
| 105,070 | 11 | 55 | 196 | 1,404 | 13 | 69 | 226 | 772 | 446 | 2,300 |
| 105,071 | 11 | 52 | 197 | 1,180 | 13 | 60 | 225 | 720 | 446 | 2,012 |

|         |    |    |     |       |    |    |     |     |     |       |
|---------|----|----|-----|-------|----|----|-----|-----|-----|-------|
| 105,072 | 11 | 52 | 199 | 1,185 | 13 | 60 | 231 | 722 | 454 | 2,019 |
| 105,073 | 11 | 52 | 192 | 1,187 | 13 | 60 | 225 | 721 | 441 | 2,020 |
| 105,074 | 11 | 50 | 192 | 1,133 | 13 | 59 | 225 | 694 | 441 | 1,936 |
| 105,075 | 11 | 51 | 190 | 1,143 | 12 | 61 | 226 | 694 | 439 | 1,949 |
| 105,076 | 11 | 51 | 188 | 1,150 | 12 | 61 | 225 | 694 | 436 | 1,956 |
| 105,077 | 11 | 50 | 183 | 1,135 | 9  | 62 | 220 | 690 | 423 | 1,937 |
| 105,078 | 10 | 49 | 167 | 1,096 | 8  | 59 | 210 | 682 | 395 | 1,886 |
| 105,079 | 9  | 49 | 164 | 1,085 | 8  | 58 | 209 | 668 | 390 | 1,860 |
| 105,080 | 8  | 48 | 144 | 1,070 | 8  | 59 | 167 | 649 | 327 | 1,826 |
| 105,081 | 7  | 48 | 139 | 1,082 | 8  | 59 | 164 | 651 | 318 | 1,840 |
| 105,082 | 6  | 48 | 138 | 1,099 | 8  | 59 | 156 | 668 | 308 | 1,874 |
| 105,083 | 5  | 47 | 135 | 1,176 | 8  | 57 | 155 | 681 | 303 | 1,961 |
| 105,084 | 5  | 47 | 135 | 1,178 | 8  | 55 | 156 | 687 | 304 | 1,967 |
| 105,085 | 5  | 48 | 131 | 1,216 | 8  | 55 | 157 | 693 | 301 | 2,012 |
| 105,086 | 5  | 50 | 129 | 1,209 | 7  | 53 | 157 | 668 | 298 | 1,980 |
| 105,087 | 5  | 50 | 124 | 1,201 | 7  | 52 | 150 | 662 | 286 | 1,965 |
| 105,088 | 5  | 43 | 111 | 1,074 | 5  | 43 | 142 | 565 | 263 | 1,725 |
| 105,089 | 5  | 43 | 110 | 1,076 | 5  | 43 | 147 | 565 | 267 | 1,727 |
| 105,090 | 5  | 43 | 106 | 1,079 | 5  | 43 | 134 | 565 | 250 | 1,730 |
| 105,091 | 5  | 43 | 106 | 1,079 | 5  | 43 | 133 | 563 | 249 | 1,728 |
| 105,092 | 5  | 43 | 106 | 1,082 | 5  | 43 | 134 | 564 | 250 | 1,732 |
| 105,093 | 5  | 43 | 106 | 1,087 | 5  | 43 | 136 | 566 | 252 | 1,739 |
| 105,094 | 5  | 42 | 105 | 1,043 | 5  | 42 | 135 | 530 | 250 | 1,657 |
| 105,095 | 4  | 41 | 103 | 1,004 | 5  | 40 | 135 | 509 | 247 | 1,594 |
| 105,096 | 4  | 38 | 98  | 984   | 5  | 37 | 134 | 485 | 241 | 1,544 |
| 105,097 | 4  | 37 | 81  | 988   | 4  | 36 | 113 | 489 | 202 | 1,550 |
| 105,098 | 4  | 36 | 80  | 996   | 5  | 39 | 112 | 497 | 201 | 1,568 |
| 105,099 | 4  | 36 | 77  | 1,000 | 5  | 38 | 111 | 500 | 197 | 1,574 |
| 105,100 | 4  | 36 | 77  | 1,009 | 4  | 38 | 110 | 494 | 195 | 1,577 |
| 105,101 | 4  | 34 | 77  | 1,004 | 4  | 38 | 110 | 492 | 195 | 1,568 |
| 105,102 | 4  | 34 | 76  | 1,004 | 4  | 38 | 110 | 493 | 194 | 1,569 |
| 105,103 | 4  | 34 | 75  | 1,001 | 4  | 37 | 108 | 487 | 191 | 1,559 |
| 105,104 | 4  | 33 | 79  | 996   | 4  | 37 | 116 | 483 | 203 | 1,549 |
| 105,105 | 4  | 33 | 78  | 997   | 4  | 37 | 116 | 489 | 202 | 1,556 |
| 105,106 | 4  | 33 | 76  | 998   | 4  | 37 | 114 | 487 | 198 | 1,555 |
| 105,107 | 4  | 32 | 75  | 976   | 4  | 34 | 115 | 462 | 198 | 1,504 |
| 105,108 | 4  | 31 | 73  | 872   | 4  | 30 | 115 | 402 | 196 | 1,335 |
| 105,109 | 5  | 27 | 73  | 663   | 4  | 16 | 114 | 254 | 196 | 960   |
| 105,110 | 5  | 27 | 71  | 671   | 4  | 16 | 112 | 260 | 192 | 974   |
| 105,111 | 3  | 27 | 54  | 677   | 3  | 17 | 67  | 261 | 127 | 982   |
| 105,112 | 3  | 26 | 53  | 658   | 3  | 17 | 68  | 254 | 127 | 955   |

|         |   |    |    |       |    |    |     |     |     |       |
|---------|---|----|----|-------|----|----|-----|-----|-----|-------|
| 105,113 | 4 | 23 | 54 | 648   | 4  | 16 | 73  | 252 | 135 | 939   |
| 105,114 | 4 | 24 | 50 | 661   | 4  | 16 | 71  | 249 | 129 | 950   |
| 105,115 | 4 | 24 | 46 | 659   | 3  | 16 | 64  | 249 | 117 | 948   |
| 105,116 | 4 | 21 | 40 | 639   | 3  | 16 | 64  | 241 | 111 | 917   |
| 105,117 | 4 | 17 | 41 | 587   | 3  | 16 | 65  | 202 | 113 | 822   |
| 105,118 | 4 | 17 | 40 | 614   | 3  | 20 | 65  | 218 | 112 | 869   |
| 105,119 | 4 | 23 | 40 | 654   | 3  | 22 | 65  | 239 | 112 | 938   |
| 105,120 | 4 | 21 | 39 | 615   | 3  | 20 | 65  | 234 | 111 | 890   |
| 105,121 | 5 | 38 | 42 | 779   | 3  | 30 | 72  | 305 | 122 | 1,152 |
| 105,122 | 5 | 44 | 40 | 892   | 3  | 31 | 72  | 320 | 120 | 1,287 |
| 105,123 | 5 | 44 | 38 | 946   | 3  | 33 | 66  | 335 | 112 | 1,358 |
| 105,124 | 5 | 45 | 38 | 968   | 3  | 33 | 67  | 337 | 113 | 1,383 |
| 105,125 | 6 | 47 | 38 | 994   | 3  | 33 | 65  | 352 | 112 | 1,426 |
| 105,126 | 6 | 46 | 36 | 989   | 3  | 32 | 63  | 353 | 108 | 1,420 |
| 105,127 | 6 | 47 | 38 | 997   | 3  | 33 | 64  | 357 | 111 | 1,434 |
| 105,128 | 6 | 47 | 37 | 1,001 | 3  | 33 | 64  | 358 | 110 | 1,439 |
| 105,129 | 6 | 48 | 55 | 1,022 | 5  | 33 | 84  | 366 | 150 | 1,469 |
| 105,130 | 6 | 48 | 68 | 1,018 | 7  | 33 | 103 | 365 | 184 | 1,464 |
| 105,131 | 6 | 48 | 71 | 1,018 | 7  | 32 | 104 | 366 | 188 | 1,464 |
| 105,132 | 6 | 49 | 72 | 998   | 7  | 33 | 104 | 350 | 189 | 1,430 |
| 105,133 | 6 | 51 | 70 | 1,004 | 7  | 33 | 104 | 351 | 187 | 1,439 |
| 105,134 | 7 | 49 | 75 | 944   | 8  | 35 | 108 | 336 | 198 | 1,364 |
| 105,135 | 7 | 50 | 77 | 964   | 8  | 35 | 115 | 337 | 207 | 1,386 |
| 105,136 | 7 | 50 | 78 | 951   | 8  | 35 | 115 | 327 | 208 | 1,363 |
| 105,137 | 7 | 49 | 79 | 987   | 8  | 35 | 115 | 334 | 209 | 1,405 |
| 105,138 | 7 | 49 | 77 | 994   | 8  | 36 | 114 | 333 | 206 | 1,412 |
| 105,139 | 6 | 49 | 76 | 994   | 8  | 36 | 112 | 334 | 202 | 1,413 |
| 105,140 | 6 | 52 | 75 | 991   | 8  | 36 | 107 | 335 | 196 | 1,414 |
| 105,141 | 6 | 52 | 75 | 992   | 8  | 36 | 107 | 336 | 196 | 1,416 |
| 105,142 | 6 | 53 | 75 | 983   | 9  | 36 | 106 | 338 | 196 | 1,410 |
| 105,143 | 6 | 53 | 75 | 983   | 9  | 36 | 106 | 340 | 196 | 1,412 |
| 105,144 | 6 | 53 | 75 | 990   | 9  | 36 | 104 | 340 | 194 | 1,419 |
| 105,145 | 6 | 53 | 75 | 994   | 9  | 36 | 104 | 344 | 194 | 1,427 |
| 105,146 | 6 | 53 | 75 | 1,000 | 9  | 36 | 104 | 343 | 194 | 1,432 |
| 105,147 | 6 | 56 | 76 | 1,042 | 10 | 40 | 105 | 364 | 197 | 1,502 |
| 105,148 | 6 | 56 | 76 | 1,056 | 10 | 40 | 105 | 364 | 197 | 1,516 |
| 105,149 | 6 | 58 | 81 | 1,149 | 11 | 39 | 109 | 357 | 207 | 1,603 |
| 105,150 | 6 | 70 | 81 | 1,208 | 11 | 40 | 109 | 369 | 207 | 1,687 |
| 105,151 | 6 | 77 | 80 | 1,248 | 11 | 41 | 109 | 370 | 206 | 1,736 |
| 105,152 | 6 | 77 | 79 | 1,259 | 11 | 41 | 109 | 373 | 205 | 1,750 |
| 105,153 | 6 | 77 | 79 | 1,265 | 11 | 41 | 108 | 368 | 204 | 1,751 |

|         |   |     |    |       |    |     |     |       |     |       |
|---------|---|-----|----|-------|----|-----|-----|-------|-----|-------|
| 105,154 | 6 | 77  | 79 | 1,267 | 11 | 42  | 108 | 368   | 204 | 1,754 |
| 105,155 | 6 | 76  | 75 | 1,267 | 10 | 42  | 94  | 368   | 185 | 1,753 |
| 105,156 | 6 | 77  | 75 | 1,272 | 10 | 42  | 94  | 371   | 185 | 1,762 |
| 105,157 | 6 | 77  | 75 | 1,271 | 10 | 42  | 93  | 371   | 184 | 1,761 |
| 105,158 | 6 | 78  | 75 | 1,277 | 10 | 42  | 93  | 378   | 184 | 1,775 |
| 105,159 | 6 | 78  | 75 | 1,283 | 10 | 43  | 93  | 382   | 184 | 1,786 |
| 105,160 | 5 | 79  | 76 | 1,298 | 10 | 43  | 97  | 386   | 188 | 1,806 |
| 105,161 | 5 | 79  | 75 | 1,291 | 10 | 43  | 93  | 381   | 183 | 1,794 |
| 105,162 | 4 | 81  | 72 | 1,283 | 10 | 42  | 90  | 378   | 176 | 1,784 |
| 105,163 | 4 | 96  | 71 | 1,364 | 10 | 46  | 90  | 398   | 175 | 1,904 |
| 105,164 | 3 | 97  | 73 | 1,388 | 9  | 45  | 84  | 409   | 169 | 1,939 |
| 105,165 | 3 | 100 | 73 | 1,387 | 9  | 46  | 84  | 414   | 169 | 1,947 |
| 105,166 | 3 | 100 | 73 | 1,388 | 9  | 46  | 83  | 414   | 168 | 1,948 |
| 105,167 | 3 | 101 | 72 | 1,387 | 9  | 46  | 82  | 412   | 166 | 1,946 |
| 105,168 | 3 | 101 | 72 | 1,359 | 9  | 42  | 82  | 395   | 166 | 1,897 |
| 105,169 | 3 | 95  | 72 | 1,215 | 9  | 38  | 82  | 342   | 166 | 1,690 |
| 105,170 | 3 | 97  | 73 | 1,230 | 9  | 40  | 82  | 349   | 167 | 1,716 |
| 105,171 | 2 | 97  | 70 | 1,231 | 9  | 40  | 75  | 349   | 156 | 1,717 |
| 105,172 | 2 | 83  | 71 | 1,057 | 9  | 30  | 75  | 276   | 157 | 1,446 |
| 105,173 | 2 | 73  | 71 | 915   | 9  | 29  | 74  | 253   | 156 | 1,270 |
| 105,174 | 2 | 73  | 72 | 859   | 9  | 27  | 74  | 236   | 157 | 1,195 |
| 105,175 | 2 | 72  | 72 | 835   | 9  | 27  | 73  | 234   | 156 | 1,168 |
| 105,176 | 1 | 71  | 71 | 815   | 9  | 27  | 72  | 221   | 153 | 1,134 |
| 105,177 | 1 | 72  | 70 | 844   | 9  | 27  | 72  | 232   | 152 | 1,175 |
| 105,178 | 1 | 71  | 69 | 842   | 9  | 27  | 71  | 240   | 150 | 1,180 |
| 105,179 | 1 | 73  | 61 | 869   | 8  | 28  | 67  | 259   | 137 | 1,229 |
| 105,180 | 1 | 104 | 50 | 1,428 | 7  | 71  | 52  | 442   | 110 | 2,045 |
| 105,181 | 1 | 126 | 35 | 1,948 | 5  | 127 | 32  | 797   | 73  | 2,998 |
| 105,182 | 1 | 146 | 32 | 2,282 | 5  | 158 | 30  | 969   | 68  | 3,555 |
| 105,183 | 1 | 150 | 30 | 2,426 | 5  | 172 | 30  | 1,031 | 66  | 3,779 |
| 105,184 | 1 | 152 | 29 | 2,440 | 5  | 177 | 30  | 1,036 | 65  | 3,805 |
| 105,185 | 0 | 182 | 24 | 2,870 | 4  | 202 | 24  | 1,254 | 52  | 4,508 |
| 105,186 | 0 | 181 | 21 | 2,841 | 4  | 202 | 16  | 1,246 | 41  | 4,470 |
| 105,187 | 0 | 185 | 18 | 2,839 | 4  | 202 | 15  | 1,247 | 37  | 4,473 |
| 105,188 | 0 | 192 | 17 | 2,884 | 4  | 206 | 14  | 1,252 | 35  | 4,534 |
| 105,189 | 0 | 192 | 17 | 2,879 | 4  | 205 | 14  | 1,252 | 35  | 4,528 |
| 105,190 | 0 | 213 | 17 | 3,065 | 4  | 213 | 14  | 1,350 | 35  | 4,841 |
| 105,191 | 0 | 213 | 17 | 3,078 | 4  | 213 | 14  | 1,353 | 35  | 4,857 |
| 105,192 | 0 | 218 | 17 | 3,152 | 4  | 217 | 14  | 1,386 | 35  | 4,973 |
| 105,193 | 0 | 220 | 17 | 3,196 | 3  | 218 | 14  | 1,387 | 34  | 5,021 |
| 105,194 | 0 | 220 | 17 | 3,201 | 3  | 218 | 14  | 1,384 | 34  | 5,023 |

|         |    |     |    |       |   |     |    |       |     |       |
|---------|----|-----|----|-------|---|-----|----|-------|-----|-------|
| 105,195 | 0  | 221 | 18 | 3,219 | 3 | 218 | 14 | 1,396 | 35  | 5,054 |
| 105,196 | 0  | 221 | 17 | 3,211 | 2 | 219 | 13 | 1,389 | 32  | 5,040 |
| 105,197 | 0  | 221 | 16 | 3,203 | 0 | 219 | 11 | 1,388 | 27  | 5,031 |
| 105,198 | 0  | 219 | 14 | 3,167 | 0 | 216 | 11 | 1,371 | 25  | 4,973 |
| 105,199 | 0  | 219 | 12 | 3,145 | 0 | 216 | 10 | 1,365 | 22  | 4,945 |
| 105,200 | 0  | 216 | 12 | 3,035 | 0 | 214 | 10 | 1,358 | 22  | 4,823 |
| 105,201 | 0  | 198 | 12 | 2,900 | 0 | 210 | 9  | 1,333 | 21  | 4,641 |
| 105,202 | 0  | 198 | 12 | 2,900 | 0 | 210 | 9  | 1,333 | 21  | 4,641 |
| 105,203 | 0  | 198 | 13 | 2,872 | 0 | 209 | 9  | 1,327 | 22  | 4,606 |
| 105,204 | 0  | 198 | 13 | 2,874 | 0 | 209 | 9  | 1,329 | 22  | 4,610 |
| 105,205 | 0  | 198 | 12 | 2,877 | 0 | 209 | 9  | 1,329 | 21  | 4,613 |
| 105,206 | 0  | 198 | 12 | 2,878 | 0 | 209 | 9  | 1,329 | 21  | 4,614 |
| 105,207 | 1  | 198 | 13 | 2,873 | 0 | 209 | 9  | 1,326 | 23  | 4,606 |
| 105,208 | 1  | 198 | 13 | 2,874 | 0 | 209 | 9  | 1,326 | 23  | 4,607 |
| 105,209 | 1  | 197 | 13 | 2,870 | 0 | 209 | 5  | 1,319 | 19  | 4,595 |
| 105,210 | 1  | 198 | 11 | 2,867 | 0 | 208 | 4  | 1,315 | 16  | 4,588 |
| 105,211 | 1  | 197 | 11 | 2,850 | 0 | 208 | 4  | 1,312 | 16  | 4,567 |
| 105,212 | 1  | 197 | 10 | 2,848 | 0 | 208 | 3  | 1,313 | 14  | 4,566 |
| 105,213 | 1  | 195 | 11 | 2,859 | 0 | 208 | 3  | 1,311 | 15  | 4,573 |
| 105,214 | 1  | 180 | 12 | 2,782 | 0 | 204 | 2  | 1,291 | 15  | 4,457 |
| 105,215 | 3  | 179 | 16 | 2,767 | 1 | 204 | 2  | 1,283 | 22  | 4,433 |
| 105,216 | 3  | 174 | 19 | 2,761 | 1 | 203 | 2  | 1,275 | 25  | 4,413 |
| 105,217 | 3  | 174 | 19 | 2,760 | 1 | 203 | 1  | 1,276 | 24  | 4,413 |
| 105,218 | 3  | 173 | 21 | 2,758 | 1 | 203 | 3  | 1,276 | 28  | 4,410 |
| 105,219 | 3  | 173 | 21 | 2,759 | 1 | 203 | 3  | 1,275 | 28  | 4,410 |
| 105,220 | 3  | 172 | 21 | 2,760 | 1 | 202 | 3  | 1,276 | 28  | 4,410 |
| 105,221 | 3  | 170 | 20 | 2,754 | 1 | 200 | 3  | 1,270 | 27  | 4,394 |
| 105,222 | 3  | 170 | 20 | 2,756 | 1 | 200 | 3  | 1,270 | 27  | 4,396 |
| 105,223 | 3  | 168 | 25 | 2,742 | 2 | 200 | 7  | 1,269 | 37  | 4,379 |
| 105,224 | 3  | 168 | 36 | 2,745 | 3 | 201 | 11 | 1,269 | 53  | 4,383 |
| 105,225 | 4  | 169 | 43 | 2,747 | 3 | 201 | 16 | 1,271 | 66  | 4,388 |
| 105,226 | 4  | 169 | 48 | 2,759 | 3 | 201 | 17 | 1,275 | 72  | 4,404 |
| 105,227 | 4  | 168 | 49 | 2,744 | 3 | 201 | 18 | 1,269 | 74  | 4,382 |
| 105,228 | 5  | 134 | 50 | 2,088 | 3 | 154 | 20 | 1,035 | 78  | 3,411 |
| 105,229 | 5  | 134 | 52 | 2,088 | 3 | 154 | 22 | 1,035 | 82  | 3,411 |
| 105,230 | 5  | 111 | 53 | 1,566 | 4 | 99  | 25 | 680   | 87  | 2,456 |
| 105,231 | 7  | 111 | 61 | 1,567 | 4 | 99  | 27 | 677   | 99  | 2,454 |
| 105,232 | 10 | 111 | 77 | 1,564 | 7 | 98  | 45 | 677   | 139 | 2,450 |
| 105,233 | 10 | 91  | 77 | 1,227 | 8 | 67  | 46 | 505   | 141 | 1,890 |
| 105,234 | 10 | 86  | 78 | 1,072 | 8 | 52  | 46 | 442   | 142 | 1,652 |
| 105,235 | 10 | 46  | 78 | 558   | 8 | 20  | 46 | 202   | 142 | 826   |

|         |    |    |     |     |    |    |    |     |     |       |
|---------|----|----|-----|-----|----|----|----|-----|-----|-------|
| 105,236 | 10 | 46 | 78  | 558 | 8  | 20 | 46 | 203 | 142 | 827   |
| 105,237 | 10 | 38 | 81  | 476 | 8  | 16 | 46 | 192 | 145 | 722   |
| 105,238 | 10 | 38 | 81  | 481 | 8  | 16 | 46 | 192 | 145 | 727   |
| 105,239 | 10 | 38 | 81  | 487 | 8  | 16 | 46 | 195 | 145 | 736   |
| 105,240 | 10 | 38 | 81  | 487 | 8  | 16 | 46 | 194 | 145 | 735   |
| 105,241 | 10 | 14 | 82  | 303 | 8  | 8  | 46 | 95  | 146 | 420   |
| 105,242 | 10 | 14 | 82  | 295 | 8  | 8  | 46 | 104 | 146 | 421   |
| 105,243 | 10 | 9  | 82  | 224 | 8  | 5  | 46 | 72  | 146 | 310   |
| 105,244 | 10 | 7  | 84  | 183 | 8  | 4  | 46 | 75  | 148 | 269   |
| 105,245 | 10 | 7  | 86  | 173 | 8  | 4  | 46 | 77  | 150 | 261   |
| 105,246 | 10 | 6  | 93  | 181 | 8  | 4  | 48 | 71  | 159 | 262   |
| 105,247 | 10 | 6  | 95  | 181 | 8  | 4  | 49 | 74  | 162 | 265   |
| 105,248 | 10 | 6  | 95  | 189 | 8  | 4  | 49 | 79  | 162 | 278   |
| 105,249 | 11 | 6  | 95  | 192 | 8  | 4  | 49 | 78  | 163 | 280   |
| 105,250 | 11 | 6  | 95  | 192 | 8  | 4  | 49 | 79  | 163 | 281   |
| 105,251 | 11 | 6  | 95  | 203 | 8  | 4  | 49 | 84  | 163 | 297   |
| 105,252 | 11 | 7  | 95  | 260 | 8  | 5  | 49 | 119 | 163 | 391   |
| 105,253 | 11 | 8  | 96  | 264 | 8  | 7  | 49 | 132 | 164 | 411   |
| 105,254 | 11 | 14 | 102 | 305 | 8  | 11 | 50 | 166 | 171 | 496   |
| 105,255 | 11 | 17 | 106 | 311 | 9  | 11 | 55 | 171 | 181 | 510   |
| 105,256 | 11 | 17 | 106 | 313 | 9  | 11 | 55 | 173 | 181 | 514   |
| 105,257 | 13 | 20 | 113 | 331 | 9  | 11 | 60 | 179 | 195 | 541   |
| 105,258 | 12 | 20 | 112 | 356 | 9  | 12 | 60 | 196 | 193 | 584   |
| 105,259 | 12 | 22 | 112 | 373 | 9  | 12 | 60 | 212 | 193 | 619   |
| 105,260 | 12 | 22 | 112 | 392 | 9  | 13 | 60 | 225 | 193 | 652   |
| 105,261 | 13 | 21 | 117 | 419 | 9  | 13 | 64 | 238 | 203 | 691   |
| 105,262 | 14 | 21 | 133 | 483 | 10 | 15 | 75 | 335 | 232 | 854   |
| 105,263 | 14 | 21 | 153 | 499 | 10 | 15 | 79 | 346 | 256 | 881   |
| 105,264 | 15 | 24 | 158 | 506 | 10 | 15 | 79 | 355 | 262 | 900   |
| 105,265 | 15 | 25 | 157 | 506 | 10 | 15 | 79 | 382 | 261 | 928   |
| 105,266 | 13 | 25 | 150 | 498 | 9  | 15 | 79 | 381 | 251 | 919   |
| 105,267 | 15 | 25 | 152 | 491 | 9  | 15 | 85 | 379 | 261 | 910   |
| 105,268 | 15 | 25 | 153 | 491 | 9  | 15 | 86 | 380 | 263 | 911   |
| 105,269 | 15 | 26 | 162 | 493 | 9  | 15 | 85 | 382 | 271 | 916   |
| 105,270 | 15 | 26 | 162 | 505 | 9  | 15 | 85 | 387 | 271 | 933   |
| 105,271 | 15 | 26 | 169 | 561 | 9  | 15 | 88 | 395 | 281 | 997   |
| 105,272 | 16 | 26 | 182 | 564 | 9  | 16 | 96 | 399 | 303 | 1,005 |
| 105,273 | 17 | 26 | 184 | 577 | 9  | 16 | 97 | 399 | 307 | 1,018 |
| 105,274 | 17 | 26 | 180 | 583 | 8  | 17 | 93 | 401 | 298 | 1,027 |
| 105,275 | 17 | 26 | 169 | 574 | 7  | 16 | 90 | 399 | 283 | 1,015 |
| 105,276 | 17 | 26 | 168 | 560 | 7  | 16 | 88 | 395 | 280 | 997   |



|         |    |    |     |     |   |    |    |     |     |       |
|---------|----|----|-----|-----|---|----|----|-----|-----|-------|
| 105,277 | 17 | 26 | 163 | 564 | 7 | 16 | 88 | 399 | 275 | 1,005 |
| 105,278 | 17 | 26 | 162 | 584 | 7 | 16 | 87 | 401 | 273 | 1,027 |
| 105,279 | 16 | 26 | 164 | 591 | 7 | 16 | 86 | 403 | 273 | 1,036 |
| 105,280 | 16 | 26 | 162 | 593 | 7 | 16 | 86 | 403 | 271 | 1,038 |
| 105,281 | 16 | 26 | 162 | 590 | 6 | 16 | 82 | 404 | 266 | 1,036 |
| 105,282 | 14 | 26 | 155 | 590 | 6 | 16 | 80 | 405 | 255 | 1,037 |
| 105,283 | 11 | 26 | 139 | 590 | 3 | 16 | 63 | 405 | 216 | 1,037 |
| 105,284 | 11 | 26 | 139 | 590 | 2 | 16 | 62 | 405 | 214 | 1,037 |
| 105,285 | 11 | 26 | 138 | 591 | 2 | 16 | 63 | 404 | 214 | 1,037 |
| 105,286 | 11 | 27 | 138 | 591 | 2 | 16 | 63 | 413 | 214 | 1,047 |
| 105,287 | 11 | 27 | 138 | 593 | 2 | 16 | 63 | 411 | 214 | 1,047 |
| 105,288 | 11 | 27 | 140 | 588 | 6 | 16 | 64 | 408 | 221 | 1,039 |
| 105,289 | 11 | 27 | 141 | 594 | 6 | 16 | 64 | 411 | 222 | 1,048 |
| 105,290 | 11 | 27 | 142 | 612 | 6 | 16 | 64 | 417 | 223 | 1,072 |
| 105,291 | 11 | 27 | 142 | 625 | 6 | 17 | 64 | 436 | 223 | 1,105 |
| 105,292 | 11 | 27 | 141 | 619 | 6 | 17 | 64 | 436 | 222 | 1,099 |
| 105,293 | 12 | 28 | 145 | 616 | 6 | 17 | 67 | 428 | 230 | 1,089 |
| 105,294 | 12 | 30 | 146 | 636 | 6 | 16 | 69 | 455 | 233 | 1,137 |
| 105,295 | 12 | 29 | 145 | 650 | 6 | 16 | 69 | 454 | 232 | 1,149 |
| 105,296 | 12 | 30 | 143 | 656 | 6 | 16 | 69 | 455 | 230 | 1,157 |
| 105,297 | 12 | 30 | 137 | 645 | 6 | 17 | 67 | 452 | 222 | 1,144 |
| 105,298 | 12 | 30 | 135 | 651 | 6 | 16 | 66 | 449 | 219 | 1,146 |
| 105,299 | 12 | 29 | 145 | 642 | 6 | 15 | 69 | 443 | 232 | 1,129 |
| 105,300 | 11 | 30 | 145 | 648 | 6 | 15 | 69 | 445 | 231 | 1,138 |
| 105,301 | 11 | 30 | 147 | 715 | 6 | 21 | 69 | 477 | 233 | 1,243 |
| 105,302 | 11 | 30 | 155 | 743 | 6 | 24 | 73 | 492 | 245 | 1,289 |
| 105,303 | 12 | 29 | 164 | 816 | 6 | 23 | 76 | 481 | 258 | 1,349 |
| 105,304 | 16 | 28 | 193 | 827 | 9 | 21 | 92 | 471 | 310 | 1,347 |
| 105,305 | 16 | 24 | 186 | 817 | 9 | 17 | 92 | 442 | 303 | 1,300 |
| 105,306 | 16 | 21 | 183 | 818 | 8 | 17 | 87 | 440 | 294 | 1,296 |
| 105,307 | 15 | 21 | 180 | 817 | 8 | 17 | 82 | 439 | 285 | 1,294 |
| 105,308 | 14 | 18 | 181 | 774 | 8 | 16 | 82 | 417 | 285 | 1,225 |
| 105,309 | 14 | 18 | 182 | 781 | 8 | 16 | 82 | 423 | 286 | 1,238 |
| 105,310 | 14 | 17 | 179 | 771 | 8 | 16 | 81 | 409 | 282 | 1,213 |
| 105,311 | 13 | 17 | 177 | 754 | 8 | 15 | 78 | 399 | 276 | 1,185 |
| 105,312 | 13 | 18 | 171 | 728 | 8 | 15 | 77 | 389 | 269 | 1,150 |
| 105,313 | 12 | 18 | 161 | 668 | 7 | 13 | 68 | 291 | 248 | 990   |
| 105,314 | 12 | 18 | 142 | 653 | 7 | 13 | 64 | 279 | 225 | 963   |
| 105,315 | 11 | 15 | 136 | 630 | 7 | 13 | 64 | 269 | 218 | 927   |
| 105,316 | 10 | 14 | 135 | 629 | 7 | 13 | 63 | 243 | 215 | 899   |
| 105,317 | 9  | 15 | 131 | 635 | 7 | 13 | 58 | 245 | 205 | 908   |

|         |    |    |     |       |   |    |    |     |     |       |
|---------|----|----|-----|-------|---|----|----|-----|-----|-------|
| 105,318 | 9  | 15 | 131 | 666   | 7 | 18 | 58 | 280 | 205 | 979   |
| 105,319 | 9  | 16 | 133 | 695   | 7 | 19 | 57 | 290 | 206 | 1,020 |
| 105,320 | 9  | 18 | 122 | 693   | 7 | 19 | 56 | 294 | 194 | 1,024 |
| 105,321 | 9  | 18 | 117 | 704   | 7 | 19 | 55 | 292 | 188 | 1,033 |
| 105,322 | 9  | 21 | 115 | 696   | 7 | 22 | 53 | 315 | 184 | 1,054 |
| 105,323 | 8  | 21 | 102 | 687   | 7 | 22 | 45 | 312 | 162 | 1,042 |
| 105,324 | 7  | 26 | 99  | 748   | 7 | 24 | 44 | 346 | 157 | 1,144 |
| 105,325 | 7  | 28 | 98  | 762   | 7 | 23 | 44 | 346 | 156 | 1,159 |
| 105,326 | 7  | 31 | 97  | 778   | 7 | 26 | 43 | 355 | 154 | 1,190 |
| 105,327 | 6  | 36 | 90  | 825   | 7 | 28 | 40 | 380 | 143 | 1,269 |
| 105,328 | 6  | 36 | 90  | 817   | 7 | 28 | 39 | 385 | 142 | 1,266 |
| 105,329 | 6  | 37 | 90  | 842   | 7 | 28 | 40 | 394 | 143 | 1,301 |
| 105,330 | 6  | 39 | 87  | 840   | 7 | 28 | 39 | 394 | 139 | 1,301 |
| 105,331 | 6  | 39 | 87  | 851   | 7 | 28 | 37 | 397 | 137 | 1,315 |
| 105,332 | 6  | 39 | 86  | 861   | 7 | 28 | 37 | 399 | 136 | 1,327 |
| 105,333 | 6  | 39 | 85  | 872   | 7 | 28 | 37 | 400 | 135 | 1,339 |
| 105,334 | 6  | 39 | 85  | 872   | 7 | 29 | 37 | 400 | 135 | 1,340 |
| 105,335 | 6  | 39 | 85  | 874   | 8 | 29 | 37 | 402 | 136 | 1,344 |
| 105,336 | 6  | 39 | 85  | 880   | 8 | 29 | 36 | 402 | 135 | 1,350 |
| 105,337 | 6  | 39 | 84  | 893   | 7 | 30 | 36 | 395 | 133 | 1,357 |
| 105,338 | 6  | 40 | 83  | 913   | 7 | 31 | 37 | 399 | 133 | 1,383 |
| 105,339 | 6  | 40 | 80  | 914   | 4 | 31 | 36 | 400 | 126 | 1,385 |
| 105,340 | 6  | 40 | 80  | 871   | 4 | 30 | 36 | 371 | 126 | 1,312 |
| 105,341 | 6  | 40 | 79  | 880   | 4 | 30 | 37 | 371 | 126 | 1,321 |
| 105,342 | 6  | 40 | 83  | 883   | 4 | 30 | 34 | 374 | 127 | 1,327 |
| 105,343 | 6  | 40 | 85  | 889   | 4 | 30 | 37 | 371 | 132 | 1,330 |
| 105,344 | 6  | 41 | 84  | 896   | 4 | 30 | 37 | 380 | 131 | 1,347 |
| 105,345 | 6  | 39 | 82  | 878   | 4 | 30 | 35 | 351 | 127 | 1,298 |
| 105,346 | 7  | 39 | 87  | 866   | 4 | 30 | 36 | 345 | 134 | 1,280 |
| 105,347 | 7  | 38 | 92  | 882   | 5 | 30 | 43 | 351 | 147 | 1,301 |
| 105,348 | 7  | 38 | 91  | 872   | 5 | 30 | 43 | 351 | 146 | 1,291 |
| 105,349 | 7  | 38 | 86  | 880   | 5 | 30 | 47 | 356 | 145 | 1,304 |
| 105,350 | 15 | 38 | 88  | 879   | 7 | 30 | 58 | 355 | 168 | 1,302 |
| 105,351 | 15 | 37 | 89  | 774   | 7 | 21 | 58 | 307 | 169 | 1,139 |
| 105,352 | 15 | 37 | 88  | 791   | 7 | 21 | 61 | 314 | 171 | 1,163 |
| 105,353 | 15 | 42 | 80  | 863   | 7 | 24 | 57 | 357 | 159 | 1,286 |
| 105,354 | 14 | 47 | 73  | 1,033 | 8 | 28 | 58 | 426 | 153 | 1,534 |
| 105,355 | 10 | 47 | 44  | 1,045 | 5 | 28 | 42 | 437 | 101 | 1,557 |
| 105,356 | 10 | 46 | 44  | 1,040 | 5 | 28 | 41 | 442 | 100 | 1,556 |
| 105,357 | 10 | 46 | 44  | 1,031 | 5 | 28 | 41 | 437 | 100 | 1,542 |
| 105,358 | 10 | 46 | 39  | 1,031 | 5 | 28 | 41 | 429 | 95  | 1,534 |

|         |    |    |     |       |    |    |     |     |     |       |
|---------|----|----|-----|-------|----|----|-----|-----|-----|-------|
| 105,359 | 10 | 49 | 39  | 1,046 | 5  | 30 | 42  | 430 | 96  | 1,555 |
| 105,360 | 10 | 49 | 38  | 1,047 | 5  | 30 | 42  | 430 | 95  | 1,556 |
| 105,361 | 10 | 48 | 41  | 1,041 | 5  | 30 | 43  | 429 | 99  | 1,548 |
| 105,362 | 10 | 48 | 41  | 1,035 | 5  | 30 | 44  | 427 | 100 | 1,540 |
| 105,363 | 10 | 47 | 41  | 1,030 | 5  | 30 | 43  | 424 | 99  | 1,531 |
| 105,364 | 10 | 50 | 43  | 1,063 | 6  | 31 | 46  | 432 | 105 | 1,576 |
| 105,365 | 10 | 50 | 42  | 1,069 | 6  | 32 | 46  | 441 | 104 | 1,592 |
| 105,366 | 10 | 50 | 42  | 1,087 | 6  | 32 | 46  | 457 | 104 | 1,626 |
| 105,367 | 10 | 51 | 45  | 1,096 | 6  | 32 | 47  | 459 | 108 | 1,638 |
| 105,368 | 10 | 51 | 45  | 1,100 | 6  | 32 | 47  | 455 | 108 | 1,638 |
| 105,369 | 11 | 59 | 47  | 1,147 | 6  | 31 | 50  | 462 | 114 | 1,699 |
| 105,370 | 11 | 59 | 44  | 1,121 | 6  | 30 | 50  | 451 | 111 | 1,661 |
| 105,371 | 11 | 56 | 44  | 1,119 | 6  | 30 | 50  | 444 | 111 | 1,649 |
| 105,372 | 11 | 52 | 46  | 1,050 | 6  | 26 | 50  | 408 | 113 | 1,536 |
| 105,373 | 11 | 53 | 46  | 1,093 | 6  | 27 | 50  | 416 | 113 | 1,589 |
| 105,374 | 11 | 64 | 46  | 1,139 | 6  | 28 | 50  | 456 | 113 | 1,687 |
| 105,375 | 11 | 60 | 46  | 1,111 | 6  | 26 | 50  | 441 | 113 | 1,638 |
| 105,376 | 11 | 68 | 47  | 1,151 | 6  | 29 | 51  | 487 | 115 | 1,735 |
| 105,377 | 11 | 67 | 49  | 1,178 | 6  | 26 | 53  | 493 | 119 | 1,764 |
| 105,378 | 11 | 65 | 49  | 1,218 | 6  | 26 | 53  | 485 | 119 | 1,794 |
| 105,379 | 11 | 65 | 49  | 1,241 | 6  | 27 | 53  | 483 | 119 | 1,816 |
| 105,380 | 12 | 72 | 50  | 1,298 | 6  | 31 | 53  | 518 | 121 | 1,919 |
| 105,381 | 12 | 70 | 50  | 1,304 | 6  | 32 | 53  | 519 | 121 | 1,925 |
| 105,382 | 12 | 72 | 55  | 1,334 | 7  | 34 | 54  | 527 | 128 | 1,967 |
| 105,383 | 12 | 75 | 55  | 1,401 | 7  | 37 | 54  | 552 | 128 | 2,065 |
| 105,384 | 12 | 76 | 55  | 1,403 | 7  | 37 | 53  | 556 | 127 | 2,072 |
| 105,385 | 16 | 78 | 110 | 1,411 | 7  | 36 | 63  | 557 | 196 | 2,082 |
| 105,386 | 16 | 78 | 160 | 1,436 | 7  | 36 | 71  | 559 | 254 | 2,109 |
| 105,387 | 16 | 76 | 165 | 1,402 | 7  | 34 | 75  | 558 | 263 | 2,070 |
| 105,388 | 16 | 78 | 175 | 1,445 | 7  | 35 | 78  | 569 | 276 | 2,127 |
| 105,389 | 16 | 81 | 208 | 1,482 | 8  | 36 | 89  | 589 | 321 | 2,188 |
| 105,390 | 20 | 82 | 275 | 1,485 | 15 | 37 | 119 | 592 | 429 | 2,196 |
| 105,391 | 20 | 83 | 277 | 1,490 | 15 | 37 | 119 | 599 | 431 | 2,209 |
| 105,392 | 20 | 83 | 277 | 1,493 | 15 | 37 | 119 | 600 | 431 | 2,213 |
| 105,393 | 19 | 83 | 272 | 1,499 | 15 | 37 | 119 | 598 | 425 | 2,217 |
| 105,394 | 19 | 83 | 269 | 1,504 | 15 | 37 | 117 | 599 | 420 | 2,223 |
| 105,395 | 19 | 82 | 268 | 1,508 | 15 | 37 | 117 | 591 | 419 | 2,218 |
| 105,396 | 19 | 82 | 266 | 1,513 | 15 | 37 | 117 | 605 | 417 | 2,237 |
| 105,397 | 18 | 87 | 266 | 1,537 | 15 | 38 | 117 | 627 | 416 | 2,289 |
| 105,398 | 18 | 99 | 261 | 1,626 | 14 | 44 | 110 | 733 | 403 | 2,502 |
| 105,399 | 18 | 99 | 260 | 1,644 | 14 | 45 | 103 | 743 | 395 | 2,531 |

|         |    |     |     |       |    |    |     |       |     |       |
|---------|----|-----|-----|-------|----|----|-----|-------|-----|-------|
| 105,400 | 11 | 101 | 254 | 1,712 | 12 | 47 | 94  | 764   | 371 | 2,624 |
| 105,401 | 10 | 108 | 254 | 1,770 | 12 | 55 | 93  | 855   | 369 | 2,788 |
| 105,402 | 10 | 110 | 253 | 1,777 | 12 | 56 | 93  | 868   | 368 | 2,811 |
| 105,403 | 10 | 123 | 252 | 1,865 | 12 | 57 | 90  | 986   | 364 | 3,031 |
| 105,404 | 10 | 120 | 252 | 1,864 | 12 | 55 | 90  | 961   | 364 | 3,000 |
| 105,405 | 11 | 119 | 251 | 1,593 | 11 | 51 | 88  | 894   | 361 | 2,657 |
| 105,406 | 11 | 120 | 250 | 1,585 | 11 | 51 | 88  | 893   | 360 | 2,649 |
| 105,407 | 11 | 124 | 252 | 1,603 | 11 | 53 | 89  | 910   | 363 | 2,690 |
| 105,408 | 11 | 124 | 251 | 1,612 | 11 | 53 | 89  | 913   | 362 | 2,702 |
| 105,409 | 11 | 140 | 251 | 1,764 | 11 | 59 | 89  | 1,068 | 362 | 3,031 |
| 105,410 | 11 | 137 | 251 | 1,769 | 11 | 57 | 88  | 1,076 | 361 | 3,039 |
| 105,411 | 12 | 139 | 251 | 1,843 | 11 | 59 | 88  | 1,108 | 362 | 3,149 |
| 105,412 | 12 | 139 | 253 | 1,854 | 11 | 59 | 87  | 1,109 | 363 | 3,161 |
| 105,413 | 12 | 139 | 253 | 1,851 | 11 | 59 | 87  | 1,108 | 363 | 3,157 |
| 105,414 | 12 | 140 | 256 | 1,859 | 11 | 59 | 87  | 1,115 | 366 | 3,173 |
| 105,415 | 12 | 139 | 254 | 1,832 | 10 | 57 | 84  | 1,092 | 360 | 3,120 |
| 105,416 | 12 | 139 | 255 | 1,838 | 10 | 57 | 84  | 1,095 | 361 | 3,129 |
| 105,417 | 12 | 139 | 255 | 1,839 | 10 | 57 | 84  | 1,095 | 361 | 3,130 |
| 105,418 | 12 | 130 | 258 | 1,731 | 10 | 53 | 86  | 1,052 | 366 | 2,966 |
| 105,419 | 12 | 131 | 273 | 1,744 | 10 | 53 | 91  | 1,057 | 386 | 2,985 |
| 105,420 | 11 | 133 | 273 | 1,751 | 10 | 53 | 98  | 1,072 | 392 | 3,009 |
| 105,421 | 11 | 133 | 273 | 1,759 | 10 | 53 | 98  | 1,075 | 392 | 3,020 |
| 105,422 | 11 | 135 | 276 | 1,770 | 10 | 53 | 100 | 1,085 | 397 | 3,043 |
| 105,423 | 11 | 123 | 274 | 1,683 | 10 | 51 | 100 | 1,043 | 395 | 2,900 |
| 105,424 | 11 | 126 | 274 | 1,737 | 10 | 53 | 101 | 1,063 | 396 | 2,979 |
| 105,425 | 12 | 126 | 273 | 1,750 | 10 | 53 | 100 | 1,071 | 395 | 3,000 |
| 105,426 | 12 | 125 | 273 | 1,704 | 10 | 53 | 100 | 1,053 | 395 | 2,935 |
| 105,427 | 12 | 115 | 271 | 1,642 | 10 | 50 | 98  | 1,005 | 391 | 2,812 |
| 105,428 | 12 | 109 | 274 | 1,514 | 10 | 48 | 99  | 969   | 395 | 2,640 |
| 105,429 | 12 | 109 | 287 | 1,477 | 11 | 47 | 100 | 968   | 410 | 2,601 |
| 105,430 | 12 | 109 | 287 | 1,478 | 11 | 47 | 100 | 969   | 410 | 2,603 |
| 105,431 | 11 | 101 | 286 | 1,407 | 11 | 43 | 102 | 933   | 410 | 2,484 |
| 105,432 | 11 | 97  | 297 | 1,290 | 11 | 37 | 113 | 900   | 432 | 2,324 |
| 105,433 | 11 | 97  | 307 | 1,548 | 11 | 40 | 119 | 950   | 448 | 2,635 |
| 105,434 | 11 | 98  | 304 | 1,702 | 11 | 47 | 122 | 1,090 | 448 | 2,937 |
| 105,435 | 11 | 99  | 295 | 2,400 | 11 | 55 | 117 | 1,192 | 434 | 3,746 |
| 105,436 | 7  | 108 | 254 | 2,664 | 10 | 69 | 112 | 1,431 | 383 | 4,272 |
| 105,437 | 7  | 114 | 204 | 2,906 | 10 | 72 | 104 | 1,475 | 325 | 4,567 |
| 105,438 | 7  | 117 | 199 | 2,950 | 10 | 74 | 100 | 1,495 | 316 | 4,636 |
| 105,439 | 7  | 117 | 190 | 2,943 | 11 | 74 | 97  | 1,492 | 305 | 4,626 |
| 105,440 | 7  | 129 | 157 | 2,995 | 10 | 76 | 85  | 1,522 | 259 | 4,722 |

|         |   |     |    |       |   |    |    |       |     |       |
|---------|---|-----|----|-------|---|----|----|-------|-----|-------|
| 105,441 | 3 | 128 | 89 | 2,990 | 3 | 75 | 53 | 1,518 | 148 | 4,711 |
| 105,442 | 3 | 127 | 86 | 2,977 | 3 | 75 | 53 | 1,513 | 145 | 4,692 |
| 105,443 | 3 | 128 | 85 | 2,988 | 3 | 76 | 53 | 1,521 | 144 | 4,713 |
| 105,444 | 3 | 128 | 85 | 2,981 | 3 | 76 | 53 | 1,520 | 144 | 4,705 |
| 105,445 | 3 | 128 | 86 | 2,996 | 3 | 79 | 53 | 1,550 | 145 | 4,753 |
| 105,446 | 3 | 128 | 86 | 2,990 | 3 | 79 | 52 | 1,549 | 144 | 4,746 |
| 105,447 | 3 | 128 | 84 | 2,984 | 3 | 80 | 52 | 1,548 | 142 | 4,740 |
| 105,448 | 3 | 122 | 84 | 2,958 | 3 | 80 | 52 | 1,529 | 142 | 4,689 |
| 105,449 | 3 | 110 | 84 | 2,753 | 3 | 71 | 54 | 1,404 | 144 | 4,338 |
| 105,450 | 3 | 118 | 84 | 2,903 | 3 | 74 | 54 | 1,478 | 144 | 4,573 |
| 105,451 | 3 | 118 | 84 | 2,912 | 3 | 77 | 54 | 1,489 | 144 | 4,596 |
| 105,452 | 3 | 112 | 85 | 2,859 | 3 | 69 | 54 | 1,402 | 145 | 4,442 |
| 105,453 | 3 | 111 | 85 | 2,848 | 3 | 68 | 54 | 1,388 | 145 | 4,415 |
| 105,454 | 3 | 98  | 85 | 2,743 | 3 | 66 | 52 | 1,265 | 143 | 4,172 |
| 105,455 | 3 | 91  | 84 | 2,645 | 3 | 65 | 52 | 1,226 | 142 | 4,027 |
| 105,456 | 3 | 92  | 84 | 2,648 | 3 | 65 | 51 | 1,228 | 141 | 4,033 |
| 105,457 | 3 | 93  | 83 | 2,673 | 3 | 68 | 51 | 1,289 | 140 | 4,123 |
| 105,458 | 3 | 88  | 83 | 2,632 | 3 | 66 | 51 | 1,265 | 140 | 4,051 |
| 105,459 | 3 | 88  | 83 | 2,638 | 3 | 66 | 51 | 1,281 | 140 | 4,073 |
| 105,460 | 3 | 72  | 83 | 2,479 | 3 | 61 | 52 | 1,129 | 141 | 3,741 |
| 105,461 | 3 | 72  | 84 | 2,460 | 3 | 61 | 52 | 1,119 | 142 | 3,712 |
| 105,462 | 2 | 70  | 83 | 2,372 | 3 | 59 | 51 | 1,087 | 139 | 3,588 |
| 105,463 | 2 | 70  | 81 | 2,371 | 3 | 59 | 51 | 1,085 | 137 | 3,585 |
| 105,464 | 2 | 70  | 81 | 2,372 | 3 | 59 | 51 | 1,101 | 137 | 3,602 |
| 105,465 | 2 | 69  | 78 | 2,365 | 3 | 59 | 51 | 1,095 | 134 | 3,588 |
| 105,466 | 2 | 67  | 78 | 2,342 | 3 | 59 | 51 | 1,088 | 134 | 3,556 |
| 105,467 | 2 | 68  | 78 | 2,336 | 3 | 59 | 51 | 1,088 | 134 | 3,551 |
| 105,468 | 2 | 68  | 78 | 2,336 | 3 | 59 | 51 | 1,088 | 134 | 3,551 |
| 105,469 | 2 | 66  | 79 | 2,329 | 3 | 59 | 48 | 1,084 | 132 | 3,538 |
| 105,470 | 2 | 65  | 64 | 2,316 | 3 | 59 | 41 | 1,079 | 110 | 3,519 |
| 105,471 | 2 | 63  | 72 | 2,301 | 3 | 59 | 32 | 1,061 | 109 | 3,484 |
| 105,472 | 2 | 63  | 75 | 2,301 | 3 | 59 | 30 | 1,061 | 110 | 3,484 |
| 105,473 | 2 | 62  | 77 | 2,294 | 3 | 59 | 31 | 1,051 | 113 | 3,466 |
| 105,474 | 2 | 62  | 77 | 2,293 | 3 | 59 | 31 | 1,048 | 113 | 3,462 |
| 105,475 | 3 | 59  | 81 | 2,226 | 3 | 57 | 33 | 1,020 | 120 | 3,362 |
| 105,476 | 5 | 59  | 90 | 2,223 | 3 | 57 | 41 | 1,020 | 139 | 3,359 |
| 105,477 | 5 | 59  | 91 | 2,212 | 3 | 57 | 41 | 1,019 | 140 | 3,347 |
| 105,478 | 5 | 59  | 91 | 2,213 | 3 | 57 | 40 | 1,019 | 139 | 3,348 |
| 105,479 | 5 | 59  | 92 | 2,214 | 3 | 57 | 41 | 1,019 | 141 | 3,349 |
| 105,480 | 5 | 59  | 83 | 2,216 | 3 | 57 | 40 | 1,018 | 131 | 3,350 |
| 105,481 | 5 | 59  | 83 | 2,229 | 3 | 57 | 39 | 1,021 | 130 | 3,366 |

|         |    |    |     |       |   |    |     |       |     |       |
|---------|----|----|-----|-------|---|----|-----|-------|-----|-------|
| 105,482 | 5  | 60 | 86  | 2,226 | 3 | 58 | 39  | 1,020 | 133 | 3,364 |
| 105,483 | 6  | 59 | 73  | 1,952 | 3 | 55 | 34  | 962   | 116 | 3,028 |
| 105,484 | 6  | 59 | 62  | 1,951 | 3 | 55 | 32  | 965   | 103 | 3,030 |
| 105,485 | 6  | 58 | 65  | 1,797 | 3 | 48 | 31  | 826   | 105 | 2,729 |
| 105,486 | 11 | 56 | 111 | 1,088 | 3 | 40 | 48  | 718   | 173 | 1,902 |
| 105,487 | 11 | 47 | 116 | 835   | 3 | 26 | 49  | 492   | 179 | 1,400 |
| 105,488 | 11 | 41 | 116 | 570   | 3 | 23 | 49  | 447   | 179 | 1,081 |
| 105,489 | 11 | 38 | 121 | 525   | 3 | 21 | 52  | 421   | 187 | 1,005 |
| 105,490 | 18 | 36 | 202 | 491   | 4 | 20 | 100 | 416   | 324 | 963   |
| 105,491 | 18 | 21 | 211 | 410   | 5 | 17 | 107 | 368   | 341 | 816   |
| 105,492 | 18 | 21 | 214 | 435   | 5 | 17 | 117 | 379   | 354 | 852   |
| 105,493 | 18 | 21 | 214 | 430   | 5 | 17 | 117 | 373   | 354 | 841   |
| 105,494 | 18 | 21 | 215 | 422   | 5 | 18 | 117 | 368   | 355 | 829   |
| 105,495 | 18 | 22 | 215 | 429   | 5 | 18 | 119 | 377   | 357 | 846   |
| 105,496 | 18 | 22 | 220 | 396   | 6 | 14 | 131 | 332   | 375 | 764   |
| 105,497 | 18 | 26 | 223 | 425   | 6 | 16 | 131 | 344   | 378 | 811   |
| 105,498 | 19 | 26 | 223 | 436   | 6 | 16 | 132 | 347   | 380 | 825   |
| 105,499 | 19 | 26 | 223 | 435   | 6 | 15 | 131 | 345   | 379 | 821   |
| 105,500 | 19 | 46 | 223 | 527   | 6 | 19 | 132 | 440   | 380 | 1,032 |
| 105,501 | 19 | 38 | 223 | 385   | 6 | 16 | 132 | 368   | 380 | 807   |
| 105,502 | 19 | 38 | 226 | 379   | 6 | 13 | 136 | 359   | 387 | 789   |
| 105,503 | 19 | 39 | 227 | 386   | 6 | 13 | 136 | 357   | 388 | 795   |
| 105,504 | 18 | 38 | 226 | 383   | 6 | 13 | 136 | 352   | 386 | 786   |
| 105,505 | 18 | 39 | 229 | 389   | 6 | 13 | 136 | 355   | 389 | 796   |
| 105,506 | 18 | 38 | 229 | 387   | 6 | 13 | 136 | 353   | 389 | 791   |
| 105,507 | 18 | 38 | 228 | 389   | 6 | 13 | 136 | 353   | 388 | 793   |
| 105,508 | 18 | 36 | 228 | 345   | 6 | 10 | 136 | 281   | 388 | 672   |
| 105,509 | 18 | 36 | 228 | 322   | 6 | 10 | 136 | 257   | 388 | 625   |
| 105,510 | 18 | 36 | 235 | 326   | 6 | 10 | 139 | 265   | 398 | 637   |
| 105,511 | 18 | 36 | 238 | 329   | 6 | 10 | 140 | 275   | 402 | 650   |
| 105,512 | 18 | 36 | 248 | 331   | 6 | 10 | 147 | 279   | 419 | 656   |
| 105,513 | 18 | 37 | 252 | 336   | 6 | 10 | 154 | 279   | 430 | 662   |
| 105,514 | 18 | 37 | 261 | 340   | 6 | 10 | 157 | 282   | 442 | 669   |
| 105,515 | 18 | 38 | 264 | 350   | 6 | 11 | 159 | 289   | 447 | 688   |
| 105,516 | 18 | 40 | 270 | 362   | 6 | 11 | 166 | 303   | 460 | 716   |
| 105,517 | 18 | 40 | 271 | 359   | 6 | 11 | 166 | 305   | 461 | 715   |
| 105,518 | 18 | 39 | 270 | 361   | 6 | 11 | 166 | 304   | 460 | 715   |
| 105,519 | 18 | 39 | 267 | 362   | 6 | 11 | 166 | 306   | 457 | 718   |
| 105,520 | 18 | 39 | 265 | 365   | 6 | 11 | 166 | 308   | 455 | 723   |
| 105,521 | 18 | 39 | 258 | 365   | 6 | 11 | 166 | 310   | 448 | 725   |
| 105,522 | 19 | 39 | 257 | 378   | 6 | 11 | 166 | 326   | 448 | 754   |

|         |    |    |     |     |   |    |     |     |     |       |
|---------|----|----|-----|-----|---|----|-----|-----|-----|-------|
| 105,523 | 19 | 39 | 252 | 383 | 6 | 11 | 166 | 327 | 443 | 760   |
| 105,524 | 19 | 40 | 259 | 419 | 6 | 14 | 168 | 402 | 452 | 875   |
| 105,525 | 20 | 40 | 268 | 464 | 6 | 15 | 173 | 429 | 467 | 948   |
| 105,526 | 20 | 42 | 272 | 477 | 6 | 17 | 173 | 461 | 471 | 997   |
| 105,527 | 17 | 43 | 265 | 494 | 6 | 19 | 166 | 480 | 454 | 1,036 |
| 105,528 | 17 | 50 | 331 | 633 | 6 | 23 | 180 | 625 | 534 | 1,331 |
| 105,529 | 17 | 58 | 347 | 713 | 7 | 24 | 194 | 707 | 565 | 1,502 |
| 105,530 | 17 | 65 | 344 | 787 | 7 | 27 | 193 | 770 | 561 | 1,649 |
| 105,531 | 17 | 65 | 340 | 792 | 6 | 27 | 194 | 770 | 557 | 1,654 |
| 105,532 | 18 | 65 | 352 | 791 | 7 | 27 | 205 | 786 | 582 | 1,669 |
| 105,533 | 18 | 64 | 353 | 787 | 7 | 26 | 203 | 781 | 581 | 1,658 |
| 105,534 | 17 | 64 | 350 | 788 | 6 | 26 | 196 | 782 | 569 | 1,660 |
| 105,535 | 17 | 64 | 353 | 809 | 6 | 26 | 194 | 792 | 570 | 1,691 |
| 105,536 | 17 | 69 | 349 | 877 | 6 | 27 | 193 | 880 | 565 | 1,853 |
| 105,537 | 12 | 69 | 303 | 891 | 6 | 29 | 176 | 882 | 497 | 1,871 |
| 105,538 | 12 | 69 | 298 | 893 | 6 | 29 | 180 | 874 | 496 | 1,865 |
| 105,539 | 12 | 69 | 293 | 897 | 6 | 29 | 177 | 877 | 488 | 1,872 |
| 105,540 | 10 | 71 | 242 | 902 | 4 | 29 | 153 | 885 | 409 | 1,887 |
| 105,541 | 5  | 72 | 212 | 871 | 4 | 29 | 129 | 873 | 350 | 1,845 |
| 105,542 | 5  | 72 | 203 | 880 | 3 | 29 | 122 | 881 | 333 | 1,862 |
| 105,543 | 5  | 73 | 200 | 881 | 3 | 29 | 112 | 885 | 320 | 1,868 |
| 105,544 | 5  | 73 | 202 | 884 | 3 | 29 | 112 | 891 | 322 | 1,877 |
| 105,545 | 5  | 73 | 223 | 881 | 3 | 27 | 127 | 883 | 358 | 1,864 |
| 105,546 | 5  | 75 | 224 | 887 | 3 | 27 | 127 | 886 | 359 | 1,875 |
| 105,547 | 6  | 75 | 219 | 891 | 2 | 27 | 118 | 893 | 345 | 1,886 |
| 105,548 | 6  | 72 | 216 | 870 | 2 | 25 | 118 | 896 | 342 | 1,863 |
| 105,549 | 5  | 74 | 215 | 862 | 2 | 25 | 116 | 893 | 338 | 1,854 |
| 105,550 | 5  | 85 | 215 | 905 | 2 | 30 | 116 | 969 | 338 | 1,989 |
| 105,551 | 5  | 64 | 214 | 803 | 2 | 25 | 116 | 851 | 337 | 1,743 |
| 105,552 | 5  | 68 | 215 | 818 | 2 | 28 | 113 | 867 | 335 | 1,781 |
| 105,553 | 5  | 68 | 214 | 818 | 2 | 28 | 112 | 863 | 333 | 1,777 |
| 105,554 | 5  | 67 | 213 | 798 | 2 | 28 | 113 | 857 | 333 | 1,750 |
| 105,555 | 5  | 67 | 212 | 799 | 2 | 28 | 113 | 859 | 332 | 1,753 |
| 105,556 | 5  | 66 | 210 | 795 | 2 | 28 | 113 | 856 | 330 | 1,745 |
| 105,557 | 5  | 66 | 210 | 799 | 2 | 29 | 113 | 867 | 330 | 1,761 |
| 105,558 | 5  | 66 | 210 | 797 | 2 | 29 | 113 | 867 | 330 | 1,759 |
| 105,559 | 5  | 66 | 223 | 800 | 2 | 30 | 115 | 873 | 345 | 1,769 |
| 105,560 | 6  | 67 | 258 | 803 | 2 | 30 | 132 | 889 | 398 | 1,789 |
| 105,561 | 6  | 68 | 254 | 812 | 2 | 30 | 132 | 889 | 394 | 1,799 |
| 105,562 | 6  | 68 | 253 | 813 | 2 | 30 | 132 | 883 | 393 | 1,794 |
| 105,563 | 6  | 69 | 242 | 822 | 2 | 30 | 125 | 885 | 375 | 1,806 |

|         |    |    |     |     |    |    |     |     |     |       |
|---------|----|----|-----|-----|----|----|-----|-----|-----|-------|
| 105,564 | 6  | 68 | 240 | 818 | 2  | 30 | 118 | 885 | 366 | 1,801 |
| 105,565 | 6  | 67 | 241 | 803 | 2  | 29 | 120 | 860 | 369 | 1,759 |
| 105,566 | 6  | 67 | 242 | 803 | 2  | 29 | 119 | 859 | 369 | 1,758 |
| 105,567 | 6  | 65 | 236 | 789 | 3  | 29 | 113 | 844 | 358 | 1,727 |
| 105,568 | 6  | 65 | 235 | 786 | 3  | 29 | 113 | 838 | 357 | 1,718 |
| 105,569 | 6  | 65 | 235 | 784 | 3  | 29 | 113 | 836 | 357 | 1,714 |
| 105,570 | 6  | 65 | 233 | 781 | 3  | 29 | 115 | 834 | 357 | 1,709 |
| 105,571 | 5  | 65 | 231 | 778 | 3  | 29 | 114 | 832 | 353 | 1,704 |
| 105,572 | 5  | 65 | 226 | 765 | 3  | 29 | 116 | 813 | 350 | 1,672 |
| 105,573 | 5  | 65 | 227 | 759 | 3  | 29 | 118 | 811 | 353 | 1,664 |
| 105,574 | 5  | 63 | 224 | 722 | 3  | 26 | 118 | 739 | 350 | 1,550 |
| 105,575 | 5  | 63 | 228 | 725 | 3  | 26 | 120 | 739 | 356 | 1,553 |
| 105,576 | 4  | 63 | 226 | 679 | 3  | 25 | 130 | 709 | 363 | 1,476 |
| 105,577 | 3  | 61 | 227 | 669 | 3  | 23 | 132 | 678 | 365 | 1,431 |
| 105,578 | 4  | 60 | 238 | 652 | 5  | 21 | 136 | 659 | 383 | 1,392 |
| 105,579 | 4  | 45 | 196 | 433 | 5  | 16 | 130 | 436 | 335 | 930   |
| 105,580 | 4  | 45 | 181 | 435 | 4  | 16 | 120 | 437 | 309 | 933   |
| 105,581 | 4  | 38 | 174 | 360 | 3  | 13 | 110 | 374 | 291 | 785   |
| 105,582 | 3  | 38 | 171 | 353 | 3  | 13 | 110 | 372 | 287 | 776   |
| 105,583 | 3  | 38 | 170 | 341 | 3  | 13 | 109 | 353 | 285 | 745   |
| 105,584 | 3  | 39 | 168 | 341 | 3  | 13 | 112 | 352 | 286 | 745   |
| 105,585 | 3  | 39 | 166 | 340 | 3  | 13 | 110 | 351 | 282 | 743   |
| 105,586 | 3  | 39 | 165 | 319 | 3  | 13 | 111 | 338 | 282 | 709   |
| 105,587 | 4  | 34 | 179 | 252 | 5  | 12 | 124 | 249 | 312 | 547   |
| 105,588 | 4  | 34 | 196 | 238 | 6  | 10 | 126 | 248 | 332 | 530   |
| 105,589 | 6  | 32 | 221 | 213 | 8  | 10 | 140 | 236 | 375 | 491   |
| 105,590 | 6  | 33 | 221 | 218 | 8  | 10 | 140 | 238 | 375 | 499   |
| 105,591 | 7  | 33 | 274 | 266 | 16 | 13 | 198 | 260 | 495 | 572   |
| 105,592 | 7  | 32 | 309 | 296 | 17 | 13 | 214 | 267 | 547 | 608   |
| 105,593 | 7  | 32 | 311 | 312 | 17 | 13 | 216 | 262 | 551 | 619   |
| 105,594 | 8  | 29 | 319 | 302 | 17 | 13 | 217 | 249 | 561 | 593   |
| 105,595 | 8  | 29 | 331 | 377 | 17 | 15 | 224 | 269 | 580 | 690   |
| 105,596 | 8  | 29 | 314 | 397 | 17 | 15 | 207 | 271 | 546 | 712   |
| 105,597 | 8  | 27 | 315 | 422 | 17 | 15 | 209 | 275 | 549 | 739   |
| 105,598 | 7  | 31 | 315 | 465 | 17 | 17 | 207 | 288 | 546 | 801   |
| 105,599 | 7  | 30 | 315 | 508 | 17 | 20 | 207 | 310 | 546 | 868   |
| 105,600 | 7  | 29 | 316 | 609 | 17 | 21 | 207 | 333 | 547 | 992   |
| 105,601 | 7  | 18 | 317 | 574 | 17 | 16 | 208 | 261 | 549 | 869   |
| 105,602 | 8  | 18 | 331 | 578 | 17 | 16 | 217 | 262 | 573 | 874   |
| 105,603 | 8  | 14 | 334 | 560 | 19 | 13 | 226 | 245 | 587 | 832   |
| 105,604 | 10 | 13 | 347 | 568 | 20 | 14 | 244 | 258 | 621 | 853   |



|         |    |    |     |       |    |    |     |     |     |       |
|---------|----|----|-----|-------|----|----|-----|-----|-----|-------|
| 105,605 | 10 | 13 | 347 | 580   | 20 | 14 | 244 | 262 | 621 | 869   |
| 105,606 | 10 | 13 | 354 | 612   | 21 | 14 | 257 | 282 | 642 | 921   |
| 105,607 | 10 | 13 | 356 | 648   | 21 | 14 | 257 | 296 | 644 | 971   |
| 105,608 | 10 | 15 | 353 | 659   | 21 | 13 | 257 | 289 | 641 | 976   |
| 105,609 | 10 | 15 | 345 | 666   | 21 | 13 | 257 | 292 | 633 | 986   |
| 105,610 | 10 | 16 | 343 | 715   | 21 | 18 | 255 | 299 | 629 | 1,048 |
| 105,611 | 9  | 17 | 309 | 743   | 21 | 19 | 238 | 306 | 577 | 1,085 |
| 105,612 | 10 | 17 | 308 | 751   | 21 | 21 | 235 | 317 | 574 | 1,106 |
| 105,613 | 10 | 16 | 307 | 749   | 21 | 21 | 234 | 329 | 572 | 1,115 |
| 105,614 | 10 | 16 | 307 | 789   | 21 | 24 | 234 | 366 | 572 | 1,195 |
| 105,615 | 10 | 16 | 305 | 812   | 21 | 24 | 236 | 378 | 572 | 1,230 |
| 105,616 | 10 | 16 | 295 | 863   | 21 | 24 | 231 | 398 | 557 | 1,301 |
| 105,617 | 10 | 16 | 291 | 873   | 21 | 24 | 230 | 400 | 552 | 1,313 |
| 105,618 | 10 | 33 | 291 | 983   | 20 | 32 | 229 | 535 | 550 | 1,583 |
| 105,619 | 10 | 33 | 291 | 988   | 20 | 32 | 229 | 541 | 550 | 1,594 |
| 105,620 | 10 | 33 | 292 | 992   | 20 | 32 | 228 | 544 | 550 | 1,601 |
| 105,621 | 10 | 34 | 292 | 1,022 | 20 | 33 | 227 | 565 | 549 | 1,654 |
| 105,622 | 10 | 34 | 292 | 1,064 | 20 | 34 | 227 | 587 | 549 | 1,719 |
| 105,623 | 10 | 37 | 291 | 1,165 | 20 | 37 | 223 | 628 | 544 | 1,867 |
| 105,624 | 10 | 38 | 290 | 1,194 | 20 | 37 | 220 | 640 | 540 | 1,909 |
| 105,625 | 10 | 45 | 290 | 1,334 | 20 | 41 | 220 | 728 | 540 | 2,148 |
| 105,626 | 10 | 45 | 285 | 1,360 | 20 | 43 | 218 | 737 | 533 | 2,185 |
| 105,627 | 10 | 51 | 280 | 1,400 | 20 | 46 | 201 | 759 | 511 | 2,256 |
| 105,628 | 11 | 51 | 275 | 1,403 | 20 | 47 | 200 | 760 | 506 | 2,261 |
| 105,629 | 11 | 51 | 277 | 1,403 | 20 | 47 | 207 | 761 | 515 | 2,262 |
| 105,630 | 11 | 51 | 263 | 1,408 | 21 | 48 | 200 | 762 | 495 | 2,269 |
| 105,631 | 11 | 51 | 261 | 1,408 | 21 | 48 | 196 | 762 | 489 | 2,269 |
| 105,632 | 11 | 51 | 268 | 1,412 | 21 | 48 | 205 | 762 | 505 | 2,273 |
| 105,633 | 11 | 51 | 276 | 1,412 | 22 | 48 | 207 | 762 | 516 | 2,273 |
| 105,634 | 11 | 51 | 276 | 1,413 | 22 | 48 | 206 | 763 | 515 | 2,275 |
| 105,635 | 13 | 50 | 278 | 1,411 | 22 | 48 | 210 | 760 | 523 | 2,269 |
| 105,636 | 13 | 50 | 278 | 1,409 | 22 | 48 | 209 | 758 | 522 | 2,265 |
| 105,637 | 13 | 50 | 275 | 1,413 | 22 | 48 | 206 | 758 | 516 | 2,269 |
| 105,638 | 12 | 50 | 264 | 1,414 | 20 | 48 | 196 | 758 | 492 | 2,270 |
| 105,639 | 12 | 50 | 248 | 1,415 | 19 | 48 | 190 | 757 | 469 | 2,270 |
| 105,640 | 10 | 51 | 223 | 1,411 | 17 | 48 | 175 | 757 | 425 | 2,267 |
| 105,641 | 9  | 50 | 199 | 1,406 | 11 | 48 | 133 | 756 | 352 | 2,260 |
| 105,642 | 10 | 48 | 170 | 1,349 | 9  | 45 | 117 | 730 | 306 | 2,172 |
| 105,643 | 10 | 48 | 135 | 1,314 | 8  | 45 | 100 | 719 | 253 | 2,126 |
| 105,644 | 10 | 48 | 134 | 1,293 | 8  | 45 | 98  | 716 | 250 | 2,102 |
| 105,645 | 9  | 48 | 124 | 1,287 | 8  | 45 | 98  | 712 | 239 | 2,092 |

|         |    |    |     |       |    |    |    |     |     |       |
|---------|----|----|-----|-------|----|----|----|-----|-----|-------|
| 105,646 | 10 | 48 | 111 | 1,193 | 8  | 43 | 91 | 692 | 220 | 1,976 |
| 105,647 | 10 | 48 | 108 | 1,193 | 8  | 43 | 93 | 692 | 219 | 1,976 |
| 105,648 | 10 | 43 | 106 | 1,108 | 8  | 41 | 91 | 659 | 215 | 1,851 |
| 105,649 | 10 | 43 | 106 | 1,108 | 8  | 41 | 90 | 661 | 214 | 1,853 |
| 105,650 | 10 | 43 | 106 | 1,064 | 9  | 38 | 90 | 629 | 215 | 1,774 |
| 105,651 | 10 | 42 | 105 | 963   | 9  | 39 | 90 | 606 | 214 | 1,650 |
| 105,652 | 10 | 43 | 102 | 975   | 10 | 39 | 89 | 611 | 211 | 1,668 |
| 105,653 | 9  | 44 | 88  | 984   | 10 | 39 | 80 | 615 | 187 | 1,682 |
| 105,654 | 9  | 45 | 85  | 982   | 8  | 39 | 69 | 616 | 171 | 1,682 |
| 105,655 | 7  | 46 | 71  | 976   | 7  | 38 | 51 | 604 | 136 | 1,664 |
| 105,656 | 7  | 46 | 65  | 931   | 6  | 38 | 40 | 577 | 118 | 1,592 |
| 105,657 | 7  | 46 | 65  | 892   | 6  | 38 | 38 | 564 | 116 | 1,540 |
| 105,658 | 7  | 46 | 63  | 893   | 6  | 38 | 38 | 564 | 114 | 1,541 |
| 105,659 | 7  | 44 | 63  | 877   | 6  | 38 | 38 | 561 | 114 | 1,520 |
| 105,660 | 7  | 44 | 64  | 835   | 6  | 32 | 39 | 552 | 116 | 1,463 |
| 105,661 | 7  | 44 | 64  | 854   | 6  | 32 | 39 | 559 | 116 | 1,489 |
| 105,662 | 7  | 48 | 63  | 906   | 6  | 44 | 39 | 645 | 115 | 1,643 |
| 105,663 | 6  | 48 | 62  | 905   | 6  | 42 | 39 | 641 | 113 | 1,636 |
| 105,664 | 6  | 51 | 61  | 914   | 6  | 42 | 38 | 628 | 111 | 1,635 |
| 105,665 | 6  | 51 | 60  | 878   | 6  | 39 | 38 | 587 | 110 | 1,555 |
| 105,666 | 6  | 56 | 60  | 883   | 6  | 43 | 36 | 629 | 108 | 1,611 |
| 105,667 | 6  | 56 | 60  | 861   | 6  | 45 | 36 | 619 | 108 | 1,581 |
| 105,668 | 6  | 56 | 60  | 870   | 6  | 46 | 36 | 625 | 108 | 1,597 |
| 105,669 | 6  | 39 | 59  | 780   | 6  | 42 | 36 | 507 | 107 | 1,368 |
| 105,670 | 6  | 39 | 59  | 777   | 6  | 42 | 36 | 502 | 107 | 1,360 |
| 105,671 | 7  | 39 | 59  | 773   | 6  | 42 | 37 | 496 | 109 | 1,350 |
| 105,672 | 7  | 38 | 59  | 745   | 7  | 41 | 37 | 475 | 110 | 1,299 |
| 105,673 | 7  | 35 | 59  | 607   | 7  | 37 | 37 | 416 | 110 | 1,095 |
| 105,674 | 7  | 35 | 59  | 609   | 7  | 37 | 37 | 416 | 110 | 1,097 |
| 105,675 | 7  | 34 | 60  | 600   | 7  | 41 | 37 | 421 | 111 | 1,096 |
| 105,676 | 7  | 28 | 60  | 516   | 7  | 37 | 37 | 348 | 111 | 929   |
| 105,677 | 7  | 28 | 60  | 525   | 7  | 37 | 37 | 358 | 111 | 948   |
| 105,678 | 7  | 22 | 56  | 503   | 7  | 36 | 37 | 345 | 107 | 906   |
| 105,679 | 6  | 22 | 54  | 502   | 7  | 35 | 36 | 344 | 103 | 903   |
| 105,680 | 5  | 22 | 38  | 516   | 5  | 35 | 23 | 345 | 71  | 918   |
| 105,681 | 5  | 23 | 28  | 512   | 4  | 34 | 22 | 345 | 59  | 914   |
| 105,682 | 5  | 30 | 26  | 674   | 4  | 41 | 20 | 416 | 55  | 1,161 |
| 105,683 | 5  | 30 | 20  | 722   | 4  | 41 | 12 | 432 | 41  | 1,225 |
| 105,684 | 5  | 30 | 11  | 730   | 3  | 41 | 10 | 437 | 29  | 1,238 |
| 105,685 | 3  | 30 | 8   | 732   | 3  | 41 | 5  | 436 | 19  | 1,239 |
| 105,686 | 3  | 30 | 9   | 738   | 3  | 41 | 4  | 438 | 19  | 1,247 |

|         |   |    |    |     |   |    |   |     |    |       |
|---------|---|----|----|-----|---|----|---|-----|----|-------|
| 105,687 | 3 | 30 | 9  | 741 | 3 | 41 | 4 | 440 | 19 | 1,252 |
| 105,688 | 3 | 31 | 9  | 744 | 3 | 41 | 4 | 441 | 19 | 1,257 |
| 105,689 | 3 | 31 | 9  | 743 | 3 | 41 | 4 | 440 | 19 | 1,255 |
| 105,690 | 3 | 31 | 8  | 748 | 3 | 42 | 4 | 440 | 18 | 1,261 |
| 105,691 | 3 | 30 | 8  | 749 | 3 | 42 | 4 | 439 | 18 | 1,260 |
| 105,692 | 3 | 30 | 8  | 753 | 3 | 42 | 4 | 440 | 18 | 1,265 |
| 105,693 | 2 | 31 | 9  | 754 | 3 | 44 | 4 | 442 | 18 | 1,271 |
| 105,694 | 2 | 31 | 9  | 763 | 3 | 44 | 4 | 446 | 18 | 1,284 |
| 105,695 | 2 | 32 | 8  | 766 | 3 | 45 | 4 | 461 | 17 | 1,304 |
| 105,696 | 2 | 32 | 8  | 770 | 3 | 45 | 4 | 464 | 17 | 1,311 |
| 105,697 | 1 | 32 | 9  | 776 | 3 | 45 | 5 | 475 | 18 | 1,328 |
| 105,698 | 1 | 32 | 8  | 776 | 3 | 46 | 3 | 476 | 15 | 1,330 |
| 105,699 | 1 | 32 | 8  | 792 | 3 | 46 | 3 | 503 | 15 | 1,373 |
| 105,700 | 1 | 32 | 7  | 806 | 3 | 46 | 3 | 501 | 14 | 1,385 |
| 105,701 | 2 | 32 | 7  | 807 | 2 | 47 | 5 | 508 | 16 | 1,394 |
| 105,702 | 2 | 32 | 7  | 819 | 2 | 45 | 5 | 512 | 16 | 1,408 |
| 105,703 | 5 | 31 | 7  | 807 | 1 | 45 | 5 | 508 | 18 | 1,391 |
| 105,704 | 5 | 30 | 9  | 798 | 1 | 45 | 5 | 502 | 20 | 1,375 |
| 105,705 | 5 | 30 | 9  | 806 | 1 | 46 | 5 | 516 | 20 | 1,398 |
| 105,706 | 5 | 29 | 9  | 824 | 1 | 46 | 6 | 528 | 21 | 1,427 |
| 105,707 | 5 | 30 | 8  | 847 | 1 | 46 | 6 | 554 | 20 | 1,477 |
| 105,708 | 5 | 31 | 9  | 904 | 1 | 48 | 6 | 608 | 21 | 1,591 |
| 105,709 | 5 | 31 | 9  | 913 | 1 | 49 | 7 | 623 | 22 | 1,616 |
| 105,710 | 5 | 31 | 10 | 919 | 1 | 49 | 6 | 626 | 22 | 1,625 |
| 105,711 | 5 | 30 | 9  | 902 | 1 | 49 | 6 | 620 | 21 | 1,601 |
| 105,712 | 5 | 30 | 9  | 887 | 1 | 50 | 6 | 614 | 21 | 1,581 |
| 105,713 | 5 | 24 | 9  | 809 | 1 | 37 | 6 | 507 | 21 | 1,377 |
| 105,714 | 5 | 23 | 8  | 789 | 1 | 37 | 7 | 492 | 21 | 1,341 |
| 105,715 | 5 | 20 | 9  | 765 | 1 | 37 | 7 | 482 | 22 | 1,304 |
| 105,716 | 5 | 20 | 9  | 767 | 1 | 37 | 7 | 485 | 22 | 1,309 |
| 105,717 | 5 | 15 | 9  | 743 | 1 | 34 | 7 | 435 | 22 | 1,227 |
| 105,718 | 5 | 15 | 9  | 715 | 1 | 32 | 7 | 427 | 22 | 1,189 |
| 105,719 | 5 | 15 | 9  | 696 | 1 | 31 | 8 | 419 | 23 | 1,161 |
| 105,720 | 4 | 15 | 9  | 677 | 1 | 27 | 7 | 405 | 21 | 1,124 |
| 105,721 | 4 | 17 | 9  | 674 | 1 | 27 | 7 | 402 | 21 | 1,120 |
| 105,722 | 4 | 17 | 9  | 672 | 1 | 27 | 7 | 403 | 21 | 1,119 |
| 105,723 | 4 | 17 | 9  | 645 | 0 | 23 | 7 | 381 | 20 | 1,066 |
| 105,724 | 4 | 17 | 9  | 645 | 0 | 23 | 7 | 381 | 20 | 1,066 |
| 105,725 | 5 | 17 | 8  | 645 | 0 | 23 | 7 | 381 | 20 | 1,066 |
| 105,726 | 5 | 17 | 10 | 645 | 0 | 23 | 8 | 381 | 23 | 1,066 |
| 105,727 | 5 | 16 | 13 | 592 | 0 | 23 | 9 | 379 | 27 | 1,010 |

|         |    |    |     |     |    |    |     |     |     |     |
|---------|----|----|-----|-----|----|----|-----|-----|-----|-----|
| 105,728 | 5  | 16 | 13  | 554 | 0  | 21 | 9   | 359 | 27  | 950 |
| 105,729 | 5  | 16 | 15  | 542 | 0  | 19 | 15  | 353 | 35  | 930 |
| 105,730 | 5  | 17 | 16  | 539 | 0  | 19 | 17  | 354 | 38  | 929 |
| 105,731 | 5  | 17 | 16  | 529 | 0  | 19 | 19  | 361 | 40  | 926 |
| 105,732 | 5  | 16 | 16  | 522 | 0  | 20 | 19  | 363 | 40  | 921 |
| 105,733 | 5  | 9  | 16  | 360 | 0  | 13 | 19  | 292 | 40  | 674 |
| 105,734 | 5  | 10 | 16  | 327 | 0  | 14 | 19  | 295 | 40  | 646 |
| 105,735 | 5  | 10 | 16  | 318 | 0  | 14 | 19  | 293 | 40  | 635 |
| 105,736 | 5  | 10 | 18  | 328 | 0  | 14 | 19  | 297 | 42  | 649 |
| 105,737 | 5  | 10 | 17  | 318 | 0  | 14 | 19  | 295 | 41  | 637 |
| 105,738 | 5  | 10 | 17  | 319 | 0  | 14 | 19  | 295 | 41  | 638 |
| 105,739 | 5  | 9  | 17  | 315 | 0  | 14 | 19  | 293 | 41  | 631 |
| 105,740 | 5  | 9  | 17  | 310 | 0  | 13 | 19  | 294 | 41  | 626 |
| 105,741 | 5  | 9  | 18  | 310 | 0  | 13 | 19  | 294 | 42  | 626 |
| 105,742 | 5  | 9  | 18  | 310 | 0  | 13 | 19  | 294 | 42  | 626 |
| 105,743 | 8  | 11 | 21  | 310 | 0  | 13 | 20  | 300 | 49  | 634 |
| 105,744 | 8  | 12 | 21  | 336 | 0  | 13 | 20  | 326 | 49  | 687 |
| 105,745 | 8  | 12 | 21  | 326 | 0  | 13 | 20  | 319 | 49  | 670 |
| 105,746 | 8  | 11 | 38  | 320 | 0  | 12 | 22  | 306 | 68  | 649 |
| 105,747 | 10 | 13 | 79  | 318 | 1  | 12 | 32  | 303 | 122 | 646 |
| 105,748 | 15 | 13 | 174 | 312 | 7  | 12 | 98  | 292 | 294 | 629 |
| 105,749 | 15 | 13 | 174 | 298 | 7  | 11 | 97  | 267 | 293 | 589 |
| 105,750 | 14 | 13 | 174 | 300 | 7  | 11 | 97  | 267 | 292 | 591 |
| 105,751 | 14 | 13 | 222 | 292 | 11 | 12 | 135 | 272 | 382 | 589 |
| 105,752 | 13 | 13 | 230 | 288 | 12 | 11 | 143 | 263 | 398 | 575 |
| 105,753 | 13 | 13 | 237 | 274 | 12 | 11 | 147 | 258 | 409 | 556 |
| 105,754 | 13 | 13 | 239 | 268 | 12 | 11 | 148 | 254 | 412 | 546 |
| 105,755 | 13 | 12 | 262 | 251 | 12 | 10 | 162 | 239 | 449 | 512 |
| 105,756 | 13 | 12 | 264 | 255 | 12 | 11 | 162 | 244 | 451 | 522 |
| 105,757 | 13 | 12 | 264 | 240 | 12 | 12 | 161 | 235 | 450 | 499 |
| 105,758 | 13 | 11 | 264 | 216 | 12 | 12 | 161 | 212 | 450 | 451 |
| 105,759 | 13 | 10 | 263 | 165 | 12 | 10 | 161 | 161 | 449 | 346 |
| 105,760 | 13 | 10 | 263 | 156 | 12 | 9  | 160 | 147 | 448 | 322 |
| 105,761 | 14 | 11 | 265 | 154 | 12 | 9  | 160 | 146 | 451 | 320 |
| 105,762 | 14 | 11 | 265 | 148 | 12 | 8  | 162 | 142 | 453 | 309 |
| 105,763 | 14 | 11 | 265 | 148 | 12 | 8  | 162 | 141 | 453 | 308 |
| 105,764 | 14 | 11 | 265 | 146 | 12 | 8  | 161 | 138 | 452 | 303 |
| 105,765 | 14 | 11 | 269 | 150 | 13 | 8  | 167 | 138 | 463 | 307 |
| 105,766 | 14 | 11 | 270 | 145 | 13 | 8  | 167 | 137 | 464 | 301 |
| 105,767 | 14 | 11 | 270 | 145 | 13 | 8  | 167 | 137 | 464 | 301 |
| 105,768 | 14 | 12 | 273 | 141 | 13 | 7  | 168 | 134 | 468 | 294 |

|         |    |    |     |     |    |    |     |     |     |     |
|---------|----|----|-----|-----|----|----|-----|-----|-----|-----|
| 105,769 | 14 | 12 | 276 | 141 | 13 | 7  | 172 | 132 | 475 | 292 |
| 105,770 | 14 | 12 | 282 | 140 | 13 | 7  | 174 | 132 | 483 | 291 |
| 105,771 | 14 | 12 | 282 | 140 | 13 | 7  | 174 | 132 | 483 | 291 |
| 105,772 | 14 | 10 | 294 | 139 | 13 | 7  | 183 | 132 | 504 | 288 |
| 105,773 | 14 | 10 | 294 | 171 | 13 | 10 | 183 | 151 | 504 | 342 |
| 105,774 | 14 | 23 | 296 | 321 | 13 | 17 | 186 | 278 | 509 | 639 |
| 105,775 | 14 | 23 | 297 | 342 | 13 | 17 | 187 | 291 | 511 | 673 |
| 105,776 | 13 | 23 | 299 | 369 | 13 | 18 | 189 | 312 | 514 | 722 |
| 105,777 | 14 | 23 | 300 | 374 | 13 | 18 | 188 | 313 | 515 | 728 |
| 105,778 | 14 | 27 | 303 | 396 | 14 | 19 | 194 | 323 | 525 | 765 |
| 105,779 | 14 | 27 | 301 | 399 | 14 | 19 | 188 | 324 | 517 | 769 |
| 105,780 | 14 | 27 | 300 | 412 | 14 | 20 | 186 | 331 | 514 | 790 |
| 105,781 | 14 | 27 | 302 | 426 | 14 | 20 | 187 | 337 | 517 | 810 |
| 105,782 | 14 | 29 | 303 | 427 | 14 | 20 | 187 | 329 | 518 | 805 |
| 105,783 | 14 | 29 | 303 | 429 | 14 | 19 | 187 | 326 | 518 | 803 |
| 105,784 | 14 | 29 | 302 | 428 | 14 | 19 | 187 | 327 | 517 | 803 |
| 105,785 | 14 | 31 | 303 | 417 | 14 | 19 | 188 | 311 | 519 | 778 |
| 105,786 | 14 | 31 | 301 | 419 | 14 | 19 | 188 | 313 | 517 | 782 |
| 105,787 | 19 | 31 | 323 | 407 | 15 | 19 | 215 | 309 | 572 | 766 |
| 105,788 | 19 | 31 | 330 | 405 | 15 | 19 | 218 | 307 | 582 | 762 |
| 105,789 | 19 | 31 | 331 | 404 | 15 | 19 | 222 | 308 | 587 | 762 |
| 105,790 | 19 | 31 | 338 | 415 | 15 | 19 | 227 | 312 | 599 | 777 |
| 105,791 | 19 | 31 | 338 | 417 | 15 | 19 | 227 | 310 | 599 | 777 |
| 105,792 | 19 | 31 | 340 | 418 | 15 | 19 | 228 | 312 | 602 | 780 |
| 105,793 | 18 | 31 | 341 | 419 | 15 | 19 | 232 | 313 | 606 | 782 |
| 105,794 | 16 | 29 | 344 | 422 | 15 | 19 | 234 | 318 | 609 | 788 |
| 105,795 | 16 | 27 | 346 | 397 | 15 | 17 | 235 | 289 | 612 | 730 |
| 105,796 | 16 | 27 | 337 | 396 | 15 | 17 | 234 | 289 | 602 | 729 |
| 105,797 | 16 | 28 | 341 | 402 | 15 | 17 | 242 | 297 | 614 | 744 |
| 105,798 | 14 | 26 | 303 | 403 | 14 | 17 | 233 | 298 | 564 | 744 |
| 105,799 | 9  | 26 | 207 | 404 | 8  | 17 | 164 | 297 | 388 | 744 |
| 105,800 | 9  | 26 | 208 | 412 | 8  | 17 | 163 | 316 | 388 | 771 |
| 105,801 | 7  | 26 | 177 | 420 | 4  | 19 | 135 | 323 | 323 | 788 |
| 105,802 | 7  | 26 | 160 | 418 | 4  | 18 | 125 | 320 | 296 | 782 |
| 105,803 | 7  | 26 | 152 | 417 | 3  | 18 | 119 | 320 | 281 | 781 |
| 105,804 | 7  | 26 | 146 | 418 | 3  | 18 | 115 | 323 | 271 | 785 |
| 105,805 | 7  | 26 | 144 | 425 | 3  | 18 | 114 | 328 | 268 | 797 |
| 105,806 | 7  | 27 | 122 | 423 | 3  | 17 | 101 | 324 | 233 | 791 |
| 105,807 | 7  | 27 | 120 | 423 | 3  | 17 | 101 | 324 | 231 | 791 |
| 105,808 | 7  | 27 | 124 | 415 | 3  | 16 | 102 | 320 | 236 | 778 |
| 105,809 | 7  | 28 | 124 | 412 | 3  | 16 | 102 | 312 | 236 | 768 |

|         |   |     |     |       |   |    |     |     |     |       |
|---------|---|-----|-----|-------|---|----|-----|-----|-----|-------|
| 105,810 | 7 | 28  | 122 | 411   | 3 | 16 | 102 | 312 | 234 | 767   |
| 105,811 | 6 | 28  | 121 | 412   | 3 | 16 | 101 | 311 | 231 | 767   |
| 105,812 | 6 | 27  | 130 | 409   | 4 | 16 | 101 | 310 | 241 | 762   |
| 105,813 | 6 | 27  | 133 | 409   | 4 | 16 | 100 | 309 | 243 | 761   |
| 105,814 | 6 | 27  | 134 | 405   | 4 | 16 | 100 | 312 | 244 | 760   |
| 105,815 | 6 | 41  | 134 | 532   | 4 | 24 | 100 | 466 | 244 | 1,063 |
| 105,816 | 6 | 42  | 129 | 551   | 3 | 25 | 94  | 474 | 232 | 1,092 |
| 105,817 | 6 | 43  | 129 | 596   | 3 | 27 | 95  | 513 | 233 | 1,179 |
| 105,818 | 6 | 44  | 131 | 608   | 3 | 27 | 95  | 523 | 235 | 1,202 |
| 105,819 | 7 | 43  | 130 | 616   | 3 | 27 | 94  | 524 | 234 | 1,210 |
| 105,820 | 7 | 43  | 129 | 621   | 3 | 27 | 90  | 526 | 229 | 1,217 |
| 105,821 | 7 | 43  | 124 | 622   | 3 | 27 | 87  | 527 | 221 | 1,219 |
| 105,822 | 7 | 43  | 120 | 622   | 3 | 27 | 82  | 528 | 212 | 1,220 |
| 105,823 | 7 | 43  | 114 | 625   | 3 | 27 | 78  | 529 | 202 | 1,224 |
| 105,824 | 7 | 30  | 119 | 450   | 3 | 17 | 76  | 393 | 205 | 890   |
| 105,825 | 7 | 30  | 118 | 451   | 3 | 18 | 76  | 395 | 204 | 894   |
| 105,826 | 7 | 30  | 117 | 468   | 3 | 18 | 75  | 402 | 202 | 918   |
| 105,827 | 7 | 30  | 115 | 446   | 3 | 17 | 73  | 381 | 198 | 874   |
| 105,828 | 6 | 30  | 113 | 442   | 3 | 17 | 73  | 380 | 195 | 869   |
| 105,829 | 6 | 26  | 108 | 411   | 2 | 16 | 66  | 359 | 182 | 812   |
| 105,830 | 6 | 26  | 108 | 395   | 2 | 15 | 65  | 350 | 181 | 786   |
| 105,831 | 6 | 26  | 106 | 395   | 2 | 15 | 65  | 350 | 179 | 786   |
| 105,832 | 6 | 25  | 111 | 378   | 2 | 15 | 64  | 344 | 183 | 762   |
| 105,833 | 6 | 23  | 125 | 378   | 2 | 15 | 67  | 346 | 200 | 762   |
| 105,834 | 6 | 23  | 135 | 377   | 3 | 15 | 70  | 347 | 214 | 762   |
| 105,835 | 6 | 21  | 137 | 375   | 3 | 14 | 70  | 340 | 216 | 750   |
| 105,836 | 6 | 22  | 141 | 414   | 3 | 17 | 72  | 355 | 222 | 808   |
| 105,837 | 2 | 27  | 186 | 493   | 3 | 17 | 55  | 367 | 246 | 904   |
| 105,838 | 2 | 30  | 189 | 542   | 3 | 17 | 63  | 384 | 257 | 973   |
| 105,839 | 2 | 32  | 202 | 607   | 3 | 20 | 66  | 401 | 273 | 1,060 |
| 105,840 | 2 | 32  | 199 | 618   | 3 | 21 | 66  | 402 | 270 | 1,073 |
| 105,841 | 2 | 32  | 195 | 612   | 3 | 21 | 65  | 399 | 265 | 1,064 |
| 105,842 | 2 | 34  | 195 | 636   | 3 | 21 | 65  | 409 | 265 | 1,100 |
| 105,843 | 2 | 38  | 198 | 739   | 3 | 25 | 62  | 458 | 265 | 1,260 |
| 105,844 | 2 | 48  | 195 | 788   | 3 | 27 | 61  | 474 | 261 | 1,337 |
| 105,845 | 2 | 84  | 197 | 1,584 | 3 | 56 | 61  | 815 | 263 | 2,539 |
| 105,846 | 2 | 89  | 192 | 1,788 | 3 | 61 | 60  | 862 | 257 | 2,800 |
| 105,847 | 2 | 89  | 198 | 1,825 | 3 | 62 | 57  | 877 | 260 | 2,853 |
| 105,848 | 4 | 91  | 224 | 1,910 | 3 | 64 | 64  | 896 | 295 | 2,961 |
| 105,849 | 4 | 91  | 221 | 1,922 | 3 | 64 | 63  | 903 | 291 | 2,980 |
| 105,850 | 5 | 101 | 263 | 2,138 | 4 | 70 | 68  | 997 | 340 | 3,306 |

|         |    |     |     |       |   |     |    |       |     |       |
|---------|----|-----|-----|-------|---|-----|----|-------|-----|-------|
| 105,851 | 5  | 102 | 262 | 2,180 | 4 | 70  | 68 | 1,001 | 339 | 3,353 |
| 105,852 | 6  | 103 | 286 | 2,191 | 4 | 70  | 83 | 1,005 | 379 | 3,369 |
| 105,853 | 9  | 103 | 298 | 2,283 | 4 | 75  | 88 | 1,070 | 399 | 3,531 |
| 105,854 | 9  | 103 | 305 | 2,289 | 4 | 75  | 88 | 1,070 | 406 | 3,537 |
| 105,855 | 9  | 103 | 306 | 2,293 | 4 | 76  | 88 | 1,068 | 407 | 3,540 |
| 105,856 | 9  | 122 | 305 | 2,612 | 4 | 101 | 88 | 1,424 | 406 | 4,259 |
| 105,857 | 9  | 121 | 302 | 2,645 | 4 | 102 | 87 | 1,435 | 402 | 4,303 |
| 105,858 | 9  | 124 | 302 | 2,696 | 4 | 111 | 86 | 1,478 | 401 | 4,409 |
| 105,859 | 9  | 125 | 298 | 2,759 | 4 | 113 | 86 | 1,518 | 397 | 4,515 |
| 105,860 | 9  | 125 | 298 | 2,779 | 4 | 113 | 86 | 1,526 | 397 | 4,543 |
| 105,861 | 9  | 125 | 298 | 2,783 | 4 | 114 | 86 | 1,528 | 397 | 4,550 |
| 105,862 | 9  | 126 | 289 | 2,793 | 3 | 115 | 86 | 1,544 | 387 | 4,578 |
| 105,863 | 9  | 128 | 289 | 2,814 | 3 | 117 | 86 | 1,569 | 387 | 4,628 |
| 105,864 | 9  | 130 | 286 | 2,862 | 3 | 123 | 85 | 1,647 | 383 | 4,762 |
| 105,865 | 9  | 131 | 285 | 2,889 | 3 | 125 | 86 | 1,674 | 383 | 4,819 |
| 105,866 | 9  | 130 | 285 | 3,100 | 3 | 134 | 86 | 1,701 | 383 | 5,065 |
| 105,867 | 9  | 134 | 285 | 3,176 | 4 | 149 | 86 | 1,846 | 384 | 5,305 |
| 105,868 | 9  | 133 | 284 | 3,174 | 4 | 153 | 86 | 1,878 | 383 | 5,338 |
| 105,869 | 9  | 138 | 282 | 3,282 | 4 | 158 | 86 | 1,949 | 381 | 5,527 |
| 105,870 | 8  | 142 | 281 | 3,317 | 4 | 160 | 86 | 1,985 | 379 | 5,604 |
| 105,871 | 8  | 161 | 279 | 3,418 | 4 | 184 | 86 | 2,214 | 377 | 5,977 |
| 105,872 | 8  | 169 | 278 | 3,604 | 4 | 203 | 86 | 2,437 | 376 | 6,413 |
| 105,873 | 8  | 174 | 277 | 3,692 | 5 | 207 | 86 | 2,498 | 376 | 6,571 |
| 105,874 | 8  | 174 | 277 | 3,690 | 5 | 207 | 86 | 2,497 | 376 | 6,568 |
| 105,875 | 8  | 176 | 273 | 3,661 | 5 | 207 | 86 | 2,479 | 372 | 6,523 |
| 105,876 | 8  | 194 | 273 | 3,774 | 5 | 211 | 86 | 2,536 | 372 | 6,715 |
| 105,877 | 8  | 194 | 273 | 3,784 | 5 | 213 | 86 | 2,543 | 372 | 6,734 |
| 105,878 | 8  | 195 | 273 | 3,800 | 5 | 214 | 87 | 2,552 | 373 | 6,761 |
| 105,879 | 8  | 195 | 272 | 3,805 | 5 | 214 | 87 | 2,555 | 372 | 6,769 |
| 105,880 | 8  | 195 | 273 | 3,807 | 5 | 216 | 87 | 2,561 | 373 | 6,779 |
| 105,881 | 8  | 195 | 274 | 3,808 | 5 | 216 | 87 | 2,561 | 374 | 6,780 |
| 105,882 | 8  | 200 | 269 | 3,820 | 5 | 216 | 86 | 2,587 | 368 | 6,823 |
| 105,883 | 8  | 200 | 254 | 3,826 | 5 | 216 | 83 | 2,605 | 350 | 6,847 |
| 105,884 | 8  | 200 | 251 | 3,835 | 4 | 217 | 82 | 2,613 | 345 | 6,865 |
| 105,885 | 8  | 203 | 264 | 3,846 | 4 | 218 | 85 | 2,642 | 361 | 6,909 |
| 105,886 | 11 | 202 | 278 | 3,847 | 4 | 220 | 87 | 2,660 | 380 | 6,929 |
| 105,887 | 11 | 201 | 279 | 3,820 | 4 | 220 | 91 | 2,726 | 385 | 6,967 |
| 105,888 | 12 | 193 | 223 | 3,710 | 3 | 220 | 99 | 2,705 | 337 | 6,828 |
| 105,889 | 13 | 193 | 223 | 3,741 | 3 | 221 | 93 | 2,750 | 332 | 6,905 |
| 105,890 | 13 | 192 | 210 | 3,688 | 3 | 218 | 86 | 2,740 | 312 | 6,838 |
| 105,891 | 13 | 192 | 212 | 3,680 | 3 | 217 | 89 | 2,738 | 317 | 6,827 |

|         |    |     |     |       |   |     |     |       |     |       |
|---------|----|-----|-----|-------|---|-----|-----|-------|-----|-------|
| 105,892 | 13 | 190 | 212 | 3,648 | 3 | 217 | 86  | 2,726 | 314 | 6,781 |
| 105,893 | 13 | 186 | 208 | 3,547 | 3 | 213 | 85  | 2,682 | 309 | 6,628 |
| 105,894 | 13 | 176 | 208 | 3,496 | 3 | 211 | 95  | 2,665 | 319 | 6,548 |
| 105,895 | 13 | 176 | 210 | 3,499 | 3 | 212 | 96  | 2,666 | 322 | 6,553 |
| 105,896 | 13 | 140 | 208 | 2,698 | 3 | 183 | 95  | 2,316 | 319 | 5,337 |
| 105,897 | 13 | 135 | 210 | 2,490 | 3 | 180 | 97  | 2,285 | 323 | 5,090 |
| 105,898 | 13 | 135 | 203 | 2,474 | 3 | 180 | 99  | 2,292 | 318 | 5,081 |
| 105,899 | 11 | 132 | 172 | 2,416 | 3 | 178 | 88  | 2,295 | 274 | 5,021 |
| 105,900 | 11 | 133 | 141 | 2,410 | 2 | 179 | 88  | 2,295 | 242 | 5,017 |
| 105,901 | 11 | 123 | 132 | 2,192 | 2 | 173 | 85  | 2,200 | 230 | 4,688 |
| 105,902 | 10 | 123 | 107 | 2,140 | 2 | 173 | 69  | 2,178 | 188 | 4,614 |
| 105,903 | 10 | 122 | 102 | 2,120 | 2 | 171 | 69  | 2,168 | 183 | 4,581 |
| 105,904 | 7  | 123 | 97  | 2,028 | 2 | 166 | 68  | 2,100 | 174 | 4,417 |
| 105,905 | 7  | 123 | 90  | 2,018 | 2 | 166 | 68  | 2,099 | 167 | 4,406 |
| 105,906 | 7  | 123 | 89  | 2,013 | 2 | 164 | 68  | 2,093 | 166 | 4,393 |
| 105,907 | 7  | 104 | 92  | 1,686 | 2 | 139 | 71  | 1,732 | 172 | 3,661 |
| 105,908 | 7  | 101 | 92  | 1,601 | 2 | 129 | 71  | 1,676 | 172 | 3,507 |
| 105,909 | 7  | 101 | 92  | 1,601 | 2 | 129 | 71  | 1,670 | 172 | 3,501 |
| 105,910 | 7  | 100 | 95  | 1,539 | 3 | 127 | 72  | 1,629 | 177 | 3,395 |
| 105,911 | 7  | 100 | 96  | 1,516 | 3 | 128 | 72  | 1,616 | 178 | 3,360 |
| 105,912 | 7  | 100 | 96  | 1,511 | 3 | 126 | 73  | 1,607 | 179 | 3,344 |
| 105,913 | 7  | 99  | 96  | 1,501 | 3 | 125 | 73  | 1,589 | 179 | 3,314 |
| 105,914 | 7  | 97  | 96  | 1,481 | 3 | 123 | 73  | 1,563 | 179 | 3,264 |
| 105,915 | 7  | 95  | 98  | 1,433 | 3 | 117 | 74  | 1,481 | 182 | 3,126 |
| 105,916 | 7  | 94  | 98  | 1,405 | 2 | 115 | 74  | 1,449 | 181 | 3,063 |
| 105,917 | 7  | 76  | 100 | 974   | 2 | 83  | 75  | 1,131 | 184 | 2,264 |
| 105,918 | 7  | 76  | 100 | 973   | 2 | 83  | 75  | 1,131 | 184 | 2,263 |
| 105,919 | 11 | 76  | 113 | 933   | 2 | 77  | 88  | 1,063 | 214 | 2,149 |
| 105,920 | 11 | 70  | 113 | 813   | 2 | 73  | 88  | 989   | 214 | 1,945 |
| 105,921 | 11 | 67  | 113 | 770   | 2 | 71  | 88  | 953   | 214 | 1,861 |
| 105,922 | 14 | 48  | 144 | 664   | 3 | 48  | 114 | 731   | 275 | 1,491 |
| 105,923 | 14 | 40  | 151 | 479   | 5 | 29  | 128 | 513   | 298 | 1,061 |
| 105,924 | 14 | 35  | 152 | 392   | 5 | 25  | 128 | 454   | 299 | 906   |
| 105,925 | 14 | 33  | 154 | 373   | 6 | 24  | 146 | 438   | 320 | 868   |
| 105,926 | 14 | 33  | 154 | 373   | 6 | 24  | 146 | 439   | 320 | 869   |
| 105,927 | 14 | 15  | 154 | 260   | 6 | 20  | 146 | 382   | 320 | 677   |
| 105,928 | 14 | 14  | 156 | 229   | 6 | 17  | 145 | 369   | 321 | 629   |
| 105,929 | 14 | 14  | 156 | 229   | 6 | 17  | 145 | 370   | 321 | 630   |
| 105,930 | 14 | 14  | 157 | 224   | 6 | 17  | 145 | 367   | 322 | 622   |
| 105,931 | 14 | 14  | 158 | 222   | 6 | 15  | 148 | 361   | 326 | 612   |
| 105,932 | 14 | 14  | 157 | 222   | 6 | 15  | 148 | 361   | 325 | 612   |



|         |    |    |     |     |    |    |     |     |     |     |
|---------|----|----|-----|-----|----|----|-----|-----|-----|-----|
| 105,933 | 14 | 9  | 162 | 210 | 6  | 15 | 151 | 333 | 333 | 567 |
| 105,934 | 14 | 10 | 163 | 206 | 6  | 15 | 154 | 328 | 337 | 559 |
| 105,935 | 14 | 10 | 158 | 195 | 6  | 14 | 151 | 319 | 329 | 538 |
| 105,936 | 14 | 7  | 144 | 183 | 6  | 13 | 149 | 287 | 313 | 490 |
| 105,937 | 11 | 7  | 128 | 168 | 6  | 8  | 146 | 191 | 291 | 374 |
| 105,938 | 11 | 7  | 125 | 171 | 6  | 8  | 140 | 193 | 282 | 379 |
| 105,939 | 10 | 7  | 134 | 150 | 6  | 8  | 129 | 178 | 279 | 343 |
| 105,940 | 10 | 6  | 128 | 108 | 7  | 7  | 128 | 126 | 273 | 247 |
| 105,941 | 10 | 6  | 135 | 110 | 8  | 7  | 134 | 133 | 287 | 256 |
| 105,942 | 11 | 6  | 158 | 109 | 9  | 7  | 140 | 135 | 318 | 257 |
| 105,943 | 11 | 6  | 162 | 110 | 9  | 7  | 141 | 133 | 323 | 256 |
| 105,944 | 11 | 6  | 173 | 112 | 9  | 7  | 146 | 135 | 339 | 260 |
| 105,945 | 11 | 6  | 168 | 112 | 10 | 7  | 136 | 137 | 325 | 262 |
| 105,946 | 11 | 6  | 169 | 110 | 10 | 6  | 139 | 139 | 329 | 261 |
| 105,947 | 11 | 6  | 174 | 60  | 11 | 3  | 151 | 71  | 347 | 140 |
| 105,948 | 11 | 6  | 172 | 60  | 11 | 3  | 150 | 71  | 344 | 140 |
| 105,949 | 11 | 5  | 199 | 53  | 11 | 2  | 156 | 64  | 377 | 124 |
| 105,950 | 11 | 5  | 200 | 55  | 11 | 2  | 158 | 66  | 380 | 128 |
| 105,951 | 11 | 5  | 200 | 55  | 11 | 2  | 158 | 66  | 380 | 128 |
| 105,952 | 10 | 4  | 200 | 59  | 11 | 2  | 158 | 77  | 379 | 142 |
| 105,953 | 10 | 5  | 200 | 62  | 11 | 2  | 157 | 79  | 378 | 148 |
| 105,954 | 10 | 5  | 207 | 59  | 11 | 2  | 157 | 78  | 385 | 144 |
| 105,955 | 10 | 4  | 207 | 58  | 11 | 2  | 155 | 80  | 383 | 144 |
| 105,956 | 10 | 4  | 207 | 67  | 11 | 2  | 155 | 87  | 383 | 160 |
| 105,957 | 12 | 4  | 211 | 74  | 11 | 2  | 158 | 92  | 392 | 172 |
| 105,958 | 12 | 4  | 211 | 74  | 11 | 2  | 155 | 92  | 389 | 172 |
| 105,959 | 12 | 4  | 214 | 81  | 11 | 2  | 155 | 92  | 392 | 179 |
| 105,960 | 13 | 4  | 216 | 83  | 10 | 2  | 157 | 92  | 396 | 181 |
| 105,961 | 14 | 3  | 218 | 85  | 10 | 1  | 156 | 92  | 398 | 181 |
| 105,962 | 15 | 3  | 218 | 86  | 10 | 1  | 159 | 93  | 402 | 183 |
| 105,963 | 15 | 3  | 217 | 85  | 10 | 1  | 158 | 92  | 400 | 181 |
| 105,964 | 15 | 3  | 219 | 85  | 10 | 1  | 158 | 92  | 402 | 181 |
| 105,965 | 15 | 3  | 221 | 83  | 10 | 1  | 159 | 92  | 405 | 179 |
| 105,966 | 15 | 3  | 229 | 84  | 10 | 1  | 169 | 92  | 423 | 180 |
| 105,967 | 15 | 3  | 240 | 86  | 11 | 1  | 178 | 93  | 444 | 183 |
| 105,968 | 15 | 7  | 238 | 117 | 11 | 1  | 177 | 135 | 441 | 260 |
| 105,969 | 11 | 7  | 226 | 120 | 11 | 1  | 164 | 139 | 412 | 267 |
| 105,970 | 11 | 10 | 226 | 134 | 11 | 1  | 165 | 173 | 413 | 318 |
| 105,971 | 10 | 10 | 223 | 146 | 11 | 1  | 167 | 181 | 411 | 338 |
| 105,972 | 10 | 13 | 221 | 174 | 11 | 2  | 167 | 215 | 409 | 404 |
| 105,973 | 8  | 13 | 197 | 182 | 9  | 3  | 145 | 219 | 359 | 417 |

|         |   |     |     |       |    |    |     |       |     |       |
|---------|---|-----|-----|-------|----|----|-----|-------|-----|-------|
| 105,974 | 8 | 13  | 190 | 182   | 7  | 3  | 131 | 217   | 336 | 415   |
| 105,975 | 8 | 14  | 188 | 195   | 7  | 3  | 131 | 227   | 334 | 439   |
| 105,976 | 8 | 14  | 184 | 196   | 6  | 4  | 113 | 229   | 311 | 443   |
| 105,977 | 8 | 16  | 184 | 217   | 6  | 4  | 114 | 252   | 312 | 489   |
| 105,978 | 8 | 18  | 184 | 237   | 6  | 5  | 114 | 268   | 312 | 528   |
| 105,979 | 8 | 25  | 187 | 254   | 6  | 7  | 117 | 297   | 318 | 583   |
| 105,980 | 8 | 25  | 187 | 269   | 6  | 8  | 118 | 318   | 319 | 620   |
| 105,981 | 8 | 28  | 187 | 347   | 6  | 10 | 118 | 378   | 319 | 763   |
| 105,982 | 8 | 32  | 184 | 398   | 6  | 13 | 115 | 412   | 313 | 855   |
| 105,983 | 8 | 35  | 183 | 419   | 6  | 15 | 113 | 425   | 310 | 894   |
| 105,984 | 8 | 35  | 178 | 429   | 6  | 15 | 112 | 428   | 304 | 907   |
| 105,985 | 8 | 34  | 178 | 426   | 6  | 15 | 109 | 414   | 301 | 889   |
| 105,986 | 8 | 34  | 181 | 426   | 6  | 15 | 110 | 416   | 305 | 891   |
| 105,987 | 8 | 34  | 208 | 435   | 8  | 15 | 129 | 428   | 353 | 912   |
| 105,988 | 8 | 35  | 238 | 445   | 8  | 16 | 137 | 441   | 391 | 937   |
| 105,989 | 8 | 39  | 237 | 501   | 8  | 20 | 137 | 536   | 390 | 1,096 |
| 105,990 | 7 | 39  | 218 | 504   | 8  | 20 | 129 | 538   | 362 | 1,101 |
| 105,991 | 9 | 41  | 322 | 550   | 13 | 22 | 233 | 569   | 577 | 1,182 |
| 105,992 | 9 | 43  | 323 | 578   | 12 | 26 | 255 | 589   | 599 | 1,236 |
| 105,993 | 8 | 43  | 300 | 584   | 12 | 26 | 257 | 590   | 577 | 1,243 |
| 105,994 | 8 | 60  | 296 | 850   | 12 | 44 | 258 | 772   | 574 | 1,726 |
| 105,995 | 8 | 63  | 285 | 937   | 12 | 48 | 254 | 825   | 559 | 1,873 |
| 105,996 | 8 | 73  | 289 | 1,135 | 11 | 55 | 255 | 915   | 563 | 2,178 |
| 105,997 | 8 | 81  | 287 | 1,228 | 11 | 60 | 254 | 987   | 560 | 2,356 |
| 105,998 | 9 | 84  | 279 | 1,286 | 10 | 63 | 241 | 1,010 | 539 | 2,443 |
| 105,999 | 9 | 109 | 279 | 1,476 | 10 | 78 | 239 | 1,192 | 537 | 2,855 |
| 106,000 | 9 | 110 | 251 | 1,510 | 10 | 79 | 230 | 1,206 | 500 | 2,905 |
| 106,001 | 9 | 114 | 249 | 1,665 | 10 | 86 | 229 | 1,289 | 497 | 3,154 |
| 106,002 | 9 | 114 | 248 | 1,667 | 10 | 86 | 228 | 1,292 | 495 | 3,159 |
| 106,003 | 9 | 114 | 247 | 1,678 | 10 | 86 | 229 | 1,287 | 495 | 3,165 |
| 106,004 | 9 | 116 | 248 | 1,693 | 10 | 87 | 230 | 1,292 | 497 | 3,188 |
| 106,005 | 9 | 116 | 244 | 1,693 | 10 | 87 | 228 | 1,293 | 491 | 3,189 |
| 106,006 | 9 | 121 | 245 | 1,753 | 10 | 90 | 229 | 1,324 | 493 | 3,288 |
| 106,007 | 9 | 121 | 245 | 1,751 | 10 | 90 | 229 | 1,332 | 493 | 3,294 |
| 106,008 | 7 | 121 | 240 | 1,745 | 10 | 90 | 226 | 1,326 | 483 | 3,282 |
| 106,009 | 8 | 121 | 239 | 1,747 | 10 | 90 | 229 | 1,328 | 486 | 3,286 |
| 106,010 | 8 | 121 | 239 | 1,743 | 10 | 90 | 230 | 1,329 | 487 | 3,283 |
| 106,011 | 7 | 121 | 239 | 1,755 | 10 | 91 | 228 | 1,335 | 484 | 3,302 |
| 106,012 | 6 | 123 | 235 | 1,797 | 10 | 91 | 228 | 1,348 | 479 | 3,359 |
| 106,013 | 5 | 128 | 240 | 1,932 | 10 | 96 | 225 | 1,400 | 480 | 3,556 |
| 106,014 | 6 | 129 | 259 | 1,952 | 10 | 96 | 235 | 1,401 | 510 | 3,578 |

|         |    |     |     |       |    |     |     |       |       |       |
|---------|----|-----|-----|-------|----|-----|-----|-------|-------|-------|
| 106,015 | 8  | 131 | 272 | 1,959 | 10 | 98  | 238 | 1,405 | 528   | 3,593 |
| 106,016 | 10 | 132 | 411 | 2,001 | 17 | 100 | 336 | 1,452 | 774   | 3,685 |
| 106,017 | 10 | 132 | 403 | 2,010 | 17 | 100 | 326 | 1,452 | 756   | 3,694 |
| 106,018 | 10 | 136 | 392 | 2,148 | 16 | 108 | 317 | 1,554 | 735   | 3,946 |
| 106,019 | 10 | 133 | 392 | 2,196 | 16 | 109 | 317 | 1,532 | 735   | 3,970 |
| 106,020 | 12 | 136 | 488 | 2,253 | 17 | 111 | 352 | 1,546 | 869   | 4,046 |
| 106,021 | 14 | 135 | 537 | 2,292 | 22 | 114 | 392 | 1,536 | 965   | 4,077 |
| 106,022 | 14 | 134 | 536 | 2,288 | 22 | 113 | 390 | 1,530 | 962   | 4,065 |
| 106,023 | 14 | 131 | 554 | 2,324 | 24 | 112 | 406 | 1,509 | 998   | 4,076 |
| 106,024 | 14 | 132 | 556 | 2,351 | 24 | 112 | 410 | 1,518 | 1,004 | 4,113 |
| 106,025 | 14 | 177 | 557 | 3,007 | 24 | 142 | 410 | 1,869 | 1,005 | 5,195 |
| 106,026 | 14 | 182 | 557 | 3,021 | 24 | 144 | 409 | 1,875 | 1,004 | 5,222 |
| 106,027 | 14 | 200 | 564 | 3,290 | 24 | 149 | 410 | 1,966 | 1,012 | 5,605 |
| 106,028 | 14 | 199 | 562 | 3,299 | 24 | 148 | 409 | 1,959 | 1,009 | 5,605 |
| 106,029 | 14 | 198 | 559 | 3,281 | 24 | 147 | 407 | 1,943 | 1,004 | 5,569 |
| 106,030 | 14 | 192 | 559 | 3,252 | 24 | 144 | 406 | 1,895 | 1,003 | 5,483 |
| 106,031 | 14 | 192 | 559 | 3,252 | 24 | 144 | 406 | 1,895 | 1,003 | 5,483 |
| 106,032 | 14 | 189 | 559 | 3,185 | 24 | 143 | 407 | 1,848 | 1,004 | 5,365 |
| 106,033 | 14 | 185 | 559 | 3,133 | 24 | 140 | 407 | 1,816 | 1,004 | 5,274 |
| 106,034 | 15 | 182 | 580 | 3,112 | 28 | 138 | 444 | 1,804 | 1,067 | 5,236 |
| 106,035 | 15 | 185 | 604 | 3,129 | 28 | 141 | 469 | 1,827 | 1,116 | 5,282 |
| 106,036 | 15 | 185 | 601 | 3,140 | 28 | 142 | 467 | 1,827 | 1,111 | 5,294 |
| 106,037 | 15 | 185 | 577 | 3,147 | 26 | 141 | 450 | 1,818 | 1,068 | 5,291 |
| 106,038 | 15 | 186 | 551 | 3,165 | 26 | 142 | 445 | 1,812 | 1,037 | 5,305 |
| 106,039 | 14 | 185 | 495 | 3,159 | 22 | 140 | 380 | 1,798 | 911   | 5,282 |
| 106,040 | 14 | 181 | 477 | 3,103 | 22 | 137 | 359 | 1,704 | 872   | 5,125 |
| 106,041 | 14 | 177 | 455 | 3,028 | 21 | 132 | 344 | 1,651 | 834   | 4,988 |
| 106,042 | 13 | 176 | 457 | 3,010 | 21 | 128 | 357 | 1,636 | 848   | 4,950 |
| 106,043 | 13 | 176 | 449 | 3,011 | 22 | 128 | 338 | 1,630 | 822   | 4,945 |
| 106,044 | 13 | 177 | 450 | 3,007 | 21 | 128 | 326 | 1,626 | 810   | 4,938 |
| 106,045 | 13 | 162 | 451 | 2,762 | 21 | 115 | 327 | 1,467 | 812   | 4,506 |
| 106,046 | 13 | 159 | 450 | 2,674 | 21 | 111 | 327 | 1,419 | 811   | 4,363 |
| 106,047 | 13 | 140 | 448 | 2,384 | 21 | 98  | 325 | 1,260 | 807   | 3,882 |
| 106,048 | 13 | 137 | 448 | 2,330 | 21 | 96  | 324 | 1,242 | 806   | 3,805 |
| 106,049 | 12 | 113 | 448 | 2,142 | 21 | 81  | 328 | 1,072 | 809   | 3,408 |
| 106,050 | 13 | 112 | 448 | 2,107 | 21 | 80  | 328 | 1,057 | 810   | 3,356 |
| 106,051 | 13 | 108 | 448 | 1,955 | 21 | 73  | 329 | 977   | 811   | 3,113 |
| 106,052 | 13 | 108 | 449 | 1,959 | 21 | 73  | 329 | 980   | 812   | 3,120 |
| 106,053 | 13 | 108 | 451 | 1,960 | 21 | 73  | 329 | 977   | 814   | 3,118 |
| 106,054 | 13 | 111 | 451 | 1,953 | 21 | 73  | 329 | 981   | 814   | 3,118 |
| 106,055 | 13 | 108 | 447 | 1,958 | 21 | 73  | 328 | 987   | 809   | 3,126 |

|         |    |     |     |       |    |    |     |       |     |       |
|---------|----|-----|-----|-------|----|----|-----|-------|-----|-------|
| 106,056 | 13 | 113 | 451 | 1,977 | 21 | 73 | 328 | 1,004 | 813 | 3,167 |
| 106,057 | 13 | 108 | 449 | 1,919 | 21 | 70 | 328 | 973   | 811 | 3,070 |
| 106,058 | 13 | 108 | 480 | 1,908 | 23 | 70 | 367 | 956   | 883 | 3,042 |
| 106,059 | 13 | 108 | 481 | 1,908 | 23 | 70 | 367 | 956   | 884 | 3,042 |
| 106,060 | 12 | 108 | 481 | 1,913 | 23 | 70 | 364 | 957   | 880 | 3,048 |
| 106,061 | 12 | 108 | 478 | 1,909 | 23 | 70 | 363 | 951   | 876 | 3,038 |
| 106,062 | 12 | 108 | 475 | 1,895 | 23 | 69 | 363 | 943   | 873 | 3,015 |
| 106,063 | 12 | 106 | 475 | 1,854 | 23 | 69 | 363 | 930   | 873 | 2,959 |
| 106,064 | 12 | 101 | 471 | 1,720 | 23 | 64 | 364 | 880   | 870 | 2,765 |
| 106,065 | 11 | 100 | 452 | 1,698 | 23 | 64 | 355 | 875   | 841 | 2,737 |
| 106,066 | 9  | 98  | 437 | 1,694 | 23 | 62 | 352 | 874   | 821 | 2,728 |
| 106,067 | 7  | 99  | 296 | 1,656 | 16 | 60 | 254 | 828   | 573 | 2,643 |
| 106,068 | 5  | 101 | 233 | 1,651 | 16 | 60 | 227 | 825   | 481 | 2,637 |
| 106,069 | 5  | 97  | 224 | 1,516 | 16 | 52 | 225 | 724   | 470 | 2,389 |
| 106,070 | 5  | 96  | 217 | 1,455 | 15 | 51 | 222 | 710   | 459 | 2,312 |
| 106,071 | 5  | 93  | 200 | 1,398 | 15 | 49 | 217 | 691   | 437 | 2,231 |
| 106,072 | 3  | 91  | 150 | 1,333 | 10 | 46 | 176 | 659   | 339 | 2,129 |
| 106,073 | 3  | 90  | 143 | 1,337 | 9  | 46 | 171 | 659   | 326 | 2,132 |
| 106,074 | 3  | 90  | 131 | 1,274 | 8  | 46 | 158 | 646   | 300 | 2,056 |
| 106,075 | 3  | 45  | 130 | 585   | 8  | 16 | 152 | 283   | 293 | 929   |
| 106,076 | 3  | 39  | 129 | 555   | 8  | 13 | 152 | 266   | 292 | 873   |
| 106,077 | 3  | 39  | 128 | 555   | 8  | 13 | 152 | 266   | 291 | 873   |
| 106,078 | 3  | 21  | 123 | 284   | 8  | 7  | 151 | 175   | 285 | 487   |
| 106,079 | 3  | 20  | 123 | 254   | 8  | 7  | 151 | 156   | 285 | 437   |
| 106,080 | 3  | 19  | 123 | 252   | 8  | 7  | 151 | 151   | 285 | 429   |
| 106,081 | 3  | 19  | 123 | 254   | 8  | 7  | 150 | 150   | 284 | 430   |
| 106,082 | 3  | 19  | 114 | 247   | 7  | 6  | 145 | 140   | 269 | 412   |
| 106,083 | 3  | 19  | 112 | 248   | 6  | 6  | 140 | 143   | 261 | 416   |
| 106,084 | 2  | 19  | 102 | 249   | 4  | 6  | 113 | 143   | 221 | 417   |
| 106,085 | 2  | 19  | 83  | 251   | 4  | 6  | 91  | 142   | 180 | 418   |
| 106,086 | 2  | 16  | 82  | 213   | 4  | 2  | 90  | 116   | 178 | 347   |
| 106,087 | 2  | 16  | 83  | 214   | 4  | 2  | 93  | 116   | 182 | 348   |
| 106,088 | 2  | 16  | 84  | 212   | 4  | 2  | 93  | 115   | 183 | 345   |
| 106,089 | 2  | 15  | 81  | 190   | 4  | 1  | 91  | 110   | 178 | 316   |
| 106,090 | 3  | 15  | 79  | 187   | 4  | 1  | 91  | 109   | 177 | 312   |
| 106,091 | 3  | 15  | 76  | 179   | 3  | 1  | 88  | 105   | 170 | 300   |
| 106,092 | 3  | 15  | 74  | 181   | 3  | 1  | 87  | 105   | 167 | 302   |
| 106,093 | 3  | 15  | 69  | 182   | 3  | 1  | 71  | 104   | 146 | 302   |
| 106,094 | 3  | 15  | 68  | 179   | 2  | 1  | 62  | 100   | 135 | 295   |
| 106,095 | 3  | 14  | 85  | 165   | 2  | 1  | 67  | 91    | 157 | 271   |
| 106,096 | 3  | 13  | 84  | 164   | 2  | 1  | 66  | 88    | 155 | 266   |

|         |    |     |     |       |   |     |     |       |     |       |
|---------|----|-----|-----|-------|---|-----|-----|-------|-----|-------|
| 106,097 | 3  | 13  | 86  | 161   | 2 | 1   | 65  | 86    | 156 | 261   |
| 106,098 | 5  | 14  | 99  | 160   | 2 | 1   | 75  | 88    | 181 | 263   |
| 106,099 | 5  | 14  | 99  | 160   | 2 | 1   | 75  | 89    | 181 | 264   |
| 106,100 | 7  | 14  | 119 | 162   | 3 | 1   | 90  | 86    | 219 | 263   |
| 106,101 | 6  | 14  | 121 | 175   | 3 | 1   | 91  | 103   | 221 | 293   |
| 106,102 | 6  | 14  | 121 | 213   | 3 | 3   | 90  | 152   | 220 | 382   |
| 106,103 | 6  | 16  | 120 | 284   | 3 | 7   | 90  | 191   | 219 | 498   |
| 106,104 | 6  | 22  | 119 | 424   | 3 | 17  | 91  | 277   | 219 | 740   |
| 106,105 | 6  | 21  | 122 | 462   | 3 | 19  | 91  | 287   | 222 | 789   |
| 106,106 | 6  | 22  | 119 | 476   | 3 | 18  | 88  | 298   | 216 | 814   |
| 106,107 | 6  | 22  | 129 | 575   | 2 | 18  | 67  | 319   | 204 | 934   |
| 106,108 | 6  | 23  | 130 | 609   | 2 | 18  | 65  | 344   | 203 | 994   |
| 106,109 | 6  | 38  | 124 | 695   | 2 | 23  | 61  | 441   | 193 | 1,197 |
| 106,110 | 6  | 39  | 123 | 699   | 2 | 23  | 61  | 447   | 192 | 1,208 |
| 106,111 | 6  | 45  | 128 | 736   | 2 | 27  | 66  | 467   | 202 | 1,275 |
| 106,112 | 6  | 52  | 156 | 759   | 2 | 27  | 68  | 478   | 232 | 1,316 |
| 106,113 | 6  | 52  | 155 | 768   | 2 | 27  | 68  | 478   | 231 | 1,325 |
| 106,114 | 7  | 77  | 220 | 991   | 4 | 32  | 94  | 564   | 325 | 1,664 |
| 106,115 | 7  | 77  | 219 | 1,002 | 4 | 32  | 94  | 569   | 324 | 1,680 |
| 106,116 | 7  | 78  | 232 | 1,005 | 5 | 32  | 103 | 571   | 347 | 1,686 |
| 106,117 | 7  | 78  | 234 | 1,006 | 6 | 32  | 103 | 569   | 350 | 1,685 |
| 106,118 | 7  | 78  | 237 | 1,043 | 6 | 32  | 104 | 587   | 354 | 1,740 |
| 106,119 | 7  | 76  | 237 | 1,049 | 6 | 32  | 104 | 594   | 354 | 1,751 |
| 106,120 | 7  | 76  | 236 | 1,050 | 6 | 32  | 104 | 595   | 353 | 1,753 |
| 106,121 | 7  | 78  | 237 | 1,065 | 6 | 33  | 106 | 605   | 356 | 1,781 |
| 106,122 | 8  | 78  | 245 | 1,098 | 6 | 34  | 107 | 623   | 366 | 1,833 |
| 106,123 | 8  | 91  | 247 | 1,419 | 6 | 54  | 108 | 776   | 369 | 2,340 |
| 106,124 | 9  | 103 | 249 | 1,993 | 7 | 67  | 108 | 913   | 373 | 3,076 |
| 106,125 | 9  | 123 | 251 | 2,304 | 7 | 86  | 111 | 1,083 | 378 | 3,596 |
| 106,126 | 9  | 130 | 250 | 2,414 | 7 | 90  | 111 | 1,118 | 377 | 3,752 |
| 106,127 | 9  | 131 | 250 | 2,432 | 7 | 90  | 112 | 1,122 | 378 | 3,775 |
| 106,128 | 9  | 144 | 250 | 2,546 | 7 | 98  | 112 | 1,150 | 378 | 3,938 |
| 106,129 | 9  | 145 | 249 | 2,550 | 7 | 98  | 112 | 1,152 | 377 | 3,945 |
| 106,130 | 10 | 149 | 253 | 2,570 | 7 | 99  | 112 | 1,176 | 382 | 3,994 |
| 106,131 | 10 | 149 | 253 | 2,571 | 7 | 100 | 112 | 1,177 | 382 | 3,997 |
| 106,132 | 10 | 154 | 253 | 2,634 | 8 | 102 | 112 | 1,249 | 383 | 4,139 |
| 106,133 | 10 | 173 | 253 | 2,735 | 8 | 107 | 112 | 1,388 | 383 | 4,403 |
| 106,134 | 10 | 175 | 252 | 2,803 | 8 | 108 | 112 | 1,411 | 382 | 4,497 |
| 106,135 | 10 | 177 | 253 | 2,850 | 8 | 112 | 112 | 1,433 | 383 | 4,572 |
| 106,136 | 10 | 177 | 253 | 2,862 | 8 | 113 | 112 | 1,436 | 383 | 4,588 |
| 106,137 | 10 | 185 | 248 | 2,910 | 8 | 116 | 111 | 1,519 | 377 | 4,730 |

|         |    |     |     |       |   |     |     |       |     |       |
|---------|----|-----|-----|-------|---|-----|-----|-------|-----|-------|
| 106,138 | 10 | 186 | 247 | 2,933 | 8 | 116 | 108 | 1,529 | 373 | 4,764 |
| 106,139 | 10 | 192 | 243 | 3,011 | 8 | 121 | 106 | 1,699 | 367 | 5,023 |
| 106,140 | 10 | 192 | 241 | 3,022 | 8 | 121 | 103 | 1,699 | 362 | 5,034 |
| 106,141 | 9  | 194 | 241 | 3,034 | 8 | 121 | 102 | 1,715 | 360 | 5,064 |
| 106,142 | 9  | 195 | 242 | 3,033 | 9 | 121 | 103 | 1,717 | 363 | 5,066 |
| 106,143 | 9  | 195 | 241 | 3,036 | 9 | 122 | 104 | 1,719 | 363 | 5,072 |
| 106,144 | 8  | 196 | 242 | 3,037 | 9 | 122 | 103 | 1,718 | 362 | 5,073 |
| 106,145 | 8  | 196 | 240 | 3,047 | 9 | 122 | 105 | 1,724 | 362 | 5,089 |
| 106,146 | 8  | 196 | 225 | 3,073 | 9 | 122 | 103 | 1,734 | 345 | 5,125 |
| 106,147 | 8  | 196 | 222 | 3,075 | 9 | 122 | 105 | 1,737 | 344 | 5,130 |
| 106,148 | 6  | 196 | 221 | 3,075 | 9 | 122 | 104 | 1,739 | 340 | 5,132 |
| 106,149 | 6  | 195 | 210 | 3,074 | 9 | 122 | 95  | 1,734 | 320 | 5,125 |
| 106,150 | 5  | 195 | 207 | 3,076 | 9 | 122 | 91  | 1,734 | 312 | 5,127 |
| 106,151 | 4  | 203 | 191 | 3,173 | 8 | 127 | 75  | 1,831 | 278 | 5,334 |
| 106,152 | 4  | 203 | 189 | 3,193 | 8 | 129 | 74  | 1,836 | 275 | 5,361 |
| 106,153 | 4  | 206 | 190 | 3,235 | 8 | 129 | 74  | 1,843 | 276 | 5,413 |
| 106,154 | 4  | 204 | 190 | 3,192 | 8 | 125 | 74  | 1,816 | 276 | 5,337 |
| 106,155 | 4  | 198 | 190 | 3,056 | 8 | 115 | 73  | 1,733 | 275 | 5,102 |
| 106,156 | 4  | 196 | 190 | 3,011 | 8 | 113 | 80  | 1,711 | 282 | 5,031 |
| 106,157 | 4  | 196 | 189 | 2,973 | 8 | 113 | 79  | 1,691 | 280 | 4,973 |
| 106,158 | 4  | 191 | 166 | 2,855 | 7 | 113 | 74  | 1,653 | 251 | 4,812 |
| 106,159 | 4  | 191 | 170 | 2,833 | 7 | 114 | 80  | 1,628 | 261 | 4,766 |
| 106,160 | 4  | 177 | 172 | 2,786 | 7 | 111 | 81  | 1,557 | 264 | 4,631 |
| 106,161 | 4  | 181 | 184 | 2,839 | 7 | 113 | 80  | 1,592 | 275 | 4,725 |
| 106,162 | 4  | 175 | 186 | 2,807 | 7 | 112 | 84  | 1,585 | 281 | 4,679 |
| 106,163 | 4  | 171 | 160 | 2,798 | 7 | 112 | 84  | 1,582 | 255 | 4,663 |
| 106,164 | 6  | 171 | 163 | 2,808 | 6 | 113 | 76  | 1,594 | 251 | 4,686 |
| 106,165 | 5  | 147 | 172 | 2,599 | 6 | 110 | 72  | 1,516 | 255 | 4,372 |
| 106,166 | 5  | 153 | 159 | 2,666 | 5 | 112 | 62  | 1,589 | 231 | 4,520 |
| 106,167 | 5  | 152 | 157 | 2,681 | 4 | 112 | 62  | 1,589 | 228 | 4,534 |
| 106,168 | 5  | 152 | 160 | 2,685 | 4 | 112 | 65  | 1,589 | 234 | 4,538 |
| 106,169 | 5  | 151 | 164 | 2,653 | 4 | 113 | 65  | 1,567 | 238 | 4,484 |
| 106,170 | 5  | 151 | 164 | 2,737 | 4 | 113 | 67  | 1,583 | 240 | 4,584 |
| 106,171 | 5  | 155 | 164 | 2,810 | 4 | 115 | 65  | 1,619 | 238 | 4,699 |
| 106,172 | 4  | 154 | 163 | 2,798 | 4 | 115 | 65  | 1,609 | 236 | 4,676 |
| 106,173 | 4  | 154 | 156 | 2,770 | 4 | 114 | 65  | 1,594 | 229 | 4,632 |
| 106,174 | 4  | 141 | 155 | 2,453 | 4 | 94  | 65  | 1,448 | 228 | 4,136 |
| 106,175 | 4  | 109 | 153 | 1,567 | 3 | 62  | 68  | 1,143 | 228 | 2,881 |
| 106,176 | 4  | 102 | 151 | 1,459 | 3 | 58  | 67  | 1,108 | 225 | 2,727 |
| 106,177 | 4  | 102 | 155 | 1,462 | 3 | 58  | 68  | 1,110 | 230 | 2,732 |
| 106,178 | 4  | 101 | 158 | 1,448 | 3 | 58  | 67  | 1,107 | 232 | 2,714 |

|         |   |    |     |       |   |    |    |       |     |       |
|---------|---|----|-----|-------|---|----|----|-------|-----|-------|
| 106,179 | 4 | 88 | 158 | 1,335 | 3 | 50 | 67 | 1,080 | 232 | 2,553 |
| 106,180 | 4 | 88 | 158 | 1,331 | 3 | 50 | 67 | 1,078 | 232 | 2,547 |
| 106,181 | 4 | 87 | 160 | 1,320 | 4 | 49 | 68 | 1,062 | 236 | 2,518 |
| 106,182 | 4 | 87 | 160 | 1,324 | 3 | 48 | 68 | 1,061 | 235 | 2,520 |
| 106,183 | 4 | 81 | 164 | 1,260 | 3 | 47 | 71 | 995   | 242 | 2,383 |
| 106,184 | 4 | 62 | 165 | 1,158 | 3 | 42 | 74 | 854   | 246 | 2,116 |
| 106,185 | 4 | 60 | 165 | 1,093 | 3 | 42 | 74 | 833   | 246 | 2,028 |
| 106,186 | 4 | 58 | 165 | 1,032 | 3 | 37 | 74 | 807   | 246 | 1,934 |
| 106,187 | 4 | 50 | 165 | 984   | 3 | 34 | 74 | 725   | 246 | 1,793 |
| 106,188 | 4 | 44 | 165 | 876   | 3 | 29 | 74 | 543   | 246 | 1,492 |
| 106,189 | 4 | 44 | 165 | 880   | 3 | 30 | 74 | 546   | 246 | 1,500 |
| 106,190 | 4 | 44 | 165 | 880   | 3 | 30 | 74 | 548   | 246 | 1,502 |
| 106,191 | 4 | 42 | 166 | 859   | 3 | 30 | 74 | 531   | 247 | 1,462 |
| 106,192 | 4 | 43 | 167 | 876   | 3 | 31 | 76 | 547   | 250 | 1,497 |
| 106,193 | 4 | 43 | 166 | 884   | 2 | 31 | 75 | 555   | 247 | 1,513 |
| 106,194 | 4 | 44 | 166 | 896   | 2 | 30 | 74 | 562   | 246 | 1,532 |
| 106,195 | 6 | 45 | 164 | 925   | 2 | 30 | 74 | 573   | 246 | 1,573 |
| 106,196 | 6 | 60 | 164 | 1,063 | 2 | 37 | 73 | 725   | 245 | 1,885 |
| 106,197 | 6 | 61 | 162 | 1,049 | 2 | 38 | 70 | 726   | 240 | 1,874 |
| 106,198 | 6 | 61 | 166 | 1,052 | 2 | 38 | 71 | 725   | 245 | 1,876 |
| 106,199 | 6 | 63 | 166 | 1,098 | 2 | 38 | 71 | 762   | 245 | 1,961 |
| 106,200 | 6 | 65 | 165 | 1,152 | 2 | 38 | 71 | 767   | 244 | 2,022 |
| 106,201 | 6 | 57 | 165 | 1,058 | 2 | 33 | 71 | 672   | 244 | 1,820 |
| 106,202 | 6 | 57 | 165 | 1,065 | 2 | 33 | 71 | 673   | 244 | 1,828 |
| 106,203 | 6 | 58 | 173 | 1,036 | 2 | 31 | 75 | 656   | 256 | 1,781 |
| 106,204 | 7 | 56 | 174 | 976   | 2 | 29 | 77 | 609   | 260 | 1,670 |
| 106,205 | 7 | 57 | 174 | 962   | 2 | 30 | 77 | 608   | 260 | 1,657 |
| 106,206 | 7 | 57 | 173 | 954   | 2 | 30 | 77 | 607   | 259 | 1,648 |
| 106,207 | 8 | 57 | 169 | 953   | 2 | 30 | 73 | 613   | 252 | 1,653 |
| 106,208 | 8 | 56 | 160 | 956   | 2 | 30 | 69 | 613   | 239 | 1,655 |
| 106,209 | 8 | 55 | 159 | 965   | 2 | 31 | 66 | 624   | 235 | 1,675 |
| 106,210 | 8 | 56 | 156 | 1,002 | 2 | 33 | 65 | 646   | 231 | 1,737 |
| 106,211 | 8 | 57 | 152 | 1,022 | 2 | 34 | 64 | 671   | 226 | 1,784 |
| 106,212 | 8 | 53 | 147 | 994   | 2 | 35 | 64 | 658   | 221 | 1,740 |
| 106,213 | 8 | 54 | 139 | 1,017 | 2 | 33 | 56 | 673   | 205 | 1,777 |
| 106,214 | 8 | 57 | 137 | 1,619 | 2 | 41 | 54 | 813   | 201 | 2,530 |
| 106,215 | 6 | 61 | 112 | 1,694 | 1 | 40 | 49 | 852   | 168 | 2,647 |
| 106,216 | 6 | 62 | 60  | 1,747 | 0 | 40 | 40 | 863   | 106 | 2,712 |
| 106,217 | 6 | 58 | 59  | 1,699 | 0 | 38 | 38 | 794   | 103 | 2,589 |
| 106,218 | 6 | 58 | 56  | 1,693 | 0 | 38 | 37 | 793   | 99  | 2,582 |
| 106,219 | 6 | 61 | 56  | 1,716 | 0 | 39 | 40 | 802   | 102 | 2,618 |

|         |   |    |     |       |   |    |    |     |     |       |
|---------|---|----|-----|-------|---|----|----|-----|-----|-------|
| 106,220 | 6 | 60 | 52  | 1,696 | 0 | 38 | 39 | 798 | 97  | 2,592 |
| 106,221 | 6 | 56 | 51  | 1,542 | 0 | 37 | 37 | 749 | 94  | 2,384 |
| 106,222 | 6 | 56 | 52  | 1,545 | 0 | 37 | 37 | 751 | 95  | 2,389 |
| 106,223 | 6 | 56 | 52  | 1,510 | 0 | 36 | 36 | 738 | 94  | 2,340 |
| 106,224 | 6 | 56 | 53  | 1,517 | 0 | 36 | 36 | 741 | 95  | 2,350 |
| 106,225 | 7 | 56 | 55  | 1,521 | 0 | 36 | 35 | 744 | 97  | 2,357 |
| 106,226 | 6 | 56 | 55  | 1,519 | 0 | 36 | 32 | 744 | 93  | 2,355 |
| 106,227 | 6 | 58 | 71  | 1,519 | 0 | 36 | 38 | 751 | 115 | 2,364 |
| 106,228 | 6 | 58 | 70  | 1,520 | 0 | 36 | 38 | 761 | 114 | 2,375 |
| 106,229 | 6 | 58 | 77  | 1,530 | 1 | 40 | 39 | 789 | 123 | 2,417 |
| 106,230 | 5 | 58 | 86  | 1,557 | 1 | 43 | 47 | 833 | 139 | 2,491 |
| 106,231 | 5 | 58 | 93  | 1,590 | 2 | 44 | 58 | 889 | 158 | 2,581 |
| 106,232 | 6 | 55 | 98  | 1,582 | 2 | 44 | 65 | 880 | 171 | 2,561 |
| 106,233 | 6 | 55 | 101 | 1,586 | 2 | 44 | 63 | 881 | 172 | 2,566 |
| 106,234 | 8 | 56 | 111 | 1,584 | 2 | 43 | 68 | 881 | 189 | 2,564 |
| 106,235 | 8 | 56 | 110 | 1,579 | 2 | 43 | 65 | 879 | 185 | 2,557 |
| 106,236 | 8 | 56 | 113 | 1,582 | 2 | 42 | 70 | 881 | 193 | 2,561 |
| 106,237 | 8 | 57 | 113 | 1,583 | 2 | 42 | 70 | 882 | 193 | 2,564 |
| 106,238 | 8 | 57 | 113 | 1,586 | 2 | 42 | 70 | 888 | 193 | 2,573 |
| 106,239 | 8 | 56 | 113 | 1,592 | 2 | 42 | 70 | 894 | 193 | 2,584 |
| 106,240 | 8 | 56 | 113 | 1,594 | 2 | 40 | 70 | 890 | 193 | 2,580 |
| 106,241 | 8 | 56 | 119 | 1,616 | 2 | 40 | 70 | 904 | 199 | 2,616 |
| 106,242 | 8 | 60 | 121 | 1,648 | 2 | 40 | 72 | 934 | 203 | 2,682 |
| 106,243 | 8 | 59 | 122 | 1,659 | 2 | 46 | 70 | 949 | 202 | 2,713 |
| 106,244 | 8 | 58 | 123 | 1,685 | 2 | 47 | 71 | 956 | 204 | 2,746 |
| 106,245 | 8 | 57 | 123 | 1,695 | 2 | 47 | 71 | 955 | 204 | 2,754 |
| 106,246 | 6 | 55 | 126 | 1,669 | 2 | 47 | 73 | 947 | 207 | 2,718 |
| 106,247 | 6 | 40 | 125 | 1,521 | 2 | 40 | 72 | 789 | 205 | 2,390 |
| 106,248 | 7 | 37 | 124 | 1,457 | 2 | 39 | 71 | 737 | 204 | 2,270 |
| 106,249 | 7 | 37 | 123 | 1,478 | 2 | 39 | 72 | 758 | 204 | 2,312 |
| 106,250 | 7 | 39 | 123 | 1,500 | 2 | 40 | 72 | 769 | 204 | 2,348 |
| 106,251 | 8 | 38 | 137 | 1,514 | 2 | 41 | 77 | 797 | 224 | 2,390 |
| 106,252 | 8 | 38 | 138 | 1,523 | 2 | 41 | 81 | 805 | 229 | 2,407 |
| 106,253 | 8 | 38 | 133 | 1,522 | 2 | 41 | 77 | 808 | 220 | 2,409 |
| 106,254 | 7 | 36 | 133 | 1,500 | 2 | 41 | 75 | 800 | 217 | 2,377 |
| 106,255 | 7 | 39 | 130 | 1,524 | 2 | 41 | 76 | 813 | 215 | 2,417 |
| 106,256 | 6 | 38 | 127 | 1,526 | 2 | 41 | 71 | 810 | 206 | 2,415 |
| 106,257 | 6 | 38 | 127 | 1,528 | 2 | 41 | 71 | 809 | 206 | 2,416 |
| 106,258 | 6 | 39 | 127 | 1,528 | 2 | 41 | 71 | 804 | 206 | 2,412 |
| 106,259 | 6 | 39 | 129 | 1,500 | 2 | 39 | 70 | 784 | 207 | 2,362 |
| 106,260 | 6 | 39 | 127 | 1,464 | 2 | 36 | 70 | 764 | 205 | 2,303 |



|         |    |    |     |       |    |    |     |     |     |       |
|---------|----|----|-----|-------|----|----|-----|-----|-----|-------|
| 106,261 | 8  | 39 | 127 | 1,466 | 2  | 36 | 70  | 765 | 207 | 2,306 |
| 106,262 | 8  | 38 | 125 | 1,412 | 2  | 34 | 70  | 734 | 205 | 2,218 |
| 106,263 | 8  | 37 | 124 | 1,386 | 2  | 32 | 70  | 707 | 204 | 2,162 |
| 106,264 | 8  | 37 | 124 | 1,352 | 2  | 31 | 70  | 678 | 204 | 2,098 |
| 106,265 | 9  | 31 | 140 | 736   | 3  | 23 | 76  | 529 | 228 | 1,319 |
| 106,266 | 9  | 25 | 143 | 576   | 3  | 20 | 79  | 461 | 234 | 1,082 |
| 106,267 | 9  | 24 | 143 | 544   | 3  | 20 | 80  | 454 | 235 | 1,042 |
| 106,268 | 9  | 21 | 154 | 503   | 4  | 19 | 94  | 444 | 261 | 987   |
| 106,269 | 9  | 21 | 154 | 504   | 4  | 19 | 94  | 449 | 261 | 993   |
| 106,270 | 9  | 21 | 153 | 504   | 4  | 19 | 91  | 449 | 257 | 993   |
| 106,271 | 9  | 21 | 153 | 498   | 4  | 19 | 91  | 445 | 257 | 983   |
| 106,272 | 9  | 21 | 153 | 499   | 4  | 19 | 91  | 441 | 257 | 980   |
| 106,273 | 9  | 21 | 158 | 497   | 4  | 19 | 93  | 439 | 264 | 976   |
| 106,274 | 9  | 20 | 161 | 496   | 4  | 19 | 93  | 439 | 267 | 974   |
| 106,275 | 9  | 20 | 171 | 489   | 4  | 19 | 94  | 436 | 278 | 964   |
| 106,276 | 10 | 20 | 170 | 486   | 5  | 19 | 95  | 431 | 280 | 956   |
| 106,277 | 10 | 20 | 167 | 488   | 5  | 19 | 93  | 436 | 275 | 963   |
| 106,278 | 10 | 18 | 154 | 490   | 5  | 19 | 87  | 429 | 256 | 956   |
| 106,279 | 11 | 19 | 185 | 490   | 6  | 19 | 113 | 418 | 315 | 946   |
| 106,280 | 11 | 19 | 184 | 498   | 6  | 16 | 119 | 401 | 320 | 934   |
| 106,281 | 15 | 21 | 269 | 488   | 10 | 13 | 166 | 367 | 460 | 889   |
| 106,282 | 15 | 24 | 289 | 463   | 9  | 12 | 158 | 322 | 471 | 821   |
| 106,283 | 14 | 24 | 304 | 468   | 11 | 12 | 153 | 327 | 482 | 831   |
| 106,284 | 14 | 24 | 298 | 466   | 11 | 13 | 152 | 334 | 475 | 837   |
| 106,285 | 12 | 23 | 287 | 465   | 11 | 13 | 147 | 327 | 457 | 828   |
| 106,286 | 14 | 25 | 338 | 472   | 12 | 13 | 163 | 329 | 527 | 839   |
| 106,287 | 14 | 25 | 338 | 469   | 12 | 13 | 163 | 327 | 527 | 834   |
| 106,288 | 16 | 24 | 407 | 468   | 14 | 13 | 209 | 326 | 646 | 831   |
| 106,289 | 16 | 24 | 408 | 465   | 14 | 13 | 210 | 320 | 648 | 822   |
| 106,290 | 16 | 24 | 409 | 457   | 14 | 13 | 210 | 312 | 649 | 806   |
| 106,291 | 16 | 24 | 412 | 452   | 14 | 13 | 211 | 308 | 653 | 797   |
| 106,292 | 16 | 24 | 405 | 430   | 14 | 13 | 211 | 293 | 646 | 760   |
| 106,293 | 16 | 20 | 402 | 389   | 14 | 13 | 209 | 261 | 641 | 683   |
| 106,294 | 16 | 20 | 418 | 361   | 14 | 7  | 216 | 233 | 664 | 621   |
| 106,295 | 16 | 20 | 430 | 296   | 14 | 6  | 217 | 210 | 677 | 532   |
| 106,296 | 16 | 20 | 437 | 302   | 14 | 6  | 220 | 211 | 687 | 539   |
| 106,297 | 17 | 21 | 444 | 307   | 14 | 6  | 223 | 215 | 698 | 549   |
| 106,298 | 19 | 24 | 451 | 337   | 14 | 8  | 224 | 225 | 708 | 594   |
| 106,299 | 18 | 26 | 451 | 344   | 14 | 8  | 222 | 231 | 705 | 609   |
| 106,300 | 18 | 28 | 464 | 327   | 14 | 8  | 226 | 212 | 722 | 575   |
| 106,301 | 18 | 26 | 461 | 308   | 14 | 7  | 225 | 201 | 718 | 542   |

|         |    |    |     |     |    |   |     |     |     |     |
|---------|----|----|-----|-----|----|---|-----|-----|-----|-----|
| 106,302 | 17 | 26 | 461 | 239 | 14 | 6 | 224 | 169 | 716 | 440 |
| 106,303 | 17 | 26 | 465 | 247 | 14 | 6 | 225 | 170 | 721 | 449 |
| 106,304 | 17 | 26 | 462 | 243 | 14 | 6 | 225 | 166 | 718 | 441 |
| 106,305 | 18 | 26 | 513 | 245 | 15 | 6 | 230 | 163 | 776 | 440 |
| 106,306 | 18 | 24 | 529 | 223 | 15 | 6 | 232 | 148 | 794 | 401 |
| 106,307 | 18 | 23 | 529 | 199 | 15 | 5 | 233 | 132 | 795 | 359 |
| 106,308 | 18 | 23 | 531 | 207 | 15 | 5 | 233 | 138 | 797 | 373 |
| 106,309 | 18 | 23 | 530 | 207 | 15 | 5 | 233 | 138 | 796 | 373 |
| 106,310 | 18 | 23 | 530 | 208 | 15 | 5 | 233 | 137 | 796 | 373 |
| 106,311 | 18 | 22 | 532 | 209 | 15 | 5 | 233 | 138 | 798 | 374 |
| 106,312 | 16 | 22 | 532 | 208 | 15 | 5 | 233 | 136 | 796 | 371 |
| 106,313 | 16 | 22 | 532 | 212 | 15 | 4 | 233 | 129 | 796 | 367 |
| 106,314 | 16 | 22 | 532 | 212 | 15 | 4 | 233 | 129 | 796 | 367 |
| 106,315 | 16 | 21 | 543 | 215 | 15 | 4 | 235 | 129 | 809 | 369 |
| 106,316 | 15 | 21 | 543 | 216 | 14 | 3 | 232 | 128 | 804 | 368 |
| 106,317 | 17 | 20 | 571 | 214 | 14 | 3 | 234 | 121 | 836 | 358 |
| 106,318 | 21 | 20 | 619 | 214 | 18 | 3 | 276 | 121 | 934 | 358 |
| 106,319 | 21 | 20 | 614 | 214 | 17 | 3 | 271 | 121 | 923 | 358 |
| 106,320 | 22 | 20 | 624 | 214 | 17 | 3 | 273 | 121 | 936 | 358 |
| 106,321 | 22 | 20 | 624 | 214 | 17 | 3 | 274 | 121 | 937 | 358 |
| 106,322 | 22 | 20 | 618 | 214 | 17 | 3 | 273 | 120 | 930 | 357 |
| 106,323 | 22 | 20 | 626 | 212 | 17 | 3 | 278 | 118 | 943 | 353 |
| 106,324 | 22 | 20 | 623 | 214 | 17 | 3 | 278 | 123 | 940 | 360 |
| 106,325 | 22 | 20 | 612 | 215 | 17 | 3 | 277 | 123 | 928 | 361 |
| 106,326 | 20 | 20 | 611 | 215 | 16 | 3 | 276 | 122 | 923 | 360 |
| 106,327 | 20 | 20 | 607 | 219 | 16 | 3 | 275 | 126 | 918 | 368 |
| 106,328 | 20 | 20 | 600 | 220 | 16 | 3 | 270 | 120 | 906 | 363 |
| 106,329 | 19 | 20 | 579 | 220 | 15 | 3 | 249 | 126 | 862 | 369 |
| 106,330 | 19 | 20 | 580 | 239 | 15 | 5 | 249 | 151 | 863 | 415 |
| 106,331 | 19 | 20 | 576 | 252 | 14 | 8 | 242 | 180 | 851 | 460 |
| 106,332 | 15 | 20 | 490 | 253 | 10 | 8 | 189 | 187 | 704 | 468 |
| 106,333 | 15 | 17 | 459 | 276 | 10 | 9 | 187 | 194 | 671 | 496 |
| 106,334 | 15 | 17 | 439 | 278 | 8  | 9 | 184 | 192 | 646 | 496 |
| 106,335 | 13 | 17 | 385 | 273 | 7  | 8 | 164 | 183 | 569 | 481 |
| 106,336 | 11 | 15 | 322 | 264 | 5  | 8 | 123 | 181 | 461 | 468 |
| 106,337 | 11 | 15 | 319 | 266 | 5  | 8 | 121 | 183 | 456 | 472 |
| 106,338 | 12 | 15 | 318 | 268 | 5  | 8 | 118 | 187 | 453 | 478 |
| 106,339 | 12 | 15 | 317 | 271 | 5  | 8 | 117 | 189 | 451 | 483 |
| 106,340 | 12 | 15 | 316 | 286 | 5  | 8 | 117 | 199 | 450 | 508 |
| 106,341 | 12 | 15 | 316 | 297 | 5  | 9 | 117 | 205 | 450 | 526 |
| 106,342 | 12 | 15 | 313 | 321 | 5  | 9 | 116 | 215 | 446 | 560 |

|         |    |    |     |     |    |    |     |     |     |       |
|---------|----|----|-----|-----|----|----|-----|-----|-----|-------|
| 106,343 | 12 | 15 | 303 | 346 | 5  | 9  | 109 | 236 | 429 | 606   |
| 106,344 | 12 | 17 | 301 | 396 | 5  | 10 | 109 | 247 | 427 | 670   |
| 106,345 | 12 | 17 | 296 | 400 | 5  | 10 | 109 | 251 | 422 | 678   |
| 106,346 | 12 | 17 | 283 | 398 | 5  | 10 | 107 | 254 | 407 | 679   |
| 106,347 | 12 | 18 | 276 | 402 | 5  | 10 | 104 | 258 | 397 | 688   |
| 106,348 | 11 | 17 | 268 | 399 | 5  | 10 | 99  | 255 | 383 | 681   |
| 106,349 | 9  | 12 | 264 | 367 | 5  | 10 | 99  | 241 | 377 | 630   |
| 106,350 | 9  | 14 | 262 | 416 | 5  | 12 | 100 | 296 | 376 | 738   |
| 106,351 | 9  | 13 | 248 | 429 | 5  | 16 | 95  | 302 | 357 | 760   |
| 106,352 | 9  | 14 | 248 | 435 | 5  | 18 | 95  | 311 | 357 | 778   |
| 106,353 | 9  | 14 | 237 | 456 | 5  | 18 | 92  | 313 | 343 | 801   |
| 106,354 | 9  | 14 | 231 | 439 | 5  | 18 | 87  | 314 | 332 | 785   |
| 106,355 | 8  | 14 | 180 | 445 | 4  | 19 | 82  | 323 | 274 | 801   |
| 106,356 | 8  | 14 | 165 | 439 | 4  | 20 | 81  | 323 | 258 | 796   |
| 106,357 | 9  | 13 | 176 | 449 | 4  | 20 | 86  | 330 | 275 | 812   |
| 106,358 | 9  | 13 | 176 | 451 | 4  | 21 | 85  | 334 | 274 | 819   |
| 106,359 | 9  | 13 | 174 | 443 | 4  | 21 | 85  | 328 | 272 | 805   |
| 106,360 | 9  | 13 | 175 | 446 | 4  | 22 | 86  | 330 | 274 | 811   |
| 106,361 | 9  | 13 | 179 | 445 | 4  | 22 | 94  | 330 | 286 | 810   |
| 106,362 | 9  | 13 | 179 | 447 | 4  | 22 | 94  | 332 | 286 | 814   |
| 106,363 | 10 | 13 | 190 | 462 | 4  | 27 | 98  | 349 | 302 | 851   |
| 106,364 | 10 | 12 | 188 | 467 | 6  | 28 | 98  | 343 | 302 | 850   |
| 106,365 | 10 | 20 | 186 | 522 | 6  | 35 | 98  | 434 | 300 | 1,011 |
| 106,366 | 12 | 41 | 206 | 713 | 11 | 51 | 109 | 676 | 338 | 1,481 |
| 106,367 | 13 | 60 | 206 | 834 | 11 | 59 | 109 | 758 | 339 | 1,711 |
| 106,368 | 13 | 67 | 192 | 863 | 12 | 61 | 113 | 763 | 330 | 1,754 |
| 106,369 | 10 | 67 | 155 | 873 | 10 | 61 | 87  | 763 | 262 | 1,764 |
| 106,370 | 10 | 68 | 148 | 877 | 10 | 62 | 78  | 766 | 246 | 1,773 |
| 106,371 | 9  | 68 | 138 | 877 | 10 | 62 | 76  | 767 | 233 | 1,774 |
| 106,372 | 9  | 68 | 148 | 878 | 10 | 62 | 85  | 767 | 252 | 1,775 |
| 106,373 | 9  | 68 | 154 | 879 | 11 | 62 | 88  | 767 | 262 | 1,776 |
| 106,374 | 9  | 68 | 167 | 879 | 14 | 62 | 101 | 767 | 291 | 1,776 |
| 106,375 | 9  | 68 | 167 | 878 | 14 | 62 | 103 | 762 | 293 | 1,770 |
| 106,376 | 9  | 68 | 168 | 877 | 14 | 62 | 104 | 762 | 295 | 1,769 |
| 106,377 | 9  | 68 | 168 | 880 | 14 | 62 | 104 | 764 | 295 | 1,774 |
| 106,378 | 9  | 68 | 166 | 875 | 14 | 62 | 104 | 760 | 293 | 1,765 |
| 106,379 | 9  | 68 | 167 | 872 | 14 | 62 | 104 | 760 | 294 | 1,762 |
| 106,380 | 9  | 68 | 168 | 869 | 14 | 62 | 106 | 754 | 297 | 1,753 |
| 106,381 | 9  | 64 | 169 | 748 | 14 | 56 | 113 | 651 | 305 | 1,519 |
| 106,382 | 9  | 65 | 168 | 752 | 14 | 56 | 113 | 653 | 304 | 1,526 |
| 106,383 | 9  | 65 | 158 | 753 | 14 | 56 | 110 | 652 | 291 | 1,526 |

|         |    |    |     |     |    |    |     |     |     |       |
|---------|----|----|-----|-----|----|----|-----|-----|-----|-------|
| 106,384 | 9  | 65 | 158 | 752 | 14 | 56 | 109 | 652 | 290 | 1,525 |
| 106,385 | 9  | 65 | 158 | 752 | 14 | 56 | 109 | 652 | 290 | 1,525 |
| 106,386 | 9  | 65 | 157 | 751 | 14 | 56 | 109 | 652 | 289 | 1,524 |
| 106,387 | 9  | 65 | 157 | 749 | 14 | 56 | 109 | 650 | 289 | 1,520 |
| 106,388 | 9  | 65 | 156 | 749 | 14 | 56 | 109 | 650 | 288 | 1,520 |
| 106,389 | 8  | 65 | 155 | 745 | 14 | 56 | 109 | 645 | 286 | 1,511 |
| 106,390 | 8  | 65 | 166 | 742 | 14 | 56 | 113 | 643 | 301 | 1,506 |
| 106,391 | 8  | 65 | 166 | 694 | 14 | 55 | 113 | 617 | 301 | 1,431 |
| 106,392 | 8  | 65 | 166 | 706 | 14 | 55 | 113 | 618 | 301 | 1,444 |
| 106,393 | 8  | 65 | 166 | 706 | 14 | 55 | 113 | 618 | 301 | 1,444 |
| 106,394 | 8  | 65 | 166 | 681 | 14 | 55 | 113 | 596 | 301 | 1,397 |
| 106,395 | 8  | 63 | 166 | 630 | 14 | 54 | 113 | 585 | 301 | 1,332 |
| 106,396 | 8  | 64 | 165 | 637 | 14 | 57 | 113 | 594 | 300 | 1,352 |
| 106,397 | 8  | 64 | 165 | 655 | 14 | 58 | 113 | 598 | 300 | 1,375 |
| 106,398 | 8  | 64 | 164 | 667 | 14 | 59 | 113 | 604 | 299 | 1,394 |
| 106,399 | 8  | 65 | 164 | 671 | 14 | 59 | 113 | 607 | 299 | 1,402 |
| 106,400 | 8  | 72 | 161 | 741 | 14 | 58 | 112 | 680 | 295 | 1,551 |
| 106,401 | 8  | 70 | 161 | 720 | 14 | 56 | 111 | 629 | 294 | 1,475 |
| 106,402 | 8  | 72 | 161 | 737 | 14 | 53 | 111 | 645 | 294 | 1,507 |
| 106,403 | 8  | 71 | 161 | 728 | 14 | 51 | 111 | 632 | 294 | 1,482 |
| 106,404 | 9  | 72 | 170 | 731 | 14 | 52 | 116 | 640 | 309 | 1,495 |
| 106,405 | 9  | 72 | 172 | 729 | 14 | 52 | 117 | 634 | 312 | 1,487 |
| 106,406 | 10 | 72 | 172 | 720 | 14 | 50 | 118 | 622 | 314 | 1,464 |
| 106,407 | 10 | 72 | 169 | 721 | 14 | 50 | 118 | 622 | 311 | 1,465 |
| 106,408 | 9  | 74 | 162 | 711 | 14 | 50 | 112 | 617 | 297 | 1,452 |
| 106,409 | 9  | 74 | 162 | 709 | 14 | 49 | 112 | 613 | 297 | 1,445 |
| 106,410 | 9  | 74 | 160 | 706 | 14 | 48 | 112 | 611 | 295 | 1,439 |
| 106,411 | 9  | 74 | 162 | 707 | 14 | 48 | 114 | 611 | 299 | 1,440 |
| 106,412 | 9  | 74 | 156 | 706 | 14 | 48 | 105 | 610 | 284 | 1,438 |
| 106,413 | 8  | 74 | 147 | 690 | 14 | 43 | 102 | 590 | 271 | 1,397 |
| 106,414 | 8  | 74 | 150 | 690 | 14 | 43 | 101 | 593 | 273 | 1,400 |
| 106,415 | 9  | 74 | 149 | 676 | 12 | 42 | 102 | 589 | 272 | 1,381 |
| 106,416 | 9  | 66 | 154 | 619 | 13 | 35 | 105 | 496 | 281 | 1,216 |
| 106,417 | 7  | 26 | 123 | 302 | 8  | 11 | 92  | 176 | 230 | 515   |
| 106,418 | 6  | 26 | 124 | 303 | 8  | 11 | 93  | 180 | 231 | 520   |
| 106,419 | 4  | 19 | 109 | 277 | 7  | 9  | 87  | 179 | 207 | 484   |
| 106,420 | 3  | 19 | 98  | 269 | 5  | 9  | 68  | 179 | 174 | 476   |
| 106,421 | 3  | 18 | 92  | 265 | 5  | 8  | 62  | 176 | 162 | 467   |
| 106,422 | 3  | 18 | 81  | 263 | 5  | 8  | 55  | 175 | 144 | 464   |
| 106,423 | 3  | 18 | 75  | 265 | 4  | 8  | 52  | 176 | 134 | 467   |
| 106,424 | 3  | 18 | 61  | 266 | 1  | 8  | 39  | 177 | 104 | 469   |

|         |   |     |     |       |   |     |    |       |     |       |
|---------|---|-----|-----|-------|---|-----|----|-------|-----|-------|
| 106,425 | 3 | 19  | 61  | 268   | 1 | 8   | 37 | 177   | 102 | 472   |
| 106,426 | 3 | 20  | 59  | 281   | 1 | 10  | 36 | 212   | 99  | 523   |
| 106,427 | 3 | 20  | 59  | 284   | 1 | 11  | 36 | 216   | 99  | 531   |
| 106,428 | 3 | 23  | 64  | 377   | 1 | 14  | 36 | 279   | 104 | 693   |
| 106,429 | 3 | 34  | 66  | 516   | 1 | 16  | 36 | 372   | 106 | 938   |
| 106,430 | 3 | 37  | 64  | 536   | 1 | 17  | 36 | 384   | 104 | 974   |
| 106,431 | 3 | 39  | 60  | 557   | 1 | 17  | 34 | 395   | 98  | 1,008 |
| 106,432 | 3 | 38  | 60  | 554   | 1 | 17  | 27 | 395   | 91  | 1,004 |
| 106,433 | 3 | 39  | 60  | 568   | 1 | 18  | 27 | 403   | 91  | 1,028 |
| 106,434 | 3 | 40  | 60  | 576   | 1 | 19  | 27 | 408   | 91  | 1,043 |
| 106,435 | 3 | 42  | 61  | 611   | 1 | 23  | 28 | 442   | 93  | 1,118 |
| 106,436 | 3 | 42  | 62  | 629   | 1 | 23  | 28 | 460   | 94  | 1,154 |
| 106,437 | 6 | 61  | 65  | 810   | 1 | 38  | 28 | 638   | 100 | 1,547 |
| 106,438 | 6 | 84  | 65  | 941   | 1 | 54  | 28 | 826   | 100 | 1,905 |
| 106,439 | 6 | 85  | 61  | 955   | 1 | 55  | 27 | 835   | 95  | 1,930 |
| 106,440 | 6 | 124 | 59  | 1,150 | 1 | 63  | 27 | 1,101 | 93  | 2,438 |
| 106,441 | 6 | 125 | 59  | 1,164 | 1 | 63  | 25 | 1,106 | 91  | 2,458 |
| 106,442 | 6 | 137 | 116 | 1,287 | 2 | 71  | 48 | 1,250 | 172 | 2,745 |
| 106,443 | 6 | 141 | 123 | 1,374 | 2 | 73  | 54 | 1,306 | 185 | 2,894 |
| 106,444 | 6 | 141 | 123 | 1,376 | 2 | 73  | 54 | 1,306 | 185 | 2,896 |
| 106,445 | 6 | 149 | 125 | 1,451 | 2 | 75  | 57 | 1,354 | 190 | 3,029 |
| 106,446 | 6 | 155 | 125 | 1,512 | 2 | 77  | 59 | 1,390 | 192 | 3,134 |
| 106,447 | 6 | 154 | 125 | 1,502 | 2 | 74  | 59 | 1,378 | 192 | 3,108 |
| 106,448 | 6 | 154 | 125 | 1,488 | 2 | 73  | 61 | 1,371 | 194 | 3,086 |
| 106,449 | 6 | 153 | 125 | 1,485 | 2 | 72  | 61 | 1,371 | 194 | 3,081 |
| 106,450 | 6 | 174 | 125 | 1,794 | 2 | 86  | 61 | 1,549 | 194 | 3,603 |
| 106,451 | 6 | 167 | 125 | 1,750 | 2 | 87  | 61 | 1,482 | 194 | 3,486 |
| 106,452 | 6 | 177 | 125 | 1,821 | 2 | 94  | 62 | 1,541 | 195 | 3,633 |
| 106,453 | 6 | 178 | 124 | 2,027 | 2 | 102 | 62 | 1,568 | 194 | 3,875 |
| 106,454 | 6 | 179 | 117 | 2,050 | 2 | 102 | 58 | 1,576 | 183 | 3,907 |
| 106,455 | 6 | 179 | 118 | 2,038 | 2 | 101 | 58 | 1,567 | 184 | 3,885 |
| 106,456 | 7 | 185 | 116 | 2,069 | 2 | 103 | 57 | 1,589 | 182 | 3,946 |
| 106,457 | 6 | 185 | 116 | 2,068 | 2 | 103 | 55 | 1,591 | 179 | 3,947 |
| 106,458 | 6 | 184 | 114 | 2,089 | 2 | 105 | 55 | 1,595 | 177 | 3,973 |
| 106,459 | 6 | 184 | 114 | 2,089 | 2 | 105 | 55 | 1,598 | 177 | 3,976 |
| 106,460 | 6 | 184 | 114 | 2,092 | 2 | 105 | 55 | 1,599 | 177 | 3,980 |
| 106,461 | 6 | 184 | 114 | 2,096 | 3 | 105 | 55 | 1,602 | 178 | 3,987 |
| 106,462 | 6 | 184 | 112 | 2,097 | 3 | 105 | 52 | 1,602 | 173 | 3,988 |
| 106,463 | 6 | 184 | 112 | 2,104 | 3 | 105 | 52 | 1,606 | 173 | 3,999 |
| 106,464 | 6 | 184 | 111 | 2,115 | 3 | 106 | 52 | 1,612 | 172 | 4,017 |
| 106,465 | 6 | 187 | 108 | 2,128 | 3 | 106 | 52 | 1,614 | 169 | 4,035 |

|         |    |     |     |       |   |     |    |       |     |       |
|---------|----|-----|-----|-------|---|-----|----|-------|-----|-------|
| 106,466 | 5  | 188 | 108 | 2,133 | 3 | 106 | 51 | 1,622 | 167 | 4,049 |
| 106,467 | 5  | 188 | 99  | 2,133 | 2 | 106 | 48 | 1,622 | 154 | 4,049 |
| 106,468 | 5  | 188 | 96  | 2,133 | 2 | 106 | 46 | 1,623 | 149 | 4,050 |
| 106,469 | 5  | 188 | 91  | 2,133 | 2 | 106 | 45 | 1,620 | 143 | 4,047 |
| 106,470 | 5  | 188 | 89  | 2,131 | 2 | 106 | 41 | 1,616 | 137 | 4,041 |
| 106,471 | 5  | 188 | 89  | 2,133 | 2 | 106 | 41 | 1,621 | 137 | 4,048 |
| 106,472 | 5  | 188 | 89  | 2,137 | 2 | 106 | 41 | 1,624 | 137 | 4,055 |
| 106,473 | 5  | 188 | 89  | 2,145 | 2 | 106 | 40 | 1,629 | 136 | 4,068 |
| 106,474 | 5  | 189 | 89  | 2,147 | 2 | 109 | 40 | 1,647 | 136 | 4,092 |
| 106,475 | 5  | 189 | 89  | 2,146 | 2 | 109 | 40 | 1,648 | 136 | 4,092 |
| 106,476 | 5  | 190 | 89  | 2,149 | 2 | 110 | 40 | 1,659 | 136 | 4,108 |
| 106,477 | 6  | 189 | 87  | 2,141 | 2 | 108 | 41 | 1,624 | 136 | 4,062 |
| 106,478 | 6  | 189 | 84  | 2,138 | 2 | 107 | 41 | 1,620 | 133 | 4,054 |
| 106,479 | 6  | 186 | 85  | 2,043 | 2 | 104 | 41 | 1,559 | 134 | 3,892 |
| 106,480 | 6  | 175 | 84  | 1,907 | 2 | 102 | 46 | 1,468 | 138 | 3,652 |
| 106,481 | 6  | 170 | 84  | 1,867 | 2 | 101 | 46 | 1,444 | 138 | 3,582 |
| 106,482 | 6  | 170 | 84  | 1,867 | 2 | 101 | 46 | 1,444 | 138 | 3,582 |
| 106,483 | 6  | 170 | 83  | 1,867 | 2 | 101 | 46 | 1,442 | 137 | 3,580 |
| 106,484 | 6  | 169 | 84  | 1,852 | 2 | 100 | 46 | 1,435 | 138 | 3,556 |
| 106,485 | 6  | 168 | 83  | 1,845 | 2 | 99  | 45 | 1,430 | 136 | 3,542 |
| 106,486 | 6  | 166 | 83  | 1,810 | 2 | 95  | 45 | 1,399 | 136 | 3,470 |
| 106,487 | 6  | 167 | 84  | 1,793 | 2 | 95  | 46 | 1,383 | 138 | 3,438 |
| 106,488 | 3  | 149 | 81  | 1,620 | 2 | 82  | 46 | 1,205 | 132 | 3,056 |
| 106,489 | 3  | 126 | 77  | 1,492 | 2 | 66  | 45 | 1,019 | 127 | 2,703 |
| 106,490 | 3  | 125 | 69  | 1,482 | 2 | 65  | 43 | 1,011 | 117 | 2,683 |
| 106,491 | 3  | 86  | 52  | 1,289 | 2 | 57  | 41 | 747   | 98  | 2,179 |
| 106,492 | 3  | 85  | 30  | 1,275 | 1 | 57  | 26 | 742   | 60  | 2,159 |
| 106,493 | 3  | 73  | 21  | 1,148 | 1 | 49  | 22 | 598   | 47  | 1,868 |
| 106,494 | 3  | 69  | 17  | 1,050 | 1 | 47  | 16 | 542   | 37  | 1,708 |
| 106,495 | 3  | 69  | 19  | 1,048 | 1 | 47  | 17 | 542   | 40  | 1,706 |
| 106,496 | 3  | 61  | 22  | 973   | 1 | 45  | 16 | 496   | 42  | 1,575 |
| 106,497 | 3  | 55  | 22  | 912   | 1 | 43  | 15 | 460   | 41  | 1,470 |
| 106,498 | 3  | 55  | 22  | 911   | 1 | 43  | 13 | 458   | 39  | 1,467 |
| 106,499 | 3  | 55  | 22  | 901   | 1 | 43  | 13 | 457   | 39  | 1,456 |
| 106,500 | 10 | 55  | 55  | 888   | 3 | 43  | 50 | 447   | 118 | 1,433 |
| 106,501 | 10 | 33  | 55  | 574   | 3 | 29  | 57 | 265   | 125 | 901   |
| 106,502 | 10 | 23  | 54  | 442   | 3 | 20  | 57 | 189   | 124 | 674   |
| 106,503 | 10 | 19  | 58  | 202   | 3 | 11  | 58 | 138   | 129 | 370   |
| 106,504 | 10 | 19  | 58  | 203   | 3 | 11  | 59 | 139   | 130 | 372   |
| 106,505 | 9  | 10  | 58  | 134   | 3 | 9   | 58 | 105   | 128 | 258   |
| 106,506 | 9  | 10  | 58  | 134   | 3 | 9   | 58 | 105   | 128 | 258   |

|         |   |    |     |       |   |    |    |       |     |       |
|---------|---|----|-----|-------|---|----|----|-------|-----|-------|
| 106,507 | 8 | 10 | 57  | 134   | 3 | 9  | 58 | 105   | 126 | 258   |
| 106,508 | 9 | 9  | 61  | 105   | 3 | 7  | 58 | 93    | 131 | 214   |
| 106,509 | 9 | 9  | 62  | 106   | 3 | 7  | 58 | 93    | 132 | 215   |
| 106,510 | 9 | 9  | 63  | 106   | 3 | 7  | 58 | 93    | 133 | 215   |
| 106,511 | 9 | 9  | 68  | 112   | 3 | 7  | 60 | 98    | 140 | 226   |
| 106,512 | 9 | 9  | 71  | 153   | 2 | 9  | 60 | 107   | 142 | 278   |
| 106,513 | 9 | 10 | 72  | 187   | 2 | 10 | 61 | 149   | 144 | 356   |
| 106,514 | 9 | 23 | 85  | 390   | 3 | 17 | 65 | 253   | 162 | 683   |
| 106,515 | 9 | 28 | 87  | 451   | 3 | 21 | 65 | 287   | 164 | 787   |
| 106,516 | 9 | 32 | 92  | 534   | 3 | 23 | 66 | 322   | 170 | 911   |
| 106,517 | 9 | 34 | 95  | 564   | 4 | 23 | 66 | 338   | 174 | 959   |
| 106,518 | 9 | 34 | 96  | 576   | 4 | 23 | 66 | 344   | 175 | 977   |
| 106,519 | 9 | 35 | 96  | 600   | 4 | 25 | 67 | 368   | 176 | 1,028 |
| 106,520 | 9 | 35 | 96  | 600   | 4 | 25 | 67 | 369   | 176 | 1,029 |
| 106,521 | 9 | 35 | 97  | 601   | 4 | 25 | 69 | 370   | 179 | 1,031 |
| 106,522 | 9 | 35 | 105 | 627   | 5 | 25 | 70 | 382   | 189 | 1,069 |
| 106,523 | 9 | 35 | 108 | 636   | 6 | 22 | 72 | 358   | 195 | 1,051 |
| 106,524 | 9 | 41 | 108 | 730   | 6 | 22 | 72 | 391   | 195 | 1,184 |
| 106,525 | 9 | 46 | 108 | 812   | 6 | 25 | 72 | 437   | 195 | 1,320 |
| 106,526 | 9 | 50 | 109 | 859   | 6 | 27 | 72 | 457   | 196 | 1,393 |
| 106,527 | 9 | 53 | 111 | 894   | 6 | 28 | 72 | 472   | 198 | 1,447 |
| 106,528 | 8 | 56 | 111 | 913   | 6 | 28 | 71 | 477   | 196 | 1,474 |
| 106,529 | 8 | 56 | 110 | 929   | 6 | 28 | 71 | 480   | 195 | 1,493 |
| 106,530 | 8 | 57 | 110 | 937   | 6 | 28 | 66 | 492   | 190 | 1,514 |
| 106,531 | 8 | 58 | 110 | 951   | 6 | 28 | 66 | 511   | 190 | 1,548 |
| 106,532 | 8 | 61 | 110 | 959   | 6 | 28 | 66 | 517   | 190 | 1,565 |
| 106,533 | 8 | 63 | 110 | 1,018 | 6 | 32 | 67 | 577   | 191 | 1,690 |
| 106,534 | 8 | 63 | 109 | 1,033 | 6 | 32 | 67 | 615   | 190 | 1,743 |
| 106,535 | 8 | 64 | 107 | 1,104 | 6 | 34 | 67 | 720   | 188 | 1,922 |
| 106,536 | 8 | 64 | 106 | 1,129 | 6 | 35 | 67 | 740   | 187 | 1,968 |
| 106,537 | 8 | 69 | 107 | 1,512 | 6 | 41 | 66 | 881   | 187 | 2,503 |
| 106,538 | 8 | 72 | 108 | 1,707 | 6 | 51 | 67 | 1,028 | 189 | 2,858 |
| 106,539 | 8 | 74 | 108 | 1,776 | 6 | 51 | 67 | 1,048 | 189 | 2,949 |
| 106,540 | 8 | 76 | 107 | 1,803 | 6 | 52 | 67 | 1,054 | 188 | 2,985 |
| 106,541 | 8 | 76 | 107 | 1,809 | 6 | 52 | 67 | 1,057 | 188 | 2,994 |
| 106,542 | 8 | 76 | 106 | 1,812 | 6 | 52 | 67 | 1,055 | 187 | 2,995 |
| 106,543 | 8 | 76 | 106 | 1,813 | 6 | 52 | 67 | 1,054 | 187 | 2,995 |
| 106,544 | 8 | 78 | 106 | 1,823 | 6 | 53 | 70 | 1,075 | 190 | 3,029 |
| 106,545 | 8 | 78 | 109 | 1,831 | 6 | 54 | 70 | 1,085 | 193 | 3,048 |
| 106,546 | 8 | 78 | 108 | 1,841 | 6 | 56 | 72 | 1,098 | 194 | 3,073 |
| 106,547 | 8 | 80 | 104 | 1,867 | 6 | 58 | 71 | 1,128 | 189 | 3,133 |

|         |   |     |     |       |   |    |     |       |     |       |
|---------|---|-----|-----|-------|---|----|-----|-------|-----|-------|
| 106,548 | 8 | 86  | 107 | 1,907 | 6 | 61 | 70  | 1,143 | 191 | 3,197 |
| 106,549 | 2 | 87  | 88  | 1,923 | 6 | 61 | 43  | 1,153 | 139 | 3,224 |
| 106,550 | 1 | 87  | 81  | 1,931 | 5 | 61 | 37  | 1,166 | 124 | 3,245 |
| 106,551 | 3 | 90  | 92  | 1,984 | 4 | 68 | 43  | 1,277 | 142 | 3,419 |
| 106,552 | 3 | 90  | 91  | 1,984 | 4 | 68 | 36  | 1,278 | 134 | 3,420 |
| 106,553 | 6 | 95  | 111 | 2,027 | 5 | 72 | 48  | 1,330 | 170 | 3,524 |
| 106,554 | 6 | 97  | 111 | 2,042 | 5 | 72 | 47  | 1,336 | 169 | 3,547 |
| 106,555 | 6 | 97  | 111 | 2,045 | 5 | 72 | 46  | 1,337 | 168 | 3,551 |
| 106,556 | 6 | 97  | 113 | 2,045 | 5 | 73 | 59  | 1,340 | 183 | 3,555 |
| 106,557 | 6 | 101 | 123 | 2,056 | 5 | 73 | 63  | 1,363 | 197 | 3,593 |
| 106,558 | 6 | 102 | 122 | 2,080 | 5 | 74 | 64  | 1,407 | 197 | 3,663 |
| 106,559 | 5 | 104 | 118 | 2,084 | 5 | 74 | 64  | 1,409 | 192 | 3,671 |
| 106,560 | 5 | 107 | 119 | 2,095 | 5 | 76 | 65  | 1,443 | 194 | 3,721 |
| 106,561 | 5 | 108 | 118 | 2,115 | 5 | 77 | 65  | 1,486 | 193 | 3,786 |
| 106,562 | 5 | 110 | 116 | 2,207 | 5 | 84 | 64  | 1,581 | 190 | 3,982 |
| 106,563 | 6 | 112 | 113 | 2,196 | 5 | 85 | 64  | 1,621 | 188 | 4,014 |
| 106,564 | 7 | 111 | 116 | 2,166 | 5 | 84 | 63  | 1,583 | 191 | 3,944 |
| 106,565 | 7 | 99  | 105 | 1,965 | 4 | 77 | 59  | 1,490 | 175 | 3,631 |
| 106,566 | 7 | 94  | 103 | 1,900 | 4 | 72 | 59  | 1,456 | 173 | 3,522 |
| 106,567 | 7 | 87  | 98  | 1,804 | 4 | 70 | 58  | 1,415 | 167 | 3,376 |
| 106,568 | 7 | 84  | 100 | 1,775 | 3 | 71 | 58  | 1,425 | 168 | 3,355 |
| 106,569 | 8 | 84  | 120 | 1,790 | 3 | 72 | 97  | 1,454 | 228 | 3,400 |
| 106,570 | 8 | 86  | 122 | 1,808 | 4 | 74 | 100 | 1,504 | 234 | 3,472 |
| 106,571 | 8 | 89  | 121 | 1,826 | 4 | 76 | 99  | 1,545 | 232 | 3,536 |
| 106,572 | 8 | 93  | 125 | 1,829 | 4 | 77 | 110 | 1,573 | 247 | 3,572 |
| 106,573 | 8 | 93  | 121 | 1,816 | 3 | 78 | 109 | 1,577 | 241 | 3,564 |
| 106,574 | 8 | 87  | 118 | 1,703 | 3 | 79 | 107 | 1,547 | 236 | 3,416 |
| 106,575 | 8 | 87  | 118 | 1,703 | 3 | 79 | 107 | 1,546 | 236 | 3,415 |
| 106,576 | 8 | 82  | 120 | 1,637 | 3 | 78 | 109 | 1,524 | 240 | 3,321 |
| 106,577 | 8 | 78  | 119 | 1,599 | 3 | 76 | 109 | 1,511 | 239 | 3,264 |
| 106,578 | 8 | 74  | 117 | 1,559 | 3 | 74 | 109 | 1,488 | 237 | 3,195 |
| 106,579 | 8 | 73  | 117 | 1,534 | 3 | 73 | 109 | 1,485 | 237 | 3,165 |
| 106,580 | 8 | 74  | 118 | 1,544 | 3 | 73 | 110 | 1,516 | 239 | 3,207 |
| 106,581 | 8 | 73  | 117 | 1,537 | 3 | 73 | 110 | 1,505 | 238 | 3,188 |
| 106,582 | 8 | 73  | 117 | 1,544 | 3 | 73 | 110 | 1,511 | 238 | 3,201 |
| 106,583 | 8 | 74  | 117 | 1,616 | 3 | 83 | 112 | 1,615 | 240 | 3,388 |
| 106,584 | 8 | 75  | 119 | 1,576 | 3 | 81 | 111 | 1,578 | 241 | 3,310 |
| 106,585 | 8 | 91  | 120 | 1,784 | 3 | 96 | 111 | 1,766 | 242 | 3,737 |
| 106,586 | 8 | 92  | 120 | 1,726 | 3 | 95 | 111 | 1,668 | 242 | 3,581 |
| 106,587 | 8 | 93  | 120 | 1,724 | 3 | 94 | 111 | 1,656 | 242 | 3,567 |
| 106,588 | 8 | 113 | 122 | 1,507 | 3 | 97 | 111 | 1,629 | 244 | 3,346 |



|         |   |     |     |       |   |    |     |       |     |       |
|---------|---|-----|-----|-------|---|----|-----|-------|-----|-------|
| 106,589 | 8 | 109 | 121 | 1,314 | 3 | 87 | 110 | 1,481 | 242 | 2,991 |
| 106,590 | 8 | 106 | 121 | 1,256 | 3 | 86 | 111 | 1,461 | 243 | 2,909 |
| 106,591 | 8 | 104 | 121 | 1,239 | 3 | 85 | 111 | 1,453 | 243 | 2,881 |
| 106,592 | 8 | 105 | 121 | 1,231 | 3 | 85 | 111 | 1,449 | 243 | 2,870 |
| 106,593 | 8 | 106 | 122 | 1,229 | 3 | 85 | 111 | 1,452 | 244 | 2,872 |
| 106,594 | 8 | 106 | 123 | 1,229 | 3 | 85 | 111 | 1,453 | 245 | 2,873 |
| 106,595 | 8 | 103 | 124 | 1,175 | 3 | 79 | 108 | 1,382 | 243 | 2,739 |
| 106,596 | 8 | 103 | 119 | 1,176 | 3 | 79 | 110 | 1,383 | 240 | 2,741 |
| 106,597 | 8 | 103 | 117 | 1,176 | 3 | 79 | 106 | 1,384 | 234 | 2,742 |
| 106,598 | 8 | 103 | 117 | 1,178 | 3 | 79 | 107 | 1,386 | 235 | 2,746 |
| 106,599 | 8 | 97  | 113 | 1,143 | 3 | 77 | 107 | 1,381 | 231 | 2,698 |
| 106,600 | 8 | 96  | 110 | 1,133 | 3 | 77 | 106 | 1,370 | 227 | 2,676 |
| 106,601 | 8 | 94  | 109 | 1,074 | 3 | 70 | 106 | 1,251 | 226 | 2,489 |
| 106,602 | 6 | 95  | 96  | 1,082 | 3 | 70 | 100 | 1,254 | 205 | 2,501 |
| 106,603 | 4 | 95  | 96  | 1,084 | 2 | 70 | 98  | 1,255 | 200 | 2,504 |
| 106,604 | 3 | 88  | 75  | 1,028 | 2 | 66 | 87  | 1,198 | 167 | 2,380 |
| 106,605 | 3 | 88  | 73  | 1,025 | 2 | 65 | 87  | 1,195 | 165 | 2,373 |
| 106,606 | 3 | 88  | 73  | 1,028 | 2 | 65 | 87  | 1,196 | 165 | 2,377 |
| 106,607 | 3 | 93  | 70  | 1,057 | 2 | 69 | 74  | 1,248 | 149 | 2,467 |
| 106,608 | 3 | 90  | 61  | 1,056 | 2 | 69 | 70  | 1,230 | 136 | 2,445 |
| 106,609 | 3 | 89  | 59  | 1,032 | 2 | 68 | 69  | 1,187 | 133 | 2,376 |
| 106,610 | 4 | 87  | 58  | 1,029 | 2 | 68 | 69  | 1,188 | 133 | 2,372 |
| 106,611 | 4 | 84  | 78  | 1,028 | 2 | 71 | 72  | 1,167 | 156 | 2,350 |
| 106,612 | 4 | 84  | 77  | 1,012 | 2 | 70 | 72  | 1,131 | 155 | 2,297 |
| 106,613 | 4 | 82  | 76  | 925   | 2 | 64 | 73  | 1,039 | 155 | 2,110 |
| 106,614 | 3 | 81  | 84  | 930   | 3 | 65 | 76  | 1,039 | 166 | 2,115 |
| 106,615 | 2 | 86  | 87  | 958   | 3 | 67 | 76  | 1,067 | 168 | 2,178 |
| 106,616 | 2 | 87  | 86  | 983   | 3 | 67 | 76  | 1,076 | 167 | 2,213 |
| 106,617 | 2 | 91  | 109 | 953   | 4 | 66 | 89  | 1,014 | 204 | 2,124 |
| 106,618 | 2 | 92  | 105 | 987   | 4 | 67 | 91  | 1,022 | 202 | 2,168 |
| 106,619 | 1 | 91  | 87  | 938   | 4 | 61 | 53  | 912   | 145 | 2,002 |
| 106,620 | 1 | 93  | 90  | 945   | 3 | 61 | 53  | 913   | 147 | 2,012 |
| 106,621 | 1 | 90  | 90  | 926   | 3 | 59 | 51  | 866   | 145 | 1,941 |
| 106,622 | 1 | 90  | 89  | 932   | 3 | 59 | 51  | 870   | 144 | 1,951 |
| 106,623 | 1 | 91  | 85  | 937   | 3 | 60 | 38  | 872   | 127 | 1,960 |
| 106,624 | 1 | 91  | 82  | 939   | 3 | 60 | 38  | 872   | 124 | 1,962 |
| 106,625 | 1 | 90  | 81  | 933   | 2 | 59 | 38  | 865   | 122 | 1,947 |
| 106,626 | 1 | 91  | 87  | 939   | 2 | 60 | 43  | 873   | 133 | 1,963 |
| 106,627 | 1 | 91  | 86  | 923   | 2 | 58 | 43  | 851   | 132 | 1,923 |
| 106,628 | 1 | 97  | 86  | 924   | 2 | 58 | 43  | 848   | 132 | 1,927 |
| 106,629 | 1 | 96  | 86  | 925   | 2 | 58 | 43  | 844   | 132 | 1,923 |

|         |    |    |     |     |    |    |     |     |       |       |
|---------|----|----|-----|-----|----|----|-----|-----|-------|-------|
| 106,630 | 1  | 94 | 89  | 922 | 3  | 59 | 43  | 840 | 136   | 1,915 |
| 106,631 | 1  | 92 | 94  | 880 | 3  | 59 | 44  | 788 | 142   | 1,819 |
| 106,632 | 1  | 88 | 98  | 792 | 3  | 49 | 46  | 672 | 148   | 1,601 |
| 106,633 | 1  | 88 | 133 | 794 | 5  | 49 | 82  | 673 | 221   | 1,604 |
| 106,634 | 1  | 88 | 137 | 795 | 7  | 49 | 89  | 674 | 234   | 1,606 |
| 106,635 | 1  | 85 | 145 | 783 | 8  | 47 | 108 | 657 | 262   | 1,572 |
| 106,636 | 1  | 66 | 145 | 521 | 8  | 31 | 110 | 414 | 264   | 1,032 |
| 106,637 | 2  | 66 | 146 | 523 | 8  | 31 | 111 | 414 | 267   | 1,034 |
| 106,638 | 5  | 66 | 168 | 525 | 8  | 31 | 131 | 416 | 312   | 1,038 |
| 106,639 | 5  | 41 | 181 | 361 | 8  | 22 | 143 | 300 | 337   | 724   |
| 106,640 | 6  | 42 | 215 | 343 | 8  | 22 | 177 | 307 | 406   | 714   |
| 106,641 | 6  | 42 | 215 | 344 | 8  | 22 | 177 | 307 | 406   | 715   |
| 106,642 | 15 | 43 | 343 | 339 | 19 | 23 | 322 | 314 | 699   | 719   |
| 106,643 | 19 | 42 | 362 | 343 | 22 | 25 | 374 | 318 | 777   | 728   |
| 106,644 | 19 | 42 | 364 | 343 | 22 | 25 | 374 | 314 | 779   | 724   |
| 106,645 | 19 | 50 | 363 | 373 | 22 | 25 | 375 | 354 | 779   | 802   |
| 106,646 | 19 | 49 | 362 | 376 | 22 | 27 | 374 | 353 | 777   | 805   |
| 106,647 | 21 | 50 | 386 | 383 | 23 | 27 | 405 | 357 | 835   | 817   |
| 106,648 | 21 | 52 | 386 | 393 | 23 | 27 | 405 | 365 | 835   | 837   |
| 106,649 | 21 | 52 | 386 | 398 | 23 | 27 | 405 | 372 | 835   | 849   |
| 106,650 | 26 | 55 | 452 | 453 | 25 | 28 | 481 | 418 | 984   | 954   |
| 106,651 | 26 | 55 | 452 | 450 | 25 | 28 | 480 | 421 | 983   | 954   |
| 106,652 | 26 | 54 | 462 | 463 | 25 | 28 | 486 | 417 | 999   | 962   |
| 106,653 | 29 | 53 | 488 | 470 | 26 | 28 | 508 | 417 | 1,051 | 968   |
| 106,654 | 30 | 54 | 511 | 492 | 28 | 29 | 527 | 431 | 1,096 | 1,006 |
| 106,655 | 30 | 54 | 511 | 496 | 28 | 29 | 527 | 430 | 1,096 | 1,009 |
| 106,656 | 31 | 54 | 522 | 501 | 30 | 29 | 539 | 429 | 1,122 | 1,013 |
| 106,657 | 31 | 54 | 522 | 533 | 30 | 29 | 539 | 449 | 1,122 | 1,065 |
| 106,658 | 31 | 49 | 522 | 509 | 30 | 25 | 539 | 398 | 1,122 | 981   |
| 106,659 | 33 | 50 | 553 | 519 | 31 | 25 | 560 | 397 | 1,177 | 991   |
| 106,660 | 33 | 50 | 553 | 529 | 31 | 25 | 560 | 398 | 1,177 | 1,002 |
| 106,661 | 32 | 50 | 563 | 533 | 31 | 25 | 562 | 406 | 1,188 | 1,014 |
| 106,662 | 32 | 50 | 544 | 578 | 31 | 20 | 560 | 410 | 1,167 | 1,058 |
| 106,663 | 35 | 49 | 560 | 678 | 32 | 26 | 587 | 528 | 1,214 | 1,281 |
| 106,664 | 35 | 55 | 563 | 794 | 32 | 26 | 589 | 554 | 1,219 | 1,429 |
| 106,665 | 35 | 59 | 573 | 860 | 31 | 23 | 594 | 573 | 1,233 | 1,515 |
| 106,666 | 35 | 57 | 572 | 887 | 31 | 22 | 603 | 571 | 1,241 | 1,537 |
| 106,667 | 35 | 55 | 573 | 862 | 31 | 22 | 604 | 553 | 1,243 | 1,492 |
| 106,668 | 39 | 51 | 598 | 864 | 34 | 21 | 656 | 542 | 1,327 | 1,478 |
| 106,669 | 39 | 51 | 604 | 832 | 34 | 20 | 659 | 535 | 1,336 | 1,438 |
| 106,670 | 39 | 48 | 601 | 835 | 34 | 20 | 657 | 535 | 1,331 | 1,438 |

|         |    |    |     |       |    |    |     |       |       |       |
|---------|----|----|-----|-------|----|----|-----|-------|-------|-------|
| 106,671 | 39 | 46 | 598 | 835   | 34 | 20 | 655 | 536   | 1,326 | 1,437 |
| 106,672 | 40 | 45 | 625 | 862   | 35 | 22 | 667 | 557   | 1,367 | 1,486 |
| 106,673 | 40 | 48 | 631 | 912   | 35 | 24 | 671 | 578   | 1,377 | 1,562 |
| 106,674 | 40 | 47 | 631 | 908   | 35 | 23 | 671 | 576   | 1,377 | 1,554 |
| 106,675 | 40 | 46 | 630 | 903   | 35 | 22 | 668 | 567   | 1,373 | 1,538 |
| 106,676 | 41 | 47 | 630 | 904   | 35 | 22 | 675 | 567   | 1,381 | 1,540 |
| 106,677 | 41 | 47 | 626 | 905   | 35 | 22 | 672 | 570   | 1,374 | 1,544 |
| 106,678 | 41 | 42 | 625 | 897   | 35 | 24 | 671 | 564   | 1,372 | 1,527 |
| 106,679 | 41 | 42 | 625 | 916   | 35 | 24 | 671 | 574   | 1,372 | 1,556 |
| 106,680 | 41 | 49 | 625 | 1,170 | 35 | 28 | 673 | 782   | 1,374 | 2,029 |
| 106,681 | 41 | 49 | 627 | 1,189 | 34 | 28 | 674 | 786   | 1,376 | 2,052 |
| 106,682 | 41 | 49 | 628 | 1,214 | 35 | 28 | 677 | 788   | 1,381 | 2,079 |
| 106,683 | 41 | 54 | 643 | 1,280 | 36 | 30 | 682 | 846   | 1,402 | 2,210 |
| 106,684 | 41 | 55 | 608 | 1,284 | 34 | 30 | 645 | 848   | 1,328 | 2,217 |
| 106,685 | 47 | 60 | 646 | 1,451 | 35 | 42 | 680 | 997   | 1,408 | 2,550 |
| 106,686 | 47 | 64 | 636 | 1,509 | 34 | 42 | 661 | 1,040 | 1,378 | 2,655 |
| 106,687 | 48 | 94 | 637 | 1,909 | 34 | 50 | 660 | 1,295 | 1,379 | 3,348 |
| 106,688 | 47 | 95 | 641 | 1,942 | 35 | 51 | 663 | 1,306 | 1,386 | 3,394 |
| 106,689 | 45 | 96 | 637 | 1,972 | 35 | 52 | 651 | 1,316 | 1,368 | 3,436 |
| 106,690 | 46 | 94 | 629 | 1,965 | 35 | 51 | 641 | 1,302 | 1,351 | 3,412 |
| 106,691 | 45 | 94 | 600 | 1,968 | 35 | 51 | 608 | 1,304 | 1,288 | 3,417 |
| 106,692 | 36 | 94 | 479 | 1,970 | 25 | 51 | 469 | 1,302 | 1,009 | 3,417 |
| 106,693 | 36 | 95 | 503 | 1,980 | 26 | 51 | 471 | 1,308 | 1,036 | 3,434 |
| 106,694 | 32 | 97 | 484 | 1,991 | 23 | 50 | 420 | 1,315 | 959   | 3,453 |
| 106,695 | 32 | 96 | 481 | 1,989 | 23 | 50 | 420 | 1,313 | 956   | 3,448 |
| 106,696 | 31 | 88 | 471 | 1,964 | 23 | 50 | 410 | 1,278 | 935   | 3,380 |
| 106,697 | 31 | 88 | 472 | 1,961 | 22 | 48 | 401 | 1,280 | 926   | 3,377 |
| 106,698 | 30 | 87 | 464 | 1,957 | 22 | 48 | 389 | 1,279 | 905   | 3,371 |
| 106,699 | 29 | 85 | 440 | 1,947 | 21 | 48 | 358 | 1,269 | 848   | 3,349 |
| 106,700 | 25 | 85 | 403 | 1,941 | 20 | 48 | 323 | 1,264 | 771   | 3,338 |
| 106,701 | 25 | 82 | 400 | 1,872 | 20 | 46 | 313 | 1,208 | 758   | 3,208 |
| 106,702 | 25 | 82 | 393 | 1,899 | 20 | 46 | 310 | 1,215 | 748   | 3,242 |
| 106,703 | 23 | 83 | 381 | 1,925 | 19 | 48 | 288 | 1,231 | 711   | 3,287 |
| 106,704 | 22 | 83 | 372 | 1,918 | 19 | 48 | 295 | 1,231 | 708   | 3,280 |
| 106,705 | 21 | 82 | 351 | 1,899 | 17 | 47 | 277 | 1,217 | 666   | 3,245 |
| 106,706 | 20 | 82 | 340 | 1,894 | 15 | 47 | 267 | 1,217 | 642   | 3,240 |
| 106,707 | 21 | 82 | 328 | 1,854 | 14 | 47 | 253 | 1,195 | 616   | 3,178 |
| 106,708 | 19 | 82 | 318 | 1,858 | 14 | 47 | 248 | 1,195 | 599   | 3,182 |
| 106,709 | 19 | 82 | 312 | 1,854 | 14 | 47 | 247 | 1,194 | 592   | 3,177 |
| 106,710 | 19 | 80 | 310 | 1,825 | 14 | 47 | 246 | 1,188 | 589   | 3,140 |
| 106,711 | 19 | 80 | 310 | 1,828 | 14 | 47 | 247 | 1,191 | 590   | 3,146 |

|         |    |    |     |       |    |    |     |       |     |       |
|---------|----|----|-----|-------|----|----|-----|-------|-----|-------|
| 106,712 | 19 | 80 | 300 | 1,663 | 14 | 41 | 245 | 1,040 | 578 | 2,824 |
| 106,713 | 19 | 81 | 299 | 1,682 | 14 | 41 | 244 | 1,044 | 576 | 2,848 |
| 106,714 | 16 | 82 | 283 | 1,690 | 13 | 42 | 215 | 1,046 | 527 | 2,860 |
| 106,715 | 16 | 76 | 277 | 1,585 | 13 | 42 | 214 | 1,028 | 520 | 2,731 |
| 106,716 | 16 | 71 | 265 | 1,482 | 13 | 41 | 206 | 960   | 500 | 2,554 |
| 106,717 | 16 | 68 | 259 | 1,411 | 13 | 41 | 197 | 930   | 485 | 2,450 |
| 106,718 | 16 | 69 | 259 | 1,455 | 13 | 45 | 196 | 957   | 484 | 2,526 |
| 106,719 | 13 | 69 | 210 | 1,459 | 9  | 45 | 132 | 965   | 364 | 2,538 |
| 106,720 | 13 | 68 | 204 | 1,466 | 9  | 46 | 127 | 973   | 353 | 2,553 |
| 106,721 | 13 | 66 | 195 | 1,454 | 8  | 46 | 121 | 967   | 337 | 2,533 |
| 106,722 | 12 | 76 | 191 | 1,460 | 8  | 45 | 120 | 1,013 | 331 | 2,594 |
| 106,723 | 12 | 76 | 187 | 1,464 | 8  | 45 | 120 | 1,014 | 327 | 2,599 |
| 106,724 | 13 | 73 | 202 | 1,426 | 8  | 43 | 120 | 991   | 343 | 2,533 |
| 106,725 | 14 | 71 | 211 | 1,404 | 8  | 41 | 123 | 976   | 356 | 2,492 |
| 106,726 | 14 | 71 | 213 | 1,404 | 8  | 41 | 124 | 975   | 359 | 2,491 |
| 106,727 | 15 | 72 | 217 | 1,410 | 8  | 42 | 117 | 987   | 357 | 2,511 |
| 106,728 | 15 | 72 | 217 | 1,415 | 8  | 42 | 117 | 990   | 357 | 2,519 |
| 106,729 | 15 | 74 | 217 | 1,429 | 8  | 42 | 119 | 1,006 | 359 | 2,551 |
| 106,730 | 15 | 74 | 217 | 1,444 | 8  | 42 | 118 | 1,018 | 358 | 2,578 |
| 106,731 | 15 | 67 | 216 | 1,204 | 8  | 38 | 117 | 819   | 356 | 2,128 |
| 106,732 | 16 | 67 | 213 | 1,195 | 9  | 37 | 116 | 826   | 354 | 2,125 |
| 106,733 | 16 | 62 | 206 | 1,119 | 8  | 35 | 112 | 776   | 342 | 1,992 |
| 106,734 | 19 | 64 | 190 | 1,135 | 7  | 35 | 105 | 796   | 321 | 2,030 |
| 106,735 | 13 | 63 | 149 | 1,159 | 5  | 36 | 64  | 827   | 231 | 2,085 |
| 106,736 | 13 | 66 | 149 | 1,079 | 4  | 27 | 60  | 768   | 226 | 1,940 |
| 106,737 | 12 | 62 | 149 | 1,033 | 4  | 27 | 60  | 739   | 225 | 1,861 |
| 106,738 | 12 | 48 | 147 | 856   | 4  | 35 | 61  | 758   | 224 | 1,697 |
| 106,739 | 12 | 57 | 142 | 1,027 | 3  | 46 | 57  | 1,089 | 214 | 2,219 |
| 106,740 | 11 | 56 | 123 | 1,007 | 3  | 46 | 48  | 1,087 | 185 | 2,196 |
| 106,741 | 10 | 57 | 119 | 1,063 | 3  | 47 | 49  | 1,142 | 181 | 2,309 |
| 106,742 | 10 | 57 | 114 | 1,068 | 3  | 47 | 49  | 1,144 | 176 | 2,316 |
| 106,743 | 10 | 57 | 108 | 1,070 | 2  | 47 | 44  | 1,146 | 164 | 2,320 |
| 106,744 | 10 | 54 | 84  | 1,052 | 1  | 46 | 38  | 1,128 | 133 | 2,280 |
| 106,745 | 10 | 54 | 83  | 1,057 | 1  | 46 | 36  | 1,132 | 130 | 2,289 |
| 106,746 | 10 | 54 | 81  | 1,060 | 1  | 46 | 36  | 1,131 | 128 | 2,291 |
| 106,747 | 10 | 54 | 81  | 1,062 | 1  | 46 | 36  | 1,134 | 128 | 2,296 |
| 106,748 | 10 | 54 | 77  | 1,081 | 1  | 46 | 35  | 1,140 | 123 | 2,321 |
| 106,749 | 10 | 54 | 77  | 1,081 | 1  | 46 | 35  | 1,143 | 123 | 2,324 |
| 106,750 | 10 | 55 | 77  | 1,090 | 1  | 49 | 35  | 1,148 | 123 | 2,342 |
| 106,751 | 10 | 77 | 77  | 1,383 | 1  | 60 | 36  | 1,427 | 124 | 2,947 |
| 106,752 | 10 | 77 | 76  | 1,387 | 1  | 60 | 36  | 1,429 | 123 | 2,953 |

|         |    |     |     |       |   |    |    |       |     |       |
|---------|----|-----|-----|-------|---|----|----|-------|-----|-------|
| 106,753 | 10 | 77  | 73  | 1,366 | 1 | 60 | 36 | 1,428 | 120 | 2,931 |
| 106,754 | 10 | 88  | 71  | 1,445 | 1 | 65 | 36 | 1,528 | 118 | 3,126 |
| 106,755 | 10 | 88  | 66  | 1,443 | 1 | 65 | 27 | 1,526 | 104 | 3,122 |
| 106,756 | 10 | 99  | 65  | 1,521 | 1 | 68 | 26 | 1,589 | 102 | 3,277 |
| 106,757 | 10 | 99  | 65  | 1,525 | 1 | 68 | 24 | 1,591 | 100 | 3,283 |
| 106,758 | 9  | 99  | 66  | 1,530 | 1 | 68 | 24 | 1,593 | 100 | 3,290 |
| 106,759 | 9  | 99  | 80  | 1,527 | 1 | 68 | 34 | 1,597 | 124 | 3,291 |
| 106,760 | 9  | 99  | 80  | 1,526 | 1 | 68 | 34 | 1,597 | 124 | 3,290 |
| 106,761 | 9  | 102 | 79  | 1,546 | 1 | 68 | 34 | 1,604 | 123 | 3,320 |
| 106,762 | 9  | 102 | 79  | 1,542 | 1 | 68 | 33 | 1,603 | 122 | 3,315 |
| 106,763 | 10 | 103 | 79  | 1,545 | 1 | 68 | 33 | 1,601 | 123 | 3,317 |
| 106,764 | 10 | 101 | 80  | 1,497 | 1 | 66 | 33 | 1,582 | 124 | 3,246 |
| 106,765 | 10 | 101 | 80  | 1,498 | 1 | 66 | 32 | 1,582 | 123 | 3,247 |
| 106,766 | 10 | 101 | 78  | 1,505 | 1 | 66 | 31 | 1,582 | 120 | 3,254 |
| 106,767 | 10 | 101 | 77  | 1,502 | 1 | 66 | 31 | 1,580 | 119 | 3,249 |
| 106,768 | 10 | 102 | 78  | 1,492 | 1 | 65 | 31 | 1,578 | 120 | 3,237 |
| 106,769 | 10 | 101 | 76  | 1,448 | 1 | 62 | 31 | 1,554 | 118 | 3,165 |
| 106,770 | 9  | 101 | 76  | 1,446 | 1 | 62 | 35 | 1,547 | 121 | 3,156 |
| 106,771 | 9  | 101 | 76  | 1,437 | 1 | 61 | 36 | 1,541 | 122 | 3,140 |
| 106,772 | 9  | 101 | 76  | 1,436 | 1 | 61 | 36 | 1,540 | 122 | 3,138 |
| 106,773 | 9  | 91  | 61  | 1,394 | 1 | 60 | 31 | 1,469 | 102 | 3,014 |
| 106,774 | 8  | 91  | 42  | 1,390 | 1 | 60 | 29 | 1,467 | 80  | 3,008 |
| 106,775 | 7  | 91  | 39  | 1,366 | 1 | 60 | 29 | 1,464 | 76  | 2,981 |
| 106,776 | 7  | 91  | 34  | 1,366 | 1 | 60 | 27 | 1,463 | 69  | 2,980 |
| 106,777 | 7  | 91  | 32  | 1,366 | 1 | 60 | 26 | 1,462 | 66  | 2,979 |
| 106,778 | 5  | 90  | 27  | 1,356 | 1 | 58 | 26 | 1,444 | 59  | 2,948 |
| 106,779 | 5  | 90  | 27  | 1,356 | 1 | 58 | 25 | 1,445 | 58  | 2,949 |
| 106,780 | 5  | 91  | 27  | 1,360 | 1 | 59 | 24 | 1,447 | 57  | 2,957 |
| 106,781 | 5  | 91  | 27  | 1,347 | 1 | 59 | 24 | 1,438 | 57  | 2,935 |
| 106,782 | 6  | 91  | 33  | 1,335 | 1 | 59 | 31 | 1,433 | 71  | 2,918 |
| 106,783 | 7  | 91  | 36  | 1,326 | 0 | 59 | 35 | 1,419 | 78  | 2,895 |
| 106,784 | 7  | 91  | 36  | 1,312 | 0 | 59 | 35 | 1,403 | 78  | 2,865 |
| 106,785 | 4  | 89  | 35  | 1,299 | 0 | 59 | 34 | 1,369 | 73  | 2,816 |
| 106,786 | 4  | 89  | 34  | 1,271 | 0 | 58 | 34 | 1,329 | 72  | 2,747 |
| 106,787 | 4  | 81  | 38  | 1,202 | 0 | 56 | 34 | 1,249 | 76  | 2,588 |
| 106,788 | 4  | 85  | 38  | 1,230 | 0 | 59 | 34 | 1,281 | 76  | 2,655 |
| 106,789 | 4  | 69  | 38  | 1,012 | 0 | 43 | 34 | 1,017 | 76  | 2,141 |
| 106,790 | 6  | 59  | 53  | 810   | 1 | 32 | 39 | 686   | 99  | 1,587 |
| 106,791 | 7  | 59  | 72  | 799   | 1 | 32 | 39 | 677   | 119 | 1,567 |
| 106,792 | 12 | 58  | 165 | 746   | 6 | 31 | 77 | 632   | 260 | 1,467 |
| 106,793 | 12 | 58  | 165 | 750   | 6 | 31 | 76 | 636   | 259 | 1,475 |

|         |    |    |     |     |    |    |     |     |       |       |
|---------|----|----|-----|-----|----|----|-----|-----|-------|-------|
| 106,794 | 15 | 58 | 205 | 760 | 9  | 31 | 109 | 637 | 338   | 1,486 |
| 106,795 | 15 | 58 | 205 | 758 | 9  | 31 | 109 | 634 | 338   | 1,481 |
| 106,796 | 15 | 58 | 204 | 754 | 9  | 31 | 109 | 631 | 337   | 1,474 |
| 106,797 | 19 | 59 | 305 | 751 | 15 | 31 | 153 | 631 | 492   | 1,472 |
| 106,798 | 19 | 60 | 311 | 765 | 15 | 31 | 161 | 631 | 506   | 1,487 |
| 106,799 | 19 | 60 | 311 | 748 | 15 | 31 | 161 | 621 | 506   | 1,460 |
| 106,800 | 21 | 60 | 326 | 746 | 16 | 31 | 169 | 616 | 532   | 1,453 |
| 106,801 | 21 | 59 | 342 | 725 | 16 | 28 | 172 | 602 | 551   | 1,414 |
| 106,802 | 22 | 37 | 349 | 429 | 16 | 17 | 175 | 330 | 562   | 813   |
| 106,803 | 22 | 25 | 354 | 320 | 16 | 10 | 179 | 215 | 571   | 570   |
| 106,804 | 22 | 25 | 360 | 320 | 16 | 10 | 179 | 217 | 577   | 572   |
| 106,805 | 22 | 26 | 360 | 320 | 16 | 10 | 178 | 217 | 576   | 573   |
| 106,806 | 25 | 26 | 418 | 321 | 21 | 11 | 249 | 224 | 713   | 582   |
| 106,807 | 26 | 15 | 448 | 252 | 21 | 8  | 265 | 169 | 760   | 444   |
| 106,808 | 26 | 15 | 471 | 256 | 22 | 8  | 279 | 169 | 798   | 448   |
| 106,809 | 26 | 15 | 500 | 251 | 24 | 8  | 315 | 166 | 865   | 440   |
| 106,810 | 26 | 15 | 506 | 256 | 24 | 8  | 308 | 161 | 864   | 440   |
| 106,811 | 26 | 15 | 506 | 262 | 24 | 8  | 308 | 161 | 864   | 446   |
| 106,812 | 27 | 12 | 510 | 242 | 24 | 8  | 314 | 153 | 875   | 415   |
| 106,813 | 26 | 12 | 514 | 243 | 24 | 10 | 316 | 154 | 880   | 419   |
| 106,814 | 26 | 11 | 515 | 247 | 24 | 11 | 317 | 154 | 882   | 423   |
| 106,815 | 27 | 11 | 517 | 247 | 24 | 11 | 318 | 153 | 886   | 422   |
| 106,816 | 27 | 15 | 528 | 250 | 24 | 11 | 320 | 157 | 899   | 433   |
| 106,817 | 27 | 18 | 531 | 264 | 24 | 11 | 321 | 162 | 903   | 455   |
| 106,818 | 27 | 19 | 534 | 265 | 24 | 11 | 320 | 162 | 905   | 457   |
| 106,819 | 27 | 18 | 536 | 262 | 24 | 11 | 318 | 155 | 905   | 446   |
| 106,820 | 27 | 18 | 541 | 262 | 24 | 10 | 318 | 153 | 910   | 443   |
| 106,821 | 28 | 20 | 542 | 265 | 24 | 10 | 322 | 150 | 916   | 445   |
| 106,822 | 28 | 20 | 542 | 265 | 24 | 10 | 322 | 150 | 916   | 445   |
| 106,823 | 28 | 20 | 544 | 264 | 24 | 10 | 322 | 151 | 918   | 445   |
| 106,824 | 28 | 20 | 544 | 264 | 25 | 10 | 324 | 150 | 921   | 444   |
| 106,825 | 28 | 20 | 545 | 266 | 25 | 10 | 325 | 152 | 923   | 448   |
| 106,826 | 29 | 20 | 547 | 267 | 25 | 10 | 328 | 153 | 929   | 450   |
| 106,827 | 29 | 20 | 546 | 272 | 25 | 10 | 327 | 151 | 927   | 453   |
| 106,828 | 29 | 20 | 546 | 272 | 25 | 10 | 327 | 151 | 927   | 453   |
| 106,829 | 28 | 20 | 540 | 271 | 25 | 10 | 321 | 151 | 914   | 452   |
| 106,830 | 28 | 17 | 540 | 256 | 25 | 9  | 320 | 134 | 913   | 416   |
| 106,831 | 28 | 17 | 540 | 258 | 25 | 9  | 320 | 134 | 913   | 418   |
| 106,832 | 28 | 17 | 541 | 272 | 25 | 9  | 319 | 134 | 913   | 432   |
| 106,833 | 26 | 17 | 538 | 271 | 25 | 9  | 315 | 132 | 904   | 429   |
| 106,834 | 30 | 17 | 596 | 271 | 29 | 9  | 387 | 130 | 1,042 | 427   |

|         |    |    |     |     |    |    |     |     |       |     |
|---------|----|----|-----|-----|----|----|-----|-----|-------|-----|
| 106,835 | 30 | 17 | 601 | 271 | 29 | 9  | 392 | 130 | 1,052 | 427 |
| 106,836 | 30 | 17 | 599 | 269 | 29 | 9  | 392 | 126 | 1,050 | 421 |
| 106,837 | 30 | 17 | 614 | 267 | 30 | 9  | 406 | 128 | 1,080 | 421 |
| 106,838 | 29 | 17 | 606 | 252 | 30 | 8  | 404 | 124 | 1,069 | 401 |
| 106,839 | 29 | 13 | 606 | 211 | 29 | 5  | 406 | 81  | 1,070 | 310 |
| 106,840 | 29 | 13 | 612 | 212 | 29 | 5  | 411 | 77  | 1,081 | 307 |
| 106,841 | 29 | 13 | 608 | 208 | 29 | 5  | 411 | 77  | 1,077 | 303 |
| 106,842 | 28 | 13 | 588 | 209 | 29 | 5  | 412 | 77  | 1,057 | 304 |
| 106,843 | 23 | 13 | 497 | 207 | 24 | 5  | 374 | 71  | 918   | 296 |
| 106,844 | 20 | 13 | 456 | 195 | 21 | 5  | 341 | 63  | 838   | 276 |
| 106,845 | 19 | 14 | 461 | 185 | 20 | 5  | 357 | 64  | 857   | 268 |
| 106,846 | 22 | 14 | 437 | 179 | 17 | 5  | 356 | 65  | 832   | 263 |
| 106,847 | 20 | 14 | 420 | 178 | 17 | 5  | 345 | 65  | 802   | 262 |
| 106,848 | 19 | 12 | 408 | 155 | 16 | 5  | 339 | 60  | 782   | 232 |
| 106,849 | 19 | 12 | 403 | 157 | 16 | 5  | 333 | 59  | 771   | 233 |
| 106,850 | 25 | 12 | 470 | 155 | 15 | 5  | 378 | 59  | 888   | 231 |
| 106,851 | 25 | 12 | 470 | 155 | 15 | 5  | 379 | 59  | 889   | 231 |
| 106,852 | 25 | 12 | 468 | 155 | 15 | 5  | 379 | 59  | 887   | 231 |
| 106,853 | 26 | 12 | 500 | 155 | 16 | 5  | 409 | 59  | 951   | 231 |
| 106,854 | 26 | 12 | 498 | 167 | 16 | 5  | 407 | 59  | 947   | 243 |
| 106,855 | 26 | 18 | 508 | 220 | 16 | 6  | 411 | 82  | 961   | 326 |
| 106,856 | 28 | 24 | 509 | 301 | 13 | 7  | 376 | 115 | 926   | 447 |
| 106,857 | 27 | 26 | 515 | 320 | 15 | 6  | 390 | 120 | 947   | 472 |
| 106,858 | 27 | 26 | 511 | 310 | 16 | 6  | 401 | 111 | 955   | 453 |
| 106,859 | 29 | 31 | 513 | 397 | 16 | 10 | 401 | 118 | 959   | 556 |
| 106,860 | 29 | 32 | 480 | 401 | 14 | 10 | 364 | 118 | 887   | 561 |
| 106,861 | 29 | 32 | 464 | 405 | 14 | 10 | 360 | 122 | 867   | 569 |
| 106,862 | 29 | 39 | 462 | 435 | 14 | 12 | 356 | 153 | 861   | 639 |
| 106,863 | 28 | 40 | 456 | 459 | 14 | 14 | 353 | 161 | 851   | 674 |
| 106,864 | 28 | 43 | 456 | 497 | 14 | 13 | 353 | 177 | 851   | 730 |
| 106,865 | 28 | 46 | 455 | 495 | 14 | 13 | 352 | 184 | 849   | 738 |
| 106,866 | 27 | 47 | 455 | 524 | 14 | 15 | 351 | 202 | 847   | 788 |
| 106,867 | 27 | 44 | 448 | 532 | 14 | 15 | 350 | 210 | 839   | 801 |
| 106,868 | 27 | 40 | 440 | 531 | 14 | 15 | 348 | 207 | 829   | 793 |
| 106,869 | 27 | 40 | 437 | 532 | 14 | 15 | 349 | 207 | 827   | 794 |
| 106,870 | 27 | 40 | 435 | 532 | 14 | 15 | 348 | 207 | 824   | 794 |
| 106,871 | 27 | 40 | 430 | 533 | 14 | 15 | 347 | 207 | 818   | 795 |
| 106,872 | 27 | 39 | 433 | 544 | 14 | 15 | 349 | 206 | 823   | 804 |
| 106,873 | 27 | 40 | 432 | 548 | 15 | 15 | 351 | 206 | 825   | 809 |
| 106,874 | 27 | 40 | 432 | 550 | 14 | 15 | 350 | 206 | 823   | 811 |
| 106,875 | 27 | 40 | 436 | 544 | 14 | 15 | 350 | 203 | 827   | 802 |

|         |    |    |     |       |    |    |     |     |     |       |
|---------|----|----|-----|-------|----|----|-----|-----|-----|-------|
| 106,876 | 27 | 40 | 435 | 546   | 14 | 15 | 351 | 204 | 827 | 805   |
| 106,877 | 26 | 40 | 434 | 546   | 14 | 15 | 348 | 205 | 822 | 806   |
| 106,878 | 26 | 40 | 434 | 546   | 14 | 15 | 348 | 206 | 822 | 807   |
| 106,879 | 26 | 40 | 435 | 589   | 13 | 17 | 345 | 218 | 819 | 864   |
| 106,880 | 26 | 41 | 436 | 646   | 13 | 17 | 346 | 277 | 821 | 981   |
| 106,881 | 26 | 41 | 433 | 660   | 13 | 17 | 340 | 279 | 812 | 997   |
| 106,882 | 26 | 44 | 432 | 704   | 13 | 19 | 340 | 298 | 811 | 1,065 |
| 106,883 | 26 | 45 | 430 | 712   | 12 | 20 | 338 | 306 | 806 | 1,083 |
| 106,884 | 26 | 50 | 405 | 814   | 12 | 20 | 309 | 344 | 752 | 1,228 |
| 106,885 | 22 | 57 | 380 | 1,063 | 10 | 23 | 276 | 408 | 688 | 1,551 |
| 106,886 | 22 | 58 | 375 | 1,106 | 10 | 28 | 272 | 437 | 679 | 1,629 |
| 106,887 | 22 | 58 | 365 | 1,109 | 10 | 28 | 268 | 441 | 665 | 1,636 |
| 106,888 | 22 | 58 | 357 | 1,114 | 9  | 28 | 260 | 440 | 648 | 1,640 |
| 106,889 | 22 | 58 | 357 | 1,105 | 9  | 28 | 258 | 435 | 646 | 1,626 |
| 106,890 | 22 | 62 | 356 | 1,145 | 9  | 29 | 257 | 460 | 644 | 1,696 |
| 106,891 | 21 | 62 | 350 | 1,144 | 9  | 29 | 251 | 460 | 631 | 1,695 |
| 106,892 | 21 | 63 | 358 | 1,148 | 10 | 29 | 252 | 466 | 641 | 1,706 |
| 106,893 | 21 | 63 | 364 | 1,147 | 10 | 28 | 261 | 466 | 656 | 1,704 |
| 106,894 | 21 | 62 | 360 | 1,142 | 10 | 28 | 262 | 460 | 653 | 1,692 |
| 106,895 | 21 | 62 | 360 | 1,149 | 10 | 28 | 265 | 461 | 656 | 1,700 |
| 106,896 | 21 | 63 | 336 | 1,156 | 10 | 29 | 239 | 468 | 606 | 1,716 |
| 106,897 | 18 | 64 | 327 | 1,163 | 10 | 29 | 227 | 471 | 582 | 1,727 |
| 106,898 | 18 | 64 | 323 | 1,179 | 9  | 29 | 230 | 479 | 580 | 1,751 |
| 106,899 | 18 | 64 | 313 | 1,180 | 9  | 29 | 230 | 479 | 570 | 1,752 |
| 106,900 | 18 | 64 | 313 | 1,182 | 9  | 29 | 232 | 481 | 572 | 1,756 |
| 106,901 | 10 | 64 | 230 | 1,186 | 9  | 30 | 179 | 483 | 428 | 1,763 |
| 106,902 | 10 | 64 | 216 | 1,186 | 9  | 30 | 174 | 483 | 409 | 1,763 |
| 106,903 | 10 | 64 | 212 | 1,196 | 9  | 30 | 172 | 490 | 403 | 1,780 |
| 106,904 | 8  | 64 | 181 | 1,205 | 8  | 30 | 142 | 492 | 339 | 1,791 |
| 106,905 | 9  | 64 | 179 | 1,196 | 8  | 30 | 141 | 487 | 337 | 1,777 |
| 106,906 | 9  | 58 | 164 | 1,143 | 8  | 29 | 139 | 463 | 320 | 1,693 |
| 106,907 | 5  | 51 | 114 | 1,063 | 6  | 28 | 106 | 432 | 231 | 1,574 |
| 106,908 | 5  | 49 | 103 | 1,040 | 4  | 28 | 89  | 420 | 201 | 1,537 |
| 106,909 | 4  | 50 | 79  | 1,036 | 3  | 28 | 62  | 421 | 148 | 1,535 |
| 106,910 | 2  | 46 | 54  | 941   | 2  | 24 | 49  | 412 | 107 | 1,423 |
| 106,911 | 2  | 46 | 54  | 940   | 2  | 24 | 49  | 413 | 107 | 1,423 |
| 106,912 | 2  | 46 | 54  | 930   | 2  | 24 | 48  | 409 | 106 | 1,409 |
| 106,913 | 11 | 39 | 97  | 894   | 2  | 22 | 53  | 379 | 163 | 1,334 |
| 106,914 | 11 | 38 | 97  | 869   | 2  | 20 | 53  | 371 | 163 | 1,298 |
| 106,915 | 15 | 35 | 116 | 832   | 2  | 19 | 63  | 357 | 196 | 1,243 |
| 106,916 | 15 | 32 | 114 | 827   | 2  | 18 | 63  | 350 | 194 | 1,227 |



|         |    |    |     |     |    |    |     |     |     |       |
|---------|----|----|-----|-----|----|----|-----|-----|-----|-------|
| 106,917 | 19 | 31 | 155 | 798 | 2  | 16 | 74  | 333 | 250 | 1,178 |
| 106,918 | 42 | 30 | 245 | 779 | 5  | 16 | 138 | 321 | 430 | 1,146 |
| 106,919 | 43 | 30 | 255 | 766 | 5  | 16 | 145 | 319 | 448 | 1,131 |
| 106,920 | 45 | 30 | 317 | 766 | 7  | 16 | 179 | 319 | 548 | 1,131 |
| 106,921 | 48 | 30 | 372 | 764 | 10 | 16 | 210 | 319 | 640 | 1,129 |
| 106,922 | 48 | 30 | 375 | 763 | 10 | 16 | 214 | 319 | 647 | 1,128 |
| 106,923 | 49 | 29 | 389 | 750 | 10 | 16 | 213 | 319 | 661 | 1,114 |
| 106,924 | 49 | 28 | 389 | 746 | 9  | 16 | 211 | 319 | 658 | 1,109 |
| 106,925 | 49 | 28 | 387 | 744 | 9  | 16 | 211 | 318 | 656 | 1,106 |
| 106,926 | 50 | 28 | 393 | 738 | 9  | 16 | 211 | 318 | 663 | 1,100 |
| 106,927 | 50 | 28 | 395 | 739 | 9  | 16 | 212 | 317 | 666 | 1,100 |
| 106,928 | 50 | 28 | 403 | 739 | 9  | 16 | 212 | 316 | 674 | 1,099 |
| 106,929 | 50 | 28 | 406 | 743 | 9  | 17 | 212 | 315 | 677 | 1,103 |
| 106,930 | 50 | 28 | 405 | 701 | 9  | 15 | 212 | 304 | 676 | 1,048 |
| 106,931 | 50 | 27 | 404 | 644 | 9  | 15 | 211 | 246 | 674 | 932   |
| 106,932 | 50 | 29 | 403 | 637 | 9  | 16 | 211 | 246 | 673 | 928   |
| 106,933 | 50 | 26 | 403 | 594 | 9  | 14 | 211 | 227 | 673 | 861   |
| 106,934 | 50 | 25 | 403 | 572 | 9  | 13 | 211 | 215 | 673 | 825   |
| 106,935 | 51 | 20 | 402 | 470 | 9  | 13 | 211 | 177 | 673 | 680   |
| 106,936 | 51 | 13 | 402 | 223 | 9  | 11 | 211 | 116 | 673 | 363   |
| 106,937 | 51 | 12 | 401 | 184 | 9  | 7  | 210 | 92  | 671 | 295   |
| 106,938 | 51 | 12 | 401 | 181 | 9  | 7  | 209 | 89  | 670 | 289   |
| 106,939 | 51 | 12 | 401 | 177 | 9  | 9  | 209 | 88  | 670 | 286   |
| 106,940 | 51 | 12 | 399 | 176 | 9  | 9  | 209 | 91  | 668 | 288   |
| 106,941 | 51 | 8  | 394 | 134 | 8  | 10 | 209 | 69  | 662 | 221   |
| 106,942 | 51 | 7  | 393 | 130 | 8  | 10 | 208 | 63  | 660 | 210   |
| 106,943 | 51 | 7  | 392 | 134 | 8  | 11 | 209 | 67  | 660 | 219   |
| 106,944 | 51 | 7  | 386 | 124 | 8  | 11 | 198 | 67  | 643 | 209   |
| 106,945 | 51 | 8  | 386 | 132 | 8  | 11 | 196 | 72  | 641 | 223   |
| 106,946 | 51 | 9  | 386 | 150 | 8  | 12 | 192 | 102 | 637 | 273   |
| 106,947 | 51 | 8  | 385 | 145 | 8  | 11 | 192 | 95  | 636 | 259   |
| 106,948 | 51 | 9  | 385 | 146 | 8  | 11 | 189 | 108 | 633 | 274   |
| 106,949 | 51 | 11 | 382 | 139 | 8  | 11 | 187 | 106 | 628 | 267   |
| 106,950 | 51 | 16 | 382 | 236 | 8  | 14 | 185 | 184 | 626 | 450   |
| 106,951 | 51 | 16 | 381 | 240 | 8  | 14 | 183 | 185 | 623 | 455   |
| 106,952 | 51 | 18 | 381 | 237 | 8  | 14 | 183 | 185 | 623 | 454   |
| 106,953 | 51 | 18 | 381 | 227 | 8  | 14 | 183 | 179 | 623 | 438   |
| 106,954 | 51 | 18 | 379 | 219 | 8  | 14 | 182 | 178 | 620 | 429   |
| 106,955 | 51 | 20 | 378 | 245 | 8  | 15 | 182 | 201 | 619 | 481   |
| 106,956 | 50 | 20 | 377 | 242 | 8  | 15 | 182 | 202 | 617 | 479   |
| 106,957 | 50 | 20 | 379 | 245 | 9  | 15 | 181 | 209 | 619 | 489   |

|         |    |    |     |     |   |    |     |     |     |       |
|---------|----|----|-----|-----|---|----|-----|-----|-----|-------|
| 106,958 | 50 | 20 | 378 | 246 | 9 | 15 | 181 | 211 | 618 | 492   |
| 106,959 | 50 | 18 | 375 | 241 | 9 | 15 | 180 | 209 | 614 | 483   |
| 106,960 | 50 | 17 | 373 | 241 | 9 | 15 | 180 | 209 | 612 | 482   |
| 106,961 | 50 | 17 | 372 | 237 | 9 | 15 | 180 | 208 | 611 | 477   |
| 106,962 | 49 | 17 | 362 | 238 | 9 | 15 | 180 | 208 | 600 | 478   |
| 106,963 | 41 | 17 | 330 | 238 | 9 | 15 | 174 | 208 | 554 | 478   |
| 106,964 | 41 | 17 | 329 | 239 | 9 | 15 | 174 | 207 | 553 | 478   |
| 106,965 | 41 | 17 | 329 | 239 | 9 | 15 | 174 | 207 | 553 | 478   |
| 106,966 | 37 | 17 | 309 | 239 | 9 | 15 | 164 | 206 | 519 | 477   |
| 106,967 | 33 | 17 | 268 | 242 | 9 | 15 | 153 | 208 | 463 | 482   |
| 106,968 | 28 | 17 | 249 | 247 | 8 | 15 | 139 | 213 | 424 | 492   |
| 106,969 | 10 | 17 | 178 | 249 | 6 | 15 | 88  | 213 | 282 | 494   |
| 106,970 | 9  | 17 | 174 | 248 | 6 | 15 | 81  | 214 | 270 | 494   |
| 106,971 | 7  | 17 | 113 | 247 | 4 | 15 | 47  | 213 | 171 | 492   |
| 106,972 | 4  | 17 | 58  | 248 | 1 | 15 | 16  | 213 | 79  | 493   |
| 106,973 | 4  | 17 | 52  | 251 | 1 | 15 | 12  | 214 | 69  | 497   |
| 106,974 | 2  | 17 | 37  | 262 | 1 | 15 | 8   | 220 | 48  | 514   |
| 106,975 | 2  | 17 | 36  | 274 | 1 | 15 | 8   | 234 | 47  | 540   |
| 106,976 | 2  | 18 | 37  | 289 | 1 | 15 | 8   | 244 | 48  | 566   |
| 106,977 | 1  | 18 | 29  | 298 | 1 | 15 | 7   | 244 | 38  | 575   |
| 106,978 | 1  | 18 | 27  | 297 | 1 | 15 | 4   | 244 | 33  | 574   |
| 106,979 | 1  | 18 | 18  | 299 | 1 | 15 | 4   | 244 | 24  | 576   |
| 106,980 | 1  | 18 | 14  | 295 | 1 | 14 | 4   | 244 | 20  | 571   |
| 106,981 | 2  | 18 | 14  | 305 | 1 | 14 | 4   | 246 | 21  | 583   |
| 106,982 | 2  | 18 | 14  | 308 | 1 | 14 | 4   | 251 | 21  | 591   |
| 106,983 | 2  | 18 | 14  | 312 | 1 | 13 | 4   | 267 | 21  | 610   |
| 106,984 | 2  | 19 | 15  | 365 | 2 | 20 | 4   | 310 | 23  | 714   |
| 106,985 | 2  | 20 | 15  | 370 | 2 | 21 | 3   | 318 | 22  | 729   |
| 106,986 | 3  | 20 | 20  | 375 | 2 | 21 | 3   | 322 | 28  | 738   |
| 106,987 | 3  | 21 | 25  | 383 | 2 | 21 | 4   | 336 | 34  | 761   |
| 106,988 | 3  | 21 | 25  | 379 | 2 | 20 | 4   | 334 | 34  | 754   |
| 106,989 | 5  | 25 | 41  | 454 | 2 | 22 | 10  | 387 | 58  | 888   |
| 106,990 | 5  | 25 | 41  | 464 | 2 | 20 | 10  | 393 | 58  | 902   |
| 106,991 | 5  | 26 | 42  | 463 | 2 | 17 | 11  | 389 | 60  | 895   |
| 106,992 | 5  | 29 | 51  | 535 | 2 | 17 | 14  | 402 | 72  | 983   |
| 106,993 | 7  | 29 | 82  | 538 | 3 | 17 | 23  | 401 | 115 | 985   |
| 106,994 | 9  | 29 | 88  | 560 | 3 | 17 | 22  | 405 | 122 | 1,011 |
| 106,995 | 10 | 29 | 96  | 566 | 3 | 17 | 24  | 411 | 133 | 1,023 |
| 106,996 | 10 | 29 | 100 | 603 | 3 | 17 | 25  | 416 | 138 | 1,065 |
| 106,997 | 10 | 29 | 100 | 591 | 3 | 18 | 25  | 389 | 138 | 1,027 |
| 106,998 | 10 | 29 | 99  | 590 | 3 | 18 | 26  | 389 | 138 | 1,026 |

|         |    |    |     |     |   |    |    |     |     |       |
|---------|----|----|-----|-----|---|----|----|-----|-----|-------|
| 106,999 | 10 | 27 | 115 | 587 | 4 | 18 | 35 | 374 | 164 | 1,006 |
| 107,000 | 10 | 25 | 114 | 578 | 4 | 18 | 34 | 369 | 162 | 990   |
| 107,001 | 10 | 20 | 114 | 476 | 4 | 16 | 34 | 294 | 162 | 806   |
| 107,002 | 10 | 20 | 114 | 478 | 4 | 16 | 34 | 295 | 162 | 809   |
| 107,003 | 10 | 19 | 117 | 488 | 4 | 16 | 34 | 299 | 165 | 822   |
| 107,004 | 10 | 19 | 119 | 494 | 4 | 16 | 34 | 302 | 167 | 831   |
| 107,005 | 10 | 19 | 120 | 525 | 4 | 17 | 34 | 310 | 168 | 871   |
| 107,006 | 10 | 17 | 119 | 506 | 3 | 16 | 34 | 296 | 166 | 835   |
| 107,007 | 10 | 17 | 122 | 558 | 3 | 17 | 33 | 330 | 168 | 922   |
| 107,008 | 10 | 17 | 122 | 561 | 3 | 17 | 33 | 324 | 168 | 919   |
| 107,009 | 10 | 17 | 123 | 560 | 3 | 17 | 33 | 322 | 169 | 916   |
| 107,010 | 10 | 17 | 126 | 567 | 3 | 17 | 33 | 322 | 172 | 923   |
| 107,011 | 10 | 17 | 126 | 568 | 3 | 17 | 33 | 323 | 172 | 925   |
| 107,012 | 10 | 18 | 133 | 570 | 3 | 17 | 33 | 325 | 179 | 930   |
| 107,013 | 10 | 18 | 133 | 571 | 3 | 17 | 33 | 325 | 179 | 931   |
| 107,014 | 10 | 18 | 140 | 572 | 3 | 17 | 33 | 329 | 186 | 936   |
| 107,015 | 10 | 18 | 147 | 571 | 3 | 17 | 35 | 329 | 195 | 935   |
| 107,016 | 10 | 19 | 148 | 575 | 3 | 17 | 36 | 334 | 197 | 945   |
| 107,017 | 10 | 19 | 148 | 575 | 3 | 17 | 36 | 334 | 197 | 945   |
| 107,018 | 11 | 19 | 151 | 573 | 3 | 17 | 37 | 333 | 202 | 942   |
| 107,019 | 11 | 19 | 151 | 570 | 3 | 17 | 37 | 328 | 202 | 934   |
| 107,020 | 11 | 20 | 152 | 568 | 3 | 17 | 37 | 328 | 203 | 933   |
| 107,021 | 11 | 20 | 148 | 569 | 3 | 17 | 37 | 327 | 199 | 933   |
| 107,022 | 11 | 20 | 147 | 572 | 3 | 17 | 37 | 332 | 198 | 941   |
| 107,023 | 11 | 20 | 147 | 571 | 3 | 17 | 37 | 334 | 198 | 942   |
| 107,024 | 11 | 20 | 147 | 570 | 3 | 17 | 37 | 336 | 198 | 943   |
| 107,025 | 11 | 20 | 147 | 558 | 3 | 17 | 37 | 331 | 198 | 926   |
| 107,026 | 11 | 21 | 147 | 555 | 3 | 18 | 37 | 337 | 198 | 931   |
| 107,027 | 11 | 30 | 146 | 598 | 3 | 20 | 37 | 383 | 197 | 1,031 |
| 107,028 | 11 | 30 | 146 | 600 | 3 | 20 | 37 | 385 | 197 | 1,035 |
| 107,029 | 11 | 30 | 146 | 603 | 3 | 20 | 37 | 385 | 197 | 1,038 |
| 107,030 | 11 | 30 | 146 | 602 | 3 | 20 | 37 | 385 | 197 | 1,037 |
| 107,031 | 11 | 33 | 146 | 603 | 3 | 21 | 37 | 389 | 197 | 1,046 |
| 107,032 | 10 | 33 | 146 | 605 | 3 | 21 | 37 | 388 | 196 | 1,047 |
| 107,033 | 10 | 33 | 146 | 602 | 3 | 21 | 37 | 383 | 196 | 1,039 |
| 107,034 | 10 | 31 | 147 | 591 | 3 | 21 | 37 | 362 | 197 | 1,005 |
| 107,035 | 10 | 28 | 146 | 511 | 2 | 12 | 37 | 292 | 195 | 843   |
| 107,036 | 10 | 28 | 146 | 511 | 2 | 12 | 37 | 293 | 195 | 844   |
| 107,037 | 8  | 28 | 141 | 511 | 2 | 12 | 37 | 294 | 188 | 845   |
| 107,038 | 8  | 28 | 136 | 512 | 2 | 12 | 36 | 294 | 182 | 846   |
| 107,039 | 6  | 28 | 122 | 513 | 2 | 12 | 30 | 291 | 160 | 844   |

|         |   |    |     |     |   |    |    |     |     |     |
|---------|---|----|-----|-----|---|----|----|-----|-----|-----|
| 107,040 | 6 | 24 | 120 | 439 | 2 | 10 | 30 | 238 | 158 | 711 |
| 107,041 | 6 | 23 | 120 | 421 | 2 | 10 | 29 | 229 | 157 | 683 |
| 107,042 | 5 | 24 | 120 | 436 | 2 | 11 | 29 | 258 | 156 | 729 |
| 107,043 | 5 | 21 | 111 | 372 | 2 | 11 | 26 | 273 | 144 | 677 |
| 107,044 | 3 | 21 | 79  | 373 | 1 | 11 | 17 | 278 | 100 | 683 |
| 107,045 | 2 | 21 | 74  | 353 | 1 | 11 | 17 | 274 | 94  | 659 |
| 107,046 | 1 | 19 | 66  | 297 | 1 | 9  | 15 | 255 | 83  | 580 |
| 107,047 | 1 | 19 | 62  | 298 | 1 | 9  | 14 | 255 | 78  | 581 |
| 107,048 | 1 | 19 | 47  | 298 | 1 | 9  | 6  | 255 | 55  | 581 |
| 107,049 | 1 | 19 | 46  | 298 | 0 | 9  | 5  | 254 | 52  | 580 |
| 107,050 | 1 | 19 | 47  | 292 | 0 | 9  | 5  | 252 | 53  | 572 |
| 107,051 | 1 | 19 | 47  | 292 | 0 | 9  | 7  | 250 | 55  | 570 |
| 107,052 | 1 | 19 | 51  | 288 | 0 | 8  | 10 | 246 | 62  | 561 |
| 107,053 | 1 | 19 | 50  | 286 | 0 | 8  | 10 | 245 | 61  | 558 |
| 107,054 | 1 | 18 | 48  | 270 | 0 | 7  | 10 | 236 | 59  | 531 |
| 107,055 | 1 | 18 | 49  | 238 | 0 | 6  | 11 | 229 | 61  | 491 |
| 107,056 | 1 | 18 | 52  | 230 | 0 | 6  | 11 | 219 | 64  | 473 |
| 107,057 | 1 | 18 | 54  | 231 | 0 | 6  | 12 | 220 | 67  | 475 |
| 107,058 | 1 | 18 | 54  | 179 | 0 | 5  | 12 | 185 | 67  | 387 |
| 107,059 | 1 | 18 | 53  | 173 | 0 | 5  | 12 | 184 | 66  | 380 |
| 107,060 | 1 | 18 | 52  | 172 | 0 | 6  | 12 | 184 | 65  | 380 |
| 107,061 | 3 | 18 | 86  | 166 | 0 | 6  | 32 | 184 | 121 | 374 |
| 107,062 | 3 | 18 | 80  | 166 | 0 | 6  | 32 | 183 | 115 | 373 |
| 107,063 | 3 | 17 | 85  | 163 | 0 | 6  | 33 | 181 | 121 | 367 |
| 107,064 | 4 | 17 | 82  | 162 | 0 | 6  | 35 | 181 | 121 | 366 |
| 107,065 | 4 | 17 | 79  | 161 | 0 | 6  | 36 | 177 | 119 | 361 |
| 107,066 | 5 | 16 | 73  | 155 | 0 | 6  | 34 | 173 | 112 | 350 |
| 107,067 | 5 | 16 | 72  | 155 | 0 | 6  | 33 | 172 | 110 | 349 |
| 107,068 | 5 | 16 | 69  | 155 | 0 | 6  | 32 | 172 | 106 | 349 |
| 107,069 | 4 | 16 | 69  | 153 | 0 | 6  | 32 | 171 | 105 | 346 |
| 107,070 | 4 | 16 | 69  | 151 | 0 | 6  | 32 | 171 | 105 | 344 |
| 107,071 | 4 | 15 | 71  | 151 | 0 | 6  | 33 | 170 | 108 | 342 |
| 107,072 | 4 | 15 | 69  | 150 | 0 | 6  | 36 | 170 | 109 | 341 |
| 107,073 | 4 | 15 | 69  | 148 | 0 | 6  | 36 | 163 | 109 | 332 |
| 107,074 | 4 | 15 | 70  | 146 | 1 | 6  | 39 | 160 | 114 | 327 |
| 107,075 | 5 | 14 | 72  | 137 | 1 | 5  | 40 | 140 | 118 | 296 |
| 107,076 | 5 | 14 | 73  | 137 | 1 | 5  | 40 | 140 | 119 | 296 |
| 107,077 | 5 | 14 | 75  | 137 | 1 | 5  | 40 | 140 | 121 | 296 |
| 107,078 | 6 | 4  | 76  | 67  | 1 | 3  | 40 | 80  | 123 | 154 |
| 107,079 | 6 | 4  | 76  | 67  | 1 | 3  | 40 | 80  | 123 | 154 |
| 107,080 | 6 | 4  | 79  | 64  | 1 | 3  | 40 | 80  | 126 | 151 |

|         |    |   |     |    |   |   |     |    |     |     |
|---------|----|---|-----|----|---|---|-----|----|-----|-----|
| 107,081 | 6  | 4 | 112 | 63 | 1 | 3 | 54  | 79 | 173 | 149 |
| 107,082 | 6  | 1 | 169 | 51 | 2 | 2 | 80  | 72 | 257 | 126 |
| 107,083 | 6  | 1 | 192 | 49 | 2 | 2 | 86  | 72 | 286 | 124 |
| 107,084 | 8  | 1 | 216 | 49 | 3 | 2 | 95  | 72 | 322 | 124 |
| 107,085 | 8  | 1 | 216 | 49 | 3 | 2 | 95  | 71 | 322 | 123 |
| 107,086 | 10 | 1 | 260 | 49 | 4 | 2 | 103 | 72 | 377 | 124 |
| 107,087 | 10 | 1 | 273 | 50 | 5 | 2 | 110 | 72 | 398 | 125 |
| 107,088 | 10 | 1 | 276 | 51 | 5 | 2 | 113 | 72 | 404 | 126 |
| 107,089 | 10 | 2 | 281 | 51 | 5 | 2 | 117 | 73 | 413 | 128 |
| 107,090 | 10 | 2 | 288 | 49 | 5 | 2 | 117 | 76 | 420 | 129 |
| 107,091 | 10 | 2 | 287 | 47 | 5 | 2 | 117 | 75 | 419 | 126 |
| 107,092 | 10 | 2 | 287 | 48 | 5 | 2 | 118 | 73 | 420 | 125 |
| 107,093 | 10 | 1 | 288 | 32 | 5 | 1 | 119 | 45 | 422 | 79  |
| 107,094 | 10 | 1 | 290 | 26 | 5 | 1 | 120 | 17 | 425 | 45  |
| 107,095 | 10 | 3 | 290 | 21 | 5 | 1 | 120 | 12 | 425 | 37  |
| 107,096 | 10 | 3 | 303 | 19 | 5 | 1 | 130 | 13 | 448 | 36  |
| 107,097 | 10 | 3 | 308 | 17 | 5 | 1 | 134 | 14 | 457 | 35  |
| 107,098 | 10 | 3 | 311 | 23 | 6 | 1 | 135 | 15 | 462 | 42  |
| 107,099 | 10 | 3 | 312 | 23 | 6 | 1 | 135 | 16 | 463 | 43  |
| 107,100 | 10 | 3 | 318 | 22 | 6 | 1 | 138 | 16 | 472 | 42  |
| 107,101 | 11 | 3 | 319 | 21 | 6 | 1 | 140 | 16 | 476 | 41  |
| 107,102 | 11 | 3 | 318 | 22 | 6 | 1 | 138 | 17 | 473 | 43  |
| 107,103 | 11 | 3 | 315 | 22 | 6 | 1 | 136 | 17 | 468 | 43  |
| 107,104 | 11 | 3 | 316 | 22 | 6 | 1 | 136 | 17 | 469 | 43  |
| 107,105 | 11 | 3 | 322 | 20 | 6 | 1 | 136 | 15 | 475 | 39  |
| 107,106 | 11 | 3 | 322 | 20 | 6 | 1 | 138 | 14 | 477 | 38  |
| 107,107 | 14 | 3 | 342 | 20 | 7 | 1 | 147 | 13 | 510 | 37  |
| 107,108 | 14 | 3 | 350 | 20 | 8 | 1 | 149 | 13 | 521 | 37  |
| 107,109 | 14 | 3 | 353 | 20 | 9 | 1 | 152 | 13 | 528 | 37  |
| 107,110 | 13 | 3 | 319 | 19 | 9 | 0 | 132 | 13 | 473 | 35  |
| 107,111 | 13 | 3 | 322 | 19 | 9 | 0 | 132 | 13 | 476 | 35  |
| 107,112 | 13 | 3 | 319 | 19 | 9 | 0 | 132 | 13 | 473 | 35  |
| 107,113 | 13 | 3 | 324 | 18 | 9 | 0 | 132 | 13 | 478 | 34  |
| 107,114 | 13 | 3 | 324 | 18 | 9 | 0 | 132 | 13 | 478 | 34  |
| 107,115 | 12 | 3 | 323 | 18 | 9 | 0 | 130 | 13 | 474 | 34  |
| 107,116 | 12 | 3 | 325 | 18 | 9 | 0 | 133 | 13 | 479 | 34  |
| 107,117 | 11 | 3 | 335 | 17 | 9 | 0 | 133 | 13 | 488 | 33  |
| 107,118 | 11 | 3 | 338 | 17 | 9 | 0 | 134 | 13 | 492 | 33  |
| 107,119 | 11 | 3 | 339 | 17 | 9 | 0 | 134 | 13 | 493 | 33  |
| 107,120 | 11 | 3 | 337 | 17 | 9 | 0 | 135 | 13 | 492 | 33  |
| 107,121 | 11 | 3 | 339 | 17 | 9 | 0 | 134 | 13 | 493 | 33  |

|         |    |   |     |    |   |   |     |    |     |    |
|---------|----|---|-----|----|---|---|-----|----|-----|----|
| 107,122 | 11 | 3 | 344 | 17 | 9 | 0 | 132 | 13 | 496 | 33 |
| 107,123 | 11 | 3 | 344 | 17 | 9 | 0 | 133 | 13 | 497 | 33 |
| 107,124 | 11 | 3 | 350 | 16 | 9 | 0 | 134 | 13 | 504 | 32 |
| 107,125 | 11 | 3 | 349 | 16 | 8 | 0 | 131 | 13 | 499 | 32 |
| 107,126 | 10 | 3 | 348 | 16 | 8 | 0 | 130 | 13 | 496 | 32 |
| 107,127 | 10 | 3 | 355 | 16 | 8 | 0 | 130 | 13 | 503 | 32 |
| 107,128 | 10 | 3 | 353 | 16 | 8 | 0 | 130 | 13 | 501 | 32 |
| 107,129 | 9  | 3 | 352 | 16 | 8 | 0 | 130 | 13 | 499 | 32 |
| 107,130 | 9  | 3 | 349 | 16 | 8 | 0 | 130 | 13 | 496 | 32 |
| 107,131 | 9  | 3 | 341 | 16 | 8 | 0 | 127 | 14 | 485 | 33 |
| 107,132 | 9  | 3 | 316 | 16 | 8 | 0 | 117 | 15 | 450 | 34 |
| 107,133 | 9  | 3 | 259 | 16 | 7 | 0 | 91  | 15 | 366 | 34 |
| 107,134 | 9  | 3 | 236 | 16 | 7 | 0 | 85  | 15 | 337 | 34 |
| 107,135 | 8  | 3 | 211 | 17 | 6 | 0 | 77  | 16 | 302 | 36 |
| 107,136 | 6  | 3 | 167 | 17 | 5 | 0 | 69  | 16 | 247 | 36 |
| 107,137 | 6  | 3 | 167 | 17 | 5 | 0 | 65  | 15 | 243 | 35 |
| 107,138 | 6  | 3 | 159 | 16 | 4 | 0 | 62  | 15 | 231 | 34 |
| 107,139 | 6  | 3 | 156 | 17 | 4 | 0 | 59  | 14 | 225 | 34 |
| 107,140 | 6  | 2 | 151 | 16 | 4 | 0 | 56  | 13 | 217 | 31 |
| 107,141 | 6  | 2 | 144 | 16 | 4 | 0 | 55  | 10 | 209 | 28 |
| 107,142 | 6  | 2 | 145 | 16 | 4 | 0 | 54  | 11 | 209 | 29 |
| 107,143 | 6  | 2 | 144 | 15 | 4 | 0 | 54  | 11 | 208 | 28 |
| 107,144 | 6  | 2 | 143 | 16 | 4 | 0 | 54  | 11 | 207 | 29 |
| 107,145 | 6  | 2 | 147 | 21 | 4 | 0 | 56  | 11 | 213 | 34 |
| 107,146 | 6  | 0 | 132 | 30 | 4 | 0 | 43  | 13 | 185 | 43 |
| 107,147 | 6  | 0 | 134 | 30 | 4 | 0 | 44  | 13 | 188 | 43 |
| 107,148 | 6  | 0 | 130 | 29 | 3 | 0 | 41  | 12 | 180 | 41 |
| 107,149 | 6  | 0 | 126 | 25 | 4 | 0 | 41  | 12 | 177 | 37 |
| 107,150 | 6  | 0 | 126 | 25 | 4 | 0 | 41  | 12 | 177 | 37 |
| 107,151 | 5  | 0 | 122 | 25 | 4 | 0 | 35  | 11 | 166 | 36 |
| 107,152 | 5  | 0 | 122 | 25 | 4 | 0 | 35  | 12 | 166 | 37 |
| 107,153 | 5  | 0 | 122 | 24 | 4 | 0 | 35  | 12 | 166 | 36 |
| 107,154 | 5  | 0 | 120 | 24 | 4 | 0 | 35  | 12 | 164 | 36 |
| 107,155 | 5  | 0 | 120 | 26 | 4 | 1 | 36  | 13 | 165 | 40 |
| 107,156 | 5  | 0 | 114 | 29 | 4 | 1 | 36  | 13 | 159 | 43 |
| 107,157 | 5  | 0 | 107 | 29 | 3 | 1 | 32  | 15 | 147 | 45 |
| 107,158 | 2  | 0 | 77  | 29 | 3 | 1 | 20  | 15 | 102 | 45 |
| 107,159 | 2  | 0 | 74  | 32 | 2 | 1 | 20  | 21 | 98  | 54 |
| 107,160 | 1  | 0 | 71  | 32 | 1 | 1 | 19  | 23 | 92  | 56 |
| 107,161 | 1  | 0 | 79  | 35 | 1 | 1 | 19  | 23 | 100 | 59 |
| 107,162 | 1  | 0 | 77  | 35 | 1 | 1 | 21  | 23 | 100 | 59 |

|         |    |   |     |    |   |   |    |    |     |     |
|---------|----|---|-----|----|---|---|----|----|-----|-----|
| 107,163 | 1  | 0 | 72  | 35 | 1 | 1 | 21 | 23 | 95  | 59  |
| 107,164 | 1  | 0 | 78  | 37 | 2 | 1 | 35 | 28 | 116 | 66  |
| 107,165 | 1  | 0 | 78  | 37 | 2 | 1 | 32 | 29 | 113 | 67  |
| 107,166 | 1  | 0 | 80  | 41 | 3 | 1 | 32 | 29 | 116 | 71  |
| 107,167 | 1  | 0 | 78  | 43 | 3 | 1 | 32 | 30 | 114 | 74  |
| 107,168 | 1  | 0 | 68  | 44 | 3 | 1 | 31 | 31 | 103 | 76  |
| 107,169 | 1  | 3 | 66  | 45 | 3 | 1 | 32 | 32 | 102 | 81  |
| 107,170 | 1  | 3 | 63  | 49 | 3 | 1 | 32 | 32 | 99  | 85  |
| 107,171 | 1  | 3 | 64  | 52 | 3 | 1 | 31 | 33 | 99  | 89  |
| 107,172 | 1  | 3 | 60  | 52 | 3 | 1 | 30 | 33 | 94  | 89  |
| 107,173 | 1  | 3 | 65  | 54 | 4 | 1 | 33 | 33 | 103 | 91  |
| 107,174 | 1  | 3 | 62  | 57 | 4 | 1 | 33 | 33 | 100 | 94  |
| 107,175 | 1  | 5 | 67  | 59 | 4 | 2 | 34 | 38 | 106 | 104 |
| 107,176 | 1  | 5 | 66  | 59 | 4 | 2 | 34 | 38 | 105 | 104 |
| 107,177 | 1  | 5 | 61  | 61 | 4 | 2 | 36 | 39 | 102 | 107 |
| 107,178 | 2  | 5 | 70  | 61 | 4 | 2 | 41 | 39 | 117 | 107 |
| 107,179 | 2  | 5 | 70  | 61 | 4 | 2 | 42 | 39 | 118 | 107 |
| 107,180 | 2  | 5 | 70  | 61 | 4 | 2 | 42 | 39 | 118 | 107 |
| 107,181 | 3  | 6 | 71  | 59 | 4 | 2 | 43 | 38 | 121 | 105 |
| 107,182 | 3  | 6 | 71  | 59 | 4 | 2 | 42 | 38 | 120 | 105 |
| 107,183 | 3  | 6 | 71  | 59 | 4 | 2 | 42 | 37 | 120 | 104 |
| 107,184 | 3  | 6 | 71  | 59 | 4 | 2 | 42 | 37 | 120 | 104 |
| 107,185 | 3  | 6 | 71  | 59 | 4 | 2 | 42 | 37 | 120 | 104 |
| 107,186 | 3  | 6 | 81  | 59 | 4 | 2 | 44 | 36 | 132 | 103 |
| 107,187 | 10 | 6 | 122 | 59 | 4 | 2 | 62 | 36 | 198 | 103 |
| 107,188 | 11 | 6 | 124 | 60 | 4 | 2 | 63 | 36 | 202 | 104 |
| 107,189 | 11 | 6 | 122 | 60 | 4 | 2 | 63 | 36 | 200 | 104 |
| 107,190 | 11 | 6 | 125 | 58 | 4 | 2 | 64 | 36 | 204 | 102 |
| 107,191 | 12 | 7 | 128 | 58 | 4 | 2 | 64 | 36 | 208 | 103 |
| 107,192 | 12 | 7 | 128 | 58 | 4 | 2 | 64 | 36 | 208 | 103 |
| 107,193 | 12 | 7 | 130 | 59 | 4 | 2 | 63 | 35 | 209 | 103 |
| 107,194 | 12 | 7 | 130 | 44 | 4 | 2 | 63 | 32 | 209 | 85  |
| 107,195 | 12 | 7 | 131 | 44 | 4 | 2 | 64 | 32 | 211 | 85  |
| 107,196 | 12 | 7 | 126 | 43 | 4 | 2 | 62 | 32 | 204 | 84  |
| 107,197 | 12 | 7 | 126 | 45 | 4 | 2 | 62 | 32 | 204 | 86  |
| 107,198 | 12 | 7 | 125 | 45 | 4 | 2 | 61 | 32 | 202 | 86  |
| 107,199 | 12 | 7 | 125 | 44 | 4 | 2 | 61 | 31 | 202 | 84  |
| 107,200 | 12 | 7 | 125 | 44 | 3 | 2 | 61 | 32 | 201 | 85  |
| 107,201 | 12 | 7 | 125 | 45 | 3 | 2 | 60 | 32 | 200 | 86  |
| 107,202 | 12 | 7 | 124 | 45 | 3 | 2 | 61 | 32 | 200 | 86  |
| 107,203 | 12 | 7 | 125 | 45 | 3 | 2 | 61 | 31 | 201 | 85  |

|         |    |   |     |    |   |   |    |    |     |     |
|---------|----|---|-----|----|---|---|----|----|-----|-----|
| 107,204 | 12 | 7 | 125 | 45 | 3 | 2 | 61 | 31 | 201 | 85  |
| 107,205 | 12 | 7 | 125 | 45 | 3 | 2 | 60 | 31 | 200 | 85  |
| 107,206 | 13 | 7 | 127 | 49 | 3 | 1 | 60 | 30 | 203 | 87  |
| 107,207 | 14 | 7 | 134 | 51 | 3 | 1 | 67 | 29 | 218 | 88  |
| 107,208 | 14 | 7 | 134 | 53 | 3 | 1 | 67 | 29 | 218 | 90  |
| 107,209 | 14 | 7 | 134 | 56 | 3 | 1 | 71 | 29 | 222 | 93  |
| 107,210 | 14 | 8 | 142 | 62 | 3 | 1 | 80 | 25 | 239 | 96  |
| 107,211 | 14 | 8 | 140 | 63 | 3 | 1 | 79 | 24 | 236 | 96  |
| 107,212 | 16 | 8 | 149 | 60 | 4 | 1 | 84 | 24 | 253 | 93  |
| 107,213 | 16 | 8 | 149 | 66 | 4 | 1 | 84 | 27 | 253 | 102 |
| 107,214 | 17 | 8 | 143 | 66 | 3 | 1 | 72 | 27 | 235 | 102 |
| 107,215 | 17 | 8 | 145 | 58 | 3 | 1 | 72 | 20 | 237 | 87  |
| 107,216 | 17 | 8 | 147 | 58 | 3 | 1 | 73 | 20 | 240 | 87  |
| 107,217 | 17 | 8 | 155 | 58 | 2 | 1 | 77 | 20 | 251 | 87  |
| 107,218 | 17 | 8 | 155 | 58 | 2 | 1 | 77 | 20 | 251 | 87  |
| 107,219 | 17 | 8 | 154 | 57 | 2 | 1 | 76 | 19 | 249 | 85  |
| 107,220 | 17 | 5 | 158 | 56 | 2 | 1 | 80 | 18 | 257 | 80  |
| 107,221 | 17 | 5 | 158 | 52 | 2 | 1 | 80 | 18 | 257 | 76  |
| 107,222 | 17 | 5 | 157 | 47 | 2 | 1 | 80 | 17 | 256 | 70  |
| 107,223 | 17 | 5 | 157 | 47 | 2 | 1 | 80 | 17 | 256 | 70  |
| 107,224 | 17 | 5 | 149 | 67 | 1 | 1 | 75 | 20 | 242 | 93  |
| 107,225 | 17 | 5 | 149 | 71 | 1 | 1 | 74 | 24 | 241 | 101 |
| 107,226 | 17 | 3 | 144 | 78 | 1 | 0 | 77 | 22 | 239 | 103 |
| 107,227 | 17 | 4 | 144 | 79 | 1 | 0 | 76 | 25 | 238 | 108 |
| 107,228 | 17 | 4 | 143 | 77 | 1 | 0 | 75 | 24 | 236 | 105 |
| 107,229 | 16 | 4 | 133 | 77 | 1 | 0 | 70 | 24 | 220 | 105 |
| 107,230 | 16 | 4 | 133 | 77 | 1 | 0 | 69 | 24 | 219 | 105 |
| 107,231 | 16 | 4 | 133 | 77 | 1 | 0 | 69 | 24 | 219 | 105 |
| 107,232 | 15 | 4 | 132 | 77 | 1 | 0 | 68 | 24 | 216 | 105 |
| 107,233 | 15 | 4 | 132 | 78 | 1 | 0 | 68 | 27 | 216 | 109 |
| 107,234 | 15 | 4 | 134 | 79 | 1 | 0 | 69 | 28 | 219 | 111 |
| 107,235 | 14 | 4 | 129 | 81 | 1 | 0 | 68 | 28 | 212 | 113 |
| 107,236 | 14 | 4 | 124 | 81 | 1 | 0 | 66 | 28 | 205 | 113 |
| 107,237 | 8  | 5 | 98  | 83 | 1 | 0 | 52 | 31 | 159 | 119 |
| 107,238 | 7  | 5 | 87  | 84 | 1 | 0 | 48 | 31 | 143 | 120 |
| 107,239 | 6  | 5 | 83  | 84 | 1 | 0 | 47 | 31 | 137 | 120 |
| 107,240 | 6  | 5 | 81  | 86 | 1 | 0 | 47 | 34 | 135 | 125 |
| 107,241 | 6  | 5 | 81  | 86 | 1 | 0 | 46 | 34 | 134 | 125 |
| 107,242 | 5  | 4 | 78  | 86 | 1 | 0 | 46 | 34 | 130 | 124 |
| 107,243 | 5  | 4 | 77  | 86 | 1 | 0 | 46 | 34 | 129 | 124 |
| 107,244 | 5  | 4 | 75  | 84 | 1 | 0 | 46 | 32 | 127 | 120 |



|         |    |   |     |    |   |   |     |    |     |     |
|---------|----|---|-----|----|---|---|-----|----|-----|-----|
| 107,245 | 5  | 4 | 75  | 84 | 1 | 0 | 46  | 32 | 127 | 120 |
| 107,246 | 5  | 4 | 73  | 84 | 1 | 0 | 44  | 32 | 123 | 120 |
| 107,247 | 5  | 4 | 73  | 83 | 1 | 0 | 44  | 32 | 123 | 119 |
| 107,248 | 5  | 4 | 73  | 83 | 1 | 0 | 44  | 32 | 123 | 119 |
| 107,249 | 5  | 4 | 73  | 83 | 1 | 0 | 44  | 32 | 123 | 119 |
| 107,250 | 5  | 4 | 73  | 84 | 1 | 0 | 44  | 34 | 123 | 122 |
| 107,251 | 5  | 4 | 72  | 84 | 1 | 0 | 44  | 34 | 122 | 122 |
| 107,252 | 5  | 4 | 71  | 83 | 1 | 0 | 44  | 34 | 121 | 121 |
| 107,253 | 5  | 4 | 70  | 83 | 1 | 0 | 44  | 34 | 120 | 121 |
| 107,254 | 5  | 4 | 70  | 83 | 1 | 0 | 44  | 34 | 120 | 121 |
| 107,255 | 5  | 4 | 70  | 83 | 1 | 0 | 44  | 34 | 120 | 121 |
| 107,256 | 5  | 4 | 68  | 72 | 1 | 0 | 45  | 32 | 119 | 108 |
| 107,257 | 4  | 4 | 68  | 72 | 1 | 0 | 45  | 33 | 118 | 109 |
| 107,258 | 3  | 4 | 61  | 72 | 1 | 0 | 38  | 33 | 103 | 109 |
| 107,259 | 3  | 3 | 60  | 57 | 1 | 0 | 34  | 30 | 98  | 90  |
| 107,260 | 3  | 3 | 63  | 57 | 1 | 0 | 37  | 30 | 104 | 90  |
| 107,261 | 3  | 3 | 55  | 51 | 1 | 0 | 30  | 28 | 89  | 82  |
| 107,262 | 3  | 3 | 54  | 52 | 1 | 0 | 30  | 28 | 88  | 83  |
| 107,263 | 1  | 3 | 42  | 52 | 0 | 0 | 24  | 28 | 67  | 83  |
| 107,264 | 1  | 3 | 41  | 52 | 0 | 0 | 23  | 28 | 65  | 83  |
| 107,265 | 0  | 3 | 40  | 54 | 0 | 0 | 22  | 29 | 62  | 86  |
| 107,266 | 0  | 3 | 38  | 54 | 0 | 0 | 22  | 29 | 60  | 86  |
| 107,267 | 0  | 3 | 35  | 55 | 0 | 0 | 21  | 29 | 56  | 87  |
| 107,268 | 0  | 3 | 26  | 55 | 0 | 0 | 17  | 29 | 43  | 87  |
| 107,269 | 1  | 3 | 27  | 55 | 1 | 0 | 22  | 29 | 51  | 87  |
| 107,270 | 1  | 3 | 27  | 55 | 1 | 0 | 26  | 30 | 55  | 88  |
| 107,271 | 1  | 3 | 27  | 55 | 1 | 0 | 25  | 30 | 54  | 88  |
| 107,272 | 6  | 3 | 53  | 56 | 1 | 0 | 37  | 30 | 97  | 89  |
| 107,273 | 7  | 3 | 59  | 56 | 2 | 0 | 39  | 30 | 107 | 89  |
| 107,274 | 15 | 3 | 95  | 56 | 5 | 0 | 71  | 30 | 186 | 89  |
| 107,275 | 19 | 3 | 119 | 36 | 5 | 0 | 87  | 27 | 230 | 66  |
| 107,276 | 26 | 3 | 134 | 29 | 6 | 0 | 103 | 24 | 269 | 56  |
| 107,277 | 29 | 3 | 139 | 19 | 6 | 0 | 103 | 18 | 277 | 40  |
| 107,278 | 29 | 2 | 139 | 19 | 6 | 0 | 103 | 18 | 277 | 39  |
| 107,279 | 30 | 2 | 145 | 19 | 6 | 0 | 113 | 18 | 294 | 39  |
| 107,280 | 30 | 2 | 145 | 19 | 6 | 0 | 113 | 17 | 294 | 38  |
| 107,281 | 34 | 1 | 173 | 20 | 6 | 0 | 129 | 17 | 342 | 38  |
| 107,282 | 34 | 1 | 180 | 21 | 6 | 2 | 132 | 24 | 352 | 48  |
| 107,283 | 41 | 1 | 235 | 29 | 9 | 2 | 190 | 26 | 475 | 58  |
| 107,284 | 41 | 1 | 239 | 35 | 9 | 2 | 189 | 28 | 478 | 66  |
| 107,285 | 42 | 1 | 239 | 36 | 9 | 2 | 192 | 40 | 482 | 79  |

|         |    |   |     |    |    |   |     |     |     |     |
|---------|----|---|-----|----|----|---|-----|-----|-----|-----|
| 107,286 | 42 | 1 | 239 | 34 | 9  | 2 | 192 | 43  | 482 | 80  |
| 107,287 | 45 | 1 | 273 | 34 | 11 | 2 | 204 | 44  | 533 | 81  |
| 107,288 | 54 | 1 | 339 | 32 | 17 | 2 | 271 | 42  | 681 | 77  |
| 107,289 | 56 | 1 | 341 | 30 | 17 | 2 | 273 | 43  | 687 | 76  |
| 107,290 | 56 | 2 | 340 | 30 | 17 | 2 | 275 | 47  | 688 | 81  |
| 107,291 | 56 | 2 | 340 | 29 | 17 | 2 | 275 | 44  | 688 | 77  |
| 107,292 | 56 | 2 | 339 | 29 | 17 | 2 | 275 | 44  | 687 | 77  |
| 107,293 | 56 | 2 | 339 | 30 | 17 | 2 | 275 | 44  | 687 | 78  |
| 107,294 | 56 | 2 | 340 | 31 | 17 | 2 | 275 | 44  | 688 | 79  |
| 107,295 | 56 | 2 | 340 | 31 | 17 | 2 | 275 | 44  | 688 | 79  |
| 107,296 | 56 | 2 | 340 | 35 | 17 | 3 | 275 | 55  | 688 | 95  |
| 107,297 | 56 | 2 | 340 | 37 | 17 | 4 | 275 | 61  | 688 | 104 |
| 107,298 | 56 | 2 | 341 | 37 | 17 | 4 | 275 | 73  | 689 | 116 |
| 107,299 | 56 | 2 | 341 | 41 | 17 | 4 | 275 | 87  | 689 | 134 |
| 107,300 | 56 | 2 | 340 | 41 | 17 | 4 | 275 | 90  | 688 | 137 |
| 107,301 | 56 | 2 | 340 | 40 | 17 | 4 | 275 | 88  | 688 | 134 |
| 107,302 | 56 | 2 | 340 | 42 | 17 | 5 | 275 | 89  | 688 | 138 |
| 107,303 | 56 | 2 | 340 | 42 | 17 | 5 | 275 | 89  | 688 | 138 |
| 107,304 | 56 | 2 | 342 | 43 | 17 | 5 | 276 | 90  | 691 | 140 |
| 107,305 | 56 | 2 | 342 | 44 | 18 | 5 | 276 | 92  | 692 | 143 |
| 107,306 | 56 | 2 | 342 | 44 | 18 | 5 | 276 | 97  | 692 | 148 |
| 107,307 | 56 | 2 | 342 | 44 | 18 | 5 | 275 | 97  | 691 | 148 |
| 107,308 | 58 | 2 | 346 | 44 | 18 | 5 | 276 | 96  | 698 | 147 |
| 107,309 | 59 | 2 | 348 | 44 | 18 | 5 | 277 | 97  | 702 | 148 |
| 107,310 | 60 | 2 | 353 | 44 | 18 | 5 | 280 | 98  | 711 | 149 |
| 107,311 | 60 | 2 | 354 | 44 | 18 | 5 | 277 | 97  | 709 | 148 |
| 107,312 | 62 | 2 | 364 | 43 | 18 | 5 | 275 | 97  | 719 | 147 |
| 107,313 | 63 | 2 | 379 | 43 | 18 | 5 | 277 | 98  | 737 | 148 |
| 107,314 | 70 | 2 | 423 | 43 | 18 | 5 | 287 | 99  | 798 | 149 |
| 107,315 | 70 | 2 | 423 | 43 | 18 | 5 | 287 | 99  | 798 | 149 |
| 107,316 | 72 | 2 | 423 | 41 | 18 | 5 | 286 | 98  | 799 | 146 |
| 107,317 | 72 | 2 | 441 | 40 | 19 | 5 | 290 | 98  | 822 | 145 |
| 107,318 | 71 | 2 | 439 | 40 | 19 | 5 | 288 | 98  | 817 | 145 |
| 107,319 | 72 | 2 | 460 | 40 | 19 | 5 | 295 | 98  | 846 | 145 |
| 107,320 | 73 | 2 | 470 | 41 | 21 | 5 | 305 | 97  | 869 | 145 |
| 107,321 | 76 | 2 | 470 | 42 | 21 | 5 | 303 | 98  | 870 | 147 |
| 107,322 | 71 | 2 | 445 | 41 | 21 | 5 | 294 | 99  | 831 | 147 |
| 107,323 | 70 | 2 | 449 | 41 | 20 | 6 | 292 | 104 | 831 | 153 |
| 107,324 | 70 | 2 | 445 | 41 | 20 | 6 | 298 | 104 | 833 | 153 |
| 107,325 | 62 | 2 | 412 | 41 | 17 | 6 | 266 | 104 | 757 | 153 |
| 107,326 | 58 | 2 | 388 | 41 | 17 | 6 | 250 | 104 | 713 | 153 |

|         |    |   |     |    |    |   |     |     |     |     |
|---------|----|---|-----|----|----|---|-----|-----|-----|-----|
| 107,327 | 51 | 2 | 372 | 41 | 17 | 6 | 235 | 103 | 675 | 152 |
| 107,328 | 48 | 2 | 367 | 41 | 17 | 6 | 232 | 103 | 664 | 152 |
| 107,329 | 48 | 2 | 363 | 44 | 17 | 6 | 226 | 104 | 654 | 156 |
| 107,330 | 47 | 2 | 360 | 44 | 17 | 6 | 224 | 104 | 648 | 156 |
| 107,331 | 43 | 2 | 352 | 44 | 17 | 6 | 221 | 106 | 633 | 158 |
| 107,332 | 38 | 2 | 302 | 28 | 15 | 4 | 197 | 96  | 552 | 130 |
| 107,333 | 38 | 2 | 288 | 28 | 15 | 4 | 195 | 96  | 536 | 130 |
| 107,334 | 24 | 2 | 170 | 27 | 6  | 4 | 80  | 96  | 280 | 129 |
| 107,335 | 23 | 2 | 165 | 27 | 6  | 4 | 77  | 97  | 271 | 130 |
| 107,336 | 26 | 2 | 169 | 26 | 6  | 4 | 72  | 81  | 273 | 113 |
| 107,337 | 25 | 2 | 167 | 26 | 6  | 4 | 72  | 82  | 270 | 114 |
| 107,338 | 25 | 3 | 175 | 26 | 6  | 4 | 77  | 89  | 283 | 122 |
| 107,339 | 25 | 2 | 175 | 25 | 6  | 4 | 77  | 88  | 283 | 119 |
| 107,340 | 28 | 2 | 182 | 25 | 7  | 4 | 86  | 87  | 303 | 118 |
| 107,341 | 28 | 1 | 182 | 24 | 7  | 4 | 84  | 83  | 301 | 112 |
| 107,342 | 28 | 2 | 183 | 24 | 8  | 4 | 91  | 84  | 310 | 114 |
| 107,343 | 28 | 2 | 183 | 24 | 8  | 4 | 91  | 84  | 310 | 114 |
| 107,344 | 29 | 2 | 192 | 23 | 9  | 4 | 96  | 84  | 326 | 113 |
| 107,345 | 29 | 2 | 192 | 22 | 9  | 4 | 97  | 84  | 327 | 112 |
| 107,346 | 29 | 3 | 192 | 22 | 9  | 4 | 98  | 84  | 328 | 113 |
| 107,347 | 30 | 3 | 192 | 16 | 9  | 2 | 98  | 67  | 329 | 88  |
| 107,348 | 30 | 3 | 192 | 16 | 9  | 2 | 98  | 67  | 329 | 88  |
| 107,349 | 30 | 3 | 191 | 15 | 9  | 2 | 98  | 55  | 328 | 75  |
| 107,350 | 30 | 3 | 190 | 11 | 9  | 2 | 98  | 41  | 327 | 57  |
| 107,351 | 30 | 3 | 191 | 11 | 9  | 2 | 98  | 38  | 328 | 54  |
| 107,352 | 30 | 3 | 192 | 11 | 9  | 2 | 100 | 38  | 331 | 54  |
| 107,353 | 30 | 3 | 192 | 9  | 9  | 1 | 100 | 36  | 331 | 49  |
| 107,354 | 30 | 3 | 193 | 9  | 9  | 1 | 100 | 36  | 332 | 49  |
| 107,355 | 30 | 3 | 191 | 7  | 9  | 1 | 99  | 33  | 329 | 44  |
| 107,356 | 30 | 4 | 191 | 8  | 8  | 1 | 99  | 33  | 328 | 46  |
| 107,357 | 29 | 4 | 195 | 8  | 8  | 1 | 99  | 28  | 331 | 41  |
| 107,358 | 29 | 4 | 191 | 8  | 8  | 1 | 98  | 28  | 326 | 41  |
| 107,359 | 28 | 4 | 192 | 8  | 8  | 1 | 98  | 28  | 326 | 41  |
| 107,360 | 28 | 4 | 190 | 7  | 8  | 1 | 97  | 27  | 323 | 39  |
| 107,361 | 27 | 4 | 186 | 8  | 8  | 1 | 94  | 26  | 315 | 39  |
| 107,362 | 27 | 4 | 188 | 8  | 8  | 1 | 102 | 26  | 325 | 39  |
| 107,363 | 26 | 4 | 178 | 8  | 8  | 1 | 102 | 25  | 314 | 38  |
| 107,364 | 25 | 4 | 164 | 8  | 8  | 1 | 100 | 25  | 297 | 38  |
| 107,365 | 18 | 4 | 112 | 8  | 8  | 1 | 92  | 24  | 230 | 37  |
| 107,366 | 16 | 4 | 111 | 8  | 8  | 1 | 93  | 24  | 228 | 37  |
| 107,367 | 16 | 4 | 112 | 8  | 8  | 1 | 94  | 25  | 230 | 38  |

|         |    |   |     |   |    |   |     |    |     |    |
|---------|----|---|-----|---|----|---|-----|----|-----|----|
| 107,368 | 16 | 4 | 93  | 8 | 8  | 1 | 90  | 25 | 207 | 38 |
| 107,369 | 15 | 4 | 80  | 8 | 8  | 1 | 89  | 25 | 192 | 38 |
| 107,370 | 15 | 4 | 74  | 8 | 7  | 1 | 80  | 25 | 176 | 38 |
| 107,371 | 15 | 4 | 71  | 7 | 7  | 1 | 80  | 25 | 173 | 37 |
| 107,372 | 12 | 4 | 73  | 6 | 7  | 1 | 91  | 23 | 183 | 34 |
| 107,373 | 12 | 4 | 72  | 6 | 7  | 0 | 88  | 18 | 179 | 28 |
| 107,374 | 12 | 5 | 68  | 6 | 7  | 0 | 88  | 18 | 175 | 29 |
| 107,375 | 12 | 5 | 66  | 6 | 7  | 0 | 82  | 18 | 167 | 29 |
| 107,376 | 12 | 6 | 64  | 6 | 7  | 0 | 82  | 19 | 165 | 31 |
| 107,377 | 12 | 6 | 64  | 6 | 7  | 0 | 82  | 20 | 165 | 32 |
| 107,378 | 13 | 6 | 72  | 6 | 7  | 0 | 91  | 20 | 183 | 32 |
| 107,379 | 13 | 6 | 77  | 6 | 8  | 0 | 92  | 21 | 190 | 33 |
| 107,380 | 13 | 7 | 77  | 3 | 8  | 0 | 90  | 20 | 188 | 30 |
| 107,381 | 15 | 7 | 89  | 3 | 8  | 0 | 100 | 20 | 212 | 30 |
| 107,382 | 15 | 7 | 89  | 3 | 8  | 0 | 98  | 18 | 210 | 28 |
| 107,383 | 15 | 7 | 90  | 3 | 8  | 0 | 102 | 15 | 215 | 25 |
| 107,384 | 15 | 7 | 90  | 3 | 8  | 0 | 101 | 15 | 214 | 25 |
| 107,385 | 15 | 7 | 90  | 3 | 8  | 0 | 101 | 16 | 214 | 26 |
| 107,386 | 15 | 7 | 89  | 4 | 8  | 0 | 101 | 15 | 213 | 26 |
| 107,387 | 12 | 7 | 85  | 3 | 8  | 0 | 99  | 14 | 204 | 24 |
| 107,388 | 12 | 7 | 85  | 3 | 8  | 0 | 100 | 14 | 205 | 24 |
| 107,389 | 12 | 6 | 80  | 3 | 8  | 0 | 95  | 7  | 195 | 16 |
| 107,390 | 10 | 6 | 79  | 3 | 7  | 0 | 91  | 7  | 187 | 16 |
| 107,391 | 9  | 6 | 78  | 3 | 7  | 0 | 89  | 7  | 183 | 16 |
| 107,392 | 9  | 6 | 79  | 3 | 7  | 0 | 89  | 7  | 184 | 16 |
| 107,393 | 9  | 5 | 79  | 3 | 6  | 0 | 84  | 6  | 178 | 14 |
| 107,394 | 8  | 5 | 70  | 3 | 5  | 0 | 82  | 6  | 165 | 14 |
| 107,395 | 8  | 5 | 70  | 3 | 5  | 0 | 81  | 6  | 164 | 14 |
| 107,396 | 8  | 4 | 73  | 4 | 5  | 0 | 81  | 6  | 167 | 14 |
| 107,397 | 8  | 4 | 73  | 4 | 5  | 1 | 81  | 6  | 167 | 15 |
| 107,398 | 7  | 5 | 79  | 4 | 6  | 1 | 87  | 6  | 179 | 16 |
| 107,399 | 7  | 5 | 79  | 4 | 6  | 1 | 87  | 6  | 179 | 16 |
| 107,400 | 8  | 5 | 85  | 4 | 6  | 1 | 92  | 6  | 191 | 16 |
| 107,401 | 8  | 5 | 85  | 4 | 6  | 1 | 92  | 6  | 191 | 16 |
| 107,402 | 8  | 5 | 85  | 4 | 6  | 1 | 92  | 6  | 191 | 16 |
| 107,403 | 9  | 5 | 85  | 5 | 6  | 1 | 93  | 6  | 193 | 17 |
| 107,404 | 9  | 6 | 85  | 5 | 6  | 1 | 93  | 6  | 193 | 18 |
| 107,405 | 9  | 6 | 95  | 5 | 7  | 1 | 105 | 6  | 216 | 18 |
| 107,406 | 9  | 6 | 100 | 5 | 9  | 1 | 109 | 6  | 227 | 18 |
| 107,407 | 10 | 5 | 109 | 4 | 12 | 1 | 123 | 6  | 254 | 16 |
| 107,408 | 9  | 5 | 108 | 4 | 12 | 1 | 123 | 6  | 252 | 16 |

|         |    |    |     |    |    |   |     |    |     |    |
|---------|----|----|-----|----|----|---|-----|----|-----|----|
| 107,409 | 9  | 5  | 108 | 4  | 12 | 1 | 126 | 6  | 255 | 16 |
| 107,410 | 9  | 5  | 108 | 4  | 12 | 1 | 126 | 6  | 255 | 16 |
| 107,411 | 9  | 5  | 108 | 3  | 12 | 1 | 126 | 6  | 255 | 15 |
| 107,412 | 9  | 5  | 110 | 3  | 12 | 1 | 126 | 6  | 257 | 15 |
| 107,413 | 9  | 7  | 104 | 3  | 12 | 1 | 120 | 6  | 245 | 17 |
| 107,414 | 8  | 7  | 110 | 3  | 12 | 1 | 124 | 6  | 254 | 17 |
| 107,415 | 8  | 7  | 125 | 4  | 12 | 1 | 141 | 6  | 286 | 18 |
| 107,416 | 8  | 7  | 125 | 4  | 12 | 1 | 139 | 7  | 284 | 19 |
| 107,417 | 8  | 7  | 125 | 4  | 12 | 1 | 138 | 8  | 283 | 20 |
| 107,418 | 9  | 7  | 142 | 4  | 12 | 1 | 152 | 11 | 315 | 23 |
| 107,419 | 10 | 7  | 152 | 6  | 12 | 1 | 156 | 14 | 330 | 28 |
| 107,420 | 10 | 7  | 152 | 11 | 12 | 1 | 156 | 18 | 330 | 37 |
| 107,421 | 10 | 9  | 151 | 17 | 12 | 1 | 155 | 23 | 328 | 50 |
| 107,422 | 9  | 9  | 147 | 24 | 10 | 2 | 145 | 25 | 311 | 60 |
| 107,423 | 9  | 9  | 143 | 24 | 10 | 2 | 131 | 25 | 293 | 60 |
| 107,424 | 9  | 10 | 150 | 24 | 10 | 2 | 139 | 27 | 308 | 63 |
| 107,425 | 9  | 9  | 165 | 26 | 10 | 2 | 160 | 27 | 344 | 64 |
| 107,426 | 9  | 9  | 165 | 26 | 10 | 2 | 160 | 27 | 344 | 64 |
| 107,427 | 9  | 9  | 166 | 30 | 10 | 4 | 161 | 34 | 346 | 77 |
| 107,428 | 8  | 9  | 159 | 30 | 9  | 4 | 152 | 33 | 328 | 76 |
| 107,429 | 9  | 9  | 229 | 30 | 13 | 4 | 195 | 33 | 446 | 76 |
| 107,430 | 10 | 8  | 224 | 30 | 12 | 4 | 194 | 32 | 440 | 74 |
| 107,431 | 9  | 8  | 220 | 30 | 12 | 4 | 189 | 32 | 430 | 74 |
| 107,432 | 8  | 8  | 212 | 30 | 12 | 4 | 184 | 32 | 416 | 74 |
| 107,433 | 8  | 8  | 212 | 30 | 12 | 4 | 183 | 32 | 415 | 74 |
| 107,434 | 8  | 8  | 212 | 30 | 12 | 4 | 181 | 32 | 413 | 74 |
| 107,435 | 8  | 8  | 214 | 30 | 12 | 4 | 181 | 33 | 415 | 75 |
| 107,436 | 8  | 8  | 214 | 29 | 12 | 4 | 177 | 32 | 411 | 73 |
| 107,437 | 8  | 8  | 212 | 29 | 12 | 4 | 178 | 32 | 410 | 73 |
| 107,438 | 7  | 8  | 216 | 29 | 12 | 4 | 176 | 32 | 411 | 73 |
| 107,439 | 7  | 8  | 213 | 29 | 12 | 4 | 175 | 31 | 407 | 72 |
| 107,440 | 7  | 8  | 217 | 29 | 12 | 4 | 176 | 31 | 412 | 72 |
| 107,441 | 7  | 8  | 212 | 29 | 12 | 4 | 174 | 31 | 405 | 72 |
| 107,442 | 7  | 9  | 212 | 29 | 12 | 4 | 173 | 31 | 404 | 73 |
| 107,443 | 7  | 10 | 211 | 29 | 12 | 4 | 173 | 31 | 403 | 74 |
| 107,444 | 7  | 10 | 210 | 29 | 12 | 4 | 171 | 31 | 400 | 74 |
| 107,445 | 7  | 10 | 220 | 29 | 13 | 4 | 178 | 31 | 418 | 74 |
| 107,446 | 8  | 10 | 227 | 28 | 13 | 4 | 181 | 31 | 429 | 73 |
| 107,447 | 8  | 10 | 227 | 28 | 13 | 4 | 181 | 31 | 429 | 73 |
| 107,448 | 8  | 10 | 224 | 28 | 12 | 3 | 180 | 31 | 424 | 72 |
| 107,449 | 8  | 10 | 223 | 28 | 12 | 3 | 178 | 31 | 421 | 72 |

|         |   |    |     |    |    |   |     |    |     |     |
|---------|---|----|-----|----|----|---|-----|----|-----|-----|
| 107,450 | 7 | 10 | 220 | 28 | 12 | 3 | 174 | 31 | 413 | 72  |
| 107,451 | 7 | 10 | 217 | 29 | 12 | 3 | 174 | 31 | 410 | 73  |
| 107,452 | 7 | 10 | 218 | 30 | 12 | 3 | 174 | 32 | 411 | 75  |
| 107,453 | 7 | 10 | 218 | 30 | 12 | 3 | 171 | 32 | 408 | 75  |
| 107,454 | 6 | 10 | 218 | 35 | 12 | 3 | 172 | 40 | 408 | 88  |
| 107,455 | 6 | 9  | 208 | 37 | 11 | 3 | 163 | 43 | 388 | 92  |
| 107,456 | 6 | 9  | 209 | 38 | 11 | 3 | 162 | 43 | 388 | 93  |
| 107,457 | 6 | 10 | 204 | 45 | 9  | 3 | 156 | 45 | 375 | 103 |
| 107,458 | 5 | 10 | 192 | 45 | 6  | 3 | 142 | 45 | 345 | 103 |
| 107,459 | 5 | 10 | 191 | 47 | 6  | 3 | 140 | 45 | 342 | 105 |
| 107,460 | 5 | 10 | 192 | 48 | 6  | 3 | 139 | 47 | 342 | 108 |
| 107,461 | 5 | 10 | 192 | 48 | 6  | 3 | 139 | 47 | 342 | 108 |
| 107,462 | 5 | 10 | 192 | 48 | 6  | 3 | 139 | 47 | 342 | 108 |
| 107,463 | 5 | 10 | 190 | 48 | 6  | 2 | 139 | 47 | 340 | 107 |
| 107,464 | 5 | 8  | 193 | 48 | 7  | 2 | 137 | 47 | 342 | 105 |
| 107,465 | 5 | 8  | 187 | 48 | 7  | 2 | 133 | 47 | 332 | 105 |
| 107,466 | 5 | 8  | 172 | 48 | 7  | 2 | 115 | 45 | 299 | 103 |
| 107,467 | 5 | 8  | 172 | 48 | 7  | 2 | 115 | 45 | 299 | 103 |
| 107,468 | 4 | 8  | 163 | 48 | 7  | 2 | 100 | 43 | 274 | 101 |
| 107,469 | 3 | 8  | 153 | 48 | 6  | 2 | 97  | 37 | 259 | 95  |
| 107,470 | 3 | 8  | 157 | 41 | 6  | 2 | 97  | 32 | 263 | 83  |
| 107,471 | 3 | 8  | 156 | 42 | 6  | 2 | 96  | 33 | 261 | 85  |
| 107,472 | 3 | 6  | 156 | 41 | 6  | 2 | 98  | 32 | 263 | 81  |
| 107,473 | 3 | 6  | 153 | 34 | 6  | 1 | 98  | 30 | 260 | 71  |
| 107,474 | 3 | 6  | 147 | 34 | 6  | 1 | 93  | 31 | 249 | 72  |
| 107,475 | 3 | 5  | 140 | 34 | 6  | 1 | 79  | 29 | 228 | 69  |
| 107,476 | 3 | 5  | 131 | 32 | 6  | 1 | 71  | 29 | 211 | 67  |
| 107,477 | 2 | 4  | 78  | 28 | 2  | 0 | 40  | 23 | 122 | 55  |
| 107,478 | 2 | 4  | 59  | 28 | 2  | 0 | 26  | 23 | 89  | 55  |
| 107,479 | 2 | 5  | 59  | 28 | 2  | 0 | 26  | 23 | 89  | 56  |
| 107,480 | 2 | 5  | 59  | 28 | 2  | 0 | 26  | 23 | 89  | 56  |
| 107,481 | 1 | 5  | 61  | 29 | 2  | 0 | 26  | 23 | 90  | 57  |
| 107,482 | 1 | 5  | 61  | 29 | 2  | 0 | 26  | 23 | 90  | 57  |
| 107,483 | 1 | 5  | 61  | 29 | 2  | 0 | 26  | 23 | 90  | 57  |
| 107,484 | 1 | 5  | 61  | 29 | 2  | 0 | 26  | 23 | 90  | 57  |
| 107,485 | 2 | 5  | 62  | 29 | 2  | 0 | 26  | 23 | 92  | 57  |
| 107,486 | 2 | 5  | 60  | 29 | 2  | 0 | 28  | 23 | 92  | 57  |
| 107,487 | 2 | 5  | 59  | 29 | 2  | 0 | 28  | 23 | 91  | 57  |
| 107,488 | 2 | 5  | 63  | 29 | 2  | 0 | 30  | 23 | 97  | 57  |
| 107,489 | 3 | 5  | 65  | 29 | 2  | 0 | 31  | 23 | 101 | 57  |
| 107,490 | 3 | 5  | 73  | 29 | 2  | 0 | 33  | 23 | 111 | 57  |

|         |    |   |     |    |   |   |     |    |     |    |
|---------|----|---|-----|----|---|---|-----|----|-----|----|
| 107,491 | 5  | 5 | 85  | 30 | 2 | 0 | 63  | 23 | 155 | 58 |
| 107,492 | 5  | 5 | 84  | 30 | 2 | 0 | 63  | 23 | 154 | 58 |
| 107,493 | 5  | 4 | 129 | 31 | 2 | 0 | 70  | 23 | 206 | 58 |
| 107,494 | 5  | 3 | 127 | 31 | 2 | 0 | 68  | 23 | 202 | 57 |
| 107,495 | 5  | 3 | 129 | 32 | 2 | 1 | 68  | 23 | 204 | 59 |
| 107,496 | 6  | 3 | 129 | 33 | 2 | 1 | 69  | 23 | 206 | 60 |
| 107,497 | 6  | 3 | 119 | 34 | 2 | 1 | 66  | 24 | 193 | 62 |
| 107,498 | 6  | 3 | 118 | 34 | 2 | 1 | 63  | 24 | 189 | 62 |
| 107,499 | 6  | 2 | 119 | 35 | 2 | 1 | 70  | 25 | 197 | 63 |
| 107,500 | 6  | 2 | 120 | 36 | 3 | 1 | 72  | 25 | 201 | 64 |
| 107,501 | 6  | 2 | 123 | 35 | 3 | 1 | 71  | 25 | 203 | 63 |
| 107,502 | 7  | 2 | 129 | 35 | 4 | 1 | 81  | 25 | 221 | 63 |
| 107,503 | 7  | 2 | 129 | 34 | 4 | 1 | 81  | 24 | 221 | 61 |
| 107,504 | 7  | 3 | 135 | 33 | 5 | 1 | 92  | 24 | 239 | 61 |
| 107,505 | 7  | 3 | 135 | 28 | 5 | 1 | 91  | 16 | 238 | 48 |
| 107,506 | 7  | 3 | 141 | 27 | 5 | 1 | 94  | 13 | 247 | 44 |
| 107,507 | 7  | 3 | 140 | 26 | 5 | 1 | 94  | 13 | 246 | 43 |
| 107,508 | 11 | 2 | 151 | 21 | 6 | 1 | 96  | 11 | 264 | 35 |
| 107,509 | 11 | 2 | 151 | 22 | 6 | 1 | 96  | 13 | 264 | 38 |
| 107,510 | 15 | 2 | 171 | 21 | 7 | 2 | 103 | 16 | 296 | 41 |
| 107,511 | 15 | 2 | 173 | 20 | 7 | 2 | 103 | 14 | 298 | 38 |
| 107,512 | 20 | 2 | 235 | 20 | 7 | 2 | 110 | 14 | 372 | 38 |
| 107,513 | 20 | 2 | 235 | 21 | 7 | 4 | 110 | 18 | 372 | 45 |
| 107,514 | 20 | 2 | 239 | 23 | 7 | 4 | 111 | 22 | 377 | 51 |
| 107,515 | 20 | 2 | 236 | 25 | 6 | 5 | 111 | 22 | 373 | 54 |
| 107,516 | 20 | 2 | 242 | 25 | 6 | 5 | 114 | 24 | 382 | 56 |
| 107,517 | 21 | 2 | 248 | 26 | 6 | 5 | 116 | 25 | 391 | 58 |
| 107,518 | 21 | 2 | 248 | 27 | 6 | 5 | 116 | 27 | 391 | 61 |
| 107,519 | 21 | 2 | 239 | 27 | 6 | 5 | 116 | 27 | 382 | 61 |
| 107,520 | 21 | 2 | 240 | 28 | 6 | 5 | 115 | 28 | 382 | 63 |
| 107,521 | 21 | 2 | 236 | 29 | 6 | 5 | 115 | 28 | 378 | 64 |
| 107,522 | 23 | 2 | 286 | 28 | 6 | 5 | 121 | 28 | 436 | 63 |
| 107,523 | 23 | 2 | 298 | 24 | 6 | 5 | 123 | 24 | 450 | 55 |
| 107,524 | 23 | 2 | 302 | 24 | 6 | 5 | 125 | 24 | 456 | 55 |
| 107,525 | 23 | 2 | 301 | 24 | 6 | 5 | 122 | 23 | 452 | 54 |
| 107,526 | 23 | 2 | 302 | 24 | 7 | 5 | 123 | 23 | 455 | 54 |
| 107,527 | 23 | 2 | 305 | 26 | 7 | 5 | 123 | 23 | 458 | 56 |
| 107,528 | 23 | 2 | 304 | 26 | 7 | 5 | 123 | 23 | 457 | 56 |
| 107,529 | 23 | 2 | 305 | 26 | 7 | 5 | 123 | 23 | 458 | 56 |
| 107,530 | 23 | 1 | 305 | 26 | 7 | 5 | 123 | 23 | 458 | 55 |
| 107,531 | 23 | 1 | 305 | 26 | 7 | 5 | 123 | 23 | 458 | 55 |

|         |    |   |     |    |    |   |     |    |     |    |
|---------|----|---|-----|----|----|---|-----|----|-----|----|
| 107,532 | 23 | 1 | 307 | 25 | 7  | 6 | 123 | 23 | 460 | 55 |
| 107,533 | 24 | 1 | 312 | 25 | 7  | 6 | 124 | 23 | 467 | 55 |
| 107,534 | 24 | 1 | 313 | 25 | 8  | 7 | 126 | 23 | 471 | 56 |
| 107,535 | 23 | 1 | 313 | 25 | 8  | 7 | 126 | 23 | 470 | 56 |
| 107,536 | 23 | 1 | 313 | 25 | 8  | 7 | 126 | 22 | 470 | 55 |
| 107,537 | 23 | 1 | 316 | 25 | 8  | 7 | 124 | 22 | 471 | 55 |
| 107,538 | 24 | 1 | 327 | 26 | 8  | 7 | 140 | 25 | 499 | 59 |
| 107,539 | 24 | 1 | 325 | 27 | 9  | 7 | 140 | 26 | 498 | 61 |
| 107,540 | 24 | 1 | 341 | 27 | 10 | 7 | 148 | 26 | 523 | 61 |
| 107,541 | 24 | 1 | 342 | 27 | 12 | 7 | 156 | 26 | 534 | 61 |
| 107,542 | 22 | 1 | 326 | 26 | 12 | 7 | 125 | 26 | 485 | 60 |
| 107,543 | 22 | 1 | 285 | 25 | 11 | 7 | 111 | 26 | 429 | 59 |
| 107,544 | 22 | 1 | 285 | 25 | 11 | 7 | 107 | 26 | 425 | 59 |
| 107,545 | 22 | 1 | 284 | 25 | 11 | 7 | 107 | 26 | 424 | 59 |
| 107,546 | 22 | 1 | 284 | 24 | 11 | 6 | 108 | 26 | 425 | 57 |
| 107,547 | 21 | 1 | 284 | 22 | 11 | 6 | 107 | 25 | 423 | 54 |
| 107,548 | 20 | 1 | 284 | 22 | 11 | 6 | 107 | 25 | 422 | 54 |
| 107,549 | 20 | 1 | 288 | 22 | 11 | 6 | 111 | 25 | 430 | 54 |
| 107,550 | 20 | 1 | 289 | 20 | 11 | 6 | 108 | 24 | 428 | 51 |
| 107,551 | 20 | 1 | 291 | 20 | 11 | 6 | 109 | 24 | 431 | 51 |
| 107,552 | 22 | 1 | 295 | 20 | 11 | 6 | 110 | 24 | 438 | 51 |
| 107,553 | 23 | 1 | 309 | 20 | 11 | 6 | 114 | 24 | 457 | 51 |
| 107,554 | 24 | 1 | 344 | 20 | 11 | 6 | 119 | 24 | 498 | 51 |
| 107,555 | 24 | 0 | 337 | 20 | 10 | 6 | 110 | 24 | 481 | 50 |
| 107,556 | 24 | 0 | 364 | 19 | 10 | 6 | 119 | 24 | 517 | 49 |
| 107,557 | 24 | 0 | 360 | 19 | 10 | 6 | 119 | 24 | 513 | 49 |
| 107,558 | 21 | 0 | 361 | 17 | 13 | 6 | 126 | 24 | 521 | 47 |
| 107,559 | 21 | 0 | 363 | 17 | 13 | 6 | 125 | 24 | 522 | 47 |
| 107,560 | 20 | 0 | 361 | 15 | 13 | 5 | 145 | 19 | 539 | 39 |
| 107,561 | 23 | 0 | 378 | 15 | 13 | 5 | 146 | 19 | 560 | 39 |
| 107,562 | 23 | 0 | 411 | 15 | 13 | 5 | 163 | 19 | 610 | 39 |
| 107,563 | 19 | 0 | 367 | 14 | 13 | 3 | 163 | 15 | 562 | 32 |
| 107,564 | 21 | 0 | 386 | 14 | 13 | 3 | 176 | 15 | 596 | 32 |
| 107,565 | 22 | 0 | 390 | 13 | 13 | 3 | 179 | 11 | 604 | 27 |
| 107,566 | 22 | 0 | 395 | 11 | 13 | 2 | 182 | 9  | 612 | 22 |
| 107,567 | 22 | 1 | 410 | 11 | 14 | 2 | 184 | 9  | 630 | 23 |
| 107,568 | 21 | 1 | 404 | 10 | 14 | 2 | 182 | 8  | 621 | 21 |
| 107,569 | 25 | 1 | 410 | 9  | 15 | 2 | 195 | 6  | 645 | 18 |
| 107,570 | 25 | 1 | 395 | 9  | 15 | 2 | 195 | 6  | 630 | 18 |
| 107,571 | 23 | 1 | 367 | 8  | 15 | 2 | 188 | 5  | 593 | 16 |
| 107,572 | 23 | 1 | 374 | 8  | 16 | 2 | 201 | 5  | 614 | 16 |



|         |    |   |     |   |    |   |     |   |     |    |
|---------|----|---|-----|---|----|---|-----|---|-----|----|
| 107,573 | 23 | 1 | 373 | 7 | 16 | 2 | 208 | 4 | 620 | 14 |
| 107,574 | 23 | 1 | 362 | 7 | 16 | 2 | 207 | 4 | 608 | 14 |
| 107,575 | 23 | 1 | 357 | 7 | 16 | 2 | 207 | 4 | 603 | 14 |
| 107,576 | 23 | 1 | 359 | 7 | 16 | 2 | 208 | 4 | 606 | 14 |
| 107,577 | 23 | 1 | 360 | 7 | 16 | 2 | 209 | 4 | 608 | 14 |
| 107,578 | 23 | 1 | 366 | 6 | 16 | 2 | 220 | 4 | 625 | 13 |
| 107,579 | 23 | 1 | 367 | 6 | 16 | 2 | 221 | 4 | 627 | 13 |
| 107,580 | 23 | 1 | 367 | 6 | 16 | 2 | 221 | 4 | 627 | 13 |
| 107,581 | 24 | 1 | 367 | 6 | 16 | 2 | 221 | 4 | 628 | 13 |
| 107,582 | 24 | 1 | 365 | 6 | 16 | 1 | 221 | 4 | 626 | 12 |
| 107,583 | 24 | 1 | 364 | 6 | 16 | 1 | 221 | 4 | 625 | 12 |
| 107,584 | 24 | 1 | 360 | 6 | 16 | 1 | 219 | 4 | 619 | 12 |
| 107,585 | 24 | 1 | 359 | 6 | 15 | 0 | 218 | 4 | 616 | 11 |
| 107,586 | 24 | 1 | 362 | 6 | 15 | 0 | 218 | 4 | 619 | 11 |
| 107,587 | 24 | 1 | 362 | 5 | 15 | 0 | 218 | 1 | 619 | 7  |
| 107,588 | 24 | 1 | 362 | 5 | 15 | 0 | 216 | 1 | 617 | 7  |
| 107,589 | 23 | 1 | 352 | 5 | 15 | 0 | 201 | 1 | 591 | 7  |
| 107,590 | 25 | 1 | 360 | 4 | 14 | 0 | 201 | 0 | 600 | 5  |
| 107,591 | 25 | 1 | 338 | 4 | 13 | 0 | 192 | 0 | 568 | 5  |
| 107,592 | 27 | 1 | 360 | 4 | 12 | 0 | 191 | 0 | 590 | 5  |
| 107,593 | 28 | 1 | 371 | 4 | 13 | 0 | 193 | 0 | 605 | 5  |
| 107,594 | 29 | 1 | 370 | 4 | 13 | 0 | 196 | 0 | 608 | 5  |
| 107,595 | 30 | 1 | 372 | 4 | 15 | 0 | 197 | 0 | 614 | 5  |
| 107,596 | 30 | 1 | 370 | 4 | 16 | 0 | 196 | 0 | 612 | 5  |
| 107,597 | 33 | 1 | 387 | 4 | 16 | 0 | 208 | 0 | 644 | 5  |
| 107,598 | 39 | 1 | 432 | 4 | 17 | 0 | 218 | 0 | 706 | 5  |
| 107,599 | 42 | 1 | 444 | 4 | 17 | 0 | 220 | 0 | 723 | 5  |
| 107,600 | 44 | 1 | 471 | 6 | 19 | 0 | 224 | 0 | 758 | 7  |
| 107,601 | 45 | 1 | 509 | 6 | 22 | 0 | 230 | 0 | 806 | 7  |
| 107,602 | 49 | 1 | 545 | 7 | 22 | 0 | 234 | 0 | 850 | 8  |
| 107,603 | 57 | 2 | 592 | 7 | 22 | 0 | 254 | 0 | 925 | 9  |
| 107,604 | 56 | 2 | 664 | 7 | 21 | 0 | 247 | 0 | 988 | 9  |
| 107,605 | 55 | 2 | 637 | 7 | 21 | 0 | 241 | 0 | 954 | 9  |
| 107,606 | 55 | 2 | 625 | 8 | 21 | 0 | 235 | 0 | 936 | 10 |
| 107,607 | 55 | 2 | 623 | 8 | 21 | 0 | 235 | 0 | 934 | 10 |
| 107,608 | 56 | 2 | 615 | 8 | 20 | 0 | 231 | 0 | 922 | 10 |
| 107,609 | 55 | 2 | 617 | 8 | 18 | 0 | 234 | 0 | 924 | 10 |
| 107,610 | 55 | 2 | 615 | 8 | 18 | 0 | 234 | 0 | 922 | 10 |
| 107,611 | 53 | 2 | 598 | 8 | 17 | 0 | 208 | 0 | 876 | 10 |
| 107,612 | 50 | 2 | 583 | 8 | 17 | 0 | 208 | 0 | 858 | 10 |
| 107,613 | 48 | 2 | 545 | 8 | 17 | 0 | 197 | 1 | 807 | 11 |

|         |    |   |     |   |    |   |     |   |     |    |
|---------|----|---|-----|---|----|---|-----|---|-----|----|
| 107,614 | 48 | 2 | 536 | 8 | 17 | 0 | 190 | 1 | 791 | 11 |
| 107,615 | 50 | 2 | 532 | 7 | 18 | 0 | 185 | 1 | 785 | 10 |
| 107,616 | 49 | 2 | 524 | 7 | 18 | 0 | 183 | 1 | 774 | 10 |
| 107,617 | 50 | 1 | 523 | 8 | 20 | 0 | 187 | 1 | 780 | 10 |
| 107,618 | 50 | 1 | 507 | 7 | 19 | 0 | 184 | 1 | 760 | 9  |
| 107,619 | 50 | 1 | 507 | 7 | 19 | 0 | 184 | 1 | 760 | 9  |
| 107,620 | 47 | 2 | 508 | 7 | 18 | 0 | 174 | 1 | 747 | 10 |
| 107,621 | 47 | 2 | 508 | 7 | 18 | 0 | 175 | 1 | 748 | 10 |
| 107,622 | 47 | 2 | 501 | 6 | 17 | 0 | 162 | 1 | 727 | 9  |
| 107,623 | 47 | 2 | 498 | 6 | 17 | 0 | 162 | 1 | 724 | 9  |
| 107,624 | 47 | 2 | 496 | 6 | 17 | 0 | 156 | 1 | 716 | 9  |
| 107,625 | 47 | 2 | 495 | 6 | 17 | 1 | 155 | 1 | 714 | 10 |
| 107,626 | 47 | 2 | 498 | 6 | 17 | 1 | 155 | 1 | 717 | 10 |
| 107,627 | 47 | 2 | 496 | 6 | 17 | 1 | 153 | 1 | 713 | 10 |
| 107,628 | 47 | 2 | 499 | 6 | 16 | 1 | 152 | 1 | 714 | 10 |
| 107,629 | 47 | 2 | 504 | 5 | 16 | 1 | 143 | 1 | 710 | 9  |
| 107,630 | 47 | 2 | 501 | 5 | 16 | 1 | 143 | 1 | 707 | 9  |
| 107,631 | 46 | 2 | 514 | 5 | 17 | 1 | 152 | 1 | 729 | 9  |
| 107,632 | 46 | 2 | 543 | 5 | 18 | 1 | 161 | 1 | 768 | 9  |
| 107,633 | 46 | 2 | 543 | 5 | 18 | 1 | 162 | 1 | 769 | 9  |
| 107,634 | 46 | 2 | 549 | 5 | 18 | 1 | 165 | 1 | 778 | 9  |
| 107,635 | 45 | 2 | 550 | 5 | 18 | 1 | 165 | 1 | 778 | 9  |
| 107,636 | 45 | 3 | 547 | 5 | 18 | 2 | 165 | 1 | 775 | 11 |
| 107,637 | 46 | 3 | 547 | 8 | 18 | 2 | 166 | 3 | 777 | 16 |
| 107,638 | 46 | 3 | 544 | 8 | 18 | 2 | 166 | 3 | 774 | 16 |
| 107,639 | 46 | 3 | 543 | 8 | 18 | 2 | 166 | 3 | 773 | 16 |
| 107,640 | 46 | 4 | 543 | 8 | 18 | 2 | 167 | 3 | 774 | 17 |
| 107,641 | 46 | 4 | 536 | 8 | 18 | 2 | 168 | 3 | 768 | 17 |
| 107,642 | 45 | 4 | 535 | 8 | 18 | 2 | 168 | 3 | 766 | 17 |
| 107,643 | 43 | 4 | 504 | 8 | 17 | 2 | 159 | 3 | 723 | 17 |
| 107,644 | 42 | 4 | 493 | 8 | 16 | 2 | 153 | 3 | 704 | 17 |
| 107,645 | 41 | 4 | 485 | 8 | 16 | 2 | 151 | 3 | 693 | 17 |
| 107,646 | 40 | 4 | 481 | 8 | 14 | 2 | 150 | 3 | 685 | 17 |
| 107,647 | 40 | 4 | 480 | 8 | 14 | 2 | 150 | 3 | 684 | 17 |
| 107,648 | 37 | 4 | 463 | 8 | 14 | 2 | 138 | 3 | 652 | 17 |
| 107,649 | 31 | 4 | 420 | 8 | 13 | 2 | 128 | 3 | 592 | 17 |
| 107,650 | 28 | 4 | 408 | 8 | 13 | 2 | 126 | 3 | 575 | 17 |
| 107,651 | 26 | 4 | 377 | 6 | 12 | 3 | 118 | 3 | 533 | 16 |
| 107,652 | 25 | 4 | 336 | 6 | 9  | 3 | 112 | 3 | 482 | 16 |
| 107,653 | 21 | 4 | 297 | 5 | 8  | 3 | 105 | 3 | 431 | 15 |
| 107,654 | 11 | 3 | 242 | 5 | 8  | 3 | 84  | 3 | 345 | 14 |

|         |    |   |     |   |   |   |    |   |     |    |
|---------|----|---|-----|---|---|---|----|---|-----|----|
| 107,655 | 10 | 3 | 152 | 5 | 8 | 3 | 77 | 3 | 247 | 14 |
| 107,656 | 10 | 3 | 145 | 5 | 8 | 3 | 77 | 3 | 240 | 14 |
| 107,657 | 10 | 3 | 131 | 5 | 8 | 4 | 73 | 3 | 222 | 15 |
| 107,658 | 10 | 3 | 131 | 5 | 8 | 4 | 73 | 3 | 222 | 15 |
| 107,659 | 9  | 3 | 132 | 5 | 8 | 4 | 70 | 3 | 219 | 15 |
| 107,660 | 9  | 3 | 135 | 5 | 8 | 4 | 66 | 3 | 218 | 15 |
| 107,661 | 9  | 3 | 135 | 5 | 8 | 4 | 66 | 3 | 218 | 15 |
| 107,662 | 8  | 3 | 133 | 5 | 8 | 4 | 65 | 3 | 214 | 15 |
| 107,663 | 8  | 3 | 129 | 5 | 8 | 4 | 64 | 2 | 209 | 14 |
| 107,664 | 8  | 3 | 125 | 5 | 8 | 4 | 58 | 2 | 199 | 14 |
| 107,665 | 6  | 3 | 115 | 5 | 8 | 4 | 52 | 2 | 181 | 14 |
| 107,666 | 5  | 4 | 111 | 5 | 7 | 5 | 50 | 2 | 173 | 16 |
| 107,667 | 5  | 4 | 111 | 5 | 7 | 5 | 48 | 2 | 171 | 16 |
| 107,668 | 4  | 4 | 104 | 4 | 5 | 5 | 39 | 2 | 152 | 15 |
| 107,669 | 4  | 4 | 102 | 4 | 5 | 5 | 39 | 2 | 150 | 15 |
| 107,670 | 3  | 4 | 97  | 4 | 5 | 5 | 37 | 2 | 142 | 15 |
| 107,671 | 3  | 3 | 94  | 4 | 5 | 5 | 36 | 2 | 138 | 14 |
| 107,672 | 3  | 3 | 94  | 4 | 5 | 5 | 35 | 2 | 137 | 14 |
| 107,673 | 3  | 3 | 94  | 4 | 5 | 5 | 34 | 2 | 136 | 14 |
| 107,674 | 3  | 3 | 94  | 4 | 5 | 5 | 34 | 2 | 136 | 14 |
| 107,675 | 3  | 3 | 93  | 4 | 5 | 5 | 33 | 2 | 134 | 14 |
| 107,676 | 3  | 3 | 93  | 4 | 5 | 5 | 33 | 2 | 134 | 14 |
| 107,677 | 3  | 3 | 89  | 4 | 5 | 5 | 31 | 2 | 128 | 14 |
| 107,678 | 3  | 3 | 88  | 4 | 5 | 5 | 31 | 2 | 127 | 14 |
| 107,679 | 3  | 3 | 84  | 4 | 5 | 5 | 31 | 2 | 123 | 14 |
| 107,680 | 3  | 3 | 70  | 4 | 5 | 5 | 27 | 2 | 105 | 14 |
| 107,681 | 3  | 3 | 57  | 4 | 4 | 5 | 19 | 2 | 83  | 14 |
| 107,682 | 3  | 3 | 32  | 4 | 3 | 5 | 15 | 2 | 53  | 14 |
| 107,683 | 3  | 3 | 29  | 4 | 3 | 5 | 10 | 2 | 45  | 14 |
| 107,684 | 3  | 3 | 22  | 4 | 3 | 5 | 9  | 2 | 37  | 14 |
| 107,685 | 3  | 3 | 22  | 4 | 3 | 5 | 7  | 2 | 35  | 14 |
| 107,686 | 3  | 3 | 26  | 4 | 3 | 6 | 8  | 3 | 40  | 16 |
| 107,687 | 2  | 2 | 26  | 4 | 3 | 5 | 9  | 3 | 40  | 14 |
| 107,688 | 2  | 2 | 26  | 1 | 3 | 5 | 9  | 1 | 40  | 9  |
| 107,689 | 2  | 2 | 27  | 1 | 3 | 5 | 9  | 1 | 41  | 9  |
| 107,690 | 2  | 1 | 27  | 1 | 3 | 5 | 9  | 1 | 41  | 8  |
| 107,691 | 2  | 1 | 27  | 1 | 3 | 5 | 7  | 1 | 39  | 8  |
| 107,692 | 0  | 1 | 25  | 1 | 3 | 5 | 6  | 1 | 34  | 8  |
| 107,693 | 0  | 1 | 24  | 1 | 3 | 5 | 6  | 1 | 33  | 8  |
| 107,694 | 0  | 1 | 24  | 1 | 3 | 5 | 6  | 1 | 33  | 8  |
| 107,695 | 0  | 1 | 24  | 1 | 3 | 5 | 5  | 1 | 32  | 8  |

|         |   |   |    |   |   |   |    |   |    |   |
|---------|---|---|----|---|---|---|----|---|----|---|
| 107,696 | 0 | 1 | 24 | 1 | 2 | 5 | 5  | 1 | 31 | 8 |
| 107,697 | 0 | 1 | 24 | 1 | 2 | 5 | 5  | 1 | 31 | 8 |
| 107,698 | 0 | 1 | 24 | 1 | 1 | 5 | 5  | 1 | 30 | 8 |
| 107,699 | 0 | 1 | 25 | 1 | 1 | 5 | 5  | 1 | 31 | 8 |
| 107,700 | 0 | 1 | 24 | 1 | 1 | 5 | 5  | 2 | 30 | 9 |
| 107,701 | 0 | 1 | 24 | 1 | 1 | 5 | 5  | 2 | 30 | 9 |
| 107,702 | 0 | 1 | 24 | 1 | 0 | 4 | 5  | 2 | 29 | 8 |
| 107,703 | 0 | 1 | 24 | 1 | 0 | 4 | 5  | 2 | 29 | 8 |
| 107,704 | 0 | 1 | 23 | 1 | 0 | 4 | 5  | 2 | 28 | 8 |
| 107,705 | 0 | 1 | 23 | 1 | 0 | 4 | 5  | 2 | 28 | 8 |
| 107,706 | 0 | 1 | 21 | 1 | 0 | 4 | 5  | 2 | 26 | 8 |
| 107,707 | 0 | 1 | 20 | 1 | 0 | 4 | 5  | 2 | 25 | 8 |
| 107,708 | 0 | 1 | 18 | 0 | 0 | 3 | 5  | 2 | 23 | 6 |
| 107,709 | 0 | 1 | 15 | 0 | 0 | 3 | 5  | 2 | 20 | 6 |
| 107,710 | 1 | 1 | 15 | 0 | 0 | 3 | 6  | 2 | 22 | 6 |
| 107,711 | 1 | 1 | 10 | 0 | 0 | 3 | 7  | 2 | 18 | 6 |
| 107,712 | 1 | 1 | 10 | 0 | 0 | 3 | 7  | 2 | 18 | 6 |
| 107,713 | 1 | 1 | 12 | 1 | 0 | 3 | 7  | 2 | 20 | 7 |
| 107,714 | 1 | 1 | 12 | 1 | 0 | 3 | 7  | 2 | 20 | 7 |
| 107,715 | 1 | 2 | 12 | 1 | 0 | 3 | 7  | 2 | 20 | 8 |
| 107,716 | 1 | 2 | 11 | 1 | 0 | 3 | 7  | 2 | 19 | 8 |
| 107,717 | 1 | 1 | 11 | 1 | 0 | 2 | 7  | 2 | 19 | 6 |
| 107,718 | 1 | 1 | 11 | 1 | 0 | 2 | 7  | 2 | 19 | 6 |
| 107,719 | 1 | 1 | 11 | 1 | 0 | 2 | 8  | 2 | 20 | 6 |
| 107,720 | 2 | 1 | 11 | 2 | 0 | 2 | 8  | 2 | 21 | 7 |
| 107,721 | 2 | 1 | 11 | 2 | 0 | 2 | 8  | 2 | 21 | 7 |
| 107,722 | 2 | 1 | 11 | 3 | 0 | 2 | 8  | 2 | 21 | 8 |
| 107,723 | 2 | 1 | 11 | 3 | 0 | 2 | 8  | 2 | 21 | 8 |
| 107,724 | 2 | 1 | 11 | 3 | 0 | 2 | 9  | 2 | 22 | 8 |
| 107,725 | 2 | 1 | 11 | 3 | 0 | 2 | 10 | 2 | 23 | 8 |
| 107,726 | 2 | 1 | 12 | 3 | 0 | 1 | 10 | 2 | 24 | 7 |
| 107,727 | 2 | 1 | 13 | 3 | 0 | 1 | 10 | 2 | 25 | 7 |
| 107,728 | 2 | 1 | 13 | 3 | 0 | 1 | 10 | 2 | 25 | 7 |
| 107,729 | 2 | 1 | 13 | 3 | 0 | 1 | 10 | 2 | 25 | 7 |
| 107,730 | 2 | 1 | 13 | 3 | 0 | 1 | 10 | 2 | 25 | 7 |
| 107,731 | 2 | 1 | 13 | 3 | 0 | 1 | 10 | 2 | 25 | 7 |
| 107,732 | 2 | 1 | 13 | 3 | 0 | 1 | 9  | 2 | 24 | 7 |
| 107,733 | 2 | 1 | 12 | 3 | 0 | 1 | 9  | 2 | 23 | 7 |
| 107,734 | 2 | 1 | 12 | 3 | 0 | 1 | 9  | 2 | 23 | 7 |
| 107,735 | 2 | 1 | 13 | 4 | 0 | 1 | 8  | 2 | 23 | 8 |
| 107,736 | 2 | 1 | 9  | 4 | 0 | 1 | 8  | 2 | 19 | 8 |

|         |   |   |    |   |   |   |    |   |    |   |
|---------|---|---|----|---|---|---|----|---|----|---|
| 107,737 | 2 | 1 | 11 | 4 | 0 | 0 | 8  | 1 | 21 | 6 |
| 107,738 | 2 | 1 | 12 | 4 | 0 | 0 | 7  | 1 | 21 | 6 |
| 107,739 | 2 | 1 | 12 | 4 | 0 | 0 | 7  | 1 | 21 | 6 |
| 107,740 | 2 | 1 | 12 | 4 | 0 | 0 | 7  | 1 | 21 | 6 |
| 107,741 | 2 | 1 | 15 | 4 | 0 | 0 | 8  | 1 | 25 | 6 |
| 107,742 | 2 | 1 | 15 | 4 | 0 | 0 | 8  | 1 | 25 | 6 |
| 107,743 | 2 | 1 | 15 | 4 | 0 | 0 | 8  | 1 | 25 | 6 |
| 107,744 | 2 | 1 | 15 | 4 | 0 | 0 | 8  | 1 | 25 | 6 |
| 107,745 | 2 | 1 | 15 | 4 | 0 | 0 | 8  | 1 | 25 | 6 |
| 107,746 | 2 | 2 | 15 | 4 | 0 | 0 | 8  | 2 | 25 | 8 |
| 107,747 | 2 | 2 | 15 | 4 | 0 | 0 | 8  | 2 | 25 | 8 |
| 107,748 | 2 | 2 | 15 | 4 | 0 | 0 | 8  | 2 | 25 | 8 |
| 107,749 | 2 | 2 | 14 | 5 | 0 | 0 | 8  | 2 | 24 | 9 |
| 107,750 | 2 | 2 | 14 | 5 | 0 | 0 | 8  | 2 | 24 | 9 |
| 107,751 | 2 | 2 | 15 | 5 | 0 | 0 | 9  | 1 | 26 | 8 |
| 107,752 | 2 | 2 | 15 | 5 | 0 | 0 | 9  | 1 | 26 | 8 |
| 107,753 | 2 | 2 | 15 | 5 | 0 | 0 | 9  | 1 | 26 | 8 |
| 107,754 | 2 | 2 | 15 | 5 | 0 | 0 | 9  | 1 | 26 | 8 |
| 107,755 | 2 | 2 | 15 | 5 | 0 | 0 | 9  | 1 | 26 | 8 |
| 107,756 | 2 | 2 | 16 | 5 | 0 | 0 | 9  | 1 | 27 | 8 |
| 107,757 | 2 | 2 | 16 | 5 | 0 | 0 | 9  | 1 | 27 | 8 |
| 107,758 | 2 | 2 | 16 | 5 | 0 | 0 | 9  | 1 | 27 | 8 |
| 107,759 | 2 | 2 | 16 | 5 | 0 | 0 | 9  | 1 | 27 | 8 |
| 107,760 | 2 | 2 | 16 | 5 | 0 | 0 | 9  | 1 | 27 | 8 |
| 107,761 | 1 | 2 | 15 | 5 | 0 | 0 | 8  | 1 | 24 | 8 |
| 107,762 | 1 | 2 | 15 | 5 | 0 | 0 | 7  | 1 | 23 | 8 |
| 107,763 | 1 | 2 | 17 | 5 | 0 | 0 | 8  | 1 | 26 | 8 |
| 107,764 | 1 | 2 | 16 | 4 | 0 | 0 | 9  | 1 | 26 | 7 |
| 107,765 | 1 | 1 | 16 | 4 | 0 | 0 | 10 | 1 | 27 | 6 |
| 107,766 | 1 | 1 | 16 | 4 | 0 | 1 | 10 | 1 | 27 | 7 |
| 107,767 | 1 | 1 | 22 | 4 | 0 | 1 | 10 | 1 | 33 | 7 |
| 107,768 | 1 | 1 | 24 | 4 | 0 | 1 | 9  | 1 | 34 | 7 |
| 107,769 | 1 | 1 | 25 | 4 | 0 | 1 | 9  | 1 | 35 | 7 |
| 107,770 | 1 | 1 | 25 | 4 | 0 | 1 | 8  | 1 | 34 | 7 |
| 107,771 | 0 | 1 | 25 | 2 | 0 | 2 | 8  | 1 | 33 | 6 |
| 107,772 | 0 | 1 | 25 | 2 | 0 | 2 | 8  | 1 | 33 | 6 |
| 107,773 | 0 | 1 | 26 | 2 | 0 | 2 | 8  | 1 | 34 | 6 |
| 107,774 | 0 | 1 | 26 | 2 | 0 | 2 | 8  | 1 | 34 | 6 |
| 107,775 | 1 | 1 | 26 | 2 | 0 | 2 | 7  | 2 | 34 | 7 |
| 107,776 | 1 | 1 | 26 | 2 | 0 | 2 | 6  | 2 | 33 | 7 |
| 107,777 | 1 | 1 | 25 | 2 | 0 | 2 | 6  | 2 | 32 | 7 |

|         |   |   |    |   |   |   |   |   |    |    |
|---------|---|---|----|---|---|---|---|---|----|----|
| 107,778 | 1 | 1 | 26 | 2 | 0 | 2 | 6 | 2 | 33 | 7  |
| 107,779 | 1 | 1 | 26 | 2 | 0 | 2 | 6 | 2 | 33 | 7  |
| 107,780 | 1 | 1 | 26 | 2 | 0 | 2 | 6 | 2 | 33 | 7  |
| 107,781 | 2 | 1 | 26 | 2 | 1 | 2 | 6 | 2 | 35 | 7  |
| 107,782 | 2 | 1 | 26 | 2 | 1 | 2 | 6 | 2 | 35 | 7  |
| 107,783 | 2 | 1 | 26 | 2 | 1 | 2 | 6 | 2 | 35 | 7  |
| 107,784 | 2 | 1 | 26 | 2 | 1 | 2 | 6 | 2 | 35 | 7  |
| 107,785 | 2 | 1 | 26 | 2 | 1 | 2 | 6 | 2 | 35 | 7  |
| 107,786 | 2 | 1 | 25 | 1 | 1 | 2 | 6 | 2 | 34 | 6  |
| 107,787 | 2 | 1 | 25 | 1 | 1 | 2 | 6 | 2 | 34 | 6  |
| 107,788 | 2 | 1 | 22 | 1 | 1 | 3 | 5 | 2 | 30 | 7  |
| 107,789 | 2 | 1 | 21 | 1 | 1 | 3 | 5 | 2 | 29 | 7  |
| 107,790 | 2 | 1 | 20 | 1 | 1 | 3 | 5 | 2 | 28 | 7  |
| 107,791 | 3 | 1 | 23 | 1 | 1 | 3 | 6 | 2 | 33 | 7  |
| 107,792 | 3 | 1 | 21 | 2 | 1 | 3 | 6 | 2 | 31 | 8  |
| 107,793 | 3 | 1 | 21 | 2 | 1 | 3 | 6 | 2 | 31 | 8  |
| 107,794 | 3 | 1 | 23 | 2 | 1 | 3 | 9 | 2 | 36 | 8  |
| 107,795 | 3 | 1 | 24 | 2 | 1 | 3 | 9 | 2 | 37 | 8  |
| 107,796 | 3 | 1 | 24 | 3 | 1 | 3 | 9 | 2 | 37 | 9  |
| 107,797 | 3 | 0 | 24 | 3 | 1 | 3 | 9 | 1 | 37 | 7  |
| 107,798 | 3 | 1 | 24 | 2 | 1 | 3 | 9 | 1 | 37 | 7  |
| 107,799 | 3 | 1 | 24 | 2 | 1 | 3 | 9 | 1 | 37 | 7  |
| 107,800 | 3 | 1 | 25 | 2 | 1 | 3 | 9 | 1 | 38 | 7  |
| 107,801 | 3 | 1 | 25 | 2 | 1 | 3 | 8 | 1 | 37 | 7  |
| 107,802 | 3 | 1 | 24 | 2 | 1 | 3 | 8 | 1 | 36 | 7  |
| 107,803 | 3 | 1 | 24 | 2 | 1 | 3 | 8 | 1 | 36 | 7  |
| 107,804 | 3 | 1 | 24 | 2 | 1 | 3 | 8 | 1 | 36 | 7  |
| 107,805 | 3 | 1 | 24 | 2 | 1 | 3 | 8 | 1 | 36 | 7  |
| 107,806 | 3 | 1 | 24 | 2 | 1 | 3 | 8 | 1 | 36 | 7  |
| 107,807 | 3 | 1 | 23 | 2 | 1 | 4 | 8 | 1 | 35 | 8  |
| 107,808 | 3 | 1 | 23 | 3 | 1 | 4 | 8 | 1 | 35 | 9  |
| 107,809 | 3 | 1 | 23 | 3 | 1 | 4 | 8 | 1 | 35 | 9  |
| 107,810 | 3 | 2 | 24 | 3 | 1 | 4 | 8 | 1 | 36 | 10 |
| 107,811 | 3 | 2 | 24 | 2 | 1 | 4 | 8 | 1 | 36 | 9  |
| 107,812 | 3 | 2 | 24 | 3 | 1 | 4 | 8 | 1 | 36 | 10 |
| 107,813 | 3 | 2 | 24 | 3 | 1 | 4 | 8 | 1 | 36 | 10 |
| 107,814 | 3 | 2 | 22 | 3 | 1 | 4 | 7 | 1 | 33 | 10 |
| 107,815 | 3 | 2 | 21 | 3 | 1 | 4 | 6 | 1 | 31 | 10 |
| 107,816 | 3 | 2 | 21 | 3 | 1 | 4 | 5 | 1 | 30 | 10 |
| 107,817 | 3 | 2 | 15 | 3 | 1 | 3 | 5 | 1 | 24 | 9  |
| 107,818 | 3 | 2 | 15 | 3 | 1 | 3 | 6 | 1 | 25 | 9  |

|         |   |   |    |   |   |   |   |   |    |    |
|---------|---|---|----|---|---|---|---|---|----|----|
| 107,819 | 3 | 2 | 13 | 3 | 1 | 3 | 6 | 1 | 23 | 9  |
| 107,820 | 3 | 2 | 12 | 3 | 1 | 3 | 6 | 1 | 22 | 9  |
| 107,821 | 3 | 2 | 13 | 3 | 2 | 3 | 8 | 1 | 26 | 9  |
| 107,822 | 3 | 3 | 14 | 4 | 2 | 2 | 8 | 1 | 27 | 10 |
| 107,823 | 3 | 3 | 14 | 4 | 2 | 2 | 8 | 1 | 27 | 10 |
| 107,824 | 3 | 3 | 13 | 4 | 2 | 2 | 8 | 1 | 26 | 10 |
| 107,825 | 3 | 3 | 13 | 4 | 2 | 2 | 8 | 0 | 26 | 9  |
| 107,826 | 2 | 3 | 13 | 4 | 2 | 2 | 8 | 0 | 25 | 9  |
| 107,827 | 2 | 3 | 13 | 4 | 2 | 2 | 8 | 0 | 25 | 9  |
| 107,828 | 2 | 3 | 12 | 4 | 2 | 2 | 8 | 0 | 24 | 9  |
| 107,829 | 2 | 3 | 11 | 4 | 2 | 2 | 8 | 0 | 23 | 9  |
| 107,830 | 2 | 3 | 11 | 4 | 2 | 2 | 8 | 0 | 23 | 9  |
| 107,831 | 2 | 3 | 12 | 4 | 2 | 2 | 8 | 0 | 24 | 9  |
| 107,832 | 1 | 3 | 12 | 4 | 1 | 2 | 8 | 0 | 22 | 9  |
| 107,833 | 1 | 3 | 12 | 4 | 1 | 2 | 8 | 0 | 22 | 9  |
| 107,834 | 1 | 3 | 12 | 4 | 1 | 2 | 8 | 0 | 22 | 9  |
| 107,835 | 2 | 3 | 12 | 4 | 1 | 2 | 8 | 0 | 23 | 9  |
| 107,836 | 2 | 3 | 12 | 4 | 1 | 2 | 8 | 0 | 23 | 9  |
| 107,837 | 2 | 3 | 12 | 4 | 1 | 2 | 8 | 0 | 23 | 9  |
| 107,838 | 2 | 3 | 13 | 4 | 1 | 2 | 8 | 0 | 24 | 9  |
| 107,839 | 2 | 3 | 13 | 4 | 1 | 1 | 8 | 0 | 24 | 8  |
| 107,840 | 2 | 3 | 13 | 4 | 1 | 1 | 8 | 0 | 24 | 8  |
| 107,841 | 3 | 3 | 13 | 4 | 1 | 1 | 8 | 0 | 25 | 8  |
| 107,842 | 2 | 3 | 10 | 4 | 1 | 1 | 7 | 0 | 20 | 8  |
| 107,843 | 2 | 3 | 9  | 3 | 1 | 1 | 6 | 0 | 18 | 7  |
| 107,844 | 2 | 3 | 8  | 3 | 1 | 1 | 5 | 0 | 16 | 7  |
| 107,845 | 2 | 3 | 7  | 3 | 1 | 1 | 3 | 0 | 13 | 7  |
| 107,846 | 3 | 4 | 6  | 3 | 1 | 1 | 3 | 0 | 13 | 8  |
| 107,847 | 3 | 4 | 6  | 3 | 1 | 1 | 3 | 0 | 13 | 8  |
| 107,848 | 4 | 4 | 9  | 2 | 1 | 1 | 4 | 0 | 18 | 7  |
| 107,849 | 4 | 3 | 11 | 2 | 1 | 1 | 6 | 0 | 22 | 6  |
| 107,850 | 4 | 4 | 11 | 2 | 1 | 1 | 6 | 0 | 22 | 7  |
| 107,851 | 4 | 4 | 10 | 2 | 1 | 1 | 6 | 0 | 21 | 7  |
| 107,852 | 4 | 4 | 10 | 2 | 1 | 1 | 6 | 0 | 21 | 7  |
| 107,853 | 4 | 4 | 11 | 2 | 1 | 1 | 6 | 0 | 22 | 7  |
| 107,854 | 4 | 4 | 11 | 2 | 1 | 1 | 6 | 0 | 22 | 7  |
| 107,855 | 4 | 4 | 12 | 2 | 1 | 1 | 6 | 0 | 23 | 7  |
| 107,856 | 4 | 4 | 12 | 2 | 1 | 1 | 6 | 0 | 23 | 7  |
| 107,857 | 5 | 4 | 12 | 2 | 1 | 1 | 6 | 0 | 24 | 7  |
| 107,858 | 5 | 4 | 12 | 2 | 1 | 0 | 7 | 0 | 25 | 6  |
| 107,859 | 5 | 4 | 12 | 1 | 1 | 0 | 7 | 0 | 25 | 5  |

|         |    |   |    |   |   |   |    |   |    |    |
|---------|----|---|----|---|---|---|----|---|----|----|
| 107,860 | 5  | 4 | 11 | 1 | 1 | 0 | 7  | 0 | 24 | 5  |
| 107,861 | 5  | 3 | 12 | 1 | 1 | 0 | 7  | 0 | 25 | 4  |
| 107,862 | 5  | 3 | 12 | 1 | 1 | 0 | 7  | 0 | 25 | 4  |
| 107,863 | 5  | 3 | 12 | 1 | 1 | 0 | 7  | 0 | 25 | 4  |
| 107,864 | 5  | 3 | 12 | 1 | 1 | 0 | 7  | 0 | 25 | 4  |
| 107,865 | 5  | 3 | 12 | 1 | 1 | 0 | 7  | 0 | 25 | 4  |
| 107,866 | 5  | 3 | 12 | 1 | 1 | 0 | 7  | 0 | 25 | 4  |
| 107,867 | 5  | 3 | 12 | 1 | 1 | 0 | 7  | 0 | 25 | 4  |
| 107,868 | 5  | 3 | 12 | 1 | 1 | 0 | 7  | 0 | 25 | 4  |
| 107,869 | 5  | 3 | 12 | 1 | 1 | 0 | 6  | 0 | 24 | 4  |
| 107,870 | 6  | 3 | 12 | 1 | 1 | 0 | 6  | 0 | 25 | 4  |
| 107,871 | 6  | 3 | 11 | 1 | 0 | 0 | 5  | 0 | 22 | 4  |
| 107,872 | 6  | 3 | 11 | 1 | 0 | 0 | 4  | 0 | 21 | 4  |
| 107,873 | 6  | 2 | 11 | 0 | 0 | 0 | 4  | 0 | 21 | 2  |
| 107,874 | 6  | 2 | 11 | 0 | 0 | 0 | 4  | 0 | 21 | 2  |
| 107,875 | 7  | 2 | 12 | 0 | 0 | 0 | 4  | 0 | 23 | 2  |
| 107,876 | 7  | 3 | 12 | 0 | 0 | 0 | 4  | 0 | 23 | 3  |
| 107,877 | 7  | 3 | 12 | 1 | 0 | 0 | 4  | 0 | 23 | 4  |
| 107,878 | 7  | 3 | 13 | 1 | 0 | 0 | 4  | 0 | 24 | 4  |
| 107,879 | 7  | 3 | 13 | 1 | 0 | 0 | 4  | 0 | 24 | 4  |
| 107,880 | 8  | 3 | 14 | 1 | 0 | 0 | 4  | 0 | 26 | 4  |
| 107,881 | 8  | 3 | 14 | 1 | 0 | 0 | 4  | 0 | 26 | 4  |
| 107,882 | 8  | 3 | 16 | 3 | 0 | 0 | 5  | 0 | 29 | 6  |
| 107,883 | 8  | 3 | 18 | 3 | 0 | 0 | 5  | 0 | 31 | 6  |
| 107,884 | 10 | 4 | 21 | 3 | 0 | 0 | 7  | 0 | 38 | 7  |
| 107,885 | 10 | 4 | 22 | 4 | 0 | 0 | 8  | 0 | 40 | 8  |
| 107,886 | 9  | 4 | 23 | 4 | 0 | 0 | 8  | 0 | 40 | 8  |
| 107,887 | 9  | 4 | 24 | 5 | 0 | 0 | 8  | 0 | 41 | 9  |
| 107,888 | 9  | 4 | 24 | 6 | 1 | 0 | 8  | 0 | 42 | 10 |
| 107,889 | 9  | 4 | 23 | 6 | 2 | 0 | 8  | 0 | 42 | 10 |
| 107,890 | 9  | 4 | 23 | 6 | 2 | 0 | 8  | 0 | 42 | 10 |
| 107,891 | 9  | 5 | 23 | 7 | 2 | 0 | 10 | 0 | 44 | 12 |
| 107,892 | 8  | 6 | 24 | 7 | 2 | 0 | 10 | 0 | 44 | 13 |
| 107,893 | 8  | 6 | 24 | 7 | 2 | 0 | 10 | 0 | 44 | 13 |
| 107,894 | 8  | 6 | 25 | 8 | 2 | 0 | 11 | 0 | 46 | 14 |
| 107,895 | 8  | 6 | 25 | 8 | 3 | 0 | 11 | 0 | 47 | 14 |
| 107,896 | 8  | 7 | 26 | 8 | 4 | 0 | 11 | 0 | 49 | 15 |
| 107,897 | 7  | 6 | 26 | 8 | 4 | 0 | 12 | 0 | 49 | 14 |
| 107,898 | 7  | 6 | 25 | 8 | 4 | 0 | 13 | 0 | 49 | 14 |
| 107,899 | 6  | 6 | 26 | 8 | 4 | 0 | 13 | 0 | 49 | 14 |
| 107,900 | 6  | 5 | 28 | 8 | 4 | 0 | 12 | 0 | 50 | 13 |



|         |   |   |    |    |   |   |    |   |    |    |
|---------|---|---|----|----|---|---|----|---|----|----|
| 107,901 | 6 | 5 | 28 | 8  | 4 | 0 | 12 | 0 | 50 | 13 |
| 107,902 | 6 | 5 | 30 | 8  | 4 | 0 | 13 | 0 | 53 | 13 |
| 107,903 | 6 | 5 | 30 | 8  | 4 | 0 | 14 | 0 | 54 | 13 |
| 107,904 | 6 | 6 | 29 | 9  | 4 | 0 | 14 | 0 | 53 | 15 |
| 107,905 | 6 | 6 | 29 | 9  | 4 | 0 | 14 | 0 | 53 | 15 |
| 107,906 | 6 | 6 | 29 | 10 | 4 | 0 | 14 | 0 | 53 | 16 |
| 107,907 | 6 | 6 | 32 | 11 | 4 | 0 | 17 | 0 | 59 | 17 |
| 107,908 | 5 | 6 | 32 | 11 | 4 | 0 | 17 | 0 | 58 | 17 |
| 107,909 | 5 | 6 | 32 | 12 | 4 | 0 | 17 | 0 | 58 | 18 |
| 107,910 | 6 | 6 | 32 | 14 | 4 | 0 | 18 | 0 | 60 | 20 |
| 107,911 | 6 | 6 | 31 | 14 | 4 | 0 | 18 | 0 | 59 | 20 |
| 107,912 | 6 | 6 | 31 | 14 | 4 | 0 | 18 | 0 | 59 | 20 |
| 107,913 | 6 | 6 | 31 | 14 | 4 | 1 | 18 | 0 | 59 | 21 |
| 107,914 | 6 | 6 | 31 | 14 | 4 | 1 | 18 | 0 | 59 | 21 |
| 107,915 | 8 | 6 | 33 | 14 | 4 | 1 | 22 | 0 | 67 | 21 |
| 107,916 | 8 | 6 | 33 | 14 | 4 | 1 | 22 | 1 | 67 | 22 |
| 107,917 | 8 | 6 | 33 | 14 | 4 | 1 | 22 | 1 | 67 | 22 |
| 107,918 | 8 | 6 | 41 | 14 | 4 | 1 | 24 | 1 | 77 | 22 |
| 107,919 | 8 | 6 | 42 | 14 | 4 | 1 | 25 | 1 | 79 | 22 |
| 107,920 | 8 | 6 | 45 | 14 | 4 | 2 | 25 | 1 | 82 | 23 |
| 107,921 | 7 | 6 | 46 | 14 | 4 | 2 | 25 | 1 | 82 | 23 |
| 107,922 | 7 | 6 | 47 | 14 | 4 | 3 | 25 | 1 | 83 | 24 |
| 107,923 | 7 | 6 | 47 | 15 | 4 | 3 | 25 | 1 | 83 | 25 |
| 107,924 | 7 | 7 | 46 | 15 | 4 | 3 | 25 | 1 | 82 | 26 |
| 107,925 | 7 | 7 | 46 | 16 | 4 | 3 | 26 | 1 | 83 | 27 |
| 107,926 | 6 | 8 | 45 | 16 | 4 | 3 | 26 | 2 | 81 | 29 |
| 107,927 | 6 | 7 | 45 | 15 | 4 | 3 | 26 | 2 | 81 | 27 |
| 107,928 | 6 | 7 | 45 | 15 | 4 | 3 | 26 | 2 | 81 | 27 |
| 107,929 | 6 | 7 | 44 | 15 | 4 | 3 | 26 | 2 | 80 | 27 |
| 107,930 | 6 | 7 | 44 | 16 | 4 | 3 | 26 | 2 | 80 | 28 |
| 107,931 | 5 | 7 | 42 | 16 | 4 | 3 | 26 | 2 | 77 | 28 |
| 107,932 | 5 | 8 | 42 | 16 | 4 | 3 | 26 | 2 | 77 | 29 |
| 107,933 | 5 | 8 | 41 | 15 | 4 | 3 | 25 | 2 | 75 | 28 |
| 107,934 | 5 | 8 | 38 | 15 | 4 | 3 | 24 | 2 | 71 | 28 |
| 107,935 | 4 | 7 | 35 | 14 | 4 | 3 | 22 | 2 | 65 | 26 |
| 107,936 | 4 | 7 | 36 | 14 | 4 | 3 | 22 | 2 | 66 | 26 |
| 107,937 | 4 | 7 | 35 | 14 | 4 | 3 | 22 | 2 | 65 | 26 |
| 107,938 | 5 | 7 | 37 | 13 | 4 | 3 | 22 | 2 | 68 | 25 |
| 107,939 | 5 | 7 | 37 | 13 | 3 | 3 | 22 | 2 | 67 | 25 |
| 107,940 | 5 | 8 | 37 | 14 | 2 | 3 | 22 | 2 | 66 | 27 |
| 107,941 | 6 | 7 | 37 | 13 | 2 | 3 | 21 | 2 | 66 | 25 |

|         |    |   |    |    |   |   |    |   |     |    |
|---------|----|---|----|----|---|---|----|---|-----|----|
| 107,942 | 6  | 6 | 38 | 13 | 2 | 3 | 20 | 2 | 66  | 24 |
| 107,943 | 6  | 6 | 37 | 13 | 2 | 3 | 20 | 2 | 65  | 24 |
| 107,944 | 6  | 6 | 37 | 13 | 2 | 3 | 20 | 2 | 65  | 24 |
| 107,945 | 6  | 6 | 36 | 12 | 2 | 3 | 19 | 2 | 63  | 23 |
| 107,946 | 6  | 6 | 36 | 12 | 1 | 3 | 19 | 2 | 62  | 23 |
| 107,947 | 6  | 5 | 35 | 12 | 0 | 3 | 19 | 2 | 60  | 22 |
| 107,948 | 6  | 5 | 35 | 12 | 0 | 3 | 18 | 3 | 59  | 23 |
| 107,949 | 6  | 5 | 36 | 12 | 1 | 3 | 18 | 3 | 61  | 23 |
| 107,950 | 6  | 5 | 35 | 13 | 1 | 3 | 17 | 3 | 59  | 24 |
| 107,951 | 6  | 5 | 31 | 13 | 1 | 3 | 16 | 3 | 54  | 24 |
| 107,952 | 6  | 5 | 32 | 13 | 1 | 3 | 16 | 3 | 55  | 24 |
| 107,953 | 6  | 5 | 30 | 14 | 2 | 3 | 15 | 3 | 53  | 25 |
| 107,954 | 6  | 5 | 30 | 14 | 3 | 3 | 15 | 4 | 54  | 26 |
| 107,955 | 6  | 4 | 30 | 13 | 3 | 3 | 15 | 4 | 54  | 24 |
| 107,956 | 6  | 4 | 31 | 13 | 3 | 3 | 15 | 5 | 55  | 25 |
| 107,957 | 7  | 4 | 31 | 12 | 3 | 3 | 15 | 5 | 56  | 24 |
| 107,958 | 7  | 4 | 28 | 11 | 3 | 3 | 11 | 5 | 49  | 23 |
| 107,959 | 7  | 4 | 28 | 9  | 3 | 3 | 11 | 5 | 49  | 21 |
| 107,960 | 7  | 4 | 28 | 9  | 3 | 3 | 11 | 5 | 49  | 21 |
| 107,961 | 6  | 4 | 29 | 9  | 3 | 3 | 11 | 5 | 49  | 21 |
| 107,962 | 8  | 4 | 31 | 9  | 3 | 3 | 13 | 5 | 55  | 21 |
| 107,963 | 8  | 4 | 31 | 9  | 3 | 2 | 15 | 5 | 57  | 20 |
| 107,964 | 8  | 4 | 31 | 9  | 3 | 2 | 17 | 5 | 59  | 20 |
| 107,965 | 8  | 4 | 31 | 9  | 3 | 2 | 17 | 5 | 59  | 20 |
| 107,966 | 7  | 4 | 29 | 9  | 3 | 2 | 13 | 5 | 52  | 20 |
| 107,967 | 7  | 4 | 31 | 9  | 3 | 2 | 13 | 4 | 54  | 19 |
| 107,968 | 7  | 4 | 31 | 9  | 3 | 2 | 12 | 4 | 53  | 19 |
| 107,969 | 6  | 4 | 20 | 8  | 3 | 2 | 11 | 4 | 40  | 18 |
| 107,970 | 7  | 4 | 24 | 9  | 3 | 1 | 10 | 4 | 44  | 18 |
| 107,971 | 7  | 4 | 21 | 9  | 3 | 1 | 10 | 4 | 41  | 18 |
| 107,972 | 10 | 4 | 24 | 9  | 3 | 0 | 15 | 4 | 52  | 17 |
| 107,973 | 11 | 4 | 29 | 8  | 3 | 0 | 15 | 4 | 58  | 16 |
| 107,974 | 14 | 3 | 34 | 8  | 3 | 0 | 15 | 4 | 66  | 15 |
| 107,975 | 15 | 3 | 46 | 7  | 4 | 0 | 18 | 4 | 83  | 14 |
| 107,976 | 15 | 3 | 46 | 7  | 4 | 0 | 17 | 4 | 82  | 14 |
| 107,977 | 17 | 2 | 56 | 7  | 4 | 0 | 21 | 3 | 98  | 12 |
| 107,978 | 17 | 2 | 58 | 7  | 5 | 2 | 23 | 3 | 103 | 14 |
| 107,979 | 18 | 2 | 67 | 7  | 6 | 2 | 27 | 3 | 118 | 14 |
| 107,980 | 18 | 2 | 67 | 7  | 6 | 2 | 27 | 3 | 118 | 14 |
| 107,981 | 19 | 2 | 68 | 6  | 6 | 2 | 28 | 3 | 121 | 13 |
| 107,982 | 21 | 2 | 77 | 6  | 6 | 2 | 30 | 3 | 134 | 13 |

|         |    |   |    |   |   |   |    |   |     |    |
|---------|----|---|----|---|---|---|----|---|-----|----|
| 107,983 | 21 | 2 | 78 | 5 | 6 | 2 | 30 | 3 | 135 | 12 |
| 107,984 | 21 | 2 | 77 | 6 | 6 | 2 | 31 | 3 | 135 | 13 |
| 107,985 | 21 | 2 | 78 | 6 | 6 | 2 | 31 | 3 | 136 | 13 |
| 107,986 | 21 | 2 | 80 | 7 | 6 | 2 | 31 | 3 | 138 | 14 |
| 107,987 | 21 | 2 | 79 | 7 | 6 | 2 | 31 | 4 | 137 | 15 |
| 107,988 | 21 | 2 | 81 | 7 | 6 | 3 | 32 | 4 | 140 | 16 |
| 107,989 | 20 | 2 | 80 | 6 | 6 | 3 | 37 | 4 | 143 | 15 |
| 107,990 | 20 | 1 | 80 | 6 | 6 | 3 | 37 | 4 | 143 | 14 |
| 107,991 | 19 | 2 | 80 | 7 | 6 | 3 | 38 | 4 | 143 | 16 |
| 107,992 | 19 | 3 | 80 | 7 | 6 | 3 | 38 | 4 | 143 | 17 |
| 107,993 | 20 | 3 | 79 | 7 | 6 | 3 | 40 | 4 | 145 | 17 |
| 107,994 | 20 | 3 | 79 | 7 | 6 | 3 | 40 | 4 | 145 | 17 |
| 107,995 | 20 | 3 | 79 | 7 | 6 | 3 | 40 | 4 | 145 | 17 |
| 107,996 | 20 | 4 | 79 | 7 | 6 | 3 | 40 | 3 | 145 | 17 |
| 107,997 | 20 | 4 | 78 | 7 | 6 | 3 | 42 | 3 | 146 | 17 |
| 107,998 | 20 | 4 | 77 | 7 | 6 | 3 | 41 | 3 | 144 | 17 |
| 107,999 | 20 | 4 | 77 | 7 | 6 | 3 | 41 | 3 | 144 | 17 |
| 108,000 | 20 | 4 | 77 | 7 | 5 | 3 | 42 | 3 | 144 | 17 |
| 108,001 | 20 | 4 | 76 | 7 | 5 | 3 | 42 | 3 | 143 | 17 |
| 108,002 | 20 | 4 | 76 | 6 | 6 | 3 | 42 | 3 | 144 | 16 |
| 108,003 | 20 | 4 | 75 | 6 | 6 | 3 | 42 | 3 | 143 | 16 |
| 108,004 | 20 | 5 | 75 | 5 | 5 | 3 | 42 | 2 | 142 | 15 |
| 108,005 | 20 | 5 | 75 | 5 | 4 | 3 | 43 | 2 | 142 | 15 |
| 108,006 | 20 | 5 | 75 | 5 | 4 | 3 | 43 | 1 | 142 | 14 |
| 108,007 | 20 | 5 | 75 | 5 | 4 | 3 | 43 | 1 | 142 | 14 |
| 108,008 | 19 | 6 | 74 | 5 | 4 | 3 | 43 | 1 | 140 | 15 |
| 108,009 | 19 | 6 | 74 | 5 | 4 | 3 | 43 | 1 | 140 | 15 |
| 108,010 | 19 | 6 | 74 | 4 | 4 | 3 | 43 | 1 | 140 | 14 |
| 108,011 | 19 | 6 | 74 | 4 | 5 | 3 | 43 | 1 | 141 | 14 |
| 108,012 | 19 | 6 | 74 | 4 | 5 | 3 | 42 | 1 | 140 | 14 |
| 108,013 | 17 | 6 | 72 | 4 | 5 | 3 | 40 | 1 | 134 | 14 |
| 108,014 | 17 | 6 | 72 | 4 | 5 | 3 | 38 | 1 | 132 | 14 |
| 108,015 | 17 | 6 | 72 | 4 | 5 | 3 | 36 | 1 | 130 | 14 |
| 108,016 | 17 | 6 | 72 | 4 | 5 | 3 | 36 | 1 | 130 | 14 |
| 108,017 | 16 | 6 | 72 | 4 | 5 | 3 | 36 | 1 | 129 | 14 |
| 108,018 | 16 | 6 | 70 | 4 | 5 | 3 | 36 | 1 | 127 | 14 |
| 108,019 | 16 | 6 | 70 | 4 | 5 | 3 | 36 | 1 | 127 | 14 |
| 108,020 | 16 | 6 | 70 | 4 | 5 | 3 | 36 | 1 | 127 | 14 |
| 108,021 | 16 | 6 | 68 | 4 | 5 | 3 | 36 | 1 | 125 | 14 |
| 108,022 | 16 | 6 | 68 | 4 | 5 | 3 | 36 | 2 | 125 | 15 |
| 108,023 | 13 | 6 | 64 | 4 | 5 | 3 | 31 | 2 | 113 | 15 |

|         |    |    |    |    |   |   |    |    |     |    |
|---------|----|----|----|----|---|---|----|----|-----|----|
| 108,024 | 12 | 6  | 58 | 4  | 5 | 3 | 31 | 2  | 106 | 15 |
| 108,025 | 9  | 6  | 53 | 4  | 5 | 3 | 31 | 3  | 98  | 16 |
| 108,026 | 8  | 7  | 41 | 4  | 4 | 3 | 28 | 3  | 81  | 17 |
| 108,027 | 6  | 7  | 31 | 4  | 4 | 3 | 24 | 3  | 65  | 17 |
| 108,028 | 6  | 7  | 29 | 4  | 3 | 3 | 22 | 3  | 60  | 17 |
| 108,029 | 5  | 8  | 20 | 4  | 2 | 1 | 18 | 3  | 45  | 16 |
| 108,030 | 5  | 8  | 20 | 4  | 2 | 1 | 18 | 3  | 45  | 16 |
| 108,031 | 4  | 9  | 19 | 5  | 2 | 1 | 17 | 3  | 42  | 18 |
| 108,032 | 4  | 10 | 19 | 5  | 2 | 1 | 17 | 3  | 42  | 19 |
| 108,033 | 2  | 10 | 10 | 5  | 2 | 1 | 14 | 3  | 28  | 19 |
| 108,034 | 2  | 9  | 9  | 5  | 2 | 1 | 14 | 3  | 27  | 18 |
| 108,035 | 2  | 9  | 9  | 4  | 2 | 1 | 13 | 3  | 26  | 17 |
| 108,036 | 2  | 9  | 8  | 5  | 2 | 1 | 13 | 3  | 25  | 18 |
| 108,037 | 2  | 9  | 6  | 5  | 2 | 1 | 13 | 3  | 23  | 18 |
| 108,038 | 1  | 9  | 6  | 5  | 2 | 1 | 13 | 2  | 22  | 17 |
| 108,039 | 1  | 10 | 4  | 5  | 2 | 0 | 12 | 3  | 19  | 18 |
| 108,040 | 1  | 11 | 2  | 6  | 2 | 0 | 4  | 3  | 9   | 20 |
| 108,041 | 1  | 11 | 2  | 5  | 2 | 0 | 4  | 3  | 9   | 19 |
| 108,042 | 1  | 10 | 2  | 4  | 2 | 0 | 2  | 3  | 7   | 17 |
| 108,043 | 0  | 9  | 2  | 4  | 2 | 0 | 1  | 3  | 5   | 16 |
| 108,044 | 0  | 9  | 2  | 4  | 2 | 0 | 0  | 3  | 4   | 16 |
| 108,045 | 0  | 9  | 2  | 4  | 2 | 0 | 0  | 3  | 4   | 16 |
| 108,046 | 0  | 8  | 2  | 4  | 2 | 0 | 0  | 3  | 4   | 15 |
| 108,047 | 0  | 8  | 2  | 4  | 2 | 0 | 0  | 3  | 4   | 15 |
| 108,048 | 0  | 8  | 2  | 5  | 2 | 0 | 0  | 3  | 4   | 16 |
| 108,049 | 0  | 8  | 3  | 5  | 2 | 0 | 0  | 3  | 5   | 16 |
| 108,050 | 0  | 8  | 3  | 7  | 2 | 0 | 0  | 3  | 5   | 18 |
| 108,051 | 0  | 8  | 3  | 7  | 2 | 0 | 0  | 3  | 5   | 18 |
| 108,052 | 0  | 8  | 3  | 8  | 1 | 0 | 0  | 3  | 4   | 19 |
| 108,053 | 0  | 8  | 3  | 10 | 1 | 0 | 0  | 3  | 4   | 21 |
| 108,054 | 0  | 8  | 3  | 12 | 1 | 0 | 0  | 4  | 4   | 24 |
| 108,055 | 0  | 7  | 3  | 12 | 1 | 0 | 0  | 4  | 4   | 23 |
| 108,056 | 0  | 7  | 2  | 12 | 1 | 0 | 0  | 4  | 3   | 23 |
| 108,057 | 0  | 7  | 2  | 12 | 1 | 0 | 0  | 5  | 3   | 24 |
| 108,058 | 0  | 10 | 2  | 19 | 1 | 0 | 0  | 7  | 3   | 36 |
| 108,059 | 0  | 9  | 2  | 28 | 1 | 1 | 0  | 11 | 3   | 49 |
| 108,060 | 0  | 9  | 2  | 28 | 1 | 1 | 1  | 11 | 4   | 49 |
| 108,061 | 0  | 9  | 2  | 30 | 1 | 2 | 1  | 13 | 4   | 54 |
| 108,062 | 0  | 9  | 2  | 31 | 0 | 2 | 1  | 15 | 3   | 57 |
| 108,063 | 0  | 9  | 2  | 34 | 0 | 2 | 1  | 15 | 3   | 60 |
| 108,064 | 0  | 9  | 1  | 35 | 0 | 3 | 1  | 15 | 2   | 62 |

|         |   |    |   |    |   |    |   |    |    |     |
|---------|---|----|---|----|---|----|---|----|----|-----|
| 108,065 | 0 | 9  | 1 | 35 | 0 | 3  | 1 | 16 | 2  | 63  |
| 108,066 | 0 | 9  | 1 | 37 | 0 | 3  | 1 | 16 | 2  | 65  |
| 108,067 | 0 | 9  | 1 | 38 | 0 | 3  | 1 | 16 | 2  | 66  |
| 108,068 | 0 | 10 | 1 | 38 | 0 | 3  | 1 | 16 | 2  | 67  |
| 108,069 | 0 | 10 | 1 | 39 | 0 | 3  | 1 | 16 | 2  | 68  |
| 108,070 | 0 | 11 | 1 | 39 | 0 | 3  | 1 | 16 | 2  | 69  |
| 108,071 | 0 | 11 | 1 | 39 | 0 | 3  | 1 | 15 | 2  | 68  |
| 108,072 | 0 | 11 | 1 | 38 | 0 | 3  | 2 | 15 | 3  | 67  |
| 108,073 | 1 | 11 | 1 | 44 | 0 | 3  | 2 | 16 | 4  | 74  |
| 108,074 | 1 | 11 | 1 | 48 | 0 | 3  | 2 | 16 | 4  | 78  |
| 108,075 | 1 | 11 | 1 | 49 | 0 | 3  | 2 | 17 | 4  | 80  |
| 108,076 | 2 | 11 | 2 | 51 | 0 | 3  | 2 | 16 | 6  | 81  |
| 108,077 | 3 | 10 | 2 | 51 | 0 | 3  | 2 | 16 | 7  | 80  |
| 108,078 | 3 | 11 | 3 | 52 | 0 | 3  | 2 | 17 | 8  | 83  |
| 108,079 | 3 | 11 | 3 | 60 | 0 | 7  | 2 | 22 | 8  | 100 |
| 108,080 | 3 | 10 | 3 | 60 | 0 | 8  | 2 | 23 | 8  | 101 |
| 108,081 | 4 | 9  | 3 | 60 | 0 | 8  | 2 | 23 | 9  | 100 |
| 108,082 | 5 | 10 | 4 | 59 | 0 | 8  | 2 | 23 | 11 | 100 |
| 108,083 | 5 | 10 | 4 | 60 | 0 | 8  | 2 | 23 | 11 | 101 |
| 108,084 | 5 | 10 | 4 | 60 | 0 | 9  | 2 | 23 | 11 | 102 |
| 108,085 | 5 | 10 | 4 | 61 | 0 | 9  | 2 | 23 | 11 | 103 |
| 108,086 | 6 | 10 | 4 | 61 | 0 | 9  | 2 | 24 | 12 | 104 |
| 108,087 | 7 | 10 | 4 | 60 | 0 | 9  | 2 | 25 | 13 | 104 |
| 108,088 | 7 | 10 | 4 | 62 | 0 | 9  | 2 | 25 | 13 | 106 |
| 108,089 | 7 | 10 | 4 | 64 | 0 | 9  | 2 | 25 | 13 | 108 |
| 108,090 | 7 | 9  | 4 | 64 | 0 | 9  | 2 | 24 | 13 | 106 |
| 108,091 | 7 | 8  | 4 | 63 | 0 | 9  | 2 | 26 | 13 | 106 |
| 108,092 | 7 | 8  | 4 | 63 | 0 | 9  | 2 | 26 | 13 | 106 |
| 108,093 | 7 | 8  | 4 | 63 | 0 | 9  | 2 | 28 | 13 | 108 |
| 108,094 | 7 | 8  | 4 | 64 | 1 | 10 | 2 | 29 | 14 | 111 |
| 108,095 | 7 | 8  | 4 | 66 | 1 | 10 | 2 | 29 | 14 | 113 |
| 108,096 | 7 | 8  | 4 | 66 | 1 | 10 | 2 | 29 | 14 | 113 |
| 108,097 | 7 | 8  | 4 | 66 | 1 | 10 | 2 | 29 | 14 | 113 |
| 108,098 | 7 | 8  | 3 | 66 | 1 | 10 | 2 | 29 | 13 | 113 |
| 108,099 | 7 | 8  | 3 | 65 | 1 | 10 | 2 | 29 | 13 | 112 |
| 108,100 | 7 | 8  | 3 | 64 | 1 | 10 | 2 | 29 | 13 | 111 |
| 108,101 | 7 | 9  | 3 | 63 | 1 | 10 | 2 | 29 | 13 | 111 |
| 108,102 | 7 | 9  | 3 | 63 | 1 | 10 | 2 | 29 | 13 | 111 |
| 108,103 | 7 | 9  | 3 | 62 | 1 | 10 | 4 | 29 | 15 | 110 |
| 108,104 | 7 | 9  | 3 | 60 | 1 | 10 | 4 | 29 | 15 | 108 |
| 108,105 | 8 | 9  | 6 | 58 | 1 | 10 | 5 | 28 | 20 | 105 |

|         |    |   |    |    |   |    |    |    |    |     |
|---------|----|---|----|----|---|----|----|----|----|-----|
| 108,106 | 8  | 9 | 6  | 58 | 1 | 10 | 5  | 28 | 20 | 105 |
| 108,107 | 8  | 9 | 6  | 58 | 1 | 10 | 5  | 28 | 20 | 105 |
| 108,108 | 8  | 9 | 6  | 58 | 1 | 10 | 5  | 27 | 20 | 104 |
| 108,109 | 8  | 6 | 6  | 49 | 1 | 10 | 5  | 25 | 20 | 90  |
| 108,110 | 8  | 6 | 6  | 42 | 1 | 9  | 4  | 21 | 19 | 78  |
| 108,111 | 8  | 6 | 6  | 42 | 1 | 9  | 6  | 21 | 21 | 78  |
| 108,112 | 8  | 6 | 6  | 40 | 1 | 8  | 8  | 19 | 23 | 73  |
| 108,113 | 8  | 7 | 6  | 39 | 1 | 8  | 8  | 17 | 23 | 71  |
| 108,114 | 8  | 7 | 6  | 37 | 1 | 8  | 9  | 17 | 24 | 69  |
| 108,115 | 9  | 7 | 7  | 35 | 1 | 7  | 9  | 17 | 26 | 66  |
| 108,116 | 10 | 7 | 7  | 33 | 1 | 8  | 9  | 17 | 27 | 65  |
| 108,117 | 10 | 7 | 7  | 33 | 1 | 9  | 9  | 17 | 27 | 66  |
| 108,118 | 10 | 7 | 8  | 32 | 1 | 9  | 10 | 17 | 29 | 65  |
| 108,119 | 10 | 6 | 8  | 32 | 1 | 9  | 10 | 17 | 29 | 64  |
| 108,120 | 10 | 6 | 8  | 31 | 1 | 9  | 10 | 17 | 29 | 63  |
| 108,121 | 10 | 5 | 9  | 31 | 1 | 9  | 10 | 17 | 30 | 62  |
| 108,122 | 10 | 5 | 9  | 31 | 1 | 9  | 10 | 17 | 30 | 62  |
| 108,123 | 10 | 5 | 9  | 26 | 2 | 9  | 9  | 17 | 30 | 57  |
| 108,124 | 9  | 5 | 9  | 27 | 2 | 9  | 9  | 17 | 29 | 58  |
| 108,125 | 9  | 5 | 9  | 22 | 2 | 9  | 9  | 17 | 29 | 53  |
| 108,126 | 9  | 5 | 9  | 22 | 2 | 9  | 9  | 18 | 29 | 54  |
| 108,127 | 8  | 5 | 8  | 20 | 2 | 10 | 9  | 18 | 27 | 53  |
| 108,128 | 7  | 5 | 8  | 20 | 2 | 10 | 9  | 19 | 26 | 54  |
| 108,129 | 7  | 4 | 8  | 19 | 2 | 10 | 9  | 18 | 26 | 51  |
| 108,130 | 7  | 4 | 8  | 11 | 2 | 6  | 9  | 14 | 26 | 35  |
| 108,131 | 6  | 4 | 8  | 11 | 2 | 5  | 9  | 13 | 25 | 33  |
| 108,132 | 5  | 4 | 7  | 11 | 2 | 5  | 9  | 13 | 23 | 33  |
| 108,133 | 5  | 2 | 7  | 11 | 2 | 5  | 9  | 13 | 23 | 31  |
| 108,134 | 5  | 2 | 7  | 10 | 2 | 4  | 9  | 13 | 23 | 29  |
| 108,135 | 5  | 2 | 7  | 11 | 2 | 4  | 9  | 13 | 23 | 30  |
| 108,136 | 4  | 2 | 7  | 11 | 2 | 4  | 9  | 13 | 22 | 30  |
| 108,137 | 4  | 2 | 7  | 11 | 2 | 4  | 9  | 12 | 22 | 29  |
| 108,138 | 3  | 2 | 8  | 11 | 2 | 4  | 9  | 11 | 22 | 28  |
| 108,139 | 3  | 2 | 8  | 8  | 2 | 4  | 9  | 11 | 22 | 25  |
| 108,140 | 3  | 2 | 8  | 6  | 2 | 4  | 9  | 11 | 22 | 23  |
| 108,141 | 3  | 4 | 8  | 6  | 2 | 4  | 9  | 11 | 22 | 25  |
| 108,142 | 3  | 4 | 8  | 6  | 2 | 5  | 9  | 9  | 22 | 24  |
| 108,143 | 3  | 4 | 11 | 6  | 2 | 5  | 13 | 9  | 29 | 24  |
| 108,144 | 3  | 4 | 20 | 6  | 3 | 5  | 22 | 7  | 48 | 22  |
| 108,145 | 3  | 4 | 23 | 5  | 2 | 4  | 23 | 6  | 51 | 19  |
| 108,146 | 4  | 4 | 42 | 3  | 4 | 4  | 38 | 6  | 88 | 17  |

|         |   |   |    |    |   |   |    |    |     |    |
|---------|---|---|----|----|---|---|----|----|-----|----|
| 108,147 | 4 | 4 | 42 | 3  | 4 | 4 | 38 | 8  | 88  | 19 |
| 108,148 | 4 | 4 | 42 | 4  | 4 | 4 | 38 | 9  | 88  | 21 |
| 108,149 | 4 | 5 | 48 | 5  | 4 | 4 | 39 | 10 | 95  | 24 |
| 108,150 | 5 | 5 | 71 | 15 | 5 | 6 | 44 | 15 | 125 | 41 |
| 108,151 | 7 | 5 | 75 | 16 | 6 | 6 | 50 | 16 | 138 | 43 |
| 108,152 | 8 | 5 | 75 | 17 | 6 | 6 | 55 | 19 | 144 | 47 |
| 108,153 | 8 | 5 | 78 | 18 | 6 | 6 | 54 | 19 | 146 | 48 |
| 108,154 | 8 | 5 | 78 | 18 | 6 | 6 | 52 | 19 | 144 | 48 |
| 108,155 | 7 | 5 | 77 | 18 | 6 | 6 | 55 | 19 | 145 | 48 |
| 108,156 | 7 | 5 | 81 | 18 | 8 | 6 | 55 | 19 | 151 | 48 |
| 108,157 | 7 | 5 | 86 | 18 | 8 | 6 | 55 | 19 | 156 | 48 |
| 108,158 | 7 | 5 | 87 | 18 | 8 | 6 | 55 | 19 | 157 | 48 |
| 108,159 | 8 | 5 | 91 | 18 | 8 | 6 | 59 | 19 | 166 | 48 |
| 108,160 | 8 | 6 | 91 | 18 | 8 | 6 | 59 | 19 | 166 | 49 |
| 108,161 | 8 | 6 | 91 | 18 | 8 | 6 | 59 | 20 | 166 | 50 |
| 108,162 | 8 | 6 | 91 | 18 | 8 | 6 | 59 | 20 | 166 | 50 |
| 108,163 | 8 | 6 | 91 | 18 | 8 | 6 | 57 | 20 | 164 | 50 |
| 108,164 | 8 | 5 | 94 | 18 | 8 | 6 | 59 | 20 | 169 | 49 |
| 108,165 | 8 | 5 | 94 | 18 | 8 | 6 | 58 | 20 | 168 | 49 |
| 108,166 | 7 | 5 | 94 | 19 | 8 | 5 | 59 | 19 | 168 | 48 |
| 108,167 | 6 | 5 | 94 | 21 | 8 | 5 | 59 | 19 | 167 | 50 |
| 108,168 | 6 | 5 | 95 | 22 | 8 | 4 | 58 | 20 | 167 | 51 |
| 108,169 | 6 | 7 | 95 | 22 | 8 | 4 | 58 | 20 | 167 | 53 |
| 108,170 | 6 | 9 | 95 | 24 | 8 | 4 | 58 | 20 | 167 | 57 |
| 108,171 | 6 | 9 | 95 | 24 | 8 | 4 | 58 | 21 | 167 | 58 |
| 108,172 | 7 | 9 | 94 | 24 | 8 | 4 | 58 | 21 | 167 | 58 |
| 108,173 | 7 | 9 | 94 | 24 | 7 | 4 | 58 | 21 | 166 | 58 |
| 108,174 | 7 | 9 | 94 | 24 | 7 | 4 | 58 | 20 | 166 | 57 |
| 108,175 | 7 | 9 | 94 | 23 | 7 | 5 | 58 | 20 | 166 | 57 |
| 108,176 | 7 | 9 | 94 | 24 | 7 | 5 | 60 | 18 | 168 | 56 |
| 108,177 | 7 | 9 | 93 | 24 | 7 | 5 | 60 | 18 | 167 | 56 |
| 108,178 | 7 | 9 | 93 | 24 | 7 | 4 | 60 | 18 | 167 | 55 |
| 108,179 | 7 | 9 | 93 | 24 | 7 | 4 | 60 | 17 | 167 | 54 |
| 108,180 | 7 | 9 | 93 | 24 | 7 | 4 | 60 | 17 | 167 | 54 |
| 108,181 | 7 | 9 | 93 | 24 | 7 | 4 | 60 | 16 | 167 | 53 |
| 108,182 | 7 | 9 | 93 | 24 | 7 | 4 | 60 | 17 | 167 | 54 |
| 108,183 | 7 | 9 | 93 | 25 | 7 | 4 | 60 | 17 | 167 | 55 |
| 108,184 | 7 | 9 | 93 | 25 | 7 | 4 | 60 | 17 | 167 | 55 |
| 108,185 | 7 | 9 | 93 | 25 | 7 | 4 | 60 | 19 | 167 | 57 |
| 108,186 | 7 | 9 | 93 | 23 | 7 | 4 | 60 | 19 | 167 | 55 |
| 108,187 | 7 | 9 | 93 | 23 | 7 | 4 | 60 | 19 | 167 | 55 |

|         |   |    |     |    |   |    |    |    |     |    |
|---------|---|----|-----|----|---|----|----|----|-----|----|
| 108,188 | 7 | 9  | 92  | 24 | 7 | 5  | 60 | 19 | 166 | 57 |
| 108,189 | 7 | 9  | 92  | 25 | 7 | 7  | 60 | 19 | 166 | 60 |
| 108,190 | 8 | 10 | 92  | 25 | 7 | 7  | 60 | 21 | 167 | 63 |
| 108,191 | 8 | 10 | 92  | 25 | 7 | 7  | 60 | 22 | 167 | 64 |
| 108,192 | 8 | 8  | 92  | 26 | 7 | 8  | 60 | 22 | 167 | 64 |
| 108,193 | 8 | 9  | 91  | 26 | 7 | 7  | 58 | 22 | 164 | 64 |
| 108,194 | 8 | 9  | 89  | 26 | 7 | 7  | 56 | 23 | 160 | 65 |
| 108,195 | 8 | 10 | 81  | 26 | 6 | 7  | 46 | 23 | 141 | 66 |
| 108,196 | 9 | 11 | 78  | 26 | 6 | 7  | 46 | 25 | 139 | 69 |
| 108,197 | 8 | 12 | 58  | 27 | 4 | 7  | 31 | 29 | 101 | 75 |
| 108,198 | 8 | 12 | 54  | 26 | 4 | 7  | 31 | 27 | 97  | 72 |
| 108,199 | 8 | 13 | 53  | 28 | 4 | 8  | 30 | 28 | 95  | 77 |
| 108,200 | 7 | 12 | 47  | 28 | 4 | 8  | 28 | 27 | 86  | 75 |
| 108,201 | 7 | 12 | 30  | 19 | 3 | 6  | 24 | 22 | 64  | 59 |
| 108,202 | 5 | 12 | 26  | 18 | 2 | 8  | 17 | 21 | 50  | 59 |
| 108,203 | 4 | 11 | 26  | 17 | 2 | 8  | 13 | 18 | 45  | 54 |
| 108,204 | 4 | 12 | 23  | 16 | 2 | 8  | 13 | 18 | 42  | 54 |
| 108,205 | 4 | 12 | 21  | 18 | 2 | 8  | 10 | 18 | 37  | 56 |
| 108,206 | 4 | 12 | 17  | 19 | 0 | 8  | 9  | 18 | 30  | 57 |
| 108,207 | 4 | 12 | 12  | 21 | 0 | 8  | 9  | 19 | 25  | 60 |
| 108,208 | 4 | 12 | 11  | 21 | 0 | 8  | 9  | 19 | 24  | 60 |
| 108,209 | 3 | 13 | 7   | 21 | 0 | 8  | 4  | 19 | 14  | 61 |
| 108,210 | 4 | 13 | 7   | 21 | 0 | 8  | 4  | 19 | 15  | 61 |
| 108,211 | 4 | 12 | 7   | 21 | 0 | 8  | 5  | 20 | 16  | 61 |
| 108,212 | 4 | 12 | 7   | 21 | 0 | 8  | 5  | 20 | 16  | 61 |
| 108,213 | 4 | 13 | 7   | 21 | 0 | 8  | 5  | 20 | 16  | 62 |
| 108,214 | 4 | 13 | 11  | 21 | 1 | 9  | 3  | 21 | 19  | 64 |
| 108,215 | 4 | 15 | 11  | 21 | 2 | 10 | 3  | 21 | 20  | 67 |
| 108,216 | 5 | 15 | 21  | 22 | 5 | 11 | 6  | 21 | 37  | 69 |
| 108,217 | 5 | 12 | 15  | 20 | 5 | 10 | 9  | 15 | 34  | 57 |
| 108,218 | 5 | 13 | 61  | 17 | 5 | 11 | 26 | 14 | 97  | 55 |
| 108,219 | 5 | 16 | 64  | 18 | 5 | 12 | 28 | 19 | 102 | 65 |
| 108,220 | 6 | 12 | 85  | 16 | 5 | 12 | 39 | 19 | 135 | 59 |
| 108,221 | 6 | 13 | 86  | 16 | 5 | 13 | 39 | 20 | 136 | 62 |
| 108,222 | 5 | 13 | 88  | 16 | 5 | 13 | 39 | 19 | 137 | 61 |
| 108,223 | 5 | 13 | 89  | 16 | 5 | 13 | 39 | 19 | 138 | 61 |
| 108,224 | 6 | 13 | 91  | 16 | 5 | 14 | 40 | 19 | 142 | 62 |
| 108,225 | 6 | 13 | 91  | 16 | 5 | 14 | 40 | 19 | 142 | 62 |
| 108,226 | 6 | 13 | 94  | 15 | 5 | 13 | 42 | 19 | 147 | 60 |
| 108,227 | 6 | 13 | 94  | 15 | 5 | 13 | 42 | 19 | 147 | 60 |
| 108,228 | 6 | 13 | 109 | 15 | 5 | 13 | 46 | 19 | 166 | 60 |



|         |   |    |     |    |   |    |    |    |     |    |
|---------|---|----|-----|----|---|----|----|----|-----|----|
| 108,229 | 6 | 13 | 109 | 15 | 5 | 13 | 46 | 19 | 166 | 60 |
| 108,230 | 7 | 13 | 109 | 15 | 5 | 13 | 46 | 19 | 167 | 60 |
| 108,231 | 7 | 14 | 109 | 15 | 5 | 13 | 46 | 20 | 167 | 62 |
| 108,232 | 7 | 14 | 109 | 15 | 5 | 13 | 46 | 19 | 167 | 61 |
| 108,233 | 7 | 14 | 109 | 15 | 5 | 13 | 46 | 19 | 167 | 61 |
| 108,234 | 7 | 14 | 109 | 14 | 5 | 13 | 46 | 19 | 167 | 60 |
| 108,235 | 7 | 14 | 109 | 14 | 5 | 13 | 46 | 19 | 167 | 60 |
| 108,236 | 7 | 14 | 114 | 14 | 5 | 13 | 48 | 18 | 174 | 59 |
| 108,237 | 7 | 14 | 114 | 15 | 5 | 13 | 48 | 18 | 174 | 60 |
| 108,238 | 7 | 13 | 116 | 13 | 6 | 12 | 50 | 18 | 179 | 56 |
| 108,239 | 7 | 14 | 116 | 13 | 6 | 11 | 50 | 18 | 179 | 56 |
| 108,240 | 6 | 14 | 116 | 13 | 6 | 9  | 50 | 18 | 178 | 54 |
| 108,241 | 6 | 14 | 116 | 13 | 6 | 9  | 50 | 18 | 178 | 54 |
| 108,242 | 6 | 14 | 116 | 12 | 6 | 10 | 50 | 17 | 178 | 53 |
| 108,243 | 6 | 14 | 117 | 12 | 6 | 10 | 50 | 18 | 179 | 54 |
| 108,244 | 6 | 13 | 117 | 11 | 6 | 10 | 51 | 15 | 180 | 49 |
| 108,245 | 7 | 13 | 117 | 11 | 6 | 10 | 51 | 15 | 181 | 49 |
| 108,246 | 7 | 12 | 118 | 11 | 6 | 11 | 51 | 11 | 182 | 45 |
| 108,247 | 6 | 12 | 119 | 11 | 6 | 11 | 52 | 11 | 183 | 45 |
| 108,248 | 6 | 10 | 119 | 8  | 7 | 12 | 52 | 10 | 184 | 40 |
| 108,249 | 6 | 10 | 120 | 9  | 7 | 12 | 53 | 10 | 186 | 41 |
| 108,250 | 6 | 9  | 120 | 9  | 7 | 9  | 53 | 9  | 186 | 36 |
| 108,251 | 6 | 9  | 120 | 9  | 7 | 9  | 53 | 9  | 186 | 36 |
| 108,252 | 6 | 9  | 119 | 9  | 7 | 9  | 54 | 9  | 186 | 36 |
| 108,253 | 6 | 9  | 120 | 9  | 7 | 9  | 56 | 9  | 189 | 36 |
| 108,254 | 6 | 9  | 120 | 9  | 7 | 9  | 56 | 9  | 189 | 36 |
| 108,255 | 6 | 9  | 120 | 9  | 7 | 9  | 56 | 9  | 189 | 36 |
| 108,256 | 6 | 8  | 121 | 8  | 7 | 9  | 56 | 9  | 190 | 34 |
| 108,257 | 6 | 8  | 121 | 6  | 7 | 9  | 56 | 9  | 190 | 32 |
| 108,258 | 6 | 8  | 121 | 5  | 7 | 9  | 56 | 9  | 190 | 31 |
| 108,259 | 8 | 8  | 134 | 5  | 7 | 9  | 61 | 9  | 210 | 31 |
| 108,260 | 8 | 9  | 134 | 6  | 7 | 9  | 61 | 10 | 210 | 34 |
| 108,261 | 8 | 9  | 134 | 7  | 7 | 10 | 60 | 10 | 209 | 36 |
| 108,262 | 8 | 8  | 133 | 7  | 7 | 10 | 60 | 10 | 208 | 35 |
| 108,263 | 8 | 8  | 134 | 8  | 7 | 9  | 60 | 13 | 209 | 38 |
| 108,264 | 8 | 8  | 134 | 9  | 6 | 9  | 60 | 12 | 208 | 38 |
| 108,265 | 8 | 8  | 132 | 9  | 2 | 8  | 62 | 10 | 204 | 35 |
| 108,266 | 8 | 7  | 110 | 10 | 2 | 7  | 59 | 11 | 179 | 35 |
| 108,267 | 7 | 7  | 109 | 9  | 2 | 7  | 52 | 11 | 170 | 34 |
| 108,268 | 6 | 7  | 67  | 9  | 2 | 7  | 48 | 11 | 123 | 34 |
| 108,269 | 6 | 6  | 56  | 9  | 2 | 6  | 26 | 11 | 90  | 32 |

|         |    |   |     |    |   |   |    |    |     |    |
|---------|----|---|-----|----|---|---|----|----|-----|----|
| 108,270 | 6  | 7 | 59  | 9  | 2 | 6 | 26 | 11 | 93  | 33 |
| 108,271 | 6  | 7 | 55  | 9  | 2 | 6 | 26 | 11 | 89  | 33 |
| 108,272 | 6  | 6 | 53  | 9  | 2 | 5 | 26 | 11 | 87  | 31 |
| 108,273 | 6  | 6 | 55  | 9  | 2 | 5 | 26 | 11 | 89  | 31 |
| 108,274 | 6  | 6 | 55  | 9  | 2 | 5 | 26 | 11 | 89  | 31 |
| 108,275 | 5  | 6 | 53  | 9  | 2 | 4 | 25 | 11 | 85  | 30 |
| 108,276 | 6  | 6 | 52  | 9  | 2 | 4 | 25 | 11 | 85  | 30 |
| 108,277 | 6  | 6 | 51  | 10 | 2 | 5 | 21 | 11 | 80  | 32 |
| 108,278 | 6  | 6 | 43  | 10 | 2 | 5 | 20 | 11 | 71  | 32 |
| 108,279 | 6  | 6 | 36  | 10 | 2 | 5 | 17 | 11 | 61  | 32 |
| 108,280 | 5  | 6 | 36  | 10 | 2 | 5 | 17 | 11 | 60  | 32 |
| 108,281 | 6  | 6 | 37  | 10 | 2 | 5 | 18 | 11 | 63  | 32 |
| 108,282 | 6  | 5 | 37  | 10 | 2 | 5 | 18 | 10 | 63  | 30 |
| 108,283 | 6  | 5 | 38  | 10 | 2 | 5 | 18 | 10 | 64  | 30 |
| 108,284 | 7  | 5 | 38  | 11 | 2 | 5 | 18 | 10 | 65  | 31 |
| 108,285 | 8  | 5 | 44  | 11 | 2 | 5 | 19 | 9  | 73  | 30 |
| 108,286 | 8  | 5 | 41  | 11 | 2 | 5 | 19 | 9  | 70  | 30 |
| 108,287 | 9  | 5 | 42  | 11 | 2 | 5 | 16 | 9  | 69  | 30 |
| 108,288 | 9  | 5 | 40  | 10 | 2 | 5 | 15 | 9  | 66  | 29 |
| 108,289 | 9  | 5 | 43  | 10 | 1 | 5 | 14 | 8  | 67  | 28 |
| 108,290 | 13 | 4 | 54  | 10 | 3 | 5 | 21 | 8  | 91  | 27 |
| 108,291 | 13 | 4 | 57  | 10 | 3 | 5 | 21 | 7  | 94  | 26 |
| 108,292 | 14 | 4 | 68  | 10 | 3 | 4 | 30 | 8  | 115 | 26 |
| 108,293 | 14 | 4 | 68  | 10 | 3 | 4 | 30 | 8  | 115 | 26 |
| 108,294 | 17 | 4 | 88  | 10 | 4 | 4 | 40 | 8  | 149 | 26 |
| 108,295 | 19 | 3 | 99  | 10 | 4 | 4 | 54 | 8  | 176 | 25 |
| 108,296 | 22 | 3 | 116 | 10 | 6 | 4 | 57 | 8  | 201 | 25 |
| 108,297 | 24 | 3 | 126 | 10 | 7 | 3 | 61 | 8  | 218 | 24 |
| 108,298 | 24 | 3 | 125 | 10 | 7 | 3 | 60 | 8  | 216 | 24 |
| 108,299 | 24 | 3 | 128 | 9  | 6 | 2 | 61 | 9  | 219 | 23 |
| 108,300 | 24 | 3 | 127 | 8  | 6 | 2 | 61 | 9  | 218 | 22 |
| 108,301 | 24 | 4 | 129 | 8  | 6 | 2 | 61 | 9  | 220 | 23 |
| 108,302 | 24 | 4 | 129 | 8  | 6 | 2 | 61 | 9  | 220 | 23 |
| 108,303 | 24 | 4 | 129 | 8  | 6 | 2 | 60 | 10 | 219 | 24 |
| 108,304 | 24 | 4 | 130 | 8  | 6 | 2 | 58 | 10 | 218 | 24 |
| 108,305 | 24 | 4 | 130 | 9  | 6 | 2 | 58 | 10 | 218 | 25 |
| 108,306 | 24 | 4 | 129 | 9  | 6 | 2 | 59 | 10 | 218 | 25 |
| 108,307 | 23 | 4 | 126 | 8  | 6 | 2 | 59 | 10 | 214 | 24 |
| 108,308 | 23 | 4 | 118 | 8  | 6 | 2 | 55 | 10 | 202 | 24 |
| 108,309 | 22 | 4 | 117 | 8  | 6 | 2 | 54 | 10 | 199 | 24 |
| 108,310 | 22 | 4 | 119 | 8  | 6 | 2 | 54 | 10 | 201 | 24 |

|         |    |   |     |   |    |   |    |   |     |    |
|---------|----|---|-----|---|----|---|----|---|-----|----|
| 108,311 | 21 | 3 | 119 | 7 | 6  | 2 | 54 | 8 | 200 | 20 |
| 108,312 | 24 | 3 | 120 | 6 | 6  | 1 | 58 | 8 | 208 | 18 |
| 108,313 | 25 | 3 | 121 | 6 | 6  | 1 | 59 | 8 | 211 | 18 |
| 108,314 | 25 | 3 | 125 | 4 | 6  | 1 | 61 | 5 | 217 | 13 |
| 108,315 | 25 | 3 | 125 | 4 | 6  | 1 | 62 | 5 | 218 | 13 |
| 108,316 | 28 | 2 | 142 | 3 | 7  | 1 | 76 | 4 | 253 | 10 |
| 108,317 | 28 | 2 | 143 | 3 | 7  | 1 | 76 | 4 | 254 | 10 |
| 108,318 | 28 | 2 | 144 | 3 | 7  | 1 | 78 | 4 | 257 | 10 |
| 108,319 | 30 | 2 | 143 | 3 | 7  | 1 | 83 | 4 | 263 | 10 |
| 108,320 | 30 | 2 | 143 | 3 | 7  | 1 | 83 | 4 | 263 | 10 |
| 108,321 | 30 | 1 | 142 | 3 | 7  | 1 | 83 | 4 | 262 | 9  |
| 108,322 | 30 | 1 | 142 | 3 | 7  | 1 | 83 | 4 | 262 | 9  |
| 108,323 | 30 | 1 | 142 | 3 | 7  | 1 | 84 | 4 | 263 | 9  |
| 108,324 | 30 | 1 | 140 | 3 | 7  | 1 | 84 | 4 | 261 | 9  |
| 108,325 | 32 | 1 | 140 | 3 | 7  | 1 | 85 | 4 | 264 | 9  |
| 108,326 | 32 | 1 | 140 | 3 | 7  | 1 | 85 | 4 | 264 | 9  |
| 108,327 | 32 | 1 | 140 | 2 | 7  | 0 | 85 | 4 | 264 | 7  |
| 108,328 | 32 | 1 | 139 | 2 | 7  | 0 | 85 | 4 | 263 | 7  |
| 108,329 | 32 | 1 | 139 | 3 | 7  | 0 | 85 | 4 | 263 | 8  |
| 108,330 | 32 | 1 | 140 | 3 | 7  | 0 | 85 | 4 | 264 | 8  |
| 108,331 | 32 | 1 | 140 | 3 | 7  | 0 | 85 | 5 | 264 | 9  |
| 108,332 | 34 | 1 | 144 | 3 | 8  | 0 | 87 | 5 | 273 | 9  |
| 108,333 | 34 | 1 | 144 | 3 | 8  | 0 | 87 | 5 | 273 | 9  |
| 108,334 | 35 | 1 | 145 | 2 | 8  | 0 | 90 | 5 | 278 | 8  |
| 108,335 | 34 | 1 | 145 | 2 | 8  | 0 | 90 | 5 | 277 | 8  |
| 108,336 | 34 | 1 | 139 | 2 | 8  | 0 | 90 | 5 | 271 | 8  |
| 108,337 | 34 | 1 | 140 | 2 | 9  | 0 | 91 | 5 | 274 | 8  |
| 108,338 | 33 | 1 | 138 | 3 | 9  | 0 | 91 | 5 | 271 | 9  |
| 108,339 | 34 | 1 | 135 | 3 | 9  | 0 | 93 | 5 | 271 | 9  |
| 108,340 | 30 | 1 | 125 | 3 | 8  | 0 | 87 | 5 | 250 | 9  |
| 108,341 | 31 | 1 | 128 | 3 | 9  | 0 | 90 | 5 | 258 | 9  |
| 108,342 | 30 | 1 | 127 | 3 | 10 | 0 | 89 | 5 | 256 | 9  |
| 108,343 | 32 | 1 | 123 | 3 | 10 | 0 | 85 | 4 | 250 | 8  |
| 108,344 | 31 | 1 | 125 | 3 | 10 | 0 | 80 | 4 | 246 | 8  |
| 108,345 | 29 | 1 | 114 | 4 | 10 | 0 | 76 | 4 | 229 | 9  |
| 108,346 | 27 | 1 | 111 | 4 | 11 | 0 | 60 | 4 | 209 | 9  |
| 108,347 | 23 | 1 | 94  | 4 | 9  | 0 | 57 | 4 | 183 | 9  |
| 108,348 | 21 | 1 | 83  | 4 | 8  | 0 | 53 | 4 | 165 | 9  |
| 108,349 | 23 | 1 | 101 | 4 | 8  | 0 | 54 | 4 | 186 | 9  |
| 108,350 | 23 | 1 | 105 | 4 | 8  | 0 | 57 | 3 | 193 | 8  |
| 108,351 | 23 | 1 | 106 | 4 | 8  | 0 | 58 | 3 | 195 | 8  |

|         |    |   |     |   |    |   |    |   |     |    |
|---------|----|---|-----|---|----|---|----|---|-----|----|
| 108,352 | 23 | 0 | 106 | 4 | 8  | 0 | 58 | 3 | 195 | 7  |
| 108,353 | 23 | 0 | 106 | 4 | 8  | 0 | 58 | 2 | 195 | 6  |
| 108,354 | 23 | 0 | 107 | 4 | 8  | 0 | 58 | 2 | 196 | 6  |
| 108,355 | 23 | 0 | 105 | 3 | 8  | 0 | 59 | 2 | 195 | 5  |
| 108,356 | 23 | 0 | 105 | 3 | 8  | 0 | 59 | 2 | 195 | 5  |
| 108,357 | 23 | 0 | 105 | 3 | 8  | 0 | 59 | 2 | 195 | 5  |
| 108,358 | 23 | 0 | 108 | 3 | 8  | 0 | 59 | 2 | 198 | 5  |
| 108,359 | 24 | 0 | 108 | 3 | 8  | 0 | 59 | 2 | 199 | 5  |
| 108,360 | 24 | 0 | 106 | 3 | 8  | 0 | 59 | 2 | 197 | 5  |
| 108,361 | 24 | 0 | 106 | 3 | 8  | 0 | 59 | 2 | 197 | 5  |
| 108,362 | 21 | 0 | 105 | 3 | 8  | 0 | 55 | 2 | 189 | 5  |
| 108,363 | 21 | 0 | 104 | 3 | 9  | 0 | 54 | 2 | 188 | 5  |
| 108,364 | 20 | 0 | 104 | 3 | 10 | 0 | 54 | 2 | 188 | 5  |
| 108,365 | 20 | 0 | 101 | 3 | 12 | 0 | 52 | 2 | 185 | 5  |
| 108,366 | 20 | 0 | 102 | 3 | 12 | 0 | 51 | 2 | 185 | 5  |
| 108,367 | 18 | 0 | 84  | 3 | 12 | 0 | 34 | 2 | 148 | 5  |
| 108,368 | 18 | 0 | 84  | 3 | 12 | 0 | 34 | 2 | 148 | 5  |
| 108,369 | 24 | 0 | 88  | 3 | 12 | 0 | 36 | 2 | 160 | 5  |
| 108,370 | 24 | 0 | 96  | 4 | 13 | 0 | 31 | 2 | 164 | 6  |
| 108,371 | 24 | 0 | 98  | 4 | 14 | 0 | 32 | 2 | 168 | 6  |
| 108,372 | 25 | 0 | 112 | 5 | 14 | 0 | 40 | 2 | 191 | 7  |
| 108,373 | 25 | 0 | 118 | 6 | 14 | 0 | 42 | 2 | 199 | 8  |
| 108,374 | 26 | 0 | 125 | 6 | 14 | 0 | 43 | 2 | 208 | 8  |
| 108,375 | 24 | 0 | 127 | 6 | 14 | 0 | 43 | 4 | 208 | 10 |
| 108,376 | 26 | 0 | 128 | 7 | 14 | 0 | 47 | 4 | 215 | 11 |
| 108,377 | 26 | 1 | 130 | 7 | 14 | 0 | 48 | 4 | 218 | 12 |
| 108,378 | 25 | 1 | 130 | 7 | 14 | 0 | 48 | 4 | 217 | 12 |
| 108,379 | 25 | 2 | 131 | 6 | 14 | 0 | 50 | 4 | 220 | 12 |
| 108,380 | 26 | 2 | 130 | 6 | 14 | 0 | 52 | 4 | 222 | 12 |
| 108,381 | 26 | 2 | 130 | 7 | 14 | 0 | 53 | 3 | 223 | 12 |
| 108,382 | 26 | 2 | 130 | 7 | 14 | 0 | 53 | 3 | 223 | 12 |
| 108,383 | 23 | 2 | 125 | 8 | 13 | 0 | 51 | 3 | 212 | 13 |
| 108,384 | 25 | 2 | 127 | 8 | 13 | 0 | 52 | 3 | 217 | 13 |
| 108,385 | 24 | 2 | 127 | 8 | 13 | 0 | 50 | 3 | 214 | 13 |
| 108,386 | 23 | 2 | 128 | 8 | 13 | 0 | 50 | 3 | 214 | 13 |
| 108,387 | 24 | 3 | 129 | 8 | 13 | 0 | 49 | 3 | 215 | 14 |
| 108,388 | 24 | 3 | 130 | 8 | 12 | 0 | 48 | 3 | 214 | 14 |
| 108,389 | 24 | 3 | 130 | 8 | 12 | 0 | 48 | 3 | 214 | 14 |
| 108,390 | 23 | 3 | 135 | 8 | 11 | 0 | 45 | 3 | 214 | 14 |
| 108,391 | 26 | 4 | 139 | 9 | 11 | 0 | 50 | 3 | 226 | 16 |
| 108,392 | 27 | 4 | 141 | 9 | 10 | 0 | 48 | 3 | 226 | 16 |

|         |    |   |     |    |    |   |     |    |     |    |
|---------|----|---|-----|----|----|---|-----|----|-----|----|
| 108,393 | 27 | 4 | 148 | 8  | 10 | 0 | 48  | 3  | 233 | 15 |
| 108,394 | 25 | 4 | 149 | 9  | 10 | 1 | 52  | 3  | 236 | 17 |
| 108,395 | 25 | 4 | 147 | 8  | 9  | 1 | 53  | 2  | 234 | 15 |
| 108,396 | 26 | 4 | 150 | 9  | 9  | 1 | 53  | 2  | 238 | 16 |
| 108,397 | 25 | 4 | 144 | 9  | 8  | 1 | 51  | 2  | 228 | 16 |
| 108,398 | 24 | 4 | 137 | 9  | 8  | 1 | 49  | 2  | 218 | 16 |
| 108,399 | 24 | 4 | 133 | 9  | 8  | 1 | 49  | 2  | 214 | 16 |
| 108,400 | 24 | 4 | 131 | 10 | 8  | 1 | 49  | 4  | 212 | 19 |
| 108,401 | 24 | 4 | 131 | 11 | 8  | 1 | 47  | 4  | 210 | 20 |
| 108,402 | 24 | 4 | 132 | 12 | 8  | 1 | 51  | 4  | 215 | 21 |
| 108,403 | 24 | 4 | 133 | 12 | 8  | 1 | 53  | 4  | 218 | 21 |
| 108,404 | 25 | 4 | 141 | 12 | 9  | 1 | 54  | 4  | 229 | 21 |
| 108,405 | 26 | 4 | 159 | 12 | 9  | 1 | 58  | 4  | 252 | 21 |
| 108,406 | 29 | 4 | 209 | 12 | 10 | 1 | 80  | 4  | 328 | 21 |
| 108,407 | 30 | 4 | 224 | 12 | 10 | 1 | 92  | 5  | 356 | 22 |
| 108,408 | 32 | 4 | 237 | 12 | 11 | 1 | 100 | 5  | 380 | 22 |
| 108,409 | 32 | 4 | 236 | 12 | 11 | 1 | 100 | 5  | 379 | 22 |
| 108,410 | 31 | 4 | 236 | 12 | 11 | 1 | 100 | 5  | 378 | 22 |
| 108,411 | 32 | 4 | 239 | 12 | 12 | 1 | 104 | 6  | 387 | 23 |
| 108,412 | 32 | 4 | 239 | 12 | 11 | 1 | 104 | 6  | 386 | 23 |
| 108,413 | 32 | 4 | 241 | 13 | 10 | 1 | 105 | 6  | 388 | 24 |
| 108,414 | 32 | 4 | 249 | 17 | 10 | 1 | 109 | 8  | 400 | 30 |
| 108,415 | 32 | 4 | 248 | 17 | 10 | 1 | 109 | 8  | 399 | 30 |
| 108,416 | 33 | 4 | 249 | 16 | 8  | 1 | 108 | 8  | 398 | 29 |
| 108,417 | 33 | 4 | 261 | 16 | 8  | 1 | 108 | 9  | 410 | 30 |
| 108,418 | 32 | 4 | 261 | 17 | 6  | 1 | 109 | 9  | 408 | 31 |
| 108,419 | 34 | 4 | 281 | 17 | 6  | 1 | 116 | 10 | 437 | 32 |
| 108,420 | 30 | 4 | 284 | 17 | 7  | 1 | 118 | 10 | 439 | 32 |
| 108,421 | 29 | 4 | 290 | 18 | 7  | 1 | 122 | 10 | 448 | 33 |
| 108,422 | 29 | 4 | 291 | 16 | 6  | 2 | 122 | 10 | 448 | 32 |
| 108,423 | 28 | 4 | 273 | 16 | 6  | 2 | 118 | 10 | 425 | 32 |
| 108,424 | 30 | 4 | 293 | 16 | 7  | 2 | 129 | 10 | 459 | 32 |
| 108,425 | 30 | 4 | 289 | 16 | 7  | 2 | 129 | 9  | 455 | 31 |
| 108,426 | 29 | 4 | 289 | 16 | 7  | 2 | 130 | 8  | 455 | 30 |
| 108,427 | 29 | 3 | 288 | 15 | 7  | 2 | 127 | 8  | 451 | 28 |
| 108,428 | 29 | 3 | 290 | 16 | 7  | 2 | 130 | 8  | 456 | 29 |
| 108,429 | 29 | 3 | 290 | 16 | 7  | 2 | 130 | 8  | 456 | 29 |
| 108,430 | 29 | 2 | 311 | 16 | 8  | 2 | 134 | 8  | 482 | 28 |
| 108,431 | 28 | 3 | 313 | 16 | 8  | 2 | 133 | 8  | 482 | 29 |
| 108,432 | 28 | 3 | 313 | 16 | 8  | 2 | 132 | 8  | 481 | 29 |
| 108,433 | 28 | 3 | 313 | 15 | 8  | 2 | 133 | 8  | 482 | 28 |

|         |    |   |     |    |   |   |     |    |     |    |
|---------|----|---|-----|----|---|---|-----|----|-----|----|
| 108,434 | 28 | 3 | 313 | 15 | 9 | 2 | 133 | 8  | 483 | 28 |
| 108,435 | 26 | 3 | 310 | 15 | 9 | 2 | 131 | 8  | 476 | 28 |
| 108,436 | 26 | 4 | 309 | 15 | 9 | 2 | 131 | 8  | 475 | 29 |
| 108,437 | 25 | 4 | 309 | 16 | 9 | 2 | 131 | 9  | 474 | 31 |
| 108,438 | 25 | 5 | 308 | 16 | 9 | 2 | 131 | 9  | 473 | 32 |
| 108,439 | 26 | 6 | 309 | 16 | 9 | 2 | 133 | 9  | 477 | 33 |
| 108,440 | 26 | 6 | 306 | 15 | 9 | 2 | 133 | 9  | 474 | 32 |
| 108,441 | 26 | 6 | 301 | 15 | 9 | 2 | 133 | 9  | 469 | 32 |
| 108,442 | 23 | 5 | 295 | 14 | 9 | 2 | 128 | 9  | 455 | 30 |
| 108,443 | 21 | 5 | 285 | 14 | 9 | 2 | 125 | 10 | 440 | 31 |
| 108,444 | 21 | 5 | 276 | 14 | 8 | 2 | 122 | 10 | 427 | 31 |
| 108,445 | 21 | 5 | 271 | 14 | 8 | 1 | 119 | 11 | 419 | 31 |
| 108,446 | 21 | 5 | 264 | 14 | 9 | 1 | 118 | 11 | 412 | 31 |
| 108,447 | 20 | 5 | 260 | 13 | 9 | 1 | 120 | 11 | 409 | 30 |
| 108,448 | 20 | 5 | 256 | 13 | 9 | 1 | 119 | 11 | 404 | 30 |
| 108,449 | 20 | 6 | 252 | 13 | 9 | 1 | 117 | 11 | 398 | 31 |
| 108,450 | 20 | 6 | 248 | 12 | 9 | 1 | 115 | 9  | 392 | 28 |
| 108,451 | 20 | 6 | 247 | 12 | 9 | 1 | 115 | 9  | 391 | 28 |
| 108,452 | 20 | 6 | 250 | 13 | 9 | 1 | 114 | 14 | 393 | 34 |
| 108,453 | 20 | 6 | 249 | 13 | 9 | 1 | 113 | 16 | 391 | 36 |
| 108,454 | 19 | 6 | 242 | 13 | 8 | 1 | 114 | 18 | 383 | 38 |
| 108,455 | 18 | 6 | 223 | 15 | 8 | 1 | 109 | 18 | 358 | 40 |
| 108,456 | 15 | 6 | 173 | 16 | 7 | 1 | 85  | 18 | 280 | 41 |
| 108,457 | 14 | 6 | 158 | 16 | 7 | 1 | 72  | 17 | 251 | 40 |
| 108,458 | 12 | 6 | 146 | 16 | 7 | 1 | 64  | 17 | 229 | 40 |
| 108,459 | 13 | 6 | 142 | 18 | 6 | 1 | 63  | 19 | 224 | 44 |
| 108,460 | 13 | 6 | 142 | 18 | 6 | 1 | 63  | 21 | 224 | 46 |
| 108,461 | 13 | 6 | 142 | 18 | 5 | 1 | 63  | 23 | 223 | 48 |
| 108,462 | 12 | 7 | 139 | 18 | 5 | 1 | 61  | 22 | 217 | 48 |
| 108,463 | 12 | 7 | 137 | 18 | 5 | 1 | 61  | 23 | 215 | 49 |
| 108,464 | 12 | 7 | 133 | 18 | 5 | 1 | 61  | 24 | 211 | 50 |
| 108,465 | 12 | 7 | 130 | 14 | 5 | 1 | 60  | 22 | 207 | 44 |
| 108,466 | 12 | 7 | 131 | 15 | 5 | 1 | 60  | 22 | 208 | 45 |
| 108,467 | 11 | 7 | 130 | 15 | 5 | 1 | 59  | 22 | 205 | 45 |
| 108,468 | 12 | 7 | 122 | 14 | 5 | 1 | 67  | 21 | 206 | 43 |
| 108,469 | 12 | 7 | 124 | 14 | 5 | 1 | 69  | 21 | 210 | 43 |
| 108,470 | 11 | 7 | 105 | 14 | 5 | 1 | 62  | 20 | 183 | 42 |
| 108,471 | 8  | 7 | 119 | 14 | 4 | 1 | 62  | 20 | 193 | 42 |
| 108,472 | 8  | 7 | 124 | 13 | 4 | 0 | 63  | 20 | 199 | 40 |
| 108,473 | 12 | 7 | 146 | 13 | 4 | 0 | 111 | 20 | 273 | 40 |
| 108,474 | 17 | 7 | 152 | 13 | 4 | 0 | 117 | 20 | 290 | 40 |

|         |    |    |     |    |   |   |     |    |     |     |
|---------|----|----|-----|----|---|---|-----|----|-----|-----|
| 108,475 | 15 | 7  | 129 | 13 | 2 | 0 | 105 | 21 | 251 | 41  |
| 108,476 | 19 | 7  | 154 | 13 | 3 | 0 | 125 | 22 | 301 | 42  |
| 108,477 | 19 | 7  | 154 | 17 | 3 | 0 | 124 | 22 | 300 | 46  |
| 108,478 | 19 | 7  | 153 | 18 | 3 | 1 | 124 | 22 | 299 | 48  |
| 108,479 | 19 | 7  | 149 | 22 | 3 | 1 | 121 | 25 | 292 | 55  |
| 108,480 | 19 | 8  | 132 | 22 | 3 | 1 | 116 | 25 | 270 | 56  |
| 108,481 | 20 | 8  | 130 | 23 | 4 | 1 | 116 | 25 | 270 | 57  |
| 108,482 | 21 | 9  | 133 | 22 | 4 | 1 | 118 | 25 | 276 | 57  |
| 108,483 | 21 | 9  | 133 | 22 | 4 | 1 | 118 | 25 | 276 | 57  |
| 108,484 | 22 | 9  | 134 | 22 | 4 | 1 | 120 | 25 | 280 | 57  |
| 108,485 | 24 | 9  | 135 | 22 | 4 | 1 | 122 | 25 | 285 | 57  |
| 108,486 | 24 | 8  | 134 | 22 | 4 | 1 | 123 | 25 | 285 | 56  |
| 108,487 | 24 | 8  | 134 | 22 | 4 | 1 | 123 | 25 | 285 | 56  |
| 108,488 | 25 | 5  | 133 | 21 | 4 | 1 | 123 | 24 | 285 | 51  |
| 108,489 | 26 | 5  | 134 | 21 | 4 | 1 | 126 | 24 | 290 | 51  |
| 108,490 | 25 | 5  | 139 | 21 | 4 | 1 | 125 | 24 | 293 | 51  |
| 108,491 | 25 | 5  | 139 | 21 | 4 | 1 | 125 | 24 | 293 | 51  |
| 108,492 | 26 | 5  | 142 | 21 | 4 | 1 | 130 | 24 | 302 | 51  |
| 108,493 | 26 | 5  | 141 | 23 | 4 | 1 | 129 | 24 | 300 | 53  |
| 108,494 | 27 | 6  | 142 | 23 | 4 | 1 | 133 | 23 | 306 | 53  |
| 108,495 | 33 | 6  | 153 | 24 | 4 | 1 | 157 | 22 | 347 | 53  |
| 108,496 | 33 | 6  | 154 | 24 | 4 | 1 | 158 | 22 | 349 | 53  |
| 108,497 | 35 | 6  | 157 | 24 | 3 | 1 | 167 | 22 | 362 | 53  |
| 108,498 | 35 | 6  | 158 | 24 | 3 | 1 | 167 | 22 | 363 | 53  |
| 108,499 | 35 | 6  | 158 | 25 | 3 | 1 | 167 | 22 | 363 | 54  |
| 108,500 | 35 | 5  | 160 | 28 | 3 | 1 | 168 | 22 | 366 | 56  |
| 108,501 | 35 | 5  | 160 | 33 | 3 | 3 | 168 | 23 | 366 | 64  |
| 108,502 | 36 | 5  | 161 | 34 | 3 | 3 | 167 | 23 | 367 | 65  |
| 108,503 | 36 | 5  | 159 | 33 | 3 | 3 | 167 | 18 | 365 | 59  |
| 108,504 | 38 | 5  | 163 | 32 | 3 | 3 | 168 | 16 | 372 | 56  |
| 108,505 | 38 | 5  | 162 | 33 | 3 | 3 | 166 | 15 | 369 | 56  |
| 108,506 | 38 | 5  | 163 | 32 | 3 | 3 | 167 | 16 | 371 | 56  |
| 108,507 | 38 | 5  | 163 | 32 | 3 | 3 | 166 | 16 | 370 | 56  |
| 108,508 | 38 | 6  | 163 | 34 | 3 | 3 | 167 | 26 | 371 | 69  |
| 108,509 | 37 | 6  | 163 | 34 | 3 | 3 | 167 | 26 | 370 | 69  |
| 108,510 | 37 | 13 | 164 | 65 | 3 | 8 | 169 | 51 | 373 | 137 |
| 108,511 | 37 | 13 | 164 | 65 | 3 | 8 | 169 | 49 | 373 | 135 |
| 108,512 | 37 | 14 | 165 | 66 | 3 | 8 | 169 | 48 | 374 | 136 |
| 108,513 | 37 | 14 | 166 | 70 | 3 | 8 | 168 | 48 | 374 | 140 |
| 108,514 | 37 | 14 | 167 | 69 | 3 | 8 | 168 | 47 | 375 | 138 |
| 108,515 | 37 | 14 | 166 | 69 | 3 | 8 | 169 | 46 | 375 | 137 |

|         |     |    |       |     |    |    |     |    |       |     |
|---------|-----|----|-------|-----|----|----|-----|----|-------|-----|
| 108,516 | 37  | 14 | 165   | 69  | 3  | 8  | 170 | 46 | 375   | 137 |
| 108,517 | 39  | 15 | 171   | 68  | 3  | 8  | 170 | 46 | 383   | 137 |
| 108,518 | 39  | 15 | 174   | 72  | 3  | 9  | 173 | 48 | 389   | 144 |
| 108,519 | 38  | 15 | 174   | 72  | 3  | 9  | 165 | 48 | 380   | 144 |
| 108,520 | 38  | 17 | 177   | 85  | 3  | 9  | 164 | 55 | 382   | 166 |
| 108,521 | 38  | 18 | 181   | 92  | 3  | 10 | 166 | 65 | 388   | 185 |
| 108,522 | 39  | 18 | 157   | 94  | 4  | 10 | 165 | 67 | 365   | 189 |
| 108,523 | 39  | 18 | 150   | 97  | 4  | 10 | 164 | 68 | 357   | 193 |
| 108,524 | 39  | 18 | 138   | 101 | 4  | 10 | 121 | 68 | 302   | 197 |
| 108,525 | 34  | 19 | 135   | 104 | 4  | 10 | 112 | 69 | 285   | 202 |
| 108,526 | 30  | 19 | 111   | 104 | 3  | 10 | 92  | 68 | 236   | 201 |
| 108,527 | 29  | 19 | 112   | 104 | 3  | 10 | 92  | 67 | 236   | 200 |
| 108,528 | 33  | 19 | 128   | 100 | 4  | 11 | 111 | 68 | 276   | 198 |
| 108,529 | 45  | 19 | 216   | 102 | 4  | 10 | 157 | 70 | 422   | 201 |
| 108,530 | 45  | 19 | 215   | 99  | 3  | 10 | 156 | 67 | 419   | 195 |
| 108,531 | 46  | 18 | 235   | 99  | 2  | 10 | 166 | 68 | 449   | 195 |
| 108,532 | 47  | 18 | 292   | 98  | 3  | 10 | 187 | 68 | 529   | 194 |
| 108,533 | 48  | 16 | 310   | 99  | 4  | 11 | 198 | 68 | 560   | 194 |
| 108,534 | 47  | 16 | 383   | 99  | 8  | 11 | 227 | 68 | 665   | 194 |
| 108,535 | 47  | 16 | 384   | 100 | 8  | 11 | 227 | 68 | 666   | 195 |
| 108,536 | 65  | 16 | 771   | 100 | 30 | 11 | 404 | 68 | 1,270 | 195 |
| 108,537 | 101 | 16 | 1,233 | 100 | 52 | 11 | 758 | 68 | 2,144 | 195 |
| 108,538 | 101 | 16 | 1,257 | 100 | 52 | 11 | 765 | 68 | 2,175 | 195 |
| 108,539 | 101 | 16 | 1,257 | 100 | 52 | 11 | 765 | 68 | 2,175 | 195 |
| 108,540 | 102 | 16 | 1,332 | 100 | 53 | 11 | 794 | 68 | 2,281 | 195 |
| 108,541 | 103 | 16 | 1,366 | 100 | 54 | 10 | 831 | 68 | 2,354 | 194 |
| 108,542 | 105 | 16 | 1,399 | 100 | 54 | 10 | 843 | 68 | 2,401 | 194 |
| 108,543 | 104 | 16 | 1,397 | 100 | 54 | 10 | 839 | 68 | 2,394 | 194 |
| 108,544 | 103 | 16 | 1,405 | 98  | 54 | 10 | 843 | 68 | 2,405 | 192 |
| 108,545 | 104 | 15 | 1,404 | 98  | 55 | 10 | 840 | 68 | 2,403 | 191 |
| 108,546 | 98  | 15 | 1,393 | 97  | 55 | 10 | 815 | 67 | 2,361 | 189 |
| 108,547 | 99  | 15 | 1,392 | 97  | 55 | 10 | 815 | 67 | 2,361 | 189 |
| 108,548 | 97  | 16 | 1,388 | 96  | 55 | 10 | 806 | 67 | 2,346 | 189 |
| 108,549 | 97  | 16 | 1,387 | 96  | 55 | 10 | 806 | 67 | 2,345 | 189 |
| 108,550 | 97  | 17 | 1,387 | 96  | 55 | 10 | 805 | 67 | 2,344 | 190 |
| 108,551 | 97  | 17 | 1,403 | 93  | 56 | 10 | 810 | 67 | 2,366 | 187 |
| 108,552 | 96  | 17 | 1,402 | 88  | 56 | 9  | 810 | 66 | 2,364 | 180 |
| 108,553 | 100 | 17 | 1,530 | 88  | 61 | 9  | 857 | 67 | 2,548 | 181 |
| 108,554 | 100 | 17 | 1,564 | 87  | 62 | 10 | 875 | 67 | 2,601 | 181 |
| 108,555 | 106 | 17 | 1,646 | 85  | 65 | 9  | 906 | 66 | 2,723 | 177 |
| 108,556 | 108 | 20 | 1,649 | 90  | 65 | 9  | 906 | 77 | 2,728 | 196 |



|         |     |    |       |    |     |   |       |    |       |     |
|---------|-----|----|-------|----|-----|---|-------|----|-------|-----|
| 108,557 | 108 | 20 | 1,650 | 90 | 65  | 9 | 905   | 77 | 2,728 | 196 |
| 108,558 | 108 | 20 | 1,671 | 90 | 65  | 9 | 908   | 77 | 2,752 | 196 |
| 108,559 | 109 | 19 | 1,680 | 88 | 65  | 9 | 912   | 68 | 2,766 | 184 |
| 108,560 | 113 | 19 | 1,740 | 91 | 66  | 9 | 955   | 68 | 2,874 | 187 |
| 108,561 | 113 | 12 | 1,739 | 58 | 66  | 5 | 954   | 41 | 2,872 | 116 |
| 108,562 | 114 | 12 | 1,757 | 58 | 66  | 5 | 957   | 41 | 2,894 | 116 |
| 108,563 | 117 | 11 | 1,849 | 58 | 74  | 5 | 1,029 | 40 | 3,069 | 114 |
| 108,564 | 117 | 10 | 1,949 | 55 | 76  | 5 | 1,106 | 40 | 3,248 | 110 |
| 108,565 | 118 | 10 | 2,015 | 55 | 78  | 5 | 1,139 | 40 | 3,350 | 110 |
| 108,566 | 118 | 9  | 2,023 | 55 | 78  | 5 | 1,151 | 40 | 3,370 | 109 |
| 108,567 | 118 | 9  | 2,031 | 56 | 78  | 5 | 1,156 | 40 | 3,383 | 110 |
| 108,568 | 116 | 9  | 2,018 | 58 | 78  | 5 | 1,158 | 40 | 3,370 | 112 |
| 108,569 | 116 | 9  | 2,037 | 54 | 79  | 4 | 1,161 | 38 | 3,393 | 105 |
| 108,570 | 116 | 7  | 2,062 | 41 | 83  | 4 | 1,200 | 31 | 3,461 | 83  |
| 108,571 | 116 | 6  | 2,084 | 34 | 84  | 3 | 1,241 | 21 | 3,525 | 64  |
| 108,572 | 118 | 6  | 2,151 | 32 | 90  | 3 | 1,319 | 19 | 3,678 | 60  |
| 108,573 | 119 | 6  | 2,182 | 25 | 101 | 3 | 1,370 | 19 | 3,772 | 53  |
| 108,574 | 121 | 7  | 2,220 | 26 | 106 | 3 | 1,410 | 19 | 3,857 | 55  |
| 108,575 | 119 | 7  | 2,223 | 26 | 109 | 3 | 1,429 | 19 | 3,880 | 55  |
| 108,576 | 119 | 7  | 2,220 | 23 | 109 | 3 | 1,429 | 18 | 3,877 | 51  |
| 108,577 | 119 | 7  | 2,214 | 23 | 109 | 3 | 1,426 | 18 | 3,868 | 51  |
| 108,578 | 116 | 7  | 2,203 | 23 | 108 | 2 | 1,417 | 18 | 3,844 | 50  |
| 108,579 | 115 | 7  | 2,196 | 23 | 108 | 2 | 1,410 | 18 | 3,829 | 50  |
| 108,580 | 102 | 7  | 2,108 | 20 | 108 | 2 | 1,365 | 16 | 3,683 | 45  |
| 108,581 | 101 | 8  | 2,094 | 20 | 108 | 2 | 1,359 | 15 | 3,662 | 45  |
| 108,582 | 100 | 8  | 2,091 | 20 | 108 | 2 | 1,360 | 17 | 3,659 | 47  |
| 108,583 | 98  | 8  | 2,039 | 23 | 108 | 2 | 1,343 | 17 | 3,588 | 50  |
| 108,584 | 98  | 8  | 2,026 | 27 | 107 | 1 | 1,334 | 17 | 3,565 | 53  |
| 108,585 | 98  | 8  | 1,952 | 28 | 103 | 1 | 1,307 | 18 | 3,460 | 55  |
| 108,586 | 78  | 8  | 1,573 | 31 | 82  | 1 | 1,135 | 25 | 2,868 | 65  |
| 108,587 | 46  | 8  | 1,153 | 37 | 60  | 2 | 788   | 33 | 2,047 | 80  |
| 108,588 | 42  | 8  | 1,115 | 39 | 60  | 2 | 781   | 37 | 1,998 | 86  |
| 108,589 | 41  | 8  | 1,090 | 40 | 60  | 2 | 775   | 38 | 1,966 | 88  |
| 108,590 | 39  | 8  | 1,029 | 40 | 59  | 2 | 747   | 37 | 1,874 | 87  |
| 108,591 | 40  | 9  | 1,029 | 41 | 59  | 2 | 747   | 38 | 1,875 | 90  |
| 108,592 | 40  | 10 | 991   | 42 | 58  | 2 | 710   | 40 | 1,799 | 94  |
| 108,593 | 40  | 10 | 973   | 42 | 61  | 2 | 707   | 42 | 1,781 | 96  |
| 108,594 | 40  | 10 | 973   | 42 | 61  | 2 | 709   | 42 | 1,783 | 96  |
| 108,595 | 40  | 10 | 970   | 43 | 61  | 2 | 705   | 42 | 1,776 | 97  |
| 108,596 | 39  | 10 | 970   | 43 | 60  | 2 | 705   | 42 | 1,774 | 97  |
| 108,597 | 68  | 10 | 1,227 | 48 | 81  | 2 | 875   | 42 | 2,251 | 102 |

|         |     |    |       |    |     |   |       |    |       |     |
|---------|-----|----|-------|----|-----|---|-------|----|-------|-----|
| 108,598 | 67  | 10 | 1,227 | 48 | 80  | 2 | 876   | 42 | 2,250 | 102 |
| 108,599 | 79  | 9  | 1,405 | 50 | 97  | 2 | 1,018 | 42 | 2,599 | 103 |
| 108,600 | 79  | 9  | 1,427 | 50 | 99  | 2 | 1,044 | 42 | 2,649 | 103 |
| 108,601 | 79  | 8  | 1,427 | 51 | 99  | 2 | 1,045 | 42 | 2,650 | 103 |
| 108,602 | 79  | 8  | 1,413 | 53 | 98  | 2 | 1,041 | 42 | 2,631 | 105 |
| 108,603 | 78  | 8  | 1,400 | 53 | 97  | 2 | 1,033 | 42 | 2,608 | 105 |
| 108,604 | 75  | 8  | 1,287 | 56 | 93  | 1 | 994   | 41 | 2,449 | 106 |
| 108,605 | 75  | 8  | 1,253 | 56 | 92  | 1 | 974   | 41 | 2,394 | 106 |
| 108,606 | 67  | 10 | 1,165 | 58 | 89  | 1 | 942   | 41 | 2,263 | 110 |
| 108,607 | 65  | 7  | 1,162 | 55 | 89  | 1 | 942   | 30 | 2,258 | 93  |
| 108,608 | 66  | 7  | 1,159 | 55 | 89  | 1 | 944   | 31 | 2,258 | 94  |
| 108,609 | 66  | 7  | 1,149 | 56 | 90  | 1 | 941   | 31 | 2,246 | 95  |
| 108,610 | 66  | 7  | 1,148 | 59 | 90  | 1 | 946   | 31 | 2,250 | 98  |
| 108,611 | 63  | 7  | 1,091 | 57 | 89  | 1 | 904   | 31 | 2,147 | 96  |
| 108,612 | 62  | 7  | 1,074 | 58 | 89  | 1 | 899   | 31 | 2,124 | 97  |
| 108,613 | 59  | 7  | 983   | 58 | 81  | 2 | 829   | 31 | 1,952 | 98  |
| 108,614 | 59  | 8  | 881   | 57 | 79  | 3 | 749   | 31 | 1,768 | 99  |
| 108,615 | 58  | 8  | 849   | 56 | 78  | 3 | 736   | 31 | 1,721 | 98  |
| 108,616 | 78  | 8  | 988   | 56 | 83  | 3 | 841   | 31 | 1,990 | 98  |
| 108,617 | 82  | 8  | 1,032 | 56 | 84  | 3 | 872   | 31 | 2,070 | 98  |
| 108,618 | 85  | 8  | 1,071 | 55 | 85  | 3 | 913   | 31 | 2,154 | 97  |
| 108,619 | 86  | 8  | 1,136 | 54 | 90  | 3 | 969   | 31 | 2,281 | 96  |
| 108,620 | 93  | 8  | 1,204 | 55 | 93  | 3 | 1,063 | 31 | 2,453 | 97  |
| 108,621 | 94  | 8  | 1,250 | 55 | 92  | 3 | 1,096 | 32 | 2,532 | 98  |
| 108,622 | 116 | 8  | 1,351 | 57 | 95  | 4 | 1,214 | 33 | 2,776 | 102 |
| 108,623 | 115 | 8  | 1,280 | 58 | 89  | 4 | 1,137 | 33 | 2,621 | 103 |
| 108,624 | 115 | 8  | 1,252 | 58 | 77  | 4 | 1,094 | 32 | 2,538 | 102 |
| 108,625 | 124 | 7  | 1,274 | 57 | 77  | 5 | 1,129 | 32 | 2,604 | 101 |
| 108,626 | 137 | 6  | 1,343 | 57 | 83  | 5 | 1,259 | 32 | 2,822 | 100 |
| 108,627 | 137 | 6  | 1,343 | 57 | 83  | 5 | 1,265 | 32 | 2,828 | 100 |
| 108,628 | 137 | 6  | 1,343 | 57 | 83  | 5 | 1,264 | 32 | 2,827 | 100 |
| 108,629 | 158 | 6  | 1,481 | 57 | 97  | 5 | 1,452 | 31 | 3,188 | 99  |
| 108,630 | 158 | 6  | 1,482 | 57 | 97  | 6 | 1,467 | 32 | 3,204 | 101 |
| 108,631 | 158 | 6  | 1,482 | 57 | 98  | 6 | 1,469 | 32 | 3,207 | 101 |
| 108,632 | 160 | 5  | 1,490 | 55 | 98  | 6 | 1,481 | 32 | 3,229 | 98  |
| 108,633 | 168 | 5  | 1,517 | 55 | 102 | 6 | 1,537 | 30 | 3,324 | 96  |
| 108,634 | 170 | 5  | 1,519 | 52 | 102 | 7 | 1,546 | 30 | 3,337 | 94  |
| 108,635 | 172 | 6  | 1,522 | 42 | 102 | 7 | 1,563 | 22 | 3,359 | 77  |
| 108,636 | 172 | 6  | 1,532 | 42 | 102 | 7 | 1,575 | 22 | 3,381 | 77  |
| 108,637 | 172 | 6  | 1,526 | 42 | 101 | 7 | 1,570 | 22 | 3,369 | 77  |
| 108,638 | 175 | 7  | 1,546 | 36 | 101 | 6 | 1,573 | 14 | 3,395 | 63  |

|         |     |    |       |    |     |   |       |    |       |    |
|---------|-----|----|-------|----|-----|---|-------|----|-------|----|
| 108,639 | 177 | 7  | 1,637 | 33 | 102 | 6 | 1,582 | 9  | 3,498 | 55 |
| 108,640 | 177 | 7  | 1,790 | 34 | 116 | 6 | 1,671 | 9  | 3,754 | 56 |
| 108,641 | 186 | 6  | 1,900 | 33 | 121 | 6 | 1,721 | 8  | 3,928 | 53 |
| 108,642 | 188 | 5  | 1,929 | 32 | 122 | 6 | 1,733 | 6  | 3,972 | 49 |
| 108,643 | 188 | 6  | 1,959 | 34 | 123 | 6 | 1,742 | 7  | 4,012 | 53 |
| 108,644 | 190 | 6  | 2,051 | 39 | 124 | 6 | 1,795 | 6  | 4,160 | 57 |
| 108,645 | 190 | 6  | 2,116 | 40 | 128 | 6 | 1,836 | 7  | 4,270 | 59 |
| 108,646 | 194 | 6  | 2,168 | 40 | 131 | 6 | 1,857 | 7  | 4,350 | 59 |
| 108,647 | 193 | 6  | 2,163 | 40 | 133 | 6 | 1,882 | 7  | 4,371 | 59 |
| 108,648 | 173 | 6  | 1,987 | 38 | 117 | 6 | 1,760 | 7  | 4,037 | 57 |
| 108,649 | 166 | 6  | 1,845 | 38 | 103 | 6 | 1,637 | 7  | 3,751 | 57 |
| 108,650 | 173 | 6  | 1,871 | 36 | 105 | 6 | 1,636 | 7  | 3,785 | 55 |
| 108,651 | 173 | 6  | 1,891 | 38 | 105 | 6 | 1,644 | 7  | 3,813 | 57 |
| 108,652 | 173 | 6  | 1,891 | 40 | 105 | 6 | 1,644 | 7  | 3,813 | 59 |
| 108,653 | 175 | 6  | 1,913 | 38 | 111 | 6 | 1,673 | 10 | 3,872 | 60 |
| 108,654 | 175 | 6  | 1,917 | 48 | 111 | 6 | 1,678 | 13 | 3,881 | 73 |
| 108,655 | 178 | 9  | 1,950 | 52 | 113 | 6 | 1,700 | 20 | 3,941 | 87 |
| 108,656 | 178 | 10 | 1,949 | 53 | 113 | 6 | 1,700 | 20 | 3,940 | 89 |
| 108,657 | 178 | 8  | 1,950 | 52 | 114 | 6 | 1,700 | 20 | 3,942 | 86 |
| 108,658 | 178 | 8  | 1,990 | 50 | 115 | 6 | 1,724 | 20 | 4,007 | 84 |
| 108,659 | 186 | 9  | 2,050 | 48 | 121 | 6 | 1,763 | 19 | 4,120 | 82 |
| 108,660 | 186 | 9  | 2,049 | 48 | 120 | 6 | 1,763 | 19 | 4,118 | 82 |
| 108,661 | 186 | 9  | 2,136 | 46 | 121 | 6 | 1,867 | 19 | 4,310 | 80 |
| 108,662 | 185 | 9  | 2,133 | 45 | 121 | 6 | 1,867 | 19 | 4,306 | 79 |
| 108,663 | 188 | 9  | 2,179 | 44 | 123 | 6 | 1,935 | 19 | 4,425 | 78 |
| 108,664 | 188 | 8  | 2,186 | 44 | 123 | 4 | 1,942 | 19 | 4,439 | 75 |
| 108,665 | 186 | 8  | 2,174 | 44 | 124 | 4 | 1,943 | 19 | 4,427 | 75 |
| 108,666 | 185 | 8  | 2,165 | 45 | 124 | 4 | 1,942 | 20 | 4,416 | 77 |
| 108,667 | 168 | 8  | 2,019 | 46 | 118 | 4 | 1,816 | 20 | 4,121 | 78 |
| 108,668 | 164 | 8  | 1,967 | 46 | 117 | 4 | 1,774 | 20 | 4,022 | 78 |
| 108,669 | 161 | 8  | 1,924 | 47 | 116 | 4 | 1,726 | 20 | 3,927 | 79 |
| 108,670 | 161 | 8  | 1,864 | 46 | 111 | 4 | 1,679 | 20 | 3,815 | 78 |
| 108,671 | 156 | 9  | 1,831 | 43 | 107 | 3 | 1,591 | 18 | 3,685 | 73 |
| 108,672 | 159 | 10 | 1,806 | 44 | 108 | 3 | 1,569 | 18 | 3,642 | 75 |
| 108,673 | 139 | 10 | 1,780 | 44 | 115 | 3 | 1,537 | 18 | 3,571 | 75 |
| 108,674 | 138 | 10 | 1,781 | 45 | 115 | 3 | 1,533 | 18 | 3,567 | 76 |
| 108,675 | 139 | 11 | 1,844 | 49 | 121 | 3 | 1,597 | 19 | 3,701 | 82 |
| 108,676 | 129 | 11 | 1,796 | 49 | 117 | 2 | 1,518 | 19 | 3,560 | 81 |
| 108,677 | 117 | 11 | 1,757 | 49 | 110 | 2 | 1,383 | 19 | 3,367 | 81 |
| 108,678 | 110 | 11 | 1,680 | 49 | 105 | 2 | 1,291 | 19 | 3,186 | 81 |
| 108,679 | 104 | 12 | 1,655 | 49 | 95  | 3 | 1,223 | 19 | 3,077 | 83 |

|         |     |    |       |    |    |   |       |    |       |    |
|---------|-----|----|-------|----|----|---|-------|----|-------|----|
| 108,680 | 100 | 12 | 1,690 | 49 | 97 | 2 | 1,227 | 18 | 3,114 | 81 |
| 108,681 | 100 | 12 | 1,689 | 49 | 97 | 2 | 1,226 | 18 | 3,112 | 81 |
| 108,682 | 101 | 12 | 1,741 | 49 | 98 | 3 | 1,242 | 18 | 3,182 | 82 |
| 108,683 | 99  | 12 | 1,731 | 49 | 98 | 3 | 1,238 | 18 | 3,166 | 82 |
| 108,684 | 91  | 12 | 1,704 | 50 | 94 | 2 | 1,178 | 18 | 3,067 | 82 |
| 108,685 | 89  | 12 | 1,696 | 50 | 93 | 2 | 1,166 | 18 | 3,044 | 82 |
| 108,686 | 86  | 11 | 1,684 | 50 | 93 | 2 | 1,147 | 18 | 3,010 | 81 |
| 108,687 | 86  | 12 | 1,673 | 50 | 93 | 2 | 1,136 | 19 | 2,988 | 83 |
| 108,688 | 86  | 12 | 1,704 | 51 | 94 | 2 | 1,163 | 19 | 3,047 | 84 |
| 108,689 | 86  | 11 | 1,684 | 51 | 94 | 2 | 1,159 | 19 | 3,023 | 83 |
| 108,690 | 85  | 11 | 1,591 | 50 | 93 | 2 | 1,151 | 19 | 2,920 | 82 |
| 108,691 | 85  | 11 | 1,439 | 51 | 79 | 2 | 1,063 | 19 | 2,666 | 83 |
| 108,692 | 76  | 11 | 1,327 | 51 | 74 | 2 | 1,011 | 19 | 2,488 | 83 |
| 108,693 | 73  | 10 | 1,285 | 44 | 73 | 2 | 996   | 17 | 2,427 | 73 |
| 108,694 | 72  | 10 | 1,255 | 44 | 72 | 2 | 988   | 17 | 2,387 | 73 |
| 108,695 | 68  | 10 | 1,148 | 44 | 67 | 2 | 925   | 17 | 2,208 | 73 |
| 108,696 | 68  | 10 | 1,084 | 42 | 63 | 2 | 880   | 16 | 2,095 | 70 |
| 108,697 | 65  | 10 | 1,034 | 42 | 60 | 2 | 862   | 16 | 2,021 | 70 |
| 108,698 | 58  | 10 | 972   | 42 | 54 | 2 | 798   | 16 | 1,882 | 70 |
| 108,699 | 57  | 10 | 968   | 39 | 53 | 2 | 794   | 16 | 1,872 | 67 |
| 108,700 | 52  | 10 | 933   | 39 | 51 | 2 | 774   | 16 | 1,810 | 67 |
| 108,701 | 45  | 10 | 884   | 40 | 47 | 2 | 747   | 16 | 1,723 | 68 |
| 108,702 | 45  | 10 | 866   | 37 | 47 | 2 | 746   | 16 | 1,704 | 65 |
| 108,703 | 43  | 11 | 853   | 34 | 41 | 2 | 720   | 13 | 1,657 | 60 |
| 108,704 | 43  | 11 | 851   | 24 | 41 | 2 | 721   | 10 | 1,656 | 47 |
| 108,705 | 43  | 12 | 846   | 24 | 41 | 2 | 719   | 10 | 1,649 | 48 |
| 108,706 | 40  | 9  | 839   | 17 | 43 | 2 | 730   | 4  | 1,652 | 32 |
| 108,707 | 40  | 8  | 844   | 16 | 43 | 2 | 730   | 4  | 1,657 | 30 |
| 108,708 | 40  | 8  | 844   | 15 | 43 | 3 | 728   | 4  | 1,655 | 30 |
| 108,709 | 39  | 8  | 799   | 16 | 42 | 3 | 708   | 5  | 1,588 | 32 |
| 108,710 | 32  | 7  | 750   | 16 | 36 | 3 | 675   | 5  | 1,493 | 31 |
| 108,711 | 32  | 7  | 692   | 16 | 35 | 3 | 610   | 5  | 1,369 | 31 |
| 108,712 | 32  | 7  | 667   | 15 | 36 | 3 | 576   | 5  | 1,311 | 30 |
| 108,713 | 33  | 7  | 665   | 15 | 37 | 3 | 539   | 5  | 1,274 | 30 |
| 108,714 | 33  | 7  | 660   | 15 | 37 | 3 | 536   | 5  | 1,266 | 30 |
| 108,715 | 39  | 7  | 748   | 15 | 41 | 4 | 558   | 6  | 1,386 | 32 |
| 108,716 | 40  | 8  | 762   | 16 | 40 | 4 | 567   | 6  | 1,409 | 34 |
| 108,717 | 48  | 8  | 1,068 | 15 | 44 | 4 | 620   | 6  | 1,780 | 33 |
| 108,718 | 48  | 8  | 1,066 | 14 | 44 | 4 | 618   | 6  | 1,776 | 32 |
| 108,719 | 56  | 8  | 1,289 | 14 | 50 | 4 | 718   | 6  | 2,113 | 32 |
| 108,720 | 77  | 8  | 1,538 | 13 | 62 | 4 | 909   | 6  | 2,586 | 31 |

|         |     |   |       |    |    |   |       |   |       |    |
|---------|-----|---|-------|----|----|---|-------|---|-------|----|
| 108,721 | 81  | 8 | 1,602 | 13 | 64 | 4 | 949   | 6 | 2,696 | 31 |
| 108,722 | 83  | 7 | 1,678 | 13 | 68 | 4 | 1,006 | 7 | 2,835 | 31 |
| 108,723 | 79  | 6 | 1,642 | 14 | 65 | 4 | 964   | 7 | 2,750 | 31 |
| 108,724 | 77  | 7 | 1,550 | 14 | 54 | 4 | 832   | 7 | 2,513 | 32 |
| 108,725 | 74  | 7 | 1,498 | 13 | 50 | 4 | 767   | 7 | 2,389 | 31 |
| 108,726 | 74  | 6 | 1,493 | 9  | 50 | 4 | 760   | 6 | 2,377 | 25 |
| 108,727 | 75  | 7 | 1,479 | 9  | 51 | 4 | 763   | 6 | 2,368 | 26 |
| 108,728 | 72  | 7 | 1,446 | 10 | 52 | 4 | 768   | 6 | 2,338 | 27 |
| 108,729 | 72  | 7 | 1,446 | 10 | 52 | 4 | 770   | 6 | 2,340 | 27 |
| 108,730 | 75  | 6 | 1,461 | 10 | 54 | 3 | 832   | 6 | 2,422 | 25 |
| 108,731 | 74  | 6 | 1,456 | 12 | 56 | 3 | 873   | 7 | 2,459 | 28 |
| 108,732 | 73  | 6 | 1,441 | 13 | 56 | 3 | 872   | 7 | 2,442 | 29 |
| 108,733 | 74  | 7 | 1,427 | 13 | 56 | 2 | 919   | 7 | 2,476 | 29 |
| 108,734 | 74  | 7 | 1,414 | 13 | 58 | 2 | 904   | 7 | 2,450 | 29 |
| 108,735 | 74  | 7 | 1,402 | 12 | 59 | 2 | 908   | 7 | 2,443 | 28 |
| 108,736 | 72  | 7 | 1,399 | 12 | 58 | 2 | 899   | 7 | 2,428 | 28 |
| 108,737 | 71  | 7 | 1,399 | 13 | 58 | 2 | 902   | 7 | 2,430 | 29 |
| 108,738 | 71  | 6 | 1,399 | 13 | 58 | 2 | 903   | 6 | 2,431 | 27 |
| 108,739 | 71  | 6 | 1,401 | 12 | 58 | 2 | 906   | 6 | 2,436 | 26 |
| 108,740 | 71  | 6 | 1,439 | 13 | 58 | 2 | 946   | 6 | 2,514 | 27 |
| 108,741 | 70  | 6 | 1,439 | 13 | 58 | 2 | 945   | 6 | 2,512 | 27 |
| 108,742 | 70  | 6 | 1,442 | 12 | 59 | 2 | 952   | 6 | 2,523 | 26 |
| 108,743 | 70  | 6 | 1,442 | 12 | 59 | 2 | 950   | 6 | 2,521 | 26 |
| 108,744 | 70  | 6 | 1,441 | 12 | 59 | 2 | 949   | 6 | 2,519 | 26 |
| 108,745 | 72  | 6 | 1,465 | 12 | 60 | 2 | 970   | 6 | 2,567 | 26 |
| 108,746 | 72  | 6 | 1,466 | 13 | 60 | 2 | 970   | 6 | 2,568 | 27 |
| 108,747 | 72  | 6 | 1,465 | 13 | 60 | 2 | 971   | 6 | 2,568 | 27 |
| 108,748 | 71  | 6 | 1,459 | 13 | 60 | 2 | 966   | 6 | 2,556 | 27 |
| 108,749 | 71  | 6 | 1,451 | 13 | 60 | 2 | 960   | 6 | 2,542 | 27 |
| 108,750 | 71  | 6 | 1,448 | 15 | 60 | 2 | 958   | 6 | 2,537 | 29 |
| 108,751 | 72  | 6 | 1,454 | 15 | 61 | 2 | 955   | 6 | 2,542 | 29 |
| 108,752 | 74  | 6 | 1,472 | 15 | 61 | 2 | 963   | 8 | 2,570 | 31 |
| 108,753 | 75  | 6 | 1,477 | 15 | 61 | 2 | 961   | 8 | 2,574 | 31 |
| 108,754 | 75  | 5 | 1,474 | 16 | 61 | 2 | 961   | 8 | 2,571 | 31 |
| 108,755 | 75  | 4 | 1,473 | 16 | 61 | 1 | 958   | 7 | 2,567 | 28 |
| 108,756 | 75  | 4 | 1,480 | 16 | 61 | 1 | 957   | 7 | 2,573 | 28 |
| 108,757 | 78  | 5 | 1,481 | 16 | 58 | 1 | 933   | 8 | 2,550 | 30 |
| 108,758 | 78  | 5 | 1,475 | 16 | 57 | 1 | 931   | 8 | 2,541 | 30 |
| 108,759 | 92  | 5 | 1,769 | 16 | 61 | 1 | 989   | 8 | 2,911 | 30 |
| 108,760 | 92  | 5 | 1,783 | 17 | 61 | 1 | 1,008 | 8 | 2,944 | 31 |
| 108,761 | 102 | 5 | 1,901 | 18 | 64 | 1 | 1,042 | 8 | 3,109 | 32 |

|         |     |    |       |    |    |   |       |    |       |     |
|---------|-----|----|-------|----|----|---|-------|----|-------|-----|
| 108,762 | 103 | 5  | 1,914 | 19 | 65 | 1 | 1,050 | 8  | 3,132 | 33  |
| 108,763 | 109 | 5  | 1,927 | 20 | 66 | 1 | 1,063 | 8  | 3,165 | 34  |
| 108,764 | 107 | 6  | 1,883 | 21 | 63 | 1 | 1,035 | 8  | 3,088 | 36  |
| 108,765 | 103 | 6  | 1,854 | 22 | 63 | 1 | 1,031 | 10 | 3,051 | 39  |
| 108,766 | 107 | 6  | 1,836 | 22 | 61 | 0 | 1,020 | 9  | 3,024 | 37  |
| 108,767 | 106 | 7  | 1,821 | 28 | 61 | 0 | 1,011 | 13 | 2,999 | 48  |
| 108,768 | 98  | 7  | 1,534 | 31 | 57 | 0 | 966   | 13 | 2,655 | 51  |
| 108,769 | 97  | 7  | 1,492 | 30 | 57 | 0 | 957   | 13 | 2,603 | 50  |
| 108,770 | 100 | 7  | 1,567 | 35 | 61 | 0 | 1,012 | 18 | 2,740 | 60  |
| 108,771 | 89  | 7  | 1,390 | 39 | 51 | 0 | 851   | 19 | 2,381 | 65  |
| 108,772 | 85  | 10 | 1,320 | 46 | 49 | 0 | 799   | 20 | 2,253 | 76  |
| 108,773 | 81  | 10 | 1,188 | 47 | 45 | 0 | 730   | 20 | 2,044 | 77  |
| 108,774 | 83  | 10 | 1,192 | 49 | 46 | 0 | 737   | 22 | 2,058 | 81  |
| 108,775 | 83  | 10 | 1,192 | 55 | 46 | 0 | 737   | 24 | 2,058 | 89  |
| 108,776 | 83  | 11 | 1,184 | 55 | 44 | 0 | 729   | 24 | 2,040 | 90  |
| 108,777 | 84  | 11 | 1,193 | 56 | 45 | 0 | 734   | 24 | 2,056 | 91  |
| 108,778 | 82  | 10 | 1,196 | 59 | 44 | 0 | 728   | 24 | 2,050 | 93  |
| 108,779 | 82  | 10 | 1,183 | 61 | 41 | 0 | 701   | 24 | 2,007 | 95  |
| 108,780 | 82  | 10 | 1,195 | 65 | 42 | 0 | 701   | 24 | 2,020 | 99  |
| 108,781 | 79  | 10 | 1,171 | 65 | 40 | 0 | 638   | 24 | 1,928 | 99  |
| 108,782 | 76  | 11 | 1,128 | 62 | 36 | 0 | 556   | 23 | 1,796 | 96  |
| 108,783 | 76  | 11 | 1,136 | 63 | 36 | 0 | 551   | 23 | 1,799 | 97  |
| 108,784 | 75  | 10 | 1,119 | 63 | 35 | 0 | 498   | 23 | 1,727 | 96  |
| 108,785 | 75  | 10 | 1,119 | 63 | 33 | 0 | 497   | 23 | 1,724 | 96  |
| 108,786 | 81  | 11 | 1,158 | 63 | 33 | 0 | 521   | 23 | 1,793 | 97  |
| 108,787 | 82  | 11 | 1,156 | 62 | 33 | 0 | 519   | 23 | 1,790 | 96  |
| 108,788 | 82  | 11 | 1,155 | 62 | 34 | 0 | 517   | 23 | 1,788 | 96  |
| 108,789 | 82  | 12 | 1,153 | 63 | 34 | 0 | 514   | 24 | 1,783 | 99  |
| 108,790 | 82  | 12 | 1,144 | 64 | 35 | 0 | 506   | 24 | 1,767 | 100 |
| 108,791 | 84  | 12 | 1,122 | 63 | 35 | 1 | 474   | 26 | 1,715 | 102 |
| 108,792 | 84  | 12 | 1,119 | 63 | 34 | 1 | 468   | 26 | 1,705 | 102 |
| 108,793 | 84  | 12 | 1,129 | 68 | 34 | 1 | 478   | 26 | 1,725 | 107 |
| 108,794 | 84  | 13 | 1,117 | 69 | 34 | 1 | 461   | 26 | 1,696 | 109 |
| 108,795 | 83  | 13 | 1,109 | 69 | 33 | 1 | 458   | 26 | 1,683 | 109 |
| 108,796 | 84  | 13 | 1,110 | 69 | 33 | 1 | 468   | 26 | 1,695 | 109 |
| 108,797 | 84  | 13 | 1,112 | 68 | 33 | 1 | 469   | 26 | 1,698 | 108 |
| 108,798 | 84  | 13 | 1,113 | 68 | 33 | 1 | 470   | 26 | 1,700 | 108 |
| 108,799 | 84  | 13 | 1,113 | 68 | 33 | 2 | 470   | 26 | 1,700 | 109 |
| 108,800 | 84  | 13 | 1,114 | 68 | 33 | 2 | 470   | 26 | 1,701 | 109 |
| 108,801 | 84  | 13 | 1,131 | 66 | 33 | 2 | 479   | 27 | 1,727 | 108 |
| 108,802 | 84  | 13 | 1,123 | 66 | 33 | 3 | 474   | 27 | 1,714 | 109 |

|         |    |    |       |    |    |   |     |    |       |     |
|---------|----|----|-------|----|----|---|-----|----|-------|-----|
| 108,803 | 87 | 13 | 1,211 | 66 | 34 | 3 | 516 | 25 | 1,848 | 107 |
| 108,804 | 86 | 14 | 1,206 | 67 | 34 | 4 | 516 | 25 | 1,842 | 110 |
| 108,805 | 86 | 14 | 1,223 | 65 | 36 | 4 | 527 | 24 | 1,872 | 107 |
| 108,806 | 86 | 14 | 1,221 | 67 | 36 | 4 | 527 | 24 | 1,870 | 109 |
| 108,807 | 84 | 14 | 1,218 | 69 | 36 | 5 | 528 | 26 | 1,866 | 114 |
| 108,808 | 83 | 13 | 1,194 | 72 | 36 | 5 | 521 | 27 | 1,834 | 117 |
| 108,809 | 77 | 13 | 1,158 | 73 | 35 | 5 | 504 | 27 | 1,774 | 118 |
| 108,810 | 69 | 14 | 899   | 72 | 32 | 5 | 462 | 27 | 1,462 | 118 |
| 108,811 | 70 | 14 | 889   | 72 | 32 | 5 | 442 | 27 | 1,433 | 118 |
| 108,812 | 59 | 14 | 767   | 69 | 29 | 5 | 405 | 27 | 1,260 | 115 |
| 108,813 | 58 | 14 | 755   | 70 | 28 | 5 | 399 | 27 | 1,240 | 116 |
| 108,814 | 51 | 14 | 729   | 70 | 26 | 5 | 374 | 27 | 1,180 | 116 |
| 108,815 | 50 | 13 | 741   | 69 | 28 | 5 | 379 | 28 | 1,198 | 115 |
| 108,816 | 49 | 13 | 740   | 71 | 28 | 5 | 379 | 26 | 1,196 | 115 |
| 108,817 | 44 | 14 | 698   | 73 | 26 | 5 | 365 | 26 | 1,133 | 118 |
| 108,818 | 44 | 12 | 704   | 66 | 26 | 5 | 368 | 22 | 1,142 | 105 |
| 108,819 | 44 | 13 | 683   | 63 | 26 | 5 | 361 | 22 | 1,114 | 103 |
| 108,820 | 36 | 13 | 527   | 63 | 20 | 5 | 274 | 22 | 857   | 103 |
| 108,821 | 33 | 13 | 427   | 58 | 16 | 5 | 214 | 17 | 690   | 93  |
| 108,822 | 23 | 10 | 376   | 47 | 14 | 5 | 184 | 15 | 597   | 77  |
| 108,823 | 25 | 11 | 381   | 47 | 17 | 5 | 189 | 15 | 612   | 78  |
| 108,824 | 24 | 11 | 383   | 46 | 15 | 5 | 176 | 14 | 598   | 76  |
| 108,825 | 24 | 11 | 394   | 42 | 16 | 5 | 179 | 12 | 613   | 70  |
| 108,826 | 24 | 10 | 393   | 36 | 16 | 5 | 179 | 10 | 612   | 61  |
| 108,827 | 23 | 11 | 378   | 36 | 15 | 5 | 172 | 10 | 588   | 62  |
| 108,828 | 24 | 11 | 394   | 35 | 17 | 5 | 183 | 10 | 618   | 61  |
| 108,829 | 24 | 11 | 401   | 29 | 16 | 5 | 186 | 11 | 627   | 56  |
| 108,830 | 25 | 11 | 405   | 30 | 16 | 5 | 185 | 11 | 631   | 57  |
| 108,831 | 27 | 11 | 395   | 28 | 15 | 5 | 186 | 11 | 623   | 55  |
| 108,832 | 27 | 12 | 396   | 28 | 15 | 6 | 187 | 11 | 625   | 57  |
| 108,833 | 28 | 11 | 398   | 28 | 15 | 6 | 194 | 11 | 635   | 56  |
| 108,834 | 28 | 10 | 393   | 27 | 15 | 6 | 193 | 11 | 629   | 54  |
| 108,835 | 28 | 11 | 436   | 27 | 15 | 6 | 200 | 11 | 679   | 55  |
| 108,836 | 22 | 11 | 401   | 27 | 13 | 6 | 176 | 11 | 612   | 55  |
| 108,837 | 22 | 11 | 397   | 27 | 13 | 6 | 172 | 11 | 604   | 55  |
| 108,838 | 24 | 11 | 401   | 27 | 13 | 6 | 176 | 11 | 614   | 55  |
| 108,839 | 24 | 11 | 405   | 27 | 13 | 6 | 179 | 11 | 621   | 55  |
| 108,840 | 24 | 11 | 407   | 25 | 13 | 6 | 181 | 10 | 625   | 52  |
| 108,841 | 25 | 11 | 406   | 25 | 12 | 6 | 183 | 10 | 626   | 52  |
| 108,842 | 24 | 11 | 401   | 25 | 12 | 5 | 183 | 8  | 620   | 49  |
| 108,843 | 24 | 11 | 392   | 20 | 12 | 5 | 175 | 8  | 603   | 44  |

|         |    |    |     |    |    |   |     |    |       |    |
|---------|----|----|-----|----|----|---|-----|----|-------|----|
| 108,844 | 24 | 10 | 390 | 20 | 12 | 5 | 174 | 8  | 600   | 43 |
| 108,845 | 25 | 10 | 389 | 20 | 12 | 6 | 172 | 8  | 598   | 44 |
| 108,846 | 23 | 10 | 388 | 20 | 12 | 6 | 162 | 8  | 585   | 44 |
| 108,847 | 23 | 10 | 384 | 20 | 12 | 6 | 161 | 8  | 580   | 44 |
| 108,848 | 23 | 10 | 386 | 20 | 12 | 6 | 160 | 9  | 581   | 45 |
| 108,849 | 23 | 10 | 392 | 21 | 12 | 6 | 161 | 10 | 588   | 47 |
| 108,850 | 23 | 11 | 391 | 21 | 12 | 5 | 161 | 10 | 587   | 47 |
| 108,851 | 23 | 11 | 386 | 25 | 12 | 5 | 160 | 10 | 581   | 51 |
| 108,852 | 22 | 11 | 369 | 26 | 11 | 5 | 150 | 10 | 552   | 52 |
| 108,853 | 22 | 11 | 302 | 27 | 10 | 4 | 119 | 11 | 453   | 53 |
| 108,854 | 17 | 11 | 272 | 26 | 10 | 4 | 105 | 11 | 404   | 52 |
| 108,855 | 17 | 11 | 263 | 25 | 8  | 3 | 96  | 11 | 384   | 50 |
| 108,856 | 18 | 11 | 252 | 23 | 8  | 3 | 95  | 11 | 373   | 48 |
| 108,857 | 18 | 11 | 248 | 24 | 8  | 3 | 94  | 11 | 368   | 49 |
| 108,858 | 18 | 11 | 254 | 19 | 8  | 2 | 98  | 7  | 378   | 39 |
| 108,859 | 18 | 11 | 253 | 19 | 8  | 2 | 98  | 7  | 377   | 39 |
| 108,860 | 19 | 11 | 263 | 18 | 8  | 2 | 106 | 7  | 396   | 38 |
| 108,861 | 20 | 11 | 268 | 19 | 8  | 2 | 107 | 7  | 403   | 39 |
| 108,862 | 19 | 19 | 264 | 25 | 8  | 2 | 109 | 19 | 400   | 65 |
| 108,863 | 19 | 19 | 255 | 28 | 8  | 2 | 103 | 20 | 385   | 69 |
| 108,864 | 22 | 19 | 326 | 31 | 8  | 2 | 122 | 21 | 478   | 73 |
| 108,865 | 23 | 19 | 338 | 31 | 9  | 2 | 129 | 21 | 499   | 73 |
| 108,866 | 24 | 20 | 356 | 27 | 8  | 2 | 139 | 21 | 527   | 70 |
| 108,867 | 24 | 21 | 356 | 29 | 8  | 2 | 140 | 21 | 528   | 73 |
| 108,868 | 24 | 20 | 351 | 28 | 8  | 2 | 137 | 22 | 520   | 72 |
| 108,869 | 33 | 20 | 457 | 28 | 10 | 3 | 211 | 22 | 711   | 73 |
| 108,870 | 50 | 19 | 609 | 28 | 13 | 3 | 293 | 21 | 965   | 71 |
| 108,871 | 51 | 19 | 630 | 28 | 13 | 3 | 302 | 21 | 996   | 71 |
| 108,872 | 52 | 19 | 637 | 28 | 13 | 3 | 302 | 21 | 1,004 | 71 |
| 108,873 | 50 | 19 | 611 | 29 | 13 | 3 | 302 | 21 | 976   | 72 |
| 108,874 | 48 | 18 | 601 | 29 | 10 | 3 | 295 | 21 | 954   | 71 |
| 108,875 | 48 | 18 | 584 | 29 | 10 | 3 | 289 | 21 | 931   | 71 |
| 108,876 | 49 | 19 | 581 | 29 | 10 | 3 | 292 | 21 | 932   | 72 |
| 108,877 | 49 | 17 | 582 | 29 | 10 | 3 | 295 | 21 | 936   | 70 |
| 108,878 | 49 | 17 | 581 | 29 | 10 | 3 | 294 | 21 | 934   | 70 |
| 108,879 | 49 | 17 | 566 | 30 | 10 | 3 | 287 | 21 | 912   | 71 |
| 108,880 | 50 | 17 | 557 | 32 | 10 | 3 | 285 | 20 | 902   | 72 |
| 108,881 | 49 | 17 | 550 | 34 | 10 | 3 | 285 | 21 | 894   | 75 |
| 108,882 | 47 | 17 | 544 | 33 | 10 | 3 | 282 | 21 | 883   | 74 |
| 108,883 | 47 | 16 | 542 | 33 | 10 | 2 | 280 | 23 | 879   | 74 |
| 108,884 | 46 | 17 | 535 | 35 | 10 | 2 | 274 | 23 | 865   | 77 |



|         |    |    |     |    |    |   |     |    |       |    |
|---------|----|----|-----|----|----|---|-----|----|-------|----|
| 108,885 | 46 | 17 | 538 | 37 | 12 | 2 | 270 | 23 | 866   | 79 |
| 108,886 | 46 | 16 | 496 | 38 | 12 | 2 | 262 | 24 | 816   | 80 |
| 108,887 | 46 | 16 | 505 | 38 | 13 | 2 | 265 | 24 | 829   | 80 |
| 108,888 | 45 | 16 | 505 | 38 | 13 | 2 | 262 | 24 | 825   | 80 |
| 108,889 | 45 | 15 | 506 | 38 | 13 | 2 | 261 | 24 | 825   | 79 |
| 108,890 | 45 | 15 | 501 | 38 | 13 | 2 | 260 | 24 | 819   | 79 |
| 108,891 | 46 | 15 | 501 | 38 | 13 | 2 | 259 | 25 | 819   | 80 |
| 108,892 | 45 | 15 | 501 | 38 | 13 | 2 | 260 | 25 | 819   | 80 |
| 108,893 | 44 | 15 | 498 | 37 | 13 | 2 | 258 | 25 | 813   | 79 |
| 108,894 | 45 | 15 | 498 | 37 | 13 | 2 | 258 | 25 | 814   | 79 |
| 108,895 | 45 | 16 | 498 | 37 | 13 | 2 | 256 | 25 | 812   | 80 |
| 108,896 | 44 | 16 | 498 | 37 | 13 | 1 | 257 | 26 | 812   | 80 |
| 108,897 | 44 | 16 | 497 | 37 | 13 | 1 | 257 | 26 | 811   | 80 |
| 108,898 | 44 | 16 | 499 | 38 | 14 | 2 | 257 | 27 | 814   | 83 |
| 108,899 | 44 | 16 | 499 | 38 | 14 | 2 | 257 | 26 | 814   | 82 |
| 108,900 | 44 | 16 | 493 | 38 | 14 | 2 | 256 | 25 | 807   | 81 |
| 108,901 | 44 | 15 | 492 | 34 | 14 | 2 | 256 | 25 | 806   | 76 |
| 108,902 | 44 | 15 | 492 | 35 | 14 | 2 | 256 | 25 | 806   | 77 |
| 108,903 | 45 | 15 | 488 | 35 | 14 | 2 | 255 | 24 | 802   | 76 |
| 108,904 | 45 | 15 | 487 | 34 | 14 | 2 | 255 | 23 | 801   | 74 |
| 108,905 | 45 | 15 | 490 | 34 | 14 | 2 | 255 | 23 | 804   | 74 |
| 108,906 | 50 | 14 | 517 | 33 | 14 | 3 | 258 | 23 | 839   | 73 |
| 108,907 | 50 | 14 | 526 | 33 | 14 | 3 | 259 | 23 | 849   | 73 |
| 108,908 | 56 | 14 | 604 | 33 | 14 | 3 | 303 | 23 | 977   | 73 |
| 108,909 | 60 | 14 | 628 | 33 | 15 | 3 | 319 | 23 | 1,022 | 73 |
| 108,910 | 60 | 14 | 619 | 33 | 15 | 3 | 309 | 23 | 1,003 | 73 |
| 108,911 | 71 | 14 | 943 | 33 | 36 | 3 | 501 | 23 | 1,551 | 73 |
| 108,912 | 70 | 13 | 938 | 32 | 36 | 3 | 500 | 23 | 1,544 | 71 |
| 108,913 | 70 | 5  | 924 | 28 | 36 | 3 | 500 | 11 | 1,530 | 47 |
| 108,914 | 70 | 5  | 976 | 25 | 38 | 3 | 527 | 10 | 1,611 | 43 |
| 108,915 | 67 | 5  | 934 | 23 | 38 | 3 | 512 | 10 | 1,551 | 41 |
| 108,916 | 66 | 6  | 917 | 24 | 36 | 3 | 502 | 10 | 1,521 | 43 |
| 108,917 | 64 | 4  | 891 | 22 | 36 | 4 | 488 | 8  | 1,479 | 38 |
| 108,918 | 64 | 4  | 877 | 24 | 35 | 4 | 482 | 8  | 1,458 | 40 |
| 108,919 | 55 | 4  | 788 | 24 | 34 | 4 | 412 | 8  | 1,289 | 40 |
| 108,920 | 38 | 4  | 637 | 24 | 31 | 3 | 331 | 8  | 1,037 | 39 |
| 108,921 | 37 | 4  | 626 | 24 | 31 | 3 | 327 | 8  | 1,021 | 39 |
| 108,922 | 36 | 4  | 617 | 24 | 31 | 3 | 326 | 8  | 1,010 | 39 |
| 108,923 | 37 | 4  | 622 | 24 | 30 | 3 | 338 | 8  | 1,027 | 39 |
| 108,924 | 37 | 4  | 621 | 23 | 30 | 3 | 339 | 8  | 1,027 | 38 |
| 108,925 | 37 | 4  | 621 | 23 | 30 | 3 | 336 | 8  | 1,024 | 38 |

|         |    |   |     |    |    |   |     |    |       |    |
|---------|----|---|-----|----|----|---|-----|----|-------|----|
| 108,926 | 37 | 4 | 622 | 23 | 30 | 3 | 342 | 9  | 1,031 | 39 |
| 108,927 | 43 | 3 | 653 | 23 | 31 | 3 | 373 | 9  | 1,100 | 38 |
| 108,928 | 43 | 3 | 652 | 23 | 31 | 3 | 371 | 9  | 1,097 | 38 |
| 108,929 | 43 | 3 | 652 | 20 | 29 | 3 | 370 | 9  | 1,094 | 35 |
| 108,930 | 43 | 3 | 655 | 21 | 29 | 3 | 373 | 9  | 1,100 | 36 |
| 108,931 | 42 | 3 | 654 | 21 | 29 | 3 | 373 | 9  | 1,098 | 36 |
| 108,932 | 42 | 3 | 654 | 18 | 29 | 3 | 373 | 8  | 1,098 | 32 |
| 108,933 | 47 | 3 | 702 | 17 | 29 | 3 | 399 | 8  | 1,177 | 31 |
| 108,934 | 47 | 3 | 710 | 17 | 30 | 3 | 411 | 6  | 1,198 | 29 |
| 108,935 | 47 | 2 | 711 | 13 | 30 | 3 | 412 | 6  | 1,200 | 24 |
| 108,936 | 48 | 2 | 731 | 12 | 32 | 3 | 424 | 5  | 1,235 | 22 |
| 108,937 | 49 | 2 | 731 | 12 | 32 | 4 | 424 | 5  | 1,236 | 23 |
| 108,938 | 49 | 2 | 747 | 12 | 32 | 4 | 432 | 6  | 1,260 | 24 |
| 108,939 | 47 | 2 | 751 | 13 | 33 | 4 | 438 | 6  | 1,269 | 25 |
| 108,940 | 47 | 2 | 753 | 13 | 33 | 4 | 440 | 6  | 1,273 | 25 |
| 108,941 | 49 | 2 | 763 | 13 | 35 | 4 | 449 | 7  | 1,296 | 26 |
| 108,942 | 48 | 2 | 761 | 13 | 35 | 4 | 449 | 6  | 1,293 | 25 |
| 108,943 | 49 | 2 | 765 | 13 | 35 | 4 | 453 | 7  | 1,302 | 26 |
| 108,944 | 49 | 1 | 765 | 13 | 35 | 4 | 454 | 7  | 1,303 | 25 |
| 108,945 | 48 | 1 | 768 | 13 | 35 | 4 | 455 | 7  | 1,306 | 25 |
| 108,946 | 48 | 1 | 769 | 13 | 35 | 4 | 456 | 7  | 1,308 | 25 |
| 108,947 | 48 | 1 | 770 | 13 | 35 | 4 | 455 | 7  | 1,308 | 25 |
| 108,948 | 50 | 2 | 766 | 13 | 35 | 4 | 455 | 7  | 1,306 | 26 |
| 108,949 | 51 | 2 | 766 | 13 | 35 | 3 | 456 | 6  | 1,308 | 24 |
| 108,950 | 51 | 2 | 767 | 12 | 35 | 3 | 457 | 6  | 1,310 | 23 |
| 108,951 | 51 | 3 | 767 | 12 | 35 | 3 | 458 | 6  | 1,311 | 24 |
| 108,952 | 51 | 4 | 767 | 12 | 35 | 3 | 458 | 6  | 1,311 | 25 |
| 108,953 | 52 | 4 | 776 | 12 | 35 | 3 | 460 | 6  | 1,323 | 25 |
| 108,954 | 51 | 4 | 776 | 11 | 35 | 3 | 460 | 6  | 1,322 | 24 |
| 108,955 | 51 | 4 | 772 | 11 | 35 | 3 | 460 | 6  | 1,318 | 24 |
| 108,956 | 49 | 4 | 777 | 12 | 36 | 3 | 461 | 7  | 1,323 | 26 |
| 108,957 | 48 | 4 | 751 | 13 | 36 | 2 | 458 | 7  | 1,293 | 26 |
| 108,958 | 48 | 4 | 752 | 13 | 36 | 2 | 462 | 8  | 1,298 | 27 |
| 108,959 | 44 | 4 | 671 | 15 | 36 | 2 | 416 | 9  | 1,167 | 30 |
| 108,960 | 40 | 5 | 641 | 19 | 35 | 2 | 398 | 12 | 1,114 | 38 |
| 108,961 | 39 | 5 | 591 | 19 | 34 | 2 | 392 | 13 | 1,056 | 39 |
| 108,962 | 28 | 6 | 317 | 21 | 14 | 2 | 206 | 14 | 565   | 43 |
| 108,963 | 28 | 6 | 296 | 21 | 13 | 2 | 201 | 14 | 538   | 43 |
| 108,964 | 32 | 6 | 293 | 19 | 14 | 2 | 193 | 14 | 532   | 41 |
| 108,965 | 32 | 6 | 281 | 20 | 13 | 2 | 190 | 16 | 516   | 44 |
| 108,966 | 32 | 8 | 276 | 18 | 13 | 2 | 189 | 15 | 510   | 43 |

|         |     |   |       |    |     |   |       |    |       |    |
|---------|-----|---|-------|----|-----|---|-------|----|-------|----|
| 108,967 | 36  | 7 | 324   | 17 | 16  | 2 | 213   | 15 | 589   | 41 |
| 108,968 | 52  | 7 | 416   | 17 | 18  | 1 | 317   | 15 | 803   | 40 |
| 108,969 | 107 | 7 | 1,054 | 15 | 65  | 1 | 813   | 15 | 2,039 | 38 |
| 108,970 | 113 | 7 | 1,112 | 15 | 73  | 1 | 938   | 15 | 2,236 | 38 |
| 108,971 | 113 | 7 | 1,111 | 15 | 73  | 1 | 937   | 15 | 2,234 | 38 |
| 108,972 | 129 | 7 | 1,603 | 16 | 94  | 1 | 1,181 | 15 | 3,007 | 39 |
| 108,973 | 153 | 7 | 2,155 | 16 | 123 | 1 | 1,558 | 15 | 3,989 | 39 |
| 108,974 | 153 | 7 | 2,202 | 16 | 123 | 1 | 1,587 | 15 | 4,065 | 39 |
| 108,975 | 153 | 7 | 2,213 | 17 | 123 | 1 | 1,591 | 14 | 4,080 | 39 |
| 108,976 | 153 | 7 | 2,212 | 17 | 123 | 1 | 1,585 | 14 | 4,073 | 39 |
| 108,977 | 146 | 7 | 2,183 | 17 | 122 | 1 | 1,553 | 14 | 4,004 | 39 |
| 108,978 | 146 | 7 | 2,182 | 17 | 122 | 1 | 1,557 | 14 | 4,007 | 39 |
| 108,979 | 146 | 7 | 2,181 | 17 | 122 | 1 | 1,556 | 14 | 4,005 | 39 |
| 108,980 | 145 | 7 | 2,182 | 18 | 122 | 1 | 1,563 | 14 | 4,012 | 40 |
| 108,981 | 145 | 7 | 2,185 | 18 | 122 | 1 | 1,563 | 14 | 4,015 | 40 |
| 108,982 | 145 | 7 | 2,169 | 19 | 122 | 1 | 1,565 | 15 | 4,001 | 42 |
| 108,983 | 140 | 7 | 2,141 | 19 | 122 | 1 | 1,561 | 15 | 3,964 | 42 |
| 108,984 | 140 | 7 | 2,134 | 19 | 121 | 1 | 1,553 | 15 | 3,948 | 42 |
| 108,985 | 142 | 7 | 2,134 | 19 | 121 | 1 | 1,560 | 15 | 3,957 | 42 |
| 108,986 | 142 | 8 | 2,145 | 19 | 121 | 1 | 1,562 | 15 | 3,970 | 43 |
| 108,987 | 141 | 8 | 2,114 | 19 | 117 | 0 | 1,549 | 15 | 3,921 | 42 |
| 108,988 | 141 | 8 | 2,129 | 19 | 119 | 0 | 1,570 | 15 | 3,959 | 42 |
| 108,989 | 141 | 8 | 2,106 | 19 | 118 | 0 | 1,564 | 14 | 3,929 | 41 |
| 108,990 | 145 | 8 | 2,103 | 18 | 117 | 0 | 1,561 | 14 | 3,926 | 40 |
| 108,991 | 150 | 8 | 2,110 | 19 | 120 | 0 | 1,573 | 15 | 3,953 | 42 |
| 108,992 | 148 | 8 | 2,100 | 19 | 118 | 0 | 1,564 | 14 | 3,930 | 41 |
| 108,993 | 149 | 8 | 2,101 | 19 | 118 | 0 | 1,564 | 14 | 3,932 | 41 |
| 108,994 | 156 | 8 | 2,147 | 19 | 122 | 0 | 1,655 | 13 | 4,080 | 40 |
| 108,995 | 160 | 8 | 2,168 | 19 | 124 | 0 | 1,697 | 12 | 4,149 | 39 |
| 108,996 | 161 | 8 | 2,186 | 19 | 125 | 0 | 1,701 | 12 | 4,173 | 39 |
| 108,997 | 161 | 9 | 2,196 | 21 | 125 | 0 | 1,706 | 12 | 4,188 | 42 |
| 108,998 | 162 | 9 | 2,213 | 22 | 126 | 0 | 1,726 | 12 | 4,227 | 43 |
| 108,999 | 160 | 8 | 2,216 | 22 | 125 | 0 | 1,726 | 12 | 4,227 | 42 |
| 109,000 | 159 | 8 | 2,218 | 21 | 125 | 0 | 1,729 | 12 | 4,231 | 41 |
| 109,001 | 159 | 7 | 2,224 | 21 | 126 | 0 | 1,739 | 12 | 4,248 | 40 |
| 109,002 | 159 | 7 | 2,225 | 20 | 125 | 0 | 1,741 | 12 | 4,250 | 39 |
| 109,003 | 158 | 7 | 2,223 | 21 | 125 | 0 | 1,745 | 12 | 4,251 | 40 |
| 109,004 | 161 | 7 | 2,225 | 23 | 125 | 0 | 1,749 | 13 | 4,260 | 43 |
| 109,005 | 161 | 7 | 2,229 | 24 | 125 | 0 | 1,751 | 13 | 4,266 | 44 |
| 109,006 | 160 | 7 | 2,227 | 24 | 124 | 0 | 1,750 | 14 | 4,261 | 45 |
| 109,007 | 163 | 7 | 2,239 | 24 | 124 | 0 | 1,766 | 13 | 4,292 | 44 |

|         |     |    |       |    |     |   |       |    |       |    |
|---------|-----|----|-------|----|-----|---|-------|----|-------|----|
| 109,008 | 163 | 7  | 2,284 | 25 | 127 | 0 | 1,789 | 14 | 4,363 | 46 |
| 109,009 | 162 | 7  | 2,274 | 25 | 127 | 0 | 1,784 | 13 | 4,347 | 45 |
| 109,010 | 184 | 7  | 2,529 | 23 | 141 | 0 | 2,094 | 12 | 4,948 | 42 |
| 109,011 | 188 | 6  | 2,570 | 19 | 145 | 0 | 2,153 | 9  | 5,056 | 34 |
| 109,012 | 189 | 5  | 2,580 | 18 | 147 | 0 | 2,157 | 8  | 5,073 | 31 |
| 109,013 | 189 | 5  | 2,576 | 18 | 146 | 0 | 2,157 | 8  | 5,068 | 31 |
| 109,014 | 189 | 5  | 2,572 | 19 | 146 | 1 | 2,158 | 9  | 5,065 | 34 |
| 109,015 | 186 | 6  | 2,571 | 20 | 147 | 1 | 2,155 | 10 | 5,059 | 37 |
| 109,016 | 182 | 4  | 2,559 | 19 | 145 | 1 | 2,143 | 9  | 5,029 | 33 |
| 109,017 | 183 | 4  | 2,548 | 21 | 146 | 1 | 2,143 | 10 | 5,020 | 36 |
| 109,018 | 173 | 4  | 2,489 | 24 | 147 | 1 | 2,077 | 10 | 4,886 | 39 |
| 109,019 | 151 | 4  | 2,269 | 28 | 136 | 1 | 1,936 | 18 | 4,492 | 51 |
| 109,020 | 119 | 4  | 1,862 | 45 | 100 | 2 | 1,579 | 20 | 3,660 | 71 |
| 109,021 | 118 | 4  | 1,827 | 45 | 93  | 2 | 1,474 | 20 | 3,512 | 71 |
| 109,022 | 121 | 4  | 1,695 | 45 | 89  | 2 | 1,453 | 20 | 3,358 | 71 |
| 109,023 | 110 | 4  | 1,392 | 44 | 76  | 2 | 1,277 | 20 | 2,855 | 70 |
| 109,024 | 85  | 4  | 859   | 44 | 50  | 2 | 892   | 20 | 1,886 | 70 |
| 109,025 | 89  | 4  | 866   | 43 | 53  | 2 | 950   | 21 | 1,958 | 70 |
| 109,026 | 89  | 6  | 855   | 43 | 53  | 2 | 945   | 21 | 1,942 | 72 |
| 109,027 | 103 | 6  | 1,011 | 43 | 66  | 3 | 1,155 | 21 | 2,335 | 73 |
| 109,028 | 103 | 6  | 1,010 | 43 | 66  | 3 | 1,155 | 21 | 2,334 | 73 |
| 109,029 | 107 | 6  | 1,062 | 43 | 69  | 3 | 1,233 | 21 | 2,471 | 73 |
| 109,030 | 109 | 6  | 1,118 | 44 | 70  | 3 | 1,270 | 22 | 2,567 | 75 |
| 109,031 | 109 | 6  | 1,119 | 43 | 70  | 3 | 1,266 | 23 | 2,564 | 75 |
| 109,032 | 109 | 6  | 1,112 | 42 | 70  | 3 | 1,265 | 23 | 2,556 | 74 |
| 109,033 | 121 | 7  | 1,227 | 41 | 77  | 3 | 1,372 | 22 | 2,797 | 73 |
| 109,034 | 134 | 7  | 1,341 | 41 | 87  | 3 | 1,487 | 22 | 3,049 | 73 |
| 109,035 | 136 | 7  | 1,381 | 42 | 89  | 3 | 1,505 | 22 | 3,111 | 74 |
| 109,036 | 161 | 7  | 1,602 | 42 | 105 | 3 | 1,709 | 22 | 3,577 | 74 |
| 109,037 | 163 | 6  | 1,613 | 42 | 106 | 3 | 1,730 | 22 | 3,612 | 73 |
| 109,038 | 163 | 7  | 1,611 | 43 | 106 | 3 | 1,730 | 22 | 3,610 | 75 |
| 109,039 | 230 | 7  | 1,864 | 43 | 111 | 3 | 1,894 | 22 | 4,099 | 75 |
| 109,040 | 248 | 7  | 2,151 | 43 | 135 | 3 | 2,098 | 22 | 4,632 | 75 |
| 109,041 | 244 | 7  | 2,326 | 43 | 139 | 3 | 2,159 | 22 | 4,868 | 75 |
| 109,042 | 343 | 8  | 3,572 | 43 | 236 | 3 | 3,501 | 21 | 7,652 | 75 |
| 109,043 | 412 | 8  | 4,374 | 43 | 300 | 3 | 4,248 | 21 | 9,334 | 75 |
| 109,044 | 403 | 8  | 4,346 | 43 | 297 | 3 | 4,150 | 21 | 9,196 | 75 |
| 109,045 | 417 | 9  | 4,450 | 43 | 308 | 3 | 4,295 | 21 | 9,470 | 76 |
| 109,046 | 421 | 10 | 4,551 | 43 | 316 | 3 | 4,419 | 21 | 9,707 | 77 |
| 109,047 | 422 | 9  | 4,557 | 42 | 320 | 4 | 4,446 | 21 | 9,745 | 76 |
| 109,048 | 423 | 10 | 4,551 | 44 | 320 | 4 | 4,458 | 23 | 9,752 | 81 |

|         |     |    |       |    |     |   |       |    |        |     |
|---------|-----|----|-------|----|-----|---|-------|----|--------|-----|
| 109,049 | 422 | 10 | 4,531 | 43 | 319 | 4 | 4,439 | 23 | 9,711  | 80  |
| 109,050 | 439 | 10 | 4,690 | 44 | 328 | 4 | 4,618 | 23 | 10,075 | 81  |
| 109,051 | 443 | 10 | 4,710 | 44 | 329 | 4 | 4,643 | 23 | 10,125 | 81  |
| 109,052 | 443 | 9  | 4,716 | 44 | 329 | 4 | 4,637 | 23 | 10,125 | 80  |
| 109,053 | 443 | 9  | 4,723 | 43 | 329 | 4 | 4,650 | 24 | 10,145 | 80  |
| 109,054 | 443 | 9  | 4,721 | 43 | 329 | 4 | 4,648 | 24 | 10,141 | 80  |
| 109,055 | 440 | 9  | 4,723 | 41 | 329 | 4 | 4,648 | 23 | 10,140 | 77  |
| 109,056 | 440 | 9  | 4,718 | 40 | 329 | 4 | 4,649 | 24 | 10,136 | 77  |
| 109,057 | 442 | 9  | 4,735 | 47 | 329 | 4 | 4,664 | 26 | 10,170 | 86  |
| 109,058 | 439 | 9  | 4,726 | 44 | 329 | 4 | 4,650 | 25 | 10,144 | 82  |
| 109,059 | 439 | 9  | 4,696 | 47 | 326 | 4 | 4,630 | 25 | 10,091 | 85  |
| 109,060 | 415 | 9  | 4,445 | 48 | 312 | 4 | 4,320 | 27 | 9,492  | 88  |
| 109,061 | 411 | 9  | 4,411 | 49 | 308 | 4 | 4,267 | 27 | 9,397  | 89  |
| 109,062 | 412 | 9  | 4,409 | 50 | 308 | 5 | 4,260 | 26 | 9,389  | 90  |
| 109,063 | 411 | 9  | 4,397 | 51 | 306 | 5 | 4,254 | 26 | 9,368  | 91  |
| 109,064 | 411 | 10 | 4,397 | 53 | 306 | 5 | 4,252 | 29 | 9,366  | 97  |
| 109,065 | 411 | 13 | 4,396 | 54 | 306 | 4 | 4,253 | 28 | 9,366  | 99  |
| 109,066 | 412 | 12 | 4,391 | 55 | 306 | 4 | 4,255 | 27 | 9,364  | 98  |
| 109,067 | 413 | 12 | 4,368 | 55 | 306 | 4 | 4,245 | 25 | 9,332  | 96  |
| 109,068 | 412 | 12 | 4,367 | 55 | 305 | 4 | 4,244 | 27 | 9,328  | 98  |
| 109,069 | 406 | 12 | 4,329 | 52 | 302 | 4 | 4,205 | 27 | 9,242  | 95  |
| 109,070 | 405 | 12 | 4,320 | 32 | 302 | 3 | 4,194 | 17 | 9,221  | 64  |
| 109,071 | 405 | 13 | 4,315 | 34 | 302 | 3 | 4,190 | 18 | 9,212  | 68  |
| 109,072 | 400 | 13 | 4,293 | 34 | 301 | 3 | 4,167 | 18 | 9,161  | 68  |
| 109,073 | 397 | 13 | 4,282 | 34 | 301 | 3 | 4,156 | 19 | 9,136  | 69  |
| 109,074 | 392 | 13 | 4,225 | 34 | 297 | 4 | 4,103 | 19 | 9,017  | 70  |
| 109,075 | 392 | 13 | 4,201 | 34 | 294 | 4 | 4,080 | 19 | 8,967  | 70  |
| 109,076 | 388 | 13 | 4,145 | 39 | 291 | 6 | 3,994 | 34 | 8,818  | 92  |
| 109,077 | 375 | 11 | 4,029 | 43 | 279 | 6 | 3,825 | 34 | 8,508  | 94  |
| 109,078 | 374 | 12 | 3,988 | 63 | 278 | 5 | 3,786 | 36 | 8,426  | 116 |
| 109,079 | 370 | 13 | 3,935 | 66 | 275 | 5 | 3,706 | 36 | 8,286  | 120 |
| 109,080 | 370 | 13 | 3,932 | 70 | 274 | 6 | 3,699 | 37 | 8,275  | 126 |
| 109,081 | 370 | 13 | 3,988 | 71 | 277 | 6 | 3,810 | 39 | 8,445  | 129 |
| 109,082 | 361 | 13 | 3,927 | 71 | 276 | 6 | 3,790 | 39 | 8,354  | 129 |
| 109,083 | 362 | 13 | 3,937 | 71 | 277 | 6 | 3,793 | 39 | 8,369  | 129 |
| 109,084 | 350 | 12 | 3,827 | 71 | 267 | 6 | 3,677 | 40 | 8,121  | 129 |
| 109,085 | 348 | 12 | 3,799 | 71 | 266 | 6 | 3,662 | 40 | 8,075  | 129 |
| 109,086 | 347 | 12 | 3,787 | 71 | 265 | 6 | 3,657 | 40 | 8,056  | 129 |
| 109,087 | 321 | 11 | 3,582 | 71 | 250 | 6 | 3,453 | 40 | 7,606  | 128 |
| 109,088 | 319 | 11 | 3,568 | 72 | 249 | 6 | 3,438 | 40 | 7,574  | 129 |
| 109,089 | 265 | 11 | 3,445 | 72 | 242 | 7 | 3,295 | 40 | 7,247  | 130 |

|         |     |    |       |    |     |   |       |    |        |     |
|---------|-----|----|-------|----|-----|---|-------|----|--------|-----|
| 109,090 | 258 | 11 | 3,427 | 72 | 252 | 7 | 3,354 | 40 | 7,291  | 130 |
| 109,091 | 243 | 11 | 3,156 | 72 | 229 | 7 | 3,155 | 40 | 6,783  | 130 |
| 109,092 | 244 | 11 | 2,979 | 73 | 224 | 7 | 3,088 | 40 | 6,535  | 131 |
| 109,093 | 140 | 10 | 1,733 | 72 | 128 | 7 | 1,729 | 40 | 3,730  | 129 |
| 109,094 | 71  | 10 | 962   | 72 | 65  | 7 | 1,008 | 39 | 2,106  | 128 |
| 109,095 | 69  | 10 | 942   | 72 | 64  | 7 | 996   | 39 | 2,071  | 128 |
| 109,096 | 59  | 9  | 863   | 72 | 55  | 8 | 862   | 40 | 1,839  | 129 |
| 109,097 | 52  | 8  | 759   | 71 | 45  | 7 | 713   | 40 | 1,569  | 126 |
| 109,098 | 51  | 8  | 727   | 71 | 40  | 7 | 682   | 40 | 1,500  | 126 |
| 109,099 | 50  | 6  | 749   | 69 | 44  | 7 | 655   | 38 | 1,498  | 120 |
| 109,100 | 43  | 7  | 707   | 69 | 43  | 7 | 619   | 38 | 1,412  | 121 |
| 109,101 | 47  | 7  | 703   | 70 | 52  | 7 | 558   | 39 | 1,360  | 123 |
| 109,102 | 43  | 7  | 681   | 70 | 51  | 7 | 529   | 39 | 1,304  | 123 |
| 109,103 | 43  | 7  | 668   | 71 | 50  | 7 | 525   | 41 | 1,286  | 126 |
| 109,104 | 43  | 7  | 660   | 71 | 50  | 7 | 511   | 41 | 1,264  | 126 |
| 109,105 | 197 | 7  | 1,752 | 71 | 162 | 7 | 1,129 | 41 | 3,240  | 126 |
| 109,106 | 212 | 7  | 1,888 | 72 | 196 | 7 | 1,331 | 41 | 3,627  | 127 |
| 109,107 | 220 | 8  | 2,066 | 73 | 205 | 7 | 1,405 | 40 | 3,896  | 128 |
| 109,108 | 282 | 8  | 2,710 | 66 | 266 | 7 | 1,779 | 37 | 5,037  | 118 |
| 109,109 | 451 | 8  | 3,750 | 66 | 440 | 7 | 2,825 | 37 | 7,466  | 118 |
| 109,110 | 507 | 8  | 4,520 | 65 | 536 | 7 | 3,501 | 38 | 9,064  | 118 |
| 109,111 | 507 | 9  | 4,516 | 65 | 536 | 7 | 3,501 | 38 | 9,060  | 119 |
| 109,112 | 552 | 10 | 4,889 | 66 | 587 | 7 | 3,909 | 38 | 9,937  | 121 |
| 109,113 | 551 | 10 | 4,897 | 64 | 588 | 6 | 3,915 | 38 | 9,951  | 118 |
| 109,114 | 550 | 10 | 4,896 | 63 | 588 | 6 | 3,913 | 38 | 9,947  | 117 |
| 109,115 | 551 | 6  | 4,896 | 62 | 589 | 7 | 3,914 | 38 | 9,950  | 113 |
| 109,116 | 551 | 6  | 4,896 | 63 | 589 | 7 | 3,914 | 38 | 9,950  | 114 |
| 109,117 | 552 | 6  | 4,898 | 61 | 589 | 7 | 3,921 | 38 | 9,960  | 112 |
| 109,118 | 551 | 6  | 4,897 | 59 | 589 | 7 | 3,919 | 38 | 9,956  | 110 |
| 109,119 | 558 | 6  | 4,913 | 59 | 591 | 7 | 3,933 | 36 | 9,995  | 108 |
| 109,120 | 558 | 7  | 4,916 | 62 | 591 | 7 | 3,935 | 36 | 10,000 | 112 |
| 109,121 | 558 | 7  | 4,915 | 62 | 591 | 7 | 3,935 | 36 | 9,999  | 112 |
| 109,122 | 563 | 6  | 4,917 | 61 | 592 | 7 | 3,940 | 36 | 10,012 | 110 |
| 109,123 | 564 | 6  | 4,918 | 61 | 592 | 7 | 3,940 | 37 | 10,014 | 111 |
| 109,124 | 568 | 6  | 4,942 | 61 | 593 | 6 | 3,961 | 36 | 10,064 | 109 |
| 109,125 | 569 | 7  | 4,957 | 61 | 595 | 6 | 3,977 | 36 | 10,098 | 110 |
| 109,126 | 569 | 7  | 4,956 | 61 | 595 | 7 | 3,976 | 36 | 10,096 | 111 |
| 109,127 | 571 | 7  | 4,993 | 58 | 597 | 5 | 4,009 | 21 | 10,170 | 91  |
| 109,128 | 592 | 7  | 5,076 | 55 | 609 | 5 | 4,119 | 21 | 10,396 | 88  |
| 109,129 | 594 | 7  | 5,088 | 35 | 609 | 6 | 4,139 | 21 | 10,430 | 69  |
| 109,130 | 596 | 7  | 5,098 | 33 | 611 | 6 | 4,148 | 21 | 10,453 | 67  |

|         |     |    |       |    |     |   |       |    |        |     |
|---------|-----|----|-------|----|-----|---|-------|----|--------|-----|
| 109,131 | 597 | 6  | 5,102 | 29 | 611 | 5 | 4,150 | 18 | 10,460 | 58  |
| 109,132 | 596 | 7  | 5,001 | 28 | 609 | 5 | 4,017 | 16 | 10,223 | 56  |
| 109,133 | 594 | 7  | 4,951 | 28 | 603 | 5 | 3,933 | 17 | 10,081 | 57  |
| 109,134 | 593 | 7  | 4,937 | 28 | 602 | 5 | 3,926 | 17 | 10,058 | 57  |
| 109,135 | 595 | 7  | 4,941 | 28 | 602 | 5 | 3,927 | 16 | 10,065 | 56  |
| 109,136 | 607 | 8  | 4,980 | 27 | 605 | 5 | 3,956 | 16 | 10,148 | 56  |
| 109,137 | 617 | 8  | 5,055 | 28 | 605 | 5 | 3,975 | 16 | 10,252 | 57  |
| 109,138 | 706 | 8  | 5,230 | 28 | 612 | 5 | 4,126 | 16 | 10,674 | 57  |
| 109,139 | 717 | 8  | 5,269 | 27 | 613 | 4 | 4,165 | 16 | 10,764 | 55  |
| 109,140 | 718 | 8  | 5,279 | 29 | 613 | 5 | 4,169 | 16 | 10,779 | 58  |
| 109,141 | 784 | 8  | 5,396 | 29 | 617 | 5 | 4,262 | 16 | 11,059 | 58  |
| 109,142 | 782 | 8  | 5,415 | 29 | 618 | 5 | 4,283 | 16 | 11,098 | 58  |
| 109,143 | 890 | 8  | 5,755 | 28 | 653 | 5 | 4,681 | 16 | 11,979 | 57  |
| 109,144 | 906 | 8  | 5,953 | 28 | 654 | 5 | 4,731 | 16 | 12,244 | 57  |
| 109,145 | 915 | 8  | 5,978 | 28 | 666 | 5 | 4,762 | 16 | 12,321 | 57  |
| 109,146 | 953 | 8  | 6,356 | 27 | 687 | 4 | 5,032 | 15 | 13,028 | 54  |
| 109,147 | 952 | 8  | 6,343 | 27 | 686 | 4 | 5,025 | 15 | 13,006 | 54  |
| 109,148 | 959 | 8  | 6,372 | 30 | 694 | 4 | 5,061 | 15 | 13,086 | 57  |
| 109,149 | 959 | 8  | 6,367 | 30 | 693 | 4 | 5,062 | 15 | 13,081 | 57  |
| 109,150 | 959 | 8  | 6,334 | 30 | 688 | 4 | 5,057 | 15 | 13,038 | 57  |
| 109,151 | 959 | 8  | 6,342 | 31 | 691 | 4 | 5,061 | 15 | 13,053 | 58  |
| 109,152 | 946 | 9  | 6,250 | 33 | 676 | 4 | 5,018 | 14 | 12,890 | 60  |
| 109,153 | 890 | 9  | 6,008 | 33 | 658 | 5 | 4,902 | 14 | 12,458 | 61  |
| 109,154 | 856 | 9  | 5,761 | 38 | 630 | 6 | 4,763 | 14 | 12,010 | 67  |
| 109,155 | 856 | 9  | 5,762 | 47 | 629 | 6 | 4,774 | 20 | 12,021 | 82  |
| 109,156 | 794 | 10 | 5,192 | 60 | 564 | 6 | 4,422 | 23 | 10,972 | 99  |
| 109,157 | 779 | 10 | 5,090 | 67 | 532 | 6 | 4,250 | 25 | 10,651 | 108 |
| 109,158 | 772 | 10 | 4,909 | 80 | 523 | 6 | 4,172 | 32 | 10,376 | 128 |
| 109,159 | 708 | 11 | 4,258 | 83 | 462 | 6 | 3,789 | 34 | 9,217  | 134 |
| 109,160 | 550 | 12 | 3,335 | 82 | 292 | 6 | 2,803 | 32 | 6,980  | 132 |
| 109,161 | 495 | 10 | 2,583 | 80 | 198 | 7 | 2,147 | 32 | 5,423  | 129 |
| 109,162 | 487 | 10 | 2,439 | 80 | 177 | 7 | 2,022 | 32 | 5,125  | 129 |
| 109,163 | 476 | 10 | 2,454 | 80 | 163 | 7 | 1,947 | 32 | 5,040  | 129 |
| 109,164 | 476 | 10 | 2,447 | 80 | 161 | 7 | 1,941 | 32 | 5,025  | 129 |
| 109,165 | 476 | 10 | 2,440 | 80 | 161 | 7 | 1,934 | 32 | 5,011  | 129 |
| 109,166 | 490 | 11 | 2,569 | 77 | 180 | 6 | 2,073 | 29 | 5,312  | 123 |
| 109,167 | 493 | 11 | 2,600 | 76 | 182 | 6 | 2,095 | 29 | 5,370  | 122 |
| 109,168 | 500 | 11 | 2,759 | 76 | 195 | 6 | 2,189 | 29 | 5,643  | 122 |
| 109,169 | 500 | 12 | 2,760 | 76 | 195 | 6 | 2,189 | 29 | 5,644  | 123 |
| 109,170 | 509 | 11 | 2,877 | 72 | 218 | 6 | 2,293 | 28 | 5,897  | 117 |
| 109,171 | 510 | 11 | 2,896 | 72 | 220 | 6 | 2,316 | 28 | 5,942  | 117 |

|         |     |    |       |    |     |   |       |    |       |     |
|---------|-----|----|-------|----|-----|---|-------|----|-------|-----|
| 109,172 | 505 | 11 | 2,893 | 72 | 219 | 6 | 2,312 | 29 | 5,929 | 118 |
| 109,173 | 508 | 11 | 2,907 | 73 | 219 | 6 | 2,325 | 29 | 5,959 | 119 |
| 109,174 | 508 | 11 | 2,924 | 73 | 219 | 6 | 2,332 | 28 | 5,983 | 118 |
| 109,175 | 510 | 11 | 2,982 | 74 | 222 | 6 | 2,342 | 28 | 6,056 | 119 |
| 109,176 | 511 | 11 | 3,086 | 72 | 226 | 5 | 2,403 | 27 | 6,226 | 115 |
| 109,177 | 514 | 11 | 3,307 | 73 | 228 | 5 | 2,454 | 27 | 6,503 | 116 |
| 109,178 | 493 | 11 | 3,317 | 73 | 219 | 6 | 2,420 | 27 | 6,449 | 117 |
| 109,179 | 492 | 10 | 3,314 | 71 | 219 | 5 | 2,414 | 25 | 6,439 | 111 |
| 109,180 | 493 | 10 | 3,313 | 72 | 219 | 5 | 2,415 | 25 | 6,440 | 112 |
| 109,181 | 491 | 10 | 3,303 | 72 | 217 | 5 | 2,406 | 25 | 6,417 | 112 |
| 109,182 | 490 | 9  | 3,295 | 73 | 217 | 5 | 2,403 | 25 | 6,405 | 112 |
| 109,183 | 489 | 9  | 3,291 | 73 | 216 | 5 | 2,396 | 25 | 6,392 | 112 |
| 109,184 | 488 | 10 | 3,297 | 74 | 217 | 5 | 2,407 | 24 | 6,409 | 113 |
| 109,185 | 487 | 9  | 3,304 | 73 | 218 | 5 | 2,414 | 24 | 6,423 | 111 |
| 109,186 | 490 | 9  | 3,315 | 73 | 219 | 5 | 2,422 | 24 | 6,446 | 111 |
| 109,187 | 480 | 9  | 3,294 | 73 | 216 | 5 | 2,405 | 24 | 6,395 | 111 |
| 109,188 | 473 | 9  | 3,240 | 74 | 218 | 5 | 2,419 | 25 | 6,350 | 113 |
| 109,189 | 384 | 9  | 3,054 | 75 | 210 | 5 | 2,274 | 25 | 5,922 | 114 |
| 109,190 | 385 | 9  | 3,084 | 76 | 214 | 4 | 2,353 | 25 | 6,036 | 114 |
| 109,191 | 385 | 9  | 3,072 | 76 | 214 | 4 | 2,349 | 25 | 6,020 | 114 |
| 109,192 | 314 | 9  | 2,838 | 77 | 200 | 4 | 2,170 | 25 | 5,522 | 115 |
| 109,193 | 315 | 9  | 2,831 | 77 | 198 | 4 | 2,158 | 25 | 5,502 | 115 |
| 109,194 | 205 | 9  | 2,495 | 77 | 163 | 4 | 1,762 | 25 | 4,625 | 115 |
| 109,195 | 197 | 9  | 2,366 | 76 | 161 | 4 | 1,764 | 27 | 4,488 | 116 |
| 109,196 | 191 | 9  | 2,339 | 76 | 149 | 4 | 1,735 | 27 | 4,414 | 116 |
| 109,197 | 148 | 9  | 1,948 | 76 | 126 | 4 | 1,466 | 27 | 3,688 | 116 |
| 109,198 | 148 | 9  | 1,945 | 76 | 125 | 4 | 1,461 | 27 | 3,679 | 116 |
| 109,199 | 142 | 9  | 1,911 | 73 | 118 | 4 | 1,434 | 27 | 3,605 | 113 |
| 109,200 | 142 | 9  | 1,903 | 74 | 118 | 4 | 1,434 | 27 | 3,597 | 114 |
| 109,201 | 142 | 9  | 1,908 | 74 | 115 | 4 | 1,424 | 27 | 3,589 | 114 |
| 109,202 | 142 | 9  | 1,903 | 74 | 115 | 4 | 1,425 | 29 | 3,585 | 116 |
| 109,203 | 142 | 8  | 1,903 | 70 | 115 | 4 | 1,425 | 29 | 3,585 | 111 |
| 109,204 | 147 | 8  | 1,925 | 70 | 115 | 3 | 1,441 | 29 | 3,628 | 110 |
| 109,205 | 147 | 8  | 1,933 | 64 | 115 | 2 | 1,444 | 27 | 3,639 | 101 |
| 109,206 | 145 | 8  | 1,906 | 57 | 115 | 2 | 1,424 | 21 | 3,590 | 88  |
| 109,207 | 145 | 7  | 1,898 | 44 | 114 | 2 | 1,419 | 18 | 3,576 | 71  |
| 109,208 | 145 | 6  | 1,864 | 22 | 114 | 2 | 1,389 | 9  | 3,512 | 39  |
| 109,209 | 144 | 5  | 1,859 | 19 | 114 | 2 | 1,389 | 7  | 3,506 | 33  |
| 109,210 | 144 | 5  | 1,851 | 20 | 114 | 2 | 1,387 | 7  | 3,496 | 34  |
| 109,211 | 133 | 4  | 1,732 | 18 | 110 | 2 | 1,329 | 6  | 3,304 | 30  |
| 109,212 | 132 | 4  | 1,708 | 18 | 108 | 1 | 1,311 | 6  | 3,259 | 29  |



|         |     |    |       |    |     |   |       |    |       |     |
|---------|-----|----|-------|----|-----|---|-------|----|-------|-----|
| 109,213 | 128 | 5  | 1,694 | 18 | 108 | 1 | 1,306 | 6  | 3,236 | 30  |
| 109,214 | 106 | 5  | 1,473 | 19 | 92  | 1 | 1,105 | 6  | 2,776 | 31  |
| 109,215 | 106 | 6  | 1,459 | 22 | 92  | 1 | 1,102 | 6  | 2,759 | 35  |
| 109,216 | 91  | 8  | 1,359 | 32 | 74  | 1 | 969   | 7  | 2,493 | 48  |
| 109,217 | 89  | 7  | 1,322 | 34 | 72  | 1 | 933   | 7  | 2,416 | 49  |
| 109,218 | 89  | 7  | 1,301 | 35 | 69  | 1 | 914   | 7  | 2,373 | 50  |
| 109,219 | 82  | 7  | 1,181 | 35 | 58  | 1 | 832   | 7  | 2,153 | 50  |
| 109,220 | 70  | 6  | 1,097 | 35 | 42  | 1 | 748   | 7  | 1,957 | 49  |
| 109,221 | 68  | 6  | 1,074 | 35 | 37  | 1 | 723   | 7  | 1,902 | 49  |
| 109,222 | 80  | 6  | 1,147 | 39 | 40  | 2 | 787   | 10 | 2,054 | 57  |
| 109,223 | 78  | 7  | 1,151 | 45 | 40  | 2 | 789   | 13 | 2,058 | 67  |
| 109,224 | 80  | 9  | 1,159 | 51 | 42  | 2 | 809   | 19 | 2,090 | 81  |
| 109,225 | 79  | 12 | 1,141 | 69 | 42  | 3 | 802   | 25 | 2,064 | 109 |
| 109,226 | 86  | 11 | 1,113 | 72 | 53  | 4 | 892   | 25 | 2,144 | 112 |
| 109,227 | 90  | 11 | 1,028 | 71 | 51  | 4 | 830   | 25 | 1,999 | 111 |
| 109,228 | 93  | 11 | 809   | 70 | 49  | 4 | 780   | 24 | 1,731 | 109 |
| 109,229 | 109 | 12 | 916   | 70 | 60  | 3 | 845   | 24 | 1,930 | 109 |
| 109,230 | 109 | 12 | 912   | 70 | 60  | 3 | 839   | 24 | 1,920 | 109 |
| 109,231 | 111 | 13 | 971   | 69 | 65  | 3 | 880   | 24 | 2,027 | 109 |
| 109,232 | 148 | 13 | 1,449 | 70 | 129 | 3 | 1,473 | 24 | 3,199 | 110 |
| 109,233 | 148 | 13 | 1,446 | 69 | 129 | 3 | 1,471 | 24 | 3,194 | 109 |
| 109,234 | 151 | 13 | 1,504 | 70 | 134 | 3 | 1,547 | 24 | 3,336 | 110 |
| 109,235 | 152 | 12 | 1,526 | 70 | 136 | 3 | 1,570 | 24 | 3,384 | 109 |
| 109,236 | 150 | 12 | 1,510 | 70 | 135 | 3 | 1,561 | 24 | 3,356 | 109 |
| 109,237 | 152 | 12 | 1,746 | 70 | 139 | 3 | 1,662 | 24 | 3,699 | 109 |
| 109,238 | 152 | 12 | 1,775 | 69 | 144 | 3 | 1,684 | 24 | 3,755 | 108 |
| 109,239 | 150 | 12 | 1,774 | 65 | 147 | 3 | 1,666 | 25 | 3,737 | 105 |
| 109,240 | 152 | 12 | 1,770 | 65 | 147 | 3 | 1,663 | 25 | 3,732 | 105 |
| 109,241 | 147 | 12 | 1,734 | 65 | 147 | 3 | 1,593 | 25 | 3,621 | 105 |
| 109,242 | 147 | 12 | 1,749 | 65 | 148 | 3 | 1,597 | 26 | 3,641 | 106 |
| 109,243 | 171 | 12 | 2,024 | 64 | 182 | 3 | 2,048 | 26 | 4,425 | 105 |
| 109,244 | 183 | 12 | 2,198 | 64 | 193 | 3 | 2,139 | 26 | 4,713 | 105 |
| 109,245 | 197 | 13 | 2,342 | 64 | 219 | 3 | 2,435 | 26 | 5,193 | 106 |
| 109,246 | 188 | 13 | 2,273 | 64 | 217 | 3 | 2,387 | 24 | 5,065 | 104 |
| 109,247 | 186 | 13 | 2,245 | 64 | 218 | 3 | 2,370 | 24 | 5,019 | 104 |
| 109,248 | 186 | 13 | 2,241 | 65 | 218 | 3 | 2,362 | 24 | 5,007 | 105 |
| 109,249 | 190 | 13 | 2,261 | 65 | 220 | 4 | 2,376 | 24 | 5,047 | 106 |
| 109,250 | 189 | 14 | 2,261 | 65 | 220 | 4 | 2,374 | 24 | 5,044 | 107 |
| 109,251 | 189 | 15 | 2,262 | 65 | 220 | 4 | 2,381 | 28 | 5,052 | 112 |
| 109,252 | 185 | 15 | 2,254 | 65 | 220 | 4 | 2,378 | 28 | 5,037 | 112 |
| 109,253 | 187 | 16 | 2,284 | 65 | 225 | 4 | 2,425 | 26 | 5,121 | 111 |

|         |     |    |       |    |     |   |       |    |       |     |
|---------|-----|----|-------|----|-----|---|-------|----|-------|-----|
| 109,254 | 189 | 16 | 2,296 | 66 | 227 | 4 | 2,450 | 26 | 5,162 | 112 |
| 109,255 | 189 | 16 | 2,292 | 66 | 227 | 4 | 2,448 | 26 | 5,156 | 112 |
| 109,256 | 189 | 16 | 2,291 | 64 | 227 | 4 | 2,463 | 26 | 5,170 | 110 |
| 109,257 | 190 | 16 | 2,295 | 64 | 227 | 5 | 2,463 | 27 | 5,175 | 112 |
| 109,258 | 190 | 16 | 2,293 | 64 | 227 | 5 | 2,462 | 27 | 5,172 | 112 |
| 109,259 | 191 | 16 | 2,297 | 66 | 227 | 5 | 2,467 | 27 | 5,182 | 114 |
| 109,260 | 191 | 16 | 2,297 | 67 | 227 | 5 | 2,469 | 28 | 5,184 | 116 |
| 109,261 | 191 | 16 | 2,308 | 66 | 227 | 5 | 2,471 | 28 | 5,197 | 115 |
| 109,262 | 191 | 16 | 2,307 | 66 | 227 | 5 | 2,466 | 29 | 5,191 | 116 |
| 109,263 | 191 | 16 | 2,318 | 66 | 229 | 5 | 2,483 | 29 | 5,221 | 116 |
| 109,264 | 191 | 15 | 2,312 | 66 | 229 | 5 | 2,477 | 29 | 5,209 | 115 |
| 109,265 | 193 | 15 | 2,343 | 65 | 230 | 5 | 2,482 | 29 | 5,248 | 114 |
| 109,266 | 194 | 15 | 2,428 | 62 | 232 | 5 | 2,511 | 29 | 5,365 | 111 |
| 109,267 | 209 | 13 | 2,621 | 53 | 248 | 5 | 2,696 | 28 | 5,774 | 99  |
| 109,268 | 217 | 13 | 2,770 | 51 | 263 | 5 | 2,919 | 29 | 6,169 | 98  |
| 109,269 | 216 | 13 | 2,788 | 50 | 266 | 5 | 2,944 | 31 | 6,214 | 99  |
| 109,270 | 216 | 13 | 2,809 | 50 | 267 | 5 | 2,959 | 31 | 6,251 | 99  |
| 109,271 | 215 | 12 | 2,815 | 40 | 267 | 5 | 2,954 | 24 | 6,251 | 81  |
| 109,272 | 214 | 13 | 2,795 | 41 | 266 | 5 | 2,952 | 26 | 6,227 | 85  |
| 109,273 | 201 | 8  | 2,723 | 15 | 261 | 4 | 2,884 | 14 | 6,069 | 41  |
| 109,274 | 201 | 9  | 2,715 | 15 | 261 | 4 | 2,882 | 14 | 6,059 | 42  |
| 109,275 | 206 | 9  | 2,732 | 15 | 260 | 5 | 2,877 | 14 | 6,075 | 43  |
| 109,276 | 205 | 9  | 2,734 | 18 | 261 | 5 | 2,876 | 15 | 6,076 | 47  |
| 109,277 | 196 | 9  | 2,686 | 15 | 246 | 4 | 2,769 | 17 | 5,897 | 45  |
| 109,278 | 194 | 9  | 2,686 | 16 | 244 | 4 | 2,777 | 18 | 5,901 | 47  |
| 109,279 | 187 | 9  | 2,652 | 16 | 242 | 4 | 2,739 | 18 | 5,820 | 47  |
| 109,280 | 178 | 7  | 2,503 | 16 | 232 | 6 | 2,641 | 19 | 5,554 | 48  |
| 109,281 | 176 | 7  | 2,466 | 16 | 227 | 6 | 2,611 | 19 | 5,480 | 48  |
| 109,282 | 145 | 8  | 2,244 | 16 | 177 | 6 | 2,171 | 19 | 4,737 | 49  |
| 109,283 | 140 | 10 | 2,036 | 24 | 165 | 6 | 2,057 | 24 | 4,398 | 64  |
| 109,284 | 137 | 10 | 1,975 | 24 | 159 | 6 | 1,980 | 24 | 4,251 | 64  |
| 109,285 | 136 | 10 | 1,967 | 25 | 160 | 6 | 1,981 | 26 | 4,244 | 67  |
| 109,286 | 136 | 10 | 1,950 | 24 | 158 | 6 | 1,958 | 23 | 4,202 | 63  |
| 109,287 | 133 | 10 | 1,827 | 24 | 156 | 6 | 1,919 | 24 | 4,035 | 64  |
| 109,288 | 130 | 10 | 1,696 | 25 | 153 | 6 | 1,844 | 24 | 3,823 | 65  |
| 109,289 | 128 | 10 | 1,657 | 27 | 148 | 6 | 1,816 | 25 | 3,749 | 68  |
| 109,290 | 128 | 10 | 1,659 | 27 | 145 | 6 | 1,812 | 24 | 3,744 | 67  |
| 109,291 | 127 | 10 | 1,662 | 27 | 145 | 6 | 1,809 | 24 | 3,743 | 67  |
| 109,292 | 120 | 10 | 1,618 | 27 | 140 | 6 | 1,755 | 23 | 3,633 | 66  |
| 109,293 | 121 | 10 | 1,605 | 27 | 139 | 6 | 1,753 | 23 | 3,618 | 66  |
| 109,294 | 94  | 10 | 1,322 | 27 | 104 | 6 | 1,282 | 23 | 2,802 | 66  |

|         |     |    |       |    |     |   |       |    |       |    |
|---------|-----|----|-------|----|-----|---|-------|----|-------|----|
| 109,295 | 83  | 10 | 1,121 | 27 | 93  | 6 | 1,175 | 23 | 2,472 | 66 |
| 109,296 | 69  | 9  | 984   | 27 | 67  | 6 | 875   | 23 | 1,995 | 65 |
| 109,297 | 69  | 9  | 972   | 27 | 67  | 6 | 863   | 22 | 1,971 | 64 |
| 109,298 | 69  | 9  | 976   | 26 | 65  | 6 | 864   | 22 | 1,974 | 63 |
| 109,299 | 66  | 9  | 960   | 27 | 64  | 6 | 850   | 22 | 1,940 | 64 |
| 109,300 | 66  | 9  | 964   | 27 | 64  | 5 | 853   | 22 | 1,947 | 63 |
| 109,301 | 66  | 8  | 964   | 28 | 64  | 5 | 852   | 22 | 1,946 | 63 |
| 109,302 | 67  | 7  | 965   | 28 | 65  | 5 | 856   | 21 | 1,953 | 61 |
| 109,303 | 67  | 7  | 980   | 28 | 63  | 5 | 840   | 21 | 1,950 | 61 |
| 109,304 | 68  | 6  | 986   | 28 | 62  | 5 | 869   | 21 | 1,985 | 60 |
| 109,305 | 65  | 6  | 963   | 27 | 60  | 5 | 838   | 21 | 1,926 | 59 |
| 109,306 | 72  | 6  | 1,122 | 27 | 64  | 5 | 966   | 21 | 2,224 | 59 |
| 109,307 | 99  | 6  | 1,365 | 27 | 71  | 5 | 1,146 | 22 | 2,681 | 60 |
| 109,308 | 102 | 7  | 1,470 | 24 | 92  | 5 | 1,290 | 20 | 2,954 | 56 |
| 109,309 | 106 | 7  | 1,503 | 24 | 95  | 5 | 1,318 | 20 | 3,022 | 56 |
| 109,310 | 111 | 7  | 1,559 | 24 | 99  | 5 | 1,370 | 20 | 3,139 | 56 |
| 109,311 | 125 | 7  | 1,686 | 24 | 115 | 6 | 1,525 | 20 | 3,451 | 57 |
| 109,312 | 129 | 8  | 1,719 | 24 | 119 | 6 | 1,563 | 20 | 3,530 | 58 |
| 109,313 | 130 | 8  | 1,740 | 24 | 119 | 6 | 1,600 | 20 | 3,589 | 58 |
| 109,314 | 129 | 8  | 1,735 | 24 | 117 | 6 | 1,589 | 20 | 3,570 | 58 |
| 109,315 | 126 | 8  | 1,697 | 24 | 116 | 6 | 1,584 | 20 | 3,523 | 58 |
| 109,316 | 128 | 8  | 1,694 | 24 | 117 | 6 | 1,588 | 20 | 3,527 | 58 |
| 109,317 | 127 | 7  | 1,607 | 24 | 114 | 7 | 1,559 | 20 | 3,407 | 58 |
| 109,318 | 113 | 7  | 1,409 | 23 | 98  | 7 | 1,366 | 19 | 2,986 | 56 |
| 109,319 | 107 | 7  | 1,253 | 23 | 82  | 7 | 1,142 | 16 | 2,584 | 53 |
| 109,320 | 109 | 7  | 1,232 | 23 | 80  | 7 | 1,120 | 16 | 2,541 | 53 |
| 109,321 | 109 | 7  | 1,204 | 23 | 79  | 7 | 1,105 | 16 | 2,497 | 53 |
| 109,322 | 113 | 6  | 1,261 | 22 | 81  | 6 | 1,147 | 16 | 2,602 | 50 |
| 109,323 | 113 | 6  | 1,260 | 22 | 81  | 6 | 1,145 | 15 | 2,599 | 49 |
| 109,324 | 148 | 5  | 1,596 | 22 | 110 | 6 | 1,435 | 16 | 3,289 | 49 |
| 109,325 | 161 | 6  | 1,669 | 22 | 111 | 6 | 1,458 | 16 | 3,399 | 50 |
| 109,326 | 157 | 6  | 1,802 | 19 | 118 | 6 | 1,572 | 13 | 3,649 | 44 |
| 109,327 | 158 | 6  | 1,837 | 19 | 118 | 6 | 1,590 | 13 | 3,703 | 44 |
| 109,328 | 237 | 6  | 3,124 | 19 | 208 | 6 | 2,910 | 13 | 6,479 | 44 |
| 109,329 | 257 | 6  | 3,230 | 18 | 229 | 6 | 3,039 | 12 | 6,755 | 42 |
| 109,330 | 257 | 6  | 3,229 | 18 | 229 | 6 | 3,042 | 12 | 6,757 | 42 |
| 109,331 | 249 | 6  | 3,198 | 19 | 230 | 4 | 3,007 | 11 | 6,684 | 40 |
| 109,332 | 251 | 6  | 3,214 | 19 | 230 | 4 | 3,029 | 11 | 6,724 | 40 |
| 109,333 | 251 | 4  | 3,175 | 10 | 230 | 4 | 2,994 | 6  | 6,650 | 24 |
| 109,334 | 263 | 4  | 3,321 | 10 | 237 | 4 | 3,146 | 6  | 6,967 | 24 |
| 109,335 | 263 | 4  | 3,341 | 8  | 238 | 4 | 3,154 | 4  | 6,996 | 20 |

|         |     |   |       |    |     |   |       |   |        |    |
|---------|-----|---|-------|----|-----|---|-------|---|--------|----|
| 109,336 | 268 | 4 | 3,397 | 8  | 240 | 4 | 3,179 | 4 | 7,084  | 20 |
| 109,337 | 270 | 4 | 3,418 | 8  | 240 | 4 | 3,204 | 6 | 7,132  | 22 |
| 109,338 | 271 | 4 | 3,430 | 8  | 240 | 4 | 3,215 | 5 | 7,156  | 21 |
| 109,339 | 271 | 4 | 3,430 | 7  | 240 | 4 | 3,216 | 5 | 7,157  | 20 |
| 109,340 | 271 | 4 | 3,418 | 5  | 238 | 5 | 3,213 | 4 | 7,140  | 18 |
| 109,341 | 313 | 4 | 3,837 | 5  | 273 | 5 | 3,491 | 4 | 7,914  | 18 |
| 109,342 | 332 | 4 | 3,990 | 5  | 298 | 5 | 3,636 | 4 | 8,256  | 18 |
| 109,343 | 336 | 5 | 4,100 | 5  | 309 | 5 | 3,678 | 4 | 8,423  | 19 |
| 109,344 | 369 | 5 | 4,427 | 5  | 326 | 5 | 3,834 | 4 | 8,956  | 19 |
| 109,345 | 423 | 5 | 4,775 | 5  | 358 | 5 | 4,120 | 4 | 9,676  | 19 |
| 109,346 | 423 | 5 | 4,947 | 5  | 364 | 5 | 4,154 | 4 | 9,888  | 19 |
| 109,347 | 427 | 5 | 5,056 | 5  | 373 | 5 | 4,216 | 4 | 10,072 | 19 |
| 109,348 | 427 | 5 | 5,047 | 5  | 373 | 5 | 4,214 | 4 | 10,061 | 19 |
| 109,349 | 427 | 5 | 5,101 | 5  | 373 | 5 | 4,219 | 4 | 10,120 | 19 |
| 109,350 | 449 | 5 | 5,632 | 4  | 386 | 5 | 4,361 | 4 | 10,828 | 18 |
| 109,351 | 451 | 5 | 5,821 | 4  | 397 | 5 | 4,435 | 4 | 11,104 | 18 |
| 109,352 | 465 | 6 | 6,384 | 3  | 407 | 5 | 4,573 | 5 | 11,829 | 19 |
| 109,353 | 464 | 6 | 6,403 | 2  | 407 | 5 | 4,591 | 5 | 11,865 | 18 |
| 109,354 | 465 | 6 | 6,378 | 4  | 407 | 5 | 4,588 | 5 | 11,838 | 20 |
| 109,355 | 463 | 7 | 6,359 | 4  | 405 | 5 | 4,544 | 5 | 11,771 | 21 |
| 109,356 | 462 | 7 | 6,327 | 5  | 405 | 5 | 4,528 | 6 | 11,722 | 23 |
| 109,357 | 457 | 7 | 6,202 | 5  | 403 | 5 | 4,416 | 6 | 11,478 | 23 |
| 109,358 | 430 | 7 | 5,964 | 5  | 396 | 6 | 4,221 | 5 | 11,011 | 23 |
| 109,359 | 428 | 6 | 5,862 | 5  | 375 | 5 | 4,083 | 5 | 10,748 | 21 |
| 109,360 | 424 | 6 | 5,832 | 5  | 372 | 5 | 4,056 | 5 | 10,684 | 21 |
| 109,361 | 423 | 6 | 5,791 | 5  | 371 | 5 | 4,021 | 5 | 10,606 | 21 |
| 109,362 | 409 | 6 | 5,662 | 6  | 355 | 4 | 3,864 | 5 | 10,290 | 21 |
| 109,363 | 414 | 5 | 5,720 | 7  | 356 | 4 | 3,853 | 5 | 10,343 | 21 |
| 109,364 | 413 | 5 | 5,697 | 8  | 356 | 4 | 3,816 | 5 | 10,282 | 22 |
| 109,365 | 435 | 5 | 6,014 | 9  | 374 | 3 | 3,926 | 4 | 10,749 | 21 |
| 109,366 | 453 | 5 | 6,416 | 9  | 386 | 4 | 4,087 | 4 | 11,342 | 22 |
| 109,367 | 455 | 5 | 6,505 | 10 | 392 | 4 | 4,128 | 4 | 11,480 | 23 |
| 109,368 | 455 | 5 | 6,502 | 10 | 392 | 4 | 4,130 | 4 | 11,479 | 23 |
| 109,369 | 468 | 5 | 6,750 | 11 | 407 | 4 | 4,247 | 4 | 11,872 | 24 |
| 109,370 | 473 | 5 | 6,853 | 11 | 411 | 4 | 4,287 | 4 | 12,024 | 24 |
| 109,371 | 472 | 6 | 6,854 | 11 | 411 | 4 | 4,289 | 4 | 12,026 | 25 |
| 109,372 | 469 | 6 | 6,804 | 11 | 411 | 4 | 4,264 | 4 | 11,948 | 25 |
| 109,373 | 468 | 6 | 6,794 | 12 | 410 | 4 | 4,248 | 4 | 11,920 | 26 |
| 109,374 | 461 | 7 | 6,567 | 12 | 397 | 4 | 4,112 | 4 | 11,537 | 27 |
| 109,375 | 433 | 7 | 6,451 | 12 | 381 | 4 | 3,959 | 4 | 11,224 | 27 |
| 109,376 | 419 | 6 | 6,384 | 12 | 381 | 4 | 3,936 | 4 | 11,120 | 26 |

|         |     |   |       |    |     |   |       |   |        |    |
|---------|-----|---|-------|----|-----|---|-------|---|--------|----|
| 109,377 | 416 | 6 | 6,221 | 11 | 372 | 3 | 3,800 | 4 | 10,809 | 24 |
| 109,378 | 415 | 6 | 6,193 | 11 | 372 | 3 | 3,786 | 4 | 10,766 | 24 |
| 109,379 | 332 | 6 | 4,897 | 11 | 282 | 3 | 2,434 | 4 | 7,945  | 24 |
| 109,380 | 308 | 6 | 4,758 | 11 | 259 | 3 | 2,279 | 4 | 7,604  | 24 |
| 109,381 | 309 | 6 | 4,758 | 11 | 259 | 3 | 2,281 | 4 | 7,607  | 24 |
| 109,382 | 309 | 6 | 4,740 | 10 | 255 | 3 | 2,262 | 4 | 7,566  | 23 |
| 109,383 | 307 | 5 | 4,697 | 10 | 255 | 3 | 2,224 | 4 | 7,483  | 22 |
| 109,384 | 307 | 5 | 4,689 | 10 | 253 | 3 | 2,218 | 4 | 7,467  | 22 |
| 109,385 | 296 | 5 | 4,542 | 10 | 246 | 3 | 2,062 | 4 | 7,146  | 22 |
| 109,386 | 298 | 5 | 4,525 | 10 | 245 | 3 | 2,058 | 4 | 7,126  | 22 |
| 109,387 | 293 | 5 | 4,469 | 10 | 242 | 3 | 2,034 | 4 | 7,038  | 22 |
| 109,388 | 295 | 5 | 4,454 | 10 | 242 | 4 | 2,018 | 2 | 7,009  | 21 |
| 109,389 | 294 | 5 | 4,446 | 10 | 242 | 3 | 2,008 | 2 | 6,990  | 20 |
| 109,390 | 288 | 5 | 4,296 | 10 | 231 | 3 | 1,942 | 2 | 6,757  | 20 |
| 109,391 | 267 | 5 | 4,232 | 10 | 222 | 3 | 1,851 | 2 | 6,572  | 20 |
| 109,392 | 255 | 5 | 4,035 | 10 | 208 | 3 | 1,730 | 2 | 6,228  | 20 |
| 109,393 | 236 | 5 | 3,879 | 10 | 183 | 3 | 1,584 | 2 | 5,882  | 20 |
| 109,394 | 232 | 4 | 3,775 | 10 | 172 | 3 | 1,542 | 2 | 5,721  | 19 |
| 109,395 | 199 | 4 | 3,452 | 10 | 155 | 3 | 1,383 | 2 | 5,189  | 19 |
| 109,396 | 150 | 4 | 3,124 | 10 | 124 | 3 | 1,099 | 2 | 4,497  | 19 |
| 109,397 | 149 | 4 | 2,949 | 10 | 118 | 3 | 1,065 | 2 | 4,281  | 19 |
| 109,398 | 146 | 4 | 2,834 | 10 | 110 | 3 | 1,003 | 2 | 4,093  | 19 |
| 109,399 | 146 | 4 | 2,779 | 10 | 110 | 3 | 997   | 2 | 4,032  | 19 |
| 109,400 | 146 | 4 | 2,706 | 11 | 107 | 3 | 984   | 2 | 3,943  | 20 |
| 109,401 | 126 | 5 | 2,247 | 11 | 97  | 3 | 854   | 2 | 3,324  | 21 |
| 109,402 | 124 | 5 | 2,058 | 11 | 86  | 3 | 776   | 2 | 3,044  | 21 |
| 109,403 | 110 | 4 | 1,497 | 12 | 76  | 3 | 641   | 1 | 2,324  | 20 |
| 109,404 | 110 | 4 | 1,469 | 12 | 75  | 3 | 615   | 1 | 2,269  | 20 |
| 109,405 | 108 | 4 | 1,464 | 10 | 75  | 3 | 615   | 1 | 2,262  | 18 |
| 109,406 | 114 | 3 | 1,498 | 9  | 75  | 3 | 610   | 0 | 2,297  | 15 |
| 109,407 | 114 | 3 | 1,496 | 9  | 75  | 3 | 610   | 0 | 2,295  | 15 |
| 109,408 | 114 | 3 | 1,528 | 9  | 74  | 2 | 624   | 0 | 2,340  | 14 |
| 109,409 | 114 | 3 | 1,525 | 9  | 74  | 2 | 623   | 0 | 2,336  | 14 |
| 109,410 | 120 | 3 | 1,646 | 9  | 82  | 2 | 656   | 1 | 2,504  | 15 |
| 109,411 | 120 | 3 | 1,658 | 9  | 82  | 2 | 657   | 1 | 2,517  | 15 |
| 109,412 | 119 | 3 | 1,680 | 9  | 80  | 2 | 650   | 2 | 2,529  | 16 |
| 109,413 | 114 | 5 | 1,610 | 8  | 76  | 2 | 636   | 3 | 2,436  | 18 |
| 109,414 | 110 | 5 | 1,613 | 8  | 75  | 2 | 629   | 3 | 2,427  | 18 |
| 109,415 | 98  | 5 | 1,419 | 7  | 68  | 2 | 571   | 3 | 2,156  | 17 |
| 109,416 | 88  | 5 | 1,310 | 7  | 57  | 2 | 515   | 3 | 1,970  | 17 |
| 109,417 | 70  | 5 | 909   | 7  | 45  | 1 | 349   | 3 | 1,373  | 16 |

|         |    |   |     |    |    |   |     |    |       |    |
|---------|----|---|-----|----|----|---|-----|----|-------|----|
| 109,418 | 66 | 5 | 820 | 7  | 39 | 1 | 307 | 3  | 1,232 | 16 |
| 109,419 | 52 | 5 | 568 | 7  | 22 | 1 | 185 | 3  | 827   | 16 |
| 109,420 | 48 | 6 | 510 | 6  | 19 | 1 | 167 | 4  | 744   | 17 |
| 109,421 | 44 | 5 | 461 | 6  | 18 | 1 | 143 | 4  | 666   | 16 |
| 109,422 | 43 | 6 | 447 | 6  | 17 | 1 | 137 | 5  | 644   | 18 |
| 109,423 | 43 | 6 | 446 | 10 | 16 | 1 | 135 | 5  | 640   | 22 |
| 109,424 | 43 | 7 | 445 | 10 | 16 | 1 | 134 | 5  | 638   | 23 |
| 109,425 | 43 | 7 | 445 | 10 | 16 | 1 | 133 | 5  | 637   | 23 |
| 109,426 | 43 | 7 | 441 | 12 | 16 | 1 | 130 | 5  | 630   | 25 |
| 109,427 | 43 | 7 | 435 | 12 | 15 | 1 | 129 | 5  | 622   | 25 |
| 109,428 | 43 | 7 | 432 | 16 | 15 | 1 | 129 | 6  | 619   | 30 |
| 109,429 | 43 | 8 | 427 | 16 | 15 | 1 | 125 | 6  | 610   | 31 |
| 109,430 | 45 | 8 | 427 | 19 | 15 | 1 | 125 | 6  | 612   | 34 |
| 109,431 | 49 | 8 | 428 | 19 | 15 | 1 | 125 | 6  | 617   | 34 |
| 109,432 | 48 | 8 | 425 | 19 | 15 | 1 | 124 | 6  | 612   | 34 |
| 109,433 | 48 | 8 | 424 | 20 | 14 | 1 | 124 | 7  | 610   | 36 |
| 109,434 | 47 | 9 | 424 | 20 | 14 | 1 | 124 | 7  | 609   | 37 |
| 109,435 | 48 | 9 | 426 | 20 | 14 | 1 | 127 | 7  | 615   | 37 |
| 109,436 | 46 | 9 | 426 | 20 | 14 | 1 | 127 | 7  | 613   | 37 |
| 109,437 | 45 | 9 | 427 | 21 | 14 | 1 | 126 | 7  | 612   | 38 |
| 109,438 | 45 | 9 | 427 | 22 | 14 | 1 | 125 | 8  | 611   | 40 |
| 109,439 | 42 | 9 | 432 | 23 | 15 | 0 | 123 | 8  | 612   | 40 |
| 109,440 | 42 | 9 | 430 | 23 | 15 | 0 | 124 | 9  | 611   | 41 |
| 109,441 | 42 | 9 | 431 | 23 | 15 | 0 | 124 | 9  | 612   | 41 |
| 109,442 | 42 | 9 | 429 | 23 | 15 | 0 | 123 | 9  | 609   | 41 |
| 109,443 | 40 | 9 | 419 | 23 | 14 | 0 | 120 | 9  | 593   | 41 |
| 109,444 | 40 | 9 | 416 | 23 | 14 | 0 | 120 | 9  | 590   | 41 |
| 109,445 | 40 | 9 | 411 | 23 | 14 | 0 | 119 | 9  | 584   | 41 |
| 109,446 | 39 | 9 | 404 | 23 | 14 | 0 | 119 | 9  | 576   | 41 |
| 109,447 | 34 | 9 | 386 | 24 | 13 | 0 | 112 | 9  | 545   | 42 |
| 109,448 | 34 | 9 | 388 | 24 | 13 | 0 | 113 | 9  | 548   | 42 |
| 109,449 | 33 | 9 | 382 | 24 | 12 | 0 | 112 | 9  | 539   | 42 |
| 109,450 | 33 | 9 | 384 | 24 | 12 | 0 | 109 | 9  | 538   | 42 |
| 109,451 | 32 | 9 | 384 | 24 | 12 | 0 | 109 | 9  | 537   | 42 |
| 109,452 | 30 | 8 | 381 | 24 | 12 | 0 | 109 | 9  | 532   | 41 |
| 109,453 | 30 | 8 | 379 | 24 | 12 | 0 | 107 | 10 | 528   | 42 |
| 109,454 | 30 | 9 | 374 | 23 | 12 | 0 | 106 | 10 | 522   | 42 |
| 109,455 | 30 | 9 | 373 | 23 | 12 | 0 | 106 | 10 | 521   | 42 |
| 109,456 | 30 | 9 | 369 | 24 | 12 | 1 | 102 | 10 | 513   | 44 |
| 109,457 | 24 | 9 | 334 | 24 | 12 | 1 | 99  | 14 | 469   | 48 |
| 109,458 | 24 | 9 | 331 | 24 | 13 | 1 | 96  | 14 | 464   | 48 |

|         |    |    |     |    |    |   |    |    |     |     |
|---------|----|----|-----|----|----|---|----|----|-----|-----|
| 109,459 | 24 | 12 | 305 | 35 | 11 | 2 | 85 | 18 | 425 | 67  |
| 109,460 | 21 | 12 | 224 | 35 | 10 | 2 | 60 | 18 | 315 | 67  |
| 109,461 | 18 | 12 | 182 | 35 | 4  | 2 | 45 | 18 | 249 | 67  |
| 109,462 | 18 | 14 | 168 | 35 | 4  | 2 | 45 | 18 | 235 | 69  |
| 109,463 | 14 | 14 | 128 | 35 | 3  | 2 | 33 | 17 | 178 | 68  |
| 109,464 | 18 | 12 | 129 | 36 | 4  | 2 | 39 | 16 | 190 | 66  |
| 109,465 | 18 | 12 | 99  | 35 | 4  | 2 | 29 | 16 | 150 | 65  |
| 109,466 | 18 | 13 | 83  | 36 | 4  | 2 | 27 | 20 | 132 | 71  |
| 109,467 | 18 | 13 | 79  | 35 | 4  | 2 | 27 | 20 | 128 | 70  |
| 109,468 | 19 | 13 | 96  | 35 | 4  | 2 | 46 | 20 | 165 | 70  |
| 109,469 | 19 | 13 | 95  | 34 | 3  | 2 | 48 | 20 | 165 | 69  |
| 109,470 | 19 | 13 | 95  | 34 | 3  | 2 | 48 | 21 | 165 | 70  |
| 109,471 | 19 | 12 | 96  | 35 | 3  | 2 | 50 | 20 | 168 | 69  |
| 109,472 | 19 | 12 | 96  | 35 | 3  | 2 | 50 | 20 | 168 | 69  |
| 109,473 | 19 | 11 | 97  | 35 | 3  | 2 | 51 | 19 | 170 | 67  |
| 109,474 | 20 | 11 | 100 | 31 | 3  | 2 | 52 | 19 | 175 | 63  |
| 109,475 | 20 | 9  | 102 | 30 | 3  | 2 | 53 | 19 | 178 | 60  |
| 109,476 | 20 | 9  | 102 | 31 | 3  | 2 | 53 | 20 | 178 | 62  |
| 109,477 | 20 | 9  | 118 | 30 | 4  | 2 | 57 | 22 | 199 | 63  |
| 109,478 | 20 | 9  | 118 | 30 | 4  | 2 | 57 | 22 | 199 | 63  |
| 109,479 | 20 | 9  | 118 | 27 | 4  | 2 | 57 | 21 | 199 | 59  |
| 109,480 | 20 | 8  | 118 | 28 | 4  | 2 | 57 | 22 | 199 | 60  |
| 109,481 | 19 | 8  | 123 | 25 | 4  | 2 | 61 | 23 | 207 | 58  |
| 109,482 | 15 | 8  | 121 | 25 | 4  | 2 | 60 | 23 | 200 | 58  |
| 109,483 | 15 | 8  | 121 | 27 | 4  | 2 | 58 | 24 | 198 | 61  |
| 109,484 | 15 | 8  | 120 | 26 | 4  | 2 | 57 | 23 | 196 | 59  |
| 109,485 | 15 | 7  | 123 | 29 | 4  | 2 | 57 | 24 | 199 | 62  |
| 109,486 | 15 | 8  | 122 | 31 | 4  | 2 | 56 | 24 | 197 | 65  |
| 109,487 | 15 | 9  | 144 | 38 | 4  | 3 | 64 | 25 | 227 | 75  |
| 109,488 | 14 | 9  | 140 | 43 | 4  | 3 | 63 | 26 | 221 | 81  |
| 109,489 | 13 | 9  | 136 | 43 | 3  | 3 | 63 | 25 | 215 | 80  |
| 109,490 | 13 | 9  | 131 | 43 | 4  | 3 | 63 | 25 | 211 | 80  |
| 109,491 | 15 | 10 | 135 | 43 | 5  | 3 | 70 | 24 | 225 | 80  |
| 109,492 | 15 | 10 | 142 | 43 | 5  | 3 | 80 | 24 | 242 | 80  |
| 109,493 | 16 | 11 | 145 | 43 | 5  | 3 | 87 | 25 | 253 | 82  |
| 109,494 | 16 | 11 | 145 | 44 | 5  | 3 | 87 | 26 | 253 | 84  |
| 109,495 | 18 | 11 | 146 | 54 | 5  | 3 | 93 | 29 | 262 | 97  |
| 109,496 | 18 | 12 | 147 | 55 | 5  | 3 | 93 | 29 | 263 | 99  |
| 109,497 | 18 | 12 | 148 | 58 | 5  | 3 | 92 | 29 | 263 | 102 |
| 109,498 | 19 | 12 | 147 | 58 | 5  | 3 | 93 | 29 | 264 | 102 |
| 109,499 | 19 | 12 | 144 | 58 | 5  | 3 | 92 | 29 | 260 | 102 |

|         |    |    |     |     |   |   |     |    |     |     |
|---------|----|----|-----|-----|---|---|-----|----|-----|-----|
| 109,500 | 22 | 12 | 166 | 58  | 6 | 3 | 99  | 29 | 293 | 102 |
| 109,501 | 22 | 12 | 162 | 57  | 6 | 4 | 99  | 29 | 289 | 102 |
| 109,502 | 22 | 12 | 165 | 60  | 6 | 5 | 101 | 30 | 294 | 107 |
| 109,503 | 22 | 15 | 170 | 75  | 6 | 5 | 104 | 40 | 302 | 135 |
| 109,504 | 22 | 15 | 170 | 77  | 6 | 5 | 104 | 42 | 302 | 139 |
| 109,505 | 22 | 14 | 171 | 88  | 6 | 5 | 108 | 46 | 307 | 153 |
| 109,506 | 22 | 14 | 174 | 91  | 6 | 5 | 110 | 46 | 312 | 156 |
| 109,507 | 22 | 14 | 173 | 90  | 6 | 4 | 109 | 44 | 310 | 152 |
| 109,508 | 22 | 14 | 172 | 90  | 6 | 4 | 109 | 43 | 309 | 151 |
| 109,509 | 21 | 11 | 167 | 83  | 5 | 3 | 109 | 39 | 302 | 136 |
| 109,510 | 20 | 11 | 165 | 84  | 5 | 3 | 109 | 39 | 299 | 137 |
| 109,511 | 20 | 11 | 165 | 84  | 5 | 3 | 109 | 39 | 299 | 137 |
| 109,512 | 19 | 9  | 163 | 86  | 5 | 3 | 112 | 39 | 299 | 137 |
| 109,513 | 19 | 9  | 165 | 86  | 5 | 3 | 112 | 39 | 301 | 137 |
| 109,514 | 16 | 9  | 155 | 87  | 4 | 3 | 106 | 38 | 281 | 137 |
| 109,515 | 15 | 10 | 157 | 87  | 4 | 3 | 106 | 38 | 282 | 138 |
| 109,516 | 14 | 11 | 142 | 88  | 4 | 3 | 87  | 38 | 247 | 140 |
| 109,517 | 15 | 10 | 141 | 87  | 4 | 3 | 87  | 35 | 247 | 135 |
| 109,518 | 15 | 10 | 140 | 87  | 4 | 3 | 84  | 36 | 243 | 136 |
| 109,519 | 15 | 11 | 144 | 89  | 4 | 3 | 83  | 36 | 246 | 139 |
| 109,520 | 15 | 11 | 144 | 89  | 4 | 3 | 83  | 36 | 246 | 139 |
| 109,521 | 16 | 11 | 144 | 89  | 4 | 3 | 82  | 36 | 246 | 139 |
| 109,522 | 16 | 11 | 144 | 91  | 4 | 3 | 82  | 36 | 246 | 141 |
| 109,523 | 16 | 11 | 144 | 91  | 4 | 3 | 81  | 36 | 245 | 141 |
| 109,524 | 15 | 11 | 140 | 93  | 4 | 3 | 80  | 36 | 239 | 143 |
| 109,525 | 15 | 11 | 140 | 93  | 4 | 3 | 80  | 36 | 239 | 143 |
| 109,526 | 15 | 12 | 138 | 126 | 4 | 3 | 80  | 41 | 237 | 182 |
| 109,527 | 15 | 12 | 129 | 131 | 3 | 3 | 77  | 47 | 224 | 193 |
| 109,528 | 15 | 13 | 122 | 130 | 3 | 3 | 76  | 45 | 216 | 191 |
| 109,529 | 14 | 13 | 120 | 131 | 3 | 3 | 75  | 45 | 212 | 192 |
| 109,530 | 14 | 13 | 120 | 136 | 4 | 3 | 74  | 47 | 212 | 199 |
| 109,531 | 14 | 13 | 117 | 135 | 4 | 3 | 74  | 46 | 209 | 197 |
| 109,532 | 14 | 15 | 116 | 135 | 4 | 3 | 73  | 45 | 207 | 198 |
| 109,533 | 15 | 15 | 117 | 135 | 4 | 3 | 74  | 45 | 210 | 198 |
| 109,534 | 15 | 15 | 117 | 133 | 4 | 3 | 74  | 44 | 210 | 195 |
| 109,535 | 14 | 15 | 115 | 130 | 4 | 3 | 75  | 43 | 208 | 191 |
| 109,536 | 14 | 14 | 114 | 128 | 4 | 3 | 75  | 43 | 207 | 188 |
| 109,537 | 14 | 14 | 114 | 128 | 4 | 3 | 76  | 43 | 208 | 188 |
| 109,538 | 14 | 13 | 95  | 123 | 4 | 2 | 69  | 47 | 182 | 185 |
| 109,539 | 14 | 13 | 93  | 119 | 4 | 2 | 69  | 47 | 180 | 181 |
| 109,540 | 14 | 15 | 93  | 122 | 4 | 2 | 69  | 49 | 180 | 188 |



|         |    |    |     |     |    |   |     |    |     |     |
|---------|----|----|-----|-----|----|---|-----|----|-----|-----|
| 109,541 | 14 | 15 | 91  | 122 | 3  | 2 | 69  | 49 | 177 | 188 |
| 109,542 | 15 | 14 | 94  | 122 | 2  | 2 | 71  | 49 | 182 | 187 |
| 109,543 | 14 | 14 | 81  | 124 | 2  | 2 | 59  | 53 | 156 | 193 |
| 109,544 | 12 | 13 | 77  | 123 | 2  | 2 | 52  | 54 | 143 | 192 |
| 109,545 | 12 | 13 | 76  | 123 | 2  | 2 | 49  | 54 | 139 | 192 |
| 109,546 | 10 | 13 | 76  | 113 | 2  | 2 | 46  | 51 | 134 | 179 |
| 109,547 | 10 | 12 | 77  | 109 | 2  | 2 | 47  | 51 | 136 | 174 |
| 109,548 | 10 | 12 | 76  | 108 | 2  | 2 | 47  | 51 | 135 | 173 |
| 109,549 | 10 | 12 | 81  | 108 | 2  | 2 | 47  | 51 | 140 | 173 |
| 109,550 | 9  | 12 | 81  | 108 | 2  | 2 | 46  | 52 | 138 | 174 |
| 109,551 | 8  | 12 | 66  | 108 | 1  | 2 | 43  | 52 | 118 | 174 |
| 109,552 | 8  | 12 | 64  | 105 | 1  | 0 | 41  | 51 | 114 | 168 |
| 109,553 | 8  | 12 | 64  | 105 | 3  | 0 | 44  | 51 | 119 | 168 |
| 109,554 | 8  | 9  | 61  | 90  | 3  | 0 | 41  | 41 | 113 | 140 |
| 109,555 | 12 | 9  | 70  | 89  | 4  | 0 | 63  | 38 | 149 | 136 |
| 109,556 | 12 | 9  | 78  | 78  | 4  | 0 | 63  | 33 | 157 | 120 |
| 109,557 | 12 | 9  | 74  | 75  | 4  | 0 | 61  | 33 | 151 | 117 |
| 109,558 | 12 | 9  | 74  | 75  | 4  | 0 | 61  | 33 | 151 | 117 |
| 109,559 | 18 | 9  | 92  | 75  | 5  | 0 | 77  | 33 | 192 | 117 |
| 109,560 | 18 | 9  | 106 | 71  | 5  | 0 | 79  | 33 | 208 | 113 |
| 109,561 | 18 | 9  | 124 | 70  | 5  | 0 | 107 | 33 | 254 | 112 |
| 109,562 | 18 | 9  | 153 | 70  | 6  | 0 | 130 | 33 | 307 | 112 |
| 109,563 | 20 | 9  | 218 | 67  | 8  | 0 | 182 | 32 | 428 | 108 |
| 109,564 | 20 | 9  | 221 | 68  | 8  | 0 | 187 | 32 | 436 | 109 |
| 109,565 | 20 | 8  | 226 | 67  | 9  | 0 | 193 | 32 | 448 | 107 |
| 109,566 | 20 | 8  | 227 | 67  | 9  | 0 | 193 | 33 | 449 | 108 |
| 109,567 | 20 | 7  | 226 | 66  | 9  | 0 | 193 | 33 | 448 | 106 |
| 109,568 | 19 | 7  | 228 | 66  | 9  | 0 | 198 | 32 | 454 | 105 |
| 109,569 | 19 | 7  | 230 | 69  | 9  | 0 | 200 | 34 | 458 | 110 |
| 109,570 | 19 | 6  | 226 | 66  | 9  | 0 | 200 | 33 | 454 | 105 |
| 109,571 | 20 | 6  | 227 | 66  | 9  | 0 | 199 | 34 | 455 | 106 |
| 109,572 | 19 | 6  | 226 | 66  | 9  | 0 | 198 | 35 | 452 | 107 |
| 109,573 | 19 | 6  | 226 | 65  | 9  | 0 | 198 | 35 | 452 | 106 |
| 109,574 | 20 | 6  | 228 | 66  | 9  | 0 | 198 | 36 | 455 | 108 |
| 109,575 | 20 | 6  | 228 | 64  | 9  | 0 | 198 | 36 | 455 | 106 |
| 109,576 | 21 | 6  | 281 | 64  | 13 | 0 | 223 | 36 | 538 | 106 |
| 109,577 | 24 | 5  | 313 | 31  | 17 | 0 | 243 | 32 | 597 | 68  |
| 109,578 | 24 | 5  | 311 | 25  | 17 | 0 | 243 | 26 | 595 | 56  |
| 109,579 | 25 | 4  | 436 | 26  | 29 | 0 | 370 | 27 | 860 | 57  |
| 109,580 | 25 | 4  | 436 | 26  | 29 | 0 | 370 | 28 | 860 | 58  |
| 109,581 | 25 | 4  | 444 | 21  | 28 | 0 | 379 | 26 | 876 | 51  |

|         |    |   |       |    |    |   |     |    |       |    |
|---------|----|---|-------|----|----|---|-----|----|-------|----|
| 109,582 | 25 | 3 | 450   | 21 | 28 | 0 | 379 | 26 | 882   | 50 |
| 109,583 | 24 | 2 | 449   | 21 | 28 | 0 | 378 | 26 | 879   | 49 |
| 109,584 | 24 | 2 | 449   | 21 | 28 | 0 | 378 | 27 | 879   | 50 |
| 109,585 | 24 | 2 | 449   | 22 | 28 | 0 | 379 | 28 | 880   | 52 |
| 109,586 | 24 | 2 | 450   | 22 | 28 | 0 | 378 | 28 | 880   | 52 |
| 109,587 | 36 | 2 | 673   | 26 | 35 | 0 | 470 | 29 | 1,214 | 57 |
| 109,588 | 36 | 2 | 672   | 26 | 35 | 0 | 469 | 29 | 1,212 | 57 |
| 109,589 | 50 | 2 | 818   | 25 | 42 | 0 | 552 | 25 | 1,462 | 52 |
| 109,590 | 54 | 2 | 871   | 23 | 44 | 0 | 586 | 24 | 1,555 | 49 |
| 109,591 | 54 | 0 | 871   | 19 | 44 | 0 | 583 | 22 | 1,552 | 41 |
| 109,592 | 59 | 0 | 904   | 18 | 45 | 0 | 625 | 22 | 1,633 | 40 |
| 109,593 | 57 | 0 | 914   | 16 | 45 | 0 | 632 | 18 | 1,648 | 34 |
| 109,594 | 57 | 0 | 914   | 17 | 45 | 0 | 633 | 18 | 1,649 | 35 |
| 109,595 | 56 | 0 | 946   | 20 | 46 | 0 | 673 | 18 | 1,721 | 38 |
| 109,596 | 57 | 0 | 946   | 20 | 47 | 0 | 674 | 19 | 1,724 | 39 |
| 109,597 | 57 | 0 | 953   | 21 | 47 | 0 | 675 | 21 | 1,732 | 42 |
| 109,598 | 61 | 0 | 966   | 21 | 49 | 0 | 693 | 21 | 1,769 | 42 |
| 109,599 | 61 | 0 | 968   | 21 | 49 | 0 | 698 | 21 | 1,776 | 42 |
| 109,600 | 61 | 0 | 975   | 22 | 51 | 0 | 708 | 21 | 1,795 | 43 |
| 109,601 | 61 | 0 | 972   | 22 | 51 | 0 | 709 | 20 | 1,793 | 42 |
| 109,602 | 60 | 0 | 968   | 23 | 51 | 0 | 707 | 20 | 1,786 | 43 |
| 109,603 | 63 | 0 | 985   | 23 | 52 | 0 | 713 | 20 | 1,813 | 43 |
| 109,604 | 63 | 0 | 1,009 | 22 | 51 | 0 | 729 | 20 | 1,852 | 42 |
| 109,605 | 67 | 0 | 1,205 | 23 | 59 | 0 | 778 | 20 | 2,109 | 43 |
| 109,606 | 63 | 0 | 1,228 | 23 | 58 | 0 | 756 | 20 | 2,105 | 43 |
| 109,607 | 65 | 0 | 1,280 | 23 | 62 | 0 | 794 | 20 | 2,201 | 43 |
| 109,608 | 65 | 0 | 1,351 | 23 | 63 | 0 | 806 | 20 | 2,285 | 43 |
| 109,609 | 59 | 0 | 1,384 | 24 | 64 | 0 | 813 | 20 | 2,320 | 44 |
| 109,610 | 59 | 0 | 1,394 | 25 | 64 | 0 | 814 | 22 | 2,331 | 47 |
| 109,611 | 59 | 0 | 1,379 | 26 | 64 | 0 | 811 | 22 | 2,313 | 48 |
| 109,612 | 60 | 0 | 1,379 | 26 | 64 | 0 | 786 | 23 | 2,289 | 49 |
| 109,613 | 61 | 0 | 1,361 | 29 | 63 | 0 | 766 | 26 | 2,251 | 55 |
| 109,614 | 59 | 0 | 1,316 | 30 | 61 | 0 | 712 | 26 | 2,148 | 56 |
| 109,615 | 62 | 1 | 1,338 | 40 | 62 | 0 | 720 | 33 | 2,182 | 74 |
| 109,616 | 62 | 1 | 1,338 | 44 | 61 | 0 | 715 | 35 | 2,176 | 80 |
| 109,617 | 62 | 1 | 1,335 | 44 | 61 | 0 | 714 | 34 | 2,172 | 79 |
| 109,618 | 64 | 1 | 1,390 | 44 | 61 | 0 | 725 | 34 | 2,240 | 79 |
| 109,619 | 64 | 1 | 1,391 | 41 | 61 | 0 | 720 | 31 | 2,236 | 73 |
| 109,620 | 64 | 1 | 1,394 | 41 | 61 | 0 | 719 | 31 | 2,238 | 73 |
| 109,621 | 64 | 1 | 1,394 | 41 | 61 | 0 | 720 | 31 | 2,239 | 73 |
| 109,622 | 63 | 1 | 1,411 | 42 | 61 | 0 | 723 | 29 | 2,258 | 72 |

|         |    |   |       |    |    |   |     |    |       |    |
|---------|----|---|-------|----|----|---|-----|----|-------|----|
| 109,623 | 63 | 1 | 1,411 | 46 | 61 | 0 | 723 | 31 | 2,258 | 78 |
| 109,624 | 68 | 1 | 1,443 | 50 | 61 | 0 | 732 | 36 | 2,304 | 87 |
| 109,625 | 67 | 1 | 1,442 | 55 | 61 | 0 | 732 | 38 | 2,302 | 94 |
| 109,626 | 67 | 1 | 1,443 | 55 | 61 | 0 | 734 | 39 | 2,305 | 95 |
| 109,627 | 75 | 1 | 1,504 | 55 | 61 | 0 | 741 | 39 | 2,381 | 95 |
| 109,628 | 73 | 1 | 1,505 | 55 | 57 | 0 | 741 | 40 | 2,376 | 96 |
| 109,629 | 72 | 1 | 1,386 | 53 | 47 | 0 | 622 | 38 | 2,127 | 92 |
| 109,630 | 72 | 1 | 1,381 | 54 | 47 | 0 | 616 | 38 | 2,116 | 93 |
| 109,631 | 73 | 1 | 1,374 | 54 | 47 | 0 | 608 | 37 | 2,102 | 92 |
| 109,632 | 79 | 1 | 1,505 | 53 | 55 | 0 | 708 | 37 | 2,347 | 91 |
| 109,633 | 82 | 1 | 1,576 | 53 | 58 | 0 | 725 | 37 | 2,441 | 91 |
| 109,634 | 84 | 1 | 1,660 | 53 | 62 | 0 | 773 | 36 | 2,579 | 90 |
| 109,635 | 84 | 1 | 1,655 | 54 | 62 | 0 | 772 | 37 | 2,573 | 92 |
| 109,636 | 75 | 1 | 1,456 | 53 | 56 | 0 | 687 | 36 | 2,274 | 90 |
| 109,637 | 66 | 1 | 1,487 | 59 | 56 | 0 | 695 | 36 | 2,304 | 96 |
| 109,638 | 64 | 1 | 1,417 | 57 | 53 | 0 | 642 | 36 | 2,176 | 94 |
| 109,639 | 64 | 1 | 1,377 | 56 | 52 | 0 | 631 | 35 | 2,124 | 92 |
| 109,640 | 65 | 1 | 1,375 | 56 | 52 | 0 | 633 | 35 | 2,125 | 92 |
| 109,641 | 60 | 1 | 1,322 | 57 | 50 | 0 | 602 | 35 | 2,034 | 93 |
| 109,642 | 60 | 1 | 1,327 | 57 | 51 | 0 | 602 | 35 | 2,040 | 93 |
| 109,643 | 55 | 1 | 1,296 | 57 | 50 | 0 | 558 | 35 | 1,959 | 93 |
| 109,644 | 55 | 1 | 1,284 | 56 | 50 | 0 | 551 | 35 | 1,940 | 92 |
| 109,645 | 55 | 1 | 1,284 | 56 | 50 | 0 | 552 | 35 | 1,941 | 92 |
| 109,646 | 55 | 1 | 1,253 | 53 | 49 | 0 | 514 | 31 | 1,871 | 85 |
| 109,647 | 55 | 1 | 1,265 | 53 | 48 | 0 | 514 | 31 | 1,882 | 85 |
| 109,648 | 60 | 1 | 1,345 | 52 | 48 | 0 | 520 | 29 | 1,973 | 82 |
| 109,649 | 64 | 1 | 1,646 | 52 | 53 | 0 | 590 | 29 | 2,353 | 82 |
| 109,650 | 64 | 1 | 1,645 | 52 | 53 | 0 | 585 | 29 | 2,347 | 82 |
| 109,651 | 64 | 1 | 1,709 | 51 | 51 | 0 | 580 | 29 | 2,404 | 81 |
| 109,652 | 65 | 1 | 1,719 | 51 | 51 | 0 | 577 | 29 | 2,412 | 81 |
| 109,653 | 65 | 1 | 1,755 | 51 | 50 | 0 | 582 | 29 | 2,452 | 81 |
| 109,654 | 62 | 1 | 1,745 | 51 | 50 | 0 | 578 | 29 | 2,435 | 81 |
| 109,655 | 62 | 1 | 1,725 | 51 | 49 | 0 | 558 | 30 | 2,394 | 82 |
| 109,656 | 59 | 1 | 1,542 | 50 | 41 | 0 | 515 | 30 | 2,157 | 81 |
| 109,657 | 59 | 1 | 1,510 | 50 | 41 | 0 | 514 | 30 | 2,124 | 81 |
| 109,658 | 57 | 1 | 1,457 | 50 | 37 | 0 | 472 | 30 | 2,023 | 81 |
| 109,659 | 57 | 1 | 1,390 | 50 | 37 | 0 | 461 | 29 | 1,945 | 80 |
| 109,660 | 57 | 1 | 1,351 | 49 | 35 | 0 | 440 | 29 | 1,883 | 79 |
| 109,661 | 57 | 2 | 1,351 | 47 | 37 | 0 | 450 | 27 | 1,895 | 76 |
| 109,662 | 57 | 2 | 1,390 | 47 | 37 | 0 | 457 | 27 | 1,941 | 76 |
| 109,663 | 56 | 2 | 1,408 | 47 | 37 | 0 | 471 | 25 | 1,972 | 74 |

|         |    |   |       |    |    |   |     |    |       |    |
|---------|----|---|-------|----|----|---|-----|----|-------|----|
| 109,664 | 55 | 1 | 1,408 | 32 | 37 | 0 | 476 | 15 | 1,976 | 48 |
| 109,665 | 55 | 1 | 1,396 | 32 | 37 | 0 | 479 | 15 | 1,967 | 48 |
| 109,666 | 53 | 2 | 1,373 | 32 | 36 | 0 | 465 | 15 | 1,927 | 49 |
| 109,667 | 53 | 3 | 1,366 | 28 | 36 | 0 | 462 | 13 | 1,917 | 44 |
| 109,668 | 51 | 3 | 1,314 | 28 | 36 | 0 | 451 | 13 | 1,852 | 44 |
| 109,669 | 51 | 3 | 1,313 | 28 | 36 | 0 | 451 | 13 | 1,851 | 44 |
| 109,670 | 51 | 3 | 1,310 | 28 | 36 | 0 | 451 | 13 | 1,848 | 44 |
| 109,671 | 56 | 3 | 1,388 | 28 | 38 | 0 | 476 | 13 | 1,958 | 44 |
| 109,672 | 58 | 3 | 1,465 | 27 | 39 | 0 | 489 | 12 | 2,051 | 42 |
| 109,673 | 58 | 3 | 1,456 | 27 | 39 | 0 | 489 | 12 | 2,042 | 42 |
| 109,674 | 54 | 3 | 1,469 | 23 | 40 | 0 | 501 | 10 | 2,064 | 36 |
| 109,675 | 62 | 3 | 1,538 | 12 | 41 | 0 | 564 | 3  | 2,205 | 18 |
| 109,676 | 62 | 3 | 1,559 | 12 | 41 | 0 | 584 | 2  | 2,246 | 17 |
| 109,677 | 62 | 3 | 1,563 | 12 | 41 | 0 | 593 | 2  | 2,259 | 17 |
| 109,678 | 53 | 3 | 1,463 | 12 | 37 | 0 | 563 | 2  | 2,116 | 17 |
| 109,679 | 52 | 3 | 1,431 | 12 | 37 | 0 | 540 | 2  | 2,060 | 17 |
| 109,680 | 52 | 3 | 1,435 | 12 | 35 | 0 | 541 | 2  | 2,063 | 17 |
| 109,681 | 49 | 3 | 1,344 | 11 | 28 | 0 | 469 | 2  | 1,890 | 16 |
| 109,682 | 45 | 4 | 1,310 | 11 | 28 | 0 | 438 | 2  | 1,821 | 17 |
| 109,683 | 42 | 4 | 1,237 | 11 | 25 | 0 | 422 | 2  | 1,726 | 17 |
| 109,684 | 39 | 4 | 1,197 | 11 | 25 | 0 | 402 | 1  | 1,663 | 16 |
| 109,685 | 38 | 4 | 1,140 | 10 | 21 | 0 | 372 | 1  | 1,571 | 15 |
| 109,686 | 38 | 4 | 1,106 | 10 | 20 | 0 | 371 | 1  | 1,535 | 15 |
| 109,687 | 37 | 4 | 1,098 | 10 | 20 | 0 | 371 | 1  | 1,526 | 15 |
| 109,688 | 37 | 4 | 1,081 | 4  | 19 | 0 | 360 | 1  | 1,497 | 9  |
| 109,689 | 37 | 4 | 1,081 | 2  | 17 | 0 | 358 | 1  | 1,493 | 7  |
| 109,690 | 37 | 4 | 1,081 | 3  | 17 | 0 | 355 | 1  | 1,490 | 8  |
| 109,691 | 36 | 4 | 1,089 | 2  | 17 | 0 | 355 | 1  | 1,497 | 7  |
| 109,692 | 35 | 4 | 1,083 | 3  | 17 | 0 | 349 | 1  | 1,484 | 8  |
| 109,693 | 35 | 4 | 1,076 | 3  | 17 | 0 | 347 | 1  | 1,475 | 8  |
| 109,694 | 39 | 4 | 1,110 | 3  | 18 | 0 | 368 | 1  | 1,535 | 8  |
| 109,695 | 41 | 4 | 1,136 | 6  | 19 | 0 | 378 | 1  | 1,574 | 11 |
| 109,696 | 43 | 4 | 1,151 | 6  | 23 | 0 | 382 | 1  | 1,599 | 11 |
| 109,697 | 43 | 4 | 1,161 | 6  | 23 | 0 | 382 | 1  | 1,609 | 11 |
| 109,698 | 44 | 4 | 1,162 | 9  | 24 | 0 | 385 | 2  | 1,615 | 15 |
| 109,699 | 44 | 4 | 1,129 | 12 | 27 | 0 | 412 | 2  | 1,612 | 18 |
| 109,700 | 40 | 4 | 819   | 12 | 20 | 0 | 332 | 2  | 1,211 | 18 |
| 109,701 | 43 | 4 | 839   | 12 | 21 | 0 | 349 | 2  | 1,252 | 18 |
| 109,702 | 44 | 4 | 844   | 12 | 21 | 0 | 351 | 2  | 1,260 | 18 |
| 109,703 | 44 | 4 | 845   | 12 | 22 | 0 | 359 | 2  | 1,270 | 18 |
| 109,704 | 44 | 4 | 802   | 12 | 22 | 0 | 355 | 2  | 1,223 | 18 |

|         |    |   |     |    |    |   |     |    |       |    |
|---------|----|---|-----|----|----|---|-----|----|-------|----|
| 109,705 | 44 | 4 | 802 | 13 | 22 | 0 | 354 | 2  | 1,222 | 19 |
| 109,706 | 44 | 4 | 797 | 13 | 22 | 0 | 354 | 1  | 1,217 | 18 |
| 109,707 | 43 | 4 | 792 | 14 | 22 | 0 | 349 | 1  | 1,206 | 19 |
| 109,708 | 43 | 4 | 792 | 14 | 22 | 0 | 349 | 1  | 1,206 | 19 |
| 109,709 | 44 | 4 | 803 | 15 | 22 | 0 | 354 | 4  | 1,223 | 23 |
| 109,710 | 44 | 4 | 802 | 17 | 22 | 0 | 353 | 6  | 1,221 | 27 |
| 109,711 | 44 | 4 | 794 | 19 | 22 | 0 | 353 | 8  | 1,213 | 31 |
| 109,712 | 44 | 3 | 779 | 19 | 20 | 0 | 342 | 8  | 1,185 | 30 |
| 109,713 | 44 | 3 | 748 | 19 | 20 | 0 | 335 | 8  | 1,147 | 30 |
| 109,714 | 44 | 3 | 712 | 19 | 20 | 0 | 318 | 8  | 1,094 | 30 |
| 109,715 | 44 | 4 | 701 | 20 | 20 | 0 | 311 | 8  | 1,076 | 32 |
| 109,716 | 44 | 3 | 697 | 20 | 20 | 0 | 311 | 8  | 1,072 | 31 |
| 109,717 | 43 | 3 | 693 | 20 | 20 | 0 | 311 | 8  | 1,067 | 31 |
| 109,718 | 43 | 2 | 692 | 20 | 20 | 0 | 310 | 8  | 1,065 | 30 |
| 109,719 | 43 | 2 | 689 | 20 | 20 | 0 | 310 | 9  | 1,062 | 31 |
| 109,720 | 42 | 2 | 734 | 20 | 21 | 0 | 337 | 11 | 1,134 | 33 |
| 109,721 | 41 | 2 | 732 | 21 | 21 | 0 | 338 | 11 | 1,132 | 34 |
| 109,722 | 39 | 2 | 667 | 21 | 19 | 0 | 314 | 12 | 1,039 | 35 |
| 109,723 | 37 | 2 | 581 | 21 | 18 | 0 | 298 | 12 | 934   | 35 |
| 109,724 | 37 | 2 | 554 | 21 | 17 | 0 | 279 | 12 | 887   | 35 |
| 109,725 | 38 | 2 | 545 | 22 | 17 | 0 | 279 | 13 | 879   | 37 |
| 109,726 | 29 | 2 | 468 | 23 | 16 | 0 | 209 | 14 | 722   | 39 |
| 109,727 | 29 | 2 | 446 | 23 | 17 | 0 | 190 | 14 | 682   | 39 |
| 109,728 | 29 | 2 | 439 | 23 | 17 | 1 | 179 | 14 | 664   | 40 |
| 109,729 | 29 | 2 | 428 | 23 | 17 | 1 | 177 | 15 | 651   | 41 |
| 109,730 | 29 | 2 | 458 | 23 | 18 | 1 | 195 | 15 | 700   | 41 |
| 109,731 | 29 | 2 | 455 | 23 | 18 | 1 | 196 | 15 | 698   | 41 |
| 109,732 | 29 | 2 | 457 | 25 | 18 | 1 | 202 | 15 | 706   | 43 |
| 109,733 | 29 | 1 | 455 | 25 | 18 | 1 | 205 | 15 | 707   | 42 |
| 109,734 | 30 | 1 | 461 | 29 | 19 | 1 | 216 | 16 | 726   | 47 |
| 109,735 | 30 | 1 | 457 | 29 | 18 | 1 | 212 | 16 | 717   | 47 |
| 109,736 | 29 | 1 | 454 | 29 | 18 | 1 | 212 | 17 | 713   | 48 |
| 109,737 | 28 | 1 | 449 | 29 | 18 | 1 | 206 | 19 | 701   | 50 |
| 109,738 | 28 | 1 | 459 | 29 | 18 | 1 | 210 | 19 | 715   | 50 |
| 109,739 | 28 | 1 | 461 | 29 | 18 | 1 | 214 | 19 | 721   | 50 |
| 109,740 | 28 | 1 | 461 | 29 | 18 | 1 | 214 | 19 | 721   | 50 |
| 109,741 | 29 | 1 | 460 | 29 | 18 | 1 | 222 | 19 | 729   | 50 |
| 109,742 | 29 | 1 | 456 | 29 | 18 | 1 | 222 | 19 | 725   | 50 |
| 109,743 | 26 | 1 | 429 | 28 | 17 | 1 | 206 | 19 | 678   | 49 |
| 109,744 | 25 | 1 | 433 | 28 | 17 | 1 | 205 | 19 | 680   | 49 |
| 109,745 | 24 | 1 | 420 | 25 | 17 | 1 | 201 | 19 | 662   | 46 |

|         |    |   |     |    |    |   |     |    |     |     |
|---------|----|---|-----|----|----|---|-----|----|-----|-----|
| 109,746 | 24 | 1 | 437 | 25 | 18 | 1 | 208 | 19 | 687 | 46  |
| 109,747 | 22 | 1 | 435 | 23 | 14 | 1 | 209 | 18 | 680 | 43  |
| 109,748 | 22 | 1 | 425 | 23 | 14 | 1 | 209 | 18 | 670 | 43  |
| 109,749 | 21 | 1 | 411 | 23 | 13 | 1 | 205 | 18 | 650 | 43  |
| 109,750 | 16 | 1 | 358 | 20 | 11 | 1 | 172 | 18 | 557 | 40  |
| 109,751 | 12 | 1 | 351 | 21 | 11 | 1 | 166 | 18 | 540 | 41  |
| 109,752 | 8  | 1 | 266 | 22 | 10 | 1 | 144 | 19 | 428 | 43  |
| 109,753 | 7  | 1 | 250 | 22 | 10 | 1 | 142 | 19 | 409 | 43  |
| 109,754 | 6  | 1 | 248 | 22 | 10 | 1 | 143 | 19 | 407 | 43  |
| 109,755 | 6  | 1 | 247 | 21 | 10 | 1 | 145 | 19 | 408 | 42  |
| 109,756 | 6  | 1 | 242 | 20 | 10 | 1 | 146 | 19 | 404 | 41  |
| 109,757 | 6  | 2 | 240 | 18 | 10 | 1 | 145 | 16 | 401 | 37  |
| 109,758 | 6  | 2 | 239 | 18 | 10 | 1 | 146 | 16 | 401 | 37  |
| 109,759 | 5  | 2 | 224 | 15 | 10 | 1 | 142 | 12 | 381 | 30  |
| 109,760 | 5  | 2 | 221 | 16 | 10 | 1 | 141 | 12 | 377 | 31  |
| 109,761 | 5  | 2 | 218 | 15 | 9  | 1 | 141 | 12 | 373 | 30  |
| 109,762 | 5  | 2 | 223 | 15 | 9  | 1 | 142 | 12 | 379 | 30  |
| 109,763 | 6  | 2 | 235 | 15 | 9  | 1 | 147 | 12 | 397 | 30  |
| 109,764 | 7  | 2 | 244 | 15 | 9  | 1 | 159 | 12 | 419 | 30  |
| 109,765 | 7  | 2 | 244 | 16 | 9  | 1 | 159 | 12 | 419 | 31  |
| 109,766 | 9  | 1 | 274 | 15 | 14 | 1 | 204 | 12 | 501 | 29  |
| 109,767 | 9  | 1 | 268 | 16 | 14 | 1 | 199 | 13 | 490 | 31  |
| 109,768 | 9  | 1 | 248 | 18 | 14 | 1 | 192 | 14 | 463 | 34  |
| 109,769 | 9  | 1 | 243 | 18 | 14 | 1 | 188 | 14 | 454 | 34  |
| 109,770 | 8  | 1 | 234 | 18 | 14 | 1 | 188 | 13 | 444 | 33  |
| 109,771 | 8  | 1 | 231 | 18 | 14 | 1 | 184 | 10 | 437 | 30  |
| 109,772 | 8  | 1 | 231 | 18 | 14 | 1 | 185 | 10 | 438 | 30  |
| 109,773 | 8  | 1 | 228 | 18 | 14 | 1 | 184 | 10 | 434 | 30  |
| 109,774 | 10 | 1 | 241 | 18 | 17 | 1 | 188 | 10 | 456 | 30  |
| 109,775 | 10 | 1 | 244 | 19 | 17 | 1 | 188 | 10 | 459 | 31  |
| 109,776 | 11 | 1 | 266 | 19 | 18 | 2 | 200 | 10 | 495 | 32  |
| 109,777 | 11 | 1 | 265 | 18 | 18 | 2 | 198 | 10 | 492 | 31  |
| 109,778 | 12 | 1 | 289 | 21 | 18 | 2 | 209 | 11 | 528 | 35  |
| 109,779 | 14 | 2 | 283 | 34 | 18 | 3 | 205 | 19 | 520 | 58  |
| 109,780 | 15 | 2 | 287 | 52 | 20 | 4 | 214 | 26 | 536 | 84  |
| 109,781 | 15 | 3 | 284 | 54 | 19 | 4 | 214 | 26 | 532 | 87  |
| 109,782 | 17 | 3 | 288 | 54 | 19 | 4 | 221 | 26 | 545 | 87  |
| 109,783 | 17 | 3 | 283 | 48 | 19 | 4 | 216 | 26 | 535 | 81  |
| 109,784 | 18 | 3 | 298 | 62 | 18 | 5 | 215 | 26 | 549 | 96  |
| 109,785 | 19 | 3 | 309 | 66 | 19 | 7 | 213 | 27 | 560 | 103 |
| 109,786 | 19 | 3 | 309 | 71 | 19 | 7 | 215 | 28 | 562 | 109 |

|         |    |   |     |     |    |    |     |    |       |     |
|---------|----|---|-----|-----|----|----|-----|----|-------|-----|
| 109,787 | 21 | 3 | 317 | 71  | 20 | 7  | 224 | 27 | 582   | 108 |
| 109,788 | 21 | 3 | 313 | 71  | 21 | 7  | 223 | 25 | 578   | 106 |
| 109,789 | 22 | 3 | 329 | 71  | 22 | 8  | 225 | 25 | 598   | 107 |
| 109,790 | 22 | 4 | 345 | 70  | 22 | 8  | 246 | 27 | 635   | 109 |
| 109,791 | 28 | 4 | 457 | 74  | 25 | 8  | 306 | 32 | 816   | 118 |
| 109,792 | 28 | 4 | 481 | 75  | 26 | 8  | 322 | 33 | 857   | 120 |
| 109,793 | 40 | 4 | 572 | 75  | 35 | 8  | 404 | 33 | 1,051 | 120 |
| 109,794 | 42 | 4 | 599 | 77  | 36 | 8  | 417 | 36 | 1,094 | 125 |
| 109,795 | 42 | 4 | 592 | 77  | 36 | 8  | 414 | 36 | 1,084 | 125 |
| 109,796 | 41 | 4 | 584 | 77  | 36 | 8  | 412 | 36 | 1,073 | 125 |
| 109,797 | 41 | 5 | 563 | 80  | 35 | 8  | 403 | 39 | 1,042 | 132 |
| 109,798 | 41 | 5 | 549 | 81  | 35 | 8  | 397 | 39 | 1,022 | 133 |
| 109,799 | 41 | 5 | 556 | 81  | 36 | 8  | 400 | 39 | 1,033 | 133 |
| 109,800 | 41 | 6 | 564 | 85  | 36 | 8  | 408 | 39 | 1,049 | 138 |
| 109,801 | 41 | 6 | 564 | 87  | 36 | 8  | 408 | 40 | 1,049 | 141 |
| 109,802 | 41 | 6 | 564 | 87  | 36 | 9  | 404 | 41 | 1,045 | 143 |
| 109,803 | 41 | 6 | 565 | 87  | 36 | 9  | 404 | 40 | 1,046 | 142 |
| 109,804 | 41 | 6 | 566 | 89  | 36 | 9  | 404 | 41 | 1,047 | 145 |
| 109,805 | 43 | 6 | 605 | 90  | 36 | 9  | 406 | 41 | 1,090 | 146 |
| 109,806 | 44 | 6 | 621 | 91  | 40 | 9  | 416 | 43 | 1,121 | 149 |
| 109,807 | 44 | 5 | 644 | 91  | 41 | 9  | 444 | 43 | 1,173 | 148 |
| 109,808 | 44 | 5 | 643 | 91  | 41 | 9  | 445 | 43 | 1,173 | 148 |
| 109,809 | 44 | 5 | 648 | 91  | 41 | 9  | 448 | 44 | 1,181 | 149 |
| 109,810 | 44 | 5 | 648 | 91  | 41 | 9  | 447 | 44 | 1,180 | 149 |
| 109,811 | 45 | 6 | 648 | 96  | 41 | 9  | 448 | 44 | 1,182 | 155 |
| 109,812 | 45 | 6 | 648 | 99  | 41 | 9  | 449 | 49 | 1,183 | 163 |
| 109,813 | 45 | 6 | 646 | 100 | 41 | 9  | 451 | 49 | 1,183 | 164 |
| 109,814 | 44 | 6 | 644 | 102 | 41 | 9  | 447 | 50 | 1,176 | 167 |
| 109,815 | 43 | 6 | 639 | 104 | 41 | 9  | 468 | 50 | 1,191 | 169 |
| 109,816 | 42 | 6 | 613 | 105 | 37 | 9  | 431 | 50 | 1,123 | 170 |
| 109,817 | 42 | 6 | 604 | 102 | 36 | 9  | 425 | 48 | 1,107 | 165 |
| 109,818 | 42 | 6 | 605 | 102 | 36 | 9  | 424 | 48 | 1,107 | 165 |
| 109,819 | 42 | 6 | 599 | 102 | 35 | 9  | 422 | 48 | 1,098 | 165 |
| 109,820 | 42 | 6 | 597 | 102 | 35 | 9  | 421 | 48 | 1,095 | 165 |
| 109,821 | 42 | 6 | 604 | 102 | 35 | 9  | 436 | 48 | 1,117 | 165 |
| 109,822 | 42 | 6 | 610 | 101 | 36 | 9  | 446 | 48 | 1,134 | 164 |
| 109,823 | 42 | 6 | 609 | 102 | 36 | 9  | 444 | 48 | 1,131 | 165 |
| 109,824 | 40 | 6 | 595 | 101 | 33 | 9  | 440 | 48 | 1,108 | 164 |
| 109,825 | 40 | 6 | 593 | 101 | 33 | 9  | 440 | 48 | 1,106 | 164 |
| 109,826 | 39 | 6 | 581 | 101 | 33 | 10 | 429 | 48 | 1,082 | 165 |
| 109,827 | 38 | 6 | 571 | 100 | 32 | 9  | 428 | 47 | 1,069 | 162 |

|         |    |   |     |     |    |   |     |    |       |     |
|---------|----|---|-----|-----|----|---|-----|----|-------|-----|
| 109,828 | 37 | 6 | 569 | 100 | 32 | 9 | 428 | 46 | 1,066 | 161 |
| 109,829 | 37 | 5 | 548 | 85  | 31 | 7 | 419 | 37 | 1,035 | 134 |
| 109,830 | 35 | 5 | 541 | 85  | 31 | 7 | 417 | 37 | 1,024 | 134 |
| 109,831 | 34 | 4 | 534 | 65  | 29 | 6 | 398 | 28 | 995   | 103 |
| 109,832 | 35 | 4 | 539 | 65  | 30 | 6 | 404 | 28 | 1,008 | 103 |
| 109,833 | 35 | 4 | 540 | 65  | 31 | 6 | 399 | 28 | 1,005 | 103 |
| 109,834 | 35 | 4 | 540 | 65  | 31 | 6 | 398 | 28 | 1,004 | 103 |
| 109,835 | 35 | 4 | 533 | 47  | 32 | 3 | 409 | 27 | 1,009 | 81  |
| 109,836 | 33 | 4 | 513 | 42  | 30 | 3 | 403 | 26 | 979   | 75  |
| 109,837 | 33 | 4 | 555 | 42  | 31 | 3 | 415 | 26 | 1,034 | 75  |
| 109,838 | 36 | 4 | 589 | 42  | 31 | 3 | 482 | 26 | 1,138 | 75  |
| 109,839 | 36 | 4 | 587 | 42  | 30 | 3 | 481 | 26 | 1,134 | 75  |
| 109,840 | 35 | 4 | 603 | 42  | 33 | 2 | 574 | 26 | 1,245 | 74  |
| 109,841 | 35 | 3 | 589 | 42  | 33 | 2 | 555 | 24 | 1,212 | 71  |
| 109,842 | 29 | 3 | 478 | 37  | 31 | 2 | 502 | 18 | 1,040 | 60  |
| 109,843 | 28 | 3 | 451 | 37  | 30 | 2 | 479 | 18 | 988   | 60  |
| 109,844 | 16 | 3 | 359 | 37  | 21 | 2 | 395 | 18 | 791   | 60  |
| 109,845 | 14 | 4 | 333 | 35  | 20 | 2 | 385 | 15 | 752   | 56  |
| 109,846 | 14 | 4 | 329 | 35  | 20 | 2 | 383 | 15 | 746   | 56  |
| 109,847 | 14 | 4 | 335 | 35  | 20 | 2 | 386 | 15 | 755   | 56  |
| 109,848 | 15 | 3 | 350 | 32  | 20 | 2 | 393 | 12 | 778   | 49  |
| 109,849 | 15 | 3 | 345 | 30  | 19 | 2 | 391 | 12 | 770   | 47  |
| 109,850 | 15 | 3 | 337 | 31  | 19 | 2 | 384 | 12 | 755   | 48  |
| 109,851 | 15 | 2 | 338 | 27  | 19 | 2 | 384 | 12 | 756   | 43  |
| 109,852 | 16 | 2 | 369 | 25  | 20 | 2 | 404 | 12 | 809   | 41  |
| 109,853 | 16 | 2 | 455 | 24  | 21 | 1 | 449 | 11 | 941   | 38  |
| 109,854 | 17 | 2 | 461 | 23  | 22 | 1 | 459 | 11 | 959   | 37  |
| 109,855 | 17 | 2 | 468 | 21  | 23 | 1 | 469 | 10 | 977   | 34  |
| 109,856 | 16 | 2 | 424 | 20  | 22 | 1 | 463 | 11 | 925   | 34  |
| 109,857 | 16 | 2 | 411 | 19  | 19 | 1 | 453 | 9  | 899   | 31  |
| 109,858 | 16 | 2 | 389 | 19  | 19 | 1 | 424 | 9  | 848   | 31  |
| 109,859 | 16 | 2 | 388 | 19  | 19 | 1 | 424 | 9  | 847   | 31  |
| 109,860 | 16 | 2 | 395 | 19  | 19 | 1 | 435 | 8  | 865   | 30  |
| 109,861 | 17 | 2 | 398 | 19  | 20 | 1 | 434 | 8  | 869   | 30  |
| 109,862 | 16 | 1 | 399 | 13  | 20 | 1 | 437 | 8  | 872   | 23  |
| 109,863 | 16 | 1 | 400 | 10  | 20 | 1 | 436 | 3  | 872   | 15  |
| 109,864 | 17 | 1 | 408 | 3   | 21 | 1 | 449 | 2  | 895   | 7   |
| 109,865 | 17 | 1 | 419 | 3   | 21 | 1 | 462 | 2  | 919   | 7   |
| 109,866 | 17 | 1 | 418 | 3   | 21 | 1 | 444 | 2  | 900   | 7   |
| 109,867 | 18 | 1 | 429 | 4   | 21 | 1 | 472 | 2  | 940   | 8   |
| 109,868 | 18 | 1 | 430 | 4   | 21 | 1 | 468 | 2  | 937   | 8   |



|         |    |   |     |    |    |   |     |   |       |    |
|---------|----|---|-----|----|----|---|-----|---|-------|----|
| 109,869 | 20 | 1 | 449 | 4  | 21 | 1 | 472 | 2 | 962   | 8  |
| 109,870 | 20 | 3 | 455 | 5  | 21 | 1 | 468 | 2 | 964   | 11 |
| 109,871 | 20 | 3 | 452 | 5  | 21 | 1 | 460 | 2 | 953   | 11 |
| 109,872 | 24 | 3 | 495 | 5  | 25 | 1 | 510 | 2 | 1,054 | 11 |
| 109,873 | 24 | 4 | 489 | 5  | 24 | 1 | 500 | 2 | 1,037 | 12 |
| 109,874 | 29 | 4 | 536 | 4  | 30 | 1 | 587 | 2 | 1,182 | 11 |
| 109,875 | 30 | 4 | 556 | 6  | 31 | 1 | 614 | 2 | 1,231 | 13 |
| 109,876 | 30 | 4 | 555 | 7  | 31 | 1 | 614 | 2 | 1,230 | 14 |
| 109,877 | 30 | 4 | 556 | 7  | 31 | 0 | 616 | 2 | 1,233 | 13 |
| 109,878 | 32 | 4 | 571 | 8  | 31 | 0 | 638 | 2 | 1,272 | 14 |
| 109,879 | 32 | 4 | 569 | 8  | 31 | 0 | 636 | 2 | 1,268 | 14 |
| 109,880 | 32 | 5 | 570 | 7  | 31 | 0 | 637 | 2 | 1,270 | 14 |
| 109,881 | 32 | 5 | 580 | 7  | 33 | 0 | 646 | 2 | 1,291 | 14 |
| 109,882 | 32 | 5 | 570 | 7  | 33 | 0 | 646 | 2 | 1,281 | 14 |
| 109,883 | 33 | 5 | 578 | 7  | 33 | 0 | 654 | 2 | 1,298 | 14 |
| 109,884 | 31 | 5 | 618 | 7  | 34 | 0 | 679 | 2 | 1,362 | 14 |
| 109,885 | 32 | 5 | 636 | 7  | 35 | 0 | 691 | 2 | 1,394 | 14 |
| 109,886 | 31 | 5 | 651 | 8  | 34 | 0 | 688 | 2 | 1,404 | 15 |
| 109,887 | 31 | 5 | 666 | 8  | 34 | 0 | 694 | 2 | 1,425 | 15 |
| 109,888 | 31 | 5 | 626 | 8  | 33 | 0 | 687 | 2 | 1,377 | 15 |
| 109,889 | 26 | 5 | 578 | 8  | 33 | 0 | 607 | 2 | 1,244 | 15 |
| 109,890 | 27 | 5 | 579 | 8  | 33 | 0 | 599 | 2 | 1,238 | 15 |
| 109,891 | 27 | 5 | 557 | 8  | 29 | 0 | 512 | 2 | 1,125 | 15 |
| 109,892 | 28 | 5 | 556 | 8  | 29 | 0 | 512 | 2 | 1,125 | 15 |
| 109,893 | 28 | 5 | 561 | 8  | 28 | 0 | 505 | 2 | 1,122 | 15 |
| 109,894 | 28 | 5 | 561 | 8  | 28 | 0 | 505 | 2 | 1,122 | 15 |
| 109,895 | 31 | 5 | 581 | 8  | 29 | 0 | 511 | 2 | 1,152 | 15 |
| 109,896 | 37 | 4 | 650 | 8  | 32 | 0 | 562 | 2 | 1,281 | 14 |
| 109,897 | 37 | 4 | 667 | 8  | 31 | 0 | 585 | 2 | 1,320 | 14 |
| 109,898 | 37 | 4 | 668 | 10 | 31 | 0 | 585 | 2 | 1,321 | 16 |
| 109,899 | 37 | 4 | 678 | 12 | 31 | 1 | 594 | 2 | 1,340 | 19 |
| 109,900 | 37 | 4 | 687 | 12 | 31 | 1 | 602 | 2 | 1,357 | 19 |
| 109,901 | 37 | 4 | 693 | 11 | 31 | 1 | 602 | 3 | 1,363 | 19 |
| 109,902 | 37 | 4 | 674 | 11 | 29 | 1 | 593 | 3 | 1,333 | 19 |
| 109,903 | 37 | 4 | 667 | 11 | 29 | 1 | 583 | 2 | 1,316 | 18 |
| 109,904 | 37 | 4 | 580 | 11 | 28 | 1 | 538 | 2 | 1,183 | 18 |
| 109,905 | 36 | 4 | 571 | 11 | 27 | 1 | 527 | 2 | 1,161 | 18 |
| 109,906 | 36 | 4 | 571 | 11 | 26 | 1 | 519 | 2 | 1,152 | 18 |
| 109,907 | 36 | 4 | 568 | 11 | 26 | 1 | 516 | 1 | 1,146 | 17 |
| 109,908 | 36 | 4 | 568 | 11 | 26 | 1 | 530 | 1 | 1,160 | 17 |
| 109,909 | 36 | 4 | 571 | 11 | 25 | 1 | 531 | 1 | 1,163 | 17 |

|         |    |   |       |    |    |   |     |   |       |    |
|---------|----|---|-------|----|----|---|-----|---|-------|----|
| 109,910 | 36 | 4 | 575   | 11 | 25 | 1 | 527 | 1 | 1,163 | 17 |
| 109,911 | 36 | 4 | 572   | 11 | 25 | 1 | 520 | 1 | 1,153 | 17 |
| 109,912 | 35 | 4 | 569   | 12 | 24 | 1 | 519 | 1 | 1,147 | 18 |
| 109,913 | 35 | 5 | 582   | 12 | 24 | 1 | 522 | 1 | 1,163 | 19 |
| 109,914 | 37 | 6 | 594   | 12 | 24 | 1 | 525 | 1 | 1,180 | 20 |
| 109,915 | 36 | 6 | 635   | 12 | 25 | 1 | 535 | 1 | 1,231 | 20 |
| 109,916 | 36 | 6 | 613   | 13 | 25 | 1 | 518 | 1 | 1,192 | 21 |
| 109,917 | 36 | 7 | 602   | 13 | 25 | 1 | 502 | 1 | 1,165 | 22 |
| 109,918 | 35 | 7 | 590   | 12 | 25 | 1 | 473 | 1 | 1,123 | 21 |
| 109,919 | 34 | 7 | 589   | 12 | 26 | 1 | 472 | 1 | 1,121 | 21 |
| 109,920 | 55 | 8 | 988   | 12 | 39 | 1 | 696 | 1 | 1,778 | 22 |
| 109,921 | 55 | 6 | 998   | 11 | 39 | 1 | 698 | 1 | 1,790 | 19 |
| 109,922 | 57 | 5 | 1,034 | 11 | 38 | 1 | 695 | 1 | 1,824 | 18 |
| 109,923 | 62 | 5 | 1,183 | 11 | 41 | 1 | 713 | 1 | 1,999 | 18 |
| 109,924 | 57 | 5 | 1,137 | 11 | 35 | 1 | 627 | 1 | 1,856 | 18 |
| 109,925 | 56 | 5 | 1,117 | 11 | 34 | 1 | 600 | 1 | 1,807 | 18 |
| 109,926 | 69 | 5 | 1,660 | 9  | 43 | 1 | 769 | 1 | 2,541 | 16 |
| 109,927 | 69 | 5 | 1,694 | 7  | 43 | 1 | 781 | 1 | 2,587 | 14 |
| 109,928 | 70 | 5 | 1,710 | 7  | 44 | 1 | 785 | 1 | 2,609 | 14 |
| 109,929 | 68 | 5 | 1,695 | 7  | 44 | 1 | 763 | 1 | 2,570 | 14 |
| 109,930 | 68 | 5 | 1,691 | 7  | 44 | 1 | 761 | 1 | 2,564 | 14 |
| 109,931 | 68 | 4 | 1,678 | 9  | 42 | 1 | 753 | 1 | 2,541 | 15 |
| 109,932 | 68 | 4 | 1,683 | 9  | 42 | 1 | 749 | 1 | 2,542 | 15 |
| 109,933 | 66 | 4 | 1,682 | 9  | 41 | 1 | 741 | 1 | 2,530 | 15 |
| 109,934 | 66 | 4 | 1,659 | 10 | 40 | 1 | 735 | 2 | 2,500 | 17 |
| 109,935 | 67 | 4 | 1,666 | 14 | 41 | 1 | 720 | 2 | 2,494 | 21 |
| 109,936 | 66 | 5 | 1,647 | 17 | 40 | 1 | 708 | 3 | 2,461 | 26 |
| 109,937 | 66 | 5 | 1,623 | 16 | 40 | 1 | 697 | 3 | 2,426 | 25 |
| 109,938 | 66 | 5 | 1,608 | 16 | 41 | 1 | 689 | 3 | 2,404 | 25 |
| 109,939 | 66 | 5 | 1,605 | 16 | 41 | 1 | 683 | 3 | 2,395 | 25 |
| 109,940 | 66 | 5 | 1,605 | 16 | 40 | 1 | 683 | 3 | 2,394 | 25 |
| 109,941 | 65 | 5 | 1,597 | 16 | 40 | 1 | 681 | 3 | 2,383 | 25 |
| 109,942 | 65 | 5 | 1,593 | 17 | 40 | 1 | 678 | 3 | 2,376 | 26 |
| 109,943 | 64 | 5 | 1,590 | 17 | 40 | 1 | 676 | 3 | 2,370 | 26 |
| 109,944 | 65 | 5 | 1,587 | 17 | 40 | 1 | 676 | 3 | 2,368 | 26 |
| 109,945 | 63 | 5 | 1,576 | 17 | 39 | 1 | 671 | 3 | 2,349 | 26 |
| 109,946 | 62 | 5 | 1,568 | 17 | 39 | 1 | 670 | 3 | 2,339 | 26 |
| 109,947 | 56 | 5 | 1,501 | 23 | 36 | 1 | 616 | 6 | 2,209 | 35 |
| 109,948 | 66 | 5 | 1,581 | 23 | 45 | 1 | 671 | 6 | 2,363 | 35 |
| 109,949 | 67 | 5 | 1,609 | 22 | 47 | 1 | 688 | 6 | 2,411 | 34 |
| 109,950 | 68 | 5 | 1,652 | 20 | 50 | 0 | 729 | 6 | 2,499 | 31 |

|         |    |   |       |    |    |   |     |   |       |    |
|---------|----|---|-------|----|----|---|-----|---|-------|----|
| 109,951 | 68 | 5 | 1,641 | 20 | 50 | 0 | 719 | 6 | 2,478 | 31 |
| 109,952 | 70 | 5 | 1,756 | 20 | 57 | 0 | 798 | 5 | 2,681 | 30 |
| 109,953 | 69 | 5 | 1,753 | 21 | 57 | 0 | 798 | 5 | 2,677 | 31 |
| 109,954 | 69 | 5 | 1,768 | 21 | 57 | 0 | 802 | 5 | 2,696 | 31 |
| 109,955 | 70 | 5 | 1,780 | 21 | 57 | 0 | 810 | 5 | 2,717 | 31 |
| 109,956 | 70 | 5 | 1,778 | 22 | 57 | 1 | 810 | 6 | 2,715 | 34 |
| 109,957 | 70 | 5 | 1,774 | 22 | 57 | 1 | 808 | 6 | 2,709 | 34 |
| 109,958 | 69 | 5 | 1,777 | 26 | 58 | 1 | 810 | 7 | 2,714 | 39 |
| 109,959 | 68 | 5 | 1,774 | 26 | 57 | 1 | 793 | 7 | 2,692 | 39 |
| 109,960 | 68 | 5 | 1,770 | 26 | 57 | 1 | 792 | 7 | 2,687 | 39 |
| 109,961 | 69 | 5 | 1,786 | 30 | 59 | 3 | 800 | 8 | 2,714 | 46 |
| 109,962 | 69 | 5 | 1,779 | 30 | 59 | 3 | 800 | 8 | 2,707 | 46 |
| 109,963 | 69 | 5 | 1,777 | 30 | 60 | 3 | 802 | 8 | 2,708 | 46 |
| 109,964 | 70 | 4 | 1,777 | 31 | 60 | 3 | 800 | 8 | 2,707 | 46 |
| 109,965 | 68 | 3 | 1,774 | 31 | 60 | 3 | 800 | 8 | 2,702 | 45 |
| 109,966 | 68 | 3 | 1,729 | 31 | 58 | 3 | 777 | 8 | 2,632 | 45 |
| 109,967 | 64 | 3 | 1,651 | 30 | 55 | 3 | 737 | 8 | 2,507 | 44 |
| 109,968 | 64 | 2 | 1,597 | 30 | 54 | 3 | 711 | 8 | 2,426 | 43 |
| 109,969 | 65 | 2 | 1,648 | 30 | 55 | 3 | 720 | 8 | 2,488 | 43 |
| 109,970 | 53 | 1 | 1,651 | 30 | 55 | 3 | 699 | 8 | 2,458 | 42 |
| 109,971 | 53 | 1 | 1,697 | 30 | 55 | 3 | 710 | 8 | 2,515 | 42 |
| 109,972 | 53 | 1 | 1,719 | 30 | 56 | 3 | 732 | 8 | 2,560 | 42 |
| 109,973 | 48 | 1 | 1,712 | 30 | 57 | 3 | 710 | 8 | 2,527 | 42 |
| 109,974 | 43 | 1 | 1,556 | 32 | 53 | 3 | 679 | 8 | 2,331 | 44 |
| 109,975 | 36 | 3 | 1,419 | 32 | 52 | 3 | 647 | 8 | 2,154 | 46 |
| 109,976 | 35 | 3 | 1,271 | 32 | 50 | 3 | 589 | 8 | 1,945 | 46 |
| 109,977 | 31 | 3 | 1,014 | 32 | 44 | 3 | 512 | 8 | 1,601 | 46 |
| 109,978 | 31 | 3 | 980   | 32 | 44 | 3 | 500 | 8 | 1,555 | 46 |
| 109,979 | 30 | 3 | 964   | 32 | 43 | 3 | 494 | 8 | 1,531 | 46 |
| 109,980 | 30 | 3 | 969   | 33 | 44 | 3 | 495 | 8 | 1,538 | 47 |
| 109,981 | 33 | 3 | 987   | 33 | 44 | 3 | 501 | 8 | 1,565 | 47 |
| 109,982 | 33 | 3 | 990   | 31 | 44 | 3 | 501 | 8 | 1,568 | 45 |
| 109,983 | 33 | 3 | 985   | 31 | 44 | 3 | 501 | 8 | 1,563 | 45 |
| 109,984 | 34 | 3 | 985   | 30 | 45 | 3 | 500 | 7 | 1,564 | 43 |
| 109,985 | 34 | 3 | 985   | 30 | 45 | 3 | 500 | 8 | 1,564 | 44 |
| 109,986 | 33 | 3 | 956   | 26 | 43 | 3 | 493 | 8 | 1,525 | 40 |
| 109,987 | 36 | 2 | 1,081 | 23 | 43 | 3 | 512 | 7 | 1,672 | 35 |
| 109,988 | 36 | 2 | 1,081 | 23 | 43 | 3 | 512 | 7 | 1,672 | 35 |
| 109,989 | 39 | 2 | 1,151 | 23 | 44 | 3 | 528 | 7 | 1,762 | 35 |
| 109,990 | 43 | 2 | 1,193 | 23 | 44 | 3 | 533 | 7 | 1,813 | 35 |
| 109,991 | 44 | 2 | 1,211 | 23 | 44 | 3 | 537 | 7 | 1,836 | 35 |

|         |    |   |       |    |    |   |     |    |       |    |
|---------|----|---|-------|----|----|---|-----|----|-------|----|
| 109,992 | 44 | 2 | 1,232 | 22 | 44 | 3 | 539 | 7  | 1,859 | 34 |
| 109,993 | 44 | 2 | 1,232 | 22 | 44 | 3 | 539 | 7  | 1,859 | 34 |
| 109,994 | 44 | 2 | 1,256 | 22 | 44 | 3 | 543 | 7  | 1,887 | 34 |
| 109,995 | 43 | 2 | 1,265 | 22 | 45 | 3 | 547 | 9  | 1,900 | 36 |
| 109,996 | 43 | 2 | 1,264 | 22 | 45 | 4 | 547 | 9  | 1,899 | 37 |
| 109,997 | 43 | 2 | 1,267 | 22 | 45 | 4 | 547 | 12 | 1,902 | 40 |
| 109,998 | 43 | 2 | 1,266 | 18 | 45 | 4 | 547 | 11 | 1,901 | 35 |
| 109,999 | 34 | 2 | 1,163 | 20 | 36 | 5 | 466 | 11 | 1,699 | 38 |
| 110,000 | 33 | 2 | 1,134 | 21 | 34 | 5 | 448 | 11 | 1,649 | 39 |
| 110,001 | 31 | 2 | 1,073 | 22 | 31 | 5 | 394 | 11 | 1,529 | 40 |
| 110,002 | 29 | 2 | 1,026 | 22 | 29 | 5 | 390 | 11 | 1,474 | 40 |
| 110,003 | 29 | 2 | 985   | 21 | 25 | 5 | 320 | 11 | 1,359 | 39 |
| 110,004 | 29 | 2 | 969   | 21 | 25 | 5 | 316 | 11 | 1,339 | 39 |
| 110,005 | 31 | 2 | 1,007 | 21 | 27 | 5 | 335 | 12 | 1,400 | 40 |
| 110,006 | 30 | 2 | 1,002 | 20 | 27 | 4 | 336 | 11 | 1,395 | 37 |
| 110,007 | 30 | 2 | 1,000 | 20 | 27 | 4 | 336 | 11 | 1,393 | 37 |
| 110,008 | 30 | 2 | 1,038 | 16 | 28 | 4 | 350 | 10 | 1,446 | 32 |
| 110,009 | 31 | 2 | 1,063 | 16 | 27 | 4 | 365 | 10 | 1,486 | 32 |
| 110,010 | 31 | 2 | 1,053 | 16 | 26 | 4 | 359 | 10 | 1,469 | 32 |
| 110,011 | 31 | 2 | 1,053 | 16 | 26 | 4 | 359 | 10 | 1,469 | 32 |
| 110,012 | 30 | 2 | 1,047 | 12 | 25 | 2 | 357 | 9  | 1,459 | 25 |
| 110,013 | 30 | 2 | 1,046 | 12 | 24 | 2 | 354 | 9  | 1,454 | 25 |
| 110,014 | 29 | 2 | 1,039 | 10 | 24 | 2 | 353 | 9  | 1,445 | 23 |
| 110,015 | 29 | 2 | 1,031 | 10 | 24 | 2 | 353 | 9  | 1,437 | 23 |
| 110,016 | 29 | 2 | 1,045 | 10 | 24 | 2 | 358 | 9  | 1,456 | 23 |
| 110,017 | 29 | 2 | 1,058 | 10 | 25 | 2 | 370 | 9  | 1,482 | 23 |
| 110,018 | 24 | 2 | 1,046 | 10 | 25 | 2 | 370 | 9  | 1,465 | 23 |
| 110,019 | 23 | 2 | 1,045 | 10 | 25 | 2 | 360 | 9  | 1,453 | 23 |
| 110,020 | 23 | 2 | 990   | 10 | 23 | 2 | 351 | 11 | 1,387 | 25 |
| 110,021 | 22 | 2 | 738   | 10 | 14 | 2 | 221 | 11 | 995   | 25 |
| 110,022 | 23 | 2 | 699   | 10 | 14 | 2 | 211 | 11 | 947   | 25 |
| 110,023 | 23 | 2 | 666   | 10 | 13 | 2 | 188 | 11 | 890   | 25 |
| 110,024 | 22 | 2 | 607   | 8  | 10 | 2 | 178 | 11 | 817   | 23 |
| 110,025 | 23 | 0 | 600   | 9  | 10 | 2 | 177 | 12 | 810   | 23 |
| 110,026 | 22 | 0 | 597   | 9  | 10 | 2 | 174 | 12 | 803   | 23 |
| 110,027 | 22 | 0 | 599   | 9  | 10 | 2 | 176 | 12 | 807   | 23 |
| 110,028 | 22 | 0 | 624   | 9  | 11 | 2 | 185 | 13 | 842   | 24 |
| 110,029 | 22 | 0 | 623   | 9  | 11 | 2 | 184 | 13 | 840   | 24 |
| 110,030 | 23 | 0 | 626   | 8  | 10 | 3 | 185 | 13 | 844   | 24 |
| 110,031 | 23 | 0 | 620   | 9  | 10 | 3 | 181 | 13 | 834   | 25 |
| 110,032 | 20 | 0 | 609   | 9  | 10 | 3 | 180 | 13 | 819   | 25 |

|         |    |   |     |    |    |   |     |    |       |    |
|---------|----|---|-----|----|----|---|-----|----|-------|----|
| 110,033 | 20 | 0 | 607 | 10 | 10 | 3 | 181 | 13 | 818   | 26 |
| 110,034 | 20 | 0 | 612 | 10 | 10 | 4 | 181 | 13 | 823   | 27 |
| 110,035 | 19 | 0 | 604 | 10 | 9  | 4 | 175 | 13 | 807   | 27 |
| 110,036 | 18 | 0 | 596 | 10 | 9  | 4 | 173 | 12 | 796   | 26 |
| 110,037 | 17 | 0 | 533 | 10 | 8  | 4 | 160 | 13 | 718   | 27 |
| 110,038 | 16 | 0 | 484 | 10 | 8  | 4 | 157 | 13 | 665   | 27 |
| 110,039 | 13 | 0 | 418 | 11 | 7  | 4 | 141 | 13 | 579   | 28 |
| 110,040 | 9  | 1 | 393 | 11 | 7  | 5 | 137 | 14 | 546   | 31 |
| 110,041 | 9  | 1 | 378 | 11 | 7  | 5 | 136 | 15 | 530   | 32 |
| 110,042 | 9  | 1 | 366 | 13 | 7  | 5 | 136 | 16 | 518   | 35 |
| 110,043 | 9  | 1 | 353 | 15 | 7  | 5 | 135 | 16 | 504   | 37 |
| 110,044 | 9  | 1 | 327 | 18 | 7  | 5 | 130 | 17 | 473   | 41 |
| 110,045 | 9  | 1 | 333 | 18 | 6  | 5 | 149 | 17 | 497   | 41 |
| 110,046 | 10 | 1 | 330 | 18 | 6  | 4 | 148 | 15 | 494   | 38 |
| 110,047 | 10 | 1 | 329 | 18 | 6  | 4 | 148 | 12 | 493   | 35 |
| 110,048 | 10 | 1 | 329 | 18 | 6  | 4 | 148 | 12 | 493   | 35 |
| 110,049 | 10 | 1 | 331 | 16 | 6  | 4 | 151 | 10 | 498   | 31 |
| 110,050 | 9  | 1 | 339 | 14 | 6  | 3 | 155 | 10 | 509   | 28 |
| 110,051 | 9  | 1 | 358 | 12 | 7  | 3 | 157 | 11 | 531   | 27 |
| 110,052 | 9  | 1 | 352 | 11 | 7  | 3 | 156 | 11 | 524   | 26 |
| 110,053 | 9  | 1 | 371 | 11 | 7  | 3 | 184 | 11 | 571   | 26 |
| 110,054 | 9  | 1 | 340 | 11 | 6  | 3 | 175 | 11 | 530   | 26 |
| 110,055 | 11 | 1 | 343 | 11 | 5  | 3 | 181 | 13 | 540   | 28 |
| 110,056 | 12 | 1 | 313 | 12 | 5  | 3 | 163 | 12 | 493   | 28 |
| 110,057 | 12 | 1 | 316 | 12 | 5  | 3 | 161 | 12 | 494   | 28 |
| 110,058 | 12 | 1 | 298 | 13 | 5  | 3 | 158 | 12 | 473   | 29 |
| 110,059 | 12 | 1 | 278 | 13 | 4  | 3 | 148 | 12 | 442   | 29 |
| 110,060 | 11 | 1 | 250 | 13 | 4  | 3 | 132 | 12 | 397   | 29 |
| 110,061 | 14 | 1 | 299 | 13 | 6  | 3 | 181 | 12 | 500   | 29 |
| 110,062 | 14 | 1 | 302 | 14 | 6  | 3 | 182 | 12 | 504   | 30 |
| 110,063 | 22 | 1 | 372 | 14 | 10 | 3 | 246 | 12 | 650   | 30 |
| 110,064 | 22 | 1 | 373 | 14 | 10 | 3 | 249 | 12 | 654   | 30 |
| 110,065 | 26 | 1 | 404 | 14 | 11 | 3 | 285 | 12 | 726   | 30 |
| 110,066 | 27 | 1 | 394 | 14 | 11 | 3 | 279 | 12 | 711   | 30 |
| 110,067 | 27 | 1 | 415 | 16 | 11 | 4 | 282 | 12 | 735   | 33 |
| 110,068 | 27 | 1 | 399 | 16 | 10 | 4 | 271 | 12 | 707   | 33 |
| 110,069 | 29 | 1 | 413 | 16 | 10 | 4 | 273 | 12 | 725   | 33 |
| 110,070 | 34 | 1 | 482 | 16 | 12 | 4 | 300 | 12 | 828   | 33 |
| 110,071 | 33 | 1 | 474 | 16 | 12 | 4 | 296 | 10 | 815   | 31 |
| 110,072 | 65 | 1 | 793 | 16 | 33 | 4 | 470 | 10 | 1,361 | 31 |
| 110,073 | 65 | 1 | 789 | 17 | 34 | 4 | 471 | 10 | 1,359 | 32 |

|         |    |   |     |    |    |   |     |    |       |    |
|---------|----|---|-----|----|----|---|-----|----|-------|----|
| 110,074 | 65 | 1 | 783 | 19 | 34 | 4 | 469 | 10 | 1,351 | 34 |
| 110,075 | 65 | 1 | 782 | 19 | 34 | 4 | 469 | 10 | 1,350 | 34 |
| 110,076 | 69 | 1 | 825 | 18 | 34 | 4 | 486 | 9  | 1,414 | 32 |
| 110,077 | 73 | 1 | 875 | 20 | 34 | 4 | 499 | 9  | 1,481 | 34 |
| 110,078 | 73 | 1 | 904 | 22 | 35 | 5 | 518 | 9  | 1,530 | 37 |
| 110,079 | 73 | 1 | 881 | 23 | 34 | 5 | 508 | 8  | 1,496 | 37 |
| 110,080 | 73 | 2 | 874 | 23 | 34 | 5 | 507 | 8  | 1,488 | 38 |
| 110,081 | 72 | 2 | 892 | 25 | 36 | 4 | 512 | 9  | 1,512 | 40 |
| 110,082 | 73 | 2 | 893 | 26 | 36 | 4 | 514 | 10 | 1,516 | 42 |
| 110,083 | 73 | 2 | 892 | 27 | 36 | 4 | 514 | 10 | 1,515 | 43 |
| 110,084 | 73 | 2 | 892 | 26 | 36 | 4 | 514 | 9  | 1,515 | 41 |
| 110,085 | 73 | 2 | 887 | 28 | 36 | 3 | 514 | 10 | 1,510 | 43 |
| 110,086 | 73 | 2 | 883 | 28 | 36 | 3 | 514 | 10 | 1,506 | 43 |
| 110,087 | 74 | 2 | 881 | 28 | 36 | 3 | 514 | 10 | 1,505 | 43 |
| 110,088 | 74 | 2 | 881 | 30 | 36 | 3 | 515 | 10 | 1,506 | 45 |
| 110,089 | 74 | 2 | 881 | 32 | 36 | 3 | 515 | 10 | 1,506 | 47 |
| 110,090 | 74 | 2 | 876 | 31 | 36 | 3 | 515 | 11 | 1,501 | 47 |
| 110,091 | 75 | 1 | 877 | 31 | 36 | 2 | 515 | 10 | 1,503 | 44 |
| 110,092 | 75 | 1 | 875 | 31 | 36 | 2 | 515 | 9  | 1,501 | 43 |
| 110,093 | 74 | 1 | 870 | 29 | 36 | 2 | 513 | 8  | 1,493 | 40 |
| 110,094 | 74 | 1 | 862 | 24 | 36 | 2 | 513 | 8  | 1,485 | 35 |
| 110,095 | 74 | 1 | 861 | 24 | 36 | 2 | 513 | 8  | 1,484 | 35 |
| 110,096 | 74 | 1 | 849 | 24 | 36 | 2 | 491 | 8  | 1,450 | 35 |
| 110,097 | 73 | 1 | 849 | 24 | 36 | 2 | 490 | 8  | 1,448 | 35 |
| 110,098 | 73 | 1 | 847 | 24 | 36 | 2 | 490 | 8  | 1,446 | 35 |
| 110,099 | 73 | 1 | 842 | 24 | 36 | 2 | 487 | 8  | 1,438 | 35 |
| 110,100 | 73 | 1 | 834 | 24 | 36 | 2 | 483 | 8  | 1,426 | 35 |
| 110,101 | 73 | 1 | 817 | 24 | 35 | 2 | 480 | 7  | 1,405 | 34 |
| 110,102 | 73 | 1 | 814 | 24 | 35 | 2 | 480 | 7  | 1,402 | 34 |
| 110,103 | 73 | 1 | 794 | 24 | 35 | 2 | 455 | 7  | 1,357 | 34 |
| 110,104 | 73 | 1 | 792 | 24 | 35 | 2 | 452 | 7  | 1,352 | 34 |
| 110,105 | 73 | 1 | 791 | 24 | 35 | 2 | 452 | 7  | 1,351 | 34 |
| 110,106 | 70 | 1 | 780 | 24 | 35 | 2 | 444 | 5  | 1,329 | 32 |
| 110,107 | 68 | 1 | 773 | 23 | 34 | 2 | 440 | 5  | 1,315 | 31 |
| 110,108 | 68 | 1 | 772 | 22 | 34 | 2 | 440 | 5  | 1,314 | 30 |
| 110,109 | 68 | 1 | 772 | 22 | 34 | 2 | 439 | 5  | 1,313 | 30 |
| 110,110 | 66 | 1 | 737 | 22 | 32 | 2 | 402 | 5  | 1,237 | 30 |
| 110,111 | 66 | 1 | 722 | 21 | 32 | 2 | 388 | 5  | 1,208 | 29 |
| 110,112 | 66 | 1 | 721 | 21 | 32 | 2 | 389 | 5  | 1,208 | 29 |
| 110,113 | 59 | 1 | 653 | 19 | 28 | 1 | 323 | 5  | 1,063 | 26 |
| 110,114 | 63 | 1 | 660 | 19 | 28 | 1 | 324 | 5  | 1,075 | 26 |

|         |    |   |     |    |    |   |     |    |       |    |
|---------|----|---|-----|----|----|---|-----|----|-------|----|
| 110,115 | 60 | 1 | 636 | 19 | 27 | 1 | 292 | 5  | 1,015 | 26 |
| 110,116 | 60 | 1 | 629 | 19 | 27 | 1 | 288 | 5  | 1,004 | 26 |
| 110,117 | 60 | 1 | 633 | 19 | 27 | 1 | 289 | 5  | 1,009 | 26 |
| 110,118 | 60 | 1 | 612 | 19 | 27 | 1 | 287 | 5  | 986   | 26 |
| 110,119 | 60 | 1 | 608 | 19 | 27 | 1 | 285 | 5  | 980   | 26 |
| 110,120 | 65 | 1 | 618 | 19 | 28 | 1 | 298 | 5  | 1,009 | 26 |
| 110,121 | 65 | 1 | 551 | 19 | 26 | 1 | 277 | 5  | 919   | 26 |
| 110,122 | 66 | 1 | 545 | 21 | 28 | 0 | 278 | 6  | 917   | 28 |
| 110,123 | 43 | 1 | 325 | 20 | 12 | 0 | 137 | 6  | 517   | 27 |
| 110,124 | 47 | 1 | 381 | 20 | 16 | 0 | 153 | 7  | 597   | 28 |
| 110,125 | 49 | 1 | 425 | 19 | 16 | 0 | 161 | 7  | 651   | 27 |
| 110,126 | 45 | 1 | 424 | 19 | 16 | 0 | 163 | 7  | 648   | 27 |
| 110,127 | 45 | 1 | 415 | 21 | 16 | 0 | 155 | 9  | 631   | 31 |
| 110,128 | 41 | 1 | 365 | 17 | 16 | 0 | 141 | 9  | 563   | 27 |
| 110,129 | 41 | 1 | 335 | 18 | 15 | 0 | 120 | 10 | 511   | 29 |
| 110,130 | 41 | 2 | 331 | 17 | 13 | 0 | 116 | 13 | 501   | 32 |
| 110,131 | 41 | 1 | 329 | 23 | 13 | 0 | 114 | 14 | 497   | 38 |
| 110,132 | 41 | 1 | 319 | 25 | 13 | 1 | 114 | 13 | 487   | 40 |
| 110,133 | 40 | 1 | 315 | 24 | 13 | 1 | 110 | 13 | 478   | 39 |
| 110,134 | 40 | 1 | 316 | 24 | 13 | 1 | 110 | 13 | 479   | 39 |
| 110,135 | 40 | 1 | 315 | 24 | 13 | 1 | 109 | 14 | 477   | 40 |
| 110,136 | 40 | 1 | 315 | 22 | 13 | 1 | 109 | 13 | 477   | 37 |
| 110,137 | 40 | 1 | 316 | 22 | 13 | 1 | 109 | 13 | 478   | 37 |
| 110,138 | 39 | 1 | 316 | 20 | 13 | 1 | 109 | 13 | 477   | 35 |
| 110,139 | 39 | 2 | 316 | 21 | 13 | 1 | 109 | 13 | 477   | 37 |
| 110,140 | 39 | 2 | 312 | 19 | 13 | 1 | 109 | 12 | 473   | 34 |
| 110,141 | 37 | 2 | 301 | 19 | 13 | 1 | 108 | 12 | 459   | 34 |
| 110,142 | 15 | 1 | 159 | 7  | 4  | 1 | 54  | 3  | 232   | 12 |
| 110,143 | 33 | 2 | 279 | 18 | 13 | 1 | 97  | 10 | 422   | 31 |
| 110,144 | 37 | 2 | 312 | 19 | 13 | 1 | 109 | 12 | 471   | 34 |
| 110,145 | 38 | 2 | 313 | 20 | 13 | 1 | 110 | 12 | 474   | 35 |
| 110,146 | 38 | 2 | 315 | 20 | 13 | 1 | 110 | 12 | 476   | 35 |
| 110,147 | 38 | 2 | 315 | 20 | 13 | 1 | 110 | 12 | 476   | 35 |
| 110,148 | 38 | 2 | 315 | 20 | 13 | 1 | 110 | 12 | 476   | 35 |
| 110,149 | 38 | 3 | 315 | 20 | 13 | 1 | 110 | 12 | 476   | 36 |
| 110,150 | 38 | 3 | 315 | 20 | 13 | 1 | 110 | 13 | 476   | 37 |
| 110,151 | 38 | 3 | 315 | 20 | 14 | 1 | 110 | 13 | 477   | 37 |
| 110,152 | 39 | 3 | 316 | 20 | 14 | 1 | 110 | 13 | 479   | 37 |
| 110,153 | 39 | 3 | 315 | 20 | 14 | 1 | 110 | 13 | 478   | 37 |
| 110,154 | 39 | 3 | 315 | 20 | 14 | 1 | 110 | 13 | 478   | 37 |
| 110,155 | 39 | 3 | 315 | 20 | 14 | 1 | 110 | 13 | 478   | 37 |

|         |    |     |     |     |    |    |     |     |     |       |
|---------|----|-----|-----|-----|----|----|-----|-----|-----|-------|
| 110,156 | 39 | 3   | 319 | 20  | 14 | 1  | 111 | 13  | 483 | 37    |
| 110,157 | 39 | 3   | 320 | 20  | 14 | 1  | 111 | 13  | 484 | 37    |
| 110,158 | 39 | 3   | 320 | 20  | 14 | 1  | 111 | 13  | 484 | 37    |
| 110,159 | 39 | 3   | 320 | 20  | 14 | 1  | 111 | 13  | 484 | 37    |
| 110,160 | 39 | 3   | 319 | 20  | 14 | 1  | 110 | 13  | 482 | 37    |
| 110,161 | 39 | 3   | 319 | 20  | 14 | 1  | 110 | 13  | 482 | 37    |
| 110,162 | 39 | 3   | 319 | 20  | 14 | 1  | 111 | 13  | 483 | 37    |
| 110,163 | 39 | 3   | 318 | 20  | 14 | 1  | 112 | 13  | 483 | 37    |
| 110,164 | 38 | 3   | 312 | 20  | 14 | 1  | 111 | 13  | 475 | 37    |
| 110,165 | 38 | 3   | 312 | 20  | 14 | 1  | 108 | 13  | 472 | 37    |
| 110,166 | 31 | 3   | 297 | 20  | 14 | 1  | 103 | 13  | 445 | 37    |
| 110,167 | 31 | 3   | 297 | 20  | 14 | 1  | 103 | 13  | 445 | 37    |
| 110,168 | 31 | 3   | 296 | 21  | 14 | 1  | 101 | 13  | 442 | 38    |
| 110,169 | 31 | 3   | 292 | 23  | 14 | 1  | 100 | 16  | 437 | 43    |
| 110,170 | 25 | 3   | 269 | 25  | 13 | 1  | 84  | 17  | 391 | 46    |
| 110,171 | 25 | 3   | 268 | 26  | 13 | 1  | 83  | 17  | 389 | 47    |
| 110,172 | 24 | 3   | 262 | 27  | 13 | 1  | 82  | 17  | 381 | 48    |
| 110,173 | 16 | 3   | 239 | 28  | 11 | 1  | 74  | 17  | 340 | 49    |
| 110,174 | 16 | 3   | 231 | 27  | 10 | 1  | 69  | 17  | 326 | 48    |
| 110,175 | 7  | 3   | 95  | 27  | 4  | 1  | 26  | 16  | 132 | 47    |
| 110,176 | 2  | 3   | 37  | 27  | 1  | 1  | 15  | 16  | 55  | 47    |
| 110,177 | 1  | 4   | 13  | 27  | 1  | 1  | 4   | 15  | 19  | 47    |
| 110,178 | 1  | 4   | 11  | 27  | 1  | 1  | 4   | 13  | 17  | 45    |
| 110,179 | 1  | 4   | 11  | 27  | 1  | 1  | 4   | 17  | 17  | 49    |
| 110,180 | 1  | 7   | 11  | 98  | 1  | 6  | 4   | 44  | 17  | 155   |
| 110,181 | 1  | 10  | 11  | 228 | 1  | 6  | 4   | 69  | 17  | 313   |
| 110,182 | 1  | 11  | 11  | 241 | 1  | 6  | 4   | 86  | 17  | 344   |
| 110,183 | 1  | 22  | 11  | 301 | 1  | 8  | 4   | 125 | 17  | 456   |
| 110,184 | 1  | 22  | 11  | 298 | 1  | 8  | 4   | 126 | 17  | 454   |
| 110,185 | 1  | 25  | 11  | 317 | 1  | 9  | 4   | 134 | 17  | 485   |
| 110,186 | 1  | 49  | 11  | 407 | 1  | 11 | 4   | 198 | 17  | 665   |
| 110,187 | 1  | 52  | 11  | 415 | 1  | 11 | 4   | 199 | 17  | 677   |
| 110,188 | 1  | 84  | 11  | 657 | 1  | 28 | 4   | 386 | 17  | 1,155 |
| 110,189 | 1  | 84  | 11  | 664 | 1  | 28 | 4   | 387 | 17  | 1,163 |
| 110,190 | 1  | 101 | 11  | 898 | 1  | 30 | 4   | 429 | 17  | 1,458 |
| 110,191 | 1  | 102 | 11  | 940 | 1  | 30 | 3   | 435 | 16  | 1,507 |
| 110,192 | 2  | 102 | 11  | 944 | 1  | 30 | 3   | 435 | 17  | 1,511 |
| 110,193 | 2  | 102 | 11  | 944 | 1  | 30 | 3   | 435 | 17  | 1,511 |
| 110,194 | 2  | 102 | 11  | 946 | 1  | 30 | 3   | 436 | 17  | 1,514 |
| 110,195 | 2  | 111 | 10  | 981 | 1  | 30 | 3   | 440 | 16  | 1,562 |
| 110,196 | 2  | 111 | 10  | 993 | 1  | 30 | 3   | 440 | 16  | 1,574 |



|         |   |     |    |       |   |    |   |     |    |       |
|---------|---|-----|----|-------|---|----|---|-----|----|-------|
| 110,197 | 2 | 111 | 10 | 1,002 | 1 | 30 | 3 | 440 | 16 | 1,583 |
| 110,198 | 2 | 111 | 10 | 1,002 | 1 | 30 | 3 | 440 | 16 | 1,583 |
| 110,199 | 2 | 110 | 12 | 1,002 | 1 | 30 | 3 | 440 | 18 | 1,582 |
| 110,200 | 2 | 110 | 12 | 1,002 | 1 | 30 | 3 | 439 | 18 | 1,581 |
| 110,201 | 3 | 110 | 13 | 1,003 | 1 | 30 | 3 | 439 | 20 | 1,582 |
| 110,202 | 3 | 110 | 13 | 1,004 | 0 | 30 | 3 | 439 | 19 | 1,583 |
| 110,203 | 2 | 110 | 12 | 1,004 | 0 | 30 | 3 | 439 | 17 | 1,583 |
| 110,204 | 2 | 110 | 12 | 1,004 | 0 | 30 | 3 | 439 | 17 | 1,583 |
| 110,205 | 2 | 110 | 13 | 1,031 | 0 | 30 | 3 | 448 | 18 | 1,619 |
| 110,206 | 2 | 110 | 13 | 1,031 | 0 | 30 | 3 | 456 | 18 | 1,627 |
| 110,207 | 2 | 110 | 9  | 1,034 | 0 | 30 | 2 | 456 | 13 | 1,630 |
| 110,208 | 2 | 110 | 8  | 1,050 | 0 | 31 | 2 | 475 | 12 | 1,666 |
| 110,209 | 3 | 110 | 8  | 1,125 | 0 | 31 | 2 | 502 | 13 | 1,768 |
| 110,210 | 3 | 118 | 8  | 1,208 | 0 | 33 | 2 | 596 | 13 | 1,955 |
| 110,211 | 3 | 118 | 8  | 1,212 | 0 | 33 | 2 | 597 | 13 | 1,960 |
| 110,212 | 3 | 120 | 8  | 1,225 | 0 | 33 | 3 | 601 | 14 | 1,979 |
| 110,213 | 3 | 120 | 8  | 1,228 | 0 | 33 | 2 | 601 | 13 | 1,982 |
| 110,214 | 3 | 120 | 7  | 1,228 | 0 | 33 | 1 | 601 | 11 | 1,982 |
| 110,215 | 3 | 120 | 7  | 1,231 | 0 | 33 | 1 | 602 | 11 | 1,986 |
| 110,216 | 3 | 120 | 6  | 1,231 | 0 | 33 | 1 | 603 | 10 | 1,987 |
| 110,217 | 3 | 120 | 6  | 1,231 | 0 | 33 | 1 | 603 | 10 | 1,987 |
| 110,218 | 3 | 120 | 6  | 1,233 | 0 | 34 | 1 | 605 | 10 | 1,992 |
| 110,219 | 3 | 120 | 7  | 1,237 | 0 | 34 | 1 | 607 | 11 | 1,998 |
| 110,220 | 3 | 121 | 7  | 1,237 | 0 | 35 | 1 | 604 | 11 | 1,997 |
| 110,221 | 3 | 122 | 5  | 1,260 | 0 | 35 | 1 | 614 | 9  | 2,031 |
| 110,222 | 3 | 122 | 5  | 1,264 | 0 | 35 | 1 | 616 | 9  | 2,037 |
| 110,223 | 3 | 122 | 5  | 1,264 | 0 | 35 | 1 | 616 | 9  | 2,037 |
| 110,224 | 3 | 122 | 5  | 1,266 | 0 | 35 | 1 | 617 | 9  | 2,040 |
| 110,225 | 3 | 122 | 7  | 1,271 | 0 | 35 | 1 | 620 | 11 | 2,048 |
| 110,226 | 3 | 122 | 7  | 1,270 | 0 | 35 | 1 | 620 | 11 | 2,047 |
| 110,227 | 3 | 122 | 7  | 1,270 | 0 | 35 | 1 | 621 | 11 | 2,048 |
| 110,228 | 3 | 121 | 8  | 1,270 | 0 | 35 | 1 | 624 | 12 | 2,050 |
| 110,229 | 3 | 121 | 8  | 1,268 | 0 | 35 | 1 | 624 | 12 | 2,048 |
| 110,230 | 3 | 121 | 8  | 1,271 | 0 | 35 | 1 | 619 | 12 | 2,046 |
| 110,231 | 3 | 117 | 8  | 1,197 | 0 | 30 | 1 | 588 | 12 | 1,932 |
| 110,232 | 3 | 114 | 8  | 1,068 | 0 | 30 | 1 | 563 | 12 | 1,775 |
| 110,233 | 3 | 102 | 8  | 996   | 0 | 28 | 1 | 506 | 12 | 1,632 |
| 110,234 | 3 | 102 | 8  | 996   | 0 | 28 | 1 | 506 | 12 | 1,632 |
| 110,235 | 3 | 104 | 8  | 1,014 | 0 | 29 | 1 | 532 | 12 | 1,679 |
| 110,236 | 3 | 81  | 8  | 972   | 0 | 27 | 1 | 487 | 12 | 1,567 |
| 110,237 | 3 | 84  | 8  | 1,051 | 0 | 34 | 1 | 562 | 12 | 1,731 |

|         |   |     |    |       |   |    |   |       |    |       |
|---------|---|-----|----|-------|---|----|---|-------|----|-------|
| 110,238 | 3 | 86  | 8  | 1,084 | 0 | 35 | 1 | 599   | 12 | 1,804 |
| 110,239 | 3 | 54  | 8  | 863   | 0 | 18 | 1 | 421   | 12 | 1,356 |
| 110,240 | 3 | 54  | 8  | 864   | 0 | 18 | 1 | 421   | 12 | 1,357 |
| 110,241 | 3 | 36  | 9  | 643   | 0 | 18 | 1 | 396   | 13 | 1,093 |
| 110,242 | 2 | 35  | 9  | 605   | 0 | 18 | 1 | 390   | 12 | 1,048 |
| 110,243 | 2 | 42  | 9  | 636   | 0 | 18 | 1 | 420   | 12 | 1,116 |
| 110,244 | 2 | 42  | 9  | 638   | 0 | 18 | 1 | 421   | 12 | 1,119 |
| 110,245 | 2 | 42  | 11 | 644   | 0 | 18 | 1 | 420   | 14 | 1,124 |
| 110,246 | 2 | 35  | 11 | 605   | 0 | 19 | 1 | 418   | 14 | 1,077 |
| 110,247 | 2 | 36  | 11 | 611   | 0 | 19 | 1 | 418   | 14 | 1,084 |
| 110,248 | 2 | 38  | 11 | 606   | 0 | 19 | 1 | 420   | 14 | 1,083 |
| 110,249 | 2 | 38  | 11 | 607   | 0 | 19 | 1 | 421   | 14 | 1,085 |
| 110,250 | 2 | 38  | 9  | 607   | 0 | 19 | 1 | 422   | 12 | 1,086 |
| 110,251 | 2 | 38  | 9  | 610   | 0 | 19 | 1 | 422   | 12 | 1,089 |
| 110,252 | 1 | 38  | 8  | 616   | 0 | 19 | 1 | 423   | 10 | 1,096 |
| 110,253 | 1 | 38  | 8  | 622   | 0 | 19 | 1 | 425   | 10 | 1,104 |
| 110,254 | 1 | 46  | 8  | 845   | 0 | 24 | 1 | 572   | 10 | 1,487 |
| 110,255 | 1 | 55  | 8  | 984   | 0 | 33 | 1 | 762   | 10 | 1,834 |
| 110,256 | 1 | 61  | 7  | 1,033 | 0 | 35 | 1 | 797   | 9  | 1,926 |
| 110,257 | 1 | 61  | 7  | 1,123 | 0 | 39 | 1 | 895   | 9  | 2,118 |
| 110,258 | 1 | 65  | 7  | 1,196 | 0 | 44 | 1 | 993   | 9  | 2,298 |
| 110,259 | 1 | 73  | 7  | 1,361 | 0 | 49 | 1 | 1,112 | 9  | 2,595 |
| 110,260 | 0 | 76  | 7  | 1,523 | 0 | 55 | 1 | 1,263 | 8  | 2,917 |
| 110,261 | 0 | 79  | 7  | 1,639 | 0 | 55 | 1 | 1,240 | 8  | 3,013 |
| 110,262 | 0 | 79  | 7  | 1,638 | 0 | 55 | 0 | 1,242 | 7  | 3,014 |
| 110,263 | 0 | 83  | 9  | 1,662 | 0 | 57 | 0 | 1,261 | 9  | 3,063 |
| 110,264 | 0 | 85  | 9  | 1,698 | 0 | 57 | 0 | 1,269 | 9  | 3,109 |
| 110,265 | 0 | 89  | 9  | 1,797 | 0 | 60 | 0 | 1,337 | 9  | 3,283 |
| 110,266 | 0 | 89  | 9  | 1,800 | 0 | 60 | 0 | 1,337 | 9  | 3,286 |
| 110,267 | 0 | 89  | 9  | 1,800 | 0 | 60 | 0 | 1,339 | 9  | 3,288 |
| 110,268 | 0 | 89  | 9  | 1,801 | 0 | 60 | 0 | 1,340 | 9  | 3,290 |
| 110,269 | 0 | 89  | 9  | 1,796 | 1 | 59 | 0 | 1,339 | 10 | 3,283 |
| 110,270 | 0 | 88  | 9  | 1,814 | 1 | 59 | 0 | 1,359 | 10 | 3,320 |
| 110,271 | 0 | 89  | 9  | 1,844 | 1 | 60 | 0 | 1,382 | 10 | 3,375 |
| 110,272 | 0 | 91  | 9  | 1,857 | 1 | 60 | 0 | 1,415 | 10 | 3,423 |
| 110,273 | 0 | 108 | 9  | 2,011 | 1 | 70 | 0 | 1,611 | 10 | 3,800 |
| 110,274 | 0 | 114 | 9  | 2,095 | 1 | 76 | 0 | 1,690 | 10 | 3,975 |
| 110,275 | 0 | 117 | 9  | 2,134 | 1 | 79 | 0 | 1,732 | 10 | 4,062 |
| 110,276 | 0 | 118 | 7  | 2,149 | 1 | 80 | 0 | 1,740 | 8  | 4,087 |
| 110,277 | 0 | 118 | 7  | 2,162 | 1 | 81 | 0 | 1,754 | 8  | 4,115 |
| 110,278 | 0 | 118 | 6  | 2,172 | 1 | 83 | 0 | 1,773 | 7  | 4,146 |

|         |   |     |    |       |   |     |    |       |    |       |
|---------|---|-----|----|-------|---|-----|----|-------|----|-------|
| 110,279 | 0 | 131 | 6  | 2,406 | 1 | 87  | 0  | 1,908 | 7  | 4,532 |
| 110,280 | 0 | 146 | 6  | 2,555 | 1 | 97  | 0  | 2,133 | 7  | 4,931 |
| 110,281 | 0 | 147 | 6  | 2,573 | 1 | 96  | 0  | 2,149 | 7  | 4,965 |
| 110,282 | 0 | 153 | 7  | 2,637 | 1 | 97  | 4  | 2,227 | 12 | 5,114 |
| 110,283 | 0 | 160 | 8  | 2,685 | 1 | 98  | 4  | 2,269 | 13 | 5,212 |
| 110,284 | 0 | 189 | 8  | 2,952 | 1 | 113 | 4  | 2,601 | 13 | 5,855 |
| 110,285 | 0 | 189 | 8  | 2,957 | 1 | 113 | 4  | 2,608 | 13 | 5,867 |
| 110,286 | 0 | 187 | 8  | 2,950 | 1 | 112 | 5  | 2,588 | 14 | 5,837 |
| 110,287 | 0 | 183 | 8  | 2,894 | 1 | 111 | 5  | 2,569 | 14 | 5,757 |
| 110,288 | 0 | 177 | 8  | 2,796 | 1 | 104 | 5  | 2,471 | 14 | 5,548 |
| 110,289 | 0 | 177 | 8  | 2,782 | 1 | 104 | 5  | 2,484 | 14 | 5,547 |
| 110,290 | 0 | 177 | 8  | 2,790 | 1 | 105 | 5  | 2,492 | 14 | 5,564 |
| 110,291 | 0 | 182 | 8  | 2,922 | 1 | 115 | 5  | 2,784 | 14 | 6,003 |
| 110,292 | 0 | 184 | 7  | 2,943 | 1 | 115 | 5  | 2,794 | 13 | 6,036 |
| 110,293 | 0 | 184 | 7  | 2,951 | 1 | 116 | 5  | 2,807 | 13 | 6,058 |
| 110,294 | 0 | 178 | 7  | 2,939 | 1 | 116 | 5  | 2,802 | 13 | 6,035 |
| 110,295 | 0 | 178 | 6  | 2,946 | 1 | 117 | 5  | 2,802 | 12 | 6,043 |
| 110,296 | 0 | 178 | 8  | 2,940 | 1 | 119 | 5  | 2,809 | 14 | 6,046 |
| 110,297 | 0 | 175 | 8  | 2,945 | 1 | 118 | 5  | 2,814 | 14 | 6,052 |
| 110,298 | 0 | 175 | 8  | 2,962 | 1 | 118 | 5  | 2,838 | 14 | 6,093 |
| 110,299 | 0 | 173 | 8  | 2,958 | 1 | 118 | 6  | 2,836 | 15 | 6,085 |
| 110,300 | 0 | 173 | 8  | 2,954 | 1 | 118 | 6  | 2,831 | 15 | 6,076 |
| 110,301 | 0 | 173 | 8  | 2,954 | 1 | 118 | 6  | 2,833 | 15 | 6,078 |
| 110,302 | 1 | 173 | 9  | 2,946 | 1 | 118 | 7  | 2,833 | 18 | 6,070 |
| 110,303 | 1 | 173 | 9  | 2,947 | 1 | 118 | 7  | 2,833 | 18 | 6,071 |
| 110,304 | 1 | 173 | 9  | 2,941 | 1 | 118 | 7  | 2,830 | 18 | 6,062 |
| 110,305 | 1 | 165 | 12 | 2,718 | 1 | 114 | 7  | 2,684 | 21 | 5,681 |
| 110,306 | 1 | 156 | 12 | 2,579 | 1 | 105 | 7  | 2,494 | 21 | 5,334 |
| 110,307 | 1 | 150 | 13 | 2,504 | 1 | 103 | 9  | 2,441 | 24 | 5,198 |
| 110,308 | 1 | 150 | 13 | 2,424 | 1 | 100 | 9  | 2,365 | 24 | 5,039 |
| 110,309 | 1 | 146 | 13 | 2,350 | 1 | 95  | 9  | 2,268 | 24 | 4,859 |
| 110,310 | 1 | 138 | 13 | 2,172 | 1 | 89  | 9  | 2,132 | 24 | 4,531 |
| 110,311 | 1 | 135 | 13 | 1,935 | 1 | 83  | 9  | 1,953 | 24 | 4,106 |
| 110,312 | 1 | 124 | 13 | 1,738 | 1 | 81  | 9  | 1,886 | 24 | 3,829 |
| 110,313 | 1 | 124 | 13 | 1,733 | 1 | 81  | 9  | 1,883 | 24 | 3,821 |
| 110,314 | 1 | 118 | 12 | 1,694 | 1 | 79  | 9  | 1,860 | 23 | 3,751 |
| 110,315 | 1 | 112 | 12 | 1,557 | 1 | 76  | 10 | 1,787 | 24 | 3,532 |
| 110,316 | 1 | 112 | 12 | 1,558 | 1 | 76  | 10 | 1,787 | 24 | 3,533 |
| 110,317 | 1 | 112 | 14 | 1,556 | 1 | 76  | 11 | 1,786 | 27 | 3,530 |
| 110,318 | 1 | 112 | 14 | 1,558 | 1 | 76  | 11 | 1,784 | 27 | 3,530 |
| 110,319 | 1 | 112 | 14 | 1,561 | 1 | 76  | 11 | 1,782 | 27 | 3,531 |

|         |   |     |    |       |   |    |    |       |    |       |
|---------|---|-----|----|-------|---|----|----|-------|----|-------|
| 110,320 | 1 | 113 | 14 | 1,560 | 0 | 76 | 11 | 1,775 | 26 | 3,524 |
| 110,321 | 1 | 86  | 13 | 1,232 | 0 | 58 | 12 | 1,422 | 26 | 2,798 |
| 110,322 | 1 | 87  | 13 | 1,232 | 0 | 58 | 12 | 1,421 | 26 | 2,798 |
| 110,323 | 1 | 87  | 13 | 1,231 | 0 | 58 | 12 | 1,420 | 26 | 2,796 |
| 110,324 | 1 | 87  | 13 | 1,230 | 0 | 58 | 12 | 1,420 | 26 | 2,795 |
| 110,325 | 1 | 87  | 13 | 1,230 | 0 | 58 | 12 | 1,418 | 26 | 2,793 |
| 110,326 | 1 | 84  | 14 | 1,188 | 0 | 55 | 12 | 1,375 | 27 | 2,702 |
| 110,327 | 1 | 83  | 14 | 1,165 | 0 | 54 | 12 | 1,363 | 27 | 2,665 |
| 110,328 | 1 | 83  | 16 | 1,152 | 0 | 53 | 14 | 1,348 | 31 | 2,636 |
| 110,329 | 1 | 55  | 17 | 761   | 0 | 37 | 14 | 961   | 32 | 1,814 |
| 110,330 | 1 | 55  | 20 | 761   | 0 | 37 | 15 | 958   | 36 | 1,811 |
| 110,331 | 1 | 55  | 20 | 761   | 0 | 37 | 11 | 952   | 32 | 1,805 |
| 110,332 | 1 | 54  | 22 | 739   | 1 | 37 | 13 | 937   | 37 | 1,767 |
| 110,333 | 1 | 49  | 22 | 675   | 1 | 36 | 13 | 860   | 37 | 1,620 |
| 110,334 | 1 | 42  | 21 | 628   | 1 | 35 | 13 | 817   | 36 | 1,522 |
| 110,335 | 1 | 13  | 23 | 358   | 1 | 20 | 15 | 490   | 40 | 881   |
| 110,336 | 1 | 13  | 23 | 353   | 1 | 20 | 14 | 480   | 39 | 866   |
| 110,337 | 1 | 13  | 23 | 325   | 1 | 20 | 17 | 458   | 42 | 816   |
| 110,338 | 1 | 11  | 23 | 301   | 1 | 19 | 17 | 444   | 42 | 775   |
| 110,339 | 1 | 11  | 23 | 296   | 1 | 19 | 17 | 426   | 42 | 752   |
| 110,340 | 1 | 11  | 23 | 296   | 1 | 19 | 17 | 426   | 42 | 752   |
| 110,341 | 1 | 11  | 24 | 288   | 1 | 18 | 20 | 417   | 46 | 734   |
| 110,342 | 1 | 6   | 27 | 158   | 1 | 8  | 20 | 140   | 49 | 312   |
| 110,343 | 1 | 4   | 27 | 123   | 1 | 6  | 20 | 112   | 49 | 245   |
| 110,344 | 1 | 4   | 30 | 111   | 1 | 5  | 20 | 99    | 52 | 219   |
| 110,345 | 1 | 3   | 30 | 91    | 1 | 6  | 22 | 76    | 54 | 176   |
| 110,346 | 1 | 3   | 28 | 80    | 1 | 3  | 22 | 64    | 52 | 150   |
| 110,347 | 1 | 3   | 28 | 80    | 1 | 3  | 22 | 65    | 52 | 151   |
| 110,348 | 1 | 3   | 28 | 61    | 1 | 3  | 22 | 59    | 52 | 126   |
| 110,349 | 1 | 3   | 32 | 44    | 1 | 3  | 22 | 37    | 56 | 87    |
| 110,350 | 1 | 3   | 32 | 44    | 2 | 3  | 22 | 37    | 57 | 87    |
| 110,351 | 1 | 3   | 32 | 44    | 2 | 3  | 22 | 37    | 57 | 87    |
| 110,352 | 1 | 3   | 32 | 44    | 2 | 3  | 22 | 37    | 57 | 87    |
| 110,353 | 0 | 3   | 32 | 46    | 2 | 3  | 21 | 37    | 55 | 89    |
| 110,354 | 0 | 3   | 29 | 45    | 2 | 3  | 22 | 37    | 53 | 88    |
| 110,355 | 0 | 3   | 29 | 45    | 2 | 2  | 22 | 37    | 53 | 87    |
| 110,356 | 0 | 3   | 29 | 45    | 2 | 2  | 22 | 37    | 53 | 87    |
| 110,357 | 0 | 3   | 28 | 44    | 2 | 2  | 20 | 37    | 50 | 86    |
| 110,358 | 0 | 3   | 30 | 34    | 2 | 1  | 20 | 20    | 52 | 58    |
| 110,359 | 0 | 3   | 30 | 33    | 2 | 1  | 20 | 17    | 52 | 54    |
| 110,360 | 0 | 3   | 30 | 33    | 2 | 1  | 20 | 17    | 52 | 54    |

|         |   |    |    |    |   |   |    |    |    |     |
|---------|---|----|----|----|---|---|----|----|----|-----|
| 110,361 | 0 | 3  | 30 | 30 | 2 | 1 | 20 | 16 | 52 | 50  |
| 110,362 | 0 | 3  | 30 | 30 | 2 | 1 | 20 | 18 | 52 | 52  |
| 110,363 | 0 | 3  | 30 | 29 | 2 | 1 | 20 | 15 | 52 | 48  |
| 110,364 | 0 | 3  | 30 | 29 | 2 | 1 | 25 | 15 | 57 | 48  |
| 110,365 | 0 | 3  | 30 | 30 | 2 | 1 | 24 | 15 | 56 | 49  |
| 110,366 | 0 | 3  | 30 | 30 | 2 | 1 | 26 | 16 | 58 | 50  |
| 110,367 | 0 | 4  | 28 | 30 | 2 | 2 | 26 | 17 | 56 | 53  |
| 110,368 | 0 | 4  | 28 | 27 | 2 | 2 | 26 | 17 | 56 | 50  |
| 110,369 | 0 | 4  | 28 | 29 | 2 | 2 | 26 | 16 | 56 | 51  |
| 110,370 | 0 | 5  | 29 | 24 | 2 | 2 | 27 | 16 | 58 | 47  |
| 110,371 | 0 | 5  | 29 | 25 | 2 | 2 | 26 | 17 | 57 | 49  |
| 110,372 | 0 | 4  | 30 | 27 | 2 | 2 | 26 | 18 | 58 | 51  |
| 110,373 | 0 | 4  | 30 | 27 | 2 | 2 | 26 | 18 | 58 | 51  |
| 110,374 | 0 | 4  | 30 | 26 | 2 | 2 | 26 | 18 | 58 | 50  |
| 110,375 | 0 | 4  | 30 | 26 | 2 | 2 | 26 | 18 | 58 | 50  |
| 110,376 | 0 | 4  | 29 | 29 | 2 | 2 | 26 | 19 | 57 | 54  |
| 110,377 | 0 | 4  | 31 | 34 | 2 | 2 | 26 | 21 | 59 | 61  |
| 110,378 | 0 | 4  | 32 | 34 | 2 | 2 | 26 | 21 | 60 | 61  |
| 110,379 | 0 | 4  | 30 | 34 | 2 | 2 | 26 | 22 | 58 | 62  |
| 110,380 | 0 | 4  | 29 | 34 | 2 | 2 | 26 | 22 | 57 | 62  |
| 110,381 | 0 | 4  | 26 | 37 | 2 | 2 | 25 | 22 | 53 | 65  |
| 110,382 | 0 | 4  | 24 | 37 | 1 | 2 | 23 | 22 | 48 | 65  |
| 110,383 | 0 | 4  | 23 | 37 | 1 | 2 | 23 | 20 | 47 | 63  |
| 110,384 | 0 | 3  | 23 | 36 | 1 | 2 | 22 | 20 | 46 | 61  |
| 110,385 | 0 | 3  | 23 | 37 | 1 | 2 | 22 | 20 | 46 | 62  |
| 110,386 | 0 | 3  | 21 | 37 | 1 | 2 | 21 | 20 | 43 | 62  |
| 110,387 | 0 | 3  | 21 | 50 | 1 | 2 | 21 | 25 | 43 | 80  |
| 110,388 | 0 | 4  | 21 | 58 | 1 | 2 | 18 | 28 | 40 | 92  |
| 110,389 | 0 | 4  | 21 | 63 | 1 | 2 | 18 | 30 | 40 | 99  |
| 110,390 | 0 | 4  | 21 | 67 | 1 | 2 | 18 | 32 | 40 | 105 |
| 110,391 | 0 | 4  | 20 | 67 | 1 | 2 | 17 | 31 | 38 | 104 |
| 110,392 | 0 | 8  | 20 | 77 | 1 | 2 | 15 | 43 | 36 | 130 |
| 110,393 | 0 | 8  | 17 | 76 | 1 | 3 | 15 | 41 | 33 | 128 |
| 110,394 | 0 | 9  | 16 | 80 | 1 | 4 | 15 | 54 | 32 | 147 |
| 110,395 | 0 | 9  | 15 | 80 | 1 | 4 | 15 | 55 | 31 | 148 |
| 110,396 | 0 | 9  | 14 | 79 | 1 | 3 | 13 | 59 | 28 | 150 |
| 110,397 | 0 | 9  | 14 | 82 | 1 | 3 | 13 | 60 | 28 | 154 |
| 110,398 | 0 | 9  | 13 | 82 | 1 | 3 | 13 | 60 | 27 | 154 |
| 110,399 | 0 | 10 | 10 | 83 | 1 | 3 | 13 | 60 | 24 | 156 |
| 110,400 | 0 | 10 | 10 | 85 | 0 | 3 | 12 | 60 | 22 | 158 |
| 110,401 | 0 | 10 | 10 | 86 | 0 | 3 | 12 | 60 | 22 | 159 |

|         |   |    |    |    |   |   |    |    |    |     |
|---------|---|----|----|----|---|---|----|----|----|-----|
| 110,402 | 1 | 11 | 10 | 94 | 0 | 3 | 12 | 60 | 23 | 168 |
| 110,403 | 1 | 11 | 10 | 96 | 0 | 3 | 12 | 62 | 23 | 172 |
| 110,404 | 1 | 11 | 9  | 96 | 0 | 3 | 12 | 62 | 22 | 172 |
| 110,405 | 1 | 11 | 9  | 98 | 0 | 3 | 11 | 62 | 21 | 174 |
| 110,406 | 1 | 11 | 9  | 98 | 0 | 3 | 11 | 62 | 21 | 174 |
| 110,407 | 1 | 11 | 9  | 99 | 0 | 3 | 11 | 62 | 21 | 175 |
| 110,408 | 1 | 11 | 9  | 99 | 0 | 3 | 11 | 62 | 21 | 175 |
| 110,409 | 1 | 11 | 7  | 99 | 0 | 3 | 11 | 62 | 19 | 175 |
| 110,410 | 1 | 11 | 7  | 99 | 0 | 3 | 11 | 62 | 19 | 175 |
| 110,411 | 1 | 12 | 7  | 99 | 0 | 3 | 11 | 62 | 19 | 176 |
| 110,412 | 1 | 13 | 7  | 99 | 0 | 3 | 11 | 60 | 19 | 175 |
| 110,413 | 1 | 13 | 7  | 98 | 0 | 3 | 11 | 59 | 19 | 173 |
| 110,414 | 1 | 13 | 6  | 98 | 0 | 3 | 10 | 59 | 17 | 173 |
| 110,415 | 1 | 14 | 6  | 99 | 0 | 3 | 6  | 59 | 13 | 175 |
| 110,416 | 1 | 14 | 6  | 99 | 0 | 3 | 6  | 59 | 13 | 175 |
| 110,417 | 1 | 13 | 6  | 99 | 0 | 2 | 4  | 57 | 11 | 171 |
| 110,418 | 1 | 13 | 6  | 99 | 0 | 2 | 3  | 57 | 10 | 171 |
| 110,419 | 1 | 13 | 6  | 99 | 0 | 2 | 3  | 57 | 10 | 171 |
| 110,420 | 2 | 13 | 6  | 95 | 0 | 2 | 2  | 57 | 10 | 167 |
| 110,421 | 2 | 11 | 6  | 93 | 0 | 2 | 3  | 56 | 11 | 162 |
| 110,422 | 2 | 11 | 5  | 93 | 0 | 2 | 3  | 56 | 10 | 162 |
| 110,423 | 2 | 11 | 5  | 91 | 0 | 2 | 3  | 55 | 10 | 159 |
| 110,424 | 2 | 11 | 5  | 91 | 0 | 2 | 3  | 55 | 10 | 159 |
| 110,425 | 2 | 11 | 5  | 98 | 0 | 2 | 3  | 59 | 10 | 170 |
| 110,426 | 2 | 11 | 5  | 98 | 0 | 2 | 3  | 59 | 10 | 170 |
| 110,427 | 2 | 11 | 5  | 96 | 0 | 2 | 3  | 58 | 10 | 167 |
| 110,428 | 2 | 11 | 3  | 91 | 0 | 2 | 3  | 56 | 8  | 160 |
| 110,429 | 2 | 12 | 2  | 91 | 0 | 2 | 3  | 55 | 7  | 160 |
| 110,430 | 2 | 13 | 2  | 91 | 0 | 2 | 1  | 57 | 5  | 163 |
| 110,431 | 2 | 13 | 2  | 91 | 0 | 2 | 1  | 57 | 5  | 163 |
| 110,432 | 2 | 13 | 2  | 88 | 1 | 2 | 1  | 57 | 6  | 160 |
| 110,433 | 2 | 13 | 2  | 88 | 1 | 2 | 1  | 57 | 6  | 160 |
| 110,434 | 3 | 14 | 5  | 88 | 2 | 2 | 3  | 57 | 13 | 161 |
| 110,435 | 3 | 14 | 6  | 87 | 2 | 2 | 3  | 57 | 14 | 160 |
| 110,436 | 3 | 14 | 6  | 87 | 2 | 2 | 4  | 58 | 15 | 161 |
| 110,437 | 3 | 13 | 6  | 61 | 2 | 2 | 4  | 48 | 15 | 124 |
| 110,438 | 3 | 13 | 6  | 61 | 2 | 2 | 4  | 48 | 15 | 124 |
| 110,439 | 3 | 13 | 6  | 61 | 2 | 2 | 4  | 48 | 15 | 124 |
| 110,440 | 3 | 13 | 6  | 57 | 2 | 2 | 4  | 46 | 15 | 118 |
| 110,441 | 3 | 13 | 6  | 57 | 2 | 2 | 4  | 46 | 15 | 118 |
| 110,442 | 3 | 13 | 6  | 57 | 2 | 2 | 4  | 46 | 15 | 118 |

|         |   |   |    |    |   |   |    |    |    |    |
|---------|---|---|----|----|---|---|----|----|----|----|
| 110,443 | 3 | 9 | 5  | 47 | 2 | 2 | 4  | 34 | 14 | 92 |
| 110,444 | 3 | 9 | 5  | 39 | 2 | 1 | 4  | 32 | 14 | 81 |
| 110,445 | 3 | 8 | 5  | 34 | 2 | 0 | 4  | 19 | 14 | 61 |
| 110,446 | 3 | 8 | 6  | 34 | 2 | 0 | 4  | 17 | 15 | 59 |
| 110,447 | 3 | 8 | 6  | 29 | 2 | 0 | 4  | 12 | 15 | 49 |
| 110,448 | 3 | 8 | 6  | 30 | 2 | 0 | 4  | 12 | 15 | 50 |
| 110,449 | 3 | 8 | 6  | 30 | 2 | 0 | 5  | 12 | 16 | 50 |
| 110,450 | 3 | 7 | 6  | 27 | 2 | 0 | 5  | 12 | 16 | 46 |
| 110,451 | 3 | 7 | 6  | 28 | 2 | 0 | 5  | 12 | 16 | 47 |
| 110,452 | 3 | 7 | 7  | 27 | 2 | 0 | 6  | 12 | 18 | 46 |
| 110,453 | 2 | 6 | 7  | 15 | 2 | 0 | 6  | 10 | 17 | 31 |
| 110,454 | 2 | 6 | 7  | 15 | 2 | 0 | 6  | 10 | 17 | 31 |
| 110,455 | 2 | 6 | 7  | 13 | 2 | 0 | 6  | 10 | 17 | 29 |
| 110,456 | 2 | 6 | 7  | 13 | 2 | 0 | 6  | 10 | 17 | 29 |
| 110,457 | 2 | 6 | 7  | 12 | 2 | 0 | 6  | 12 | 17 | 30 |
| 110,458 | 2 | 6 | 7  | 12 | 2 | 0 | 6  | 12 | 17 | 30 |
| 110,459 | 2 | 6 | 8  | 12 | 2 | 0 | 6  | 12 | 18 | 30 |
| 110,460 | 2 | 6 | 8  | 12 | 2 | 0 | 6  | 12 | 18 | 30 |
| 110,461 | 2 | 6 | 8  | 12 | 2 | 0 | 6  | 12 | 18 | 30 |
| 110,462 | 2 | 4 | 10 | 12 | 2 | 0 | 6  | 12 | 20 | 28 |
| 110,463 | 2 | 4 | 10 | 12 | 2 | 1 | 6  | 12 | 20 | 29 |
| 110,464 | 2 | 4 | 10 | 16 | 2 | 1 | 6  | 14 | 20 | 35 |
| 110,465 | 2 | 4 | 10 | 16 | 2 | 1 | 6  | 14 | 20 | 35 |
| 110,466 | 2 | 3 | 11 | 15 | 2 | 1 | 6  | 14 | 21 | 33 |
| 110,467 | 2 | 3 | 11 | 15 | 2 | 2 | 6  | 15 | 21 | 35 |
| 110,468 | 2 | 3 | 11 | 14 | 2 | 2 | 6  | 17 | 21 | 36 |
| 110,469 | 2 | 3 | 11 | 14 | 2 | 2 | 6  | 17 | 21 | 36 |
| 110,470 | 1 | 3 | 11 | 15 | 2 | 2 | 9  | 17 | 23 | 37 |
| 110,471 | 1 | 3 | 10 | 15 | 2 | 2 | 9  | 17 | 22 | 37 |
| 110,472 | 1 | 3 | 10 | 16 | 2 | 2 | 8  | 17 | 21 | 38 |
| 110,473 | 1 | 3 | 10 | 16 | 2 | 2 | 8  | 18 | 21 | 39 |
| 110,474 | 1 | 3 | 10 | 16 | 2 | 2 | 8  | 19 | 21 | 40 |
| 110,475 | 1 | 3 | 10 | 16 | 2 | 2 | 8  | 18 | 21 | 39 |
| 110,476 | 1 | 3 | 10 | 9  | 2 | 2 | 8  | 14 | 21 | 28 |
| 110,477 | 1 | 3 | 10 | 8  | 2 | 3 | 8  | 14 | 21 | 28 |
| 110,478 | 1 | 3 | 10 | 9  | 2 | 3 | 9  | 14 | 22 | 29 |
| 110,479 | 1 | 3 | 10 | 9  | 2 | 3 | 9  | 14 | 22 | 29 |
| 110,480 | 1 | 2 | 10 | 9  | 2 | 3 | 10 | 14 | 23 | 28 |
| 110,481 | 1 | 1 | 10 | 10 | 2 | 3 | 11 | 12 | 24 | 26 |
| 110,482 | 1 | 1 | 10 | 10 | 2 | 3 | 12 | 12 | 25 | 26 |
| 110,483 | 1 | 1 | 10 | 10 | 1 | 3 | 12 | 12 | 24 | 26 |

|         |   |   |    |    |   |   |    |    |    |    |
|---------|---|---|----|----|---|---|----|----|----|----|
| 110,484 | 1 | 1 | 10 | 10 | 1 | 3 | 12 | 12 | 24 | 26 |
| 110,485 | 0 | 0 | 7  | 11 | 0 | 3 | 10 | 12 | 17 | 26 |
| 110,486 | 0 | 0 | 6  | 11 | 0 | 3 | 10 | 12 | 16 | 26 |
| 110,487 | 0 | 0 | 6  | 11 | 0 | 3 | 9  | 11 | 15 | 25 |
| 110,488 | 0 | 0 | 6  | 11 | 1 | 3 | 9  | 11 | 16 | 25 |
| 110,489 | 0 | 0 | 6  | 11 | 1 | 3 | 9  | 11 | 16 | 25 |
| 110,490 | 0 | 0 | 7  | 11 | 1 | 3 | 9  | 11 | 17 | 25 |
| 110,491 | 0 | 0 | 7  | 11 | 1 | 3 | 9  | 11 | 17 | 25 |
| 110,492 | 0 | 0 | 7  | 11 | 1 | 3 | 9  | 11 | 17 | 25 |
| 110,493 | 0 | 0 | 7  | 11 | 1 | 3 | 9  | 11 | 17 | 25 |
| 110,494 | 0 | 0 | 7  | 11 | 1 | 3 | 9  | 11 | 17 | 25 |
| 110,495 | 0 | 0 | 7  | 11 | 1 | 3 | 9  | 11 | 17 | 25 |
| 110,496 | 0 | 1 | 6  | 11 | 1 | 3 | 9  | 11 | 16 | 26 |
| 110,497 | 0 | 1 | 6  | 18 | 1 | 3 | 9  | 26 | 16 | 48 |
| 110,498 | 0 | 1 | 6  | 24 | 1 | 3 | 9  | 30 | 16 | 58 |
| 110,499 | 0 | 2 | 6  | 31 | 1 | 3 | 9  | 31 | 16 | 67 |
| 110,500 | 0 | 2 | 6  | 33 | 1 | 3 | 8  | 30 | 15 | 68 |
| 110,501 | 0 | 2 | 6  | 33 | 1 | 3 | 8  | 30 | 15 | 68 |
| 110,502 | 0 | 6 | 7  | 38 | 1 | 3 | 8  | 35 | 16 | 82 |
| 110,503 | 0 | 6 | 6  | 40 | 1 | 3 | 7  | 35 | 14 | 84 |
| 110,504 | 0 | 6 | 6  | 40 | 1 | 3 | 7  | 35 | 14 | 84 |
| 110,505 | 0 | 6 | 6  | 40 | 1 | 3 | 7  | 35 | 14 | 84 |
| 110,506 | 0 | 6 | 6  | 40 | 1 | 5 | 7  | 35 | 14 | 86 |
| 110,507 | 0 | 6 | 6  | 40 | 2 | 5 | 7  | 33 | 15 | 84 |
| 110,508 | 0 | 6 | 6  | 40 | 2 | 5 | 7  | 33 | 15 | 84 |
| 110,509 | 0 | 6 | 5  | 40 | 2 | 5 | 7  | 33 | 14 | 84 |
| 110,510 | 0 | 6 | 5  | 41 | 2 | 5 | 7  | 33 | 14 | 85 |
| 110,511 | 0 | 6 | 6  | 41 | 2 | 5 | 7  | 33 | 15 | 85 |
| 110,512 | 0 | 6 | 6  | 42 | 2 | 5 | 7  | 36 | 15 | 89 |
| 110,513 | 0 | 7 | 4  | 42 | 2 | 5 | 7  | 36 | 13 | 90 |
| 110,514 | 0 | 7 | 4  | 42 | 2 | 4 | 7  | 36 | 13 | 89 |
| 110,515 | 0 | 7 | 4  | 38 | 2 | 4 | 7  | 34 | 13 | 83 |
| 110,516 | 0 | 7 | 3  | 38 | 2 | 4 | 7  | 34 | 12 | 83 |
| 110,517 | 0 | 7 | 3  | 38 | 2 | 4 | 7  | 34 | 12 | 83 |
| 110,518 | 0 | 7 | 3  | 38 | 2 | 3 | 7  | 33 | 12 | 81 |
| 110,519 | 0 | 7 | 3  | 38 | 2 | 3 | 7  | 30 | 12 | 78 |
| 110,520 | 0 | 7 | 3  | 38 | 2 | 3 | 7  | 30 | 12 | 78 |
| 110,521 | 0 | 8 | 3  | 37 | 2 | 3 | 4  | 30 | 9  | 78 |
| 110,522 | 0 | 8 | 3  | 37 | 2 | 3 | 4  | 30 | 9  | 78 |
| 110,523 | 0 | 8 | 3  | 37 | 2 | 3 | 4  | 30 | 9  | 78 |
| 110,524 | 0 | 8 | 3  | 37 | 2 | 3 | 4  | 28 | 9  | 76 |



|         |   |    |    |    |   |   |    |    |    |     |
|---------|---|----|----|----|---|---|----|----|----|-----|
| 110,525 | 0 | 8  | 3  | 37 | 2 | 3 | 4  | 28 | 9  | 76  |
| 110,526 | 0 | 8  | 3  | 37 | 2 | 3 | 4  | 28 | 9  | 76  |
| 110,527 | 0 | 8  | 3  | 37 | 2 | 2 | 4  | 28 | 9  | 75  |
| 110,528 | 0 | 8  | 3  | 36 | 2 | 2 | 4  | 28 | 9  | 74  |
| 110,529 | 0 | 8  | 3  | 36 | 2 | 2 | 3  | 28 | 8  | 74  |
| 110,530 | 0 | 9  | 3  | 36 | 2 | 2 | 2  | 28 | 7  | 75  |
| 110,531 | 0 | 9  | 3  | 36 | 2 | 2 | 2  | 28 | 7  | 75  |
| 110,532 | 0 | 9  | 3  | 35 | 2 | 2 | 1  | 28 | 6  | 74  |
| 110,533 | 0 | 9  | 3  | 35 | 2 | 2 | 0  | 28 | 5  | 74  |
| 110,534 | 0 | 9  | 3  | 35 | 2 | 2 | 0  | 28 | 5  | 74  |
| 110,535 | 0 | 9  | 3  | 35 | 2 | 2 | 0  | 28 | 5  | 74  |
| 110,536 | 0 | 9  | 3  | 34 | 3 | 2 | 2  | 28 | 8  | 73  |
| 110,537 | 0 | 9  | 5  | 34 | 3 | 2 | 2  | 28 | 10 | 73  |
| 110,538 | 0 | 9  | 6  | 34 | 3 | 2 | 2  | 28 | 11 | 73  |
| 110,539 | 0 | 9  | 6  | 34 | 2 | 2 | 2  | 28 | 10 | 73  |
| 110,540 | 0 | 9  | 6  | 34 | 2 | 2 | 2  | 28 | 10 | 73  |
| 110,541 | 0 | 9  | 6  | 35 | 2 | 2 | 2  | 28 | 10 | 74  |
| 110,542 | 0 | 9  | 7  | 35 | 2 | 2 | 3  | 28 | 12 | 74  |
| 110,543 | 0 | 9  | 7  | 35 | 2 | 2 | 3  | 28 | 12 | 74  |
| 110,544 | 0 | 9  | 10 | 39 | 2 | 2 | 5  | 33 | 17 | 83  |
| 110,545 | 0 | 9  | 10 | 40 | 2 | 2 | 6  | 34 | 18 | 85  |
| 110,546 | 0 | 9  | 11 | 42 | 2 | 2 | 6  | 35 | 19 | 88  |
| 110,547 | 0 | 14 | 11 | 71 | 2 | 3 | 6  | 70 | 19 | 158 |
| 110,548 | 0 | 14 | 11 | 65 | 2 | 3 | 6  | 55 | 19 | 137 |
| 110,549 | 0 | 14 | 12 | 60 | 2 | 3 | 6  | 53 | 20 | 130 |
| 110,550 | 0 | 13 | 13 | 53 | 2 | 3 | 7  | 52 | 22 | 121 |
| 110,551 | 0 | 13 | 13 | 51 | 2 | 3 | 7  | 53 | 22 | 120 |
| 110,552 | 0 | 13 | 13 | 51 | 2 | 3 | 7  | 53 | 22 | 120 |
| 110,553 | 0 | 9  | 12 | 46 | 2 | 3 | 8  | 49 | 22 | 107 |
| 110,554 | 0 | 9  | 12 | 44 | 3 | 3 | 10 | 50 | 25 | 106 |
| 110,555 | 0 | 9  | 12 | 44 | 3 | 3 | 10 | 50 | 25 | 106 |
| 110,556 | 0 | 9  | 12 | 44 | 3 | 1 | 10 | 50 | 25 | 104 |
| 110,557 | 0 | 9  | 12 | 46 | 3 | 1 | 10 | 50 | 25 | 106 |
| 110,558 | 0 | 9  | 12 | 47 | 2 | 1 | 10 | 54 | 24 | 111 |
| 110,559 | 0 | 9  | 13 | 48 | 2 | 1 | 10 | 56 | 25 | 114 |
| 110,560 | 0 | 9  | 13 | 48 | 2 | 1 | 10 | 56 | 25 | 114 |
| 110,561 | 0 | 10 | 12 | 48 | 2 | 1 | 10 | 58 | 24 | 117 |
| 110,562 | 0 | 10 | 12 | 51 | 2 | 2 | 10 | 61 | 24 | 124 |
| 110,563 | 0 | 10 | 12 | 50 | 2 | 2 | 10 | 59 | 24 | 121 |
| 110,564 | 0 | 9  | 12 | 53 | 2 | 2 | 12 | 59 | 26 | 123 |
| 110,565 | 0 | 9  | 13 | 53 | 2 | 2 | 12 | 61 | 27 | 125 |

|         |   |    |    |    |   |   |    |    |    |     |
|---------|---|----|----|----|---|---|----|----|----|-----|
| 110,566 | 0 | 9  | 13 | 53 | 2 | 2 | 12 | 61 | 27 | 125 |
| 110,567 | 0 | 9  | 13 | 55 | 2 | 2 | 12 | 64 | 27 | 130 |
| 110,568 | 0 | 11 | 14 | 55 | 2 | 3 | 13 | 65 | 29 | 134 |
| 110,569 | 0 | 11 | 14 | 55 | 2 | 3 | 13 | 65 | 29 | 134 |
| 110,570 | 0 | 11 | 14 | 55 | 2 | 3 | 14 | 65 | 30 | 134 |
| 110,571 | 0 | 12 | 15 | 55 | 2 | 3 | 15 | 65 | 32 | 135 |
| 110,572 | 0 | 11 | 15 | 55 | 2 | 3 | 15 | 65 | 32 | 134 |
| 110,573 | 0 | 11 | 15 | 54 | 2 | 3 | 16 | 65 | 33 | 133 |
| 110,574 | 0 | 11 | 15 | 56 | 2 | 3 | 16 | 66 | 33 | 136 |
| 110,575 | 0 | 11 | 15 | 56 | 2 | 3 | 16 | 66 | 33 | 136 |
| 110,576 | 0 | 11 | 16 | 58 | 2 | 3 | 16 | 66 | 34 | 138 |
| 110,577 | 0 | 11 | 16 | 58 | 2 | 3 | 16 | 66 | 34 | 138 |
| 110,578 | 0 | 11 | 16 | 58 | 2 | 3 | 16 | 66 | 34 | 138 |
| 110,579 | 0 | 11 | 16 | 58 | 2 | 3 | 16 | 67 | 34 | 139 |
| 110,580 | 0 | 11 | 19 | 59 | 2 | 3 | 16 | 67 | 37 | 140 |
| 110,581 | 0 | 10 | 20 | 63 | 2 | 4 | 16 | 69 | 38 | 146 |
| 110,582 | 0 | 10 | 20 | 67 | 2 | 4 | 16 | 70 | 38 | 151 |
| 110,583 | 0 | 10 | 20 | 67 | 2 | 4 | 16 | 70 | 38 | 151 |
| 110,584 | 0 | 10 | 22 | 71 | 2 | 4 | 16 | 71 | 40 | 156 |
| 110,585 | 0 | 10 | 22 | 72 | 2 | 4 | 16 | 73 | 40 | 159 |
| 110,586 | 0 | 10 | 22 | 72 | 1 | 5 | 16 | 73 | 39 | 160 |
| 110,587 | 0 | 10 | 22 | 73 | 1 | 5 | 14 | 74 | 37 | 162 |
| 110,588 | 0 | 10 | 20 | 74 | 1 | 5 | 14 | 75 | 35 | 164 |
| 110,589 | 0 | 10 | 20 | 75 | 1 | 5 | 15 | 77 | 36 | 167 |
| 110,590 | 0 | 10 | 20 | 80 | 1 | 5 | 15 | 77 | 36 | 172 |
| 110,591 | 0 | 10 | 20 | 80 | 1 | 5 | 15 | 78 | 36 | 173 |
| 110,592 | 0 | 10 | 19 | 82 | 1 | 5 | 15 | 79 | 35 | 176 |
| 110,593 | 1 | 10 | 18 | 82 | 1 | 5 | 14 | 79 | 34 | 176 |
| 110,594 | 1 | 10 | 18 | 82 | 1 | 5 | 14 | 79 | 34 | 176 |
| 110,595 | 1 | 10 | 15 | 78 | 1 | 5 | 12 | 73 | 29 | 166 |
| 110,596 | 1 | 10 | 15 | 78 | 1 | 5 | 11 | 72 | 28 | 165 |
| 110,597 | 1 | 10 | 16 | 76 | 1 | 5 | 11 | 71 | 29 | 162 |
| 110,598 | 1 | 4  | 15 | 46 | 1 | 4 | 11 | 36 | 28 | 90  |
| 110,599 | 1 | 4  | 17 | 46 | 1 | 4 | 12 | 36 | 31 | 90  |
| 110,600 | 1 | 4  | 22 | 45 | 2 | 4 | 18 | 34 | 43 | 87  |
| 110,601 | 1 | 4  | 23 | 44 | 2 | 4 | 17 | 34 | 43 | 86  |
| 110,602 | 1 | 4  | 23 | 44 | 2 | 4 | 17 | 35 | 43 | 87  |
| 110,603 | 2 | 4  | 26 | 44 | 2 | 4 | 16 | 35 | 46 | 87  |
| 110,604 | 2 | 4  | 27 | 43 | 2 | 4 | 15 | 35 | 46 | 86  |
| 110,605 | 2 | 4  | 27 | 43 | 1 | 4 | 14 | 35 | 44 | 86  |
| 110,606 | 2 | 4  | 27 | 43 | 1 | 4 | 14 | 35 | 44 | 86  |

|         |   |   |    |    |   |   |    |    |    |    |
|---------|---|---|----|----|---|---|----|----|----|----|
| 110,607 | 2 | 4 | 27 | 44 | 1 | 4 | 15 | 35 | 45 | 87 |
| 110,608 | 2 | 4 | 27 | 43 | 1 | 4 | 15 | 35 | 45 | 86 |
| 110,609 | 2 | 4 | 27 | 42 | 1 | 4 | 15 | 31 | 45 | 81 |
| 110,610 | 2 | 4 | 26 | 41 | 1 | 4 | 15 | 29 | 44 | 78 |
| 110,611 | 2 | 4 | 26 | 41 | 1 | 4 | 15 | 29 | 44 | 78 |
| 110,612 | 2 | 3 | 26 | 40 | 1 | 5 | 15 | 27 | 44 | 75 |
| 110,613 | 2 | 3 | 27 | 35 | 1 | 4 | 15 | 23 | 45 | 65 |
| 110,614 | 2 | 3 | 28 | 35 | 1 | 4 | 13 | 23 | 44 | 65 |
| 110,615 | 2 | 3 | 27 | 35 | 1 | 4 | 13 | 23 | 43 | 65 |
| 110,616 | 2 | 3 | 29 | 35 | 1 | 4 | 23 | 21 | 55 | 63 |
| 110,617 | 2 | 1 | 29 | 33 | 1 | 3 | 23 | 17 | 55 | 54 |
| 110,618 | 2 | 1 | 30 | 33 | 1 | 3 | 23 | 17 | 56 | 54 |
| 110,619 | 2 | 1 | 29 | 33 | 1 | 3 | 22 | 17 | 54 | 54 |
| 110,620 | 2 | 1 | 29 | 33 | 1 | 3 | 21 | 17 | 53 | 54 |
| 110,621 | 2 | 2 | 28 | 33 | 1 | 3 | 21 | 17 | 52 | 55 |
| 110,622 | 2 | 1 | 28 | 33 | 1 | 3 | 21 | 17 | 52 | 54 |
| 110,623 | 2 | 1 | 28 | 33 | 1 | 3 | 20 | 17 | 51 | 54 |
| 110,624 | 2 | 1 | 29 | 34 | 1 | 3 | 20 | 17 | 52 | 55 |
| 110,625 | 2 | 1 | 29 | 32 | 1 | 3 | 20 | 16 | 52 | 52 |
| 110,626 | 2 | 1 | 29 | 32 | 1 | 3 | 20 | 16 | 52 | 52 |
| 110,627 | 2 | 1 | 28 | 30 | 1 | 3 | 20 | 16 | 51 | 50 |
| 110,628 | 2 | 1 | 28 | 30 | 1 | 3 | 20 | 16 | 51 | 50 |
| 110,629 | 2 | 1 | 31 | 30 | 1 | 3 | 22 | 16 | 56 | 50 |
| 110,630 | 2 | 1 | 33 | 29 | 1 | 3 | 22 | 15 | 58 | 48 |
| 110,631 | 2 | 1 | 33 | 29 | 1 | 3 | 22 | 15 | 58 | 48 |
| 110,632 | 2 | 1 | 32 | 25 | 1 | 2 | 24 | 13 | 59 | 41 |
| 110,633 | 2 | 1 | 32 | 23 | 1 | 2 | 24 | 12 | 59 | 38 |
| 110,634 | 2 | 1 | 30 | 23 | 1 | 2 | 24 | 12 | 57 | 38 |
| 110,635 | 3 | 1 | 30 | 19 | 1 | 2 | 24 | 11 | 58 | 33 |
| 110,636 | 3 | 1 | 30 | 18 | 1 | 2 | 24 | 9  | 58 | 30 |
| 110,637 | 3 | 1 | 30 | 17 | 1 | 1 | 24 | 8  | 58 | 27 |
| 110,638 | 3 | 1 | 30 | 17 | 1 | 1 | 23 | 8  | 57 | 27 |
| 110,639 | 3 | 1 | 29 | 16 | 1 | 1 | 23 | 7  | 56 | 25 |
| 110,640 | 3 | 1 | 29 | 16 | 1 | 1 | 23 | 5  | 56 | 23 |
| 110,641 | 3 | 1 | 29 | 11 | 1 | 1 | 23 | 5  | 56 | 18 |
| 110,642 | 3 | 1 | 29 | 12 | 1 | 1 | 23 | 4  | 56 | 18 |
| 110,643 | 3 | 1 | 29 | 9  | 1 | 1 | 23 | 3  | 56 | 14 |
| 110,644 | 2 | 1 | 29 | 9  | 1 | 1 | 23 | 3  | 55 | 14 |
| 110,645 | 2 | 1 | 30 | 9  | 1 | 1 | 23 | 3  | 56 | 14 |
| 110,646 | 2 | 1 | 30 | 9  | 1 | 1 | 23 | 3  | 56 | 14 |
| 110,647 | 2 | 1 | 30 | 8  | 1 | 1 | 23 | 4  | 56 | 14 |

|         |   |   |    |    |   |   |    |    |    |    |
|---------|---|---|----|----|---|---|----|----|----|----|
| 110,648 | 2 | 1 | 30 | 8  | 1 | 1 | 23 | 3  | 56 | 13 |
| 110,649 | 2 | 1 | 32 | 10 | 1 | 1 | 26 | 5  | 61 | 17 |
| 110,650 | 4 | 1 | 33 | 11 | 1 | 1 | 25 | 7  | 63 | 20 |
| 110,651 | 4 | 1 | 28 | 11 | 0 | 1 | 19 | 7  | 51 | 20 |
| 110,652 | 4 | 1 | 26 | 11 | 0 | 1 | 19 | 6  | 49 | 19 |
| 110,653 | 4 | 1 | 30 | 11 | 0 | 1 | 22 | 6  | 56 | 19 |
| 110,654 | 3 | 1 | 27 | 11 | 0 | 1 | 24 | 5  | 54 | 18 |
| 110,655 | 3 | 1 | 26 | 11 | 1 | 1 | 24 | 4  | 54 | 17 |
| 110,656 | 3 | 1 | 26 | 11 | 1 | 2 | 23 | 4  | 53 | 18 |
| 110,657 | 3 | 1 | 26 | 9  | 1 | 2 | 23 | 4  | 53 | 16 |
| 110,658 | 3 | 1 | 31 | 9  | 1 | 2 | 23 | 4  | 58 | 16 |
| 110,659 | 3 | 1 | 31 | 9  | 1 | 2 | 23 | 4  | 58 | 16 |
| 110,660 | 3 | 1 | 31 | 9  | 1 | 2 | 23 | 4  | 58 | 16 |
| 110,661 | 3 | 1 | 31 | 9  | 1 | 2 | 23 | 4  | 58 | 16 |
| 110,662 | 3 | 1 | 31 | 9  | 1 | 2 | 23 | 4  | 58 | 16 |
| 110,663 | 3 | 1 | 31 | 9  | 1 | 1 | 23 | 5  | 58 | 16 |
| 110,664 | 3 | 1 | 30 | 8  | 1 | 1 | 23 | 5  | 57 | 15 |
| 110,665 | 3 | 1 | 29 | 8  | 1 | 1 | 23 | 6  | 56 | 16 |
| 110,666 | 3 | 1 | 29 | 8  | 1 | 1 | 22 | 6  | 55 | 16 |
| 110,667 | 3 | 1 | 27 | 8  | 1 | 1 | 12 | 6  | 43 | 16 |
| 110,668 | 3 | 1 | 27 | 8  | 1 | 1 | 12 | 6  | 43 | 16 |
| 110,669 | 3 | 1 | 26 | 8  | 1 | 1 | 12 | 6  | 42 | 16 |
| 110,670 | 3 | 1 | 27 | 8  | 1 | 1 | 12 | 6  | 43 | 16 |
| 110,671 | 3 | 1 | 27 | 9  | 1 | 1 | 12 | 6  | 43 | 17 |
| 110,672 | 3 | 0 | 29 | 9  | 1 | 1 | 12 | 6  | 45 | 16 |
| 110,673 | 3 | 0 | 29 | 8  | 1 | 1 | 11 | 6  | 44 | 15 |
| 110,674 | 3 | 0 | 30 | 8  | 1 | 1 | 11 | 6  | 45 | 15 |
| 110,675 | 3 | 0 | 29 | 8  | 1 | 1 | 11 | 7  | 44 | 16 |
| 110,676 | 3 | 0 | 29 | 8  | 1 | 1 | 11 | 7  | 44 | 16 |
| 110,677 | 3 | 0 | 29 | 8  | 1 | 1 | 11 | 7  | 44 | 16 |
| 110,678 | 3 | 0 | 30 | 8  | 1 | 1 | 10 | 7  | 44 | 16 |
| 110,679 | 3 | 0 | 30 | 9  | 1 | 1 | 10 | 7  | 44 | 17 |
| 110,680 | 3 | 0 | 27 | 10 | 1 | 1 | 9  | 7  | 40 | 18 |
| 110,681 | 3 | 0 | 25 | 11 | 1 | 1 | 9  | 7  | 38 | 19 |
| 110,682 | 3 | 0 | 25 | 13 | 1 | 1 | 9  | 7  | 38 | 21 |
| 110,683 | 3 | 0 | 25 | 13 | 1 | 1 | 8  | 7  | 37 | 21 |
| 110,684 | 3 | 0 | 25 | 12 | 1 | 1 | 8  | 9  | 37 | 22 |
| 110,685 | 2 | 0 | 25 | 12 | 1 | 1 | 8  | 9  | 36 | 22 |
| 110,686 | 2 | 0 | 26 | 12 | 1 | 1 | 8  | 9  | 37 | 22 |
| 110,687 | 2 | 0 | 26 | 13 | 1 | 1 | 8  | 10 | 37 | 24 |
| 110,688 | 2 | 0 | 26 | 13 | 1 | 1 | 8  | 10 | 37 | 24 |

|         |   |   |    |    |   |   |   |    |    |    |
|---------|---|---|----|----|---|---|---|----|----|----|
| 110,689 | 2 | 0 | 26 | 13 | 1 | 1 | 8 | 10 | 37 | 24 |
| 110,690 | 2 | 0 | 26 | 13 | 1 | 1 | 8 | 10 | 37 | 24 |
| 110,691 | 2 | 0 | 26 | 12 | 1 | 1 | 8 | 10 | 37 | 23 |
| 110,692 | 2 | 0 | 26 | 11 | 1 | 1 | 9 | 11 | 38 | 23 |
| 110,693 | 2 | 0 | 26 | 11 | 1 | 1 | 9 | 11 | 38 | 23 |
| 110,694 | 2 | 0 | 26 | 11 | 1 | 1 | 9 | 11 | 38 | 23 |
| 110,695 | 2 | 0 | 25 | 12 | 1 | 1 | 9 | 11 | 37 | 24 |
| 110,696 | 2 | 0 | 25 | 12 | 1 | 1 | 9 | 11 | 37 | 24 |
| 110,697 | 2 | 0 | 23 | 13 | 1 | 1 | 9 | 11 | 35 | 25 |
| 110,698 | 2 | 0 | 23 | 13 | 1 | 1 | 9 | 10 | 35 | 24 |
| 110,699 | 2 | 0 | 23 | 13 | 1 | 1 | 9 | 10 | 35 | 24 |
| 110,700 | 2 | 0 | 21 | 11 | 1 | 1 | 6 | 8  | 30 | 20 |
| 110,701 | 0 | 0 | 18 | 10 | 1 | 1 | 6 | 7  | 25 | 18 |
| 110,702 | 0 | 0 | 18 | 10 | 1 | 1 | 6 | 7  | 25 | 18 |
| 110,703 | 0 | 0 | 18 | 10 | 1 | 1 | 6 | 7  | 25 | 18 |
| 110,704 | 0 | 0 | 15 | 10 | 1 | 1 | 3 | 7  | 19 | 18 |
| 110,705 | 0 | 0 | 15 | 10 | 1 | 1 | 1 | 7  | 17 | 18 |
| 110,706 | 0 | 0 | 15 | 10 | 0 | 1 | 1 | 7  | 16 | 18 |
| 110,707 | 0 | 0 | 15 | 10 | 0 | 0 | 1 | 7  | 16 | 17 |
| 110,708 | 0 | 0 | 15 | 10 | 0 | 0 | 1 | 7  | 16 | 17 |
| 110,709 | 0 | 0 | 10 | 10 | 0 | 0 | 1 | 8  | 11 | 18 |
| 110,710 | 0 | 0 | 11 | 10 | 0 | 0 | 1 | 8  | 12 | 18 |
| 110,711 | 0 | 0 | 11 | 10 | 0 | 0 | 1 | 8  | 12 | 18 |
| 110,712 | 0 | 0 | 11 | 10 | 0 | 0 | 1 | 8  | 12 | 18 |
| 110,713 | 0 | 0 | 12 | 10 | 0 | 0 | 1 | 8  | 13 | 18 |
| 110,714 | 0 | 0 | 12 | 10 | 0 | 0 | 1 | 7  | 13 | 17 |
| 110,715 | 0 | 0 | 12 | 10 | 0 | 0 | 1 | 7  | 13 | 17 |
| 110,716 | 0 | 0 | 13 | 10 | 0 | 0 | 1 | 6  | 14 | 16 |
| 110,717 | 0 | 0 | 13 | 10 | 0 | 0 | 1 | 6  | 14 | 16 |
| 110,718 | 0 | 0 | 13 | 11 | 0 | 0 | 1 | 6  | 14 | 17 |
| 110,719 | 1 | 0 | 14 | 11 | 0 | 0 | 2 | 6  | 17 | 17 |
| 110,720 | 1 | 0 | 14 | 11 | 0 | 0 | 2 | 6  | 17 | 17 |
| 110,721 | 2 | 0 | 13 | 11 | 0 | 0 | 2 | 6  | 17 | 17 |
| 110,722 | 2 | 0 | 13 | 10 | 0 | 0 | 2 | 7  | 17 | 17 |
| 110,723 | 2 | 0 | 12 | 10 | 0 | 0 | 2 | 7  | 16 | 17 |
| 110,724 | 2 | 0 | 12 | 10 | 0 | 0 | 2 | 7  | 16 | 17 |
| 110,725 | 2 | 0 | 11 | 10 | 0 | 0 | 2 | 6  | 15 | 16 |
| 110,726 | 2 | 0 | 11 | 10 | 0 | 0 | 2 | 6  | 15 | 16 |
| 110,727 | 2 | 0 | 11 | 10 | 0 | 0 | 2 | 6  | 15 | 16 |
| 110,728 | 2 | 0 | 11 | 11 | 0 | 0 | 2 | 6  | 15 | 17 |
| 110,729 | 2 | 0 | 10 | 10 | 0 | 0 | 2 | 6  | 14 | 16 |

|         |   |    |    |    |   |   |   |    |    |     |
|---------|---|----|----|----|---|---|---|----|----|-----|
| 110,730 | 2 | 0  | 10 | 10 | 0 | 0 | 2 | 6  | 14 | 16  |
| 110,731 | 2 | 0  | 10 | 12 | 0 | 0 | 2 | 10 | 14 | 22  |
| 110,732 | 2 | 0  | 8  | 12 | 0 | 0 | 2 | 14 | 12 | 26  |
| 110,733 | 2 | 0  | 7  | 11 | 0 | 0 | 2 | 14 | 11 | 25  |
| 110,734 | 2 | 0  | 7  | 9  | 0 | 0 | 2 | 12 | 11 | 21  |
| 110,735 | 2 | 0  | 7  | 9  | 0 | 0 | 2 | 12 | 11 | 21  |
| 110,736 | 2 | 0  | 6  | 9  | 0 | 0 | 2 | 12 | 10 | 21  |
| 110,737 | 2 | 0  | 6  | 10 | 0 | 0 | 2 | 12 | 10 | 22  |
| 110,738 | 2 | 0  | 6  | 10 | 0 | 0 | 3 | 12 | 11 | 22  |
| 110,739 | 2 | 0  | 6  | 10 | 0 | 0 | 3 | 12 | 11 | 22  |
| 110,740 | 2 | 0  | 6  | 10 | 0 | 0 | 3 | 12 | 11 | 22  |
| 110,741 | 2 | 0  | 6  | 10 | 0 | 0 | 3 | 11 | 11 | 21  |
| 110,742 | 2 | 0  | 10 | 10 | 0 | 0 | 3 | 11 | 15 | 21  |
| 110,743 | 2 | 0  | 10 | 10 | 0 | 0 | 2 | 11 | 14 | 21  |
| 110,744 | 2 | 0  | 10 | 10 | 0 | 0 | 2 | 11 | 14 | 21  |
| 110,745 | 2 | 0  | 10 | 10 | 0 | 0 | 3 | 11 | 15 | 21  |
| 110,746 | 2 | 0  | 11 | 9  | 0 | 0 | 3 | 11 | 16 | 20  |
| 110,747 | 2 | 0  | 11 | 9  | 0 | 0 | 3 | 12 | 16 | 21  |
| 110,748 | 2 | 0  | 12 | 8  | 0 | 0 | 3 | 12 | 17 | 20  |
| 110,749 | 2 | 0  | 12 | 8  | 0 | 0 | 3 | 12 | 17 | 20  |
| 110,750 | 2 | 0  | 12 | 8  | 0 | 0 | 3 | 12 | 17 | 20  |
| 110,751 | 2 | 0  | 12 | 8  | 0 | 0 | 3 | 12 | 17 | 20  |
| 110,752 | 2 | 0  | 12 | 8  | 0 | 0 | 4 | 12 | 18 | 20  |
| 110,753 | 2 | 0  | 12 | 8  | 0 | 0 | 4 | 12 | 18 | 20  |
| 110,754 | 2 | 0  | 11 | 8  | 0 | 0 | 4 | 12 | 17 | 20  |
| 110,755 | 2 | 0  | 11 | 8  | 0 | 0 | 4 | 12 | 17 | 20  |
| 110,756 | 2 | 0  | 11 | 8  | 0 | 0 | 5 | 12 | 18 | 20  |
| 110,757 | 2 | 0  | 11 | 8  | 0 | 1 | 5 | 15 | 18 | 24  |
| 110,758 | 2 | 0  | 11 | 10 | 0 | 1 | 5 | 20 | 18 | 31  |
| 110,759 | 2 | 0  | 11 | 10 | 0 | 1 | 5 | 20 | 18 | 31  |
| 110,760 | 2 | 3  | 11 | 10 | 0 | 1 | 5 | 22 | 18 | 36  |
| 110,761 | 2 | 6  | 10 | 24 | 0 | 1 | 5 | 33 | 17 | 64  |
| 110,762 | 2 | 6  | 9  | 24 | 0 | 1 | 5 | 33 | 16 | 64  |
| 110,763 | 2 | 6  | 9  | 26 | 0 | 1 | 5 | 33 | 16 | 66  |
| 110,764 | 2 | 6  | 9  | 26 | 0 | 1 | 5 | 33 | 16 | 66  |
| 110,765 | 2 | 6  | 9  | 26 | 0 | 1 | 6 | 33 | 17 | 66  |
| 110,766 | 2 | 6  | 8  | 26 | 0 | 1 | 6 | 33 | 16 | 66  |
| 110,767 | 2 | 6  | 8  | 25 | 0 | 2 | 6 | 33 | 16 | 66  |
| 110,768 | 2 | 11 | 8  | 37 | 0 | 3 | 6 | 42 | 16 | 93  |
| 110,769 | 1 | 11 | 7  | 43 | 0 | 3 | 6 | 53 | 14 | 110 |
| 110,770 | 1 | 11 | 7  | 43 | 0 | 4 | 5 | 53 | 13 | 111 |

|         |   |    |   |    |   |   |    |    |    |     |
|---------|---|----|---|----|---|---|----|----|----|-----|
| 110,771 | 0 | 11 | 7 | 44 | 0 | 4 | 5  | 53 | 12 | 112 |
| 110,772 | 0 | 14 | 7 | 45 | 0 | 4 | 5  | 58 | 12 | 121 |
| 110,773 | 0 | 14 | 6 | 45 | 0 | 4 | 5  | 57 | 11 | 120 |
| 110,774 | 0 | 14 | 6 | 46 | 0 | 4 | 5  | 57 | 11 | 121 |
| 110,775 | 0 | 14 | 6 | 46 | 0 | 4 | 5  | 57 | 11 | 121 |
| 110,776 | 0 | 14 | 7 | 46 | 0 | 4 | 5  | 57 | 12 | 121 |
| 110,777 | 0 | 14 | 7 | 46 | 0 | 4 | 5  | 57 | 12 | 121 |
| 110,778 | 0 | 15 | 7 | 45 | 0 | 4 | 5  | 57 | 12 | 121 |
| 110,779 | 0 | 15 | 7 | 45 | 0 | 4 | 5  | 57 | 12 | 121 |
| 110,780 | 0 | 15 | 7 | 45 | 0 | 4 | 6  | 57 | 13 | 121 |
| 110,781 | 0 | 15 | 7 | 42 | 0 | 4 | 6  | 53 | 13 | 114 |
| 110,782 | 0 | 15 | 7 | 41 | 0 | 4 | 6  | 49 | 13 | 109 |
| 110,783 | 0 | 15 | 7 | 41 | 0 | 4 | 6  | 49 | 13 | 109 |
| 110,784 | 0 | 15 | 7 | 40 | 0 | 4 | 6  | 49 | 13 | 108 |
| 110,785 | 0 | 15 | 7 | 40 | 0 | 4 | 6  | 48 | 13 | 107 |
| 110,786 | 0 | 15 | 7 | 40 | 0 | 4 | 6  | 48 | 13 | 107 |
| 110,787 | 0 | 15 | 7 | 41 | 0 | 4 | 6  | 48 | 13 | 108 |
| 110,788 | 0 | 15 | 7 | 40 | 0 | 4 | 5  | 48 | 12 | 107 |
| 110,789 | 0 | 15 | 7 | 40 | 0 | 4 | 5  | 48 | 12 | 107 |
| 110,790 | 0 | 15 | 7 | 40 | 0 | 4 | 5  | 49 | 12 | 108 |
| 110,791 | 0 | 15 | 7 | 40 | 0 | 4 | 5  | 49 | 12 | 108 |
| 110,792 | 0 | 15 | 7 | 40 | 0 | 4 | 5  | 49 | 12 | 108 |
| 110,793 | 0 | 15 | 3 | 40 | 0 | 4 | 5  | 49 | 8  | 108 |
| 110,794 | 0 | 15 | 4 | 40 | 0 | 4 | 5  | 50 | 9  | 109 |
| 110,795 | 0 | 15 | 4 | 40 | 0 | 4 | 4  | 50 | 8  | 109 |
| 110,796 | 0 | 15 | 3 | 41 | 0 | 4 | 4  | 50 | 7  | 110 |
| 110,797 | 0 | 15 | 4 | 42 | 0 | 4 | 4  | 50 | 8  | 111 |
| 110,798 | 0 | 15 | 4 | 43 | 2 | 4 | 9  | 49 | 15 | 111 |
| 110,799 | 0 | 15 | 5 | 43 | 2 | 4 | 9  | 49 | 16 | 111 |
| 110,800 | 0 | 15 | 5 | 43 | 2 | 4 | 10 | 49 | 17 | 111 |
| 110,801 | 0 | 15 | 5 | 43 | 2 | 4 | 12 | 49 | 19 | 111 |
| 110,802 | 0 | 15 | 5 | 43 | 2 | 4 | 11 | 49 | 18 | 111 |
| 110,803 | 0 | 15 | 5 | 43 | 2 | 4 | 11 | 49 | 18 | 111 |
| 110,804 | 0 | 15 | 5 | 43 | 2 | 4 | 11 | 49 | 18 | 111 |
| 110,805 | 0 | 15 | 5 | 43 | 2 | 4 | 11 | 49 | 18 | 111 |
| 110,806 | 0 | 15 | 5 | 43 | 2 | 4 | 11 | 49 | 18 | 111 |
| 110,807 | 0 | 15 | 9 | 43 | 2 | 4 | 12 | 49 | 23 | 111 |
| 110,808 | 0 | 15 | 9 | 41 | 2 | 3 | 12 | 41 | 23 | 100 |
| 110,809 | 0 | 15 | 9 | 41 | 2 | 3 | 12 | 41 | 23 | 100 |
| 110,810 | 0 | 12 | 9 | 41 | 2 | 3 | 12 | 38 | 23 | 94  |
| 110,811 | 0 | 9  | 9 | 27 | 2 | 3 | 12 | 27 | 23 | 66  |

|         |   |    |    |    |   |   |    |    |    |    |
|---------|---|----|----|----|---|---|----|----|----|----|
| 110,812 | 0 | 9  | 9  | 25 | 2 | 3 | 12 | 27 | 23 | 64 |
| 110,813 | 0 | 10 | 9  | 25 | 2 | 3 | 13 | 27 | 24 | 65 |
| 110,814 | 0 | 10 | 9  | 25 | 2 | 3 | 13 | 27 | 24 | 65 |
| 110,815 | 0 | 10 | 9  | 25 | 2 | 3 | 12 | 27 | 23 | 65 |
| 110,816 | 0 | 10 | 9  | 25 | 2 | 3 | 12 | 27 | 23 | 65 |
| 110,817 | 0 | 10 | 9  | 25 | 2 | 3 | 12 | 27 | 23 | 65 |
| 110,818 | 0 | 5  | 10 | 13 | 2 | 1 | 12 | 18 | 24 | 37 |
| 110,819 | 0 | 5  | 10 | 7  | 2 | 1 | 12 | 7  | 24 | 20 |
| 110,820 | 0 | 5  | 10 | 6  | 2 | 0 | 12 | 7  | 24 | 18 |
| 110,821 | 0 | 5  | 10 | 6  | 2 | 0 | 12 | 7  | 24 | 18 |
| 110,822 | 0 | 5  | 10 | 7  | 2 | 0 | 12 | 7  | 24 | 19 |
| 110,823 | 0 | 2  | 11 | 6  | 2 | 0 | 14 | 2  | 27 | 10 |
| 110,824 | 0 | 2  | 11 | 5  | 2 | 0 | 14 | 2  | 27 | 9  |
| 110,825 | 0 | 2  | 11 | 5  | 2 | 0 | 14 | 2  | 27 | 9  |
| 110,826 | 0 | 2  | 10 | 6  | 2 | 0 | 14 | 2  | 26 | 10 |
| 110,827 | 0 | 2  | 10 | 6  | 2 | 0 | 14 | 2  | 26 | 10 |
| 110,828 | 0 | 2  | 10 | 6  | 2 | 0 | 14 | 2  | 26 | 10 |
| 110,829 | 0 | 1  | 10 | 6  | 2 | 0 | 14 | 2  | 26 | 9  |
| 110,830 | 0 | 1  | 10 | 7  | 2 | 0 | 13 | 2  | 25 | 10 |
| 110,831 | 0 | 1  | 10 | 7  | 2 | 0 | 13 | 2  | 25 | 10 |
| 110,832 | 0 | 1  | 10 | 7  | 2 | 0 | 13 | 2  | 25 | 10 |
| 110,833 | 0 | 1  | 10 | 7  | 2 | 0 | 13 | 2  | 25 | 10 |
| 110,834 | 0 | 1  | 10 | 7  | 2 | 0 | 13 | 2  | 25 | 10 |
| 110,835 | 0 | 1  | 10 | 7  | 2 | 0 | 13 | 2  | 25 | 10 |
| 110,836 | 1 | 1  | 10 | 7  | 2 | 0 | 13 | 2  | 26 | 10 |
| 110,837 | 1 | 1  | 12 | 6  | 2 | 0 | 14 | 2  | 29 | 9  |
| 110,838 | 1 | 1  | 12 | 7  | 2 | 0 | 14 | 2  | 29 | 10 |
| 110,839 | 1 | 1  | 12 | 7  | 2 | 0 | 14 | 2  | 29 | 10 |
| 110,840 | 1 | 1  | 12 | 7  | 2 | 0 | 14 | 1  | 29 | 9  |
| 110,841 | 1 | 1  | 12 | 7  | 2 | 0 | 14 | 1  | 29 | 9  |
| 110,842 | 1 | 1  | 12 | 7  | 2 | 0 | 14 | 1  | 29 | 9  |
| 110,843 | 1 | 1  | 12 | 7  | 2 | 0 | 14 | 1  | 29 | 9  |
| 110,844 | 1 | 1  | 11 | 9  | 2 | 0 | 14 | 0  | 28 | 10 |
| 110,845 | 1 | 1  | 11 | 9  | 2 | 0 | 14 | 0  | 28 | 10 |
| 110,846 | 1 | 1  | 11 | 8  | 2 | 0 | 14 | 0  | 28 | 9  |
| 110,847 | 1 | 1  | 11 | 7  | 2 | 0 | 14 | 0  | 28 | 8  |
| 110,848 | 1 | 1  | 10 | 7  | 2 | 0 | 14 | 0  | 27 | 8  |
| 110,849 | 1 | 1  | 9  | 6  | 0 | 0 | 9  | 0  | 19 | 7  |
| 110,850 | 1 | 1  | 8  | 6  | 0 | 0 | 9  | 0  | 18 | 7  |
| 110,851 | 1 | 1  | 8  | 6  | 0 | 0 | 8  | 0  | 17 | 7  |
| 110,852 | 1 | 1  | 8  | 6  | 0 | 0 | 6  | 0  | 15 | 7  |



|         |   |   |    |    |   |   |    |    |     |    |
|---------|---|---|----|----|---|---|----|----|-----|----|
| 110,853 | 1 | 1 | 10 | 6  | 0 | 0 | 8  | 0  | 19  | 7  |
| 110,854 | 1 | 1 | 10 | 7  | 0 | 0 | 8  | 0  | 19  | 8  |
| 110,855 | 1 | 1 | 9  | 7  | 0 | 0 | 7  | 0  | 17  | 8  |
| 110,856 | 2 | 1 | 9  | 7  | 0 | 0 | 6  | 0  | 17  | 8  |
| 110,857 | 2 | 1 | 9  | 7  | 0 | 0 | 6  | 1  | 17  | 9  |
| 110,858 | 2 | 1 | 9  | 8  | 0 | 0 | 6  | 1  | 17  | 10 |
| 110,859 | 2 | 1 | 9  | 8  | 0 | 0 | 6  | 1  | 17  | 10 |
| 110,860 | 2 | 1 | 21 | 9  | 3 | 0 | 19 | 1  | 45  | 11 |
| 110,861 | 2 | 1 | 21 | 9  | 3 | 0 | 19 | 1  | 45  | 11 |
| 110,862 | 2 | 1 | 21 | 11 | 3 | 0 | 21 | 1  | 47  | 13 |
| 110,863 | 4 | 0 | 26 | 11 | 4 | 0 | 28 | 1  | 62  | 12 |
| 110,864 | 4 | 0 | 28 | 12 | 4 | 0 | 31 | 1  | 67  | 13 |
| 110,865 | 4 | 0 | 28 | 12 | 4 | 0 | 31 | 1  | 67  | 13 |
| 110,866 | 8 | 0 | 31 | 13 | 5 | 0 | 41 | 2  | 85  | 15 |
| 110,867 | 8 | 0 | 32 | 13 | 5 | 0 | 41 | 2  | 86  | 15 |
| 110,868 | 8 | 0 | 31 | 13 | 5 | 0 | 41 | 2  | 85  | 15 |
| 110,869 | 8 | 0 | 31 | 13 | 5 | 1 | 41 | 6  | 85  | 20 |
| 110,870 | 8 | 0 | 31 | 16 | 5 | 1 | 41 | 7  | 85  | 24 |
| 110,871 | 8 | 0 | 31 | 16 | 5 | 1 | 41 | 8  | 85  | 25 |
| 110,872 | 8 | 0 | 31 | 15 | 5 | 1 | 42 | 8  | 86  | 24 |
| 110,873 | 8 | 0 | 30 | 17 | 5 | 1 | 40 | 9  | 83  | 27 |
| 110,874 | 8 | 0 | 30 | 17 | 5 | 1 | 40 | 10 | 83  | 28 |
| 110,875 | 8 | 0 | 30 | 17 | 5 | 1 | 40 | 10 | 83  | 28 |
| 110,876 | 8 | 0 | 30 | 16 | 5 | 1 | 40 | 10 | 83  | 27 |
| 110,877 | 8 | 0 | 31 | 16 | 5 | 1 | 40 | 10 | 84  | 27 |
| 110,878 | 8 | 0 | 31 | 16 | 5 | 1 | 41 | 10 | 85  | 27 |
| 110,879 | 8 | 0 | 31 | 16 | 5 | 1 | 41 | 11 | 85  | 28 |
| 110,880 | 8 | 0 | 31 | 16 | 5 | 1 | 41 | 11 | 85  | 28 |
| 110,881 | 8 | 0 | 31 | 15 | 5 | 1 | 41 | 11 | 85  | 27 |
| 110,882 | 8 | 0 | 31 | 15 | 5 | 1 | 42 | 11 | 86  | 27 |
| 110,883 | 8 | 0 | 31 | 15 | 5 | 1 | 42 | 11 | 86  | 27 |
| 110,884 | 8 | 0 | 36 | 15 | 5 | 1 | 42 | 11 | 91  | 27 |
| 110,885 | 8 | 0 | 36 | 15 | 5 | 1 | 42 | 11 | 91  | 27 |
| 110,886 | 7 | 0 | 36 | 15 | 5 | 1 | 47 | 13 | 95  | 29 |
| 110,887 | 8 | 0 | 37 | 15 | 5 | 1 | 51 | 13 | 101 | 29 |
| 110,888 | 8 | 0 | 37 | 14 | 5 | 2 | 51 | 13 | 101 | 29 |
| 110,889 | 8 | 0 | 37 | 14 | 5 | 2 | 51 | 13 | 101 | 29 |
| 110,890 | 8 | 0 | 37 | 14 | 5 | 2 | 51 | 13 | 101 | 29 |
| 110,891 | 8 | 0 | 37 | 14 | 5 | 2 | 51 | 13 | 101 | 29 |
| 110,892 | 8 | 0 | 37 | 14 | 5 | 2 | 51 | 13 | 101 | 29 |
| 110,893 | 8 | 0 | 37 | 14 | 5 | 2 | 51 | 13 | 101 | 29 |

|         |   |   |    |    |   |   |    |    |     |    |
|---------|---|---|----|----|---|---|----|----|-----|----|
| 110,894 | 8 | 0 | 37 | 14 | 5 | 2 | 51 | 14 | 101 | 30 |
| 110,895 | 8 | 0 | 37 | 12 | 5 | 2 | 51 | 14 | 101 | 28 |
| 110,896 | 8 | 0 | 37 | 12 | 5 | 2 | 51 | 14 | 101 | 28 |
| 110,897 | 8 | 0 | 37 | 13 | 5 | 2 | 51 | 14 | 101 | 29 |
| 110,898 | 8 | 0 | 37 | 13 | 5 | 2 | 51 | 14 | 101 | 29 |
| 110,899 | 8 | 0 | 37 | 13 | 5 | 2 | 51 | 14 | 101 | 29 |
| 110,900 | 8 | 0 | 37 | 13 | 5 | 2 | 51 | 14 | 101 | 29 |
| 110,901 | 8 | 0 | 38 | 13 | 5 | 2 | 53 | 14 | 104 | 29 |
| 110,902 | 8 | 0 | 38 | 13 | 5 | 2 | 53 | 14 | 104 | 29 |
| 110,903 | 8 | 0 | 37 | 13 | 5 | 2 | 54 | 14 | 104 | 29 |
| 110,904 | 8 | 0 | 37 | 13 | 5 | 2 | 53 | 14 | 103 | 29 |
| 110,905 | 8 | 0 | 37 | 12 | 5 | 2 | 53 | 14 | 103 | 28 |
| 110,906 | 8 | 0 | 37 | 12 | 5 | 2 | 53 | 14 | 103 | 28 |
| 110,907 | 7 | 0 | 37 | 12 | 5 | 2 | 53 | 13 | 102 | 27 |
| 110,908 | 7 | 0 | 34 | 11 | 5 | 2 | 53 | 13 | 99  | 26 |
| 110,909 | 7 | 0 | 34 | 11 | 5 | 2 | 53 | 14 | 99  | 27 |
| 110,910 | 7 | 0 | 24 | 12 | 2 | 2 | 42 | 14 | 75  | 28 |
| 110,911 | 7 | 0 | 22 | 11 | 2 | 2 | 40 | 14 | 71  | 27 |
| 110,912 | 7 | 0 | 22 | 12 | 2 | 2 | 38 | 14 | 69  | 28 |
| 110,913 | 7 | 0 | 22 | 10 | 2 | 2 | 33 | 14 | 64  | 26 |
| 110,914 | 5 | 0 | 17 | 11 | 1 | 2 | 31 | 14 | 54  | 27 |
| 110,915 | 5 | 0 | 15 | 11 | 1 | 2 | 27 | 14 | 48  | 27 |
| 110,916 | 3 | 0 | 13 | 11 | 0 | 2 | 19 | 14 | 35  | 27 |
| 110,917 | 1 | 0 | 12 | 12 | 0 | 2 | 17 | 13 | 30  | 27 |
| 110,918 | 1 | 0 | 11 | 12 | 0 | 2 | 17 | 13 | 29  | 27 |
| 110,919 | 1 | 0 | 11 | 12 | 0 | 2 | 17 | 13 | 29  | 27 |
| 110,920 | 1 | 0 | 11 | 12 | 0 | 1 | 17 | 9  | 29  | 22 |
| 110,921 | 1 | 0 | 11 | 9  | 0 | 1 | 16 | 8  | 28  | 18 |
| 110,922 | 1 | 0 | 11 | 9  | 0 | 1 | 16 | 7  | 28  | 17 |
| 110,923 | 1 | 0 | 11 | 10 | 0 | 1 | 16 | 9  | 28  | 20 |
| 110,924 | 1 | 0 | 11 | 8  | 0 | 1 | 16 | 8  | 28  | 17 |
| 110,925 | 1 | 0 | 11 | 8  | 0 | 1 | 16 | 7  | 28  | 16 |
| 110,926 | 1 | 0 | 11 | 8  | 0 | 1 | 16 | 7  | 28  | 16 |
| 110,927 | 1 | 0 | 11 | 8  | 0 | 1 | 16 | 7  | 28  | 16 |
| 110,928 | 1 | 0 | 10 | 8  | 0 | 1 | 16 | 7  | 27  | 16 |
| 110,929 | 1 | 0 | 10 | 8  | 0 | 1 | 15 | 6  | 26  | 15 |
| 110,930 | 1 | 0 | 10 | 8  | 0 | 1 | 15 | 6  | 26  | 15 |
| 110,931 | 1 | 0 | 10 | 8  | 0 | 1 | 15 | 9  | 26  | 18 |
| 110,932 | 1 | 0 | 10 | 8  | 0 | 1 | 15 | 9  | 26  | 18 |
| 110,933 | 1 | 0 | 10 | 8  | 0 | 1 | 14 | 11 | 25  | 20 |
| 110,934 | 1 | 0 | 10 | 10 | 0 | 1 | 14 | 11 | 25  | 22 |

|         |   |   |   |    |   |   |    |    |    |    |
|---------|---|---|---|----|---|---|----|----|----|----|
| 110,935 | 1 | 0 | 5 | 10 | 0 | 1 | 14 | 11 | 20 | 22 |
| 110,936 | 1 | 1 | 5 | 10 | 0 | 1 | 11 | 11 | 17 | 23 |
| 110,937 | 1 | 1 | 6 | 10 | 0 | 1 | 10 | 9  | 17 | 21 |
| 110,938 | 0 | 1 | 3 | 10 | 0 | 1 | 5  | 9  | 8  | 21 |
| 110,939 | 0 | 1 | 3 | 10 | 0 | 0 | 5  | 9  | 8  | 20 |
| 110,940 | 0 | 2 | 3 | 11 | 0 | 0 | 5  | 9  | 8  | 22 |
| 110,941 | 0 | 2 | 3 | 11 | 0 | 0 | 5  | 9  | 8  | 22 |
| 110,942 | 0 | 2 | 4 | 11 | 0 | 0 | 5  | 9  | 9  | 22 |
| 110,943 | 0 | 2 | 4 | 11 | 0 | 0 | 5  | 9  | 9  | 22 |
| 110,944 | 0 | 2 | 4 | 11 | 0 | 0 | 5  | 10 | 9  | 23 |
| 110,945 | 0 | 2 | 4 | 13 | 0 | 1 | 5  | 10 | 9  | 26 |
| 110,946 | 0 | 2 | 4 | 14 | 0 | 1 | 7  | 11 | 11 | 28 |
| 110,947 | 0 | 2 | 4 | 14 | 0 | 1 | 7  | 11 | 11 | 28 |
| 110,948 | 0 | 2 | 5 | 14 | 0 | 1 | 9  | 13 | 14 | 30 |
| 110,949 | 1 | 2 | 5 | 14 | 0 | 1 | 9  | 13 | 15 | 30 |
| 110,950 | 1 | 2 | 5 | 14 | 0 | 1 | 9  | 13 | 15 | 30 |
| 110,951 | 1 | 2 | 7 | 14 | 0 | 1 | 7  | 14 | 15 | 31 |
| 110,952 | 1 | 2 | 6 | 14 | 0 | 1 | 7  | 14 | 14 | 31 |
| 110,953 | 2 | 2 | 5 | 14 | 0 | 1 | 5  | 14 | 12 | 31 |
| 110,954 | 2 | 2 | 5 | 14 | 0 | 1 | 5  | 14 | 12 | 31 |
| 110,955 | 2 | 2 | 5 | 14 | 0 | 1 | 5  | 14 | 12 | 31 |
| 110,956 | 2 | 2 | 5 | 14 | 0 | 1 | 5  | 14 | 12 | 31 |
| 110,957 | 2 | 2 | 6 | 14 | 0 | 1 | 5  | 14 | 13 | 31 |
| 110,958 | 2 | 2 | 6 | 14 | 0 | 1 | 5  | 15 | 13 | 32 |
| 110,959 | 2 | 2 | 6 | 14 | 0 | 1 | 5  | 14 | 13 | 31 |
| 110,960 | 2 | 2 | 6 | 14 | 0 | 1 | 5  | 14 | 13 | 31 |
| 110,961 | 2 | 2 | 6 | 13 | 0 | 1 | 5  | 14 | 13 | 30 |
| 110,962 | 2 | 2 | 6 | 12 | 0 | 1 | 5  | 15 | 13 | 30 |
| 110,963 | 2 | 2 | 6 | 13 | 0 | 1 | 5  | 15 | 13 | 31 |
| 110,964 | 2 | 2 | 6 | 13 | 0 | 1 | 5  | 15 | 13 | 31 |
| 110,965 | 2 | 2 | 6 | 12 | 0 | 1 | 5  | 15 | 13 | 30 |
| 110,966 | 2 | 2 | 6 | 11 | 0 | 1 | 5  | 15 | 13 | 29 |
| 110,967 | 2 | 2 | 6 | 12 | 0 | 1 | 6  | 18 | 14 | 33 |
| 110,968 | 2 | 2 | 6 | 11 | 0 | 1 | 6  | 19 | 14 | 33 |
| 110,969 | 2 | 2 | 6 | 14 | 0 | 1 | 6  | 20 | 14 | 37 |
| 110,970 | 2 | 2 | 6 | 17 | 0 | 2 | 6  | 21 | 14 | 42 |
| 110,971 | 2 | 2 | 6 | 18 | 0 | 3 | 6  | 21 | 14 | 44 |
| 110,972 | 2 | 2 | 6 | 19 | 0 | 3 | 6  | 22 | 14 | 46 |
| 110,973 | 2 | 2 | 6 | 19 | 0 | 3 | 6  | 22 | 14 | 46 |
| 110,974 | 2 | 2 | 6 | 18 | 0 | 3 | 6  | 20 | 14 | 43 |
| 110,975 | 2 | 3 | 6 | 19 | 0 | 3 | 6  | 20 | 14 | 45 |

|         |   |   |    |    |   |   |    |    |    |    |
|---------|---|---|----|----|---|---|----|----|----|----|
| 110,976 | 2 | 3 | 6  | 19 | 0 | 3 | 6  | 20 | 14 | 45 |
| 110,977 | 2 | 3 | 6  | 19 | 0 | 3 | 6  | 20 | 14 | 45 |
| 110,978 | 2 | 3 | 6  | 19 | 0 | 3 | 6  | 20 | 14 | 45 |
| 110,979 | 2 | 3 | 6  | 23 | 0 | 3 | 6  | 21 | 14 | 50 |
| 110,980 | 2 | 3 | 6  | 23 | 0 | 3 | 6  | 21 | 14 | 50 |
| 110,981 | 2 | 3 | 7  | 23 | 0 | 3 | 6  | 21 | 15 | 50 |
| 110,982 | 2 | 3 | 7  | 23 | 0 | 3 | 6  | 19 | 15 | 48 |
| 110,983 | 2 | 3 | 7  | 23 | 0 | 3 | 6  | 19 | 15 | 48 |
| 110,984 | 2 | 3 | 7  | 23 | 0 | 3 | 6  | 17 | 15 | 46 |
| 110,985 | 2 | 3 | 7  | 21 | 0 | 3 | 6  | 17 | 15 | 44 |
| 110,986 | 2 | 2 | 10 | 22 | 0 | 3 | 6  | 17 | 18 | 44 |
| 110,987 | 2 | 2 | 11 | 22 | 0 | 3 | 6  | 17 | 19 | 44 |
| 110,988 | 2 | 2 | 13 | 22 | 0 | 3 | 6  | 17 | 21 | 44 |
| 110,989 | 2 | 2 | 20 | 22 | 1 | 3 | 8  | 17 | 31 | 44 |
| 110,990 | 2 | 2 | 20 | 22 | 1 | 3 | 8  | 17 | 31 | 44 |
| 110,991 | 2 | 1 | 23 | 21 | 1 | 3 | 13 | 17 | 39 | 42 |
| 110,992 | 2 | 1 | 23 | 21 | 1 | 3 | 14 | 18 | 40 | 43 |
| 110,993 | 2 | 1 | 23 | 21 | 1 | 3 | 14 | 18 | 40 | 43 |
| 110,994 | 2 | 1 | 23 | 22 | 1 | 3 | 14 | 19 | 40 | 45 |
| 110,995 | 2 | 1 | 23 | 22 | 1 | 3 | 14 | 18 | 40 | 44 |
| 110,996 | 2 | 1 | 23 | 20 | 1 | 2 | 14 | 17 | 40 | 40 |
| 110,997 | 2 | 1 | 23 | 19 | 1 | 2 | 12 | 16 | 38 | 38 |
| 110,998 | 3 | 1 | 23 | 19 | 1 | 2 | 13 | 17 | 40 | 39 |
| 110,999 | 3 | 1 | 22 | 19 | 1 | 2 | 12 | 15 | 38 | 37 |
| 111,000 | 3 | 1 | 22 | 20 | 1 | 2 | 12 | 15 | 38 | 38 |
| 111,001 | 3 | 1 | 22 | 20 | 1 | 2 | 12 | 15 | 38 | 38 |
| 111,002 | 3 | 1 | 22 | 20 | 1 | 2 | 12 | 14 | 38 | 37 |
| 111,003 | 3 | 1 | 22 | 20 | 1 | 2 | 13 | 14 | 39 | 37 |
| 111,004 | 2 | 1 | 22 | 20 | 1 | 2 | 13 | 14 | 38 | 37 |
| 111,005 | 2 | 1 | 22 | 20 | 1 | 2 | 13 | 14 | 38 | 37 |
| 111,006 | 2 | 1 | 25 | 20 | 1 | 2 | 13 | 14 | 41 | 37 |
| 111,007 | 2 | 1 | 24 | 20 | 1 | 2 | 13 | 15 | 40 | 38 |
| 111,008 | 2 | 1 | 24 | 20 | 1 | 2 | 13 | 15 | 40 | 38 |
| 111,009 | 2 | 1 | 26 | 20 | 1 | 2 | 16 | 14 | 45 | 37 |
| 111,010 | 2 | 1 | 26 | 21 | 1 | 2 | 16 | 14 | 45 | 38 |
| 111,011 | 2 | 1 | 26 | 21 | 1 | 2 | 17 | 15 | 46 | 39 |
| 111,012 | 2 | 1 | 26 | 21 | 1 | 2 | 17 | 16 | 46 | 40 |
| 111,013 | 2 | 1 | 26 | 21 | 1 | 2 | 17 | 15 | 46 | 39 |
| 111,014 | 2 | 1 | 26 | 20 | 1 | 2 | 17 | 17 | 46 | 40 |
| 111,015 | 2 | 1 | 29 | 20 | 1 | 2 | 17 | 19 | 49 | 42 |
| 111,016 | 2 | 1 | 29 | 20 | 1 | 2 | 17 | 19 | 49 | 42 |

|         |   |   |    |    |   |   |    |    |    |    |
|---------|---|---|----|----|---|---|----|----|----|----|
| 111,017 | 2 | 1 | 29 | 21 | 1 | 2 | 16 | 20 | 48 | 44 |
| 111,018 | 2 | 1 | 29 | 20 | 1 | 2 | 19 | 16 | 51 | 39 |
| 111,019 | 2 | 1 | 30 | 17 | 1 | 2 | 19 | 15 | 52 | 35 |
| 111,020 | 2 | 1 | 30 | 17 | 1 | 2 | 19 | 15 | 52 | 35 |
| 111,021 | 2 | 1 | 30 | 13 | 1 | 0 | 19 | 14 | 52 | 28 |
| 111,022 | 2 | 1 | 30 | 13 | 1 | 0 | 19 | 14 | 52 | 28 |
| 111,023 | 2 | 1 | 30 | 12 | 1 | 0 | 19 | 13 | 52 | 26 |
| 111,024 | 3 | 1 | 35 | 12 | 1 | 0 | 25 | 13 | 64 | 26 |
| 111,025 | 3 | 1 | 35 | 12 | 1 | 0 | 25 | 13 | 64 | 26 |
| 111,026 | 3 | 0 | 37 | 11 | 1 | 0 | 26 | 13 | 67 | 24 |
| 111,027 | 3 | 0 | 37 | 11 | 1 | 0 | 26 | 13 | 67 | 24 |
| 111,028 | 3 | 0 | 37 | 11 | 1 | 0 | 27 | 13 | 68 | 24 |
| 111,029 | 3 | 0 | 38 | 11 | 1 | 0 | 28 | 13 | 70 | 24 |
| 111,030 | 3 | 0 | 38 | 7  | 1 | 0 | 28 | 12 | 70 | 19 |
| 111,031 | 3 | 0 | 37 | 7  | 1 | 0 | 28 | 12 | 69 | 19 |
| 111,032 | 3 | 0 | 37 | 7  | 1 | 0 | 28 | 11 | 69 | 18 |
| 111,033 | 3 | 1 | 37 | 7  | 1 | 0 | 28 | 11 | 69 | 19 |
| 111,034 | 3 | 1 | 37 | 12 | 1 | 2 | 28 | 17 | 69 | 32 |
| 111,035 | 3 | 1 | 37 | 12 | 1 | 2 | 28 | 18 | 69 | 33 |
| 111,036 | 3 | 1 | 37 | 23 | 1 | 3 | 28 | 28 | 69 | 55 |
| 111,037 | 3 | 2 | 34 | 41 | 1 | 3 | 28 | 35 | 66 | 81 |
| 111,038 | 3 | 3 | 33 | 43 | 1 | 3 | 27 | 36 | 64 | 85 |
| 111,039 | 3 | 3 | 31 | 45 | 1 | 3 | 27 | 36 | 62 | 87 |
| 111,040 | 3 | 3 | 25 | 46 | 0 | 3 | 24 | 36 | 52 | 88 |
| 111,041 | 3 | 3 | 21 | 46 | 0 | 3 | 18 | 36 | 42 | 88 |
| 111,042 | 3 | 3 | 21 | 46 | 0 | 4 | 18 | 35 | 42 | 88 |
| 111,043 | 3 | 3 | 21 | 47 | 0 | 4 | 18 | 38 | 42 | 92 |
| 111,044 | 3 | 3 | 22 | 49 | 0 | 4 | 18 | 37 | 43 | 93 |
| 111,045 | 3 | 3 | 22 | 49 | 0 | 4 | 18 | 37 | 43 | 93 |
| 111,046 | 3 | 3 | 23 | 49 | 0 | 4 | 18 | 37 | 44 | 93 |
| 111,047 | 3 | 3 | 23 | 50 | 0 | 4 | 18 | 37 | 44 | 94 |
| 111,048 | 3 | 3 | 23 | 50 | 0 | 4 | 18 | 37 | 44 | 94 |
| 111,049 | 2 | 3 | 23 | 50 | 0 | 4 | 17 | 37 | 42 | 94 |
| 111,050 | 2 | 3 | 23 | 49 | 0 | 4 | 17 | 38 | 42 | 94 |
| 111,051 | 1 | 3 | 23 | 49 | 0 | 4 | 17 | 38 | 41 | 94 |
| 111,052 | 1 | 3 | 27 | 49 | 0 | 4 | 19 | 38 | 47 | 94 |
| 111,053 | 1 | 3 | 31 | 49 | 0 | 4 | 21 | 38 | 53 | 94 |
| 111,054 | 1 | 3 | 31 | 49 | 0 | 4 | 21 | 38 | 53 | 94 |
| 111,055 | 1 | 3 | 34 | 49 | 2 | 4 | 24 | 38 | 61 | 94 |
| 111,056 | 1 | 3 | 34 | 49 | 2 | 4 | 25 | 38 | 62 | 94 |
| 111,057 | 1 | 3 | 43 | 49 | 2 | 4 | 26 | 37 | 72 | 93 |

|         |    |   |     |    |   |   |     |    |     |    |
|---------|----|---|-----|----|---|---|-----|----|-----|----|
| 111,058 | 1  | 3 | 60  | 49 | 2 | 4 | 28  | 37 | 91  | 93 |
| 111,059 | 1  | 3 | 60  | 49 | 3 | 4 | 26  | 37 | 90  | 93 |
| 111,060 | 1  | 3 | 61  | 49 | 4 | 4 | 26  | 37 | 92  | 93 |
| 111,061 | 1  | 3 | 62  | 50 | 4 | 4 | 28  | 39 | 95  | 96 |
| 111,062 | 1  | 3 | 62  | 50 | 4 | 4 | 27  | 38 | 94  | 95 |
| 111,063 | 1  | 3 | 62  | 50 | 4 | 4 | 27  | 37 | 94  | 94 |
| 111,064 | 1  | 3 | 62  | 50 | 4 | 4 | 27  | 37 | 94  | 94 |
| 111,065 | 1  | 3 | 65  | 50 | 4 | 4 | 27  | 35 | 97  | 92 |
| 111,066 | 1  | 3 | 63  | 51 | 4 | 4 | 28  | 33 | 96  | 91 |
| 111,067 | 1  | 3 | 63  | 51 | 4 | 4 | 28  | 33 | 96  | 91 |
| 111,068 | 1  | 3 | 84  | 50 | 4 | 4 | 31  | 33 | 120 | 90 |
| 111,069 | 1  | 3 | 84  | 49 | 4 | 4 | 31  | 33 | 120 | 89 |
| 111,070 | 1  | 3 | 83  | 49 | 4 | 4 | 31  | 33 | 119 | 89 |
| 111,071 | 2  | 3 | 84  | 49 | 4 | 4 | 35  | 33 | 125 | 89 |
| 111,072 | 4  | 3 | 102 | 49 | 4 | 4 | 51  | 33 | 161 | 89 |
| 111,073 | 4  | 3 | 100 | 49 | 4 | 4 | 51  | 33 | 159 | 89 |
| 111,074 | 5  | 3 | 121 | 49 | 6 | 4 | 79  | 34 | 211 | 90 |
| 111,075 | 4  | 3 | 123 | 49 | 6 | 4 | 76  | 34 | 209 | 90 |
| 111,076 | 4  | 3 | 125 | 49 | 6 | 4 | 77  | 34 | 212 | 90 |
| 111,077 | 4  | 3 | 124 | 49 | 6 | 4 | 79  | 34 | 213 | 90 |
| 111,078 | 4  | 3 | 127 | 49 | 6 | 4 | 86  | 34 | 223 | 90 |
| 111,079 | 4  | 3 | 127 | 49 | 6 | 4 | 85  | 36 | 222 | 92 |
| 111,080 | 4  | 3 | 126 | 49 | 6 | 4 | 84  | 36 | 220 | 92 |
| 111,081 | 4  | 3 | 126 | 50 | 6 | 4 | 85  | 37 | 221 | 94 |
| 111,082 | 5  | 3 | 126 | 50 | 6 | 4 | 85  | 39 | 222 | 96 |
| 111,083 | 5  | 3 | 126 | 51 | 6 | 4 | 85  | 39 | 222 | 97 |
| 111,084 | 5  | 2 | 126 | 51 | 6 | 4 | 85  | 39 | 222 | 96 |
| 111,085 | 5  | 2 | 126 | 47 | 6 | 2 | 85  | 34 | 222 | 85 |
| 111,086 | 5  | 2 | 127 | 47 | 6 | 2 | 89  | 35 | 227 | 86 |
| 111,087 | 6  | 1 | 128 | 37 | 6 | 1 | 90  | 25 | 230 | 64 |
| 111,088 | 6  | 0 | 128 | 16 | 6 | 1 | 91  | 18 | 231 | 35 |
| 111,089 | 6  | 0 | 128 | 16 | 6 | 1 | 92  | 18 | 232 | 35 |
| 111,090 | 6  | 1 | 128 | 14 | 6 | 1 | 92  | 18 | 232 | 34 |
| 111,091 | 6  | 1 | 130 | 16 | 6 | 0 | 96  | 18 | 238 | 35 |
| 111,092 | 6  | 2 | 130 | 17 | 6 | 0 | 96  | 18 | 238 | 37 |
| 111,093 | 6  | 2 | 131 | 17 | 6 | 0 | 96  | 18 | 239 | 37 |
| 111,094 | 8  | 2 | 132 | 14 | 6 | 0 | 97  | 15 | 243 | 31 |
| 111,095 | 8  | 2 | 131 | 14 | 6 | 0 | 97  | 15 | 242 | 31 |
| 111,096 | 8  | 2 | 138 | 13 | 6 | 0 | 105 | 14 | 257 | 29 |
| 111,097 | 10 | 2 | 139 | 13 | 6 | 0 | 109 | 14 | 264 | 29 |
| 111,098 | 10 | 2 | 139 | 13 | 6 | 0 | 109 | 14 | 264 | 29 |

|         |    |   |     |    |   |   |     |    |     |    |
|---------|----|---|-----|----|---|---|-----|----|-----|----|
| 111,099 | 10 | 2 | 155 | 13 | 7 | 0 | 122 | 14 | 294 | 29 |
| 111,100 | 10 | 2 | 159 | 13 | 7 | 0 | 123 | 14 | 299 | 29 |
| 111,101 | 10 | 2 | 162 | 12 | 7 | 0 | 123 | 13 | 302 | 27 |
| 111,102 | 10 | 2 | 161 | 12 | 7 | 0 | 122 | 13 | 300 | 27 |
| 111,103 | 10 | 2 | 158 | 12 | 7 | 0 | 121 | 13 | 296 | 27 |
| 111,104 | 10 | 2 | 155 | 12 | 7 | 0 | 120 | 13 | 292 | 27 |
| 111,105 | 10 | 2 | 155 | 12 | 7 | 0 | 120 | 13 | 292 | 27 |
| 111,106 | 11 | 2 | 154 | 12 | 5 | 0 | 119 | 13 | 289 | 27 |
| 111,107 | 11 | 2 | 151 | 12 | 5 | 0 | 118 | 13 | 285 | 27 |
| 111,108 | 11 | 2 | 143 | 12 | 5 | 0 | 117 | 13 | 276 | 27 |
| 111,109 | 11 | 2 | 125 | 12 | 5 | 0 | 116 | 13 | 257 | 27 |
| 111,110 | 11 | 2 | 123 | 11 | 4 | 0 | 114 | 13 | 252 | 26 |
| 111,111 | 11 | 2 | 122 | 11 | 3 | 0 | 114 | 13 | 250 | 26 |
| 111,112 | 11 | 2 | 121 | 10 | 3 | 0 | 113 | 11 | 248 | 23 |
| 111,113 | 11 | 2 | 121 | 10 | 3 | 0 | 113 | 11 | 248 | 23 |
| 111,114 | 11 | 2 | 123 | 10 | 4 | 0 | 115 | 11 | 253 | 23 |
| 111,115 | 11 | 2 | 120 | 10 | 4 | 0 | 115 | 11 | 250 | 23 |
| 111,116 | 11 | 2 | 120 | 9  | 4 | 0 | 115 | 11 | 250 | 22 |
| 111,117 | 11 | 2 | 119 | 9  | 4 | 0 | 114 | 11 | 248 | 22 |
| 111,118 | 11 | 2 | 100 | 9  | 4 | 0 | 110 | 10 | 225 | 21 |
| 111,119 | 11 | 2 | 98  | 9  | 4 | 0 | 110 | 10 | 223 | 21 |
| 111,120 | 11 | 2 | 99  | 9  | 4 | 0 | 107 | 10 | 221 | 21 |
| 111,121 | 11 | 2 | 99  | 9  | 4 | 1 | 107 | 9  | 221 | 21 |
| 111,122 | 10 | 2 | 98  | 9  | 4 | 1 | 103 | 9  | 215 | 21 |
| 111,123 | 8  | 2 | 80  | 9  | 4 | 1 | 87  | 9  | 179 | 21 |
| 111,124 | 8  | 2 | 78  | 9  | 4 | 1 | 86  | 9  | 176 | 21 |
| 111,125 | 7  | 2 | 57  | 9  | 2 | 1 | 57  | 9  | 123 | 21 |
| 111,126 | 7  | 2 | 55  | 9  | 2 | 1 | 57  | 10 | 121 | 22 |
| 111,127 | 7  | 2 | 53  | 9  | 2 | 1 | 56  | 10 | 118 | 22 |
| 111,128 | 7  | 2 | 52  | 9  | 2 | 1 | 53  | 10 | 114 | 22 |
| 111,129 | 7  | 2 | 49  | 9  | 2 | 1 | 46  | 8  | 104 | 20 |
| 111,130 | 7  | 2 | 49  | 9  | 2 | 1 | 45  | 8  | 103 | 20 |
| 111,131 | 7  | 2 | 59  | 8  | 2 | 1 | 49  | 7  | 117 | 18 |
| 111,132 | 6  | 2 | 59  | 8  | 2 | 1 | 49  | 7  | 116 | 18 |
| 111,133 | 6  | 2 | 72  | 8  | 2 | 1 | 50  | 5  | 130 | 16 |
| 111,134 | 11 | 2 | 102 | 7  | 2 | 1 | 63  | 5  | 178 | 15 |
| 111,135 | 11 | 2 | 102 | 7  | 2 | 1 | 63  | 5  | 178 | 15 |
| 111,136 | 11 | 2 | 145 | 6  | 3 | 1 | 87  | 4  | 246 | 13 |
| 111,137 | 11 | 2 | 165 | 5  | 3 | 1 | 94  | 2  | 273 | 10 |
| 111,138 | 10 | 2 | 174 | 5  | 3 | 1 | 101 | 1  | 288 | 9  |
| 111,139 | 10 | 2 | 178 | 5  | 3 | 1 | 100 | 1  | 291 | 9  |

|         |    |   |     |    |    |   |     |   |     |    |
|---------|----|---|-----|----|----|---|-----|---|-----|----|
| 111,140 | 10 | 1 | 178 | 4  | 3  | 1 | 99  | 1 | 290 | 7  |
| 111,141 | 10 | 1 | 177 | 4  | 3  | 1 | 99  | 1 | 289 | 7  |
| 111,142 | 10 | 0 | 174 | 1  | 3  | 1 | 95  | 1 | 282 | 3  |
| 111,143 | 10 | 0 | 174 | 1  | 3  | 1 | 94  | 1 | 281 | 3  |
| 111,144 | 10 | 1 | 173 | 2  | 3  | 1 | 94  | 1 | 280 | 5  |
| 111,145 | 8  | 1 | 172 | 1  | 3  | 1 | 93  | 1 | 276 | 4  |
| 111,146 | 8  | 1 | 177 | 2  | 3  | 1 | 93  | 1 | 281 | 5  |
| 111,147 | 8  | 1 | 173 | 4  | 3  | 2 | 86  | 1 | 270 | 8  |
| 111,148 | 7  | 2 | 172 | 4  | 3  | 2 | 82  | 1 | 264 | 9  |
| 111,149 | 7  | 2 | 156 | 5  | 2  | 2 | 69  | 1 | 234 | 10 |
| 111,150 | 9  | 2 | 193 | 6  | 8  | 2 | 99  | 1 | 309 | 11 |
| 111,151 | 9  | 2 | 198 | 6  | 9  | 2 | 102 | 1 | 318 | 11 |
| 111,152 | 9  | 3 | 203 | 8  | 9  | 2 | 103 | 1 | 324 | 14 |
| 111,153 | 9  | 3 | 203 | 8  | 9  | 2 | 103 | 1 | 324 | 14 |
| 111,154 | 9  | 3 | 210 | 8  | 9  | 2 | 105 | 1 | 333 | 14 |
| 111,155 | 11 | 3 | 228 | 8  | 9  | 2 | 119 | 1 | 367 | 14 |
| 111,156 | 12 | 3 | 232 | 8  | 10 | 2 | 123 | 1 | 377 | 14 |
| 111,157 | 14 | 3 | 305 | 8  | 11 | 2 | 152 | 1 | 482 | 14 |
| 111,158 | 15 | 3 | 308 | 8  | 11 | 2 | 157 | 2 | 491 | 15 |
| 111,159 | 15 | 3 | 319 | 8  | 13 | 2 | 160 | 2 | 507 | 15 |
| 111,160 | 15 | 3 | 326 | 8  | 14 | 2 | 159 | 2 | 514 | 15 |
| 111,161 | 20 | 3 | 339 | 8  | 14 | 2 | 165 | 2 | 538 | 15 |
| 111,162 | 20 | 3 | 339 | 8  | 14 | 2 | 165 | 2 | 538 | 15 |
| 111,163 | 20 | 3 | 341 | 8  | 14 | 2 | 166 | 2 | 541 | 15 |
| 111,164 | 20 | 3 | 340 | 8  | 13 | 2 | 166 | 2 | 539 | 15 |
| 111,165 | 20 | 3 | 343 | 8  | 14 | 2 | 166 | 2 | 543 | 15 |
| 111,166 | 21 | 3 | 348 | 8  | 14 | 2 | 169 | 2 | 552 | 15 |
| 111,167 | 23 | 3 | 367 | 8  | 14 | 2 | 181 | 2 | 585 | 15 |
| 111,168 | 24 | 3 | 369 | 8  | 14 | 2 | 184 | 2 | 591 | 15 |
| 111,169 | 24 | 3 | 369 | 8  | 14 | 2 | 184 | 2 | 591 | 15 |
| 111,170 | 24 | 3 | 369 | 8  | 14 | 2 | 184 | 3 | 591 | 16 |
| 111,171 | 24 | 3 | 368 | 9  | 14 | 2 | 184 | 4 | 590 | 18 |
| 111,172 | 24 | 3 | 369 | 9  | 14 | 1 | 184 | 5 | 591 | 18 |
| 111,173 | 24 | 3 | 382 | 9  | 14 | 1 | 190 | 5 | 610 | 18 |
| 111,174 | 24 | 3 | 385 | 9  | 14 | 1 | 192 | 5 | 615 | 18 |
| 111,175 | 24 | 3 | 387 | 10 | 14 | 1 | 192 | 5 | 617 | 19 |
| 111,176 | 24 | 3 | 389 | 10 | 14 | 1 | 193 | 4 | 620 | 18 |
| 111,177 | 24 | 3 | 389 | 10 | 14 | 1 | 193 | 4 | 620 | 18 |
| 111,178 | 24 | 3 | 399 | 10 | 14 | 1 | 205 | 4 | 642 | 18 |
| 111,179 | 24 | 3 | 399 | 10 | 14 | 1 | 205 | 4 | 642 | 18 |
| 111,180 | 28 | 3 | 411 | 10 | 15 | 1 | 215 | 4 | 669 | 18 |



|         |    |   |     |    |    |   |     |   |     |    |
|---------|----|---|-----|----|----|---|-----|---|-----|----|
| 111,181 | 28 | 3 | 408 | 12 | 15 | 1 | 215 | 4 | 666 | 20 |
| 111,182 | 27 | 3 | 401 | 12 | 15 | 1 | 211 | 4 | 654 | 20 |
| 111,183 | 29 | 3 | 391 | 14 | 15 | 1 | 211 | 6 | 646 | 24 |
| 111,184 | 26 | 3 | 381 | 14 | 15 | 1 | 202 | 6 | 624 | 24 |
| 111,185 | 24 | 3 | 365 | 14 | 15 | 1 | 199 | 6 | 603 | 24 |
| 111,186 | 24 | 3 | 355 | 14 | 15 | 1 | 191 | 6 | 585 | 24 |
| 111,187 | 24 | 3 | 324 | 14 | 14 | 1 | 171 | 6 | 533 | 24 |
| 111,188 | 25 | 3 | 308 | 14 | 14 | 1 | 166 | 6 | 513 | 24 |
| 111,189 | 25 | 3 | 298 | 14 | 14 | 1 | 158 | 7 | 495 | 25 |
| 111,190 | 25 | 3 | 294 | 14 | 14 | 1 | 158 | 7 | 491 | 25 |
| 111,191 | 25 | 3 | 294 | 14 | 14 | 1 | 158 | 7 | 491 | 25 |
| 111,192 | 25 | 3 | 294 | 14 | 14 | 1 | 158 | 7 | 491 | 25 |
| 111,193 | 25 | 3 | 294 | 14 | 14 | 1 | 158 | 7 | 491 | 25 |
| 111,194 | 25 | 3 | 294 | 14 | 14 | 1 | 158 | 7 | 491 | 25 |
| 111,195 | 25 | 2 | 294 | 13 | 14 | 1 | 158 | 7 | 491 | 23 |
| 111,196 | 25 | 2 | 294 | 13 | 14 | 1 | 158 | 7 | 491 | 23 |
| 111,197 | 25 | 2 | 290 | 12 | 14 | 1 | 158 | 7 | 487 | 22 |
| 111,198 | 25 | 1 | 288 | 9  | 14 | 0 | 158 | 7 | 485 | 17 |
| 111,199 | 25 | 1 | 287 | 9  | 14 | 0 | 158 | 7 | 484 | 17 |
| 111,200 | 22 | 1 | 249 | 9  | 8  | 0 | 127 | 7 | 406 | 17 |
| 111,201 | 22 | 1 | 244 | 8  | 7  | 0 | 125 | 7 | 398 | 16 |
| 111,202 | 22 | 1 | 244 | 8  | 7  | 0 | 125 | 7 | 398 | 16 |
| 111,203 | 22 | 0 | 237 | 6  | 7  | 0 | 124 | 7 | 390 | 13 |
| 111,204 | 23 | 0 | 229 | 6  | 8  | 0 | 122 | 7 | 382 | 13 |
| 111,205 | 23 | 0 | 228 | 6  | 8  | 0 | 122 | 7 | 381 | 13 |
| 111,206 | 21 | 0 | 209 | 6  | 8  | 0 | 108 | 7 | 346 | 13 |
| 111,207 | 20 | 0 | 205 | 6  | 7  | 0 | 102 | 7 | 334 | 13 |
| 111,208 | 17 | 0 | 137 | 6  | 6  | 0 | 76  | 7 | 236 | 13 |
| 111,209 | 16 | 0 | 135 | 6  | 6  | 0 | 72  | 6 | 229 | 12 |
| 111,210 | 17 | 1 | 127 | 6  | 4  | 0 | 72  | 6 | 220 | 13 |
| 111,211 | 17 | 1 | 120 | 6  | 3  | 0 | 72  | 6 | 212 | 13 |
| 111,212 | 12 | 1 | 106 | 6  | 3  | 0 | 64  | 6 | 185 | 13 |
| 111,213 | 12 | 1 | 107 | 6  | 4  | 0 | 70  | 6 | 193 | 13 |
| 111,214 | 12 | 1 | 107 | 6  | 4  | 0 | 70  | 6 | 193 | 13 |
| 111,215 | 12 | 1 | 108 | 6  | 3  | 0 | 73  | 6 | 196 | 13 |
| 111,216 | 11 | 1 | 105 | 6  | 3  | 0 | 71  | 6 | 190 | 13 |
| 111,217 | 11 | 1 | 101 | 6  | 3  | 1 | 72  | 6 | 187 | 14 |
| 111,218 | 9  | 1 | 86  | 6  | 3  | 1 | 60  | 6 | 158 | 14 |
| 111,219 | 8  | 1 | 84  | 6  | 3  | 1 | 57  | 6 | 152 | 14 |
| 111,220 | 8  | 1 | 86  | 6  | 3  | 1 | 57  | 6 | 154 | 14 |
| 111,221 | 8  | 1 | 92  | 5  | 3  | 1 | 61  | 5 | 164 | 12 |

|         |    |   |     |   |   |   |    |   |     |    |
|---------|----|---|-----|---|---|---|----|---|-----|----|
| 111,222 | 12 | 1 | 104 | 5 | 3 | 1 | 79 | 4 | 198 | 11 |
| 111,223 | 12 | 1 | 103 | 6 | 3 | 1 | 80 | 4 | 198 | 12 |
| 111,224 | 12 | 1 | 93  | 6 | 3 | 1 | 74 | 5 | 182 | 13 |
| 111,225 | 12 | 1 | 90  | 6 | 3 | 1 | 72 | 5 | 177 | 13 |
| 111,226 | 13 | 1 | 103 | 5 | 4 | 1 | 75 | 5 | 195 | 12 |
| 111,227 | 13 | 1 | 117 | 5 | 6 | 1 | 81 | 5 | 217 | 12 |
| 111,228 | 13 | 1 | 112 | 5 | 6 | 1 | 73 | 5 | 204 | 12 |
| 111,229 | 13 | 1 | 107 | 5 | 6 | 1 | 69 | 5 | 195 | 12 |
| 111,230 | 9  | 1 | 97  | 5 | 5 | 1 | 60 | 5 | 171 | 12 |
| 111,231 | 9  | 1 | 97  | 5 | 5 | 1 | 59 | 5 | 170 | 12 |
| 111,232 | 9  | 1 | 97  | 3 | 5 | 1 | 59 | 5 | 170 | 10 |
| 111,233 | 9  | 1 | 97  | 3 | 5 | 1 | 59 | 5 | 170 | 10 |
| 111,234 | 8  | 1 | 94  | 1 | 5 | 1 | 58 | 3 | 165 | 6  |
| 111,235 | 8  | 1 | 90  | 1 | 5 | 1 | 57 | 3 | 160 | 6  |
| 111,236 | 8  | 1 | 90  | 1 | 5 | 1 | 57 | 3 | 160 | 6  |
| 111,237 | 8  | 1 | 87  | 1 | 5 | 1 | 57 | 3 | 157 | 6  |
| 111,238 | 8  | 1 | 87  | 1 | 5 | 1 | 57 | 3 | 157 | 6  |
| 111,239 | 7  | 1 | 83  | 1 | 5 | 1 | 55 | 3 | 150 | 6  |
| 111,240 | 7  | 1 | 83  | 2 | 5 | 1 | 55 | 2 | 150 | 6  |
| 111,241 | 7  | 1 | 83  | 2 | 5 | 1 | 55 | 2 | 150 | 6  |
| 111,242 | 7  | 1 | 83  | 3 | 5 | 1 | 55 | 2 | 150 | 7  |
| 111,243 | 7  | 1 | 83  | 3 | 5 | 1 | 55 | 2 | 150 | 7  |
| 111,244 | 7  | 1 | 83  | 3 | 5 | 1 | 55 | 2 | 150 | 7  |
| 111,245 | 7  | 1 | 83  | 3 | 5 | 1 | 55 | 2 | 150 | 7  |
| 111,246 | 7  | 1 | 83  | 3 | 5 | 1 | 55 | 2 | 150 | 7  |
| 111,247 | 7  | 1 | 83  | 3 | 5 | 1 | 55 | 3 | 150 | 8  |
| 111,248 | 7  | 1 | 83  | 3 | 5 | 1 | 55 | 3 | 150 | 8  |
| 111,249 | 7  | 1 | 82  | 4 | 5 | 1 | 54 | 3 | 148 | 9  |
| 111,250 | 7  | 1 | 82  | 4 | 5 | 1 | 54 | 3 | 148 | 9  |
| 111,251 | 7  | 1 | 79  | 4 | 5 | 1 | 54 | 3 | 145 | 9  |
| 111,252 | 7  | 2 | 80  | 4 | 5 | 1 | 54 | 3 | 146 | 10 |
| 111,253 | 7  | 2 | 80  | 4 | 5 | 1 | 54 | 3 | 146 | 10 |
| 111,254 | 7  | 2 | 79  | 5 | 5 | 1 | 54 | 3 | 145 | 11 |
| 111,255 | 7  | 2 | 79  | 5 | 4 | 1 | 55 | 3 | 145 | 11 |
| 111,256 | 7  | 2 | 79  | 5 | 4 | 1 | 54 | 3 | 144 | 11 |
| 111,257 | 9  | 2 | 87  | 6 | 4 | 1 | 58 | 3 | 158 | 12 |
| 111,258 | 9  | 2 | 85  | 6 | 4 | 1 | 58 | 3 | 156 | 12 |
| 111,259 | 9  | 2 | 84  | 6 | 4 | 1 | 56 | 3 | 153 | 12 |
| 111,260 | 9  | 2 | 84  | 6 | 4 | 2 | 55 | 6 | 152 | 16 |
| 111,261 | 8  | 1 | 79  | 8 | 4 | 2 | 52 | 6 | 143 | 17 |
| 111,262 | 9  | 1 | 79  | 9 | 4 | 2 | 53 | 6 | 145 | 18 |

|         |    |   |     |    |    |   |     |   |     |    |
|---------|----|---|-----|----|----|---|-----|---|-----|----|
| 111,263 | 9  | 1 | 78  | 9  | 3  | 2 | 48  | 6 | 138 | 18 |
| 111,264 | 9  | 1 | 77  | 9  | 3  | 2 | 46  | 6 | 135 | 18 |
| 111,265 | 9  | 1 | 76  | 9  | 3  | 2 | 46  | 6 | 134 | 18 |
| 111,266 | 9  | 1 | 74  | 9  | 3  | 2 | 43  | 6 | 129 | 18 |
| 111,267 | 9  | 1 | 72  | 10 | 3  | 2 | 42  | 6 | 126 | 19 |
| 111,268 | 9  | 1 | 72  | 11 | 3  | 1 | 41  | 6 | 125 | 19 |
| 111,269 | 9  | 1 | 77  | 11 | 3  | 1 | 43  | 5 | 132 | 18 |
| 111,270 | 9  | 1 | 75  | 11 | 3  | 1 | 43  | 5 | 130 | 18 |
| 111,271 | 9  | 1 | 73  | 11 | 3  | 1 | 43  | 5 | 128 | 18 |
| 111,272 | 10 | 1 | 71  | 11 | 3  | 1 | 40  | 5 | 124 | 18 |
| 111,273 | 7  | 1 | 67  | 11 | 3  | 1 | 24  | 5 | 101 | 18 |
| 111,274 | 8  | 1 | 74  | 10 | 3  | 1 | 24  | 5 | 109 | 17 |
| 111,275 | 9  | 1 | 91  | 10 | 3  | 1 | 30  | 4 | 133 | 16 |
| 111,276 | 10 | 1 | 126 | 10 | 5  | 1 | 53  | 4 | 194 | 16 |
| 111,277 | 21 | 1 | 155 | 10 | 12 | 1 | 97  | 4 | 285 | 16 |
| 111,278 | 26 | 1 | 165 | 10 | 13 | 1 | 105 | 4 | 309 | 16 |
| 111,279 | 26 | 1 | 165 | 10 | 13 | 1 | 112 | 4 | 316 | 16 |
| 111,280 | 26 | 1 | 165 | 11 | 13 | 1 | 112 | 4 | 316 | 17 |
| 111,281 | 26 | 1 | 164 | 11 | 13 | 1 | 112 | 4 | 315 | 17 |
| 111,282 | 26 | 1 | 164 | 11 | 13 | 1 | 112 | 4 | 315 | 17 |
| 111,283 | 26 | 1 | 164 | 11 | 13 | 1 | 112 | 4 | 315 | 17 |
| 111,284 | 26 | 1 | 166 | 15 | 13 | 1 | 112 | 4 | 317 | 21 |
| 111,285 | 26 | 1 | 166 | 15 | 13 | 1 | 112 | 4 | 317 | 21 |
| 111,286 | 26 | 1 | 166 | 15 | 13 | 1 | 112 | 4 | 317 | 21 |
| 111,287 | 26 | 1 | 166 | 15 | 13 | 1 | 112 | 4 | 317 | 21 |
| 111,288 | 26 | 1 | 166 | 15 | 13 | 1 | 112 | 4 | 317 | 21 |
| 111,289 | 26 | 1 | 166 | 15 | 13 | 1 | 112 | 4 | 317 | 21 |
| 111,290 | 26 | 1 | 166 | 15 | 13 | 1 | 112 | 4 | 317 | 21 |
| 111,291 | 26 | 1 | 166 | 14 | 13 | 1 | 112 | 4 | 317 | 20 |
| 111,292 | 26 | 1 | 166 | 15 | 13 | 1 | 112 | 4 | 317 | 21 |
| 111,293 | 26 | 1 | 166 | 14 | 13 | 1 | 112 | 4 | 317 | 20 |
| 111,294 | 26 | 1 | 166 | 14 | 13 | 1 | 112 | 4 | 317 | 20 |
| 111,295 | 26 | 1 | 166 | 14 | 13 | 1 | 112 | 5 | 317 | 21 |
| 111,296 | 26 | 1 | 166 | 14 | 13 | 1 | 112 | 5 | 317 | 21 |
| 111,297 | 26 | 1 | 166 | 14 | 13 | 1 | 112 | 5 | 317 | 21 |
| 111,298 | 26 | 1 | 165 | 13 | 14 | 1 | 112 | 4 | 317 | 19 |
| 111,299 | 26 | 1 | 167 | 13 | 14 | 1 | 115 | 4 | 322 | 19 |
| 111,300 | 26 | 1 | 167 | 13 | 14 | 2 | 116 | 4 | 323 | 20 |
| 111,301 | 27 | 0 | 169 | 13 | 14 | 2 | 117 | 4 | 327 | 19 |
| 111,302 | 27 | 0 | 169 | 13 | 14 | 2 | 118 | 4 | 328 | 19 |
| 111,303 | 27 | 0 | 168 | 13 | 14 | 2 | 120 | 4 | 329 | 19 |

|         |    |   |     |    |    |   |     |    |     |    |
|---------|----|---|-----|----|----|---|-----|----|-----|----|
| 111,304 | 27 | 0 | 170 | 12 | 14 | 2 | 121 | 4  | 332 | 18 |
| 111,305 | 27 | 0 | 171 | 12 | 14 | 2 | 121 | 4  | 333 | 18 |
| 111,306 | 26 | 0 | 172 | 12 | 14 | 2 | 123 | 4  | 335 | 18 |
| 111,307 | 24 | 0 | 176 | 12 | 14 | 2 | 121 | 4  | 335 | 18 |
| 111,308 | 24 | 0 | 179 | 11 | 15 | 2 | 129 | 5  | 347 | 18 |
| 111,309 | 24 | 0 | 176 | 11 | 15 | 2 | 128 | 5  | 343 | 18 |
| 111,310 | 24 | 0 | 177 | 11 | 15 | 2 | 129 | 6  | 345 | 19 |
| 111,311 | 24 | 0 | 182 | 11 | 15 | 1 | 132 | 3  | 353 | 15 |
| 111,312 | 24 | 0 | 183 | 9  | 16 | 1 | 137 | 3  | 360 | 13 |
| 111,313 | 23 | 0 | 186 | 8  | 17 | 1 | 138 | 3  | 364 | 12 |
| 111,314 | 23 | 0 | 185 | 8  | 17 | 1 | 138 | 3  | 363 | 12 |
| 111,315 | 23 | 0 | 185 | 8  | 17 | 1 | 138 | 3  | 363 | 12 |
| 111,316 | 23 | 0 | 185 | 8  | 17 | 1 | 137 | 3  | 362 | 12 |
| 111,317 | 23 | 0 | 184 | 7  | 17 | 1 | 137 | 3  | 361 | 11 |
| 111,318 | 23 | 0 | 184 | 6  | 17 | 1 | 137 | 3  | 361 | 10 |
| 111,319 | 23 | 0 | 184 | 6  | 17 | 1 | 138 | 3  | 362 | 10 |
| 111,320 | 23 | 0 | 179 | 6  | 17 | 1 | 136 | 3  | 355 | 10 |
| 111,321 | 23 | 0 | 179 | 6  | 17 | 1 | 136 | 3  | 355 | 10 |
| 111,322 | 23 | 0 | 179 | 6  | 17 | 1 | 136 | 3  | 355 | 10 |
| 111,323 | 22 | 0 | 176 | 18 | 17 | 1 | 136 | 6  | 351 | 25 |
| 111,324 | 21 | 3 | 169 | 20 | 17 | 1 | 134 | 9  | 341 | 33 |
| 111,325 | 20 | 4 | 161 | 26 | 17 | 1 | 134 | 9  | 332 | 40 |
| 111,326 | 19 | 4 | 143 | 26 | 17 | 1 | 128 | 9  | 307 | 40 |
| 111,327 | 17 | 4 | 104 | 26 | 14 | 1 | 105 | 9  | 240 | 40 |
| 111,328 | 6  | 4 | 64  | 26 | 7  | 1 | 57  | 10 | 134 | 41 |
| 111,329 | 1  | 4 | 38  | 26 | 4  | 1 | 41  | 10 | 84  | 41 |
| 111,330 | 1  | 4 | 37  | 26 | 4  | 1 | 36  | 10 | 78  | 41 |
| 111,331 | 1  | 4 | 37  | 25 | 4  | 1 | 36  | 10 | 78  | 40 |
| 111,332 | 1  | 4 | 36  | 25 | 4  | 1 | 38  | 10 | 79  | 40 |
| 111,333 | 1  | 4 | 36  | 25 | 4  | 1 | 38  | 10 | 79  | 40 |
| 111,334 | 3  | 4 | 36  | 21 | 4  | 1 | 38  | 10 | 81  | 36 |
| 111,335 | 3  | 4 | 36  | 21 | 4  | 1 | 39  | 10 | 82  | 36 |
| 111,336 | 3  | 4 | 36  | 21 | 4  | 1 | 39  | 10 | 82  | 36 |
| 111,337 | 3  | 4 | 36  | 21 | 4  | 1 | 39  | 10 | 82  | 36 |
| 111,338 | 3  | 4 | 36  | 21 | 4  | 1 | 39  | 10 | 82  | 36 |
| 111,339 | 3  | 4 | 37  | 21 | 5  | 1 | 43  | 10 | 88  | 36 |
| 111,340 | 3  | 4 | 37  | 21 | 5  | 1 | 44  | 10 | 89  | 36 |
| 111,341 | 3  | 4 | 37  | 21 | 5  | 1 | 44  | 10 | 89  | 36 |
| 111,342 | 3  | 4 | 37  | 20 | 5  | 1 | 44  | 10 | 89  | 35 |
| 111,343 | 3  | 4 | 38  | 20 | 5  | 1 | 44  | 10 | 90  | 35 |
| 111,344 | 3  | 4 | 38  | 20 | 5  | 1 | 44  | 10 | 90  | 35 |

|         |    |   |     |    |   |   |     |    |     |    |
|---------|----|---|-----|----|---|---|-----|----|-----|----|
| 111,345 | 3  | 4 | 42  | 20 | 5 | 1 | 44  | 10 | 94  | 35 |
| 111,346 | 3  | 4 | 45  | 20 | 5 | 1 | 45  | 9  | 98  | 34 |
| 111,347 | 3  | 4 | 45  | 20 | 5 | 1 | 45  | 9  | 98  | 34 |
| 111,348 | 3  | 4 | 45  | 20 | 5 | 1 | 45  | 9  | 98  | 34 |
| 111,349 | 3  | 4 | 45  | 20 | 4 | 1 | 45  | 10 | 97  | 35 |
| 111,350 | 4  | 4 | 43  | 20 | 4 | 0 | 43  | 10 | 94  | 34 |
| 111,351 | 5  | 4 | 45  | 20 | 4 | 0 | 45  | 10 | 99  | 34 |
| 111,352 | 4  | 4 | 43  | 20 | 4 | 1 | 44  | 10 | 95  | 35 |
| 111,353 | 4  | 4 | 44  | 21 | 4 | 1 | 43  | 10 | 95  | 36 |
| 111,354 | 4  | 4 | 44  | 21 | 4 | 1 | 40  | 10 | 92  | 36 |
| 111,355 | 4  | 4 | 42  | 21 | 4 | 1 | 39  | 11 | 89  | 37 |
| 111,356 | 4  | 4 | 41  | 22 | 4 | 1 | 43  | 13 | 92  | 40 |
| 111,357 | 4  | 4 | 40  | 24 | 4 | 1 | 42  | 15 | 90  | 44 |
| 111,358 | 4  | 4 | 36  | 30 | 4 | 1 | 40  | 16 | 84  | 51 |
| 111,359 | 4  | 4 | 28  | 35 | 4 | 1 | 39  | 15 | 75  | 55 |
| 111,360 | 4  | 6 | 29  | 37 | 4 | 1 | 39  | 19 | 76  | 63 |
| 111,361 | 4  | 7 | 31  | 47 | 4 | 1 | 39  | 20 | 78  | 75 |
| 111,362 | 4  | 7 | 25  | 50 | 4 | 1 | 36  | 21 | 69  | 79 |
| 111,363 | 4  | 7 | 24  | 51 | 3 | 1 | 34  | 21 | 65  | 80 |
| 111,364 | 4  | 7 | 21  | 51 | 2 | 1 | 32  | 21 | 59  | 80 |
| 111,365 | 4  | 7 | 21  | 51 | 2 | 1 | 32  | 21 | 59  | 80 |
| 111,366 | 5  | 7 | 21  | 51 | 2 | 1 | 32  | 21 | 60  | 80 |
| 111,367 | 5  | 7 | 21  | 51 | 2 | 1 | 32  | 21 | 60  | 80 |
| 111,368 | 5  | 7 | 23  | 51 | 2 | 1 | 32  | 21 | 62  | 80 |
| 111,369 | 5  | 7 | 24  | 53 | 2 | 1 | 32  | 21 | 63  | 82 |
| 111,370 | 5  | 7 | 34  | 55 | 2 | 1 | 35  | 21 | 76  | 84 |
| 111,371 | 8  | 7 | 58  | 56 | 2 | 1 | 46  | 21 | 114 | 85 |
| 111,372 | 8  | 7 | 67  | 57 | 2 | 2 | 54  | 21 | 131 | 87 |
| 111,373 | 10 | 7 | 85  | 59 | 2 | 2 | 80  | 22 | 177 | 90 |
| 111,374 | 10 | 7 | 85  | 47 | 2 | 2 | 80  | 19 | 177 | 75 |
| 111,375 | 11 | 4 | 95  | 45 | 3 | 2 | 88  | 16 | 197 | 67 |
| 111,376 | 11 | 3 | 95  | 39 | 3 | 2 | 90  | 19 | 199 | 63 |
| 111,377 | 12 | 3 | 95  | 40 | 4 | 2 | 91  | 19 | 202 | 64 |
| 111,378 | 12 | 3 | 95  | 41 | 4 | 2 | 90  | 21 | 201 | 67 |
| 111,379 | 12 | 3 | 96  | 41 | 4 | 2 | 91  | 20 | 203 | 66 |
| 111,380 | 12 | 3 | 96  | 41 | 4 | 2 | 91  | 20 | 203 | 66 |
| 111,381 | 12 | 3 | 96  | 42 | 4 | 2 | 91  | 20 | 203 | 67 |
| 111,382 | 12 | 3 | 96  | 42 | 4 | 2 | 89  | 22 | 201 | 69 |
| 111,383 | 12 | 3 | 97  | 43 | 4 | 2 | 91  | 22 | 204 | 70 |
| 111,384 | 12 | 3 | 97  | 43 | 4 | 2 | 91  | 22 | 204 | 70 |
| 111,385 | 10 | 3 | 105 | 50 | 5 | 2 | 102 | 22 | 222 | 77 |

|         |    |   |     |    |    |   |     |    |     |    |
|---------|----|---|-----|----|----|---|-----|----|-----|----|
| 111,386 | 10 | 3 | 105 | 50 | 5  | 2 | 101 | 22 | 221 | 77 |
| 111,387 | 10 | 3 | 105 | 50 | 5  | 2 | 101 | 22 | 221 | 77 |
| 111,388 | 10 | 3 | 109 | 50 | 5  | 2 | 102 | 22 | 226 | 77 |
| 111,389 | 10 | 3 | 115 | 50 | 4  | 2 | 103 | 23 | 232 | 78 |
| 111,390 | 10 | 3 | 117 | 50 | 4  | 2 | 105 | 24 | 236 | 79 |
| 111,391 | 10 | 3 | 117 | 50 | 4  | 2 | 105 | 24 | 236 | 79 |
| 111,392 | 16 | 3 | 161 | 50 | 6  | 2 | 127 | 25 | 310 | 80 |
| 111,393 | 16 | 3 | 164 | 50 | 6  | 2 | 130 | 25 | 316 | 80 |
| 111,394 | 16 | 3 | 166 | 50 | 6  | 2 | 136 | 25 | 324 | 80 |
| 111,395 | 16 | 3 | 174 | 50 | 7  | 2 | 139 | 25 | 336 | 80 |
| 111,396 | 16 | 3 | 171 | 50 | 8  | 2 | 140 | 25 | 335 | 80 |
| 111,397 | 17 | 3 | 171 | 50 | 8  | 2 | 140 | 25 | 336 | 80 |
| 111,398 | 17 | 3 | 171 | 50 | 8  | 2 | 140 | 25 | 336 | 80 |
| 111,399 | 22 | 3 | 207 | 50 | 11 | 2 | 170 | 25 | 410 | 80 |
| 111,400 | 22 | 3 | 207 | 50 | 11 | 2 | 170 | 24 | 410 | 79 |
| 111,401 | 21 | 3 | 219 | 50 | 13 | 2 | 179 | 24 | 432 | 79 |
| 111,402 | 20 | 3 | 217 | 50 | 13 | 1 | 177 | 24 | 427 | 78 |
| 111,403 | 24 | 3 | 219 | 49 | 13 | 1 | 181 | 24 | 437 | 77 |
| 111,404 | 24 | 3 | 220 | 49 | 13 | 1 | 181 | 24 | 438 | 77 |
| 111,405 | 24 | 3 | 220 | 49 | 13 | 1 | 181 | 23 | 438 | 76 |
| 111,406 | 24 | 3 | 220 | 49 | 13 | 1 | 181 | 23 | 438 | 76 |
| 111,407 | 24 | 3 | 221 | 48 | 14 | 1 | 181 | 21 | 440 | 73 |
| 111,408 | 24 | 3 | 221 | 46 | 14 | 1 | 179 | 19 | 438 | 69 |
| 111,409 | 24 | 3 | 223 | 40 | 14 | 1 | 179 | 18 | 440 | 62 |
| 111,410 | 24 | 3 | 220 | 35 | 13 | 1 | 172 | 18 | 429 | 57 |
| 111,411 | 24 | 1 | 218 | 33 | 13 | 1 | 171 | 14 | 426 | 49 |
| 111,412 | 25 | 0 | 218 | 23 | 13 | 1 | 171 | 12 | 427 | 36 |
| 111,413 | 25 | 0 | 220 | 19 | 13 | 1 | 171 | 11 | 429 | 31 |
| 111,414 | 25 | 0 | 220 | 19 | 13 | 1 | 168 | 11 | 426 | 31 |
| 111,415 | 25 | 0 | 221 | 19 | 13 | 1 | 170 | 11 | 429 | 31 |
| 111,416 | 25 | 0 | 225 | 19 | 13 | 1 | 172 | 11 | 435 | 31 |
| 111,417 | 24 | 0 | 227 | 19 | 13 | 1 | 172 | 11 | 436 | 31 |
| 111,418 | 25 | 0 | 237 | 17 | 13 | 1 | 176 | 11 | 451 | 29 |
| 111,419 | 25 | 0 | 252 | 17 | 13 | 1 | 179 | 11 | 469 | 29 |
| 111,420 | 25 | 0 | 243 | 17 | 13 | 1 | 176 | 11 | 457 | 29 |
| 111,421 | 26 | 0 | 243 | 15 | 13 | 1 | 182 | 11 | 464 | 27 |
| 111,422 | 28 | 0 | 311 | 14 | 14 | 1 | 217 | 11 | 570 | 26 |
| 111,423 | 30 | 0 | 327 | 13 | 14 | 0 | 216 | 11 | 587 | 24 |
| 111,424 | 28 | 0 | 311 | 11 | 14 | 0 | 189 | 10 | 542 | 21 |
| 111,425 | 29 | 0 | 323 | 11 | 14 | 0 | 215 | 10 | 581 | 21 |
| 111,426 | 29 | 0 | 331 | 11 | 14 | 0 | 216 | 7  | 590 | 18 |

|         |    |   |     |    |    |   |     |   |     |    |
|---------|----|---|-----|----|----|---|-----|---|-----|----|
| 111,427 | 29 | 0 | 346 | 10 | 15 | 0 | 222 | 7 | 612 | 17 |
| 111,428 | 28 | 0 | 346 | 10 | 15 | 0 | 227 | 8 | 616 | 18 |
| 111,429 | 28 | 0 | 346 | 9  | 15 | 0 | 228 | 6 | 617 | 15 |
| 111,430 | 28 | 0 | 345 | 9  | 15 | 0 | 227 | 6 | 615 | 15 |
| 111,431 | 28 | 0 | 350 | 9  | 15 | 0 | 230 | 6 | 623 | 15 |
| 111,432 | 28 | 0 | 355 | 9  | 15 | 0 | 230 | 4 | 628 | 13 |
| 111,433 | 28 | 0 | 357 | 8  | 15 | 0 | 229 | 4 | 629 | 12 |
| 111,434 | 28 | 0 | 361 | 8  | 16 | 0 | 229 | 4 | 634 | 12 |
| 111,435 | 28 | 0 | 369 | 8  | 15 | 0 | 226 | 4 | 638 | 12 |
| 111,436 | 28 | 0 | 368 | 1  | 15 | 0 | 224 | 4 | 635 | 5  |
| 111,437 | 28 | 0 | 370 | 1  | 15 | 0 | 224 | 4 | 637 | 5  |
| 111,438 | 29 | 0 | 385 | 1  | 16 | 0 | 231 | 4 | 661 | 5  |
| 111,439 | 29 | 1 | 381 | 1  | 16 | 0 | 232 | 4 | 658 | 6  |
| 111,440 | 29 | 1 | 375 | 1  | 16 | 0 | 228 | 3 | 648 | 5  |
| 111,441 | 29 | 1 | 376 | 1  | 16 | 0 | 226 | 2 | 647 | 4  |
| 111,442 | 23 | 1 | 356 | 1  | 15 | 0 | 221 | 2 | 615 | 4  |
| 111,443 | 23 | 1 | 338 | 1  | 14 | 0 | 207 | 1 | 582 | 3  |
| 111,444 | 23 | 1 | 336 | 1  | 14 | 0 | 204 | 1 | 577 | 3  |
| 111,445 | 23 | 1 | 335 | 1  | 14 | 0 | 199 | 1 | 571 | 3  |
| 111,446 | 23 | 1 | 330 | 1  | 14 | 0 | 203 | 1 | 570 | 3  |
| 111,447 | 25 | 1 | 343 | 1  | 14 | 0 | 220 | 1 | 602 | 3  |
| 111,448 | 24 | 1 | 349 | 1  | 14 | 0 | 220 | 1 | 607 | 3  |
| 111,449 | 20 | 1 | 329 | 1  | 13 | 0 | 199 | 1 | 561 | 3  |
| 111,450 | 19 | 1 | 313 | 1  | 11 | 0 | 192 | 1 | 535 | 3  |
| 111,451 | 22 | 1 | 312 | 1  | 11 | 0 | 196 | 1 | 541 | 3  |
| 111,452 | 23 | 1 | 315 | 1  | 10 | 0 | 201 | 1 | 549 | 3  |
| 111,453 | 23 | 1 | 315 | 1  | 10 | 0 | 200 | 1 | 548 | 3  |
| 111,454 | 19 | 1 | 313 | 1  | 10 | 0 | 196 | 1 | 538 | 3  |
| 111,455 | 19 | 1 | 311 | 1  | 10 | 0 | 196 | 1 | 536 | 3  |
| 111,456 | 19 | 1 | 311 | 1  | 10 | 0 | 196 | 1 | 536 | 3  |
| 111,457 | 19 | 1 | 311 | 1  | 9  | 0 | 198 | 1 | 537 | 3  |
| 111,458 | 19 | 1 | 310 | 1  | 9  | 0 | 194 | 1 | 532 | 3  |
| 111,459 | 19 | 1 | 308 | 1  | 9  | 0 | 194 | 1 | 530 | 3  |
| 111,460 | 19 | 2 | 309 | 1  | 9  | 0 | 195 | 1 | 532 | 4  |
| 111,461 | 19 | 2 | 309 | 1  | 9  | 0 | 195 | 1 | 532 | 4  |
| 111,462 | 19 | 2 | 309 | 1  | 9  | 0 | 195 | 1 | 532 | 4  |
| 111,463 | 18 | 2 | 307 | 1  | 9  | 0 | 195 | 1 | 529 | 4  |
| 111,464 | 18 | 2 | 305 | 1  | 9  | 0 | 195 | 1 | 527 | 4  |
| 111,465 | 18 | 2 | 304 | 2  | 9  | 0 | 193 | 1 | 524 | 5  |
| 111,466 | 18 | 2 | 303 | 2  | 9  | 0 | 191 | 1 | 521 | 5  |
| 111,467 | 18 | 2 | 300 | 2  | 9  | 0 | 191 | 1 | 518 | 5  |

|         |    |   |     |   |   |   |     |   |     |    |
|---------|----|---|-----|---|---|---|-----|---|-----|----|
| 111,468 | 18 | 2 | 299 | 2 | 9 | 0 | 191 | 1 | 517 | 5  |
| 111,469 | 18 | 2 | 291 | 2 | 9 | 0 | 193 | 1 | 511 | 5  |
| 111,470 | 18 | 2 | 276 | 2 | 9 | 0 | 190 | 1 | 493 | 5  |
| 111,471 | 18 | 2 | 275 | 2 | 9 | 0 | 190 | 1 | 492 | 5  |
| 111,472 | 16 | 2 | 265 | 2 | 9 | 0 | 181 | 1 | 471 | 5  |
| 111,473 | 13 | 2 | 190 | 2 | 8 | 0 | 141 | 3 | 352 | 7  |
| 111,474 | 11 | 2 | 163 | 2 | 8 | 0 | 134 | 3 | 316 | 7  |
| 111,475 | 11 | 2 | 157 | 3 | 8 | 0 | 131 | 4 | 307 | 9  |
| 111,476 | 9  | 2 | 140 | 3 | 7 | 0 | 97  | 3 | 253 | 8  |
| 111,477 | 9  | 2 | 132 | 3 | 7 | 0 | 96  | 3 | 244 | 8  |
| 111,478 | 9  | 2 | 117 | 3 | 5 | 0 | 90  | 3 | 221 | 8  |
| 111,479 | 9  | 2 | 117 | 3 | 5 | 0 | 87  | 3 | 218 | 8  |
| 111,480 | 9  | 2 | 121 | 5 | 5 | 0 | 91  | 3 | 226 | 10 |
| 111,481 | 9  | 2 | 127 | 7 | 5 | 0 | 95  | 5 | 236 | 14 |
| 111,482 | 9  | 2 | 127 | 7 | 5 | 0 | 93  | 6 | 234 | 15 |
| 111,483 | 9  | 2 | 122 | 6 | 5 | 0 | 93  | 6 | 229 | 14 |
| 111,484 | 9  | 2 | 124 | 6 | 5 | 0 | 95  | 6 | 233 | 14 |
| 111,485 | 9  | 2 | 120 | 6 | 4 | 0 | 97  | 6 | 230 | 14 |
| 111,486 | 9  | 2 | 107 | 6 | 4 | 0 | 91  | 6 | 211 | 14 |
| 111,487 | 12 | 2 | 120 | 6 | 5 | 0 | 102 | 6 | 239 | 14 |
| 111,488 | 14 | 2 | 127 | 6 | 8 | 0 | 104 | 6 | 253 | 14 |
| 111,489 | 13 | 1 | 121 | 6 | 7 | 0 | 100 | 6 | 241 | 13 |
| 111,490 | 13 | 1 | 122 | 7 | 7 | 0 | 104 | 6 | 246 | 14 |
| 111,491 | 13 | 1 | 121 | 7 | 7 | 0 | 103 | 6 | 244 | 14 |
| 111,492 | 13 | 1 | 118 | 7 | 7 | 0 | 103 | 6 | 241 | 14 |
| 111,493 | 13 | 1 | 118 | 7 | 8 | 0 | 103 | 6 | 242 | 14 |
| 111,494 | 14 | 1 | 127 | 7 | 8 | 0 | 107 | 6 | 256 | 14 |
| 111,495 | 14 | 1 | 128 | 7 | 8 | 0 | 110 | 6 | 260 | 14 |
| 111,496 | 15 | 1 | 153 | 7 | 8 | 0 | 117 | 6 | 293 | 14 |
| 111,497 | 15 | 1 | 159 | 7 | 7 | 0 | 113 | 6 | 294 | 14 |
| 111,498 | 13 | 1 | 146 | 7 | 6 | 0 | 96  | 6 | 261 | 14 |
| 111,499 | 13 | 1 | 142 | 7 | 6 | 0 | 100 | 6 | 261 | 14 |
| 111,500 | 13 | 1 | 142 | 7 | 6 | 0 | 98  | 6 | 259 | 14 |
| 111,501 | 13 | 1 | 143 | 7 | 6 | 0 | 98  | 6 | 260 | 14 |
| 111,502 | 10 | 1 | 133 | 7 | 5 | 0 | 86  | 7 | 234 | 15 |
| 111,503 | 9  | 1 | 129 | 7 | 5 | 0 | 80  | 7 | 223 | 15 |
| 111,504 | 9  | 1 | 129 | 7 | 5 | 0 | 80  | 7 | 223 | 15 |
| 111,505 | 9  | 1 | 129 | 7 | 5 | 0 | 80  | 8 | 223 | 16 |
| 111,506 | 9  | 1 | 130 | 7 | 5 | 0 | 82  | 9 | 226 | 17 |
| 111,507 | 9  | 1 | 134 | 8 | 5 | 0 | 85  | 9 | 233 | 18 |
| 111,508 | 9  | 1 | 141 | 8 | 5 | 0 | 83  | 9 | 238 | 18 |



|         |    |   |     |    |    |   |     |    |     |    |
|---------|----|---|-----|----|----|---|-----|----|-----|----|
| 111,509 | 9  | 1 | 141 | 8  | 5  | 0 | 83  | 9  | 238 | 18 |
| 111,510 | 9  | 0 | 145 | 8  | 5  | 0 | 86  | 9  | 245 | 17 |
| 111,511 | 9  | 0 | 145 | 8  | 5  | 0 | 85  | 9  | 244 | 17 |
| 111,512 | 9  | 0 | 145 | 9  | 5  | 0 | 85  | 9  | 244 | 18 |
| 111,513 | 9  | 0 | 146 | 9  | 5  | 0 | 86  | 9  | 246 | 18 |
| 111,514 | 9  | 0 | 147 | 9  | 5  | 0 | 86  | 9  | 247 | 18 |
| 111,515 | 9  | 0 | 147 | 8  | 5  | 0 | 87  | 9  | 248 | 17 |
| 111,516 | 9  | 0 | 147 | 8  | 5  | 0 | 87  | 9  | 248 | 17 |
| 111,517 | 9  | 0 | 147 | 8  | 5  | 0 | 87  | 9  | 248 | 17 |
| 111,518 | 9  | 0 | 146 | 8  | 5  | 0 | 87  | 10 | 247 | 18 |
| 111,519 | 9  | 0 | 146 | 8  | 5  | 0 | 85  | 10 | 245 | 18 |
| 111,520 | 10 | 0 | 151 | 8  | 5  | 0 | 81  | 11 | 247 | 19 |
| 111,521 | 10 | 0 | 151 | 8  | 5  | 0 | 81  | 12 | 247 | 20 |
| 111,522 | 10 | 0 | 152 | 8  | 6  | 0 | 83  | 12 | 251 | 20 |
| 111,523 | 9  | 0 | 145 | 8  | 6  | 0 | 78  | 10 | 238 | 18 |
| 111,524 | 9  | 0 | 145 | 8  | 6  | 0 | 78  | 10 | 238 | 18 |
| 111,525 | 9  | 0 | 145 | 10 | 6  | 0 | 78  | 15 | 238 | 25 |
| 111,526 | 9  | 0 | 145 | 9  | 6  | 0 | 77  | 14 | 237 | 23 |
| 111,527 | 9  | 0 | 145 | 9  | 6  | 0 | 77  | 14 | 237 | 23 |
| 111,528 | 9  | 0 | 145 | 9  | 6  | 0 | 75  | 14 | 235 | 23 |
| 111,529 | 9  | 0 | 147 | 9  | 6  | 0 | 76  | 15 | 238 | 24 |
| 111,530 | 11 | 0 | 175 | 7  | 9  | 0 | 82  | 16 | 277 | 23 |
| 111,531 | 11 | 0 | 175 | 7  | 9  | 0 | 82  | 16 | 277 | 23 |
| 111,532 | 13 | 0 | 185 | 5  | 9  | 0 | 89  | 13 | 296 | 18 |
| 111,533 | 13 | 0 | 180 | 5  | 9  | 0 | 89  | 13 | 291 | 18 |
| 111,534 | 17 | 0 | 199 | 5  | 9  | 0 | 96  | 13 | 321 | 18 |
| 111,535 | 18 | 0 | 215 | 5  | 9  | 0 | 95  | 13 | 337 | 18 |
| 111,536 | 19 | 0 | 222 | 7  | 9  | 0 | 96  | 13 | 346 | 20 |
| 111,537 | 23 | 0 | 290 | 7  | 10 | 0 | 104 | 13 | 427 | 20 |
| 111,538 | 27 | 0 | 356 | 7  | 11 | 0 | 132 | 14 | 526 | 21 |
| 111,539 | 35 | 0 | 428 | 7  | 12 | 0 | 156 | 15 | 631 | 22 |
| 111,540 | 36 | 1 | 439 | 7  | 12 | 0 | 158 | 15 | 645 | 23 |
| 111,541 | 36 | 1 | 438 | 8  | 12 | 0 | 152 | 15 | 638 | 24 |
| 111,542 | 36 | 1 | 440 | 9  | 12 | 0 | 155 | 15 | 643 | 25 |
| 111,543 | 36 | 1 | 439 | 10 | 11 | 0 | 153 | 15 | 639 | 26 |
| 111,544 | 36 | 1 | 437 | 10 | 11 | 0 | 153 | 16 | 637 | 27 |
| 111,545 | 35 | 1 | 427 | 10 | 11 | 0 | 148 | 16 | 621 | 27 |
| 111,546 | 35 | 2 | 426 | 10 | 11 | 0 | 148 | 16 | 620 | 28 |
| 111,547 | 34 | 2 | 399 | 10 | 11 | 1 | 140 | 16 | 584 | 29 |
| 111,548 | 35 | 2 | 393 | 10 | 11 | 1 | 139 | 16 | 578 | 29 |
| 111,549 | 35 | 2 | 392 | 12 | 11 | 1 | 138 | 16 | 576 | 31 |

|         |    |   |     |    |    |   |     |    |     |    |
|---------|----|---|-----|----|----|---|-----|----|-----|----|
| 111,550 | 35 | 2 | 387 | 12 | 11 | 1 | 133 | 15 | 566 | 30 |
| 111,551 | 35 | 2 | 387 | 12 | 11 | 1 | 133 | 15 | 566 | 30 |
| 111,552 | 35 | 2 | 386 | 12 | 11 | 1 | 133 | 16 | 565 | 31 |
| 111,553 | 35 | 2 | 386 | 12 | 11 | 1 | 132 | 16 | 564 | 31 |
| 111,554 | 35 | 2 | 386 | 13 | 11 | 1 | 132 | 16 | 564 | 32 |
| 111,555 | 35 | 2 | 386 | 13 | 11 | 1 | 132 | 16 | 564 | 32 |
| 111,556 | 35 | 2 | 386 | 13 | 11 | 1 | 131 | 14 | 563 | 30 |
| 111,557 | 35 | 2 | 386 | 13 | 11 | 1 | 130 | 14 | 562 | 30 |
| 111,558 | 35 | 2 | 383 | 13 | 11 | 1 | 127 | 14 | 556 | 30 |
| 111,559 | 35 | 2 | 376 | 13 | 11 | 1 | 127 | 14 | 549 | 30 |
| 111,560 | 35 | 2 | 372 | 13 | 11 | 1 | 125 | 14 | 543 | 30 |
| 111,561 | 35 | 2 | 371 | 13 | 11 | 1 | 124 | 14 | 541 | 30 |
| 111,562 | 35 | 2 | 371 | 13 | 11 | 1 | 124 | 14 | 541 | 30 |
| 111,563 | 35 | 2 | 371 | 12 | 11 | 1 | 124 | 14 | 541 | 29 |
| 111,564 | 35 | 2 | 376 | 12 | 11 | 1 | 125 | 14 | 547 | 29 |
| 111,565 | 35 | 2 | 375 | 12 | 11 | 1 | 125 | 14 | 546 | 29 |
| 111,566 | 35 | 2 | 375 | 12 | 11 | 1 | 124 | 14 | 545 | 29 |
| 111,567 | 35 | 2 | 375 | 12 | 11 | 1 | 124 | 14 | 545 | 29 |
| 111,568 | 36 | 2 | 394 | 12 | 11 | 1 | 132 | 13 | 573 | 28 |
| 111,569 | 36 | 2 | 395 | 12 | 11 | 1 | 132 | 13 | 574 | 28 |
| 111,570 | 34 | 2 | 389 | 12 | 11 | 1 | 132 | 13 | 566 | 28 |
| 111,571 | 34 | 2 | 386 | 12 | 11 | 1 | 132 | 12 | 563 | 27 |
| 111,572 | 34 | 2 | 386 | 12 | 11 | 1 | 132 | 11 | 563 | 26 |
| 111,573 | 34 | 2 | 387 | 12 | 10 | 1 | 130 | 11 | 561 | 26 |
| 111,574 | 34 | 2 | 390 | 12 | 10 | 1 | 132 | 11 | 566 | 26 |
| 111,575 | 34 | 3 | 390 | 10 | 10 | 1 | 132 | 6  | 566 | 20 |
| 111,576 | 34 | 3 | 398 | 10 | 10 | 1 | 132 | 6  | 574 | 20 |
| 111,577 | 34 | 3 | 399 | 10 | 10 | 1 | 134 | 6  | 577 | 20 |
| 111,578 | 35 | 3 | 425 | 10 | 10 | 1 | 142 | 6  | 612 | 20 |
| 111,579 | 36 | 3 | 433 | 10 | 13 | 1 | 146 | 6  | 628 | 20 |
| 111,580 | 38 | 3 | 461 | 10 | 15 | 1 | 154 | 5  | 668 | 19 |
| 111,581 | 41 | 3 | 448 | 10 | 13 | 1 | 153 | 4  | 655 | 18 |
| 111,582 | 39 | 3 | 444 | 10 | 13 | 1 | 146 | 4  | 642 | 18 |
| 111,583 | 39 | 3 | 439 | 10 | 13 | 1 | 143 | 5  | 634 | 19 |
| 111,584 | 35 | 5 | 416 | 13 | 13 | 1 | 134 | 7  | 598 | 26 |
| 111,585 | 34 | 5 | 407 | 14 | 13 | 1 | 133 | 7  | 587 | 27 |
| 111,586 | 34 | 5 | 399 | 17 | 14 | 1 | 133 | 9  | 580 | 32 |
| 111,587 | 33 | 5 | 392 | 18 | 14 | 2 | 132 | 11 | 571 | 36 |
| 111,588 | 27 | 5 | 316 | 19 | 13 | 3 | 117 | 11 | 473 | 38 |
| 111,589 | 22 | 5 | 242 | 20 | 11 | 3 | 85  | 10 | 360 | 38 |
| 111,590 | 12 | 6 | 161 | 21 | 7  | 4 | 59  | 9  | 239 | 40 |

|         |    |   |     |    |   |   |    |    |     |    |
|---------|----|---|-----|----|---|---|----|----|-----|----|
| 111,591 | 11 | 6 | 141 | 21 | 7 | 4 | 54 | 9  | 213 | 40 |
| 111,592 | 11 | 6 | 139 | 18 | 7 | 4 | 51 | 9  | 208 | 37 |
| 111,593 | 11 | 6 | 139 | 18 | 7 | 4 | 51 | 9  | 208 | 37 |
| 111,594 | 11 | 6 | 139 | 18 | 7 | 4 | 51 | 10 | 208 | 38 |
| 111,595 | 11 | 6 | 139 | 19 | 7 | 4 | 51 | 9  | 208 | 38 |
| 111,596 | 11 | 6 | 140 | 19 | 7 | 4 | 51 | 9  | 209 | 38 |
| 111,597 | 11 | 5 | 140 | 19 | 7 | 3 | 48 | 9  | 206 | 36 |
| 111,598 | 11 | 5 | 140 | 20 | 7 | 3 | 48 | 9  | 206 | 37 |
| 111,599 | 10 | 5 | 137 | 18 | 7 | 3 | 46 | 9  | 200 | 35 |
| 111,600 | 10 | 5 | 137 | 18 | 7 | 3 | 46 | 10 | 200 | 36 |
| 111,601 | 10 | 5 | 137 | 18 | 7 | 3 | 46 | 10 | 200 | 36 |
| 111,602 | 10 | 5 | 137 | 19 | 7 | 3 | 46 | 10 | 200 | 37 |
| 111,603 | 10 | 5 | 137 | 19 | 7 | 3 | 48 | 9  | 202 | 36 |
| 111,604 | 10 | 5 | 141 | 18 | 7 | 3 | 48 | 9  | 206 | 35 |
| 111,605 | 10 | 5 | 144 | 18 | 7 | 3 | 48 | 9  | 209 | 35 |
| 111,606 | 10 | 5 | 143 | 18 | 7 | 3 | 48 | 9  | 208 | 35 |
| 111,607 | 10 | 5 | 143 | 18 | 7 | 3 | 49 | 9  | 209 | 35 |
| 111,608 | 11 | 5 | 142 | 17 | 7 | 3 | 49 | 9  | 209 | 34 |
| 111,609 | 11 | 5 | 142 | 17 | 7 | 3 | 49 | 9  | 209 | 34 |
| 111,610 | 11 | 5 | 143 | 17 | 7 | 3 | 50 | 9  | 211 | 34 |
| 111,611 | 11 | 5 | 148 | 17 | 7 | 3 | 50 | 9  | 216 | 34 |
| 111,612 | 13 | 5 | 166 | 18 | 7 | 3 | 57 | 9  | 243 | 35 |
| 111,613 | 13 | 5 | 162 | 18 | 7 | 3 | 58 | 9  | 240 | 35 |
| 111,614 | 13 | 5 | 160 | 18 | 7 | 3 | 56 | 9  | 236 | 35 |
| 111,615 | 12 | 5 | 146 | 18 | 7 | 3 | 55 | 9  | 220 | 35 |
| 111,616 | 12 | 5 | 141 | 18 | 7 | 3 | 48 | 9  | 208 | 35 |
| 111,617 | 12 | 5 | 141 | 18 | 7 | 3 | 48 | 9  | 208 | 35 |
| 111,618 | 12 | 5 | 141 | 18 | 7 | 3 | 48 | 9  | 208 | 35 |
| 111,619 | 12 | 5 | 141 | 18 | 7 | 3 | 48 | 9  | 208 | 35 |
| 111,620 | 12 | 5 | 171 | 18 | 7 | 3 | 79 | 9  | 269 | 35 |
| 111,621 | 12 | 5 | 171 | 18 | 7 | 3 | 79 | 9  | 269 | 35 |
| 111,622 | 12 | 5 | 171 | 18 | 7 | 3 | 79 | 9  | 269 | 35 |
| 111,623 | 12 | 6 | 170 | 18 | 7 | 3 | 79 | 9  | 268 | 36 |
| 111,624 | 12 | 6 | 168 | 18 | 7 | 3 | 79 | 9  | 266 | 36 |
| 111,625 | 12 | 5 | 165 | 19 | 8 | 3 | 77 | 9  | 262 | 36 |
| 111,626 | 12 | 5 | 165 | 19 | 8 | 3 | 77 | 9  | 262 | 36 |
| 111,627 | 12 | 5 | 157 | 24 | 8 | 3 | 77 | 11 | 254 | 43 |
| 111,628 | 12 | 5 | 156 | 24 | 8 | 3 | 75 | 11 | 251 | 43 |
| 111,629 | 11 | 5 | 128 | 24 | 8 | 3 | 65 | 11 | 212 | 43 |
| 111,630 | 10 | 6 | 120 | 24 | 5 | 3 | 61 | 11 | 196 | 44 |
| 111,631 | 8  | 6 | 91  | 25 | 2 | 3 | 53 | 11 | 154 | 45 |

|         |    |   |     |    |   |   |    |    |     |    |
|---------|----|---|-----|----|---|---|----|----|-----|----|
| 111,632 | 3  | 6 | 74  | 25 | 2 | 3 | 44 | 11 | 123 | 45 |
| 111,633 | 3  | 6 | 67  | 25 | 2 | 3 | 44 | 11 | 116 | 45 |
| 111,634 | 3  | 4 | 68  | 22 | 2 | 3 | 44 | 8  | 117 | 37 |
| 111,635 | 3  | 4 | 69  | 22 | 2 | 3 | 44 | 8  | 118 | 37 |
| 111,636 | 3  | 4 | 69  | 15 | 2 | 2 | 44 | 4  | 118 | 25 |
| 111,637 | 4  | 4 | 71  | 15 | 1 | 2 | 45 | 4  | 121 | 25 |
| 111,638 | 4  | 5 | 71  | 15 | 1 | 2 | 45 | 5  | 121 | 27 |
| 111,639 | 4  | 5 | 72  | 13 | 1 | 1 | 45 | 5  | 122 | 24 |
| 111,640 | 4  | 5 | 72  | 13 | 1 | 1 | 45 | 5  | 122 | 24 |
| 111,641 | 4  | 3 | 72  | 13 | 1 | 0 | 45 | 5  | 122 | 21 |
| 111,642 | 4  | 3 | 72  | 14 | 1 | 0 | 45 | 5  | 122 | 22 |
| 111,643 | 4  | 3 | 77  | 14 | 2 | 0 | 49 | 5  | 132 | 22 |
| 111,644 | 6  | 3 | 86  | 14 | 2 | 1 | 50 | 5  | 144 | 23 |
| 111,645 | 7  | 3 | 93  | 12 | 2 | 1 | 51 | 4  | 153 | 20 |
| 111,646 | 7  | 3 | 92  | 12 | 2 | 1 | 51 | 4  | 152 | 20 |
| 111,647 | 10 | 3 | 109 | 13 | 5 | 1 | 57 | 4  | 181 | 21 |
| 111,648 | 10 | 3 | 121 | 12 | 5 | 1 | 63 | 4  | 199 | 20 |
| 111,649 | 10 | 3 | 121 | 12 | 5 | 1 | 63 | 4  | 199 | 20 |
| 111,650 | 10 | 3 | 127 | 12 | 6 | 1 | 67 | 3  | 210 | 19 |
| 111,651 | 10 | 3 | 129 | 12 | 6 | 1 | 67 | 3  | 212 | 19 |
| 111,652 | 10 | 3 | 129 | 12 | 6 | 1 | 67 | 3  | 212 | 19 |
| 111,653 | 10 | 3 | 129 | 11 | 6 | 1 | 65 | 3  | 210 | 18 |
| 111,654 | 10 | 3 | 132 | 11 | 6 | 1 | 65 | 3  | 213 | 18 |
| 111,655 | 10 | 3 | 128 | 11 | 6 | 1 | 65 | 3  | 209 | 18 |
| 111,656 | 10 | 3 | 126 | 11 | 6 | 1 | 65 | 3  | 207 | 18 |
| 111,657 | 10 | 3 | 126 | 11 | 6 | 1 | 65 | 3  | 207 | 18 |
| 111,658 | 10 | 3 | 126 | 11 | 6 | 1 | 64 | 3  | 206 | 18 |
| 111,659 | 9  | 3 | 126 | 11 | 6 | 1 | 64 | 3  | 205 | 18 |
| 111,660 | 9  | 3 | 125 | 11 | 6 | 1 | 63 | 3  | 203 | 18 |
| 111,661 | 9  | 3 | 121 | 11 | 6 | 1 | 63 | 3  | 199 | 18 |
| 111,662 | 9  | 3 | 120 | 12 | 6 | 1 | 63 | 4  | 198 | 20 |
| 111,663 | 7  | 3 | 102 | 11 | 6 | 1 | 56 | 6  | 171 | 21 |
| 111,664 | 7  | 4 | 102 | 11 | 6 | 1 | 56 | 8  | 171 | 24 |
| 111,665 | 7  | 4 | 97  | 12 | 6 | 1 | 38 | 9  | 148 | 26 |
| 111,666 | 7  | 4 | 93  | 12 | 6 | 1 | 38 | 9  | 144 | 26 |
| 111,667 | 7  | 4 | 93  | 12 | 6 | 1 | 38 | 9  | 144 | 26 |
| 111,668 | 7  | 4 | 90  | 12 | 6 | 1 | 39 | 9  | 142 | 26 |
| 111,669 | 7  | 4 | 81  | 12 | 6 | 1 | 29 | 9  | 123 | 26 |
| 111,670 | 7  | 4 | 79  | 12 | 6 | 1 | 28 | 9  | 120 | 26 |
| 111,671 | 8  | 4 | 85  | 12 | 6 | 1 | 30 | 9  | 129 | 26 |
| 111,672 | 8  | 4 | 85  | 12 | 6 | 1 | 30 | 9  | 129 | 26 |

|         |    |   |     |    |   |   |    |   |     |    |
|---------|----|---|-----|----|---|---|----|---|-----|----|
| 111,673 | 9  | 3 | 95  | 12 | 6 | 1 | 38 | 9 | 148 | 25 |
| 111,674 | 9  | 3 | 95  | 12 | 6 | 1 | 38 | 9 | 148 | 25 |
| 111,675 | 9  | 3 | 95  | 11 | 6 | 1 | 38 | 9 | 148 | 24 |
| 111,676 | 9  | 3 | 95  | 11 | 5 | 1 | 38 | 9 | 147 | 24 |
| 111,677 | 9  | 3 | 95  | 11 | 5 | 1 | 38 | 9 | 147 | 24 |
| 111,678 | 9  | 3 | 95  | 6  | 5 | 1 | 38 | 7 | 147 | 17 |
| 111,679 | 9  | 3 | 95  | 6  | 5 | 1 | 38 | 7 | 147 | 17 |
| 111,680 | 10 | 3 | 100 | 6  | 5 | 1 | 40 | 7 | 155 | 17 |
| 111,681 | 11 | 2 | 105 | 5  | 5 | 1 | 47 | 7 | 168 | 15 |
| 111,682 | 11 | 2 | 105 | 5  | 5 | 1 | 47 | 7 | 168 | 15 |
| 111,683 | 11 | 2 | 105 | 5  | 5 | 1 | 46 | 7 | 167 | 15 |
| 111,684 | 11 | 2 | 112 | 5  | 5 | 1 | 48 | 7 | 176 | 15 |
| 111,685 | 11 | 2 | 112 | 5  | 5 | 1 | 48 | 7 | 176 | 15 |
| 111,686 | 12 | 2 | 137 | 5  | 5 | 1 | 58 | 7 | 212 | 15 |
| 111,687 | 12 | 2 | 137 | 5  | 5 | 1 | 58 | 7 | 212 | 15 |
| 111,688 | 11 | 1 | 135 | 5  | 5 | 1 | 57 | 6 | 208 | 13 |
| 111,689 | 11 | 1 | 134 | 5  | 5 | 1 | 57 | 6 | 207 | 13 |
| 111,690 | 11 | 1 | 133 | 5  | 5 | 1 | 57 | 6 | 206 | 13 |
| 111,691 | 11 | 1 | 133 | 5  | 5 | 1 | 55 | 7 | 204 | 14 |
| 111,692 | 11 | 1 | 134 | 3  | 5 | 1 | 54 | 7 | 204 | 12 |
| 111,693 | 11 | 1 | 133 | 3  | 4 | 1 | 54 | 7 | 202 | 12 |
| 111,694 | 11 | 1 | 134 | 3  | 4 | 1 | 54 | 7 | 203 | 12 |
| 111,695 | 9  | 1 | 130 | 3  | 4 | 0 | 55 | 7 | 198 | 11 |
| 111,696 | 8  | 2 | 127 | 3  | 4 | 0 | 54 | 7 | 193 | 12 |
| 111,697 | 8  | 2 | 124 | 3  | 3 | 0 | 55 | 7 | 190 | 12 |
| 111,698 | 5  | 2 | 114 | 2  | 1 | 0 | 51 | 7 | 171 | 11 |
| 111,699 | 5  | 2 | 101 | 2  | 1 | 0 | 46 | 7 | 153 | 11 |
| 111,700 | 5  | 2 | 101 | 2  | 1 | 0 | 46 | 7 | 153 | 11 |
| 111,701 | 5  | 2 | 95  | 2  | 0 | 0 | 42 | 7 | 142 | 11 |
| 111,702 | 5  | 2 | 93  | 2  | 0 | 0 | 42 | 7 | 140 | 11 |
| 111,703 | 5  | 2 | 93  | 2  | 0 | 0 | 42 | 7 | 140 | 11 |
| 111,704 | 5  | 2 | 93  | 2  | 0 | 0 | 42 | 7 | 140 | 11 |
| 111,705 | 5  | 2 | 90  | 2  | 0 | 0 | 42 | 7 | 137 | 11 |
| 111,706 | 5  | 2 | 90  | 2  | 0 | 0 | 42 | 7 | 137 | 11 |
| 111,707 | 5  | 2 | 90  | 2  | 0 | 0 | 42 | 7 | 137 | 11 |
| 111,708 | 5  | 2 | 90  | 2  | 0 | 0 | 42 | 7 | 137 | 11 |
| 111,709 | 5  | 2 | 90  | 2  | 0 | 0 | 42 | 7 | 137 | 11 |
| 111,710 | 5  | 2 | 92  | 2  | 0 | 0 | 44 | 7 | 141 | 11 |
| 111,711 | 5  | 2 | 92  | 2  | 0 | 0 | 44 | 7 | 141 | 11 |
| 111,712 | 5  | 2 | 93  | 2  | 0 | 0 | 44 | 7 | 142 | 11 |
| 111,713 | 5  | 2 | 93  | 1  | 0 | 0 | 45 | 6 | 143 | 9  |

|         |   |   |    |    |   |   |    |    |     |    |
|---------|---|---|----|----|---|---|----|----|-----|----|
| 111,714 | 5 | 2 | 94 | 1  | 0 | 0 | 48 | 4  | 147 | 7  |
| 111,715 | 5 | 1 | 94 | 1  | 0 | 0 | 47 | 2  | 146 | 4  |
| 111,716 | 5 | 1 | 95 | 0  | 0 | 0 | 47 | 1  | 147 | 2  |
| 111,717 | 5 | 1 | 91 | 1  | 0 | 0 | 46 | 1  | 142 | 3  |
| 111,718 | 5 | 2 | 90 | 11 | 0 | 0 | 46 | 4  | 141 | 17 |
| 111,719 | 5 | 2 | 89 | 16 | 0 | 1 | 45 | 7  | 139 | 26 |
| 111,720 | 5 | 2 | 88 | 22 | 0 | 1 | 45 | 11 | 138 | 36 |
| 111,721 | 4 | 2 | 84 | 25 | 0 | 1 | 43 | 12 | 131 | 40 |
| 111,722 | 4 | 2 | 83 | 25 | 0 | 1 | 44 | 12 | 131 | 40 |
| 111,723 | 3 | 2 | 73 | 25 | 0 | 1 | 37 | 12 | 113 | 40 |
| 111,724 | 3 | 2 | 73 | 28 | 0 | 1 | 36 | 12 | 112 | 43 |
| 111,725 | 3 | 2 | 73 | 28 | 0 | 1 | 36 | 12 | 112 | 43 |
| 111,726 | 3 | 2 | 73 | 28 | 0 | 1 | 37 | 12 | 113 | 43 |
| 111,727 | 3 | 2 | 74 | 28 | 0 | 1 | 37 | 12 | 114 | 43 |
| 111,728 | 4 | 2 | 74 | 29 | 0 | 1 | 37 | 12 | 115 | 44 |
| 111,729 | 4 | 2 | 76 | 29 | 0 | 1 | 39 | 12 | 119 | 44 |
| 111,730 | 3 | 2 | 76 | 29 | 0 | 1 | 38 | 12 | 117 | 44 |
| 111,731 | 3 | 2 | 78 | 30 | 0 | 1 | 38 | 12 | 119 | 45 |
| 111,732 | 2 | 2 | 73 | 30 | 0 | 1 | 31 | 12 | 106 | 45 |
| 111,733 | 2 | 2 | 73 | 30 | 0 | 1 | 31 | 13 | 106 | 46 |
| 111,734 | 2 | 2 | 73 | 30 | 0 | 1 | 31 | 13 | 106 | 46 |
| 111,735 | 2 | 2 | 65 | 30 | 0 | 1 | 28 | 13 | 95  | 46 |
| 111,736 | 1 | 2 | 61 | 31 | 0 | 1 | 27 | 13 | 89  | 47 |
| 111,737 | 1 | 2 | 39 | 31 | 0 | 1 | 17 | 13 | 57  | 47 |
| 111,738 | 1 | 2 | 39 | 31 | 0 | 1 | 17 | 13 | 57  | 47 |
| 111,739 | 1 | 2 | 39 | 31 | 0 | 1 | 17 | 13 | 57  | 47 |
| 111,740 | 1 | 2 | 39 | 31 | 0 | 1 | 17 | 13 | 57  | 47 |
| 111,741 | 1 | 3 | 40 | 31 | 0 | 1 | 17 | 14 | 58  | 49 |
| 111,742 | 1 | 3 | 42 | 31 | 0 | 1 | 18 | 13 | 61  | 48 |
| 111,743 | 4 | 3 | 76 | 31 | 3 | 1 | 31 | 13 | 114 | 48 |
| 111,744 | 4 | 3 | 74 | 31 | 3 | 1 | 31 | 13 | 112 | 48 |
| 111,745 | 4 | 3 | 70 | 31 | 3 | 1 | 30 | 13 | 107 | 48 |
| 111,746 | 4 | 3 | 70 | 32 | 3 | 1 | 31 | 13 | 108 | 49 |
| 111,747 | 4 | 2 | 66 | 32 | 3 | 1 | 31 | 13 | 104 | 48 |
| 111,748 | 4 | 2 | 66 | 33 | 4 | 1 | 30 | 13 | 104 | 49 |
| 111,749 | 4 | 2 | 62 | 34 | 4 | 1 | 28 | 13 | 98  | 50 |
| 111,750 | 4 | 2 | 62 | 34 | 4 | 1 | 27 | 13 | 97  | 50 |
| 111,751 | 4 | 2 | 62 | 34 | 4 | 1 | 27 | 13 | 97  | 50 |
| 111,752 | 4 | 2 | 62 | 34 | 4 | 1 | 27 | 13 | 97  | 50 |
| 111,753 | 4 | 2 | 62 | 34 | 4 | 1 | 27 | 13 | 97  | 50 |
| 111,754 | 5 | 2 | 62 | 34 | 4 | 1 | 27 | 13 | 98  | 50 |

|         |   |   |    |    |   |   |    |    |     |    |
|---------|---|---|----|----|---|---|----|----|-----|----|
| 111,755 | 5 | 2 | 62 | 34 | 4 | 1 | 27 | 13 | 98  | 50 |
| 111,756 | 5 | 2 | 62 | 34 | 4 | 1 | 27 | 13 | 98  | 50 |
| 111,757 | 5 | 2 | 62 | 34 | 4 | 1 | 27 | 13 | 98  | 50 |
| 111,758 | 5 | 2 | 63 | 34 | 4 | 1 | 27 | 13 | 99  | 50 |
| 111,759 | 5 | 2 | 63 | 34 | 4 | 1 | 27 | 13 | 99  | 50 |
| 111,760 | 5 | 2 | 63 | 34 | 4 | 1 | 26 | 13 | 98  | 50 |
| 111,761 | 5 | 2 | 61 | 34 | 4 | 1 | 25 | 13 | 95  | 50 |
| 111,762 | 5 | 2 | 60 | 34 | 4 | 1 | 26 | 13 | 95  | 50 |
| 111,763 | 5 | 2 | 61 | 34 | 4 | 1 | 25 | 13 | 95  | 50 |
| 111,764 | 5 | 2 | 62 | 35 | 4 | 1 | 22 | 13 | 93  | 51 |
| 111,765 | 5 | 2 | 61 | 35 | 4 | 1 | 22 | 13 | 92  | 51 |
| 111,766 | 5 | 2 | 63 | 35 | 4 | 1 | 22 | 13 | 94  | 51 |
| 111,767 | 5 | 2 | 61 | 35 | 4 | 2 | 22 | 13 | 92  | 52 |
| 111,768 | 5 | 1 | 63 | 24 | 4 | 2 | 22 | 10 | 94  | 37 |
| 111,769 | 5 | 1 | 63 | 24 | 4 | 2 | 22 | 10 | 94  | 37 |
| 111,770 | 8 | 1 | 68 | 19 | 4 | 1 | 24 | 7  | 104 | 28 |
| 111,771 | 8 | 1 | 70 | 10 | 5 | 1 | 26 | 2  | 109 | 14 |
| 111,772 | 8 | 1 | 69 | 10 | 5 | 1 | 26 | 2  | 108 | 14 |
| 111,773 | 8 | 1 | 71 | 10 | 5 | 1 | 25 | 2  | 109 | 14 |
| 111,774 | 8 | 1 | 71 | 10 | 5 | 1 | 25 | 2  | 109 | 14 |
| 111,775 | 8 | 4 | 71 | 7  | 5 | 1 | 25 | 4  | 109 | 16 |
| 111,776 | 8 | 4 | 71 | 7  | 5 | 1 | 24 | 4  | 108 | 16 |
| 111,777 | 8 | 4 | 72 | 7  | 5 | 1 | 25 | 4  | 110 | 16 |
| 111,778 | 7 | 4 | 72 | 10 | 5 | 1 | 25 | 5  | 109 | 20 |
| 111,779 | 7 | 4 | 75 | 11 | 5 | 2 | 25 | 8  | 112 | 25 |
| 111,780 | 7 | 4 | 73 | 14 | 5 | 2 | 23 | 11 | 108 | 31 |
| 111,781 | 7 | 4 | 69 | 14 | 5 | 2 | 22 | 11 | 103 | 31 |
| 111,782 | 7 | 4 | 66 | 17 | 5 | 3 | 22 | 14 | 100 | 38 |
| 111,783 | 8 | 4 | 66 | 18 | 5 | 3 | 23 | 15 | 102 | 40 |
| 111,784 | 8 | 4 | 65 | 18 | 5 | 3 | 23 | 14 | 101 | 39 |
| 111,785 | 8 | 4 | 65 | 18 | 5 | 3 | 23 | 14 | 101 | 39 |
| 111,786 | 8 | 4 | 65 | 18 | 5 | 3 | 24 | 14 | 102 | 39 |
| 111,787 | 8 | 4 | 65 | 17 | 5 | 3 | 24 | 14 | 102 | 38 |
| 111,788 | 8 | 4 | 66 | 17 | 5 | 3 | 25 | 14 | 104 | 38 |
| 111,789 | 8 | 4 | 66 | 17 | 5 | 3 | 25 | 14 | 104 | 38 |
| 111,790 | 8 | 4 | 66 | 17 | 5 | 3 | 25 | 14 | 104 | 38 |
| 111,791 | 8 | 4 | 65 | 17 | 5 | 3 | 25 | 15 | 103 | 39 |
| 111,792 | 8 | 3 | 63 | 17 | 5 | 3 | 26 | 14 | 102 | 37 |
| 111,793 | 8 | 3 | 63 | 17 | 5 | 3 | 25 | 14 | 101 | 37 |
| 111,794 | 5 | 3 | 27 | 19 | 2 | 3 | 12 | 14 | 46  | 39 |
| 111,795 | 5 | 3 | 27 | 19 | 2 | 3 | 12 | 14 | 46  | 39 |

|         |    |   |     |    |    |   |     |    |     |    |
|---------|----|---|-----|----|----|---|-----|----|-----|----|
| 111,796 | 5  | 3 | 27  | 18 | 2  | 3 | 12  | 14 | 46  | 38 |
| 111,797 | 5  | 3 | 26  | 18 | 2  | 3 | 11  | 14 | 44  | 38 |
| 111,798 | 5  | 3 | 27  | 17 | 2  | 3 | 11  | 14 | 45  | 37 |
| 111,799 | 5  | 3 | 26  | 17 | 1  | 3 | 11  | 14 | 43  | 37 |
| 111,800 | 5  | 3 | 26  | 16 | 1  | 3 | 11  | 14 | 43  | 36 |
| 111,801 | 5  | 3 | 27  | 16 | 1  | 3 | 11  | 14 | 44  | 36 |
| 111,802 | 5  | 3 | 27  | 16 | 1  | 3 | 11  | 14 | 44  | 36 |
| 111,803 | 5  | 3 | 27  | 16 | 1  | 3 | 11  | 14 | 44  | 36 |
| 111,804 | 4  | 3 | 27  | 16 | 1  | 3 | 11  | 14 | 43  | 36 |
| 111,805 | 4  | 3 | 27  | 16 | 1  | 3 | 11  | 14 | 43  | 36 |
| 111,806 | 4  | 3 | 29  | 16 | 1  | 3 | 13  | 14 | 47  | 36 |
| 111,807 | 6  | 3 | 43  | 16 | 1  | 3 | 16  | 15 | 66  | 37 |
| 111,808 | 7  | 3 | 66  | 16 | 3  | 3 | 24  | 15 | 100 | 37 |
| 111,809 | 8  | 4 | 64  | 16 | 3  | 3 | 24  | 15 | 99  | 38 |
| 111,810 | 10 | 4 | 117 | 16 | 10 | 3 | 75  | 16 | 212 | 39 |
| 111,811 | 10 | 4 | 128 | 16 | 10 | 3 | 82  | 16 | 230 | 39 |
| 111,812 | 10 | 4 | 128 | 16 | 10 | 3 | 82  | 16 | 230 | 39 |
| 111,813 | 10 | 4 | 128 | 16 | 10 | 3 | 81  | 16 | 229 | 39 |
| 111,814 | 10 | 4 | 128 | 16 | 10 | 3 | 81  | 16 | 229 | 39 |
| 111,815 | 10 | 4 | 127 | 15 | 10 | 3 | 81  | 16 | 228 | 38 |
| 111,816 | 10 | 4 | 127 | 15 | 10 | 3 | 81  | 16 | 228 | 38 |
| 111,817 | 10 | 4 | 125 | 15 | 10 | 3 | 81  | 16 | 226 | 38 |
| 111,818 | 10 | 4 | 125 | 15 | 10 | 2 | 81  | 16 | 226 | 37 |
| 111,819 | 10 | 4 | 124 | 15 | 10 | 2 | 81  | 16 | 225 | 37 |
| 111,820 | 7  | 4 | 119 | 15 | 10 | 2 | 78  | 16 | 214 | 37 |
| 111,821 | 8  | 4 | 124 | 15 | 10 | 2 | 80  | 16 | 222 | 37 |
| 111,822 | 8  | 4 | 124 | 15 | 9  | 2 | 78  | 16 | 219 | 37 |
| 111,823 | 8  | 4 | 122 | 15 | 9  | 2 | 78  | 16 | 217 | 37 |
| 111,824 | 8  | 4 | 128 | 15 | 9  | 2 | 80  | 16 | 225 | 37 |
| 111,825 | 8  | 4 | 128 | 15 | 9  | 2 | 80  | 16 | 225 | 37 |
| 111,826 | 10 | 1 | 134 | 15 | 9  | 2 | 81  | 14 | 234 | 32 |
| 111,827 | 10 | 1 | 133 | 15 | 9  | 2 | 80  | 14 | 232 | 32 |
| 111,828 | 11 | 1 | 134 | 12 | 9  | 2 | 80  | 14 | 234 | 29 |
| 111,829 | 11 | 1 | 134 | 12 | 9  | 2 | 80  | 14 | 234 | 29 |
| 111,830 | 17 | 1 | 221 | 10 | 13 | 1 | 124 | 11 | 375 | 23 |
| 111,831 | 17 | 1 | 223 | 7  | 14 | 1 | 125 | 8  | 379 | 17 |
| 111,832 | 18 | 1 | 231 | 3  | 15 | 0 | 128 | 5  | 392 | 9  |
| 111,833 | 18 | 1 | 231 | 3  | 15 | 0 | 130 | 5  | 394 | 9  |
| 111,834 | 17 | 1 | 231 | 4  | 15 | 0 | 129 | 4  | 392 | 9  |
| 111,835 | 17 | 1 | 231 | 6  | 15 | 0 | 129 | 4  | 392 | 11 |
| 111,836 | 19 | 1 | 245 | 6  | 18 | 0 | 140 | 4  | 422 | 11 |



|         |    |   |     |    |    |   |     |    |     |    |
|---------|----|---|-----|----|----|---|-----|----|-----|----|
| 111,837 | 22 | 1 | 249 | 6  | 18 | 0 | 142 | 4  | 431 | 11 |
| 111,838 | 22 | 1 | 251 | 6  | 18 | 0 | 143 | 4  | 434 | 11 |
| 111,839 | 22 | 1 | 257 | 6  | 18 | 0 | 145 | 4  | 442 | 11 |
| 111,840 | 22 | 1 | 257 | 7  | 18 | 0 | 145 | 4  | 442 | 12 |
| 111,841 | 22 | 1 | 259 | 10 | 18 | 0 | 146 | 5  | 445 | 16 |
| 111,842 | 22 | 1 | 262 | 10 | 18 | 0 | 146 | 5  | 448 | 16 |
| 111,843 | 22 | 1 | 261 | 10 | 18 | 0 | 145 | 5  | 446 | 16 |
| 111,844 | 22 | 1 | 261 | 10 | 18 | 0 | 145 | 5  | 446 | 16 |
| 111,845 | 22 | 1 | 260 | 8  | 18 | 0 | 145 | 5  | 445 | 14 |
| 111,846 | 22 | 1 | 260 | 8  | 18 | 0 | 145 | 5  | 445 | 14 |
| 111,847 | 22 | 1 | 260 | 8  | 18 | 0 | 145 | 5  | 445 | 14 |
| 111,848 | 22 | 1 | 260 | 8  | 18 | 0 | 145 | 5  | 445 | 14 |
| 111,849 | 23 | 1 | 259 | 8  | 18 | 0 | 145 | 5  | 445 | 14 |
| 111,850 | 23 | 1 | 258 | 8  | 18 | 1 | 145 | 5  | 444 | 15 |
| 111,851 | 23 | 1 | 258 | 9  | 18 | 1 | 145 | 5  | 444 | 16 |
| 111,852 | 23 | 1 | 259 | 9  | 18 | 1 | 145 | 5  | 445 | 16 |
| 111,853 | 23 | 1 | 259 | 10 | 18 | 1 | 145 | 5  | 445 | 17 |
| 111,854 | 23 | 1 | 259 | 12 | 18 | 1 | 145 | 8  | 445 | 22 |
| 111,855 | 23 | 1 | 258 | 19 | 18 | 1 | 145 | 10 | 444 | 31 |
| 111,856 | 23 | 1 | 258 | 22 | 18 | 1 | 145 | 12 | 444 | 36 |
| 111,857 | 23 | 1 | 257 | 22 | 18 | 1 | 144 | 12 | 442 | 36 |
| 111,858 | 21 | 1 | 243 | 23 | 18 | 1 | 141 | 11 | 423 | 36 |
| 111,859 | 20 | 1 | 220 | 23 | 16 | 1 | 133 | 12 | 389 | 37 |
| 111,860 | 17 | 0 | 167 | 23 | 9  | 1 | 82  | 11 | 275 | 35 |
| 111,861 | 17 | 0 | 161 | 23 | 9  | 1 | 76  | 12 | 263 | 36 |
| 111,862 | 17 | 0 | 156 | 23 | 9  | 1 | 76  | 12 | 258 | 36 |
| 111,863 | 17 | 0 | 157 | 23 | 9  | 1 | 76  | 12 | 259 | 36 |
| 111,864 | 17 | 0 | 156 | 23 | 9  | 1 | 76  | 12 | 258 | 36 |
| 111,865 | 17 | 0 | 156 | 23 | 9  | 1 | 77  | 12 | 259 | 36 |
| 111,866 | 17 | 0 | 156 | 23 | 9  | 1 | 77  | 12 | 259 | 36 |
| 111,867 | 17 | 0 | 156 | 23 | 9  | 1 | 77  | 12 | 259 | 36 |
| 111,868 | 19 | 0 | 158 | 23 | 9  | 1 | 80  | 12 | 266 | 36 |
| 111,869 | 19 | 0 | 158 | 23 | 9  | 1 | 80  | 12 | 266 | 36 |
| 111,870 | 19 | 0 | 159 | 23 | 9  | 1 | 85  | 12 | 272 | 36 |
| 111,871 | 19 | 0 | 159 | 23 | 9  | 1 | 86  | 12 | 273 | 36 |
| 111,872 | 18 | 0 | 157 | 23 | 9  | 1 | 88  | 12 | 272 | 36 |
| 111,873 | 18 | 0 | 158 | 23 | 9  | 1 | 89  | 12 | 274 | 36 |
| 111,874 | 18 | 0 | 156 | 23 | 9  | 1 | 91  | 12 | 274 | 36 |
| 111,875 | 18 | 0 | 152 | 23 | 9  | 1 | 89  | 13 | 268 | 37 |
| 111,876 | 18 | 0 | 152 | 23 | 9  | 1 | 89  | 13 | 268 | 37 |
| 111,877 | 16 | 0 | 146 | 23 | 9  | 1 | 88  | 13 | 259 | 37 |

|         |    |   |     |    |   |   |    |    |     |    |
|---------|----|---|-----|----|---|---|----|----|-----|----|
| 111,878 | 15 | 0 | 144 | 25 | 9 | 1 | 88 | 13 | 256 | 39 |
| 111,879 | 15 | 0 | 144 | 25 | 9 | 1 | 88 | 13 | 256 | 39 |
| 111,880 | 10 | 0 | 97  | 25 | 7 | 1 | 72 | 14 | 186 | 40 |
| 111,881 | 9  | 0 | 55  | 26 | 5 | 2 | 46 | 14 | 115 | 42 |
| 111,882 | 9  | 0 | 54  | 26 | 4 | 2 | 45 | 14 | 112 | 42 |
| 111,883 | 8  | 0 | 48  | 24 | 3 | 2 | 42 | 14 | 101 | 40 |
| 111,884 | 8  | 0 | 48  | 27 | 3 | 2 | 40 | 14 | 99  | 43 |
| 111,885 | 7  | 0 | 45  | 28 | 1 | 3 | 37 | 15 | 90  | 46 |
| 111,886 | 6  | 0 | 35  | 27 | 0 | 3 | 31 | 15 | 72  | 45 |
| 111,887 | 9  | 0 | 44  | 27 | 0 | 3 | 35 | 15 | 88  | 45 |
| 111,888 | 7  | 0 | 48  | 26 | 0 | 3 | 37 | 15 | 92  | 44 |
| 111,889 | 9  | 0 | 51  | 26 | 0 | 3 | 39 | 15 | 99  | 44 |
| 111,890 | 9  | 0 | 45  | 26 | 0 | 3 | 36 | 15 | 90  | 44 |
| 111,891 | 9  | 0 | 45  | 23 | 0 | 3 | 38 | 14 | 92  | 40 |
| 111,892 | 9  | 0 | 44  | 23 | 0 | 3 | 38 | 14 | 91  | 40 |
| 111,893 | 9  | 0 | 41  | 24 | 0 | 3 | 38 | 13 | 88  | 40 |
| 111,894 | 9  | 0 | 46  | 24 | 1 | 3 | 41 | 13 | 97  | 40 |
| 111,895 | 9  | 0 | 47  | 24 | 1 | 3 | 42 | 13 | 99  | 40 |
| 111,896 | 9  | 0 | 47  | 24 | 1 | 3 | 42 | 13 | 99  | 40 |
| 111,897 | 9  | 0 | 47  | 24 | 1 | 3 | 42 | 13 | 99  | 40 |
| 111,898 | 9  | 0 | 47  | 24 | 1 | 3 | 42 | 14 | 99  | 41 |
| 111,899 | 9  | 0 | 47  | 24 | 1 | 3 | 42 | 14 | 99  | 41 |
| 111,900 | 8  | 0 | 50  | 24 | 1 | 3 | 42 | 14 | 101 | 41 |
| 111,901 | 8  | 0 | 62  | 24 | 1 | 2 | 47 | 14 | 118 | 40 |
| 111,902 | 8  | 0 | 62  | 23 | 1 | 2 | 47 | 14 | 118 | 39 |
| 111,903 | 8  | 0 | 62  | 22 | 1 | 2 | 47 | 14 | 118 | 38 |
| 111,904 | 8  | 0 | 63  | 20 | 1 | 2 | 47 | 11 | 119 | 33 |
| 111,905 | 11 | 0 | 75  | 20 | 1 | 2 | 52 | 12 | 139 | 34 |
| 111,906 | 11 | 0 | 76  | 13 | 1 | 2 | 51 | 10 | 139 | 25 |
| 111,907 | 11 | 0 | 76  | 9  | 1 | 2 | 51 | 9  | 139 | 20 |
| 111,908 | 11 | 0 | 77  | 9  | 1 | 2 | 51 | 9  | 140 | 20 |
| 111,909 | 13 | 0 | 84  | 10 | 1 | 2 | 52 | 9  | 150 | 21 |
| 111,910 | 15 | 0 | 95  | 10 | 1 | 2 | 56 | 9  | 167 | 21 |
| 111,911 | 15 | 0 | 95  | 10 | 1 | 2 | 55 | 9  | 166 | 21 |
| 111,912 | 16 | 0 | 123 | 13 | 2 | 3 | 69 | 10 | 210 | 26 |
| 111,913 | 16 | 0 | 123 | 13 | 2 | 3 | 69 | 10 | 210 | 26 |
| 111,914 | 16 | 0 | 129 | 17 | 2 | 3 | 75 | 10 | 222 | 30 |
| 111,915 | 16 | 0 | 132 | 17 | 3 | 3 | 76 | 10 | 227 | 30 |
| 111,916 | 16 | 0 | 133 | 17 | 3 | 3 | 75 | 10 | 227 | 30 |
| 111,917 | 16 | 0 | 133 | 17 | 3 | 3 | 75 | 10 | 227 | 30 |
| 111,918 | 15 | 0 | 131 | 17 | 3 | 3 | 72 | 10 | 221 | 30 |

|         |    |   |     |    |   |   |     |    |     |    |
|---------|----|---|-----|----|---|---|-----|----|-----|----|
| 111,919 | 14 | 0 | 131 | 17 | 3 | 3 | 72  | 11 | 220 | 31 |
| 111,920 | 14 | 0 | 131 | 21 | 3 | 3 | 69  | 14 | 217 | 38 |
| 111,921 | 14 | 0 | 133 | 21 | 3 | 3 | 69  | 14 | 219 | 38 |
| 111,922 | 14 | 1 | 136 | 22 | 3 | 3 | 71  | 14 | 224 | 40 |
| 111,923 | 14 | 1 | 134 | 22 | 3 | 3 | 67  | 14 | 218 | 40 |
| 111,924 | 14 | 1 | 133 | 22 | 3 | 3 | 66  | 14 | 216 | 40 |
| 111,925 | 14 | 1 | 133 | 22 | 3 | 3 | 64  | 14 | 214 | 40 |
| 111,926 | 14 | 1 | 134 | 22 | 3 | 3 | 65  | 13 | 216 | 39 |
| 111,927 | 15 | 1 | 138 | 22 | 4 | 3 | 72  | 13 | 229 | 39 |
| 111,928 | 15 | 1 | 138 | 23 | 4 | 3 | 72  | 14 | 229 | 41 |
| 111,929 | 17 | 1 | 146 | 23 | 5 | 3 | 87  | 14 | 255 | 41 |
| 111,930 | 17 | 1 | 150 | 24 | 5 | 3 | 86  | 12 | 258 | 40 |
| 111,931 | 17 | 1 | 150 | 25 | 5 | 3 | 86  | 12 | 258 | 41 |
| 111,932 | 18 | 1 | 152 | 24 | 5 | 2 | 87  | 12 | 262 | 39 |
| 111,933 | 18 | 1 | 151 | 25 | 5 | 2 | 87  | 12 | 261 | 40 |
| 111,934 | 18 | 1 | 149 | 25 | 5 | 2 | 87  | 12 | 259 | 40 |
| 111,935 | 18 | 1 | 150 | 22 | 5 | 2 | 87  | 12 | 260 | 37 |
| 111,936 | 18 | 1 | 149 | 21 | 5 | 1 | 86  | 11 | 258 | 34 |
| 111,937 | 18 | 1 | 150 | 21 | 5 | 1 | 86  | 11 | 259 | 34 |
| 111,938 | 15 | 1 | 141 | 21 | 5 | 1 | 81  | 11 | 242 | 34 |
| 111,939 | 14 | 1 | 136 | 25 | 5 | 4 | 76  | 14 | 231 | 44 |
| 111,940 | 12 | 1 | 131 | 25 | 5 | 4 | 71  | 14 | 219 | 44 |
| 111,941 | 14 | 1 | 169 | 25 | 6 | 4 | 81  | 15 | 270 | 45 |
| 111,942 | 14 | 1 | 175 | 26 | 6 | 4 | 79  | 15 | 274 | 46 |
| 111,943 | 23 | 1 | 187 | 26 | 5 | 4 | 87  | 15 | 302 | 46 |
| 111,944 | 24 | 1 | 188 | 26 | 5 | 4 | 89  | 15 | 306 | 46 |
| 111,945 | 24 | 1 | 187 | 26 | 5 | 4 | 89  | 15 | 305 | 46 |
| 111,946 | 24 | 1 | 187 | 26 | 5 | 4 | 89  | 15 | 305 | 46 |
| 111,947 | 25 | 1 | 225 | 27 | 6 | 4 | 117 | 15 | 373 | 47 |
| 111,948 | 27 | 1 | 255 | 27 | 9 | 4 | 139 | 14 | 430 | 46 |
| 111,949 | 27 | 1 | 259 | 27 | 9 | 4 | 143 | 14 | 438 | 46 |
| 111,950 | 27 | 1 | 256 | 27 | 9 | 4 | 143 | 14 | 435 | 46 |
| 111,951 | 27 | 1 | 244 | 27 | 9 | 4 | 139 | 14 | 419 | 46 |
| 111,952 | 27 | 1 | 247 | 27 | 9 | 4 | 143 | 14 | 426 | 46 |
| 111,953 | 27 | 1 | 257 | 27 | 9 | 4 | 151 | 14 | 444 | 46 |
| 111,954 | 27 | 1 | 256 | 27 | 9 | 4 | 151 | 14 | 443 | 46 |
| 111,955 | 27 | 1 | 257 | 27 | 9 | 4 | 151 | 14 | 444 | 46 |
| 111,956 | 24 | 1 | 245 | 27 | 9 | 4 | 147 | 13 | 425 | 45 |
| 111,957 | 24 | 1 | 244 | 27 | 9 | 4 | 147 | 14 | 424 | 46 |
| 111,958 | 24 | 1 | 244 | 28 | 9 | 4 | 148 | 12 | 425 | 45 |
| 111,959 | 24 | 1 | 244 | 30 | 9 | 4 | 148 | 13 | 425 | 48 |

|         |    |   |     |    |   |   |     |    |     |    |
|---------|----|---|-----|----|---|---|-----|----|-----|----|
| 111,960 | 22 | 1 | 237 | 29 | 9 | 4 | 147 | 13 | 415 | 47 |
| 111,961 | 20 | 1 | 226 | 29 | 9 | 4 | 143 | 13 | 398 | 47 |
| 111,962 | 20 | 1 | 226 | 30 | 9 | 4 | 143 | 13 | 398 | 48 |
| 111,963 | 19 | 1 | 198 | 27 | 8 | 3 | 129 | 11 | 354 | 42 |
| 111,964 | 19 | 1 | 191 | 23 | 8 | 3 | 123 | 13 | 341 | 40 |
| 111,965 | 19 | 1 | 188 | 23 | 7 | 3 | 122 | 13 | 336 | 40 |
| 111,966 | 19 | 1 | 188 | 23 | 7 | 3 | 122 | 16 | 336 | 43 |
| 111,967 | 19 | 1 | 187 | 23 | 7 | 3 | 122 | 16 | 335 | 43 |
| 111,968 | 23 | 1 | 212 | 23 | 9 | 3 | 146 | 16 | 390 | 43 |
| 111,969 | 23 | 1 | 219 | 23 | 9 | 3 | 150 | 16 | 401 | 43 |
| 111,970 | 23 | 1 | 219 | 19 | 9 | 3 | 150 | 12 | 401 | 35 |
| 111,971 | 23 | 1 | 218 | 19 | 9 | 3 | 148 | 12 | 398 | 35 |
| 111,972 | 23 | 1 | 216 | 19 | 9 | 3 | 147 | 13 | 395 | 36 |
| 111,973 | 23 | 0 | 212 | 18 | 9 | 3 | 145 | 13 | 389 | 34 |
| 111,974 | 23 | 0 | 212 | 18 | 9 | 3 | 145 | 13 | 389 | 34 |
| 111,975 | 23 | 0 | 210 | 18 | 9 | 3 | 145 | 13 | 387 | 34 |
| 111,976 | 23 | 0 | 209 | 20 | 9 | 3 | 144 | 13 | 385 | 36 |
| 111,977 | 23 | 0 | 207 | 20 | 8 | 3 | 139 | 13 | 377 | 36 |
| 111,978 | 22 | 0 | 205 | 20 | 8 | 4 | 138 | 13 | 373 | 37 |
| 111,979 | 20 | 0 | 199 | 19 | 7 | 4 | 131 | 12 | 357 | 35 |
| 111,980 | 20 | 0 | 197 | 16 | 7 | 4 | 123 | 13 | 347 | 33 |
| 111,981 | 20 | 0 | 193 | 15 | 8 | 4 | 123 | 13 | 344 | 32 |
| 111,982 | 20 | 0 | 193 | 15 | 8 | 4 | 123 | 13 | 344 | 32 |
| 111,983 | 19 | 0 | 190 | 15 | 8 | 4 | 120 | 13 | 337 | 32 |
| 111,984 | 19 | 0 | 190 | 14 | 8 | 4 | 120 | 13 | 337 | 31 |
| 111,985 | 19 | 0 | 190 | 14 | 8 | 4 | 120 | 13 | 337 | 31 |
| 111,986 | 19 | 0 | 189 | 14 | 8 | 4 | 120 | 13 | 336 | 31 |
| 111,987 | 19 | 0 | 189 | 13 | 8 | 4 | 120 | 13 | 336 | 30 |
| 111,988 | 19 | 1 | 188 | 15 | 8 | 4 | 120 | 15 | 335 | 35 |
| 111,989 | 19 | 1 | 188 | 17 | 8 | 5 | 121 | 18 | 336 | 41 |
| 111,990 | 19 | 1 | 186 | 13 | 8 | 2 | 122 | 15 | 335 | 31 |
| 111,991 | 19 | 1 | 183 | 13 | 8 | 2 | 123 | 15 | 333 | 31 |
| 111,992 | 17 | 1 | 144 | 12 | 7 | 2 | 113 | 15 | 281 | 30 |
| 111,993 | 17 | 1 | 140 | 12 | 7 | 2 | 111 | 15 | 275 | 30 |
| 111,994 | 8  | 2 | 126 | 11 | 7 | 2 | 102 | 15 | 243 | 30 |
| 111,995 | 7  | 2 | 131 | 11 | 7 | 2 | 103 | 15 | 248 | 30 |
| 111,996 | 7  | 2 | 130 | 12 | 7 | 2 | 103 | 16 | 247 | 32 |
| 111,997 | 7  | 2 | 128 | 15 | 7 | 2 | 103 | 19 | 245 | 38 |
| 111,998 | 6  | 3 | 92  | 19 | 6 | 2 | 76  | 22 | 180 | 46 |
| 111,999 | 4  | 3 | 62  | 20 | 3 | 2 | 54  | 22 | 123 | 47 |
| 112,000 | 4  | 3 | 58  | 20 | 3 | 2 | 50  | 22 | 115 | 47 |

|         |   |   |    |    |   |   |    |    |     |    |
|---------|---|---|----|----|---|---|----|----|-----|----|
| 112,001 | 4 | 3 | 55 | 20 | 3 | 2 | 46 | 22 | 108 | 47 |
| 112,002 | 4 | 3 | 55 | 20 | 3 | 2 | 46 | 22 | 108 | 47 |
| 112,003 | 4 | 3 | 52 | 21 | 3 | 2 | 42 | 22 | 101 | 48 |
| 112,004 | 4 | 4 | 45 | 21 | 3 | 2 | 38 | 22 | 90  | 49 |
| 112,005 | 4 | 4 | 46 | 21 | 3 | 2 | 38 | 22 | 91  | 49 |
| 112,006 | 4 | 4 | 46 | 21 | 3 | 2 | 38 | 23 | 91  | 50 |
| 112,007 | 4 | 4 | 48 | 21 | 3 | 2 | 39 | 22 | 94  | 49 |
| 112,008 | 4 | 4 | 48 | 20 | 3 | 2 | 38 | 22 | 93  | 48 |
| 112,009 | 4 | 4 | 48 | 20 | 3 | 2 | 38 | 22 | 93  | 48 |
| 112,010 | 4 | 4 | 47 | 18 | 3 | 2 | 38 | 21 | 92  | 45 |
| 112,011 | 4 | 4 | 47 | 20 | 3 | 2 | 38 | 21 | 92  | 47 |
| 112,012 | 4 | 5 | 56 | 20 | 4 | 2 | 48 | 21 | 112 | 48 |
| 112,013 | 4 | 5 | 55 | 19 | 4 | 2 | 48 | 23 | 111 | 49 |
| 112,014 | 1 | 5 | 50 | 23 | 4 | 2 | 48 | 27 | 103 | 57 |
| 112,015 | 1 | 5 | 43 | 23 | 3 | 2 | 33 | 25 | 80  | 55 |
| 112,016 | 1 | 5 | 46 | 27 | 3 | 2 | 34 | 28 | 84  | 62 |
| 112,017 | 0 | 5 | 42 | 27 | 3 | 2 | 31 | 25 | 76  | 59 |
| 112,018 | 0 | 5 | 34 | 28 | 2 | 2 | 28 | 25 | 64  | 60 |
| 112,019 | 0 | 5 | 34 | 28 | 2 | 2 | 27 | 25 | 63  | 60 |
| 112,020 | 0 | 5 | 27 | 28 | 2 | 2 | 23 | 25 | 52  | 60 |
| 112,021 | 0 | 5 | 26 | 28 | 2 | 2 | 23 | 25 | 51  | 60 |
| 112,022 | 0 | 5 | 26 | 28 | 2 | 2 | 23 | 25 | 51  | 60 |
| 112,023 | 0 | 5 | 26 | 28 | 2 | 2 | 23 | 24 | 51  | 59 |
| 112,024 | 0 | 5 | 26 | 28 | 2 | 2 | 24 | 26 | 52  | 61 |
| 112,025 | 0 | 5 | 26 | 28 | 2 | 2 | 25 | 26 | 53  | 61 |
| 112,026 | 0 | 5 | 26 | 28 | 2 | 2 | 25 | 26 | 53  | 61 |
| 112,027 | 0 | 5 | 27 | 26 | 2 | 2 | 25 | 26 | 54  | 59 |
| 112,028 | 0 | 5 | 27 | 26 | 2 | 2 | 25 | 27 | 54  | 60 |
| 112,029 | 0 | 5 | 27 | 26 | 2 | 1 | 25 | 29 | 54  | 61 |
| 112,030 | 0 | 5 | 27 | 27 | 2 | 1 | 25 | 29 | 54  | 62 |
| 112,031 | 0 | 5 | 27 | 27 | 2 | 1 | 25 | 28 | 54  | 61 |
| 112,032 | 0 | 5 | 27 | 27 | 1 | 1 | 25 | 28 | 53  | 61 |
| 112,033 | 0 | 5 | 27 | 28 | 2 | 1 | 26 | 29 | 55  | 63 |
| 112,034 | 0 | 5 | 27 | 28 | 2 | 1 | 26 | 29 | 55  | 63 |
| 112,035 | 0 | 5 | 29 | 28 | 2 | 1 | 27 | 29 | 58  | 63 |
| 112,036 | 0 | 5 | 31 | 28 | 2 | 1 | 28 | 29 | 61  | 63 |
| 112,037 | 0 | 5 | 32 | 28 | 2 | 1 | 28 | 29 | 62  | 63 |
| 112,038 | 0 | 4 | 32 | 26 | 2 | 1 | 29 | 27 | 63  | 58 |
| 112,039 | 0 | 4 | 32 | 26 | 2 | 0 | 28 | 24 | 62  | 54 |
| 112,040 | 0 | 4 | 34 | 26 | 2 | 0 | 32 | 24 | 68  | 54 |
| 112,041 | 0 | 4 | 33 | 28 | 2 | 0 | 31 | 24 | 66  | 56 |

|         |   |   |    |    |   |   |    |    |     |    |
|---------|---|---|----|----|---|---|----|----|-----|----|
| 112,042 | 0 | 4 | 34 | 28 | 2 | 0 | 31 | 24 | 67  | 56 |
| 112,043 | 0 | 4 | 34 | 28 | 2 | 0 | 31 | 23 | 67  | 55 |
| 112,044 | 0 | 4 | 33 | 29 | 2 | 0 | 31 | 23 | 66  | 56 |
| 112,045 | 0 | 3 | 26 | 29 | 2 | 0 | 28 | 23 | 56  | 55 |
| 112,046 | 1 | 3 | 39 | 29 | 3 | 0 | 35 | 23 | 78  | 55 |
| 112,047 | 1 | 3 | 39 | 28 | 3 | 0 | 35 | 22 | 78  | 53 |
| 112,048 | 1 | 3 | 39 | 25 | 3 | 0 | 35 | 19 | 78  | 47 |
| 112,049 | 1 | 2 | 50 | 20 | 3 | 0 | 42 | 16 | 96  | 38 |
| 112,050 | 1 | 2 | 50 | 19 | 3 | 0 | 42 | 16 | 96  | 37 |
| 112,051 | 1 | 2 | 50 | 19 | 3 | 0 | 42 | 16 | 96  | 37 |
| 112,052 | 1 | 2 | 50 | 19 | 3 | 0 | 42 | 16 | 96  | 37 |
| 112,053 | 1 | 2 | 51 | 18 | 3 | 0 | 42 | 16 | 97  | 36 |
| 112,054 | 1 | 1 | 51 | 18 | 3 | 0 | 42 | 17 | 97  | 36 |
| 112,055 | 1 | 1 | 51 | 18 | 3 | 0 | 42 | 17 | 97  | 36 |
| 112,056 | 2 | 1 | 48 | 18 | 3 | 0 | 42 | 17 | 95  | 36 |
| 112,057 | 2 | 1 | 48 | 18 | 3 | 0 | 43 | 16 | 96  | 35 |
| 112,058 | 2 | 1 | 49 | 18 | 3 | 0 | 46 | 16 | 100 | 35 |
| 112,059 | 2 | 1 | 49 | 18 | 2 | 0 | 44 | 16 | 97  | 35 |
| 112,060 | 2 | 1 | 46 | 19 | 2 | 0 | 38 | 17 | 88  | 37 |
| 112,061 | 2 | 1 | 42 | 19 | 2 | 0 | 37 | 17 | 83  | 37 |
| 112,062 | 2 | 1 | 41 | 17 | 2 | 1 | 36 | 17 | 81  | 36 |
| 112,063 | 2 | 0 | 41 | 18 | 2 | 1 | 36 | 17 | 81  | 36 |
| 112,064 | 3 | 0 | 41 | 15 | 2 | 1 | 36 | 12 | 82  | 28 |
| 112,065 | 3 | 0 | 41 | 15 | 2 | 2 | 36 | 12 | 82  | 29 |
| 112,066 | 3 | 0 | 40 | 16 | 2 | 2 | 35 | 12 | 80  | 30 |
| 112,067 | 3 | 0 | 38 | 12 | 2 | 2 | 35 | 10 | 78  | 24 |
| 112,068 | 3 | 0 | 38 | 12 | 2 | 2 | 34 | 10 | 77  | 24 |
| 112,069 | 3 | 1 | 38 | 11 | 2 | 2 | 33 | 11 | 76  | 25 |
| 112,070 | 3 | 1 | 38 | 11 | 2 | 2 | 33 | 11 | 76  | 25 |
| 112,071 | 3 | 1 | 38 | 11 | 2 | 2 | 33 | 11 | 76  | 25 |
| 112,072 | 3 | 1 | 38 | 11 | 2 | 2 | 35 | 11 | 78  | 25 |
| 112,073 | 3 | 1 | 38 | 11 | 2 | 2 | 35 | 11 | 78  | 25 |
| 112,074 | 3 | 1 | 38 | 12 | 2 | 2 | 37 | 13 | 80  | 28 |
| 112,075 | 3 | 1 | 38 | 12 | 2 | 2 | 36 | 12 | 79  | 27 |
| 112,076 | 3 | 1 | 38 | 12 | 2 | 2 | 35 | 13 | 78  | 28 |
| 112,077 | 3 | 1 | 37 | 13 | 2 | 2 | 34 | 13 | 76  | 29 |
| 112,078 | 3 | 1 | 37 | 13 | 2 | 2 | 34 | 12 | 76  | 28 |
| 112,079 | 3 | 1 | 37 | 13 | 2 | 2 | 34 | 10 | 76  | 26 |
| 112,080 | 3 | 2 | 37 | 12 | 2 | 2 | 34 | 10 | 76  | 26 |
| 112,081 | 3 | 2 | 37 | 12 | 2 | 2 | 34 | 10 | 76  | 26 |
| 112,082 | 3 | 2 | 37 | 12 | 2 | 2 | 34 | 10 | 76  | 26 |

|         |    |   |     |    |   |   |     |    |     |    |
|---------|----|---|-----|----|---|---|-----|----|-----|----|
| 112,083 | 3  | 2 | 37  | 12 | 1 | 2 | 33  | 10 | 74  | 26 |
| 112,084 | 3  | 2 | 37  | 11 | 1 | 2 | 34  | 9  | 75  | 24 |
| 112,085 | 3  | 2 | 37  | 11 | 1 | 2 | 34  | 9  | 75  | 24 |
| 112,086 | 5  | 2 | 39  | 11 | 1 | 2 | 35  | 9  | 80  | 24 |
| 112,087 | 5  | 2 | 37  | 11 | 1 | 2 | 34  | 9  | 77  | 24 |
| 112,088 | 6  | 2 | 56  | 11 | 1 | 2 | 55  | 9  | 118 | 24 |
| 112,089 | 9  | 2 | 69  | 9  | 1 | 2 | 70  | 9  | 149 | 22 |
| 112,090 | 9  | 2 | 71  | 9  | 1 | 2 | 73  | 10 | 154 | 23 |
| 112,091 | 9  | 3 | 69  | 9  | 1 | 2 | 69  | 10 | 148 | 24 |
| 112,092 | 9  | 3 | 70  | 9  | 1 | 2 | 70  | 10 | 150 | 24 |
| 112,093 | 10 | 3 | 73  | 11 | 1 | 2 | 71  | 12 | 155 | 28 |
| 112,094 | 9  | 3 | 72  | 11 | 1 | 2 | 70  | 12 | 152 | 28 |
| 112,095 | 9  | 3 | 73  | 10 | 1 | 2 | 68  | 12 | 151 | 27 |
| 112,096 | 9  | 3 | 63  | 10 | 1 | 2 | 65  | 12 | 138 | 27 |
| 112,097 | 9  | 3 | 56  | 10 | 1 | 2 | 63  | 13 | 129 | 28 |
| 112,098 | 9  | 3 | 55  | 10 | 1 | 2 | 60  | 13 | 125 | 28 |
| 112,099 | 9  | 3 | 52  | 10 | 1 | 2 | 57  | 13 | 119 | 28 |
| 112,100 | 9  | 3 | 54  | 10 | 1 | 2 | 62  | 13 | 126 | 28 |
| 112,101 | 12 | 4 | 62  | 10 | 1 | 2 | 65  | 13 | 140 | 29 |
| 112,102 | 12 | 4 | 62  | 10 | 1 | 2 | 65  | 13 | 140 | 29 |
| 112,103 | 12 | 4 | 63  | 11 | 1 | 2 | 67  | 13 | 143 | 30 |
| 112,104 | 12 | 4 | 62  | 12 | 1 | 2 | 70  | 15 | 145 | 33 |
| 112,105 | 12 | 4 | 62  | 13 | 1 | 2 | 70  | 16 | 145 | 35 |
| 112,106 | 14 | 4 | 68  | 13 | 1 | 2 | 73  | 16 | 156 | 35 |
| 112,107 | 13 | 4 | 68  | 13 | 1 | 2 | 75  | 16 | 157 | 35 |
| 112,108 | 13 | 4 | 75  | 14 | 2 | 2 | 78  | 16 | 168 | 36 |
| 112,109 | 13 | 4 | 72  | 14 | 2 | 2 | 73  | 16 | 160 | 36 |
| 112,110 | 13 | 5 | 86  | 13 | 3 | 2 | 91  | 15 | 193 | 35 |
| 112,111 | 13 | 5 | 86  | 13 | 3 | 2 | 91  | 15 | 193 | 35 |
| 112,112 | 13 | 5 | 91  | 13 | 3 | 2 | 93  | 15 | 200 | 35 |
| 112,113 | 13 | 5 | 95  | 13 | 3 | 1 | 102 | 15 | 213 | 34 |
| 112,114 | 13 | 5 | 99  | 12 | 3 | 1 | 113 | 15 | 228 | 33 |
| 112,115 | 12 | 6 | 105 | 11 | 3 | 0 | 122 | 14 | 242 | 31 |
| 112,116 | 12 | 6 | 105 | 11 | 3 | 0 | 122 | 14 | 242 | 31 |
| 112,117 | 12 | 6 | 106 | 10 | 3 | 0 | 124 | 13 | 245 | 29 |
| 112,118 | 12 | 6 | 106 | 10 | 3 | 0 | 124 | 13 | 245 | 29 |
| 112,119 | 12 | 6 | 107 | 10 | 3 | 0 | 124 | 13 | 246 | 29 |
| 112,120 | 12 | 5 | 107 | 10 | 3 | 0 | 124 | 12 | 246 | 27 |
| 112,121 | 12 | 5 | 107 | 10 | 3 | 0 | 124 | 12 | 246 | 27 |
| 112,122 | 12 | 5 | 107 | 9  | 3 | 0 | 124 | 9  | 246 | 23 |
| 112,123 | 12 | 5 | 107 | 9  | 3 | 0 | 122 | 9  | 244 | 23 |

|         |    |   |     |    |    |   |     |    |     |    |
|---------|----|---|-----|----|----|---|-----|----|-----|----|
| 112,124 | 13 | 5 | 109 | 9  | 3  | 0 | 120 | 9  | 245 | 23 |
| 112,125 | 13 | 5 | 109 | 9  | 3  | 0 | 120 | 9  | 245 | 23 |
| 112,126 | 13 | 5 | 111 | 9  | 3  | 0 | 120 | 9  | 247 | 23 |
| 112,127 | 13 | 5 | 111 | 9  | 3  | 0 | 120 | 8  | 247 | 22 |
| 112,128 | 13 | 5 | 111 | 8  | 3  | 0 | 120 | 8  | 247 | 21 |
| 112,129 | 13 | 5 | 111 | 8  | 3  | 0 | 120 | 8  | 247 | 21 |
| 112,130 | 13 | 5 | 111 | 8  | 3  | 0 | 120 | 8  | 247 | 21 |
| 112,131 | 13 | 4 | 111 | 8  | 3  | 0 | 120 | 8  | 247 | 20 |
| 112,132 | 13 | 4 | 111 | 9  | 3  | 0 | 120 | 10 | 247 | 23 |
| 112,133 | 13 | 4 | 111 | 9  | 3  | 0 | 120 | 10 | 247 | 23 |
| 112,134 | 13 | 4 | 111 | 9  | 3  | 0 | 120 | 10 | 247 | 23 |
| 112,135 | 13 | 4 | 111 | 10 | 3  | 0 | 119 | 10 | 246 | 24 |
| 112,136 | 13 | 4 | 111 | 10 | 3  | 0 | 118 | 11 | 245 | 25 |
| 112,137 | 11 | 4 | 112 | 10 | 3  | 0 | 118 | 11 | 244 | 25 |
| 112,138 | 10 | 4 | 113 | 10 | 3  | 0 | 118 | 11 | 244 | 25 |
| 112,139 | 10 | 4 | 96  | 10 | 3  | 0 | 97  | 11 | 206 | 25 |
| 112,140 | 7  | 4 | 85  | 10 | 3  | 0 | 82  | 11 | 177 | 25 |
| 112,141 | 8  | 3 | 90  | 11 | 3  | 0 | 80  | 10 | 181 | 24 |
| 112,142 | 8  | 3 | 89  | 11 | 3  | 0 | 80  | 10 | 180 | 24 |
| 112,143 | 8  | 3 | 94  | 9  | 3  | 0 | 79  | 10 | 184 | 22 |
| 112,144 | 7  | 3 | 91  | 7  | 3  | 0 | 77  | 10 | 178 | 20 |
| 112,145 | 10 | 3 | 111 | 7  | 6  | 0 | 84  | 10 | 211 | 20 |
| 112,146 | 12 | 3 | 129 | 7  | 6  | 0 | 90  | 10 | 237 | 20 |
| 112,147 | 12 | 3 | 129 | 7  | 5  | 1 | 90  | 10 | 236 | 21 |
| 112,148 | 45 | 3 | 287 | 8  | 11 | 1 | 176 | 9  | 519 | 21 |
| 112,149 | 46 | 3 | 306 | 8  | 17 | 1 | 201 | 9  | 570 | 21 |
| 112,150 | 46 | 3 | 326 | 8  | 18 | 1 | 201 | 9  | 591 | 21 |
| 112,151 | 51 | 3 | 379 | 8  | 23 | 1 | 247 | 9  | 700 | 21 |
| 112,152 | 48 | 2 | 373 | 9  | 23 | 1 | 243 | 9  | 687 | 21 |
| 112,153 | 48 | 2 | 373 | 10 | 23 | 1 | 241 | 9  | 685 | 22 |
| 112,154 | 48 | 2 | 373 | 11 | 23 | 1 | 238 | 9  | 682 | 23 |
| 112,155 | 48 | 2 | 373 | 10 | 23 | 1 | 238 | 9  | 682 | 22 |
| 112,156 | 48 | 2 | 373 | 10 | 23 | 1 | 238 | 7  | 682 | 20 |
| 112,157 | 46 | 2 | 367 | 10 | 23 | 1 | 235 | 7  | 671 | 20 |
| 112,158 | 46 | 2 | 367 | 10 | 23 | 1 | 233 | 7  | 669 | 20 |
| 112,159 | 46 | 1 | 360 | 9  | 22 | 1 | 229 | 7  | 657 | 18 |
| 112,160 | 46 | 1 | 359 | 10 | 22 | 1 | 225 | 7  | 652 | 19 |
| 112,161 | 46 | 1 | 345 | 10 | 21 | 1 | 211 | 7  | 623 | 19 |
| 112,162 | 46 | 1 | 341 | 10 | 21 | 1 | 209 | 7  | 617 | 19 |
| 112,163 | 46 | 1 | 337 | 10 | 21 | 1 | 201 | 7  | 605 | 19 |
| 112,164 | 46 | 1 | 333 | 10 | 21 | 1 | 191 | 7  | 591 | 19 |



|         |    |   |     |    |    |   |     |    |     |    |
|---------|----|---|-----|----|----|---|-----|----|-----|----|
| 112,165 | 46 | 1 | 334 | 10 | 21 | 1 | 190 | 8  | 591 | 20 |
| 112,166 | 46 | 0 | 328 | 10 | 21 | 1 | 181 | 8  | 576 | 19 |
| 112,167 | 46 | 0 | 327 | 13 | 21 | 1 | 179 | 8  | 573 | 22 |
| 112,168 | 46 | 0 | 328 | 14 | 21 | 1 | 180 | 8  | 575 | 23 |
| 112,169 | 46 | 0 | 328 | 15 | 21 | 1 | 180 | 8  | 575 | 24 |
| 112,170 | 46 | 0 | 327 | 15 | 21 | 1 | 180 | 8  | 574 | 24 |
| 112,171 | 46 | 0 | 327 | 16 | 21 | 1 | 180 | 8  | 574 | 25 |
| 112,172 | 46 | 0 | 327 | 16 | 21 | 1 | 180 | 8  | 574 | 25 |
| 112,173 | 46 | 0 | 327 | 16 | 21 | 1 | 180 | 8  | 574 | 25 |
| 112,174 | 46 | 0 | 327 | 16 | 21 | 1 | 180 | 10 | 574 | 27 |
| 112,175 | 45 | 0 | 325 | 16 | 21 | 1 | 180 | 12 | 571 | 29 |
| 112,176 | 45 | 0 | 324 | 16 | 21 | 1 | 180 | 12 | 570 | 29 |
| 112,177 | 45 | 1 | 323 | 16 | 21 | 1 | 180 | 13 | 569 | 31 |
| 112,178 | 45 | 1 | 323 | 16 | 21 | 1 | 180 | 13 | 569 | 31 |
| 112,179 | 45 | 1 | 323 | 16 | 21 | 1 | 180 | 13 | 569 | 31 |
| 112,180 | 45 | 1 | 323 | 16 | 21 | 1 | 180 | 13 | 569 | 31 |
| 112,181 | 45 | 1 | 327 | 16 | 21 | 1 | 182 | 13 | 575 | 31 |
| 112,182 | 45 | 1 | 327 | 16 | 21 | 1 | 182 | 13 | 575 | 31 |
| 112,183 | 45 | 1 | 327 | 15 | 21 | 1 | 182 | 11 | 575 | 28 |
| 112,184 | 45 | 1 | 327 | 15 | 21 | 1 | 182 | 11 | 575 | 28 |
| 112,185 | 45 | 2 | 328 | 15 | 21 | 1 | 182 | 11 | 576 | 29 |
| 112,186 | 45 | 2 | 328 | 14 | 21 | 1 | 183 | 11 | 577 | 28 |
| 112,187 | 46 | 2 | 330 | 14 | 21 | 1 | 183 | 10 | 580 | 27 |
| 112,188 | 46 | 3 | 325 | 14 | 21 | 1 | 182 | 10 | 574 | 28 |
| 112,189 | 46 | 3 | 325 | 14 | 21 | 1 | 182 | 10 | 574 | 28 |
| 112,190 | 46 | 3 | 322 | 14 | 21 | 1 | 182 | 10 | 571 | 28 |
| 112,191 | 46 | 3 | 320 | 14 | 21 | 1 | 181 | 10 | 568 | 28 |
| 112,192 | 45 | 3 | 313 | 13 | 21 | 1 | 180 | 10 | 559 | 27 |
| 112,193 | 46 | 3 | 322 | 15 | 22 | 1 | 182 | 10 | 572 | 29 |
| 112,194 | 46 | 3 | 316 | 15 | 22 | 1 | 182 | 12 | 566 | 31 |
| 112,195 | 46 | 3 | 309 | 17 | 22 | 1 | 182 | 10 | 559 | 31 |
| 112,196 | 46 | 3 | 370 | 17 | 19 | 1 | 194 | 11 | 629 | 32 |
| 112,197 | 56 | 3 | 439 | 17 | 23 | 1 | 238 | 12 | 756 | 33 |
| 112,198 | 40 | 3 | 350 | 17 | 20 | 0 | 175 | 13 | 585 | 33 |
| 112,199 | 24 | 3 | 294 | 16 | 18 | 0 | 163 | 13 | 499 | 32 |
| 112,200 | 26 | 3 | 297 | 16 | 12 | 0 | 150 | 13 | 485 | 32 |
| 112,201 | 26 | 3 | 276 | 16 | 11 | 0 | 147 | 13 | 460 | 32 |
| 112,202 | 21 | 3 | 223 | 16 | 6  | 0 | 103 | 13 | 353 | 32 |
| 112,203 | 21 | 3 | 221 | 15 | 6  | 0 | 103 | 13 | 351 | 31 |
| 112,204 | 21 | 3 | 221 | 12 | 6  | 0 | 103 | 13 | 351 | 28 |
| 112,205 | 21 | 3 | 221 | 12 | 6  | 0 | 103 | 13 | 351 | 28 |

|         |    |   |     |    |    |   |     |    |     |    |
|---------|----|---|-----|----|----|---|-----|----|-----|----|
| 112,206 | 22 | 3 | 221 | 11 | 6  | 0 | 103 | 11 | 352 | 25 |
| 112,207 | 22 | 3 | 221 | 11 | 6  | 0 | 103 | 11 | 352 | 25 |
| 112,208 | 22 | 3 | 221 | 11 | 6  | 0 | 103 | 11 | 352 | 25 |
| 112,209 | 22 | 3 | 221 | 11 | 6  | 0 | 103 | 11 | 352 | 25 |
| 112,210 | 23 | 3 | 221 | 10 | 6  | 0 | 103 | 11 | 353 | 24 |
| 112,211 | 23 | 3 | 221 | 10 | 6  | 0 | 103 | 11 | 353 | 24 |
| 112,212 | 23 | 3 | 221 | 10 | 6  | 0 | 103 | 12 | 353 | 25 |
| 112,213 | 23 | 3 | 220 | 10 | 6  | 0 | 103 | 12 | 352 | 25 |
| 112,214 | 23 | 3 | 220 | 11 | 6  | 0 | 102 | 12 | 351 | 26 |
| 112,215 | 23 | 3 | 219 | 11 | 6  | 0 | 103 | 12 | 351 | 26 |
| 112,216 | 23 | 3 | 219 | 11 | 6  | 0 | 103 | 11 | 351 | 25 |
| 112,217 | 23 | 3 | 219 | 8  | 6  | 0 | 103 | 11 | 351 | 22 |
| 112,218 | 23 | 3 | 219 | 8  | 6  | 0 | 103 | 11 | 351 | 22 |
| 112,219 | 23 | 3 | 218 | 7  | 6  | 0 | 102 | 11 | 349 | 21 |
| 112,220 | 23 | 3 | 219 | 6  | 6  | 0 | 102 | 11 | 350 | 20 |
| 112,221 | 23 | 3 | 219 | 5  | 6  | 0 | 102 | 11 | 350 | 19 |
| 112,222 | 23 | 3 | 219 | 5  | 6  | 0 | 102 | 11 | 350 | 19 |
| 112,223 | 23 | 3 | 219 | 5  | 6  | 0 | 102 | 11 | 350 | 19 |
| 112,224 | 23 | 3 | 219 | 5  | 6  | 0 | 102 | 11 | 350 | 19 |
| 112,225 | 23 | 3 | 220 | 5  | 6  | 0 | 102 | 9  | 351 | 17 |
| 112,226 | 23 | 3 | 221 | 5  | 6  | 0 | 102 | 7  | 352 | 15 |
| 112,227 | 23 | 3 | 222 | 5  | 6  | 0 | 102 | 7  | 353 | 15 |
| 112,228 | 23 | 2 | 222 | 5  | 6  | 0 | 102 | 6  | 353 | 13 |
| 112,229 | 23 | 2 | 222 | 5  | 6  | 0 | 102 | 6  | 353 | 13 |
| 112,230 | 23 | 2 | 221 | 5  | 6  | 0 | 101 | 6  | 351 | 13 |
| 112,231 | 23 | 2 | 218 | 5  | 6  | 0 | 101 | 6  | 348 | 13 |
| 112,232 | 23 | 2 | 218 | 5  | 6  | 0 | 100 | 6  | 347 | 13 |
| 112,233 | 23 | 2 | 220 | 5  | 6  | 0 | 101 | 6  | 350 | 13 |
| 112,234 | 23 | 2 | 222 | 5  | 6  | 0 | 101 | 6  | 352 | 13 |
| 112,235 | 23 | 1 | 221 | 5  | 6  | 0 | 101 | 6  | 351 | 12 |
| 112,236 | 24 | 1 | 227 | 5  | 6  | 0 | 103 | 6  | 360 | 12 |
| 112,237 | 24 | 1 | 227 | 5  | 6  | 0 | 103 | 6  | 360 | 12 |
| 112,238 | 23 | 1 | 227 | 5  | 6  | 0 | 104 | 6  | 360 | 12 |
| 112,239 | 23 | 0 | 232 | 5  | 7  | 0 | 106 | 6  | 368 | 11 |
| 112,240 | 23 | 0 | 232 | 5  | 7  | 0 | 107 | 6  | 369 | 11 |
| 112,241 | 23 | 0 | 232 | 5  | 7  | 0 | 107 | 6  | 369 | 11 |
| 112,242 | 22 | 0 | 230 | 5  | 6  | 0 | 105 | 6  | 363 | 11 |
| 112,243 | 20 | 0 | 245 | 3  | 10 | 0 | 117 | 6  | 392 | 9  |
| 112,244 | 20 | 0 | 250 | 2  | 12 | 0 | 118 | 5  | 400 | 7  |
| 112,245 | 20 | 0 | 250 | 3  | 12 | 1 | 117 | 7  | 399 | 11 |
| 112,246 | 19 | 0 | 237 | 3  | 12 | 2 | 113 | 9  | 381 | 14 |

|         |    |   |     |   |    |   |     |    |     |    |
|---------|----|---|-----|---|----|---|-----|----|-----|----|
| 112,247 | 19 | 0 | 180 | 4 | 12 | 4 | 101 | 10 | 312 | 18 |
| 112,248 | 7  | 0 | 91  | 6 | 8  | 5 | 48  | 11 | 154 | 22 |
| 112,249 | 6  | 0 | 91  | 6 | 8  | 5 | 50  | 10 | 155 | 21 |
| 112,250 | 6  | 0 | 80  | 6 | 7  | 5 | 40  | 10 | 133 | 21 |
| 112,251 | 3  | 0 | 58  | 6 | 7  | 5 | 28  | 10 | 96  | 21 |
| 112,252 | 3  | 0 | 59  | 6 | 7  | 5 | 27  | 10 | 96  | 21 |
| 112,253 | 3  | 0 | 66  | 7 | 7  | 5 | 31  | 10 | 107 | 22 |
| 112,254 | 3  | 0 | 66  | 7 | 7  | 5 | 31  | 10 | 107 | 22 |
| 112,255 | 3  | 0 | 68  | 8 | 7  | 5 | 32  | 11 | 110 | 24 |
| 112,256 | 3  | 0 | 72  | 8 | 7  | 5 | 33  | 11 | 115 | 24 |
| 112,257 | 3  | 0 | 76  | 8 | 7  | 5 | 36  | 11 | 122 | 24 |
| 112,258 | 3  | 0 | 78  | 8 | 7  | 5 | 38  | 11 | 126 | 24 |
| 112,259 | 3  | 0 | 78  | 8 | 7  | 5 | 38  | 11 | 126 | 24 |
| 112,260 | 3  | 0 | 79  | 8 | 7  | 5 | 39  | 11 | 128 | 24 |
| 112,261 | 2  | 0 | 79  | 8 | 7  | 5 | 39  | 11 | 127 | 24 |
| 112,262 | 2  | 0 | 79  | 8 | 7  | 5 | 39  | 11 | 127 | 24 |
| 112,263 | 2  | 0 | 79  | 8 | 7  | 5 | 39  | 10 | 127 | 23 |
| 112,264 | 2  | 0 | 79  | 8 | 7  | 5 | 39  | 10 | 127 | 23 |
| 112,265 | 2  | 0 | 81  | 7 | 7  | 5 | 40  | 10 | 130 | 22 |
| 112,266 | 2  | 0 | 81  | 7 | 7  | 5 | 39  | 10 | 129 | 22 |
| 112,267 | 3  | 0 | 100 | 7 | 8  | 5 | 48  | 10 | 159 | 22 |
| 112,268 | 5  | 0 | 119 | 7 | 11 | 5 | 52  | 10 | 187 | 22 |
| 112,269 | 6  | 0 | 121 | 7 | 12 | 5 | 58  | 10 | 197 | 22 |
| 112,270 | 6  | 0 | 121 | 7 | 12 | 5 | 58  | 11 | 197 | 23 |
| 112,271 | 6  | 0 | 122 | 7 | 12 | 5 | 58  | 11 | 198 | 23 |
| 112,272 | 6  | 0 | 123 | 7 | 12 | 5 | 58  | 11 | 199 | 23 |
| 112,273 | 6  | 0 | 123 | 7 | 12 | 5 | 58  | 11 | 199 | 23 |
| 112,274 | 6  | 0 | 124 | 7 | 12 | 5 | 58  | 11 | 200 | 23 |
| 112,275 | 6  | 0 | 123 | 7 | 12 | 5 | 58  | 12 | 199 | 24 |
| 112,276 | 6  | 0 | 123 | 7 | 12 | 5 | 58  | 12 | 199 | 24 |
| 112,277 | 6  | 0 | 122 | 7 | 12 | 5 | 58  | 13 | 198 | 25 |
| 112,278 | 6  | 0 | 121 | 8 | 12 | 5 | 58  | 13 | 197 | 26 |
| 112,279 | 6  | 0 | 121 | 8 | 12 | 5 | 58  | 13 | 197 | 26 |
| 112,280 | 6  | 0 | 121 | 8 | 12 | 5 | 58  | 13 | 197 | 26 |
| 112,281 | 6  | 0 | 121 | 8 | 12 | 5 | 58  | 13 | 197 | 26 |
| 112,282 | 6  | 0 | 121 | 8 | 12 | 5 | 58  | 14 | 197 | 27 |
| 112,283 | 6  | 0 | 119 | 8 | 12 | 5 | 59  | 14 | 196 | 27 |
| 112,284 | 6  | 0 | 119 | 9 | 12 | 5 | 58  | 14 | 195 | 28 |
| 112,285 | 6  | 0 | 117 | 9 | 12 | 5 | 58  | 14 | 193 | 28 |
| 112,286 | 6  | 0 | 117 | 9 | 12 | 5 | 58  | 14 | 193 | 28 |
| 112,287 | 5  | 1 | 111 | 9 | 12 | 5 | 56  | 14 | 184 | 29 |

|         |    |   |     |    |    |   |    |    |     |    |
|---------|----|---|-----|----|----|---|----|----|-----|----|
| 112,288 | 5  | 1 | 109 | 9  | 12 | 5 | 55 | 14 | 181 | 29 |
| 112,289 | 5  | 1 | 107 | 9  | 12 | 5 | 55 | 14 | 179 | 29 |
| 112,290 | 5  | 1 | 104 | 9  | 11 | 5 | 53 | 14 | 173 | 29 |
| 112,291 | 5  | 1 | 103 | 10 | 11 | 5 | 53 | 14 | 172 | 30 |
| 112,292 | 5  | 1 | 96  | 10 | 11 | 5 | 53 | 14 | 165 | 30 |
| 112,293 | 5  | 1 | 88  | 10 | 11 | 5 | 47 | 14 | 151 | 30 |
| 112,294 | 7  | 1 | 79  | 10 | 7  | 5 | 41 | 14 | 134 | 30 |
| 112,295 | 7  | 1 | 74  | 8  | 5  | 4 | 39 | 11 | 125 | 24 |
| 112,296 | 7  | 1 | 74  | 7  | 5  | 1 | 39 | 7  | 125 | 16 |
| 112,297 | 7  | 1 | 74  | 7  | 5  | 1 | 39 | 7  | 125 | 16 |
| 112,298 | 8  | 1 | 75  | 7  | 5  | 1 | 41 | 7  | 129 | 16 |
| 112,299 | 8  | 1 | 74  | 5  | 5  | 0 | 41 | 5  | 128 | 11 |
| 112,300 | 8  | 1 | 72  | 5  | 5  | 0 | 40 | 5  | 125 | 11 |
| 112,301 | 8  | 1 | 73  | 5  | 5  | 0 | 40 | 5  | 126 | 11 |
| 112,302 | 8  | 1 | 72  | 5  | 5  | 0 | 40 | 5  | 125 | 11 |
| 112,303 | 8  | 1 | 72  | 5  | 5  | 0 | 39 | 5  | 124 | 11 |
| 112,304 | 8  | 1 | 66  | 3  | 5  | 0 | 35 | 4  | 114 | 8  |
| 112,305 | 8  | 1 | 67  | 3  | 5  | 0 | 36 | 4  | 116 | 8  |
| 112,306 | 8  | 1 | 66  | 3  | 5  | 0 | 36 | 4  | 115 | 8  |
| 112,307 | 8  | 1 | 62  | 3  | 5  | 0 | 38 | 4  | 113 | 8  |
| 112,308 | 7  | 1 | 58  | 3  | 5  | 0 | 35 | 4  | 105 | 8  |
| 112,309 | 7  | 1 | 57  | 3  | 5  | 0 | 33 | 4  | 102 | 8  |
| 112,310 | 7  | 1 | 57  | 3  | 5  | 0 | 32 | 4  | 101 | 8  |
| 112,311 | 7  | 1 | 57  | 3  | 5  | 0 | 32 | 5  | 101 | 9  |
| 112,312 | 7  | 1 | 59  | 3  | 5  | 0 | 32 | 5  | 103 | 9  |
| 112,313 | 7  | 1 | 59  | 4  | 5  | 0 | 32 | 5  | 103 | 10 |
| 112,314 | 7  | 1 | 60  | 4  | 5  | 0 | 32 | 5  | 104 | 10 |
| 112,315 | 7  | 1 | 59  | 4  | 5  | 0 | 34 | 6  | 105 | 11 |
| 112,316 | 7  | 1 | 58  | 4  | 5  | 0 | 34 | 6  | 104 | 11 |
| 112,317 | 7  | 1 | 57  | 4  | 5  | 0 | 34 | 6  | 103 | 11 |
| 112,318 | 6  | 1 | 39  | 4  | 4  | 0 | 25 | 6  | 74  | 11 |
| 112,319 | 4  | 1 | 20  | 5  | 1  | 0 | 21 | 6  | 46  | 12 |
| 112,320 | 3  | 1 | 17  | 5  | 0  | 0 | 16 | 5  | 36  | 11 |
| 112,321 | 3  | 1 | 16  | 5  | 0  | 0 | 16 | 5  | 35  | 11 |
| 112,322 | 8  | 1 | 20  | 5  | 0  | 0 | 20 | 5  | 48  | 11 |
| 112,323 | 8  | 1 | 20  | 6  | 0  | 0 | 20 | 5  | 48  | 12 |
| 112,324 | 10 | 1 | 20  | 6  | 0  | 0 | 20 | 5  | 50  | 12 |
| 112,325 | 10 | 1 | 19  | 6  | 0  | 0 | 20 | 5  | 49  | 12 |
| 112,326 | 10 | 1 | 20  | 6  | 0  | 0 | 20 | 4  | 50  | 11 |
| 112,327 | 13 | 1 | 40  | 6  | 2  | 0 | 23 | 4  | 78  | 11 |
| 112,328 | 13 | 1 | 60  | 5  | 2  | 0 | 27 | 3  | 102 | 9  |

|         |    |   |     |   |    |   |    |   |     |   |
|---------|----|---|-----|---|----|---|----|---|-----|---|
| 112,329 | 14 | 1 | 63  | 5 | 2  | 0 | 29 | 3 | 108 | 9 |
| 112,330 | 14 | 1 | 64  | 5 | 3  | 0 | 29 | 3 | 110 | 9 |
| 112,331 | 14 | 1 | 64  | 5 | 3  | 0 | 29 | 3 | 110 | 9 |
| 112,332 | 15 | 1 | 69  | 5 | 3  | 0 | 31 | 2 | 118 | 8 |
| 112,333 | 15 | 1 | 69  | 5 | 3  | 0 | 31 | 2 | 118 | 8 |
| 112,334 | 15 | 1 | 69  | 5 | 3  | 0 | 30 | 2 | 117 | 8 |
| 112,335 | 15 | 1 | 69  | 4 | 3  | 0 | 31 | 2 | 118 | 7 |
| 112,336 | 15 | 1 | 70  | 4 | 3  | 0 | 31 | 2 | 119 | 7 |
| 112,337 | 15 | 1 | 70  | 4 | 3  | 0 | 31 | 2 | 119 | 7 |
| 112,338 | 15 | 0 | 70  | 4 | 3  | 0 | 30 | 2 | 118 | 6 |
| 112,339 | 15 | 0 | 70  | 4 | 3  | 0 | 30 | 2 | 118 | 6 |
| 112,340 | 16 | 0 | 71  | 4 | 3  | 0 | 30 | 2 | 120 | 6 |
| 112,341 | 16 | 0 | 71  | 3 | 3  | 0 | 30 | 2 | 120 | 5 |
| 112,342 | 16 | 0 | 71  | 3 | 3  | 0 | 30 | 2 | 120 | 5 |
| 112,343 | 16 | 0 | 71  | 3 | 3  | 0 | 29 | 2 | 119 | 5 |
| 112,344 | 15 | 0 | 74  | 3 | 3  | 0 | 32 | 2 | 124 | 5 |
| 112,345 | 15 | 0 | 75  | 3 | 3  | 0 | 33 | 2 | 126 | 5 |
| 112,346 | 15 | 0 | 75  | 3 | 3  | 0 | 35 | 2 | 128 | 5 |
| 112,347 | 15 | 0 | 75  | 3 | 3  | 0 | 35 | 2 | 128 | 5 |
| 112,348 | 15 | 1 | 75  | 3 | 3  | 0 | 35 | 2 | 128 | 6 |
| 112,349 | 14 | 1 | 77  | 3 | 3  | 0 | 32 | 2 | 126 | 6 |
| 112,350 | 18 | 1 | 92  | 3 | 3  | 0 | 39 | 2 | 152 | 6 |
| 112,351 | 18 | 1 | 92  | 3 | 3  | 0 | 39 | 2 | 152 | 6 |
| 112,352 | 19 | 1 | 95  | 3 | 4  | 0 | 39 | 2 | 157 | 6 |
| 112,353 | 19 | 1 | 101 | 3 | 5  | 0 | 40 | 2 | 165 | 6 |
| 112,354 | 24 | 1 | 110 | 3 | 11 | 0 | 49 | 2 | 194 | 6 |
| 112,355 | 24 | 1 | 109 | 3 | 11 | 0 | 49 | 2 | 193 | 6 |
| 112,356 | 29 | 1 | 127 | 3 | 14 | 0 | 64 | 2 | 234 | 6 |
| 112,357 | 29 | 1 | 129 | 3 | 14 | 0 | 63 | 2 | 235 | 6 |
| 112,358 | 29 | 1 | 129 | 3 | 14 | 0 | 60 | 2 | 232 | 6 |
| 112,359 | 29 | 1 | 129 | 3 | 14 | 0 | 60 | 2 | 232 | 6 |
| 112,360 | 29 | 1 | 128 | 3 | 14 | 0 | 60 | 2 | 231 | 6 |
| 112,361 | 29 | 1 | 128 | 3 | 14 | 0 | 60 | 2 | 231 | 6 |
| 112,362 | 29 | 1 | 127 | 3 | 14 | 0 | 60 | 1 | 230 | 5 |
| 112,363 | 29 | 1 | 125 | 3 | 14 | 0 | 60 | 1 | 228 | 5 |
| 112,364 | 29 | 1 | 125 | 2 | 14 | 0 | 60 | 1 | 228 | 4 |
| 112,365 | 29 | 1 | 124 | 2 | 14 | 0 | 60 | 0 | 227 | 3 |
| 112,366 | 29 | 1 | 124 | 2 | 14 | 0 | 60 | 0 | 227 | 3 |
| 112,367 | 29 | 1 | 124 | 2 | 14 | 0 | 59 | 0 | 226 | 3 |
| 112,368 | 29 | 1 | 124 | 2 | 14 | 0 | 59 | 0 | 226 | 3 |
| 112,369 | 29 | 1 | 124 | 1 | 14 | 0 | 59 | 0 | 226 | 2 |

|         |    |   |     |   |    |   |    |   |     |    |
|---------|----|---|-----|---|----|---|----|---|-----|----|
| 112,370 | 29 | 1 | 124 | 1 | 14 | 0 | 59 | 0 | 226 | 2  |
| 112,371 | 29 | 1 | 124 | 1 | 14 | 0 | 58 | 0 | 225 | 2  |
| 112,372 | 28 | 1 | 123 | 2 | 14 | 0 | 56 | 1 | 221 | 4  |
| 112,373 | 24 | 1 | 119 | 2 | 14 | 0 | 54 | 1 | 211 | 4  |
| 112,374 | 22 | 1 | 119 | 2 | 14 | 0 | 54 | 1 | 209 | 4  |
| 112,375 | 22 | 1 | 120 | 2 | 14 | 0 | 54 | 1 | 210 | 4  |
| 112,376 | 24 | 1 | 119 | 3 | 14 | 0 | 56 | 3 | 213 | 7  |
| 112,377 | 22 | 1 | 106 | 3 | 14 | 0 | 54 | 3 | 196 | 7  |
| 112,378 | 21 | 3 | 99  | 5 | 12 | 0 | 53 | 3 | 185 | 11 |
| 112,379 | 22 | 3 | 81  | 5 | 12 | 0 | 51 | 4 | 166 | 12 |
| 112,380 | 21 | 3 | 79  | 5 | 12 | 0 | 49 | 4 | 161 | 12 |
| 112,381 | 21 | 3 | 81  | 5 | 11 | 0 | 49 | 4 | 162 | 12 |
| 112,382 | 21 | 3 | 81  | 5 | 11 | 0 | 50 | 5 | 163 | 13 |
| 112,383 | 20 | 3 | 77  | 5 | 11 | 0 | 48 | 5 | 156 | 13 |
| 112,384 | 20 | 3 | 78  | 5 | 11 | 0 | 47 | 5 | 156 | 13 |
| 112,385 | 20 | 3 | 79  | 5 | 11 | 0 | 47 | 5 | 157 | 13 |
| 112,386 | 20 | 3 | 79  | 5 | 11 | 0 | 47 | 5 | 157 | 13 |
| 112,387 | 20 | 3 | 78  | 5 | 11 | 0 | 47 | 5 | 156 | 13 |
| 112,388 | 20 | 3 | 78  | 5 | 11 | 0 | 47 | 5 | 156 | 13 |
| 112,389 | 20 | 3 | 78  | 5 | 11 | 0 | 47 | 5 | 156 | 13 |
| 112,390 | 20 | 3 | 79  | 5 | 11 | 0 | 47 | 5 | 157 | 13 |
| 112,391 | 19 | 3 | 79  | 5 | 11 | 0 | 48 | 5 | 157 | 13 |
| 112,392 | 19 | 3 | 80  | 5 | 11 | 0 | 48 | 5 | 158 | 13 |
| 112,393 | 19 | 3 | 80  | 5 | 11 | 0 | 49 | 5 | 159 | 13 |
| 112,394 | 18 | 3 | 79  | 5 | 11 | 0 | 47 | 5 | 155 | 13 |
| 112,395 | 18 | 3 | 77  | 5 | 11 | 0 | 47 | 5 | 153 | 13 |
| 112,396 | 18 | 3 | 89  | 5 | 12 | 0 | 48 | 5 | 167 | 13 |
| 112,397 | 18 | 3 | 91  | 5 | 12 | 0 | 46 | 5 | 167 | 13 |
| 112,398 | 18 | 2 | 91  | 5 | 12 | 0 | 46 | 5 | 167 | 12 |
| 112,399 | 20 | 2 | 103 | 5 | 12 | 0 | 48 | 6 | 183 | 13 |
| 112,400 | 21 | 2 | 113 | 5 | 12 | 0 | 49 | 7 | 195 | 14 |
| 112,401 | 17 | 2 | 106 | 6 | 12 | 0 | 44 | 7 | 179 | 15 |
| 112,402 | 17 | 2 | 109 | 7 | 12 | 0 | 46 | 8 | 184 | 17 |
| 112,403 | 16 | 2 | 108 | 7 | 12 | 0 | 47 | 8 | 183 | 17 |
| 112,404 | 16 | 2 | 103 | 7 | 11 | 0 | 46 | 8 | 176 | 17 |
| 112,405 | 11 | 2 | 96  | 7 | 5  | 0 | 37 | 8 | 149 | 17 |
| 112,406 | 6  | 2 | 77  | 7 | 3  | 0 | 20 | 8 | 106 | 17 |
| 112,407 | 6  | 2 | 77  | 7 | 3  | 0 | 19 | 8 | 105 | 17 |
| 112,408 | 6  | 2 | 75  | 7 | 3  | 0 | 19 | 8 | 103 | 17 |
| 112,409 | 6  | 2 | 76  | 7 | 3  | 0 | 19 | 8 | 104 | 17 |
| 112,410 | 6  | 2 | 76  | 7 | 3  | 0 | 19 | 8 | 104 | 17 |

|         |   |   |     |   |    |   |    |   |     |    |
|---------|---|---|-----|---|----|---|----|---|-----|----|
| 112,411 | 6 | 2 | 76  | 7 | 3  | 0 | 19 | 8 | 104 | 17 |
| 112,412 | 6 | 2 | 76  | 7 | 3  | 0 | 20 | 8 | 105 | 17 |
| 112,413 | 6 | 2 | 76  | 7 | 3  | 0 | 20 | 8 | 105 | 17 |
| 112,414 | 6 | 2 | 76  | 7 | 3  | 0 | 20 | 8 | 105 | 17 |
| 112,415 | 6 | 3 | 76  | 7 | 3  | 0 | 20 | 7 | 105 | 17 |
| 112,416 | 6 | 3 | 76  | 7 | 3  | 0 | 21 | 7 | 106 | 17 |
| 112,417 | 6 | 3 | 76  | 7 | 5  | 0 | 22 | 7 | 109 | 17 |
| 112,418 | 6 | 3 | 76  | 7 | 5  | 0 | 22 | 7 | 109 | 17 |
| 112,419 | 6 | 3 | 76  | 7 | 5  | 0 | 22 | 7 | 109 | 17 |
| 112,420 | 6 | 3 | 76  | 7 | 5  | 0 | 22 | 7 | 109 | 17 |
| 112,421 | 6 | 3 | 76  | 7 | 5  | 0 | 22 | 7 | 109 | 17 |
| 112,422 | 6 | 3 | 76  | 7 | 5  | 0 | 22 | 7 | 109 | 17 |
| 112,423 | 6 | 3 | 76  | 6 | 5  | 0 | 22 | 7 | 109 | 16 |
| 112,424 | 6 | 3 | 76  | 6 | 5  | 0 | 22 | 7 | 109 | 16 |
| 112,425 | 6 | 3 | 76  | 4 | 5  | 0 | 22 | 5 | 109 | 12 |
| 112,426 | 6 | 3 | 75  | 4 | 5  | 0 | 22 | 5 | 108 | 12 |
| 112,427 | 4 | 3 | 75  | 4 | 5  | 0 | 20 | 5 | 104 | 12 |
| 112,428 | 4 | 1 | 75  | 2 | 6  | 0 | 20 | 4 | 105 | 7  |
| 112,429 | 4 | 1 | 75  | 3 | 6  | 0 | 20 | 4 | 105 | 8  |
| 112,430 | 3 | 1 | 73  | 3 | 6  | 0 | 18 | 4 | 100 | 8  |
| 112,431 | 3 | 1 | 72  | 3 | 6  | 0 | 18 | 4 | 99  | 8  |
| 112,432 | 3 | 1 | 69  | 3 | 6  | 0 | 18 | 6 | 96  | 10 |
| 112,433 | 3 | 1 | 68  | 4 | 6  | 0 | 17 | 5 | 94  | 10 |
| 112,434 | 4 | 1 | 69  | 4 | 6  | 0 | 17 | 5 | 96  | 10 |
| 112,435 | 4 | 1 | 68  | 4 | 6  | 0 | 18 | 5 | 96  | 10 |
| 112,436 | 4 | 1 | 68  | 4 | 6  | 0 | 18 | 5 | 96  | 10 |
| 112,437 | 4 | 1 | 68  | 4 | 6  | 0 | 18 | 5 | 96  | 10 |
| 112,438 | 4 | 1 | 68  | 4 | 6  | 0 | 18 | 5 | 96  | 10 |
| 112,439 | 4 | 1 | 68  | 4 | 6  | 0 | 18 | 5 | 96  | 10 |
| 112,440 | 4 | 1 | 68  | 4 | 6  | 0 | 20 | 5 | 98  | 10 |
| 112,441 | 4 | 1 | 67  | 4 | 6  | 0 | 20 | 5 | 97  | 10 |
| 112,442 | 4 | 1 | 67  | 4 | 6  | 0 | 19 | 5 | 96  | 10 |
| 112,443 | 4 | 1 | 68  | 4 | 7  | 0 | 21 | 5 | 100 | 10 |
| 112,444 | 5 | 1 | 79  | 4 | 9  | 0 | 28 | 5 | 121 | 10 |
| 112,445 | 5 | 1 | 83  | 4 | 10 | 0 | 31 | 5 | 129 | 10 |
| 112,446 | 5 | 1 | 77  | 4 | 10 | 0 | 30 | 5 | 122 | 10 |
| 112,447 | 5 | 1 | 70  | 4 | 9  | 0 | 29 | 5 | 113 | 10 |
| 112,448 | 5 | 1 | 95  | 4 | 11 | 0 | 48 | 5 | 159 | 10 |
| 112,449 | 5 | 1 | 111 | 4 | 11 | 0 | 55 | 5 | 182 | 10 |
| 112,450 | 2 | 1 | 99  | 4 | 11 | 0 | 53 | 4 | 165 | 9  |
| 112,451 | 2 | 1 | 87  | 4 | 11 | 0 | 55 | 3 | 155 | 8  |

|         |    |   |     |    |    |   |     |   |     |    |
|---------|----|---|-----|----|----|---|-----|---|-----|----|
| 112,452 | 2  | 1 | 79  | 3  | 11 | 0 | 53  | 3 | 145 | 7  |
| 112,453 | 2  | 2 | 76  | 2  | 11 | 0 | 52  | 2 | 141 | 6  |
| 112,454 | 2  | 2 | 73  | 3  | 10 | 0 | 51  | 2 | 136 | 7  |
| 112,455 | 2  | 2 | 72  | 3  | 10 | 0 | 51  | 2 | 135 | 7  |
| 112,456 | 2  | 2 | 69  | 3  | 10 | 0 | 51  | 2 | 132 | 7  |
| 112,457 | 2  | 2 | 71  | 3  | 9  | 0 | 51  | 2 | 133 | 7  |
| 112,458 | 2  | 3 | 75  | 3  | 9  | 0 | 53  | 2 | 139 | 8  |
| 112,459 | 2  | 4 | 77  | 3  | 9  | 0 | 54  | 2 | 142 | 9  |
| 112,460 | 2  | 4 | 77  | 3  | 9  | 0 | 54  | 2 | 142 | 9  |
| 112,461 | 3  | 4 | 86  | 3  | 9  | 0 | 66  | 2 | 164 | 9  |
| 112,462 | 3  | 4 | 88  | 3  | 9  | 0 | 68  | 2 | 168 | 9  |
| 112,463 | 6  | 4 | 93  | 3  | 10 | 0 | 81  | 2 | 190 | 9  |
| 112,464 | 6  | 4 | 93  | 3  | 10 | 0 | 81  | 2 | 190 | 9  |
| 112,465 | 6  | 4 | 93  | 3  | 10 | 0 | 80  | 2 | 189 | 9  |
| 112,466 | 6  | 3 | 93  | 3  | 10 | 0 | 80  | 2 | 189 | 8  |
| 112,467 | 6  | 3 | 93  | 3  | 9  | 0 | 80  | 3 | 188 | 9  |
| 112,468 | 6  | 3 | 93  | 3  | 8  | 0 | 79  | 3 | 186 | 9  |
| 112,469 | 6  | 3 | 93  | 12 | 8  | 0 | 79  | 3 | 186 | 18 |
| 112,470 | 6  | 3 | 93  | 12 | 8  | 0 | 79  | 3 | 186 | 18 |
| 112,471 | 6  | 3 | 94  | 12 | 8  | 0 | 79  | 3 | 187 | 18 |
| 112,472 | 8  | 3 | 95  | 12 | 8  | 0 | 85  | 3 | 196 | 18 |
| 112,473 | 8  | 3 | 95  | 12 | 8  | 0 | 85  | 3 | 196 | 18 |
| 112,474 | 8  | 3 | 97  | 12 | 8  | 0 | 85  | 3 | 198 | 18 |
| 112,475 | 8  | 3 | 97  | 12 | 8  | 0 | 85  | 3 | 198 | 18 |
| 112,476 | 8  | 3 | 99  | 13 | 8  | 0 | 91  | 3 | 206 | 19 |
| 112,477 | 8  | 3 | 99  | 13 | 8  | 0 | 91  | 3 | 206 | 19 |
| 112,478 | 8  | 3 | 103 | 13 | 7  | 0 | 93  | 3 | 211 | 19 |
| 112,479 | 8  | 3 | 103 | 13 | 7  | 0 | 93  | 3 | 211 | 19 |
| 112,480 | 8  | 3 | 103 | 13 | 7  | 0 | 93  | 3 | 211 | 19 |
| 112,481 | 8  | 3 | 103 | 14 | 7  | 0 | 93  | 4 | 211 | 21 |
| 112,482 | 8  | 5 | 105 | 14 | 7  | 0 | 93  | 4 | 213 | 23 |
| 112,483 | 9  | 5 | 105 | 15 | 7  | 0 | 93  | 2 | 214 | 22 |
| 112,484 | 9  | 5 | 108 | 14 | 7  | 0 | 97  | 2 | 221 | 21 |
| 112,485 | 8  | 5 | 107 | 14 | 7  | 1 | 96  | 2 | 218 | 22 |
| 112,486 | 8  | 5 | 109 | 14 | 7  | 1 | 98  | 2 | 222 | 22 |
| 112,487 | 8  | 5 | 109 | 14 | 7  | 1 | 98  | 2 | 222 | 22 |
| 112,488 | 10 | 5 | 119 | 14 | 7  | 1 | 101 | 2 | 237 | 22 |
| 112,489 | 10 | 6 | 119 | 14 | 7  | 1 | 101 | 2 | 237 | 23 |
| 112,490 | 10 | 6 | 119 | 14 | 7  | 1 | 101 | 2 | 237 | 23 |
| 112,491 | 26 | 6 | 431 | 14 | 28 | 1 | 275 | 2 | 760 | 23 |
| 112,492 | 27 | 7 | 463 | 14 | 29 | 1 | 315 | 3 | 834 | 25 |



|         |    |    |     |    |    |   |     |    |       |    |
|---------|----|----|-----|----|----|---|-----|----|-------|----|
| 112,493 | 27 | 7  | 463 | 14 | 29 | 1 | 314 | 3  | 833   | 25 |
| 112,494 | 28 | 7  | 476 | 16 | 29 | 1 | 317 | 3  | 850   | 27 |
| 112,495 | 27 | 7  | 465 | 17 | 27 | 1 | 308 | 3  | 827   | 28 |
| 112,496 | 27 | 7  | 458 | 19 | 26 | 2 | 304 | 4  | 815   | 32 |
| 112,497 | 27 | 7  | 453 | 19 | 25 | 3 | 292 | 5  | 797   | 34 |
| 112,498 | 27 | 9  | 448 | 20 | 25 | 3 | 290 | 6  | 790   | 38 |
| 112,499 | 27 | 9  | 431 | 20 | 24 | 3 | 285 | 6  | 767   | 38 |
| 112,500 | 29 | 10 | 415 | 20 | 27 | 3 | 278 | 6  | 749   | 39 |
| 112,501 | 29 | 10 | 415 | 22 | 27 | 3 | 278 | 8  | 749   | 43 |
| 112,502 | 29 | 10 | 414 | 22 | 27 | 3 | 275 | 8  | 745   | 43 |
| 112,503 | 29 | 10 | 414 | 23 | 27 | 3 | 275 | 8  | 745   | 44 |
| 112,504 | 29 | 9  | 420 | 23 | 27 | 3 | 281 | 8  | 757   | 43 |
| 112,505 | 29 | 9  | 420 | 22 | 27 | 3 | 281 | 8  | 757   | 42 |
| 112,506 | 29 | 9  | 420 | 23 | 27 | 3 | 281 | 8  | 757   | 43 |
| 112,507 | 29 | 9  | 420 | 23 | 27 | 4 | 281 | 8  | 757   | 44 |
| 112,508 | 29 | 9  | 419 | 23 | 27 | 4 | 281 | 9  | 756   | 45 |
| 112,509 | 29 | 8  | 417 | 23 | 27 | 4 | 279 | 9  | 752   | 44 |
| 112,510 | 34 | 7  | 453 | 23 | 29 | 4 | 311 | 9  | 827   | 43 |
| 112,511 | 34 | 7  | 455 | 23 | 29 | 4 | 314 | 9  | 832   | 43 |
| 112,512 | 36 | 7  | 452 | 23 | 29 | 4 | 303 | 9  | 820   | 43 |
| 112,513 | 36 | 7  | 450 | 23 | 29 | 4 | 300 | 9  | 815   | 43 |
| 112,514 | 43 | 7  | 501 | 23 | 33 | 4 | 343 | 9  | 920   | 43 |
| 112,515 | 43 | 7  | 501 | 23 | 33 | 4 | 343 | 9  | 920   | 43 |
| 112,516 | 45 | 7  | 529 | 23 | 36 | 4 | 348 | 9  | 958   | 43 |
| 112,517 | 45 | 7  | 537 | 23 | 38 | 4 | 351 | 9  | 971   | 43 |
| 112,518 | 45 | 7  | 540 | 23 | 38 | 4 | 356 | 8  | 979   | 42 |
| 112,519 | 46 | 7  | 556 | 23 | 41 | 4 | 370 | 8  | 1,013 | 42 |
| 112,520 | 46 | 7  | 579 | 14 | 42 | 4 | 379 | 8  | 1,046 | 33 |
| 112,521 | 46 | 7  | 580 | 14 | 42 | 4 | 379 | 8  | 1,047 | 33 |
| 112,522 | 46 | 7  | 580 | 14 | 42 | 4 | 378 | 8  | 1,046 | 33 |
| 112,523 | 44 | 7  | 579 | 14 | 42 | 4 | 374 | 12 | 1,039 | 37 |
| 112,524 | 44 | 7  | 579 | 17 | 42 | 4 | 374 | 12 | 1,039 | 40 |
| 112,525 | 44 | 7  | 577 | 18 | 42 | 4 | 374 | 12 | 1,037 | 41 |
| 112,526 | 44 | 7  | 577 | 18 | 42 | 4 | 373 | 12 | 1,036 | 41 |
| 112,527 | 44 | 8  | 575 | 17 | 42 | 4 | 368 | 12 | 1,029 | 41 |
| 112,528 | 44 | 8  | 575 | 18 | 42 | 4 | 369 | 14 | 1,030 | 44 |
| 112,529 | 44 | 8  | 573 | 17 | 42 | 4 | 367 | 14 | 1,026 | 43 |
| 112,530 | 44 | 8  | 573 | 17 | 42 | 4 | 368 | 14 | 1,027 | 43 |
| 112,531 | 44 | 8  | 576 | 17 | 42 | 4 | 369 | 14 | 1,031 | 43 |
| 112,532 | 44 | 8  | 594 | 17 | 42 | 4 | 380 | 13 | 1,060 | 42 |
| 112,533 | 47 | 6  | 611 | 16 | 45 | 5 | 401 | 13 | 1,104 | 40 |

|         |    |   |     |    |    |   |     |    |       |    |
|---------|----|---|-----|----|----|---|-----|----|-------|----|
| 112,534 | 46 | 6 | 611 | 16 | 45 | 5 | 401 | 13 | 1,103 | 40 |
| 112,535 | 47 | 6 | 612 | 17 | 46 | 4 | 404 | 14 | 1,109 | 41 |
| 112,536 | 47 | 6 | 611 | 17 | 46 | 4 | 403 | 14 | 1,107 | 41 |
| 112,537 | 47 | 6 | 662 | 19 | 50 | 4 | 446 | 17 | 1,205 | 46 |
| 112,538 | 47 | 6 | 679 | 21 | 50 | 6 | 454 | 22 | 1,230 | 55 |
| 112,539 | 50 | 6 | 739 | 22 | 53 | 6 | 501 | 23 | 1,343 | 57 |
| 112,540 | 49 | 5 | 701 | 22 | 51 | 6 | 476 | 24 | 1,277 | 57 |
| 112,541 | 39 | 5 | 529 | 22 | 43 | 6 | 390 | 24 | 1,001 | 57 |
| 112,542 | 36 | 5 | 448 | 22 | 34 | 6 | 336 | 25 | 854   | 58 |
| 112,543 | 35 | 4 | 416 | 22 | 33 | 6 | 295 | 25 | 779   | 57 |
| 112,544 | 34 | 5 | 404 | 22 | 33 | 6 | 294 | 25 | 765   | 58 |
| 112,545 | 34 | 5 | 417 | 19 | 33 | 6 | 295 | 26 | 779   | 56 |
| 112,546 | 34 | 5 | 417 | 19 | 33 | 6 | 295 | 26 | 779   | 56 |
| 112,547 | 34 | 5 | 426 | 17 | 33 | 4 | 307 | 24 | 800   | 50 |
| 112,548 | 34 | 5 | 426 | 17 | 33 | 4 | 308 | 25 | 801   | 51 |
| 112,549 | 34 | 3 | 428 | 16 | 30 | 4 | 311 | 24 | 803   | 47 |
| 112,550 | 34 | 3 | 429 | 16 | 30 | 4 | 311 | 24 | 804   | 47 |
| 112,551 | 33 | 2 | 430 | 16 | 30 | 4 | 311 | 24 | 804   | 46 |
| 112,552 | 33 | 2 | 433 | 14 | 30 | 4 | 314 | 22 | 810   | 42 |
| 112,553 | 33 | 2 | 433 | 14 | 30 | 4 | 315 | 22 | 811   | 42 |
| 112,554 | 33 | 2 | 428 | 13 | 30 | 4 | 309 | 22 | 800   | 41 |
| 112,555 | 33 | 2 | 428 | 13 | 30 | 4 | 309 | 22 | 800   | 41 |
| 112,556 | 33 | 2 | 430 | 12 | 30 | 4 | 309 | 22 | 802   | 40 |
| 112,557 | 33 | 2 | 429 | 12 | 30 | 4 | 309 | 22 | 801   | 40 |
| 112,558 | 33 | 2 | 429 | 12 | 30 | 3 | 309 | 21 | 801   | 38 |
| 112,559 | 33 | 2 | 431 | 12 | 30 | 3 | 310 | 21 | 804   | 38 |
| 112,560 | 33 | 2 | 442 | 12 | 30 | 3 | 311 | 21 | 816   | 38 |
| 112,561 | 28 | 2 | 404 | 12 | 28 | 3 | 278 | 21 | 738   | 38 |
| 112,562 | 28 | 2 | 405 | 12 | 31 | 3 | 278 | 21 | 742   | 38 |
| 112,563 | 25 | 2 | 401 | 13 | 31 | 3 | 277 | 21 | 734   | 39 |
| 112,564 | 25 | 2 | 401 | 13 | 31 | 3 | 277 | 21 | 734   | 39 |
| 112,565 | 15 | 2 | 348 | 13 | 26 | 3 | 223 | 21 | 612   | 39 |
| 112,566 | 13 | 2 | 321 | 13 | 23 | 3 | 218 | 21 | 575   | 39 |
| 112,567 | 13 | 2 | 314 | 13 | 21 | 3 | 215 | 21 | 563   | 39 |
| 112,568 | 13 | 2 | 311 | 13 | 21 | 3 | 211 | 21 | 556   | 39 |
| 112,569 | 12 | 2 | 295 | 14 | 18 | 3 | 196 | 21 | 521   | 40 |
| 112,570 | 12 | 2 | 284 | 14 | 18 | 3 | 188 | 21 | 502   | 40 |
| 112,571 | 12 | 2 | 272 | 14 | 17 | 3 | 187 | 21 | 488   | 40 |
| 112,572 | 12 | 2 | 270 | 14 | 17 | 3 | 187 | 21 | 486   | 40 |
| 112,573 | 13 | 2 | 270 | 14 | 17 | 3 | 187 | 21 | 487   | 40 |
| 112,574 | 13 | 2 | 271 | 14 | 17 | 3 | 186 | 17 | 487   | 36 |

|         |     |   |     |    |    |   |     |    |       |    |
|---------|-----|---|-----|----|----|---|-----|----|-------|----|
| 112,575 | 13  | 2 | 271 | 10 | 17 | 3 | 186 | 17 | 487   | 32 |
| 112,576 | 13  | 2 | 271 | 10 | 17 | 3 | 186 | 17 | 487   | 32 |
| 112,577 | 13  | 2 | 271 | 11 | 17 | 3 | 185 | 17 | 486   | 33 |
| 112,578 | 13  | 1 | 271 | 11 | 17 | 3 | 184 | 17 | 485   | 32 |
| 112,579 | 15  | 1 | 280 | 10 | 18 | 3 | 185 | 15 | 498   | 29 |
| 112,580 | 16  | 1 | 314 | 10 | 18 | 3 | 188 | 15 | 536   | 29 |
| 112,581 | 16  | 1 | 319 | 10 | 18 | 3 | 187 | 15 | 540   | 29 |
| 112,582 | 17  | 1 | 357 | 9  | 21 | 2 | 184 | 15 | 579   | 27 |
| 112,583 | 29  | 1 | 395 | 10 | 23 | 2 | 210 | 15 | 657   | 28 |
| 112,584 | 33  | 1 | 409 | 10 | 22 | 2 | 208 | 15 | 672   | 28 |
| 112,585 | 33  | 1 | 437 | 10 | 22 | 2 | 211 | 15 | 703   | 28 |
| 112,586 | 46  | 1 | 544 | 9  | 29 | 2 | 261 | 14 | 880   | 26 |
| 112,587 | 58  | 1 | 632 | 12 | 30 | 2 | 285 | 14 | 1,005 | 29 |
| 112,588 | 60  | 1 | 638 | 8  | 27 | 0 | 271 | 6  | 996   | 15 |
| 112,589 | 74  | 1 | 644 | 8  | 27 | 0 | 298 | 6  | 1,043 | 15 |
| 112,590 | 72  | 1 | 592 | 7  | 24 | 0 | 260 | 5  | 948   | 13 |
| 112,591 | 70  | 1 | 575 | 7  | 23 | 0 | 253 | 4  | 921   | 12 |
| 112,592 | 70  | 1 | 577 | 7  | 23 | 0 | 259 | 4  | 929   | 12 |
| 112,593 | 70  | 1 | 573 | 7  | 22 | 0 | 259 | 3  | 924   | 11 |
| 112,594 | 70  | 1 | 573 | 7  | 22 | 0 | 257 | 2  | 922   | 10 |
| 112,595 | 70  | 0 | 569 | 7  | 21 | 0 | 257 | 2  | 917   | 9  |
| 112,596 | 70  | 0 | 568 | 7  | 21 | 0 | 255 | 1  | 914   | 8  |
| 112,597 | 70  | 0 | 572 | 7  | 21 | 0 | 256 | 1  | 919   | 8  |
| 112,598 | 70  | 0 | 563 | 7  | 21 | 0 | 244 | 1  | 898   | 8  |
| 112,599 | 70  | 0 | 561 | 7  | 21 | 0 | 243 | 0  | 895   | 7  |
| 112,600 | 70  | 0 | 566 | 7  | 21 | 0 | 247 | 0  | 904   | 7  |
| 112,601 | 74  | 0 | 572 | 7  | 21 | 0 | 247 | 0  | 914   | 7  |
| 112,602 | 75  | 0 | 572 | 7  | 21 | 0 | 246 | 0  | 914   | 7  |
| 112,603 | 77  | 0 | 571 | 7  | 21 | 0 | 245 | 0  | 914   | 7  |
| 112,604 | 77  | 0 | 575 | 7  | 21 | 0 | 248 | 1  | 921   | 8  |
| 112,605 | 84  | 0 | 602 | 7  | 21 | 0 | 262 | 1  | 969   | 8  |
| 112,606 | 84  | 0 | 600 | 7  | 21 | 0 | 262 | 1  | 967   | 8  |
| 112,607 | 85  | 0 | 611 | 7  | 21 | 0 | 268 | 1  | 985   | 8  |
| 112,608 | 100 | 0 | 651 | 7  | 24 | 0 | 301 | 1  | 1,076 | 8  |
| 112,609 | 104 | 0 | 664 | 7  | 25 | 0 | 322 | 1  | 1,115 | 8  |
| 112,610 | 104 | 0 | 665 | 7  | 25 | 0 | 322 | 1  | 1,116 | 8  |
| 112,611 | 109 | 0 | 669 | 7  | 25 | 0 | 347 | 1  | 1,150 | 8  |
| 112,612 | 110 | 1 | 691 | 8  | 22 | 0 | 373 | 1  | 1,196 | 10 |
| 112,613 | 110 | 1 | 690 | 8  | 22 | 0 | 377 | 1  | 1,199 | 10 |
| 112,614 | 110 | 1 | 689 | 7  | 22 | 0 | 380 | 1  | 1,201 | 9  |
| 112,615 | 110 | 1 | 689 | 7  | 22 | 0 | 380 | 1  | 1,201 | 9  |

|         |     |   |     |   |    |   |     |   |       |   |
|---------|-----|---|-----|---|----|---|-----|---|-------|---|
| 112,616 | 110 | 1 | 686 | 7 | 22 | 0 | 378 | 1 | 1,196 | 9 |
| 112,617 | 110 | 1 | 685 | 7 | 22 | 0 | 378 | 1 | 1,195 | 9 |
| 112,618 | 110 | 1 | 684 | 7 | 22 | 0 | 378 | 1 | 1,194 | 9 |
| 112,619 | 116 | 1 | 719 | 7 | 23 | 0 | 415 | 1 | 1,273 | 9 |
| 112,620 | 117 | 1 | 719 | 6 | 23 | 0 | 415 | 1 | 1,274 | 8 |
| 112,621 | 119 | 1 | 735 | 6 | 24 | 0 | 432 | 1 | 1,310 | 8 |
| 112,622 | 119 | 1 | 739 | 6 | 26 | 0 | 437 | 1 | 1,321 | 8 |
| 112,623 | 118 | 1 | 739 | 6 | 26 | 0 | 437 | 1 | 1,320 | 8 |
| 112,624 | 118 | 1 | 738 | 6 | 26 | 0 | 437 | 1 | 1,319 | 8 |
| 112,625 | 118 | 1 | 738 | 6 | 26 | 0 | 437 | 1 | 1,319 | 8 |
| 112,626 | 121 | 1 | 741 | 6 | 27 | 0 | 441 | 1 | 1,330 | 8 |
| 112,627 | 121 | 1 | 741 | 6 | 27 | 0 | 441 | 1 | 1,330 | 8 |
| 112,628 | 120 | 1 | 734 | 5 | 27 | 0 | 441 | 1 | 1,322 | 7 |
| 112,629 | 119 | 1 | 731 | 5 | 26 | 0 | 440 | 1 | 1,316 | 7 |
| 112,630 | 118 | 1 | 701 | 5 | 26 | 0 | 438 | 1 | 1,283 | 7 |
| 112,631 | 120 | 1 | 701 | 5 | 29 | 1 | 440 | 1 | 1,290 | 8 |
| 112,632 | 121 | 1 | 702 | 5 | 29 | 1 | 439 | 1 | 1,291 | 8 |
| 112,633 | 120 | 1 | 657 | 5 | 26 | 1 | 432 | 1 | 1,235 | 8 |
| 112,634 | 108 | 1 | 617 | 4 | 24 | 1 | 405 | 1 | 1,154 | 7 |
| 112,635 | 114 | 1 | 645 | 4 | 30 | 1 | 430 | 1 | 1,219 | 7 |
| 112,636 | 116 | 1 | 632 | 4 | 29 | 1 | 432 | 1 | 1,209 | 7 |
| 112,637 | 110 | 1 | 536 | 4 | 25 | 1 | 402 | 1 | 1,073 | 7 |
| 112,638 | 99  | 1 | 452 | 1 | 24 | 1 | 383 | 1 | 958   | 4 |
| 112,639 | 97  | 1 | 397 | 1 | 23 | 1 | 353 | 1 | 870   | 4 |
| 112,640 | 103 | 1 | 437 | 1 | 35 | 1 | 437 | 1 | 1,012 | 4 |
| 112,641 | 102 | 1 | 440 | 1 | 38 | 1 | 462 | 1 | 1,042 | 4 |
| 112,642 | 102 | 1 | 447 | 1 | 39 | 1 | 468 | 1 | 1,056 | 4 |
| 112,643 | 102 | 1 | 449 | 1 | 40 | 1 | 471 | 1 | 1,062 | 4 |
| 112,644 | 102 | 1 | 464 | 1 | 40 | 1 | 481 | 2 | 1,087 | 5 |
| 112,645 | 104 | 1 | 479 | 1 | 42 | 1 | 498 | 2 | 1,123 | 5 |
| 112,646 | 104 | 2 | 478 | 1 | 42 | 1 | 498 | 2 | 1,122 | 6 |
| 112,647 | 106 | 2 | 500 | 2 | 42 | 1 | 507 | 2 | 1,155 | 7 |
| 112,648 | 106 | 2 | 506 | 2 | 42 | 1 | 514 | 2 | 1,168 | 7 |
| 112,649 | 106 | 2 | 506 | 2 | 42 | 1 | 514 | 2 | 1,168 | 7 |
| 112,650 | 111 | 2 | 532 | 2 | 46 | 1 | 526 | 2 | 1,215 | 7 |
| 112,651 | 107 | 2 | 532 | 2 | 46 | 1 | 526 | 2 | 1,211 | 7 |
| 112,652 | 107 | 2 | 529 | 2 | 46 | 1 | 526 | 2 | 1,208 | 7 |
| 112,653 | 108 | 2 | 568 | 2 | 48 | 1 | 554 | 2 | 1,278 | 7 |
| 112,654 | 116 | 2 | 640 | 2 | 49 | 1 | 586 | 1 | 1,391 | 6 |
| 112,655 | 116 | 2 | 636 | 2 | 49 | 1 | 582 | 1 | 1,383 | 6 |
| 112,656 | 119 | 2 | 898 | 2 | 77 | 1 | 793 | 1 | 1,887 | 6 |

|         |     |   |     |   |    |   |     |   |       |   |
|---------|-----|---|-----|---|----|---|-----|---|-------|---|
| 112,657 | 118 | 2 | 910 | 2 | 79 | 1 | 800 | 1 | 1,907 | 6 |
| 112,658 | 104 | 2 | 879 | 2 | 77 | 1 | 780 | 1 | 1,840 | 6 |
| 112,659 | 103 | 2 | 884 | 2 | 77 | 1 | 782 | 1 | 1,846 | 6 |
| 112,660 | 99  | 1 | 870 | 1 | 76 | 1 | 761 | 1 | 1,806 | 4 |
| 112,661 | 99  | 1 | 868 | 1 | 76 | 1 | 760 | 1 | 1,803 | 4 |
| 112,662 | 96  | 1 | 855 | 1 | 76 | 1 | 737 | 1 | 1,764 | 4 |
| 112,663 | 95  | 2 | 833 | 1 | 76 | 1 | 709 | 1 | 1,713 | 5 |
| 112,664 | 96  | 2 | 833 | 1 | 76 | 1 | 705 | 1 | 1,710 | 5 |
| 112,665 | 96  | 2 | 834 | 1 | 76 | 1 | 706 | 1 | 1,712 | 5 |
| 112,666 | 97  | 2 | 836 | 1 | 76 | 1 | 709 | 1 | 1,718 | 5 |
| 112,667 | 105 | 2 | 839 | 1 | 77 | 1 | 716 | 1 | 1,737 | 5 |
| 112,668 | 106 | 2 | 836 | 1 | 78 | 1 | 718 | 1 | 1,738 | 5 |
| 112,669 | 104 | 2 | 823 | 1 | 78 | 1 | 702 | 1 | 1,707 | 5 |
| 112,670 | 104 | 2 | 841 | 1 | 79 | 1 | 720 | 1 | 1,744 | 5 |
| 112,671 | 103 | 2 | 861 | 1 | 81 | 1 | 741 | 1 | 1,786 | 5 |
| 112,672 | 103 | 2 | 889 | 1 | 82 | 1 | 773 | 1 | 1,847 | 5 |
| 112,673 | 105 | 2 | 922 | 1 | 83 | 1 | 793 | 1 | 1,903 | 5 |
| 112,674 | 102 | 2 | 920 | 1 | 82 | 1 | 791 | 1 | 1,895 | 5 |
| 112,675 | 102 | 2 | 919 | 1 | 82 | 1 | 791 | 1 | 1,894 | 5 |
| 112,676 | 102 | 2 | 923 | 1 | 82 | 1 | 793 | 1 | 1,900 | 5 |
| 112,677 | 104 | 2 | 927 | 1 | 82 | 1 | 796 | 1 | 1,909 | 5 |
| 112,678 | 104 | 2 | 927 | 1 | 82 | 1 | 796 | 1 | 1,909 | 5 |
| 112,679 | 104 | 2 | 927 | 1 | 82 | 1 | 796 | 1 | 1,909 | 5 |
| 112,680 | 103 | 2 | 924 | 1 | 80 | 1 | 796 | 1 | 1,903 | 5 |
| 112,681 | 106 | 2 | 950 | 2 | 81 | 1 | 811 | 1 | 1,948 | 6 |
| 112,682 | 106 | 2 | 949 | 2 | 81 | 0 | 812 | 1 | 1,948 | 5 |
| 112,683 | 105 | 2 | 943 | 2 | 81 | 0 | 812 | 1 | 1,941 | 5 |
| 112,684 | 105 | 2 | 934 | 2 | 81 | 0 | 811 | 1 | 1,931 | 5 |
| 112,685 | 97  | 2 | 899 | 2 | 77 | 0 | 779 | 1 | 1,852 | 5 |
| 112,686 | 92  | 2 | 873 | 2 | 73 | 0 | 767 | 1 | 1,805 | 5 |
| 112,687 | 89  | 2 | 857 | 2 | 73 | 0 | 758 | 1 | 1,777 | 5 |
| 112,688 | 82  | 2 | 843 | 2 | 70 | 0 | 738 | 1 | 1,733 | 5 |
| 112,689 | 81  | 2 | 836 | 2 | 70 | 0 | 734 | 1 | 1,721 | 5 |
| 112,690 | 61  | 2 | 778 | 2 | 58 | 0 | 613 | 1 | 1,510 | 5 |
| 112,691 | 61  | 2 | 779 | 2 | 58 | 0 | 614 | 1 | 1,512 | 5 |
| 112,692 | 59  | 2 | 760 | 2 | 55 | 0 | 580 | 2 | 1,454 | 6 |
| 112,693 | 60  | 2 | 767 | 2 | 56 | 0 | 585 | 3 | 1,468 | 7 |
| 112,694 | 60  | 2 | 767 | 2 | 56 | 0 | 578 | 2 | 1,461 | 6 |
| 112,695 | 60  | 2 | 752 | 2 | 56 | 0 | 568 | 2 | 1,436 | 6 |
| 112,696 | 58  | 2 | 732 | 2 | 54 | 0 | 550 | 2 | 1,394 | 6 |
| 112,697 | 57  | 1 | 713 | 1 | 54 | 0 | 552 | 2 | 1,376 | 4 |

|         |    |   |     |    |    |   |     |   |       |    |
|---------|----|---|-----|----|----|---|-----|---|-------|----|
| 112,698 | 57 | 1 | 712 | 1  | 54 | 0 | 552 | 2 | 1,375 | 4  |
| 112,699 | 57 | 1 | 704 | 1  | 54 | 0 | 545 | 2 | 1,360 | 4  |
| 112,700 | 52 | 1 | 680 | 3  | 51 | 0 | 535 | 2 | 1,318 | 6  |
| 112,701 | 52 | 1 | 680 | 3  | 52 | 0 | 539 | 2 | 1,323 | 6  |
| 112,702 | 52 | 1 | 683 | 5  | 52 | 0 | 545 | 2 | 1,332 | 8  |
| 112,703 | 50 | 1 | 649 | 5  | 50 | 0 | 520 | 4 | 1,269 | 10 |
| 112,704 | 44 | 1 | 616 | 5  | 49 | 0 | 514 | 4 | 1,223 | 10 |
| 112,705 | 40 | 1 | 576 | 9  | 49 | 0 | 491 | 4 | 1,156 | 14 |
| 112,706 | 34 | 1 | 362 | 9  | 31 | 0 | 375 | 4 | 802   | 14 |
| 112,707 | 30 | 1 | 286 | 9  | 20 | 0 | 260 | 4 | 596   | 14 |
| 112,708 | 30 | 1 | 263 | 9  | 18 | 0 | 249 | 4 | 560   | 14 |
| 112,709 | 30 | 1 | 257 | 9  | 17 | 0 | 238 | 4 | 542   | 14 |
| 112,710 | 30 | 1 | 249 | 9  | 17 | 0 | 234 | 4 | 530   | 14 |
| 112,711 | 30 | 1 | 249 | 9  | 17 | 0 | 234 | 4 | 530   | 14 |
| 112,712 | 30 | 1 | 248 | 9  | 17 | 0 | 234 | 4 | 529   | 14 |
| 112,713 | 28 | 1 | 243 | 9  | 17 | 0 | 231 | 4 | 519   | 14 |
| 112,714 | 27 | 0 | 241 | 9  | 17 | 0 | 232 | 4 | 517   | 13 |
| 112,715 | 27 | 0 | 242 | 10 | 17 | 0 | 232 | 4 | 518   | 14 |
| 112,716 | 27 | 0 | 249 | 10 | 18 | 0 | 234 | 4 | 528   | 14 |
| 112,717 | 26 | 0 | 248 | 11 | 18 | 0 | 231 | 4 | 523   | 15 |
| 112,718 | 17 | 0 | 243 | 11 | 17 | 0 | 224 | 5 | 501   | 16 |
| 112,719 | 16 | 0 | 238 | 11 | 16 | 0 | 219 | 5 | 489   | 16 |
| 112,720 | 14 | 0 | 229 | 11 | 15 | 0 | 208 | 5 | 466   | 16 |
| 112,721 | 13 | 0 | 211 | 11 | 14 | 0 | 186 | 5 | 424   | 16 |
| 112,722 | 13 | 0 | 191 | 11 | 13 | 0 | 166 | 5 | 383   | 16 |
| 112,723 | 11 | 0 | 149 | 11 | 11 | 0 | 118 | 6 | 289   | 17 |
| 112,724 | 9  | 0 | 112 | 12 | 8  | 0 | 93  | 6 | 222   | 18 |
| 112,725 | 9  | 0 | 111 | 12 | 8  | 0 | 96  | 6 | 224   | 18 |
| 112,726 | 9  | 0 | 108 | 13 | 8  | 0 | 97  | 6 | 222   | 19 |
| 112,727 | 9  | 0 | 123 | 13 | 8  | 0 | 107 | 6 | 247   | 19 |
| 112,728 | 7  | 0 | 120 | 13 | 8  | 0 | 106 | 6 | 241   | 19 |
| 112,729 | 3  | 0 | 107 | 13 | 6  | 0 | 101 | 6 | 217   | 19 |
| 112,730 | 4  | 0 | 106 | 13 | 6  | 0 | 97  | 6 | 213   | 19 |
| 112,731 | 4  | 0 | 100 | 13 | 6  | 0 | 91  | 6 | 201   | 19 |
| 112,732 | 4  | 0 | 98  | 12 | 6  | 0 | 90  | 6 | 198   | 18 |
| 112,733 | 13 | 0 | 136 | 12 | 11 | 0 | 112 | 6 | 272   | 18 |
| 112,734 | 13 | 0 | 136 | 12 | 11 | 0 | 112 | 6 | 272   | 18 |
| 112,735 | 13 | 0 | 140 | 12 | 11 | 0 | 113 | 6 | 277   | 18 |
| 112,736 | 15 | 0 | 161 | 12 | 13 | 0 | 122 | 6 | 311   | 18 |
| 112,737 | 15 | 0 | 161 | 12 | 13 | 0 | 122 | 6 | 311   | 18 |
| 112,738 | 20 | 0 | 227 | 12 | 17 | 0 | 132 | 6 | 396   | 18 |

|         |     |   |       |    |     |   |       |   |       |    |
|---------|-----|---|-------|----|-----|---|-------|---|-------|----|
| 112,739 | 20  | 0 | 230   | 13 | 17  | 0 | 133   | 7 | 400   | 20 |
| 112,740 | 38  | 0 | 371   | 13 | 41  | 0 | 277   | 7 | 727   | 20 |
| 112,741 | 39  | 0 | 379   | 14 | 41  | 0 | 284   | 7 | 743   | 21 |
| 112,742 | 39  | 0 | 400   | 14 | 42  | 0 | 318   | 7 | 799   | 21 |
| 112,743 | 42  | 0 | 428   | 14 | 44  | 0 | 331   | 6 | 845   | 20 |
| 112,744 | 42  | 0 | 423   | 14 | 45  | 0 | 332   | 5 | 842   | 19 |
| 112,745 | 42  | 0 | 419   | 14 | 44  | 0 | 327   | 5 | 832   | 19 |
| 112,746 | 41  | 0 | 419   | 14 | 45  | 0 | 325   | 5 | 830   | 19 |
| 112,747 | 41  | 0 | 419   | 14 | 45  | 0 | 325   | 5 | 830   | 19 |
| 112,748 | 41  | 0 | 425   | 14 | 45  | 0 | 330   | 5 | 841   | 19 |
| 112,749 | 50  | 0 | 473   | 16 | 46  | 1 | 353   | 5 | 922   | 22 |
| 112,750 | 49  | 0 | 470   | 16 | 46  | 2 | 351   | 5 | 916   | 23 |
| 112,751 | 51  | 1 | 542   | 21 | 52  | 2 | 404   | 5 | 1,049 | 29 |
| 112,752 | 53  | 1 | 635   | 23 | 56  | 2 | 466   | 5 | 1,210 | 31 |
| 112,753 | 53  | 1 | 647   | 21 | 56  | 2 | 470   | 5 | 1,226 | 29 |
| 112,754 | 53  | 2 | 645   | 24 | 56  | 3 | 469   | 5 | 1,223 | 34 |
| 112,755 | 53  | 2 | 645   | 24 | 56  | 3 | 466   | 5 | 1,220 | 34 |
| 112,756 | 53  | 2 | 647   | 20 | 56  | 3 | 466   | 5 | 1,222 | 30 |
| 112,757 | 53  | 2 | 647   | 20 | 56  | 3 | 466   | 5 | 1,222 | 30 |
| 112,758 | 53  | 2 | 653   | 20 | 56  | 3 | 468   | 5 | 1,230 | 30 |
| 112,759 | 53  | 2 | 673   | 20 | 56  | 3 | 472   | 5 | 1,254 | 30 |
| 112,760 | 53  | 2 | 673   | 20 | 56  | 3 | 472   | 5 | 1,254 | 30 |
| 112,761 | 57  | 2 | 712   | 20 | 60  | 4 | 494   | 5 | 1,323 | 31 |
| 112,762 | 58  | 2 | 726   | 20 | 61  | 4 | 502   | 5 | 1,347 | 31 |
| 112,763 | 84  | 2 | 835   | 20 | 64  | 4 | 584   | 6 | 1,567 | 32 |
| 112,764 | 118 | 2 | 1,324 | 20 | 91  | 4 | 874   | 6 | 2,407 | 32 |
| 112,765 | 122 | 2 | 1,376 | 21 | 100 | 4 | 951   | 6 | 2,549 | 33 |
| 112,766 | 122 | 2 | 1,402 | 20 | 101 | 4 | 957   | 6 | 2,582 | 32 |
| 112,767 | 122 | 2 | 1,397 | 20 | 100 | 4 | 951   | 6 | 2,570 | 32 |
| 112,768 | 122 | 2 | 1,424 | 19 | 101 | 4 | 969   | 6 | 2,616 | 31 |
| 112,769 | 122 | 2 | 1,423 | 20 | 101 | 4 | 967   | 5 | 2,613 | 31 |
| 112,770 | 122 | 2 | 1,423 | 20 | 101 | 4 | 968   | 5 | 2,614 | 31 |
| 112,771 | 122 | 2 | 1,423 | 20 | 101 | 4 | 968   | 5 | 2,614 | 31 |
| 112,772 | 122 | 2 | 1,422 | 21 | 101 | 4 | 968   | 5 | 2,613 | 32 |
| 112,773 | 122 | 2 | 1,423 | 21 | 101 | 4 | 969   | 5 | 2,615 | 32 |
| 112,774 | 123 | 2 | 1,424 | 20 | 101 | 4 | 967   | 4 | 2,615 | 30 |
| 112,775 | 124 | 2 | 1,432 | 19 | 102 | 4 | 971   | 4 | 2,629 | 29 |
| 112,776 | 124 | 2 | 1,438 | 19 | 103 | 4 | 982   | 4 | 2,647 | 29 |
| 112,777 | 124 | 3 | 1,425 | 19 | 103 | 4 | 977   | 4 | 2,629 | 30 |
| 112,778 | 127 | 3 | 1,473 | 19 | 107 | 4 | 1,027 | 4 | 2,734 | 30 |
| 112,779 | 130 | 3 | 1,485 | 19 | 107 | 4 | 1,039 | 4 | 2,761 | 30 |

|         |     |   |       |    |     |   |       |    |       |    |
|---------|-----|---|-------|----|-----|---|-------|----|-------|----|
| 112,780 | 130 | 3 | 1,486 | 19 | 107 | 4 | 1,040 | 4  | 2,763 | 30 |
| 112,781 | 134 | 3 | 1,487 | 19 | 108 | 4 | 1,052 | 4  | 2,781 | 30 |
| 112,782 | 135 | 3 | 1,494 | 19 | 109 | 4 | 1,059 | 4  | 2,797 | 30 |
| 112,783 | 135 | 4 | 1,501 | 19 | 109 | 4 | 1,063 | 4  | 2,808 | 31 |
| 112,784 | 127 | 4 | 1,467 | 19 | 105 | 4 | 1,045 | 4  | 2,744 | 31 |
| 112,785 | 127 | 4 | 1,463 | 19 | 105 | 4 | 1,044 | 4  | 2,739 | 31 |
| 112,786 | 126 | 4 | 1,462 | 20 | 103 | 4 | 1,042 | 4  | 2,733 | 32 |
| 112,787 | 125 | 4 | 1,454 | 20 | 103 | 4 | 1,040 | 4  | 2,722 | 32 |
| 112,788 | 121 | 4 | 1,400 | 20 | 102 | 4 | 1,031 | 4  | 2,654 | 32 |
| 112,789 | 125 | 4 | 1,413 | 19 | 100 | 4 | 1,042 | 3  | 2,680 | 30 |
| 112,790 | 125 | 4 | 1,417 | 19 | 100 | 4 | 1,043 | 3  | 2,685 | 30 |
| 112,791 | 107 | 4 | 1,275 | 19 | 76  | 4 | 897   | 3  | 2,355 | 30 |
| 112,792 | 108 | 4 | 1,278 | 18 | 78  | 4 | 899   | 3  | 2,363 | 29 |
| 112,793 | 117 | 4 | 1,326 | 18 | 77  | 4 | 876   | 3  | 2,396 | 29 |
| 112,794 | 114 | 4 | 1,297 | 18 | 75  | 4 | 859   | 3  | 2,345 | 29 |
| 112,795 | 140 | 4 | 1,482 | 18 | 80  | 4 | 932   | 3  | 2,634 | 29 |
| 112,796 | 140 | 4 | 1,478 | 18 | 79  | 4 | 924   | 3  | 2,621 | 29 |
| 112,797 | 152 | 4 | 1,798 | 19 | 98  | 4 | 1,242 | 4  | 3,290 | 31 |
| 112,798 | 154 | 4 | 1,865 | 21 | 102 | 4 | 1,304 | 7  | 3,425 | 36 |
| 112,799 | 157 | 4 | 1,895 | 23 | 105 | 4 | 1,335 | 10 | 3,492 | 41 |
| 112,800 | 148 | 4 | 1,847 | 22 | 104 | 3 | 1,314 | 10 | 3,413 | 39 |
| 112,801 | 148 | 4 | 1,840 | 22 | 102 | 2 | 1,302 | 9  | 3,392 | 37 |
| 112,802 | 146 | 3 | 1,778 | 15 | 97  | 2 | 1,258 | 9  | 3,279 | 29 |
| 112,803 | 144 | 3 | 1,683 | 14 | 92  | 2 | 1,194 | 9  | 3,113 | 28 |
| 112,804 | 144 | 3 | 1,664 | 14 | 92  | 2 | 1,183 | 9  | 3,083 | 28 |
| 112,805 | 145 | 2 | 1,669 | 12 | 92  | 1 | 1,183 | 8  | 3,089 | 23 |
| 112,806 | 147 | 2 | 1,679 | 12 | 93  | 1 | 1,186 | 8  | 3,105 | 23 |
| 112,807 | 147 | 2 | 1,680 | 12 | 93  | 1 | 1,187 | 8  | 3,107 | 23 |
| 112,808 | 147 | 2 | 1,677 | 12 | 93  | 1 | 1,185 | 8  | 3,102 | 23 |
| 112,809 | 147 | 2 | 1,677 | 12 | 93  | 1 | 1,185 | 8  | 3,102 | 23 |
| 112,810 | 147 | 2 | 1,667 | 13 | 93  | 1 | 1,184 | 8  | 3,091 | 24 |
| 112,811 | 143 | 2 | 1,635 | 13 | 89  | 1 | 1,162 | 8  | 3,029 | 24 |
| 112,812 | 143 | 3 | 1,634 | 13 | 88  | 0 | 1,162 | 8  | 3,027 | 24 |
| 112,813 | 143 | 3 | 1,626 | 14 | 88  | 1 | 1,163 | 8  | 3,020 | 26 |
| 112,814 | 123 | 3 | 1,584 | 15 | 87  | 1 | 1,113 | 9  | 2,907 | 28 |
| 112,815 | 105 | 3 | 1,180 | 16 | 62  | 1 | 887   | 9  | 2,234 | 29 |
| 112,816 | 101 | 3 | 1,127 | 15 | 53  | 1 | 811   | 12 | 2,092 | 31 |
| 112,817 | 101 | 3 | 1,098 | 15 | 52  | 1 | 798   | 12 | 2,049 | 31 |
| 112,818 | 102 | 3 | 1,112 | 15 | 52  | 1 | 807   | 12 | 2,073 | 31 |
| 112,819 | 102 | 3 | 1,110 | 15 | 52  | 1 | 809   | 12 | 2,073 | 31 |
| 112,820 | 103 | 3 | 1,148 | 14 | 55  | 1 | 845   | 12 | 2,151 | 30 |



|         |     |   |       |    |    |   |     |    |       |    |
|---------|-----|---|-------|----|----|---|-----|----|-------|----|
| 112,821 | 104 | 3 | 1,169 | 14 | 56 | 1 | 867 | 12 | 2,196 | 30 |
| 112,822 | 104 | 3 | 1,169 | 14 | 56 | 1 | 867 | 12 | 2,196 | 30 |
| 112,823 | 104 | 3 | 1,171 | 13 | 56 | 1 | 870 | 12 | 2,201 | 29 |
| 112,824 | 107 | 3 | 1,190 | 13 | 57 | 1 | 890 | 12 | 2,244 | 29 |
| 112,825 | 107 | 3 | 1,195 | 13 | 57 | 1 | 891 | 12 | 2,250 | 29 |
| 112,826 | 106 | 3 | 1,187 | 13 | 56 | 1 | 887 | 12 | 2,236 | 29 |
| 112,827 | 106 | 3 | 1,180 | 13 | 55 | 1 | 875 | 12 | 2,216 | 29 |
| 112,828 | 105 | 2 | 1,165 | 13 | 54 | 1 | 873 | 13 | 2,197 | 29 |
| 112,829 | 103 | 2 | 1,136 | 13 | 51 | 1 | 826 | 13 | 2,116 | 29 |
| 112,830 | 102 | 2 | 1,155 | 13 | 53 | 1 | 832 | 13 | 2,142 | 29 |
| 112,831 | 105 | 2 | 1,164 | 14 | 53 | 1 | 837 | 13 | 2,159 | 30 |
| 112,832 | 100 | 3 | 1,157 | 14 | 53 | 1 | 825 | 13 | 2,135 | 31 |
| 112,833 | 98  | 3 | 1,148 | 14 | 51 | 1 | 816 | 13 | 2,113 | 31 |
| 112,834 | 104 | 2 | 1,179 | 14 | 51 | 1 | 841 | 15 | 2,175 | 32 |
| 112,835 | 104 | 2 | 1,186 | 15 | 51 | 1 | 843 | 16 | 2,184 | 34 |
| 112,836 | 108 | 2 | 1,252 | 14 | 53 | 1 | 879 | 16 | 2,292 | 33 |
| 112,837 | 112 | 2 | 1,286 | 14 | 55 | 1 | 914 | 16 | 2,367 | 33 |
| 112,838 | 113 | 2 | 1,313 | 14 | 55 | 1 | 922 | 16 | 2,403 | 33 |
| 112,839 | 118 | 2 | 1,325 | 14 | 55 | 1 | 938 | 16 | 2,436 | 33 |
| 112,840 | 113 | 2 | 1,301 | 14 | 54 | 2 | 930 | 16 | 2,398 | 34 |
| 112,841 | 113 | 2 | 1,294 | 14 | 54 | 2 | 928 | 16 | 2,389 | 34 |
| 112,842 | 113 | 2 | 1,294 | 14 | 54 | 2 | 928 | 16 | 2,389 | 34 |
| 112,843 | 111 | 2 | 1,282 | 14 | 52 | 2 | 920 | 17 | 2,365 | 35 |
| 112,844 | 102 | 4 | 1,211 | 14 | 53 | 2 | 910 | 19 | 2,276 | 39 |
| 112,845 | 89  | 5 | 1,122 | 14 | 51 | 2 | 852 | 19 | 2,114 | 40 |
| 112,846 | 75  | 5 | 1,018 | 14 | 45 | 2 | 826 | 20 | 1,964 | 41 |
| 112,847 | 66  | 5 | 730   | 16 | 28 | 2 | 540 | 21 | 1,364 | 44 |
| 112,848 | 63  | 6 | 698   | 15 | 26 | 3 | 500 | 20 | 1,287 | 44 |
| 112,849 | 61  | 6 | 631   | 11 | 22 | 3 | 437 | 14 | 1,151 | 34 |
| 112,850 | 58  | 6 | 594   | 11 | 19 | 3 | 406 | 14 | 1,077 | 34 |
| 112,851 | 58  | 6 | 595   | 10 | 19 | 3 | 405 | 14 | 1,077 | 33 |
| 112,852 | 58  | 6 | 589   | 10 | 19 | 3 | 404 | 14 | 1,070 | 33 |
| 112,853 | 58  | 6 | 588   | 10 | 19 | 3 | 404 | 14 | 1,069 | 33 |
| 112,854 | 58  | 6 | 588   | 10 | 19 | 3 | 404 | 15 | 1,069 | 34 |
| 112,855 | 58  | 6 | 580   | 10 | 19 | 3 | 401 | 15 | 1,058 | 34 |
| 112,856 | 58  | 6 | 571   | 9  | 18 | 3 | 399 | 15 | 1,046 | 33 |
| 112,857 | 56  | 6 | 568   | 9  | 18 | 3 | 398 | 15 | 1,040 | 33 |
| 112,858 | 56  | 6 | 567   | 9  | 18 | 3 | 397 | 15 | 1,038 | 33 |
| 112,859 | 56  | 6 | 564   | 9  | 18 | 3 | 397 | 15 | 1,035 | 33 |
| 112,860 | 56  | 6 | 562   | 9  | 18 | 3 | 394 | 15 | 1,030 | 33 |
| 112,861 | 57  | 6 | 558   | 8  | 18 | 3 | 394 | 15 | 1,027 | 32 |

|         |    |   |     |    |    |   |     |    |       |    |
|---------|----|---|-----|----|----|---|-----|----|-------|----|
| 112,862 | 57 | 5 | 555 | 9  | 18 | 3 | 396 | 14 | 1,026 | 31 |
| 112,863 | 56 | 5 | 544 | 8  | 18 | 2 | 388 | 14 | 1,006 | 29 |
| 112,864 | 56 | 5 | 544 | 8  | 18 | 2 | 387 | 14 | 1,005 | 29 |
| 112,865 | 50 | 5 | 486 | 7  | 16 | 2 | 354 | 13 | 906   | 27 |
| 112,866 | 34 | 5 | 402 | 6  | 14 | 2 | 289 | 13 | 739   | 26 |
| 112,867 | 34 | 5 | 392 | 7  | 13 | 2 | 276 | 11 | 715   | 25 |
| 112,868 | 34 | 5 | 389 | 7  | 13 | 2 | 273 | 11 | 709   | 25 |
| 112,869 | 38 | 5 | 399 | 9  | 14 | 2 | 276 | 11 | 727   | 27 |
| 112,870 | 37 | 5 | 416 | 9  | 14 | 2 | 279 | 11 | 746   | 27 |
| 112,871 | 43 | 5 | 545 | 10 | 19 | 2 | 405 | 12 | 1,012 | 29 |
| 112,872 | 46 | 5 | 571 | 10 | 19 | 2 | 441 | 12 | 1,077 | 29 |
| 112,873 | 46 | 5 | 569 | 10 | 19 | 2 | 440 | 12 | 1,074 | 29 |
| 112,874 | 43 | 5 | 553 | 10 | 19 | 2 | 435 | 12 | 1,050 | 29 |
| 112,875 | 43 | 5 | 546 | 10 | 19 | 2 | 434 | 12 | 1,042 | 29 |
| 112,876 | 42 | 5 | 545 | 10 | 19 | 2 | 434 | 12 | 1,040 | 29 |
| 112,877 | 42 | 5 | 545 | 10 | 19 | 2 | 435 | 12 | 1,041 | 29 |
| 112,878 | 45 | 5 | 543 | 10 | 19 | 2 | 438 | 11 | 1,045 | 28 |
| 112,879 | 45 | 5 | 540 | 10 | 19 | 2 | 443 | 11 | 1,047 | 28 |
| 112,880 | 43 | 4 | 523 | 10 | 18 | 2 | 434 | 11 | 1,018 | 27 |
| 112,881 | 43 | 4 | 510 | 10 | 17 | 2 | 427 | 11 | 997   | 27 |
| 112,882 | 40 | 4 | 501 | 10 | 17 | 2 | 421 | 12 | 979   | 28 |
| 112,883 | 40 | 4 | 502 | 12 | 16 | 2 | 422 | 12 | 980   | 30 |
| 112,884 | 36 | 4 | 483 | 14 | 16 | 2 | 403 | 13 | 938   | 33 |
| 112,885 | 34 | 4 | 468 | 14 | 16 | 2 | 398 | 11 | 916   | 31 |
| 112,886 | 34 | 4 | 467 | 13 | 16 | 2 | 400 | 10 | 917   | 29 |
| 112,887 | 30 | 4 | 405 | 13 | 14 | 2 | 366 | 10 | 815   | 29 |
| 112,888 | 26 | 4 | 358 | 13 | 12 | 2 | 335 | 10 | 731   | 29 |
| 112,889 | 25 | 5 | 334 | 13 | 12 | 2 | 324 | 10 | 695   | 30 |
| 112,890 | 20 | 5 | 321 | 13 | 12 | 2 | 310 | 10 | 663   | 30 |
| 112,891 | 20 | 5 | 320 | 15 | 12 | 1 | 306 | 11 | 658   | 32 |
| 112,892 | 20 | 5 | 320 | 15 | 12 | 1 | 306 | 11 | 658   | 32 |
| 112,893 | 20 | 5 | 321 | 15 | 12 | 1 | 309 | 11 | 662   | 32 |
| 112,894 | 20 | 5 | 321 | 16 | 12 | 1 | 309 | 11 | 662   | 33 |
| 112,895 | 20 | 3 | 317 | 17 | 11 | 1 | 307 | 9  | 655   | 30 |
| 112,896 | 20 | 2 | 317 | 17 | 11 | 1 | 306 | 9  | 654   | 29 |
| 112,897 | 20 | 2 | 313 | 17 | 11 | 1 | 306 | 8  | 650   | 28 |
| 112,898 | 20 | 1 | 316 | 15 | 11 | 0 | 310 | 7  | 657   | 23 |
| 112,899 | 20 | 1 | 316 | 15 | 11 | 0 | 310 | 7  | 657   | 23 |
| 112,900 | 20 | 1 | 315 | 15 | 11 | 0 | 310 | 7  | 656   | 23 |
| 112,901 | 20 | 1 | 314 | 16 | 11 | 0 | 311 | 8  | 656   | 25 |
| 112,902 | 20 | 1 | 314 | 16 | 11 | 0 | 311 | 9  | 656   | 26 |

|         |     |   |       |    |     |   |       |    |       |    |
|---------|-----|---|-------|----|-----|---|-------|----|-------|----|
| 112,903 | 20  | 1 | 314   | 16 | 11  | 0 | 311   | 9  | 656   | 26 |
| 112,904 | 20  | 1 | 326   | 16 | 11  | 0 | 318   | 9  | 675   | 26 |
| 112,905 | 21  | 1 | 334   | 15 | 11  | 0 | 323   | 8  | 689   | 24 |
| 112,906 | 20  | 1 | 341   | 15 | 11  | 0 | 325   | 8  | 697   | 24 |
| 112,907 | 30  | 1 | 406   | 15 | 15  | 0 | 369   | 8  | 820   | 24 |
| 112,908 | 31  | 1 | 453   | 15 | 16  | 0 | 419   | 8  | 919   | 24 |
| 112,909 | 31  | 1 | 453   | 15 | 16  | 0 | 419   | 8  | 919   | 24 |
| 112,910 | 31  | 1 | 473   | 15 | 16  | 0 | 433   | 8  | 953   | 24 |
| 112,911 | 35  | 1 | 534   | 15 | 17  | 0 | 501   | 8  | 1,087 | 24 |
| 112,912 | 38  | 1 | 564   | 15 | 19  | 0 | 524   | 8  | 1,145 | 24 |
| 112,913 | 38  | 1 | 561   | 14 | 19  | 0 | 523   | 8  | 1,141 | 23 |
| 112,914 | 43  | 1 | 705   | 14 | 29  | 0 | 680   | 8  | 1,457 | 23 |
| 112,915 | 43  | 1 | 708   | 14 | 30  | 0 | 685   | 8  | 1,466 | 23 |
| 112,916 | 44  | 1 | 713   | 14 | 31  | 0 | 692   | 8  | 1,480 | 23 |
| 112,917 | 44  | 1 | 735   | 16 | 31  | 0 | 703   | 10 | 1,513 | 27 |
| 112,918 | 43  | 1 | 728   | 16 | 31  | 0 | 711   | 11 | 1,513 | 28 |
| 112,919 | 96  | 1 | 877   | 16 | 37  | 0 | 900   | 11 | 1,910 | 28 |
| 112,920 | 94  | 1 | 894   | 14 | 39  | 0 | 902   | 11 | 1,929 | 26 |
| 112,921 | 94  | 1 | 848   | 14 | 36  | 0 | 872   | 11 | 1,850 | 26 |
| 112,922 | 110 | 1 | 903   | 13 | 50  | 0 | 937   | 10 | 2,000 | 24 |
| 112,923 | 108 | 1 | 904   | 13 | 50  | 0 | 900   | 10 | 1,962 | 24 |
| 112,924 | 108 | 1 | 901   | 13 | 50  | 0 | 884   | 10 | 1,943 | 24 |
| 112,925 | 116 | 1 | 988   | 13 | 56  | 0 | 955   | 11 | 2,115 | 25 |
| 112,926 | 123 | 1 | 1,101 | 13 | 62  | 0 | 1,003 | 11 | 2,289 | 25 |
| 112,927 | 124 | 1 | 1,171 | 13 | 64  | 0 | 1,056 | 11 | 2,415 | 25 |
| 112,928 | 124 | 1 | 1,171 | 13 | 64  | 0 | 1,056 | 11 | 2,415 | 25 |
| 112,929 | 168 | 1 | 1,625 | 13 | 95  | 0 | 1,384 | 12 | 3,272 | 26 |
| 112,930 | 188 | 1 | 1,751 | 12 | 114 | 0 | 1,486 | 12 | 3,539 | 25 |
| 112,931 | 188 | 1 | 1,751 | 12 | 114 | 0 | 1,486 | 12 | 3,539 | 25 |
| 112,932 | 188 | 1 | 1,757 | 13 | 114 | 0 | 1,490 | 13 | 3,549 | 27 |
| 112,933 | 188 | 1 | 1,757 | 17 | 114 | 2 | 1,490 | 16 | 3,549 | 36 |
| 112,934 | 188 | 1 | 1,754 | 16 | 114 | 2 | 1,489 | 16 | 3,545 | 35 |
| 112,935 | 188 | 1 | 1,756 | 14 | 114 | 2 | 1,492 | 15 | 3,550 | 32 |
| 112,936 | 188 | 1 | 1,753 | 15 | 114 | 2 | 1,488 | 15 | 3,543 | 33 |
| 112,937 | 188 | 1 | 1,747 | 16 | 114 | 2 | 1,483 | 15 | 3,532 | 34 |
| 112,938 | 188 | 1 | 1,743 | 17 | 114 | 2 | 1,481 | 15 | 3,526 | 35 |
| 112,939 | 188 | 1 | 1,741 | 17 | 114 | 2 | 1,476 | 15 | 3,519 | 35 |
| 112,940 | 188 | 1 | 1,742 | 17 | 114 | 2 | 1,475 | 15 | 3,519 | 35 |
| 112,941 | 188 | 1 | 1,742 | 17 | 114 | 2 | 1,473 | 15 | 3,517 | 35 |
| 112,942 | 188 | 1 | 1,749 | 17 | 114 | 2 | 1,473 | 15 | 3,524 | 35 |
| 112,943 | 188 | 1 | 1,748 | 17 | 114 | 2 | 1,473 | 15 | 3,523 | 35 |

|         |     |   |       |    |     |   |       |    |       |    |
|---------|-----|---|-------|----|-----|---|-------|----|-------|----|
| 112,944 | 189 | 1 | 1,751 | 17 | 114 | 2 | 1,471 | 15 | 3,525 | 35 |
| 112,945 | 189 | 1 | 1,751 | 16 | 114 | 2 | 1,470 | 14 | 3,524 | 33 |
| 112,946 | 195 | 1 | 1,784 | 15 | 114 | 2 | 1,519 | 14 | 3,612 | 32 |
| 112,947 | 195 | 1 | 1,784 | 16 | 114 | 2 | 1,519 | 14 | 3,612 | 33 |
| 112,948 | 195 | 1 | 1,783 | 16 | 114 | 2 | 1,519 | 14 | 3,611 | 33 |
| 112,949 | 195 | 1 | 1,785 | 17 | 114 | 2 | 1,519 | 15 | 3,613 | 35 |
| 112,950 | 195 | 2 | 1,785 | 17 | 114 | 2 | 1,519 | 16 | 3,613 | 37 |
| 112,951 | 195 | 2 | 1,785 | 17 | 114 | 2 | 1,519 | 16 | 3,613 | 37 |
| 112,952 | 195 | 2 | 1,787 | 16 | 114 | 2 | 1,519 | 15 | 3,615 | 35 |
| 112,953 | 199 | 4 | 1,796 | 16 | 115 | 2 | 1,520 | 14 | 3,630 | 36 |
| 112,954 | 199 | 4 | 1,792 | 16 | 115 | 2 | 1,518 | 14 | 3,624 | 36 |
| 112,955 | 199 | 4 | 1,784 | 16 | 115 | 2 | 1,514 | 14 | 3,612 | 36 |
| 112,956 | 198 | 4 | 1,777 | 16 | 115 | 2 | 1,511 | 14 | 3,601 | 36 |
| 112,957 | 201 | 4 | 1,777 | 16 | 116 | 2 | 1,511 | 14 | 3,605 | 36 |
| 112,958 | 192 | 4 | 1,716 | 16 | 113 | 2 | 1,471 | 14 | 3,492 | 36 |
| 112,959 | 191 | 4 | 1,670 | 16 | 112 | 2 | 1,421 | 14 | 3,394 | 36 |
| 112,960 | 200 | 4 | 1,665 | 16 | 112 | 2 | 1,407 | 14 | 3,384 | 36 |
| 112,961 | 200 | 4 | 1,640 | 16 | 112 | 2 | 1,359 | 14 | 3,311 | 36 |
| 112,962 | 198 | 4 | 1,620 | 17 | 112 | 2 | 1,345 | 14 | 3,275 | 37 |
| 112,963 | 198 | 4 | 1,596 | 17 | 113 | 2 | 1,332 | 14 | 3,239 | 37 |
| 112,964 | 211 | 4 | 1,777 | 17 | 120 | 2 | 1,369 | 14 | 3,477 | 37 |
| 112,965 | 220 | 4 | 1,707 | 17 | 115 | 2 | 1,254 | 14 | 3,296 | 37 |
| 112,966 | 227 | 4 | 1,913 | 17 | 121 | 2 | 1,352 | 13 | 3,613 | 36 |
| 112,967 | 226 | 4 | 1,908 | 17 | 120 | 2 | 1,345 | 13 | 3,599 | 36 |
| 112,968 | 259 | 4 | 2,291 | 14 | 142 | 2 | 1,456 | 9  | 4,148 | 29 |
| 112,969 | 260 | 4 | 2,295 | 14 | 144 | 2 | 1,459 | 9  | 4,158 | 29 |
| 112,970 | 206 | 4 | 2,142 | 14 | 139 | 2 | 1,270 | 9  | 3,757 | 29 |
| 112,971 | 207 | 4 | 2,140 | 14 | 137 | 2 | 1,262 | 9  | 3,746 | 29 |
| 112,972 | 207 | 4 | 2,165 | 14 | 137 | 2 | 1,259 | 9  | 3,768 | 29 |
| 112,973 | 185 | 4 | 1,977 | 14 | 118 | 2 | 1,057 | 9  | 3,337 | 29 |
| 112,974 | 184 | 4 | 1,934 | 14 | 117 | 2 | 1,043 | 9  | 3,278 | 29 |
| 112,975 | 177 | 4 | 1,882 | 14 | 112 | 2 | 991   | 9  | 3,162 | 29 |
| 112,976 | 176 | 4 | 1,855 | 14 | 111 | 2 | 974   | 9  | 3,116 | 29 |
| 112,977 | 169 | 4 | 1,748 | 14 | 105 | 2 | 928   | 9  | 2,950 | 29 |
| 112,978 | 168 | 4 | 1,684 | 14 | 103 | 2 | 875   | 9  | 2,830 | 29 |
| 112,979 | 161 | 4 | 1,591 | 14 | 92  | 2 | 791   | 9  | 2,635 | 29 |
| 112,980 | 122 | 4 | 1,239 | 14 | 72  | 2 | 544   | 8  | 1,977 | 28 |
| 112,981 | 102 | 4 | 1,115 | 14 | 53  | 2 | 439   | 8  | 1,709 | 28 |
| 112,982 | 102 | 4 | 1,110 | 14 | 53  | 2 | 432   | 8  | 1,697 | 28 |
| 112,983 | 102 | 4 | 1,111 | 13 | 53  | 2 | 434   | 7  | 1,700 | 26 |
| 112,984 | 103 | 4 | 1,115 | 9  | 53  | 0 | 432   | 4  | 1,703 | 17 |

|         |     |   |       |    |    |   |     |    |       |    |
|---------|-----|---|-------|----|----|---|-----|----|-------|----|
| 112,985 | 103 | 4 | 1,114 | 8  | 53 | 0 | 432 | 4  | 1,702 | 16 |
| 112,986 | 103 | 4 | 1,120 | 10 | 53 | 0 | 434 | 4  | 1,710 | 18 |
| 112,987 | 114 | 4 | 1,190 | 9  | 54 | 0 | 467 | 4  | 1,825 | 17 |
| 112,988 | 123 | 4 | 1,311 | 8  | 64 | 0 | 587 | 4  | 2,085 | 16 |
| 112,989 | 125 | 4 | 1,345 | 7  | 64 | 0 | 622 | 4  | 2,156 | 15 |
| 112,990 | 125 | 4 | 1,345 | 7  | 64 | 0 | 622 | 4  | 2,156 | 15 |
| 112,991 | 127 | 3 | 1,356 | 7  | 65 | 0 | 635 | 4  | 2,183 | 14 |
| 112,992 | 127 | 3 | 1,353 | 8  | 65 | 0 | 635 | 5  | 2,180 | 16 |
| 112,993 | 127 | 3 | 1,347 | 6  | 65 | 0 | 635 | 4  | 2,174 | 13 |
| 112,994 | 129 | 3 | 1,354 | 6  | 66 | 0 | 641 | 4  | 2,190 | 13 |
| 112,995 | 129 | 3 | 1,360 | 6  | 66 | 0 | 641 | 4  | 2,196 | 13 |
| 112,996 | 127 | 3 | 1,357 | 6  | 66 | 0 | 629 | 5  | 2,179 | 14 |
| 112,997 | 123 | 3 | 1,341 | 6  | 66 | 0 | 594 | 5  | 2,124 | 14 |
| 112,998 | 126 | 3 | 1,343 | 5  | 66 | 0 | 596 | 5  | 2,131 | 13 |
| 112,999 | 126 | 3 | 1,341 | 5  | 66 | 0 | 592 | 5  | 2,125 | 13 |
| 113,000 | 126 | 2 | 1,343 | 4  | 66 | 0 | 593 | 3  | 2,128 | 9  |
| 113,001 | 126 | 2 | 1,341 | 4  | 66 | 0 | 593 | 3  | 2,126 | 9  |
| 113,002 | 126 | 2 | 1,343 | 4  | 66 | 0 | 594 | 3  | 2,129 | 9  |
| 113,003 | 126 | 2 | 1,342 | 4  | 66 | 0 | 594 | 3  | 2,128 | 9  |
| 113,004 | 122 | 0 | 1,338 | 5  | 65 | 0 | 593 | 3  | 2,118 | 8  |
| 113,005 | 122 | 1 | 1,338 | 6  | 65 | 0 | 592 | 3  | 2,117 | 10 |
| 113,006 | 123 | 1 | 1,372 | 6  | 65 | 0 | 607 | 3  | 2,167 | 10 |
| 113,007 | 123 | 1 | 1,371 | 6  | 65 | 0 | 605 | 3  | 2,164 | 10 |
| 113,008 | 120 | 1 | 1,385 | 6  | 64 | 0 | 610 | 3  | 2,179 | 10 |
| 113,009 | 119 | 1 | 1,381 | 6  | 63 | 0 | 606 | 3  | 2,169 | 10 |
| 113,010 | 110 | 1 | 1,370 | 6  | 63 | 0 | 609 | 3  | 2,152 | 10 |
| 113,011 | 110 | 1 | 1,372 | 6  | 63 | 0 | 610 | 4  | 2,155 | 11 |
| 113,012 | 108 | 1 | 1,367 | 6  | 63 | 0 | 610 | 4  | 2,148 | 11 |
| 113,013 | 108 | 1 | 1,353 | 6  | 62 | 0 | 606 | 5  | 2,129 | 12 |
| 113,014 | 106 | 1 | 1,349 | 7  | 59 | 0 | 596 | 6  | 2,110 | 14 |
| 113,015 | 92  | 1 | 1,168 | 8  | 52 | 0 | 558 | 6  | 1,870 | 15 |
| 113,016 | 79  | 1 | 1,094 | 10 | 47 | 0 | 516 | 7  | 1,736 | 18 |
| 113,017 | 73  | 1 | 884   | 11 | 39 | 0 | 409 | 7  | 1,405 | 19 |
| 113,018 | 62  | 1 | 804   | 12 | 29 | 0 | 370 | 8  | 1,265 | 21 |
| 113,019 | 39  | 1 | 476   | 12 | 18 | 0 | 287 | 10 | 820   | 23 |
| 113,020 | 39  | 1 | 469   | 12 | 16 | 0 | 273 | 10 | 797   | 23 |
| 113,021 | 40  | 1 | 471   | 12 | 15 | 0 | 275 | 10 | 801   | 23 |
| 113,022 | 38  | 1 | 442   | 13 | 15 | 0 | 272 | 10 | 767   | 24 |
| 113,023 | 38  | 1 | 414   | 13 | 15 | 0 | 270 | 10 | 737   | 24 |
| 113,024 | 37  | 1 | 411   | 13 | 13 | 0 | 268 | 10 | 729   | 24 |
| 113,025 | 37  | 1 | 414   | 14 | 13 | 0 | 269 | 10 | 733   | 25 |

|         |    |   |     |    |    |   |     |    |       |    |
|---------|----|---|-----|----|----|---|-----|----|-------|----|
| 113,026 | 37 | 1 | 411 | 14 | 13 | 0 | 268 | 10 | 729   | 25 |
| 113,027 | 37 | 1 | 411 | 14 | 13 | 0 | 267 | 10 | 728   | 25 |
| 113,028 | 42 | 1 | 445 | 14 | 13 | 0 | 283 | 10 | 783   | 25 |
| 113,029 | 42 | 1 | 439 | 14 | 13 | 0 | 283 | 10 | 777   | 25 |
| 113,030 | 46 | 1 | 478 | 14 | 14 | 0 | 304 | 10 | 842   | 25 |
| 113,031 | 45 | 1 | 482 | 14 | 14 | 0 | 303 | 10 | 844   | 25 |
| 113,032 | 45 | 1 | 479 | 14 | 14 | 0 | 302 | 10 | 840   | 25 |
| 113,033 | 46 | 1 | 499 | 14 | 14 | 0 | 304 | 10 | 863   | 25 |
| 113,034 | 60 | 1 | 554 | 14 | 18 | 0 | 327 | 10 | 959   | 25 |
| 113,035 | 82 | 1 | 647 | 14 | 21 | 0 | 395 | 9  | 1,145 | 24 |
| 113,036 | 82 | 1 | 650 | 14 | 21 | 0 | 393 | 9  | 1,146 | 24 |
| 113,037 | 76 | 1 | 635 | 12 | 26 | 0 | 395 | 9  | 1,132 | 22 |
| 113,038 | 70 | 1 | 587 | 13 | 18 | 0 | 303 | 10 | 978   | 24 |
| 113,039 | 70 | 1 | 601 | 13 | 20 | 1 | 304 | 10 | 995   | 25 |
| 113,040 | 72 | 1 | 580 | 13 | 21 | 1 | 273 | 10 | 946   | 25 |
| 113,041 | 70 | 1 | 568 | 13 | 20 | 1 | 261 | 10 | 919   | 25 |
| 113,042 | 68 | 1 | 563 | 13 | 20 | 1 | 256 | 10 | 907   | 25 |
| 113,043 | 67 | 1 | 563 | 12 | 19 | 1 | 255 | 9  | 904   | 23 |
| 113,044 | 67 | 1 | 562 | 12 | 19 | 1 | 255 | 9  | 903   | 23 |
| 113,045 | 67 | 1 | 562 | 15 | 19 | 1 | 255 | 9  | 903   | 26 |
| 113,046 | 67 | 1 | 554 | 15 | 19 | 2 | 254 | 9  | 894   | 27 |
| 113,047 | 67 | 1 | 566 | 15 | 20 | 2 | 262 | 8  | 915   | 26 |
| 113,048 | 67 | 1 | 567 | 15 | 20 | 2 | 260 | 8  | 914   | 26 |
| 113,049 | 65 | 1 | 567 | 15 | 20 | 2 | 260 | 9  | 912   | 27 |
| 113,050 | 65 | 1 | 567 | 15 | 20 | 2 | 259 | 9  | 911   | 27 |
| 113,051 | 65 | 1 | 565 | 15 | 20 | 2 | 259 | 10 | 909   | 28 |
| 113,052 | 73 | 1 | 605 | 15 | 20 | 2 | 278 | 11 | 976   | 29 |
| 113,053 | 73 | 1 | 603 | 16 | 20 | 2 | 277 | 13 | 973   | 32 |
| 113,054 | 73 | 1 | 600 | 17 | 20 | 2 | 277 | 13 | 970   | 33 |
| 113,055 | 74 | 1 | 609 | 16 | 21 | 2 | 292 | 13 | 996   | 32 |
| 113,056 | 74 | 0 | 601 | 15 | 21 | 2 | 290 | 14 | 986   | 31 |
| 113,057 | 73 | 0 | 576 | 16 | 21 | 2 | 277 | 14 | 947   | 32 |
| 113,058 | 73 | 0 | 558 | 16 | 21 | 2 | 270 | 14 | 922   | 32 |
| 113,059 | 73 | 0 | 555 | 16 | 21 | 2 | 270 | 14 | 919   | 32 |
| 113,060 | 73 | 0 | 555 | 16 | 21 | 2 | 269 | 14 | 918   | 32 |
| 113,061 | 72 | 0 | 551 | 16 | 21 | 2 | 268 | 14 | 912   | 32 |
| 113,062 | 72 | 0 | 548 | 16 | 21 | 2 | 267 | 13 | 908   | 31 |
| 113,063 | 73 | 0 | 567 | 15 | 21 | 2 | 269 | 12 | 930   | 29 |
| 113,064 | 73 | 0 | 569 | 15 | 21 | 2 | 270 | 12 | 933   | 29 |
| 113,065 | 72 | 0 | 569 | 10 | 21 | 3 | 271 | 10 | 933   | 23 |
| 113,066 | 74 | 0 | 595 | 10 | 21 | 3 | 276 | 10 | 966   | 23 |

|         |     |   |       |    |    |   |     |    |       |    |
|---------|-----|---|-------|----|----|---|-----|----|-------|----|
| 113,067 | 74  | 0 | 595   | 10 | 21 | 3 | 275 | 10 | 965   | 23 |
| 113,068 | 77  | 0 | 635   | 9  | 22 | 3 | 296 | 9  | 1,030 | 21 |
| 113,069 | 77  | 0 | 635   | 9  | 22 | 3 | 296 | 9  | 1,030 | 21 |
| 113,070 | 105 | 0 | 861   | 9  | 35 | 3 | 369 | 7  | 1,370 | 19 |
| 113,071 | 115 | 0 | 928   | 9  | 41 | 3 | 420 | 7  | 1,504 | 19 |
| 113,072 | 116 | 0 | 986   | 9  | 42 | 3 | 433 | 7  | 1,577 | 19 |
| 113,073 | 116 | 0 | 986   | 9  | 42 | 3 | 432 | 7  | 1,576 | 19 |
| 113,074 | 118 | 0 | 1,152 | 9  | 49 | 3 | 496 | 7  | 1,815 | 19 |
| 113,075 | 118 | 0 | 1,148 | 9  | 49 | 3 | 495 | 7  | 1,810 | 19 |
| 113,076 | 129 | 0 | 1,260 | 8  | 54 | 3 | 568 | 7  | 2,011 | 18 |
| 113,077 | 129 | 0 | 1,260 | 8  | 54 | 3 | 572 | 7  | 2,015 | 18 |
| 113,078 | 129 | 0 | 1,259 | 8  | 54 | 3 | 572 | 7  | 2,014 | 18 |
| 113,079 | 128 | 0 | 1,293 | 8  | 55 | 3 | 568 | 7  | 2,044 | 18 |
| 113,080 | 130 | 0 | 1,330 | 8  | 55 | 3 | 585 | 7  | 2,100 | 18 |
| 113,081 | 127 | 0 | 1,298 | 8  | 54 | 3 | 569 | 7  | 2,048 | 18 |
| 113,082 | 127 | 0 | 1,316 | 8  | 54 | 3 | 575 | 7  | 2,072 | 18 |
| 113,083 | 130 | 0 | 1,320 | 8  | 58 | 3 | 615 | 7  | 2,123 | 18 |
| 113,084 | 118 | 0 | 1,280 | 8  | 55 | 3 | 594 | 7  | 2,047 | 18 |
| 113,085 | 119 | 0 | 1,275 | 8  | 55 | 3 | 593 | 7  | 2,042 | 18 |
| 113,086 | 97  | 0 | 1,177 | 9  | 52 | 3 | 524 | 7  | 1,850 | 19 |
| 113,087 | 98  | 0 | 1,183 | 9  | 53 | 3 | 535 | 9  | 1,869 | 21 |
| 113,088 | 93  | 0 | 1,131 | 9  | 47 | 3 | 499 | 9  | 1,770 | 21 |
| 113,089 | 90  | 1 | 1,068 | 8  | 46 | 3 | 478 | 8  | 1,682 | 20 |
| 113,090 | 96  | 1 | 1,119 | 8  | 46 | 2 | 534 | 8  | 1,795 | 19 |
| 113,091 | 92  | 1 | 1,144 | 8  | 49 | 2 | 547 | 8  | 1,832 | 19 |
| 113,092 | 92  | 1 | 1,168 | 8  | 49 | 2 | 572 | 8  | 1,881 | 19 |
| 113,093 | 93  | 2 | 1,180 | 8  | 51 | 2 | 581 | 8  | 1,905 | 20 |
| 113,094 | 103 | 2 | 1,245 | 8  | 52 | 2 | 617 | 8  | 2,017 | 20 |
| 113,095 | 104 | 2 | 1,269 | 5  | 53 | 2 | 620 | 8  | 2,046 | 17 |
| 113,096 | 106 | 2 | 1,309 | 5  | 55 | 1 | 640 | 8  | 2,110 | 16 |
| 113,097 | 110 | 2 | 1,353 | 5  | 56 | 1 | 656 | 8  | 2,175 | 16 |
| 113,098 | 112 | 2 | 1,408 | 5  | 57 | 1 | 685 | 8  | 2,262 | 16 |
| 113,099 | 112 | 2 | 1,419 | 5  | 57 | 1 | 695 | 7  | 2,283 | 15 |
| 113,100 | 113 | 2 | 1,434 | 5  | 57 | 1 | 708 | 8  | 2,312 | 16 |
| 113,101 | 111 | 3 | 1,430 | 7  | 57 | 1 | 702 | 9  | 2,300 | 20 |
| 113,102 | 105 | 3 | 1,394 | 7  | 57 | 1 | 692 | 8  | 2,248 | 19 |
| 113,103 | 104 | 3 | 1,394 | 7  | 57 | 1 | 686 | 7  | 2,241 | 18 |
| 113,104 | 104 | 3 | 1,394 | 6  | 57 | 1 | 687 | 5  | 2,242 | 15 |
| 113,105 | 104 | 3 | 1,392 | 5  | 56 | 1 | 682 | 5  | 2,234 | 14 |
| 113,106 | 104 | 3 | 1,393 | 5  | 56 | 1 | 681 | 5  | 2,234 | 14 |
| 113,107 | 104 | 3 | 1,392 | 5  | 56 | 1 | 681 | 4  | 2,233 | 13 |

|         |     |   |       |    |    |   |     |    |       |    |
|---------|-----|---|-------|----|----|---|-----|----|-------|----|
| 113,108 | 104 | 3 | 1,394 | 4  | 56 | 1 | 684 | 4  | 2,238 | 12 |
| 113,109 | 104 | 3 | 1,393 | 4  | 56 | 1 | 684 | 4  | 2,237 | 12 |
| 113,110 | 104 | 3 | 1,394 | 5  | 56 | 1 | 684 | 4  | 2,238 | 13 |
| 113,111 | 104 | 3 | 1,394 | 5  | 56 | 1 | 684 | 4  | 2,238 | 13 |
| 113,112 | 104 | 3 | 1,382 | 5  | 56 | 1 | 682 | 4  | 2,224 | 13 |
| 113,113 | 103 | 3 | 1,377 | 5  | 56 | 1 | 681 | 4  | 2,217 | 13 |
| 113,114 | 103 | 3 | 1,376 | 5  | 56 | 1 | 681 | 4  | 2,216 | 13 |
| 113,115 | 103 | 3 | 1,374 | 5  | 56 | 1 | 680 | 4  | 2,213 | 13 |
| 113,116 | 103 | 4 | 1,373 | 5  | 56 | 0 | 679 | 4  | 2,211 | 13 |
| 113,117 | 101 | 4 | 1,349 | 7  | 57 | 0 | 675 | 4  | 2,182 | 15 |
| 113,118 | 101 | 4 | 1,348 | 7  | 57 | 0 | 676 | 4  | 2,182 | 15 |
| 113,119 | 98  | 4 | 1,308 | 7  | 56 | 0 | 653 | 4  | 2,115 | 15 |
| 113,120 | 90  | 4 | 1,210 | 7  | 47 | 0 | 609 | 4  | 1,956 | 15 |
| 113,121 | 70  | 4 | 1,078 | 7  | 43 | 0 | 580 | 4  | 1,771 | 15 |
| 113,122 | 59  | 4 | 1,011 | 7  | 37 | 0 | 530 | 4  | 1,637 | 15 |
| 113,123 | 58  | 4 | 970   | 6  | 36 | 0 | 527 | 4  | 1,591 | 14 |
| 113,124 | 57  | 4 | 830   | 6  | 29 | 0 | 470 | 4  | 1,386 | 14 |
| 113,125 | 57  | 4 | 823   | 6  | 29 | 0 | 476 | 4  | 1,385 | 14 |
| 113,126 | 47  | 4 | 721   | 6  | 24 | 0 | 403 | 4  | 1,195 | 14 |
| 113,127 | 47  | 4 | 734   | 6  | 24 | 0 | 405 | 4  | 1,210 | 14 |
| 113,128 | 47  | 4 | 742   | 6  | 25 | 0 | 413 | 4  | 1,227 | 14 |
| 113,129 | 46  | 4 | 728   | 6  | 24 | 0 | 430 | 4  | 1,228 | 14 |
| 113,130 | 50  | 4 | 760   | 6  | 24 | 0 | 452 | 4  | 1,286 | 14 |
| 113,131 | 48  | 4 | 723   | 6  | 24 | 0 | 436 | 4  | 1,231 | 14 |
| 113,132 | 47  | 4 | 710   | 6  | 24 | 0 | 432 | 4  | 1,213 | 14 |
| 113,133 | 47  | 4 | 684   | 6  | 24 | 0 | 422 | 4  | 1,177 | 14 |
| 113,134 | 43  | 4 | 657   | 6  | 20 | 0 | 379 | 4  | 1,099 | 14 |
| 113,135 | 41  | 4 | 653   | 6  | 20 | 0 | 377 | 4  | 1,091 | 14 |
| 113,136 | 40  | 4 | 651   | 6  | 19 | 0 | 377 | 5  | 1,087 | 15 |
| 113,137 | 40  | 4 | 653   | 5  | 19 | 0 | 378 | 5  | 1,090 | 14 |
| 113,138 | 39  | 4 | 644   | 5  | 18 | 0 | 368 | 4  | 1,069 | 13 |
| 113,139 | 37  | 4 | 629   | 5  | 19 | 0 | 361 | 4  | 1,046 | 13 |
| 113,140 | 39  | 3 | 593   | 5  | 19 | 0 | 328 | 4  | 979   | 12 |
| 113,141 | 39  | 3 | 554   | 5  | 15 | 0 | 310 | 5  | 918   | 13 |
| 113,142 | 39  | 3 | 542   | 5  | 15 | 0 | 299 | 5  | 895   | 13 |
| 113,143 | 41  | 3 | 545   | 5  | 15 | 0 | 313 | 6  | 914   | 14 |
| 113,144 | 35  | 2 | 508   | 8  | 14 | 0 | 277 | 8  | 834   | 18 |
| 113,145 | 31  | 2 | 478   | 8  | 14 | 0 | 275 | 8  | 798   | 18 |
| 113,146 | 30  | 2 | 463   | 13 | 14 | 1 | 288 | 11 | 795   | 27 |
| 113,147 | 28  | 2 | 417   | 15 | 12 | 1 | 267 | 11 | 724   | 29 |
| 113,148 | 24  | 2 | 370   | 16 | 11 | 1 | 251 | 11 | 656   | 30 |



|         |    |   |     |    |    |   |     |    |       |    |
|---------|----|---|-----|----|----|---|-----|----|-------|----|
| 113,149 | 21 | 2 | 302 | 16 | 9  | 1 | 214 | 11 | 546   | 30 |
| 113,150 | 21 | 2 | 295 | 16 | 9  | 1 | 209 | 11 | 534   | 30 |
| 113,151 | 20 | 2 | 278 | 16 | 9  | 1 | 197 | 10 | 504   | 29 |
| 113,152 | 20 | 1 | 275 | 14 | 9  | 1 | 198 | 9  | 502   | 25 |
| 113,153 | 20 | 1 | 276 | 14 | 9  | 1 | 199 | 9  | 504   | 25 |
| 113,154 | 24 | 1 | 282 | 14 | 9  | 1 | 208 | 9  | 523   | 25 |
| 113,155 | 25 | 1 | 282 | 14 | 9  | 1 | 208 | 10 | 524   | 26 |
| 113,156 | 26 | 1 | 284 | 14 | 9  | 1 | 208 | 10 | 527   | 26 |
| 113,157 | 26 | 1 | 284 | 14 | 9  | 1 | 209 | 10 | 528   | 26 |
| 113,158 | 27 | 1 | 335 | 14 | 13 | 1 | 218 | 10 | 593   | 26 |
| 113,159 | 27 | 1 | 334 | 14 | 13 | 1 | 218 | 10 | 592   | 26 |
| 113,160 | 34 | 1 | 388 | 13 | 15 | 1 | 257 | 10 | 694   | 25 |
| 113,161 | 34 | 1 | 388 | 13 | 15 | 1 | 257 | 10 | 694   | 25 |
| 113,162 | 37 | 1 | 425 | 17 | 18 | 1 | 293 | 11 | 773   | 30 |
| 113,163 | 37 | 1 | 425 | 17 | 18 | 1 | 293 | 13 | 773   | 32 |
| 113,164 | 37 | 1 | 425 | 17 | 18 | 1 | 293 | 13 | 773   | 32 |
| 113,165 | 73 | 1 | 651 | 17 | 21 | 1 | 489 | 13 | 1,234 | 32 |
| 113,166 | 75 | 1 | 710 | 17 | 23 | 1 | 538 | 13 | 1,346 | 32 |
| 113,167 | 75 | 0 | 709 | 15 | 22 | 1 | 538 | 13 | 1,344 | 29 |
| 113,168 | 75 | 0 | 708 | 15 | 22 | 1 | 537 | 13 | 1,342 | 29 |
| 113,169 | 75 | 0 | 707 | 16 | 22 | 1 | 537 | 13 | 1,341 | 30 |
| 113,170 | 75 | 0 | 707 | 16 | 22 | 1 | 537 | 13 | 1,341 | 30 |
| 113,171 | 92 | 0 | 857 | 16 | 32 | 1 | 720 | 13 | 1,701 | 30 |
| 113,172 | 94 | 0 | 862 | 16 | 32 | 1 | 724 | 16 | 1,712 | 33 |
| 113,173 | 94 | 0 | 865 | 16 | 32 | 1 | 723 | 16 | 1,714 | 33 |
| 113,174 | 93 | 0 | 843 | 16 | 32 | 1 | 710 | 17 | 1,678 | 34 |
| 113,175 | 98 | 0 | 898 | 17 | 32 | 1 | 743 | 18 | 1,771 | 36 |
| 113,176 | 98 | 1 | 891 | 17 | 32 | 1 | 735 | 22 | 1,756 | 41 |
| 113,177 | 98 | 1 | 926 | 20 | 39 | 2 | 773 | 22 | 1,836 | 45 |
| 113,178 | 98 | 2 | 921 | 29 | 39 | 2 | 773 | 26 | 1,831 | 59 |
| 113,179 | 98 | 2 | 908 | 31 | 38 | 2 | 782 | 27 | 1,826 | 62 |
| 113,180 | 96 | 2 | 873 | 31 | 38 | 2 | 756 | 27 | 1,763 | 62 |
| 113,181 | 92 | 2 | 832 | 31 | 39 | 2 | 741 | 28 | 1,704 | 63 |
| 113,182 | 92 | 2 | 835 | 31 | 39 | 2 | 743 | 28 | 1,709 | 63 |
| 113,183 | 92 | 2 | 835 | 31 | 39 | 2 | 743 | 28 | 1,709 | 63 |
| 113,184 | 92 | 2 | 835 | 31 | 39 | 2 | 743 | 28 | 1,709 | 63 |
| 113,185 | 92 | 2 | 835 | 31 | 39 | 2 | 744 | 28 | 1,710 | 63 |
| 113,186 | 92 | 2 | 832 | 31 | 39 | 2 | 745 | 28 | 1,708 | 63 |
| 113,187 | 91 | 2 | 829 | 31 | 39 | 2 | 745 | 27 | 1,704 | 62 |
| 113,188 | 93 | 3 | 831 | 31 | 39 | 2 | 746 | 27 | 1,709 | 63 |
| 113,189 | 93 | 3 | 828 | 31 | 39 | 2 | 744 | 25 | 1,704 | 61 |

|         |     |   |       |    |    |   |     |    |       |    |
|---------|-----|---|-------|----|----|---|-----|----|-------|----|
| 113,190 | 91  | 3 | 818   | 31 | 35 | 2 | 725 | 25 | 1,669 | 61 |
| 113,191 | 88  | 3 | 812   | 31 | 35 | 2 | 720 | 25 | 1,655 | 61 |
| 113,192 | 88  | 3 | 813   | 31 | 35 | 2 | 721 | 25 | 1,657 | 61 |
| 113,193 | 91  | 3 | 810   | 31 | 35 | 2 | 711 | 25 | 1,647 | 61 |
| 113,194 | 88  | 3 | 798   | 28 | 33 | 2 | 688 | 22 | 1,607 | 55 |
| 113,195 | 88  | 3 | 796   | 28 | 32 | 2 | 683 | 22 | 1,599 | 55 |
| 113,196 | 88  | 3 | 790   | 23 | 32 | 1 | 678 | 19 | 1,588 | 46 |
| 113,197 | 90  | 3 | 794   | 21 | 32 | 1 | 675 | 19 | 1,591 | 44 |
| 113,198 | 96  | 4 | 817   | 21 | 32 | 1 | 679 | 20 | 1,624 | 46 |
| 113,199 | 102 | 4 | 854   | 21 | 33 | 2 | 711 | 20 | 1,700 | 47 |
| 113,200 | 102 | 4 | 852   | 21 | 33 | 2 | 711 | 21 | 1,698 | 48 |
| 113,201 | 102 | 4 | 851   | 21 | 34 | 2 | 711 | 21 | 1,698 | 48 |
| 113,202 | 105 | 4 | 888   | 21 | 38 | 2 | 734 | 21 | 1,765 | 48 |
| 113,203 | 125 | 4 | 969   | 21 | 44 | 2 | 804 | 21 | 1,942 | 48 |
| 113,204 | 130 | 4 | 1,007 | 21 | 45 | 2 | 833 | 21 | 2,015 | 48 |
| 113,205 | 127 | 4 | 1,002 | 21 | 45 | 2 | 825 | 21 | 1,999 | 48 |
| 113,206 | 140 | 4 | 1,103 | 21 | 54 | 2 | 922 | 20 | 2,219 | 47 |
| 113,207 | 141 | 4 | 1,128 | 21 | 57 | 2 | 941 | 20 | 2,267 | 47 |
| 113,208 | 141 | 4 | 1,131 | 22 | 57 | 2 | 941 | 20 | 2,270 | 48 |
| 113,209 | 141 | 4 | 1,079 | 22 | 53 | 2 | 932 | 20 | 2,205 | 48 |
| 113,210 | 141 | 4 | 1,075 | 22 | 52 | 2 | 927 | 20 | 2,195 | 48 |
| 113,211 | 134 | 4 | 1,024 | 22 | 51 | 2 | 893 | 20 | 2,102 | 48 |
| 113,212 | 131 | 4 | 990   | 18 | 49 | 2 | 857 | 17 | 2,027 | 41 |
| 113,213 | 131 | 4 | 989   | 18 | 49 | 2 | 857 | 17 | 2,026 | 41 |
| 113,214 | 113 | 4 | 859   | 18 | 47 | 2 | 763 | 17 | 1,782 | 41 |
| 113,215 | 100 | 4 | 773   | 18 | 46 | 2 | 665 | 17 | 1,584 | 41 |
| 113,216 | 101 | 4 | 713   | 18 | 44 | 2 | 620 | 17 | 1,478 | 41 |
| 113,217 | 89  | 4 | 635   | 18 | 37 | 2 | 473 | 17 | 1,234 | 41 |
| 113,218 | 89  | 4 | 621   | 18 | 36 | 2 | 464 | 17 | 1,210 | 41 |
| 113,219 | 90  | 4 | 623   | 18 | 36 | 2 | 467 | 17 | 1,216 | 41 |
| 113,220 | 90  | 4 | 631   | 17 | 36 | 2 | 475 | 17 | 1,232 | 40 |
| 113,221 | 90  | 4 | 628   | 18 | 36 | 2 | 474 | 17 | 1,228 | 41 |
| 113,222 | 89  | 4 | 627   | 18 | 36 | 2 | 477 | 17 | 1,229 | 41 |
| 113,223 | 90  | 4 | 623   | 18 | 36 | 2 | 476 | 14 | 1,225 | 38 |
| 113,224 | 90  | 4 | 620   | 19 | 36 | 2 | 475 | 14 | 1,221 | 39 |
| 113,225 | 85  | 4 | 574   | 19 | 36 | 2 | 452 | 13 | 1,147 | 38 |
| 113,226 | 85  | 3 | 578   | 18 | 36 | 2 | 446 | 8  | 1,145 | 31 |
| 113,227 | 85  | 3 | 578   | 18 | 36 | 2 | 448 | 8  | 1,147 | 31 |
| 113,228 | 89  | 2 | 574   | 5  | 29 | 1 | 437 | 3  | 1,129 | 11 |
| 113,229 | 91  | 2 | 575   | 5  | 29 | 1 | 438 | 3  | 1,133 | 11 |
| 113,230 | 90  | 2 | 578   | 5  | 29 | 1 | 429 | 3  | 1,126 | 11 |

|         |     |   |       |    |    |   |       |   |       |    |
|---------|-----|---|-------|----|----|---|-------|---|-------|----|
| 113,231 | 90  | 2 | 575   | 5  | 29 | 1 | 423   | 2 | 1,117 | 10 |
| 113,232 | 90  | 2 | 582   | 5  | 30 | 1 | 422   | 2 | 1,124 | 10 |
| 113,233 | 90  | 2 | 579   | 5  | 30 | 1 | 419   | 2 | 1,118 | 10 |
| 113,234 | 90  | 2 | 578   | 5  | 30 | 1 | 418   | 2 | 1,116 | 10 |
| 113,235 | 90  | 2 | 599   | 5  | 30 | 2 | 419   | 2 | 1,138 | 11 |
| 113,236 | 90  | 2 | 598   | 5  | 30 | 2 | 419   | 2 | 1,137 | 11 |
| 113,237 | 90  | 2 | 620   | 7  | 31 | 3 | 426   | 4 | 1,167 | 16 |
| 113,238 | 88  | 2 | 617   | 7  | 31 | 3 | 423   | 4 | 1,159 | 16 |
| 113,239 | 98  | 1 | 748   | 8  | 35 | 3 | 461   | 5 | 1,342 | 17 |
| 113,240 | 115 | 2 | 904   | 9  | 39 | 3 | 523   | 5 | 1,581 | 19 |
| 113,241 | 120 | 2 | 1,001 | 9  | 39 | 3 | 563   | 5 | 1,723 | 19 |
| 113,242 | 119 | 2 | 995   | 9  | 39 | 3 | 561   | 5 | 1,714 | 19 |
| 113,243 | 119 | 2 | 1,004 | 9  | 39 | 3 | 562   | 6 | 1,724 | 20 |
| 113,244 | 121 | 2 | 1,031 | 9  | 43 | 3 | 577   | 6 | 1,772 | 20 |
| 113,245 | 121 | 2 | 1,028 | 9  | 43 | 3 | 576   | 6 | 1,768 | 20 |
| 113,246 | 126 | 2 | 1,221 | 10 | 49 | 3 | 658   | 6 | 2,054 | 21 |
| 113,247 | 151 | 2 | 1,684 | 10 | 63 | 3 | 816   | 6 | 2,714 | 21 |
| 113,248 | 180 | 1 | 2,090 | 10 | 94 | 2 | 1,082 | 5 | 3,446 | 18 |
| 113,249 | 174 | 1 | 2,218 | 10 | 99 | 2 | 1,129 | 5 | 3,620 | 18 |
| 113,250 | 173 | 1 | 2,249 | 10 | 99 | 2 | 1,129 | 5 | 3,650 | 18 |
| 113,251 | 170 | 1 | 2,239 | 13 | 96 | 2 | 1,119 | 4 | 3,624 | 20 |
| 113,252 | 170 | 1 | 2,271 | 15 | 95 | 2 | 1,121 | 6 | 3,657 | 24 |
| 113,253 | 153 | 1 | 2,217 | 15 | 91 | 2 | 1,070 | 7 | 3,531 | 25 |
| 113,254 | 152 | 1 | 2,202 | 15 | 90 | 2 | 1,062 | 8 | 3,506 | 26 |
| 113,255 | 146 | 1 | 2,184 | 15 | 92 | 2 | 1,046 | 8 | 3,468 | 26 |
| 113,256 | 141 | 1 | 2,134 | 15 | 85 | 4 | 964   | 8 | 3,324 | 28 |
| 113,257 | 138 | 1 | 2,119 | 16 | 82 | 4 | 954   | 8 | 3,293 | 29 |
| 113,258 | 153 | 1 | 2,230 | 20 | 88 | 4 | 1,008 | 8 | 3,479 | 33 |
| 113,259 | 153 | 1 | 2,236 | 21 | 88 | 4 | 1,013 | 8 | 3,490 | 34 |
| 113,260 | 152 | 1 | 2,243 | 21 | 88 | 4 | 1,010 | 8 | 3,493 | 34 |
| 113,261 | 152 | 1 | 2,245 | 21 | 88 | 4 | 1,012 | 8 | 3,497 | 34 |
| 113,262 | 156 | 1 | 2,284 | 21 | 88 | 4 | 1,040 | 8 | 3,568 | 34 |
| 113,263 | 163 | 1 | 2,325 | 21 | 89 | 4 | 1,062 | 8 | 3,639 | 34 |
| 113,264 | 163 | 1 | 2,323 | 21 | 89 | 4 | 1,062 | 8 | 3,637 | 34 |
| 113,265 | 159 | 1 | 2,335 | 21 | 91 | 4 | 1,077 | 8 | 3,662 | 34 |
| 113,266 | 161 | 1 | 2,350 | 21 | 91 | 4 | 1,088 | 8 | 3,690 | 34 |
| 113,267 | 196 | 1 | 2,584 | 21 | 95 | 4 | 1,194 | 8 | 4,069 | 34 |
| 113,268 | 198 | 1 | 2,563 | 21 | 96 | 4 | 1,188 | 8 | 4,045 | 34 |
| 113,269 | 197 | 1 | 2,559 | 21 | 96 | 4 | 1,185 | 8 | 4,037 | 34 |
| 113,270 | 220 | 1 | 2,792 | 22 | 98 | 4 | 1,297 | 8 | 4,407 | 35 |
| 113,271 | 220 | 1 | 2,792 | 22 | 98 | 4 | 1,295 | 8 | 4,405 | 35 |

|         |     |   |       |    |     |   |       |    |       |    |
|---------|-----|---|-------|----|-----|---|-------|----|-------|----|
| 113,272 | 258 | 1 | 3,191 | 21 | 111 | 4 | 1,686 | 8  | 5,246 | 34 |
| 113,273 | 258 | 1 | 3,191 | 21 | 111 | 4 | 1,686 | 8  | 5,246 | 34 |
| 113,274 | 256 | 1 | 3,251 | 21 | 111 | 4 | 1,714 | 8  | 5,332 | 34 |
| 113,275 | 256 | 1 | 3,262 | 20 | 111 | 4 | 1,717 | 8  | 5,346 | 33 |
| 113,276 | 255 | 1 | 3,251 | 20 | 111 | 4 | 1,709 | 8  | 5,326 | 33 |
| 113,277 | 257 | 1 | 3,237 | 20 | 111 | 4 | 1,713 | 8  | 5,318 | 33 |
| 113,278 | 257 | 1 | 3,241 | 20 | 111 | 4 | 1,715 | 8  | 5,324 | 33 |
| 113,279 | 252 | 1 | 3,200 | 19 | 111 | 4 | 1,689 | 8  | 5,252 | 32 |
| 113,280 | 250 | 1 | 3,192 | 19 | 111 | 4 | 1,686 | 8  | 5,239 | 32 |
| 113,281 | 251 | 1 | 3,192 | 19 | 111 | 4 | 1,683 | 8  | 5,237 | 32 |
| 113,282 | 251 | 1 | 3,190 | 19 | 111 | 4 | 1,684 | 8  | 5,236 | 32 |
| 113,283 | 251 | 1 | 3,183 | 19 | 109 | 4 | 1,684 | 8  | 5,227 | 32 |
| 113,284 | 251 | 1 | 3,181 | 20 | 109 | 4 | 1,683 | 8  | 5,224 | 33 |
| 113,285 | 251 | 2 | 3,176 | 22 | 109 | 4 | 1,683 | 11 | 5,219 | 39 |
| 113,286 | 251 | 2 | 3,162 | 22 | 109 | 3 | 1,682 | 11 | 5,204 | 38 |
| 113,287 | 252 | 2 | 3,162 | 22 | 109 | 3 | 1,684 | 12 | 5,207 | 39 |
| 113,288 | 252 | 2 | 3,143 | 21 | 108 | 2 | 1,679 | 10 | 5,182 | 35 |
| 113,289 | 242 | 2 | 3,048 | 20 | 106 | 2 | 1,657 | 9  | 5,053 | 33 |
| 113,290 | 242 | 2 | 3,011 | 20 | 104 | 2 | 1,641 | 9  | 4,998 | 33 |
| 113,291 | 227 | 1 | 2,856 | 19 | 100 | 2 | 1,578 | 9  | 4,761 | 31 |
| 113,292 | 222 | 1 | 2,753 | 19 | 100 | 2 | 1,538 | 9  | 4,613 | 31 |
| 113,293 | 222 | 1 | 2,744 | 19 | 100 | 2 | 1,540 | 9  | 4,606 | 31 |
| 113,294 | 218 | 1 | 2,719 | 19 | 96  | 2 | 1,524 | 8  | 4,557 | 30 |
| 113,295 | 218 | 1 | 2,721 | 19 | 96  | 2 | 1,526 | 8  | 4,561 | 30 |
| 113,296 | 213 | 1 | 2,530 | 19 | 90  | 2 | 1,443 | 8  | 4,276 | 30 |
| 113,297 | 203 | 1 | 2,401 | 18 | 86  | 2 | 1,380 | 8  | 4,070 | 29 |
| 113,298 | 188 | 1 | 2,072 | 18 | 77  | 2 | 1,288 | 8  | 3,625 | 29 |
| 113,299 | 156 | 1 | 1,657 | 17 | 45  | 2 | 1,017 | 8  | 2,875 | 28 |
| 113,300 | 157 | 1 | 1,505 | 17 | 40  | 2 | 970   | 8  | 2,672 | 28 |
| 113,301 | 152 | 1 | 1,435 | 14 | 38  | 2 | 933   | 8  | 2,558 | 25 |
| 113,302 | 152 | 1 | 1,409 | 12 | 38  | 2 | 924   | 6  | 2,523 | 21 |
| 113,303 | 152 | 1 | 1,384 | 12 | 38  | 2 | 918   | 6  | 2,492 | 21 |
| 113,304 | 150 | 1 | 1,373 | 12 | 37  | 3 | 905   | 6  | 2,465 | 22 |
| 113,305 | 152 | 1 | 1,379 | 12 | 37  | 3 | 915   | 5  | 2,483 | 21 |
| 113,306 | 152 | 1 | 1,359 | 12 | 34  | 3 | 905   | 7  | 2,450 | 23 |
| 113,307 | 143 | 2 | 1,308 | 12 | 32  | 1 | 888   | 9  | 2,371 | 24 |
| 113,308 | 137 | 2 | 1,225 | 11 | 30  | 1 | 852   | 9  | 2,244 | 23 |
| 113,309 | 130 | 2 | 1,193 | 6  | 27  | 1 | 828   | 10 | 2,178 | 19 |
| 113,310 | 130 | 2 | 1,195 | 5  | 27  | 1 | 827   | 10 | 2,179 | 18 |
| 113,311 | 130 | 2 | 1,191 | 5  | 27  | 1 | 829   | 10 | 2,177 | 18 |
| 113,312 | 130 | 2 | 1,188 | 5  | 27  | 1 | 827   | 10 | 2,172 | 18 |

|         |     |   |       |   |    |   |     |    |       |    |
|---------|-----|---|-------|---|----|---|-----|----|-------|----|
| 113,313 | 126 | 2 | 1,163 | 5 | 28 | 1 | 806 | 10 | 2,123 | 18 |
| 113,314 | 119 | 2 | 1,125 | 5 | 26 | 1 | 785 | 11 | 2,055 | 19 |
| 113,315 | 119 | 2 | 1,121 | 5 | 26 | 1 | 783 | 11 | 2,049 | 19 |
| 113,316 | 126 | 2 | 1,153 | 5 | 25 | 1 | 785 | 11 | 2,089 | 19 |
| 113,317 | 124 | 2 | 1,133 | 5 | 25 | 1 | 772 | 11 | 2,054 | 19 |
| 113,318 | 87  | 2 | 894   | 6 | 21 | 1 | 665 | 11 | 1,667 | 20 |
| 113,319 | 100 | 2 | 1,043 | 6 | 22 | 1 | 699 | 11 | 1,864 | 20 |
| 113,320 | 107 | 2 | 1,058 | 6 | 25 | 1 | 699 | 11 | 1,889 | 20 |
| 113,321 | 125 | 2 | 1,132 | 5 | 42 | 1 | 784 | 11 | 2,083 | 19 |
| 113,322 | 125 | 2 | 1,114 | 5 | 40 | 1 | 724 | 11 | 2,003 | 19 |
| 113,323 | 97  | 2 | 889   | 5 | 33 | 1 | 422 | 11 | 1,441 | 19 |
| 113,324 | 99  | 2 | 1,022 | 5 | 40 | 1 | 462 | 11 | 1,623 | 19 |
| 113,325 | 100 | 2 | 1,010 | 5 | 44 | 1 | 455 | 11 | 1,609 | 19 |
| 113,326 | 100 | 2 | 999   | 5 | 44 | 1 | 452 | 11 | 1,595 | 19 |
| 113,327 | 100 | 2 | 999   | 5 | 44 | 1 | 452 | 11 | 1,595 | 19 |
| 113,328 | 98  | 2 | 996   | 5 | 44 | 1 | 446 | 11 | 1,584 | 19 |
| 113,329 | 98  | 2 | 991   | 5 | 44 | 1 | 446 | 11 | 1,579 | 19 |
| 113,330 | 101 | 2 | 1,034 | 5 | 45 | 1 | 469 | 11 | 1,649 | 19 |
| 113,331 | 101 | 2 | 1,033 | 5 | 45 | 1 | 469 | 11 | 1,648 | 19 |
| 113,332 | 100 | 2 | 1,025 | 5 | 45 | 1 | 462 | 11 | 1,632 | 19 |
| 113,333 | 100 | 2 | 1,027 | 5 | 45 | 1 | 461 | 11 | 1,633 | 19 |
| 113,334 | 100 | 2 | 1,027 | 4 | 45 | 1 | 462 | 11 | 1,634 | 18 |
| 113,335 | 100 | 2 | 1,026 | 4 | 45 | 1 | 463 | 11 | 1,634 | 18 |
| 113,336 | 100 | 1 | 1,026 | 2 | 45 | 1 | 463 | 8  | 1,634 | 12 |
| 113,337 | 99  | 1 | 1,026 | 2 | 45 | 1 | 462 | 7  | 1,632 | 11 |
| 113,338 | 99  | 1 | 1,026 | 2 | 45 | 1 | 462 | 7  | 1,632 | 11 |
| 113,339 | 99  | 1 | 1,024 | 1 | 45 | 1 | 460 | 7  | 1,628 | 10 |
| 113,340 | 99  | 1 | 1,024 | 1 | 45 | 1 | 461 | 7  | 1,629 | 10 |
| 113,341 | 99  | 1 | 1,024 | 1 | 45 | 1 | 461 | 7  | 1,629 | 10 |
| 113,342 | 97  | 1 | 1,023 | 1 | 45 | 1 | 461 | 7  | 1,626 | 10 |
| 113,343 | 97  | 1 | 1,021 | 1 | 45 | 2 | 460 | 7  | 1,623 | 11 |
| 113,344 | 96  | 1 | 1,017 | 1 | 45 | 2 | 460 | 7  | 1,618 | 11 |
| 113,345 | 96  | 1 | 1,012 | 1 | 45 | 2 | 458 | 7  | 1,611 | 11 |
| 113,346 | 97  | 1 | 1,017 | 1 | 45 | 2 | 456 | 7  | 1,615 | 11 |
| 113,347 | 97  | 1 | 1,016 | 1 | 45 | 2 | 456 | 7  | 1,614 | 11 |
| 113,348 | 98  | 1 | 1,017 | 1 | 45 | 2 | 458 | 7  | 1,618 | 11 |
| 113,349 | 99  | 1 | 1,037 | 1 | 44 | 2 | 463 | 7  | 1,643 | 11 |
| 113,350 | 99  | 1 | 1,037 | 1 | 44 | 2 | 460 | 7  | 1,640 | 11 |
| 113,351 | 99  | 2 | 1,053 | 1 | 44 | 2 | 474 | 6  | 1,670 | 11 |
| 113,352 | 100 | 2 | 1,059 | 1 | 44 | 2 | 478 | 6  | 1,681 | 11 |
| 113,353 | 100 | 2 | 1,059 | 3 | 44 | 2 | 478 | 7  | 1,681 | 14 |

|         |     |   |       |   |    |   |     |    |       |    |
|---------|-----|---|-------|---|----|---|-----|----|-------|----|
| 113,354 | 100 | 2 | 1,060 | 3 | 44 | 2 | 480 | 7  | 1,684 | 14 |
| 113,355 | 98  | 2 | 1,053 | 4 | 44 | 1 | 470 | 7  | 1,665 | 14 |
| 113,356 | 98  | 2 | 1,052 | 4 | 44 | 1 | 470 | 9  | 1,664 | 16 |
| 113,357 | 98  | 2 | 1,051 | 4 | 44 | 1 | 466 | 8  | 1,659 | 15 |
| 113,358 | 125 | 1 | 1,262 | 5 | 61 | 2 | 589 | 7  | 2,037 | 15 |
| 113,359 | 125 | 1 | 1,262 | 5 | 61 | 2 | 589 | 7  | 2,037 | 15 |
| 113,360 | 132 | 3 | 1,382 | 5 | 69 | 2 | 683 | 6  | 2,266 | 16 |
| 113,361 | 132 | 3 | 1,377 | 7 | 69 | 2 | 682 | 6  | 2,260 | 18 |
| 113,362 | 132 | 3 | 1,374 | 7 | 69 | 2 | 680 | 6  | 2,255 | 18 |
| 113,363 | 133 | 3 | 1,370 | 7 | 69 | 2 | 688 | 6  | 2,260 | 18 |
| 113,364 | 133 | 3 | 1,369 | 7 | 68 | 2 | 685 | 5  | 2,255 | 17 |
| 113,365 | 133 | 3 | 1,366 | 7 | 68 | 2 | 684 | 5  | 2,251 | 17 |
| 113,366 | 125 | 3 | 1,335 | 7 | 67 | 2 | 667 | 5  | 2,194 | 17 |
| 113,367 | 125 | 3 | 1,324 | 7 | 68 | 2 | 668 | 5  | 2,185 | 17 |
| 113,368 | 115 | 3 | 1,216 | 7 | 67 | 2 | 644 | 5  | 2,042 | 17 |
| 113,369 | 111 | 3 | 1,198 | 6 | 66 | 2 | 637 | 6  | 2,012 | 17 |
| 113,370 | 104 | 3 | 1,151 | 6 | 64 | 2 | 610 | 6  | 1,929 | 17 |
| 113,371 | 91  | 3 | 1,090 | 6 | 61 | 2 | 579 | 6  | 1,821 | 17 |
| 113,372 | 56  | 3 | 832   | 6 | 42 | 2 | 404 | 7  | 1,334 | 18 |
| 113,373 | 49  | 3 | 710   | 6 | 38 | 2 | 378 | 7  | 1,175 | 18 |
| 113,374 | 49  | 3 | 714   | 6 | 43 | 2 | 390 | 7  | 1,196 | 18 |
| 113,375 | 47  | 3 | 550   | 7 | 36 | 2 | 337 | 7  | 970   | 19 |
| 113,376 | 48  | 3 | 535   | 7 | 32 | 2 | 329 | 8  | 944   | 20 |
| 113,377 | 48  | 3 | 504   | 7 | 31 | 2 | 313 | 9  | 896   | 21 |
| 113,378 | 47  | 3 | 504   | 8 | 31 | 2 | 307 | 10 | 889   | 23 |
| 113,379 | 45  | 3 | 508   | 8 | 31 | 2 | 309 | 10 | 893   | 23 |
| 113,380 | 45  | 3 | 506   | 8 | 31 | 2 | 309 | 10 | 891   | 23 |
| 113,381 | 45  | 3 | 507   | 8 | 31 | 2 | 311 | 10 | 894   | 23 |
| 113,382 | 52  | 3 | 520   | 8 | 33 | 2 | 315 | 10 | 920   | 23 |
| 113,383 | 52  | 3 | 520   | 8 | 33 | 2 | 315 | 11 | 920   | 24 |
| 113,384 | 55  | 3 | 535   | 8 | 34 | 2 | 325 | 11 | 949   | 24 |
| 113,385 | 58  | 3 | 585   | 8 | 34 | 2 | 334 | 11 | 1,011 | 24 |
| 113,386 | 58  | 3 | 585   | 8 | 34 | 2 | 334 | 11 | 1,011 | 24 |
| 113,387 | 62  | 3 | 719   | 8 | 35 | 2 | 376 | 11 | 1,192 | 24 |
| 113,388 | 73  | 4 | 861   | 8 | 44 | 2 | 469 | 11 | 1,447 | 25 |
| 113,389 | 73  | 4 | 860   | 8 | 44 | 2 | 469 | 11 | 1,446 | 25 |
| 113,390 | 74  | 4 | 867   | 8 | 44 | 2 | 474 | 11 | 1,459 | 25 |
| 113,391 | 76  | 4 | 912   | 8 | 51 | 2 | 511 | 11 | 1,550 | 25 |
| 113,392 | 76  | 4 | 911   | 8 | 51 | 2 | 511 | 11 | 1,549 | 25 |
| 113,393 | 76  | 4 | 920   | 8 | 51 | 1 | 520 | 11 | 1,567 | 24 |
| 113,394 | 76  | 4 | 921   | 8 | 51 | 1 | 517 | 11 | 1,565 | 24 |

|         |     |   |       |    |     |   |       |    |       |    |
|---------|-----|---|-------|----|-----|---|-------|----|-------|----|
| 113,395 | 76  | 4 | 919   | 8  | 51  | 1 | 518   | 11 | 1,564 | 24 |
| 113,396 | 76  | 4 | 916   | 8  | 51  | 1 | 519   | 11 | 1,562 | 24 |
| 113,397 | 75  | 4 | 914   | 8  | 51  | 1 | 519   | 11 | 1,559 | 24 |
| 113,398 | 75  | 4 | 915   | 8  | 51  | 1 | 520   | 11 | 1,561 | 24 |
| 113,399 | 75  | 4 | 912   | 8  | 51  | 1 | 516   | 11 | 1,554 | 24 |
| 113,400 | 74  | 4 | 895   | 9  | 52  | 1 | 509   | 11 | 1,530 | 25 |
| 113,401 | 74  | 4 | 888   | 10 | 52  | 1 | 500   | 11 | 1,514 | 26 |
| 113,402 | 74  | 3 | 880   | 10 | 52  | 1 | 495   | 11 | 1,501 | 25 |
| 113,403 | 74  | 3 | 878   | 8  | 52  | 1 | 496   | 10 | 1,500 | 22 |
| 113,404 | 74  | 3 | 884   | 7  | 52  | 1 | 502   | 10 | 1,512 | 21 |
| 113,405 | 87  | 3 | 910   | 8  | 53  | 1 | 545   | 11 | 1,595 | 23 |
| 113,406 | 73  | 3 | 873   | 8  | 50  | 1 | 514   | 11 | 1,510 | 23 |
| 113,407 | 67  | 3 | 777   | 8  | 42  | 1 | 509   | 9  | 1,395 | 21 |
| 113,408 | 74  | 3 | 752   | 7  | 37  | 0 | 476   | 7  | 1,339 | 17 |
| 113,409 | 85  | 3 | 787   | 7  | 45  | 1 | 518   | 7  | 1,435 | 18 |
| 113,410 | 101 | 3 | 811   | 7  | 51  | 1 | 538   | 7  | 1,501 | 18 |
| 113,411 | 96  | 1 | 763   | 7  | 48  | 1 | 504   | 7  | 1,411 | 16 |
| 113,412 | 165 | 1 | 1,100 | 5  | 100 | 1 | 957   | 7  | 2,322 | 14 |
| 113,413 | 171 | 1 | 1,146 | 5  | 110 | 1 | 1,049 | 7  | 2,476 | 14 |
| 113,414 | 171 | 1 | 1,154 | 5  | 110 | 1 | 1,055 | 7  | 2,490 | 14 |
| 113,415 | 171 | 1 | 1,153 | 5  | 110 | 1 | 1,055 | 7  | 2,489 | 14 |
| 113,416 | 171 | 1 | 1,152 | 5  | 110 | 1 | 1,055 | 7  | 2,488 | 14 |
| 113,417 | 171 | 1 | 1,152 | 5  | 110 | 1 | 1,057 | 7  | 2,490 | 14 |
| 113,418 | 171 | 1 | 1,153 | 5  | 110 | 1 | 1,059 | 8  | 2,493 | 15 |
| 113,419 | 171 | 1 | 1,158 | 5  | 110 | 1 | 1,060 | 7  | 2,499 | 14 |
| 113,420 | 171 | 1 | 1,158 | 6  | 110 | 1 | 1,061 | 7  | 2,500 | 15 |
| 113,421 | 177 | 1 | 1,174 | 6  | 114 | 1 | 1,067 | 7  | 2,532 | 15 |
| 113,422 | 177 | 2 | 1,171 | 6  | 115 | 1 | 1,065 | 6  | 2,528 | 15 |
| 113,423 | 182 | 2 | 1,245 | 6  | 117 | 1 | 1,088 | 6  | 2,632 | 15 |
| 113,424 | 192 | 2 | 1,428 | 6  | 135 | 1 | 1,200 | 6  | 2,955 | 15 |
| 113,425 | 189 | 2 | 1,389 | 5  | 130 | 2 | 1,182 | 6  | 2,890 | 15 |
| 113,426 | 189 | 2 | 1,389 | 5  | 130 | 2 | 1,182 | 6  | 2,890 | 15 |
| 113,427 | 216 | 2 | 1,574 | 5  | 159 | 2 | 1,457 | 5  | 3,406 | 14 |
| 113,428 | 216 | 2 | 1,567 | 5  | 159 | 2 | 1,457 | 4  | 3,399 | 13 |
| 113,429 | 216 | 2 | 1,573 | 4  | 159 | 2 | 1,461 | 3  | 3,409 | 11 |
| 113,430 | 216 | 2 | 1,573 | 4  | 159 | 2 | 1,463 | 3  | 3,411 | 11 |
| 113,431 | 216 | 2 | 1,572 | 4  | 159 | 2 | 1,461 | 3  | 3,408 | 11 |
| 113,432 | 217 | 2 | 1,616 | 4  | 163 | 2 | 1,539 | 3  | 3,535 | 11 |
| 113,433 | 217 | 2 | 1,622 | 4  | 163 | 2 | 1,547 | 3  | 3,549 | 11 |
| 113,434 | 215 | 2 | 1,614 | 4  | 163 | 2 | 1,549 | 2  | 3,541 | 10 |
| 113,435 | 215 | 3 | 1,598 | 4  | 163 | 2 | 1,549 | 2  | 3,525 | 11 |

|         |     |   |       |    |     |   |       |   |       |    |
|---------|-----|---|-------|----|-----|---|-------|---|-------|----|
| 113,436 | 212 | 4 | 1,564 | 4  | 163 | 2 | 1,539 | 4 | 3,478 | 14 |
| 113,437 | 209 | 4 | 1,439 | 6  | 162 | 2 | 1,500 | 4 | 3,310 | 16 |
| 113,438 | 207 | 4 | 1,426 | 8  | 160 | 2 | 1,477 | 6 | 3,270 | 20 |
| 113,439 | 201 | 3 | 1,328 | 8  | 154 | 2 | 1,432 | 7 | 3,115 | 20 |
| 113,440 | 202 | 3 | 1,322 | 8  | 154 | 2 | 1,429 | 7 | 3,107 | 20 |
| 113,441 | 201 | 3 | 1,309 | 8  | 153 | 2 | 1,420 | 7 | 3,083 | 20 |
| 113,442 | 200 | 3 | 1,278 | 8  | 147 | 2 | 1,392 | 7 | 3,017 | 20 |
| 113,443 | 200 | 3 | 1,269 | 9  | 147 | 2 | 1,384 | 8 | 3,000 | 22 |
| 113,444 | 200 | 3 | 1,270 | 9  | 147 | 2 | 1,382 | 8 | 2,999 | 22 |
| 113,445 | 203 | 3 | 1,275 | 9  | 147 | 2 | 1,386 | 8 | 3,011 | 22 |
| 113,446 | 203 | 3 | 1,275 | 9  | 147 | 2 | 1,387 | 8 | 3,012 | 22 |
| 113,447 | 203 | 3 | 1,273 | 9  | 147 | 2 | 1,383 | 9 | 3,006 | 23 |
| 113,448 | 205 | 3 | 1,278 | 9  | 147 | 2 | 1,386 | 9 | 3,016 | 23 |
| 113,449 | 208 | 3 | 1,291 | 9  | 147 | 2 | 1,404 | 9 | 3,050 | 23 |
| 113,450 | 207 | 3 | 1,295 | 8  | 147 | 2 | 1,409 | 9 | 3,058 | 22 |
| 113,451 | 218 | 3 | 1,347 | 7  | 152 | 2 | 1,509 | 9 | 3,226 | 21 |
| 113,452 | 220 | 3 | 1,353 | 7  | 154 | 2 | 1,515 | 9 | 3,242 | 21 |
| 113,453 | 219 | 3 | 1,373 | 7  | 155 | 2 | 1,522 | 9 | 3,269 | 21 |
| 113,454 | 219 | 3 | 1,398 | 7  | 156 | 2 | 1,529 | 8 | 3,302 | 20 |
| 113,455 | 226 | 3 | 1,449 | 7  | 168 | 2 | 1,556 | 8 | 3,399 | 20 |
| 113,456 | 225 | 3 | 1,930 | 8  | 177 | 2 | 1,643 | 8 | 3,975 | 21 |
| 113,457 | 227 | 3 | 1,973 | 8  | 177 | 2 | 1,662 | 8 | 4,039 | 21 |
| 113,458 | 226 | 3 | 1,990 | 9  | 179 | 2 | 1,670 | 9 | 4,065 | 23 |
| 113,459 | 214 | 3 | 1,968 | 9  | 178 | 3 | 1,650 | 9 | 4,010 | 24 |
| 113,460 | 204 | 3 | 1,931 | 10 | 170 | 2 | 1,611 | 9 | 3,916 | 24 |
| 113,461 | 191 | 3 | 1,839 | 10 | 161 | 2 | 1,531 | 9 | 3,722 | 24 |
| 113,462 | 183 | 3 | 1,890 | 10 | 156 | 2 | 1,455 | 9 | 3,684 | 24 |
| 113,463 | 124 | 3 | 1,593 | 10 | 112 | 2 | 1,089 | 9 | 2,918 | 24 |
| 113,464 | 117 | 3 | 1,548 | 11 | 102 | 2 | 1,001 | 9 | 2,768 | 25 |
| 113,465 | 118 | 3 | 1,625 | 11 | 105 | 2 | 1,037 | 9 | 2,885 | 25 |
| 113,466 | 118 | 3 | 1,629 | 11 | 106 | 2 | 1,043 | 9 | 2,896 | 25 |
| 113,467 | 121 | 3 | 1,648 | 11 | 106 | 2 | 1,064 | 9 | 2,939 | 25 |
| 113,468 | 122 | 3 | 1,651 | 11 | 106 | 2 | 1,068 | 8 | 2,947 | 24 |
| 113,469 | 122 | 3 | 1,663 | 11 | 106 | 2 | 1,073 | 8 | 2,964 | 24 |
| 113,470 | 124 | 3 | 1,663 | 10 | 107 | 2 | 1,082 | 8 | 2,976 | 23 |
| 113,471 | 124 | 3 | 1,663 | 10 | 107 | 2 | 1,082 | 8 | 2,976 | 23 |
| 113,472 | 120 | 4 | 1,723 | 10 | 107 | 2 | 1,136 | 8 | 3,086 | 24 |
| 113,473 | 120 | 3 | 1,725 | 10 | 106 | 2 | 1,142 | 8 | 3,093 | 23 |
| 113,474 | 115 | 3 | 1,652 | 10 | 105 | 2 | 1,132 | 8 | 3,004 | 23 |
| 113,475 | 107 | 3 | 1,478 | 10 | 89  | 1 | 1,026 | 8 | 2,700 | 22 |
| 113,476 | 107 | 3 | 1,477 | 11 | 89  | 1 | 1,023 | 8 | 2,696 | 23 |



|         |     |   |       |    |     |   |       |   |       |    |
|---------|-----|---|-------|----|-----|---|-------|---|-------|----|
| 113,477 | 78  | 3 | 1,292 | 11 | 63  | 1 | 749   | 8 | 2,182 | 23 |
| 113,478 | 78  | 3 | 1,289 | 11 | 60  | 1 | 745   | 8 | 2,172 | 23 |
| 113,479 | 78  | 3 | 1,288 | 11 | 60  | 1 | 746   | 8 | 2,172 | 23 |
| 113,480 | 78  | 3 | 1,279 | 11 | 60  | 1 | 742   | 8 | 2,159 | 23 |
| 113,481 | 78  | 3 | 1,284 | 11 | 60  | 1 | 736   | 8 | 2,158 | 23 |
| 113,482 | 73  | 3 | 1,244 | 11 | 55  | 1 | 670   | 8 | 2,042 | 23 |
| 113,483 | 73  | 3 | 1,237 | 11 | 55  | 1 | 667   | 8 | 2,032 | 23 |
| 113,484 | 73  | 3 | 1,233 | 11 | 54  | 1 | 655   | 8 | 2,015 | 23 |
| 113,485 | 78  | 3 | 1,284 | 12 | 55  | 1 | 691   | 8 | 2,108 | 24 |
| 113,486 | 78  | 3 | 1,285 | 12 | 55  | 1 | 693   | 8 | 2,111 | 24 |
| 113,487 | 80  | 2 | 1,295 | 13 | 56  | 1 | 702   | 6 | 2,133 | 22 |
| 113,488 | 81  | 2 | 1,299 | 9  | 57  | 1 | 703   | 4 | 2,140 | 16 |
| 113,489 | 81  | 2 | 1,293 | 9  | 57  | 1 | 701   | 4 | 2,132 | 16 |
| 113,490 | 127 | 2 | 1,544 | 9  | 80  | 1 | 822   | 3 | 2,573 | 15 |
| 113,491 | 125 | 2 | 1,543 | 9  | 80  | 1 | 821   | 3 | 2,569 | 15 |
| 113,492 | 388 | 2 | 3,040 | 9  | 263 | 1 | 1,862 | 3 | 5,553 | 15 |
| 113,493 | 482 | 2 | 3,530 | 8  | 326 | 1 | 2,172 | 2 | 6,510 | 13 |
| 113,494 | 482 | 2 | 3,530 | 8  | 327 | 1 | 2,172 | 2 | 6,511 | 13 |
| 113,495 | 495 | 2 | 3,613 | 8  | 341 | 1 | 2,235 | 2 | 6,684 | 13 |
| 113,496 | 495 | 2 | 3,610 | 8  | 341 | 1 | 2,234 | 2 | 6,680 | 13 |
| 113,497 | 496 | 2 | 3,639 | 8  | 345 | 1 | 2,255 | 2 | 6,735 | 13 |
| 113,498 | 499 | 2 | 3,647 | 8  | 347 | 1 | 2,261 | 1 | 6,754 | 12 |
| 113,499 | 497 | 2 | 3,645 | 8  | 347 | 1 | 2,262 | 1 | 6,751 | 12 |
| 113,500 | 494 | 2 | 3,631 | 8  | 347 | 1 | 2,245 | 1 | 6,717 | 12 |
| 113,501 | 494 | 2 | 3,626 | 9  | 348 | 1 | 2,243 | 1 | 6,711 | 13 |
| 113,502 | 483 | 3 | 3,572 | 9  | 342 | 1 | 2,141 | 1 | 6,538 | 14 |
| 113,503 | 482 | 4 | 3,581 | 9  | 340 | 1 | 2,140 | 2 | 6,543 | 16 |
| 113,504 | 482 | 4 | 3,573 | 9  | 339 | 1 | 2,133 | 2 | 6,527 | 16 |
| 113,505 | 485 | 4 | 3,574 | 8  | 338 | 1 | 2,129 | 2 | 6,526 | 15 |
| 113,506 | 477 | 4 | 3,529 | 8  | 326 | 1 | 2,111 | 2 | 6,443 | 15 |
| 113,507 | 466 | 4 | 3,024 | 7  | 316 | 1 | 1,982 | 2 | 5,788 | 14 |
| 113,508 | 465 | 4 | 2,975 | 6  | 316 | 1 | 1,953 | 1 | 5,709 | 12 |
| 113,509 | 464 | 4 | 2,945 | 6  | 313 | 1 | 1,928 | 1 | 5,650 | 12 |
| 113,510 | 464 | 4 | 3,017 | 6  | 313 | 0 | 1,942 | 2 | 5,736 | 12 |
| 113,511 | 482 | 4 | 3,167 | 5  | 329 | 0 | 2,123 | 2 | 6,101 | 11 |
| 113,512 | 483 | 4 | 3,224 | 5  | 328 | 0 | 2,144 | 2 | 6,179 | 11 |
| 113,513 | 486 | 4 | 3,189 | 5  | 326 | 0 | 2,151 | 2 | 6,152 | 11 |
| 113,514 | 516 | 4 | 3,601 | 5  | 346 | 0 | 2,507 | 2 | 6,970 | 11 |
| 113,515 | 526 | 4 | 3,685 | 4  | 351 | 0 | 2,593 | 2 | 7,155 | 10 |
| 113,516 | 528 | 4 | 3,677 | 4  | 352 | 0 | 2,599 | 2 | 7,156 | 10 |
| 113,517 | 528 | 4 | 3,672 | 4  | 351 | 0 | 2,592 | 2 | 7,143 | 10 |

|         |     |   |       |   |     |   |       |   |       |    |
|---------|-----|---|-------|---|-----|---|-------|---|-------|----|
| 113,518 | 525 | 4 | 3,652 | 4 | 351 | 0 | 2,569 | 2 | 7,097 | 10 |
| 113,519 | 524 | 4 | 3,659 | 4 | 351 | 0 | 2,572 | 2 | 7,106 | 10 |
| 113,520 | 524 | 4 | 3,647 | 4 | 352 | 0 | 2,566 | 2 | 7,089 | 10 |
| 113,521 | 522 | 4 | 3,648 | 4 | 351 | 0 | 2,558 | 2 | 7,079 | 10 |
| 113,522 | 521 | 3 | 3,591 | 4 | 347 | 0 | 2,516 | 2 | 6,975 | 9  |
| 113,523 | 520 | 3 | 3,570 | 4 | 347 | 0 | 2,499 | 2 | 6,936 | 9  |
| 113,524 | 521 | 3 | 3,568 | 4 | 347 | 0 | 2,496 | 2 | 6,932 | 9  |
| 113,525 | 521 | 3 | 3,564 | 4 | 346 | 0 | 2,486 | 2 | 6,917 | 9  |
| 113,526 | 519 | 3 | 3,558 | 3 | 344 | 0 | 2,474 | 2 | 6,895 | 8  |
| 113,527 | 519 | 3 | 3,557 | 3 | 344 | 0 | 2,474 | 2 | 6,894 | 8  |
| 113,528 | 519 | 3 | 3,556 | 3 | 344 | 0 | 2,473 | 2 | 6,892 | 8  |
| 113,529 | 528 | 3 | 3,575 | 3 | 345 | 0 | 2,487 | 2 | 6,935 | 8  |
| 113,530 | 528 | 3 | 3,575 | 3 | 347 | 0 | 2,487 | 2 | 6,937 | 8  |
| 113,531 | 529 | 3 | 3,576 | 3 | 347 | 0 | 2,487 | 2 | 6,939 | 8  |
| 113,532 | 529 | 3 | 3,568 | 3 | 347 | 0 | 2,487 | 2 | 6,931 | 8  |
| 113,533 | 529 | 3 | 3,564 | 3 | 346 | 0 | 2,483 | 2 | 6,922 | 8  |
| 113,534 | 533 | 2 | 3,577 | 3 | 347 | 0 | 2,480 | 2 | 6,937 | 7  |
| 113,535 | 533 | 2 | 3,561 | 3 | 348 | 0 | 2,473 | 2 | 6,915 | 7  |
| 113,536 | 536 | 2 | 3,545 | 3 | 348 | 0 | 2,450 | 2 | 6,879 | 7  |
| 113,537 | 536 | 2 | 3,578 | 2 | 348 | 0 | 2,454 | 2 | 6,916 | 6  |
| 113,538 | 534 | 2 | 3,567 | 2 | 347 | 0 | 2,445 | 2 | 6,893 | 6  |
| 113,539 | 632 | 2 | 3,967 | 2 | 362 | 0 | 2,600 | 2 | 7,561 | 6  |
| 113,540 | 666 | 2 | 4,174 | 2 | 385 | 0 | 2,778 | 2 | 8,003 | 6  |
| 113,541 | 630 | 2 | 4,193 | 2 | 382 | 0 | 2,898 | 2 | 8,103 | 6  |
| 113,542 | 580 | 2 | 3,931 | 2 | 341 | 0 | 2,725 | 3 | 7,577 | 7  |
| 113,543 | 374 | 2 | 2,813 | 2 | 206 | 0 | 1,920 | 3 | 5,313 | 7  |
| 113,544 | 280 | 2 | 2,324 | 2 | 142 | 0 | 1,611 | 3 | 4,357 | 7  |
| 113,545 | 272 | 2 | 2,288 | 2 | 137 | 0 | 1,586 | 3 | 4,283 | 7  |
| 113,546 | 264 | 2 | 2,238 | 2 | 128 | 0 | 1,550 | 3 | 4,180 | 7  |
| 113,547 | 262 | 2 | 2,207 | 2 | 124 | 0 | 1,528 | 3 | 4,121 | 7  |
| 113,548 | 262 | 2 | 2,203 | 2 | 124 | 0 | 1,525 | 3 | 4,114 | 7  |
| 113,549 | 260 | 2 | 2,199 | 2 | 123 | 0 | 1,524 | 3 | 4,106 | 7  |
| 113,550 | 260 | 2 | 2,198 | 2 | 123 | 0 | 1,523 | 3 | 4,104 | 7  |
| 113,551 | 260 | 2 | 2,198 | 2 | 123 | 0 | 1,522 | 3 | 4,103 | 7  |
| 113,552 | 260 | 2 | 2,199 | 1 | 123 | 0 | 1,522 | 3 | 4,104 | 6  |
| 113,553 | 260 | 1 | 2,197 | 1 | 123 | 0 | 1,521 | 3 | 4,101 | 5  |
| 113,554 | 259 | 0 | 2,182 | 1 | 123 | 0 | 1,519 | 2 | 4,083 | 3  |
| 113,555 | 259 | 0 | 2,168 | 1 | 123 | 0 | 1,516 | 2 | 4,066 | 3  |
| 113,556 | 258 | 0 | 2,147 | 1 | 123 | 0 | 1,510 | 2 | 4,038 | 3  |
| 113,557 | 258 | 0 | 2,134 | 1 | 123 | 0 | 1,493 | 2 | 4,008 | 3  |
| 113,558 | 258 | 0 | 2,121 | 1 | 123 | 0 | 1,490 | 2 | 3,992 | 3  |

|         |     |   |       |   |     |   |       |   |       |    |
|---------|-----|---|-------|---|-----|---|-------|---|-------|----|
| 113,559 | 261 | 0 | 2,127 | 1 | 123 | 0 | 1,494 | 2 | 4,005 | 3  |
| 113,560 | 261 | 0 | 2,046 | 1 | 123 | 0 | 1,477 | 1 | 3,907 | 2  |
| 113,561 | 260 | 0 | 1,993 | 1 | 120 | 0 | 1,431 | 1 | 3,804 | 2  |
| 113,562 | 242 | 0 | 1,895 | 1 | 107 | 0 | 1,294 | 1 | 3,538 | 2  |
| 113,563 | 236 | 0 | 1,832 | 1 | 106 | 0 | 1,270 | 1 | 3,444 | 2  |
| 113,564 | 235 | 0 | 1,774 | 1 | 105 | 0 | 1,247 | 1 | 3,361 | 2  |
| 113,565 | 205 | 0 | 1,360 | 1 | 85  | 0 | 887   | 1 | 2,537 | 2  |
| 113,566 | 194 | 0 | 1,211 | 1 | 78  | 0 | 763   | 1 | 2,246 | 2  |
| 113,567 | 192 | 0 | 1,209 | 1 | 77  | 0 | 743   | 1 | 2,221 | 2  |
| 113,568 | 194 | 0 | 1,215 | 1 | 77  | 0 | 746   | 1 | 2,232 | 2  |
| 113,569 | 194 | 0 | 1,213 | 1 | 77  | 0 | 746   | 1 | 2,230 | 2  |
| 113,570 | 195 | 0 | 1,215 | 1 | 78  | 0 | 746   | 1 | 2,234 | 2  |
| 113,571 | 195 | 0 | 1,215 | 1 | 77  | 0 | 746   | 1 | 2,233 | 2  |
| 113,572 | 195 | 0 | 1,208 | 1 | 77  | 0 | 745   | 1 | 2,225 | 2  |
| 113,573 | 195 | 0 | 1,207 | 1 | 77  | 0 | 745   | 1 | 2,224 | 2  |
| 113,574 | 195 | 0 | 1,207 | 1 | 77  | 0 | 745   | 1 | 2,224 | 2  |
| 113,575 | 194 | 0 | 1,202 | 2 | 77  | 0 | 742   | 1 | 2,215 | 3  |
| 113,576 | 194 | 0 | 1,202 | 2 | 77  | 0 | 741   | 1 | 2,214 | 3  |
| 113,577 | 194 | 0 | 1,198 | 2 | 77  | 1 | 741   | 1 | 2,210 | 4  |
| 113,578 | 194 | 0 | 1,198 | 2 | 77  | 1 | 741   | 2 | 2,210 | 5  |
| 113,579 | 194 | 0 | 1,198 | 2 | 77  | 1 | 741   | 2 | 2,210 | 5  |
| 113,580 | 185 | 0 | 1,179 | 2 | 76  | 1 | 727   | 2 | 2,167 | 5  |
| 113,581 | 185 | 0 | 1,180 | 2 | 74  | 2 | 728   | 2 | 2,167 | 6  |
| 113,582 | 184 | 0 | 1,179 | 2 | 74  | 2 | 728   | 2 | 2,165 | 6  |
| 113,583 | 184 | 0 | 1,177 | 2 | 74  | 2 | 728   | 2 | 2,163 | 6  |
| 113,584 | 182 | 0 | 1,170 | 2 | 74  | 2 | 719   | 2 | 2,145 | 6  |
| 113,585 | 178 | 0 | 1,151 | 1 | 73  | 2 | 716   | 2 | 2,118 | 5  |
| 113,586 | 178 | 0 | 1,148 | 1 | 72  | 2 | 716   | 2 | 2,114 | 5  |
| 113,587 | 169 | 0 | 1,130 | 1 | 71  | 2 | 710   | 3 | 2,080 | 6  |
| 113,588 | 169 | 1 | 1,098 | 1 | 71  | 2 | 704   | 6 | 2,042 | 10 |
| 113,589 | 153 | 1 | 1,012 | 3 | 65  | 2 | 664   | 7 | 1,894 | 13 |
| 113,590 | 69  | 1 | 682   | 3 | 55  | 2 | 536   | 7 | 1,342 | 13 |
| 113,591 | 30  | 1 | 460   | 3 | 32  | 2 | 349   | 7 | 871   | 13 |
| 113,592 | 22  | 1 | 191   | 3 | 12  | 2 | 101   | 6 | 326   | 12 |
| 113,593 | 16  | 1 | 84    | 3 | 8   | 2 | 64    | 6 | 172   | 12 |
| 113,594 | 15  | 1 | 69    | 4 | 4   | 2 | 28    | 6 | 116   | 13 |
| 113,595 | 15  | 1 | 69    | 4 | 4   | 2 | 28    | 6 | 116   | 13 |
| 113,596 | 15  | 1 | 69    | 4 | 4   | 2 | 28    | 6 | 116   | 13 |
| 113,597 | 15  | 1 | 70    | 4 | 4   | 2 | 29    | 6 | 118   | 13 |
| 113,598 | 15  | 1 | 70    | 4 | 4   | 2 | 29    | 6 | 118   | 13 |
| 113,599 | 16  | 1 | 74    | 4 | 3   | 2 | 29    | 6 | 122   | 13 |

|         |    |   |     |   |   |   |     |    |     |    |
|---------|----|---|-----|---|---|---|-----|----|-----|----|
| 113,600 | 16 | 1 | 74  | 4 | 3 | 2 | 29  | 6  | 122 | 13 |
| 113,601 | 16 | 1 | 75  | 4 | 3 | 2 | 29  | 6  | 123 | 13 |
| 113,602 | 18 | 1 | 77  | 4 | 3 | 2 | 30  | 6  | 128 | 13 |
| 113,603 | 18 | 1 | 78  | 4 | 3 | 2 | 30  | 6  | 129 | 13 |
| 113,604 | 24 | 1 | 106 | 4 | 3 | 2 | 45  | 6  | 178 | 13 |
| 113,605 | 24 | 1 | 106 | 4 | 3 | 2 | 45  | 6  | 178 | 13 |
| 113,606 | 34 | 1 | 131 | 4 | 4 | 2 | 87  | 6  | 256 | 13 |
| 113,607 | 36 | 1 | 135 | 4 | 5 | 2 | 102 | 6  | 278 | 13 |
| 113,608 | 37 | 1 | 142 | 4 | 7 | 2 | 110 | 6  | 296 | 13 |
| 113,609 | 37 | 1 | 142 | 4 | 7 | 2 | 110 | 6  | 296 | 13 |
| 113,610 | 33 | 1 | 131 | 4 | 7 | 2 | 104 | 6  | 275 | 13 |
| 113,611 | 33 | 1 | 141 | 4 | 7 | 2 | 112 | 6  | 293 | 13 |
| 113,612 | 33 | 1 | 141 | 4 | 7 | 2 | 112 | 6  | 293 | 13 |
| 113,613 | 33 | 1 | 139 | 4 | 7 | 2 | 112 | 6  | 291 | 13 |
| 113,614 | 33 | 1 | 137 | 4 | 7 | 2 | 112 | 7  | 289 | 14 |
| 113,615 | 29 | 2 | 133 | 4 | 7 | 2 | 109 | 7  | 278 | 15 |
| 113,616 | 29 | 2 | 129 | 4 | 7 | 2 | 108 | 8  | 273 | 16 |
| 113,617 | 29 | 3 | 120 | 5 | 6 | 2 | 108 | 10 | 263 | 20 |
| 113,618 | 28 | 3 | 111 | 6 | 6 | 2 | 102 | 10 | 247 | 21 |
| 113,619 | 27 | 3 | 107 | 6 | 6 | 2 | 99  | 10 | 239 | 21 |
| 113,620 | 26 | 4 | 105 | 6 | 5 | 3 | 98  | 10 | 234 | 23 |
| 113,621 | 26 | 4 | 106 | 6 | 5 | 3 | 98  | 10 | 235 | 23 |
| 113,622 | 26 | 4 | 106 | 6 | 5 | 3 | 98  | 10 | 235 | 23 |
| 113,623 | 26 | 4 | 106 | 6 | 5 | 3 | 98  | 10 | 235 | 23 |
| 113,624 | 26 | 4 | 105 | 6 | 5 | 3 | 100 | 10 | 236 | 23 |
| 113,625 | 26 | 4 | 111 | 6 | 6 | 3 | 101 | 10 | 244 | 23 |
| 113,626 | 26 | 4 | 111 | 5 | 6 | 2 | 101 | 10 | 244 | 21 |
| 113,627 | 26 | 5 | 111 | 5 | 6 | 2 | 101 | 10 | 244 | 22 |
| 113,628 | 26 | 5 | 111 | 5 | 6 | 2 | 101 | 10 | 244 | 22 |
| 113,629 | 26 | 5 | 112 | 5 | 6 | 2 | 101 | 9  | 245 | 21 |
| 113,630 | 26 | 5 | 111 | 5 | 6 | 2 | 101 | 9  | 244 | 21 |
| 113,631 | 26 | 5 | 111 | 5 | 6 | 2 | 101 | 9  | 244 | 21 |
| 113,632 | 27 | 5 | 111 | 5 | 6 | 1 | 100 | 9  | 244 | 20 |
| 113,633 | 27 | 6 | 111 | 5 | 6 | 1 | 100 | 9  | 244 | 21 |
| 113,634 | 27 | 6 | 112 | 5 | 6 | 1 | 101 | 9  | 246 | 21 |
| 113,635 | 26 | 6 | 112 | 5 | 6 | 1 | 101 | 9  | 245 | 21 |
| 113,636 | 26 | 6 | 112 | 5 | 6 | 1 | 101 | 9  | 245 | 21 |
| 113,637 | 26 | 6 | 111 | 5 | 6 | 1 | 101 | 9  | 244 | 21 |
| 113,638 | 28 | 5 | 115 | 5 | 6 | 1 | 102 | 5  | 251 | 16 |
| 113,639 | 34 | 5 | 155 | 5 | 6 | 1 | 123 | 5  | 318 | 16 |
| 113,640 | 34 | 5 | 158 | 3 | 6 | 1 | 125 | 4  | 323 | 13 |

|         |    |   |     |   |    |   |     |   |     |    |
|---------|----|---|-----|---|----|---|-----|---|-----|----|
| 113,641 | 35 | 5 | 171 | 3 | 6  | 1 | 127 | 4 | 339 | 13 |
| 113,642 | 36 | 5 | 172 | 3 | 6  | 1 | 128 | 4 | 342 | 13 |
| 113,643 | 36 | 5 | 166 | 3 | 5  | 1 | 126 | 4 | 333 | 13 |
| 113,644 | 36 | 5 | 172 | 3 | 6  | 1 | 126 | 4 | 340 | 13 |
| 113,645 | 41 | 5 | 246 | 2 | 14 | 1 | 158 | 4 | 459 | 12 |
| 113,646 | 41 | 5 | 246 | 2 | 14 | 1 | 158 | 4 | 459 | 12 |
| 113,647 | 41 | 5 | 255 | 2 | 14 | 1 | 163 | 4 | 473 | 12 |
| 113,648 | 41 | 6 | 254 | 2 | 14 | 1 | 162 | 4 | 471 | 13 |
| 113,649 | 41 | 6 | 254 | 2 | 14 | 1 | 162 | 4 | 471 | 13 |
| 113,650 | 40 | 6 | 250 | 2 | 14 | 1 | 162 | 4 | 466 | 13 |
| 113,651 | 40 | 6 | 249 | 3 | 14 | 1 | 162 | 4 | 465 | 14 |
| 113,652 | 39 | 6 | 249 | 3 | 14 | 1 | 162 | 4 | 464 | 14 |
| 113,653 | 38 | 6 | 247 | 3 | 14 | 1 | 161 | 4 | 460 | 14 |
| 113,654 | 38 | 6 | 246 | 3 | 14 | 1 | 161 | 4 | 459 | 14 |
| 113,655 | 32 | 6 | 218 | 3 | 14 | 1 | 146 | 5 | 410 | 15 |
| 113,656 | 28 | 6 | 206 | 5 | 13 | 1 | 122 | 8 | 369 | 20 |
| 113,657 | 20 | 6 | 186 | 6 | 13 | 1 | 104 | 9 | 323 | 22 |
| 113,658 | 18 | 6 | 182 | 7 | 12 | 1 | 89  | 9 | 301 | 23 |
| 113,659 | 17 | 6 | 175 | 7 | 10 | 1 | 82  | 9 | 284 | 23 |
| 113,660 | 17 | 6 | 169 | 7 | 10 | 1 | 77  | 9 | 273 | 23 |
| 113,661 | 17 | 6 | 166 | 7 | 10 | 1 | 72  | 9 | 265 | 23 |
| 113,662 | 16 | 6 | 164 | 8 | 10 | 1 | 69  | 9 | 259 | 24 |
| 113,663 | 16 | 6 | 164 | 8 | 10 | 1 | 69  | 9 | 259 | 24 |
| 113,664 | 16 | 6 | 163 | 8 | 10 | 1 | 69  | 9 | 258 | 24 |
| 113,665 | 16 | 5 | 163 | 8 | 10 | 1 | 69  | 8 | 258 | 22 |
| 113,666 | 16 | 4 | 164 | 7 | 10 | 1 | 71  | 5 | 261 | 17 |
| 113,667 | 16 | 4 | 164 | 7 | 10 | 1 | 71  | 5 | 261 | 17 |
| 113,668 | 19 | 4 | 167 | 7 | 10 | 1 | 77  | 5 | 273 | 17 |
| 113,669 | 19 | 4 | 166 | 7 | 10 | 1 | 77  | 5 | 272 | 17 |
| 113,670 | 19 | 4 | 165 | 7 | 10 | 1 | 77  | 5 | 271 | 17 |
| 113,671 | 19 | 3 | 164 | 7 | 10 | 0 | 77  | 5 | 270 | 15 |
| 113,672 | 19 | 3 | 164 | 7 | 10 | 0 | 77  | 5 | 270 | 15 |
| 113,673 | 20 | 3 | 174 | 7 | 10 | 0 | 81  | 5 | 285 | 15 |
| 113,674 | 20 | 3 | 174 | 7 | 10 | 0 | 79  | 5 | 283 | 15 |
| 113,675 | 20 | 3 | 168 | 7 | 9  | 0 | 78  | 5 | 275 | 15 |
| 113,676 | 21 | 3 | 171 | 7 | 9  | 0 | 82  | 6 | 283 | 16 |
| 113,677 | 21 | 2 | 171 | 7 | 9  | 0 | 83  | 6 | 284 | 15 |
| 113,678 | 21 | 2 | 171 | 8 | 9  | 0 | 83  | 6 | 284 | 16 |
| 113,679 | 21 | 2 | 171 | 8 | 9  | 0 | 83  | 6 | 284 | 16 |
| 113,680 | 22 | 2 | 174 | 8 | 9  | 0 | 85  | 6 | 290 | 16 |
| 113,681 | 22 | 2 | 174 | 8 | 9  | 0 | 85  | 6 | 290 | 16 |

|         |    |   |     |   |    |   |     |   |     |    |
|---------|----|---|-----|---|----|---|-----|---|-----|----|
| 113,682 | 21 | 2 | 174 | 8 | 9  | 0 | 87  | 6 | 291 | 16 |
| 113,683 | 22 | 1 | 178 | 8 | 9  | 0 | 89  | 6 | 298 | 15 |
| 113,684 | 22 | 1 | 190 | 8 | 10 | 0 | 98  | 6 | 320 | 15 |
| 113,685 | 22 | 1 | 189 | 8 | 10 | 0 | 97  | 6 | 318 | 15 |
| 113,686 | 22 | 1 | 200 | 8 | 11 | 0 | 99  | 6 | 332 | 15 |
| 113,687 | 23 | 1 | 214 | 8 | 11 | 0 | 123 | 6 | 371 | 15 |
| 113,688 | 23 | 1 | 214 | 8 | 11 | 0 | 123 | 6 | 371 | 15 |
| 113,689 | 21 | 1 | 211 | 8 | 11 | 0 | 123 | 6 | 366 | 15 |
| 113,690 | 15 | 1 | 171 | 8 | 11 | 0 | 108 | 6 | 305 | 15 |
| 113,691 | 15 | 1 | 193 | 8 | 11 | 0 | 116 | 6 | 335 | 15 |
| 113,692 | 14 | 1 | 182 | 8 | 11 | 0 | 115 | 6 | 322 | 15 |
| 113,693 | 14 | 1 | 184 | 8 | 11 | 0 | 114 | 6 | 323 | 15 |
| 113,694 | 14 | 1 | 181 | 8 | 10 | 0 | 114 | 6 | 319 | 15 |
| 113,695 | 13 | 1 | 140 | 8 | 3  | 0 | 93  | 6 | 249 | 15 |
| 113,696 | 10 | 1 | 113 | 8 | 2  | 0 | 83  | 6 | 208 | 15 |
| 113,697 | 13 | 1 | 110 | 8 | 2  | 0 | 84  | 6 | 209 | 15 |
| 113,698 | 14 | 0 | 115 | 8 | 4  | 0 | 89  | 6 | 222 | 14 |
| 113,699 | 14 | 0 | 115 | 8 | 4  | 0 | 89  | 6 | 222 | 14 |
| 113,700 | 14 | 0 | 115 | 8 | 4  | 0 | 90  | 6 | 223 | 14 |
| 113,701 | 28 | 0 | 163 | 8 | 10 | 0 | 152 | 6 | 353 | 14 |
| 113,702 | 31 | 0 | 178 | 7 | 14 | 0 | 165 | 6 | 388 | 13 |
| 113,703 | 33 | 0 | 178 | 7 | 14 | 0 | 166 | 6 | 391 | 13 |
| 113,704 | 33 | 0 | 179 | 7 | 14 | 0 | 166 | 6 | 392 | 13 |
| 113,705 | 34 | 0 | 190 | 8 | 15 | 0 | 174 | 6 | 413 | 14 |
| 113,706 | 34 | 0 | 193 | 8 | 15 | 0 | 174 | 6 | 416 | 14 |
| 113,707 | 35 | 0 | 199 | 6 | 15 | 0 | 174 | 3 | 423 | 9  |
| 113,708 | 37 | 0 | 208 | 5 | 15 | 0 | 175 | 2 | 435 | 7  |
| 113,709 | 37 | 0 | 208 | 4 | 15 | 0 | 175 | 2 | 435 | 6  |
| 113,710 | 37 | 0 | 211 | 4 | 15 | 0 | 175 | 2 | 438 | 6  |
| 113,711 | 37 | 1 | 211 | 4 | 15 | 0 | 175 | 2 | 438 | 7  |
| 113,712 | 38 | 1 | 211 | 5 | 15 | 0 | 175 | 3 | 439 | 9  |
| 113,713 | 38 | 1 | 211 | 4 | 15 | 0 | 175 | 3 | 439 | 8  |
| 113,714 | 38 | 1 | 211 | 4 | 15 | 0 | 175 | 3 | 439 | 8  |
| 113,715 | 38 | 1 | 211 | 4 | 15 | 0 | 175 | 3 | 439 | 8  |
| 113,716 | 38 | 1 | 211 | 4 | 15 | 0 | 175 | 4 | 439 | 9  |
| 113,717 | 38 | 1 | 210 | 3 | 15 | 0 | 173 | 4 | 436 | 8  |
| 113,718 | 38 | 1 | 210 | 3 | 15 | 0 | 173 | 4 | 436 | 8  |
| 113,719 | 35 | 1 | 208 | 3 | 15 | 0 | 167 | 4 | 425 | 8  |
| 113,720 | 35 | 1 | 204 | 3 | 15 | 0 | 167 | 4 | 421 | 8  |
| 113,721 | 35 | 1 | 204 | 3 | 15 | 0 | 167 | 4 | 421 | 8  |
| 113,722 | 36 | 1 | 203 | 3 | 15 | 0 | 165 | 4 | 419 | 8  |

|         |    |   |     |   |    |   |     |   |     |    |
|---------|----|---|-----|---|----|---|-----|---|-----|----|
| 113,723 | 35 | 1 | 202 | 3 | 15 | 0 | 163 | 4 | 415 | 8  |
| 113,724 | 35 | 1 | 199 | 3 | 15 | 0 | 163 | 4 | 412 | 8  |
| 113,725 | 35 | 1 | 199 | 3 | 15 | 0 | 161 | 4 | 410 | 8  |
| 113,726 | 35 | 1 | 198 | 3 | 15 | 0 | 164 | 4 | 412 | 8  |
| 113,727 | 34 | 1 | 198 | 3 | 15 | 0 | 164 | 3 | 411 | 7  |
| 113,728 | 34 | 1 | 199 | 2 | 15 | 0 | 165 | 3 | 413 | 6  |
| 113,729 | 34 | 1 | 199 | 2 | 15 | 0 | 165 | 3 | 413 | 6  |
| 113,730 | 34 | 1 | 197 | 2 | 15 | 0 | 165 | 3 | 411 | 6  |
| 113,731 | 33 | 1 | 195 | 2 | 15 | 0 | 163 | 3 | 406 | 6  |
| 113,732 | 33 | 1 | 195 | 3 | 15 | 0 | 163 | 3 | 406 | 7  |
| 113,733 | 33 | 1 | 195 | 3 | 15 | 0 | 161 | 3 | 404 | 7  |
| 113,734 | 32 | 1 | 191 | 3 | 15 | 0 | 159 | 3 | 397 | 7  |
| 113,735 | 32 | 1 | 182 | 3 | 14 | 0 | 151 | 3 | 379 | 7  |
| 113,736 | 32 | 1 | 174 | 3 | 13 | 0 | 149 | 3 | 368 | 7  |
| 113,737 | 31 | 1 | 161 | 5 | 13 | 0 | 128 | 5 | 333 | 11 |
| 113,738 | 31 | 1 | 160 | 5 | 13 | 0 | 125 | 5 | 329 | 11 |
| 113,739 | 31 | 1 | 171 | 5 | 14 | 0 | 127 | 5 | 343 | 11 |
| 113,740 | 31 | 1 | 170 | 5 | 14 | 0 | 127 | 5 | 342 | 11 |
| 113,741 | 31 | 1 | 170 | 5 | 14 | 0 | 121 | 5 | 336 | 11 |
| 113,742 | 31 | 1 | 147 | 5 | 15 | 0 | 111 | 5 | 304 | 11 |
| 113,743 | 31 | 1 | 144 | 5 | 15 | 0 | 110 | 5 | 300 | 11 |
| 113,744 | 30 | 1 | 144 | 5 | 15 | 0 | 110 | 5 | 299 | 11 |
| 113,745 | 34 | 1 | 158 | 5 | 15 | 0 | 134 | 5 | 341 | 11 |
| 113,746 | 34 | 2 | 153 | 5 | 15 | 0 | 133 | 5 | 335 | 12 |
| 113,747 | 33 | 2 | 154 | 5 | 15 | 0 | 136 | 5 | 338 | 12 |
| 113,748 | 30 | 2 | 147 | 5 | 15 | 0 | 130 | 5 | 322 | 12 |
| 113,749 | 29 | 2 | 147 | 5 | 13 | 0 | 128 | 5 | 317 | 12 |
| 113,750 | 29 | 2 | 148 | 5 | 14 | 0 | 127 | 5 | 318 | 12 |
| 113,751 | 17 | 2 | 100 | 5 | 8  | 0 | 65  | 5 | 190 | 12 |
| 113,752 | 17 | 2 | 99  | 5 | 8  | 0 | 66  | 5 | 190 | 12 |
| 113,753 | 14 | 3 | 86  | 5 | 4  | 0 | 53  | 5 | 157 | 13 |
| 113,754 | 13 | 3 | 86  | 4 | 4  | 0 | 53  | 5 | 156 | 12 |
| 113,755 | 13 | 3 | 85  | 4 | 4  | 0 | 53  | 5 | 155 | 12 |
| 113,756 | 12 | 3 | 73  | 4 | 3  | 0 | 45  | 5 | 133 | 12 |
| 113,757 | 14 | 3 | 81  | 4 | 3  | 0 | 47  | 4 | 145 | 11 |
| 113,758 | 13 | 4 | 86  | 4 | 4  | 0 | 52  | 4 | 155 | 12 |
| 113,759 | 13 | 4 | 105 | 4 | 4  | 0 | 55  | 4 | 177 | 12 |
| 113,760 | 13 | 4 | 105 | 4 | 4  | 0 | 55  | 4 | 177 | 12 |
| 113,761 | 50 | 4 | 298 | 4 | 17 | 0 | 191 | 4 | 556 | 12 |
| 113,762 | 51 | 3 | 302 | 4 | 17 | 0 | 195 | 4 | 565 | 11 |
| 113,763 | 50 | 3 | 302 | 3 | 17 | 0 | 195 | 3 | 564 | 9  |

|         |    |   |     |   |    |   |     |   |     |    |
|---------|----|---|-----|---|----|---|-----|---|-----|----|
| 113,764 | 50 | 4 | 305 | 3 | 18 | 0 | 199 | 3 | 572 | 10 |
| 113,765 | 50 | 4 | 305 | 3 | 18 | 0 | 199 | 3 | 572 | 10 |
| 113,766 | 53 | 4 | 307 | 3 | 18 | 0 | 203 | 3 | 581 | 10 |
| 113,767 | 53 | 4 | 312 | 3 | 19 | 0 | 204 | 2 | 588 | 9  |
| 113,768 | 53 | 4 | 313 | 3 | 19 | 0 | 205 | 2 | 590 | 9  |
| 113,769 | 53 | 5 | 314 | 3 | 19 | 0 | 205 | 2 | 591 | 10 |
| 113,770 | 53 | 5 | 315 | 3 | 20 | 0 | 208 | 2 | 596 | 10 |
| 113,771 | 53 | 5 | 314 | 3 | 20 | 0 | 208 | 2 | 595 | 10 |
| 113,772 | 53 | 5 | 314 | 3 | 20 | 0 | 208 | 2 | 595 | 10 |
| 113,773 | 55 | 5 | 327 | 3 | 20 | 0 | 214 | 2 | 616 | 10 |
| 113,774 | 55 | 5 | 328 | 5 | 20 | 0 | 217 | 2 | 620 | 12 |
| 113,775 | 56 | 5 | 328 | 5 | 20 | 0 | 221 | 2 | 625 | 12 |
| 113,776 | 57 | 5 | 328 | 5 | 20 | 1 | 218 | 2 | 623 | 13 |
| 113,777 | 59 | 5 | 334 | 5 | 21 | 1 | 224 | 2 | 638 | 13 |
| 113,778 | 59 | 5 | 342 | 5 | 23 | 1 | 234 | 2 | 658 | 13 |
| 113,779 | 63 | 5 | 350 | 5 | 23 | 1 | 242 | 2 | 678 | 13 |
| 113,780 | 63 | 5 | 357 | 5 | 25 | 1 | 244 | 2 | 689 | 13 |
| 113,781 | 63 | 5 | 357 | 5 | 25 | 1 | 244 | 2 | 689 | 13 |
| 113,782 | 63 | 5 | 360 | 5 | 26 | 1 | 244 | 2 | 693 | 13 |
| 113,783 | 63 | 5 | 363 | 5 | 27 | 1 | 245 | 2 | 698 | 13 |
| 113,784 | 63 | 5 | 365 | 5 | 27 | 1 | 245 | 3 | 700 | 14 |
| 113,785 | 63 | 5 | 365 | 7 | 27 | 1 | 245 | 4 | 700 | 17 |
| 113,786 | 63 | 5 | 362 | 7 | 27 | 1 | 244 | 4 | 696 | 17 |
| 113,787 | 63 | 5 | 359 | 7 | 27 | 1 | 244 | 4 | 693 | 17 |
| 113,788 | 64 | 5 | 353 | 8 | 26 | 1 | 243 | 2 | 686 | 16 |
| 113,789 | 64 | 5 | 350 | 8 | 26 | 1 | 240 | 2 | 680 | 16 |
| 113,790 | 64 | 5 | 351 | 8 | 26 | 1 | 240 | 2 | 681 | 16 |
| 113,791 | 64 | 5 | 351 | 8 | 26 | 1 | 240 | 2 | 681 | 16 |
| 113,792 | 64 | 5 | 350 | 8 | 26 | 1 | 240 | 2 | 680 | 16 |
| 113,793 | 64 | 5 | 352 | 8 | 25 | 1 | 241 | 2 | 682 | 16 |
| 113,794 | 64 | 5 | 353 | 8 | 25 | 1 | 242 | 2 | 684 | 16 |
| 113,795 | 64 | 5 | 351 | 8 | 25 | 1 | 243 | 2 | 683 | 16 |
| 113,796 | 60 | 5 | 334 | 8 | 25 | 1 | 219 | 2 | 638 | 16 |
| 113,797 | 60 | 4 | 338 | 8 | 25 | 1 | 228 | 2 | 651 | 15 |
| 113,798 | 60 | 4 | 338 | 8 | 25 | 1 | 227 | 2 | 650 | 15 |
| 113,799 | 60 | 4 | 338 | 8 | 25 | 1 | 227 | 2 | 650 | 15 |
| 113,800 | 60 | 4 | 334 | 8 | 25 | 1 | 224 | 2 | 643 | 15 |
| 113,801 | 63 | 4 | 337 | 8 | 24 | 1 | 228 | 2 | 652 | 15 |
| 113,802 | 61 | 4 | 337 | 8 | 24 | 1 | 227 | 2 | 649 | 15 |
| 113,803 | 63 | 3 | 349 | 8 | 24 | 1 | 232 | 2 | 668 | 14 |
| 113,804 | 63 | 3 | 349 | 8 | 24 | 1 | 232 | 2 | 668 | 14 |



|         |    |   |     |    |    |   |     |   |     |    |
|---------|----|---|-----|----|----|---|-----|---|-----|----|
| 113,805 | 62 | 3 | 351 | 8  | 24 | 1 | 233 | 2 | 670 | 14 |
| 113,806 | 62 | 3 | 352 | 8  | 24 | 1 | 233 | 2 | 671 | 14 |
| 113,807 | 61 | 3 | 350 | 8  | 24 | 1 | 233 | 2 | 668 | 14 |
| 113,808 | 60 | 3 | 342 | 8  | 24 | 1 | 231 | 2 | 657 | 14 |
| 113,809 | 60 | 2 | 331 | 8  | 23 | 1 | 226 | 2 | 640 | 13 |
| 113,810 | 59 | 2 | 302 | 8  | 23 | 1 | 223 | 2 | 607 | 13 |
| 113,811 | 37 | 2 | 202 | 8  | 19 | 1 | 131 | 2 | 389 | 13 |
| 113,812 | 22 | 2 | 102 | 8  | 8  | 1 | 76  | 3 | 208 | 14 |
| 113,813 | 21 | 2 | 102 | 8  | 8  | 1 | 75  | 3 | 206 | 14 |
| 113,814 | 22 | 2 | 106 | 8  | 8  | 1 | 79  | 3 | 215 | 14 |
| 113,815 | 22 | 1 | 108 | 9  | 8  | 1 | 80  | 3 | 218 | 14 |
| 113,816 | 20 | 2 | 107 | 9  | 8  | 1 | 77  | 3 | 212 | 15 |
| 113,817 | 20 | 2 | 105 | 9  | 7  | 1 | 77  | 4 | 209 | 16 |
| 113,818 | 20 | 2 | 102 | 9  | 7  | 1 | 76  | 4 | 205 | 16 |
| 113,819 | 20 | 2 | 101 | 9  | 7  | 1 | 75  | 4 | 203 | 16 |
| 113,820 | 20 | 1 | 99  | 9  | 7  | 1 | 75  | 4 | 201 | 15 |
| 113,821 | 20 | 1 | 99  | 9  | 7  | 1 | 75  | 4 | 201 | 15 |
| 113,822 | 20 | 1 | 100 | 9  | 7  | 1 | 72  | 4 | 199 | 15 |
| 113,823 | 20 | 1 | 96  | 9  | 7  | 1 | 71  | 4 | 194 | 15 |
| 113,824 | 17 | 1 | 91  | 7  | 7  | 1 | 70  | 5 | 185 | 14 |
| 113,825 | 17 | 1 | 90  | 7  | 7  | 1 | 69  | 5 | 183 | 14 |
| 113,826 | 18 | 1 | 93  | 9  | 7  | 1 | 74  | 5 | 192 | 16 |
| 113,827 | 18 | 1 | 109 | 10 | 7  | 0 | 79  | 6 | 213 | 17 |
| 113,828 | 18 | 1 | 103 | 10 | 6  | 0 | 80  | 6 | 207 | 17 |
| 113,829 | 20 | 1 | 109 | 12 | 6  | 0 | 90  | 6 | 225 | 19 |
| 113,830 | 16 | 1 | 109 | 12 | 6  | 0 | 86  | 6 | 217 | 19 |
| 113,831 | 16 | 1 | 106 | 12 | 4  | 0 | 88  | 6 | 214 | 19 |
| 113,832 | 17 | 1 | 116 | 11 | 7  | 0 | 108 | 6 | 248 | 18 |
| 113,833 | 17 | 1 | 119 | 11 | 7  | 0 | 119 | 6 | 262 | 18 |
| 113,834 | 17 | 1 | 119 | 11 | 6  | 0 | 119 | 6 | 261 | 18 |
| 113,835 | 17 | 1 | 119 | 11 | 7  | 0 | 123 | 5 | 266 | 17 |
| 113,836 | 17 | 1 | 122 | 9  | 7  | 0 | 127 | 4 | 273 | 14 |
| 113,837 | 17 | 1 | 122 | 9  | 7  | 0 | 128 | 4 | 274 | 14 |
| 113,838 | 17 | 1 | 122 | 9  | 7  | 0 | 128 | 4 | 274 | 14 |
| 113,839 | 17 | 1 | 122 | 6  | 7  | 0 | 131 | 4 | 277 | 11 |
| 113,840 | 17 | 1 | 128 | 6  | 7  | 0 | 137 | 4 | 289 | 11 |
| 113,841 | 18 | 1 | 131 | 6  | 7  | 0 | 141 | 4 | 297 | 11 |
| 113,842 | 18 | 1 | 133 | 6  | 7  | 0 | 142 | 5 | 300 | 12 |
| 113,843 | 18 | 1 | 132 | 6  | 7  | 0 | 143 | 5 | 300 | 12 |
| 113,844 | 18 | 1 | 130 | 6  | 7  | 0 | 142 | 5 | 297 | 12 |
| 113,845 | 18 | 1 | 132 | 6  | 7  | 0 | 144 | 5 | 301 | 12 |

|         |    |    |     |    |    |   |     |    |       |    |
|---------|----|----|-----|----|----|---|-----|----|-------|----|
| 113,846 | 18 | 1  | 131 | 6  | 7  | 0 | 143 | 5  | 299   | 12 |
| 113,847 | 18 | 1  | 140 | 6  | 8  | 0 | 144 | 5  | 310   | 12 |
| 113,848 | 18 | 1  | 139 | 7  | 8  | 0 | 140 | 6  | 305   | 14 |
| 113,849 | 18 | 1  | 138 | 7  | 9  | 0 | 139 | 6  | 304   | 14 |
| 113,850 | 18 | 1  | 143 | 10 | 9  | 0 | 141 | 6  | 311   | 17 |
| 113,851 | 19 | 6  | 159 | 16 | 9  | 1 | 156 | 8  | 343   | 31 |
| 113,852 | 16 | 7  | 157 | 16 | 9  | 1 | 153 | 8  | 335   | 32 |
| 113,853 | 16 | 8  | 160 | 16 | 9  | 1 | 154 | 8  | 339   | 33 |
| 113,854 | 17 | 8  | 198 | 18 | 14 | 1 | 165 | 8  | 394   | 35 |
| 113,855 | 17 | 8  | 196 | 18 | 14 | 1 | 164 | 8  | 391   | 35 |
| 113,856 | 36 | 8  | 395 | 19 | 23 | 1 | 273 | 9  | 727   | 37 |
| 113,857 | 36 | 8  | 395 | 19 | 23 | 1 | 273 | 9  | 727   | 37 |
| 113,858 | 37 | 8  | 412 | 19 | 25 | 1 | 294 | 9  | 768   | 37 |
| 113,859 | 39 | 8  | 449 | 19 | 28 | 1 | 311 | 9  | 827   | 37 |
| 113,860 | 39 | 8  | 459 | 19 | 28 | 1 | 313 | 10 | 839   | 38 |
| 113,861 | 39 | 8  | 459 | 21 | 28 | 2 | 314 | 13 | 840   | 44 |
| 113,862 | 46 | 8  | 521 | 23 | 32 | 2 | 381 | 14 | 980   | 47 |
| 113,863 | 46 | 8  | 522 | 23 | 32 | 2 | 381 | 13 | 981   | 46 |
| 113,864 | 47 | 8  | 532 | 23 | 32 | 2 | 387 | 13 | 998   | 46 |
| 113,865 | 45 | 11 | 536 | 29 | 32 | 3 | 393 | 17 | 1,006 | 60 |
| 113,866 | 45 | 12 | 534 | 28 | 32 | 3 | 392 | 17 | 1,003 | 60 |
| 113,867 | 48 | 11 | 586 | 28 | 35 | 3 | 408 | 17 | 1,077 | 59 |
| 113,868 | 50 | 11 | 606 | 34 | 35 | 3 | 413 | 16 | 1,104 | 64 |
| 113,869 | 50 | 12 | 627 | 34 | 35 | 3 | 418 | 16 | 1,130 | 65 |
| 113,870 | 51 | 12 | 633 | 34 | 36 | 3 | 423 | 16 | 1,143 | 65 |
| 113,871 | 51 | 12 | 636 | 34 | 37 | 3 | 425 | 16 | 1,149 | 65 |
| 113,872 | 51 | 12 | 636 | 34 | 37 | 3 | 426 | 16 | 1,150 | 65 |
| 113,873 | 51 | 12 | 634 | 34 | 37 | 3 | 426 | 16 | 1,148 | 65 |
| 113,874 | 54 | 12 | 658 | 34 | 37 | 3 | 428 | 16 | 1,177 | 65 |
| 113,875 | 54 | 12 | 684 | 34 | 41 | 3 | 452 | 15 | 1,231 | 64 |
| 113,876 | 54 | 12 | 684 | 34 | 41 | 3 | 451 | 15 | 1,230 | 64 |
| 113,877 | 54 | 12 | 690 | 32 | 43 | 3 | 451 | 15 | 1,238 | 62 |
| 113,878 | 53 | 12 | 674 | 31 | 43 | 3 | 445 | 14 | 1,215 | 60 |
| 113,879 | 51 | 12 | 678 | 31 | 43 | 3 | 440 | 14 | 1,212 | 60 |
| 113,880 | 49 | 12 | 667 | 29 | 41 | 3 | 419 | 14 | 1,176 | 58 |
| 113,881 | 52 | 12 | 673 | 29 | 44 | 3 | 420 | 14 | 1,189 | 58 |
| 113,882 | 52 | 12 | 674 | 29 | 44 | 3 | 419 | 14 | 1,189 | 58 |
| 113,883 | 51 | 12 | 664 | 29 | 41 | 3 | 402 | 14 | 1,158 | 58 |
| 113,884 | 52 | 12 | 665 | 29 | 40 | 3 | 393 | 14 | 1,150 | 58 |
| 113,885 | 52 | 12 | 671 | 30 | 39 | 3 | 388 | 14 | 1,150 | 59 |
| 113,886 | 56 | 12 | 705 | 30 | 41 | 3 | 396 | 14 | 1,198 | 59 |

|         |     |    |       |    |    |   |       |    |       |    |
|---------|-----|----|-------|----|----|---|-------|----|-------|----|
| 113,887 | 56  | 12 | 704   | 30 | 41 | 3 | 395   | 14 | 1,196 | 59 |
| 113,888 | 56  | 12 | 710   | 30 | 41 | 3 | 396   | 14 | 1,203 | 59 |
| 113,889 | 61  | 12 | 831   | 30 | 43 | 3 | 450   | 14 | 1,385 | 59 |
| 113,890 | 83  | 12 | 1,229 | 30 | 61 | 3 | 703   | 14 | 2,076 | 59 |
| 113,891 | 83  | 12 | 1,234 | 30 | 61 | 3 | 707   | 14 | 2,085 | 59 |
| 113,892 | 82  | 12 | 1,231 | 30 | 61 | 3 | 702   | 14 | 2,076 | 59 |
| 113,893 | 85  | 12 | 1,272 | 30 | 65 | 3 | 715   | 13 | 2,137 | 58 |
| 113,894 | 85  | 12 | 1,272 | 30 | 65 | 3 | 715   | 13 | 2,137 | 58 |
| 113,895 | 86  | 12 | 1,347 | 30 | 68 | 3 | 757   | 13 | 2,258 | 58 |
| 113,896 | 99  | 12 | 1,507 | 30 | 86 | 3 | 919   | 13 | 2,611 | 58 |
| 113,897 | 102 | 12 | 1,534 | 30 | 90 | 3 | 957   | 13 | 2,683 | 58 |
| 113,898 | 102 | 12 | 1,530 | 30 | 89 | 3 | 959   | 13 | 2,680 | 58 |
| 113,899 | 102 | 12 | 1,544 | 29 | 89 | 3 | 973   | 12 | 2,708 | 56 |
| 113,900 | 114 | 12 | 1,618 | 28 | 94 | 3 | 1,065 | 13 | 2,891 | 56 |
| 113,901 | 114 | 12 | 1,615 | 28 | 94 | 4 | 1,064 | 13 | 2,887 | 57 |
| 113,902 | 116 | 8  | 1,614 | 24 | 94 | 3 | 1,083 | 11 | 2,907 | 46 |
| 113,903 | 118 | 7  | 1,620 | 24 | 96 | 3 | 1,089 | 11 | 2,923 | 45 |
| 113,904 | 117 | 6  | 1,622 | 24 | 96 | 3 | 1,094 | 11 | 2,929 | 44 |
| 113,905 | 116 | 8  | 1,601 | 24 | 91 | 3 | 1,087 | 17 | 2,895 | 52 |
| 113,906 | 105 | 8  | 1,487 | 24 | 82 | 3 | 1,017 | 17 | 2,691 | 52 |
| 113,907 | 108 | 8  | 1,516 | 23 | 86 | 3 | 1,023 | 16 | 2,733 | 50 |
| 113,908 | 107 | 8  | 1,507 | 24 | 84 | 3 | 1,010 | 16 | 2,708 | 51 |
| 113,909 | 114 | 8  | 1,580 | 25 | 84 | 3 | 1,067 | 16 | 2,845 | 52 |
| 113,910 | 115 | 8  | 1,602 | 23 | 87 | 2 | 1,092 | 13 | 2,896 | 46 |
| 113,911 | 133 | 8  | 1,753 | 23 | 92 | 2 | 1,257 | 13 | 3,235 | 46 |
| 113,912 | 125 | 8  | 1,699 | 23 | 89 | 2 | 1,193 | 13 | 3,106 | 46 |
| 113,913 | 125 | 8  | 1,690 | 21 | 89 | 2 | 1,194 | 12 | 3,098 | 43 |
| 113,914 | 125 | 8  | 1,689 | 21 | 89 | 2 | 1,193 | 12 | 3,096 | 43 |
| 113,915 | 124 | 8  | 1,682 | 21 | 89 | 2 | 1,187 | 12 | 3,082 | 43 |
| 113,916 | 124 | 5  | 1,695 | 15 | 89 | 1 | 1,182 | 8  | 3,090 | 29 |
| 113,917 | 127 | 4  | 1,678 | 16 | 88 | 1 | 1,196 | 8  | 3,089 | 29 |
| 113,918 | 126 | 4  | 1,661 | 16 | 88 | 1 | 1,193 | 8  | 3,068 | 29 |
| 113,919 | 125 | 4  | 1,658 | 10 | 88 | 1 | 1,191 | 8  | 3,062 | 23 |
| 113,920 | 125 | 3  | 1,637 | 10 | 88 | 1 | 1,186 | 8  | 3,036 | 22 |
| 113,921 | 128 | 3  | 1,677 | 10 | 91 | 1 | 1,200 | 8  | 3,096 | 22 |
| 113,922 | 135 | 3  | 1,787 | 10 | 91 | 1 | 1,239 | 8  | 3,252 | 22 |
| 113,923 | 135 | 3  | 1,803 | 10 | 91 | 1 | 1,247 | 8  | 3,276 | 22 |
| 113,924 | 147 | 3  | 1,839 | 10 | 91 | 1 | 1,274 | 8  | 3,351 | 22 |
| 113,925 | 147 | 3  | 1,813 | 10 | 87 | 1 | 1,250 | 8  | 3,297 | 22 |
| 113,926 | 147 | 3  | 1,813 | 10 | 87 | 1 | 1,250 | 8  | 3,297 | 22 |
| 113,927 | 151 | 3  | 1,933 | 10 | 90 | 1 | 1,300 | 8  | 3,474 | 22 |

|         |     |   |       |    |     |   |       |   |       |    |
|---------|-----|---|-------|----|-----|---|-------|---|-------|----|
| 113,928 | 151 | 3 | 1,947 | 11 | 91  | 1 | 1,303 | 8 | 3,492 | 23 |
| 113,929 | 202 | 3 | 2,213 | 11 | 105 | 1 | 1,509 | 8 | 4,029 | 23 |
| 113,930 | 207 | 3 | 2,264 | 11 | 106 | 1 | 1,525 | 8 | 4,102 | 23 |
| 113,931 | 207 | 3 | 2,262 | 11 | 106 | 1 | 1,525 | 8 | 4,100 | 23 |
| 113,932 | 227 | 3 | 2,542 | 11 | 109 | 1 | 1,687 | 8 | 4,565 | 23 |
| 113,933 | 232 | 3 | 2,543 | 11 | 109 | 1 | 1,688 | 8 | 4,572 | 23 |
| 113,934 | 232 | 3 | 2,539 | 11 | 108 | 1 | 1,682 | 8 | 4,561 | 23 |
| 113,935 | 232 | 3 | 2,568 | 11 | 108 | 1 | 1,688 | 8 | 4,596 | 23 |
| 113,936 | 251 | 3 | 2,759 | 10 | 115 | 1 | 1,826 | 8 | 4,951 | 22 |
| 113,937 | 250 | 3 | 2,763 | 10 | 114 | 1 | 1,838 | 8 | 4,965 | 22 |
| 113,938 | 253 | 3 | 2,801 | 10 | 117 | 1 | 1,849 | 9 | 5,020 | 23 |
| 113,939 | 250 | 3 | 2,730 | 10 | 115 | 1 | 1,821 | 9 | 4,916 | 23 |
| 113,940 | 252 | 3 | 2,716 | 10 | 116 | 1 | 1,809 | 9 | 4,893 | 23 |
| 113,941 | 229 | 3 | 2,321 | 10 | 98  | 1 | 1,559 | 9 | 4,207 | 23 |
| 113,942 | 229 | 3 | 2,310 | 10 | 98  | 1 | 1,551 | 9 | 4,188 | 23 |
| 113,943 | 226 | 3 | 2,283 | 10 | 96  | 1 | 1,547 | 9 | 4,152 | 23 |
| 113,944 | 227 | 3 | 2,273 | 10 | 94  | 1 | 1,544 | 9 | 4,138 | 23 |
| 113,945 | 228 | 3 | 2,261 | 10 | 93  | 1 | 1,544 | 9 | 4,126 | 23 |
| 113,946 | 228 | 3 | 2,217 | 10 | 92  | 1 | 1,518 | 9 | 4,055 | 23 |
| 113,947 | 216 | 3 | 2,066 | 10 | 75  | 1 | 1,358 | 9 | 3,715 | 23 |
| 113,948 | 213 | 3 | 2,042 | 10 | 71  | 1 | 1,320 | 9 | 3,646 | 23 |
| 113,949 | 213 | 3 | 2,038 | 8  | 71  | 0 | 1,314 | 8 | 3,636 | 19 |
| 113,950 | 215 | 3 | 2,032 | 8  | 71  | 0 | 1,301 | 8 | 3,619 | 19 |
| 113,951 | 206 | 3 | 1,970 | 8  | 70  | 0 | 1,221 | 8 | 3,467 | 19 |
| 113,952 | 207 | 3 | 1,997 | 8  | 70  | 0 | 1,222 | 8 | 3,496 | 19 |
| 113,953 | 205 | 2 | 2,018 | 6  | 70  | 0 | 1,218 | 8 | 3,511 | 16 |
| 113,954 | 203 | 2 | 2,032 | 6  | 69  | 0 | 1,244 | 8 | 3,548 | 16 |
| 113,955 | 203 | 0 | 2,040 | 4  | 69  | 0 | 1,241 | 3 | 3,553 | 7  |
| 113,956 | 202 | 0 | 2,019 | 4  | 69  | 0 | 1,236 | 3 | 3,526 | 7  |
| 113,957 | 195 | 0 | 1,936 | 4  | 65  | 0 | 1,194 | 3 | 3,390 | 7  |
| 113,958 | 200 | 0 | 1,946 | 4  | 70  | 0 | 1,226 | 3 | 3,442 | 7  |
| 113,959 | 200 | 0 | 1,947 | 3  | 70  | 0 | 1,220 | 2 | 3,437 | 5  |
| 113,960 | 191 | 0 | 1,851 | 2  | 68  | 0 | 1,153 | 2 | 3,263 | 4  |
| 113,961 | 190 | 0 | 1,816 | 2  | 64  | 0 | 1,124 | 2 | 3,194 | 4  |
| 113,962 | 172 | 0 | 1,692 | 2  | 59  | 0 | 987   | 2 | 2,910 | 4  |
| 113,963 | 174 | 0 | 1,715 | 2  | 58  | 0 | 1,002 | 2 | 2,949 | 4  |
| 113,964 | 174 | 0 | 1,714 | 2  | 59  | 0 | 1,002 | 2 | 2,949 | 4  |
| 113,965 | 174 | 1 | 1,714 | 2  | 59  | 0 | 1,005 | 2 | 2,952 | 5  |
| 113,966 | 174 | 1 | 1,726 | 3  | 59  | 0 | 1,014 | 2 | 2,973 | 6  |
| 113,967 | 174 | 1 | 1,705 | 3  | 59  | 0 | 1,009 | 2 | 2,947 | 6  |
| 113,968 | 168 | 1 | 1,669 | 2  | 57  | 0 | 979   | 2 | 2,873 | 5  |

|         |     |   |       |   |     |   |       |   |       |   |
|---------|-----|---|-------|---|-----|---|-------|---|-------|---|
| 113,969 | 166 | 1 | 1,666 | 2 | 55  | 0 | 980   | 2 | 2,867 | 5 |
| 113,970 | 166 | 1 | 1,665 | 2 | 55  | 0 | 980   | 2 | 2,866 | 5 |
| 113,971 | 164 | 1 | 1,626 | 2 | 53  | 0 | 967   | 2 | 2,810 | 5 |
| 113,972 | 157 | 1 | 1,545 | 2 | 52  | 0 | 937   | 2 | 2,691 | 5 |
| 113,973 | 158 | 1 | 1,539 | 2 | 52  | 0 | 947   | 2 | 2,696 | 5 |
| 113,974 | 158 | 1 | 1,522 | 2 | 52  | 0 | 938   | 2 | 2,670 | 5 |
| 113,975 | 176 | 1 | 1,725 | 2 | 76  | 0 | 1,153 | 2 | 3,130 | 5 |
| 113,976 | 176 | 1 | 1,725 | 2 | 76  | 0 | 1,153 | 2 | 3,130 | 5 |
| 113,977 | 226 | 1 | 2,110 | 2 | 105 | 0 | 1,639 | 2 | 4,080 | 5 |
| 113,978 | 252 | 1 | 2,124 | 1 | 114 | 0 | 1,766 | 2 | 4,256 | 4 |
| 113,979 | 252 | 1 | 2,110 | 2 | 113 | 0 | 1,764 | 2 | 4,239 | 5 |
| 113,980 | 202 | 1 | 1,851 | 2 | 100 | 0 | 1,574 | 2 | 3,727 | 5 |
| 113,981 | 197 | 1 | 1,796 | 2 | 99  | 0 | 1,556 | 2 | 3,648 | 5 |
| 113,982 | 176 | 1 | 1,518 | 2 | 93  | 0 | 1,392 | 2 | 3,179 | 5 |
| 113,983 | 174 | 1 | 1,504 | 2 | 93  | 0 | 1,390 | 2 | 3,161 | 5 |
| 113,984 | 169 | 1 | 1,499 | 2 | 93  | 0 | 1,385 | 2 | 3,146 | 5 |
| 113,985 | 168 | 1 | 1,465 | 2 | 93  | 0 | 1,379 | 2 | 3,105 | 5 |
| 113,986 | 149 | 1 | 1,266 | 2 | 86  | 0 | 1,240 | 2 | 2,741 | 5 |
| 113,987 | 146 | 1 | 1,232 | 2 | 85  | 0 | 1,222 | 2 | 2,685 | 5 |
| 113,988 | 146 | 1 | 1,223 | 2 | 85  | 0 | 1,222 | 2 | 2,676 | 5 |
| 113,989 | 143 | 1 | 1,193 | 3 | 82  | 0 | 1,210 | 1 | 2,628 | 5 |
| 113,990 | 142 | 1 | 1,188 | 3 | 82  | 0 | 1,207 | 2 | 2,619 | 6 |
| 113,991 | 139 | 1 | 1,162 | 3 | 81  | 0 | 1,199 | 2 | 2,581 | 6 |
| 113,992 | 139 | 1 | 1,159 | 3 | 81  | 0 | 1,191 | 2 | 2,570 | 6 |
| 113,993 | 154 | 1 | 1,229 | 3 | 84  | 0 | 1,233 | 2 | 2,700 | 6 |
| 113,994 | 155 | 2 | 1,255 | 3 | 87  | 0 | 1,238 | 2 | 2,735 | 7 |
| 113,995 | 158 | 2 | 1,362 | 3 | 97  | 0 | 1,330 | 2 | 2,947 | 7 |
| 113,996 | 163 | 2 | 1,451 | 3 | 98  | 0 | 1,384 | 2 | 3,096 | 7 |
| 113,997 | 163 | 2 | 1,446 | 3 | 98  | 0 | 1,383 | 2 | 3,090 | 7 |
| 113,998 | 196 | 2 | 1,639 | 3 | 112 | 0 | 1,616 | 2 | 3,563 | 7 |
| 113,999 | 197 | 2 | 1,642 | 3 | 112 | 0 | 1,621 | 2 | 3,572 | 7 |
| 114,000 | 197 | 2 | 1,641 | 4 | 112 | 0 | 1,621 | 2 | 3,571 | 8 |
| 114,001 | 199 | 2 | 1,643 | 4 | 113 | 0 | 1,623 | 2 | 3,578 | 8 |
| 114,002 | 197 | 2 | 1,638 | 4 | 109 | 0 | 1,625 | 2 | 3,569 | 8 |
| 114,003 | 197 | 2 | 1,650 | 5 | 109 | 0 | 1,637 | 2 | 3,593 | 9 |
| 114,004 | 198 | 2 | 1,648 | 5 | 109 | 0 | 1,630 | 2 | 3,585 | 9 |
| 114,005 | 198 | 2 | 1,659 | 5 | 109 | 0 | 1,612 | 1 | 3,578 | 8 |
| 114,006 | 199 | 2 | 1,699 | 5 | 113 | 0 | 1,660 | 1 | 3,671 | 8 |
| 114,007 | 190 | 2 | 1,659 | 5 | 108 | 0 | 1,625 | 1 | 3,582 | 8 |
| 114,008 | 190 | 2 | 1,659 | 5 | 108 | 0 | 1,624 | 1 | 3,581 | 8 |
| 114,009 | 190 | 3 | 1,658 | 5 | 108 | 0 | 1,626 | 1 | 3,582 | 9 |

|         |     |   |       |    |     |   |       |   |       |    |
|---------|-----|---|-------|----|-----|---|-------|---|-------|----|
| 114,010 | 211 | 4 | 1,772 | 5  | 110 | 0 | 1,678 | 1 | 3,771 | 10 |
| 114,011 | 222 | 4 | 1,864 | 5  | 121 | 0 | 1,803 | 1 | 4,010 | 10 |
| 114,012 | 225 | 4 | 1,873 | 5  | 123 | 0 | 1,810 | 1 | 4,031 | 10 |
| 114,013 | 225 | 4 | 1,856 | 5  | 123 | 0 | 1,790 | 1 | 3,994 | 10 |
| 114,014 | 233 | 4 | 1,864 | 5  | 125 | 0 | 1,791 | 1 | 4,013 | 10 |
| 114,015 | 233 | 4 | 1,864 | 5  | 125 | 0 | 1,791 | 2 | 4,013 | 11 |
| 114,016 | 234 | 3 | 1,879 | 5  | 125 | 0 | 1,795 | 2 | 4,033 | 10 |
| 114,017 | 234 | 3 | 1,865 | 4  | 125 | 0 | 1,786 | 2 | 4,010 | 9  |
| 114,018 | 259 | 3 | 1,948 | 4  | 128 | 0 | 1,811 | 2 | 4,146 | 9  |
| 114,019 | 261 | 3 | 1,957 | 4  | 128 | 0 | 1,809 | 2 | 4,155 | 9  |
| 114,020 | 271 | 3 | 1,977 | 4  | 128 | 0 | 1,809 | 2 | 4,185 | 9  |
| 114,021 | 271 | 3 | 1,976 | 4  | 128 | 0 | 1,809 | 2 | 4,184 | 9  |
| 114,022 | 293 | 3 | 2,046 | 5  | 132 | 0 | 1,837 | 3 | 4,308 | 11 |
| 114,023 | 362 | 3 | 2,901 | 6  | 193 | 0 | 2,196 | 3 | 5,652 | 12 |
| 114,024 | 367 | 3 | 2,934 | 7  | 199 | 0 | 2,232 | 3 | 5,732 | 13 |
| 114,025 | 363 | 3 | 2,963 | 7  | 202 | 0 | 2,243 | 3 | 5,771 | 13 |
| 114,026 | 338 | 3 | 2,781 | 7  | 189 | 0 | 2,053 | 3 | 5,361 | 13 |
| 114,027 | 293 | 3 | 2,463 | 7  | 171 | 0 | 1,623 | 3 | 4,550 | 13 |
| 114,028 | 293 | 3 | 2,441 | 7  | 170 | 0 | 1,598 | 3 | 4,502 | 13 |
| 114,029 | 261 | 3 | 2,331 | 7  | 158 | 0 | 1,427 | 3 | 4,177 | 13 |
| 114,030 | 261 | 3 | 2,329 | 7  | 158 | 0 | 1,426 | 3 | 4,174 | 13 |
| 114,031 | 260 | 3 | 2,321 | 7  | 156 | 0 | 1,412 | 3 | 4,149 | 13 |
| 114,032 | 260 | 3 | 2,319 | 8  | 156 | 0 | 1,410 | 3 | 4,145 | 14 |
| 114,033 | 260 | 3 | 2,319 | 8  | 156 | 0 | 1,408 | 4 | 4,143 | 15 |
| 114,034 | 260 | 3 | 2,328 | 8  | 156 | 0 | 1,416 | 4 | 4,160 | 15 |
| 114,035 | 262 | 3 | 2,337 | 9  | 156 | 0 | 1,423 | 4 | 4,178 | 16 |
| 114,036 | 262 | 3 | 2,342 | 9  | 156 | 0 | 1,423 | 4 | 4,183 | 16 |
| 114,037 | 266 | 3 | 2,356 | 9  | 156 | 0 | 1,433 | 4 | 4,211 | 16 |
| 114,038 | 267 | 3 | 2,363 | 9  | 156 | 0 | 1,438 | 4 | 4,224 | 16 |
| 114,039 | 269 | 3 | 2,360 | 8  | 157 | 0 | 1,436 | 4 | 4,222 | 15 |
| 114,040 | 270 | 3 | 2,362 | 8  | 157 | 0 | 1,444 | 3 | 4,233 | 14 |
| 114,041 | 273 | 3 | 2,359 | 8  | 158 | 0 | 1,446 | 3 | 4,236 | 14 |
| 114,042 | 275 | 3 | 2,367 | 8  | 159 | 0 | 1,452 | 3 | 4,253 | 14 |
| 114,043 | 275 | 3 | 2,366 | 8  | 159 | 0 | 1,452 | 3 | 4,252 | 14 |
| 114,044 | 260 | 3 | 2,302 | 9  | 157 | 0 | 1,417 | 3 | 4,136 | 15 |
| 114,045 | 259 | 2 | 2,271 | 9  | 154 | 0 | 1,412 | 3 | 4,096 | 14 |
| 114,046 | 255 | 2 | 2,163 | 9  | 144 | 0 | 1,317 | 3 | 3,879 | 14 |
| 114,047 | 249 | 2 | 2,054 | 9  | 142 | 1 | 1,244 | 3 | 3,689 | 15 |
| 114,048 | 248 | 2 | 2,044 | 9  | 138 | 1 | 1,209 | 3 | 3,639 | 15 |
| 114,049 | 216 | 2 | 1,917 | 10 | 129 | 1 | 1,014 | 3 | 3,276 | 16 |
| 114,050 | 233 | 2 | 1,946 | 9  | 130 | 1 | 1,023 | 4 | 3,332 | 16 |

|         |     |   |       |    |     |   |       |   |       |    |
|---------|-----|---|-------|----|-----|---|-------|---|-------|----|
| 114,051 | 233 | 2 | 1,943 | 9  | 130 | 1 | 1,022 | 4 | 3,328 | 16 |
| 114,052 | 245 | 2 | 1,989 | 9  | 132 | 1 | 1,038 | 4 | 3,404 | 16 |
| 114,053 | 246 | 3 | 1,985 | 8  | 133 | 1 | 1,028 | 4 | 3,392 | 16 |
| 114,054 | 245 | 3 | 1,939 | 8  | 133 | 1 | 1,005 | 4 | 3,322 | 16 |
| 114,055 | 274 | 3 | 2,112 | 8  | 140 | 1 | 1,052 | 4 | 3,578 | 16 |
| 114,056 | 284 | 3 | 2,138 | 8  | 146 | 1 | 1,070 | 4 | 3,638 | 16 |
| 114,057 | 284 | 3 | 2,086 | 8  | 142 | 1 | 1,014 | 4 | 3,526 | 16 |
| 114,058 | 269 | 3 | 2,018 | 8  | 141 | 1 | 978   | 4 | 3,406 | 16 |
| 114,059 | 355 | 3 | 3,077 | 8  | 197 | 1 | 1,310 | 4 | 4,939 | 16 |
| 114,060 | 361 | 2 | 3,106 | 9  | 206 | 1 | 1,339 | 4 | 5,012 | 16 |
| 114,061 | 364 | 1 | 3,112 | 10 | 208 | 1 | 1,334 | 4 | 5,018 | 16 |
| 114,062 | 353 | 1 | 3,026 | 10 | 197 | 1 | 1,223 | 4 | 4,799 | 16 |
| 114,063 | 350 | 1 | 2,995 | 10 | 194 | 1 | 1,204 | 4 | 4,743 | 16 |
| 114,064 | 344 | 1 | 3,006 | 10 | 194 | 1 | 1,207 | 4 | 4,751 | 16 |
| 114,065 | 346 | 1 | 3,026 | 10 | 197 | 1 | 1,217 | 3 | 4,786 | 15 |
| 114,066 | 346 | 1 | 3,028 | 10 | 197 | 1 | 1,218 | 3 | 4,789 | 15 |
| 114,067 | 348 | 1 | 3,024 | 10 | 197 | 1 | 1,220 | 3 | 4,789 | 15 |
| 114,068 | 345 | 1 | 2,985 | 10 | 195 | 1 | 1,204 | 3 | 4,729 | 15 |
| 114,069 | 323 | 1 | 2,947 | 10 | 194 | 1 | 1,198 | 3 | 4,662 | 15 |
| 114,070 | 321 | 1 | 2,938 | 11 | 194 | 1 | 1,196 | 3 | 4,649 | 16 |
| 114,071 | 315 | 1 | 2,928 | 11 | 195 | 1 | 1,200 | 3 | 4,638 | 16 |
| 114,072 | 300 | 1 | 2,901 | 11 | 195 | 1 | 1,200 | 3 | 4,596 | 16 |
| 114,073 | 295 | 1 | 2,876 | 10 | 193 | 1 | 1,186 | 2 | 4,550 | 14 |
| 114,074 | 226 | 1 | 2,010 | 13 | 132 | 2 | 822   | 4 | 3,190 | 20 |
| 114,075 | 220 | 1 | 1,964 | 12 | 126 | 2 | 772   | 4 | 3,082 | 19 |
| 114,076 | 219 | 1 | 1,892 | 12 | 119 | 2 | 738   | 5 | 2,968 | 20 |
| 114,077 | 217 | 1 | 1,856 | 12 | 112 | 2 | 711   | 6 | 2,896 | 21 |
| 114,078 | 212 | 1 | 1,784 | 11 | 101 | 2 | 666   | 6 | 2,763 | 20 |
| 114,079 | 213 | 1 | 1,783 | 11 | 101 | 2 | 667   | 6 | 2,764 | 20 |
| 114,080 | 213 | 1 | 1,787 | 11 | 101 | 2 | 665   | 6 | 2,766 | 20 |
| 114,081 | 213 | 1 | 1,786 | 11 | 101 | 2 | 664   | 6 | 2,764 | 20 |
| 114,082 | 215 | 1 | 1,794 | 11 | 101 | 2 | 662   | 6 | 2,772 | 20 |
| 114,083 | 215 | 1 | 1,795 | 10 | 101 | 2 | 661   | 5 | 2,772 | 18 |
| 114,084 | 215 | 1 | 1,793 | 10 | 101 | 2 | 661   | 5 | 2,770 | 18 |
| 114,085 | 216 | 1 | 1,844 | 10 | 101 | 2 | 674   | 5 | 2,835 | 18 |
| 114,086 | 238 | 1 | 2,051 | 9  | 112 | 2 | 800   | 5 | 3,201 | 17 |
| 114,087 | 238 | 1 | 2,047 | 9  | 112 | 2 | 800   | 5 | 3,197 | 17 |
| 114,088 | 244 | 1 | 2,085 | 9  | 118 | 2 | 849   | 5 | 3,296 | 17 |
| 114,089 | 243 | 1 | 2,077 | 9  | 119 | 2 | 846   | 5 | 3,285 | 17 |
| 114,090 | 241 | 1 | 2,076 | 9  | 118 | 2 | 846   | 5 | 3,281 | 17 |
| 114,091 | 241 | 1 | 2,097 | 9  | 119 | 2 | 852   | 5 | 3,309 | 17 |

|         |     |   |       |    |     |   |     |   |       |    |
|---------|-----|---|-------|----|-----|---|-----|---|-------|----|
| 114,092 | 238 | 2 | 2,105 | 9  | 118 | 2 | 853 | 5 | 3,314 | 18 |
| 114,093 | 236 | 2 | 2,096 | 9  | 117 | 2 | 848 | 5 | 3,297 | 18 |
| 114,094 | 236 | 2 | 2,093 | 10 | 116 | 2 | 846 | 5 | 3,291 | 19 |
| 114,095 | 236 | 2 | 2,090 | 9  | 116 | 2 | 840 | 5 | 3,282 | 18 |
| 114,096 | 236 | 2 | 2,091 | 9  | 116 | 2 | 837 | 5 | 3,280 | 18 |
| 114,097 | 236 | 2 | 2,091 | 9  | 116 | 2 | 837 | 5 | 3,280 | 18 |
| 114,098 | 235 | 2 | 2,090 | 9  | 116 | 1 | 837 | 5 | 3,278 | 17 |
| 114,099 | 237 | 2 | 2,084 | 8  | 116 | 1 | 836 | 4 | 3,273 | 15 |
| 114,100 | 236 | 2 | 2,043 | 8  | 114 | 1 | 831 | 4 | 3,224 | 15 |
| 114,101 | 218 | 1 | 2,011 | 8  | 113 | 1 | 818 | 4 | 3,160 | 14 |
| 114,102 | 220 | 1 | 1,997 | 8  | 113 | 1 | 818 | 4 | 3,148 | 14 |
| 114,103 | 205 | 1 | 1,992 | 8  | 112 | 2 | 806 | 4 | 3,115 | 15 |
| 114,104 | 204 | 1 | 2,002 | 8  | 111 | 2 | 807 | 4 | 3,124 | 15 |
| 114,105 | 212 | 1 | 2,156 | 8  | 118 | 2 | 871 | 4 | 3,357 | 15 |
| 114,106 | 190 | 1 | 2,047 | 8  | 122 | 2 | 879 | 4 | 3,238 | 15 |
| 114,107 | 213 | 1 | 2,202 | 8  | 137 | 2 | 998 | 4 | 3,550 | 15 |
| 114,108 | 165 | 1 | 1,392 | 8  | 107 | 2 | 858 | 4 | 2,522 | 15 |
| 114,109 | 157 | 1 | 1,349 | 8  | 103 | 2 | 826 | 4 | 2,435 | 15 |
| 114,110 | 123 | 1 | 1,146 | 7  | 80  | 2 | 680 | 4 | 2,029 | 14 |
| 114,111 | 116 | 1 | 1,086 | 7  | 71  | 2 | 645 | 4 | 1,918 | 14 |
| 114,112 | 114 | 1 | 1,081 | 6  | 70  | 2 | 645 | 4 | 1,910 | 13 |
| 114,113 | 114 | 1 | 1,064 | 6  | 69  | 2 | 631 | 4 | 1,878 | 13 |
| 114,114 | 117 | 1 | 1,081 | 6  | 70  | 2 | 636 | 4 | 1,904 | 13 |
| 114,115 | 117 | 1 | 1,097 | 6  | 69  | 2 | 636 | 4 | 1,919 | 13 |
| 114,116 | 112 | 1 | 1,079 | 6  | 67  | 2 | 626 | 4 | 1,884 | 13 |
| 114,117 | 120 | 1 | 1,152 | 6  | 72  | 2 | 644 | 4 | 1,988 | 13 |
| 114,118 | 122 | 1 | 1,166 | 6  | 73  | 2 | 651 | 4 | 2,012 | 13 |
| 114,119 | 129 | 1 | 1,250 | 6  | 76  | 2 | 668 | 4 | 2,123 | 13 |
| 114,120 | 129 | 1 | 1,246 | 6  | 76  | 2 | 664 | 4 | 2,115 | 13 |
| 114,121 | 129 | 1 | 1,281 | 6  | 78  | 2 | 683 | 4 | 2,171 | 13 |
| 114,122 | 178 | 1 | 1,529 | 6  | 94  | 2 | 813 | 4 | 2,614 | 13 |
| 114,123 | 188 | 1 | 1,597 | 6  | 93  | 2 | 817 | 5 | 2,695 | 14 |
| 114,124 | 190 | 1 | 1,613 | 7  | 93  | 2 | 832 | 5 | 2,728 | 15 |
| 114,125 | 190 | 1 | 1,612 | 3  | 93  | 1 | 830 | 3 | 2,725 | 8  |
| 114,126 | 193 | 1 | 1,619 | 4  | 95  | 1 | 843 | 3 | 2,750 | 9  |
| 114,127 | 192 | 1 | 1,615 | 4  | 95  | 1 | 836 | 2 | 2,738 | 8  |
| 114,128 | 192 | 1 | 1,630 | 4  | 95  | 1 | 843 | 1 | 2,760 | 7  |
| 114,129 | 192 | 1 | 1,629 | 4  | 95  | 1 | 842 | 1 | 2,758 | 7  |
| 114,130 | 191 | 1 | 1,630 | 4  | 95  | 1 | 840 | 1 | 2,756 | 7  |
| 114,131 | 192 | 1 | 1,626 | 4  | 95  | 1 | 842 | 1 | 2,755 | 7  |
| 114,132 | 192 | 1 | 1,625 | 4  | 95  | 1 | 842 | 1 | 2,754 | 7  |



|         |     |   |       |    |     |   |       |   |       |    |
|---------|-----|---|-------|----|-----|---|-------|---|-------|----|
| 114,133 | 196 | 1 | 1,629 | 4  | 95  | 1 | 846   | 1 | 2,766 | 7  |
| 114,134 | 196 | 1 | 1,623 | 4  | 95  | 1 | 842   | 1 | 2,756 | 7  |
| 114,135 | 194 | 1 | 1,587 | 4  | 95  | 1 | 829   | 1 | 2,705 | 7  |
| 114,136 | 202 | 1 | 1,587 | 7  | 93  | 1 | 807   | 2 | 2,689 | 11 |
| 114,137 | 189 | 1 | 1,519 | 9  | 87  | 1 | 778   | 2 | 2,573 | 13 |
| 114,138 | 186 | 1 | 1,563 | 10 | 86  | 1 | 759   | 2 | 2,594 | 14 |
| 114,139 | 185 | 1 | 1,555 | 10 | 87  | 1 | 752   | 4 | 2,579 | 16 |
| 114,140 | 188 | 1 | 1,597 | 10 | 87  | 1 | 771   | 4 | 2,643 | 16 |
| 114,141 | 187 | 1 | 1,579 | 10 | 86  | 1 | 762   | 4 | 2,614 | 16 |
| 114,142 | 194 | 1 | 1,597 | 10 | 87  | 1 | 772   | 4 | 2,650 | 16 |
| 114,143 | 202 | 0 | 1,640 | 10 | 89  | 1 | 792   | 5 | 2,723 | 16 |
| 114,144 | 202 | 0 | 1,639 | 10 | 89  | 1 | 792   | 5 | 2,722 | 16 |
| 114,145 | 238 | 0 | 1,819 | 9  | 102 | 1 | 916   | 5 | 3,075 | 15 |
| 114,146 | 238 | 0 | 1,818 | 9  | 102 | 1 | 916   | 5 | 3,074 | 15 |
| 114,147 | 242 | 0 | 1,829 | 9  | 102 | 1 | 926   | 5 | 3,099 | 15 |
| 114,148 | 242 | 0 | 1,840 | 9  | 102 | 1 | 931   | 5 | 3,115 | 15 |
| 114,149 | 241 | 0 | 1,838 | 10 | 102 | 1 | 930   | 5 | 3,111 | 16 |
| 114,150 | 241 | 0 | 1,838 | 10 | 102 | 1 | 930   | 5 | 3,111 | 16 |
| 114,151 | 243 | 0 | 1,830 | 10 | 102 | 1 | 927   | 5 | 3,102 | 16 |
| 114,152 | 245 | 0 | 1,843 | 12 | 105 | 1 | 935   | 5 | 3,128 | 18 |
| 114,153 | 249 | 0 | 1,926 | 13 | 110 | 1 | 985   | 6 | 3,270 | 20 |
| 114,154 | 249 | 0 | 1,912 | 15 | 110 | 0 | 994   | 6 | 3,265 | 21 |
| 114,155 | 249 | 0 | 1,920 | 15 | 111 | 0 | 1,004 | 6 | 3,284 | 21 |
| 114,156 | 242 | 0 | 1,763 | 15 | 104 | 0 | 937   | 6 | 3,046 | 21 |
| 114,157 | 233 | 0 | 1,691 | 16 | 93  | 0 | 874   | 6 | 2,891 | 22 |
| 114,158 | 200 | 0 | 1,486 | 16 | 71  | 0 | 723   | 6 | 2,480 | 22 |
| 114,159 | 200 | 0 | 1,479 | 16 | 71  | 0 | 714   | 6 | 2,464 | 22 |
| 114,160 | 202 | 0 | 1,511 | 16 | 72  | 0 | 734   | 6 | 2,519 | 22 |
| 114,161 | 201 | 0 | 1,503 | 17 | 71  | 0 | 736   | 6 | 2,511 | 23 |
| 114,162 | 203 | 0 | 1,519 | 17 | 71  | 0 | 744   | 6 | 2,537 | 23 |
| 114,163 | 202 | 0 | 1,509 | 17 | 71  | 0 | 738   | 6 | 2,520 | 23 |
| 114,164 | 206 | 0 | 1,545 | 17 | 70  | 0 | 747   | 6 | 2,568 | 23 |
| 114,165 | 251 | 0 | 1,871 | 17 | 92  | 0 | 987   | 6 | 3,201 | 23 |
| 114,166 | 257 | 0 | 1,906 | 17 | 92  | 0 | 1,043 | 6 | 3,298 | 23 |
| 114,167 | 257 | 0 | 1,901 | 17 | 92  | 0 | 1,043 | 6 | 3,293 | 23 |
| 114,168 | 249 | 0 | 1,862 | 17 | 94  | 0 | 1,057 | 6 | 3,262 | 23 |
| 114,169 | 246 | 0 | 1,845 | 17 | 94  | 0 | 1,052 | 6 | 3,237 | 23 |
| 114,170 | 239 | 0 | 1,767 | 17 | 92  | 0 | 1,039 | 6 | 3,137 | 23 |
| 114,171 | 238 | 0 | 1,749 | 16 | 91  | 0 | 1,030 | 6 | 3,108 | 22 |
| 114,172 | 238 | 0 | 1,733 | 16 | 90  | 0 | 1,033 | 6 | 3,094 | 22 |
| 114,173 | 186 | 0 | 1,484 | 16 | 73  | 0 | 903   | 6 | 2,646 | 22 |

|         |     |   |       |    |    |   |       |   |       |    |
|---------|-----|---|-------|----|----|---|-------|---|-------|----|
| 114,174 | 175 | 0 | 1,408 | 16 | 72 | 0 | 885   | 5 | 2,540 | 21 |
| 114,175 | 173 | 0 | 1,388 | 15 | 72 | 0 | 871   | 5 | 2,504 | 20 |
| 114,176 | 171 | 0 | 1,383 | 15 | 72 | 0 | 871   | 5 | 2,497 | 20 |
| 114,177 | 170 | 1 | 1,387 | 14 | 70 | 0 | 863   | 5 | 2,490 | 20 |
| 114,178 | 170 | 1 | 1,375 | 14 | 71 | 0 | 863   | 5 | 2,479 | 20 |
| 114,179 | 171 | 1 | 1,388 | 14 | 71 | 0 | 884   | 5 | 2,514 | 20 |
| 114,180 | 171 | 1 | 1,410 | 14 | 71 | 0 | 892   | 5 | 2,544 | 20 |
| 114,181 | 171 | 1 | 1,411 | 14 | 72 | 0 | 898   | 5 | 2,552 | 20 |
| 114,182 | 170 | 1 | 1,410 | 14 | 72 | 0 | 899   | 5 | 2,551 | 20 |
| 114,183 | 165 | 1 | 1,407 | 14 | 72 | 0 | 899   | 5 | 2,543 | 20 |
| 114,184 | 164 | 1 | 1,406 | 14 | 72 | 0 | 897   | 5 | 2,539 | 20 |
| 114,185 | 164 | 1 | 1,406 | 14 | 72 | 0 | 897   | 5 | 2,539 | 20 |
| 114,186 | 163 | 1 | 1,385 | 14 | 72 | 0 | 894   | 5 | 2,514 | 20 |
| 114,187 | 149 | 1 | 1,332 | 11 | 72 | 0 | 882   | 4 | 2,435 | 16 |
| 114,188 | 148 | 1 | 1,278 | 9  | 69 | 0 | 828   | 4 | 2,323 | 14 |
| 114,189 | 142 | 1 | 1,193 | 8  | 64 | 0 | 798   | 3 | 2,197 | 12 |
| 114,190 | 158 | 1 | 1,353 | 8  | 68 | 0 | 893   | 3 | 2,472 | 12 |
| 114,191 | 155 | 1 | 1,326 | 8  | 68 | 0 | 888   | 3 | 2,437 | 12 |
| 114,192 | 157 | 1 | 1,324 | 10 | 68 | 0 | 890   | 4 | 2,439 | 15 |
| 114,193 | 153 | 1 | 1,379 | 10 | 69 | 0 | 911   | 5 | 2,512 | 16 |
| 114,194 | 161 | 1 | 1,589 | 10 | 81 | 0 | 1,125 | 4 | 2,956 | 15 |
| 114,195 | 162 | 1 | 1,703 | 10 | 84 | 0 | 1,166 | 5 | 3,115 | 16 |
| 114,196 | 126 | 1 | 1,533 | 10 | 72 | 0 | 1,046 | 5 | 2,777 | 16 |
| 114,197 | 123 | 1 | 1,527 | 10 | 72 | 0 | 1,046 | 5 | 2,768 | 16 |
| 114,198 | 122 | 1 | 1,520 | 10 | 72 | 0 | 1,042 | 5 | 2,756 | 16 |
| 114,199 | 122 | 1 | 1,509 | 10 | 72 | 0 | 1,039 | 5 | 2,742 | 16 |
| 114,200 | 121 | 1 | 1,508 | 9  | 72 | 0 | 1,039 | 5 | 2,740 | 15 |
| 114,201 | 140 | 1 | 1,731 | 9  | 79 | 0 | 1,160 | 5 | 3,110 | 15 |
| 114,202 | 156 | 1 | 1,824 | 10 | 87 | 0 | 1,233 | 5 | 3,300 | 16 |
| 114,203 | 158 | 1 | 1,817 | 8  | 84 | 0 | 1,237 | 5 | 3,296 | 14 |
| 114,204 | 153 | 1 | 1,743 | 7  | 81 | 0 | 1,198 | 4 | 3,175 | 12 |
| 114,205 | 152 | 1 | 1,729 | 7  | 80 | 0 | 1,189 | 4 | 3,150 | 12 |
| 114,206 | 151 | 1 | 1,715 | 7  | 79 | 0 | 1,175 | 4 | 3,120 | 12 |
| 114,207 | 150 | 2 | 1,715 | 7  | 79 | 0 | 1,175 | 4 | 3,119 | 13 |
| 114,208 | 150 | 2 | 1,695 | 6  | 79 | 0 | 1,168 | 4 | 3,092 | 12 |
| 114,209 | 150 | 2 | 1,687 | 6  | 79 | 0 | 1,165 | 4 | 3,081 | 12 |
| 114,210 | 150 | 2 | 1,686 | 6  | 79 | 0 | 1,165 | 5 | 3,080 | 13 |
| 114,211 | 149 | 2 | 1,648 | 5  | 79 | 0 | 1,139 | 5 | 3,015 | 12 |
| 114,212 | 149 | 2 | 1,651 | 5  | 79 | 0 | 1,138 | 5 | 3,017 | 12 |
| 114,213 | 147 | 2 | 1,638 | 5  | 79 | 0 | 1,132 | 5 | 2,996 | 12 |
| 114,214 | 142 | 2 | 1,608 | 5  | 79 | 0 | 1,121 | 5 | 2,950 | 12 |

|         |     |   |       |   |     |   |       |   |       |    |
|---------|-----|---|-------|---|-----|---|-------|---|-------|----|
| 114,215 | 141 | 2 | 1,544 | 5 | 74  | 0 | 1,079 | 5 | 2,838 | 12 |
| 114,216 | 98  | 2 | 1,309 | 5 | 57  | 0 | 878   | 5 | 2,342 | 12 |
| 114,217 | 112 | 3 | 1,289 | 5 | 57  | 0 | 823   | 5 | 2,281 | 13 |
| 114,218 | 111 | 3 | 1,256 | 5 | 51  | 0 | 789   | 5 | 2,207 | 13 |
| 114,219 | 113 | 3 | 1,321 | 5 | 52  | 0 | 801   | 6 | 2,287 | 14 |
| 114,220 | 134 | 3 | 1,677 | 5 | 64  | 0 | 934   | 6 | 2,809 | 14 |
| 114,221 | 166 | 3 | 1,905 | 5 | 77  | 0 | 1,072 | 6 | 3,220 | 14 |
| 114,222 | 180 | 3 | 2,080 | 5 | 87  | 0 | 1,215 | 6 | 3,562 | 14 |
| 114,223 | 240 | 3 | 2,469 | 5 | 131 | 0 | 1,579 | 6 | 4,419 | 14 |
| 114,224 | 240 | 3 | 2,466 | 6 | 131 | 0 | 1,577 | 6 | 4,414 | 15 |
| 114,225 | 241 | 3 | 2,475 | 6 | 131 | 0 | 1,583 | 6 | 4,430 | 15 |
| 114,226 | 241 | 3 | 2,503 | 6 | 133 | 0 | 1,598 | 6 | 4,475 | 15 |
| 114,227 | 241 | 3 | 2,502 | 6 | 133 | 0 | 1,597 | 5 | 4,473 | 14 |
| 114,228 | 249 | 2 | 2,538 | 6 | 134 | 0 | 1,636 | 5 | 4,557 | 13 |
| 114,229 | 249 | 2 | 2,534 | 6 | 134 | 0 | 1,635 | 5 | 4,552 | 13 |
| 114,230 | 248 | 2 | 2,520 | 6 | 134 | 0 | 1,611 | 5 | 4,513 | 13 |
| 114,231 | 248 | 2 | 2,495 | 6 | 134 | 0 | 1,603 | 5 | 4,480 | 13 |
| 114,232 | 248 | 2 | 2,499 | 6 | 134 | 0 | 1,598 | 5 | 4,479 | 13 |
| 114,233 | 248 | 2 | 2,501 | 6 | 134 | 0 | 1,601 | 5 | 4,484 | 13 |
| 114,234 | 248 | 2 | 2,491 | 6 | 134 | 0 | 1,601 | 5 | 4,474 | 13 |
| 114,235 | 248 | 2 | 2,481 | 6 | 134 | 0 | 1,595 | 5 | 4,458 | 13 |
| 114,236 | 248 | 2 | 2,481 | 6 | 134 | 0 | 1,595 | 5 | 4,458 | 13 |
| 114,237 | 248 | 2 | 2,482 | 6 | 134 | 0 | 1,599 | 5 | 4,463 | 13 |
| 114,238 | 248 | 2 | 2,488 | 6 | 135 | 0 | 1,603 | 5 | 4,474 | 13 |
| 114,239 | 246 | 2 | 2,471 | 6 | 136 | 0 | 1,612 | 4 | 4,465 | 12 |
| 114,240 | 246 | 2 | 2,471 | 6 | 137 | 0 | 1,612 | 4 | 4,466 | 12 |
| 114,241 | 231 | 2 | 2,309 | 6 | 132 | 0 | 1,506 | 4 | 4,178 | 12 |
| 114,242 | 231 | 2 | 2,293 | 8 | 131 | 0 | 1,488 | 4 | 4,143 | 14 |
| 114,243 | 230 | 2 | 2,291 | 6 | 131 | 0 | 1,485 | 5 | 4,137 | 13 |
| 114,244 | 227 | 2 | 2,216 | 6 | 129 | 0 | 1,449 | 5 | 4,021 | 13 |
| 114,245 | 211 | 2 | 1,952 | 6 | 115 | 0 | 1,202 | 4 | 3,480 | 12 |
| 114,246 | 210 | 2 | 1,826 | 6 | 110 | 0 | 1,157 | 4 | 3,303 | 12 |
| 114,247 | 196 | 2 | 1,719 | 6 | 110 | 0 | 1,115 | 4 | 3,140 | 12 |
| 114,248 | 196 | 2 | 1,702 | 6 | 110 | 0 | 1,108 | 4 | 3,116 | 12 |
| 114,249 | 196 | 2 | 1,703 | 6 | 110 | 0 | 1,109 | 4 | 3,118 | 12 |
| 114,250 | 189 | 2 | 1,639 | 5 | 103 | 0 | 1,049 | 4 | 2,980 | 11 |
| 114,251 | 226 | 2 | 1,742 | 5 | 104 | 0 | 1,133 | 4 | 3,205 | 11 |
| 114,252 | 218 | 2 | 1,693 | 5 | 96  | 0 | 1,087 | 4 | 3,094 | 11 |
| 114,253 | 218 | 2 | 1,681 | 5 | 96  | 0 | 1,086 | 4 | 3,081 | 11 |
| 114,254 | 231 | 2 | 1,785 | 5 | 100 | 0 | 1,167 | 4 | 3,283 | 11 |
| 114,255 | 230 | 2 | 1,774 | 5 | 99  | 0 | 1,154 | 4 | 3,257 | 11 |

|         |     |   |       |    |     |   |       |   |       |    |
|---------|-----|---|-------|----|-----|---|-------|---|-------|----|
| 114,256 | 240 | 2 | 1,847 | 3  | 104 | 0 | 1,236 | 4 | 3,427 | 9  |
| 114,257 | 240 | 1 | 1,842 | 3  | 104 | 0 | 1,235 | 4 | 3,421 | 8  |
| 114,258 | 240 | 1 | 1,842 | 3  | 104 | 0 | 1,236 | 4 | 3,422 | 8  |
| 114,259 | 240 | 1 | 1,842 | 3  | 104 | 0 | 1,236 | 4 | 3,422 | 8  |
| 114,260 | 240 | 1 | 1,841 | 3  | 104 | 0 | 1,236 | 4 | 3,421 | 8  |
| 114,261 | 238 | 1 | 1,838 | 3  | 104 | 0 | 1,236 | 3 | 3,416 | 7  |
| 114,262 | 243 | 1 | 1,850 | 3  | 105 | 0 | 1,238 | 3 | 3,436 | 7  |
| 114,263 | 243 | 1 | 1,845 | 3  | 105 | 0 | 1,238 | 3 | 3,431 | 7  |
| 114,264 | 244 | 1 | 1,860 | 3  | 105 | 0 | 1,237 | 3 | 3,446 | 7  |
| 114,265 | 244 | 1 | 1,850 | 3  | 105 | 0 | 1,237 | 3 | 3,436 | 7  |
| 114,266 | 240 | 1 | 1,811 | 3  | 104 | 1 | 1,231 | 3 | 3,386 | 8  |
| 114,267 | 240 | 1 | 1,807 | 3  | 104 | 2 | 1,229 | 3 | 3,380 | 9  |
| 114,268 | 226 | 0 | 1,914 | 3  | 107 | 2 | 1,246 | 3 | 3,493 | 8  |
| 114,269 | 226 | 0 | 1,883 | 3  | 107 | 2 | 1,237 | 3 | 3,453 | 8  |
| 114,270 | 270 | 0 | 2,084 | 4  | 114 | 2 | 1,423 | 2 | 3,891 | 8  |
| 114,271 | 249 | 0 | 1,777 | 8  | 105 | 2 | 1,298 | 2 | 3,429 | 12 |
| 114,272 | 241 | 0 | 1,954 | 10 | 104 | 2 | 1,286 | 2 | 3,585 | 14 |
| 114,273 | 239 | 0 | 1,901 | 13 | 99  | 2 | 1,260 | 3 | 3,499 | 18 |
| 114,274 | 183 | 0 | 1,651 | 14 | 58  | 2 | 965   | 3 | 2,857 | 19 |
| 114,275 | 219 | 1 | 1,791 | 13 | 69  | 2 | 1,150 | 4 | 3,229 | 20 |
| 114,276 | 223 | 1 | 1,827 | 13 | 67  | 2 | 1,164 | 4 | 3,281 | 20 |
| 114,277 | 231 | 1 | 1,849 | 14 | 70  | 2 | 1,187 | 4 | 3,337 | 21 |
| 114,278 | 229 | 1 | 1,858 | 14 | 72  | 2 | 1,202 | 5 | 3,361 | 22 |
| 114,279 | 225 | 1 | 1,834 | 14 | 71  | 2 | 1,172 | 5 | 3,302 | 22 |
| 114,280 | 233 | 1 | 1,932 | 14 | 74  | 2 | 1,222 | 5 | 3,461 | 22 |
| 114,281 | 234 | 1 | 1,945 | 14 | 74  | 2 | 1,232 | 5 | 3,485 | 22 |
| 114,282 | 242 | 1 | 1,968 | 14 | 76  | 2 | 1,257 | 5 | 3,543 | 22 |
| 114,283 | 242 | 1 | 1,967 | 14 | 75  | 2 | 1,257 | 5 | 3,541 | 22 |
| 114,284 | 242 | 1 | 1,968 | 14 | 75  | 2 | 1,254 | 5 | 3,539 | 22 |
| 114,285 | 242 | 1 | 1,970 | 14 | 75  | 2 | 1,256 | 5 | 3,543 | 22 |
| 114,286 | 243 | 1 | 1,976 | 14 | 75  | 2 | 1,259 | 5 | 3,553 | 22 |
| 114,287 | 244 | 1 | 1,981 | 14 | 75  | 2 | 1,261 | 5 | 3,561 | 22 |
| 114,288 | 244 | 1 | 1,978 | 14 | 75  | 2 | 1,260 | 5 | 3,557 | 22 |
| 114,289 | 247 | 1 | 1,976 | 14 | 75  | 2 | 1,261 | 5 | 3,559 | 22 |
| 114,290 | 248 | 1 | 1,978 | 14 | 74  | 2 | 1,252 | 5 | 3,552 | 22 |
| 114,291 | 248 | 1 | 1,981 | 14 | 73  | 2 | 1,253 | 5 | 3,555 | 22 |
| 114,292 | 251 | 1 | 2,000 | 14 | 74  | 2 | 1,272 | 5 | 3,597 | 22 |
| 114,293 | 251 | 1 | 1,999 | 12 | 74  | 2 | 1,272 | 5 | 3,596 | 20 |
| 114,294 | 256 | 1 | 2,033 | 12 | 75  | 2 | 1,291 | 4 | 3,655 | 19 |
| 114,295 | 256 | 1 | 2,033 | 12 | 75  | 2 | 1,291 | 3 | 3,655 | 18 |
| 114,296 | 257 | 1 | 2,037 | 12 | 75  | 2 | 1,294 | 3 | 3,663 | 18 |

|         |     |   |       |    |     |   |       |   |       |    |
|---------|-----|---|-------|----|-----|---|-------|---|-------|----|
| 114,297 | 257 | 1 | 2,037 | 12 | 75  | 2 | 1,294 | 3 | 3,663 | 18 |
| 114,298 | 258 | 1 | 2,043 | 12 | 75  | 2 | 1,296 | 3 | 3,672 | 18 |
| 114,299 | 258 | 1 | 2,058 | 13 | 76  | 2 | 1,304 | 3 | 3,696 | 19 |
| 114,300 | 258 | 1 | 2,062 | 13 | 76  | 2 | 1,304 | 3 | 3,700 | 19 |
| 114,301 | 258 | 1 | 2,047 | 13 | 76  | 2 | 1,301 | 3 | 3,682 | 19 |
| 114,302 | 224 | 1 | 1,944 | 13 | 75  | 2 | 1,227 | 3 | 3,470 | 19 |
| 114,303 | 217 | 1 | 1,918 | 13 | 74  | 2 | 1,209 | 3 | 3,418 | 19 |
| 114,304 | 217 | 1 | 1,918 | 13 | 74  | 2 | 1,207 | 3 | 3,416 | 19 |
| 114,305 | 200 | 1 | 1,808 | 13 | 70  | 2 | 1,113 | 3 | 3,191 | 19 |
| 114,306 | 193 | 1 | 1,738 | 13 | 66  | 2 | 1,052 | 3 | 3,049 | 19 |
| 114,307 | 190 | 1 | 1,728 | 13 | 64  | 2 | 1,031 | 3 | 3,013 | 19 |
| 114,308 | 190 | 1 | 1,726 | 13 | 64  | 2 | 1,031 | 3 | 3,011 | 19 |
| 114,309 | 201 | 1 | 1,797 | 13 | 68  | 2 | 1,080 | 3 | 3,146 | 19 |
| 114,310 | 220 | 1 | 1,989 | 13 | 73  | 2 | 1,154 | 3 | 3,436 | 19 |
| 114,311 | 235 | 1 | 2,193 | 13 | 77  | 2 | 1,223 | 3 | 3,728 | 19 |
| 114,312 | 235 | 1 | 2,190 | 13 | 77  | 2 | 1,224 | 3 | 3,726 | 19 |
| 114,313 | 300 | 1 | 2,969 | 13 | 120 | 2 | 1,685 | 3 | 5,074 | 19 |
| 114,314 | 313 | 1 | 3,071 | 13 | 124 | 2 | 1,758 | 3 | 5,266 | 19 |
| 114,315 | 336 | 1 | 3,189 | 13 | 130 | 2 | 1,821 | 3 | 5,476 | 19 |
| 114,316 | 344 | 1 | 3,276 | 13 | 140 | 1 | 1,943 | 3 | 5,703 | 18 |
| 114,317 | 348 | 1 | 3,299 | 13 | 140 | 0 | 1,958 | 3 | 5,745 | 17 |
| 114,318 | 345 | 1 | 3,206 | 13 | 137 | 0 | 1,950 | 3 | 5,638 | 17 |
| 114,319 | 345 | 1 | 3,179 | 13 | 138 | 0 | 1,944 | 3 | 5,606 | 17 |
| 114,320 | 298 | 1 | 2,948 | 13 | 129 | 0 | 1,750 | 3 | 5,125 | 17 |
| 114,321 | 300 | 1 | 2,966 | 12 | 129 | 0 | 1,755 | 3 | 5,150 | 16 |
| 114,322 | 302 | 1 | 2,919 | 8  | 126 | 0 | 1,745 | 3 | 5,092 | 12 |
| 114,323 | 279 | 1 | 2,534 | 3  | 112 | 0 | 1,612 | 2 | 4,537 | 6  |
| 114,324 | 270 | 0 | 2,437 | 2  | 106 | 0 | 1,491 | 1 | 4,304 | 3  |
| 114,325 | 266 | 0 | 2,296 | 2  | 103 | 0 | 1,417 | 1 | 4,082 | 3  |
| 114,326 | 231 | 0 | 2,233 | 2  | 93  | 0 | 1,246 | 1 | 3,803 | 3  |
| 114,327 | 231 | 0 | 2,259 | 2  | 100 | 0 | 1,270 | 1 | 3,860 | 3  |
| 114,328 | 245 | 0 | 2,622 | 1  | 104 | 0 | 1,361 | 1 | 4,332 | 2  |
| 114,329 | 246 | 0 | 2,638 | 1  | 105 | 0 | 1,398 | 0 | 4,387 | 1  |
| 114,330 | 243 | 0 | 2,598 | 1  | 102 | 0 | 1,357 | 0 | 4,300 | 1  |
| 114,331 | 239 | 0 | 2,606 | 1  | 105 | 0 | 1,382 | 0 | 4,332 | 1  |
| 114,332 | 248 | 0 | 2,679 | 1  | 108 | 0 | 1,434 | 0 | 4,469 | 1  |
| 114,333 | 242 | 0 | 2,666 | 1  | 107 | 0 | 1,414 | 0 | 4,429 | 1  |
| 114,334 | 242 | 0 | 2,666 | 1  | 107 | 0 | 1,414 | 0 | 4,429 | 1  |
| 114,335 | 242 | 0 | 2,663 | 1  | 107 | 0 | 1,414 | 0 | 4,426 | 1  |
| 114,336 | 244 | 0 | 2,687 | 1  | 110 | 0 | 1,451 | 0 | 4,492 | 1  |
| 114,337 | 246 | 0 | 2,687 | 1  | 111 | 0 | 1,451 | 0 | 4,495 | 1  |

|         |     |   |       |   |     |   |       |   |       |   |
|---------|-----|---|-------|---|-----|---|-------|---|-------|---|
| 114,338 | 245 | 0 | 2,680 | 1 | 111 | 0 | 1,445 | 0 | 4,481 | 1 |
| 114,339 | 244 | 0 | 2,685 | 2 | 110 | 0 | 1,443 | 0 | 4,482 | 2 |
| 114,340 | 245 | 0 | 2,748 | 3 | 113 | 0 | 1,506 | 0 | 4,612 | 3 |
| 114,341 | 251 | 0 | 3,063 | 3 | 115 | 0 | 1,595 | 0 | 5,024 | 3 |
| 114,342 | 259 | 0 | 3,099 | 3 | 117 | 0 | 1,640 | 0 | 5,115 | 3 |
| 114,343 | 260 | 0 | 3,229 | 3 | 124 | 0 | 1,773 | 0 | 5,386 | 3 |
| 114,344 | 255 | 0 | 3,207 | 3 | 123 | 0 | 1,764 | 0 | 5,349 | 3 |
| 114,345 | 257 | 0 | 3,250 | 3 | 125 | 0 | 1,792 | 0 | 5,424 | 3 |
| 114,346 | 256 | 0 | 3,246 | 3 | 125 | 0 | 1,789 | 0 | 5,416 | 3 |
| 114,347 | 256 | 0 | 3,251 | 3 | 126 | 0 | 1,791 | 0 | 5,424 | 3 |
| 114,348 | 255 | 0 | 3,250 | 2 | 126 | 0 | 1,791 | 0 | 5,422 | 2 |
| 114,349 | 255 | 0 | 3,242 | 2 | 126 | 0 | 1,789 | 0 | 5,412 | 2 |
| 114,350 | 255 | 0 | 3,225 | 2 | 125 | 0 | 1,778 | 0 | 5,383 | 2 |
| 114,351 | 255 | 0 | 3,227 | 2 | 125 | 0 | 1,791 | 0 | 5,398 | 2 |
| 114,352 | 255 | 0 | 3,228 | 2 | 125 | 0 | 1,786 | 2 | 5,394 | 4 |
| 114,353 | 252 | 0 | 3,221 | 2 | 125 | 0 | 1,782 | 2 | 5,380 | 4 |
| 114,354 | 251 | 0 | 3,216 | 2 | 125 | 0 | 1,779 | 2 | 5,371 | 4 |
| 114,355 | 249 | 0 | 3,202 | 2 | 124 | 0 | 1,774 | 2 | 5,349 | 4 |
| 114,356 | 240 | 0 | 3,171 | 2 | 120 | 0 | 1,737 | 2 | 5,268 | 4 |
| 114,357 | 240 | 0 | 3,169 | 2 | 122 | 0 | 1,737 | 2 | 5,268 | 4 |
| 114,358 | 244 | 0 | 3,227 | 2 | 123 | 0 | 1,761 | 2 | 5,355 | 4 |
| 114,359 | 251 | 0 | 3,255 | 2 | 124 | 0 | 1,767 | 2 | 5,397 | 4 |
| 114,360 | 247 | 0 | 3,199 | 2 | 124 | 0 | 1,752 | 2 | 5,322 | 4 |
| 114,361 | 233 | 0 | 3,094 | 2 | 123 | 0 | 1,714 | 2 | 5,164 | 4 |
| 114,362 | 218 | 0 | 2,890 | 2 | 119 | 0 | 1,645 | 2 | 4,872 | 4 |
| 114,363 | 211 | 0 | 2,747 | 3 | 115 | 0 | 1,586 | 2 | 4,659 | 5 |
| 114,364 | 149 | 0 | 2,152 | 3 | 76  | 0 | 1,178 | 2 | 3,555 | 5 |
| 114,365 | 137 | 0 | 2,054 | 3 | 73  | 0 | 1,126 | 2 | 3,390 | 5 |
| 114,366 | 113 | 0 | 1,950 | 3 | 68  | 0 | 1,069 | 2 | 3,200 | 5 |
| 114,367 | 105 | 0 | 1,860 | 3 | 58  | 0 | 943   | 2 | 2,966 | 5 |
| 114,368 | 151 | 0 | 2,137 | 3 | 80  | 0 | 1,237 | 2 | 3,605 | 5 |
| 114,369 | 158 | 0 | 2,238 | 3 | 83  | 0 | 1,287 | 2 | 3,766 | 5 |
| 114,370 | 157 | 0 | 2,262 | 3 | 86  | 0 | 1,330 | 2 | 3,835 | 5 |
| 114,371 | 157 | 0 | 2,262 | 3 | 86  | 0 | 1,330 | 2 | 3,835 | 5 |
| 114,372 | 155 | 0 | 2,235 | 3 | 86  | 0 | 1,324 | 3 | 3,800 | 6 |
| 114,373 | 153 | 0 | 2,240 | 3 | 86  | 0 | 1,330 | 3 | 3,809 | 6 |
| 114,374 | 152 | 0 | 2,222 | 3 | 87  | 0 | 1,338 | 3 | 3,799 | 6 |
| 114,375 | 161 | 0 | 2,283 | 3 | 101 | 0 | 1,416 | 3 | 3,961 | 6 |
| 114,376 | 161 | 0 | 2,290 | 3 | 101 | 0 | 1,423 | 3 | 3,975 | 6 |
| 114,377 | 159 | 0 | 2,204 | 4 | 101 | 0 | 1,401 | 3 | 3,865 | 7 |
| 114,378 | 154 | 0 | 2,122 | 4 | 95  | 0 | 1,354 | 3 | 3,725 | 7 |

|         |     |   |       |    |     |   |       |   |       |    |
|---------|-----|---|-------|----|-----|---|-------|---|-------|----|
| 114,379 | 132 | 0 | 1,726 | 4  | 87  | 0 | 1,248 | 3 | 3,193 | 7  |
| 114,380 | 129 | 0 | 1,683 | 6  | 85  | 0 | 1,191 | 3 | 3,088 | 9  |
| 114,381 | 128 | 0 | 1,674 | 7  | 84  | 0 | 1,191 | 3 | 3,077 | 10 |
| 114,382 | 131 | 0 | 1,677 | 8  | 84  | 0 | 1,191 | 3 | 3,083 | 11 |
| 114,383 | 124 | 0 | 1,800 | 8  | 84  | 0 | 1,211 | 3 | 3,219 | 11 |
| 114,384 | 136 | 0 | 1,949 | 8  | 87  | 0 | 1,302 | 3 | 3,474 | 11 |
| 114,385 | 136 | 0 | 1,982 | 8  | 88  | 0 | 1,325 | 3 | 3,531 | 11 |
| 114,386 | 136 | 0 | 1,981 | 8  | 88  | 0 | 1,323 | 3 | 3,528 | 11 |
| 114,387 | 137 | 0 | 1,990 | 8  | 88  | 0 | 1,328 | 3 | 3,543 | 11 |
| 114,388 | 134 | 0 | 2,011 | 8  | 92  | 1 | 1,335 | 3 | 3,572 | 12 |
| 114,389 | 133 | 2 | 2,007 | 6  | 92  | 2 | 1,336 | 4 | 3,568 | 14 |
| 114,390 | 133 | 2 | 2,003 | 9  | 91  | 2 | 1,330 | 4 | 3,557 | 17 |
| 114,391 | 131 | 2 | 1,943 | 9  | 89  | 2 | 1,270 | 4 | 3,433 | 17 |
| 114,392 | 124 | 2 | 1,620 | 9  | 87  | 2 | 1,176 | 4 | 3,007 | 17 |
| 114,393 | 117 | 2 | 1,597 | 9  | 87  | 2 | 1,145 | 4 | 2,946 | 17 |
| 114,394 | 111 | 2 | 1,464 | 9  | 80  | 2 | 994   | 4 | 2,649 | 17 |
| 114,395 | 111 | 2 | 1,441 | 9  | 78  | 2 | 982   | 4 | 2,612 | 17 |
| 114,396 | 113 | 2 | 1,417 | 9  | 78  | 2 | 961   | 4 | 2,569 | 17 |
| 114,397 | 114 | 2 | 1,428 | 9  | 78  | 2 | 965   | 4 | 2,585 | 17 |
| 114,398 | 114 | 2 | 1,439 | 9  | 81  | 2 | 973   | 4 | 2,607 | 17 |
| 114,399 | 114 | 2 | 1,438 | 9  | 81  | 2 | 974   | 4 | 2,607 | 17 |
| 114,400 | 118 | 2 | 1,479 | 9  | 84  | 2 | 1,009 | 4 | 2,690 | 17 |
| 114,401 | 123 | 2 | 1,491 | 9  | 85  | 2 | 1,003 | 4 | 2,702 | 17 |
| 114,402 | 128 | 2 | 1,554 | 9  | 92  | 2 | 1,064 | 2 | 2,838 | 15 |
| 114,403 | 129 | 2 | 1,586 | 11 | 95  | 2 | 1,086 | 2 | 2,896 | 17 |
| 114,404 | 129 | 2 | 1,583 | 11 | 95  | 2 | 1,074 | 2 | 2,881 | 17 |
| 114,405 | 157 | 2 | 1,864 | 11 | 136 | 2 | 1,426 | 2 | 3,583 | 17 |
| 114,406 | 159 | 3 | 1,874 | 11 | 137 | 2 | 1,438 | 2 | 3,608 | 18 |
| 114,407 | 166 | 3 | 1,884 | 12 | 137 | 2 | 1,443 | 2 | 3,630 | 19 |
| 114,408 | 166 | 3 | 1,904 | 12 | 136 | 2 | 1,444 | 2 | 3,650 | 19 |
| 114,409 | 162 | 3 | 1,842 | 12 | 135 | 2 | 1,420 | 2 | 3,559 | 19 |
| 114,410 | 174 | 3 | 1,982 | 12 | 144 | 2 | 1,555 | 2 | 3,855 | 19 |
| 114,411 | 199 | 3 | 2,259 | 12 | 149 | 2 | 1,628 | 2 | 4,235 | 19 |
| 114,412 | 209 | 3 | 2,342 | 12 | 159 | 2 | 1,683 | 2 | 4,393 | 19 |
| 114,413 | 213 | 3 | 2,550 | 12 | 165 | 2 | 1,719 | 2 | 4,647 | 19 |
| 114,414 | 220 | 3 | 2,701 | 12 | 171 | 2 | 1,790 | 2 | 4,882 | 19 |
| 114,415 | 237 | 3 | 3,234 | 12 | 190 | 2 | 1,884 | 2 | 5,545 | 19 |
| 114,416 | 244 | 3 | 3,340 | 12 | 203 | 2 | 1,937 | 2 | 5,724 | 19 |
| 114,417 | 251 | 3 | 3,957 | 12 | 215 | 2 | 1,998 | 2 | 6,421 | 19 |
| 114,418 | 215 | 3 | 4,215 | 12 | 201 | 2 | 1,795 | 2 | 6,426 | 19 |
| 114,419 | 208 | 3 | 4,110 | 12 | 198 | 2 | 1,746 | 2 | 6,262 | 19 |

|         |     |   |       |    |     |   |       |   |       |    |
|---------|-----|---|-------|----|-----|---|-------|---|-------|----|
| 114,420 | 206 | 3 | 4,059 | 12 | 195 | 2 | 1,698 | 2 | 6,158 | 19 |
| 114,421 | 210 | 3 | 4,189 | 14 | 197 | 2 | 1,733 | 3 | 6,329 | 22 |
| 114,422 | 223 | 3 | 4,416 | 15 | 198 | 2 | 1,768 | 3 | 6,605 | 23 |
| 114,423 | 228 | 3 | 4,487 | 15 | 202 | 2 | 1,787 | 2 | 6,704 | 22 |
| 114,424 | 233 | 3 | 4,514 | 15 | 204 | 2 | 1,795 | 2 | 6,746 | 22 |
| 114,425 | 235 | 3 | 4,632 | 15 | 206 | 2 | 1,824 | 2 | 6,897 | 22 |
| 114,426 | 224 | 3 | 4,561 | 15 | 196 | 2 | 1,756 | 2 | 6,737 | 22 |
| 114,427 | 223 | 3 | 4,541 | 15 | 196 | 2 | 1,748 | 2 | 6,708 | 22 |
| 114,428 | 231 | 3 | 4,611 | 14 | 201 | 2 | 1,779 | 2 | 6,822 | 21 |
| 114,429 | 231 | 3 | 4,614 | 14 | 201 | 2 | 1,777 | 2 | 6,823 | 21 |
| 114,430 | 231 | 3 | 4,614 | 14 | 201 | 2 | 1,777 | 2 | 6,823 | 21 |
| 114,431 | 231 | 4 | 4,611 | 13 | 200 | 2 | 1,776 | 4 | 6,818 | 23 |
| 114,432 | 231 | 5 | 4,595 | 12 | 200 | 2 | 1,771 | 6 | 6,797 | 25 |
| 114,433 | 228 | 5 | 4,553 | 14 | 197 | 2 | 1,741 | 6 | 6,719 | 27 |
| 114,434 | 225 | 5 | 4,342 | 14 | 194 | 2 | 1,661 | 6 | 6,422 | 27 |
| 114,435 | 211 | 5 | 4,182 | 14 | 190 | 2 | 1,565 | 6 | 6,148 | 27 |
| 114,436 | 209 | 5 | 4,125 | 14 | 186 | 2 | 1,510 | 6 | 6,030 | 27 |
| 114,437 | 208 | 5 | 4,114 | 14 | 186 | 2 | 1,501 | 6 | 6,009 | 27 |
| 114,438 | 208 | 5 | 4,101 | 14 | 185 | 1 | 1,500 | 6 | 5,994 | 26 |
| 114,439 | 208 | 5 | 4,088 | 14 | 181 | 1 | 1,492 | 6 | 5,969 | 26 |
| 114,440 | 209 | 3 | 4,087 | 14 | 181 | 0 | 1,492 | 5 | 5,969 | 22 |
| 114,441 | 210 | 3 | 4,095 | 11 | 183 | 0 | 1,501 | 5 | 5,989 | 19 |
| 114,442 | 210 | 3 | 4,096 | 11 | 183 | 0 | 1,501 | 5 | 5,990 | 19 |
| 114,443 | 210 | 3 | 4,095 | 11 | 183 | 0 | 1,502 | 5 | 5,990 | 19 |
| 114,444 | 209 | 3 | 4,079 | 11 | 181 | 0 | 1,486 | 5 | 5,955 | 19 |
| 114,445 | 209 | 3 | 4,061 | 11 | 180 | 0 | 1,482 | 5 | 5,932 | 19 |
| 114,446 | 205 | 3 | 4,057 | 11 | 180 | 0 | 1,480 | 5 | 5,922 | 19 |
| 114,447 | 204 | 3 | 4,040 | 11 | 179 | 0 | 1,473 | 5 | 5,896 | 19 |
| 114,448 | 204 | 3 | 4,029 | 11 | 176 | 0 | 1,469 | 5 | 5,878 | 19 |
| 114,449 | 204 | 3 | 4,028 | 11 | 176 | 0 | 1,467 | 5 | 5,875 | 19 |
| 114,450 | 200 | 3 | 3,992 | 11 | 174 | 1 | 1,441 | 5 | 5,807 | 20 |
| 114,451 | 201 | 3 | 3,992 | 11 | 173 | 1 | 1,433 | 5 | 5,799 | 20 |
| 114,452 | 196 | 3 | 3,973 | 11 | 172 | 1 | 1,430 | 5 | 5,771 | 20 |
| 114,453 | 191 | 3 | 3,910 | 9  | 165 | 1 | 1,367 | 5 | 5,633 | 18 |
| 114,454 | 190 | 3 | 3,875 | 9  | 162 | 1 | 1,344 | 5 | 5,571 | 18 |
| 114,455 | 162 | 3 | 3,603 | 9  | 121 | 1 | 993   | 5 | 4,879 | 18 |
| 114,456 | 162 | 3 | 3,596 | 9  | 121 | 1 | 986   | 7 | 4,865 | 20 |
| 114,457 | 160 | 2 | 3,588 | 9  | 120 | 1 | 974   | 7 | 4,842 | 19 |
| 114,458 | 155 | 2 | 3,574 | 8  | 121 | 1 | 968   | 7 | 4,818 | 18 |
| 114,459 | 155 | 2 | 3,551 | 8  | 121 | 1 | 962   | 7 | 4,789 | 18 |
| 114,460 | 149 | 2 | 3,470 | 8  | 119 | 1 | 930   | 7 | 4,668 | 18 |



|         |     |   |       |   |     |   |     |   |       |    |
|---------|-----|---|-------|---|-----|---|-----|---|-------|----|
| 114,461 | 136 | 2 | 3,381 | 8 | 111 | 1 | 824 | 7 | 4,452 | 18 |
| 114,462 | 111 | 2 | 3,102 | 8 | 103 | 1 | 749 | 7 | 4,065 | 18 |
| 114,463 | 101 | 2 | 3,002 | 8 | 93  | 1 | 683 | 7 | 3,879 | 18 |
| 114,464 | 97  | 2 | 2,802 | 9 | 87  | 1 | 656 | 7 | 3,642 | 19 |
| 114,465 | 91  | 2 | 2,641 | 8 | 80  | 1 | 587 | 7 | 3,399 | 18 |
| 114,466 | 73  | 2 | 2,065 | 8 | 61  | 1 | 483 | 7 | 2,682 | 18 |
| 114,467 | 65  | 2 | 1,952 | 8 | 47  | 1 | 413 | 7 | 2,477 | 18 |
| 114,468 | 58  | 2 | 1,307 | 8 | 34  | 1 | 346 | 7 | 1,745 | 18 |
| 114,469 | 44  | 2 | 744   | 8 | 26  | 1 | 239 | 7 | 1,053 | 18 |
| 114,470 | 42  | 2 | 638   | 8 | 24  | 1 | 210 | 7 | 914   | 18 |
| 114,471 | 40  | 2 | 616   | 8 | 23  | 1 | 206 | 7 | 885   | 18 |
| 114,472 | 39  | 2 | 586   | 7 | 23  | 1 | 203 | 6 | 851   | 16 |
| 114,473 | 27  | 2 | 389   | 6 | 22  | 1 | 170 | 6 | 608   | 15 |
| 114,474 | 22  | 2 | 307   | 6 | 18  | 1 | 143 | 6 | 490   | 15 |
| 114,475 | 17  | 2 | 269   | 6 | 14  | 1 | 125 | 6 | 425   | 15 |
| 114,476 | 14  | 2 | 131   | 6 | 9   | 1 | 83  | 6 | 237   | 15 |
| 114,477 | 9   | 2 | 74    | 6 | 4   | 1 | 54  | 6 | 141   | 15 |
| 114,478 | 7   | 2 | 69    | 6 | 4   | 1 | 53  | 6 | 133   | 15 |
| 114,479 | 7   | 2 | 69    | 6 | 4   | 1 | 53  | 6 | 133   | 15 |
| 114,480 | 7   | 2 | 72    | 6 | 4   | 1 | 53  | 6 | 136   | 15 |
| 114,481 | 7   | 2 | 72    | 6 | 4   | 1 | 53  | 6 | 136   | 15 |
| 114,482 | 8   | 1 | 78    | 5 | 4   | 1 | 59  | 4 | 149   | 11 |
| 114,483 | 8   | 0 | 79    | 5 | 4   | 1 | 59  | 2 | 150   | 8  |
| 114,484 | 14  | 0 | 229   | 2 | 6   | 1 | 87  | 2 | 336   | 5  |
| 114,485 | 23  | 0 | 347   | 2 | 14  | 1 | 179 | 2 | 563   | 5  |
| 114,486 | 30  | 0 | 540   | 2 | 30  | 1 | 340 | 2 | 940   | 5  |
| 114,487 | 32  | 0 | 566   | 2 | 31  | 1 | 358 | 2 | 987   | 5  |
| 114,488 | 32  | 0 | 573   | 2 | 31  | 1 | 361 | 2 | 997   | 5  |
| 114,489 | 32  | 0 | 572   | 2 | 31  | 1 | 360 | 3 | 995   | 6  |
| 114,490 | 32  | 0 | 585   | 2 | 31  | 1 | 362 | 3 | 1,010 | 6  |
| 114,491 | 31  | 0 | 577   | 2 | 29  | 1 | 353 | 3 | 990   | 6  |
| 114,492 | 31  | 0 | 577   | 2 | 29  | 1 | 353 | 3 | 990   | 6  |
| 114,493 | 36  | 0 | 607   | 2 | 29  | 1 | 363 | 3 | 1,035 | 6  |
| 114,494 | 37  | 0 | 619   | 2 | 29  | 1 | 367 | 3 | 1,052 | 6  |
| 114,495 | 37  | 0 | 637   | 2 | 29  | 1 | 369 | 3 | 1,072 | 6  |
| 114,496 | 38  | 0 | 667   | 2 | 29  | 1 | 378 | 3 | 1,112 | 6  |
| 114,497 | 87  | 0 | 863   | 2 | 30  | 1 | 472 | 3 | 1,452 | 6  |
| 114,498 | 88  | 0 | 863   | 2 | 30  | 1 | 479 | 3 | 1,460 | 6  |
| 114,499 | 88  | 0 | 863   | 3 | 30  | 1 | 481 | 3 | 1,462 | 7  |
| 114,500 | 161 | 0 | 1,217 | 3 | 54  | 1 | 795 | 3 | 2,227 | 7  |
| 114,501 | 161 | 0 | 1,217 | 3 | 54  | 0 | 798 | 3 | 2,230 | 6  |

|         |     |   |       |    |     |   |       |   |       |    |
|---------|-----|---|-------|----|-----|---|-------|---|-------|----|
| 114,502 | 160 | 0 | 1,212 | 3  | 54  | 0 | 797   | 3 | 2,223 | 6  |
| 114,503 | 166 | 0 | 1,303 | 3  | 61  | 0 | 926   | 3 | 2,456 | 6  |
| 114,504 | 166 | 0 | 1,309 | 3  | 63  | 0 | 930   | 3 | 2,468 | 6  |
| 114,505 | 169 | 0 | 1,329 | 3  | 63  | 0 | 947   | 3 | 2,508 | 6  |
| 114,506 | 169 | 0 | 1,330 | 3  | 63  | 0 | 947   | 1 | 2,509 | 4  |
| 114,507 | 170 | 0 | 1,349 | 3  | 63  | 0 | 956   | 1 | 2,538 | 4  |
| 114,508 | 171 | 0 | 1,364 | 3  | 64  | 0 | 970   | 1 | 2,569 | 4  |
| 114,509 | 172 | 0 | 1,372 | 3  | 66  | 0 | 972   | 1 | 2,582 | 4  |
| 114,510 | 177 | 0 | 1,588 | 4  | 72  | 0 | 1,008 | 1 | 2,845 | 5  |
| 114,511 | 209 | 0 | 1,983 | 4  | 85  | 0 | 1,160 | 1 | 3,437 | 5  |
| 114,512 | 209 | 0 | 1,981 | 4  | 85  | 0 | 1,159 | 2 | 3,434 | 6  |
| 114,513 | 222 | 0 | 2,326 | 4  | 113 | 0 | 1,385 | 2 | 4,046 | 6  |
| 114,514 | 221 | 1 | 2,346 | 4  | 113 | 0 | 1,391 | 2 | 4,071 | 7  |
| 114,515 | 221 | 1 | 2,342 | 3  | 113 | 0 | 1,392 | 2 | 4,068 | 6  |
| 114,516 | 221 | 1 | 2,360 | 3  | 114 | 0 | 1,407 | 2 | 4,102 | 6  |
| 114,517 | 221 | 1 | 2,359 | 3  | 114 | 0 | 1,406 | 2 | 4,100 | 6  |
| 114,518 | 221 | 1 | 2,357 | 3  | 114 | 0 | 1,404 | 2 | 4,096 | 6  |
| 114,519 | 225 | 1 | 2,372 | 3  | 115 | 0 | 1,422 | 2 | 4,134 | 6  |
| 114,520 | 225 | 1 | 2,375 | 3  | 115 | 0 | 1,421 | 3 | 4,136 | 7  |
| 114,521 | 225 | 1 | 2,372 | 4  | 115 | 0 | 1,423 | 3 | 4,135 | 8  |
| 114,522 | 225 | 1 | 2,372 | 4  | 115 | 0 | 1,423 | 3 | 4,135 | 8  |
| 114,523 | 225 | 1 | 2,379 | 4  | 115 | 0 | 1,429 | 3 | 4,148 | 8  |
| 114,524 | 225 | 1 | 2,379 | 4  | 115 | 0 | 1,429 | 3 | 4,148 | 8  |
| 114,525 | 228 | 1 | 2,409 | 6  | 115 | 0 | 1,443 | 3 | 4,195 | 10 |
| 114,526 | 228 | 1 | 2,416 | 6  | 115 | 0 | 1,443 | 3 | 4,202 | 10 |
| 114,527 | 228 | 1 | 2,416 | 7  | 115 | 0 | 1,443 | 3 | 4,202 | 11 |
| 114,528 | 228 | 1 | 2,415 | 7  | 115 | 0 | 1,442 | 3 | 4,200 | 11 |
| 114,529 | 229 | 1 | 2,417 | 7  | 115 | 0 | 1,442 | 3 | 4,203 | 11 |
| 114,530 | 229 | 1 | 2,417 | 7  | 115 | 0 | 1,442 | 3 | 4,203 | 11 |
| 114,531 | 229 | 1 | 2,415 | 7  | 115 | 1 | 1,442 | 4 | 4,201 | 13 |
| 114,532 | 229 | 1 | 2,410 | 11 | 115 | 5 | 1,440 | 4 | 4,194 | 21 |
| 114,533 | 228 | 1 | 2,409 | 11 | 115 | 5 | 1,436 | 6 | 4,188 | 23 |
| 114,534 | 222 | 1 | 2,258 | 11 | 113 | 5 | 1,409 | 6 | 4,002 | 23 |
| 114,535 | 213 | 1 | 2,141 | 11 | 107 | 5 | 1,313 | 6 | 3,774 | 23 |
| 114,536 | 206 | 1 | 1,961 | 11 | 89  | 5 | 1,157 | 6 | 3,413 | 23 |
| 114,537 | 206 | 1 | 1,939 | 12 | 89  | 5 | 1,145 | 6 | 3,379 | 24 |
| 114,538 | 204 | 1 | 1,920 | 12 | 89  | 5 | 1,127 | 6 | 3,340 | 24 |
| 114,539 | 204 | 1 | 1,913 | 12 | 89  | 5 | 1,126 | 5 | 3,332 | 23 |
| 114,540 | 204 | 1 | 1,913 | 12 | 89  | 5 | 1,126 | 5 | 3,332 | 23 |
| 114,541 | 203 | 1 | 1,906 | 12 | 89  | 5 | 1,123 | 5 | 3,321 | 23 |
| 114,542 | 203 | 1 | 1,905 | 12 | 89  | 5 | 1,123 | 5 | 3,320 | 23 |

|         |     |   |       |    |     |   |       |   |       |    |
|---------|-----|---|-------|----|-----|---|-------|---|-------|----|
| 114,543 | 198 | 1 | 1,875 | 12 | 89  | 5 | 1,114 | 5 | 3,276 | 23 |
| 114,544 | 200 | 1 | 1,884 | 12 | 89  | 5 | 1,122 | 5 | 3,295 | 23 |
| 114,545 | 208 | 1 | 1,893 | 12 | 89  | 5 | 1,137 | 5 | 3,327 | 23 |
| 114,546 | 208 | 1 | 1,881 | 12 | 89  | 5 | 1,135 | 5 | 3,313 | 23 |
| 114,547 | 207 | 1 | 1,853 | 12 | 89  | 5 | 1,131 | 5 | 3,280 | 23 |
| 114,548 | 158 | 1 | 1,668 | 11 | 89  | 5 | 1,042 | 5 | 2,957 | 22 |
| 114,549 | 157 | 1 | 1,672 | 11 | 89  | 5 | 1,038 | 5 | 2,956 | 22 |
| 114,550 | 112 | 1 | 1,506 | 11 | 76  | 5 | 874   | 5 | 2,568 | 22 |
| 114,551 | 90  | 1 | 1,367 | 11 | 70  | 5 | 755   | 5 | 2,282 | 22 |
| 114,552 | 89  | 1 | 1,333 | 11 | 68  | 5 | 706   | 5 | 2,196 | 22 |
| 114,553 | 84  | 1 | 1,278 | 11 | 63  | 5 | 622   | 5 | 2,047 | 22 |
| 114,554 | 84  | 1 | 1,276 | 11 | 61  | 5 | 620   | 5 | 2,041 | 22 |
| 114,555 | 83  | 1 | 1,275 | 11 | 61  | 5 | 617   | 5 | 2,036 | 22 |
| 114,556 | 82  | 1 | 1,261 | 11 | 61  | 5 | 604   | 5 | 2,008 | 22 |
| 114,557 | 82  | 1 | 1,262 | 11 | 61  | 5 | 603   | 5 | 2,008 | 22 |
| 114,558 | 81  | 1 | 1,247 | 11 | 61  | 5 | 596   | 5 | 1,985 | 22 |
| 114,559 | 82  | 1 | 1,249 | 12 | 63  | 5 | 603   | 5 | 1,997 | 23 |
| 114,560 | 79  | 1 | 1,235 | 12 | 61  | 5 | 597   | 5 | 1,972 | 23 |
| 114,561 | 74  | 1 | 1,025 | 11 | 56  | 5 | 561   | 5 | 1,716 | 22 |
| 114,562 | 42  | 1 | 629   | 11 | 43  | 5 | 404   | 5 | 1,118 | 22 |
| 114,563 | 32  | 1 | 342   | 11 | 17  | 5 | 204   | 4 | 595   | 21 |
| 114,564 | 30  | 0 | 279   | 11 | 15  | 5 | 172   | 4 | 496   | 20 |
| 114,565 | 30  | 0 | 247   | 11 | 14  | 5 | 161   | 4 | 452   | 20 |
| 114,566 | 30  | 0 | 244   | 11 | 15  | 5 | 165   | 4 | 454   | 20 |
| 114,567 | 34  | 0 | 276   | 11 | 14  | 5 | 165   | 4 | 489   | 20 |
| 114,568 | 34  | 0 | 289   | 11 | 14  | 5 | 167   | 4 | 504   | 20 |
| 114,569 | 39  | 0 | 354   | 11 | 14  | 5 | 174   | 4 | 581   | 20 |
| 114,570 | 35  | 0 | 338   | 11 | 13  | 5 | 157   | 4 | 543   | 20 |
| 114,571 | 38  | 0 | 358   | 11 | 13  | 5 | 162   | 3 | 571   | 19 |
| 114,572 | 80  | 0 | 732   | 10 | 22  | 5 | 281   | 3 | 1,115 | 18 |
| 114,573 | 86  | 0 | 830   | 10 | 24  | 5 | 315   | 3 | 1,255 | 18 |
| 114,574 | 114 | 0 | 1,210 | 9  | 52  | 5 | 509   | 3 | 1,885 | 17 |
| 114,575 | 119 | 0 | 1,234 | 9  | 53  | 5 | 532   | 3 | 1,938 | 17 |
| 114,576 | 117 | 0 | 1,213 | 7  | 53  | 5 | 521   | 3 | 1,904 | 15 |
| 114,577 | 484 | 0 | 2,648 | 7  | 210 | 5 | 2,127 | 3 | 5,469 | 15 |
| 114,578 | 497 | 0 | 2,814 | 6  | 221 | 5 | 2,215 | 3 | 5,747 | 14 |
| 114,579 | 497 | 0 | 2,865 | 6  | 227 | 5 | 2,273 | 3 | 5,862 | 14 |
| 114,580 | 508 | 0 | 2,984 | 6  | 236 | 5 | 2,339 | 3 | 6,067 | 14 |
| 114,581 | 512 | 0 | 3,071 | 6  | 241 | 4 | 2,395 | 2 | 6,219 | 12 |
| 114,582 | 512 | 0 | 3,073 | 2  | 241 | 0 | 2,397 | 0 | 6,223 | 2  |
| 114,583 | 512 | 0 | 3,077 | 2  | 241 | 0 | 2,404 | 0 | 6,234 | 2  |

|         |     |   |       |   |     |   |       |   |        |    |
|---------|-----|---|-------|---|-----|---|-------|---|--------|----|
| 114,584 | 512 | 0 | 3,081 | 2 | 241 | 0 | 2,406 | 0 | 6,240  | 2  |
| 114,585 | 512 | 0 | 3,081 | 2 | 241 | 0 | 2,407 | 0 | 6,241  | 2  |
| 114,586 | 513 | 0 | 3,081 | 2 | 241 | 0 | 2,410 | 0 | 6,245  | 2  |
| 114,587 | 513 | 0 | 3,093 | 1 | 241 | 0 | 2,416 | 0 | 6,263  | 1  |
| 114,588 | 513 | 0 | 3,093 | 1 | 241 | 0 | 2,417 | 0 | 6,264  | 1  |
| 114,589 | 513 | 0 | 3,099 | 1 | 241 | 0 | 2,427 | 0 | 6,280  | 1  |
| 114,590 | 514 | 0 | 3,106 | 1 | 241 | 0 | 2,428 | 0 | 6,289  | 1  |
| 114,591 | 514 | 0 | 3,109 | 1 | 241 | 0 | 2,431 | 0 | 6,295  | 1  |
| 114,592 | 514 | 0 | 3,104 | 1 | 241 | 0 | 2,438 | 0 | 6,297  | 1  |
| 114,593 | 514 | 0 | 3,105 | 1 | 241 | 0 | 2,438 | 0 | 6,298  | 1  |
| 114,594 | 514 | 0 | 3,113 | 1 | 241 | 0 | 2,437 | 0 | 6,305  | 1  |
| 114,595 | 512 | 0 | 3,111 | 1 | 241 | 0 | 2,432 | 0 | 6,296  | 1  |
| 114,596 | 505 | 0 | 3,104 | 1 | 242 | 0 | 2,421 | 0 | 6,272  | 1  |
| 114,597 | 505 | 0 | 3,107 | 1 | 242 | 0 | 2,425 | 0 | 6,279  | 1  |
| 114,598 | 505 | 0 | 3,147 | 1 | 242 | 0 | 2,431 | 0 | 6,325  | 1  |
| 114,599 | 521 | 0 | 3,204 | 1 | 244 | 0 | 2,450 | 0 | 6,419  | 1  |
| 114,600 | 525 | 0 | 3,239 | 1 | 247 | 0 | 2,457 | 0 | 6,468  | 1  |
| 114,601 | 520 | 0 | 3,206 | 1 | 242 | 0 | 2,427 | 0 | 6,395  | 1  |
| 114,602 | 548 | 0 | 3,367 | 1 | 245 | 0 | 2,513 | 0 | 6,673  | 1  |
| 114,603 | 575 | 0 | 3,782 | 1 | 262 | 0 | 2,664 | 0 | 7,283  | 1  |
| 114,604 | 683 | 0 | 4,604 | 1 | 345 | 0 | 3,205 | 0 | 8,837  | 1  |
| 114,605 | 690 | 0 | 4,664 | 2 | 347 | 0 | 3,236 | 0 | 8,937  | 2  |
| 114,606 | 701 | 0 | 4,803 | 3 | 360 | 0 | 3,279 | 0 | 9,143  | 3  |
| 114,607 | 701 | 0 | 4,800 | 3 | 360 | 0 | 3,279 | 0 | 9,140  | 3  |
| 114,608 | 714 | 0 | 5,220 | 3 | 376 | 0 | 3,388 | 0 | 9,698  | 3  |
| 114,609 | 742 | 0 | 5,769 | 5 | 408 | 0 | 3,608 | 0 | 10,527 | 5  |
| 114,610 | 742 | 0 | 5,850 | 4 | 409 | 0 | 3,624 | 0 | 10,625 | 4  |
| 114,611 | 742 | 0 | 5,847 | 4 | 409 | 0 | 3,624 | 0 | 10,622 | 4  |
| 114,612 | 743 | 2 | 5,921 | 4 | 424 | 0 | 3,662 | 0 | 10,750 | 6  |
| 114,613 | 745 | 2 | 5,948 | 4 | 426 | 0 | 3,679 | 0 | 10,798 | 6  |
| 114,614 | 744 | 3 | 5,948 | 4 | 426 | 0 | 3,678 | 0 | 10,796 | 7  |
| 114,615 | 744 | 3 | 5,948 | 4 | 426 | 0 | 3,678 | 0 | 10,796 | 7  |
| 114,616 | 744 | 3 | 5,947 | 5 | 426 | 0 | 3,678 | 1 | 10,795 | 9  |
| 114,617 | 739 | 3 | 5,904 | 5 | 425 | 0 | 3,658 | 1 | 10,726 | 9  |
| 114,618 | 739 | 3 | 5,906 | 5 | 425 | 0 | 3,660 | 1 | 10,730 | 9  |
| 114,619 | 739 | 4 | 5,894 | 5 | 425 | 0 | 3,661 | 1 | 10,719 | 10 |
| 114,620 | 745 | 4 | 5,906 | 5 | 429 | 0 | 3,690 | 1 | 10,770 | 10 |
| 114,621 | 745 | 4 | 5,903 | 6 | 430 | 0 | 3,694 | 1 | 10,772 | 11 |
| 114,622 | 703 | 4 | 5,556 | 6 | 422 | 0 | 3,590 | 1 | 10,271 | 11 |
| 114,623 | 703 | 4 | 5,609 | 6 | 424 | 0 | 3,612 | 1 | 10,348 | 11 |
| 114,624 | 725 | 4 | 5,848 | 6 | 442 | 0 | 3,887 | 1 | 10,902 | 11 |

|         |     |   |       |   |     |   |       |   |        |    |
|---------|-----|---|-------|---|-----|---|-------|---|--------|----|
| 114,625 | 711 | 4 | 5,652 | 6 | 423 | 0 | 3,835 | 1 | 10,621 | 11 |
| 114,626 | 705 | 4 | 5,634 | 6 | 423 | 0 | 3,835 | 1 | 10,597 | 11 |
| 114,627 | 338 | 4 | 4,188 | 6 | 266 | 0 | 2,218 | 1 | 7,010  | 11 |
| 114,628 | 325 | 4 | 4,022 | 6 | 255 | 0 | 2,128 | 1 | 6,730  | 11 |
| 114,629 | 324 | 4 | 3,972 | 7 | 249 | 0 | 2,068 | 1 | 6,613  | 12 |
| 114,630 | 315 | 4 | 3,878 | 7 | 242 | 0 | 2,015 | 1 | 6,450  | 12 |
| 114,631 | 313 | 4 | 3,851 | 7 | 240 | 0 | 2,002 | 1 | 6,406  | 12 |
| 114,632 | 309 | 4 | 3,765 | 7 | 235 | 0 | 1,947 | 1 | 6,256  | 12 |
| 114,633 | 309 | 4 | 3,763 | 7 | 235 | 0 | 1,946 | 1 | 6,253  | 12 |
| 114,634 | 309 | 4 | 3,758 | 7 | 235 | 0 | 1,937 | 1 | 6,239  | 12 |
| 114,635 | 309 | 4 | 3,756 | 7 | 235 | 0 | 1,938 | 1 | 6,238  | 12 |
| 114,636 | 309 | 4 | 3,760 | 7 | 235 | 0 | 1,943 | 1 | 6,247  | 12 |
| 114,637 | 308 | 4 | 3,765 | 7 | 235 | 0 | 1,943 | 1 | 6,251  | 12 |
| 114,638 | 311 | 4 | 3,776 | 7 | 235 | 0 | 1,951 | 1 | 6,273  | 12 |
| 114,639 | 311 | 4 | 3,777 | 7 | 235 | 0 | 1,950 | 1 | 6,273  | 12 |
| 114,640 | 313 | 4 | 3,802 | 7 | 234 | 0 | 1,948 | 1 | 6,297  | 12 |
| 114,641 | 313 | 4 | 3,811 | 7 | 234 | 0 | 1,959 | 1 | 6,317  | 12 |
| 114,642 | 323 | 4 | 3,875 | 7 | 235 | 0 | 1,999 | 1 | 6,432  | 12 |
| 114,643 | 323 | 4 | 3,874 | 8 | 235 | 0 | 1,997 | 1 | 6,429  | 13 |
| 114,644 | 323 | 4 | 3,870 | 8 | 235 | 0 | 1,994 | 1 | 6,422  | 13 |
| 114,645 | 349 | 4 | 4,229 | 8 | 248 | 0 | 2,315 | 1 | 7,141  | 13 |
| 114,646 | 350 | 4 | 4,230 | 8 | 248 | 0 | 2,320 | 1 | 7,148  | 13 |
| 114,647 | 350 | 4 | 4,219 | 8 | 247 | 0 | 2,315 | 1 | 7,131  | 13 |
| 114,648 | 350 | 4 | 4,224 | 8 | 247 | 0 | 2,317 | 1 | 7,138  | 13 |
| 114,649 | 350 | 4 | 4,180 | 8 | 247 | 0 | 2,306 | 1 | 7,083  | 13 |
| 114,650 | 335 | 4 | 4,127 | 8 | 244 | 0 | 2,285 | 1 | 6,991  | 13 |
| 114,651 | 332 | 4 | 4,102 | 8 | 241 | 0 | 2,284 | 1 | 6,959  | 13 |
| 114,652 | 332 | 4 | 4,093 | 8 | 241 | 0 | 2,282 | 1 | 6,948  | 13 |
| 114,653 | 307 | 4 | 3,965 | 8 | 239 | 0 | 2,227 | 1 | 6,738  | 13 |
| 114,654 | 283 | 4 | 3,550 | 7 | 222 | 0 | 2,075 | 1 | 6,130  | 12 |
| 114,655 | 175 | 4 | 2,730 | 7 | 138 | 0 | 1,529 | 1 | 4,572  | 12 |
| 114,656 | 172 | 4 | 2,684 | 6 | 136 | 0 | 1,507 | 1 | 4,499  | 11 |
| 114,657 | 161 | 4 | 2,542 | 5 | 123 | 0 | 1,464 | 1 | 4,290  | 10 |
| 114,658 | 152 | 4 | 2,194 | 5 | 114 | 0 | 1,391 | 2 | 3,851  | 11 |
| 114,659 | 151 | 4 | 2,138 | 5 | 108 | 0 | 1,361 | 2 | 3,758  | 11 |
| 114,660 | 123 | 4 | 1,591 | 4 | 75  | 0 | 1,142 | 2 | 2,931  | 10 |
| 114,661 | 135 | 6 | 1,576 | 4 | 72  | 0 | 1,182 | 2 | 2,965  | 12 |
| 114,662 | 146 | 3 | 1,658 | 4 | 63  | 0 | 1,322 | 2 | 3,189  | 9  |
| 114,663 | 163 | 3 | 1,969 | 4 | 74  | 0 | 1,666 | 2 | 3,872  | 9  |
| 114,664 | 164 | 3 | 1,967 | 4 | 73  | 0 | 1,671 | 2 | 3,875  | 9  |
| 114,665 | 164 | 3 | 1,967 | 4 | 73  | 0 | 1,671 | 2 | 3,875  | 9  |

|         |     |   |       |   |     |   |       |   |       |    |
|---------|-----|---|-------|---|-----|---|-------|---|-------|----|
| 114,666 | 165 | 3 | 2,053 | 4 | 83  | 0 | 1,767 | 2 | 4,068 | 9  |
| 114,667 | 166 | 3 | 2,055 | 3 | 83  | 0 | 1,773 | 1 | 4,077 | 7  |
| 114,668 | 169 | 3 | 2,069 | 3 | 83  | 0 | 1,785 | 1 | 4,106 | 7  |
| 114,669 | 169 | 2 | 2,077 | 3 | 84  | 0 | 1,791 | 1 | 4,121 | 6  |
| 114,670 | 170 | 2 | 2,086 | 3 | 84  | 0 | 1,806 | 1 | 4,146 | 6  |
| 114,671 | 159 | 2 | 2,009 | 3 | 80  | 0 | 1,769 | 1 | 4,017 | 6  |
| 114,672 | 157 | 2 | 1,991 | 2 | 79  | 0 | 1,759 | 1 | 3,986 | 5  |
| 114,673 | 156 | 2 | 1,976 | 2 | 78  | 0 | 1,755 | 2 | 3,965 | 6  |
| 114,674 | 157 | 2 | 1,920 | 2 | 77  | 0 | 1,730 | 2 | 3,884 | 6  |
| 114,675 | 129 | 2 | 1,580 | 2 | 56  | 0 | 1,414 | 2 | 3,179 | 6  |
| 114,676 | 115 | 2 | 1,428 | 2 | 49  | 0 | 1,312 | 2 | 2,904 | 6  |
| 114,677 | 115 | 2 | 1,413 | 2 | 49  | 0 | 1,288 | 2 | 2,865 | 6  |
| 114,678 | 115 | 2 | 1,414 | 3 | 49  | 0 | 1,288 | 2 | 2,866 | 7  |
| 114,679 | 115 | 2 | 1,414 | 3 | 49  | 0 | 1,288 | 2 | 2,866 | 7  |
| 114,680 | 117 | 2 | 1,453 | 2 | 51  | 0 | 1,373 | 2 | 2,994 | 6  |
| 114,681 | 118 | 2 | 1,453 | 2 | 51  | 0 | 1,373 | 2 | 2,995 | 6  |
| 114,682 | 118 | 2 | 1,459 | 2 | 51  | 0 | 1,373 | 2 | 3,001 | 6  |
| 114,683 | 121 | 2 | 1,547 | 2 | 52  | 0 | 1,407 | 2 | 3,127 | 6  |
| 114,684 | 122 | 3 | 1,575 | 2 | 55  | 0 | 1,438 | 2 | 3,190 | 7  |
| 114,685 | 125 | 3 | 1,754 | 2 | 58  | 0 | 1,469 | 2 | 3,406 | 7  |
| 114,686 | 125 | 3 | 1,749 | 2 | 58  | 0 | 1,465 | 2 | 3,397 | 7  |
| 114,687 | 147 | 3 | 2,483 | 2 | 102 | 0 | 2,043 | 2 | 4,775 | 7  |
| 114,688 | 147 | 3 | 2,482 | 2 | 102 | 0 | 2,043 | 3 | 4,774 | 8  |
| 114,689 | 144 | 3 | 2,459 | 2 | 102 | 0 | 2,030 | 3 | 4,735 | 8  |
| 114,690 | 153 | 3 | 2,656 | 2 | 116 | 0 | 2,137 | 3 | 5,062 | 8  |
| 114,691 | 155 | 3 | 2,698 | 2 | 116 | 0 | 2,142 | 3 | 5,111 | 8  |
| 114,692 | 159 | 3 | 2,732 | 2 | 116 | 0 | 2,146 | 3 | 5,153 | 8  |
| 114,693 | 149 | 3 | 2,666 | 2 | 116 | 0 | 2,102 | 3 | 5,033 | 8  |
| 114,694 | 152 | 3 | 2,621 | 1 | 113 | 0 | 2,081 | 3 | 4,967 | 7  |
| 114,695 | 152 | 3 | 2,620 | 1 | 113 | 0 | 2,082 | 5 | 4,967 | 9  |
| 114,696 | 128 | 3 | 2,335 | 1 | 103 | 0 | 1,813 | 5 | 4,379 | 9  |
| 114,697 | 129 | 3 | 2,332 | 2 | 103 | 0 | 1,811 | 5 | 4,375 | 10 |
| 114,698 | 127 | 3 | 2,332 | 2 | 103 | 0 | 1,811 | 5 | 4,373 | 10 |
| 114,699 | 128 | 3 | 2,345 | 2 | 103 | 0 | 1,814 | 5 | 4,390 | 10 |
| 114,700 | 128 | 3 | 2,335 | 2 | 103 | 0 | 1,810 | 5 | 4,376 | 10 |
| 114,701 | 128 | 3 | 2,324 | 2 | 103 | 0 | 1,804 | 5 | 4,359 | 10 |
| 114,702 | 132 | 3 | 2,340 | 2 | 105 | 0 | 1,806 | 5 | 4,383 | 10 |
| 114,703 | 137 | 3 | 2,389 | 2 | 108 | 0 | 1,829 | 5 | 4,463 | 10 |
| 114,704 | 133 | 3 | 2,363 | 2 | 107 | 0 | 1,803 | 5 | 4,406 | 10 |
| 114,705 | 135 | 3 | 2,481 | 2 | 109 | 0 | 1,846 | 5 | 4,571 | 10 |
| 114,706 | 135 | 3 | 2,480 | 2 | 109 | 0 | 1,847 | 5 | 4,571 | 10 |

|         |     |   |       |    |     |   |       |    |       |    |
|---------|-----|---|-------|----|-----|---|-------|----|-------|----|
| 114,707 | 187 | 3 | 3,561 | 2  | 152 | 0 | 2,195 | 5  | 6,095 | 10 |
| 114,708 | 186 | 3 | 3,561 | 2  | 152 | 0 | 2,195 | 5  | 6,094 | 10 |
| 114,709 | 183 | 3 | 3,544 | 2  | 152 | 0 | 2,193 | 4  | 6,072 | 9  |
| 114,710 | 190 | 3 | 3,682 | 2  | 164 | 0 | 2,266 | 5  | 6,302 | 10 |
| 114,711 | 210 | 3 | 4,418 | 2  | 200 | 0 | 2,721 | 6  | 7,549 | 11 |
| 114,712 | 205 | 1 | 4,717 | 2  | 222 | 0 | 2,873 | 6  | 8,017 | 9  |
| 114,713 | 192 | 1 | 4,570 | 4  | 216 | 0 | 2,711 | 7  | 7,689 | 12 |
| 114,714 | 175 | 1 | 4,248 | 4  | 205 | 0 | 2,358 | 7  | 6,986 | 12 |
| 114,715 | 179 | 1 | 4,363 | 6  | 213 | 0 | 2,435 | 8  | 7,190 | 15 |
| 114,716 | 178 | 1 | 4,276 | 6  | 203 | 0 | 2,339 | 8  | 6,996 | 15 |
| 114,717 | 177 | 1 | 4,300 | 9  | 204 | 0 | 2,350 | 10 | 7,031 | 20 |
| 114,718 | 177 | 1 | 4,299 | 9  | 204 | 0 | 2,345 | 10 | 7,025 | 20 |
| 114,719 | 174 | 2 | 4,281 | 9  | 204 | 0 | 2,331 | 10 | 6,990 | 21 |
| 114,720 | 174 | 2 | 4,275 | 10 | 203 | 0 | 2,325 | 10 | 6,977 | 22 |
| 114,721 | 176 | 2 | 4,282 | 13 | 203 | 0 | 2,317 | 10 | 6,978 | 25 |
| 114,722 | 176 | 3 | 4,279 | 13 | 203 | 0 | 2,317 | 10 | 6,975 | 26 |
| 114,723 | 177 | 3 | 4,287 | 13 | 203 | 0 | 2,325 | 10 | 6,992 | 26 |
| 114,724 | 177 | 3 | 4,286 | 13 | 203 | 0 | 2,323 | 9  | 6,989 | 25 |
| 114,725 | 176 | 3 | 4,293 | 13 | 202 | 0 | 2,327 | 9  | 6,998 | 25 |
| 114,726 | 176 | 3 | 4,282 | 13 | 200 | 0 | 2,301 | 9  | 6,959 | 25 |
| 114,727 | 176 | 3 | 4,285 | 13 | 201 | 0 | 2,293 | 9  | 6,955 | 25 |
| 114,728 | 180 | 3 | 4,275 | 12 | 200 | 0 | 2,260 | 9  | 6,915 | 24 |
| 114,729 | 180 | 3 | 4,309 | 12 | 200 | 0 | 2,274 | 9  | 6,963 | 24 |
| 114,730 | 180 | 3 | 4,315 | 12 | 200 | 0 | 2,252 | 9  | 6,947 | 24 |
| 114,731 | 179 | 3 | 4,315 | 12 | 200 | 0 | 2,252 | 9  | 6,946 | 24 |
| 114,732 | 180 | 3 | 4,341 | 12 | 201 | 0 | 2,257 | 9  | 6,979 | 24 |
| 114,733 | 181 | 3 | 4,345 | 13 | 200 | 0 | 2,259 | 10 | 6,985 | 26 |
| 114,734 | 182 | 3 | 4,295 | 13 | 205 | 0 | 2,253 | 10 | 6,935 | 26 |
| 114,735 | 183 | 2 | 4,283 | 13 | 202 | 0 | 2,230 | 10 | 6,898 | 25 |
| 114,736 | 180 | 2 | 4,129 | 13 | 200 | 0 | 2,223 | 10 | 6,732 | 25 |
| 114,737 | 211 | 2 | 3,741 | 13 | 182 | 0 | 1,887 | 10 | 6,021 | 25 |
| 114,738 | 208 | 2 | 3,650 | 13 | 178 | 0 | 1,810 | 12 | 5,846 | 27 |
| 114,739 | 202 | 2 | 3,491 | 13 | 170 | 0 | 1,738 | 11 | 5,601 | 26 |
| 114,740 | 205 | 2 | 3,497 | 13 | 172 | 0 | 1,781 | 11 | 5,655 | 26 |
| 114,741 | 205 | 2 | 3,484 | 13 | 172 | 0 | 1,779 | 11 | 5,640 | 26 |
| 114,742 | 203 | 2 | 3,455 | 13 | 172 | 0 | 1,776 | 11 | 5,606 | 26 |
| 114,743 | 198 | 2 | 3,410 | 13 | 172 | 0 | 1,764 | 11 | 5,544 | 26 |
| 114,744 | 198 | 2 | 3,407 | 13 | 171 | 0 | 1,763 | 11 | 5,539 | 26 |
| 114,745 | 194 | 2 | 3,400 | 14 | 171 | 0 | 1,740 | 11 | 5,505 | 27 |
| 114,746 | 194 | 2 | 3,393 | 14 | 171 | 0 | 1,735 | 9  | 5,493 | 25 |
| 114,747 | 193 | 2 | 3,393 | 14 | 171 | 0 | 1,734 | 9  | 5,491 | 25 |

|         |     |   |       |    |     |   |       |    |        |    |
|---------|-----|---|-------|----|-----|---|-------|----|--------|----|
| 114,748 | 205 | 2 | 3,487 | 13 | 173 | 0 | 1,763 | 9  | 5,628  | 24 |
| 114,749 | 207 | 2 | 3,532 | 13 | 174 | 0 | 1,778 | 9  | 5,691  | 24 |
| 114,750 | 354 | 2 | 3,996 | 13 | 191 | 0 | 1,921 | 9  | 6,462  | 24 |
| 114,751 | 353 | 2 | 3,992 | 13 | 191 | 0 | 1,921 | 9  | 6,457  | 24 |
| 114,752 | 353 | 2 | 3,990 | 13 | 191 | 0 | 1,919 | 9  | 6,453  | 24 |
| 114,753 | 348 | 2 | 3,973 | 13 | 189 | 0 | 1,915 | 9  | 6,425  | 24 |
| 114,754 | 434 | 2 | 4,586 | 13 | 233 | 0 | 2,464 | 9  | 7,717  | 24 |
| 114,755 | 507 | 2 | 5,269 | 13 | 274 | 0 | 2,816 | 9  | 8,866  | 24 |
| 114,756 | 502 | 2 | 5,149 | 13 | 272 | 0 | 2,772 | 9  | 8,695  | 24 |
| 114,757 | 454 | 2 | 4,175 | 13 | 238 | 0 | 2,461 | 9  | 7,328  | 24 |
| 114,758 | 702 | 2 | 6,206 | 14 | 378 | 0 | 3,780 | 9  | 11,066 | 25 |
| 114,759 | 816 | 2 | 6,761 | 14 | 437 | 0 | 4,318 | 9  | 12,332 | 25 |
| 114,760 | 831 | 2 | 6,802 | 15 | 443 | 0 | 4,427 | 11 | 12,503 | 28 |
| 114,761 | 823 | 2 | 6,688 | 15 | 420 | 0 | 4,093 | 12 | 12,024 | 29 |
| 114,762 | 838 | 2 | 6,751 | 17 | 434 | 0 | 4,145 | 11 | 12,168 | 30 |
| 114,763 | 851 | 2 | 6,757 | 15 | 426 | 0 | 4,012 | 10 | 12,046 | 27 |
| 114,764 | 908 | 2 | 7,948 | 15 | 495 | 0 | 4,549 | 10 | 13,900 | 27 |
| 114,765 | 923 | 2 | 8,613 | 15 | 517 | 0 | 4,711 | 10 | 14,764 | 27 |
| 114,766 | 918 | 2 | 8,510 | 13 | 507 | 0 | 4,633 | 9  | 14,568 | 24 |
| 114,767 | 928 | 2 | 8,631 | 13 | 518 | 0 | 4,687 | 9  | 14,764 | 24 |
| 114,768 | 931 | 2 | 8,704 | 10 | 524 | 0 | 4,740 | 7  | 14,899 | 19 |
| 114,769 | 932 | 2 | 8,706 | 10 | 524 | 0 | 4,740 | 7  | 14,902 | 19 |
| 114,770 | 932 | 1 | 8,709 | 10 | 524 | 0 | 4,741 | 7  | 14,906 | 18 |
| 114,771 | 936 | 1 | 8,744 | 9  | 524 | 0 | 4,760 | 7  | 14,964 | 17 |
| 114,772 | 935 | 1 | 8,745 | 7  | 524 | 0 | 4,758 | 7  | 14,962 | 15 |
| 114,773 | 934 | 0 | 8,736 | 7  | 524 | 0 | 4,750 | 7  | 14,944 | 14 |
| 114,774 | 937 | 0 | 8,797 | 7  | 525 | 0 | 4,773 | 8  | 15,032 | 15 |
| 114,775 | 938 | 0 | 8,802 | 7  | 526 | 0 | 4,780 | 8  | 15,046 | 15 |
| 114,776 | 938 | 0 | 8,805 | 7  | 526 | 0 | 4,778 | 8  | 15,047 | 15 |
| 114,777 | 938 | 0 | 8,796 | 7  | 526 | 1 | 4,773 | 8  | 15,033 | 16 |
| 114,778 | 938 | 0 | 8,779 | 7  | 525 | 1 | 4,766 | 8  | 15,008 | 16 |
| 114,779 | 936 | 0 | 8,816 | 7  | 524 | 1 | 4,781 | 8  | 15,057 | 16 |
| 114,780 | 935 | 0 | 8,773 | 7  | 525 | 1 | 4,754 | 8  | 14,987 | 16 |
| 114,781 | 934 | 0 | 8,764 | 8  | 525 | 1 | 4,751 | 8  | 14,974 | 17 |
| 114,782 | 934 | 0 | 8,763 | 8  | 524 | 1 | 4,750 | 8  | 14,971 | 17 |
| 114,783 | 940 | 0 | 8,785 | 7  | 524 | 1 | 4,774 | 7  | 15,023 | 15 |
| 114,784 | 941 | 1 | 8,804 | 10 | 525 | 1 | 4,780 | 7  | 15,050 | 19 |
| 114,785 | 944 | 1 | 8,786 | 10 | 522 | 1 | 4,792 | 7  | 15,044 | 19 |
| 114,786 | 942 | 2 | 8,784 | 10 | 523 | 1 | 4,791 | 7  | 15,040 | 20 |
| 114,787 | 945 | 2 | 8,779 | 10 | 522 | 1 | 4,777 | 7  | 15,023 | 20 |
| 114,788 | 909 | 2 | 8,565 | 10 | 503 | 1 | 4,651 | 5  | 14,628 | 18 |



|         |     |   |       |    |     |   |       |   |        |    |
|---------|-----|---|-------|----|-----|---|-------|---|--------|----|
| 114,789 | 904 | 2 | 8,519 | 10 | 497 | 1 | 4,598 | 5 | 14,518 | 18 |
| 114,790 | 905 | 2 | 8,535 | 10 | 500 | 1 | 4,612 | 5 | 14,552 | 18 |
| 114,791 | 905 | 2 | 8,535 | 10 | 502 | 1 | 4,610 | 5 | 14,552 | 18 |
| 114,792 | 906 | 2 | 8,535 | 10 | 502 | 1 | 4,612 | 5 | 14,555 | 18 |
| 114,793 | 906 | 2 | 8,536 | 10 | 502 | 1 | 4,618 | 5 | 14,562 | 18 |
| 114,794 | 907 | 2 | 8,533 | 10 | 502 | 1 | 4,616 | 5 | 14,558 | 18 |
| 114,795 | 907 | 2 | 8,517 | 9  | 502 | 1 | 4,615 | 5 | 14,541 | 17 |
| 114,796 | 907 | 2 | 8,513 | 9  | 502 | 1 | 4,615 | 5 | 14,537 | 17 |
| 114,797 | 907 | 2 | 8,513 | 9  | 502 | 1 | 4,614 | 5 | 14,536 | 17 |
| 114,798 | 897 | 2 | 8,440 | 9  | 500 | 1 | 4,591 | 5 | 14,428 | 17 |
| 114,799 | 895 | 2 | 8,424 | 9  | 500 | 1 | 4,593 | 5 | 14,412 | 17 |
| 114,800 | 893 | 2 | 8,381 | 10 | 499 | 1 | 4,578 | 5 | 14,351 | 18 |
| 114,801 | 745 | 2 | 7,886 | 10 | 483 | 1 | 4,425 | 5 | 13,539 | 18 |
| 114,802 | 732 | 2 | 7,853 | 10 | 481 | 1 | 4,409 | 5 | 13,475 | 18 |
| 114,803 | 724 | 2 | 7,791 | 11 | 474 | 1 | 4,357 | 5 | 13,346 | 19 |
| 114,804 | 720 | 2 | 7,798 | 11 | 474 | 1 | 4,359 | 5 | 13,351 | 19 |
| 114,805 | 659 | 2 | 7,289 | 11 | 436 | 1 | 3,906 | 5 | 12,290 | 19 |
| 114,806 | 584 | 2 | 6,593 | 11 | 397 | 1 | 3,547 | 5 | 11,121 | 19 |
| 114,807 | 534 | 2 | 5,983 | 11 | 362 | 1 | 3,163 | 5 | 10,042 | 19 |
| 114,808 | 348 | 2 | 4,666 | 10 | 265 | 1 | 2,339 | 5 | 7,618  | 18 |
| 114,809 | 334 | 2 | 4,497 | 10 | 252 | 1 | 2,209 | 6 | 7,292  | 19 |
| 114,810 | 218 | 3 | 3,939 | 10 | 192 | 1 | 1,656 | 6 | 6,005  | 20 |
| 114,811 | 198 | 3 | 3,776 | 10 | 176 | 1 | 1,494 | 5 | 5,644  | 19 |
| 114,812 | 196 | 3 | 3,525 | 10 | 172 | 1 | 1,489 | 3 | 5,382  | 17 |
| 114,813 | 181 | 3 | 3,250 | 8  | 153 | 1 | 1,394 | 4 | 4,978  | 16 |
| 114,814 | 160 | 3 | 2,887 | 8  | 139 | 1 | 1,310 | 4 | 4,496  | 16 |
| 114,815 | 106 | 3 | 1,680 | 8  | 66  | 1 | 753   | 4 | 2,605  | 16 |
| 114,816 | 92  | 3 | 993   | 8  | 46  | 1 | 598   | 4 | 1,729  | 16 |
| 114,817 | 83  | 3 | 884   | 9  | 37  | 1 | 557   | 4 | 1,561  | 17 |
| 114,818 | 79  | 3 | 810   | 9  | 30  | 1 | 501   | 4 | 1,420  | 17 |
| 114,819 | 79  | 3 | 933   | 9  | 31  | 1 | 535   | 4 | 1,578  | 17 |
| 114,820 | 79  | 4 | 935   | 9  | 32  | 1 | 542   | 4 | 1,588  | 18 |
| 114,821 | 79  | 4 | 932   | 9  | 32  | 1 | 542   | 4 | 1,585  | 18 |
| 114,822 | 75  | 4 | 897   | 9  | 32  | 1 | 523   | 4 | 1,527  | 18 |
| 114,823 | 73  | 4 | 881   | 8  | 32  | 1 | 522   | 4 | 1,508  | 17 |
| 114,824 | 70  | 4 | 879   | 8  | 32  | 1 | 521   | 4 | 1,502  | 17 |
| 114,825 | 70  | 4 | 815   | 8  | 31  | 1 | 497   | 3 | 1,413  | 16 |
| 114,826 | 69  | 4 | 804   | 8  | 30  | 1 | 490   | 3 | 1,393  | 16 |
| 114,827 | 69  | 4 | 802   | 8  | 30  | 0 | 491   | 3 | 1,392  | 15 |
| 114,828 | 69  | 4 | 789   | 8  | 30  | 0 | 481   | 3 | 1,369  | 15 |
| 114,829 | 69  | 4 | 792   | 8  | 30  | 0 | 480   | 3 | 1,371  | 15 |

|         |    |   |       |   |    |   |     |   |       |    |
|---------|----|---|-------|---|----|---|-----|---|-------|----|
| 114,830 | 69 | 4 | 786   | 8 | 31 | 0 | 496 | 3 | 1,382 | 15 |
| 114,831 | 69 | 4 | 792   | 7 | 31 | 0 | 496 | 3 | 1,388 | 14 |
| 114,832 | 69 | 3 | 786   | 4 | 31 | 0 | 491 | 3 | 1,377 | 10 |
| 114,833 | 68 | 3 | 782   | 4 | 31 | 0 | 494 | 4 | 1,375 | 11 |
| 114,834 | 62 | 3 | 747   | 4 | 31 | 0 | 471 | 4 | 1,311 | 11 |
| 114,835 | 60 | 3 | 737   | 4 | 31 | 0 | 477 | 4 | 1,305 | 11 |
| 114,836 | 60 | 3 | 808   | 4 | 31 | 0 | 542 | 4 | 1,441 | 11 |
| 114,837 | 60 | 3 | 803   | 5 | 30 | 0 | 560 | 5 | 1,453 | 13 |
| 114,838 | 57 | 3 | 785   | 5 | 30 | 0 | 553 | 5 | 1,425 | 13 |
| 114,839 | 43 | 3 | 733   | 5 | 27 | 0 | 502 | 7 | 1,305 | 15 |
| 114,840 | 41 | 3 | 719   | 5 | 26 | 0 | 484 | 7 | 1,270 | 15 |
| 114,841 | 41 | 3 | 706   | 5 | 23 | 0 | 471 | 7 | 1,241 | 15 |
| 114,842 | 40 | 3 | 701   | 5 | 20 | 0 | 466 | 7 | 1,227 | 15 |
| 114,843 | 39 | 3 | 701   | 6 | 20 | 0 | 463 | 7 | 1,223 | 16 |
| 114,844 | 39 | 3 | 699   | 6 | 20 | 0 | 457 | 7 | 1,215 | 16 |
| 114,845 | 39 | 3 | 713   | 6 | 21 | 0 | 458 | 7 | 1,231 | 16 |
| 114,846 | 39 | 3 | 717   | 6 | 21 | 0 | 458 | 7 | 1,235 | 16 |
| 114,847 | 44 | 3 | 824   | 6 | 23 | 0 | 487 | 7 | 1,378 | 16 |
| 114,848 | 47 | 3 | 837   | 6 | 23 | 0 | 502 | 7 | 1,409 | 16 |
| 114,849 | 47 | 3 | 836   | 6 | 23 | 0 | 501 | 7 | 1,407 | 16 |
| 114,850 | 50 | 3 | 866   | 5 | 24 | 0 | 518 | 8 | 1,458 | 16 |
| 114,851 | 50 | 3 | 865   | 5 | 24 | 0 | 518 | 8 | 1,457 | 16 |
| 114,852 | 62 | 3 | 1,159 | 5 | 28 | 0 | 631 | 8 | 1,880 | 16 |
| 114,853 | 62 | 3 | 1,160 | 5 | 28 | 0 | 633 | 8 | 1,883 | 16 |
| 114,854 | 63 | 3 | 1,238 | 4 | 34 | 0 | 685 | 8 | 2,020 | 15 |
| 114,855 | 63 | 4 | 1,222 | 4 | 34 | 0 | 681 | 9 | 2,000 | 17 |
| 114,856 | 58 | 4 | 1,177 | 4 | 32 | 0 | 633 | 9 | 1,900 | 17 |
| 114,857 | 57 | 4 | 1,181 | 4 | 27 | 0 | 611 | 9 | 1,876 | 17 |
| 114,858 | 56 | 4 | 1,165 | 4 | 27 | 0 | 605 | 9 | 1,853 | 17 |
| 114,859 | 55 | 4 | 1,155 | 4 | 28 | 0 | 610 | 9 | 1,848 | 17 |
| 114,860 | 55 | 3 | 1,155 | 4 | 28 | 0 | 609 | 8 | 1,847 | 15 |
| 114,861 | 55 | 3 | 1,153 | 4 | 28 | 0 | 609 | 8 | 1,845 | 15 |
| 114,862 | 54 | 3 | 1,139 | 3 | 27 | 0 | 601 | 7 | 1,821 | 13 |
| 114,863 | 47 | 3 | 980   | 3 | 23 | 0 | 526 | 6 | 1,576 | 12 |
| 114,864 | 45 | 4 | 966   | 3 | 23 | 0 | 520 | 6 | 1,554 | 13 |
| 114,865 | 43 | 4 | 944   | 3 | 23 | 0 | 509 | 6 | 1,519 | 13 |
| 114,866 | 39 | 4 | 942   | 3 | 23 | 0 | 505 | 7 | 1,509 | 14 |
| 114,867 | 39 | 4 | 936   | 3 | 22 | 0 | 504 | 7 | 1,501 | 14 |
| 114,868 | 39 | 4 | 915   | 2 | 22 | 0 | 492 | 7 | 1,468 | 13 |
| 114,869 | 39 | 4 | 802   | 2 | 21 | 0 | 467 | 7 | 1,329 | 13 |
| 114,870 | 39 | 4 | 792   | 2 | 21 | 0 | 460 | 7 | 1,312 | 13 |

|         |    |   |       |   |    |   |     |    |       |    |
|---------|----|---|-------|---|----|---|-----|----|-------|----|
| 114,871 | 39 | 3 | 790   | 3 | 20 | 0 | 457 | 7  | 1,306 | 13 |
| 114,872 | 39 | 3 | 790   | 3 | 20 | 0 | 455 | 7  | 1,304 | 13 |
| 114,873 | 39 | 3 | 792   | 3 | 20 | 0 | 456 | 9  | 1,307 | 15 |
| 114,874 | 39 | 3 | 791   | 3 | 20 | 0 | 456 | 9  | 1,306 | 15 |
| 114,875 | 39 | 3 | 791   | 3 | 20 | 0 | 456 | 9  | 1,306 | 15 |
| 114,876 | 39 | 3 | 795   | 3 | 20 | 0 | 456 | 9  | 1,310 | 15 |
| 114,877 | 39 | 3 | 795   | 3 | 20 | 0 | 457 | 9  | 1,311 | 15 |
| 114,878 | 42 | 3 | 801   | 3 | 20 | 0 | 463 | 9  | 1,326 | 15 |
| 114,879 | 42 | 3 | 797   | 3 | 20 | 0 | 458 | 9  | 1,317 | 15 |
| 114,880 | 41 | 3 | 791   | 3 | 20 | 0 | 456 | 10 | 1,308 | 16 |
| 114,881 | 40 | 3 | 772   | 3 | 19 | 0 | 435 | 10 | 1,266 | 16 |
| 114,882 | 41 | 4 | 779   | 5 | 19 | 0 | 446 | 10 | 1,285 | 19 |
| 114,883 | 44 | 4 | 874   | 6 | 22 | 0 | 475 | 10 | 1,415 | 20 |
| 114,884 | 46 | 4 | 906   | 6 | 22 | 0 | 484 | 9  | 1,458 | 19 |
| 114,885 | 46 | 4 | 901   | 6 | 22 | 0 | 482 | 9  | 1,451 | 19 |
| 114,886 | 56 | 4 | 1,089 | 8 | 23 | 0 | 566 | 9  | 1,734 | 21 |
| 114,887 | 49 | 4 | 1,004 | 7 | 21 | 0 | 464 | 9  | 1,538 | 20 |
| 114,888 | 49 | 4 | 995   | 7 | 21 | 0 | 443 | 9  | 1,508 | 20 |
| 114,889 | 49 | 4 | 993   | 7 | 21 | 0 | 442 | 7  | 1,505 | 18 |
| 114,890 | 49 | 4 | 990   | 8 | 21 | 0 | 441 | 7  | 1,501 | 19 |
| 114,891 | 49 | 4 | 989   | 8 | 21 | 0 | 442 | 8  | 1,501 | 20 |
| 114,892 | 48 | 4 | 984   | 8 | 21 | 0 | 442 | 8  | 1,495 | 20 |
| 114,893 | 48 | 4 | 984   | 8 | 21 | 0 | 441 | 8  | 1,494 | 20 |
| 114,894 | 48 | 4 | 984   | 7 | 21 | 0 | 441 | 8  | 1,494 | 19 |
| 114,895 | 47 | 4 | 969   | 7 | 20 | 0 | 440 | 8  | 1,476 | 19 |
| 114,896 | 47 | 4 | 965   | 7 | 20 | 0 | 439 | 8  | 1,471 | 19 |
| 114,897 | 44 | 4 | 958   | 7 | 19 | 0 | 435 | 8  | 1,456 | 19 |
| 114,898 | 42 | 4 | 857   | 7 | 18 | 0 | 410 | 8  | 1,327 | 19 |
| 114,899 | 39 | 4 | 844   | 7 | 18 | 0 | 395 | 8  | 1,296 | 19 |
| 114,900 | 38 | 4 | 838   | 7 | 18 | 0 | 393 | 8  | 1,287 | 19 |
| 114,901 | 34 | 4 | 806   | 7 | 17 | 0 | 372 | 7  | 1,229 | 18 |
| 114,902 | 31 | 4 | 717   | 7 | 16 | 0 | 342 | 7  | 1,106 | 18 |
| 114,903 | 22 | 4 | 507   | 8 | 13 | 0 | 258 | 7  | 800   | 19 |
| 114,904 | 23 | 4 | 438   | 8 | 7  | 0 | 208 | 7  | 676   | 19 |
| 114,905 | 22 | 4 | 430   | 8 | 7  | 0 | 204 | 7  | 663   | 19 |
| 114,906 | 22 | 3 | 427   | 8 | 7  | 0 | 200 | 6  | 656   | 17 |
| 114,907 | 21 | 3 | 424   | 8 | 7  | 0 | 199 | 6  | 651   | 17 |
| 114,908 | 21 | 3 | 397   | 8 | 7  | 0 | 193 | 6  | 618   | 17 |
| 114,909 | 21 | 3 | 393   | 8 | 6  | 0 | 187 | 6  | 607   | 17 |
| 114,910 | 21 | 3 | 392   | 8 | 6  | 0 | 187 | 6  | 606   | 17 |
| 114,911 | 21 | 3 | 392   | 8 | 6  | 0 | 187 | 6  | 606   | 17 |

|         |     |   |       |   |    |   |     |   |       |    |
|---------|-----|---|-------|---|----|---|-----|---|-------|----|
| 114,912 | 21  | 3 | 393   | 8 | 7  | 0 | 190 | 6 | 611   | 17 |
| 114,913 | 22  | 3 | 401   | 8 | 7  | 0 | 195 | 6 | 625   | 17 |
| 114,914 | 22  | 2 | 409   | 8 | 7  | 0 | 195 | 6 | 633   | 16 |
| 114,915 | 22  | 2 | 409   | 8 | 7  | 0 | 196 | 6 | 634   | 16 |
| 114,916 | 22  | 3 | 408   | 8 | 7  | 0 | 196 | 6 | 633   | 17 |
| 114,917 | 32  | 3 | 477   | 8 | 9  | 0 | 215 | 5 | 733   | 16 |
| 114,918 | 32  | 3 | 477   | 8 | 9  | 0 | 215 | 5 | 733   | 16 |
| 114,919 | 59  | 3 | 844   | 8 | 18 | 0 | 371 | 5 | 1,292 | 16 |
| 114,920 | 60  | 3 | 896   | 7 | 19 | 0 | 396 | 3 | 1,371 | 13 |
| 114,921 | 60  | 3 | 934   | 7 | 19 | 0 | 428 | 3 | 1,441 | 13 |
| 114,922 | 63  | 3 | 954   | 7 | 19 | 0 | 428 | 3 | 1,464 | 13 |
| 114,923 | 63  | 3 | 954   | 7 | 19 | 0 | 428 | 3 | 1,464 | 13 |
| 114,924 | 70  | 3 | 1,055 | 7 | 23 | 0 | 476 | 3 | 1,624 | 13 |
| 114,925 | 81  | 3 | 1,125 | 7 | 24 | 0 | 532 | 3 | 1,762 | 13 |
| 114,926 | 81  | 3 | 1,186 | 8 | 26 | 0 | 562 | 3 | 1,855 | 14 |
| 114,927 | 81  | 3 | 1,186 | 8 | 26 | 0 | 563 | 3 | 1,856 | 14 |
| 114,928 | 95  | 3 | 1,343 | 8 | 31 | 0 | 616 | 3 | 2,085 | 14 |
| 114,929 | 92  | 3 | 1,344 | 8 | 31 | 0 | 611 | 3 | 2,078 | 14 |
| 114,930 | 118 | 3 | 1,535 | 8 | 35 | 0 | 711 | 2 | 2,399 | 13 |
| 114,931 | 119 | 3 | 1,545 | 8 | 35 | 0 | 720 | 3 | 2,419 | 14 |
| 114,932 | 118 | 3 | 1,535 | 8 | 35 | 0 | 717 | 5 | 2,405 | 16 |
| 114,933 | 115 | 3 | 1,455 | 7 | 35 | 0 | 700 | 5 | 2,305 | 15 |
| 114,934 | 116 | 3 | 1,443 | 6 | 34 | 0 | 689 | 5 | 2,282 | 14 |
| 114,935 | 114 | 3 | 1,415 | 6 | 35 | 0 | 681 | 5 | 2,245 | 14 |
| 114,936 | 106 | 3 | 1,273 | 5 | 35 | 0 | 630 | 5 | 2,044 | 13 |
| 114,937 | 105 | 3 | 1,218 | 5 | 34 | 0 | 591 | 5 | 1,948 | 13 |
| 114,938 | 105 | 2 | 1,229 | 5 | 34 | 0 | 594 | 4 | 1,962 | 11 |
| 114,939 | 118 | 2 | 1,311 | 6 | 39 | 0 | 625 | 4 | 2,093 | 12 |
| 114,940 | 118 | 2 | 1,326 | 6 | 39 | 0 | 634 | 4 | 2,117 | 12 |
| 114,941 | 118 | 2 | 1,328 | 5 | 39 | 0 | 635 | 3 | 2,120 | 10 |
| 114,942 | 118 | 2 | 1,328 | 5 | 39 | 0 | 635 | 3 | 2,120 | 10 |
| 114,943 | 119 | 2 | 1,330 | 5 | 39 | 0 | 640 | 3 | 2,128 | 10 |
| 114,944 | 119 | 2 | 1,333 | 5 | 40 | 0 | 648 | 4 | 2,140 | 11 |
| 114,945 | 120 | 2 | 1,350 | 5 | 40 | 0 | 655 | 4 | 2,165 | 11 |
| 114,946 | 120 | 2 | 1,350 | 7 | 40 | 0 | 655 | 4 | 2,165 | 13 |
| 114,947 | 120 | 2 | 1,350 | 7 | 40 | 0 | 656 | 4 | 2,166 | 13 |
| 114,948 | 122 | 2 | 1,376 | 7 | 43 | 0 | 677 | 5 | 2,218 | 14 |
| 114,949 | 122 | 2 | 1,376 | 7 | 43 | 0 | 677 | 5 | 2,218 | 14 |
| 114,950 | 122 | 2 | 1,377 | 7 | 43 | 0 | 677 | 6 | 2,219 | 15 |
| 114,951 | 122 | 2 | 1,378 | 6 | 43 | 0 | 679 | 6 | 2,222 | 14 |
| 114,952 | 123 | 2 | 1,380 | 6 | 43 | 0 | 679 | 6 | 2,225 | 14 |

|         |     |   |       |    |     |   |       |   |       |    |
|---------|-----|---|-------|----|-----|---|-------|---|-------|----|
| 114,953 | 123 | 2 | 1,381 | 6  | 42  | 1 | 679   | 6 | 2,225 | 15 |
| 114,954 | 123 | 2 | 1,385 | 6  | 42  | 1 | 680   | 6 | 2,230 | 15 |
| 114,955 | 122 | 2 | 1,384 | 6  | 42  | 1 | 680   | 6 | 2,228 | 15 |
| 114,956 | 124 | 3 | 1,388 | 6  | 42  | 1 | 682   | 6 | 2,236 | 16 |
| 114,957 | 124 | 3 | 1,395 | 8  | 42  | 2 | 703   | 6 | 2,264 | 19 |
| 114,958 | 124 | 3 | 1,392 | 8  | 42  | 2 | 703   | 6 | 2,261 | 19 |
| 114,959 | 124 | 3 | 1,393 | 8  | 42  | 2 | 702   | 6 | 2,261 | 19 |
| 114,960 | 124 | 3 | 1,394 | 8  | 42  | 2 | 703   | 7 | 2,263 | 20 |
| 114,961 | 124 | 3 | 1,393 | 8  | 41  | 2 | 702   | 7 | 2,260 | 20 |
| 114,962 | 124 | 3 | 1,393 | 8  | 42  | 2 | 701   | 7 | 2,260 | 20 |
| 114,963 | 124 | 3 | 1,392 | 8  | 42  | 2 | 700   | 7 | 2,258 | 20 |
| 114,964 | 125 | 3 | 1,409 | 8  | 43  | 2 | 710   | 7 | 2,287 | 20 |
| 114,965 | 125 | 3 | 1,399 | 8  | 43  | 2 | 710   | 7 | 2,277 | 20 |
| 114,966 | 129 | 3 | 1,405 | 8  | 43  | 2 | 714   | 7 | 2,291 | 20 |
| 114,967 | 135 | 2 | 1,427 | 8  | 43  | 2 | 733   | 7 | 2,338 | 19 |
| 114,968 | 126 | 3 | 1,383 | 8  | 42  | 2 | 720   | 7 | 2,271 | 20 |
| 114,969 | 100 | 3 | 1,062 | 8  | 36  | 2 | 581   | 8 | 1,779 | 21 |
| 114,970 | 98  | 3 | 1,032 | 10 | 34  | 2 | 569   | 8 | 1,733 | 23 |
| 114,971 | 97  | 3 | 981   | 10 | 33  | 2 | 542   | 8 | 1,653 | 23 |
| 114,972 | 129 | 3 | 1,498 | 10 | 58  | 2 | 710   | 8 | 2,395 | 23 |
| 114,973 | 130 | 3 | 1,576 | 10 | 61  | 2 | 736   | 8 | 2,503 | 23 |
| 114,974 | 127 | 3 | 1,623 | 10 | 63  | 2 | 739   | 8 | 2,552 | 23 |
| 114,975 | 127 | 3 | 1,592 | 10 | 63  | 2 | 724   | 8 | 2,506 | 23 |
| 114,976 | 185 | 3 | 2,256 | 10 | 102 | 2 | 943   | 8 | 3,486 | 23 |
| 114,977 | 185 | 3 | 2,191 | 10 | 100 | 2 | 913   | 8 | 3,389 | 23 |
| 114,978 | 174 | 3 | 2,068 | 10 | 96  | 2 | 869   | 8 | 3,207 | 23 |
| 114,979 | 198 | 3 | 2,398 | 10 | 108 | 2 | 963   | 8 | 3,667 | 23 |
| 114,980 | 203 | 3 | 2,553 | 10 | 116 | 2 | 1,046 | 8 | 3,918 | 23 |
| 114,981 | 190 | 3 | 2,451 | 10 | 118 | 2 | 965   | 7 | 3,724 | 22 |
| 114,982 | 189 | 3 | 2,442 | 10 | 118 | 2 | 957   | 7 | 3,706 | 22 |
| 114,983 | 204 | 3 | 2,658 | 11 | 125 | 2 | 998   | 5 | 3,985 | 21 |
| 114,984 | 204 | 2 | 2,656 | 10 | 123 | 2 | 997   | 5 | 3,980 | 19 |
| 114,985 | 206 | 2 | 2,733 | 10 | 124 | 2 | 1,029 | 5 | 4,092 | 19 |
| 114,986 | 210 | 2 | 2,747 | 9  | 125 | 2 | 1,041 | 5 | 4,123 | 18 |
| 114,987 | 211 | 2 | 2,756 | 9  | 124 | 2 | 1,043 | 5 | 4,134 | 18 |
| 114,988 | 211 | 2 | 2,763 | 10 | 124 | 2 | 1,038 | 5 | 4,136 | 19 |
| 114,989 | 199 | 2 | 2,693 | 10 | 119 | 2 | 1,005 | 5 | 4,016 | 19 |
| 114,990 | 203 | 2 | 2,693 | 9  | 119 | 2 | 1,006 | 5 | 4,021 | 18 |
| 114,991 | 203 | 2 | 2,709 | 9  | 119 | 2 | 1,007 | 5 | 4,038 | 18 |
| 114,992 | 203 | 2 | 2,707 | 9  | 119 | 2 | 1,006 | 5 | 4,035 | 18 |
| 114,993 | 203 | 2 | 2,716 | 9  | 119 | 2 | 1,006 | 5 | 4,044 | 18 |

|         |     |   |       |    |     |   |       |   |       |    |
|---------|-----|---|-------|----|-----|---|-------|---|-------|----|
| 114,994 | 203 | 2 | 2,717 | 9  | 118 | 2 | 998   | 5 | 4,036 | 18 |
| 114,995 | 204 | 2 | 2,713 | 9  | 118 | 2 | 996   | 4 | 4,031 | 17 |
| 114,996 | 203 | 3 | 2,709 | 9  | 118 | 2 | 994   | 4 | 4,024 | 18 |
| 114,997 | 202 | 3 | 2,697 | 7  | 118 | 2 | 987   | 4 | 4,004 | 16 |
| 114,998 | 201 | 3 | 2,684 | 7  | 115 | 2 | 977   | 4 | 3,977 | 16 |
| 114,999 | 201 | 3 | 2,686 | 7  | 115 | 2 | 972   | 3 | 3,974 | 15 |
| 115,000 | 201 | 3 | 2,685 | 7  | 115 | 2 | 972   | 3 | 3,973 | 15 |
| 115,001 | 201 | 3 | 2,686 | 8  | 115 | 2 | 969   | 2 | 3,971 | 15 |
| 115,002 | 201 | 3 | 2,685 | 8  | 115 | 2 | 969   | 2 | 3,970 | 15 |
| 115,003 | 200 | 3 | 2,682 | 8  | 115 | 2 | 972   | 2 | 3,969 | 15 |
| 115,004 | 200 | 3 | 2,681 | 10 | 115 | 1 | 971   | 3 | 3,967 | 17 |
| 115,005 | 200 | 3 | 2,677 | 10 | 115 | 1 | 970   | 3 | 3,962 | 17 |
| 115,006 | 203 | 2 | 2,703 | 13 | 116 | 1 | 979   | 3 | 4,001 | 19 |
| 115,007 | 222 | 2 | 2,826 | 14 | 117 | 1 | 1,039 | 3 | 4,204 | 20 |
| 115,008 | 245 | 2 | 3,064 | 14 | 138 | 0 | 1,184 | 3 | 4,631 | 19 |
| 115,009 | 245 | 2 | 3,063 | 15 | 138 | 0 | 1,185 | 3 | 4,631 | 20 |
| 115,010 | 254 | 2 | 3,203 | 19 | 141 | 0 | 1,297 | 4 | 4,895 | 25 |
| 115,011 | 254 | 2 | 3,199 | 20 | 141 | 0 | 1,297 | 3 | 4,891 | 25 |
| 115,012 | 254 | 2 | 3,207 | 20 | 141 | 0 | 1,299 | 3 | 4,901 | 25 |
| 115,013 | 254 | 2 | 3,208 | 20 | 140 | 0 | 1,299 | 4 | 4,901 | 26 |
| 115,014 | 252 | 3 | 3,216 | 21 | 141 | 0 | 1,304 | 4 | 4,913 | 28 |
| 115,015 | 252 | 3 | 3,198 | 21 | 140 | 0 | 1,291 | 4 | 4,881 | 28 |
| 115,016 | 249 | 3 | 3,195 | 21 | 140 | 0 | 1,288 | 4 | 4,872 | 28 |
| 115,017 | 249 | 3 | 3,193 | 21 | 140 | 0 | 1,287 | 4 | 4,869 | 28 |
| 115,018 | 247 | 3 | 3,187 | 21 | 140 | 0 | 1,268 | 4 | 4,842 | 28 |
| 115,019 | 246 | 2 | 3,206 | 21 | 139 | 0 | 1,269 | 3 | 4,860 | 26 |
| 115,020 | 246 | 3 | 3,200 | 21 | 139 | 0 | 1,263 | 3 | 4,848 | 27 |
| 115,021 | 307 | 3 | 3,587 | 19 | 146 | 0 | 1,385 | 4 | 5,425 | 26 |
| 115,022 | 307 | 3 | 3,602 | 19 | 147 | 0 | 1,382 | 4 | 5,438 | 26 |
| 115,023 | 281 | 3 | 3,111 | 19 | 122 | 0 | 1,197 | 4 | 4,711 | 26 |
| 115,024 | 287 | 3 | 3,130 | 19 | 126 | 0 | 1,238 | 4 | 4,781 | 26 |
| 115,025 | 284 | 3 | 3,297 | 19 | 126 | 0 | 1,241 | 4 | 4,948 | 26 |
| 115,026 | 307 | 3 | 3,698 | 19 | 134 | 0 | 1,364 | 4 | 5,503 | 26 |
| 115,027 | 239 | 3 | 3,146 | 19 | 97  | 0 | 1,124 | 4 | 4,606 | 26 |
| 115,028 | 222 | 3 | 3,049 | 19 | 98  | 0 | 1,082 | 4 | 4,451 | 26 |
| 115,029 | 217 | 3 | 2,904 | 19 | 93  | 0 | 1,067 | 4 | 4,281 | 26 |
| 115,030 | 217 | 3 | 2,874 | 19 | 93  | 0 | 1,058 | 4 | 4,242 | 26 |
| 115,031 | 215 | 3 | 2,716 | 20 | 87  | 0 | 978   | 4 | 3,996 | 27 |
| 115,032 | 203 | 3 | 2,639 | 20 | 81  | 0 | 958   | 4 | 3,881 | 27 |
| 115,033 | 193 | 3 | 2,565 | 20 | 76  | 0 | 941   | 4 | 3,775 | 27 |
| 115,034 | 212 | 3 | 2,493 | 19 | 77  | 0 | 948   | 4 | 3,730 | 26 |

|         |     |   |       |    |     |   |       |    |       |    |
|---------|-----|---|-------|----|-----|---|-------|----|-------|----|
| 115,035 | 226 | 3 | 2,799 | 19 | 92  | 0 | 1,014 | 4  | 4,131 | 26 |
| 115,036 | 226 | 3 | 2,780 | 20 | 91  | 0 | 1,009 | 4  | 4,106 | 27 |
| 115,037 | 254 | 3 | 3,088 | 20 | 98  | 0 | 1,073 | 4  | 4,513 | 27 |
| 115,038 | 253 | 5 | 3,125 | 24 | 99  | 0 | 1,088 | 4  | 4,565 | 33 |
| 115,039 | 253 | 5 | 3,101 | 25 | 99  | 0 | 1,090 | 6  | 4,543 | 36 |
| 115,040 | 252 | 5 | 3,087 | 25 | 99  | 0 | 1,090 | 6  | 4,528 | 36 |
| 115,041 | 274 | 5 | 3,310 | 25 | 113 | 1 | 1,245 | 6  | 4,942 | 37 |
| 115,042 | 274 | 5 | 3,288 | 25 | 113 | 1 | 1,236 | 6  | 4,911 | 37 |
| 115,043 | 275 | 6 | 3,366 | 25 | 116 | 1 | 1,270 | 6  | 5,027 | 38 |
| 115,044 | 275 | 6 | 3,364 | 25 | 116 | 1 | 1,269 | 6  | 5,024 | 38 |
| 115,045 | 275 | 6 | 3,369 | 25 | 116 | 1 | 1,270 | 6  | 5,030 | 38 |
| 115,046 | 276 | 5 | 3,367 | 26 | 116 | 1 | 1,269 | 6  | 5,028 | 38 |
| 115,047 | 276 | 5 | 3,360 | 26 | 116 | 1 | 1,268 | 6  | 5,020 | 38 |
| 115,048 | 276 | 5 | 3,379 | 26 | 117 | 1 | 1,272 | 6  | 5,044 | 38 |
| 115,049 | 276 | 5 | 3,378 | 26 | 117 | 1 | 1,272 | 6  | 5,043 | 38 |
| 115,050 | 290 | 5 | 3,466 | 26 | 117 | 1 | 1,325 | 6  | 5,198 | 38 |
| 115,051 | 291 | 5 | 3,562 | 25 | 117 | 1 | 1,351 | 6  | 5,321 | 37 |
| 115,052 | 291 | 5 | 3,563 | 25 | 117 | 1 | 1,352 | 6  | 5,323 | 37 |
| 115,053 | 291 | 5 | 3,563 | 25 | 117 | 1 | 1,349 | 8  | 5,320 | 39 |
| 115,054 | 291 | 5 | 3,573 | 26 | 117 | 1 | 1,358 | 10 | 5,339 | 42 |
| 115,055 | 299 | 5 | 3,601 | 24 | 117 | 1 | 1,380 | 14 | 5,397 | 44 |
| 115,056 | 299 | 5 | 3,602 | 24 | 117 | 1 | 1,380 | 16 | 5,398 | 46 |
| 115,057 | 295 | 5 | 3,582 | 21 | 116 | 1 | 1,376 | 17 | 5,369 | 44 |
| 115,058 | 276 | 6 | 3,466 | 21 | 115 | 1 | 1,319 | 17 | 5,176 | 45 |
| 115,059 | 253 | 6 | 3,220 | 19 | 94  | 1 | 1,150 | 17 | 4,717 | 43 |
| 115,060 | 245 | 6 | 3,095 | 18 | 92  | 1 | 1,059 | 17 | 4,491 | 42 |
| 115,061 | 244 | 6 | 3,082 | 15 | 91  | 1 | 1,036 | 16 | 4,453 | 38 |
| 115,062 | 244 | 6 | 3,074 | 15 | 91  | 1 | 1,035 | 16 | 4,444 | 38 |
| 115,063 | 244 | 6 | 3,075 | 15 | 91  | 1 | 1,035 | 15 | 4,445 | 37 |
| 115,064 | 244 | 6 | 3,077 | 15 | 91  | 1 | 1,035 | 15 | 4,447 | 37 |
| 115,065 | 244 | 5 | 3,066 | 14 | 90  | 1 | 1,029 | 15 | 4,429 | 35 |
| 115,066 | 244 | 5 | 3,063 | 14 | 90  | 1 | 1,027 | 15 | 4,424 | 35 |
| 115,067 | 245 | 5 | 3,064 | 14 | 90  | 1 | 1,030 | 16 | 4,429 | 36 |
| 115,068 | 245 | 5 | 3,066 | 14 | 90  | 1 | 1,031 | 16 | 4,432 | 36 |
| 115,069 | 241 | 5 | 3,054 | 14 | 90  | 1 | 1,030 | 16 | 4,415 | 36 |
| 115,070 | 242 | 5 | 3,019 | 15 | 90  | 1 | 1,033 | 16 | 4,384 | 37 |
| 115,071 | 238 | 4 | 2,982 | 15 | 87  | 1 | 1,012 | 17 | 4,319 | 37 |
| 115,072 | 181 | 4 | 2,617 | 15 | 82  | 1 | 905   | 16 | 3,785 | 36 |
| 115,073 | 183 | 4 | 2,599 | 15 | 81  | 1 | 914   | 16 | 3,777 | 36 |
| 115,074 | 177 | 4 | 2,566 | 15 | 80  | 1 | 907   | 18 | 3,730 | 38 |
| 115,075 | 169 | 4 | 2,449 | 15 | 73  | 1 | 839   | 18 | 3,530 | 38 |

|         |     |   |       |    |    |   |       |    |       |    |
|---------|-----|---|-------|----|----|---|-------|----|-------|----|
| 115,076 | 168 | 4 | 2,178 | 15 | 67 | 1 | 802   | 18 | 3,215 | 38 |
| 115,077 | 145 | 4 | 1,691 | 14 | 57 | 1 | 668   | 18 | 2,561 | 37 |
| 115,078 | 145 | 4 | 1,627 | 14 | 57 | 1 | 653   | 18 | 2,482 | 37 |
| 115,079 | 159 | 4 | 1,604 | 14 | 49 | 1 | 652   | 18 | 2,464 | 37 |
| 115,080 | 159 | 4 | 1,596 | 14 | 49 | 1 | 650   | 18 | 2,454 | 37 |
| 115,081 | 160 | 4 | 1,625 | 14 | 50 | 1 | 656   | 18 | 2,491 | 37 |
| 115,082 | 169 | 4 | 1,676 | 15 | 50 | 1 | 668   | 18 | 2,563 | 38 |
| 115,083 | 169 | 4 | 1,692 | 15 | 51 | 1 | 673   | 18 | 2,585 | 38 |
| 115,084 | 198 | 5 | 1,905 | 15 | 53 | 1 | 739   | 18 | 2,895 | 39 |
| 115,085 | 175 | 5 | 1,876 | 15 | 53 | 1 | 719   | 18 | 2,823 | 39 |
| 115,086 | 159 | 5 | 1,543 | 15 | 40 | 1 | 641   | 19 | 2,383 | 40 |
| 115,087 | 185 | 5 | 1,749 | 14 | 58 | 1 | 781   | 19 | 2,773 | 39 |
| 115,088 | 175 | 3 | 1,677 | 8  | 55 | 1 | 807   | 18 | 2,714 | 30 |
| 115,089 | 201 | 4 | 1,808 | 8  | 59 | 1 | 852   | 18 | 2,920 | 31 |
| 115,090 | 201 | 4 | 1,779 | 8  | 54 | 1 | 768   | 18 | 2,802 | 31 |
| 115,091 | 229 | 4 | 1,874 | 8  | 67 | 1 | 880   | 18 | 3,050 | 31 |
| 115,092 | 228 | 4 | 1,841 | 8  | 66 | 0 | 852   | 20 | 2,987 | 32 |
| 115,093 | 239 | 4 | 2,251 | 8  | 73 | 0 | 972   | 20 | 3,535 | 32 |
| 115,094 | 239 | 3 | 2,249 | 8  | 73 | 0 | 969   | 20 | 3,530 | 31 |
| 115,095 | 241 | 3 | 2,297 | 8  | 78 | 0 | 1,009 | 20 | 3,625 | 31 |
| 115,096 | 241 | 3 | 2,298 | 8  | 78 | 0 | 1,009 | 20 | 3,626 | 31 |
| 115,097 | 239 | 3 | 2,298 | 7  | 78 | 0 | 1,011 | 20 | 3,626 | 30 |
| 115,098 | 240 | 3 | 2,279 | 7  | 77 | 0 | 1,012 | 20 | 3,608 | 30 |
| 115,099 | 240 | 3 | 2,282 | 7  | 77 | 0 | 1,009 | 20 | 3,608 | 30 |
| 115,100 | 240 | 3 | 2,260 | 7  | 77 | 0 | 1,009 | 20 | 3,586 | 30 |
| 115,101 | 229 | 3 | 2,229 | 7  | 79 | 0 | 982   | 20 | 3,519 | 30 |
| 115,102 | 231 | 3 | 2,142 | 7  | 79 | 0 | 965   | 21 | 3,417 | 31 |
| 115,103 | 235 | 3 | 2,165 | 7  | 79 | 0 | 977   | 21 | 3,456 | 31 |
| 115,104 | 234 | 3 | 2,182 | 6  | 81 | 0 | 992   | 12 | 3,489 | 21 |
| 115,105 | 234 | 3 | 2,187 | 6  | 81 | 0 | 994   | 12 | 3,496 | 21 |
| 115,106 | 227 | 3 | 2,172 | 6  | 81 | 0 | 979   | 12 | 3,459 | 21 |
| 115,107 | 229 | 3 | 2,179 | 6  | 81 | 0 | 982   | 10 | 3,471 | 19 |
| 115,108 | 229 | 3 | 2,177 | 6  | 81 | 0 | 976   | 9  | 3,463 | 18 |
| 115,109 | 229 | 2 | 2,173 | 5  | 81 | 0 | 973   | 9  | 3,456 | 16 |
| 115,110 | 229 | 2 | 2,173 | 5  | 81 | 0 | 974   | 9  | 3,457 | 16 |
| 115,111 | 233 | 2 | 2,193 | 5  | 82 | 0 | 979   | 9  | 3,487 | 16 |
| 115,112 | 236 | 2 | 2,234 | 3  | 83 | 0 | 984   | 9  | 3,537 | 14 |
| 115,113 | 238 | 2 | 2,236 | 3  | 83 | 0 | 989   | 9  | 3,546 | 14 |
| 115,114 | 256 | 2 | 2,312 | 3  | 87 | 0 | 1,019 | 9  | 3,674 | 14 |
| 115,115 | 256 | 2 | 2,311 | 3  | 87 | 0 | 1,019 | 9  | 3,673 | 14 |
| 115,116 | 256 | 2 | 2,308 | 3  | 87 | 0 | 1,019 | 9  | 3,670 | 14 |



|         |     |   |       |   |     |   |       |   |       |    |
|---------|-----|---|-------|---|-----|---|-------|---|-------|----|
| 115,117 | 263 | 2 | 2,325 | 3 | 88  | 0 | 1,031 | 9 | 3,707 | 14 |
| 115,118 | 265 | 2 | 2,343 | 3 | 89  | 0 | 1,042 | 8 | 3,739 | 13 |
| 115,119 | 265 | 2 | 2,337 | 4 | 89  | 0 | 1,041 | 8 | 3,732 | 14 |
| 115,120 | 344 | 2 | 2,614 | 4 | 99  | 0 | 1,303 | 8 | 4,360 | 14 |
| 115,121 | 345 | 2 | 2,662 | 3 | 100 | 0 | 1,321 | 7 | 4,428 | 12 |
| 115,122 | 345 | 2 | 2,660 | 3 | 101 | 0 | 1,322 | 7 | 4,428 | 12 |
| 115,123 | 345 | 2 | 2,693 | 3 | 103 | 0 | 1,332 | 7 | 4,473 | 12 |
| 115,124 | 342 | 2 | 2,682 | 3 | 103 | 0 | 1,323 | 5 | 4,450 | 10 |
| 115,125 | 342 | 2 | 2,680 | 3 | 103 | 0 | 1,323 | 5 | 4,448 | 10 |
| 115,126 | 347 | 2 | 2,717 | 3 | 105 | 0 | 1,355 | 5 | 4,524 | 10 |
| 115,127 | 347 | 2 | 2,705 | 3 | 105 | 0 | 1,351 | 5 | 4,508 | 10 |
| 115,128 | 347 | 2 | 2,693 | 3 | 105 | 0 | 1,349 | 5 | 4,494 | 10 |
| 115,129 | 346 | 2 | 2,674 | 3 | 104 | 0 | 1,338 | 5 | 4,462 | 10 |
| 115,130 | 329 | 2 | 2,619 | 4 | 103 | 0 | 1,305 | 5 | 4,356 | 11 |
| 115,131 | 328 | 2 | 2,590 | 4 | 102 | 0 | 1,299 | 5 | 4,319 | 11 |
| 115,132 | 319 | 2 | 2,551 | 2 | 101 | 0 | 1,287 | 5 | 4,258 | 9  |
| 115,133 | 319 | 2 | 2,548 | 2 | 101 | 0 | 1,294 | 5 | 4,262 | 9  |
| 115,134 | 319 | 2 | 2,543 | 2 | 100 | 0 | 1,292 | 5 | 4,254 | 9  |
| 115,135 | 290 | 1 | 2,322 | 2 | 98  | 0 | 1,226 | 5 | 3,936 | 8  |
| 115,136 | 290 | 1 | 2,304 | 2 | 96  | 0 | 1,216 | 4 | 3,906 | 7  |
| 115,137 | 296 | 1 | 2,318 | 3 | 97  | 0 | 1,223 | 4 | 3,934 | 8  |
| 115,138 | 259 | 1 | 1,968 | 4 | 75  | 1 | 1,043 | 3 | 3,345 | 9  |
| 115,139 | 257 | 1 | 1,935 | 4 | 74  | 2 | 997   | 3 | 3,263 | 10 |
| 115,140 | 231 | 0 | 1,763 | 6 | 70  | 2 | 931   | 3 | 2,995 | 11 |
| 115,141 | 205 | 0 | 1,590 | 6 | 62  | 2 | 865   | 3 | 2,722 | 11 |
| 115,142 | 250 | 0 | 1,787 | 6 | 66  | 2 | 959   | 3 | 3,062 | 11 |
| 115,143 | 246 | 0 | 1,486 | 6 | 61  | 2 | 900   | 1 | 2,693 | 9  |
| 115,144 | 239 | 0 | 1,377 | 6 | 59  | 2 | 842   | 1 | 2,517 | 9  |
| 115,145 | 254 | 0 | 1,414 | 6 | 59  | 2 | 853   | 1 | 2,580 | 9  |
| 115,146 | 254 | 0 | 1,411 | 6 | 59  | 2 | 853   | 1 | 2,577 | 9  |
| 115,147 | 254 | 0 | 1,413 | 6 | 59  | 2 | 853   | 1 | 2,579 | 9  |
| 115,148 | 273 | 0 | 1,650 | 6 | 64  | 2 | 955   | 1 | 2,942 | 9  |
| 115,149 | 272 | 0 | 1,649 | 6 | 64  | 2 | 954   | 1 | 2,939 | 9  |
| 115,150 | 272 | 0 | 1,645 | 7 | 64  | 2 | 956   | 3 | 2,937 | 12 |
| 115,151 | 272 | 0 | 1,645 | 7 | 64  | 2 | 955   | 5 | 2,936 | 14 |
| 115,152 | 370 | 0 | 2,481 | 7 | 121 | 2 | 1,348 | 6 | 4,320 | 15 |
| 115,153 | 371 | 2 | 2,560 | 8 | 125 | 2 | 1,362 | 9 | 4,418 | 21 |
| 115,154 | 367 | 2 | 2,571 | 8 | 127 | 2 | 1,373 | 9 | 4,438 | 21 |
| 115,155 | 375 | 2 | 2,661 | 9 | 126 | 2 | 1,391 | 9 | 4,553 | 22 |
| 115,156 | 383 | 2 | 2,700 | 9 | 128 | 2 | 1,393 | 9 | 4,604 | 22 |
| 115,157 | 383 | 2 | 2,694 | 9 | 128 | 2 | 1,391 | 9 | 4,596 | 22 |

|         |     |   |       |    |     |   |       |    |       |    |
|---------|-----|---|-------|----|-----|---|-------|----|-------|----|
| 115,158 | 382 | 2 | 2,726 | 9  | 128 | 2 | 1,394 | 9  | 4,630 | 22 |
| 115,159 | 382 | 2 | 2,723 | 9  | 128 | 2 | 1,394 | 9  | 4,627 | 22 |
| 115,160 | 382 | 2 | 2,723 | 9  | 128 | 2 | 1,399 | 9  | 4,632 | 22 |
| 115,161 | 381 | 2 | 2,714 | 9  | 128 | 2 | 1,395 | 9  | 4,618 | 22 |
| 115,162 | 381 | 2 | 2,757 | 9  | 128 | 2 | 1,410 | 9  | 4,676 | 22 |
| 115,163 | 378 | 2 | 2,714 | 9  | 127 | 2 | 1,404 | 9  | 4,623 | 22 |
| 115,164 | 376 | 2 | 2,710 | 9  | 127 | 2 | 1,398 | 9  | 4,611 | 22 |
| 115,165 | 358 | 2 | 2,638 | 9  | 123 | 2 | 1,370 | 9  | 4,489 | 22 |
| 115,166 | 358 | 2 | 2,637 | 10 | 123 | 2 | 1,370 | 9  | 4,488 | 23 |
| 115,167 | 349 | 2 | 2,622 | 10 | 122 | 2 | 1,363 | 9  | 4,456 | 23 |
| 115,168 | 349 | 2 | 2,623 | 10 | 122 | 2 | 1,365 | 9  | 4,459 | 23 |
| 115,169 | 351 | 3 | 2,660 | 9  | 121 | 2 | 1,368 | 11 | 4,500 | 25 |
| 115,170 | 357 | 3 | 2,678 | 9  | 121 | 2 | 1,377 | 11 | 4,533 | 25 |
| 115,171 | 280 | 3 | 2,430 | 9  | 112 | 2 | 1,128 | 11 | 3,950 | 25 |
| 115,172 | 278 | 3 | 2,377 | 9  | 112 | 2 | 1,101 | 11 | 3,868 | 25 |
| 115,173 | 278 | 3 | 2,371 | 10 | 111 | 2 | 1,097 | 11 | 3,857 | 26 |
| 115,174 | 289 | 3 | 2,374 | 10 | 110 | 2 | 1,099 | 11 | 3,872 | 26 |
| 115,175 | 289 | 3 | 2,371 | 10 | 110 | 2 | 1,097 | 11 | 3,867 | 26 |
| 115,176 | 282 | 3 | 2,333 | 12 | 108 | 2 | 1,062 | 11 | 3,785 | 28 |
| 115,177 | 282 | 3 | 2,332 | 13 | 108 | 2 | 1,060 | 11 | 3,782 | 29 |
| 115,178 | 285 | 3 | 2,359 | 13 | 110 | 2 | 1,067 | 11 | 3,821 | 29 |
| 115,179 | 285 | 3 | 2,359 | 13 | 110 | 2 | 1,069 | 12 | 3,823 | 30 |
| 115,180 | 293 | 3 | 2,404 | 13 | 112 | 2 | 1,085 | 12 | 3,894 | 30 |
| 115,181 | 293 | 3 | 2,450 | 14 | 113 | 2 | 1,106 | 14 | 3,962 | 33 |
| 115,182 | 293 | 3 | 2,443 | 14 | 113 | 2 | 1,105 | 14 | 3,954 | 33 |
| 115,183 | 290 | 3 | 2,432 | 16 | 112 | 3 | 1,103 | 16 | 3,937 | 38 |
| 115,184 | 290 | 3 | 2,413 | 16 | 112 | 3 | 1,092 | 16 | 3,907 | 38 |
| 115,185 | 298 | 3 | 2,512 | 16 | 115 | 3 | 1,156 | 16 | 4,081 | 38 |
| 115,186 | 297 | 3 | 2,507 | 16 | 115 | 3 | 1,156 | 16 | 4,075 | 38 |
| 115,187 | 297 | 3 | 2,495 | 16 | 115 | 3 | 1,156 | 16 | 4,063 | 38 |
| 115,188 | 290 | 3 | 2,450 | 15 | 112 | 3 | 1,134 | 16 | 3,986 | 37 |
| 115,189 | 281 | 3 | 2,370 | 14 | 112 | 2 | 1,112 | 16 | 3,875 | 35 |
| 115,190 | 281 | 3 | 2,373 | 14 | 111 | 1 | 1,116 | 16 | 3,881 | 34 |
| 115,191 | 282 | 3 | 2,389 | 12 | 110 | 1 | 1,123 | 16 | 3,904 | 32 |
| 115,192 | 288 | 3 | 2,416 | 12 | 111 | 1 | 1,156 | 16 | 3,971 | 32 |
| 115,193 | 214 | 3 | 2,090 | 12 | 92  | 1 | 946   | 16 | 3,342 | 32 |
| 115,194 | 214 | 3 | 2,090 | 12 | 92  | 1 | 957   | 16 | 3,353 | 32 |
| 115,195 | 198 | 3 | 2,007 | 12 | 88  | 1 | 918   | 16 | 3,211 | 32 |
| 115,196 | 200 | 3 | 2,006 | 12 | 87  | 1 | 914   | 16 | 3,207 | 32 |
| 115,197 | 200 | 3 | 2,004 | 12 | 87  | 1 | 914   | 16 | 3,205 | 32 |
| 115,198 | 196 | 3 | 1,891 | 12 | 83  | 1 | 886   | 16 | 3,056 | 32 |

|         |     |   |       |    |    |   |     |    |       |    |
|---------|-----|---|-------|----|----|---|-----|----|-------|----|
| 115,199 | 182 | 3 | 1,767 | 12 | 82 | 1 | 809 | 16 | 2,840 | 32 |
| 115,200 | 164 | 3 | 1,432 | 12 | 61 | 1 | 656 | 16 | 2,313 | 32 |
| 115,201 | 128 | 3 | 1,231 | 11 | 42 | 1 | 557 | 14 | 1,958 | 29 |
| 115,202 | 113 | 3 | 1,131 | 11 | 39 | 1 | 514 | 12 | 1,797 | 27 |
| 115,203 | 81  | 3 | 886   | 11 | 23 | 1 | 385 | 11 | 1,375 | 26 |
| 115,204 | 77  | 1 | 798   | 10 | 19 | 1 | 361 | 7  | 1,255 | 19 |
| 115,205 | 77  | 1 | 771   | 10 | 17 | 1 | 342 | 7  | 1,207 | 19 |
| 115,206 | 69  | 1 | 647   | 9  | 16 | 1 | 299 | 7  | 1,031 | 18 |
| 115,207 | 60  | 1 | 589   | 10 | 14 | 1 | 288 | 7  | 951   | 19 |
| 115,208 | 59  | 2 | 555   | 10 | 14 | 1 | 285 | 7  | 913   | 20 |
| 115,209 | 58  | 2 | 540   | 11 | 14 | 1 | 278 | 7  | 890   | 21 |
| 115,210 | 56  | 2 | 525   | 11 | 13 | 1 | 272 | 7  | 866   | 21 |
| 115,211 | 56  | 2 | 512   | 11 | 13 | 1 | 272 | 7  | 853   | 21 |
| 115,212 | 56  | 2 | 505   | 11 | 13 | 1 | 271 | 7  | 845   | 21 |
| 115,213 | 56  | 2 | 505   | 11 | 13 | 1 | 271 | 7  | 845   | 21 |
| 115,214 | 56  | 2 | 505   | 11 | 13 | 1 | 271 | 7  | 845   | 21 |
| 115,215 | 56  | 2 | 505   | 11 | 13 | 1 | 271 | 7  | 845   | 21 |
| 115,216 | 56  | 3 | 503   | 11 | 13 | 1 | 270 | 7  | 842   | 22 |
| 115,217 | 56  | 3 | 501   | 10 | 13 | 1 | 269 | 7  | 839   | 21 |
| 115,218 | 56  | 4 | 501   | 10 | 13 | 1 | 266 | 7  | 836   | 22 |
| 115,219 | 56  | 4 | 496   | 10 | 13 | 1 | 268 | 7  | 833   | 22 |
| 115,220 | 52  | 3 | 448   | 10 | 13 | 1 | 254 | 5  | 767   | 19 |
| 115,221 | 44  | 3 | 422   | 9  | 13 | 1 | 246 | 5  | 725   | 18 |
| 115,222 | 51  | 3 | 518   | 9  | 15 | 1 | 315 | 5  | 899   | 18 |
| 115,223 | 43  | 3 | 527   | 9  | 18 | 1 | 358 | 5  | 946   | 18 |
| 115,224 | 43  | 3 | 524   | 9  | 18 | 1 | 357 | 5  | 942   | 18 |
| 115,225 | 43  | 3 | 525   | 9  | 18 | 1 | 365 | 5  | 951   | 18 |
| 115,226 | 44  | 3 | 557   | 9  | 18 | 1 | 393 | 5  | 1,012 | 18 |
| 115,227 | 43  | 3 | 573   | 6  | 21 | 1 | 428 | 5  | 1,065 | 15 |
| 115,228 | 44  | 3 | 564   | 7  | 20 | 1 | 434 | 5  | 1,062 | 16 |
| 115,229 | 44  | 3 | 563   | 7  | 20 | 1 | 434 | 5  | 1,061 | 16 |
| 115,230 | 36  | 3 | 530   | 8  | 18 | 1 | 419 | 4  | 1,003 | 16 |
| 115,231 | 36  | 3 | 518   | 9  | 18 | 2 | 419 | 4  | 991   | 18 |
| 115,232 | 35  | 3 | 466   | 5  | 17 | 1 | 396 | 0  | 914   | 9  |
| 115,233 | 34  | 3 | 453   | 5  | 17 | 1 | 392 | 0  | 896   | 9  |
| 115,234 | 27  | 3 | 376   | 5  | 15 | 1 | 335 | 0  | 753   | 9  |
| 115,235 | 32  | 3 | 410   | 5  | 14 | 1 | 377 | 0  | 833   | 9  |
| 115,236 | 32  | 3 | 408   | 5  | 14 | 1 | 375 | 0  | 829   | 9  |
| 115,237 | 36  | 3 | 439   | 5  | 14 | 1 | 381 | 0  | 870   | 9  |
| 115,238 | 39  | 3 | 470   | 5  | 14 | 1 | 392 | 0  | 915   | 9  |
| 115,239 | 43  | 3 | 550   | 6  | 15 | 2 | 435 | 1  | 1,043 | 12 |

|         |    |   |     |    |    |   |     |   |       |    |
|---------|----|---|-----|----|----|---|-----|---|-------|----|
| 115,240 | 43 | 3 | 543 | 7  | 15 | 2 | 430 | 1 | 1,031 | 13 |
| 115,241 | 50 | 4 | 658 | 8  | 19 | 2 | 501 | 1 | 1,228 | 15 |
| 115,242 | 51 | 4 | 657 | 8  | 22 | 2 | 506 | 1 | 1,236 | 15 |
| 115,243 | 46 | 4 | 614 | 8  | 20 | 2 | 464 | 1 | 1,144 | 15 |
| 115,244 | 46 | 4 | 604 | 8  | 20 | 2 | 455 | 1 | 1,125 | 15 |
| 115,245 | 46 | 4 | 598 | 8  | 20 | 2 | 445 | 2 | 1,109 | 16 |
| 115,246 | 46 | 4 | 596 | 8  | 20 | 2 | 445 | 2 | 1,107 | 16 |
| 115,247 | 44 | 4 | 610 | 8  | 21 | 2 | 461 | 2 | 1,136 | 16 |
| 115,248 | 44 | 4 | 617 | 8  | 21 | 2 | 462 | 2 | 1,144 | 16 |
| 115,249 | 43 | 4 | 617 | 8  | 21 | 2 | 462 | 2 | 1,143 | 16 |
| 115,250 | 43 | 4 | 620 | 9  | 21 | 2 | 467 | 2 | 1,151 | 17 |
| 115,251 | 43 | 4 | 620 | 9  | 21 | 2 | 469 | 2 | 1,153 | 17 |
| 115,252 | 43 | 4 | 623 | 9  | 21 | 2 | 470 | 2 | 1,157 | 17 |
| 115,253 | 43 | 4 | 621 | 9  | 21 | 2 | 470 | 2 | 1,155 | 17 |
| 115,254 | 44 | 4 | 629 | 10 | 21 | 2 | 485 | 2 | 1,179 | 18 |
| 115,255 | 44 | 4 | 633 | 10 | 21 | 2 | 493 | 2 | 1,191 | 18 |
| 115,256 | 44 | 4 | 638 | 10 | 21 | 2 | 495 | 2 | 1,198 | 18 |
| 115,257 | 44 | 4 | 655 | 10 | 22 | 2 | 512 | 2 | 1,233 | 18 |
| 115,258 | 59 | 4 | 755 | 9  | 22 | 2 | 578 | 2 | 1,414 | 17 |
| 115,259 | 59 | 3 | 755 | 9  | 22 | 2 | 576 | 2 | 1,412 | 16 |
| 115,260 | 62 | 3 | 787 | 8  | 22 | 2 | 601 | 2 | 1,472 | 15 |
| 115,261 | 66 | 3 | 811 | 8  | 22 | 2 | 621 | 2 | 1,520 | 15 |
| 115,262 | 66 | 3 | 811 | 8  | 22 | 2 | 620 | 2 | 1,519 | 15 |
| 115,263 | 75 | 3 | 839 | 8  | 23 | 2 | 666 | 2 | 1,603 | 15 |
| 115,264 | 75 | 3 | 839 | 8  | 23 | 2 | 666 | 2 | 1,603 | 15 |
| 115,265 | 80 | 3 | 856 | 9  | 24 | 2 | 693 | 3 | 1,653 | 17 |
| 115,266 | 80 | 3 | 856 | 10 | 24 | 2 | 695 | 3 | 1,655 | 18 |
| 115,267 | 80 | 2 | 856 | 10 | 24 | 2 | 697 | 3 | 1,657 | 17 |
| 115,268 | 80 | 3 | 856 | 10 | 24 | 2 | 701 | 3 | 1,661 | 18 |
| 115,269 | 80 | 2 | 858 | 10 | 25 | 2 | 704 | 3 | 1,667 | 17 |
| 115,270 | 81 | 2 | 857 | 10 | 26 | 2 | 702 | 3 | 1,666 | 17 |
| 115,271 | 82 | 2 | 853 | 10 | 26 | 2 | 697 | 3 | 1,658 | 17 |
| 115,272 | 82 | 2 | 843 | 11 | 26 | 2 | 693 | 5 | 1,644 | 20 |
| 115,273 | 77 | 2 | 746 | 11 | 23 | 2 | 619 | 5 | 1,465 | 20 |
| 115,274 | 75 | 2 | 716 | 12 | 20 | 2 | 570 | 7 | 1,381 | 23 |
| 115,275 | 75 | 2 | 723 | 12 | 20 | 2 | 571 | 7 | 1,389 | 23 |
| 115,276 | 75 | 2 | 736 | 12 | 21 | 2 | 564 | 7 | 1,396 | 23 |
| 115,277 | 74 | 3 | 729 | 12 | 22 | 2 | 544 | 7 | 1,369 | 24 |
| 115,278 | 72 | 3 | 701 | 12 | 18 | 2 | 506 | 7 | 1,297 | 24 |
| 115,279 | 79 | 3 | 736 | 12 | 18 | 2 | 524 | 8 | 1,357 | 25 |
| 115,280 | 79 | 3 | 736 | 12 | 18 | 2 | 524 | 8 | 1,357 | 25 |

|         |     |   |       |    |    |   |       |   |       |    |
|---------|-----|---|-------|----|----|---|-------|---|-------|----|
| 115,281 | 79  | 3 | 759   | 11 | 19 | 2 | 536   | 8 | 1,393 | 24 |
| 115,282 | 86  | 3 | 913   | 10 | 22 | 1 | 610   | 8 | 1,631 | 22 |
| 115,283 | 85  | 3 | 916   | 10 | 22 | 1 | 611   | 8 | 1,634 | 22 |
| 115,284 | 85  | 3 | 917   | 10 | 22 | 1 | 614   | 8 | 1,638 | 22 |
| 115,285 | 85  | 4 | 914   | 10 | 22 | 1 | 611   | 8 | 1,632 | 23 |
| 115,286 | 81  | 4 | 872   | 10 | 22 | 1 | 567   | 9 | 1,542 | 24 |
| 115,287 | 77  | 4 | 841   | 10 | 22 | 1 | 561   | 9 | 1,501 | 24 |
| 115,288 | 74  | 4 | 812   | 10 | 22 | 1 | 554   | 9 | 1,462 | 24 |
| 115,289 | 74  | 4 | 785   | 10 | 21 | 1 | 536   | 9 | 1,416 | 24 |
| 115,290 | 77  | 3 | 751   | 7  | 22 | 0 | 542   | 8 | 1,392 | 18 |
| 115,291 | 78  | 3 | 664   | 7  | 20 | 0 | 515   | 8 | 1,277 | 18 |
| 115,292 | 76  | 3 | 646   | 7  | 18 | 0 | 481   | 8 | 1,221 | 18 |
| 115,293 | 75  | 3 | 631   | 7  | 15 | 0 | 469   | 8 | 1,190 | 18 |
| 115,294 | 74  | 3 | 625   | 7  | 15 | 0 | 469   | 8 | 1,183 | 18 |
| 115,295 | 77  | 3 | 637   | 7  | 20 | 0 | 488   | 7 | 1,222 | 17 |
| 115,296 | 80  | 3 | 647   | 7  | 24 | 0 | 507   | 7 | 1,258 | 17 |
| 115,297 | 79  | 3 | 631   | 7  | 23 | 0 | 486   | 7 | 1,219 | 17 |
| 115,298 | 79  | 3 | 626   | 7  | 23 | 0 | 486   | 7 | 1,214 | 17 |
| 115,299 | 79  | 3 | 625   | 7  | 23 | 0 | 485   | 7 | 1,212 | 17 |
| 115,300 | 80  | 4 | 622   | 7  | 24 | 0 | 482   | 7 | 1,208 | 18 |
| 115,301 | 80  | 4 | 622   | 6  | 24 | 0 | 482   | 7 | 1,208 | 17 |
| 115,302 | 80  | 4 | 623   | 6  | 24 | 1 | 480   | 7 | 1,207 | 18 |
| 115,303 | 108 | 4 | 1,064 | 6  | 45 | 1 | 718   | 7 | 1,935 | 18 |
| 115,304 | 107 | 4 | 1,057 | 6  | 45 | 1 | 703   | 7 | 1,912 | 18 |
| 115,305 | 140 | 4 | 1,752 | 5  | 65 | 1 | 975   | 7 | 2,932 | 17 |
| 115,306 | 140 | 4 | 1,748 | 5  | 65 | 1 | 973   | 7 | 2,926 | 17 |
| 115,307 | 141 | 4 | 1,835 | 5  | 71 | 2 | 988   | 7 | 3,035 | 18 |
| 115,308 | 142 | 4 | 1,862 | 5  | 73 | 2 | 1,010 | 7 | 3,087 | 18 |
| 115,309 | 130 | 4 | 1,824 | 5  | 80 | 2 | 988   | 7 | 3,022 | 18 |
| 115,310 | 131 | 4 | 1,822 | 5  | 80 | 2 | 997   | 7 | 3,030 | 18 |
| 115,311 | 128 | 4 | 1,810 | 6  | 80 | 2 | 984   | 7 | 3,002 | 19 |
| 115,312 | 124 | 4 | 1,831 | 6  | 80 | 2 | 976   | 7 | 3,011 | 19 |
| 115,313 | 116 | 4 | 1,805 | 6  | 79 | 2 | 931   | 7 | 2,931 | 19 |
| 115,314 | 124 | 3 | 1,922 | 4  | 86 | 2 | 1,007 | 6 | 3,139 | 15 |
| 115,315 | 124 | 3 | 1,939 | 5  | 86 | 2 | 1,015 | 6 | 3,164 | 16 |
| 115,316 | 119 | 3 | 1,925 | 5  | 85 | 2 | 996   | 6 | 3,125 | 16 |
| 115,317 | 119 | 3 | 1,925 | 5  | 85 | 2 | 995   | 6 | 3,124 | 16 |
| 115,318 | 120 | 3 | 1,948 | 5  | 88 | 2 | 1,005 | 6 | 3,161 | 16 |
| 115,319 | 120 | 3 | 1,955 | 5  | 87 | 2 | 1,006 | 6 | 3,168 | 16 |
| 115,320 | 120 | 3 | 1,954 | 5  | 86 | 2 | 1,005 | 6 | 3,165 | 16 |
| 115,321 | 122 | 3 | 1,983 | 5  | 88 | 2 | 1,016 | 6 | 3,209 | 16 |

|         |     |   |       |   |     |   |       |   |       |    |
|---------|-----|---|-------|---|-----|---|-------|---|-------|----|
| 115,322 | 121 | 3 | 1,984 | 6 | 88  | 2 | 1,016 | 6 | 3,209 | 17 |
| 115,323 | 121 | 3 | 1,987 | 5 | 89  | 2 | 1,024 | 4 | 3,221 | 14 |
| 115,324 | 120 | 3 | 2,004 | 5 | 89  | 2 | 1,027 | 4 | 3,240 | 14 |
| 115,325 | 119 | 3 | 1,996 | 5 | 89  | 2 | 1,023 | 2 | 3,227 | 12 |
| 115,326 | 122 | 3 | 2,018 | 5 | 89  | 2 | 1,035 | 2 | 3,264 | 12 |
| 115,327 | 124 | 3 | 2,017 | 5 | 88  | 2 | 1,052 | 2 | 3,281 | 12 |
| 115,328 | 124 | 3 | 1,996 | 5 | 87  | 2 | 1,044 | 2 | 3,251 | 12 |
| 115,329 | 125 | 3 | 2,037 | 7 | 87  | 2 | 1,062 | 3 | 3,311 | 15 |
| 115,330 | 117 | 3 | 2,012 | 6 | 87  | 2 | 1,041 | 2 | 3,257 | 13 |
| 115,331 | 117 | 3 | 1,992 | 6 | 86  | 2 | 1,030 | 2 | 3,225 | 13 |
| 115,332 | 119 | 3 | 1,935 | 6 | 85  | 2 | 1,017 | 2 | 3,156 | 13 |
| 115,333 | 115 | 3 | 1,877 | 6 | 83  | 2 | 966   | 2 | 3,041 | 13 |
| 115,334 | 115 | 3 | 1,874 | 6 | 83  | 2 | 964   | 2 | 3,036 | 13 |
| 115,335 | 115 | 3 | 1,894 | 6 | 83  | 2 | 966   | 2 | 3,058 | 13 |
| 115,336 | 117 | 2 | 1,972 | 6 | 84  | 2 | 997   | 2 | 3,170 | 12 |
| 115,337 | 160 | 2 | 2,304 | 6 | 100 | 2 | 1,238 | 1 | 3,802 | 11 |
| 115,338 | 163 | 2 | 2,328 | 6 | 102 | 2 | 1,245 | 1 | 3,838 | 11 |
| 115,339 | 168 | 2 | 2,390 | 6 | 108 | 2 | 1,283 | 1 | 3,949 | 11 |
| 115,340 | 164 | 2 | 2,526 | 6 | 112 | 2 | 1,343 | 1 | 4,145 | 11 |
| 115,341 | 168 | 2 | 2,582 | 6 | 113 | 2 | 1,379 | 1 | 4,242 | 11 |
| 115,342 | 232 | 2 | 2,912 | 6 | 151 | 2 | 1,920 | 1 | 5,215 | 11 |
| 115,343 | 241 | 2 | 3,036 | 6 | 158 | 2 | 2,057 | 3 | 5,492 | 13 |
| 115,344 | 239 | 2 | 3,027 | 6 | 158 | 2 | 2,055 | 3 | 5,479 | 13 |
| 115,345 | 239 | 2 | 3,026 | 6 | 155 | 2 | 2,061 | 3 | 5,481 | 13 |
| 115,346 | 237 | 2 | 3,038 | 7 | 155 | 2 | 2,056 | 3 | 5,486 | 14 |
| 115,347 | 253 | 2 | 3,166 | 7 | 157 | 2 | 2,109 | 3 | 5,685 | 14 |
| 115,348 | 252 | 2 | 3,166 | 7 | 157 | 2 | 2,109 | 3 | 5,684 | 14 |
| 115,349 | 269 | 2 | 3,253 | 7 | 160 | 2 | 2,123 | 3 | 5,805 | 14 |
| 115,350 | 270 | 3 | 3,277 | 7 | 161 | 2 | 2,143 | 3 | 5,851 | 15 |
| 115,351 | 318 | 2 | 3,925 | 7 | 219 | 2 | 2,549 | 5 | 7,011 | 16 |
| 115,352 | 351 | 2 | 4,261 | 7 | 241 | 2 | 2,753 | 5 | 7,606 | 16 |
| 115,353 | 366 | 2 | 4,342 | 7 | 243 | 1 | 2,786 | 5 | 7,737 | 15 |
| 115,354 | 347 | 2 | 3,967 | 7 | 225 | 1 | 2,574 | 5 | 7,113 | 15 |
| 115,355 | 343 | 2 | 3,665 | 7 | 231 | 1 | 2,564 | 5 | 6,803 | 15 |
| 115,356 | 319 | 2 | 3,396 | 7 | 217 | 1 | 2,382 | 5 | 6,314 | 15 |
| 115,357 | 318 | 2 | 3,317 | 7 | 210 | 0 | 2,357 | 5 | 6,202 | 14 |
| 115,358 | 318 | 2 | 3,322 | 7 | 210 | 0 | 2,359 | 5 | 6,209 | 14 |
| 115,359 | 315 | 2 | 3,292 | 7 | 208 | 0 | 2,334 | 5 | 6,149 | 14 |
| 115,360 | 320 | 2 | 3,258 | 7 | 202 | 0 | 2,297 | 5 | 6,077 | 14 |
| 115,361 | 320 | 2 | 3,282 | 7 | 204 | 0 | 2,294 | 5 | 6,100 | 14 |
| 115,362 | 320 | 2 | 3,275 | 6 | 205 | 0 | 2,287 | 5 | 6,087 | 13 |

|         |     |   |       |   |     |   |       |   |       |    |
|---------|-----|---|-------|---|-----|---|-------|---|-------|----|
| 115,363 | 324 | 2 | 3,298 | 6 | 206 | 0 | 2,286 | 5 | 6,114 | 13 |
| 115,364 | 332 | 2 | 3,298 | 6 | 207 | 0 | 2,263 | 5 | 6,100 | 13 |
| 115,365 | 331 | 2 | 3,280 | 6 | 206 | 0 | 2,249 | 5 | 6,066 | 13 |
| 115,366 | 365 | 2 | 3,982 | 5 | 229 | 0 | 2,449 | 5 | 7,025 | 12 |
| 115,367 | 365 | 2 | 3,988 | 5 | 230 | 0 | 2,454 | 5 | 7,037 | 12 |
| 115,368 | 370 | 2 | 4,058 | 5 | 229 | 0 | 2,465 | 5 | 7,122 | 12 |
| 115,369 | 370 | 2 | 4,058 | 5 | 228 | 0 | 2,470 | 5 | 7,126 | 12 |
| 115,370 | 370 | 2 | 4,057 | 5 | 228 | 0 | 2,469 | 5 | 7,124 | 12 |
| 115,371 | 371 | 2 | 4,112 | 5 | 228 | 0 | 2,478 | 5 | 7,189 | 12 |
| 115,372 | 378 | 2 | 4,215 | 5 | 236 | 0 | 2,521 | 6 | 7,350 | 13 |
| 115,373 | 401 | 3 | 4,504 | 4 | 247 | 0 | 2,637 | 6 | 7,789 | 13 |
| 115,374 | 412 | 3 | 4,583 | 4 | 248 | 0 | 2,656 | 6 | 7,899 | 13 |
| 115,375 | 413 | 3 | 4,589 | 4 | 248 | 0 | 2,664 | 6 | 7,914 | 13 |
| 115,376 | 416 | 3 | 4,590 | 3 | 247 | 0 | 2,658 | 8 | 7,911 | 14 |
| 115,377 | 413 | 3 | 4,579 | 3 | 247 | 0 | 2,652 | 8 | 7,891 | 14 |
| 115,378 | 411 | 2 | 4,567 | 3 | 247 | 0 | 2,631 | 8 | 7,856 | 13 |
| 115,379 | 411 | 2 | 4,563 | 4 | 247 | 0 | 2,630 | 8 | 7,851 | 14 |
| 115,380 | 410 | 2 | 4,518 | 2 | 247 | 0 | 2,609 | 7 | 7,784 | 11 |
| 115,381 | 412 | 2 | 4,532 | 2 | 247 | 0 | 2,617 | 8 | 7,808 | 12 |
| 115,382 | 412 | 2 | 4,529 | 2 | 247 | 0 | 2,617 | 8 | 7,805 | 12 |
| 115,383 | 408 | 2 | 4,500 | 2 | 247 | 0 | 2,608 | 8 | 7,763 | 12 |
| 115,384 | 415 | 2 | 4,585 | 2 | 251 | 0 | 2,674 | 9 | 7,925 | 13 |
| 115,385 | 417 | 2 | 4,577 | 3 | 252 | 0 | 2,692 | 9 | 7,938 | 14 |
| 115,386 | 415 | 2 | 4,525 | 3 | 253 | 0 | 2,680 | 9 | 7,873 | 14 |
| 115,387 | 431 | 2 | 4,584 | 3 | 254 | 0 | 2,705 | 9 | 7,974 | 14 |
| 115,388 | 387 | 2 | 4,263 | 4 | 238 | 0 | 2,468 | 9 | 7,356 | 15 |
| 115,389 | 401 | 2 | 4,366 | 4 | 242 | 0 | 2,516 | 9 | 7,525 | 15 |
| 115,390 | 466 | 2 | 5,254 | 4 | 296 | 0 | 3,094 | 9 | 9,110 | 15 |
| 115,391 | 466 | 2 | 5,133 | 4 | 297 | 0 | 3,077 | 9 | 8,973 | 15 |
| 115,392 | 469 | 2 | 5,429 | 4 | 315 | 0 | 3,195 | 9 | 9,408 | 15 |
| 115,393 | 400 | 2 | 5,160 | 4 | 281 | 0 | 2,696 | 8 | 8,537 | 14 |
| 115,394 | 392 | 2 | 5,049 | 4 | 276 | 0 | 2,576 | 6 | 8,293 | 12 |
| 115,395 | 391 | 2 | 5,050 | 4 | 276 | 0 | 2,574 | 6 | 8,291 | 12 |
| 115,396 | 394 | 2 | 5,059 | 3 | 278 | 0 | 2,590 | 6 | 8,321 | 11 |
| 115,397 | 394 | 2 | 5,039 | 3 | 277 | 0 | 2,586 | 6 | 8,296 | 11 |
| 115,398 | 375 | 2 | 4,898 | 3 | 271 | 0 | 2,515 | 6 | 8,059 | 11 |
| 115,399 | 368 | 2 | 4,866 | 3 | 273 | 0 | 2,546 | 6 | 8,053 | 11 |
| 115,400 | 368 | 2 | 4,860 | 3 | 272 | 0 | 2,540 | 6 | 8,040 | 11 |
| 115,401 | 340 | 1 | 4,533 | 3 | 244 | 0 | 2,443 | 6 | 7,560 | 10 |
| 115,402 | 325 | 1 | 4,399 | 3 | 223 | 0 | 2,309 | 5 | 7,256 | 9  |
| 115,403 | 457 | 1 | 5,114 | 4 | 302 | 0 | 3,563 | 5 | 9,436 | 10 |

|         |     |   |       |   |     |   |       |   |       |    |
|---------|-----|---|-------|---|-----|---|-------|---|-------|----|
| 115,404 | 454 | 1 | 5,150 | 5 | 316 | 0 | 3,683 | 5 | 9,603 | 11 |
| 115,405 | 461 | 1 | 5,203 | 5 | 336 | 0 | 3,838 | 5 | 9,838 | 11 |
| 115,406 | 456 | 1 | 5,105 | 5 | 325 | 0 | 3,760 | 5 | 9,646 | 11 |
| 115,407 | 457 | 1 | 5,146 | 5 | 325 | 0 | 3,818 | 5 | 9,746 | 11 |
| 115,408 | 458 | 1 | 5,138 | 5 | 325 | 0 | 3,821 | 5 | 9,742 | 11 |
| 115,409 | 458 | 1 | 5,136 | 5 | 326 | 0 | 3,820 | 5 | 9,740 | 11 |
| 115,410 | 459 | 1 | 5,170 | 5 | 326 | 1 | 3,833 | 5 | 9,788 | 12 |
| 115,411 | 454 | 1 | 5,153 | 5 | 325 | 1 | 3,828 | 5 | 9,760 | 12 |
| 115,412 | 454 | 1 | 5,149 | 5 | 327 | 1 | 3,855 | 5 | 9,785 | 12 |
| 115,413 | 457 | 1 | 5,171 | 6 | 326 | 1 | 3,867 | 5 | 9,821 | 13 |
| 115,414 | 454 | 1 | 5,117 | 6 | 325 | 1 | 3,857 | 5 | 9,753 | 13 |
| 115,415 | 437 | 1 | 5,029 | 6 | 318 | 1 | 3,828 | 5 | 9,612 | 13 |
| 115,416 | 406 | 1 | 4,388 | 6 | 297 | 1 | 3,639 | 6 | 8,730 | 14 |
| 115,417 | 404 | 1 | 4,313 | 6 | 295 | 1 | 3,623 | 6 | 8,635 | 14 |
| 115,418 | 404 | 1 | 4,303 | 6 | 293 | 1 | 3,624 | 6 | 8,624 | 14 |
| 115,419 | 398 | 1 | 4,231 | 6 | 293 | 1 | 3,619 | 6 | 8,541 | 14 |
| 115,420 | 398 | 1 | 4,213 | 6 | 293 | 1 | 3,605 | 5 | 8,509 | 13 |
| 115,421 | 398 | 1 | 4,204 | 7 | 293 | 1 | 3,607 | 8 | 8,502 | 17 |
| 115,422 | 395 | 1 | 4,122 | 7 | 291 | 1 | 3,587 | 8 | 8,395 | 17 |
| 115,423 | 388 | 1 | 4,016 | 7 | 283 | 1 | 3,543 | 7 | 8,230 | 16 |
| 115,424 | 365 | 0 | 3,724 | 7 | 271 | 1 | 3,418 | 7 | 7,778 | 15 |
| 115,425 | 354 | 0 | 3,642 | 7 | 270 | 1 | 3,407 | 7 | 7,673 | 15 |
| 115,426 | 352 | 0 | 3,623 | 7 | 270 | 1 | 3,394 | 7 | 7,639 | 15 |
| 115,427 | 349 | 0 | 3,605 | 7 | 270 | 1 | 3,391 | 6 | 7,615 | 14 |
| 115,428 | 351 | 1 | 3,612 | 7 | 271 | 1 | 3,399 | 6 | 7,633 | 15 |
| 115,429 | 351 | 1 | 3,610 | 7 | 271 | 1 | 3,398 | 6 | 7,630 | 15 |
| 115,430 | 350 | 1 | 3,594 | 6 | 271 | 1 | 3,391 | 6 | 7,606 | 14 |
| 115,431 | 350 | 1 | 3,602 | 6 | 271 | 1 | 3,403 | 5 | 7,626 | 13 |
| 115,432 | 350 | 1 | 3,619 | 6 | 271 | 1 | 3,409 | 5 | 7,649 | 13 |
| 115,433 | 352 | 1 | 3,596 | 6 | 270 | 1 | 3,394 | 6 | 7,612 | 14 |
| 115,434 | 350 | 1 | 3,608 | 6 | 270 | 1 | 3,379 | 6 | 7,607 | 14 |
| 115,435 | 349 | 1 | 3,607 | 6 | 270 | 1 | 3,379 | 6 | 7,605 | 14 |
| 115,436 | 347 | 1 | 3,612 | 6 | 269 | 1 | 3,367 | 6 | 7,595 | 14 |
| 115,437 | 347 | 1 | 3,602 | 6 | 268 | 1 | 3,363 | 6 | 7,580 | 14 |
| 115,438 | 331 | 1 | 3,526 | 6 | 266 | 1 | 3,322 | 6 | 7,445 | 14 |
| 115,439 | 331 | 1 | 3,515 | 5 | 266 | 1 | 3,317 | 6 | 7,429 | 13 |
| 115,440 | 313 | 1 | 3,389 | 5 | 260 | 1 | 3,260 | 6 | 7,222 | 13 |
| 115,441 | 243 | 1 | 2,437 | 6 | 199 | 1 | 2,622 | 7 | 5,501 | 15 |
| 115,442 | 241 | 1 | 2,404 | 6 | 194 | 1 | 2,549 | 7 | 5,388 | 15 |
| 115,443 | 238 | 1 | 2,072 | 7 | 175 | 1 | 2,395 | 7 | 4,880 | 16 |
| 115,444 | 236 | 1 | 2,001 | 7 | 171 | 1 | 2,340 | 7 | 4,748 | 16 |



|         |     |   |       |   |     |   |       |   |       |    |
|---------|-----|---|-------|---|-----|---|-------|---|-------|----|
| 115,445 | 235 | 1 | 2,005 | 7 | 170 | 1 | 2,334 | 7 | 4,744 | 16 |
| 115,446 | 236 | 1 | 2,012 | 7 | 171 | 1 | 2,330 | 7 | 4,749 | 16 |
| 115,447 | 234 | 1 | 2,001 | 7 | 168 | 1 | 2,314 | 7 | 4,717 | 16 |
| 115,448 | 234 | 1 | 2,012 | 7 | 168 | 1 | 2,314 | 7 | 4,728 | 16 |
| 115,449 | 225 | 1 | 2,004 | 7 | 164 | 1 | 2,284 | 7 | 4,677 | 16 |
| 115,450 | 225 | 1 | 2,011 | 7 | 164 | 1 | 2,287 | 7 | 4,687 | 16 |
| 115,451 | 226 | 1 | 2,059 | 7 | 168 | 1 | 2,306 | 7 | 4,759 | 16 |
| 115,452 | 258 | 1 | 2,109 | 6 | 172 | 1 | 2,262 | 7 | 4,801 | 15 |
| 115,453 | 257 | 1 | 2,056 | 6 | 173 | 1 | 2,234 | 7 | 4,720 | 15 |
| 115,454 | 91  | 1 | 1,004 | 6 | 67  | 1 | 756   | 7 | 1,918 | 15 |
| 115,455 | 75  | 2 | 932   | 5 | 59  | 1 | 642   | 7 | 1,708 | 15 |
| 115,456 | 64  | 2 | 823   | 5 | 37  | 1 | 460   | 6 | 1,384 | 14 |
| 115,457 | 63  | 2 | 779   | 5 | 36  | 1 | 421   | 6 | 1,299 | 14 |
| 115,458 | 63  | 2 | 804   | 5 | 39  | 1 | 432   | 6 | 1,338 | 14 |
| 115,459 | 63  | 2 | 804   | 5 | 39  | 1 | 430   | 6 | 1,336 | 14 |
| 115,460 | 63  | 2 | 812   | 5 | 38  | 2 | 433   | 6 | 1,346 | 15 |
| 115,461 | 62  | 2 | 779   | 5 | 38  | 1 | 422   | 6 | 1,301 | 14 |
| 115,462 | 61  | 2 | 776   | 5 | 37  | 1 | 420   | 6 | 1,294 | 14 |
| 115,463 | 60  | 2 | 761   | 5 | 34  | 1 | 404   | 6 | 1,259 | 14 |
| 115,464 | 64  | 2 | 776   | 4 | 35  | 1 | 432   | 6 | 1,307 | 13 |
| 115,465 | 71  | 2 | 773   | 4 | 35  | 1 | 438   | 6 | 1,317 | 13 |
| 115,466 | 71  | 2 | 761   | 4 | 35  | 1 | 426   | 6 | 1,293 | 13 |
| 115,467 | 84  | 2 | 831   | 4 | 40  | 1 | 500   | 5 | 1,455 | 12 |
| 115,468 | 102 | 2 | 965   | 4 | 47  | 1 | 616   | 5 | 1,730 | 12 |
| 115,469 | 102 | 2 | 964   | 4 | 47  | 1 | 610   | 5 | 1,723 | 12 |
| 115,470 | 123 | 2 | 1,055 | 4 | 60  | 1 | 747   | 5 | 1,985 | 12 |
| 115,471 | 123 | 2 | 1,055 | 4 | 60  | 1 | 747   | 5 | 1,985 | 12 |
| 115,472 | 123 | 2 | 1,053 | 3 | 60  | 1 | 744   | 3 | 1,980 | 9  |
| 115,473 | 122 | 2 | 1,056 | 3 | 60  | 1 | 747   | 3 | 1,985 | 9  |
| 115,474 | 122 | 2 | 1,056 | 3 | 60  | 1 | 747   | 3 | 1,985 | 9  |
| 115,475 | 122 | 2 | 1,055 | 3 | 60  | 1 | 747   | 3 | 1,984 | 9  |
| 115,476 | 123 | 2 | 1,058 | 3 | 61  | 1 | 742   | 3 | 1,984 | 9  |
| 115,477 | 123 | 2 | 1,055 | 3 | 61  | 1 | 742   | 3 | 1,981 | 9  |
| 115,478 | 122 | 2 | 1,047 | 3 | 60  | 1 | 736   | 2 | 1,965 | 8  |
| 115,479 | 121 | 1 | 1,034 | 4 | 60  | 1 | 727   | 3 | 1,942 | 9  |
| 115,480 | 121 | 1 | 1,033 | 5 | 60  | 1 | 727   | 5 | 1,941 | 12 |
| 115,481 | 121 | 1 | 1,032 | 5 | 60  | 1 | 725   | 5 | 1,938 | 12 |
| 115,482 | 122 | 1 | 1,041 | 5 | 61  | 1 | 733   | 5 | 1,957 | 12 |
| 115,483 | 122 | 1 | 1,022 | 8 | 61  | 1 | 726   | 5 | 1,931 | 15 |
| 115,484 | 115 | 1 | 989   | 8 | 59  | 1 | 702   | 4 | 1,865 | 14 |
| 115,485 | 115 | 1 | 945   | 9 | 58  | 1 | 688   | 4 | 1,806 | 15 |

|         |     |   |       |    |     |   |       |    |       |    |
|---------|-----|---|-------|----|-----|---|-------|----|-------|----|
| 115,486 | 115 | 1 | 935   | 8  | 59  | 1 | 678   | 5  | 1,787 | 15 |
| 115,487 | 115 | 1 | 933   | 8  | 59  | 1 | 677   | 5  | 1,784 | 15 |
| 115,488 | 115 | 1 | 938   | 8  | 59  | 1 | 696   | 5  | 1,808 | 15 |
| 115,489 | 115 | 1 | 938   | 8  | 59  | 1 | 695   | 5  | 1,807 | 15 |
| 115,490 | 116 | 1 | 946   | 8  | 59  | 1 | 697   | 5  | 1,818 | 15 |
| 115,491 | 116 | 1 | 951   | 8  | 59  | 1 | 697   | 5  | 1,823 | 15 |
| 115,492 | 116 | 1 | 950   | 7  | 59  | 1 | 697   | 4  | 1,822 | 13 |
| 115,493 | 131 | 1 | 1,013 | 7  | 61  | 1 | 731   | 4  | 1,936 | 13 |
| 115,494 | 137 | 1 | 1,086 | 6  | 68  | 1 | 768   | 4  | 2,059 | 12 |
| 115,495 | 137 | 1 | 1,068 | 6  | 68  | 1 | 765   | 4  | 2,038 | 12 |
| 115,496 | 137 | 1 | 1,068 | 6  | 68  | 1 | 766   | 4  | 2,039 | 12 |
| 115,497 | 136 | 1 | 1,062 | 6  | 67  | 1 | 765   | 5  | 2,030 | 13 |
| 115,498 | 135 | 1 | 1,056 | 6  | 67  | 1 | 764   | 5  | 2,022 | 13 |
| 115,499 | 245 | 1 | 2,434 | 6  | 128 | 1 | 1,297 | 5  | 4,104 | 13 |
| 115,500 | 245 | 1 | 2,412 | 6  | 126 | 1 | 1,289 | 5  | 4,072 | 13 |
| 115,501 | 247 | 1 | 2,406 | 6  | 127 | 1 | 1,288 | 5  | 4,068 | 13 |
| 115,502 | 246 | 1 | 2,344 | 6  | 123 | 1 | 1,254 | 5  | 3,967 | 13 |
| 115,503 | 210 | 1 | 2,169 | 7  | 112 | 1 | 1,156 | 6  | 3,647 | 15 |
| 115,504 | 209 | 1 | 2,168 | 7  | 111 | 1 | 1,155 | 6  | 3,643 | 15 |
| 115,505 | 209 | 1 | 2,165 | 7  | 111 | 1 | 1,156 | 6  | 3,641 | 15 |
| 115,506 | 209 | 0 | 2,108 | 10 | 106 | 1 | 1,121 | 6  | 3,544 | 17 |
| 115,507 | 210 | 0 | 2,102 | 10 | 104 | 1 | 1,104 | 7  | 3,520 | 18 |
| 115,508 | 211 | 0 | 2,108 | 10 | 105 | 1 | 1,108 | 7  | 3,532 | 18 |
| 115,509 | 218 | 0 | 2,135 | 10 | 106 | 1 | 1,151 | 7  | 3,610 | 18 |
| 115,510 | 218 | 0 | 2,145 | 10 | 106 | 1 | 1,152 | 7  | 3,621 | 18 |
| 115,511 | 218 | 0 | 2,130 | 10 | 106 | 0 | 1,149 | 7  | 3,603 | 17 |
| 115,512 | 218 | 0 | 2,130 | 10 | 106 | 0 | 1,148 | 7  | 3,602 | 17 |
| 115,513 | 220 | 0 | 2,131 | 10 | 106 | 0 | 1,159 | 7  | 3,616 | 17 |
| 115,514 | 220 | 0 | 2,125 | 10 | 106 | 0 | 1,156 | 8  | 3,607 | 18 |
| 115,515 | 213 | 0 | 2,083 | 10 | 105 | 0 | 1,126 | 8  | 3,527 | 18 |
| 115,516 | 206 | 0 | 2,074 | 10 | 105 | 0 | 1,114 | 8  | 3,499 | 18 |
| 115,517 | 206 | 0 | 2,076 | 10 | 105 | 0 | 1,114 | 8  | 3,501 | 18 |
| 115,518 | 192 | 0 | 2,005 | 11 | 100 | 0 | 1,041 | 9  | 3,338 | 20 |
| 115,519 | 178 | 1 | 1,882 | 13 | 93  | 0 | 926   | 10 | 3,079 | 24 |
| 115,520 | 157 | 1 | 1,800 | 13 | 80  | 0 | 803   | 10 | 2,840 | 24 |
| 115,521 | 157 | 1 | 1,798 | 13 | 81  | 0 | 794   | 10 | 2,830 | 24 |
| 115,522 | 159 | 1 | 1,846 | 13 | 83  | 0 | 801   | 11 | 2,889 | 25 |
| 115,523 | 160 | 1 | 1,881 | 13 | 83  | 0 | 835   | 11 | 2,959 | 25 |
| 115,524 | 162 | 1 | 1,900 | 13 | 83  | 0 | 841   | 11 | 2,986 | 25 |
| 115,525 | 166 | 1 | 1,915 | 13 | 83  | 0 | 850   | 11 | 3,014 | 25 |
| 115,526 | 165 | 1 | 1,929 | 13 | 83  | 0 | 857   | 11 | 3,034 | 25 |

|         |     |   |       |    |    |   |     |    |       |    |
|---------|-----|---|-------|----|----|---|-----|----|-------|----|
| 115,527 | 165 | 1 | 1,926 | 14 | 83 | 0 | 857 | 12 | 3,031 | 27 |
| 115,528 | 165 | 1 | 1,926 | 14 | 83 | 0 | 856 | 12 | 3,030 | 27 |
| 115,529 | 164 | 1 | 1,929 | 13 | 83 | 0 | 857 | 11 | 3,033 | 25 |
| 115,530 | 164 | 1 | 1,924 | 13 | 82 | 0 | 856 | 11 | 3,026 | 25 |
| 115,531 | 163 | 1 | 1,927 | 12 | 82 | 0 | 852 | 9  | 3,024 | 22 |
| 115,532 | 164 | 1 | 1,930 | 12 | 82 | 0 | 854 | 9  | 3,030 | 22 |
| 115,533 | 164 | 1 | 1,930 | 12 | 82 | 0 | 852 | 9  | 3,028 | 22 |
| 115,534 | 164 | 1 | 1,929 | 11 | 82 | 0 | 855 | 9  | 3,030 | 21 |
| 115,535 | 164 | 1 | 1,927 | 11 | 82 | 0 | 855 | 9  | 3,028 | 21 |
| 115,536 | 164 | 1 | 1,926 | 11 | 82 | 0 | 854 | 8  | 3,026 | 20 |
| 115,537 | 165 | 1 | 1,931 | 11 | 81 | 0 | 855 | 8  | 3,032 | 20 |
| 115,538 | 165 | 1 | 1,927 | 11 | 81 | 0 | 836 | 8  | 3,009 | 20 |
| 115,539 | 165 | 1 | 1,926 | 11 | 81 | 0 | 837 | 8  | 3,009 | 20 |
| 115,540 | 164 | 1 | 1,919 | 12 | 81 | 0 | 835 | 8  | 2,999 | 21 |
| 115,541 | 164 | 1 | 1,913 | 12 | 81 | 0 | 835 | 8  | 2,993 | 21 |
| 115,542 | 165 | 1 | 1,913 | 12 | 82 | 0 | 837 | 8  | 2,997 | 21 |
| 115,543 | 150 | 1 | 1,849 | 13 | 80 | 0 | 803 | 8  | 2,882 | 22 |
| 115,544 | 149 | 1 | 1,843 | 14 | 79 | 0 | 805 | 8  | 2,876 | 23 |
| 115,545 | 141 | 1 | 1,768 | 14 | 72 | 0 | 761 | 8  | 2,742 | 23 |
| 115,546 | 133 | 1 | 1,678 | 14 | 71 | 0 | 749 | 8  | 2,631 | 23 |
| 115,547 | 121 | 1 | 1,442 | 14 | 63 | 0 | 697 | 8  | 2,323 | 23 |
| 115,548 | 83  | 1 | 895   | 14 | 45 | 0 | 528 | 10 | 1,551 | 25 |
| 115,549 | 49  | 1 | 599   | 14 | 17 | 0 | 316 | 10 | 981   | 25 |
| 115,550 | 42  | 1 | 403   | 14 | 11 | 0 | 257 | 10 | 713   | 25 |
| 115,551 | 41  | 1 | 381   | 14 | 10 | 0 | 250 | 10 | 682   | 25 |
| 115,552 | 41  | 1 | 378   | 14 | 10 | 0 | 246 | 10 | 675   | 25 |
| 115,553 | 40  | 1 | 374   | 13 | 10 | 0 | 246 | 9  | 670   | 23 |
| 115,554 | 42  | 1 | 373   | 13 | 10 | 0 | 246 | 9  | 671   | 23 |
| 115,555 | 42  | 1 | 367   | 13 | 9  | 0 | 241 | 9  | 659   | 23 |
| 115,556 | 40  | 1 | 348   | 10 | 9  | 0 | 240 | 9  | 637   | 20 |
| 115,557 | 40  | 1 | 342   | 10 | 9  | 0 | 239 | 8  | 630   | 19 |
| 115,558 | 40  | 1 | 341   | 10 | 9  | 0 | 238 | 8  | 628   | 19 |
| 115,559 | 39  | 1 | 314   | 10 | 8  | 0 | 218 | 8  | 579   | 19 |
| 115,560 | 33  | 1 | 290   | 10 | 8  | 0 | 184 | 8  | 515   | 19 |
| 115,561 | 33  | 1 | 282   | 10 | 8  | 0 | 189 | 9  | 512   | 20 |
| 115,562 | 33  | 1 | 279   | 10 | 8  | 0 | 185 | 9  | 505   | 20 |
| 115,563 | 33  | 1 | 278   | 10 | 8  | 0 | 191 | 9  | 510   | 20 |
| 115,564 | 31  | 1 | 276   | 10 | 8  | 0 | 183 | 9  | 498   | 20 |
| 115,565 | 31  | 1 | 272   | 10 | 8  | 0 | 186 | 9  | 497   | 20 |
| 115,566 | 31  | 1 | 271   | 10 | 8  | 0 | 185 | 9  | 495   | 20 |
| 115,567 | 32  | 2 | 273   | 10 | 9  | 0 | 189 | 9  | 503   | 21 |

|         |     |   |       |    |    |   |       |    |       |    |
|---------|-----|---|-------|----|----|---|-------|----|-------|----|
| 115,568 | 33  | 2 | 279   | 9  | 10 | 0 | 202   | 8  | 524   | 19 |
| 115,569 | 36  | 2 | 296   | 9  | 10 | 0 | 209   | 9  | 551   | 20 |
| 115,570 | 33  | 1 | 291   | 8  | 13 | 0 | 223   | 8  | 560   | 17 |
| 115,571 | 33  | 2 | 282   | 8  | 12 | 0 | 218   | 9  | 545   | 19 |
| 115,572 | 31  | 2 | 241   | 9  | 10 | 0 | 212   | 11 | 494   | 22 |
| 115,573 | 36  | 2 | 279   | 9  | 20 | 0 | 349   | 10 | 684   | 21 |
| 115,574 | 35  | 2 | 254   | 9  | 21 | 0 | 338   | 13 | 648   | 24 |
| 115,575 | 33  | 2 | 241   | 9  | 21 | 0 | 346   | 13 | 641   | 24 |
| 115,576 | 29  | 2 | 226   | 10 | 21 | 0 | 336   | 13 | 612   | 25 |
| 115,577 | 29  | 3 | 205   | 10 | 20 | 0 | 323   | 13 | 577   | 26 |
| 115,578 | 32  | 3 | 221   | 9  | 21 | 0 | 376   | 12 | 650   | 24 |
| 115,579 | 33  | 3 | 229   | 9  | 21 | 0 | 386   | 12 | 669   | 24 |
| 115,580 | 34  | 3 | 238   | 9  | 21 | 0 | 397   | 12 | 690   | 24 |
| 115,581 | 35  | 3 | 250   | 9  | 22 | 0 | 425   | 12 | 732   | 24 |
| 115,582 | 35  | 3 | 260   | 9  | 23 | 0 | 429   | 13 | 747   | 25 |
| 115,583 | 34  | 3 | 257   | 9  | 22 | 0 | 427   | 13 | 740   | 25 |
| 115,584 | 34  | 3 | 266   | 9  | 23 | 0 | 441   | 13 | 764   | 25 |
| 115,585 | 36  | 3 | 278   | 8  | 25 | 0 | 458   | 14 | 797   | 25 |
| 115,586 | 37  | 3 | 287   | 7  | 25 | 0 | 469   | 14 | 818   | 24 |
| 115,587 | 39  | 3 | 322   | 8  | 25 | 0 | 490   | 14 | 876   | 25 |
| 115,588 | 44  | 3 | 454   | 8  | 36 | 0 | 783   | 14 | 1,317 | 25 |
| 115,589 | 44  | 3 | 462   | 9  | 36 | 0 | 803   | 14 | 1,345 | 26 |
| 115,590 | 44  | 3 | 462   | 9  | 36 | 0 | 804   | 14 | 1,346 | 26 |
| 115,591 | 44  | 3 | 467   | 8  | 37 | 0 | 823   | 15 | 1,371 | 26 |
| 115,592 | 44  | 3 | 481   | 8  | 37 | 0 | 837   | 15 | 1,399 | 26 |
| 115,593 | 43  | 3 | 505   | 9  | 37 | 0 | 857   | 15 | 1,442 | 27 |
| 115,594 | 43  | 3 | 512   | 8  | 37 | 0 | 864   | 16 | 1,456 | 27 |
| 115,595 | 86  | 3 | 773   | 7  | 52 | 0 | 1,205 | 16 | 2,116 | 26 |
| 115,596 | 88  | 3 | 814   | 7  | 52 | 0 | 1,254 | 16 | 2,208 | 26 |
| 115,597 | 90  | 3 | 849   | 7  | 52 | 0 | 1,306 | 16 | 2,297 | 26 |
| 115,598 | 84  | 3 | 863   | 7  | 51 | 0 | 1,302 | 13 | 2,300 | 23 |
| 115,599 | 84  | 3 | 864   | 7  | 51 | 0 | 1,303 | 13 | 2,302 | 23 |
| 115,600 | 82  | 3 | 865   | 7  | 51 | 0 | 1,300 | 13 | 2,298 | 23 |
| 115,601 | 125 | 3 | 1,243 | 8  | 72 | 0 | 1,657 | 13 | 3,097 | 24 |
| 115,602 | 125 | 3 | 1,252 | 8  | 72 | 0 | 1,668 | 13 | 3,117 | 24 |
| 115,603 | 127 | 3 | 1,280 | 8  | 73 | 0 | 1,681 | 13 | 3,161 | 24 |
| 115,604 | 128 | 3 | 1,334 | 9  | 75 | 0 | 1,728 | 13 | 3,265 | 25 |
| 115,605 | 126 | 4 | 1,333 | 9  | 75 | 0 | 1,728 | 13 | 3,262 | 26 |
| 115,606 | 126 | 4 | 1,333 | 9  | 75 | 0 | 1,729 | 14 | 3,263 | 27 |
| 115,607 | 126 | 4 | 1,333 | 9  | 75 | 0 | 1,732 | 14 | 3,266 | 27 |
| 115,608 | 126 | 4 | 1,331 | 9  | 75 | 0 | 1,732 | 14 | 3,264 | 27 |

|         |     |   |       |   |     |   |       |    |       |    |
|---------|-----|---|-------|---|-----|---|-------|----|-------|----|
| 115,609 | 151 | 4 | 1,691 | 9 | 93  | 0 | 2,087 | 14 | 4,022 | 27 |
| 115,610 | 151 | 4 | 1,692 | 9 | 93  | 0 | 2,092 | 14 | 4,028 | 27 |
| 115,611 | 151 | 4 | 1,687 | 9 | 92  | 0 | 2,083 | 14 | 4,013 | 27 |
| 115,612 | 151 | 5 | 1,686 | 9 | 92  | 0 | 2,079 | 13 | 4,008 | 27 |
| 115,613 | 151 | 5 | 1,687 | 9 | 93  | 0 | 2,075 | 13 | 4,006 | 27 |
| 115,614 | 151 | 6 | 1,687 | 9 | 93  | 0 | 2,075 | 13 | 4,006 | 28 |
| 115,615 | 159 | 6 | 1,841 | 9 | 99  | 0 | 2,169 | 12 | 4,268 | 27 |
| 115,616 | 160 | 6 | 1,869 | 9 | 102 | 0 | 2,194 | 12 | 4,325 | 27 |
| 115,617 | 160 | 6 | 1,870 | 9 | 101 | 0 | 2,195 | 12 | 4,326 | 27 |
| 115,618 | 168 | 5 | 2,041 | 9 | 102 | 0 | 2,257 | 12 | 4,568 | 26 |
| 115,619 | 174 | 5 | 2,268 | 9 | 111 | 0 | 2,434 | 11 | 4,987 | 25 |
| 115,620 | 190 | 4 | 2,431 | 7 | 121 | 0 | 2,569 | 8  | 5,311 | 19 |
| 115,621 | 195 | 4 | 2,503 | 7 | 121 | 0 | 2,654 | 8  | 5,473 | 19 |
| 115,622 | 193 | 4 | 2,540 | 7 | 114 | 0 | 2,612 | 8  | 5,459 | 19 |
| 115,623 | 199 | 4 | 2,612 | 7 | 115 | 0 | 2,644 | 5  | 5,570 | 16 |
| 115,624 | 207 | 4 | 2,762 | 7 | 124 | 0 | 2,844 | 5  | 5,937 | 16 |
| 115,625 | 215 | 4 | 2,993 | 6 | 130 | 0 | 2,966 | 5  | 6,304 | 15 |
| 115,626 | 215 | 4 | 2,991 | 6 | 130 | 0 | 2,956 | 5  | 6,292 | 15 |
| 115,627 | 212 | 4 | 2,970 | 6 | 129 | 0 | 2,901 | 5  | 6,212 | 15 |
| 115,628 | 212 | 3 | 2,975 | 6 | 129 | 0 | 2,904 | 5  | 6,220 | 14 |
| 115,629 | 212 | 3 | 2,975 | 6 | 129 | 0 | 2,905 | 5  | 6,221 | 14 |
| 115,630 | 211 | 3 | 2,972 | 6 | 129 | 0 | 2,896 | 5  | 6,208 | 14 |
| 115,631 | 212 | 3 | 2,967 | 7 | 129 | 0 | 2,888 | 5  | 6,196 | 15 |
| 115,632 | 211 | 3 | 2,950 | 7 | 128 | 0 | 2,857 | 5  | 6,146 | 15 |
| 115,633 | 213 | 3 | 2,947 | 7 | 127 | 0 | 2,856 | 4  | 6,143 | 14 |
| 115,634 | 213 | 3 | 2,955 | 7 | 126 | 0 | 2,854 | 4  | 6,148 | 14 |
| 115,635 | 213 | 3 | 2,954 | 7 | 126 | 0 | 2,848 | 4  | 6,141 | 14 |
| 115,636 | 218 | 3 | 2,990 | 6 | 124 | 0 | 2,860 | 3  | 6,192 | 12 |
| 115,637 | 218 | 3 | 2,980 | 6 | 124 | 0 | 2,851 | 3  | 6,173 | 12 |
| 115,638 | 216 | 3 | 2,957 | 5 | 124 | 0 | 2,843 | 3  | 6,140 | 11 |
| 115,639 | 211 | 3 | 2,822 | 4 | 113 | 0 | 2,536 | 3  | 5,682 | 10 |
| 115,640 | 211 | 3 | 2,812 | 4 | 113 | 0 | 2,519 | 3  | 5,655 | 10 |
| 115,641 | 211 | 3 | 2,819 | 4 | 112 | 0 | 2,506 | 3  | 5,648 | 10 |
| 115,642 | 221 | 3 | 2,962 | 4 | 116 | 0 | 2,605 | 2  | 5,904 | 9  |
| 115,643 | 222 | 3 | 3,023 | 4 | 117 | 0 | 2,628 | 2  | 5,990 | 9  |
| 115,644 | 223 | 3 | 3,030 | 5 | 119 | 0 | 2,642 | 1  | 6,014 | 9  |
| 115,645 | 224 | 3 | 3,023 | 5 | 119 | 1 | 2,637 | 1  | 6,003 | 10 |
| 115,646 | 181 | 3 | 2,760 | 5 | 104 | 1 | 2,292 | 1  | 5,337 | 10 |
| 115,647 | 179 | 3 | 2,710 | 5 | 104 | 1 | 2,242 | 1  | 5,235 | 10 |
| 115,648 | 175 | 3 | 2,656 | 5 | 103 | 1 | 2,159 | 1  | 5,093 | 10 |
| 115,649 | 173 | 3 | 2,634 | 5 | 103 | 1 | 2,143 | 1  | 5,053 | 10 |

|         |     |   |       |   |    |   |       |   |       |    |
|---------|-----|---|-------|---|----|---|-------|---|-------|----|
| 115,650 | 141 | 3 | 2,463 | 5 | 92 | 1 | 1,920 | 1 | 4,616 | 10 |
| 115,651 | 130 | 3 | 2,271 | 5 | 83 | 1 | 1,797 | 1 | 4,281 | 10 |
| 115,652 | 130 | 3 | 2,257 | 4 | 82 | 1 | 1,788 | 1 | 4,257 | 9  |
| 115,653 | 130 | 3 | 2,248 | 4 | 82 | 1 | 1,779 | 1 | 4,239 | 9  |
| 115,654 | 129 | 3 | 2,218 | 5 | 82 | 2 | 1,768 | 1 | 4,197 | 11 |
| 115,655 | 127 | 3 | 2,167 | 4 | 80 | 2 | 1,719 | 1 | 4,093 | 10 |
| 115,656 | 123 | 2 | 2,080 | 4 | 78 | 2 | 1,646 | 1 | 3,927 | 9  |
| 115,657 | 107 | 2 | 1,903 | 4 | 67 | 2 | 1,451 | 0 | 3,528 | 8  |
| 115,658 | 104 | 2 | 1,878 | 6 | 67 | 2 | 1,426 | 3 | 3,475 | 13 |
| 115,659 | 103 | 2 | 1,850 | 6 | 65 | 2 | 1,395 | 3 | 3,413 | 13 |
| 115,660 | 103 | 2 | 1,830 | 6 | 62 | 2 | 1,383 | 3 | 3,378 | 13 |
| 115,661 | 103 | 2 | 1,833 | 6 | 62 | 2 | 1,383 | 3 | 3,381 | 13 |
| 115,662 | 102 | 2 | 1,830 | 6 | 62 | 2 | 1,382 | 3 | 3,376 | 13 |
| 115,663 | 102 | 0 | 1,828 | 6 | 62 | 2 | 1,382 | 3 | 3,374 | 11 |
| 115,664 | 102 | 0 | 1,827 | 6 | 61 | 2 | 1,382 | 3 | 3,372 | 11 |
| 115,665 | 98  | 0 | 1,711 | 6 | 57 | 2 | 1,297 | 3 | 3,163 | 11 |
| 115,666 | 94  | 0 | 1,671 | 6 | 55 | 3 | 1,281 | 3 | 3,101 | 12 |
| 115,667 | 96  | 0 | 1,658 | 6 | 53 | 3 | 1,265 | 4 | 3,072 | 13 |
| 115,668 | 95  | 0 | 1,663 | 6 | 53 | 3 | 1,262 | 4 | 3,073 | 13 |
| 115,669 | 95  | 0 | 1,554 | 6 | 54 | 3 | 1,263 | 5 | 2,966 | 14 |
| 115,670 | 91  | 1 | 1,387 | 6 | 46 | 3 | 1,114 | 5 | 2,638 | 15 |
| 115,671 | 72  | 1 | 1,218 | 6 | 37 | 3 | 998   | 5 | 2,325 | 15 |
| 115,672 | 66  | 1 | 1,139 | 6 | 34 | 3 | 895   | 5 | 2,134 | 15 |
| 115,673 | 63  | 1 | 1,059 | 6 | 31 | 3 | 798   | 5 | 1,951 | 15 |
| 115,674 | 58  | 1 | 1,008 | 6 | 32 | 3 | 772   | 5 | 1,870 | 15 |
| 115,675 | 50  | 1 | 856   | 6 | 23 | 3 | 570   | 5 | 1,499 | 15 |
| 115,676 | 42  | 1 | 615   | 6 | 16 | 3 | 425   | 5 | 1,098 | 15 |
| 115,677 | 42  | 1 | 612   | 6 | 16 | 3 | 422   | 5 | 1,092 | 15 |
| 115,678 | 42  | 1 | 609   | 6 | 16 | 3 | 420   | 5 | 1,087 | 15 |
| 115,679 | 42  | 1 | 607   | 6 | 16 | 3 | 419   | 5 | 1,084 | 15 |
| 115,680 | 42  | 1 | 607   | 5 | 17 | 3 | 419   | 5 | 1,085 | 14 |
| 115,681 | 42  | 1 | 606   | 5 | 17 | 3 | 419   | 6 | 1,084 | 15 |
| 115,682 | 40  | 1 | 605   | 5 | 17 | 3 | 418   | 7 | 1,080 | 16 |
| 115,683 | 39  | 1 | 603   | 5 | 17 | 3 | 418   | 7 | 1,077 | 16 |
| 115,684 | 52  | 1 | 634   | 5 | 17 | 3 | 414   | 7 | 1,117 | 16 |
| 115,685 | 52  | 1 | 624   | 5 | 17 | 3 | 413   | 7 | 1,106 | 16 |
| 115,686 | 53  | 1 | 623   | 5 | 17 | 3 | 412   | 7 | 1,105 | 16 |
| 115,687 | 46  | 1 | 581   | 5 | 17 | 3 | 385   | 7 | 1,029 | 16 |
| 115,688 | 48  | 1 | 624   | 5 | 17 | 3 | 389   | 7 | 1,078 | 16 |
| 115,689 | 58  | 1 | 872   | 5 | 20 | 3 | 428   | 7 | 1,378 | 16 |
| 115,690 | 57  | 1 | 875   | 5 | 21 | 3 | 430   | 7 | 1,383 | 16 |

|         |     |   |       |   |    |   |     |   |       |    |
|---------|-----|---|-------|---|----|---|-----|---|-------|----|
| 115,691 | 91  | 1 | 1,152 | 5 | 38 | 3 | 620 | 8 | 1,901 | 17 |
| 115,692 | 83  | 1 | 1,101 | 5 | 36 | 3 | 572 | 8 | 1,792 | 17 |
| 115,693 | 81  | 1 | 1,003 | 5 | 34 | 3 | 511 | 8 | 1,629 | 17 |
| 115,694 | 100 | 1 | 1,052 | 5 | 39 | 3 | 570 | 8 | 1,761 | 17 |
| 115,695 | 99  | 1 | 1,037 | 3 | 37 | 2 | 551 | 8 | 1,724 | 14 |
| 115,696 | 98  | 1 | 1,037 | 3 | 37 | 2 | 551 | 8 | 1,723 | 14 |
| 115,697 | 111 | 1 | 1,118 | 4 | 42 | 2 | 601 | 8 | 1,872 | 15 |
| 115,698 | 113 | 1 | 1,234 | 4 | 48 | 2 | 630 | 8 | 2,025 | 15 |
| 115,699 | 116 | 1 | 1,319 | 4 | 51 | 2 | 659 | 8 | 2,145 | 15 |
| 115,700 | 116 | 1 | 1,323 | 4 | 52 | 3 | 666 | 8 | 2,157 | 16 |
| 115,701 | 116 | 1 | 1,324 | 4 | 52 | 3 | 667 | 8 | 2,159 | 16 |
| 115,702 | 116 | 1 | 1,322 | 4 | 52 | 3 | 665 | 8 | 2,155 | 16 |
| 115,703 | 116 | 1 | 1,322 | 4 | 52 | 3 | 665 | 8 | 2,155 | 16 |
| 115,704 | 116 | 1 | 1,322 | 4 | 52 | 3 | 665 | 8 | 2,155 | 16 |
| 115,705 | 116 | 1 | 1,323 | 3 | 51 | 2 | 665 | 8 | 2,155 | 14 |
| 115,706 | 116 | 1 | 1,325 | 3 | 51 | 2 | 665 | 9 | 2,157 | 15 |
| 115,707 | 116 | 1 | 1,328 | 3 | 51 | 2 | 665 | 9 | 2,160 | 15 |
| 115,708 | 117 | 1 | 1,328 | 3 | 51 | 2 | 661 | 9 | 2,157 | 15 |
| 115,709 | 116 | 1 | 1,314 | 1 | 51 | 2 | 642 | 6 | 2,123 | 10 |
| 115,710 | 116 | 1 | 1,316 | 1 | 51 | 2 | 641 | 6 | 2,124 | 10 |
| 115,711 | 116 | 1 | 1,313 | 1 | 51 | 2 | 642 | 6 | 2,122 | 10 |
| 115,712 | 116 | 1 | 1,311 | 1 | 51 | 3 | 640 | 6 | 2,118 | 11 |
| 115,713 | 116 | 1 | 1,311 | 1 | 51 | 4 | 640 | 6 | 2,118 | 12 |
| 115,714 | 116 | 1 | 1,311 | 1 | 51 | 4 | 640 | 6 | 2,118 | 12 |
| 115,715 | 116 | 1 | 1,308 | 1 | 51 | 4 | 638 | 6 | 2,113 | 12 |
| 115,716 | 116 | 1 | 1,309 | 3 | 51 | 4 | 638 | 7 | 2,114 | 15 |
| 115,717 | 116 | 1 | 1,309 | 3 | 51 | 3 | 637 | 7 | 2,113 | 14 |
| 115,718 | 113 | 1 | 1,294 | 3 | 50 | 3 | 629 | 5 | 2,086 | 12 |
| 115,719 | 113 | 1 | 1,287 | 3 | 50 | 3 | 628 | 5 | 2,078 | 12 |
| 115,720 | 105 | 1 | 1,218 | 3 | 48 | 3 | 558 | 5 | 1,929 | 12 |
| 115,721 | 102 | 0 | 1,152 | 3 | 46 | 3 | 520 | 5 | 1,820 | 11 |
| 115,722 | 102 | 1 | 1,139 | 3 | 45 | 3 | 492 | 5 | 1,778 | 12 |
| 115,723 | 102 | 2 | 1,139 | 6 | 45 | 3 | 492 | 6 | 1,778 | 17 |
| 115,724 | 101 | 2 | 1,136 | 7 | 45 | 3 | 489 | 6 | 1,771 | 18 |
| 115,725 | 101 | 3 | 1,113 | 7 | 43 | 3 | 479 | 6 | 1,736 | 19 |
| 115,726 | 101 | 3 | 1,113 | 7 | 43 | 3 | 477 | 6 | 1,734 | 19 |
| 115,727 | 101 | 3 | 1,112 | 9 | 43 | 3 | 477 | 6 | 1,733 | 21 |
| 115,728 | 101 | 3 | 1,111 | 9 | 43 | 3 | 477 | 6 | 1,732 | 21 |
| 115,729 | 101 | 3 | 1,111 | 9 | 43 | 3 | 477 | 6 | 1,732 | 21 |
| 115,730 | 101 | 3 | 1,111 | 9 | 42 | 3 | 477 | 6 | 1,731 | 21 |
| 115,731 | 103 | 3 | 1,110 | 9 | 42 | 3 | 477 | 5 | 1,732 | 20 |

|         |     |    |       |     |    |    |     |     |       |     |
|---------|-----|----|-------|-----|----|----|-----|-----|-------|-----|
| 115,732 | 103 | 3  | 1,111 | 9   | 42 | 3  | 477 | 4   | 1,733 | 19  |
| 115,733 | 103 | 3  | 1,107 | 9   | 42 | 3  | 476 | 4   | 1,728 | 19  |
| 115,734 | 103 | 4  | 1,101 | 9   | 42 | 3  | 476 | 4   | 1,722 | 20  |
| 115,735 | 89  | 4  | 1,067 | 9   | 42 | 3  | 475 | 4   | 1,673 | 20  |
| 115,736 | 89  | 4  | 1,066 | 9   | 42 | 3  | 474 | 4   | 1,671 | 20  |
| 115,737 | 88  | 4  | 1,062 | 9   | 42 | 3  | 474 | 4   | 1,666 | 20  |
| 115,738 | 89  | 4  | 1,056 | 9   | 42 | 3  | 472 | 4   | 1,659 | 20  |
| 115,739 | 87  | 4  | 1,011 | 9   | 42 | 3  | 467 | 4   | 1,607 | 20  |
| 115,740 | 77  | 4  | 750   | 9   | 39 | 3  | 414 | 4   | 1,280 | 20  |
| 115,741 | 77  | 4  | 743   | 9   | 38 | 3  | 411 | 4   | 1,269 | 20  |
| 115,742 | 43  | 4  | 453   | 9   | 21 | 3  | 215 | 3   | 732   | 19  |
| 115,743 | 43  | 4  | 444   | 9   | 21 | 3  | 212 | 3   | 720   | 19  |
| 115,744 | 26  | 4  | 346   | 9   | 15 | 3  | 141 | 3   | 528   | 19  |
| 115,745 | 23  | 4  | 322   | 9   | 15 | 3  | 127 | 3   | 487   | 19  |
| 115,746 | 23  | 4  | 324   | 9   | 15 | 3  | 125 | 3   | 487   | 19  |
| 115,747 | 11  | 4  | 260   | 9   | 10 | 3  | 84  | 4   | 365   | 20  |
| 115,748 | 11  | 4  | 245   | 8   | 10 | 3  | 74  | 4   | 340   | 19  |
| 115,749 | 9   | 4  | 127   | 8   | 4  | 3  | 44  | 4   | 184   | 19  |
| 115,750 | 6   | 4  | 46    | 8   | 1  | 3  | 17  | 4   | 70    | 19  |
| 115,751 | 7   | 4  | 43    | 8   | 0  | 2  | 11  | 4   | 61    | 18  |
| 115,752 | 7   | 4  | 41    | 10  | 0  | 2  | 10  | 5   | 58    | 21  |
| 115,753 | 8   | 4  | 44    | 28  | 0  | 3  | 11  | 14  | 63    | 49  |
| 115,754 | 8   | 6  | 43    | 66  | 0  | 5  | 11  | 32  | 62    | 109 |
| 115,755 | 8   | 12 | 44    | 185 | 0  | 10 | 11  | 80  | 63    | 287 |
| 115,756 | 8   | 14 | 42    | 192 | 0  | 11 | 10  | 85  | 60    | 302 |
| 115,757 | 8   | 18 | 39    | 221 | 0  | 11 | 10  | 89  | 57    | 339 |
| 115,758 | 8   | 18 | 36    | 230 | 0  | 11 | 10  | 90  | 54    | 349 |
| 115,759 | 7   | 18 | 29    | 231 | 0  | 11 | 9   | 90  | 45    | 350 |
| 115,760 | 7   | 24 | 27    | 258 | 0  | 12 | 8   | 101 | 42    | 395 |
| 115,761 | 7   | 24 | 23    | 265 | 0  | 12 | 7   | 104 | 37    | 405 |
| 115,762 | 7   | 25 | 23    | 266 | 0  | 11 | 6   | 105 | 36    | 407 |
| 115,763 | 7   | 27 | 23    | 266 | 0  | 11 | 6   | 105 | 36    | 409 |
| 115,764 | 7   | 33 | 23    | 286 | 0  | 10 | 6   | 115 | 36    | 444 |
| 115,765 | 7   | 34 | 23    | 290 | 0  | 10 | 6   | 115 | 36    | 449 |
| 115,766 | 7   | 34 | 22    | 297 | 0  | 10 | 6   | 118 | 35    | 459 |
| 115,767 | 7   | 34 | 22    | 300 | 0  | 10 | 6   | 117 | 35    | 461 |
| 115,768 | 7   | 34 | 23    | 300 | 0  | 10 | 6   | 117 | 36    | 461 |
| 115,769 | 7   | 35 | 23    | 302 | 0  | 10 | 6   | 117 | 36    | 464 |
| 115,770 | 7   | 35 | 23    | 302 | 0  | 10 | 6   | 117 | 36    | 464 |
| 115,771 | 7   | 35 | 23    | 303 | 0  | 10 | 6   | 117 | 36    | 465 |
| 115,772 | 7   | 35 | 23    | 303 | 0  | 10 | 6   | 117 | 36    | 465 |



|         |   |    |    |     |   |    |    |     |    |       |
|---------|---|----|----|-----|---|----|----|-----|----|-------|
| 115,773 | 7 | 34 | 23 | 303 | 0 | 10 | 6  | 117 | 36 | 464   |
| 115,774 | 7 | 33 | 23 | 300 | 0 | 10 | 6  | 116 | 36 | 459   |
| 115,775 | 7 | 32 | 23 | 299 | 0 | 10 | 6  | 116 | 36 | 457   |
| 115,776 | 3 | 15 | 11 | 159 | 0 | 4  | 2  | 52  | 16 | 230   |
| 115,777 | 7 | 30 | 18 | 256 | 0 | 8  | 5  | 101 | 30 | 395   |
| 115,778 | 7 | 32 | 22 | 293 | 0 | 10 | 6  | 114 | 35 | 449   |
| 115,779 | 7 | 32 | 23 | 296 | 0 | 10 | 6  | 116 | 36 | 454   |
| 115,780 | 7 | 32 | 23 | 297 | 0 | 10 | 6  | 116 | 36 | 455   |
| 115,781 | 5 | 32 | 23 | 297 | 0 | 10 | 6  | 116 | 34 | 455   |
| 115,782 | 5 | 32 | 23 | 298 | 0 | 10 | 6  | 116 | 34 | 456   |
| 115,783 | 5 | 32 | 21 | 298 | 0 | 10 | 6  | 116 | 32 | 456   |
| 115,784 | 5 | 32 | 21 | 298 | 0 | 10 | 6  | 116 | 32 | 456   |
| 115,785 | 5 | 31 | 20 | 299 | 0 | 10 | 5  | 116 | 30 | 456   |
| 115,786 | 5 | 31 | 20 | 300 | 0 | 10 | 5  | 116 | 30 | 457   |
| 115,787 | 5 | 31 | 20 | 298 | 0 | 10 | 5  | 116 | 30 | 455   |
| 115,788 | 5 | 31 | 20 | 287 | 0 | 9  | 5  | 116 | 30 | 443   |
| 115,789 | 5 | 31 | 20 | 300 | 0 | 10 | 5  | 116 | 30 | 457   |
| 115,790 | 3 | 31 | 22 | 300 | 0 | 10 | 7  | 116 | 32 | 457   |
| 115,791 | 3 | 31 | 22 | 301 | 0 | 10 | 7  | 116 | 32 | 458   |
| 115,792 | 3 | 31 | 24 | 301 | 0 | 10 | 8  | 116 | 35 | 458   |
| 115,793 | 3 | 31 | 23 | 301 | 0 | 10 | 8  | 116 | 34 | 458   |
| 115,794 | 3 | 31 | 21 | 302 | 0 | 10 | 8  | 116 | 32 | 459   |
| 115,795 | 3 | 31 | 20 | 303 | 0 | 11 | 8  | 116 | 31 | 461   |
| 115,796 | 3 | 31 | 21 | 304 | 0 | 11 | 8  | 116 | 32 | 462   |
| 115,797 | 3 | 31 | 23 | 307 | 0 | 11 | 6  | 116 | 32 | 465   |
| 115,798 | 3 | 31 | 27 | 313 | 0 | 11 | 7  | 121 | 37 | 476   |
| 115,799 | 2 | 31 | 25 | 316 | 0 | 11 | 7  | 122 | 34 | 480   |
| 115,800 | 2 | 32 | 27 | 322 | 0 | 11 | 10 | 126 | 39 | 491   |
| 115,801 | 2 | 37 | 26 | 365 | 0 | 12 | 10 | 144 | 38 | 558   |
| 115,802 | 1 | 41 | 25 | 419 | 0 | 13 | 9  | 169 | 35 | 642   |
| 115,803 | 1 | 41 | 26 | 425 | 0 | 14 | 9  | 176 | 36 | 656   |
| 115,804 | 1 | 41 | 26 | 427 | 0 | 14 | 8  | 173 | 35 | 655   |
| 115,805 | 0 | 39 | 25 | 408 | 0 | 14 | 8  | 161 | 33 | 622   |
| 115,806 | 0 | 34 | 25 | 365 | 0 | 10 | 8  | 144 | 33 | 553   |
| 115,807 | 0 | 58 | 26 | 599 | 0 | 22 | 8  | 295 | 34 | 974   |
| 115,808 | 0 | 55 | 26 | 609 | 0 | 20 | 8  | 291 | 34 | 975   |
| 115,809 | 0 | 55 | 28 | 672 | 0 | 22 | 8  | 320 | 36 | 1,069 |
| 115,810 | 0 | 53 | 29 | 663 | 0 | 21 | 8  | 320 | 37 | 1,057 |
| 115,811 | 0 | 53 | 30 | 673 | 0 | 21 | 8  | 318 | 38 | 1,065 |
| 115,812 | 0 | 53 | 30 | 692 | 0 | 22 | 8  | 321 | 38 | 1,088 |
| 115,813 | 0 | 51 | 30 | 684 | 0 | 23 | 8  | 319 | 38 | 1,077 |

|         |   |    |    |     |   |    |    |     |    |       |
|---------|---|----|----|-----|---|----|----|-----|----|-------|
| 115,814 | 0 | 50 | 30 | 689 | 0 | 23 | 8  | 324 | 38 | 1,086 |
| 115,815 | 0 | 54 | 30 | 707 | 0 | 24 | 8  | 380 | 38 | 1,165 |
| 115,816 | 0 | 50 | 30 | 701 | 0 | 24 | 8  | 378 | 38 | 1,153 |
| 115,817 | 0 | 53 | 31 | 751 | 2 | 28 | 9  | 453 | 42 | 1,285 |
| 115,818 | 0 | 53 | 31 | 750 | 2 | 28 | 9  | 454 | 42 | 1,285 |
| 115,819 | 0 | 53 | 31 | 758 | 2 | 29 | 9  | 469 | 42 | 1,309 |
| 115,820 | 0 | 58 | 33 | 804 | 2 | 31 | 9  | 510 | 44 | 1,403 |
| 115,821 | 0 | 57 | 33 | 804 | 2 | 31 | 9  | 512 | 44 | 1,404 |
| 115,822 | 0 | 58 | 33 | 809 | 2 | 31 | 9  | 514 | 44 | 1,412 |
| 115,823 | 0 | 59 | 34 | 828 | 2 | 32 | 9  | 518 | 45 | 1,437 |
| 115,824 | 0 | 59 | 34 | 840 | 2 | 32 | 9  | 528 | 45 | 1,459 |
| 115,825 | 0 | 59 | 34 | 840 | 2 | 32 | 9  | 528 | 45 | 1,459 |
| 115,826 | 0 | 59 | 34 | 842 | 2 | 32 | 10 | 532 | 46 | 1,465 |
| 115,827 | 0 | 59 | 34 | 877 | 2 | 35 | 10 | 560 | 46 | 1,531 |
| 115,828 | 0 | 59 | 34 | 881 | 2 | 35 | 10 | 561 | 46 | 1,536 |
| 115,829 | 0 | 59 | 34 | 893 | 2 | 35 | 10 | 568 | 46 | 1,555 |
| 115,830 | 0 | 59 | 34 | 899 | 2 | 35 | 10 | 572 | 46 | 1,565 |
| 115,831 | 0 | 59 | 34 | 905 | 2 | 35 | 10 | 574 | 46 | 1,573 |
| 115,832 | 0 | 59 | 34 | 905 | 2 | 35 | 10 | 574 | 46 | 1,573 |
| 115,833 | 0 | 59 | 34 | 904 | 2 | 35 | 10 | 574 | 46 | 1,572 |
| 115,834 | 0 | 59 | 34 | 919 | 2 | 36 | 10 | 585 | 46 | 1,599 |
| 115,835 | 0 | 59 | 34 | 921 | 2 | 36 | 10 | 585 | 46 | 1,601 |
| 115,836 | 0 | 59 | 34 | 925 | 3 | 36 | 10 | 587 | 47 | 1,607 |
| 115,837 | 0 | 59 | 38 | 925 | 4 | 36 | 11 | 588 | 53 | 1,608 |
| 115,838 | 0 | 59 | 38 | 926 | 4 | 36 | 11 | 588 | 53 | 1,609 |
| 115,839 | 0 | 59 | 38 | 926 | 5 | 36 | 11 | 588 | 54 | 1,609 |
| 115,840 | 0 | 59 | 38 | 929 | 5 | 36 | 11 | 589 | 54 | 1,613 |
| 115,841 | 0 | 59 | 36 | 929 | 5 | 36 | 10 | 588 | 51 | 1,612 |
| 115,842 | 0 | 59 | 34 | 928 | 5 | 36 | 9  | 586 | 48 | 1,609 |
| 115,843 | 0 | 59 | 34 | 928 | 5 | 36 | 10 | 586 | 49 | 1,609 |
| 115,844 | 0 | 59 | 34 | 928 | 5 | 36 | 10 | 588 | 49 | 1,611 |
| 115,845 | 0 | 59 | 34 | 932 | 5 | 36 | 11 | 588 | 50 | 1,615 |
| 115,846 | 0 | 59 | 34 | 932 | 5 | 35 | 11 | 588 | 50 | 1,614 |
| 115,847 | 0 | 59 | 33 | 932 | 5 | 35 | 11 | 588 | 49 | 1,614 |
| 115,848 | 0 | 59 | 29 | 931 | 5 | 35 | 10 | 586 | 44 | 1,611 |
| 115,849 | 0 | 58 | 23 | 916 | 5 | 35 | 9  | 576 | 37 | 1,585 |
| 115,850 | 0 | 58 | 22 | 919 | 5 | 35 | 9  | 579 | 36 | 1,591 |
| 115,851 | 0 | 59 | 20 | 933 | 5 | 35 | 6  | 582 | 31 | 1,609 |
| 115,852 | 0 | 54 | 20 | 890 | 5 | 34 | 6  | 564 | 31 | 1,542 |
| 115,853 | 0 | 50 | 19 | 837 | 5 | 33 | 6  | 537 | 30 | 1,457 |
| 115,854 | 0 | 50 | 17 | 796 | 5 | 31 | 6  | 521 | 28 | 1,398 |

|         |   |    |    |     |   |    |    |     |    |       |
|---------|---|----|----|-----|---|----|----|-----|----|-------|
| 115,855 | 0 | 50 | 17 | 796 | 5 | 31 | 6  | 521 | 28 | 1,398 |
| 115,856 | 0 | 50 | 16 | 806 | 5 | 33 | 6  | 523 | 27 | 1,412 |
| 115,857 | 0 | 50 | 14 | 801 | 5 | 32 | 6  | 518 | 25 | 1,401 |
| 115,858 | 0 | 25 | 14 | 471 | 6 | 19 | 6  | 345 | 26 | 860   |
| 115,859 | 0 | 25 | 15 | 480 | 6 | 19 | 8  | 348 | 29 | 872   |
| 115,860 | 0 | 23 | 14 | 405 | 7 | 17 | 8  | 318 | 29 | 763   |
| 115,861 | 0 | 18 | 14 | 385 | 7 | 18 | 8  | 314 | 29 | 735   |
| 115,862 | 0 | 18 | 13 | 388 | 7 | 19 | 8  | 322 | 28 | 747   |
| 115,863 | 0 | 18 | 12 | 371 | 5 | 18 | 7  | 318 | 24 | 725   |
| 115,864 | 0 | 17 | 12 | 383 | 5 | 17 | 7  | 320 | 24 | 737   |
| 115,865 | 0 | 12 | 12 | 351 | 5 | 16 | 7  | 258 | 24 | 637   |
| 115,866 | 0 | 12 | 13 | 350 | 5 | 16 | 7  | 256 | 25 | 634   |
| 115,867 | 1 | 8  | 13 | 296 | 5 | 12 | 7  | 180 | 26 | 496   |
| 115,868 | 1 | 8  | 12 | 294 | 5 | 12 | 7  | 179 | 25 | 493   |
| 115,869 | 1 | 3  | 12 | 243 | 5 | 9  | 7  | 127 | 25 | 382   |
| 115,870 | 1 | 3  | 13 | 272 | 5 | 9  | 8  | 140 | 27 | 424   |
| 115,871 | 1 | 4  | 11 | 286 | 6 | 9  | 8  | 155 | 26 | 454   |
| 115,872 | 1 | 4  | 11 | 293 | 6 | 9  | 8  | 160 | 26 | 466   |
| 115,873 | 1 | 3  | 11 | 287 | 6 | 9  | 8  | 160 | 26 | 459   |
| 115,874 | 1 | 6  | 10 | 308 | 6 | 10 | 8  | 176 | 25 | 500   |
| 115,875 | 1 | 7  | 10 | 303 | 6 | 11 | 8  | 167 | 25 | 488   |
| 115,876 | 1 | 9  | 10 | 336 | 6 | 12 | 7  | 171 | 24 | 528   |
| 115,877 | 1 | 9  | 13 | 301 | 7 | 9  | 7  | 139 | 28 | 458   |
| 115,878 | 1 | 9  | 13 | 306 | 7 | 9  | 7  | 141 | 28 | 465   |
| 115,879 | 1 | 9  | 14 | 296 | 7 | 9  | 7  | 132 | 29 | 446   |
| 115,880 | 1 | 9  | 16 | 290 | 7 | 9  | 8  | 128 | 32 | 436   |
| 115,881 | 1 | 9  | 18 | 284 | 7 | 9  | 9  | 126 | 35 | 428   |
| 115,882 | 1 | 9  | 18 | 285 | 7 | 9  | 9  | 126 | 35 | 429   |
| 115,883 | 1 | 9  | 18 | 285 | 7 | 9  | 10 | 126 | 36 | 429   |
| 115,884 | 1 | 9  | 18 | 291 | 7 | 9  | 10 | 126 | 36 | 435   |
| 115,885 | 1 | 9  | 18 | 289 | 7 | 8  | 10 | 116 | 36 | 422   |
| 115,886 | 1 | 9  | 18 | 314 | 7 | 8  | 10 | 124 | 36 | 455   |
| 115,887 | 1 | 9  | 18 | 322 | 6 | 9  | 10 | 124 | 35 | 464   |
| 115,888 | 1 | 9  | 14 | 342 | 5 | 9  | 10 | 128 | 30 | 488   |
| 115,889 | 2 | 10 | 14 | 354 | 5 | 9  | 10 | 128 | 31 | 501   |
| 115,890 | 2 | 10 | 14 | 377 | 4 | 9  | 10 | 132 | 30 | 528   |
| 115,891 | 2 | 11 | 14 | 450 | 5 | 10 | 10 | 136 | 31 | 607   |
| 115,892 | 2 | 11 | 15 | 507 | 5 | 11 | 9  | 144 | 31 | 673   |
| 115,893 | 2 | 13 | 15 | 561 | 5 | 11 | 9  | 162 | 31 | 747   |
| 115,894 | 2 | 13 | 15 | 564 | 5 | 11 | 8  | 162 | 30 | 750   |
| 115,895 | 2 | 13 | 15 | 575 | 5 | 11 | 8  | 166 | 30 | 765   |

|         |   |    |    |       |   |    |    |     |    |       |
|---------|---|----|----|-------|---|----|----|-----|----|-------|
| 115,896 | 2 | 13 | 15 | 570   | 5 | 11 | 7  | 166 | 29 | 760   |
| 115,897 | 2 | 13 | 15 | 571   | 5 | 11 | 7  | 166 | 29 | 761   |
| 115,898 | 2 | 14 | 15 | 583   | 5 | 11 | 7  | 166 | 29 | 774   |
| 115,899 | 2 | 15 | 15 | 590   | 5 | 11 | 7  | 171 | 29 | 787   |
| 115,900 | 2 | 16 | 15 | 590   | 6 | 11 | 7  | 171 | 30 | 788   |
| 115,901 | 2 | 16 | 15 | 591   | 6 | 11 | 7  | 172 | 30 | 790   |
| 115,902 | 2 | 15 | 15 | 579   | 6 | 11 | 7  | 168 | 30 | 773   |
| 115,903 | 2 | 15 | 15 | 583   | 6 | 11 | 7  | 170 | 30 | 779   |
| 115,904 | 2 | 15 | 15 | 588   | 6 | 11 | 7  | 171 | 30 | 785   |
| 115,905 | 2 | 15 | 15 | 602   | 6 | 11 | 7  | 172 | 30 | 800   |
| 115,906 | 2 | 15 | 15 | 653   | 6 | 12 | 7  | 191 | 30 | 871   |
| 115,907 | 2 | 15 | 15 | 686   | 6 | 12 | 7  | 209 | 30 | 922   |
| 115,908 | 2 | 15 | 16 | 739   | 6 | 12 | 8  | 229 | 32 | 995   |
| 115,909 | 2 | 17 | 16 | 970   | 5 | 19 | 8  | 370 | 31 | 1,376 |
| 115,910 | 2 | 17 | 15 | 1,003 | 5 | 19 | 6  | 381 | 28 | 1,420 |
| 115,911 | 2 | 20 | 14 | 1,017 | 4 | 20 | 6  | 388 | 26 | 1,445 |
| 115,912 | 2 | 23 | 13 | 1,032 | 4 | 19 | 6  | 388 | 25 | 1,462 |
| 115,913 | 2 | 23 | 14 | 1,023 | 4 | 18 | 6  | 382 | 26 | 1,446 |
| 115,914 | 2 | 23 | 15 | 1,011 | 4 | 18 | 6  | 383 | 27 | 1,435 |
| 115,915 | 2 | 23 | 15 | 1,012 | 4 | 18 | 6  | 388 | 27 | 1,441 |
| 115,916 | 2 | 23 | 15 | 1,020 | 4 | 19 | 6  | 394 | 27 | 1,456 |
| 115,917 | 2 | 23 | 14 | 1,023 | 4 | 20 | 6  | 398 | 26 | 1,464 |
| 115,918 | 2 | 25 | 19 | 1,027 | 4 | 21 | 7  | 400 | 32 | 1,473 |
| 115,919 | 2 | 25 | 19 | 1,027 | 4 | 21 | 7  | 401 | 32 | 1,474 |
| 115,920 | 2 | 25 | 19 | 1,031 | 4 | 21 | 7  | 400 | 32 | 1,477 |
| 115,921 | 2 | 25 | 20 | 1,004 | 4 | 21 | 6  | 386 | 32 | 1,436 |
| 115,922 | 2 | 24 | 24 | 984   | 4 | 21 | 7  | 366 | 37 | 1,395 |
| 115,923 | 2 | 24 | 24 | 984   | 4 | 21 | 7  | 366 | 37 | 1,395 |
| 115,924 | 2 | 24 | 25 | 991   | 4 | 21 | 8  | 368 | 39 | 1,404 |
| 115,925 | 2 | 20 | 25 | 951   | 4 | 19 | 9  | 353 | 40 | 1,343 |
| 115,926 | 2 | 20 | 25 | 973   | 4 | 20 | 9  | 356 | 40 | 1,369 |
| 115,927 | 2 | 20 | 27 | 1,021 | 4 | 21 | 9  | 431 | 42 | 1,493 |
| 115,928 | 2 | 23 | 24 | 1,065 | 3 | 21 | 9  | 437 | 38 | 1,546 |
| 115,929 | 2 | 25 | 24 | 1,129 | 3 | 27 | 9  | 485 | 38 | 1,666 |
| 115,930 | 2 | 28 | 24 | 1,165 | 3 | 30 | 9  | 500 | 38 | 1,723 |
| 115,931 | 2 | 40 | 22 | 1,297 | 3 | 39 | 8  | 587 | 35 | 1,963 |
| 115,932 | 4 | 40 | 23 | 1,299 | 3 | 39 | 10 | 588 | 40 | 1,966 |
| 115,933 | 4 | 40 | 23 | 1,298 | 3 | 39 | 10 | 588 | 40 | 1,965 |
| 115,934 | 4 | 40 | 24 | 1,298 | 3 | 39 | 10 | 589 | 41 | 1,966 |
| 115,935 | 4 | 40 | 24 | 1,280 | 3 | 39 | 10 | 588 | 41 | 1,947 |
| 115,936 | 4 | 40 | 24 | 1,255 | 3 | 39 | 12 | 582 | 43 | 1,916 |

|         |   |    |    |       |   |    |    |     |    |       |
|---------|---|----|----|-------|---|----|----|-----|----|-------|
| 115,937 | 4 | 40 | 24 | 1,255 | 3 | 39 | 12 | 582 | 43 | 1,916 |
| 115,938 | 4 | 40 | 25 | 1,242 | 3 | 38 | 12 | 580 | 44 | 1,900 |
| 115,939 | 4 | 40 | 25 | 1,221 | 3 | 38 | 11 | 575 | 43 | 1,874 |
| 115,940 | 3 | 40 | 25 | 1,185 | 3 | 38 | 11 | 571 | 42 | 1,834 |
| 115,941 | 3 | 39 | 25 | 1,109 | 3 | 37 | 11 | 566 | 42 | 1,751 |
| 115,942 | 3 | 39 | 25 | 1,109 | 2 | 37 | 11 | 566 | 41 | 1,751 |
| 115,943 | 3 | 37 | 25 | 991   | 2 | 37 | 12 | 539 | 42 | 1,604 |
| 115,944 | 3 | 37 | 26 | 1,030 | 2 | 37 | 12 | 549 | 43 | 1,653 |
| 115,945 | 3 | 37 | 26 | 1,032 | 2 | 37 | 12 | 549 | 43 | 1,655 |
| 115,946 | 3 | 37 | 27 | 1,034 | 3 | 38 | 15 | 549 | 48 | 1,658 |
| 115,947 | 3 | 37 | 27 | 1,036 | 3 | 38 | 15 | 552 | 48 | 1,663 |
| 115,948 | 4 | 37 | 28 | 1,034 | 3 | 38 | 15 | 551 | 50 | 1,660 |
| 115,949 | 4 | 35 | 28 | 1,012 | 3 | 38 | 15 | 546 | 50 | 1,631 |
| 115,950 | 4 | 35 | 28 | 1,007 | 3 | 38 | 15 | 544 | 50 | 1,624 |
| 115,951 | 4 | 35 | 28 | 1,023 | 2 | 38 | 15 | 552 | 49 | 1,648 |
| 115,952 | 4 | 36 | 28 | 1,061 | 2 | 39 | 15 | 559 | 49 | 1,695 |
| 115,953 | 4 | 47 | 28 | 1,272 | 2 | 44 | 15 | 649 | 49 | 2,012 |
| 115,954 | 4 | 54 | 28 | 1,415 | 2 | 47 | 15 | 695 | 49 | 2,211 |
| 115,955 | 4 | 61 | 29 | 1,541 | 2 | 49 | 15 | 717 | 50 | 2,368 |
| 115,956 | 4 | 63 | 30 | 1,692 | 2 | 52 | 15 | 750 | 51 | 2,557 |
| 115,957 | 4 | 65 | 30 | 1,717 | 2 | 55 | 15 | 759 | 51 | 2,596 |
| 115,958 | 4 | 65 | 29 | 1,696 | 2 | 53 | 15 | 736 | 50 | 2,550 |
| 115,959 | 4 | 65 | 28 | 1,641 | 2 | 53 | 14 | 716 | 48 | 2,475 |
| 115,960 | 4 | 88 | 28 | 1,628 | 2 | 58 | 15 | 700 | 49 | 2,474 |
| 115,961 | 4 | 88 | 28 | 1,598 | 2 | 59 | 15 | 692 | 49 | 2,437 |
| 115,962 | 4 | 87 | 28 | 1,647 | 2 | 60 | 16 | 721 | 50 | 2,515 |
| 115,963 | 4 | 87 | 28 | 1,726 | 2 | 61 | 16 | 762 | 50 | 2,636 |
| 115,964 | 4 | 89 | 27 | 1,748 | 2 | 61 | 16 | 778 | 49 | 2,676 |
| 115,965 | 4 | 91 | 26 | 1,763 | 3 | 61 | 16 | 774 | 49 | 2,689 |
| 115,966 | 5 | 92 | 26 | 1,758 | 3 | 60 | 16 | 776 | 50 | 2,686 |
| 115,967 | 5 | 92 | 26 | 1,758 | 3 | 59 | 16 | 772 | 50 | 2,681 |
| 115,968 | 5 | 92 | 26 | 1,759 | 3 | 59 | 16 | 773 | 50 | 2,683 |
| 115,969 | 4 | 90 | 21 | 1,744 | 3 | 58 | 15 | 765 | 43 | 2,657 |
| 115,970 | 4 | 90 | 21 | 1,748 | 3 | 58 | 15 | 765 | 43 | 2,661 |
| 115,971 | 4 | 90 | 19 | 1,757 | 3 | 58 | 15 | 772 | 41 | 2,677 |
| 115,972 | 4 | 90 | 15 | 1,754 | 2 | 58 | 14 | 771 | 35 | 2,673 |
| 115,973 | 4 | 90 | 15 | 1,756 | 4 | 58 | 14 | 773 | 37 | 2,677 |
| 115,974 | 4 | 90 | 14 | 1,759 | 4 | 58 | 13 | 774 | 35 | 2,681 |
| 115,975 | 4 | 89 | 14 | 1,743 | 4 | 57 | 13 | 764 | 35 | 2,653 |
| 115,976 | 4 | 89 | 14 | 1,722 | 4 | 56 | 12 | 761 | 34 | 2,628 |
| 115,977 | 4 | 89 | 12 | 1,727 | 4 | 57 | 12 | 763 | 32 | 2,636 |

|         |   |    |    |       |   |    |    |     |    |       |
|---------|---|----|----|-------|---|----|----|-----|----|-------|
| 115,978 | 4 | 84 | 12 | 1,606 | 4 | 57 | 12 | 681 | 32 | 2,428 |
| 115,979 | 4 | 85 | 12 | 1,617 | 4 | 57 | 12 | 689 | 32 | 2,448 |
| 115,980 | 4 | 84 | 14 | 1,582 | 5 | 51 | 13 | 656 | 36 | 2,373 |
| 115,981 | 4 | 81 | 13 | 1,540 | 5 | 48 | 13 | 641 | 35 | 2,310 |
| 115,982 | 4 | 70 | 14 | 1,434 | 5 | 39 | 13 | 578 | 36 | 2,121 |
| 115,983 | 2 | 81 | 11 | 1,508 | 5 | 44 | 11 | 640 | 29 | 2,273 |
| 115,984 | 2 | 82 | 11 | 1,519 | 5 | 44 | 10 | 644 | 28 | 2,289 |
| 115,985 | 2 | 84 | 10 | 1,532 | 5 | 46 | 10 | 649 | 27 | 2,311 |
| 115,986 | 2 | 85 | 10 | 1,533 | 5 | 46 | 10 | 648 | 27 | 2,312 |
| 115,987 | 2 | 87 | 10 | 1,541 | 5 | 46 | 8  | 649 | 25 | 2,323 |
| 115,988 | 2 | 87 | 10 | 1,543 | 5 | 46 | 8  | 651 | 25 | 2,327 |
| 115,989 | 2 | 87 | 10 | 1,557 | 5 | 46 | 8  | 654 | 25 | 2,344 |
| 115,990 | 2 | 87 | 10 | 1,557 | 5 | 46 | 8  | 654 | 25 | 2,344 |
| 115,991 | 2 | 86 | 10 | 1,563 | 5 | 46 | 8  | 656 | 25 | 2,351 |
| 115,992 | 2 | 86 | 10 | 1,574 | 5 | 45 | 9  | 666 | 26 | 2,371 |
| 115,993 | 2 | 87 | 10 | 1,602 | 5 | 46 | 9  | 680 | 26 | 2,415 |
| 115,994 | 2 | 87 | 9  | 1,617 | 5 | 46 | 9  | 688 | 25 | 2,438 |
| 115,995 | 2 | 87 | 8  | 1,605 | 5 | 49 | 9  | 701 | 24 | 2,442 |
| 115,996 | 2 | 87 | 7  | 1,625 | 4 | 50 | 6  | 707 | 19 | 2,469 |
| 115,997 | 2 | 88 | 7  | 1,624 | 4 | 51 | 6  | 715 | 19 | 2,478 |
| 115,998 | 2 | 88 | 7  | 1,626 | 4 | 51 | 6  | 716 | 19 | 2,481 |
| 115,999 | 1 | 88 | 7  | 1,636 | 4 | 51 | 7  | 729 | 19 | 2,504 |
| 116,000 | 1 | 88 | 7  | 1,641 | 4 | 51 | 7  | 729 | 19 | 2,509 |
| 116,001 | 1 | 88 | 7  | 1,647 | 4 | 51 | 7  | 747 | 19 | 2,533 |
| 116,002 | 1 | 88 | 7  | 1,636 | 4 | 51 | 7  | 741 | 19 | 2,516 |
| 116,003 | 1 | 87 | 7  | 1,598 | 5 | 50 | 7  | 735 | 20 | 2,470 |
| 116,004 | 1 | 62 | 8  | 1,107 | 5 | 40 | 7  | 573 | 21 | 1,782 |
| 116,005 | 1 | 62 | 8  | 1,128 | 5 | 43 | 7  | 585 | 21 | 1,818 |
| 116,006 | 1 | 63 | 7  | 1,168 | 5 | 51 | 7  | 674 | 20 | 1,956 |
| 116,007 | 1 | 61 | 6  | 1,021 | 5 | 48 | 7  | 664 | 19 | 1,794 |
| 116,008 | 1 | 62 | 6  | 965   | 5 | 45 | 7  | 679 | 19 | 1,751 |
| 116,009 | 1 | 62 | 8  | 949   | 5 | 45 | 7  | 681 | 21 | 1,737 |
| 116,010 | 1 | 32 | 9  | 563   | 5 | 29 | 8  | 477 | 23 | 1,101 |
| 116,011 | 1 | 33 | 11 | 565   | 5 | 29 | 7  | 479 | 24 | 1,106 |
| 116,012 | 1 | 33 | 11 | 576   | 5 | 30 | 7  | 504 | 24 | 1,143 |
| 116,013 | 1 | 33 | 11 | 593   | 5 | 30 | 7  | 513 | 24 | 1,169 |
| 116,014 | 1 | 33 | 11 | 618   | 5 | 31 | 7  | 524 | 24 | 1,206 |
| 116,015 | 1 | 31 | 11 | 609   | 5 | 32 | 7  | 518 | 24 | 1,190 |
| 116,016 | 1 | 29 | 11 | 589   | 4 | 32 | 7  | 513 | 23 | 1,163 |
| 116,017 | 0 | 28 | 11 | 585   | 4 | 32 | 7  | 506 | 22 | 1,151 |
| 116,018 | 0 | 29 | 11 | 588   | 4 | 32 | 7  | 508 | 22 | 1,157 |

|         |   |    |    |     |   |    |   |     |    |       |
|---------|---|----|----|-----|---|----|---|-----|----|-------|
| 116,019 | 0 | 29 | 11 | 593 | 4 | 32 | 7 | 515 | 22 | 1,169 |
| 116,020 | 0 | 29 | 11 | 593 | 4 | 32 | 7 | 518 | 22 | 1,172 |
| 116,021 | 0 | 29 | 11 | 589 | 4 | 32 | 7 | 520 | 22 | 1,170 |
| 116,022 | 0 | 32 | 11 | 589 | 4 | 32 | 7 | 516 | 22 | 1,169 |
| 116,023 | 0 | 32 | 11 | 591 | 4 | 32 | 7 | 516 | 22 | 1,171 |
| 116,024 | 0 | 33 | 12 | 593 | 2 | 32 | 7 | 528 | 21 | 1,186 |
| 116,025 | 0 | 33 | 12 | 606 | 2 | 33 | 7 | 536 | 21 | 1,208 |
| 116,026 | 0 | 34 | 13 | 668 | 2 | 37 | 8 | 575 | 23 | 1,314 |
| 116,027 | 0 | 35 | 13 | 674 | 2 | 37 | 8 | 579 | 23 | 1,325 |
| 116,028 | 0 | 35 | 13 | 680 | 2 | 36 | 8 | 584 | 23 | 1,335 |
| 116,029 | 0 | 35 | 13 | 679 | 2 | 34 | 8 | 586 | 23 | 1,334 |
| 116,030 | 0 | 34 | 14 | 670 | 2 | 34 | 9 | 581 | 25 | 1,319 |
| 116,031 | 0 | 33 | 12 | 648 | 1 | 35 | 9 | 574 | 22 | 1,290 |
| 116,032 | 0 | 33 | 12 | 650 | 1 | 35 | 9 | 578 | 22 | 1,296 |
| 116,033 | 0 | 32 | 11 | 624 | 1 | 35 | 9 | 559 | 21 | 1,250 |
| 116,034 | 0 | 21 | 11 | 550 | 1 | 30 | 9 | 498 | 21 | 1,099 |
| 116,035 | 0 | 18 | 11 | 527 | 1 | 28 | 9 | 488 | 21 | 1,061 |
| 116,036 | 0 | 18 | 11 | 527 | 1 | 28 | 9 | 488 | 21 | 1,061 |
| 116,037 | 0 | 17 | 11 | 527 | 1 | 28 | 9 | 496 | 21 | 1,068 |
| 116,038 | 0 | 15 | 11 | 522 | 1 | 28 | 9 | 496 | 21 | 1,061 |
| 116,039 | 0 | 15 | 10 | 552 | 1 | 34 | 9 | 559 | 20 | 1,160 |
| 116,040 | 0 | 15 | 10 | 548 | 1 | 34 | 9 | 563 | 20 | 1,160 |
| 116,041 | 0 | 18 | 10 | 589 | 1 | 39 | 9 | 620 | 20 | 1,266 |
| 116,042 | 1 | 18 | 10 | 621 | 1 | 42 | 9 | 628 | 21 | 1,309 |
| 116,043 | 1 | 18 | 10 | 611 | 1 | 42 | 8 | 625 | 20 | 1,296 |
| 116,044 | 1 | 18 | 10 | 590 | 1 | 41 | 8 | 620 | 20 | 1,269 |
| 116,045 | 1 | 18 | 10 | 576 | 1 | 41 | 7 | 613 | 19 | 1,248 |
| 116,046 | 1 | 22 | 11 | 535 | 1 | 38 | 7 | 585 | 20 | 1,180 |
| 116,047 | 1 | 21 | 11 | 528 | 1 | 36 | 7 | 577 | 20 | 1,162 |
| 116,048 | 1 | 21 | 11 | 532 | 1 | 36 | 7 | 577 | 20 | 1,166 |
| 116,049 | 1 | 21 | 12 | 520 | 1 | 36 | 7 | 563 | 21 | 1,140 |
| 116,050 | 1 | 21 | 12 | 515 | 1 | 36 | 6 | 564 | 20 | 1,136 |
| 116,051 | 1 | 21 | 12 | 518 | 1 | 36 | 6 | 564 | 20 | 1,139 |
| 116,052 | 1 | 20 | 13 | 512 | 1 | 36 | 6 | 544 | 21 | 1,112 |
| 116,053 | 1 | 20 | 13 | 506 | 0 | 36 | 7 | 541 | 21 | 1,103 |
| 116,054 | 1 | 20 | 13 | 507 | 0 | 36 | 7 | 541 | 21 | 1,104 |
| 116,055 | 1 | 20 | 12 | 485 | 0 | 33 | 7 | 529 | 20 | 1,067 |
| 116,056 | 1 | 19 | 12 | 445 | 0 | 25 | 7 | 443 | 20 | 932   |
| 116,057 | 1 | 19 | 12 | 452 | 0 | 25 | 7 | 456 | 20 | 952   |
| 116,058 | 1 | 16 | 12 | 414 | 0 | 24 | 7 | 393 | 20 | 847   |
| 116,059 | 2 | 16 | 12 | 417 | 0 | 25 | 7 | 402 | 21 | 860   |

|         |   |    |    |     |   |    |    |     |     |       |
|---------|---|----|----|-----|---|----|----|-----|-----|-------|
| 116,060 | 2 | 16 | 10 | 415 | 0 | 25 | 7  | 400 | 19  | 856   |
| 116,061 | 2 | 16 | 9  | 402 | 0 | 25 | 6  | 388 | 17  | 831   |
| 116,062 | 2 | 15 | 7  | 402 | 0 | 25 | 6  | 389 | 15  | 831   |
| 116,063 | 2 | 15 | 7  | 391 | 0 | 24 | 5  | 363 | 14  | 793   |
| 116,064 | 2 | 15 | 8  | 383 | 0 | 26 | 5  | 389 | 15  | 813   |
| 116,065 | 2 | 15 | 8  | 364 | 0 | 25 | 5  | 380 | 15  | 784   |
| 116,066 | 2 | 15 | 14 | 350 | 0 | 25 | 7  | 368 | 23  | 758   |
| 116,067 | 2 | 15 | 18 | 349 | 0 | 25 | 8  | 369 | 28  | 758   |
| 116,068 | 3 | 15 | 22 | 350 | 0 | 25 | 11 | 368 | 36  | 758   |
| 116,069 | 4 | 14 | 22 | 348 | 0 | 25 | 11 | 366 | 37  | 753   |
| 116,070 | 4 | 14 | 22 | 339 | 0 | 25 | 11 | 359 | 37  | 737   |
| 116,071 | 4 | 14 | 22 | 339 | 0 | 25 | 11 | 359 | 37  | 737   |
| 116,072 | 4 | 15 | 22 | 358 | 0 | 25 | 11 | 378 | 37  | 776   |
| 116,073 | 4 | 12 | 23 | 377 | 0 | 29 | 11 | 391 | 38  | 809   |
| 116,074 | 4 | 12 | 24 | 423 | 0 | 29 | 11 | 401 | 39  | 865   |
| 116,075 | 4 | 11 | 24 | 416 | 0 | 29 | 11 | 388 | 39  | 844   |
| 116,076 | 4 | 11 | 24 | 405 | 0 | 28 | 11 | 381 | 39  | 825   |
| 116,077 | 4 | 10 | 28 | 343 | 0 | 24 | 11 | 342 | 43  | 719   |
| 116,078 | 4 | 9  | 31 | 325 | 0 | 24 | 12 | 331 | 47  | 689   |
| 116,079 | 4 | 9  | 32 | 323 | 0 | 24 | 13 | 328 | 49  | 684   |
| 116,080 | 4 | 9  | 32 | 326 | 0 | 24 | 13 | 331 | 49  | 690   |
| 116,081 | 4 | 11 | 31 | 334 | 0 | 25 | 11 | 331 | 46  | 701   |
| 116,082 | 4 | 11 | 34 | 326 | 1 | 24 | 12 | 322 | 51  | 683   |
| 116,083 | 4 | 11 | 34 | 325 | 1 | 24 | 12 | 312 | 51  | 672   |
| 116,084 | 4 | 11 | 34 | 329 | 1 | 24 | 12 | 313 | 51  | 677   |
| 116,085 | 4 | 13 | 37 | 353 | 2 | 24 | 11 | 330 | 54  | 720   |
| 116,086 | 5 | 21 | 37 | 439 | 2 | 28 | 12 | 402 | 56  | 890   |
| 116,087 | 5 | 22 | 37 | 467 | 2 | 28 | 12 | 425 | 56  | 942   |
| 116,088 | 6 | 29 | 40 | 549 | 2 | 32 | 15 | 461 | 63  | 1,071 |
| 116,089 | 6 | 29 | 40 | 561 | 2 | 34 | 15 | 470 | 63  | 1,094 |
| 116,090 | 6 | 29 | 40 | 529 | 2 | 28 | 15 | 402 | 63  | 988   |
| 116,091 | 6 | 29 | 40 | 530 | 2 | 28 | 15 | 406 | 63  | 993   |
| 116,092 | 6 | 30 | 41 | 512 | 2 | 23 | 15 | 363 | 64  | 928   |
| 116,093 | 5 | 30 | 41 | 476 | 2 | 20 | 15 | 354 | 63  | 880   |
| 116,094 | 5 | 31 | 49 | 497 | 2 | 21 | 15 | 363 | 71  | 912   |
| 116,095 | 6 | 31 | 69 | 497 | 2 | 21 | 20 | 358 | 97  | 907   |
| 116,096 | 6 | 31 | 68 | 498 | 2 | 21 | 20 | 358 | 96  | 908   |
| 116,097 | 6 | 29 | 68 | 503 | 2 | 20 | 20 | 359 | 96  | 911   |
| 116,098 | 6 | 29 | 68 | 498 | 2 | 20 | 20 | 354 | 96  | 901   |
| 116,099 | 7 | 31 | 91 | 511 | 2 | 20 | 30 | 367 | 130 | 929   |
| 116,100 | 7 | 32 | 90 | 520 | 2 | 20 | 30 | 372 | 129 | 944   |



|         |   |    |     |     |   |    |    |     |     |       |
|---------|---|----|-----|-----|---|----|----|-----|-----|-------|
| 116,101 | 7 | 32 | 105 | 538 | 2 | 21 | 43 | 387 | 157 | 978   |
| 116,102 | 7 | 33 | 108 | 542 | 2 | 21 | 44 | 391 | 161 | 987   |
| 116,103 | 7 | 33 | 109 | 552 | 2 | 21 | 44 | 392 | 162 | 998   |
| 116,104 | 7 | 33 | 109 | 568 | 2 | 22 | 43 | 397 | 161 | 1,020 |
| 116,105 | 7 | 33 | 109 | 569 | 2 | 22 | 43 | 397 | 161 | 1,021 |
| 116,106 | 7 | 33 | 109 | 588 | 2 | 23 | 43 | 399 | 161 | 1,043 |
| 116,107 | 7 | 33 | 109 | 589 | 2 | 23 | 43 | 398 | 161 | 1,043 |
| 116,108 | 7 | 33 | 109 | 586 | 2 | 23 | 43 | 384 | 161 | 1,026 |
| 116,109 | 7 | 33 | 109 | 579 | 2 | 22 | 43 | 372 | 161 | 1,006 |
| 116,110 | 6 | 34 | 110 | 580 | 3 | 22 | 44 | 372 | 163 | 1,008 |
| 116,111 | 6 | 36 | 110 | 585 | 3 | 22 | 44 | 374 | 163 | 1,017 |
| 116,112 | 6 | 36 | 110 | 582 | 3 | 22 | 44 | 379 | 163 | 1,019 |
| 116,113 | 6 | 38 | 112 | 598 | 4 | 24 | 46 | 397 | 168 | 1,057 |
| 116,114 | 6 | 38 | 112 | 632 | 4 | 24 | 46 | 425 | 168 | 1,119 |
| 116,115 | 6 | 39 | 111 | 638 | 4 | 22 | 46 | 401 | 167 | 1,100 |
| 116,116 | 6 | 39 | 111 | 650 | 4 | 22 | 45 | 410 | 166 | 1,121 |
| 116,117 | 6 | 39 | 106 | 647 | 4 | 21 | 44 | 407 | 160 | 1,114 |
| 116,118 | 6 | 39 | 102 | 646 | 5 | 21 | 43 | 406 | 156 | 1,112 |
| 116,119 | 5 | 39 | 98  | 644 | 5 | 21 | 40 | 406 | 148 | 1,110 |
| 116,120 | 4 | 39 | 98  | 643 | 5 | 21 | 40 | 406 | 147 | 1,109 |
| 116,121 | 4 | 40 | 98  | 646 | 5 | 21 | 40 | 403 | 147 | 1,110 |
| 116,122 | 4 | 40 | 98  | 646 | 5 | 21 | 40 | 403 | 147 | 1,110 |
| 116,123 | 4 | 39 | 98  | 627 | 5 | 21 | 40 | 383 | 147 | 1,070 |
| 116,124 | 4 | 39 | 98  | 601 | 5 | 17 | 40 | 367 | 147 | 1,024 |
| 116,125 | 4 | 39 | 97  | 561 | 5 | 17 | 40 | 367 | 146 | 984   |
| 116,126 | 4 | 39 | 96  | 560 | 5 | 17 | 40 | 365 | 145 | 981   |
| 116,127 | 4 | 39 | 96  | 565 | 5 | 17 | 41 | 368 | 146 | 989   |
| 116,128 | 4 | 39 | 91  | 567 | 5 | 17 | 40 | 369 | 140 | 992   |
| 116,129 | 4 | 39 | 88  | 567 | 5 | 17 | 39 | 371 | 136 | 994   |
| 116,130 | 4 | 39 | 88  | 564 | 5 | 17 | 38 | 369 | 135 | 989   |
| 116,131 | 4 | 37 | 88  | 551 | 5 | 16 | 41 | 368 | 138 | 972   |
| 116,132 | 4 | 39 | 88  | 568 | 5 | 16 | 41 | 376 | 138 | 999   |
| 116,133 | 4 | 40 | 85  | 594 | 4 | 16 | 40 | 377 | 133 | 1,027 |
| 116,134 | 4 | 40 | 85  | 598 | 4 | 16 | 40 | 383 | 133 | 1,037 |
| 116,135 | 4 | 40 | 85  | 602 | 4 | 16 | 40 | 388 | 133 | 1,046 |
| 116,136 | 4 | 38 | 82  | 578 | 3 | 16 | 40 | 370 | 129 | 1,002 |
| 116,137 | 3 | 30 | 82  | 493 | 3 | 12 | 39 | 298 | 127 | 833   |
| 116,138 | 3 | 31 | 81  | 475 | 3 | 13 | 38 | 284 | 125 | 803   |
| 116,139 | 2 | 24 | 79  | 389 | 3 | 9  | 36 | 239 | 120 | 661   |
| 116,140 | 2 | 24 | 79  | 375 | 3 | 7  | 36 | 229 | 120 | 635   |
| 116,141 | 2 | 24 | 79  | 366 | 3 | 7  | 36 | 226 | 120 | 623   |

|         |   |    |    |     |   |    |    |     |     |     |
|---------|---|----|----|-----|---|----|----|-----|-----|-----|
| 116,142 | 2 | 24 | 79 | 366 | 4 | 7  | 36 | 224 | 121 | 621 |
| 116,143 | 2 | 20 | 79 | 345 | 4 | 7  | 36 | 215 | 121 | 587 |
| 116,144 | 2 | 20 | 71 | 345 | 4 | 7  | 36 | 215 | 113 | 587 |
| 116,145 | 2 | 19 | 68 | 332 | 4 | 9  | 34 | 209 | 108 | 569 |
| 116,146 | 1 | 18 | 51 | 327 | 4 | 9  | 31 | 205 | 87  | 559 |
| 116,147 | 1 | 18 | 53 | 328 | 5 | 10 | 31 | 206 | 90  | 562 |
| 116,148 | 1 | 16 | 50 | 317 | 5 | 10 | 32 | 201 | 88  | 544 |
| 116,149 | 0 | 16 | 45 | 319 | 5 | 10 | 30 | 201 | 80  | 546 |
| 116,150 | 0 | 16 | 31 | 315 | 5 | 11 | 23 | 196 | 59  | 538 |
| 116,151 | 0 | 15 | 18 | 329 | 5 | 12 | 12 | 198 | 35  | 554 |
| 116,152 | 0 | 14 | 16 | 307 | 5 | 11 | 9  | 180 | 30  | 512 |
| 116,153 | 0 | 14 | 13 | 309 | 5 | 11 | 8  | 181 | 26  | 515 |
| 116,154 | 0 | 14 | 13 | 283 | 5 | 10 | 8  | 175 | 26  | 482 |
| 116,155 | 0 | 14 | 15 | 282 | 5 | 10 | 8  | 175 | 28  | 481 |
| 116,156 | 0 | 14 | 16 | 264 | 5 | 9  | 8  | 174 | 29  | 461 |
| 116,157 | 0 | 14 | 16 | 271 | 5 | 9  | 8  | 181 | 29  | 475 |
| 116,158 | 1 | 14 | 16 | 274 | 5 | 9  | 8  | 181 | 30  | 478 |
| 116,159 | 1 | 14 | 19 | 275 | 5 | 9  | 9  | 181 | 34  | 479 |
| 116,160 | 1 | 14 | 19 | 288 | 5 | 9  | 9  | 182 | 34  | 493 |
| 116,161 | 1 | 13 | 19 | 291 | 4 | 11 | 9  | 190 | 33  | 505 |
| 116,162 | 1 | 12 | 18 | 310 | 4 | 11 | 9  | 199 | 32  | 532 |
| 116,163 | 1 | 12 | 16 | 317 | 3 | 11 | 8  | 199 | 28  | 539 |
| 116,164 | 1 | 10 | 17 | 272 | 3 | 9  | 7  | 151 | 28  | 442 |
| 116,165 | 1 | 11 | 17 | 271 | 3 | 9  | 7  | 151 | 28  | 442 |
| 116,166 | 1 | 10 | 17 | 263 | 3 | 9  | 7  | 141 | 28  | 423 |
| 116,167 | 1 | 10 | 17 | 245 | 3 | 9  | 7  | 133 | 28  | 397 |
| 116,168 | 1 | 10 | 17 | 244 | 3 | 9  | 7  | 133 | 28  | 396 |
| 116,169 | 1 | 10 | 17 | 248 | 2 | 10 | 7  | 138 | 27  | 406 |
| 116,170 | 1 | 10 | 17 | 249 | 2 | 10 | 7  | 139 | 27  | 408 |
| 116,171 | 1 | 11 | 20 | 260 | 2 | 10 | 14 | 152 | 37  | 433 |
| 116,172 | 1 | 11 | 20 | 256 | 2 | 11 | 14 | 151 | 37  | 429 |
| 116,173 | 1 | 11 | 22 | 259 | 2 | 11 | 15 | 154 | 40  | 435 |
| 116,174 | 1 | 12 | 22 | 259 | 2 | 12 | 15 | 154 | 40  | 437 |
| 116,175 | 1 | 12 | 21 | 260 | 2 | 12 | 15 | 155 | 39  | 439 |
| 116,176 | 1 | 14 | 21 | 260 | 2 | 12 | 15 | 145 | 39  | 431 |
| 116,177 | 1 | 17 | 22 | 276 | 2 | 12 | 15 | 152 | 40  | 457 |
| 116,178 | 1 | 20 | 22 | 347 | 3 | 14 | 14 | 175 | 40  | 556 |
| 116,179 | 1 | 22 | 22 | 356 | 3 | 14 | 15 | 186 | 41  | 578 |
| 116,180 | 1 | 24 | 24 | 405 | 3 | 16 | 15 | 206 | 43  | 651 |
| 116,181 | 1 | 25 | 23 | 407 | 3 | 16 | 15 | 211 | 42  | 659 |
| 116,182 | 1 | 26 | 23 | 408 | 3 | 16 | 12 | 210 | 39  | 660 |

|         |   |    |    |     |   |    |    |     |    |       |
|---------|---|----|----|-----|---|----|----|-----|----|-------|
| 116,183 | 2 | 25 | 24 | 404 | 3 | 19 | 12 | 208 | 41 | 656   |
| 116,184 | 2 | 24 | 24 | 380 | 3 | 19 | 12 | 210 | 41 | 633   |
| 116,185 | 2 | 29 | 27 | 396 | 3 | 19 | 12 | 211 | 44 | 655   |
| 116,186 | 2 | 29 | 27 | 391 | 3 | 19 | 12 | 211 | 44 | 650   |
| 116,187 | 2 | 32 | 27 | 418 | 3 | 19 | 13 | 221 | 45 | 690   |
| 116,188 | 2 | 32 | 27 | 420 | 3 | 19 | 13 | 224 | 45 | 695   |
| 116,189 | 2 | 30 | 27 | 412 | 3 | 18 | 13 | 215 | 45 | 675   |
| 116,190 | 2 | 30 | 27 | 412 | 3 | 18 | 13 | 215 | 45 | 675   |
| 116,191 | 2 | 30 | 27 | 413 | 3 | 18 | 13 | 214 | 45 | 675   |
| 116,192 | 2 | 30 | 27 | 410 | 3 | 18 | 13 | 206 | 45 | 664   |
| 116,193 | 2 | 30 | 27 | 420 | 2 | 18 | 13 | 209 | 44 | 677   |
| 116,194 | 2 | 32 | 26 | 421 | 2 | 18 | 13 | 210 | 43 | 681   |
| 116,195 | 2 | 32 | 26 | 419 | 2 | 18 | 13 | 215 | 43 | 684   |
| 116,196 | 2 | 32 | 23 | 409 | 1 | 15 | 12 | 207 | 38 | 663   |
| 116,197 | 2 | 32 | 23 | 413 | 1 | 17 | 12 | 211 | 38 | 673   |
| 116,198 | 2 | 32 | 23 | 419 | 1 | 16 | 12 | 211 | 38 | 678   |
| 116,199 | 2 | 32 | 23 | 419 | 1 | 16 | 11 | 210 | 37 | 677   |
| 116,200 | 2 | 30 | 23 | 383 | 1 | 14 | 11 | 192 | 37 | 619   |
| 116,201 | 2 | 30 | 23 | 391 | 1 | 14 | 11 | 193 | 37 | 628   |
| 116,202 | 2 | 31 | 23 | 393 | 1 | 14 | 11 | 200 | 37 | 638   |
| 116,203 | 2 | 32 | 22 | 415 | 1 | 15 | 11 | 213 | 36 | 675   |
| 116,204 | 2 | 37 | 22 | 487 | 1 | 18 | 11 | 276 | 36 | 818   |
| 116,205 | 2 | 37 | 20 | 494 | 1 | 18 | 11 | 276 | 34 | 825   |
| 116,206 | 2 | 39 | 18 | 522 | 1 | 19 | 11 | 285 | 32 | 865   |
| 116,207 | 2 | 47 | 17 | 595 | 1 | 22 | 11 | 314 | 31 | 978   |
| 116,208 | 2 | 51 | 17 | 649 | 1 | 24 | 11 | 340 | 31 | 1,064 |
| 116,209 | 1 | 51 | 16 | 649 | 1 | 24 | 10 | 342 | 28 | 1,066 |
| 116,210 | 1 | 50 | 14 | 608 | 1 | 22 | 11 | 315 | 27 | 995   |
| 116,211 | 1 | 50 | 15 | 613 | 1 | 22 | 11 | 316 | 28 | 1,001 |
| 116,212 | 1 | 51 | 15 | 617 | 1 | 22 | 11 | 317 | 28 | 1,007 |
| 116,213 | 1 | 51 | 15 | 620 | 1 | 22 | 11 | 319 | 28 | 1,012 |
| 116,214 | 1 | 51 | 15 | 628 | 1 | 23 | 11 | 321 | 28 | 1,023 |
| 116,215 | 1 | 51 | 14 | 644 | 1 | 23 | 11 | 324 | 27 | 1,042 |
| 116,216 | 1 | 50 | 15 | 680 | 1 | 24 | 11 | 334 | 28 | 1,088 |
| 116,217 | 2 | 50 | 15 | 711 | 1 | 24 | 11 | 341 | 29 | 1,126 |
| 116,218 | 2 | 50 | 16 | 724 | 1 | 24 | 11 | 344 | 30 | 1,142 |
| 116,219 | 2 | 50 | 13 | 732 | 1 | 24 | 6  | 345 | 22 | 1,151 |
| 116,220 | 2 | 50 | 13 | 732 | 1 | 23 | 4  | 339 | 20 | 1,144 |
| 116,221 | 2 | 49 | 11 | 728 | 1 | 23 | 3  | 324 | 17 | 1,124 |
| 116,222 | 2 | 49 | 11 | 728 | 1 | 23 | 3  | 324 | 17 | 1,124 |
| 116,223 | 2 | 47 | 11 | 735 | 1 | 21 | 3  | 325 | 17 | 1,128 |

|         |   |    |    |       |   |    |    |     |    |       |
|---------|---|----|----|-------|---|----|----|-----|----|-------|
| 116,224 | 2 | 47 | 11 | 739   | 1 | 21 | 3  | 326 | 17 | 1,133 |
| 116,225 | 2 | 47 | 11 | 741   | 1 | 21 | 3  | 329 | 17 | 1,138 |
| 116,226 | 2 | 48 | 11 | 788   | 1 | 21 | 4  | 333 | 18 | 1,190 |
| 116,227 | 2 | 47 | 11 | 789   | 1 | 21 | 4  | 332 | 18 | 1,189 |
| 116,228 | 2 | 44 | 10 | 781   | 1 | 21 | 4  | 325 | 17 | 1,171 |
| 116,229 | 2 | 41 | 10 | 764   | 0 | 19 | 4  | 304 | 16 | 1,128 |
| 116,230 | 2 | 45 | 10 | 1,090 | 0 | 26 | 3  | 375 | 15 | 1,536 |
| 116,231 | 2 | 46 | 8  | 1,132 | 0 | 24 | 3  | 370 | 13 | 1,572 |
| 116,232 | 2 | 45 | 7  | 1,160 | 0 | 25 | 3  | 368 | 12 | 1,598 |
| 116,233 | 1 | 44 | 7  | 1,160 | 0 | 25 | 3  | 368 | 11 | 1,597 |
| 116,234 | 1 | 43 | 7  | 1,151 | 0 | 22 | 3  | 363 | 11 | 1,579 |
| 116,235 | 1 | 39 | 4  | 1,129 | 0 | 22 | 3  | 354 | 8  | 1,544 |
| 116,236 | 1 | 35 | 4  | 1,099 | 0 | 22 | 3  | 341 | 8  | 1,497 |
| 116,237 | 1 | 35 | 5  | 1,105 | 0 | 22 | 4  | 347 | 10 | 1,509 |
| 116,238 | 1 | 36 | 5  | 1,109 | 0 | 22 | 3  | 354 | 9  | 1,521 |
| 116,239 | 1 | 36 | 6  | 1,112 | 0 | 22 | 4  | 351 | 11 | 1,521 |
| 116,240 | 1 | 36 | 6  | 1,113 | 0 | 22 | 4  | 353 | 11 | 1,524 |
| 116,241 | 1 | 36 | 7  | 1,114 | 0 | 22 | 4  | 357 | 12 | 1,529 |
| 116,242 | 1 | 36 | 8  | 1,128 | 0 | 22 | 4  | 362 | 13 | 1,548 |
| 116,243 | 1 | 36 | 8  | 1,137 | 0 | 22 | 4  | 366 | 13 | 1,561 |
| 116,244 | 1 | 36 | 8  | 1,161 | 0 | 23 | 4  | 372 | 13 | 1,592 |
| 116,245 | 1 | 34 | 8  | 1,241 | 0 | 27 | 4  | 400 | 13 | 1,702 |
| 116,246 | 1 | 37 | 8  | 1,296 | 0 | 27 | 5  | 413 | 14 | 1,773 |
| 116,247 | 1 | 37 | 8  | 1,391 | 0 | 27 | 5  | 435 | 14 | 1,890 |
| 116,248 | 1 | 38 | 8  | 1,421 | 0 | 28 | 5  | 461 | 14 | 1,948 |
| 116,249 | 1 | 44 | 8  | 1,497 | 0 | 33 | 5  | 526 | 14 | 2,100 |
| 116,250 | 1 | 44 | 8  | 1,495 | 0 | 33 | 5  | 526 | 14 | 2,098 |
| 116,251 | 2 | 47 | 8  | 1,537 | 0 | 33 | 5  | 542 | 15 | 2,159 |
| 116,252 | 2 | 55 | 8  | 1,628 | 0 | 37 | 5  | 576 | 15 | 2,296 |
| 116,253 | 2 | 54 | 8  | 1,632 | 0 | 37 | 5  | 574 | 15 | 2,297 |
| 116,254 | 2 | 53 | 8  | 1,611 | 0 | 36 | 6  | 563 | 16 | 2,263 |
| 116,255 | 2 | 49 | 17 | 1,539 | 0 | 33 | 10 | 501 | 29 | 2,122 |
| 116,256 | 2 | 50 | 18 | 1,527 | 0 | 32 | 10 | 499 | 30 | 2,108 |
| 116,257 | 2 | 50 | 18 | 1,533 | 0 | 33 | 10 | 503 | 30 | 2,119 |
| 116,258 | 2 | 42 | 19 | 1,464 | 0 | 30 | 10 | 472 | 31 | 2,008 |
| 116,259 | 2 | 38 | 19 | 1,391 | 1 | 28 | 10 | 440 | 32 | 1,897 |
| 116,260 | 2 | 38 | 19 | 1,393 | 1 | 28 | 10 | 441 | 32 | 1,900 |
| 116,261 | 2 | 37 | 20 | 1,390 | 1 | 28 | 10 | 439 | 33 | 1,894 |
| 116,262 | 2 | 37 | 21 | 1,426 | 1 | 28 | 10 | 447 | 34 | 1,938 |
| 116,263 | 2 | 37 | 24 | 1,434 | 1 | 29 | 12 | 450 | 39 | 1,950 |
| 116,264 | 2 | 40 | 24 | 1,457 | 1 | 30 | 12 | 455 | 39 | 1,982 |

|         |   |    |    |       |   |    |    |     |    |       |
|---------|---|----|----|-------|---|----|----|-----|----|-------|
| 116,265 | 2 | 40 | 24 | 1,455 | 1 | 29 | 12 | 454 | 39 | 1,978 |
| 116,266 | 2 | 40 | 34 | 1,452 | 1 | 29 | 19 | 451 | 56 | 1,972 |
| 116,267 | 2 | 41 | 34 | 1,433 | 1 | 28 | 19 | 443 | 56 | 1,945 |
| 116,268 | 1 | 41 | 34 | 1,395 | 1 | 28 | 19 | 436 | 55 | 1,900 |
| 116,269 | 1 | 41 | 34 | 1,399 | 1 | 28 | 19 | 431 | 55 | 1,899 |
| 116,270 | 1 | 42 | 35 | 1,432 | 1 | 28 | 19 | 450 | 56 | 1,952 |
| 116,271 | 1 | 44 | 35 | 1,496 | 1 | 28 | 20 | 453 | 57 | 2,021 |
| 116,272 | 1 | 45 | 35 | 1,554 | 1 | 32 | 20 | 494 | 57 | 2,125 |
| 116,273 | 1 | 46 | 35 | 1,584 | 1 | 32 | 20 | 504 | 57 | 2,166 |
| 116,274 | 1 | 54 | 35 | 1,768 | 1 | 40 | 20 | 553 | 57 | 2,415 |
| 116,275 | 1 | 56 | 35 | 1,785 | 1 | 41 | 20 | 559 | 57 | 2,441 |
| 116,276 | 1 | 57 | 35 | 1,786 | 1 | 41 | 20 | 560 | 57 | 2,444 |
| 116,277 | 1 | 56 | 35 | 1,745 | 1 | 41 | 19 | 559 | 56 | 2,401 |
| 116,278 | 1 | 55 | 35 | 1,730 | 1 | 41 | 19 | 557 | 56 | 2,383 |
| 116,279 | 1 | 55 | 35 | 1,684 | 1 | 42 | 19 | 578 | 56 | 2,359 |
| 116,280 | 1 | 55 | 35 | 1,685 | 1 | 42 | 19 | 580 | 56 | 2,362 |
| 116,281 | 2 | 49 | 36 | 1,363 | 1 | 36 | 19 | 522 | 58 | 1,970 |
| 116,282 | 2 | 46 | 38 | 1,278 | 2 | 36 | 19 | 506 | 61 | 1,866 |
| 116,283 | 2 | 46 | 38 | 1,247 | 2 | 35 | 19 | 505 | 61 | 1,833 |
| 116,284 | 2 | 52 | 38 | 1,274 | 2 | 37 | 21 | 546 | 63 | 1,909 |
| 116,285 | 2 | 52 | 38 | 1,271 | 2 | 37 | 21 | 548 | 63 | 1,908 |
| 116,286 | 2 | 52 | 38 | 1,279 | 2 | 37 | 21 | 558 | 63 | 1,926 |
| 116,287 | 2 | 55 | 38 | 1,315 | 2 | 38 | 21 | 598 | 63 | 2,006 |
| 116,288 | 2 | 55 | 37 | 1,311 | 2 | 39 | 20 | 593 | 61 | 1,998 |
| 116,289 | 2 | 59 | 37 | 1,365 | 2 | 42 | 20 | 623 | 61 | 2,089 |
| 116,290 | 2 | 59 | 36 | 1,360 | 2 | 43 | 19 | 623 | 59 | 2,085 |
| 116,291 | 2 | 60 | 38 | 1,403 | 2 | 43 | 19 | 632 | 61 | 2,138 |
| 116,292 | 2 | 63 | 39 | 1,459 | 3 | 47 | 19 | 671 | 63 | 2,240 |
| 116,293 | 2 | 70 | 38 | 1,433 | 3 | 47 | 19 | 670 | 62 | 2,220 |
| 116,294 | 2 | 83 | 39 | 1,622 | 3 | 53 | 20 | 772 | 64 | 2,530 |
| 116,295 | 2 | 83 | 39 | 1,628 | 3 | 53 | 20 | 777 | 64 | 2,541 |
| 116,296 | 2 | 81 | 39 | 1,504 | 3 | 49 | 20 | 736 | 64 | 2,370 |
| 116,297 | 2 | 81 | 39 | 1,410 | 3 | 49 | 20 | 714 | 64 | 2,254 |
| 116,298 | 2 | 74 | 39 | 1,293 | 3 | 41 | 20 | 618 | 64 | 2,026 |
| 116,299 | 2 | 74 | 39 | 1,302 | 3 | 41 | 21 | 626 | 65 | 2,043 |
| 116,300 | 2 | 74 | 39 | 1,304 | 3 | 42 | 21 | 631 | 65 | 2,051 |
| 116,301 | 3 | 79 | 39 | 1,397 | 3 | 46 | 26 | 774 | 71 | 2,296 |
| 116,302 | 2 | 81 | 39 | 1,390 | 3 | 48 | 26 | 779 | 70 | 2,298 |
| 116,303 | 2 | 74 | 39 | 1,336 | 3 | 47 | 26 | 772 | 70 | 2,229 |
| 116,304 | 2 | 74 | 39 | 1,331 | 3 | 47 | 25 | 767 | 69 | 2,219 |
| 116,305 | 2 | 74 | 36 | 1,328 | 3 | 47 | 25 | 765 | 66 | 2,214 |

|         |   |    |    |       |   |    |    |     |    |       |
|---------|---|----|----|-------|---|----|----|-----|----|-------|
| 116,306 | 2 | 70 | 32 | 1,301 | 3 | 47 | 22 | 754 | 59 | 2,172 |
| 116,307 | 2 | 70 | 31 | 1,302 | 3 | 47 | 22 | 754 | 58 | 2,173 |
| 116,308 | 2 | 70 | 30 | 1,291 | 3 | 46 | 22 | 751 | 57 | 2,158 |
| 116,309 | 2 | 70 | 30 | 1,291 | 3 | 46 | 22 | 751 | 57 | 2,158 |
| 116,310 | 2 | 70 | 30 | 1,286 | 2 | 46 | 22 | 748 | 56 | 2,150 |
| 116,311 | 2 | 70 | 33 | 1,292 | 2 | 46 | 24 | 752 | 61 | 2,160 |
| 116,312 | 2 | 70 | 33 | 1,255 | 2 | 46 | 23 | 744 | 60 | 2,115 |
| 116,313 | 2 | 70 | 32 | 1,256 | 2 | 46 | 23 | 746 | 59 | 2,118 |
| 116,314 | 2 | 70 | 29 | 1,255 | 2 | 46 | 21 | 750 | 54 | 2,121 |
| 116,315 | 2 | 67 | 21 | 1,238 | 2 | 45 | 17 | 748 | 42 | 2,098 |
| 116,316 | 2 | 70 | 21 | 1,291 | 2 | 49 | 17 | 802 | 42 | 2,212 |
| 116,317 | 2 | 70 | 18 | 1,320 | 2 | 54 | 15 | 826 | 37 | 2,270 |
| 116,318 | 2 | 73 | 18 | 1,329 | 2 | 60 | 15 | 841 | 37 | 2,303 |
| 116,319 | 2 | 73 | 19 | 1,343 | 2 | 60 | 15 | 843 | 38 | 2,319 |
| 116,320 | 2 | 73 | 19 | 1,329 | 2 | 60 | 16 | 844 | 39 | 2,306 |
| 116,321 | 2 | 75 | 18 | 1,309 | 2 | 63 | 16 | 857 | 38 | 2,304 |
| 116,322 | 2 | 73 | 18 | 1,242 | 2 | 63 | 15 | 855 | 37 | 2,233 |
| 116,323 | 2 | 72 | 18 | 1,182 | 2 | 59 | 15 | 815 | 37 | 2,128 |
| 116,324 | 2 | 72 | 18 | 1,167 | 2 | 60 | 15 | 820 | 37 | 2,119 |
| 116,325 | 2 | 64 | 18 | 974   | 2 | 52 | 15 | 767 | 37 | 1,857 |
| 116,326 | 2 | 62 | 18 | 955   | 2 | 51 | 15 | 763 | 37 | 1,831 |
| 116,327 | 2 | 61 | 19 | 944   | 2 | 51 | 15 | 755 | 38 | 1,811 |
| 116,328 | 2 | 61 | 19 | 946   | 2 | 51 | 15 | 757 | 38 | 1,815 |
| 116,329 | 2 | 61 | 20 | 946   | 2 | 51 | 15 | 762 | 39 | 1,820 |
| 116,330 | 2 | 61 | 20 | 934   | 2 | 50 | 16 | 738 | 40 | 1,783 |
| 116,331 | 1 | 61 | 20 | 932   | 2 | 50 | 16 | 736 | 39 | 1,779 |
| 116,332 | 1 | 61 | 19 | 918   | 2 | 49 | 16 | 713 | 38 | 1,741 |
| 116,333 | 1 | 60 | 17 | 912   | 1 | 49 | 16 | 711 | 35 | 1,732 |
| 116,334 | 1 | 60 | 17 | 912   | 1 | 49 | 16 | 707 | 35 | 1,728 |
| 116,335 | 1 | 55 | 18 | 880   | 1 | 47 | 15 | 665 | 35 | 1,647 |
| 116,336 | 1 | 55 | 18 | 880   | 1 | 47 | 15 | 664 | 35 | 1,646 |
| 116,337 | 1 | 55 | 22 | 869   | 1 | 47 | 15 | 656 | 39 | 1,627 |
| 116,338 | 1 | 53 | 22 | 831   | 1 | 45 | 15 | 625 | 39 | 1,554 |
| 116,339 | 1 | 54 | 24 | 832   | 1 | 44 | 18 | 626 | 44 | 1,556 |
| 116,340 | 1 | 50 | 26 | 777   | 1 | 43 | 18 | 597 | 46 | 1,467 |
| 116,341 | 1 | 39 | 26 | 648   | 1 | 37 | 19 | 526 | 47 | 1,250 |
| 116,342 | 1 | 39 | 26 | 648   | 1 | 37 | 19 | 526 | 47 | 1,250 |
| 116,343 | 1 | 25 | 24 | 440   | 0 | 31 | 18 | 414 | 43 | 910   |
| 116,344 | 1 | 25 | 24 | 442   | 0 | 31 | 18 | 416 | 43 | 914   |
| 116,345 | 2 | 25 | 23 | 442   | 0 | 31 | 17 | 415 | 42 | 913   |
| 116,346 | 2 | 25 | 23 | 442   | 0 | 31 | 17 | 415 | 42 | 913   |

|         |    |    |     |     |   |    |    |     |     |     |
|---------|----|----|-----|-----|---|----|----|-----|-----|-----|
| 116,347 | 2  | 25 | 23  | 444 | 0 | 31 | 18 | 416 | 43  | 916 |
| 116,348 | 2  | 25 | 24  | 442 | 0 | 31 | 18 | 413 | 44  | 911 |
| 116,349 | 4  | 25 | 31  | 431 | 1 | 31 | 19 | 405 | 55  | 892 |
| 116,350 | 4  | 25 | 31  | 432 | 1 | 31 | 17 | 406 | 53  | 894 |
| 116,351 | 5  | 20 | 35  | 336 | 1 | 26 | 15 | 260 | 56  | 642 |
| 116,352 | 5  | 20 | 44  | 336 | 1 | 26 | 14 | 260 | 64  | 642 |
| 116,353 | 6  | 15 | 69  | 300 | 1 | 24 | 19 | 238 | 95  | 577 |
| 116,354 | 7  | 14 | 69  | 253 | 1 | 21 | 21 | 210 | 98  | 498 |
| 116,355 | 7  | 15 | 69  | 255 | 1 | 21 | 21 | 210 | 98  | 501 |
| 116,356 | 7  | 15 | 68  | 255 | 1 | 21 | 20 | 210 | 96  | 501 |
| 116,357 | 7  | 15 | 67  | 255 | 1 | 21 | 20 | 210 | 95  | 501 |
| 116,358 | 7  | 15 | 68  | 253 | 1 | 21 | 20 | 210 | 96  | 499 |
| 116,359 | 7  | 16 | 68  | 255 | 1 | 21 | 20 | 209 | 96  | 501 |
| 116,360 | 8  | 17 | 68  | 258 | 1 | 21 | 20 | 211 | 97  | 507 |
| 116,361 | 8  | 17 | 65  | 255 | 1 | 21 | 19 | 211 | 93  | 504 |
| 116,362 | 8  | 17 | 65  | 250 | 1 | 21 | 20 | 206 | 94  | 494 |
| 116,363 | 8  | 17 | 68  | 248 | 1 | 21 | 20 | 206 | 97  | 492 |
| 116,364 | 8  | 17 | 67  | 248 | 1 | 21 | 20 | 199 | 96  | 485 |
| 116,365 | 8  | 17 | 67  | 244 | 1 | 20 | 23 | 194 | 99  | 475 |
| 116,366 | 8  | 18 | 67  | 239 | 1 | 20 | 23 | 189 | 99  | 466 |
| 116,367 | 8  | 16 | 70  | 181 | 1 | 16 | 23 | 137 | 102 | 350 |
| 116,368 | 8  | 16 | 70  | 141 | 1 | 12 | 23 | 115 | 102 | 284 |
| 116,369 | 8  | 12 | 70  | 113 | 1 | 6  | 23 | 98  | 102 | 229 |
| 116,370 | 8  | 12 | 71  | 101 | 1 | 6  | 25 | 98  | 105 | 217 |
| 116,371 | 8  | 9  | 71  | 76  | 1 | 3  | 24 | 66  | 104 | 154 |
| 116,372 | 8  | 9  | 71  | 76  | 1 | 3  | 24 | 66  | 104 | 154 |
| 116,373 | 8  | 9  | 74  | 75  | 1 | 3  | 25 | 63  | 108 | 150 |
| 116,374 | 9  | 9  | 94  | 71  | 2 | 3  | 27 | 63  | 132 | 146 |
| 116,375 | 9  | 8  | 97  | 58  | 2 | 2  | 31 | 51  | 139 | 119 |
| 116,376 | 11 | 8  | 106 | 60  | 2 | 2  | 43 | 52  | 162 | 122 |
| 116,377 | 11 | 8  | 106 | 62  | 2 | 2  | 43 | 50  | 162 | 122 |
| 116,378 | 11 | 10 | 109 | 66  | 2 | 2  | 43 | 50  | 165 | 128 |
| 116,379 | 11 | 10 | 109 | 77  | 2 | 2  | 43 | 54  | 165 | 143 |
| 116,380 | 11 | 11 | 108 | 82  | 2 | 2  | 43 | 51  | 164 | 146 |
| 116,381 | 11 | 11 | 108 | 80  | 2 | 2  | 42 | 50  | 163 | 143 |
| 116,382 | 11 | 11 | 108 | 81  | 2 | 2  | 42 | 50  | 163 | 144 |
| 116,383 | 11 | 11 | 112 | 82  | 2 | 2  | 43 | 50  | 168 | 145 |
| 116,384 | 11 | 11 | 114 | 83  | 2 | 2  | 44 | 52  | 171 | 148 |
| 116,385 | 11 | 11 | 114 | 86  | 2 | 2  | 44 | 57  | 171 | 156 |
| 116,386 | 12 | 12 | 116 | 97  | 2 | 2  | 43 | 67  | 173 | 178 |
| 116,387 | 12 | 12 | 112 | 110 | 2 | 3  | 43 | 73  | 169 | 198 |

|         |    |    |     |     |   |   |    |    |     |     |
|---------|----|----|-----|-----|---|---|----|----|-----|-----|
| 116,388 | 12 | 10 | 112 | 107 | 2 | 2 | 43 | 60 | 169 | 179 |
| 116,389 | 12 | 10 | 116 | 114 | 2 | 3 | 43 | 60 | 173 | 187 |
| 116,390 | 12 | 10 | 115 | 115 | 2 | 3 | 40 | 60 | 169 | 188 |
| 116,391 | 12 | 10 | 114 | 115 | 2 | 3 | 41 | 61 | 169 | 189 |
| 116,392 | 13 | 13 | 124 | 131 | 2 | 3 | 41 | 68 | 180 | 215 |
| 116,393 | 13 | 13 | 124 | 132 | 2 | 3 | 41 | 68 | 180 | 216 |
| 116,394 | 13 | 13 | 125 | 132 | 2 | 3 | 41 | 68 | 181 | 216 |
| 116,395 | 13 | 13 | 128 | 131 | 2 | 3 | 41 | 66 | 184 | 213 |
| 116,396 | 13 | 13 | 130 | 131 | 2 | 3 | 42 | 67 | 187 | 214 |
| 116,397 | 14 | 13 | 130 | 129 | 2 | 3 | 41 | 66 | 187 | 211 |
| 116,398 | 14 | 13 | 128 | 129 | 2 | 3 | 41 | 66 | 185 | 211 |
| 116,399 | 14 | 14 | 128 | 129 | 2 | 3 | 42 | 66 | 186 | 212 |
| 116,400 | 12 | 14 | 122 | 131 | 1 | 3 | 41 | 66 | 176 | 214 |
| 116,401 | 11 | 14 | 120 | 130 | 1 | 3 | 41 | 65 | 173 | 212 |
| 116,402 | 12 | 14 | 121 | 142 | 1 | 3 | 41 | 66 | 175 | 225 |
| 116,403 | 11 | 14 | 112 | 142 | 1 | 4 | 39 | 67 | 163 | 227 |
| 116,404 | 10 | 15 | 87  | 145 | 1 | 4 | 34 | 68 | 132 | 232 |
| 116,405 | 9  | 15 | 87  | 146 | 1 | 4 | 32 | 68 | 129 | 233 |
| 116,406 | 9  | 14 | 87  | 146 | 1 | 4 | 32 | 71 | 129 | 235 |
| 116,407 | 9  | 15 | 87  | 153 | 1 | 4 | 32 | 71 | 129 | 243 |
| 116,408 | 9  | 15 | 87  | 155 | 1 | 4 | 32 | 71 | 129 | 245 |
| 116,409 | 9  | 16 | 86  | 163 | 1 | 4 | 32 | 75 | 128 | 258 |
| 116,410 | 9  | 15 | 86  | 162 | 1 | 4 | 32 | 75 | 128 | 256 |
| 116,411 | 8  | 14 | 86  | 161 | 1 | 4 | 33 | 75 | 128 | 254 |
| 116,412 | 8  | 14 | 87  | 162 | 1 | 4 | 32 | 76 | 128 | 256 |
| 116,413 | 9  | 14 | 88  | 160 | 1 | 4 | 32 | 77 | 130 | 255 |
| 116,414 | 9  | 15 | 85  | 181 | 1 | 6 | 32 | 92 | 127 | 294 |
| 116,415 | 9  | 15 | 84  | 181 | 1 | 6 | 31 | 92 | 125 | 294 |
| 116,416 | 9  | 17 | 84  | 200 | 1 | 8 | 30 | 98 | 124 | 323 |
| 116,417 | 9  | 16 | 84  | 197 | 1 | 8 | 30 | 98 | 124 | 319 |
| 116,418 | 9  | 15 | 83  | 193 | 1 | 7 | 32 | 96 | 125 | 311 |
| 116,419 | 9  | 15 | 83  | 194 | 1 | 7 | 32 | 96 | 125 | 312 |
| 116,420 | 9  | 15 | 83  | 196 | 1 | 7 | 32 | 96 | 125 | 314 |
| 116,421 | 14 | 16 | 102 | 202 | 2 | 8 | 42 | 96 | 160 | 322 |
| 116,422 | 14 | 17 | 102 | 202 | 2 | 8 | 42 | 97 | 160 | 324 |
| 116,423 | 15 | 17 | 104 | 203 | 3 | 9 | 43 | 97 | 165 | 326 |
| 116,424 | 15 | 17 | 102 | 204 | 3 | 9 | 42 | 97 | 162 | 327 |
| 116,425 | 14 | 17 | 82  | 196 | 2 | 9 | 40 | 92 | 138 | 314 |
| 116,426 | 14 | 17 | 79  | 197 | 2 | 9 | 37 | 92 | 132 | 315 |
| 116,427 | 12 | 17 | 71  | 191 | 2 | 9 | 25 | 89 | 110 | 306 |
| 116,428 | 12 | 15 | 69  | 187 | 2 | 9 | 25 | 89 | 108 | 300 |



|         |    |    |    |     |   |    |    |    |     |     |
|---------|----|----|----|-----|---|----|----|----|-----|-----|
| 116,429 | 12 | 15 | 68 | 187 | 2 | 9  | 25 | 90 | 107 | 301 |
| 116,430 | 13 | 14 | 68 | 171 | 2 | 9  | 25 | 81 | 108 | 275 |
| 116,431 | 14 | 15 | 68 | 171 | 2 | 9  | 25 | 82 | 109 | 277 |
| 116,432 | 14 | 15 | 69 | 169 | 2 | 9  | 25 | 82 | 110 | 275 |
| 116,433 | 14 | 16 | 67 | 168 | 3 | 9  | 25 | 83 | 109 | 276 |
| 116,434 | 14 | 16 | 65 | 166 | 3 | 9  | 24 | 83 | 106 | 274 |
| 116,435 | 14 | 16 | 63 | 162 | 3 | 9  | 23 | 76 | 103 | 263 |
| 116,436 | 14 | 16 | 62 | 162 | 3 | 10 | 23 | 77 | 102 | 265 |
| 116,437 | 13 | 16 | 60 | 152 | 3 | 11 | 23 | 67 | 99  | 246 |
| 116,438 | 14 | 16 | 60 | 146 | 4 | 10 | 23 | 62 | 101 | 234 |
| 116,439 | 14 | 15 | 60 | 141 | 4 | 10 | 24 | 58 | 102 | 224 |
| 116,440 | 14 | 15 | 57 | 138 | 4 | 9  | 24 | 59 | 99  | 221 |
| 116,441 | 14 | 15 | 56 | 140 | 4 | 9  | 24 | 63 | 98  | 227 |
| 116,442 | 14 | 15 | 56 | 146 | 4 | 9  | 23 | 66 | 97  | 236 |
| 116,443 | 13 | 12 | 45 | 127 | 4 | 9  | 22 | 60 | 84  | 208 |
| 116,444 | 14 | 12 | 44 | 128 | 4 | 9  | 22 | 60 | 84  | 209 |
| 116,445 | 14 | 12 | 41 | 128 | 4 | 9  | 22 | 59 | 81  | 208 |
| 116,446 | 14 | 12 | 41 | 129 | 4 | 9  | 22 | 59 | 81  | 209 |
| 116,447 | 13 | 12 | 39 | 130 | 4 | 9  | 22 | 60 | 78  | 211 |
| 116,448 | 12 | 13 | 39 | 130 | 4 | 10 | 23 | 60 | 78  | 213 |
| 116,449 | 12 | 13 | 40 | 128 | 4 | 10 | 24 | 59 | 80  | 210 |
| 116,450 | 12 | 13 | 40 | 129 | 4 | 10 | 23 | 59 | 79  | 211 |
| 116,451 | 12 | 13 | 39 | 129 | 4 | 10 | 22 | 59 | 77  | 211 |
| 116,452 | 12 | 13 | 38 | 129 | 4 | 11 | 22 | 60 | 76  | 213 |
| 116,453 | 11 | 13 | 37 | 119 | 4 | 10 | 22 | 58 | 74  | 200 |
| 116,454 | 11 | 13 | 37 | 119 | 4 | 10 | 22 | 59 | 74  | 201 |
| 116,455 | 13 | 12 | 38 | 117 | 4 | 10 | 22 | 57 | 77  | 196 |
| 116,456 | 13 | 12 | 43 | 115 | 4 | 10 | 24 | 54 | 84  | 191 |
| 116,457 | 13 | 11 | 43 | 109 | 4 | 10 | 24 | 54 | 84  | 184 |
| 116,458 | 13 | 12 | 43 | 108 | 4 | 10 | 24 | 54 | 84  | 184 |
| 116,459 | 13 | 11 | 43 | 100 | 4 | 10 | 24 | 50 | 84  | 171 |
| 116,460 | 13 | 11 | 44 | 99  | 4 | 10 | 24 | 50 | 85  | 170 |
| 116,461 | 13 | 11 | 44 | 97  | 4 | 10 | 24 | 48 | 85  | 166 |
| 116,462 | 13 | 10 | 44 | 75  | 4 | 8  | 24 | 32 | 85  | 125 |
| 116,463 | 13 | 10 | 43 | 78  | 4 | 8  | 24 | 33 | 84  | 129 |
| 116,464 | 13 | 10 | 42 | 95  | 4 | 9  | 23 | 35 | 82  | 149 |
| 116,465 | 13 | 10 | 42 | 114 | 4 | 9  | 23 | 47 | 82  | 180 |
| 116,466 | 13 | 8  | 42 | 104 | 4 | 7  | 22 | 39 | 81  | 158 |
| 116,467 | 13 | 9  | 43 | 136 | 4 | 8  | 21 | 52 | 81  | 205 |
| 116,468 | 13 | 9  | 42 | 146 | 4 | 9  | 22 | 53 | 81  | 217 |
| 116,469 | 13 | 13 | 41 | 197 | 4 | 11 | 22 | 70 | 80  | 291 |

|         |    |    |    |     |   |    |    |     |    |     |
|---------|----|----|----|-----|---|----|----|-----|----|-----|
| 116,470 | 13 | 16 | 41 | 276 | 4 | 12 | 22 | 93  | 80 | 397 |
| 116,471 | 8  | 19 | 23 | 313 | 4 | 15 | 11 | 98  | 46 | 445 |
| 116,472 | 8  | 20 | 18 | 315 | 3 | 14 | 10 | 98  | 39 | 447 |
| 116,473 | 7  | 22 | 17 | 345 | 2 | 17 | 9  | 111 | 35 | 495 |
| 116,474 | 7  | 23 | 17 | 350 | 2 | 17 | 9  | 112 | 35 | 502 |
| 116,475 | 7  | 23 | 16 | 350 | 2 | 17 | 9  | 112 | 34 | 502 |
| 116,476 | 7  | 25 | 17 | 356 | 2 | 17 | 9  | 116 | 35 | 514 |
| 116,477 | 7  | 25 | 17 | 356 | 2 | 17 | 8  | 118 | 34 | 516 |
| 116,478 | 7  | 28 | 15 | 362 | 2 | 17 | 8  | 119 | 32 | 526 |
| 116,479 | 7  | 29 | 15 | 362 | 2 | 17 | 8  | 121 | 32 | 529 |
| 116,480 | 8  | 30 | 15 | 363 | 2 | 17 | 8  | 120 | 33 | 530 |
| 116,481 | 8  | 32 | 17 | 369 | 2 | 17 | 8  | 123 | 35 | 541 |
| 116,482 | 7  | 31 | 16 | 369 | 2 | 17 | 8  | 122 | 33 | 539 |
| 116,483 | 7  | 37 | 16 | 382 | 2 | 18 | 10 | 124 | 35 | 561 |
| 116,484 | 7  | 39 | 16 | 390 | 1 | 18 | 10 | 125 | 34 | 572 |
| 116,485 | 7  | 39 | 16 | 392 | 1 | 18 | 10 | 126 | 34 | 575 |
| 116,486 | 7  | 40 | 16 | 394 | 1 | 18 | 10 | 126 | 34 | 578 |
| 116,487 | 7  | 41 | 16 | 402 | 0 | 18 | 10 | 126 | 33 | 587 |
| 116,488 | 6  | 41 | 16 | 407 | 0 | 18 | 10 | 127 | 32 | 593 |
| 116,489 | 6  | 41 | 16 | 405 | 0 | 18 | 10 | 130 | 32 | 594 |
| 116,490 | 6  | 41 | 16 | 406 | 0 | 18 | 9  | 130 | 31 | 595 |
| 116,491 | 6  | 41 | 15 | 406 | 0 | 18 | 9  | 129 | 30 | 594 |
| 116,492 | 6  | 41 | 15 | 407 | 0 | 18 | 9  | 129 | 30 | 595 |
| 116,493 | 6  | 41 | 14 | 405 | 0 | 18 | 9  | 127 | 29 | 591 |
| 116,494 | 6  | 41 | 13 | 404 | 0 | 18 | 9  | 127 | 28 | 590 |
| 116,495 | 5  | 41 | 13 | 405 | 0 | 18 | 9  | 127 | 27 | 591 |
| 116,496 | 5  | 41 | 13 | 405 | 0 | 18 | 9  | 128 | 27 | 592 |
| 116,497 | 5  | 41 | 13 | 406 | 0 | 18 | 8  | 129 | 26 | 594 |
| 116,498 | 5  | 42 | 13 | 410 | 0 | 18 | 8  | 130 | 26 | 600 |
| 116,499 | 5  | 41 | 13 | 412 | 0 | 17 | 7  | 131 | 25 | 601 |
| 116,500 | 5  | 40 | 12 | 416 | 0 | 17 | 7  | 132 | 24 | 605 |
| 116,501 | 5  | 41 | 12 | 422 | 0 | 17 | 7  | 136 | 24 | 616 |
| 116,502 | 5  | 41 | 12 | 423 | 0 | 17 | 7  | 135 | 24 | 616 |
| 116,503 | 5  | 41 | 12 | 426 | 0 | 18 | 7  | 137 | 24 | 622 |
| 116,504 | 5  | 43 | 11 | 433 | 0 | 18 | 7  | 138 | 23 | 632 |
| 116,505 | 5  | 43 | 11 | 434 | 0 | 18 | 7  | 138 | 23 | 633 |
| 116,506 | 3  | 43 | 10 | 435 | 0 | 18 | 7  | 139 | 20 | 635 |
| 116,507 | 3  | 43 | 5  | 438 | 0 | 18 | 5  | 140 | 13 | 639 |
| 116,508 | 3  | 44 | 5  | 456 | 0 | 18 | 5  | 153 | 13 | 671 |
| 116,509 | 4  | 44 | 6  | 503 | 0 | 18 | 5  | 178 | 15 | 743 |
| 116,510 | 4  | 48 | 6  | 591 | 0 | 20 | 5  | 206 | 15 | 865 |

|         |   |     |    |       |   |     |   |       |    |        |
|---------|---|-----|----|-------|---|-----|---|-------|----|--------|
| 116,511 | 5 | 66  | 5  | 870   | 0 | 30  | 4 | 347   | 14 | 1,313  |
| 116,512 | 5 | 70  | 7  | 970   | 0 | 35  | 4 | 392   | 16 | 1,467  |
| 116,513 | 5 | 90  | 7  | 1,394 | 0 | 49  | 4 | 553   | 16 | 2,086  |
| 116,514 | 5 | 103 | 7  | 1,513 | 0 | 55  | 6 | 617   | 18 | 2,288  |
| 116,515 | 4 | 114 | 7  | 1,712 | 0 | 62  | 6 | 671   | 17 | 2,559  |
| 116,516 | 4 | 116 | 9  | 1,717 | 1 | 62  | 7 | 677   | 21 | 2,572  |
| 116,517 | 4 | 119 | 9  | 1,776 | 1 | 66  | 7 | 694   | 21 | 2,655  |
| 116,518 | 4 | 121 | 9  | 1,760 | 1 | 66  | 8 | 700   | 22 | 2,647  |
| 116,519 | 4 | 121 | 9  | 1,750 | 1 | 65  | 7 | 698   | 21 | 2,634  |
| 116,520 | 4 | 115 | 10 | 1,624 | 1 | 63  | 7 | 664   | 22 | 2,466  |
| 116,521 | 4 | 115 | 10 | 1,628 | 1 | 63  | 7 | 666   | 22 | 2,472  |
| 116,522 | 5 | 112 | 11 | 1,590 | 1 | 61  | 7 | 668   | 24 | 2,431  |
| 116,523 | 5 | 112 | 11 | 1,591 | 1 | 61  | 7 | 669   | 24 | 2,433  |
| 116,524 | 5 | 109 | 13 | 1,566 | 1 | 57  | 7 | 658   | 26 | 2,390  |
| 116,525 | 5 | 108 | 13 | 1,572 | 1 | 57  | 7 | 661   | 26 | 2,398  |
| 116,526 | 5 | 108 | 13 | 1,600 | 1 | 59  | 7 | 684   | 26 | 2,451  |
| 116,527 | 5 | 129 | 12 | 2,168 | 1 | 73  | 7 | 825   | 25 | 3,195  |
| 116,528 | 5 | 136 | 12 | 2,353 | 1 | 86  | 7 | 908   | 25 | 3,483  |
| 116,529 | 5 | 153 | 13 | 2,824 | 1 | 105 | 7 | 1,029 | 26 | 4,111  |
| 116,530 | 4 | 155 | 13 | 2,890 | 1 | 108 | 7 | 1,040 | 25 | 4,193  |
| 116,531 | 4 | 156 | 11 | 2,954 | 1 | 109 | 7 | 1,048 | 23 | 4,267  |
| 116,532 | 3 | 155 | 11 | 3,054 | 1 | 119 | 7 | 1,113 | 22 | 4,441  |
| 116,533 | 3 | 158 | 11 | 3,247 | 1 | 122 | 5 | 1,150 | 20 | 4,677  |
| 116,534 | 3 | 204 | 11 | 3,616 | 1 | 158 | 5 | 1,445 | 20 | 5,423  |
| 116,535 | 3 | 241 | 11 | 3,926 | 1 | 185 | 5 | 1,636 | 20 | 5,988  |
| 116,536 | 3 | 248 | 11 | 4,020 | 1 | 193 | 5 | 1,682 | 20 | 6,143  |
| 116,537 | 3 | 258 | 11 | 4,192 | 1 | 211 | 5 | 1,793 | 20 | 6,454  |
| 116,538 | 3 | 277 | 11 | 4,365 | 1 | 229 | 5 | 1,923 | 20 | 6,794  |
| 116,539 | 3 | 291 | 11 | 4,427 | 1 | 240 | 5 | 2,015 | 20 | 6,973  |
| 116,540 | 3 | 295 | 11 | 4,585 | 1 | 246 | 5 | 2,080 | 20 | 7,206  |
| 116,541 | 3 | 295 | 11 | 4,608 | 1 | 249 | 6 | 2,088 | 21 | 7,240  |
| 116,542 | 3 | 296 | 12 | 4,620 | 2 | 251 | 6 | 2,101 | 23 | 7,268  |
| 116,543 | 3 | 301 | 13 | 4,665 | 2 | 256 | 6 | 2,113 | 24 | 7,335  |
| 116,544 | 3 | 302 | 13 | 4,676 | 2 | 257 | 6 | 2,123 | 24 | 7,358  |
| 116,545 | 4 | 320 | 13 | 4,815 | 3 | 267 | 6 | 2,240 | 26 | 7,642  |
| 116,546 | 4 | 320 | 13 | 4,816 | 3 | 267 | 6 | 2,242 | 26 | 7,645  |
| 116,547 | 5 | 323 | 13 | 4,864 | 3 | 269 | 6 | 2,280 | 27 | 7,736  |
| 116,548 | 5 | 326 | 14 | 4,877 | 4 | 272 | 6 | 2,290 | 29 | 7,765  |
| 116,549 | 5 | 325 | 14 | 4,875 | 4 | 272 | 5 | 2,289 | 28 | 7,761  |
| 116,550 | 5 | 344 | 14 | 5,018 | 4 | 288 | 5 | 2,482 | 28 | 8,132  |
| 116,551 | 5 | 446 | 14 | 6,290 | 4 | 379 | 4 | 3,906 | 27 | 11,021 |

|         |   |     |    |       |   |     |   |       |    |        |
|---------|---|-----|----|-------|---|-----|---|-------|----|--------|
| 116,552 | 5 | 445 | 14 | 6,321 | 4 | 380 | 4 | 3,928 | 27 | 11,074 |
| 116,553 | 6 | 452 | 14 | 6,452 | 4 | 387 | 4 | 4,074 | 28 | 11,365 |
| 116,554 | 6 | 458 | 14 | 6,525 | 4 | 389 | 4 | 4,098 | 28 | 11,470 |
| 116,555 | 6 | 497 | 14 | 6,649 | 4 | 411 | 4 | 4,241 | 28 | 11,798 |
| 116,556 | 6 | 510 | 14 | 6,880 | 4 | 426 | 4 | 4,408 | 28 | 12,224 |
| 116,557 | 6 | 510 | 14 | 6,883 | 4 | 427 | 4 | 4,420 | 28 | 12,240 |
| 116,558 | 6 | 513 | 14 | 6,931 | 4 | 428 | 4 | 4,440 | 28 | 12,312 |
| 116,559 | 5 | 512 | 14 | 6,933 | 4 | 428 | 4 | 4,431 | 27 | 12,304 |
| 116,560 | 5 | 509 | 13 | 6,798 | 4 | 426 | 4 | 4,380 | 26 | 12,113 |
| 116,561 | 5 | 493 | 13 | 6,524 | 4 | 417 | 4 | 4,242 | 26 | 11,676 |
| 116,562 | 4 | 493 | 13 | 6,525 | 4 | 417 | 3 | 4,240 | 24 | 11,675 |
| 116,563 | 4 | 490 | 11 | 6,429 | 4 | 414 | 3 | 4,198 | 22 | 11,531 |
| 116,564 | 4 | 470 | 11 | 6,007 | 4 | 399 | 3 | 4,038 | 22 | 10,914 |
| 116,565 | 5 | 447 | 12 | 5,673 | 4 | 385 | 2 | 3,924 | 23 | 10,429 |
| 116,566 | 5 | 449 | 12 | 5,699 | 4 | 386 | 2 | 3,966 | 23 | 10,500 |
| 116,567 | 5 | 448 | 10 | 5,650 | 3 | 384 | 1 | 3,964 | 19 | 10,446 |
| 116,568 | 5 | 465 | 10 | 5,764 | 3 | 394 | 1 | 4,107 | 19 | 10,730 |
| 116,569 | 5 | 467 | 9  | 5,824 | 3 | 401 | 1 | 4,157 | 18 | 10,849 |
| 116,570 | 5 | 470 | 9  | 5,849 | 3 | 403 | 1 | 4,186 | 18 | 10,908 |
| 116,571 | 5 | 481 | 8  | 5,933 | 4 | 421 | 1 | 4,355 | 18 | 11,190 |
| 116,572 | 4 | 524 | 7  | 6,171 | 4 | 445 | 1 | 4,581 | 16 | 11,721 |
| 116,573 | 4 | 537 | 7  | 6,319 | 4 | 455 | 1 | 4,725 | 16 | 12,036 |
| 116,574 | 4 | 537 | 5  | 6,339 | 4 | 455 | 1 | 4,727 | 14 | 12,058 |
| 116,575 | 4 | 539 | 5  | 6,376 | 4 | 456 | 1 | 4,762 | 14 | 12,133 |
| 116,576 | 4 | 541 | 5  | 6,404 | 4 | 457 | 2 | 4,773 | 15 | 12,175 |
| 116,577 | 5 | 543 | 5  | 6,385 | 4 | 456 | 2 | 4,758 | 16 | 12,142 |
| 116,578 | 5 | 520 | 5  | 5,812 | 4 | 442 | 2 | 4,614 | 16 | 11,388 |
| 116,579 | 5 | 513 | 5  | 5,628 | 4 | 429 | 2 | 4,533 | 16 | 11,103 |
| 116,580 | 6 | 492 | 4  | 5,097 | 4 | 408 | 2 | 4,398 | 16 | 10,395 |
| 116,581 | 6 | 490 | 4  | 5,033 | 4 | 407 | 2 | 4,391 | 16 | 10,321 |
| 116,582 | 6 | 490 | 5  | 5,033 | 4 | 407 | 2 | 4,396 | 17 | 10,326 |
| 116,583 | 6 | 489 | 5  | 4,943 | 4 | 397 | 2 | 4,333 | 17 | 10,162 |
| 116,584 | 7 | 486 | 5  | 4,753 | 4 | 393 | 2 | 4,293 | 18 | 9,925  |
| 116,585 | 7 | 434 | 6  | 4,373 | 4 | 356 | 2 | 4,001 | 19 | 9,164  |
| 116,586 | 7 | 398 | 6  | 4,062 | 4 | 331 | 2 | 3,809 | 19 | 8,600  |
| 116,587 | 7 | 392 | 6  | 3,970 | 4 | 323 | 2 | 3,764 | 19 | 8,449  |
| 116,588 | 7 | 383 | 8  | 3,810 | 5 | 305 | 3 | 3,655 | 23 | 8,153  |
| 116,589 | 7 | 345 | 8  | 3,404 | 5 | 268 | 3 | 3,368 | 23 | 7,385  |
| 116,590 | 7 | 345 | 8  | 3,416 | 5 | 269 | 3 | 3,372 | 23 | 7,402  |
| 116,591 | 7 | 345 | 9  | 3,416 | 6 | 269 | 2 | 3,372 | 24 | 7,402  |
| 116,592 | 7 | 345 | 10 | 3,392 | 6 | 266 | 3 | 3,364 | 26 | 7,367  |

|         |   |     |    |       |   |     |    |       |    |       |
|---------|---|-----|----|-------|---|-----|----|-------|----|-------|
| 116,593 | 7 | 344 | 9  | 3,372 | 5 | 264 | 3  | 3,334 | 24 | 7,314 |
| 116,594 | 7 | 339 | 8  | 3,331 | 5 | 260 | 3  | 3,324 | 23 | 7,254 |
| 116,595 | 6 | 338 | 8  | 3,317 | 5 | 259 | 5  | 3,313 | 24 | 7,227 |
| 116,596 | 6 | 320 | 8  | 3,180 | 4 | 249 | 5  | 3,200 | 23 | 6,949 |
| 116,597 | 7 | 321 | 12 | 3,221 | 5 | 250 | 9  | 3,235 | 33 | 7,027 |
| 116,598 | 6 | 320 | 12 | 3,196 | 5 | 248 | 10 | 3,210 | 33 | 6,974 |
| 116,599 | 6 | 321 | 11 | 3,238 | 4 | 250 | 10 | 3,241 | 31 | 7,050 |
| 116,600 | 6 | 321 | 11 | 3,236 | 4 | 250 | 10 | 3,243 | 31 | 7,050 |
| 116,601 | 6 | 305 | 11 | 3,124 | 4 | 236 | 11 | 3,076 | 32 | 6,741 |
| 116,602 | 6 | 207 | 11 | 1,867 | 4 | 146 | 11 | 1,678 | 32 | 3,898 |
| 116,603 | 5 | 207 | 11 | 1,830 | 4 | 144 | 11 | 1,655 | 31 | 3,836 |
| 116,604 | 5 | 211 | 17 | 1,738 | 5 | 138 | 13 | 1,534 | 40 | 3,621 |
| 116,605 | 5 | 205 | 17 | 1,663 | 5 | 136 | 13 | 1,507 | 40 | 3,511 |
| 116,606 | 5 | 154 | 17 | 1,309 | 5 | 100 | 13 | 1,203 | 40 | 2,766 |
| 116,607 | 5 | 154 | 17 | 1,311 | 5 | 100 | 13 | 1,207 | 40 | 2,772 |
| 116,608 | 6 | 153 | 17 | 1,262 | 5 | 99  | 14 | 1,176 | 42 | 2,690 |
| 116,609 | 6 | 153 | 17 | 1,278 | 5 | 100 | 14 | 1,191 | 42 | 2,722 |
| 116,610 | 6 | 153 | 17 | 1,290 | 5 | 102 | 14 | 1,217 | 42 | 2,762 |
| 116,611 | 6 | 159 | 18 | 1,473 | 5 | 121 | 15 | 1,432 | 44 | 3,185 |
| 116,612 | 6 | 176 | 18 | 1,648 | 5 | 133 | 15 | 1,622 | 44 | 3,579 |
| 116,613 | 7 | 178 | 18 | 1,715 | 5 | 136 | 15 | 1,643 | 45 | 3,672 |
| 116,614 | 6 | 177 | 18 | 1,712 | 5 | 134 | 15 | 1,641 | 44 | 3,664 |
| 116,615 | 6 | 180 | 17 | 1,734 | 5 | 135 | 15 | 1,651 | 43 | 3,700 |
| 116,616 | 6 | 179 | 17 | 1,741 | 5 | 138 | 15 | 1,655 | 43 | 3,713 |
| 116,617 | 6 | 177 | 17 | 1,715 | 5 | 137 | 15 | 1,614 | 43 | 3,643 |
| 116,618 | 6 | 173 | 17 | 1,679 | 5 | 135 | 16 | 1,589 | 44 | 3,576 |
| 116,619 | 6 | 156 | 17 | 1,561 | 5 | 125 | 16 | 1,440 | 44 | 3,282 |
| 116,620 | 6 | 154 | 17 | 1,507 | 5 | 117 | 16 | 1,388 | 44 | 3,166 |
| 116,621 | 6 | 151 | 17 | 1,483 | 5 | 115 | 16 | 1,360 | 44 | 3,109 |
| 116,622 | 6 | 138 | 19 | 1,396 | 4 | 95  | 16 | 1,190 | 45 | 2,819 |
| 116,623 | 6 | 95  | 20 | 1,157 | 4 | 72  | 16 | 969   | 46 | 2,293 |
| 116,624 | 6 | 82  | 20 | 984   | 5 | 62  | 16 | 818   | 47 | 1,946 |
| 116,625 | 6 | 82  | 20 | 1,002 | 5 | 64  | 16 | 864   | 47 | 2,012 |
| 116,626 | 6 | 80  | 20 | 979   | 5 | 65  | 16 | 853   | 47 | 1,977 |
| 116,627 | 7 | 78  | 20 | 961   | 5 | 65  | 15 | 851   | 47 | 1,955 |
| 116,628 | 6 | 76  | 21 | 960   | 5 | 64  | 17 | 844   | 49 | 1,944 |
| 116,629 | 6 | 76  | 21 | 958   | 5 | 64  | 17 | 843   | 49 | 1,941 |
| 116,630 | 6 | 76  | 21 | 958   | 5 | 64  | 18 | 839   | 50 | 1,937 |
| 116,631 | 5 | 74  | 21 | 963   | 5 | 66  | 18 | 857   | 49 | 1,960 |
| 116,632 | 5 | 75  | 21 | 964   | 5 | 66  | 18 | 857   | 49 | 1,962 |
| 116,633 | 5 | 75  | 20 | 986   | 5 | 66  | 18 | 869   | 48 | 1,996 |

|         |   |     |    |       |   |     |    |       |     |       |
|---------|---|-----|----|-------|---|-----|----|-------|-----|-------|
| 116,634 | 5 | 82  | 21 | 1,133 | 5 | 77  | 18 | 1,155 | 49  | 2,447 |
| 116,635 | 4 | 84  | 21 | 1,320 | 5 | 84  | 19 | 1,295 | 49  | 2,783 |
| 116,636 | 4 | 107 | 20 | 1,603 | 5 | 128 | 19 | 1,737 | 48  | 3,575 |
| 116,637 | 4 | 104 | 20 | 1,608 | 5 | 127 | 19 | 1,745 | 48  | 3,584 |
| 116,638 | 4 | 107 | 21 | 1,669 | 5 | 131 | 21 | 1,812 | 51  | 3,719 |
| 116,639 | 5 | 107 | 19 | 1,666 | 4 | 131 | 20 | 1,813 | 48  | 3,717 |
| 116,640 | 5 | 109 | 19 | 1,668 | 4 | 131 | 20 | 1,823 | 48  | 3,731 |
| 116,641 | 5 | 116 | 19 | 1,696 | 4 | 136 | 20 | 1,863 | 48  | 3,811 |
| 116,642 | 5 | 119 | 18 | 1,799 | 4 | 139 | 20 | 1,942 | 47  | 3,999 |
| 116,643 | 5 | 123 | 17 | 1,922 | 4 | 142 | 20 | 2,006 | 46  | 4,193 |
| 116,644 | 5 | 123 | 19 | 1,950 | 4 | 144 | 25 | 2,029 | 53  | 4,246 |
| 116,645 | 5 | 126 | 19 | 1,951 | 5 | 144 | 24 | 2,032 | 53  | 4,253 |
| 116,646 | 5 | 127 | 19 | 2,020 | 5 | 148 | 24 | 2,091 | 53  | 4,386 |
| 116,647 | 4 | 135 | 15 | 2,211 | 4 | 151 | 20 | 2,196 | 43  | 4,693 |
| 116,648 | 4 | 164 | 15 | 2,429 | 4 | 199 | 20 | 2,607 | 43  | 5,399 |
| 116,649 | 4 | 167 | 15 | 2,456 | 4 | 204 | 19 | 2,648 | 42  | 5,475 |
| 116,650 | 4 | 179 | 15 | 2,594 | 4 | 209 | 19 | 2,735 | 42  | 5,717 |
| 116,651 | 5 | 184 | 15 | 2,644 | 4 | 211 | 19 | 2,767 | 43  | 5,806 |
| 116,652 | 6 | 187 | 16 | 2,653 | 4 | 208 | 18 | 2,784 | 44  | 5,832 |
| 116,653 | 6 | 199 | 14 | 2,695 | 4 | 222 | 17 | 2,903 | 41  | 6,019 |
| 116,654 | 6 | 200 | 11 | 2,692 | 3 | 222 | 17 | 2,898 | 37  | 6,012 |
| 116,655 | 6 | 189 | 12 | 2,671 | 3 | 221 | 17 | 2,900 | 38  | 5,981 |
| 116,656 | 6 | 189 | 12 | 2,675 | 3 | 221 | 17 | 2,905 | 38  | 5,990 |
| 116,657 | 7 | 197 | 41 | 2,739 | 5 | 229 | 28 | 2,971 | 81  | 6,136 |
| 116,658 | 7 | 198 | 41 | 2,752 | 5 | 229 | 28 | 2,969 | 81  | 6,148 |
| 116,659 | 6 | 196 | 57 | 2,752 | 6 | 228 | 31 | 2,967 | 100 | 6,143 |
| 116,660 | 6 | 196 | 57 | 2,742 | 6 | 227 | 31 | 2,950 | 100 | 6,115 |
| 116,661 | 6 | 196 | 57 | 2,723 | 6 | 225 | 31 | 2,921 | 100 | 6,065 |
| 116,662 | 6 | 188 | 57 | 2,552 | 6 | 208 | 30 | 2,709 | 99  | 5,657 |
| 116,663 | 6 | 169 | 63 | 2,392 | 7 | 199 | 31 | 2,526 | 107 | 5,286 |
| 116,664 | 5 | 167 | 65 | 2,328 | 7 | 195 | 34 | 2,506 | 111 | 5,196 |
| 116,665 | 5 | 164 | 65 | 2,314 | 7 | 194 | 34 | 2,495 | 111 | 5,167 |
| 116,666 | 6 | 165 | 67 | 2,320 | 7 | 194 | 34 | 2,500 | 114 | 5,179 |
| 116,667 | 6 | 167 | 68 | 2,318 | 7 | 192 | 34 | 2,488 | 115 | 5,165 |
| 116,668 | 6 | 167 | 68 | 2,317 | 7 | 192 | 33 | 2,487 | 114 | 5,163 |
| 116,669 | 6 | 167 | 68 | 2,308 | 7 | 192 | 33 | 2,481 | 114 | 5,148 |
| 116,670 | 6 | 167 | 68 | 2,302 | 7 | 192 | 33 | 2,478 | 114 | 5,139 |
| 116,671 | 6 | 164 | 68 | 2,291 | 7 | 192 | 33 | 2,469 | 114 | 5,116 |
| 116,672 | 6 | 164 | 67 | 2,295 | 7 | 192 | 33 | 2,470 | 113 | 5,121 |
| 116,673 | 6 | 164 | 66 | 2,288 | 7 | 192 | 33 | 2,467 | 112 | 5,111 |
| 116,674 | 6 | 164 | 65 | 2,288 | 7 | 192 | 33 | 2,459 | 111 | 5,103 |

|         |   |     |    |       |   |     |    |       |     |       |
|---------|---|-----|----|-------|---|-----|----|-------|-----|-------|
| 116,675 | 6 | 164 | 65 | 2,286 | 6 | 191 | 33 | 2,451 | 110 | 5,092 |
| 116,676 | 6 | 164 | 65 | 2,275 | 6 | 191 | 33 | 2,416 | 110 | 5,046 |
| 116,677 | 6 | 164 | 65 | 2,234 | 6 | 188 | 33 | 2,378 | 110 | 4,964 |
| 116,678 | 5 | 167 | 65 | 2,238 | 6 | 188 | 32 | 2,378 | 108 | 4,971 |
| 116,679 | 5 | 167 | 65 | 2,233 | 6 | 188 | 24 | 2,380 | 100 | 4,968 |
| 116,680 | 5 | 167 | 65 | 2,235 | 6 | 188 | 24 | 2,379 | 100 | 4,969 |
| 116,681 | 5 | 168 | 66 | 2,218 | 6 | 186 | 23 | 2,360 | 100 | 4,932 |
| 116,682 | 5 | 168 | 66 | 2,225 | 6 | 186 | 23 | 2,369 | 100 | 4,948 |
| 116,683 | 5 | 171 | 67 | 2,242 | 6 | 188 | 23 | 2,387 | 101 | 4,988 |
| 116,684 | 5 | 180 | 67 | 2,294 | 6 | 190 | 24 | 2,423 | 102 | 5,087 |
| 116,685 | 5 | 173 | 66 | 2,139 | 6 | 179 | 24 | 2,140 | 101 | 4,631 |
| 116,686 | 5 | 171 | 66 | 1,967 | 6 | 174 | 24 | 2,019 | 101 | 4,331 |
| 116,687 | 5 | 150 | 66 | 1,687 | 6 | 131 | 24 | 1,586 | 101 | 3,554 |
| 116,688 | 5 | 150 | 66 | 1,676 | 6 | 131 | 22 | 1,580 | 99  | 3,537 |
| 116,689 | 5 | 158 | 66 | 1,694 | 6 | 132 | 22 | 1,631 | 99  | 3,615 |
| 116,690 | 4 | 157 | 66 | 1,694 | 6 | 132 | 22 | 1,632 | 98  | 3,615 |
| 116,691 | 5 | 156 | 67 | 1,700 | 6 | 132 | 22 | 1,634 | 100 | 3,622 |
| 116,692 | 5 | 152 | 67 | 1,686 | 5 | 128 | 23 | 1,601 | 100 | 3,567 |
| 116,693 | 5 | 147 | 67 | 1,479 | 5 | 122 | 23 | 1,461 | 100 | 3,209 |
| 116,694 | 5 | 149 | 67 | 1,501 | 5 | 123 | 23 | 1,480 | 100 | 3,253 |
| 116,695 | 5 | 146 | 65 | 1,463 | 5 | 121 | 23 | 1,449 | 98  | 3,179 |
| 116,696 | 5 | 145 | 65 | 1,394 | 4 | 117 | 23 | 1,391 | 97  | 3,047 |
| 116,697 | 5 | 145 | 65 | 1,396 | 4 | 118 | 23 | 1,392 | 97  | 3,051 |
| 116,698 | 5 | 108 | 65 | 941   | 4 | 67  | 23 | 835   | 97  | 1,951 |
| 116,699 | 5 | 103 | 65 | 900   | 4 | 62  | 23 | 786   | 97  | 1,851 |
| 116,700 | 5 | 105 | 65 | 903   | 4 | 63  | 23 | 791   | 97  | 1,862 |
| 116,701 | 5 | 91  | 65 | 798   | 4 | 60  | 23 | 737   | 97  | 1,686 |
| 116,702 | 4 | 88  | 65 | 981   | 4 | 58  | 24 | 785   | 97  | 1,912 |
| 116,703 | 3 | 83  | 64 | 1,043 | 4 | 65  | 24 | 821   | 95  | 2,012 |
| 116,704 | 3 | 69  | 63 | 1,059 | 4 | 55  | 23 | 719   | 93  | 1,902 |
| 116,705 | 3 | 68  | 49 | 1,087 | 3 | 56  | 18 | 735   | 73  | 1,946 |
| 116,706 | 2 | 68  | 35 | 1,072 | 3 | 55  | 12 | 717   | 52  | 1,912 |
| 116,707 | 3 | 68  | 24 | 1,073 | 2 | 56  | 10 | 715   | 39  | 1,912 |
| 116,708 | 3 | 57  | 19 | 1,009 | 2 | 48  | 8  | 654   | 32  | 1,768 |
| 116,709 | 3 | 61  | 19 | 1,038 | 2 | 51  | 8  | 690   | 32  | 1,840 |
| 116,710 | 4 | 72  | 21 | 1,112 | 2 | 62  | 8  | 773   | 35  | 2,019 |
| 116,711 | 4 | 79  | 21 | 1,205 | 2 | 74  | 8  | 853   | 35  | 2,211 |
| 116,712 | 4 | 80  | 21 | 1,236 | 2 | 76  | 8  | 872   | 35  | 2,264 |
| 116,713 | 4 | 87  | 20 | 1,267 | 2 | 80  | 8  | 923   | 34  | 2,357 |
| 116,714 | 4 | 106 | 14 | 1,351 | 1 | 91  | 7  | 1,036 | 26  | 2,584 |
| 116,715 | 4 | 106 | 12 | 1,361 | 1 | 91  | 4  | 1,042 | 21  | 2,600 |

|         |   |     |    |       |   |     |    |       |     |       |
|---------|---|-----|----|-------|---|-----|----|-------|-----|-------|
| 116,716 | 4 | 135 | 12 | 1,594 | 1 | 109 | 4  | 1,252 | 21  | 3,090 |
| 116,717 | 3 | 135 | 10 | 1,622 | 1 | 109 | 4  | 1,259 | 18  | 3,125 |
| 116,718 | 4 | 136 | 10 | 1,645 | 1 | 109 | 5  | 1,278 | 20  | 3,168 |
| 116,719 | 4 | 151 | 10 | 1,741 | 1 | 115 | 6  | 1,348 | 21  | 3,355 |
| 116,720 | 4 | 151 | 10 | 1,746 | 1 | 116 | 6  | 1,350 | 21  | 3,363 |
| 116,721 | 4 | 151 | 11 | 1,749 | 1 | 116 | 6  | 1,351 | 22  | 3,367 |
| 116,722 | 8 | 153 | 29 | 1,785 | 2 | 117 | 19 | 1,384 | 58  | 3,439 |
| 116,723 | 8 | 154 | 46 | 1,801 | 2 | 117 | 24 | 1,386 | 80  | 3,458 |
| 116,724 | 8 | 156 | 58 | 1,836 | 3 | 117 | 32 | 1,403 | 101 | 3,512 |
| 116,725 | 8 | 156 | 61 | 1,836 | 3 | 118 | 32 | 1,404 | 104 | 3,514 |
| 116,726 | 8 | 154 | 65 | 1,823 | 3 | 116 | 35 | 1,392 | 111 | 3,485 |
| 116,727 | 8 | 154 | 66 | 1,824 | 3 | 116 | 35 | 1,394 | 112 | 3,488 |
| 116,728 | 8 | 155 | 70 | 1,826 | 3 | 116 | 37 | 1,396 | 118 | 3,493 |
| 116,729 | 8 | 158 | 70 | 1,830 | 3 | 119 | 37 | 1,394 | 118 | 3,501 |
| 116,730 | 8 | 158 | 69 | 1,836 | 3 | 119 | 37 | 1,396 | 117 | 3,509 |
| 116,731 | 8 | 164 | 69 | 1,889 | 3 | 125 | 37 | 1,432 | 117 | 3,610 |
| 116,732 | 8 | 164 | 68 | 1,894 | 3 | 125 | 38 | 1,432 | 117 | 3,615 |
| 116,733 | 8 | 198 | 68 | 2,268 | 3 | 154 | 39 | 1,715 | 118 | 4,335 |
| 116,734 | 8 | 200 | 67 | 2,290 | 3 | 155 | 39 | 1,748 | 117 | 4,393 |
| 116,735 | 8 | 209 | 68 | 2,430 | 3 | 160 | 38 | 1,755 | 117 | 4,554 |
| 116,736 | 8 | 311 | 68 | 2,753 | 3 | 194 | 38 | 2,134 | 117 | 5,392 |
| 116,737 | 8 | 314 | 68 | 2,783 | 3 | 194 | 38 | 2,143 | 117 | 5,434 |
| 116,738 | 8 | 388 | 67 | 3,042 | 3 | 207 | 38 | 2,338 | 116 | 5,975 |
| 116,739 | 8 | 389 | 66 | 3,048 | 3 | 207 | 38 | 2,339 | 115 | 5,983 |
| 116,740 | 8 | 386 | 67 | 3,009 | 3 | 207 | 40 | 2,260 | 118 | 5,862 |
| 116,741 | 7 | 465 | 67 | 3,218 | 3 | 219 | 40 | 2,435 | 117 | 6,337 |
| 116,742 | 7 | 465 | 67 | 3,247 | 3 | 219 | 40 | 2,430 | 117 | 6,361 |
| 116,743 | 7 | 467 | 68 | 3,270 | 3 | 218 | 39 | 2,441 | 117 | 6,396 |
| 116,744 | 7 | 467 | 68 | 3,253 | 3 | 218 | 39 | 2,438 | 117 | 6,376 |
| 116,745 | 8 | 468 | 70 | 3,247 | 3 | 217 | 41 | 2,422 | 122 | 6,354 |
| 116,746 | 8 | 470 | 70 | 3,255 | 3 | 216 | 41 | 2,420 | 122 | 6,361 |
| 116,747 | 8 | 470 | 70 | 3,262 | 3 | 217 | 41 | 2,426 | 122 | 6,375 |
| 116,748 | 8 | 471 | 70 | 3,276 | 3 | 217 | 41 | 2,433 | 122 | 6,397 |
| 116,749 | 8 | 472 | 70 | 3,287 | 3 | 218 | 41 | 2,444 | 122 | 6,421 |
| 116,750 | 8 | 472 | 70 | 3,280 | 3 | 218 | 41 | 2,448 | 122 | 6,418 |
| 116,751 | 8 | 470 | 72 | 3,284 | 3 | 217 | 42 | 2,458 | 125 | 6,429 |
| 116,752 | 8 | 487 | 72 | 3,298 | 3 | 219 | 42 | 2,496 | 125 | 6,500 |
| 116,753 | 8 | 487 | 72 | 3,103 | 3 | 222 | 41 | 2,460 | 124 | 6,272 |
| 116,754 | 9 | 487 | 72 | 3,018 | 3 | 216 | 44 | 2,413 | 128 | 6,134 |
| 116,755 | 9 | 488 | 72 | 2,964 | 3 | 213 | 44 | 2,407 | 128 | 6,072 |
| 116,756 | 9 | 489 | 70 | 2,938 | 3 | 212 | 44 | 2,392 | 126 | 6,031 |



|         |    |     |    |       |   |     |    |       |     |        |
|---------|----|-----|----|-------|---|-----|----|-------|-----|--------|
| 116,757 | 10 | 489 | 70 | 2,930 | 2 | 212 | 43 | 2,384 | 125 | 6,015  |
| 116,758 | 9  | 490 | 70 | 2,935 | 2 | 212 | 43 | 2,394 | 124 | 6,031  |
| 116,759 | 9  | 490 | 70 | 2,920 | 2 | 211 | 43 | 2,372 | 124 | 5,993  |
| 116,760 | 9  | 476 | 73 | 2,805 | 2 | 197 | 44 | 2,264 | 128 | 5,742  |
| 116,761 | 8  | 476 | 71 | 2,806 | 2 | 197 | 44 | 2,265 | 125 | 5,744  |
| 116,762 | 8  | 468 | 71 | 2,663 | 2 | 183 | 45 | 2,168 | 126 | 5,482  |
| 116,763 | 8  | 461 | 71 | 2,636 | 2 | 179 | 45 | 2,131 | 126 | 5,407  |
| 116,764 | 9  | 442 | 73 | 2,521 | 2 | 167 | 47 | 2,007 | 131 | 5,137  |
| 116,765 | 9  | 442 | 75 | 2,524 | 2 | 169 | 47 | 2,010 | 133 | 5,145  |
| 116,766 | 9  | 442 | 75 | 2,529 | 2 | 170 | 47 | 2,014 | 133 | 5,155  |
| 116,767 | 9  | 446 | 75 | 2,524 | 2 | 180 | 47 | 2,093 | 133 | 5,243  |
| 116,768 | 8  | 465 | 74 | 2,643 | 2 | 191 | 46 | 2,202 | 130 | 5,501  |
| 116,769 | 8  | 494 | 75 | 3,358 | 2 | 281 | 48 | 2,916 | 133 | 7,049  |
| 116,770 | 8  | 658 | 75 | 4,316 | 2 | 416 | 49 | 3,894 | 134 | 9,284  |
| 116,771 | 8  | 717 | 74 | 4,934 | 2 | 487 | 49 | 4,256 | 133 | 10,394 |
| 116,772 | 4  | 729 | 63 | 5,095 | 2 | 495 | 41 | 4,314 | 110 | 10,633 |
| 116,773 | 4  | 746 | 57 | 5,198 | 1 | 529 | 37 | 4,469 | 99  | 10,942 |
| 116,774 | 4  | 797 | 40 | 5,820 | 1 | 596 | 32 | 4,899 | 77  | 12,112 |
| 116,775 | 4  | 796 | 28 | 5,803 | 0 | 597 | 24 | 4,890 | 56  | 12,086 |
| 116,776 | 4  | 837 | 30 | 6,047 | 0 | 619 | 30 | 5,032 | 64  | 12,535 |
| 116,777 | 4  | 911 | 27 | 6,303 | 0 | 647 | 27 | 5,155 | 58  | 13,016 |
| 116,778 | 4  | 925 | 28 | 6,414 | 0 | 659 | 27 | 5,197 | 59  | 13,195 |
| 116,779 | 4  | 924 | 24 | 6,416 | 0 | 656 | 25 | 5,192 | 53  | 13,188 |
| 116,780 | 4  | 925 | 24 | 6,451 | 0 | 656 | 25 | 5,201 | 53  | 13,233 |
| 116,781 | 4  | 927 | 26 | 6,463 | 0 | 656 | 26 | 5,203 | 56  | 13,249 |
| 116,782 | 4  | 921 | 26 | 6,412 | 0 | 650 | 26 | 5,171 | 56  | 13,154 |
| 116,783 | 4  | 922 | 26 | 6,424 | 0 | 650 | 25 | 5,176 | 55  | 13,172 |
| 116,784 | 4  | 890 | 26 | 6,063 | 0 | 622 | 25 | 4,893 | 55  | 12,468 |
| 116,785 | 4  | 887 | 26 | 6,045 | 0 | 618 | 25 | 4,852 | 55  | 12,402 |
| 116,786 | 4  | 870 | 26 | 5,844 | 0 | 612 | 25 | 4,801 | 55  | 12,127 |
| 116,787 | 4  | 768 | 27 | 5,524 | 0 | 578 | 25 | 4,419 | 56  | 11,289 |
| 116,788 | 4  | 768 | 27 | 5,494 | 0 | 577 | 24 | 4,406 | 55  | 11,245 |
| 116,789 | 5  | 697 | 28 | 5,379 | 0 | 566 | 24 | 4,296 | 57  | 10,938 |
| 116,790 | 5  | 696 | 28 | 5,386 | 0 | 566 | 23 | 4,296 | 56  | 10,944 |
| 116,791 | 5  | 687 | 30 | 5,351 | 0 | 562 | 26 | 4,263 | 61  | 10,863 |
| 116,792 | 5  | 607 | 29 | 5,146 | 0 | 550 | 26 | 4,089 | 60  | 10,392 |
| 116,793 | 5  | 605 | 29 | 5,091 | 0 | 549 | 26 | 4,070 | 60  | 10,315 |
| 116,794 | 5  | 600 | 30 | 5,050 | 0 | 549 | 24 | 4,047 | 59  | 10,246 |
| 116,795 | 5  | 597 | 31 | 5,036 | 0 | 549 | 25 | 4,044 | 61  | 10,226 |
| 116,796 | 4  | 597 | 30 | 5,047 | 0 | 549 | 25 | 4,060 | 59  | 10,253 |
| 116,797 | 4  | 595 | 35 | 5,093 | 0 | 552 | 26 | 4,128 | 65  | 10,368 |

|         |   |     |    |       |   |     |    |       |     |        |
|---------|---|-----|----|-------|---|-----|----|-------|-----|--------|
| 116,798 | 5 | 595 | 38 | 5,188 | 0 | 556 | 27 | 4,250 | 70  | 10,589 |
| 116,799 | 5 | 596 | 46 | 5,181 | 0 | 555 | 30 | 4,249 | 81  | 10,581 |
| 116,800 | 5 | 595 | 48 | 5,175 | 0 | 554 | 29 | 4,239 | 82  | 10,563 |
| 116,801 | 6 | 594 | 54 | 5,162 | 1 | 554 | 35 | 4,213 | 96  | 10,523 |
| 116,802 | 6 | 575 | 62 | 5,060 | 1 | 545 | 36 | 4,107 | 105 | 10,287 |
| 116,803 | 7 | 572 | 69 | 5,015 | 3 | 542 | 42 | 4,067 | 121 | 10,196 |
| 116,804 | 7 | 572 | 69 | 5,015 | 3 | 542 | 42 | 4,066 | 121 | 10,195 |
| 116,805 | 7 | 572 | 69 | 5,002 | 3 | 540 | 43 | 4,039 | 122 | 10,153 |
| 116,806 | 7 | 569 | 72 | 4,985 | 3 | 538 | 44 | 4,014 | 126 | 10,106 |
| 116,807 | 7 | 568 | 72 | 4,981 | 3 | 537 | 44 | 4,012 | 126 | 10,098 |
| 116,808 | 6 | 567 | 72 | 4,976 | 3 | 537 | 44 | 4,002 | 125 | 10,082 |
| 116,809 | 6 | 567 | 72 | 4,976 | 3 | 537 | 44 | 4,003 | 125 | 10,083 |
| 116,810 | 6 | 567 | 69 | 4,967 | 4 | 536 | 43 | 3,996 | 122 | 10,066 |
| 116,811 | 6 | 565 | 70 | 4,954 | 4 | 535 | 43 | 3,988 | 123 | 10,042 |
| 116,812 | 6 | 565 | 70 | 4,956 | 4 | 535 | 43 | 3,991 | 123 | 10,047 |
| 116,813 | 6 | 566 | 70 | 4,952 | 4 | 535 | 42 | 3,988 | 122 | 10,041 |
| 116,814 | 6 | 566 | 70 | 4,953 | 4 | 535 | 42 | 3,988 | 122 | 10,042 |
| 116,815 | 5 | 566 | 74 | 4,951 | 4 | 533 | 44 | 3,979 | 127 | 10,029 |
| 116,816 | 5 | 567 | 72 | 4,953 | 4 | 531 | 44 | 3,979 | 125 | 10,030 |
| 116,817 | 6 | 568 | 72 | 4,948 | 4 | 529 | 44 | 3,975 | 126 | 10,020 |
| 116,818 | 6 | 515 | 71 | 4,557 | 4 | 491 | 43 | 3,570 | 124 | 9,133  |
| 116,819 | 6 | 515 | 71 | 4,557 | 4 | 491 | 43 | 3,570 | 124 | 9,133  |
| 116,820 | 7 | 483 | 75 | 3,815 | 4 | 399 | 44 | 2,840 | 130 | 7,537  |
| 116,821 | 7 | 304 | 75 | 2,767 | 4 | 261 | 44 | 1,802 | 130 | 5,134  |
| 116,822 | 7 | 248 | 78 | 2,159 | 4 | 189 | 44 | 1,458 | 133 | 4,054  |
| 116,823 | 7 | 237 | 78 | 1,999 | 4 | 181 | 43 | 1,404 | 132 | 3,821  |
| 116,824 | 7 | 218 | 77 | 1,860 | 4 | 146 | 43 | 1,219 | 131 | 3,443  |
| 116,825 | 7 | 49  | 77 | 701   | 4 | 27  | 43 | 520   | 131 | 1,297  |
| 116,826 | 7 | 51  | 77 | 712   | 4 | 27  | 42 | 531   | 130 | 1,321  |
| 116,827 | 7 | 52  | 72 | 721   | 4 | 28  | 37 | 539   | 120 | 1,340  |
| 116,828 | 7 | 53  | 71 | 755   | 4 | 31  | 37 | 577   | 119 | 1,416  |
| 116,829 | 7 | 54  | 69 | 727   | 4 | 26  | 36 | 647   | 116 | 1,454  |
| 116,830 | 7 | 59  | 69 | 761   | 4 | 28  | 36 | 676   | 116 | 1,524  |
| 116,831 | 7 | 58  | 76 | 738   | 4 | 31  | 37 | 689   | 124 | 1,516  |
| 116,832 | 7 | 59  | 75 | 775   | 4 | 33  | 36 | 725   | 122 | 1,592  |
| 116,833 | 7 | 69  | 77 | 872   | 4 | 46  | 37 | 864   | 125 | 1,851  |
| 116,834 | 7 | 84  | 78 | 952   | 4 | 53  | 37 | 981   | 126 | 2,070  |
| 116,835 | 7 | 85  | 78 | 968   | 4 | 54  | 37 | 997   | 126 | 2,104  |
| 116,836 | 7 | 146 | 77 | 1,820 | 4 | 135 | 37 | 1,731 | 125 | 3,832  |
| 116,837 | 7 | 252 | 78 | 3,085 | 4 | 226 | 37 | 2,974 | 126 | 6,537  |
| 116,838 | 7 | 254 | 77 | 3,280 | 4 | 233 | 37 | 3,036 | 125 | 6,803  |

|         |   |     |    |       |   |     |    |       |     |        |
|---------|---|-----|----|-------|---|-----|----|-------|-----|--------|
| 116,839 | 7 | 273 | 77 | 3,568 | 4 | 258 | 37 | 3,228 | 125 | 7,327  |
| 116,840 | 6 | 282 | 76 | 3,581 | 4 | 258 | 37 | 3,164 | 123 | 7,285  |
| 116,841 | 6 | 338 | 75 | 3,719 | 4 | 266 | 35 | 3,300 | 120 | 7,623  |
| 116,842 | 6 | 341 | 73 | 3,736 | 4 | 265 | 34 | 3,312 | 117 | 7,654  |
| 116,843 | 6 | 373 | 74 | 3,902 | 4 | 280 | 34 | 3,512 | 118 | 8,067  |
| 116,844 | 6 | 373 | 74 | 3,910 | 4 | 280 | 34 | 3,518 | 118 | 8,081  |
| 116,845 | 6 | 373 | 74 | 3,942 | 4 | 280 | 34 | 3,532 | 118 | 8,127  |
| 116,846 | 6 | 385 | 73 | 4,046 | 4 | 288 | 33 | 3,642 | 116 | 8,361  |
| 116,847 | 6 | 385 | 71 | 4,035 | 4 | 288 | 32 | 3,633 | 113 | 8,341  |
| 116,848 | 6 | 406 | 68 | 4,096 | 4 | 294 | 32 | 3,662 | 110 | 8,458  |
| 116,849 | 5 | 407 | 65 | 4,039 | 4 | 290 | 31 | 3,567 | 105 | 8,303  |
| 116,850 | 5 | 405 | 59 | 4,053 | 4 | 291 | 29 | 3,577 | 97  | 8,326  |
| 116,851 | 5 | 408 | 57 | 4,106 | 4 | 302 | 29 | 3,661 | 95  | 8,477  |
| 116,852 | 5 | 411 | 50 | 4,129 | 3 | 302 | 24 | 3,691 | 82  | 8,533  |
| 116,853 | 5 | 421 | 42 | 4,220 | 3 | 314 | 24 | 3,861 | 74  | 8,816  |
| 116,854 | 3 | 428 | 35 | 4,284 | 1 | 317 | 15 | 3,947 | 54  | 8,976  |
| 116,855 | 3 | 431 | 35 | 4,321 | 1 | 318 | 14 | 3,982 | 53  | 9,052  |
| 116,856 | 3 | 436 | 34 | 4,370 | 1 | 324 | 14 | 4,038 | 52  | 9,168  |
| 116,857 | 3 | 436 | 32 | 4,384 | 1 | 326 | 13 | 4,052 | 49  | 9,198  |
| 116,858 | 3 | 442 | 32 | 4,410 | 1 | 326 | 13 | 4,076 | 49  | 9,254  |
| 116,859 | 3 | 442 | 32 | 4,413 | 1 | 326 | 13 | 4,080 | 49  | 9,261  |
| 116,860 | 4 | 442 | 53 | 4,425 | 1 | 327 | 19 | 4,091 | 77  | 9,285  |
| 116,861 | 4 | 448 | 56 | 4,454 | 1 | 331 | 19 | 4,133 | 80  | 9,366  |
| 116,862 | 4 | 448 | 55 | 4,455 | 1 | 331 | 19 | 4,133 | 79  | 9,367  |
| 116,863 | 4 | 449 | 59 | 4,484 | 1 | 332 | 19 | 4,143 | 83  | 9,408  |
| 116,864 | 4 | 446 | 59 | 4,492 | 1 | 333 | 19 | 4,150 | 83  | 9,421  |
| 116,865 | 4 | 446 | 58 | 4,497 | 1 | 333 | 17 | 4,150 | 80  | 9,426  |
| 116,866 | 5 | 446 | 54 | 4,499 | 1 | 333 | 15 | 4,155 | 75  | 9,433  |
| 116,867 | 5 | 446 | 54 | 4,510 | 1 | 333 | 15 | 4,165 | 75  | 9,454  |
| 116,868 | 4 | 446 | 56 | 4,526 | 1 | 333 | 14 | 4,175 | 75  | 9,480  |
| 116,869 | 4 | 450 | 56 | 4,552 | 1 | 337 | 14 | 4,223 | 75  | 9,562  |
| 116,870 | 4 | 470 | 55 | 4,774 | 1 | 359 | 14 | 4,523 | 74  | 10,126 |
| 116,871 | 3 | 471 | 52 | 4,803 | 1 | 359 | 12 | 4,544 | 68  | 10,177 |
| 116,872 | 4 | 474 | 54 | 4,809 | 2 | 359 | 12 | 4,554 | 72  | 10,196 |
| 116,873 | 4 | 470 | 51 | 4,791 | 2 | 359 | 13 | 4,532 | 70  | 10,152 |
| 116,874 | 4 | 470 | 52 | 4,796 | 2 | 359 | 13 | 4,533 | 71  | 10,158 |
| 116,875 | 5 | 471 | 55 | 4,795 | 2 | 360 | 13 | 4,538 | 75  | 10,164 |
| 116,876 | 5 | 471 | 55 | 4,798 | 2 | 360 | 13 | 4,538 | 75  | 10,167 |
| 116,877 | 5 | 469 | 55 | 4,794 | 2 | 360 | 14 | 4,529 | 76  | 10,152 |
| 116,878 | 5 | 468 | 58 | 4,799 | 2 | 363 | 14 | 4,535 | 79  | 10,165 |
| 116,879 | 5 | 467 | 58 | 4,772 | 2 | 360 | 14 | 4,498 | 79  | 10,097 |

|         |   |     |    |       |   |     |    |       |    |       |
|---------|---|-----|----|-------|---|-----|----|-------|----|-------|
| 116,880 | 5 | 443 | 58 | 4,614 | 2 | 348 | 14 | 4,322 | 79 | 9,727 |
| 116,881 | 5 | 445 | 58 | 4,642 | 2 | 350 | 14 | 4,338 | 79 | 9,775 |
| 116,882 | 5 | 445 | 50 | 4,649 | 2 | 350 | 13 | 4,327 | 70 | 9,771 |
| 116,883 | 6 | 444 | 51 | 4,637 | 2 | 348 | 13 | 4,293 | 72 | 9,722 |
| 116,884 | 6 | 433 | 51 | 4,549 | 2 | 336 | 13 | 4,170 | 72 | 9,488 |
| 116,885 | 6 | 416 | 50 | 4,439 | 2 | 328 | 13 | 4,045 | 71 | 9,228 |
| 116,886 | 6 | 422 | 50 | 4,478 | 2 | 332 | 13 | 4,129 | 71 | 9,361 |
| 116,887 | 6 | 357 | 50 | 3,600 | 2 | 251 | 13 | 3,384 | 71 | 7,592 |
| 116,888 | 7 | 253 | 50 | 2,337 | 2 | 159 | 14 | 2,161 | 73 | 4,910 |
| 116,889 | 7 | 253 | 50 | 2,148 | 2 | 152 | 14 | 2,103 | 73 | 4,656 |
| 116,890 | 7 | 231 | 50 | 1,843 | 2 | 126 | 14 | 1,892 | 73 | 4,092 |
| 116,891 | 8 | 160 | 51 | 1,542 | 2 | 115 | 14 | 1,741 | 75 | 3,558 |
| 116,892 | 8 | 160 | 51 | 1,543 | 2 | 116 | 14 | 1,743 | 75 | 3,562 |
| 116,893 | 8 | 157 | 51 | 1,532 | 2 | 116 | 14 | 1,723 | 75 | 3,528 |
| 116,894 | 8 | 127 | 50 | 1,355 | 2 | 101 | 14 | 1,524 | 74 | 3,107 |
| 116,895 | 8 | 126 | 49 | 1,318 | 2 | 101 | 14 | 1,503 | 73 | 3,048 |
| 116,896 | 8 | 114 | 48 | 1,215 | 2 | 93  | 14 | 1,390 | 72 | 2,812 |
| 116,897 | 8 | 94  | 48 | 1,102 | 2 | 85  | 14 | 1,285 | 72 | 2,566 |
| 116,898 | 8 | 94  | 47 | 1,116 | 2 | 85  | 15 | 1,290 | 72 | 2,585 |
| 116,899 | 8 | 94  | 46 | 1,117 | 2 | 84  | 15 | 1,290 | 71 | 2,585 |
| 116,900 | 8 | 93  | 46 | 1,049 | 2 | 82  | 15 | 1,247 | 71 | 2,471 |
| 116,901 | 8 | 90  | 47 | 997   | 2 | 71  | 16 | 1,163 | 73 | 2,321 |
| 116,902 | 8 | 91  | 47 | 998   | 2 | 71  | 16 | 1,163 | 73 | 2,323 |
| 116,903 | 7 | 78  | 47 | 889   | 2 | 59  | 15 | 966   | 71 | 1,992 |
| 116,904 | 7 | 78  | 47 | 896   | 2 | 59  | 14 | 972   | 70 | 2,005 |
| 116,905 | 7 | 71  | 47 | 892   | 2 | 56  | 14 | 917   | 70 | 1,936 |
| 116,906 | 7 | 99  | 47 | 1,359 | 2 | 81  | 14 | 1,286 | 70 | 2,825 |
| 116,907 | 7 | 116 | 47 | 1,651 | 2 | 93  | 14 | 1,466 | 70 | 3,326 |
| 116,908 | 8 | 118 | 47 | 1,757 | 2 | 92  | 14 | 1,501 | 71 | 3,468 |
| 116,909 | 8 | 119 | 49 | 1,801 | 2 | 100 | 14 | 1,592 | 73 | 3,612 |
| 116,910 | 7 | 164 | 31 | 2,204 | 1 | 132 | 11 | 1,926 | 50 | 4,426 |
| 116,911 | 7 | 187 | 28 | 2,403 | 1 | 146 | 8  | 2,087 | 44 | 4,823 |
| 116,912 | 7 | 195 | 25 | 2,457 | 1 | 145 | 8  | 2,148 | 41 | 4,945 |
| 116,913 | 7 | 196 | 21 | 2,468 | 1 | 146 | 8  | 2,151 | 37 | 4,961 |
| 116,914 | 7 | 202 | 26 | 2,463 | 1 | 148 | 9  | 2,159 | 43 | 4,972 |
| 116,915 | 8 | 204 | 26 | 2,462 | 1 | 147 | 9  | 2,147 | 44 | 4,960 |
| 116,916 | 8 | 204 | 25 | 2,464 | 1 | 147 | 9  | 2,144 | 43 | 4,959 |
| 116,917 | 7 | 204 | 25 | 2,468 | 1 | 147 | 9  | 2,146 | 42 | 4,965 |
| 116,918 | 8 | 205 | 27 | 2,459 | 1 | 147 | 10 | 2,137 | 46 | 4,948 |
| 116,919 | 8 | 201 | 26 | 2,417 | 1 | 143 | 12 | 2,078 | 47 | 4,839 |
| 116,920 | 8 | 182 | 26 | 2,200 | 1 | 121 | 12 | 1,782 | 47 | 4,285 |

|         |    |     |    |       |   |     |    |       |    |       |
|---------|----|-----|----|-------|---|-----|----|-------|----|-------|
| 116,921 | 8  | 188 | 28 | 2,206 | 1 | 123 | 14 | 1,785 | 51 | 4,302 |
| 116,922 | 7  | 187 | 27 | 2,177 | 1 | 124 | 14 | 1,764 | 49 | 4,252 |
| 116,923 | 8  | 184 | 26 | 2,164 | 0 | 124 | 14 | 1,754 | 48 | 4,226 |
| 116,924 | 8  | 185 | 26 | 2,167 | 0 | 124 | 14 | 1,756 | 48 | 4,232 |
| 116,925 | 8  | 185 | 25 | 2,162 | 0 | 124 | 13 | 1,753 | 46 | 4,224 |
| 116,926 | 7  | 186 | 22 | 2,159 | 0 | 123 | 13 | 1,741 | 42 | 4,209 |
| 116,927 | 7  | 186 | 22 | 2,158 | 0 | 123 | 12 | 1,743 | 41 | 4,210 |
| 116,928 | 8  | 187 | 19 | 2,151 | 0 | 123 | 12 | 1,739 | 39 | 4,200 |
| 116,929 | 8  | 185 | 19 | 2,136 | 0 | 119 | 14 | 1,724 | 41 | 4,164 |
| 116,930 | 9  | 187 | 20 | 2,129 | 0 | 119 | 14 | 1,724 | 43 | 4,159 |
| 116,931 | 9  | 186 | 20 | 2,131 | 0 | 119 | 14 | 1,724 | 43 | 4,160 |
| 116,932 | 9  | 184 | 20 | 2,103 | 0 | 117 | 14 | 1,703 | 43 | 4,107 |
| 116,933 | 8  | 184 | 17 | 2,095 | 0 | 118 | 14 | 1,700 | 39 | 4,097 |
| 116,934 | 8  | 183 | 17 | 2,070 | 0 | 118 | 14 | 1,698 | 39 | 4,069 |
| 116,935 | 9  | 183 | 19 | 2,047 | 0 | 117 | 13 | 1,659 | 41 | 4,006 |
| 116,936 | 10 | 179 | 19 | 1,994 | 0 | 112 | 13 | 1,574 | 42 | 3,859 |
| 116,937 | 10 | 179 | 20 | 1,993 | 0 | 112 | 13 | 1,575 | 43 | 3,859 |
| 116,938 | 9  | 180 | 19 | 1,998 | 0 | 112 | 12 | 1,582 | 40 | 3,872 |
| 116,939 | 9  | 179 | 19 | 1,984 | 0 | 112 | 12 | 1,570 | 40 | 3,845 |
| 116,940 | 8  | 178 | 18 | 1,981 | 0 | 112 | 12 | 1,570 | 38 | 3,841 |
| 116,941 | 8  | 180 | 18 | 2,009 | 0 | 113 | 12 | 1,597 | 38 | 3,899 |
| 116,942 | 8  | 180 | 18 | 1,996 | 0 | 113 | 12 | 1,575 | 38 | 3,864 |
| 116,943 | 9  | 182 | 18 | 2,019 | 0 | 113 | 13 | 1,586 | 40 | 3,900 |
| 116,944 | 9  | 183 | 18 | 2,012 | 0 | 113 | 13 | 1,584 | 40 | 3,892 |
| 116,945 | 9  | 180 | 18 | 2,013 | 0 | 113 | 13 | 1,572 | 40 | 3,878 |
| 116,946 | 9  | 180 | 18 | 2,020 | 0 | 113 | 13 | 1,576 | 40 | 3,889 |
| 116,947 | 9  | 181 | 18 | 2,040 | 1 | 114 | 13 | 1,566 | 41 | 3,901 |
| 116,948 | 9  | 180 | 20 | 2,052 | 1 | 114 | 14 | 1,561 | 44 | 3,907 |
| 116,949 | 9  | 181 | 20 | 2,041 | 1 | 114 | 13 | 1,566 | 43 | 3,902 |
| 116,950 | 9  | 181 | 20 | 2,039 | 1 | 114 | 13 | 1,563 | 43 | 3,897 |
| 116,951 | 10 | 181 | 20 | 2,041 | 1 | 114 | 13 | 1,564 | 44 | 3,900 |
| 116,952 | 10 | 180 | 19 | 2,040 | 1 | 114 | 12 | 1,557 | 42 | 3,891 |
| 116,953 | 10 | 183 | 19 | 2,089 | 1 | 119 | 12 | 1,583 | 42 | 3,974 |
| 116,954 | 10 | 184 | 18 | 2,092 | 1 | 120 | 12 | 1,591 | 41 | 3,987 |
| 116,955 | 10 | 184 | 19 | 2,085 | 1 | 120 | 12 | 1,584 | 42 | 3,973 |
| 116,956 | 10 | 184 | 20 | 2,022 | 1 | 121 | 13 | 1,558 | 44 | 3,885 |
| 116,957 | 10 | 153 | 21 | 1,538 | 1 | 95  | 13 | 1,178 | 45 | 2,964 |
| 116,958 | 10 | 131 | 21 | 1,085 | 1 | 76  | 13 | 912   | 45 | 2,204 |
| 116,959 | 9  | 131 | 21 | 1,085 | 1 | 76  | 13 | 912   | 44 | 2,204 |
| 116,960 | 10 | 124 | 19 | 1,013 | 1 | 67  | 13 | 800   | 43 | 2,004 |
| 116,961 | 10 | 56  | 20 | 400   | 1 | 21  | 13 | 301   | 44 | 778   |

|         |    |    |    |     |   |    |    |     |    |       |
|---------|----|----|----|-----|---|----|----|-----|----|-------|
| 116,962 | 10 | 42 | 20 | 318 | 1 | 18 | 14 | 202 | 45 | 580   |
| 116,963 | 10 | 34 | 19 | 282 | 1 | 14 | 14 | 182 | 44 | 512   |
| 116,964 | 11 | 34 | 19 | 283 | 1 | 14 | 14 | 185 | 45 | 516   |
| 116,965 | 11 | 34 | 15 | 290 | 1 | 14 | 13 | 189 | 40 | 527   |
| 116,966 | 11 | 33 | 17 | 294 | 1 | 14 | 13 | 198 | 42 | 539   |
| 116,967 | 11 | 33 | 17 | 315 | 1 | 15 | 13 | 204 | 42 | 567   |
| 116,968 | 10 | 48 | 16 | 583 | 1 | 30 | 12 | 392 | 39 | 1,053 |
| 116,969 | 10 | 49 | 15 | 659 | 1 | 32 | 12 | 402 | 38 | 1,142 |
| 116,970 | 10 | 51 | 14 | 702 | 1 | 34 | 10 | 417 | 35 | 1,204 |
| 116,971 | 11 | 62 | 14 | 786 | 1 | 35 | 10 | 452 | 36 | 1,335 |
| 116,972 | 11 | 56 | 12 | 783 | 1 | 33 | 8  | 450 | 32 | 1,322 |
| 116,973 | 11 | 58 | 12 | 796 | 1 | 32 | 8  | 447 | 32 | 1,333 |
| 116,974 | 10 | 57 | 12 | 793 | 1 | 32 | 9  | 445 | 32 | 1,327 |
| 116,975 | 10 | 58 | 12 | 794 | 1 | 32 | 8  | 445 | 31 | 1,329 |
| 116,976 | 10 | 59 | 13 | 797 | 1 | 32 | 8  | 448 | 32 | 1,336 |
| 116,977 | 9  | 57 | 14 | 792 | 1 | 32 | 8  | 443 | 32 | 1,324 |
| 116,978 | 9  | 57 | 14 | 792 | 1 | 32 | 8  | 443 | 32 | 1,324 |
| 116,979 | 9  | 56 | 14 | 792 | 1 | 32 | 7  | 443 | 31 | 1,323 |
| 116,980 | 9  | 56 | 14 | 793 | 1 | 32 | 7  | 443 | 31 | 1,324 |
| 116,981 | 8  | 55 | 14 | 794 | 1 | 33 | 8  | 443 | 31 | 1,325 |
| 116,982 | 8  | 55 | 15 | 792 | 1 | 33 | 9  | 444 | 33 | 1,324 |
| 116,983 | 8  | 55 | 15 | 793 | 1 | 33 | 9  | 443 | 33 | 1,324 |
| 116,984 | 8  | 55 | 15 | 795 | 1 | 32 | 9  | 444 | 33 | 1,326 |
| 116,985 | 8  | 55 | 15 | 795 | 1 | 32 | 9  | 444 | 33 | 1,326 |
| 116,986 | 7  | 54 | 14 | 792 | 1 | 32 | 11 | 444 | 33 | 1,322 |
| 116,987 | 6  | 52 | 14 | 791 | 1 | 32 | 11 | 441 | 32 | 1,316 |
| 116,988 | 6  | 52 | 14 | 796 | 1 | 32 | 11 | 444 | 32 | 1,324 |
| 116,989 | 6  | 51 | 14 | 791 | 1 | 32 | 11 | 437 | 32 | 1,311 |
| 116,990 | 6  | 51 | 14 | 793 | 1 | 33 | 12 | 437 | 33 | 1,314 |
| 116,991 | 6  | 51 | 14 | 794 | 2 | 33 | 13 | 432 | 35 | 1,310 |
| 116,992 | 6  | 49 | 14 | 774 | 2 | 33 | 13 | 413 | 35 | 1,269 |
| 116,993 | 5  | 49 | 14 | 772 | 2 | 33 | 13 | 413 | 34 | 1,267 |
| 116,994 | 5  | 47 | 15 | 755 | 2 | 33 | 12 | 402 | 34 | 1,237 |
| 116,995 | 6  | 46 | 18 | 750 | 2 | 33 | 15 | 402 | 41 | 1,231 |
| 116,996 | 6  | 46 | 19 | 738 | 2 | 33 | 15 | 396 | 42 | 1,213 |
| 116,997 | 6  | 45 | 19 | 701 | 2 | 32 | 15 | 384 | 42 | 1,162 |
| 116,998 | 6  | 45 | 20 | 704 | 1 | 32 | 16 | 384 | 43 | 1,165 |
| 116,999 | 6  | 45 | 18 | 705 | 1 | 32 | 15 | 385 | 40 | 1,167 |
| 117,000 | 6  | 44 | 18 | 703 | 1 | 32 | 15 | 375 | 40 | 1,154 |
| 117,001 | 6  | 44 | 20 | 707 | 1 | 33 | 15 | 376 | 42 | 1,160 |
| 117,002 | 5  | 44 | 20 | 707 | 1 | 33 | 14 | 375 | 40 | 1,159 |

|         |   |    |    |     |   |    |    |     |    |       |
|---------|---|----|----|-----|---|----|----|-----|----|-------|
| 117,003 | 5 | 41 | 21 | 658 | 1 | 28 | 14 | 353 | 41 | 1,080 |
| 117,004 | 5 | 40 | 22 | 652 | 1 | 27 | 14 | 343 | 42 | 1,062 |
| 117,005 | 5 | 40 | 21 | 654 | 1 | 28 | 14 | 345 | 41 | 1,067 |
| 117,006 | 5 | 40 | 21 | 652 | 1 | 27 | 14 | 344 | 41 | 1,063 |
| 117,007 | 5 | 41 | 21 | 639 | 1 | 27 | 13 | 336 | 40 | 1,043 |
| 117,008 | 5 | 42 | 20 | 649 | 1 | 27 | 13 | 340 | 39 | 1,058 |
| 117,009 | 5 | 41 | 20 | 659 | 1 | 28 | 13 | 347 | 39 | 1,075 |
| 117,010 | 5 | 53 | 20 | 803 | 1 | 31 | 13 | 435 | 39 | 1,322 |
| 117,011 | 5 | 67 | 20 | 882 | 1 | 36 | 13 | 499 | 39 | 1,484 |
| 117,012 | 5 | 70 | 19 | 892 | 1 | 37 | 13 | 499 | 38 | 1,498 |
| 117,013 | 6 | 72 | 19 | 924 | 1 | 38 | 12 | 518 | 38 | 1,552 |
| 117,014 | 6 | 74 | 19 | 951 | 1 | 38 | 12 | 525 | 38 | 1,588 |
| 117,015 | 6 | 77 | 21 | 993 | 1 | 39 | 13 | 528 | 41 | 1,637 |
| 117,016 | 5 | 78 | 28 | 947 | 1 | 38 | 14 | 500 | 48 | 1,563 |
| 117,017 | 7 | 78 | 36 | 963 | 2 | 38 | 22 | 502 | 67 | 1,581 |
| 117,018 | 7 | 78 | 36 | 966 | 2 | 38 | 22 | 502 | 67 | 1,584 |
| 117,019 | 7 | 61 | 38 | 621 | 2 | 21 | 22 | 303 | 69 | 1,006 |
| 117,020 | 7 | 61 | 38 | 630 | 2 | 21 | 22 | 307 | 69 | 1,019 |
| 117,021 | 7 | 59 | 38 | 587 | 2 | 19 | 22 | 292 | 69 | 957   |
| 117,022 | 6 | 47 | 38 | 499 | 2 | 18 | 22 | 256 | 68 | 820   |
| 117,023 | 6 | 47 | 38 | 496 | 2 | 18 | 22 | 255 | 68 | 816   |
| 117,024 | 6 | 46 | 38 | 476 | 2 | 18 | 22 | 251 | 68 | 791   |
| 117,025 | 6 | 45 | 38 | 475 | 2 | 18 | 22 | 251 | 68 | 789   |
| 117,026 | 6 | 45 | 39 | 475 | 2 | 18 | 22 | 251 | 69 | 789   |
| 117,027 | 6 | 45 | 38 | 472 | 2 | 19 | 22 | 249 | 68 | 785   |
| 117,028 | 6 | 45 | 37 | 471 | 2 | 19 | 22 | 249 | 67 | 784   |
| 117,029 | 7 | 45 | 44 | 471 | 2 | 19 | 24 | 249 | 77 | 784   |
| 117,030 | 7 | 45 | 44 | 478 | 2 | 19 | 24 | 249 | 77 | 791   |
| 117,031 | 7 | 45 | 45 | 477 | 2 | 19 | 24 | 249 | 78 | 790   |
| 117,032 | 7 | 46 | 44 | 478 | 2 | 18 | 23 | 249 | 76 | 791   |
| 117,033 | 7 | 46 | 44 | 479 | 2 | 18 | 22 | 250 | 75 | 793   |
| 117,034 | 7 | 46 | 44 | 479 | 4 | 18 | 21 | 250 | 76 | 793   |
| 117,035 | 7 | 47 | 44 | 477 | 4 | 18 | 20 | 248 | 75 | 790   |
| 117,036 | 7 | 47 | 44 | 477 | 4 | 18 | 20 | 248 | 75 | 790   |
| 117,037 | 8 | 48 | 45 | 479 | 5 | 18 | 20 | 248 | 78 | 793   |
| 117,038 | 8 | 48 | 45 | 479 | 5 | 17 | 20 | 245 | 78 | 789   |
| 117,039 | 8 | 48 | 44 | 478 | 5 | 17 | 20 | 243 | 77 | 786   |
| 117,040 | 8 | 48 | 44 | 480 | 5 | 17 | 20 | 246 | 77 | 791   |
| 117,041 | 8 | 47 | 46 | 481 | 5 | 16 | 20 | 245 | 79 | 789   |
| 117,042 | 8 | 47 | 49 | 482 | 4 | 17 | 19 | 247 | 80 | 793   |
| 117,043 | 8 | 47 | 49 | 475 | 4 | 17 | 19 | 242 | 80 | 781   |

|         |   |    |    |     |   |    |    |     |    |     |
|---------|---|----|----|-----|---|----|----|-----|----|-----|
| 117,044 | 8 | 47 | 48 | 513 | 4 | 17 | 19 | 247 | 79 | 824 |
| 117,045 | 7 | 47 | 49 | 513 | 4 | 17 | 18 | 255 | 78 | 832 |
| 117,046 | 7 | 47 | 46 | 515 | 4 | 18 | 16 | 257 | 73 | 837 |
| 117,047 | 7 | 48 | 45 | 516 | 4 | 18 | 16 | 260 | 72 | 842 |
| 117,048 | 7 | 48 | 46 | 520 | 4 | 18 | 16 | 264 | 73 | 850 |
| 117,049 | 7 | 49 | 45 | 523 | 4 | 18 | 15 | 266 | 71 | 856 |
| 117,050 | 8 | 50 | 44 | 527 | 4 | 18 | 15 | 267 | 71 | 862 |
| 117,051 | 8 | 52 | 44 | 535 | 4 | 17 | 16 | 278 | 72 | 882 |
| 117,052 | 8 | 52 | 44 | 535 | 4 | 17 | 16 | 279 | 72 | 883 |
| 117,053 | 8 | 52 | 43 | 533 | 4 | 17 | 16 | 278 | 71 | 880 |
| 117,054 | 8 | 51 | 43 | 529 | 4 | 16 | 16 | 274 | 71 | 870 |
| 117,055 | 8 | 52 | 42 | 541 | 4 | 16 | 16 | 283 | 70 | 892 |
| 117,056 | 8 | 54 | 42 | 550 | 4 | 16 | 16 | 289 | 70 | 909 |
| 117,057 | 8 | 54 | 42 | 563 | 4 | 16 | 16 | 290 | 70 | 923 |
| 117,058 | 8 | 53 | 43 | 557 | 4 | 16 | 16 | 288 | 71 | 914 |
| 117,059 | 8 | 52 | 44 | 542 | 4 | 15 | 17 | 274 | 73 | 883 |
| 117,060 | 7 | 40 | 47 | 401 | 4 | 12 | 17 | 186 | 75 | 639 |
| 117,061 | 7 | 23 | 47 | 312 | 4 | 6  | 17 | 124 | 75 | 465 |
| 117,062 | 7 | 23 | 47 | 320 | 4 | 6  | 17 | 129 | 75 | 478 |
| 117,063 | 7 | 23 | 47 | 321 | 4 | 6  | 17 | 129 | 75 | 479 |
| 117,064 | 6 | 23 | 48 | 299 | 4 | 5  | 19 | 124 | 77 | 451 |
| 117,065 | 6 | 21 | 49 | 278 | 4 | 5  | 19 | 117 | 78 | 421 |
| 117,066 | 7 | 18 | 49 | 204 | 4 | 4  | 19 | 106 | 79 | 332 |
| 117,067 | 7 | 19 | 44 | 216 | 4 | 4  | 18 | 112 | 73 | 351 |
| 117,068 | 5 | 19 | 34 | 217 | 3 | 4  | 10 | 112 | 52 | 352 |
| 117,069 | 6 | 20 | 35 | 220 | 3 | 4  | 10 | 116 | 54 | 360 |
| 117,070 | 6 | 21 | 33 | 214 | 3 | 5  | 10 | 113 | 52 | 353 |
| 117,071 | 6 | 21 | 33 | 213 | 3 | 5  | 10 | 113 | 52 | 352 |
| 117,072 | 6 | 22 | 42 | 214 | 3 | 5  | 12 | 113 | 63 | 354 |
| 117,073 | 6 | 22 | 42 | 218 | 3 | 5  | 12 | 114 | 63 | 359 |
| 117,074 | 6 | 22 | 42 | 229 | 4 | 6  | 12 | 114 | 64 | 371 |
| 117,075 | 6 | 23 | 42 | 244 | 4 | 7  | 12 | 128 | 64 | 402 |
| 117,076 | 8 | 25 | 42 | 291 | 4 | 10 | 11 | 141 | 65 | 467 |
| 117,077 | 8 | 27 | 41 | 340 | 4 | 12 | 12 | 169 | 65 | 548 |
| 117,078 | 8 | 26 | 41 | 354 | 4 | 11 | 12 | 175 | 65 | 566 |
| 117,079 | 7 | 26 | 35 | 355 | 4 | 11 | 11 | 175 | 57 | 567 |
| 117,080 | 7 | 26 | 35 | 356 | 4 | 11 | 11 | 176 | 57 | 569 |
| 117,081 | 7 | 26 | 35 | 349 | 4 | 11 | 10 | 176 | 56 | 562 |
| 117,082 | 7 | 25 | 34 | 347 | 4 | 11 | 10 | 175 | 55 | 558 |
| 117,083 | 7 | 26 | 34 | 349 | 4 | 11 | 10 | 175 | 55 | 561 |
| 117,084 | 7 | 30 | 33 | 361 | 4 | 11 | 10 | 183 | 54 | 585 |



|         |    |     |    |       |   |    |    |     |     |       |
|---------|----|-----|----|-------|---|----|----|-----|-----|-------|
| 117,085 | 7  | 30  | 32 | 365   | 2 | 11 | 10 | 184 | 51  | 590   |
| 117,086 | 7  | 30  | 33 | 366   | 2 | 11 | 10 | 186 | 52  | 593   |
| 117,087 | 9  | 32  | 36 | 372   | 1 | 12 | 12 | 194 | 58  | 610   |
| 117,088 | 9  | 32  | 35 | 376   | 1 | 13 | 13 | 198 | 58  | 619   |
| 117,089 | 9  | 33  | 35 | 375   | 1 | 13 | 13 | 198 | 58  | 619   |
| 117,090 | 10 | 33  | 37 | 371   | 1 | 13 | 15 | 197 | 63  | 614   |
| 117,091 | 10 | 33  | 36 | 366   | 1 | 13 | 15 | 194 | 62  | 606   |
| 117,092 | 10 | 32  | 36 | 360   | 1 | 11 | 15 | 190 | 62  | 593   |
| 117,093 | 10 | 32  | 33 | 362   | 1 | 11 | 15 | 190 | 59  | 595   |
| 117,094 | 10 | 43  | 33 | 397   | 1 | 13 | 15 | 218 | 59  | 671   |
| 117,095 | 10 | 43  | 33 | 360   | 1 | 13 | 15 | 213 | 59  | 629   |
| 117,096 | 12 | 43  | 32 | 368   | 1 | 13 | 15 | 210 | 60  | 634   |
| 117,097 | 12 | 43  | 33 | 373   | 1 | 12 | 15 | 210 | 61  | 638   |
| 117,098 | 12 | 45  | 33 | 370   | 1 | 12 | 15 | 207 | 61  | 634   |
| 117,099 | 12 | 45  | 34 | 376   | 1 | 12 | 15 | 205 | 62  | 638   |
| 117,100 | 12 | 44  | 34 | 372   | 1 | 12 | 15 | 204 | 62  | 632   |
| 117,101 | 12 | 43  | 34 | 370   | 1 | 12 | 17 | 205 | 64  | 630   |
| 117,102 | 12 | 41  | 36 | 359   | 1 | 12 | 17 | 191 | 66  | 603   |
| 117,103 | 12 | 42  | 36 | 376   | 1 | 12 | 17 | 203 | 66  | 633   |
| 117,104 | 12 | 42  | 39 | 378   | 1 | 12 | 18 | 204 | 70  | 636   |
| 117,105 | 12 | 42  | 39 | 375   | 1 | 12 | 20 | 199 | 72  | 628   |
| 117,106 | 12 | 42  | 41 | 373   | 1 | 12 | 20 | 203 | 74  | 630   |
| 117,107 | 12 | 40  | 41 | 373   | 1 | 12 | 20 | 198 | 74  | 623   |
| 117,108 | 12 | 47  | 50 | 431   | 1 | 19 | 24 | 239 | 87  | 736   |
| 117,109 | 15 | 50  | 57 | 542   | 2 | 28 | 25 | 296 | 99  | 916   |
| 117,110 | 15 | 63  | 56 | 706   | 2 | 38 | 24 | 384 | 97  | 1,191 |
| 117,111 | 16 | 66  | 54 | 711   | 2 | 38 | 24 | 390 | 96  | 1,205 |
| 117,112 | 16 | 67  | 67 | 705   | 2 | 38 | 31 | 385 | 116 | 1,195 |
| 117,113 | 16 | 69  | 73 | 746   | 2 | 39 | 32 | 401 | 123 | 1,255 |
| 117,114 | 16 | 69  | 78 | 745   | 2 | 39 | 32 | 401 | 128 | 1,254 |
| 117,115 | 16 | 67  | 78 | 734   | 2 | 39 | 33 | 385 | 129 | 1,225 |
| 117,116 | 16 | 77  | 77 | 768   | 2 | 40 | 33 | 413 | 128 | 1,298 |
| 117,117 | 14 | 78  | 75 | 778   | 2 | 41 | 32 | 416 | 123 | 1,313 |
| 117,118 | 15 | 87  | 73 | 892   | 2 | 44 | 32 | 485 | 122 | 1,508 |
| 117,119 | 15 | 87  | 73 | 911   | 2 | 44 | 32 | 496 | 122 | 1,538 |
| 117,120 | 14 | 93  | 72 | 1,149 | 2 | 47 | 32 | 545 | 120 | 1,834 |
| 117,121 | 14 | 98  | 72 | 1,167 | 2 | 47 | 32 | 554 | 120 | 1,866 |
| 117,122 | 14 | 100 | 65 | 1,180 | 2 | 47 | 31 | 556 | 112 | 1,883 |
| 117,123 | 14 | 103 | 63 | 1,179 | 2 | 47 | 30 | 555 | 109 | 1,884 |
| 117,124 | 14 | 103 | 63 | 1,181 | 1 | 47 | 30 | 557 | 108 | 1,888 |
| 117,125 | 14 | 102 | 63 | 1,158 | 1 | 45 | 30 | 544 | 108 | 1,849 |

|         |    |     |    |       |   |    |    |       |     |       |
|---------|----|-----|----|-------|---|----|----|-------|-----|-------|
| 117,126 | 14 | 104 | 63 | 1,162 | 1 | 45 | 30 | 545   | 108 | 1,856 |
| 117,127 | 13 | 103 | 63 | 1,088 | 1 | 42 | 30 | 508   | 107 | 1,741 |
| 117,128 | 13 | 103 | 63 | 1,099 | 1 | 42 | 30 | 509   | 107 | 1,753 |
| 117,129 | 13 | 104 | 64 | 1,090 | 1 | 44 | 30 | 503   | 108 | 1,741 |
| 117,130 | 13 | 104 | 64 | 1,091 | 1 | 44 | 30 | 505   | 108 | 1,744 |
| 117,131 | 13 | 104 | 63 | 1,091 | 1 | 44 | 30 | 505   | 107 | 1,744 |
| 117,132 | 13 | 104 | 63 | 1,091 | 1 | 44 | 30 | 505   | 107 | 1,744 |
| 117,133 | 13 | 103 | 63 | 1,089 | 1 | 44 | 30 | 505   | 107 | 1,741 |
| 117,134 | 13 | 99  | 64 | 1,076 | 2 | 44 | 30 | 497   | 109 | 1,716 |
| 117,135 | 13 | 99  | 64 | 1,082 | 2 | 44 | 30 | 503   | 109 | 1,728 |
| 117,136 | 13 | 101 | 63 | 1,092 | 4 | 45 | 31 | 520   | 111 | 1,758 |
| 117,137 | 10 | 97  | 60 | 1,089 | 4 | 44 | 29 | 514   | 103 | 1,744 |
| 117,138 | 10 | 97  | 61 | 1,093 | 4 | 44 | 29 | 521   | 104 | 1,755 |
| 117,139 | 10 | 99  | 60 | 1,123 | 4 | 45 | 28 | 552   | 102 | 1,819 |
| 117,140 | 12 | 98  | 59 | 1,128 | 4 | 45 | 28 | 564   | 103 | 1,835 |
| 117,141 | 11 | 99  | 58 | 1,131 | 4 | 45 | 26 | 567   | 99  | 1,842 |
| 117,142 | 11 | 99  | 59 | 1,133 | 4 | 45 | 26 | 567   | 100 | 1,844 |
| 117,143 | 11 | 99  | 61 | 1,132 | 5 | 45 | 26 | 569   | 103 | 1,845 |
| 117,144 | 10 | 88  | 61 | 1,095 | 5 | 43 | 26 | 541   | 102 | 1,767 |
| 117,145 | 9  | 88  | 61 | 1,095 | 5 | 43 | 26 | 542   | 101 | 1,768 |
| 117,146 | 9  | 90  | 63 | 1,122 | 5 | 44 | 26 | 597   | 103 | 1,853 |
| 117,147 | 9  | 90  | 63 | 1,114 | 5 | 44 | 26 | 609   | 103 | 1,857 |
| 117,148 | 9  | 94  | 67 | 1,171 | 5 | 49 | 29 | 693   | 110 | 2,007 |
| 117,149 | 9  | 96  | 67 | 1,198 | 5 | 53 | 29 | 755   | 110 | 2,102 |
| 117,150 | 9  | 96  | 65 | 1,195 | 5 | 53 | 29 | 755   | 108 | 2,099 |
| 117,151 | 8  | 97  | 66 | 1,207 | 5 | 53 | 28 | 783   | 107 | 2,140 |
| 117,152 | 8  | 98  | 66 | 1,208 | 5 | 53 | 28 | 784   | 107 | 2,143 |
| 117,153 | 8  | 97  | 64 | 1,194 | 5 | 53 | 27 | 774   | 104 | 2,118 |
| 117,154 | 8  | 97  | 66 | 1,211 | 6 | 54 | 27 | 788   | 107 | 2,150 |
| 117,155 | 8  | 97  | 64 | 1,210 | 6 | 54 | 26 | 788   | 104 | 2,149 |
| 117,156 | 8  | 96  | 64 | 1,197 | 7 | 54 | 24 | 782   | 103 | 2,129 |
| 117,157 | 8  | 100 | 62 | 1,329 | 7 | 58 | 24 | 859   | 101 | 2,346 |
| 117,158 | 8  | 102 | 56 | 1,387 | 7 | 63 | 21 | 901   | 92  | 2,453 |
| 117,159 | 8  | 120 | 52 | 1,542 | 7 | 69 | 20 | 1,061 | 87  | 2,792 |
| 117,160 | 5  | 117 | 44 | 1,456 | 6 | 61 | 19 | 1,015 | 74  | 2,649 |
| 117,161 | 5  | 118 | 44 | 1,472 | 6 | 54 | 19 | 1,007 | 74  | 2,651 |
| 117,162 | 4  | 117 | 43 | 1,728 | 6 | 58 | 19 | 1,058 | 72  | 2,961 |
| 117,163 | 4  | 119 | 31 | 1,743 | 6 | 58 | 11 | 1,060 | 52  | 2,980 |
| 117,164 | 4  | 119 | 26 | 1,747 | 6 | 58 | 10 | 1,061 | 46  | 2,985 |
| 117,165 | 4  | 121 | 20 | 1,788 | 6 | 58 | 9  | 1,067 | 39  | 3,034 |
| 117,166 | 4  | 123 | 20 | 1,832 | 6 | 61 | 7  | 1,108 | 37  | 3,124 |

|         |   |     |    |       |   |    |   |       |    |       |
|---------|---|-----|----|-------|---|----|---|-------|----|-------|
| 117,167 | 4 | 113 | 20 | 1,802 | 6 | 61 | 7 | 1,090 | 37 | 3,066 |
| 117,168 | 3 | 110 | 20 | 1,793 | 6 | 60 | 7 | 1,086 | 36 | 3,049 |
| 117,169 | 3 | 100 | 21 | 1,679 | 6 | 57 | 7 | 1,019 | 37 | 2,855 |
| 117,170 | 3 | 100 | 21 | 1,658 | 6 | 57 | 7 | 1,010 | 37 | 2,825 |
| 117,171 | 3 | 87  | 21 | 1,398 | 6 | 53 | 7 | 952   | 37 | 2,490 |
| 117,172 | 3 | 87  | 21 | 1,401 | 6 | 53 | 7 | 953   | 37 | 2,494 |
| 117,173 | 3 | 87  | 21 | 1,407 | 6 | 54 | 7 | 997   | 37 | 2,545 |
| 117,174 | 3 | 84  | 21 | 1,403 | 6 | 54 | 7 | 996   | 37 | 2,537 |
| 117,175 | 3 | 84  | 22 | 1,405 | 6 | 54 | 8 | 996   | 39 | 2,539 |
| 117,176 | 3 | 83  | 23 | 1,413 | 6 | 55 | 8 | 996   | 40 | 2,547 |
| 117,177 | 3 | 81  | 23 | 1,409 | 6 | 55 | 8 | 995   | 40 | 2,540 |
| 117,178 | 2 | 78  | 23 | 1,375 | 6 | 53 | 9 | 993   | 40 | 2,499 |
| 117,179 | 2 | 77  | 23 | 1,367 | 6 | 52 | 9 | 993   | 40 | 2,489 |
| 117,180 | 2 | 77  | 22 | 1,372 | 6 | 52 | 9 | 994   | 39 | 2,495 |
| 117,181 | 2 | 77  | 22 | 1,380 | 6 | 52 | 9 | 1,004 | 39 | 2,513 |
| 117,182 | 2 | 77  | 22 | 1,384 | 6 | 52 | 9 | 1,006 | 39 | 2,519 |
| 117,183 | 2 | 77  | 22 | 1,387 | 6 | 52 | 9 | 1,006 | 39 | 2,522 |
| 117,184 | 2 | 77  | 22 | 1,387 | 6 | 52 | 9 | 1,006 | 39 | 2,522 |
| 117,185 | 3 | 75  | 21 | 1,366 | 5 | 51 | 9 | 979   | 38 | 2,471 |
| 117,186 | 3 | 75  | 21 | 1,366 | 5 | 51 | 9 | 979   | 38 | 2,471 |
| 117,187 | 3 | 75  | 21 | 1,366 | 3 | 51 | 8 | 979   | 35 | 2,471 |
| 117,188 | 3 | 76  | 21 | 1,358 | 3 | 51 | 8 | 969   | 35 | 2,454 |
| 117,189 | 3 | 76  | 20 | 1,358 | 3 | 51 | 8 | 968   | 34 | 2,453 |
| 117,190 | 4 | 74  | 21 | 1,318 | 3 | 49 | 8 | 922   | 36 | 2,363 |
| 117,191 | 2 | 73  | 21 | 1,315 | 3 | 49 | 8 | 919   | 34 | 2,356 |
| 117,192 | 2 | 73  | 20 | 1,313 | 3 | 50 | 7 | 917   | 32 | 2,353 |
| 117,193 | 2 | 74  | 19 | 1,314 | 3 | 50 | 7 | 915   | 31 | 2,353 |
| 117,194 | 2 | 74  | 19 | 1,326 | 2 | 50 | 7 | 918   | 30 | 2,368 |
| 117,195 | 2 | 74  | 19 | 1,335 | 2 | 49 | 7 | 918   | 30 | 2,376 |
| 117,196 | 2 | 74  | 19 | 1,347 | 2 | 49 | 7 | 923   | 30 | 2,393 |
| 117,197 | 2 | 74  | 18 | 1,350 | 3 | 48 | 7 | 876   | 30 | 2,348 |
| 117,198 | 2 | 75  | 19 | 1,365 | 3 | 52 | 6 | 866   | 30 | 2,358 |
| 117,199 | 2 | 78  | 14 | 1,351 | 3 | 47 | 4 | 804   | 23 | 2,280 |
| 117,200 | 2 | 74  | 15 | 1,330 | 3 | 44 | 4 | 742   | 24 | 2,190 |
| 117,201 | 2 | 74  | 14 | 1,327 | 3 | 44 | 4 | 741   | 23 | 2,186 |
| 117,202 | 2 | 76  | 13 | 1,350 | 3 | 45 | 4 | 742   | 22 | 2,213 |
| 117,203 | 2 | 76  | 13 | 1,364 | 3 | 45 | 3 | 750   | 21 | 2,235 |
| 117,204 | 2 | 76  | 13 | 1,369 | 3 | 45 | 4 | 759   | 22 | 2,249 |
| 117,205 | 2 | 82  | 11 | 1,415 | 2 | 48 | 4 | 833   | 19 | 2,378 |
| 117,206 | 3 | 84  | 10 | 1,514 | 2 | 60 | 4 | 949   | 19 | 2,607 |
| 117,207 | 3 | 92  | 10 | 1,560 | 1 | 61 | 4 | 992   | 18 | 2,705 |

|         |   |     |    |       |   |    |    |       |    |       |
|---------|---|-----|----|-------|---|----|----|-------|----|-------|
| 117,208 | 3 | 90  | 10 | 1,487 | 1 | 58 | 4  | 928   | 18 | 2,563 |
| 117,209 | 3 | 88  | 10 | 1,441 | 1 | 54 | 4  | 898   | 18 | 2,481 |
| 117,210 | 3 | 63  | 10 | 1,224 | 1 | 41 | 4  | 699   | 18 | 2,027 |
| 117,211 | 3 | 49  | 10 | 1,021 | 1 | 37 | 4  | 608   | 18 | 1,715 |
| 117,212 | 4 | 51  | 10 | 1,019 | 1 | 37 | 5  | 610   | 20 | 1,717 |
| 117,213 | 4 | 49  | 11 | 757   | 1 | 33 | 5  | 553   | 21 | 1,392 |
| 117,214 | 4 | 47  | 10 | 741   | 1 | 33 | 5  | 550   | 20 | 1,371 |
| 117,215 | 4 | 43  | 11 | 657   | 1 | 32 | 5  | 530   | 21 | 1,262 |
| 117,216 | 4 | 43  | 11 | 660   | 1 | 32 | 5  | 531   | 21 | 1,266 |
| 117,217 | 4 | 43  | 11 | 652   | 2 | 36 | 5  | 541   | 22 | 1,272 |
| 117,218 | 4 | 45  | 13 | 685   | 2 | 39 | 5  | 568   | 24 | 1,337 |
| 117,219 | 5 | 45  | 13 | 730   | 2 | 40 | 5  | 614   | 25 | 1,429 |
| 117,220 | 5 | 50  | 12 | 778   | 2 | 40 | 5  | 658   | 24 | 1,526 |
| 117,221 | 5 | 53  | 11 | 811   | 2 | 41 | 5  | 689   | 23 | 1,594 |
| 117,222 | 5 | 53  | 13 | 813   | 2 | 41 | 5  | 690   | 25 | 1,597 |
| 117,223 | 5 | 56  | 13 | 811   | 2 | 42 | 5  | 690   | 25 | 1,599 |
| 117,224 | 5 | 59  | 15 | 828   | 2 | 41 | 7  | 658   | 29 | 1,586 |
| 117,225 | 5 | 59  | 15 | 829   | 2 | 41 | 7  | 658   | 29 | 1,587 |
| 117,226 | 5 | 59  | 22 | 828   | 2 | 41 | 7  | 657   | 36 | 1,585 |
| 117,227 | 5 | 62  | 21 | 839   | 2 | 41 | 7  | 686   | 35 | 1,628 |
| 117,228 | 6 | 63  | 23 | 852   | 2 | 40 | 8  | 699   | 39 | 1,654 |
| 117,229 | 6 | 66  | 24 | 903   | 2 | 43 | 8  | 725   | 40 | 1,737 |
| 117,230 | 6 | 67  | 24 | 943   | 2 | 43 | 8  | 736   | 40 | 1,789 |
| 117,231 | 6 | 67  | 25 | 944   | 4 | 43 | 8  | 739   | 43 | 1,793 |
| 117,232 | 6 | 81  | 26 | 1,033 | 4 | 46 | 7  | 812   | 43 | 1,972 |
| 117,233 | 6 | 82  | 26 | 1,069 | 4 | 48 | 7  | 826   | 43 | 2,025 |
| 117,234 | 6 | 88  | 28 | 1,125 | 4 | 53 | 9  | 868   | 47 | 2,134 |
| 117,235 | 6 | 95  | 29 | 1,235 | 4 | 61 | 9  | 931   | 48 | 2,322 |
| 117,236 | 5 | 96  | 29 | 1,261 | 4 | 62 | 9  | 948   | 47 | 2,367 |
| 117,237 | 5 | 99  | 33 | 1,295 | 5 | 63 | 12 | 965   | 55 | 2,422 |
| 117,238 | 5 | 110 | 33 | 1,411 | 5 | 66 | 12 | 1,018 | 55 | 2,605 |
| 117,239 | 5 | 115 | 33 | 1,546 | 5 | 76 | 12 | 1,136 | 55 | 2,873 |
| 117,240 | 5 | 116 | 33 | 1,649 | 5 | 80 | 12 | 1,148 | 55 | 2,993 |
| 117,241 | 4 | 117 | 32 | 1,669 | 5 | 81 | 12 | 1,159 | 53 | 3,026 |
| 117,242 | 4 | 116 | 32 | 1,638 | 5 | 80 | 12 | 1,151 | 53 | 2,985 |
| 117,243 | 4 | 119 | 32 | 1,657 | 5 | 80 | 13 | 1,160 | 54 | 3,016 |
| 117,244 | 4 | 122 | 31 | 1,663 | 5 | 80 | 13 | 1,179 | 53 | 3,044 |
| 117,245 | 4 | 123 | 31 | 1,671 | 5 | 82 | 13 | 1,188 | 53 | 3,064 |
| 117,246 | 4 | 132 | 31 | 1,703 | 5 | 86 | 13 | 1,233 | 53 | 3,154 |
| 117,247 | 4 | 134 | 31 | 1,709 | 5 | 86 | 13 | 1,238 | 53 | 3,167 |
| 117,248 | 4 | 131 | 30 | 1,654 | 4 | 82 | 13 | 1,225 | 51 | 3,092 |

|         |   |     |    |       |   |     |    |       |    |       |
|---------|---|-----|----|-------|---|-----|----|-------|----|-------|
| 117,249 | 4 | 131 | 29 | 1,654 | 4 | 82  | 13 | 1,225 | 50 | 3,092 |
| 117,250 | 5 | 130 | 29 | 1,621 | 4 | 85  | 13 | 1,230 | 51 | 3,066 |
| 117,251 | 5 | 132 | 28 | 1,651 | 4 | 89  | 13 | 1,292 | 50 | 3,164 |
| 117,252 | 5 | 138 | 28 | 1,719 | 4 | 93  | 13 | 1,399 | 50 | 3,349 |
| 117,253 | 5 | 148 | 28 | 1,774 | 4 | 95  | 13 | 1,518 | 50 | 3,535 |
| 117,254 | 5 | 153 | 28 | 1,808 | 4 | 98  | 13 | 1,570 | 50 | 3,629 |
| 117,255 | 5 | 148 | 28 | 1,742 | 4 | 94  | 12 | 1,488 | 49 | 3,472 |
| 117,256 | 5 | 148 | 28 | 1,743 | 4 | 94  | 12 | 1,490 | 49 | 3,475 |
| 117,257 | 4 | 177 | 28 | 1,786 | 4 | 96  | 12 | 1,510 | 48 | 3,569 |
| 117,258 | 4 | 175 | 28 | 1,815 | 4 | 96  | 12 | 1,533 | 48 | 3,619 |
| 117,259 | 4 | 180 | 34 | 1,829 | 4 | 101 | 13 | 1,616 | 55 | 3,726 |
| 117,260 | 4 | 184 | 34 | 1,898 | 4 | 104 | 13 | 1,682 | 55 | 3,868 |
| 117,261 | 5 | 188 | 34 | 1,945 | 5 | 104 | 15 | 1,734 | 59 | 3,971 |
| 117,262 | 5 | 193 | 34 | 2,015 | 5 | 112 | 16 | 1,780 | 60 | 4,100 |
| 117,263 | 4 | 204 | 34 | 2,195 | 5 | 117 | 16 | 1,936 | 59 | 4,452 |
| 117,264 | 4 | 204 | 33 | 2,199 | 5 | 118 | 16 | 1,936 | 58 | 4,457 |
| 117,265 | 4 | 204 | 31 | 2,207 | 5 | 118 | 16 | 1,936 | 56 | 4,465 |
| 117,266 | 5 | 206 | 33 | 2,205 | 5 | 119 | 16 | 1,935 | 59 | 4,465 |
| 117,267 | 5 | 204 | 34 | 2,166 | 4 | 112 | 16 | 1,883 | 59 | 4,365 |
| 117,268 | 5 | 205 | 36 | 2,170 | 4 | 112 | 17 | 1,889 | 62 | 4,376 |
| 117,269 | 5 | 203 | 36 | 2,093 | 4 | 107 | 17 | 1,810 | 62 | 4,213 |
| 117,270 | 4 | 203 | 36 | 2,093 | 4 | 107 | 17 | 1,810 | 61 | 4,213 |
| 117,271 | 4 | 198 | 39 | 2,037 | 4 | 107 | 18 | 1,763 | 65 | 4,105 |
| 117,272 | 4 | 195 | 39 | 2,001 | 4 | 106 | 18 | 1,726 | 65 | 4,028 |
| 117,273 | 5 | 192 | 39 | 2,001 | 6 | 105 | 19 | 1,724 | 69 | 4,022 |
| 117,274 | 5 | 192 | 40 | 2,001 | 6 | 105 | 19 | 1,726 | 70 | 4,024 |
| 117,275 | 5 | 186 | 38 | 1,970 | 6 | 106 | 16 | 1,714 | 65 | 3,976 |
| 117,276 | 5 | 187 | 31 | 1,970 | 6 | 106 | 17 | 1,712 | 59 | 3,975 |
| 117,277 | 5 | 183 | 31 | 1,945 | 6 | 105 | 17 | 1,682 | 59 | 3,915 |
| 117,278 | 5 | 183 | 31 | 1,946 | 6 | 105 | 19 | 1,682 | 61 | 3,916 |
| 117,279 | 4 | 183 | 31 | 1,934 | 6 | 105 | 18 | 1,666 | 59 | 3,888 |
| 117,280 | 4 | 180 | 30 | 1,902 | 6 | 105 | 17 | 1,653 | 57 | 3,840 |
| 117,281 | 4 | 190 | 30 | 2,031 | 6 | 113 | 18 | 1,796 | 58 | 4,130 |
| 117,282 | 4 | 221 | 30 | 2,216 | 4 | 127 | 18 | 1,937 | 56 | 4,501 |
| 117,283 | 4 | 221 | 29 | 2,213 | 4 | 126 | 18 | 1,895 | 55 | 4,455 |
| 117,284 | 4 | 222 | 29 | 2,182 | 4 | 124 | 18 | 1,883 | 55 | 4,411 |
| 117,285 | 4 | 216 | 29 | 2,127 | 4 | 119 | 16 | 1,843 | 53 | 4,305 |
| 117,286 | 4 | 209 | 27 | 2,026 | 4 | 111 | 15 | 1,786 | 50 | 4,132 |
| 117,287 | 4 | 208 | 25 | 1,999 | 4 | 111 | 13 | 1,768 | 46 | 4,086 |
| 117,288 | 4 | 205 | 24 | 1,969 | 3 | 110 | 15 | 1,753 | 46 | 4,037 |
| 117,289 | 4 | 194 | 26 | 1,856 | 3 | 107 | 15 | 1,700 | 48 | 3,857 |

|         |    |     |    |       |    |    |    |       |     |       |
|---------|----|-----|----|-------|----|----|----|-------|-----|-------|
| 117,290 | 4  | 188 | 26 | 1,721 | 3  | 97 | 15 | 1,583 | 48  | 3,589 |
| 117,291 | 5  | 187 | 30 | 1,618 | 3  | 93 | 17 | 1,570 | 55  | 3,468 |
| 117,292 | 6  | 187 | 33 | 1,599 | 5  | 92 | 23 | 1,561 | 67  | 3,439 |
| 117,293 | 6  | 187 | 33 | 1,604 | 5  | 93 | 23 | 1,570 | 67  | 3,454 |
| 117,294 | 6  | 184 | 33 | 1,586 | 5  | 93 | 22 | 1,559 | 66  | 3,422 |
| 117,295 | 7  | 182 | 41 | 1,587 | 9  | 95 | 30 | 1,545 | 87  | 3,409 |
| 117,296 | 7  | 181 | 41 | 1,587 | 9  | 93 | 31 | 1,540 | 88  | 3,401 |
| 117,297 | 7  | 172 | 44 | 1,555 | 10 | 89 | 32 | 1,494 | 93  | 3,310 |
| 117,298 | 8  | 171 | 44 | 1,549 | 10 | 89 | 32 | 1,482 | 94  | 3,291 |
| 117,299 | 8  | 171 | 44 | 1,552 | 10 | 89 | 32 | 1,480 | 94  | 3,292 |
| 117,300 | 8  | 171 | 44 | 1,554 | 10 | 89 | 32 | 1,467 | 94  | 3,281 |
| 117,301 | 7  | 156 | 45 | 1,426 | 10 | 78 | 33 | 1,278 | 95  | 2,938 |
| 117,302 | 7  | 156 | 45 | 1,428 | 10 | 78 | 33 | 1,279 | 95  | 2,941 |
| 117,303 | 7  | 156 | 45 | 1,428 | 10 | 78 | 33 | 1,277 | 95  | 2,939 |
| 117,304 | 8  | 145 | 45 | 1,355 | 10 | 78 | 33 | 1,158 | 96  | 2,736 |
| 117,305 | 8  | 140 | 45 | 1,359 | 10 | 78 | 33 | 1,129 | 96  | 2,706 |
| 117,306 | 8  | 150 | 45 | 1,388 | 10 | 81 | 33 | 1,173 | 96  | 2,792 |
| 117,307 | 8  | 151 | 43 | 1,437 | 10 | 84 | 33 | 1,241 | 94  | 2,913 |
| 117,308 | 8  | 120 | 40 | 1,310 | 11 | 71 | 32 | 1,148 | 91  | 2,649 |
| 117,309 | 8  | 117 | 40 | 1,258 | 12 | 72 | 32 | 1,101 | 92  | 2,548 |
| 117,310 | 9  | 110 | 40 | 1,199 | 12 | 67 | 32 | 1,007 | 93  | 2,383 |
| 117,311 | 9  | 106 | 41 | 1,121 | 12 | 64 | 31 | 934   | 93  | 2,225 |
| 117,312 | 9  | 103 | 42 | 1,073 | 11 | 65 | 31 | 883   | 93  | 2,124 |
| 117,313 | 9  | 98  | 42 | 1,008 | 11 | 60 | 28 | 846   | 90  | 2,012 |
| 117,314 | 9  | 85  | 42 | 847   | 11 | 54 | 30 | 708   | 92  | 1,694 |
| 117,315 | 9  | 85  | 42 | 881   | 11 | 54 | 30 | 720   | 92  | 1,740 |
| 117,316 | 8  | 88  | 40 | 961   | 11 | 59 | 30 | 796   | 89  | 1,904 |
| 117,317 | 8  | 89  | 40 | 1,060 | 11 | 64 | 30 | 857   | 89  | 2,070 |
| 117,318 | 9  | 90  | 39 | 1,075 | 11 | 65 | 31 | 861   | 90  | 2,091 |
| 117,319 | 9  | 90  | 40 | 1,125 | 12 | 69 | 30 | 893   | 91  | 2,177 |
| 117,320 | 9  | 91  | 38 | 1,126 | 12 | 71 | 30 | 898   | 89  | 2,186 |
| 117,321 | 9  | 91  | 38 | 1,130 | 12 | 72 | 30 | 899   | 89  | 2,192 |
| 117,322 | 9  | 91  | 36 | 1,131 | 12 | 72 | 30 | 896   | 87  | 2,190 |
| 117,323 | 13 | 92  | 48 | 1,135 | 12 | 72 | 36 | 899   | 109 | 2,198 |
| 117,324 | 12 | 102 | 47 | 1,213 | 10 | 75 | 36 | 924   | 105 | 2,314 |
| 117,325 | 12 | 102 | 46 | 1,250 | 10 | 76 | 36 | 944   | 104 | 2,372 |
| 117,326 | 12 | 104 | 46 | 1,364 | 11 | 77 | 37 | 972   | 106 | 2,517 |
| 117,327 | 12 | 105 | 46 | 1,373 | 11 | 77 | 36 | 983   | 105 | 2,538 |
| 117,328 | 12 | 106 | 47 | 1,379 | 11 | 78 | 37 | 988   | 107 | 2,551 |
| 117,329 | 12 | 106 | 46 | 1,379 | 11 | 78 | 38 | 989   | 107 | 2,552 |
| 117,330 | 12 | 107 | 46 | 1,361 | 11 | 75 | 38 | 978   | 107 | 2,521 |

|         |    |     |     |       |    |     |    |       |     |       |
|---------|----|-----|-----|-------|----|-----|----|-------|-----|-------|
| 117,331 | 12 | 96  | 46  | 1,193 | 11 | 67  | 38 | 825   | 107 | 2,181 |
| 117,332 | 12 | 95  | 46  | 1,193 | 11 | 68  | 37 | 824   | 106 | 2,180 |
| 117,333 | 12 | 52  | 45  | 908   | 11 | 53  | 37 | 638   | 105 | 1,651 |
| 117,334 | 12 | 52  | 45  | 913   | 11 | 53  | 37 | 639   | 105 | 1,657 |
| 117,335 | 12 | 50  | 44  | 906   | 11 | 53  | 37 | 643   | 104 | 1,652 |
| 117,336 | 12 | 50  | 43  | 903   | 11 | 53  | 37 | 643   | 103 | 1,649 |
| 117,337 | 12 | 51  | 44  | 917   | 11 | 55  | 37 | 651   | 104 | 1,674 |
| 117,338 | 12 | 55  | 44  | 946   | 11 | 56  | 35 | 688   | 102 | 1,745 |
| 117,339 | 12 | 56  | 42  | 956   | 11 | 57  | 35 | 692   | 100 | 1,761 |
| 117,340 | 12 | 57  | 42  | 994   | 11 | 59  | 35 | 729   | 100 | 1,839 |
| 117,341 | 12 | 60  | 42  | 1,006 | 11 | 58  | 34 | 740   | 99  | 1,864 |
| 117,342 | 11 | 66  | 38  | 1,035 | 11 | 61  | 33 | 751   | 93  | 1,913 |
| 117,343 | 10 | 89  | 36  | 1,481 | 9  | 95  | 27 | 1,023 | 82  | 2,688 |
| 117,344 | 9  | 95  | 33  | 1,898 | 9  | 113 | 23 | 1,195 | 74  | 3,301 |
| 117,345 | 9  | 97  | 33  | 1,954 | 5  | 118 | 23 | 1,215 | 70  | 3,384 |
| 117,346 | 9  | 97  | 28  | 1,959 | 5  | 117 | 18 | 1,216 | 60  | 3,389 |
| 117,347 | 10 | 103 | 28  | 1,998 | 5  | 118 | 18 | 1,233 | 61  | 3,452 |
| 117,348 | 10 | 104 | 25  | 2,003 | 4  | 118 | 17 | 1,236 | 56  | 3,461 |
| 117,349 | 10 | 104 | 27  | 2,010 | 4  | 118 | 16 | 1,239 | 57  | 3,471 |
| 117,350 | 10 | 113 | 29  | 2,096 | 4  | 119 | 17 | 1,272 | 60  | 3,600 |
| 117,351 | 10 | 115 | 29  | 2,110 | 4  | 120 | 17 | 1,275 | 60  | 3,620 |
| 117,352 | 10 | 115 | 28  | 2,114 | 4  | 120 | 17 | 1,283 | 59  | 3,632 |
| 117,353 | 10 | 115 | 28  | 2,118 | 4  | 120 | 17 | 1,283 | 59  | 3,636 |
| 117,354 | 10 | 115 | 30  | 2,126 | 5  | 120 | 18 | 1,285 | 63  | 3,646 |
| 117,355 | 10 | 116 | 30  | 2,120 | 5  | 119 | 18 | 1,279 | 63  | 3,634 |
| 117,356 | 10 | 115 | 30  | 2,066 | 5  | 116 | 18 | 1,247 | 63  | 3,544 |
| 117,357 | 10 | 104 | 31  | 2,040 | 6  | 113 | 18 | 1,197 | 65  | 3,454 |
| 117,358 | 11 | 103 | 33  | 1,994 | 6  | 110 | 20 | 1,132 | 70  | 3,339 |
| 117,359 | 11 | 103 | 44  | 1,980 | 5  | 110 | 22 | 1,094 | 82  | 3,287 |
| 117,360 | 12 | 99  | 58  | 1,947 | 4  | 108 | 29 | 1,064 | 103 | 3,218 |
| 117,361 | 11 | 100 | 61  | 1,932 | 4  | 107 | 31 | 1,062 | 107 | 3,201 |
| 117,362 | 10 | 100 | 60  | 1,936 | 4  | 106 | 30 | 1,062 | 104 | 3,204 |
| 117,363 | 10 | 100 | 59  | 1,928 | 4  | 105 | 30 | 1,059 | 103 | 3,192 |
| 117,364 | 10 | 100 | 59  | 1,923 | 4  | 102 | 28 | 1,049 | 101 | 3,174 |
| 117,365 | 10 | 98  | 59  | 1,857 | 4  | 102 | 30 | 1,018 | 103 | 3,075 |
| 117,366 | 10 | 96  | 61  | 1,778 | 4  | 97  | 30 | 941   | 105 | 2,912 |
| 117,367 | 11 | 93  | 61  | 1,679 | 4  | 91  | 32 | 877   | 108 | 2,740 |
| 117,368 | 11 | 92  | 62  | 1,664 | 4  | 91  | 34 | 873   | 111 | 2,720 |
| 117,369 | 20 | 92  | 100 | 1,665 | 8  | 91  | 54 | 873   | 182 | 2,721 |
| 117,370 | 20 | 91  | 97  | 1,612 | 7  | 88  | 54 | 836   | 178 | 2,627 |
| 117,371 | 20 | 90  | 99  | 1,602 | 7  | 86  | 58 | 826   | 184 | 2,604 |

|         |    |    |     |       |    |    |    |     |     |       |
|---------|----|----|-----|-------|----|----|----|-----|-----|-------|
| 117,372 | 20 | 89 | 100 | 1,591 | 7  | 85 | 57 | 823 | 184 | 2,588 |
| 117,373 | 20 | 89 | 100 | 1,593 | 7  | 85 | 57 | 823 | 184 | 2,590 |
| 117,374 | 16 | 88 | 88  | 1,589 | 7  | 85 | 51 | 820 | 162 | 2,582 |
| 117,375 | 16 | 79 | 90  | 1,513 | 9  | 82 | 52 | 795 | 167 | 2,469 |
| 117,376 | 16 | 80 | 91  | 1,476 | 9  | 82 | 53 | 773 | 169 | 2,411 |
| 117,377 | 16 | 76 | 91  | 1,349 | 8  | 80 | 52 | 733 | 167 | 2,238 |
| 117,378 | 16 | 76 | 94  | 1,350 | 9  | 80 | 55 | 733 | 174 | 2,239 |
| 117,379 | 16 | 75 | 94  | 1,341 | 9  | 79 | 56 | 722 | 175 | 2,217 |
| 117,380 | 16 | 75 | 94  | 1,343 | 9  | 79 | 55 | 721 | 174 | 2,218 |
| 117,381 | 16 | 74 | 93  | 1,343 | 9  | 79 | 55 | 721 | 173 | 2,217 |
| 117,382 | 16 | 74 | 93  | 1,350 | 10 | 81 | 55 | 738 | 174 | 2,243 |
| 117,383 | 16 | 74 | 93  | 1,350 | 10 | 80 | 55 | 737 | 174 | 2,241 |
| 117,384 | 16 | 75 | 93  | 1,370 | 10 | 79 | 55 | 762 | 174 | 2,286 |
| 117,385 | 16 | 75 | 94  | 1,366 | 10 | 79 | 55 | 763 | 175 | 2,283 |
| 117,386 | 16 | 75 | 94  | 1,364 | 10 | 79 | 55 | 755 | 175 | 2,273 |
| 117,387 | 16 | 75 | 94  | 1,365 | 10 | 80 | 57 | 760 | 177 | 2,280 |
| 117,388 | 16 | 74 | 93  | 1,344 | 10 | 78 | 57 | 745 | 176 | 2,241 |
| 117,389 | 16 | 70 | 93  | 1,319 | 11 | 77 | 57 | 709 | 177 | 2,175 |
| 117,390 | 16 | 68 | 93  | 1,268 | 11 | 74 | 58 | 665 | 178 | 2,075 |
| 117,391 | 16 | 68 | 93  | 1,268 | 11 | 74 | 58 | 666 | 178 | 2,076 |
| 117,392 | 16 | 66 | 93  | 1,255 | 12 | 74 | 59 | 654 | 180 | 2,049 |
| 117,393 | 16 | 36 | 93  | 777   | 12 | 38 | 59 | 370 | 180 | 1,221 |
| 117,394 | 16 | 30 | 94  | 355   | 12 | 19 | 59 | 191 | 181 | 595   |
| 117,395 | 16 | 31 | 94  | 356   | 12 | 19 | 59 | 191 | 181 | 597   |
| 117,396 | 16 | 30 | 94  | 300   | 12 | 14 | 59 | 172 | 181 | 516   |
| 117,397 | 17 | 29 | 94  | 291   | 12 | 13 | 59 | 167 | 182 | 500   |
| 117,398 | 16 | 24 | 94  | 246   | 12 | 12 | 59 | 147 | 181 | 429   |
| 117,399 | 16 | 23 | 92  | 229   | 13 | 12 | 60 | 140 | 181 | 404   |
| 117,400 | 15 | 23 | 92  | 229   | 13 | 12 | 63 | 140 | 183 | 404   |
| 117,401 | 15 | 15 | 93  | 144   | 13 | 11 | 66 | 103 | 187 | 273   |
| 117,402 | 15 | 12 | 96  | 123   | 13 | 10 | 69 | 91  | 193 | 236   |
| 117,403 | 15 | 13 | 96  | 126   | 13 | 10 | 69 | 99  | 193 | 248   |
| 117,404 | 16 | 15 | 96  | 149   | 13 | 11 | 69 | 125 | 194 | 300   |
| 117,405 | 15 | 16 | 95  | 149   | 12 | 12 | 68 | 132 | 190 | 309   |
| 117,406 | 15 | 14 | 94  | 175   | 12 | 12 | 68 | 168 | 189 | 369   |
| 117,407 | 15 | 14 | 93  | 179   | 11 | 12 | 68 | 176 | 187 | 381   |
| 117,408 | 14 | 15 | 91  | 201   | 11 | 12 | 66 | 175 | 182 | 403   |
| 117,409 | 14 | 15 | 80  | 202   | 11 | 12 | 64 | 172 | 169 | 401   |
| 117,410 | 13 | 15 | 68  | 203   | 11 | 11 | 58 | 171 | 150 | 400   |
| 117,411 | 13 | 17 | 67  | 212   | 11 | 11 | 57 | 173 | 148 | 413   |
| 117,412 | 13 | 17 | 64  | 211   | 11 | 11 | 55 | 174 | 143 | 413   |



|         |    |    |    |     |    |    |    |     |     |     |
|---------|----|----|----|-----|----|----|----|-----|-----|-----|
| 117,413 | 14 | 16 | 65 | 207 | 11 | 11 | 55 | 171 | 145 | 405 |
| 117,414 | 14 | 16 | 65 | 210 | 11 | 12 | 55 | 170 | 145 | 408 |
| 117,415 | 15 | 16 | 65 | 209 | 11 | 12 | 53 | 170 | 144 | 407 |
| 117,416 | 15 | 17 | 65 | 209 | 11 | 12 | 53 | 170 | 144 | 408 |
| 117,417 | 15 | 17 | 63 | 208 | 11 | 12 | 53 | 170 | 142 | 407 |
| 117,418 | 14 | 17 | 63 | 205 | 11 | 11 | 51 | 170 | 139 | 403 |
| 117,419 | 14 | 17 | 63 | 205 | 11 | 11 | 50 | 170 | 138 | 403 |
| 117,420 | 4  | 17 | 27 | 203 | 6  | 10 | 29 | 169 | 66  | 399 |
| 117,421 | 4  | 17 | 27 | 204 | 6  | 10 | 29 | 169 | 66  | 400 |
| 117,422 | 4  | 17 | 24 | 204 | 6  | 10 | 26 | 169 | 60  | 400 |
| 117,423 | 4  | 17 | 24 | 204 | 6  | 10 | 26 | 170 | 60  | 401 |
| 117,424 | 4  | 17 | 22 | 203 | 6  | 10 | 24 | 170 | 56  | 400 |
| 117,425 | 5  | 17 | 22 | 203 | 6  | 10 | 27 | 170 | 60  | 400 |
| 117,426 | 5  | 18 | 21 | 202 | 5  | 10 | 28 | 173 | 59  | 403 |
| 117,427 | 7  | 17 | 26 | 205 | 6  | 9  | 28 | 175 | 67  | 406 |
| 117,428 | 8  | 17 | 26 | 204 | 6  | 10 | 28 | 175 | 68  | 406 |
| 117,429 | 8  | 17 | 23 | 203 | 5  | 10 | 25 | 175 | 61  | 405 |
| 117,430 | 8  | 17 | 22 | 200 | 5  | 10 | 23 | 175 | 58  | 402 |
| 117,431 | 8  | 17 | 22 | 200 | 5  | 11 | 23 | 175 | 58  | 403 |
| 117,432 | 8  | 17 | 22 | 200 | 4  | 12 | 23 | 175 | 57  | 404 |
| 117,433 | 8  | 18 | 22 | 195 | 4  | 10 | 23 | 159 | 57  | 382 |
| 117,434 | 8  | 19 | 24 | 194 | 4  | 10 | 23 | 159 | 59  | 382 |
| 117,435 | 8  | 18 | 24 | 174 | 4  | 10 | 23 | 137 | 59  | 339 |
| 117,436 | 8  | 18 | 23 | 173 | 4  | 10 | 23 | 135 | 58  | 336 |
| 117,437 | 8  | 18 | 23 | 174 | 4  | 10 | 23 | 135 | 58  | 337 |
| 117,438 | 8  | 18 | 23 | 172 | 4  | 9  | 21 | 130 | 56  | 329 |
| 117,439 | 8  | 19 | 23 | 172 | 3  | 9  | 21 | 130 | 55  | 330 |
| 117,440 | 8  | 20 | 23 | 170 | 3  | 9  | 21 | 130 | 55  | 329 |
| 117,441 | 8  | 21 | 23 | 168 | 3  | 8  | 20 | 130 | 54  | 327 |
| 117,442 | 8  | 20 | 24 | 168 | 3  | 8  | 20 | 130 | 55  | 326 |
| 117,443 | 8  | 20 | 24 | 168 | 2  | 8  | 20 | 130 | 54  | 326 |
| 117,444 | 8  | 20 | 24 | 168 | 2  | 8  | 20 | 129 | 54  | 325 |
| 117,445 | 8  | 20 | 22 | 165 | 2  | 8  | 20 | 129 | 52  | 322 |
| 117,446 | 8  | 19 | 22 | 163 | 2  | 8  | 20 | 127 | 52  | 317 |
| 117,447 | 8  | 20 | 22 | 164 | 2  | 8  | 20 | 127 | 52  | 319 |
| 117,448 | 7  | 19 | 23 | 161 | 2  | 8  | 21 | 125 | 53  | 313 |
| 117,449 | 7  | 19 | 24 | 161 | 2  | 8  | 21 | 126 | 54  | 314 |
| 117,450 | 7  | 22 | 24 | 180 | 1  | 9  | 20 | 134 | 52  | 345 |
| 117,451 | 7  | 22 | 25 | 189 | 1  | 10 | 17 | 136 | 50  | 357 |
| 117,452 | 7  | 23 | 22 | 192 | 1  | 10 | 13 | 136 | 43  | 361 |
| 117,453 | 7  | 23 | 19 | 191 | 1  | 10 | 9  | 133 | 36  | 357 |

|         |   |    |    |     |   |    |    |     |    |     |
|---------|---|----|----|-----|---|----|----|-----|----|-----|
| 117,454 | 7 | 22 | 20 | 168 | 1 | 9  | 9  | 102 | 37 | 301 |
| 117,455 | 6 | 25 | 20 | 181 | 1 | 9  | 9  | 117 | 36 | 332 |
| 117,456 | 6 | 24 | 19 | 173 | 1 | 8  | 9  | 112 | 35 | 317 |
| 117,457 | 6 | 23 | 20 | 138 | 1 | 6  | 11 | 64  | 38 | 231 |
| 117,458 | 8 | 25 | 20 | 136 | 1 | 6  | 12 | 61  | 41 | 228 |
| 117,459 | 8 | 25 | 20 | 128 | 1 | 8  | 12 | 67  | 41 | 228 |
| 117,460 | 8 | 25 | 20 | 144 | 1 | 8  | 12 | 79  | 41 | 256 |
| 117,461 | 8 | 25 | 19 | 143 | 1 | 8  | 12 | 79  | 40 | 255 |
| 117,462 | 8 | 24 | 19 | 135 | 1 | 8  | 13 | 75  | 41 | 242 |
| 117,463 | 8 | 26 | 19 | 135 | 1 | 8  | 13 | 75  | 41 | 244 |
| 117,464 | 7 | 26 | 19 | 132 | 1 | 7  | 13 | 75  | 40 | 240 |
| 117,465 | 7 | 26 | 19 | 131 | 2 | 7  | 16 | 77  | 44 | 241 |
| 117,466 | 6 | 27 | 19 | 133 | 2 | 7  | 16 | 78  | 43 | 245 |
| 117,467 | 6 | 27 | 20 | 132 | 2 | 7  | 16 | 79  | 44 | 245 |
| 117,468 | 6 | 27 | 20 | 133 | 2 | 7  | 18 | 79  | 46 | 246 |
| 117,469 | 6 | 27 | 20 | 134 | 2 | 7  | 18 | 81  | 46 | 249 |
| 117,470 | 6 | 28 | 19 | 134 | 2 | 7  | 17 | 80  | 44 | 249 |
| 117,471 | 6 | 30 | 17 | 133 | 3 | 7  | 17 | 81  | 43 | 251 |
| 117,472 | 6 | 32 | 17 | 139 | 3 | 10 | 17 | 86  | 43 | 267 |
| 117,473 | 6 | 35 | 17 | 164 | 3 | 10 | 17 | 97  | 43 | 306 |
| 117,474 | 6 | 41 | 17 | 225 | 3 | 12 | 17 | 117 | 43 | 395 |
| 117,475 | 6 | 44 | 17 | 236 | 3 | 14 | 17 | 121 | 43 | 415 |
| 117,476 | 5 | 44 | 17 | 245 | 3 | 15 | 14 | 121 | 39 | 425 |
| 117,477 | 5 | 44 | 18 | 244 | 3 | 15 | 13 | 119 | 39 | 422 |
| 117,478 | 3 | 44 | 12 | 244 | 3 | 14 | 12 | 120 | 30 | 422 |
| 117,479 | 2 | 44 | 12 | 244 | 3 | 14 | 12 | 120 | 29 | 422 |
| 117,480 | 2 | 44 | 16 | 245 | 3 | 15 | 14 | 120 | 35 | 424 |
| 117,481 | 2 | 44 | 16 | 250 | 3 | 15 | 14 | 122 | 35 | 431 |
| 117,482 | 2 | 44 | 17 | 259 | 3 | 14 | 14 | 125 | 36 | 442 |
| 117,483 | 2 | 44 | 17 | 262 | 3 | 13 | 14 | 124 | 36 | 443 |
| 117,484 | 2 | 43 | 15 | 262 | 4 | 13 | 14 | 125 | 35 | 443 |
| 117,485 | 2 | 43 | 15 | 271 | 4 | 14 | 14 | 126 | 35 | 454 |
| 117,486 | 2 | 42 | 15 | 277 | 4 | 14 | 14 | 127 | 35 | 460 |
| 117,487 | 2 | 42 | 15 | 282 | 4 | 14 | 14 | 130 | 35 | 468 |
| 117,488 | 3 | 43 | 15 | 298 | 4 | 16 | 14 | 132 | 36 | 489 |
| 117,489 | 3 | 43 | 14 | 301 | 4 | 16 | 14 | 132 | 35 | 492 |
| 117,490 | 3 | 42 | 15 | 301 | 4 | 16 | 13 | 132 | 35 | 491 |
| 117,491 | 3 | 40 | 15 | 298 | 4 | 16 | 13 | 129 | 35 | 483 |
| 117,492 | 3 | 40 | 15 | 298 | 4 | 16 | 13 | 129 | 35 | 483 |
| 117,493 | 3 | 40 | 15 | 298 | 4 | 16 | 13 | 128 | 35 | 482 |
| 117,494 | 4 | 40 | 16 | 298 | 4 | 16 | 13 | 127 | 37 | 481 |

|         |   |    |    |     |   |    |    |     |    |     |
|---------|---|----|----|-----|---|----|----|-----|----|-----|
| 117,495 | 4 | 40 | 16 | 300 | 4 | 16 | 13 | 126 | 37 | 482 |
| 117,496 | 4 | 39 | 16 | 301 | 4 | 16 | 13 | 126 | 37 | 482 |
| 117,497 | 4 | 39 | 17 | 301 | 4 | 16 | 13 | 126 | 38 | 482 |
| 117,498 | 4 | 38 | 17 | 300 | 4 | 16 | 12 | 127 | 37 | 481 |
| 117,499 | 5 | 38 | 16 | 299 | 4 | 16 | 12 | 127 | 37 | 480 |
| 117,500 | 5 | 34 | 15 | 279 | 4 | 15 | 12 | 117 | 36 | 445 |
| 117,501 | 5 | 34 | 15 | 280 | 4 | 15 | 12 | 117 | 36 | 446 |
| 117,502 | 5 | 35 | 14 | 275 | 4 | 14 | 12 | 115 | 35 | 439 |
| 117,503 | 5 | 34 | 14 | 272 | 4 | 16 | 12 | 115 | 35 | 437 |
| 117,504 | 5 | 34 | 14 | 274 | 4 | 16 | 12 | 117 | 35 | 441 |
| 117,505 | 5 | 34 | 15 | 272 | 4 | 17 | 12 | 118 | 36 | 441 |
| 117,506 | 5 | 32 | 14 | 262 | 4 | 17 | 11 | 105 | 34 | 416 |
| 117,507 | 5 | 32 | 14 | 267 | 4 | 17 | 10 | 106 | 33 | 422 |
| 117,508 | 5 | 33 | 14 | 268 | 4 | 18 | 10 | 112 | 33 | 431 |
| 117,509 | 3 | 31 | 15 | 255 | 4 | 18 | 9  | 105 | 31 | 409 |
| 117,510 | 3 | 31 | 15 | 251 | 4 | 19 | 9  | 103 | 31 | 404 |
| 117,511 | 3 | 31 | 15 | 232 | 4 | 19 | 9  | 91  | 31 | 373 |
| 117,512 | 3 | 31 | 17 | 232 | 4 | 19 | 9  | 91  | 33 | 373 |
| 117,513 | 3 | 30 | 17 | 230 | 4 | 19 | 10 | 90  | 34 | 369 |
| 117,514 | 5 | 29 | 19 | 229 | 5 | 19 | 11 | 90  | 40 | 367 |
| 117,515 | 5 | 29 | 18 | 229 | 5 | 19 | 11 | 90  | 39 | 367 |
| 117,516 | 5 | 28 | 19 | 225 | 4 | 19 | 9  | 85  | 37 | 357 |
| 117,517 | 5 | 28 | 18 | 225 | 4 | 20 | 9  | 84  | 36 | 357 |
| 117,518 | 5 | 28 | 18 | 227 | 4 | 20 | 9  | 84  | 36 | 359 |
| 117,519 | 5 | 28 | 18 | 223 | 4 | 20 | 7  | 82  | 34 | 353 |
| 117,520 | 5 | 30 | 18 | 225 | 4 | 21 | 7  | 82  | 34 | 358 |
| 117,521 | 5 | 29 | 18 | 226 | 4 | 21 | 7  | 82  | 34 | 358 |
| 117,522 | 4 | 26 | 18 | 220 | 3 | 18 | 7  | 78  | 32 | 342 |
| 117,523 | 5 | 23 | 18 | 193 | 3 | 18 | 7  | 67  | 33 | 301 |
| 117,524 | 5 | 17 | 18 | 135 | 3 | 16 | 6  | 47  | 32 | 215 |
| 117,525 | 5 | 14 | 17 | 123 | 3 | 14 | 6  | 43  | 31 | 194 |
| 117,526 | 5 | 14 | 17 | 114 | 3 | 13 | 6  | 42  | 31 | 183 |
| 117,527 | 5 | 13 | 17 | 114 | 3 | 13 | 6  | 41  | 31 | 181 |
| 117,528 | 5 | 13 | 16 | 111 | 3 | 13 | 6  | 39  | 30 | 176 |
| 117,529 | 4 | 14 | 15 | 110 | 2 | 14 | 6  | 36  | 27 | 174 |
| 117,530 | 5 | 14 | 12 | 117 | 2 | 14 | 4  | 40  | 23 | 185 |
| 117,531 | 5 | 16 | 13 | 123 | 2 | 13 | 4  | 43  | 24 | 195 |
| 117,532 | 5 | 18 | 15 | 121 | 2 | 13 | 4  | 43  | 26 | 195 |
| 117,533 | 5 | 21 | 15 | 124 | 2 | 13 | 4  | 42  | 26 | 200 |
| 117,534 | 5 | 21 | 15 | 124 | 2 | 13 | 4  | 42  | 26 | 200 |
| 117,535 | 5 | 21 | 15 | 132 | 1 | 13 | 4  | 44  | 25 | 210 |

|         |   |    |    |     |   |    |   |    |    |     |
|---------|---|----|----|-----|---|----|---|----|----|-----|
| 117,536 | 5 | 21 | 17 | 133 | 1 | 12 | 5 | 45 | 28 | 211 |
| 117,537 | 5 | 22 | 17 | 128 | 1 | 14 | 5 | 46 | 28 | 210 |
| 117,538 | 5 | 29 | 17 | 149 | 1 | 15 | 5 | 53 | 28 | 246 |
| 117,539 | 4 | 28 | 17 | 136 | 1 | 13 | 5 | 52 | 27 | 229 |
| 117,540 | 4 | 30 | 17 | 135 | 1 | 13 | 5 | 57 | 27 | 235 |
| 117,541 | 4 | 30 | 16 | 137 | 1 | 13 | 5 | 57 | 26 | 237 |
| 117,542 | 4 | 30 | 16 | 137 | 1 | 13 | 5 | 57 | 26 | 237 |
| 117,543 | 4 | 30 | 16 | 138 | 1 | 13 | 5 | 57 | 26 | 238 |
| 117,544 | 4 | 31 | 16 | 138 | 1 | 13 | 5 | 57 | 26 | 239 |
| 117,545 | 4 | 35 | 15 | 148 | 1 | 14 | 5 | 60 | 25 | 257 |
| 117,546 | 3 | 20 | 8  | 90  | 1 | 10 | 1 | 41 | 13 | 161 |
| 117,547 | 3 | 35 | 13 | 145 | 1 | 15 | 5 | 59 | 22 | 254 |
| 117,548 | 3 | 38 | 15 | 150 | 1 | 15 | 5 | 59 | 24 | 262 |
| 117,549 | 3 | 39 | 15 | 151 | 1 | 15 | 5 | 59 | 24 | 264 |
| 117,550 | 2 | 39 | 15 | 154 | 1 | 15 | 5 | 60 | 23 | 268 |
| 117,551 | 2 | 39 | 15 | 156 | 1 | 15 | 5 | 60 | 23 | 270 |
| 117,552 | 2 | 38 | 15 | 155 | 1 | 16 | 5 | 60 | 23 | 269 |
| 117,553 | 2 | 38 | 14 | 152 | 1 | 16 | 5 | 60 | 22 | 266 |
| 117,554 | 2 | 39 | 14 | 152 | 1 | 14 | 5 | 60 | 22 | 265 |
| 117,555 | 2 | 39 | 14 | 147 | 1 | 14 | 5 | 59 | 22 | 259 |
| 117,556 | 2 | 36 | 13 | 144 | 1 | 13 | 5 | 56 | 21 | 249 |
| 117,557 | 2 | 36 | 13 | 135 | 1 | 13 | 5 | 55 | 21 | 239 |
| 117,558 | 2 | 37 | 13 | 139 | 1 | 13 | 5 | 55 | 21 | 244 |
| 117,559 | 2 | 37 | 13 | 140 | 1 | 12 | 5 | 51 | 21 | 240 |
| 117,560 | 2 | 36 | 13 | 133 | 1 | 9  | 5 | 49 | 21 | 227 |
| 117,561 | 2 | 36 | 12 | 134 | 1 | 9  | 5 | 49 | 20 | 228 |
| 117,562 | 2 | 41 | 12 | 149 | 1 | 9  | 5 | 54 | 20 | 253 |
| 117,563 | 2 | 42 | 11 | 147 | 1 | 9  | 3 | 52 | 17 | 250 |
| 117,564 | 2 | 43 | 10 | 147 | 0 | 9  | 3 | 54 | 15 | 253 |
| 117,565 | 0 | 42 | 9  | 145 | 0 | 9  | 3 | 54 | 12 | 250 |
| 117,566 | 0 | 42 | 9  | 145 | 0 | 9  | 2 | 54 | 11 | 250 |
| 117,567 | 0 | 42 | 8  | 150 | 0 | 8  | 1 | 59 | 9  | 259 |
| 117,568 | 0 | 42 | 8  | 151 | 0 | 8  | 1 | 59 | 9  | 260 |
| 117,569 | 0 | 42 | 8  | 150 | 0 | 8  | 1 | 59 | 9  | 259 |
| 117,570 | 0 | 41 | 8  | 150 | 0 | 8  | 1 | 59 | 9  | 258 |
| 117,571 | 0 | 40 | 8  | 149 | 0 | 7  | 1 | 59 | 9  | 255 |
| 117,572 | 0 | 40 | 8  | 149 | 0 | 7  | 1 | 59 | 9  | 255 |
| 117,573 | 0 | 39 | 8  | 149 | 0 | 7  | 1 | 59 | 9  | 254 |
| 117,574 | 0 | 39 | 8  | 149 | 0 | 7  | 1 | 59 | 9  | 254 |
| 117,575 | 0 | 40 | 8  | 149 | 0 | 7  | 1 | 59 | 9  | 255 |
| 117,576 | 0 | 40 | 8  | 149 | 0 | 7  | 1 | 60 | 9  | 256 |

|         |   |    |   |     |   |    |   |    |    |     |
|---------|---|----|---|-----|---|----|---|----|----|-----|
| 117,577 | 0 | 40 | 9 | 149 | 0 | 7  | 1 | 60 | 10 | 256 |
| 117,578 | 0 | 40 | 9 | 149 | 0 | 7  | 1 | 60 | 10 | 256 |
| 117,579 | 0 | 40 | 9 | 147 | 0 | 7  | 1 | 60 | 10 | 254 |
| 117,580 | 0 | 38 | 9 | 141 | 0 | 6  | 1 | 58 | 10 | 243 |
| 117,581 | 0 | 38 | 9 | 157 | 0 | 10 | 1 | 62 | 10 | 267 |
| 117,582 | 0 | 39 | 9 | 166 | 0 | 10 | 1 | 65 | 10 | 280 |
| 117,583 | 0 | 40 | 9 | 171 | 0 | 10 | 1 | 79 | 10 | 300 |
| 117,584 | 0 | 39 | 5 | 171 | 0 | 10 | 1 | 83 | 6  | 303 |
| 117,585 | 0 | 39 | 5 | 171 | 0 | 10 | 1 | 83 | 6  | 303 |
| 117,586 | 0 | 37 | 5 | 166 | 0 | 10 | 1 | 81 | 6  | 294 |
| 117,587 | 0 | 37 | 4 | 161 | 0 | 10 | 1 | 88 | 5  | 296 |
| 117,588 | 0 | 35 | 4 | 157 | 0 | 11 | 0 | 85 | 4  | 288 |
| 117,589 | 0 | 41 | 3 | 155 | 0 | 11 | 0 | 90 | 3  | 297 |
| 117,590 | 0 | 39 | 3 | 140 | 0 | 10 | 0 | 86 | 3  | 275 |
| 117,591 | 0 | 36 | 4 | 139 | 0 | 10 | 0 | 82 | 4  | 267 |
| 117,592 | 0 | 36 | 4 | 139 | 0 | 10 | 0 | 81 | 4  | 266 |
| 117,593 | 0 | 37 | 4 | 143 | 0 | 11 | 0 | 82 | 4  | 273 |
| 117,594 | 0 | 37 | 4 | 145 | 0 | 11 | 0 | 83 | 4  | 276 |
| 117,595 | 0 | 36 | 4 | 149 | 0 | 11 | 0 | 83 | 4  | 279 |
| 117,596 | 0 | 32 | 4 | 139 | 0 | 10 | 1 | 80 | 5  | 261 |
| 117,597 | 0 | 28 | 3 | 140 | 0 | 9  | 1 | 79 | 4  | 256 |
| 117,598 | 0 | 28 | 3 | 137 | 0 | 9  | 1 | 79 | 4  | 253 |
| 117,599 | 0 | 28 | 3 | 136 | 0 | 9  | 1 | 79 | 4  | 252 |
| 117,600 | 0 | 28 | 4 | 132 | 0 | 9  | 1 | 77 | 5  | 246 |
| 117,601 | 0 | 28 | 4 | 132 | 0 | 9  | 1 | 77 | 5  | 246 |
| 117,602 | 0 | 28 | 4 | 131 | 0 | 8  | 1 | 78 | 5  | 245 |
| 117,603 | 0 | 28 | 4 | 131 | 0 | 8  | 1 | 78 | 5  | 245 |
| 117,604 | 0 | 27 | 4 | 131 | 0 | 8  | 1 | 78 | 5  | 244 |
| 117,605 | 0 | 27 | 4 | 131 | 0 | 8  | 1 | 78 | 5  | 244 |
| 117,606 | 0 | 27 | 4 | 131 | 1 | 8  | 1 | 77 | 6  | 243 |
| 117,607 | 0 | 27 | 4 | 131 | 1 | 8  | 1 | 77 | 6  | 243 |
| 117,608 | 0 | 26 | 4 | 128 | 1 | 8  | 1 | 74 | 6  | 236 |
| 117,609 | 0 | 26 | 4 | 128 | 1 | 8  | 1 | 74 | 6  | 236 |
| 117,610 | 0 | 26 | 4 | 122 | 1 | 8  | 1 | 72 | 6  | 228 |
| 117,611 | 0 | 26 | 4 | 122 | 1 | 8  | 1 | 71 | 6  | 227 |
| 117,612 | 0 | 26 | 3 | 121 | 1 | 8  | 1 | 71 | 5  | 226 |
| 117,613 | 0 | 20 | 4 | 104 | 1 | 8  | 2 | 64 | 7  | 196 |
| 117,614 | 0 | 19 | 4 | 104 | 1 | 8  | 2 | 64 | 7  | 195 |
| 117,615 | 1 | 19 | 4 | 105 | 1 | 8  | 2 | 62 | 8  | 194 |
| 117,616 | 1 | 19 | 4 | 105 | 1 | 8  | 2 | 62 | 8  | 194 |
| 117,617 | 1 | 19 | 4 | 100 | 1 | 8  | 2 | 57 | 8  | 184 |

|         |   |    |    |     |   |   |   |    |    |     |
|---------|---|----|----|-----|---|---|---|----|----|-----|
| 117,618 | 1 | 19 | 4  | 99  | 1 | 8 | 2 | 57 | 8  | 183 |
| 117,619 | 3 | 19 | 4  | 102 | 1 | 8 | 2 | 57 | 10 | 186 |
| 117,620 | 3 | 19 | 4  | 110 | 1 | 8 | 2 | 59 | 10 | 196 |
| 117,621 | 3 | 20 | 5  | 113 | 1 | 8 | 2 | 61 | 11 | 202 |
| 117,622 | 3 | 20 | 5  | 115 | 1 | 8 | 2 | 62 | 11 | 205 |
| 117,623 | 3 | 21 | 5  | 118 | 1 | 8 | 2 | 61 | 11 | 208 |
| 117,624 | 3 | 22 | 5  | 119 | 1 | 8 | 2 | 61 | 11 | 210 |
| 117,625 | 3 | 21 | 6  | 119 | 1 | 8 | 2 | 61 | 12 | 209 |
| 117,626 | 3 | 20 | 6  | 120 | 1 | 8 | 2 | 60 | 12 | 208 |
| 117,627 | 3 | 20 | 6  | 120 | 1 | 8 | 2 | 59 | 12 | 207 |
| 117,628 | 3 | 20 | 6  | 120 | 1 | 8 | 2 | 59 | 12 | 207 |
| 117,629 | 4 | 20 | 6  | 120 | 1 | 8 | 2 | 59 | 13 | 207 |
| 117,630 | 4 | 20 | 6  | 119 | 1 | 8 | 2 | 57 | 13 | 204 |
| 117,631 | 4 | 20 | 7  | 119 | 1 | 8 | 2 | 57 | 14 | 204 |
| 117,632 | 4 | 20 | 7  | 103 | 1 | 4 | 2 | 53 | 14 | 180 |
| 117,633 | 4 | 19 | 7  | 94  | 1 | 4 | 2 | 49 | 14 | 166 |
| 117,634 | 4 | 17 | 8  | 83  | 1 | 4 | 2 | 39 | 15 | 143 |
| 117,635 | 4 | 14 | 8  | 70  | 1 | 4 | 3 | 28 | 16 | 116 |
| 117,636 | 4 | 15 | 8  | 70  | 1 | 4 | 3 | 28 | 16 | 117 |
| 117,637 | 4 | 15 | 8  | 63  | 2 | 4 | 3 | 18 | 17 | 100 |
| 117,638 | 4 | 15 | 8  | 60  | 2 | 3 | 3 | 18 | 17 | 96  |
| 117,639 | 5 | 7  | 9  | 51  | 2 | 1 | 4 | 7  | 20 | 66  |
| 117,640 | 5 | 7  | 8  | 50  | 2 | 1 | 4 | 7  | 19 | 65  |
| 117,641 | 5 | 7  | 8  | 51  | 2 | 1 | 4 | 9  | 19 | 68  |
| 117,642 | 5 | 7  | 8  | 51  | 2 | 1 | 4 | 11 | 19 | 70  |
| 117,643 | 5 | 6  | 9  | 50  | 2 | 1 | 4 | 11 | 20 | 68  |
| 117,644 | 5 | 5  | 9  | 43  | 2 | 0 | 4 | 10 | 20 | 58  |
| 117,645 | 5 | 5  | 10 | 42  | 2 | 0 | 4 | 9  | 21 | 56  |
| 117,646 | 5 | 5  | 11 | 39  | 2 | 0 | 3 | 9  | 21 | 53  |
| 117,647 | 5 | 5  | 11 | 39  | 2 | 0 | 3 | 9  | 21 | 53  |
| 117,648 | 5 | 5  | 11 | 36  | 3 | 0 | 3 | 9  | 22 | 50  |
| 117,649 | 5 | 5  | 11 | 36  | 3 | 0 | 3 | 10 | 22 | 51  |
| 117,650 | 5 | 5  | 11 | 43  | 4 | 0 | 3 | 14 | 23 | 62  |
| 117,651 | 6 | 5  | 11 | 45  | 4 | 0 | 3 | 14 | 24 | 64  |
| 117,652 | 6 | 5  | 12 | 46  | 4 | 0 | 3 | 16 | 25 | 67  |
| 117,653 | 6 | 5  | 12 | 47  | 4 | 0 | 3 | 17 | 25 | 69  |
| 117,654 | 6 | 6  | 12 | 47  | 4 | 0 | 3 | 17 | 25 | 70  |
| 117,655 | 6 | 6  | 12 | 46  | 4 | 0 | 3 | 17 | 25 | 69  |
| 117,656 | 6 | 6  | 12 | 46  | 3 | 0 | 3 | 18 | 24 | 70  |
| 117,657 | 6 | 6  | 13 | 48  | 3 | 1 | 3 | 18 | 25 | 73  |
| 117,658 | 6 | 6  | 13 | 48  | 3 | 1 | 3 | 18 | 25 | 73  |

|         |    |   |    |     |    |   |    |    |    |     |
|---------|----|---|----|-----|----|---|----|----|----|-----|
| 117,659 | 6  | 6 | 13 | 49  | 3  | 1 | 3  | 18 | 25 | 74  |
| 117,660 | 7  | 6 | 13 | 72  | 3  | 3 | 3  | 29 | 26 | 110 |
| 117,661 | 8  | 6 | 13 | 112 | 3  | 6 | 4  | 36 | 28 | 160 |
| 117,662 | 8  | 6 | 13 | 123 | 3  | 7 | 4  | 41 | 28 | 177 |
| 117,663 | 8  | 6 | 13 | 142 | 3  | 7 | 4  | 43 | 28 | 198 |
| 117,664 | 9  | 7 | 12 | 144 | 3  | 7 | 3  | 45 | 27 | 203 |
| 117,665 | 9  | 7 | 12 | 144 | 5  | 7 | 3  | 45 | 29 | 203 |
| 117,666 | 10 | 6 | 12 | 143 | 5  | 7 | 3  | 45 | 30 | 201 |
| 117,667 | 10 | 6 | 12 | 143 | 7  | 7 | 3  | 45 | 32 | 201 |
| 117,668 | 10 | 6 | 13 | 143 | 7  | 7 | 3  | 45 | 33 | 201 |
| 117,669 | 10 | 6 | 13 | 140 | 7  | 7 | 3  | 45 | 33 | 198 |
| 117,670 | 8  | 5 | 14 | 128 | 7  | 7 | 4  | 40 | 33 | 180 |
| 117,671 | 8  | 5 | 14 | 129 | 9  | 7 | 4  | 40 | 35 | 181 |
| 117,672 | 9  | 5 | 14 | 129 | 9  | 7 | 4  | 40 | 36 | 181 |
| 117,673 | 9  | 4 | 14 | 126 | 9  | 7 | 4  | 40 | 36 | 177 |
| 117,674 | 9  | 4 | 14 | 125 | 10 | 7 | 4  | 40 | 37 | 176 |
| 117,675 | 9  | 4 | 14 | 125 | 10 | 7 | 4  | 40 | 37 | 176 |
| 117,676 | 9  | 4 | 13 | 126 | 10 | 7 | 4  | 40 | 36 | 177 |
| 117,677 | 9  | 4 | 13 | 125 | 10 | 7 | 4  | 40 | 36 | 176 |
| 117,678 | 9  | 4 | 13 | 125 | 10 | 7 | 4  | 40 | 36 | 176 |
| 117,679 | 10 | 5 | 12 | 125 | 10 | 7 | 6  | 40 | 38 | 177 |
| 117,680 | 9  | 5 | 12 | 125 | 10 | 7 | 6  | 40 | 37 | 177 |
| 117,681 | 10 | 5 | 13 | 125 | 10 | 7 | 7  | 40 | 40 | 177 |
| 117,682 | 10 | 6 | 12 | 125 | 10 | 7 | 7  | 40 | 39 | 178 |
| 117,683 | 11 | 7 | 12 | 125 | 10 | 7 | 8  | 40 | 41 | 179 |
| 117,684 | 11 | 7 | 12 | 125 | 10 | 7 | 8  | 40 | 41 | 179 |
| 117,685 | 12 | 7 | 12 | 124 | 10 | 7 | 11 | 40 | 45 | 178 |
| 117,686 | 12 | 7 | 12 | 123 | 10 | 7 | 10 | 40 | 44 | 177 |
| 117,687 | 12 | 6 | 12 | 123 | 9  | 7 | 12 | 40 | 45 | 176 |
| 117,688 | 9  | 6 | 9  | 117 | 5  | 7 | 11 | 41 | 34 | 171 |
| 117,689 | 9  | 6 | 9  | 117 | 6  | 8 | 12 | 41 | 36 | 172 |
| 117,690 | 9  | 6 | 10 | 123 | 10 | 8 | 11 | 41 | 40 | 178 |
| 117,691 | 10 | 6 | 10 | 122 | 11 | 8 | 12 | 39 | 43 | 175 |
| 117,692 | 11 | 7 | 11 | 122 | 11 | 8 | 13 | 39 | 46 | 176 |
| 117,693 | 11 | 8 | 12 | 119 | 11 | 8 | 14 | 37 | 48 | 172 |
| 117,694 | 12 | 8 | 11 | 120 | 11 | 8 | 14 | 37 | 48 | 173 |
| 117,695 | 12 | 8 | 12 | 119 | 11 | 8 | 14 | 37 | 49 | 172 |
| 117,696 | 12 | 8 | 11 | 119 | 11 | 8 | 14 | 37 | 48 | 172 |
| 117,697 | 12 | 8 | 11 | 119 | 11 | 8 | 14 | 37 | 48 | 172 |
| 117,698 | 12 | 8 | 11 | 119 | 11 | 8 | 14 | 37 | 48 | 172 |
| 117,699 | 12 | 8 | 11 | 118 | 10 | 8 | 14 | 36 | 47 | 170 |

|         |    |    |    |     |    |    |    |    |    |     |
|---------|----|----|----|-----|----|----|----|----|----|-----|
| 117,700 | 12 | 8  | 11 | 119 | 9  | 8  | 14 | 36 | 46 | 171 |
| 117,701 | 12 | 8  | 12 | 110 | 9  | 8  | 14 | 32 | 47 | 158 |
| 117,702 | 11 | 8  | 11 | 110 | 9  | 8  | 14 | 32 | 45 | 158 |
| 117,703 | 11 | 8  | 10 | 108 | 9  | 8  | 14 | 29 | 44 | 153 |
| 117,704 | 11 | 8  | 10 | 108 | 9  | 8  | 14 | 29 | 44 | 153 |
| 117,705 | 11 | 7  | 10 | 108 | 9  | 8  | 14 | 29 | 44 | 152 |
| 117,706 | 11 | 7  | 10 | 108 | 9  | 8  | 14 | 29 | 44 | 152 |
| 117,707 | 12 | 7  | 10 | 106 | 9  | 7  | 14 | 28 | 45 | 148 |
| 117,708 | 12 | 7  | 9  | 103 | 9  | 7  | 14 | 28 | 44 | 145 |
| 117,709 | 12 | 7  | 11 | 84  | 9  | 3  | 17 | 24 | 49 | 118 |
| 117,710 | 12 | 7  | 11 | 79  | 9  | 3  | 17 | 23 | 49 | 112 |
| 117,711 | 11 | 7  | 12 | 31  | 9  | 1  | 19 | 6  | 51 | 45  |
| 117,712 | 10 | 7  | 14 | 28  | 9  | 1  | 19 | 4  | 52 | 40  |
| 117,713 | 10 | 9  | 14 | 17  | 9  | 1  | 19 | 3  | 52 | 30  |
| 117,714 | 10 | 9  | 15 | 14  | 9  | 1  | 19 | 2  | 53 | 26  |
| 117,715 | 9  | 10 | 15 | 5   | 10 | 1  | 19 | 2  | 53 | 18  |
| 117,716 | 9  | 10 | 15 | 5   | 8  | 1  | 19 | 2  | 51 | 18  |
| 117,717 | 8  | 11 | 15 | 5   | 8  | 1  | 19 | 2  | 50 | 19  |
| 117,718 | 8  | 11 | 15 | 5   | 7  | 1  | 19 | 2  | 49 | 19  |
| 117,719 | 8  | 11 | 14 | 6   | 7  | 1  | 19 | 2  | 48 | 20  |
| 117,720 | 8  | 12 | 14 | 11  | 6  | 2  | 19 | 6  | 47 | 31  |
| 117,721 | 8  | 13 | 14 | 11  | 6  | 2  | 19 | 6  | 47 | 32  |
| 117,722 | 8  | 13 | 14 | 16  | 6  | 3  | 19 | 8  | 47 | 40  |
| 117,723 | 7  | 13 | 13 | 19  | 6  | 4  | 19 | 11 | 45 | 47  |
| 117,724 | 7  | 13 | 14 | 19  | 4  | 4  | 19 | 14 | 44 | 50  |
| 117,725 | 6  | 13 | 15 | 20  | 3  | 4  | 18 | 14 | 42 | 51  |
| 117,726 | 8  | 13 | 16 | 21  | 3  | 4  | 18 | 17 | 45 | 55  |
| 117,727 | 7  | 13 | 17 | 23  | 3  | 4  | 16 | 27 | 43 | 67  |
| 117,728 | 12 | 13 | 25 | 28  | 4  | 5  | 20 | 31 | 61 | 77  |
| 117,729 | 13 | 12 | 27 | 32  | 4  | 6  | 21 | 39 | 65 | 89  |
| 117,730 | 12 | 12 | 26 | 33  | 4  | 6  | 21 | 40 | 63 | 91  |
| 117,731 | 11 | 12 | 29 | 39  | 4  | 6  | 23 | 51 | 67 | 108 |
| 117,732 | 10 | 13 | 29 | 54  | 4  | 9  | 22 | 70 | 65 | 146 |
| 117,733 | 10 | 12 | 29 | 58  | 4  | 9  | 21 | 71 | 64 | 150 |
| 117,734 | 10 | 11 | 29 | 67  | 4  | 10 | 21 | 74 | 64 | 162 |
| 117,735 | 12 | 12 | 30 | 70  | 4  | 10 | 20 | 75 | 66 | 167 |
| 117,736 | 12 | 12 | 30 | 72  | 4  | 10 | 19 | 76 | 65 | 170 |
| 117,737 | 13 | 12 | 30 | 72  | 3  | 10 | 19 | 78 | 65 | 172 |
| 117,738 | 14 | 12 | 30 | 72  | 3  | 10 | 18 | 78 | 65 | 172 |
| 117,739 | 14 | 11 | 30 | 72  | 3  | 9  | 16 | 77 | 63 | 169 |
| 117,740 | 14 | 11 | 30 | 72  | 3  | 9  | 16 | 77 | 63 | 169 |



|         |    |    |    |    |   |    |    |    |    |     |
|---------|----|----|----|----|---|----|----|----|----|-----|
| 117,741 | 13 | 11 | 30 | 72 | 2 | 10 | 16 | 77 | 61 | 170 |
| 117,742 | 13 | 11 | 30 | 72 | 2 | 10 | 16 | 77 | 61 | 170 |
| 117,743 | 15 | 11 | 30 | 72 | 2 | 10 | 17 | 77 | 64 | 170 |
| 117,744 | 15 | 10 | 29 | 72 | 2 | 10 | 17 | 77 | 63 | 169 |
| 117,745 | 15 | 10 | 29 | 71 | 2 | 10 | 17 | 78 | 63 | 169 |
| 117,746 | 15 | 10 | 28 | 72 | 2 | 10 | 17 | 78 | 62 | 170 |
| 117,747 | 15 | 10 | 28 | 72 | 2 | 10 | 17 | 78 | 62 | 170 |
| 117,748 | 15 | 10 | 27 | 72 | 2 | 10 | 17 | 78 | 61 | 170 |
| 117,749 | 15 | 10 | 28 | 72 | 2 | 10 | 17 | 78 | 62 | 170 |
| 117,750 | 16 | 10 | 28 | 73 | 2 | 10 | 18 | 78 | 64 | 171 |
| 117,751 | 16 | 10 | 28 | 72 | 2 | 10 | 18 | 78 | 64 | 170 |
| 117,752 | 16 | 10 | 27 | 72 | 2 | 10 | 18 | 78 | 63 | 170 |
| 117,753 | 17 | 11 | 27 | 72 | 2 | 10 | 18 | 78 | 64 | 171 |
| 117,754 | 17 | 11 | 27 | 72 | 2 | 10 | 18 | 78 | 64 | 171 |
| 117,755 | 17 | 12 | 27 | 72 | 2 | 10 | 19 | 78 | 65 | 172 |
| 117,756 | 17 | 12 | 27 | 72 | 2 | 10 | 19 | 78 | 65 | 172 |
| 117,757 | 17 | 13 | 27 | 72 | 2 | 10 | 19 | 78 | 65 | 173 |
| 117,758 | 16 | 13 | 27 | 72 | 2 | 10 | 19 | 78 | 64 | 173 |
| 117,759 | 16 | 13 | 25 | 72 | 2 | 10 | 18 | 78 | 61 | 173 |
| 117,760 | 16 | 13 | 25 | 72 | 2 | 10 | 16 | 79 | 59 | 174 |
| 117,761 | 16 | 13 | 25 | 73 | 2 | 10 | 15 | 79 | 58 | 175 |
| 117,762 | 16 | 14 | 24 | 73 | 2 | 10 | 14 | 79 | 56 | 176 |
| 117,763 | 16 | 12 | 23 | 73 | 2 | 10 | 13 | 79 | 54 | 174 |
| 117,764 | 16 | 13 | 23 | 73 | 2 | 10 | 13 | 79 | 54 | 175 |
| 117,765 | 16 | 11 | 22 | 73 | 2 | 10 | 13 | 78 | 53 | 172 |
| 117,766 | 16 | 12 | 22 | 73 | 2 | 10 | 14 | 78 | 54 | 173 |
| 117,767 | 16 | 12 | 22 | 74 | 2 | 10 | 14 | 78 | 54 | 174 |
| 117,768 | 16 | 11 | 22 | 75 | 2 | 10 | 16 | 77 | 56 | 173 |
| 117,769 | 16 | 11 | 22 | 74 | 2 | 10 | 16 | 76 | 56 | 171 |
| 117,770 | 16 | 10 | 22 | 69 | 2 | 9  | 16 | 73 | 56 | 161 |
| 117,771 | 16 | 9  | 23 | 69 | 2 | 9  | 16 | 74 | 57 | 161 |
| 117,772 | 16 | 10 | 23 | 64 | 2 | 8  | 16 | 72 | 57 | 154 |
| 117,773 | 16 | 10 | 23 | 61 | 2 | 7  | 16 | 69 | 57 | 147 |
| 117,774 | 16 | 11 | 23 | 64 | 2 | 7  | 16 | 67 | 57 | 149 |
| 117,775 | 16 | 11 | 22 | 64 | 2 | 7  | 16 | 68 | 56 | 150 |
| 117,776 | 16 | 12 | 20 | 63 | 2 | 7  | 16 | 68 | 54 | 150 |
| 117,777 | 14 | 12 | 19 | 61 | 2 | 7  | 17 | 65 | 52 | 145 |
| 117,778 | 14 | 12 | 18 | 59 | 2 | 7  | 17 | 56 | 51 | 134 |
| 117,779 | 9  | 13 | 10 | 50 | 1 | 5  | 12 | 44 | 32 | 112 |
| 117,780 | 8  | 12 | 8  | 43 | 1 | 5  | 11 | 33 | 28 | 93  |
| 117,781 | 8  | 12 | 8  | 43 | 1 | 5  | 9  | 33 | 26 | 93  |

|         |   |    |    |    |   |   |    |    |    |    |
|---------|---|----|----|----|---|---|----|----|----|----|
| 117,782 | 8 | 13 | 6  | 43 | 1 | 5 | 9  | 33 | 24 | 94 |
| 117,783 | 8 | 12 | 7  | 29 | 1 | 2 | 9  | 13 | 25 | 56 |
| 117,784 | 8 | 12 | 7  | 25 | 1 | 2 | 10 | 12 | 26 | 51 |
| 117,785 | 6 | 12 | 7  | 16 | 1 | 1 | 12 | 9  | 26 | 38 |
| 117,786 | 6 | 11 | 6  | 11 | 1 | 1 | 12 | 8  | 25 | 31 |
| 117,787 | 6 | 11 | 6  | 12 | 2 | 1 | 12 | 6  | 26 | 30 |
| 117,788 | 5 | 11 | 6  | 12 | 2 | 1 | 12 | 6  | 25 | 30 |
| 117,789 | 4 | 11 | 7  | 12 | 3 | 1 | 12 | 6  | 26 | 30 |
| 117,790 | 6 | 11 | 7  | 12 | 3 | 1 | 12 | 6  | 28 | 30 |
| 117,791 | 6 | 11 | 7  | 12 | 3 | 0 | 12 | 5  | 28 | 28 |
| 117,792 | 6 | 11 | 8  | 12 | 3 | 0 | 13 | 5  | 30 | 28 |
| 117,793 | 5 | 11 | 8  | 12 | 3 | 0 | 13 | 5  | 29 | 28 |
| 117,794 | 4 | 11 | 8  | 12 | 3 | 0 | 12 | 5  | 27 | 28 |
| 117,795 | 4 | 11 | 8  | 12 | 3 | 0 | 11 | 5  | 26 | 28 |
| 117,796 | 4 | 12 | 9  | 11 | 3 | 0 | 11 | 5  | 27 | 28 |
| 117,797 | 5 | 12 | 9  | 11 | 3 | 0 | 11 | 5  | 28 | 28 |
| 117,798 | 5 | 12 | 9  | 11 | 3 | 0 | 11 | 5  | 28 | 28 |
| 117,799 | 5 | 12 | 16 | 10 | 3 | 0 | 21 | 5  | 45 | 27 |
| 117,800 | 5 | 12 | 15 | 11 | 3 | 0 | 21 | 5  | 44 | 28 |
| 117,801 | 4 | 12 | 17 | 11 | 4 | 0 | 20 | 5  | 45 | 28 |
| 117,802 | 4 | 12 | 18 | 12 | 4 | 0 | 20 | 5  | 46 | 29 |
| 117,803 | 4 | 12 | 18 | 12 | 4 | 0 | 20 | 5  | 46 | 29 |
| 117,804 | 4 | 11 | 22 | 12 | 6 | 0 | 22 | 5  | 54 | 28 |
| 117,805 | 4 | 11 | 22 | 12 | 6 | 0 | 22 | 5  | 54 | 28 |
| 117,806 | 4 | 11 | 26 | 12 | 7 | 0 | 25 | 5  | 62 | 28 |
| 117,807 | 4 | 11 | 26 | 12 | 7 | 0 | 25 | 5  | 62 | 28 |
| 117,808 | 4 | 10 | 26 | 12 | 7 | 0 | 25 | 5  | 62 | 27 |
| 117,809 | 4 | 10 | 26 | 12 | 7 | 0 | 25 | 5  | 62 | 27 |
| 117,810 | 4 | 10 | 26 | 13 | 7 | 0 | 25 | 5  | 62 | 28 |
| 117,811 | 4 | 10 | 26 | 12 | 7 | 0 | 25 | 4  | 62 | 26 |
| 117,812 | 4 | 10 | 26 | 12 | 7 | 0 | 25 | 4  | 62 | 26 |
| 117,813 | 4 | 9  | 25 | 12 | 7 | 0 | 25 | 4  | 61 | 25 |
| 117,814 | 4 | 9  | 25 | 12 | 7 | 0 | 25 | 4  | 61 | 25 |
| 117,815 | 4 | 8  | 25 | 12 | 7 | 0 | 25 | 4  | 61 | 24 |
| 117,816 | 4 | 8  | 25 | 12 | 7 | 0 | 25 | 4  | 61 | 24 |
| 117,817 | 4 | 7  | 25 | 12 | 6 | 0 | 24 | 4  | 59 | 23 |
| 117,818 | 4 | 7  | 25 | 11 | 6 | 0 | 23 | 4  | 58 | 22 |
| 117,819 | 4 | 7  | 25 | 10 | 7 | 0 | 22 | 4  | 58 | 21 |
| 117,820 | 4 | 7  | 25 | 10 | 7 | 0 | 23 | 4  | 59 | 21 |
| 117,821 | 4 | 7  | 25 | 10 | 7 | 0 | 24 | 3  | 60 | 20 |
| 117,822 | 4 | 8  | 24 | 10 | 7 | 0 | 24 | 3  | 59 | 21 |

|         |   |   |    |    |   |   |    |   |    |    |
|---------|---|---|----|----|---|---|----|---|----|----|
| 117,823 | 4 | 7 | 24 | 10 | 7 | 0 | 24 | 3 | 59 | 20 |
| 117,824 | 4 | 7 | 24 | 5  | 7 | 0 | 24 | 3 | 59 | 15 |
| 117,825 | 4 | 7 | 24 | 5  | 7 | 0 | 24 | 3 | 59 | 15 |
| 117,826 | 4 | 6 | 24 | 5  | 7 | 0 | 24 | 1 | 59 | 12 |
| 117,827 | 4 | 7 | 24 | 5  | 7 | 0 | 24 | 1 | 59 | 13 |
| 117,828 | 4 | 7 | 24 | 5  | 7 | 0 | 23 | 1 | 58 | 13 |
| 117,829 | 4 | 7 | 24 | 5  | 7 | 0 | 22 | 1 | 57 | 13 |
| 117,830 | 4 | 6 | 24 | 5  | 7 | 0 | 22 | 1 | 57 | 12 |
| 117,831 | 4 | 6 | 24 | 5  | 7 | 0 | 22 | 1 | 57 | 12 |
| 117,832 | 4 | 6 | 23 | 5  | 7 | 0 | 22 | 1 | 56 | 12 |
| 117,833 | 4 | 5 | 23 | 5  | 7 | 0 | 22 | 1 | 56 | 11 |
| 117,834 | 4 | 5 | 22 | 4  | 7 | 0 | 22 | 1 | 55 | 10 |
| 117,835 | 4 | 5 | 22 | 4  | 7 | 0 | 21 | 1 | 54 | 10 |
| 117,836 | 4 | 5 | 22 | 4  | 7 | 0 | 19 | 0 | 52 | 9  |
| 117,837 | 4 | 5 | 22 | 4  | 7 | 0 | 19 | 0 | 52 | 9  |
| 117,838 | 4 | 5 | 21 | 3  | 6 | 0 | 19 | 0 | 50 | 8  |
| 117,839 | 4 | 5 | 20 | 3  | 5 | 0 | 19 | 0 | 48 | 8  |
| 117,840 | 4 | 5 | 20 | 3  | 5 | 0 | 19 | 0 | 48 | 8  |
| 117,841 | 2 | 5 | 20 | 3  | 5 | 0 | 19 | 0 | 46 | 8  |
| 117,842 | 2 | 5 | 20 | 3  | 5 | 0 | 19 | 0 | 46 | 8  |
| 117,843 | 2 | 5 | 19 | 3  | 5 | 0 | 18 | 0 | 44 | 8  |
| 117,844 | 2 | 5 | 19 | 3  | 5 | 0 | 18 | 0 | 44 | 8  |
| 117,845 | 2 | 5 | 19 | 3  | 5 | 0 | 18 | 0 | 44 | 8  |
| 117,846 | 2 | 5 | 19 | 3  | 5 | 0 | 18 | 0 | 44 | 8  |
| 117,847 | 2 | 4 | 18 | 3  | 5 | 0 | 18 | 0 | 43 | 7  |
| 117,848 | 1 | 4 | 18 | 3  | 5 | 0 | 18 | 0 | 42 | 7  |
| 117,849 | 1 | 4 | 18 | 3  | 5 | 0 | 18 | 0 | 42 | 7  |
| 117,850 | 1 | 4 | 11 | 3  | 5 | 0 | 8  | 0 | 25 | 7  |
| 117,851 | 1 | 4 | 11 | 2  | 5 | 0 | 8  | 0 | 25 | 6  |
| 117,852 | 1 | 4 | 9  | 2  | 4 | 0 | 8  | 0 | 22 | 6  |
| 117,853 | 1 | 4 | 8  | 1  | 4 | 0 | 8  | 0 | 21 | 5  |
| 117,854 | 0 | 4 | 7  | 1  | 3 | 0 | 7  | 0 | 17 | 5  |
| 117,855 | 0 | 4 | 4  | 1  | 3 | 0 | 6  | 0 | 13 | 5  |
| 117,856 | 0 | 4 | 0  | 1  | 2 | 0 | 1  | 0 | 3  | 5  |
| 117,857 | 0 | 3 | 0  | 1  | 2 | 0 | 0  | 0 | 2  | 4  |
| 117,858 | 0 | 3 | 1  | 1  | 2 | 0 | 2  | 0 | 5  | 4  |
| 117,859 | 0 | 3 | 1  | 1  | 2 | 0 | 2  | 0 | 5  | 4  |
| 117,860 | 0 | 3 | 1  | 1  | 2 | 0 | 2  | 0 | 5  | 4  |
| 117,861 | 0 | 3 | 2  | 0  | 2 | 0 | 2  | 0 | 6  | 3  |
| 117,862 | 0 | 3 | 2  | 0  | 2 | 0 | 2  | 0 | 6  | 3  |
| 117,863 | 0 | 3 | 2  | 0  | 2 | 0 | 2  | 0 | 6  | 3  |

|         |   |    |   |    |   |   |   |    |    |     |
|---------|---|----|---|----|---|---|---|----|----|-----|
| 117,864 | 0 | 3  | 2 | 0  | 2 | 0 | 2 | 0  | 6  | 3   |
| 117,865 | 0 | 3  | 2 | 0  | 2 | 0 | 2 | 1  | 6  | 4   |
| 117,866 | 0 | 3  | 2 | 0  | 2 | 0 | 2 | 1  | 6  | 4   |
| 117,867 | 0 | 3  | 2 | 1  | 2 | 0 | 2 | 1  | 6  | 5   |
| 117,868 | 0 | 3  | 2 | 1  | 2 | 0 | 2 | 1  | 6  | 5   |
| 117,869 | 0 | 4  | 2 | 1  | 2 | 1 | 2 | 1  | 6  | 7   |
| 117,870 | 1 | 4  | 2 | 1  | 1 | 1 | 3 | 1  | 7  | 7   |
| 117,871 | 1 | 4  | 3 | 1  | 1 | 1 | 3 | 1  | 8  | 7   |
| 117,872 | 1 | 4  | 3 | 1  | 1 | 1 | 2 | 1  | 7  | 7   |
| 117,873 | 1 | 3  | 5 | 1  | 1 | 1 | 2 | 1  | 9  | 6   |
| 117,874 | 1 | 3  | 5 | 1  | 1 | 1 | 3 | 1  | 10 | 6   |
| 117,875 | 2 | 3  | 5 | 1  | 1 | 1 | 3 | 1  | 11 | 6   |
| 117,876 | 3 | 2  | 6 | 1  | 1 | 1 | 3 | 1  | 13 | 5   |
| 117,877 | 3 | 2  | 6 | 1  | 1 | 1 | 3 | 1  | 13 | 5   |
| 117,878 | 3 | 2  | 6 | 2  | 1 | 1 | 3 | 1  | 13 | 6   |
| 117,879 | 3 | 2  | 6 | 2  | 1 | 1 | 3 | 1  | 13 | 6   |
| 117,880 | 3 | 2  | 6 | 2  | 1 | 1 | 3 | 1  | 13 | 6   |
| 117,881 | 3 | 2  | 6 | 2  | 1 | 1 | 3 | 1  | 13 | 6   |
| 117,882 | 3 | 3  | 6 | 2  | 1 | 1 | 3 | 1  | 13 | 7   |
| 117,883 | 3 | 3  | 6 | 2  | 1 | 1 | 3 | 1  | 13 | 7   |
| 117,884 | 3 | 3  | 8 | 2  | 1 | 1 | 3 | 2  | 15 | 8   |
| 117,885 | 3 | 3  | 8 | 2  | 1 | 1 | 3 | 4  | 15 | 10  |
| 117,886 | 3 | 4  | 8 | 2  | 2 | 1 | 4 | 4  | 17 | 11  |
| 117,887 | 4 | 5  | 8 | 2  | 2 | 1 | 4 | 4  | 18 | 12  |
| 117,888 | 4 | 5  | 8 | 4  | 2 | 1 | 4 | 7  | 18 | 17  |
| 117,889 | 4 | 5  | 8 | 9  | 2 | 2 | 5 | 13 | 19 | 29  |
| 117,890 | 4 | 6  | 8 | 12 | 2 | 2 | 5 | 15 | 19 | 35  |
| 117,891 | 4 | 6  | 8 | 13 | 2 | 2 | 5 | 16 | 19 | 37  |
| 117,892 | 4 | 7  | 8 | 15 | 2 | 3 | 6 | 18 | 20 | 43  |
| 117,893 | 4 | 7  | 8 | 15 | 2 | 3 | 6 | 18 | 20 | 43  |
| 117,894 | 4 | 7  | 8 | 15 | 2 | 3 | 6 | 18 | 20 | 43  |
| 117,895 | 4 | 8  | 8 | 15 | 3 | 3 | 6 | 18 | 21 | 44  |
| 117,896 | 4 | 9  | 8 | 21 | 3 | 3 | 6 | 23 | 21 | 56  |
| 117,897 | 4 | 9  | 8 | 22 | 3 | 3 | 6 | 23 | 21 | 57  |
| 117,898 | 4 | 9  | 8 | 26 | 3 | 3 | 6 | 23 | 21 | 61  |
| 117,899 | 4 | 9  | 8 | 28 | 3 | 4 | 6 | 23 | 21 | 64  |
| 117,900 | 4 | 9  | 8 | 36 | 3 | 4 | 6 | 25 | 21 | 74  |
| 117,901 | 4 | 10 | 8 | 39 | 3 | 4 | 7 | 29 | 22 | 82  |
| 117,902 | 4 | 11 | 9 | 47 | 3 | 4 | 7 | 34 | 23 | 96  |
| 117,903 | 4 | 12 | 9 | 62 | 3 | 4 | 7 | 40 | 23 | 118 |
| 117,904 | 4 | 14 | 9 | 67 | 3 | 4 | 7 | 41 | 23 | 126 |

|         |   |    |   |    |   |   |    |    |    |     |
|---------|---|----|---|----|---|---|----|----|----|-----|
| 117,905 | 5 | 15 | 9 | 72 | 2 | 5 | 7  | 42 | 23 | 134 |
| 117,906 | 5 | 16 | 9 | 76 | 2 | 5 | 7  | 43 | 23 | 140 |
| 117,907 | 5 | 16 | 8 | 76 | 2 | 5 | 7  | 43 | 22 | 140 |
| 117,908 | 5 | 16 | 8 | 76 | 2 | 5 | 6  | 43 | 21 | 140 |
| 117,909 | 5 | 16 | 9 | 76 | 2 | 5 | 6  | 43 | 22 | 140 |
| 117,910 | 5 | 16 | 9 | 76 | 2 | 5 | 6  | 43 | 22 | 140 |
| 117,911 | 5 | 16 | 8 | 76 | 3 | 5 | 6  | 43 | 22 | 140 |
| 117,912 | 5 | 16 | 8 | 76 | 3 | 5 | 6  | 43 | 22 | 140 |
| 117,913 | 5 | 16 | 8 | 76 | 3 | 5 | 6  | 43 | 22 | 140 |
| 117,914 | 5 | 16 | 8 | 76 | 3 | 5 | 6  | 43 | 22 | 140 |
| 117,915 | 5 | 16 | 8 | 76 | 3 | 5 | 6  | 45 | 22 | 142 |
| 117,916 | 5 | 16 | 8 | 81 | 3 | 5 | 6  | 49 | 22 | 151 |
| 117,917 | 5 | 16 | 8 | 81 | 3 | 5 | 6  | 49 | 22 | 151 |
| 117,918 | 6 | 16 | 8 | 82 | 3 | 5 | 7  | 49 | 24 | 152 |
| 117,919 | 6 | 15 | 8 | 83 | 3 | 4 | 7  | 49 | 24 | 151 |
| 117,920 | 6 | 15 | 8 | 83 | 4 | 4 | 8  | 49 | 26 | 151 |
| 117,921 | 5 | 15 | 8 | 84 | 4 | 4 | 7  | 49 | 24 | 152 |
| 117,922 | 5 | 15 | 7 | 84 | 4 | 4 | 7  | 49 | 23 | 152 |
| 117,923 | 6 | 15 | 7 | 85 | 4 | 4 | 7  | 49 | 24 | 153 |
| 117,924 | 6 | 15 | 5 | 85 | 4 | 4 | 7  | 50 | 22 | 154 |
| 117,925 | 6 | 16 | 5 | 85 | 4 | 4 | 6  | 50 | 21 | 155 |
| 117,926 | 5 | 15 | 6 | 85 | 4 | 4 | 8  | 50 | 23 | 154 |
| 117,927 | 4 | 15 | 6 | 84 | 4 | 4 | 8  | 50 | 22 | 153 |
| 117,928 | 4 | 15 | 6 | 84 | 4 | 4 | 8  | 50 | 22 | 153 |
| 117,929 | 4 | 15 | 6 | 84 | 4 | 4 | 8  | 50 | 22 | 153 |
| 117,930 | 4 | 15 | 6 | 84 | 4 | 4 | 8  | 50 | 22 | 153 |
| 117,931 | 4 | 16 | 6 | 87 | 4 | 4 | 8  | 52 | 22 | 159 |
| 117,932 | 4 | 16 | 6 | 89 | 4 | 4 | 8  | 52 | 22 | 161 |
| 117,933 | 5 | 15 | 6 | 90 | 4 | 4 | 9  | 52 | 24 | 161 |
| 117,934 | 5 | 16 | 5 | 91 | 4 | 4 | 10 | 51 | 24 | 162 |
| 117,935 | 5 | 16 | 4 | 92 | 4 | 4 | 10 | 48 | 23 | 160 |
| 117,936 | 5 | 15 | 4 | 93 | 4 | 3 | 10 | 46 | 23 | 157 |
| 117,937 | 5 | 17 | 4 | 94 | 3 | 3 | 9  | 46 | 21 | 160 |
| 117,938 | 4 | 16 | 4 | 94 | 3 | 3 | 9  | 46 | 20 | 159 |
| 117,939 | 4 | 16 | 4 | 92 | 3 | 3 | 9  | 44 | 20 | 155 |
| 117,940 | 6 | 16 | 5 | 88 | 3 | 2 | 8  | 41 | 22 | 147 |
| 117,941 | 6 | 16 | 5 | 85 | 3 | 2 | 8  | 39 | 22 | 142 |
| 117,942 | 6 | 16 | 5 | 85 | 3 | 2 | 8  | 38 | 22 | 141 |
| 117,943 | 6 | 15 | 5 | 83 | 3 | 2 | 7  | 37 | 21 | 137 |
| 117,944 | 6 | 15 | 6 | 83 | 3 | 2 | 8  | 37 | 23 | 137 |
| 117,945 | 6 | 15 | 6 | 84 | 3 | 2 | 8  | 37 | 23 | 138 |

|         |   |    |    |    |   |   |    |    |    |     |
|---------|---|----|----|----|---|---|----|----|----|-----|
| 117,946 | 6 | 14 | 7  | 86 | 2 | 2 | 8  | 37 | 23 | 139 |
| 117,947 | 6 | 13 | 7  | 79 | 2 | 2 | 8  | 32 | 23 | 126 |
| 117,948 | 6 | 13 | 8  | 76 | 3 | 2 | 8  | 32 | 25 | 123 |
| 117,949 | 6 | 13 | 8  | 78 | 3 | 2 | 8  | 32 | 25 | 125 |
| 117,950 | 6 | 13 | 8  | 68 | 3 | 1 | 8  | 29 | 25 | 111 |
| 117,951 | 6 | 12 | 8  | 65 | 3 | 1 | 8  | 25 | 25 | 103 |
| 117,952 | 6 | 11 | 8  | 57 | 3 | 1 | 8  | 20 | 25 | 89  |
| 117,953 | 6 | 10 | 5  | 53 | 3 | 1 | 8  | 19 | 22 | 83  |
| 117,954 | 6 | 10 | 8  | 42 | 3 | 1 | 8  | 15 | 25 | 68  |
| 117,955 | 6 | 8  | 8  | 37 | 3 | 1 | 10 | 14 | 27 | 60  |
| 117,956 | 5 | 7  | 9  | 32 | 3 | 0 | 10 | 13 | 27 | 52  |
| 117,957 | 5 | 6  | 9  | 28 | 3 | 0 | 11 | 12 | 28 | 46  |
| 117,958 | 5 | 6  | 9  | 30 | 3 | 0 | 11 | 12 | 28 | 48  |
| 117,959 | 6 | 6  | 10 | 31 | 3 | 0 | 11 | 13 | 30 | 50  |
| 117,960 | 6 | 7  | 10 | 43 | 3 | 0 | 11 | 17 | 30 | 67  |
| 117,961 | 6 | 7  | 10 | 43 | 3 | 1 | 11 | 17 | 30 | 68  |
| 117,962 | 6 | 7  | 11 | 43 | 2 | 1 | 12 | 18 | 31 | 69  |
| 117,963 | 7 | 9  | 11 | 43 | 2 | 1 | 12 | 19 | 32 | 72  |
| 117,964 | 7 | 9  | 11 | 43 | 2 | 1 | 12 | 19 | 32 | 72  |
| 117,965 | 7 | 9  | 11 | 43 | 2 | 1 | 12 | 19 | 32 | 72  |
| 117,966 | 7 | 9  | 11 | 44 | 2 | 1 | 12 | 17 | 32 | 71  |
| 117,967 | 8 | 9  | 12 | 39 | 2 | 1 | 11 | 12 | 33 | 61  |
| 117,968 | 7 | 10 | 12 | 40 | 2 | 1 | 11 | 12 | 32 | 63  |
| 117,969 | 7 | 10 | 12 | 38 | 2 | 1 | 11 | 12 | 32 | 61  |
| 117,970 | 7 | 10 | 15 | 37 | 3 | 1 | 12 | 13 | 37 | 61  |
| 117,971 | 7 | 10 | 16 | 40 | 2 | 1 | 11 | 17 | 36 | 68  |
| 117,972 | 7 | 10 | 17 | 39 | 2 | 1 | 11 | 21 | 37 | 71  |
| 117,973 | 7 | 10 | 17 | 39 | 2 | 1 | 11 | 22 | 37 | 72  |
| 117,974 | 6 | 10 | 18 | 40 | 2 | 1 | 11 | 23 | 37 | 74  |
| 117,975 | 6 | 10 | 18 | 43 | 2 | 1 | 11 | 22 | 37 | 76  |
| 117,976 | 6 | 11 | 18 | 44 | 2 | 2 | 11 | 22 | 37 | 79  |
| 117,977 | 6 | 11 | 17 | 44 | 2 | 2 | 9  | 22 | 34 | 79  |
| 117,978 | 6 | 11 | 17 | 46 | 2 | 2 | 9  | 23 | 34 | 82  |
| 117,979 | 6 | 12 | 16 | 46 | 2 | 2 | 9  | 23 | 33 | 83  |
| 117,980 | 6 | 12 | 16 | 43 | 2 | 2 | 9  | 21 | 33 | 78  |
| 117,981 | 5 | 12 | 16 | 43 | 2 | 2 | 8  | 22 | 31 | 79  |
| 117,982 | 5 | 11 | 17 | 41 | 2 | 2 | 9  | 22 | 33 | 76  |
| 117,983 | 5 | 11 | 17 | 41 | 2 | 2 | 9  | 22 | 33 | 76  |
| 117,984 | 5 | 11 | 18 | 41 | 2 | 2 | 8  | 22 | 33 | 76  |
| 117,985 | 5 | 11 | 18 | 40 | 2 | 2 | 8  | 22 | 33 | 75  |
| 117,986 | 5 | 11 | 18 | 41 | 2 | 2 | 8  | 22 | 33 | 76  |

|         |   |    |    |    |   |   |   |    |    |    |
|---------|---|----|----|----|---|---|---|----|----|----|
| 117,987 | 5 | 11 | 18 | 40 | 2 | 2 | 8 | 22 | 33 | 75 |
| 117,988 | 6 | 9  | 18 | 39 | 2 | 2 | 8 | 22 | 34 | 72 |
| 117,989 | 6 | 9  | 18 | 39 | 2 | 2 | 8 | 22 | 34 | 72 |
| 117,990 | 5 | 9  | 17 | 39 | 2 | 2 | 8 | 21 | 32 | 71 |
| 117,991 | 4 | 9  | 17 | 38 | 2 | 2 | 8 | 23 | 31 | 72 |
| 117,992 | 4 | 8  | 17 | 38 | 2 | 2 | 8 | 22 | 31 | 70 |
| 117,993 | 4 | 9  | 17 | 41 | 2 | 2 | 8 | 22 | 31 | 74 |
| 117,994 | 4 | 10 | 17 | 42 | 2 | 2 | 7 | 23 | 30 | 77 |
| 117,995 | 4 | 11 | 16 | 44 | 2 | 2 | 7 | 29 | 29 | 86 |
| 117,996 | 4 | 11 | 16 | 45 | 2 | 2 | 7 | 29 | 29 | 87 |
| 117,997 | 4 | 11 | 15 | 44 | 2 | 2 | 8 | 29 | 29 | 86 |
| 117,998 | 4 | 12 | 15 | 43 | 2 | 2 | 8 | 29 | 29 | 86 |
| 117,999 | 4 | 12 | 14 | 44 | 1 | 2 | 8 | 29 | 27 | 87 |
| 118,000 | 4 | 13 | 14 | 42 | 1 | 2 | 8 | 29 | 27 | 86 |
| 118,001 | 4 | 13 | 14 | 42 | 1 | 2 | 8 | 29 | 27 | 86 |
| 118,002 | 4 | 13 | 14 | 44 | 1 | 2 | 8 | 30 | 27 | 89 |
| 118,003 | 5 | 13 | 14 | 44 | 1 | 2 | 8 | 30 | 28 | 89 |
| 118,004 | 5 | 13 | 13 | 45 | 1 | 2 | 8 | 31 | 27 | 91 |
| 118,005 | 5 | 13 | 13 | 46 | 1 | 2 | 6 | 31 | 25 | 92 |
| 118,006 | 5 | 13 | 12 | 46 | 1 | 2 | 6 | 32 | 24 | 93 |
| 118,007 | 5 | 13 | 12 | 47 | 1 | 2 | 5 | 32 | 23 | 94 |
| 118,008 | 5 | 13 | 12 | 47 | 1 | 2 | 5 | 32 | 23 | 94 |
| 118,009 | 4 | 13 | 10 | 45 | 1 | 2 | 5 | 32 | 20 | 92 |
| 118,010 | 4 | 13 | 10 | 44 | 1 | 2 | 5 | 31 | 20 | 90 |
| 118,011 | 4 | 12 | 10 | 32 | 1 | 1 | 5 | 27 | 20 | 72 |
| 118,012 | 4 | 12 | 9  | 32 | 1 | 1 | 4 | 27 | 18 | 72 |
| 118,013 | 4 | 12 | 9  | 32 | 1 | 1 | 4 | 26 | 18 | 71 |
| 118,014 | 3 | 10 | 9  | 32 | 1 | 1 | 4 | 25 | 17 | 68 |
| 118,015 | 3 | 10 | 9  | 32 | 1 | 1 | 4 | 25 | 17 | 68 |
| 118,016 | 3 | 10 | 9  | 32 | 1 | 1 | 4 | 25 | 17 | 68 |
| 118,017 | 2 | 10 | 8  | 31 | 1 | 1 | 3 | 25 | 14 | 67 |
| 118,018 | 2 | 10 | 8  | 31 | 1 | 1 | 4 | 25 | 15 | 67 |
| 118,019 | 2 | 9  | 7  | 30 | 1 | 1 | 4 | 25 | 14 | 65 |
| 118,020 | 2 | 9  | 6  | 31 | 0 | 1 | 3 | 25 | 11 | 66 |
| 118,021 | 2 | 9  | 5  | 31 | 0 | 1 | 3 | 24 | 10 | 65 |
| 118,022 | 2 | 9  | 4  | 28 | 0 | 1 | 3 | 20 | 9  | 58 |
| 118,023 | 2 | 9  | 3  | 28 | 0 | 1 | 3 | 17 | 8  | 55 |
| 118,024 | 2 | 9  | 3  | 28 | 0 | 1 | 3 | 16 | 8  | 54 |
| 118,025 | 2 | 9  | 2  | 27 | 0 | 1 | 3 | 15 | 7  | 52 |
| 118,026 | 2 | 9  | 2  | 25 | 0 | 1 | 3 | 15 | 7  | 50 |
| 118,027 | 2 | 7  | 2  | 25 | 0 | 0 | 3 | 15 | 7  | 47 |

|         |   |   |   |    |   |   |   |    |   |    |
|---------|---|---|---|----|---|---|---|----|---|----|
| 118,028 | 2 | 7 | 2 | 25 | 0 | 0 | 3 | 15 | 7 | 47 |
| 118,029 | 3 | 7 | 2 | 25 | 0 | 0 | 3 | 15 | 8 | 47 |
| 118,030 | 3 | 6 | 2 | 26 | 0 | 0 | 3 | 16 | 8 | 48 |
| 118,031 | 3 | 5 | 2 | 27 | 0 | 0 | 3 | 16 | 8 | 48 |
| 118,032 | 3 | 5 | 2 | 27 | 0 | 0 | 3 | 15 | 8 | 47 |
| 118,033 | 3 | 5 | 1 | 28 | 0 | 0 | 3 | 15 | 7 | 48 |
| 118,034 | 3 | 5 | 1 | 29 | 0 | 0 | 2 | 15 | 6 | 49 |
| 118,035 | 3 | 5 | 0 | 29 | 0 | 0 | 2 | 15 | 5 | 49 |
| 118,036 | 3 | 5 | 0 | 29 | 0 | 0 | 2 | 15 | 5 | 49 |
| 118,037 | 3 | 5 | 0 | 28 | 0 | 0 | 2 | 15 | 5 | 48 |
| 118,038 | 2 | 5 | 0 | 28 | 0 | 0 | 2 | 15 | 4 | 48 |
| 118,039 | 2 | 5 | 0 | 28 | 0 | 0 | 2 | 15 | 4 | 48 |
| 118,040 | 2 | 5 | 0 | 28 | 0 | 0 | 2 | 15 | 4 | 48 |
| 118,041 | 2 | 5 | 0 | 29 | 0 | 0 | 2 | 15 | 4 | 49 |
| 118,042 | 2 | 5 | 0 | 29 | 0 | 0 | 2 | 13 | 4 | 47 |
| 118,043 | 2 | 5 | 1 | 29 | 0 | 0 | 2 | 13 | 5 | 47 |
| 118,044 | 2 | 4 | 1 | 26 | 0 | 0 | 3 | 13 | 6 | 43 |
| 118,045 | 2 | 3 | 1 | 24 | 0 | 0 | 3 | 12 | 6 | 39 |
| 118,046 | 2 | 2 | 1 | 22 | 0 | 0 | 3 | 6  | 6 | 30 |
| 118,047 | 2 | 2 | 1 | 19 | 0 | 0 | 2 | 6  | 5 | 27 |
| 118,048 | 2 | 1 | 1 | 19 | 0 | 0 | 1 | 6  | 4 | 26 |
| 118,049 | 2 | 0 | 1 | 19 | 0 | 0 | 1 | 6  | 4 | 25 |
| 118,050 | 2 | 0 | 1 | 18 | 0 | 0 | 1 | 6  | 4 | 24 |
| 118,051 | 2 | 0 | 1 | 18 | 0 | 0 | 1 | 6  | 4 | 24 |
| 118,052 | 2 | 0 | 1 | 18 | 0 | 0 | 1 | 6  | 4 | 24 |
| 118,053 | 2 | 0 | 2 | 16 | 0 | 0 | 1 | 5  | 5 | 21 |
| 118,054 | 1 | 0 | 2 | 15 | 0 | 0 | 1 | 4  | 4 | 19 |
| 118,055 | 1 | 0 | 2 | 15 | 0 | 0 | 1 | 4  | 4 | 19 |
| 118,056 | 1 | 0 | 4 | 15 | 0 | 0 | 1 | 4  | 6 | 19 |
| 118,057 | 1 | 0 | 4 | 16 | 0 | 1 | 1 | 3  | 6 | 20 |
| 118,058 | 1 | 0 | 4 | 15 | 0 | 1 | 1 | 4  | 6 | 20 |
| 118,059 | 1 | 0 | 4 | 17 | 0 | 1 | 1 | 4  | 6 | 22 |
| 118,060 | 1 | 0 | 4 | 17 | 0 | 1 | 1 | 5  | 6 | 23 |
| 118,061 | 1 | 0 | 4 | 17 | 0 | 1 | 1 | 5  | 6 | 23 |
| 118,062 | 1 | 0 | 5 | 17 | 0 | 1 | 1 | 5  | 7 | 23 |
| 118,063 | 1 | 0 | 5 | 17 | 0 | 1 | 1 | 5  | 7 | 23 |
| 118,064 | 1 | 0 | 5 | 18 | 0 | 1 | 1 | 6  | 7 | 25 |
| 118,065 | 1 | 0 | 5 | 18 | 0 | 1 | 1 | 5  | 7 | 24 |
| 118,066 | 1 | 0 | 5 | 18 | 0 | 1 | 1 | 5  | 7 | 24 |
| 118,067 | 1 | 0 | 5 | 18 | 0 | 1 | 1 | 5  | 7 | 24 |
| 118,068 | 1 | 0 | 5 | 18 | 0 | 1 | 1 | 5  | 7 | 24 |



|         |   |   |   |    |   |   |   |   |    |    |
|---------|---|---|---|----|---|---|---|---|----|----|
| 118,069 | 2 | 0 | 5 | 19 | 0 | 1 | 1 | 5 | 8  | 25 |
| 118,070 | 2 | 0 | 5 | 18 | 0 | 1 | 1 | 5 | 8  | 24 |
| 118,071 | 2 | 0 | 5 | 18 | 0 | 1 | 1 | 5 | 8  | 24 |
| 118,072 | 2 | 0 | 6 | 18 | 0 | 1 | 1 | 4 | 9  | 23 |
| 118,073 | 2 | 1 | 6 | 17 | 0 | 1 | 1 | 4 | 9  | 23 |
| 118,074 | 2 | 1 | 6 | 17 | 0 | 1 | 1 | 4 | 9  | 23 |
| 118,075 | 2 | 1 | 6 | 17 | 0 | 1 | 1 | 4 | 9  | 23 |
| 118,076 | 2 | 1 | 6 | 18 | 0 | 1 | 1 | 4 | 9  | 24 |
| 118,077 | 3 | 1 | 6 | 17 | 0 | 1 | 1 | 4 | 10 | 23 |
| 118,078 | 3 | 1 | 6 | 16 | 0 | 1 | 1 | 4 | 10 | 22 |
| 118,079 | 3 | 1 | 6 | 16 | 0 | 1 | 1 | 4 | 10 | 22 |
| 118,080 | 2 | 2 | 6 | 14 | 0 | 1 | 1 | 3 | 9  | 20 |
| 118,081 | 2 | 2 | 7 | 11 | 0 | 1 | 1 | 3 | 10 | 17 |
| 118,082 | 2 | 2 | 7 | 11 | 0 | 1 | 1 | 3 | 10 | 17 |
| 118,083 | 2 | 2 | 7 | 11 | 0 | 1 | 1 | 3 | 10 | 17 |
| 118,084 | 2 | 2 | 7 | 9  | 0 | 1 | 1 | 4 | 10 | 16 |
| 118,085 | 2 | 2 | 7 | 8  | 0 | 1 | 1 | 4 | 10 | 15 |
| 118,086 | 2 | 3 | 7 | 8  | 0 | 1 | 1 | 4 | 10 | 16 |
| 118,087 | 2 | 3 | 7 | 10 | 0 | 1 | 1 | 4 | 10 | 18 |
| 118,088 | 2 | 3 | 7 | 11 | 0 | 1 | 1 | 4 | 10 | 19 |
| 118,089 | 2 | 3 | 7 | 11 | 0 | 1 | 1 | 4 | 10 | 19 |
| 118,090 | 3 | 3 | 7 | 11 | 0 | 1 | 1 | 4 | 11 | 19 |
| 118,091 | 3 | 3 | 7 | 11 | 0 | 1 | 1 | 4 | 11 | 19 |
| 118,092 | 3 | 3 | 7 | 10 | 0 | 1 | 1 | 4 | 11 | 18 |
| 118,093 | 3 | 3 | 7 | 10 | 0 | 1 | 1 | 4 | 11 | 18 |
| 118,094 | 3 | 3 | 6 | 10 | 0 | 1 | 1 | 4 | 10 | 18 |
| 118,095 | 3 | 3 | 6 | 10 | 0 | 1 | 1 | 4 | 10 | 18 |
| 118,096 | 3 | 3 | 6 | 10 | 0 | 1 | 1 | 4 | 10 | 18 |
| 118,097 | 3 | 3 | 6 | 10 | 0 | 1 | 1 | 5 | 10 | 19 |
| 118,098 | 3 | 3 | 6 | 10 | 0 | 1 | 1 | 5 | 10 | 19 |
| 118,099 | 3 | 3 | 6 | 10 | 0 | 1 | 1 | 5 | 10 | 19 |
| 118,100 | 3 | 3 | 6 | 12 | 0 | 1 | 1 | 5 | 10 | 21 |
| 118,101 | 3 | 3 | 7 | 13 | 0 | 1 | 1 | 5 | 11 | 22 |
| 118,102 | 3 | 3 | 7 | 14 | 0 | 1 | 1 | 5 | 11 | 23 |
| 118,103 | 3 | 3 | 7 | 14 | 0 | 1 | 1 | 5 | 11 | 23 |
| 118,104 | 4 | 3 | 6 | 15 | 0 | 1 | 1 | 6 | 11 | 25 |
| 118,105 | 4 | 3 | 6 | 14 | 0 | 1 | 1 | 6 | 11 | 24 |
| 118,106 | 4 | 3 | 5 | 15 | 0 | 1 | 1 | 6 | 10 | 25 |
| 118,107 | 4 | 3 | 4 | 15 | 0 | 1 | 1 | 6 | 9  | 25 |
| 118,108 | 4 | 3 | 4 | 15 | 0 | 0 | 1 | 5 | 9  | 23 |
| 118,109 | 4 | 3 | 4 | 15 | 0 | 0 | 1 | 5 | 9  | 23 |

|         |   |   |   |    |   |   |   |   |    |    |
|---------|---|---|---|----|---|---|---|---|----|----|
| 118,110 | 5 | 3 | 4 | 13 | 0 | 0 | 1 | 7 | 10 | 23 |
| 118,111 | 5 | 3 | 4 | 15 | 0 | 0 | 1 | 6 | 10 | 24 |
| 118,112 | 5 | 3 | 4 | 15 | 0 | 0 | 1 | 7 | 10 | 25 |
| 118,113 | 5 | 3 | 3 | 15 | 0 | 0 | 1 | 8 | 9  | 26 |
| 118,114 | 5 | 3 | 3 | 16 | 0 | 0 | 1 | 8 | 9  | 27 |
| 118,115 | 5 | 3 | 3 | 15 | 0 | 0 | 1 | 7 | 9  | 25 |
| 118,116 | 5 | 3 | 3 | 15 | 0 | 0 | 1 | 7 | 9  | 25 |
| 118,117 | 5 | 3 | 3 | 15 | 0 | 0 | 1 | 7 | 9  | 25 |
| 118,118 | 5 | 3 | 3 | 15 | 0 | 0 | 1 | 7 | 9  | 25 |
| 118,119 | 5 | 3 | 4 | 14 | 0 | 0 | 1 | 7 | 10 | 24 |
| 118,120 | 4 | 4 | 4 | 15 | 0 | 0 | 1 | 7 | 9  | 26 |
| 118,121 | 4 | 4 | 4 | 16 | 0 | 0 | 1 | 7 | 9  | 27 |
| 118,122 | 4 | 4 | 4 | 16 | 0 | 0 | 1 | 7 | 9  | 27 |
| 118,123 | 5 | 4 | 3 | 16 | 0 | 0 | 2 | 7 | 10 | 27 |
| 118,124 | 5 | 3 | 3 | 16 | 0 | 0 | 2 | 7 | 10 | 26 |
| 118,125 | 5 | 3 | 3 | 16 | 0 | 0 | 2 | 7 | 10 | 26 |
| 118,126 | 5 | 3 | 3 | 16 | 0 | 0 | 2 | 7 | 10 | 26 |
| 118,127 | 5 | 3 | 3 | 15 | 0 | 0 | 2 | 7 | 10 | 25 |
| 118,128 | 4 | 3 | 3 | 15 | 0 | 0 | 2 | 7 | 9  | 25 |
| 118,129 | 4 | 3 | 3 | 15 | 0 | 0 | 2 | 7 | 9  | 25 |
| 118,130 | 4 | 3 | 3 | 15 | 0 | 0 | 2 | 8 | 9  | 26 |
| 118,131 | 4 | 2 | 3 | 15 | 0 | 0 | 2 | 9 | 9  | 26 |
| 118,132 | 4 | 2 | 2 | 15 | 0 | 0 | 2 | 9 | 8  | 26 |
| 118,133 | 4 | 2 | 2 | 15 | 0 | 0 | 2 | 9 | 8  | 26 |
| 118,134 | 4 | 2 | 2 | 15 | 0 | 0 | 2 | 9 | 8  | 26 |
| 118,135 | 4 | 2 | 2 | 15 | 0 | 0 | 2 | 8 | 8  | 25 |
| 118,136 | 4 | 2 | 2 | 15 | 0 | 0 | 2 | 8 | 8  | 25 |
| 118,137 | 4 | 1 | 2 | 16 | 0 | 0 | 2 | 8 | 8  | 25 |
| 118,138 | 4 | 1 | 2 | 14 | 0 | 0 | 2 | 8 | 8  | 23 |
| 118,139 | 4 | 1 | 2 | 13 | 0 | 0 | 2 | 8 | 8  | 22 |
| 118,140 | 4 | 1 | 2 | 13 | 0 | 0 | 2 | 8 | 8  | 22 |
| 118,141 | 3 | 1 | 2 | 13 | 0 | 0 | 2 | 8 | 7  | 22 |
| 118,142 | 3 | 1 | 2 | 14 | 0 | 0 | 2 | 8 | 7  | 23 |
| 118,143 | 3 | 1 | 2 | 14 | 0 | 1 | 2 | 8 | 7  | 24 |
| 118,144 | 3 | 1 | 2 | 14 | 0 | 1 | 2 | 8 | 7  | 24 |
| 118,145 | 3 | 1 | 2 | 15 | 0 | 1 | 2 | 8 | 7  | 25 |
| 118,146 | 3 | 1 | 2 | 15 | 1 | 1 | 1 | 8 | 7  | 25 |
| 118,147 | 3 | 1 | 2 | 15 | 1 | 1 | 1 | 8 | 7  | 25 |
| 118,148 | 3 | 1 | 2 | 16 | 1 | 1 | 1 | 7 | 7  | 25 |
| 118,149 | 3 | 1 | 2 | 16 | 1 | 1 | 1 | 7 | 7  | 25 |
| 118,150 | 3 | 1 | 2 | 16 | 1 | 1 | 1 | 7 | 7  | 25 |

|         |   |   |   |    |   |   |   |   |    |    |
|---------|---|---|---|----|---|---|---|---|----|----|
| 118,151 | 3 | 1 | 2 | 13 | 1 | 1 | 1 | 7 | 7  | 22 |
| 118,152 | 3 | 1 | 1 | 12 | 1 | 1 | 1 | 7 | 6  | 21 |
| 118,153 | 3 | 2 | 1 | 12 | 1 | 1 | 1 | 7 | 6  | 22 |
| 118,154 | 2 | 2 | 1 | 12 | 1 | 1 | 1 | 7 | 5  | 22 |
| 118,155 | 2 | 2 | 1 | 12 | 1 | 1 | 1 | 6 | 5  | 21 |
| 118,156 | 2 | 2 | 1 | 12 | 1 | 1 | 1 | 6 | 5  | 21 |
| 118,157 | 2 | 2 | 1 | 11 | 1 | 1 | 1 | 6 | 5  | 20 |
| 118,158 | 2 | 2 | 3 | 11 | 1 | 1 | 1 | 6 | 7  | 20 |
| 118,159 | 2 | 2 | 4 | 10 | 1 | 1 | 1 | 6 | 8  | 19 |
| 118,160 | 1 | 2 | 4 | 10 | 2 | 1 | 1 | 6 | 8  | 19 |
| 118,161 | 1 | 2 | 4 | 10 | 2 | 1 | 1 | 4 | 8  | 17 |
| 118,162 | 1 | 2 | 4 | 9  | 2 | 1 | 1 | 3 | 8  | 15 |
| 118,163 | 1 | 2 | 4 | 9  | 2 | 1 | 1 | 3 | 8  | 15 |
| 118,164 | 1 | 2 | 4 | 9  | 2 | 1 | 1 | 2 | 8  | 14 |
| 118,165 | 1 | 2 | 4 | 8  | 2 | 1 | 1 | 2 | 8  | 13 |
| 118,166 | 1 | 2 | 4 | 11 | 2 | 1 | 1 | 3 | 8  | 17 |
| 118,167 | 1 | 2 | 4 | 14 | 2 | 1 | 1 | 5 | 8  | 22 |
| 118,168 | 1 | 2 | 4 | 16 | 2 | 1 | 1 | 5 | 8  | 24 |
| 118,169 | 1 | 3 | 3 | 17 | 2 | 1 | 1 | 5 | 7  | 26 |
| 118,170 | 1 | 3 | 3 | 17 | 2 | 1 | 1 | 5 | 7  | 26 |
| 118,171 | 1 | 2 | 3 | 16 | 2 | 1 | 1 | 5 | 7  | 24 |
| 118,172 | 1 | 2 | 3 | 15 | 2 | 1 | 1 | 5 | 7  | 23 |
| 118,173 | 2 | 2 | 4 | 15 | 2 | 1 | 1 | 5 | 9  | 23 |
| 118,174 | 1 | 2 | 4 | 15 | 2 | 1 | 0 | 5 | 7  | 23 |
| 118,175 | 1 | 2 | 4 | 15 | 2 | 1 | 0 | 5 | 7  | 23 |
| 118,176 | 1 | 2 | 4 | 15 | 2 | 1 | 0 | 5 | 7  | 23 |
| 118,177 | 1 | 2 | 4 | 16 | 2 | 1 | 0 | 5 | 7  | 24 |
| 118,178 | 1 | 2 | 4 | 16 | 2 | 1 | 0 | 5 | 7  | 24 |
| 118,179 | 1 | 2 | 4 | 16 | 2 | 1 | 0 | 4 | 7  | 23 |
| 118,180 | 1 | 2 | 5 | 16 | 2 | 1 | 0 | 4 | 8  | 23 |
| 118,181 | 1 | 2 | 5 | 16 | 2 | 1 | 0 | 4 | 8  | 23 |
| 118,182 | 1 | 2 | 5 | 16 | 2 | 1 | 0 | 3 | 8  | 22 |
| 118,183 | 1 | 2 | 5 | 18 | 2 | 1 | 0 | 3 | 8  | 24 |
| 118,184 | 1 | 2 | 5 | 19 | 2 | 1 | 0 | 3 | 8  | 25 |
| 118,185 | 1 | 2 | 7 | 19 | 2 | 1 | 0 | 3 | 10 | 25 |
| 118,186 | 1 | 3 | 7 | 19 | 2 | 1 | 0 | 4 | 10 | 27 |
| 118,187 | 1 | 3 | 7 | 19 | 2 | 1 | 0 | 4 | 10 | 27 |
| 118,188 | 1 | 3 | 7 | 18 | 2 | 1 | 0 | 4 | 10 | 26 |
| 118,189 | 1 | 3 | 7 | 18 | 2 | 1 | 0 | 4 | 10 | 26 |
| 118,190 | 1 | 3 | 7 | 18 | 2 | 2 | 0 | 5 | 10 | 28 |
| 118,191 | 1 | 3 | 7 | 18 | 2 | 2 | 0 | 5 | 10 | 28 |

|         |   |   |   |    |   |   |   |    |    |    |
|---------|---|---|---|----|---|---|---|----|----|----|
| 118,192 | 1 | 4 | 7 | 18 | 2 | 2 | 0 | 5  | 10 | 29 |
| 118,193 | 1 | 4 | 7 | 18 | 2 | 2 | 0 | 6  | 10 | 30 |
| 118,194 | 1 | 4 | 7 | 18 | 2 | 1 | 0 | 8  | 10 | 31 |
| 118,195 | 1 | 4 | 7 | 18 | 1 | 1 | 0 | 8  | 9  | 31 |
| 118,196 | 1 | 4 | 7 | 17 | 1 | 1 | 0 | 8  | 9  | 30 |
| 118,197 | 1 | 4 | 7 | 17 | 1 | 1 | 0 | 8  | 9  | 30 |
| 118,198 | 1 | 4 | 7 | 17 | 1 | 1 | 1 | 9  | 10 | 31 |
| 118,199 | 1 | 4 | 7 | 16 | 1 | 1 | 1 | 9  | 10 | 30 |
| 118,200 | 1 | 4 | 7 | 16 | 1 | 1 | 1 | 9  | 10 | 30 |
| 118,201 | 1 | 4 | 7 | 16 | 1 | 1 | 1 | 10 | 10 | 31 |
| 118,202 | 2 | 4 | 7 | 16 | 1 | 1 | 1 | 10 | 11 | 31 |
| 118,203 | 2 | 3 | 7 | 15 | 1 | 1 | 1 | 10 | 11 | 29 |
| 118,204 | 2 | 3 | 7 | 15 | 1 | 1 | 1 | 10 | 11 | 29 |
| 118,205 | 2 | 3 | 7 | 15 | 1 | 1 | 1 | 10 | 11 | 29 |
| 118,206 | 2 | 3 | 7 | 15 | 1 | 1 | 1 | 10 | 11 | 29 |
| 118,207 | 2 | 3 | 7 | 17 | 1 | 1 | 1 | 10 | 11 | 31 |
| 118,208 | 2 | 3 | 6 | 17 | 1 | 1 | 1 | 10 | 10 | 31 |
| 118,209 | 2 | 3 | 5 | 17 | 1 | 1 | 1 | 10 | 9  | 31 |
| 118,210 | 2 | 3 | 4 | 17 | 1 | 1 | 1 | 10 | 8  | 31 |
| 118,211 | 2 | 3 | 4 | 17 | 0 | 1 | 1 | 10 | 7  | 31 |
| 118,212 | 2 | 3 | 4 | 17 | 0 | 1 | 1 | 10 | 7  | 31 |
| 118,213 | 2 | 3 | 4 | 16 | 0 | 1 | 1 | 10 | 7  | 30 |
| 118,214 | 2 | 3 | 4 | 16 | 0 | 1 | 1 | 10 | 7  | 30 |
| 118,215 | 2 | 3 | 4 | 16 | 0 | 1 | 1 | 10 | 7  | 30 |
| 118,216 | 2 | 3 | 4 | 13 | 0 | 1 | 1 | 9  | 7  | 26 |
| 118,217 | 2 | 3 | 4 | 13 | 0 | 1 | 1 | 9  | 7  | 26 |
| 118,218 | 2 | 3 | 4 | 11 | 0 | 1 | 1 | 8  | 7  | 23 |
| 118,219 | 2 | 3 | 4 | 9  | 0 | 1 | 1 | 8  | 7  | 21 |
| 118,220 | 2 | 2 | 4 | 9  | 0 | 1 | 1 | 8  | 7  | 20 |
| 118,221 | 2 | 2 | 4 | 11 | 0 | 1 | 1 | 10 | 7  | 24 |
| 118,222 | 2 | 2 | 4 | 11 | 0 | 1 | 1 | 11 | 7  | 25 |
| 118,223 | 1 | 2 | 3 | 11 | 0 | 1 | 1 | 11 | 5  | 25 |
| 118,224 | 1 | 2 | 3 | 11 | 0 | 1 | 1 | 11 | 5  | 25 |
| 118,225 | 1 | 3 | 3 | 11 | 0 | 1 | 1 | 11 | 5  | 26 |
| 118,226 | 1 | 3 | 3 | 11 | 0 | 1 | 1 | 11 | 5  | 26 |
| 118,227 | 1 | 3 | 3 | 10 | 0 | 1 | 1 | 11 | 5  | 25 |
| 118,228 | 1 | 3 | 3 | 10 | 0 | 1 | 1 | 11 | 5  | 25 |
| 118,229 | 1 | 3 | 3 | 10 | 0 | 1 | 1 | 11 | 5  | 25 |
| 118,230 | 1 | 3 | 3 | 10 | 0 | 1 | 1 | 11 | 5  | 25 |
| 118,231 | 1 | 3 | 2 | 10 | 0 | 1 | 1 | 11 | 4  | 25 |
| 118,232 | 1 | 3 | 2 | 10 | 0 | 1 | 1 | 11 | 4  | 25 |

|         |   |    |   |     |   |   |   |    |   |     |
|---------|---|----|---|-----|---|---|---|----|---|-----|
| 118,233 | 1 | 3  | 2 | 10  | 0 | 1 | 1 | 11 | 4 | 25  |
| 118,234 | 1 | 3  | 2 | 9   | 0 | 2 | 1 | 12 | 4 | 26  |
| 118,235 | 1 | 3  | 2 | 10  | 0 | 2 | 1 | 13 | 4 | 28  |
| 118,236 | 1 | 3  | 0 | 10  | 1 | 2 | 1 | 14 | 3 | 29  |
| 118,237 | 1 | 2  | 0 | 10  | 1 | 2 | 1 | 14 | 3 | 28  |
| 118,238 | 1 | 2  | 0 | 12  | 1 | 2 | 1 | 14 | 3 | 30  |
| 118,239 | 1 | 2  | 0 | 13  | 1 | 2 | 1 | 15 | 3 | 32  |
| 118,240 | 3 | 2  | 0 | 13  | 1 | 2 | 1 | 15 | 5 | 32  |
| 118,241 | 3 | 2  | 0 | 13  | 1 | 1 | 3 | 14 | 7 | 30  |
| 118,242 | 3 | 2  | 0 | 13  | 1 | 1 | 3 | 14 | 7 | 30  |
| 118,243 | 3 | 1  | 0 | 12  | 1 | 1 | 3 | 14 | 7 | 28  |
| 118,244 | 3 | 1  | 0 | 12  | 1 | 1 | 3 | 14 | 7 | 28  |
| 118,245 | 3 | 1  | 0 | 19  | 1 | 1 | 3 | 16 | 7 | 37  |
| 118,246 | 3 | 1  | 0 | 22  | 1 | 1 | 3 | 18 | 7 | 42  |
| 118,247 | 3 | 1  | 0 | 55  | 1 | 1 | 3 | 24 | 7 | 81  |
| 118,248 | 3 | 3  | 0 | 63  | 1 | 1 | 3 | 33 | 7 | 100 |
| 118,249 | 3 | 3  | 0 | 74  | 1 | 1 | 2 | 36 | 6 | 114 |
| 118,250 | 3 | 3  | 0 | 77  | 1 | 1 | 2 | 37 | 6 | 118 |
| 118,251 | 3 | 3  | 0 | 77  | 2 | 1 | 2 | 37 | 7 | 118 |
| 118,252 | 3 | 3  | 0 | 79  | 2 | 1 | 2 | 38 | 7 | 121 |
| 118,253 | 2 | 3  | 0 | 79  | 2 | 1 | 2 | 39 | 6 | 122 |
| 118,254 | 2 | 3  | 0 | 81  | 2 | 1 | 2 | 40 | 6 | 125 |
| 118,255 | 2 | 3  | 0 | 81  | 2 | 1 | 2 | 40 | 6 | 125 |
| 118,256 | 2 | 3  | 0 | 82  | 2 | 1 | 2 | 40 | 6 | 126 |
| 118,257 | 2 | 4  | 0 | 83  | 2 | 1 | 2 | 40 | 6 | 128 |
| 118,258 | 2 | 5  | 0 | 85  | 2 | 1 | 2 | 41 | 6 | 132 |
| 118,259 | 2 | 5  | 0 | 88  | 2 | 1 | 2 | 43 | 6 | 137 |
| 118,260 | 2 | 6  | 0 | 89  | 2 | 1 | 2 | 43 | 6 | 139 |
| 118,261 | 2 | 8  | 0 | 95  | 2 | 1 | 2 | 47 | 6 | 151 |
| 118,262 | 2 | 9  | 0 | 97  | 2 | 1 | 2 | 47 | 6 | 154 |
| 118,263 | 2 | 9  | 0 | 104 | 2 | 1 | 2 | 51 | 6 | 165 |
| 118,264 | 2 | 11 | 0 | 112 | 2 | 1 | 2 | 61 | 6 | 185 |
| 118,265 | 2 | 11 | 0 | 122 | 2 | 1 | 2 | 62 | 6 | 196 |
| 118,266 | 2 | 11 | 0 | 128 | 3 | 1 | 2 | 68 | 7 | 208 |
| 118,267 | 2 | 11 | 0 | 130 | 3 | 1 | 2 | 68 | 7 | 210 |
| 118,268 | 3 | 12 | 0 | 131 | 3 | 1 | 2 | 68 | 8 | 212 |
| 118,269 | 3 | 12 | 0 | 131 | 3 | 2 | 3 | 69 | 9 | 214 |
| 118,270 | 3 | 12 | 0 | 133 | 3 | 2 | 3 | 70 | 9 | 217 |
| 118,271 | 3 | 12 | 0 | 138 | 3 | 2 | 3 | 71 | 9 | 223 |
| 118,272 | 3 | 12 | 0 | 142 | 3 | 2 | 3 | 72 | 9 | 228 |
| 118,273 | 3 | 13 | 0 | 145 | 3 | 2 | 3 | 71 | 9 | 231 |

|         |   |    |   |     |   |    |   |     |    |     |
|---------|---|----|---|-----|---|----|---|-----|----|-----|
| 118,274 | 3 | 13 | 0 | 211 | 3 | 2  | 3 | 73  | 9  | 299 |
| 118,275 | 3 | 19 | 0 | 265 | 3 | 3  | 3 | 98  | 9  | 385 |
| 118,276 | 3 | 21 | 1 | 303 | 3 | 4  | 3 | 103 | 10 | 431 |
| 118,277 | 3 | 24 | 1 | 340 | 3 | 5  | 3 | 114 | 10 | 483 |
| 118,278 | 3 | 26 | 1 | 368 | 3 | 5  | 3 | 118 | 10 | 517 |
| 118,279 | 3 | 29 | 2 | 393 | 3 | 7  | 3 | 124 | 11 | 553 |
| 118,280 | 3 | 30 | 2 | 444 | 3 | 9  | 3 | 138 | 11 | 621 |
| 118,281 | 3 | 31 | 2 | 455 | 3 | 10 | 3 | 147 | 11 | 643 |
| 118,282 | 3 | 31 | 2 | 455 | 3 | 10 | 3 | 148 | 11 | 644 |
| 118,283 | 3 | 31 | 2 | 462 | 3 | 10 | 3 | 152 | 11 | 655 |
| 118,284 | 3 | 31 | 2 | 462 | 3 | 9  | 4 | 154 | 12 | 656 |
| 118,285 | 3 | 31 | 2 | 478 | 3 | 10 | 4 | 162 | 12 | 681 |
| 118,286 | 3 | 31 | 3 | 506 | 3 | 11 | 4 | 172 | 13 | 720 |
| 118,287 | 3 | 31 | 3 | 507 | 2 | 11 | 4 | 171 | 12 | 720 |
| 118,288 | 3 | 33 | 3 | 526 | 3 | 11 | 4 | 172 | 13 | 742 |
| 118,289 | 3 | 33 | 5 | 524 | 3 | 11 | 4 | 172 | 15 | 740 |
| 118,290 | 3 | 33 | 5 | 524 | 3 | 11 | 5 | 172 | 16 | 740 |
| 118,291 | 1 | 33 | 5 | 525 | 3 | 11 | 5 | 172 | 14 | 741 |
| 118,292 | 1 | 33 | 5 | 527 | 3 | 11 | 3 | 171 | 12 | 742 |
| 118,293 | 1 | 33 | 5 | 528 | 3 | 11 | 3 | 172 | 12 | 744 |
| 118,294 | 1 | 33 | 6 | 529 | 3 | 11 | 3 | 172 | 13 | 745 |
| 118,295 | 1 | 33 | 6 | 522 | 3 | 11 | 3 | 168 | 13 | 734 |
| 118,296 | 1 | 33 | 6 | 523 | 3 | 11 | 3 | 168 | 13 | 735 |
| 118,297 | 1 | 33 | 6 | 487 | 3 | 11 | 3 | 160 | 13 | 691 |
| 118,298 | 1 | 31 | 6 | 479 | 3 | 11 | 3 | 152 | 13 | 673 |
| 118,299 | 1 | 31 | 6 | 479 | 3 | 11 | 3 | 154 | 13 | 675 |
| 118,300 | 1 | 31 | 6 | 473 | 3 | 11 | 3 | 158 | 13 | 673 |
| 118,301 | 1 | 31 | 6 | 473 | 3 | 12 | 3 | 158 | 13 | 674 |
| 118,302 | 1 | 31 | 6 | 476 | 2 | 12 | 3 | 160 | 12 | 679 |
| 118,303 | 1 | 32 | 6 | 476 | 2 | 12 | 3 | 159 | 12 | 679 |
| 118,304 | 1 | 32 | 6 | 480 | 2 | 12 | 3 | 158 | 12 | 682 |
| 118,305 | 1 | 34 | 6 | 483 | 2 | 12 | 3 | 158 | 12 | 687 |
| 118,306 | 1 | 35 | 6 | 483 | 2 | 12 | 3 | 158 | 12 | 688 |
| 118,307 | 1 | 35 | 6 | 485 | 2 | 14 | 3 | 170 | 12 | 704 |
| 118,308 | 1 | 34 | 6 | 482 | 2 | 14 | 3 | 172 | 12 | 702 |
| 118,309 | 1 | 37 | 6 | 481 | 2 | 14 | 3 | 177 | 12 | 709 |
| 118,310 | 1 | 37 | 6 | 484 | 2 | 14 | 3 | 177 | 12 | 712 |
| 118,311 | 1 | 36 | 6 | 506 | 2 | 14 | 3 | 182 | 12 | 738 |
| 118,312 | 1 | 34 | 6 | 504 | 2 | 15 | 3 | 179 | 12 | 732 |
| 118,313 | 1 | 34 | 6 | 507 | 2 | 15 | 3 | 183 | 12 | 739 |
| 118,314 | 1 | 36 | 6 | 505 | 2 | 17 | 3 | 185 | 12 | 743 |

|         |   |    |   |     |   |    |   |     |    |     |
|---------|---|----|---|-----|---|----|---|-----|----|-----|
| 118,315 | 1 | 39 | 6 | 510 | 2 | 18 | 3 | 195 | 12 | 762 |
| 118,316 | 1 | 41 | 6 | 546 | 1 | 18 | 3 | 205 | 11 | 810 |
| 118,317 | 1 | 42 | 6 | 554 | 1 | 18 | 3 | 203 | 11 | 817 |
| 118,318 | 1 | 43 | 7 | 576 | 1 | 19 | 3 | 224 | 12 | 862 |
| 118,319 | 0 | 42 | 7 | 578 | 1 | 19 | 3 | 226 | 11 | 865 |
| 118,320 | 0 | 42 | 7 | 578 | 1 | 18 | 2 | 225 | 10 | 863 |
| 118,321 | 0 | 42 | 7 | 585 | 1 | 20 | 3 | 229 | 11 | 876 |
| 118,322 | 0 | 42 | 7 | 591 | 1 | 20 | 3 | 230 | 11 | 883 |
| 118,323 | 0 | 43 | 7 | 603 | 1 | 20 | 3 | 245 | 11 | 911 |
| 118,324 | 0 | 42 | 7 | 637 | 1 | 20 | 3 | 253 | 11 | 952 |
| 118,325 | 0 | 44 | 7 | 593 | 1 | 22 | 3 | 267 | 11 | 926 |
| 118,326 | 0 | 38 | 7 | 545 | 1 | 21 | 3 | 247 | 11 | 851 |
| 118,327 | 0 | 35 | 6 | 515 | 1 | 20 | 3 | 244 | 10 | 814 |
| 118,328 | 0 | 32 | 6 | 481 | 1 | 19 | 3 | 235 | 10 | 767 |
| 118,329 | 0 | 30 | 6 | 460 | 1 | 19 | 3 | 232 | 10 | 741 |
| 118,330 | 0 | 27 | 5 | 437 | 1 | 17 | 3 | 226 | 9  | 707 |
| 118,331 | 0 | 26 | 5 | 386 | 1 | 15 | 3 | 212 | 9  | 639 |
| 118,332 | 1 | 25 | 5 | 376 | 1 | 14 | 3 | 204 | 10 | 619 |
| 118,333 | 1 | 25 | 5 | 376 | 1 | 14 | 3 | 205 | 10 | 620 |
| 118,334 | 1 | 25 | 5 | 372 | 1 | 15 | 2 | 203 | 9  | 615 |
| 118,335 | 1 | 25 | 5 | 379 | 1 | 15 | 2 | 202 | 9  | 621 |
| 118,336 | 2 | 25 | 5 | 364 | 1 | 14 | 2 | 195 | 10 | 598 |
| 118,337 | 2 | 24 | 4 | 342 | 1 | 14 | 2 | 190 | 9  | 570 |
| 118,338 | 2 | 28 | 4 | 372 | 1 | 15 | 2 | 200 | 9  | 615 |
| 118,339 | 2 | 27 | 5 | 356 | 0 | 15 | 2 | 198 | 9  | 596 |
| 118,340 | 2 | 29 | 3 | 369 | 0 | 15 | 2 | 217 | 7  | 630 |
| 118,341 | 2 | 29 | 3 | 375 | 0 | 15 | 1 | 221 | 6  | 640 |
| 118,342 | 2 | 29 | 5 | 376 | 0 | 15 | 4 | 224 | 11 | 644 |
| 118,343 | 2 | 29 | 5 | 372 | 0 | 15 | 4 | 224 | 11 | 640 |
| 118,344 | 2 | 29 | 5 | 372 | 0 | 15 | 4 | 226 | 11 | 642 |
| 118,345 | 2 | 30 | 4 | 374 | 0 | 15 | 4 | 227 | 10 | 646 |
| 118,346 | 2 | 30 | 4 | 375 | 0 | 15 | 4 | 227 | 10 | 647 |
| 118,347 | 2 | 30 | 4 | 373 | 0 | 15 | 4 | 227 | 10 | 645 |
| 118,348 | 2 | 30 | 4 | 373 | 0 | 15 | 4 | 227 | 10 | 645 |
| 118,349 | 2 | 30 | 4 | 373 | 0 | 15 | 4 | 227 | 10 | 645 |
| 118,350 | 2 | 31 | 4 | 375 | 0 | 15 | 4 | 227 | 10 | 648 |
| 118,351 | 2 | 31 | 4 | 371 | 0 | 15 | 5 | 219 | 11 | 636 |
| 118,352 | 2 | 31 | 4 | 369 | 0 | 14 | 5 | 218 | 11 | 632 |
| 118,353 | 2 | 31 | 4 | 368 | 0 | 14 | 5 | 216 | 11 | 629 |
| 118,354 | 2 | 30 | 5 | 374 | 0 | 14 | 5 | 220 | 12 | 638 |
| 118,355 | 2 | 30 | 5 | 380 | 0 | 14 | 5 | 223 | 12 | 647 |

|         |   |    |    |     |   |    |    |     |    |     |
|---------|---|----|----|-----|---|----|----|-----|----|-----|
| 118,356 | 2 | 28 | 5  | 378 | 0 | 14 | 6  | 222 | 13 | 642 |
| 118,357 | 2 | 29 | 6  | 377 | 0 | 12 | 6  | 208 | 14 | 626 |
| 118,358 | 2 | 32 | 6  | 399 | 0 | 12 | 6  | 212 | 14 | 655 |
| 118,359 | 2 | 32 | 6  | 416 | 0 | 12 | 6  | 213 | 14 | 673 |
| 118,360 | 2 | 28 | 6  | 414 | 0 | 12 | 6  | 205 | 14 | 659 |
| 118,361 | 2 | 28 | 8  | 420 | 0 | 12 | 7  | 206 | 17 | 666 |
| 118,362 | 2 | 28 | 8  | 401 | 0 | 12 | 7  | 201 | 17 | 642 |
| 118,363 | 2 | 28 | 9  | 401 | 2 | 11 | 12 | 200 | 25 | 640 |
| 118,364 | 2 | 27 | 12 | 406 | 2 | 13 | 15 | 199 | 31 | 645 |
| 118,365 | 2 | 23 | 12 | 393 | 2 | 11 | 15 | 183 | 31 | 610 |
| 118,366 | 3 | 23 | 14 | 433 | 2 | 10 | 19 | 178 | 38 | 644 |
| 118,367 | 3 | 22 | 16 | 397 | 2 | 10 | 19 | 168 | 40 | 597 |
| 118,368 | 3 | 22 | 16 | 387 | 2 | 10 | 19 | 164 | 40 | 583 |
| 118,369 | 3 | 27 | 16 | 382 | 3 | 9  | 20 | 147 | 42 | 565 |
| 118,370 | 3 | 27 | 16 | 379 | 3 | 9  | 20 | 146 | 42 | 561 |
| 118,371 | 3 | 30 | 17 | 372 | 3 | 8  | 20 | 145 | 43 | 555 |
| 118,372 | 3 | 30 | 17 | 372 | 3 | 8  | 20 | 146 | 43 | 556 |
| 118,373 | 3 | 29 | 17 | 350 | 3 | 8  | 20 | 127 | 43 | 514 |
| 118,374 | 3 | 30 | 18 | 359 | 3 | 8  | 20 | 132 | 44 | 529 |
| 118,375 | 3 | 30 | 18 | 322 | 3 | 8  | 20 | 125 | 44 | 485 |
| 118,376 | 3 | 30 | 18 | 305 | 3 | 6  | 20 | 121 | 44 | 462 |
| 118,377 | 3 | 30 | 18 | 303 | 3 | 6  | 20 | 117 | 44 | 456 |
| 118,378 | 3 | 30 | 19 | 300 | 3 | 6  | 20 | 118 | 45 | 454 |
| 118,379 | 3 | 30 | 19 | 300 | 3 | 6  | 20 | 119 | 45 | 455 |
| 118,380 | 3 | 30 | 19 | 293 | 3 | 6  | 20 | 118 | 45 | 447 |
| 118,381 | 3 | 30 | 20 | 291 | 3 | 6  | 20 | 118 | 46 | 445 |
| 118,382 | 3 | 30 | 25 | 291 | 3 | 6  | 20 | 119 | 51 | 446 |
| 118,383 | 2 | 30 | 25 | 291 | 3 | 6  | 20 | 116 | 50 | 443 |
| 118,384 | 2 | 30 | 25 | 294 | 3 | 6  | 20 | 116 | 50 | 446 |
| 118,385 | 2 | 30 | 25 | 292 | 3 | 5  | 21 | 120 | 51 | 447 |
| 118,386 | 2 | 30 | 26 | 315 | 3 | 5  | 21 | 131 | 52 | 481 |
| 118,387 | 3 | 32 | 26 | 333 | 3 | 5  | 21 | 150 | 53 | 520 |
| 118,388 | 3 | 32 | 26 | 334 | 3 | 4  | 21 | 147 | 53 | 517 |
| 118,389 | 3 | 29 | 26 | 305 | 3 | 3  | 21 | 137 | 53 | 474 |
| 118,390 | 3 | 29 | 25 | 304 | 3 | 3  | 21 | 137 | 52 | 473 |
| 118,391 | 3 | 27 | 23 | 284 | 3 | 3  | 18 | 113 | 47 | 427 |
| 118,392 | 3 | 27 | 23 | 282 | 3 | 3  | 18 | 111 | 47 | 423 |
| 118,393 | 3 | 27 | 23 | 282 | 3 | 3  | 19 | 111 | 48 | 423 |
| 118,394 | 3 | 27 | 23 | 282 | 3 | 3  | 19 | 110 | 48 | 422 |
| 118,395 | 3 | 27 | 23 | 282 | 3 | 3  | 19 | 108 | 48 | 420 |
| 118,396 | 3 | 26 | 23 | 279 | 3 | 3  | 20 | 106 | 49 | 414 |



|         |   |    |    |     |   |   |    |     |    |     |
|---------|---|----|----|-----|---|---|----|-----|----|-----|
| 118,397 | 3 | 26 | 23 | 281 | 3 | 3 | 22 | 106 | 51 | 416 |
| 118,398 | 3 | 26 | 23 | 282 | 3 | 3 | 22 | 106 | 51 | 417 |
| 118,399 | 3 | 26 | 23 | 282 | 3 | 3 | 22 | 106 | 51 | 417 |
| 118,400 | 3 | 26 | 23 | 280 | 3 | 3 | 22 | 104 | 51 | 413 |
| 118,401 | 3 | 26 | 23 | 281 | 3 | 3 | 22 | 105 | 51 | 415 |
| 118,402 | 3 | 26 | 24 | 281 | 3 | 3 | 21 | 105 | 51 | 415 |
| 118,403 | 3 | 26 | 24 | 279 | 3 | 3 | 21 | 105 | 51 | 413 |
| 118,404 | 4 | 26 | 23 | 282 | 3 | 3 | 21 | 105 | 51 | 416 |
| 118,405 | 4 | 26 | 24 | 275 | 4 | 3 | 21 | 100 | 53 | 404 |
| 118,406 | 4 | 26 | 29 | 265 | 4 | 3 | 24 | 97  | 61 | 391 |
| 118,407 | 4 | 21 | 30 | 221 | 4 | 3 | 23 | 92  | 61 | 337 |
| 118,408 | 4 | 22 | 29 | 225 | 4 | 3 | 23 | 94  | 60 | 344 |
| 118,409 | 4 | 22 | 29 | 223 | 4 | 3 | 23 | 95  | 60 | 343 |
| 118,410 | 4 | 22 | 29 | 227 | 4 | 3 | 23 | 95  | 60 | 347 |
| 118,411 | 4 | 22 | 29 | 229 | 4 | 3 | 23 | 96  | 60 | 350 |
| 118,412 | 4 | 22 | 27 | 222 | 4 | 4 | 22 | 95  | 57 | 343 |
| 118,413 | 4 | 22 | 26 | 215 | 3 | 4 | 20 | 95  | 53 | 336 |
| 118,414 | 4 | 22 | 26 | 218 | 2 | 4 | 17 | 96  | 49 | 340 |
| 118,415 | 4 | 22 | 23 | 208 | 2 | 2 | 14 | 93  | 43 | 325 |
| 118,416 | 4 | 22 | 22 | 208 | 2 | 2 | 10 | 94  | 38 | 326 |
| 118,417 | 3 | 18 | 22 | 152 | 2 | 2 | 10 | 88  | 37 | 260 |
| 118,418 | 3 | 17 | 22 | 148 | 2 | 2 | 13 | 88  | 40 | 255 |
| 118,419 | 3 | 11 | 21 | 128 | 1 | 2 | 12 | 83  | 37 | 224 |
| 118,420 | 3 | 11 | 21 | 128 | 1 | 2 | 12 | 83  | 37 | 224 |
| 118,421 | 3 | 8  | 27 | 119 | 1 | 1 | 14 | 78  | 45 | 206 |
| 118,422 | 3 | 8  | 29 | 119 | 1 | 1 | 15 | 78  | 48 | 206 |
| 118,423 | 3 | 8  | 29 | 117 | 1 | 1 | 16 | 76  | 49 | 202 |
| 118,424 | 3 | 8  | 34 | 117 | 1 | 1 | 19 | 78  | 57 | 204 |
| 118,425 | 3 | 7  | 36 | 109 | 2 | 1 | 20 | 73  | 61 | 190 |
| 118,426 | 3 | 7  | 36 | 112 | 2 | 1 | 21 | 73  | 62 | 193 |
| 118,427 | 3 | 5  | 35 | 107 | 2 | 1 | 21 | 61  | 61 | 174 |
| 118,428 | 3 | 5  | 35 | 107 | 2 | 1 | 21 | 61  | 61 | 174 |
| 118,429 | 3 | 5  | 35 | 102 | 2 | 1 | 21 | 58  | 61 | 166 |
| 118,430 | 3 | 5  | 35 | 101 | 2 | 1 | 21 | 54  | 61 | 161 |
| 118,431 | 3 | 5  | 34 | 102 | 2 | 1 | 21 | 55  | 60 | 163 |
| 118,432 | 4 | 5  | 30 | 106 | 2 | 1 | 21 | 58  | 57 | 170 |
| 118,433 | 4 | 5  | 29 | 106 | 2 | 1 | 21 | 57  | 56 | 169 |
| 118,434 | 4 | 5  | 29 | 107 | 2 | 1 | 21 | 60  | 56 | 173 |
| 118,435 | 4 | 5  | 29 | 107 | 2 | 1 | 20 | 62  | 55 | 175 |
| 118,436 | 4 | 9  | 28 | 77  | 2 | 3 | 20 | 48  | 54 | 137 |
| 118,437 | 4 | 9  | 28 | 78  | 2 | 4 | 20 | 48  | 54 | 139 |

|         |   |    |    |     |   |    |    |     |     |     |
|---------|---|----|----|-----|---|----|----|-----|-----|-----|
| 118,438 | 2 | 7  | 28 | 59  | 2 | 4  | 20 | 30  | 52  | 100 |
| 118,439 | 2 | 7  | 28 | 52  | 2 | 4  | 20 | 29  | 52  | 92  |
| 118,440 | 2 | 6  | 29 | 52  | 2 | 4  | 20 | 31  | 53  | 93  |
| 118,441 | 2 | 6  | 29 | 49  | 2 | 4  | 20 | 31  | 53  | 90  |
| 118,442 | 2 | 6  | 29 | 49  | 2 | 4  | 20 | 31  | 53  | 90  |
| 118,443 | 2 | 6  | 29 | 50  | 2 | 4  | 20 | 31  | 53  | 91  |
| 118,444 | 2 | 6  | 29 | 50  | 2 | 4  | 19 | 31  | 52  | 91  |
| 118,445 | 2 | 6  | 29 | 50  | 2 | 4  | 19 | 31  | 52  | 91  |
| 118,446 | 2 | 6  | 29 | 50  | 2 | 4  | 18 | 31  | 51  | 91  |
| 118,447 | 2 | 6  | 29 | 51  | 2 | 4  | 18 | 30  | 51  | 91  |
| 118,448 | 2 | 5  | 30 | 47  | 2 | 4  | 16 | 29  | 50  | 85  |
| 118,449 | 2 | 5  | 30 | 47  | 2 | 4  | 16 | 29  | 50  | 85  |
| 118,450 | 2 | 5  | 30 | 51  | 2 | 4  | 16 | 29  | 50  | 89  |
| 118,451 | 2 | 7  | 30 | 72  | 2 | 4  | 16 | 47  | 50  | 130 |
| 118,452 | 3 | 7  | 37 | 132 | 3 | 5  | 20 | 70  | 63  | 214 |
| 118,453 | 3 | 7  | 37 | 139 | 3 | 5  | 20 | 75  | 63  | 226 |
| 118,454 | 4 | 7  | 39 | 148 | 3 | 6  | 21 | 83  | 67  | 244 |
| 118,455 | 3 | 8  | 40 | 156 | 3 | 6  | 21 | 94  | 67  | 264 |
| 118,456 | 4 | 8  | 46 | 163 | 3 | 6  | 24 | 94  | 77  | 271 |
| 118,457 | 5 | 10 | 49 | 165 | 3 | 6  | 24 | 95  | 81  | 276 |
| 118,458 | 5 | 10 | 48 | 166 | 3 | 6  | 24 | 95  | 80  | 277 |
| 118,459 | 5 | 9  | 55 | 165 | 6 | 6  | 28 | 94  | 94  | 274 |
| 118,460 | 5 | 10 | 59 | 174 | 6 | 6  | 30 | 99  | 100 | 289 |
| 118,461 | 5 | 11 | 61 | 189 | 6 | 7  | 30 | 108 | 102 | 315 |
| 118,462 | 5 | 12 | 61 | 189 | 6 | 7  | 30 | 107 | 102 | 315 |
| 118,463 | 5 | 12 | 61 | 204 | 6 | 6  | 30 | 116 | 102 | 338 |
| 118,464 | 5 | 12 | 61 | 207 | 6 | 6  | 30 | 120 | 102 | 345 |
| 118,465 | 5 | 12 | 61 | 206 | 6 | 6  | 31 | 120 | 103 | 344 |
| 118,466 | 5 | 12 | 61 | 207 | 6 | 6  | 31 | 119 | 103 | 344 |
| 118,467 | 5 | 12 | 60 | 207 | 6 | 6  | 31 | 119 | 102 | 344 |
| 118,468 | 5 | 12 | 60 | 208 | 6 | 6  | 32 | 119 | 103 | 345 |
| 118,469 | 5 | 12 | 58 | 208 | 6 | 7  | 29 | 120 | 98  | 347 |
| 118,470 | 6 | 12 | 58 | 210 | 6 | 7  | 29 | 122 | 99  | 351 |
| 118,471 | 6 | 13 | 58 | 216 | 6 | 7  | 29 | 136 | 99  | 372 |
| 118,472 | 6 | 13 | 52 | 226 | 6 | 7  | 26 | 147 | 90  | 393 |
| 118,473 | 6 | 13 | 50 | 227 | 6 | 7  | 25 | 147 | 87  | 394 |
| 118,474 | 7 | 13 | 51 | 231 | 6 | 10 | 24 | 151 | 88  | 405 |
| 118,475 | 7 | 13 | 46 | 232 | 6 | 10 | 21 | 149 | 80  | 404 |
| 118,476 | 7 | 13 | 43 | 238 | 5 | 10 | 20 | 150 | 75  | 411 |
| 118,477 | 7 | 13 | 43 | 235 | 5 | 10 | 19 | 149 | 74  | 407 |
| 118,478 | 7 | 13 | 43 | 237 | 5 | 10 | 19 | 150 | 74  | 410 |

|         |   |    |    |     |   |    |    |     |    |     |
|---------|---|----|----|-----|---|----|----|-----|----|-----|
| 118,479 | 7 | 14 | 43 | 238 | 5 | 11 | 19 | 152 | 74 | 415 |
| 118,480 | 7 | 14 | 43 | 238 | 5 | 11 | 19 | 152 | 74 | 415 |
| 118,481 | 7 | 14 | 43 | 236 | 5 | 11 | 19 | 154 | 74 | 415 |
| 118,482 | 7 | 14 | 43 | 236 | 5 | 11 | 19 | 154 | 74 | 415 |
| 118,483 | 6 | 14 | 43 | 234 | 5 | 11 | 19 | 152 | 73 | 411 |
| 118,484 | 6 | 10 | 44 | 226 | 5 | 8  | 19 | 141 | 74 | 385 |
| 118,485 | 6 | 10 | 44 | 226 | 5 | 8  | 19 | 141 | 74 | 385 |
| 118,486 | 6 | 10 | 44 | 228 | 5 | 8  | 20 | 142 | 75 | 388 |
| 118,487 | 6 | 10 | 44 | 228 | 5 | 8  | 20 | 142 | 75 | 388 |
| 118,488 | 6 | 10 | 44 | 228 | 6 | 8  | 21 | 143 | 77 | 389 |
| 118,489 | 6 | 10 | 44 | 229 | 6 | 8  | 21 | 143 | 77 | 390 |
| 118,490 | 6 | 10 | 45 | 230 | 6 | 8  | 22 | 141 | 79 | 389 |
| 118,491 | 6 | 10 | 45 | 229 | 6 | 8  | 22 | 140 | 79 | 387 |
| 118,492 | 6 | 10 | 45 | 230 | 6 | 9  | 22 | 143 | 79 | 392 |
| 118,493 | 6 | 10 | 46 | 230 | 6 | 9  | 23 | 143 | 81 | 392 |
| 118,494 | 6 | 10 | 46 | 230 | 6 | 9  | 23 | 143 | 81 | 392 |
| 118,495 | 6 | 10 | 46 | 232 | 6 | 9  | 23 | 144 | 81 | 395 |
| 118,496 | 6 | 10 | 46 | 233 | 6 | 9  | 23 | 144 | 81 | 396 |
| 118,497 | 6 | 10 | 46 | 241 | 6 | 11 | 24 | 154 | 82 | 416 |
| 118,498 | 6 | 10 | 46 | 241 | 6 | 11 | 24 | 162 | 82 | 424 |
| 118,499 | 6 | 12 | 45 | 244 | 7 | 11 | 24 | 165 | 82 | 432 |
| 118,500 | 6 | 10 | 45 | 163 | 7 | 10 | 24 | 126 | 82 | 309 |
| 118,501 | 6 | 11 | 45 | 173 | 7 | 10 | 24 | 134 | 82 | 328 |
| 118,502 | 5 | 11 | 38 | 173 | 6 | 10 | 20 | 133 | 69 | 327 |
| 118,503 | 5 | 11 | 38 | 173 | 6 | 10 | 20 | 133 | 69 | 327 |
| 118,504 | 5 | 11 | 37 | 157 | 6 | 9  | 20 | 120 | 68 | 297 |
| 118,505 | 4 | 10 | 35 | 149 | 6 | 9  | 19 | 111 | 64 | 279 |
| 118,506 | 4 | 10 | 34 | 150 | 6 | 9  | 19 | 115 | 63 | 284 |
| 118,507 | 3 | 10 | 27 | 148 | 5 | 9  | 16 | 120 | 51 | 287 |
| 118,508 | 2 | 8  | 19 | 146 | 5 | 9  | 13 | 119 | 39 | 282 |
| 118,509 | 2 | 8  | 14 | 145 | 3 | 9  | 11 | 121 | 30 | 283 |
| 118,510 | 2 | 7  | 12 | 133 | 3 | 9  | 8  | 115 | 25 | 264 |
| 118,511 | 2 | 6  | 8  | 115 | 3 | 8  | 6  | 108 | 19 | 237 |
| 118,512 | 2 | 6  | 6  | 115 | 3 | 8  | 6  | 109 | 17 | 238 |
| 118,513 | 2 | 5  | 6  | 113 | 3 | 8  | 6  | 115 | 17 | 241 |
| 118,514 | 2 | 5  | 6  | 96  | 3 | 8  | 6  | 107 | 17 | 216 |
| 118,515 | 2 | 5  | 6  | 92  | 3 | 8  | 6  | 105 | 17 | 210 |
| 118,516 | 2 | 6  | 6  | 99  | 3 | 8  | 6  | 111 | 17 | 224 |
| 118,517 | 2 | 6  | 6  | 99  | 3 | 8  | 6  | 111 | 17 | 224 |
| 118,518 | 2 | 7  | 6  | 100 | 3 | 8  | 6  | 111 | 17 | 226 |
| 118,519 | 2 | 7  | 6  | 100 | 3 | 8  | 5  | 112 | 16 | 227 |

|         |   |    |   |     |   |   |    |     |    |     |
|---------|---|----|---|-----|---|---|----|-----|----|-----|
| 118,520 | 2 | 7  | 6 | 98  | 3 | 7 | 5  | 110 | 16 | 222 |
| 118,521 | 1 | 7  | 6 | 100 | 3 | 7 | 5  | 111 | 15 | 225 |
| 118,522 | 1 | 7  | 6 | 99  | 3 | 7 | 5  | 97  | 15 | 210 |
| 118,523 | 1 | 7  | 5 | 89  | 3 | 7 | 5  | 85  | 14 | 188 |
| 118,524 | 1 | 8  | 5 | 84  | 3 | 4 | 5  | 81  | 14 | 177 |
| 118,525 | 0 | 8  | 4 | 84  | 3 | 4 | 5  | 81  | 12 | 177 |
| 118,526 | 0 | 8  | 4 | 76  | 3 | 4 | 5  | 81  | 12 | 169 |
| 118,527 | 0 | 8  | 4 | 75  | 3 | 4 | 5  | 80  | 12 | 167 |
| 118,528 | 0 | 8  | 4 | 81  | 3 | 4 | 5  | 80  | 12 | 173 |
| 118,529 | 0 | 7  | 5 | 76  | 3 | 3 | 5  | 76  | 13 | 162 |
| 118,530 | 0 | 7  | 5 | 76  | 3 | 3 | 5  | 76  | 13 | 162 |
| 118,531 | 0 | 7  | 5 | 75  | 3 | 3 | 5  | 73  | 13 | 158 |
| 118,532 | 0 | 7  | 5 | 75  | 3 | 3 | 5  | 73  | 13 | 158 |
| 118,533 | 0 | 7  | 5 | 73  | 3 | 4 | 5  | 72  | 13 | 156 |
| 118,534 | 0 | 7  | 5 | 73  | 3 | 4 | 5  | 72  | 13 | 156 |
| 118,535 | 0 | 7  | 4 | 78  | 3 | 4 | 5  | 79  | 12 | 168 |
| 118,536 | 0 | 9  | 6 | 81  | 3 | 4 | 5  | 82  | 14 | 176 |
| 118,537 | 0 | 9  | 6 | 80  | 3 | 4 | 4  | 81  | 13 | 174 |
| 118,538 | 0 | 9  | 6 | 82  | 2 | 4 | 4  | 83  | 12 | 178 |
| 118,539 | 0 | 9  | 6 | 85  | 2 | 4 | 3  | 88  | 11 | 186 |
| 118,540 | 0 | 11 | 5 | 92  | 3 | 4 | 10 | 92  | 18 | 199 |
| 118,541 | 0 | 11 | 5 | 89  | 3 | 4 | 10 | 92  | 18 | 196 |
| 118,542 | 0 | 11 | 6 | 105 | 3 | 3 | 10 | 96  | 19 | 215 |
| 118,543 | 0 | 11 | 5 | 108 | 3 | 3 | 10 | 96  | 18 | 218 |
| 118,544 | 0 | 11 | 5 | 108 | 3 | 3 | 9  | 96  | 17 | 218 |
| 118,545 | 0 | 11 | 5 | 109 | 3 | 3 | 9  | 97  | 17 | 220 |
| 118,546 | 0 | 11 | 6 | 106 | 3 | 3 | 11 | 96  | 20 | 216 |
| 118,547 | 0 | 11 | 6 | 107 | 3 | 3 | 10 | 96  | 19 | 217 |
| 118,548 | 0 | 11 | 7 | 97  | 3 | 1 | 10 | 78  | 20 | 187 |
| 118,549 | 1 | 13 | 8 | 99  | 2 | 2 | 12 | 78  | 23 | 192 |
| 118,550 | 1 | 11 | 8 | 96  | 2 | 2 | 13 | 75  | 24 | 184 |
| 118,551 | 1 | 10 | 8 | 82  | 2 | 2 | 13 | 65  | 24 | 159 |
| 118,552 | 1 | 10 | 8 | 82  | 2 | 2 | 13 | 66  | 24 | 160 |
| 118,553 | 1 | 10 | 9 | 82  | 2 | 2 | 14 | 67  | 26 | 161 |
| 118,554 | 1 | 10 | 9 | 86  | 2 | 2 | 14 | 69  | 26 | 167 |
| 118,555 | 1 | 10 | 9 | 87  | 2 | 2 | 14 | 70  | 26 | 169 |
| 118,556 | 1 | 10 | 9 | 85  | 2 | 3 | 14 | 72  | 26 | 170 |
| 118,557 | 1 | 10 | 9 | 86  | 2 | 3 | 15 | 69  | 27 | 168 |
| 118,558 | 1 | 12 | 9 | 91  | 2 | 4 | 15 | 74  | 27 | 181 |
| 118,559 | 1 | 12 | 9 | 106 | 2 | 4 | 15 | 79  | 27 | 201 |
| 118,560 | 1 | 12 | 9 | 115 | 2 | 4 | 15 | 79  | 27 | 210 |

|         |   |    |    |     |    |    |     |     |     |     |
|---------|---|----|----|-----|----|----|-----|-----|-----|-----|
| 118,561 | 1 | 12 | 9  | 133 | 1  | 4  | 15  | 84  | 26  | 233 |
| 118,562 | 1 | 12 | 9  | 132 | 1  | 4  | 15  | 82  | 26  | 230 |
| 118,563 | 1 | 12 | 9  | 137 | 1  | 4  | 15  | 84  | 26  | 237 |
| 118,564 | 1 | 22 | 9  | 196 | 2  | 4  | 15  | 91  | 27  | 313 |
| 118,565 | 1 | 22 | 9  | 205 | 2  | 4  | 15  | 93  | 27  | 324 |
| 118,566 | 1 | 24 | 9  | 212 | 2  | 4  | 15  | 91  | 27  | 331 |
| 118,567 | 1 | 23 | 9  | 205 | 2  | 4  | 15  | 84  | 27  | 316 |
| 118,568 | 1 | 23 | 9  | 206 | 2  | 4  | 15  | 85  | 27  | 318 |
| 118,569 | 1 | 23 | 9  | 206 | 2  | 4  | 15  | 84  | 27  | 317 |
| 118,570 | 1 | 23 | 9  | 206 | 2  | 4  | 16  | 83  | 28  | 316 |
| 118,571 | 1 | 23 | 9  | 206 | 2  | 4  | 16  | 83  | 28  | 316 |
| 118,572 | 1 | 24 | 9  | 199 | 3  | 4  | 22  | 82  | 35  | 309 |
| 118,573 | 1 | 24 | 9  | 199 | 3  | 4  | 22  | 83  | 35  | 310 |
| 118,574 | 1 | 23 | 11 | 199 | 3  | 4  | 23  | 84  | 38  | 310 |
| 118,575 | 1 | 23 | 11 | 199 | 3  | 4  | 23  | 84  | 38  | 310 |
| 118,576 | 1 | 23 | 11 | 199 | 3  | 4  | 27  | 84  | 42  | 310 |
| 118,577 | 1 | 23 | 11 | 199 | 3  | 4  | 27  | 84  | 42  | 310 |
| 118,578 | 1 | 23 | 11 | 194 | 4  | 4  | 29  | 85  | 45  | 306 |
| 118,579 | 1 | 23 | 11 | 194 | 6  | 4  | 39  | 85  | 57  | 306 |
| 118,580 | 1 | 23 | 10 | 195 | 6  | 4  | 47  | 85  | 64  | 307 |
| 118,581 | 1 | 23 | 10 | 195 | 6  | 4  | 47  | 85  | 64  | 307 |
| 118,582 | 1 | 23 | 15 | 195 | 8  | 4  | 68  | 85  | 92  | 307 |
| 118,583 | 1 | 23 | 15 | 196 | 8  | 3  | 71  | 85  | 95  | 307 |
| 118,584 | 3 | 23 | 15 | 196 | 8  | 3  | 71  | 85  | 97  | 307 |
| 118,585 | 3 | 23 | 15 | 192 | 8  | 3  | 71  | 78  | 97  | 296 |
| 118,586 | 3 | 23 | 15 | 193 | 8  | 3  | 71  | 78  | 97  | 297 |
| 118,587 | 3 | 22 | 13 | 190 | 8  | 3  | 72  | 75  | 96  | 290 |
| 118,588 | 3 | 22 | 17 | 190 | 9  | 3  | 80  | 76  | 109 | 291 |
| 118,589 | 3 | 22 | 17 | 186 | 8  | 3  | 81  | 68  | 109 | 279 |
| 118,590 | 4 | 22 | 18 | 186 | 9  | 3  | 82  | 68  | 113 | 279 |
| 118,591 | 4 | 20 | 17 | 179 | 9  | 3  | 75  | 63  | 105 | 265 |
| 118,592 | 4 | 20 | 16 | 179 | 9  | 3  | 75  | 64  | 104 | 266 |
| 118,593 | 4 | 21 | 22 | 164 | 10 | 3  | 86  | 73  | 122 | 261 |
| 118,594 | 4 | 21 | 22 | 168 | 10 | 3  | 86  | 74  | 122 | 266 |
| 118,595 | 4 | 42 | 23 | 275 | 10 | 11 | 86  | 185 | 123 | 513 |
| 118,596 | 4 | 42 | 23 | 280 | 10 | 11 | 86  | 189 | 123 | 522 |
| 118,597 | 4 | 44 | 30 | 345 | 13 | 12 | 103 | 205 | 150 | 606 |
| 118,598 | 4 | 44 | 30 | 348 | 13 | 12 | 103 | 209 | 150 | 613 |
| 118,599 | 4 | 45 | 29 | 353 | 13 | 12 | 103 | 211 | 149 | 621 |
| 118,600 | 3 | 45 | 28 | 361 | 13 | 11 | 101 | 222 | 145 | 639 |
| 118,601 | 3 | 46 | 28 | 365 | 13 | 11 | 100 | 229 | 144 | 651 |

|         |   |    |    |     |    |    |     |     |     |     |
|---------|---|----|----|-----|----|----|-----|-----|-----|-----|
| 118,602 | 3 | 50 | 28 | 383 | 13 | 13 | 101 | 248 | 145 | 694 |
| 118,603 | 4 | 52 | 28 | 405 | 13 | 14 | 101 | 259 | 146 | 730 |
| 118,604 | 4 | 54 | 27 | 441 | 13 | 19 | 100 | 281 | 144 | 795 |
| 118,605 | 4 | 54 | 27 | 442 | 13 | 19 | 100 | 282 | 144 | 797 |
| 118,606 | 4 | 54 | 27 | 441 | 13 | 19 | 101 | 282 | 145 | 796 |
| 118,607 | 5 | 57 | 28 | 463 | 13 | 18 | 101 | 287 | 147 | 825 |
| 118,608 | 5 | 57 | 28 | 464 | 13 | 18 | 102 | 290 | 148 | 829 |
| 118,609 | 6 | 55 | 28 | 455 | 13 | 17 | 102 | 282 | 149 | 809 |
| 118,610 | 6 | 55 | 28 | 438 | 13 | 17 | 102 | 280 | 149 | 790 |
| 118,611 | 6 | 55 | 28 | 439 | 13 | 17 | 102 | 282 | 149 | 793 |
| 118,612 | 6 | 55 | 30 | 422 | 13 | 17 | 104 | 278 | 153 | 772 |
| 118,613 | 6 | 56 | 32 | 417 | 13 | 17 | 105 | 275 | 156 | 765 |
| 118,614 | 6 | 56 | 32 | 416 | 13 | 17 | 105 | 275 | 156 | 764 |
| 118,615 | 6 | 46 | 33 | 359 | 12 | 17 | 106 | 262 | 157 | 684 |
| 118,616 | 6 | 46 | 33 | 351 | 12 | 17 | 106 | 260 | 157 | 674 |
| 118,617 | 6 | 44 | 33 | 345 | 12 | 17 | 106 | 261 | 157 | 667 |
| 118,618 | 6 | 44 | 34 | 347 | 12 | 17 | 107 | 261 | 159 | 669 |
| 118,619 | 6 | 43 | 34 | 344 | 12 | 17 | 107 | 260 | 159 | 664 |
| 118,620 | 6 | 43 | 35 | 343 | 12 | 17 | 107 | 261 | 160 | 664 |
| 118,621 | 6 | 41 | 35 | 343 | 12 | 17 | 106 | 261 | 159 | 662 |
| 118,622 | 6 | 41 | 35 | 343 | 12 | 17 | 106 | 261 | 159 | 662 |
| 118,623 | 6 | 41 | 35 | 343 | 11 | 17 | 100 | 261 | 152 | 662 |
| 118,624 | 6 | 41 | 33 | 343 | 11 | 17 | 99  | 260 | 149 | 661 |
| 118,625 | 6 | 41 | 33 | 343 | 11 | 17 | 99  | 259 | 149 | 660 |
| 118,626 | 6 | 41 | 33 | 344 | 11 | 17 | 98  | 260 | 148 | 662 |
| 118,627 | 6 | 41 | 33 | 346 | 11 | 17 | 95  | 260 | 145 | 664 |
| 118,628 | 6 | 41 | 33 | 346 | 11 | 17 | 95  | 260 | 145 | 664 |
| 118,629 | 6 | 41 | 33 | 347 | 10 | 17 | 93  | 259 | 142 | 664 |
| 118,630 | 6 | 41 | 33 | 348 | 8  | 17 | 83  | 259 | 130 | 665 |
| 118,631 | 6 | 41 | 33 | 348 | 8  | 17 | 75  | 259 | 122 | 665 |
| 118,632 | 6 | 41 | 32 | 348 | 8  | 17 | 65  | 259 | 111 | 665 |
| 118,633 | 7 | 41 | 29 | 347 | 6  | 17 | 54  | 259 | 96  | 664 |
| 118,634 | 7 | 41 | 29 | 347 | 6  | 17 | 51  | 259 | 93  | 664 |
| 118,635 | 5 | 40 | 29 | 346 | 6  | 17 | 51  | 259 | 91  | 662 |
| 118,636 | 5 | 40 | 29 | 346 | 6  | 17 | 53  | 259 | 93  | 662 |
| 118,637 | 5 | 40 | 29 | 346 | 6  | 17 | 52  | 259 | 92  | 662 |
| 118,638 | 5 | 40 | 31 | 347 | 6  | 17 | 52  | 259 | 94  | 663 |
| 118,639 | 5 | 40 | 27 | 349 | 5  | 17 | 44  | 258 | 81  | 664 |
| 118,640 | 5 | 40 | 28 | 347 | 5  | 17 | 47  | 256 | 85  | 660 |
| 118,641 | 4 | 27 | 34 | 286 | 4  | 11 | 49  | 183 | 91  | 507 |
| 118,642 | 4 | 25 | 37 | 241 | 4  | 11 | 48  | 167 | 93  | 444 |

|         |   |    |     |     |   |    |    |     |     |     |
|---------|---|----|-----|-----|---|----|----|-----|-----|-----|
| 118,643 | 5 | 25 | 39  | 242 | 4 | 11 | 48 | 166 | 96  | 444 |
| 118,644 | 5 | 24 | 34  | 242 | 3 | 11 | 38 | 159 | 80  | 436 |
| 118,645 | 6 | 25 | 30  | 237 | 1 | 11 | 32 | 159 | 69  | 432 |
| 118,646 | 6 | 17 | 30  | 189 | 0 | 10 | 23 | 112 | 59  | 328 |
| 118,647 | 6 | 17 | 29  | 185 | 0 | 10 | 20 | 111 | 55  | 323 |
| 118,648 | 6 | 17 | 32  | 161 | 0 | 9  | 20 | 104 | 58  | 291 |
| 118,649 | 6 | 17 | 32  | 161 | 0 | 9  | 20 | 104 | 58  | 291 |
| 118,650 | 6 | 14 | 32  | 146 | 0 | 9  | 20 | 91  | 58  | 260 |
| 118,651 | 7 | 14 | 32  | 146 | 0 | 9  | 20 | 91  | 59  | 260 |
| 118,652 | 7 | 13 | 45  | 144 | 0 | 9  | 22 | 87  | 74  | 253 |
| 118,653 | 7 | 9  | 52  | 126 | 0 | 7  | 28 | 69  | 87  | 211 |
| 118,654 | 7 | 7  | 79  | 103 | 2 | 6  | 30 | 57  | 118 | 173 |
| 118,655 | 7 | 5  | 80  | 69  | 2 | 1  | 29 | 33  | 118 | 108 |
| 118,656 | 7 | 5  | 80  | 64  | 2 | 1  | 29 | 29  | 118 | 99  |
| 118,657 | 7 | 2  | 79  | 42  | 2 | 1  | 28 | 21  | 116 | 66  |
| 118,658 | 6 | 2  | 79  | 43  | 2 | 1  | 28 | 21  | 115 | 67  |
| 118,659 | 5 | 2  | 80  | 40  | 2 | 1  | 28 | 17  | 115 | 60  |
| 118,660 | 5 | 2  | 80  | 31  | 2 | 1  | 28 | 8   | 115 | 42  |
| 118,661 | 5 | 2  | 81  | 43  | 2 | 1  | 28 | 11  | 116 | 57  |
| 118,662 | 5 | 2  | 81  | 45  | 2 | 1  | 28 | 11  | 116 | 59  |
| 118,663 | 5 | 2  | 79  | 48  | 2 | 1  | 27 | 10  | 113 | 61  |
| 118,664 | 5 | 1  | 77  | 50  | 2 | 1  | 26 | 12  | 110 | 64  |
| 118,665 | 5 | 1  | 77  | 52  | 2 | 1  | 25 | 14  | 109 | 68  |
| 118,666 | 5 | 1  | 76  | 71  | 2 | 1  | 25 | 22  | 108 | 95  |
| 118,667 | 5 | 1  | 76  | 71  | 2 | 1  | 25 | 23  | 108 | 96  |
| 118,668 | 6 | 2  | 77  | 81  | 2 | 1  | 26 | 31  | 111 | 115 |
| 118,669 | 6 | 2  | 77  | 77  | 2 | 1  | 26 | 31  | 111 | 111 |
| 118,670 | 7 | 2  | 92  | 84  | 2 | 1  | 28 | 36  | 129 | 123 |
| 118,671 | 7 | 2  | 91  | 93  | 2 | 2  | 28 | 43  | 128 | 140 |
| 118,672 | 7 | 2  | 91  | 93  | 2 | 2  | 28 | 43  | 128 | 140 |
| 118,673 | 7 | 2  | 98  | 94  | 2 | 2  | 35 | 43  | 142 | 141 |
| 118,674 | 7 | 2  | 98  | 94  | 2 | 2  | 36 | 44  | 143 | 142 |
| 118,675 | 7 | 2  | 98  | 94  | 2 | 2  | 38 | 44  | 145 | 142 |
| 118,676 | 7 | 2  | 98  | 93  | 2 | 2  | 38 | 43  | 145 | 140 |
| 118,677 | 7 | 2  | 98  | 94  | 2 | 2  | 39 | 43  | 146 | 141 |
| 118,678 | 7 | 2  | 98  | 92  | 2 | 2  | 39 | 43  | 146 | 139 |
| 118,679 | 7 | 2  | 98  | 92  | 2 | 2  | 39 | 43  | 146 | 139 |
| 118,680 | 7 | 2  | 100 | 91  | 2 | 2  | 40 | 43  | 149 | 138 |
| 118,681 | 7 | 2  | 100 | 91  | 2 | 2  | 40 | 43  | 149 | 138 |
| 118,682 | 7 | 2  | 101 | 91  | 2 | 2  | 40 | 43  | 150 | 138 |
| 118,683 | 7 | 3  | 100 | 92  | 2 | 2  | 40 | 43  | 149 | 140 |

|         |   |   |     |     |   |   |    |    |     |     |
|---------|---|---|-----|-----|---|---|----|----|-----|-----|
| 118,684 | 6 | 3 | 100 | 92  | 2 | 2 | 40 | 43 | 148 | 140 |
| 118,685 | 7 | 3 | 100 | 94  | 2 | 2 | 44 | 43 | 153 | 142 |
| 118,686 | 7 | 3 | 100 | 95  | 2 | 2 | 44 | 45 | 153 | 145 |
| 118,687 | 7 | 4 | 101 | 101 | 2 | 2 | 43 | 46 | 153 | 153 |
| 118,688 | 7 | 4 | 101 | 102 | 2 | 3 | 43 | 50 | 153 | 159 |
| 118,689 | 7 | 4 | 99  | 101 | 2 | 3 | 43 | 50 | 151 | 158 |
| 118,690 | 7 | 4 | 98  | 102 | 2 | 3 | 43 | 51 | 150 | 160 |
| 118,691 | 7 | 5 | 98  | 115 | 2 | 3 | 39 | 58 | 146 | 181 |
| 118,692 | 7 | 8 | 92  | 134 | 2 | 2 | 36 | 69 | 137 | 213 |
| 118,693 | 7 | 8 | 89  | 143 | 2 | 2 | 36 | 72 | 134 | 225 |
| 118,694 | 6 | 8 | 87  | 155 | 2 | 2 | 36 | 72 | 131 | 237 |
| 118,695 | 6 | 7 | 87  | 157 | 2 | 2 | 34 | 72 | 129 | 238 |
| 118,696 | 5 | 7 | 85  | 157 | 2 | 2 | 33 | 72 | 125 | 238 |
| 118,697 | 5 | 7 | 83  | 158 | 2 | 2 | 33 | 72 | 123 | 239 |
| 118,698 | 5 | 7 | 83  | 159 | 2 | 2 | 33 | 72 | 123 | 240 |
| 118,699 | 5 | 7 | 82  | 160 | 2 | 2 | 34 | 74 | 123 | 243 |
| 118,700 | 5 | 7 | 83  | 167 | 2 | 2 | 34 | 78 | 124 | 254 |
| 118,701 | 6 | 7 | 85  | 170 | 2 | 2 | 34 | 80 | 127 | 259 |
| 118,702 | 5 | 7 | 85  | 171 | 2 | 2 | 33 | 81 | 125 | 261 |
| 118,703 | 6 | 7 | 77  | 169 | 3 | 2 | 35 | 79 | 121 | 257 |
| 118,704 | 6 | 7 | 74  | 171 | 3 | 2 | 33 | 79 | 116 | 259 |
| 118,705 | 5 | 7 | 47  | 178 | 1 | 2 | 30 | 82 | 83  | 269 |
| 118,706 | 5 | 7 | 46  | 177 | 1 | 2 | 30 | 82 | 82  | 268 |
| 118,707 | 5 | 7 | 49  | 178 | 1 | 2 | 32 | 83 | 87  | 270 |
| 118,708 | 5 | 7 | 49  | 177 | 1 | 2 | 32 | 83 | 87  | 269 |
| 118,709 | 5 | 7 | 52  | 173 | 1 | 2 | 34 | 83 | 92  | 265 |
| 118,710 | 5 | 7 | 51  | 173 | 1 | 2 | 34 | 83 | 91  | 265 |
| 118,711 | 5 | 7 | 51  | 173 | 1 | 2 | 34 | 83 | 91  | 265 |
| 118,712 | 5 | 7 | 50  | 165 | 1 | 3 | 34 | 81 | 90  | 256 |
| 118,713 | 5 | 7 | 51  | 163 | 1 | 3 | 34 | 82 | 91  | 255 |
| 118,714 | 6 | 7 | 56  | 163 | 2 | 3 | 36 | 86 | 100 | 259 |
| 118,715 | 6 | 7 | 56  | 175 | 2 | 4 | 37 | 94 | 101 | 280 |
| 118,716 | 5 | 7 | 54  | 174 | 2 | 4 | 36 | 91 | 97  | 276 |
| 118,717 | 5 | 8 | 55  | 158 | 2 | 4 | 37 | 86 | 99  | 256 |
| 118,718 | 5 | 8 | 53  | 157 | 2 | 4 | 38 | 86 | 98  | 255 |
| 118,719 | 4 | 7 | 46  | 150 | 3 | 6 | 39 | 77 | 92  | 240 |
| 118,720 | 4 | 7 | 45  | 143 | 3 | 6 | 40 | 74 | 92  | 230 |
| 118,721 | 4 | 7 | 44  | 143 | 3 | 6 | 40 | 74 | 91  | 230 |
| 118,722 | 6 | 8 | 45  | 134 | 3 | 5 | 39 | 67 | 93  | 214 |
| 118,723 | 6 | 8 | 47  | 133 | 6 | 5 | 37 | 67 | 96  | 213 |
| 118,724 | 6 | 8 | 47  | 133 | 6 | 5 | 37 | 68 | 96  | 214 |



|         |   |   |    |     |   |   |    |    |     |     |
|---------|---|---|----|-----|---|---|----|----|-----|-----|
| 118,725 | 6 | 8 | 47 | 133 | 6 | 5 | 36 | 67 | 95  | 213 |
| 118,726 | 6 | 8 | 47 | 133 | 6 | 5 | 34 | 67 | 93  | 213 |
| 118,727 | 6 | 8 | 48 | 134 | 6 | 5 | 34 | 67 | 94  | 214 |
| 118,728 | 6 | 8 | 48 | 134 | 6 | 5 | 33 | 70 | 93  | 217 |
| 118,729 | 6 | 8 | 48 | 136 | 6 | 5 | 33 | 70 | 93  | 219 |
| 118,730 | 6 | 8 | 49 | 138 | 6 | 5 | 33 | 74 | 94  | 225 |
| 118,731 | 6 | 8 | 49 | 140 | 6 | 5 | 32 | 75 | 93  | 228 |
| 118,732 | 6 | 8 | 48 | 140 | 6 | 5 | 32 | 75 | 92  | 228 |
| 118,733 | 6 | 8 | 48 | 143 | 6 | 5 | 32 | 76 | 92  | 232 |
| 118,734 | 5 | 7 | 48 | 142 | 6 | 5 | 32 | 77 | 91  | 231 |
| 118,735 | 6 | 7 | 61 | 142 | 6 | 5 | 32 | 77 | 105 | 231 |
| 118,736 | 6 | 7 | 61 | 138 | 6 | 5 | 31 | 75 | 104 | 225 |
| 118,737 | 6 | 7 | 60 | 138 | 6 | 5 | 31 | 75 | 103 | 225 |
| 118,738 | 6 | 6 | 60 | 133 | 6 | 5 | 30 | 74 | 102 | 218 |
| 118,739 | 6 | 6 | 64 | 132 | 6 | 4 | 31 | 70 | 107 | 212 |
| 118,740 | 6 | 6 | 64 | 133 | 6 | 4 | 31 | 70 | 107 | 213 |
| 118,741 | 6 | 6 | 65 | 129 | 6 | 4 | 31 | 68 | 108 | 207 |
| 118,742 | 6 | 2 | 66 | 92  | 6 | 4 | 31 | 51 | 109 | 149 |
| 118,743 | 6 | 2 | 69 | 68  | 6 | 4 | 31 | 49 | 112 | 123 |
| 118,744 | 6 | 2 | 69 | 68  | 6 | 4 | 31 | 49 | 112 | 123 |
| 118,745 | 6 | 2 | 69 | 68  | 6 | 4 | 31 | 49 | 112 | 123 |
| 118,746 | 6 | 2 | 68 | 68  | 6 | 4 | 31 | 49 | 111 | 123 |
| 118,747 | 6 | 2 | 68 | 68  | 6 | 4 | 31 | 49 | 111 | 123 |
| 118,748 | 6 | 2 | 67 | 68  | 6 | 4 | 31 | 48 | 110 | 122 |
| 118,749 | 6 | 2 | 66 | 68  | 6 | 4 | 29 | 48 | 107 | 122 |
| 118,750 | 6 | 2 | 66 | 67  | 6 | 4 | 29 | 46 | 107 | 119 |
| 118,751 | 6 | 2 | 66 | 61  | 6 | 4 | 29 | 42 | 107 | 109 |
| 118,752 | 5 | 2 | 64 | 67  | 6 | 4 | 29 | 40 | 104 | 113 |
| 118,753 | 5 | 2 | 64 | 74  | 6 | 4 | 29 | 45 | 104 | 125 |
| 118,754 | 4 | 3 | 61 | 78  | 5 | 4 | 26 | 46 | 96  | 131 |
| 118,755 | 4 | 3 | 57 | 86  | 5 | 4 | 22 | 46 | 88  | 139 |
| 118,756 | 4 | 3 | 55 | 106 | 5 | 4 | 21 | 45 | 85  | 158 |
| 118,757 | 4 | 3 | 56 | 112 | 5 | 4 | 21 | 50 | 86  | 169 |
| 118,758 | 4 | 3 | 55 | 112 | 5 | 4 | 20 | 49 | 84  | 168 |
| 118,759 | 4 | 3 | 55 | 125 | 5 | 4 | 20 | 50 | 84  | 182 |
| 118,760 | 5 | 3 | 52 | 125 | 5 | 4 | 18 | 50 | 80  | 182 |
| 118,761 | 5 | 3 | 52 | 137 | 5 | 4 | 18 | 52 | 80  | 196 |
| 118,762 | 4 | 3 | 48 | 142 | 5 | 4 | 17 | 52 | 74  | 201 |
| 118,763 | 4 | 3 | 48 | 141 | 5 | 3 | 16 | 50 | 73  | 197 |
| 118,764 | 4 | 3 | 48 | 151 | 5 | 3 | 16 | 53 | 73  | 210 |
| 118,765 | 4 | 3 | 47 | 147 | 4 | 2 | 16 | 41 | 71  | 193 |

|         |   |    |    |     |   |    |    |     |    |     |
|---------|---|----|----|-----|---|----|----|-----|----|-----|
| 118,766 | 4 | 3  | 48 | 157 | 4 | 2  | 15 | 45  | 71 | 207 |
| 118,767 | 4 | 3  | 48 | 160 | 4 | 2  | 15 | 46  | 71 | 211 |
| 118,768 | 4 | 2  | 47 | 163 | 4 | 2  | 13 | 44  | 68 | 211 |
| 118,769 | 4 | 3  | 47 | 181 | 4 | 2  | 13 | 56  | 68 | 242 |
| 118,770 | 4 | 3  | 45 | 188 | 3 | 0  | 10 | 61  | 62 | 252 |
| 118,771 | 5 | 4  | 45 | 242 | 3 | 1  | 9  | 98  | 62 | 345 |
| 118,772 | 5 | 7  | 44 | 276 | 3 | 1  | 8  | 106 | 60 | 390 |
| 118,773 | 3 | 7  | 40 | 298 | 3 | 1  | 6  | 109 | 52 | 415 |
| 118,774 | 3 | 7  | 38 | 298 | 0 | 1  | 5  | 108 | 46 | 414 |
| 118,775 | 3 | 7  | 38 | 301 | 0 | 1  | 6  | 108 | 47 | 417 |
| 118,776 | 3 | 7  | 38 | 301 | 0 | 2  | 6  | 108 | 47 | 418 |
| 118,777 | 3 | 7  | 38 | 303 | 0 | 2  | 6  | 108 | 47 | 420 |
| 118,778 | 3 | 8  | 45 | 311 | 0 | 3  | 11 | 115 | 59 | 437 |
| 118,779 | 3 | 8  | 46 | 317 | 0 | 3  | 11 | 117 | 60 | 445 |
| 118,780 | 5 | 8  | 49 | 332 | 1 | 3  | 18 | 118 | 73 | 461 |
| 118,781 | 5 | 8  | 50 | 337 | 1 | 3  | 19 | 119 | 75 | 467 |
| 118,782 | 6 | 10 | 51 | 341 | 1 | 3  | 21 | 120 | 79 | 474 |
| 118,783 | 5 | 11 | 43 | 384 | 1 | 4  | 18 | 147 | 67 | 546 |
| 118,784 | 5 | 11 | 38 | 380 | 1 | 4  | 18 | 146 | 62 | 541 |
| 118,785 | 5 | 12 | 38 | 392 | 1 | 4  | 19 | 152 | 63 | 560 |
| 118,786 | 5 | 12 | 38 | 391 | 1 | 4  | 18 | 152 | 62 | 559 |
| 118,787 | 5 | 12 | 38 | 385 | 1 | 4  | 18 | 150 | 62 | 551 |
| 118,788 | 5 | 6  | 20 | 177 | 1 | 2  | 11 | 68  | 37 | 253 |
| 118,789 | 5 | 12 | 35 | 399 | 1 | 4  | 19 | 152 | 60 | 567 |
| 118,790 | 5 | 12 | 35 | 418 | 1 | 4  | 18 | 157 | 59 | 591 |
| 118,791 | 5 | 12 | 36 | 427 | 1 | 6  | 19 | 157 | 61 | 602 |
| 118,792 | 5 | 12 | 36 | 468 | 1 | 9  | 20 | 167 | 62 | 656 |
| 118,793 | 5 | 12 | 35 | 501 | 1 | 10 | 20 | 178 | 61 | 701 |
| 118,794 | 5 | 13 | 31 | 528 | 1 | 10 | 20 | 182 | 57 | 733 |
| 118,795 | 5 | 16 | 31 | 608 | 1 | 12 | 20 | 194 | 57 | 830 |
| 118,796 | 6 | 16 | 31 | 633 | 1 | 12 | 20 | 201 | 58 | 862 |
| 118,797 | 7 | 16 | 32 | 640 | 1 | 12 | 21 | 202 | 61 | 870 |
| 118,798 | 7 | 16 | 32 | 641 | 1 | 12 | 21 | 202 | 61 | 871 |
| 118,799 | 7 | 18 | 33 | 642 | 1 | 13 | 21 | 202 | 62 | 875 |
| 118,800 | 7 | 18 | 33 | 642 | 1 | 13 | 21 | 202 | 62 | 875 |
| 118,801 | 7 | 18 | 33 | 642 | 1 | 13 | 21 | 202 | 62 | 875 |
| 118,802 | 7 | 18 | 32 | 640 | 1 | 13 | 21 | 205 | 61 | 876 |
| 118,803 | 7 | 18 | 32 | 643 | 1 | 13 | 21 | 207 | 61 | 881 |
| 118,804 | 7 | 17 | 33 | 633 | 1 | 13 | 21 | 201 | 62 | 864 |
| 118,805 | 7 | 17 | 34 | 633 | 1 | 13 | 21 | 201 | 63 | 864 |
| 118,806 | 7 | 17 | 32 | 623 | 1 | 13 | 21 | 201 | 61 | 854 |

|         |   |    |    |     |   |    |    |     |     |     |
|---------|---|----|----|-----|---|----|----|-----|-----|-----|
| 118,807 | 7 | 17 | 32 | 612 | 1 | 13 | 21 | 200 | 61  | 842 |
| 118,808 | 7 | 17 | 32 | 595 | 1 | 13 | 21 | 197 | 61  | 822 |
| 118,809 | 7 | 17 | 31 | 587 | 1 | 13 | 21 | 194 | 60  | 811 |
| 118,810 | 7 | 17 | 31 | 580 | 1 | 13 | 21 | 194 | 60  | 804 |
| 118,811 | 6 | 17 | 31 | 568 | 1 | 13 | 21 | 192 | 59  | 790 |
| 118,812 | 6 | 17 | 31 | 559 | 1 | 13 | 21 | 191 | 59  | 780 |
| 118,813 | 7 | 17 | 34 | 561 | 1 | 14 | 21 | 197 | 63  | 789 |
| 118,814 | 7 | 17 | 33 | 561 | 1 | 14 | 21 | 197 | 62  | 789 |
| 118,815 | 7 | 17 | 35 | 548 | 1 | 14 | 21 | 194 | 64  | 773 |
| 118,816 | 7 | 17 | 35 | 549 | 1 | 14 | 21 | 194 | 64  | 774 |
| 118,817 | 7 | 17 | 34 | 538 | 1 | 14 | 21 | 192 | 63  | 761 |
| 118,818 | 7 | 18 | 34 | 561 | 1 | 16 | 21 | 211 | 63  | 806 |
| 118,819 | 7 | 18 | 34 | 553 | 1 | 16 | 21 | 210 | 63  | 797 |
| 118,820 | 7 | 19 | 34 | 552 | 1 | 17 | 21 | 206 | 63  | 794 |
| 118,821 | 7 | 18 | 34 | 542 | 1 | 17 | 20 | 197 | 62  | 774 |
| 118,822 | 6 | 17 | 34 | 510 | 1 | 16 | 20 | 172 | 61  | 715 |
| 118,823 | 6 | 14 | 35 | 444 | 1 | 16 | 21 | 147 | 63  | 621 |
| 118,824 | 6 | 14 | 32 | 426 | 1 | 16 | 21 | 144 | 60  | 600 |
| 118,825 | 6 | 14 | 31 | 428 | 1 | 16 | 21 | 149 | 59  | 607 |
| 118,826 | 6 | 14 | 30 | 428 | 1 | 16 | 20 | 150 | 57  | 608 |
| 118,827 | 6 | 15 | 30 | 426 | 1 | 15 | 20 | 151 | 57  | 607 |
| 118,828 | 6 | 15 | 30 | 425 | 1 | 15 | 20 | 151 | 57  | 606 |
| 118,829 | 6 | 16 | 29 | 419 | 1 | 15 | 20 | 147 | 56  | 597 |
| 118,830 | 4 | 17 | 19 | 415 | 0 | 15 | 9  | 142 | 32  | 589 |
| 118,831 | 4 | 17 | 23 | 402 | 0 | 15 | 8  | 139 | 35  | 573 |
| 118,832 | 4 | 16 | 24 | 384 | 0 | 15 | 10 | 132 | 38  | 547 |
| 118,833 | 3 | 16 | 20 | 384 | 1 | 15 | 12 | 132 | 36  | 547 |
| 118,834 | 4 | 15 | 43 | 363 | 2 | 15 | 36 | 119 | 85  | 512 |
| 118,835 | 4 | 13 | 48 | 331 | 3 | 14 | 53 | 101 | 108 | 459 |
| 118,836 | 5 | 13 | 48 | 322 | 3 | 14 | 55 | 97  | 111 | 446 |
| 118,837 | 5 | 13 | 48 | 323 | 3 | 14 | 55 | 97  | 111 | 447 |
| 118,838 | 5 | 13 | 48 | 321 | 3 | 14 | 55 | 98  | 111 | 446 |
| 118,839 | 5 | 13 | 48 | 315 | 3 | 14 | 56 | 97  | 112 | 439 |
| 118,840 | 5 | 13 | 48 | 309 | 3 | 14 | 56 | 96  | 112 | 432 |
| 118,841 | 5 | 13 | 48 | 288 | 3 | 12 | 57 | 93  | 113 | 406 |
| 118,842 | 5 | 13 | 46 | 247 | 3 | 9  | 57 | 83  | 111 | 352 |
| 118,843 | 5 | 13 | 46 | 248 | 3 | 9  | 57 | 83  | 111 | 353 |
| 118,844 | 5 | 13 | 46 | 215 | 4 | 8  | 58 | 71  | 113 | 307 |
| 118,845 | 5 | 12 | 53 | 189 | 4 | 8  | 59 | 67  | 121 | 276 |
| 118,846 | 7 | 9  | 67 | 109 | 6 | 6  | 66 | 55  | 146 | 179 |
| 118,847 | 7 | 9  | 68 | 77  | 6 | 6  | 66 | 47  | 147 | 139 |

|         |    |   |     |     |    |   |     |    |     |     |
|---------|----|---|-----|-----|----|---|-----|----|-----|-----|
| 118,848 | 7  | 9 | 67  | 75  | 6  | 6 | 68  | 47 | 148 | 137 |
| 118,849 | 7  | 9 | 67  | 75  | 6  | 6 | 68  | 47 | 148 | 137 |
| 118,850 | 13 | 7 | 139 | 73  | 7  | 5 | 128 | 47 | 287 | 132 |
| 118,851 | 13 | 7 | 139 | 73  | 7  | 5 | 128 | 47 | 287 | 132 |
| 118,852 | 13 | 7 | 139 | 72  | 7  | 5 | 128 | 47 | 287 | 131 |
| 118,853 | 13 | 7 | 162 | 69  | 7  | 5 | 153 | 44 | 335 | 125 |
| 118,854 | 13 | 7 | 164 | 64  | 7  | 5 | 157 | 42 | 341 | 118 |
| 118,855 | 13 | 7 | 163 | 64  | 7  | 5 | 161 | 42 | 344 | 118 |
| 118,856 | 13 | 7 | 164 | 63  | 7  | 5 | 161 | 41 | 345 | 116 |
| 118,857 | 14 | 7 | 165 | 62  | 7  | 5 | 161 | 41 | 347 | 115 |
| 118,858 | 14 | 7 | 168 | 62  | 8  | 5 | 161 | 41 | 351 | 115 |
| 118,859 | 14 | 7 | 168 | 64  | 8  | 5 | 163 | 41 | 353 | 117 |
| 118,860 | 14 | 7 | 168 | 65  | 8  | 6 | 163 | 41 | 353 | 119 |
| 118,861 | 14 | 7 | 168 | 66  | 8  | 6 | 163 | 41 | 353 | 120 |
| 118,862 | 16 | 7 | 171 | 75  | 8  | 6 | 168 | 43 | 363 | 131 |
| 118,863 | 16 | 7 | 172 | 79  | 8  | 6 | 169 | 44 | 365 | 136 |
| 118,864 | 15 | 7 | 169 | 79  | 8  | 5 | 169 | 38 | 361 | 129 |
| 118,865 | 15 | 8 | 168 | 73  | 8  | 5 | 170 | 37 | 361 | 123 |
| 118,866 | 15 | 8 | 168 | 73  | 8  | 5 | 173 | 39 | 364 | 125 |
| 118,867 | 15 | 8 | 170 | 47  | 8  | 3 | 173 | 17 | 366 | 75  |
| 118,868 | 15 | 8 | 174 | 47  | 9  | 3 | 174 | 17 | 372 | 75  |
| 118,869 | 15 | 8 | 177 | 47  | 9  | 3 | 174 | 17 | 375 | 75  |
| 118,870 | 15 | 8 | 231 | 47  | 11 | 3 | 209 | 16 | 466 | 74  |
| 118,871 | 15 | 7 | 231 | 42  | 11 | 2 | 209 | 16 | 466 | 67  |
| 118,872 | 15 | 7 | 234 | 36  | 13 | 2 | 224 | 14 | 486 | 59  |
| 118,873 | 15 | 7 | 256 | 37  | 13 | 2 | 231 | 14 | 515 | 60  |
| 118,874 | 15 | 6 | 290 | 38  | 13 | 2 | 244 | 14 | 562 | 60  |
| 118,875 | 15 | 6 | 291 | 38  | 13 | 2 | 244 | 14 | 563 | 60  |
| 118,876 | 15 | 6 | 295 | 35  | 13 | 2 | 246 | 8  | 569 | 51  |
| 118,877 | 16 | 5 | 298 | 35  | 13 | 3 | 247 | 7  | 574 | 50  |
| 118,878 | 16 | 5 | 304 | 35  | 13 | 3 | 248 | 7  | 581 | 50  |
| 118,879 | 16 | 3 | 305 | 35  | 13 | 3 | 251 | 6  | 585 | 47  |
| 118,880 | 16 | 3 | 305 | 49  | 13 | 5 | 251 | 18 | 585 | 75  |
| 118,881 | 16 | 2 | 301 | 64  | 13 | 4 | 250 | 19 | 580 | 89  |
| 118,882 | 17 | 2 | 359 | 72  | 13 | 4 | 275 | 25 | 664 | 103 |
| 118,883 | 17 | 2 | 395 | 77  | 13 | 4 | 276 | 27 | 701 | 110 |
| 118,884 | 17 | 3 | 409 | 104 | 14 | 4 | 274 | 38 | 714 | 149 |
| 118,885 | 16 | 4 | 437 | 106 | 14 | 4 | 263 | 43 | 730 | 157 |
| 118,886 | 16 | 4 | 432 | 106 | 13 | 4 | 246 | 43 | 707 | 157 |
| 118,887 | 15 | 4 | 444 | 106 | 14 | 4 | 256 | 43 | 729 | 157 |
| 118,888 | 18 | 4 | 531 | 108 | 18 | 4 | 320 | 43 | 887 | 159 |

|         |    |   |     |     |    |   |     |    |       |     |
|---------|----|---|-----|-----|----|---|-----|----|-------|-----|
| 118,889 | 18 | 4 | 531 | 120 | 18 | 4 | 323 | 46 | 890   | 174 |
| 118,890 | 18 | 4 | 531 | 126 | 18 | 4 | 322 | 46 | 889   | 180 |
| 118,891 | 18 | 4 | 531 | 130 | 18 | 4 | 323 | 49 | 890   | 187 |
| 118,892 | 18 | 4 | 530 | 132 | 18 | 4 | 322 | 49 | 888   | 189 |
| 118,893 | 22 | 4 | 610 | 133 | 24 | 4 | 382 | 49 | 1,038 | 190 |
| 118,894 | 22 | 4 | 625 | 133 | 24 | 4 | 397 | 49 | 1,068 | 190 |
| 118,895 | 22 | 4 | 628 | 133 | 23 | 4 | 400 | 49 | 1,073 | 190 |
| 118,896 | 22 | 4 | 621 | 134 | 23 | 4 | 399 | 49 | 1,065 | 191 |
| 118,897 | 21 | 4 | 611 | 134 | 21 | 4 | 396 | 49 | 1,049 | 191 |
| 118,898 | 20 | 4 | 613 | 134 | 21 | 4 | 396 | 49 | 1,050 | 191 |
| 118,899 | 20 | 4 | 614 | 134 | 21 | 4 | 394 | 49 | 1,049 | 191 |
| 118,900 | 20 | 4 | 605 | 134 | 21 | 4 | 391 | 49 | 1,037 | 191 |
| 118,901 | 16 | 4 | 550 | 134 | 20 | 4 | 344 | 49 | 930   | 191 |
| 118,902 | 16 | 4 | 540 | 134 | 20 | 4 | 335 | 49 | 911   | 191 |
| 118,903 | 16 | 4 | 545 | 134 | 21 | 4 | 341 | 49 | 923   | 191 |
| 118,904 | 16 | 4 | 544 | 134 | 21 | 4 | 338 | 49 | 919   | 191 |
| 118,905 | 16 | 4 | 545 | 134 | 21 | 4 | 337 | 49 | 919   | 191 |
| 118,906 | 16 | 4 | 545 | 134 | 21 | 4 | 334 | 49 | 916   | 191 |
| 118,907 | 16 | 4 | 546 | 135 | 21 | 4 | 334 | 49 | 917   | 192 |
| 118,908 | 15 | 4 | 548 | 135 | 21 | 4 | 335 | 49 | 919   | 192 |
| 118,909 | 15 | 4 | 548 | 135 | 20 | 4 | 337 | 50 | 920   | 193 |
| 118,910 | 16 | 4 | 552 | 132 | 20 | 3 | 335 | 50 | 923   | 189 |
| 118,911 | 16 | 4 | 552 | 132 | 20 | 3 | 335 | 50 | 923   | 189 |
| 118,912 | 15 | 4 | 551 | 131 | 20 | 3 | 333 | 50 | 919   | 188 |
| 118,913 | 14 | 4 | 550 | 122 | 20 | 3 | 333 | 48 | 917   | 177 |
| 118,914 | 14 | 4 | 549 | 116 | 20 | 3 | 332 | 47 | 915   | 170 |
| 118,915 | 14 | 4 | 549 | 116 | 20 | 3 | 332 | 47 | 915   | 170 |
| 118,916 | 14 | 3 | 549 | 117 | 20 | 3 | 331 | 45 | 914   | 168 |
| 118,917 | 14 | 3 | 549 | 118 | 20 | 3 | 328 | 45 | 911   | 169 |
| 118,918 | 14 | 2 | 547 | 114 | 20 | 3 | 327 | 45 | 908   | 164 |
| 118,919 | 14 | 2 | 544 | 114 | 19 | 3 | 326 | 45 | 903   | 164 |
| 118,920 | 14 | 2 | 546 | 114 | 19 | 3 | 330 | 45 | 909   | 164 |
| 118,921 | 14 | 2 | 493 | 114 | 17 | 3 | 295 | 45 | 819   | 164 |
| 118,922 | 18 | 2 | 523 | 113 | 16 | 3 | 302 | 45 | 859   | 163 |
| 118,923 | 18 | 2 | 501 | 112 | 16 | 3 | 295 | 45 | 830   | 162 |
| 118,924 | 18 | 2 | 484 | 110 | 16 | 3 | 291 | 45 | 809   | 160 |
| 118,925 | 19 | 2 | 478 | 109 | 16 | 3 | 283 | 45 | 796   | 159 |
| 118,926 | 19 | 2 | 477 | 109 | 16 | 3 | 283 | 45 | 795   | 159 |
| 118,927 | 21 | 2 | 570 | 110 | 19 | 3 | 366 | 45 | 976   | 160 |
| 118,928 | 21 | 2 | 577 | 111 | 19 | 2 | 382 | 46 | 999   | 161 |
| 118,929 | 22 | 2 | 582 | 96  | 22 | 0 | 399 | 35 | 1,025 | 133 |

|         |    |    |     |     |    |    |     |     |       |     |
|---------|----|----|-----|-----|----|----|-----|-----|-------|-----|
| 118,930 | 22 | 2  | 582 | 96  | 22 | 0  | 398 | 34  | 1,024 | 132 |
| 118,931 | 23 | 2  | 594 | 96  | 24 | 0  | 417 | 34  | 1,058 | 132 |
| 118,932 | 24 | 2  | 551 | 81  | 24 | 0  | 408 | 33  | 1,007 | 116 |
| 118,933 | 23 | 2  | 546 | 73  | 24 | 0  | 402 | 27  | 995   | 102 |
| 118,934 | 23 | 2  | 509 | 67  | 24 | 0  | 399 | 25  | 955   | 94  |
| 118,935 | 23 | 1  | 498 | 40  | 22 | 0  | 398 | 14  | 941   | 55  |
| 118,936 | 23 | 0  | 446 | 38  | 21 | 0  | 384 | 9   | 874   | 47  |
| 118,937 | 23 | 0  | 451 | 37  | 21 | 0  | 387 | 9   | 882   | 46  |
| 118,938 | 23 | 0  | 449 | 37  | 21 | 0  | 383 | 9   | 876   | 46  |
| 118,939 | 20 | 0  | 363 | 23  | 17 | 0  | 319 | 5   | 719   | 28  |
| 118,940 | 20 | 0  | 366 | 24  | 17 | 0  | 320 | 5   | 723   | 29  |
| 118,941 | 19 | 0  | 354 | 18  | 14 | 0  | 306 | 6   | 693   | 24  |
| 118,942 | 18 | 0  | 346 | 14  | 12 | 0  | 302 | 3   | 678   | 17  |
| 118,943 | 17 | 0  | 332 | 12  | 13 | 0  | 295 | 3   | 657   | 15  |
| 118,944 | 16 | 0  | 292 | 10  | 12 | 0  | 263 | 3   | 583   | 13  |
| 118,945 | 17 | 0  | 290 | 9   | 12 | 0  | 254 | 3   | 573   | 12  |
| 118,946 | 17 | 0  | 287 | 9   | 12 | 0  | 251 | 3   | 567   | 12  |
| 118,947 | 16 | 0  | 284 | 8   | 12 | 0  | 248 | 3   | 560   | 11  |
| 118,948 | 16 | 0  | 286 | 14  | 12 | 0  | 248 | 5   | 562   | 19  |
| 118,949 | 16 | 0  | 286 | 21  | 12 | 0  | 249 | 5   | 563   | 26  |
| 118,950 | 15 | 0  | 286 | 22  | 12 | 0  | 249 | 6   | 562   | 28  |
| 118,951 | 15 | 1  | 286 | 33  | 12 | 0  | 249 | 8   | 562   | 42  |
| 118,952 | 13 | 1  | 278 | 36  | 12 | 0  | 239 | 9   | 542   | 46  |
| 118,953 | 13 | 1  | 266 | 40  | 12 | 0  | 224 | 9   | 515   | 50  |
| 118,954 | 13 | 1  | 260 | 62  | 11 | 0  | 217 | 18  | 501   | 81  |
| 118,955 | 13 | 1  | 259 | 73  | 11 | 0  | 216 | 19  | 499   | 93  |
| 118,956 | 13 | 4  | 258 | 120 | 11 | 4  | 216 | 73  | 498   | 201 |
| 118,957 | 14 | 5  | 258 | 172 | 11 | 7  | 216 | 104 | 499   | 288 |
| 118,958 | 15 | 7  | 258 | 176 | 11 | 7  | 216 | 106 | 500   | 296 |
| 118,959 | 15 | 19 | 255 | 239 | 11 | 11 | 216 | 163 | 497   | 432 |
| 118,960 | 15 | 22 | 252 | 268 | 11 | 12 | 214 | 172 | 492   | 474 |
| 118,961 | 14 | 25 | 248 | 306 | 12 | 13 | 215 | 181 | 489   | 525 |
| 118,962 | 15 | 32 | 248 | 326 | 12 | 14 | 215 | 193 | 490   | 565 |
| 118,963 | 15 | 32 | 248 | 328 | 12 | 14 | 214 | 194 | 489   | 568 |
| 118,964 | 15 | 32 | 248 | 328 | 12 | 14 | 214 | 195 | 489   | 569 |
| 118,965 | 15 | 36 | 248 | 359 | 12 | 15 | 214 | 202 | 489   | 612 |
| 118,966 | 15 | 36 | 248 | 371 | 12 | 15 | 213 | 202 | 488   | 624 |
| 118,967 | 15 | 36 | 247 | 370 | 13 | 15 | 217 | 202 | 492   | 623 |
| 118,968 | 15 | 36 | 247 | 371 | 13 | 15 | 217 | 202 | 492   | 624 |
| 118,969 | 17 | 36 | 253 | 372 | 13 | 15 | 223 | 203 | 506   | 626 |
| 118,970 | 17 | 36 | 252 | 372 | 13 | 15 | 223 | 203 | 505   | 626 |

|         |    |    |     |     |    |    |     |     |       |     |
|---------|----|----|-----|-----|----|----|-----|-----|-------|-----|
| 118,971 | 17 | 37 | 247 | 374 | 13 | 15 | 219 | 204 | 496   | 630 |
| 118,972 | 17 | 37 | 248 | 376 | 13 | 15 | 219 | 205 | 497   | 633 |
| 118,973 | 13 | 37 | 215 | 376 | 12 | 15 | 197 | 205 | 437   | 633 |
| 118,974 | 13 | 37 | 219 | 378 | 12 | 15 | 201 | 205 | 445   | 635 |
| 118,975 | 13 | 37 | 227 | 379 | 13 | 15 | 213 | 206 | 466   | 637 |
| 118,976 | 12 | 37 | 225 | 379 | 13 | 15 | 214 | 207 | 464   | 638 |
| 118,977 | 12 | 37 | 220 | 382 | 13 | 15 | 213 | 207 | 458   | 641 |
| 118,978 | 11 | 37 | 140 | 381 | 10 | 15 | 132 | 207 | 293   | 640 |
| 118,979 | 10 | 37 | 150 | 384 | 10 | 15 | 124 | 211 | 294   | 647 |
| 118,980 | 9  | 37 | 144 | 388 | 7  | 15 | 107 | 211 | 267   | 651 |
| 118,981 | 10 | 37 | 158 | 388 | 8  | 15 | 110 | 213 | 286   | 653 |
| 118,982 | 9  | 37 | 143 | 390 | 6  | 15 | 81  | 214 | 239   | 656 |
| 118,983 | 8  | 37 | 134 | 391 | 6  | 15 | 80  | 214 | 228   | 657 |
| 118,984 | 8  | 38 | 150 | 399 | 6  | 15 | 82  | 218 | 246   | 670 |
| 118,985 | 8  | 38 | 147 | 399 | 6  | 15 | 80  | 219 | 241   | 671 |
| 118,986 | 8  | 39 | 159 | 399 | 7  | 15 | 84  | 219 | 258   | 672 |
| 118,987 | 14 | 39 | 191 | 399 | 6  | 15 | 104 | 221 | 315   | 674 |
| 118,988 | 14 | 39 | 187 | 402 | 6  | 15 | 97  | 224 | 304   | 680 |
| 118,989 | 15 | 39 | 187 | 402 | 6  | 15 | 95  | 224 | 303   | 680 |
| 118,990 | 15 | 39 | 193 | 402 | 7  | 15 | 97  | 225 | 312   | 681 |
| 118,991 | 17 | 39 | 228 | 402 | 7  | 15 | 120 | 226 | 372   | 682 |
| 118,992 | 26 | 39 | 480 | 404 | 9  | 15 | 188 | 225 | 703   | 683 |
| 118,993 | 33 | 39 | 580 | 405 | 9  | 15 | 221 | 225 | 843   | 684 |
| 118,994 | 34 | 39 | 611 | 407 | 8  | 15 | 232 | 226 | 885   | 687 |
| 118,995 | 34 | 39 | 653 | 408 | 11 | 15 | 258 | 226 | 956   | 688 |
| 118,996 | 33 | 39 | 654 | 408 | 13 | 15 | 253 | 226 | 953   | 688 |
| 118,997 | 34 | 39 | 724 | 408 | 15 | 15 | 294 | 226 | 1,067 | 688 |
| 118,998 | 38 | 39 | 745 | 409 | 17 | 15 | 306 | 226 | 1,106 | 689 |
| 118,999 | 38 | 39 | 744 | 403 | 17 | 15 | 306 | 225 | 1,105 | 682 |
| 119,000 | 38 | 39 | 744 | 396 | 17 | 15 | 305 | 225 | 1,104 | 675 |
| 119,001 | 38 | 39 | 746 | 396 | 17 | 15 | 305 | 226 | 1,106 | 676 |
| 119,002 | 39 | 38 | 749 | 386 | 17 | 15 | 307 | 224 | 1,112 | 663 |
| 119,003 | 39 | 38 | 749 | 384 | 17 | 15 | 307 | 225 | 1,112 | 662 |
| 119,004 | 39 | 38 | 755 | 381 | 17 | 15 | 308 | 226 | 1,119 | 660 |
| 119,005 | 41 | 38 | 764 | 361 | 17 | 15 | 310 | 220 | 1,132 | 634 |
| 119,006 | 41 | 38 | 765 | 355 | 17 | 15 | 310 | 222 | 1,133 | 630 |
| 119,007 | 41 | 35 | 767 | 308 | 17 | 11 | 312 | 168 | 1,137 | 522 |
| 119,008 | 40 | 33 | 767 | 256 | 17 | 8  | 312 | 137 | 1,136 | 434 |
| 119,009 | 43 | 31 | 775 | 252 | 17 | 8  | 315 | 135 | 1,150 | 426 |
| 119,010 | 43 | 17 | 793 | 160 | 16 | 3  | 325 | 68  | 1,177 | 248 |
| 119,011 | 44 | 14 | 848 | 123 | 17 | 2  | 344 | 59  | 1,253 | 198 |

|         |    |    |       |     |    |    |     |     |       |     |
|---------|----|----|-------|-----|----|----|-----|-----|-------|-----|
| 119,012 | 44 | 14 | 857   | 125 | 17 | 2  | 349 | 59  | 1,267 | 200 |
| 119,013 | 47 | 7  | 891   | 103 | 19 | 1  | 366 | 46  | 1,323 | 157 |
| 119,014 | 48 | 7  | 911   | 103 | 19 | 1  | 373 | 46  | 1,351 | 157 |
| 119,015 | 51 | 3  | 957   | 59  | 20 | 0  | 403 | 39  | 1,431 | 101 |
| 119,016 | 51 | 3  | 969   | 60  | 20 | 0  | 405 | 40  | 1,445 | 103 |
| 119,017 | 51 | 3  | 974   | 61  | 19 | 0  | 403 | 41  | 1,447 | 105 |
| 119,018 | 57 | 5  | 1,061 | 82  | 20 | 0  | 432 | 56  | 1,570 | 143 |
| 119,019 | 56 | 5  | 1,063 | 102 | 20 | 1  | 432 | 71  | 1,571 | 179 |
| 119,020 | 55 | 6  | 1,086 | 120 | 21 | 2  | 433 | 79  | 1,595 | 207 |
| 119,021 | 62 | 6  | 1,169 | 168 | 26 | 3  | 466 | 110 | 1,723 | 287 |
| 119,022 | 69 | 6  | 1,210 | 182 | 29 | 3  | 486 | 109 | 1,794 | 300 |
| 119,023 | 69 | 6  | 1,217 | 183 | 29 | 3  | 487 | 110 | 1,802 | 302 |
| 119,024 | 69 | 7  | 1,213 | 216 | 29 | 5  | 483 | 129 | 1,794 | 357 |
| 119,025 | 69 | 7  | 1,204 | 227 | 29 | 7  | 472 | 133 | 1,774 | 374 |
| 119,026 | 69 | 7  | 1,206 | 248 | 28 | 7  | 473 | 138 | 1,776 | 400 |
| 119,027 | 69 | 11 | 1,197 | 317 | 28 | 8  | 471 | 189 | 1,765 | 525 |
| 119,028 | 69 | 11 | 1,195 | 316 | 28 | 8  | 470 | 189 | 1,762 | 524 |
| 119,029 | 68 | 12 | 1,189 | 318 | 28 | 9  | 468 | 189 | 1,753 | 528 |
| 119,030 | 68 | 12 | 1,170 | 313 | 28 | 9  | 460 | 188 | 1,726 | 522 |
| 119,031 | 68 | 13 | 1,167 | 336 | 28 | 9  | 460 | 207 | 1,723 | 565 |
| 119,032 | 67 | 13 | 1,152 | 361 | 27 | 10 | 456 | 236 | 1,702 | 620 |
| 119,033 | 67 | 13 | 1,141 | 359 | 27 | 10 | 455 | 235 | 1,690 | 617 |
| 119,034 | 69 | 14 | 1,147 | 359 | 27 | 10 | 456 | 239 | 1,699 | 622 |
| 119,035 | 70 | 13 | 1,147 | 351 | 27 | 10 | 454 | 235 | 1,698 | 609 |
| 119,036 | 70 | 12 | 1,136 | 351 | 26 | 10 | 450 | 231 | 1,682 | 604 |
| 119,037 | 70 | 13 | 1,142 | 356 | 27 | 10 | 453 | 240 | 1,692 | 619 |
| 119,038 | 63 | 13 | 1,108 | 357 | 27 | 10 | 432 | 240 | 1,630 | 620 |
| 119,039 | 66 | 14 | 1,122 | 356 | 27 | 10 | 435 | 240 | 1,650 | 620 |
| 119,040 | 66 | 16 | 1,122 | 362 | 27 | 11 | 435 | 245 | 1,650 | 634 |
| 119,041 | 66 | 16 | 1,116 | 374 | 26 | 11 | 433 | 250 | 1,641 | 651 |
| 119,042 | 65 | 16 | 1,078 | 380 | 26 | 11 | 405 | 252 | 1,574 | 659 |
| 119,043 | 56 | 18 | 824   | 402 | 24 | 12 | 335 | 292 | 1,239 | 724 |
| 119,044 | 49 | 20 | 723   | 443 | 23 | 14 | 302 | 327 | 1,097 | 804 |
| 119,045 | 49 | 20 | 704   | 441 | 23 | 14 | 302 | 330 | 1,078 | 805 |
| 119,046 | 49 | 20 | 661   | 445 | 21 | 14 | 276 | 330 | 1,007 | 809 |
| 119,047 | 49 | 21 | 647   | 450 | 19 | 14 | 274 | 337 | 989   | 822 |
| 119,048 | 48 | 21 | 577   | 451 | 17 | 14 | 233 | 337 | 875   | 823 |
| 119,049 | 44 | 21 | 555   | 450 | 15 | 14 | 220 | 339 | 834   | 824 |
| 119,050 | 44 | 21 | 553   | 450 | 15 | 14 | 220 | 339 | 832   | 824 |
| 119,051 | 44 | 21 | 551   | 454 | 15 | 14 | 220 | 343 | 830   | 832 |
| 119,052 | 44 | 21 | 548   | 453 | 15 | 14 | 220 | 341 | 827   | 829 |



|         |    |    |     |     |    |    |     |     |     |       |
|---------|----|----|-----|-----|----|----|-----|-----|-----|-------|
| 119,053 | 45 | 21 | 546 | 452 | 16 | 14 | 220 | 339 | 827 | 826   |
| 119,054 | 45 | 21 | 545 | 452 | 16 | 14 | 221 | 339 | 827 | 826   |
| 119,055 | 45 | 21 | 539 | 452 | 16 | 14 | 220 | 338 | 820 | 825   |
| 119,056 | 43 | 21 | 536 | 448 | 16 | 14 | 217 | 335 | 812 | 818   |
| 119,057 | 43 | 21 | 535 | 451 | 16 | 14 | 217 | 335 | 811 | 821   |
| 119,058 | 43 | 21 | 534 | 451 | 16 | 14 | 216 | 338 | 809 | 824   |
| 119,059 | 43 | 21 | 534 | 452 | 16 | 14 | 216 | 339 | 809 | 826   |
| 119,060 | 40 | 21 | 544 | 457 | 16 | 14 | 220 | 339 | 820 | 831   |
| 119,061 | 40 | 21 | 534 | 464 | 16 | 14 | 215 | 340 | 805 | 839   |
| 119,062 | 39 | 22 | 479 | 464 | 15 | 14 | 197 | 344 | 730 | 844   |
| 119,063 | 39 | 22 | 473 | 466 | 15 | 14 | 192 | 346 | 719 | 848   |
| 119,064 | 35 | 23 | 439 | 466 | 13 | 14 | 175 | 346 | 662 | 849   |
| 119,065 | 34 | 23 | 419 | 466 | 13 | 14 | 168 | 346 | 634 | 849   |
| 119,066 | 31 | 23 | 373 | 471 | 12 | 14 | 138 | 349 | 554 | 857   |
| 119,067 | 31 | 23 | 364 | 489 | 13 | 14 | 138 | 358 | 546 | 884   |
| 119,068 | 31 | 24 | 359 | 514 | 13 | 15 | 137 | 386 | 540 | 939   |
| 119,069 | 25 | 22 | 287 | 530 | 12 | 15 | 112 | 386 | 436 | 953   |
| 119,070 | 25 | 26 | 305 | 563 | 13 | 16 | 132 | 385 | 475 | 990   |
| 119,071 | 25 | 25 | 282 | 550 | 13 | 15 | 130 | 378 | 450 | 968   |
| 119,072 | 18 | 27 | 199 | 551 | 8  | 18 | 98  | 416 | 323 | 1,012 |
| 119,073 | 11 | 26 | 159 | 535 | 5  | 18 | 78  | 416 | 253 | 995   |
| 119,074 | 11 | 26 | 150 | 537 | 5  | 18 | 79  | 424 | 245 | 1,005 |
| 119,075 | 11 | 25 | 150 | 498 | 5  | 14 | 78  | 403 | 244 | 940   |
| 119,076 | 11 | 25 | 148 | 503 | 5  | 15 | 78  | 404 | 242 | 947   |
| 119,077 | 11 | 25 | 150 | 492 | 5  | 15 | 76  | 400 | 242 | 932   |
| 119,078 | 11 | 23 | 150 | 451 | 5  | 14 | 76  | 351 | 242 | 839   |
| 119,079 | 11 | 23 | 149 | 464 | 5  | 14 | 76  | 357 | 241 | 858   |
| 119,080 | 13 | 23 | 161 | 484 | 5  | 13 | 82  | 365 | 261 | 885   |
| 119,081 | 13 | 24 | 161 | 502 | 5  | 14 | 81  | 367 | 260 | 907   |
| 119,082 | 14 | 24 | 167 | 516 | 5  | 15 | 85  | 369 | 271 | 924   |
| 119,083 | 12 | 25 | 178 | 510 | 5  | 14 | 88  | 351 | 283 | 900   |
| 119,084 | 12 | 25 | 189 | 565 | 6  | 20 | 90  | 391 | 297 | 1,001 |
| 119,085 | 12 | 27 | 199 | 664 | 6  | 28 | 98  | 431 | 315 | 1,150 |
| 119,086 | 11 | 27 | 194 | 679 | 6  | 28 | 99  | 435 | 310 | 1,169 |
| 119,087 | 11 | 28 | 196 | 682 | 6  | 28 | 102 | 435 | 315 | 1,173 |
| 119,088 | 11 | 27 | 191 | 680 | 5  | 28 | 102 | 427 | 309 | 1,162 |
| 119,089 | 18 | 26 | 212 | 680 | 8  | 28 | 134 | 425 | 372 | 1,159 |
| 119,090 | 19 | 26 | 223 | 684 | 8  | 28 | 135 | 427 | 385 | 1,165 |
| 119,091 | 18 | 24 | 220 | 666 | 8  | 28 | 135 | 416 | 381 | 1,134 |
| 119,092 | 18 | 24 | 224 | 669 | 8  | 28 | 137 | 417 | 387 | 1,138 |
| 119,093 | 18 | 24 | 224 | 663 | 8  | 28 | 137 | 415 | 387 | 1,130 |

|         |    |    |     |     |    |    |     |     |       |     |
|---------|----|----|-----|-----|----|----|-----|-----|-------|-----|
| 119,094 | 18 | 19 | 223 | 587 | 8  | 25 | 139 | 330 | 388   | 961 |
| 119,095 | 18 | 21 | 220 | 590 | 8  | 25 | 139 | 334 | 385   | 970 |
| 119,096 | 17 | 21 | 223 | 590 | 8  | 25 | 130 | 334 | 378   | 970 |
| 119,097 | 17 | 21 | 223 | 590 | 8  | 25 | 128 | 334 | 376   | 970 |
| 119,098 | 20 | 21 | 231 | 591 | 8  | 25 | 146 | 335 | 405   | 972 |
| 119,099 | 19 | 21 | 231 | 593 | 8  | 25 | 146 | 348 | 404   | 987 |
| 119,100 | 19 | 21 | 231 | 593 | 7  | 25 | 145 | 348 | 402   | 987 |
| 119,101 | 19 | 21 | 230 | 593 | 7  | 25 | 145 | 349 | 401   | 988 |
| 119,102 | 19 | 21 | 230 | 589 | 7  | 25 | 145 | 345 | 401   | 980 |
| 119,103 | 19 | 21 | 232 | 589 | 7  | 25 | 144 | 345 | 402   | 980 |
| 119,104 | 18 | 21 | 234 | 588 | 7  | 25 | 148 | 345 | 407   | 979 |
| 119,105 | 18 | 21 | 237 | 587 | 7  | 25 | 150 | 345 | 412   | 978 |
| 119,106 | 18 | 21 | 237 | 587 | 7  | 25 | 150 | 345 | 412   | 978 |
| 119,107 | 18 | 21 | 231 | 584 | 7  | 25 | 152 | 342 | 408   | 972 |
| 119,108 | 18 | 21 | 236 | 581 | 7  | 25 | 156 | 343 | 417   | 970 |
| 119,109 | 18 | 21 | 239 | 581 | 7  | 25 | 157 | 341 | 421   | 968 |
| 119,110 | 18 | 21 | 236 | 580 | 7  | 25 | 156 | 341 | 417   | 967 |
| 119,111 | 17 | 21 | 220 | 575 | 7  | 25 | 150 | 341 | 394   | 962 |
| 119,112 | 18 | 21 | 214 | 568 | 7  | 25 | 150 | 340 | 389   | 954 |
| 119,113 | 18 | 20 | 214 | 565 | 7  | 25 | 151 | 336 | 390   | 946 |
| 119,114 | 18 | 20 | 216 | 564 | 7  | 25 | 152 | 334 | 393   | 943 |
| 119,115 | 18 | 19 | 215 | 563 | 7  | 25 | 152 | 332 | 392   | 939 |
| 119,116 | 21 | 19 | 237 | 559 | 8  | 24 | 164 | 330 | 430   | 932 |
| 119,117 | 21 | 19 | 237 | 559 | 8  | 24 | 164 | 329 | 430   | 931 |
| 119,118 | 21 | 19 | 241 | 549 | 7  | 24 | 165 | 326 | 434   | 918 |
| 119,119 | 22 | 18 | 243 | 527 | 7  | 23 | 165 | 300 | 437   | 868 |
| 119,120 | 22 | 18 | 234 | 490 | 7  | 23 | 165 | 286 | 428   | 817 |
| 119,121 | 30 | 14 | 298 | 435 | 11 | 21 | 204 | 271 | 543   | 741 |
| 119,122 | 30 | 12 | 298 | 380 | 10 | 17 | 201 | 202 | 539   | 611 |
| 119,123 | 30 | 12 | 299 | 380 | 10 | 17 | 200 | 203 | 539   | 612 |
| 119,124 | 30 | 12 | 299 | 378 | 10 | 17 | 199 | 203 | 538   | 610 |
| 119,125 | 35 | 12 | 413 | 373 | 16 | 17 | 335 | 193 | 799   | 595 |
| 119,126 | 48 | 12 | 665 | 366 | 25 | 17 | 620 | 191 | 1,358 | 586 |
| 119,127 | 50 | 12 | 680 | 350 | 26 | 16 | 642 | 188 | 1,398 | 566 |
| 119,128 | 50 | 10 | 681 | 325 | 26 | 16 | 647 | 185 | 1,404 | 536 |
| 119,129 | 53 | 10 | 717 | 324 | 28 | 16 | 656 | 185 | 1,454 | 535 |
| 119,130 | 53 | 10 | 721 | 309 | 28 | 16 | 654 | 180 | 1,456 | 515 |
| 119,131 | 51 | 6  | 721 | 210 | 28 | 15 | 650 | 130 | 1,450 | 361 |
| 119,132 | 51 | 6  | 725 | 210 | 28 | 15 | 650 | 130 | 1,454 | 361 |
| 119,133 | 50 | 6  | 721 | 210 | 28 | 15 | 657 | 130 | 1,456 | 361 |
| 119,134 | 50 | 7  | 711 | 155 | 28 | 9  | 655 | 90  | 1,444 | 261 |

|         |    |   |       |     |    |   |       |    |       |     |
|---------|----|---|-------|-----|----|---|-------|----|-------|-----|
| 119,135 | 50 | 7 | 708   | 155 | 27 | 9 | 656   | 91 | 1,441 | 262 |
| 119,136 | 53 | 4 | 757   | 56  | 28 | 1 | 683   | 47 | 1,521 | 108 |
| 119,137 | 53 | 4 | 768   | 41  | 29 | 1 | 691   | 43 | 1,541 | 89  |
| 119,138 | 68 | 3 | 997   | 28  | 43 | 1 | 995   | 38 | 2,103 | 70  |
| 119,139 | 84 | 3 | 1,259 | 31  | 59 | 1 | 1,227 | 39 | 2,629 | 74  |
| 119,140 | 74 | 3 | 1,251 | 32  | 60 | 1 | 1,213 | 39 | 2,598 | 75  |
| 119,141 | 79 | 3 | 1,317 | 31  | 63 | 0 | 1,292 | 38 | 2,751 | 72  |
| 119,142 | 79 | 3 | 1,327 | 31  | 63 | 0 | 1,317 | 38 | 2,786 | 72  |
| 119,143 | 80 | 3 | 1,346 | 34  | 63 | 0 | 1,338 | 40 | 2,827 | 77  |
| 119,144 | 81 | 3 | 1,371 | 34  | 65 | 0 | 1,350 | 40 | 2,867 | 77  |
| 119,145 | 82 | 1 | 1,387 | 30  | 65 | 0 | 1,361 | 36 | 2,895 | 67  |
| 119,146 | 82 | 1 | 1,397 | 28  | 65 | 0 | 1,371 | 23 | 2,915 | 52  |
| 119,147 | 83 | 1 | 1,400 | 28  | 65 | 0 | 1,380 | 23 | 2,928 | 52  |
| 119,148 | 80 | 1 | 1,408 | 28  | 65 | 0 | 1,384 | 23 | 2,937 | 52  |
| 119,149 | 80 | 1 | 1,408 | 28  | 65 | 1 | 1,383 | 24 | 2,936 | 54  |
| 119,150 | 81 | 1 | 1,423 | 31  | 65 | 1 | 1,403 | 26 | 2,972 | 59  |
| 119,151 | 81 | 1 | 1,423 | 35  | 65 | 1 | 1,403 | 26 | 2,972 | 63  |
| 119,152 | 81 | 1 | 1,424 | 43  | 65 | 1 | 1,405 | 27 | 2,975 | 72  |
| 119,153 | 81 | 1 | 1,440 | 50  | 65 | 1 | 1,415 | 27 | 3,001 | 79  |
| 119,154 | 81 | 1 | 1,439 | 74  | 65 | 1 | 1,416 | 30 | 3,001 | 106 |
| 119,155 | 92 | 2 | 1,489 | 86  | 68 | 1 | 1,470 | 43 | 3,119 | 132 |
| 119,156 | 92 | 2 | 1,494 | 87  | 68 | 1 | 1,469 | 43 | 3,123 | 133 |
| 119,157 | 92 | 2 | 1,504 | 87  | 69 | 1 | 1,475 | 44 | 3,140 | 134 |
| 119,158 | 92 | 2 | 1,513 | 87  | 70 | 1 | 1,480 | 41 | 3,155 | 131 |
| 119,159 | 92 | 2 | 1,548 | 89  | 73 | 1 | 1,511 | 41 | 3,224 | 133 |
| 119,160 | 93 | 2 | 1,557 | 90  | 73 | 1 | 1,516 | 42 | 3,239 | 135 |
| 119,161 | 93 | 2 | 1,564 | 92  | 73 | 1 | 1,519 | 42 | 3,249 | 137 |
| 119,162 | 92 | 2 | 1,563 | 93  | 73 | 1 | 1,515 | 43 | 3,243 | 139 |
| 119,163 | 92 | 2 | 1,562 | 96  | 73 | 1 | 1,514 | 43 | 3,241 | 142 |
| 119,164 | 93 | 2 | 1,611 | 95  | 74 | 1 | 1,533 | 43 | 3,311 | 141 |
| 119,165 | 93 | 2 | 1,608 | 95  | 74 | 1 | 1,533 | 43 | 3,308 | 141 |
| 119,166 | 93 | 2 | 1,610 | 95  | 74 | 1 | 1,535 | 43 | 3,312 | 141 |
| 119,167 | 90 | 2 | 1,592 | 94  | 73 | 1 | 1,525 | 42 | 3,280 | 139 |
| 119,168 | 90 | 2 | 1,592 | 95  | 73 | 1 | 1,526 | 42 | 3,281 | 140 |
| 119,169 | 90 | 2 | 1,589 | 83  | 73 | 1 | 1,525 | 33 | 3,277 | 119 |
| 119,170 | 89 | 3 | 1,590 | 84  | 73 | 1 | 1,525 | 33 | 3,277 | 121 |
| 119,171 | 89 | 3 | 1,586 | 84  | 73 | 1 | 1,520 | 34 | 3,268 | 122 |
| 119,172 | 81 | 4 | 1,505 | 86  | 68 | 1 | 1,460 | 38 | 3,114 | 129 |
| 119,173 | 81 | 4 | 1,506 | 92  | 68 | 1 | 1,460 | 43 | 3,115 | 140 |
| 119,174 | 78 | 4 | 1,421 | 96  | 62 | 1 | 1,338 | 42 | 2,899 | 143 |
| 119,175 | 78 | 5 | 1,449 | 98  | 62 | 1 | 1,346 | 43 | 2,935 | 147 |

|         |    |    |       |     |    |    |       |     |       |     |
|---------|----|----|-------|-----|----|----|-------|-----|-------|-----|
| 119,176 | 78 | 5  | 1,446 | 99  | 62 | 1  | 1,344 | 44  | 2,930 | 149 |
| 119,177 | 64 | 5  | 1,192 | 100 | 53 | 1  | 1,051 | 44  | 2,360 | 150 |
| 119,178 | 64 | 5  | 1,201 | 99  | 54 | 1  | 1,038 | 42  | 2,357 | 147 |
| 119,179 | 65 | 5  | 1,202 | 100 | 54 | 1  | 1,035 | 43  | 2,356 | 149 |
| 119,180 | 62 | 5  | 1,167 | 102 | 52 | 1  | 1,028 | 43  | 2,309 | 151 |
| 119,181 | 62 | 5  | 1,157 | 102 | 52 | 1  | 1,028 | 42  | 2,299 | 150 |
| 119,182 | 62 | 6  | 1,164 | 106 | 52 | 1  | 1,033 | 42  | 2,311 | 155 |
| 119,183 | 62 | 6  | 1,159 | 107 | 52 | 1  | 1,032 | 43  | 2,305 | 157 |
| 119,184 | 65 | 6  | 1,186 | 127 | 52 | 3  | 1,048 | 51  | 2,351 | 187 |
| 119,185 | 66 | 5  | 1,188 | 132 | 52 | 3  | 1,046 | 56  | 2,352 | 196 |
| 119,186 | 66 | 5  | 1,183 | 138 | 53 | 3  | 1,048 | 56  | 2,350 | 202 |
| 119,187 | 63 | 8  | 1,122 | 140 | 52 | 3  | 1,013 | 63  | 2,250 | 214 |
| 119,188 | 63 | 9  | 1,133 | 168 | 52 | 4  | 1,013 | 75  | 2,261 | 256 |
| 119,189 | 49 | 9  | 928   | 170 | 38 | 4  | 718   | 75  | 1,733 | 258 |
| 119,190 | 60 | 9  | 1,128 | 168 | 30 | 4  | 741   | 73  | 1,959 | 254 |
| 119,191 | 60 | 9  | 1,186 | 169 | 28 | 4  | 773   | 74  | 2,047 | 256 |
| 119,192 | 63 | 9  | 1,294 | 169 | 39 | 5  | 832   | 75  | 2,228 | 258 |
| 119,193 | 63 | 13 | 1,289 | 209 | 39 | 7  | 817   | 126 | 2,208 | 355 |
| 119,194 | 62 | 14 | 1,265 | 216 | 39 | 7  | 799   | 127 | 2,165 | 364 |
| 119,195 | 66 | 15 | 1,319 | 224 | 37 | 7  | 842   | 133 | 2,264 | 379 |
| 119,196 | 65 | 15 | 1,313 | 229 | 37 | 7  | 831   | 133 | 2,246 | 384 |
| 119,197 | 68 | 15 | 1,593 | 232 | 40 | 7  | 1,018 | 135 | 2,719 | 389 |
| 119,198 | 67 | 15 | 1,578 | 233 | 40 | 7  | 1,013 | 135 | 2,698 | 390 |
| 119,199 | 67 | 15 | 1,562 | 234 | 40 | 6  | 989   | 134 | 2,658 | 389 |
| 119,200 | 66 | 15 | 1,557 | 234 | 40 | 6  | 987   | 134 | 2,650 | 389 |
| 119,201 | 66 | 15 | 1,547 | 233 | 40 | 6  | 973   | 135 | 2,626 | 389 |
| 119,202 | 66 | 15 | 1,545 | 229 | 40 | 6  | 974   | 135 | 2,625 | 385 |
| 119,203 | 66 | 15 | 1,561 | 216 | 42 | 6  | 987   | 133 | 2,656 | 370 |
| 119,204 | 69 | 15 | 1,599 | 194 | 43 | 6  | 1,009 | 131 | 2,720 | 346 |
| 119,205 | 69 | 15 | 1,599 | 196 | 43 | 6  | 1,008 | 132 | 2,719 | 349 |
| 119,206 | 58 | 14 | 1,569 | 194 | 42 | 6  | 986   | 121 | 2,655 | 335 |
| 119,207 | 59 | 14 | 1,578 | 196 | 42 | 6  | 997   | 125 | 2,676 | 341 |
| 119,208 | 59 | 14 | 1,571 | 203 | 41 | 6  | 991   | 130 | 2,662 | 353 |
| 119,209 | 59 | 15 | 1,559 | 236 | 40 | 9  | 983   | 198 | 2,641 | 458 |
| 119,210 | 59 | 15 | 1,521 | 237 | 37 | 9  | 951   | 199 | 2,568 | 460 |
| 119,211 | 59 | 15 | 1,592 | 248 | 38 | 9  | 1,006 | 208 | 2,695 | 480 |
| 119,212 | 62 | 16 | 1,702 | 252 | 41 | 10 | 1,069 | 214 | 2,874 | 492 |
| 119,213 | 64 | 16 | 1,833 | 255 | 41 | 10 | 1,097 | 214 | 3,035 | 495 |
| 119,214 | 64 | 18 | 1,829 | 266 | 41 | 13 | 1,093 | 250 | 3,027 | 547 |
| 119,215 | 63 | 18 | 1,805 | 273 | 40 | 13 | 1,084 | 252 | 2,992 | 556 |
| 119,216 | 66 | 18 | 1,972 | 286 | 43 | 13 | 1,237 | 253 | 3,318 | 570 |

|         |    |    |       |     |    |    |       |     |       |       |
|---------|----|----|-------|-----|----|----|-------|-----|-------|-------|
| 119,217 | 66 | 18 | 1,972 | 286 | 43 | 13 | 1,234 | 253 | 3,315 | 570   |
| 119,218 | 67 | 18 | 1,997 | 287 | 43 | 13 | 1,247 | 253 | 3,354 | 571   |
| 119,219 | 67 | 18 | 2,002 | 294 | 43 | 13 | 1,245 | 257 | 3,357 | 582   |
| 119,220 | 67 | 18 | 1,999 | 303 | 43 | 14 | 1,245 | 266 | 3,354 | 601   |
| 119,221 | 67 | 17 | 2,026 | 319 | 44 | 15 | 1,270 | 281 | 3,407 | 632   |
| 119,222 | 68 | 19 | 2,032 | 335 | 44 | 16 | 1,272 | 289 | 3,416 | 659   |
| 119,223 | 69 | 18 | 2,062 | 360 | 44 | 16 | 1,290 | 313 | 3,465 | 707   |
| 119,224 | 70 | 18 | 2,068 | 369 | 44 | 17 | 1,295 | 311 | 3,477 | 715   |
| 119,225 | 68 | 20 | 2,043 | 372 | 44 | 18 | 1,281 | 333 | 3,436 | 743   |
| 119,226 | 68 | 19 | 2,009 | 377 | 44 | 18 | 1,269 | 336 | 3,390 | 750   |
| 119,227 | 72 | 19 | 2,072 | 391 | 48 | 20 | 1,303 | 346 | 3,495 | 776   |
| 119,228 | 71 | 20 | 2,076 | 441 | 48 | 23 | 1,311 | 378 | 3,506 | 862   |
| 119,229 | 71 | 20 | 2,084 | 460 | 47 | 25 | 1,316 | 405 | 3,518 | 910   |
| 119,230 | 70 | 22 | 2,092 | 469 | 47 | 27 | 1,324 | 410 | 3,533 | 928   |
| 119,231 | 71 | 23 | 2,089 | 474 | 48 | 28 | 1,324 | 413 | 3,532 | 938   |
| 119,232 | 80 | 22 | 2,109 | 480 | 49 | 28 | 1,363 | 430 | 3,601 | 960   |
| 119,233 | 80 | 22 | 2,110 | 481 | 49 | 28 | 1,362 | 431 | 3,601 | 962   |
| 119,234 | 81 | 24 | 2,095 | 501 | 49 | 34 | 1,345 | 484 | 3,570 | 1,043 |
| 119,235 | 78 | 24 | 2,085 | 481 | 49 | 32 | 1,338 | 478 | 3,550 | 1,015 |
| 119,236 | 77 | 34 | 2,079 | 621 | 49 | 38 | 1,340 | 623 | 3,545 | 1,316 |
| 119,237 | 77 | 38 | 2,076 | 657 | 48 | 39 | 1,335 | 645 | 3,536 | 1,379 |
| 119,238 | 77 | 36 | 2,085 | 664 | 49 | 39 | 1,347 | 649 | 3,558 | 1,388 |
| 119,239 | 77 | 36 | 2,062 | 659 | 48 | 39 | 1,341 | 649 | 3,528 | 1,383 |
| 119,240 | 76 | 36 | 2,036 | 657 | 48 | 39 | 1,325 | 649 | 3,485 | 1,381 |
| 119,241 | 49 | 36 | 1,573 | 655 | 40 | 39 | 1,061 | 649 | 2,723 | 1,379 |
| 119,242 | 49 | 37 | 1,492 | 660 | 38 | 39 | 1,012 | 673 | 2,591 | 1,409 |
| 119,243 | 40 | 33 | 1,305 | 624 | 24 | 38 | 872   | 634 | 2,241 | 1,329 |
| 119,244 | 40 | 34 | 1,303 | 647 | 24 | 40 | 869   | 663 | 2,236 | 1,384 |
| 119,245 | 36 | 33 | 1,242 | 635 | 24 | 40 | 827   | 660 | 2,129 | 1,368 |
| 119,246 | 35 | 32 | 1,226 | 636 | 24 | 40 | 817   | 658 | 2,102 | 1,366 |
| 119,247 | 35 | 32 | 1,218 | 633 | 24 | 40 | 817   | 659 | 2,094 | 1,364 |
| 119,248 | 32 | 32 | 926   | 630 | 21 | 40 | 618   | 656 | 1,597 | 1,358 |
| 119,249 | 32 | 32 | 914   | 630 | 20 | 40 | 609   | 656 | 1,575 | 1,358 |
| 119,250 | 33 | 32 | 924   | 629 | 19 | 40 | 616   | 656 | 1,592 | 1,357 |
| 119,251 | 33 | 32 | 924   | 634 | 19 | 40 | 613   | 658 | 1,589 | 1,364 |
| 119,252 | 33 | 33 | 922   | 633 | 19 | 40 | 613   | 656 | 1,587 | 1,362 |
| 119,253 | 33 | 33 | 929   | 633 | 19 | 40 | 618   | 656 | 1,599 | 1,362 |
| 119,254 | 33 | 33 | 932   | 632 | 19 | 40 | 619   | 656 | 1,603 | 1,361 |
| 119,255 | 30 | 33 | 885   | 628 | 18 | 40 | 591   | 654 | 1,524 | 1,355 |
| 119,256 | 32 | 33 | 876   | 614 | 16 | 40 | 564   | 647 | 1,488 | 1,334 |
| 119,257 | 32 | 33 | 885   | 620 | 17 | 40 | 559   | 647 | 1,493 | 1,340 |

|         |    |    |     |     |    |    |     |     |       |       |
|---------|----|----|-----|-----|----|----|-----|-----|-------|-------|
| 119,258 | 34 | 33 | 889 | 630 | 17 | 40 | 557 | 651 | 1,497 | 1,354 |
| 119,259 | 35 | 33 | 910 | 626 | 17 | 40 | 568 | 648 | 1,530 | 1,347 |
| 119,260 | 38 | 33 | 935 | 617 | 17 | 39 | 579 | 596 | 1,569 | 1,285 |
| 119,261 | 40 | 34 | 961 | 616 | 17 | 39 | 590 | 597 | 1,608 | 1,286 |
| 119,262 | 41 | 34 | 913 | 607 | 18 | 39 | 559 | 587 | 1,531 | 1,267 |
| 119,263 | 40 | 33 | 843 | 609 | 17 | 38 | 544 | 585 | 1,444 | 1,265 |
| 119,264 | 38 | 33 | 696 | 605 | 17 | 38 | 509 | 586 | 1,260 | 1,262 |
| 119,265 | 35 | 32 | 617 | 594 | 14 | 35 | 386 | 553 | 1,052 | 1,214 |
| 119,266 | 36 | 33 | 561 | 594 | 14 | 35 | 378 | 554 | 989   | 1,216 |
| 119,267 | 37 | 34 | 548 | 582 | 14 | 35 | 374 | 553 | 973   | 1,204 |
| 119,268 | 37 | 34 | 545 | 581 | 14 | 35 | 374 | 553 | 970   | 1,203 |
| 119,269 | 36 | 34 | 530 | 547 | 14 | 33 | 366 | 524 | 946   | 1,138 |
| 119,270 | 44 | 34 | 548 | 549 | 17 | 33 | 407 | 524 | 1,016 | 1,140 |
| 119,271 | 44 | 34 | 520 | 548 | 16 | 33 | 387 | 524 | 967   | 1,139 |
| 119,272 | 44 | 32 | 519 | 533 | 16 | 32 | 388 | 515 | 967   | 1,112 |
| 119,273 | 45 | 32 | 514 | 533 | 16 | 32 | 388 | 515 | 963   | 1,112 |
| 119,274 | 47 | 32 | 483 | 506 | 16 | 32 | 375 | 487 | 921   | 1,057 |
| 119,275 | 47 | 30 | 480 | 486 | 17 | 30 | 374 | 463 | 918   | 1,009 |
| 119,276 | 48 | 30 | 475 | 477 | 18 | 30 | 376 | 458 | 917   | 995   |
| 119,277 | 48 | 30 | 476 | 477 | 18 | 31 | 376 | 459 | 918   | 997   |
| 119,278 | 44 | 29 | 422 | 392 | 16 | 24 | 350 | 388 | 832   | 833   |
| 119,279 | 44 | 29 | 410 | 393 | 16 | 24 | 342 | 389 | 812   | 835   |
| 119,280 | 44 | 29 | 401 | 395 | 16 | 24 | 338 | 389 | 799   | 837   |
| 119,281 | 44 | 26 | 392 | 369 | 16 | 21 | 333 | 360 | 785   | 776   |
| 119,282 | 43 | 26 | 394 | 372 | 15 | 21 | 333 | 360 | 785   | 779   |
| 119,283 | 34 | 26 | 364 | 374 | 14 | 21 | 289 | 358 | 701   | 779   |
| 119,284 | 35 | 26 | 361 | 373 | 14 | 21 | 291 | 356 | 701   | 776   |
| 119,285 | 35 | 24 | 363 | 353 | 14 | 15 | 289 | 304 | 701   | 696   |
| 119,286 | 35 | 14 | 365 | 208 | 13 | 9  | 281 | 155 | 694   | 386   |
| 119,287 | 35 | 14 | 363 | 208 | 13 | 9  | 281 | 155 | 692   | 386   |
| 119,288 | 36 | 10 | 378 | 166 | 13 | 8  | 279 | 131 | 706   | 315   |
| 119,289 | 53 | 10 | 550 | 158 | 19 | 8  | 396 | 119 | 1,018 | 295   |
| 119,290 | 53 | 9  | 549 | 135 | 19 | 7  | 394 | 108 | 1,015 | 259   |
| 119,291 | 53 | 9  | 547 | 135 | 19 | 7  | 392 | 108 | 1,011 | 259   |
| 119,292 | 76 | 9  | 809 | 135 | 32 | 7  | 629 | 107 | 1,546 | 258   |
| 119,293 | 80 | 9  | 824 | 132 | 33 | 7  | 646 | 85  | 1,583 | 233   |
| 119,294 | 80 | 9  | 823 | 128 | 33 | 5  | 646 | 74  | 1,582 | 216   |
| 119,295 | 80 | 8  | 819 | 106 | 33 | 3  | 646 | 44  | 1,578 | 161   |
| 119,296 | 87 | 8  | 896 | 105 | 43 | 3  | 793 | 44  | 1,819 | 160   |
| 119,297 | 88 | 8  | 929 | 96  | 43 | 3  | 836 | 40  | 1,896 | 147   |
| 119,298 | 88 | 8  | 930 | 93  | 44 | 3  | 840 | 40  | 1,902 | 144   |

|         |    |    |       |     |    |   |       |     |       |     |
|---------|----|----|-------|-----|----|---|-------|-----|-------|-----|
| 119,299 | 88 | 8  | 930   | 93  | 44 | 3 | 841   | 40  | 1,903 | 144 |
| 119,300 | 88 | 8  | 931   | 93  | 45 | 3 | 840   | 40  | 1,904 | 144 |
| 119,301 | 89 | 8  | 945   | 94  | 46 | 3 | 860   | 39  | 1,940 | 144 |
| 119,302 | 89 | 7  | 939   | 90  | 46 | 3 | 859   | 38  | 1,933 | 138 |
| 119,303 | 89 | 7  | 943   | 90  | 46 | 3 | 875   | 43  | 1,953 | 143 |
| 119,304 | 89 | 7  | 942   | 92  | 46 | 3 | 872   | 46  | 1,949 | 148 |
| 119,305 | 89 | 7  | 938   | 96  | 46 | 4 | 871   | 54  | 1,944 | 161 |
| 119,306 | 89 | 7  | 932   | 95  | 46 | 4 | 870   | 55  | 1,937 | 161 |
| 119,307 | 90 | 8  | 947   | 96  | 49 | 4 | 929   | 56  | 2,015 | 164 |
| 119,308 | 90 | 8  | 933   | 90  | 48 | 4 | 925   | 58  | 1,996 | 160 |
| 119,309 | 94 | 12 | 957   | 110 | 49 | 5 | 1,025 | 89  | 2,125 | 216 |
| 119,310 | 93 | 12 | 933   | 108 | 49 | 5 | 1,012 | 87  | 2,087 | 212 |
| 119,311 | 91 | 11 | 958   | 89  | 52 | 3 | 1,053 | 76  | 2,154 | 179 |
| 119,312 | 89 | 10 | 923   | 89  | 53 | 3 | 1,048 | 74  | 2,113 | 176 |
| 119,313 | 87 | 10 | 909   | 85  | 51 | 3 | 1,032 | 75  | 2,079 | 173 |
| 119,314 | 85 | 10 | 895   | 77  | 50 | 3 | 1,049 | 69  | 2,079 | 159 |
| 119,315 | 89 | 9  | 976   | 74  | 54 | 3 | 1,169 | 66  | 2,288 | 152 |
| 119,316 | 90 | 9  | 983   | 75  | 54 | 3 | 1,205 | 66  | 2,332 | 153 |
| 119,317 | 92 | 8  | 993   | 68  | 55 | 3 | 1,235 | 64  | 2,375 | 143 |
| 119,318 | 91 | 7  | 992   | 68  | 55 | 3 | 1,228 | 64  | 2,366 | 142 |
| 119,319 | 92 | 7  | 1,014 | 70  | 55 | 3 | 1,264 | 65  | 2,425 | 145 |
| 119,320 | 94 | 7  | 1,016 | 77  | 57 | 3 | 1,289 | 68  | 2,456 | 155 |
| 119,321 | 86 | 7  | 992   | 82  | 54 | 3 | 1,248 | 73  | 2,380 | 165 |
| 119,322 | 86 | 7  | 991   | 85  | 54 | 3 | 1,243 | 73  | 2,374 | 168 |
| 119,323 | 86 | 7  | 994   | 87  | 54 | 3 | 1,251 | 74  | 2,385 | 171 |
| 119,324 | 87 | 7  | 1,051 | 108 | 57 | 3 | 1,298 | 88  | 2,493 | 206 |
| 119,325 | 84 | 9  | 1,050 | 108 | 57 | 3 | 1,295 | 92  | 2,486 | 212 |
| 119,326 | 83 | 9  | 1,039 | 119 | 56 | 3 | 1,289 | 98  | 2,467 | 229 |
| 119,327 | 88 | 9  | 1,103 | 120 | 63 | 2 | 1,398 | 97  | 2,652 | 228 |
| 119,328 | 89 | 9  | 1,109 | 124 | 64 | 2 | 1,409 | 99  | 2,671 | 234 |
| 119,329 | 90 | 9  | 1,132 | 128 | 63 | 2 | 1,422 | 100 | 2,707 | 239 |
| 119,330 | 90 | 9  | 1,132 | 127 | 63 | 2 | 1,421 | 99  | 2,706 | 237 |
| 119,331 | 90 | 10 | 1,132 | 127 | 63 | 2 | 1,420 | 100 | 2,705 | 239 |
| 119,332 | 90 | 10 | 1,130 | 125 | 63 | 2 | 1,419 | 101 | 2,702 | 238 |
| 119,333 | 94 | 10 | 1,190 | 122 | 67 | 2 | 1,479 | 102 | 2,830 | 236 |
| 119,334 | 94 | 10 | 1,195 | 120 | 67 | 2 | 1,480 | 102 | 2,836 | 234 |
| 119,335 | 93 | 10 | 1,196 | 120 | 67 | 2 | 1,481 | 102 | 2,837 | 234 |
| 119,336 | 94 | 10 | 1,198 | 120 | 68 | 2 | 1,486 | 102 | 2,846 | 234 |
| 119,337 | 94 | 10 | 1,213 | 120 | 69 | 2 | 1,505 | 102 | 2,881 | 234 |
| 119,338 | 97 | 10 | 1,256 | 120 | 69 | 2 | 1,516 | 102 | 2,938 | 234 |
| 119,339 | 99 | 10 | 1,434 | 120 | 80 | 2 | 1,658 | 102 | 3,271 | 234 |

|         |    |    |       |     |    |   |       |     |       |     |
|---------|----|----|-------|-----|----|---|-------|-----|-------|-----|
| 119,340 | 88 | 9  | 1,702 | 119 | 83 | 2 | 1,687 | 102 | 3,560 | 232 |
| 119,341 | 87 | 9  | 1,693 | 119 | 85 | 2 | 1,703 | 102 | 3,568 | 232 |
| 119,342 | 89 | 9  | 1,748 | 119 | 89 | 2 | 1,835 | 102 | 3,761 | 232 |
| 119,343 | 69 | 9  | 1,552 | 120 | 77 | 2 | 1,629 | 103 | 3,327 | 234 |
| 119,344 | 66 | 8  | 1,585 | 118 | 80 | 2 | 1,663 | 103 | 3,394 | 231 |
| 119,345 | 61 | 8  | 1,531 | 117 | 71 | 2 | 1,527 | 103 | 3,190 | 230 |
| 119,346 | 61 | 8  | 1,521 | 118 | 70 | 2 | 1,518 | 103 | 3,170 | 231 |
| 119,347 | 62 | 8  | 1,522 | 118 | 73 | 2 | 1,529 | 104 | 3,186 | 232 |
| 119,348 | 62 | 8  | 1,519 | 118 | 73 | 2 | 1,509 | 103 | 3,163 | 231 |
| 119,349 | 65 | 8  | 1,543 | 119 | 73 | 2 | 1,527 | 102 | 3,208 | 231 |
| 119,350 | 65 | 8  | 1,586 | 119 | 73 | 2 | 1,548 | 102 | 3,272 | 231 |
| 119,351 | 71 | 8  | 1,635 | 119 | 77 | 2 | 1,557 | 102 | 3,340 | 231 |
| 119,352 | 78 | 8  | 1,726 | 116 | 76 | 2 | 1,579 | 99  | 3,459 | 225 |
| 119,353 | 78 | 8  | 1,726 | 116 | 76 | 2 | 1,578 | 99  | 3,458 | 225 |
| 119,354 | 88 | 8  | 1,832 | 118 | 78 | 2 | 1,603 | 96  | 3,601 | 224 |
| 119,355 | 88 | 8  | 1,852 | 117 | 80 | 2 | 1,600 | 94  | 3,620 | 221 |
| 119,356 | 86 | 8  | 1,849 | 112 | 77 | 2 | 1,567 | 86  | 3,579 | 208 |
| 119,357 | 85 | 9  | 1,832 | 114 | 78 | 2 | 1,548 | 85  | 3,543 | 210 |
| 119,358 | 81 | 8  | 1,833 | 113 | 77 | 2 | 1,488 | 83  | 3,479 | 206 |
| 119,359 | 80 | 4  | 1,809 | 83  | 76 | 1 | 1,457 | 51  | 3,422 | 139 |
| 119,360 | 83 | 4  | 1,830 | 84  | 74 | 1 | 1,453 | 52  | 3,440 | 141 |
| 119,361 | 87 | 5  | 1,936 | 89  | 75 | 1 | 1,489 | 53  | 3,587 | 148 |
| 119,362 | 88 | 5  | 2,024 | 88  | 75 | 1 | 1,533 | 53  | 3,720 | 147 |
| 119,363 | 98 | 5  | 2,232 | 101 | 83 | 2 | 1,626 | 63  | 4,039 | 171 |
| 119,364 | 99 | 5  | 2,269 | 104 | 85 | 2 | 1,657 | 62  | 4,110 | 173 |
| 119,365 | 99 | 5  | 2,272 | 107 | 84 | 2 | 1,596 | 62  | 4,051 | 176 |
| 119,366 | 95 | 7  | 2,187 | 106 | 81 | 2 | 1,480 | 63  | 3,843 | 178 |
| 119,367 | 94 | 9  | 2,174 | 107 | 81 | 2 | 1,441 | 63  | 3,790 | 181 |
| 119,368 | 91 | 9  | 2,153 | 106 | 80 | 2 | 1,400 | 62  | 3,724 | 179 |
| 119,369 | 91 | 9  | 2,151 | 110 | 80 | 2 | 1,398 | 62  | 3,720 | 183 |
| 119,370 | 90 | 9  | 2,128 | 111 | 80 | 2 | 1,362 | 62  | 3,660 | 184 |
| 119,371 | 88 | 9  | 2,116 | 104 | 78 | 2 | 1,332 | 59  | 3,614 | 174 |
| 119,372 | 88 | 9  | 2,118 | 97  | 78 | 2 | 1,328 | 54  | 3,612 | 162 |
| 119,373 | 88 | 9  | 2,115 | 97  | 78 | 2 | 1,325 | 54  | 3,606 | 162 |
| 119,374 | 87 | 9  | 2,095 | 94  | 78 | 2 | 1,312 | 55  | 3,572 | 160 |
| 119,375 | 85 | 7  | 2,056 | 73  | 75 | 2 | 1,278 | 37  | 3,494 | 119 |
| 119,376 | 86 | 7  | 2,054 | 75  | 75 | 3 | 1,275 | 40  | 3,490 | 125 |
| 119,377 | 80 | 7  | 2,004 | 68  | 67 | 3 | 1,172 | 39  | 3,323 | 117 |
| 119,378 | 80 | 8  | 1,990 | 76  | 66 | 3 | 1,159 | 44  | 3,295 | 131 |
| 119,379 | 79 | 12 | 1,977 | 89  | 65 | 3 | 1,149 | 61  | 3,270 | 165 |
| 119,380 | 78 | 12 | 1,948 | 88  | 64 | 3 | 1,127 | 61  | 3,217 | 164 |



|         |    |    |       |     |    |   |       |    |       |     |
|---------|----|----|-------|-----|----|---|-------|----|-------|-----|
| 119,381 | 77 | 12 | 1,930 | 90  | 62 | 3 | 1,107 | 61 | 3,176 | 166 |
| 119,382 | 77 | 11 | 1,917 | 95  | 62 | 3 | 1,087 | 61 | 3,143 | 170 |
| 119,383 | 76 | 12 | 1,904 | 100 | 62 | 3 | 1,082 | 62 | 3,124 | 177 |
| 119,384 | 75 | 12 | 1,886 | 100 | 60 | 3 | 1,066 | 61 | 3,087 | 176 |
| 119,385 | 75 | 12 | 1,883 | 100 | 60 | 3 | 1,067 | 61 | 3,085 | 176 |
| 119,386 | 75 | 12 | 1,882 | 100 | 60 | 3 | 1,064 | 62 | 3,081 | 177 |
| 119,387 | 73 | 12 | 1,875 | 103 | 59 | 3 | 1,057 | 63 | 3,064 | 181 |
| 119,388 | 73 | 12 | 1,859 | 103 | 58 | 3 | 1,040 | 63 | 3,030 | 181 |
| 119,389 | 69 | 12 | 1,804 | 103 | 59 | 3 | 1,030 | 63 | 2,962 | 181 |
| 119,390 | 67 | 12 | 1,627 | 103 | 48 | 3 | 888   | 63 | 2,630 | 181 |
| 119,391 | 61 | 12 | 1,185 | 101 | 39 | 3 | 740   | 64 | 2,025 | 180 |
| 119,392 | 60 | 12 | 1,166 | 101 | 37 | 3 | 721   | 66 | 1,984 | 182 |
| 119,393 | 59 | 12 | 1,095 | 101 | 33 | 3 | 588   | 66 | 1,775 | 182 |
| 119,394 | 58 | 12 | 1,076 | 99  | 32 | 3 | 567   | 65 | 1,733 | 179 |
| 119,395 | 57 | 12 | 1,026 | 100 | 27 | 3 | 513   | 66 | 1,623 | 181 |
| 119,396 | 55 | 12 | 1,012 | 100 | 27 | 3 | 509   | 66 | 1,603 | 181 |
| 119,397 | 53 | 12 | 1,005 | 99  | 24 | 3 | 491   | 66 | 1,573 | 180 |
| 119,398 | 53 | 12 | 1,002 | 100 | 24 | 3 | 482   | 67 | 1,561 | 182 |
| 119,399 | 53 | 12 | 984   | 100 | 24 | 3 | 475   | 67 | 1,536 | 182 |
| 119,400 | 51 | 12 | 971   | 99  | 23 | 3 | 460   | 68 | 1,505 | 182 |
| 119,401 | 52 | 13 | 935   | 99  | 23 | 3 | 446   | 68 | 1,456 | 183 |
| 119,402 | 45 | 13 | 876   | 99  | 18 | 3 | 429   | 68 | 1,368 | 183 |
| 119,403 | 37 | 13 | 771   | 100 | 18 | 3 | 387   | 68 | 1,213 | 184 |
| 119,404 | 28 | 13 | 680   | 100 | 17 | 3 | 358   | 68 | 1,083 | 184 |
| 119,405 | 29 | 13 | 681   | 98  | 17 | 3 | 373   | 67 | 1,100 | 181 |
| 119,406 | 28 | 13 | 650   | 97  | 16 | 3 | 359   | 66 | 1,053 | 179 |
| 119,407 | 29 | 12 | 646   | 95  | 16 | 2 | 353   | 66 | 1,044 | 175 |
| 119,408 | 29 | 12 | 646   | 95  | 15 | 2 | 356   | 66 | 1,046 | 175 |
| 119,409 | 27 | 12 | 616   | 95  | 14 | 2 | 324   | 65 | 981   | 174 |
| 119,410 | 27 | 12 | 611   | 95  | 15 | 2 | 321   | 63 | 974   | 172 |
| 119,411 | 27 | 13 | 582   | 93  | 16 | 2 | 320   | 64 | 945   | 172 |
| 119,412 | 23 | 12 | 484   | 88  | 15 | 2 | 289   | 63 | 811   | 165 |
| 119,413 | 23 | 12 | 400   | 85  | 16 | 2 | 256   | 62 | 695   | 161 |
| 119,414 | 13 | 12 | 194   | 70  | 7  | 1 | 154   | 52 | 368   | 135 |
| 119,415 | 13 | 13 | 156   | 67  | 6  | 1 | 118   | 52 | 293   | 133 |
| 119,416 | 13 | 13 | 126   | 64  | 5  | 1 | 113   | 52 | 257   | 130 |
| 119,417 | 13 | 12 | 121   | 63  | 4  | 1 | 108   | 51 | 246   | 127 |
| 119,418 | 13 | 10 | 121   | 62  | 4  | 1 | 107   | 51 | 245   | 124 |
| 119,419 | 13 | 10 | 121   | 61  | 4  | 1 | 107   | 51 | 245   | 123 |
| 119,420 | 13 | 11 | 149   | 57  | 4  | 1 | 133   | 51 | 299   | 120 |
| 119,421 | 13 | 11 | 148   | 56  | 4  | 1 | 133   | 51 | 298   | 119 |

|         |     |    |       |     |    |   |       |    |       |     |
|---------|-----|----|-------|-----|----|---|-------|----|-------|-----|
| 119,422 | 13  | 11 | 145   | 56  | 4  | 1 | 133   | 51 | 295   | 119 |
| 119,423 | 24  | 11 | 219   | 55  | 5  | 1 | 155   | 51 | 403   | 118 |
| 119,424 | 24  | 11 | 220   | 56  | 5  | 1 | 155   | 51 | 404   | 119 |
| 119,425 | 31  | 11 | 479   | 57  | 7  | 1 | 204   | 49 | 721   | 118 |
| 119,426 | 39  | 11 | 624   | 59  | 13 | 1 | 288   | 52 | 964   | 123 |
| 119,427 | 51  | 11 | 952   | 57  | 29 | 0 | 464   | 49 | 1,496 | 117 |
| 119,428 | 51  | 6  | 969   | 25  | 29 | 0 | 470   | 19 | 1,519 | 50  |
| 119,429 | 51  | 6  | 978   | 25  | 29 | 0 | 472   | 20 | 1,530 | 51  |
| 119,430 | 51  | 6  | 981   | 26  | 29 | 0 | 474   | 20 | 1,535 | 52  |
| 119,431 | 51  | 6  | 1,031 | 26  | 30 | 0 | 499   | 20 | 1,611 | 52  |
| 119,432 | 52  | 6  | 1,087 | 32  | 33 | 0 | 534   | 21 | 1,706 | 59  |
| 119,433 | 52  | 6  | 1,089 | 30  | 33 | 0 | 535   | 23 | 1,709 | 59  |
| 119,434 | 57  | 5  | 1,185 | 34  | 36 | 0 | 610   | 27 | 1,888 | 66  |
| 119,435 | 69  | 5  | 1,329 | 42  | 45 | 1 | 744   | 33 | 2,187 | 81  |
| 119,436 | 70  | 5  | 1,352 | 62  | 45 | 2 | 749   | 44 | 2,216 | 113 |
| 119,437 | 113 | 6  | 1,552 | 76  | 57 | 2 | 1,026 | 46 | 2,748 | 130 |
| 119,438 | 114 | 6  | 1,562 | 77  | 63 | 2 | 1,042 | 46 | 2,781 | 131 |
| 119,439 | 131 | 6  | 1,679 | 81  | 71 | 2 | 1,237 | 47 | 3,118 | 136 |
| 119,440 | 141 | 6  | 1,846 | 84  | 79 | 3 | 1,422 | 48 | 3,488 | 141 |
| 119,441 | 141 | 6  | 1,858 | 84  | 80 | 3 | 1,448 | 46 | 3,527 | 139 |
| 119,442 | 149 | 6  | 1,891 | 84  | 80 | 3 | 1,483 | 44 | 3,603 | 137 |
| 119,443 | 149 | 6  | 1,900 | 84  | 80 | 3 | 1,487 | 44 | 3,616 | 137 |
| 119,444 | 151 | 6  | 1,915 | 85  | 80 | 3 | 1,490 | 44 | 3,636 | 138 |
| 119,445 | 151 | 7  | 1,920 | 85  | 80 | 3 | 1,489 | 43 | 3,640 | 138 |
| 119,446 | 151 | 7  | 1,920 | 85  | 80 | 3 | 1,489 | 43 | 3,640 | 138 |
| 119,447 | 153 | 7  | 1,956 | 85  | 81 | 3 | 1,505 | 43 | 3,695 | 138 |
| 119,448 | 168 | 7  | 2,116 | 85  | 88 | 3 | 1,612 | 41 | 3,984 | 136 |
| 119,449 | 179 | 7  | 2,185 | 85  | 89 | 3 | 1,670 | 41 | 4,123 | 136 |
| 119,450 | 178 | 7  | 2,192 | 87  | 89 | 3 | 1,684 | 41 | 4,143 | 138 |
| 119,451 | 182 | 7  | 2,203 | 88  | 89 | 3 | 1,715 | 46 | 4,189 | 144 |
| 119,452 | 181 | 6  | 2,198 | 89  | 89 | 3 | 1,708 | 46 | 4,176 | 144 |
| 119,453 | 181 | 6  | 2,197 | 89  | 89 | 3 | 1,705 | 46 | 4,172 | 144 |
| 119,454 | 179 | 6  | 2,191 | 88  | 88 | 3 | 1,691 | 46 | 4,149 | 143 |
| 119,455 | 179 | 6  | 2,184 | 88  | 88 | 3 | 1,684 | 46 | 4,135 | 143 |
| 119,456 | 179 | 6  | 2,182 | 88  | 88 | 3 | 1,679 | 46 | 4,128 | 143 |
| 119,457 | 178 | 6  | 2,178 | 88  | 88 | 3 | 1,678 | 46 | 4,122 | 143 |
| 119,458 | 178 | 6  | 2,184 | 91  | 88 | 3 | 1,679 | 48 | 4,129 | 148 |
| 119,459 | 178 | 6  | 2,189 | 93  | 89 | 4 | 1,682 | 48 | 4,138 | 151 |
| 119,460 | 178 | 5  | 2,188 | 96  | 89 | 4 | 1,682 | 48 | 4,137 | 153 |
| 119,461 | 178 | 5  | 2,187 | 104 | 89 | 4 | 1,681 | 51 | 4,135 | 164 |
| 119,462 | 176 | 7  | 2,183 | 105 | 88 | 4 | 1,665 | 52 | 4,112 | 168 |

|         |     |   |       |     |    |   |       |    |       |     |
|---------|-----|---|-------|-----|----|---|-------|----|-------|-----|
| 119,463 | 176 | 7 | 2,174 | 113 | 88 | 4 | 1,661 | 53 | 4,099 | 177 |
| 119,464 | 175 | 7 | 2,161 | 116 | 87 | 5 | 1,651 | 54 | 4,074 | 182 |
| 119,465 | 175 | 7 | 2,155 | 117 | 87 | 5 | 1,648 | 54 | 4,065 | 183 |
| 119,466 | 174 | 6 | 2,153 | 119 | 87 | 5 | 1,648 | 55 | 4,062 | 185 |
| 119,467 | 174 | 6 | 2,145 | 119 | 87 | 5 | 1,643 | 56 | 4,049 | 186 |
| 119,468 | 174 | 5 | 2,142 | 119 | 87 | 5 | 1,639 | 56 | 4,042 | 185 |
| 119,469 | 174 | 5 | 2,141 | 119 | 87 | 5 | 1,636 | 56 | 4,038 | 185 |
| 119,470 | 174 | 4 | 2,133 | 120 | 87 | 5 | 1,627 | 56 | 4,021 | 185 |
| 119,471 | 174 | 4 | 2,130 | 122 | 87 | 5 | 1,622 | 57 | 4,013 | 188 |
| 119,472 | 166 | 4 | 2,103 | 123 | 86 | 5 | 1,611 | 57 | 3,966 | 189 |
| 119,473 | 166 | 4 | 2,099 | 123 | 87 | 5 | 1,626 | 59 | 3,978 | 191 |
| 119,474 | 164 | 6 | 2,082 | 132 | 87 | 5 | 1,623 | 61 | 3,956 | 204 |
| 119,475 | 158 | 6 | 1,853 | 131 | 86 | 5 | 1,610 | 61 | 3,707 | 203 |
| 119,476 | 150 | 6 | 1,778 | 128 | 81 | 5 | 1,545 | 58 | 3,554 | 197 |
| 119,477 | 161 | 6 | 1,806 | 130 | 83 | 5 | 1,618 | 58 | 3,668 | 199 |
| 119,478 | 148 | 6 | 1,483 | 131 | 67 | 5 | 1,443 | 58 | 3,141 | 200 |
| 119,479 | 149 | 6 | 1,484 | 133 | 69 | 5 | 1,446 | 58 | 3,148 | 202 |
| 119,480 | 149 | 7 | 1,497 | 132 | 70 | 5 | 1,457 | 58 | 3,173 | 202 |
| 119,481 | 149 | 7 | 1,501 | 133 | 70 | 5 | 1,459 | 58 | 3,179 | 203 |
| 119,482 | 148 | 7 | 1,451 | 135 | 69 | 5 | 1,435 | 59 | 3,103 | 206 |
| 119,483 | 147 | 7 | 1,395 | 121 | 66 | 5 | 1,400 | 55 | 3,008 | 188 |
| 119,484 | 147 | 7 | 1,393 | 121 | 66 | 5 | 1,398 | 55 | 3,004 | 188 |
| 119,485 | 145 | 7 | 1,303 | 113 | 63 | 5 | 1,325 | 49 | 2,836 | 174 |
| 119,486 | 133 | 6 | 1,157 | 67  | 54 | 3 | 1,190 | 28 | 2,534 | 104 |
| 119,487 | 132 | 6 | 1,134 | 68  | 55 | 3 | 1,186 | 28 | 2,507 | 105 |
| 119,488 | 88  | 7 | 931   | 68  | 43 | 3 | 907   | 29 | 1,969 | 107 |
| 119,489 | 88  | 7 | 919   | 74  | 37 | 3 | 893   | 29 | 1,937 | 113 |
| 119,490 | 71  | 7 | 796   | 74  | 29 | 3 | 695   | 29 | 1,591 | 113 |
| 119,491 | 61  | 7 | 628   | 71  | 19 | 2 | 508   | 28 | 1,216 | 108 |
| 119,492 | 61  | 7 | 613   | 71  | 19 | 2 | 480   | 28 | 1,173 | 108 |
| 119,493 | 53  | 7 | 575   | 71  | 19 | 2 | 445   | 28 | 1,092 | 108 |
| 119,494 | 52  | 7 | 566   | 71  | 19 | 2 | 440   | 28 | 1,077 | 108 |
| 119,495 | 50  | 7 | 551   | 70  | 19 | 2 | 437   | 27 | 1,057 | 106 |
| 119,496 | 50  | 7 | 548   | 71  | 19 | 2 | 438   | 30 | 1,055 | 110 |
| 119,497 | 49  | 8 | 528   | 73  | 19 | 2 | 429   | 36 | 1,025 | 119 |
| 119,498 | 48  | 8 | 510   | 74  | 18 | 2 | 420   | 37 | 996   | 121 |
| 119,499 | 33  | 8 | 350   | 73  | 11 | 2 | 313   | 37 | 707   | 120 |
| 119,500 | 22  | 8 | 280   | 70  | 10 | 2 | 255   | 31 | 567   | 111 |
| 119,501 | 22  | 8 | 271   | 70  | 10 | 2 | 243   | 31 | 546   | 111 |
| 119,502 | 18  | 8 | 255   | 72  | 10 | 2 | 207   | 31 | 490   | 113 |
| 119,503 | 18  | 8 | 253   | 71  | 10 | 2 | 206   | 33 | 487   | 114 |

|         |    |    |     |     |    |   |     |     |       |     |
|---------|----|----|-----|-----|----|---|-----|-----|-------|-----|
| 119,504 | 18 | 8  | 252 | 76  | 10 | 2 | 204 | 41  | 484   | 127 |
| 119,505 | 18 | 8  | 248 | 82  | 10 | 2 | 200 | 43  | 476   | 135 |
| 119,506 | 18 | 9  | 251 | 93  | 10 | 2 | 201 | 52  | 480   | 156 |
| 119,507 | 18 | 9  | 261 | 98  | 10 | 2 | 205 | 56  | 494   | 165 |
| 119,508 | 19 | 9  | 269 | 117 | 10 | 2 | 205 | 68  | 503   | 196 |
| 119,509 | 22 | 10 | 300 | 122 | 12 | 2 | 208 | 76  | 542   | 210 |
| 119,510 | 22 | 10 | 295 | 120 | 11 | 2 | 206 | 76  | 534   | 208 |
| 119,511 | 63 | 10 | 654 | 138 | 28 | 4 | 514 | 86  | 1,259 | 238 |
| 119,512 | 70 | 10 | 754 | 135 | 34 | 4 | 615 | 84  | 1,473 | 233 |
| 119,513 | 69 | 8  | 770 | 135 | 36 | 4 | 619 | 83  | 1,494 | 230 |
| 119,514 | 69 | 8  | 770 | 128 | 36 | 4 | 619 | 82  | 1,494 | 222 |
| 119,515 | 71 | 9  | 789 | 137 | 36 | 3 | 648 | 89  | 1,544 | 238 |
| 119,516 | 71 | 9  | 786 | 144 | 36 | 3 | 648 | 99  | 1,541 | 255 |
| 119,517 | 71 | 9  | 786 | 142 | 36 | 3 | 648 | 98  | 1,541 | 252 |
| 119,518 | 72 | 9  | 789 | 142 | 36 | 3 | 649 | 97  | 1,546 | 251 |
| 119,519 | 73 | 9  | 791 | 146 | 36 | 3 | 652 | 97  | 1,552 | 255 |
| 119,520 | 73 | 10 | 794 | 157 | 36 | 3 | 649 | 102 | 1,552 | 272 |
| 119,521 | 73 | 10 | 792 | 158 | 36 | 3 | 649 | 102 | 1,550 | 273 |
| 119,522 | 73 | 10 | 806 | 156 | 36 | 3 | 658 | 101 | 1,573 | 270 |
| 119,523 | 73 | 10 | 810 | 157 | 36 | 4 | 665 | 101 | 1,584 | 272 |
| 119,524 | 72 | 8  | 798 | 148 | 36 | 4 | 646 | 97  | 1,552 | 257 |
| 119,525 | 72 | 8  | 813 | 148 | 36 | 4 | 662 | 97  | 1,583 | 257 |
| 119,526 | 72 | 8  | 805 | 148 | 36 | 4 | 651 | 97  | 1,564 | 257 |
| 119,527 | 75 | 8  | 820 | 149 | 36 | 4 | 692 | 98  | 1,623 | 259 |
| 119,528 | 64 | 8  | 761 | 146 | 34 | 4 | 612 | 98  | 1,471 | 256 |
| 119,529 | 64 | 8  | 755 | 146 | 35 | 4 | 614 | 98  | 1,468 | 256 |
| 119,530 | 63 | 7  | 740 | 144 | 34 | 4 | 609 | 97  | 1,446 | 252 |
| 119,531 | 63 | 7  | 728 | 144 | 33 | 4 | 600 | 97  | 1,424 | 252 |
| 119,532 | 64 | 7  | 722 | 142 | 33 | 4 | 598 | 96  | 1,417 | 249 |
| 119,533 | 64 | 7  | 739 | 142 | 33 | 4 | 608 | 96  | 1,444 | 249 |
| 119,534 | 64 | 7  | 767 | 142 | 34 | 4 | 631 | 96  | 1,496 | 249 |
| 119,535 | 64 | 7  | 767 | 142 | 34 | 4 | 631 | 96  | 1,496 | 249 |
| 119,536 | 61 | 7  | 761 | 142 | 34 | 4 | 630 | 96  | 1,486 | 249 |
| 119,537 | 61 | 7  | 839 | 142 | 35 | 4 | 658 | 96  | 1,593 | 249 |
| 119,538 | 61 | 6  | 840 | 131 | 35 | 4 | 660 | 94  | 1,596 | 235 |
| 119,539 | 61 | 6  | 846 | 132 | 35 | 4 | 662 | 94  | 1,604 | 236 |
| 119,540 | 61 | 6  | 846 | 134 | 35 | 4 | 662 | 95  | 1,604 | 239 |
| 119,541 | 61 | 6  | 848 | 134 | 35 | 4 | 664 | 94  | 1,608 | 238 |
| 119,542 | 61 | 6  | 856 | 134 | 35 | 4 | 666 | 94  | 1,618 | 238 |
| 119,543 | 61 | 6  | 856 | 134 | 35 | 4 | 666 | 94  | 1,618 | 238 |
| 119,544 | 61 | 6  | 856 | 134 | 35 | 4 | 666 | 94  | 1,618 | 238 |

|         |    |    |     |     |    |    |     |     |       |     |
|---------|----|----|-----|-----|----|----|-----|-----|-------|-----|
| 119,545 | 61 | 6  | 856 | 140 | 35 | 4  | 666 | 95  | 1,618 | 245 |
| 119,546 | 61 | 6  | 854 | 140 | 35 | 5  | 664 | 95  | 1,614 | 246 |
| 119,547 | 67 | 6  | 969 | 138 | 37 | 5  | 761 | 92  | 1,834 | 241 |
| 119,548 | 67 | 5  | 975 | 136 | 37 | 5  | 765 | 86  | 1,844 | 232 |
| 119,549 | 67 | 5  | 980 | 135 | 37 | 5  | 767 | 85  | 1,851 | 230 |
| 119,550 | 67 | 5  | 984 | 136 | 37 | 5  | 771 | 85  | 1,859 | 231 |
| 119,551 | 67 | 5  | 980 | 136 | 37 | 5  | 768 | 85  | 1,852 | 231 |
| 119,552 | 67 | 5  | 981 | 134 | 37 | 5  | 769 | 85  | 1,854 | 229 |
| 119,553 | 67 | 5  | 982 | 134 | 37 | 5  | 772 | 83  | 1,858 | 227 |
| 119,554 | 67 | 5  | 982 | 129 | 37 | 5  | 773 | 75  | 1,859 | 214 |
| 119,555 | 67 | 5  | 982 | 123 | 37 | 5  | 773 | 73  | 1,859 | 206 |
| 119,556 | 67 | 4  | 981 | 116 | 37 | 5  | 772 | 63  | 1,857 | 188 |
| 119,557 | 67 | 4  | 979 | 120 | 37 | 5  | 772 | 64  | 1,855 | 193 |
| 119,558 | 67 | 4  | 969 | 133 | 37 | 5  | 768 | 73  | 1,841 | 215 |
| 119,559 | 66 | 8  | 961 | 185 | 37 | 10 | 766 | 101 | 1,830 | 304 |
| 119,560 | 63 | 7  | 923 | 201 | 35 | 11 | 762 | 96  | 1,783 | 315 |
| 119,561 | 47 | 7  | 789 | 206 | 28 | 10 | 678 | 99  | 1,542 | 322 |
| 119,562 | 23 | 7  | 568 | 207 | 18 | 8  | 455 | 89  | 1,064 | 311 |
| 119,563 | 16 | 7  | 469 | 211 | 12 | 8  | 354 | 96  | 851   | 322 |
| 119,564 | 16 | 7  | 457 | 211 | 10 | 8  | 356 | 96  | 839   | 322 |
| 119,565 | 14 | 6  | 442 | 198 | 10 | 8  | 332 | 88  | 798   | 300 |
| 119,566 | 14 | 6  | 439 | 199 | 10 | 8  | 328 | 88  | 791   | 301 |
| 119,567 | 14 | 6  | 445 | 193 | 10 | 8  | 328 | 78  | 797   | 285 |
| 119,568 | 13 | 6  | 442 | 189 | 10 | 8  | 328 | 78  | 793   | 281 |
| 119,569 | 13 | 6  | 450 | 190 | 10 | 8  | 328 | 78  | 801   | 282 |
| 119,570 | 12 | 6  | 451 | 190 | 10 | 8  | 325 | 80  | 798   | 284 |
| 119,571 | 12 | 5  | 445 | 182 | 10 | 8  | 325 | 78  | 792   | 273 |
| 119,572 | 12 | 5  | 453 | 191 | 10 | 7  | 326 | 82  | 801   | 285 |
| 119,573 | 12 | 6  | 446 | 230 | 10 | 7  | 319 | 86  | 787   | 329 |
| 119,574 | 12 | 6  | 450 | 242 | 12 | 7  | 324 | 91  | 798   | 346 |
| 119,575 | 12 | 9  | 440 | 255 | 11 | 7  | 323 | 96  | 786   | 367 |
| 119,576 | 12 | 9  | 425 | 257 | 11 | 7  | 309 | 96  | 757   | 369 |
| 119,577 | 12 | 9  | 411 | 264 | 10 | 8  | 287 | 103 | 720   | 384 |
| 119,578 | 9  | 9  | 360 | 263 | 9  | 8  | 233 | 103 | 611   | 383 |
| 119,579 | 12 | 10 | 410 | 270 | 10 | 8  | 239 | 103 | 671   | 391 |
| 119,580 | 12 | 11 | 413 | 281 | 9  | 8  | 238 | 108 | 672   | 408 |
| 119,581 | 12 | 11 | 411 | 292 | 9  | 9  | 235 | 110 | 667   | 422 |
| 119,582 | 12 | 11 | 404 | 306 | 9  | 9  | 235 | 112 | 660   | 438 |
| 119,583 | 11 | 11 | 404 | 308 | 9  | 9  | 233 | 122 | 657   | 450 |
| 119,584 | 11 | 11 | 386 | 308 | 9  | 9  | 223 | 123 | 629   | 451 |
| 119,585 | 11 | 11 | 358 | 310 | 8  | 9  | 201 | 126 | 578   | 456 |

|         |    |    |     |     |    |    |     |     |     |     |
|---------|----|----|-----|-----|----|----|-----|-----|-----|-----|
| 119,586 | 11 | 11 | 318 | 312 | 8  | 10 | 195 | 126 | 532 | 459 |
| 119,587 | 11 | 11 | 302 | 313 | 8  | 10 | 188 | 126 | 509 | 460 |
| 119,588 | 11 | 11 | 281 | 314 | 7  | 10 | 173 | 126 | 472 | 461 |
| 119,589 | 11 | 11 | 281 | 317 | 7  | 10 | 171 | 128 | 470 | 466 |
| 119,590 | 11 | 12 | 277 | 315 | 7  | 10 | 169 | 130 | 464 | 467 |
| 119,591 | 11 | 12 | 276 | 317 | 7  | 10 | 167 | 131 | 461 | 470 |
| 119,592 | 11 | 20 | 284 | 405 | 7  | 12 | 170 | 170 | 472 | 607 |
| 119,593 | 11 | 23 | 281 | 458 | 7  | 12 | 174 | 192 | 473 | 685 |
| 119,594 | 11 | 23 | 276 | 472 | 7  | 13 | 170 | 198 | 464 | 706 |
| 119,595 | 10 | 23 | 266 | 503 | 7  | 13 | 165 | 202 | 448 | 741 |
| 119,596 | 12 | 28 | 262 | 604 | 7  | 16 | 159 | 246 | 440 | 894 |
| 119,597 | 11 | 28 | 231 | 610 | 7  | 16 | 122 | 252 | 371 | 906 |
| 119,598 | 9  | 27 | 232 | 613 | 7  | 16 | 115 | 253 | 363 | 909 |
| 119,599 | 9  | 28 | 230 | 632 | 7  | 16 | 111 | 257 | 357 | 933 |
| 119,600 | 9  | 28 | 227 | 642 | 7  | 16 | 112 | 262 | 355 | 948 |
| 119,601 | 9  | 28 | 223 | 647 | 7  | 16 | 108 | 263 | 347 | 954 |
| 119,602 | 9  | 28 | 223 | 650 | 7  | 16 | 107 | 264 | 346 | 958 |
| 119,603 | 9  | 28 | 221 | 655 | 7  | 16 | 107 | 266 | 344 | 965 |
| 119,604 | 9  | 28 | 220 | 656 | 7  | 16 | 104 | 265 | 340 | 965 |
| 119,605 | 9  | 28 | 221 | 647 | 7  | 16 | 104 | 262 | 341 | 953 |
| 119,606 | 10 | 28 | 223 | 656 | 7  | 16 | 107 | 265 | 347 | 965 |
| 119,607 | 10 | 28 | 223 | 656 | 7  | 16 | 107 | 265 | 347 | 965 |
| 119,608 | 10 | 28 | 223 | 653 | 7  | 16 | 107 | 264 | 347 | 961 |
| 119,609 | 10 | 28 | 222 | 648 | 7  | 16 | 107 | 268 | 346 | 960 |
| 119,610 | 10 | 24 | 222 | 577 | 7  | 11 | 107 | 229 | 346 | 841 |
| 119,611 | 11 | 24 | 226 | 554 | 7  | 10 | 114 | 232 | 358 | 820 |
| 119,612 | 11 | 24 | 226 | 549 | 7  | 10 | 116 | 231 | 360 | 814 |
| 119,613 | 10 | 24 | 226 | 525 | 7  | 10 | 115 | 224 | 358 | 783 |
| 119,614 | 10 | 24 | 228 | 527 | 7  | 10 | 117 | 224 | 362 | 785 |
| 119,615 | 14 | 24 | 229 | 527 | 7  | 10 | 126 | 224 | 376 | 785 |
| 119,616 | 14 | 24 | 230 | 526 | 7  | 10 | 127 | 224 | 378 | 784 |
| 119,617 | 14 | 24 | 230 | 525 | 7  | 10 | 129 | 224 | 380 | 783 |
| 119,618 | 14 | 24 | 225 | 525 | 7  | 10 | 129 | 224 | 375 | 783 |
| 119,619 | 14 | 24 | 225 | 526 | 7  | 10 | 128 | 224 | 374 | 784 |
| 119,620 | 14 | 24 | 217 | 525 | 7  | 10 | 128 | 224 | 366 | 783 |
| 119,621 | 17 | 24 | 238 | 525 | 8  | 10 | 156 | 222 | 419 | 781 |
| 119,622 | 23 | 24 | 253 | 509 | 9  | 10 | 179 | 215 | 464 | 758 |
| 119,623 | 23 | 23 | 248 | 471 | 10 | 10 | 187 | 211 | 468 | 715 |
| 119,624 | 23 | 23 | 247 | 472 | 10 | 10 | 189 | 212 | 469 | 717 |
| 119,625 | 23 | 23 | 240 | 463 | 10 | 10 | 184 | 210 | 457 | 706 |
| 119,626 | 29 | 24 | 296 | 461 | 11 | 10 | 204 | 214 | 540 | 709 |

|         |    |    |       |     |    |    |     |     |       |     |
|---------|----|----|-------|-----|----|----|-----|-----|-------|-----|
| 119,627 | 33 | 24 | 313   | 460 | 11 | 10 | 211 | 216 | 568   | 710 |
| 119,628 | 33 | 24 | 324   | 456 | 12 | 9  | 230 | 211 | 599   | 700 |
| 119,629 | 33 | 24 | 303   | 458 | 12 | 9  | 228 | 213 | 576   | 704 |
| 119,630 | 31 | 23 | 272   | 453 | 9  | 9  | 219 | 213 | 531   | 698 |
| 119,631 | 31 | 22 | 269   | 445 | 9  | 9  | 221 | 208 | 530   | 684 |
| 119,632 | 31 | 22 | 266   | 434 | 9  | 8  | 219 | 206 | 525   | 670 |
| 119,633 | 31 | 22 | 318   | 422 | 13 | 8  | 245 | 206 | 607   | 658 |
| 119,634 | 31 | 22 | 342   | 417 | 13 | 8  | 267 | 192 | 653   | 639 |
| 119,635 | 33 | 22 | 409   | 417 | 13 | 8  | 312 | 192 | 767   | 639 |
| 119,636 | 33 | 22 | 429   | 418 | 14 | 8  | 330 | 192 | 806   | 640 |
| 119,637 | 33 | 22 | 432   | 417 | 14 | 7  | 331 | 194 | 810   | 640 |
| 119,638 | 33 | 22 | 442   | 415 | 14 | 7  | 338 | 194 | 827   | 638 |
| 119,639 | 33 | 22 | 446   | 412 | 14 | 7  | 342 | 191 | 835   | 632 |
| 119,640 | 33 | 13 | 445   | 321 | 14 | 5  | 342 | 152 | 834   | 491 |
| 119,641 | 33 | 13 | 448   | 321 | 15 | 5  | 346 | 152 | 842   | 491 |
| 119,642 | 33 | 11 | 443   | 273 | 15 | 6  | 344 | 132 | 835   | 422 |
| 119,643 | 33 | 11 | 442   | 287 | 15 | 6  | 352 | 137 | 842   | 441 |
| 119,644 | 33 | 11 | 441   | 289 | 15 | 6  | 349 | 140 | 838   | 446 |
| 119,645 | 32 | 11 | 437   | 282 | 15 | 5  | 349 | 136 | 833   | 434 |
| 119,646 | 35 | 12 | 466   | 262 | 15 | 5  | 406 | 138 | 922   | 417 |
| 119,647 | 34 | 7  | 482   | 161 | 15 | 3  | 464 | 97  | 995   | 268 |
| 119,648 | 37 | 7  | 487   | 155 | 14 | 2  | 484 | 95  | 1,022 | 259 |
| 119,649 | 39 | 6  | 479   | 125 | 14 | 2  | 480 | 88  | 1,012 | 221 |
| 119,650 | 39 | 6  | 475   | 134 | 14 | 3  | 485 | 92  | 1,013 | 235 |
| 119,651 | 39 | 6  | 473   | 136 | 14 | 3  | 484 | 92  | 1,010 | 237 |
| 119,652 | 39 | 6  | 475   | 134 | 14 | 3  | 489 | 91  | 1,017 | 234 |
| 119,653 | 40 | 6  | 477   | 131 | 14 | 3  | 490 | 89  | 1,021 | 229 |
| 119,654 | 42 | 6  | 478   | 131 | 14 | 3  | 492 | 90  | 1,026 | 230 |
| 119,655 | 42 | 6  | 483   | 123 | 14 | 3  | 495 | 88  | 1,034 | 220 |
| 119,656 | 42 | 6  | 482   | 123 | 14 | 3  | 495 | 89  | 1,033 | 221 |
| 119,657 | 41 | 6  | 487   | 123 | 14 | 3  | 501 | 89  | 1,043 | 221 |
| 119,658 | 41 | 6  | 487   | 123 | 14 | 3  | 501 | 89  | 1,043 | 221 |
| 119,659 | 41 | 6  | 485   | 122 | 14 | 3  | 496 | 89  | 1,036 | 220 |
| 119,660 | 46 | 6  | 524   | 114 | 15 | 3  | 503 | 77  | 1,088 | 200 |
| 119,661 | 46 | 6  | 562   | 115 | 16 | 3  | 509 | 77  | 1,133 | 201 |
| 119,662 | 50 | 6  | 733   | 114 | 20 | 3  | 580 | 69  | 1,383 | 192 |
| 119,663 | 59 | 6  | 1,380 | 106 | 28 | 3  | 728 | 64  | 2,195 | 179 |
| 119,664 | 64 | 6  | 1,422 | 104 | 29 | 3  | 749 | 64  | 2,264 | 177 |
| 119,665 | 65 | 6  | 1,446 | 105 | 30 | 3  | 766 | 64  | 2,307 | 178 |
| 119,666 | 63 | 6  | 1,492 | 107 | 34 | 3  | 798 | 66  | 2,387 | 182 |
| 119,667 | 63 | 6  | 1,491 | 108 | 34 | 3  | 796 | 66  | 2,384 | 183 |

|         |    |   |       |     |    |   |     |    |       |     |
|---------|----|---|-------|-----|----|---|-----|----|-------|-----|
| 119,668 | 63 | 6 | 1,530 | 108 | 34 | 3 | 813 | 66 | 2,440 | 183 |
| 119,669 | 63 | 6 | 1,549 | 107 | 37 | 3 | 832 | 67 | 2,481 | 183 |
| 119,670 | 63 | 6 | 1,554 | 107 | 37 | 3 | 832 | 67 | 2,486 | 183 |
| 119,671 | 63 | 6 | 1,546 | 107 | 37 | 3 | 829 | 67 | 2,475 | 183 |
| 119,672 | 60 | 6 | 1,546 | 112 | 36 | 3 | 825 | 71 | 2,467 | 192 |
| 119,673 | 54 | 6 | 1,528 | 113 | 35 | 3 | 801 | 73 | 2,418 | 195 |
| 119,674 | 56 | 6 | 1,544 | 114 | 36 | 3 | 805 | 75 | 2,441 | 198 |
| 119,675 | 56 | 6 | 1,555 | 117 | 36 | 3 | 804 | 83 | 2,451 | 209 |
| 119,676 | 56 | 6 | 1,553 | 114 | 34 | 3 | 804 | 80 | 2,447 | 203 |
| 119,677 | 55 | 2 | 1,538 | 103 | 34 | 3 | 796 | 69 | 2,423 | 177 |
| 119,678 | 51 | 2 | 1,522 | 104 | 34 | 3 | 788 | 69 | 2,395 | 178 |
| 119,679 | 50 | 3 | 1,502 | 102 | 33 | 3 | 764 | 67 | 2,349 | 175 |
| 119,680 | 50 | 3 | 1,554 | 102 | 37 | 3 | 829 | 66 | 2,470 | 174 |
| 119,681 | 67 | 3 | 1,703 | 103 | 46 | 3 | 980 | 69 | 2,796 | 178 |
| 119,682 | 72 | 3 | 1,725 | 100 | 47 | 3 | 991 | 69 | 2,835 | 175 |
| 119,683 | 73 | 3 | 1,725 | 101 | 47 | 3 | 989 | 69 | 2,834 | 176 |
| 119,684 | 73 | 3 | 1,712 | 99  | 44 | 3 | 987 | 67 | 2,816 | 172 |
| 119,685 | 73 | 3 | 1,701 | 99  | 44 | 3 | 983 | 70 | 2,801 | 175 |
| 119,686 | 72 | 3 | 1,641 | 102 | 44 | 3 | 948 | 75 | 2,705 | 183 |
| 119,687 | 73 | 3 | 1,621 | 103 | 43 | 3 | 932 | 75 | 2,669 | 184 |
| 119,688 | 73 | 3 | 1,624 | 102 | 43 | 3 | 935 | 74 | 2,675 | 182 |
| 119,689 | 73 | 3 | 1,614 | 103 | 43 | 3 | 925 | 74 | 2,655 | 183 |
| 119,690 | 73 | 3 | 1,610 | 103 | 43 | 3 | 923 | 74 | 2,649 | 183 |
| 119,691 | 73 | 3 | 1,610 | 103 | 43 | 3 | 923 | 74 | 2,649 | 183 |
| 119,692 | 73 | 2 | 1,607 | 98  | 42 | 2 | 921 | 70 | 2,643 | 172 |
| 119,693 | 73 | 2 | 1,608 | 98  | 42 | 2 | 925 | 70 | 2,648 | 172 |
| 119,694 | 73 | 2 | 1,612 | 86  | 43 | 2 | 920 | 65 | 2,648 | 155 |
| 119,695 | 73 | 2 | 1,611 | 88  | 43 | 2 | 917 | 64 | 2,644 | 156 |
| 119,696 | 73 | 2 | 1,621 | 85  | 43 | 2 | 940 | 62 | 2,677 | 151 |
| 119,697 | 70 | 1 | 1,586 | 78  | 43 | 2 | 877 | 57 | 2,576 | 138 |
| 119,698 | 68 | 1 | 1,550 | 78  | 42 | 1 | 803 | 53 | 2,463 | 133 |
| 119,699 | 64 | 1 | 1,533 | 76  | 42 | 1 | 772 | 46 | 2,411 | 124 |
| 119,700 | 63 | 1 | 1,531 | 72  | 42 | 1 | 774 | 44 | 2,410 | 118 |
| 119,701 | 63 | 1 | 1,534 | 61  | 42 | 0 | 771 | 40 | 2,410 | 102 |
| 119,702 | 63 | 1 | 1,534 | 62  | 42 | 0 | 770 | 42 | 2,409 | 105 |
| 119,703 | 63 | 2 | 1,532 | 62  | 42 | 0 | 769 | 50 | 2,406 | 114 |
| 119,704 | 62 | 2 | 1,530 | 60  | 42 | 0 | 769 | 50 | 2,403 | 112 |
| 119,705 | 61 | 2 | 1,560 | 59  | 42 | 0 | 788 | 49 | 2,451 | 110 |
| 119,706 | 61 | 2 | 1,555 | 58  | 42 | 0 | 786 | 49 | 2,444 | 109 |
| 119,707 | 63 | 2 | 1,693 | 58  | 44 | 0 | 841 | 48 | 2,641 | 108 |
| 119,708 | 63 | 2 | 1,708 | 60  | 44 | 1 | 839 | 48 | 2,654 | 111 |



|         |    |   |       |     |    |   |       |    |       |     |
|---------|----|---|-------|-----|----|---|-------|----|-------|-----|
| 119,709 | 61 | 2 | 1,703 | 63  | 43 | 2 | 837   | 49 | 2,644 | 116 |
| 119,710 | 58 | 3 | 1,694 | 63  | 43 | 2 | 836   | 49 | 2,631 | 117 |
| 119,711 | 64 | 3 | 1,729 | 64  | 46 | 2 | 913   | 50 | 2,752 | 119 |
| 119,712 | 64 | 3 | 1,658 | 113 | 46 | 2 | 898   | 62 | 2,666 | 180 |
| 119,713 | 62 | 4 | 1,582 | 139 | 43 | 3 | 855   | 73 | 2,542 | 219 |
| 119,714 | 55 | 4 | 945   | 141 | 35 | 3 | 716   | 74 | 1,751 | 222 |
| 119,715 | 52 | 5 | 922   | 149 | 34 | 3 | 717   | 79 | 1,725 | 236 |
| 119,716 | 54 | 5 | 960   | 157 | 36 | 3 | 744   | 80 | 1,794 | 245 |
| 119,717 | 54 | 5 | 933   | 158 | 33 | 3 | 730   | 80 | 1,750 | 246 |
| 119,718 | 54 | 5 | 894   | 160 | 33 | 3 | 710   | 81 | 1,691 | 249 |
| 119,719 | 54 | 5 | 891   | 160 | 32 | 3 | 711   | 83 | 1,688 | 251 |
| 119,720 | 56 | 6 | 889   | 175 | 30 | 3 | 703   | 83 | 1,678 | 267 |
| 119,721 | 56 | 6 | 885   | 180 | 30 | 3 | 698   | 87 | 1,669 | 276 |
| 119,722 | 60 | 6 | 885   | 183 | 30 | 3 | 698   | 87 | 1,673 | 279 |
| 119,723 | 61 | 6 | 887   | 183 | 31 | 3 | 695   | 89 | 1,674 | 281 |
| 119,724 | 64 | 6 | 925   | 183 | 30 | 3 | 752   | 85 | 1,771 | 277 |
| 119,725 | 65 | 6 | 951   | 180 | 33 | 3 | 765   | 76 | 1,814 | 265 |
| 119,726 | 65 | 6 | 940   | 180 | 33 | 3 | 764   | 76 | 1,802 | 265 |
| 119,727 | 76 | 6 | 1,052 | 182 | 36 | 3 | 859   | 76 | 2,023 | 267 |
| 119,728 | 71 | 6 | 1,011 | 182 | 35 | 3 | 842   | 76 | 1,959 | 267 |
| 119,729 | 70 | 6 | 981   | 181 | 32 | 3 | 797   | 76 | 1,880 | 266 |
| 119,730 | 70 | 5 | 979   | 178 | 32 | 3 | 797   | 74 | 1,878 | 260 |
| 119,731 | 71 | 5 | 990   | 178 | 31 | 3 | 788   | 75 | 1,880 | 261 |
| 119,732 | 54 | 5 | 848   | 175 | 23 | 3 | 639   | 73 | 1,564 | 256 |
| 119,733 | 49 | 5 | 823   | 173 | 22 | 3 | 627   | 73 | 1,521 | 254 |
| 119,734 | 48 | 5 | 809   | 173 | 22 | 3 | 622   | 73 | 1,501 | 254 |
| 119,735 | 48 | 5 | 796   | 174 | 21 | 3 | 607   | 74 | 1,472 | 256 |
| 119,736 | 48 | 5 | 783   | 174 | 21 | 3 | 589   | 71 | 1,441 | 253 |
| 119,737 | 48 | 5 | 817   | 171 | 23 | 3 | 595   | 66 | 1,483 | 245 |
| 119,738 | 47 | 5 | 817   | 170 | 24 | 3 | 590   | 66 | 1,478 | 244 |
| 119,739 | 47 | 5 | 811   | 170 | 24 | 3 | 587   | 65 | 1,469 | 243 |
| 119,740 | 52 | 5 | 929   | 169 | 30 | 3 | 795   | 65 | 1,806 | 242 |
| 119,741 | 57 | 5 | 990   | 169 | 32 | 3 | 861   | 65 | 1,940 | 242 |
| 119,742 | 59 | 5 | 1,030 | 170 | 33 | 3 | 882   | 66 | 2,004 | 244 |
| 119,743 | 59 | 5 | 1,088 | 171 | 35 | 3 | 902   | 65 | 2,084 | 244 |
| 119,744 | 71 | 5 | 1,226 | 171 | 40 | 3 | 1,033 | 65 | 2,370 | 244 |
| 119,745 | 72 | 5 | 1,277 | 165 | 42 | 3 | 1,092 | 64 | 2,483 | 237 |
| 119,746 | 72 | 5 | 1,273 | 165 | 43 | 3 | 1,094 | 64 | 2,482 | 237 |
| 119,747 | 75 | 5 | 1,280 | 153 | 44 | 3 | 1,088 | 63 | 2,487 | 224 |
| 119,748 | 75 | 5 | 1,281 | 153 | 45 | 3 | 1,090 | 63 | 2,491 | 224 |
| 119,749 | 85 | 5 | 1,396 | 153 | 53 | 3 | 1,127 | 63 | 2,661 | 224 |

|         |     |    |       |     |     |   |       |     |       |     |
|---------|-----|----|-------|-----|-----|---|-------|-----|-------|-----|
| 119,750 | 86  | 5  | 1,410 | 155 | 54  | 4 | 1,132 | 63  | 2,682 | 227 |
| 119,751 | 86  | 5  | 1,407 | 154 | 54  | 4 | 1,126 | 63  | 2,673 | 226 |
| 119,752 | 96  | 5  | 1,515 | 156 | 57  | 4 | 1,161 | 64  | 2,829 | 229 |
| 119,753 | 142 | 6  | 2,402 | 157 | 98  | 4 | 1,492 | 66  | 4,134 | 233 |
| 119,754 | 151 | 5  | 2,747 | 159 | 111 | 4 | 1,658 | 61  | 4,667 | 229 |
| 119,755 | 153 | 5  | 2,774 | 160 | 111 | 4 | 1,666 | 62  | 4,704 | 231 |
| 119,756 | 152 | 6  | 2,781 | 160 | 112 | 4 | 1,675 | 62  | 4,720 | 232 |
| 119,757 | 150 | 6  | 2,706 | 160 | 110 | 4 | 1,632 | 62  | 4,598 | 232 |
| 119,758 | 150 | 6  | 2,643 | 160 | 110 | 4 | 1,619 | 63  | 4,522 | 233 |
| 119,759 | 154 | 6  | 2,672 | 157 | 111 | 2 | 1,640 | 62  | 4,577 | 227 |
| 119,760 | 154 | 5  | 2,660 | 156 | 111 | 2 | 1,636 | 61  | 4,561 | 224 |
| 119,761 | 155 | 5  | 2,652 | 159 | 111 | 2 | 1,641 | 62  | 4,559 | 228 |
| 119,762 | 149 | 5  | 2,587 | 182 | 109 | 2 | 1,561 | 70  | 4,406 | 259 |
| 119,763 | 166 | 6  | 2,800 | 173 | 111 | 3 | 1,621 | 68  | 4,698 | 250 |
| 119,764 | 164 | 6  | 2,789 | 173 | 112 | 3 | 1,609 | 65  | 4,674 | 247 |
| 119,765 | 167 | 6  | 2,807 | 189 | 112 | 3 | 1,621 | 71  | 4,707 | 269 |
| 119,766 | 171 | 5  | 2,842 | 187 | 113 | 3 | 1,622 | 70  | 4,748 | 265 |
| 119,767 | 169 | 5  | 2,788 | 176 | 110 | 3 | 1,582 | 69  | 4,649 | 253 |
| 119,768 | 188 | 5  | 2,853 | 174 | 119 | 3 | 1,629 | 68  | 4,789 | 250 |
| 119,769 | 190 | 4  | 2,859 | 160 | 119 | 3 | 1,645 | 66  | 4,813 | 233 |
| 119,770 | 190 | 9  | 2,958 | 181 | 120 | 4 | 1,681 | 80  | 4,949 | 274 |
| 119,771 | 193 | 9  | 2,978 | 184 | 121 | 4 | 1,699 | 80  | 4,991 | 277 |
| 119,772 | 196 | 9  | 3,047 | 177 | 121 | 4 | 1,729 | 77  | 5,093 | 267 |
| 119,773 | 198 | 9  | 3,185 | 175 | 127 | 4 | 1,813 | 77  | 5,323 | 265 |
| 119,774 | 199 | 9  | 3,248 | 175 | 126 | 4 | 1,843 | 75  | 5,416 | 263 |
| 119,775 | 195 | 9  | 3,228 | 172 | 127 | 4 | 1,820 | 77  | 5,370 | 262 |
| 119,776 | 193 | 9  | 3,211 | 174 | 125 | 5 | 1,823 | 82  | 5,352 | 270 |
| 119,777 | 182 | 9  | 3,095 | 191 | 122 | 5 | 1,720 | 109 | 5,119 | 314 |
| 119,778 | 182 | 10 | 3,092 | 191 | 122 | 5 | 1,719 | 118 | 5,115 | 324 |
| 119,779 | 182 | 11 | 3,095 | 205 | 122 | 5 | 1,724 | 124 | 5,123 | 345 |
| 119,780 | 182 | 11 | 3,094 | 208 | 122 | 5 | 1,722 | 124 | 5,120 | 348 |
| 119,781 | 182 | 11 | 3,085 | 210 | 122 | 5 | 1,721 | 124 | 5,110 | 350 |
| 119,782 | 181 | 12 | 3,066 | 220 | 122 | 5 | 1,714 | 130 | 5,083 | 367 |
| 119,783 | 181 | 12 | 3,059 | 220 | 121 | 5 | 1,710 | 129 | 5,071 | 366 |
| 119,784 | 181 | 12 | 3,057 | 221 | 121 | 5 | 1,709 | 130 | 5,068 | 368 |
| 119,785 | 181 | 12 | 3,054 | 223 | 121 | 5 | 1,707 | 131 | 5,063 | 371 |
| 119,786 | 181 | 12 | 3,050 | 222 | 121 | 5 | 1,708 | 130 | 5,060 | 369 |
| 119,787 | 180 | 12 | 3,020 | 221 | 120 | 5 | 1,702 | 130 | 5,022 | 368 |
| 119,788 | 180 | 12 | 3,012 | 224 | 119 | 5 | 1,702 | 130 | 5,013 | 371 |
| 119,789 | 178 | 12 | 2,931 | 226 | 114 | 5 | 1,507 | 130 | 4,730 | 373 |
| 119,790 | 176 | 12 | 2,908 | 229 | 112 | 5 | 1,496 | 131 | 4,692 | 377 |

|         |     |    |       |     |     |   |       |     |       |     |
|---------|-----|----|-------|-----|-----|---|-------|-----|-------|-----|
| 119,791 | 171 | 13 | 2,847 | 235 | 110 | 6 | 1,431 | 135 | 4,559 | 389 |
| 119,792 | 171 | 13 | 2,847 | 235 | 110 | 6 | 1,427 | 136 | 4,555 | 390 |
| 119,793 | 169 | 13 | 2,811 | 233 | 109 | 6 | 1,409 | 135 | 4,498 | 387 |
| 119,794 | 169 | 13 | 2,751 | 233 | 107 | 6 | 1,388 | 135 | 4,415 | 387 |
| 119,795 | 158 | 13 | 2,619 | 233 | 102 | 6 | 1,256 | 135 | 4,135 | 387 |
| 119,796 | 157 | 13 | 2,563 | 233 | 99  | 6 | 1,194 | 134 | 4,013 | 386 |
| 119,797 | 157 | 13 | 2,563 | 233 | 98  | 6 | 1,193 | 134 | 4,011 | 386 |
| 119,798 | 154 | 13 | 2,550 | 231 | 97  | 6 | 1,176 | 134 | 3,977 | 384 |
| 119,799 | 154 | 13 | 2,549 | 231 | 96  | 6 | 1,179 | 134 | 3,978 | 384 |
| 119,800 | 144 | 13 | 2,428 | 231 | 88  | 6 | 1,138 | 134 | 3,798 | 384 |
| 119,801 | 144 | 13 | 2,411 | 228 | 87  | 5 | 1,133 | 135 | 3,775 | 381 |
| 119,802 | 134 | 13 | 2,301 | 229 | 84  | 5 | 1,100 | 135 | 3,619 | 382 |
| 119,803 | 104 | 13 | 1,970 | 228 | 59  | 5 | 908   | 134 | 3,041 | 380 |
| 119,804 | 88  | 12 | 1,413 | 226 | 43  | 5 | 768   | 130 | 2,312 | 373 |
| 119,805 | 79  | 12 | 1,068 | 224 | 30  | 5 | 599   | 126 | 1,776 | 367 |
| 119,806 | 77  | 12 | 1,036 | 223 | 30  | 5 | 588   | 125 | 1,731 | 365 |
| 119,807 | 77  | 12 | 1,015 | 223 | 29  | 5 | 572   | 124 | 1,693 | 364 |
| 119,808 | 77  | 12 | 1,011 | 223 | 29  | 5 | 571   | 124 | 1,688 | 364 |
| 119,809 | 77  | 12 | 1,005 | 223 | 29  | 5 | 571   | 124 | 1,682 | 364 |
| 119,810 | 74  | 12 | 972   | 219 | 28  | 5 | 554   | 123 | 1,628 | 359 |
| 119,811 | 74  | 12 | 974   | 218 | 29  | 5 | 557   | 122 | 1,634 | 357 |
| 119,812 | 73  | 12 | 972   | 194 | 29  | 5 | 551   | 114 | 1,625 | 325 |
| 119,813 | 73  | 12 | 963   | 194 | 27  | 5 | 548   | 114 | 1,611 | 325 |
| 119,814 | 55  | 10 | 744   | 129 | 24  | 3 | 486   | 96  | 1,309 | 238 |
| 119,815 | 55  | 10 | 741   | 129 | 23  | 3 | 486   | 96  | 1,305 | 238 |
| 119,816 | 50  | 10 | 711   | 111 | 23  | 3 | 468   | 89  | 1,252 | 213 |
| 119,817 | 45  | 10 | 656   | 104 | 22  | 3 | 447   | 83  | 1,170 | 200 |
| 119,818 | 44  | 10 | 647   | 104 | 22  | 3 | 440   | 83  | 1,153 | 200 |
| 119,819 | 23  | 10 | 557   | 110 | 12  | 3 | 353   | 86  | 945   | 209 |
| 119,820 | 21  | 10 | 540   | 115 | 12  | 3 | 329   | 90  | 902   | 218 |
| 119,821 | 25  | 5  | 457   | 115 | 12  | 4 | 315   | 97  | 809   | 221 |
| 119,822 | 20  | 6  | 454   | 116 | 12  | 4 | 305   | 101 | 791   | 227 |
| 119,823 | 21  | 7  | 390   | 118 | 12  | 4 | 282   | 98  | 705   | 227 |
| 119,824 | 16  | 7  | 254   | 120 | 6   | 4 | 200   | 99  | 476   | 230 |
| 119,825 | 14  | 7  | 179   | 120 | 7   | 4 | 157   | 99  | 357   | 230 |
| 119,826 | 14  | 7  | 148   | 119 | 5   | 4 | 116   | 98  | 283   | 228 |
| 119,827 | 14  | 7  | 129   | 117 | 4   | 3 | 94    | 93  | 241   | 220 |
| 119,828 | 14  | 6  | 130   | 100 | 4   | 3 | 93    | 58  | 241   | 167 |
| 119,829 | 14  | 7  | 130   | 100 | 4   | 3 | 93    | 58  | 241   | 168 |
| 119,830 | 15  | 6  | 132   | 82  | 4   | 3 | 91    | 52  | 242   | 143 |
| 119,831 | 16  | 6  | 142   | 81  | 4   | 3 | 94    | 52  | 256   | 142 |

|         |     |    |       |     |    |    |     |     |       |     |
|---------|-----|----|-------|-----|----|----|-----|-----|-------|-----|
| 119,832 | 16  | 6  | 147   | 83  | 4  | 4  | 99  | 52  | 266   | 145 |
| 119,833 | 17  | 5  | 163   | 77  | 5  | 4  | 105 | 47  | 290   | 133 |
| 119,834 | 17  | 5  | 165   | 79  | 6  | 4  | 110 | 60  | 298   | 148 |
| 119,835 | 17  | 6  | 165   | 94  | 6  | 4  | 110 | 71  | 298   | 175 |
| 119,836 | 17  | 6  | 164   | 94  | 6  | 4  | 109 | 73  | 296   | 177 |
| 119,837 | 18  | 7  | 175   | 102 | 6  | 4  | 111 | 78  | 310   | 191 |
| 119,838 | 18  | 7  | 184   | 105 | 6  | 4  | 109 | 78  | 317   | 194 |
| 119,839 | 19  | 7  | 204   | 106 | 6  | 4  | 118 | 86  | 347   | 203 |
| 119,840 | 18  | 7  | 194   | 107 | 6  | 4  | 120 | 88  | 338   | 206 |
| 119,841 | 18  | 7  | 194   | 104 | 6  | 4  | 119 | 89  | 337   | 204 |
| 119,842 | 20  | 7  | 238   | 102 | 7  | 3  | 137 | 89  | 402   | 201 |
| 119,843 | 20  | 8  | 235   | 114 | 7  | 4  | 138 | 100 | 400   | 226 |
| 119,844 | 20  | 10 | 235   | 127 | 7  | 4  | 140 | 125 | 402   | 266 |
| 119,845 | 20  | 11 | 232   | 132 | 7  | 4  | 141 | 129 | 400   | 276 |
| 119,846 | 19  | 11 | 236   | 138 | 7  | 5  | 155 | 133 | 417   | 287 |
| 119,847 | 19  | 11 | 235   | 139 | 7  | 5  | 156 | 133 | 417   | 288 |
| 119,848 | 19  | 11 | 232   | 139 | 7  | 5  | 156 | 133 | 414   | 288 |
| 119,849 | 20  | 11 | 276   | 140 | 7  | 5  | 170 | 134 | 473   | 290 |
| 119,850 | 38  | 11 | 544   | 145 | 12 | 5  | 253 | 134 | 847   | 295 |
| 119,851 | 38  | 11 | 544   | 146 | 12 | 5  | 253 | 135 | 847   | 297 |
| 119,852 | 39  | 11 | 593   | 147 | 13 | 5  | 276 | 135 | 921   | 298 |
| 119,853 | 85  | 11 | 1,225 | 146 | 44 | 5  | 638 | 139 | 1,992 | 301 |
| 119,854 | 85  | 11 | 1,294 | 163 | 45 | 5  | 653 | 145 | 2,077 | 324 |
| 119,855 | 85  | 11 | 1,292 | 171 | 45 | 5  | 653 | 150 | 2,075 | 337 |
| 119,856 | 86  | 13 | 1,370 | 220 | 46 | 7  | 682 | 178 | 2,184 | 418 |
| 119,857 | 89  | 12 | 1,439 | 229 | 46 | 7  | 692 | 182 | 2,266 | 430 |
| 119,858 | 89  | 12 | 1,511 | 231 | 48 | 7  | 709 | 185 | 2,357 | 435 |
| 119,859 | 93  | 12 | 1,679 | 243 | 55 | 7  | 802 | 189 | 2,629 | 451 |
| 119,860 | 92  | 18 | 1,692 | 306 | 55 | 9  | 806 | 234 | 2,645 | 567 |
| 119,861 | 93  | 21 | 1,737 | 478 | 59 | 13 | 856 | 330 | 2,745 | 842 |
| 119,862 | 93  | 21 | 1,752 | 489 | 58 | 14 | 855 | 331 | 2,758 | 855 |
| 119,863 | 93  | 21 | 1,766 | 504 | 58 | 14 | 861 | 339 | 2,778 | 878 |
| 119,864 | 99  | 21 | 1,898 | 507 | 68 | 14 | 918 | 339 | 2,983 | 881 |
| 119,865 | 99  | 21 | 1,930 | 507 | 69 | 14 | 927 | 340 | 3,025 | 882 |
| 119,866 | 100 | 21 | 1,944 | 509 | 69 | 14 | 943 | 340 | 3,056 | 884 |
| 119,867 | 100 | 21 | 1,948 | 512 | 69 | 14 | 944 | 341 | 3,061 | 888 |
| 119,868 | 99  | 22 | 1,946 | 512 | 69 | 14 | 941 | 344 | 3,055 | 892 |
| 119,869 | 99  | 22 | 1,943 | 512 | 69 | 14 | 941 | 343 | 3,052 | 891 |
| 119,870 | 99  | 21 | 1,954 | 475 | 69 | 12 | 956 | 313 | 3,078 | 821 |
| 119,871 | 105 | 21 | 2,002 | 475 | 73 | 12 | 989 | 314 | 3,169 | 822 |
| 119,872 | 101 | 20 | 1,986 | 474 | 72 | 12 | 971 | 314 | 3,130 | 820 |

|         |     |    |       |     |     |    |       |     |       |       |
|---------|-----|----|-------|-----|-----|----|-------|-----|-------|-------|
| 119,873 | 103 | 20 | 1,990 | 477 | 72  | 12 | 968   | 314 | 3,133 | 823   |
| 119,874 | 102 | 20 | 1,998 | 477 | 72  | 12 | 972   | 315 | 3,144 | 824   |
| 119,875 | 101 | 20 | 1,997 | 474 | 72  | 12 | 969   | 315 | 3,139 | 821   |
| 119,876 | 101 | 20 | 1,979 | 473 | 71  | 12 | 962   | 314 | 3,113 | 819   |
| 119,877 | 114 | 20 | 2,177 | 474 | 80  | 12 | 1,048 | 314 | 3,419 | 820   |
| 119,878 | 114 | 20 | 2,202 | 474 | 80  | 12 | 1,073 | 314 | 3,469 | 820   |
| 119,879 | 140 | 20 | 2,417 | 473 | 91  | 12 | 1,234 | 313 | 3,882 | 818   |
| 119,880 | 142 | 19 | 2,469 | 476 | 92  | 12 | 1,252 | 316 | 3,955 | 823   |
| 119,881 | 150 | 19 | 2,790 | 478 | 102 | 12 | 1,384 | 319 | 4,426 | 828   |
| 119,882 | 150 | 19 | 2,866 | 479 | 104 | 12 | 1,443 | 321 | 4,563 | 831   |
| 119,883 | 165 | 19 | 3,097 | 477 | 114 | 11 | 1,618 | 321 | 4,994 | 828   |
| 119,884 | 165 | 19 | 3,093 | 476 | 115 | 11 | 1,630 | 325 | 5,003 | 831   |
| 119,885 | 165 | 19 | 3,093 | 483 | 114 | 12 | 1,630 | 335 | 5,002 | 849   |
| 119,886 | 165 | 18 | 3,100 | 473 | 116 | 12 | 1,646 | 329 | 5,027 | 832   |
| 119,887 | 168 | 19 | 3,155 | 496 | 119 | 13 | 1,705 | 346 | 5,147 | 874   |
| 119,888 | 174 | 18 | 3,203 | 502 | 125 | 13 | 1,783 | 363 | 5,285 | 896   |
| 119,889 | 174 | 20 | 3,204 | 561 | 125 | 16 | 1,797 | 431 | 5,300 | 1,028 |
| 119,890 | 173 | 22 | 3,191 | 582 | 126 | 19 | 1,799 | 440 | 5,289 | 1,063 |
| 119,891 | 174 | 24 | 3,189 | 604 | 126 | 19 | 1,806 | 461 | 5,295 | 1,108 |
| 119,892 | 174 | 26 | 3,183 | 610 | 125 | 19 | 1,807 | 459 | 5,289 | 1,114 |
| 119,893 | 172 | 24 | 3,163 | 594 | 125 | 18 | 1,791 | 443 | 5,251 | 1,079 |
| 119,894 | 173 | 21 | 3,181 | 571 | 127 | 17 | 1,805 | 410 | 5,286 | 1,019 |
| 119,895 | 175 | 21 | 3,221 | 571 | 130 | 17 | 1,827 | 410 | 5,353 | 1,019 |
| 119,896 | 177 | 21 | 3,290 | 570 | 135 | 17 | 1,887 | 410 | 5,489 | 1,018 |
| 119,897 | 177 | 21 | 3,290 | 570 | 135 | 17 | 1,886 | 411 | 5,488 | 1,019 |
| 119,898 | 177 | 21 | 3,327 | 572 | 136 | 17 | 1,927 | 411 | 5,567 | 1,021 |
| 119,899 | 178 | 21 | 3,351 | 574 | 136 | 17 | 1,941 | 413 | 5,606 | 1,025 |
| 119,900 | 178 | 21 | 3,323 | 573 | 140 | 17 | 1,946 | 414 | 5,587 | 1,025 |
| 119,901 | 160 | 21 | 3,053 | 567 | 135 | 17 | 1,858 | 412 | 5,206 | 1,017 |
| 119,902 | 158 | 21 | 3,022 | 567 | 135 | 17 | 1,853 | 415 | 5,168 | 1,020 |
| 119,903 | 113 | 21 | 2,397 | 568 | 105 | 17 | 1,496 | 413 | 4,111 | 1,019 |
| 119,904 | 113 | 21 | 2,387 | 568 | 104 | 17 | 1,493 | 411 | 4,097 | 1,017 |
| 119,905 | 116 | 21 | 2,343 | 544 | 104 | 17 | 1,500 | 400 | 4,063 | 982   |
| 119,906 | 116 | 21 | 2,341 | 544 | 104 | 17 | 1,511 | 401 | 4,072 | 983   |
| 119,907 | 119 | 19 | 2,301 | 494 | 103 | 15 | 1,514 | 379 | 4,037 | 907   |
| 119,908 | 116 | 13 | 2,230 | 409 | 103 | 13 | 1,511 | 324 | 3,960 | 759   |
| 119,909 | 117 | 13 | 2,185 | 409 | 103 | 13 | 1,549 | 325 | 3,954 | 760   |
| 119,910 | 113 | 13 | 2,017 | 418 | 96  | 13 | 1,455 | 332 | 3,681 | 776   |
| 119,911 | 113 | 13 | 2,004 | 425 | 96  | 15 | 1,451 | 351 | 3,664 | 804   |
| 119,912 | 112 | 10 | 1,956 | 254 | 92  | 11 | 1,398 | 259 | 3,558 | 534   |
| 119,913 | 112 | 10 | 1,939 | 248 | 92  | 10 | 1,396 | 260 | 3,539 | 528   |

|         |     |    |       |     |    |    |       |     |       |     |
|---------|-----|----|-------|-----|----|----|-------|-----|-------|-----|
| 119,914 | 112 | 10 | 1,925 | 233 | 92 | 10 | 1,391 | 252 | 3,520 | 505 |
| 119,915 | 106 | 10 | 1,788 | 232 | 82 | 10 | 1,331 | 256 | 3,307 | 508 |
| 119,916 | 106 | 10 | 1,754 | 233 | 81 | 10 | 1,322 | 257 | 3,263 | 510 |
| 119,917 | 105 | 10 | 1,742 | 234 | 81 | 10 | 1,310 | 258 | 3,238 | 512 |
| 119,918 | 105 | 10 | 1,742 | 234 | 81 | 10 | 1,311 | 257 | 3,239 | 511 |
| 119,919 | 105 | 9  | 1,741 | 233 | 82 | 10 | 1,310 | 255 | 3,238 | 507 |
| 119,920 | 105 | 10 | 1,752 | 242 | 82 | 10 | 1,314 | 259 | 3,253 | 521 |
| 119,921 | 105 | 10 | 1,747 | 242 | 82 | 10 | 1,306 | 259 | 3,240 | 521 |
| 119,922 | 99  | 10 | 1,697 | 240 | 78 | 10 | 1,274 | 257 | 3,148 | 517 |
| 119,923 | 99  | 10 | 1,696 | 242 | 78 | 10 | 1,274 | 262 | 3,147 | 524 |
| 119,924 | 97  | 10 | 1,677 | 241 | 77 | 10 | 1,266 | 263 | 3,117 | 524 |
| 119,925 | 95  | 10 | 1,669 | 241 | 77 | 10 | 1,262 | 261 | 3,103 | 522 |
| 119,926 | 95  | 10 | 1,667 | 241 | 77 | 10 | 1,262 | 262 | 3,101 | 523 |
| 119,927 | 81  | 10 | 1,479 | 246 | 68 | 10 | 1,179 | 263 | 2,807 | 529 |
| 119,928 | 81  | 10 | 1,457 | 272 | 67 | 10 | 1,155 | 281 | 2,760 | 573 |
| 119,929 | 56  | 10 | 1,239 | 274 | 55 | 10 | 987   | 280 | 2,337 | 574 |
| 119,930 | 54  | 11 | 1,190 | 279 | 54 | 10 | 970   | 290 | 2,268 | 590 |
| 119,931 | 52  | 11 | 1,088 | 279 | 49 | 11 | 904   | 288 | 2,093 | 589 |
| 119,932 | 46  | 11 | 860   | 277 | 43 | 11 | 820   | 282 | 1,769 | 581 |
| 119,933 | 46  | 11 | 781   | 282 | 41 | 11 | 766   | 288 | 1,634 | 592 |
| 119,934 | 30  | 11 | 536   | 286 | 29 | 11 | 566   | 288 | 1,161 | 596 |
| 119,935 | 31  | 12 | 532   | 319 | 29 | 11 | 563   | 294 | 1,155 | 636 |
| 119,936 | 30  | 12 | 512   | 319 | 27 | 10 | 545   | 277 | 1,114 | 618 |
| 119,937 | 28  | 9  | 484   | 221 | 26 | 6  | 511   | 164 | 1,049 | 400 |
| 119,938 | 28  | 10 | 483   | 240 | 26 | 7  | 510   | 171 | 1,047 | 428 |
| 119,939 | 22  | 10 | 432   | 242 | 20 | 7  | 434   | 172 | 908   | 431 |
| 119,940 | 22  | 8  | 425   | 217 | 20 | 4  | 425   | 154 | 892   | 383 |
| 119,941 | 22  | 6  | 420   | 192 | 20 | 4  | 415   | 133 | 877   | 335 |
| 119,942 | 21  | 4  | 418   | 186 | 20 | 4  | 417   | 134 | 876   | 328 |
| 119,943 | 26  | 5  | 420   | 187 | 21 | 4  | 424   | 136 | 891   | 332 |
| 119,944 | 26  | 5  | 403   | 186 | 21 | 4  | 420   | 136 | 870   | 331 |
| 119,945 | 25  | 5  | 384   | 188 | 19 | 4  | 406   | 141 | 834   | 338 |
| 119,946 | 23  | 5  | 343   | 189 | 16 | 4  | 381   | 139 | 763   | 337 |
| 119,947 | 21  | 5  | 266   | 189 | 11 | 4  | 306   | 138 | 604   | 336 |
| 119,948 | 21  | 5  | 247   | 187 | 10 | 4  | 284   | 138 | 562   | 334 |
| 119,949 | 21  | 5  | 228   | 187 | 10 | 4  | 265   | 136 | 524   | 332 |
| 119,950 | 20  | 5  | 203   | 187 | 10 | 4  | 252   | 136 | 485   | 332 |
| 119,951 | 19  | 5  | 190   | 187 | 6  | 4  | 234   | 135 | 449   | 331 |
| 119,952 | 19  | 5  | 191   | 190 | 6  | 6  | 234   | 147 | 450   | 348 |
| 119,953 | 19  | 5  | 181   | 193 | 5  | 6  | 217   | 147 | 422   | 351 |
| 119,954 | 19  | 5  | 181   | 195 | 5  | 6  | 218   | 162 | 423   | 368 |

|         |    |    |     |     |    |   |     |     |     |     |
|---------|----|----|-----|-----|----|---|-----|-----|-----|-----|
| 119,955 | 18 | 5  | 178 | 215 | 5  | 6 | 213 | 186 | 414 | 412 |
| 119,956 | 15 | 5  | 152 | 219 | 4  | 6 | 189 | 186 | 360 | 416 |
| 119,957 | 15 | 5  | 140 | 223 | 4  | 6 | 182 | 186 | 341 | 420 |
| 119,958 | 11 | 5  | 119 | 224 | 4  | 6 | 155 | 184 | 289 | 419 |
| 119,959 | 11 | 9  | 114 | 242 | 4  | 6 | 148 | 191 | 277 | 448 |
| 119,960 | 10 | 9  | 83  | 244 | 2  | 6 | 87  | 193 | 182 | 452 |
| 119,961 | 10 | 9  | 80  | 235 | 2  | 6 | 87  | 185 | 179 | 435 |
| 119,962 | 10 | 9  | 80  | 228 | 2  | 4 | 87  | 167 | 179 | 408 |
| 119,963 | 10 | 9  | 80  | 227 | 2  | 4 | 88  | 164 | 180 | 404 |
| 119,964 | 10 | 9  | 80  | 222 | 2  | 4 | 87  | 161 | 179 | 396 |
| 119,965 | 11 | 9  | 80  | 222 | 2  | 4 | 90  | 162 | 183 | 397 |
| 119,966 | 11 | 9  | 80  | 220 | 2  | 4 | 90  | 157 | 183 | 390 |
| 119,967 | 11 | 9  | 78  | 219 | 3  | 4 | 89  | 157 | 181 | 389 |
| 119,968 | 11 | 9  | 75  | 217 | 3  | 5 | 89  | 157 | 178 | 388 |
| 119,969 | 11 | 9  | 74  | 214 | 3  | 5 | 88  | 158 | 176 | 386 |
| 119,970 | 11 | 10 | 74  | 214 | 2  | 5 | 88  | 158 | 175 | 387 |
| 119,971 | 11 | 9  | 63  | 205 | 2  | 5 | 83  | 154 | 159 | 373 |
| 119,972 | 11 | 9  | 60  | 205 | 2  | 5 | 78  | 154 | 151 | 373 |
| 119,973 | 13 | 9  | 58  | 204 | 2  | 5 | 78  | 155 | 151 | 373 |
| 119,974 | 13 | 9  | 59  | 199 | 2  | 5 | 78  | 153 | 152 | 366 |
| 119,975 | 13 | 9  | 55  | 200 | 2  | 5 | 77  | 154 | 147 | 368 |
| 119,976 | 12 | 9  | 55  | 200 | 2  | 5 | 73  | 155 | 142 | 369 |
| 119,977 | 12 | 9  | 55  | 202 | 2  | 5 | 73  | 155 | 142 | 371 |
| 119,978 | 12 | 9  | 54  | 197 | 2  | 5 | 70  | 154 | 138 | 365 |
| 119,979 | 12 | 9  | 55  | 172 | 3  | 5 | 77  | 141 | 147 | 327 |
| 119,980 | 11 | 9  | 55  | 170 | 3  | 5 | 77  | 141 | 146 | 325 |
| 119,981 | 14 | 8  | 109 | 165 | 6  | 5 | 148 | 133 | 277 | 311 |
| 119,982 | 13 | 8  | 108 | 163 | 6  | 4 | 144 | 131 | 271 | 306 |
| 119,983 | 13 | 10 | 107 | 169 | 6  | 4 | 141 | 133 | 267 | 316 |
| 119,984 | 12 | 10 | 103 | 164 | 6  | 4 | 136 | 127 | 257 | 305 |
| 119,985 | 12 | 10 | 102 | 160 | 6  | 4 | 134 | 127 | 254 | 301 |
| 119,986 | 11 | 9  | 98  | 124 | 6  | 4 | 136 | 120 | 251 | 257 |
| 119,987 | 11 | 9  | 91  | 116 | 6  | 4 | 131 | 114 | 239 | 243 |
| 119,988 | 12 | 9  | 127 | 120 | 6  | 4 | 170 | 124 | 315 | 257 |
| 119,989 | 14 | 9  | 137 | 109 | 6  | 5 | 185 | 134 | 342 | 257 |
| 119,990 | 14 | 9  | 135 | 116 | 6  | 5 | 179 | 139 | 334 | 269 |
| 119,991 | 15 | 10 | 153 | 132 | 8  | 5 | 255 | 143 | 431 | 290 |
| 119,992 | 16 | 11 | 179 | 141 | 10 | 5 | 279 | 149 | 484 | 306 |
| 119,993 | 16 | 11 | 185 | 149 | 10 | 5 | 284 | 150 | 495 | 315 |
| 119,994 | 11 | 10 | 194 | 153 | 9  | 5 | 290 | 148 | 504 | 316 |
| 119,995 | 14 | 10 | 207 | 151 | 10 | 5 | 309 | 143 | 540 | 309 |

|         |     |    |       |     |     |   |       |     |       |     |
|---------|-----|----|-------|-----|-----|---|-------|-----|-------|-----|
| 119,996 | 14  | 10 | 207   | 151 | 10  | 5 | 309   | 143 | 540   | 309 |
| 119,997 | 14  | 10 | 215   | 151 | 10  | 5 | 311   | 144 | 550   | 310 |
| 119,998 | 14  | 10 | 225   | 151 | 10  | 5 | 318   | 146 | 567   | 312 |
| 119,999 | 14  | 10 | 225   | 151 | 10  | 5 | 318   | 146 | 567   | 312 |
| 120,000 | 16  | 10 | 264   | 149 | 11  | 5 | 328   | 145 | 619   | 309 |
| 120,001 | 35  | 10 | 390   | 149 | 18  | 5 | 385   | 145 | 828   | 309 |
| 120,002 | 35  | 10 | 390   | 149 | 18  | 5 | 385   | 145 | 828   | 309 |
| 120,003 | 37  | 10 | 419   | 147 | 21  | 3 | 393   | 135 | 870   | 295 |
| 120,004 | 46  | 10 | 494   | 145 | 24  | 3 | 442   | 135 | 1,006 | 293 |
| 120,005 | 58  | 10 | 659   | 141 | 40  | 3 | 663   | 120 | 1,420 | 274 |
| 120,006 | 78  | 11 | 756   | 111 | 62  | 3 | 894   | 91  | 1,790 | 216 |
| 120,007 | 81  | 11 | 794   | 111 | 64  | 3 | 933   | 91  | 1,872 | 216 |
| 120,008 | 83  | 11 | 901   | 112 | 72  | 3 | 1,033 | 91  | 2,089 | 217 |
| 120,009 | 83  | 7  | 943   | 93  | 77  | 3 | 1,078 | 82  | 2,181 | 185 |
| 120,010 | 83  | 7  | 943   | 93  | 77  | 3 | 1,080 | 82  | 2,183 | 185 |
| 120,011 | 96  | 7  | 1,341 | 91  | 102 | 3 | 1,429 | 80  | 2,968 | 181 |
| 120,012 | 96  | 7  | 1,378 | 91  | 102 | 3 | 1,466 | 80  | 3,042 | 181 |
| 120,013 | 100 | 7  | 1,420 | 89  | 110 | 3 | 1,549 | 79  | 3,179 | 178 |
| 120,014 | 100 | 7  | 1,439 | 89  | 112 | 3 | 1,570 | 79  | 3,221 | 178 |
| 120,015 | 99  | 7  | 1,453 | 89  | 112 | 3 | 1,576 | 79  | 3,240 | 178 |
| 120,016 | 99  | 7  | 1,455 | 91  | 112 | 3 | 1,585 | 79  | 3,251 | 180 |
| 120,017 | 99  | 7  | 1,466 | 91  | 111 | 3 | 1,597 | 79  | 3,273 | 180 |
| 120,018 | 99  | 7  | 1,540 | 90  | 111 | 2 | 1,639 | 77  | 3,389 | 176 |
| 120,019 | 99  | 7  | 1,540 | 90  | 111 | 2 | 1,641 | 77  | 3,391 | 176 |
| 120,020 | 102 | 7  | 1,663 | 90  | 118 | 2 | 1,696 | 76  | 3,579 | 175 |
| 120,021 | 128 | 6  | 2,020 | 89  | 150 | 2 | 2,041 | 73  | 4,339 | 170 |
| 120,022 | 128 | 6  | 2,021 | 89  | 150 | 2 | 2,045 | 75  | 4,344 | 172 |
| 120,023 | 128 | 6  | 2,028 | 93  | 150 | 2 | 2,046 | 75  | 4,352 | 176 |
| 120,024 | 127 | 6  | 2,113 | 105 | 152 | 3 | 2,103 | 83  | 4,495 | 197 |
| 120,025 | 128 | 6  | 2,138 | 117 | 152 | 3 | 2,115 | 82  | 4,533 | 208 |
| 120,026 | 129 | 7  | 2,199 | 137 | 157 | 5 | 2,129 | 95  | 4,614 | 244 |
| 120,027 | 145 | 7  | 2,455 | 146 | 162 | 5 | 2,215 | 94  | 4,977 | 252 |
| 120,028 | 145 | 7  | 2,462 | 181 | 161 | 7 | 2,214 | 100 | 4,982 | 295 |
| 120,029 | 147 | 8  | 2,513 | 206 | 163 | 9 | 2,202 | 109 | 5,025 | 332 |
| 120,030 | 147 | 8  | 2,520 | 210 | 163 | 9 | 2,202 | 106 | 5,032 | 333 |
| 120,031 | 151 | 8  | 2,709 | 210 | 165 | 9 | 2,242 | 107 | 5,267 | 334 |
| 120,032 | 183 | 9  | 3,434 | 214 | 185 | 9 | 2,548 | 107 | 6,350 | 339 |
| 120,033 | 183 | 9  | 3,435 | 213 | 185 | 9 | 2,548 | 110 | 6,351 | 341 |
| 120,034 | 188 | 7  | 3,495 | 210 | 187 | 9 | 2,571 | 108 | 6,441 | 334 |
| 120,035 | 192 | 7  | 3,615 | 213 | 194 | 9 | 2,609 | 108 | 6,610 | 337 |
| 120,036 | 194 | 7  | 3,634 | 216 | 195 | 9 | 2,621 | 108 | 6,644 | 340 |



|         |     |   |       |     |     |    |       |     |       |     |
|---------|-----|---|-------|-----|-----|----|-------|-----|-------|-----|
| 120,037 | 195 | 7 | 3,642 | 217 | 195 | 9  | 2,630 | 104 | 6,662 | 337 |
| 120,038 | 196 | 7 | 3,680 | 230 | 197 | 10 | 2,644 | 115 | 6,717 | 362 |
| 120,039 | 196 | 7 | 3,659 | 230 | 197 | 10 | 2,611 | 115 | 6,663 | 362 |
| 120,040 | 199 | 6 | 3,777 | 285 | 200 | 10 | 2,626 | 115 | 6,802 | 416 |
| 120,041 | 201 | 7 | 3,799 | 280 | 199 | 10 | 2,594 | 109 | 6,793 | 406 |
| 120,042 | 201 | 6 | 3,799 | 265 | 200 | 10 | 2,574 | 105 | 6,774 | 386 |
| 120,043 | 200 | 5 | 3,773 | 251 | 198 | 10 | 2,549 | 98  | 6,720 | 364 |
| 120,044 | 200 | 5 | 3,773 | 249 | 198 | 11 | 2,540 | 98  | 6,711 | 363 |
| 120,045 | 200 | 6 | 3,762 | 266 | 198 | 12 | 2,525 | 100 | 6,685 | 384 |
| 120,046 | 197 | 6 | 3,749 | 271 | 197 | 12 | 2,506 | 100 | 6,649 | 389 |
| 120,047 | 197 | 6 | 3,749 | 273 | 197 | 12 | 2,506 | 100 | 6,649 | 391 |
| 120,048 | 197 | 6 | 3,741 | 272 | 197 | 12 | 2,501 | 97  | 6,636 | 387 |
| 120,049 | 197 | 6 | 3,732 | 272 | 197 | 12 | 2,496 | 97  | 6,622 | 387 |
| 120,050 | 195 | 6 | 3,714 | 272 | 196 | 12 | 2,486 | 96  | 6,591 | 386 |
| 120,051 | 195 | 6 | 3,699 | 275 | 196 | 12 | 2,485 | 96  | 6,575 | 389 |
| 120,052 | 176 | 6 | 3,572 | 275 | 189 | 12 | 2,426 | 95  | 6,363 | 388 |
| 120,053 | 176 | 6 | 3,596 | 278 | 188 | 12 | 2,462 | 94  | 6,422 | 390 |
| 120,054 | 176 | 6 | 3,593 | 280 | 187 | 12 | 2,464 | 94  | 6,420 | 392 |
| 120,055 | 167 | 5 | 3,518 | 280 | 184 | 12 | 2,415 | 94  | 6,284 | 391 |
| 120,056 | 155 | 5 | 3,354 | 280 | 168 | 12 | 2,188 | 96  | 5,865 | 393 |
| 120,057 | 135 | 5 | 3,258 | 282 | 147 | 12 | 1,962 | 98  | 5,502 | 397 |
| 120,058 | 133 | 5 | 3,229 | 284 | 146 | 12 | 1,927 | 98  | 5,435 | 399 |
| 120,059 | 131 | 5 | 3,140 | 284 | 138 | 12 | 1,824 | 98  | 5,233 | 399 |
| 120,060 | 131 | 5 | 3,128 | 286 | 135 | 12 | 1,807 | 99  | 5,201 | 402 |
| 120,061 | 125 | 5 | 3,052 | 287 | 125 | 12 | 1,631 | 98  | 4,933 | 402 |
| 120,062 | 134 | 5 | 2,858 | 287 | 114 | 12 | 1,594 | 98  | 4,700 | 402 |
| 120,063 | 134 | 5 | 2,823 | 288 | 114 | 12 | 1,564 | 97  | 4,635 | 402 |
| 120,064 | 130 | 5 | 2,783 | 288 | 106 | 12 | 1,489 | 97  | 4,508 | 402 |
| 120,065 | 130 | 5 | 2,764 | 290 | 104 | 12 | 1,467 | 97  | 4,465 | 404 |
| 120,066 | 130 | 5 | 2,751 | 292 | 104 | 12 | 1,463 | 98  | 4,448 | 407 |
| 120,067 | 130 | 6 | 2,751 | 291 | 104 | 12 | 1,460 | 100 | 4,445 | 409 |
| 120,068 | 131 | 6 | 2,740 | 292 | 104 | 12 | 1,455 | 100 | 4,430 | 410 |
| 120,069 | 131 | 6 | 2,666 | 295 | 104 | 12 | 1,413 | 100 | 4,314 | 413 |
| 120,070 | 130 | 6 | 2,585 | 295 | 101 | 12 | 1,375 | 100 | 4,191 | 413 |
| 120,071 | 128 | 6 | 2,543 | 298 | 97  | 12 | 1,361 | 101 | 4,129 | 417 |
| 120,072 | 102 | 6 | 2,194 | 298 | 65  | 12 | 1,021 | 101 | 3,382 | 417 |
| 120,073 | 102 | 6 | 2,197 | 298 | 65  | 12 | 1,024 | 99  | 3,388 | 415 |
| 120,074 | 102 | 6 | 2,194 | 294 | 65  | 12 | 1,025 | 99  | 3,386 | 411 |
| 120,075 | 101 | 6 | 2,114 | 270 | 63  | 11 | 971   | 87  | 3,249 | 374 |
| 120,076 | 101 | 6 | 2,100 | 249 | 63  | 9  | 970   | 76  | 3,234 | 340 |
| 120,077 | 101 | 6 | 2,050 | 249 | 58  | 9  | 968   | 76  | 3,177 | 340 |

|         |    |   |       |     |    |   |     |     |       |     |
|---------|----|---|-------|-----|----|---|-----|-----|-------|-----|
| 120,078 | 86 | 6 | 1,796 | 203 | 53 | 7 | 883 | 69  | 2,818 | 285 |
| 120,079 | 86 | 6 | 1,789 | 204 | 53 | 8 | 877 | 70  | 2,805 | 288 |
| 120,080 | 82 | 5 | 1,729 | 185 | 50 | 6 | 858 | 67  | 2,719 | 263 |
| 120,081 | 82 | 5 | 1,688 | 181 | 49 | 6 | 840 | 69  | 2,659 | 261 |
| 120,082 | 79 | 5 | 1,502 | 185 | 46 | 6 | 783 | 72  | 2,410 | 268 |
| 120,083 | 48 | 4 | 784   | 185 | 26 | 6 | 484 | 72  | 1,342 | 267 |
| 120,084 | 43 | 4 | 724   | 187 | 24 | 6 | 462 | 73  | 1,253 | 270 |
| 120,085 | 39 | 4 | 603   | 183 | 17 | 6 | 424 | 74  | 1,083 | 267 |
| 120,086 | 37 | 5 | 593   | 181 | 16 | 7 | 419 | 79  | 1,065 | 272 |
| 120,087 | 38 | 5 | 603   | 180 | 16 | 7 | 423 | 82  | 1,080 | 274 |
| 120,088 | 37 | 5 | 597   | 180 | 16 | 7 | 414 | 86  | 1,064 | 278 |
| 120,089 | 35 | 5 | 543   | 168 | 14 | 6 | 393 | 79  | 985   | 258 |
| 120,090 | 35 | 5 | 495   | 160 | 12 | 6 | 377 | 73  | 919   | 244 |
| 120,091 | 30 | 7 | 418   | 126 | 11 | 4 | 365 | 81  | 824   | 218 |
| 120,092 | 27 | 6 | 379   | 125 | 10 | 5 | 340 | 82  | 756   | 218 |
| 120,093 | 30 | 7 | 381   | 127 | 9  | 5 | 342 | 82  | 762   | 221 |
| 120,094 | 31 | 7 | 386   | 121 | 9  | 4 | 341 | 82  | 767   | 214 |
| 120,095 | 31 | 6 | 386   | 104 | 9  | 3 | 340 | 80  | 766   | 193 |
| 120,096 | 32 | 6 | 402   | 100 | 9  | 3 | 345 | 81  | 788   | 190 |
| 120,097 | 32 | 6 | 402   | 100 | 9  | 3 | 345 | 81  | 788   | 190 |
| 120,098 | 32 | 6 | 417   | 99  | 9  | 3 | 358 | 81  | 816   | 189 |
| 120,099 | 37 | 6 | 442   | 104 | 11 | 3 | 384 | 84  | 874   | 197 |
| 120,100 | 39 | 7 | 448   | 110 | 11 | 3 | 384 | 87  | 882   | 207 |
| 120,101 | 39 | 7 | 463   | 115 | 11 | 3 | 403 | 87  | 916   | 212 |
| 120,102 | 40 | 7 | 447   | 112 | 11 | 3 | 383 | 87  | 881   | 209 |
| 120,103 | 40 | 7 | 443   | 112 | 11 | 3 | 379 | 87  | 873   | 209 |
| 120,104 | 49 | 7 | 636   | 108 | 22 | 3 | 533 | 87  | 1,240 | 205 |
| 120,105 | 49 | 7 | 637   | 111 | 22 | 3 | 533 | 92  | 1,241 | 213 |
| 120,106 | 49 | 7 | 637   | 118 | 22 | 4 | 533 | 98  | 1,241 | 227 |
| 120,107 | 49 | 7 | 636   | 122 | 22 | 4 | 533 | 100 | 1,240 | 233 |
| 120,108 | 49 | 7 | 632   | 130 | 21 | 4 | 527 | 106 | 1,229 | 247 |
| 120,109 | 48 | 7 | 625   | 130 | 20 | 4 | 523 | 106 | 1,216 | 247 |
| 120,110 | 48 | 7 | 611   | 131 | 20 | 4 | 516 | 106 | 1,195 | 248 |
| 120,111 | 48 | 7 | 581   | 128 | 18 | 4 | 483 | 105 | 1,130 | 244 |
| 120,112 | 48 | 7 | 570   | 134 | 18 | 4 | 478 | 110 | 1,114 | 255 |
| 120,113 | 32 | 7 | 452   | 134 | 14 | 4 | 335 | 109 | 833   | 254 |
| 120,114 | 32 | 7 | 455   | 134 | 14 | 4 | 333 | 110 | 834   | 255 |
| 120,115 | 33 | 7 | 455   | 132 | 14 | 4 | 335 | 110 | 837   | 253 |
| 120,116 | 34 | 7 | 458   | 130 | 14 | 4 | 336 | 109 | 842   | 250 |
| 120,117 | 34 | 7 | 457   | 129 | 14 | 4 | 336 | 107 | 841   | 247 |
| 120,118 | 34 | 7 | 455   | 130 | 14 | 4 | 336 | 108 | 839   | 249 |

|         |    |    |     |     |    |    |     |     |     |     |
|---------|----|----|-----|-----|----|----|-----|-----|-----|-----|
| 120,119 | 33 | 7  | 455 | 129 | 14 | 4  | 335 | 108 | 837 | 248 |
| 120,120 | 33 | 7  | 457 | 127 | 14 | 4  | 337 | 108 | 841 | 246 |
| 120,121 | 33 | 7  | 457 | 130 | 14 | 4  | 337 | 108 | 841 | 249 |
| 120,122 | 33 | 7  | 463 | 168 | 14 | 4  | 339 | 121 | 849 | 300 |
| 120,123 | 33 | 7  | 458 | 170 | 15 | 4  | 335 | 122 | 841 | 303 |
| 120,124 | 33 | 7  | 454 | 179 | 15 | 4  | 330 | 129 | 832 | 319 |
| 120,125 | 33 | 9  | 453 | 193 | 15 | 5  | 332 | 132 | 833 | 339 |
| 120,126 | 33 | 11 | 456 | 211 | 16 | 6  | 331 | 136 | 836 | 364 |
| 120,127 | 32 | 11 | 444 | 227 | 16 | 9  | 321 | 163 | 813 | 410 |
| 120,128 | 31 | 11 | 432 | 228 | 16 | 9  | 309 | 164 | 788 | 412 |
| 120,129 | 30 | 19 | 435 | 317 | 16 | 15 | 307 | 227 | 788 | 578 |
| 120,130 | 30 | 23 | 435 | 355 | 16 | 15 | 307 | 240 | 788 | 633 |
| 120,131 | 29 | 23 | 430 | 355 | 16 | 15 | 301 | 231 | 776 | 624 |
| 120,132 | 29 | 23 | 430 | 364 | 16 | 15 | 301 | 232 | 776 | 634 |
| 120,133 | 34 | 23 | 440 | 364 | 16 | 15 | 329 | 228 | 819 | 630 |
| 120,134 | 33 | 23 | 433 | 357 | 16 | 15 | 328 | 222 | 810 | 617 |
| 120,135 | 33 | 23 | 431 | 356 | 16 | 15 | 328 | 221 | 808 | 615 |
| 120,136 | 33 | 22 | 427 | 357 | 16 | 14 | 327 | 216 | 803 | 609 |
| 120,137 | 33 | 22 | 426 | 359 | 16 | 14 | 327 | 216 | 802 | 611 |
| 120,138 | 32 | 22 | 414 | 356 | 17 | 14 | 321 | 209 | 784 | 601 |
| 120,139 | 32 | 22 | 417 | 354 | 17 | 14 | 320 | 205 | 786 | 595 |
| 120,140 | 32 | 22 | 421 | 349 | 18 | 14 | 321 | 199 | 792 | 584 |
| 120,141 | 32 | 20 | 432 | 320 | 18 | 14 | 323 | 174 | 805 | 528 |
| 120,142 | 32 | 20 | 428 | 320 | 18 | 14 | 320 | 174 | 798 | 528 |
| 120,143 | 29 | 19 | 440 | 314 | 20 | 13 | 352 | 173 | 841 | 519 |
| 120,144 | 29 | 19 | 440 | 314 | 20 | 13 | 351 | 173 | 840 | 519 |
| 120,145 | 28 | 19 | 437 | 314 | 20 | 13 | 354 | 172 | 839 | 518 |
| 120,146 | 28 | 19 | 432 | 314 | 21 | 13 | 363 | 172 | 844 | 518 |
| 120,147 | 27 | 19 | 417 | 314 | 21 | 13 | 365 | 171 | 830 | 517 |
| 120,148 | 27 | 19 | 408 | 313 | 21 | 13 | 352 | 172 | 808 | 517 |
| 120,149 | 27 | 19 | 408 | 319 | 21 | 13 | 352 | 178 | 808 | 529 |
| 120,150 | 22 | 19 | 390 | 317 | 19 | 13 | 333 | 177 | 764 | 526 |
| 120,151 | 20 | 18 | 384 | 311 | 19 | 13 | 333 | 175 | 756 | 517 |
| 120,152 | 20 | 19 | 362 | 306 | 19 | 13 | 313 | 176 | 714 | 514 |
| 120,153 | 19 | 19 | 340 | 306 | 18 | 13 | 304 | 177 | 681 | 515 |
| 120,154 | 9  | 19 | 173 | 307 | 9  | 13 | 155 | 177 | 346 | 516 |
| 120,155 | 8  | 19 | 139 | 308 | 7  | 13 | 139 | 177 | 293 | 517 |
| 120,156 | 8  | 19 | 137 | 295 | 7  | 12 | 136 | 167 | 288 | 493 |
| 120,157 | 8  | 19 | 136 | 295 | 7  | 12 | 136 | 166 | 287 | 492 |
| 120,158 | 9  | 19 | 136 | 291 | 7  | 12 | 136 | 163 | 288 | 485 |
| 120,159 | 9  | 19 | 138 | 282 | 7  | 12 | 139 | 156 | 293 | 469 |

|         |    |    |     |     |    |    |     |     |     |     |
|---------|----|----|-----|-----|----|----|-----|-----|-----|-----|
| 120,160 | 9  | 19 | 138 | 279 | 8  | 12 | 139 | 156 | 294 | 466 |
| 120,161 | 9  | 19 | 133 | 279 | 8  | 12 | 139 | 156 | 289 | 466 |
| 120,162 | 9  | 19 | 138 | 280 | 8  | 12 | 140 | 156 | 295 | 467 |
| 120,163 | 9  | 19 | 135 | 274 | 8  | 12 | 139 | 151 | 291 | 456 |
| 120,164 | 9  | 19 | 137 | 275 | 8  | 12 | 142 | 151 | 296 | 457 |
| 120,165 | 9  | 19 | 136 | 275 | 8  | 12 | 142 | 151 | 295 | 457 |
| 120,166 | 8  | 19 | 139 | 275 | 8  | 12 | 152 | 151 | 307 | 457 |
| 120,167 | 7  | 18 | 138 | 274 | 9  | 12 | 153 | 150 | 307 | 454 |
| 120,168 | 7  | 18 | 144 | 275 | 10 | 12 | 161 | 150 | 322 | 455 |
| 120,169 | 9  | 18 | 188 | 276 | 11 | 12 | 210 | 149 | 418 | 455 |
| 120,170 | 11 | 18 | 202 | 277 | 14 | 12 | 234 | 149 | 461 | 456 |
| 120,171 | 11 | 18 | 216 | 276 | 14 | 12 | 245 | 150 | 486 | 456 |
| 120,172 | 11 | 18 | 209 | 273 | 14 | 12 | 243 | 151 | 477 | 454 |
| 120,173 | 11 | 18 | 223 | 231 | 14 | 12 | 257 | 139 | 505 | 400 |
| 120,174 | 11 | 18 | 229 | 230 | 13 | 12 | 259 | 138 | 512 | 398 |
| 120,175 | 11 | 18 | 240 | 220 | 13 | 12 | 261 | 131 | 525 | 381 |
| 120,176 | 11 | 16 | 243 | 206 | 14 | 11 | 269 | 128 | 537 | 361 |
| 120,177 | 11 | 13 | 247 | 173 | 13 | 7  | 270 | 98  | 541 | 291 |
| 120,178 | 11 | 13 | 247 | 173 | 13 | 7  | 270 | 99  | 541 | 292 |
| 120,179 | 11 | 13 | 263 | 176 | 14 | 7  | 285 | 100 | 573 | 296 |
| 120,180 | 12 | 5  | 266 | 87  | 14 | 1  | 289 | 37  | 581 | 130 |
| 120,181 | 12 | 1  | 270 | 49  | 14 | 0  | 291 | 23  | 587 | 73  |
| 120,182 | 13 | 1  | 278 | 29  | 15 | 0  | 309 | 22  | 615 | 52  |
| 120,183 | 13 | 1  | 285 | 29  | 15 | 0  | 323 | 22  | 636 | 52  |
| 120,184 | 7  | 1  | 272 | 29  | 16 | 0  | 297 | 22  | 592 | 52  |
| 120,185 | 7  | 1  | 271 | 28  | 16 | 0  | 288 | 22  | 582 | 51  |
| 120,186 | 7  | 1  | 271 | 28  | 16 | 0  | 287 | 22  | 581 | 51  |
| 120,187 | 7  | 1  | 271 | 27  | 16 | 0  | 288 | 22  | 582 | 50  |
| 120,188 | 7  | 1  | 275 | 25  | 16 | 0  | 289 | 22  | 587 | 48  |
| 120,189 | 7  | 1  | 276 | 25  | 15 | 0  | 288 | 22  | 586 | 48  |
| 120,190 | 7  | 1  | 272 | 25  | 15 | 0  | 288 | 22  | 582 | 48  |
| 120,191 | 8  | 1  | 278 | 25  | 14 | 0  | 290 | 23  | 590 | 49  |
| 120,192 | 10 | 1  | 268 | 25  | 14 | 0  | 291 | 23  | 583 | 49  |
| 120,193 | 14 | 1  | 280 | 25  | 15 | 0  | 290 | 23  | 599 | 49  |
| 120,194 | 16 | 1  | 318 | 25  | 13 | 0  | 286 | 23  | 633 | 49  |
| 120,195 | 24 | 1  | 489 | 25  | 20 | 0  | 361 | 23  | 894 | 49  |
| 120,196 | 24 | 1  | 496 | 25  | 20 | 0  | 363 | 23  | 903 | 49  |
| 120,197 | 24 | 1  | 503 | 24  | 19 | 0  | 363 | 23  | 909 | 48  |
| 120,198 | 24 | 1  | 505 | 24  | 19 | 0  | 357 | 22  | 905 | 47  |
| 120,199 | 24 | 1  | 520 | 18  | 19 | 0  | 365 | 16  | 928 | 35  |
| 120,200 | 24 | 1  | 552 | 18  | 22 | 0  | 380 | 16  | 978 | 35  |

|         |    |   |     |    |    |   |     |    |       |    |
|---------|----|---|-----|----|----|---|-----|----|-------|----|
| 120,201 | 25 | 1 | 610 | 15 | 22 | 0 | 384 | 14 | 1,041 | 30 |
| 120,202 | 25 | 1 | 610 | 15 | 22 | 0 | 384 | 13 | 1,041 | 29 |
| 120,203 | 25 | 0 | 610 | 15 | 22 | 0 | 384 | 12 | 1,041 | 27 |
| 120,204 | 25 | 0 | 610 | 15 | 22 | 0 | 383 | 11 | 1,040 | 26 |
| 120,205 | 25 | 0 | 635 | 14 | 23 | 0 | 399 | 11 | 1,082 | 25 |
| 120,206 | 25 | 0 | 641 | 13 | 23 | 0 | 400 | 11 | 1,089 | 24 |
| 120,207 | 25 | 0 | 643 | 13 | 23 | 0 | 401 | 10 | 1,092 | 23 |
| 120,208 | 26 | 0 | 664 | 13 | 23 | 0 | 422 | 10 | 1,135 | 23 |
| 120,209 | 25 | 0 | 681 | 13 | 23 | 0 | 428 | 9  | 1,157 | 22 |
| 120,210 | 25 | 0 | 709 | 12 | 23 | 0 | 433 | 8  | 1,190 | 20 |
| 120,211 | 31 | 0 | 732 | 11 | 27 | 0 | 473 | 8  | 1,263 | 19 |
| 120,212 | 32 | 0 | 729 | 11 | 27 | 0 | 473 | 8  | 1,261 | 19 |
| 120,213 | 32 | 0 | 750 | 10 | 27 | 0 | 482 | 8  | 1,291 | 18 |
| 120,214 | 34 | 0 | 774 | 8  | 28 | 0 | 487 | 7  | 1,323 | 15 |
| 120,215 | 40 | 0 | 868 | 8  | 33 | 0 | 597 | 7  | 1,538 | 15 |
| 120,216 | 41 | 0 | 885 | 9  | 33 | 0 | 597 | 7  | 1,556 | 16 |
| 120,217 | 44 | 0 | 891 | 9  | 34 | 0 | 613 | 7  | 1,582 | 16 |
| 120,218 | 44 | 0 | 890 | 9  | 33 | 0 | 613 | 7  | 1,580 | 16 |
| 120,219 | 44 | 1 | 884 | 8  | 32 | 0 | 603 | 7  | 1,563 | 16 |
| 120,220 | 42 | 1 | 840 | 7  | 31 | 0 | 552 | 7  | 1,465 | 15 |
| 120,221 | 40 | 1 | 827 | 6  | 28 | 0 | 528 | 7  | 1,423 | 14 |
| 120,222 | 41 | 1 | 817 | 6  | 28 | 0 | 516 | 6  | 1,402 | 13 |
| 120,223 | 41 | 1 | 811 | 6  | 28 | 0 | 503 | 5  | 1,383 | 12 |
| 120,224 | 43 | 1 | 823 | 7  | 30 | 0 | 511 | 4  | 1,407 | 12 |
| 120,225 | 44 | 1 | 835 | 7  | 30 | 0 | 515 | 4  | 1,424 | 12 |
| 120,226 | 47 | 1 | 830 | 7  | 30 | 0 | 516 | 4  | 1,423 | 12 |
| 120,227 | 47 | 1 | 828 | 3  | 29 | 0 | 513 | 1  | 1,417 | 5  |
| 120,228 | 47 | 1 | 819 | 3  | 29 | 0 | 511 | 1  | 1,406 | 5  |
| 120,229 | 47 | 1 | 800 | 3  | 29 | 0 | 497 | 1  | 1,373 | 5  |
| 120,230 | 47 | 1 | 798 | 3  | 29 | 0 | 497 | 1  | 1,371 | 5  |
| 120,231 | 46 | 1 | 794 | 2  | 29 | 0 | 494 | 1  | 1,363 | 4  |
| 120,232 | 47 | 1 | 788 | 2  | 29 | 0 | 491 | 1  | 1,355 | 4  |
| 120,233 | 47 | 1 | 777 | 2  | 28 | 0 | 473 | 1  | 1,325 | 4  |
| 120,234 | 47 | 1 | 779 | 2  | 28 | 0 | 463 | 1  | 1,317 | 4  |
| 120,235 | 47 | 1 | 774 | 2  | 27 | 0 | 460 | 1  | 1,308 | 4  |
| 120,236 | 47 | 1 | 773 | 2  | 27 | 0 | 459 | 1  | 1,306 | 4  |
| 120,237 | 47 | 1 | 774 | 2  | 27 | 0 | 458 | 1  | 1,306 | 4  |
| 120,238 | 47 | 1 | 773 | 2  | 27 | 0 | 458 | 1  | 1,305 | 4  |
| 120,239 | 47 | 1 | 773 | 2  | 27 | 0 | 457 | 1  | 1,304 | 4  |
| 120,240 | 47 | 1 | 772 | 3  | 27 | 0 | 459 | 2  | 1,305 | 6  |
| 120,241 | 46 | 1 | 771 | 5  | 27 | 0 | 457 | 2  | 1,301 | 8  |

|         |    |   |       |     |    |   |     |    |       |     |
|---------|----|---|-------|-----|----|---|-----|----|-------|-----|
| 120,242 | 46 | 1 | 763   | 5   | 27 | 0 | 456 | 2  | 1,292 | 8   |
| 120,243 | 44 | 1 | 760   | 6   | 27 | 0 | 453 | 6  | 1,284 | 13  |
| 120,244 | 41 | 1 | 750   | 10  | 26 | 1 | 448 | 8  | 1,265 | 20  |
| 120,245 | 39 | 2 | 693   | 13  | 26 | 1 | 425 | 11 | 1,183 | 27  |
| 120,246 | 31 | 2 | 522   | 18  | 19 | 1 | 348 | 12 | 920   | 33  |
| 120,247 | 34 | 3 | 523   | 24  | 20 | 2 | 350 | 13 | 927   | 42  |
| 120,248 | 34 | 3 | 515   | 44  | 20 | 2 | 341 | 25 | 910   | 74  |
| 120,249 | 34 | 3 | 522   | 46  | 20 | 2 | 342 | 25 | 918   | 76  |
| 120,250 | 35 | 3 | 547   | 47  | 22 | 2 | 357 | 25 | 961   | 77  |
| 120,251 | 39 | 3 | 560   | 47  | 20 | 2 | 348 | 25 | 967   | 77  |
| 120,252 | 45 | 3 | 642   | 47  | 26 | 2 | 420 | 25 | 1,133 | 77  |
| 120,253 | 45 | 3 | 641   | 47  | 26 | 2 | 412 | 25 | 1,124 | 77  |
| 120,254 | 45 | 3 | 640   | 47  | 25 | 2 | 411 | 25 | 1,121 | 77  |
| 120,255 | 49 | 3 | 784   | 47  | 30 | 2 | 488 | 25 | 1,351 | 77  |
| 120,256 | 49 | 3 | 815   | 47  | 32 | 2 | 504 | 25 | 1,400 | 77  |
| 120,257 | 50 | 3 | 821   | 47  | 32 | 2 | 508 | 25 | 1,411 | 77  |
| 120,258 | 51 | 3 | 830   | 47  | 32 | 2 | 508 | 25 | 1,421 | 77  |
| 120,259 | 67 | 3 | 918   | 47  | 36 | 2 | 621 | 25 | 1,642 | 77  |
| 120,260 | 67 | 3 | 912   | 47  | 36 | 2 | 615 | 25 | 1,630 | 77  |
| 120,261 | 68 | 3 | 914   | 47  | 39 | 2 | 631 | 25 | 1,652 | 77  |
| 120,262 | 64 | 3 | 924   | 48  | 34 | 2 | 601 | 25 | 1,623 | 78  |
| 120,263 | 66 | 3 | 961   | 48  | 34 | 2 | 636 | 26 | 1,697 | 79  |
| 120,264 | 67 | 3 | 957   | 50  | 35 | 2 | 641 | 28 | 1,700 | 83  |
| 120,265 | 65 | 3 | 953   | 55  | 36 | 2 | 658 | 28 | 1,712 | 88  |
| 120,266 | 60 | 3 | 884   | 54  | 31 | 2 | 563 | 28 | 1,538 | 87  |
| 120,267 | 59 | 3 | 866   | 54  | 31 | 2 | 556 | 28 | 1,512 | 87  |
| 120,268 | 57 | 3 | 925   | 54  | 31 | 2 | 563 | 27 | 1,576 | 86  |
| 120,269 | 58 | 2 | 943   | 54  | 34 | 2 | 571 | 28 | 1,606 | 86  |
| 120,270 | 58 | 2 | 943   | 55  | 34 | 2 | 571 | 28 | 1,606 | 87  |
| 120,271 | 59 | 2 | 969   | 56  | 36 | 2 | 583 | 28 | 1,647 | 88  |
| 120,272 | 59 | 2 | 1,022 | 62  | 38 | 3 | 594 | 46 | 1,713 | 113 |
| 120,273 | 59 | 3 | 1,035 | 75  | 38 | 3 | 616 | 66 | 1,748 | 147 |
| 120,274 | 59 | 3 | 1,033 | 81  | 38 | 4 | 614 | 73 | 1,744 | 161 |
| 120,275 | 57 | 4 | 1,027 | 97  | 36 | 5 | 608 | 81 | 1,728 | 187 |
| 120,276 | 56 | 4 | 1,015 | 97  | 36 | 5 | 608 | 81 | 1,715 | 187 |
| 120,277 | 57 | 4 | 1,139 | 97  | 36 | 5 | 643 | 81 | 1,875 | 187 |
| 120,278 | 59 | 4 | 1,203 | 97  | 39 | 5 | 668 | 82 | 1,969 | 188 |
| 120,279 | 59 | 4 | 1,200 | 97  | 39 | 5 | 666 | 82 | 1,964 | 188 |
| 120,280 | 63 | 4 | 1,273 | 103 | 39 | 5 | 696 | 83 | 2,071 | 195 |
| 120,281 | 63 | 4 | 1,272 | 104 | 39 | 5 | 696 | 83 | 2,070 | 196 |
| 120,282 | 64 | 5 | 1,349 | 117 | 39 | 5 | 719 | 86 | 2,171 | 213 |

|         |    |    |       |     |    |    |     |     |       |     |
|---------|----|----|-------|-----|----|----|-----|-----|-------|-----|
| 120,283 | 63 | 5  | 1,356 | 125 | 40 | 5  | 722 | 87  | 2,181 | 222 |
| 120,284 | 62 | 5  | 1,373 | 125 | 41 | 6  | 726 | 90  | 2,202 | 226 |
| 120,285 | 62 | 6  | 1,403 | 155 | 43 | 6  | 737 | 102 | 2,245 | 269 |
| 120,286 | 65 | 6  | 1,477 | 194 | 44 | 6  | 762 | 124 | 2,348 | 330 |
| 120,287 | 65 | 8  | 1,488 | 216 | 44 | 8  | 764 | 164 | 2,361 | 396 |
| 120,288 | 65 | 8  | 1,487 | 238 | 44 | 9  | 762 | 181 | 2,358 | 436 |
| 120,289 | 65 | 8  | 1,490 | 254 | 44 | 9  | 762 | 186 | 2,361 | 457 |
| 120,290 | 65 | 9  | 1,489 | 260 | 44 | 9  | 761 | 190 | 2,359 | 468 |
| 120,291 | 65 | 9  | 1,488 | 264 | 44 | 9  | 761 | 190 | 2,358 | 472 |
| 120,292 | 65 | 10 | 1,491 | 266 | 44 | 9  | 763 | 190 | 2,363 | 475 |
| 120,293 | 65 | 10 | 1,494 | 266 | 44 | 9  | 767 | 187 | 2,370 | 472 |
| 120,294 | 65 | 11 | 1,494 | 267 | 44 | 9  | 767 | 187 | 2,370 | 474 |
| 120,295 | 64 | 11 | 1,492 | 264 | 44 | 8  | 767 | 184 | 2,367 | 467 |
| 120,296 | 64 | 10 | 1,492 | 256 | 44 | 8  | 766 | 181 | 2,366 | 455 |
| 120,297 | 64 | 10 | 1,487 | 258 | 44 | 8  | 765 | 185 | 2,360 | 461 |
| 120,298 | 62 | 9  | 1,484 | 280 | 43 | 8  | 762 | 193 | 2,351 | 490 |
| 120,299 | 64 | 9  | 1,482 | 270 | 43 | 8  | 761 | 186 | 2,350 | 473 |
| 120,300 | 64 | 9  | 1,477 | 280 | 43 | 8  | 760 | 189 | 2,344 | 486 |
| 120,301 | 63 | 9  | 1,432 | 289 | 42 | 8  | 737 | 197 | 2,274 | 503 |
| 120,302 | 59 | 9  | 1,390 | 293 | 41 | 8  | 732 | 199 | 2,222 | 509 |
| 120,303 | 52 | 9  | 1,240 | 294 | 34 | 8  | 645 | 199 | 1,971 | 510 |
| 120,304 | 52 | 9  | 1,220 | 296 | 34 | 8  | 638 | 201 | 1,944 | 514 |
| 120,305 | 48 | 9  | 1,114 | 297 | 30 | 8  | 586 | 205 | 1,778 | 519 |
| 120,306 | 49 | 10 | 1,075 | 297 | 29 | 8  | 561 | 208 | 1,714 | 523 |
| 120,307 | 49 | 10 | 1,044 | 297 | 27 | 8  | 544 | 208 | 1,664 | 523 |
| 120,308 | 48 | 10 | 1,032 | 299 | 27 | 8  | 541 | 209 | 1,648 | 526 |
| 120,309 | 47 | 10 | 1,023 | 299 | 28 | 8  | 542 | 211 | 1,640 | 528 |
| 120,310 | 30 | 10 | 912   | 299 | 24 | 8  | 410 | 212 | 1,376 | 529 |
| 120,311 | 30 | 10 | 901   | 302 | 24 | 8  | 409 | 215 | 1,364 | 535 |
| 120,312 | 29 | 11 | 869   | 305 | 21 | 8  | 383 | 222 | 1,302 | 546 |
| 120,313 | 27 | 11 | 834   | 306 | 21 | 8  | 370 | 222 | 1,252 | 547 |
| 120,314 | 24 | 11 | 797   | 308 | 21 | 8  | 334 | 221 | 1,176 | 548 |
| 120,315 | 23 | 11 | 802   | 309 | 20 | 8  | 329 | 219 | 1,174 | 547 |
| 120,316 | 24 | 11 | 791   | 305 | 18 | 8  | 314 | 220 | 1,147 | 544 |
| 120,317 | 23 | 15 | 768   | 336 | 18 | 11 | 307 | 252 | 1,116 | 614 |
| 120,318 | 22 | 15 | 716   | 338 | 18 | 11 | 292 | 254 | 1,048 | 618 |
| 120,319 | 22 | 15 | 707   | 344 | 18 | 11 | 288 | 257 | 1,035 | 627 |
| 120,320 | 21 | 15 | 691   | 347 | 15 | 11 | 284 | 258 | 1,011 | 631 |
| 120,321 | 20 | 15 | 665   | 346 | 13 | 11 | 273 | 258 | 971   | 630 |
| 120,322 | 20 | 15 | 621   | 340 | 11 | 10 | 264 | 241 | 916   | 606 |
| 120,323 | 20 | 15 | 613   | 340 | 11 | 10 | 263 | 241 | 907   | 606 |

|         |    |    |     |     |    |    |     |     |       |     |
|---------|----|----|-----|-----|----|----|-----|-----|-------|-----|
| 120,324 | 19 | 14 | 599 | 327 | 12 | 10 | 242 | 222 | 872   | 573 |
| 120,325 | 22 | 14 | 615 | 321 | 12 | 9  | 257 | 216 | 906   | 560 |
| 120,326 | 22 | 13 | 611 | 304 | 12 | 8  | 258 | 209 | 903   | 534 |
| 120,327 | 31 | 13 | 669 | 304 | 13 | 8  | 321 | 210 | 1,034 | 535 |
| 120,328 | 27 | 13 | 540 | 307 | 13 | 8  | 281 | 210 | 861   | 538 |
| 120,329 | 26 | 13 | 476 | 308 | 10 | 8  | 255 | 210 | 767   | 539 |
| 120,330 | 23 | 13 | 437 | 310 | 9  | 8  | 237 | 211 | 706   | 542 |
| 120,331 | 22 | 13 | 411 | 304 | 9  | 8  | 236 | 210 | 678   | 535 |
| 120,332 | 22 | 14 | 402 | 311 | 10 | 10 | 233 | 221 | 667   | 556 |
| 120,333 | 21 | 13 | 334 | 298 | 10 | 10 | 213 | 218 | 578   | 539 |
| 120,334 | 22 | 13 | 347 | 290 | 12 | 10 | 231 | 216 | 612   | 529 |
| 120,335 | 23 | 13 | 338 | 290 | 11 | 9  | 231 | 214 | 603   | 526 |
| 120,336 | 25 | 12 | 305 | 260 | 9  | 9  | 220 | 202 | 559   | 483 |
| 120,337 | 23 | 10 | 239 | 199 | 8  | 7  | 202 | 141 | 472   | 357 |
| 120,338 | 23 | 10 | 227 | 199 | 8  | 7  | 201 | 141 | 459   | 357 |
| 120,339 | 25 | 10 | 250 | 177 | 8  | 6  | 220 | 124 | 503   | 317 |
| 120,340 | 25 | 10 | 260 | 164 | 8  | 6  | 225 | 120 | 518   | 300 |
| 120,341 | 41 | 9  | 335 | 153 | 10 | 6  | 321 | 115 | 707   | 283 |
| 120,342 | 41 | 8  | 355 | 151 | 10 | 6  | 329 | 115 | 735   | 280 |
| 120,343 | 41 | 8  | 360 | 152 | 10 | 6  | 333 | 118 | 744   | 284 |
| 120,344 | 43 | 7  | 360 | 149 | 10 | 6  | 333 | 117 | 746   | 279 |
| 120,345 | 43 | 7  | 372 | 150 | 10 | 6  | 348 | 119 | 773   | 282 |
| 120,346 | 43 | 7  | 380 | 154 | 10 | 6  | 354 | 120 | 787   | 287 |
| 120,347 | 48 | 7  | 428 | 160 | 16 | 6  | 434 | 134 | 926   | 307 |
| 120,348 | 48 | 8  | 425 | 172 | 16 | 6  | 435 | 146 | 924   | 332 |
| 120,349 | 60 | 8  | 681 | 195 | 26 | 5  | 640 | 145 | 1,407 | 353 |
| 120,350 | 60 | 8  | 702 | 186 | 28 | 5  | 664 | 142 | 1,454 | 341 |
| 120,351 | 61 | 8  | 718 | 178 | 30 | 5  | 701 | 141 | 1,510 | 332 |
| 120,352 | 61 | 8  | 762 | 179 | 29 | 6  | 727 | 143 | 1,579 | 336 |
| 120,353 | 61 | 8  | 761 | 175 | 29 | 6  | 726 | 141 | 1,577 | 330 |
| 120,354 | 61 | 8  | 793 | 175 | 31 | 6  | 796 | 141 | 1,681 | 330 |
| 120,355 | 61 | 8  | 797 | 174 | 31 | 6  | 797 | 139 | 1,686 | 327 |
| 120,356 | 61 | 8  | 812 | 177 | 32 | 6  | 824 | 137 | 1,729 | 328 |
| 120,357 | 60 | 7  | 813 | 177 | 32 | 6  | 829 | 134 | 1,734 | 324 |
| 120,358 | 60 | 7  | 817 | 175 | 32 | 6  | 831 | 133 | 1,740 | 321 |
| 120,359 | 61 | 7  | 820 | 175 | 32 | 6  | 832 | 133 | 1,745 | 321 |
| 120,360 | 61 | 7  | 824 | 177 | 31 | 6  | 831 | 132 | 1,747 | 322 |
| 120,361 | 63 | 8  | 841 | 181 | 31 | 7  | 837 | 136 | 1,772 | 332 |
| 120,362 | 63 | 8  | 841 | 180 | 31 | 7  | 838 | 135 | 1,773 | 330 |
| 120,363 | 65 | 7  | 860 | 184 | 31 | 7  | 857 | 138 | 1,813 | 336 |
| 120,364 | 65 | 7  | 866 | 192 | 32 | 7  | 865 | 145 | 1,828 | 351 |



|         |    |    |     |     |    |    |     |     |       |     |
|---------|----|----|-----|-----|----|----|-----|-----|-------|-----|
| 120,365 | 65 | 7  | 852 | 200 | 33 | 7  | 868 | 150 | 1,818 | 364 |
| 120,366 | 65 | 8  | 851 | 203 | 33 | 8  | 873 | 152 | 1,822 | 371 |
| 120,367 | 65 | 8  | 850 | 207 | 33 | 8  | 871 | 153 | 1,819 | 376 |
| 120,368 | 65 | 4  | 845 | 176 | 33 | 5  | 858 | 121 | 1,801 | 306 |
| 120,369 | 65 | 4  | 839 | 166 | 33 | 5  | 850 | 116 | 1,787 | 291 |
| 120,370 | 65 | 4  | 839 | 166 | 33 | 5  | 853 | 116 | 1,790 | 291 |
| 120,371 | 65 | 4  | 836 | 166 | 33 | 5  | 850 | 116 | 1,784 | 291 |
| 120,372 | 65 | 4  | 839 | 166 | 34 | 5  | 852 | 116 | 1,790 | 291 |
| 120,373 | 65 | 4  | 836 | 165 | 34 | 5  | 853 | 116 | 1,788 | 290 |
| 120,374 | 66 | 4  | 852 | 166 | 33 | 6  | 859 | 112 | 1,810 | 288 |
| 120,375 | 66 | 4  | 856 | 167 | 33 | 6  | 859 | 112 | 1,814 | 289 |
| 120,376 | 63 | 4  | 847 | 165 | 33 | 6  | 845 | 111 | 1,788 | 286 |
| 120,377 | 86 | 4  | 940 | 165 | 35 | 6  | 963 | 111 | 2,024 | 286 |
| 120,378 | 77 | 4  | 874 | 163 | 34 | 6  | 891 | 111 | 1,876 | 284 |
| 120,379 | 77 | 4  | 883 | 164 | 34 | 6  | 896 | 112 | 1,890 | 286 |
| 120,380 | 77 | 5  | 900 | 168 | 36 | 6  | 901 | 112 | 1,914 | 291 |
| 120,381 | 78 | 9  | 900 | 169 | 37 | 6  | 899 | 118 | 1,914 | 302 |
| 120,382 | 78 | 9  | 898 | 169 | 37 | 6  | 892 | 118 | 1,905 | 302 |
| 120,383 | 83 | 8  | 908 | 161 | 34 | 4  | 892 | 110 | 1,917 | 283 |
| 120,384 | 83 | 8  | 903 | 161 | 33 | 4  | 887 | 113 | 1,906 | 286 |
| 120,385 | 82 | 8  | 897 | 167 | 33 | 5  | 882 | 119 | 1,894 | 299 |
| 120,386 | 81 | 8  | 889 | 170 | 33 | 5  | 879 | 121 | 1,882 | 304 |
| 120,387 | 80 | 12 | 897 | 212 | 35 | 9  | 897 | 147 | 1,909 | 380 |
| 120,388 | 79 | 15 | 889 | 247 | 36 | 10 | 891 | 170 | 1,895 | 442 |
| 120,389 | 78 | 15 | 889 | 250 | 36 | 10 | 885 | 170 | 1,888 | 445 |
| 120,390 | 80 | 15 | 890 | 250 | 37 | 10 | 889 | 170 | 1,896 | 445 |
| 120,391 | 80 | 18 | 877 | 289 | 37 | 13 | 886 | 184 | 1,880 | 504 |
| 120,392 | 64 | 18 | 803 | 293 | 35 | 13 | 785 | 188 | 1,687 | 512 |
| 120,393 | 64 | 19 | 783 | 292 | 35 | 14 | 781 | 187 | 1,663 | 512 |
| 120,394 | 64 | 20 | 778 | 304 | 35 | 14 | 777 | 189 | 1,654 | 527 |
| 120,395 | 63 | 20 | 784 | 307 | 35 | 14 | 781 | 190 | 1,663 | 531 |
| 120,396 | 64 | 20 | 775 | 296 | 35 | 14 | 770 | 172 | 1,644 | 502 |
| 120,397 | 64 | 20 | 771 | 299 | 35 | 14 | 768 | 175 | 1,638 | 508 |
| 120,398 | 59 | 21 | 723 | 303 | 29 | 14 | 686 | 178 | 1,497 | 516 |
| 120,399 | 57 | 20 | 648 | 290 | 26 | 14 | 621 | 163 | 1,352 | 487 |
| 120,400 | 47 | 20 | 466 | 243 | 19 | 14 | 480 | 156 | 1,012 | 433 |
| 120,401 | 45 | 20 | 447 | 253 | 18 | 15 | 456 | 164 | 966   | 452 |
| 120,402 | 44 | 21 | 429 | 249 | 16 | 15 | 419 | 162 | 908   | 447 |
| 120,403 | 44 | 21 | 385 | 243 | 16 | 14 | 395 | 152 | 840   | 430 |
| 120,404 | 44 | 21 | 355 | 237 | 14 | 14 | 326 | 150 | 739   | 422 |
| 120,405 | 44 | 21 | 352 | 240 | 14 | 14 | 325 | 150 | 735   | 425 |

|         |    |    |       |     |    |    |     |     |       |     |
|---------|----|----|-------|-----|----|----|-----|-----|-------|-----|
| 120,406 | 44 | 21 | 338   | 241 | 13 | 15 | 299 | 150 | 694   | 427 |
| 120,407 | 44 | 21 | 338   | 244 | 13 | 15 | 298 | 150 | 693   | 430 |
| 120,408 | 44 | 21 | 338   | 245 | 13 | 15 | 292 | 150 | 687   | 431 |
| 120,409 | 44 | 22 | 336   | 248 | 13 | 15 | 289 | 151 | 682   | 436 |
| 120,410 | 44 | 22 | 333   | 252 | 13 | 15 | 288 | 151 | 678   | 440 |
| 120,411 | 45 | 22 | 333   | 250 | 13 | 15 | 292 | 150 | 683   | 437 |
| 120,412 | 43 | 21 | 317   | 247 | 13 | 14 | 285 | 145 | 658   | 427 |
| 120,413 | 42 | 21 | 312   | 245 | 13 | 14 | 286 | 143 | 653   | 423 |
| 120,414 | 41 | 21 | 305   | 238 | 13 | 14 | 284 | 133 | 643   | 406 |
| 120,415 | 41 | 21 | 297   | 228 | 12 | 14 | 277 | 126 | 627   | 389 |
| 120,416 | 41 | 21 | 296   | 218 | 11 | 14 | 273 | 121 | 621   | 374 |
| 120,417 | 41 | 20 | 292   | 214 | 11 | 13 | 265 | 121 | 609   | 368 |
| 120,418 | 40 | 20 | 284   | 209 | 11 | 13 | 259 | 119 | 594   | 361 |
| 120,419 | 40 | 20 | 310   | 209 | 12 | 13 | 282 | 119 | 644   | 361 |
| 120,420 | 42 | 20 | 346   | 208 | 12 | 13 | 348 | 118 | 748   | 359 |
| 120,421 | 42 | 21 | 346   | 208 | 12 | 13 | 345 | 118 | 745   | 360 |
| 120,422 | 42 | 21 | 348   | 208 | 12 | 13 | 347 | 118 | 749   | 360 |
| 120,423 | 43 | 21 | 346   | 209 | 11 | 13 | 344 | 118 | 744   | 361 |
| 120,424 | 43 | 22 | 352   | 211 | 11 | 13 | 344 | 118 | 750   | 364 |
| 120,425 | 42 | 22 | 343   | 212 | 11 | 12 | 337 | 118 | 733   | 364 |
| 120,426 | 42 | 22 | 346   | 211 | 12 | 12 | 345 | 117 | 745   | 362 |
| 120,427 | 53 | 22 | 478   | 211 | 16 | 12 | 425 | 117 | 972   | 362 |
| 120,428 | 31 | 22 | 391   | 211 | 17 | 12 | 321 | 116 | 760   | 361 |
| 120,429 | 31 | 22 | 393   | 211 | 17 | 12 | 323 | 116 | 764   | 361 |
| 120,430 | 31 | 22 | 384   | 211 | 17 | 12 | 318 | 117 | 750   | 362 |
| 120,431 | 30 | 21 | 361   | 207 | 15 | 12 | 304 | 116 | 710   | 356 |
| 120,432 | 33 | 17 | 406   | 205 | 16 | 12 | 340 | 109 | 795   | 343 |
| 120,433 | 30 | 17 | 399   | 205 | 16 | 12 | 331 | 107 | 776   | 341 |
| 120,434 | 29 | 18 | 398   | 205 | 16 | 12 | 336 | 103 | 779   | 338 |
| 120,435 | 30 | 18 | 407   | 205 | 16 | 12 | 342 | 103 | 795   | 338 |
| 120,436 | 29 | 18 | 400   | 201 | 15 | 11 | 328 | 98  | 772   | 328 |
| 120,437 | 37 | 18 | 477   | 198 | 16 | 11 | 368 | 96  | 898   | 323 |
| 120,438 | 38 | 11 | 506   | 121 | 18 | 6  | 371 | 48  | 933   | 186 |
| 120,439 | 39 | 11 | 553   | 118 | 22 | 6  | 394 | 48  | 1,008 | 183 |
| 120,440 | 48 | 12 | 809   | 118 | 23 | 6  | 425 | 48  | 1,305 | 184 |
| 120,441 | 56 | 12 | 1,068 | 115 | 40 | 6  | 661 | 47  | 1,825 | 180 |
| 120,442 | 59 | 9  | 1,701 | 76  | 45 | 4  | 757 | 33  | 2,562 | 122 |
| 120,443 | 63 | 9  | 1,846 | 74  | 51 | 4  | 908 | 29  | 2,868 | 116 |
| 120,444 | 63 | 8  | 1,846 | 76  | 51 | 3  | 905 | 35  | 2,865 | 122 |
| 120,445 | 66 | 7  | 2,112 | 80  | 53 | 3  | 962 | 46  | 3,193 | 136 |
| 120,446 | 66 | 7  | 2,124 | 80  | 54 | 3  | 967 | 48  | 3,211 | 138 |

|         |     |   |       |     |    |   |       |     |       |     |
|---------|-----|---|-------|-----|----|---|-------|-----|-------|-----|
| 120,447 | 65  | 8 | 2,118 | 85  | 54 | 3 | 964   | 53  | 3,201 | 149 |
| 120,448 | 65  | 9 | 2,117 | 88  | 54 | 3 | 963   | 53  | 3,199 | 153 |
| 120,449 | 65  | 8 | 2,116 | 84  | 54 | 3 | 963   | 53  | 3,198 | 148 |
| 120,450 | 64  | 8 | 2,116 | 83  | 54 | 3 | 963   | 53  | 3,197 | 147 |
| 120,451 | 65  | 8 | 2,124 | 79  | 54 | 3 | 964   | 52  | 3,207 | 142 |
| 120,452 | 65  | 8 | 2,128 | 69  | 53 | 2 | 965   | 42  | 3,211 | 121 |
| 120,453 | 65  | 7 | 2,182 | 64  | 54 | 2 | 998   | 42  | 3,299 | 115 |
| 120,454 | 65  | 7 | 2,185 | 65  | 54 | 2 | 1,000 | 42  | 3,304 | 116 |
| 120,455 | 65  | 7 | 2,190 | 65  | 54 | 2 | 1,003 | 42  | 3,312 | 116 |
| 120,456 | 65  | 7 | 2,189 | 63  | 54 | 2 | 1,003 | 42  | 3,311 | 114 |
| 120,457 | 67  | 7 | 2,203 | 63  | 54 | 1 | 1,016 | 52  | 3,340 | 123 |
| 120,458 | 68  | 7 | 2,217 | 69  | 54 | 2 | 1,023 | 56  | 3,362 | 134 |
| 120,459 | 68  | 7 | 2,223 | 73  | 54 | 2 | 1,025 | 58  | 3,370 | 140 |
| 120,460 | 68  | 6 | 2,221 | 72  | 54 | 2 | 1,025 | 58  | 3,368 | 138 |
| 120,461 | 67  | 6 | 2,224 | 68  | 54 | 2 | 1,027 | 58  | 3,372 | 134 |
| 120,462 | 67  | 6 | 2,255 | 67  | 55 | 2 | 1,031 | 58  | 3,408 | 133 |
| 120,463 | 67  | 6 | 2,260 | 70  | 55 | 3 | 1,037 | 61  | 3,419 | 140 |
| 120,464 | 67  | 6 | 2,253 | 70  | 55 | 3 | 1,017 | 61  | 3,392 | 140 |
| 120,465 | 67  | 6 | 2,254 | 70  | 55 | 3 | 1,018 | 61  | 3,394 | 140 |
| 120,466 | 69  | 6 | 2,337 | 73  | 56 | 3 | 1,041 | 61  | 3,503 | 143 |
| 120,467 | 69  | 6 | 2,354 | 74  | 57 | 3 | 1,052 | 61  | 3,532 | 144 |
| 120,468 | 88  | 6 | 2,488 | 72  | 66 | 3 | 1,212 | 59  | 3,854 | 140 |
| 120,469 | 88  | 5 | 2,479 | 71  | 65 | 3 | 1,199 | 60  | 3,831 | 139 |
| 120,470 | 91  | 5 | 2,507 | 71  | 69 | 3 | 1,238 | 60  | 3,905 | 139 |
| 120,471 | 89  | 5 | 2,497 | 72  | 69 | 3 | 1,182 | 60  | 3,837 | 140 |
| 120,472 | 89  | 5 | 2,495 | 72  | 69 | 3 | 1,180 | 60  | 3,833 | 140 |
| 120,473 | 97  | 5 | 2,573 | 72  | 72 | 3 | 1,222 | 60  | 3,964 | 140 |
| 120,474 | 102 | 5 | 2,650 | 73  | 79 | 3 | 1,335 | 64  | 4,166 | 145 |
| 120,475 | 102 | 4 | 2,650 | 72  | 79 | 3 | 1,348 | 65  | 4,179 | 144 |
| 120,476 | 113 | 4 | 2,705 | 72  | 88 | 3 | 1,453 | 65  | 4,359 | 144 |
| 120,477 | 113 | 5 | 2,697 | 72  | 87 | 3 | 1,444 | 67  | 4,341 | 147 |
| 120,478 | 102 | 5 | 2,557 | 72  | 83 | 3 | 1,363 | 67  | 4,105 | 147 |
| 120,479 | 107 | 5 | 2,740 | 71  | 86 | 3 | 1,499 | 64  | 4,432 | 143 |
| 120,480 | 110 | 5 | 2,764 | 71  | 86 | 3 | 1,514 | 64  | 4,474 | 143 |
| 120,481 | 109 | 5 | 2,768 | 71  | 85 | 3 | 1,519 | 64  | 4,481 | 143 |
| 120,482 | 110 | 5 | 2,773 | 71  | 85 | 3 | 1,520 | 64  | 4,488 | 143 |
| 120,483 | 109 | 4 | 2,749 | 71  | 84 | 3 | 1,493 | 64  | 4,435 | 142 |
| 120,484 | 109 | 4 | 2,752 | 71  | 84 | 3 | 1,495 | 64  | 4,440 | 142 |
| 120,485 | 108 | 4 | 2,745 | 71  | 84 | 3 | 1,490 | 64  | 4,427 | 142 |
| 120,486 | 108 | 4 | 2,751 | 74  | 86 | 3 | 1,494 | 66  | 4,439 | 147 |
| 120,487 | 108 | 7 | 2,757 | 142 | 87 | 8 | 1,495 | 101 | 4,447 | 258 |

|         |     |    |       |     |    |    |       |     |       |     |
|---------|-----|----|-------|-----|----|----|-------|-----|-------|-----|
| 120,488 | 108 | 7  | 2,710 | 169 | 85 | 9  | 1,479 | 113 | 4,382 | 298 |
| 120,489 | 110 | 7  | 2,707 | 177 | 85 | 9  | 1,485 | 115 | 4,387 | 308 |
| 120,490 | 109 | 7  | 2,674 | 187 | 80 | 9  | 1,466 | 117 | 4,329 | 320 |
| 120,491 | 100 | 9  | 2,438 | 232 | 79 | 9  | 1,440 | 124 | 4,057 | 374 |
| 120,492 | 89  | 9  | 2,176 | 257 | 61 | 10 | 1,191 | 138 | 3,517 | 414 |
| 120,493 | 86  | 9  | 1,556 | 259 | 56 | 9  | 1,099 | 140 | 2,797 | 417 |
| 120,494 | 82  | 9  | 1,411 | 259 | 50 | 9  | 948   | 141 | 2,491 | 418 |
| 120,495 | 79  | 10 | 1,155 | 260 | 48 | 9  | 901   | 135 | 2,183 | 414 |
| 120,496 | 82  | 11 | 1,268 | 248 | 52 | 9  | 932   | 123 | 2,334 | 391 |
| 120,497 | 87  | 11 | 1,322 | 245 | 57 | 9  | 974   | 115 | 2,440 | 380 |
| 120,498 | 87  | 11 | 1,322 | 247 | 57 | 9  | 974   | 115 | 2,440 | 382 |
| 120,499 | 87  | 10 | 1,341 | 241 | 57 | 9  | 981   | 113 | 2,466 | 373 |
| 120,500 | 90  | 10 | 1,511 | 243 | 61 | 9  | 1,008 | 109 | 2,670 | 371 |
| 120,501 | 91  | 10 | 1,572 | 247 | 63 | 9  | 1,054 | 110 | 2,780 | 376 |
| 120,502 | 91  | 10 | 1,622 | 247 | 64 | 9  | 1,063 | 110 | 2,840 | 376 |
| 120,503 | 91  | 11 | 1,602 | 247 | 64 | 9  | 1,051 | 112 | 2,808 | 379 |
| 120,504 | 91  | 11 | 1,566 | 247 | 63 | 9  | 1,030 | 112 | 2,750 | 379 |
| 120,505 | 96  | 12 | 1,648 | 247 | 64 | 9  | 1,075 | 112 | 2,883 | 380 |
| 120,506 | 96  | 12 | 1,641 | 246 | 64 | 9  | 1,072 | 112 | 2,873 | 379 |
| 120,507 | 94  | 12 | 1,633 | 246 | 64 | 9  | 1,068 | 112 | 2,859 | 379 |
| 120,508 | 94  | 13 | 1,626 | 246 | 64 | 9  | 1,060 | 104 | 2,844 | 372 |
| 120,509 | 93  | 13 | 1,613 | 240 | 64 | 8  | 1,053 | 100 | 2,823 | 361 |
| 120,510 | 98  | 13 | 1,740 | 235 | 73 | 8  | 1,111 | 97  | 3,022 | 353 |
| 120,511 | 98  | 13 | 1,740 | 236 | 73 | 8  | 1,111 | 97  | 3,022 | 354 |
| 120,512 | 98  | 13 | 1,737 | 236 | 73 | 8  | 1,109 | 97  | 3,017 | 354 |
| 120,513 | 99  | 13 | 1,750 | 239 | 72 | 9  | 1,141 | 99  | 3,062 | 360 |
| 120,514 | 99  | 13 | 1,745 | 236 | 72 | 8  | 1,135 | 96  | 3,051 | 353 |
| 120,515 | 99  | 14 | 1,753 | 238 | 72 | 8  | 1,138 | 97  | 3,062 | 357 |
| 120,516 | 98  | 15 | 1,749 | 238 | 72 | 8  | 1,132 | 98  | 3,051 | 359 |
| 120,517 | 97  | 15 | 1,672 | 237 | 71 | 8  | 1,114 | 97  | 2,954 | 357 |
| 120,518 | 97  | 16 | 1,668 | 237 | 70 | 8  | 1,105 | 98  | 2,940 | 359 |
| 120,519 | 78  | 16 | 1,536 | 238 | 61 | 8  | 940   | 98  | 2,615 | 360 |
| 120,520 | 78  | 16 | 1,525 | 238 | 61 | 8  | 938   | 98  | 2,602 | 360 |
| 120,521 | 75  | 16 | 1,516 | 238 | 59 | 8  | 900   | 100 | 2,550 | 362 |
| 120,522 | 75  | 16 | 1,518 | 239 | 59 | 8  | 899   | 100 | 2,551 | 363 |
| 120,523 | 76  | 16 | 1,794 | 238 | 64 | 8  | 952   | 99  | 2,886 | 361 |
| 120,524 | 77  | 16 | 1,795 | 240 | 65 | 8  | 978   | 99  | 2,915 | 363 |
| 120,525 | 71  | 16 | 1,739 | 241 | 59 | 8  | 866   | 101 | 2,735 | 366 |
| 120,526 | 71  | 16 | 1,744 | 241 | 59 | 8  | 856   | 105 | 2,730 | 370 |
| 120,527 | 60  | 16 | 1,683 | 240 | 50 | 8  | 753   | 108 | 2,546 | 372 |
| 120,528 | 58  | 16 | 1,634 | 250 | 49 | 9  | 725   | 110 | 2,466 | 385 |

|         |    |    |       |     |    |    |     |     |       |     |
|---------|----|----|-------|-----|----|----|-----|-----|-------|-----|
| 120,529 | 58 | 16 | 1,622 | 255 | 49 | 10 | 716 | 113 | 2,445 | 394 |
| 120,530 | 54 | 17 | 1,537 | 266 | 45 | 10 | 617 | 116 | 2,253 | 409 |
| 120,531 | 51 | 17 | 1,513 | 266 | 45 | 10 | 600 | 116 | 2,209 | 409 |
| 120,532 | 51 | 17 | 1,506 | 267 | 45 | 10 | 589 | 118 | 2,191 | 412 |
| 120,533 | 51 | 17 | 1,519 | 271 | 45 | 10 | 591 | 118 | 2,206 | 416 |
| 120,534 | 50 | 17 | 1,521 | 273 | 45 | 10 | 585 | 120 | 2,201 | 420 |
| 120,535 | 50 | 17 | 1,520 | 274 | 45 | 10 | 585 | 120 | 2,200 | 421 |
| 120,536 | 50 | 17 | 1,518 | 275 | 45 | 10 | 583 | 121 | 2,196 | 423 |
| 120,537 | 51 | 17 | 1,522 | 270 | 43 | 10 | 576 | 119 | 2,192 | 416 |
| 120,538 | 51 | 14 | 1,516 | 202 | 42 | 5  | 575 | 84  | 2,184 | 305 |
| 120,539 | 43 | 15 | 1,482 | 175 | 42 | 5  | 548 | 72  | 2,115 | 267 |
| 120,540 | 40 | 15 | 1,452 | 167 | 40 | 5  | 538 | 70  | 2,070 | 257 |
| 120,541 | 43 | 15 | 1,460 | 157 | 40 | 5  | 543 | 68  | 2,086 | 245 |
| 120,542 | 43 | 12 | 1,433 | 112 | 40 | 5  | 535 | 61  | 2,051 | 190 |
| 120,543 | 43 | 11 | 1,422 | 79  | 40 | 4  | 532 | 42  | 2,037 | 136 |
| 120,544 | 43 | 11 | 1,414 | 80  | 40 | 4  | 529 | 42  | 2,026 | 137 |
| 120,545 | 40 | 11 | 1,344 | 80  | 39 | 4  | 501 | 43  | 1,924 | 138 |
| 120,546 | 40 | 10 | 1,320 | 75  | 38 | 4  | 495 | 42  | 1,893 | 131 |
| 120,547 | 40 | 10 | 1,318 | 75  | 36 | 4  | 491 | 42  | 1,885 | 131 |
| 120,548 | 34 | 9  | 1,278 | 70  | 30 | 4  | 448 | 42  | 1,790 | 125 |
| 120,549 | 35 | 9  | 1,261 | 68  | 30 | 4  | 441 | 42  | 1,767 | 123 |
| 120,550 | 38 | 9  | 1,198 | 68  | 27 | 4  | 459 | 41  | 1,722 | 122 |
| 120,551 | 42 | 9  | 1,161 | 62  | 28 | 4  | 460 | 40  | 1,691 | 115 |
| 120,552 | 43 | 9  | 1,112 | 61  | 27 | 4  | 416 | 38  | 1,598 | 112 |
| 120,553 | 50 | 9  | 1,134 | 61  | 29 | 4  | 443 | 38  | 1,656 | 112 |
| 120,554 | 46 | 9  | 1,090 | 61  | 28 | 4  | 402 | 38  | 1,566 | 112 |
| 120,555 | 45 | 9  | 1,049 | 61  | 28 | 4  | 395 | 38  | 1,517 | 112 |
| 120,556 | 48 | 8  | 1,141 | 60  | 30 | 4  | 438 | 39  | 1,657 | 111 |
| 120,557 | 49 | 8  | 1,145 | 61  | 31 | 5  | 440 | 40  | 1,665 | 114 |
| 120,558 | 49 | 8  | 1,165 | 61  | 31 | 5  | 451 | 40  | 1,696 | 114 |
| 120,559 | 46 | 7  | 1,095 | 57  | 26 | 5  | 433 | 38  | 1,600 | 107 |
| 120,560 | 46 | 7  | 1,086 | 57  | 25 | 5  | 432 | 38  | 1,589 | 107 |
| 120,561 | 45 | 7  | 1,082 | 55  | 25 | 5  | 426 | 38  | 1,578 | 105 |
| 120,562 | 45 | 7  | 1,071 | 54  | 25 | 5  | 414 | 38  | 1,555 | 104 |
| 120,563 | 45 | 7  | 1,054 | 54  | 25 | 5  | 409 | 38  | 1,533 | 104 |
| 120,564 | 43 | 7  | 1,033 | 51  | 25 | 4  | 388 | 36  | 1,489 | 98  |
| 120,565 | 44 | 7  | 1,031 | 51  | 26 | 4  | 389 | 36  | 1,490 | 98  |
| 120,566 | 44 | 5  | 1,038 | 50  | 26 | 4  | 394 | 34  | 1,502 | 93  |
| 120,567 | 44 | 5  | 1,049 | 47  | 26 | 4  | 396 | 34  | 1,515 | 90  |
| 120,568 | 44 | 5  | 1,049 | 48  | 26 | 4  | 396 | 34  | 1,515 | 91  |
| 120,569 | 44 | 4  | 1,035 | 48  | 26 | 4  | 394 | 33  | 1,499 | 89  |

|         |    |   |       |     |    |   |     |    |       |     |
|---------|----|---|-------|-----|----|---|-----|----|-------|-----|
| 120,570 | 47 | 4 | 1,046 | 50  | 26 | 4 | 403 | 33 | 1,522 | 91  |
| 120,571 | 47 | 4 | 1,056 | 50  | 26 | 4 | 408 | 33 | 1,537 | 91  |
| 120,572 | 48 | 4 | 1,061 | 49  | 24 | 4 | 406 | 31 | 1,539 | 88  |
| 120,573 | 49 | 4 | 1,057 | 66  | 24 | 5 | 406 | 49 | 1,536 | 124 |
| 120,574 | 43 | 4 | 888   | 71  | 18 | 6 | 343 | 47 | 1,292 | 128 |
| 120,575 | 41 | 5 | 826   | 76  | 15 | 7 | 300 | 51 | 1,182 | 139 |
| 120,576 | 41 | 5 | 805   | 77  | 14 | 7 | 299 | 50 | 1,159 | 139 |
| 120,577 | 44 | 5 | 902   | 77  | 20 | 7 | 362 | 47 | 1,328 | 136 |
| 120,578 | 44 | 4 | 907   | 67  | 20 | 6 | 360 | 41 | 1,331 | 118 |
| 120,579 | 44 | 4 | 888   | 66  | 19 | 5 | 353 | 42 | 1,304 | 117 |
| 120,580 | 45 | 4 | 899   | 67  | 19 | 5 | 362 | 43 | 1,325 | 119 |
| 120,581 | 46 | 3 | 880   | 56  | 19 | 5 | 357 | 40 | 1,302 | 104 |
| 120,582 | 46 | 3 | 891   | 51  | 19 | 5 | 360 | 39 | 1,316 | 98  |
| 120,583 | 47 | 3 | 917   | 52  | 23 | 5 | 388 | 40 | 1,375 | 100 |
| 120,584 | 46 | 3 | 897   | 52  | 23 | 5 | 382 | 40 | 1,348 | 100 |
| 120,585 | 46 | 3 | 885   | 51  | 23 | 5 | 383 | 38 | 1,337 | 97  |
| 120,586 | 46 | 4 | 881   | 51  | 23 | 5 | 382 | 38 | 1,332 | 98  |
| 120,587 | 44 | 4 | 869   | 51  | 23 | 5 | 382 | 37 | 1,318 | 97  |
| 120,588 | 46 | 4 | 892   | 54  | 24 | 6 | 407 | 38 | 1,369 | 102 |
| 120,589 | 46 | 4 | 892   | 58  | 24 | 6 | 407 | 38 | 1,369 | 106 |
| 120,590 | 44 | 3 | 881   | 60  | 24 | 5 | 397 | 39 | 1,346 | 107 |
| 120,591 | 43 | 3 | 879   | 61  | 26 | 5 | 397 | 39 | 1,345 | 108 |
| 120,592 | 43 | 3 | 876   | 61  | 26 | 5 | 398 | 40 | 1,343 | 109 |
| 120,593 | 43 | 3 | 877   | 61  | 26 | 5 | 399 | 40 | 1,345 | 109 |
| 120,594 | 43 | 3 | 876   | 62  | 26 | 5 | 398 | 40 | 1,343 | 110 |
| 120,595 | 43 | 3 | 867   | 65  | 26 | 5 | 396 | 43 | 1,332 | 116 |
| 120,596 | 43 | 4 | 856   | 65  | 26 | 5 | 393 | 44 | 1,318 | 118 |
| 120,597 | 43 | 4 | 844   | 65  | 26 | 5 | 392 | 45 | 1,305 | 119 |
| 120,598 | 43 | 4 | 844   | 71  | 26 | 5 | 395 | 46 | 1,308 | 126 |
| 120,599 | 43 | 4 | 814   | 71  | 26 | 6 | 386 | 46 | 1,269 | 127 |
| 120,600 | 44 | 4 | 830   | 73  | 27 | 6 | 389 | 46 | 1,290 | 129 |
| 120,601 | 41 | 6 | 778   | 81  | 27 | 6 | 357 | 55 | 1,203 | 148 |
| 120,602 | 34 | 6 | 761   | 82  | 26 | 6 | 349 | 55 | 1,170 | 149 |
| 120,603 | 32 | 5 | 750   | 82  | 25 | 6 | 354 | 55 | 1,161 | 148 |
| 120,604 | 25 | 5 | 687   | 86  | 23 | 6 | 315 | 57 | 1,050 | 154 |
| 120,605 | 25 | 6 | 687   | 100 | 24 | 8 | 318 | 63 | 1,054 | 177 |
| 120,606 | 22 | 6 | 662   | 107 | 22 | 8 | 290 | 64 | 996   | 185 |
| 120,607 | 22 | 6 | 647   | 115 | 22 | 8 | 291 | 63 | 982   | 192 |
| 120,608 | 21 | 7 | 640   | 119 | 21 | 7 | 294 | 66 | 976   | 199 |
| 120,609 | 20 | 7 | 618   | 119 | 21 | 7 | 282 | 66 | 941   | 199 |
| 120,610 | 20 | 7 | 590   | 120 | 20 | 7 | 258 | 66 | 888   | 200 |

|         |    |    |     |     |    |   |     |     |       |     |
|---------|----|----|-----|-----|----|---|-----|-----|-------|-----|
| 120,611 | 20 | 7  | 590 | 126 | 20 | 7 | 260 | 68  | 890   | 208 |
| 120,612 | 21 | 7  | 596 | 127 | 23 | 7 | 274 | 68  | 914   | 209 |
| 120,613 | 24 | 7  | 612 | 132 | 24 | 7 | 280 | 69  | 940   | 215 |
| 120,614 | 24 | 7  | 626 | 155 | 26 | 8 | 288 | 82  | 964   | 252 |
| 120,615 | 25 | 9  | 701 | 165 | 29 | 8 | 377 | 94  | 1,132 | 276 |
| 120,616 | 25 | 9  | 727 | 170 | 29 | 8 | 386 | 95  | 1,167 | 282 |
| 120,617 | 25 | 9  | 734 | 173 | 29 | 8 | 385 | 97  | 1,173 | 287 |
| 120,618 | 27 | 9  | 737 | 173 | 29 | 8 | 393 | 97  | 1,186 | 287 |
| 120,619 | 26 | 9  | 727 | 173 | 29 | 8 | 387 | 97  | 1,169 | 287 |
| 120,620 | 24 | 9  | 770 | 177 | 30 | 8 | 402 | 97  | 1,226 | 291 |
| 120,621 | 24 | 9  | 771 | 178 | 30 | 9 | 401 | 99  | 1,226 | 295 |
| 120,622 | 26 | 9  | 770 | 178 | 30 | 9 | 404 | 103 | 1,230 | 299 |
| 120,623 | 30 | 9  | 782 | 185 | 31 | 9 | 432 | 108 | 1,275 | 311 |
| 120,624 | 29 | 9  | 766 | 168 | 31 | 8 | 439 | 90  | 1,265 | 275 |
| 120,625 | 31 | 9  | 697 | 163 | 33 | 7 | 464 | 87  | 1,225 | 266 |
| 120,626 | 30 | 8  | 661 | 161 | 32 | 6 | 444 | 84  | 1,167 | 259 |
| 120,627 | 28 | 8  | 602 | 159 | 28 | 6 | 404 | 83  | 1,062 | 256 |
| 120,628 | 28 | 8  | 596 | 160 | 28 | 6 | 398 | 82  | 1,050 | 256 |
| 120,629 | 30 | 8  | 608 | 155 | 29 | 7 | 408 | 77  | 1,075 | 247 |
| 120,630 | 30 | 8  | 606 | 157 | 29 | 7 | 412 | 79  | 1,077 | 251 |
| 120,631 | 33 | 9  | 612 | 158 | 30 | 7 | 412 | 78  | 1,087 | 252 |
| 120,632 | 32 | 9  | 610 | 160 | 30 | 7 | 409 | 78  | 1,081 | 254 |
| 120,633 | 34 | 9  | 595 | 166 | 31 | 7 | 412 | 78  | 1,072 | 260 |
| 120,634 | 32 | 9  | 568 | 166 | 27 | 7 | 388 | 77  | 1,015 | 259 |
| 120,635 | 33 | 8  | 577 | 164 | 27 | 7 | 395 | 77  | 1,032 | 256 |
| 120,636 | 33 | 8  | 578 | 165 | 27 | 7 | 398 | 77  | 1,036 | 257 |
| 120,637 | 32 | 9  | 568 | 165 | 26 | 7 | 379 | 77  | 1,005 | 258 |
| 120,638 | 32 | 9  | 559 | 166 | 26 | 7 | 376 | 78  | 993   | 260 |
| 120,639 | 31 | 9  | 557 | 163 | 26 | 6 | 375 | 77  | 989   | 255 |
| 120,640 | 31 | 9  | 559 | 159 | 26 | 6 | 377 | 76  | 993   | 250 |
| 120,641 | 31 | 9  | 560 | 160 | 27 | 6 | 377 | 76  | 995   | 251 |
| 120,642 | 31 | 9  | 557 | 160 | 25 | 6 | 376 | 78  | 989   | 253 |
| 120,643 | 31 | 9  | 556 | 160 | 25 | 6 | 376 | 77  | 988   | 252 |
| 120,644 | 31 | 9  | 554 | 160 | 25 | 6 | 375 | 77  | 985   | 252 |
| 120,645 | 31 | 13 | 553 | 180 | 25 | 7 | 375 | 93  | 984   | 293 |
| 120,646 | 31 | 13 | 553 | 184 | 25 | 7 | 375 | 96  | 984   | 300 |
| 120,647 | 31 | 12 | 557 | 187 | 25 | 7 | 375 | 98  | 988   | 304 |
| 120,648 | 31 | 12 | 556 | 190 | 25 | 7 | 375 | 97  | 987   | 306 |
| 120,649 | 31 | 12 | 546 | 184 | 25 | 7 | 370 | 99  | 972   | 302 |
| 120,650 | 29 | 12 | 527 | 186 | 24 | 6 | 365 | 99  | 945   | 303 |
| 120,651 | 29 | 12 | 525 | 189 | 23 | 6 | 363 | 101 | 940   | 308 |

|         |    |    |     |     |    |   |     |    |     |     |
|---------|----|----|-----|-----|----|---|-----|----|-----|-----|
| 120,652 | 28 | 10 | 535 | 188 | 23 | 6 | 364 | 95 | 950 | 299 |
| 120,653 | 29 | 11 | 547 | 193 | 23 | 6 | 362 | 96 | 961 | 306 |
| 120,654 | 30 | 11 | 552 | 198 | 23 | 6 | 356 | 98 | 961 | 313 |
| 120,655 | 30 | 11 | 540 | 194 | 22 | 6 | 356 | 96 | 948 | 307 |
| 120,656 | 30 | 10 | 537 | 180 | 21 | 4 | 351 | 90 | 939 | 284 |
| 120,657 | 30 | 13 | 500 | 168 | 20 | 4 | 344 | 89 | 894 | 274 |
| 120,658 | 30 | 13 | 495 | 169 | 20 | 4 | 336 | 89 | 881 | 275 |
| 120,659 | 30 | 12 | 499 | 164 | 20 | 4 | 333 | 86 | 882 | 266 |
| 120,660 | 30 | 12 | 499 | 164 | 20 | 4 | 333 | 86 | 882 | 266 |
| 120,661 | 30 | 12 | 512 | 157 | 19 | 4 | 334 | 84 | 895 | 257 |
| 120,662 | 30 | 12 | 518 | 161 | 20 | 4 | 335 | 85 | 903 | 262 |
| 120,663 | 29 | 12 | 514 | 163 | 17 | 4 | 315 | 85 | 875 | 264 |
| 120,664 | 26 | 12 | 510 | 159 | 16 | 4 | 306 | 84 | 858 | 259 |
| 120,665 | 26 | 12 | 495 | 136 | 14 | 3 | 299 | 71 | 834 | 222 |
| 120,666 | 24 | 10 | 422 | 121 | 10 | 3 | 208 | 58 | 664 | 192 |
| 120,667 | 24 | 10 | 393 | 117 | 10 | 3 | 197 | 56 | 624 | 186 |
| 120,668 | 24 | 10 | 377 | 118 | 10 | 3 | 192 | 56 | 603 | 187 |
| 120,669 | 22 | 10 | 360 | 118 | 10 | 3 | 184 | 56 | 576 | 187 |
| 120,670 | 22 | 10 | 331 | 117 | 10 | 3 | 173 | 56 | 536 | 186 |
| 120,671 | 22 | 10 | 312 | 109 | 9  | 2 | 169 | 54 | 512 | 175 |
| 120,672 | 22 | 10 | 312 | 109 | 9  | 2 | 169 | 54 | 512 | 175 |
| 120,673 | 19 | 10 | 305 | 109 | 9  | 2 | 164 | 50 | 497 | 171 |
| 120,674 | 14 | 10 | 265 | 102 | 8  | 2 | 133 | 45 | 420 | 159 |
| 120,675 | 14 | 10 | 258 | 101 | 8  | 2 | 117 | 45 | 397 | 158 |
| 120,676 | 10 | 10 | 201 | 100 | 6  | 3 | 77  | 45 | 294 | 158 |
| 120,677 | 10 | 10 | 192 | 95  | 5  | 3 | 75  | 44 | 282 | 152 |
| 120,678 | 10 | 10 | 190 | 95  | 5  | 3 | 75  | 44 | 280 | 152 |
| 120,679 | 12 | 10 | 191 | 94  | 5  | 3 | 75  | 44 | 283 | 151 |
| 120,680 | 12 | 11 | 179 | 93  | 5  | 2 | 72  | 44 | 268 | 150 |
| 120,681 | 12 | 11 | 176 | 91  | 4  | 2 | 71  | 42 | 263 | 146 |
| 120,682 | 10 | 10 | 176 | 89  | 3  | 2 | 69  | 42 | 258 | 143 |
| 120,683 | 11 | 10 | 179 | 87  | 3  | 2 | 72  | 42 | 265 | 141 |
| 120,684 | 9  | 10 | 222 | 80  | 2  | 2 | 70  | 42 | 303 | 134 |
| 120,685 | 11 | 10 | 299 | 80  | 6  | 2 | 95  | 42 | 411 | 134 |
| 120,686 | 10 | 10 | 305 | 80  | 7  | 2 | 92  | 42 | 414 | 134 |
| 120,687 | 29 | 10 | 501 | 79  | 13 | 2 | 195 | 42 | 738 | 133 |
| 120,688 | 29 | 9  | 504 | 79  | 14 | 2 | 196 | 42 | 743 | 132 |
| 120,689 | 29 | 9  | 501 | 77  | 14 | 2 | 194 | 41 | 738 | 129 |
| 120,690 | 29 | 9  | 498 | 77  | 14 | 2 | 194 | 41 | 735 | 129 |
| 120,691 | 36 | 9  | 572 | 74  | 16 | 2 | 208 | 41 | 832 | 126 |
| 120,692 | 36 | 9  | 572 | 73  | 16 | 2 | 208 | 40 | 832 | 124 |



|         |     |   |       |    |     |   |       |    |       |     |
|---------|-----|---|-------|----|-----|---|-------|----|-------|-----|
| 120,693 | 79  | 9 | 1,062 | 73 | 51  | 2 | 446   | 38 | 1,638 | 122 |
| 120,694 | 95  | 9 | 1,230 | 73 | 62  | 2 | 523   | 38 | 1,910 | 122 |
| 120,695 | 124 | 9 | 1,585 | 73 | 83  | 2 | 665   | 38 | 2,457 | 122 |
| 120,696 | 124 | 5 | 1,586 | 51 | 83  | 1 | 666   | 20 | 2,459 | 77  |
| 120,697 | 124 | 5 | 1,588 | 44 | 83  | 1 | 666   | 15 | 2,461 | 65  |
| 120,698 | 150 | 5 | 2,075 | 41 | 138 | 1 | 1,041 | 12 | 3,404 | 59  |
| 120,699 | 150 | 5 | 2,076 | 38 | 138 | 1 | 1,041 | 12 | 3,405 | 56  |
| 120,700 | 184 | 6 | 2,718 | 38 | 171 | 1 | 1,270 | 9  | 4,343 | 54  |
| 120,701 | 184 | 6 | 2,732 | 36 | 171 | 1 | 1,274 | 9  | 4,361 | 52  |
| 120,702 | 184 | 6 | 2,723 | 31 | 171 | 1 | 1,275 | 8  | 4,353 | 46  |
| 120,703 | 183 | 6 | 2,722 | 24 | 171 | 1 | 1,274 | 5  | 4,350 | 36  |
| 120,704 | 183 | 5 | 2,715 | 18 | 171 | 1 | 1,273 | 4  | 4,342 | 28  |
| 120,705 | 184 | 5 | 2,713 | 13 | 171 | 1 | 1,275 | 2  | 4,343 | 21  |
| 120,706 | 184 | 5 | 2,714 | 13 | 171 | 2 | 1,275 | 2  | 4,344 | 22  |
| 120,707 | 185 | 5 | 2,715 | 14 | 171 | 2 | 1,276 | 2  | 4,347 | 23  |
| 120,708 | 185 | 2 | 2,717 | 11 | 172 | 2 | 1,274 | 2  | 4,348 | 17  |
| 120,709 | 185 | 2 | 2,716 | 10 | 172 | 2 | 1,275 | 2  | 4,348 | 16  |
| 120,710 | 188 | 2 | 2,708 | 10 | 173 | 2 | 1,274 | 1  | 4,343 | 15  |
| 120,711 | 188 | 2 | 2,709 | 10 | 173 | 2 | 1,274 | 1  | 4,344 | 15  |
| 120,712 | 191 | 2 | 2,707 | 10 | 174 | 2 | 1,276 | 1  | 4,348 | 15  |
| 120,713 | 192 | 2 | 2,720 | 7  | 174 | 2 | 1,281 | 1  | 4,367 | 12  |
| 120,714 | 200 | 2 | 2,805 | 7  | 177 | 2 | 1,309 | 1  | 4,491 | 12  |
| 120,715 | 200 | 2 | 2,799 | 6  | 177 | 2 | 1,311 | 1  | 4,487 | 11  |
| 120,716 | 200 | 2 | 2,800 | 8  | 177 | 2 | 1,310 | 2  | 4,487 | 14  |
| 120,717 | 200 | 2 | 2,807 | 8  | 178 | 2 | 1,315 | 2  | 4,500 | 14  |
| 120,718 | 200 | 2 | 2,808 | 8  | 179 | 2 | 1,316 | 2  | 4,503 | 14  |
| 120,719 | 200 | 2 | 2,818 | 9  | 180 | 2 | 1,318 | 2  | 4,516 | 15  |
| 120,720 | 200 | 2 | 2,817 | 9  | 180 | 2 | 1,316 | 2  | 4,513 | 15  |
| 120,721 | 201 | 2 | 2,818 | 10 | 180 | 2 | 1,317 | 2  | 4,516 | 16  |
| 120,722 | 202 | 2 | 2,820 | 10 | 181 | 2 | 1,316 | 2  | 4,519 | 16  |
| 120,723 | 202 | 2 | 2,820 | 10 | 181 | 2 | 1,316 | 2  | 4,519 | 16  |
| 120,724 | 202 | 2 | 2,819 | 10 | 181 | 2 | 1,313 | 2  | 4,515 | 16  |
| 120,725 | 203 | 2 | 2,839 | 10 | 181 | 2 | 1,319 | 2  | 4,542 | 16  |
| 120,726 | 203 | 2 | 2,839 | 10 | 181 | 2 | 1,319 | 2  | 4,542 | 16  |
| 120,727 | 211 | 2 | 2,971 | 10 | 183 | 1 | 1,346 | 2  | 4,711 | 15  |
| 120,728 | 214 | 2 | 3,070 | 10 | 184 | 1 | 1,358 | 2  | 4,826 | 15  |
| 120,729 | 214 | 4 | 3,093 | 11 | 184 | 1 | 1,363 | 2  | 4,854 | 18  |
| 120,730 | 215 | 4 | 3,142 | 13 | 183 | 1 | 1,379 | 3  | 4,919 | 21  |
| 120,731 | 215 | 3 | 3,155 | 13 | 184 | 1 | 1,379 | 7  | 4,933 | 24  |
| 120,732 | 215 | 3 | 3,162 | 17 | 184 | 1 | 1,384 | 7  | 4,945 | 28  |
| 120,733 | 213 | 3 | 3,143 | 17 | 184 | 1 | 1,376 | 7  | 4,916 | 28  |

|         |     |    |       |     |     |    |       |     |       |     |
|---------|-----|----|-------|-----|-----|----|-------|-----|-------|-----|
| 120,734 | 212 | 3  | 3,147 | 19  | 184 | 1  | 1,373 | 7   | 4,916 | 30  |
| 120,735 | 212 | 4  | 3,103 | 19  | 184 | 1  | 1,368 | 7   | 4,867 | 31  |
| 120,736 | 210 | 4  | 3,024 | 19  | 180 | 1  | 1,339 | 7   | 4,753 | 31  |
| 120,737 | 210 | 4  | 3,007 | 19  | 179 | 1  | 1,334 | 7   | 4,730 | 31  |
| 120,738 | 191 | 4  | 2,816 | 19  | 173 | 1  | 1,232 | 7   | 4,412 | 31  |
| 120,739 | 191 | 4  | 2,816 | 19  | 172 | 1  | 1,231 | 7   | 4,410 | 31  |
| 120,740 | 184 | 5  | 2,773 | 19  | 170 | 1  | 1,221 | 8   | 4,348 | 33  |
| 120,741 | 180 | 5  | 2,792 | 22  | 170 | 1  | 1,219 | 12  | 4,361 | 40  |
| 120,742 | 180 | 5  | 2,808 | 29  | 169 | 2  | 1,225 | 19  | 4,382 | 55  |
| 120,743 | 146 | 5  | 2,394 | 41  | 137 | 2  | 1,012 | 28  | 3,689 | 76  |
| 120,744 | 143 | 5  | 2,378 | 44  | 136 | 2  | 1,001 | 29  | 3,658 | 80  |
| 120,745 | 128 | 5  | 2,223 | 46  | 126 | 2  | 926   | 31  | 3,403 | 84  |
| 120,746 | 101 | 5  | 1,871 | 49  | 105 | 3  | 784   | 36  | 2,861 | 93  |
| 120,747 | 75  | 5  | 1,381 | 69  | 49  | 8  | 408   | 55  | 1,913 | 137 |
| 120,748 | 45  | 5  | 864   | 81  | 18  | 9  | 229   | 71  | 1,156 | 166 |
| 120,749 | 44  | 5  | 840   | 86  | 16  | 10 | 213   | 76  | 1,113 | 177 |
| 120,750 | 43  | 5  | 836   | 92  | 17  | 11 | 208   | 76  | 1,104 | 184 |
| 120,751 | 43  | 6  | 802   | 93  | 17  | 11 | 194   | 77  | 1,056 | 187 |
| 120,752 | 44  | 9  | 822   | 95  | 17  | 11 | 200   | 78  | 1,083 | 193 |
| 120,753 | 47  | 9  | 852   | 95  | 17  | 11 | 204   | 78  | 1,120 | 193 |
| 120,754 | 48  | 9  | 903   | 97  | 17  | 11 | 209   | 78  | 1,177 | 195 |
| 120,755 | 58  | 9  | 1,042 | 97  | 19  | 11 | 241   | 78  | 1,360 | 195 |
| 120,756 | 69  | 9  | 1,201 | 97  | 28  | 10 | 299   | 78  | 1,597 | 194 |
| 120,757 | 69  | 11 | 1,201 | 101 | 28  | 10 | 299   | 79  | 1,597 | 201 |
| 120,758 | 68  | 11 | 1,188 | 100 | 28  | 10 | 298   | 79  | 1,582 | 200 |
| 120,759 | 72  | 12 | 1,351 | 100 | 34  | 10 | 347   | 79  | 1,804 | 201 |
| 120,760 | 74  | 12 | 1,386 | 101 | 39  | 11 | 369   | 80  | 1,868 | 204 |
| 120,761 | 72  | 12 | 1,392 | 103 | 38  | 11 | 374   | 80  | 1,876 | 206 |
| 120,762 | 72  | 12 | 1,391 | 103 | 38  | 11 | 374   | 81  | 1,875 | 207 |
| 120,763 | 69  | 12 | 1,389 | 103 | 38  | 11 | 373   | 81  | 1,869 | 207 |
| 120,764 | 68  | 13 | 1,368 | 105 | 37  | 11 | 365   | 82  | 1,838 | 211 |
| 120,765 | 60  | 13 | 1,278 | 105 | 34  | 11 | 337   | 82  | 1,709 | 211 |
| 120,766 | 60  | 13 | 1,284 | 105 | 34  | 11 | 340   | 84  | 1,718 | 213 |
| 120,767 | 60  | 13 | 1,291 | 107 | 34  | 11 | 344   | 87  | 1,729 | 218 |
| 120,768 | 60  | 13 | 1,282 | 107 | 33  | 11 | 339   | 91  | 1,714 | 222 |
| 120,769 | 60  | 13 | 1,283 | 109 | 32  | 11 | 339   | 91  | 1,714 | 224 |
| 120,770 | 60  | 13 | 1,273 | 110 | 31  | 11 | 337   | 91  | 1,701 | 225 |
| 120,771 | 60  | 13 | 1,274 | 110 | 31  | 11 | 338   | 91  | 1,703 | 225 |
| 120,772 | 59  | 13 | 1,273 | 110 | 31  | 11 | 337   | 91  | 1,700 | 225 |
| 120,773 | 58  | 17 | 1,271 | 115 | 30  | 11 | 337   | 101 | 1,696 | 244 |
| 120,774 | 58  | 17 | 1,270 | 116 | 30  | 11 | 337   | 101 | 1,695 | 245 |

|         |    |    |       |     |    |    |     |     |       |     |
|---------|----|----|-------|-----|----|----|-----|-----|-------|-----|
| 120,775 | 57 | 17 | 1,267 | 117 | 30 | 11 | 338 | 104 | 1,692 | 249 |
| 120,776 | 58 | 17 | 1,261 | 117 | 30 | 11 | 335 | 107 | 1,684 | 252 |
| 120,777 | 56 | 17 | 1,236 | 117 | 28 | 11 | 340 | 107 | 1,660 | 252 |
| 120,778 | 52 | 17 | 1,181 | 117 | 28 | 11 | 325 | 107 | 1,586 | 252 |
| 120,779 | 49 | 15 | 1,095 | 114 | 27 | 11 | 327 | 102 | 1,498 | 242 |
| 120,780 | 49 | 15 | 1,076 | 114 | 27 | 11 | 333 | 102 | 1,485 | 242 |
| 120,781 | 45 | 15 | 1,019 | 111 | 27 | 11 | 311 | 102 | 1,402 | 239 |
| 120,782 | 45 | 15 | 1,012 | 111 | 26 | 11 | 311 | 102 | 1,394 | 239 |
| 120,783 | 45 | 15 | 1,007 | 111 | 26 | 11 | 305 | 102 | 1,383 | 239 |
| 120,784 | 45 | 15 | 999   | 111 | 26 | 11 | 305 | 102 | 1,375 | 239 |
| 120,785 | 45 | 15 | 998   | 109 | 26 | 11 | 304 | 102 | 1,373 | 237 |
| 120,786 | 45 | 15 | 996   | 109 | 26 | 11 | 308 | 102 | 1,375 | 237 |
| 120,787 | 45 | 14 | 996   | 109 | 26 | 11 | 308 | 102 | 1,375 | 236 |
| 120,788 | 45 | 14 | 994   | 112 | 26 | 11 | 307 | 104 | 1,372 | 241 |
| 120,789 | 45 | 14 | 992   | 117 | 26 | 12 | 305 | 105 | 1,368 | 248 |
| 120,790 | 45 | 14 | 989   | 120 | 26 | 12 | 305 | 105 | 1,365 | 251 |
| 120,791 | 46 | 14 | 956   | 120 | 26 | 12 | 301 | 105 | 1,329 | 251 |
| 120,792 | 50 | 14 | 974   | 120 | 31 | 12 | 324 | 101 | 1,379 | 247 |
| 120,793 | 50 | 15 | 966   | 114 | 30 | 11 | 320 | 94  | 1,366 | 234 |
| 120,794 | 53 | 15 | 1,013 | 100 | 32 | 11 | 331 | 86  | 1,429 | 212 |
| 120,795 | 52 | 15 | 1,008 | 100 | 32 | 11 | 330 | 88  | 1,422 | 214 |
| 120,796 | 51 | 15 | 1,026 | 98  | 32 | 11 | 342 | 90  | 1,451 | 214 |
| 120,797 | 49 | 15 | 1,025 | 95  | 32 | 10 | 342 | 85  | 1,448 | 205 |
| 120,798 | 49 | 15 | 1,028 | 75  | 32 | 5  | 342 | 66  | 1,451 | 161 |
| 120,799 | 47 | 15 | 995   | 59  | 32 | 3  | 335 | 46  | 1,409 | 123 |
| 120,800 | 47 | 15 | 988   | 59  | 32 | 3  | 332 | 47  | 1,399 | 124 |
| 120,801 | 47 | 13 | 976   | 52  | 31 | 2  | 326 | 46  | 1,380 | 113 |
| 120,802 | 47 | 13 | 993   | 54  | 33 | 2  | 328 | 49  | 1,401 | 118 |
| 120,803 | 46 | 10 | 965   | 55  | 33 | 2  | 322 | 53  | 1,366 | 120 |
| 120,804 | 43 | 10 | 935   | 55  | 33 | 2  | 319 | 54  | 1,330 | 121 |
| 120,805 | 42 | 10 | 885   | 54  | 33 | 2  | 315 | 57  | 1,275 | 123 |
| 120,806 | 36 | 10 | 785   | 56  | 31 | 2  | 298 | 57  | 1,150 | 125 |
| 120,807 | 25 | 9  | 638   | 52  | 22 | 2  | 240 | 56  | 925   | 119 |
| 120,808 | 29 | 9  | 672   | 54  | 21 | 2  | 247 | 56  | 969   | 121 |
| 120,809 | 27 | 9  | 614   | 54  | 16 | 2  | 229 | 56  | 886   | 121 |
| 120,810 | 25 | 8  | 581   | 54  | 11 | 3  | 208 | 57  | 825   | 122 |
| 120,811 | 25 | 8  | 625   | 51  | 13 | 2  | 241 | 58  | 904   | 119 |
| 120,812 | 27 | 8  | 650   | 55  | 14 | 2  | 249 | 60  | 940   | 125 |
| 120,813 | 27 | 8  | 651   | 62  | 14 | 2  | 249 | 66  | 941   | 138 |
| 120,814 | 29 | 8  | 645   | 65  | 14 | 3  | 253 | 66  | 941   | 142 |
| 120,815 | 29 | 7  | 654   | 62  | 14 | 3  | 258 | 65  | 955   | 137 |

|         |    |    |       |     |    |   |     |     |       |     |
|---------|----|----|-------|-----|----|---|-----|-----|-------|-----|
| 120,816 | 30 | 7  | 671   | 61  | 15 | 3 | 261 | 67  | 977   | 138 |
| 120,817 | 30 | 8  | 666   | 80  | 15 | 3 | 257 | 119 | 968   | 210 |
| 120,818 | 30 | 8  | 658   | 79  | 15 | 3 | 253 | 120 | 956   | 210 |
| 120,819 | 39 | 8  | 868   | 78  | 23 | 3 | 409 | 118 | 1,339 | 207 |
| 120,820 | 43 | 8  | 987   | 76  | 30 | 3 | 481 | 118 | 1,541 | 205 |
| 120,821 | 44 | 8  | 1,016 | 74  | 34 | 3 | 496 | 120 | 1,590 | 205 |
| 120,822 | 44 | 8  | 1,017 | 78  | 34 | 3 | 495 | 120 | 1,590 | 209 |
| 120,823 | 44 | 8  | 1,015 | 78  | 34 | 3 | 492 | 120 | 1,585 | 209 |
| 120,824 | 44 | 4  | 1,020 | 80  | 35 | 3 | 493 | 111 | 1,592 | 198 |
| 120,825 | 45 | 4  | 1,028 | 79  | 37 | 3 | 497 | 112 | 1,607 | 198 |
| 120,826 | 45 | 4  | 1,026 | 78  | 37 | 3 | 497 | 109 | 1,605 | 194 |
| 120,827 | 44 | 4  | 1,025 | 79  | 37 | 3 | 503 | 106 | 1,609 | 192 |
| 120,828 | 45 | 4  | 1,018 | 81  | 38 | 3 | 504 | 106 | 1,605 | 194 |
| 120,829 | 43 | 5  | 992   | 83  | 39 | 3 | 506 | 108 | 1,580 | 199 |
| 120,830 | 44 | 5  | 987   | 89  | 39 | 3 | 496 | 109 | 1,566 | 206 |
| 120,831 | 44 | 6  | 984   | 102 | 39 | 3 | 488 | 128 | 1,555 | 239 |
| 120,832 | 45 | 6  | 1,015 | 111 | 41 | 3 | 501 | 128 | 1,602 | 248 |
| 120,833 | 46 | 6  | 1,080 | 112 | 43 | 3 | 524 | 128 | 1,693 | 249 |
| 120,834 | 48 | 6  | 1,133 | 113 | 47 | 3 | 569 | 128 | 1,797 | 250 |
| 120,835 | 48 | 6  | 1,132 | 113 | 47 | 3 | 566 | 128 | 1,793 | 250 |
| 120,836 | 48 | 6  | 1,131 | 113 | 47 | 3 | 567 | 128 | 1,793 | 250 |
| 120,837 | 48 | 6  | 1,132 | 113 | 47 | 3 | 568 | 128 | 1,795 | 250 |
| 120,838 | 48 | 6  | 1,130 | 116 | 47 | 3 | 567 | 141 | 1,792 | 266 |
| 120,839 | 48 | 6  | 1,130 | 114 | 47 | 3 | 566 | 139 | 1,791 | 262 |
| 120,840 | 57 | 6  | 1,260 | 124 | 52 | 2 | 646 | 146 | 2,015 | 278 |
| 120,841 | 58 | 6  | 1,269 | 130 | 52 | 2 | 655 | 154 | 2,034 | 292 |
| 120,842 | 58 | 5  | 1,275 | 133 | 53 | 2 | 681 | 155 | 2,067 | 295 |
| 120,843 | 55 | 5  | 1,221 | 134 | 49 | 2 | 661 | 155 | 1,986 | 296 |
| 120,844 | 55 | 4  | 1,223 | 133 | 49 | 2 | 664 | 158 | 1,991 | 297 |
| 120,845 | 53 | 5  | 1,157 | 135 | 47 | 3 | 655 | 158 | 1,912 | 301 |
| 120,846 | 53 | 5  | 1,138 | 147 | 47 | 3 | 649 | 163 | 1,887 | 318 |
| 120,847 | 53 | 5  | 1,127 | 154 | 46 | 4 | 641 | 162 | 1,867 | 325 |
| 120,848 | 54 | 7  | 1,149 | 181 | 48 | 5 | 659 | 184 | 1,910 | 377 |
| 120,849 | 54 | 7  | 1,158 | 181 | 49 | 5 | 671 | 183 | 1,932 | 376 |
| 120,850 | 54 | 8  | 1,199 | 190 | 50 | 5 | 685 | 191 | 1,988 | 394 |
| 120,851 | 57 | 10 | 1,217 | 193 | 52 | 6 | 694 | 192 | 2,020 | 401 |
| 120,852 | 57 | 10 | 1,210 | 198 | 52 | 6 | 694 | 202 | 2,013 | 416 |
| 120,853 | 57 | 10 | 1,192 | 201 | 50 | 6 | 692 | 200 | 1,991 | 417 |
| 120,854 | 59 | 10 | 1,248 | 199 | 51 | 6 | 719 | 198 | 2,077 | 413 |
| 120,855 | 59 | 10 | 1,247 | 208 | 51 | 8 | 718 | 208 | 2,075 | 434 |
| 120,856 | 59 | 10 | 1,242 | 208 | 51 | 8 | 717 | 205 | 2,069 | 431 |

|         |    |    |       |     |    |    |     |     |       |     |
|---------|----|----|-------|-----|----|----|-----|-----|-------|-----|
| 120,857 | 61 | 10 | 1,451 | 210 | 54 | 8  | 784 | 206 | 2,350 | 434 |
| 120,858 | 60 | 9  | 1,437 | 213 | 54 | 8  | 781 | 207 | 2,332 | 437 |
| 120,859 | 58 | 9  | 1,360 | 211 | 56 | 8  | 781 | 207 | 2,255 | 435 |
| 120,860 | 56 | 9  | 1,306 | 211 | 55 | 7  | 754 | 206 | 2,171 | 433 |
| 120,861 | 56 | 9  | 1,305 | 212 | 55 | 7  | 755 | 206 | 2,171 | 434 |
| 120,862 | 55 | 9  | 1,258 | 208 | 54 | 7  | 720 | 200 | 2,087 | 424 |
| 120,863 | 53 | 9  | 1,238 | 201 | 53 | 7  | 711 | 196 | 2,055 | 413 |
| 120,864 | 53 | 9  | 1,239 | 201 | 53 | 7  | 711 | 196 | 2,056 | 413 |
| 120,865 | 51 | 9  | 1,235 | 198 | 53 | 6  | 706 | 198 | 2,045 | 411 |
| 120,866 | 51 | 9  | 1,222 | 201 | 53 | 6  | 702 | 201 | 2,028 | 417 |
| 120,867 | 50 | 9  | 1,208 | 203 | 52 | 6  | 701 | 201 | 2,011 | 419 |
| 120,868 | 48 | 8  | 1,196 | 183 | 51 | 6  | 695 | 146 | 1,990 | 343 |
| 120,869 | 42 | 8  | 1,113 | 185 | 50 | 6  | 634 | 142 | 1,839 | 341 |
| 120,870 | 42 | 8  | 1,027 | 184 | 47 | 6  | 568 | 140 | 1,684 | 338 |
| 120,871 | 40 | 8  | 914   | 185 | 40 | 6  | 501 | 140 | 1,495 | 339 |
| 120,872 | 39 | 8  | 901   | 181 | 39 | 6  | 509 | 138 | 1,488 | 333 |
| 120,873 | 39 | 8  | 902   | 181 | 40 | 6  | 512 | 138 | 1,493 | 333 |
| 120,874 | 39 | 8  | 908   | 174 | 39 | 6  | 515 | 137 | 1,501 | 325 |
| 120,875 | 39 | 8  | 915   | 174 | 39 | 6  | 517 | 137 | 1,510 | 325 |
| 120,876 | 38 | 8  | 942   | 175 | 39 | 6  | 538 | 138 | 1,557 | 327 |
| 120,877 | 51 | 8  | 1,062 | 175 | 43 | 6  | 617 | 138 | 1,773 | 327 |
| 120,878 | 52 | 8  | 1,092 | 175 | 44 | 6  | 640 | 139 | 1,828 | 328 |
| 120,879 | 51 | 9  | 1,083 | 177 | 43 | 6  | 631 | 147 | 1,808 | 339 |
| 120,880 | 51 | 8  | 1,073 | 176 | 42 | 6  | 619 | 146 | 1,785 | 336 |
| 120,881 | 67 | 8  | 1,192 | 176 | 53 | 9  | 785 | 152 | 2,097 | 345 |
| 120,882 | 70 | 7  | 1,239 | 168 | 56 | 9  | 860 | 135 | 2,225 | 319 |
| 120,883 | 69 | 7  | 1,213 | 159 | 54 | 9  | 855 | 136 | 2,191 | 311 |
| 120,884 | 68 | 7  | 1,148 | 159 | 52 | 9  | 832 | 135 | 2,100 | 310 |
| 120,885 | 66 | 7  | 1,096 | 159 | 48 | 9  | 790 | 136 | 2,000 | 311 |
| 120,886 | 66 | 7  | 1,082 | 159 | 48 | 9  | 787 | 136 | 1,983 | 311 |
| 120,887 | 61 | 7  | 988   | 159 | 43 | 9  | 717 | 138 | 1,809 | 313 |
| 120,888 | 61 | 7  | 984   | 159 | 43 | 9  | 718 | 146 | 1,806 | 321 |
| 120,889 | 61 | 7  | 978   | 156 | 43 | 9  | 715 | 133 | 1,797 | 305 |
| 120,890 | 57 | 7  | 968   | 155 | 43 | 9  | 714 | 136 | 1,782 | 307 |
| 120,891 | 58 | 7  | 966   | 128 | 43 | 9  | 713 | 119 | 1,780 | 263 |
| 120,892 | 58 | 7  | 963   | 132 | 43 | 9  | 706 | 120 | 1,770 | 268 |
| 120,893 | 57 | 7  | 957   | 134 | 42 | 10 | 679 | 121 | 1,735 | 272 |
| 120,894 | 57 | 7  | 960   | 134 | 42 | 10 | 675 | 124 | 1,734 | 275 |
| 120,895 | 57 | 7  | 952   | 147 | 43 | 10 | 676 | 125 | 1,728 | 289 |
| 120,896 | 56 | 6  | 944   | 145 | 43 | 9  | 670 | 123 | 1,713 | 283 |
| 120,897 | 56 | 6  | 946   | 139 | 43 | 9  | 672 | 118 | 1,717 | 272 |

|         |     |    |       |     |     |    |       |     |       |     |
|---------|-----|----|-------|-----|-----|----|-------|-----|-------|-----|
| 120,898 | 56  | 6  | 946   | 140 | 42  | 8  | 675   | 118 | 1,719 | 272 |
| 120,899 | 55  | 4  | 925   | 118 | 41  | 7  | 660   | 99  | 1,681 | 228 |
| 120,900 | 55  | 4  | 913   | 120 | 40  | 7  | 647   | 105 | 1,655 | 236 |
| 120,901 | 56  | 3  | 891   | 120 | 40  | 8  | 639   | 100 | 1,626 | 231 |
| 120,902 | 55  | 1  | 882   | 125 | 38  | 7  | 640   | 102 | 1,615 | 235 |
| 120,903 | 55  | 1  | 875   | 130 | 37  | 7  | 616   | 94  | 1,583 | 232 |
| 120,904 | 57  | 1  | 903   | 131 | 39  | 7  | 669   | 94  | 1,668 | 233 |
| 120,905 | 58  | 2  | 954   | 150 | 41  | 7  | 688   | 103 | 1,741 | 262 |
| 120,906 | 52  | 2  | 834   | 147 | 41  | 6  | 634   | 98  | 1,561 | 253 |
| 120,907 | 52  | 2  | 760   | 147 | 40  | 7  | 623   | 98  | 1,475 | 254 |
| 120,908 | 56  | 2  | 811   | 154 | 44  | 8  | 694   | 106 | 1,605 | 270 |
| 120,909 | 57  | 3  | 827   | 158 | 45  | 8  | 703   | 109 | 1,632 | 278 |
| 120,910 | 55  | 10 | 821   | 180 | 43  | 11 | 694   | 154 | 1,613 | 355 |
| 120,911 | 55  | 10 | 817   | 189 | 43  | 12 | 694   | 161 | 1,609 | 372 |
| 120,912 | 56  | 17 | 829   | 212 | 45  | 14 | 711   | 179 | 1,641 | 422 |
| 120,913 | 56  | 17 | 825   | 219 | 44  | 14 | 711   | 179 | 1,636 | 429 |
| 120,914 | 58  | 17 | 926   | 225 | 45  | 14 | 743   | 188 | 1,772 | 444 |
| 120,915 | 58  | 17 | 924   | 229 | 45  | 14 | 743   | 189 | 1,770 | 449 |
| 120,916 | 80  | 17 | 1,156 | 228 | 63  | 14 | 929   | 187 | 2,228 | 446 |
| 120,917 | 82  | 17 | 1,184 | 226 | 65  | 14 | 936   | 184 | 2,267 | 441 |
| 120,918 | 82  | 19 | 1,179 | 229 | 65  | 15 | 934   | 186 | 2,260 | 449 |
| 120,919 | 82  | 19 | 1,177 | 236 | 65  | 15 | 930   | 196 | 2,254 | 466 |
| 120,920 | 273 | 19 | 2,825 | 234 | 203 | 15 | 2,611 | 196 | 5,912 | 464 |
| 120,921 | 273 | 19 | 2,813 | 236 | 202 | 16 | 2,595 | 196 | 5,883 | 467 |
| 120,922 | 285 | 19 | 3,186 | 237 | 221 | 16 | 2,789 | 197 | 6,481 | 469 |
| 120,923 | 285 | 19 | 3,170 | 238 | 218 | 16 | 2,765 | 199 | 6,438 | 472 |
| 120,924 | 285 | 19 | 3,180 | 243 | 217 | 16 | 2,774 | 210 | 6,456 | 488 |
| 120,925 | 285 | 19 | 3,170 | 243 | 217 | 16 | 2,770 | 210 | 6,442 | 488 |
| 120,926 | 286 | 19 | 3,164 | 250 | 217 | 19 | 2,768 | 222 | 6,435 | 510 |
| 120,927 | 286 | 20 | 3,132 | 262 | 215 | 21 | 2,747 | 251 | 6,380 | 554 |
| 120,928 | 273 | 21 | 3,011 | 279 | 211 | 21 | 2,669 | 257 | 6,164 | 578 |
| 120,929 | 272 | 22 | 2,992 | 293 | 210 | 21 | 2,657 | 278 | 6,131 | 614 |
| 120,930 | 262 | 24 | 2,932 | 299 | 205 | 21 | 2,554 | 283 | 5,953 | 627 |
| 120,931 | 259 | 25 | 2,898 | 316 | 203 | 22 | 2,535 | 293 | 5,895 | 656 |
| 120,932 | 256 | 25 | 2,877 | 311 | 199 | 19 | 2,497 | 286 | 5,829 | 641 |
| 120,933 | 253 | 25 | 2,830 | 310 | 196 | 19 | 2,417 | 283 | 5,696 | 637 |
| 120,934 | 253 | 25 | 2,823 | 311 | 196 | 19 | 2,412 | 283 | 5,684 | 638 |
| 120,935 | 253 | 25 | 2,830 | 310 | 196 | 19 | 2,427 | 283 | 5,706 | 637 |
| 120,936 | 253 | 25 | 2,831 | 310 | 196 | 19 | 2,430 | 284 | 5,710 | 638 |
| 120,937 | 253 | 25 | 2,832 | 310 | 196 | 19 | 2,429 | 285 | 5,710 | 639 |
| 120,938 | 253 | 25 | 2,843 | 313 | 197 | 19 | 2,436 | 283 | 5,729 | 640 |

|         |     |    |       |     |     |    |       |     |       |     |
|---------|-----|----|-------|-----|-----|----|-------|-----|-------|-----|
| 120,939 | 253 | 27 | 2,864 | 314 | 197 | 19 | 2,444 | 275 | 5,758 | 635 |
| 120,940 | 253 | 27 | 2,861 | 315 | 197 | 19 | 2,443 | 275 | 5,754 | 636 |
| 120,941 | 253 | 28 | 2,865 | 317 | 197 | 19 | 2,445 | 272 | 5,760 | 636 |
| 120,942 | 252 | 28 | 2,870 | 317 | 197 | 19 | 2,449 | 272 | 5,768 | 636 |
| 120,943 | 253 | 28 | 2,902 | 312 | 199 | 18 | 2,476 | 270 | 5,830 | 628 |
| 120,944 | 253 | 28 | 2,911 | 312 | 200 | 18 | 2,478 | 270 | 5,842 | 628 |
| 120,945 | 253 | 28 | 2,907 | 308 | 199 | 18 | 2,480 | 267 | 5,839 | 621 |
| 120,946 | 253 | 28 | 2,904 | 294 | 198 | 18 | 2,472 | 262 | 5,827 | 602 |
| 120,947 | 253 | 28 | 2,922 | 288 | 200 | 18 | 2,479 | 260 | 5,854 | 594 |
| 120,948 | 253 | 28 | 2,922 | 289 | 200 | 18 | 2,478 | 261 | 5,853 | 596 |
| 120,949 | 253 | 28 | 2,920 | 281 | 200 | 18 | 2,473 | 257 | 5,846 | 584 |
| 120,950 | 259 | 28 | 2,944 | 276 | 200 | 18 | 2,478 | 254 | 5,881 | 576 |
| 120,951 | 259 | 28 | 2,943 | 273 | 200 | 18 | 2,478 | 248 | 5,880 | 567 |
| 120,952 | 261 | 28 | 2,929 | 264 | 200 | 17 | 2,479 | 245 | 5,869 | 554 |
| 120,953 | 259 | 28 | 2,919 | 256 | 200 | 17 | 2,469 | 241 | 5,847 | 542 |
| 120,954 | 257 | 28 | 2,897 | 247 | 200 | 17 | 2,469 | 239 | 5,823 | 531 |
| 120,955 | 275 | 28 | 2,921 | 241 | 202 | 17 | 2,475 | 238 | 5,873 | 524 |
| 120,956 | 280 | 27 | 2,886 | 215 | 203 | 16 | 2,491 | 221 | 5,860 | 479 |
| 120,957 | 293 | 27 | 2,993 | 203 | 204 | 14 | 2,604 | 213 | 6,094 | 457 |
| 120,958 | 293 | 27 | 2,991 | 203 | 204 | 14 | 2,606 | 213 | 6,094 | 457 |
| 120,959 | 303 | 27 | 2,976 | 203 | 203 | 14 | 2,592 | 214 | 6,074 | 458 |
| 120,960 | 303 | 26 | 2,974 | 196 | 202 | 14 | 2,590 | 211 | 6,069 | 447 |
| 120,961 | 302 | 20 | 2,968 | 174 | 200 | 11 | 2,586 | 166 | 6,056 | 371 |
| 120,962 | 302 | 13 | 2,940 | 140 | 203 | 8  | 2,581 | 141 | 6,026 | 302 |
| 120,963 | 301 | 13 | 2,893 | 128 | 204 | 8  | 2,577 | 132 | 5,975 | 281 |
| 120,964 | 301 | 13 | 2,868 | 128 | 205 | 8  | 2,579 | 133 | 5,953 | 282 |
| 120,965 | 280 | 13 | 2,716 | 128 | 189 | 8  | 2,418 | 134 | 5,603 | 283 |
| 120,966 | 288 | 13 | 2,834 | 124 | 192 | 9  | 2,541 | 134 | 5,855 | 280 |
| 120,967 | 288 | 13 | 2,834 | 124 | 191 | 9  | 2,543 | 134 | 5,856 | 280 |
| 120,968 | 288 | 13 | 2,824 | 124 | 188 | 9  | 2,542 | 133 | 5,842 | 279 |
| 120,969 | 276 | 11 | 2,570 | 110 | 185 | 8  | 2,420 | 118 | 5,451 | 247 |
| 120,970 | 257 | 11 | 2,303 | 110 | 172 | 8  | 2,289 | 118 | 5,021 | 247 |
| 120,971 | 99  | 11 | 1,233 | 111 | 54  | 8  | 893   | 118 | 2,279 | 248 |
| 120,972 | 87  | 11 | 885   | 110 | 36  | 7  | 709   | 117 | 1,717 | 245 |
| 120,973 | 85  | 11 | 875   | 102 | 35  | 7  | 709   | 104 | 1,704 | 224 |
| 120,974 | 87  | 11 | 901   | 102 | 37  | 7  | 746   | 104 | 1,771 | 224 |
| 120,975 | 87  | 11 | 897   | 102 | 37  | 7  | 738   | 104 | 1,759 | 224 |
| 120,976 | 88  | 11 | 923   | 104 | 37  | 7  | 752   | 104 | 1,800 | 226 |
| 120,977 | 87  | 11 | 937   | 97  | 37  | 4  | 757   | 92  | 1,818 | 204 |
| 120,978 | 87  | 5  | 935   | 42  | 37  | 2  | 757   | 21  | 1,816 | 70  |
| 120,979 | 89  | 5  | 1,002 | 42  | 39  | 2  | 803   | 21  | 1,933 | 70  |

|         |     |   |       |    |    |   |       |    |       |    |
|---------|-----|---|-------|----|----|---|-------|----|-------|----|
| 120,980 | 90  | 4 | 1,033 | 24 | 41 | 1 | 824   | 10 | 1,988 | 39 |
| 120,981 | 90  | 4 | 1,075 | 25 | 41 | 1 | 889   | 10 | 2,095 | 40 |
| 120,982 | 89  | 4 | 1,077 | 25 | 41 | 1 | 895   | 10 | 2,102 | 40 |
| 120,983 | 89  | 5 | 1,078 | 18 | 41 | 1 | 896   | 10 | 2,104 | 34 |
| 120,984 | 89  | 5 | 1,078 | 18 | 41 | 1 | 897   | 10 | 2,105 | 34 |
| 120,985 | 90  | 5 | 1,084 | 18 | 41 | 1 | 884   | 10 | 2,099 | 34 |
| 120,986 | 90  | 5 | 1,095 | 17 | 41 | 1 | 890   | 7  | 2,116 | 30 |
| 120,987 | 90  | 5 | 1,127 | 17 | 42 | 1 | 924   | 7  | 2,183 | 30 |
| 120,988 | 90  | 5 | 1,122 | 17 | 41 | 1 | 923   | 7  | 2,176 | 30 |
| 120,989 | 90  | 5 | 1,115 | 14 | 41 | 1 | 922   | 7  | 2,168 | 27 |
| 120,990 | 90  | 3 | 1,094 | 14 | 41 | 1 | 914   | 7  | 2,139 | 25 |
| 120,991 | 92  | 3 | 1,111 | 13 | 41 | 1 | 928   | 7  | 2,172 | 24 |
| 120,992 | 92  | 2 | 1,106 | 12 | 41 | 1 | 926   | 10 | 2,165 | 25 |
| 120,993 | 90  | 2 | 1,069 | 12 | 40 | 1 | 899   | 10 | 2,098 | 25 |
| 120,994 | 92  | 3 | 1,087 | 11 | 39 | 1 | 926   | 10 | 2,144 | 25 |
| 120,995 | 92  | 4 | 1,081 | 11 | 38 | 1 | 924   | 11 | 2,135 | 27 |
| 120,996 | 90  | 4 | 1,081 | 11 | 39 | 1 | 923   | 12 | 2,133 | 28 |
| 120,997 | 93  | 4 | 1,086 | 12 | 39 | 1 | 927   | 12 | 2,145 | 29 |
| 120,998 | 93  | 4 | 1,072 | 11 | 37 | 1 | 924   | 11 | 2,126 | 27 |
| 120,999 | 93  | 4 | 1,074 | 11 | 37 | 1 | 927   | 11 | 2,131 | 27 |
| 121,000 | 93  | 4 | 1,064 | 11 | 37 | 1 | 927   | 11 | 2,121 | 27 |
| 121,001 | 87  | 5 | 1,056 | 11 | 37 | 1 | 923   | 11 | 2,103 | 28 |
| 121,002 | 87  | 5 | 1,056 | 11 | 37 | 1 | 923   | 11 | 2,103 | 28 |
| 121,003 | 84  | 5 | 1,048 | 12 | 36 | 1 | 917   | 12 | 2,085 | 30 |
| 121,004 | 89  | 5 | 1,111 | 12 | 38 | 1 | 938   | 12 | 2,176 | 30 |
| 121,005 | 90  | 6 | 1,135 | 13 | 39 | 1 | 946   | 13 | 2,210 | 33 |
| 121,006 | 71  | 6 | 1,177 | 13 | 39 | 1 | 924   | 13 | 2,211 | 33 |
| 121,007 | 103 | 6 | 1,288 | 15 | 62 | 1 | 1,174 | 12 | 2,627 | 34 |
| 121,008 | 93  | 6 | 1,188 | 16 | 60 | 1 | 1,071 | 10 | 2,412 | 33 |
| 121,009 | 96  | 6 | 1,221 | 16 | 63 | 1 | 1,104 | 10 | 2,484 | 33 |
| 121,010 | 83  | 6 | 1,190 | 16 | 61 | 1 | 1,056 | 10 | 2,390 | 33 |
| 121,011 | 83  | 6 | 1,232 | 16 | 69 | 1 | 1,091 | 11 | 2,475 | 34 |
| 121,012 | 83  | 5 | 1,260 | 16 | 70 | 1 | 1,097 | 11 | 2,510 | 33 |
| 121,013 | 100 | 5 | 1,329 | 17 | 69 | 1 | 1,190 | 11 | 2,688 | 34 |
| 121,014 | 100 | 5 | 1,335 | 17 | 69 | 1 | 1,188 | 12 | 2,692 | 35 |
| 121,015 | 102 | 5 | 1,317 | 18 | 67 | 1 | 1,192 | 11 | 2,678 | 35 |
| 121,016 | 100 | 5 | 1,298 | 22 | 65 | 1 | 1,187 | 13 | 2,650 | 41 |
| 121,017 | 93  | 5 | 1,177 | 24 | 63 | 0 | 1,065 | 12 | 2,398 | 41 |
| 121,018 | 93  | 5 | 1,188 | 30 | 64 | 0 | 1,081 | 15 | 2,426 | 50 |
| 121,019 | 93  | 5 | 1,182 | 31 | 66 | 0 | 1,081 | 15 | 2,422 | 51 |
| 121,020 | 93  | 5 | 1,214 | 30 | 65 | 0 | 1,106 | 16 | 2,478 | 51 |



|         |     |   |       |     |    |   |       |    |       |     |
|---------|-----|---|-------|-----|----|---|-------|----|-------|-----|
| 121,021 | 92  | 5 | 1,202 | 31  | 65 | 0 | 1,108 | 19 | 2,467 | 55  |
| 121,022 | 92  | 5 | 1,195 | 30  | 65 | 0 | 1,100 | 19 | 2,452 | 54  |
| 121,023 | 92  | 5 | 1,184 | 30  | 65 | 0 | 1,088 | 19 | 2,429 | 54  |
| 121,024 | 92  | 5 | 1,174 | 33  | 65 | 0 | 1,083 | 22 | 2,414 | 60  |
| 121,025 | 90  | 5 | 1,142 | 39  | 63 | 0 | 1,044 | 25 | 2,339 | 69  |
| 121,026 | 90  | 5 | 1,148 | 48  | 63 | 1 | 1,042 | 35 | 2,343 | 89  |
| 121,027 | 89  | 5 | 1,135 | 63  | 63 | 1 | 1,034 | 45 | 2,321 | 114 |
| 121,028 | 94  | 7 | 1,190 | 72  | 69 | 1 | 1,117 | 45 | 2,470 | 125 |
| 121,029 | 94  | 7 | 1,209 | 79  | 69 | 2 | 1,118 | 46 | 2,490 | 134 |
| 121,030 | 93  | 7 | 1,164 | 82  | 68 | 2 | 1,078 | 46 | 2,403 | 137 |
| 121,031 | 92  | 7 | 1,123 | 85  | 66 | 3 | 1,044 | 48 | 2,325 | 143 |
| 121,032 | 92  | 7 | 1,075 | 87  | 66 | 3 | 976   | 48 | 2,209 | 145 |
| 121,033 | 93  | 7 | 1,083 | 91  | 67 | 3 | 986   | 50 | 2,229 | 151 |
| 121,034 | 94  | 7 | 1,145 | 102 | 71 | 3 | 1,033 | 51 | 2,343 | 163 |
| 121,035 | 94  | 7 | 1,148 | 102 | 72 | 3 | 1,040 | 52 | 2,354 | 164 |
| 121,036 | 98  | 8 | 1,182 | 107 | 75 | 3 | 1,077 | 55 | 2,432 | 173 |
| 121,037 | 98  | 8 | 1,177 | 111 | 77 | 3 | 1,070 | 55 | 2,422 | 177 |
| 121,038 | 98  | 8 | 1,140 | 111 | 76 | 3 | 1,032 | 56 | 2,346 | 178 |
| 121,039 | 100 | 8 | 1,143 | 112 | 76 | 3 | 1,032 | 56 | 2,351 | 179 |
| 121,040 | 98  | 8 | 1,140 | 113 | 76 | 3 | 1,023 | 57 | 2,337 | 181 |
| 121,041 | 98  | 8 | 1,137 | 113 | 76 | 3 | 1,022 | 57 | 2,333 | 181 |
| 121,042 | 98  | 8 | 1,132 | 113 | 76 | 3 | 1,022 | 58 | 2,328 | 182 |
| 121,043 | 98  | 8 | 1,138 | 113 | 77 | 3 | 1,012 | 55 | 2,325 | 179 |
| 121,044 | 100 | 8 | 1,147 | 113 | 77 | 3 | 1,014 | 57 | 2,338 | 181 |
| 121,045 | 99  | 7 | 1,142 | 114 | 77 | 3 | 1,004 | 60 | 2,322 | 184 |
| 121,046 | 99  | 6 | 1,160 | 134 | 77 | 5 | 1,022 | 76 | 2,358 | 221 |
| 121,047 | 99  | 6 | 1,151 | 134 | 76 | 5 | 1,013 | 76 | 2,339 | 221 |
| 121,048 | 101 | 7 | 1,204 | 143 | 77 | 5 | 1,048 | 79 | 2,430 | 234 |
| 121,049 | 103 | 7 | 1,219 | 151 | 78 | 6 | 1,051 | 87 | 2,451 | 251 |
| 121,050 | 103 | 7 | 1,215 | 151 | 78 | 6 | 1,047 | 87 | 2,443 | 251 |
| 121,051 | 103 | 7 | 1,219 | 153 | 78 | 6 | 1,053 | 87 | 2,453 | 253 |
| 121,052 | 103 | 6 | 1,217 | 159 | 78 | 6 | 1,052 | 88 | 2,450 | 259 |
| 121,053 | 104 | 6 | 1,234 | 166 | 78 | 6 | 1,060 | 89 | 2,476 | 267 |
| 121,054 | 104 | 7 | 1,234 | 165 | 78 | 6 | 1,060 | 88 | 2,476 | 266 |
| 121,055 | 99  | 6 | 1,186 | 165 | 78 | 6 | 1,043 | 88 | 2,406 | 265 |
| 121,056 | 99  | 6 | 1,173 | 163 | 78 | 6 | 1,043 | 88 | 2,393 | 263 |
| 121,057 | 99  | 6 | 1,056 | 163 | 76 | 6 | 1,005 | 88 | 2,236 | 263 |
| 121,058 | 61  | 6 | 897   | 165 | 51 | 6 | 719   | 88 | 1,728 | 265 |
| 121,059 | 59  | 6 | 904   | 165 | 52 | 6 | 724   | 88 | 1,739 | 265 |
| 121,060 | 56  | 6 | 879   | 165 | 49 | 6 | 694   | 88 | 1,678 | 265 |
| 121,061 | 57  | 6 | 899   | 165 | 49 | 6 | 691   | 87 | 1,696 | 264 |

|         |     |   |       |     |     |   |       |    |       |     |
|---------|-----|---|-------|-----|-----|---|-------|----|-------|-----|
| 121,062 | 55  | 6 | 836   | 164 | 43  | 6 | 655   | 86 | 1,589 | 262 |
| 121,063 | 58  | 6 | 861   | 164 | 47  | 6 | 679   | 86 | 1,645 | 262 |
| 121,064 | 43  | 6 | 829   | 163 | 46  | 6 | 587   | 86 | 1,505 | 261 |
| 121,065 | 45  | 6 | 824   | 164 | 45  | 6 | 585   | 87 | 1,499 | 263 |
| 121,066 | 60  | 6 | 1,198 | 164 | 59  | 6 | 781   | 87 | 2,098 | 263 |
| 121,067 | 69  | 6 | 1,280 | 162 | 66  | 6 | 801   | 84 | 2,216 | 258 |
| 121,068 | 74  | 6 | 1,398 | 160 | 73  | 6 | 892   | 84 | 2,437 | 256 |
| 121,069 | 72  | 6 | 1,450 | 154 | 74  | 6 | 885   | 81 | 2,481 | 247 |
| 121,070 | 72  | 6 | 1,531 | 152 | 74  | 6 | 895   | 81 | 2,572 | 245 |
| 121,071 | 71  | 6 | 1,491 | 151 | 73  | 6 | 855   | 80 | 2,490 | 243 |
| 121,072 | 71  | 6 | 1,570 | 150 | 77  | 6 | 877   | 77 | 2,595 | 239 |
| 121,073 | 71  | 6 | 1,569 | 150 | 76  | 6 | 877   | 77 | 2,593 | 239 |
| 121,074 | 71  | 6 | 1,588 | 150 | 76  | 6 | 884   | 77 | 2,619 | 239 |
| 121,075 | 87  | 6 | 1,717 | 147 | 79  | 6 | 918   | 74 | 2,801 | 233 |
| 121,076 | 90  | 6 | 1,740 | 141 | 79  | 6 | 923   | 71 | 2,832 | 224 |
| 121,077 | 90  | 4 | 1,736 | 106 | 79  | 5 | 923   | 51 | 2,828 | 166 |
| 121,078 | 101 | 4 | 1,869 | 106 | 89  | 5 | 1,001 | 51 | 3,060 | 166 |
| 121,079 | 105 | 5 | 1,891 | 107 | 88  | 5 | 967   | 51 | 3,051 | 168 |
| 121,080 | 106 | 5 | 1,873 | 100 | 88  | 4 | 966   | 52 | 3,033 | 161 |
| 121,081 | 122 | 5 | 1,951 | 97  | 102 | 4 | 1,117 | 52 | 3,292 | 158 |
| 121,082 | 131 | 5 | 2,018 | 96  | 103 | 3 | 1,168 | 50 | 3,420 | 154 |
| 121,083 | 130 | 5 | 2,003 | 93  | 102 | 3 | 1,146 | 50 | 3,381 | 151 |
| 121,084 | 138 | 5 | 2,103 | 89  | 106 | 3 | 1,223 | 48 | 3,570 | 145 |
| 121,085 | 138 | 4 | 2,124 | 78  | 107 | 3 | 1,209 | 45 | 3,578 | 130 |
| 121,086 | 150 | 4 | 2,294 | 78  | 114 | 3 | 1,287 | 45 | 3,845 | 130 |
| 121,087 | 150 | 3 | 2,267 | 73  | 111 | 3 | 1,266 | 42 | 3,794 | 121 |
| 121,088 | 151 | 3 | 2,279 | 69  | 109 | 3 | 1,272 | 41 | 3,811 | 116 |
| 121,089 | 151 | 3 | 2,278 | 69  | 109 | 3 | 1,270 | 41 | 3,808 | 116 |
| 121,090 | 155 | 3 | 2,337 | 69  | 115 | 3 | 1,298 | 41 | 3,905 | 116 |
| 121,091 | 181 | 3 | 2,662 | 67  | 136 | 3 | 1,437 | 40 | 4,416 | 113 |
| 121,092 | 201 | 3 | 2,911 | 67  | 158 | 3 | 1,613 | 40 | 4,883 | 113 |
| 121,093 | 201 | 3 | 2,894 | 67  | 157 | 3 | 1,606 | 40 | 4,858 | 113 |
| 121,094 | 200 | 3 | 2,893 | 66  | 157 | 3 | 1,606 | 40 | 4,856 | 112 |
| 121,095 | 209 | 3 | 3,102 | 67  | 167 | 3 | 1,769 | 39 | 5,247 | 112 |
| 121,096 | 211 | 3 | 3,202 | 67  | 170 | 3 | 1,799 | 36 | 5,382 | 109 |
| 121,097 | 214 | 3 | 3,254 | 47  | 171 | 1 | 1,822 | 20 | 5,461 | 71  |
| 121,098 | 215 | 3 | 3,283 | 48  | 177 | 1 | 1,832 | 21 | 5,507 | 73  |
| 121,099 | 213 | 2 | 3,379 | 38  | 177 | 1 | 1,863 | 18 | 5,632 | 59  |
| 121,100 | 220 | 4 | 3,630 | 32  | 182 | 0 | 1,959 | 12 | 5,991 | 48  |
| 121,101 | 220 | 4 | 3,631 | 32  | 182 | 0 | 1,954 | 13 | 5,987 | 49  |
| 121,102 | 221 | 4 | 3,652 | 31  | 182 | 0 | 1,962 | 13 | 6,017 | 48  |

|         |     |   |       |    |     |   |       |    |       |     |
|---------|-----|---|-------|----|-----|---|-------|----|-------|-----|
| 121,103 | 222 | 5 | 3,659 | 26 | 183 | 0 | 1,964 | 12 | 6,028 | 43  |
| 121,104 | 221 | 5 | 3,646 | 20 | 183 | 0 | 1,956 | 10 | 6,006 | 35  |
| 121,105 | 221 | 4 | 3,647 | 27 | 183 | 0 | 1,960 | 13 | 6,011 | 44  |
| 121,106 | 222 | 4 | 3,635 | 31 | 181 | 0 | 1,960 | 15 | 5,998 | 50  |
| 121,107 | 221 | 4 | 3,617 | 31 | 180 | 0 | 1,949 | 15 | 5,967 | 50  |
| 121,108 | 220 | 4 | 3,613 | 31 | 178 | 0 | 1,947 | 15 | 5,958 | 50  |
| 121,109 | 220 | 4 | 3,609 | 29 | 177 | 0 | 1,943 | 15 | 5,949 | 48  |
| 121,110 | 219 | 4 | 3,600 | 28 | 176 | 0 | 1,927 | 15 | 5,922 | 47  |
| 121,111 | 219 | 4 | 3,592 | 28 | 176 | 0 | 1,920 | 15 | 5,907 | 47  |
| 121,112 | 217 | 5 | 3,568 | 28 | 175 | 0 | 1,907 | 15 | 5,867 | 48  |
| 121,113 | 217 | 5 | 3,567 | 28 | 173 | 0 | 1,905 | 16 | 5,862 | 49  |
| 121,114 | 214 | 5 | 3,506 | 33 | 168 | 0 | 1,859 | 23 | 5,747 | 61  |
| 121,115 | 212 | 5 | 3,451 | 34 | 167 | 1 | 1,846 | 27 | 5,676 | 67  |
| 121,116 | 210 | 5 | 3,437 | 35 | 166 | 1 | 1,838 | 27 | 5,651 | 68  |
| 121,117 | 194 | 5 | 3,049 | 39 | 152 | 1 | 1,616 | 31 | 5,011 | 76  |
| 121,118 | 183 | 5 | 2,963 | 41 | 145 | 1 | 1,596 | 31 | 4,887 | 78  |
| 121,119 | 179 | 5 | 2,850 | 41 | 138 | 1 | 1,502 | 33 | 4,669 | 80  |
| 121,120 | 180 | 5 | 2,770 | 41 | 135 | 1 | 1,488 | 33 | 4,573 | 80  |
| 121,121 | 179 | 5 | 2,666 | 43 | 133 | 1 | 1,463 | 33 | 4,441 | 82  |
| 121,122 | 179 | 5 | 2,602 | 43 | 129 | 1 | 1,437 | 33 | 4,347 | 82  |
| 121,123 | 179 | 5 | 2,581 | 44 | 129 | 1 | 1,435 | 33 | 4,324 | 83  |
| 121,124 | 179 | 5 | 2,573 | 45 | 129 | 1 | 1,433 | 33 | 4,314 | 84  |
| 121,125 | 179 | 5 | 2,568 | 45 | 129 | 1 | 1,432 | 33 | 4,308 | 84  |
| 121,126 | 163 | 5 | 2,442 | 45 | 127 | 1 | 1,398 | 33 | 4,130 | 84  |
| 121,127 | 160 | 5 | 2,422 | 45 | 127 | 1 | 1,393 | 34 | 4,102 | 85  |
| 121,128 | 160 | 5 | 2,432 | 47 | 127 | 2 | 1,394 | 38 | 4,113 | 92  |
| 121,129 | 149 | 5 | 2,291 | 47 | 117 | 2 | 1,316 | 38 | 3,873 | 92  |
| 121,130 | 139 | 4 | 2,206 | 48 | 113 | 2 | 1,265 | 37 | 3,723 | 91  |
| 121,131 | 139 | 5 | 2,202 | 62 | 113 | 3 | 1,264 | 48 | 3,718 | 118 |
| 121,132 | 122 | 5 | 2,102 | 69 | 98  | 3 | 1,102 | 53 | 3,424 | 130 |
| 121,133 | 113 | 5 | 2,031 | 68 | 97  | 3 | 1,049 | 53 | 3,290 | 129 |
| 121,134 | 112 | 5 | 2,018 | 71 | 97  | 3 | 1,040 | 55 | 3,267 | 134 |
| 121,135 | 104 | 5 | 1,897 | 76 | 91  | 3 | 957   | 55 | 3,049 | 139 |
| 121,136 | 104 | 6 | 1,848 | 80 | 88  | 4 | 938   | 59 | 2,978 | 149 |
| 121,137 | 92  | 6 | 1,672 | 81 | 80  | 4 | 851   | 59 | 2,695 | 150 |
| 121,138 | 87  | 6 | 1,650 | 88 | 80  | 4 | 833   | 61 | 2,650 | 159 |
| 121,139 | 86  | 6 | 1,638 | 93 | 81  | 5 | 831   | 62 | 2,636 | 166 |
| 121,140 | 80  | 6 | 1,579 | 92 | 75  | 5 | 805   | 62 | 2,539 | 165 |
| 121,141 | 80  | 6 | 1,577 | 96 | 75  | 5 | 805   | 63 | 2,537 | 170 |
| 121,142 | 56  | 6 | 1,256 | 97 | 55  | 5 | 662   | 63 | 2,029 | 171 |
| 121,143 | 36  | 6 | 1,000 | 97 | 33  | 5 | 481   | 63 | 1,550 | 171 |

|         |    |   |     |     |    |   |     |    |       |     |
|---------|----|---|-----|-----|----|---|-----|----|-------|-----|
| 121,144 | 32 | 6 | 899 | 97  | 32 | 5 | 394 | 63 | 1,357 | 171 |
| 121,145 | 28 | 6 | 875 | 97  | 30 | 5 | 385 | 63 | 1,318 | 171 |
| 121,146 | 26 | 6 | 804 | 96  | 24 | 5 | 323 | 62 | 1,177 | 169 |
| 121,147 | 24 | 6 | 729 | 95  | 21 | 5 | 299 | 62 | 1,073 | 168 |
| 121,148 | 22 | 6 | 672 | 95  | 21 | 5 | 265 | 63 | 980   | 169 |
| 121,149 | 21 | 6 | 615 | 94  | 15 | 5 | 248 | 61 | 899   | 166 |
| 121,150 | 18 | 6 | 503 | 94  | 14 | 5 | 195 | 61 | 730   | 166 |
| 121,151 | 9  | 4 | 232 | 92  | 8  | 5 | 91  | 59 | 340   | 160 |
| 121,152 | 9  | 4 | 226 | 93  | 8  | 5 | 90  | 58 | 333   | 160 |
| 121,153 | 8  | 3 | 205 | 91  | 8  | 5 | 82  | 58 | 303   | 157 |
| 121,154 | 7  | 3 | 194 | 90  | 7  | 5 | 79  | 58 | 287   | 156 |
| 121,155 | 7  | 3 | 190 | 84  | 7  | 5 | 78  | 55 | 282   | 147 |
| 121,156 | 7  | 3 | 189 | 84  | 7  | 5 | 79  | 55 | 282   | 147 |
| 121,157 | 6  | 3 | 189 | 80  | 7  | 5 | 77  | 53 | 279   | 141 |
| 121,158 | 6  | 3 | 189 | 82  | 7  | 5 | 77  | 53 | 279   | 143 |
| 121,159 | 6  | 3 | 190 | 84  | 7  | 5 | 78  | 53 | 281   | 145 |
| 121,160 | 6  | 3 | 193 | 84  | 7  | 5 | 81  | 53 | 287   | 145 |
| 121,161 | 6  | 3 | 189 | 84  | 7  | 5 | 77  | 53 | 279   | 145 |
| 121,162 | 6  | 2 | 185 | 85  | 6  | 5 | 71  | 53 | 268   | 145 |
| 121,163 | 6  | 2 | 182 | 85  | 6  | 5 | 70  | 53 | 264   | 145 |
| 121,164 | 6  | 2 | 188 | 88  | 6  | 5 | 72  | 52 | 272   | 147 |
| 121,165 | 6  | 2 | 210 | 87  | 8  | 5 | 85  | 46 | 309   | 140 |
| 121,166 | 6  | 3 | 226 | 90  | 9  | 5 | 88  | 48 | 329   | 146 |
| 121,167 | 6  | 3 | 227 | 105 | 10 | 6 | 88  | 57 | 331   | 171 |
| 121,168 | 6  | 3 | 236 | 107 | 10 | 6 | 90  | 54 | 342   | 170 |
| 121,169 | 7  | 3 | 257 | 103 | 11 | 6 | 90  | 55 | 365   | 167 |
| 121,170 | 6  | 4 | 247 | 105 | 11 | 6 | 91  | 53 | 355   | 168 |
| 121,171 | 5  | 4 | 244 | 105 | 11 | 6 | 85  | 53 | 345   | 168 |
| 121,172 | 10 | 4 | 299 | 106 | 13 | 6 | 126 | 55 | 448   | 171 |
| 121,173 | 10 | 4 | 299 | 107 | 13 | 6 | 125 | 55 | 447   | 172 |
| 121,174 | 11 | 4 | 298 | 107 | 13 | 6 | 129 | 55 | 451   | 172 |
| 121,175 | 19 | 4 | 408 | 109 | 16 | 6 | 235 | 57 | 678   | 176 |
| 121,176 | 19 | 4 | 442 | 115 | 18 | 6 | 249 | 60 | 728   | 185 |
| 121,177 | 20 | 4 | 451 | 120 | 19 | 6 | 253 | 60 | 743   | 190 |
| 121,178 | 24 | 4 | 491 | 120 | 20 | 6 | 287 | 59 | 822   | 189 |
| 121,179 | 24 | 4 | 484 | 120 | 20 | 5 | 288 | 55 | 816   | 184 |
| 121,180 | 24 | 4 | 484 | 121 | 20 | 5 | 290 | 55 | 818   | 185 |
| 121,181 | 24 | 4 | 491 | 119 | 19 | 5 | 290 | 54 | 824   | 182 |
| 121,182 | 24 | 3 | 499 | 105 | 19 | 4 | 290 | 43 | 832   | 155 |
| 121,183 | 36 | 3 | 707 | 97  | 26 | 4 | 391 | 38 | 1,160 | 142 |
| 121,184 | 38 | 3 | 748 | 97  | 30 | 4 | 406 | 38 | 1,222 | 142 |

|         |     |   |       |    |    |   |       |    |       |     |
|---------|-----|---|-------|----|----|---|-------|----|-------|-----|
| 121,185 | 54  | 3 | 1,054 | 94 | 45 | 4 | 530   | 36 | 1,683 | 137 |
| 121,186 | 60  | 3 | 1,232 | 89 | 54 | 4 | 563   | 36 | 1,909 | 132 |
| 121,187 | 60  | 2 | 1,231 | 86 | 54 | 3 | 563   | 32 | 1,908 | 123 |
| 121,188 | 60  | 3 | 1,229 | 85 | 54 | 3 | 563   | 32 | 1,906 | 123 |
| 121,189 | 64  | 3 | 1,410 | 78 | 62 | 3 | 672   | 30 | 2,208 | 114 |
| 121,190 | 64  | 3 | 1,410 | 74 | 61 | 2 | 672   | 29 | 2,207 | 108 |
| 121,191 | 64  | 3 | 1,413 | 70 | 61 | 2 | 670   | 28 | 2,208 | 103 |
| 121,192 | 64  | 3 | 1,412 | 70 | 61 | 2 | 666   | 28 | 2,203 | 103 |
| 121,193 | 62  | 3 | 1,427 | 69 | 60 | 2 | 677   | 28 | 2,226 | 102 |
| 121,194 | 62  | 3 | 1,429 | 69 | 60 | 3 | 678   | 28 | 2,229 | 103 |
| 121,195 | 64  | 3 | 1,445 | 69 | 61 | 3 | 691   | 27 | 2,261 | 102 |
| 121,196 | 64  | 3 | 1,445 | 69 | 61 | 3 | 695   | 27 | 2,265 | 102 |
| 121,197 | 65  | 3 | 1,456 | 69 | 60 | 3 | 711   | 27 | 2,292 | 102 |
| 121,198 | 67  | 3 | 1,485 | 69 | 62 | 3 | 721   | 27 | 2,335 | 102 |
| 121,199 | 67  | 3 | 1,499 | 69 | 62 | 3 | 728   | 26 | 2,356 | 101 |
| 121,200 | 67  | 3 | 1,489 | 69 | 62 | 3 | 721   | 26 | 2,339 | 101 |
| 121,201 | 73  | 3 | 1,566 | 68 | 67 | 3 | 800   | 26 | 2,506 | 100 |
| 121,202 | 73  | 3 | 1,571 | 69 | 67 | 3 | 802   | 26 | 2,513 | 101 |
| 121,203 | 73  | 3 | 1,578 | 68 | 67 | 3 | 805   | 26 | 2,523 | 100 |
| 121,204 | 76  | 3 | 1,592 | 68 | 68 | 3 | 818   | 26 | 2,554 | 100 |
| 121,205 | 76  | 3 | 1,592 | 68 | 68 | 3 | 818   | 26 | 2,554 | 100 |
| 121,206 | 77  | 3 | 1,613 | 68 | 68 | 3 | 824   | 27 | 2,582 | 101 |
| 121,207 | 79  | 3 | 1,630 | 67 | 68 | 3 | 833   | 27 | 2,610 | 100 |
| 121,208 | 82  | 3 | 1,653 | 66 | 69 | 3 | 846   | 28 | 2,650 | 100 |
| 121,209 | 82  | 3 | 1,694 | 64 | 69 | 3 | 863   | 28 | 2,708 | 98  |
| 121,210 | 82  | 3 | 1,695 | 66 | 69 | 3 | 864   | 29 | 2,710 | 101 |
| 121,211 | 92  | 3 | 1,988 | 66 | 75 | 3 | 984   | 30 | 3,139 | 102 |
| 121,212 | 94  | 3 | 2,049 | 66 | 77 | 3 | 1,066 | 30 | 3,286 | 102 |
| 121,213 | 94  | 3 | 2,057 | 65 | 77 | 3 | 1,071 | 30 | 3,299 | 101 |
| 121,214 | 106 | 3 | 2,229 | 65 | 87 | 3 | 1,321 | 30 | 3,743 | 101 |
| 121,215 | 106 | 3 | 2,208 | 63 | 85 | 3 | 1,309 | 30 | 3,708 | 99  |
| 121,216 | 106 | 3 | 2,192 | 60 | 85 | 3 | 1,306 | 29 | 3,689 | 95  |
| 121,217 | 109 | 2 | 2,297 | 55 | 87 | 2 | 1,351 | 25 | 3,844 | 84  |
| 121,218 | 109 | 2 | 2,301 | 39 | 86 | 1 | 1,352 | 15 | 3,848 | 57  |
| 121,219 | 110 | 2 | 2,298 | 33 | 86 | 1 | 1,354 | 14 | 3,848 | 50  |
| 121,220 | 109 | 1 | 2,278 | 31 | 85 | 1 | 1,354 | 13 | 3,826 | 46  |
| 121,221 | 109 | 1 | 2,274 | 28 | 85 | 1 | 1,355 | 11 | 3,823 | 41  |
| 121,222 | 109 | 1 | 2,259 | 34 | 85 | 2 | 1,353 | 12 | 3,806 | 49  |
| 121,223 | 107 | 1 | 2,239 | 38 | 84 | 2 | 1,322 | 12 | 3,752 | 53  |
| 121,224 | 109 | 1 | 2,305 | 37 | 85 | 2 | 1,351 | 12 | 3,850 | 52  |
| 121,225 | 119 | 1 | 2,381 | 37 | 88 | 2 | 1,436 | 14 | 4,024 | 54  |

|         |     |   |       |    |    |   |       |    |       |     |
|---------|-----|---|-------|----|----|---|-------|----|-------|-----|
| 121,226 | 113 | 1 | 2,308 | 34 | 85 | 2 | 1,347 | 12 | 3,853 | 49  |
| 121,227 | 129 | 1 | 2,550 | 24 | 90 | 2 | 1,444 | 10 | 4,213 | 37  |
| 121,228 | 128 | 1 | 2,538 | 24 | 88 | 2 | 1,440 | 10 | 4,194 | 37  |
| 121,229 | 124 | 1 | 2,492 | 24 | 87 | 2 | 1,405 | 10 | 4,108 | 37  |
| 121,230 | 136 | 1 | 2,672 | 22 | 94 | 2 | 1,583 | 10 | 4,485 | 35  |
| 121,231 | 136 | 1 | 2,671 | 21 | 94 | 2 | 1,580 | 10 | 4,481 | 34  |
| 121,232 | 141 | 1 | 2,728 | 21 | 98 | 2 | 1,615 | 11 | 4,582 | 35  |
| 121,233 | 141 | 1 | 2,729 | 21 | 99 | 2 | 1,617 | 13 | 4,586 | 37  |
| 121,234 | 130 | 1 | 2,525 | 22 | 92 | 2 | 1,528 | 15 | 4,275 | 40  |
| 121,235 | 128 | 2 | 2,489 | 32 | 88 | 2 | 1,512 | 30 | 4,217 | 66  |
| 121,236 | 114 | 2 | 2,189 | 33 | 73 | 2 | 1,397 | 33 | 3,773 | 70  |
| 121,237 | 108 | 2 | 2,020 | 34 | 64 | 2 | 1,369 | 34 | 3,561 | 72  |
| 121,238 | 108 | 2 | 2,012 | 33 | 64 | 2 | 1,364 | 34 | 3,548 | 71  |
| 121,239 | 105 | 1 | 1,873 | 33 | 56 | 3 | 1,269 | 34 | 3,303 | 71  |
| 121,240 | 106 | 1 | 1,855 | 32 | 56 | 3 | 1,269 | 34 | 3,286 | 70  |
| 121,241 | 106 | 1 | 1,854 | 32 | 56 | 3 | 1,268 | 34 | 3,284 | 70  |
| 121,242 | 106 | 1 | 1,856 | 32 | 56 | 3 | 1,275 | 34 | 3,293 | 70  |
| 121,243 | 106 | 1 | 1,846 | 32 | 56 | 3 | 1,266 | 35 | 3,274 | 71  |
| 121,244 | 106 | 1 | 1,838 | 34 | 56 | 2 | 1,263 | 38 | 3,263 | 75  |
| 121,245 | 106 | 1 | 1,836 | 34 | 56 | 2 | 1,263 | 38 | 3,261 | 75  |
| 121,246 | 104 | 2 | 1,818 | 42 | 55 | 3 | 1,246 | 51 | 3,223 | 98  |
| 121,247 | 103 | 2 | 1,810 | 42 | 55 | 4 | 1,241 | 53 | 3,209 | 101 |
| 121,248 | 102 | 3 | 1,792 | 48 | 55 | 7 | 1,224 | 59 | 3,173 | 117 |
| 121,249 | 101 | 3 | 1,731 | 48 | 53 | 7 | 1,208 | 59 | 3,093 | 117 |
| 121,250 | 101 | 3 | 1,710 | 49 | 52 | 7 | 1,195 | 59 | 3,058 | 118 |
| 121,251 | 101 | 3 | 1,679 | 51 | 51 | 7 | 1,177 | 62 | 3,008 | 123 |
| 121,252 | 95  | 3 | 1,630 | 51 | 47 | 7 | 1,114 | 62 | 2,886 | 123 |
| 121,253 | 95  | 3 | 1,623 | 51 | 47 | 7 | 1,112 | 62 | 2,877 | 123 |
| 121,254 | 95  | 3 | 1,616 | 52 | 47 | 7 | 1,110 | 62 | 2,868 | 124 |
| 121,255 | 93  | 3 | 1,615 | 52 | 48 | 7 | 1,113 | 62 | 2,869 | 124 |
| 121,256 | 93  | 4 | 1,615 | 53 | 48 | 7 | 1,130 | 66 | 2,886 | 130 |
| 121,257 | 93  | 4 | 1,608 | 52 | 48 | 7 | 1,128 | 65 | 2,877 | 128 |
| 121,258 | 91  | 4 | 1,597 | 55 | 49 | 8 | 1,122 | 69 | 2,859 | 136 |
| 121,259 | 88  | 4 | 1,583 | 55 | 48 | 8 | 1,110 | 68 | 2,829 | 135 |
| 121,260 | 89  | 4 | 1,577 | 52 | 49 | 8 | 1,109 | 67 | 2,824 | 131 |
| 121,261 | 96  | 4 | 1,705 | 53 | 61 | 8 | 1,204 | 71 | 3,066 | 136 |
| 121,262 | 88  | 4 | 1,555 | 53 | 57 | 8 | 1,146 | 71 | 2,846 | 136 |
| 121,263 | 86  | 4 | 1,515 | 57 | 57 | 8 | 1,082 | 74 | 2,740 | 143 |
| 121,264 | 86  | 4 | 1,508 | 61 | 57 | 8 | 1,077 | 75 | 2,728 | 148 |
| 121,265 | 74  | 6 | 1,330 | 63 | 48 | 8 | 828   | 80 | 2,280 | 157 |
| 121,266 | 73  | 6 | 1,323 | 63 | 48 | 8 | 825   | 84 | 2,269 | 161 |

|         |    |   |       |    |    |   |     |     |       |     |
|---------|----|---|-------|----|----|---|-----|-----|-------|-----|
| 121,267 | 71 | 6 | 1,262 | 70 | 47 | 8 | 813 | 90  | 2,193 | 174 |
| 121,268 | 71 | 6 | 1,226 | 71 | 45 | 8 | 784 | 91  | 2,126 | 176 |
| 121,269 | 71 | 6 | 1,221 | 73 | 45 | 8 | 783 | 91  | 2,120 | 178 |
| 121,270 | 70 | 6 | 1,217 | 80 | 45 | 8 | 780 | 95  | 2,112 | 189 |
| 121,271 | 70 | 6 | 1,215 | 81 | 45 | 8 | 778 | 95  | 2,108 | 190 |
| 121,272 | 70 | 6 | 1,218 | 81 | 45 | 8 | 777 | 96  | 2,110 | 191 |
| 121,273 | 70 | 6 | 1,217 | 76 | 45 | 8 | 777 | 98  | 2,109 | 188 |
| 121,274 | 66 | 6 | 1,199 | 77 | 44 | 8 | 774 | 105 | 2,083 | 196 |
| 121,275 | 64 | 6 | 1,131 | 81 | 43 | 8 | 741 | 109 | 1,979 | 204 |
| 121,276 | 52 | 8 | 1,016 | 83 | 40 | 9 | 638 | 110 | 1,746 | 210 |
| 121,277 | 36 | 8 | 758   | 82 | 33 | 9 | 538 | 109 | 1,365 | 208 |
| 121,278 | 36 | 8 | 739   | 82 | 33 | 9 | 525 | 109 | 1,333 | 208 |
| 121,279 | 24 | 8 | 574   | 83 | 26 | 9 | 355 | 109 | 979   | 209 |
| 121,280 | 24 | 8 | 573   | 84 | 26 | 9 | 348 | 109 | 971   | 210 |
| 121,281 | 26 | 8 | 565   | 85 | 26 | 9 | 356 | 110 | 973   | 212 |
| 121,282 | 22 | 8 | 506   | 86 | 23 | 9 | 329 | 113 | 880   | 216 |
| 121,283 | 21 | 8 | 495   | 87 | 22 | 9 | 319 | 112 | 857   | 216 |
| 121,284 | 21 | 8 | 492   | 87 | 21 | 9 | 315 | 111 | 849   | 215 |
| 121,285 | 20 | 8 | 488   | 88 | 21 | 9 | 303 | 109 | 832   | 214 |
| 121,286 | 20 | 7 | 483   | 80 | 21 | 9 | 302 | 96  | 826   | 192 |
| 121,287 | 18 | 7 | 477   | 80 | 21 | 9 | 293 | 94  | 809   | 190 |
| 121,288 | 18 | 7 | 468   | 80 | 21 | 9 | 289 | 96  | 796   | 192 |
| 121,289 | 18 | 7 | 464   | 85 | 21 | 9 | 288 | 97  | 791   | 198 |
| 121,290 | 17 | 7 | 460   | 92 | 21 | 8 | 283 | 109 | 781   | 216 |
| 121,291 | 16 | 7 | 449   | 92 | 21 | 8 | 277 | 110 | 763   | 217 |
| 121,292 | 17 | 7 | 448   | 93 | 22 | 8 | 278 | 112 | 765   | 220 |
| 121,293 | 17 | 7 | 442   | 96 | 22 | 8 | 272 | 117 | 753   | 228 |
| 121,294 | 17 | 7 | 437   | 99 | 22 | 8 | 273 | 121 | 749   | 235 |
| 121,295 | 17 | 7 | 436   | 99 | 22 | 8 | 273 | 121 | 748   | 235 |
| 121,296 | 17 | 7 | 432   | 99 | 22 | 8 | 273 | 123 | 744   | 237 |
| 121,297 | 17 | 6 | 439   | 91 | 22 | 6 | 280 | 108 | 758   | 211 |
| 121,298 | 17 | 5 | 440   | 87 | 22 | 3 | 282 | 102 | 761   | 197 |
| 121,299 | 18 | 5 | 457   | 87 | 23 | 3 | 313 | 102 | 811   | 197 |
| 121,300 | 17 | 5 | 457   | 87 | 23 | 3 | 309 | 102 | 806   | 197 |
| 121,301 | 16 | 6 | 454   | 86 | 23 | 3 | 306 | 102 | 799   | 197 |
| 121,302 | 16 | 6 | 457   | 84 | 23 | 3 | 313 | 99  | 809   | 192 |
| 121,303 | 19 | 6 | 474   | 84 | 24 | 3 | 364 | 99  | 881   | 192 |
| 121,304 | 19 | 6 | 484   | 84 | 26 | 3 | 398 | 99  | 927   | 192 |
| 121,305 | 18 | 6 | 483   | 83 | 25 | 3 | 389 | 99  | 915   | 191 |
| 121,306 | 18 | 6 | 481   | 83 | 25 | 3 | 388 | 99  | 912   | 191 |
| 121,307 | 20 | 5 | 520   | 82 | 27 | 3 | 414 | 95  | 981   | 185 |

|         |    |   |       |    |     |   |       |    |       |     |
|---------|----|---|-------|----|-----|---|-------|----|-------|-----|
| 121,308 | 22 | 5 | 574   | 82 | 30  | 3 | 523   | 95 | 1,149 | 185 |
| 121,309 | 26 | 5 | 623   | 78 | 36  | 2 | 628   | 91 | 1,313 | 176 |
| 121,310 | 26 | 5 | 622   | 77 | 36  | 2 | 642   | 92 | 1,326 | 176 |
| 121,311 | 25 | 5 | 595   | 77 | 35  | 2 | 628   | 92 | 1,283 | 176 |
| 121,312 | 18 | 5 | 467   | 76 | 23  | 2 | 535   | 88 | 1,043 | 171 |
| 121,313 | 18 | 5 | 319   | 76 | 21  | 2 | 473   | 87 | 831   | 170 |
| 121,314 | 18 | 5 | 296   | 72 | 19  | 2 | 464   | 84 | 797   | 163 |
| 121,315 | 18 | 5 | 294   | 69 | 19  | 2 | 464   | 83 | 795   | 159 |
| 121,316 | 18 | 3 | 293   | 67 | 18  | 2 | 461   | 78 | 790   | 150 |
| 121,317 | 19 | 3 | 329   | 66 | 23  | 2 | 490   | 74 | 861   | 145 |
| 121,318 | 22 | 3 | 402   | 59 | 30  | 2 | 567   | 66 | 1,021 | 130 |
| 121,319 | 22 | 3 | 402   | 60 | 30  | 2 | 571   | 67 | 1,025 | 132 |
| 121,320 | 22 | 3 | 425   | 59 | 30  | 2 | 603   | 67 | 1,080 | 131 |
| 121,321 | 24 | 3 | 452   | 52 | 30  | 2 | 626   | 63 | 1,132 | 120 |
| 121,322 | 25 | 3 | 552   | 51 | 33  | 2 | 680   | 63 | 1,290 | 119 |
| 121,323 | 26 | 4 | 558   | 50 | 34  | 1 | 690   | 59 | 1,308 | 114 |
| 121,324 | 28 | 4 | 576   | 45 | 38  | 1 | 714   | 52 | 1,356 | 102 |
| 121,325 | 30 | 4 | 649   | 42 | 40  | 1 | 763   | 48 | 1,482 | 95  |
| 121,326 | 30 | 4 | 649   | 42 | 40  | 1 | 763   | 48 | 1,482 | 95  |
| 121,327 | 30 | 2 | 695   | 40 | 40  | 0 | 802   | 45 | 1,567 | 87  |
| 121,328 | 30 | 2 | 699   | 40 | 41  | 0 | 806   | 45 | 1,576 | 87  |
| 121,329 | 39 | 2 | 753   | 40 | 44  | 0 | 915   | 45 | 1,751 | 87  |
| 121,330 | 39 | 2 | 748   | 39 | 44  | 0 | 916   | 45 | 1,747 | 86  |
| 121,331 | 40 | 2 | 744   | 38 | 44  | 0 | 913   | 47 | 1,741 | 87  |
| 121,332 | 38 | 2 | 737   | 39 | 44  | 0 | 904   | 51 | 1,723 | 92  |
| 121,333 | 38 | 2 | 731   | 38 | 44  | 0 | 904   | 48 | 1,717 | 88  |
| 121,334 | 51 | 2 | 862   | 37 | 60  | 0 | 1,098 | 53 | 2,071 | 92  |
| 121,335 | 53 | 2 | 873   | 38 | 61  | 0 | 1,113 | 52 | 2,100 | 92  |
| 121,336 | 55 | 2 | 897   | 36 | 63  | 0 | 1,130 | 52 | 2,145 | 90  |
| 121,337 | 60 | 2 | 939   | 34 | 66  | 0 | 1,181 | 50 | 2,246 | 86  |
| 121,338 | 61 | 2 | 980   | 32 | 68  | 1 | 1,186 | 51 | 2,295 | 86  |
| 121,339 | 61 | 2 | 980   | 31 | 68  | 1 | 1,185 | 48 | 2,294 | 82  |
| 121,340 | 67 | 2 | 1,105 | 28 | 75  | 1 | 1,281 | 47 | 2,528 | 78  |
| 121,341 | 70 | 2 | 1,193 | 22 | 75  | 1 | 1,297 | 35 | 2,635 | 60  |
| 121,342 | 72 | 2 | 1,284 | 22 | 81  | 1 | 1,375 | 34 | 2,812 | 59  |
| 121,343 | 71 | 2 | 1,299 | 21 | 80  | 1 | 1,380 | 32 | 2,830 | 56  |
| 121,344 | 75 | 2 | 1,332 | 21 | 82  | 1 | 1,439 | 27 | 2,928 | 51  |
| 121,345 | 78 | 2 | 1,394 | 20 | 86  | 1 | 1,541 | 22 | 3,099 | 45  |
| 121,346 | 78 | 2 | 1,408 | 19 | 87  | 1 | 1,578 | 19 | 3,151 | 41  |
| 121,347 | 80 | 2 | 1,431 | 20 | 87  | 1 | 1,613 | 17 | 3,211 | 40  |
| 121,348 | 95 | 2 | 1,589 | 20 | 104 | 1 | 2,121 | 17 | 3,909 | 40  |



|         |     |   |       |    |     |   |       |    |        |    |
|---------|-----|---|-------|----|-----|---|-------|----|--------|----|
| 121,349 | 96  | 2 | 1,613 | 21 | 105 | 1 | 2,188 | 18 | 4,002  | 42 |
| 121,350 | 95  | 2 | 1,598 | 21 | 104 | 1 | 2,158 | 18 | 3,955  | 42 |
| 121,351 | 95  | 1 | 1,599 | 22 | 104 | 1 | 2,164 | 18 | 3,962  | 42 |
| 121,352 | 95  | 1 | 1,612 | 22 | 104 | 1 | 2,177 | 18 | 3,988  | 42 |
| 121,353 | 92  | 1 | 1,613 | 22 | 103 | 1 | 2,171 | 18 | 3,979  | 42 |
| 121,354 | 92  | 1 | 1,632 | 23 | 103 | 2 | 2,177 | 19 | 4,004  | 45 |
| 121,355 | 93  | 1 | 1,652 | 26 | 103 | 2 | 2,184 | 23 | 4,032  | 52 |
| 121,356 | 93  | 2 | 1,654 | 34 | 103 | 2 | 2,188 | 28 | 4,038  | 66 |
| 121,357 | 91  | 2 | 1,620 | 36 | 102 | 2 | 2,159 | 28 | 3,972  | 68 |
| 121,358 | 90  | 2 | 1,623 | 36 | 102 | 2 | 2,171 | 28 | 3,986  | 68 |
| 121,359 | 88  | 2 | 1,570 | 37 | 100 | 2 | 2,056 | 28 | 3,814  | 69 |
| 121,360 | 86  | 2 | 1,537 | 37 | 98  | 2 | 1,980 | 29 | 3,701  | 70 |
| 121,361 | 86  | 2 | 1,528 | 37 | 98  | 2 | 1,965 | 28 | 3,677  | 69 |
| 121,362 | 87  | 2 | 1,519 | 37 | 98  | 2 | 1,967 | 29 | 3,671  | 70 |
| 121,363 | 87  | 2 | 1,534 | 37 | 98  | 2 | 1,966 | 29 | 3,685  | 70 |
| 121,364 | 88  | 2 | 1,623 | 38 | 104 | 2 | 2,040 | 29 | 3,855  | 71 |
| 121,365 | 104 | 2 | 2,341 | 40 | 145 | 2 | 2,468 | 29 | 5,058  | 73 |
| 121,366 | 104 | 2 | 2,324 | 39 | 143 | 2 | 2,455 | 29 | 5,026  | 72 |
| 121,367 | 106 | 2 | 2,443 | 39 | 169 | 2 | 2,912 | 29 | 5,630  | 72 |
| 121,368 | 105 | 2 | 2,420 | 39 | 164 | 2 | 2,881 | 29 | 5,570  | 72 |
| 121,369 | 105 | 2 | 2,403 | 36 | 166 | 2 | 2,869 | 27 | 5,543  | 67 |
| 121,370 | 105 | 2 | 2,419 | 37 | 166 | 2 | 2,868 | 27 | 5,558  | 68 |
| 121,371 | 109 | 2 | 2,436 | 36 | 168 | 2 | 2,863 | 27 | 5,576  | 67 |
| 121,372 | 111 | 2 | 2,583 | 38 | 175 | 2 | 2,917 | 28 | 5,786  | 70 |
| 121,373 | 111 | 2 | 2,529 | 38 | 173 | 2 | 2,889 | 29 | 5,702  | 71 |
| 121,374 | 243 | 1 | 3,514 | 42 | 294 | 2 | 4,393 | 29 | 8,444  | 74 |
| 121,375 | 243 | 1 | 3,534 | 42 | 292 | 2 | 4,408 | 29 | 8,477  | 74 |
| 121,376 | 249 | 1 | 3,505 | 41 | 295 | 2 | 4,445 | 29 | 8,494  | 73 |
| 121,377 | 251 | 1 | 3,495 | 41 | 295 | 2 | 4,434 | 29 | 8,475  | 73 |
| 121,378 | 251 | 1 | 3,484 | 41 | 295 | 2 | 4,423 | 29 | 8,453  | 73 |
| 121,379 | 259 | 1 | 3,653 | 41 | 306 | 3 | 4,539 | 29 | 8,757  | 74 |
| 121,380 | 254 | 1 | 3,694 | 41 | 313 | 3 | 4,568 | 29 | 8,829  | 74 |
| 121,381 | 266 | 1 | 4,245 | 43 | 356 | 3 | 5,083 | 29 | 9,950  | 76 |
| 121,382 | 296 | 1 | 4,689 | 43 | 418 | 3 | 5,804 | 27 | 11,207 | 74 |
| 121,383 | 296 | 1 | 4,671 | 43 | 413 | 3 | 5,799 | 17 | 11,179 | 64 |
| 121,384 | 296 | 2 | 4,656 | 46 | 412 | 3 | 5,793 | 19 | 11,157 | 70 |
| 121,385 | 283 | 2 | 4,571 | 47 | 404 | 3 | 5,640 | 19 | 10,898 | 71 |
| 121,386 | 282 | 2 | 4,561 | 46 | 403 | 3 | 5,631 | 19 | 10,877 | 70 |
| 121,387 | 280 | 2 | 4,541 | 47 | 401 | 3 | 5,617 | 19 | 10,839 | 71 |
| 121,388 | 275 | 2 | 4,499 | 51 | 398 | 4 | 5,566 | 24 | 10,738 | 81 |
| 121,389 | 274 | 2 | 4,458 | 51 | 396 | 3 | 5,562 | 23 | 10,690 | 79 |

|         |     |   |       |     |     |   |       |    |        |     |
|---------|-----|---|-------|-----|-----|---|-------|----|--------|-----|
| 121,390 | 292 | 2 | 4,583 | 53  | 412 | 3 | 6,013 | 25 | 11,300 | 83  |
| 121,391 | 291 | 2 | 4,578 | 57  | 412 | 3 | 6,041 | 28 | 11,322 | 90  |
| 121,392 | 289 | 2 | 4,514 | 62  | 418 | 3 | 6,070 | 29 | 11,291 | 96  |
| 121,393 | 288 | 2 | 4,463 | 63  | 414 | 4 | 6,064 | 29 | 11,229 | 98  |
| 121,394 | 288 | 3 | 4,448 | 69  | 414 | 4 | 6,065 | 33 | 11,215 | 109 |
| 121,395 | 284 | 3 | 4,417 | 67  | 412 | 4 | 6,013 | 34 | 11,126 | 108 |
| 121,396 | 281 | 3 | 4,356 | 65  | 408 | 4 | 5,913 | 34 | 10,958 | 106 |
| 121,397 | 281 | 3 | 4,339 | 61  | 407 | 4 | 5,881 | 34 | 10,908 | 102 |
| 121,398 | 279 | 3 | 4,313 | 61  | 407 | 4 | 5,844 | 34 | 10,843 | 102 |
| 121,399 | 264 | 3 | 4,158 | 64  | 390 | 4 | 5,335 | 34 | 10,147 | 105 |
| 121,400 | 263 | 3 | 4,132 | 63  | 389 | 4 | 5,267 | 34 | 10,051 | 104 |
| 121,401 | 264 | 3 | 4,134 | 63  | 390 | 4 | 5,267 | 34 | 10,055 | 104 |
| 121,402 | 264 | 3 | 4,130 | 64  | 390 | 4 | 5,260 | 39 | 10,044 | 110 |
| 121,403 | 265 | 3 | 4,116 | 68  | 390 | 4 | 5,245 | 43 | 10,016 | 118 |
| 121,404 | 266 | 3 | 4,097 | 81  | 388 | 4 | 5,203 | 54 | 9,954  | 142 |
| 121,405 | 266 | 4 | 4,077 | 83  | 388 | 3 | 5,197 | 62 | 9,928  | 152 |
| 121,406 | 265 | 4 | 4,046 | 81  | 386 | 3 | 5,156 | 59 | 9,853  | 147 |
| 121,407 | 265 | 3 | 4,039 | 78  | 387 | 3 | 5,155 | 58 | 9,846  | 142 |
| 121,408 | 265 | 3 | 4,037 | 76  | 387 | 3 | 5,148 | 58 | 9,837  | 140 |
| 121,409 | 265 | 3 | 4,021 | 75  | 387 | 4 | 5,128 | 58 | 9,801  | 140 |
| 121,410 | 265 | 3 | 4,017 | 75  | 386 | 4 | 5,123 | 58 | 9,791  | 140 |
| 121,411 | 264 | 3 | 4,008 | 81  | 381 | 4 | 5,098 | 57 | 9,751  | 145 |
| 121,412 | 265 | 3 | 4,013 | 85  | 381 | 5 | 5,096 | 59 | 9,755  | 152 |
| 121,413 | 265 | 3 | 4,006 | 105 | 382 | 6 | 5,098 | 59 | 9,751  | 173 |
| 121,414 | 265 | 3 | 4,000 | 105 | 379 | 6 | 5,087 | 59 | 9,731  | 173 |
| 121,415 | 263 | 3 | 3,937 | 104 | 377 | 6 | 5,044 | 59 | 9,621  | 172 |
| 121,416 | 247 | 3 | 3,239 | 102 | 336 | 6 | 4,609 | 59 | 8,431  | 170 |
| 121,417 | 246 | 3 | 3,204 | 102 | 328 | 6 | 4,532 | 59 | 8,310  | 170 |
| 121,418 | 246 | 3 | 3,159 | 102 | 307 | 6 | 4,146 | 59 | 7,858  | 170 |
| 121,419 | 246 | 3 | 3,144 | 102 | 307 | 6 | 4,131 | 59 | 7,828  | 170 |
| 121,420 | 251 | 3 | 3,234 | 103 | 313 | 6 | 4,227 | 59 | 8,025  | 171 |
| 121,421 | 251 | 3 | 3,228 | 103 | 313 | 6 | 4,228 | 59 | 8,020  | 171 |
| 121,422 | 261 | 3 | 3,364 | 103 | 344 | 6 | 4,561 | 59 | 8,530  | 171 |
| 121,423 | 257 | 3 | 3,207 | 97  | 337 | 6 | 4,498 | 57 | 8,299  | 163 |
| 121,424 | 262 | 3 | 3,192 | 98  | 337 | 6 | 4,522 | 57 | 8,313  | 164 |
| 121,425 | 136 | 3 | 2,314 | 98  | 221 | 6 | 3,134 | 57 | 5,805  | 164 |
| 121,426 | 134 | 3 | 2,294 | 99  | 220 | 6 | 3,117 | 57 | 5,765  | 165 |
| 121,427 | 141 | 3 | 2,376 | 100 | 231 | 6 | 3,297 | 57 | 6,045  | 166 |
| 121,428 | 140 | 3 | 2,370 | 102 | 232 | 6 | 3,302 | 57 | 6,044  | 168 |
| 121,429 | 141 | 3 | 2,359 | 104 | 232 | 6 | 3,293 | 57 | 6,025  | 170 |
| 121,430 | 133 | 3 | 2,192 | 104 | 220 | 5 | 3,176 | 57 | 5,721  | 169 |

|         |     |   |       |     |     |   |       |    |       |     |
|---------|-----|---|-------|-----|-----|---|-------|----|-------|-----|
| 121,431 | 122 | 3 | 1,764 | 102 | 183 | 5 | 2,709 | 57 | 4,778 | 167 |
| 121,432 | 117 | 3 | 1,549 | 103 | 167 | 5 | 2,524 | 56 | 4,357 | 167 |
| 121,433 | 89  | 3 | 1,133 | 103 | 106 | 5 | 1,821 | 56 | 3,149 | 167 |
| 121,434 | 98  | 2 | 1,284 | 98  | 121 | 5 | 1,940 | 54 | 3,443 | 159 |
| 121,435 | 98  | 2 | 1,283 | 98  | 121 | 5 | 1,940 | 55 | 3,442 | 160 |
| 121,436 | 111 | 2 | 1,521 | 97  | 134 | 6 | 2,095 | 56 | 3,861 | 161 |
| 121,437 | 110 | 2 | 1,521 | 98  | 134 | 6 | 2,091 | 56 | 3,856 | 162 |
| 121,438 | 127 | 2 | 1,961 | 97  | 157 | 6 | 2,356 | 56 | 4,601 | 161 |
| 121,439 | 129 | 3 | 2,026 | 92  | 160 | 5 | 2,382 | 50 | 4,697 | 150 |
| 121,440 | 131 | 3 | 2,080 | 95  | 162 | 5 | 2,397 | 51 | 4,770 | 154 |
| 121,441 | 110 | 3 | 1,892 | 96  | 145 | 6 | 1,911 | 51 | 4,058 | 156 |
| 121,442 | 110 | 5 | 1,869 | 92  | 144 | 6 | 1,859 | 51 | 3,982 | 154 |
| 121,443 | 109 | 5 | 1,844 | 89  | 138 | 6 | 1,817 | 50 | 3,908 | 150 |
| 121,444 | 108 | 5 | 1,817 | 89  | 136 | 5 | 1,754 | 50 | 3,815 | 149 |
| 121,445 | 108 | 4 | 1,817 | 89  | 136 | 5 | 1,749 | 47 | 3,810 | 145 |
| 121,446 | 108 | 4 | 1,815 | 89  | 136 | 5 | 1,744 | 46 | 3,803 | 144 |
| 121,447 | 115 | 4 | 1,892 | 90  | 139 | 4 | 1,824 | 46 | 3,970 | 144 |
| 121,448 | 118 | 4 | 1,903 | 90  | 139 | 4 | 1,824 | 45 | 3,984 | 143 |
| 121,449 | 118 | 4 | 1,903 | 90  | 139 | 4 | 1,822 | 45 | 3,982 | 143 |
| 121,450 | 128 | 4 | 2,068 | 87  | 149 | 4 | 1,939 | 45 | 4,284 | 140 |
| 121,451 | 127 | 4 | 2,063 | 87  | 149 | 4 | 1,940 | 44 | 4,279 | 139 |
| 121,452 | 127 | 4 | 2,062 | 87  | 148 | 4 | 1,938 | 44 | 4,275 | 139 |
| 121,453 | 127 | 4 | 2,062 | 85  | 148 | 4 | 1,938 | 39 | 4,275 | 132 |
| 121,454 | 126 | 4 | 2,062 | 81  | 148 | 4 | 1,938 | 35 | 4,274 | 124 |
| 121,455 | 137 | 3 | 2,250 | 65  | 162 | 4 | 2,022 | 16 | 4,571 | 88  |
| 121,456 | 139 | 3 | 2,326 | 66  | 162 | 4 | 2,049 | 16 | 4,676 | 89  |
| 121,457 | 140 | 3 | 2,431 | 65  | 171 | 4 | 2,130 | 16 | 4,872 | 88  |
| 121,458 | 140 | 3 | 2,435 | 61  | 172 | 4 | 2,131 | 12 | 4,878 | 80  |
| 121,459 | 140 | 3 | 2,435 | 61  | 172 | 4 | 2,131 | 12 | 4,878 | 80  |
| 121,460 | 145 | 4 | 2,532 | 62  | 179 | 3 | 2,241 | 12 | 5,097 | 81  |
| 121,461 | 145 | 4 | 2,545 | 62  | 180 | 3 | 2,259 | 13 | 5,129 | 82  |
| 121,462 | 145 | 4 | 2,576 | 56  | 180 | 3 | 2,270 | 13 | 5,171 | 76  |
| 121,463 | 143 | 4 | 2,571 | 52  | 180 | 3 | 2,267 | 11 | 5,161 | 70  |
| 121,464 | 143 | 4 | 2,568 | 32  | 179 | 2 | 2,270 | 10 | 5,160 | 48  |
| 121,465 | 145 | 4 | 2,593 | 32  | 178 | 2 | 2,266 | 10 | 5,182 | 48  |
| 121,466 | 150 | 5 | 2,800 | 32  | 184 | 2 | 2,374 | 10 | 5,508 | 49  |
| 121,467 | 155 | 6 | 3,024 | 33  | 206 | 3 | 2,507 | 11 | 5,892 | 53  |
| 121,468 | 208 | 6 | 3,769 | 34  | 286 | 3 | 3,290 | 11 | 7,553 | 54  |
| 121,469 | 208 | 6 | 3,799 | 34  | 290 | 3 | 3,349 | 11 | 7,646 | 54  |
| 121,470 | 203 | 6 | 3,741 | 34  | 285 | 3 | 3,321 | 11 | 7,550 | 54  |
| 121,471 | 202 | 6 | 3,704 | 33  | 283 | 3 | 3,272 | 12 | 7,461 | 54  |

|         |     |   |       |    |     |   |       |    |       |    |
|---------|-----|---|-------|----|-----|---|-------|----|-------|----|
| 121,472 | 202 | 6 | 3,701 | 35 | 284 | 3 | 3,278 | 13 | 7,465 | 57 |
| 121,473 | 188 | 6 | 3,529 | 34 | 251 | 3 | 2,926 | 15 | 6,894 | 58 |
| 121,474 | 189 | 6 | 3,517 | 35 | 251 | 3 | 2,922 | 15 | 6,879 | 59 |
| 121,475 | 184 | 6 | 3,510 | 35 | 252 | 3 | 2,898 | 15 | 6,844 | 59 |
| 121,476 | 179 | 6 | 3,427 | 34 | 246 | 3 | 2,788 | 15 | 6,640 | 58 |
| 121,477 | 179 | 6 | 3,419 | 34 | 246 | 3 | 2,791 | 16 | 6,635 | 59 |
| 121,478 | 166 | 6 | 3,298 | 31 | 231 | 3 | 2,539 | 16 | 6,234 | 56 |
| 121,479 | 166 | 6 | 3,293 | 31 | 230 | 3 | 2,531 | 16 | 6,220 | 56 |
| 121,480 | 167 | 6 | 3,320 | 29 | 234 | 3 | 2,558 | 16 | 6,279 | 54 |
| 121,481 | 167 | 6 | 3,322 | 30 | 234 | 3 | 2,561 | 16 | 6,284 | 55 |
| 121,482 | 167 | 6 | 3,327 | 30 | 234 | 3 | 2,577 | 16 | 6,305 | 55 |
| 121,483 | 167 | 6 | 3,368 | 30 | 234 | 3 | 2,619 | 16 | 6,388 | 55 |
| 121,484 | 164 | 6 | 3,350 | 30 | 234 | 3 | 2,600 | 16 | 6,348 | 55 |
| 121,485 | 155 | 6 | 3,213 | 30 | 218 | 4 | 2,487 | 16 | 6,073 | 56 |
| 121,486 | 152 | 6 | 3,192 | 30 | 215 | 4 | 2,474 | 15 | 6,033 | 55 |
| 121,487 | 143 | 6 | 2,998 | 30 | 206 | 3 | 2,354 | 13 | 5,701 | 52 |
| 121,488 | 133 | 6 | 2,767 | 29 | 190 | 3 | 2,192 | 13 | 5,282 | 51 |
| 121,489 | 128 | 6 | 2,588 | 29 | 184 | 3 | 2,102 | 13 | 5,002 | 51 |
| 121,490 | 124 | 5 | 2,514 | 29 | 179 | 3 | 2,058 | 13 | 4,875 | 50 |
| 121,491 | 123 | 5 | 2,451 | 27 | 177 | 3 | 2,031 | 11 | 4,782 | 46 |
| 121,492 | 130 | 5 | 2,558 | 26 | 178 | 2 | 2,278 | 11 | 5,144 | 44 |
| 121,493 | 130 | 3 | 2,561 | 25 | 178 | 2 | 2,281 | 8  | 5,150 | 38 |
| 121,494 | 130 | 3 | 2,550 | 14 | 178 | 2 | 2,274 | 7  | 5,132 | 26 |
| 121,495 | 130 | 3 | 2,549 | 14 | 178 | 2 | 2,278 | 7  | 5,135 | 26 |
| 121,496 | 126 | 3 | 2,502 | 13 | 176 | 2 | 2,235 | 7  | 5,039 | 25 |
| 121,497 | 126 | 3 | 2,505 | 13 | 176 | 2 | 2,239 | 8  | 5,046 | 26 |
| 121,498 | 123 | 3 | 2,490 | 13 | 175 | 2 | 2,225 | 8  | 5,013 | 26 |
| 121,499 | 120 | 3 | 2,480 | 13 | 176 | 2 | 2,222 | 8  | 4,998 | 26 |
| 121,500 | 120 | 3 | 2,474 | 13 | 176 | 2 | 2,219 | 8  | 4,989 | 26 |
| 121,501 | 110 | 3 | 2,314 | 13 | 166 | 2 | 2,102 | 9  | 4,692 | 27 |
| 121,502 | 109 | 3 | 2,311 | 13 | 165 | 2 | 2,102 | 9  | 4,687 | 27 |
| 121,503 | 105 | 3 | 2,233 | 13 | 158 | 2 | 2,062 | 9  | 4,558 | 27 |
| 121,504 | 103 | 3 | 2,227 | 13 | 158 | 2 | 2,060 | 9  | 4,548 | 27 |
| 121,505 | 103 | 3 | 2,217 | 13 | 155 | 2 | 2,059 | 9  | 4,534 | 27 |
| 121,506 | 98  | 3 | 2,140 | 13 | 153 | 2 | 2,022 | 9  | 4,413 | 27 |
| 121,507 | 96  | 3 | 2,064 | 12 | 152 | 2 | 1,998 | 9  | 4,310 | 26 |
| 121,508 | 95  | 3 | 1,957 | 11 | 142 | 2 | 1,915 | 8  | 4,109 | 24 |
| 121,509 | 95  | 3 | 1,959 | 11 | 142 | 2 | 1,913 | 8  | 4,109 | 24 |
| 121,510 | 91  | 2 | 1,873 | 10 | 134 | 3 | 1,806 | 6  | 3,904 | 21 |
| 121,511 | 91  | 2 | 1,869 | 10 | 134 | 3 | 1,808 | 6  | 3,902 | 21 |
| 121,512 | 91  | 2 | 1,863 | 10 | 133 | 3 | 1,797 | 5  | 3,884 | 20 |

|         |    |   |       |    |     |   |       |    |       |    |
|---------|----|---|-------|----|-----|---|-------|----|-------|----|
| 121,513 | 90 | 2 | 1,824 | 10 | 133 | 3 | 1,785 | 5  | 3,832 | 20 |
| 121,514 | 91 | 2 | 1,963 | 10 | 142 | 3 | 1,908 | 5  | 4,104 | 20 |
| 121,515 | 91 | 3 | 1,968 | 10 | 142 | 3 | 1,915 | 5  | 4,116 | 21 |
| 121,516 | 90 | 3 | 2,044 | 11 | 149 | 3 | 1,999 | 5  | 4,282 | 22 |
| 121,517 | 85 | 2 | 1,851 | 11 | 145 | 3 | 1,905 | 5  | 3,986 | 21 |
| 121,518 | 80 | 1 | 1,609 | 9  | 123 | 2 | 1,771 | 4  | 3,583 | 16 |
| 121,519 | 27 | 1 | 864   | 8  | 42  | 2 | 996   | 4  | 1,929 | 15 |
| 121,520 | 26 | 1 | 799   | 8  | 40  | 2 | 943   | 5  | 1,808 | 16 |
| 121,521 | 25 | 1 | 790   | 8  | 38  | 2 | 906   | 5  | 1,759 | 16 |
| 121,522 | 27 | 1 | 818   | 8  | 41  | 2 | 932   | 5  | 1,818 | 16 |
| 121,523 | 27 | 1 | 810   | 6  | 41  | 2 | 928   | 5  | 1,806 | 14 |
| 121,524 | 27 | 1 | 810   | 6  | 41  | 2 | 928   | 3  | 1,806 | 12 |
| 121,525 | 26 | 1 | 807   | 6  | 41  | 2 | 924   | 3  | 1,798 | 12 |
| 121,526 | 25 | 1 | 781   | 6  | 39  | 2 | 897   | 3  | 1,742 | 12 |
| 121,527 | 24 | 1 | 849   | 8  | 42  | 2 | 929   | 3  | 1,844 | 14 |
| 121,528 | 29 | 1 | 897   | 8  | 47  | 2 | 983   | 3  | 1,956 | 14 |
| 121,529 | 28 | 1 | 966   | 8  | 52  | 2 | 1,085 | 3  | 2,131 | 14 |
| 121,530 | 30 | 1 | 1,025 | 9  | 53  | 2 | 1,149 | 4  | 2,257 | 16 |
| 121,531 | 29 | 1 | 1,004 | 9  | 50  | 2 | 1,132 | 4  | 2,215 | 16 |
| 121,532 | 30 | 1 | 1,010 | 8  | 55  | 2 | 1,157 | 4  | 2,252 | 15 |
| 121,533 | 30 | 1 | 1,005 | 7  | 55  | 2 | 1,140 | 4  | 2,230 | 14 |
| 121,534 | 30 | 1 | 964   | 7  | 55  | 2 | 1,104 | 5  | 2,153 | 15 |
| 121,535 | 30 | 1 | 951   | 7  | 54  | 2 | 1,100 | 5  | 2,135 | 15 |
| 121,536 | 32 | 1 | 959   | 7  | 57  | 1 | 1,097 | 5  | 2,145 | 14 |
| 121,537 | 32 | 1 | 965   | 9  | 58  | 1 | 1,104 | 5  | 2,159 | 16 |
| 121,538 | 31 | 1 | 960   | 9  | 57  | 1 | 1,108 | 5  | 2,156 | 16 |
| 121,539 | 29 | 1 | 956   | 10 | 56  | 1 | 1,115 | 5  | 2,156 | 17 |
| 121,540 | 29 | 1 | 1,037 | 9  | 58  | 1 | 1,175 | 6  | 2,299 | 17 |
| 121,541 | 30 | 1 | 1,075 | 9  | 59  | 1 | 1,221 | 6  | 2,385 | 17 |
| 121,542 | 22 | 1 | 1,010 | 14 | 56  | 1 | 997   | 8  | 2,085 | 24 |
| 121,543 | 27 | 1 | 1,076 | 19 | 66  | 2 | 1,200 | 10 | 2,369 | 32 |
| 121,544 | 29 | 3 | 1,109 | 36 | 67  | 2 | 1,211 | 18 | 2,416 | 59 |
| 121,545 | 29 | 3 | 1,114 | 41 | 68  | 2 | 1,215 | 19 | 2,426 | 65 |
| 121,546 | 30 | 3 | 1,126 | 48 | 68  | 2 | 1,223 | 21 | 2,447 | 74 |
| 121,547 | 30 | 3 | 1,118 | 48 | 68  | 2 | 1,204 | 22 | 2,420 | 75 |
| 121,548 | 30 | 3 | 1,113 | 50 | 68  | 2 | 1,197 | 21 | 2,408 | 76 |
| 121,549 | 30 | 3 | 1,118 | 50 | 68  | 2 | 1,195 | 21 | 2,411 | 76 |
| 121,550 | 30 | 3 | 1,116 | 50 | 67  | 2 | 1,194 | 21 | 2,407 | 76 |
| 121,551 | 30 | 3 | 1,116 | 57 | 67  | 2 | 1,194 | 27 | 2,407 | 89 |
| 121,552 | 30 | 3 | 1,116 | 58 | 67  | 2 | 1,194 | 27 | 2,407 | 90 |
| 121,553 | 31 | 3 | 1,139 | 59 | 69  | 2 | 1,222 | 30 | 2,461 | 94 |

|         |    |   |       |    |    |   |       |    |       |     |
|---------|----|---|-------|----|----|---|-------|----|-------|-----|
| 121,554 | 31 | 3 | 1,137 | 59 | 69 | 2 | 1,221 | 30 | 2,458 | 94  |
| 121,555 | 33 | 3 | 1,147 | 59 | 69 | 2 | 1,234 | 30 | 2,483 | 94  |
| 121,556 | 35 | 3 | 1,163 | 65 | 70 | 2 | 1,281 | 30 | 2,549 | 100 |
| 121,557 | 35 | 3 | 1,160 | 65 | 69 | 2 | 1,279 | 30 | 2,543 | 100 |
| 121,558 | 35 | 3 | 1,170 | 69 | 70 | 2 | 1,297 | 30 | 2,572 | 104 |
| 121,559 | 35 | 3 | 1,169 | 70 | 70 | 2 | 1,297 | 30 | 2,571 | 105 |
| 121,560 | 35 | 3 | 1,160 | 70 | 70 | 2 | 1,294 | 30 | 2,559 | 105 |
| 121,561 | 35 | 4 | 1,177 | 72 | 70 | 1 | 1,293 | 32 | 2,575 | 109 |
| 121,562 | 35 | 4 | 1,193 | 77 | 71 | 1 | 1,304 | 32 | 2,603 | 114 |
| 121,563 | 35 | 4 | 1,189 | 77 | 71 | 1 | 1,296 | 32 | 2,591 | 114 |
| 121,564 | 34 | 4 | 1,073 | 77 | 65 | 1 | 1,218 | 32 | 2,390 | 114 |
| 121,565 | 35 | 5 | 1,046 | 83 | 62 | 1 | 1,167 | 34 | 2,310 | 123 |
| 121,566 | 35 | 4 | 1,034 | 83 | 62 | 1 | 1,159 | 35 | 2,290 | 123 |
| 121,567 | 33 | 4 | 917   | 84 | 55 | 1 | 1,057 | 36 | 2,062 | 125 |
| 121,568 | 33 | 5 | 901   | 87 | 53 | 1 | 1,038 | 37 | 2,025 | 130 |
| 121,569 | 33 | 6 | 898   | 88 | 53 | 1 | 1,031 | 37 | 2,015 | 132 |
| 121,570 | 35 | 6 | 902   | 88 | 53 | 1 | 1,020 | 37 | 2,010 | 132 |
| 121,571 | 34 | 6 | 895   | 88 | 51 | 1 | 1,014 | 36 | 1,994 | 131 |
| 121,572 | 34 | 6 | 896   | 88 | 51 | 1 | 1,015 | 37 | 1,996 | 132 |
| 121,573 | 32 | 6 | 866   | 88 | 48 | 1 | 989   | 37 | 1,935 | 132 |
| 121,574 | 32 | 6 | 874   | 91 | 48 | 1 | 995   | 39 | 1,949 | 137 |
| 121,575 | 32 | 6 | 914   | 93 | 48 | 1 | 1,019 | 39 | 2,013 | 139 |
| 121,576 | 32 | 6 | 912   | 95 | 48 | 1 | 1,016 | 41 | 2,008 | 143 |
| 121,577 | 33 | 6 | 907   | 97 | 49 | 1 | 1,008 | 45 | 1,997 | 149 |
| 121,578 | 31 | 6 | 851   | 95 | 46 | 1 | 975   | 45 | 1,903 | 147 |
| 121,579 | 26 | 6 | 798   | 96 | 40 | 1 | 903   | 45 | 1,767 | 148 |
| 121,580 | 25 | 6 | 723   | 97 | 34 | 1 | 781   | 46 | 1,563 | 150 |
| 121,581 | 22 | 6 | 683   | 97 | 35 | 1 | 718   | 45 | 1,458 | 149 |
| 121,582 | 21 | 6 | 689   | 97 | 32 | 1 | 706   | 45 | 1,448 | 149 |
| 121,583 | 21 | 6 | 683   | 97 | 30 | 1 | 697   | 45 | 1,431 | 149 |
| 121,584 | 21 | 6 | 702   | 97 | 30 | 1 | 706   | 45 | 1,459 | 149 |
| 121,585 | 21 | 6 | 702   | 98 | 30 | 1 | 702   | 44 | 1,455 | 149 |
| 121,586 | 21 | 6 | 687   | 98 | 30 | 1 | 694   | 44 | 1,432 | 149 |
| 121,587 | 19 | 6 | 670   | 98 | 27 | 1 | 672   | 44 | 1,388 | 149 |
| 121,588 | 21 | 6 | 672   | 96 | 28 | 1 | 673   | 44 | 1,394 | 147 |
| 121,589 | 23 | 6 | 683   | 96 | 28 | 1 | 667   | 44 | 1,401 | 147 |
| 121,590 | 25 | 6 | 733   | 97 | 29 | 1 | 715   | 44 | 1,502 | 148 |
| 121,591 | 25 | 6 | 755   | 96 | 29 | 1 | 681   | 43 | 1,490 | 146 |
| 121,592 | 25 | 6 | 729   | 86 | 29 | 0 | 650   | 39 | 1,433 | 131 |
| 121,593 | 26 | 6 | 716   | 85 | 29 | 0 | 645   | 39 | 1,416 | 130 |
| 121,594 | 21 | 6 | 645   | 85 | 18 | 0 | 431   | 39 | 1,115 | 130 |

|         |    |   |       |    |    |   |       |    |       |    |
|---------|----|---|-------|----|----|---|-------|----|-------|----|
| 121,595 | 21 | 4 | 618   | 64 | 17 | 0 | 417   | 30 | 1,073 | 98 |
| 121,596 | 21 | 4 | 612   | 65 | 16 | 0 | 408   | 30 | 1,057 | 99 |
| 121,597 | 20 | 4 | 596   | 58 | 16 | 0 | 397   | 28 | 1,029 | 90 |
| 121,598 | 28 | 4 | 709   | 58 | 19 | 0 | 458   | 27 | 1,214 | 89 |
| 121,599 | 28 | 4 | 708   | 56 | 19 | 0 | 467   | 27 | 1,222 | 87 |
| 121,600 | 28 | 4 | 705   | 56 | 19 | 0 | 464   | 27 | 1,216 | 87 |
| 121,601 | 32 | 4 | 773   | 56 | 23 | 0 | 492   | 27 | 1,320 | 87 |
| 121,602 | 34 | 4 | 839   | 49 | 25 | 0 | 502   | 21 | 1,400 | 74 |
| 121,603 | 34 | 4 | 836   | 48 | 25 | 0 | 500   | 20 | 1,395 | 72 |
| 121,604 | 34 | 4 | 827   | 47 | 24 | 0 | 486   | 17 | 1,371 | 68 |
| 121,605 | 42 | 4 | 1,063 | 47 | 44 | 0 | 783   | 17 | 1,932 | 68 |
| 121,606 | 40 | 4 | 1,062 | 47 | 44 | 0 | 803   | 17 | 1,949 | 68 |
| 121,607 | 38 | 4 | 1,044 | 41 | 43 | 0 | 759   | 17 | 1,884 | 62 |
| 121,608 | 38 | 4 | 1,042 | 42 | 42 | 0 | 747   | 17 | 1,869 | 63 |
| 121,609 | 38 | 4 | 1,043 | 39 | 43 | 0 | 744   | 17 | 1,868 | 60 |
| 121,610 | 38 | 4 | 1,043 | 38 | 43 | 0 | 744   | 17 | 1,868 | 59 |
| 121,611 | 38 | 4 | 1,038 | 38 | 43 | 0 | 743   | 17 | 1,862 | 59 |
| 121,612 | 38 | 3 | 1,029 | 37 | 43 | 0 | 742   | 15 | 1,852 | 55 |
| 121,613 | 38 | 3 | 1,007 | 32 | 42 | 0 | 725   | 15 | 1,812 | 50 |
| 121,614 | 39 | 3 | 1,011 | 32 | 42 | 0 | 725   | 15 | 1,817 | 50 |
| 121,615 | 39 | 3 | 1,009 | 32 | 42 | 0 | 725   | 15 | 1,815 | 50 |
| 121,616 | 38 | 2 | 1,008 | 26 | 42 | 0 | 725   | 13 | 1,813 | 41 |
| 121,617 | 42 | 2 | 1,042 | 26 | 43 | 0 | 728   | 12 | 1,855 | 40 |
| 121,618 | 43 | 2 | 1,045 | 25 | 43 | 0 | 729   | 11 | 1,860 | 38 |
| 121,619 | 47 | 0 | 1,073 | 21 | 43 | 0 | 733   | 10 | 1,896 | 31 |
| 121,620 | 48 | 0 | 1,077 | 22 | 43 | 0 | 735   | 10 | 1,903 | 32 |
| 121,621 | 48 | 0 | 1,098 | 22 | 44 | 0 | 737   | 12 | 1,927 | 34 |
| 121,622 | 59 | 0 | 1,241 | 22 | 47 | 0 | 777   | 12 | 2,124 | 34 |
| 121,623 | 59 | 0 | 1,237 | 22 | 47 | 0 | 773   | 11 | 2,116 | 33 |
| 121,624 | 72 | 0 | 1,473 | 22 | 60 | 0 | 886   | 11 | 2,491 | 33 |
| 121,625 | 73 | 0 | 1,481 | 19 | 62 | 0 | 883   | 9  | 2,499 | 28 |
| 121,626 | 73 | 0 | 1,452 | 16 | 62 | 0 | 858   | 9  | 2,445 | 25 |
| 121,627 | 81 | 0 | 1,538 | 15 | 62 | 0 | 895   | 7  | 2,576 | 22 |
| 121,628 | 80 | 0 | 1,550 | 13 | 62 | 0 | 892   | 4  | 2,584 | 17 |
| 121,629 | 91 | 0 | 1,718 | 13 | 73 | 0 | 1,026 | 5  | 2,908 | 18 |
| 121,630 | 91 | 0 | 1,725 | 12 | 73 | 0 | 1,023 | 5  | 2,912 | 17 |
| 121,631 | 91 | 0 | 1,699 | 11 | 70 | 0 | 1,016 | 4  | 2,876 | 15 |
| 121,632 | 92 | 0 | 1,687 | 10 | 70 | 0 | 1,005 | 4  | 2,854 | 14 |
| 121,633 | 92 | 0 | 1,687 | 10 | 70 | 0 | 1,004 | 4  | 2,853 | 14 |
| 121,634 | 92 | 0 | 1,679 | 10 | 71 | 0 | 1,001 | 4  | 2,843 | 14 |
| 121,635 | 92 | 0 | 1,677 | 10 | 71 | 0 | 1,000 | 4  | 2,840 | 14 |

|         |    |   |       |    |    |   |       |    |       |    |
|---------|----|---|-------|----|----|---|-------|----|-------|----|
| 121,636 | 93 | 0 | 1,742 | 16 | 71 | 0 | 1,022 | 10 | 2,928 | 26 |
| 121,637 | 93 | 0 | 1,741 | 18 | 71 | 0 | 1,019 | 13 | 2,924 | 31 |
| 121,638 | 92 | 0 | 1,761 | 23 | 71 | 0 | 1,028 | 14 | 2,952 | 37 |
| 121,639 | 91 | 0 | 1,750 | 24 | 69 | 0 | 1,019 | 14 | 2,929 | 38 |
| 121,640 | 89 | 0 | 1,723 | 24 | 68 | 0 | 1,007 | 14 | 2,887 | 38 |
| 121,641 | 87 | 0 | 1,653 | 25 | 67 | 0 | 944   | 14 | 2,751 | 39 |
| 121,642 | 87 | 0 | 1,542 | 25 | 65 | 0 | 910   | 14 | 2,604 | 39 |
| 121,643 | 87 | 0 | 1,515 | 25 | 64 | 0 | 885   | 14 | 2,551 | 39 |
| 121,644 | 86 | 0 | 1,513 | 25 | 64 | 0 | 879   | 14 | 2,542 | 39 |
| 121,645 | 87 | 0 | 1,543 | 25 | 64 | 0 | 889   | 14 | 2,583 | 39 |
| 121,646 | 85 | 0 | 1,542 | 24 | 64 | 0 | 888   | 14 | 2,579 | 38 |
| 121,647 | 85 | 0 | 1,536 | 24 | 64 | 0 | 891   | 14 | 2,576 | 38 |
| 121,648 | 85 | 0 | 1,538 | 24 | 64 | 0 | 886   | 14 | 2,573 | 38 |
| 121,649 | 77 | 0 | 1,450 | 25 | 61 | 0 | 839   | 14 | 2,427 | 39 |
| 121,650 | 77 | 0 | 1,449 | 25 | 61 | 0 | 831   | 14 | 2,418 | 39 |
| 121,651 | 78 | 0 | 1,436 | 26 | 60 | 0 | 829   | 14 | 2,403 | 40 |
| 121,652 | 74 | 0 | 1,385 | 27 | 57 | 0 | 797   | 14 | 2,313 | 41 |
| 121,653 | 71 | 0 | 1,315 | 27 | 54 | 0 | 781   | 14 | 2,221 | 41 |
| 121,654 | 64 | 0 | 1,178 | 27 | 45 | 0 | 611   | 14 | 1,898 | 41 |
| 121,655 | 63 | 0 | 1,138 | 27 | 38 | 1 | 550   | 14 | 1,789 | 42 |
| 121,656 | 63 | 0 | 1,083 | 31 | 35 | 2 | 476   | 15 | 1,657 | 48 |
| 121,657 | 63 | 1 | 1,075 | 32 | 35 | 2 | 450   | 15 | 1,623 | 50 |
| 121,658 | 63 | 2 | 1,073 | 36 | 35 | 2 | 443   | 17 | 1,614 | 57 |
| 121,659 | 63 | 2 | 1,068 | 35 | 35 | 2 | 438   | 17 | 1,604 | 56 |
| 121,660 | 63 | 2 | 1,065 | 34 | 34 | 2 | 438   | 17 | 1,600 | 55 |
| 121,661 | 63 | 2 | 1,067 | 34 | 34 | 2 | 440   | 17 | 1,604 | 55 |
| 121,662 | 63 | 2 | 1,066 | 34 | 34 | 2 | 440   | 17 | 1,603 | 55 |
| 121,663 | 62 | 2 | 1,070 | 33 | 34 | 2 | 451   | 17 | 1,617 | 54 |
| 121,664 | 62 | 2 | 1,069 | 33 | 34 | 2 | 451   | 17 | 1,616 | 54 |
| 121,665 | 61 | 3 | 1,061 | 34 | 34 | 2 | 450   | 17 | 1,606 | 56 |
| 121,666 | 61 | 3 | 1,048 | 34 | 34 | 2 | 450   | 17 | 1,593 | 56 |
| 121,667 | 59 | 3 | 1,044 | 34 | 34 | 2 | 448   | 17 | 1,585 | 56 |
| 121,668 | 57 | 3 | 1,026 | 34 | 33 | 2 | 446   | 17 | 1,562 | 56 |
| 121,669 | 56 | 4 | 1,029 | 33 | 33 | 2 | 443   | 17 | 1,561 | 56 |
| 121,670 | 52 | 4 | 1,001 | 33 | 33 | 2 | 439   | 17 | 1,525 | 56 |
| 121,671 | 51 | 4 | 1,000 | 33 | 33 | 2 | 439   | 18 | 1,523 | 57 |
| 121,672 | 49 | 4 | 962   | 34 | 32 | 2 | 424   | 16 | 1,467 | 56 |
| 121,673 | 38 | 4 | 817   | 35 | 29 | 2 | 384   | 16 | 1,268 | 57 |
| 121,674 | 38 | 4 | 818   | 35 | 29 | 2 | 384   | 16 | 1,269 | 57 |
| 121,675 | 25 | 4 | 583   | 36 | 16 | 2 | 269   | 18 | 893   | 60 |
| 121,676 | 24 | 4 | 570   | 36 | 14 | 2 | 267   | 19 | 875   | 61 |



|         |    |   |     |    |    |   |     |    |     |    |
|---------|----|---|-----|----|----|---|-----|----|-----|----|
| 121,677 | 24 | 4 | 557 | 36 | 14 | 2 | 266 | 19 | 861 | 61 |
| 121,678 | 17 | 4 | 471 | 35 | 14 | 2 | 227 | 17 | 729 | 58 |
| 121,679 | 17 | 4 | 444 | 36 | 13 | 2 | 220 | 17 | 694 | 59 |
| 121,680 | 6  | 4 | 256 | 36 | 2  | 2 | 85  | 17 | 349 | 59 |
| 121,681 | 7  | 4 | 265 | 36 | 2  | 2 | 84  | 17 | 358 | 59 |
| 121,682 | 7  | 4 | 263 | 36 | 2  | 2 | 82  | 17 | 354 | 59 |
| 121,683 | 6  | 4 | 262 | 36 | 2  | 2 | 82  | 17 | 352 | 59 |
| 121,684 | 8  | 4 | 299 | 36 | 2  | 2 | 90  | 17 | 399 | 59 |
| 121,685 | 8  | 4 | 304 | 36 | 1  | 2 | 88  | 17 | 401 | 59 |
| 121,686 | 9  | 5 | 317 | 36 | 1  | 2 | 90  | 17 | 417 | 60 |
| 121,687 | 8  | 5 | 259 | 29 | 1  | 2 | 70  | 11 | 338 | 47 |
| 121,688 | 8  | 5 | 238 | 27 | 1  | 2 | 61  | 8  | 308 | 42 |
| 121,689 | 8  | 5 | 240 | 22 | 1  | 2 | 61  | 7  | 310 | 36 |
| 121,690 | 8  | 5 | 240 | 21 | 1  | 2 | 61  | 7  | 310 | 35 |
| 121,691 | 8  | 5 | 242 | 21 | 1  | 2 | 61  | 8  | 312 | 36 |
| 121,692 | 7  | 5 | 242 | 19 | 1  | 2 | 61  | 8  | 311 | 34 |
| 121,693 | 7  | 5 | 239 | 18 | 1  | 2 | 61  | 9  | 308 | 34 |
| 121,694 | 7  | 6 | 229 | 18 | 1  | 2 | 61  | 9  | 298 | 35 |
| 121,695 | 6  | 7 | 214 | 19 | 1  | 2 | 54  | 10 | 275 | 38 |
| 121,696 | 7  | 7 | 192 | 19 | 1  | 2 | 48  | 10 | 248 | 38 |
| 121,697 | 7  | 7 | 183 | 19 | 1  | 2 | 48  | 10 | 239 | 38 |
| 121,698 | 7  | 7 | 180 | 19 | 1  | 2 | 45  | 10 | 233 | 38 |
| 121,699 | 7  | 8 | 165 | 19 | 1  | 2 | 39  | 10 | 212 | 39 |
| 121,700 | 7  | 8 | 163 | 19 | 1  | 2 | 38  | 11 | 209 | 40 |
| 121,701 | 7  | 8 | 160 | 19 | 1  | 2 | 36  | 11 | 204 | 40 |
| 121,702 | 6  | 8 | 157 | 21 | 1  | 3 | 35  | 14 | 199 | 46 |
| 121,703 | 6  | 8 | 151 | 20 | 1  | 3 | 35  | 15 | 193 | 46 |
| 121,704 | 6  | 8 | 154 | 21 | 1  | 2 | 36  | 15 | 197 | 46 |
| 121,705 | 6  | 8 | 156 | 21 | 1  | 2 | 38  | 15 | 201 | 46 |
| 121,706 | 6  | 8 | 148 | 21 | 0  | 2 | 38  | 15 | 192 | 46 |
| 121,707 | 6  | 7 | 167 | 16 | 0  | 1 | 51  | 14 | 224 | 38 |
| 121,708 | 6  | 7 | 167 | 16 | 0  | 1 | 51  | 14 | 224 | 38 |
| 121,709 | 6  | 6 | 167 | 12 | 0  | 1 | 51  | 13 | 224 | 32 |
| 121,710 | 6  | 6 | 166 | 12 | 0  | 1 | 51  | 13 | 223 | 32 |
| 121,711 | 6  | 6 | 208 | 12 | 0  | 1 | 60  | 13 | 274 | 32 |
| 121,712 | 6  | 6 | 212 | 12 | 0  | 1 | 62  | 13 | 280 | 32 |
| 121,713 | 6  | 6 | 211 | 15 | 0  | 1 | 63  | 13 | 280 | 35 |
| 121,714 | 6  | 6 | 209 | 19 | 0  | 2 | 56  | 27 | 271 | 54 |
| 121,715 | 6  | 6 | 209 | 25 | 0  | 2 | 56  | 29 | 271 | 62 |
| 121,716 | 7  | 5 | 228 | 28 | 1  | 2 | 61  | 30 | 297 | 65 |
| 121,717 | 7  | 5 | 230 | 31 | 1  | 2 | 64  | 30 | 302 | 68 |

|         |    |   |     |     |    |    |     |     |       |     |
|---------|----|---|-----|-----|----|----|-----|-----|-------|-----|
| 121,718 | 7  | 5 | 227 | 32  | 1  | 2  | 64  | 30  | 299   | 69  |
| 121,719 | 7  | 5 | 226 | 35  | 2  | 2  | 64  | 30  | 299   | 72  |
| 121,720 | 7  | 4 | 227 | 38  | 2  | 2  | 65  | 34  | 301   | 78  |
| 121,721 | 7  | 4 | 225 | 38  | 2  | 2  | 65  | 34  | 299   | 78  |
| 121,722 | 8  | 4 | 229 | 37  | 2  | 2  | 74  | 33  | 313   | 76  |
| 121,723 | 8  | 4 | 236 | 41  | 2  | 2  | 78  | 36  | 324   | 83  |
| 121,724 | 8  | 4 | 236 | 40  | 2  | 2  | 80  | 38  | 326   | 84  |
| 121,725 | 8  | 4 | 236 | 41  | 2  | 2  | 80  | 38  | 326   | 85  |
| 121,726 | 8  | 4 | 232 | 44  | 2  | 2  | 80  | 38  | 322   | 88  |
| 121,727 | 8  | 4 | 231 | 45  | 2  | 2  | 80  | 37  | 321   | 88  |
| 121,728 | 11 | 4 | 269 | 46  | 3  | 2  | 110 | 38  | 393   | 90  |
| 121,729 | 10 | 4 | 269 | 46  | 3  | 2  | 110 | 38  | 392   | 90  |
| 121,730 | 15 | 4 | 455 | 47  | 9  | 2  | 279 | 39  | 758   | 92  |
| 121,731 | 17 | 4 | 539 | 55  | 22 | 3  | 416 | 40  | 994   | 102 |
| 121,732 | 16 | 4 | 532 | 58  | 24 | 3  | 444 | 42  | 1,016 | 107 |
| 121,733 | 16 | 4 | 558 | 59  | 26 | 3  | 498 | 42  | 1,098 | 108 |
| 121,734 | 19 | 4 | 590 | 62  | 35 | 3  | 585 | 43  | 1,229 | 112 |
| 121,735 | 18 | 4 | 575 | 64  | 35 | 3  | 582 | 43  | 1,210 | 114 |
| 121,736 | 18 | 5 | 559 | 67  | 35 | 5  | 580 | 45  | 1,192 | 122 |
| 121,737 | 17 | 4 | 541 | 90  | 36 | 5  | 584 | 49  | 1,178 | 148 |
| 121,738 | 18 | 4 | 541 | 95  | 36 | 5  | 596 | 49  | 1,191 | 153 |
| 121,739 | 18 | 4 | 542 | 95  | 36 | 5  | 598 | 49  | 1,194 | 153 |
| 121,740 | 21 | 4 | 560 | 97  | 39 | 5  | 635 | 50  | 1,255 | 156 |
| 121,741 | 23 | 4 | 576 | 98  | 40 | 5  | 654 | 50  | 1,293 | 157 |
| 121,742 | 23 | 4 | 576 | 102 | 40 | 5  | 654 | 49  | 1,293 | 160 |
| 121,743 | 23 | 4 | 581 | 104 | 40 | 6  | 658 | 50  | 1,302 | 164 |
| 121,744 | 24 | 4 | 660 | 107 | 41 | 6  | 721 | 50  | 1,446 | 167 |
| 121,745 | 24 | 7 | 661 | 131 | 41 | 7  | 722 | 84  | 1,448 | 229 |
| 121,746 | 24 | 6 | 661 | 142 | 41 | 8  | 722 | 86  | 1,448 | 242 |
| 121,747 | 27 | 7 | 714 | 148 | 43 | 8  | 789 | 87  | 1,573 | 250 |
| 121,748 | 27 | 8 | 717 | 159 | 43 | 8  | 789 | 96  | 1,576 | 271 |
| 121,749 | 27 | 8 | 717 | 160 | 43 | 8  | 788 | 96  | 1,575 | 272 |
| 121,750 | 28 | 8 | 719 | 193 | 43 | 10 | 790 | 113 | 1,580 | 324 |
| 121,751 | 28 | 8 | 719 | 193 | 43 | 10 | 790 | 112 | 1,580 | 323 |
| 121,752 | 28 | 8 | 728 | 209 | 44 | 11 | 793 | 114 | 1,593 | 342 |
| 121,753 | 28 | 9 | 733 | 219 | 44 | 10 | 801 | 114 | 1,606 | 352 |
| 121,754 | 30 | 9 | 745 | 232 | 44 | 10 | 822 | 114 | 1,641 | 365 |
| 121,755 | 30 | 9 | 741 | 232 | 44 | 10 | 819 | 115 | 1,634 | 366 |
| 121,756 | 30 | 9 | 741 | 239 | 44 | 10 | 817 | 119 | 1,632 | 377 |
| 121,757 | 30 | 9 | 727 | 239 | 44 | 10 | 806 | 119 | 1,607 | 377 |
| 121,758 | 30 | 9 | 725 | 240 | 45 | 10 | 810 | 119 | 1,610 | 378 |

|         |    |    |     |     |    |    |       |     |       |     |
|---------|----|----|-----|-----|----|----|-------|-----|-------|-----|
| 121,759 | 30 | 9  | 723 | 240 | 45 | 10 | 808   | 119 | 1,606 | 378 |
| 121,760 | 32 | 9  | 747 | 243 | 46 | 10 | 869   | 120 | 1,694 | 382 |
| 121,761 | 32 | 9  | 739 | 247 | 46 | 11 | 869   | 120 | 1,686 | 387 |
| 121,762 | 35 | 9  | 728 | 248 | 49 | 11 | 885   | 121 | 1,697 | 389 |
| 121,763 | 38 | 9  | 743 | 252 | 52 | 11 | 912   | 123 | 1,745 | 395 |
| 121,764 | 39 | 9  | 749 | 250 | 52 | 11 | 924   | 123 | 1,764 | 393 |
| 121,765 | 38 | 9  | 743 | 246 | 51 | 10 | 924   | 114 | 1,756 | 379 |
| 121,766 | 38 | 11 | 738 | 249 | 51 | 11 | 922   | 126 | 1,749 | 397 |
| 121,767 | 38 | 12 | 735 | 246 | 51 | 11 | 921   | 125 | 1,745 | 394 |
| 121,768 | 39 | 12 | 763 | 246 | 52 | 11 | 944   | 126 | 1,798 | 395 |
| 121,769 | 40 | 12 | 772 | 245 | 52 | 11 | 951   | 126 | 1,815 | 394 |
| 121,770 | 42 | 12 | 776 | 239 | 51 | 11 | 961   | 122 | 1,830 | 384 |
| 121,771 | 42 | 12 | 817 | 240 | 52 | 11 | 1,008 | 122 | 1,919 | 385 |
| 121,772 | 41 | 12 | 814 | 235 | 53 | 11 | 1,011 | 119 | 1,919 | 377 |
| 121,773 | 41 | 12 | 829 | 236 | 54 | 11 | 1,038 | 119 | 1,962 | 378 |
| 121,774 | 41 | 12 | 826 | 236 | 54 | 11 | 1,041 | 119 | 1,962 | 378 |
| 121,775 | 41 | 12 | 826 | 236 | 54 | 11 | 1,039 | 117 | 1,960 | 376 |
| 121,776 | 41 | 12 | 825 | 236 | 54 | 11 | 1,040 | 117 | 1,960 | 376 |
| 121,777 | 38 | 12 | 789 | 231 | 54 | 11 | 1,008 | 115 | 1,889 | 369 |
| 121,778 | 36 | 12 | 784 | 230 | 54 | 11 | 994   | 116 | 1,868 | 369 |
| 121,779 | 34 | 12 | 721 | 235 | 49 | 11 | 934   | 120 | 1,738 | 378 |
| 121,780 | 34 | 12 | 651 | 237 | 50 | 11 | 878   | 121 | 1,613 | 381 |
| 121,781 | 34 | 12 | 624 | 235 | 49 | 11 | 866   | 120 | 1,573 | 378 |
| 121,782 | 32 | 12 | 545 | 227 | 36 | 10 | 731   | 119 | 1,344 | 368 |
| 121,783 | 33 | 12 | 549 | 225 | 35 | 10 | 715   | 118 | 1,332 | 365 |
| 121,784 | 33 | 12 | 516 | 224 | 33 | 10 | 658   | 118 | 1,240 | 364 |
| 121,785 | 31 | 12 | 489 | 219 | 27 | 10 | 584   | 117 | 1,131 | 358 |
| 121,786 | 31 | 12 | 489 | 220 | 27 | 10 | 583   | 117 | 1,130 | 359 |
| 121,787 | 31 | 13 | 509 | 217 | 30 | 8  | 592   | 115 | 1,162 | 353 |
| 121,788 | 34 | 13 | 530 | 195 | 31 | 8  | 614   | 112 | 1,209 | 328 |
| 121,789 | 33 | 13 | 530 | 190 | 31 | 8  | 605   | 113 | 1,199 | 324 |
| 121,790 | 34 | 13 | 607 | 192 | 35 | 8  | 681   | 115 | 1,357 | 328 |
| 121,791 | 31 | 13 | 599 | 195 | 34 | 8  | 660   | 117 | 1,324 | 333 |
| 121,792 | 29 | 13 | 606 | 195 | 33 | 8  | 648   | 118 | 1,316 | 334 |
| 121,793 | 30 | 13 | 637 | 195 | 34 | 8  | 669   | 119 | 1,370 | 335 |
| 121,794 | 29 | 13 | 608 | 198 | 34 | 7  | 630   | 124 | 1,301 | 342 |
| 121,795 | 29 | 13 | 557 | 195 | 33 | 7  | 606   | 124 | 1,225 | 339 |
| 121,796 | 26 | 9  | 526 | 172 | 31 | 6  | 552   | 94  | 1,135 | 281 |
| 121,797 | 25 | 9  | 527 | 160 | 31 | 5  | 549   | 92  | 1,132 | 266 |
| 121,798 | 35 | 8  | 634 | 154 | 37 | 5  | 688   | 92  | 1,394 | 259 |
| 121,799 | 35 | 7  | 631 | 143 | 37 | 5  | 688   | 85  | 1,391 | 240 |

|         |    |   |     |     |    |   |     |    |       |     |
|---------|----|---|-----|-----|----|---|-----|----|-------|-----|
| 121,800 | 35 | 9 | 631 | 149 | 37 | 5 | 688 | 97 | 1,391 | 260 |
| 121,801 | 34 | 8 | 628 | 118 | 37 | 3 | 686 | 82 | 1,385 | 211 |
| 121,802 | 35 | 8 | 652 | 118 | 36 | 3 | 701 | 84 | 1,424 | 213 |
| 121,803 | 35 | 7 | 655 | 77  | 36 | 2 | 698 | 78 | 1,424 | 164 |
| 121,804 | 35 | 7 | 651 | 77  | 36 | 2 | 694 | 78 | 1,416 | 164 |
| 121,805 | 33 | 7 | 639 | 76  | 36 | 2 | 673 | 78 | 1,381 | 163 |
| 121,806 | 34 | 7 | 639 | 70  | 36 | 2 | 674 | 73 | 1,383 | 152 |
| 121,807 | 34 | 7 | 637 | 72  | 36 | 2 | 674 | 75 | 1,381 | 156 |
| 121,808 | 34 | 7 | 633 | 76  | 37 | 2 | 680 | 77 | 1,384 | 162 |
| 121,809 | 34 | 7 | 632 | 75  | 36 | 2 | 676 | 77 | 1,378 | 161 |
| 121,810 | 35 | 7 | 630 | 76  | 36 | 2 | 675 | 78 | 1,376 | 163 |
| 121,811 | 33 | 8 | 597 | 75  | 35 | 3 | 612 | 81 | 1,277 | 167 |
| 121,812 | 32 | 8 | 591 | 72  | 33 | 2 | 599 | 81 | 1,255 | 163 |
| 121,813 | 30 | 8 | 588 | 72  | 33 | 2 | 595 | 82 | 1,246 | 164 |
| 121,814 | 27 | 8 | 569 | 68  | 30 | 2 | 566 | 80 | 1,192 | 158 |
| 121,815 | 26 | 8 | 568 | 67  | 30 | 2 | 565 | 75 | 1,189 | 152 |
| 121,816 | 26 | 8 | 565 | 68  | 31 | 2 | 563 | 75 | 1,185 | 153 |
| 121,817 | 25 | 6 | 540 | 60  | 32 | 1 | 549 | 64 | 1,146 | 131 |
| 121,818 | 25 | 5 | 534 | 60  | 31 | 1 | 540 | 64 | 1,130 | 130 |
| 121,819 | 25 | 5 | 533 | 57  | 31 | 1 | 537 | 65 | 1,126 | 128 |
| 121,820 | 24 | 5 | 532 | 57  | 31 | 1 | 538 | 65 | 1,125 | 128 |
| 121,821 | 22 | 5 | 525 | 57  | 31 | 1 | 533 | 65 | 1,111 | 128 |
| 121,822 | 22 | 5 | 498 | 56  | 33 | 1 | 499 | 65 | 1,052 | 127 |
| 121,823 | 22 | 5 | 505 | 55  | 32 | 1 | 506 | 65 | 1,065 | 126 |
| 121,824 | 22 | 5 | 495 | 53  | 31 | 1 | 484 | 65 | 1,032 | 124 |
| 121,825 | 22 | 5 | 491 | 59  | 31 | 1 | 480 | 66 | 1,024 | 131 |
| 121,826 | 22 | 5 | 494 | 59  | 32 | 1 | 479 | 66 | 1,027 | 131 |
| 121,827 | 23 | 5 | 498 | 60  | 32 | 1 | 483 | 67 | 1,036 | 133 |
| 121,828 | 24 | 5 | 532 | 60  | 32 | 1 | 494 | 67 | 1,082 | 133 |
| 121,829 | 24 | 5 | 554 | 61  | 36 | 1 | 506 | 66 | 1,120 | 133 |
| 121,830 | 25 | 5 | 595 | 57  | 38 | 1 | 534 | 62 | 1,192 | 125 |
| 121,831 | 25 | 5 | 607 | 54  | 38 | 1 | 547 | 61 | 1,217 | 121 |
| 121,832 | 25 | 5 | 621 | 54  | 38 | 1 | 554 | 61 | 1,238 | 121 |
| 121,833 | 34 | 5 | 713 | 54  | 58 | 1 | 770 | 61 | 1,575 | 121 |
| 121,834 | 35 | 5 | 725 | 53  | 61 | 1 | 802 | 60 | 1,623 | 119 |
| 121,835 | 36 | 5 | 726 | 53  | 61 | 1 | 805 | 60 | 1,628 | 119 |
| 121,836 | 40 | 5 | 727 | 53  | 66 | 1 | 863 | 60 | 1,696 | 119 |
| 121,837 | 40 | 5 | 738 | 52  | 66 | 1 | 901 | 60 | 1,745 | 118 |
| 121,838 | 40 | 3 | 737 | 52  | 65 | 1 | 901 | 60 | 1,743 | 116 |
| 121,839 | 38 | 3 | 728 | 51  | 68 | 1 | 909 | 58 | 1,743 | 113 |
| 121,840 | 38 | 3 | 750 | 51  | 68 | 1 | 919 | 58 | 1,775 | 113 |

|         |    |   |       |    |     |   |       |    |       |     |
|---------|----|---|-------|----|-----|---|-------|----|-------|-----|
| 121,841 | 37 | 3 | 721   | 49 | 65  | 1 | 864   | 56 | 1,687 | 109 |
| 121,842 | 38 | 3 | 721   | 46 | 63  | 1 | 849   | 55 | 1,671 | 105 |
| 121,843 | 40 | 3 | 755   | 45 | 64  | 1 | 889   | 54 | 1,748 | 103 |
| 121,844 | 40 | 3 | 763   | 41 | 65  | 1 | 882   | 53 | 1,750 | 98  |
| 121,845 | 40 | 3 | 765   | 35 | 67  | 1 | 895   | 42 | 1,767 | 81  |
| 121,846 | 43 | 3 | 766   | 37 | 69  | 1 | 870   | 43 | 1,748 | 84  |
| 121,847 | 37 | 3 | 731   | 37 | 68  | 1 | 801   | 43 | 1,637 | 84  |
| 121,848 | 35 | 3 | 709   | 37 | 67  | 1 | 785   | 42 | 1,596 | 83  |
| 121,849 | 35 | 3 | 691   | 37 | 65  | 1 | 768   | 41 | 1,559 | 82  |
| 121,850 | 35 | 3 | 685   | 37 | 65  | 1 | 766   | 39 | 1,551 | 80  |
| 121,851 | 34 | 1 | 677   | 30 | 65  | 1 | 756   | 26 | 1,532 | 58  |
| 121,852 | 34 | 1 | 662   | 28 | 65  | 1 | 752   | 25 | 1,513 | 55  |
| 121,853 | 34 | 1 | 660   | 28 | 65  | 1 | 751   | 24 | 1,510 | 54  |
| 121,854 | 34 | 1 | 657   | 28 | 65  | 1 | 750   | 24 | 1,506 | 54  |
| 121,855 | 34 | 1 | 668   | 29 | 65  | 1 | 755   | 25 | 1,522 | 56  |
| 121,856 | 34 | 1 | 669   | 29 | 65  | 1 | 755   | 26 | 1,523 | 57  |
| 121,857 | 33 | 1 | 669   | 27 | 65  | 1 | 759   | 26 | 1,526 | 55  |
| 121,858 | 33 | 1 | 670   | 21 | 64  | 1 | 753   | 22 | 1,520 | 45  |
| 121,859 | 33 | 1 | 670   | 21 | 64  | 1 | 753   | 22 | 1,520 | 45  |
| 121,860 | 34 | 1 | 673   | 25 | 64  | 1 | 753   | 26 | 1,524 | 53  |
| 121,861 | 34 | 1 | 680   | 34 | 64  | 2 | 758   | 28 | 1,536 | 65  |
| 121,862 | 36 | 0 | 764   | 37 | 68  | 2 | 848   | 27 | 1,716 | 66  |
| 121,863 | 37 | 0 | 849   | 36 | 72  | 2 | 874   | 28 | 1,832 | 66  |
| 121,864 | 42 | 0 | 987   | 35 | 91  | 2 | 985   | 26 | 2,105 | 63  |
| 121,865 | 44 | 0 | 1,091 | 35 | 94  | 2 | 1,000 | 26 | 2,229 | 63  |
| 121,866 | 44 | 0 | 1,121 | 35 | 95  | 2 | 1,004 | 26 | 2,264 | 63  |
| 121,867 | 44 | 0 | 1,121 | 35 | 94  | 2 | 1,004 | 28 | 2,263 | 65  |
| 121,868 | 44 | 0 | 1,120 | 34 | 93  | 2 | 1,003 | 26 | 2,260 | 62  |
| 121,869 | 46 | 0 | 1,155 | 38 | 94  | 2 | 1,011 | 30 | 2,306 | 70  |
| 121,870 | 46 | 0 | 1,155 | 38 | 94  | 2 | 1,011 | 28 | 2,306 | 68  |
| 121,871 | 46 | 0 | 1,152 | 39 | 94  | 2 | 1,007 | 28 | 2,299 | 69  |
| 121,872 | 48 | 0 | 1,239 | 44 | 100 | 2 | 1,061 | 30 | 2,448 | 76  |
| 121,873 | 57 | 0 | 1,287 | 46 | 99  | 2 | 1,089 | 30 | 2,532 | 78  |
| 121,874 | 73 | 1 | 1,435 | 46 | 110 | 4 | 1,181 | 31 | 2,799 | 82  |
| 121,875 | 73 | 1 | 1,430 | 46 | 110 | 4 | 1,174 | 31 | 2,787 | 82  |
| 121,876 | 81 | 1 | 1,565 | 42 | 117 | 4 | 1,215 | 31 | 2,978 | 78  |
| 121,877 | 81 | 1 | 1,583 | 41 | 117 | 4 | 1,226 | 30 | 3,007 | 76  |
| 121,878 | 81 | 1 | 1,652 | 43 | 124 | 4 | 1,275 | 32 | 3,132 | 80  |
| 121,879 | 81 | 1 | 1,628 | 44 | 123 | 4 | 1,268 | 32 | 3,100 | 81  |
| 121,880 | 81 | 1 | 1,606 | 43 | 119 | 4 | 1,255 | 32 | 3,061 | 80  |
| 121,881 | 79 | 1 | 1,562 | 43 | 117 | 4 | 1,222 | 31 | 2,980 | 79  |

|         |    |   |       |    |     |   |       |    |       |     |
|---------|----|---|-------|----|-----|---|-------|----|-------|-----|
| 121,882 | 79 | 1 | 1,534 | 43 | 116 | 4 | 1,198 | 31 | 2,927 | 79  |
| 121,883 | 79 | 1 | 1,520 | 44 | 116 | 4 | 1,183 | 31 | 2,898 | 80  |
| 121,884 | 70 | 1 | 1,421 | 44 | 96  | 4 | 964   | 31 | 2,551 | 80  |
| 121,885 | 68 | 1 | 1,390 | 45 | 92  | 4 | 921   | 31 | 2,471 | 81  |
| 121,886 | 67 | 1 | 1,388 | 45 | 92  | 4 | 918   | 31 | 2,465 | 81  |
| 121,887 | 61 | 1 | 1,368 | 45 | 84  | 4 | 845   | 31 | 2,358 | 81  |
| 121,888 | 61 | 1 | 1,347 | 45 | 83  | 4 | 806   | 31 | 2,297 | 81  |
| 121,889 | 61 | 1 | 1,340 | 45 | 82  | 4 | 799   | 31 | 2,282 | 81  |
| 121,890 | 60 | 1 | 1,336 | 45 | 77  | 4 | 767   | 31 | 2,240 | 81  |
| 121,891 | 60 | 1 | 1,315 | 45 | 77  | 4 | 752   | 32 | 2,204 | 82  |
| 121,892 | 60 | 1 | 1,265 | 45 | 76  | 4 | 730   | 32 | 2,131 | 82  |
| 121,893 | 60 | 1 | 1,259 | 43 | 76  | 4 | 727   | 30 | 2,122 | 78  |
| 121,894 | 58 | 1 | 1,205 | 43 | 75  | 5 | 684   | 31 | 2,022 | 80  |
| 121,895 | 56 | 1 | 1,169 | 45 | 73  | 5 | 669   | 32 | 1,967 | 83  |
| 121,896 | 56 | 1 | 1,154 | 49 | 72  | 6 | 655   | 34 | 1,937 | 90  |
| 121,897 | 52 | 1 | 1,120 | 56 | 68  | 6 | 641   | 35 | 1,881 | 98  |
| 121,898 | 65 | 1 | 1,207 | 58 | 74  | 6 | 771   | 37 | 2,117 | 102 |
| 121,899 | 65 | 1 | 1,207 | 58 | 74  | 6 | 769   | 37 | 2,115 | 102 |
| 121,900 | 66 | 1 | 1,218 | 71 | 74  | 6 | 782   | 41 | 2,140 | 119 |
| 121,901 | 66 | 1 | 1,218 | 71 | 74  | 6 | 782   | 41 | 2,140 | 119 |
| 121,902 | 66 | 1 | 1,228 | 73 | 77  | 6 | 788   | 41 | 2,159 | 121 |
| 121,903 | 66 | 1 | 1,227 | 74 | 79  | 6 | 789   | 41 | 2,161 | 122 |
| 121,904 | 67 | 1 | 1,300 | 74 | 82  | 6 | 822   | 40 | 2,271 | 121 |
| 121,905 | 67 | 1 | 1,306 | 74 | 82  | 6 | 825   | 40 | 2,280 | 121 |
| 121,906 | 67 | 2 | 1,305 | 73 | 83  | 6 | 829   | 38 | 2,284 | 119 |
| 121,907 | 67 | 2 | 1,303 | 74 | 83  | 6 | 828   | 38 | 2,281 | 120 |
| 121,908 | 70 | 3 | 1,326 | 76 | 84  | 6 | 841   | 38 | 2,321 | 123 |
| 121,909 | 70 | 3 | 1,346 | 76 | 84  | 6 | 843   | 38 | 2,343 | 123 |
| 121,910 | 69 | 3 | 1,345 | 76 | 84  | 6 | 843   | 38 | 2,341 | 123 |
| 121,911 | 91 | 3 | 1,772 | 73 | 93  | 6 | 1,091 | 37 | 3,047 | 119 |
| 121,912 | 90 | 4 | 1,787 | 64 | 94  | 5 | 1,104 | 34 | 3,075 | 107 |
| 121,913 | 92 | 4 | 1,751 | 59 | 91  | 4 | 1,082 | 31 | 3,016 | 98  |
| 121,914 | 92 | 4 | 1,685 | 59 | 87  | 4 | 1,058 | 30 | 2,922 | 97  |
| 121,915 | 87 | 5 | 1,554 | 58 | 67  | 4 | 944   | 30 | 2,652 | 97  |
| 121,916 | 87 | 5 | 1,450 | 58 | 65  | 4 | 943   | 31 | 2,545 | 98  |
| 121,917 | 87 | 5 | 1,423 | 58 | 65  | 4 | 930   | 31 | 2,505 | 98  |
| 121,918 | 87 | 5 | 1,407 | 59 | 64  | 4 | 926   | 29 | 2,484 | 97  |
| 121,919 | 86 | 5 | 1,403 | 58 | 64  | 4 | 925   | 28 | 2,478 | 95  |
| 121,920 | 88 | 5 | 1,447 | 54 | 67  | 4 | 976   | 24 | 2,578 | 87  |
| 121,921 | 91 | 5 | 1,458 | 55 | 67  | 4 | 982   | 24 | 2,598 | 88  |
| 121,922 | 91 | 5 | 1,506 | 60 | 67  | 5 | 1,011 | 27 | 2,675 | 97  |

|         |    |   |       |    |    |   |       |    |       |     |
|---------|----|---|-------|----|----|---|-------|----|-------|-----|
| 121,923 | 96 | 5 | 1,581 | 56 | 73 | 5 | 1,062 | 26 | 2,812 | 92  |
| 121,924 | 88 | 5 | 1,652 | 56 | 80 | 5 | 1,129 | 27 | 2,949 | 93  |
| 121,925 | 72 | 4 | 1,508 | 57 | 70 | 4 | 1,038 | 27 | 2,688 | 92  |
| 121,926 | 65 | 4 | 1,408 | 57 | 65 | 4 | 1,031 | 27 | 2,569 | 92  |
| 121,927 | 65 | 4 | 1,383 | 54 | 64 | 4 | 1,029 | 27 | 2,541 | 89  |
| 121,928 | 65 | 4 | 1,365 | 60 | 64 | 4 | 1,016 | 28 | 2,510 | 96  |
| 121,929 | 67 | 4 | 1,402 | 60 | 59 | 4 | 1,002 | 28 | 2,530 | 96  |
| 121,930 | 66 | 4 | 1,418 | 60 | 61 | 4 | 1,012 | 28 | 2,557 | 96  |
| 121,931 | 66 | 4 | 1,416 | 60 | 61 | 4 | 1,008 | 28 | 2,551 | 96  |
| 121,932 | 66 | 4 | 1,488 | 60 | 64 | 4 | 1,079 | 28 | 2,697 | 96  |
| 121,933 | 66 | 4 | 1,485 | 60 | 64 | 4 | 1,078 | 28 | 2,693 | 96  |
| 121,934 | 71 | 4 | 1,530 | 59 | 66 | 4 | 1,095 | 28 | 2,762 | 95  |
| 121,935 | 74 | 4 | 1,625 | 59 | 68 | 4 | 1,125 | 28 | 2,892 | 95  |
| 121,936 | 82 | 4 | 1,736 | 58 | 73 | 4 | 1,166 | 28 | 3,057 | 94  |
| 121,937 | 84 | 4 | 1,812 | 58 | 75 | 4 | 1,225 | 28 | 3,196 | 94  |
| 121,938 | 84 | 4 | 1,812 | 62 | 75 | 4 | 1,225 | 33 | 3,196 | 103 |
| 121,939 | 84 | 4 | 1,810 | 62 | 75 | 4 | 1,224 | 33 | 3,193 | 103 |
| 121,940 | 85 | 4 | 1,835 | 62 | 75 | 4 | 1,238 | 33 | 3,233 | 103 |
| 121,941 | 85 | 4 | 1,824 | 62 | 75 | 4 | 1,236 | 33 | 3,220 | 103 |
| 121,942 | 85 | 4 | 1,821 | 62 | 75 | 4 | 1,237 | 32 | 3,218 | 102 |
| 121,943 | 86 | 4 | 1,830 | 63 | 75 | 4 | 1,240 | 32 | 3,231 | 103 |
| 121,944 | 85 | 4 | 1,827 | 63 | 75 | 4 | 1,240 | 32 | 3,227 | 103 |
| 121,945 | 86 | 4 | 1,838 | 63 | 76 | 3 | 1,269 | 31 | 3,269 | 101 |
| 121,946 | 86 | 4 | 1,852 | 61 | 77 | 3 | 1,277 | 30 | 3,292 | 98  |
| 121,947 | 90 | 4 | 1,873 | 46 | 76 | 2 | 1,298 | 24 | 3,337 | 76  |
| 121,948 | 92 | 4 | 1,892 | 46 | 76 | 2 | 1,319 | 24 | 3,379 | 76  |
| 121,949 | 79 | 4 | 1,819 | 46 | 70 | 2 | 1,186 | 24 | 3,154 | 76  |
| 121,950 | 78 | 4 | 1,809 | 48 | 70 | 2 | 1,184 | 30 | 3,141 | 84  |
| 121,951 | 78 | 4 | 1,805 | 37 | 70 | 2 | 1,174 | 28 | 3,127 | 71  |
| 121,952 | 79 | 4 | 1,844 | 42 | 69 | 2 | 1,212 | 29 | 3,204 | 77  |
| 121,953 | 81 | 4 | 1,848 | 41 | 67 | 2 | 1,219 | 30 | 3,215 | 77  |
| 121,954 | 80 | 4 | 1,795 | 43 | 64 | 2 | 1,215 | 31 | 3,154 | 80  |
| 121,955 | 80 | 4 | 1,775 | 42 | 64 | 3 | 1,193 | 31 | 3,112 | 80  |
| 121,956 | 81 | 4 | 1,778 | 42 | 64 | 3 | 1,202 | 31 | 3,125 | 80  |
| 121,957 | 81 | 3 | 1,772 | 42 | 63 | 3 | 1,195 | 34 | 3,111 | 82  |
| 121,958 | 81 | 3 | 1,784 | 43 | 64 | 3 | 1,205 | 34 | 3,134 | 83  |
| 121,959 | 79 | 2 | 1,785 | 42 | 63 | 3 | 1,200 | 37 | 3,127 | 84  |
| 121,960 | 79 | 2 | 1,763 | 42 | 63 | 3 | 1,198 | 37 | 3,103 | 84  |
| 121,961 | 61 | 2 | 1,403 | 41 | 58 | 3 | 1,009 | 34 | 2,531 | 80  |
| 121,962 | 62 | 1 | 1,381 | 40 | 60 | 3 | 1,021 | 35 | 2,524 | 79  |
| 121,963 | 64 | 1 | 1,440 | 40 | 62 | 3 | 1,037 | 35 | 2,603 | 79  |

|         |    |   |       |    |    |   |       |    |       |     |
|---------|----|---|-------|----|----|---|-------|----|-------|-----|
| 121,964 | 60 | 1 | 1,392 | 40 | 60 | 3 | 965   | 35 | 2,477 | 79  |
| 121,965 | 59 | 1 | 1,374 | 40 | 60 | 3 | 963   | 35 | 2,456 | 79  |
| 121,966 | 64 | 0 | 1,426 | 40 | 63 | 3 | 1,033 | 35 | 2,586 | 78  |
| 121,967 | 62 | 0 | 1,423 | 41 | 62 | 3 | 1,016 | 34 | 2,563 | 78  |
| 121,968 | 63 | 0 | 1,425 | 42 | 63 | 3 | 1,023 | 35 | 2,574 | 80  |
| 121,969 | 63 | 0 | 1,419 | 45 | 65 | 3 | 1,029 | 35 | 2,576 | 83  |
| 121,970 | 60 | 0 | 1,392 | 45 | 62 | 3 | 992   | 36 | 2,506 | 84  |
| 121,971 | 57 | 0 | 1,383 | 45 | 62 | 3 | 992   | 36 | 2,494 | 84  |
| 121,972 | 57 | 0 | 1,378 | 46 | 62 | 3 | 997   | 37 | 2,494 | 86  |
| 121,973 | 57 | 0 | 1,346 | 44 | 62 | 2 | 984   | 35 | 2,449 | 81  |
| 121,974 | 50 | 0 | 1,193 | 44 | 49 | 2 | 882   | 34 | 2,174 | 80  |
| 121,975 | 49 | 0 | 1,064 | 43 | 39 | 2 | 785   | 34 | 1,937 | 79  |
| 121,976 | 49 | 0 | 1,053 | 42 | 38 | 1 | 767   | 33 | 1,907 | 76  |
| 121,977 | 48 | 0 | 1,042 | 42 | 37 | 1 | 737   | 29 | 1,864 | 72  |
| 121,978 | 49 | 0 | 1,046 | 36 | 37 | 1 | 745   | 29 | 1,877 | 66  |
| 121,979 | 49 | 0 | 1,048 | 36 | 37 | 1 | 746   | 29 | 1,880 | 66  |
| 121,980 | 46 | 0 | 948   | 36 | 36 | 1 | 707   | 29 | 1,737 | 66  |
| 121,981 | 47 | 0 | 957   | 35 | 36 | 1 | 717   | 30 | 1,757 | 66  |
| 121,982 | 47 | 0 | 993   | 40 | 36 | 2 | 726   | 31 | 1,802 | 73  |
| 121,983 | 47 | 1 | 957   | 43 | 39 | 2 | 680   | 32 | 1,723 | 78  |
| 121,984 | 42 | 4 | 929   | 45 | 37 | 2 | 669   | 33 | 1,677 | 84  |
| 121,985 | 39 | 4 | 834   | 53 | 35 | 4 | 639   | 41 | 1,547 | 102 |
| 121,986 | 31 | 4 | 721   | 54 | 30 | 4 | 597   | 42 | 1,379 | 104 |
| 121,987 | 30 | 4 | 710   | 57 | 33 | 4 | 610   | 44 | 1,383 | 109 |
| 121,988 | 29 | 4 | 675   | 57 | 31 | 4 | 575   | 46 | 1,310 | 111 |
| 121,989 | 28 | 4 | 682   | 58 | 31 | 4 | 571   | 43 | 1,312 | 109 |
| 121,990 | 28 | 4 | 677   | 58 | 31 | 4 | 568   | 43 | 1,304 | 109 |
| 121,991 | 28 | 4 | 682   | 59 | 31 | 4 | 570   | 43 | 1,311 | 110 |
| 121,992 | 29 | 4 | 688   | 59 | 31 | 4 | 572   | 43 | 1,320 | 110 |
| 121,993 | 29 | 4 | 695   | 62 | 31 | 4 | 576   | 43 | 1,331 | 113 |
| 121,994 | 28 | 4 | 687   | 61 | 31 | 4 | 572   | 44 | 1,318 | 113 |
| 121,995 | 31 | 4 | 715   | 66 | 32 | 4 | 602   | 49 | 1,380 | 123 |
| 121,996 | 30 | 4 | 706   | 68 | 32 | 4 | 591   | 51 | 1,359 | 127 |
| 121,997 | 31 | 4 | 691   | 71 | 31 | 4 | 581   | 58 | 1,334 | 137 |
| 121,998 | 28 | 4 | 678   | 73 | 32 | 4 | 560   | 59 | 1,298 | 140 |
| 121,999 | 34 | 4 | 700   | 74 | 35 | 4 | 577   | 59 | 1,346 | 141 |
| 122,000 | 35 | 4 | 754   | 75 | 36 | 4 | 613   | 60 | 1,438 | 143 |
| 122,001 | 35 | 5 | 752   | 82 | 40 | 5 | 617   | 57 | 1,444 | 149 |
| 122,002 | 35 | 5 | 744   | 84 | 40 | 6 | 607   | 56 | 1,426 | 151 |
| 122,003 | 35 | 5 | 753   | 85 | 40 | 6 | 608   | 58 | 1,436 | 154 |
| 122,004 | 34 | 6 | 789   | 85 | 42 | 6 | 618   | 59 | 1,483 | 156 |



|         |    |   |       |    |    |   |       |    |       |     |
|---------|----|---|-------|----|----|---|-------|----|-------|-----|
| 122,005 | 35 | 6 | 844   | 82 | 44 | 6 | 633   | 58 | 1,556 | 152 |
| 122,006 | 39 | 6 | 989   | 82 | 46 | 5 | 681   | 58 | 1,755 | 151 |
| 122,007 | 42 | 6 | 1,119 | 82 | 49 | 5 | 710   | 55 | 1,920 | 148 |
| 122,008 | 43 | 6 | 1,144 | 82 | 50 | 5 | 726   | 55 | 1,963 | 148 |
| 122,009 | 44 | 8 | 1,177 | 82 | 53 | 5 | 734   | 56 | 2,008 | 151 |
| 122,010 | 44 | 8 | 1,169 | 82 | 53 | 5 | 729   | 53 | 1,995 | 148 |
| 122,011 | 48 | 8 | 1,265 | 83 | 57 | 5 | 758   | 53 | 2,128 | 149 |
| 122,012 | 53 | 8 | 1,440 | 83 | 72 | 5 | 835   | 53 | 2,400 | 149 |
| 122,013 | 50 | 8 | 1,524 | 83 | 67 | 5 | 793   | 52 | 2,434 | 148 |
| 122,014 | 55 | 8 | 1,597 | 83 | 69 | 5 | 834   | 52 | 2,555 | 148 |
| 122,015 | 54 | 8 | 1,553 | 83 | 67 | 5 | 784   | 51 | 2,458 | 147 |
| 122,016 | 55 | 8 | 1,641 | 83 | 67 | 5 | 803   | 51 | 2,566 | 147 |
| 122,017 | 59 | 8 | 1,747 | 83 | 69 | 5 | 864   | 51 | 2,739 | 147 |
| 122,018 | 59 | 8 | 1,762 | 80 | 67 | 5 | 853   | 52 | 2,741 | 145 |
| 122,019 | 60 | 8 | 1,811 | 80 | 72 | 5 | 883   | 52 | 2,826 | 145 |
| 122,020 | 60 | 8 | 1,806 | 77 | 70 | 5 | 868   | 53 | 2,804 | 143 |
| 122,021 | 60 | 8 | 1,791 | 78 | 70 | 5 | 863   | 52 | 2,784 | 143 |
| 122,022 | 60 | 8 | 1,789 | 78 | 70 | 6 | 857   | 52 | 2,776 | 144 |
| 122,023 | 61 | 8 | 1,789 | 76 | 70 | 6 | 853   | 51 | 2,773 | 141 |
| 122,024 | 61 | 8 | 1,780 | 72 | 70 | 6 | 837   | 50 | 2,748 | 136 |
| 122,025 | 63 | 8 | 1,777 | 71 | 70 | 6 | 832   | 50 | 2,742 | 135 |
| 122,026 | 63 | 8 | 1,772 | 70 | 70 | 6 | 819   | 49 | 2,724 | 133 |
| 122,027 | 73 | 8 | 1,885 | 70 | 81 | 6 | 918   | 49 | 2,957 | 133 |
| 122,028 | 76 | 8 | 1,976 | 70 | 91 | 6 | 993   | 51 | 3,136 | 135 |
| 122,029 | 75 | 8 | 1,982 | 71 | 92 | 6 | 1,013 | 51 | 3,162 | 136 |
| 122,030 | 76 | 8 | 1,998 | 71 | 92 | 6 | 1,025 | 52 | 3,191 | 137 |
| 122,031 | 76 | 8 | 1,990 | 71 | 92 | 6 | 1,025 | 52 | 3,183 | 137 |
| 122,032 | 75 | 8 | 1,950 | 71 | 91 | 6 | 1,003 | 51 | 3,119 | 136 |
| 122,033 | 75 | 8 | 1,915 | 66 | 91 | 5 | 993   | 50 | 3,074 | 129 |
| 122,034 | 75 | 7 | 1,879 | 63 | 85 | 5 | 969   | 49 | 3,008 | 124 |
| 122,035 | 75 | 4 | 1,864 | 61 | 85 | 5 | 965   | 48 | 2,989 | 118 |
| 122,036 | 75 | 4 | 1,846 | 53 | 85 | 3 | 946   | 40 | 2,952 | 100 |
| 122,037 | 75 | 5 | 1,842 | 52 | 82 | 3 | 934   | 39 | 2,933 | 99  |
| 122,038 | 75 | 5 | 1,837 | 49 | 82 | 3 | 928   | 37 | 2,922 | 94  |
| 122,039 | 75 | 5 | 1,817 | 49 | 82 | 3 | 924   | 35 | 2,898 | 92  |
| 122,040 | 75 | 5 | 1,810 | 44 | 82 | 3 | 923   | 33 | 2,890 | 85  |
| 122,041 | 75 | 5 | 1,805 | 44 | 82 | 3 | 922   | 33 | 2,884 | 85  |
| 122,042 | 74 | 5 | 1,799 | 43 | 82 | 3 | 920   | 33 | 2,875 | 84  |
| 122,043 | 74 | 5 | 1,799 | 35 | 82 | 3 | 921   | 27 | 2,876 | 70  |
| 122,044 | 74 | 5 | 1,792 | 35 | 82 | 3 | 920   | 27 | 2,868 | 70  |
| 122,045 | 71 | 5 | 1,762 | 35 | 81 | 3 | 887   | 27 | 2,801 | 70  |

|         |     |   |       |    |    |   |       |    |       |    |
|---------|-----|---|-------|----|----|---|-------|----|-------|----|
| 122,046 | 71  | 5 | 1,760 | 36 | 81 | 3 | 887   | 27 | 2,799 | 71 |
| 122,047 | 71  | 5 | 1,756 | 34 | 80 | 3 | 871   | 25 | 2,778 | 67 |
| 122,048 | 70  | 5 | 1,749 | 31 | 80 | 3 | 871   | 18 | 2,770 | 57 |
| 122,049 | 69  | 5 | 1,737 | 29 | 79 | 3 | 870   | 17 | 2,755 | 54 |
| 122,050 | 61  | 5 | 1,695 | 28 | 76 | 3 | 831   | 17 | 2,663 | 53 |
| 122,051 | 60  | 5 | 1,624 | 27 | 75 | 3 | 793   | 16 | 2,552 | 51 |
| 122,052 | 59  | 4 | 1,585 | 18 | 69 | 2 | 756   | 13 | 2,469 | 37 |
| 122,053 | 59  | 4 | 1,583 | 14 | 69 | 1 | 757   | 12 | 2,468 | 31 |
| 122,054 | 59  | 4 | 1,575 | 8  | 69 | 1 | 754   | 9  | 2,457 | 22 |
| 122,055 | 58  | 3 | 1,538 | 7  | 67 | 1 | 738   | 7  | 2,401 | 18 |
| 122,056 | 58  | 3 | 1,492 | 7  | 65 | 1 | 728   | 7  | 2,343 | 18 |
| 122,057 | 53  | 4 | 1,336 | 7  | 63 | 1 | 668   | 7  | 2,120 | 19 |
| 122,058 | 50  | 4 | 1,204 | 7  | 60 | 1 | 637   | 7  | 1,951 | 19 |
| 122,059 | 51  | 4 | 1,261 | 8  | 59 | 1 | 637   | 7  | 2,008 | 20 |
| 122,060 | 49  | 2 | 1,203 | 6  | 55 | 1 | 612   | 6  | 1,919 | 15 |
| 122,061 | 95  | 2 | 1,579 | 5  | 72 | 1 | 1,030 | 7  | 2,776 | 15 |
| 122,062 | 91  | 2 | 1,499 | 4  | 69 | 1 | 1,006 | 7  | 2,665 | 14 |
| 122,063 | 116 | 2 | 1,481 | 4  | 74 | 1 | 1,174 | 7  | 2,845 | 14 |
| 122,064 | 118 | 2 | 1,477 | 4  | 81 | 1 | 1,244 | 7  | 2,920 | 14 |
| 122,065 | 111 | 3 | 1,331 | 4  | 78 | 1 | 1,175 | 8  | 2,695 | 16 |
| 122,066 | 109 | 3 | 1,295 | 4  | 79 | 1 | 1,173 | 8  | 2,656 | 16 |
| 122,067 | 113 | 3 | 1,341 | 5  | 83 | 1 | 1,265 | 8  | 2,802 | 17 |
| 122,068 | 107 | 3 | 1,283 | 5  | 81 | 1 | 1,213 | 8  | 2,684 | 17 |
| 122,069 | 110 | 3 | 1,630 | 5  | 86 | 1 | 1,323 | 6  | 3,149 | 15 |
| 122,070 | 109 | 3 | 1,667 | 6  | 81 | 1 | 1,303 | 5  | 3,160 | 15 |
| 122,071 | 109 | 3 | 1,691 | 6  | 83 | 1 | 1,337 | 5  | 3,220 | 15 |
| 122,072 | 109 | 3 | 1,691 | 6  | 83 | 1 | 1,337 | 5  | 3,220 | 15 |
| 122,073 | 108 | 3 | 1,689 | 6  | 83 | 0 | 1,338 | 5  | 3,218 | 14 |
| 122,074 | 108 | 3 | 1,700 | 6  | 83 | 0 | 1,350 | 5  | 3,241 | 14 |
| 122,075 | 107 | 3 | 1,696 | 7  | 83 | 0 | 1,350 | 5  | 3,236 | 15 |
| 122,076 | 106 | 3 | 1,695 | 7  | 83 | 0 | 1,349 | 5  | 3,233 | 15 |
| 122,077 | 106 | 3 | 1,681 | 7  | 83 | 0 | 1,342 | 5  | 3,212 | 15 |
| 122,078 | 97  | 3 | 1,584 | 7  | 72 | 1 | 1,253 | 5  | 3,006 | 16 |
| 122,079 | 94  | 3 | 1,497 | 6  | 62 | 1 | 1,177 | 2  | 2,830 | 12 |
| 122,080 | 97  | 3 | 1,503 | 6  | 61 | 1 | 1,156 | 2  | 2,817 | 12 |
| 122,081 | 96  | 3 | 1,487 | 6  | 61 | 1 | 1,145 | 2  | 2,789 | 12 |
| 122,082 | 97  | 3 | 1,525 | 6  | 62 | 1 | 1,171 | 2  | 2,855 | 12 |
| 122,083 | 97  | 3 | 1,527 | 6  | 62 | 1 | 1,176 | 2  | 2,862 | 12 |
| 122,084 | 97  | 4 | 1,528 | 6  | 62 | 1 | 1,176 | 2  | 2,863 | 13 |
| 122,085 | 97  | 4 | 1,528 | 6  | 62 | 1 | 1,176 | 2  | 2,863 | 13 |
| 122,086 | 97  | 4 | 1,529 | 6  | 62 | 1 | 1,177 | 2  | 2,865 | 13 |

|         |     |   |       |    |    |   |       |    |       |     |
|---------|-----|---|-------|----|----|---|-------|----|-------|-----|
| 122,087 | 97  | 4 | 1,529 | 6  | 62 | 1 | 1,176 | 2  | 2,864 | 13  |
| 122,088 | 97  | 3 | 1,528 | 6  | 62 | 1 | 1,175 | 5  | 2,862 | 15  |
| 122,089 | 97  | 3 | 1,532 | 15 | 62 | 1 | 1,176 | 11 | 2,867 | 30  |
| 122,090 | 97  | 3 | 1,534 | 22 | 62 | 1 | 1,176 | 17 | 2,869 | 43  |
| 122,091 | 97  | 3 | 1,534 | 27 | 62 | 1 | 1,177 | 18 | 2,870 | 49  |
| 122,092 | 97  | 3 | 1,534 | 27 | 62 | 1 | 1,177 | 18 | 2,870 | 49  |
| 122,093 | 97  | 3 | 1,534 | 27 | 62 | 1 | 1,177 | 18 | 2,870 | 49  |
| 122,094 | 97  | 3 | 1,533 | 28 | 62 | 1 | 1,176 | 20 | 2,868 | 52  |
| 122,095 | 97  | 3 | 1,533 | 28 | 62 | 1 | 1,174 | 20 | 2,866 | 52  |
| 122,096 | 97  | 3 | 1,536 | 29 | 62 | 1 | 1,177 | 20 | 2,872 | 53  |
| 122,097 | 97  | 3 | 1,537 | 28 | 62 | 1 | 1,182 | 20 | 2,878 | 52  |
| 122,098 | 97  | 3 | 1,539 | 28 | 62 | 1 | 1,183 | 20 | 2,881 | 52  |
| 122,099 | 97  | 3 | 1,544 | 31 | 62 | 1 | 1,188 | 20 | 2,891 | 55  |
| 122,100 | 97  | 3 | 1,545 | 31 | 62 | 1 | 1,188 | 20 | 2,892 | 55  |
| 122,101 | 97  | 3 | 1,560 | 32 | 62 | 1 | 1,191 | 20 | 2,910 | 56  |
| 122,102 | 97  | 3 | 1,566 | 34 | 62 | 1 | 1,194 | 21 | 2,919 | 59  |
| 122,103 | 97  | 3 | 1,569 | 35 | 62 | 1 | 1,197 | 23 | 2,925 | 62  |
| 122,104 | 97  | 3 | 1,569 | 35 | 62 | 1 | 1,195 | 23 | 2,923 | 62  |
| 122,105 | 98  | 3 | 1,571 | 35 | 62 | 1 | 1,195 | 23 | 2,926 | 62  |
| 122,106 | 100 | 3 | 1,578 | 43 | 62 | 1 | 1,198 | 23 | 2,938 | 70  |
| 122,107 | 99  | 3 | 1,569 | 44 | 62 | 1 | 1,187 | 26 | 2,917 | 74  |
| 122,108 | 99  | 2 | 1,531 | 44 | 62 | 1 | 1,184 | 26 | 2,876 | 73  |
| 122,109 | 99  | 2 | 1,536 | 43 | 64 | 1 | 1,186 | 27 | 2,885 | 73  |
| 122,110 | 98  | 2 | 1,520 | 43 | 65 | 1 | 1,186 | 27 | 2,869 | 73  |
| 122,111 | 57  | 3 | 1,294 | 43 | 55 | 1 | 922   | 27 | 2,328 | 74  |
| 122,112 | 54  | 3 | 1,184 | 43 | 58 | 1 | 872   | 26 | 2,168 | 73  |
| 122,113 | 54  | 3 | 1,176 | 44 | 58 | 1 | 869   | 26 | 2,157 | 74  |
| 122,114 | 25  | 3 | 1,003 | 48 | 38 | 1 | 604   | 27 | 1,670 | 79  |
| 122,115 | 21  | 3 | 891   | 48 | 30 | 1 | 524   | 27 | 1,466 | 79  |
| 122,116 | 21  | 2 | 923   | 51 | 30 | 2 | 558   | 28 | 1,532 | 83  |
| 122,117 | 33  | 2 | 1,041 | 52 | 40 | 2 | 717   | 28 | 1,831 | 84  |
| 122,118 | 28  | 3 | 948   | 52 | 37 | 2 | 610   | 31 | 1,623 | 88  |
| 122,119 | 26  | 3 | 617   | 53 | 36 | 2 | 557   | 31 | 1,236 | 89  |
| 122,120 | 29  | 3 | 567   | 54 | 40 | 2 | 548   | 32 | 1,184 | 91  |
| 122,121 | 30  | 3 | 507   | 53 | 42 | 2 | 573   | 32 | 1,152 | 90  |
| 122,122 | 35  | 3 | 541   | 52 | 43 | 2 | 589   | 32 | 1,208 | 89  |
| 122,123 | 35  | 3 | 545   | 52 | 44 | 2 | 596   | 33 | 1,220 | 90  |
| 122,124 | 35  | 3 | 542   | 51 | 45 | 2 | 593   | 33 | 1,215 | 89  |
| 122,125 | 35  | 3 | 532   | 51 | 45 | 2 | 582   | 33 | 1,194 | 89  |
| 122,126 | 35  | 3 | 530   | 51 | 45 | 2 | 581   | 33 | 1,191 | 89  |
| 122,127 | 35  | 4 | 529   | 57 | 45 | 2 | 581   | 39 | 1,190 | 102 |

|         |    |   |     |    |    |   |     |    |       |     |
|---------|----|---|-----|----|----|---|-----|----|-------|-----|
| 122,128 | 35 | 4 | 529 | 58 | 46 | 2 | 580 | 39 | 1,190 | 103 |
| 122,129 | 36 | 4 | 529 | 58 | 47 | 1 | 583 | 42 | 1,195 | 105 |
| 122,130 | 37 | 5 | 529 | 62 | 47 | 1 | 585 | 43 | 1,198 | 111 |
| 122,131 | 34 | 5 | 517 | 62 | 47 | 1 | 583 | 43 | 1,181 | 111 |
| 122,132 | 36 | 5 | 506 | 63 | 49 | 1 | 578 | 44 | 1,169 | 113 |
| 122,133 | 36 | 5 | 491 | 69 | 49 | 2 | 566 | 47 | 1,142 | 123 |
| 122,134 | 36 | 5 | 488 | 70 | 49 | 2 | 561 | 47 | 1,134 | 124 |
| 122,135 | 36 | 5 | 487 | 78 | 49 | 4 | 561 | 51 | 1,133 | 138 |
| 122,136 | 36 | 5 | 486 | 81 | 49 | 4 | 560 | 52 | 1,131 | 142 |
| 122,137 | 36 | 5 | 533 | 82 | 50 | 4 | 580 | 52 | 1,199 | 143 |
| 122,138 | 37 | 5 | 540 | 82 | 50 | 4 | 588 | 52 | 1,215 | 143 |
| 122,139 | 37 | 5 | 552 | 82 | 51 | 4 | 604 | 49 | 1,244 | 140 |
| 122,140 | 37 | 5 | 551 | 73 | 51 | 4 | 604 | 43 | 1,243 | 125 |
| 122,141 | 37 | 5 | 549 | 72 | 51 | 4 | 604 | 41 | 1,241 | 122 |
| 122,142 | 37 | 5 | 548 | 67 | 51 | 4 | 604 | 40 | 1,240 | 116 |
| 122,143 | 38 | 5 | 553 | 68 | 51 | 4 | 609 | 41 | 1,251 | 118 |
| 122,144 | 40 | 5 | 583 | 69 | 53 | 4 | 642 | 41 | 1,318 | 119 |
| 122,145 | 40 | 5 | 585 | 69 | 53 | 4 | 645 | 40 | 1,323 | 118 |
| 122,146 | 42 | 5 | 596 | 70 | 53 | 4 | 650 | 40 | 1,341 | 119 |
| 122,147 | 42 | 5 | 606 | 69 | 53 | 4 | 646 | 40 | 1,347 | 118 |
| 122,148 | 53 | 5 | 660 | 70 | 57 | 4 | 713 | 41 | 1,483 | 120 |
| 122,149 | 57 | 6 | 681 | 74 | 60 | 4 | 742 | 42 | 1,540 | 126 |
| 122,150 | 59 | 6 | 685 | 79 | 60 | 4 | 751 | 44 | 1,555 | 133 |
| 122,151 | 60 | 6 | 700 | 83 | 60 | 4 | 757 | 45 | 1,577 | 138 |
| 122,152 | 60 | 6 | 686 | 83 | 60 | 4 | 757 | 45 | 1,563 | 138 |
| 122,153 | 61 | 6 | 747 | 81 | 66 | 4 | 806 | 44 | 1,680 | 135 |
| 122,154 | 61 | 6 | 748 | 80 | 66 | 4 | 810 | 42 | 1,685 | 132 |
| 122,155 | 60 | 6 | 746 | 80 | 66 | 4 | 810 | 42 | 1,682 | 132 |
| 122,156 | 58 | 6 | 739 | 80 | 66 | 4 | 807 | 42 | 1,670 | 132 |
| 122,157 | 58 | 6 | 739 | 72 | 66 | 4 | 815 | 42 | 1,678 | 124 |
| 122,158 | 59 | 6 | 745 | 71 | 67 | 4 | 819 | 39 | 1,690 | 120 |
| 122,159 | 58 | 6 | 744 | 73 | 67 | 4 | 822 | 39 | 1,691 | 122 |
| 122,160 | 58 | 6 | 734 | 73 | 65 | 4 | 819 | 38 | 1,676 | 121 |
| 122,161 | 58 | 7 | 712 | 73 | 64 | 5 | 809 | 38 | 1,643 | 123 |
| 122,162 | 58 | 6 | 685 | 73 | 62 | 5 | 756 | 38 | 1,561 | 122 |
| 122,163 | 56 | 6 | 670 | 72 | 53 | 5 | 704 | 38 | 1,483 | 121 |
| 122,164 | 56 | 6 | 694 | 72 | 53 | 5 | 704 | 38 | 1,507 | 121 |
| 122,165 | 56 | 6 | 691 | 68 | 51 | 5 | 692 | 37 | 1,490 | 116 |
| 122,166 | 56 | 6 | 680 | 64 | 51 | 4 | 676 | 35 | 1,463 | 109 |
| 122,167 | 56 | 6 | 675 | 64 | 51 | 4 | 671 | 35 | 1,453 | 109 |
| 122,168 | 43 | 6 | 544 | 64 | 38 | 4 | 497 | 36 | 1,122 | 110 |

|         |    |   |     |    |    |   |     |    |       |     |
|---------|----|---|-----|----|----|---|-----|----|-------|-----|
| 122,169 | 43 | 5 | 544 | 65 | 37 | 4 | 495 | 33 | 1,119 | 107 |
| 122,170 | 50 | 5 | 538 | 64 | 37 | 4 | 475 | 33 | 1,100 | 106 |
| 122,171 | 47 | 5 | 525 | 63 | 31 | 4 | 439 | 32 | 1,042 | 104 |
| 122,172 | 48 | 5 | 552 | 63 | 31 | 4 | 426 | 32 | 1,057 | 104 |
| 122,173 | 45 | 5 | 498 | 63 | 28 | 4 | 378 | 31 | 949   | 103 |
| 122,174 | 45 | 5 | 497 | 63 | 27 | 4 | 369 | 31 | 938   | 103 |
| 122,175 | 49 | 5 | 504 | 63 | 26 | 4 | 374 | 31 | 953   | 103 |
| 122,176 | 49 | 5 | 503 | 63 | 26 | 4 | 373 | 31 | 951   | 103 |
| 122,177 | 49 | 4 | 547 | 56 | 26 | 4 | 379 | 25 | 1,001 | 89  |
| 122,178 | 49 | 4 | 549 | 56 | 26 | 4 | 380 | 25 | 1,004 | 89  |
| 122,179 | 47 | 4 | 549 | 58 | 25 | 4 | 377 | 25 | 998   | 91  |
| 122,180 | 47 | 4 | 545 | 59 | 25 | 4 | 377 | 22 | 994   | 89  |
| 122,181 | 46 | 3 | 545 | 55 | 25 | 4 | 379 | 21 | 995   | 83  |
| 122,182 | 46 | 3 | 542 | 55 | 26 | 4 | 374 | 21 | 988   | 83  |
| 122,183 | 43 | 3 | 535 | 57 | 24 | 4 | 365 | 20 | 967   | 84  |
| 122,184 | 43 | 3 | 528 | 52 | 23 | 3 | 363 | 17 | 957   | 75  |
| 122,185 | 43 | 3 | 539 | 53 | 23 | 3 | 364 | 17 | 969   | 76  |
| 122,186 | 43 | 2 | 527 | 46 | 23 | 1 | 364 | 14 | 957   | 63  |
| 122,187 | 44 | 2 | 525 | 43 | 22 | 1 | 353 | 14 | 944   | 60  |
| 122,188 | 44 | 2 | 519 | 42 | 22 | 1 | 351 | 15 | 936   | 60  |
| 122,189 | 45 | 2 | 529 | 44 | 24 | 1 | 362 | 15 | 960   | 62  |
| 122,190 | 45 | 2 | 517 | 44 | 23 | 1 | 348 | 15 | 933   | 62  |
| 122,191 | 46 | 2 | 515 | 38 | 23 | 1 | 347 | 11 | 931   | 52  |
| 122,192 | 45 | 2 | 512 | 38 | 23 | 1 | 343 | 11 | 923   | 52  |
| 122,193 | 45 | 2 | 511 | 37 | 23 | 1 | 346 | 10 | 925   | 50  |
| 122,194 | 46 | 2 | 514 | 37 | 24 | 1 | 351 | 10 | 935   | 50  |
| 122,195 | 44 | 2 | 487 | 36 | 22 | 1 | 322 | 10 | 875   | 49  |
| 122,196 | 44 | 2 | 491 | 35 | 23 | 1 | 321 | 9  | 879   | 47  |
| 122,197 | 42 | 2 | 493 | 34 | 31 | 1 | 342 | 10 | 908   | 47  |
| 122,198 | 42 | 3 | 482 | 40 | 31 | 1 | 341 | 14 | 896   | 58  |
| 122,199 | 32 | 3 | 435 | 48 | 27 | 1 | 275 | 18 | 769   | 70  |
| 122,200 | 28 | 2 | 423 | 45 | 24 | 1 | 241 | 18 | 716   | 66  |
| 122,201 | 26 | 3 | 419 | 44 | 24 | 3 | 233 | 21 | 702   | 71  |
| 122,202 | 26 | 3 | 436 | 43 | 26 | 3 | 253 | 21 | 741   | 70  |
| 122,203 | 28 | 6 | 479 | 46 | 30 | 3 | 321 | 24 | 858   | 79  |
| 122,204 | 27 | 6 | 412 | 53 | 24 | 4 | 270 | 30 | 733   | 93  |
| 122,205 | 27 | 6 | 408 | 56 | 24 | 4 | 264 | 30 | 723   | 96  |
| 122,206 | 41 | 6 | 475 | 58 | 40 | 4 | 361 | 30 | 917   | 98  |
| 122,207 | 41 | 6 | 475 | 59 | 40 | 4 | 360 | 30 | 916   | 99  |
| 122,208 | 40 | 6 | 473 | 60 | 39 | 4 | 358 | 31 | 910   | 101 |
| 122,209 | 40 | 6 | 471 | 63 | 39 | 4 | 353 | 32 | 903   | 105 |

|         |    |    |     |    |    |    |     |    |       |     |
|---------|----|----|-----|----|----|----|-----|----|-------|-----|
| 122,210 | 42 | 6  | 490 | 63 | 39 | 4  | 357 | 37 | 928   | 110 |
| 122,211 | 42 | 6  | 501 | 67 | 39 | 5  | 360 | 42 | 942   | 120 |
| 122,212 | 43 | 6  | 508 | 77 | 40 | 6  | 366 | 50 | 957   | 139 |
| 122,213 | 42 | 6  | 509 | 77 | 41 | 6  | 371 | 52 | 963   | 141 |
| 122,214 | 42 | 6  | 516 | 78 | 41 | 6  | 372 | 53 | 971   | 143 |
| 122,215 | 42 | 6  | 497 | 78 | 41 | 6  | 371 | 53 | 951   | 143 |
| 122,216 | 42 | 6  | 490 | 81 | 41 | 6  | 367 | 53 | 940   | 146 |
| 122,217 | 42 | 6  | 480 | 81 | 41 | 6  | 367 | 53 | 930   | 146 |
| 122,218 | 42 | 6  | 485 | 81 | 41 | 6  | 377 | 53 | 945   | 146 |
| 122,219 | 44 | 6  | 497 | 81 | 42 | 6  | 400 | 53 | 983   | 146 |
| 122,220 | 44 | 6  | 500 | 81 | 44 | 6  | 402 | 54 | 990   | 147 |
| 122,221 | 36 | 6  | 490 | 81 | 42 | 6  | 393 | 56 | 961   | 149 |
| 122,222 | 36 | 6  | 490 | 83 | 43 | 6  | 396 | 58 | 965   | 153 |
| 122,223 | 36 | 7  | 464 | 85 | 41 | 6  | 386 | 60 | 927   | 158 |
| 122,224 | 35 | 7  | 476 | 85 | 42 | 6  | 411 | 62 | 964   | 160 |
| 122,225 | 37 | 8  | 528 | 86 | 44 | 6  | 430 | 62 | 1,039 | 162 |
| 122,226 | 33 | 8  | 519 | 86 | 44 | 6  | 424 | 62 | 1,020 | 162 |
| 122,227 | 33 | 9  | 510 | 88 | 44 | 9  | 424 | 68 | 1,011 | 174 |
| 122,228 | 33 | 9  | 478 | 88 | 44 | 9  | 419 | 69 | 974   | 175 |
| 122,229 | 34 | 9  | 536 | 88 | 52 | 9  | 474 | 69 | 1,096 | 175 |
| 122,230 | 34 | 9  | 560 | 86 | 53 | 9  | 494 | 70 | 1,141 | 174 |
| 122,231 | 34 | 10 | 560 | 86 | 53 | 9  | 492 | 70 | 1,139 | 175 |
| 122,232 | 34 | 10 | 556 | 86 | 53 | 9  | 487 | 70 | 1,130 | 175 |
| 122,233 | 38 | 10 | 584 | 86 | 55 | 10 | 526 | 70 | 1,203 | 176 |
| 122,234 | 57 | 11 | 778 | 84 | 67 | 10 | 636 | 70 | 1,538 | 175 |
| 122,235 | 58 | 11 | 802 | 83 | 67 | 10 | 648 | 70 | 1,575 | 174 |
| 122,236 | 60 | 11 | 818 | 81 | 69 | 10 | 690 | 70 | 1,637 | 172 |
| 122,237 | 60 | 11 | 823 | 80 | 69 | 10 | 693 | 69 | 1,645 | 170 |
| 122,238 | 61 | 11 | 818 | 78 | 69 | 10 | 697 | 67 | 1,645 | 166 |
| 122,239 | 62 | 11 | 822 | 78 | 69 | 10 | 716 | 68 | 1,669 | 167 |
| 122,240 | 60 | 11 | 813 | 78 | 67 | 10 | 706 | 68 | 1,646 | 167 |
| 122,241 | 60 | 11 | 827 | 78 | 68 | 10 | 722 | 68 | 1,677 | 167 |
| 122,242 | 63 | 11 | 856 | 78 | 71 | 10 | 745 | 68 | 1,735 | 167 |
| 122,243 | 64 | 11 | 876 | 79 | 75 | 10 | 783 | 68 | 1,798 | 168 |
| 122,244 | 64 | 11 | 874 | 79 | 76 | 10 | 783 | 68 | 1,797 | 168 |
| 122,245 | 64 | 11 | 897 | 79 | 76 | 10 | 806 | 68 | 1,843 | 168 |
| 122,246 | 66 | 10 | 908 | 73 | 79 | 10 | 822 | 63 | 1,875 | 156 |
| 122,247 | 66 | 10 | 909 | 73 | 78 | 10 | 825 | 63 | 1,878 | 156 |
| 122,248 | 67 | 10 | 893 | 73 | 70 | 10 | 797 | 63 | 1,827 | 156 |
| 122,249 | 66 | 10 | 891 | 73 | 70 | 10 | 798 | 63 | 1,825 | 156 |
| 122,250 | 66 | 10 | 891 | 64 | 70 | 10 | 799 | 58 | 1,826 | 142 |

|         |    |    |     |    |    |    |     |    |       |     |
|---------|----|----|-----|----|----|----|-----|----|-------|-----|
| 122,251 | 66 | 10 | 880 | 63 | 70 | 10 | 797 | 57 | 1,813 | 140 |
| 122,252 | 66 | 9  | 877 | 56 | 70 | 8  | 798 | 52 | 1,811 | 125 |
| 122,253 | 65 | 9  | 846 | 53 | 68 | 8  | 770 | 50 | 1,749 | 120 |
| 122,254 | 63 | 6  | 802 | 49 | 64 | 8  | 700 | 48 | 1,629 | 111 |
| 122,255 | 50 | 6  | 747 | 42 | 50 | 7  | 605 | 42 | 1,452 | 97  |
| 122,256 | 49 | 6  | 757 | 39 | 49 | 7  | 606 | 42 | 1,461 | 94  |
| 122,257 | 50 | 6  | 793 | 38 | 49 | 7  | 625 | 42 | 1,517 | 93  |
| 122,258 | 50 | 6  | 799 | 37 | 49 | 7  | 625 | 42 | 1,523 | 92  |
| 122,259 | 50 | 6  | 797 | 36 | 49 | 7  | 626 | 41 | 1,522 | 90  |
| 122,260 | 48 | 6  | 787 | 33 | 49 | 7  | 624 | 41 | 1,508 | 87  |
| 122,261 | 48 | 6  | 783 | 31 | 50 | 7  | 622 | 36 | 1,503 | 80  |
| 122,262 | 48 | 6  | 772 | 27 | 51 | 6  | 623 | 31 | 1,494 | 70  |
| 122,263 | 47 | 5  | 765 | 17 | 50 | 4  | 617 | 23 | 1,479 | 49  |
| 122,264 | 47 | 5  | 769 | 17 | 49 | 4  | 612 | 21 | 1,477 | 47  |
| 122,265 | 47 | 5  | 759 | 16 | 50 | 4  | 610 | 20 | 1,466 | 45  |
| 122,266 | 48 | 6  | 754 | 17 | 50 | 4  | 608 | 19 | 1,460 | 46  |
| 122,267 | 48 | 6  | 757 | 15 | 50 | 4  | 611 | 19 | 1,466 | 44  |
| 122,268 | 48 | 6  | 755 | 15 | 50 | 4  | 606 | 18 | 1,459 | 43  |
| 122,269 | 48 | 6  | 761 | 15 | 49 | 4  | 610 | 18 | 1,468 | 43  |
| 122,270 | 47 | 6  | 757 | 15 | 49 | 4  | 593 | 18 | 1,446 | 43  |
| 122,271 | 47 | 6  | 757 | 13 | 47 | 4  | 598 | 18 | 1,449 | 41  |
| 122,272 | 47 | 6  | 758 | 13 | 47 | 4  | 600 | 17 | 1,452 | 40  |
| 122,273 | 47 | 6  | 758 | 11 | 46 | 5  | 601 | 15 | 1,452 | 37  |
| 122,274 | 46 | 5  | 745 | 9  | 49 | 5  | 606 | 13 | 1,446 | 32  |
| 122,275 | 45 | 5  | 729 | 9  | 48 | 5  | 580 | 11 | 1,402 | 30  |
| 122,276 | 43 | 4  | 682 | 8  | 46 | 5  | 564 | 11 | 1,335 | 28  |
| 122,277 | 45 | 3  | 705 | 6  | 43 | 2  | 580 | 6  | 1,373 | 17  |
| 122,278 | 45 | 3  | 764 | 8  | 44 | 2  | 608 | 6  | 1,461 | 19  |
| 122,279 | 54 | 4  | 946 | 8  | 62 | 2  | 883 | 5  | 1,945 | 19  |
| 122,280 | 54 | 4  | 932 | 8  | 61 | 2  | 865 | 5  | 1,912 | 19  |
| 122,281 | 55 | 3  | 945 | 7  | 61 | 2  | 872 | 4  | 1,933 | 16  |
| 122,282 | 55 | 3  | 941 | 9  | 59 | 2  | 867 | 4  | 1,922 | 18  |
| 122,283 | 51 | 3  | 925 | 9  | 59 | 2  | 838 | 4  | 1,873 | 18  |
| 122,284 | 51 | 3  | 941 | 9  | 59 | 1  | 842 | 3  | 1,893 | 16  |
| 122,285 | 34 | 2  | 821 | 8  | 53 | 1  | 794 | 3  | 1,702 | 14  |
| 122,286 | 34 | 2  | 846 | 8  | 57 | 1  | 836 | 3  | 1,773 | 14  |
| 122,287 | 32 | 2  | 821 | 8  | 55 | 1  | 789 | 3  | 1,697 | 14  |
| 122,288 | 32 | 2  | 810 | 9  | 55 | 1  | 784 | 3  | 1,681 | 15  |
| 122,289 | 30 | 2  | 891 | 12 | 58 | 1  | 861 | 4  | 1,840 | 19  |
| 122,290 | 29 | 2  | 884 | 13 | 61 | 2  | 863 | 5  | 1,837 | 22  |
| 122,291 | 29 | 2  | 890 | 14 | 61 | 2  | 878 | 5  | 1,858 | 23  |

|         |    |   |       |    |     |   |       |    |       |    |
|---------|----|---|-------|----|-----|---|-------|----|-------|----|
| 122,292 | 31 | 2 | 911   | 14 | 61  | 2 | 894   | 5  | 1,897 | 23 |
| 122,293 | 28 | 2 | 902   | 14 | 58  | 2 | 882   | 5  | 1,870 | 23 |
| 122,294 | 27 | 2 | 893   | 14 | 54  | 2 | 853   | 5  | 1,827 | 23 |
| 122,295 | 29 | 2 | 950   | 14 | 54  | 2 | 871   | 7  | 1,904 | 25 |
| 122,296 | 32 | 3 | 992   | 14 | 67  | 2 | 980   | 7  | 2,071 | 26 |
| 122,297 | 31 | 3 | 1,004 | 14 | 65  | 2 | 974   | 7  | 2,074 | 26 |
| 122,298 | 31 | 3 | 996   | 14 | 65  | 2 | 968   | 7  | 2,060 | 26 |
| 122,299 | 35 | 3 | 1,081 | 15 | 67  | 2 | 1,028 | 10 | 2,211 | 30 |
| 122,300 | 35 | 3 | 1,078 | 15 | 67  | 2 | 1,026 | 10 | 2,206 | 30 |
| 122,301 | 35 | 3 | 1,093 | 15 | 68  | 2 | 1,033 | 10 | 2,229 | 30 |
| 122,302 | 38 | 3 | 1,170 | 15 | 70  | 2 | 1,085 | 10 | 2,363 | 30 |
| 122,303 | 39 | 5 | 1,186 | 15 | 74  | 2 | 1,110 | 10 | 2,409 | 32 |
| 122,304 | 39 | 5 | 1,210 | 19 | 74  | 2 | 1,127 | 12 | 2,450 | 38 |
| 122,305 | 59 | 5 | 1,446 | 19 | 88  | 2 | 1,334 | 12 | 2,927 | 38 |
| 122,306 | 60 | 5 | 1,449 | 22 | 89  | 2 | 1,340 | 12 | 2,938 | 41 |
| 122,307 | 61 | 5 | 1,443 | 24 | 93  | 2 | 1,363 | 12 | 2,960 | 43 |
| 122,308 | 63 | 5 | 1,440 | 25 | 97  | 2 | 1,381 | 12 | 2,981 | 44 |
| 122,309 | 63 | 5 | 1,440 | 26 | 97  | 2 | 1,378 | 12 | 2,978 | 45 |
| 122,310 | 63 | 5 | 1,448 | 27 | 97  | 2 | 1,382 | 11 | 2,990 | 45 |
| 122,311 | 63 | 5 | 1,451 | 27 | 97  | 2 | 1,381 | 13 | 2,992 | 47 |
| 122,312 | 63 | 5 | 1,470 | 27 | 99  | 2 | 1,414 | 13 | 3,046 | 47 |
| 122,313 | 64 | 5 | 1,471 | 32 | 101 | 3 | 1,425 | 15 | 3,061 | 55 |
| 122,314 | 64 | 5 | 1,476 | 32 | 101 | 3 | 1,432 | 15 | 3,073 | 55 |
| 122,315 | 64 | 5 | 1,467 | 35 | 101 | 3 | 1,430 | 15 | 3,062 | 58 |
| 122,316 | 64 | 5 | 1,467 | 36 | 100 | 3 | 1,430 | 16 | 3,061 | 60 |
| 122,317 | 63 | 4 | 1,475 | 40 | 103 | 3 | 1,439 | 16 | 3,080 | 63 |
| 122,318 | 63 | 4 | 1,471 | 42 | 103 | 3 | 1,433 | 17 | 3,070 | 66 |
| 122,319 | 63 | 4 | 1,464 | 42 | 103 | 3 | 1,432 | 17 | 3,062 | 66 |
| 122,320 | 64 | 4 | 1,461 | 42 | 103 | 3 | 1,430 | 17 | 3,058 | 66 |
| 122,321 | 63 | 4 | 1,457 | 42 | 103 | 3 | 1,426 | 17 | 3,049 | 66 |
| 122,322 | 63 | 4 | 1,454 | 42 | 103 | 3 | 1,419 | 15 | 3,039 | 64 |
| 122,323 | 63 | 4 | 1,449 | 42 | 103 | 2 | 1,417 | 15 | 3,032 | 63 |
| 122,324 | 63 | 4 | 1,447 | 42 | 103 | 2 | 1,414 | 15 | 3,027 | 63 |
| 122,325 | 62 | 4 | 1,432 | 42 | 100 | 3 | 1,397 | 15 | 2,991 | 64 |
| 122,326 | 62 | 4 | 1,432 | 42 | 100 | 3 | 1,393 | 15 | 2,987 | 64 |
| 122,327 | 62 | 4 | 1,433 | 42 | 100 | 3 | 1,401 | 15 | 2,996 | 64 |
| 122,328 | 60 | 3 | 1,393 | 40 | 98  | 3 | 1,354 | 15 | 2,905 | 61 |
| 122,329 | 61 | 3 | 1,342 | 40 | 98  | 3 | 1,333 | 15 | 2,834 | 61 |
| 122,330 | 51 | 3 | 1,134 | 40 | 78  | 3 | 1,042 | 15 | 2,305 | 61 |
| 122,331 | 51 | 3 | 1,119 | 40 | 78  | 3 | 1,035 | 15 | 2,283 | 61 |
| 122,332 | 50 | 3 | 1,111 | 38 | 78  | 3 | 1,034 | 15 | 2,273 | 59 |



|         |    |   |       |    |    |   |       |    |       |    |
|---------|----|---|-------|----|----|---|-------|----|-------|----|
| 122,333 | 55 | 3 | 1,254 | 39 | 81 | 3 | 1,097 | 17 | 2,487 | 62 |
| 122,334 | 55 | 3 | 1,283 | 40 | 82 | 3 | 1,105 | 17 | 2,525 | 63 |
| 122,335 | 54 | 3 | 1,251 | 40 | 79 | 3 | 1,104 | 17 | 2,488 | 63 |
| 122,336 | 53 | 3 | 1,221 | 40 | 76 | 3 | 1,068 | 17 | 2,418 | 63 |
| 122,337 | 52 | 3 | 1,171 | 40 | 72 | 3 | 1,014 | 17 | 2,309 | 63 |
| 122,338 | 52 | 3 | 1,140 | 39 | 72 | 3 | 1,005 | 17 | 2,269 | 62 |
| 122,339 | 52 | 3 | 1,108 | 39 | 71 | 3 | 973   | 17 | 2,204 | 62 |
| 122,340 | 52 | 3 | 1,087 | 36 | 69 | 2 | 932   | 17 | 2,140 | 58 |
| 122,341 | 52 | 3 | 1,080 | 35 | 66 | 2 | 914   | 17 | 2,112 | 57 |
| 122,342 | 52 | 3 | 1,066 | 38 | 66 | 2 | 890   | 20 | 2,074 | 63 |
| 122,343 | 50 | 3 | 1,031 | 41 | 65 | 2 | 861   | 25 | 2,007 | 71 |
| 122,344 | 49 | 3 | 1,023 | 42 | 65 | 2 | 852   | 26 | 1,989 | 73 |
| 122,345 | 49 | 4 | 1,012 | 47 | 65 | 5 | 842   | 38 | 1,968 | 94 |
| 122,346 | 47 | 4 | 955   | 47 | 64 | 5 | 822   | 37 | 1,888 | 93 |
| 122,347 | 44 | 3 | 902   | 47 | 53 | 5 | 707   | 37 | 1,706 | 92 |
| 122,348 | 44 | 3 | 891   | 48 | 52 | 5 | 703   | 37 | 1,690 | 93 |
| 122,349 | 39 | 3 | 834   | 48 | 50 | 5 | 645   | 37 | 1,568 | 93 |
| 122,350 | 39 | 3 | 814   | 47 | 51 | 5 | 652   | 34 | 1,556 | 89 |
| 122,351 | 39 | 3 | 796   | 48 | 50 | 5 | 641   | 35 | 1,526 | 91 |
| 122,352 | 36 | 3 | 719   | 49 | 48 | 5 | 589   | 35 | 1,392 | 92 |
| 122,353 | 35 | 3 | 715   | 51 | 45 | 5 | 598   | 35 | 1,393 | 94 |
| 122,354 | 37 | 1 | 730   | 52 | 48 | 5 | 619   | 36 | 1,434 | 94 |
| 122,355 | 37 | 1 | 711   | 48 | 48 | 5 | 605   | 34 | 1,401 | 88 |
| 122,356 | 17 | 1 | 480   | 45 | 35 | 5 | 411   | 34 | 943   | 85 |
| 122,357 | 16 | 1 | 486   | 45 | 34 | 5 | 425   | 34 | 961   | 85 |
| 122,358 | 15 | 1 | 477   | 43 | 31 | 5 | 400   | 34 | 923   | 83 |
| 122,359 | 12 | 1 | 439   | 41 | 26 | 5 | 365   | 34 | 842   | 81 |
| 122,360 | 12 | 1 | 437   | 40 | 26 | 5 | 369   | 34 | 844   | 80 |
| 122,361 | 12 | 1 | 426   | 39 | 26 | 5 | 362   | 34 | 826   | 79 |
| 122,362 | 12 | 1 | 426   | 45 | 26 | 5 | 364   | 35 | 828   | 86 |
| 122,363 | 13 | 1 | 430   | 49 | 25 | 6 | 357   | 39 | 825   | 95 |
| 122,364 | 14 | 1 | 498   | 48 | 28 | 5 | 388   | 38 | 928   | 92 |
| 122,365 | 15 | 1 | 511   | 48 | 28 | 5 | 396   | 38 | 950   | 92 |
| 122,366 | 15 | 1 | 526   | 45 | 28 | 5 | 416   | 38 | 985   | 89 |
| 122,367 | 19 | 1 | 627   | 45 | 30 | 5 | 457   | 38 | 1,133 | 89 |
| 122,368 | 19 | 1 | 624   | 40 | 29 | 5 | 448   | 38 | 1,120 | 84 |
| 122,369 | 32 | 1 | 773   | 37 | 40 | 5 | 560   | 38 | 1,405 | 81 |
| 122,370 | 34 | 1 | 800   | 37 | 41 | 5 | 577   | 38 | 1,452 | 81 |
| 122,371 | 36 | 1 | 831   | 39 | 43 | 5 | 595   | 39 | 1,505 | 84 |
| 122,372 | 36 | 1 | 830   | 39 | 43 | 5 | 594   | 39 | 1,503 | 84 |
| 122,373 | 38 | 1 | 892   | 48 | 49 | 6 | 638   | 41 | 1,617 | 96 |

|         |     |   |       |     |     |   |       |    |       |     |
|---------|-----|---|-------|-----|-----|---|-------|----|-------|-----|
| 122,374 | 39  | 1 | 901   | 52  | 50  | 6 | 649   | 41 | 1,639 | 100 |
| 122,375 | 39  | 1 | 900   | 57  | 50  | 6 | 649   | 42 | 1,638 | 106 |
| 122,376 | 39  | 1 | 898   | 64  | 50  | 5 | 647   | 43 | 1,634 | 113 |
| 122,377 | 40  | 2 | 907   | 72  | 50  | 5 | 651   | 44 | 1,648 | 123 |
| 122,378 | 42  | 2 | 928   | 86  | 52  | 5 | 653   | 44 | 1,675 | 137 |
| 122,379 | 46  | 2 | 1,023 | 86  | 52  | 6 | 690   | 44 | 1,811 | 138 |
| 122,380 | 63  | 2 | 1,100 | 89  | 57  | 6 | 788   | 44 | 2,008 | 141 |
| 122,381 | 63  | 2 | 1,088 | 89  | 56  | 6 | 777   | 45 | 1,984 | 142 |
| 122,382 | 61  | 2 | 969   | 89  | 54  | 6 | 742   | 45 | 1,826 | 142 |
| 122,383 | 63  | 2 | 1,040 | 90  | 58  | 6 | 799   | 45 | 1,960 | 143 |
| 122,384 | 62  | 2 | 1,021 | 91  | 58  | 6 | 779   | 44 | 1,920 | 143 |
| 122,385 | 62  | 2 | 985   | 90  | 56  | 6 | 766   | 44 | 1,869 | 142 |
| 122,386 | 62  | 2 | 957   | 90  | 56  | 6 | 740   | 44 | 1,815 | 142 |
| 122,387 | 65  | 2 | 982   | 91  | 58  | 6 | 760   | 44 | 1,865 | 143 |
| 122,388 | 67  | 2 | 991   | 91  | 58  | 6 | 766   | 44 | 1,882 | 143 |
| 122,389 | 68  | 2 | 1,005 | 92  | 60  | 7 | 782   | 45 | 1,915 | 146 |
| 122,390 | 68  | 2 | 1,005 | 92  | 60  | 7 | 781   | 45 | 1,914 | 146 |
| 122,391 | 79  | 2 | 1,165 | 96  | 74  | 7 | 910   | 46 | 2,228 | 151 |
| 122,392 | 95  | 2 | 1,299 | 101 | 85  | 8 | 990   | 46 | 2,469 | 157 |
| 122,393 | 96  | 2 | 1,395 | 99  | 101 | 8 | 1,056 | 43 | 2,648 | 152 |
| 122,394 | 96  | 2 | 1,471 | 97  | 103 | 8 | 1,075 | 39 | 2,745 | 146 |
| 122,395 | 99  | 2 | 1,552 | 98  | 108 | 8 | 1,111 | 39 | 2,870 | 147 |
| 122,396 | 101 | 1 | 1,561 | 92  | 107 | 5 | 1,095 | 27 | 2,864 | 125 |
| 122,397 | 103 | 1 | 1,604 | 93  | 109 | 5 | 1,122 | 26 | 2,938 | 125 |
| 122,398 | 103 | 1 | 1,613 | 94  | 111 | 5 | 1,135 | 29 | 2,962 | 129 |
| 122,399 | 102 | 1 | 1,599 | 93  | 111 | 5 | 1,128 | 29 | 2,940 | 128 |
| 122,400 | 103 | 1 | 1,590 | 92  | 110 | 5 | 1,120 | 28 | 2,923 | 126 |
| 122,401 | 104 | 1 | 1,590 | 92  | 110 | 5 | 1,120 | 28 | 2,924 | 126 |
| 122,402 | 104 | 1 | 1,580 | 97  | 109 | 5 | 1,088 | 29 | 2,881 | 132 |
| 122,403 | 104 | 1 | 1,579 | 101 | 109 | 5 | 1,085 | 32 | 2,877 | 139 |
| 122,404 | 102 | 1 | 1,559 | 101 | 106 | 5 | 1,062 | 32 | 2,829 | 139 |
| 122,405 | 102 | 1 | 1,579 | 101 | 107 | 5 | 1,085 | 31 | 2,873 | 138 |
| 122,406 | 102 | 1 | 1,579 | 103 | 107 | 5 | 1,088 | 31 | 2,876 | 140 |
| 122,407 | 102 | 1 | 1,576 | 103 | 106 | 5 | 1,075 | 31 | 2,859 | 140 |
| 122,408 | 102 | 1 | 1,569 | 103 | 106 | 5 | 1,055 | 31 | 2,832 | 140 |
| 122,409 | 102 | 1 | 1,569 | 103 | 106 | 5 | 1,050 | 31 | 2,827 | 140 |
| 122,410 | 102 | 2 | 1,568 | 103 | 106 | 5 | 1,047 | 31 | 2,823 | 141 |
| 122,411 | 102 | 2 | 1,584 | 103 | 107 | 5 | 1,056 | 31 | 2,849 | 141 |
| 122,412 | 102 | 2 | 1,591 | 103 | 107 | 5 | 1,060 | 31 | 2,860 | 141 |
| 122,413 | 102 | 2 | 1,592 | 97  | 107 | 5 | 1,061 | 28 | 2,862 | 132 |
| 122,414 | 101 | 2 | 1,566 | 93  | 105 | 4 | 1,035 | 24 | 2,807 | 123 |

|         |     |   |       |    |     |   |       |    |       |     |
|---------|-----|---|-------|----|-----|---|-------|----|-------|-----|
| 122,415 | 99  | 2 | 1,495 | 89 | 99  | 4 | 990   | 23 | 2,683 | 118 |
| 122,416 | 114 | 2 | 1,519 | 89 | 103 | 4 | 1,041 | 23 | 2,777 | 118 |
| 122,417 | 114 | 2 | 1,512 | 89 | 102 | 4 | 1,028 | 23 | 2,756 | 118 |
| 122,418 | 110 | 2 | 1,412 | 88 | 99  | 4 | 993   | 22 | 2,614 | 116 |
| 122,419 | 108 | 2 | 1,455 | 88 | 98  | 4 | 1,041 | 22 | 2,702 | 116 |
| 122,420 | 99  | 2 | 1,364 | 88 | 95  | 4 | 993   | 21 | 2,551 | 115 |
| 122,421 | 97  | 2 | 1,344 | 88 | 94  | 4 | 982   | 21 | 2,517 | 115 |
| 122,422 | 94  | 2 | 1,304 | 86 | 92  | 4 | 961   | 20 | 2,451 | 112 |
| 122,423 | 92  | 2 | 1,252 | 77 | 86  | 3 | 923   | 18 | 2,353 | 100 |
| 122,424 | 92  | 2 | 1,249 | 77 | 86  | 3 | 920   | 18 | 2,347 | 100 |
| 122,425 | 91  | 2 | 1,242 | 73 | 85  | 3 | 911   | 18 | 2,329 | 96  |
| 122,426 | 95  | 2 | 1,269 | 70 | 85  | 3 | 940   | 20 | 2,389 | 95  |
| 122,427 | 95  | 2 | 1,272 | 64 | 85  | 3 | 940   | 21 | 2,392 | 90  |
| 122,428 | 94  | 1 | 1,268 | 56 | 87  | 3 | 942   | 20 | 2,391 | 80  |
| 122,429 | 92  | 1 | 1,240 | 40 | 86  | 2 | 937   | 20 | 2,355 | 63  |
| 122,430 | 88  | 1 | 1,148 | 40 | 86  | 2 | 899   | 21 | 2,221 | 64  |
| 122,431 | 82  | 1 | 1,132 | 40 | 85  | 2 | 853   | 21 | 2,152 | 64  |
| 122,432 | 81  | 1 | 1,096 | 42 | 85  | 2 | 836   | 21 | 2,098 | 66  |
| 122,433 | 78  | 1 | 1,059 | 42 | 80  | 2 | 786   | 21 | 2,003 | 66  |
| 122,434 | 79  | 1 | 1,074 | 39 | 83  | 2 | 790   | 20 | 2,026 | 62  |
| 122,435 | 80  | 1 | 1,102 | 39 | 83  | 2 | 796   | 20 | 2,061 | 62  |
| 122,436 | 80  | 1 | 1,101 | 39 | 83  | 2 | 796   | 21 | 2,060 | 63  |
| 122,437 | 82  | 1 | 1,136 | 39 | 85  | 2 | 828   | 21 | 2,131 | 63  |
| 122,438 | 80  | 2 | 1,120 | 38 | 84  | 2 | 814   | 22 | 2,098 | 64  |
| 122,439 | 79  | 2 | 1,136 | 42 | 84  | 2 | 817   | 27 | 2,116 | 73  |
| 122,440 | 78  | 2 | 1,142 | 43 | 85  | 1 | 816   | 26 | 2,121 | 72  |
| 122,441 | 70  | 2 | 1,120 | 43 | 83  | 1 | 778   | 26 | 2,051 | 72  |
| 122,442 | 67  | 3 | 999   | 39 | 71  | 1 | 692   | 24 | 1,829 | 67  |
| 122,443 | 51  | 4 | 881   | 37 | 63  | 0 | 628   | 27 | 1,623 | 68  |
| 122,444 | 50  | 5 | 803   | 42 | 47  | 1 | 594   | 32 | 1,494 | 80  |
| 122,445 | 50  | 5 | 733   | 45 | 46  | 1 | 582   | 33 | 1,411 | 84  |
| 122,446 | 47  | 5 | 639   | 43 | 41  | 1 | 543   | 32 | 1,270 | 81  |
| 122,447 | 45  | 5 | 625   | 43 | 41  | 1 | 542   | 34 | 1,253 | 83  |
| 122,448 | 43  | 5 | 576   | 42 | 37  | 1 | 511   | 34 | 1,167 | 82  |
| 122,449 | 43  | 5 | 566   | 41 | 35  | 1 | 498   | 31 | 1,142 | 78  |
| 122,450 | 43  | 5 | 568   | 42 | 35  | 1 | 498   | 31 | 1,144 | 79  |
| 122,451 | 42  | 5 | 576   | 42 | 37  | 1 | 504   | 31 | 1,159 | 79  |
| 122,452 | 41  | 5 | 586   | 43 | 37  | 2 | 507   | 31 | 1,171 | 81  |
| 122,453 | 42  | 5 | 610   | 39 | 37  | 3 | 513   | 32 | 1,202 | 79  |
| 122,454 | 43  | 5 | 703   | 37 | 40  | 3 | 558   | 29 | 1,344 | 74  |
| 122,455 | 48  | 5 | 870   | 36 | 53  | 3 | 750   | 29 | 1,721 | 73  |

|         |    |   |       |    |     |    |       |    |       |     |
|---------|----|---|-------|----|-----|----|-------|----|-------|-----|
| 122,456 | 48 | 5 | 863   | 41 | 54  | 4  | 743   | 37 | 1,708 | 87  |
| 122,457 | 55 | 5 | 931   | 40 | 75  | 4  | 887   | 38 | 1,948 | 87  |
| 122,458 | 55 | 5 | 943   | 43 | 75  | 4  | 894   | 41 | 1,967 | 93  |
| 122,459 | 55 | 5 | 965   | 48 | 75  | 4  | 903   | 42 | 1,998 | 99  |
| 122,460 | 56 | 5 | 1,013 | 48 | 78  | 4  | 911   | 45 | 2,058 | 102 |
| 122,461 | 56 | 4 | 1,019 | 49 | 79  | 4  | 920   | 47 | 2,074 | 104 |
| 122,462 | 56 | 4 | 1,088 | 49 | 82  | 4  | 965   | 47 | 2,191 | 104 |
| 122,463 | 57 | 5 | 1,131 | 49 | 86  | 4  | 1,011 | 48 | 2,285 | 106 |
| 122,464 | 63 | 5 | 1,386 | 50 | 100 | 4  | 1,203 | 49 | 2,752 | 108 |
| 122,465 | 61 | 5 | 1,484 | 51 | 110 | 4  | 1,306 | 50 | 2,961 | 110 |
| 122,466 | 64 | 5 | 1,541 | 53 | 116 | 6  | 1,390 | 52 | 3,111 | 116 |
| 122,467 | 66 | 6 | 1,612 | 54 | 120 | 6  | 1,445 | 54 | 3,243 | 120 |
| 122,468 | 67 | 6 | 1,623 | 54 | 123 | 6  | 1,464 | 54 | 3,277 | 120 |
| 122,469 | 67 | 6 | 1,617 | 54 | 123 | 6  | 1,461 | 54 | 3,268 | 120 |
| 122,470 | 65 | 6 | 1,550 | 58 | 120 | 7  | 1,383 | 56 | 3,118 | 127 |
| 122,471 | 65 | 6 | 1,526 | 59 | 118 | 7  | 1,351 | 56 | 3,060 | 128 |
| 122,472 | 66 | 6 | 1,524 | 60 | 118 | 7  | 1,351 | 56 | 3,059 | 129 |
| 122,473 | 66 | 6 | 1,529 | 63 | 119 | 8  | 1,357 | 56 | 3,071 | 133 |
| 122,474 | 66 | 6 | 1,524 | 63 | 119 | 8  | 1,355 | 55 | 3,064 | 132 |
| 122,475 | 68 | 6 | 1,550 | 62 | 125 | 9  | 1,372 | 53 | 3,115 | 130 |
| 122,476 | 69 | 6 | 1,553 | 64 | 126 | 9  | 1,380 | 53 | 3,128 | 132 |
| 122,477 | 65 | 6 | 1,539 | 66 | 127 | 9  | 1,358 | 53 | 3,089 | 134 |
| 122,478 | 75 | 7 | 1,728 | 66 | 134 | 10 | 1,452 | 54 | 3,389 | 137 |
| 122,479 | 78 | 7 | 1,836 | 67 | 142 | 10 | 1,555 | 54 | 3,611 | 138 |
| 122,480 | 79 | 7 | 1,906 | 67 | 149 | 10 | 1,614 | 53 | 3,748 | 137 |
| 122,481 | 79 | 7 | 1,926 | 73 | 150 | 10 | 1,620 | 53 | 3,775 | 143 |
| 122,482 | 67 | 7 | 1,892 | 77 | 145 | 10 | 1,581 | 57 | 3,685 | 151 |
| 122,483 | 67 | 7 | 1,894 | 77 | 146 | 10 | 1,589 | 60 | 3,696 | 154 |
| 122,484 | 67 | 7 | 1,899 | 77 | 143 | 10 | 1,617 | 60 | 3,726 | 154 |
| 122,485 | 67 | 7 | 1,899 | 79 | 144 | 10 | 1,622 | 60 | 3,732 | 156 |
| 122,486 | 66 | 7 | 1,882 | 79 | 144 | 10 | 1,622 | 60 | 3,714 | 156 |
| 122,487 | 63 | 7 | 1,859 | 80 | 143 | 10 | 1,600 | 59 | 3,665 | 156 |
| 122,488 | 64 | 6 | 1,873 | 81 | 148 | 10 | 1,628 | 58 | 3,713 | 155 |
| 122,489 | 64 | 6 | 1,866 | 78 | 149 | 10 | 1,629 | 53 | 3,708 | 147 |
| 122,490 | 66 | 7 | 1,878 | 81 | 149 | 10 | 1,636 | 61 | 3,729 | 159 |
| 122,491 | 69 | 7 | 1,926 | 83 | 158 | 10 | 1,693 | 64 | 3,846 | 164 |
| 122,492 | 86 | 7 | 2,143 | 83 | 177 | 10 | 2,003 | 65 | 4,409 | 165 |
| 122,493 | 90 | 7 | 2,190 | 82 | 184 | 10 | 2,105 | 66 | 4,569 | 165 |
| 122,494 | 91 | 6 | 2,188 | 80 | 182 | 10 | 2,099 | 66 | 4,560 | 162 |
| 122,495 | 91 | 5 | 2,168 | 74 | 181 | 9  | 2,065 | 63 | 4,505 | 151 |
| 122,496 | 91 | 5 | 2,167 | 71 | 181 | 9  | 2,066 | 61 | 4,505 | 146 |

|         |     |   |       |    |     |   |       |    |       |     |
|---------|-----|---|-------|----|-----|---|-------|----|-------|-----|
| 122,497 | 91  | 6 | 2,192 | 72 | 182 | 9 | 2,073 | 62 | 4,538 | 149 |
| 122,498 | 91  | 6 | 2,204 | 73 | 183 | 9 | 2,093 | 62 | 4,571 | 150 |
| 122,499 | 90  | 6 | 2,203 | 73 | 183 | 9 | 2,093 | 62 | 4,569 | 150 |
| 122,500 | 90  | 6 | 2,203 | 74 | 184 | 9 | 2,100 | 63 | 4,577 | 152 |
| 122,501 | 90  | 7 | 2,195 | 73 | 182 | 9 | 2,093 | 63 | 4,560 | 152 |
| 122,502 | 90  | 7 | 2,186 | 74 | 182 | 9 | 2,090 | 64 | 4,548 | 154 |
| 122,503 | 92  | 7 | 2,198 | 73 | 186 | 8 | 2,110 | 67 | 4,586 | 155 |
| 122,504 | 91  | 7 | 2,178 | 73 | 186 | 7 | 2,107 | 66 | 4,562 | 153 |
| 122,505 | 91  | 8 | 2,092 | 70 | 183 | 7 | 2,068 | 66 | 4,434 | 151 |
| 122,506 | 86  | 8 | 1,924 | 63 | 170 | 6 | 1,881 | 58 | 4,061 | 135 |
| 122,507 | 86  | 8 | 1,958 | 63 | 172 | 6 | 1,914 | 58 | 4,130 | 135 |
| 122,508 | 79  | 8 | 1,933 | 59 | 153 | 6 | 1,800 | 54 | 3,965 | 127 |
| 122,509 | 79  | 8 | 1,934 | 59 | 157 | 6 | 1,830 | 54 | 4,000 | 127 |
| 122,510 | 79  | 8 | 1,954 | 55 | 158 | 6 | 1,838 | 56 | 4,029 | 125 |
| 122,511 | 79  | 8 | 1,913 | 54 | 155 | 6 | 1,839 | 51 | 3,986 | 119 |
| 122,512 | 80  | 8 | 1,939 | 56 | 157 | 6 | 1,853 | 51 | 4,029 | 121 |
| 122,513 | 80  | 8 | 1,875 | 59 | 155 | 7 | 1,800 | 53 | 3,910 | 127 |
| 122,514 | 85  | 7 | 1,883 | 62 | 155 | 7 | 1,799 | 55 | 3,922 | 131 |
| 122,515 | 80  | 7 | 1,777 | 62 | 146 | 7 | 1,630 | 55 | 3,633 | 131 |
| 122,516 | 70  | 7 | 1,681 | 61 | 136 | 7 | 1,492 | 55 | 3,379 | 130 |
| 122,517 | 86  | 7 | 1,991 | 59 | 186 | 5 | 1,936 | 53 | 4,199 | 124 |
| 122,518 | 80  | 6 | 1,908 | 66 | 179 | 5 | 1,862 | 66 | 4,029 | 143 |
| 122,519 | 79  | 6 | 1,889 | 66 | 176 | 5 | 1,837 | 66 | 3,981 | 143 |
| 122,520 | 94  | 6 | 2,014 | 69 | 190 | 5 | 2,011 | 67 | 4,309 | 147 |
| 122,521 | 94  | 6 | 2,014 | 66 | 191 | 5 | 2,012 | 69 | 4,311 | 146 |
| 122,522 | 105 | 6 | 2,139 | 65 | 213 | 6 | 2,187 | 70 | 4,644 | 147 |
| 122,523 | 106 | 6 | 2,161 | 61 | 217 | 5 | 2,190 | 70 | 4,674 | 142 |
| 122,524 | 146 | 6 | 2,374 | 61 | 237 | 5 | 2,482 | 70 | 5,239 | 142 |
| 122,525 | 148 | 6 | 2,426 | 61 | 243 | 5 | 2,539 | 71 | 5,356 | 143 |
| 122,526 | 189 | 6 | 2,615 | 61 | 260 | 5 | 2,835 | 70 | 5,899 | 142 |
| 122,527 | 194 | 6 | 2,727 | 60 | 269 | 5 | 2,929 | 71 | 6,119 | 142 |
| 122,528 | 195 | 6 | 2,733 | 58 | 269 | 5 | 2,946 | 71 | 6,143 | 140 |
| 122,529 | 214 | 5 | 2,747 | 57 | 294 | 4 | 3,125 | 68 | 6,380 | 134 |
| 122,530 | 211 | 6 | 2,637 | 56 | 287 | 4 | 3,022 | 77 | 6,157 | 143 |
| 122,531 | 210 | 6 | 2,565 | 55 | 278 | 4 | 2,955 | 77 | 6,008 | 142 |
| 122,532 | 227 | 6 | 2,692 | 49 | 304 | 4 | 3,123 | 79 | 6,346 | 138 |
| 122,533 | 232 | 6 | 2,905 | 42 | 331 | 4 | 3,253 | 71 | 6,721 | 123 |
| 122,534 | 238 | 6 | 3,009 | 42 | 345 | 4 | 3,398 | 71 | 6,990 | 123 |
| 122,535 | 238 | 6 | 2,998 | 42 | 346 | 4 | 3,375 | 71 | 6,957 | 123 |
| 122,536 | 239 | 6 | 3,018 | 42 | 345 | 4 | 3,382 | 71 | 6,984 | 123 |
| 122,537 | 244 | 7 | 3,028 | 41 | 348 | 4 | 3,389 | 71 | 7,009 | 123 |

|         |     |   |       |    |     |   |       |    |       |     |
|---------|-----|---|-------|----|-----|---|-------|----|-------|-----|
| 122,538 | 246 | 7 | 3,070 | 41 | 351 | 4 | 3,414 | 71 | 7,081 | 123 |
| 122,539 | 245 | 7 | 3,076 | 40 | 347 | 4 | 3,404 | 71 | 7,072 | 122 |
| 122,540 | 258 | 7 | 3,136 | 39 | 358 | 4 | 3,514 | 71 | 7,266 | 121 |
| 122,541 | 258 | 6 | 3,124 | 35 | 359 | 4 | 3,507 | 63 | 7,248 | 108 |
| 122,542 | 256 | 6 | 3,066 | 32 | 347 | 5 | 3,441 | 60 | 7,110 | 103 |
| 122,543 | 239 | 6 | 2,905 | 32 | 333 | 5 | 3,162 | 59 | 6,639 | 102 |
| 122,544 | 243 | 6 | 3,041 | 33 | 351 | 5 | 3,221 | 57 | 6,856 | 101 |
| 122,545 | 248 | 6 | 3,216 | 34 | 362 | 5 | 3,341 | 54 | 7,167 | 99  |
| 122,546 | 251 | 6 | 3,343 | 34 | 375 | 5 | 3,480 | 52 | 7,449 | 97  |
| 122,547 | 252 | 6 | 3,387 | 33 | 387 | 5 | 3,521 | 52 | 7,547 | 96  |
| 122,548 | 252 | 5 | 3,371 | 32 | 386 | 5 | 3,515 | 51 | 7,524 | 93  |
| 122,549 | 252 | 5 | 3,357 | 33 | 384 | 5 | 3,498 | 50 | 7,491 | 93  |
| 122,550 | 252 | 5 | 3,363 | 33 | 385 | 5 | 3,498 | 50 | 7,498 | 93  |
| 122,551 | 254 | 4 | 3,374 | 32 | 384 | 5 | 3,501 | 49 | 7,513 | 90  |
| 122,552 | 254 | 4 | 3,383 | 33 | 384 | 5 | 3,503 | 49 | 7,524 | 91  |
| 122,553 | 258 | 4 | 3,414 | 33 | 387 | 5 | 3,519 | 48 | 7,578 | 90  |
| 122,554 | 261 | 5 | 3,427 | 33 | 383 | 5 | 3,514 | 45 | 7,585 | 88  |
| 122,555 | 274 | 5 | 3,478 | 32 | 385 | 5 | 3,577 | 44 | 7,714 | 86  |
| 122,556 | 275 | 4 | 3,488 | 32 | 389 | 5 | 3,589 | 44 | 7,741 | 85  |
| 122,557 | 276 | 4 | 3,481 | 33 | 388 | 5 | 3,570 | 44 | 7,715 | 86  |
| 122,558 | 276 | 4 | 3,452 | 33 | 385 | 5 | 3,539 | 44 | 7,652 | 86  |
| 122,559 | 276 | 4 | 3,425 | 33 | 383 | 5 | 3,514 | 45 | 7,598 | 87  |
| 122,560 | 278 | 4 | 3,430 | 33 | 380 | 5 | 3,484 | 46 | 7,572 | 88  |
| 122,561 | 280 | 4 | 3,398 | 32 | 379 | 6 | 3,470 | 43 | 7,527 | 85  |
| 122,562 | 279 | 4 | 3,406 | 32 | 380 | 8 | 3,465 | 43 | 7,530 | 87  |
| 122,563 | 278 | 4 | 3,370 | 30 | 377 | 8 | 3,444 | 43 | 7,469 | 85  |
| 122,564 | 278 | 4 | 3,355 | 28 | 375 | 7 | 3,438 | 41 | 7,446 | 80  |
| 122,565 | 272 | 4 | 3,297 | 25 | 371 | 7 | 3,389 | 38 | 7,329 | 74  |
| 122,566 | 271 | 4 | 3,145 | 16 | 366 | 7 | 3,364 | 21 | 7,146 | 48  |
| 122,567 | 271 | 4 | 3,113 | 16 | 365 | 7 | 3,351 | 21 | 7,100 | 48  |
| 122,568 | 257 | 4 | 2,762 | 16 | 310 | 7 | 2,838 | 20 | 6,167 | 47  |
| 122,569 | 256 | 4 | 2,761 | 17 | 310 | 7 | 2,838 | 21 | 6,165 | 49  |
| 122,570 | 249 | 4 | 2,699 | 17 | 302 | 7 | 2,707 | 21 | 5,957 | 49  |
| 122,571 | 249 | 4 | 2,675 | 13 | 299 | 6 | 2,688 | 17 | 5,911 | 40  |
| 122,572 | 249 | 4 | 2,698 | 13 | 300 | 6 | 2,694 | 17 | 5,941 | 40  |
| 122,573 | 239 | 4 | 2,653 | 14 | 282 | 5 | 2,578 | 15 | 5,752 | 38  |
| 122,574 | 239 | 4 | 2,650 | 14 | 278 | 5 | 2,576 | 15 | 5,743 | 38  |
| 122,575 | 199 | 4 | 2,478 | 12 | 261 | 4 | 2,312 | 13 | 5,250 | 33  |
| 122,576 | 200 | 4 | 2,447 | 12 | 257 | 4 | 2,281 | 13 | 5,185 | 33  |
| 122,577 | 158 | 4 | 2,251 | 12 | 237 | 4 | 1,978 | 13 | 4,624 | 33  |
| 122,578 | 152 | 4 | 2,136 | 12 | 228 | 4 | 1,881 | 13 | 4,397 | 33  |

|         |     |   |       |    |     |   |       |    |       |    |
|---------|-----|---|-------|----|-----|---|-------|----|-------|----|
| 122,579 | 151 | 4 | 2,149 | 13 | 230 | 4 | 1,877 | 16 | 4,407 | 37 |
| 122,580 | 122 | 3 | 1,950 | 13 | 198 | 3 | 1,603 | 8  | 3,873 | 27 |
| 122,581 | 124 | 3 | 1,955 | 13 | 195 | 3 | 1,600 | 8  | 3,874 | 27 |
| 122,582 | 117 | 3 | 1,904 | 13 | 184 | 3 | 1,513 | 8  | 3,718 | 27 |
| 122,583 | 109 | 3 | 1,844 | 13 | 171 | 3 | 1,436 | 6  | 3,560 | 25 |
| 122,584 | 104 | 3 | 1,590 | 12 | 144 | 3 | 1,289 | 6  | 3,127 | 24 |
| 122,585 | 99  | 3 | 1,529 | 12 | 134 | 3 | 1,166 | 6  | 2,928 | 24 |
| 122,586 | 103 | 3 | 1,542 | 12 | 137 | 3 | 1,192 | 7  | 2,974 | 25 |
| 122,587 | 104 | 3 | 1,558 | 12 | 142 | 3 | 1,208 | 7  | 3,012 | 25 |
| 122,588 | 101 | 2 | 1,543 | 12 | 140 | 3 | 1,204 | 7  | 2,988 | 24 |
| 122,589 | 99  | 2 | 1,492 | 12 | 136 | 3 | 1,167 | 7  | 2,894 | 24 |
| 122,590 | 99  | 2 | 1,461 | 12 | 135 | 3 | 1,143 | 7  | 2,838 | 24 |
| 122,591 | 85  | 2 | 1,392 | 12 | 123 | 3 | 1,025 | 7  | 2,625 | 24 |
| 122,592 | 83  | 2 | 1,382 | 12 | 122 | 3 | 1,024 | 8  | 2,611 | 25 |
| 122,593 | 85  | 2 | 1,376 | 12 | 122 | 3 | 1,020 | 9  | 2,603 | 26 |
| 122,594 | 85  | 2 | 1,316 | 12 | 117 | 3 | 985   | 10 | 2,503 | 27 |
| 122,595 | 77  | 1 | 1,120 | 9  | 92  | 3 | 822   | 10 | 2,111 | 23 |
| 122,596 | 71  | 1 | 929   | 9  | 80  | 3 | 690   | 10 | 1,770 | 23 |
| 122,597 | 68  | 1 | 800   | 9  | 67  | 3 | 542   | 10 | 1,477 | 23 |
| 122,598 | 67  | 1 | 754   | 9  | 55  | 3 | 500   | 10 | 1,376 | 23 |
| 122,599 | 67  | 1 | 746   | 9  | 55  | 3 | 499   | 10 | 1,367 | 23 |
| 122,600 | 67  | 1 | 745   | 8  | 55  | 3 | 497   | 10 | 1,364 | 22 |
| 122,601 | 67  | 1 | 740   | 9  | 55  | 3 | 496   | 10 | 1,358 | 23 |
| 122,602 | 65  | 1 | 727   | 9  | 55  | 3 | 486   | 10 | 1,333 | 23 |
| 122,603 | 65  | 1 | 717   | 8  | 55  | 3 | 484   | 10 | 1,321 | 22 |
| 122,604 | 61  | 0 | 683   | 7  | 52  | 3 | 458   | 10 | 1,254 | 20 |
| 122,605 | 57  | 0 | 657   | 7  | 52  | 3 | 451   | 11 | 1,217 | 21 |
| 122,606 | 44  | 0 | 612   | 8  | 50  | 3 | 387   | 11 | 1,093 | 22 |
| 122,607 | 42  | 0 | 592   | 8  | 46  | 3 | 365   | 12 | 1,045 | 23 |
| 122,608 | 41  | 0 | 593   | 7  | 46  | 3 | 365   | 12 | 1,045 | 22 |
| 122,609 | 41  | 0 | 587   | 7  | 49  | 3 | 362   | 12 | 1,039 | 22 |
| 122,610 | 41  | 0 | 569   | 9  | 48  | 3 | 354   | 11 | 1,012 | 23 |
| 122,611 | 39  | 0 | 550   | 9  | 47  | 3 | 347   | 10 | 983   | 22 |
| 122,612 | 37  | 0 | 537   | 10 | 47  | 3 | 344   | 11 | 965   | 24 |
| 122,613 | 37  | 0 | 522   | 12 | 46  | 1 | 342   | 13 | 947   | 26 |
| 122,614 | 37  | 0 | 518   | 12 | 46  | 1 | 341   | 14 | 942   | 27 |
| 122,615 | 37  | 0 | 518   | 12 | 46  | 1 | 342   | 14 | 943   | 27 |
| 122,616 | 37  | 0 | 519   | 12 | 46  | 1 | 344   | 14 | 946   | 27 |
| 122,617 | 37  | 0 | 520   | 12 | 46  | 1 | 344   | 13 | 947   | 26 |
| 122,618 | 38  | 0 | 521   | 13 | 46  | 1 | 344   | 13 | 949   | 27 |
| 122,619 | 33  | 0 | 505   | 13 | 45  | 1 | 331   | 13 | 914   | 27 |

|         |    |   |     |    |    |   |     |    |     |    |
|---------|----|---|-----|----|----|---|-----|----|-----|----|
| 122,620 | 33 | 0 | 502 | 13 | 45 | 1 | 330 | 13 | 910 | 27 |
| 122,621 | 28 | 0 | 480 | 14 | 42 | 1 | 313 | 13 | 863 | 28 |
| 122,622 | 26 | 0 | 459 | 14 | 40 | 1 | 303 | 13 | 828 | 28 |
| 122,623 | 26 | 0 | 435 | 14 | 38 | 1 | 294 | 13 | 793 | 28 |
| 122,624 | 24 | 0 | 346 | 13 | 34 | 1 | 228 | 13 | 632 | 27 |
| 122,625 | 23 | 0 | 320 | 14 | 34 | 2 | 221 | 14 | 598 | 30 |
| 122,626 | 23 | 0 | 280 | 14 | 30 | 2 | 192 | 14 | 525 | 30 |
| 122,627 | 20 | 0 | 258 | 14 | 28 | 2 | 167 | 14 | 473 | 30 |
| 122,628 | 19 | 0 | 234 | 15 | 26 | 2 | 154 | 14 | 433 | 31 |
| 122,629 | 19 | 0 | 231 | 16 | 25 | 2 | 148 | 14 | 423 | 32 |
| 122,630 | 19 | 0 | 203 | 15 | 22 | 2 | 129 | 11 | 373 | 28 |
| 122,631 | 19 | 0 | 192 | 15 | 22 | 2 | 125 | 11 | 358 | 28 |
| 122,632 | 18 | 0 | 184 | 15 | 22 | 2 | 119 | 11 | 343 | 28 |
| 122,633 | 16 | 0 | 142 | 15 | 20 | 2 | 108 | 11 | 286 | 28 |
| 122,634 | 16 | 0 | 103 | 15 | 16 | 2 | 87  | 11 | 222 | 28 |
| 122,635 | 15 | 0 | 97  | 15 | 15 | 2 | 79  | 11 | 206 | 28 |
| 122,636 | 10 | 0 | 75  | 15 | 11 | 2 | 48  | 11 | 144 | 28 |
| 122,637 | 8  | 0 | 43  | 15 | 6  | 2 | 26  | 10 | 83  | 27 |
| 122,638 | 8  | 0 | 39  | 16 | 6  | 2 | 22  | 10 | 75  | 28 |
| 122,639 | 6  | 0 | 32  | 16 | 5  | 2 | 13  | 10 | 56  | 28 |
| 122,640 | 6  | 0 | 31  | 16 | 4  | 2 | 11  | 10 | 52  | 28 |
| 122,641 | 6  | 0 | 31  | 16 | 4  | 2 | 11  | 10 | 52  | 28 |
| 122,642 | 4  | 0 | 29  | 16 | 4  | 2 | 10  | 10 | 47  | 28 |
| 122,643 | 4  | 0 | 28  | 16 | 4  | 2 | 9   | 9  | 45  | 27 |
| 122,644 | 3  | 0 | 30  | 17 | 4  | 2 | 8   | 8  | 45  | 27 |
| 122,645 | 3  | 0 | 31  | 19 | 4  | 2 | 9   | 7  | 47  | 28 |
| 122,646 | 3  | 0 | 32  | 19 | 4  | 2 | 9   | 7  | 48  | 28 |
| 122,647 | 3  | 0 | 32  | 19 | 4  | 2 | 10  | 7  | 49  | 28 |
| 122,648 | 3  | 0 | 32  | 19 | 4  | 2 | 10  | 7  | 49  | 28 |
| 122,649 | 3  | 0 | 32  | 20 | 4  | 2 | 10  | 7  | 49  | 29 |
| 122,650 | 4  | 0 | 33  | 20 | 5  | 2 | 12  | 7  | 54  | 29 |
| 122,651 | 4  | 0 | 33  | 19 | 5  | 2 | 12  | 7  | 54  | 28 |
| 122,652 | 4  | 0 | 33  | 18 | 5  | 2 | 12  | 7  | 54  | 27 |
| 122,653 | 4  | 0 | 34  | 20 | 5  | 2 | 12  | 8  | 55  | 30 |
| 122,654 | 4  | 0 | 36  | 20 | 5  | 2 | 12  | 8  | 57  | 30 |
| 122,655 | 4  | 0 | 34  | 20 | 5  | 2 | 12  | 8  | 55  | 30 |
| 122,656 | 3  | 0 | 34  | 20 | 5  | 2 | 12  | 7  | 54  | 29 |
| 122,657 | 3  | 0 | 29  | 19 | 5  | 2 | 11  | 7  | 48  | 28 |
| 122,658 | 3  | 0 | 26  | 19 | 5  | 2 | 11  | 6  | 45  | 27 |
| 122,659 | 3  | 0 | 26  | 19 | 5  | 2 | 11  | 6  | 45  | 27 |
| 122,660 | 3  | 0 | 25  | 20 | 2  | 2 | 10  | 6  | 40  | 28 |



|         |   |   |    |    |   |   |    |    |    |    |
|---------|---|---|----|----|---|---|----|----|----|----|
| 122,661 | 3 | 1 | 25 | 18 | 2 | 2 | 10 | 6  | 40 | 27 |
| 122,662 | 3 | 1 | 24 | 20 | 4 | 2 | 10 | 6  | 41 | 29 |
| 122,663 | 3 | 1 | 25 | 20 | 4 | 1 | 9  | 7  | 41 | 29 |
| 122,664 | 3 | 1 | 25 | 19 | 4 | 1 | 9  | 8  | 41 | 29 |
| 122,665 | 4 | 2 | 27 | 20 | 4 | 1 | 9  | 8  | 44 | 31 |
| 122,666 | 4 | 2 | 27 | 19 | 4 | 1 | 9  | 8  | 44 | 30 |
| 122,667 | 4 | 2 | 31 | 19 | 4 | 1 | 14 | 9  | 53 | 31 |
| 122,668 | 4 | 2 | 29 | 18 | 5 | 2 | 16 | 11 | 54 | 33 |
| 122,669 | 3 | 2 | 27 | 17 | 5 | 2 | 15 | 11 | 50 | 32 |
| 122,670 | 3 | 2 | 27 | 17 | 5 | 2 | 15 | 12 | 50 | 33 |
| 122,671 | 3 | 2 | 28 | 16 | 5 | 2 | 16 | 13 | 52 | 33 |
| 122,672 | 3 | 2 | 28 | 16 | 5 | 2 | 16 | 13 | 52 | 33 |
| 122,673 | 3 | 3 | 31 | 16 | 7 | 2 | 21 | 13 | 62 | 34 |
| 122,674 | 3 | 3 | 31 | 16 | 7 | 2 | 21 | 14 | 62 | 35 |
| 122,675 | 3 | 3 | 31 | 16 | 7 | 2 | 21 | 14 | 62 | 35 |
| 122,676 | 3 | 3 | 34 | 15 | 7 | 1 | 22 | 13 | 66 | 32 |
| 122,677 | 3 | 3 | 34 | 15 | 7 | 1 | 22 | 13 | 66 | 32 |
| 122,678 | 3 | 3 | 34 | 17 | 7 | 1 | 23 | 13 | 67 | 34 |
| 122,679 | 3 | 3 | 34 | 16 | 6 | 3 | 23 | 13 | 66 | 35 |
| 122,680 | 3 | 3 | 33 | 16 | 6 | 3 | 23 | 13 | 65 | 35 |
| 122,681 | 3 | 3 | 33 | 19 | 6 | 3 | 23 | 16 | 65 | 41 |
| 122,682 | 3 | 3 | 33 | 20 | 6 | 3 | 23 | 18 | 65 | 44 |
| 122,683 | 2 | 3 | 33 | 20 | 6 | 3 | 23 | 18 | 64 | 44 |
| 122,684 | 2 | 3 | 33 | 20 | 6 | 3 | 23 | 18 | 64 | 44 |
| 122,685 | 2 | 4 | 33 | 20 | 6 | 3 | 23 | 18 | 64 | 45 |
| 122,686 | 2 | 4 | 31 | 20 | 6 | 3 | 23 | 18 | 62 | 45 |
| 122,687 | 2 | 4 | 31 | 20 | 6 | 3 | 22 | 18 | 61 | 45 |
| 122,688 | 2 | 4 | 30 | 20 | 6 | 3 | 22 | 18 | 60 | 45 |
| 122,689 | 2 | 4 | 30 | 19 | 6 | 3 | 22 | 18 | 60 | 44 |
| 122,690 | 2 | 4 | 30 | 19 | 6 | 3 | 22 | 18 | 60 | 44 |
| 122,691 | 2 | 4 | 29 | 19 | 6 | 3 | 22 | 18 | 59 | 44 |
| 122,692 | 2 | 4 | 29 | 19 | 7 | 3 | 22 | 20 | 60 | 46 |
| 122,693 | 2 | 4 | 28 | 19 | 7 | 3 | 22 | 20 | 59 | 46 |
| 122,694 | 2 | 4 | 26 | 19 | 7 | 3 | 23 | 20 | 58 | 46 |
| 122,695 | 2 | 4 | 24 | 18 | 7 | 3 | 23 | 20 | 56 | 45 |
| 122,696 | 2 | 4 | 23 | 16 | 7 | 3 | 22 | 20 | 54 | 43 |
| 122,697 | 2 | 4 | 22 | 16 | 7 | 3 | 22 | 20 | 53 | 43 |
| 122,698 | 2 | 4 | 22 | 16 | 7 | 3 | 21 | 20 | 52 | 43 |
| 122,699 | 2 | 4 | 24 | 16 | 7 | 3 | 21 | 20 | 54 | 43 |
| 122,700 | 2 | 4 | 24 | 15 | 7 | 3 | 20 | 21 | 53 | 43 |
| 122,701 | 1 | 4 | 23 | 18 | 6 | 3 | 19 | 21 | 49 | 46 |

|         |   |   |    |    |   |   |    |    |    |    |
|---------|---|---|----|----|---|---|----|----|----|----|
| 122,702 | 1 | 4 | 23 | 18 | 6 | 3 | 19 | 21 | 49 | 46 |
| 122,703 | 1 | 4 | 23 | 18 | 6 | 3 | 19 | 21 | 49 | 46 |
| 122,704 | 1 | 4 | 22 | 16 | 6 | 3 | 19 | 20 | 48 | 43 |
| 122,705 | 1 | 4 | 20 | 16 | 6 | 3 | 24 | 20 | 51 | 43 |
| 122,706 | 1 | 4 | 24 | 16 | 6 | 3 | 25 | 20 | 56 | 43 |
| 122,707 | 1 | 4 | 24 | 16 | 6 | 3 | 25 | 20 | 56 | 43 |
| 122,708 | 1 | 4 | 25 | 16 | 6 | 3 | 25 | 20 | 57 | 43 |
| 122,709 | 1 | 4 | 25 | 16 | 6 | 3 | 25 | 20 | 57 | 43 |
| 122,710 | 1 | 4 | 26 | 17 | 6 | 3 | 25 | 20 | 58 | 44 |
| 122,711 | 1 | 4 | 26 | 16 | 6 | 3 | 25 | 20 | 58 | 43 |
| 122,712 | 1 | 3 | 26 | 16 | 6 | 3 | 25 | 20 | 58 | 42 |
| 122,713 | 1 | 3 | 26 | 14 | 4 | 3 | 25 | 19 | 56 | 39 |
| 122,714 | 1 | 3 | 26 | 13 | 4 | 3 | 25 | 18 | 56 | 37 |
| 122,715 | 1 | 3 | 25 | 12 | 4 | 3 | 26 | 15 | 56 | 33 |
| 122,716 | 0 | 2 | 22 | 11 | 4 | 2 | 24 | 11 | 50 | 26 |
| 122,717 | 0 | 2 | 22 | 11 | 4 | 2 | 25 | 11 | 51 | 26 |
| 122,718 | 0 | 2 | 16 | 11 | 4 | 2 | 18 | 11 | 38 | 26 |
| 122,719 | 0 | 2 | 16 | 11 | 3 | 2 | 17 | 11 | 36 | 26 |
| 122,720 | 0 | 2 | 16 | 11 | 3 | 2 | 16 | 11 | 35 | 26 |
| 122,721 | 0 | 2 | 16 | 11 | 3 | 2 | 16 | 10 | 35 | 25 |
| 122,722 | 0 | 2 | 15 | 11 | 3 | 2 | 15 | 9  | 33 | 24 |
| 122,723 | 0 | 2 | 12 | 11 | 1 | 2 | 15 | 9  | 28 | 24 |
| 122,724 | 0 | 1 | 12 | 11 | 1 | 2 | 11 | 9  | 24 | 23 |
| 122,725 | 0 | 1 | 9  | 11 | 1 | 2 | 10 | 9  | 20 | 23 |
| 122,726 | 0 | 1 | 9  | 11 | 1 | 2 | 9  | 9  | 19 | 23 |
| 122,727 | 0 | 1 | 9  | 11 | 1 | 2 | 9  | 9  | 19 | 23 |
| 122,728 | 0 | 1 | 9  | 11 | 1 | 2 | 9  | 9  | 19 | 23 |
| 122,729 | 0 | 1 | 9  | 9  | 1 | 2 | 10 | 9  | 20 | 21 |
| 122,730 | 0 | 1 | 9  | 9  | 1 | 0 | 10 | 9  | 20 | 19 |
| 122,731 | 0 | 1 | 9  | 8  | 1 | 0 | 10 | 9  | 20 | 18 |
| 122,732 | 0 | 1 | 9  | 5  | 1 | 0 | 10 | 6  | 20 | 12 |
| 122,733 | 0 | 1 | 9  | 4  | 1 | 0 | 11 | 4  | 21 | 9  |
| 122,734 | 0 | 1 | 9  | 4  | 1 | 0 | 11 | 4  | 21 | 9  |
| 122,735 | 0 | 1 | 10 | 4  | 1 | 0 | 12 | 4  | 23 | 9  |
| 122,736 | 0 | 0 | 12 | 5  | 1 | 0 | 12 | 4  | 25 | 9  |
| 122,737 | 0 | 0 | 12 | 5  | 1 | 0 | 12 | 5  | 25 | 10 |
| 122,738 | 0 | 0 | 12 | 5  | 2 | 0 | 13 | 5  | 27 | 10 |
| 122,739 | 0 | 0 | 12 | 5  | 2 | 0 | 13 | 5  | 27 | 10 |
| 122,740 | 0 | 0 | 12 | 5  | 2 | 0 | 13 | 5  | 27 | 10 |
| 122,741 | 0 | 0 | 12 | 5  | 2 | 0 | 13 | 5  | 27 | 10 |
| 122,742 | 0 | 0 | 13 | 5  | 2 | 0 | 13 | 6  | 28 | 11 |

|         |    |   |     |   |    |   |     |   |     |    |
|---------|----|---|-----|---|----|---|-----|---|-----|----|
| 122,743 | 0  | 0 | 13  | 5 | 1  | 0 | 13  | 4 | 27  | 9  |
| 122,744 | 0  | 0 | 13  | 6 | 1  | 0 | 12  | 4 | 26  | 10 |
| 122,745 | 0  | 0 | 13  | 6 | 1  | 0 | 12  | 4 | 26  | 10 |
| 122,746 | 0  | 0 | 13  | 6 | 1  | 0 | 12  | 4 | 26  | 10 |
| 122,747 | 0  | 0 | 13  | 7 | 1  | 0 | 12  | 4 | 26  | 11 |
| 122,748 | 0  | 0 | 13  | 9 | 1  | 0 | 12  | 4 | 26  | 13 |
| 122,749 | 0  | 0 | 19  | 9 | 1  | 0 | 16  | 4 | 36  | 13 |
| 122,750 | 2  | 0 | 23  | 9 | 1  | 0 | 24  | 4 | 50  | 13 |
| 122,751 | 2  | 0 | 23  | 9 | 1  | 0 | 24  | 3 | 50  | 12 |
| 122,752 | 5  | 0 | 53  | 7 | 3  | 0 | 53  | 3 | 114 | 10 |
| 122,753 | 5  | 0 | 59  | 7 | 4  | 0 | 53  | 4 | 121 | 11 |
| 122,754 | 10 | 0 | 95  | 8 | 9  | 0 | 101 | 4 | 215 | 12 |
| 122,755 | 12 | 0 | 128 | 8 | 13 | 0 | 120 | 4 | 273 | 12 |
| 122,756 | 12 | 0 | 128 | 8 | 13 | 0 | 116 | 4 | 269 | 12 |
| 122,757 | 12 | 0 | 124 | 8 | 13 | 0 | 115 | 4 | 264 | 12 |
| 122,758 | 16 | 0 | 166 | 8 | 17 | 0 | 145 | 4 | 344 | 12 |
| 122,759 | 16 | 0 | 165 | 8 | 17 | 0 | 145 | 4 | 343 | 12 |
| 122,760 | 17 | 0 | 181 | 8 | 17 | 0 | 147 | 4 | 362 | 12 |
| 122,761 | 17 | 0 | 183 | 7 | 17 | 0 | 149 | 4 | 366 | 11 |
| 122,762 | 17 | 0 | 183 | 7 | 17 | 0 | 149 | 4 | 366 | 11 |
| 122,763 | 17 | 0 | 183 | 7 | 17 | 0 | 151 | 4 | 368 | 11 |
| 122,764 | 17 | 0 | 183 | 7 | 17 | 0 | 151 | 4 | 368 | 11 |
| 122,765 | 17 | 0 | 182 | 7 | 17 | 0 | 151 | 4 | 367 | 11 |
| 122,766 | 17 | 0 | 184 | 7 | 17 | 0 | 152 | 4 | 370 | 11 |
| 122,767 | 17 | 0 | 184 | 7 | 18 | 0 | 153 | 4 | 372 | 11 |
| 122,768 | 17 | 0 | 184 | 7 | 18 | 0 | 152 | 4 | 371 | 11 |
| 122,769 | 17 | 0 | 185 | 7 | 20 | 0 | 156 | 4 | 378 | 11 |
| 122,770 | 17 | 0 | 185 | 7 | 20 | 0 | 156 | 4 | 378 | 11 |
| 122,771 | 17 | 0 | 185 | 7 | 20 | 0 | 156 | 4 | 378 | 11 |
| 122,772 | 21 | 0 | 189 | 7 | 22 | 0 | 165 | 4 | 397 | 11 |
| 122,773 | 21 | 0 | 189 | 7 | 22 | 0 | 165 | 4 | 397 | 11 |
| 122,774 | 21 | 0 | 189 | 7 | 22 | 0 | 165 | 4 | 397 | 11 |
| 122,775 | 21 | 0 | 203 | 7 | 27 | 0 | 176 | 4 | 427 | 11 |
| 122,776 | 21 | 0 | 203 | 7 | 27 | 0 | 176 | 3 | 427 | 10 |
| 122,777 | 21 | 0 | 203 | 7 | 27 | 0 | 176 | 3 | 427 | 10 |
| 122,778 | 22 | 0 | 219 | 7 | 28 | 0 | 180 | 3 | 449 | 10 |
| 122,779 | 22 | 0 | 219 | 7 | 28 | 0 | 180 | 3 | 449 | 10 |
| 122,780 | 22 | 0 | 219 | 7 | 28 | 0 | 179 | 3 | 448 | 10 |
| 122,781 | 22 | 0 | 219 | 7 | 28 | 0 | 179 | 3 | 448 | 10 |
| 122,782 | 22 | 0 | 219 | 7 | 28 | 0 | 179 | 3 | 448 | 10 |
| 122,783 | 22 | 0 | 219 | 7 | 28 | 0 | 178 | 3 | 447 | 10 |

|         |    |   |     |   |    |   |     |   |     |    |
|---------|----|---|-----|---|----|---|-----|---|-----|----|
| 122,784 | 22 | 0 | 219 | 7 | 28 | 0 | 178 | 3 | 447 | 10 |
| 122,785 | 22 | 0 | 220 | 7 | 28 | 0 | 179 | 3 | 449 | 10 |
| 122,786 | 22 | 0 | 222 | 7 | 28 | 1 | 178 | 3 | 450 | 11 |
| 122,787 | 23 | 0 | 233 | 6 | 29 | 1 | 183 | 2 | 468 | 9  |
| 122,788 | 23 | 0 | 239 | 6 | 29 | 1 | 186 | 2 | 477 | 9  |
| 122,789 | 23 | 0 | 239 | 6 | 28 | 1 | 188 | 2 | 478 | 9  |
| 122,790 | 23 | 0 | 239 | 6 | 28 | 1 | 188 | 2 | 478 | 9  |
| 122,791 | 23 | 0 | 244 | 6 | 28 | 1 | 190 | 2 | 485 | 9  |
| 122,792 | 23 | 1 | 245 | 6 | 28 | 1 | 190 | 2 | 486 | 10 |
| 122,793 | 24 | 1 | 246 | 6 | 28 | 1 | 192 | 1 | 490 | 9  |
| 122,794 | 24 | 1 | 246 | 6 | 28 | 1 | 192 | 1 | 490 | 9  |
| 122,795 | 24 | 1 | 255 | 5 | 29 | 1 | 196 | 1 | 504 | 8  |
| 122,796 | 24 | 1 | 255 | 5 | 29 | 1 | 196 | 1 | 504 | 8  |
| 122,797 | 25 | 1 | 268 | 6 | 35 | 1 | 214 | 1 | 542 | 9  |
| 122,798 | 25 | 1 | 268 | 5 | 35 | 1 | 214 | 0 | 542 | 7  |
| 122,799 | 31 | 1 | 280 | 4 | 37 | 1 | 225 | 0 | 573 | 6  |
| 122,800 | 31 | 1 | 305 | 5 | 42 | 1 | 246 | 0 | 624 | 7  |
| 122,801 | 33 | 1 | 317 | 6 | 46 | 1 | 251 | 0 | 647 | 8  |
| 122,802 | 43 | 1 | 435 | 6 | 73 | 1 | 332 | 0 | 883 | 8  |
| 122,803 | 44 | 1 | 437 | 4 | 78 | 1 | 335 | 0 | 894 | 6  |
| 122,804 | 44 | 1 | 438 | 5 | 79 | 1 | 345 | 0 | 906 | 7  |
| 122,805 | 40 | 2 | 413 | 5 | 76 | 1 | 304 | 0 | 833 | 8  |
| 122,806 | 38 | 2 | 382 | 5 | 72 | 1 | 287 | 0 | 779 | 8  |
| 122,807 | 38 | 2 | 375 | 6 | 70 | 1 | 277 | 0 | 760 | 9  |
| 122,808 | 34 | 2 | 344 | 6 | 70 | 1 | 263 | 0 | 711 | 9  |
| 122,809 | 34 | 2 | 342 | 6 | 68 | 1 | 258 | 0 | 702 | 9  |
| 122,810 | 33 | 2 | 325 | 5 | 68 | 1 | 258 | 0 | 684 | 8  |
| 122,811 | 33 | 2 | 324 | 6 | 68 | 1 | 258 | 0 | 683 | 9  |
| 122,812 | 33 | 2 | 326 | 6 | 68 | 2 | 260 | 0 | 687 | 10 |
| 122,813 | 33 | 2 | 333 | 6 | 69 | 2 | 261 | 0 | 696 | 10 |
| 122,814 | 33 | 2 | 333 | 6 | 69 | 2 | 260 | 0 | 695 | 10 |
| 122,815 | 33 | 2 | 338 | 6 | 70 | 2 | 264 | 1 | 705 | 11 |
| 122,816 | 33 | 2 | 336 | 6 | 71 | 2 | 263 | 1 | 703 | 11 |
| 122,817 | 33 | 2 | 353 | 6 | 71 | 2 | 278 | 1 | 735 | 11 |
| 122,818 | 35 | 2 | 357 | 6 | 70 | 2 | 277 | 1 | 739 | 11 |
| 122,819 | 35 | 2 | 362 | 6 | 68 | 2 | 281 | 1 | 746 | 11 |
| 122,820 | 37 | 2 | 374 | 6 | 68 | 2 | 289 | 1 | 768 | 11 |
| 122,821 | 34 | 2 | 371 | 6 | 68 | 2 | 287 | 1 | 760 | 11 |
| 122,822 | 34 | 2 | 376 | 6 | 68 | 2 | 291 | 1 | 769 | 11 |
| 122,823 | 34 | 2 | 377 | 6 | 67 | 2 | 290 | 1 | 768 | 11 |
| 122,824 | 34 | 2 | 377 | 6 | 67 | 2 | 290 | 1 | 768 | 11 |

|         |    |   |     |   |    |   |     |   |       |    |
|---------|----|---|-----|---|----|---|-----|---|-------|----|
| 122,825 | 34 | 2 | 375 | 6 | 64 | 2 | 287 | 1 | 760   | 11 |
| 122,826 | 34 | 2 | 363 | 6 | 62 | 2 | 280 | 1 | 739   | 11 |
| 122,827 | 35 | 2 | 359 | 6 | 61 | 2 | 279 | 1 | 734   | 11 |
| 122,828 | 34 | 2 | 358 | 6 | 61 | 2 | 281 | 1 | 734   | 11 |
| 122,829 | 34 | 2 | 356 | 6 | 62 | 2 | 280 | 1 | 732   | 11 |
| 122,830 | 34 | 3 | 360 | 6 | 62 | 2 | 282 | 1 | 738   | 12 |
| 122,831 | 34 | 3 | 369 | 6 | 62 | 2 | 282 | 1 | 747   | 12 |
| 122,832 | 34 | 3 | 376 | 6 | 62 | 2 | 288 | 1 | 760   | 12 |
| 122,833 | 34 | 3 | 376 | 6 | 62 | 2 | 288 | 1 | 760   | 12 |
| 122,834 | 38 | 3 | 436 | 6 | 69 | 2 | 319 | 1 | 862   | 12 |
| 122,835 | 39 | 3 | 440 | 6 | 69 | 2 | 324 | 1 | 872   | 12 |
| 122,836 | 39 | 3 | 439 | 6 | 69 | 2 | 326 | 1 | 873   | 12 |
| 122,837 | 39 | 3 | 437 | 6 | 69 | 1 | 326 | 1 | 871   | 11 |
| 122,838 | 38 | 3 | 424 | 6 | 68 | 1 | 321 | 1 | 851   | 11 |
| 122,839 | 38 | 3 | 419 | 6 | 68 | 1 | 320 | 1 | 845   | 11 |
| 122,840 | 38 | 3 | 419 | 6 | 68 | 1 | 317 | 1 | 842   | 11 |
| 122,841 | 38 | 3 | 419 | 6 | 68 | 1 | 317 | 1 | 842   | 11 |
| 122,842 | 38 | 2 | 414 | 6 | 68 | 1 | 315 | 1 | 835   | 10 |
| 122,843 | 38 | 2 | 415 | 6 | 68 | 1 | 315 | 1 | 836   | 10 |
| 122,844 | 37 | 2 | 412 | 6 | 69 | 1 | 313 | 1 | 831   | 10 |
| 122,845 | 37 | 2 | 408 | 6 | 68 | 1 | 312 | 1 | 825   | 10 |
| 122,846 | 37 | 2 | 404 | 5 | 68 | 1 | 309 | 1 | 818   | 9  |
| 122,847 | 37 | 2 | 405 | 5 | 68 | 1 | 307 | 1 | 817   | 9  |
| 122,848 | 36 | 2 | 394 | 5 | 62 | 1 | 291 | 1 | 783   | 9  |
| 122,849 | 37 | 2 | 403 | 6 | 62 | 1 | 290 | 1 | 792   | 10 |
| 122,850 | 31 | 2 | 394 | 5 | 60 | 1 | 282 | 2 | 767   | 10 |
| 122,851 | 31 | 2 | 364 | 4 | 55 | 1 | 257 | 2 | 707   | 9  |
| 122,852 | 27 | 2 | 346 | 3 | 51 | 1 | 244 | 2 | 668   | 8  |
| 122,853 | 15 | 2 | 212 | 3 | 23 | 1 | 149 | 2 | 399   | 8  |
| 122,854 | 36 | 2 | 287 | 3 | 24 | 1 | 157 | 2 | 504   | 8  |
| 122,855 | 36 | 2 | 280 | 2 | 22 | 1 | 148 | 2 | 486   | 7  |
| 122,856 | 35 | 1 | 270 | 2 | 20 | 1 | 142 | 2 | 467   | 6  |
| 122,857 | 48 | 1 | 437 | 2 | 27 | 1 | 219 | 2 | 731   | 6  |
| 122,858 | 59 | 1 | 527 | 2 | 30 | 1 | 274 | 2 | 890   | 6  |
| 122,859 | 71 | 1 | 637 | 1 | 38 | 1 | 338 | 2 | 1,084 | 5  |
| 122,860 | 71 | 2 | 635 | 1 | 38 | 1 | 339 | 2 | 1,083 | 6  |
| 122,861 | 71 | 2 | 635 | 1 | 38 | 1 | 337 | 2 | 1,081 | 6  |
| 122,862 | 90 | 2 | 739 | 1 | 44 | 1 | 404 | 2 | 1,277 | 6  |
| 122,863 | 92 | 2 | 740 | 1 | 44 | 0 | 405 | 2 | 1,281 | 5  |
| 122,864 | 92 | 2 | 733 | 1 | 43 | 0 | 404 | 2 | 1,272 | 5  |
| 122,865 | 94 | 2 | 737 | 1 | 43 | 0 | 406 | 2 | 1,280 | 5  |

|         |    |   |     |   |    |   |     |   |       |   |
|---------|----|---|-----|---|----|---|-----|---|-------|---|
| 122,866 | 94 | 2 | 732 | 1 | 42 | 0 | 401 | 1 | 1,269 | 4 |
| 122,867 | 94 | 2 | 732 | 1 | 41 | 0 | 401 | 1 | 1,268 | 4 |
| 122,868 | 94 | 2 | 715 | 1 | 41 | 0 | 386 | 1 | 1,236 | 4 |
| 122,869 | 92 | 2 | 711 | 1 | 41 | 0 | 386 | 1 | 1,230 | 4 |
| 122,870 | 92 | 2 | 705 | 1 | 41 | 0 | 379 | 1 | 1,217 | 4 |
| 122,871 | 90 | 2 | 693 | 1 | 41 | 0 | 370 | 1 | 1,194 | 4 |
| 122,872 | 90 | 2 | 692 | 1 | 41 | 0 | 367 | 1 | 1,190 | 4 |
| 122,873 | 89 | 2 | 687 | 1 | 40 | 0 | 361 | 1 | 1,177 | 4 |
| 122,874 | 89 | 2 | 686 | 1 | 40 | 0 | 360 | 1 | 1,175 | 4 |
| 122,875 | 90 | 2 | 686 | 1 | 40 | 0 | 360 | 1 | 1,176 | 4 |
| 122,876 | 90 | 2 | 687 | 1 | 40 | 0 | 359 | 1 | 1,176 | 4 |
| 122,877 | 90 | 2 | 689 | 1 | 40 | 0 | 360 | 1 | 1,179 | 4 |
| 122,878 | 89 | 2 | 688 | 1 | 40 | 0 | 360 | 1 | 1,177 | 4 |
| 122,879 | 89 | 3 | 685 | 1 | 40 | 0 | 356 | 1 | 1,170 | 5 |
| 122,880 | 89 | 3 | 680 | 1 | 39 | 0 | 356 | 1 | 1,164 | 5 |
| 122,881 | 89 | 2 | 677 | 1 | 39 | 0 | 354 | 1 | 1,159 | 4 |
| 122,882 | 89 | 2 | 667 | 1 | 39 | 0 | 354 | 1 | 1,149 | 4 |
| 122,883 | 89 | 2 | 661 | 1 | 39 | 0 | 348 | 1 | 1,137 | 4 |
| 122,884 | 85 | 2 | 601 | 1 | 32 | 0 | 319 | 1 | 1,037 | 4 |
| 122,885 | 85 | 2 | 601 | 1 | 32 | 0 | 317 | 1 | 1,035 | 4 |
| 122,886 | 84 | 2 | 597 | 1 | 32 | 0 | 312 | 1 | 1,025 | 4 |
| 122,887 | 86 | 2 | 600 | 1 | 32 | 0 | 312 | 1 | 1,030 | 4 |
| 122,888 | 86 | 2 | 599 | 1 | 32 | 0 | 312 | 1 | 1,029 | 4 |
| 122,889 | 86 | 2 | 599 | 2 | 32 | 0 | 312 | 1 | 1,029 | 5 |
| 122,890 | 86 | 2 | 599 | 2 | 32 | 0 | 311 | 1 | 1,028 | 5 |
| 122,891 | 87 | 2 | 607 | 2 | 32 | 0 | 314 | 1 | 1,040 | 5 |
| 122,892 | 87 | 2 | 607 | 2 | 32 | 0 | 314 | 1 | 1,040 | 5 |
| 122,893 | 87 | 2 | 607 | 2 | 32 | 0 | 314 | 1 | 1,040 | 5 |
| 122,894 | 87 | 2 | 627 | 2 | 32 | 0 | 320 | 1 | 1,066 | 5 |
| 122,895 | 87 | 2 | 627 | 2 | 31 | 0 | 320 | 1 | 1,065 | 5 |
| 122,896 | 87 | 2 | 627 | 2 | 31 | 0 | 321 | 1 | 1,066 | 5 |
| 122,897 | 87 | 2 | 626 | 3 | 31 | 0 | 322 | 1 | 1,066 | 6 |
| 122,898 | 87 | 2 | 623 | 3 | 31 | 0 | 322 | 1 | 1,063 | 6 |
| 122,899 | 87 | 2 | 620 | 3 | 31 | 0 | 322 | 1 | 1,060 | 6 |
| 122,900 | 86 | 2 | 611 | 2 | 32 | 0 | 320 | 0 | 1,049 | 4 |
| 122,901 | 86 | 2 | 611 | 2 | 32 | 0 | 321 | 0 | 1,050 | 4 |
| 122,902 | 86 | 2 | 611 | 2 | 32 | 0 | 321 | 0 | 1,050 | 4 |
| 122,903 | 86 | 2 | 606 | 2 | 32 | 1 | 318 | 0 | 1,042 | 5 |
| 122,904 | 84 | 2 | 598 | 2 | 32 | 1 | 318 | 0 | 1,032 | 5 |
| 122,905 | 63 | 2 | 520 | 2 | 25 | 1 | 293 | 0 | 901   | 5 |
| 122,906 | 52 | 2 | 428 | 2 | 19 | 1 | 262 | 0 | 761   | 5 |

|         |    |   |     |   |    |   |     |   |     |    |
|---------|----|---|-----|---|----|---|-----|---|-----|----|
| 122,907 | 50 | 2 | 352 | 2 | 18 | 1 | 211 | 0 | 631 | 5  |
| 122,908 | 39 | 2 | 263 | 2 | 15 | 1 | 156 | 0 | 473 | 5  |
| 122,909 | 27 | 2 | 155 | 2 | 7  | 1 | 91  | 0 | 280 | 5  |
| 122,910 | 15 | 2 | 76  | 2 | 4  | 1 | 50  | 0 | 145 | 5  |
| 122,911 | 11 | 1 | 68  | 2 | 2  | 1 | 31  | 0 | 112 | 4  |
| 122,912 | 9  | 1 | 63  | 2 | 2  | 1 | 29  | 0 | 103 | 4  |
| 122,913 | 8  | 1 | 55  | 2 | 1  | 1 | 25  | 0 | 89  | 4  |
| 122,914 | 7  | 1 | 51  | 2 | 1  | 1 | 21  | 0 | 80  | 4  |
| 122,915 | 5  | 2 | 48  | 2 | 1  | 2 | 19  | 0 | 73  | 6  |
| 122,916 | 5  | 2 | 48  | 2 | 1  | 2 | 19  | 0 | 73  | 6  |
| 122,917 | 5  | 2 | 48  | 2 | 1  | 2 | 19  | 0 | 73  | 6  |
| 122,918 | 5  | 2 | 49  | 2 | 1  | 2 | 19  | 0 | 74  | 6  |
| 122,919 | 5  | 2 | 49  | 2 | 1  | 2 | 19  | 0 | 74  | 6  |
| 122,920 | 5  | 2 | 50  | 2 | 1  | 2 | 20  | 0 | 76  | 6  |
| 122,921 | 5  | 2 | 50  | 2 | 1  | 2 | 20  | 0 | 76  | 6  |
| 122,922 | 5  | 2 | 53  | 2 | 1  | 2 | 21  | 0 | 80  | 6  |
| 122,923 | 5  | 2 | 53  | 2 | 1  | 2 | 21  | 0 | 80  | 6  |
| 122,924 | 5  | 2 | 53  | 2 | 1  | 2 | 21  | 0 | 80  | 6  |
| 122,925 | 5  | 2 | 54  | 2 | 1  | 2 | 21  | 0 | 81  | 6  |
| 122,926 | 4  | 2 | 57  | 2 | 1  | 2 | 21  | 0 | 83  | 6  |
| 122,927 | 4  | 2 | 61  | 3 | 1  | 2 | 21  | 0 | 87  | 7  |
| 122,928 | 4  | 2 | 60  | 3 | 1  | 2 | 20  | 0 | 85  | 7  |
| 122,929 | 4  | 2 | 61  | 3 | 2  | 3 | 20  | 0 | 87  | 8  |
| 122,930 | 4  | 1 | 61  | 3 | 2  | 3 | 20  | 0 | 87  | 7  |
| 122,931 | 4  | 1 | 61  | 3 | 2  | 3 | 20  | 0 | 87  | 7  |
| 122,932 | 4  | 1 | 60  | 3 | 2  | 3 | 20  | 0 | 86  | 7  |
| 122,933 | 4  | 1 | 60  | 3 | 2  | 4 | 20  | 0 | 86  | 8  |
| 122,934 | 4  | 1 | 60  | 3 | 2  | 5 | 20  | 0 | 86  | 9  |
| 122,935 | 4  | 1 | 60  | 3 | 2  | 5 | 20  | 0 | 86  | 9  |
| 122,936 | 3  | 1 | 60  | 3 | 2  | 5 | 20  | 0 | 85  | 9  |
| 122,937 | 2  | 1 | 59  | 4 | 2  | 5 | 20  | 0 | 83  | 10 |
| 122,938 | 2  | 1 | 57  | 4 | 2  | 5 | 18  | 0 | 79  | 10 |
| 122,939 | 2  | 1 | 57  | 5 | 2  | 5 | 19  | 0 | 80  | 11 |
| 122,940 | 2  | 1 | 56  | 4 | 2  | 5 | 18  | 0 | 78  | 10 |
| 122,941 | 3  | 1 | 55  | 4 | 3  | 5 | 18  | 0 | 79  | 10 |
| 122,942 | 3  | 1 | 53  | 4 | 3  | 5 | 17  | 1 | 76  | 11 |
| 122,943 | 4  | 1 | 54  | 4 | 3  | 5 | 18  | 1 | 79  | 11 |
| 122,944 | 4  | 1 | 46  | 4 | 3  | 5 | 17  | 2 | 70  | 12 |
| 122,945 | 6  | 1 | 33  | 4 | 3  | 5 | 12  | 2 | 54  | 12 |
| 122,946 | 6  | 1 | 33  | 5 | 3  | 5 | 11  | 2 | 53  | 13 |
| 122,947 | 6  | 1 | 34  | 5 | 3  | 5 | 10  | 2 | 53  | 13 |

|         |   |   |    |   |   |   |    |   |    |    |
|---------|---|---|----|---|---|---|----|---|----|----|
| 122,948 | 6 | 1 | 34 | 4 | 3 | 5 | 10 | 2 | 53 | 12 |
| 122,949 | 6 | 1 | 34 | 4 | 3 | 5 | 10 | 2 | 53 | 12 |
| 122,950 | 6 | 1 | 35 | 4 | 2 | 5 | 10 | 2 | 53 | 12 |
| 122,951 | 6 | 1 | 35 | 4 | 2 | 5 | 10 | 2 | 53 | 12 |
| 122,952 | 6 | 1 | 36 | 4 | 2 | 5 | 8  | 2 | 52 | 12 |
| 122,953 | 6 | 1 | 35 | 4 | 2 | 5 | 8  | 2 | 51 | 12 |
| 122,954 | 6 | 1 | 35 | 4 | 2 | 4 | 8  | 2 | 51 | 11 |
| 122,955 | 6 | 1 | 35 | 4 | 2 | 4 | 8  | 2 | 51 | 11 |
| 122,956 | 6 | 1 | 35 | 4 | 2 | 4 | 8  | 2 | 51 | 11 |
| 122,957 | 6 | 1 | 33 | 4 | 2 | 4 | 8  | 2 | 49 | 11 |
| 122,958 | 6 | 1 | 33 | 4 | 2 | 4 | 8  | 2 | 49 | 11 |
| 122,959 | 6 | 1 | 32 | 4 | 3 | 4 | 8  | 2 | 49 | 11 |
| 122,960 | 6 | 1 | 30 | 4 | 3 | 4 | 8  | 2 | 47 | 11 |
| 122,961 | 6 | 1 | 29 | 4 | 3 | 4 | 7  | 2 | 45 | 11 |
| 122,962 | 6 | 1 | 25 | 4 | 3 | 4 | 7  | 2 | 41 | 11 |
| 122,963 | 6 | 1 | 25 | 4 | 3 | 4 | 7  | 2 | 41 | 11 |
| 122,964 | 5 | 1 | 25 | 4 | 3 | 4 | 8  | 2 | 41 | 11 |
| 122,965 | 5 | 1 | 25 | 4 | 3 | 4 | 8  | 2 | 41 | 11 |
| 122,966 | 5 | 0 | 25 | 4 | 3 | 3 | 8  | 2 | 41 | 9  |
| 122,967 | 5 | 0 | 25 | 4 | 3 | 3 | 8  | 2 | 41 | 9  |
| 122,968 | 6 | 0 | 24 | 4 | 3 | 3 | 9  | 2 | 42 | 9  |
| 122,969 | 6 | 0 | 24 | 4 | 3 | 3 | 9  | 2 | 42 | 9  |
| 122,970 | 6 | 0 | 23 | 4 | 3 | 3 | 8  | 2 | 40 | 9  |
| 122,971 | 6 | 0 | 23 | 4 | 3 | 3 | 8  | 2 | 40 | 9  |
| 122,972 | 6 | 0 | 23 | 4 | 3 | 3 | 8  | 1 | 40 | 8  |
| 122,973 | 6 | 0 | 20 | 4 | 3 | 3 | 7  | 2 | 36 | 9  |
| 122,974 | 6 | 0 | 20 | 4 | 3 | 3 | 7  | 2 | 36 | 9  |
| 122,975 | 6 | 0 | 20 | 4 | 3 | 3 | 7  | 2 | 36 | 9  |
| 122,976 | 6 | 0 | 19 | 4 | 3 | 3 | 7  | 2 | 35 | 9  |
| 122,977 | 6 | 0 | 16 | 4 | 3 | 3 | 7  | 2 | 32 | 9  |
| 122,978 | 7 | 0 | 10 | 4 | 3 | 3 | 8  | 2 | 28 | 9  |
| 122,979 | 7 | 0 | 9  | 4 | 3 | 3 | 8  | 2 | 27 | 9  |
| 122,980 | 7 | 0 | 9  | 4 | 2 | 2 | 8  | 2 | 26 | 8  |
| 122,981 | 7 | 0 | 9  | 4 | 2 | 2 | 8  | 2 | 26 | 8  |
| 122,982 | 7 | 0 | 9  | 4 | 2 | 2 | 8  | 2 | 26 | 8  |
| 122,983 | 7 | 0 | 9  | 4 | 2 | 1 | 8  | 2 | 26 | 7  |
| 122,984 | 7 | 0 | 9  | 4 | 2 | 0 | 8  | 2 | 26 | 6  |
| 122,985 | 7 | 0 | 9  | 4 | 2 | 0 | 8  | 2 | 26 | 6  |
| 122,986 | 7 | 0 | 9  | 4 | 2 | 0 | 8  | 2 | 26 | 6  |
| 122,987 | 7 | 0 | 9  | 3 | 2 | 0 | 8  | 2 | 26 | 5  |
| 122,988 | 7 | 0 | 9  | 3 | 2 | 0 | 7  | 2 | 25 | 5  |



|         |   |   |   |   |   |   |   |   |    |   |
|---------|---|---|---|---|---|---|---|---|----|---|
| 122,989 | 7 | 0 | 9 | 3 | 2 | 0 | 7 | 2 | 25 | 5 |
| 122,990 | 6 | 0 | 6 | 2 | 1 | 0 | 6 | 2 | 19 | 4 |
| 122,991 | 6 | 0 | 4 | 2 | 1 | 0 | 6 | 2 | 17 | 4 |
| 122,992 | 5 | 0 | 4 | 2 | 1 | 0 | 4 | 2 | 14 | 4 |
| 122,993 | 4 | 0 | 4 | 2 | 1 | 0 | 4 | 2 | 13 | 4 |
| 122,994 | 4 | 0 | 3 | 2 | 1 | 0 | 3 | 1 | 11 | 3 |
| 122,995 | 4 | 0 | 3 | 2 | 1 | 0 | 3 | 0 | 11 | 2 |
| 122,996 | 2 | 0 | 3 | 2 | 1 | 0 | 3 | 0 | 9  | 2 |
| 122,997 | 2 | 0 | 3 | 1 | 1 | 0 | 3 | 0 | 9  | 1 |
| 122,998 | 2 | 0 | 2 | 1 | 1 | 0 | 3 | 0 | 8  | 1 |
| 122,999 | 2 | 0 | 2 | 1 | 1 | 0 | 3 | 0 | 8  | 1 |
| 123,000 | 2 | 0 | 2 | 1 | 1 | 0 | 3 | 0 | 8  | 1 |
| 123,001 | 2 | 0 | 1 | 1 | 1 | 0 | 3 | 0 | 7  | 1 |
| 123,002 | 2 | 0 | 0 | 1 | 1 | 0 | 3 | 0 | 6  | 1 |
| 123,003 | 2 | 0 | 0 | 1 | 1 | 0 | 3 | 0 | 6  | 1 |
| 123,004 | 2 | 0 | 0 | 1 | 1 | 0 | 3 | 0 | 6  | 1 |
| 123,005 | 2 | 0 | 0 | 1 | 1 | 0 | 3 | 0 | 6  | 1 |
| 123,006 | 2 | 0 | 0 | 1 | 1 | 0 | 3 | 0 | 6  | 1 |
| 123,007 | 2 | 0 | 0 | 1 | 1 | 0 | 3 | 0 | 6  | 1 |
| 123,008 | 2 | 0 | 0 | 1 | 1 | 0 | 3 | 0 | 6  | 1 |
| 123,009 | 2 | 0 | 0 | 1 | 1 | 0 | 3 | 0 | 6  | 1 |
| 123,010 | 2 | 0 | 0 | 1 | 0 | 0 | 3 | 0 | 5  | 1 |
| 123,011 | 2 | 0 | 0 | 1 | 0 | 0 | 3 | 0 | 5  | 1 |
| 123,012 | 2 | 0 | 0 | 1 | 0 | 0 | 3 | 0 | 5  | 1 |
| 123,013 | 2 | 0 | 0 | 1 | 0 | 0 | 3 | 0 | 5  | 1 |
| 123,014 | 2 | 0 | 0 | 1 | 0 | 0 | 2 | 0 | 4  | 1 |
| 123,015 | 2 | 0 | 0 | 1 | 0 | 0 | 2 | 0 | 4  | 1 |
| 123,016 | 2 | 0 | 0 | 1 | 0 | 0 | 2 | 0 | 4  | 1 |
| 123,017 | 2 | 0 | 0 | 1 | 0 | 0 | 2 | 0 | 4  | 1 |
| 123,018 | 2 | 0 | 0 | 1 | 0 | 0 | 2 | 0 | 4  | 1 |
| 123,019 | 1 | 0 | 0 | 1 | 0 | 0 | 1 | 0 | 2  | 1 |
| 123,020 | 1 | 0 | 0 | 1 | 0 | 0 | 1 | 0 | 2  | 1 |
| 123,021 | 1 | 0 | 0 | 1 | 0 | 0 | 1 | 0 | 2  | 1 |
| 123,022 | 1 | 0 | 0 | 1 | 0 | 0 | 1 | 0 | 2  | 1 |
| 123,023 | 1 | 0 | 0 | 1 | 0 | 0 | 1 | 0 | 2  | 1 |
| 123,024 | 1 | 0 | 0 | 1 | 0 | 0 | 1 | 0 | 2  | 1 |
| 123,025 | 1 | 0 | 0 | 1 | 0 | 0 | 1 | 0 | 2  | 1 |

<sup>a</sup> Nucleotide location relative to VZV-DEN09 DNA.

TABLE S4 VZV-DEN09 transcripts per million (TPM) mapped reads for annotated open reading frames (ORF)

| ORF <sup>a</sup> | Start <sup>a</sup> | End    | Length | TPM                     | TPM                   | TPM                     | TPM                   | P (t-test) |
|------------------|--------------------|--------|--------|-------------------------|-----------------------|-------------------------|-----------------------|------------|
|                  |                    |        |        | library C<br>unenriched | library C<br>enriched | library D<br>unenriched | library D<br>enriched |            |
| ORF 0            | 173                | 559    | 387    | 5.933                   | 6.621                 | 8.986                   | 6.244                 | 0.919      |
| ORF 1            | 915                | 592    | 324    | 1.672                   | 0.981                 | 1.136                   | 1.093                 | 0.977      |
| ORF 2            | 1,134              | 1,847  | 714    | 2.692                   | 2.398                 | 2.974                   | 2.188                 | 0.998      |
| ORF 3            | 2,447              | 1,911  | 537    | 9.073                   | 8.268                 | 9.780                   | 8.040                 | 0.971      |
| ORF 4            | 4,141              | 2,786  | 1,356  | 25.065                  | 20.162                | 22.318                  | 20.454                | 0.898      |
| ORF 5            | 5,274              | 4,255  | 1,020  | 3.049                   | 2.765                 | 2.649                   | 2.540                 | 0.705      |
| ORF 6            | 8,577              | 5,329  | 3,249  | 1.480                   | 1.348                 | 1.441                   | 1.400                 | 0.694      |
| ORF 7            | 8,607              | 9,383  | 777    | 3.440                   | 2.655                 | 2.883                   | 2.710                 | 0.690      |
| ORF 8            | 10,667             | 9,480  | 1,188  | 3.575                   | 3.284                 | 4.354                   | 3.805                 | 0.664      |
| ORF 9A           | 10,642             | 10,902 | 261    | 6.094                   | 6.151                 | 6.528                   | 7.344                 | 0.641      |
| ORF 9            | 11,009             | 11,914 | 906    | 39.991                  | 40.377                | 45.843                  | 42.716                | 0.664      |
| ORF 10           | 12,160             | 13,389 | 1,230  | 7.531                   | 7.270                 | 6.025                   | 6.857                 | 0.583      |
| ORF 11           | 13,590             | 16,034 | 2,445  | 14.995                  | 14.384                | 19.791                  | 16.942                | 0.597      |
| ORF 12           | 16,202             | 16,267 | 66     | 4.700                   | 3.521                 | 3.600                   | 3.568                 | 0.500      |
| ORF 13           | 16,270             | 17,172 | 903    | 9.473                   | 7.473                 | 7.774                   | 8.519                 | 0.470      |
| ORF 14           | 18,942             | 17,263 | 1,680  | 0.306                   | 0.273                 | 0.347                   | 0.358                 | 0.440      |
| ORF 15           | 20,307             | 19,090 | 1,218  | 3.374                   | 3.451                 | 3.364                   | 3.513                 | 0.440      |
| ORF 16           | 21,623             | 20,400 | 1,224  | 2.328                   | 1.779                 | 1.897                   | 1.902                 | 0.445      |
| ORF 17           | 21,978             | 23,342 | 1,365  | 2.584                   | 2.429                 | 2.334                   | 2.482                 | 0.433      |
| ORF 18           | 24,322             | 23,405 | 918    | 6.819                   | 5.591                 | 6.606                   | 6.544                 | 0.432      |
| ORF 19           | 26,674             | 24,350 | 2,325  | 5.288                   | 4.350                 | 4.804                   | 4.782                 | 0.403      |
| ORF 20           | 28,304             | 26,856 | 1,449  | 7.971                   | 8.074                 | 9.324                   | 8.985                 | 0.382      |
| ORF 21           | 28,588             | 31,701 | 3,114  | 3.710                   | 3.117                 | 3.031                   | 3.076                 | 0.377      |
| ORF 22           | 31,912             | 40,245 | 8,334  | 3.739                   | 3.424                 | 2.903                   | 2.869                 | 0.365      |
| ORF 23           | 41,012             | 40,308 | 705    | 12.769                  | 14.638                | 13.616                  | 11.444                | 0.358      |
| ORF 24           | 41,895             | 41,089 | 807    | 5.937                   | 6.968                 | 5.196                   | 5.677                 | 0.350      |
| ORF 25           | 42,492             | 42,025 | 468    | 2.992                   | 2.319                 | 3.074                   | 2.398                 | 0.381      |
| ORF 26           | 42,380             | 44,134 | 1,755  | 1.710                   | 1.711                 | 1.589                   | 1.692                 | 0.352      |
| ORF 27           | 44,001             | 44,999 | 999    | 3.260                   | 3.771                 | 3.474                   | 3.623                 | 0.354      |
| ORF 28           | 48,510             | 44,929 | 3,582  | 3.024                   | 2.489                 | 2.772                   | 2.594                 | 0.368      |
| ORF 29           | 48,731             | 52,342 | 3,612  | 7.503                   | 7.344                 | 6.505                   | 6.397                 | 0.353      |
| ORF 30           | 52,525             | 54,834 | 2,310  | 1.899                   | 1.718                 | 1.415                   | 1.664                 | 0.347      |
| ORF 31           | 54,882             | 57,485 | 2,604  | 12.864                  | 11.826                | 11.339                  | 11.612                | 0.349      |
| ORF 32           | 57,640             | 58,068 | 429    | 12.951                  | 10.397                | 13.269                  | 11.423                | 0.333      |

|          |         |         |       |        |        |        |        |       |
|----------|---------|---------|-------|--------|--------|--------|--------|-------|
| ORF 33   | 60,015  | 58,201  | 1,815 | 15.067 | 14.386 | 12.014 | 12.989 | 0.249 |
| ORF 33.5 | 59,106  | 58,201  | 906   | 20.207 | 19.267 | 15.756 | 16.917 | 0.251 |
| ORF 34   | 61,787  | 60,051  | 1,737 | 4.935  | 4.266  | 4.086  | 3.988  | 0.245 |
| ORF 35   | 62,630  | 61,857  | 774   | 1.853  | 1.868  | 1.332  | 1.589  | 0.232 |
| ORF 36   | 62,684  | 63,706  | 1,023 | 5.209  | 5.461  | 5.818  | 5.136  | 0.237 |
| ORF 37   | 63,951  | 66,473  | 2,523 | 6.569  | 6.653  | 6.034  | 6.064  | 0.230 |
| ORF 38   | 68,170  | 66,548  | 1,623 | 5.388  | 5.449  | 5.798  | 5.868  | 0.231 |
| ORF 39   | 68,510  | 69,229  | 720   | 1.033  | 1.082  | 1.131  | 1.213  | 0.233 |
| ORF 40   | 69,417  | 73,604  | 4,188 | 9.775  | 9.690  | 8.140  | 7.751  | 0.236 |
| ORF 41   | 73,724  | 74,671  | 948   | 16.209 | 16.370 | 15.765 | 14.614 | 0.226 |
| ORF 42   | 75,693  | 74,731  | 963   | 2.059  | 1.516  | 1.538  | 1.563  | 0.209 |
| ORF 43   | 76,050  | 78,077  | 2,028 | 3.404  | 3.140  | 2.829  | 2.677  | 0.201 |
| ORF 44   | 78,240  | 79,328  | 1,089 | 8.242  | 8.840  | 6.783  | 7.801  | 0.195 |
| ORF 45   | 80,473  | 79,406  | 1,068 | 1.728  | 1.636  | 1.580  | 1.746  | 0.218 |
| ORF 46   | 80,599  | 81,195  | 597   | 15.575 | 12.665 | 12.450 | 11.776 | 0.219 |
| ORF 47   | 81,048  | 82,577  | 1,530 | 15.075 | 13.869 | 12.316 | 11.503 | 0.163 |
| ORF 48   | 82,547  | 84,199  | 1,653 | 16.432 | 15.011 | 14.315 | 14.457 | 0.133 |
| ORF 49   | 84,106  | 84,348  | 243   | 36.668 | 39.167 | 37.423 | 40.051 | 0.118 |
| ORF 50   | 85,762  | 84,458  | 1,305 | 10.889 | 12.129 | 10.927 | 10.467 | 0.174 |
| ORF 51   | 85,761  | 88,265  | 2,505 | 0.931  | 0.909  | 0.803  | 0.767  | 0.184 |
| ORF 52   | 88,373  | 90,685  | 2,313 | 1.617  | 1.639  | 1.367  | 1.448  | 0.184 |
| ORF 53   | 91,730  | 90,738  | 993   | 4.596  | 3.717  | 3.777  | 3.268  | 0.185 |
| ORF 54   | 93,864  | 91,558  | 2,307 | 4.323  | 3.132  | 3.607  | 3.096  | 0.165 |
| ORF 55   | 93,876  | 96,518  | 2,643 | 1.535  | 1.369  | 1.354  | 1.403  | 0.143 |
| ORF 56   | 96,448  | 97,179  | 732   | 1.077  | 0.857  | 0.722  | 0.685  | 0.142 |
| ORF 57   | 97,506  | 97,294  | 213   | 14.934 | 16.378 | 15.972 | 18.084 | 0.139 |
| ORF 58   | 98,152  | 97,490  | 663   | 15.752 | 15.515 | 14.375 | 13.678 | 0.182 |
| ORF 59   | 99,099  | 98,185  | 915   | 10.061 | 10.884 | 8.682  | 10.485 | 0.167 |
| ORF 60   | 99,529  | 99,053  | 477   | 4.419  | 4.611  | 4.245  | 4.548  | 0.204 |
| ORF 61   | 102,365 | 100,965 | 1,401 | 12.844 | 13.440 | 13.139 | 13.526 | 0.213 |
| ORF 62   | 107,013 | 103,084 | 3,930 | 11.209 | 17.430 | 17.297 | 20.258 | 0.230 |
| ORF 63   | 108,591 | 109,424 | 834   | 30.199 | 31.197 | 40.219 | 37.906 | 0.389 |
| ORF 64   | 109,575 | 110,114 | 540   | 6.528  | 12.534 | 8.449  | 10.338 | 0.256 |
| ORF 65   | 110,652 | 110,347 | 306   | 1.014  | 0.654  | 0.677  | 0.791  | 0.480 |
| ORF 66   | 111,049 | 112,227 | 1,179 | 2.314  | 2.306  | 1.912  | 2.110  | 0.474 |
| ORF 67   | 112,508 | 113,569 | 1,062 | 19.571 | 17.015 | 18.887 | 17.528 | 0.486 |
| ORF 68   | 113,820 | 115,688 | 1,869 | 32.925 | 32.628 | 30.185 | 30.057 | 0.348 |
| ORF 69   | 116,346 | 115,807 | 540   | 6.428  | 12.430 | 7.900  | 10.277 | 0.330 |
| ORF 70   | 117,330 | 116,497 | 834   | 31.950 | 31.102 | 39.370 | 38.101 | 0.650 |
| ORF 71   | 118,906 | 122,835 | 3,930 | 10.978 | 17.451 | 16.972 | 20.385 | 0.468 |

<sup>a</sup> Nucleotide location based on VZV-DEN09 DNA sequence.
